# Supplementary material for: In silico prediction of tumor antigens derived from functional missense mutations of the cancer gene census
Source: PubMed Central journal article supplement — Oncoimmunology. 2012 Nov 1;1(8):1281–9. doi: 10.4161/onci.21511 (PMC3518500; doi:10.4161/onci.21511), 2012-11-01
Supplement: onci-1-1281-s01.pdf [file onci-1-1281-s01.pdf]

## **Supplemental Material to:**

**Jahan S. Khalili, Russell W. Hanson and Zoltan Szallasi**

**In silico prediction of tumor antigens derived from  
functional missense mutations of the cancer gene census**

**Oncolmmunology 2012; 1(9)**

**<http://dx.doi.org/10.4161/onci.21511>**

**[http://www.landesbioscience.com/journals/oncoimmunology/  
article/21511/](http://www.landesbioscience.com/journals/oncoimmunology/article/21511/)**

**Table S1. List of all genes and mutations from the Cancer Gene Census analyzed in the present study.**



GeneSymbol AA Location Mutation

|      |     |       |
|------|-----|-------|
| ABL1 | 105 | A105T |
| ABL1 | 47  | R047G |
| ABL1 | 166 | R166K |
| ABL1 | 237 | M237I |
| ABL1 | 244 | M244V |
| ABL1 | 248 | L248V |
| ABL1 | 250 | G250E |
| ABL1 | 251 | G251D |
| ABL1 | 252 | Q252E |
| ABL1 | 252 | Q252H |
| ABL1 | 252 | Q252R |
| ABL1 | 253 | Y253F |
| ABL1 | 253 | Y253H |
| ABL1 | 255 | E255K |
| ABL1 | 255 | E255V |
| ABL1 | 273 | L273M |
| ABL1 | 276 | D276G |
| ABL1 | 279 | E279K |
| ABL1 | 279 | E279Y |
| ABL1 | 279 | E279Z |
| ABL1 | 282 | E282G |
| ABL1 | 292 | E292V |
| ABL1 | 298 | L298V |
| ABL1 | 299 | V299L |
| ABL1 | 304 | V304G |
| ABL1 | 305 | C305R |
| ABL1 | 311 | F311I |
| ABL1 | 311 | F311L |
| ABL1 | 315 | T315I |
| ABL1 | 315 | T315N |
| ABL1 | 317 | F317L |
| ABL1 | 321 | G321E |
| ABL1 | 325 | D325D |
| ABL1 | 328 | R328M |
| ABL1 | 330 | C330G |
| ABL1 | 339 | V339L |
| ABL1 | 343 | M343T |
| ABL1 | 351 | M351T |
| ABL1 | 352 | E352D |
| ABL1 | 352 | E352G |
| ABL1 | 353 | Y353H |
| ABL1 | 355 | E355A |

|      |           |
|------|-----------|
| ABL1 | 355 E355G |
| ABL1 | 359 F359A |
| ABL1 | 359 F359C |
| ABL1 | 359 F359I |
| ABL1 | 359 F359V |
| ABL1 | 360 I360S |
| ABL1 | 364 L364I |
| ABL1 | 370 L370R |
| ABL1 | 371 V371A |
| ABL1 | 373 E373G |
| ABL1 | 374 N374Y |
| ABL1 | 379 V379I |
| ABL1 | 382 F382L |
| ABL1 | 384 L384M |
| ABL1 | 387 L387M |
| ABL1 | 388 M388L |
| ABL1 | 389 T389A |
| ABL1 | 396 H396P |
| ABL1 | 396 H396R |
| ABL1 | 397 A397P |
| ABL1 | 417 S417Y |
| ABL1 | 418 I418V |
| ABL1 | 433 A433T |
| ABL1 | 450 E450A |
| ABL1 | 450 E450G |
| ABL1 | 450 E450K |
| ABL1 | 453 E453D |
| ABL1 | 453 E453K |
| ABL1 | 453 E453L |
| ABL1 | 459 E459G |
| ABL1 | 459 E459K |
| ABL1 | 459 E459Q |
| ABL1 | 480 P480L |
| ABL1 | 482 D482V |
| ABL1 | 486 F486S |
| ABL1 | 495 T495R |
| ABL1 | 732 R732S |
| ABL1 | 806 P806L |
| ABL1 | 984 T984T |
| ABL2 | 190 A190T |
| ABL2 | 451 P451L |
| ABL2 | 483 R483I |
| ABL2 | 63 E63Q   |

|       |             |
|-------|-------------|
| ABL2  | 717 T717A   |
| AFF1  | 1204 Q1204K |
| AFF3  | 1117 D1117H |
| AFF3  | 220 T220I   |
| AFF3  | 670 V670M   |
| AFF4  | 178 S178C   |
| AFF4  | 539 G539E   |
| AFF4  | 757 S757T   |
| AKAP9 | 1174 Q1174H |
| AKAP9 | 1343 L1343F |
| AKAP9 | 1742 R1742K |
| AKAP9 | 2325 D2325H |
| AKAP9 | 2421 M2421I |
| AKAP9 | 2657 E2657D |
| AKAP9 | 2724 A2724T |
| AKAP9 | 2748 V2748F |
| AKAP9 | 3301 E3301Q |
| AKT1  | 17 E17K     |
| AKT1  | 32 D32Y     |
| AKT1  | 35 F35L     |
| AKT1  | 39 K39N     |
| AKT1  | 42 P42T     |
| AKT1  | 49 E49K     |
| ALK   | 1061 R1061Q |
| ALK   | 1062 K1062M |
| ALK   | 1091 D1091N |
| ALK   | 1135 V1135E |
| ALK   | 1166 M1166R |
| ALK   | 1168 A1168P |
| ALK   | 1171 I1171N |
| ALK   | 1174 F1174C |
| ALK   | 1174 F1174I |
| ALK   | 1174 F1174L |
| ALK   | 1174 F1174S |
| ALK   | 1174 F1174V |
| ALK   | 1234 A1234T |
| ALK   | 1245 F1245C |
| ALK   | 1245 F1245I |
| ALK   | 1245 F1245L |
| ALK   | 1245 F1245V |
| ALK   | 1275 R1275L |
| ALK   | 1275 R1275Q |
| ALK   | 1278 Y1278S |

|     |             |
|-----|-------------|
| ALK | 225 S225R   |
| ALK | 401 R401Q   |
| ALK | 496 P496L   |
| ALK | 542 P542R   |
| ALK | 560 L560F   |
| ALK | 631 S631I   |
| ALK | 757 V757M   |
| ALK | 877 A877S   |
| APC | 1027 Y1027C |
| APC | 1081 S1081I |
| APC | 1102 Y1102H |
| APC | 1120 G1120E |
| APC | 1129 L1129S |
| APC | 117 S117L   |
| APC | 1171 R1171H |
| APC | 1197 F1197S |
| APC | 1202 S1202C |
| APC | 1209 E1209V |
| APC | 1254 I1254F |
| APC | 1259 I1259T |
| APC | 1278 S1278P |
| APC | 1284 E1284K |
| APC | 1296 A1296V |
| APC | 1297 D1297A |
| APC | 130 S130G   |
| APC | 1301 T1301S |
| APC | 1305 A1305G |
| APC | 1306 E1306K |
| APC | 1307 I1307K |
| APC | 1308 K1308E |
| APC | 1309 E1309K |
| APC | 1312 G1312E |
| APC | 1313 T1313A |
| APC | 1314 R1314K |
| APC | 1315 S1315L |
| APC | 1317 E1317Q |
| APC | 1319 P1319L |
| APC | 1319 P1319T |
| APC | 1321 S1321N |
| APC | 1321 S1321R |
| APC | 1323 V1323I |
| APC | 1326 V1326A |
| APC | 1326 V1326M |

|     |             |
|-----|-------------|
| APC | 1339 G1339A |
| APC | 1341 S1341R |
| APC | 1346 S1346P |
| APC | 1352 V1352I |
| APC | 1353 E1353V |
| APC | 1354 F1354L |
| APC | 1355 S1355P |
| APC | 1357 G1357R |
| APC | 1358 A1358E |
| APC | 1360 S1360F |
| APC | 1361 P1361L |
| APC | 1362 S1362F |
| APC | 1364 S1364R |
| APC | 1365 G1365D |
| APC | 1366 A1366V |
| APC | 1367 Q1367H |
| APC | 1368 T1368I |
| APC | 1369 P1369H |
| APC | 1373 P1373S |
| APC | 1373 P1373T |
| APC | 1374 E1374K |
| APC | 1375 H1375Y |
| APC | 1389 S1389F |
| APC | 1393 L1393P |
| APC | 1395 S1395C |
| APC | 1398 S1398N |
| APC | 1398 S1398T |
| APC | 141 R141S   |
| APC | 1414 V1414I |
| APC | 1416 G1416D |
| APC | 1420 P1420L |
| APC | 1422 D1422H |
| APC | 1422 D1422N |
| APC | 1425 D1425A |
| APC | 1429 Q1429R |
| APC | 1431 M1431R |
| APC | 1432 P1432H |
| APC | 1434 S1434I |
| APC | 1439 P1439L |
| APC | 1453 P1453S |
| APC | 1454 K1454E |
| APC | 1463 R1463S |
| APC | 1464 E1464D |

|     |             |
|-----|-------------|
| APC | 1464 E1464K |
| APC | 1465 S1465R |
| APC | 1466 G1466E |
| APC | 1466 G1466R |
| APC | 1470 A1470T |
| APC | 1472 V1472I |
| APC | 1475 A1475V |
| APC | 1477 Q1477H |
| APC | 1482 L1482F |
| APC | 1488 L1488F |
| APC | 1490 H1490Y |
| APC | 1491 F1491L |
| APC | 1495 S1495G |
| APC | 1499 G1499R |
| APC | 1508 A1508V |
| APC | 1534 G1534R |
| APC | 1537 T1537K |
| APC | 1599 S1599L |
| APC | 1609 P1609L |
| APC | 1842 S1842L |
| APC | 2540 P2540S |
| APC | 2570 S2570L |
| APC | 2631 S2631F |
| APC | 380 R380P   |
| APC | 409 L409V   |
| APC | 464 H464Q   |
| APC | 465 A465S   |
| APC | 53 G53V     |
| APC | 593 W593L   |
| APC | 66 I66L     |
| APC | 662 L662V   |
| APC | 67 D67H     |
| APC | 771 E771G   |
| APC | 798 D798G   |
| APC | 813 N813S   |
| APC | 817 G817C   |
| APC | 852 L852M   |
| APC | 865 P865S   |
| APC | 880 I880T   |
| APC | 890 V890I   |
| APC | 906 S906Y   |
| APC | 911 E911G   |
| APC | 942 N942D   |

|        |             |
|--------|-------------|
| APC    | 966 S966R   |
| ARID1A | 1020 R1020K |
| ARID1A | 1129 K1129T |
| ARID1A | 1389 Y1389H |
| ARID1A | 1413 A1413V |
| ARID1A | 16 P16S     |
| ARID1A | 1985 S1985P |
| ARID1A | 2066 N2066D |
| ARID1A | 2089 L2089P |
| ARID1A | 414 G414E   |
| ARNT   | 607 P607S   |
| ASXL1  | 1102 E1102D |
| ASXL1  | 1322 P1322R |
| ASXL1  | 1376 G1376D |
| ASXL1  | 1395 L1395V |
| ASXL1  | 811 N811D   |
| ATIC   | 34 S34F     |
| ATIC   | 384 L384F   |
| ATM    | 1 M1L       |
| ATM    | 1040 M1040V |
| ATM    | 1054 P1054R |
| ATM    | 1086 R1086L |
| ATM    | 1128 Q1128R |
| ATM    | 1179 S1179F |
| ATM    | 1208 D1208H |
| ATM    | 126 D126E   |
| ATM    | 1309 A1309T |
| ATM    | 1322 L1322I |
| ATM    | 1322 L1322P |
| ATM    | 138 G138R   |
| ATM    | 1380 H1380Y |
| ATM    | 1407 I1407S |
| ATM    | 1407 I1407T |
| ATM    | 1454 K1454N |
| ATM    | 1463 F1463L |
| ATM    | 1463 F1463S |
| ATM    | 1469 I1469M |
| ATM    | 1472 L1472F |
| ATM    | 1475 Y1475C |
| ATM    | 1681 I1681V |
| ATM    | 1682 D1682H |
| ATM    | 1682 D1682Y |
| ATM    | 1739 N1739T |

|     |             |
|-----|-------------|
| ATM | 1742 A1742P |
| ATM | 1743 T1743I |
| ATM | 1801 N1801Y |
| ATM | 1853 D1853N |
| ATM | 1853 D1853V |
| ATM | 1905 S1905L |
| ATM | 1910 L1910H |
| ATM | 1916 M1916I |
| ATM | 1939 L1939V |
| ATM | 1941 V1941L |
| ATM | 1945 A1945T |
| ATM | 1953 T1953R |
| ATM | 1961 Y1961C |
| ATM | 1991 E1991D |
| ATM | 1994 K1994E |
| ATM | 2004 L2004R |
| ATM | 2019 Y2019S |
| ATM | 2023 G2023R |
| ATM | 2063 G2063E |
| ATM | 207 S207C   |
| ATM | 2076 I2076S |
| ATM | 2164 E2164K |
| ATM | 2263 R2263S |
| ATM | 2274 A2274T |
| ATM | 23 R23Q     |
| ATM | 2349 C2349W |
| ATM | 2356 I2356F |
| ATM | 2375 S2375I |
| ATM | 2394 S2394L |
| ATM | 2396 T2396S |
| ATM | 2408 S2408L |
| ATM | 2417 L2417P |
| ATM | 2420 A2420P |
| ATM | 2423 E2423G |
| ATM | 2423 E2423K |
| ATM | 2424 V2424G |
| ATM | 2427 L2427R |
| ATM | 2438 T2438K |
| ATM | 2442 Q2442P |
| ATM | 2443 R2443Q |
| ATM | 2445 L2445P |
| ATM | 245 V245A   |
| ATM | 2453 R2453P |



|     |             |
|-----|-------------|
| ATM | 2486 R2486G |
| ATM | 2616 M2616I |
| ATM | 2622 A2622V |
| ATM | 2666 T2666A |
| ATM | 2695 G2695A |
| ATM | 2699 P2699R |
| ATM | 2708 D2708N |
| ATM | 2713 R2713K |
| ATM | 2717 K2717M |
| ATM | 2722 L2722R |
| ATM | 2725 D2725G |
| ATM | 2725 D2725V |
| ATM | 2732 F2732L |
| ATM | 2832 R2832C |
| ATM | 2842 P2842R |
| ATM | 2859 S2859F |
| ATM | 2867 G2867E |
| ATM | 2872 H2872Q |
| ATM | 2888 I2888T |
| ATM | 2890 L2890V |
| ATM | 2912 R2912K |
| ATM | 2925 G2925D |
| ATM | 2925 G2925V |
| ATM | 2947 T2947S |
| ATM | 2954 Y2954C |
| ATM | 3006 A3006P |
| ATM | 3006 A3006V |
| ATM | 3008 R3008C |
| ATM | 3008 R3008H |
| ATM | 3017 L3017P |
| ATM | 3018 K3018N |
| ATM | 3051 G3051V |
| ATM | 332 Y332C   |
| ATM | 337 R337C   |
| ATM | 337 R337H   |
| ATM | 337 R337S   |
| ATM | 350 A350T   |
| ATM | 352 I352T   |
| ATM | 410 V410A   |
| ATM | 540 C540Y   |
| ATM | 570 F570S   |
| ATM | 604 P604S   |
| ATM | 707 S707P   |

|        |             |
|--------|-------------|
| ATM    | 717 R717W   |
| ATM    | 747 Q747H   |
| ATM    | 750 N750K   |
| ATM    | 848 E848Q   |
| ATM    | 858 F858L   |
| ATM    | 978 S978P   |
| ATM    | 996 H996Q   |
| BAP1   | 128 G128R   |
| BAP1   | 169 H169Q   |
| BAP1   | 172 S172R   |
| BAP1   | 227 R227C   |
| BAP1   | 672 D672G   |
| BAP1   | 91 C91W     |
| BCAR3  | 197 Q197E   |
| BCAR3  | 404 P404S   |
| BCL11A | 142 S142F   |
| BCL11A | 188 H188Y   |
| BCL11A | 189 A189T   |
| BCL11A | 305 P305S   |
| BCL11A | 390 S390N   |
| BCL11A | 514 G514S   |
| BCL11A | 554 S554F   |
| BCL11A | 740 R740C   |
| BCL11B | 402 P402S   |
| BCL11B | 66 P66H     |
| BCL2   | 85 A85T     |
| BCL3   | 145 R145W   |
| BCL3   | 420 P420A   |
| BCL6   | 159 G159S   |
| BCL6   | 293 Y293F   |
| BCL6   | 359 S359F   |
| BCL9   | 587 L587V   |
| BCR    | 138 A138T   |
| BCR    | 400 S400P   |
| BCR    | 426 A426E   |
| BCR    | 451 D451N   |
| BIRC3  | 248 S248C   |
| BIRC3  | 297 G297D   |
| BIRC3  | 536 T536R   |
| BLM    | 1279 I1279V |
| BLM    | 830 T830M   |
| BLM    | 85 R85S     |
| BMPR1A | 486 R486Q   |

|        |           |
|--------|-----------|
| BMPR1A | 520 T520M |
| BMPR1A | 58 F58Y   |
| BRAF   | 201 Q201H |
| BRAF   | 310 T310I |
| BRAF   | 326 I326T |
| BRAF   | 421 G421V |
| BRAF   | 439 K439Q |
| BRAF   | 439 K439T |
| BRAF   | 440 T440P |
| BRAF   | 443 R443T |
| BRAF   | 444 R444Q |
| BRAF   | 444 R444W |
| BRAF   | 453 P453T |
| BRAF   | 459 V459L |
| BRAF   | 462 R462I |
| BRAF   | 463 I463S |
| BRAF   | 464 G464E |
| BRAF   | 464 G464R |
| BRAF   | 464 G464V |
| BRAF   | 466 G466A |
| BRAF   | 466 G466E |
| BRAF   | 466 G466R |
| BRAF   | 466 G466V |
| BRAF   | 467 S467L |
| BRAF   | 468 F468C |
| BRAF   | 468 F468S |
| BRAF   | 469 G469A |
| BRAF   | 469 G469E |
| BRAF   | 469 G469R |
| BRAF   | 469 G469S |
| BRAF   | 469 G469V |
| BRAF   | 471 V471F |
| BRAF   | 472 Y472S |
| BRAF   | 475 K475M |
| BRAF   | 485 L485F |
| BRAF   | 529 T529A |
| BRAF   | 581 N581I |
| BRAF   | 581 N581S |
| BRAF   | 581 N581Y |
| BRAF   | 582 I582M |
| BRAF   | 584 L584F |
| BRAF   | 586 E586K |
| BRAF   | 587 D587A |

|      |           |
|------|-----------|
| BRAF | 587 D587E |
| BRAF | 587 D587N |
| BRAF | 588 L588P |
| BRAF | 588 L588R |
| BRAF | 589 T589I |
| BRAF | 590 V590I |
| BRAF | 591 K591R |
| BRAF | 592 I592M |
| BRAF | 592 I592V |
| BRAF | 593 G593D |
| BRAF | 594 D594E |
| BRAF | 594 D594G |
| BRAF | 594 D594K |
| BRAF | 594 D594N |
| BRAF | 594 D594V |
| BRAF | 595 F595L |
| BRAF | 595 F595S |
| BRAF | 596 G596D |
| BRAF | 596 G596R |
| BRAF | 596 G596S |
| BRAF | 597 L597Q |
| BRAF | 597 L597R |
| BRAF | 597 L597S |
| BRAF | 597 L597V |
| BRAF | 598 A598T |
| BRAF | 598 A598V |
| BRAF | 599 T599I |
| BRAF | 600 V600A |
| BRAF | 600 V600D |
| BRAF | 600 V600E |
| BRAF | 600 V600G |
| BRAF | 600 V600K |
| BRAF | 600 V600L |
| BRAF | 600 V600M |
| BRAF | 600 V600R |
| BRAF | 601 K601E |
| BRAF | 601 K601I |
| BRAF | 601 K601L |
| BRAF | 601 K601N |
| BRAF | 601 K601Q |
| BRAF | 602 S602Y |
| BRAF | 604 W604G |
| BRAF | 604 W604S |

|       |             |
|-------|-------------|
| BRAF  | 605 S605F   |
| BRAF  | 605 S605G   |
| BRAF  | 605 S605N   |
| BRAF  | 605 S605R   |
| BRAF  | 606 G606E   |
| BRAF  | 606 G606L   |
| BRAF  | 606 G606R   |
| BRAF  | 607 S607P   |
| BRAF  | 608 H608L   |
| BRAF  | 608 H608R   |
| BRAF  | 609 Q609R   |
| BRAF  | 610 F610S   |
| BRAF  | 611 E611D   |
| BRAF  | 612 Q612E   |
| BRAF  | 614 S614P   |
| BRAF  | 615 G615R   |
| BRAF  | 616 S616F   |
| BRAF  | 616 S616P   |
| BRAF  | 617 I617T   |
| BRAF  | 618 L618S   |
| BRAF  | 618 L618W   |
| BRAF  | 619 W619R   |
| BRAF  | 636 Q636E   |
| BRAF  | 682 R682Q   |
| BRCA1 | 1077 G1077W |
| BRCA1 | 114 S114T   |
| BRCA1 | 1140 S1140G |
| BRCA1 | 30 L30F     |
| BRCA1 | 47 C47W     |
| BRCA1 | 758 L758F   |
| BRCA1 | 778 G778C   |
| BRCA2 | 1017 I1017S |
| BRCA2 | 1143 E1143D |
| BRCA2 | 1354 T1354M |
| BRCA2 | 1638 K1638E |
| BRCA2 | 18 R18H     |
| BRCA2 | 187 E187K   |
| BRCA2 | 1988 V1988I |
| BRCA2 | 2004 E2004Q |
| BRCA2 | 2415 H2415N |
| BRCA2 | 2678 R2678S |
| BRCA2 | 2787 R2787H |
| BRCA2 | 2842 R2842C |

|            |             |
|------------|-------------|
| BRCA2      | 3095 D3095E |
| BRCA2      | 3103 I3103M |
| BRCA2      | 3357 T3357R |
| BRCA2      | 355 V355L   |
| BRCA2      | 630 T630I   |
| BRCA2      | 920 P920S   |
| BRD3       | 161 A161T   |
| BRD3       | 36 T36N     |
| BRD4       | 125 C125Y   |
| BRD4_ENST0 | 125 C125Y   |
| BRIP1      | 650 T650I   |
| BUB1B      | 931 R931W   |
| C15orf55   | 354 P354S   |
| C15orf55   | 720 P720T   |
| CARD11     | 184 N184S   |
| CARD11     | 458 A458D   |
| CARD11     | 711 C711G   |
| CARS       | 268 V268L   |
| CARS       | 626 G626V   |
| CBFA2T3    | 306 R306H   |
| CBFA2T3    | 518 E518K   |
| CBFA2T3    | 534 A534V   |
| CBFB       | 100 P100A   |
| CBL        | 249 Q249E   |
| CBL        | 287 K287R   |
| CBL        | 366 E366K   |
| CBL        | 371 Y371C   |
| CBL        | 371 Y371D   |
| CBL        | 371 Y371H   |
| CBL        | 375 G375P   |
| CBL        | 375 G375S   |
| CBL        | 376 S376F   |
| CBL        | 380 L380P   |
| CBL        | 381 C381R   |
| CBL        | 381 C381Y   |
| CBL        | 382 K382E   |
| CBL        | 384 C384R   |
| CBL        | 384 C384Y   |
| CBL        | 391 V391I   |
| CBL        | 396 C396G   |
| CBL        | 396 C396R   |
| CBL        | 396 C396Y   |
| CBL        | 398 H398Y   |

|          |           |
|----------|-----------|
| CBL      | 401 C401S |
| CBL      | 404 C404R |
| CBL      | 404 C404S |
| CBL      | 404 C404Y |
| CBL      | 408 W408C |
| CBL      | 408 W408R |
| CBL      | 415 G415V |
| CBL      | 416 C416Y |
| CBL      | 417 P417A |
| CBL      | 417 P417L |
| CBL      | 417 P417S |
| CBL      | 418 F418L |
| CBL      | 418 F418S |
| CBL      | 419 C419R |
| CBL      | 420 R420G |
| CBL      | 420 R420L |
| CBL      | 420 R420P |
| CBL      | 420 R420Q |
| CBL      | 428 P428L |
| CBL      | 454 N454D |
| CBL      | 499 R499L |
| CBL      | 80 S80N   |
| CBL      | 830 R830K |
| CBL      | 848 A848T |
| CBL      | 94 H94Y   |
| CBLB     | 244 G244C |
| CBLB     | 509 P509S |
| CBLB     | 619 I619M |
| CBLB     | 759 D759E |
| CBLC     | 444 P444L |
| CCDC6    | 217 L217P |
| CCDC6    | 226 A226S |
| CCDC6    | 442 P442S |
| CCNB1IP1 | 168 N168K |
| CCND2    | 262 R262L |
| CD79A    | 161 T161M |
| CDC73    | 2 A2S     |
| CDC73    | 295 Q295E |
| CDC73    | 369 T369N |
| CDC73    | 95 L95P   |
| CDH1     | 121 H121R |
| CDH1     | 123 H123Y |
| CDH1     | 193 T193P |

|      |           |
|------|-----------|
| CDH1 | 233 H233Q |
| CDH1 | 245 P245L |
| CDH1 | 254 D254Y |
| CDH1 | 257 D257G |
| CDH1 | 260 P260L |
| CDH1 | 282 M282I |
| CDH1 | 286 A286T |
| CDH1 | 295 T295I |
| CDH1 | 298 A298D |
| CDH1 | 30 P30T   |
| CDH1 | 300 I300M |
| CDH1 | 308 D308N |
| CDH1 | 309 P309S |
| CDH1 | 315 N315S |
| CDH1 | 316 M316V |
| CDH1 | 330 T330I |
| CDH1 | 334 D334H |
| CDH1 | 340 T340A |
| CDH1 | 340 T340M |
| CDH1 | 347 A347V |
| CDH1 | 357 T357I |
| CDH1 | 365 V365L |
| CDH1 | 369 N369D |
| CDH1 | 370 D370A |
| CDH1 | 370 D370H |
| CDH1 | 400 D400Y |
| CDH1 | 402 D402N |
| CDH1 | 428 N428D |
| CDH1 | 456 V456M |
| CDH1 | 463 E463Q |
| CDH1 | 473 V473D |
| CDH1 | 479 D479G |
| CDH1 | 522 T522I |
| CDH1 | 559 S559N |
| CDH1 | 571 G571S |
| CDH1 | 581 L581P |
| CDH1 | 592 A592T |
| CDH1 | 598 R598Q |
| CDH1 | 600 I600M |
| CDH1 | 617 A617T |
| CDH1 | 62 G62D   |
| CDH1 | 634 A634V |
| CDH1 | 692 A692V |



|        |           |
|--------|-----------|
| CDH1   | 709 A709T |
| CDH1   | 711 L711V |
| CDH1   | 740 P740S |
| CDH1   | 774 R774K |
| CDH1   | 838 S838G |
| CDH1   | 846 S846T |
| CDH1   | 851 S851L |
| CDH1   | 92 H92Y   |
| CDH11  | 103 I103V |
| CDH11  | 226 R226W |
| CDH11  | 380 P380H |
| CDH11  | 473 P473R |
| CDH11  | 489 A489S |
| CDH11  | 646 E646D |
| CDH11  | 684 P684S |
| CDH11  | 710 P710S |
| CDK6   | 199 P199L |
| CDKN2A | 100 A100P |
| CDKN2A | 100 A100S |
| CDKN2A | 100 A100V |
| CDKN2A | 101 G101W |
| CDKN2A | 102 A102E |
| CDKN2A | 102 A102P |
| CDKN2A | 102 A102T |
| CDKN2A | 102 A102V |
| CDKN2A | 103 R103Q |
| CDKN2A | 105 D105E |
| CDKN2A | 105 D105N |
| CDKN2A | 105 D105V |
| CDKN2A | 106 V106M |
| CDKN2A | 107 R107C |
| CDKN2A | 108 D108H |
| CDKN2A | 108 D108N |
| CDKN2A | 108 D108Y |
| CDKN2A | 109 A109T |
| CDKN2A | 109 A109V |
| CDKN2A | 11 P11S   |
| CDKN2A | 110 W110C |
| CDKN2A | 111 G111D |
| CDKN2A | 112 R112G |
| CDKN2A | 112 R112P |
| CDKN2A | 112 R112S |
| CDKN2A | 113 L113M |

|        |           |
|--------|-----------|
| CDKN2A | 113 L113P |
| CDKN2A | 114 P114H |
| CDKN2A | 114 P114L |
| CDKN2A | 114 P114S |
| CDKN2A | 115 V115E |
| CDKN2A | 115 V115L |
| CDKN2A | 116 D116N |
| CDKN2A | 116 D116V |
| CDKN2A | 116 D116Y |
| CDKN2A | 118 A118V |
| CDKN2A | 119 E119Q |
| CDKN2A | 120 E120A |
| CDKN2A | 120 E120K |
| CDKN2A | 122 G122D |
| CDKN2A | 122 G122S |
| CDKN2A | 123 H123Q |
| CDKN2A | 124 R124H |
| CDKN2A | 125 D125E |
| CDKN2A | 125 D125N |
| CDKN2A | 126 V126F |
| CDKN2A | 126 V126I |
| CDKN2A | 127 A127S |
| CDKN2A | 127 A127V |
| CDKN2A | 128 R128Q |
| CDKN2A | 128 R128W |
| CDKN2A | 129 Y129C |
| CDKN2A | 129 Y129H |
| CDKN2A | 130 L130P |
| CDKN2A | 130 L130Q |
| CDKN2A | 130 L130R |
| CDKN2A | 131 R131C |
| CDKN2A | 131 R131H |
| CDKN2A | 131 R131L |
| CDKN2A | 132 A132P |
| CDKN2A | 132 A132V |
| CDKN2A | 134 A134V |
| CDKN2A | 135 G135A |
| CDKN2A | 135 G135E |
| CDKN2A | 136 G136D |
| CDKN2A | 136 G136S |
| CDKN2A | 137 T137A |
| CDKN2A | 137 T137I |
| CDKN2A | 137 T137P |

|        |           |
|--------|-----------|
| CDKN2A | 138 R138I |
| CDKN2A | 138 R138T |
| CDKN2A | 139 G139D |
| CDKN2A | 14 D14E   |
| CDKN2A | 14 D14V   |
| CDKN2A | 140 S140C |
| CDKN2A | 142 H142Q |
| CDKN2A | 142 H142Y |
| CDKN2A | 143 A143T |
| CDKN2A | 146 D146E |
| CDKN2A | 147 A147T |
| CDKN2A | 148 A148T |
| CDKN2A | 15 W15L   |
| CDKN2A | 150 G150V |
| CDKN2A | 151 P151L |
| CDKN2A | 151 P151S |
| CDKN2A | 153 D153Y |
| CDKN2A | 16 L16P   |
| CDKN2A | 16 L16R   |
| CDKN2A | 17 A17T   |
| CDKN2A | 18 T18M   |
| CDKN2A | 2 E2K     |
| CDKN2A | 20 A20E   |
| CDKN2A | 20 A20P   |
| CDKN2A | 20 A20S   |
| CDKN2A | 20 A20T   |
| CDKN2A | 21 A21D   |
| CDKN2A | 22 R22P   |
| CDKN2A | 23 G23D   |
| CDKN2A | 24 R24P   |
| CDKN2A | 24 R24Q   |
| CDKN2A | 26 E26D   |
| CDKN2A | 26 E26K   |
| CDKN2A | 28 V28G   |
| CDKN2A | 28 V28M   |
| CDKN2A | 29 R29Q   |
| CDKN2A | 30 A30P   |
| CDKN2A | 30 A30V   |
| CDKN2A | 31 L31P   |
| CDKN2A | 32 L32R   |
| CDKN2A | 33 E33D   |
| CDKN2A | 34 A34V   |
| CDKN2A | 35 G35E   |

|        |         |
|--------|---------|
| CDKN2A | 35 G35R |
| CDKN2A | 35 G35V |
| CDKN2A | 36 A36T |
| CDKN2A | 38 P38L |
| CDKN2A | 39 N39K |
| CDKN2A | 4 A4S   |
| CDKN2A | 4 A4T   |
| CDKN2A | 40 A40S |
| CDKN2A | 40 A40V |
| CDKN2A | 42 N42D |
| CDKN2A | 42 N42T |
| CDKN2A | 42 N42Y |
| CDKN2A | 43 S43I |
| CDKN2A | 43 S43R |
| CDKN2A | 44 Y44S |
| CDKN2A | 45 G45D |
| CDKN2A | 45 G45S |
| CDKN2A | 48 P48L |
| CDKN2A | 48 P48R |
| CDKN2A | 49 I49M |
| CDKN2A | 49 I49S |
| CDKN2A | 5 A5T   |
| CDKN2A | 50 Q50R |
| CDKN2A | 51 V51A |
| CDKN2A | 51 V51I |
| CDKN2A | 52 M52I |
| CDKN2A | 52 M52K |
| CDKN2A | 52 M52L |
| CDKN2A | 53 M53T |
| CDKN2A | 55 G55R |
| CDKN2A | 56 S56N |
| CDKN2A | 57 A57P |
| CDKN2A | 57 A57V |
| CDKN2A | 58 R58Q |
| CDKN2A | 59 V59G |
| CDKN2A | 59 V59M |
| CDKN2A | 60 A60E |
| CDKN2A | 60 A60V |
| CDKN2A | 61 E61G |
| CDKN2A | 63 L63P |
| CDKN2A | 63 L63V |
| CDKN2A | 64 L64P |
| CDKN2A | 65 L65P |

|        |         |
|--------|---------|
| CDKN2A | 66 H66P |
| CDKN2A | 66 H66R |
| CDKN2A | 66 H66Y |
| CDKN2A | 67 G67S |
| CDKN2A | 67 G67V |
| CDKN2A | 68 A68E |
| CDKN2A | 68 A68T |
| CDKN2A | 68 A68V |
| CDKN2A | 69 E69K |
| CDKN2A | 69 E69Q |
| CDKN2A | 69 E69V |
| CDKN2A | 70 P70A |
| CDKN2A | 70 P70L |
| CDKN2A | 70 P70S |
| CDKN2A | 71 N71I |
| CDKN2A | 71 N71K |
| CDKN2A | 72 C72G |
| CDKN2A | 72 C72S |
| CDKN2A | 72 C72Y |
| CDKN2A | 73 A73G |
| CDKN2A | 73 A73P |
| CDKN2A | 73 A73S |
| CDKN2A | 73 A73T |
| CDKN2A | 74 D74E |
| CDKN2A | 74 D74N |
| CDKN2A | 74 D74V |
| CDKN2A | 74 D74Y |
| CDKN2A | 75 P75H |
| CDKN2A | 75 P75L |
| CDKN2A | 75 P75S |
| CDKN2A | 76 A76T |
| CDKN2A | 76 A76V |
| CDKN2A | 77 T77S |
| CDKN2A | 78 L78H |
| CDKN2A | 79 T79I |
| CDKN2A | 80 R80L |
| CDKN2A | 80 R80Q |
| CDKN2A | 81 P81H |
| CDKN2A | 81 P81L |
| CDKN2A | 81 P81S |
| CDKN2A | 82 V82L |
| CDKN2A | 82 V82M |
| CDKN2A | 83 H83N |

|        |           |
|--------|-----------|
| CDKN2A | 83 H83P   |
| CDKN2A | 83 H83Q   |
| CDKN2A | 83 H83R   |
| CDKN2A | 83 H83Y   |
| CDKN2A | 84 D84G   |
| CDKN2A | 84 D84H   |
| CDKN2A | 84 D84N   |
| CDKN2A | 84 D84V   |
| CDKN2A | 84 D84Y   |
| CDKN2A | 85 A85P   |
| CDKN2A | 85 A85T   |
| CDKN2A | 86 A86V   |
| CDKN2A | 87 E87K   |
| CDKN2A | 87 R87L   |
| CDKN2A | 87 R87Q   |
| CDKN2A | 87 R87W   |
| CDKN2A | 88 E88A   |
| CDKN2A | 88 E88D   |
| CDKN2A | 88 E88G   |
| CDKN2A | 88 E88K   |
| CDKN2A | 88 E88V   |
| CDKN2A | 89 G89S   |
| CDKN2A | 89 G89V   |
| CDKN2A | 9 M9I     |
| CDKN2A | 90 F90L   |
| CDKN2A | 91 L91Q   |
| CDKN2A | 91 L91V   |
| CDKN2A | 92 D92N   |
| CDKN2A | 93 T93A   |
| CDKN2A | 93 T93M   |
| CDKN2A | 93 T93R   |
| CDKN2A | 95 V95A   |
| CDKN2A | 95 V95L   |
| CDKN2A | 97 L97P   |
| CDKN2A | 98 H98R   |
| CDKN2A | 98 H98Y   |
| CDKN2A | 99 R99Q   |
| CDKN2A | 99 R99W   |
| CDKN2C | 1 M1I     |
| CDKN2C | 41 A41G   |
| CDKN2C | 64 D64N   |
| CEBPA  | 116 G116D |
| CEBPA  | 122 G122E |

|        |             |
|--------|-------------|
| CEBPA  | 14 P14R     |
| CEBPA  | 142 R142T   |
| CEBPA  | 175 L175V   |
| CEBPA  | 176 A176V   |
| CEBPA  | 177 G177F   |
| CEBPA  | 180 P180H   |
| CEBPA  | 199 A199L   |
| CEBPA  | 21 S21G     |
| CEBPA  | 21 S21R     |
| CEBPA  | 239 P239A   |
| CEBPA  | 289 R289P   |
| CEBPA  | 295 A295P   |
| CEBPA  | 297 R297P   |
| CEBPA  | 300 R300G   |
| CEBPA  | 300 R300L   |
| CEBPA  | 306 R306P   |
| CEBPA  | 314 V314M   |
| CEBPA  | 316 E316K   |
| CEBPA  | 324 L324Q   |
| CEBPA  | 335 L335Q   |
| CEBPA  | 339 R339P   |
| CEBPA  | 340 G340S   |
| CEBPA  | 39 P39S     |
| CEBPA  | 84 H84L     |
| CEP110 | 482 Q482P   |
| CEP110 | 644 D644N   |
| CHEK2  | 346 R346H   |
| CHEK2  | 373 K373E   |
| CHEK2  | 536 P536L   |
| CHN1   | 12 R12T     |
| CHN1   | 395 R395Q   |
| CHN1   | 70 Y70N     |
| CIC    | 104 E104K   |
| CIC    | 37 W37S     |
| CIC    | 427 Q427H   |
| CIC    | 652 A652T   |
| CLTC   | 1289 Y1289C |
| CLTCL1 | 1139 E1139V |
| CLTCL1 | 846 V846L   |
| COL1A1 | 1235 L1235F |
| COL1A1 | 343 P343S   |
| COL1A1 | 434 G434D   |
| COL1A1 | 629 G629D   |

|        |             |
|--------|-------------|
| COL1A1 | 774 P774S   |
| CREBBP | 1338 L1338S |
| CREBBP | 1379 F1379V |
| CREBBP | 1453 I1453T |
| CREBBP | 2281 A2281T |
| CREBBP | 83 N83T     |
| CREBBP | 937 P937S   |
| CRLF2  | 232 F232C   |
| CRTC3  | 158 N158K   |
| CSF1R  | 106 R106W   |
| CSF1R  | 301 L301F   |
| CSF1R  | 301 L301S   |
| CSF1R  | 301 L301V   |
| CSF1R  | 32 V32G     |
| CSF1R  | 413 G413S   |
| CSF1R  | 506 H506Q   |
| CSF1R  | 571 Y571D   |
| CSF1R  | 638 S638N   |
| CSF1R  | 693 P693H   |
| CSF1R  | 753 R753Q   |
| CSF1R  | 952 T952I   |
| CSF1R  | 969 Y969C   |
| CSF1R  | 969 Y969D   |
| CSF1R  | 969 Y969F   |
| CSF1R  | 969 Y969H   |
| CSF1R  | 969 Y969N   |
| CTNNA1 | 308 R308H   |
| CTNNA1 | 59 H59Y     |
| CTNNB1 | 11 D11N     |
| CTNNB1 | 13 A13T     |
| CTNNB1 | 15 E15K     |
| CTNNB1 | 17 D17H     |
| CTNNB1 | 177 Q177P   |
| CTNNB1 | 183 A183S   |
| CTNNB1 | 183 A183T   |
| CTNNB1 | 19 K19D     |
| CTNNB1 | 198 I198L   |
| CTNNB1 | 20 A20V     |
| CTNNB1 | 21 A21T     |
| CTNNB1 | 22 V22A     |
| CTNNB1 | 22 V22I     |
| CTNNB1 | 23 S23G     |
| CTNNB1 | 23 S23N     |



|        |           |
|--------|-----------|
| CTNNB1 | 23 S23R   |
| CTNNB1 | 24 H24R   |
| CTNNB1 | 24 H24Y   |
| CTNNB1 | 245 G245A |
| CTNNB1 | 25 W25L   |
| CTNNB1 | 287 N287S |
| CTNNB1 | 29 S29A   |
| CTNNB1 | 29 S29F   |
| CTNNB1 | 29 S29P   |
| CTNNB1 | 29 S29Y   |
| CTNNB1 | 3 T3S     |
| CTNNB1 | 30 Y30C   |
| CTNNB1 | 31 L31Q   |
| CTNNB1 | 31 L31W   |
| CTNNB1 | 32 D32A   |
| CTNNB1 | 32 D32E   |
| CTNNB1 | 32 D32G   |
| CTNNB1 | 32 D32H   |
| CTNNB1 | 32 D32N   |
| CTNNB1 | 32 D32V   |
| CTNNB1 | 32 D32Y   |
| CTNNB1 | 33 S33A   |
| CTNNB1 | 33 S33C   |
| CTNNB1 | 33 S33F   |
| CTNNB1 | 33 S33L   |
| CTNNB1 | 33 S33N   |
| CTNNB1 | 33 S33P   |
| CTNNB1 | 33 S33T   |
| CTNNB1 | 33 S33Y   |
| CTNNB1 | 335 K335I |
| CTNNB1 | 34 G34E   |
| CTNNB1 | 34 G34R   |
| CTNNB1 | 34 G34V   |
| CTNNB1 | 35 I35K   |
| CTNNB1 | 35 I35M   |
| CTNNB1 | 35 I35N   |
| CTNNB1 | 35 I35S   |
| CTNNB1 | 35 I35T   |
| CTNNB1 | 36 H36P   |
| CTNNB1 | 36 H36R   |
| CTNNB1 | 36 H36Y   |
| CTNNB1 | 37 S37A   |
| CTNNB1 | 37 S37C   |

|        |           |
|--------|-----------|
| CTNNB1 | 37 S37F   |
| CTNNB1 | 37 S37P   |
| CTNNB1 | 37 S37T   |
| CTNNB1 | 37 S37Y   |
| CTNNB1 | 38 G38A   |
| CTNNB1 | 38 G38D   |
| CTNNB1 | 38 G38P   |
| CTNNB1 | 383 W383G |
| CTNNB1 | 383 W383R |
| CTNNB1 | 39 A39G   |
| CTNNB1 | 39 A39T   |
| CTNNB1 | 4 Q4H     |
| CTNNB1 | 40 T40A   |
| CTNNB1 | 40 T40I   |
| CTNNB1 | 40 T40S   |
| CTNNB1 | 41 T41A   |
| CTNNB1 | 41 T41I   |
| CTNNB1 | 41 T41N   |
| CTNNB1 | 41 T41P   |
| CTNNB1 | 41 T41S   |
| CTNNB1 | 42 T42A   |
| CTNNB1 | 42 T42I   |
| CTNNB1 | 42 T42R   |
| CTNNB1 | 42 T42S   |
| CTNNB1 | 43 A43P   |
| CTNNB1 | 43 A43T   |
| CTNNB1 | 43 A43V   |
| CTNNB1 | 44 P44A   |
| CTNNB1 | 44 P44L   |
| CTNNB1 | 44 P44S   |
| CTNNB1 | 45 S45A   |
| CTNNB1 | 45 S45C   |
| CTNNB1 | 45 S45F   |
| CTNNB1 | 45 S45P   |
| CTNNB1 | 45 S45T   |
| CTNNB1 | 45 S45Y   |
| CTNNB1 | 46 L46V   |
| CTNNB1 | 47 S47C   |
| CTNNB1 | 47 S47G   |
| CTNNB1 | 47 S47I   |
| CTNNB1 | 47 S47N   |
| CTNNB1 | 47 S47R   |
| CTNNB1 | 47 S47T   |

|        |           |
|--------|-----------|
| CTNNB1 | 48 G48D   |
| CTNNB1 | 48 G48V   |
| CTNNB1 | 486 R486C |
| CTNNB1 | 49 K49E   |
| CTNNB1 | 49 K49R   |
| CTNNB1 | 5 A5V     |
| CTNNB1 | 50 G50D   |
| CTNNB1 | 50 G50S   |
| CTNNB1 | 51 N51S   |
| CTNNB1 | 52 P52L   |
| CTNNB1 | 53 E53K   |
| CTNNB1 | 54 E54G   |
| CTNNB1 | 54 E54K   |
| CTNNB1 | 55 E55G   |
| CTNNB1 | 55 E55K   |
| CTNNB1 | 555 G555A |
| CTNNB1 | 56 D56N   |
| CTNNB1 | 57 V57A   |
| CTNNB1 | 57 V57M   |
| CTNNB1 | 58 D58N   |
| CTNNB1 | 6 D6G     |
| CTNNB1 | 60 S60C   |
| CTNNB1 | 60 S60F   |
| CTNNB1 | 61 Q61L   |
| CTNNB1 | 61 Q61R   |
| CTNNB1 | 638 A638T |
| CTNNB1 | 66 W66L   |
| CTNNB1 | 67 E67K   |
| CTNNB1 | 75 T75A   |
| CTNNB1 | 8 M8I     |
| CXCR7  | 15 S15L   |
| CYLD   | 154 A154V |
| CYTSB  | 131 S131L |
| CYTSB  | 144 T144R |
| CYTSB  | 312 S312P |
| DDB2   | 338 T338P |
| DDIT3  | 115 A115V |
| DDIT3  | 25 L25R   |
| DDIT3  | 32 D32Y   |
| DDIT3  | 35 G35E   |
| DDX10  | 566 L566V |
| DDX5   | 300 I300V |
| DDX5   | 533 G533A |

|        |             |
|--------|-------------|
| DDX5   | 535 Y535C   |
| DDX6   | 356 K356E   |
| DEK    | 348 K348N   |
| DICER1 | 502 E502K   |
| DICER1 | 806 T806M   |
| DICER1 | 84 Q84E     |
| DICER1 | 871 D871G   |
| DNMT3A | 30 E30A     |
| DNMT3A | 368 A368D   |
| DNMT3A | 414 F414S   |
| DNMT3A | 468 K468R   |
| DNMT3A | 718 P718L   |
| DNMT3A | 729 R729Q   |
| DNMT3A | 729 R729W   |
| DNMT3A | 736 R736H   |
| DNMT3A | 737 L737F   |
| DNMT3A | 741 A741V   |
| DNMT3A | 792 R792H   |
| DNMT3A | 803 R803S   |
| DNMT3A | 829 K829R   |
| DNMT3A | 841 K841Q   |
| DNMT3A | 882 R882C   |
| DNMT3A | 882 R882H   |
| DNMT3A | 882 R882P   |
| DNMT3A | 882 R882S   |
| DNMT3A | 904 P904L   |
| DNMT3A | 909 F909C   |
| DNMT3A | 910 A910T   |
| EGFR   | 1012 D1012H |
| EGFR   | 1048 A1048V |
| EGFR   | 105 Q105H   |
| EGFR   | 108 R108K   |
| EGFR   | 1164 Q1164R |
| EGFR   | 136 P136T   |
| EGFR   | 219 C219G   |
| EGFR   | 222 R222C   |
| EGFR   | 252 R252C   |
| EGFR   | 256 D256A   |
| EGFR   | 263 T263P   |
| EGFR   | 273 T273N   |
| EGFR   | 289 A289D   |
| EGFR   | 289 A289T   |
| EGFR   | 289 A289V   |

|      |           |
|------|-----------|
| EGFR | 292 V292L |
| EGFR | 311 C311S |
| EGFR | 324 R324L |
| EGFR | 326 C326Y |
| EGFR | 451 R451F |
| EGFR | 46 D46N   |
| EGFR | 596 P596L |
| EGFR | 597 A597P |
| EGFR | 597 A597T |
| EGFR | 598 G598V |
| EGFR | 60 V60L   |
| EGFR | 602 E602Q |
| EGFR | 62 L62R   |
| EGFR | 620 C620W |
| EGFR | 620 C620Y |
| EGFR | 624 C624F |
| EGFR | 63 G63R   |
| EGFR | 636 C636Y |
| EGFR | 651 V651M |
| EGFR | 677 R677H |
| EGFR | 680 R680G |
| EGFR | 688 L688P |
| EGFR | 689 V689L |
| EGFR | 691 P691S |
| EGFR | 692 L692P |
| EGFR | 694 P694L |
| EGFR | 694 P694S |
| EGFR | 695 S695G |
| EGFR | 698 A698T |
| EGFR | 699 P699S |
| EGFR | 700 N700S |
| EGFR | 700 N700Y |
| EGFR | 702 A702S |
| EGFR | 702 A702T |
| EGFR | 703 L703F |
| EGFR | 703 L703P |
| EGFR | 703 L703V |
| EGFR | 706 I706T |
| EGFR | 708 K708E |
| EGFR | 708 K708M |
| EGFR | 708 K708R |
| EGFR | 709 E709A |
| EGFR | 709 E709G |

|      |           |
|------|-----------|
| EGFR | 709 E709H |
| EGFR | 709 E709K |
| EGFR | 709 E709V |
| EGFR | 711 E711K |
| EGFR | 712 F712L |
| EGFR | 712 F712S |
| EGFR | 713 K713F |
| EGFR | 715 I715L |
| EGFR | 715 I715S |
| EGFR | 717 V717A |
| EGFR | 718 L718P |
| EGFR | 719 G719A |
| EGFR | 719 G719C |
| EGFR | 719 G719D |
| EGFR | 719 G719S |
| EGFR | 719 G719V |
| EGFR | 720 S720F |
| EGFR | 720 S720P |
| EGFR | 720 S720T |
| EGFR | 721 G721A |
| EGFR | 721 G721D |
| EGFR | 721 G721S |
| EGFR | 722 A722V |
| EGFR | 723 F723S |
| EGFR | 724 G724S |
| EGFR | 725 T725A |
| EGFR | 725 T725M |
| EGFR | 726 V726M |
| EGFR | 727 Y727C |
| EGFR | 727 Y727H |
| EGFR | 728 K728R |
| EGFR | 729 G729E |
| EGFR | 729 G729R |
| EGFR | 730 L730F |
| EGFR | 731 W731L |
| EGFR | 731 W731R |
| EGFR | 732 I732T |
| EGFR | 733 P733L |
| EGFR | 733 P733S |
| EGFR | 733 P733T |
| EGFR | 734 E734K |
| EGFR | 734 E734Q |
| EGFR | 735 G735S |

|      |           |
|------|-----------|
| EGFR | 738 V738G |
| EGFR | 740 I740T |
| EGFR | 741 P741H |
| EGFR | 741 P741L |
| EGFR | 742 V742A |
| EGFR | 743 A743P |
| EGFR | 743 A743S |
| EGFR | 743 A743T |
| EGFR | 744 I744M |
| EGFR | 744 I744V |
| EGFR | 745 K745R |
| EGFR | 746 E746I |
| EGFR | 746 E746K |
| EGFR | 746 E746V |
| EGFR | 747 L747P |
| EGFR | 747 L747S |
| EGFR | 748 R748I |
| EGFR | 748 R748K |
| EGFR | 750 A750P |
| EGFR | 751 T751I |
| EGFR | 752 S752P |
| EGFR | 752 S752Y |
| EGFR | 753 P753F |
| EGFR | 753 P753S |
| EGFR | 754 K754R |
| EGFR | 755 A755D |
| EGFR | 756 N756S |
| EGFR | 756 N756Y |
| EGFR | 758 E758D |
| EGFR | 758 E758G |
| EGFR | 759 I759N |
| EGFR | 759 I759V |
| EGFR | 761 D761G |
| EGFR | 761 D761N |
| EGFR | 761 D761Y |
| EGFR | 765 V765M |
| EGFR | 766 M766T |
| EGFR | 767 A767V |
| EGFR | 768 S768C |
| EGFR | 768 S768I |
| EGFR | 768 S768N |
| EGFR | 769 V769L |
| EGFR | 769 V769M |

|      |           |
|------|-----------|
| EGFR | 770 D770N |
| EGFR | 773 H773L |
| EGFR | 773 H773R |
| EGFR | 773 H773Y |
| EGFR | 774 V774L |
| EGFR | 774 V774M |
| EGFR | 775 C775Y |
| EGFR | 776 R776C |
| EGFR | 776 R776G |
| EGFR | 776 R776H |
| EGFR | 777 L777Q |
| EGFR | 779 G779C |
| EGFR | 779 G779F |
| EGFR | 779 G779S |
| EGFR | 783 T783I |
| EGFR | 784 S784F |
| EGFR | 784 S784P |
| EGFR | 784 S784Y |
| EGFR | 785 T785A |
| EGFR | 785 T785I |
| EGFR | 785 T785N |
| EGFR | 786 V786M |
| EGFR | 787 Q787R |
| EGFR | 790 T790M |
| EGFR | 792 L792P |
| EGFR | 795 F795S |
| EGFR | 796 G796A |
| EGFR | 796 G796S |
| EGFR | 797 C797Y |
| EGFR | 798 L798F |
| EGFR | 798 L798H |
| EGFR | 799 L799R |
| EGFR | 800 D800N |
| EGFR | 801 Y801H |
| EGFR | 802 V802F |
| EGFR | 802 V802I |
| EGFR | 803 R803L |
| EGFR | 804 E804G |
| EGFR | 805 H805I |
| EGFR | 806 K806A |
| EGFR | 806 K806E |
| EGFR | 807 D807N |
| EGFR | 810 G810D |



|      |           |
|------|-----------|
| EGFR | 810 G810S |
| EGFR | 811 S811F |
| EGFR | 812 Q812R |
| EGFR | 813 Y813C |
| EGFR | 814 L814P |
| EGFR | 818 C818Y |
| EGFR | 819 V819A |
| EGFR | 821 I821T |
| EGFR | 826 N826S |
| EGFR | 829 E829K |
| EGFR | 829 E829Q |
| EGFR | 831 R831C |
| EGFR | 831 R831H |
| EGFR | 832 R832C |
| EGFR | 832 R832H |
| EGFR | 832 R832L |
| EGFR | 833 L833V |
| EGFR | 834 V834A |
| EGFR | 834 V834L |
| EGFR | 834 V834M |
| EGFR | 835 H835L |
| EGFR | 836 R836C |
| EGFR | 836 R836S |
| EGFR | 838 L838P |
| EGFR | 838 L838V |
| EGFR | 839 A839T |
| EGFR | 841 R841K |
| EGFR | 842 N842D |
| EGFR | 843 V843I |
| EGFR | 844 L844P |
| EGFR | 845 V845A |
| EGFR | 845 V845M |
| EGFR | 846 K846R |
| EGFR | 847 T847A |
| EGFR | 847 T847I |
| EGFR | 848 P848L |
| EGFR | 849 Q849L |
| EGFR | 849 Q849R |
| EGFR | 850 H850D |
| EGFR | 850 H850N |
| EGFR | 851 V851A |
| EGFR | 851 V851I |
| EGFR | 852 K852N |

|      |           |
|------|-----------|
| EGFR | 853 I853T |
| EGFR | 854 T854A |
| EGFR | 855 D855G |
| EGFR | 855 D855N |
| EGFR | 856 F856L |
| EGFR | 856 F856S |
| EGFR | 857 G857E |
| EGFR | 857 G857R |
| EGFR | 858 L858A |
| EGFR | 858 L858G |
| EGFR | 858 L858K |
| EGFR | 858 L858M |
| EGFR | 858 L858P |
| EGFR | 858 L858Q |
| EGFR | 858 L858R |
| EGFR | 858 L858W |
| EGFR | 859 A859T |
| EGFR | 860 K860E |
| EGFR | 860 K860I |
| EGFR | 861 L861F |
| EGFR | 861 L861P |
| EGFR | 861 L861Q |
| EGFR | 861 L861R |
| EGFR | 861 L861V |
| EGFR | 862 L862P |
| EGFR | 863 G863D |
| EGFR | 863 G863S |
| EGFR | 864 A864E |
| EGFR | 864 A864T |
| EGFR | 866 E866G |
| EGFR | 866 E866K |
| EGFR | 868 E868D |
| EGFR | 868 E868G |
| EGFR | 869 Y869C |
| EGFR | 870 H870N |
| EGFR | 870 H870R |
| EGFR | 870 H870Y |
| EGFR | 871 A871E |
| EGFR | 871 A871G |
| EGFR | 871 A871T |
| EGFR | 872 E872G |
| EGFR | 873 G873E |
| EGFR | 874 G874S |

|        |             |
|--------|-------------|
| EGFR   | 875 K875R   |
| EGFR   | 884 E884K   |
| EGFR   | 897 V897I   |
| EGFR   | 91 I91L     |
| EGFR   | 921 S921R   |
| EGFR   | 968 F968L   |
| EIF4A2 | 181 V181L   |
| EIF4A2 | 3 G3V       |
| EIF4A2 | 316 M316I   |
| ELF4   | 360 P360S   |
| ELN    | 157 G157E   |
| ELN    | 384 G384R   |
| ELN    | 418 A418T   |
| ELN    | 461 A461S   |
| EML4   | 782 V782L   |
| EP300  | 1337 P1337S |
| EP300  | 1452 P1452L |
| EP300  | 1880 P1880S |
| EP300  | 1950 R1950S |
| EP300  | 2143 A2143T |
| ERBB2  | 216 T216S   |
| ERBB2  | 310 S310F   |
| ERBB2  | 311 C311R   |
| ERBB2  | 319 N319D   |
| ERBB2  | 321 E321G   |
| ERBB2  | 326 D326G   |
| ERBB2  | 334 C334S   |
| ERBB2  | 49 L49H     |
| ERBB2  | 724 K724N   |
| ERBB2  | 733 T733I   |
| ERBB2  | 744 E744G   |
| ERBB2  | 745 N745D   |
| ERBB2  | 750 V750E   |
| ERBB2  | 755 L755P   |
| ERBB2  | 755 L755S   |
| ERBB2  | 760 S760F   |
| ERBB2  | 767 I767M   |
| ERBB2  | 769 D769H   |
| ERBB2  | 773 V773A   |
| ERBB2  | 776 G776S   |
| ERBB2  | 776 G776V   |
| ERBB2  | 777 V777A   |
| ERBB2  | 777 V777L   |

|       |           |
|-------|-----------|
| ERBB2 | 777 V777M |
| ERBB2 | 784 R784C |
| ERBB2 | 791 T791I |
| ERBB2 | 799 Q799P |
| ERBB2 | 804 G804S |
| ERBB2 | 829 I829T |
| ERBB2 | 842 V842I |
| ERBB2 | 857 N857S |
| ERBB2 | 869 L869Q |
| ERBB2 | 878 H878Y |
| ERBB2 | 896 R896C |
| ERBB2 | 914 E914K |
| ERC1  | 583 L583I |
| ERCC2 | 618 V618I |
| ERCC3 | 418 K418Q |
| ERCC3 | 517 E517A |
| ERCC4 | 583 A583T |
| ERCC4 | 646 R646T |
| ERCC5 | 186 I186T |
| ERCC5 | 621 Q621E |
| ERCC5 | 78 G78V   |
| ERCC5 | 943 D943Y |
| ERG   | 293 Q293K |
| ERG   | 305 S305L |
| ERG   | 353 R353L |
| ETV1  | 222 F222L |
| ETV1  | 234 P234S |
| ETV1  | 79 L79M   |
| ETV5  | 445 Y445C |
| ETV5  | 452 D452H |
| ETV5  | 77 N77H   |
| ETV6  | 375 G375R |
| EWSR1 | 414 T414A |
| EZH2  | 145 F145C |
| EZH2  | 192 D192N |
| EZH2  | 243 K243Q |
| EZH2  | 244 Y244D |
| EZH2  | 249 E249K |
| EZH2  | 252 L252V |
| EZH2  | 255 A255T |
| EZH2  | 288 R288Q |
| EZH2  | 297 H297R |
| EZH2  | 322 N322S |

|         |             |
|---------|-------------|
| EZH2    | 345 A345T   |
| EZH2    | 509 R509G   |
| EZH2    | 571 C571Y   |
| EZH2    | 576 C576W   |
| EZH2    | 640 N640K   |
| EZH2    | 646 Y646C   |
| EZH2    | 646 Y646F   |
| EZH2    | 646 Y646H   |
| EZH2    | 646 Y646N   |
| EZH2    | 646 Y646S   |
| EZH2    | 656 A656V   |
| EZH2    | 660 G660R   |
| EZH2    | 664 D664E   |
| EZH2    | 664 D664V   |
| EZH2    | 674 L674V   |
| EZH2    | 675 N675K   |
| EZH2    | 684 R684C   |
| EZH2    | 690 R690C   |
| EZH2    | 690 R690H   |
| EZH2    | 693 N693I   |
| EZH2    | 693 N693K   |
| EZH2    | 713 I713T   |
| EZH2    | 731 Y731D   |
| FAM123B | 29 A29T     |
| FAM123B | 292 K292N   |
| FAM123B | 373 A373T   |
| FAM123B | 429 T429I   |
| FAM123B | 46 S46L     |
| FAM123B | 609 Y609F   |
| FANCA   | 1094 S1094G |
| FANCA   | 500 P500A   |
| FANCA   | 932 W932L   |
| FANCE   | 236 H236Y   |
| FANCF   | 185 P185L   |
| FANCG   | 471 V471E   |
| FANCG   | 607 A607T   |
| FAS     | 269 D269N   |
| FBXW7   | 11 K11R     |
| FBXW7   | 121 E121Y   |
| FBXW7   | 156 Q156E   |
| FBXW7   | 264 Q264R   |
| FBXW7   | 298 P298R   |
| FBXW7   | 298 P298S   |

|       |           |
|-------|-----------|
| FBXW7 | 312 R312S |
| FBXW7 | 315 A315T |
| FBXW7 | 379 H379R |
| FBXW7 | 386 C386W |
| FBXW7 | 397 G397D |
| FBXW7 | 420 H420Y |
| FBXW7 | 423 G423V |
| FBXW7 | 438 S438F |
| FBXW7 | 440 D440N |
| FBXW7 | 441 R441W |
| FBXW7 | 460 H460R |
| FBXW7 | 465 R465C |
| FBXW7 | 465 R465H |
| FBXW7 | 465 R465L |
| FBXW7 | 470 H470P |
| FBXW7 | 479 R479G |
| FBXW7 | 479 R479L |
| FBXW7 | 479 R479Q |
| FBXW7 | 480 D480Y |
| FBXW7 | 484 R484M |
| FBXW7 | 484 R484T |
| FBXW7 | 504 V504I |
| FBXW7 | 505 R505C |
| FBXW7 | 505 R505H |
| FBXW7 | 505 R505L |
| FBXW7 | 505 R505P |
| FBXW7 | 505 R505S |
| FBXW7 | 519 Y519C |
| FBXW7 | 520 D520N |
| FBXW7 | 526 W526R |
| FBXW7 | 527 D527G |
| FBXW7 | 532 T532N |
| FBXW7 | 540 H540Y |
| FBXW7 | 543 R543K |
| FBXW7 | 545 Y545C |
| FBXW7 | 563 I563T |
| FBXW7 | 582 S582L |
| FBXW7 | 582 S582P |
| FBXW7 | 594 L594F |
| FBXW7 | 596 S596F |
| FBXW7 | 627 V627A |
| FBXW7 | 672 V672M |
| FBXW7 | 674 R674Q |

|           |           |
|-----------|-----------|
| FBXW7     | 689 R689W |
| FBXW7     | 693 E693K |
| FBXW7_NM_ | 425 R425C |
| FBXW7_NM_ | 483 I483T |
| FCRL4     | 171 G171V |
| FCRL4     | 99 L99R   |
| FGFR1     | 125 S125L |
| FGFR1     | 141 T141R |
| FGFR1     | 252 P252T |
| FGFR1     | 315 G315E |
| FGFR1     | 433 S433F |
| FGFR1     | 546 N546K |
| FGFR1     | 576 R576W |
| FGFR1     | 656 K656E |
| FGFR1     | 664 V664L |
| FGFR1     | 70 G70R   |
| FGFR2     | 101 D101Y |
| FGFR2     | 160 E160A |
| FGFR2     | 203 R203C |
| FGFR2     | 211 N211I |
| FGFR2     | 212 Q212K |
| FGFR2     | 213 H213Y |
| FGFR2     | 219 E219K |
| FGFR2     | 227 G227E |
| FGFR2     | 24 S24F   |
| FGFR2     | 248 V248D |
| FGFR2     | 251 R251Q |
| FGFR2     | 252 S252W |
| FGFR2     | 253 P253R |
| FGFR2     | 267 S267P |
| FGFR2     | 271 G271E |
| FGFR2     | 272 G272V |
| FGFR2     | 283 D283N |
| FGFR2     | 290 W290C |
| FGFR2     | 303 P303L |
| FGFR2     | 305 G305R |
| FGFR2     | 310 K310R |
| FGFR2     | 314 A314D |
| FGFR2     | 315 A315T |
| FGFR2     | 370 T370R |
| FGFR2     | 372 S372C |
| FGFR2     | 375 Y375C |
| FGFR2     | 380 I380V |

|       |           |
|-------|-----------|
| FGFR2 | 382 C382R |
| FGFR2 | 389 A389T |
| FGFR2 | 391 M391R |
| FGFR2 | 475 E475K |
| FGFR2 | 530 D530N |
| FGFR2 | 544 H544Q |
| FGFR2 | 547 I547V |
| FGFR2 | 549 N549K |
| FGFR2 | 574 E574K |
| FGFR2 | 612 R612T |
| FGFR2 | 636 E636K |
| FGFR2 | 640 M640I |
| FGFR2 | 642 I642V |
| FGFR2 | 648 A648T |
| FGFR2 | 659 K659E |
| FGFR2 | 659 K659M |
| FGFR2 | 659 K659N |
| FGFR2 | 688 S688F |
| FGFR2 | 701 G701S |
| FGFR2 | 708 P708S |
| FGFR2 | 759 R759Q |
| FGFR2 | 77 V77M   |
| FGFR2 | 770 L770V |
| FGFR2 | 97 A97T   |
| FGFR3 | 228 C228R |
| FGFR3 | 241 Y241C |
| FGFR3 | 248 R248C |
| FGFR3 | 249 S249C |
| FGFR3 | 249 S249T |
| FGFR3 | 265 A265T |
| FGFR3 | 266 V266M |
| FGFR3 | 322 E322K |
| FGFR3 | 366 A366D |
| FGFR3 | 370 G370C |
| FGFR3 | 371 S371C |
| FGFR3 | 373 Y373C |
| FGFR3 | 376 I376C |
| FGFR3 | 379 Y379C |
| FGFR3 | 380 G380E |
| FGFR3 | 380 G380R |
| FGFR3 | 382 G382D |
| FGFR3 | 384 F384L |
| FGFR3 | 391 A391E |



|        |           |
|--------|-----------|
| FGFR3  | 466 E466K |
| FGFR3  | 540 N540S |
| FGFR3  | 572 P572A |
| FGFR3  | 617 D617G |
| FGFR3  | 627 E627D |
| FGFR3  | 630 V630M |
| FGFR3  | 641 D641N |
| FGFR3  | 643 H643D |
| FGFR3  | 646 D646Y |
| FGFR3  | 650 K650E |
| FGFR3  | 650 K650M |
| FGFR3  | 650 K650N |
| FGFR3  | 650 K650Q |
| FGFR3  | 650 K650T |
| FGFR3  | 653 N653H |
| FGFR3  | 686 E686K |
| FGFR3  | 697 G697C |
| FGFR3  | 79 T79S   |
| FH     | 416 V416M |
| FH     | 442 T442R |
| FIP1L1 | 165 W165R |
| FIP1L1 | 6 V6I     |
| FLI1   | 410 V410I |
| FLI1   | 94 G94E   |
| FLT3   | 167 T167A |
| FLT3   | 194 V194M |
| FLT3   | 31 P31L   |
| FLT3   | 324 D324N |
| FLT3   | 364 Y364H |
| FLT3   | 451 S451F |
| FLT3   | 530 N530Y |
| FLT3   | 557 V557I |
| FLT3   | 563 C563S |
| FLT3   | 571 V571I |
| FLT3   | 572 Y572C |
| FLT3   | 574 S574G |
| FLT3   | 579 V579A |
| FLT3   | 591 Y591C |
| FLT3   | 592 V592A |
| FLT3   | 592 V592G |
| FLT3   | 594 F594L |
| FLT3   | 598 E598G |
| FLT3   | 599 Y599F |

|       |           |
|-------|-----------|
| FLT3  | 615 V615A |
| FLT3  | 627 A627T |
| FLT3  | 663 K663Q |
| FLT3  | 680 A680V |
| FLT3  | 737 M737I |
| FLT3  | 831 G831E |
| FLT3  | 834 R834Q |
| FLT3  | 835 D835A |
| FLT3  | 835 D835E |
| FLT3  | 835 D835F |
| FLT3  | 835 D835H |
| FLT3  | 835 D835I |
| FLT3  | 835 D835N |
| FLT3  | 835 D835V |
| FLT3  | 835 D835Y |
| FLT3  | 836 I836D |
| FLT3  | 836 I836F |
| FLT3  | 836 I836H |
| FLT3  | 836 I836L |
| FLT3  | 836 I836M |
| FLT3  | 836 I836S |
| FLT3  | 836 I836V |
| FLT3  | 837 M837P |
| FLT3  | 841 N841H |
| FLT3  | 841 N841K |
| FLT3  | 842 Y842C |
| FOXL2 | 134 C134W |
| FOXL2 | 135 E135G |
| FOXO3 | 318 S318C |
| FOXO3 | 6 A6S     |
| FOXO3 | 86 G86R   |
| FOXO4 | 344 S344F |
| FOXP1 | 603 R603Q |
| FUS   | 312 K312Q |
| GATA1 | 1 M1I     |
| GATA1 | 1 M1N     |
| GATA1 | 1 M1V     |
| GATA1 | 11 T11N   |
| GATA1 | 2 E2G     |
| GATA1 | 26 S26F   |
| GATA1 | 59 A59V   |
| GATA1 | 61 A61D   |
| GATA1 | 74 V74D   |

|           |           |
|-----------|-----------|
| GATA1     | 74 V74F   |
| GATA1     | 74 V74I   |
| GATA1     | 76 Q76E   |
| GATA2     | 125 P125T |
| GATA2     | 359 L359V |
| GATA2     | 71 S71F   |
| GATA3     | 146 A146T |
| GATA3     | 199 S199F |
| GATA3     | 344 L344F |
| GATA3     | 367 R367L |
| GATA3     | 403 S403F |
| GMPS      | 359 P359A |
| GNA11     | 183 R183C |
| GNA11     | 183 R183H |
| GNA11     | 209 Q209L |
| GNA11     | 209 Q209P |
| GNA11     | 223 V223M |
| GNA11     | 256 R256W |
| GNA11     | 266 N266K |
| GNA11     | 333 D333Y |
| GNAS      | 141 D141V |
| GNAS      | 201 R201C |
| GNAS      | 201 R201H |
| GNAS      | 201 R201S |
| GNAS      | 203 L203P |
| GNAS      | 227 Q227E |
| GNAS      | 227 Q227H |
| GNAS      | 227 Q227K |
| GNAS      | 227 Q227L |
| GNAS      | 227 Q227R |
| GNAS      | 248 V248M |
| GNAS_NM_0 | 110 E110K |
| GNAS_NM_0 | 217 R217C |
| GNAS_NM_0 | 49 N49K   |
| GNAS_NM_0 | 89 E89D   |
| GOLGA5    | 476 E476Q |
| GOLGA5    | 492 L492F |
| GOLGA5    | 87 G87A   |
| GPC3      | 164 D164H |
| GPC3      | 317 E317K |
| GPHN      | 377 I377N |
| GPHN      | 685 P685L |
| HIP1      | 459 R459K |

|          |           |
|----------|-----------|
| HIP1     | 464 N464T |
| HIP1     | 949 A949V |
| HLF      | 196 R196G |
| HNF1A    | 127 N127Y |
| HNF1A    | 131 R131W |
| HNF1A    | 155 K155N |
| HNF1A    | 165 W165C |
| HNF1A    | 165 W165R |
| HNF1A    | 168 R168C |
| HNF1A    | 203 R203C |
| HNF1A    | 206 W206C |
| HNF1A    | 206 W206L |
| HNF1A    | 207 G207D |
| HNF1A    | 211 Q211P |
| HNF1A    | 218 Y218C |
| HNF1A    | 229 R229G |
| HNF1A    | 229 R229Q |
| HNF1A    | 237 N237S |
| HNF1A    | 244 R244G |
| HNF1A    | 250 Q250P |
| HNF1A    | 259 V259L |
| HNF1A    | 26 L26Q   |
| HNF1A    | 260 T260M |
| HNF1A    | 263 R263C |
| HNF1A    | 263 R263H |
| HNF1A    | 268 F268C |
| HNF1A    | 271 R271W |
| HNF1A    | 272 R272H |
| HNF1A    | 272 R272S |
| HNF1A    | 273 K273E |
| HNF1A    | 447 P447L |
| HNF1A    | 574 G574D |
| HOOK3    | 221 Q221R |
| HSP90AA1 | 327 E327D |
| HSP90AA1 | 48 P48S   |
| HSP90AA1 | 854 D854G |
| IDH1     | 123 G123E |
| IDH1     | 132 R132C |
| IDH1     | 132 R132G |
| IDH1     | 132 R132H |
| IDH1     | 132 R132L |
| IDH1     | 132 R132S |
| IDH1     | 132 R132V |

|       |             |
|-------|-------------|
| IDH1  | 49 R49C     |
| IDH1  | 71 V71I     |
| IDH1  | 97 G97D     |
| IDH1  | 99 I99M     |
| IDH2  | 140 R140L   |
| IDH2  | 140 R140Q   |
| IDH2  | 140 R140W   |
| IDH2  | 172 R172G   |
| IDH2  | 172 R172K   |
| IDH2  | 172 R172M   |
| IDH2  | 172 R172S   |
| IDH2  | 172 R172W   |
| IDH2  | 294 V294M   |
| IKZF1 | 433 R433S   |
| IL21R | 422 G422E   |
| IL6ST | 415 T415I   |
| ITK   | 108 E108Q   |
| ITK   | 137 E137D   |
| ITK   | 159 P159L   |
| ITK   | 19 R19K     |
| ITK   | 202 D202A   |
| ITK   | 23 P23L     |
| ITK   | 261 A261P   |
| ITK   | 349 A349S   |
| ITK   | 372 G372V   |
| ITK   | 451 R451Q   |
| ITK   | 51 L51Q     |
| ITK   | 582 L582V   |
| JAK1  | 1045 V1045K |
| JAK1  | 1047 W1047G |
| JAK1  | 204 K204M   |
| JAK1  | 463 Y463S   |
| JAK1  | 478 T478S   |
| JAK1  | 512 S512L   |
| JAK1  | 593 T593M   |
| JAK1  | 623 V623A   |
| JAK1  | 634 A634D   |
| JAK1  | 642 M642I   |
| JAK1  | 644 Q644H   |
| JAK1  | 645 V645F   |
| JAK1  | 646 S646F   |
| JAK1  | 647 H647Y   |
| JAK1  | 652 Y652H   |

|      |             |
|------|-------------|
| JAK1 | 653 L653F   |
| JAK1 | 658 V658F   |
| JAK1 | 660 D660H   |
| JAK1 | 724 R724H   |
| JAK1 | 724 R724Q   |
| JAK1 | 771 S771C   |
| JAK1 | 782 T782M   |
| JAK1 | 783 L783F   |
| JAK1 | 828 M828I   |
| JAK1 | 879 R879C   |
| JAK1 | 879 R879H   |
| JAK1 | 879 R879S   |
| JAK1 | 882 G882E   |
| JAK1 | 966 E966V   |
| JAK2 | 1108 N1108S |
| JAK2 | 1122 R1122P |
| JAK2 | 166 I166T   |
| JAK2 | 191 K191Q   |
| JAK2 | 324 I324S   |
| JAK2 | 503 P503L   |
| JAK2 | 514 T514M   |
| JAK2 | 533 N533Y   |
| JAK2 | 535 M535I   |
| JAK2 | 537 F537I   |
| JAK2 | 538 H538Q   |
| JAK2 | 539 K539E   |
| JAK2 | 539 K539L   |
| JAK2 | 544 D544G   |
| JAK2 | 545 L545S   |
| JAK2 | 545 L545V   |
| JAK2 | 547 F547L   |
| JAK2 | 564 R564L   |
| JAK2 | 564 R564Q   |
| JAK2 | 567 V567A   |
| JAK2 | 571 G571R   |
| JAK2 | 571 G571S   |
| JAK2 | 579 L579F   |
| JAK2 | 587 H587N   |
| JAK2 | 591 S591L   |
| JAK2 | 606 H606Q   |
| JAK2 | 607 K607N   |
| JAK2 | 608 H608Y   |
| JAK2 | 609 L609S   |

|       |             |
|-------|-------------|
| JAK2  | 611 L611S   |
| JAK2  | 611 L611V   |
| JAK2  | 616 C616Y   |
| JAK2  | 617 V617F   |
| JAK2  | 617 V617I   |
| JAK2  | 618 C618F   |
| JAK2  | 618 C618R   |
| JAK2  | 620 D620E   |
| JAK2  | 624 L624P   |
| JAK2  | 645 I645V   |
| JAK2  | 683 R683G   |
| JAK2  | 683 R683K   |
| JAK2  | 683 R683S   |
| JAK2  | 683 R683T   |
| JAK2  | 813 Y813D   |
| JAK2  | 875 T875N   |
| JAK2  | 931 Y931C   |
| JAK3  | 1017 L1017M |
| JAK3  | 1090 A1090S |
| JAK3  | 1101 G1101R |
| JAK3  | 127 A127D   |
| JAK3  | 132 P132T   |
| JAK3  | 151 P151R   |
| JAK3  | 434 P434R   |
| JAK3  | 435 T435I   |
| JAK3  | 493 S493C   |
| JAK3  | 501 Q501H   |
| JAK3  | 511 M511I   |
| JAK3  | 527 L527P   |
| JAK3  | 572 A572V   |
| JAK3  | 573 A573V   |
| JAK3  | 576 M576K   |
| JAK3  | 593 A593T   |
| JAK3  | 62 G62S     |
| JAK3  | 657 R657Q   |
| JAK3  | 715 V715I   |
| JAK3  | 722 V722I   |
| JAK3  | 789 S789P   |
| JAK3  | 87 I87T     |
| JAK3  | 918 R918C   |
| KDM5A | 1229 L1229F |
| KDM5C | 1222 S1222P |
| KDM5C | 1429 P1429L |

|       |             |
|-------|-------------|
| KDM5C | 179 R179H   |
| KDM5C | 643 S643F   |
| KDM5C | 912 G912E   |
| KDM6A | 1074 R1074G |
| KDM6A | 1106 L1106R |
| KDM6A | 771 G771D   |
| KDM6A | 977 L977I   |
| KDR   | 1041 V1041M |
| KDR   | 1065 A1065T |
| KDR   | 1140 L1140M |
| KDR   | 1145 G1145E |
| KDR   | 1210 P1210L |
| KDR   | 180 D180N   |
| KDR   | 2 Q2R       |
| KDR   | 248 A248G   |
| KDR   | 275 R275L   |
| KDR   | 352 A352V   |
| KDR   | 476 V476L   |
| KDR   | 717 D717V   |
| KDR   | 771 T771R   |
| KDR   | 873 G873R   |
| KDR   | 973 A973S   |
| KDR   | 984 S984T   |
| KIT   | 270 E270K   |
| KIT   | 31 P31L     |
| KIT   | 327 D327N   |
| KIT   | 338 E338K   |
| KIT   | 351 M351I   |
| KIT   | 399 V399I   |
| KIT   | 418 Y418N   |
| KIT   | 456 P456S   |
| KIT   | 457 V457M   |
| KIT   | 469 F469L   |
| KIT   | 470 G470R   |
| KIT   | 476 S476I   |
| KIT   | 486 N486D   |
| KIT   | 489 V489A   |
| KIT   | 495 N495I   |
| KIT   | 496 D496V   |
| KIT   | 498 G498S   |
| KIT   | 50 V50M     |
| KIT   | 504 F504L   |
| KIT   | 509 K509I   |



|     |           |
|-----|-----------|
| KIT | 512 N512D |
| KIT | 52 D52N   |
| KIT | 53 E53K   |
| KIT | 530 V530I |
| KIT | 538 I538M |
| KIT | 541 M541L |
| KIT | 550 K550I |
| KIT | 550 K550N |
| KIT | 550 K550R |
| KIT | 551 P551L |
| KIT | 551 P551S |
| KIT | 551 P551T |
| KIT | 552 M552I |
| KIT | 552 M552K |
| KIT | 552 M552L |
| KIT | 552 M552T |
| KIT | 552 M552V |
| KIT | 553 Y553C |
| KIT | 553 Y553N |
| KIT | 553 Y553V |
| KIT | 554 E554A |
| KIT | 554 E554D |
| KIT | 554 E554G |
| KIT | 554 E554K |
| KIT | 555 V555E |
| KIT | 556 Q556H |
| KIT | 556 Q556P |
| KIT | 557 W557C |
| KIT | 557 W557F |
| KIT | 557 W557G |
| KIT | 557 W557R |
| KIT | 557 W557S |
| KIT | 558 K558E |
| KIT | 558 K558N |
| KIT | 558 K558Q |
| KIT | 558 K558R |
| KIT | 559 V559A |
| KIT | 559 V559D |
| KIT | 559 V559F |
| KIT | 559 V559G |
| KIT | 559 V559I |
| KIT | 560 V560A |
| KIT | 560 V560D |

|     |           |
|-----|-----------|
| KIT | 560 V560E |
| KIT | 560 V560G |
| KIT | 561 E561D |
| KIT | 561 E561K |
| KIT | 562 E562A |
| KIT | 562 E562K |
| KIT | 562 E562V |
| KIT | 564 N564H |
| KIT | 564 N564K |
| KIT | 564 N564S |
| KIT | 565 G565R |
| KIT | 566 N566D |
| KIT | 566 N566S |
| KIT | 567 N567H |
| KIT | 567 N567K |
| KIT | 567 N567S |
| KIT | 568 Y568C |
| KIT | 568 Y568D |
| KIT | 568 Y568S |
| KIT | 569 V569A |
| KIT | 569 V569G |
| KIT | 569 V569I |
| KIT | 570 Y570D |
| KIT | 570 Y570F |
| KIT | 571 I571R |
| KIT | 572 D572Y |
| KIT | 574 T574I |
| KIT | 576 L576F |
| KIT | 576 L576P |
| KIT | 577 P577K |
| KIT | 577 P577L |
| KIT | 577 P577S |
| KIT | 579 D579E |
| KIT | 580 H580Y |
| KIT | 581 K581Q |
| KIT | 581 K581R |
| KIT | 584 F584L |
| KIT | 584 F584S |
| KIT | 586 R586I |
| KIT | 589 L589P |
| KIT | 590 S590N |
| KIT | 591 F591L |
| KIT | 594 T594I |

|     |           |
|-----|-----------|
| KIT | 596 G596D |
| KIT | 599 A599T |
| KIT | 617 A617S |
| KIT | 627 P627L |
| KIT | 634 R634W |
| KIT | 636 A636V |
| KIT | 639 S639P |
| KIT | 642 K642E |
| KIT | 643 V643A |
| KIT | 647 L647P |
| KIT | 651 M651V |
| KIT | 653 I653T |
| KIT | 654 V654A |
| KIT | 654 V654E |
| KIT | 655 N655K |
| KIT | 658 G658E |
| KIT | 664 G664R |
| KIT | 670 T670E |
| KIT | 670 T670I |
| KIT | 672 Y672S |
| KIT | 696 D696G |
| KIT | 697 H697Y |
| KIT | 709 S709F |
| KIT | 716 D716N |
| KIT | 720 E720K |
| KIT | 724 M724I |
| KIT | 73 E73K   |
| KIT | 735 K735M |
| KIT | 737 D737N |
| KIT | 748 I748T |
| KIT | 753 T753A |
| KIT | 761 E761K |
| KIT | 786 K786N |
| KIT | 796 R796G |
| KIT | 801 T801I |
| KIT | 802 H802Y |
| KIT | 804 R804W |
| KIT | 809 C809G |
| KIT | 809 C809R |
| KIT | 813 L813P |
| KIT | 814 A814S |
| KIT | 814 A814T |
| KIT | 816 D816A |

|     |           |
|-----|-----------|
| KIT | 816 D816E |
| KIT | 816 D816F |
| KIT | 816 D816G |
| KIT | 816 D816H |
| KIT | 816 D816I |
| KIT | 816 D816N |
| KIT | 816 D816V |
| KIT | 816 D816Y |
| KIT | 817 I817L |
| KIT | 817 I817V |
| KIT | 818 K818R |
| KIT | 819 N819Y |
| KIT | 820 D820A |
| KIT | 820 D820E |
| KIT | 820 D820G |
| KIT | 820 D820H |
| KIT | 820 D820N |
| KIT | 820 D820V |
| KIT | 820 D820Y |
| KIT | 822 N822D |
| KIT | 822 N822H |
| KIT | 822 N822I |
| KIT | 822 N822K |
| KIT | 822 N822S |
| KIT | 822 N822T |
| KIT | 822 N822Y |
| KIT | 823 Y823C |
| KIT | 823 Y823D |
| KIT | 823 Y823N |
| KIT | 825 V825A |
| KIT | 825 V825I |
| KIT | 829 A829P |
| KIT | 839 E839K |
| KIT | 841 I841V |
| KIT | 854 S854P |
| KIT | 859 L859P |
| KIT | 864 S864F |
| KIT | 868 S868G |
| KIT | 910 D910Y |
| KIT | 918 K918E |
| KIT | 925 E925G |
| KIT | 950 V950A |
| KIT | 956 R956Q |

|      |           |
|------|-----------|
| KIT  | 957 I957T |
| KIT  | 96 T96M   |
| KIT  | 961 G961S |
| KLF6 | 12 E12G   |
| KLF6 | 124 K124R |
| KLF6 | 77 S77F   |
| KLK2 | 237 P237S |
| KLK2 | 57 P57S   |
| KRAS | 11 A11P   |
| KRAS | 11 A11V   |
| KRAS | 117 K117N |
| KRAS | 12 G12A   |
| KRAS | 12 G12C   |
| KRAS | 12 G12D   |
| KRAS | 12 G12E   |
| KRAS | 12 G12F   |
| KRAS | 12 G12I   |
| KRAS | 12 G12L   |
| KRAS | 12 G12N   |
| KRAS | 12 G12R   |
| KRAS | 12 G12S   |
| KRAS | 12 G12V   |
| KRAS | 12 G12W   |
| KRAS | 12 G12Y   |
| KRAS | 13 G13A   |
| KRAS | 13 G13C   |
| KRAS | 13 G13D   |
| KRAS | 13 G13E   |
| KRAS | 13 G13I   |
| KRAS | 13 G13N   |
| KRAS | 13 G13R   |
| KRAS | 13 G13S   |
| KRAS | 13 G13V   |
| KRAS | 14 V14I   |
| KRAS | 146 A146P |
| KRAS | 146 A146T |
| KRAS | 146 A146V |
| KRAS | 15 G15D   |
| KRAS | 15 G15S   |
| KRAS | 164 R164Q |
| KRAS | 17 S17G   |
| KRAS | 17 S17N   |
| KRAS | 18 A18D   |

|        |             |
|--------|-------------|
| KRAS   | 18 A18T     |
| KRAS   | 19 L19F     |
| KRAS   | 22 Q22K     |
| KRAS   | 22 Q22R     |
| KRAS   | 23 L23I     |
| KRAS   | 27 H27L     |
| KRAS   | 31 E31Q     |
| KRAS   | 34 P34S     |
| KRAS   | 35 T35I     |
| KRAS   | 45 V45I     |
| KRAS   | 5 K5N       |
| KRAS   | 59 A59E     |
| KRAS   | 59 A59G     |
| KRAS   | 59 A59T     |
| KRAS   | 60 G60A     |
| KRAS   | 61 Q61E     |
| KRAS   | 61 Q61H     |
| KRAS   | 61 Q61K     |
| KRAS   | 61 Q61L     |
| KRAS   | 61 Q61P     |
| KRAS   | 61 Q61R     |
| KRAS   | 62 E62D     |
| KRAS   | 63 E63K     |
| KRAS   | 69 D69N     |
| KRAS   | 7 V7M       |
| KRAS   | 72 M72I     |
| KRAS   | 74 T74P     |
| KRAS   | 80 C80Y     |
| KRAS   | 92 D92Y     |
| KTN1   | 113 E113K   |
| KTN1   | 1316 T1316P |
| KTN1   | 226 P226R   |
| KTN1   | 908 K908R   |
| LCK    | 331 P331S   |
| LHFP   | 55 H55N     |
| LIFR   | 1068 F1068L |
| LIFR   | 135 I135N   |
| LIFR   | 302 R302H   |
| LPP    | 601 I601L   |
| MALT1  | 795 E795K   |
| MAML2  | 514 M514V   |
| MAML2  | 857 M857V   |
| MAP2K4 | 142 Q142L   |

|        |           |
|--------|-----------|
| MAP2K4 | 154 R154W |
| MAP2K4 | 184 S184L |
| MAP2K4 | 234 N234I |
| MAP2K4 | 251 S251N |
| MAP2K4 | 274 R274G |
| MAP2K4 | 279 A279T |
| MAP2K4 | 309 K309N |
| MDM2   | 281 Y281H |
| MDM2   | 329 W329G |
| MDM2   | 459 M459I |
| MDM4   | 160 T160S |
| MDM4   | 367 S367L |
| MDS2   | 49 S49G   |
| MDS2   | 49 S49R   |
| MECOM  | 225 M225I |
| MECOM  | 269 V269I |
| MECOM  | 711 M711V |
| MECOM  | 928 D928N |
| MEN1   | 121 V121D |
| MEN1   | 126 W126G |
| MEN1   | 139 H139D |
| MEN1   | 141 Q141R |
| MEN1   | 145 S145R |
| MEN1   | 152 L152W |
| MEN1   | 156 G156D |
| MEN1   | 159 F159C |
| MEN1   | 162 V162C |
| MEN1   | 162 V162F |
| MEN1   | 171 R171Q |
| MEN1   | 172 D172V |
| MEN1   | 175 L175R |
| MEN1   | 178 S178Y |
| MEN1   | 179 E179V |
| MEN1   | 183 W183G |
| MEN1   | 183 W183R |
| MEN1   | 211 V211F |
| MEN1   | 253 S253L |
| MEN1   | 26 E26K   |
| MEN1   | 284 A284P |
| MEN1   | 291 P291A |
| MEN1   | 295 R295L |
| MEN1   | 32 P32R   |
| MEN1   | 320 P320L |

|      |             |
|------|-------------|
| MEN1 | 330 R330P   |
| MEN1 | 359 E359K   |
| MEN1 | 37 L37P     |
| MEN1 | 378 E378V   |
| MEN1 | 410 F410L   |
| MEN1 | 418 D418N   |
| MEN1 | 42 G42S     |
| MEN1 | 433 H433P   |
| MEN1 | 443 S443P   |
| MEN1 | 45 E45D     |
| MEN1 | 49 A49D     |
| MEN1 | 502 K502M   |
| MEN1 | 53 V53I     |
| MEN1 | 535 A535V   |
| MEN1 | 543 S543L   |
| MEN1 | 552 T552S   |
| MEN1 | 561 M561T   |
| MEN1 | 580 T580R   |
| MEN1 | 86 I86F     |
| MEN1 | 89 L89R     |
| MET  | 1000 R1000S |
| MET  | 1010 T1010I |
| MET  | 1021 Y1021N |
| MET  | 1112 H1112L |
| MET  | 1112 H1112R |
| MET  | 1112 H1112Y |
| MET  | 1118 N1118Y |
| MET  | 1124 H1124D |
| MET  | 1126 A1126S |
| MET  | 1137 G1137V |
| MET  | 1149 M1149T |
| MET  | 1178 M1178I |
| MET  | 1191 T1191I |
| MET  | 1209 A1209G |
| MET  | 1213 L1213V |
| MET  | 1246 D1246H |
| MET  | 1248 Y1248C |
| MET  | 1248 Y1248H |
| MET  | 1253 Y1253D |
| MET  | 1260 G1260C |
| MET  | 1262 K1262R |
| MET  | 1268 M1268I |
| MET  | 1268 M1268T |



|      |             |
|------|-------------|
| MET  | 1275 T1275I |
| MET  | 1290 V1290L |
| MET  | 1333 V1333I |
| MET  | 136 V136I   |
| MET  | 1398 D1398N |
| MET  | 168 E168D   |
| MET  | 211 L211W   |
| MET  | 221 E221G   |
| MET  | 229 L229F   |
| MET  | 230 T230M   |
| MET  | 238 L238F   |
| MET  | 266 R266S   |
| MET  | 370 V370D   |
| MET  | 375 N375S   |
| MET  | 978 Q978L   |
| MET  | 983 G983V   |
| MET  | 988 R988C   |
| MITF | 270 R270L   |
| MITF | 323 N323T   |
| MKL1 | 39 L39V     |
| MLH1 | 101 G101S   |
| MLH1 | 108 S108R   |
| MLH1 | 158 N158H   |
| MLH1 | 187 N187Y   |
| MLH1 | 2 S2L       |
| MLH1 | 233 C233R   |
| MLH1 | 244 G244V   |
| MLH1 | 325 R325Q   |
| MLH1 | 384 V384D   |
| MLH1 | 410 A410T   |
| MLH1 | 469 P469L   |
| MLH1 | 522 R522W   |
| MLH1 | 523 E523D   |
| MLH1 | 523 E523K   |
| MLH1 | 54 G54E     |
| MLH1 | 543 H543R   |
| MLH1 | 587 M587V   |
| MLH1 | 618 K618T   |
| MLH1 | 681 A681V   |
| MLH1 | 69 R69K     |
| MLH1 | 724 L724W   |
| MLL  | 1464 E1464G |
| MLL  | 1690 D1690H |

|        |             |
|--------|-------------|
| MLL    | 1904 A1904V |
| MLL    | 2158 G2158D |
| MLL    | 2170 P2170S |
| MLL    | 2204 R2204Q |
| MLL    | 2274 G2274R |
| MLL    | 2330 K2330E |
| MLL    | 2338 T2338S |
| MLL    | 2590 N2590K |
| MLL    | 2673 T2673S |
| MLL    | 353 R353Q   |
| MLL    | 3550 G3550R |
| MLL    | 960 I960M   |
| MLLT10 | 352 S352N   |
| MLLT3  | 219 K219R   |
| MLLT3  | 36 V36L     |
| MLLT4  | 1344 I1344V |
| MLLT6  | 647 T647I   |
| MN1    | 100 G100S   |
| MN1    | 1197 S1197N |
| MN1    | 1292 A1292T |
| MN1    | 67 P67S     |
| MPL    | 204 S204F   |
| MPL    | 204 S204P   |
| MPL    | 487 T487A   |
| MPL    | 505 S505N   |
| MPL    | 506 A506T   |
| MPL    | 509 G509C   |
| MPL    | 510 L510P   |
| MPL    | 515 W515A   |
| MPL    | 515 W515K   |
| MPL    | 515 W515L   |
| MPL    | 515 W515R   |
| MPL    | 519 A519T   |
| MPL    | 591 Y591D   |
| MSH2   | 237 I237V   |
| MSH2   | 322 G322D   |
| MSH2   | 467 E467K   |
| MSH2   | 587 G587R   |
| MSH2   | 603 D603Y   |
| MSH2   | 674 G674S   |
| MSH2   | 69 P69T     |
| MSH2   | 692 G692E   |
| MSH2   | 822 C822F   |

|       |             |
|-------|-------------|
| MSH2  | 827 G827R   |
| MSH6  | 1008 T1008I |
| MSH6  | 1024 R1024W |
| MSH6  | 1034 R1034Q |
| MSH6  | 1056 V1056M |
| MSH6  | 109 L109V   |
| MSH6  | 1151 A1151V |
| MSH6  | 1219 T1219I |
| MSH6  | 1303 A1303T |
| MSH6  | 187 K187T   |
| MSH6  | 197 D197H   |
| MSH6  | 198 E198A   |
| MSH6  | 201 E201Q   |
| MSH6  | 247 K247I   |
| MSH6  | 258 I258T   |
| MSH6  | 265 F265C   |
| MSH6  | 315 S315F   |
| MSH6  | 390 D390N   |
| MSH6  | 397 Y397C   |
| MSH6  | 42 P42S     |
| MSH6  | 474 V474A   |
| MSH6  | 480 V480L   |
| MSH6  | 484 E484K   |
| MSH6  | 487 E487D   |
| MSH6  | 509 V509A   |
| MSH6  | 532 S532A   |
| MSH6  | 575 D575Y   |
| MSH6  | 58 R58S     |
| MSH6  | 623 P623L   |
| MSH6  | 644 R644S   |
| MSH6  | 770 G770V   |
| MSH6  | 932 G932D   |
| MSH6  | 971 G971E   |
| MSN   | 88 D88A     |
| MUC1  | 137 T137K   |
| MUC1  | 244 R244H   |
| MYB   | 130 C130Y   |
| MYC   | 250 S250I   |
| MYCL1 | 140 P140T   |
| MYCL1 | 205 F205C   |
| MYCN  | 358 P358L   |
| MYCN  | 402 L402F   |
| MYCN  | 44 P44L     |

|       |             |
|-------|-------------|
| MYCN  | 74 P74L     |
| MYH11 | 1284 K1284Q |
| MYH11 | 280 T280R   |
| MYH11 | 414 K414E   |
| MYH11 | 786 I786T   |
| MYH9  | 398 R398Q   |
| MYH9  | 438 D438E   |
| MYH9  | 686 H686Y   |
| MYH9  | 810 K810N   |
| MYST3 | 26 R26C     |
| MYST3 | 456 N456S   |
| MYST3 | 585 V585M   |
| MYST3 | 673 E673D   |
| MYST4 | 1194 Q1194L |
| MYST4 | 1317 A1317T |
| MYST4 | 1373 E1373G |
| MYST4 | 1530 G1530E |
| MYST4 | 1618 S1618I |
| MYST4 | 483 T483A   |
| MYST4 | 705 E705K   |
| NACA  | 128 I128M   |
| NBN   | 679 Y679H   |
| NBN   | 748 P748S   |
| NCOA1 | 356 P356L   |
| NCOA2 | 1032 Q1032E |
| NCOA2 | 1206 L1206R |
| NCOA2 | 439 G439D   |
| NCOA2 | 470 P470S   |
| NF1   | 1099 K1099I |
| NF1   | 1150 S1150L |
| NF1   | 1182 V1182F |
| NF1   | 1187 L1187I |
| NF1   | 1276 R1276Q |
| NF1   | 1302 D1302Y |
| NF1   | 1412 R1412S |
| NF1   | 1444 K1444E |
| NF1   | 1444 K1444Q |
| NF1   | 1447 Q1447K |
| NF1   | 1757 V1757D |
| NF1   | 176 D176E   |
| NF1   | 1830 R1830C |
| NF1   | 1849 D1849N |
| NF1   | 1858 A1858T |

|     |             |
|-----|-------------|
| NF1 | 1863 G1863A |
| NF1 | 1882 C1882F |
| NF1 | 1919 E1919K |
| NF1 | 194 L194P   |
| NF1 | 1951 P1951L |
| NF1 | 1984 N1984T |
| NF1 | 209 Q209H   |
| NF1 | 21 L21R     |
| NF1 | 2150 R2150S |
| NF1 | 2156 F2156L |
| NF1 | 2181 S2181G |
| NF1 | 23 I23L     |
| NF1 | 2336 A2336T |
| NF1 | 2416 L2416V |
| NF1 | 2472 P2472H |
| NF1 | 2477 P2477S |
| NF1 | 2484 S2484F |
| NF1 | 2632 D2632E |
| NF1 | 274 L274R   |
| NF1 | 2745 G2745R |
| NF1 | 519 Q519P   |
| NF1 | 526 I526S   |
| NF1 | 550 L550P   |
| NF1 | 554 Q554E   |
| NF1 | 574 S574T   |
| NF1 | 583 K583R   |
| NF1 | 712 H712R   |
| NF1 | 74 A74D     |
| NF1 | 809 H809Y   |
| NF1 | 835 Q835H   |
| NF1 | 91 E91K     |
| NF1 | 922 G922V   |
| NF1 | 997 R997K   |
| NF2 | 117 L117I   |
| NF2 | 141 L141R   |
| NF2 | 146 V146I   |
| NF2 | 149 K149N   |
| NF2 | 156 S156R   |
| NF2 | 167 E167D   |
| NF2 | 191 W191R   |
| NF2 | 197 G197C   |
| NF2 | 211 A211D   |
| NF2 | 219 V219M   |

|        |             |
|--------|-------------|
| NF2    | 221 Y221C   |
| NF2    | 247 E247K   |
| NF2    | 270 E270D   |
| NF2    | 273 I273F   |
| NF2    | 324 Q324L   |
| NF2    | 339 L339F   |
| NF2    | 346 R346S   |
| NF2    | 364 K364I   |
| NF2    | 387 K387E   |
| NF2    | 395 A395V   |
| NF2    | 41 W41C     |
| NF2    | 46 L46R     |
| NF2    | 463 E463K   |
| NF2    | 470 Q470L   |
| NF2    | 487 I487V   |
| NF2    | 539 L539H   |
| NF2    | 79 K79E     |
| NIN    | 1565 E1565K |
| NKX2-1 | 92 G92D     |
| NONO   | 213 F213L   |
| NOTCH1 | 1050 Q1050L |
| NOTCH1 | 1216 G1216D |
| NOTCH1 | 1541 F1541L |
| NOTCH1 | 1547 D1547G |
| NOTCH1 | 1575 L1575P |
| NOTCH1 | 1575 L1575Q |
| NOTCH1 | 1577 V1577A |
| NOTCH1 | 1577 V1577E |
| NOTCH1 | 1578 V1578A |
| NOTCH1 | 1579 V1579A |
| NOTCH1 | 1579 V1579E |
| NOTCH1 | 1579 V1579G |
| NOTCH1 | 1584 E1584G |
| NOTCH1 | 1586 L1586P |
| NOTCH1 | 1586 L1586Q |
| NOTCH1 | 1586 L1586R |
| NOTCH1 | 1587 R1587P |
| NOTCH1 | 1592 H1592Y |
| NOTCH1 | 1593 F1593C |
| NOTCH1 | 1593 F1593L |
| NOTCH1 | 1593 F1593S |
| NOTCH1 | 1594 L1594P |
| NOTCH1 | 1597 L1597H |

|        |             |
|--------|-------------|
| NOTCH1 | 1598 S1598I |
| NOTCH1 | 1599 R1599P |
| NOTCH1 | 1601 L1601P |
| NOTCH1 | 1601 L1601Q |
| NOTCH1 | 1602 H1602P |
| NOTCH1 | 1605 V1605E |
| NOTCH1 | 1605 V1605G |
| NOTCH1 | 1608 K1608N |
| NOTCH1 | 1609 R1609S |
| NOTCH1 | 1610 D1610V |
| NOTCH1 | 1611 A1611T |
| NOTCH1 | 1615 Q1615K |
| NOTCH1 | 1617 I1617N |
| NOTCH1 | 1620 Y1620N |
| NOTCH1 | 1628 R1628H |
| NOTCH1 | 1628 R1628Q |
| NOTCH1 | 1632 I1632V |
| NOTCH1 | 1634 R1634L |
| NOTCH1 | 1635 A1635S |
| NOTCH1 | 1643 D1643H |
| NOTCH1 | 1647 G1647S |
| NOTCH1 | 1651 A1651T |
| NOTCH1 | 1657 G1657S |
| NOTCH1 | 1660 G1660D |
| NOTCH1 | 1663 R1663L |
| NOTCH1 | 1672 V1672I |
| NOTCH1 | 1675 S1675P |
| NOTCH1 | 1677 V1677D |
| NOTCH1 | 1677 V1677H |
| NOTCH1 | 1679 L1679P |
| NOTCH1 | 1679 L1679Q |
| NOTCH1 | 1681 I1681N |
| NOTCH1 | 1681 I1681S |
| NOTCH1 | 1682 D1682G |
| NOTCH1 | 1686 C1686F |
| NOTCH1 | 1693 C1693R |
| NOTCH1 | 1694 F1694S |
| NOTCH1 | 1697 A1697D |
| NOTCH1 | 1701 A1701P |
| NOTCH1 | 1701 A1701V |
| NOTCH1 | 1702 A1702P |
| NOTCH1 | 1710 L1710P |
| NOTCH1 | 1717 Y1717F |

|        |             |
|--------|-------------|
| NOTCH1 | 1719 I1719T |
| NOTCH1 | 1722 V1722E |
| NOTCH1 | 1722 V1722G |
| NOTCH1 | 1722 V1722M |
| NOTCH1 | 1900 N1900I |
| NOTCH1 | 1997 T1997M |
| NOTCH1 | 2153 G2153R |
| NOTCH1 | 2246 G2246R |
| NOTCH1 | 2272 P2272S |
| NOTCH1 | 2280 A2280V |
| NOTCH1 | 2286 V2286I |
| NOTCH1 | 2290 S2290R |
| NOTCH1 | 2328 R2328W |
| NOTCH1 | 2332 A2332T |
| NOTCH1 | 2408 S2408N |
| NOTCH1 | 2413 P2413S |
| NOTCH1 | 2413 P2413T |
| NOTCH1 | 2414 P2414L |
| NOTCH1 | 2418 P2418L |
| NOTCH1 | 2422 V2422M |
| NOTCH1 | 2425 A2425V |
| NOTCH1 | 2439 P2439L |
| NOTCH1 | 2440 S2440G |
| NOTCH1 | 2442 A2442V |
| NOTCH1 | 2444 V2444A |
| NOTCH1 | 2453 A2453T |
| NOTCH1 | 2458 L2458V |
| NOTCH1 | 2467 T2467M |
| NOTCH1 | 2484 T2484A |
| NOTCH1 | 2484 T2484M |
| NOTCH1 | 2508 H2508Y |
| NOTCH1 | 2513 P2513L |
| NOTCH1 | 2514 S2514F |
| NOTCH1 | 2537 V2537I |
| NOTCH1 | 2554 A2554D |
| NOTCH1 | 620 D620Y   |
| NOTCH1 | 971 T971I   |
| NOTCH2 | 1048 R1048C |
| NOTCH2 | 1340 A1340S |
| NOTCH2 | 1638 H1638Y |
| NOTCH2 | 1931 R1931H |
| NOTCH2 | 2075 V2075M |
| NOTCH2 | 2222 S2222I |



|        |             |
|--------|-------------|
| NOTCH2 | 2453 R2453Q |
| NOTCH2 | 601 G601C   |
| NOTCH2 | 790 Y790C   |
| NPM1   | 287 L287F   |
| NPM1   | 290 W290G   |
| NPM1   | 293 S293P   |
| NPM1   | 69 G69D     |
| NRAS   | 10 G10E     |
| NRAS   | 11 A11T     |
| NRAS   | 12 G12A     |
| NRAS   | 12 G12C     |
| NRAS   | 12 G12D     |
| NRAS   | 12 G12G     |
| NRAS   | 12 G12N     |
| NRAS   | 12 G12P     |
| NRAS   | 12 G12R     |
| NRAS   | 12 G12S     |
| NRAS   | 12 G12T     |
| NRAS   | 12 G12V     |
| NRAS   | 12 G12Y     |
| NRAS   | 13 G13A     |
| NRAS   | 13 G13C     |
| NRAS   | 13 G13D     |
| NRAS   | 13 G13N     |
| NRAS   | 13 G13R     |
| NRAS   | 13 G13S     |
| NRAS   | 13 G13V     |
| NRAS   | 13 G13Y     |
| NRAS   | 146 A146T   |
| NRAS   | 15 G15E     |
| NRAS   | 16 K16N     |
| NRAS   | 18 A18T     |
| NRAS   | 20 T20T     |
| NRAS   | 45 V45A     |
| NRAS   | 49 E49K     |
| NRAS   | 51 C51Y     |
| NRAS   | 58 T58I     |
| NRAS   | 59 A59T     |
| NRAS   | 60 G60E     |
| NRAS   | 60 G60R     |
| NRAS   | 61 Q61E     |
| NRAS   | 61 Q61H     |
| NRAS   | 61 Q61K     |

|       |             |
|-------|-------------|
| NRAS  | 61 Q61L     |
| NRAS  | 61 Q61P     |
| NRAS  | 61 Q61Q     |
| NRAS  | 61 Q61R     |
| NRAS  | 64 Y64N     |
| NRAS  | 65 S65C     |
| NRAS  | 65 S65R     |
| NRAS  | 68 R68T     |
| NRAS  | 8 V8A       |
| NRAS  | 92 D92N     |
| NRAS  | 97 R97G     |
| NSD1  | 1676 A1676D |
| NSD1  | 2420 P2420R |
| NTRK1 | 107 A107V   |
| NTRK1 | 119 R119H   |
| NTRK1 | 326 S326R   |
| NTRK1 | 368 G368C   |
| NTRK1 | 375 M375I   |
| NTRK1 | 420 V420M   |
| NTRK1 | 422 V422L   |
| NTRK1 | 649 R649W   |
| NTRK1 | 776 D776E   |
| NTRK1 | 780 R780G   |
| NTRK3 | 149 T149R   |
| NTRK3 | 152 L152I   |
| NTRK3 | 184 S184C   |
| NTRK3 | 248 L248M   |
| NTRK3 | 270 L270M   |
| NTRK3 | 283 T283K   |
| NTRK3 | 307 V307L   |
| NTRK3 | 322 E322K   |
| NTRK3 | 336 L336Q   |
| NTRK3 | 405 D405N   |
| NTRK3 | 488 I488T   |
| NTRK3 | 584 D584E   |
| NTRK3 | 677 H677Y   |
| NTRK3 | 678 R678Q   |
| NTRK3 | 721 R721F   |
| NTRK3 | 721 R721H   |
| NTRK3 | 731 R731W   |
| NTRK3 | 769 I769N   |
| NTRK3 | 813 L813F   |
| NTRK3 | 95 N95S     |

|          |             |
|----------|-------------|
| NUMA1    | 1275 E1275K |
| NUMA1    | 32 D32N     |
| NUMA1    | 692 R692S   |
| NUP214   | 1104 Q1104E |
| NUP214   | 1378 P1378L |
| NUP214   | 1392 A1392V |
| NUP214   | 424 G424A   |
| NUP98    | 1652 G1652V |
| NUP98    | 413 G413E   |
| NUP98    | 417 G417D   |
| NUP98    | 493 Y493F   |
| NUP98    | 538 R538H   |
| OMD      | 232 P232H   |
| OMD      | 7 I7M       |
| PAFAH1B2 | 175 T175S   |
| PALB2    | 1008 P1008L |
| PALB2    | 1170 D1170G |
| PALB2    | 15 E15A     |
| PALB2    | 486 K486E   |
| PALB2    | 9 L9F       |
| PAX3     | 125 N125K   |
| PAX3     | 236 R236H   |
| PAX3     | 354 Y354F   |
| PAX3     | 364 S364A   |
| PAX5     | 346 Y346C   |
| PAX7     | 60 V60L     |
| PBRM1    | 1204 H1204P |
| PBRM1    | 1285 D1285G |
| PBRM1    | 1507 I1507N |
| PBRM1    | 201 G201V   |
| PBRM1    | 232 T232P   |
| PBRM1    | 254 L254P   |
| PBRM1    | 523 M523I   |
| PBRM1    | 540 R540G   |
| PBRM1    | 540 R540S   |
| PBRM1    | 597 A597D   |
| PBRM1    | 621 K621E   |
| PBRM1    | 661 K661N   |
| PBRM1    | 674 D674E   |
| PBRM1    | 840 F840L   |
| PBRM1    | 963 Y963H   |
| PCM1     | 1698 I1698L |
| PCM1     | 433 Q433E   |

|         |             |
|---------|-------------|
| PDE4DIP | 1882 G1882A |
| PDE4DIP | 667 V667L   |
| PDGFRA  | 1050 I1050T |
| PDGFRA  | 1071 D1071N |
| PDGFRA  | 130 P130S   |
| PDGFRA  | 133 M133K   |
| PDGFRA  | 193 V193I   |
| PDGFRA  | 210 A210V   |
| PDGFRA  | 235 C235Y   |
| PDGFRA  | 338 E338Q   |
| PDGFRA  | 349 W349C   |
| PDGFRA  | 431 Q431R   |
| PDGFRA  | 469 V469A   |
| PDGFRA  | 478 S478P   |
| PDGFRA  | 480 D480E   |
| PDGFRA  | 509 A509D   |
| PDGFRA  | 536 V536E   |
| PDGFRA  | 555 Y555C   |
| PDGFRA  | 556 E556K   |
| PDGFRA  | 561 V561D   |
| PDGFRA  | 563 E563K   |
| PDGFRA  | 580 L580M   |
| PDGFRA  | 581 P581S   |
| PDGFRA  | 583 D583G   |
| PDGFRA  | 589 P589S   |
| PDGFRA  | 59 Y59N     |
| PDGFRA  | 591 D591H   |
| PDGFRA  | 646 K646E   |
| PDGFRA  | 659 N659K   |
| PDGFRA  | 659 N659Y   |
| PDGFRA  | 674 T674I   |
| PDGFRA  | 808 F808L   |
| PDGFRA  | 816 H816Y   |
| PDGFRA  | 822 R822S   |
| PDGFRA  | 824 V824L   |
| PDGFRA  | 829 G829R   |
| PDGFRA  | 841 R841S   |
| PDGFRA  | 842 D842F   |
| PDGFRA  | 842 D842I   |
| PDGFRA  | 842 D842V   |
| PDGFRA  | 842 D842Y   |
| PDGFRA  | 846 D846Y   |
| PDGFRA  | 848 N848K   |

|        |             |
|--------|-------------|
| PDGFRA | 849 Y849C   |
| PDGFRA | 851 S851W   |
| PDGFRA | 870 N870S   |
| PDGFRA | 996 E996K   |
| PDGFRB | 182 I182M   |
| PDGFRB | 545 T545I   |
| PDGFRB | 589 Y589H   |
| PDGFRB | 74 A74T     |
| PDGFRB | 849 R849G   |
| PDGFRB | 882 T882I   |
| PDGFRB | 986 L986F   |
| PER1   | 1060 S1060L |
| PER1   | 218 D218N   |
| PER1   | 696 E696Q   |
| PER1   | 985 N985S   |
| PHOX2B | 112 E112Q   |
| PHOX2B | 146 F146C   |
| PHOX2B | 223 A223P   |
| PHOX2B | 7 S7Y       |
| PICALM | 634 V634I   |
| PIK3CA | 1001 L1001H |
| PIK3CA | 1001 L1001I |
| PIK3CA | 1004 M1004I |
| PIK3CA | 1007 G1007D |
| PIK3CA | 1007 G1007R |
| PIK3CA | 1008 S1008P |
| PIK3CA | 1009 G1009E |
| PIK3CA | 1010 M1010I |
| PIK3CA | 1011 P1011S |
| PIK3CA | 1012 E1012K |
| PIK3CA | 1015 S1015F |
| PIK3CA | 1016 F1016L |
| PIK3CA | 1017 D1017H |
| PIK3CA | 1018 D1018N |
| PIK3CA | 1019 I1019F |
| PIK3CA | 1020 A1020V |
| PIK3CA | 1021 Y1021C |
| PIK3CA | 1021 Y1021H |
| PIK3CA | 1021 Y1021N |
| PIK3CA | 1023 R1023L |
| PIK3CA | 1023 R1023Q |
| PIK3CA | 1024 K1024R |
| PIK3CA | 1025 T1025A |

|        |             |
|--------|-------------|
| PIK3CA | 1025 T1025I |
| PIK3CA | 1025 T1025N |
| PIK3CA | 1025 T1025S |
| PIK3CA | 1026 L1026P |
| PIK3CA | 1029 D1029E |
| PIK3CA | 1029 D1029H |
| PIK3CA | 1029 D1029Y |
| PIK3CA | 1030 K1030E |
| PIK3CA | 1031 T1031I |
| PIK3CA | 1034 E1034G |
| PIK3CA | 1035 A1035T |
| PIK3CA | 1035 A1035V |
| PIK3CA | 1036 L1036S |
| PIK3CA | 1037 E1037K |
| PIK3CA | 1038 Y1038C |
| PIK3CA | 1039 F1039L |
| PIK3CA | 104 P104R   |
| PIK3CA | 1040 M1040I |
| PIK3CA | 1041 K1041N |
| PIK3CA | 1043 M1043I |
| PIK3CA | 1043 M1043T |
| PIK3CA | 1043 M1043V |
| PIK3CA | 1044 N1044D |
| PIK3CA | 1044 N1044K |
| PIK3CA | 1044 N1044S |
| PIK3CA | 1044 N1044Y |
| PIK3CA | 1045 D1045N |
| PIK3CA | 1046 A1046E |
| PIK3CA | 1046 A1046T |
| PIK3CA | 1046 A1046V |
| PIK3CA | 1047 H1047L |
| PIK3CA | 1047 H1047Q |
| PIK3CA | 1047 H1047R |
| PIK3CA | 1047 H1047T |
| PIK3CA | 1047 H1047Y |
| PIK3CA | 1048 H1048L |
| PIK3CA | 1048 H1048Q |
| PIK3CA | 1048 H1048R |
| PIK3CA | 1048 H1048T |
| PIK3CA | 1049 G1049A |
| PIK3CA | 1049 G1049R |
| PIK3CA | 1049 G1049S |
| PIK3CA | 1050 G1050D |

|        |             |
|--------|-------------|
| PIK3CA | 1052 T1052I |
| PIK3CA | 1052 T1052K |
| PIK3CA | 1053 T1053I |
| PIK3CA | 1056 D1056G |
| PIK3CA | 1056 D1056N |
| PIK3CA | 1058 I1058F |
| PIK3CA | 106 G106V   |
| PIK3CA | 1062 I1062V |
| PIK3CA | 1065 H1065L |
| PIK3CA | 1065 H1065Y |
| PIK3CA | 1066 A1066V |
| PIK3CA | 1067 L1067F |
| PIK3CA | 108 R108H   |
| PIK3CA | 108 R108P   |
| PIK3CA | 110 E110K   |
| PIK3CA | 111 K111E   |
| PIK3CA | 111 K111N   |
| PIK3CA | 111 K111R   |
| PIK3CA | 112 I112N   |
| PIK3CA | 118 G118D   |
| PIK3CA | 12 G12D     |
| PIK3CA | 122 G122D   |
| PIK3CA | 124 P124L   |
| PIK3CA | 124 P124T   |
| PIK3CA | 133 D133V   |
| PIK3CA | 134 P134S   |
| PIK3CA | 158 S158L   |
| PIK3CA | 160 H160N   |
| PIK3CA | 17 P17S     |
| PIK3CA | 173 S173Y   |
| PIK3CA | 179 K179T   |
| PIK3CA | 18 P18L     |
| PIK3CA | 184 K184E   |
| PIK3CA | 298 P298T   |
| PIK3CA | 31 I31M     |
| PIK3CA | 310 R310C   |
| PIK3CA | 324 T324I   |
| PIK3CA | 339 L339F   |
| PIK3CA | 341 A341V   |
| PIK3CA | 343 Y343C   |
| PIK3CA | 344 V344G   |
| PIK3CA | 345 N345I   |
| PIK3CA | 345 N345K   |

|        |           |
|--------|-----------|
| PIK3CA | 345 N345S |
| PIK3CA | 350 D350H |
| PIK3CA | 378 C378F |
| PIK3CA | 378 C378R |
| PIK3CA | 38 R38C   |
| PIK3CA | 38 R38G   |
| PIK3CA | 38 R38H   |
| PIK3CA | 39 E39K   |
| PIK3CA | 405 S405F |
| PIK3CA | 407 C407W |
| PIK3CA | 418 E418K |
| PIK3CA | 420 C420R |
| PIK3CA | 421 P421L |
| PIK3CA | 449 P449T |
| PIK3CA | 453 E453K |
| PIK3CA | 453 E453Q |
| PIK3CA | 457 N457K |
| PIK3CA | 520 D520N |
| PIK3CA | 521 N521S |
| PIK3CA | 522 E522G |
| PIK3CA | 522 E522K |
| PIK3CA | 523 L523S |
| PIK3CA | 524 R524K |
| PIK3CA | 524 R524M |
| PIK3CA | 525 E525K |
| PIK3CA | 530 Q530R |
| PIK3CA | 531 L531P |
| PIK3CA | 533 A533V |
| PIK3CA | 538 D538G |
| PIK3CA | 538 D538N |
| PIK3CA | 539 P539R |
| PIK3CA | 539 P539T |
| PIK3CA | 542 E542G |
| PIK3CA | 542 E542K |
| PIK3CA | 542 E542Q |
| PIK3CA | 542 E542V |
| PIK3CA | 543 I543V |
| PIK3CA | 545 E545A |
| PIK3CA | 545 E545D |
| PIK3CA | 545 E545G |
| PIK3CA | 545 E545K |
| PIK3CA | 545 E545Q |
| PIK3CA | 545 E545V |



|        |           |
|--------|-----------|
| PIK3CA | 546 Q546E |
| PIK3CA | 546 Q546H |
| PIK3CA | 546 Q546K |
| PIK3CA | 546 Q546L |
| PIK3CA | 546 Q546P |
| PIK3CA | 546 Q546R |
| PIK3CA | 547 E547K |
| PIK3CA | 549 D549N |
| PIK3CA | 550 F550S |
| PIK3CA | 552 W552G |
| PIK3CA | 553 S553N |
| PIK3CA | 567 K567R |
| PIK3CA | 60 Q60K   |
| PIK3CA | 643 Q643R |
| PIK3CA | 661 Q661K |
| PIK3CA | 701 H701P |
| PIK3CA | 707 E707K |
| PIK3CA | 719 L719V |
| PIK3CA | 733 K733R |
| PIK3CA | 75 Q75E   |
| PIK3CA | 81 E81K   |
| PIK3CA | 866 L866F |
| PIK3CA | 88 R88Q   |
| PIK3CA | 901 C901F |
| PIK3CA | 909 F909L |
| PIK3CA | 93 R93W   |
| PIK3CA | 982 E982D |
| PIK3CA | 982 E982G |
| PIK3CA | 982 E982K |
| PIK3CA | 987 A987T |
| PIK3CA | 989 L989I |
| PIK3R1 | 376 G376R |
| PIK3R1 | 459 K459E |
| PIK3R1 | 464 D464H |
| PIK3R1 | 560 D560Y |
| PIK3R1 | 564 N564D |
| PIK3R1 | 564 N564K |
| PIK3R1 | 570 L570P |
| PIM1   | 178 N178S |
| PIM1   | 53 Y53H   |
| PLAG1  | 361 M361I |
| PML    | 420 E420V |
| PML    | 96 P96T   |

|         |               |
|---------|---------------|
| PMS1    | 142 T142N     |
| PMS1    | 676 P676R     |
| PPARG   | 4 T4S         |
| PPP2R1A | 182 R182W     |
| PPP2R1A | 183 R183G     |
| PPP2R1A | 183 R183Q     |
| PPP2R1A | 183 R183W     |
| PPP2R1A | 257 W257C     |
| PPP2R1A | 260 R260C     |
| PPP2R1A | 418 R418W     |
| PPP2R1A | 64 E64D       |
| PPP2R1A | 64 E64G       |
| PRCC    | 449 G449D     |
| PRDM16  | 1132 S1132N   |
| PRDM16  | 161 N161D     |
| PRF1    | 123 R123H     |
| PRF1    | 385 R385W     |
| PRKAR1A | 213 A213D     |
| PRKAR1A | 222 K222E     |
| PRRX1   | 180 V180I     |
| PTCH1   | 1016 L1016F   |
| PTCH1   | 1079 S1079I   |
| PTCH1   | 1101 A1101S   |
| PTCH1   | 1107 A1107V   |
| PTCH1   | 1114 R1114W   |
| PTCH1   | 1125 P1125L   |
| PTCH1   | 1126 VL1126VL |
| PTCH1   | 1139 M1139I   |
| PTCH1   | 115 G115K     |
| PTCH1   | 1163 G1163S   |
| PTCH1   | 1164 V1164I   |
| PTCH1   | 1167 G1167R   |
| PTCH1   | 1167 G1167W   |
| PTCH1   | 1195 T1195I   |
| PTCH1   | 1195 T1195S   |
| PTCH1   | 1196 P1196S   |
| PTCH1   | 1197 S1197F   |
| PTCH1   | 1202 P1202L   |
| PTCH1   | 1212 G1212S   |
| PTCH1   | 1214 T1214M   |
| PTCH1   | 1237 E1237K   |
| PTCH1   | 1242 E1242K   |
| PTCH1   | 1243 A1243G   |

|       |             |
|-------|-------------|
| PTCH1 | 1272 P1272L |
| PTCH1 | 1284 Q1284H |
| PTCH1 | 1292 S1292F |
| PTCH1 | 1302 P1302H |
| PTCH1 | 1305 D1305Y |
| PTCH1 | 1306 P1306S |
| PTCH1 | 1308 R1308G |
| PTCH1 | 1315 L1315P |
| PTCH1 | 1380 A1380V |
| PTCH1 | 1396 G1396R |
| PTCH1 | 155 P155S   |
| PTCH1 | 159 I159L   |
| PTCH1 | 175 L175F   |
| PTCH1 | 195 R195K   |
| PTCH1 | 195 R195M   |
| PTCH1 | 237 E237K   |
| PTCH1 | 252 P252S   |
| PTCH1 | 288 G288D   |
| PTCH1 | 294 R294C   |
| PTCH1 | 331 S331F   |
| PTCH1 | 341 L341F   |
| PTCH1 | 361 Q361P   |
| PTCH1 | 362 T362I   |
| PTCH1 | 362 T362N   |
| PTCH1 | 369 P369L   |
| PTCH1 | 390 D390Y   |
| PTCH1 | 410 S410N   |
| PTCH1 | 416 T416S   |
| PTCH1 | 431 L431Q   |
| PTCH1 | 439 V439A   |
| PTCH1 | 474 V474I   |
| PTCH1 | 478 A478V   |
| PTCH1 | 484 G484R   |
| PTCH1 | 494 S494F   |
| PTCH1 | 504 P504Q   |
| PTCH1 | 545 G545E   |
| PTCH1 | 561 M561R   |
| PTCH1 | 563 A563V   |
| PTCH1 | 568 P568L   |
| PTCH1 | 616 S616N   |
| PTCH1 | 641 P641L   |
| PTCH1 | 665 R665G   |
| PTCH1 | 667 E667A   |

|       |           |
|-------|-----------|
| PTCH1 | 670 P670S |
| PTCH1 | 671 H671Y |
| PTCH1 | 678 T678I |
| PTCH1 | 681 P681L |
| PTCH1 | 682 R682L |
| PTCH1 | 688 Q688K |
| PTCH1 | 689 P689L |
| PTCH1 | 691 T691I |
| PTCH1 | 702 P702L |
| PTCH1 | 707 S707F |
| PTCH1 | 725 P725S |
| PTCH1 | 736 A736V |
| PTCH1 | 743 F743L |
| PTCH1 | 763 V763I |
| PTCH1 | 774 G774E |
| PTCH1 | 791 I791T |
| PTCH1 | 816 Q816L |
| PTCH1 | 829 V829M |
| PTCH1 | 844 W844C |
| PTCH1 | 898 D898G |
| PTCH1 | 916 P916H |
| PTCH1 | 955 Y955H |
| PTCH1 | 988 V988E |
| PTCH1 | 992 E992G |
| PTCH1 | 995 R995S |
| PTEN  | 1 M1T     |
| PTEN  | 10 S10N   |
| PTEN  | 101 I101M |
| PTEN  | 101 I101N |
| PTEN  | 101 I101T |
| PTEN  | 103 P103S |
| PTEN  | 105 C105F |
| PTEN  | 105 C105G |
| PTEN  | 105 C105R |
| PTEN  | 105 C105S |
| PTEN  | 105 C105Y |
| PTEN  | 107 D107A |
| PTEN  | 107 D107N |
| PTEN  | 107 D107Y |
| PTEN  | 108 L108P |
| PTEN  | 108 L108R |
| PTEN  | 111 W111R |
| PTEN  | 112 L112P |

|      |           |
|------|-----------|
| PTEN | 112 L112Q |
| PTEN | 112 L112R |
| PTEN | 112 L112V |
| PTEN | 113 S113R |
| PTEN | 116 D116G |
| PTEN | 118 H118L |
| PTEN | 118 H118R |
| PTEN | 119 V119D |
| PTEN | 119 V119F |
| PTEN | 121 A121E |
| PTEN | 121 A121P |
| PTEN | 122 I122S |
| PTEN | 123 H123Y |
| PTEN | 124 C124F |
| PTEN | 124 C124S |
| PTEN | 124 C124Y |
| PTEN | 125 K125E |
| PTEN | 125 K125N |
| PTEN | 126 A126D |
| PTEN | 126 A126P |
| PTEN | 126 A126S |
| PTEN | 126 A126T |
| PTEN | 126 A126V |
| PTEN | 127 G127E |
| PTEN | 127 G127V |
| PTEN | 128 K128N |
| PTEN | 129 G129E |
| PTEN | 129 G129R |
| PTEN | 129 G129V |
| PTEN | 13 K13E   |
| PTEN | 13 K13Q   |
| PTEN | 130 R130G |
| PTEN | 130 R130P |
| PTEN | 130 R130Q |
| PTEN | 131 T131A |
| PTEN | 131 T131I |
| PTEN | 131 T131N |
| PTEN | 131 T131P |
| PTEN | 132 G132D |
| PTEN | 132 G132R |
| PTEN | 132 G132S |
| PTEN | 132 G132V |
| PTEN | 133 V133I |

|      |           |
|------|-----------|
| PTEN | 134 M134L |
| PTEN | 134 M134R |
| PTEN | 135 I135K |
| PTEN | 135 I135M |
| PTEN | 135 I135V |
| PTEN | 136 C136F |
| PTEN | 136 C136R |
| PTEN | 136 C136W |
| PTEN | 136 C136Y |
| PTEN | 137 A137V |
| PTEN | 138 Y138C |
| PTEN | 139 L139F |
| PTEN | 14 R14G   |
| PTEN | 141 H141Y |
| PTEN | 142 R142Q |
| PTEN | 142 R142W |
| PTEN | 144 K144I |
| PTEN | 145 F145I |
| PTEN | 146 L146V |
| PTEN | 147 K147R |
| PTEN | 148 A148E |
| PTEN | 148 A148T |
| PTEN | 149 Q149R |
| PTEN | 15 R15I   |
| PTEN | 15 R15K   |
| PTEN | 15 R15S   |
| PTEN | 150 E150D |
| PTEN | 150 E150G |
| PTEN | 150 E150Q |
| PTEN | 151 A151D |
| PTEN | 151 A151T |
| PTEN | 152 L152V |
| PTEN | 153 D153N |
| PTEN | 153 D153Y |
| PTEN | 154 F154L |
| PTEN | 154 F154S |
| PTEN | 155 Y155C |
| PTEN | 155 Y155H |
| PTEN | 155 Y155N |
| PTEN | 156 G156R |
| PTEN | 159 R159K |
| PTEN | 159 R159S |
| PTEN | 16 Y16C   |

|      |           |
|------|-----------|
| PTEN | 160 T160I |
| PTEN | 160 T160S |
| PTEN | 161 R161G |
| PTEN | 161 R161I |
| PTEN | 161 R161K |
| PTEN | 162 D162G |
| PTEN | 162 D162H |
| PTEN | 162 D162V |
| PTEN | 164 K164R |
| PTEN | 165 G165E |
| PTEN | 165 G165R |
| PTEN | 166 V166I |
| PTEN | 166 V166L |
| PTEN | 167 T167A |
| PTEN | 167 T167I |
| PTEN | 167 T167P |
| PTEN | 167 T167S |
| PTEN | 168 I168F |
| PTEN | 169 P169H |
| PTEN | 17 Q17P   |
| PTEN | 170 S170G |
| PTEN | 170 S170I |
| PTEN | 170 S170N |
| PTEN | 171 Q171E |
| PTEN | 171 Q171H |
| PTEN | 171 Q171P |
| PTEN | 172 R172W |
| PTEN | 173 R173C |
| PTEN | 173 R173H |
| PTEN | 173 R173P |
| PTEN | 174 Y174D |
| PTEN | 174 Y174N |
| PTEN | 175 V175L |
| PTEN | 177 Y177C |
| PTEN | 179 S179I |
| PTEN | 181 L181P |
| PTEN | 182 L182F |
| PTEN | 184 N184I |
| PTEN | 188 Y188S |
| PTEN | 19 D19N   |
| PTEN | 193 L193P |
| PTEN | 198 M198K |
| PTEN | 2 T2I     |

|      |           |
|------|-----------|
| PTEN | 20 G20E   |
| PTEN | 204 P204S |
| PTEN | 204 P204T |
| PTEN | 205 M205I |
| PTEN | 211 C211Y |
| PTEN | 213 P213H |
| PTEN | 213 P213S |
| PTEN | 216 V216M |
| PTEN | 217 V217A |
| PTEN | 217 V217I |
| PTEN | 222 V222A |
| PTEN | 225 Y225C |
| PTEN | 227 S227F |
| PTEN | 23 L23F   |
| PTEN | 230 G230E |
| PTEN | 230 G230R |
| PTEN | 234 R234Q |
| PTEN | 234 R234W |
| PTEN | 238 F238L |
| PTEN | 24 D24E   |
| PTEN | 24 D24G   |
| PTEN | 24 D24N   |
| PTEN | 24 D24Y   |
| PTEN | 241 F241L |
| PTEN | 241 F241S |
| PTEN | 242 E242K |
| PTEN | 243 F243S |
| PTEN | 244 P244S |
| PTEN | 246 P246L |
| PTEN | 248 P248? |
| PTEN | 25 L25F   |
| PTEN | 251 G251C |
| PTEN | 251 G251D |
| PTEN | 251 G251V |
| PTEN | 252 D252G |
| PTEN | 252 D252Y |
| PTEN | 253 I253N |
| PTEN | 254 K254E |
| PTEN | 255 V255A |
| PTEN | 256 E256K |
| PTEN | 257 F257L |
| PTEN | 26 T26P   |
| PTEN | 27 Y27C   |



|      |           |
|------|-----------|
| PTEN | 27 Y27N   |
| PTEN | 27 Y27S   |
| PTEN | 271 F271S |
| PTEN | 272 H272R |
| PTEN | 272 H272Y |
| PTEN | 274 W274G |
| PTEN | 274 W274R |
| PTEN | 275 V275A |
| PTEN | 277 T277I |
| PTEN | 284 E284K |
| PTEN | 288 E288K |
| PTEN | 291 E291K |
| PTEN | 3 A3S     |
| PTEN | 304 C304G |
| PTEN | 304 C304S |
| PTEN | 307 E307K |
| PTEN | 308 R308C |
| PTEN | 314 E314K |
| PTEN | 318 L318F |
| PTEN | 323 N323K |
| PTEN | 325 L325V |
| PTEN | 326 D326G |
| PTEN | 33 I33S   |
| PTEN | 331 D331G |
| PTEN | 336 Y336F |
| PTEN | 338 S338T |
| PTEN | 339 P339L |
| PTEN | 339 P339S |
| PTEN | 341 F341C |
| PTEN | 341 F341V |
| PTEN | 342 K342N |
| PTEN | 344 K344R |
| PTEN | 345 L345Q |
| PTEN | 348 T348I |
| PTEN | 35 M35R   |
| PTEN | 35 M35V   |
| PTEN | 36 G36E   |
| PTEN | 36 G36R   |
| PTEN | 36 G36V   |
| PTEN | 364 S364C |
| PTEN | 365 V365I |
| PTEN | 369 V369G |
| PTEN | 37 F37S   |

|      |           |
|------|-----------|
| PTEN | 375 D375N |
| PTEN | 38 P38L   |
| PTEN | 38 P38S   |
| PTEN | 382 T382S |
| PTEN | 383 T383I |
| PTEN | 39 A39T   |
| PTEN | 397 H397Y |
| PTEN | 398 T398S |
| PTEN | 401 T401I |
| PTEN | 42 L42P   |
| PTEN | 42 L42R   |
| PTEN | 44 G44D   |
| PTEN | 47 R47G   |
| PTEN | 48 N48D   |
| PTEN | 48 N48I   |
| PTEN | 49 N49T   |
| PTEN | 5 I5L     |
| PTEN | 52 D52G   |
| PTEN | 52 D52N   |
| PTEN | 53 V53A   |
| PTEN | 53 V53G   |
| PTEN | 54 V54L   |
| PTEN | 55 R55G   |
| PTEN | 55 R55S   |
| PTEN | 56 F56C   |
| PTEN | 56 F56V   |
| PTEN | 57 L57S   |
| PTEN | 57 L57W   |
| PTEN | 58 D58Y   |
| PTEN | 59 S59P   |
| PTEN | 6 K6I     |
| PTEN | 6 K6R     |
| PTEN | 61 H61L   |
| PTEN | 61 H61P   |
| PTEN | 61 H61R   |
| PTEN | 62 K62I   |
| PTEN | 62 K62R   |
| PTEN | 65 Y65C   |
| PTEN | 65 Y65D   |
| PTEN | 65 Y65N   |
| PTEN | 66 K66E   |
| PTEN | 66 K66N   |
| PTEN | 66 K66Q   |

|      |         |
|------|---------|
| PTEN | 67 I67K |
| PTEN | 67 I67R |
| PTEN | 68 Y68C |
| PTEN | 68 Y68H |
| PTEN | 70 L70F |
| PTEN | 70 L70P |
| PTEN | 71 C71W |
| PTEN | 71 C71Y |
| PTEN | 73 E73V |
| PTEN | 75 H75N |
| PTEN | 78 T78A |
| PTEN | 79 A79T |
| PTEN | 80 K80E |
| PTEN | 80 K80N |
| PTEN | 81 F81C |
| PTEN | 81 F81L |
| PTEN | 81 F81S |
| PTEN | 82 N82T |
| PTEN | 84 R84G |
| PTEN | 85 V85A |
| PTEN | 85 V85G |
| PTEN | 86 A86P |
| PTEN | 88 Y88C |
| PTEN | 88 Y88H |
| PTEN | 88 Y88N |
| PTEN | 88 Y88S |
| PTEN | 90 F90L |
| PTEN | 90 F90S |
| PTEN | 91 E91A |
| PTEN | 91 E91Q |
| PTEN | 92 D92A |
| PTEN | 92 D92E |
| PTEN | 92 D92G |
| PTEN | 92 D92H |
| PTEN | 92 D92V |
| PTEN | 93 H93D |
| PTEN | 93 H93Q |
| PTEN | 93 H93R |
| PTEN | 93 H93Y |
| PTEN | 94 N94I |
| PTEN | 94 N94Y |
| PTEN | 95 P95L |
| PTEN | 95 P95S |

|        |           |
|--------|-----------|
| PTEN   | 96 P96L   |
| PTEN   | 96 P96Q   |
| PTEN   | 96 P96S   |
| PTPN11 | 138 R138Q |
| PTPN11 | 139 E139D |
| PTPN11 | 152 R152H |
| PTPN11 | 282 I282M |
| PTPN11 | 289 R289G |
| PTPN11 | 308 N308D |
| PTPN11 | 339 N339S |
| PTPN11 | 45 V45L   |
| PTPN11 | 491 P491L |
| PTPN11 | 491 P491S |
| PTPN11 | 502 S502A |
| PTPN11 | 502 S502L |
| PTPN11 | 502 S502P |
| PTPN11 | 502 S502T |
| PTPN11 | 503 G503A |
| PTPN11 | 503 G503E |
| PTPN11 | 503 G503L |
| PTPN11 | 503 G503R |
| PTPN11 | 503 G503V |
| PTPN11 | 507 T507K |
| PTPN11 | 510 Q510H |
| PTPN11 | 510 Q510K |
| PTPN11 | 52 T52S   |
| PTPN11 | 53 H53Q   |
| PTPN11 | 58 N58S   |
| PTPN11 | 58 N58Y   |
| PTPN11 | 60 G60A   |
| PTPN11 | 60 G60R   |
| PTPN11 | 60 G60V   |
| PTPN11 | 61 D61G   |
| PTPN11 | 61 D61H   |
| PTPN11 | 61 D61N   |
| PTPN11 | 61 D61V   |
| PTPN11 | 61 D61Y   |
| PTPN11 | 63 Y63C   |
| PTPN11 | 69 E69G   |
| PTPN11 | 69 E69K   |
| PTPN11 | 69 E69V   |
| PTPN11 | 71 F71K   |
| PTPN11 | 71 F71L   |

|         |           |
|---------|-----------|
| PTPN11  | 72 A72D   |
| PTPN11  | 72 A72T   |
| PTPN11  | 72 A72V   |
| PTPN11  | 73 T73I   |
| PTPN11  | 74 L74M   |
| PTPN11  | 76 E76A   |
| PTPN11  | 76 E76G   |
| PTPN11  | 76 E76K   |
| PTPN11  | 76 E76M   |
| PTPN11  | 76 E76Q   |
| PTPN11  | 76 E76V   |
| PTPN11  | 77 L77V   |
| RAD51L1 | 360 A360V |
| RAF1    | 115 N115S |
| RAF1    | 259 S259A |
| RAF1    | 319 A319S |
| RAF1    | 335 Q335H |
| RANBP17 | 262 D262H |
| RARA    | 255 A255T |
| RARA    | 380 K380N |
| RB1     | 126 I126S |
| RB1     | 127 S127I |
| RB1     | 138 I138S |
| RB1     | 158 L158S |
| RB1     | 187 S187T |
| RB1     | 208 M208V |
| RB1     | 328 N328H |
| RB1     | 388 I388S |
| RB1     | 444 Q444H |
| RB1     | 474 S474N |
| RB1     | 515 P515L |
| RB1     | 607 L607I |
| RB1     | 612 S612P |
| RB1     | 621 R621S |
| RB1     | 654 V654L |
| RB1     | 659 Y659F |
| RB1     | 661 R661W |
| RB1     | 673 H673P |
| RB1     | 688 L688P |
| RB1     | 698 R698W |
| RB1     | 702 Q702K |
| RB1     | 704 M704V |
| RB1     | 706 C706F |

|       |             |
|-------|-------------|
| RB1   | 718 D718N   |
| RB1   | 728 Y728C   |
| RB1   | 754 V754G   |
| RB1   | 794 S794I   |
| RB1   | 798 R798W   |
| RBM15 | 431 K431R   |
| RBM15 | 563 G563R   |
| REL   | 38 E38Q     |
| RET   | 1112 F1112Y |
| RET   | 145 V145G   |
| RET   | 163 R163Q   |
| RET   | 178 E178K   |
| RET   | 330 R330W   |
| RET   | 360 R360W   |
| RET   | 555 F555L   |
| RET   | 591 V591I   |
| RET   | 593 G593E   |
| RET   | 609 C609Y   |
| RET   | 618 C618R   |
| RET   | 618 C618Y   |
| RET   | 620 C620R   |
| RET   | 620 C620S   |
| RET   | 630 C630G   |
| RET   | 630 C630R   |
| RET   | 631 D631G   |
| RET   | 634 C634A   |
| RET   | 634 C634R   |
| RET   | 634 C634T   |
| RET   | 634 C634W   |
| RET   | 634 C634Y   |
| RET   | 636 T636M   |
| RET   | 664 A664D   |
| RET   | 748 G748C   |
| RET   | 766 P766S   |
| RET   | 768 E768D   |
| RET   | 876 A876V   |
| RET   | 883 A883F   |
| RET   | 883 A883P   |
| RET   | 883 A883S   |
| RET   | 884 E884K   |
| RET   | 901 E901K   |
| RET   | 908 R908K   |
| RET   | 911 G911D   |

|        |             |
|--------|-------------|
| RET    | 918 M918T   |
| RET    | 919 A919V   |
| RET    | 921 E921K   |
| RET    | 922 S922P   |
| RET    | 923 L923V   |
| RET    | 925 D925H   |
| RET    | 930 T930M   |
| RHOH   | 23 R23H     |
| RNF213 | 1014 T1014M |
| RNF213 | 144 F144L   |
| RNF213 | 2360 R2360Q |
| RNF213 | 2513 D2513N |
| RNF213 | 2874 V2874I |
| RNF213 | 3092 S3092N |
| RNF213 | 3184 P3184L |
| RNF213 | 568 I568L   |
| RNF213 | 741 K741N   |
| RNF213 | 839 F839I   |
| ROS1   | 1399 I1399V |
| ROS1   | 1495 N1495D |
| ROS1   | 1666 V1666I |
| ROS1   | 2003 K2003R |
| ROS1   | 2106 A2106T |
| ROS1   | 2138 F2138S |
| ROS1   | 370 S370Y   |
| ROS1   | 419 Y419H   |
| ROS1   | 865 Q865H   |
| RPN1   | 454 I454T   |
| RPN1   | 99 E99K     |
| RUNX1  | 100 S100F   |
| RUNX1  | 105 H105Q   |
| RUNX1  | 105 H105Y   |
| RUNX1  | 106 W106C   |
| RUNX1  | 106 W106L   |
| RUNX1  | 107 R107C   |
| RUNX1  | 107 R107H   |
| RUNX1  | 110 K110N   |
| RUNX1  | 110 K110Q   |
| RUNX1  | 110 K110R   |
| RUNX1  | 111 T111N   |
| RUNX1  | 112 L112P   |
| RUNX1  | 113 P113L   |
| RUNX1  | 116 F116S   |

|       |           |
|-------|-----------|
| RUNX1 | 132 V132L |
| RUNX1 | 141 S141L |
| RUNX1 | 144 L144P |
| RUNX1 | 146 N146I |
| RUNX1 | 147 A147D |
| RUNX1 | 160 D160E |
| RUNX1 | 162 R162G |
| RUNX1 | 162 R162M |
| RUNX1 | 162 R162S |
| RUNX1 | 163 F163Y |
| RUNX1 | 165 G165C |
| RUNX1 | 165 G165D |
| RUNX1 | 165 G165V |
| RUNX1 | 166 R166G |
| RUNX1 | 166 R166P |
| RUNX1 | 166 R166Q |
| RUNX1 | 170 G170R |
| RUNX1 | 171 K171N |
| RUNX1 | 177 I177T |
| RUNX1 | 183 P183A |
| RUNX1 | 185 Q185H |
| RUNX1 | 193 I193T |
| RUNX1 | 198 D198G |
| RUNX1 | 198 D198N |
| RUNX1 | 198 D198V |
| RUNX1 | 199 G199A |
| RUNX1 | 199 G199N |
| RUNX1 | 199 G199Q |
| RUNX1 | 199 G199R |
| RUNX1 | 200 P200S |
| RUNX1 | 201 R201Q |
| RUNX1 | 204 R204Q |
| RUNX1 | 223 E223G |
| RUNX1 | 250 R250H |
| RUNX1 | 397 Q397R |
| RUNX1 | 425 P425Q |
| RUNX1 | 466 M466L |
| RUNX1 | 52 M52K   |
| RUNX1 | 56 L56S   |
| RUNX1 | 59 G59D   |
| RUNX1 | 60 A60V   |
| RUNX1 | 69 G69R   |
| RUNX1 | 75 D75Y   |



|             |             |
|-------------|-------------|
| RUNX1       | 76 R76H     |
| RUNX1       | 76 R76S     |
| RUNX1       | 85 H85N     |
| RUNX1       | 94 S94I     |
| RUNX1       | 96 N96S     |
| RUNX1T1     | 349 R349W   |
| RUNX1T1     | 358 R358W   |
| RUNX1T1     | 434 A434V   |
| RUNX1T1     | 87 S87G     |
| SBDS        | 171 H171L   |
| SDHAF2      | 117 D117G   |
| SDHB        | 198 S198N   |
| SDHD        | 126 A126S   |
| 6-Sep       | 171 K171R   |
| 6-Sep       | 18 P18T     |
| 9-Sep       | 384 R384H   |
| 9-Sep       | 508 E508K   |
| SETD2       | 1051 V1051G |
| SETD2       | 1113 D1113N |
| SETD2       | 1128 C1128Y |
| SETD2       | 1156 G1156V |
| SETD2       | 1182 C1182F |
| SETD2       | 1196 A1196V |
| SETD2       | 1297 I1297N |
| SETD2       | 1391 S1391F |
| SETD2       | 676 D676H   |
| SETD2       | 756 G756V   |
| SETD2       | 998 C998G   |
| SETD2_ENSTI | 1179 D1179H |
| SETD2_ENSTI | 1659 G1659V |
| SETD2_ENSTI | 1699 A1699V |
| SETD2_ENSTI | 1800 I1800N |
| SETD2_ENSTI | 1894 S1894F |
| SFPQ        | 444 P444S   |
| SH3GL1      | 225 Y225D   |
| SLC45A3     | 272 R272G   |
| SLC45A3     | 309 P309L   |
| SLC45A3     | 372 S372P   |
| SMAD4       | 100 R100T   |
| SMAD4       | 102 P102L   |
| SMAD4       | 115 C115R   |
| SMAD4       | 118 A118E   |
| SMAD4       | 118 A118V   |

|       |           |
|-------|-----------|
| SMAD4 | 126 V126A |
| SMAD4 | 128 V128M |
| SMAD4 | 129 N129K |
| SMAD4 | 130 P130S |
| SMAD4 | 131 Y131C |
| SMAD4 | 132 H132L |
| SMAD4 | 203 P203L |
| SMAD4 | 226 A226T |
| SMAD4 | 247 G247E |
| SMAD4 | 25 C25Y   |
| SMAD4 | 262 H262R |
| SMAD4 | 263 N263S |
| SMAD4 | 274 A274E |
| SMAD4 | 302 W302R |
| SMAD4 | 314 I314N |
| SMAD4 | 317 H317Q |
| SMAD4 | 317 H317R |
| SMAD4 | 324 C324Y |
| SMAD4 | 330 E330A |
| SMAD4 | 330 E330K |
| SMAD4 | 330 E330Q |
| SMAD4 | 331 M331T |
| SMAD4 | 332 D332G |
| SMAD4 | 339 F339S |
| SMAD4 | 340 K340E |
| SMAD4 | 350 V350D |
| SMAD4 | 351 D351H |
| SMAD4 | 351 D351N |
| SMAD4 | 353 Y353C |
| SMAD4 | 355 D355A |
| SMAD4 | 355 D355E |
| SMAD4 | 355 D355G |
| SMAD4 | 355 D355N |
| SMAD4 | 356 P356L |
| SMAD4 | 361 R361C |
| SMAD4 | 361 R361H |
| SMAD4 | 361 R361S |
| SMAD4 | 363 C363R |
| SMAD4 | 363 C363S |
| SMAD4 | 369 N369D |
| SMAD4 | 379 A379T |
| SMAD4 | 383 I383K |
| SMAD4 | 386 G386C |

|         |             |
|---------|-------------|
| SMAD4   | 386 G386R   |
| SMAD4   | 39 A39T     |
| SMAD4   | 401 C401R   |
| SMAD4   | 406 A406T   |
| SMAD4   | 408 F408S   |
| SMAD4   | 416 R416S   |
| SMAD4   | 420 R420H   |
| SMAD4   | 43 L43S     |
| SMAD4   | 432 S432G   |
| SMAD4   | 433 A433T   |
| SMAD4   | 433 A433V   |
| SMAD4   | 441 R441C   |
| SMAD4   | 441 R441P   |
| SMAD4   | 457 A457S   |
| SMAD4   | 491 G491V   |
| SMAD4   | 492 V492F   |
| SMAD4   | 493 D493A   |
| SMAD4   | 493 D493H   |
| SMAD4   | 493 D493N   |
| SMAD4   | 494 D494G   |
| SMAD4   | 496 R496H   |
| SMAD4   | 497 R497H   |
| SMAD4   | 499 C499Y   |
| SMAD4   | 502 R502G   |
| SMAD4   | 504 S504R   |
| SMAD4   | 506 V506M   |
| SMAD4   | 507 K507Q   |
| SMAD4   | 523 C523W   |
| SMAD4   | 527 I527V   |
| SMAD4   | 531 R531W   |
| SMAD4   | 533 L533F   |
| SMAD4   | 533 L533V   |
| SMAD4   | 537 D537Y   |
| SMAD4   | 539 V539G   |
| SMAD4   | 54 L54S     |
| SMAD4   | 540 L540R   |
| SMAD4   | 550 P550S   |
| SMAD4   | 76 R76I     |
| SMAD4   | 86 G86V     |
| SMAD4   | 95 Y95N     |
| SMAD4   | 95 Y95S     |
| SMAD4   | 99 W99R     |
| SMARCA4 | 1102 F1102L |

|         |             |
|---------|-------------|
| SMARCA4 | 1157 R1157W |
| SMARCA4 | 1160 G1160R |
| SMARCA4 | 1163 L1163P |
| SMARCA4 | 1176 S1176C |
| SMARCA4 | 1186 A1186V |
| SMARCA4 | 1189 R1189Q |
| SMARCA4 | 1232 G1232D |
| SMARCA4 | 1233 M1233I |
| SMARCA4 | 1234 F1234L |
| SMARCA4 | 1284 D1284N |
| SMARCA4 | 1286 E1286A |
| SMARCA4 | 1336 R1336H |
| SMARCA4 | 160 Q160R   |
| SMARCA4 | 1601 R1601W |
| SMARCA4 | 1609 L1609P |
| SMARCA4 | 197 P197S   |
| SMARCA4 | 403 E403G   |
| SMARCA4 | 44 G44R     |
| SMARCA4 | 687 K687E   |
| SMARCA4 | 764 W764R   |
| SMARCA4 | 767 S767F   |
| SMARCA4 | 814 T814K   |
| SMARCA4 | 885 R885C   |
| SMARCA4 | 910 T910M   |
| SMARCA4 | 966 R966W   |
| SMARCB1 | 109 A109T   |
| SMARCB1 | 116 P116T   |
| SMARCB1 | 127 R127G   |
| SMARCB1 | 152 N152D   |
| SMARCB1 | 173 P173S   |
| SMARCB1 | 183 P183L   |
| SMARCB1 | 188 P188L   |
| SMARCB1 | 188 P188S   |
| SMARCB1 | 203 A203T   |
| SMARCB1 | 242 R242K   |
| SMARCB1 | 262 V262I   |
| SMARCB1 | 284 S284L   |
| SMARCB1 | 327 A327T   |
| SMARCB1 | 341 R341L   |
| SMARCB1 | 351 P351S   |
| SMARCB1 | 368 Q368R   |
| SMARCB1 | 374 R374Q   |
| SMARCB1 | 377 R377H   |

|         |           |
|---------|-----------|
| SMARCB1 | 48 P48S   |
| SMO     | 117 R117L |
| SMO     | 199 R199W |
| SMO     | 290 R290S |
| SMO     | 324 A324T |
| SMO     | 349 T349I |
| SMO     | 404 V404M |
| SMO     | 473 D473H |
| SMO     | 484 R484W |
| SMO     | 514 L514F |
| SMO     | 533 S533N |
| SMO     | 535 W535L |
| SMO     | 562 R562Q |
| SMO     | 575 K575M |
| SMO     | 640 T640A |
| SMO     | 652 A652V |
| SMO     | 68 A68V   |
| SMO     | 755 P755F |
| SOCS1   | 116 S116N |
| SOCS1   | 131 Q131K |
| SOCS1   | 16 A16T   |
| SOCS1   | 17 A17T   |
| SOCS1   | 198 P198S |
| SOCS1   | 205 S205N |
| SOCS1   | 206 S206P |
| SOCS1   | 210 Q210H |
| SOCS1   | 27 S27F   |
| SOCS1   | 28 S28F   |
| SOCS1   | 3 A3T     |
| SOCS1   | 43 P43S   |
| SOCS1   | 64 Y64N   |
| SOCS1   | 79 F79C   |
| SOCS1   | 81 W81R   |
| SOCS1   | 82 G82E   |
| SRC     | 407 D407H |
| SRGAP3  | 429 R429K |
| SRGAP3  | 556 S556F |
| SRGAP3  | 623 L623I |
| SRGAP3  | 684 K684Q |
| SS18L1  | 293 R293W |
| SS18L1  | 350 G350E |
| SS18L1  | 363 G363D |
| SSX1    | 77 T77A   |

|       |           |
|-------|-----------|
| SSX1  | 82 N82H   |
| STIL  | 533 D533N |
| STIL  | 626 V626F |
| STIL  | 685 V685L |
| STIL  | 836 T836I |
| STIL  | 978 H978Y |
| STK11 | 1 M1T     |
| STK11 | 100 Q100E |
| STK11 | 107 H107R |
| STK11 | 123 Q123R |
| STK11 | 135 G135R |
| STK11 | 14 E14K   |
| STK11 | 160 L160P |
| STK11 | 163 G163C |
| STK11 | 163 G163D |
| STK11 | 171 G171S |
| STK11 | 174 H174R |
| STK11 | 176 D176Y |
| STK11 | 179 P179L |
| STK11 | 180 G180V |
| STK11 | 194 D194H |
| STK11 | 194 D194N |
| STK11 | 194 D194V |
| STK11 | 194 D194Y |
| STK11 | 196 G196V |
| STK11 | 199 E199K |
| STK11 | 199 E199Q |
| STK11 | 205 A205T |
| STK11 | 208 D208N |
| STK11 | 215 G215D |
| STK11 | 216 S216F |
| STK11 | 216 S216P |
| STK11 | 223 E223L |
| STK11 | 231 F231L |
| STK11 | 237 D237Y |
| STK11 | 242 G242R |
| STK11 | 242 G242V |
| STK11 | 277 D277Y |
| STK11 | 279 G279F |
| STK11 | 281 P281L |
| STK11 | 285 L285Q |
| STK11 | 297 R297S |
| STK11 | 298 F298L |

|       |             |
|-------|-------------|
| STK11 | 304 R304G   |
| STK11 | 304 R304W   |
| STK11 | 308 W308L   |
| STK11 | 314 P314H   |
| STK11 | 324 P324L   |
| STK11 | 354 F354L   |
| STK11 | 367 T367M   |
| STK11 | 37 Q37L     |
| STK11 | 389 A389T   |
| STK11 | 409 R409W   |
| STK11 | 426 R426W   |
| STK11 | 49 Y49D     |
| STK11 | 56 G56V     |
| STK11 | 56 G56W     |
| STK11 | 6 P6Q       |
| STK11 | 66 V66M     |
| STK11 | 78 K78E     |
| STK11 | 86 R86G     |
| STK11 | 87 R87K     |
| STK11 | 91 G91L     |
| SUFU  | 187 P187L   |
| SUFU  | 299 R299Q   |
| SUFU  | 362 R362C   |
| SYK   | 246 Y246C   |
| SYK   | 293 S293C   |
| SYK   | 405 D405N   |
| SYK   | 580 D580H   |
| TAF15 | 236 I236V   |
| TAF15 | 278 D278V   |
| TAL1  | 315 R315L   |
| TCF12 | 74 R74G     |
| TCF3  | 10 V10L     |
| TCF3  | 218 D218E   |
| TCF3  | 491 T491M   |
| TCF3  | 545 E545K   |
| TCF3  | 633 P633L   |
| TCF3  | 8 A8V       |
| TCL1A | 23 K23N     |
| TCL1A | 59 G59E     |
| TET1  | 1257 V1257F |
| TET1  | 1505 R1505C |
| TET1  | 1706 H1706Q |
| TET1  | 1715 D1715N |

|      |             |
|------|-------------|
| TET1 | 1846 P1846L |
| TET1 | 1886 G1886R |
| TET1 | 2023 A2023T |
| TET1 | 329 F329V   |
| TET2 | 101 P101H   |
| TET2 | 1144 E1144K |
| TET2 | 1167 R1167T |
| TET2 | 1175 I1175V |
| TET2 | 1193 C1193F |
| TET2 | 1193 C1193W |
| TET2 | 1194 P1194A |
| TET2 | 1195 I1195V |
| TET2 | 1197 K1197R |
| TET2 | 1199 V1199I |
| TET2 | 1210 L1210P |
| TET2 | 1211 C1211Y |
| TET2 | 1214 R1214W |
| TET2 | 1216 R1216Q |
| TET2 | 1219 H1219Q |
| TET2 | 1219 H1219R |
| TET2 | 1219 H1219Y |
| TET2 | 1222 E1222G |
| TET2 | 1227 V1227E |
| TET2 | 1234 E1234G |
| TET2 | 1242 D1242V |
| TET2 | 1256 G1256D |
| TET2 | 1261 R1261C |
| TET2 | 1261 R1261G |
| TET2 | 1261 R1261L |
| TET2 | 1263 C1263G |
| TET2 | 1263 C1263R |
| TET2 | 1264 A1264P |
| TET2 | 1270 T1270P |
| TET2 | 1271 C1271W |
| TET2 | 1273 C1273F |
| TET2 | 1273 C1273S |
| TET2 | 1275 G1275E |
| TET2 | 1275 G1275R |
| TET2 | 1282 G1282D |
| TET2 | 1284 S1284F |
| TET2 | 1286 S1286P |
| TET2 | 1287 F1287L |
| TET2 | 1288 G1288S |



|      |             |
|------|-------------|
| TET2 | 1288 G1288V |
| TET2 | 1289 C1289F |
| TET2 | 1289 C1289Y |
| TET2 | 1291 W1291R |
| TET2 | 1292 S1292R |
| TET2 | 1298 C1298W |
| TET2 | 1298 C1298Y |
| TET2 | 1299 K1299E |
| TET2 | 1299 K1299N |
| TET2 | 1302 R1302G |
| TET2 | 1303 S1303N |
| TET2 | 1318 E1318G |
| TET2 | 1322 L1322P |
| TET2 | 1340 L1340P |
| TET2 | 1344 A1344E |
| TET2 | 1348 Q1348R |
| TET2 | 1355 A1355P |
| TET2 | 1358 C1358G |
| TET2 | 1359 R1359C |
| TET2 | 1359 R1359H |
| TET2 | 1359 R1359P |
| TET2 | 1360 L1360Q |
| TET2 | 1360 L1360R |
| TET2 | 1361 G1361D |
| TET2 | 1361 G1361S |
| TET2 | 1366 R1366H |
| TET2 | 1367 P1367S |
| TET2 | 1368 F1368L |
| TET2 | 1368 F1368Y |
| TET2 | 1370 G1370E |
| TET2 | 1370 G1370V |
| TET2 | 1372 T1372I |
| TET2 | 1376 D1376E |
| TET2 | 1376 D1376G |
| TET2 | 1376 D1376N |
| TET2 | 1380 H1380P |
| TET2 | 1380 H1380Y |
| TET2 | 1382 H1382Y |
| TET2 | 1384 D1384H |
| TET2 | 1384 D1384V |
| TET2 | 1393 T1393P |
| TET2 | 1396 C1396W |
| TET2 | 1398 L1398P |

|      |             |
|------|-------------|
| TET2 | 1398 L1398R |
| TET2 | 1417 V1417F |
| TET2 | 1419 P1419R |
| TET2 | 1427 D1427Y |
| TET2 | 145 S145N   |
| TET2 | 1465 R1465Q |
| TET2 | 1556 S1556Y |
| TET2 | 1579 Y1579S |
| TET2 | 1641 N1641I |
| TET2 | 1660 R1660G |
| TET2 | 1718 V1718L |
| TET2 | 1719 G1719R |
| TET2 | 1801 L1801F |
| TET2 | 1817 H1817N |
| TET2 | 1844 D1844G |
| TET2 | 1861 G1861R |
| TET2 | 1865 A1865G |
| TET2 | 1868 H1868P |
| TET2 | 1868 H1868R |
| TET2 | 1869 G1869W |
| TET2 | 1871 I1871S |
| TET2 | 1872 L1872P |
| TET2 | 1873 I1873N |
| TET2 | 1873 I1873T |
| TET2 | 1875 C1875R |
| TET2 | 1876 A1876G |
| TET2 | 1876 A1876V |
| TET2 | 1878 R1878H |
| TET2 | 1879 E1879A |
| TET2 | 1881 H1881Q |
| TET2 | 1881 H1881R |
| TET2 | 1882 A1882P |
| TET2 | 1884 T1884A |
| TET2 | 1894 P1894H |
| TET2 | 1896 R1896M |
| TET2 | 1896 R1896S |
| TET2 | 1898 S1898F |
| TET2 | 1899 L1899P |
| TET2 | 1904 H1904Q |
| TET2 | 1904 H1904R |
| TET2 | 1913 G1913D |
| TET2 | 1913 G1913V |
| TET2 | 1937 P1937S |

|         |             |
|---------|-------------|
| TET2    | 1941 P1941S |
| TET2    | 1962 P1962L |
| TET2    | 1971 L1971F |
| TET2    | 2000 R2000K |
| TET2    | 282 S282F   |
| TET2    | 308 A308T   |
| TET2    | 350 E350K   |
| TET2    | 399 P399L   |
| TET2    | 460 S460F   |
| TET2    | 492 T492S   |
| TET2    | 548 Q548L   |
| TET2    | 686 R686S   |
| TET2    | 699 L699M   |
| TET2    | 773 G773V   |
| TET2    | 817 S817T   |
| TET2    | 868 F868L   |
| TFE3    | 125 A125T   |
| TFG     | 149 A149S   |
| TFG     | 384 N384K   |
| TFRC    | 155 R155H   |
| TFRC    | 297 F297L   |
| TFRC    | 563 Y563C   |
| TFRC    | 658 T658R   |
| THRAP3  | 249 P249A   |
| THRAP3  | 418 F418L   |
| THRAP3  | 478 P478T   |
| THRAP3  | 642 H642Q   |
| TIF1    | 270 I270V   |
| TIF1    | 320 I320T   |
| TIF1    | 403 T403N   |
| TIF1    | 499 P499S   |
| TIF1    | 673 D673H   |
| TIF1    | 740 E740Q   |
| TIF1    | 968 K968N   |
| TIF1    | 975 R975S   |
| TIF1    | 976 F976C   |
| TLX3    | 206 T206R   |
| TMPRSS2 | 414 Y414F   |
| TMPRSS2 | 48 P48L     |
| TNFAIP3 | 102 N102S   |
| TNFAIP3 | 103 C103G   |
| TNFAIP3 | 117 D117V   |
| TNFAIP3 | 18 A18P     |

|          |           |
|----------|-----------|
| TNFAIP3  | 20 K20Q   |
| TNFAIP3  | 235 P235T |
| TNFAIP3  | 302 L302P |
| TNFAIP3  | 364 R364G |
| TNFAIP3  | 377 V377M |
| TNFAIP3  | 421 L421V |
| TNFAIP3  | 431 P431L |
| TNFAIP3  | 474 T474N |
| TNFAIP3  | 476 M476I |
| TNFAIP3  | 571 V571I |
| TNFAIP3  | 574 P574L |
| TNFAIP3  | 586 A586T |
| TNFAIP3  | 614 Y614C |
| TNFAIP3  | 656 P656L |
| TNFAIP3  | 737 Q737K |
| TNFAIP3  | 751 E751K |
| TNFAIP3  | 753 A753T |
| TNFAIP3  | 758 P758R |
| TNFAIP3  | 772 N772K |
| TNFAIP3  | 776 N776S |
| TNFAIP3  | 781 E781D |
| TNFRSF14 | 243 R243Q |
| TOP1     | 326 K326R |
| TOP1     | 449 R449W |
| TOP1     | 560 P560L |
| TOP1     | 623 N623S |
| TOP1     | 96 A96S   |
| TP53     | 10 V10I   |
| TP53     | 101 K101N |
| TP53     | 101 K101R |
| TP53     | 102 T102I |
| TP53     | 104 Q104H |
| TP53     | 105 G105A |
| TP53     | 105 G105C |
| TP53     | 105 G105D |
| TP53     | 105 G105R |
| TP53     | 105 G105V |
| TP53     | 106 S106R |
| TP53     | 107 Y107C |
| TP53     | 107 Y107D |
| TP53     | 107 Y107Q |
| TP53     | 108 G108D |
| TP53     | 108 G108S |

|      |           |
|------|-----------|
| TP53 | 109 F109S |
| TP53 | 109 F109V |
| TP53 | 11 E11Q   |
| TP53 | 110 R110C |
| TP53 | 110 R110H |
| TP53 | 110 R110L |
| TP53 | 110 R110P |
| TP53 | 110 R110S |
| TP53 | 111 L111M |
| TP53 | 111 L111P |
| TP53 | 111 L111Q |
| TP53 | 111 L111R |
| TP53 | 112 G112D |
| TP53 | 112 G112S |
| TP53 | 113 F113C |
| TP53 | 113 F113L |
| TP53 | 113 F113S |
| TP53 | 113 F113V |
| TP53 | 116 S116C |
| TP53 | 116 S116F |
| TP53 | 117 G117E |
| TP53 | 117 G117R |
| TP53 | 118 T118A |
| TP53 | 118 T118I |
| TP53 | 118 T118R |
| TP53 | 120 K120E |
| TP53 | 120 K120M |
| TP53 | 120 K120N |
| TP53 | 120 K120Q |
| TP53 | 120 K120R |
| TP53 | 121 S121F |
| TP53 | 122 V122L |
| TP53 | 123 T123I |
| TP53 | 124 C124G |
| TP53 | 124 C124R |
| TP53 | 124 C124S |
| TP53 | 124 C124Y |
| TP53 | 125 T125A |
| TP53 | 125 T125K |
| TP53 | 125 T125M |
| TP53 | 125 T125P |
| TP53 | 125 T125R |
| TP53 | 126 Y126C |

|      |           |
|------|-----------|
| TP53 | 126 Y126D |
| TP53 | 126 Y126N |
| TP53 | 126 Y126S |
| TP53 | 127 S127C |
| TP53 | 127 S127F |
| TP53 | 127 S127P |
| TP53 | 127 S127Y |
| TP53 | 128 P128A |
| TP53 | 128 P128L |
| TP53 | 128 P128S |
| TP53 | 129 A129D |
| TP53 | 129 A129G |
| TP53 | 129 A129T |
| TP53 | 129 A129V |
| TP53 | 130 L130F |
| TP53 | 130 L130H |
| TP53 | 130 L130P |
| TP53 | 130 L130R |
| TP53 | 130 L130V |
| TP53 | 131 N131H |
| TP53 | 131 N131I |
| TP53 | 131 N131K |
| TP53 | 131 N131S |
| TP53 | 131 N131T |
| TP53 | 131 N131Y |
| TP53 | 132 K132E |
| TP53 | 132 K132M |
| TP53 | 132 K132N |
| TP53 | 132 K132Q |
| TP53 | 132 K132R |
| TP53 | 132 K132T |
| TP53 | 132 K132W |
| TP53 | 133 M133I |
| TP53 | 133 M133K |
| TP53 | 133 M133L |
| TP53 | 133 M133R |
| TP53 | 133 M133T |
| TP53 | 133 M133V |
| TP53 | 134 F134C |
| TP53 | 134 F134L |
| TP53 | 134 F134S |
| TP53 | 134 F134V |
| TP53 | 135 C135F |

|      |           |
|------|-----------|
| TP53 | 135 C135G |
| TP53 | 135 C135R |
| TP53 | 135 C135S |
| TP53 | 135 C135T |
| TP53 | 135 C135W |
| TP53 | 135 C135Y |
| TP53 | 136 Q136E |
| TP53 | 136 Q136H |
| TP53 | 136 Q136K |
| TP53 | 136 Q136P |
| TP53 | 136 Q136R |
| TP53 | 137 L137M |
| TP53 | 137 L137P |
| TP53 | 137 L137Q |
| TP53 | 137 L137V |
| TP53 | 138 A138P |
| TP53 | 138 A138S |
| TP53 | 138 A138T |
| TP53 | 138 A138V |
| TP53 | 139 K139E |
| TP53 | 139 K139N |
| TP53 | 139 K139Q |
| TP53 | 139 K139R |
| TP53 | 139 K139T |
| TP53 | 140 T140I |
| TP53 | 140 T140N |
| TP53 | 141 C141A |
| TP53 | 141 C141F |
| TP53 | 141 C141G |
| TP53 | 141 C141R |
| TP53 | 141 C141S |
| TP53 | 141 C141W |
| TP53 | 141 C141Y |
| TP53 | 142 P142A |
| TP53 | 142 P142F |
| TP53 | 142 P142H |
| TP53 | 142 P142L |
| TP53 | 142 P142S |
| TP53 | 142 P142T |
| TP53 | 143 V143A |
| TP53 | 143 V143E |
| TP53 | 143 V143G |
| TP53 | 143 V143L |

|      |           |
|------|-----------|
| TP53 | 143 V143M |
| TP53 | 144 Q144H |
| TP53 | 144 Q144K |
| TP53 | 144 Q144L |
| TP53 | 144 Q144P |
| TP53 | 144 Q144R |
| TP53 | 145 L145M |
| TP53 | 145 L145P |
| TP53 | 145 L145Q |
| TP53 | 145 L145R |
| TP53 | 145 L145V |
| TP53 | 146 W146C |
| TP53 | 146 W146G |
| TP53 | 146 W146R |
| TP53 | 146 W146S |
| TP53 | 147 V147A |
| TP53 | 147 V147D |
| TP53 | 147 V147E |
| TP53 | 147 V147G |
| TP53 | 147 V147I |
| TP53 | 148 D148E |
| TP53 | 148 D148N |
| TP53 | 148 D148V |
| TP53 | 148 D148Y |
| TP53 | 149 S149F |
| TP53 | 149 S149P |
| TP53 | 149 S149T |
| TP53 | 150 T150I |
| TP53 | 150 T150K |
| TP53 | 150 T150R |
| TP53 | 151 P151A |
| TP53 | 151 P151H |
| TP53 | 151 P151L |
| TP53 | 151 P151R |
| TP53 | 151 P151S |
| TP53 | 151 P151T |
| TP53 | 152 P152A |
| TP53 | 152 P152L |
| TP53 | 152 P152Q |
| TP53 | 152 P152R |
| TP53 | 152 P152S |
| TP53 | 152 P152T |
| TP53 | 153 P153A |



|      |           |
|------|-----------|
| TP53 | 153 P153F |
| TP53 | 153 P153H |
| TP53 | 153 P153L |
| TP53 | 153 P153S |
| TP53 | 153 P153T |
| TP53 | 154 G154A |
| TP53 | 154 G154C |
| TP53 | 154 G154D |
| TP53 | 154 G154I |
| TP53 | 154 G154S |
| TP53 | 154 G154V |
| TP53 | 155 T155A |
| TP53 | 155 T155I |
| TP53 | 155 T155N |
| TP53 | 155 T155P |
| TP53 | 155 T155S |
| TP53 | 156 R156C |
| TP53 | 156 R156G |
| TP53 | 156 R156H |
| TP53 | 156 R156L |
| TP53 | 156 R156P |
| TP53 | 156 R156S |
| TP53 | 157 V157A |
| TP53 | 157 V157D |
| TP53 | 157 V157F |
| TP53 | 157 V157G |
| TP53 | 157 V157I |
| TP53 | 157 V157L |
| TP53 | 158 R158C |
| TP53 | 158 R158F |
| TP53 | 158 R158G |
| TP53 | 158 R158H |
| TP53 | 158 R158L |
| TP53 | 158 R158P |
| TP53 | 159 A159D |
| TP53 | 159 A159P |
| TP53 | 159 A159S |
| TP53 | 159 A159T |
| TP53 | 159 A159V |
| TP53 | 16 Q16L   |
| TP53 | 160 M160I |
| TP53 | 160 M160K |
| TP53 | 160 M160L |

|      |           |
|------|-----------|
| TP53 | 160 M160T |
| TP53 | 160 M160V |
| TP53 | 161 A161D |
| TP53 | 161 A161F |
| TP53 | 161 A161G |
| TP53 | 161 A161P |
| TP53 | 161 A161S |
| TP53 | 161 A161T |
| TP53 | 161 A161V |
| TP53 | 162 I162F |
| TP53 | 162 I162M |
| TP53 | 162 I162N |
| TP53 | 162 I162S |
| TP53 | 162 I162V |
| TP53 | 163 Y163C |
| TP53 | 163 Y163D |
| TP53 | 163 Y163H |
| TP53 | 163 Y163N |
| TP53 | 163 Y163S |
| TP53 | 164 K164E |
| TP53 | 164 K164M |
| TP53 | 164 K164N |
| TP53 | 164 K164Q |
| TP53 | 164 K164R |
| TP53 | 164 K164T |
| TP53 | 165 Q165E |
| TP53 | 165 Q165H |
| TP53 | 165 Q165L |
| TP53 | 165 Q165P |
| TP53 | 165 Q165R |
| TP53 | 166 S166A |
| TP53 | 166 S166G |
| TP53 | 166 S166L |
| TP53 | 166 S166P |
| TP53 | 166 S166T |
| TP53 | 167 Q167E |
| TP53 | 167 Q167H |
| TP53 | 167 Q167K |
| TP53 | 167 Q167L |
| TP53 | 167 Q167R |
| TP53 | 168 H168D |
| TP53 | 168 H168L |
| TP53 | 168 H168N |

|      |           |
|------|-----------|
| TP53 | 168 H168P |
| TP53 | 168 H168Q |
| TP53 | 168 H168R |
| TP53 | 168 H168Y |
| TP53 | 169 M169I |
| TP53 | 169 M169T |
| TP53 | 169 M169V |
| TP53 | 170 T170A |
| TP53 | 170 T170M |
| TP53 | 170 T170P |
| TP53 | 170 T170S |
| TP53 | 171 E171A |
| TP53 | 171 E171D |
| TP53 | 171 E171G |
| TP53 | 171 E171K |
| TP53 | 171 E171Q |
| TP53 | 171 E171V |
| TP53 | 172 V172A |
| TP53 | 172 V172D |
| TP53 | 172 V172F |
| TP53 | 172 V172G |
| TP53 | 172 V172I |
| TP53 | 173 V173A |
| TP53 | 173 V173E |
| TP53 | 173 V173G |
| TP53 | 173 V173L |
| TP53 | 173 V173M |
| TP53 | 173 V173W |
| TP53 | 174 R174G |
| TP53 | 174 R174K |
| TP53 | 174 R174M |
| TP53 | 174 R174S |
| TP53 | 174 R174W |
| TP53 | 175 R175C |
| TP53 | 175 R175G |
| TP53 | 175 R175H |
| TP53 | 175 R175L |
| TP53 | 175 R175P |
| TP53 | 175 R175S |
| TP53 | 176 C176F |
| TP53 | 176 C176G |
| TP53 | 176 C176R |
| TP53 | 176 C176S |

|      |           |
|------|-----------|
| TP53 | 176 C176W |
| TP53 | 176 C176Y |
| TP53 | 177 P177H |
| TP53 | 177 P177I |
| TP53 | 177 P177L |
| TP53 | 177 P177R |
| TP53 | 177 P177S |
| TP53 | 177 P177T |
| TP53 | 178 H178D |
| TP53 | 178 H178L |
| TP53 | 178 H178N |
| TP53 | 178 H178P |
| TP53 | 178 H178Q |
| TP53 | 178 H178Y |
| TP53 | 179 H179D |
| TP53 | 179 H179L |
| TP53 | 179 H179N |
| TP53 | 179 H179P |
| TP53 | 179 H179Q |
| TP53 | 179 H179R |
| TP53 | 179 H179Y |
| TP53 | 180 E180D |
| TP53 | 180 E180K |
| TP53 | 180 E180Q |
| TP53 | 181 R181C |
| TP53 | 181 R181G |
| TP53 | 181 R181H |
| TP53 | 181 R181L |
| TP53 | 181 R181P |
| TP53 | 182 C182R |
| TP53 | 182 C182S |
| TP53 | 182 C182Y |
| TP53 | 183 S183L |
| TP53 | 183 S183P |
| TP53 | 184 D184H |
| TP53 | 184 D184N |
| TP53 | 184 D184Y |
| TP53 | 185 S185C |
| TP53 | 185 S185G |
| TP53 | 185 S185I |
| TP53 | 185 S185N |
| TP53 | 185 S185R |
| TP53 | 185 S185T |

|      |           |
|------|-----------|
| TP53 | 186 D186E |
| TP53 | 186 D186G |
| TP53 | 186 D186H |
| TP53 | 186 D186N |
| TP53 | 186 D186V |
| TP53 | 187 G187C |
| TP53 | 187 G187D |
| TP53 | 187 G187S |
| TP53 | 187 G187V |
| TP53 | 188 L188V |
| TP53 | 189 A189D |
| TP53 | 189 A189G |
| TP53 | 189 A189P |
| TP53 | 189 A189S |
| TP53 | 189 A189T |
| TP53 | 189 A189V |
| TP53 | 190 P190A |
| TP53 | 190 P190H |
| TP53 | 190 P190L |
| TP53 | 190 P190R |
| TP53 | 190 P190S |
| TP53 | 190 P190T |
| TP53 | 191 P191H |
| TP53 | 191 P191L |
| TP53 | 191 P191R |
| TP53 | 191 P191S |
| TP53 | 191 P191T |
| TP53 | 192 Q192H |
| TP53 | 192 Q192K |
| TP53 | 192 Q192R |
| TP53 | 193 H193D |
| TP53 | 193 H193L |
| TP53 | 193 H193N |
| TP53 | 193 H193P |
| TP53 | 193 H193R |
| TP53 | 193 H193Y |
| TP53 | 194 L194F |
| TP53 | 194 L194H |
| TP53 | 194 L194I |
| TP53 | 194 L194P |
| TP53 | 194 L194R |
| TP53 | 194 L194V |
| TP53 | 195 I195F |

|      |           |
|------|-----------|
| TP53 | 195 I195L |
| TP53 | 195 I195N |
| TP53 | 195 I195S |
| TP53 | 195 I195T |
| TP53 | 196 R196L |
| TP53 | 196 R196P |
| TP53 | 196 R196Q |
| TP53 | 197 V197A |
| TP53 | 197 V197E |
| TP53 | 197 V197G |
| TP53 | 197 V197L |
| TP53 | 197 V197M |
| TP53 | 198 E198G |
| TP53 | 198 E198K |
| TP53 | 198 E198Q |
| TP53 | 199 G199A |
| TP53 | 199 G199E |
| TP53 | 199 G199R |
| TP53 | 199 G199V |
| TP53 | 200 N200D |
| TP53 | 200 N200I |
| TP53 | 200 N200S |
| TP53 | 200 N200T |
| TP53 | 201 L201F |
| TP53 | 201 L201P |
| TP53 | 201 L201S |
| TP53 | 202 R202C |
| TP53 | 202 R202G |
| TP53 | 202 R202H |
| TP53 | 202 R202L |
| TP53 | 202 R202P |
| TP53 | 202 R202S |
| TP53 | 203 V203A |
| TP53 | 203 V203E |
| TP53 | 203 V203L |
| TP53 | 203 V203M |
| TP53 | 204 E204A |
| TP53 | 204 E204D |
| TP53 | 204 E204G |
| TP53 | 204 E204K |
| TP53 | 204 E204Q |
| TP53 | 204 E204V |
| TP53 | 205 Y205C |

|      |           |
|------|-----------|
| TP53 | 205 Y205D |
| TP53 | 205 Y205F |
| TP53 | 205 Y205H |
| TP53 | 205 Y205N |
| TP53 | 205 Y205S |
| TP53 | 206 L206F |
| TP53 | 207 D207A |
| TP53 | 207 D207E |
| TP53 | 207 D207G |
| TP53 | 207 D207Y |
| TP53 | 208 D208E |
| TP53 | 208 D208G |
| TP53 | 208 D208H |
| TP53 | 208 D208I |
| TP53 | 208 D208N |
| TP53 | 208 D208V |
| TP53 | 208 D208Y |
| TP53 | 209 R209I |
| TP53 | 209 R209K |
| TP53 | 209 R209S |
| TP53 | 209 R209T |
| TP53 | 210 N210D |
| TP53 | 210 N210H |
| TP53 | 210 N210K |
| TP53 | 210 N210S |
| TP53 | 210 N210T |
| TP53 | 211 T211A |
| TP53 | 211 T211I |
| TP53 | 211 T211N |
| TP53 | 211 T211P |
| TP53 | 211 T211S |
| TP53 | 212 F212I |
| TP53 | 212 F212L |
| TP53 | 212 F212S |
| TP53 | 212 F212Y |
| TP53 | 213 R213G |
| TP53 | 213 R213L |
| TP53 | 213 R213P |
| TP53 | 213 R213Q |
| TP53 | 213 R213W |
| TP53 | 214 H214D |
| TP53 | 214 H214Q |
| TP53 | 214 H214R |

|      |           |
|------|-----------|
| TP53 | 214 H214Y |
| TP53 | 215 S215C |
| TP53 | 215 S215G |
| TP53 | 215 S215I |
| TP53 | 215 S215N |
| TP53 | 215 S215R |
| TP53 | 215 S215T |
| TP53 | 216 V216A |
| TP53 | 216 V216E |
| TP53 | 216 V216G |
| TP53 | 216 V216L |
| TP53 | 216 V216M |
| TP53 | 217 V217A |
| TP53 | 217 V217E |
| TP53 | 217 V217G |
| TP53 | 217 V217L |
| TP53 | 218 V218A |
| TP53 | 218 V218E |
| TP53 | 218 V218G |
| TP53 | 218 V218L |
| TP53 | 218 V218M |
| TP53 | 219 P219C |
| TP53 | 219 P219H |
| TP53 | 219 P219L |
| TP53 | 219 P219R |
| TP53 | 219 P219S |
| TP53 | 219 P219T |
| TP53 | 220 Y220C |
| TP53 | 220 Y220D |
| TP53 | 220 Y220H |
| TP53 | 220 Y220N |
| TP53 | 220 Y220S |
| TP53 | 221 E221D |
| TP53 | 221 E221G |
| TP53 | 221 E221K |
| TP53 | 222 P222A |
| TP53 | 222 P222L |
| TP53 | 222 P222Q |
| TP53 | 222 P222S |
| TP53 | 222 P222T |
| TP53 | 223 P223A |
| TP53 | 223 P223H |
| TP53 | 223 P223L |



|      |           |
|------|-----------|
| TP53 | 223 P223R |
| TP53 | 223 P223S |
| TP53 | 224 E224D |
| TP53 | 224 E224G |
| TP53 | 224 E224K |
| TP53 | 225 V225A |
| TP53 | 225 V225D |
| TP53 | 225 V225F |
| TP53 | 225 V225I |
| TP53 | 226 G226A |
| TP53 | 226 G226D |
| TP53 | 226 G226S |
| TP53 | 226 G226V |
| TP53 | 227 S227F |
| TP53 | 228 D228A |
| TP53 | 228 D228E |
| TP53 | 228 D228G |
| TP53 | 228 D228H |
| TP53 | 228 D228N |
| TP53 | 228 D228V |
| TP53 | 228 D228Y |
| TP53 | 229 C229G |
| TP53 | 229 C229R |
| TP53 | 229 C229S |
| TP53 | 229 C229Y |
| TP53 | 230 T230A |
| TP53 | 230 T230I |
| TP53 | 230 T230N |
| TP53 | 230 T230P |
| TP53 | 230 T230S |
| TP53 | 231 T231A |
| TP53 | 231 T231I |
| TP53 | 231 T231N |
| TP53 | 231 T231S |
| TP53 | 232 I232F |
| TP53 | 232 I232L |
| TP53 | 232 I232N |
| TP53 | 232 I232S |
| TP53 | 232 I232T |
| TP53 | 232 I232V |
| TP53 | 233 H233D |
| TP53 | 233 H233L |
| TP53 | 233 H233P |

|      |           |
|------|-----------|
| TP53 | 233 H233Q |
| TP53 | 233 H233R |
| TP53 | 233 H233Y |
| TP53 | 234 Y234C |
| TP53 | 234 Y234D |
| TP53 | 234 Y234F |
| TP53 | 234 Y234H |
| TP53 | 234 Y234N |
| TP53 | 234 Y234S |
| TP53 | 235 N235D |
| TP53 | 235 N235H |
| TP53 | 235 N235I |
| TP53 | 235 N235M |
| TP53 | 235 N235S |
| TP53 | 235 N235T |
| TP53 | 235 N235Y |
| TP53 | 236 Y236C |
| TP53 | 236 Y236D |
| TP53 | 236 Y236H |
| TP53 | 236 Y236N |
| TP53 | 236 Y236S |
| TP53 | 237 M237I |
| TP53 | 237 M237K |
| TP53 | 237 M237L |
| TP53 | 237 M237R |
| TP53 | 237 M237T |
| TP53 | 237 M237V |
| TP53 | 238 C238F |
| TP53 | 238 C238G |
| TP53 | 238 C238R |
| TP53 | 238 C238S |
| TP53 | 238 C238W |
| TP53 | 238 C238Y |
| TP53 | 239 N239D |
| TP53 | 239 N239K |
| TP53 | 239 N239S |
| TP53 | 239 N239T |
| TP53 | 239 N239Y |
| TP53 | 240 S240C |
| TP53 | 240 S240G |
| TP53 | 240 S240I |
| TP53 | 240 S240P |
| TP53 | 240 S240R |

|      |           |
|------|-----------|
| TP53 | 240 S240T |
| TP53 | 241 S241A |
| TP53 | 241 S241C |
| TP53 | 241 S241F |
| TP53 | 241 S241P |
| TP53 | 241 S241T |
| TP53 | 241 S241Y |
| TP53 | 242 C242F |
| TP53 | 242 C242G |
| TP53 | 242 C242R |
| TP53 | 242 C242S |
| TP53 | 242 C242W |
| TP53 | 242 C242Y |
| TP53 | 243 M243I |
| TP53 | 243 M243K |
| TP53 | 243 M243L |
| TP53 | 243 M243R |
| TP53 | 243 M243T |
| TP53 | 243 M243V |
| TP53 | 244 G244A |
| TP53 | 244 G244C |
| TP53 | 244 G244D |
| TP53 | 244 G244E |
| TP53 | 244 G244R |
| TP53 | 244 G244S |
| TP53 | 244 G244V |
| TP53 | 245 G245A |
| TP53 | 245 G245C |
| TP53 | 245 G245D |
| TP53 | 245 G245E |
| TP53 | 245 G245F |
| TP53 | 245 G245H |
| TP53 | 245 G245L |
| TP53 | 245 G245N |
| TP53 | 245 G245R |
| TP53 | 245 G245S |
| TP53 | 245 G245V |
| TP53 | 246 M246I |
| TP53 | 246 M246K |
| TP53 | 246 M246L |
| TP53 | 246 M246R |
| TP53 | 246 M246T |
| TP53 | 246 M246V |

|      |           |
|------|-----------|
| TP53 | 247 N247D |
| TP53 | 247 N247F |
| TP53 | 247 N247I |
| TP53 | 247 N247K |
| TP53 | 247 N247S |
| TP53 | 247 N247T |
| TP53 | 247 N247Y |
| TP53 | 248 R248C |
| TP53 | 248 R248G |
| TP53 | 248 R248L |
| TP53 | 248 R248P |
| TP53 | 248 R248Q |
| TP53 | 248 R248W |
| TP53 | 249 R249G |
| TP53 | 249 R249K |
| TP53 | 249 R249M |
| TP53 | 249 R249S |
| TP53 | 249 R249T |
| TP53 | 249 R249W |
| TP53 | 250 P250A |
| TP53 | 250 P250F |
| TP53 | 250 P250H |
| TP53 | 250 P250L |
| TP53 | 250 P250N |
| TP53 | 250 P250Q |
| TP53 | 250 P250S |
| TP53 | 250 P250T |
| TP53 | 251 I251F |
| TP53 | 251 I251L |
| TP53 | 251 I251N |
| TP53 | 251 I251S |
| TP53 | 251 I251T |
| TP53 | 251 I251V |
| TP53 | 252 L252F |
| TP53 | 252 L252H |
| TP53 | 252 L252P |
| TP53 | 253 T253A |
| TP53 | 253 T253I |
| TP53 | 253 T253N |
| TP53 | 253 T253P |
| TP53 | 253 T253S |
| TP53 | 254 I254D |
| TP53 | 254 I254F |

|      |           |
|------|-----------|
| TP53 | 254 I254N |
| TP53 | 254 I254S |
| TP53 | 254 I254T |
| TP53 | 254 I254V |
| TP53 | 255 I255F |
| TP53 | 255 I255M |
| TP53 | 255 I255N |
| TP53 | 255 I255S |
| TP53 | 255 I255T |
| TP53 | 255 I255V |
| TP53 | 256 T256A |
| TP53 | 256 T256I |
| TP53 | 256 T256K |
| TP53 | 256 T256P |
| TP53 | 256 T256S |
| TP53 | 257 L257P |
| TP53 | 257 L257Q |
| TP53 | 257 L257R |
| TP53 | 257 L257V |
| TP53 | 258 E258A |
| TP53 | 258 E258D |
| TP53 | 258 E258G |
| TP53 | 258 E258K |
| TP53 | 258 E258L |
| TP53 | 258 E258Q |
| TP53 | 258 E258V |
| TP53 | 259 D259E |
| TP53 | 259 D259G |
| TP53 | 259 D259H |
| TP53 | 259 D259N |
| TP53 | 259 D259S |
| TP53 | 259 D259V |
| TP53 | 259 D259Y |
| TP53 | 260 S260A |
| TP53 | 260 S260C |
| TP53 | 260 S260F |
| TP53 | 260 S260P |
| TP53 | 260 S260Y |
| TP53 | 261 S261C |
| TP53 | 261 S261G |
| TP53 | 261 S261N |
| TP53 | 261 S261R |
| TP53 | 261 S261T |

|      |           |
|------|-----------|
| TP53 | 262 G262D |
| TP53 | 262 G262H |
| TP53 | 262 G262S |
| TP53 | 262 G262V |
| TP53 | 263 N263D |
| TP53 | 263 N263H |
| TP53 | 263 N263I |
| TP53 | 263 N263K |
| TP53 | 264 L264I |
| TP53 | 264 L264P |
| TP53 | 264 L264R |
| TP53 | 264 L264V |
| TP53 | 265 L265M |
| TP53 | 265 L265P |
| TP53 | 265 L265Q |
| TP53 | 265 L265R |
| TP53 | 266 G266A |
| TP53 | 266 G266E |
| TP53 | 266 G266R |
| TP53 | 266 G266T |
| TP53 | 266 G266V |
| TP53 | 267 R267G |
| TP53 | 267 R267L |
| TP53 | 267 R267P |
| TP53 | 267 R267Q |
| TP53 | 267 R267W |
| TP53 | 268 N268F |
| TP53 | 268 N268H |
| TP53 | 268 N268I |
| TP53 | 268 N268S |
| TP53 | 269 S269C |
| TP53 | 269 S269G |
| TP53 | 269 S269N |
| TP53 | 269 S269R |
| TP53 | 269 S269T |
| TP53 | 270 F270C |
| TP53 | 270 F270I |
| TP53 | 270 F270L |
| TP53 | 270 F270S |
| TP53 | 270 F270V |
| TP53 | 270 F270Y |
| TP53 | 271 E271D |
| TP53 | 271 E271G |

|      |           |
|------|-----------|
| TP53 | 271 E271K |
| TP53 | 271 E271P |
| TP53 | 271 E271Q |
| TP53 | 271 E271V |
| TP53 | 272 V272A |
| TP53 | 272 V272E |
| TP53 | 272 V272G |
| TP53 | 272 V272L |
| TP53 | 272 V272M |
| TP53 | 273 R273C |
| TP53 | 273 R273G |
| TP53 | 273 R273H |
| TP53 | 273 R273L |
| TP53 | 273 R273P |
| TP53 | 273 R273S |
| TP53 | 274 V274A |
| TP53 | 274 V274D |
| TP53 | 274 V274F |
| TP53 | 274 V274G |
| TP53 | 274 V274I |
| TP53 | 274 V274L |
| TP53 | 275 C275F |
| TP53 | 275 C275G |
| TP53 | 275 C275R |
| TP53 | 275 C275S |
| TP53 | 275 C275W |
| TP53 | 275 C275Y |
| TP53 | 276 A276D |
| TP53 | 276 A276G |
| TP53 | 276 A276P |
| TP53 | 276 A276S |
| TP53 | 276 A276T |
| TP53 | 276 A276V |
| TP53 | 277 C277F |
| TP53 | 277 C277G |
| TP53 | 277 C277R |
| TP53 | 277 C277S |
| TP53 | 277 C277W |
| TP53 | 277 C277Y |
| TP53 | 278 P278A |
| TP53 | 278 P278F |
| TP53 | 278 P278H |
| TP53 | 278 P278L |

|      |           |
|------|-----------|
| TP53 | 278 P278R |
| TP53 | 278 P278S |
| TP53 | 278 P278T |
| TP53 | 279 G279E |
| TP53 | 279 G279R |
| TP53 | 279 G279V |
| TP53 | 279 G279W |
| TP53 | 280 R280G |
| TP53 | 280 R280I |
| TP53 | 280 R280K |
| TP53 | 280 R280S |
| TP53 | 280 R280T |
| TP53 | 281 D281A |
| TP53 | 281 D281E |
| TP53 | 281 D281G |
| TP53 | 281 D281H |
| TP53 | 281 D281N |
| TP53 | 281 D281R |
| TP53 | 281 D281V |
| TP53 | 281 D281Y |
| TP53 | 282 R282G |
| TP53 | 282 R282H |
| TP53 | 282 R282L |
| TP53 | 282 R282P |
| TP53 | 282 R282Q |
| TP53 | 282 R282W |
| TP53 | 283 R283C |
| TP53 | 283 R283G |
| TP53 | 283 R283H |
| TP53 | 283 R283L |
| TP53 | 283 R283P |
| TP53 | 283 R283S |
| TP53 | 284 T284A |
| TP53 | 284 T284I |
| TP53 | 284 T284P |
| TP53 | 285 E285A |
| TP53 | 285 E285G |
| TP53 | 285 E285K |
| TP53 | 285 E285Q |
| TP53 | 285 E285V |
| TP53 | 286 E286A |
| TP53 | 286 E286D |
| TP53 | 286 E286G |



|      |           |
|------|-----------|
| TP53 | 286 E286K |
| TP53 | 286 E286Q |
| TP53 | 286 E286V |
| TP53 | 287 E287A |
| TP53 | 287 E287D |
| TP53 | 287 E287G |
| TP53 | 287 E287K |
| TP53 | 287 E287V |
| TP53 | 288 N288D |
| TP53 | 288 N288K |
| TP53 | 288 N288S |
| TP53 | 288 N288Y |
| TP53 | 289 L289F |
| TP53 | 289 L289P |
| TP53 | 289 L289R |
| TP53 | 290 R290C |
| TP53 | 290 R290H |
| TP53 | 290 R290L |
| TP53 | 290 R290S |
| TP53 | 291 K291E |
| TP53 | 291 K291M |
| TP53 | 291 K291N |
| TP53 | 291 K291Q |
| TP53 | 291 K291R |
| TP53 | 291 K291T |
| TP53 | 292 K292E |
| TP53 | 292 K292N |
| TP53 | 292 K292R |
| TP53 | 292 K292T |
| TP53 | 293 G293R |
| TP53 | 293 G293V |
| TP53 | 293 G293W |
| TP53 | 294 E294D |
| TP53 | 294 E294G |
| TP53 | 294 E294K |
| TP53 | 294 E294Q |
| TP53 | 294 E294V |
| TP53 | 295 P295H |
| TP53 | 295 P295L |
| TP53 | 295 P295R |
| TP53 | 295 P295S |
| TP53 | 296 H296L |
| TP53 | 296 H296N |

|      |           |
|------|-----------|
| TP53 | 296 H296P |
| TP53 | 296 H296Q |
| TP53 | 296 H296R |
| TP53 | 296 H296Y |
| TP53 | 297 H297N |
| TP53 | 297 H297P |
| TP53 | 297 H297Y |
| TP53 | 298 E298A |
| TP53 | 298 E298K |
| TP53 | 298 E298Q |
| TP53 | 298 E298V |
| TP53 | 299 L299P |
| TP53 | 299 L299V |
| TP53 | 300 P300A |
| TP53 | 300 P300L |
| TP53 | 300 P300R |
| TP53 | 300 P300S |
| TP53 | 301 P301A |
| TP53 | 301 P301L |
| TP53 | 301 P301Q |
| TP53 | 301 P301S |
| TP53 | 301 P301T |
| TP53 | 302 G302E |
| TP53 | 303 S303C |
| TP53 | 303 S303N |
| TP53 | 303 S303T |
| TP53 | 304 T304A |
| TP53 | 304 T304I |
| TP53 | 304 T304N |
| TP53 | 305 K305E |
| TP53 | 305 K305N |
| TP53 | 305 K305R |
| TP53 | 305 K305T |
| TP53 | 307 A307S |
| TP53 | 307 A307T |
| TP53 | 307 A307V |
| TP53 | 308 L308M |
| TP53 | 308 L308V |
| TP53 | 309 P309R |
| TP53 | 309 P309S |
| TP53 | 31 V31I   |
| TP53 | 310 N310L |
| TP53 | 310 N310T |

|      |           |
|------|-----------|
| TP53 | 311 N311H |
| TP53 | 311 N311K |
| TP53 | 312 T312A |
| TP53 | 312 T312I |
| TP53 | 312 T312S |
| TP53 | 313 S313C |
| TP53 | 313 S313N |
| TP53 | 314 S314F |
| TP53 | 315 S315C |
| TP53 | 315 S315P |
| TP53 | 316 P316L |
| TP53 | 317 Q317K |
| TP53 | 317 Q317P |
| TP53 | 317 Q317R |
| TP53 | 318 P318A |
| TP53 | 319 K319E |
| TP53 | 319 K319N |
| TP53 | 319 K319R |
| TP53 | 320 K320N |
| TP53 | 322 P322L |
| TP53 | 322 P322R |
| TP53 | 323 L323G |
| TP53 | 323 L323M |
| TP53 | 323 L323P |
| TP53 | 323 L323R |
| TP53 | 323 L323V |
| TP53 | 324 D324E |
| TP53 | 324 D324S |
| TP53 | 325 G325A |
| TP53 | 325 G325E |
| TP53 | 325 G325V |
| TP53 | 327 Y327D |
| TP53 | 328 F328S |
| TP53 | 328 F328V |
| TP53 | 329 T329I |
| TP53 | 33 S33T   |
| TP53 | 330 L330H |
| TP53 | 330 L330P |
| TP53 | 330 L330R |
| TP53 | 331 Q331P |
| TP53 | 331 Q331R |
| TP53 | 332 I332V |
| TP53 | 334 G334V |

|      |           |
|------|-----------|
| TP53 | 334 G334W |
| TP53 | 335 R335L |
| TP53 | 337 R337C |
| TP53 | 337 R337H |
| TP53 | 337 R337L |
| TP53 | 338 F338I |
| TP53 | 339 E339K |
| TP53 | 339 E339Q |
| TP53 | 34 P34L   |
| TP53 | 341 F341C |
| TP53 | 342 R342P |
| TP53 | 342 R342Q |
| TP53 | 344 L344P |
| TP53 | 344 L344R |
| TP53 | 346 E346A |
| TP53 | 347 A347G |
| TP53 | 347 A347T |
| TP53 | 348 L348F |
| TP53 | 35 L35F   |
| TP53 | 353 A353T |
| TP53 | 354 Q354K |
| TP53 | 354 Q354R |
| TP53 | 356 G356W |
| TP53 | 358 E358V |
| TP53 | 359 P359S |
| TP53 | 364 A364T |
| TP53 | 366 S366A |
| TP53 | 37 S37T   |
| TP53 | 370 K370Q |
| TP53 | 376 S376A |
| TP53 | 376 S376T |
| TP53 | 379 R379H |
| TP53 | 389 G389W |
| TP53 | 392 S392L |
| TP53 | 42 D42Y   |
| TP53 | 44 M44I   |
| TP53 | 44 M44T   |
| TP53 | 44 M44V   |
| TP53 | 45 L45P   |
| TP53 | 46 S46F   |
| TP53 | 46 S46P   |
| TP53 | 47 P47L   |
| TP53 | 49 D49H   |

|      |         |
|------|---------|
| TP53 | 49 D49Y |
| TP53 | 5 Q5H   |
| TP53 | 52 Q52H |
| TP53 | 53 W53C |
| TP53 | 54 F54L |
| TP53 | 56 E56K |
| TP53 | 56 E56V |
| TP53 | 58 P58L |
| TP53 | 58 P58Q |
| TP53 | 59 G59C |
| TP53 | 59 G59D |
| TP53 | 59 G59N |
| TP53 | 60 P60A |
| TP53 | 60 P60L |
| TP53 | 60 P60Q |
| TP53 | 60 P60R |
| TP53 | 60 P60S |
| TP53 | 60 P60T |
| TP53 | 61 D61G |
| TP53 | 61 D61N |
| TP53 | 62 E62D |
| TP53 | 63 A63T |
| TP53 | 66 M66I |
| TP53 | 66 M66R |
| TP53 | 67 P67L |
| TP53 | 67 P67R |
| TP53 | 67 P67S |
| TP53 | 68 E68G |
| TP53 | 68 E68Q |
| TP53 | 69 A69G |
| TP53 | 69 A69V |
| TP53 | 7 D7H   |
| TP53 | 70 A70T |
| TP53 | 72 R72C |
| TP53 | 72 R72H |
| TP53 | 73 V73E |
| TP53 | 73 V73L |
| TP53 | 73 V73M |
| TP53 | 74 A74V |
| TP53 | 75 P75R |
| TP53 | 75 P75S |
| TP53 | 76 A76V |
| TP53 | 77 P77A |

|        |             |
|--------|-------------|
| TP53   | 78 A78V     |
| TP53   | 79 A79V     |
| TP53   | 80 P80L     |
| TP53   | 81 T81I     |
| TP53   | 82 P82L     |
| TP53   | 83 A83E     |
| TP53   | 84 A84G     |
| TP53   | 84 A84V     |
| TP53   | 85 P85L     |
| TP53   | 85 P85S     |
| TP53   | 86 A86V     |
| TP53   | 87 P87Q     |
| TP53   | 89 P89L     |
| TP53   | 89 P89S     |
| TP53   | 90 S90F     |
| TP53   | 92 P92A     |
| TP53   | 92 P92L     |
| TP53   | 93 L93M     |
| TP53   | 94 S94T     |
| TP53   | 95 S95F     |
| TP53   | 96 S96C     |
| TP53   | 96 S96F     |
| TP53   | 96 S96P     |
| TP53   | 97 V97A     |
| TP53   | 97 V97I     |
| TP53   | 98 P98L     |
| TP53   | 98 P98S     |
| TP53   | 99 S99F     |
| TP53   | 99 S99P     |
| TPM3   | 151 E151K   |
| TPM3   | 189 I189V   |
| TPM4   | 204 E204Q   |
| TPR    | 1759 S1759F |
| TPR    | 1825 S1825N |
| TPR    | 500 Q500L   |
| TPR    | 792 L792F   |
| TPR    | 878 K878E   |
| TRIM33 | 127 V127M   |
| TRIM33 | 272 R272H   |
| TRIM33 | 580 M580I   |
| TRIM33 | 603 P603S   |
| TRIM33 | 604 R604S   |
| TRIM33 | 719 P719S   |

|        |             |
|--------|-------------|
| TRIM33 | 811 E811K   |
| TRIM33 | 885 P885S   |
| TRIP11 | 1038 K1038N |
| TRIP11 | 1213 K1213N |
| TRIP11 | 1557 Q1557K |
| TRIP11 | 1694 E1694K |
| TRIP11 | 1844 P1844R |
| TRIP11 | 1970 G1970E |
| TRIP11 | 284 L284F   |
| TRIP11 | 348 E348K   |
| TRIP11 | 539 E539A   |
| TRIP11 | 546 L546F   |
| TSC1   | 1043 S1043N |
| TSC1   | 204 R204L   |
| TSC1   | 461 G461E   |
| TSC1   | 47 D47G     |
| TSC1   | 590 P590S   |
| TSC1   | 65 Q65E     |
| TSC1   | 804 R804T   |
| TSC2   | 1029 M1029I |
| TSC2   | 1141 A1141T |
| TSC2   | 1289 R1289S |
| TSC2   | 1608 Y1608D |
| TSC2   | 1629 D1629N |
| TSC2   | 1711 V1711M |
| TSC2   | 223 D223N   |
| TSC2   | 45 L45M     |
| TSC2   | 472 V472M   |
| TSC2   | 641 S641R   |
| TSC2   | 841 V841I   |
| TSHR   | 281 S281I   |
| TSHR   | 281 S281N   |
| TSHR   | 281 S281T   |
| TSHR   | 312 R312T   |
| TSHR   | 336 G336E   |
| TSHR   | 339 E339K   |
| TSHR   | 382 D382H   |
| TSHR   | 395 D395N   |
| TSHR   | 425 S425I   |
| TSHR   | 428 A428V   |
| TSHR   | 431 G431S   |
| TSHR   | 453 M453T   |
| TSHR   | 463 M463V   |

|             |           |
|-------------|-----------|
| TSHR        | 486 I486F |
| TSHR        | 486 I486M |
| TSHR        | 486 I486N |
| TSHR        | 505 S505N |
| TSHR        | 512 L512Q |
| TSHR        | 512 L512R |
| TSHR        | 519 R519S |
| TSHR        | 568 I568F |
| TSHR        | 568 I568T |
| TSHR        | 593 A593N |
| TSHR        | 597 V597F |
| TSHR        | 597 V597L |
| TSHR        | 6 L6F     |
| TSHR        | 619 D619G |
| TSHR        | 623 A623F |
| TSHR        | 623 A623I |
| TSHR        | 623 A623S |
| TSHR        | 623 A623V |
| TSHR        | 627 A627V |
| TSHR        | 629 L629F |
| TSHR        | 630 I630L |
| TSHR        | 631 F631C |
| TSHR        | 631 F631I |
| TSHR        | 631 F631L |
| TSHR        | 631 F631V |
| TSHR        | 632 T632A |
| TSHR        | 632 T632I |
| TSHR        | 633 D633E |
| TSHR        | 633 D633H |
| TSHR        | 633 D633Y |
| TSHR        | 635 I635V |
| TSHR        | 639 P639A |
| TSHR        | 639 P639S |
| TSHR        | 640 I640K |
| TSHR        | 656 V656F |
| TSHR        | 656 V656I |
| TSHR        | 666 F666L |
| TSHR        | 677 L677V |
| TTL         | 91 C91F   |
| TTLL6_ENSTC | 232 R232K |
| USP6        | 17 D17N   |
| USP6        | 456 R456W |
| USP6        | 678 V678A |



|         |             |
|---------|-------------|
| USP6    | 89 H89N     |
| WAS     | 417 P417S   |
| WHSC1L1 | 275 W275S   |
| WHSC1L1 | 482 S482P   |
| WHSC1L1 | 514 G514E   |
| WHSC1L1 | 637 S637F   |
| WRN     | 1230 T1230S |
| WRN     | 1312 V1312F |
| WRN     | 211 L211V   |
| WRN     | 469 E469G   |
| WRN     | 511 D511N   |
| WRN     | 602 M602K   |
| WRN     | 631 I631M   |
| WRN     | 92 G92V     |
| WRN     | 999 R999C   |
| WT1     | 107 C107S   |
| WT1     | 154 F154S   |
| WT1     | 181 P181S   |
| WT1     | 201 G201D   |
| WT1     | 223 S223T   |
| WT1     | 262 E262A   |
| WT1     | 266 N266S   |
| WT1     | 273 S273G   |
| WT1     | 282 C282R   |
| WT1     | 286 Y286C   |
| WT1     | 299 D299Y   |
| WT1     | 302 R302H   |
| WT1     | 31 A31V     |
| WT1     | 312 R312G   |
| WT1     | 312 R312Q   |
| WT1     | 315 S315P   |
| WT1     | 327 Y327H   |
| WT1     | 333 R333K   |
| WT1     | 336 K336E   |
| WT1     | 338 S338P   |
| WT1     | 338 S338Y   |
| WT1     | 346 K346R   |
| WT1     | 366 R366C   |
| WT1     | 371 K371R   |
| WT1     | 373 H373Y   |
| WT1     | 379 G379V   |
| WT1     | 385 C385Y   |
| WT1     | 388 C388Y   |

|        |             |
|--------|-------------|
| WT1    | 390 R390P   |
| WT1    | 394 R394G   |
| WT1    | 394 R394P   |
| WT1    | 394 R394Q   |
| WT1    | 394 R394W   |
| WT1    | 396 D396G   |
| WT1    | 396 D396H   |
| WT1    | 396 D396N   |
| WT1    | 397 H397D   |
| WT1    | 397 H397Q   |
| WT1    | 403 R403T   |
| WT1    | 405 H405L   |
| WT1    | 433 R433C   |
| XPA    | 221 K221E   |
| XPC    | 121 D121E   |
| XPC    | 387 K387T   |
| XPC    | 742 Q742E   |
| XPC    | 757 G757R   |
| ZBTB16 | 138 A138V   |
| ZBTB16 | 425 L425Q   |
| ZBTB16 | 510 E510K   |
| ZBTB16 | 649 M649I   |
| ZMYM2  | 1026 V1026I |
| ZMYM2  | 32 G32R     |
| ZMYM2  | 455 R455T   |
| ZMYM2  | 495 C495F   |
| ZMYM2  | 964 T964A   |
| ZNF331 | 183 G183W   |
| ZNF331 | 193 G193E   |
| ZNF331 | 7 T7M       |
| ZNF331 | 79 L79F     |
| ZNF384 | 269 S269F   |
| ZNF384 | 433 A433T   |
| ZNF384 | 468 Q468R   |
| ZNF521 | 1175 T1175M |
| ZNF521 | 1203 V1203A |
| ZNF521 | 1212 V1212L |
| ZNF521 | 267 E267Q   |
| ZNF521 | 729 E729K   |
| ZNF521 | 748 E748K   |
| ZNF521 | 750 K750E   |
| ZNF521 | 805 H805Q   |
| ZNF521 | 967 R967Q   |

**Table S2. Table of mutated peptides from the Cancer Gene Census with binding affinity <500 nM for all MHC class I alleles examined and the corresponding wild-type peptide.**

|                        |       |                         |       |       |
|------------------------|-------|-------------------------|-------|-------|
| >ABI1-A105T ARREIGIL   | 493   | >ABI1-A105T TRREIGIL    | 1541  | 1048  |
| >ABI1-A105T ARREIGILTT | 334   | >ABI1-A105T TRREIGILTT  | 774   | 440   |
| >ABI1-A105T ARREIGILTT | 427   | >ABI1-A105T TRREIGILTT  | 392   | 35    |
| >ABI1-A105T VARREIGI   | 493   | >ABI1-A105T VTRREIGI    | 84    | 409   |
| >ABI1-A105T VARREIGIL  | 1578  | >ABI1-A105T VTRREIGIL   | 257   | 1321  |
| >ABI1-A105T VARREIGI   | 906   | >ABI1-A105T VTRREIGI    | 71    | 835   |
| >ABI1-A105T VARREIGIL  | 1553  | >ABI1-A105T VTRREIGIL   | 83    | 1470  |
| >ABI1-A105T VARREIGIL  | 2085  | >ABI1-A105T VTRREIGIL   | 95    | 1990  |
| >ABI1-A105T VARREIGI   | 2345  | >ABI1-A105T VTRREIGI    | 486   | 1859  |
| >ABI1-A105T KVARREIGI  | 505   | >ABI1-A105T KVTRREIGI   | 411   | 94    |
| >ABI1-A105T KVARREIGI  | 318   | >ABI1-A105T KVTRREIGI   | 610   | 292   |
| >ABI1-A105T KEKVARREI  | 37    | >ABI1-A105T KEKVTRREI   | 34    | 3     |
| >ABI1-A105T KEKVARREIG | 145   | >ABI1-A105T KEKVTRREIGI | 148   | 3     |
| >ABI1-A105T KEKVARREI  | 97    | >ABI1-A105T KEKVTRREI   | 124   | 27    |
| >ABI1-A105T KEKVARREIG | 297   | >ABI1-A105T KEKVTRREIGI | 367   | 70    |
| >ABI1-A105T KEKVARREI  | 28    | >ABI1-A105T KEKVTRREI   | 49    | 21    |
| >ABI1-A105T KEKVARREIG | 19    | >ABI1-A105T KEKVTRREIGI | 25    | 6     |
| >ABI1-A105T HKEKVARREI | 298   | >ABI1-A105T HKEKVTRREI  | 227   | 71    |
| >ABI1-A105T DIHKEKVAR  | 122   | >ABI1-A105T DIHKEKVTR   | 212   | 90    |
| >ABI1-A105T DIHKEKVAR  | 90    | >ABI1-A105T DIHKEKVTR   | 76    | 14    |
| >ABI1-A105T DIHKEKVAR  | 348   | >ABI1-A105T DIHKEKVTR   | 292   | 56    |
| >ABI1-A105T TVDIHKEKVA | 163   | >ABI1-A105T TVDIHKEKVTI | 158   | 5     |
| >ABL1-A397F AGAKFPIKW  | 258   | >ABL1-A397F PGAKFPIKW   | 1619  | 1361  |
| >ABL1-A397F AGAKFPIKW  | 216   | >ABL1-A397F PGAKFPIKW   | 4735  | 4519  |
| >ABL1-A397F AGAKFPIK   | 159   | >ABL1-A397F PGAKFPIK    | 4117  | 3958  |
| >ABL1-A397F HAGAKFPIK  | 76    | >ABL1-A397F HPGAKFPIK   | 12539 | 12463 |
| >ABL1-A397F HAGAKFPI   | 459   | >ABL1-A397F HPGAKFPI    | 10873 | 10414 |
| >ABL1-A397F HAGAKFPI   | 381   | >ABL1-A397F HPGAKFPI    | 1487  | 1106  |
| >ABL1-A397F HAGAKFPI   | 11941 | >ABL1-A397F HPGAKFPI    | 61    | 11880 |
| >ABL1-A397F HAGAKFPIKM | 306   | >ABL1-A397F HPGAKFPIKM  | 10489 | 10183 |
| >ABL1-A397F HAGAKFPI   | 5673  | >ABL1-A397F HPGAKFPI    | 312   | 5361  |
| >ABL1-A397F HAGAKFPIKM | 77    | >ABL1-A397F HPGAKFPIKM  | 8130  | 8053  |
| >ABL1-A397F HAGAKFPIKM | 32    | >ABL1-A397F HPGAKFPIKM  | 8173  | 8141  |
| >ABL1-A397F HAGAKFPIKM | 2347  | >ABL1-A397F HPGAKFPIKM  | 53    | 2294  |
| >ABL1-A397F LMTGDYTAI  | 98    | >ABL1-A397F LMTGDYTAI   | 17982 | 17884 |
| >ABL1-A397F LMTGDYTAI  | 20    | >ABL1-A397F LMTGDYTAI   | 1360  | 1340  |
| >ABL1-A397F LMTGDYTAI  | 19    | >ABL1-A397F LMTGDYTAI   | 7562  | 7543  |
| >ABL1-A397F LMTGDYTAI  | 69    | >ABL1-A397F LMTGDYTAI   | 7561  | 7492  |
| >ABL1-A397F LMTGDYTAI  | 31    | >ABL1-A397F LMTGDYTAI   | 5084  | 5053  |
| >ABL1-A397F LMTGDYTAI  | 24    | >ABL1-A397F LMTGDYTAI   | 6851  | 6827  |
| >ABL1-A397F LMTGDYTAI  | 43    | >ABL1-A397F LMTGDYTAI   | 9735  | 9692  |
| >ABL1-A397F LMTGDYTAI  | 77    | >ABL1-A397F LMTGDYTAI   | 14464 | 14387 |
| >ABL1-A397F LMTGDYTAI  | 4     | >ABL1-A397F LMTGDYTAI   | 1506  | 1502  |

|                       |     |                       |      |      |
|-----------------------|-----|-----------------------|------|------|
| >ABL1-A397FAHAGAKFPI  | 79  | >ABL1-A397FAHPGAKFPI  | 1998 | 1919 |
| >ABL1-A397FAHAGAKFPIK | 71  | >ABL1-A397FAHPGAKFPIK | 360  | 289  |
| >ABL1-A397FTAHAGAKFPI | 141 | >ABL1-A397FTAHPGAKFPI | 164  | 23   |
| >ABL1-A397FTAHAGAKFPI | 434 | >ABL1-A397FTAHPGAKFPI | 435  | 1    |
| >ABL1-A397FTAHAGAKFPI | 21  | >ABL1-A397FTAHPGAKFPI | 22   | 1    |
| >ABL1-A397FTAHAGAKFPI | 204 | >ABL1-A397FTAHPGAKFPI | 297  | 93   |
| >ABL1-A397FTAHAGAKFPI | 433 | >ABL1-A397FTAHPGAKFPI | 551  | 118  |
| >ABL1-A397FTAHAGAKF   | 416 | >ABL1-A397FTAHPGAKF   | 297  | 119  |
| >ABL1-A397FTAHAGAKF   | 11  | >ABL1-A397FTAHPGAKF   | 5    | 6    |
| >ABL1-A397FTAHAGAKFPI | 896 | >ABL1-A397FTAHPGAKFPI | 262  | 634  |
| >ABL1-A397FYTAHAGAKFF | 184 | >ABL1-A397FYTAHPGAKFF | 324  | 140  |
| >ABL1-A397FYTAHAGAKFF | 62  | >ABL1-A397FYTAHPGAKFF | 197  | 135  |
| >ABL1-A397FYTAHAGAKFF | 134 | >ABL1-A397FYTAHPGAKFF | 263  | 129  |
| >ABL1-A397FYTAHAGAKFF | 25  | >ABL1-A397FYTAHPGAKFF | 45   | 20   |
| >ABL1-A397FYTAHAGAKFF | 225 | >ABL1-A397FYTAHPGAKFF | 102  | 123  |
| >ABL1-A397FYTAHAGAKFF | 393 | >ABL1-A397FYTAHPGAKFF | 632  | 239  |
| >ABL1-A397FYTAHAGAK   | 347 | >ABL1-A397FYTAHPGAK   | 241  | 106  |
| >ABL1-A397FYTAHAGAK   | 166 | >ABL1-A397FYTAHPGAK   | 134  | 32   |
| >ABL1-A397FYTAHAGAKF  | 263 | >ABL1-A397FYTAHPGAKF  | 1047 | 784  |
| >ABL1-A397FYTAHAGAKF  | 112 | >ABL1-A397FYTAHPGAKF  | 271  | 159  |
| >ABL1-A397FYTAHAGAKF  | 52  | >ABL1-A397FYTAHPGAKF  | 28   | 24   |
| >ABL1-A397FYTAHAGAKF  | 253 | >ABL1-A397FYTAHPGAKF  | 237  | 16   |
| >ABL1-A397FYTAHAGAK   | 8   | >ABL1-A397FYTAHPGAK   | 17   | 9    |
| >ABL1-A397FYTAHAGAKFF | 6   | >ABL1-A397FYTAHPGAKFF | 6    | 0    |
| >ABL1-A397FYTAHAGAKFF | 13  | >ABL1-A397FYTAHPGAKFF | 11   | 2    |
| >ABL1-A397FYTAHAGAKF  | 72  | >ABL1-A397FYTAHPGAKF  | 122  | 50   |
| >ABL1-A397FYTAHAGAKF  | 238 | >ABL1-A397FYTAHPGAKF  | 83   | 155  |
| >ABL1-A397FYTAHAGAKF  | 41  | >ABL1-A397FYTAHPGAKF  | 33   | 8    |
| >ABL1-A397FYTAHAGAKF  | 3   | >ABL1-A397FYTAHPGAKF  | 3    | 0    |
| >ABL1-A397FYTAHAGAKFF | 14  | >ABL1-A397FYTAHPGAKFF | 14   | 0    |
| >ABL1-A397FYTAHAGAKF  | 211 | >ABL1-A397FYTAHPGAKF  | 732  | 521  |
| >ABL1-A397FYTAHAGAKF  | 98  | >ABL1-A397FYTAHPGAKF  | 234  | 136  |
| >ABL1-A397FYTAHAGAKF  | 24  | >ABL1-A397FYTAHPGAKF  | 23   | 1    |
| >ABL1-A397FYTAHAGAKFF | 60  | >ABL1-A397FYTAHPGAKFF | 64   | 4    |
| >ABL1-A397FYTAHAGAKF  | 8   | >ABL1-A397FYTAHPGAKF  | 4    | 4    |
| >ABL1-A397FYTAHAGAKFF | 437 | >ABL1-A397FYTAHPGAKFF | 228  | 209  |
| >ABL1-A397FYTAHAGAKF  | 214 | >ABL1-A397FYTAHPGAKF  | 1009 | 795  |
| >ABL1-A397FYTAHAGAKFF | 30  | >ABL1-A397FYTAHPGAKFF | 26   | 4    |
| >ABL1-A397FYTAHAGAKF  | 59  | >ABL1-A397FYTAHPGAKF  | 81   | 22   |
| >ABL1-A397FYTAHAGAKF  | 61  | >ABL1-A397FYTAHPGAKF  | 81   | 20   |
| >ABL1-A397FYTAHAGAKF  | 9   | >ABL1-A397FYTAHPGAKF  | 11   | 2    |
| >ABL1-A397FYTAHAGAKF  | 645 | >ABL1-A397FYTAHPGAKF  | 479  | 166  |
| >ABL1-A397FDYTAHAGAI  | 439 | >ABL1-A397FDYTAHPGAI  | 446  | 7    |

|                       |      |                       |       |       |
|-----------------------|------|-----------------------|-------|-------|
| >ABL1-A397FDTYTAHAGAI | 530  | >ABL1-A397FDTYTAHPGAI | 368   | 162   |
| >ABL1-A397FDTYTAHAGAI | 108  | >ABL1-A397FDTYTAHPGAI | 167   | 59    |
| >ABL1-A397FDTYTAHAGAI | 20   | >ABL1-A397FDTYTAHPGAI | 15    | 5     |
| >ABL1-A397FDTYTAHAGAI | 483  | >ABL1-A397FDTYTAHPGAI | 449   | 34    |
| >ABL1-A397FDTYTAHAGAI | 37   | >ABL1-A397FDTYTAHPGAI | 68    | 31    |
| >ABL1-A397FDTYTAHAGA  | 19   | >ABL1-A397FDTYTAHPGA  | 519   | 500   |
| >ABL1-A397FDTYTAHAGA  | 31   | >ABL1-A397FDTYTAHPGA  | 19    | 12    |
| >ABL1-A397FDTYTAHAGAI | 8    | >ABL1-A397FDTYTAHPGAI | 9     | 1     |
| >ABL1-A397FDTYTAHAGAI | 242  | >ABL1-A397FDTYTAHPGAI | 223   | 19    |
| >ABL1-A397FMTGDTYTAH  | 146  | >ABL1-A397FMTGDTYTAH  | 21653 | 21507 |
| >ABL1-A397FMTGDTYTAH  | 138  | >ABL1-A397FMTGDTYTAH  | 9480  | 9342  |
| >ABL1-A4331ATYGMSPYPC | 116  | >ABL1-A4331TTYGMSPYPC | 84    | 32    |
| >ABL1-A4331ATYGMSPYPC | 308  | >ABL1-A4331TTYGMSPYPC | 633   | 325   |
| >ABL1-A4331ATYGMSPYPC | 78   | >ABL1-A4331TTYGMSPYPC | 225   | 147   |
| >ABL1-A4331ATYGMSPYPC | 28   | >ABL1-A4331TTYGMSPYPC | 111   | 83    |
| >ABL1-A4331ATYGMSPYPC | 122  | >ABL1-A4331TTYGMSPYPC | 449   | 327   |
| >ABL1-A4331ATYGMSPYPC | 313  | >ABL1-A4331TTYGMSPYPC | 2080  | 1767  |
| >ABL1-A4331ATYGMSPY   | 92   | >ABL1-A4331TTYGMSPY   | 111   | 19    |
| >ABL1-A4331ATYGMSPY   | 19   | >ABL1-A4331TTYGMSPY   | 20    | 1     |
| >ABL1-A4331ATYGMSPY   | 540  | >ABL1-A4331TTYGMSPY   | 135   | 405   |
| >ABL1-A4331ATYGMSPY   | 54   | >ABL1-A4331TTYGMSPY   | 10    | 44    |
| >ABL1-A4331ATYGMSPY   | 7    | >ABL1-A4331TTYGMSPY   | 6     | 1     |
| >ABL1-A4331ATYGMSPY   | 105  | >ABL1-A4331TTYGMSPY   | 28    | 77    |
| >ABL1-A4331ATYGMSPY   | 16   | >ABL1-A4331TTYGMSPY   | 13    | 3     |
| >ABL1-A4331ATYGMSPYPC | 136  | >ABL1-A4331TTYGMSPYPC | 1104  | 968   |
| >ABL1-A4331ATYGMSPY   | 37   | >ABL1-A4331TTYGMSPY   | 56    | 19    |
| >ABL1-A4331ATYGMSPY   | 92   | >ABL1-A4331TTYGMSPY   | 299   | 207   |
| >ABL1-A4331ATYGMSPYPC | 283  | >ABL1-A4331TTYGMSPYPC | 940   | 657   |
| >ABL1-A4331ATYGMSPYPC | 77   | >ABL1-A4331TTYGMSPYPC | 247   | 170   |
| >ABL1-A4331ATYGMSPY   | 574  | >ABL1-A4331TTYGMSPY   | 30    | 544   |
| >ABL1-A4331ATYGMSPYPC | 1076 | >ABL1-A4331TTYGMSPYPC | 30    | 1046  |
| >ABL1-A4331ATYGMSPYPC | 37   | >ABL1-A4331TTYGMSPYPC | 7     | 30    |
| >ABL1-A4331ATYGMSPY   | 310  | >ABL1-A4331TTYGMSPY   | 242   | 68    |
| >ABL1-A4331ATYGMSPY   | 46   | >ABL1-A4331TTYGMSPY   | 69    | 23    |
| >ABL1-A4331ATYGMSPY   | 240  | >ABL1-A4331TTYGMSPY   | 127   | 113   |
| >ABL1-A4331ATYGMSPY   | 112  | >ABL1-A4331TTYGMSPY   | 565   | 453   |
| >ABL1-A4331ATYGMSPY   | 2    | >ABL1-A4331TTYGMSPY   | 3     | 1     |
| >ABL1-A4331ATYGMSPYPC | 10   | >ABL1-A4331TTYGMSPYPC | 20    | 10    |
| >ABL1-A4331ATYGMSPY   | 345  | >ABL1-A4331TTYGMSPY   | 79    | 266   |
| >ABL1-A4331ATYGMSPYPC | 196  | >ABL1-A4331TTYGMSPYPC | 153   | 43    |
| >ABL1-A4331ATYGMSPY   | 770  | >ABL1-A4331TTYGMSPY   | 329   | 441   |
| >ABL1-A4331ATYGMSPYPC | 15   | >ABL1-A4331TTYGMSPYPC | 21    | 6     |
| >ABL1-A4331IATYGMSPY  | 8920 | >ABL1-A4331ITTYGMSPY  | 209   | 8711  |

|                       |      |                       |      |      |
|-----------------------|------|-----------------------|------|------|
| >ABL1-A4331IATYGMSPY  | 4624 | >ABL1-A4331ITTYGMSPY  | 449  | 4175 |
| >ABL1-A4331IATYGMSPY  | 4041 | >ABL1-A4331ITTYGMSPY  | 60   | 3981 |
| >ABL1-A4331IATYGMSPY  | 3603 | >ABL1-A4331ITTYGMSPY  | 98   | 3505 |
| >ABL1-A4331IATYGMSPY  | 61   | >ABL1-A4331ITTYGMSPY  | 4    | 57   |
| >ABL1-A4331IATYGMSPY  | 94   | >ABL1-A4331ITTYGMSPY  | 17   | 77   |
| >ABL1-A4331IATYGMSPY  | 30   | >ABL1-A4331ITTYGMSPY  | 13   | 17   |
| >ABL1-A4331IATYGMSPY  | 1151 | >ABL1-A4331ITTYGMSPY  | 359  | 792  |
| >ABL1-A4331IATYGMSPY  | 717  | >ABL1-A4331ITTYGMSPY  | 57   | 660  |
| >ABL1-A4331IATYGMSPY  | 206  | >ABL1-A4331ITTYGMSPY  | 150  | 56   |
| >ABL1-A4331IATYGMSPY  | 226  | >ABL1-A4331ITTYGMSPY  | 215  | 11   |
| >ABL1-A4331IATYGMSPY  | 102  | >ABL1-A4331ITTYGMSPY  | 173  | 71   |
| >ABL1-A4331IATYGMSPY  | 12   | >ABL1-A4331ITTYGMSPY  | 5    | 7    |
| >ABL1-A4331IATYGMSPY  | 26   | >ABL1-A4331ITTYGMSPY  | 422  | 396  |
| >ABL1-A4331IATYGMSPY  | 211  | >ABL1-A4331ITTYGMSPY  | 752  | 541  |
| >ABL1-A4331IATYGMSPY  | 13   | >ABL1-A4331ITTYGMSPY  | 3    | 10   |
| >ABL1-A4331WAFGVLLWE  | 133  | >ABL1-A4331WAFGVLLWE  | 1063 | 930  |
| >ABL1-A4331WAFGVLLWE  | 176  | >ABL1-A4331WAFGVLLWE  | 2415 | 2239 |
| >ABL1-A4331EIATYGMSPY | 108  | >ABL1-A4331EITTYGMSPY | 206  | 98   |
| >ABL1-A4331EIATYGMSPY | 171  | >ABL1-A4331EITTYGMSPY | 432  | 261  |
| >ABL1-A4331EIATYGMSPY | 5    | >ABL1-A4331EITTYGMSPY | 8    | 3    |
| >ABL1-A4331EIATYGMSPY | 278  | >ABL1-A4331EITTYGMSPY | 210  | 68   |
| >ABL1-A4331EIATYGMSPY | 196  | >ABL1-A4331EITTYGMSPY | 363  | 167  |
| >ABL1-A4331EIATYGMSPY | 383  | >ABL1-A4331EITTYGMSPY | 983  | 600  |
| >ABL1-A4331EIATYGMSPY | 146  | >ABL1-A4331EITTYGMSPY | 433  | 287  |
| >ABL1-A4331EIATYGMSPY | 166  | >ABL1-A4331EITTYGMSPY | 1563 | 1397 |
| >ABL1-A4331EIATYGMSPY | 251  | >ABL1-A4331EITTYGMSPY | 380  | 129  |
| >ABL1-A4331WEIATYGMSI | 410  | >ABL1-A4331WEITTYGMSI | 266  | 144  |
| >ABL1-A4331WEIATYGMSI | 295  | >ABL1-A4331WEITTYGMSI | 351  | 56   |
| >ABL1-A4331WEIATYGMSI | 73   | >ABL1-A4331WEITTYGMSI | 127  | 54   |
| >ABL1-A4331WEIATYGMSI | 95   | >ABL1-A4331WEITTYGMSI | 257  | 162  |
| >ABL1-A4331WEIATYGMSI | 63   | >ABL1-A4331WEITTYGMSI | 54   | 9    |
| >ABL1-A4331WEIATYGM   | 17   | >ABL1-A4331WEITTYGM   | 19   | 2    |
| >ABL1-A4331WEIATYGMSI | 6    | >ABL1-A4331WEITTYGMSI | 6    | 0    |
| >ABL1-A4331WEIATYGMSI | 229  | >ABL1-A4331WEITTYGMSI | 284  | 55   |
| >ABL1-A4331WEIATYGM   | 263  | >ABL1-A4331WEITTYGM   | 384  | 121  |
| >ABL1-A4331WEIATYGM   | 15   | >ABL1-A4331WEITTYGM   | 22   | 7    |
| >ABL1-A4331WEIATYGMSI | 219  | >ABL1-A4331WEITTYGMSI | 341  | 122  |
| >ABL1-A4331WEIATYGM   | 111  | >ABL1-A4331WEITTYGM   | 310  | 199  |
| >ABL1-A4331WEIATYGM   | 452  | >ABL1-A4331WEITTYGM   | 654  | 202  |
| >ABL1-A4331WEIATYGMSI | 329  | >ABL1-A4331WEITTYGMSI | 546  | 217  |
| >ABL1-A4331WEIATYGMSI | 354  | >ABL1-A4331WEITTYGMSI | 387  | 33   |
| >ABL1-A4331WEIATYGMSI | 536  | >ABL1-A4331WEITTYGMSI | 394  | 142  |
| >ABL1-A4331WEIATYGM   | 22   | >ABL1-A4331WEITTYGM   | 31   | 9    |

|                       |      |                       |     |     |
|-----------------------|------|-----------------------|-----|-----|
| >ABL1-A4331WEIATYGMS  | 847  | >ABL1-A4331WEITTYGMS  | 382 | 465 |
| >ABL1-A4331WEIATYGMSI | 784  | >ABL1-A4331WEITTYGMSI | 296 | 488 |
| >ABL1-A4331WEIATYGMSI | 165  | >ABL1-A4331WEITTYGMSI | 87  | 78  |
| >ABL1-A4331LWEIATYG   | 405  | >ABL1-A4331LWEITTYG   | 304 | 101 |
| >ABL1-A4331LWEIATYGM  | 418  | >ABL1-A4331LWEITTYGM  | 243 | 175 |
| >ABL1-A4331LWEIATYGM! | 522  | >ABL1-A4331LWEITTYGM! | 356 | 166 |
| >ABL1-A4331LLWEIATYG  | 496  | >ABL1-A4331LLWEITTYG  | 153 | 343 |
| >ABL1-A4331LLWEIATYGM | 51   | >ABL1-A4331LLWEITTYGM | 53  | 2   |
| >ABL1-A4331LLWEIATYG  | 113  | >ABL1-A4331LLWEITTYG  | 33  | 80  |
| >ABL1-A4331LLWEIATYGM | 25   | >ABL1-A4331LLWEITTYGM | 22  | 3   |
| >ABL1-A4331LLWEIATYGM | 734  | >ABL1-A4331LLWEITTYGM | 454 | 280 |
| >ABL1-A4331LLWEIATYGM | 198  | >ABL1-A4331LLWEITTYGM | 141 | 57  |
| >ABL1-A4331LLWEIATYGM | 116  | >ABL1-A4331LLWEITTYGM | 96  | 20  |
| >ABL1-A4331LLWEIATY   | 32   | >ABL1-A4331LLWEITTY   | 44  | 12  |
| >ABL1-A4331LLWEIATYG  | 16   | >ABL1-A4331LLWEITTYG  | 12  | 4   |
| >ABL1-A4331LLWEIATYGM | 3    | >ABL1-A4331LLWEITTYGM | 2   | 1   |
| >ABL1-A4331LLWEIATYGM | 32   | >ABL1-A4331LLWEITTYGM | 33  | 1   |
| >ABL1-A4331LLWEIATYG  | 901  | >ABL1-A4331LLWEITTYG  | 451 | 450 |
| >ABL1-A4331LLWEIATYGM | 8    | >ABL1-A4331LLWEITTYGM | 6   | 2   |
| >ABL1-A4331LLWEIATYG  | 195  | >ABL1-A4331LLWEITTYG  | 137 | 58  |
| >ABL1-A4331LLWEIATYGM | 9    | >ABL1-A4331LLWEITTYGM | 8   | 1   |
| >ABL1-A4331LLWEIATYGM | 532  | >ABL1-A4331LLWEITTYGM | 455 | 77  |
| >ABL1-A4331LLWEIATYGM | 3    | >ABL1-A4331LLWEITTYGM | 3   | 0   |
| >ABL1-A4331LLWEIATY   | 28   | >ABL1-A4331LLWEITTY   | 27  | 1   |
| >ABL1-A4331LLWEIATYG  | 118  | >ABL1-A4331LLWEITTYG  | 67  | 51  |
| >ABL1-A4331LLWEIATYGM | 6    | >ABL1-A4331LLWEITTYGM | 5   | 1   |
| >ABL1-A4331LLWEIATYGM | 240  | >ABL1-A4331LLWEITTYGM | 201 | 39  |
| >ABL1-A4331LLWEIATY   | 17   | >ABL1-A4331LLWEITTY   | 19  | 2   |
| >ABL1-A4331LLWEIATY   | 40   | >ABL1-A4331LLWEITTY   | 96  | 56  |
| >ABL1-A4331LLWEIATY   | 310  | >ABL1-A4331LLWEITTY   | 151 | 159 |
| >ABL1-A4331LLWEIATYGM | 661  | >ABL1-A4331LLWEITTYGM | 342 | 319 |
| >ABL1-A4331LLWEIATYGM | 62   | >ABL1-A4331LLWEITTYGM | 57  | 5   |
| >ABL1-A4331LLWEIATY   | 327  | >ABL1-A4331LLWEITTY   | 189 | 138 |
| >ABL1-A4331LLWEIATY   | 99   | >ABL1-A4331LLWEITTY   | 84  | 15  |
| >ABL1-A4331LLWEIATY   | 139  | >ABL1-A4331LLWEITTY   | 136 | 3   |
| >ABL1-A4331LLWEIATY   | 84   | >ABL1-A4331LLWEITTY   | 47  | 37  |
| >ABL1-A4331LLWEIATYGM | 511  | >ABL1-A4331LLWEITTYGM | 366 | 145 |
| >ABL1-A4331LLWEIATY   | 65   | >ABL1-A4331LLWEITTY   | 178 | 113 |
| >ABL1-A4331LLWEIATY   | 40   | >ABL1-A4331LLWEITTY   | 37  | 3   |
| >ABL1-A4331LLWEIATY   | 301  | >ABL1-A4331LLWEITTY   | 249 | 52  |
| >ABL1-A4331VLLWEIAT   | 326  | >ABL1-A4331VLLWEITT   | 366 | 40  |
| >ABL1-A4331VLLWEIATYG | 1034 | >ABL1-A4331VLLWEITTYG | 407 | 627 |
| >ABL1-A4331VLLWEIATYG | 35   | >ABL1-A4331VLLWEITTYG | 41  | 6   |



|                        |      |                        |      |      |
|------------------------|------|------------------------|------|------|
| >ABL1-A4331VLLWEIATYG  | 252  | >ABL1-A4331VLLWEITTYG  | 324  | 72   |
| >ABL1-A4331VLLWEIATYG  | 184  | >ABL1-A4331VLLWEITTYG  | 218  | 34   |
| >ABL1-A4331VLLWEIAT    | 8    | >ABL1-A4331VLLWEITT    | 8    | 0    |
| >ABL1-A4331VLLWEIATY   | 25   | >ABL1-A4331VLLWEITTY   | 63   | 38   |
| >ABL1-A4331VLLWEIATYG  | 30   | >ABL1-A4331VLLWEITTYG  | 31   | 1    |
| >ABL1-A4331VLLWEIATYG  | 4    | >ABL1-A4331VLLWEITTYG  | 3    | 1    |
| >ABL1-A4331VLLWEIAT    | 596  | >ABL1-A4331VLLWEITT    | 481  | 115  |
| >ABL1-A4331VLLWEIATYG  | 19   | >ABL1-A4331VLLWEITTYG  | 24   | 5    |
| >ABL1-A4331VLLWEIAT    | 74   | >ABL1-A4331VLLWEITT    | 34   | 40   |
| >ABL1-A4331VLLWEIATYG  | 497  | >ABL1-A4331VLLWEITTYG  | 408  | 89   |
| >ABL1-A4331VLLWEIATYG  | 15   | >ABL1-A4331VLLWEITTYG  | 15   | 0    |
| >ABL1-A4331VLLWEIAT    | 242  | >ABL1-A4331VLLWEITT    | 188  | 54   |
| >ABL1-A4331VLLWEIATYG  | 6    | >ABL1-A4331VLLWEITTYG  | 7    | 1    |
| >ABL1-A4331VLLWEIAT    | 16   | >ABL1-A4331VLLWEITT    | 9    | 7    |
| >ABL1-A4331VLLWEIATY   | 26   | >ABL1-A4331VLLWEITTY   | 37   | 11   |
| >ABL1-A4331VLLWEIATYG  | 258  | >ABL1-A4331VLLWEITTYG  | 201  | 57   |
| >ABL1-A4331VLLWEIATYG  | 9    | >ABL1-A4331VLLWEITTYG  | 9    | 0    |
| >ABL1-A4331VLLWEIATY   | 81   | >ABL1-A4331VLLWEITTY   | 146  | 65   |
| >ABL1-A4331VLLWEIATY   | 21   | >ABL1-A4331VLLWEITTY   | 94   | 73   |
| >ABL1-A4331VLLWEIATY   | 419  | >ABL1-A4331VLLWEITTY   | 703  | 284  |
| >ABL1-A4331VLLWEIATY   | 776  | >ABL1-A4331VLLWEITTY   | 338  | 438  |
| >ABL1-A4331VLLWEIATY   | 71   | >ABL1-A4331VLLWEITTY   | 159  | 88   |
| >ABL1-A4331VLLWEIATY   | 262  | >ABL1-A4331VLLWEITTY   | 312  | 50   |
| >ABL1-A4331VLLWEIATY   | 1180 | >ABL1-A4331VLLWEITTY   | 456  | 724  |
| >ABL1-A4331GVLLWEIATY  | 480  | >ABL1-A4331GVLLWEITTY  | 1785 | 1305 |
| >ABL1-A4331GVLLWEIATY  | 201  | >ABL1-A4331GVLLWEITTY  | 489  | 288  |
| >ABL1-A4331GVLLWEIATY  | 205  | >ABL1-A4331GVLLWEITTY  | 310  | 105  |
| >ABL1-A4331FGVLLWEIAT  | 262  | >ABL1-A4331FGVLLWEITT' | 437  | 175  |
| >ABL1-A4331FGVLLWEIAT  | 294  | >ABL1-A4331FGVLLWEITT' | 569  | 275  |
| >ABL1-A4331FGVLLWEIAT  | 48   | >ABL1-A4331FGVLLWEITT' | 54   | 6    |
| >ABL1-A4331FGVLLWEIAT  | 520  | >ABL1-A4331FGVLLWEITT' | 279  | 241  |
| >ABL1-A4331FGVLLWEIAT  | 367  | >ABL1-A4331FGVLLWEITT' | 567  | 200  |
| >ABL1-A4331AFGVLLWEIA  | 82   | >ABL1-A4331AFGVLLWEIT  | 306  | 224  |
| >ABL1-C305FCTREPPFYI   | 184  | >ABL1-C305FRTREPPFYI   | 19   | 165  |
| >ABL1-C305FCTREPPFY    | 1630 | >ABL1-C305FRTREPPFY    | 147  | 1483 |
| >ABL1-C305FCTREPPFY    | 33   | >ABL1-C305FRTREPPFY    | 59   | 26   |
| >ABL1-C305FCTREPPFY    | 35   | >ABL1-C305FRTREPPFY    | 73   | 38   |
| >ABL1-C305FCTREPPFY    | 84   | >ABL1-C305FRTREPPFY    | 121  | 37   |
| >ABL1-C305FCTREPPFY    | 47   | >ABL1-C305FRTREPPFY    | 4    | 43   |
| >ABL1-C305FCTREPPFYI   | 20   | >ABL1-C305FRTREPPFYI   | 4    | 16   |
| >ABL1-C305FCTREPPFYII  | 67   | >ABL1-C305FRTREPPFYII  | 5    | 62   |
| >ABL1-C305FCTREPPFYIIT | 363  | >ABL1-C305FRTREPPFYIIT | 10   | 353  |
| >ABL1-C305FCTREPPFY    | 117  | >ABL1-C305FRTREPPFY    | 66   | 51   |

|                        |       |                        |      |       |
|------------------------|-------|------------------------|------|-------|
| >ABL1-C305FCTREPPFYI   | 11177 | >ABL1-C305FRTREPPFYI   | 194  | 10983 |
| >ABL1-C305FCTREPPFYII  | 6625  | >ABL1-C305FRTREPPFYII  | 48   | 6577  |
| >ABL1-C305FCTREPPFYI   | 118   | >ABL1-C305FRTREPPFYI   | 1385 | 1267  |
| >ABL1-C305FCTREPPFYII  | 276   | >ABL1-C305FRTREPPFYII  | 263  | 13    |
| >ABL1-C305FCTREPPFYI   | 213   | >ABL1-C305FRTREPPFYI   | 192  | 21    |
| >ABL1-C305FCTREPPFY    | 375   | >ABL1-C305FRTREPPFY    | 45   | 330   |
| >ABL1-C305FCTREPPFY    | 4051  | >ABL1-C305FRTREPPFY    | 364  | 3687  |
| >ABL1-C305FCTREPPFY    | 964   | >ABL1-C305FRTREPPFY    | 144  | 820   |
| >ABL1-C305FCTREPPFY    | 11    | >ABL1-C305FRTREPPFY    | 4    | 7     |
| >ABL1-C305FCTREPPFYI   | 131   | >ABL1-C305FRTREPPFYI   | 6    | 125   |
| >ABL1-C305FCTREPPFYII  | 593   | >ABL1-C305FRTREPPFYII  | 10   | 583   |
| >ABL1-C305FCTREPPFYIIT | 10383 | >ABL1-C305FRTREPPFYIIT | 303  | 10080 |
| >ABL1-C305FCTREPPFY    | 1868  | >ABL1-C305FRTREPPFY    | 96   | 1772  |
| >ABL1-C305FCTREPPFYI   | 6183  | >ABL1-C305FRTREPPFYI   | 220  | 5963  |
| >ABL1-C305FCTREPPFYI   | 3663  | >ABL1-C305FRTREPPFYI   | 114  | 3549  |
| >ABL1-C305FCTREPPFYI   | 468   | >ABL1-C305FRTREPPFYI   | 302  | 166   |
| >ABL1-C305FCTREPPFYII  | 193   | >ABL1-C305FRTREPPFYII  | 127  | 66    |
| >ABL1-C305FCTREPPFY    | 4959  | >ABL1-C305FRTREPPFY    | 402  | 4557  |
| >ABL1-C305FCTREPPFYI   | 2530  | >ABL1-C305FRTREPPFYI   | 140  | 2390  |
| >ABL1-C305FCTREPPFYII  | 3278  | >ABL1-C305FRTREPPFYII  | 231  | 3047  |
| >ABL1-C305FCTREPPFY    | 492   | >ABL1-C305FRTREPPFY    | 1525 | 1033  |
| >ABL1-C305FCTREPPFYI   | 11    | >ABL1-C305FRTREPPFYI   | 15   | 4     |
| >ABL1-C305FCTREPPFYII  | 60    | >ABL1-C305FRTREPPFYII  | 114  | 54    |
| >ABL1-C305FVCTREPPFY   | 296   | >ABL1-C305FVRTREPPFY   | 263  | 33    |
| >ABL1-C305FVCTREPPFY   | 77    | >ABL1-C305FVRTREPPFY   | 414  | 337   |
| >ABL1-C305FVCTREPPF    | 996   | >ABL1-C305FVRTREPPF    | 56   | 940   |
| >ABL1-C305FVCTREPPFY   | 5577  | >ABL1-C305FVRTREPPFY   | 403  | 5174  |
| >ABL1-C305FVCTREPPFYI  | 31767 | >ABL1-C305FVRTREPPFYI  | 279  | 31488 |
| >ABL1-C305FVCTREPPFYI  | 33236 | >ABL1-C305FVRTREPPFYI  | 319  | 32917 |
| >ABL1-C305FVCTREPPFY   | 401   | >ABL1-C305FVRTREPPFY   | 1883 | 1482  |
| >ABL1-C305FVCTREPPFY   | 229   | >ABL1-C305FVRTREPPFY   | 571  | 342   |
| >ABL1-C305FVCTREPPF    | 12183 | >ABL1-C305FVRTREPPF    | 356  | 11827 |
| >ABL1-C305FVCTREPPFY   | 3716  | >ABL1-C305FVRTREPPFY   | 19   | 3697  |
| >ABL1-C305FVCTREPPFY   | 3727  | >ABL1-C305FVRTREPPFY   | 15   | 3712  |
| >ABL1-C305FVCTREPPF    | 1277  | >ABL1-C305FVRTREPPF    | 226  | 1051  |
| >ABL1-C305FVCTREPPFY   | 542   | >ABL1-C305FVRTREPPFY   | 179  | 363   |
| >ABL1-C305FVCTREPPFY   | 571   | >ABL1-C305FVRTREPPFY   | 308  | 263   |
| >ABL1-C305FVCTREPPF    | 255   | >ABL1-C305FVRTREPPF    | 431  | 176   |
| >ABL1-C305FVCTREPPF    | 125   | >ABL1-C305FVRTREPPF    | 170  | 45    |
| >ABL1-C305FLLGVCTREPP  | 4106  | >ABL1-C305FLLGVCTREPP  | 472  | 3634  |
| >ABL1-C305FLLGVCTREPP  | 86    | >ABL1-C305FLLGVCTREPP  | 88   | 2     |
| >ABL1-C305FLLGVCTREPP  | 183   | >ABL1-C305FLLGVCTREPP  | 409  | 226   |
| >ABL1-C305FLLGVCTR     | 411   | >ABL1-C305FLLGVCTR     | 389  | 22    |

|                        |       |                         |       |       |
|------------------------|-------|-------------------------|-------|-------|
| >ABL1-C305FQLLGVCTR    | 195   | >ABL1-C305FQLLGVTRTR    | 385   | 190   |
| >ABL1-C305FQLLGVCTR    | 368   | >ABL1-C305FQLLGVTRTR    | 765   | 397   |
| >ABL1-C305FQLLGVCTR    | 177   | >ABL1-C305FQLLGVTRTR    | 359   | 182   |
| >ABL1-C305FVQLLGVCTR   | 198   | >ABL1-C305FVQLLGVTRTR   | 580   | 382   |
| >ABL1-C305FLVQLLGVCTR  | 21595 | >ABL1-C305FLVQLLGVTRTR  | 178   | 21417 |
| >ABL1-C305FLVQLLGVCTR  | 61    | >ABL1-C305FLVQLLGVTRTR  | 89    | 28    |
| >ABL1-C305FLVQLLGVCTR  | 318   | >ABL1-C305FLVQLLGVTRTR  | 1667  | 1349  |
| >ABL1-C305FNLVQLLGVCTR | 392   | >ABL1-C305FNLVQLLGVTRTR | 959   | 567   |
| >ABL1-C305FNLVQLLGVCTR | 41736 | >ABL1-C305FNLVQLLGVTRTR | 422   | 41314 |
| >ABL1-C305FNLVQLLGVCTR | 165   | >ABL1-C305FNLVQLLGVTRTR | 507   | 342   |
| >ABL1-C305FNLVQLLGVCTR | 204   | >ABL1-C305FNLVQLLGVTRTR | 771   | 567   |
| >ABL1-C330CRECNRQEV    | 211   | >ABL1-C330CREGNRQEV     | 1391  | 1180  |
| >ABL1-C330CRECNRQEVN   | 182   | >ABL1-C330CREGNRQEVN    | 1053  | 871   |
| >ABL1-C330CRECNRQEV    | 405   | >ABL1-C330CREGNRQEV     | 220   | 185   |
| >ABL1-C330CRECNRQEVN   | 303   | >ABL1-C330CREGNRQEVN    | 204   | 99    |
| >ABL1-C330CRECNRQEV    | 298   | >ABL1-C330CREGNRQEV     | 179   | 119   |
| >ABL1-C330CRECNRQEVN   | 163   | >ABL1-C330CREGNRQEVN    | 159   | 4     |
| >ABL1-C330CRECNRQEVN   | 25    | >ABL1-C330CREGNRQEVN    | 30    | 5     |
| >ABL1-C330CYLRECNRQEV  | 269   | >ABL1-C330CYLREGNRQEV   | 274   | 5     |
| >ABL1-C330CYLRECNRQEV  | 55    | >ABL1-C330CYLREGNRQEV   | 73    | 18    |
| >ABL1-C330CYLRECNRQEV  | 52    | >ABL1-C330CYLREGNRQEV   | 62    | 10    |
| >ABL1-C330CYLRECNRQEV  | 4     | >ABL1-C330CYLREGNRQEV   | 3     | 1     |
| >ABL1-C330CYLRECNRQEV  | 9     | >ABL1-C330CYLREGNRQEV   | 13    | 4     |
| >ABL1-C330CYLRECNRQEV  | 16    | >ABL1-C330CYLREGNRQEV   | 10    | 6     |
| >ABL1-C330CYLRECNRQEV  | 38    | >ABL1-C330CYLREGNRQEV   | 24    | 14    |
| >ABL1-C330CYLRECNRQ    | 41    | >ABL1-C330CYLREGNRQ     | 26    | 15    |
| >ABL1-C330CYLRECNRQEV  | 2     | >ABL1-C330CYLREGNRQEV   | 1     | 1     |
| >ABL1-C330CYLRECNRQEV  | 1748  | >ABL1-C330CYLREGNRQEV   | 250   | 1498  |
| >ABL1-C330CYLRECNRQEV  | 280   | >ABL1-C330CYLREGNRQEV   | 612   | 332   |
| >ABL1-C330CYLRECNR     | 14    | >ABL1-C330CYLREGNR      | 28    | 14    |
| >ABL1-C330CYLRECNR     | 80    | >ABL1-C330CYLREGNR      | 228   | 148   |
| >ABL1-C330CYLRECNR     | 161   | >ABL1-C330CYLREGNR      | 1039  | 878   |
| >ABL1-C330CYLRECNR     | 449   | >ABL1-C330CYLREGNR      | 3535  | 3086  |
| >ABL1-C330CYLRECNR     | 25    | >ABL1-C330CYLREGNR      | 684   | 659   |
| >ABL1-C330CYLRECNR     | 210   | >ABL1-C330CYLREGNR      | 4710  | 4500  |
| >ABL1-C330CYLRECNR     | 242   | >ABL1-C330CYLREGNR      | 12921 | 12679 |
| >ABL1-C330CYLRECNR     | 115   | >ABL1-C330CYLREGNR      | 8978  | 8863  |
| >ABL1-C330CYLRECNR     | 364   | >ABL1-C330CYLREGNR      | 841   | 477   |
| >ABL1-C330CYLRECNR     | 78    | >ABL1-C330CYLREGNR      | 144   | 66    |
| >ABL1-C330CYLRECNR     | 486   | >ABL1-C330CYLREGNR      | 687   | 201   |
| >ABL1-C330CYLRECNR     | 136   | >ABL1-C330CYLREGNR      | 468   | 332   |
| >ABL1-D276GDTMEVEEFL   | 11219 | >ABL1-D276GDTMEVEEFL    | 147   | 11072 |
| >ABL1-D276GDTMEVEEFL   | 1008  | >ABL1-D276GDTMEVEEFL    | 18    | 990   |

|                       |      |                       |       |       |
|-----------------------|------|-----------------------|-------|-------|
| >ABL1-D276(DTMEVEEFL  | 3886 | >ABL1-D276(GTMEVEEFL  | 65    | 3821  |
| >ABL1-D276(DTMEVEEFL  | 1542 | >ABL1-D276(GTMEVEEFL  | 45    | 1497  |
| >ABL1-D276(DTMEVEEFL  | 8758 | >ABL1-D276(GTMEVEEFL  | 216   | 8542  |
| >ABL1-D276(DTMEVEEFL  | 3209 | >ABL1-D276(GTMEVEEFL  | 122   | 3087  |
| >ABL1-D276(DTMEVEEFLK | 2578 | >ABL1-D276(GTMEVEEFLK | 287   | 2291  |
| >ABL1-D276(DTMEVEEFLK | 28   | >ABL1-D276(GTMEVEEFLK | 10    | 18    |
| >ABL1-D276(DTMEVEEF   | 4235 | >ABL1-D276(GTMEVEEF   | 476   | 3759  |
| >ABL1-D276(DTMEVEEF   | 439  | >ABL1-D276(GTMEVEEF   | 9638  | 9199  |
| >ABL1-D276(DTMEVEEF   | 76   | >ABL1-D276(GTMEVEEF   | 3926  | 3850  |
| >ABL1-D276(DTMEVEEF   | 15   | >ABL1-D276(GTMEVEEF   | 523   | 508   |
| >ABL1-D276(DTMEVEEFL  | 40   | >ABL1-D276(GTMEVEEFL  | 2984  | 2944  |
| >ABL1-D276(DTMEVEEF   | 357  | >ABL1-D276(GTMEVEEF   | 82    | 275   |
| >ABL1-D276(DTMEVEEFLK | 489  | >ABL1-D276(GTMEVEEFLK | 7816  | 7327  |
| >ABL1-D276(DTMEVEEFL  | 258  | >ABL1-D276(GTMEVEEFL  | 4783  | 4525  |
| >ABL1-D276(DTMEVEEFLK | 6    | >ABL1-D276(GTMEVEEFLK | 20    | 14    |
| >ABL1-D276(DTMEVEEFL  | 8    | >ABL1-D276(GTMEVEEFL  | 109   | 101   |
| >ABL1-D276(DTMEVEEFL  | 68   | >ABL1-D276(GTMEVEEFL  | 2642  | 2574  |
| >ABL1-D276(DTMEVEEF   | 405  | >ABL1-D276(GTMEVEEF   | 17    | 388   |
| >ABL1-D276(DTMEVEEF   | 3557 | >ABL1-D276(GTMEVEEF   | 166   | 3391  |
| >ABL1-D276(DTMEVEEFL  | 5735 | >ABL1-D276(GTMEVEEFL  | 163   | 5572  |
| >ABL1-D276(DTMEVEEFLK | 860  | >ABL1-D276(GTMEVEEFLK | 163   | 697   |
| >ABL1-D276(EDTMEVEEFL | 401  | >ABL1-D276(EGTMEVEEFL | 161   | 240   |
| >ABL1-D276(EDTMEVEEFL | 312  | >ABL1-D276(EGTMEVEEFL | 20758 | 20446 |
| >ABL1-D276(KEDTMEVEEF | 295  | >ABL1-D276(KEGTMEVEEF | 222   | 73    |
| >ABL1-D276(KEDTMEVEEF | 2159 | >ABL1-D276(KEGTMEVEEF | 447   | 1712  |
| >ABL1-D276(KEDTMEVEEF | 17   | >ABL1-D276(KEGTMEVEEF | 69    | 52    |
| >ABL1-D276(KEDTMEVEEF | 521  | >ABL1-D276(KEGTMEVEEF | 312   | 209   |
| >ABL1-D276(KEDTMEVEEF | 348  | >ABL1-D276(KEGTMEVEEF | 1596  | 1248  |
| >ABL1-D276(KEDTMEVEEF | 44   | >ABL1-D276(KEGTMEVEEF | 40    | 4     |
| >ABL1-D276(KEDTMEVEEF | 127  | >ABL1-D276(KEGTMEVEEF | 115   | 12    |
| >ABL1-D276(LKEDTMEVEE | 49   | >ABL1-D276(LKEGTMEVEE | 123   | 74    |
| >ABL1-D276(TLKEDTMEV  | 75   | >ABL1-D276(TLKEGTMEV  | 63    | 12    |
| >ABL1-D276(TLKEDTMEV  | 20   | >ABL1-D276(TLKEGTMEV  | 28    | 8     |
| >ABL1-D276(TLKEDTMEV  | 3    | >ABL1-D276(TLKEGTMEV  | 2     | 1     |
| >ABL1-D276(TLKEDTMEV  | 141  | >ABL1-D276(TLKEGTMEV  | 53    | 88    |
| >ABL1-D276(TLKEDTMEV  | 16   | >ABL1-D276(TLKEGTMEV  | 9     | 7     |
| >ABL1-D276(TLKEDTMEV  | 9    | >ABL1-D276(TLKEGTMEV  | 10    | 1     |
| >ABL1-D276(TLKEDTMEV  | 24   | >ABL1-D276(TLKEGTMEV  | 15    | 9     |
| >ABL1-D276(TLKEDTMEV  | 30   | >ABL1-D276(TLKEGTMEV  | 19    | 11    |
| >ABL1-D276(TLKEDTMEV  | 2    | >ABL1-D276(TLKEGTMEV  | 2     | 0     |
| >ABL1-D276(TLKEDTMEV  | 362  | >ABL1-D276(TLKEGTMEV  | 152   | 210   |
| >ABL1-D276(TLKEDTMEV  | 313  | >ABL1-D276(TLKEGTMEV  | 175   | 138   |
| >ABL1-D276(KTLKEDTMEV | 176  | >ABL1-D276(KTLKEGTMEV | 262   | 86    |

|                        |     |                        |     |     |
|------------------------|-----|------------------------|-----|-----|
| >ABL1-D276(KTLKEDTMEV  | 135 | >ABL1-D276(KTLKEGTMEV  | 70  | 65  |
| >ABL1-D276(KTLKEDTMEV  | 59  | >ABL1-D276(KTLKEGTMEV  | 68  | 9   |
| >ABL1-D276(KTLKEDTMEV  | 98  | >ABL1-D276(KTLKEGTMEV  | 45  | 53  |
| >ABL1-D276(KTLKEDTMEV  | 200 | >ABL1-D276(KTLKEGTMEV  | 216 | 16  |
| >ABL1-D276(KTLKEDTMEV  | 48  | >ABL1-D276(KTLKEGTMEV  | 47  | 1   |
| >ABL1-D276(KTLKEDTMEV  | 331 | >ABL1-D276(KTLKEGTMEV  | 220 | 111 |
| >ABL1-D276(KTLKEDTMEV  | 404 | >ABL1-D276(KTLKEGTMEV  | 157 | 247 |
| >ABL1-D276(KTLKEDTM    | 168 | >ABL1-D276(KTLKEGTM    | 683 | 515 |
| >ABL1-D276(KTLKEDTMEV  | 342 | >ABL1-D276(KTLKEGTMEV  | 332 | 10  |
| >ABL1-D276(KTLKEDTMEV  | 339 | >ABL1-D276(KTLKEGTMEV  | 140 | 199 |
| >ABL1-D276(KTLKEDTM    | 13  | >ABL1-D276(KTLKEGTM    | 8   | 5   |
| >ABL1-D276(KTLKEDTMEV  | 314 | >ABL1-D276(KTLKEGTMEV  | 133 | 181 |
| >ABL1-D276(KTLKEDTM    | 289 | >ABL1-D276(KTLKEGTM    | 415 | 126 |
| >ABL1-D276(KTLKEDTM    | 133 | >ABL1-D276(KTLKEGTM    | 449 | 316 |
| >ABL1-D276(KTLKEDTM    | 800 | >ABL1-D276(KTLKEGTM    | 400 | 400 |
| >ABL1-D276(VAVKTLKEDT  | 124 | >ABL1-D276(VAVKTLKEGT  | 56  | 68  |
| >ABL1-D276(VAVKTLKEDT  | 483 | >ABL1-D276(VAVKTLKEGT  | 852 | 369 |
| >ABL1-D276(VAVKTLKEDT  | 526 | >ABL1-D276(VAVKTLKEGT  | 315 | 211 |
| >ABL1-D325I DYLRECNR   | 14  | >ABL1-D325I DYLRECNR   | 14  | 0   |
| >ABL1-D325I DYLRECNR   | 80  | >ABL1-D325I DYLRECNR   | 80  | 0   |
| >ABL1-D325I LLDYLRECNR | 161 | >ABL1-D325I LLDYLRECNR | 161 | 0   |
| >ABL1-D325I NLLDYLREC  | 449 | >ABL1-D325I NLLDYLREC  | 449 | 0   |
| >ABL1-D325I NLLDYLREC  | 25  | >ABL1-D325I NLLDYLREC  | 25  | 0   |
| >ABL1-D325I NLLDYLREC  | 210 | >ABL1-D325I NLLDYLREC  | 210 | 0   |
| >ABL1-D325I NLLDYLREC  | 242 | >ABL1-D325I NLLDYLREC  | 242 | 0   |
| >ABL1-D325I NLLDYLREC  | 115 | >ABL1-D325I NLLDYLREC  | 115 | 0   |
| >ABL1-D325I NLLDYLREC  | 364 | >ABL1-D325I NLLDYLREC  | 364 | 0   |
| >ABL1-D325I NLLDYLREC  | 78  | >ABL1-D325I NLLDYLREC  | 78  | 0   |
| >ABL1-D325I NLLDYLREC  | 486 | >ABL1-D325I NLLDYLREC  | 486 | 0   |
| >ABL1-D325I NLLDYLREC  | 136 | >ABL1-D325I NLLDYLREC  | 136 | 0   |
| >ABL1-D325I YGNLLDYL   | 208 | >ABL1-D325I YGNLLDYL   | 208 | 0   |
| >ABL1-D325I YGNLLDYLR  | 127 | >ABL1-D325I YGNLLDYLR  | 127 | 0   |
| >ABL1-D325I YGNLLDYLR  | 161 | >ABL1-D325I YGNLLDYLR  | 161 | 0   |
| >ABL1-D325I YGNLLDYLR  | 54  | >ABL1-D325I YGNLLDYLR  | 54  | 0   |
| >ABL1-D325I TYGNLLDYL  | 155 | >ABL1-D325I TYGNLLDYL  | 155 | 0   |
| >ABL1-D325I TYGNLLDYL  | 431 | >ABL1-D325I TYGNLLDYL  | 431 | 0   |
| >ABL1-D325I TYGNLLDYL  | 6   | >ABL1-D325I TYGNLLDYL  | 6   | 0   |
| >ABL1-D325I TYGNLLDY   | 35  | >ABL1-D325I TYGNLLDY   | 35  | 0   |
| >ABL1-D325I TYGNLLDYLR | 227 | >ABL1-D325I TYGNLLDYLR | 227 | 0   |
| >ABL1-D325I TYGNLLDYLR | 480 | >ABL1-D325I TYGNLLDYLR | 480 | 0   |
| >ABL1-D325I TYGNLLDYLR | 433 | >ABL1-D325I TYGNLLDYLR | 433 | 0   |
| >ABL1-D325I TYGNLLDY   | 21  | >ABL1-D325I TYGNLLDY   | 21  | 0   |
| >ABL1-D325I TYGNLLDYLR | 17  | >ABL1-D325I TYGNLLDYLR | 17  | 0   |

|                        |     |                        |     |   |
|------------------------|-----|------------------------|-----|---|
| >ABL1-D325I TYGNLLDYL  | 352 | >ABL1-D325I TYGNLLDYL  | 352 | 0 |
| >ABL1-D325I MTYGNLLDY  | 76  | >ABL1-D325I MTYGNLLDY  | 76  | 0 |
| >ABL1-D325I MTYGNLLDYI | 45  | >ABL1-D325I MTYGNLLDYI | 45  | 0 |
| >ABL1-D325I MTYGNLLDYI | 19  | >ABL1-D325I MTYGNLLDYI | 19  | 0 |
| >ABL1-D325I MTYGNLLDYI | 34  | >ABL1-D325I MTYGNLLDYI | 34  | 0 |
| >ABL1-D325I MTYGNLLDYI | 30  | >ABL1-D325I MTYGNLLDYI | 30  | 0 |
| >ABL1-D325I MTYGNLLDYI | 10  | >ABL1-D325I MTYGNLLDYI | 10  | 0 |
| >ABL1-D325I MTYGNLLDYI | 220 | >ABL1-D325I MTYGNLLDYI | 220 | 0 |
| >ABL1-D325I MTYGNLLDYI | 167 | >ABL1-D325I MTYGNLLDYI | 167 | 0 |
| >ABL1-D325I MTYGNLLDYI | 81  | >ABL1-D325I MTYGNLLDYI | 81  | 0 |
| >ABL1-D325I MTYGNLLDY  | 95  | >ABL1-D325I MTYGNLLDY  | 95  | 0 |
| >ABL1-D325I MTYGNLLDYI | 265 | >ABL1-D325I MTYGNLLDYI | 265 | 0 |
| >ABL1-D325I MTYGNLLDY  | 61  | >ABL1-D325I MTYGNLLDY  | 61  | 0 |
| >ABL1-D325I MTYGNLLDYI | 21  | >ABL1-D325I MTYGNLLDYI | 21  | 0 |
| >ABL1-D325I MTYGNLLDY  | 227 | >ABL1-D325I MTYGNLLDY  | 227 | 0 |
| >ABL1-D325I MTYGNLLDY  | 27  | >ABL1-D325I MTYGNLLDY  | 27  | 0 |
| >ABL1-D325I MTYGNLLDY  | 9   | >ABL1-D325I MTYGNLLDY  | 9   | 0 |
| >ABL1-D325I MTYGNLLDYI | 47  | >ABL1-D325I MTYGNLLDYI | 47  | 0 |
| >ABL1-D325I MTYGNLLDY  | 100 | >ABL1-D325I MTYGNLLDY  | 100 | 0 |
| >ABL1-D325I MTYGNLLDY  | 5   | >ABL1-D325I MTYGNLLDY  | 5   | 0 |
| >ABL1-D325I MTYGNLLDY  | 92  | >ABL1-D325I MTYGNLLDY  | 92  | 0 |
| >ABL1-D325I MTYGNLLDYI | 13  | >ABL1-D325I MTYGNLLDYI | 13  | 0 |
| >ABL1-D325I MTYGNLLDY  | 226 | >ABL1-D325I MTYGNLLDY  | 226 | 0 |
| >ABL1-D325I MTYGNLLDYI | 302 | >ABL1-D325I MTYGNLLDYI | 302 | 0 |
| >ABL1-D325I MTYGNLLDYI | 36  | >ABL1-D325I MTYGNLLDYI | 36  | 0 |
| >ABL1-D325I MTYGNLLDY  | 63  | >ABL1-D325I MTYGNLLDY  | 63  | 0 |
| >ABL1-D325I MTYGNLLDYI | 2   | >ABL1-D325I MTYGNLLDYI | 2   | 0 |
| >ABL1-D325I MTYGNLLDYI | 22  | >ABL1-D325I MTYGNLLDYI | 22  | 0 |
| >ABL1-D325I MTYGNLLDYI | 35  | >ABL1-D325I MTYGNLLDYI | 35  | 0 |
| >ABL1-D325I MTYGNLLDY  | 12  | >ABL1-D325I MTYGNLLDY  | 12  | 0 |
| >ABL1-D325I MTYGNLLDY  | 170 | >ABL1-D325I MTYGNLLDY  | 170 | 0 |
| >ABL1-D325I MTYGNLLDY  | 230 | >ABL1-D325I MTYGNLLDY  | 230 | 0 |
| >ABL1-D325I MTYGNLLDY  | 3   | >ABL1-D325I MTYGNLLDY  | 3   | 0 |
| >ABL1-D325I MTYGNLLDYI | 9   | >ABL1-D325I MTYGNLLDYI | 9   | 0 |
| >ABL1-D325I MTYGNLLDY  | 214 | >ABL1-D325I MTYGNLLDY  | 214 | 0 |
| >ABL1-D325I MTYGNLLDY  | 348 | >ABL1-D325I MTYGNLLDY  | 348 | 0 |
| >ABL1-D325I MTYGNLLDY  | 176 | >ABL1-D325I MTYGNLLDY  | 176 | 0 |
| >ABL1-D325I MTYGNLLDYI | 152 | >ABL1-D325I MTYGNLLDYI | 152 | 0 |
| >ABL1-D325I MTYGNLLDYI | 126 | >ABL1-D325I MTYGNLLDYI | 126 | 0 |
| >ABL1-D325I MTYGNLLDY  | 133 | >ABL1-D325I MTYGNLLDY  | 133 | 0 |
| >ABL1-D325I MTYGNLLDYI | 242 | >ABL1-D325I MTYGNLLDYI | 242 | 0 |
| >ABL1-D325I MTYGNLLDY  | 264 | >ABL1-D325I MTYGNLLDY  | 264 | 0 |
| >ABL1-D325I MTYGNLLDYI | 450 | >ABL1-D325I MTYGNLLDYI | 450 | 0 |

|                         |       |                         |       |       |
|-------------------------|-------|-------------------------|-------|-------|
| >ABL1-D325[MTYGNLLDYI   | 37    | >ABL1-D325[MTYGNLLDYI   | 37    | 0     |
| >ABL1-D325[FMTYGNLLD\   | 219   | >ABL1-D325[FMTYGNLLD\   | 219   | 0     |
| >ABL1-D325[FMTYGNLLD\   | 10    | >ABL1-D325[FMTYGNLLD\   | 10    | 0     |
| >ABL1-D325[FMTYGNLLD\   | 2     | >ABL1-D325[FMTYGNLLD\   | 2     | 0     |
| >ABL1-D325[FMTYGNLLD\   | 12    | >ABL1-D325[FMTYGNLLD\   | 12    | 0     |
| >ABL1-D325[FMTYGNLLD\   | 11    | >ABL1-D325[FMTYGNLLD\   | 11    | 0     |
| >ABL1-D325[FMTYGNLLD\   | 7     | >ABL1-D325[FMTYGNLLD\   | 7     | 0     |
| >ABL1-D325[FMTYGNLLD\   | 6     | >ABL1-D325[FMTYGNLLD\   | 6     | 0     |
| >ABL1-D325[FMTYGNLLD\   | 11    | >ABL1-D325[FMTYGNLLD\   | 11    | 0     |
| >ABL1-D325[FMTYGNLLD\   | 19    | >ABL1-D325[FMTYGNLLD\   | 19    | 0     |
| >ABL1-D325[FMTYGNLLD\   | 4     | >ABL1-D325[FMTYGNLLD\   | 4     | 0     |
| >ABL1-D325[FMTYGNLLD\   | 247   | >ABL1-D325[FMTYGNLLD\   | 247   | 0     |
| >ABL1-D325[FMTYGNLLD\   | 178   | >ABL1-D325[FMTYGNLLD\   | 178   | 0     |
| >ABL1-D325[FMTYGNLLD\   | 485   | >ABL1-D325[FMTYGNLLD\   | 485   | 0     |
| >ABL1-D325[FMTYGNLLD\   | 10    | >ABL1-D325[FMTYGNLLD\   | 10    | 0     |
| >ABL1-D325[FMTYGNLLD\   | 128   | >ABL1-D325[FMTYGNLLD\   | 128   | 0     |
| >ABL1-D325[FMTYGNLLD\   | 27    | >ABL1-D325[FMTYGNLLD\   | 27    | 0     |
| >ABL1-D325[FMTYGNLLD\   | 28    | >ABL1-D325[FMTYGNLLD\   | 28    | 0     |
| >ABL1-D325[FMTYGNLLD\   | 450   | >ABL1-D325[FMTYGNLLD\   | 450   | 0     |
| >ABL1-D325[FMTYGNLLD\   | 163   | >ABL1-D325[FMTYGNLLD\   | 163   | 0     |
| >ABL1-D325[EFMTYGNLLC   | 126   | >ABL1-D325[EFMTYGNLLC   | 126   | 0     |
| >ABL1-D325[EFMTYGNLLC   | 240   | >ABL1-D325[EFMTYGNLLC   | 240   | 0     |
| >ABL1-D325[EFMTYGNLLC   | 21    | >ABL1-D325[EFMTYGNLLC   | 21    | 0     |
| >ABL1-D325[EFMTYGNLLC   | 319   | >ABL1-D325[EFMTYGNLLC   | 319   | 0     |
| >ABL1-D482\SDRPSFAEI    | 436   | >ABL1-D482\SVRPSFAEI    | 7240  | 6804  |
| >ABL1-D482\SDRPSFAEI    | 15108 | >ABL1-D482\SVRPSFAEI    | 148   | 14960 |
| >ABL1-D482\SDRPSFAEI    | 13400 | >ABL1-D482\SVRPSFAEI    | 176   | 13224 |
| >ABL1-D482\SDRPSFAEI    | 25630 | >ABL1-D482\SVRPSFAEI    | 465   | 25165 |
| >ABL1-D482\SDRPSFAE     | 12958 | >ABL1-D482\SVRPSFAE     | 244   | 12714 |
| >ABL1-D482\SDRPSFAEI    | 1522  | >ABL1-D482\SVRPSFAEI    | 5     | 1517  |
| >ABL1-D482\SDRPSFAEIH(C | 6007  | >ABL1-D482\SVRPSFAEIH(C | 20    | 5987  |
| >ABL1-D482\SDRPSFAEI    | 16639 | >ABL1-D482\SVRPSFAEI    | 222   | 16417 |
| >ABL1-D482\SDRPSFAEI    | 18496 | >ABL1-D482\SVRPSFAEI    | 488   | 18008 |
| >ABL1-D482\SDRPSFAEI    | 11710 | >ABL1-D482\SVRPSFAEI    | 155   | 11555 |
| >ABL1-D482\SDRPSFAEI    | 3609  | >ABL1-D482\SVRPSFAEI    | 407   | 3202  |
| >ABL1-D482\SDRPSFAEI    | 895   | >ABL1-D482\SVRPSFAEI    | 290   | 605   |
| >ABL1-D482\SDRPSFAEI    | 39    | >ABL1-D482\SVRPSFAEI    | 10930 | 10891 |
| >ABL1-D482\MRACWQW\F    | 28116 | >ABL1-D482\MRACWQW\F    | 425   | 27691 |
| >ABL1-D482\MRACWQW\F    | 36631 | >ABL1-D482\MRACWQW\F    | 373   | 36258 |
| >ABL1-D482\MRACWQW\F    | 20685 | >ABL1-D482\MRACWQW\F    | 284   | 20401 |
| >ABL1-D482\MRACWQW\F    | 10656 | >ABL1-D482\MRACWQW\F    | 213   | 10443 |
| >ABL1-D482\MRACWQW\F    | 3689  | >ABL1-D482\MRACWQW\F    | 177   | 3512  |
| >ABL1-D482\MRACWQW\F    | 7976  | >ABL1-D482\MRACWQW\F    | 155   | 7821  |

|                       |       |                       |     |       |
|-----------------------|-------|-----------------------|-----|-------|
| >ABL1-D482\NPSDRPSF   | 68    | >ABL1-D482\NPSVRPSF   | 90  | 22    |
| >ABL1-D482\NPSDRPSFAE | 267   | >ABL1-D482\NPSVRPSFAE | 348 | 81    |
| >ABL1-D482\NPSDRPSF   | 1793  | >ABL1-D482\NPSVRPSF   | 422 | 1371  |
| >ABL1-D482\NPSDRPSF   | 61    | >ABL1-D482\NPSVRPSF   | 126 | 65    |
| >ABL1-D482\NPSDRPSFAE | 439   | >ABL1-D482\NPSVRPSFAE | 494 | 55    |
| >ABL1-D482\NPSDRPSF   | 151   | >ABL1-D482\NPSVRPSF   | 181 | 30    |
| >ABL1-D482\NPSDRPSFAE | 242   | >ABL1-D482\NPSVRPSFAE | 290 | 48    |
| >ABL1-D482\WNPSDRPSF  | 363   | >ABL1-D482\WNPSVRPSF  | 392 | 29    |
| >ABL1-D482\QWNPSDRPS  | 56    | >ABL1-D482\QWNPSVRPS  | 51  | 5     |
| >ABL1-D482\QWNPSDRPS  | 81    | >ABL1-D482\QWNPSVRPS  | 47  | 34    |
| >ABL1-D482\QWNPSDRPS  | 133   | >ABL1-D482\QWNPSVRPS  | 51  | 82    |
| >ABL1-D482\QWNPSDRPS  | 377   | >ABL1-D482\QWNPSVRPS  | 184 | 193   |
| >ABL1-D482\QWNPSDRPS  | 528   | >ABL1-D482\QWNPSVRPS  | 338 | 190   |
| >ABL1-D482\QWNPSDRPS  | 72    | >ABL1-D482\QWNPSVRPS  | 59  | 13    |
| >ABL1-D482\WQWNPSDR   | 139   | >ABL1-D482\WQWNPSVR   | 131 | 8     |
| >ABL1-D482\WQWNPSDR   | 2377  | >ABL1-D482\WQWNPSVR   | 410 | 1967  |
| >ABL1-D482\WQWNPSDR   | 56    | >ABL1-D482\WQWNPSVR   | 45  | 11    |
| >ABL1-D482\WQWNPSDR   | 100   | >ABL1-D482\WQWNPSVR   | 96  | 4     |
| >ABL1-D482\WQWNPSDR   | 77    | >ABL1-D482\WQWNPSVR   | 30  | 47    |
| >ABL1-D482\WQWNPSDR   | 2715  | >ABL1-D482\WQWNPSVR   | 286 | 2429  |
| >ABL1-D482\WQWNPSDR   | 432   | >ABL1-D482\WQWNPSVR   | 91  | 341   |
| >ABL1-D482\WQWNPSDR   | 2     | >ABL1-D482\WQWNPSVR   | 2   | 0     |
| >ABL1-D482\WQWNPSDR   | 606   | >ABL1-D482\WQWNPSVR   | 250 | 356   |
| >ABL1-D482\WQWNPSDR   | 752   | >ABL1-D482\WQWNPSVR   | 355 | 397   |
| >ABL1-D482\WQWNPSDR   | 156   | >ABL1-D482\WQWNPSVR   | 163 | 7     |
| >ABL1-D482\WQWNPSDR   | 285   | >ABL1-D482\WQWNPSVR   | 124 | 161   |
| >ABL1-D482\WQWNPSDR   | 381   | >ABL1-D482\WQWNPSVR   | 165 | 216   |
| >ABL1-D482\CWQWNPSD   | 26    | >ABL1-D482\CWQWNPSV   | 17  | 9     |
| >ABL1-D482\CWQWNPSD   | 160   | >ABL1-D482\CWQWNPSV   | 52  | 108   |
| >ABL1-D482\CWQWNPSD   | 207   | >ABL1-D482\CWQWNPSV   | 145 | 62    |
| >ABL1-D482\CWQWNPSD   | 241   | >ABL1-D482\CWQWNPSV   | 186 | 55    |
| >ABL1-D482\ACWQWNPS   | 23307 | >ABL1-D482\ACWQWNPS   | 125 | 23182 |
| >ABL1-D482\ACWQWNPS   | 19496 | >ABL1-D482\ACWQWNPS   | 10  | 19486 |
| >ABL1-D482\ACWQWNPS   | 22144 | >ABL1-D482\ACWQWNPS   | 23  | 22121 |
| >ABL1-D482\ACWQWNPS   | 24432 | >ABL1-D482\ACWQWNPS   | 416 | 24016 |
| >ABL1-D482\ACWQWNPS   | 33156 | >ABL1-D482\ACWQWNPS   | 11  | 33145 |
| >ABL1-D482\ACWQWNPS   | 17562 | >ABL1-D482\ACWQWNPS   | 53  | 17509 |
| >ABL1-D482\ACWQWNPS   | 318   | >ABL1-D482\ACWQWNPS   | 180 | 138   |
| >ABL1-D482\RACWQWNP   | 24476 | >ABL1-D482\RACWQWNP   | 452 | 24024 |
| >ABL1-D482\RACWQWNP   | 25886 | >ABL1-D482\RACWQWNP   | 84  | 25802 |
| >ABL1-D482\RACWQWNP   | 36417 | >ABL1-D482\RACWQWNP   | 229 | 36188 |
| >ABL1-D482\RACWQWNP   | 3806  | >ABL1-D482\RACWQWNP   | 302 | 3504  |
| >ABL1-D482\RACWQWNP   | 49    | >ABL1-D482\RACWQWNP   | 20  | 29    |



|                        |       |                        |       |       |
|------------------------|-------|------------------------|-------|-------|
| >ABL1-D482\RACWQWNP    | 583   | >ABL1-D482\RACWQWNP    | 367   | 216   |
| >ABL1-D482\RACWQWNP    | 152   | >ABL1-D482\RACWQWNP    | 82    | 70    |
| >ABL1-E255K\EVYEGVWKK  | 4044  | >ABL1-E255K\KVYEGVWKK  | 386   | 3658  |
| >ABL1-E255K\EVYEGVWKK' | 2288  | >ABL1-E255K\KVYEGVWKK  | 258   | 2030  |
| >ABL1-E255K\EVYEGVWKK  | 262   | >ABL1-E255K\KVYEGVWKK  | 32    | 230   |
| >ABL1-E255K\EVYEGVWKK  | 239   | >ABL1-E255K\KVYEGVWKK  | 31    | 208   |
| >ABL1-E255K\EVYEGVWKK  | 192   | >ABL1-E255K\KVYEGVWKK  | 20    | 172   |
| >ABL1-E255K\EVYEGVWKK  | 61    | >ABL1-E255K\KVYEGVWKK  | 11    | 50    |
| >ABL1-E255K\EVYEGVWKK' | 52    | >ABL1-E255K\KVYEGVWKK  | 1710  | 1658  |
| >ABL1-E255K\EVYEGVWKK' | 250   | >ABL1-E255K\KVYEGVWKK  | 6593  | 6343  |
| >ABL1-E255K\EVYEGVWKK' | 5     | >ABL1-E255K\KVYEGVWKK  | 171   | 166   |
| >ABL1-E255K\EVYEGVWKK' | 63    | >ABL1-E255K\KVYEGVWKK  | 2670  | 2607  |
| >ABL1-E255K\EVYEGVWKK  | 11285 | >ABL1-E255K\KVYEGVWKK  | 25    | 11260 |
| >ABL1-E255K\EVYEGVWKK  | 12760 | >ABL1-E255K\KVYEGVWKK  | 36    | 12724 |
| >ABL1-E255K\EVYEGVWKK' | 136   | >ABL1-E255K\KVYEGVWKK  | 50    | 86    |
| >ABL1-E255K\EVYEGVWKK  | 7476  | >ABL1-E255K\KVYEGVWKK  | 81    | 7395  |
| >ABL1-E255K\EVYEGVWKK  | 5357  | >ABL1-E255K\KVYEGVWKK  | 58    | 5299  |
| >ABL1-E255K\EVYEGVWKK' | 8746  | >ABL1-E255K\KVYEGVWKK  | 329   | 8417  |
| >ABL1-E255K\EVYEGVWKK  | 267   | >ABL1-E255K\KVYEGVWKK  | 9146  | 8879  |
| >ABL1-E255K\EVYEGVWKK  | 5     | >ABL1-E255K\KVYEGVWKK  | 310   | 305   |
| >ABL1-E255K\EVYEGVWKK  | 7     | >ABL1-E255K\KVYEGVWKK  | 468   | 461   |
| >ABL1-E255K\EVYEGVWKK  | 124   | >ABL1-E255K\KVYEGVWKK  | 9635  | 9511  |
| >ABL1-E255K\EVYEGVWKK' | 292   | >ABL1-E255K\KVYEGVWKK  | 8391  | 8099  |
| >ABL1-E255K\EVYEGVWKK' | 2134  | >ABL1-E255K\KVYEGVWKK  | 198   | 1936  |
| >ABL1-E255K\EVYEGVWKK' | 213   | >ABL1-E255K\KVYEGVWKK  | 319   | 106   |
| >ABL1-E255K\EVYEGVWKK' | 125   | >ABL1-E255K\KVYEGVWKK  | 8     | 117   |
| >ABL1-E255K\EVYEGVWKK' | 11995 | >ABL1-E255K\KVYEGVWKK  | 367   | 11628 |
| >ABL1-E255K\EVYEGVWKK' | 12919 | >ABL1-E255K\KVYEGVWKK  | 301   | 12618 |
| >ABL1-E255K\EVYEGVWKK  | 2727  | >ABL1-E255K\KVYEGVWKK  | 396   | 2331  |
| >ABL1-E255K\EVYEGVWKK  | 2292  | >ABL1-E255K\KVYEGVWKK  | 198   | 2094  |
| >ABL1-E255K\GEVYEGVWKK | 2469  | >ABL1-E255K\GKVYEGVWKK | 77    | 2392  |
| >ABL1-E255K\GEVYEGVW   | 369   | >ABL1-E255K\GKVYEGVW   | 13731 | 13362 |
| >ABL1-E255K\GEVYEGVW   | 81    | >ABL1-E255K\GKVYEGVW   | 9566  | 9485  |
| >ABL1-E255K\GEVYEGVWKK | 56    | >ABL1-E255K\GKVYEGVWKK | 9707  | 9651  |
| >ABL1-E255K\KHKLGGGQY' | 14356 | >ABL1-E255K\KHKLGGGQY' | 403   | 13953 |
| >ABL1-E255K\YGEVYEGVW  | 157   | >ABL1-E255K\YGKVYEGVW  | 330   | 173   |
| >ABL1-E255K\QYGEVYEGV  | 434   | >ABL1-E255K\QYGKVYEGV  | 5040  | 4606  |
| >ABL1-E255K\QYGEVYEGV\ | 277   | >ABL1-E255K\QYGKVYEGV\ | 164   | 113   |
| >ABL1-E255K\QYGEVYEGV\ | 765   | >ABL1-E255K\QYGKVYEGV\ | 317   | 448   |
| >ABL1-E255K\QYGEVYEGV  | 92    | >ABL1-E255K\QYGKVYEGV  | 46    | 46    |
| >ABL1-E255K\QYGEVYEGV\ | 17    | >ABL1-E255K\QYGKVYEGV\ | 13    | 4     |
| >ABL1-E255K\QYGEVYEGV\ | 685   | >ABL1-E255K\QYGKVYEGV\ | 411   | 274   |
| >ABL1-E255K\QYGEVYEGV\ | 450   | >ABL1-E255K\QYGKVYEGV\ | 247   | 203   |

|                        |       |                        |      |       |
|------------------------|-------|------------------------|------|-------|
| >ABL1-E255K GQYGEVYEG' | 170   | >ABL1-E255K GQYGKVYEG' | 720  | 550   |
| >ABL1-E255K GQYGEVYEG' | 44    | >ABL1-E255K GQYGKVYEG' | 87   | 43    |
| >ABL1-E255K GQYGEVYEG' | 58    | >ABL1-E255K GQYGKVYEG' | 67   | 9     |
| >ABL1-E255K GQYGEVYEG' | 109   | >ABL1-E255K GQYGKVYEG' | 226  | 117   |
| >ABL1-E255K GQYGEVYEG' | 6     | >ABL1-E255K GQYGKVYEG' | 8    | 2     |
| >ABL1-E255K GQYGEVYEG' | 21    | >ABL1-E255K GQYGKVYEG' | 33   | 12    |
| >ABL1-E255K GQYGEVYEG' | 13    | >ABL1-E255K GQYGKVYEG' | 16   | 3     |
| >ABL1-E255K GQYGEVYEG' | 66    | >ABL1-E255K GQYGKVYEG' | 105  | 39    |
| >ABL1-E255K GQYGEVYEG' | 58    | >ABL1-E255K GQYGKVYEG' | 159  | 101   |
| >ABL1-E255K GGQYGEVY   | 341   | >ABL1-E255K GGQYGVY    | 461  | 120   |
| >ABL1-E255K GGGQYGEVY  | 235   | >ABL1-E255K GGGQYGVY   | 679  | 444   |
| >ABL1-E255K GGGQYGEVY  | 326   | >ABL1-E255K GGGQYGVY   | 576  | 250   |
| >ABL1-E255K LGGGQYGEV' | 272   | >ABL1-E255K LGGGQYGV'  | 592  | 320   |
| >ABL1-E255K KLGGGQYGE' | 212   | >ABL1-E255K KLGGGQYGV' | 730  | 518   |
| >ABL1-E255K KLGGGQYGE' | 90    | >ABL1-E255K KLGGGQYGV' | 120  | 30    |
| >ABL1-E255K KLGGGQYGE' | 56    | >ABL1-E255K KLGGGQYGV' | 92   | 36    |
| >ABL1-E255K KLGGGQYGE' | 3     | >ABL1-E255K KLGGGQYGV' | 5    | 2     |
| >ABL1-E255K KLGGGQYGE' | 16    | >ABL1-E255K KLGGGQYGV' | 32   | 16    |
| >ABL1-E255K KLGGGQYGE' | 7     | >ABL1-E255K KLGGGQYGV' | 9    | 2     |
| >ABL1-E255K KLGGGQYGE' | 19    | >ABL1-E255K KLGGGQYGV' | 25   | 6     |
| >ABL1-E255K KLGGGQYGE' | 2     | >ABL1-E255K KLGGGQYGV' | 3    | 1     |
| >ABL1-E255K KLGGGQYGE  | 18048 | >ABL1-E255K KLGGGQYGV  | 63   | 17985 |
| >ABL1-E255K KLGGGQYGE  | 26539 | >ABL1-E255K KLGGGQYGV  | 283  | 26256 |
| >ABL1-E255K KLGGGQYGE' | 128   | >ABL1-E255K KLGGGQYGV' | 280  | 152   |
| >ABL1-E255K KLGGGQYGE' | 64    | >ABL1-E255K KLGGGQYGV' | 89   | 25    |
| >ABL1-E255K KLGGGQYGE' | 37    | >ABL1-E255K KLGGGQYGV' | 104  | 67    |
| >ABL1-E255K KLGGGQYGE' | 87    | >ABL1-E255K KLGGGQYGV' | 118  | 31    |
| >ABL1-E255K KLGGGQYGE' | 354   | >ABL1-E255K KLGGGQYGV' | 280  | 74    |
| >ABL1-E255K KLGGGQYGE' | 385   | >ABL1-E255K KLGGGQYGV' | 404  | 19    |
| >ABL1-E255K KLGGGQYGE  | 21062 | >ABL1-E255K KLGGGQYGV  | 338  | 20724 |
| >ABL1-E255\ EVYEGVWKK  | 4044  | >ABL1-E255\ VVYEGVWKK  | 356  | 3688  |
| >ABL1-E255\ EVYEGVWKK' | 2288  | >ABL1-E255\ VVYEGVWKK' | 242  | 2046  |
| >ABL1-E255\ EVYEGVWKK  | 262   | >ABL1-E255\ VVYEGVWKK  | 43   | 219   |
| >ABL1-E255\ EVYEGVWKK  | 239   | >ABL1-E255\ VVYEGVWKK  | 41   | 198   |
| >ABL1-E255\ EVYEGVWKK  | 192   | >ABL1-E255\ VVYEGVWKK  | 20   | 172   |
| >ABL1-E255\ EVYEGVWKK  | 61    | >ABL1-E255\ VVYEGVWKK  | 11   | 50    |
| >ABL1-E255\ EVYEGVWKK' | 52    | >ABL1-E255\ VVYEGVWKK' | 2515 | 2463  |
| >ABL1-E255\ EVYEGVWKK' | 250   | >ABL1-E255\ VVYEGVWKK' | 5558 | 5308  |
| >ABL1-E255\ EVYEGVWKK' | 5     | >ABL1-E255\ VVYEGVWKK' | 96   | 91    |
| >ABL1-E255\ EVYEGVWKK' | 63    | >ABL1-E255\ VVYEGVWKK' | 2346 | 2283  |
| >ABL1-E255\ EVYEGVWKK' | 136   | >ABL1-E255\ VVYEGVWKK' | 48   | 88    |
| >ABL1-E255\ EVYEGVWKK  | 267   | >ABL1-E255\ VVYEGVWKK  | 2013 | 1746  |
| >ABL1-E255\ EVYEGVWKK  | 5     | >ABL1-E255\ VVYEGVWKK  | 128  | 123   |

|                       |       |                       |       |       |
|-----------------------|-------|-----------------------|-------|-------|
| >ABL1-E255\EVYEGVWKK  | 7     | >ABL1-E255\VVYEGVWKK  | 176   | 169   |
| >ABL1-E255\EVYEGVWKK  | 124   | >ABL1-E255\VVYEGVWKK  | 7973  | 7849  |
| >ABL1-E255\EVYEGVWKK' | 292   | >ABL1-E255\VVYEGVWKK  | 6772  | 6480  |
| >ABL1-E255\EVYEGVWKK' | 2134  | >ABL1-E255\VVYEGVWKK  | 350   | 1784  |
| >ABL1-E255\EVYEGVWKK' | 213   | >ABL1-E255\VVYEGVWKK  | 113   | 100   |
| >ABL1-E255\EVYEGVWKK' | 125   | >ABL1-E255\VVYEGVWKK  | 12    | 113   |
| >ABL1-E255\GEVYEGVWK  | 13952 | >ABL1-E255\GVVYEGVWK  | 187   | 13765 |
| >ABL1-E255\GEVYEGVWK  | 20256 | >ABL1-E255\GVVYEGVWK  | 162   | 20094 |
| >ABL1-E255\GEVYEGVWK  | 15352 | >ABL1-E255\GVVYEGVWK  | 77    | 15275 |
| >ABL1-E255\GEVYEGVWK  | 21808 | >ABL1-E255\GVVYEGVWK  | 344   | 21464 |
| >ABL1-E255\GEVYEGVWK  | 3427  | >ABL1-E255\GVVYEGVWK  | 96    | 3331  |
| >ABL1-E255\GEVYEGVWK  | 15512 | >ABL1-E255\GVVYEGVWK  | 409   | 15103 |
| >ABL1-E255\GEVYEGVW   | 369   | >ABL1-E255\GVVYEGVW   | 20227 | 19858 |
| >ABL1-E255\GEVYEGVW   | 81    | >ABL1-E255\GVVYEGVW   | 25314 | 25233 |
| >ABL1-E255\GEVYEGVWK  | 56    | >ABL1-E255\GVVYEGVWK  | 26408 | 26352 |
| >ABL1-E255\GEVYEGVWK  | 3434  | >ABL1-E255\GVVYEGVWK  | 211   | 3223  |
| >ABL1-E255\YGEVYEGV   | 3038  | >ABL1-E255\YGVVYEGV   | 304   | 2734  |
| >ABL1-E255\YGEVYEGVW  | 2163  | >ABL1-E255\YGVVYEGVW  | 198   | 1965  |
| >ABL1-E255\YGEVYEGVW  | 4939  | >ABL1-E255\YGVVYEGVW  | 122   | 4817  |
| >ABL1-E255\YGEVYEGVW  | 157   | >ABL1-E255\YGVVYEGVW  | 66    | 91    |
| >ABL1-E255\QYGEVYEGV  | 434   | >ABL1-E255\QYGVVYEGV  | 7088  | 6654  |
| >ABL1-E255\QYGEVYEGV\ | 277   | >ABL1-E255\QYGVVYEGV\ | 439   | 162   |
| >ABL1-E255\QYGEVYEGV  | 92    | >ABL1-E255\QYGVVYEGV  | 100   | 8     |
| >ABL1-E255\QYGEVYEGV\ | 17    | >ABL1-E255\QYGVVYEGV\ | 22    | 5     |
| >ABL1-E255\QYGEVYEGV\ | 450   | >ABL1-E255\QYGVVYEGV\ | 562   | 112   |
| >ABL1-E255\GQYGEVYEG' | 170   | >ABL1-E255\GQYGVVYEG' | 338   | 168   |
| >ABL1-E255\GQYGEVYEG' | 44    | >ABL1-E255\GQYGVVYEG' | 47    | 3     |
| >ABL1-E255\GQYGEVYEG' | 58    | >ABL1-E255\GQYGVVYEG' | 58    | 0     |
| >ABL1-E255\GQYGEVYEG' | 109   | >ABL1-E255\GQYGVVYEG' | 131   | 22    |
| >ABL1-E255\GQYGEVYEG' | 6     | >ABL1-E255\GQYGVVYEG' | 5     | 1     |
| >ABL1-E255\GQYGEVYEG' | 21    | >ABL1-E255\GQYGVVYEG' | 25    | 4     |
| >ABL1-E255\GQYGEVYEG' | 13    | >ABL1-E255\GQYGVVYEG' | 10    | 3     |
| >ABL1-E255\GQYGEVYEG' | 66    | >ABL1-E255\GQYGVVYEG' | 99    | 33    |
| >ABL1-E255\GQYGEVYEG' | 699   | >ABL1-E255\GQYGVVYEG' | 496   | 203   |
| >ABL1-E255\GQYGEVYEG' | 58    | >ABL1-E255\GQYGVVYEG' | 108   | 50    |
| >ABL1-E255\GGQYGEVY   | 341   | >ABL1-E255\GGQYGVVY   | 299   | 42    |
| >ABL1-E255\GGQYGEVY   | 583   | >ABL1-E255\GGQYGVVY   | 277   | 306   |
| >ABL1-E255\GGGQYGEVY  | 235   | >ABL1-E255\GGGQYGVVY  | 265   | 30    |
| >ABL1-E255\GGGQYGEVY  | 326   | >ABL1-E255\GGGQYGVVY  | 775   | 449   |
| >ABL1-E255\LGGGQYGEV' | 272   | >ABL1-E255\LGGGQYGVV' | 225   | 47    |
| >ABL1-E255\LGGGQYGEV' | 1610  | >ABL1-E255\LGGGQYGVV' | 495   | 1115  |
| >ABL1-E255\KLGGGQYGE  | 15984 | >ABL1-E255\KLGGGQYGV  | 22    | 15962 |
| >ABL1-E255\KLGGGQYGE' | 212   | >ABL1-E255\KLGGGQYGV' | 316   | 104   |

|                       |       |                       |       |       |
|-----------------------|-------|-----------------------|-------|-------|
| >ABL1-E255\KLGQQYGE   | 8443  | >ABL1-E255\KLGQQYGV   | 13    | 8430  |
| >ABL1-E255\KLGQQYGE'  | 90    | >ABL1-E255\KLGQQYGV   | 115   | 25    |
| >ABL1-E255\KLGQQYGE   | 21248 | >ABL1-E255\KLGQQYGV   | 27    | 21221 |
| >ABL1-E255\KLGQQYGE'  | 56    | >ABL1-E255\KLGQQYGV   | 71    | 15    |
| >ABL1-E255\KLGQQYGE   | 22167 | >ABL1-E255\KLGQQYGV   | 32    | 22135 |
| >ABL1-E255\KLGQQYGE   | 4589  | >ABL1-E255\KLGQQYGV   | 2     | 4587  |
| >ABL1-E255\KLGQQYGE'  | 3     | >ABL1-E255\KLGQQYGV   | 5     | 2     |
| >ABL1-E255\KLGQQYGE   | 7018  | >ABL1-E255\KLGQQYGV   | 3     | 7015  |
| >ABL1-E255\KLGQQYGE'  | 16    | >ABL1-E255\KLGQQYGV   | 16    | 0     |
| >ABL1-E255\KLGQQYGE   | 9412  | >ABL1-E255\KLGQQYGV   | 4     | 9408  |
| >ABL1-E255\KLGQQYGE'  | 7     | >ABL1-E255\KLGQQYGV   | 9     | 2     |
| >ABL1-E255\KLGQQYGE   | 14164 | >ABL1-E255\KLGQQYGV   | 2     | 14162 |
| >ABL1-E255\KLGQQYGE'  | 19    | >ABL1-E255\KLGQQYGV   | 23    | 4     |
| >ABL1-E255\KLGQQYGE   | 2895  | >ABL1-E255\KLGQQYGV   | 2     | 2893  |
| >ABL1-E255\KLGQQYGE'  | 2     | >ABL1-E255\KLGQQYGV   | 3     | 1     |
| >ABL1-E255\KLGQQYGE'  | 128   | >ABL1-E255\KLGQQYGV   | 112   | 16    |
| >ABL1-E255\KLGQQYGE'  | 64    | >ABL1-E255\KLGQQYGV   | 55    | 9     |
| >ABL1-E255\KLGQQYGE   | 3738  | >ABL1-E255\KLGQQYGV   | 472   | 3266  |
| >ABL1-E255\KLGQQYGE'  | 873   | >ABL1-E255\KLGQQYGV   | 453   | 420   |
| >ABL1-E255\KLGQQYGE'  | 37    | >ABL1-E255\KLGQQYGV   | 45    | 8     |
| >ABL1-E255\KLGQQYGE'  | 87    | >ABL1-E255\KLGQQYGV   | 93    | 6     |
| >ABL1-E255\KLGQQYGE'  | 354   | >ABL1-E255\KLGQQYGV   | 368   | 14    |
| >ABL1-E255\KLGQQYGE'  | 385   | >ABL1-E255\KLGQQYGV   | 511   | 126   |
| >ABL1-E279KVEEFLKEA   | 9970  | >ABL1-E279KVEEFLKEA   | 289   | 9681  |
| >ABL1-E279KVEEFLKEAA' | 1574  | >ABL1-E279KVEEFLKEAA' | 67    | 1507  |
| >ABL1-E279KVEEFLKEAA' | 1419  | >ABL1-E279KVEEFLKEAA' | 134   | 1285  |
| >ABL1-E279KVEEFLKEAA' | 4703  | >ABL1-E279KVEEFLKEAA' | 290   | 4413  |
| >ABL1-E279KVEEFLKEAA' | 811   | >ABL1-E279KVEEFLKEAA' | 102   | 709   |
| >ABL1-E279KVEEFLKEAA' | 92    | >ABL1-E279KVEEFLKEAA' | 6897  | 6805  |
| >ABL1-E279KVEEFLKEAA' | 47    | >ABL1-E279KVEEFLKEAA' | 2500  | 2453  |
| >ABL1-E279KMEVEEFLK   | 572   | >ABL1-E279KMKVEEFLK   | 454   | 118   |
| >ABL1-E279KMEVEEFLKEA | 5768  | >ABL1-E279KMKVEEFLKEA | 234   | 5534  |
| >ABL1-E279KMEVEEFLKEA | 7549  | >ABL1-E279KMKVEEFLKEA | 338   | 7211  |
| >ABL1-E279KMEVEEFLKEA | 110   | >ABL1-E279KMKVEEFLKEA | 17076 | 16966 |
| >ABL1-E279KMEVEEFLKEA | 261   | >ABL1-E279KMKVEEFLKEA | 28861 | 28600 |
| >ABL1-E279KMEVEEFLKEA | 12    | >ABL1-E279KMKVEEFLKEA | 9139  | 9127  |
| >ABL1-E279KMEVEEFLKEA | 416   | >ABL1-E279KMKVEEFLKEA | 30313 | 29897 |
| >ABL1-E279KAVKTLKEDTN | 25476 | >ABL1-E279KAVKTLKEDTN | 387   | 25089 |
| >ABL1-E279KAVKTLKEDTN | 10976 | >ABL1-E279KAVKTLKEDTN | 75    | 10901 |
| >ABL1-E279KTMEVEEFL   | 78    | >ABL1-E279KTMKVEEFL   | 88    | 10    |
| >ABL1-E279KTMEVEEFLKE | 3959  | >ABL1-E279KTMKVEEFLKE | 403   | 3556  |
| >ABL1-E279KTMEVEEFL   | 187   | >ABL1-E279KTMKVEEFL   | 246   | 59    |
| >ABL1-E279KTMEVEEFLK  | 1915  | >ABL1-E279KTMKVEEFLK  | 299   | 1616  |

|                        |       |                         |      |       |
|------------------------|-------|-------------------------|------|-------|
| >ABL1-E279KTMEVEEFLK   | 38    | >ABL1-E279KTMKVVEEFLK   | 35   | 3     |
| >ABL1-E279KTMEVEEFLK   | 12942 | >ABL1-E279KTMKVVEEFLK   | 445  | 12497 |
| >ABL1-E279KTMEVEEFLK   | 2856  | >ABL1-E279KTMKVVEEFLK   | 139  | 2717  |
| >ABL1-E279KTMEVEEFLK   | 186   | >ABL1-E279KTMKVVEEFLK   | 163  | 23    |
| >ABL1-E279KDTMEVEEFLK  | 28    | >ABL1-E279KDTMKVVEEFLK  | 34   | 6     |
| >ABL1-E279KDTMEVEEFLK  | 439   | >ABL1-E279KDTMKVVEEFLK  | 902  | 463   |
| >ABL1-E279KDTMEVEEFLK  | 76    | >ABL1-E279KDTMKVVEEFLK  | 167  | 91    |
| >ABL1-E279KDTMEVEEFLK  | 15    | >ABL1-E279KDTMKVVEEFLK  | 27   | 12    |
| >ABL1-E279KDTMEVEEFLK  | 40    | >ABL1-E279KDTMKVVEEFLK  | 84   | 44    |
| >ABL1-E279KDTMEVEEFLK  | 357   | >ABL1-E279KDTMKVVEEFLK  | 539  | 182   |
| >ABL1-E279KDTMEVEEFLK  | 489   | >ABL1-E279KDTMKVVEEFLK  | 759  | 270   |
| >ABL1-E279KDTMEVEEFLK  | 258   | >ABL1-E279KDTMKVVEEFLK  | 393  | 135   |
| >ABL1-E279KDTMEVEEFLK  | 6     | >ABL1-E279KDTMKVVEEFLK  | 8    | 2     |
| >ABL1-E279KDTMEVEEFLK  | 8     | >ABL1-E279KDTMKVVEEFLK  | 14   | 6     |
| >ABL1-E279KDTMEVEEFLK  | 68    | >ABL1-E279KDTMKVVEEFLK  | 449  | 381   |
| >ABL1-E279KDTMEVEEFLK  | 405   | >ABL1-E279KDTMKVVEEFLK  | 703  | 298   |
| >ABL1-E279KEDTMEVEEFLK | 401   | >ABL1-E279KEDTMKVVEEFLK | 573  | 172   |
| >ABL1-E279KEDTMEVEEFLK | 312   | >ABL1-E279KEDTMKVVEEFLK | 582  | 270   |
| >ABL1-E279KEDTMEVEEFLK | 295   | >ABL1-E279KEDTMKVVEEFLK | 151  | 144   |
| >ABL1-E279KEDTMEVEEFLK | 17    | >ABL1-E279KEDTMKVVEEFLK | 17   | 0     |
| >ABL1-E279KEDTMEVEEFLK | 348   | >ABL1-E279KEDTMKVVEEFLK | 155  | 193   |
| >ABL1-E279KEDTMEVEEFLK | 44    | >ABL1-E279KEDTMKVVEEFLK | 129  | 85    |
| >ABL1-E279KEDTMEVEEFLK | 127   | >ABL1-E279KEDTMKVVEEFLK | 143  | 16    |
| >ABL1-E279KEDTMEVEEFLK | 49    | >ABL1-E279KEDTMKVVEEFLK | 51   | 2     |
| >ABL1-E279KEDTMEVEEFLK | 75    | >ABL1-E279KEDTMKVVEEFLK | 316  | 241   |
| >ABL1-E279KEDTMEVEEFLK | 20    | >ABL1-E279KEDTMKVVEEFLK | 60   | 40    |
| >ABL1-E279KEDTMEVEEFLK | 3     | >ABL1-E279KEDTMKVVEEFLK | 4    | 1     |
| >ABL1-E279KEDTMEVEEFLK | 141   | >ABL1-E279KEDTMKVVEEFLK | 641  | 500   |
| >ABL1-E279KEDTMEVEEFLK | 16    | >ABL1-E279KEDTMKVVEEFLK | 39   | 23    |
| >ABL1-E279KEDTMEVEEFLK | 9     | >ABL1-E279KEDTMKVVEEFLK | 18   | 9     |
| >ABL1-E279KEDTMEVEEFLK | 24    | >ABL1-E279KEDTMKVVEEFLK | 51   | 27    |
| >ABL1-E279KEDTMEVEEFLK | 30    | >ABL1-E279KEDTMKVVEEFLK | 46   | 16    |
| >ABL1-E279KEDTMEVEEFLK | 2     | >ABL1-E279KEDTMKVVEEFLK | 2    | 0     |
| >ABL1-E279KEDTMEVEEFLK | 21003 | >ABL1-E279KEDTMKVVEEFLK | 456  | 20547 |
| >ABL1-E279KEDTMEVEEFLK | 25373 | >ABL1-E279KEDTMKVVEEFLK | 480  | 24893 |
| >ABL1-E279KEDTMEVEEFLK | 362   | >ABL1-E279KEDTMKVVEEFLK | 1076 | 714   |
| >ABL1-E279KEDTMEVEEFLK | 313   | >ABL1-E279KEDTMKVVEEFLK | 479  | 166   |
| >ABL1-E279KEDTMEVEEFLK | 176   | >ABL1-E279KEDTMKVVEEFLK | 611  | 435   |
| >ABL1-E279KEDTMEVEEFLK | 135   | >ABL1-E279KEDTMKVVEEFLK | 241  | 106   |
| >ABL1-E279KEDTMEVEEFLK | 59    | >ABL1-E279KEDTMKVVEEFLK | 112  | 53    |
| >ABL1-E279KEDTMEVEEFLK | 98    | >ABL1-E279KEDTMKVVEEFLK | 206  | 108   |
| >ABL1-E279KEDTMEVEEFLK | 200   | >ABL1-E279KEDTMKVVEEFLK | 433  | 233   |
| >ABL1-E279KEDTMEVEEFLK | 48    | >ABL1-E279KEDTMKVVEEFLK | 91   | 43    |

|                         |       |                         |       |       |
|-------------------------|-------|-------------------------|-------|-------|
| >ABL1-E279K KTLKEDTMEV  | 331   | >ABL1-E279K KTLKEDTMKV  | 722   | 391   |
| >ABL1-E279K KTLKEDTME   | 27263 | >ABL1-E279K KTLKEDTMK   | 100   | 27163 |
| >ABL1-E279K KTLKEDTME   | 12080 | >ABL1-E279K KTLKEDTMK   | 150   | 11930 |
| >ABL1-E279K KTLKEDTMEV  | 404   | >ABL1-E279K KTLKEDTMKV  | 542   | 138   |
| >ABL1-E279K KTLKEDTMEV  | 342   | >ABL1-E279K KTLKEDTMKV  | 322   | 20    |
| >ABL1-E279K KTLKEDTMEV  | 339   | >ABL1-E279K KTLKEDTMKV  | 483   | 144   |
| >ABL1-E279K KTLKEDTMEV  | 314   | >ABL1-E279K KTLKEDTMKV  | 286   | 28    |
| >ABL1-E279Y EVEEFLKEAA' | 12663 | >ABL1-E279Y YVEEFLKEAA' | 213   | 12450 |
| >ABL1-E279Y EVEEFLKEAA' | 4917  | >ABL1-E279Y YVEEFLKEAA' | 141   | 4776  |
| >ABL1-E279Y EVEEFLKEA   | 12231 | >ABL1-E279Y YVEEFLKEA   | 497   | 11734 |
| >ABL1-E279Y EVEEFLKEAA' | 5854  | >ABL1-E279Y YVEEFLKEAA' | 91    | 5763  |
| >ABL1-E279Y EVEEFLKEA   | 9970  | >ABL1-E279Y YVEEFLKEA   | 52    | 9918  |
| >ABL1-E279Y EVEEFLKEAA  | 10823 | >ABL1-E279Y YVEEFLKEAA  | 402   | 10421 |
| >ABL1-E279Y EVEEFLKEAA' | 1574  | >ABL1-E279Y YVEEFLKEAA' | 19    | 1555  |
| >ABL1-E279Y EVEEFLKEA   | 14330 | >ABL1-E279Y YVEEFLKEA   | 406   | 13924 |
| >ABL1-E279Y EVEEFLKEAA' | 1419  | >ABL1-E279Y YVEEFLKEAA' | 22    | 1397  |
| >ABL1-E279Y EVEEFLKEAA' | 4703  | >ABL1-E279Y YVEEFLKEAA' | 46    | 4657  |
| >ABL1-E279Y EVEEFLKEA   | 15403 | >ABL1-E279Y YVEEFLKEA   | 238   | 15165 |
| >ABL1-E279Y EVEEFLKEAA' | 811   | >ABL1-E279Y YVEEFLKEAA' | 7     | 804   |
| >ABL1-E279Y EVEEFLKEAA' | 92    | >ABL1-E279Y YVEEFLKEAA' | 414   | 322   |
| >ABL1-E279Y EVEEFLKEAA' | 47    | >ABL1-E279Y YVEEFLKEAA' | 102   | 55    |
| >ABL1-E279Y MEVEEFLK    | 5650  | >ABL1-E279Y MYVEEFLK    | 283   | 5367  |
| >ABL1-E279Y MEVEEFLK    | 13705 | >ABL1-E279Y MYVEEFLK    | 114   | 13591 |
| >ABL1-E279Y MEVEEFLKEA  | 23572 | >ABL1-E279Y MYVEEFLKEA  | 337   | 23235 |
| >ABL1-E279Y MEVEEFLK    | 17451 | >ABL1-E279Y MYVEEFLK    | 383   | 17068 |
| >ABL1-E279Y MEVEEFLK    | 572   | >ABL1-E279Y MYVEEFLK    | 72    | 500   |
| >ABL1-E279Y MEVEEFLKEA  | 110   | >ABL1-E279Y MYVEEFLKEA  | 18202 | 18092 |
| >ABL1-E279Y MEVEEFLKEA  | 261   | >ABL1-E279Y MYVEEFLKEA  | 36529 | 36268 |
| >ABL1-E279Y MEVEEFLKEA  | 12    | >ABL1-E279Y MYVEEFLKEA  | 18901 | 18889 |
| >ABL1-E279Y MEVEEFLKEA  | 416   | >ABL1-E279Y MYVEEFLKEA  | 37562 | 37146 |
| >ABL1-E279Y MEVEEFLK    | 3406  | >ABL1-E279Y MYVEEFLK    | 74    | 3332  |
| >ABL1-E279Y MEVEEFLKEA  | 18330 | >ABL1-E279Y MYVEEFLKEA  | 200   | 18130 |
| >ABL1-E279Y AVKTLKEDTN  | 26449 | >ABL1-E279Y AVKTLKEDTN  | 344   | 26105 |
| >ABL1-E279Y AVKTLKEDTN  | 14076 | >ABL1-E279Y AVKTLKEDTN  | 109   | 13967 |
| >ABL1-E279Y TMEVEEFL    | 4055  | >ABL1-E279Y TMYVEEFL    | 81    | 3974  |
| >ABL1-E279Y TMEVEEFLKE  | 6046  | >ABL1-E279Y TMYVEEFLKE  | 266   | 5780  |
| >ABL1-E279Y TMEVEEFL    | 78    | >ABL1-E279Y TMYVEEFL    | 15    | 63    |
| >ABL1-E279Y TMEVEEFLKE  | 1944  | >ABL1-E279Y TMYVEEFLKE  | 246   | 1698  |
| >ABL1-E279Y TMEVEEFL    | 9268  | >ABL1-E279Y TMYVEEFL    | 237   | 9031  |
| >ABL1-E279Y TMEVEEFLKE  | 3959  | >ABL1-E279Y TMYVEEFLKE  | 89    | 3870  |
| >ABL1-E279Y TMEVEEFL    | 4569  | >ABL1-E279Y TMYVEEFL    | 288   | 4281  |
| >ABL1-E279Y TMEVEEFL    | 1130  | >ABL1-E279Y TMYVEEFL    | 12    | 1118  |
| >ABL1-E279Y TMEVEEFLKE  | 3554  | >ABL1-E279Y TMYVEEFLKE  | 57    | 3497  |

|                       |      |                        |      |      |
|-----------------------|------|------------------------|------|------|
| >ABL1-E279YTMEVEEFL   | 1185 | >ABL1-E279Y TMYVEEFL   | 61   | 1124 |
| >ABL1-E279YTMEVEEFLKE | 4707 | >ABL1-E279Y TMYVEEFLKE | 436  | 4271 |
| >ABL1-E279YTMEVEEFL   | 1524 | >ABL1-E279Y TMYVEEFL   | 15   | 1509 |
| >ABL1-E279YTMEVEEFLKE | 7508 | >ABL1-E279Y TMYVEEFLKE | 150  | 7358 |
| >ABL1-E279YTMEVEEFL   | 5031 | >ABL1-E279Y TMYVEEFL   | 167  | 4864 |
| >ABL1-E279YTMEVEEFL   | 187  | >ABL1-E279Y TMYVEEFL   | 24   | 163  |
| >ABL1-E279YTMEVEEFLKE | 830  | >ABL1-E279Y TMYVEEFLKE | 58   | 772  |
| >ABL1-E279YTMEVEEFLK  | 1915 | >ABL1-E279Y TMYVEEFLK  | 36   | 1879 |
| >ABL1-E279YTMEVEEFLK  | 38   | >ABL1-E279Y TMYVEEFLK  | 10   | 28   |
| >ABL1-E279YTMEVEEFLK  | 2856 | >ABL1-E279Y TMYVEEFLK  | 178  | 2678 |
| >ABL1-E279YTMEVEEFLK  | 186  | >ABL1-E279Y TMYVEEFLK  | 25   | 161  |
| >ABL1-E279YDTMEVEEFLK | 2578 | >ABL1-E279YDTMYVEEFLK  | 230  | 2348 |
| >ABL1-E279YDTMEVEEFLK | 28   | >ABL1-E279YDTMYVEEFLK  | 15   | 13   |
| >ABL1-E279YDTMEVEEF   | 439  | >ABL1-E279YDTMYVEEF    | 1141 | 702  |
| >ABL1-E279YDTMEVEEF   | 76   | >ABL1-E279YDTMYVEEF    | 198  | 122  |
| >ABL1-E279YDTMEVEEF   | 15   | >ABL1-E279YDTMYVEEF    | 17   | 2    |
| >ABL1-E279YDTMEVEEFL  | 40   | >ABL1-E279YDTMYVEEFL   | 51   | 11   |
| >ABL1-E279YDTMEVEEF   | 357  | >ABL1-E279YDTMYVEEF    | 115  | 242  |
| >ABL1-E279YDTMEVEEFLK | 489  | >ABL1-E279YDTMYVEEFLK  | 322  | 167  |
| >ABL1-E279YDTMEVEEF   | 782  | >ABL1-E279YDTMYVEEF    | 354  | 428  |
| >ABL1-E279YDTMEVEEFL  | 258  | >ABL1-E279YDTMYVEEFL   | 128  | 130  |
| >ABL1-E279YDTMEVEEFLK | 6    | >ABL1-E279YDTMYVEEFLK  | 6    | 0    |
| >ABL1-E279YDTMEVEEFL  | 8    | >ABL1-E279YDTMYVEEFL   | 8    | 0    |
| >ABL1-E279YDTMEVEEFL  | 68   | >ABL1-E279YDTMYVEEFL   | 454  | 386  |
| >ABL1-E279YDTMEVEEF   | 405  | >ABL1-E279YDTMYVEEF    | 578  | 173  |
| >ABL1-E279YEDTMEVEEFL | 401  | >ABL1-E279YEDTMYVEEFL  | 203  | 198  |
| >ABL1-E279YEDTMEVEEFL | 312  | >ABL1-E279YEDTMYVEEFL  | 265  | 47   |
| >ABL1-E279YKEDTMEVEEF | 295  | >ABL1-E279YKEDTMYVEEF  | 144  | 151  |
| >ABL1-E279YKEDTMEVEEF | 17   | >ABL1-E279YKEDTMYVEEF  | 11   | 6    |
| >ABL1-E279YKEDTMEVEEF | 521  | >ABL1-E279YKEDTMYVEEF  | 344  | 177  |
| >ABL1-E279YKEDTMEVEEF | 348  | >ABL1-E279YKEDTMYVEEF  | 91   | 257  |
| >ABL1-E279YKEDTMEVEEF | 1492 | >ABL1-E279YKEDTMYVEEF  | 298  | 1194 |
| >ABL1-E279YKEDTMEVEEF | 44   | >ABL1-E279YKEDTMYVEEF  | 39   | 5    |
| >ABL1-E279YKEDTMEVEEF | 127  | >ABL1-E279YKEDTMYVEEF  | 91   | 36   |
| >ABL1-E279YLKEDTMEVEE | 49   | >ABL1-E279YLKEDTMYVEE  | 30   | 19   |
| >ABL1-E279YTLKEDTMEV  | 75   | >ABL1-E279YTLKEDTMYV   | 30   | 45   |
| >ABL1-E279YTLKEDTMEV  | 20   | >ABL1-E279YTLKEDTMYV   | 8    | 12   |
| >ABL1-E279YTLKEDTMEV  | 3    | >ABL1-E279YTLKEDTMYV   | 3    | 0    |
| >ABL1-E279YTLKEDTMEV  | 141  | >ABL1-E279YTLKEDTMYV   | 44   | 97   |
| >ABL1-E279YTLKEDTMEV  | 16   | >ABL1-E279YTLKEDTMYV   | 5    | 11   |
| >ABL1-E279YTLKEDTMEV  | 9    | >ABL1-E279YTLKEDTMYV   | 4    | 5    |
| >ABL1-E279YTLKEDTMEV  | 24   | >ABL1-E279YTLKEDTMYV   | 12   | 12   |
| >ABL1-E279YTLKEDTMEV  | 30   | >ABL1-E279YTLKEDTMYV   | 5    | 25   |

|                         |       |                        |       |       |
|-------------------------|-------|------------------------|-------|-------|
| >ABL1-E279YTLKEDTMEV    | 2     | >ABL1-E279YTLKEDTMYV   | 2     | 0     |
| >ABL1-E279YTLKEDTME     | 23997 | >ABL1-E279YTLKEDTMY    | 472   | 23525 |
| >ABL1-E279YTLKEDTME     | 28299 | >ABL1-E279YTLKEDTMY    | 425   | 27874 |
| >ABL1-E279YTLKEDTMEV    | 362   | >ABL1-E279YTLKEDTMYV   | 133   | 229   |
| >ABL1-E279YTLKEDTMEV    | 313   | >ABL1-E279YTLKEDTMYV   | 114   | 199   |
| >ABL1-E279YTLKEDTME     | 19055 | >ABL1-E279YTLKEDTMY    | 177   | 18878 |
| >ABL1-E279YTLKEDTME     | 23908 | >ABL1-E279YTLKEDTMY    | 108   | 23800 |
| >ABL1-E279YKTLKEDTMEV   | 176   | >ABL1-E279YKTLKEDTMYV  | 33    | 143   |
| >ABL1-E279YKTLKEDTMEV   | 510   | >ABL1-E279YKTLKEDTMYV  | 115   | 395   |
| >ABL1-E279YKTLKEDTMEV   | 135   | >ABL1-E279YKTLKEDTMYV  | 51    | 84    |
| >ABL1-E279YKTLKEDTMEV   | 59    | >ABL1-E279YKTLKEDTMYV  | 34    | 25    |
| >ABL1-E279YKTLKEDTMEV   | 98    | >ABL1-E279YKTLKEDTMYV  | 29    | 69    |
| >ABL1-E279YKTLKEDTMEV   | 200   | >ABL1-E279YKTLKEDTMYV  | 64    | 136   |
| >ABL1-E279YKTLKEDTMEV   | 48    | >ABL1-E279YKTLKEDTMYV  | 23    | 25    |
| >ABL1-E279YKTLKEDTMEV   | 1929  | >ABL1-E279YKTLKEDTMYV  | 339   | 1590  |
| >ABL1-E279YKTLKEDTMEV   | 331   | >ABL1-E279YKTLKEDTMYV  | 281   | 50    |
| >ABL1-E279YKTLKEDTMEV   | 404   | >ABL1-E279YKTLKEDTMYV  | 119   | 285   |
| >ABL1-E279YKTLKEDTME    | 16553 | >ABL1-E279YKTLKEDTMY   | 146   | 16407 |
| >ABL1-E279YKTLKEDTMEV   | 342   | >ABL1-E279YKTLKEDTMYV  | 659   | 317   |
| >ABL1-E279YKTLKEDTMEV   | 339   | >ABL1-E279YKTLKEDTMYV  | 157   | 182   |
| >ABL1-E279YKTLKEDTME    | 23492 | >ABL1-E279YKTLKEDTMY   | 120   | 23372 |
| >ABL1-E279YKTLKEDTME    | 21981 | >ABL1-E279YKTLKEDTMY   | 451   | 21530 |
| >ABL1-E279YKTLKEDTME    | 6274  | >ABL1-E279YKTLKEDTMY   | 8     | 6266  |
| >ABL1-E279YKTLKEDTMEV   | 314   | >ABL1-E279YKTLKEDTMYV  | 396   | 82    |
| >ABL1-E279YKTLKEDTME    | 12426 | >ABL1-E279YKTLKEDTMY   | 186   | 12240 |
| >ABL1-E279YKTLKEDTME    | 17557 | >ABL1-E279YKTLKEDTMY   | 163   | 17394 |
| >ABL1-E279YKTLKEDTME    | 2437  | >ABL1-E279YKTLKEDTMY   | 12    | 2425  |
| >ABL1-E282C EEFLKEAAV   | 132   | >ABL1-E282C EGFLKEAAV  | 19627 | 19495 |
| >ABL1-E282C EEFLKEAAVM  | 222   | >ABL1-E282C EGFLKEAAVM | 21835 | 21613 |
| >ABL1-E282C EEFLKEAAVM  | 286   | >ABL1-E282C EGFLKEAAVM | 110   | 176   |
| >ABL1-E282C EEFLKEAA    | 420   | >ABL1-E282C EGFLKEAA   | 38278 | 37858 |
| >ABL1-E282C EEFLKEAA    | 34    | >ABL1-E282C EGFLKEAA   | 29618 | 29584 |
| >ABL1-E282C EEFLKEAAV   | 134   | >ABL1-E282C EGFLKEAAV  | 34981 | 34847 |
| >ABL1-E282C VEEFLKEAAV  | 177   | >ABL1-E282C VEGFLKEAAV | 1068  | 891   |
| >ABL1-E282C VEEFLKEA    | 296   | >ABL1-E282C VEGFLKEA   | 185   | 111   |
| >ABL1-E282C VEEFLKEAA   | 207   | >ABL1-E282C VEGFLKEAA  | 134   | 73    |
| >ABL1-E282C VEEFLKEAAV  | 276   | >ABL1-E282C VEGFLKEAAV | 1404  | 1128  |
| >ABL1-E282C EVEEFLKEAA' | 92    | >ABL1-E282C EVEGFLKEAA | 100   | 8     |
| >ABL1-E282C EVEEFLKEAA' | 47    | >ABL1-E282C EVEGFLKEAA | 193   | 146   |
| >ABL1-E282C MEVEEFLK    | 576   | >ABL1-E282C MEVEGFLK   | 31    | 545   |
| >ABL1-E282C MEVEEFLKEA  | 718   | >ABL1-E282C MEVEGFLKEA | 412   | 306   |
| >ABL1-E282C MEVEEFLK    | 1547  | >ABL1-E282C MEVEGFLK   | 415   | 1132  |
| >ABL1-E282C MEVEEFLKE   | 664   | >ABL1-E282C MEVEGFLKE  | 173   | 491   |



|                        |       |                         |       |       |
|------------------------|-------|-------------------------|-------|-------|
| >ABL1-E282CMEVEEFLKEA  | 110   | >ABL1-E282CMEVEGFLKE/   | 50    | 60    |
| >ABL1-E282CMEVEEFLKEA  | 1027  | >ABL1-E282CMEVEGFLKE/   | 318   | 709   |
| >ABL1-E282CMEVEEFLKEA  | 261   | >ABL1-E282CMEVEGFLKE/   | 161   | 100   |
| >ABL1-E282CMEVEEFLKEA  | 659   | >ABL1-E282CMEVEGFLKE/   | 424   | 235   |
| >ABL1-E282CMEVEEFLKEA  | 12    | >ABL1-E282CMEVEGFLKE/   | 9     | 3     |
| >ABL1-E282CMEVEEFLKE   | 1701  | >ABL1-E282CMEVEGFLKE    | 449   | 1252  |
| >ABL1-E282CMEVEEFLKEA  | 416   | >ABL1-E282CMEVEGFLKE/   | 207   | 209   |
| >ABL1-E282CTMEVEEFL    | 78    | >ABL1-E282CTMEVEGFL     | 271   | 193   |
| >ABL1-E282CTMEVEEFL    | 187   | >ABL1-E282CTMEVEGFL     | 522   | 335   |
| >ABL1-E282CTMEVEEFLK   | 38    | >ABL1-E282CTMEVEGFLK    | 34    | 4     |
| >ABL1-E282CTMEVEEFLK   | 186   | >ABL1-E282CTMEVEGFLK    | 525   | 339   |
| >ABL1-E282CDTMEVEEFLK  | 28    | >ABL1-E282CDTMEVEGFLK   | 15    | 13    |
| >ABL1-E282CDTMEVEEF    | 439   | >ABL1-E282CDTMEVEGF     | 418   | 21    |
| >ABL1-E282CDTMEVEEF    | 76    | >ABL1-E282CDTMEVEGF     | 17    | 59    |
| >ABL1-E282CDTMEVEEFL   | 919   | >ABL1-E282CDTMEVEGFL    | 42    | 877   |
| >ABL1-E282CDTMEVEEF    | 15    | >ABL1-E282CDTMEVEGF     | 12    | 3     |
| >ABL1-E282CDTMEVEEFL   | 40    | >ABL1-E282CDTMEVEGFL    | 42    | 2     |
| >ABL1-E282CDTMEVEEF    | 1189  | >ABL1-E282CDTMEVEGF     | 123   | 1066  |
| >ABL1-E282CDTMEVEEF    | 357   | >ABL1-E282CDTMEVEGF     | 622   | 265   |
| >ABL1-E282CDTMEVEEFL   | 573   | >ABL1-E282CDTMEVEGFL    | 413   | 160   |
| >ABL1-E282CDTMEVEEFLK  | 489   | >ABL1-E282CDTMEVEGFLK   | 234   | 255   |
| >ABL1-E282CDTMEVEEFL   | 258   | >ABL1-E282CDTMEVEGFL    | 495   | 237   |
| >ABL1-E282CDTMEVEEFLK  | 6     | >ABL1-E282CDTMEVEGFLK   | 4     | 2     |
| >ABL1-E282CDTMEVEEFL   | 8     | >ABL1-E282CDTMEVEGFL    | 11    | 3     |
| >ABL1-E282CDTMEVEEFL   | 68    | >ABL1-E282CDTMEVEGFL    | 84    | 16    |
| >ABL1-E282CDTMEVEEF    | 405   | >ABL1-E282CDTMEVEGF     | 242   | 163   |
| >ABL1-E282CEDTMEVEEFL  | 401   | >ABL1-E282CEDTMEVEGFL   | 540   | 139   |
| >ABL1-E282CEDTMEVEEFL  | 312   | >ABL1-E282CEDTMEVEGFL   | 234   | 78    |
| >ABL1-E282CKEDTMEVEEF  | 295   | >ABL1-E282CKEDTMEVEGFL  | 253   | 42    |
| >ABL1-E282CKEDTMEVEEF  | 17    | >ABL1-E282CKEDTMEVEGFL  | 26    | 9     |
| >ABL1-E282CKEDTMEVEEF  | 348   | >ABL1-E282CKEDTMEVEGFL  | 900   | 552   |
| >ABL1-E282CKEDTMEVEEF  | 44    | >ABL1-E282CKEDTMEVEGFL  | 21    | 23    |
| >ABL1-E282CKEDTMEVEEF  | 127   | >ABL1-E282CKEDTMEVEGFL  | 165   | 38    |
| >ABL1-E282CLKEDTMEVEE  | 49    | >ABL1-E282CLKEDTMEVEGFL | 131   | 82    |
| >ABL1-E292V EIKHPNLV   | 1413  | >ABL1-E292V VIKHPNLV    | 56    | 1357  |
| >ABL1-E292V EIKHPNLV   | 2614  | >ABL1-E292V VIKHPNLV    | 140   | 2474  |
| >ABL1-E292V EIKHPNLVQL | 4986  | >ABL1-E292V VIKHPNLVQL  | 486   | 4500  |
| >ABL1-E292V EIKHPNLV   | 73    | >ABL1-E292V VIKHPNLV    | 3300  | 3227  |
| >ABL1-E292V EIKHPNLV   | 354   | >ABL1-E292V VIKHPNLV    | 10547 | 10193 |
| >ABL1-E292V KEIKHPNL   | 3103  | >ABL1-E292V KVIKHPNL    | 159   | 2944  |
| >ABL1-E292V KEIKHPNLV  | 16845 | >ABL1-E292V KVIKHPNLV   | 156   | 16689 |
| >ABL1-E292V KEIKHPNLV  | 7491  | >ABL1-E292V KVIKHPNLV   | 140   | 7351  |
| >ABL1-E292V KEIKHPNLVQ | 9465  | >ABL1-E292V KVIKHPNLVQ  | 211   | 9254  |

|                         |       |                         |       |       |
|-------------------------|-------|-------------------------|-------|-------|
| >ABL1-E292\ KEIKHPNLV   | 3386  | >ABL1-E292\ KVIKHPNLV   | 14    | 3372  |
| >ABL1-E292\ KEIKHPNLVQ  | 12534 | >ABL1-E292\ KVIKHPNLVQ  | 231   | 12303 |
| >ABL1-E292\ KEIKHPNL    | 5380  | >ABL1-E292\ KVIKHPNL    | 472   | 4908  |
| >ABL1-E292\ KEIKHPNLV   | 1723  | >ABL1-E292\ KVIKHPNLV   | 108   | 1615  |
| >ABL1-E292\ KEIKHPNLVQ  | 3541  | >ABL1-E292\ KVIKHPNLVQ  | 158   | 3383  |
| >ABL1-E292\ KEIKHPNLV   | 12847 | >ABL1-E292\ KVIKHPNLV   | 375   | 12472 |
| >ABL1-E292\ KEIKHPNLV   | 23950 | >ABL1-E292\ KVIKHPNLV   | 406   | 23544 |
| >ABL1-E292\ KEIKHPNL    | 19852 | >ABL1-E292\ KVIKHPNL    | 220   | 19632 |
| >ABL1-E292\ KEIKHPNLVQ  | 17977 | >ABL1-E292\ KVIKHPNLVQ  | 198   | 17779 |
| >ABL1-E292\ KEIKHPNL    | 12849 | >ABL1-E292\ KVIKHPNL    | 155   | 12694 |
| >ABL1-E292\ KEIKHPNLV   | 13449 | >ABL1-E292\ KVIKHPNLV   | 162   | 13287 |
| >ABL1-E292\ KEIKHPNL    | 10039 | >ABL1-E292\ KVIKHPNL    | 274   | 9765  |
| >ABL1-E292\ KEIKHPNLVQ  | 3648  | >ABL1-E292\ KVIKHPNLVQ  | 81    | 3567  |
| >ABL1-E292\ KEIKHPNL    | 18508 | >ABL1-E292\ KVIKHPNL    | 369   | 18139 |
| >ABL1-E292\ KEIKHPNLVQ  | 15384 | >ABL1-E292\ KVIKHPNLVQ  | 251   | 15133 |
| >ABL1-E292\ KEIKHPNL    | 40    | >ABL1-E292\ KVIKHPNL    | 20969 | 20929 |
| >ABL1-E292\ KEIKHPNLVQ  | 50    | >ABL1-E292\ KVIKHPNLVQ  | 20795 | 20745 |
| >ABL1-E292\ KEIKHPNL    | 53    | >ABL1-E292\ KVIKHPNL    | 32047 | 31994 |
| >ABL1-E292\ KEIKHPNLV   | 369   | >ABL1-E292\ KVIKHPNLV   | 40182 | 39813 |
| >ABL1-E292\ KEIKHPNLVQ  | 53    | >ABL1-E292\ KVIKHPNLVQ  | 34616 | 34563 |
| >ABL1-E292\ KEIKHPNLV   | 5     | >ABL1-E292\ KVIKHPNLV   | 16296 | 16291 |
| >ABL1-E292\ KEIKHPNLVQ  | 5     | >ABL1-E292\ KVIKHPNLVQ  | 11464 | 11459 |
| >ABL1-E292\ EFLKEAAVMFI | 22003 | >ABL1-E292\ EFLKEAAVMFI | 396   | 21607 |
| >ABL1-E292\ MKEIKHPNL   | 2303  | >ABL1-E292\ MKVIKHPNL   | 111   | 2192  |
| >ABL1-E292\ MKEIKHPNLV  | 4876  | >ABL1-E292\ MKVIKHPNLV  | 349   | 4527  |
| >ABL1-E292\ VMKEIKHPNI  | 199   | >ABL1-E292\ VMKVIKHPNI  | 1591  | 1392  |
| >ABL1-E292\ VMKEIKHPNI  | 22    | >ABL1-E292\ VMKVIKHPNI  | 71    | 49    |
| >ABL1-E292\ VMKEIKHPNI  | 4     | >ABL1-E292\ VMKVIKHPNI  | 14    | 10    |
| >ABL1-E292\ VMKEIKHPNI  | 374   | >ABL1-E292\ VMKVIKHPNI  | 2257  | 1883  |
| >ABL1-E292\ VMKEIKHPNI  | 44    | >ABL1-E292\ VMKVIKHPNI  | 784   | 740   |
| >ABL1-E292\ VMKEIKHPNI  | 7     | >ABL1-E292\ VMKVIKHPNI  | 62    | 55    |
| >ABL1-E292\ VMKEIKHPNI  | 243   | >ABL1-E292\ VMKVIKHPNI  | 1456  | 1213  |
| >ABL1-E292\ VMKEIKHPNI  | 22    | >ABL1-E292\ VMKVIKHPNI  | 133   | 111   |
| >ABL1-E292\ VMKEIKHPNI  | 306   | >ABL1-E292\ VMKVIKHPNI  | 2398  | 2092  |
| >ABL1-E292\ VMKEIKHPNI  | 61    | >ABL1-E292\ VMKVIKHPNI  | 367   | 306   |
| >ABL1-E292\ VMKEIKHPNI  | 136   | >ABL1-E292\ VMKVIKHPNI  | 911   | 775   |
| >ABL1-E292\ VMKEIKHPNI  | 6     | >ABL1-E292\ VMKVIKHPNI  | 24    | 18    |
| >ABL1-E292\ VMKEIKHPNI  | 4     | >ABL1-E292\ VMKVIKHPNI  | 8     | 4     |
| >ABL1-E292\ AVMKVIKHPFI | 561   | >ABL1-E292\ AVMKVIKHPFI | 364   | 197   |
| >ABL1-E292\ AVMKVIKHPFI | 524   | >ABL1-E292\ AVMKVIKHPFI | 247   | 277   |
| >ABL1-E292\ AVMKVIKH    | 1128  | >ABL1-E292\ AVMKVIKH    | 310   | 818   |
| >ABL1-E292\ AVMKVIKHPFI | 324   | >ABL1-E292\ AVMKVIKHPFI | 473   | 149   |
| >ABL1-E292\ AVMKVIKHPFI | 813   | >ABL1-E292\ AVMKVIKHPFI | 494   | 319   |

|                        |       |                        |      |       |
|------------------------|-------|------------------------|------|-------|
| >ABL1-E292\AAVMKEIK    | 610   | >ABL1-E292\AAVMKVIK    | 199  | 411   |
| >ABL1-E292\EAAMKEIK    | 13    | >ABL1-E292\EAAMKVIK    | 10   | 3     |
| >ABL1-E292\EAAMKEI     | 50    | >ABL1-E292\EAAMKVI     | 167  | 117   |
| >ABL1-E292\KEAAMKEI    | 6     | >ABL1-E292\KEAAMKVI    | 7    | 1     |
| >ABL1-E292\KEAAMKE     | 9021  | >ABL1-E292\KEAAMKV     | 124  | 8897  |
| >ABL1-E292\KEAAMKEI    | 121   | >ABL1-E292\KEAAMKVI    | 69   | 52    |
| >ABL1-E292\KEAAMKEI    | 148   | >ABL1-E292\KEAAMKVI    | 190  | 42    |
| >ABL1-E292\KEAAMKEI    | 336   | >ABL1-E292\KEAAMKVI    | 1183 | 847   |
| >ABL1-E292\KEAAMKE     | 4489  | >ABL1-E292\KEAAMKV     | 125  | 4364  |
| >ABL1-E292\KEAAMKEI    | 283   | >ABL1-E292\KEAAMKVI    | 207  | 76    |
| >ABL1-E292\KEAAMKEI    | 6     | >ABL1-E292\KEAAMKVI    | 8    | 2     |
| >ABL1-E292\LKEAAMKEI   | 453   | >ABL1-E292\LKEAAMKVI   | 697  | 244   |
| >ABL1-E292\FLKEAAMKE   | 8185  | >ABL1-E292\FLKEAAMK\   | 26   | 8159  |
| >ABL1-E292\FLKEAAMKE   | 97    | >ABL1-E292\FLKEAAMK\   | 379  | 282   |
| >ABL1-E292\FLKEAAMKE   | 4385  | >ABL1-E292\FLKEAAMK\   | 9    | 4376  |
| >ABL1-E292\FLKEAAMKE   | 13    | >ABL1-E292\FLKEAAMK\   | 49   | 36    |
| >ABL1-E292\FLKEAAMKE   | 5610  | >ABL1-E292\FLKEAAMK\   | 9    | 5601  |
| >ABL1-E292\FLKEAAMKE   | 4     | >ABL1-E292\FLKEAAMK\   | 4    | 0     |
| >ABL1-E292\FLKEAAMKE   | 16765 | >ABL1-E292\FLKEAAMK\   | 80   | 16685 |
| >ABL1-E292\FLKEAAMKE   | 103   | >ABL1-E292\FLKEAAMK\   | 229  | 126   |
| >ABL1-E292\FLKEAAMKE   | 9666  | >ABL1-E292\FLKEAAMK\   | 3    | 9663  |
| >ABL1-E292\FLKEAAMKE   | 14    | >ABL1-E292\FLKEAAMK\   | 29   | 15    |
| >ABL1-E292\FLKEAAMKE   | 14427 | >ABL1-E292\FLKEAAMK\   | 5    | 14422 |
| >ABL1-E292\FLKEAAMKE   | 40    | >ABL1-E292\FLKEAAMK\   | 51   | 11    |
| >ABL1-E292\FLKEAAMKE   | 14465 | >ABL1-E292\FLKEAAMK\   | 6    | 14459 |
| >ABL1-E292\FLKEAAMKE   | 148   | >ABL1-E292\FLKEAAMK\   | 360  | 212   |
| >ABL1-E292\FLKEAAMKE   | 21764 | >ABL1-E292\FLKEAAMK\   | 7    | 21757 |
| >ABL1-E292\FLKEAAMKE   | 1205  | >ABL1-E292\FLKEAAMK\   | 1    | 1204  |
| >ABL1-E292\FLKEAAMKE   | 6     | >ABL1-E292\FLKEAAMK\   | 13   | 7     |
| >ABL1-E292\FLKEAAMKE   | 19104 | >ABL1-E292\FLKEAAMK\   | 204  | 18900 |
| >ABL1-E352[EYLEKKNFI   | 554   | >ABL1-E352[DYLEKKNFI   | 455  | 99    |
| >ABL1-E352[EYLEKKNFI   | 117   | >ABL1-E352[DYLEKKNFI   | 140  | 23    |
| >ABL1-E352[EYLEKKNF    | 213   | >ABL1-E352[DYLEKKNF    | 395  | 182   |
| >ABL1-E352[EYLEKKNF    | 27    | >ABL1-E352[DYLEKKNF    | 105  | 78    |
| >ABL1-E352[EYLEKKNFI   | 86    | >ABL1-E352[DYLEKKNFI   | 507  | 421   |
| >ABL1-E352[EYLEKKNFIHF | 154   | >ABL1-E352[DYLEKKNFIHF | 297  | 143   |
| >ABL1-E352[EYLEKKNFIHF | 10    | >ABL1-E352[DYLEKKNFIHF | 7    | 3     |
| >ABL1-E352[EYLEKKNFIHF | 172   | >ABL1-E352[DYLEKKNFIHF | 790  | 618   |
| >ABL1-E352[EYLEKKNFIHF | 13    | >ABL1-E352[DYLEKKNFIHF | 22   | 9     |
| >ABL1-E352[MEYLEKKNF   | 21    | >ABL1-E352[MDYLEKKNF   | 1485 | 1464  |
| >ABL1-E352[MEYLEKKNFI  | 4     | >ABL1-E352[MDYLEKKNFI  | 10   | 6     |
| >ABL1-E352[MEYLEKKNF   | 77    | >ABL1-E352[MDYLEKKNF   | 765  | 688   |
| >ABL1-E352[MEYLEKKNF   | 31    | >ABL1-E352[MDYLEKKNF   | 6746 | 6715  |

|                         |      |                        |       |       |
|-------------------------|------|------------------------|-------|-------|
| >ABL1-E352[ MEYLEKKNFI  | 277  | >ABL1-E352[ MDYLEKKNFI | 19290 | 19013 |
| >ABL1-E352[ MEYLEKKNF   | 183  | >ABL1-E352[ MDYLEKKNF  | 5696  | 5513  |
| >ABL1-E352[ MEYLEKKNFI  | 483  | >ABL1-E352[ MDYLEKKNFI | 7814  | 7331  |
| >ABL1-E352[ MEYLEKKNF   | 120  | >ABL1-E352[ MDYLEKKNF  | 8995  | 8875  |
| >ABL1-E352[ MEYLEKKNFI  | 28   | >ABL1-E352[ MDYLEKKNFI | 3060  | 3032  |
| >ABL1-E352[ MEYLEKKNF   | 5280 | >ABL1-E352[ MDYLEKKNF  | 349   | 4931  |
| >ABL1-E352[ MEYLEKKNFI  | 884  | >ABL1-E352[ MDYLEKKNFI | 75    | 809   |
| >ABL1-E352[ MEYLEKKNFI  | 3463 | >ABL1-E352[ MDYLEKKNFI | 67    | 3396  |
| >ABL1-E352[ AMEYLEKKNF  | 277  | >ABL1-E352[ AMDYLEKKN  | 143   | 134   |
| >ABL1-E352[ AMEYLEKKNF  | 1433 | >ABL1-E352[ AMDYLEKKN  | 67    | 1366  |
| >ABL1-E352[ AMEYLEKKNF  | 981  | >ABL1-E352[ AMDYLEKKN  | 106   | 875   |
| >ABL1-E352[ AMEYLEKKNF  | 3451 | >ABL1-E352[ AMDYLEKKN  | 80    | 3371  |
| >ABL1-E352[ AMEYLEKK    | 414  | >ABL1-E352[ AMDYLEKK   | 131   | 283   |
| >ABL1-E352[ AMEYLEKKNF  | 194  | >ABL1-E352[ AMDYLEKKN  | 346   | 152   |
| >ABL1-E352[ SAMEYLEK    | 9    | >ABL1-E352[ SAMDYLEK   | 8     | 1     |
| >ABL1-E352[ SAMEYLEKK   | 14   | >ABL1-E352[ SAMDYLEKK  | 12    | 2     |
| >ABL1-E352[ SAMEYLEK    | 327  | >ABL1-E352[ SAMDYLEK   | 317   | 10    |
| >ABL1-E352[ SAMEYLEK    | 93   | >ABL1-E352[ SAMDYLEK   | 88    | 5     |
| >ABL1-E352[ SAMEYLEKK   | 60   | >ABL1-E352[ SAMDYLEKK  | 56    | 4     |
| >ABL1-E352[ SAMEYLEKKN  | 99   | >ABL1-E352[ SAMDYLEKKN | 128   | 29    |
| >ABL1-E352[ SAMEYLEKKN  | 23   | >ABL1-E352[ SAMDYLEKKN | 26    | 3     |
| >ABL1-E352[ SAMEYLEK    | 147  | >ABL1-E352[ SAMDYLEK   | 132   | 15    |
| >ABL1-E352[ SAMEYLEKK   | 270  | >ABL1-E352[ SAMDYLEKK  | 254   | 16    |
| >ABL1-E352[ SSAMEYLEK   | 9    | >ABL1-E352[ SSAMDYLEK  | 10    | 1     |
| >ABL1-E352[ SSAMEYLEKK  | 16   | >ABL1-E352[ SSAMDYLEKK | 13    | 3     |
| >ABL1-E352[ SSAMEYLEK   | 224  | >ABL1-E352[ SSAMDYLEK  | 422   | 198   |
| >ABL1-E352[ SSAMEYLEK   | 222  | >ABL1-E352[ SSAMDYLEK  | 229   | 7     |
| >ABL1-E352[ SSAMEYLEKK  | 35   | >ABL1-E352[ SSAMDYLEKK | 32    | 3     |
| >ABL1-E352[ SSAMEYLEK   | 81   | >ABL1-E352[ SSAMDYLEK  | 67    | 14    |
| >ABL1-E352[ SSAMEYLEKK  | 121  | >ABL1-E352[ SSAMDYLEKK | 105   | 16    |
| >ABL1-E352[ ISSAMEYL    | 102  | >ABL1-E352[ ISSAMDYL   | 99    | 3     |
| >ABL1-E352[ ISSAMEYLEK  | 61   | >ABL1-E352[ ISSAMDYLEK | 102   | 41    |
| >ABL1-E352[ ISSAMEYLEK  | 7    | >ABL1-E352[ ISSAMDYLEK | 9     | 2     |
| >ABL1-E352[ ISSAMEYLEKI | 24   | >ABL1-E352[ ISSAMDYLEK | 26    | 2     |
| >ABL1-E352[ ISSAMEYLEK  | 354  | >ABL1-E352[ ISSAMDYLEK | 422   | 68    |
| >ABL1-E352[ ISSAMEYLEK  | 50   | >ABL1-E352[ ISSAMDYLEK | 54    | 4     |
| >ABL1-E352[ ISSAMEYLEKI | 80   | >ABL1-E352[ ISSAMDYLEK | 73    | 7     |
| >ABL1-E352[ ISSAMEYL    | 24   | >ABL1-E352[ ISSAMDYL   | 27    | 3     |
| >ABL1-E352[ ISSAMEYL    | 93   | >ABL1-E352[ ISSAMDYL   | 131   | 38    |
| >ABL1-E352[ ISSAMEYLEK  | 366  | >ABL1-E352[ ISSAMDYLEK | 350   | 16    |
| >ABL1-E352[ QISSAMEYL   | 6    | >ABL1-E352[ QISSAMDYL  | 7     | 1     |
| >ABL1-E352[ QISSAMEYL   | 398  | >ABL1-E352[ QISSAMDYL  | 496   | 98    |
| >ABL1-E352[ QISSAMEYL   | 126  | >ABL1-E352[ QISSAMDYL  | 186   | 60    |

|                        |     |                        |      |      |
|------------------------|-----|------------------------|------|------|
| >ABL1-E352[ QISSAMEYLE | 380 | >ABL1-E352[ QISSAMDYLE | 443  | 63   |
| >ABL1-E352[ QISSAMEYLE | 33  | >ABL1-E352[ QISSAMDYLE | 35   | 2    |
| >ABL1-E352[ QISSAMEY   | 287 | >ABL1-E352[ QISSAMDY   | 476  | 189  |
| >ABL1-E352[ QISSAMEYL  | 166 | >ABL1-E352[ QISSAMDYL  | 160  | 6    |
| >ABL1-E352[ QISSAMEY   | 65  | >ABL1-E352[ QISSAMDY   | 77   | 12   |
| >ABL1-E352[ QISSAMEY   | 148 | >ABL1-E352[ QISSAMDY   | 162  | 14   |
| >ABL1-E352[ QISSAMEYLE | 148 | >ABL1-E352[ QISSAMDYLE | 153  | 5    |
| >ABL1-E352[ QISSAMEYL  | 28  | >ABL1-E352[ QISSAMDYL  | 51   | 23   |
| >ABL1-E352[ QISSAMEYL  | 238 | >ABL1-E352[ QISSAMDYL  | 480  | 242  |
| >ABL1-E352[ QISSAMEY   | 128 | >ABL1-E352[ QISSAMDY   | 176  | 48   |
| >ABL1-E352[ QISSAMEY   | 293 | >ABL1-E352[ QISSAMDY   | 891  | 598  |
| >ABL1-E352[ QISSAMEY   | 483 | >ABL1-E352[ QISSAMDY   | 1333 | 850  |
| >ABL1-E352[ QISSAMEY   | 212 | >ABL1-E352[ QISSAMDY   | 2258 | 2046 |
| >ABL1-E352[ QISSAMEY   | 780 | >ABL1-E352[ QISSAMDY   | 499  | 281  |
| >ABL1-E352[ TQISSAMEYL | 442 | >ABL1-E352[ TQISSAMDYL | 286  | 156  |
| >ABL1-E352[ TQISSAMEYL | 31  | >ABL1-E352[ TQISSAMDYL | 45   | 14   |
| >ABL1-E352[ TQISSAMEYL | 135 | >ABL1-E352[ TQISSAMDYL | 204  | 69   |
| >ABL1-E352[ TQISSAMEYL | 189 | >ABL1-E352[ TQISSAMDYL | 191  | 2    |
| >ABL1-E352[ TQISSAMEY  | 186 | >ABL1-E352[ TQISSAMDY  | 835  | 649  |
| >ABL1-E352[ TQISSAMEYL | 410 | >ABL1-E352[ TQISSAMDYL | 407  | 3    |
| >ABL1-E352[ TQISSAMEY  | 106 | >ABL1-E352[ TQISSAMDY  | 105  | 1    |
| >ABL1-E352[ TQISSAMEY  | 302 | >ABL1-E352[ TQISSAMDY  | 390  | 88   |
| >ABL1-E352[ TQISSAMEY  | 156 | >ABL1-E352[ TQISSAMDY  | 202  | 46   |
| >ABL1-E352[ TQISSAMEY  | 48  | >ABL1-E352[ TQISSAMDY  | 73   | 25   |
| >ABL1-E352[ TQISSAMEYL | 347 | >ABL1-E352[ TQISSAMDYL | 873  | 526  |
| >ABL1-E352[ TQISSAMEY  | 164 | >ABL1-E352[ TQISSAMDY  | 185  | 21   |
| >ABL1-E352[ TQISSAMEY  | 3   | >ABL1-E352[ TQISSAMDY  | 4    | 1    |
| >ABL1-E352[ TQISSAMEYL | 42  | >ABL1-E352[ TQISSAMDYL | 89   | 47   |
| >ABL1-E352[ TQISSAMEYL | 61  | >ABL1-E352[ TQISSAMDYL | 65   | 4    |
| >ABL1-E352[ ATQISSAMEY | 30  | >ABL1-E352[ ATQISSAMDY | 28   | 2    |
| >ABL1-E352[ ATQISSAMEY | 392 | >ABL1-E352[ ATQISSAMDY | 424  | 32   |
| >ABL1-E352[ ATQISSAMEY | 59  | >ABL1-E352[ ATQISSAMDY | 125  | 66   |
| >ABL1-E352[ ATQISSAMEY | 136 | >ABL1-E352[ ATQISSAMDY | 223  | 87   |
| >ABL1-E352[ ATQISSAMEY | 68  | >ABL1-E352[ ATQISSAMDY | 93   | 25   |
| >ABL1-E352[ ATQISSAMEY | 263 | >ABL1-E352[ ATQISSAMDY | 322  | 59   |
| >ABL1-E352[ ATQISSAMEY | 146 | >ABL1-E352[ ATQISSAMDY | 322  | 176  |
| >ABL1-E352[ ATQISSAMEY | 257 | >ABL1-E352[ ATQISSAMDY | 459  | 202  |
| >ABL1-E352[ ATQISSAMEY | 3   | >ABL1-E352[ ATQISSAMDY | 4    | 1    |
| >ABL1-E352[ ATQISSAMEY | 9   | >ABL1-E352[ ATQISSAMDY | 12   | 3    |
| >ABL1-E352[ ATQISSAMEY | 32  | >ABL1-E352[ ATQISSAMDY | 34   | 2    |
| >ABL1-E352[ ATQISSAMEY | 18  | >ABL1-E352[ ATQISSAMDY | 21   | 3    |
| >ABL1-E352[ ATQISSAMEY | 200 | >ABL1-E352[ ATQISSAMDY | 265  | 65   |
| >ABL1-E352[ ATQISSAMEY | 285 | >ABL1-E352[ ATQISSAMDY | 325  | 40   |

|                         |       |                         |       |       |
|-------------------------|-------|-------------------------|-------|-------|
| >ABL1-E352C MATQISSAM   | 56    | >ABL1-E352C MATQISSAM   | 54    | 2     |
| >ABL1-E352C MATQISSAM   | 140   | >ABL1-E352C MATQISSAM   | 180   | 40    |
| >ABL1-E352C MATQISSAM   | 43    | >ABL1-E352C MATQISSAM   | 128   | 85    |
| >ABL1-E352C MATQISSAM   | 122   | >ABL1-E352C MATQISSAM   | 145   | 23    |
| >ABL1-E352C MATQISSAM   | 86    | >ABL1-E352C MATQISSAM   | 137   | 51    |
| >ABL1-E352C MATQISSAM   | 9     | >ABL1-E352C MATQISSAM   | 22    | 13    |
| >ABL1-E352C MATQISSAM   | 8     | >ABL1-E352C MATQISSAM   | 13    | 5     |
| >ABL1-E352C MATQISSAM   | 191   | >ABL1-E352C MATQISSAM   | 296   | 105   |
| >ABL1-E352C MATQISSAM   | 73    | >ABL1-E352C MATQISSAM   | 375   | 302   |
| >ABL1-E352C MATQISSAM   | 37    | >ABL1-E352C MATQISSAM   | 107   | 70    |
| >ABL1-E352C MATQISSAM   | 94    | >ABL1-E352C MATQISSAM   | 758   | 664   |
| >ABL1-E352C MATQISSAM   | 115   | >ABL1-E352C MATQISSAM   | 156   | 41    |
| >ABL1-E352C EYLEKKNFI   | 554   | >ABL1-E352C GYLEKKNFI   | 178   | 376   |
| >ABL1-E352C EYLEKKNFI   | 117   | >ABL1-E352C GYLEKKNFI   | 228   | 111   |
| >ABL1-E352C EYLEKKNF    | 213   | >ABL1-E352C GYLEKKNF    | 90    | 123   |
| >ABL1-E352C EYLEKKNF    | 27    | >ABL1-E352C GYLEKKNF    | 11    | 16    |
| >ABL1-E352C EYLEKKNFI   | 86    | >ABL1-E352C GYLEKKNFI   | 27    | 59    |
| >ABL1-E352C EYLEKKNFIHF | 154   | >ABL1-E352C GYLEKKNFIHI | 32    | 122   |
| >ABL1-E352C EYLEKKNFIHF | 10    | >ABL1-E352C GYLEKKNFIHI | 163   | 153   |
| >ABL1-E352C EYLEKKNFIHF | 172   | >ABL1-E352C GYLEKKNFIHI | 6639  | 6467  |
| >ABL1-E352C EYLEKKNFIHF | 13    | >ABL1-E352C GYLEKKNFIHI | 28    | 15    |
| >ABL1-E352C MEYLEKKNF   | 21    | >ABL1-E352C MGYLEKKNF   | 16634 | 16613 |
| >ABL1-E352C MEYLEKKNFI  | 4     | >ABL1-E352C MGYLEKKNFI  | 66    | 62    |
| >ABL1-E352C MEYLEKKNF   | 77    | >ABL1-E352C MGYLEKKNF   | 450   | 373   |
| >ABL1-E352C MEYLEKKNF   | 11341 | >ABL1-E352C MGYLEKKNF   | 217   | 11124 |
| >ABL1-E352C MEYLEKKNF   | 31    | >ABL1-E352C MGYLEKKNF   | 18867 | 18836 |
| >ABL1-E352C MEYLEKKNFI  | 277   | >ABL1-E352C MGYLEKKNFI  | 34738 | 34461 |
| >ABL1-E352C MEYLEKKNF   | 183   | >ABL1-E352C MGYLEKKNF   | 20241 | 20058 |
| >ABL1-E352C MEYLEKKNFI  | 483   | >ABL1-E352C MGYLEKKNFI  | 23615 | 23132 |
| >ABL1-E352C MEYLEKKNF   | 120   | >ABL1-E352C MGYLEKKNF   | 32921 | 32801 |
| >ABL1-E352C MEYLEKKNFI  | 28    | >ABL1-E352C MGYLEKKNFI  | 27723 | 27695 |
| >ABL1-E352C YMATQISSAM  | 777   | >ABL1-E352C YMATQISSAM  | 155   | 622   |
| >ABL1-E352C YMATQISSAM  | 916   | >ABL1-E352C YMATQISSAM  | 150   | 766   |
| >ABL1-E352C YMATQISSAM  | 1835  | >ABL1-E352C YMATQISSAM  | 323   | 1512  |
| >ABL1-E352C YMATQISSAM  | 2751  | >ABL1-E352C YMATQISSAM  | 473   | 2278  |
| >ABL1-E352C AMEYLEKKNF  | 277   | >ABL1-E352C AMGYLEKKN   | 173   | 104   |
| >ABL1-E352C AMEYLEKKNF  | 1433  | >ABL1-E352C AMGYLEKKN   | 190   | 1243  |
| >ABL1-E352C AMEYLEKKNF  | 981   | >ABL1-E352C AMGYLEKKN   | 234   | 747   |
| >ABL1-E352C AMEYLEKKNF  | 3451  | >ABL1-E352C AMGYLEKKN   | 219   | 3232  |
| >ABL1-E352C AMEYLEKK    | 414   | >ABL1-E352C AMGYLEKK    | 144   | 270   |
| >ABL1-E352C AMEYLEKKNF  | 194   | >ABL1-E352C AMGYLEKKN   | 51    | 143   |
| >ABL1-E352C SAMEYLEK    | 691   | >ABL1-E352C SAMGYLEK    | 479   | 212   |
| >ABL1-E352C SAMEYLEK    | 9     | >ABL1-E352C SAMGYLEK    | 9     | 0     |

|                        |     |                        |      |     |
|------------------------|-----|------------------------|------|-----|
| >ABL1-E352CSAMEYLEKK   | 14  | >ABL1-E352CSAMGYLEKK   | 13   | 1   |
| >ABL1-E352CSAMEYLEK    | 327 | >ABL1-E352CSAMGYLEK    | 231  | 96  |
| >ABL1-E352CSAMEYLEK    | 93  | >ABL1-E352CSAMGYLEK    | 106  | 13  |
| >ABL1-E352CSAMEYLEKK   | 60  | >ABL1-E352CSAMGYLEKK   | 75   | 15  |
| >ABL1-E352CSAMEYLEKKM  | 99  | >ABL1-E352CSAMGYLEKKM  | 299  | 200 |
| >ABL1-E352CSAMEYLEKKM  | 23  | >ABL1-E352CSAMGYLEKKM  | 37   | 14  |
| >ABL1-E352CSAMEYLEK    | 147 | >ABL1-E352CSAMGYLEK    | 177  | 30  |
| >ABL1-E352CSAMEYLEKK   | 270 | >ABL1-E352CSAMGYLEKK   | 336  | 66  |
| >ABL1-E352CSSAMEYLEK   | 602 | >ABL1-E352CSSAMGYLEK   | 188  | 414 |
| >ABL1-E352CSSAMEYLEKK  | 612 | >ABL1-E352CSSAMGYLEKK  | 177  | 435 |
| >ABL1-E352CSSAMEYLEK   | 9   | >ABL1-E352CSSAMGYLEK   | 9    | 0   |
| >ABL1-E352CSSAMEYLEKK  | 16  | >ABL1-E352CSSAMGYLEKK  | 12   | 4   |
| >ABL1-E352CSSAMEYLEK   | 224 | >ABL1-E352CSSAMGYLEK   | 64   | 160 |
| >ABL1-E352CSSAMEYLEK   | 222 | >ABL1-E352CSSAMGYLEK   | 205  | 17  |
| >ABL1-E352CSSAMEYLEKK  | 35  | >ABL1-E352CSSAMGYLEKK  | 19   | 16  |
| >ABL1-E352CSSAMEYLEK   | 81  | >ABL1-E352CSSAMGYLEK   | 82   | 1   |
| >ABL1-E352CSSAMEYLEKK  | 121 | >ABL1-E352CSSAMGYLEKK  | 128  | 7   |
| >ABL1-E352CISSAMEYL    | 686 | >ABL1-E352CISSAMGYL    | 147  | 539 |
| >ABL1-E352CISSAMEYL    | 102 | >ABL1-E352CISSAMGYL    | 313  | 211 |
| >ABL1-E352CISSAMEYLEK  | 61  | >ABL1-E352CISSAMGYLEK  | 27   | 34  |
| >ABL1-E352CISSAMEYLEKI | 685 | >ABL1-E352CISSAMGYLEKI | 430  | 255 |
| >ABL1-E352CISSAMEYLEK  | 7   | >ABL1-E352CISSAMGYLEK  | 8    | 1   |
| >ABL1-E352CISSAMEYLEKI | 24  | >ABL1-E352CISSAMGYLEKI | 21   | 3   |
| >ABL1-E352CISSAMEYLEK  | 354 | >ABL1-E352CISSAMGYLEK  | 133  | 221 |
| >ABL1-E352CISSAMEYLEK  | 50  | >ABL1-E352CISSAMGYLEK  | 81   | 31  |
| >ABL1-E352CISSAMEYLEKI | 80  | >ABL1-E352CISSAMGYLEKI | 124  | 44  |
| >ABL1-E352CISSAMEYL    | 24  | >ABL1-E352CISSAMGYL    | 13   | 11  |
| >ABL1-E352CISSAMEYL    | 93  | >ABL1-E352CISSAMGYL    | 387  | 294 |
| >ABL1-E352CISSAMEYLEK  | 366 | >ABL1-E352CISSAMGYLEK  | 321  | 45  |
| >ABL1-E352CQISSAMEYL   | 6   | >ABL1-E352CQISSAMGYL   | 26   | 20  |
| >ABL1-E352CQISSAMEYL   | 398 | >ABL1-E352CQISSAMGYL   | 155  | 243 |
| >ABL1-E352CQISSAMEYL   | 126 | >ABL1-E352CQISSAMGYL   | 1051 | 925 |
| >ABL1-E352CQISSAMEYLE  | 380 | >ABL1-E352CQISSAMGYLE  | 148  | 232 |
| >ABL1-E352CQISSAMEYLE  | 33  | >ABL1-E352CQISSAMGYLE  | 32   | 1   |
| >ABL1-E352CQISSAMEY    | 287 | >ABL1-E352CQISSAMGY    | 251  | 36  |
| >ABL1-E352CQISSAMEYL   | 166 | >ABL1-E352CQISSAMGYL   | 168  | 2   |
| >ABL1-E352CQISSAMEY    | 65  | >ABL1-E352CQISSAMGY    | 87   | 22  |
| >ABL1-E352CQISSAMEYLE  | 834 | >ABL1-E352CQISSAMGYLE  | 318  | 516 |
| >ABL1-E352CQISSAMEY    | 148 | >ABL1-E352CQISSAMGY    | 99   | 49  |
| >ABL1-E352CQISSAMEYLE  | 148 | >ABL1-E352CQISSAMGYLE  | 176  | 28  |
| >ABL1-E352CQISSAMEYL   | 28  | >ABL1-E352CQISSAMGYL   | 58   | 30  |
| >ABL1-E352CQISSAMEYL   | 238 | >ABL1-E352CQISSAMGYL   | 282  | 44  |
| >ABL1-E352CQISSAMEY    | 128 | >ABL1-E352CQISSAMGY    | 195  | 67  |

|                       |      |                       |      |      |
|-----------------------|------|-----------------------|------|------|
| >ABL1-E352CQISSAMEY   | 293  | >ABL1-E352CQISSAMGY   | 330  | 37   |
| >ABL1-E352CQISSAMEY   | 483  | >ABL1-E352CQISSAMGY   | 1384 | 901  |
| >ABL1-E352CQISSAMEY   | 212  | >ABL1-E352CQISSAMGY   | 6013 | 5801 |
| >ABL1-E352CTQISSAMEYL | 442  | >ABL1-E352CTQISSAMGYL | 449  | 7    |
| >ABL1-E352CTQISSAMEYL | 31   | >ABL1-E352CTQISSAMGYL | 72   | 41   |
| >ABL1-E352CTQISSAMEYL | 135  | >ABL1-E352CTQISSAMGYL | 81   | 54   |
| >ABL1-E352CTQISSAMEYL | 189  | >ABL1-E352CTQISSAMGYL | 342  | 153  |
| >ABL1-E352CTQISSAMEY  | 186  | >ABL1-E352CTQISSAMGY  | 272  | 86   |
| >ABL1-E352CTQISSAMEY  | 792  | >ABL1-E352CTQISSAMGY  | 498  | 294  |
| >ABL1-E352CTQISSAMEYL | 410  | >ABL1-E352CTQISSAMGYL | 363  | 47   |
| >ABL1-E352CTQISSAMEY  | 4308 | >ABL1-E352CTQISSAMGY  | 290  | 4018 |
| >ABL1-E352CTQISSAMEY  | 106  | >ABL1-E352CTQISSAMGY  | 189  | 83   |
| >ABL1-E352CTQISSAMEY  | 302  | >ABL1-E352CTQISSAMGY  | 311  | 9    |
| >ABL1-E352CTQISSAMEY  | 156  | >ABL1-E352CTQISSAMGY  | 367  | 211  |
| >ABL1-E352CTQISSAMEY  | 48   | >ABL1-E352CTQISSAMGY  | 47   | 1    |
| >ABL1-E352CTQISSAMEYL | 347  | >ABL1-E352CTQISSAMGYL | 443  | 96   |
| >ABL1-E352CTQISSAMEY  | 164  | >ABL1-E352CTQISSAMGY  | 94   | 70   |
| >ABL1-E352CTQISSAMEY  | 3    | >ABL1-E352CTQISSAMGY  | 5    | 2    |
| >ABL1-E352CTQISSAMEYL | 42   | >ABL1-E352CTQISSAMGYL | 130  | 88   |
| >ABL1-E352CTQISSAMEYL | 61   | >ABL1-E352CTQISSAMGYL | 79   | 18   |
| >ABL1-E352CATQISSAMEY | 30   | >ABL1-E352CATQISSAMGY | 40   | 10   |
| >ABL1-E352CATQISSAMEY | 392  | >ABL1-E352CATQISSAMGY | 1448 | 1056 |
| >ABL1-E352CATQISSAMEY | 630  | >ABL1-E352CATQISSAMGY | 448  | 182  |
| >ABL1-E352CATQISSAMEY | 59   | >ABL1-E352CATQISSAMGY | 108  | 49   |
| >ABL1-E352CATQISSAMEY | 136  | >ABL1-E352CATQISSAMGY | 110  | 26   |
| >ABL1-E352CATQISSAMEY | 68   | >ABL1-E352CATQISSAMGY | 125  | 57   |
| >ABL1-E352CATQISSAMEY | 263  | >ABL1-E352CATQISSAMGY | 512  | 249  |
| >ABL1-E352CATQISSAMEY | 146  | >ABL1-E352CATQISSAMGY | 155  | 9    |
| >ABL1-E352CATQISSAMEY | 257  | >ABL1-E352CATQISSAMGY | 668  | 411  |
| >ABL1-E352CATQISSAMEY | 3    | >ABL1-E352CATQISSAMGY | 3    | 0    |
| >ABL1-E352CATQISSAMEY | 9    | >ABL1-E352CATQISSAMGY | 7    | 2    |
| >ABL1-E352CATQISSAMEY | 32   | >ABL1-E352CATQISSAMGY | 46   | 14   |
| >ABL1-E352CATQISSAMEY | 18   | >ABL1-E352CATQISSAMGY | 20   | 2    |
| >ABL1-E352CATQISSAMEY | 200  | >ABL1-E352CATQISSAMGY | 156  | 44   |
| >ABL1-E352CATQISSAMEY | 285  | >ABL1-E352CATQISSAMGY | 178  | 107  |
| >ABL1-E352CMATQISSAM  | 56   | >ABL1-E352CMATQISSAM  | 92   | 36   |
| >ABL1-E352CMATQISSAM  | 140  | >ABL1-E352CMATQISSAM  | 155  | 15   |
| >ABL1-E352CMATQISSAM  | 43   | >ABL1-E352CMATQISSAM  | 61   | 18   |
| >ABL1-E352CMATQISSAM  | 122  | >ABL1-E352CMATQISSAM  | 230  | 108  |
| >ABL1-E352CMATQISSAM  | 86   | >ABL1-E352CMATQISSAM  | 208  | 122  |
| >ABL1-E352CMATQISSAM  | 9    | >ABL1-E352CMATQISSAM  | 8    | 1    |
| >ABL1-E352CMATQISSAM  | 8    | >ABL1-E352CMATQISSAM  | 10   | 2    |
| >ABL1-E352CMATQISSAM  | 191  | >ABL1-E352CMATQISSAM  | 487  | 296  |



|                         |       |                         |       |       |
|-------------------------|-------|-------------------------|-------|-------|
| >ABL1-E352C MATQISSAM   | 73    | >ABL1-E352C MATQISSAM   | 133   | 60    |
| >ABL1-E352C MATQISSAM   | 37    | >ABL1-E352C MATQISSAM   | 68    | 31    |
| >ABL1-E352C MATQISSAM   | 94    | >ABL1-E352C MATQISSAM   | 2671  | 2577  |
| >ABL1-E352C MATQISSAM   | 115   | >ABL1-E352C MATQISSAM   | 95    | 20    |
| >ABL1-E355A EKKNFIHR    | 5517  | >ABL1-E355A AKKNFIHR    | 398   | 5119  |
| >ABL1-E355A EKKNFIHR    | 464   | >ABL1-E355A AKKNFIHR    | 8327  | 7863  |
| >ABL1-E355A EKKNFIHR    | 177   | >ABL1-E355A AKKNFIHR    | 5622  | 5445  |
| >ABL1-E355A EKKNFIHR    | 1575  | >ABL1-E355A AKKNFIHR    | 182   | 1393  |
| >ABL1-E355A EKKNFIHRDL  | 534   | >ABL1-E355A AKKNFIHRDL  | 63    | 471   |
| >ABL1-E355A EKKNFIHR    | 154   | >ABL1-E355A AKKNFIHR    | 818   | 664   |
| >ABL1-E355A LEKKNFIHR   | 10906 | >ABL1-E355A LAKKNFIHR   | 214   | 10692 |
| >ABL1-E355A LEKKNFIHR   | 387   | >ABL1-E355A LAKKNFIHR   | 12    | 375   |
| >ABL1-E355A LEKKNFIHR   | 5149  | >ABL1-E355A LAKKNFIHR   | 176   | 4973  |
| >ABL1-E355A LEKKNFIHR   | 5129  | >ABL1-E355A LAKKNFIHR   | 156   | 4973  |
| >ABL1-E355A LEKKNFIHRDI | 1686  | >ABL1-E355A LAKKNFIHRD  | 205   | 1481  |
| >ABL1-E355A LEKKNFIHRDI | 238   | >ABL1-E355A LAKKNFIHRD  | 21326 | 21088 |
| >ABL1-E355A LEKKNFIHRDI | 181   | >ABL1-E355A LAKKNFIHRD  | 36236 | 36055 |
| >ABL1-E355A LEKKNFIHRDI | 290   | >ABL1-E355A LAKKNFIHRD  | 29261 | 28971 |
| >ABL1-E355A LEKKNFIHR   | 115   | >ABL1-E355A LAKKNFIHR   | 134   | 19    |
| >ABL1-E355A TQISSAMEYL  | 11605 | >ABL1-E355A TQISSAMEYL  | 74    | 11531 |
| >ABL1-E355A YLEKKNFI    | 313   | >ABL1-E355A YLAKKNFI    | 21    | 292   |
| >ABL1-E355A YLEKKNFI    | 23    | >ABL1-E355A YLAKKNFI    | 4     | 19    |
| >ABL1-E355A YLEKKNFIHRI | 5389  | >ABL1-E355A YLAKKNFIHRI | 441   | 4948  |
| >ABL1-E355A YLEKKNFI    | 306   | >ABL1-E355A YLAKKNFI    | 8     | 298   |
| >ABL1-E355A YLEKKNFI    | 590   | >ABL1-E355A YLAKKNFI    | 34    | 556   |
| >ABL1-E355A YLEKKNFI    | 57    | >ABL1-E355A YLAKKNFI    | 8     | 49    |
| >ABL1-E355A YLEKKNFI    | 24    | >ABL1-E355A YLAKKNFI    | 9     | 15    |
| >ABL1-E355A YLEKKNFI    | 146   | >ABL1-E355A YLAKKNFI    | 9     | 137   |
| >ABL1-E355A YLEKKNFI    | 1725  | >ABL1-E355A YLAKKNFI    | 17    | 1708  |
| >ABL1-E355A YLEKKNFI    | 19    | >ABL1-E355A YLAKKNFI    | 5     | 14    |
| >ABL1-E355A YLEKKNFIHRI | 1389  | >ABL1-E355A YLAKKNFIHRI | 352   | 1037  |
| >ABL1-E355A YLEKKNFIHR  | 517   | >ABL1-E355A YLAKKNFIHR  | 169   | 348   |
| >ABL1-E355A YLEKKNFIHR  | 3473  | >ABL1-E355A YLAKKNFIHR  | 141   | 3332  |
| >ABL1-E355A YLEKKNFI    | 8692  | >ABL1-E355A YLAKKNFI    | 423   | 8269  |
| >ABL1-E355A YLEKKNFI    | 789   | >ABL1-E355A YLAKKNFI    | 297   | 492   |
| >ABL1-E355A YLEKKNFIHR  | 398   | >ABL1-E355A YLAKKNFIHR  | 266   | 132   |
| >ABL1-E355A YLEKKNFIHR  | 68    | >ABL1-E355A YLAKKNFIHR  | 52    | 16    |
| >ABL1-E355A EYLEKKNFI   | 554   | >ABL1-E355A EYLAKKNFI   | 42    | 512   |
| >ABL1-E355A EYLEKKNFI   | 117   | >ABL1-E355A EYLAKKNFI   | 227   | 110   |
| >ABL1-E355A EYLEKKNF    | 213   | >ABL1-E355A EYLAKKNF    | 160   | 53    |
| >ABL1-E355A EYLEKKNF    | 27    | >ABL1-E355A EYLAKKNF    | 26    | 1     |
| >ABL1-E355A EYLEKKNFI   | 86    | >ABL1-E355A EYLAKKNFI   | 68    | 18    |
| >ABL1-E355A EYLEKKNFIHF | 154   | >ABL1-E355A EYLAKKNFIHF | 76    | 78    |

|                         |      |                         |     |      |
|-------------------------|------|-------------------------|-----|------|
| >ABL1-E355A EYLEKKNFIHF | 10   | >ABL1-E355A EYLAKKNFIHF | 13  | 3    |
| >ABL1-E355A EYLEKKNFIHF | 172  | >ABL1-E355A EYLAKKNFIHF | 173 | 1    |
| >ABL1-E355A EYLEKKNFIHF | 13   | >ABL1-E355A EYLAKKNFIHF | 11  | 2    |
| >ABL1-E355A MEYLEKKN    | 714  | >ABL1-E355A MEYLAKKN    | 46  | 668  |
| >ABL1-E355A MEYLEKKNF   | 21   | >ABL1-E355A MEYLAKKNF   | 10  | 11   |
| >ABL1-E355A MEYLEKKNFI  | 4    | >ABL1-E355A MEYLAKKNFI  | 3   | 1    |
| >ABL1-E355A MEYLEKKNF   | 77   | >ABL1-E355A MEYLAKKNF   | 48  | 29   |
| >ABL1-E355A MEYLEKKNF   | 31   | >ABL1-E355A MEYLAKKNF   | 8   | 23   |
| >ABL1-E355A MEYLEKKNFI  | 548  | >ABL1-E355A MEYLAKKNFI  | 151 | 397  |
| >ABL1-E355A MEYLEKKNF   | 853  | >ABL1-E355A MEYLAKKNF   | 388 | 465  |
| >ABL1-E355A MEYLEKKNFI  | 277  | >ABL1-E355A MEYLAKKNFI  | 250 | 27   |
| >ABL1-E355A MEYLEKKNF   | 183  | >ABL1-E355A MEYLAKKNF   | 153 | 30   |
| >ABL1-E355A MEYLEKKNFI  | 483  | >ABL1-E355A MEYLAKKNFI  | 295 | 188  |
| >ABL1-E355A MEYLEKKNF   | 120  | >ABL1-E355A MEYLAKKNF   | 54  | 66   |
| >ABL1-E355A MEYLEKKNFI  | 688  | >ABL1-E355A MEYLAKKNFI  | 322 | 366  |
| >ABL1-E355A MEYLEKKNFI  | 507  | >ABL1-E355A MEYLAKKNFI  | 223 | 284  |
| >ABL1-E355A MEYLEKKNF   | 532  | >ABL1-E355A MEYLAKKNF   | 284 | 248  |
| >ABL1-E355A MEYLEKKNFI  | 28   | >ABL1-E355A MEYLAKKNFI  | 27  | 1    |
| >ABL1-E355A AMEYLEKKNF  | 277  | >ABL1-E355A AMEYLAKKNI  | 230 | 47   |
| >ABL1-E355A AMEYLEKK    | 414  | >ABL1-E355A AMEYLAKK    | 214 | 200  |
| >ABL1-E355A AMEYLEKKNF  | 194  | >ABL1-E355A AMEYLAKKNI  | 129 | 65   |
| >ABL1-E355A SAMEYLEKKN  | 1042 | >ABL1-E355A SAMEYLAKKN  | 478 | 564  |
| >ABL1-E355A SAMEYLEK    | 691  | >ABL1-E355A SAMEYLAK    | 300 | 391  |
| >ABL1-E355A SAMEYLEKK   | 3031 | >ABL1-E355A SAMEYLAKK   | 280 | 2751 |
| >ABL1-E355A SAMEYLEK    | 9    | >ABL1-E355A SAMEYLAK    | 10  | 1    |
| >ABL1-E355A SAMEYLEKK   | 14   | >ABL1-E355A SAMEYLAKK   | 10  | 4    |
| >ABL1-E355A SAMEYLEK    | 327  | >ABL1-E355A SAMEYLAK    | 110 | 217  |
| >ABL1-E355A SAMEYLEKK   | 4554 | >ABL1-E355A SAMEYLAKK   | 267 | 4287 |
| >ABL1-E355A SAMEYLEKK   | 1564 | >ABL1-E355A SAMEYLAKK   | 246 | 1318 |
| >ABL1-E355A SAMEYLEK    | 93   | >ABL1-E355A SAMEYLAK    | 128 | 35   |
| >ABL1-E355A SAMEYLEKK   | 60   | >ABL1-E355A SAMEYLAKK   | 34  | 26   |
| >ABL1-E355A SAMEYLEKKN  | 99   | >ABL1-E355A SAMEYLAKKNI | 75  | 24   |
| >ABL1-E355A SAMEYLEKKN  | 23   | >ABL1-E355A SAMEYLAKKNI | 12  | 11   |
| >ABL1-E355A SAMEYLEK    | 147  | >ABL1-E355A SAMEYLAK    | 150 | 3    |
| >ABL1-E355A SAMEYLEKK   | 270  | >ABL1-E355A SAMEYLAKK   | 369 | 99   |
| >ABL1-E355A SSAMEYLEK   | 602  | >ABL1-E355A SSAMEYLAK   | 391 | 211  |
| >ABL1-E355A SSAMEYLEKK  | 612  | >ABL1-E355A SSAMEYLAKK  | 214 | 398  |
| >ABL1-E355A SSAMEYLEK   | 9    | >ABL1-E355A SSAMEYLAK   | 10  | 1    |
| >ABL1-E355A SSAMEYLEKK  | 16   | >ABL1-E355A SSAMEYLAKK  | 17  | 1    |
| >ABL1-E355A SSAMEYLEK   | 224  | >ABL1-E355A SSAMEYLAK   | 122 | 102  |
| >ABL1-E355A SSAMEYLEKK  | 2146 | >ABL1-E355A SSAMEYLAKK  | 372 | 1774 |
| >ABL1-E355A SSAMEYLEK   | 222  | >ABL1-E355A SSAMEYLAK   | 343 | 121  |
| >ABL1-E355A SSAMEYLEKK  | 35   | >ABL1-E355A SSAMEYLAKK  | 20  | 15   |

|                         |      |                         |       |       |
|-------------------------|------|-------------------------|-------|-------|
| >ABL1-E355A SSAMEYLEK   | 81   | >ABL1-E355A SSAMEYLAK   | 79    | 2     |
| >ABL1-E355A SSAMEYLEKK  | 121  | >ABL1-E355A SSAMEYLAKK  | 158   | 37    |
| >ABL1-E355A ISSAMEYLEK  | 61   | >ABL1-E355A ISSAMEYLAK  | 54    | 7     |
| >ABL1-E355A ISSAMEYLEKI | 685  | >ABL1-E355A ISSAMEYLAKI | 173   | 512   |
| >ABL1-E355A ISSAMEYLEK  | 7    | >ABL1-E355A ISSAMEYLAK  | 9     | 2     |
| >ABL1-E355A ISSAMEYLEKI | 24   | >ABL1-E355A ISSAMEYLAKI | 17    | 7     |
| >ABL1-E355A ISSAMEYLEK  | 354  | >ABL1-E355A ISSAMEYLAK  | 230   | 124   |
| >ABL1-E355A ISSAMEYLEK  | 50   | >ABL1-E355A ISSAMEYLAK  | 60    | 10    |
| >ABL1-E355A ISSAMEYLEKI | 80   | >ABL1-E355A ISSAMEYLAKI | 62    | 18    |
| >ABL1-E355A ISSAMEYLEK  | 366  | >ABL1-E355A ISSAMEYLAK  | 433   | 67    |
| >ABL1-E355A QISSAMEYLE  | 8738 | >ABL1-E355A QISSAMEYLA  | 125   | 8613  |
| >ABL1-E355A QISSAMEYLE  | 380  | >ABL1-E355A QISSAMEYLA  | 280   | 100   |
| >ABL1-E355A QISSAMEYLE  | 33   | >ABL1-E355A QISSAMEYLA  | 44    | 11    |
| >ABL1-E355A QISSAMEYLE  | 148  | >ABL1-E355A QISSAMEYLA  | 235   | 87    |
| >ABL1-E355C EKKNFIHR    | 464  | >ABL1-E355C GKKNFIHR    | 8356  | 7892  |
| >ABL1-E355C EKKNFIHR    | 177  | >ABL1-E355C GKKNFIHR    | 6112  | 5935  |
| >ABL1-E355C EKKNFIHRDL  | 534  | >ABL1-E355C GKKNFIHRDL  | 339   | 195   |
| >ABL1-E355C EKKNFIHR    | 154  | >ABL1-E355C GKKNFIHR    | 930   | 776   |
| >ABL1-E355C LEKKNFIHR   | 387  | >ABL1-E355C LGKKNFIHR   | 51    | 336   |
| >ABL1-E355C LEKKNFIHRDI | 238  | >ABL1-E355C LGKKNFIHRD  | 23074 | 22836 |
| >ABL1-E355C LEKKNFIHRDI | 181  | >ABL1-E355C LGKKNFIHRD  | 38697 | 38516 |
| >ABL1-E355C LEKKNFIHRDI | 290  | >ABL1-E355C LGKKNFIHRD  | 32400 | 32110 |
| >ABL1-E355C LEKKNFIHR   | 115  | >ABL1-E355C LGKKNFIHR   | 84    | 31    |
| >ABL1-E355C YLEKKNFI    | 313  | >ABL1-E355C YLGKKNFI    | 83    | 230   |
| >ABL1-E355C YLEKKNFI    | 23   | >ABL1-E355C YLGKKNFI    | 16    | 7     |
| >ABL1-E355C YLEKKNFI    | 306  | >ABL1-E355C YLGKKNFI    | 68    | 238   |
| >ABL1-E355C YLEKKNFI    | 590  | >ABL1-E355C YLGKKNFI    | 376   | 214   |
| >ABL1-E355C YLEKKNFI    | 57   | >ABL1-E355C YLGKKNFI    | 8     | 49    |
| >ABL1-E355C YLEKKNFI    | 24   | >ABL1-E355C YLGKKNFI    | 8     | 16    |
| >ABL1-E355C YLEKKNFI    | 146  | >ABL1-E355C YLGKKNFI    | 14    | 132   |
| >ABL1-E355C YLEKKNFI    | 1725 | >ABL1-E355C YLGKKNFI    | 35    | 1690  |
| >ABL1-E355C YLEKKNFI    | 19   | >ABL1-E355C YLGKKNFI    | 9     | 10    |
| >ABL1-E355C YLEKKNFIHR  | 517  | >ABL1-E355C YLGKKNFIHR  | 211   | 306   |
| >ABL1-E355C YLEKKNFIHR  | 398  | >ABL1-E355C YLGKKNFIHR  | 188   | 210   |
| >ABL1-E355C YLEKKNFIHR  | 68   | >ABL1-E355C YLGKKNFIHR  | 43    | 25    |
| >ABL1-E355C EYLEKKNFI   | 554  | >ABL1-E355C EYLGKKNFI   | 235   | 319   |
| >ABL1-E355C EYLEKKNFI   | 117  | >ABL1-E355C EYLGKKNFI   | 327   | 210   |
| >ABL1-E355C EYLEKKNF    | 213  | >ABL1-E355C EYLGKKNF    | 205   | 8     |
| >ABL1-E355C EYLEKKNF    | 27   | >ABL1-E355C EYLGKKNF    | 23    | 4     |
| >ABL1-E355C EYLEKKNFI   | 86   | >ABL1-E355C EYLGKKNFI   | 56    | 30    |
| >ABL1-E355C EYLEKKNFIHF | 154  | >ABL1-E355C EYLGKKNFIHI | 163   | 9     |
| >ABL1-E355C EYLEKKNFIHF | 10   | >ABL1-E355C EYLGKKNFIHI | 12    | 2     |
| >ABL1-E355C EYLEKKNFIHF | 172  | >ABL1-E355C EYLGKKNFIHI | 244   | 72    |

|                         |      |                         |     |      |
|-------------------------|------|-------------------------|-----|------|
| >ABL1-E355C EYLEKKNFIHF | 13   | >ABL1-E355C EYLGKKNFIHI | 12  | 1    |
| >ABL1-E355C EYLEKKNFI   | 798  | >ABL1-E355C EYLGKKNFI   | 316 | 482  |
| >ABL1-E355C MEYLEKKN    | 714  | >ABL1-E355C MEYLGKKN    | 35  | 679  |
| >ABL1-E355C MEYLEKKNF   | 21   | >ABL1-E355C MEYLGKKNF   | 20  | 1    |
| >ABL1-E355C MEYLEKKNFI  | 4    | >ABL1-E355C MEYLGKKNFI  | 4   | 0    |
| >ABL1-E355C MEYLEKKNF   | 77   | >ABL1-E355C MEYLGKKNF   | 60  | 17   |
| >ABL1-E355C MEYLEKKNF   | 31   | >ABL1-E355C MEYLGKKNF   | 13  | 18   |
| >ABL1-E355C MEYLEKKNFI  | 548  | >ABL1-E355C MEYLGKKNFI  | 235 | 313  |
| >ABL1-E355C MEYLEKKNF   | 853  | >ABL1-E355C MEYLGKKNF   | 365 | 488  |
| >ABL1-E355C MEYLEKKNFI  | 277  | >ABL1-E355C MEYLGKKNFI  | 286 | 9    |
| >ABL1-E355C MEYLEKKNF   | 183  | >ABL1-E355C MEYLGKKNF   | 280 | 97   |
| >ABL1-E355C MEYLEKKNFI  | 483  | >ABL1-E355C MEYLGKKNFI  | 718 | 235  |
| >ABL1-E355C MEYLEKKNF   | 120  | >ABL1-E355C MEYLGKKNF   | 131 | 11   |
| >ABL1-E355C MEYLEKKNFI  | 507  | >ABL1-E355C MEYLGKKNFI  | 369 | 138  |
| >ABL1-E355C MEYLEKKNF   | 532  | >ABL1-E355C MEYLGKKNF   | 211 | 321  |
| >ABL1-E355C MEYLEKKNFI  | 28   | >ABL1-E355C MEYLGKKNFI  | 81  | 53   |
| >ABL1-E355C AMEYLEKKNF  | 277  | >ABL1-E355C AMEYLGKKN   | 276 | 1    |
| >ABL1-E355C AMEYLEKK    | 414  | >ABL1-E355C AMEYLGKK    | 430 | 16   |
| >ABL1-E355C AMEYLEKKNF  | 194  | >ABL1-E355C AMEYLGKKN   | 116 | 78   |
| >ABL1-E355C SAMEYLEK    | 691  | >ABL1-E355C SAMEYLGK    | 383 | 308  |
| >ABL1-E355C SAMEYLEKK   | 3031 | >ABL1-E355C SAMEYLGKK   | 378 | 2653 |
| >ABL1-E355C SAMEYLEK    | 9    | >ABL1-E355C SAMEYLGK    | 12  | 3    |
| >ABL1-E355C SAMEYLEKK   | 14   | >ABL1-E355C SAMEYLGKK   | 16  | 2    |
| >ABL1-E355C SAMEYLEK    | 327  | >ABL1-E355C SAMEYLGK    | 366 | 39   |
| >ABL1-E355C SAMEYLEK    | 93   | >ABL1-E355C SAMEYLGK    | 143 | 50   |
| >ABL1-E355C SAMEYLEKK   | 60   | >ABL1-E355C SAMEYLGKK   | 118 | 58   |
| >ABL1-E355C SAMEYLEKKN  | 99   | >ABL1-E355C SAMEYLGKKF  | 167 | 68   |
| >ABL1-E355C SAMEYLEKKN  | 23   | >ABL1-E355C SAMEYLGKKF  | 15  | 8    |
| >ABL1-E355C SAMEYLEK    | 147  | >ABL1-E355C SAMEYLGK    | 197 | 50   |
| >ABL1-E355C SAMEYLEKK   | 270  | >ABL1-E355C SAMEYLGKK   | 335 | 65   |
| >ABL1-E355C SSAMEYLEKK  | 612  | >ABL1-E355C SSAMEYLGKK  | 331 | 281  |
| >ABL1-E355C SSAMEYLEK   | 9    | >ABL1-E355C SSAMEYLGK   | 12  | 3    |
| >ABL1-E355C SSAMEYLEKK  | 16   | >ABL1-E355C SSAMEYLGKK  | 28  | 12   |
| >ABL1-E355C SSAMEYLEK   | 224  | >ABL1-E355C SSAMEYLGK   | 411 | 187  |
| >ABL1-E355C SSAMEYLEK   | 222  | >ABL1-E355C SSAMEYLGK   | 320 | 98   |
| >ABL1-E355C SSAMEYLEKK  | 35   | >ABL1-E355C SSAMEYLGKK  | 190 | 155  |
| >ABL1-E355C SSAMEYLEK   | 81   | >ABL1-E355C SSAMEYLGK   | 91  | 10   |
| >ABL1-E355C SSAMEYLEKK  | 121  | >ABL1-E355C SSAMEYLGKK  | 138 | 17   |
| >ABL1-E355C ISSAMEYLEK  | 61   | >ABL1-E355C ISSAMEYLGK  | 48  | 13   |
| >ABL1-E355C ISSAMEYLEKI | 685  | >ABL1-E355C ISSAMEYLGK  | 206 | 479  |
| >ABL1-E355C ISSAMEYLEK  | 7    | >ABL1-E355C ISSAMEYLGK  | 10  | 3    |
| >ABL1-E355C ISSAMEYLEKI | 24   | >ABL1-E355C ISSAMEYLGK  | 29  | 5    |
| >ABL1-E355C ISSAMEYLEK  | 354  | >ABL1-E355C ISSAMEYLGK  | 555 | 201  |

|                         |      |                        |       |       |
|-------------------------|------|------------------------|-------|-------|
| >ABL1-E355C ISSAMEYLEK  | 50   | >ABL1-E355C ISSAMEYLGK | 68    | 18    |
| >ABL1-E355C ISSAMEYLEKI | 80   | >ABL1-E355C ISSAMEYLGK | 137   | 57    |
| >ABL1-E355C ISSAMEYLEK  | 366  | >ABL1-E355C ISSAMEYLGK | 501   | 135   |
| >ABL1-E355C QISSAMEYLE  | 380  | >ABL1-E355C QISSAMEYLG | 337   | 43    |
| >ABL1-E355C QISSAMEYLE  | 33   | >ABL1-E355C QISSAMEYLG | 56    | 23    |
| >ABL1-E355C QISSAMEYLE  | 148  | >ABL1-E355C QISSAMEYLG | 219   | 71    |
| >ABL1-E373C GENHLVKV    | 375  | >ABL1-E373C GGNHLVKV   | 24190 | 23815 |
| >ABL1-E373C GENHLVKV    | 247  | >ABL1-E373C GGNHLVKV   | 33174 | 32927 |
| >ABL1-E373C GENHLVKVA   | 86   | >ABL1-E373C GGNHLVKVA  | 30184 | 30098 |
| >ABL1-E373C GENHLVKVAI  | 476  | >ABL1-E373C GGNHLVKVA  | 34283 | 33807 |
| >ABL1-E373C GENHLVKVAI  | 147  | >ABL1-E373C GGNHLVKVA  | 17884 | 17737 |
| >ABL1-E373C GENHLVKVAI  | 79   | >ABL1-E373C GGNHLVKVA  | 26923 | 26844 |
| >ABL1-E373C GENHLVKV    | 299  | >ABL1-E373C GGNHLVKV   | 39016 | 38717 |
| >ABL1-E373C GENHLVKVA   | 58   | >ABL1-E373C GGNHLVKVA  | 32702 | 32644 |
| >ABL1-E373C GENHLVKVAI  | 116  | >ABL1-E373C GGNHLVKVA  | 36264 | 36148 |
| >ABL1-E373C LVGENHLV    | 173  | >ABL1-E373C LVGGNHLV   | 242   | 69    |
| >ABL1-E373C LVGENHLV    | 361  | >ABL1-E373C LVGGNHLV   | 740   | 379   |
| >ABL1-E373C LVGENHLVK\  | 318  | >ABL1-E373C LVGGNHLVK\ | 283   | 35    |
| >ABL1-E373C LVGENHLV    | 140  | >ABL1-E373C LVGGNHLV   | 301   | 161   |
| >ABL1-E373C LVGENHLVK\  | 494  | >ABL1-E373C LVGGNHLVK\ | 510   | 16    |
| >ABL1-E373C LVGENHLV    | 21   | >ABL1-E373C LVGGNHLV   | 41    | 20    |
| >ABL1-E373C LVGENHLVK\  | 17   | >ABL1-E373C LVGGNHLVK\ | 42    | 25    |
| >ABL1-E373C LVGENHLV    | 93   | >ABL1-E373C LVGGNHLV   | 558   | 465   |
| >ABL1-E373C LVGENHLVK\  | 125  | >ABL1-E373C LVGGNHLVK\ | 861   | 736   |
| >ABL1-E373C LVGENHLV    | 128  | >ABL1-E373C LVGGNHLV   | 240   | 112   |
| >ABL1-E373C LVGENHLVK\  | 187  | >ABL1-E373C LVGGNHLVK\ | 481   | 294   |
| >ABL1-E373C LVGENHLV    | 120  | >ABL1-E373C LVGGNHLV   | 197   | 77    |
| >ABL1-E373C LVGENHLVK\  | 245  | >ABL1-E373C LVGGNHLVK\ | 531   | 286   |
| >ABL1-E373C LVGENHLV    | 5    | >ABL1-E373C LVGGNHLV   | 4     | 1     |
| >ABL1-E373C LVGENHLVK\  | 5    | >ABL1-E373C LVGGNHLVK\ | 5     | 0     |
| >ABL1-E373C LVGENHLVK   | 517  | >ABL1-E373C LVGGNHLVK  | 470   | 47    |
| >ABL1-E373C LVGENHLVK   | 127  | >ABL1-E373C LVGGNHLVK  | 138   | 11    |
| >ABL1-E373C LVGENHLVK   | 290  | >ABL1-E373C LVGGNHLVK  | 250   | 40    |
| >ABL1-E373C LVGENHLV    | 527  | >ABL1-E373C LVGGNHLV   | 466   | 61    |
| >ABL1-E373C LVGENHLV    | 87   | >ABL1-E373C LVGGNHLV   | 418   | 331   |
| >ABL1-E373C LVGENHLVK\  | 236  | >ABL1-E373C LVGGNHLVK\ | 1140  | 904   |
| >ABL1-E373C CLVGENHLV   | 111  | >ABL1-E373C CLVGGNHLV  | 79    | 32    |
| >ABL1-E373C CLVGENHLVK  | 147  | >ABL1-E373C CLVGGNHLVI | 113   | 34    |
| >ABL1-E373C CLVGENHL    | 64   | >ABL1-E373C CLVGGNHL   | 100   | 36    |
| >ABL1-E373C CLVGENHLV   | 10   | >ABL1-E373C CLVGGNHLV  | 15    | 5     |
| >ABL1-E373C CLVGENHLVK  | 23   | >ABL1-E373C CLVGGNHLVI | 34    | 11    |
| >ABL1-E373C CLVGENHL    | 1112 | >ABL1-E373C CLVGGNHL   | 353   | 759   |
| >ABL1-E373C CLVGENHLV   | 58   | >ABL1-E373C CLVGGNHLV  | 23    | 35    |

|                       |      |                       |       |       |
|-----------------------|------|-----------------------|-------|-------|
| >ABL1-E373CCLVGENHLVK | 41   | >ABL1-E373CCLVGGNHLVI | 23    | 18    |
| >ABL1-E373CCLVGENHLV  | 245  | >ABL1-E373CCLVGGNHLV  | 58    | 187   |
| >ABL1-E373CCLVGENHLVK | 147  | >ABL1-E373CCLVGGNHLVI | 64    | 83    |
| >ABL1-E373CCLVGENHL   | 700  | >ABL1-E373CCLVGGNHL   | 307   | 393   |
| >ABL1-E373CCLVGENHLV  | 17   | >ABL1-E373CCLVGGNHLV  | 8     | 9     |
| >ABL1-E373CCLVGENHLVK | 12   | >ABL1-E373CCLVGGNHLVI | 8     | 4     |
| >ABL1-E373CCLVGENHL   | 554  | >ABL1-E373CCLVGGNHL   | 354   | 200   |
| >ABL1-E373CCLVGENHLV  | 41   | >ABL1-E373CCLVGGNHLV  | 24    | 17    |
| >ABL1-E373CCLVGENHLVK | 43   | >ABL1-E373CCLVGGNHLVI | 30    | 13    |
| >ABL1-E373CCLVGENHLV  | 55   | >ABL1-E373CCLVGGNHLV  | 19    | 36    |
| >ABL1-E373CCLVGENHLVK | 67   | >ABL1-E373CCLVGGNHLVI | 31    | 36    |
| >ABL1-E373CCLVGENHLV  | 20   | >ABL1-E373CCLVGGNHLV  | 12    | 8     |
| >ABL1-E373CCLVGENHLVK | 31   | >ABL1-E373CCLVGGNHLVI | 19    | 12    |
| >ABL1-E373CCLVGENHL   | 29   | >ABL1-E373CCLVGGNHL   | 18    | 11    |
| >ABL1-E373CCLVGENHLV  | 3    | >ABL1-E373CCLVGGNHLV  | 2     | 1     |
| >ABL1-E373CCLVGENHLVK | 3    | >ABL1-E373CCLVGGNHLVI | 2     | 1     |
| >ABL1-E373CCLVGENHLVK | 136  | >ABL1-E373CCLVGGNHLVI | 53    | 83    |
| >ABL1-E373CCLVGENHLVK | 365  | >ABL1-E373CCLVGGNHLVI | 183   | 182   |
| >ABL1-E373CCLVGENHLV  | 1144 | >ABL1-E373CCLVGGNHLV  | 245   | 899   |
| >ABL1-E373CNCLVGENHL  | 489  | >ABL1-E373CNCLVGGNHL  | 155   | 334   |
| >ABL1-E373CARNCLVGENI | 556  | >ABL1-E373CARNCLVGGN  | 341   | 215   |
| >ABL1-E373CARNCLVGENI | 294  | >ABL1-E373CARNCLVGGN  | 181   | 113   |
| >ABL1-E373CARNCLVGENI | 159  | >ABL1-E373CARNCLVGGN  | 106   | 53    |
| >ABL1-E450AELLEKDYRM  | 3319 | >ABL1-E450AALLEKDYRM  | 38    | 3281  |
| >ABL1-E450AELLEKDYRM  | 3824 | >ABL1-E450AALLEKDYRM  | 349   | 3475  |
| >ABL1-E450AELLEKDYRM  | 94   | >ABL1-E450AALLEKDYRM  | 9     | 85    |
| >ABL1-E450AELLEKDYRM  | 116  | >ABL1-E450AALLEKDYRM  | 10    | 106   |
| >ABL1-E450AELLEKDYRM  | 737  | >ABL1-E450AALLEKDYRM  | 31    | 706   |
| >ABL1-E450AELLEKDYRM  | 53   | >ABL1-E450AALLEKDYRM  | 40    | 13    |
| >ABL1-E450AELLEKDYRM  | 730  | >ABL1-E450AALLEKDYRM  | 18    | 712   |
| >ABL1-E450AELLEKDYRM  | 459  | >ABL1-E450AALLEKDYRM  | 9928  | 9469  |
| >ABL1-E450AELLEKDYR   | 1041 | >ABL1-E450AALLEKDYR   | 51    | 990   |
| >ABL1-E450AELLEKDYRME | 675  | >ABL1-E450AALLEKDYRME | 41    | 634   |
| >ABL1-E450AELLEKDYR   | 55   | >ABL1-E450AALLEKDYR   | 1309  | 1254  |
| >ABL1-E450AELLEKDYRME | 24   | >ABL1-E450AALLEKDYRME | 462   | 438   |
| >ABL1-E450AELLEKDYR   | 53   | >ABL1-E450AALLEKDYR   | 2704  | 2651  |
| >ABL1-E450AELLEKDYRME | 51   | >ABL1-E450AALLEKDYRME | 2314  | 2263  |
| >ABL1-E450AELLEKDYR   | 52   | >ABL1-E450AALLEKDYR   | 215   | 163   |
| >ABL1-E450AELLEKDYRME | 168  | >ABL1-E450AALLEKDYRME | 621   | 453   |
| >ABL1-E450AYELLEKDY   | 80   | >ABL1-E450AYALLEKDY   | 30436 | 30356 |
| >ABL1-E450AYELLEKDYRM | 364  | >ABL1-E450AYALLEKDYRM | 25631 | 25267 |
| >ABL1-E450AYELLEKDYRM | 6069 | >ABL1-E450AYALLEKDYRM | 432   | 5637  |
| >ABL1-E450AYELLEKDYR  | 7876 | >ABL1-E450AYALLEKDYR  | 299   | 7577  |

|                        |       |                        |       |       |
|------------------------|-------|------------------------|-------|-------|
| >ABL1-E450AYELLEKDYR   | 4340  | >ABL1-E450AYALLEKDYR   | 52    | 4288  |
| >ABL1-E450AYELLEKDY    | 21150 | >ABL1-E450AYALLEKDY    | 81    | 21069 |
| >ABL1-E450AYELLEKDYRM  | 21205 | >ABL1-E450AYALLEKDYRM  | 126   | 21079 |
| >ABL1-E450AYELLEKDY    | 63    | >ABL1-E450AYALLEKDY    | 13633 | 13570 |
| >ABL1-E450AYELLEKDY    | 8135  | >ABL1-E450AYALLEKDY    | 117   | 8018  |
| >ABL1-E450AYELLEKDY    | 381   | >ABL1-E450AYALLEKDY    | 33769 | 33388 |
| >ABL1-E450AYELLEKDYRM  | 115   | >ABL1-E450AYALLEKDYRM  | 29504 | 29389 |
| >ABL1-E450AYELLEKDYR   | 126   | >ABL1-E450AYALLEKDYR   | 149   | 23    |
| >ABL1-E450AYPGIDLSQVYI | 7590  | >ABL1-E450AYPGIDLSQVYI | 258   | 7332  |
| >ABL1-E450AVYELLEKDYR  | 512   | >ABL1-E450AVYALLEKDYR  | 314   | 198   |
| >ABL1-E450AVYELLEKDY   | 483   | >ABL1-E450AVYALLEKDY   | 495   | 12    |
| >ABL1-E450AVYELLEKDYR  | 50    | >ABL1-E450AVYALLEKDYR  | 34    | 16    |
| >ABL1-E450AQVYELLEK    | 96    | >ABL1-E450AQVYALLEK    | 62    | 34    |
| >ABL1-E450AQVYELLEK    | 23    | >ABL1-E450AQVYALLEK    | 18    | 5     |
| >ABL1-E450AQVYELLEKDY  | 288   | >ABL1-E450AQVYALLEKDY  | 172   | 116   |
| >ABL1-E450AQVYELLEKDY  | 71    | >ABL1-E450AQVYALLEKDY  | 108   | 37    |
| >ABL1-E450AQVYELLEK    | 712   | >ABL1-E450AQVYALLEK    | 178   | 534   |
| >ABL1-E450AQVYELLEKDY  | 76    | >ABL1-E450AQVYALLEKDY  | 41    | 35    |
| >ABL1-E450AQVYELLEKDY  | 246   | >ABL1-E450AQVYALLEKDY  | 416   | 170   |
| >ABL1-E450AQVYELLEK    | 49    | >ABL1-E450AQVYALLEK    | 43    | 6     |
| >ABL1-E450AQVYELLEKDY  | 12    | >ABL1-E450AQVYALLEKDY  | 12    | 0     |
| >ABL1-E450AQVYELLEKDY  | 347   | >ABL1-E450AQVYALLEKDY  | 137   | 210   |
| >ABL1-E450AQVYELLEKDY  | 399   | >ABL1-E450AQVYALLEKDY  | 516   | 117   |
| >ABL1-E450AQVYELLEKDY  | 65    | >ABL1-E450AQVYALLEKDY  | 40    | 25    |
| >ABL1-E450ASQVYELLEK   | 48    | >ABL1-E450ASQVYALLEK   | 32    | 16    |
| >ABL1-E450ASQVYELLEKDY | 291   | >ABL1-E450ASQVYALLEKDY | 190   | 101   |
| >ABL1-E450ASQVYELLEKDY | 33    | >ABL1-E450ASQVYALLEKDY | 26    | 7     |
| >ABL1-E450ALSQVYELL    | 162   | >ABL1-E450ALSQVYALL    | 8     | 154   |
| >ABL1-E450ALSQVYELLEK  | 459   | >ABL1-E450ALSQVYALLEK  | 170   | 289   |
| >ABL1-E450ALSQVYELLEK  | 29    | >ABL1-E450ALSQVYALLEK  | 23    | 6     |
| >ABL1-E450ALSQVYELLEK  | 791   | >ABL1-E450ALSQVYALLEK  | 183   | 608   |
| >ABL1-E450ALSQVYELL    | 411   | >ABL1-E450ALSQVYALL    | 45    | 366   |
| >ABL1-E450ALSQVYELL    | 507   | >ABL1-E450ALSQVYALL    | 410   | 97    |
| >ABL1-E450ALSQVYELL    | 498   | >ABL1-E450ALSQVYALL    | 139   | 359   |
| >ABL1-E450ALSQVYELLEK  | 479   | >ABL1-E450ALSQVYALLEK  | 418   | 61    |
| >ABL1-E450ALSQVYELL    | 395   | >ABL1-E450ALSQVYALL    | 196   | 199   |
| >ABL1-E450DLSQVYEL     | 123   | >ABL1-E450DLSQVYAL     | 140   | 17    |
| >ABL1-E450DLSQVYELL    | 169   | >ABL1-E450DLSQVYALL    | 138   | 31    |
| >ABL1-E450DLSQVYEL     | 170   | >ABL1-E450DLSQVYAL     | 178   | 8     |
| >ABL1-E450DLSQVYEL     | 232   | >ABL1-E450DLSQVYAL     | 479   | 247   |
| >ABL1-E450DLSQVYELL    | 729   | >ABL1-E450DLSQVYALL    | 462   | 267   |
| >ABL1-E450DLSQVYEL     | 177   | >ABL1-E450DLSQVYAL     | 195   | 18    |
| >ABL1-E450DLSQVYEL     | 71    | >ABL1-E450DLSQVYAL     | 161   | 90    |

|                         |      |                         |       |       |
|-------------------------|------|-------------------------|-------|-------|
| >ABL1-E450A DLSQVYELL   | 308  | >ABL1-E450A DLSQVYALL   | 99    | 209   |
| >ABL1-E450A DLSQVYELLEI | 174  | >ABL1-E450A DLSQVYALLEI | 114   | 60    |
| >ABL1-E450A IDLSQVYEL   | 599  | >ABL1-E450A IDLSQVYAL   | 408   | 191   |
| >ABL1-E450A IDLSQVYEL   | 93   | >ABL1-E450A IDLSQVYAL   | 101   | 8     |
| >ABL1-E450A IDLSQVYELL  | 99   | >ABL1-E450A IDLSQVYALL  | 131   | 32    |
| >ABL1-E450A GIDLSQVYEL  | 549  | >ABL1-E450A GIDLSQVYAL  | 436   | 113   |
| >ABL1-E450A GIDLSQVYELI | 375  | >ABL1-E450A GIDLSQVYALI | 352   | 23    |
| >ABL1-E450A GIDLSQVYEL  | 330  | >ABL1-E450A GIDLSQVYAL  | 330   | 0     |
| >ABL1-E450A GIDLSQVYEL  | 227  | >ABL1-E450A GIDLSQVYAL  | 138   | 89    |
| >ABL1-E450A GIDLSQVYEL  | 230  | >ABL1-E450A GIDLSQVYAL  | 624   | 394   |
| >ABL1-E450C ELLEKDYRM   | 3319 | >ABL1-E450C GLLLEKDYRM  | 60    | 3259  |
| >ABL1-E450C ELLEKDYRM   | 94   | >ABL1-E450C GLLLEKDYRM  | 14    | 80    |
| >ABL1-E450C ELLEKDYRM   | 116  | >ABL1-E450C GLLLEKDYRM  | 7     | 109   |
| >ABL1-E450C ELLEKDYRM   | 737  | >ABL1-E450C GLLLEKDYRM  | 29    | 708   |
| >ABL1-E450C ELLEKDYRM   | 53   | >ABL1-E450C GLLLEKDYRM  | 135   | 82    |
| >ABL1-E450C ELLEKDYRM   | 730  | >ABL1-E450C GLLLEKDYRM  | 65    | 665   |
| >ABL1-E450C ELLEKDYRM   | 459  | >ABL1-E450C GLLLEKDYRM  | 18635 | 18176 |
| >ABL1-E450C ELLEKDYR    | 1041 | >ABL1-E450C GLLLEKDYR   | 103   | 938   |
| >ABL1-E450C ELLEKDYRME  | 675  | >ABL1-E450C GLLLEKDYRME | 77    | 598   |
| >ABL1-E450C ELLEKDYR    | 55   | >ABL1-E450C GLLLEKDYR   | 1822  | 1767  |
| >ABL1-E450C ELLEKDYRME  | 24   | >ABL1-E450C GLLLEKDYRME | 753   | 729   |
| >ABL1-E450C ELLEKDYR    | 53   | >ABL1-E450C GLLLEKDYR   | 3218  | 3165  |
| >ABL1-E450C ELLEKDYRME  | 51   | >ABL1-E450C GLLLEKDYRME | 2420  | 2369  |
| >ABL1-E450C ELLEKDYR    | 52   | >ABL1-E450C GLLLEKDYR   | 278   | 226   |
| >ABL1-E450C ELLEKDYRME  | 168  | >ABL1-E450C GLLLEKDYRME | 832   | 664   |
| >ABL1-E450C YELLEKDY    | 80   | >ABL1-E450C YGLLEKDY    | 38139 | 38059 |
| >ABL1-E450C YELLEKDYRM  | 364  | >ABL1-E450C YGLLEKDYRM  | 22554 | 22190 |
| >ABL1-E450C YELLEKDY    | 63   | >ABL1-E450C YGLLEKDY    | 17509 | 17446 |
| >ABL1-E450C YELLEKDY    | 381  | >ABL1-E450C YGLLEKDY    | 38351 | 37970 |
| >ABL1-E450C YELLEKDYRM  | 115  | >ABL1-E450C YGLLEKDYRM  | 33025 | 32910 |
| >ABL1-E450C YELLEKDYR   | 126  | >ABL1-E450C YGLLEKDYR   | 100   | 26    |
| >ABL1-E450C VYELLEKDYR  | 512  | >ABL1-E450C VYGLLEKDYR  | 383   | 129   |
| >ABL1-E450C VYELLEKDY   | 483  | >ABL1-E450C VYGLLEKDY   | 1430  | 947   |
| >ABL1-E450C VYELLEKDYR  | 50   | >ABL1-E450C VYGLLEKDYR  | 27    | 23    |
| >ABL1-E450C QVYELLEK    | 96   | >ABL1-E450C QVYGLLEK    | 81    | 15    |
| >ABL1-E450C QVYELLEK    | 23   | >ABL1-E450C QVYGLLEK    | 23    | 0     |
| >ABL1-E450C QVYELLEKDY  | 288  | >ABL1-E450C QVYGLLEKDY  | 288   | 0     |
| >ABL1-E450C QVYELLEKDY  | 71   | >ABL1-E450C QVYGLLEKDY  | 57    | 14    |
| >ABL1-E450C QVYELLEK    | 712  | >ABL1-E450C QVYGLLEK    | 491   | 221   |
| >ABL1-E450C QVYELLEKDY  | 76   | >ABL1-E450C QVYGLLEKDY  | 77    | 1     |
| >ABL1-E450C QVYELLEKDY  | 246  | >ABL1-E450C QVYGLLEKDY  | 340   | 94    |
| >ABL1-E450C QVYELLEK    | 49   | >ABL1-E450C QVYGLLEK    | 54    | 5     |
| >ABL1-E450C QVYELLEKDY  | 12   | >ABL1-E450C QVYGLLEKDY  | 12    | 0     |



|                         |       |                        |      |       |
|-------------------------|-------|------------------------|------|-------|
| >ABL1-E450C QVYELLEKDY  | 347   | >ABL1-E450C QVYGLLEKDY | 589  | 242   |
| >ABL1-E450C QVYELLEKDY  | 399   | >ABL1-E450C QVYGLLEKDY | 595  | 196   |
| >ABL1-E450C QVYELLEKDY  | 65    | >ABL1-E450C QVYGLLEKDY | 47   | 18    |
| >ABL1-E450C SQVYELLEK   | 48    | >ABL1-E450C SQVYGLLEK  | 42   | 6     |
| >ABL1-E450C SQVYELLEKD' | 962   | >ABL1-E450C SQVYGLLEKD | 488  | 474   |
| >ABL1-E450C SQVYELLEKD' | 712   | >ABL1-E450C SQVYGLLEKD | 371  | 341   |
| >ABL1-E450C SQVYELLEKD' | 291   | >ABL1-E450C SQVYGLLEKD | 193  | 98    |
| >ABL1-E450C SQVYELLEKD' | 2069  | >ABL1-E450C SQVYGLLEKD | 430  | 1639  |
| >ABL1-E450C SQVYELLEKD' | 33    | >ABL1-E450C SQVYGLLEKD | 34   | 1     |
| >ABL1-E450C LSQVYELL    | 162   | >ABL1-E450C LSQVYGLL   | 35   | 127   |
| >ABL1-E450C LSQVYELLEK  | 459   | >ABL1-E450C LSQVYGLLEK | 160  | 299   |
| >ABL1-E450C LSQVYELLEK  | 29    | >ABL1-E450C LSQVYGLLEK | 33   | 4     |
| >ABL1-E450C LSQVYELLEK  | 791   | >ABL1-E450C LSQVYGLLEK | 289  | 502   |
| >ABL1-E450C LSQVYELL    | 411   | >ABL1-E450C LSQVYGLL   | 196  | 215   |
| >ABL1-E450C LSQVYELL    | 498   | >ABL1-E450C LSQVYGLL   | 1861 | 1363  |
| >ABL1-E450C LSQVYELLEK  | 479   | >ABL1-E450C LSQVYGLLEK | 436  | 43    |
| >ABL1-E450C LSQVYELL    | 395   | >ABL1-E450C LSQVYGLL   | 168  | 227   |
| >ABL1-E450C DLSQVYEL    | 123   | >ABL1-E450C DLSQVYGL   | 237  | 114   |
| >ABL1-E450C DLSQVYELL   | 169   | >ABL1-E450C DLSQVYGLL  | 980  | 811   |
| >ABL1-E450C DLSQVYEL    | 170   | >ABL1-E450C DLSQVYGL   | 211  | 41    |
| >ABL1-E450C DLSQVYEL    | 232   | >ABL1-E450C DLSQVYGL   | 314  | 82    |
| >ABL1-E450C DLSQVYEL    | 177   | >ABL1-E450C DLSQVYGL   | 139  | 38    |
| >ABL1-E450C DLSQVYEL    | 71    | >ABL1-E450C DLSQVYGL   | 133  | 62    |
| >ABL1-E450C DLSQVYELL   | 308   | >ABL1-E450C DLSQVYGLL  | 1263 | 955   |
| >ABL1-E450C DLSQVYELLEI | 174   | >ABL1-E450C DLSQVYGLLE | 218  | 44    |
| >ABL1-E450C IDLSQVYEL   | 571   | >ABL1-E450C IDLSQVYGL  | 366  | 205   |
| >ABL1-E450C IDLSQVYEL   | 93    | >ABL1-E450C IDLSQVYGL  | 115  | 22    |
| >ABL1-E450C IDLSQVYELL  | 99    | >ABL1-E450C IDLSQVYGLL | 82   | 17    |
| >ABL1-E450C GIDLSQVYELI | 375   | >ABL1-E450C GIDLSQVYGL | 1136 | 761   |
| >ABL1-E450C GIDLSQVYEL  | 330   | >ABL1-E450C GIDLSQVYGL | 308  | 22    |
| >ABL1-E450C GIDLSQVYEL  | 227   | >ABL1-E450C GIDLSQVYGL | 135  | 92    |
| >ABL1-E450C GIDLSQVYEL  | 230   | >ABL1-E450C GIDLSQVYGL | 266  | 36    |
| >ABL1-E450K ELLEKDYRM   | 3319  | >ABL1-E450K KLEKDYRM   | 22   | 3297  |
| >ABL1-E450K ELLEKDYRM   | 3824  | >ABL1-E450K KLEKDYRM   | 322  | 3502  |
| >ABL1-E450K ELLEKDYRM   | 94    | >ABL1-E450K KLEKDYRM   | 8    | 86    |
| >ABL1-E450K ELLEKDYRM   | 116   | >ABL1-E450K KLEKDYRM   | 7    | 109   |
| >ABL1-E450K ELLEKDYRM   | 737   | >ABL1-E450K KLEKDYRM   | 29   | 708   |
| >ABL1-E450K ELLEKDYRM   | 53    | >ABL1-E450K KLEKDYRM   | 36   | 17    |
| >ABL1-E450K ELLEKDYRM   | 730   | >ABL1-E450K KLEKDYRM   | 74   | 656   |
| >ABL1-E450K ELLEKDYRM   | 459   | >ABL1-E450K KLEKDYRM   | 9319 | 8860  |
| >ABL1-E450K ELLEKDYR    | 1041  | >ABL1-E450K KLEKDYR    | 17   | 1024  |
| >ABL1-E450K ELLEKDYRME  | 675   | >ABL1-E450K KLEKDYRME  | 15   | 660   |
| >ABL1-E450K ELLEKDYRM   | 11462 | >ABL1-E450K KLEKDYRM   | 367  | 11095 |

|                         |       |                        |       |       |
|-------------------------|-------|------------------------|-------|-------|
| >ABL1-E450K ELLEKDYR    | 55    | >ABL1-E450K KLEEKDYR   | 2643  | 2588  |
| >ABL1-E450K ELLEKDYRME  | 24    | >ABL1-E450K KLEEKDYRME | 1140  | 1116  |
| >ABL1-E450K ELLEKDYR    | 53    | >ABL1-E450K KLEEKDYR   | 4742  | 4689  |
| >ABL1-E450K ELLEKDYRME  | 51    | >ABL1-E450K KLEEKDYRME | 3663  | 3612  |
| >ABL1-E450K ELLEKDYRM   | 10244 | >ABL1-E450K KLEEKDYRM  | 485   | 9759  |
| >ABL1-E450K ELLEKDYR    | 52    | >ABL1-E450K KLEEKDYR   | 14    | 38    |
| >ABL1-E450K ELLEKDYRME  | 168   | >ABL1-E450K KLEEKDYRME | 24    | 144   |
| >ABL1-E450K YELLEKDY    | 80    | >ABL1-E450K YKLEEKDY   | 24958 | 24878 |
| >ABL1-E450K YELLEKDYRM  | 364   | >ABL1-E450K YKLEEKDYRM | 9346  | 8982  |
| >ABL1-E450K YELLEKDY    | 1172  | >ABL1-E450K YKLEEKDY   | 23    | 1149  |
| >ABL1-E450K YELLEKDY    | 63    | >ABL1-E450K YKLEEKDY   | 11742 | 11679 |
| >ABL1-E450K YELLEKDY    | 381   | >ABL1-E450K YKLEEKDY   | 25401 | 25020 |
| >ABL1-E450K YELLEKDYRM  | 115   | >ABL1-E450K YKLEEKDYRM | 19471 | 19356 |
| >ABL1-E450K YELLEKDYR   | 126   | >ABL1-E450K YKLEEKDYR  | 173   | 47    |
| >ABL1-E450K VYELLEKDYR  | 1927  | >ABL1-E450K VYKLEEKDYR | 199   | 1728  |
| >ABL1-E450K VYELLEKDYR  | 512   | >ABL1-E450K VYKLEEKDYR | 186   | 326   |
| >ABL1-E450K VYELLEKDY   | 483   | >ABL1-E450K VYKLEEKDY  | 1527  | 1044  |
| >ABL1-E450K VYELLEKDYR  | 50    | >ABL1-E450K VYKLEEKDYR | 43    | 7     |
| >ABL1-E450K QVYELLEK    | 96    | >ABL1-E450K QVYKLEK    | 70    | 26    |
| >ABL1-E450K QVYELLEK    | 23    | >ABL1-E450K QVYKLEK    | 27    | 4     |
| >ABL1-E450K QVYELLEKDY  | 288   | >ABL1-E450K QVYKLEKDY  | 344   | 56    |
| >ABL1-E450K QVYELLEKDY  | 71    | >ABL1-E450K QVYKLEKDY  | 125   | 54    |
| >ABL1-E450K QVYELLEK    | 712   | >ABL1-E450K QVYKLEK    | 297   | 415   |
| >ABL1-E450K QVYELLEKDY  | 76    | >ABL1-E450K QVYKLEKDY  | 53    | 23    |
| >ABL1-E450K QVYELLEKDY  | 246   | >ABL1-E450K QVYKLEKDY  | 445   | 199   |
| >ABL1-E450K QVYELLEK    | 49    | >ABL1-E450K QVYKLEK    | 72    | 23    |
| >ABL1-E450K QVYELLEKDY  | 12    | >ABL1-E450K QVYKLEKDY  | 17    | 5     |
| >ABL1-E450K QVYELLEKDY  | 347   | >ABL1-E450K QVYKLEKDY  | 142   | 205   |
| >ABL1-E450K QVYELLEKDY  | 399   | >ABL1-E450K QVYKLEKDY  | 978   | 579   |
| >ABL1-E450K QVYELLEKDY  | 65    | >ABL1-E450K QVYKLEKDY  | 39    | 26    |
| >ABL1-E450K SQVYELLEK   | 48    | >ABL1-E450K SQVYKLEK   | 48    | 0     |
| >ABL1-E450K SQVYELLEKD' | 291   | >ABL1-E450K SQVYKLEKD' | 320   | 29    |
| >ABL1-E450K SQVYELLEKD' | 33    | >ABL1-E450K SQVYKLEKD' | 54    | 21    |
| >ABL1-E450K LSQVYELL    | 162   | >ABL1-E450K LSQVYKLL   | 81    | 81    |
| >ABL1-E450K LSQVYELLEK  | 459   | >ABL1-E450K LSQVYKLEK  | 173   | 286   |
| >ABL1-E450K LSQVYELLEK  | 29    | >ABL1-E450K LSQVYKLEK  | 34    | 5     |
| >ABL1-E450K LSQVYELLEK  | 791   | >ABL1-E450K LSQVYKLEK  | 346   | 445   |
| >ABL1-E450K LSQVYELL    | 411   | >ABL1-E450K LSQVYKLL   | 235   | 176   |
| >ABL1-E450K LSQVYELL    | 498   | >ABL1-E450K LSQVYKLL   | 1732  | 1234  |
| >ABL1-E450K LSQVYELLEK  | 479   | >ABL1-E450K LSQVYKLEK  | 392   | 87    |
| >ABL1-E450K LSQVYELL    | 395   | >ABL1-E450K LSQVYKLL   | 367   | 28    |
| >ABL1-E450K DLSQVYEL    | 123   | >ABL1-E450K DLSQVYKL   | 446   | 323   |
| >ABL1-E450K DLSQVYELL   | 169   | >ABL1-E450K DLSQVYKLL  | 1782  | 1613  |

|                         |       |                         |      |       |
|-------------------------|-------|-------------------------|------|-------|
| >ABL1-E450K DLSQVYEL    | 170   | >ABL1-E450K DLSQVYKL    | 541  | 371   |
| >ABL1-E450K DLSQVYEL    | 232   | >ABL1-E450K DLSQVYKL    | 473  | 241   |
| >ABL1-E450K DLSQVYEL    | 177   | >ABL1-E450K DLSQVYKL    | 379  | 202   |
| >ABL1-E450K DLSQVYEL    | 71    | >ABL1-E450K DLSQVYKL    | 217  | 146   |
| >ABL1-E450K DLSQVYELL   | 308   | >ABL1-E450K DLSQVYKLL   | 1133 | 825   |
| >ABL1-E450K DLSQVYELLEI | 174   | >ABL1-E450K DLSQVYKLEI  | 345  | 171   |
| >ABL1-E450K IDLSQVYELL  | 1073  | >ABL1-E450K IDLSQVYKLL  | 453  | 620   |
| >ABL1-E450K IDLSQVYEL   | 571   | >ABL1-E450K IDLSQVYKL   | 318  | 253   |
| >ABL1-E450K IDLSQVYEL   | 93    | >ABL1-E450K IDLSQVYKL   | 113  | 20    |
| >ABL1-E450K IDLSQVYELL  | 99    | >ABL1-E450K IDLSQVYKLL  | 216  | 117   |
| >ABL1-E450K GIDLSQVYELI | 375   | >ABL1-E450K GIDLSQVYKLI | 1733 | 1358  |
| >ABL1-E450K GIDLSQVYEL  | 330   | >ABL1-E450K GIDLSQVYKL  | 678  | 348   |
| >ABL1-E450K GIDLSQVYEL  | 227   | >ABL1-E450K GIDLSQVYKL  | 561  | 334   |
| >ABL1-E450K GIDLSQVYEL  | 230   | >ABL1-E450K GIDLSQVYKL  | 457  | 227   |
| >ABL1-E450K GIDLSQVYE   | 20643 | >ABL1-E450K GIDLSQVYK   | 183  | 20460 |
| >ABL1-E450K GIDLSQVYE   | 19223 | >ABL1-E450K GIDLSQVYK   | 20   | 19203 |
| >ABL1-E453C LEKDYRMER   | 437   | >ABL1-E453C LDKDYRMER   | 1207 | 770   |
| >ABL1-E453C LLEKDYRM    | 3486  | >ABL1-E453C LLDKDYRM    | 146  | 3340  |
| >ABL1-E453C LLEKDYRM    | 2543  | >ABL1-E453C LLDKDYRM    | 306  | 2237  |
| >ABL1-E453C LLEKDYRM    | 408   | >ABL1-E453C LLDKDYRM    | 220  | 188   |
| >ABL1-E453C LLEKDYRMER  | 313   | >ABL1-E453C LLDKDYRMEF  | 215  | 98    |
| >ABL1-E453C ELLEKDYRM   | 94    | >ABL1-E453C ELLDKDYRM   | 164  | 70    |
| >ABL1-E453C ELLEKDYRM   | 116   | >ABL1-E453C ELLDKDYRM   | 178  | 62    |
| >ABL1-E453C ELLEKDYRM   | 53    | >ABL1-E453C ELLDKDYRM   | 35   | 18    |
| >ABL1-E453C ELLEKDYRM   | 730   | >ABL1-E453C ELLDKDYRM   | 197  | 533   |
| >ABL1-E453C ELLEKDYRM   | 459   | >ABL1-E453C ELLDKDYRM   | 2540 | 2081  |
| >ABL1-E453C ELLEKDYR    | 55    | >ABL1-E453C ELLDKDYR    | 63   | 8     |
| >ABL1-E453C ELLEKDYRME  | 24    | >ABL1-E453C ELLDKDYRME  | 27   | 3     |
| >ABL1-E453C ELLEKDYR    | 53    | >ABL1-E453C ELLDKDYR    | 60   | 7     |
| >ABL1-E453C ELLEKDYRME  | 51    | >ABL1-E453C ELLDKDYRME  | 56   | 5     |
| >ABL1-E453C ELLEKDYR    | 52    | >ABL1-E453C ELLDKDYR    | 43   | 9     |
| >ABL1-E453C ELLEKDYRME  | 168   | >ABL1-E453C ELLDKDYRME  | 109  | 59    |
| >ABL1-E453C YELLEKDY    | 80    | >ABL1-E453C YELLDKDY    | 60   | 20    |
| >ABL1-E453C YELLEKDYRM  | 364   | >ABL1-E453C YELLDKDYRM  | 449  | 85    |
| >ABL1-E453C YELLEKDY    | 63    | >ABL1-E453C YELLDKDY    | 49   | 14    |
| >ABL1-E453C YELLEKDY    | 682   | >ABL1-E453C YELLDKDY    | 442  | 240   |
| >ABL1-E453C YELLEKDY    | 381   | >ABL1-E453C YELLDKDY    | 302  | 79    |
| >ABL1-E453C YELLEKDYRM  | 115   | >ABL1-E453C YELLDKDYRM  | 158  | 43    |
| >ABL1-E453C YELLEKDYR   | 126   | >ABL1-E453C YELLDKDYR   | 263  | 137   |
| >ABL1-E453C VYELLEKDY   | 483   | >ABL1-E453C VYELLDKDY   | 957  | 474   |
| >ABL1-E453C VYELLEKDYR  | 50    | >ABL1-E453C VYELLDKDYR  | 54   | 4     |
| >ABL1-E453C QVYELLEK    | 96    | >ABL1-E453C QVYELLDK    | 134  | 38    |
| >ABL1-E453C QVYELLEK    | 23    | >ABL1-E453C QVYELLDK    | 43   | 20    |

|                         |      |                        |      |      |
|-------------------------|------|------------------------|------|------|
| >ABL1-E453C QVYELLEKDY  | 288  | >ABL1-E453C QVYELLDKDY | 291  | 3    |
| >ABL1-E453C QVYELLEKDY  | 71   | >ABL1-E453C QVYELLDKDY | 70   | 1    |
| >ABL1-E453C QVYELLEKDY  | 581  | >ABL1-E453C QVYELLDKDY | 494  | 87   |
| >ABL1-E453C QVYELLEKDY  | 76   | >ABL1-E453C QVYELLDKDY | 89   | 13   |
| >ABL1-E453C QVYELLEKDY  | 246  | >ABL1-E453C QVYELLDKDY | 296  | 50   |
| >ABL1-E453C QVYELLEK    | 49   | >ABL1-E453C QVYELLDK   | 118  | 69   |
| >ABL1-E453C QVYELLEKDY  | 12   | >ABL1-E453C QVYELLDKDY | 12   | 0    |
| >ABL1-E453C QVYELLEKDY  | 347  | >ABL1-E453C QVYELLDKDY | 432  | 85   |
| >ABL1-E453C QVYELLEKDY  | 399  | >ABL1-E453C QVYELLDKDY | 376  | 23   |
| >ABL1-E453C QVYELLEKDY  | 65   | >ABL1-E453C QVYELLDKDY | 81   | 16   |
| >ABL1-E453C SQVYELLEK   | 48   | >ABL1-E453C SQVYELLDK  | 201  | 153  |
| >ABL1-E453C SQVYELLEKD' | 291  | >ABL1-E453C SQVYELLDKD | 181  | 110  |
| >ABL1-E453C SQVYELLEKD' | 33   | >ABL1-E453C SQVYELLDKD | 50   | 17   |
| >ABL1-E453C LSQVYELLEK  | 459  | >ABL1-E453C LSQVYELLDK | 903  | 444  |
| >ABL1-E453C LSQVYELLEK  | 29   | >ABL1-E453C LSQVYELLDK | 52   | 23   |
| >ABL1-E453C LSQVYELLEK  | 479  | >ABL1-E453C LSQVYELLDK | 497  | 18   |
| >ABL1-E453C DLSQVYELLEI | 174  | >ABL1-E453C DLSQVYELLD | 468  | 294  |
| >ABL1-E453K LEKDYRMER   | 437  | >ABL1-E453K LKKDYRMER  | 854  | 417  |
| >ABL1-E453K LEKDYRMER   | 4097 | >ABL1-E453K LKKDYRMER  | 169  | 3928 |
| >ABL1-E453K LLEKDYRM    | 408  | >ABL1-E453K LLKKDYRM   | 500  | 92   |
| >ABL1-E453K LLEKDYRMER  | 313  | >ABL1-E453K LLKKDYRMEF | 36   | 277  |
| >ABL1-E453K LLEKDYRM    | 5513 | >ABL1-E453K LLKKDYRM   | 282  | 5231 |
| >ABL1-E453K LLEKDYRM    | 9081 | >ABL1-E453K LLKKDYRM   | 459  | 8622 |
| >ABL1-E453K ELLEKDYRM   | 94   | >ABL1-E453K ELLKKDYRM  | 1826 | 1732 |
| >ABL1-E453K ELLEKDYRM   | 116  | >ABL1-E453K ELLKKDYRM  | 1811 | 1695 |
| >ABL1-E453K ELLEKDYRM   | 53   | >ABL1-E453K ELLKKDYRM  | 931  | 878  |
| >ABL1-E453K ELLEKDYRM   | 459  | >ABL1-E453K ELLKKDYRM  | 1552 | 1093 |
| >ABL1-E453K ELLEKDYR    | 1041 | >ABL1-E453K ELLKKDYR   | 442  | 599  |
| >ABL1-E453K ELLEKDYRME  | 675  | >ABL1-E453K ELLKKDYRME | 455  | 220  |
| >ABL1-E453K ELLEKDYR    | 55   | >ABL1-E453K ELLKKDYR   | 75   | 20   |
| >ABL1-E453K ELLEKDYRME  | 24   | >ABL1-E453K ELLKKDYRME | 37   | 13   |
| >ABL1-E453K ELLEKDYR    | 53   | >ABL1-E453K ELLKKDYR   | 69   | 16   |
| >ABL1-E453K ELLEKDYRME  | 51   | >ABL1-E453K ELLKKDYRME | 62   | 11   |
| >ABL1-E453K ELLEKDYRM   | 697  | >ABL1-E453K ELLKKDYRM  | 173  | 524  |
| >ABL1-E453K ELLEKDYR    | 52   | >ABL1-E453K ELLKKDYR   | 34   | 18   |
| >ABL1-E453K ELLEKDYRME  | 168  | >ABL1-E453K ELLKKDYRME | 93   | 75   |
| >ABL1-E453K YELLEKDY    | 80   | >ABL1-E453K YELLKKDY   | 65   | 15   |
| >ABL1-E453K YELLEKDYRM  | 364  | >ABL1-E453K YELLKKDYRM | 236  | 128  |
| >ABL1-E453K YELLEKDY    | 63   | >ABL1-E453K YELLKKDY   | 54   | 9    |
| >ABL1-E453K YELLEKDY    | 381  | >ABL1-E453K YELLKKDY   | 405  | 24   |
| >ABL1-E453K YELLEKDYRM  | 115  | >ABL1-E453K YELLKKDYRM | 157  | 42   |
| >ABL1-E453K YELLEKDYR   | 126  | >ABL1-E453K YELLKKDYR  | 164  | 38   |
| >ABL1-E453K VYELLEKDY   | 483  | >ABL1-E453K VYELLKKDY  | 741  | 258  |

|                        |       |                        |      |       |
|------------------------|-------|------------------------|------|-------|
| >ABL1-E453KVYELLEKDYR  | 50    | >ABL1-E453KVYELLKKDYR  | 46   | 4     |
| >ABL1-E453KQVYELLEK    | 96    | >ABL1-E453KQVYELLKK    | 64   | 32    |
| >ABL1-E453KQVYELLEK    | 23    | >ABL1-E453KQVYELLKK    | 23   | 0     |
| >ABL1-E453KQVYELLEKDY  | 288   | >ABL1-E453KQVYELLKKDY  | 399  | 111   |
| >ABL1-E453KQVYELLEKDY  | 71    | >ABL1-E453KQVYELLKKDY  | 133  | 62    |
| >ABL1-E453KQVYELLEKDY  | 76    | >ABL1-E453KQVYELLKKDY  | 45   | 31    |
| >ABL1-E453KQVYELLEKDY  | 246   | >ABL1-E453KQVYELLKKDY  | 217  | 29    |
| >ABL1-E453KQVYELLEK    | 49    | >ABL1-E453KQVYELLKK    | 94   | 45    |
| >ABL1-E453KQVYELLEKDY  | 12    | >ABL1-E453KQVYELLKKDY  | 20   | 8     |
| >ABL1-E453KQVYELLEKDY  | 347   | >ABL1-E453KQVYELLKKDY  | 759  | 412   |
| >ABL1-E453KQVYELLEKDY  | 399   | >ABL1-E453KQVYELLKKDY  | 311  | 88    |
| >ABL1-E453KQVYELLEKDY  | 65    | >ABL1-E453KQVYELLKKDY  | 57   | 8     |
| >ABL1-E453KSQVYELLE    | 23462 | >ABL1-E453KSQVYELLK    | 39   | 23423 |
| >ABL1-E453KSQVYELLEK   | 48    | >ABL1-E453KSQVYELLKK   | 58   | 10    |
| >ABL1-E453KSQVYELLEKD' | 291   | >ABL1-E453KSQVYELLKKD' | 287  | 4     |
| >ABL1-E453KSQVYELLEKD' | 33    | >ABL1-E453KSQVYELLKKD' | 45   | 12    |
| >ABL1-E453KLSQVYELLEK  | 459   | >ABL1-E453KLSQVYELLKK  | 416  | 43    |
| >ABL1-E453KLSQVYELLE   | 19488 | >ABL1-E453KLSQVYELLK   | 21   | 19467 |
| >ABL1-E453KLSQVYELLEK  | 29    | >ABL1-E453KLSQVYELLKK  | 33   | 4     |
| >ABL1-E453KLSQVYELLEK  | 479   | >ABL1-E453KLSQVYELLKK  | 629  | 150   |
| >ABL1-E453KLSQVYELLE   | 32047 | >ABL1-E453KLSQVYELLK   | 218  | 31829 |
| >ABL1-E453KLSQVYELLE   | 28403 | >ABL1-E453KLSQVYELLK   | 327  | 28076 |
| >ABL1-E453KLSQVYELLEI  | 174   | >ABL1-E453KLSQVYELLI   | 244  | 70    |
| >ABL1-E453LLEKDYRMER   | 437   | >ABL1-E453LLEKDYRMER   | 10   | 427   |
| >ABL1-E453LLEKDYRMER   | 1026  | >ABL1-E453LLEKDYRMER   | 41   | 985   |
| >ABL1-E453LLEKDYRMER   | 2145  | >ABL1-E453LLEKDYRMER   | 193  | 1952  |
| >ABL1-E453LIDLSQVYELLE | 7672  | >ABL1-E453LIDLSQVYELLL | 69   | 7603  |
| >ABL1-E453LLEKDYRM     | 7101  | >ABL1-E453LLEKDYRM     | 349  | 6752  |
| >ABL1-E453LLEKDYRM     | 3486  | >ABL1-E453LLEKDYRM     | 59   | 3427  |
| >ABL1-E453LLEKDYRM     | 2543  | >ABL1-E453LLEKDYRM     | 143  | 2400  |
| >ABL1-E453LLEKDYRM     | 11091 | >ABL1-E453LLEKDYRM     | 337  | 10754 |
| >ABL1-E453LLEKDYRM     | 13013 | >ABL1-E453LLEKDYRM     | 292  | 12721 |
| >ABL1-E453LLEKDYRM     | 408   | >ABL1-E453LLEKDYRM     | 73   | 335   |
| >ABL1-E453LLEKDYRMER   | 313   | >ABL1-E453LLEKDYRMER   | 38   | 275   |
| >ABL1-E453LLEKDYRM     | 94    | >ABL1-E453LLEKDYRM     | 3715 | 3621  |
| >ABL1-E453LLEKDYRM     | 116   | >ABL1-E453LLEKDYRM     | 2786 | 2670  |
| >ABL1-E453LLEKDYRM     | 53    | >ABL1-E453LLEKDYRM     | 698  | 645   |
| >ABL1-E453LLEKDYRM     | 459   | >ABL1-E453LLEKDYRM     | 4155 | 3696  |
| >ABL1-E453LLEKDYR      | 55    | >ABL1-E453LLEKDYR      | 42   | 13    |
| >ABL1-E453LLEKDYRME    | 24    | >ABL1-E453LLEKDYRME    | 24   | 0     |
| >ABL1-E453LLEKDYR      | 53    | >ABL1-E453LLEKDYR      | 68   | 15    |
| >ABL1-E453LLEKDYRME    | 51    | >ABL1-E453LLEKDYRME    | 77   | 26    |
| >ABL1-E453LLEKDYRM     | 697   | >ABL1-E453LLEKDYRM     | 377  | 320   |

|                         |       |                        |     |       |
|-------------------------|-------|------------------------|-----|-------|
| >ABL1-E453L ELLEKDYR    | 52    | >ABL1-E453L ELLLKDYR   | 39  | 13    |
| >ABL1-E453L ELLEKDYRME  | 168   | >ABL1-E453L ELLLKDYRME | 134 | 34    |
| >ABL1-E453L YELLEKDY    | 80    | >ABL1-E453L YELLKKDY   | 62  | 18    |
| >ABL1-E453L YELLEKDYRM  | 364   | >ABL1-E453L YELLKKDYRM | 126 | 238   |
| >ABL1-E453L YELLEKDY    | 63    | >ABL1-E453L YELLKKDY   | 16  | 47    |
| >ABL1-E453L YELLEKDYRM  | 630   | >ABL1-E453L YELLKKDYRM | 373 | 257   |
| >ABL1-E453L YELLEKDY    | 682   | >ABL1-E453L YELLKKDY   | 347 | 335   |
| >ABL1-E453L YELLEKDY    | 381   | >ABL1-E453L YELLKKDY   | 136 | 245   |
| >ABL1-E453L YELLEKDYRM  | 115   | >ABL1-E453L YELLKKDYRM | 70  | 45    |
| >ABL1-E453L YELLEKDYR   | 126   | >ABL1-E453L YELLKKDYR  | 79  | 47    |
| >ABL1-E453L VYELLEKDYR  | 512   | >ABL1-E453L VYELLKKDYR | 387 | 125   |
| >ABL1-E453L VYELLEKDY   | 483   | >ABL1-E453L VYELLKKDY  | 744 | 261   |
| >ABL1-E453L VYELLEKDYR  | 50    | >ABL1-E453L VYELLKKDYR | 44  | 6     |
| >ABL1-E453L QVYELLEK    | 96    | >ABL1-E453L QVYELLK    | 43  | 53    |
| >ABL1-E453L QVYELLEK    | 23    | >ABL1-E453L QVYELLK    | 14  | 9     |
| >ABL1-E453L QVYELLEKDY  | 288   | >ABL1-E453L QVYELLKDY  | 111 | 177   |
| >ABL1-E453L QVYELLEKDY  | 744   | >ABL1-E453L QVYELLKDY  | 254 | 490   |
| >ABL1-E453L QVYELLEKDY  | 71    | >ABL1-E453L QVYELLKDY  | 18  | 53    |
| >ABL1-E453L QVYELLEKDY  | 581   | >ABL1-E453L QVYELLKDY  | 253 | 328   |
| >ABL1-E453L QVYELLEK    | 712   | >ABL1-E453L QVYELLK    | 210 | 502   |
| >ABL1-E453L QVYELLEKDY  | 76    | >ABL1-E453L QVYELLKDY  | 39  | 37    |
| >ABL1-E453L QVYELLEKDY  | 246   | >ABL1-E453L QVYELLKDY  | 142 | 104   |
| >ABL1-E453L QVYELLEK    | 49    | >ABL1-E453L QVYELLK    | 37  | 12    |
| >ABL1-E453L QVYELLEKDY  | 12    | >ABL1-E453L QVYELLKDY  | 12  | 0     |
| >ABL1-E453L QVYELLEKDY  | 347   | >ABL1-E453L QVYELLKDY  | 71  | 276   |
| >ABL1-E453L QVYELLEKDY  | 399   | >ABL1-E453L QVYELLKDY  | 119 | 280   |
| >ABL1-E453L QVYELLEKDY  | 65    | >ABL1-E453L QVYELLKDY  | 40  | 25    |
| >ABL1-E453L SQVYELLE    | 25350 | >ABL1-E453L SQVYELL    | 447 | 24903 |
| >ABL1-E453L SQVYELLE    | 9866  | >ABL1-E453L SQVYELL    | 31  | 9835  |
| >ABL1-E453L SQVYELLEK   | 48    | >ABL1-E453L SQVYELLK   | 29  | 19    |
| >ABL1-E453L SQVYELLEKD` | 936   | >ABL1-E453L SQVYELLKD` | 257 | 679   |
| >ABL1-E453L SQVYELLEKD` | 962   | >ABL1-E453L SQVYELLKD` | 488 | 474   |
| >ABL1-E453L SQVYELLEKD` | 291   | >ABL1-E453L SQVYELLKD` | 168 | 123   |
| >ABL1-E453L SQVYELLE    | 11233 | >ABL1-E453L SQVYELL    | 221 | 11012 |
| >ABL1-E453L SQVYELLEKD` | 33    | >ABL1-E453L SQVYELLKD` | 35  | 2     |
| >ABL1-E453L SQVYELLE    | 25511 | >ABL1-E453L SQVYELL    | 392 | 25119 |
| >ABL1-E453L SQVYELLE    | 17664 | >ABL1-E453L SQVYELL    | 482 | 17182 |
| >ABL1-E453L LSQVYELLE   | 13061 | >ABL1-E453L LSQVYELL   | 451 | 12610 |
| >ABL1-E453L LSQVYELLEK  | 459   | >ABL1-E453L LSQVYELLK  | 251 | 208   |
| >ABL1-E453L LSQVYELLEK  | 29    | >ABL1-E453L LSQVYELLK  | 27  | 2     |
| >ABL1-E453L LSQVYELLEK  | 791   | >ABL1-E453L LSQVYELLK  | 437 | 354   |
| >ABL1-E453L LSQVYELLEK  | 531   | >ABL1-E453L LSQVYELLK  | 258 | 273   |
| >ABL1-E453L LSQVYELLE   | 13463 | >ABL1-E453L LSQVYELL   | 65  | 13398 |

|                         |       |                         |       |       |
|-------------------------|-------|-------------------------|-------|-------|
| >ABL1-E453L LSQVYELLE   | 16255 | >ABL1-E453L LSQVYELL    | 314   | 15941 |
| >ABL1-E453L LSQVYELLEK  | 479   | >ABL1-E453L LSQVYELLLK  | 455   | 24    |
| >ABL1-E453L DLSQVYELLE  | 11716 | >ABL1-E453L DLSQVYELL   | 64    | 11652 |
| >ABL1-E453L DLSQVYELLE  | 26070 | >ABL1-E453L DLSQVYELLL  | 294   | 25776 |
| >ABL1-E453L DLSQVYELLEI | 174   | >ABL1-E453L DLSQVYELLLI | 103   | 71    |
| >ABL1-E459C MERPEGCPEI  | 184   | >ABL1-E459C MGRPEGCPE   | 9     | 175   |
| >ABL1-E459C MERPEGCPEI  | 39    | >ABL1-E459C MGRPEGCPE   | 28473 | 28434 |
| >ABL1-E459C RMERPEGC    | 1048  | >ABL1-E459C RMGRPEGC    | 120   | 928   |
| >ABL1-E459C RMERPEGCPI  | 208   | >ABL1-E459C RMGRPEGCP   | 64    | 144   |
| >ABL1-E459C RMERPEGCPI  | 455   | >ABL1-E459C RMGRPEGCP   | 160   | 295   |
| >ABL1-E459C RMERPEGCPI  | 497   | >ABL1-E459C RMGRPEGCP   | 421   | 76    |
| >ABL1-E459C LEKDYRMER   | 437   | >ABL1-E459C LEKDYRMGR   | 1136  | 699   |
| >ABL1-E459C LEKDYRMER   | 1006  | >ABL1-E459C LEKDYRMGR   | 480   | 526   |
| >ABL1-E459C LLEKDYRMER  | 313   | >ABL1-E459C LLEKDYRMGR  | 273   | 40    |
| >ABL1-E459C ELLEKDYRME  | 24    | >ABL1-E459C ELLEKDYRMC  | 31    | 7     |
| >ABL1-E459C ELLEKDYRME  | 51    | >ABL1-E459C ELLEKDYRMC  | 65    | 14    |
| >ABL1-E459C ELLEKDYRME  | 168   | >ABL1-E459C ELLEKDYRMC  | 145   | 23    |
| >ABL1-E459K ERPEGCPEKV  | 2091  | >ABL1-E459K KRPEGCPEKV  | 364   | 1727  |
| >ABL1-E459K MERPEGCPEI  | 184   | >ABL1-E459K MKRPEGCPEI  | 28    | 156   |
| >ABL1-E459K MERPEGCPEI  | 2875  | >ABL1-E459K MKRPEGCPEI  | 121   | 2754  |
| >ABL1-E459K MERPEGCPEI  | 1647  | >ABL1-E459K MKRPEGCPEI  | 68    | 1579  |
| >ABL1-E459K MERPEGCPEI  | 39    | >ABL1-E459K MKRPEGCPEI  | 15465 | 15426 |
| >ABL1-E459K RMERPEGCPI  | 208   | >ABL1-E459K RMKRPEGCP   | 64    | 144   |
| >ABL1-E459K RMERPEGCPI  | 455   | >ABL1-E459K RMKRPEGCP   | 362   | 93    |
| >ABL1-E459K RMERPEGCPI  | 497   | >ABL1-E459K RMKRPEGCP   | 7     | 490   |
| >ABL1-E459K RMERPEGCPI  | 1384  | >ABL1-E459K RMKRPEGCP   | 89    | 1295  |
| >ABL1-E459K LEKDYRMER   | 437   | >ABL1-E459K LEKDYRMKR   | 549   | 112   |
| >ABL1-E459K LEKDYRMER   | 1006  | >ABL1-E459K LEKDYRMKR   | 435   | 571   |
| >ABL1-E459K LLEKDYRMER  | 313   | >ABL1-E459K LLEKDYRMKR  | 298   | 15    |
| >ABL1-E459K ELLEKDYRME  | 24    | >ABL1-E459K ELLEKDYRMK  | 35    | 11    |
| >ABL1-E459K ELLEKDYRME  | 51    | >ABL1-E459K ELLEKDYRMK  | 69    | 18    |
| >ABL1-E459K ELLEKDYRME  | 168   | >ABL1-E459K ELLEKDYRMK  | 107   | 61    |
| >ABL1-E459C MERPEGCPEI  | 10686 | >ABL1-E459C MQRPEGCPE   | 155   | 10531 |
| >ABL1-E459C MERPEGCPEI  | 7017  | >ABL1-E459C MQRPEGCPE   | 261   | 6756  |
| >ABL1-E459C MERPEGCPEI  | 184   | >ABL1-E459C MQRPEGCPE   | 8     | 176   |
| >ABL1-E459C MERPEGCPE   | 7722  | >ABL1-E459C MQRPEGCPE   | 275   | 7447  |
| >ABL1-E459C MERPEGCPEI  | 2875  | >ABL1-E459C MQRPEGCPE   | 117   | 2758  |
| >ABL1-E459C MERPEGCPEI  | 1647  | >ABL1-E459C MQRPEGCPE   | 71    | 1576  |
| >ABL1-E459C MERPEGCPEI  | 39    | >ABL1-E459C MQRPEGCPE   | 7665  | 7626  |
| >ABL1-E459C RMERPEGC    | 1048  | >ABL1-E459C RMQRPEGC    | 200   | 848   |
| >ABL1-E459C RMERPEGCPI  | 208   | >ABL1-E459C RMQRPEGCP   | 99    | 109   |
| >ABL1-E459C RMERPEGCPI  | 455   | >ABL1-E459C RMQRPEGCP   | 67    | 388   |
| >ABL1-E459C RMERPEGCPI  | 497   | >ABL1-E459C RMQRPEGCP   | 113   | 384   |

|                         |       |                         |      |       |
|-------------------------|-------|-------------------------|------|-------|
| >ABL1-E459C RMERPEGCP   | 1384  | >ABL1-E459C RMQRPEGCP   | 307  | 1077  |
| >ABL1-E459C LEKDYRMER   | 437   | >ABL1-E459C LEKDYRMQR   | 484  | 47    |
| >ABL1-E459C LLEKDYRMER  | 313   | >ABL1-E459C LLEKDYRMQI  | 389  | 76    |
| >ABL1-E459C ELLEKDYRME  | 24    | >ABL1-E459C ELLEKDYRMC  | 28   | 4     |
| >ABL1-E459C ELLEKDYRME  | 51    | >ABL1-E459C ELLEKDYRMC  | 47   | 4     |
| >ABL1-E459C ELLEKDYRME  | 168   | >ABL1-E459C ELLEKDYRMC  | 155  | 13    |
| >ABL1-F311I·FYIITEFM    | 84    | >ABL1-F311I·IYIITEFM    | 275  | 191   |
| >ABL1-F311I·FYIITEFMTY  | 435   | >ABL1-F311I·IYIITEFMTY  | 998  | 563   |
| >ABL1-F311I·FYIITEFM    | 412   | >ABL1-F311I·IYIITEFM    | 3096 | 2684  |
| >ABL1-F311I·FYIITEFM    | 251   | >ABL1-F311I·IYIITEFM    | 235  | 16    |
| >ABL1-F311I·FYIITEFM    | 835   | >ABL1-F311I·IYIITEFM    | 212  | 623   |
| >ABL1-F311I·FYIITEFM    | 22    | >ABL1-F311I·IYIITEFM    | 109  | 87    |
| >ABL1-F311I·FYIITEFMT   | 203   | >ABL1-F311I·IYIITEFMT   | 1438 | 1235  |
| >ABL1-F311I·FYIITEFMTY  | 32    | >ABL1-F311I·IYIITEFMTY  | 150  | 118   |
| >ABL1-F311I·FYIITEFMTY  | 23    | >ABL1-F311I·IYIITEFMTY  | 25   | 2     |
| >ABL1-F311I·FYIITEFMTY  | 124   | >ABL1-F311I·IYIITEFMTY  | 63   | 61    |
| >ABL1-F311I·FYIITEFMTY  | 114   | >ABL1-F311I·IYIITEFMTY  | 91   | 23    |
| >ABL1-F311I·FYIITEFMTY  | 308   | >ABL1-F311I·IYIITEFMTY  | 425  | 117   |
| >ABL1-F311I·PFYIITEF    | 48    | >ABL1-F311I·PIYIITEF    | 2314 | 2266  |
| >ABL1-F311I·PFYIITEF    | 105   | >ABL1-F311I·PIYIITEF    | 8007 | 7902  |
| >ABL1-F311I·PFYIITEFMTY | 11    | >ABL1-F311I·PIYIITEFMTY | 31   | 20    |
| >ABL1-F311I·PFYIITEFMTY | 914   | >ABL1-F311I·PIYIITEFMTY | 444  | 470   |
| >ABL1-F311I·PFYIITEF    | 5322  | >ABL1-F311I·PIYIITEF    | 415  | 4907  |
| >ABL1-F311I·PFYIITEFMTY | 339   | >ABL1-F311I·PIYIITEFMTY | 159  | 180   |
| >ABL1-F311I·LLGVCTREPP  | 13033 | >ABL1-F311I·LLGVCTREPP  | 381  | 12652 |
| >ABL1-F311I·LLGVCTREPP  | 10626 | >ABL1-F311I·LLGVCTREPP  | 182  | 10444 |
| >ABL1-F311I·LLGVCTREPP  | 10590 | >ABL1-F311I·LLGVCTREPP  | 103  | 10487 |
| >ABL1-F311I·LLGVCTREPP  | 13334 | >ABL1-F311I·LLGVCTREPP  | 193  | 13141 |
| >ABL1-F311I·LLGVCTREPP  | 16605 | >ABL1-F311I·LLGVCTREPP  | 374  | 16231 |
| >ABL1-F311I·LLGVCTREPP  | 5368  | >ABL1-F311I·LLGVCTREPP  | 39   | 5329  |
| >ABL1-F311I·LLGVCTREPP  | 86    | >ABL1-F311I·LLGVCTREPP  | 3657 | 3571  |
| >ABL1-F311I·LLGVCTREPP  | 183   | >ABL1-F311I·LLGVCTREPP  | 4099 | 3916  |
| >ABL1-F311I·PPFYIITEF   | 19    | >ABL1-F311I·PPIYIITEF   | 60   | 41    |
| >ABL1-F311I·PPFYIITEFM  | 13    | >ABL1-F311I·PPIYIITEFM  | 34   | 21    |
| >ABL1-F311I·PPFYIITEF   | 290   | >ABL1-F311I·PPIYIITEF   | 1353 | 1063  |
| >ABL1-F311I·PPFYIITEF   | 110   | >ABL1-F311I·PPIYIITEF   | 108  | 2     |
| >ABL1-F311I·PPFYIITEF   | 161   | >ABL1-F311I·PPIYIITEF   | 76   | 85    |
| >ABL1-F311I·PPFYIITEF   | 114   | >ABL1-F311I·PPIYIITEF   | 124  | 10    |
| >ABL1-F311I·PPFYIITEF   | 48    | >ABL1-F311I·PPIYIITEF   | 50   | 2     |
| >ABL1-F311I·EPPFYIITEF  | 447   | >ABL1-F311I·EPPIYIITEF  | 770  | 323   |
| >ABL1-F311I·EPPFYIITEFM | 438   | >ABL1-F311I·EPPIYIITEFM | 1321 | 883   |
| >ABL1-F311I·EPPFYIITEFM | 419   | >ABL1-F311I·EPPIYIITEFM | 487  | 68    |
| >ABL1-F311I·EPPFYIITEFM | 513   | >ABL1-F311I·EPPIYIITEFM | 220  | 293   |



|                         |      |                        |      |      |
|-------------------------|------|------------------------|------|------|
| >ABL1-F311I·EPPFYIITEF  | 399  | >ABL1-F311I·EPPYIITEF  | 299  | 100  |
| >ABL1-F311I·REPPFYIITEF | 117  | >ABL1-F311I·REPPYIITEF | 115  | 2    |
| >ABL1-F311I·REPPFYIITEF | 64   | >ABL1-F311I·REPPYIITEF | 136  | 72   |
| >ABL1-F311I·REPPFYIITEF | 414  | >ABL1-F311I·REPPYIITEF | 694  | 280  |
| >ABL1-F311I·REPPFYII    | 154  | >ABL1-F311I·REPPYII    | 214  | 60   |
| >ABL1-F311I·REPPFYII    | 212  | >ABL1-F311I·REPPYII    | 418  | 206  |
| >ABL1-F311I·REPPFYIIT   | 399  | >ABL1-F311I·REPPYIIT   | 759  | 360  |
| >ABL1-F311I·REPPFYIITEF | 176  | >ABL1-F311I·REPPYIITEF | 233  | 57   |
| >ABL1-F311I·REPPFYII    | 160  | >ABL1-F311I·REPPYII    | 41   | 119  |
| >ABL1-F311I·REPPFYIIT   | 347  | >ABL1-F311I·REPPYIIT   | 563  | 216  |
| >ABL1-F311I·REPPFYIITEF | 72   | >ABL1-F311I·REPPYIITEF | 98   | 26   |
| >ABL1-F311I·REPPFYII    | 371  | >ABL1-F311I·REPPYII    | 624  | 253  |
| >ABL1-F311I·TREPPFYII   | 451  | >ABL1-F311I·TREPPYII   | 488  | 37   |
| >ABL1-F311I·CTREPPFYI   | 184  | >ABL1-F311I·CTREPPYI   | 560  | 376  |
| >ABL1-F311I·CTREPPFY    | 33   | >ABL1-F311I·CTREPPYI   | 142  | 109  |
| >ABL1-F311I·CTREPPFY    | 35   | >ABL1-F311I·CTREPPYI   | 84   | 49   |
| >ABL1-F311I·CTREPPFYI   | 1600 | >ABL1-F311I·CTREPPYI   | 360  | 1240 |
| >ABL1-F311I·CTREPPFY    | 84   | >ABL1-F311I·CTREPPYI   | 583  | 499  |
| >ABL1-F311I·CTREPPFY    | 47   | >ABL1-F311I·CTREPPYI   | 177  | 130  |
| >ABL1-F311I·CTREPPFYI   | 20   | >ABL1-F311I·CTREPPYI   | 12   | 8    |
| >ABL1-F311I·CTREPPFYII  | 67   | >ABL1-F311I·CTREPPYII  | 62   | 5    |
| >ABL1-F311I·CTREPPFYIIT | 363  | >ABL1-F311I·CTREPPYIIT | 356  | 7    |
| >ABL1-F311I·CTREPPFY    | 117  | >ABL1-F311I·CTREPPYI   | 352  | 235  |
| >ABL1-F311I·CTREPPFYI   | 118  | >ABL1-F311I·CTREPPYI   | 653  | 535  |
| >ABL1-F311I·CTREPPFYII  | 276  | >ABL1-F311I·CTREPPYII  | 623  | 347  |
| >ABL1-F311I·CTREPPFYI   | 213  | >ABL1-F311I·CTREPPYI   | 1061 | 848  |
| >ABL1-F311I·CTREPPFY    | 375  | >ABL1-F311I·CTREPPYI   | 2443 | 2068 |
| >ABL1-F311I·CTREPPFY    | 11   | >ABL1-F311I·CTREPPYI   | 12   | 1    |
| >ABL1-F311I·CTREPPFYI   | 131  | >ABL1-F311I·CTREPPYI   | 313  | 182  |
| >ABL1-F311I·CTREPPFYII  | 593  | >ABL1-F311I·CTREPPYII  | 384  | 209  |
| >ABL1-F311I·CTREPPFYI   | 468  | >ABL1-F311I·CTREPPYI   | 852  | 384  |
| >ABL1-F311I·CTREPPFYII  | 193  | >ABL1-F311I·CTREPPYII  | 371  | 178  |
| >ABL1-F311I·CTREPPFY    | 492  | >ABL1-F311I·CTREPPYI   | 698  | 206  |
| >ABL1-F311I·CTREPPFYI   | 11   | >ABL1-F311I·CTREPPYI   | 19   | 8    |
| >ABL1-F311I·CTREPPFYII  | 60   | >ABL1-F311I·CTREPPYII  | 99   | 39   |
| >ABL1-F311I·VCTREPPFY   | 296  | >ABL1-F311I·VCTREPPYI  | 737  | 441  |
| >ABL1-F311I·VCTREPPFY   | 77   | >ABL1-F311I·VCTREPPYI  | 563  | 486  |
| >ABL1-F311I·GVCTREPPFY  | 401  | >ABL1-F311I·GVCTREPPYI | 700  | 299  |
| >ABL1-F311I·GVCTREPPFY  | 229  | >ABL1-F311I·GVCTREPPYI | 967  | 738  |
| >ABL1-F311I·LGVCTREPPF  | 255  | >ABL1-F311I·LGVCTREPPI | 8610 | 8355 |
| >ABL1-F311I·LGVCTREPPF  | 125  | >ABL1-F311I·LGVCTREPPI | 3360 | 3235 |
| >ABL1-F311I·LGVCTREPPF  | 869  | >ABL1-F311I·LGVCTREPPI | 315  | 554  |
| >ABL1-F311I·FYIITEFM    | 84   | >ABL1-F311I·LYIITEFM   | 300  | 216  |

|                         |       |                         |      |       |
|-------------------------|-------|-------------------------|------|-------|
| >ABL1-F311L FYIITEFMTY  | 435   | >ABL1-F311L LYIITEFMTY  | 827  | 392   |
| >ABL1-F311L FYIITEFM    | 412   | >ABL1-F311L LYIITEFM    | 2336 | 1924  |
| >ABL1-F311L FYIITEFM    | 251   | >ABL1-F311L LYIITEFM    | 581  | 330   |
| >ABL1-F311L FYIITEFM    | 835   | >ABL1-F311L LYIITEFM    | 496  | 339   |
| >ABL1-F311L FYIITEFM    | 22    | >ABL1-F311L LYIITEFM    | 37   | 15    |
| >ABL1-F311L FYIITEFMT   | 203   | >ABL1-F311L LYIITEFMT   | 452  | 249   |
| >ABL1-F311L FYIITEFMTY  | 32    | >ABL1-F311L LYIITEFMTY  | 55   | 23    |
| >ABL1-F311L FYIITEFMTY  | 23    | >ABL1-F311L LYIITEFMTY  | 33   | 10    |
| >ABL1-F311L FYIITEFMTY  | 124   | >ABL1-F311L LYIITEFMTY  | 84   | 40    |
| >ABL1-F311L FYIITEFMTY  | 114   | >ABL1-F311L LYIITEFMTY  | 244  | 130   |
| >ABL1-F311L FYIITEFMTY  | 308   | >ABL1-F311L LYIITEFMTY  | 573  | 265   |
| >ABL1-F311L FYIITEFM    | 548   | >ABL1-F311L LYIITEFM    | 405  | 143   |
| >ABL1-F311L PFYIITEFM   | 2747  | >ABL1-F311L PLYIITEFM   | 179  | 2568  |
| >ABL1-F311L PFYIITEFM   | 16463 | >ABL1-F311L PLYIITEFM   | 111  | 16352 |
| >ABL1-F311L PFYIITEFMT  | 21384 | >ABL1-F311L PLYIITEFMT  | 330  | 21054 |
| >ABL1-F311L PFYIITEFM   | 19397 | >ABL1-F311L PLYIITEFM   | 270  | 19127 |
| >ABL1-F311L PFYIITEF    | 48    | >ABL1-F311L PLYIITEF    | 993  | 945   |
| >ABL1-F311L PFYIITEF    | 105   | >ABL1-F311L PLYIITEF    | 5809 | 5704  |
| >ABL1-F311L PFYIITEFMTY | 11    | >ABL1-F311L PLYIITEFMTY | 23   | 12    |
| >ABL1-F311L PFYIITEFMTY | 914   | >ABL1-F311L PLYIITEFMTY | 355  | 559   |
| >ABL1-F311L PFYIITEF    | 5322  | >ABL1-F311L PLYIITEF    | 340  | 4982  |
| >ABL1-F311L PFYIITEFMTY | 339   | >ABL1-F311L PLYIITEFMTY | 72   | 267   |
| >ABL1-F311L PFYIITEF    | 2515  | >ABL1-F311L PLYIITEF    | 270  | 2245  |
| >ABL1-F311L PFYIITEFMTY | 3424  | >ABL1-F311L PLYIITEFMTY | 492  | 2932  |
| >ABL1-F311L LLGVCTREPP  | 13033 | >ABL1-F311L LLGVCTREPP  | 322  | 12711 |
| >ABL1-F311L LLGVCTREPP  | 7300  | >ABL1-F311L LLGVCTREPP  | 200  | 7100  |
| >ABL1-F311L LLGVCTREPP  | 10626 | >ABL1-F311L LLGVCTREPP  | 214  | 10412 |
| >ABL1-F311L LLGVCTREPP  | 10590 | >ABL1-F311L LLGVCTREPP  | 105  | 10485 |
| >ABL1-F311L LLGVCTREPP  | 13334 | >ABL1-F311L LLGVCTREPP  | 135  | 13199 |
| >ABL1-F311L LLGVCTREPP  | 16605 | >ABL1-F311L LLGVCTREPP  | 193  | 16412 |
| >ABL1-F311L LLGVCTREPP  | 5368  | >ABL1-F311L LLGVCTREPP  | 13   | 5355  |
| >ABL1-F311L LLGVCTREPP  | 86    | >ABL1-F311L LLGVCTREPP  | 1727 | 1641  |
| >ABL1-F311L LLGVCTREPP  | 183   | >ABL1-F311L LLGVCTREPP  | 3297 | 3114  |
| >ABL1-F311L PPFYIITEF   | 19    | >ABL1-F311L PPLYIITEF   | 109  | 90    |
| >ABL1-F311L PPFYIITEFM  | 13    | >ABL1-F311L PPLYIITEFM  | 58   | 45    |
| >ABL1-F311L PPFYIITEF   | 290   | >ABL1-F311L PPLYIITEF   | 1008 | 718   |
| >ABL1-F311L PPFYIITEF   | 110   | >ABL1-F311L PPLYIITEF   | 193  | 83    |
| >ABL1-F311L PPFYIITEF   | 161   | >ABL1-F311L PPLYIITEF   | 120  | 41    |
| >ABL1-F311L PPFYIITEF   | 114   | >ABL1-F311L PPLYIITEF   | 824  | 710   |
| >ABL1-F311L PPFYIITEF   | 48    | >ABL1-F311L PPLYIITEF   | 42   | 6     |
| >ABL1-F311L EPPFYIITEF  | 447   | >ABL1-F311L EPPLYIITEF  | 1301 | 854   |
| >ABL1-F311L EPPFYIITEFM | 438   | >ABL1-F311L EPPLYIITEFM | 725  | 287   |
| >ABL1-F311L EPPFYIITEFM | 419   | >ABL1-F311L EPPLYIITEFM | 444  | 25    |

|                         |     |                         |      |      |
|-------------------------|-----|-------------------------|------|------|
| >ABL1-F311L EPPFYIITEFM | 513 | >ABL1-F311L EPPLYIITEFM | 371  | 142  |
| >ABL1-F311L EPPFYIITEF  | 399 | >ABL1-F311L EPPLYIITEF  | 395  | 4    |
| >ABL1-F311L REPPFYIITEF | 117 | >ABL1-F311L REPPLYIITEF | 119  | 2    |
| >ABL1-F311L REPPFYIITEF | 64  | >ABL1-F311L REPPLYIITEF | 137  | 73   |
| >ABL1-F311L REPPFYIITEF | 414 | >ABL1-F311L REPPLYIITEF | 605  | 191  |
| >ABL1-F311L REPPFYII    | 154 | >ABL1-F311L REPPLYII    | 334  | 180  |
| >ABL1-F311L REPPFYII    | 212 | >ABL1-F311L REPPLYII    | 279  | 67   |
| >ABL1-F311L REPPFYIIT   | 399 | >ABL1-F311L REPPLYIIT   | 402  | 3    |
| >ABL1-F311L REPPFYIITEF | 176 | >ABL1-F311L REPPLYIITEF | 165  | 11   |
| >ABL1-F311L REPPFYII    | 160 | >ABL1-F311L REPPLYII    | 61   | 99   |
| >ABL1-F311L REPPFYIIT   | 347 | >ABL1-F311L REPPLYIIT   | 572  | 225  |
| >ABL1-F311L REPPFYIITEF | 72  | >ABL1-F311L REPPLYIITEF | 100  | 28   |
| >ABL1-F311L REPPFYII    | 371 | >ABL1-F311L REPPLYII    | 936  | 565  |
| >ABL1-F311L TREPPFYII   | 451 | >ABL1-F311L TREPPLYII   | 1082 | 631  |
| >ABL1-F311L CTREPPFY    | 923 | >ABL1-F311L CTREPPLY    | 457  | 466  |
| >ABL1-F311L CTREPPFYI   | 184 | >ABL1-F311L CTREPPLYI   | 1157 | 973  |
| >ABL1-F311L CTREPPFY    | 33  | >ABL1-F311L CTREPPLY    | 309  | 276  |
| >ABL1-F311L CTREPPFY    | 35  | >ABL1-F311L CTREPPLY    | 65   | 30   |
| >ABL1-F311L CTREPPFY    | 84  | >ABL1-F311L CTREPPLY    | 56   | 28   |
| >ABL1-F311L CTREPPFY    | 47  | >ABL1-F311L CTREPPLY    | 122  | 75   |
| >ABL1-F311L CTREPPFYI   | 20  | >ABL1-F311L CTREPPLYI   | 13   | 7    |
| >ABL1-F311L CTREPPFYII  | 67  | >ABL1-F311L CTREPPLYII  | 65   | 2    |
| >ABL1-F311L CTREPPFYIIT | 363 | >ABL1-F311L CTREPPLYIIT | 407  | 44   |
| >ABL1-F311L CTREPPFY    | 117 | >ABL1-F311L CTREPPLY    | 356  | 239  |
| >ABL1-F311L CTREPPFYI   | 118 | >ABL1-F311L CTREPPLYI   | 2358 | 2240 |
| >ABL1-F311L CTREPPFYII  | 276 | >ABL1-F311L CTREPPLYII  | 788  | 512  |
| >ABL1-F311L CTREPPFYI   | 213 | >ABL1-F311L CTREPPLYI   | 1686 | 1473 |
| >ABL1-F311L CTREPPFY    | 375 | >ABL1-F311L CTREPPLY    | 433  | 58   |
| >ABL1-F311L CTREPPFY    | 11  | >ABL1-F311L CTREPPLY    | 10   | 1    |
| >ABL1-F311L CTREPPFYI   | 131 | >ABL1-F311L CTREPPLYI   | 116  | 15   |
| >ABL1-F311L CTREPPFYII  | 593 | >ABL1-F311L CTREPPLYII  | 286  | 307  |
| >ABL1-F311L CTREPPFYI   | 468 | >ABL1-F311L CTREPPLYI   | 1101 | 633  |
| >ABL1-F311L CTREPPFYII  | 193 | >ABL1-F311L CTREPPLYII  | 549  | 356  |
| >ABL1-F311L CTREPPFY    | 492 | >ABL1-F311L CTREPPLY    | 295  | 197  |
| >ABL1-F311L CTREPPFYI   | 11  | >ABL1-F311L CTREPPLYI   | 17   | 6    |
| >ABL1-F311L CTREPPFYII  | 60  | >ABL1-F311L CTREPPLYII  | 68   | 8    |
| >ABL1-F311L VCTREPPFY   | 296 | >ABL1-F311L VCTREPPLY   | 754  | 458  |
| >ABL1-F311L VCTREPPFY   | 77  | >ABL1-F311L VCTREPPLY   | 117  | 40   |
| >ABL1-F311L GVCTREPPFY  | 401 | >ABL1-F311L GVCTREPPLY  | 1017 | 616  |
| >ABL1-F311L GVCTREPPFY  | 229 | >ABL1-F311L GVCTREPPLY  | 1731 | 1502 |
| >ABL1-F311L LGVCTREPPF  | 586 | >ABL1-F311L LGVCTREPPL  | 370  | 216  |
| >ABL1-F311L LGVCTREPPF  | 255 | >ABL1-F311L LGVCTREPPL  | 5281 | 5026 |
| >ABL1-F311L LGVCTREPPF  | 125 | >ABL1-F311L LGVCTREPPL  | 2435 | 2310 |

|                        |       |                        |      |       |
|------------------------|-------|------------------------|------|-------|
| >ABL1-F317L FMTYGNLLD\ | 219   | >ABL1-F317L LMTYGNLLD\ | 468  | 249   |
| >ABL1-F317L FMTYGNLL   | 20    | >ABL1-F317L LMTYGNLL   | 204  | 184   |
| >ABL1-F317L FMTYGNLLD\ | 10    | >ABL1-F317L LMTYGNLLD\ | 40   | 30    |
| >ABL1-F317L FMTYGNLL   | 3     | >ABL1-F317L LMTYGNLL   | 18   | 15    |
| >ABL1-F317L FMTYGNLLD\ | 2     | >ABL1-F317L LMTYGNLLD\ | 10   | 8     |
| >ABL1-F317L FMTYGNLL   | 14    | >ABL1-F317L LMTYGNLL   | 126  | 112   |
| >ABL1-F317L FMTYGNLLD\ | 12    | >ABL1-F317L LMTYGNLLD\ | 97   | 85    |
| >ABL1-F317L FMTYGNLL   | 28    | >ABL1-F317L LMTYGNLL   | 301  | 273   |
| >ABL1-F317L FMTYGNLLD\ | 11    | >ABL1-F317L LMTYGNLLD\ | 62   | 51    |
| >ABL1-F317L FMTYGNLL   | 34    | >ABL1-F317L LMTYGNLL   | 292  | 258   |
| >ABL1-F317L FMTYGNLLD\ | 7     | >ABL1-F317L LMTYGNLLD\ | 29   | 22    |
| >ABL1-F317L FMTYGNLL   | 15    | >ABL1-F317L LMTYGNLL   | 184  | 169   |
| >ABL1-F317L FMTYGNLLD\ | 6     | >ABL1-F317L LMTYGNLLD\ | 28   | 22    |
| >ABL1-F317L FMTYGNLL   | 26    | >ABL1-F317L LMTYGNLL   | 281  | 255   |
| >ABL1-F317L FMTYGNLLD\ | 11    | >ABL1-F317L LMTYGNLLD\ | 42   | 31    |
| >ABL1-F317L FMTYGNLL   | 327   | >ABL1-F317L LMTYGNLL   | 2373 | 2046  |
| >ABL1-F317L FMTYGNLLD\ | 19    | >ABL1-F317L LMTYGNLLD\ | 77   | 58    |
| >ABL1-F317L FMTYGNLL   | 5     | >ABL1-F317L LMTYGNLL   | 13   | 8     |
| >ABL1-F317L FMTYGNLLD\ | 4     | >ABL1-F317L LMTYGNLLD\ | 10   | 6     |
| >ABL1-F317L FMTYGNLLD\ | 247   | >ABL1-F317L LMTYGNLLD\ | 220  | 27    |
| >ABL1-F317L FMTYGNLLD\ | 178   | >ABL1-F317L LMTYGNLLD\ | 294  | 116   |
| >ABL1-F317L FMTYGNLLD\ | 485   | >ABL1-F317L LMTYGNLLD\ | 237  | 248   |
| >ABL1-F317L FMTYGNLLD\ | 10    | >ABL1-F317L LMTYGNLLD\ | 17   | 7     |
| >ABL1-F317L FMTYGNLLD\ | 128   | >ABL1-F317L LMTYGNLLD\ | 118  | 10    |
| >ABL1-F317L FMTYGNLL   | 406   | >ABL1-F317L LMTYGNLL   | 2648 | 2242  |
| >ABL1-F317L FMTYGNLLD\ | 27    | >ABL1-F317L LMTYGNLLD\ | 115  | 88    |
| >ABL1-F317L FMTYGNLL   | 128   | >ABL1-F317L LMTYGNLL   | 295  | 167   |
| >ABL1-F317L FMTYGNLLD\ | 28    | >ABL1-F317L LMTYGNLLD\ | 65   | 37    |
| >ABL1-F317L FMTYGNLLD\ | 450   | >ABL1-F317L LMTYGNLLD\ | 918  | 468   |
| >ABL1-F317L FMTYGNLL   | 324   | >ABL1-F317L LMTYGNLL   | 5817 | 5493  |
| >ABL1-F317L FMTYGNLL   | 482   | >ABL1-F317L LMTYGNLL   | 1542 | 1060  |
| >ABL1-F317L FMTYGNLLD\ | 163   | >ABL1-F317L LMTYGNLLD\ | 100  | 63    |
| >ABL1-F317L EFMTYGNL   | 5591  | >ABL1-F317L ELMTYGNL   | 75   | 5516  |
| >ABL1-F317L EFMTYGNLL  | 1432  | >ABL1-F317L ELMTYGNLL  | 17   | 1415  |
| >ABL1-F317L EFMTYGNL   | 15805 | >ABL1-F317L ELMTYGNL   | 374  | 15431 |
| >ABL1-F317L EFMTYGNLL  | 15538 | >ABL1-F317L ELMTYGNLL  | 414  | 15124 |
| >ABL1-F317L EFMTYGNL   | 23633 | >ABL1-F317L ELMTYGNL   | 371  | 23262 |
| >ABL1-F317L EFMTYGNLL  | 24255 | >ABL1-F317L ELMTYGNLL  | 459  | 23796 |
| >ABL1-F317L EFMTYGNLL  | 22500 | >ABL1-F317L ELMTYGNLL  | 435  | 22065 |
| >ABL1-F317L EFMTYGNL   | 15908 | >ABL1-F317L ELMTYGNL   | 124  | 15784 |
| >ABL1-F317L EFMTYGNLL  | 16155 | >ABL1-F317L ELMTYGNLL  | 153  | 16002 |
| >ABL1-F317L EFMTYGNL   | 27400 | >ABL1-F317L ELMTYGNL   | 156  | 27244 |
| >ABL1-F317L EFMTYGNLL  | 26497 | >ABL1-F317L ELMTYGNLL  | 128  | 26369 |

|                         |      |                         |      |      |
|-------------------------|------|-------------------------|------|------|
| >ABL1-F317L EFMTYGNLLC  | 996  | >ABL1-F317L ELMTYGNLLC  | 114  | 882  |
| >ABL1-F317L EFMTYGNLLC  | 126  | >ABL1-F317L ELMTYGNLLC  | 50   | 76   |
| >ABL1-F317L EFMTYGNLLC  | 240  | >ABL1-F317L ELMTYGNLLC  | 119  | 121  |
| >ABL1-F317L EFMTYGNLLC  | 21   | >ABL1-F317L ELMTYGNLLC  | 60   | 39   |
| >ABL1-F317L EFMTYGNL    | 5200 | >ABL1-F317L ELMTYGNL    | 271  | 4929 |
| >ABL1-F317L EFMTYGNLL   | 4705 | >ABL1-F317L ELMTYGNLL   | 236  | 4469 |
| >ABL1-F317L EFMTYGNL    | 3608 | >ABL1-F317L ELMTYGNL    | 104  | 3504 |
| >ABL1-F317L EFMTYGNLL   | 5557 | >ABL1-F317L ELMTYGNLL   | 258  | 5299 |
| >ABL1-F317L EFMTYGNLLC  | 565  | >ABL1-F317L ELMTYGNLLC  | 118  | 447  |
| >ABL1-F317L EFMTYGNLLC  | 1007 | >ABL1-F317L ELMTYGNLLC  | 295  | 712  |
| >ABL1-F317L EFMTYGNLLC  | 4307 | >ABL1-F317L ELMTYGNLLC  | 438  | 3869 |
| >ABL1-F317L EFMTYGNLL   | 2675 | >ABL1-F317L ELMTYGNLL   | 385  | 2290 |
| >ABL1-F317L EFMTYGNLLC  | 319  | >ABL1-F317L ELMTYGNLLC  | 393  | 74   |
| >ABL1-F317L REPPFYIITEF | 117  | >ABL1-F317L REPPFYIITEL | 1918 | 1801 |
| >ABL1-F317L REPPFYIITEF | 64   | >ABL1-F317L REPPFYIITEL | 1326 | 1262 |
| >ABL1-F317L REPPFYIITEF | 414  | >ABL1-F317L REPPFYIITEL | 4308 | 3894 |
| >ABL1-F317L REPPFYIITEF | 811  | >ABL1-F317L REPPFYIITEL | 62   | 749  |
| >ABL1-F317L REPPFYIITEF | 176  | >ABL1-F317L REPPFYIITEL | 62   | 114  |
| >ABL1-F317L REPPFYIITEF | 991  | >ABL1-F317L REPPFYIITEL | 484  | 507  |
| >ABL1-F317L REPPFYIITEF | 72   | >ABL1-F317L REPPFYIITEL | 32   | 40   |
| >ABL1-F317L REPPFYIITEF | 1407 | >ABL1-F317L REPPFYIITEL | 443  | 964  |
| >ABL1-F317L REPPFYIITEF | 1780 | >ABL1-F317L REPPFYIITEL | 416  | 1364 |
| >ABL1-F317L TEFMTYGNL   | 491  | >ABL1-F317L TELMTYGNL   | 1783 | 1292 |
| >ABL1-F317L TEFMTYGNL   | 36   | >ABL1-F317L TELMTYGNL   | 28   | 8    |
| >ABL1-F317L TEFMTYGNLL  | 13   | >ABL1-F317L TELMTYGNLL  | 15   | 2    |
| >ABL1-F317L TEFMTYGNL   | 378  | >ABL1-F317L TELMTYGNL   | 841  | 463  |
| >ABL1-F317L TEFMTYGNLL  | 396  | >ABL1-F317L TELMTYGNLL  | 834  | 438  |
| >ABL1-F317L TEFMTYGNL   | 13   | >ABL1-F317L TELMTYGNL   | 35   | 22   |
| >ABL1-F317L TEFMTYGNLL  | 202  | >ABL1-F317L TELMTYGNLL  | 975  | 773  |
| >ABL1-F317L TEFMTYGNL   | 103  | >ABL1-F317L TELMTYGNL   | 167  | 64   |
| >ABL1-F317L TEFMTYGNLL  | 278  | >ABL1-F317L TELMTYGNLL  | 716  | 438  |
| >ABL1-F317L TEFMTYGNLL  | 381  | >ABL1-F317L TELMTYGNLL  | 1192 | 811  |
| >ABL1-F317L TEFMTYGNL   | 120  | >ABL1-F317L TELMTYGNL   | 400  | 280  |
| >ABL1-F317L TEFMTYGNLL  | 11   | >ABL1-F317L TELMTYGNLL  | 12   | 1    |
| >ABL1-F317L ITEFMTYGNL  | 434  | >ABL1-F317L ITELMTYGNL  | 558  | 124  |
| >ABL1-F317L ITEFMTYGNL  | 458  | >ABL1-F317L ITELMTYGNL  | 2385 | 1927 |
| >ABL1-F317L ITEFMTYGNL  | 54   | >ABL1-F317L ITELMTYGNL  | 51   | 3    |
| >ABL1-F317L ITEFMTYGNL  | 175  | >ABL1-F317L ITELMTYGNL  | 158  | 17   |
| >ABL1-F317L ITEFMTYGNL  | 324  | >ABL1-F317L ITELMTYGNL  | 232  | 92   |
| >ABL1-F317L ITEFMTYGNL  | 31   | >ABL1-F317L ITELMTYGNL  | 23   | 8    |
| >ABL1-F317L ITEFMTYGNL  | 257  | >ABL1-F317L ITELMTYGNL  | 267  | 10   |
| >ABL1-F317L ITEFMTYGNL  | 31   | >ABL1-F317L ITELMTYGNL  | 66   | 35   |
| >ABL1-F317L IITEFMTYGNL | 144  | >ABL1-F317L IITEFMTYGNL | 651  | 507  |

|                         |      |                         |      |      |
|-------------------------|------|-------------------------|------|------|
| >ABL1-F317L IITEFMTYGNI | 118  | >ABL1-F317L IITELMTYGNI | 168  | 50   |
| >ABL1-F317L IITEFMTYGNI | 138  | >ABL1-F317L IITELMTYGNI | 176  | 38   |
| >ABL1-F317L IITEFMTYGNI | 388  | >ABL1-F317L IITELMTYGNI | 545  | 157  |
| >ABL1-F317L IITEFMTYGNI | 366  | >ABL1-F317L IITELMTYGNI | 772  | 406  |
| >ABL1-F317L IITEFMTYGNI | 155  | >ABL1-F317L IITELMTYGNI | 230  | 75   |
| >ABL1-F317L IITEFMTY    | 577  | >ABL1-F317L IITELMTY    | 335  | 242  |
| >ABL1-F317L IITEFMTY    | 69   | >ABL1-F317L IITELMTY    | 94   | 25   |
| >ABL1-F317L IITEFMTY    | 133  | >ABL1-F317L IITELMTY    | 172  | 39   |
| >ABL1-F317L IITEFMTY    | 41   | >ABL1-F317L IITELMTY    | 51   | 10   |
| >ABL1-F317L IITEFMTY    | 375  | >ABL1-F317L IITELMTY    | 1313 | 938  |
| >ABL1-F317L IITEFMTY    | 409  | >ABL1-F317L IITELMTY    | 245  | 164  |
| >ABL1-F317L IITEFMTY    | 401  | >ABL1-F317L IITELMTY    | 611  | 210  |
| >ABL1-F317L IITEFMTY    | 121  | >ABL1-F317L IITELMTY    | 121  | 0    |
| >ABL1-F317L YIITEFMT    | 393  | >ABL1-F317L YIITELMT    | 1072 | 679  |
| >ABL1-F317L YIITEFMT    | 62   | >ABL1-F317L YIITELMT    | 324  | 262  |
| >ABL1-F317L YIITEFMTY   | 74   | >ABL1-F317L YIITELMTY   | 44   | 30   |
| >ABL1-F317L YIITEFMTY   | 44   | >ABL1-F317L YIITELMTY   | 26   | 18   |
| >ABL1-F317L YIITEFMTY   | 8    | >ABL1-F317L YIITELMTY   | 3    | 5    |
| >ABL1-F317L YIITEFMTY   | 456  | >ABL1-F317L YIITELMTY   | 1649 | 1193 |
| >ABL1-F317L YIITEFMTY   | 9    | >ABL1-F317L YIITELMTY   | 12   | 3    |
| >ABL1-F317L YIITEFMTY   | 348  | >ABL1-F317L YIITELMTY   | 831  | 483  |
| >ABL1-F317L YIITEFMTY   | 16   | >ABL1-F317L YIITELMTY   | 26   | 10   |
| >ABL1-F317L YIITEFMTY   | 52   | >ABL1-F317L YIITELMTY   | 103  | 51   |
| >ABL1-F317L YIITEFMTY   | 22   | >ABL1-F317L YIITELMTY   | 80   | 58   |
| >ABL1-F317L YIITEFMTY   | 433  | >ABL1-F317L YIITELMTY   | 118  | 315  |
| >ABL1-F317L YIITEFMTY   | 91   | >ABL1-F317L YIITELMTY   | 157  | 66   |
| >ABL1-F317L YIITEFMTY   | 241  | >ABL1-F317L YIITELMTY   | 354  | 113  |
| >ABL1-F317L YIITEFMTY   | 51   | >ABL1-F317L YIITELMTY   | 53   | 2    |
| >ABL1-F317L YIITEFMTY   | 1415 | >ABL1-F317L YIITELMTY   | 321  | 1094 |
| >ABL1-F317L FYIITEFM    | 84   | >ABL1-F317L FYIITELM    | 301  | 217  |
| >ABL1-F317L FYIITEFMTY  | 435  | >ABL1-F317L FYIITELMTY  | 402  | 33   |
| >ABL1-F317L FYIITEFM    | 412  | >ABL1-F317L FYIITELM    | 892  | 480  |
| >ABL1-F317L FYIITEFM    | 251  | >ABL1-F317L FYIITELM    | 212  | 39   |
| >ABL1-F317L FYIITEFM    | 22   | >ABL1-F317L FYIITELM    | 45   | 23   |
| >ABL1-F317L FYIITEFMT   | 203  | >ABL1-F317L FYIITELMT   | 513  | 310  |
| >ABL1-F317L FYIITEFMTY  | 32   | >ABL1-F317L FYIITELMTY  | 56   | 24   |
| >ABL1-F317L FYIITEFMTY  | 550  | >ABL1-F317L FYIITELMTY  | 295  | 255  |
| >ABL1-F317L FYIITEFMTY  | 23   | >ABL1-F317L FYIITELMTY  | 36   | 13   |
| >ABL1-F317L FYIITEFMTY  | 124  | >ABL1-F317L FYIITELMTY  | 143  | 19   |
| >ABL1-F317L FYIITEFMTY  | 114  | >ABL1-F317L FYIITELMTY  | 77   | 37   |
| >ABL1-F317L FYIITEFMTY  | 308  | >ABL1-F317L FYIITELMTY  | 491  | 183  |
| >ABL1-F317L PFYIITEF    | 48   | >ABL1-F317L PFYIITEL    | 661  | 613  |
| >ABL1-F317L PFYIITEF    | 105  | >ABL1-F317L PFYIITEL    | 861  | 756  |

|                         |       |                         |       |       |
|-------------------------|-------|-------------------------|-------|-------|
| >ABL1-F317L PFYIITEFMTY | 11    | >ABL1-F317L PFYIITELMTY | 13    | 2     |
| >ABL1-F317L PFYIITEFMTY | 339   | >ABL1-F317L PFYIITELMTY | 496   | 157   |
| >ABL1-F317L PPFYIITEF   | 19    | >ABL1-F317L PPFYIITEL   | 23    | 4     |
| >ABL1-F317L PPFYIITEFM  | 13    | >ABL1-F317L PPFYIITELM  | 194   | 181   |
| >ABL1-F317L PPFYIITEF   | 290   | >ABL1-F317L PPFYIITEL   | 5047  | 4757  |
| >ABL1-F317L PPFYIITEF   | 110   | >ABL1-F317L PPFYIITEL   | 1937  | 1827  |
| >ABL1-F317L PPFYIITEF   | 161   | >ABL1-F317L PPFYIITEL   | 691   | 530   |
| >ABL1-F317L PPFYIITEF   | 114   | >ABL1-F317L PPFYIITEL   | 1038  | 924   |
| >ABL1-F317L PPFYIITEF   | 48    | >ABL1-F317L PPFYIITEL   | 667   | 619   |
| >ABL1-F317L EPPFYIITEF  | 447   | >ABL1-F317L EPPFYIITEL  | 901   | 454   |
| >ABL1-F317L EPPFYIITEFM | 438   | >ABL1-F317L EPPFYIITELM | 3536  | 3098  |
| >ABL1-F317L EPPFYIITEFM | 419   | >ABL1-F317L EPPFYIITELM | 411   | 8     |
| >ABL1-F317L EPPFYIITEFM | 513   | >ABL1-F317L EPPFYIITELM | 301   | 212   |
| >ABL1-F317L EPPFYIITEF  | 399   | >ABL1-F317L EPPFYIITEL  | 4159  | 3760  |
| >ABL1-F359A FIHRDLAA    | 46    | >ABL1-F359A AIHRDLAA    | 618   | 572   |
| >ABL1-F359A FIHRDLAA    | 74    | >ABL1-F359A AIHRDLAA    | 1539  | 1465  |
| >ABL1-F359A FIHRDLAA    | 379   | >ABL1-F359A AIHRDLAA    | 3064  | 2685  |
| >ABL1-F359A FIHRDLAA    | 150   | >ABL1-F359A AIHRDLAA    | 1433  | 1283  |
| >ABL1-F359A FIHRDLAA    | 8108  | >ABL1-F359A AIHRDLAA    | 216   | 7892  |
| >ABL1-F359A FIHRDLAAR   | 435   | >ABL1-F359A AIHRDLAAR   | 43    | 392   |
| >ABL1-F359A FIHRDLAAR   | 66    | >ABL1-F359A AIHRDLAAR   | 1082  | 1016  |
| >ABL1-F359A NFIHRDLAAR  | 52    | >ABL1-F359A NAIHRDLAAR  | 200   | 148   |
| >ABL1-F359A NFIHRDLAAR  | 26    | >ABL1-F359A NAIHRDLAAR  | 253   | 227   |
| >ABL1-F359A NFIHRDLAAR  | 35    | >ABL1-F359A NAIHRDLAAR  | 15    | 20    |
| >ABL1-F359A NFIHRDLA    | 10600 | >ABL1-F359A NAIHRDLA    | 425   | 10175 |
| >ABL1-F359A NFIHRDLAAR  | 165   | >ABL1-F359A NAIHRDLAAR  | 3058  | 2893  |
| >ABL1-F359A SAMEYLEKKN  | 99    | >ABL1-F359A SAMEYLEKKN  | 13061 | 12962 |
| >ABL1-F359A SAMEYLEKKN  | 23    | >ABL1-F359A SAMEYLEKKN  | 16684 | 16661 |
| >ABL1-F359A KNFIHRDL    | 150   | >ABL1-F359A KNAIHRDL    | 7558  | 7408  |
| >ABL1-F359A KNFIHRDLAA  | 23    | >ABL1-F359A KNAIHRDLAA  | 119   | 96    |
| >ABL1-F359A KNFIHRDLAA  | 124   | >ABL1-F359A KNAIHRDLAA  | 449   | 325   |
| >ABL1-F359A KKNFIHRDL   | 232   | >ABL1-F359A KKNAIHRDL   | 117   | 115   |
| >ABL1-F359A EKKNFIHR    | 464   | >ABL1-F359A EKKNAIHR    | 2555  | 2091  |
| >ABL1-F359A EKKNFIHR    | 177   | >ABL1-F359A EKKNAIHR    | 347   | 170   |
| >ABL1-F359A EKKNFIHR    | 154   | >ABL1-F359A EKKNAIHR    | 1013  | 859   |
| >ABL1-F359A LEKKNFIHR   | 387   | >ABL1-F359A LEKKNAIHR   | 4386  | 3999  |
| >ABL1-F359A LEKKNFIHRDI | 238   | >ABL1-F359A LEKKNAIHRD  | 266   | 28    |
| >ABL1-F359A LEKKNFIHRDI | 181   | >ABL1-F359A LEKKNAIHRD  | 379   | 198   |
| >ABL1-F359A LEKKNFIHRDI | 290   | >ABL1-F359A LEKKNAIHRD  | 485   | 195   |
| >ABL1-F359A LEKKNFIHR   | 115   | >ABL1-F359A LEKKNAIHR   | 370   | 255   |
| >ABL1-F359A YLEKKNFI    | 313   | >ABL1-F359A YLEKKNAI    | 1171  | 858   |
| >ABL1-F359A YLEKKNFI    | 23    | >ABL1-F359A YLEKKNAI    | 75    | 52    |
| >ABL1-F359A YLEKKNFI    | 306   | >ABL1-F359A YLEKKNAI    | 283   | 23    |

|                       |      |                       |       |       |
|-----------------------|------|-----------------------|-------|-------|
| >ABL1-F359AYLEKKNFI   | 57   | >ABL1-F359AYLEKKNAI   | 105   | 48    |
| >ABL1-F359AYLEKKNFI   | 24   | >ABL1-F359AYLEKKNAI   | 32    | 8     |
| >ABL1-F359AYLEKKNFI   | 146  | >ABL1-F359AYLEKKNAI   | 1596  | 1450  |
| >ABL1-F359AYLEKKNFI   | 19   | >ABL1-F359AYLEKKNAI   | 29    | 10    |
| >ABL1-F359AYLEKKNFI   | 789  | >ABL1-F359AYLEKKNAI   | 142   | 647   |
| >ABL1-F359AYLEKKNFIHR | 398  | >ABL1-F359AYLEKKNAIHR | 408   | 10    |
| >ABL1-F359AYLEKKNFIHR | 68   | >ABL1-F359AYLEKKNAIHR | 127   | 59    |
| >ABL1-F359AYLEKKNFI   | 554  | >ABL1-F359AYLEKKNAI   | 226   | 328   |
| >ABL1-F359AYLEKKNFI   | 117  | >ABL1-F359AYLEKKNAI   | 1513  | 1396  |
| >ABL1-F359AYLEKKNF    | 213  | >ABL1-F359AYLEKKNAI   | 22178 | 21965 |
| >ABL1-F359AYLEKKNF    | 27   | >ABL1-F359AYLEKKNAI   | 8993  | 8966  |
| >ABL1-F359AYLEKKNFI   | 86   | >ABL1-F359AYLEKKNAI   | 197   | 111   |
| >ABL1-F359AYLEKKNFIHF | 154  | >ABL1-F359AYLEKKNAIHF | 640   | 486   |
| >ABL1-F359AYLEKKNFIHF | 10   | >ABL1-F359AYLEKKNAIHF | 23    | 13    |
| >ABL1-F359AYLEKKNFIHF | 172  | >ABL1-F359AYLEKKNAIHF | 280   | 108   |
| >ABL1-F359AYLEKKNFIHF | 13   | >ABL1-F359AYLEKKNAIHF | 18    | 5     |
| >ABL1-F359AMEYLEKKNF  | 21   | >ABL1-F359AMEYLEKKNAI | 96    | 75    |
| >ABL1-F359AMEYLEKKNFI | 4    | >ABL1-F359AMEYLEKKNAI | 5     | 1     |
| >ABL1-F359AMEYLEKKNF  | 77   | >ABL1-F359AMEYLEKKNAI | 11158 | 11081 |
| >ABL1-F359AMEYLEKKNF  | 31   | >ABL1-F359AMEYLEKKNAI | 3258  | 3227  |
| >ABL1-F359AMEYLEKKNFI | 277  | >ABL1-F359AMEYLEKKNAI | 209   | 68    |
| >ABL1-F359AMEYLEKKNF  | 183  | >ABL1-F359AMEYLEKKNAI | 3192  | 3009  |
| >ABL1-F359AMEYLEKKNFI | 483  | >ABL1-F359AMEYLEKKNAI | 835   | 352   |
| >ABL1-F359AMEYLEKKNF  | 120  | >ABL1-F359AMEYLEKKNAI | 3406  | 3286  |
| >ABL1-F359AMEYLEKKNF  | 8840 | >ABL1-F359AMEYLEKKNAI | 126   | 8714  |
| >ABL1-F359AMEYLEKKNFI | 507  | >ABL1-F359AMEYLEKKNAI | 338   | 169   |
| >ABL1-F359AMEYLEKKNFI | 28   | >ABL1-F359AMEYLEKKNAI | 51    | 23    |
| >ABL1-F359AMEYLEKKNFI | 277  | >ABL1-F359AMEYLEKKNAI | 867   | 590   |
| >ABL1-F359AMEYLEKKNFI | 3964 | >ABL1-F359AMEYLEKKNAI | 440   | 3524  |
| >ABL1-F359AMEYLEKKNFI | 194  | >ABL1-F359AMEYLEKKNAI | 13536 | 13342 |
| >ABL1-F359CFIHRDLAA   | 46   | >ABL1-F359CFIHRDLAA   | 1618  | 1572  |
| >ABL1-F359CFIHRDLAA   | 74   | >ABL1-F359CFIHRDLAA   | 7669  | 7595  |
| >ABL1-F359CFIHRDLAA   | 379  | >ABL1-F359CFIHRDLAA   | 10889 | 10510 |
| >ABL1-F359CFIHRDLAA   | 150  | >ABL1-F359CFIHRDLAA   | 8168  | 8018  |
| >ABL1-F359CFIHRDLAAR  | 435  | >ABL1-F359CFIHRDLAAR  | 121   | 314   |
| >ABL1-F359CFIHRDLAAR  | 66   | >ABL1-F359CFIHRDLAAR  | 323   | 257   |
| >ABL1-F359CFIHRDLAAR  | 52   | >ABL1-F359CFIHRDLAAR  | 444   | 392   |
| >ABL1-F359CFIHRDLAAR  | 26   | >ABL1-F359CFIHRDLAAR  | 807   | 781   |
| >ABL1-F359CFIHRDLAAR  | 35   | >ABL1-F359CFIHRDLAAR  | 2330  | 2295  |
| >ABL1-F359CFIHRDLAAR  | 165  | >ABL1-F359CFIHRDLAAR  | 961   | 796   |
| >ABL1-F359CSAMEYLEKKN | 99   | >ABL1-F359CSAMEYLEKKN | 15678 | 15579 |
| >ABL1-F359CSAMEYLEKKN | 23   | >ABL1-F359CSAMEYLEKKN | 18197 | 18174 |
| >ABL1-F359CKNFIHRDL   | 150  | >ABL1-F359CKNFIHRDL   | 6434  | 6284  |



|                         |     |                         |       |       |
|-------------------------|-----|-------------------------|-------|-------|
| >ABL1-F359C KNFIHRDLAA  | 23  | >ABL1-F359C KNCIHRDLAA  | 56    | 33    |
| >ABL1-F359C KNFIHRDLAA  | 124 | >ABL1-F359C KNCIHRDLAA  | 312   | 188   |
| >ABL1-F359C KKNFIHRDL   | 232 | >ABL1-F359C KKNCIHRDL   | 53    | 179   |
| >ABL1-F359C KKNFIHRDLA  | 864 | >ABL1-F359C KKNCIHRDLA  | 299   | 565   |
| >ABL1-F359C EKKNFIHR    | 464 | >ABL1-F359C EKKNCIHR    | 873   | 409   |
| >ABL1-F359C EKKNFIHR    | 177 | >ABL1-F359C EKKNCIHR    | 506   | 329   |
| >ABL1-F359C EKKNFIHR    | 154 | >ABL1-F359C EKKNCIHR    | 355   | 201   |
| >ABL1-F359C LEKKNFIHR   | 387 | >ABL1-F359C LEKKNCIHR   | 2948  | 2561  |
| >ABL1-F359C LEKKNFIHRDI | 238 | >ABL1-F359C LEKKNCIHRD  | 449   | 211   |
| >ABL1-F359C LEKKNFIHRDI | 181 | >ABL1-F359C LEKKNCIHRD  | 339   | 158   |
| >ABL1-F359C LEKKNFIHRDI | 290 | >ABL1-F359C LEKKNCIHRD  | 460   | 170   |
| >ABL1-F359C LEKKNFIHR   | 115 | >ABL1-F359C LEKKNCIHR   | 525   | 410   |
| >ABL1-F359C YLEKKNFI    | 313 | >ABL1-F359C YLEKKNCI    | 1920  | 1607  |
| >ABL1-F359C YLEKKNFI    | 23  | >ABL1-F359C YLEKKNCI    | 174   | 151   |
| >ABL1-F359C YLEKKNFI    | 306 | >ABL1-F359C YLEKKNCI    | 2069  | 1763  |
| >ABL1-F359C YLEKKNFI    | 57  | >ABL1-F359C YLEKKNCI    | 431   | 374   |
| >ABL1-F359C YLEKKNFI    | 24  | >ABL1-F359C YLEKKNCI    | 81    | 57    |
| >ABL1-F359C YLEKKNFI    | 146 | >ABL1-F359C YLEKKNCI    | 601   | 455   |
| >ABL1-F359C YLEKKNFI    | 19  | >ABL1-F359C YLEKKNCI    | 46    | 27    |
| >ABL1-F359C YLEKKNFI    | 789 | >ABL1-F359C YLEKKNCI    | 173   | 616   |
| >ABL1-F359C YLEKKNFIHR  | 398 | >ABL1-F359C YLEKKNCIHR  | 275   | 123   |
| >ABL1-F359C YLEKKNFIHR  | 68  | >ABL1-F359C YLEKKNCIHR  | 108   | 40    |
| >ABL1-F359C EYLEKKNFI   | 117 | >ABL1-F359C EYLEKKNCI   | 600   | 483   |
| >ABL1-F359C EYLEKKNF    | 213 | >ABL1-F359C EYLEKKNC    | 24100 | 23887 |
| >ABL1-F359C EYLEKKNF    | 27  | >ABL1-F359C EYLEKKNC    | 9760  | 9733  |
| >ABL1-F359C EYLEKKNFI   | 86  | >ABL1-F359C EYLEKKNCI   | 1186  | 1100  |
| >ABL1-F359C EYLEKKNFIHF | 154 | >ABL1-F359C EYLEKKNCIHF | 555   | 401   |
| >ABL1-F359C EYLEKKNFIHF | 10  | >ABL1-F359C EYLEKKNCIHF | 15    | 5     |
| >ABL1-F359C EYLEKKNFIHF | 172 | >ABL1-F359C EYLEKKNCIHF | 252   | 80    |
| >ABL1-F359C EYLEKKNFIHF | 13  | >ABL1-F359C EYLEKKNCIHF | 22    | 9     |
| >ABL1-F359C MEYLEKKNF   | 21  | >ABL1-F359C MEYLEKKNC   | 574   | 553   |
| >ABL1-F359C MEYLEKKNFI  | 4   | >ABL1-F359C MEYLEKKNCI  | 4     | 0     |
| >ABL1-F359C MEYLEKKNF   | 77  | >ABL1-F359C MEYLEKKNC   | 16025 | 15948 |
| >ABL1-F359C MEYLEKKNF   | 31  | >ABL1-F359C MEYLEKKNC   | 5464  | 5433  |
| >ABL1-F359C MEYLEKKNFI  | 277 | >ABL1-F359C MEYLEKKNCI  | 852   | 575   |
| >ABL1-F359C MEYLEKKNF   | 183 | >ABL1-F359C MEYLEKKNC   | 4440  | 4257  |
| >ABL1-F359C MEYLEKKNFI  | 483 | >ABL1-F359C MEYLEKKNCI  | 1941  | 1458  |
| >ABL1-F359C MEYLEKKNF   | 120 | >ABL1-F359C MEYLEKKNC   | 5860  | 5740  |
| >ABL1-F359C MEYLEKKNFI  | 28  | >ABL1-F359C MEYLEKKNCI  | 44    | 16    |
| >ABL1-F359C AMEYLEKKNF  | 277 | >ABL1-F359C AMEYLEKKNC  | 1726  | 1449  |
| >ABL1-F359C AMEYLEKKNF  | 194 | >ABL1-F359C AMEYLEKKNC  | 19682 | 19488 |
| >ABL1-F359I- FIHRDLAA   | 46  | >ABL1-F359I- IHRDLAA    | 631   | 585   |
| >ABL1-F359I- FIHRDLAA   | 74  | >ABL1-F359I- IHRDLAA    | 1248  | 1174  |

|                         |       |                         |      |       |
|-------------------------|-------|-------------------------|------|-------|
| >ABL1-F359I-FIHRDLAA    | 379   | >ABL1-F359I-IIHRDLAA    | 2885 | 2506  |
| >ABL1-F359I-FIHRDLAA    | 150   | >ABL1-F359I-IIHRDLAA    | 1816 | 1666  |
| >ABL1-F359I-FIHRDLAAR   | 435   | >ABL1-F359I-IIHRDLAAR   | 45   | 390   |
| >ABL1-F359I-FIHRDLAAR   | 66    | >ABL1-F359I-IIHRDLAAR   | 233  | 167   |
| >ABL1-F359I-NFIHRDLAAR  | 52    | >ABL1-F359I-NIIHRDLAAR  | 91   | 39    |
| >ABL1-F359I-NFIHRDLAAR  | 26    | >ABL1-F359I-NIIHRDLAAR  | 63   | 37    |
| >ABL1-F359I-NFIHRDLAAR  | 35    | >ABL1-F359I-NIIHRDLAAR  | 11   | 24    |
| >ABL1-F359I-NFIHRDLA    | 10600 | >ABL1-F359I-NIIHRDLA    | 357  | 10243 |
| >ABL1-F359I-NFIHRDLAA   | 2980  | >ABL1-F359I-NIIHRDLAA   | 495  | 2485  |
| >ABL1-F359I-NFIHRDLAAR  | 165   | >ABL1-F359I-NIIHRDLAAR  | 513  | 348   |
| >ABL1-F359I-SAMEYLEKKN  | 1557  | >ABL1-F359I-SAMEYLEKKN  | 464  | 1093  |
| >ABL1-F359I-SAMEYLEKKN  | 7950  | >ABL1-F359I-SAMEYLEKKN  | 269  | 7681  |
| >ABL1-F359I-SAMEYLEKKN  | 99    | >ABL1-F359I-SAMEYLEKKN  | 3542 | 3443  |
| >ABL1-F359I-SAMEYLEKKN  | 23    | >ABL1-F359I-SAMEYLEKKN  | 1566 | 1543  |
| >ABL1-F359I-SAMEYLEKKN  | 18838 | >ABL1-F359I-SAMEYLEKKN  | 155  | 18683 |
| >ABL1-F359I-KNFIHRDL    | 150   | >ABL1-F359I-KNIIHRDL    | 934  | 784   |
| >ABL1-F359I-KNFIHRDLAA  | 23    | >ABL1-F359I-KNIIHRDLAAI | 66   | 43    |
| >ABL1-F359I-KNFIHRDLAA  | 124   | >ABL1-F359I-KNIIHRDLAAI | 357  | 233   |
| >ABL1-F359I-KKNFIHRDL   | 232   | >ABL1-F359I-KKNIIHRDL   | 327  | 95    |
| >ABL1-F359I-EKKNFIHR    | 464   | >ABL1-F359I-EKKNIIHR    | 735  | 271   |
| >ABL1-F359I-EKKNFIHR    | 177   | >ABL1-F359I-EKKNIIHR    | 170  | 7     |
| >ABL1-F359I-EKKNFIHR    | 154   | >ABL1-F359I-EKKNIIHR    | 472  | 318   |
| >ABL1-F359I-LEKKNFIHR   | 387   | >ABL1-F359I-LEKKNIIHR   | 1122 | 735   |
| >ABL1-F359I-LEKKNFIHRDI | 238   | >ABL1-F359I-LEKKNIIHRDL | 481  | 243   |
| >ABL1-F359I-LEKKNFIHRDI | 181   | >ABL1-F359I-LEKKNIIHRDL | 233  | 52    |
| >ABL1-F359I-LEKKNFIHRDI | 290   | >ABL1-F359I-LEKKNIIHRDL | 216  | 74    |
| >ABL1-F359I-LEKKNFIHR   | 115   | >ABL1-F359I-LEKKNIIHR   | 288  | 173   |
| >ABL1-F359I-YLEKKNFI    | 313   | >ABL1-F359I-YLEKKNII    | 1845 | 1532  |
| >ABL1-F359I-YLEKKNFI    | 23    | >ABL1-F359I-YLEKKNII    | 221  | 198   |
| >ABL1-F359I-YLEKKNFI    | 306   | >ABL1-F359I-YLEKKNII    | 896  | 590   |
| >ABL1-F359I-YLEKKNFI    | 57    | >ABL1-F359I-YLEKKNII    | 589  | 532   |
| >ABL1-F359I-YLEKKNFI    | 24    | >ABL1-F359I-YLEKKNII    | 97   | 73    |
| >ABL1-F359I-YLEKKNFI    | 146   | >ABL1-F359I-YLEKKNII    | 1483 | 1337  |
| >ABL1-F359I-YLEKKNFI    | 19    | >ABL1-F359I-YLEKKNII    | 54   | 35    |
| >ABL1-F359I-YLEKKNFI    | 789   | >ABL1-F359I-YLEKKNII    | 462  | 327   |
| >ABL1-F359I-YLEKKNFIHR  | 398   | >ABL1-F359I-YLEKKNIIHR  | 440  | 42    |
| >ABL1-F359I-YLEKKNFIHR  | 68    | >ABL1-F359I-YLEKKNIIHR  | 89   | 21    |
| >ABL1-F359I-EYLEKKNFI   | 117   | >ABL1-F359I-EYLEKKNII   | 1039 | 922   |
| >ABL1-F359I-EYLEKKNF    | 213   | >ABL1-F359I-EYLEKKNII   | 1309 | 1096  |
| >ABL1-F359I-EYLEKKNF    | 27    | >ABL1-F359I-EYLEKKNII   | 214  | 187   |
| >ABL1-F359I-EYLEKKNFI   | 86    | >ABL1-F359I-EYLEKKNII   | 344  | 258   |
| >ABL1-F359I-EYLEKKNFIHF | 154   | >ABL1-F359I-EYLEKKNIIHR | 312  | 158   |
| >ABL1-F359I-EYLEKKNFIHF | 10    | >ABL1-F359I-EYLEKKNIIHR | 15   | 5     |

|                          |       |                          |      |       |
|--------------------------|-------|--------------------------|------|-------|
| >ABL1-F359I- EYLEKKNFIHF | 172   | >ABL1-F359I- EYLEKKNIIHR | 243  | 71    |
| >ABL1-F359I- EYLEKKNFIHF | 13    | >ABL1-F359I- EYLEKKNIIHR | 17   | 4     |
| >ABL1-F359I- MEYLEKKNF   | 21    | >ABL1-F359I- MEYLEKKNI   | 5    | 16    |
| >ABL1-F359I- MEYLEKKNFI  | 4     | >ABL1-F359I- MEYLEKKNII  | 5    | 1     |
| >ABL1-F359I- MEYLEKKNF   | 77    | >ABL1-F359I- MEYLEKKNI   | 2919 | 2842  |
| >ABL1-F359I- MEYLEKKNF   | 31    | >ABL1-F359I- MEYLEKKNI   | 2192 | 2161  |
| >ABL1-F359I- MEYLEKKNFI  | 277   | >ABL1-F359I- MEYLEKKNII  | 371  | 94    |
| >ABL1-F359I- MEYLEKKNF   | 183   | >ABL1-F359I- MEYLEKKNI   | 817  | 634   |
| >ABL1-F359I- MEYLEKKNFI  | 483   | >ABL1-F359I- MEYLEKKNII  | 2500 | 2017  |
| >ABL1-F359I- MEYLEKKNF   | 120   | >ABL1-F359I- MEYLEKKNI   | 1265 | 1145  |
| >ABL1-F359I- MEYLEKKNF   | 532   | >ABL1-F359I- MEYLEKKNI   | 29   | 503   |
| >ABL1-F359I- MEYLEKKNFI  | 28    | >ABL1-F359I- MEYLEKKNII  | 67   | 39    |
| >ABL1-F359I- AMEYLEKKNF  | 277   | >ABL1-F359I- AMEYLEKKNI  | 2103 | 1826  |
| >ABL1-F359I- AMEYLEKKNF  | 194   | >ABL1-F359I- AMEYLEKKNI  | 5085 | 4891  |
| >ABL1-F359I- AMEYLEKKNFI | 4386  | >ABL1-F359I- AMEYLEKKNI  | 468  | 3918  |
| >ABL1-F359V FIHRDLAA     | 46    | >ABL1-F359V VIHRDLAA     | 832  | 786   |
| >ABL1-F359V FIHRDLAA     | 74    | >ABL1-F359V VIHRDLAA     | 1803 | 1729  |
| >ABL1-F359V FIHRDLAA     | 379   | >ABL1-F359V VIHRDLAA     | 2607 | 2228  |
| >ABL1-F359V FIHRDLAA     | 150   | >ABL1-F359V VIHRDLAA     | 1418 | 1268  |
| >ABL1-F359V FIHRDLAAR    | 435   | >ABL1-F359V VIHRDLAAR    | 75   | 360   |
| >ABL1-F359V FIHRDLAAR    | 66    | >ABL1-F359V VIHRDLAAR    | 822  | 756   |
| >ABL1-F359V NFIHRDLAAR   | 52    | >ABL1-F359V NVIHRDLAAR   | 113  | 61    |
| >ABL1-F359V NFIHRDLAAR   | 26    | >ABL1-F359V NVIHRDLAAR   | 79   | 53    |
| >ABL1-F359V NFIHRDLAAR   | 35    | >ABL1-F359V NVIHRDLAAR   | 8    | 27    |
| >ABL1-F359V NFIHRDLA     | 10600 | >ABL1-F359V NVIHRDLA     | 89   | 10511 |
| >ABL1-F359V NFIHRDLAA    | 17478 | >ABL1-F359V NVIHRDLAA    | 407  | 17071 |
| >ABL1-F359V NFIHRDLAAR   | 165   | >ABL1-F359V NVIHRDLAAR   | 1309 | 1144  |
| >ABL1-F359V SAMEYLEKKN   | 16286 | >ABL1-F359V SAMEYLEKKN   | 379  | 15907 |
| >ABL1-F359V SAMEYLEKKN   | 9391  | >ABL1-F359V SAMEYLEKKN   | 335  | 9056  |
| >ABL1-F359V SAMEYLEKKN   | 16292 | >ABL1-F359V SAMEYLEKKN   | 244  | 16048 |
| >ABL1-F359V SAMEYLEKKN   | 1557  | >ABL1-F359V SAMEYLEKKN   | 157  | 1400  |
| >ABL1-F359V SAMEYLEKKN   | 15515 | >ABL1-F359V SAMEYLEKKN   | 140  | 15375 |
| >ABL1-F359V SAMEYLEKKN   | 30912 | >ABL1-F359V SAMEYLEKKN   | 224  | 30688 |
| >ABL1-F359V SAMEYLEKKN   | 19875 | >ABL1-F359V SAMEYLEKKN   | 292  | 19583 |
| >ABL1-F359V SAMEYLEKKN   | 7950  | >ABL1-F359V SAMEYLEKKN   | 62   | 7888  |
| >ABL1-F359V SAMEYLEKKN   | 99    | >ABL1-F359V SAMEYLEKKN   | 4695 | 4596  |
| >ABL1-F359V SAMEYLEKKN   | 23    | >ABL1-F359V SAMEYLEKKN   | 7711 | 7688  |
| >ABL1-F359V KNFIHRDL     | 150   | >ABL1-F359V KNVIHRDL     | 1496 | 1346  |
| >ABL1-F359V KNFIHRDLAA   | 23    | >ABL1-F359V KNVIHRDLAA   | 113  | 90    |
| >ABL1-F359V KNFIHRDLAA   | 124   | >ABL1-F359V KNVIHRDLAA   | 317  | 193   |
| >ABL1-F359V KKNFIHRDL    | 232   | >ABL1-F359V KKNVIHRDL    | 176  | 56    |
| >ABL1-F359V EKKNFIHR     | 464   | >ABL1-F359V EKKNVIHR     | 809  | 345   |
| >ABL1-F359V EKKNFIHR     | 177   | >ABL1-F359V EKKNVIHR     | 187  | 10    |

|                         |       |                         |      |       |
|-------------------------|-------|-------------------------|------|-------|
| >ABL1-F359V EKKNFIHR    | 154   | >ABL1-F359V EKKNVIHR    | 1256 | 1102  |
| >ABL1-F359V LEKKNFIHR   | 387   | >ABL1-F359V LEKKNVIHR   | 1867 | 1480  |
| >ABL1-F359V LEKKNFIHRDI | 238   | >ABL1-F359V LEKKNVIHRD  | 527  | 289   |
| >ABL1-F359V LEKKNFIHRDI | 181   | >ABL1-F359V LEKKNVIHRD  | 237  | 56    |
| >ABL1-F359V LEKKNFIHRDI | 290   | >ABL1-F359V LEKKNVIHRD  | 211  | 79    |
| >ABL1-F359V LEKKNFIHR   | 115   | >ABL1-F359V LEKKNVIHR   | 425  | 310   |
| >ABL1-F359V YLEKKNFI    | 313   | >ABL1-F359V YLEKKNVI    | 2080 | 1767  |
| >ABL1-F359V YLEKKNFI    | 23    | >ABL1-F359V YLEKKNVI    | 218  | 195   |
| >ABL1-F359V YLEKKNFI    | 306   | >ABL1-F359V YLEKKNVI    | 972  | 666   |
| >ABL1-F359V YLEKKNFI    | 57    | >ABL1-F359V YLEKKNVI    | 238  | 181   |
| >ABL1-F359V YLEKKNFI    | 24    | >ABL1-F359V YLEKKNVI    | 75   | 51    |
| >ABL1-F359V YLEKKNFI    | 146   | >ABL1-F359V YLEKKNVI    | 1279 | 1133  |
| >ABL1-F359V YLEKKNFI    | 19    | >ABL1-F359V YLEKKNVI    | 38   | 19    |
| >ABL1-F359V YLEKKNFI    | 789   | >ABL1-F359V YLEKKNVI    | 288  | 501   |
| >ABL1-F359V YLEKKNFIHR  | 398   | >ABL1-F359V YLEKKNVIHR  | 326  | 72    |
| >ABL1-F359V YLEKKNFIHR  | 68    | >ABL1-F359V YLEKKNVIHR  | 101  | 33    |
| >ABL1-F359V EYLEKKNFI   | 554   | >ABL1-F359V EYLEKKNVI   | 471  | 83    |
| >ABL1-F359V EYLEKKNFI   | 117   | >ABL1-F359V EYLEKKNVI   | 1184 | 1067  |
| >ABL1-F359V EYLEKKNF    | 213   | >ABL1-F359V EYLEKKNV    | 9876 | 9663  |
| >ABL1-F359V EYLEKKNF    | 27    | >ABL1-F359V EYLEKKNV    | 4596 | 4569  |
| >ABL1-F359V EYLEKKNFI   | 86    | >ABL1-F359V EYLEKKNVI   | 127  | 41    |
| >ABL1-F359V EYLEKKNFIHF | 154   | >ABL1-F359V EYLEKKNVIHF | 432  | 278   |
| >ABL1-F359V EYLEKKNFIHF | 10    | >ABL1-F359V EYLEKKNVIHF | 18   | 8     |
| >ABL1-F359V EYLEKKNFIHF | 172   | >ABL1-F359V EYLEKKNVIHF | 274  | 102   |
| >ABL1-F359V EYLEKKNFIHF | 13    | >ABL1-F359V EYLEKKNVIHF | 18   | 5     |
| >ABL1-F359V MEYLEKKNF   | 21    | >ABL1-F359V MEYLEKKNV   | 8    | 13    |
| >ABL1-F359V MEYLEKKNFI  | 4     | >ABL1-F359V MEYLEKKNVI  | 5    | 1     |
| >ABL1-F359V MEYLEKKNF   | 77    | >ABL1-F359V MEYLEKKNV   | 3783 | 3706  |
| >ABL1-F359V MEYLEKKNF   | 31    | >ABL1-F359V MEYLEKKNV   | 1504 | 1473  |
| >ABL1-F359V MEYLEKKNFI  | 277   | >ABL1-F359V MEYLEKKNVI  | 372  | 95    |
| >ABL1-F359V MEYLEKKNF   | 183   | >ABL1-F359V MEYLEKKNV   | 1451 | 1268  |
| >ABL1-F359V MEYLEKKNFI  | 483   | >ABL1-F359V MEYLEKKNVI  | 2317 | 1834  |
| >ABL1-F359V MEYLEKKNF   | 120   | >ABL1-F359V MEYLEKKNV   | 1610 | 1490  |
| >ABL1-F359V MEYLEKKNF   | 532   | >ABL1-F359V MEYLEKKNV   | 82   | 450   |
| >ABL1-F359V MEYLEKKNFI  | 28    | >ABL1-F359V MEYLEKKNVI  | 79   | 51    |
| >ABL1-F359V AMEYLEKKNF  | 277   | >ABL1-F359V AMEYLEKKNV  | 2168 | 1891  |
| >ABL1-F359V AMEYLEKKNF  | 28496 | >ABL1-F359V AMEYLEKKNV  | 46   | 28450 |
| >ABL1-F359V AMEYLEKKNF  | 194   | >ABL1-F359V AMEYLEKKNV  | 6251 | 6057  |
| >ABL1-F382L GENHLVKVAI  | 1099  | >ABL1-F382L GENHLVKVAI  | 285  | 814   |
| >ABL1-F382L GENHLVKVAI  | 1862  | >ABL1-F382L GENHLVKVAI  | 172  | 1690  |
| >ABL1-F382L GENHLVKVAI  | 476   | >ABL1-F382L GENHLVKVAI  | 191  | 285   |
| >ABL1-F382L GENHLVKVAI  | 147   | >ABL1-F382L GENHLVKVAI  | 733  | 586   |
| >ABL1-F382L GENHLVKVAI  | 79    | >ABL1-F382L GENHLVKVAI  | 324  | 245   |

|                        |       |                        |      |       |
|------------------------|-------|------------------------|------|-------|
| >ABL1-F382L GENHLVKVAI | 116   | >ABL1-F382L GENHLVKVAI | 43   | 73    |
| >ABL1-F382L ADFGLSRL   | 111   | >ABL1-F382L ADLGLSRL   | 406  | 295   |
| >ABL1-F382L ADFGLSRLM  | 106   | >ABL1-F382L ADLGLSRLM  | 612  | 506   |
| >ABL1-F382L ADFGLSRLM  | 156   | >ABL1-F382L ADLGLSRLM  | 692  | 536   |
| >ABL1-F382L VADFGLSRL  | 120   | >ABL1-F382L VADLGLSRL  | 88   | 32    |
| >ABL1-F382L VADFGLSRLM | 464   | >ABL1-F382L VADLGLSRLM | 411  | 53    |
| >ABL1-F382L VADFGLSRL  | 179   | >ABL1-F382L VADLGLSRL  | 531  | 352   |
| >ABL1-F382L KVADFGLSRL | 46    | >ABL1-F382L KVADLGLSRL | 107  | 61    |
| >ABL1-F382L KVADFGLSRL | 351   | >ABL1-F382L KVADLGLSRL | 577  | 226   |
| >ABL1-F382L KVADFGLSRL | 101   | >ABL1-F382L KVADLGLSRL | 191  | 90    |
| >ABL1-F382L KVADFGLSRL | 307   | >ABL1-F382L KVADLGLSRL | 429  | 122   |
| >ABL1-F382L KVADFGLSRL | 217   | >ABL1-F382L KVADLGLSRL | 548  | 331   |
| >ABL1-F382L KVADFGLSRL | 51    | >ABL1-F382L KVADLGLSRL | 88   | 37    |
| >ABL1-F382L KVADFGLSR  | 309   | >ABL1-F382L KVADLGLSR  | 532  | 223   |
| >ABL1-F382L KVADFGLSR  | 27    | >ABL1-F382L KVADLGLSR  | 65   | 38    |
| >ABL1-F382L KVADFGLSR  | 59    | >ABL1-F382L KVADLGLSR  | 91   | 32    |
| >ABL1-F382L KVADFGLSR  | 145   | >ABL1-F382L KVADLGLSR  | 394  | 249   |
| >ABL1-F382L KVADFGLSRL | 67    | >ABL1-F382L KVADLGLSRL | 78   | 11    |
| >ABL1-F382L KVADFGLSRL | 317   | >ABL1-F382L KVADLGLSRL | 339  | 22    |
| >ABL1-F382L KVADFGLSRL | 44    | >ABL1-F382L KVADLGLSRL | 45   | 1     |
| >ABL1-F382L KVADFGLSR  | 21    | >ABL1-F382L KVADLGLSR  | 37   | 16    |
| >ABL1-F382L VKVADFGI   | 477   | >ABL1-F382L VKVADLGI   | 499  | 22    |
| >ABL1-F382L VKVADFGLSR | 341   | >ABL1-F382L VKVADLGLSR | 907  | 566   |
| >ABL1-F382L VKVADFGLSR | 345   | >ABL1-F382L VKVADLGLSR | 616  | 271   |
| >ABL1-F382L LVKVADFGI  | 257   | >ABL1-F382L LVKVADLGI  | 302  | 45    |
| >ABL1-F382L LVKVADFGI  | 64    | >ABL1-F382L LVKVADLGI  | 205  | 141   |
| >ABL1-F382L LVKVADFGI  | 358   | >ABL1-F382L LVKVADLGI  | 929  | 571   |
| >ABL1-F382L LVKVADFGI  | 133   | >ABL1-F382L LVKVADLGI  | 316  | 183   |
| >ABL1-F382L HLVKVADFGI | 418   | >ABL1-F382L HLVKVADLGI | 913  | 495   |
| >ABL1-F382L HLVKVADF   | 3476  | >ABL1-F382L HLVKVADL   | 101  | 3375  |
| >ABL1-F382L HLVKVADFGI | 73    | >ABL1-F382L HLVKVADLGI | 115  | 42    |
| >ABL1-F382L HLVKVADF   | 8059  | >ABL1-F382L HLVKVADL   | 219  | 7840  |
| >ABL1-F382L HLVKVADF   | 12460 | >ABL1-F382L HLVKVADL   | 335  | 12125 |
| >ABL1-F382L HLVKVADFGI | 71    | >ABL1-F382L HLVKVADLGI | 246  | 175   |
| >ABL1-F382L HLVKVADF   | 14022 | >ABL1-F382L HLVKVADL   | 253  | 13769 |
| >ABL1-F382L HLVKVADFGI | 37    | >ABL1-F382L HLVKVADLGI | 216  | 179   |
| >ABL1-F382L HLVKVADF   | 18897 | >ABL1-F382L HLVKVADL   | 341  | 18556 |
| >ABL1-F382L HLVKVADFGI | 36    | >ABL1-F382L HLVKVADLGI | 133  | 97    |
| >ABL1-F382L HLVKVADF   | 11478 | >ABL1-F382L HLVKVADL   | 47   | 11431 |
| >ABL1-F382L HLVKVADFGI | 31    | >ABL1-F382L HLVKVADLGI | 71   | 40    |
| >ABL1-F382L HLVKVADF   | 416   | >ABL1-F382L HLVKVADL   | 6483 | 6067  |
| >ABL1-F382L HLVKVADF   | 257   | >ABL1-F382L HLVKVADL   | 4050 | 3793  |
| >ABL1-F382L NHLVKVADF  | 9576  | >ABL1-F382L NHLVKVADL  | 366  | 9210  |

|                         |       |                         |       |       |
|-------------------------|-------|-------------------------|-------|-------|
| >ABL1-F382L NHLVKVADFC  | 224   | >ABL1-F382L NHLVKVADLC  | 345   | 121   |
| >ABL1-F486S FAEIHQAF    | 364   | >ABL1-F486S SAEIHQAF    | 1676  | 1312  |
| >ABL1-F486S FAEIHQAF    | 47    | >ABL1-F486S SAEIHQAF    | 129   | 82    |
| >ABL1-F486S FAEIHQAF    | 23    | >ABL1-F486S SAEIHQAF    | 211   | 188   |
| >ABL1-F486S FAEIHQAFETI | 50    | >ABL1-F486S SAEIHQAFETI | 576   | 526   |
| >ABL1-F486S SFAEIHQA    | 387   | >ABL1-F486S SSAEIHQA    | 807   | 420   |
| >ABL1-F486S SFAEIHQAF   | 202   | >ABL1-F486S SSAEIHQAF   | 11360 | 11158 |
| >ABL1-F486S SFAEIHQAF   | 288   | >ABL1-F486S SSAEIHQAF   | 4519  | 4231  |
| >ABL1-F486S SFAEIHQAF   | 14    | >ABL1-F486S SSAEIHQAF   | 5331  | 5317  |
| >ABL1-F486S SFAEIHQAF   | 3203  | >ABL1-F486S SSAEIHQAF   | 172   | 3031  |
| >ABL1-F486S SFAEIHQAF   | 247   | >ABL1-F486S SSAEIHQAF   | 4415  | 4168  |
| >ABL1-F486S SFAEIHQAF   | 1063  | >ABL1-F486S SSAEIHQAF   | 62    | 1001  |
| >ABL1-F486S SFAEIHQA    | 5762  | >ABL1-F486S SSAEIHQA    | 92    | 5670  |
| >ABL1-F486S SFAEIHQAF   | 916   | >ABL1-F486S SSAEIHQAF   | 103   | 813   |
| >ABL1-F486S SFAEIHQAF   | 220   | >ABL1-F486S SSAEIHQAF   | 1926  | 1706  |
| >ABL1-F486S SFAEIHQAF   | 868   | >ABL1-F486S SSAEIHQAF   | 26    | 842   |
| >ABL1-F486S SFAEIHQAF   | 20149 | >ABL1-F486S SSAEIHQAF   | 11    | 20138 |
| >ABL1-F486S SFAEIHQAF   | 214   | >ABL1-F486S SSAEIHQAF   | 135   | 79    |
| >ABL1-F486S SFAEIHQAF   | 20130 | >ABL1-F486S SSAEIHQAF   | 398   | 19732 |
| >ABL1-F486S SFAEIHQAF   | 3379  | >ABL1-F486S SSAEIHQAF   | 86    | 3293  |
| >ABL1-F486S SFAEIHQAF   | 282   | >ABL1-F486S SSAEIHQAF   | 380   | 98    |
| >ABL1-F486S WQWNPSDR    | 139   | >ABL1-F486S WQWNPSDR    | 944   | 805   |
| >ABL1-F486S WQWNPSDR    | 56    | >ABL1-F486S WQWNPSDR    | 6921  | 6865  |
| >ABL1-F486S WQWNPSDR    | 100   | >ABL1-F486S WQWNPSDR    | 9164  | 9064  |
| >ABL1-F486S WQWNPSDR    | 2     | >ABL1-F486S WQWNPSDR    | 357   | 355   |
| >ABL1-F486S WQWNPSDR    | 156   | >ABL1-F486S WQWNPSDR    | 10015 | 9859  |
| >ABL1-F486S WQWNPSDR    | 285   | >ABL1-F486S WQWNPSDR    | 1750  | 1465  |
| >ABL1-F486S PSFAEIHQAF  | 219   | >ABL1-F486S PSSAEIHQAF  | 3923  | 3704  |
| >ABL1-F486S PSFAEIHQAF  | 30    | >ABL1-F486S PSSAEIHQAF  | 293   | 263   |
| >ABL1-F486S PSFAEIHQAF  | 91    | >ABL1-F486S PSSAEIHQAF  | 697   | 606   |
| >ABL1-F486S RPSFAEIHQ   | 6048  | >ABL1-F486S RPSSAEIHQ   | 233   | 5815  |
| >ABL1-F486S RPSFAEIHQA  | 216   | >ABL1-F486S RPSSAEIHQA  | 39    | 177   |
| >ABL1-F486S RPSFAEIHQA  | 25    | >ABL1-F486S RPSSAEIHQA  | 21    | 4     |
| >ABL1-F486S RPSFAEIHQA  | 110   | >ABL1-F486S RPSSAEIHQA  | 41    | 69    |
| >ABL1-F486S RPSFAEIHQA  | 26    | >ABL1-F486S RPSSAEIHQA  | 20    | 6     |
| >ABL1-F486S RPSFAEIHQA  | 38    | >ABL1-F486S RPSSAEIHQA  | 19    | 19    |
| >ABL1-F486S SDRPSFAEI   | 436   | >ABL1-F486S SDRPSSAEI   | 453   | 17    |
| >ABL1-F486S SDRPSFAEI   | 39    | >ABL1-F486S SDRPSSAEI   | 53    | 14    |
| >ABL1-F486S NPSDRPSF    | 68    | >ABL1-F486S NPSDRPSS    | 10296 | 10228 |
| >ABL1-F486S NPSDRPSFA   | 2586  | >ABL1-F486S NPSDRPSSA   | 142   | 2444  |
| >ABL1-F486S NPSDRPSFAE  | 267   | >ABL1-F486S NPSDRPSSAE  | 136   | 131   |
| >ABL1-F486S NPSDRPSF    | 61    | >ABL1-F486S NPSDRPSS    | 3618  | 3557  |
| >ABL1-F486S NPSDRPSFAE  | 439   | >ABL1-F486S NPSDRPSSAE  | 667   | 228   |

|                        |       |                        |       |       |
|------------------------|-------|------------------------|-------|-------|
| >ABL1-F486S NPSDRPSF   | 151   | >ABL1-F486S NPSDRPSS   | 17218 | 17067 |
| >ABL1-F486S NPSDRPSFAE | 242   | >ABL1-F486S NPSDRPSSAE | 308   | 66    |
| >ABL1-F486S WNPSDRPSF  | 363   | >ABL1-F486S WNPSDRPSS  | 21894 | 21531 |
| >ABL1-F486S QWNPSDRPS  | 56    | >ABL1-F486S QWNPSDRPS  | 28139 | 28083 |
| >ABL1-F486S QWNPSDRPS  | 81    | >ABL1-F486S QWNPSDRPS  | 25048 | 24967 |
| >ABL1-F486S QWNPSDRPS  | 133   | >ABL1-F486S QWNPSDRPS  | 19407 | 19274 |
| >ABL1-F486S QWNPSDRPS  | 377   | >ABL1-F486S QWNPSDRPS  | 19688 | 19311 |
| >ABL1-F486S QWNPSDRPS  | 72    | >ABL1-F486S QWNPSDRPS  | 225   | 153   |
| >ABL1-G250I GGQYGEVY   | 341   | >ABL1-G250I EGQYGEVY   | 1295  | 954   |
| >ABL1-G250I GGQYGEVYEI | 16185 | >ABL1-G250I EGQYGEVYEC | 349   | 15836 |
| >ABL1-G250I GGGQYGEVY  | 235   | >ABL1-G250I GEGQYGEVY  | 190   | 45    |
| >ABL1-G250I GGGQYGEV   | 39269 | >ABL1-G250I GEGQYGEV   | 351   | 38918 |
| >ABL1-G250I GGGQYGEVY  | 33755 | >ABL1-G250I GEGQYGEVY  | 132   | 33623 |
| >ABL1-G250I GGGQYGEV   | 38559 | >ABL1-G250I GEGQYGEV   | 104   | 38455 |
| >ABL1-G250I GGGQYGEVY  | 326   | >ABL1-G250I GEGQYGEVY  | 2155  | 1829  |
| >ABL1-G250I LGGGQYGEV  | 272   | >ABL1-G250I LGEGQYGEV  | 1986  | 1714  |
| >ABL1-G250I KLGGGQYGE  | 212   | >ABL1-G250I KLGEGQYGE  | 154   | 58    |
| >ABL1-G250I KLGGGQYGE  | 90    | >ABL1-G250I KLGEGQYGE  | 82    | 8     |
| >ABL1-G250I KLGGGQYGE  | 56    | >ABL1-G250I KLGEGQYGE  | 60    | 4     |
| >ABL1-G250I KLGGGQYG   | 529   | >ABL1-G250I KLGEGQYG   | 228   | 301   |
| >ABL1-G250I KLGGGQYGE  | 3     | >ABL1-G250I KLGEGQYGE  | 2     | 1     |
| >ABL1-G250I KLGGGQYGE  | 16    | >ABL1-G250I KLGEGQYGE  | 7     | 9     |
| >ABL1-G250I KLGGGQYGE  | 7     | >ABL1-G250I KLGEGQYGE  | 6     | 1     |
| >ABL1-G250I KLGGGQYGE  | 19    | >ABL1-G250I KLGEGQYGE  | 11    | 8     |
| >ABL1-G250I KLGGGQYGE  | 2     | >ABL1-G250I KLGEGQYGE  | 2     | 0     |
| >ABL1-G250I KLGGGQYGE  | 128   | >ABL1-G250I KLGEGQYGE  | 271   | 143   |
| >ABL1-G250I KLGGGQYGE  | 64    | >ABL1-G250I KLGEGQYGE  | 74    | 10    |
| >ABL1-G250I KLGGGQYGE  | 37    | >ABL1-G250I KLGEGQYGE  | 23    | 14    |
| >ABL1-G250I KLGGGQYGE  | 87    | >ABL1-G250I KLGEGQYGE  | 84    | 3     |
| >ABL1-G250I KLGGGQYGE  | 354   | >ABL1-G250I KLGEGQYGE  | 414   | 60    |
| >ABL1-G250I KLGGGQYGE  | 385   | >ABL1-G250I KLGEGQYGE  | 1520  | 1135  |
| >ABL1-G250I HKLGGGQY   | 132   | >ABL1-G250I HKLGEGQY   | 1229  | 1097  |
| >ABL1-G250I HKLGGGQY   | 100   | >ABL1-G250I HKLGEGQY   | 177   | 77    |
| >ABL1-G250I KHKLGGGQY  | 241   | >ABL1-G250I KHKLGEGQY  | 244   | 3     |
| >ABL1-G250I MKHKLGGGC  | 221   | >ABL1-G250I MKHKLGEGC  | 338   | 117   |
| >ABL1-G250I MKHKLGGGC  | 35    | >ABL1-G250I MKHKLGEGC  | 43    | 8     |
| >ABL1-G250I MKHKLGGGC  | 330   | >ABL1-G250I MKHKLGEGC  | 681   | 351   |
| >ABL1-G250I TMKHKLGGG  | 76    | >ABL1-G250I TMKHKLGEG  | 119   | 43    |
| >ABL1-G250I TMKHKLGGG  | 32    | >ABL1-G250I TMKHKLGEG  | 33    | 1     |
| >ABL1-G250I TMKHKLGGG  | 69    | >ABL1-G250I TMKHKLGEG  | 112   | 43    |
| >ABL1-G250I TMKHKLGGG  | 77    | >ABL1-G250I TMKHKLGEG  | 182   | 105   |
| >ABL1-G251I GQYGEVYEG  | 170   | >ABL1-G251I DQYGEVYEG  | 1190  | 1020  |
| >ABL1-G251I GQYGEVYEG  | 44    | >ABL1-G251I DQYGEVYEG  | 352   | 308   |

|                       |       |                       |      |       |
|-----------------------|-------|-----------------------|------|-------|
| >ABL1-G251IGQYGEVYEG' | 58    | >ABL1-G251IDQYGEVYEG' | 250  | 192   |
| >ABL1-G251IGQYGEVYEG' | 109   | >ABL1-G251IDQYGEVYEG' | 404  | 295   |
| >ABL1-G251IGQYGEVYEG' | 6     | >ABL1-G251IDQYGEVYEG' | 54   | 48    |
| >ABL1-G251IGQYGEVYEG' | 21    | >ABL1-G251IDQYGEVYEG' | 1225 | 1204  |
| >ABL1-G251IGQYGEVYEG' | 13    | >ABL1-G251IDQYGEVYEG' | 178  | 165   |
| >ABL1-G251IGQYGEVYEG' | 66    | >ABL1-G251IDQYGEVYEG' | 3402 | 3336  |
| >ABL1-G251IGQYGEVYEG' | 58    | >ABL1-G251IDQYGEVYEG' | 448  | 390   |
| >ABL1-G251IGGQYGEVY   | 341   | >ABL1-G251IGDQYGEVY   | 3475 | 3134  |
| >ABL1-G251IGGGQYGEVY  | 235   | >ABL1-G251IGGDQYGEVY  | 3552 | 3317  |
| >ABL1-G251IGGGQYGEVY  | 326   | >ABL1-G251IGGDQYGEVY  | 286  | 40    |
| >ABL1-G251ILGGGQYGEV' | 272   | >ABL1-G251ILGGDQYGEV' | 202  | 70    |
| >ABL1-G251IKLGGGQYGE' | 212   | >ABL1-G251IKLGGDQYGE' | 208  | 4     |
| >ABL1-G251IKLGGGQYGE' | 90    | >ABL1-G251IKLGGDQYGE' | 106  | 16    |
| >ABL1-G251IKLGGGQYGE' | 56    | >ABL1-G251IKLGGDQYGE' | 61   | 5     |
| >ABL1-G251IKLGGGQYGE' | 3     | >ABL1-G251IKLGGDQYGE' | 3    | 0     |
| >ABL1-G251IKLGGGQYGE' | 16    | >ABL1-G251IKLGGDQYGE' | 12   | 4     |
| >ABL1-G251IKLGGGQYGE' | 7     | >ABL1-G251IKLGGDQYGE' | 8    | 1     |
| >ABL1-G251IKLGGGQYGE' | 19    | >ABL1-G251IKLGGDQYGE' | 15   | 4     |
| >ABL1-G251IKLGGGQYGE' | 2     | >ABL1-G251IKLGGDQYGE' | 3    | 1     |
| >ABL1-G251IKLGGGQYGE' | 128   | >ABL1-G251IKLGGDQYGE' | 233  | 105   |
| >ABL1-G251IKLGGGQYGE' | 64    | >ABL1-G251IKLGGDQYGE' | 77   | 13    |
| >ABL1-G251IKLGGGQYGE' | 37    | >ABL1-G251IKLGGDQYGE' | 61   | 24    |
| >ABL1-G251IKLGGGQYGE' | 87    | >ABL1-G251IKLGGDQYGE' | 127  | 40    |
| >ABL1-G251IKLGGGQYGE' | 354   | >ABL1-G251IKLGGDQYGE' | 1025 | 671   |
| >ABL1-G251IKLGGGQYGE' | 385   | >ABL1-G251IKLGGDQYGE' | 356  | 29    |
| >ABL1-G251IHKLGGGQY   | 132   | >ABL1-G251IHKLGGDQY   | 304  | 172   |
| >ABL1-G251IHKLGGGQY   | 100   | >ABL1-G251IHKLGGDQY   | 177  | 77    |
| >ABL1-G251IKHKLGGGQY  | 241   | >ABL1-G251IKHKLGGDQY  | 1240 | 999   |
| >ABL1-G251IMKHKLGGGC  | 221   | >ABL1-G251IMKHKLGGDC  | 1529 | 1308  |
| >ABL1-G251IMKHKLGGGC  | 35    | >ABL1-G251IMKHKLGGDC  | 23   | 12    |
| >ABL1-G251IMKHKLGGGC  | 330   | >ABL1-G251IMKHKLGGDC  | 407  | 77    |
| >ABL1-G251ITMKHKLGGG  | 76    | >ABL1-G251ITMKHKLGGD  | 155  | 79    |
| >ABL1-G251ITMKHKLGGG  | 32    | >ABL1-G251ITMKHKLGGD  | 92   | 60    |
| >ABL1-G251ITMKHKLGGG  | 69    | >ABL1-G251ITMKHKLGGD  | 92   | 23    |
| >ABL1-G251ITMKHKLGGG  | 77    | >ABL1-G251ITMKHKLGGD  | 124  | 47    |
| >ABL1-G321IGNLLDYLR   | 8125  | >ABL1-G321IENLLDYLR   | 233  | 7892  |
| >ABL1-G321IGNLLDYLR   | 911   | >ABL1-G321IENLLDYLR   | 171  | 740   |
| >ABL1-G321IYGNLLDYL   | 36872 | >ABL1-G321IYENLLDYL   | 58   | 36814 |
| >ABL1-G321IYGNLLDYL   | 208   | >ABL1-G321IYENLLDYL   | 599  | 391   |
| >ABL1-G321IYGNLLDYLR  | 127   | >ABL1-G321IYENLLDYLR  | 1635 | 1508  |
| >ABL1-G321IYGNLLDYLR  | 161   | >ABL1-G321IYENLLDYLR  | 490  | 329   |
| >ABL1-G321IYGNLLDYL   | 21603 | >ABL1-G321IYENLLDYL   | 188  | 21415 |
| >ABL1-G321IYGNLLDYLR  | 21515 | >ABL1-G321IYENLLDYLR  | 476  | 21039 |



|                        |       |                        |     |       |
|------------------------|-------|------------------------|-----|-------|
| >ABL1-G321FYGNLLDYL    | 21707 | >ABL1-G321FYENLLDYL    | 26  | 21681 |
| >ABL1-G321FYGNLLDYL    | 27404 | >ABL1-G321FYENLLDYL    | 63  | 27341 |
| >ABL1-G321FYGNLLDYLREI | 36411 | >ABL1-G321FYENLLDYLREI | 431 | 35980 |
| >ABL1-G321FYGNLLDYL    | 26364 | >ABL1-G321FYENLLDYL    | 73  | 26291 |
| >ABL1-G321FYGNLLDYLREI | 37297 | >ABL1-G321FYENLLDYLREI | 431 | 36866 |
| >ABL1-G321FYGNLLDYLRL  | 54    | >ABL1-G321FYENLLDYLRL  | 83  | 29    |
| >ABL1-G321FTYGNLLDYL   | 155   | >ABL1-G321FTYENLLDYL   | 64  | 91    |
| >ABL1-G321FTYGNLLDYL   | 431   | >ABL1-G321FTYENLLDYL   | 764 | 333   |
| >ABL1-G321FTYGNLLDYL   | 6     | >ABL1-G321FTYENLLDYL   | 13  | 7     |
| >ABL1-G321FTYGNLLDY    | 35    | >ABL1-G321FTYENLLDY    | 109 | 74    |
| >ABL1-G321FTYGNLLDYLRL | 227   | >ABL1-G321FTYENLLDYLRL | 541 | 314   |
| >ABL1-G321FTYGNLLDYLRL | 480   | >ABL1-G321FTYENLLDYLRL | 666 | 186   |
| >ABL1-G321FTYGNLLDYLRL | 433   | >ABL1-G321FTYENLLDYLRL | 758 | 325   |
| >ABL1-G321FTYGNLLDY    | 21    | >ABL1-G321FTYENLLDY    | 158 | 137   |
| >ABL1-G321FTYGNLLDY    | 514   | >ABL1-G321FTYENLLDY    | 195 | 319   |
| >ABL1-G321FTYGNLLDYLRL | 17    | >ABL1-G321FTYENLLDYLRL | 26  | 9     |
| >ABL1-G321FTYGNLLDYL   | 352   | >ABL1-G321FTYENLLDYL   | 355 | 3     |
| >ABL1-G321FTYGNLLDYL   | 738   | >ABL1-G321FTYENLLDYL   | 322 | 416   |
| >ABL1-G321FTYGNLLDY    | 76    | >ABL1-G321FTYENLLDY    | 31  | 45    |
| >ABL1-G321FTYGNLLDYI   | 45    | >ABL1-G321FTYENLLDYL   | 38  | 7     |
| >ABL1-G321FTYGNLLDYI   | 19    | >ABL1-G321FTYENLLDYL   | 19  | 0     |
| >ABL1-G321FTYGNLLDYI   | 34    | >ABL1-G321FTYENLLDYL   | 39  | 5     |
| >ABL1-G321FTYGNLLDYI   | 30    | >ABL1-G321FTYENLLDYL   | 30  | 0     |
| >ABL1-G321FTYGNLLDYI   | 10    | >ABL1-G321FTYENLLDYL   | 5   | 5     |
| >ABL1-G321FTYGNLLDYI   | 220   | >ABL1-G321FTYENLLDYL   | 33  | 187   |
| >ABL1-G321FTYGNLLDYI   | 167   | >ABL1-G321FTYENLLDYL   | 74  | 93    |
| >ABL1-G321FTYGNLLDYI   | 81    | >ABL1-G321FTYENLLDYL   | 102 | 21    |
| >ABL1-G321FTYGNLLDY    | 95    | >ABL1-G321FTYENLLDY    | 108 | 13    |
| >ABL1-G321FTYGNLLDYI   | 265   | >ABL1-G321FTYENLLDYL   | 294 | 29    |
| >ABL1-G321FTYGNLLDY    | 61    | >ABL1-G321FTYENLLDY    | 57  | 4     |
| >ABL1-G321FTYGNLLDYI   | 21    | >ABL1-G321FTYENLLDYL   | 21  | 0     |
| >ABL1-G321FTYGNLLDY    | 227   | >ABL1-G321FTYENLLDY    | 92  | 135   |
| >ABL1-G321FTYGNLLDY    | 27    | >ABL1-G321FTYENLLDY    | 20  | 7     |
| >ABL1-G321FTYGNLLDY    | 9     | >ABL1-G321FTYENLLDY    | 15  | 6     |
| >ABL1-G321FTYGNLLDYI   | 47    | >ABL1-G321FTYENLLDYL   | 53  | 6     |
| >ABL1-G321FTYGNLLDY    | 100   | >ABL1-G321FTYENLLDY    | 62  | 38    |
| >ABL1-G321FTYGNLLDY    | 5     | >ABL1-G321FTYENLLDY    | 6   | 1     |
| >ABL1-G321FTYGNLLDY    | 92    | >ABL1-G321FTYENLLDY    | 106 | 14    |
| >ABL1-G321FTYGNLLDYI   | 13    | >ABL1-G321FTYENLLDYL   | 13  | 0     |
| >ABL1-G321FTYGNLLDY    | 226   | >ABL1-G321FTYENLLDY    | 609 | 383   |
| >ABL1-G321FTYGNLLDYI   | 302   | >ABL1-G321FTYENLLDYL   | 667 | 365   |
| >ABL1-G321FTYGNLLDYI   | 36    | >ABL1-G321FTYENLLDYL   | 29  | 7     |
| >ABL1-G321FTYGNLLDY    | 63    | >ABL1-G321FTYENLLDY    | 65  | 2     |

|                       |     |                       |      |      |
|-----------------------|-----|-----------------------|------|------|
| >ABL1-G321fMTYGNLLDYI | 2   | >ABL1-G321fMTYENLLDYL | 2    | 0    |
| >ABL1-G321fMTYGNLLDYI | 22  | >ABL1-G321fMTYENLLDYL | 16   | 6    |
| >ABL1-G321fMTYGNLLDYI | 35  | >ABL1-G321fMTYENLLDYL | 12   | 23   |
| >ABL1-G321fMTYGNLLDY  | 12  | >ABL1-G321fMTYENLLDY  | 8    | 4    |
| >ABL1-G321fMTYGNLLDY  | 170 | >ABL1-G321fMTYENLLDY  | 163  | 7    |
| >ABL1-G321fMTYGNLLDY  | 230 | >ABL1-G321fMTYENLLDY  | 100  | 130  |
| >ABL1-G321fMTYGNLLDY  | 3   | >ABL1-G321fMTYENLLDY  | 4    | 1    |
| >ABL1-G321fMTYGNLLDYI | 9   | >ABL1-G321fMTYENLLDYL | 18   | 9    |
| >ABL1-G321fMTYGNLLDY  | 214 | >ABL1-G321fMTYENLLDY  | 128  | 86   |
| >ABL1-G321fMTYGNLLDY  | 348 | >ABL1-G321fMTYENLLDY  | 634  | 286  |
| >ABL1-G321fMTYGNLLDY  | 176 | >ABL1-G321fMTYENLLDY  | 168  | 8    |
| >ABL1-G321fMTYGNLLDYI | 152 | >ABL1-G321fMTYENLLDYL | 155  | 3    |
| >ABL1-G321fMTYGNLLDYI | 126 | >ABL1-G321fMTYENLLDYL | 155  | 29   |
| >ABL1-G321fMTYGNLLDY  | 133 | >ABL1-G321fMTYENLLDY  | 504  | 371  |
| >ABL1-G321fMTYGNLLDYI | 242 | >ABL1-G321fMTYENLLDYL | 277  | 35   |
| >ABL1-G321fMTYGNLLDY  | 264 | >ABL1-G321fMTYENLLDY  | 1070 | 806  |
| >ABL1-G321fMTYGNLLDYI | 450 | >ABL1-G321fMTYENLLDYL | 391  | 59   |
| >ABL1-G321fMTYGNLLDYI | 37  | >ABL1-G321fMTYENLLDYL | 53   | 16   |
| >ABL1-G321fFMTYGNLLD\ | 219 | >ABL1-G321fFMTYENLLDY | 164  | 55   |
| >ABL1-G321fFMTYGNLL   | 20  | >ABL1-G321fFMTYENLL   | 21   | 1    |
| >ABL1-G321fFMTYGNLLD\ | 10  | >ABL1-G321fFMTYENLLDY | 12   | 2    |
| >ABL1-G321fFMTYGNLL   | 3   | >ABL1-G321fFMTYENLL   | 3    | 0    |
| >ABL1-G321fFMTYGNLLD\ | 2   | >ABL1-G321fFMTYENLLDY | 2    | 0    |
| >ABL1-G321fFMTYGNLL   | 14  | >ABL1-G321fFMTYENLL   | 34   | 20   |
| >ABL1-G321fFMTYGNLLD\ | 12  | >ABL1-G321fFMTYENLLDY | 19   | 7    |
| >ABL1-G321fFMTYGNLL   | 28  | >ABL1-G321fFMTYENLL   | 53   | 25   |
| >ABL1-G321fFMTYGNLLD\ | 11  | >ABL1-G321fFMTYENLLDY | 15   | 4    |
| >ABL1-G321fFMTYGNLL   | 34  | >ABL1-G321fFMTYENLL   | 70   | 36   |
| >ABL1-G321fFMTYGNLLD\ | 7   | >ABL1-G321fFMTYENLLDY | 10   | 3    |
| >ABL1-G321fFMTYGNLL   | 15  | >ABL1-G321fFMTYENLL   | 20   | 5    |
| >ABL1-G321fFMTYGNLLD\ | 6   | >ABL1-G321fFMTYENLLDY | 7    | 1    |
| >ABL1-G321fFMTYGNLL   | 26  | >ABL1-G321fFMTYENLL   | 48   | 22   |
| >ABL1-G321fFMTYGNLLD\ | 11  | >ABL1-G321fFMTYENLLDY | 17   | 6    |
| >ABL1-G321fFMTYGNLL   | 327 | >ABL1-G321fFMTYENLL   | 641  | 314  |
| >ABL1-G321fFMTYGNLLD\ | 19  | >ABL1-G321fFMTYENLLDY | 29   | 10   |
| >ABL1-G321fFMTYGNLL   | 5   | >ABL1-G321fFMTYENLL   | 7    | 2    |
| >ABL1-G321fFMTYGNLLD\ | 4   | >ABL1-G321fFMTYENLLDY | 6    | 2    |
| >ABL1-G321fFMTYGNLLD\ | 247 | >ABL1-G321fFMTYENLLDY | 691  | 444  |
| >ABL1-G321fFMTYGNLLD\ | 178 | >ABL1-G321fFMTYENLLDY | 119  | 59   |
| >ABL1-G321fFMTYGNLLD\ | 485 | >ABL1-G321fFMTYENLLDY | 875  | 390  |
| >ABL1-G321fFMTYGNLLD\ | 10  | >ABL1-G321fFMTYENLLDY | 10   | 0    |
| >ABL1-G321fFMTYGNLLD\ | 128 | >ABL1-G321fFMTYENLLDY | 233  | 105  |
| >ABL1-G321fFMTYGNLL   | 406 | >ABL1-G321fFMTYENLL   | 4025 | 3619 |

|                        |      |                        |       |       |
|------------------------|------|------------------------|-------|-------|
| >ABL1-G321fFMTYGNLLD\  | 27   | >ABL1-G321fFMTYENLLDY  | 82    | 55    |
| >ABL1-G321fFMTYGNLL    | 128  | >ABL1-G321fFMTYENLL    | 247   | 119   |
| >ABL1-G321fFMTYGNLLD\  | 28   | >ABL1-G321fFMTYENLLDY  | 24    | 4     |
| >ABL1-G321fFMTYGNLLD\  | 450  | >ABL1-G321fFMTYENLLDY  | 483   | 33    |
| >ABL1-G321fFMTYGNLL    | 324  | >ABL1-G321fFMTYENLL    | 864   | 540   |
| >ABL1-G321fFMTYGNLL    | 482  | >ABL1-G321fFMTYENLL    | 5842  | 5360  |
| >ABL1-G321fFMTYGNLLD\  | 163  | >ABL1-G321fFMTYENLLDY  | 203   | 40    |
| >ABL1-G321fEFMTYGNLLC  | 126  | >ABL1-G321fEFMTYENLLC  | 122   | 4     |
| >ABL1-G321fEFMTYGNLLC  | 240  | >ABL1-G321fEFMTYENLLC  | 416   | 176   |
| >ABL1-G321fEFMTYGNLLC  | 21   | >ABL1-G321fEFMTYENLLC  | 43    | 22    |
| >ABL1-G321fEFMTYGNLLC  | 319  | >ABL1-G321fEFMTYENLLC  | 301   | 18    |
| >ABL1-G321fTEFMTYGNL   | 491  | >ABL1-G321fTEFMTYENL   | 1043  | 552   |
| >ABL1-G321fTEFMTYGNL   | 36   | >ABL1-G321fTEFMTYENL   | 66    | 30    |
| >ABL1-G321fTEFMTYGNLI  | 13   | >ABL1-G321fTEFMTYENLL  | 16    | 3     |
| >ABL1-G321fTEFMTYGNL   | 1780 | >ABL1-G321fTEFMTYENL   | 449   | 1331  |
| >ABL1-G321fTEFMTYGNL   | 378  | >ABL1-G321fTEFMTYENL   | 230   | 148   |
| >ABL1-G321fTEFMTYGNLI  | 396  | >ABL1-G321fTEFMTYENLL  | 461   | 65    |
| >ABL1-G321fTEFMTYGNL   | 13   | >ABL1-G321fTEFMTYENL   | 8     | 5     |
| >ABL1-G321fTEFMTYGNLI  | 202  | >ABL1-G321fTEFMTYENLL  | 334   | 132   |
| >ABL1-G321fTEFMTYGNL   | 103  | >ABL1-G321fTEFMTYENL   | 66    | 37    |
| >ABL1-G321fTEFMTYGNLI  | 278  | >ABL1-G321fTEFMTYENLL  | 296   | 18    |
| >ABL1-G321fTEFMTYGNL   | 1255 | >ABL1-G321fTEFMTYENL   | 393   | 862   |
| >ABL1-G321fTEFMTYGNL   | 799  | >ABL1-G321fTEFMTYENL   | 473   | 326   |
| >ABL1-G321fTEFMTYGNLI  | 381  | >ABL1-G321fTEFMTYENLL  | 515   | 134   |
| >ABL1-G321fTEFMTYGNL   | 120  | >ABL1-G321fTEFMTYENL   | 81    | 39    |
| >ABL1-G321fTEFMTYGNLI  | 11   | >ABL1-G321fTEFMTYENLL  | 12    | 1     |
| >ABL1-G321fITEFMTYGNL  | 434  | >ABL1-G321fITEFMTYENL  | 3451  | 3017  |
| >ABL1-G321fITEFMTYGNL  | 458  | >ABL1-G321fITEFMTYENL  | 813   | 355   |
| >ABL1-G321fITEFMTYGNL  | 54   | >ABL1-G321fITEFMTYENL  | 69    | 15    |
| >ABL1-G321fITEFMTYGNL  | 175  | >ABL1-G321fITEFMTYENLI | 360   | 185   |
| >ABL1-G321fITEFMTYGNL  | 324  | >ABL1-G321fITEFMTYENL  | 252   | 72    |
| >ABL1-G321fITEFMTYGNL  | 31   | >ABL1-G321fITEFMTYENLI | 82    | 51    |
| >ABL1-G321fITEFMTYGNL  | 257  | >ABL1-G321fITEFMTYENL  | 911   | 654   |
| >ABL1-G321fITEFMTYGNL  | 31   | >ABL1-G321fITEFMTYENLI | 40    | 9     |
| >ABL1-G321fIITEFMTYGNL | 144  | >ABL1-G321fIITEFMTYENL | 181   | 37    |
| >ABL1-G321fIITEFMTYGNL | 997  | >ABL1-G321fIITEFMTYENL | 425   | 572   |
| >ABL1-G321fIITEFMTYGNL | 118  | >ABL1-G321fIITEFMTYENL | 33    | 85    |
| >ABL1-G321fIITEFMTYGNL | 138  | >ABL1-G321fIITEFMTYENL | 240   | 102   |
| >ABL1-G321fIITEFMTYGNL | 388  | >ABL1-G321fIITEFMTYENL | 132   | 256   |
| >ABL1-G321fIITEFMTYGNL | 366  | >ABL1-G321fIITEFMTYENL | 153   | 213   |
| >ABL1-G321fIITEFMTYGNL | 155  | >ABL1-G321fIITEFMTYENL | 53    | 102   |
| >ABL1-H396fHAGAKFPIK   | 76   | >ABL1-H396fPAGAKFPIK   | 4503  | 4427  |
| >ABL1-H396fHAGAKFPI    | 459  | >ABL1-H396fPAGAKFPI    | 16699 | 16240 |

|                       |       |                        |       |       |
|-----------------------|-------|------------------------|-------|-------|
| >ABL1-H396FHAGAKFPI   | 381   | >ABL1-H396F PAGAKFPI   | 7852  | 7471  |
| >ABL1-H396FHAGAKFPIKM | 306   | >ABL1-H396F PAGAKFPIKM | 6254  | 5948  |
| >ABL1-H396FHAGAKFPIKM | 77    | >ABL1-H396F PAGAKFPIKM | 2310  | 2233  |
| >ABL1-H396FHAGAKFPIKM | 32    | >ABL1-H396F PAGAKFPIKM | 2948  | 2916  |
| >ABL1-H396FAHAGAKFPI  | 11868 | >ABL1-H396F APAGAKFPI  | 19    | 11849 |
| >ABL1-H396FAHAGAKFPI  | 14495 | >ABL1-H396F APAGAKFPI  | 10    | 14485 |
| >ABL1-H396FAHAGAKFPI  | 79    | >ABL1-H396F APAGAKFPI  | 452   | 373   |
| >ABL1-H396FAHAGAKFPI  | 21791 | >ABL1-H396F APAGAKFPI  | 398   | 21393 |
| >ABL1-H396FAHAGAKFPIK | 4646  | >ABL1-H396F APAGAKFPIK | 31    | 4615  |
| >ABL1-H396FAHAGAKFPI  | 25968 | >ABL1-H396F APAGAKFPI  | 365   | 25603 |
| >ABL1-H396FAHAGAKFPI  | 26286 | >ABL1-H396F APAGAKFPI  | 304   | 25982 |
| >ABL1-H396FAHAGAKFPIK | 6507  | >ABL1-H396F APAGAKFPIK | 20    | 6487  |
| >ABL1-H396FAHAGAKFPIK | 71    | >ABL1-H396F APAGAKFPIK | 1852  | 1781  |
| >ABL1-H396FRLMTGDTYT/ | 337   | >ABL1-H396FRLMTGDTYT/  | 14034 | 13697 |
| >ABL1-H396FRLMTGDTYT/ | 497   | >ABL1-H396FRLMTGDTYT/  | 3391  | 2894  |
| >ABL1-H396FRLMTGDTYT/ | 389   | >ABL1-H396FRLMTGDTYT/  | 1891  | 1502  |
| >ABL1-H396FTAHAGAKFPI | 141   | >ABL1-H396FTAPAGAKFPI  | 859   | 718   |
| >ABL1-H396FTAHAGAKFPI | 434   | >ABL1-H396FTAPAGAKFPI  | 12886 | 12452 |
| >ABL1-H396FTAHAGAKFPI | 21    | >ABL1-H396FTAPAGAKFPI  | 3910  | 3889  |
| >ABL1-H396FTAHAGAKFPI | 204   | >ABL1-H396FTAPAGAKFPI  | 887   | 683   |
| >ABL1-H396FTAHAGAKFPI | 890   | >ABL1-H396FTAPAGAKFPI  | 197   | 693   |
| >ABL1-H396FTAHAGAKFPI | 433   | >ABL1-H396FTAPAGAKFPI  | 695   | 262   |
| >ABL1-H396FTAHAGAKF   | 416   | >ABL1-H396FTAPAGAKF    | 3943  | 3527  |
| >ABL1-H396FTAHAGAKF   | 11    | >ABL1-H396FTAPAGAKF    | 511   | 500   |
| >ABL1-H396FTAHAGAKF   | 16359 | >ABL1-H396FTAPAGAKF    | 49    | 16310 |
| >ABL1-H396FTAHAGAKFPI | 9378  | >ABL1-H396FTAPAGAKFPI  | 41    | 9337  |
| >ABL1-H396FYTAHAGAKFF | 184   | >ABL1-H396FYTAPAGAKFF  | 131   | 53    |
| >ABL1-H396FYTAHAGAKFF | 62    | >ABL1-H396FYTAPAGAKFF  | 44    | 18    |
| >ABL1-H396FYTAHAGAKFF | 134   | >ABL1-H396FYTAPAGAKFF  | 122   | 12    |
| >ABL1-H396FYTAHAGAKFF | 25    | >ABL1-H396FYTAPAGAKFF  | 15    | 10    |
| >ABL1-H396FYTAHAGAKFF | 225   | >ABL1-H396FYTAPAGAKFF  | 89    | 136   |
| >ABL1-H396FYTAHAGAKFF | 583   | >ABL1-H396FYTAPAGAKFF  | 439   | 144   |
| >ABL1-H396FYTAHAGAKFF | 393   | >ABL1-H396FYTAPAGAKFF  | 169   | 224   |
| >ABL1-H396FYTAHAGAKFF | 2407  | >ABL1-H396FYTAPAGAKFF  | 367   | 2040  |
| >ABL1-H396FYTAHAGAK   | 347   | >ABL1-H396FYTAPAGAK    | 498   | 151   |
| >ABL1-H396FYTAHAGAK   | 166   | >ABL1-H396FYTAPAGAK    | 93    | 73    |
| >ABL1-H396FYTAHAGAKF  | 851   | >ABL1-H396FYTAPAGAKF   | 156   | 695   |
| >ABL1-H396FYTAHAGAKF  | 263   | >ABL1-H396FYTAPAGAKF   | 264   | 1     |
| >ABL1-H396FYTAHAGAKF  | 112   | >ABL1-H396FYTAPAGAKF   | 156   | 44    |
| >ABL1-H396FYTAHAGAKF  | 52    | >ABL1-H396FYTAPAGAKF   | 75    | 23    |
| >ABL1-H396FYTAHAGAKF  | 253   | >ABL1-H396FYTAPAGAKF   | 165   | 88    |
| >ABL1-H396FYTAHAGAK   | 8     | >ABL1-H396FYTAPAGAK    | 10    | 2     |
| >ABL1-H396FYTAHAGAKFF | 6     | >ABL1-H396FYTAPAGAKFF  | 6     | 0     |

|                       |      |                       |     |     |
|-----------------------|------|-----------------------|-----|-----|
| >ABL1-H396FYTAHAGAKFF | 13   | >ABL1-H396FYTAPAGAKFF | 8   | 5   |
| >ABL1-H396FYTAHAGAKF  | 72   | >ABL1-H396FYTAPAGAKF  | 69  | 3   |
| >ABL1-H396FYTAHAGAKF  | 238  | >ABL1-H396FYTAPAGAKF  | 258 | 20  |
| >ABL1-H396FYTAHAGAKF  | 41   | >ABL1-H396FYTAPAGAKF  | 43  | 2   |
| >ABL1-H396FYTAHAGAKF  | 3    | >ABL1-H396FYTAPAGAKF  | 2   | 1   |
| >ABL1-H396FYTAHAGAKFF | 14   | >ABL1-H396FYTAPAGAKFF | 11  | 3   |
| >ABL1-H396FYTAHAGAKF  | 211  | >ABL1-H396FYTAPAGAKF  | 158 | 53  |
| >ABL1-H396FYTAHAGAKF  | 567  | >ABL1-H396FYTAPAGAKF  | 126 | 441 |
| >ABL1-H396FYTAHAGAKF  | 98   | >ABL1-H396FYTAPAGAKF  | 45  | 53  |
| >ABL1-H396FYTAHAGAKFF | 910  | >ABL1-H396FYTAPAGAKFF | 421 | 489 |
| >ABL1-H396FYTAHAGAKF  | 24   | >ABL1-H396FYTAPAGAKF  | 5   | 19  |
| >ABL1-H396FYTAHAGAKFF | 60   | >ABL1-H396FYTAPAGAKFF | 13  | 47  |
| >ABL1-H396FYTAHAGAKF  | 8    | >ABL1-H396FYTAPAGAKF  | 6   | 2   |
| >ABL1-H396FYTAHAGAKFF | 437  | >ABL1-H396FYTAPAGAKFF | 343 | 94  |
| >ABL1-H396FYTAHAGAKF  | 214  | >ABL1-H396FYTAPAGAKF  | 127 | 87  |
| >ABL1-H396FYTAHAGAKFF | 30   | >ABL1-H396FYTAPAGAKFF | 16  | 14  |
| >ABL1-H396FYTAHAGAKF  | 59   | >ABL1-H396FYTAPAGAKF  | 51  | 8   |
| >ABL1-H396FYTAHAGAKF  | 61   | >ABL1-H396FYTAPAGAKF  | 72  | 11  |
| >ABL1-H396FYTAHAGAKF  | 9    | >ABL1-H396FYTAPAGAKF  | 9   | 0   |
| >ABL1-H396FYTAHAGAKF  | 645  | >ABL1-H396FYTAPAGAKF  | 404 | 241 |
| >ABL1-H396FYTAHAGAKF  | 439  | >ABL1-H396FYTAPAGAKF  | 405 | 34  |
| >ABL1-H396FYTAHAGAKF  | 530  | >ABL1-H396FYTAPAGAKF  | 267 | 263 |
| >ABL1-H396FYTAHAGAKF  | 108  | >ABL1-H396FYTAPAGAKF  | 310 | 202 |
| >ABL1-H396FYTAHAGAKF  | 20   | >ABL1-H396FYTAPAGAKF  | 29  | 9   |
| >ABL1-H396FYTAHAGAKF  | 483  | >ABL1-H396FYTAPAGAKF  | 421 | 62  |
| >ABL1-H396FYTAHAGAKF  | 37   | >ABL1-H396FYTAPAGAKF  | 30  | 7   |
| >ABL1-H396FYTAHAGAKF  | 19   | >ABL1-H396FYTAPAGAKF  | 23  | 4   |
| >ABL1-H396FYTAHAGAKF  | 31   | >ABL1-H396FYTAPAGAKF  | 41  | 10  |
| >ABL1-H396FYTAHAGAKF  | 8    | >ABL1-H396FYTAPAGAKF  | 9   | 1   |
| >ABL1-H396FYTAHAGAKF  | 242  | >ABL1-H396FYTAPAGAKF  | 426 | 184 |
| >ABL1-H396FYTAHAGAKF  | 1186 | >ABL1-H396FYTAPAGAKF  | 350 | 836 |
| >ABL1-H396FYTAHAGAKF  | 586  | >ABL1-H396FYTAPAGAKF  | 266 | 320 |
| >ABL1-H396FYTAHAGAKF  | 608  | >ABL1-H396FYTAPAGAKF  | 211 | 397 |
| >ABL1-H396FYTAHAGAKF  | 806  | >ABL1-H396FYTAPAGAKF  | 463 | 343 |
| >ABL1-H396FYTAHAGAKF  | 588  | >ABL1-H396FYTAPAGAKF  | 296 | 292 |
| >ABL1-H396FYTAHAGAKF  | 146  | >ABL1-H396FYTAPAGAKF  | 93  | 53  |
| >ABL1-H396FYTAHAGAKF  | 138  | >ABL1-H396FYTAPAGAKF  | 35  | 103 |
| >ABL1-H396FYTAHAGAKF  | 98   | >ABL1-H396FYTAPAGAKF  | 38  | 60  |
| >ABL1-H396FYTAHAGAKF  | 20   | >ABL1-H396FYTAPAGAKF  | 12  | 8   |
| >ABL1-H396FYTAHAGAKF  | 19   | >ABL1-H396FYTAPAGAKF  | 9   | 10  |
| >ABL1-H396FYTAHAGAKF  | 69   | >ABL1-H396FYTAPAGAKF  | 43  | 26  |
| >ABL1-H396FYTAHAGAKF  | 31   | >ABL1-H396FYTAPAGAKF  | 17  | 14  |
| >ABL1-H396FYTAHAGAKF  | 24   | >ABL1-H396FYTAPAGAKF  | 14  | 10  |

|                       |       |                       |       |       |
|-----------------------|-------|-----------------------|-------|-------|
| >ABL1-H396FLMTGDTYTAI | 43    | >ABL1-H396FLMTGDTYTAI | 56    | 13    |
| >ABL1-H396FLMTGDTYTAI | 77    | >ABL1-H396FLMTGDTYTAI | 47    | 30    |
| >ABL1-H396FLMTGDTYTAI | 4     | >ABL1-H396FLMTGDTYTAI | 4     | 0     |
| >ABL1-H396FHAGAKFPIK  | 865   | >ABL1-H396FHAGAKFPIK  | 288   | 577   |
| >ABL1-H396FHAGAKFPIK  | 793   | >ABL1-H396FHAGAKFPIK  | 108   | 685   |
| >ABL1-H396FHAGAKFPIK  | 76    | >ABL1-H396FHAGAKFPIK  | 23    | 53    |
| >ABL1-H396FHAGAKFPIK  | 1366  | >ABL1-H396FHAGAKFPIK  | 300   | 1066  |
| >ABL1-H396FHAGAKFPI   | 459   | >ABL1-H396FHAGAKFPI   | 10520 | 10061 |
| >ABL1-H396FHAGAKFPI   | 381   | >ABL1-H396FHAGAKFPI   | 4945  | 4564  |
| >ABL1-H396FHAGAKFPIKM | 306   | >ABL1-H396FHAGAKFPIKM | 56    | 250   |
| >ABL1-H396FHAGAKFPIKM | 77    | >ABL1-H396FHAGAKFPIKM | 47    | 30    |
| >ABL1-H396FHAGAKFPIKM | 32    | >ABL1-H396FHAGAKFPIKM | 12    | 20    |
| >ABL1-H396FHAGAKFPI   | 586   | >ABL1-H396FHAGAKFPI   | 121   | 465   |
| >ABL1-H396FAHAGAKFPI  | 12039 | >ABL1-H396FAHAGAKFPI  | 41    | 11998 |
| >ABL1-H396FAHAGAKFPIK | 14109 | >ABL1-H396FAHAGAKFPIK | 229   | 13880 |
| >ABL1-H396FAHAGAKFPI  | 79    | >ABL1-H396FAHAGAKFPI  | 181   | 102   |
| >ABL1-H396FAHAGAKFPIK | 71    | >ABL1-H396FAHAGAKFPIK | 240   | 169   |
| >ABL1-H396FLMTGDTYT/  | 337   | >ABL1-H396FLMTGDTYT/  | 128   | 209   |
| >ABL1-H396FLMTGDTYT/  | 1016  | >ABL1-H396FLMTGDTYT/  | 12    | 1004  |
| >ABL1-H396FLMTGDTYT/  | 497   | >ABL1-H396FLMTGDTYT/  | 8536  | 8039  |
| >ABL1-H396FLMTGDTYT/  | 389   | >ABL1-H396FLMTGDTYT/  | 503   | 114   |
| >ABL1-H396FLMTGDTYT/  | 21203 | >ABL1-H396FLMTGDTYT/  | 77    | 21126 |
| >ABL1-H396FTAHAGAKFPI | 141   | >ABL1-H396FTAHAGAKFPI | 1564  | 1423  |
| >ABL1-H396FTAHAGAKFPI | 434   | >ABL1-H396FTAHAGAKFPI | 38    | 396   |
| >ABL1-H396FTAHAGAKFPI | 21    | >ABL1-H396FTAHAGAKFPI | 6     | 15    |
| >ABL1-H396FTAHAGAKFPI | 204   | >ABL1-H396FTAHAGAKFPI | 1261  | 1057  |
| >ABL1-H396FTAHAGAKFPI | 433   | >ABL1-H396FTAHAGAKFPI | 1532  | 1099  |
| >ABL1-H396FTAHAGAKF   | 416   | >ABL1-H396FTAHAGAKF   | 214   | 202   |
| >ABL1-H396FTAHAGAKF   | 11    | >ABL1-H396FTAHAGAKF   | 7     | 4     |
| >ABL1-H396FTAHAGAKFPI | 896   | >ABL1-H396FTAHAGAKFPI | 190   | 706   |
| >ABL1-H396FTAHAGAKF   | 1241  | >ABL1-H396FTAHAGAKF   | 474   | 767   |
| >ABL1-H396FYTAHAGAKFF | 184   | >ABL1-H396FYTAHAGAKFF | 380   | 196   |
| >ABL1-H396FYTAHAGAKFF | 62    | >ABL1-H396FYTAHAGAKFF | 142   | 80    |
| >ABL1-H396FYTAHAGAKFF | 134   | >ABL1-H396FYTAHAGAKFF | 301   | 167   |
| >ABL1-H396FYTAHAGAKFF | 25    | >ABL1-H396FYTAHAGAKFF | 36    | 11    |
| >ABL1-H396FYTAHAGAKFF | 225   | >ABL1-H396FYTAHAGAKFF | 188   | 37    |
| >ABL1-H396FYTAHAGAKFF | 393   | >ABL1-H396FYTAHAGAKFF | 378   | 15    |
| >ABL1-H396FYTAHAGAK   | 347   | >ABL1-H396FYTAHAGAK   | 372   | 25    |
| >ABL1-H396FYTAHAGAK   | 166   | >ABL1-H396FYTAHAGAK   | 125   | 41    |
| >ABL1-H396FYTAHAGAKF  | 263   | >ABL1-H396FYTAHAGAKF  | 441   | 178   |
| >ABL1-H396FYTAHAGAKF  | 112   | >ABL1-H396FYTAHAGAKF  | 197   | 85    |
| >ABL1-H396FYTAHAGAKF  | 52    | >ABL1-H396FYTAHAGAKF  | 34    | 18    |
| >ABL1-H396FYTAHAGAKF  | 253   | >ABL1-H396FYTAHAGAKF  | 876   | 623   |

|                       |       |                       |     |       |
|-----------------------|-------|-----------------------|-----|-------|
| >ABL1-H396FYTAHAGAK   | 789   | >ABL1-H396FYTARAGAK   | 448 | 341   |
| >ABL1-H396FYTAHAGAK   | 8     | >ABL1-H396FYTARAGAK   | 8   | 0     |
| >ABL1-H396FYTAHAGAKFF | 6     | >ABL1-H396FYTARAGAKFF | 8   | 2     |
| >ABL1-H396FYTAHAGAKFF | 13    | >ABL1-H396FYTARAGAKFF | 13  | 0     |
| >ABL1-H396FYTAHAGAKF  | 72    | >ABL1-H396FYTARAGAKF  | 106 | 34    |
| >ABL1-H396FYTAHAGAKF  | 238   | >ABL1-H396FYTARAGAKF  | 375 | 137   |
| >ABL1-H396FYTAHAGAKF  | 41    | >ABL1-H396FYTARAGAKF  | 45  | 4     |
| >ABL1-H396FYTAHAGAKF  | 3     | >ABL1-H396FYTARAGAKF  | 3   | 0     |
| >ABL1-H396FYTAHAGAKFF | 14    | >ABL1-H396FYTARAGAKFF | 34  | 20    |
| >ABL1-H396FYTAHAGAKF  | 211   | >ABL1-H396FYTARAGAKF  | 608 | 397   |
| >ABL1-H396FYTAHAGAKF  | 567   | >ABL1-H396FYTARAGAKF  | 210 | 357   |
| >ABL1-H396FYTAHAGAKF  | 98    | >ABL1-H396FYTARAGAKF  | 59  | 39    |
| >ABL1-H396FYTAHAGAKF  | 24    | >ABL1-H396FYTARAGAKF  | 23  | 1     |
| >ABL1-H396FYTAHAGAKFF | 60    | >ABL1-H396FYTARAGAKFF | 58  | 2     |
| >ABL1-H396FYTAHAGAKF  | 8     | >ABL1-H396FYTARAGAKF  | 8   | 0     |
| >ABL1-H396FYTAHAGAKFF | 437   | >ABL1-H396FYTARAGAKFF | 435 | 2     |
| >ABL1-H396FYTAHAGAKF  | 214   | >ABL1-H396FYTARAGAKF  | 76  | 138   |
| >ABL1-H396FYTAHAGAKFF | 30    | >ABL1-H396FYTARAGAKFF | 33  | 3     |
| >ABL1-H396FYTAHAGAKF  | 59    | >ABL1-H396FYTARAGAKF  | 129 | 70    |
| >ABL1-H396FYTAHAGAKF  | 61    | >ABL1-H396FYTARAGAKF  | 71  | 10    |
| >ABL1-H396FYTAHAGAKF  | 9     | >ABL1-H396FYTARAGAKF  | 10  | 1     |
| >ABL1-H396FDYTAHAGAI  | 439   | >ABL1-H396FDYTTARAGAI | 381 | 58    |
| >ABL1-H396FDYTAHAGAI  | 530   | >ABL1-H396FDYTTARAGAI | 372 | 158   |
| >ABL1-H396FDYTAHAGAI  | 108   | >ABL1-H396FDYTTARAGAI | 125 | 17    |
| >ABL1-H396FDYTAHAGAI  | 20    | >ABL1-H396FDYTTARAGAI | 30  | 10    |
| >ABL1-H396FDYTAHAGAI  | 483   | >ABL1-H396FDYTTARAGAI | 544 | 61    |
| >ABL1-H396FDYTAHAGAI  | 37    | >ABL1-H396FDYTTARAGAI | 38  | 1     |
| >ABL1-H396FDYTAHAGAI  | 19    | >ABL1-H396FDYTTARAGAI | 13  | 6     |
| >ABL1-H396FDYTAHAGAI  | 31    | >ABL1-H396FDYTTARAGAI | 88  | 57    |
| >ABL1-H396FDYTAHAGAI  | 8     | >ABL1-H396FDYTTARAGAI | 16  | 8     |
| >ABL1-H396FDYTAHAGAI  | 242   | >ABL1-H396FDYTTARAGAI | 358 | 116   |
| >ABL1-H396FMGTGDTYTAH | 3846  | >ABL1-H396FMGTGDTYTAR | 230 | 3616  |
| >ABL1-H396FMGTGDTYTAH | 1807  | >ABL1-H396FMGTGDTYTAR | 12  | 1795  |
| >ABL1-H396FMGTGDTYTAH | 17093 | >ABL1-H396FMGTGDTYTAR | 71  | 17022 |
| >ABL1-H396FMGTGDTYTAH | 2343  | >ABL1-H396FMGTGDTYTAR | 8   | 2335  |
| >ABL1-H396FMGTGDTYTAH | 146   | >ABL1-H396FMGTGDTYTAR | 199 | 53    |
| >ABL1-H396FMGTGDTYTAH | 138   | >ABL1-H396FMGTGDTYTAR | 220 | 82    |
| >ABL1-H396FMGTGDTYTAH | 30890 | >ABL1-H396FMGTGDTYTAR | 327 | 30563 |
| >ABL1-H396FLMTGDTYTAI | 98    | >ABL1-H396FLMTGDTYTAI | 107 | 9     |
| >ABL1-H396FLMTGDTYTAI | 20    | >ABL1-H396FLMTGDTYTAI | 23  | 3     |
| >ABL1-H396FLMTGDTYTAI | 19    | >ABL1-H396FLMTGDTYTAI | 24  | 5     |
| >ABL1-H396FLMTGDTYTAI | 69    | >ABL1-H396FLMTGDTYTAI | 355 | 286   |
| >ABL1-H396FLMTGDTYTAI | 31    | >ABL1-H396FLMTGDTYTAI | 22  | 9     |

|                         |       |                        |       |       |
|-------------------------|-------|------------------------|-------|-------|
| >ABL1-H396F LMTGDTYTAI  | 24    | >ABL1-H396F LMTGDTYTAI | 74    | 50    |
| >ABL1-H396F LMTGDTYTAI  | 43    | >ABL1-H396F LMTGDTYTAI | 133   | 90    |
| >ABL1-H396F LMTGDTYTAI  | 77    | >ABL1-H396F LMTGDTYTAI | 50    | 27    |
| >ABL1-H396F LMTGDTYTAI  | 4     | >ABL1-H396F LMTGDTYTAI | 4     | 0     |
| >ABL1-H396F LMTGDTYTAI  | 10406 | >ABL1-H396F LMTGDTYTAI | 100   | 10306 |
| >ABL1-H396F LMTGDTYTAI  | 13198 | >ABL1-H396F LMTGDTYTAI | 356   | 12842 |
| >ABL1-H396F LMTGDTYTAI  | 18895 | >ABL1-H396F LMTGDTYTAI | 187   | 18708 |
| >ABL1-H396F LMTGDTYTAI  | 30124 | >ABL1-H396F LMTGDTYTAI | 221   | 29903 |
| >ABL1-I360S-IHRDLAARNC  | 1835  | >ABL1-I360S-SHRDLAARNC | 292   | 1543  |
| >ABL1-I360S-FIHRDLAA    | 46    | >ABL1-I360S-FSHRDLAA   | 3677  | 3631  |
| >ABL1-I360S-FIHRDLAA    | 74    | >ABL1-I360S-FSHRDLAA   | 1613  | 1539  |
| >ABL1-I360S-FIHRDLAA    | 379   | >ABL1-I360S-FSHRDLAA   | 11096 | 10717 |
| >ABL1-I360S-FIHRDLAA    | 150   | >ABL1-I360S-FSHRDLAA   | 19926 | 19776 |
| >ABL1-I360S-FIHRDLAAR   | 435   | >ABL1-I360S-FSHRDLAAR  | 232   | 203   |
| >ABL1-I360S-FIHRDLAAR   | 66    | >ABL1-I360S-FSHRDLAAR  | 74    | 8     |
| >ABL1-I360S-AMEYLEKKNF  | 277   | >ABL1-I360S-AMEYLEKKNF | 10142 | 9865  |
| >ABL1-I360S-NFIHRDLAAR  | 52    | >ABL1-I360S-NFSHRDLAAF | 51    | 1     |
| >ABL1-I360S-NFIHRDLAAR  | 26    | >ABL1-I360S-NFSHRDLAAF | 35    | 9     |
| >ABL1-I360S-NFIHRDLAAR  | 35    | >ABL1-I360S-NFSHRDLAAF | 55    | 20    |
| >ABL1-I360S-NFIHRDLAAR  | 165   | >ABL1-I360S-NFSHRDLAAF | 225   | 60    |
| >ABL1-I360S-KNFIHRDL    | 150   | >ABL1-I360S-KNFSHRDL   | 209   | 59    |
| >ABL1-I360S-KNFIHRDLAA  | 23    | >ABL1-I360S-KNFSHRDLAA | 18    | 5     |
| >ABL1-I360S-KNFIHRDL    | 2188  | >ABL1-I360S-KNFSHRDL   | 477   | 1711  |
| >ABL1-I360S-KNFIHRDLAA  | 124   | >ABL1-I360S-KNFSHRDLAA | 121   | 3     |
| >ABL1-I360S-KKNFIHRDL   | 232   | >ABL1-I360S-KKNFSHRDL  | 27    | 205   |
| >ABL1-I360S-KKNFIHRDLA  | 864   | >ABL1-I360S-KKNFSHRDLA | 278   | 586   |
| >ABL1-I360S-EKKNFIHR    | 464   | >ABL1-I360S-EKKNFSHR   | 567   | 103   |
| >ABL1-I360S-EKKNFIHR    | 177   | >ABL1-I360S-EKKNFSHR   | 160   | 17    |
| >ABL1-I360S-EKKNFIHRDL  | 534   | >ABL1-I360S-EKKNFSHRDL | 242   | 292   |
| >ABL1-I360S-EKKNFIHR    | 154   | >ABL1-I360S-EKKNFSHR   | 509   | 355   |
| >ABL1-I360S-LEKKNFIHR   | 387   | >ABL1-I360S-LEKKNFSHR  | 360   | 27    |
| >ABL1-I360S-LEKKNFIHRDI | 238   | >ABL1-I360S-LEKKNFSHRD | 422   | 184   |
| >ABL1-I360S-LEKKNFIHRDI | 181   | >ABL1-I360S-LEKKNFSHRD | 265   | 84    |
| >ABL1-I360S-LEKKNFIHRDI | 290   | >ABL1-I360S-LEKKNFSHRD | 333   | 43    |
| >ABL1-I360S-LEKKNFIHR   | 115   | >ABL1-I360S-LEKKNFSHR  | 472   | 357   |
| >ABL1-I360S-YLEKKNFI    | 313   | >ABL1-I360S-YLEKKNFS   | 12316 | 12003 |
| >ABL1-I360S-YLEKKNFI    | 23    | >ABL1-I360S-YLEKKNFS   | 1581  | 1558  |
| >ABL1-I360S-YLEKKNFI    | 306   | >ABL1-I360S-YLEKKNFS   | 12188 | 11882 |
| >ABL1-I360S-YLEKKNFI    | 57    | >ABL1-I360S-YLEKKNFS   | 6391  | 6334  |
| >ABL1-I360S-YLEKKNFI    | 24    | >ABL1-I360S-YLEKKNFS   | 9290  | 9266  |
| >ABL1-I360S-YLEKKNFI    | 146   | >ABL1-I360S-YLEKKNFS   | 12350 | 12204 |
| >ABL1-I360S-YLEKKNFI    | 19    | >ABL1-I360S-YLEKKNFS   | 1997  | 1978  |
| >ABL1-I360S-YLEKKNFIHR  | 398   | >ABL1-I360S-YLEKKNFSHR | 509   | 111   |



|                         |      |                         |       |       |
|-------------------------|------|-------------------------|-------|-------|
| >ABL1-I360S-YLEKKNFIHR  | 68   | >ABL1-I360S-YLEKKNFSHR  | 168   | 100   |
| >ABL1-I360S-EYLEKKNFI   | 117  | >ABL1-I360S-EYLEKKNFS   | 16483 | 16366 |
| >ABL1-I360S-EYLEKKNFI   | 86   | >ABL1-I360S-EYLEKKNFS   | 8180  | 8094  |
| >ABL1-I360S-EYLEKKNFIHF | 154  | >ABL1-I360S-EYLEKKNFSHI | 148   | 6     |
| >ABL1-I360S-EYLEKKNFIHF | 10   | >ABL1-I360S-EYLEKKNFSHI | 10    | 0     |
| >ABL1-I360S-EYLEKKNFIHF | 172  | >ABL1-I360S-EYLEKKNFSHI | 129   | 43    |
| >ABL1-I360S-EYLEKKNFIHF | 13   | >ABL1-I360S-EYLEKKNFSHI | 18    | 5     |
| >ABL1-I360S-MEYLEKKNFI  | 4    | >ABL1-I360S-MEYLEKKNFS  | 63    | 59    |
| >ABL1-I360S-MEYLEKKNFI  | 548  | >ABL1-I360S-MEYLEKKNFS  | 234   | 314   |
| >ABL1-I360S-MEYLEKKNFI  | 277  | >ABL1-I360S-MEYLEKKNFS  | 1915  | 1638  |
| >ABL1-I360S-MEYLEKKNFI  | 483  | >ABL1-I360S-MEYLEKKNFS  | 5896  | 5413  |
| >ABL1-I360S-MEYLEKKNFI  | 28   | >ABL1-I360S-MEYLEKKNFS  | 20243 | 20215 |
| >ABL1-I418V-IKSDVWAFG\  | 193  | >ABL1-I418V-VKSDVWAFG   | 167   | 26    |
| >ABL1-I418V-IKSDVWAFG\  | 669  | >ABL1-I418V-VKSDVWAFG   | 354   | 315   |
| >ABL1-I418V-IKSDVWAFG\  | 492  | >ABL1-I418V-VKSDVWAFG   | 360   | 132   |
| >ABL1-I418V-IKSDVWAF    | 6    | >ABL1-I418V-VKSDVWAF    | 9     | 3     |
| >ABL1-I418V-IKSDVWAFG\  | 261  | >ABL1-I418V-VKSDVWAFG   | 737   | 476   |
| >ABL1-I418V-SIKSDVWAFG  | 182  | >ABL1-I418V-SVKSDVWAFG  | 355   | 173   |
| >ABL1-I418V-SIKSDVWAFG  | 167  | >ABL1-I418V-SVKSDVWAFG  | 533   | 366   |
| >ABL1-I418V-SIKSDVWA    | 350  | >ABL1-I418V-SVKSDVWA    | 853   | 503   |
| >ABL1-I418V-SIKSDVWAFG  | 13   | >ABL1-I418V-SVKSDVWAFG  | 30    | 17    |
| >ABL1-I418V-SIKSDVWAFG  | 23   | >ABL1-I418V-SVKSDVWAFG  | 23    | 0     |
| >ABL1-I418V-SIKSDVWAFG  | 25   | >ABL1-I418V-SVKSDVWAFG  | 81    | 56    |
| >ABL1-I418V-SIKSDVWAFG  | 68   | >ABL1-I418V-SVKSDVWAFG  | 155   | 87    |
| >ABL1-I418V-SIKSDVWAFG  | 52   | >ABL1-I418V-SVKSDVWAFG  | 156   | 104   |
| >ABL1-I418V-SIKSDVWAFG  | 312  | >ABL1-I418V-SVKSDVWAFG  | 718   | 406   |
| >ABL1-I418V-SIKSDVWAFG  | 4    | >ABL1-I418V-SVKSDVWAFG  | 7     | 3     |
| >ABL1-I418V-SIKSDVWAF   | 1516 | >ABL1-I418V-SVKSDVWAF   | 361   | 1155  |
| >ABL1-I418V-SIKSDVWAF   | 38   | >ABL1-I418V-SVKSDVWAF   | 11    | 27    |
| >ABL1-I418V-SIKSDVWAFG  | 688  | >ABL1-I418V-SVKSDVWAFG  | 247   | 441   |
| >ABL1-I418V-SIKSDVWAFG  | 444  | >ABL1-I418V-SVKSDVWAFG  | 104   | 340   |
| >ABL1-I418V-SIKSDVWAFG  | 93   | >ABL1-I418V-SVKSDVWAFG  | 50    | 43    |
| >ABL1-I418V-SIKSDVWAF   | 107  | >ABL1-I418V-SVKSDVWAF   | 120   | 13    |
| >ABL1-I418V-SIKSDVWAF   | 69   | >ABL1-I418V-SVKSDVWAF   | 103   | 34    |
| >ABL1-I418V-PESLAYNKFSI | 43   | >ABL1-I418V-PESLAYNKFSI | 355   | 312   |
| >ABL1-I418V-PESLAYNKFSI | 249  | >ABL1-I418V-PESLAYNKFSI | 1193  | 944   |
| >ABL1-I418V-FSIKSDVWAF  | 196  | >ABL1-I418V-FSVKSDVWAF  | 458   | 262   |
| >ABL1-I418V-FSIKSDVWAF  | 25   | >ABL1-I418V-FSVKSDVWAF  | 50    | 25    |
| >ABL1-I418V-FSIKSDVWAF  | 352  | >ABL1-I418V-FSVKSDVWAF  | 648   | 296   |
| >ABL1-I418V-FSIKSDVWA   | 485  | >ABL1-I418V-FSVKSDVWA   | 976   | 491   |
| >ABL1-I418V-FSIKSDVWAF  | 63   | >ABL1-I418V-FSVKSDVWAF  | 113   | 50    |
| >ABL1-I418V-FSIKSDVWAF  | 6    | >ABL1-I418V-FSVKSDVWAF  | 7     | 1     |
| >ABL1-I418V-FSIKSDVW    | 6    | >ABL1-I418V-FSVKSDVW    | 5     | 1     |

|                         |      |                        |      |      |
|-------------------------|------|------------------------|------|------|
| >ABL1-I418V FSIKSDVWAF  | 6    | >ABL1-I418V FSVKSDVWA  | 5    | 1    |
| >ABL1-I418V FSIKSDVWAF  | 301  | >ABL1-I418V FSVKSDVWA  | 321  | 20   |
| >ABL1-I418V FSIKSDVW    | 208  | >ABL1-I418V FSVKSDVW   | 230  | 22   |
| >ABL1-I418V FSIKSDVW    | 76   | >ABL1-I418V FSVKSDVW   | 92   | 16   |
| >ABL1-I418V FSIKSDVW    | 10   | >ABL1-I418V FSVKSDVW   | 10   | 0    |
| >ABL1-I418V FSIKSDVWAF  | 35   | >ABL1-I418V FSVKSDVWA  | 46   | 11   |
| >ABL1-I418V FSIKSDVW    | 166  | >ABL1-I418V FSVKSDVW   | 113  | 53   |
| >ABL1-I418V FSIKSDVW    | 34   | >ABL1-I418V FSVKSDVW   | 40   | 6    |
| >ABL1-I418V FSIKSDVWAF  | 382  | >ABL1-I418V FSVKSDVWA  | 530  | 148  |
| >ABL1-I418V FSIKSDVW    | 179  | >ABL1-I418V FSVKSDVW   | 88   | 91   |
| >ABL1-I418V KFSIKSDVWA  | 304  | >ABL1-I418V KFSVKSDVW/ | 219  | 85   |
| >ABL1-I418V KFSIKSDVWA  | 346  | >ABL1-I418V KFSVKSDVW/ | 340  | 6    |
| >ABL1-I418V KFSIKSDVWA  | 16   | >ABL1-I418V KFSVKSDVW/ | 16   | 0    |
| >ABL1-I418V KFSIKSDVW   | 145  | >ABL1-I418V KFSVKSDVW  | 82   | 63   |
| >ABL1-I418V KFSIKSDV    | 401  | >ABL1-I418V KFSVKSDV   | 467  | 66   |
| >ABL1-I418V KFSIKSDVWA  | 183  | >ABL1-I418V KFSVKSDVW/ | 200  | 17   |
| >ABL1-I418V NKFSIKSDV   | 159  | >ABL1-I418V NKFSVKSDV  | 151  | 8    |
| >ABL1-I418V NKFSIKSDVW  | 443  | >ABL1-I418V NKFSVKSDVV | 379  | 64   |
| >ABL1-I418V AYNKFSIKSD\ | 431  | >ABL1-I418V AYNKFSVKSD | 313  | 118  |
| >ABL1-I418V AYNKFSIK    | 226  | >ABL1-I418V AYNKFSVK   | 244  | 18   |
| >ABL1-I418V AYNKFSIK    | 24   | >ABL1-I418V AYNKFSVK   | 30   | 6    |
| >ABL1-I418V AYNKFSIK    | 232  | >ABL1-I418V AYNKFSVK   | 180  | 52   |
| >ABL1-I418V LAYNKFSI    | 1792 | >ABL1-I418V LAYNKFSV   | 466  | 1326 |
| >ABL1-I418V LAYNKFSI    | 703  | >ABL1-I418V LAYNKFSV   | 109  | 594  |
| >ABL1-I418V LAYNKFSI    | 147  | >ABL1-I418V LAYNKFSV   | 23   | 124  |
| >ABL1-I418V LAYNKFSI    | 298  | >ABL1-I418V LAYNKFSV   | 20   | 278  |
| >ABL1-I418V LAYNKFSI    | 5960 | >ABL1-I418V LAYNKFSV   | 219  | 5741 |
| >ABL1-I418V LAYNKFSI    | 2217 | >ABL1-I418V LAYNKFSV   | 12   | 2205 |
| >ABL1-I418V LAYNKFSIK   | 62   | >ABL1-I418V LAYNKFSVK  | 58   | 4    |
| >ABL1-I418V LAYNKFSIK   | 56   | >ABL1-I418V LAYNKFSVK  | 55   | 1    |
| >ABL1-I418V LAYNKFSIK   | 267  | >ABL1-I418V LAYNKFSVK  | 228  | 39   |
| >ABL1-I418V LAYNKFSIK   | 107  | >ABL1-I418V LAYNKFSVK  | 109  | 2    |
| >ABL1-I418V LAYNKFSI    | 1421 | >ABL1-I418V LAYNKFSV   | 301  | 1120 |
| >ABL1-I418V LAYNKFSI    | 1191 | >ABL1-I418V LAYNKFSV   | 172  | 1019 |
| >ABL1-I418V LAYNKFSI    | 435  | >ABL1-I418V LAYNKFSV   | 607  | 172  |
| >ABL1-I418V LAYNKFSI    | 363  | >ABL1-I418V LAYNKFSV   | 499  | 136  |
| >ABL1-I418V LAYNKFSI    | 229  | >ABL1-I418V LAYNKFSV   | 1437 | 1208 |
| >ABL1-I418V LAYNKFSI    | 375  | >ABL1-I418V LAYNKFSV   | 863  | 488  |
| >ABL1-I418V LAYNKFSI    | 357  | >ABL1-I418V LAYNKFSV   | 3325 | 2968 |
| >ABL1-I418V LAYNKFSI    | 1539 | >ABL1-I418V LAYNKFSV   | 235  | 1304 |
| >ABL1-I418V LAYNKFSI    | 21   | >ABL1-I418V LAYNKFSV   | 792  | 771  |
| >ABL1-I418V SLAYNKFSI   | 71   | >ABL1-I418V SLAYNKFSV  | 18   | 53   |
| >ABL1-I418V SLAYNKFSI   | 20   | >ABL1-I418V SLAYNKFSV  | 6    | 14   |

|                         |      |                         |       |       |
|-------------------------|------|-------------------------|-------|-------|
| >ABL1-I418V SLAYNKFSI   | 89   | >ABL1-I418V SLAYNKFSV   | 17    | 72    |
| >ABL1-I418V SLAYNKFSI   | 382  | >ABL1-I418V SLAYNKFSV   | 32    | 350   |
| >ABL1-I418V SLAYNKFSI   | 25   | >ABL1-I418V SLAYNKFSV   | 4     | 21    |
| >ABL1-I418V SLAYNKFSI   | 21   | >ABL1-I418V SLAYNKFSV   | 7     | 14    |
| >ABL1-I418V SLAYNKFSI   | 27   | >ABL1-I418V SLAYNKFSV   | 7     | 20    |
| >ABL1-I418V SLAYNKFSI   | 135  | >ABL1-I418V SLAYNKFSV   | 8     | 127   |
| >ABL1-I418V SLAYNKFSI   | 9    | >ABL1-I418V SLAYNKFSV   | 2     | 7     |
| >ABL1-I418V SLAYNKFSIK  | 17   | >ABL1-I418V SLAYNKFSVK  | 18    | 1     |
| >ABL1-I418V SLAYNKFSIK  | 41   | >ABL1-I418V SLAYNKFSVK  | 45    | 4     |
| >ABL1-I418V SLAYNKFSI   | 134  | >ABL1-I418V SLAYNKFSV   | 1597  | 1463  |
| >ABL1-I418V SLAYNKFSI   | 196  | >ABL1-I418V SLAYNKFSV   | 49    | 147   |
| >ABL1-I418V SLAYNKFSI   | 1018 | >ABL1-I418V SLAYNKFSV   | 121   | 897   |
| >ABL1-I418V ESLAYNKFSIK | 320  | >ABL1-I418V ESLAYNKFSVI | 288   | 32    |
| >ABL1-I418V ESLAYNKFSIK | 57   | >ABL1-I418V ESLAYNKFSVI | 60    | 3     |
| >ABL1-I418V ESLAYNKFSI  | 156  | >ABL1-I418V ESLAYNKFSV  | 54    | 102   |
| >ABL1-I418V ESLAYNKFSI  | 33   | >ABL1-I418V ESLAYNKFSV  | 9     | 24    |
| >ABL1-I418V ESLAYNKFSI  | 281  | >ABL1-I418V ESLAYNKFSV  | 13317 | 13036 |
| >ABL1-L248V LGGGQYGEV   | 272  | >ABL1-L248V VGGGQYGEV   | 767   | 495   |
| >ABL1-L248V KLGGGQYGE'  | 212  | >ABL1-L248V KVGGGQYGE   | 4530  | 4318  |
| >ABL1-L248V KLGGGQYGE'  | 90   | >ABL1-L248V KVGGGQYGE   | 1638  | 1548  |
| >ABL1-L248V KLGGGQYGE'  | 56   | >ABL1-L248V KVGGGQYGE   | 457   | 401   |
| >ABL1-L248V KLGGGQYGE'  | 3    | >ABL1-L248V KVGGGQYGE   | 63    | 60    |
| >ABL1-L248V KLGGGQYGE'  | 16   | >ABL1-L248V KVGGGQYGE   | 756   | 740   |
| >ABL1-L248V KLGGGQYGE'  | 7    | >ABL1-L248V KVGGGQYGE   | 122   | 115   |
| >ABL1-L248V KLGGGQYGE'  | 19   | >ABL1-L248V KVGGGQYGE   | 812   | 793   |
| >ABL1-L248V KLGGGQYGE'  | 2    | >ABL1-L248V KVGGGQYGE   | 20    | 18    |
| >ABL1-L248V KLGGGQYGE'  | 128  | >ABL1-L248V KVGGGQYGE   | 100   | 28    |
| >ABL1-L248V KLGGGQYGE'  | 64   | >ABL1-L248V KVGGGQYGE   | 66    | 2     |
| >ABL1-L248V KLGGGQYGE'  | 37   | >ABL1-L248V KVGGGQYGE   | 35    | 2     |
| >ABL1-L248V KLGGGQYGE'  | 87   | >ABL1-L248V KVGGGQYGE   | 150   | 63    |
| >ABL1-L248V KLGGGQYGE'  | 354  | >ABL1-L248V KVGGGQYGE   | 2054  | 1700  |
| >ABL1-L248V KLGGGQYGE'  | 1690 | >ABL1-L248V KVGGGQYGE   | 325   | 1365  |
| >ABL1-L248V KLGGGQYGE'  | 385  | >ABL1-L248V KVGGGQYGE   | 716   | 331   |
| >ABL1-L248V ERTDITMKHK  | 2151 | >ABL1-L248V ERTDITMKHK  | 292   | 1859  |
| >ABL1-L248V HKLGGGQY    | 132  | >ABL1-L248V HKVGGGQY    | 212   | 80    |
| >ABL1-L248V HKLGGGQY    | 100  | >ABL1-L248V HKVGGGQY    | 140   | 40    |
| >ABL1-L248V KHKLGGGQY   | 241  | >ABL1-L248V KHKVGGGQY   | 114   | 127   |
| >ABL1-L248V MKHKLGGGC   | 221  | >ABL1-L248V MKHKVGGGC   | 128   | 93    |
| >ABL1-L248V MKHKLGGGC   | 694  | >ABL1-L248V MKHKVGGGC   | 468   | 226   |
| >ABL1-L248V MKHKLGGGC   | 35   | >ABL1-L248V MKHKVGGGC   | 28    | 7     |
| >ABL1-L248V MKHKLGGGC   | 330  | >ABL1-L248V MKHKVGGGC   | 450   | 120   |
| >ABL1-L248V TMKHKLGGG   | 76   | >ABL1-L248V TMKHKVGGC   | 97    | 21    |
| >ABL1-L248V TMKHKLGGG   | 32   | >ABL1-L248V TMKHKVGGC   | 36    | 4     |

|                         |      |                         |      |      |
|-------------------------|------|-------------------------|------|------|
| >ABL1-L248V TMKHKLG     | 69   | >ABL1-L248V TMKHKVGGC   | 55   | 14   |
| >ABL1-L248V TMKHKLG     | 77   | >ABL1-L248V TMKHKVGGC   | 65   | 12   |
| >ABL1-L248V DITMKHKL    | 5195 | >ABL1-L248V DITMKHKV    | 280  | 4915 |
| >ABL1-L248V TDITMKHKL   | 711  | >ABL1-L248V TDITMKHKV   | 133  | 578  |
| >ABL1-L248V RTDITMKHKL  | 3198 | >ABL1-L248V RTDITMKHKV  | 237  | 2961 |
| >ABL1-L248V RTDITMKHKL  | 4278 | >ABL1-L248V RTDITMKHKV  | 492  | 3786 |
| >ABL1-L248V RTDITMKHKL  | 6    | >ABL1-L248V RTDITMKHKV  | 61   | 55   |
| >ABL1-L248V RTDITMKHKL  | 453  | >ABL1-L248V RTDITMKHKV  | 2108 | 1655 |
| >ABL1-L248V RTDITMKHKL  | 396  | >ABL1-L248V RTDITMKHKV  | 744  | 348  |
| >ABL1-L273N LKEDTMEVEE  | 49   | >ABL1-L273N MKEDTMEVE   | 24   | 25   |
| >ABL1-L273N TLKEDTMEV   | 75   | >ABL1-L273N TMKEDTMEV   | 72   | 3    |
| >ABL1-L273N TLKEDTMEV   | 20   | >ABL1-L273N TMKEDTMEV   | 23   | 3    |
| >ABL1-L273N TLKEDTMEV   | 3    | >ABL1-L273N TMKEDTMEV   | 3    | 0    |
| >ABL1-L273N TLKEDTMEV   | 141  | >ABL1-L273N TMKEDTMEV   | 79   | 62   |
| >ABL1-L273N TLKEDTMEV   | 16   | >ABL1-L273N TMKEDTMEV   | 10   | 6    |
| >ABL1-L273N TLKEDTMEV   | 9    | >ABL1-L273N TMKEDTMEV   | 8    | 1    |
| >ABL1-L273N TLKEDTMEV   | 24   | >ABL1-L273N TMKEDTMEV   | 25   | 1    |
| >ABL1-L273N TLKEDTMEV   | 30   | >ABL1-L273N TMKEDTMEV   | 23   | 7    |
| >ABL1-L273N TLKEDTMEV   | 2    | >ABL1-L273N TMKEDTMEV   | 2    | 0    |
| >ABL1-L273N TLKEDTMEV   | 362  | >ABL1-L273N TMKEDTMEV   | 606  | 244  |
| >ABL1-L273N TLKEDTMEV   | 313  | >ABL1-L273N TMKEDTMEV   | 281  | 32   |
| >ABL1-L273N KYSLTVAVKTI | 18   | >ABL1-L273N KYSLTVAVKTI | 64   | 46   |
| >ABL1-L273N KYSLTVAVKTI | 126  | >ABL1-L273N KYSLTVAVKTI | 413  | 287  |
| >ABL1-L273N KYSLTVAVKTI | 14   | >ABL1-L273N KYSLTVAVKTI | 99   | 85   |
| >ABL1-L273N KYSLTVAVKTI | 126  | >ABL1-L273N KYSLTVAVKTI | 165  | 39   |
| >ABL1-L273N KTLKEDTMEV  | 176  | >ABL1-L273N KTMKEDTME   | 63   | 113  |
| >ABL1-L273N KTLKEDTMEV  | 510  | >ABL1-L273N KTMKEDTME   | 115  | 395  |
| >ABL1-L273N KTLKEDTMEV  | 135  | >ABL1-L273N KTMKEDTME   | 36   | 99   |
| >ABL1-L273N KTLKEDTMEV  | 59   | >ABL1-L273N KTMKEDTME   | 47   | 12   |
| >ABL1-L273N KTLKEDTMEV  | 98   | >ABL1-L273N KTMKEDTME   | 212  | 114  |
| >ABL1-L273N KTLKEDTMEV  | 200  | >ABL1-L273N KTMKEDTME   | 154  | 46   |
| >ABL1-L273N KTLKEDTMEV  | 48   | >ABL1-L273N KTMKEDTME   | 188  | 140  |
| >ABL1-L273N KTLKEDTMEV  | 331  | >ABL1-L273N KTMKEDTME   | 322  | 9    |
| >ABL1-L273N KTLKEDTMEV  | 404  | >ABL1-L273N KTMKEDTME   | 467  | 63   |
| >ABL1-L273N KTLKEDTM    | 168  | >ABL1-L273N KTMKEDTM    | 80   | 88   |
| >ABL1-L273N KTLKEDTMEV  | 342  | >ABL1-L273N KTMKEDTME   | 167  | 175  |
| >ABL1-L273N KTLKEDTMEV  | 339  | >ABL1-L273N KTMKEDTME   | 347  | 8    |
| >ABL1-L273N KTLKEDTM    | 13   | >ABL1-L273N KTMKEDTM    | 12   | 1    |
| >ABL1-L273N KTLKEDTMEV  | 314  | >ABL1-L273N KTMKEDTME   | 235  | 79   |
| >ABL1-L273N KTLKEDTM    | 289  | >ABL1-L273N KTMKEDTM    | 191  | 98   |
| >ABL1-L273N KTLKEDTM    | 133  | >ABL1-L273N KTMKEDTM    | 51   | 82   |
| >ABL1-L273N VAVKTLKEDT  | 545  | >ABL1-L273N VAVKTMKED   | 496  | 49   |
| >ABL1-L273N VAVKTLKEDT  | 124  | >ABL1-L273N VAVKTMKED   | 60   | 64   |

|                         |      |                        |      |      |
|-------------------------|------|------------------------|------|------|
| >ABL1-L273N VAVKTLKEDT  | 483  | >ABL1-L273N VAVKTMKED  | 438  | 45   |
| >ABL1-L273N VAVKTLKEDT  | 526  | >ABL1-L273N VAVKTMKED  | 385  | 141  |
| >ABL1-L273N TVAVKTLK    | 108  | >ABL1-L273N TVAVKTMK   | 163  | 55   |
| >ABL1-L273N TVAVKTLK    | 26   | >ABL1-L273N TVAVKTMK   | 30   | 4    |
| >ABL1-L273N TVAVKTLK    | 14   | >ABL1-L273N TVAVKTMK   | 13   | 1    |
| >ABL1-L273N LTVAVKTLK   | 129  | >ABL1-L273N LTVAVKTMK  | 260  | 131  |
| >ABL1-L273N LTVAVKTLK   | 30   | >ABL1-L273N LTVAVKTMK  | 51   | 21   |
| >ABL1-L273N LTVAVKTL    | 1679 | >ABL1-L273N LTVAVKTM   | 178  | 1501 |
| >ABL1-L273N LTVAVKTLK   | 140  | >ABL1-L273N LTVAVKTMK  | 370  | 230  |
| >ABL1-L273N LTVAVKTLK   | 9    | >ABL1-L273N LTVAVKTMK  | 12   | 3    |
| >ABL1-L273N LTVAVKTL    | 14   | >ABL1-L273N LTVAVKTM   | 10   | 4    |
| >ABL1-L273N LTVAVKTL    | 862  | >ABL1-L273N LTVAVKTM   | 250  | 612  |
| >ABL1-L273N LTVAVKTL    | 403  | >ABL1-L273N LTVAVKTM   | 95   | 308  |
| >ABL1-L273N SLTVAVKTL   | 374  | >ABL1-L273N SLTVAVKTM  | 2513 | 2139 |
| >ABL1-L273N SLTVAVKTL   | 121  | >ABL1-L273N SLTVAVKTM  | 1010 | 889  |
| >ABL1-L273N SLTVAVKTL   | 232  | >ABL1-L273N SLTVAVKTM  | 2483 | 2251 |
| >ABL1-L273N SLTVAVKTL   | 33   | >ABL1-L273N SLTVAVKTM  | 567  | 534  |
| >ABL1-L273N SLTVAVKTL   | 7    | >ABL1-L273N SLTVAVKTM  | 195  | 188  |
| >ABL1-L273N SLTVAVKTLK  | 78   | >ABL1-L273N SLTVAVKTMK | 77   | 1    |
| >ABL1-L273N SLTVAVKTLK  | 42   | >ABL1-L273N SLTVAVKTMK | 42   | 0    |
| >ABL1-L273N SLTVAVKTLK  | 336  | >ABL1-L273N SLTVAVKTMK | 528  | 192  |
| >ABL1-L273N YSLTVAVKTLK | 192  | >ABL1-L273N YSLTVAVKTM | 377  | 185  |
| >ABL1-L273N YSLTVAVKTLK | 30   | >ABL1-L273N YSLTVAVKTM | 46   | 16   |
| >ABL1-L273N YSLTVAVKTLK | 24   | >ABL1-L273N YSLTVAVKTM | 31   | 7    |
| >ABL1-L273N YSLTVAVKTL  | 97   | >ABL1-L273N YSLTVAVKTM | 52   | 45   |
| >ABL1-L273N YSLTVAVKTL  | 8    | >ABL1-L273N YSLTVAVKTM | 6    | 2    |
| >ABL1-L273N YSLTVAVKTL  | 289  | >ABL1-L273N YSLTVAVKTM | 1509 | 1220 |
| >ABL1-L273N YSLTVAVKTL  | 1440 | >ABL1-L273N YSLTVAVKTM | 389  | 1051 |
| >ABL1-L273N YSLTVAVKTL  | 1152 | >ABL1-L273N YSLTVAVKTM | 74   | 1078 |
| >ABL1-L273N YSLTVAVKTLK | 527  | >ABL1-L273N YSLTVAVKTM | 459  | 68   |
| >ABL1-L298V LVQLLGVCTR  | 61   | >ABL1-L298V VVQLLGVCTF | 88   | 27   |
| >ABL1-L298V LVQLLGVCTR  | 318  | >ABL1-L298V VVQLLGVCTF | 847  | 529  |
| >ABL1-L298V NLVQLLGV    | 191  | >ABL1-L298V NVVQLLGV   | 2630 | 2439 |
| >ABL1-L298V NLVQLLGV    | 58   | >ABL1-L298V NVVQLLGV   | 848  | 790  |
| >ABL1-L298V NLVQLLGV    | 15   | >ABL1-L298V NVVQLLGV   | 122  | 107  |
| >ABL1-L298V NLVQLLGV    | 22   | >ABL1-L298V NVVQLLGV   | 23   | 1    |
| >ABL1-L298V NLVQLLGV    | 8    | >ABL1-L298V NVVQLLGV   | 706  | 698  |
| >ABL1-L298V NLVQLLGV    | 20   | >ABL1-L298V NVVQLLGV   | 2026 | 2006 |
| >ABL1-L298V NLVQLLGV    | 27   | >ABL1-L298V NVVQLLGV   | 1688 | 1661 |
| >ABL1-L298V NLVQLLGV    | 54   | >ABL1-L298V NVVQLLGV   | 2800 | 2746 |
| >ABL1-L298V NLVQLLGV    | 4    | >ABL1-L298V NVVQLLGV   | 350  | 346  |
| >ABL1-L298V NLVQLLGVCT  | 392  | >ABL1-L298V NVVQLLGVCT | 351  | 41   |
| >ABL1-L298V NLVQLLGVCT  | 165  | >ABL1-L298V NVVQLLGVCT | 35   | 130  |

|                        |      |                        |      |      |
|------------------------|------|------------------------|------|------|
| >ABL1-L298V NLVQLLGV   | 735  | >ABL1-L298V NVVQLLGV   | 32   | 703  |
| >ABL1-L298V NLVQLLGV   | 82   | >ABL1-L298V NVVQLLGV   | 16   | 66   |
| >ABL1-L298V NLVQLLGVCT | 204  | >ABL1-L298V NVVQLLGVCT | 354  | 150  |
| >ABL1-L298V AVMKEIKHPN | 1561 | >ABL1-L298V AVMKEIKHPN | 354  | 1207 |
| >ABL1-L298V AVMKEIKHPN | 561  | >ABL1-L298V AVMKEIKHPN | 415  | 146  |
| >ABL1-L298V AVMKEIKHPN | 1230 | >ABL1-L298V AVMKEIKHPN | 75   | 1155 |
| >ABL1-L298V AVMKEIKHPN | 524  | >ABL1-L298V AVMKEIKHPN | 68   | 456  |
| >ABL1-L298V AVMKEIKHPN | 2220 | >ABL1-L298V AVMKEIKHPN | 140  | 2080 |
| >ABL1-L298V AVMKEIKHPN | 3924 | >ABL1-L298V AVMKEIKHPN | 179  | 3745 |
| >ABL1-L298V AVMKEIKHPN | 3241 | >ABL1-L298V AVMKEIKHPN | 239  | 3002 |
| >ABL1-L298V AVMKEIKHPN | 538  | >ABL1-L298V AVMKEIKHPN | 22   | 516  |
| >ABL1-L298V AVMKEIKHPN | 324  | >ABL1-L298V AVMKEIKHPN | 2846 | 2522 |
| >ABL1-L298V AVMKEIKHPN | 3091 | >ABL1-L298V AVMKEIKHPN | 350  | 2741 |
| >ABL1-L298V HPNLVQLL   | 200  | >ABL1-L298V HPNVVQLL   | 1168 | 968  |
| >ABL1-L298V HPNLVQLL   | 286  | >ABL1-L298V HPNVVQLL   | 310  | 24   |
| >ABL1-L298V HPNLVQLL   | 492  | >ABL1-L298V HPNVVQLL   | 488  | 4    |
| >ABL1-L298V HPNLVQLL   | 319  | >ABL1-L298V HPNVVQLL   | 232  | 87   |
| >ABL1-L298V HPNLVQLL   | 298  | >ABL1-L298V HPNVVQLL   | 242  | 56   |
| >ABL1-L298V HPNLVQLLGV | 29   | >ABL1-L298V HPNVVQLLGV | 35   | 6    |
| >ABL1-L298V HPNLVQLL   | 610  | >ABL1-L298V HPNVVQLL   | 340  | 270  |
| >ABL1-L298V IKHPNLVQ   | 521  | >ABL1-L298V IKHPNVVQ   | 245  | 276  |
| >ABL1-L298V IKHPNLVQ   | 29   | >ABL1-L298V IKHPNVVQ   | 13   | 16   |
| >ABL1-L298V IKHPNLVQLL | 29   | >ABL1-L298V IKHPNVVQLL | 19   | 10   |
| >ABL1-L298V EIKHPNLV   | 73   | >ABL1-L298V EIKHPNVV   | 135  | 62   |
| >ABL1-L298V EIKHPNLVQ  | 912  | >ABL1-L298V EIKHPNVVQ  | 339  | 573  |
| >ABL1-L298V EIKHPNLV   | 354  | >ABL1-L298V EIKHPNVV   | 929  | 575  |
| >ABL1-L298V KEIKHPNL   | 40   | >ABL1-L298V KEIKHPNV   | 466  | 426  |
| >ABL1-L298V KEIKHPNLVQ | 50   | >ABL1-L298V KEIKHPNVQ  | 65   | 15   |
| >ABL1-L298V KEIKHPNL   | 53   | >ABL1-L298V KEIKHPNV   | 139  | 86   |
| >ABL1-L298V KEIKHPNLV  | 369  | >ABL1-L298V KEIKHPNVV  | 153  | 216  |
| >ABL1-L298V KEIKHPNLVQ | 53   | >ABL1-L298V KEIKHPNVQ  | 50   | 3    |
| >ABL1-L298V KEIKHPNL   | 2803 | >ABL1-L298V KEIKHPNV   | 233  | 2570 |
| >ABL1-L298V KEIKHPNLV  | 1032 | >ABL1-L298V KEIKHPNVV  | 305  | 727  |
| >ABL1-L298V KEIKHPNLV  | 5    | >ABL1-L298V KEIKHPNVV  | 9    | 4    |
| >ABL1-L298V KEIKHPNLVQ | 5    | >ABL1-L298V KEIKHPNVQ  | 6    | 1    |
| >ABL1-L298V VMKEIKHPNI | 199  | >ABL1-L298V VMKEIKHPNI | 683  | 484  |
| >ABL1-L298V VMKEIKHPNI | 22   | >ABL1-L298V VMKEIKHPNI | 109  | 87   |
| >ABL1-L298V VMKEIKHPNI | 999  | >ABL1-L298V VMKEIKHPNI | 191  | 808  |
| >ABL1-L298V VMKEIKHPNI | 4    | >ABL1-L298V VMKEIKHPNI | 6    | 2    |
| >ABL1-L298V VMKEIKHPNI | 374  | >ABL1-L298V VMKEIKHPNI | 975  | 601  |
| >ABL1-L298V VMKEIKHPNI | 44   | >ABL1-L298V VMKEIKHPNI | 6    | 38   |
| >ABL1-L298V VMKEIKHPNI | 7    | >ABL1-L298V VMKEIKHPNI | 8    | 1    |
| >ABL1-L298V VMKEIKHPNI | 243  | >ABL1-L298V VMKEIKHPNI | 37   | 206  |

|                          |      |                          |       |       |
|--------------------------|------|--------------------------|-------|-------|
| >ABL1-L298V VMKEIKHPN\   | 22   | >ABL1-L298V VMKEIKHPN\   | 17    | 5     |
| >ABL1-L298V VMKEIKHPN\   | 306  | >ABL1-L298V VMKEIKHPN\   | 20    | 286   |
| >ABL1-L298V VMKEIKHPN\   | 61   | >ABL1-L298V VMKEIKHPN\   | 85    | 24    |
| >ABL1-L298V VMKEIKHPN\   | 593  | >ABL1-L298V VMKEIKHPN\   | 42    | 551   |
| >ABL1-L298V VMKEIKHPN\   | 136  | >ABL1-L298V VMKEIKHPN\   | 109   | 27    |
| >ABL1-L298V VMKEIKHPN\   | 6    | >ABL1-L298V VMKEIKHPN\   | 2     | 4     |
| >ABL1-L298V VMKEIKHPN\   | 4    | >ABL1-L298V VMKEIKHPN\   | 5     | 1     |
| >ABL1-L364I- LAARNCLV    | 55   | >ABL1-L364I- IAARNCLV    | 106   | 51    |
| >ABL1-L364I- LAARNCLV    | 387  | >ABL1-L364I- IAARNCLV    | 591   | 204   |
| >ABL1-L364I- DLAARNCLV   | 198  | >ABL1-L364I- DIAARNCLV   | 2168  | 1970  |
| >ABL1-L364I- DLAARNCLV   | 142  | >ABL1-L364I- DIAARNCLV   | 3437  | 3295  |
| >ABL1-L364I- DLAARNCLV   | 33   | >ABL1-L364I- DIAARNCLV   | 1122  | 1089  |
| >ABL1-L364I- DLAARNCLV   | 85   | >ABL1-L364I- DIAARNCLV   | 2434  | 2349  |
| >ABL1-L364I- DLAARNCL    | 404  | >ABL1-L364I- DIAARNCL    | 10856 | 10452 |
| >ABL1-L364I- DLAARNCLV   | 12   | >ABL1-L364I- DIAARNCLV   | 130   | 118   |
| >ABL1-L364I- DLAARNCL    | 1767 | >ABL1-L364I- DIAARNCL    | 373   | 1394  |
| >ABL1-L364I- DLAARNCLV   | 200  | >ABL1-L364I- DIAARNCLV   | 47    | 153   |
| >ABL1-L364I- DLAARNCLV   | 355  | >ABL1-L364I- DIAARNCLV   | 103   | 252   |
| >ABL1-L364I- DLAARNCL    | 447  | >ABL1-L364I- DIAARNCL    | 1010  | 563   |
| >ABL1-L364I- LEKKNFIHRDI | 1152 | >ABL1-L364I- LEKKNFIHRDI | 62    | 1090  |
| >ABL1-L364I- LEKKNFIHRDI | 238  | >ABL1-L364I- LEKKNFIHRDI | 720   | 482   |
| >ABL1-L364I- LEKKNFIHRDI | 181  | >ABL1-L364I- LEKKNFIHRDI | 403   | 222   |
| >ABL1-L364I- LEKKNFIHRDI | 290  | >ABL1-L364I- LEKKNFIHRDI | 69    | 221   |
| >ABL1-L364I- RDLAARNCL   | 182  | >ABL1-L364I- RDIAARNCL   | 169   | 13    |
| >ABL1-L364I- RDLAARNCL   | 760  | >ABL1-L364I- RDIAARNCL   | 414   | 346   |
| >ABL1-L364I- RDLAARNCLV  | 89   | >ABL1-L364I- RDIAARNCLV  | 111   | 22    |
| >ABL1-L364I- HRDLAARNCI  | 52   | >ABL1-L364I- HRDIAARNCL  | 70    | 18    |
| >ABL1-L364I- HRDLAARNCI  | 42   | >ABL1-L364I- HRDIAARNCL  | 59    | 17    |
| >ABL1-L364I- FIHRDLAA    | 46   | >ABL1-L364I- FIHRDIAA    | 64    | 18    |
| >ABL1-L364I- FIHRDLAA    | 74   | >ABL1-L364I- FIHRDIAA    | 85    | 11    |
| >ABL1-L364I- FIHRDLAA    | 379  | >ABL1-L364I- FIHRDIAA    | 182   | 197   |
| >ABL1-L364I- FIHRDLAA    | 150  | >ABL1-L364I- FIHRDIAA    | 99    | 51    |
| >ABL1-L364I- FIHRDLAAR   | 435  | >ABL1-L364I- FIHRDIAAR   | 340   | 95    |
| >ABL1-L364I- FIHRDLAAR   | 657  | >ABL1-L364I- FIHRDIAAR   | 468   | 189   |
| >ABL1-L364I- FIHRDLAAR   | 66   | >ABL1-L364I- FIHRDIAAR   | 38    | 28    |
| >ABL1-L364I- NFIHRDLAAR  | 52   | >ABL1-L364I- NFIHRDIAAR  | 91    | 39    |
| >ABL1-L364I- NFIHRDLAAR  | 26   | >ABL1-L364I- NFIHRDIAAR  | 40    | 14    |
| >ABL1-L364I- NFIHRDLAAR  | 35   | >ABL1-L364I- NFIHRDIAAR  | 62    | 27    |
| >ABL1-L364I- NFIHRDLAAR  | 165  | >ABL1-L364I- NFIHRDIAAR  | 109   | 56    |
| >ABL1-L364I- KNFIHRDL    | 150  | >ABL1-L364I- KNFIHRDI    | 1464  | 1314  |
| >ABL1-L364I- KNFIHRDLAA  | 23   | >ABL1-L364I- KNFIHRDIAAI | 26    | 3     |
| >ABL1-L364I- KNFIHRDLAA  | 124  | >ABL1-L364I- KNFIHRDIAAI | 102   | 22    |
| >ABL1-L364I- KNFIHRDL    | 4315 | >ABL1-L364I- KNFIHRDI    | 347   | 3968  |

|                        |     |                        |       |       |
|------------------------|-----|------------------------|-------|-------|
| >ABL1-L364I- KKNFIHRDL | 232 | >ABL1-L364I- KKNFIHRDI | 466   | 234   |
| >ABL1-L370R LVGENHLV   | 173 | >ABL1-L370R RVGENHLV   | 624   | 451   |
| >ABL1-L370R LVGENHLV   | 361 | >ABL1-L370R RVGENHLV   | 483   | 122   |
| >ABL1-L370R LVGENHLVK\ | 318 | >ABL1-L370R RVGENHLVK\ | 426   | 108   |
| >ABL1-L370R LVGENHLV   | 140 | >ABL1-L370R RVGENHLV   | 144   | 4     |
| >ABL1-L370R LVGENHLVK\ | 494 | >ABL1-L370R RVGENHLVK\ | 1050  | 556   |
| >ABL1-L370R LVGENHLV   | 21  | >ABL1-L370R RVGENHLV   | 23    | 2     |
| >ABL1-L370R LVGENHLVK\ | 17  | >ABL1-L370R RVGENHLVK\ | 18    | 1     |
| >ABL1-L370R LVGENHLV   | 93  | >ABL1-L370R RVGENHLV   | 110   | 17    |
| >ABL1-L370R LVGENHLVK\ | 125 | >ABL1-L370R RVGENHLVK\ | 134   | 9     |
| >ABL1-L370R LVGENHLV   | 128 | >ABL1-L370R RVGENHLV   | 130   | 2     |
| >ABL1-L370R LVGENHLVK\ | 187 | >ABL1-L370R RVGENHLVK\ | 181   | 6     |
| >ABL1-L370R LVGENHLV   | 120 | >ABL1-L370R RVGENHLV   | 334   | 214   |
| >ABL1-L370R LVGENHLVK\ | 245 | >ABL1-L370R RVGENHLVK\ | 738   | 493   |
| >ABL1-L370R LVGENHLV   | 5   | >ABL1-L370R RVGENHLV   | 14    | 9     |
| >ABL1-L370R LVGENHLVK\ | 5   | >ABL1-L370R RVGENHLVK\ | 20    | 15    |
| >ABL1-L370R LVGENHLVK  | 517 | >ABL1-L370R RVGENHLVK  | 101   | 416   |
| >ABL1-L370R LVGENHLVK  | 127 | >ABL1-L370R RVGENHLVK  | 46    | 81    |
| >ABL1-L370R LVGENHLVK  | 290 | >ABL1-L370R RVGENHLVK  | 11    | 279   |
| >ABL1-L370R LVGENHLV   | 87  | >ABL1-L370R RVGENHLV   | 282   | 195   |
| >ABL1-L370R LVGENHLVK\ | 236 | >ABL1-L370R RVGENHLVK\ | 605   | 369   |
| >ABL1-L370R CLVGENHLV  | 111 | >ABL1-L370R CRVGENHLV  | 19241 | 19130 |
| >ABL1-L370R CLVGENHLVK | 147 | >ABL1-L370R CRVGENHLV† | 20908 | 20761 |
| >ABL1-L370R CLVGENHL   | 64  | >ABL1-L370R CRVGENHL   | 16479 | 16415 |
| >ABL1-L370R CLVGENHLV  | 10  | >ABL1-L370R CRVGENHLV  | 7586  | 7576  |
| >ABL1-L370R CLVGENHLVK | 23  | >ABL1-L370R CRVGENHLV† | 10907 | 10884 |
| >ABL1-L370R CLVGENHLV  | 58  | >ABL1-L370R CRVGENHLV  | 16038 | 15980 |
| >ABL1-L370R CLVGENHLVK | 41  | >ABL1-L370R CRVGENHLV† | 14125 | 14084 |
| >ABL1-L370R CLVGENHLV  | 245 | >ABL1-L370R CRVGENHLV  | 8138  | 7893  |
| >ABL1-L370R CLVGENHLVK | 147 | >ABL1-L370R CRVGENHLV† | 11040 | 10893 |
| >ABL1-L370R CLVGENHLV  | 17  | >ABL1-L370R CRVGENHLV  | 17829 | 17812 |
| >ABL1-L370R CLVGENHLVK | 12  | >ABL1-L370R CRVGENHLV† | 18053 | 18041 |
| >ABL1-L370R CLVGENHLV  | 41  | >ABL1-L370R CRVGENHLV  | 18855 | 18814 |
| >ABL1-L370R CLVGENHLVK | 43  | >ABL1-L370R CRVGENHLV† | 20558 | 20515 |
| >ABL1-L370R CLVGENHLV  | 55  | >ABL1-L370R CRVGENHLV  | 21271 | 21216 |
| >ABL1-L370R CLVGENHLVK | 67  | >ABL1-L370R CRVGENHLV† | 21871 | 21804 |
| >ABL1-L370R CLVGENHLV  | 20  | >ABL1-L370R CRVGENHLV  | 19906 | 19886 |
| >ABL1-L370R CLVGENHLVK | 31  | >ABL1-L370R CRVGENHLV† | 22017 | 21986 |
| >ABL1-L370R CLVGENHL   | 29  | >ABL1-L370R CRVGENHL   | 29023 | 28994 |
| >ABL1-L370R CLVGENHLV  | 3   | >ABL1-L370R CRVGENHLV  | 10515 | 10512 |
| >ABL1-L370R CLVGENHLVK | 3   | >ABL1-L370R CRVGENHLV† | 12675 | 12672 |
| >ABL1-L370R CLVGENHLVK | 136 | >ABL1-L370R CRVGENHLV† | 8363  | 8227  |
| >ABL1-L370R CLVGENHLVK | 365 | >ABL1-L370R CRVGENHLV† | 10005 | 9640  |



|                       |       |                      |       |       |
|-----------------------|-------|----------------------|-------|-------|
| >ABL1-L370RCLVGENHLVK | 23621 | >ABL1-L370RCRVGENHLV | 77    | 23544 |
| >ABL1-L370RCLVGENHL   | 18247 | >ABL1-L370RCRVGENHL  | 409   | 17838 |
| >ABL1-L370RNCLVGENHL\ | 6723  | >ABL1-L370NCRVGENHL' | 166   | 6557  |
| >ABL1-L370RNCLVGENHL\ | 489   | >ABL1-L370NCRVGENHL' | 9444  | 8955  |
| >ABL1-L370RARNCLVGENI | 294   | >ABL1-L370RARNCRVGEN | 431   | 137   |
| >ABL1-L370RARNCLVGENI | 159   | >ABL1-L370RARNCRVGEN | 161   | 2     |
| >ABL1-L370RLAARNCLV   | 55    | >ABL1-L370RLAARNCRV  | 61    | 6     |
| >ABL1-L370RLAARNCLV   | 387   | >ABL1-L370RLAARNCRV  | 610   | 223   |
| >ABL1-L370RDLAARNCLV  | 198   | >ABL1-L370RDLAARNCRV | 609   | 411   |
| >ABL1-L370RDLAARNCLV  | 142   | >ABL1-L370RDLAARNCRV | 79    | 63    |
| >ABL1-L370RDLAARNCLV  | 33    | >ABL1-L370RDLAARNCRV | 41    | 8     |
| >ABL1-L370RDLAARNCLV  | 85    | >ABL1-L370RDLAARNCRV | 50    | 35    |
| >ABL1-L370RDLAARNCL   | 404   | >ABL1-L370RDLAARNCR  | 28533 | 28129 |
| >ABL1-L370RDLAARNCLV  | 12    | >ABL1-L370RDLAARNCRV | 7     | 5     |
| >ABL1-L370RDLAARNCL   | 12342 | >ABL1-L370RDLAARNCR  | 42    | 12300 |
| >ABL1-L370RDLAARNCL   | 21127 | >ABL1-L370RDLAARNCR  | 31    | 21096 |
| >ABL1-L370RDLAARNCLV  | 200   | >ABL1-L370RDLAARNCRV | 252   | 52    |
| >ABL1-L370RDLAARNCLV  | 355   | >ABL1-L370RDLAARNCRV | 475   | 120   |
| >ABL1-L370RDLAARNCL   | 447   | >ABL1-L370RDLAARNCR  | 16269 | 15822 |
| >ABL1-L370RDLAARNCL   | 182   | >ABL1-L370RDLAARNCR  | 8976  | 8794  |
| >ABL1-L370RDLAARNCLV  | 89    | >ABL1-L370RDLAARNCRV | 226   | 137   |
| >ABL1-L370RDLAARNCL   | 52    | >ABL1-L370RDLAARNCR  | 131   | 79    |
| >ABL1-L370RDLAARNCL   | 42    | >ABL1-L370RDLAARNCR  | 10388 | 10346 |
| >ABL1-L384NLSRLMTGDTY | 908   | >ABL1-L384NMSRLMTGDT | 117   | 791   |
| >ABL1-L384NLSRLMTGDTY | 1798  | >ABL1-L384NMSRLMTGDT | 280   | 1518  |
| >ABL1-L384NLSRLMTGDTY | 183   | >ABL1-L384NMSRLMTGDT | 136   | 47    |
| >ABL1-L384NLSRLMTGDTY | 127   | >ABL1-L384NMSRLMTGDT | 143   | 16    |
| >ABL1-L384NLSRLMTGDTY | 436   | >ABL1-L384NMSRLMTGDT | 246   | 190   |
| >ABL1-L384NLSRLMTGDTY | 6     | >ABL1-L384NMSRLMTGDT | 4     | 2     |
| >ABL1-L384NLSRLMTGDTY | 47    | >ABL1-L384NMSRLMTGDT | 67    | 20    |
| >ABL1-L384NLSRLMTGDTY | 1239  | >ABL1-L384NMSRLMTGDT | 499   | 740   |
| >ABL1-L384NLSRLMTGD`  | 456   | >ABL1-L384NGMSRLMTGE | 421   | 35    |
| >ABL1-L384NLSRLMTGD`  | 266   | >ABL1-L384NGMSRLMTGE | 64    | 202   |
| >ABL1-L384NLSRLMTGD`  | 217   | >ABL1-L384NGMSRLMTGE | 58    | 159   |
| >ABL1-L384NLSRLMTGD`  | 181   | >ABL1-L384NGMSRLMTGE | 83    | 98    |
| >ABL1-L384NLSRLMTGD`  | 605   | >ABL1-L384NGMSRLMTGE | 413   | 192   |
| >ABL1-L384NLSRLMTGD`  | 1592  | >ABL1-L384NGMSRLMTGE | 198   | 1394  |
| >ABL1-L384NLSRLMTGD`  | 82    | >ABL1-L384NGMSRLMTGE | 134   | 52    |
| >ABL1-L384NHLVKVADF(  | 224   | >ABL1-L384NHLVKVADF( | 1416  | 1192  |
| >ABL1-L384NFGLSRLMTG  | 1011  | >ABL1-L384NFGMSRLMTG | 278   | 733   |
| >ABL1-L384NADFGLSRL   | 111   | >ABL1-L384NADFGMSRL  | 90    | 21    |
| >ABL1-L384NADFGLSRLM  | 106   | >ABL1-L384NADFGMSRLM | 90    | 16    |
| >ABL1-L384NADFGLSRLM  | 156   | >ABL1-L384NADFGMSRLM | 194   | 38    |

|                        |      |                        |      |      |
|------------------------|------|------------------------|------|------|
| >ABL1-L384N VADFGLSRL  | 120  | >ABL1-L384N VADFGMSRL  | 35   | 85   |
| >ABL1-L384N VADFGLSRLM | 464  | >ABL1-L384N VADFGMSRLM | 213  | 251  |
| >ABL1-L384N VADFGLSRL  | 179  | >ABL1-L384N VADFGMSRL  | 110  | 69   |
| >ABL1-L384N KVADFGLSRL | 46   | >ABL1-L384N KVADFGMSR  | 72   | 26   |
| >ABL1-L384N KVADFGLSRL | 351  | >ABL1-L384N KVADFGMSR  | 391  | 40   |
| >ABL1-L384N KVADFGLSRL | 101  | >ABL1-L384N KVADFGMSR  | 191  | 90   |
| >ABL1-L384N KVADFGLSRL | 307  | >ABL1-L384N KVADFGMSR  | 967  | 660  |
| >ABL1-L384N KVADFGLSRL | 217  | >ABL1-L384N KVADFGMSR  | 321  | 104  |
| >ABL1-L384N KVADFGLSRL | 51   | >ABL1-L384N KVADFGMSR  | 65   | 14   |
| >ABL1-L384N KVADFGLSR  | 309  | >ABL1-L384N KVADFGMSR  | 223  | 86   |
| >ABL1-L384N KVADFGLSR  | 27   | >ABL1-L384N KVADFGMSR  | 22   | 5    |
| >ABL1-L384N KVADFGLSR  | 853  | >ABL1-L384N KVADFGMSR  | 403  | 450  |
| >ABL1-L384N KVADFGLSR  | 59   | >ABL1-L384N KVADFGMSR  | 32   | 27   |
| >ABL1-L384N KVADFGLSR  | 145  | >ABL1-L384N KVADFGMSR  | 60   | 85   |
| >ABL1-L384N KVADFGLSRL | 67   | >ABL1-L384N KVADFGMSR  | 59   | 8    |
| >ABL1-L384N KVADFGLSRL | 317  | >ABL1-L384N KVADFGMSR  | 404  | 87   |
| >ABL1-L384N KVADFGLSRL | 44   | >ABL1-L384N KVADFGMSR  | 39   | 5    |
| >ABL1-L384N KVADFGLSR  | 21   | >ABL1-L384N KVADFGMSR  | 27   | 6    |
| >ABL1-L384N VKVADFG    | 477  | >ABL1-L384N VKVADFGM   | 315  | 162  |
| >ABL1-L384N VKVADFGLSR | 341  | >ABL1-L384N VKVADFGMS  | 194  | 147  |
| >ABL1-L384N VKVADFGLSR | 345  | >ABL1-L384N VKVADFGMS  | 295  | 50   |
| >ABL1-L384N LVKVADFG   | 257  | >ABL1-L384N LVKVADFGM  | 162  | 95   |
| >ABL1-L384N LVKVADFG   | 64   | >ABL1-L384N LVKVADFGM  | 38   | 26   |
| >ABL1-L384N LVKVADFG   | 358  | >ABL1-L384N LVKVADFGM  | 151  | 207  |
| >ABL1-L384N LVKVADFG   | 133  | >ABL1-L384N LVKVADFGM  | 69   | 64   |
| >ABL1-L384N HLVKVADFG  | 418  | >ABL1-L384N HLVKVADFGM | 1445 | 1027 |
| >ABL1-L384N HLVKVADFG  | 73   | >ABL1-L384N HLVKVADFGM | 306  | 233  |
| >ABL1-L384N HLVKVADFG  | 71   | >ABL1-L384N HLVKVADFGM | 577  | 506  |
| >ABL1-L384N HLVKVADFG  | 37   | >ABL1-L384N HLVKVADFGM | 408  | 371  |
| >ABL1-L384N HLVKVADFG  | 36   | >ABL1-L384N HLVKVADFGM | 438  | 402  |
| >ABL1-L384N HLVKVADFG  | 31   | >ABL1-L384N HLVKVADFGM | 1119 | 1088 |
| >ABL1-L387N LMTGDTYT   | 1252 | >ABL1-L387N MMTGDTYT   | 238  | 1014 |
| >ABL1-L387N LMTGDTYTA  | 47   | >ABL1-L387N MMTGDTYT/  | 19   | 28   |
| >ABL1-L387N LMTGDTYTAI | 98   | >ABL1-L387N MMTGDTYT/  | 31   | 67   |
| >ABL1-L387N LMTGDTYT   | 164  | >ABL1-L387N MMTGDTYT   | 46   | 118  |
| >ABL1-L387N LMTGDTYTA  | 18   | >ABL1-L387N MMTGDTYT/  | 7    | 11   |
| >ABL1-L387N LMTGDTYTAI | 20   | >ABL1-L387N MMTGDTYT/  | 9    | 11   |
| >ABL1-L387N LMTGDTYT   | 524  | >ABL1-L387N MMTGDTYT   | 127  | 397  |
| >ABL1-L387N LMTGDTYTA  | 38   | >ABL1-L387N MMTGDTYT/  | 13   | 25   |
| >ABL1-L387N LMTGDTYTAI | 19   | >ABL1-L387N MMTGDTYT/  | 8    | 11   |
| >ABL1-L387N LMTGDTYT   | 729  | >ABL1-L387N MMTGDTYT   | 252  | 477  |
| >ABL1-L387N LMTGDTYTA  | 137  | >ABL1-L387N MMTGDTYT/  | 59   | 78   |
| >ABL1-L387N LMTGDTYTAI | 69   | >ABL1-L387N MMTGDTYT/  | 30   | 39   |

|                        |      |                       |     |      |
|------------------------|------|-----------------------|-----|------|
| >ABL1-L387N LMTGDTYT   | 148  | >ABL1-L387N MMTGDTYT  | 60  | 88   |
| >ABL1-L387N LMTGDTYTA  | 10   | >ABL1-L387N MMTGDTYT/ | 6   | 4    |
| >ABL1-L387N LMTGDTYTAI | 31   | >ABL1-L387N MMTGDTYT/ | 15  | 16   |
| >ABL1-L387N LMTGDTYTA  | 6    | >ABL1-L387N MMTGDTYT/ | 5   | 1    |
| >ABL1-L387N LMTGDTYTAI | 24   | >ABL1-L387N MMTGDTYT/ | 16  | 8    |
| >ABL1-L387N LMTGDTYT   | 261  | >ABL1-L387N MMTGDTYT  | 165 | 96   |
| >ABL1-L387N LMTGDTYTA  | 25   | >ABL1-L387N MMTGDTYT/ | 18  | 7    |
| >ABL1-L387N LMTGDTYTAI | 43   | >ABL1-L387N MMTGDTYT/ | 27  | 16   |
| >ABL1-L387N LMTGDTYT   | 806  | >ABL1-L387N MMTGDTYT  | 404 | 402  |
| >ABL1-L387N LMTGDTYTA  | 12   | >ABL1-L387N MMTGDTYT/ | 7   | 5    |
| >ABL1-L387N LMTGDTYTAI | 77   | >ABL1-L387N MMTGDTYT/ | 45  | 32   |
| >ABL1-L387N LMTGDTYT   | 12   | >ABL1-L387N MMTGDTYT  | 9   | 3    |
| >ABL1-L387N LMTGDTYTA  | 3    | >ABL1-L387N MMTGDTYT/ | 3   | 0    |
| >ABL1-L387N LMTGDTYTAI | 4    | >ABL1-L387N MMTGDTYT/ | 4   | 0    |
| >ABL1-L387N LMTGDTYTA  | 1557 | >ABL1-L387N MMTGDTYT/ | 326 | 1231 |
| >ABL1-L387N LMTGDTYTA  | 5143 | >ABL1-L387N MMTGDTYT/ | 259 | 4884 |
| >ABL1-L387N LMTGDTYTAI | 4830 | >ABL1-L387N MMTGDTYT/ | 232 | 4598 |
| >ABL1-L387N RLMTGDTYT  | 144  | >ABL1-L387N RMMTGDTYI | 125 | 19   |
| >ABL1-L387N RLMTGDTYT/ | 16   | >ABL1-L387N RMMTGDTYI | 15  | 1    |
| >ABL1-L387N RLMTGDTYT  | 222  | >ABL1-L387N RMMTGDTYI | 334 | 112  |
| >ABL1-L387N RLMTGDTYT/ | 10   | >ABL1-L387N RMMTGDTYI | 11  | 1    |
| >ABL1-L387N RLMTGDTYT  | 62   | >ABL1-L387N RMMTGDTYI | 57  | 5    |
| >ABL1-L387N RLMTGDTYT/ | 31   | >ABL1-L387N RMMTGDTYI | 30  | 1    |
| >ABL1-L387N RLMTGDTYT  | 134  | >ABL1-L387N RMMTGDTYI | 96  | 38   |
| >ABL1-L387N RLMTGDTYT/ | 82   | >ABL1-L387N RMMTGDTYI | 61  | 21   |
| >ABL1-L387N RLMTGDTYT  | 309  | >ABL1-L387N RMMTGDTYI | 152 | 157  |
| >ABL1-L387N RLMTGDTYT/ | 23   | >ABL1-L387N RMMTGDTYI | 14  | 9    |
| >ABL1-L387N RLMTGDTYT  | 417  | >ABL1-L387N RMMTGDTYI | 293 | 124  |
| >ABL1-L387N RLMTGDTYT/ | 10   | >ABL1-L387N RMMTGDTYI | 7   | 3    |
| >ABL1-L387N RLMTGDTYT/ | 61   | >ABL1-L387N RMMTGDTYI | 53  | 8    |
| >ABL1-L387N RLMTGDTYT  | 486  | >ABL1-L387N RMMTGDTYI | 418 | 68   |
| >ABL1-L387N RLMTGDTYT/ | 23   | >ABL1-L387N RMMTGDTYI | 19  | 4    |
| >ABL1-L387N RLMTGDTYT  | 134  | >ABL1-L387N RMMTGDTYI | 314 | 180  |
| >ABL1-L387N RLMTGDTYT/ | 11   | >ABL1-L387N RMMTGDTYI | 18  | 7    |
| >ABL1-L387N RLMTGDTY   | 578  | >ABL1-L387N RMMTGDTY  | 458 | 120  |
| >ABL1-L387N RLMTGDTYT/ | 337  | >ABL1-L387N RMMTGDTYI | 274 | 63   |
| >ABL1-L387N RLMTGDTY   | 329  | >ABL1-L387N RMMTGDTY  | 63  | 266  |
| >ABL1-L387N RLMTGDTY   | 63   | >ABL1-L387N RMMTGDTY  | 20  | 43   |
| >ABL1-L387N RLMTGDTYT/ | 1016 | >ABL1-L387N RMMTGDTYI | 292 | 724  |
| >ABL1-L387N RLMTGDTY   | 88   | >ABL1-L387N RMMTGDTY  | 60  | 28   |
| >ABL1-L387N RLMTGDTYT/ | 123  | >ABL1-L387N RMMTGDTYI | 94  | 29   |
| >ABL1-L387N RLMTGDTY   | 116  | >ABL1-L387N RMMTGDTY  | 134 | 18   |
| >ABL1-L387N RLMTGDTY   | 60   | >ABL1-L387N RMMTGDTY  | 42  | 18   |

|                        |      |                        |      |      |
|------------------------|------|------------------------|------|------|
| >ABL1-L387N RLMTGDTYT/ | 947  | >ABL1-L387N RMMTGDTYI  | 257  | 690  |
| >ABL1-L387N RLMTGDTYT/ | 497  | >ABL1-L387N RMMTGDTYI  | 128  | 369  |
| >ABL1-L387N RLMTGDTY   | 80   | >ABL1-L387N RMMTGDTY   | 62   | 18   |
| >ABL1-L387N RLMTGDTY   | 62   | >ABL1-L387N RMMTGDTY   | 7    | 55   |
| >ABL1-L387N RLMTGDTYT/ | 3344 | >ABL1-L387N RMMTGDTYI  | 320  | 3024 |
| >ABL1-L387N RLMTGDTYT/ | 389  | >ABL1-L387N RMMTGDTYI  | 41   | 348  |
| >ABL1-L387N RLMTGDTY   | 74   | >ABL1-L387N RMMTGDTY   | 30   | 44   |
| >ABL1-L387N RLMTGDTY   | 602  | >ABL1-L387N RMMTGDTY   | 228  | 374  |
| >ABL1-L387N RLMTGDTY   | 2481 | >ABL1-L387N RMMTGDTY   | 156  | 2325 |
| >ABL1-L387N VKVADFGLSR | 345  | >ABL1-L387N VKVADFGLSR | 209  | 136  |
| >ABL1-L387N SRLMTGDTY  | 47   | >ABL1-L387N SRMMTGDTY  | 28   | 19   |
| >ABL1-L387N SRLMTGDTY  | 851  | >ABL1-L387N SRMMTGDTY  | 293  | 558  |
| >ABL1-L387N SRLMTGDTYI | 590  | >ABL1-L387N SRMMTGDTY  | 479  | 111  |
| >ABL1-L387N SRLMTGDTY  | 386  | >ABL1-L387N SRMMTGDTY  | 300  | 86   |
| >ABL1-L387N LSRLMTGDTY | 183  | >ABL1-L387N LSRMMTGDT  | 195  | 12   |
| >ABL1-L387N LSRLMTGDTY | 127  | >ABL1-L387N LSRMMTGDT  | 61   | 66   |
| >ABL1-L387N LSRLMTGDTY | 436  | >ABL1-L387N LSRMMTGDT  | 149  | 287  |
| >ABL1-L387N LSRLMTGDTY | 6    | >ABL1-L387N LSRMMTGDT  | 5    | 1    |
| >ABL1-L387N LSRLMTGDTY | 47   | >ABL1-L387N LSRMMTGDT  | 90   | 43   |
| >ABL1-L387N GLSRLMTGD  | 456  | >ABL1-L387N GLSRMMTGE  | 581  | 125  |
| >ABL1-L387N GLSRLMTGD  | 266  | >ABL1-L387N GLSRMMTGE  | 232  | 34   |
| >ABL1-L387N GLSRLMTGD  | 217  | >ABL1-L387N GLSRMMTGE  | 216  | 1    |
| >ABL1-L387N GLSRLMTGD  | 181  | >ABL1-L387N GLSRMMTGE  | 190  | 9    |
| >ABL1-L387N GLSRLMTGD  | 82   | >ABL1-L387N GLSRMMTGE  | 94   | 12   |
| >ABL1-L387N ADFGLSRL   | 111  | >ABL1-L387N ADFGLSRM   | 225  | 114  |
| >ABL1-L387N ADFGLSRLM  | 106  | >ABL1-L387N ADFGLSRMM  | 65   | 41   |
| >ABL1-L387N ADFGLSRLM  | 156  | >ABL1-L387N ADFGLSRMM  | 130  | 26   |
| >ABL1-L387N VADFGLSRL  | 120  | >ABL1-L387N VADFGLSRM  | 76   | 44   |
| >ABL1-L387N VADFGLSRLM | 464  | >ABL1-L387N VADFGLSRM  | 293  | 171  |
| >ABL1-L387N VADFGLSRL  | 179  | >ABL1-L387N VADFGLSRM  | 25   | 154  |
| >ABL1-L387N KVADFGLSRL | 46   | >ABL1-L387N KVADFGLSRM | 198  | 152  |
| >ABL1-L387N KVADFGLSRL | 351  | >ABL1-L387N KVADFGLSRM | 780  | 429  |
| >ABL1-L387N KVADFGLSRL | 101  | >ABL1-L387N KVADFGLSRM | 509  | 408  |
| >ABL1-L387N KVADFGLSRL | 307  | >ABL1-L387N KVADFGLSRM | 1104 | 797  |
| >ABL1-L387N KVADFGLSRL | 217  | >ABL1-L387N KVADFGLSRM | 1561 | 1344 |
| >ABL1-L387N KVADFGLSRL | 51   | >ABL1-L387N KVADFGLSRM | 1566 | 1515 |
| >ABL1-L387N KVADFGLSRL | 1751 | >ABL1-L387N KVADFGLSRM | 261  | 1490 |
| >ABL1-L387N KVADFGLSRL | 580  | >ABL1-L387N KVADFGLSRM | 218  | 362  |
| >ABL1-L387N KVADFGLSRL | 67   | >ABL1-L387N KVADFGLSRM | 44   | 23   |
| >ABL1-L387N KVADFGLSRL | 317  | >ABL1-L387N KVADFGLSRM | 179  | 138  |
| >ABL1-L387N KVADFGLSRL | 2476 | >ABL1-L387N KVADFGLSRM | 120  | 2356 |
| >ABL1-L387N KVADFGLSRL | 44   | >ABL1-L387N KVADFGLSRM | 37   | 7    |
| >ABL1-M237 MERTDITM    | 158  | >ABL1-M237 IERTDITM    | 388  | 230  |

|                       |      |                       |      |      |
|-----------------------|------|-----------------------|------|------|
| >ABL1-M237 MERTDITM   | 337  | >ABL1-M237 IERTDITM   | 424  | 87   |
| >ABL1-M237 MERTDITM   | 88   | >ABL1-M237 IERTDITM   | 153  | 65   |
| >ABL1-M237 EMERTDITM  | 258  | >ABL1-M237 EIERTDITM  | 529  | 271  |
| >ABL1-M237 GVSPNYDKW  | 2273 | >ABL1-M237 GVSPNYDKW  | 431  | 1842 |
| >ABL1-M237 WEMERTDIT  | 164  | >ABL1-M237 WEIERTDIT  | 620  | 456  |
| >ABL1-M237 WEMERTDIT  | 135  | >ABL1-M237 WEIERTDITM | 414  | 279  |
| >ABL1-M237 WEMERTDIT  | 1085 | >ABL1-M237 WEIERTDITM | 346  | 739  |
| >ABL1-M237 WEMERTDIT  | 121  | >ABL1-M237 WEIERTDITM | 331  | 210  |
| >ABL1-M237 WEMERTDI   | 186  | >ABL1-M237 WEIERTDI   | 109  | 77   |
| >ABL1-M237 WEMERTDI   | 178  | >ABL1-M237 WEIERTDI   | 271  | 93   |
| >ABL1-M237 WEMERTDIT  | 237  | >ABL1-M237 WEIERTDIT  | 378  | 141  |
| >ABL1-M237 WEMERTDIT  | 331  | >ABL1-M237 WEIERTDITM | 510  | 179  |
| >ABL1-M237 WEMERTDI   | 31   | >ABL1-M237 WEIERTDI   | 26   | 5    |
| >ABL1-M237 WEMERTDIT  | 7    | >ABL1-M237 WEIERTDIT  | 12   | 5    |
| >ABL1-M237 WEMERTDIT  | 10   | >ABL1-M237 WEIERTDITM | 10   | 0    |
| >ABL1-M237 WEMERTDIT  | 33   | >ABL1-M237 WEIERTDITM | 107  | 74   |
| >ABL1-M237 KWEMERTD   | 369  | >ABL1-M237 KWEIERTD   | 471  | 102  |
| >ABL1-M237 KWEMERTDI  | 160  | >ABL1-M237 KWEIERTDI  | 216  | 56   |
| >ABL1-M237 KWEMERTDI  | 88   | >ABL1-M237 KWEIERTDIT | 110  | 22   |
| >ABL1-M237 YDKWEMERT  | 123  | >ABL1-M237 YDKWEIERTD | 109  | 14   |
| >ABL1-M237 NYDKWEMER  | 62   | >ABL1-M237 NYDKWEIER  | 93   | 31   |
| >ABL1-M237 NYDKWEMER  | 63   | >ABL1-M237 NYDKWEIER  | 56   | 7    |
| >ABL1-M237 SPNYDKWEN  | 266  | >ABL1-M237 SPNYDKWEI  | 1715 | 1449 |
| >ABL1-M237 SPNYDKWEN  | 88   | >ABL1-M237 SPNYDKWEI  | 3942 | 3854 |
| >ABL1-M237 SPNYDKWEN  | 77   | >ABL1-M237 SPNYDKWEI  | 51   | 26   |
| >ABL1-M237 VSPNYDKWE  | 37   | >ABL1-M237 VSPNYDKWE  | 78   | 41   |
| >ABL1-M237 VSPNYDKWE  | 236  | >ABL1-M237 VSPNYDKWE  | 8883 | 8647 |
| >ABL1-M244 MKHKLGGGC  | 221  | >ABL1-M244 VKHKLGGGQ  | 230  | 9    |
| >ABL1-M244 MKHKLGGGC  | 35   | >ABL1-M244 VKHKLGGGQ  | 105  | 70   |
| >ABL1-M244 MKHKLGGGC  | 330  | >ABL1-M244 VKHKLGGGQ  | 6835 | 6505 |
| >ABL1-M244 TMKHKLGGG  | 4241 | >ABL1-M244 TVKHKLGGGQ | 111  | 4130 |
| >ABL1-M244 TMKHKLGGG  | 1982 | >ABL1-M244 TVKHKLGGGQ | 114  | 1868 |
| >ABL1-M244 TMKHKLGGG  | 76   | >ABL1-M244 TVKHKLGGGQ | 203  | 127  |
| >ABL1-M244 TMKHKLGGG  | 32   | >ABL1-M244 TVKHKLGGGQ | 96   | 64   |
| >ABL1-M244 TMKHKLGGG  | 544  | >ABL1-M244 TVKHKLGGGQ | 437  | 107  |
| >ABL1-M244 TMKHKLGGG  | 69   | >ABL1-M244 TVKHKLGGGQ | 454  | 385  |
| >ABL1-M244 TMKHKLGGG  | 77   | >ABL1-M244 TVKHKLGGGQ | 578  | 501  |
| >ABL1-M244 TMKHKLGGG  | 2946 | >ABL1-M244 TVKHKLGGGQ | 408  | 2538 |
| >ABL1-M244 KWEMERTDI  | 88   | >ABL1-M244 KWEMERTDI  | 93   | 5    |
| >ABL1-M244 RTDITMKHK  | 161  | >ABL1-M244 RTDITVKHK  | 299  | 138  |
| >ABL1-M244 RTDITMKHK  | 156  | >ABL1-M244 RTDITVKHK  | 175  | 19   |
| >ABL1-M244 RTDITMKH   | 81   | >ABL1-M244 RTDITVKH   | 101  | 20   |
| >ABL1-M244 RTDITMKHKL | 6    | >ABL1-M244 RTDITVKHKL | 11   | 5    |

|                       |       |                       |       |       |
|-----------------------|-------|-----------------------|-------|-------|
| >ABL1-M244 RTDITMKHKL | 453   | >ABL1-M244 RTDITVKHKL | 517   | 64    |
| >ABL1-M244 RTDITMKHKL | 396   | >ABL1-M244 RTDITVKHKL | 876   | 480   |
| >ABL1-M244 RTDITMKHK  | 181   | >ABL1-M244 RTDITVKHK  | 376   | 195   |
| >ABL1-M244 ERTDITMK   | 356   | >ABL1-M244 ERTDITVK   | 864   | 508   |
| >ABL1-M244 MERTDITM   | 158   | >ABL1-M244 MERTDITV   | 114   | 44    |
| >ABL1-M244 MERTDITM   | 337   | >ABL1-M244 MERTDITV   | 1126  | 789   |
| >ABL1-M244 MERTDITM   | 88    | >ABL1-M244 MERTDITV   | 497   | 409   |
| >ABL1-M244 MERTDITM   | 1401  | >ABL1-M244 MERTDITV   | 104   | 1297  |
| >ABL1-M244 EMERTDITM  | 6973  | >ABL1-M244 EMERTDITV  | 164   | 6809  |
| >ABL1-M244 EMERTDITM  | 5530  | >ABL1-M244 EMERTDITV  | 50    | 5480  |
| >ABL1-M244 EMERTDITM  | 13388 | >ABL1-M244 EMERTDITV  | 229   | 13159 |
| >ABL1-M244 EMERTDITM  | 6568  | >ABL1-M244 EMERTDITV  | 25    | 6543  |
| >ABL1-M244 EMERTDITM  | 258   | >ABL1-M244 EMERTDITV  | 9292  | 9034  |
| >ABL1-M244 WEMERTDITM | 135   | >ABL1-M244 WEMERTDITV | 59    | 76    |
| >ABL1-M244 WEMERTDITM | 121   | >ABL1-M244 WEMERTDITV | 437   | 316   |
| >ABL1-M244 WEMERTDITM | 331   | >ABL1-M244 WEMERTDITV | 8834  | 8503  |
| >ABL1-M244 WEMERTDITM | 10    | >ABL1-M244 WEMERTDITV | 8     | 2     |
| >ABL1-M244 WEMERTDITM | 33    | >ABL1-M244 WEMERTDITV | 52    | 19    |
| >ABL1-M343 MATQISSAM  | 56    | >ABL1-M343 TATQISSAME | 239   | 183   |
| >ABL1-M343 MATQISSAM  | 140   | >ABL1-M343 TATQISSAME | 259   | 119   |
| >ABL1-M343 MATQISSAM  | 43    | >ABL1-M343 TATQISSAME | 125   | 82    |
| >ABL1-M343 MATQISSA   | 75    | >ABL1-M343 TATQISSA   | 253   | 178   |
| >ABL1-M343 MATQISSAM  | 219   | >ABL1-M343 TATQISSAM  | 816   | 597   |
| >ABL1-M343 MATQISSAM  | 122   | >ABL1-M343 TATQISSAME | 216   | 94    |
| >ABL1-M343 MATQISSAM  | 322   | >ABL1-M343 TATQISSAM  | 4157  | 3835  |
| >ABL1-M343 MATQISSAM  | 342   | >ABL1-M343 TATQISSAM  | 2866  | 2524  |
| >ABL1-M343 MATQISSAM  | 86    | >ABL1-M343 TATQISSAME | 855   | 769   |
| >ABL1-M343 MATQISSAM  | 40    | >ABL1-M343 TATQISSAM  | 431   | 391   |
| >ABL1-M343 MATQISSAM  | 9     | >ABL1-M343 TATQISSAME | 60    | 51    |
| >ABL1-M343 MATQISSAM  | 7     | >ABL1-M343 TATQISSAM  | 15    | 8     |
| >ABL1-M343 MATQISSAM  | 8     | >ABL1-M343 TATQISSAME | 21    | 13    |
| >ABL1-M343 MATQISSAM  | 491   | >ABL1-M343 TATQISSAM  | 2143  | 1652  |
| >ABL1-M343 MATQISSAM  | 191   | >ABL1-M343 TATQISSAME | 1536  | 1345  |
| >ABL1-M343 MATQISSA   | 434   | >ABL1-M343 TATQISSA   | 14360 | 13926 |
| >ABL1-M343 MATQISSAM  | 73    | >ABL1-M343 TATQISSAME | 1283  | 1210  |
| >ABL1-M343 MATQISSAM  | 12    | >ABL1-M343 TATQISSAM  | 28    | 16    |
| >ABL1-M343 MATQISSAM  | 37    | >ABL1-M343 TATQISSAME | 86    | 49    |
| >ABL1-M343 MATQISSAM  | 94    | >ABL1-M343 TATQISSAME | 436   | 342   |
| >ABL1-M343 MATQISSAM  | 115   | >ABL1-M343 TATQISSAME | 16463 | 16348 |
| >ABL1-M343 YMATQISS   | 428   | >ABL1-M343 YTATQISS   | 13918 | 13490 |
| >ABL1-M343 YMATQISSA  | 17    | >ABL1-M343 YTATQISSA  | 1067  | 1050  |
| >ABL1-M343 YMATQISSAM | 234   | >ABL1-M343 YTATQISSAM | 6529  | 6295  |
| >ABL1-M343 YMATQISS   | 111   | >ABL1-M343 YTATQISS   | 5434  | 5323  |

|                       |       |                       |       |       |
|-----------------------|-------|-----------------------|-------|-------|
| >ABL1-M343 YMATQISSA  | 4     | >ABL1-M343 YTATQISSA  | 78    | 74    |
| >ABL1-M343 YMATQISSAM | 21    | >ABL1-M343 YTATQISSAM | 363   | 342   |
| >ABL1-M343 YMATQISS   | 99    | >ABL1-M343 YTATQISS   | 5594  | 5495  |
| >ABL1-M343 YMATQISSA  | 2     | >ABL1-M343 YTATQISSA  | 12    | 10    |
| >ABL1-M343 YMATQISSAM | 44    | >ABL1-M343 YTATQISSAM | 599   | 555   |
| >ABL1-M343 YMATQISSA  | 18    | >ABL1-M343 YTATQISSA  | 74    | 56    |
| >ABL1-M343 YMATQISSAM | 267   | >ABL1-M343 YTATQISSAM | 574   | 307   |
| >ABL1-M343 YMATQISS   | 172   | >ABL1-M343 YTATQISS   | 9824  | 9652  |
| >ABL1-M343 YMATQISSA  | 5     | >ABL1-M343 YTATQISSA  | 650   | 645   |
| >ABL1-M343 YMATQISSAM | 11    | >ABL1-M343 YTATQISSAM | 1408  | 1397  |
| >ABL1-M343 YMATQISSA  | 12    | >ABL1-M343 YTATQISSA  | 3421  | 3409  |
| >ABL1-M343 YMATQISSAM | 14    | >ABL1-M343 YTATQISSAM | 5056  | 5042  |
| >ABL1-M343 YMATQISSA  | 12    | >ABL1-M343 YTATQISSA  | 3026  | 3014  |
| >ABL1-M343 YMATQISSAM | 47    | >ABL1-M343 YTATQISSAM | 9737  | 9690  |
| >ABL1-M343 YMATQISSA  | 13    | >ABL1-M343 YTATQISSA  | 8580  | 8567  |
| >ABL1-M343 YMATQISSAM | 18    | >ABL1-M343 YTATQISSAM | 6410  | 6392  |
| >ABL1-M343 YMATQISS   | 50    | >ABL1-M343 YTATQISS   | 19216 | 19166 |
| >ABL1-M343 YMATQISSA  | 3     | >ABL1-M343 YTATQISSA  | 371   | 368   |
| >ABL1-M343 YMATQISSAM | 8     | >ABL1-M343 YTATQISSAM | 5831  | 5823  |
| >ABL1-M343 YMATQISSAM | 2451  | >ABL1-M343 YTATQISSAM | 148   | 2303  |
| >ABL1-M343 YMATQISSAM | 191   | >ABL1-M343 YTATQISSAM | 6     | 185   |
| >ABL1-M343 YMATQISSA  | 1566  | >ABL1-M343 YTATQISSA  | 25    | 1541  |
| >ABL1-M343 YMATQISSAM | 2780  | >ABL1-M343 YTATQISSAM | 489   | 2291  |
| >ABL1-M343 YMATQISSAM | 1408  | >ABL1-M343 YTATQISSAM | 153   | 1255  |
| >ABL1-M343 YMATQISSA  | 160   | >ABL1-M343 YTATQISSA  | 2749  | 2589  |
| >ABL1-M343 YMATQISSAM | 26    | >ABL1-M343 YTATQISSAM | 97    | 71    |
| >ABL1-M343 YMATQISSAM | 33    | >ABL1-M343 YTATQISSAM | 1072  | 1039  |
| >ABL1-M343 YMATQISSA  | 96    | >ABL1-M343 YTATQISSA  | 3024  | 2928  |
| >ABL1-M343 YMATQISSAM | 7     | >ABL1-M343 YTATQISSAM | 111   | 104   |
| >ABL1-M343 YMATQISSAM | 666   | >ABL1-M343 YTATQISSAM | 7     | 659   |
| >ABL1-M343 YMATQISSAM | 34    | >ABL1-M343 YTATQISSAM | 685   | 651   |
| >ABL1-M343 YMATQISSAM | 342   | >ABL1-M343 YTATQISSAM | 654   | 312   |
| >ABL1-M343 YMATQISSAM | 6545  | >ABL1-M343 YTATQISSAM | 45    | 6500  |
| >ABL1-M343 YMATQISSA  | 11414 | >ABL1-M343 YTATQISSA  | 171   | 11243 |
| >ABL1-M343 YMATQISSAM | 74    | >ABL1-M343 YTATQISSAM | 16    | 58    |
| >ABL1-M343 QEVNAVLLY  | 178   | >ABL1-M343 QEVNAVLLY  | 3006  | 2828  |
| >ABL1-M343 QEVNAVLLY  | 152   | >ABL1-M343 QEVNAVLLY  | 3901  | 3749  |
| >ABL1-M343 QEVNAVLLY  | 82    | >ABL1-M343 QEVNAVLLY  | 4315  | 4233  |
| >ABL1-M343 QEVNAVLLY  | 388   | >ABL1-M343 QEVNAVLLY  | 592   | 204   |
| >ABL1-M343 QEVNAVLLY  | 114   | >ABL1-M343 QEVNAVLLY  | 781   | 667   |
| >ABL1-M343 QEVNAVLLY  | 2001  | >ABL1-M343 QEVNAVLLY  | 150   | 1851  |
| >ABL1-M343 QEVNAVLLY  | 44    | >ABL1-M343 QEVNAVLLY  | 289   | 245   |
| >ABL1-M343 LYMATQISSA | 92    | >ABL1-M343 LYTATQISSA | 208   | 116   |

|                        |     |                        |      |      |
|------------------------|-----|------------------------|------|------|
| >ABL1-M343 LYMATQISSA  | 6   | >ABL1-M343 LYTATQISSAN | 11   | 5    |
| >ABL1-M343 LYMATQISSA  | 466 | >ABL1-M343 LYTATQISSA  | 2432 | 1966 |
| >ABL1-M343 LYMATQISSA  | 28  | >ABL1-M343 LYTATQISSAN | 172  | 144  |
| >ABL1-M343 LYMATQISSA  | 477 | >ABL1-M343 LYTATQISSA  | 1957 | 1480 |
| >ABL1-M343 LYMATQISSA  | 266 | >ABL1-M343 LYTATQISSAN | 1672 | 1406 |
| >ABL1-M343 LYMATQISSA  | 436 | >ABL1-M343 LYTATQISSAN | 750  | 314  |
| >ABL1-M343 LYMATQISSA  | 340 | >ABL1-M343 LYTATQISSAN | 5055 | 4715 |
| >ABL1-M343 LYMATQISSA  | 424 | >ABL1-M343 LYTATQISSAN | 581  | 157  |
| >ABL1-M343 LYMATQISSA  | 333 | >ABL1-M343 LYTATQISSAN | 467  | 134  |
| >ABL1-M343 LLYMATQI    | 79  | >ABL1-M343 LLYTATQI    | 57   | 22   |
| >ABL1-M343 LLYMATQISS, | 106 | >ABL1-M343 LLYTATQISSA | 71   | 35   |
| >ABL1-M343 LLYMATQI    | 51  | >ABL1-M343 LLYTATQI    | 28   | 23   |
| >ABL1-M343 LLYMATQISS, | 70  | >ABL1-M343 LLYTATQISSA | 30   | 40   |
| >ABL1-M343 LLYMATQI    | 7   | >ABL1-M343 LLYTATQI    | 7    | 0    |
| >ABL1-M343 LLYMATQIS   | 588 | >ABL1-M343 LLYTATQIS   | 489  | 99   |
| >ABL1-M343 LLYMATQISS, | 4   | >ABL1-M343 LLYTATQISSA | 4    | 0    |
| >ABL1-M343 LLYMATQI    | 287 | >ABL1-M343 LLYTATQI    | 204  | 83   |
| >ABL1-M343 LLYMATQISS, | 297 | >ABL1-M343 LLYTATQISSA | 173  | 124  |
| >ABL1-M343 LLYMATQI    | 5   | >ABL1-M343 LLYTATQI    | 6    | 1    |
| >ABL1-M343 LLYMATQISS  | 306 | >ABL1-M343 LLYTATQISS  | 415  | 109  |
| >ABL1-M343 LLYMATQISS, | 9   | >ABL1-M343 LLYTATQISSA | 12   | 3    |
| >ABL1-M343 LLYMATQI    | 75  | >ABL1-M343 LLYTATQI    | 33   | 42   |
| >ABL1-M343 LLYMATQISS, | 71  | >ABL1-M343 LLYTATQISSA | 41   | 30   |
| >ABL1-M343 LLYMATQI    | 13  | >ABL1-M343 LLYTATQI    | 13   | 0    |
| >ABL1-M343 LLYMATQISS, | 24  | >ABL1-M343 LLYTATQISSA | 26   | 2    |
| >ABL1-M343 LLYMATQI    | 70  | >ABL1-M343 LLYTATQI    | 40   | 30   |
| >ABL1-M343 LLYMATQISS, | 461 | >ABL1-M343 LLYTATQISSA | 297  | 164  |
| >ABL1-M343 LLYMATQI    | 5   | >ABL1-M343 LLYTATQI    | 5    | 0    |
| >ABL1-M343 LLYMATQIS   | 222 | >ABL1-M343 LLYTATQIS   | 312  | 90   |
| >ABL1-M343 LLYMATQISS  | 91  | >ABL1-M343 LLYTATQISS  | 116  | 25   |
| >ABL1-M343 LLYMATQISS, | 4   | >ABL1-M343 LLYTATQISSA | 4    | 0    |
| >ABL1-M343 LLYMATQI    | 449 | >ABL1-M343 LLYTATQI    | 493  | 44   |
| >ABL1-M343 LLYMATQISS, | 185 | >ABL1-M343 LLYTATQISSA | 369  | 184  |
| >ABL1-M343 LLYMATQI    | 324 | >ABL1-M343 LLYTATQI    | 196  | 128  |
| >ABL1-M343 LLYMATQISS, | 402 | >ABL1-M343 LLYTATQISSA | 329  | 73   |
| >ABL1-M343 LLYMATQI    | 215 | >ABL1-M343 LLYTATQI    | 217  | 2    |
| >ABL1-M343 VLLYMATQI   | 170 | >ABL1-M343 VLLYTATQI   | 332  | 162  |
| >ABL1-M343 VLLYMATQI   | 104 | >ABL1-M343 VLLYTATQI   | 133  | 29   |
| >ABL1-M343 VLLYMATQI   | 52  | >ABL1-M343 VLLYTATQI   | 17   | 35   |
| >ABL1-M343 VLLYMATQI   | 178 | >ABL1-M343 VLLYTATQI   | 62   | 116  |
| >ABL1-M343 VLLYMATQI   | 44  | >ABL1-M343 VLLYTATQI   | 23   | 21   |
| >ABL1-M343 VLLYMATQI   | 57  | >ABL1-M343 VLLYTATQI   | 38   | 19   |
| >ABL1-M343 VLLYMATQ    | 155 | >ABL1-M343 VLLYTATQ    | 155  | 0    |



|                       |      |                        |       |       |
|-----------------------|------|------------------------|-------|-------|
| >ABL1-M343 VLLYMATQI  | 17   | >ABL1-M343 VLLYTATQI   | 20    | 3     |
| >ABL1-M343 VLLYMATQI  | 47   | >ABL1-M343 VLLYTATQI   | 95    | 48    |
| >ABL1-M343 VLLYMATQI  | 1839 | >ABL1-M343 VLLYTATQI   | 390   | 1449  |
| >ABL1-M343 VVLLYMAT   | 269  | >ABL1-M343 VVLLYTAT    | 348   | 79    |
| >ABL1-M343 VVLLYMATQI | 750  | >ABL1-M343 VVLLYTATQI  | 499   | 251   |
| >ABL1-M343 VVLLYMATQI | 603  | >ABL1-M343 VVLLYTATQI  | 237   | 366   |
| >ABL1-M343 VVLLYMATQI | 622  | >ABL1-M343 VVLLYTATQI  | 477   | 145   |
| >ABL1-M343 VVLLYMATQI | 261  | >ABL1-M343 VVLLYTATQI  | 480   | 219   |
| >ABL1-M343 AVVLLYMATC | 520  | >ABL1-M343 AVVLLYTATQ  | 462   | 58    |
| >ABL1-M343 AVVLLYMA   | 392  | >ABL1-M343 AVVLLYTA    | 318   | 74    |
| >ABL1-M343 AVVLLYMATC | 334  | >ABL1-M343 AVVLLYTATQ  | 406   | 72    |
| >ABL1-M343 NAVVLLYM   | 201  | >ABL1-M343 NAVVLLYT    | 22368 | 22167 |
| >ABL1-M343 NAVVLLYMA  | 142  | >ABL1-M343 NAVVLLYTA   | 165   | 23    |
| >ABL1-M343 NAVVLLYMA  | 668  | >ABL1-M343 NAVVLLYTA   | 437   | 231   |
| >ABL1-M343 EVNAVVLLYM | 22   | >ABL1-M343 EVNAVVLLYT  | 6785  | 6763  |
| >ABL1-M343 EVNAVVLLYM | 440  | >ABL1-M343 EVNAVVLLYT  | 20496 | 20056 |
| >ABL1-M343 EVNAVVLLYM | 193  | >ABL1-M343 EVNAVVLLYT  | 124   | 69    |
| >ABL1-M343 EVNAVVLLYM | 10   | >ABL1-M343 EVNAVVLLYT  | 10    | 0     |
| >ABL1-M343 EVNAVVLLYM | 22   | >ABL1-M343 EVNAVVLLYT  | 362   | 340   |
| >ABL1-M343 EVNAVVLLYM | 50   | >ABL1-M343 EVNAVVLLYT  | 88    | 38    |
| >ABL1-M351 MEYLEKKNF  | 21   | >ABL1-M351 TEYLEKKNF   | 26    | 5     |
| >ABL1-M351 MEYLEKKNFI | 4    | >ABL1-M351 TEYLEKKNFI  | 4     | 0     |
| >ABL1-M351 MEYLEKKNF  | 77   | >ABL1-M351 TEYLEKKNF   | 775   | 698   |
| >ABL1-M351 MEYLEKKNF  | 31   | >ABL1-M351 TEYLEKKNF   | 84    | 53    |
| >ABL1-M351 MEYLEKKNFI | 277  | >ABL1-M351 TEYLEKKNFI  | 374   | 97    |
| >ABL1-M351 MEYLEKKNF  | 183  | >ABL1-M351 TEYLEKKNF   | 206   | 23    |
| >ABL1-M351 MEYLEKKNFI | 483  | >ABL1-M351 TEYLEKKNFI  | 1038  | 555   |
| >ABL1-M351 MEYLEKKNF  | 120  | >ABL1-M351 TEYLEKKNF   | 445   | 325   |
| >ABL1-M351 MEYLEKKNFI | 28   | >ABL1-M351 TEYLEKKNFI  | 52    | 24    |
| >ABL1-M351 MEYLEKKNFI | 884  | >ABL1-M351 TEYLEKKNFI  | 244   | 640   |
| >ABL1-M351 AMEYLEKKNF | 277  | >ABL1-M351 ATEYLEKKNFI | 5789  | 5512  |
| >ABL1-M351 AMEYLEKK   | 414  | >ABL1-M351 ATEYLEKK    | 175   | 239   |
| >ABL1-M351 AMEYLEKKNF | 194  | >ABL1-M351 ATEYLEKKNF  | 3251  | 3057  |
| >ABL1-M351 AMEYLEKKNF | 4865 | >ABL1-M351 ATEYLEKKNF  | 25    | 4840  |
| >ABL1-M351 AMEYLEKKNF | 4366 | >ABL1-M351 ATEYLEKKNF  | 66    | 4300  |
| >ABL1-M351 AMEYLEKK   | 4029 | >ABL1-M351 ATEYLEKK    | 276   | 3753  |
| >ABL1-M351 AMEYLEKKNF | 8485 | >ABL1-M351 ATEYLEKKNFI | 373   | 8112  |
| >ABL1-M351 LYMATQISSA | 6    | >ABL1-M351 LYMATQISSA  | 97    | 91    |
| >ABL1-M351 LYMATQISSA | 28   | >ABL1-M351 LYMATQISSA  | 603   | 575   |
| >ABL1-M351 LYMATQISSA | 266  | >ABL1-M351 LYMATQISSA  | 10729 | 10463 |
| >ABL1-M351 LYMATQISSA | 436  | >ABL1-M351 LYMATQISSA  | 11413 | 10977 |
| >ABL1-M351 LYMATQISSA | 340  | >ABL1-M351 LYMATQISSA  | 14040 | 13700 |
| >ABL1-M351 LYMATQISSA | 424  | >ABL1-M351 LYMATQISSA  | 13668 | 13244 |

|                        |      |                        |      |      |
|------------------------|------|------------------------|------|------|
| >ABL1-M351 LYMATQISSA  | 333  | >ABL1-M351 LYMATQISSA  | 1385 | 1052 |
| >ABL1-M351 SAMEYLEK    | 9    | >ABL1-M351 SATEYLEK    | 40   | 31   |
| >ABL1-M351 SAMEYLEKK   | 14   | >ABL1-M351 SATEYLEKK   | 130  | 116  |
| >ABL1-M351 SAMEYLEK    | 327  | >ABL1-M351 SATEYLEK    | 1348 | 1021 |
| >ABL1-M351 SAMEYLEK    | 93   | >ABL1-M351 SATEYLEK    | 188  | 95   |
| >ABL1-M351 SAMEYLEKK   | 60   | >ABL1-M351 SATEYLEKK   | 100  | 40   |
| >ABL1-M351 SAMEYLEKKNI | 99   | >ABL1-M351 SATEYLEKKNI | 826  | 727  |
| >ABL1-M351 SAMEYLEKKNI | 23   | >ABL1-M351 SATEYLEKKNI | 112  | 89   |
| >ABL1-M351 SAMEYLEK    | 147  | >ABL1-M351 SATEYLEK    | 400  | 253  |
| >ABL1-M351 SAMEYLEKK   | 270  | >ABL1-M351 SATEYLEKK   | 798  | 528  |
| >ABL1-M351 SSAMEYLEK   | 602  | >ABL1-M351 SSATEYLEK   | 426  | 176  |
| >ABL1-M351 SSAMEYLEK   | 9    | >ABL1-M351 SSATEYLEK   | 9    | 0    |
| >ABL1-M351 SSAMEYLEKK  | 16   | >ABL1-M351 SSATEYLEKK  | 26   | 10   |
| >ABL1-M351 SSAMEYLEK   | 224  | >ABL1-M351 SSATEYLEK   | 261  | 37   |
| >ABL1-M351 SSAMEYLEK   | 222  | >ABL1-M351 SSATEYLEK   | 278  | 56   |
| >ABL1-M351 SSAMEYLEKK  | 35   | >ABL1-M351 SSATEYLEKK  | 50   | 15   |
| >ABL1-M351 SSAMEYLEK   | 81   | >ABL1-M351 SSATEYLEK   | 102  | 21   |
| >ABL1-M351 SSAMEYLEKK  | 121  | >ABL1-M351 SSATEYLEKK  | 153  | 32   |
| >ABL1-M351 ISSAMEYL    | 102  | >ABL1-M351 ISSATEYL    | 126  | 24   |
| >ABL1-M351 ISSAMEYLEK  | 61   | >ABL1-M351 ISSATEYLEK  | 74   | 13   |
| >ABL1-M351 ISSAMEYLEK  | 7    | >ABL1-M351 ISSATEYLEK  | 9    | 2    |
| >ABL1-M351 ISSAMEYLEKI | 24   | >ABL1-M351 ISSATEYLEKK | 33   | 9    |
| >ABL1-M351 ISSAMEYLEK  | 354  | >ABL1-M351 ISSATEYLEK  | 191  | 163  |
| >ABL1-M351 ISSAMEYLEK  | 50   | >ABL1-M351 ISSATEYLEK  | 86   | 36   |
| >ABL1-M351 ISSAMEYLEKI | 80   | >ABL1-M351 ISSATEYLEKK | 95   | 15   |
| >ABL1-M351 ISSAMEYL    | 24   | >ABL1-M351 ISSATEYL    | 31   | 7    |
| >ABL1-M351 ISSAMEYL    | 93   | >ABL1-M351 ISSATEYL    | 42   | 51   |
| >ABL1-M351 ISSAMEYLEK  | 366  | >ABL1-M351 ISSATEYLEK  | 435  | 69   |
| >ABL1-M351 QISSAMEYL   | 6    | >ABL1-M351 QISSATEYL   | 6    | 0    |
| >ABL1-M351 QISSAMEYL   | 398  | >ABL1-M351 QISSATEYL   | 496  | 98   |
| >ABL1-M351 QISSAMEYL   | 126  | >ABL1-M351 QISSATEYL   | 286  | 160  |
| >ABL1-M351 QISSAMEYL   | 2214 | >ABL1-M351 QISSATEYL   | 124  | 2090 |
| >ABL1-M351 QISSAMEYLE  | 380  | >ABL1-M351 QISSATEYLEK | 336  | 44   |
| >ABL1-M351 QISSAMEYLE  | 33   | >ABL1-M351 QISSATEYLEK | 37   | 4    |
| >ABL1-M351 QISSAMEY    | 287  | >ABL1-M351 QISSATEY    | 838  | 551  |
| >ABL1-M351 QISSAMEYL   | 166  | >ABL1-M351 QISSATEYL   | 1461 | 1295 |
| >ABL1-M351 QISSAMEY    | 65   | >ABL1-M351 QISSATEY    | 135  | 70   |
| >ABL1-M351 QISSAMEY    | 148  | >ABL1-M351 QISSATEY    | 194  | 46   |
| >ABL1-M351 QISSAMEYLE  | 148  | >ABL1-M351 QISSATEYLEK | 125  | 23   |
| >ABL1-M351 QISSAMEYL   | 28   | >ABL1-M351 QISSATEYL   | 25   | 3    |
| >ABL1-M351 QISSAMEYL   | 238  | >ABL1-M351 QISSATEYL   | 228  | 10   |
| >ABL1-M351 QISSAMEY    | 128  | >ABL1-M351 QISSATEY    | 544  | 416  |
| >ABL1-M351 QISSAMEY    | 293  | >ABL1-M351 QISSATEY    | 215  | 78   |

|                       |     |                        |       |       |
|-----------------------|-----|------------------------|-------|-------|
| >ABL1-M351 QISSAMEY   | 483 | >ABL1-M351 QISSATEY    | 192   | 291   |
| >ABL1-M351 QISSAMEY   | 212 | >ABL1-M351 QISSATEY    | 147   | 65    |
| >ABL1-M351 TQISSAMEYL | 442 | >ABL1-M351 TQISSATEYL  | 303   | 139   |
| >ABL1-M351 TQISSAMEYL | 31  | >ABL1-M351 TQISSATEYL  | 31    | 0     |
| >ABL1-M351 TQISSAMEYL | 135 | >ABL1-M351 TQISSATEYL  | 125   | 10    |
| >ABL1-M351 TQISSAMEYL | 189 | >ABL1-M351 TQISSATEYL  | 223   | 34    |
| >ABL1-M351 TQISSAMEY  | 186 | >ABL1-M351 TQISSATEY   | 1559  | 1373  |
| >ABL1-M351 TQISSAMEYL | 410 | >ABL1-M351 TQISSATEYL  | 1761  | 1351  |
| >ABL1-M351 TQISSAMEY  | 106 | >ABL1-M351 TQISSATEY   | 410   | 304   |
| >ABL1-M351 TQISSAMEY  | 302 | >ABL1-M351 TQISSATEY   | 409   | 107   |
| >ABL1-M351 TQISSAMEY  | 156 | >ABL1-M351 TQISSATEY   | 2549  | 2393  |
| >ABL1-M351 TQISSAMEY  | 48  | >ABL1-M351 TQISSATEY   | 44    | 4     |
| >ABL1-M351 TQISSAMEYL | 347 | >ABL1-M351 TQISSATEYL  | 263   | 84    |
| >ABL1-M351 TQISSAMEY  | 164 | >ABL1-M351 TQISSATEY   | 141   | 23    |
| >ABL1-M351 TQISSAMEY  | 3   | >ABL1-M351 TQISSATEY   | 4     | 1     |
| >ABL1-M351 TQISSAMEYL | 42  | >ABL1-M351 TQISSATEYL  | 33    | 9     |
| >ABL1-M351 TQISSAMEYL | 61  | >ABL1-M351 TQISSATEYL  | 55    | 6     |
| >ABL1-M351 ATQISSAMEY | 30  | >ABL1-M351 ATQISSATEY  | 29    | 1     |
| >ABL1-M351 ATQISSAMEY | 392 | >ABL1-M351 ATQISSATEYL | 383   | 9     |
| >ABL1-M351 ATQISSAMEY | 59  | >ABL1-M351 ATQISSATEY  | 299   | 240   |
| >ABL1-M351 ATQISSAMEY | 136 | >ABL1-M351 ATQISSATEY  | 206   | 70    |
| >ABL1-M351 ATQISSAMEY | 68  | >ABL1-M351 ATQISSATEY  | 60    | 8     |
| >ABL1-M351 ATQISSAMEY | 263 | >ABL1-M351 ATQISSATEY  | 2308  | 2045  |
| >ABL1-M351 ATQISSAM   | 221 | >ABL1-M351 ATQISSAT    | 12657 | 12436 |
| >ABL1-M351 ATQISSAMEY | 146 | >ABL1-M351 ATQISSATEY  | 120   | 26    |
| >ABL1-M351 ATQISSAMEY | 257 | >ABL1-M351 ATQISSATEY  | 279   | 22    |
| >ABL1-M351 ATQISSAM   | 6   | >ABL1-M351 ATQISSAT    | 1069  | 1063  |
| >ABL1-M351 ATQISSAME  | 594 | >ABL1-M351 ATQISSATE   | 251   | 343   |
| >ABL1-M351 ATQISSAMEY | 3   | >ABL1-M351 ATQISSATEY  | 3     | 0     |
| >ABL1-M351 ATQISSAMEY | 9   | >ABL1-M351 ATQISSATEYL | 14    | 5     |
| >ABL1-M351 ATQISSAMEY | 32  | >ABL1-M351 ATQISSATEYL | 35    | 3     |
| >ABL1-M351 ATQISSAM   | 368 | >ABL1-M351 ATQISSAT    | 13442 | 13074 |
| >ABL1-M351 ATQISSAMEY | 18  | >ABL1-M351 ATQISSATEY  | 19    | 1     |
| >ABL1-M351 ATQISSAMEY | 200 | >ABL1-M351 ATQISSATEYL | 389   | 189   |
| >ABL1-M351 ATQISSAMEY | 639 | >ABL1-M351 ATQISSATEY  | 448   | 191   |
| >ABL1-M351 ATQISSAM   | 406 | >ABL1-M351 ATQISSAT    | 26747 | 26341 |
| >ABL1-M351 ATQISSAMEY | 285 | >ABL1-M351 ATQISSATEYL | 195   | 90    |
| >ABL1-M351 MATQISSAM  | 56  | >ABL1-M351 MATQISSATE  | 128   | 72    |
| >ABL1-M351 MATQISSAM  | 140 | >ABL1-M351 MATQISSATE  | 157   | 17    |
| >ABL1-M351 MATQISSAM  | 43  | >ABL1-M351 MATQISSATE  | 50    | 7     |
| >ABL1-M351 MATQISSAM  | 219 | >ABL1-M351 MATQISSAT   | 495   | 276   |
| >ABL1-M351 MATQISSAM  | 122 | >ABL1-M351 MATQISSATE  | 931   | 809   |
| >ABL1-M351 MATQISSAM  | 322 | >ABL1-M351 MATQISSAT   | 12658 | 12336 |

|                       |     |                       |       |       |
|-----------------------|-----|-----------------------|-------|-------|
| >ABL1-M351 MATQISSAM  | 342 | >ABL1-M351 MATQISSAT  | 11405 | 11063 |
| >ABL1-M351 MATQISSAM  | 86  | >ABL1-M351 MATQISSATE | 100   | 14    |
| >ABL1-M351 MATQISSAM  | 40  | >ABL1-M351 MATQISSAT  | 7867  | 7827  |
| >ABL1-M351 MATQISSAM  | 9   | >ABL1-M351 MATQISSATE | 8     | 1     |
| >ABL1-M351 MATQISSAM  | 7   | >ABL1-M351 MATQISSAT  | 43    | 36    |
| >ABL1-M351 MATQISSAM  | 8   | >ABL1-M351 MATQISSATE | 8     | 0     |
| >ABL1-M351 MATQISSAM  | 491 | >ABL1-M351 MATQISSAT  | 10972 | 10481 |
| >ABL1-M351 MATQISSAM  | 191 | >ABL1-M351 MATQISSATE | 253   | 62    |
| >ABL1-M351 MATQISSAM  | 73  | >ABL1-M351 MATQISSATE | 139   | 66    |
| >ABL1-M351 MATQISSAM  | 12  | >ABL1-M351 MATQISSAT  | 1662  | 1650  |
| >ABL1-M351 MATQISSAM  | 37  | >ABL1-M351 MATQISSATE | 19    | 18    |
| >ABL1-M351 MATQISSAM  | 94  | >ABL1-M351 MATQISSATE | 81    | 13    |
| >ABL1-M351 MATQISSAM  | 115 | >ABL1-M351 MATQISSATE | 436   | 321   |
| >ABL1-M351 YMATQISSAM | 234 | >ABL1-M351 YMATQISSAT | 673   | 439   |
| >ABL1-M351 YMATQISSAM | 21  | >ABL1-M351 YMATQISSAT | 62    | 41    |
| >ABL1-M351 YMATQISSAM | 44  | >ABL1-M351 YMATQISSAT | 30    | 14    |
| >ABL1-M351 YMATQISSAM | 267 | >ABL1-M351 YMATQISSAT | 330   | 63    |
| >ABL1-M351 YMATQISSAM | 11  | >ABL1-M351 YMATQISSAT | 26    | 15    |
| >ABL1-M351 YMATQISSAM | 14  | >ABL1-M351 YMATQISSAT | 82    | 68    |
| >ABL1-M351 YMATQISSAM | 47  | >ABL1-M351 YMATQISSAT | 116   | 69    |
| >ABL1-M351 YMATQISSAM | 18  | >ABL1-M351 YMATQISSAT | 95    | 77    |
| >ABL1-M351 YMATQISSAM | 8   | >ABL1-M351 YMATQISSAT | 11    | 3     |
| >ABL1-M351 YMATQISSAM | 875 | >ABL1-M351 YMATQISSAT | 317   | 558   |
| >ABL1-M351 YMATQISSAM | 191 | >ABL1-M351 YMATQISSAT | 16287 | 16096 |
| >ABL1-M351 YMATQISSAM | 26  | >ABL1-M351 YMATQISSAT | 985   | 959   |
| >ABL1-M351 YMATQISSAM | 33  | >ABL1-M351 YMATQISSAT | 1329  | 1296  |
| >ABL1-M351 YMATQISSAM | 7   | >ABL1-M351 YMATQISSAT | 421   | 414   |
| >ABL1-M351 YMATQISSAM | 34  | >ABL1-M351 YMATQISSAT | 3316  | 3282  |
| >ABL1-M351 YMATQISSAM | 342 | >ABL1-M351 YMATQISSAT | 9406  | 9064  |
| >ABL1-M351 YMATQISSAM | 74  | >ABL1-M351 YMATQISSAT | 15165 | 15091 |
| >ABL1-M388 MTGDTYTA   | 439 | >ABL1-M388 LTGDTYTA   | 1359  | 920   |
| >ABL1-M388 MTGDTYTA   | 396 | >ABL1-M388 LTGDTYTA   | 1338  | 942   |
| >ABL1-M388 MTGDTYTA   | 300 | >ABL1-M388 LTGDTYTA   | 777   | 477   |
| >ABL1-M388 MTGDTYTA   | 47  | >ABL1-M388 LTGDTYTA   | 1771  | 1724  |
| >ABL1-M388 MTGDTYTAH  | 146 | >ABL1-M388 LTGDTYTAHA | 639   | 493   |
| >ABL1-M388 MTGDTYTA   | 234 | >ABL1-M388 LTGDTYTA   | 2142  | 1908  |
| >ABL1-M388 MTGDTYTAH  | 138 | >ABL1-M388 LTGDTYTAHA | 1475  | 1337  |
| >ABL1-M388 LMTGDTYTA  | 47  | >ABL1-M388 LLTGDTYTA  | 69    | 22    |
| >ABL1-M388 LMTGDTYTAI | 98  | >ABL1-M388 LLTGDTYTAH | 138   | 40    |
| >ABL1-M388 LMTGDTYT   | 164 | >ABL1-M388 LLTGDTYT   | 119   | 45    |
| >ABL1-M388 LMTGDTYTA  | 18  | >ABL1-M388 LLTGDTYTA  | 17    | 1     |
| >ABL1-M388 LMTGDTYTAI | 20  | >ABL1-M388 LLTGDTYTAH | 18    | 2     |
| >ABL1-M388 LMTGDTYTA  | 38  | >ABL1-M388 LLTGDTYTA  | 53    | 15    |

|                        |      |                        |      |      |
|------------------------|------|------------------------|------|------|
| >ABL1-M388 LMTGDTYTAI  | 19   | >ABL1-M388 LLTGDTYTAH  | 23   | 4    |
| >ABL1-M388 LMTGDTYTA   | 137  | >ABL1-M388 LLTGDTYTA   | 259  | 122  |
| >ABL1-M388 LMTGDTYTAI  | 69   | >ABL1-M388 LLTGDTYTAH  | 116  | 47   |
| >ABL1-M388 LMTGDTYTT   | 148  | >ABL1-M388 LLTGDTYTT   | 291  | 143  |
| >ABL1-M388 LMTGDTYTA   | 10   | >ABL1-M388 LLTGDTYTA   | 16   | 6    |
| >ABL1-M388 LMTGDTYTAI  | 31   | >ABL1-M388 LLTGDTYTAH  | 57   | 26   |
| >ABL1-M388 LMTGDTYTA   | 6    | >ABL1-M388 LLTGDTYTA   | 8    | 2    |
| >ABL1-M388 LMTGDTYTAI  | 24   | >ABL1-M388 LLTGDTYTAH  | 35   | 11   |
| >ABL1-M388 LMTGDTYTT   | 261  | >ABL1-M388 LLTGDTYTT   | 316  | 55   |
| >ABL1-M388 LMTGDTYTA   | 25   | >ABL1-M388 LLTGDTYTA   | 25   | 0    |
| >ABL1-M388 LMTGDTYTAI  | 43   | >ABL1-M388 LLTGDTYTAH  | 43   | 0    |
| >ABL1-M388 LMTGDTYTA   | 12   | >ABL1-M388 LLTGDTYTA   | 20   | 8    |
| >ABL1-M388 LMTGDTYTAI  | 77   | >ABL1-M388 LLTGDTYTAH  | 120  | 43   |
| >ABL1-M388 LMTGDTYTT   | 12   | >ABL1-M388 LLTGDTYTT   | 8    | 4    |
| >ABL1-M388 LMTGDTYTA   | 3    | >ABL1-M388 LLTGDTYTA   | 3    | 0    |
| >ABL1-M388 LMTGDTYTAI  | 4    | >ABL1-M388 LLTGDTYTAH  | 3    | 1    |
| >ABL1-M388 KVADFGLSRL  | 2302 | >ABL1-M388 KVADFGLSRL  | 427  | 1875 |
| >ABL1-M388 KVADFGLSRL  | 351  | >ABL1-M388 KVADFGLSRL  | 28   | 323  |
| >ABL1-M388 KVADFGLSRL  | 2262 | >ABL1-M388 KVADFGLSRL  | 245  | 2017 |
| >ABL1-M388 KVADFGLSRL  | 547  | >ABL1-M388 KVADFGLSRL  | 124  | 423  |
| >ABL1-M388 KVADFGLSRL  | 1053 | >ABL1-M388 KVADFGLSRL  | 204  | 849  |
| >ABL1-M388 KVADFGLSRL  | 317  | >ABL1-M388 KVADFGLSRL  | 541  | 224  |
| >ABL1-M388 KVADFGLSRL  | 44   | >ABL1-M388 KVADFGLSRL  | 309  | 265  |
| >ABL1-M388 RLMTGDTYTT  | 144  | >ABL1-M388 RLLTGDTYTT  | 653  | 509  |
| >ABL1-M388 RLMTGDTYTT/ | 16   | >ABL1-M388 RLLTGDTYTTA | 36   | 20   |
| >ABL1-M388 RLMTGDTYTT  | 222  | >ABL1-M388 RLLTGDTYTT  | 3842 | 3620 |
| >ABL1-M388 RLMTGDTYTT/ | 10   | >ABL1-M388 RLLTGDTYTTA | 30   | 20   |
| >ABL1-M388 RLMTGDTYTT  | 62   | >ABL1-M388 RLLTGDTYTT  | 1572 | 1510 |
| >ABL1-M388 RLMTGDTYTT/ | 31   | >ABL1-M388 RLLTGDTYTTA | 100  | 69   |
| >ABL1-M388 RLMTGDTYTT  | 134  | >ABL1-M388 RLLTGDTYTT  | 222  | 88   |
| >ABL1-M388 RLMTGDTYTT/ | 82   | >ABL1-M388 RLLTGDTYTTA | 103  | 21   |
| >ABL1-M388 RLMTGDTYTT  | 309  | >ABL1-M388 RLLTGDTYTT  | 129  | 180  |
| >ABL1-M388 RLMTGDTYTT/ | 23   | >ABL1-M388 RLLTGDTYTTA | 12   | 11   |
| >ABL1-M388 RLMTGDTYTT  | 417  | >ABL1-M388 RLLTGDTYTT  | 632  | 215  |
| >ABL1-M388 RLMTGDTYTT/ | 10   | >ABL1-M388 RLLTGDTYTTA | 13   | 3    |
| >ABL1-M388 RLMTGDTYTT  | 674  | >ABL1-M388 RLLTGDTYTT  | 221  | 453  |
| >ABL1-M388 RLMTGDTYTT/ | 61   | >ABL1-M388 RLLTGDTYTTA | 19   | 42   |
| >ABL1-M388 RLMTGDTYTT  | 486  | >ABL1-M388 RLLTGDTYTT  | 1481 | 995  |
| >ABL1-M388 RLMTGDTYTT/ | 23   | >ABL1-M388 RLLTGDTYTTA | 52   | 29   |
| >ABL1-M388 RLMTGDTYTT  | 134  | >ABL1-M388 RLLTGDTYTT  | 142  | 8    |
| >ABL1-M388 RLMTGDTYTT/ | 11   | >ABL1-M388 RLLTGDTYTTA | 13   | 2    |
| >ABL1-M388 RLMTGDTYTT/ | 337  | >ABL1-M388 RLLTGDTYTTA | 1127 | 790  |
| >ABL1-M388 RLMTGDTYTT  | 329  | >ABL1-M388 RLLTGDTYTT  | 215  | 114  |

|                        |       |                        |      |       |
|------------------------|-------|------------------------|------|-------|
| >ABL1-M388 RLMTGDTY    | 63    | >ABL1-M388 RLLTGDTY    | 108  | 45    |
| >ABL1-M388 RLMTGDTY    | 88    | >ABL1-M388 RLLTGDTY    | 186  | 98    |
| >ABL1-M388 RLMTGDTYT/  | 123   | >ABL1-M388 RLLTGDTYTA  | 212  | 89    |
| >ABL1-M388 RLMTGDTY    | 116   | >ABL1-M388 RLLTGDTY    | 103  | 13    |
| >ABL1-M388 RLMTGDTY    | 60    | >ABL1-M388 RLLTGDTY    | 155  | 95    |
| >ABL1-M388 RLMTGDTYT/  | 497   | >ABL1-M388 RLLTGDTYTA  | 3761 | 3264  |
| >ABL1-M388 RLMTGDTY    | 80    | >ABL1-M388 RLLTGDTY    | 132  | 52    |
| >ABL1-M388 RLMTGDTY    | 62    | >ABL1-M388 RLLTGDTY    | 119  | 57    |
| >ABL1-M388 RLMTGDTYT/  | 389   | >ABL1-M388 RLLTGDTYTA  | 708  | 319   |
| >ABL1-M388 RLMTGDTY    | 74    | >ABL1-M388 RLLTGDTY    | 88   | 14    |
| >ABL1-M388 SRLMTGDTY   | 47    | >ABL1-M388 SRLLTGDTY   | 214  | 167   |
| >ABL1-M388 SRLMTGDTY   | 386   | >ABL1-M388 SRLLTGDTY   | 683  | 297   |
| >ABL1-M388 LSRLMTGDTY  | 183   | >ABL1-M388 LSRLLTGDTY  | 343  | 160   |
| >ABL1-M388 LSRLMTGDTY  | 127   | >ABL1-M388 LSRLLTGDTY  | 136  | 9     |
| >ABL1-M388 LSRLMTGDTY  | 436   | >ABL1-M388 LSRLLTGDTY  | 481  | 45    |
| >ABL1-M388 LSRLMTGDTY  | 6     | >ABL1-M388 LSRLLTGDTY  | 7    | 1     |
| >ABL1-M388 LSRLMTGDTY  | 47    | >ABL1-M388 LSRLLTGDTY  | 56   | 9     |
| >ABL1-M388 GLSRLMTGD`  | 456   | >ABL1-M388 GLSRLLTGDT` | 417  | 39    |
| >ABL1-M388 GLSRLMTGD`  | 266   | >ABL1-M388 GLSRLLTGDT` | 281  | 15    |
| >ABL1-M388 GLSRLMTGD`  | 217   | >ABL1-M388 GLSRLLTGDT` | 301  | 84    |
| >ABL1-M388 GLSRLMTGD`  | 181   | >ABL1-M388 GLSRLLTGDT` | 217  | 36    |
| >ABL1-M388 GLSRLMTGD`  | 82    | >ABL1-M388 GLSRLLTGDT` | 111  | 29    |
| >ABL1-M388 ADFGLSRLM   | 106   | >ABL1-M388 ADFGLSRL    | 51   | 55    |
| >ABL1-M388 ADFGLSRLM   | 156   | >ABL1-M388 ADFGLSRL    | 1121 | 965   |
| >ABL1-M388 VADFGLSRLM  | 464   | >ABL1-M388 VADFGLSRL   | 728  | 264   |
| >ABL1-N374\NHLVKVADF   | 972   | >ABL1-N374\YHLVKVADF   | 35   | 937   |
| >ABL1-N374\NHLVKVADF(  | 224   | >ABL1-N374\YHLVKVADFC  | 68   | 156   |
| >ABL1-N374\ENHLVKVADFI | 14674 | >ABL1-N374\EYHLVKVADF  | 84   | 14590 |
| >ABL1-N374\ENHLVKVADFI | 29864 | >ABL1-N374\EYHLVKVADF  | 472  | 29392 |
| >ABL1-N374\ENHLVKVADFI | 21892 | >ABL1-N374\EYHLVKVADF  | 35   | 21857 |
| >ABL1-N374\LAARNCLVGE  | 23553 | >ABL1-N374\LAARNCLVGE  | 184  | 23369 |
| >ABL1-N374\LAARNCLVGE  | 29143 | >ABL1-N374\LAARNCLVGE  | 157  | 28986 |
| >ABL1-N374\LAARNCLVGE  | 18465 | >ABL1-N374\LAARNCLVGE  | 129  | 18336 |
| >ABL1-N374\LAARNCLVGE  | 19847 | >ABL1-N374\LAARNCLVGE  | 161  | 19686 |
| >ABL1-N374\LAARNCLVGE  | 12566 | >ABL1-N374\LAARNCLVGE  | 31   | 12535 |
| >ABL1-N374\LAARNCLVGE  | 17298 | >ABL1-N374\LAARNCLVGE  | 207  | 17091 |
| >ABL1-N374\LAARNCLVGE  | 20998 | >ABL1-N374\LAARNCLVGE  | 479  | 20519 |
| >ABL1-N374\LAARNCLVGE  | 33917 | >ABL1-N374\LAARNCLVGE  | 272  | 33645 |
| >ABL1-N374\GENHLVKVA   | 1868  | >ABL1-N374\GEYHLVKVA   | 160  | 1708  |
| >ABL1-N374\GENHLVKVAI  | 1099  | >ABL1-N374\GEYHLVKVAI  | 148  | 951   |
| >ABL1-N374\GENHLVKVAI  | 565   | >ABL1-N374\GEYHLVKVAI  | 93   | 472   |
| >ABL1-N374\GENHLVKV    | 375   | >ABL1-N374\GEYHLVKV    | 94   | 281   |
| >ABL1-N374\GENHLVKV    | 247   | >ABL1-N374\GEYHLVKV    | 115  | 132   |

|                       |     |                       |     |     |
|-----------------------|-----|-----------------------|-----|-----|
| >ABL1-N374\GENHLVKVA  | 86  | >ABL1-N374\GEYHLVKVA  | 43  | 43  |
| >ABL1-N374\GENHLVKVAI | 476 | >ABL1-N374\GEYHLVKVAE | 225 | 251 |
| >ABL1-N374\GENHLVKVAI | 147 | >ABL1-N374\GEYHLVKVAE | 199 | 52  |
| >ABL1-N374\GENHLVKVAI | 79  | >ABL1-N374\GEYHLVKVAE | 53  | 26  |
| >ABL1-N374\GENHLVKV   | 299 | >ABL1-N374\GEYHLVKV   | 263 | 36  |
| >ABL1-N374\GENHLVKVA  | 58  | >ABL1-N374\GEYHLVKVA  | 49  | 9   |
| >ABL1-N374\GENHLVKV   | 704 | >ABL1-N374\GEYHLVKV   | 90  | 614 |
| >ABL1-N374\GENHLVKVA  | 821 | >ABL1-N374\GEYHLVKVA  | 49  | 772 |
| >ABL1-N374\GENHLVKVAI | 116 | >ABL1-N374\GEYHLVKVAE | 13  | 103 |
| >ABL1-N374\LVGENHLV   | 603 | >ABL1-N374\LVGEYHLV   | 160 | 443 |
| >ABL1-N374\LVGENHLV   | 173 | >ABL1-N374\LVGEYHLV   | 69  | 104 |
| >ABL1-N374\LVGENHLVK\ | 829 | >ABL1-N374\LVGEYHLVKV | 450 | 379 |
| >ABL1-N374\LVGENHLV   | 361 | >ABL1-N374\LVGEYHLV   | 123 | 238 |
| >ABL1-N374\LVGENHLVK\ | 318 | >ABL1-N374\LVGEYHLVKV | 266 | 52  |
| >ABL1-N374\LVGENHLV   | 140 | >ABL1-N374\LVGEYHLV   | 41  | 99  |
| >ABL1-N374\LVGENHLVK\ | 494 | >ABL1-N374\LVGEYHLVKV | 306 | 188 |
| >ABL1-N374\LVGENHLV   | 21  | >ABL1-N374\LVGEYHLV   | 13  | 8   |
| >ABL1-N374\LVGENHLVK\ | 17  | >ABL1-N374\LVGEYHLVKV | 18  | 1   |
| >ABL1-N374\LVGENHLV   | 93  | >ABL1-N374\LVGEYHLV   | 152 | 59  |
| >ABL1-N374\LVGENHLVK\ | 125 | >ABL1-N374\LVGEYHLVKV | 282 | 157 |
| >ABL1-N374\LVGENHLV   | 128 | >ABL1-N374\LVGEYHLV   | 87  | 41  |
| >ABL1-N374\LVGENHLVK\ | 187 | >ABL1-N374\LVGEYHLVKV | 208 | 21  |
| >ABL1-N374\LVGENHLV   | 120 | >ABL1-N374\LVGEYHLV   | 130 | 10  |
| >ABL1-N374\LVGENHLVK\ | 245 | >ABL1-N374\LVGEYHLVKV | 355 | 110 |
| >ABL1-N374\LVGENHLV   | 5   | >ABL1-N374\LVGEYHLV   | 4   | 1   |
| >ABL1-N374\LVGENHLVK\ | 5   | >ABL1-N374\LVGEYHLVKV | 7   | 2   |
| >ABL1-N374\LVGENHLVK  | 517 | >ABL1-N374\LVGEYHLVK  | 354 | 163 |
| >ABL1-N374\LVGENHLVK  | 127 | >ABL1-N374\LVGEYHLVK  | 69  | 58  |
| >ABL1-N374\LVGENHLVK  | 290 | >ABL1-N374\LVGEYHLVK  | 315 | 25  |
| >ABL1-N374\LVGENHLV   | 527 | >ABL1-N374\LVGEYHLV   | 416 | 111 |
| >ABL1-N374\LVGENHLV   | 87  | >ABL1-N374\LVGEYHLV   | 47  | 40  |
| >ABL1-N374\LVGENHLVK\ | 236 | >ABL1-N374\LVGEYHLVKV | 141 | 95  |
| >ABL1-N374\CLVGENHLV  | 111 | >ABL1-N374\CLVGEYHLV  | 109 | 2   |
| >ABL1-N374\CLVGENHLVK | 147 | >ABL1-N374\CLVGEYHLVK | 148 | 1   |
| >ABL1-N374\CLVGENHL   | 64  | >ABL1-N374\CLVGEYHL   | 37  | 27  |
| >ABL1-N374\CLVGENHLV  | 10  | >ABL1-N374\CLVGEYHLV  | 9   | 1   |
| >ABL1-N374\CLVGENHLVK | 23  | >ABL1-N374\CLVGEYHLVK | 22  | 1   |
| >ABL1-N374\CLVGENHLV  | 58  | >ABL1-N374\CLVGEYHLV  | 29  | 29  |
| >ABL1-N374\CLVGENHLVK | 41  | >ABL1-N374\CLVGEYHLVK | 30  | 11  |
| >ABL1-N374\CLVGENHLV  | 245 | >ABL1-N374\CLVGEYHLV  | 115 | 130 |
| >ABL1-N374\CLVGENHLVK | 147 | >ABL1-N374\CLVGEYHLVK | 108 | 39  |
| >ABL1-N374\CLVGENHL   | 700 | >ABL1-N374\CLVGEYHL   | 139 | 561 |
| >ABL1-N374\CLVGENHLV  | 17  | >ABL1-N374\CLVGEYHLV  | 9   | 8   |

|                        |       |                        |     |       |
|------------------------|-------|------------------------|-----|-------|
| >ABL1-N374\CLVGENHLVK  | 12    | >ABL1-N374\CLVGEYHLVK  | 12  | 0     |
| >ABL1-N374\CLVGENHL    | 554   | >ABL1-N374\CLVGEYHL    | 128 | 426   |
| >ABL1-N374\CLVGENHLV   | 41    | >ABL1-N374\CLVGEYHLV   | 42  | 1     |
| >ABL1-N374\CLVGENHLVK  | 43    | >ABL1-N374\CLVGEYHLVK  | 52  | 9     |
| >ABL1-N374\CLVGENHL    | 1742  | >ABL1-N374\CLVGEYHL    | 434 | 1308  |
| >ABL1-N374\CLVGENHLV   | 55    | >ABL1-N374\CLVGEYHLV   | 29  | 26    |
| >ABL1-N374\CLVGENHLVK  | 67    | >ABL1-N374\CLVGEYHLVK  | 63  | 4     |
| >ABL1-N374\CLVGENHLV   | 20    | >ABL1-N374\CLVGEYHLV   | 20  | 0     |
| >ABL1-N374\CLVGENHLVK  | 31    | >ABL1-N374\CLVGEYHLVK  | 47  | 16    |
| >ABL1-N374\CLVGENHL    | 29    | >ABL1-N374\CLVGEYHL    | 13  | 16    |
| >ABL1-N374\CLVGENHLV   | 3     | >ABL1-N374\CLVGEYHLV   | 2   | 1     |
| >ABL1-N374\CLVGENHLVK  | 3     | >ABL1-N374\CLVGEYHLVK  | 3   | 0     |
| >ABL1-N374\CLVGENHLVK  | 136   | >ABL1-N374\CLVGEYHLVK  | 128 | 8     |
| >ABL1-N374\CLVGENHLVK  | 365   | >ABL1-N374\CLVGEYHLVK  | 266 | 99    |
| >ABL1-N374\NCLVGENHL\  | 489   | >ABL1-N374\NCLVGEYHLV  | 288 | 201   |
| >ABL1-N374\ARNCLVGEN   | 14991 | >ABL1-N374\ARNCLVGEY   | 285 | 14706 |
| >ABL1-N374\ARNCLVGEN   | 2483  | >ABL1-N374\ARNCLVGEY   | 162 | 2321  |
| >ABL1-N374\ARNCLVGENI  | 294   | >ABL1-N374\ARNCLVGEY†  | 100 | 194   |
| >ABL1-N374\ARNCLVGENI  | 159   | >ABL1-N374\ARNCLVGEY†  | 248 | 89    |
| >ABL1-N374\AARNCLVGE†  | 3389  | >ABL1-N374\AARNCLVGE\  | 470 | 2919  |
| >ABL1-N374\AARNCLVGE†  | 29051 | >ABL1-N374\AARNCLVGE\  | 249 | 28802 |
| >ABL1-N374\AARNCLVGE†  | 18673 | >ABL1-N374\AARNCLVGE\  | 164 | 18509 |
| >ABL1-N374\AARNCLVGE†  | 17158 | >ABL1-N374\AARNCLVGE\  | 212 | 16946 |
| >ABL1-N374\AARNCLVGE†  | 12765 | >ABL1-N374\AARNCLVGE\  | 17  | 12748 |
| >ABL1-P480L PSDRPSFAEI | 9635  | >ABL1-P480L LSDRPSFAEI | 201 | 9434  |
| >ABL1-P480L PSDRPSFAEI | 13988 | >ABL1-P480L LSDRPSFAEI | 299 | 13689 |
| >ABL1-P480L PSDRPSFAEI | 2294  | >ABL1-P480L LSDRPSFAEI | 95  | 2199  |
| >ABL1-P480L NPSDRPSFA  | 23744 | >ABL1-P480L NLSDRPSFA  | 465 | 23279 |
| >ABL1-P480L NPSDRPSFAE | 22670 | >ABL1-P480L NLSDRPSFAE | 84  | 22586 |
| >ABL1-P480L NPSDRPSFA  | 24367 | >ABL1-P480L NLSDRPSFA  | 21  | 24346 |
| >ABL1-P480L NPSDRPSFAE | 20541 | >ABL1-P480L NLSDRPSFAE | 10  | 20531 |
| >ABL1-P480L NPSDRPSFA  | 12798 | >ABL1-P480L NLSDRPSFA  | 7   | 12791 |
| >ABL1-P480L NPSDRPSFAE | 14737 | >ABL1-P480L NLSDRPSFAE | 8   | 14729 |
| >ABL1-P480L NPSDRPSFAE | 15179 | >ABL1-P480L NLSDRPSFAE | 220 | 14959 |
| >ABL1-P480L NPSDRPSFA  | 27568 | >ABL1-P480L NLSDRPSFA  | 111 | 27457 |
| >ABL1-P480L NPSDRPSFAE | 24324 | >ABL1-P480L NLSDRPSFAE | 37  | 24287 |
| >ABL1-P480L NPSDRPSFA  | 22818 | >ABL1-P480L NLSDRPSFA  | 272 | 22546 |
| >ABL1-P480L NPSDRPSFAE | 22944 | >ABL1-P480L NLSDRPSFAE | 32  | 22912 |
| >ABL1-P480L NPSDRPSFA  | 25826 | >ABL1-P480L NLSDRPSFA  | 347 | 25479 |
| >ABL1-P480L NPSDRPSFAE | 24904 | >ABL1-P480L NLSDRPSFAE | 298 | 24606 |
| >ABL1-P480L NPSDRPSFA  | 22015 | >ABL1-P480L NLSDRPSFA  | 207 | 21808 |
| >ABL1-P480L NPSDRPSFAE | 22945 | >ABL1-P480L NLSDRPSFAE | 71  | 22874 |
| >ABL1-P480L NPSDRPSFA  | 33314 | >ABL1-P480L NLSDRPSFA  | 37  | 33277 |



|                        |       |                        |       |       |
|------------------------|-------|------------------------|-------|-------|
| >ABL1-P480L NPSDRPSFAE | 30922 | >ABL1-P480L NLSDRPSFAE | 13    | 30909 |
| >ABL1-P480L NPSDRPSFAE | 2502  | >ABL1-P480L NLSDRPSFAE | 226   | 2276  |
| >ABL1-P480L NPSDRPSF   | 68    | >ABL1-P480L NLSDRPSF   | 18080 | 18012 |
| >ABL1-P480L NPSDRPSFAE | 267   | >ABL1-P480L NLSDRPSFAE | 23617 | 23350 |
| >ABL1-P480L NPSDRPSF   | 16076 | >ABL1-P480L NLSDRPSF   | 397   | 15679 |
| >ABL1-P480L NPSDRPSF   | 2440  | >ABL1-P480L NLSDRPSF   | 451   | 1989  |
| >ABL1-P480L NPSDRPSF   | 61    | >ABL1-P480L NLSDRPSF   | 3867  | 3806  |
| >ABL1-P480L NPSDRPSFAE | 439   | >ABL1-P480L NLSDRPSFAE | 23584 | 23145 |
| >ABL1-P480L NPSDRPSF   | 151   | >ABL1-P480L NLSDRPSF   | 28277 | 28126 |
| >ABL1-P480L NPSDRPSFAE | 242   | >ABL1-P480L NLSDRPSFAE | 25033 | 24791 |
| >ABL1-P480L ELMRACWQ\  | 20778 | >ABL1-P480L ELMRACWQ\  | 67    | 20711 |
| >ABL1-P480L ELMRACWQ\  | 5363  | >ABL1-P480L ELMRACWQ\  | 18    | 5345  |
| >ABL1-P480L ELMRACWQ\  | 14489 | >ABL1-P480L ELMRACWQ\  | 168   | 14321 |
| >ABL1-P480L ELMRACWQ\  | 6442  | >ABL1-P480L ELMRACWQ\  | 39    | 6403  |
| >ABL1-P480L ELMRACWQ\  | 7539  | >ABL1-P480L ELMRACWQ\  | 26    | 7513  |
| >ABL1-P480L ELMRACWQ\  | 10761 | >ABL1-P480L ELMRACWQ\  | 51    | 10710 |
| >ABL1-P480L ELMRACWQ\  | 8290  | >ABL1-P480L ELMRACWQ\  | 4     | 8286  |
| >ABL1-P480L ELMRACWQ\  | 8092  | >ABL1-P480L ELMRACWQ\  | 6     | 8086  |
| >ABL1-P480L ELMRACWQ\  | 9956  | >ABL1-P480L ELMRACWQ\  | 69    | 9887  |
| >ABL1-P480L ELMRACWQ\  | 3084  | >ABL1-P480L ELMRACWQ\  | 16    | 3068  |
| >ABL1-P480L ELMRACWQ\  | 12343 | >ABL1-P480L ELMRACWQ\  | 301   | 12042 |
| >ABL1-P480L WNPSDRPSF  | 363   | >ABL1-P480L WNLSDRPSF  | 23    | 340   |
| >ABL1-P480L QWNPSDRPS  | 56    | >ABL1-P480L QWNLSDRPS  | 39    | 17    |
| >ABL1-P480L QWNPSDRPS  | 81    | >ABL1-P480L QWNLSDRPS  | 79    | 2     |
| >ABL1-P480L QWNPSDRPS  | 133   | >ABL1-P480L QWNLSDRPS  | 563   | 430   |
| >ABL1-P480L QWNPSDRPS  | 377   | >ABL1-P480L QWNLSDRPS  | 1014  | 637   |
| >ABL1-P480L QWNPSDRPS  | 72    | >ABL1-P480L QWNLSDRPS  | 105   | 33    |
| >ABL1-P480L WQWNPSDR   | 139   | >ABL1-P480L WQWNLSDR   | 106   | 33    |
| >ABL1-P480L WQWNPSDR   | 56    | >ABL1-P480L WQWNLSDR   | 52    | 4     |
| >ABL1-P480L WQWNPSDR   | 100   | >ABL1-P480L WQWNLSDR   | 325   | 225   |
| >ABL1-P480L WQWNPSDR   | 77    | >ABL1-P480L WQWNLSDR   | 194   | 117   |
| >ABL1-P480L WQWNPSDR   | 432   | >ABL1-P480L WQWNLSDR   | 903   | 471   |
| >ABL1-P480L WQWNPSDR   | 2     | >ABL1-P480L WQWNLSDR   | 3     | 1     |
| >ABL1-P480L WQWNPSDR   | 606   | >ABL1-P480L WQWNLSDR   | 199   | 407   |
| >ABL1-P480L WQWNPSDR   | 752   | >ABL1-P480L WQWNLSDR   | 383   | 369   |
| >ABL1-P480L WQWNPSDR   | 156   | >ABL1-P480L WQWNLSDR   | 109   | 47    |
| >ABL1-P480L WQWNPSDR   | 285   | >ABL1-P480L WQWNLSDR   | 366   | 81    |
| >ABL1-P480L WQWNPSDR   | 381   | >ABL1-P480L WQWNLSDR   | 291   | 90    |
| >ABL1-P480L CWQWNPSD   | 26    | >ABL1-P480L CWQWNLSD   | 37    | 11    |
| >ABL1-P480L CWQWNPSD   | 160   | >ABL1-P480L CWQWNLSD   | 158   | 2     |
| >ABL1-P480L CWQWNPSD   | 207   | >ABL1-P480L CWQWNLSD   | 220   | 13    |
| >ABL1-P480L CWQWNPSD   | 241   | >ABL1-P480L CWQWNLSD   | 270   | 29    |
| >ABL1-P480L ACWQWNPS   | 750   | >ABL1-P480L ACWQWNLSI  | 367   | 383   |

|                        |       |                        |       |       |
|------------------------|-------|------------------------|-------|-------|
| >ABL1-P480L ACWQWNPS   | 318   | >ABL1-P480L ACWQWNLSI  | 369   | 51    |
| >ABL1-P480L RACWQWNP   | 49    | >ABL1-P480L RACWQWNL   | 30    | 19    |
| >ABL1-P480L RACWQWNP   | 583   | >ABL1-P480L RACWQWNL   | 379   | 204   |
| >ABL1-P480L RACWQWNP   | 16484 | >ABL1-P480L RACWQWNL   | 47    | 16437 |
| >ABL1-P480L RACWQWNP   | 152   | >ABL1-P480L RACWQWNL   | 237   | 85    |
| >ABL1-P480L MRACWQWF   | 17607 | >ABL1-P480L MRACWQWF   | 243   | 17364 |
| >ABL1-P480L MRACWQWF   | 4158  | >ABL1-P480L MRACWQWF   | 213   | 3945  |
| >ABL1-P480L MRACWQWF   | 841   | >ABL1-P480L MRACWQWF   | 42    | 799   |
| >ABL1-P480L MRACWQWF   | 12331 | >ABL1-P480L MRACWQWF   | 41    | 12290 |
| >ABL1-P480L MRACWQWF   | 9886  | >ABL1-P480L MRACWQWF   | 449   | 9437  |
| >ABL1-P480L MRACWQWF   | 5496  | >ABL1-P480L MRACWQWF   | 125   | 5371  |
| >ABL1-P480L LMRACWQW   | 13656 | >ABL1-P480L LMRACWQW   | 426   | 13230 |
| >ABL1-P480L LMRACWQW   | 12208 | >ABL1-P480L LMRACWQW   | 62    | 12146 |
| >ABL1-P480L LMRACWQW   | 6449  | >ABL1-P480L LMRACWQW   | 31    | 6418  |
| >ABL1-P480L LMRACWQW   | 11684 | >ABL1-P480L LMRACWQW   | 76    | 11608 |
| >ABL1-P480L LMRACWQW   | 14443 | >ABL1-P480L LMRACWQW   | 141   | 14302 |
| >ABL1-P480L LMRACWQW   | 21353 | >ABL1-P480L LMRACWQW   | 161   | 21192 |
| >ABL1-P480L LMRACWQW   | 3709  | >ABL1-P480L LMRACWQW   | 4     | 3705  |
| >ABL1-P480L LMRACWQW   | 3272  | >ABL1-P480L LMRACWQW   | 380   | 2892  |
| >ABL1-P480L LMRACWQW   | 120   | >ABL1-P480L LMRACWQW   | 273   | 153   |
| >ABL1-P480L LMRACWQW   | 2657  | >ABL1-P480L LMRACWQW   | 91    | 2566  |
| >ABL1-P806L SPGSSPPNL  | 6     | >ABL1-P806L SLGSSPPNL  | 4475  | 4469  |
| >ABL1-P806L SPGSSPPNL  | 23406 | >ABL1-P806L SLGSSPPNL  | 97    | 23309 |
| >ABL1-P806L SPGSSPPNL  | 32834 | >ABL1-P806L SLGSSPPNL  | 83    | 32751 |
| >ABL1-P806L SPGSSPPNLT | 22932 | >ABL1-P806L SLGSSPPNLT | 156   | 22776 |
| >ABL1-P806L SPGSSPPNL  | 24965 | >ABL1-P806L SLGSSPPNL  | 162   | 24803 |
| >ABL1-P806L SPGSSPPNLT | 21881 | >ABL1-P806L SLGSSPPNLT | 190   | 21691 |
| >ABL1-P806L SPGSSPPNL  | 21010 | >ABL1-P806L SLGSSPPNL  | 12    | 20998 |
| >ABL1-P806L SPGSSPPNL  | 23666 | >ABL1-P806L SLGSSPPNL  | 76    | 23590 |
| >ABL1-P806L SPGSSPPNL  | 18633 | >ABL1-P806L SLGSSPPNL  | 8     | 18625 |
| >ABL1-P806L SPGSSPPNL  | 23564 | >ABL1-P806L SLGSSPPNL  | 35    | 23529 |
| >ABL1-P806L SPGSSPPNL  | 25245 | >ABL1-P806L SLGSSPPNL  | 9     | 25236 |
| >ABL1-P806L SPGSSPPNLT | 36378 | >ABL1-P806L SLGSSPPNLT | 354   | 36024 |
| >ABL1-P806L EVFKDIMESS | 8254  | >ABL1-P806L EVFKDIMESS | 413   | 7841  |
| >ABL1-P806L EVFKDIMESS | 10240 | >ABL1-P806L EVFKDIMESS | 311   | 9929  |
| >ABL1-P806L EVFKDIMESS | 17978 | >ABL1-P806L EVFKDIMESS | 380   | 17598 |
| >ABL1-P806L EVFKDIMESS | 5335  | >ABL1-P806L EVFKDIMESS | 27    | 5308  |
| >ABL1-P806L EVFKDIMESS | 12731 | >ABL1-P806L EVFKDIMESS | 207   | 12524 |
| >ABL1-P806L SSPGSSPPNL | 4624  | >ABL1-P806L SSLGSSPPNL | 306   | 4318  |
| >ABL1-P806L SSPGSSPPNL | 7628  | >ABL1-P806L SSLGSSPPNL | 279   | 7349  |
| >ABL1-P806L SSPGSSPPNL | 163   | >ABL1-P806L SSLGSSPPNL | 5     | 158   |
| >ABL1-P806L SSPGSSPPNL | 5     | >ABL1-P806L SSLGSSPPNL | 1329  | 1324  |
| >ABL1-P806L SSPGSSPPNL | 58    | >ABL1-P806L SSLGSSPPNL | 15416 | 15358 |

|                        |       |                         |      |       |
|------------------------|-------|-------------------------|------|-------|
| >ABL1-P806L SSPGSSPPNL | 237   | >ABL1-P806L SSLGSSPPNL  | 266  | 29    |
| >ABL1-P806L ESSPGSSPPN | 443   | >ABL1-P806L ESSLGSSPPNI | 1320 | 877   |
| >ABL1-P806L ESSPGSSPPN | 360   | >ABL1-P806L ESSLGSSPPNI | 885  | 525   |
| >ABL1-P806L ESSPGSSPPN | 21    | >ABL1-P806L ESSLGSSPPNI | 54   | 33    |
| >ABL1-P806L MESSPGSS   | 616   | >ABL1-P806L MESSLGSS    | 407  | 209   |
| >ABL1-P806L MESSPGSSPP | 394   | >ABL1-P806L MESSLGSSPP  | 331  | 63    |
| >ABL1-P806L DIMESSPGS  | 381   | >ABL1-P806L DIMESSLGS   | 1317 | 936   |
| >ABL1-P806L KDIMESSP   | 7488  | >ABL1-P806L KDIMESSL    | 171  | 7317  |
| >ABL1-P806L FKDIMESSP  | 14648 | >ABL1-P806L FKDIMESSL   | 160  | 14488 |
| >ABL1-Q252IQYGEVYEGV   | 434   | >ABL1-Q252IEYGEVYEGV    | 761  | 327   |
| >ABL1-Q252IQYGEVYEGV\  | 277   | >ABL1-Q252IEYGEVYEGVV   | 474  | 197   |
| >ABL1-Q252IQYGEVYEGV   | 92    | >ABL1-Q252IEYGEVYEGV    | 632  | 540   |
| >ABL1-Q252IQYGEVYEGV\  | 17    | >ABL1-Q252IEYGEVYEGVV   | 67   | 50    |
| >ABL1-Q252IQYGEVYEGV\  | 2958  | >ABL1-Q252IEYGEVYEGVV   | 268  | 2690  |
| >ABL1-Q252IQYGEVYEGV   | 1552  | >ABL1-Q252IEYGEVYEGV    | 146  | 1406  |
| >ABL1-Q252IQYGEVYEGV   | 3354  | >ABL1-Q252IEYGEVYEGV    | 364  | 2990  |
| >ABL1-Q252IQYGEVYEGV\  | 450   | >ABL1-Q252IEYGEVYEGVV   | 630  | 180   |
| >ABL1-Q252IGQYGEVYEG\  | 4315  | >ABL1-Q252IGEYGEVYEG\   | 114  | 4201  |
| >ABL1-Q252IGQYGEVYEG\  | 170   | >ABL1-Q252IGEYGEVYEG\   | 6585 | 6415  |
| >ABL1-Q252IGQYGEVYEG\  | 44    | >ABL1-Q252IGEYGEVYEG\   | 2131 | 2087  |
| >ABL1-Q252IGQYGEVYEG\  | 58    | >ABL1-Q252IGEYGEVYEG\   | 3439 | 3381  |
| >ABL1-Q252IGQYGEVYEG\  | 109   | >ABL1-Q252IGEYGEVYEG\   | 4245 | 4136  |
| >ABL1-Q252IGQYGEVYEG\  | 6     | >ABL1-Q252IGEYGEVYEG\   | 118  | 112   |
| >ABL1-Q252IGQYGEVYEG\  | 21    | >ABL1-Q252IGEYGEVYEG\   | 2862 | 2841  |
| >ABL1-Q252IGQYGEVYEG\  | 13    | >ABL1-Q252IGEYGEVYEG\   | 253  | 240   |
| >ABL1-Q252IGQYGEVYEG\  | 66    | >ABL1-Q252IGEYGEVYEG\   | 1581 | 1515  |
| >ABL1-Q252IGQYGEVYEG\  | 23618 | >ABL1-Q252IGEYGEVYEG\   | 180  | 23438 |
| >ABL1-Q252IGQYGEVYEG\  | 8254  | >ABL1-Q252IGEYGEVYEG\   | 395  | 7859  |
| >ABL1-Q252IGQYGEVYEG\  | 3254  | >ABL1-Q252IGEYGEVYEG\   | 86   | 3168  |
| >ABL1-Q252IGQYGEVYEG\  | 10720 | >ABL1-Q252IGEYGEVYEG\   | 34   | 10686 |
| >ABL1-Q252IGQYGEVYEG\  | 10285 | >ABL1-Q252IGEYGEVYEG\   | 124  | 10161 |
| >ABL1-Q252IGQYGEVYEG\  | 58    | >ABL1-Q252IGEYGEVYEG\   | 356  | 298   |
| >ABL1-Q252IGGQYGEVY    | 341   | >ABL1-Q252IGGEYGEVY     | 881  | 540   |
| >ABL1-Q252IGGGQYGEVY   | 235   | >ABL1-Q252IGGGEYGEVY    | 406  | 171   |
| >ABL1-Q252IGGGQYGEVY   | 326   | >ABL1-Q252IGGGEYGEVY    | 1190 | 864   |
| >ABL1-Q252ILGGGQYGEV\  | 272   | >ABL1-Q252ILGGGEYGEV\   | 370  | 98    |
| >ABL1-Q252IKLGGGQYGE\  | 212   | >ABL1-Q252IKLGGGEYGE\   | 148  | 64    |
| >ABL1-Q252IKLGGGQYGE\  | 90    | >ABL1-Q252IKLGGGEYGE\   | 59   | 31    |
| >ABL1-Q252IKLGGGQYGE\  | 56    | >ABL1-Q252IKLGGGEYGE\   | 42   | 14    |
| >ABL1-Q252IKLGGGQYGE\  | 3     | >ABL1-Q252IKLGGGEYGE\   | 4    | 1     |
| >ABL1-Q252IKLGGGQYGE\  | 16    | >ABL1-Q252IKLGGGEYGE\   | 19   | 3     |
| >ABL1-Q252IKLGGGQYGE\  | 7     | >ABL1-Q252IKLGGGEYGE\   | 8    | 1     |
| >ABL1-Q252IKLGGGQYGE\  | 19    | >ABL1-Q252IKLGGGEYGE\   | 21   | 2     |

|                       |      |                       |      |      |
|-----------------------|------|-----------------------|------|------|
| >ABL1-Q252IKLGGGQYGE' | 2    | >ABL1-Q252IKLGGGEYGE\ | 3    | 1    |
| >ABL1-Q252IKLGGGQYGE' | 128  | >ABL1-Q252IKLGGGEYGE\ | 238  | 110  |
| >ABL1-Q252IKLGGGQYGE' | 64   | >ABL1-Q252IKLGGGEYGE\ | 92   | 28   |
| >ABL1-Q252IKLGGGQYGE' | 37   | >ABL1-Q252IKLGGGEYGE\ | 57   | 20   |
| >ABL1-Q252IKLGGGQYGE' | 87   | >ABL1-Q252IKLGGGEYGE\ | 118  | 31   |
| >ABL1-Q252IKLGGGQYGE' | 354  | >ABL1-Q252IKLGGGEYGE\ | 422  | 68   |
| >ABL1-Q252IKLGGGQYGE' | 385  | >ABL1-Q252IKLGGGEYGE\ | 399  | 14   |
| >ABL1-Q252IHKLGGGQY   | 132  | >ABL1-Q252IHKLGGGEY   | 159  | 27   |
| >ABL1-Q252IHKLGGGQY   | 100  | >ABL1-Q252IHKLGGGEY   | 68   | 32   |
| >ABL1-Q252IKHKLGGGQY  | 241  | >ABL1-Q252IKHKLGGGEY  | 114  | 127  |
| >ABL1-Q252IMKHKLGGGC  | 221  | >ABL1-Q252IMKHKLGGGE  | 235  | 14   |
| >ABL1-Q252IMKHKLGGGC  | 35   | >ABL1-Q252IMKHKLGGGE  | 24   | 11   |
| >ABL1-Q252IMKHKLGGGC  | 330  | >ABL1-Q252IMKHKLGGGE  | 408  | 78   |
| >ABL1-Q252ITMKHKLGGG  | 76   | >ABL1-Q252ITMKHKLGGG  | 81   | 5    |
| >ABL1-Q252ITMKHKLGGG  | 32   | >ABL1-Q252ITMKHKLGGG  | 18   | 14   |
| >ABL1-Q252ITMKHKLGGG  | 544  | >ABL1-Q252ITMKHKLGGG  | 244  | 300  |
| >ABL1-Q252ITMKHKLGGG  | 69   | >ABL1-Q252ITMKHKLGGG  | 62   | 7    |
| >ABL1-Q252ITMKHKLGGG  | 77   | >ABL1-Q252ITMKHKLGGG  | 81   | 4    |
| >ABL1-Q252IQYGEVYEGV  | 434  | >ABL1-Q252IHYGEVYEGV  | 210  | 224  |
| >ABL1-Q252IQYGEVYEGV\ | 277  | >ABL1-Q252IHYGEVYEGV\ | 738  | 461  |
| >ABL1-Q252IQYGEVYEGV  | 92   | >ABL1-Q252IHYGEVYEGV  | 41   | 51   |
| >ABL1-Q252IQYGEVYEGV\ | 17   | >ABL1-Q252IHYGEVYEGV\ | 10   | 7    |
| >ABL1-Q252IQYGEVYEGV\ | 685  | >ABL1-Q252IHYGEVYEGV\ | 295  | 390  |
| >ABL1-Q252IQYGEVYEGV\ | 2168 | >ABL1-Q252IHYGEVYEGV\ | 288  | 1880 |
| >ABL1-Q252IQYGEVYEGV\ | 450  | >ABL1-Q252IHYGEVYEGV\ | 161  | 289  |
| >ABL1-Q252IGQYGEVYEG' | 170  | >ABL1-Q252IGHYGEVYEG\ | 7451 | 7281 |
| >ABL1-Q252IGQYGEVYEG' | 44   | >ABL1-Q252IGHYGEVYEG\ | 3433 | 3389 |
| >ABL1-Q252IGQYGEVYEG' | 58   | >ABL1-Q252IGHYGEVYEG\ | 5414 | 5356 |
| >ABL1-Q252IGQYGEVYEG' | 109  | >ABL1-Q252IGHYGEVYEG\ | 7360 | 7251 |
| >ABL1-Q252IGQYGEVYEG' | 6    | >ABL1-Q252IGHYGEVYEG\ | 245  | 239  |
| >ABL1-Q252IGQYGEVYEG' | 21   | >ABL1-Q252IGHYGEVYEG\ | 5771 | 5750 |
| >ABL1-Q252IGQYGEVYEG' | 13   | >ABL1-Q252IGHYGEVYEG\ | 634  | 621  |
| >ABL1-Q252IGQYGEVYEG' | 66   | >ABL1-Q252IGHYGEVYEG\ | 2509 | 2443 |
| >ABL1-Q252IGQYGEVYEG' | 58   | >ABL1-Q252IGHYGEVYEG\ | 11   | 47   |
| >ABL1-Q252IITMKHKLGGC | 2658 | >ABL1-Q252IITMKHKLGGC | 487  | 2171 |
| >ABL1-Q252IGGQYGEVY   | 341  | >ABL1-Q252IGGHYGEVY   | 427  | 86   |
| >ABL1-Q252IGGGQYGEVY  | 235  | >ABL1-Q252IGGGHYGEVY  | 265  | 30   |
| >ABL1-Q252IGGGQYGEVY  | 326  | >ABL1-Q252IGGGHYGEVY  | 378  | 52   |
| >ABL1-Q252ILGGGQYGEV' | 272  | >ABL1-Q252ILGGGHYGEV' | 175  | 97   |
| >ABL1-Q252IKLGGGQYGE' | 212  | >ABL1-Q252IKLGGGHYGE\ | 232  | 20   |
| >ABL1-Q252IKLGGGQYGE' | 90   | >ABL1-Q252IKLGGGHYGE\ | 67   | 23   |
| >ABL1-Q252IKLGGGQYGE' | 56   | >ABL1-Q252IKLGGGHYGE\ | 50   | 6    |
| >ABL1-Q252IKLGGGQYG   | 529  | >ABL1-Q252IKLGGGHYG   | 250  | 279  |

|                       |       |                       |      |       |
|-----------------------|-------|-----------------------|------|-------|
| >ABL1-Q252IKLGGGQYGE' | 3     | >ABL1-Q252IKLGGGHYGE' | 3    | 0     |
| >ABL1-Q252IKLGGGQYGE' | 16    | >ABL1-Q252IKLGGGHYGE' | 20   | 4     |
| >ABL1-Q252IKLGGGQYGE' | 7     | >ABL1-Q252IKLGGGHYGE' | 9    | 2     |
| >ABL1-Q252IKLGGGQYGE' | 19    | >ABL1-Q252IKLGGGHYGE' | 31   | 12    |
| >ABL1-Q252IKLGGGQYGE' | 2     | >ABL1-Q252IKLGGGHYGE' | 2    | 0     |
| >ABL1-Q252IKLGGGQYGE' | 128   | >ABL1-Q252IKLGGGHYGE' | 86   | 42    |
| >ABL1-Q252IKLGGGQYGE' | 64    | >ABL1-Q252IKLGGGHYGE' | 81   | 17    |
| >ABL1-Q252IKLGGGQYGE' | 37    | >ABL1-Q252IKLGGGHYGE' | 31   | 6     |
| >ABL1-Q252IKLGGGQYGE' | 87    | >ABL1-Q252IKLGGGHYGE' | 67   | 20    |
| >ABL1-Q252IKLGGGQYGE' | 354   | >ABL1-Q252IKLGGGHYGE' | 276  | 78    |
| >ABL1-Q252IKLGGGQYGE' | 385   | >ABL1-Q252IKLGGGHYGE' | 439  | 54    |
| >ABL1-Q252IHKLGGGQY   | 607   | >ABL1-Q252IHKLGGGHY   | 454  | 153   |
| >ABL1-Q252IHKLGGGQY   | 132   | >ABL1-Q252IHKLGGGHY   | 221  | 89    |
| >ABL1-Q252IHKLGGGQY   | 100   | >ABL1-Q252IHKLGGGHY   | 75   | 25    |
| >ABL1-Q252IKHKLGGGQY  | 241   | >ABL1-Q252IKHKLGGGHY  | 109  | 132   |
| >ABL1-Q252IMKHKLGGGC  | 221   | >ABL1-Q252IMKHKLGGGF  | 338  | 117   |
| >ABL1-Q252IMKHKLGGGC  | 35    | >ABL1-Q252IMKHKLGGGF  | 23   | 12    |
| >ABL1-Q252IMKHKLGGGC  | 330   | >ABL1-Q252IMKHKLGGGF  | 308  | 22    |
| >ABL1-Q252ITMKHKLGGG  | 76    | >ABL1-Q252ITMKHKLGGG  | 71   | 5     |
| >ABL1-Q252ITMKHKLGGG  | 32    | >ABL1-Q252ITMKHKLGGG  | 19   | 13    |
| >ABL1-Q252ITMKHKLGGG  | 544   | >ABL1-Q252ITMKHKLGGG  | 123  | 421   |
| >ABL1-Q252ITMKHKLGGG  | 69    | >ABL1-Q252ITMKHKLGGG  | 40   | 29    |
| >ABL1-Q252ITMKHKLGGG  | 77    | >ABL1-Q252ITMKHKLGGG  | 117  | 40    |
| >ABL1-Q252IQYGEVYEGV  | 434   | >ABL1-Q252IRYGEVYEGV  | 46   | 388   |
| >ABL1-Q252IQYGEVYEGV  | 2211  | >ABL1-Q252IRYGEVYEGV  | 252  | 1959  |
| >ABL1-Q252IQYGEVYEGV\ | 277   | >ABL1-Q252IRYGEVYEGV\ | 154  | 123   |
| >ABL1-Q252IQYGEVYEGV\ | 765   | >ABL1-Q252IRYGEVYEGV\ | 422  | 343   |
| >ABL1-Q252IQYGEVYEG   | 1143  | >ABL1-Q252IRYGEVYEG   | 230  | 913   |
| >ABL1-Q252IQYGEVYEGV  | 92    | >ABL1-Q252IRYGEVYEGV  | 15   | 77    |
| >ABL1-Q252IQYGEVYEGV\ | 17    | >ABL1-Q252IRYGEVYEGV\ | 6    | 11    |
| >ABL1-Q252IQYGEVYEGV\ | 685   | >ABL1-Q252IRYGEVYEGV\ | 119  | 566   |
| >ABL1-Q252IQYGEVYEGV\ | 5664  | >ABL1-Q252IRYGEVYEGV\ | 433  | 5231  |
| >ABL1-Q252IQYGEVYEGV\ | 450   | >ABL1-Q252IRYGEVYEGV\ | 151  | 299   |
| >ABL1-Q252IGQYGEVYEG' | 170   | >ABL1-Q252IGRYGEVYEG\ | 7220 | 7050  |
| >ABL1-Q252IGQYGEVYEG' | 44    | >ABL1-Q252IGRYGEVYEG\ | 2755 | 2711  |
| >ABL1-Q252IGQYGEVYEG' | 58    | >ABL1-Q252IGRYGEVYEG\ | 4147 | 4089  |
| >ABL1-Q252IGQYGEVYEG' | 109   | >ABL1-Q252IGRYGEVYEG\ | 4521 | 4412  |
| >ABL1-Q252IGQYGEVYEG' | 6     | >ABL1-Q252IGRYGEVYEG\ | 284  | 278   |
| >ABL1-Q252IGQYGEVYEG' | 21    | >ABL1-Q252IGRYGEVYEG\ | 6072 | 6051  |
| >ABL1-Q252IGQYGEVYEG' | 13    | >ABL1-Q252IGRYGEVYEG\ | 846  | 833   |
| >ABL1-Q252IGQYGEVYEG' | 66    | >ABL1-Q252IGRYGEVYEG\ | 2141 | 2075  |
| >ABL1-Q252IGQYGEVYEG' | 12569 | >ABL1-Q252IGRYGEVYEG\ | 221  | 12348 |
| >ABL1-Q252IGQYGEVYEG' | 58    | >ABL1-Q252IGRYGEVYEG\ | 20   | 38    |

|                        |       |                        |      |       |
|------------------------|-------|------------------------|------|-------|
| >ABL1-Q252IITMKHKLGGC  | 19051 | >ABL1-Q252IITMKHKLGGC  | 297  | 18754 |
| >ABL1-Q252IITMKHKLGGC  | 17478 | >ABL1-Q252IITMKHKLGGC  | 67   | 17411 |
| >ABL1-Q252IITMKHKLGGC  | 4878  | >ABL1-Q252IITMKHKLGGC  | 28   | 4850  |
| >ABL1-Q252IITMKHKLGGC  | 5117  | >ABL1-Q252IITMKHKLGGC  | 425  | 4692  |
| >ABL1-Q252IITMKHKLGGC  | 22414 | >ABL1-Q252IITMKHKLGGC  | 438  | 21976 |
| >ABL1-Q252IGGQYGEVY    | 341   | >ABL1-Q252IGGQYGEVY    | 660  | 319   |
| >ABL1-Q252IGGQYGEVY    | 583   | >ABL1-Q252IGGQYGEVY    | 326  | 257   |
| >ABL1-Q252IGGGQYGEVY   | 235   | >ABL1-Q252IGGGQYGEVY   | 463  | 228   |
| >ABL1-Q252IGGGQYGEVY   | 326   | >ABL1-Q252IGGGQYGEVY   | 390  | 64    |
| >ABL1-Q252ILGGGQYGEV   | 272   | >ABL1-Q252ILGGGQYGEV   | 310  | 38    |
| >ABL1-Q252IKLGGGQYGE'  | 212   | >ABL1-Q252IKLGGGQYGE'  | 302  | 90    |
| >ABL1-Q252IKLGGGQYGE'  | 90    | >ABL1-Q252IKLGGGQYGE'  | 119  | 29    |
| >ABL1-Q252IKLGGGQYGE'  | 56    | >ABL1-Q252IKLGGGQYGE'  | 50   | 6     |
| >ABL1-Q252IKLGGGQYGE'  | 3     | >ABL1-Q252IKLGGGQYGE'  | 5    | 2     |
| >ABL1-Q252IKLGGGQYGE'  | 16    | >ABL1-Q252IKLGGGQYGE'  | 39   | 23    |
| >ABL1-Q252IKLGGGQYGE'  | 7     | >ABL1-Q252IKLGGGQYGE'  | 10   | 3     |
| >ABL1-Q252IKLGGGQYGE'  | 19    | >ABL1-Q252IKLGGGQYGE'  | 63   | 44    |
| >ABL1-Q252IKLGGGQYGE'  | 2     | >ABL1-Q252IKLGGGQYGE'  | 3    | 1     |
| >ABL1-Q252IKLGGGQYGE'  | 128   | >ABL1-Q252IKLGGGQYGE'  | 193  | 65    |
| >ABL1-Q252IKLGGGQYGE'  | 64    | >ABL1-Q252IKLGGGQYGE'  | 78   | 14    |
| >ABL1-Q252IKLGGGQYGE'  | 37    | >ABL1-Q252IKLGGGQYGE'  | 70   | 33    |
| >ABL1-Q252IKLGGGQYGE'  | 87    | >ABL1-Q252IKLGGGQYGE'  | 86   | 1     |
| >ABL1-Q252IKLGGGQYGE'  | 354   | >ABL1-Q252IKLGGGQYGE'  | 436  | 82    |
| >ABL1-Q252IKLGGGQYGE'  | 385   | >ABL1-Q252IKLGGGQYGE'  | 460  | 75    |
| >ABL1-Q252IHKLGGGQY    | 132   | >ABL1-Q252IHKLGGGQY    | 194  | 62    |
| >ABL1-Q252IHKLGGGQY    | 100   | >ABL1-Q252IHKLGGGQY    | 249  | 149   |
| >ABL1-Q252IKHKLGGGQY   | 241   | >ABL1-Q252IKHKLGGGQY   | 107  | 134   |
| >ABL1-Q252IMKHKLGGGC   | 221   | >ABL1-Q252IMKHKLGGGC   | 253  | 32    |
| >ABL1-Q252IMKHKLGGGC   | 35    | >ABL1-Q252IMKHKLGGGC   | 61   | 26    |
| >ABL1-Q252IMKHKLGGGC   | 330   | >ABL1-Q252IMKHKLGGGC   | 725  | 395   |
| >ABL1-Q252ITMKHKLGGG   | 76    | >ABL1-Q252ITMKHKLGGG   | 92   | 16    |
| >ABL1-Q252ITMKHKLGGG   | 32    | >ABL1-Q252ITMKHKLGGG   | 19   | 13    |
| >ABL1-Q252ITMKHKLGGG   | 19094 | >ABL1-Q252ITMKHKLGGG   | 98   | 18996 |
| >ABL1-Q252ITMKHKLGGG   | 544   | >ABL1-Q252ITMKHKLGGG   | 321  | 223   |
| >ABL1-Q252ITMKHKLGGG   | 69    | >ABL1-Q252ITMKHKLGGG   | 82   | 13    |
| >ABL1-Q252ITMKHKLGGG   | 77    | >ABL1-Q252ITMKHKLGGG   | 99   | 22    |
| >ABL1-R047C RWNSKENL   | 449   | >ABL1-R047C RWNSKENL   | 4532 | 4083  |
| >ABL1-R047C RWNSKENLL  | 439   | >ABL1-R047C RWNSKENLL  | 4482 | 4043  |
| >ABL1-R047C RWNSKENL   | 351   | >ABL1-R047C RWNSKENL   | 1356 | 1005  |
| >ABL1-R047C RWNSKENLL  | 207   | >ABL1-R047C RWNSKENLL  | 880  | 673   |
| >ABL1-R047C RWNSKENLL/ | 291   | >ABL1-R047C RWNSKENLL/ | 1149 | 858   |
| >ABL1-R047C ARWNSKENL  | 76    | >ABL1-R047C ARWNSKENL  | 2207 | 2131  |
| >ABL1-R047C ARWNSKENL  | 197   | >ABL1-R047C ARWNSKENL  | 4024 | 3827  |

|                        |     |                        |       |       |
|------------------------|-----|------------------------|-------|-------|
| >ABL1-R047C ARWNSKENL  | 64  | >ABL1-R047C AGWNSKENL  | 20991 | 20927 |
| >ABL1-R047C ARWNSKENL  | 53  | >ABL1-R047C AGWNSKENL  | 22761 | 22708 |
| >ABL1-R047C ARWNSKENL  | 117 | >ABL1-R047C AGWNSKENL  | 21840 | 21723 |
| >ABL1-R047C ARWNSKEN   | 456 | >ABL1-R047C AGWNSKEN   | 23456 | 23000 |
| >ABL1-R047C ARWNSKENL  | 263 | >ABL1-R047C AGWNSKENL  | 21274 | 21011 |
| >ABL1-R047C ARWNSKENL  | 340 | >ABL1-R047C AGWNSKENL  | 24800 | 24460 |
| >ABL1-R047C ARWNSKENL  | 202 | >ABL1-R047C AGWNSKENL  | 22538 | 22336 |
| >ABL1-R047C ARWNSKENL  | 58  | >ABL1-R047C AGWNSKENL  | 18928 | 18870 |
| >ABL1-R047C AARWNSKEN  | 470 | >ABL1-R047C AAGWNSKEN  | 15046 | 14576 |
| >ABL1-R047C AARWNSKEN  | 136 | >ABL1-R047C AAGWNSKEN  | 13879 | 13743 |
| >ABL1-R047C AARWNSKEN  | 43  | >ABL1-R047C AAGWNSKEN  | 1335  | 1292  |
| >ABL1-R047C AARWNSKEN  | 208 | >ABL1-R047C AAGWNSKEN  | 3033  | 2825  |
| >ABL1-R047C EAARWNSK   | 10  | >ABL1-R047C EAAGWNSK   | 9     | 1     |
| >ABL1-R047C EAARWNSKE  | 33  | >ABL1-R047C EAAGWNSKE  | 18    | 15    |
| >ABL1-R047C EAARWNSKE  | 71  | >ABL1-R047C EAAGWNSKE  | 54    | 17    |
| >ABL1-R047C SEAARWNS   | 183 | >ABL1-R047C SEAAGWNS   | 81    | 102   |
| >ABL1-R047C SEAARWNSK  | 492 | >ABL1-R047C SEAAGWNSK  | 197   | 295   |
| >ABL1-R047C SEAARWNSK  | 698 | >ABL1-R047C SEAAGWNSK  | 397   | 301   |
| >ABL1-R047C LSEAARWNSI | 314 | >ABL1-R047C LSEAAGWNSI | 372   | 58    |
| >ABL1-R047C LSEAARWNSI | 106 | >ABL1-R047C LSEAAGWNSI | 301   | 195   |
| >ABL1-R047C GLSEAARWN  | 108 | >ABL1-R047C GLSEAAGWN  | 108   | 0     |
| >ABL1-R047C GLSEAARWN  | 360 | >ABL1-R047C GLSEAAGWN  | 350   | 10    |
| >ABL1-R047C GLSEAARW   | 181 | >ABL1-R047C GLSEAAGW   | 221   | 40    |
| >ABL1-R047C QGLSEAARW  | 128 | >ABL1-R047C QGLSEAAGW  | 132   | 4     |
| >ABL1-R047C QGLSEAARW  | 378 | >ABL1-R047C QGLSEAAGW  | 843   | 465   |
| >ABL1-R047C QGLSEAAR   | 490 | >ABL1-R047C QGLSEAAG   | 36579 | 36089 |
| >ABL1-R047C EPQGLSEAAR | 33  | >ABL1-R047C EPQGLSEAAC | 57    | 24    |
| >ABL1-R047C EPQGLSEAAR | 25  | >ABL1-R047C EPQGLSEAAC | 50    | 25    |
| >ABL1-R166K RYEGRVYHYF | 85  | >ABL1-R166K KYEGRVYHYF | 62    | 23    |
| >ABL1-R166K RYEGRVYHYF | 51  | >ABL1-R166K KYEGRVYHYF | 62    | 11    |
| >ABL1-R166K RYEGRVYHY  | 209 | >ABL1-R166K KYEGRVYHY  | 1035  | 826   |
| >ABL1-R166K RYEGRVYHYF | 214 | >ABL1-R166K KYEGRVYHYF | 761   | 547   |
| >ABL1-R166K RYEGRVYHYF | 15  | >ABL1-R166K KYEGRVYHYF | 47    | 32    |
| >ABL1-R166K RYEGRVYHY  | 273 | >ABL1-R166K KYEGRVYHY  | 237   | 36    |
| >ABL1-R166K RYEGRVYHY  | 205 | >ABL1-R166K KYEGRVYHY  | 108   | 97    |
| >ABL1-R166K RYEGRVYHYF | 7   | >ABL1-R166K KYEGRVYHYF | 7     | 0     |
| >ABL1-R166K RYEGRVYHYF | 238 | >ABL1-R166K KYEGRVYHYF | 208   | 30    |
| >ABL1-R166K RYEGRVYHYF | 148 | >ABL1-R166K KYEGRVYHYF | 195   | 47    |
| >ABL1-R166K RYEGRVYHY  | 59  | >ABL1-R166K KYEGRVYHY  | 71    | 12    |
| >ABL1-R166K RYEGRVYHY  | 19  | >ABL1-R166K KYEGRVYHY  | 20    | 1     |
| >ABL1-R166K RYEGRVYHYF | 107 | >ABL1-R166K KYEGRVYHYF | 99    | 8     |
| >ABL1-R166K RYEGRVYHY  | 535 | >ABL1-R166K KYEGRVYHY  | 355   | 180   |
| >ABL1-R166K RYEGRVYHYF | 9   | >ABL1-R166K KYEGRVYHYF | 8     | 1     |

|                         |       |                         |      |       |
|-------------------------|-------|-------------------------|------|-------|
| >ABL1-R166K LRYEGRVYHY  | 346   | >ABL1-R166K LKYEGRVYHY  | 176  | 170   |
| >ABL1-R166K LRYEGRVYHY  | 336   | >ABL1-R166K LKYEGRVYHY  | 139  | 197   |
| >ABL1-R166K LRYEGRVYHY  | 587   | >ABL1-R166K LKYEGRVYHY  | 402  | 185   |
| >ABL1-R166K LRYEGRVYHY  | 229   | >ABL1-R166K LKYEGRVYHY  | 123  | 106   |
| >ABL1-R166K LRYEGRVYHY  | 1462  | >ABL1-R166K LKYEGRVYHY  | 442  | 1020  |
| >ABL1-R166K LRYEGRVY    | 545   | >ABL1-R166K LKYEGRVY    | 446  | 99    |
| >ABL1-R166K LRYEGRVY    | 20    | >ABL1-R166K LKYEGRVY    | 4    | 16    |
| >ABL1-R166K LRYEGRVYH   | 364   | >ABL1-R166K LKYEGRVYH   | 73   | 291   |
| >ABL1-R166K LRYEGRVYHY  | 27    | >ABL1-R166K LKYEGRVYHY  | 4    | 23    |
| >ABL1-R166K LRYEGRVYHY  | 606   | >ABL1-R166K LKYEGRVYHY  | 110  | 496   |
| >ABL1-R166K LRYEGRVY    | 175   | >ABL1-R166K LKYEGRVY    | 9136 | 8961  |
| >ABL1-R166K LRYEGRVYH   | 190   | >ABL1-R166K LKYEGRVYH   | 8641 | 8451  |
| >ABL1-R166K LRYEGRVYHY  | 31    | >ABL1-R166K LKYEGRVYHY  | 2811 | 2780  |
| >ABL1-R166K LRYEGRVYHY  | 63    | >ABL1-R166K LKYEGRVYHY  | 5041 | 4978  |
| >ABL1-R166K LRYEGRVYH   | 416   | >ABL1-R166K LKYEGRVYH   | 6689 | 6273  |
| >ABL1-R166K LRYEGRVYHY  | 102   | >ABL1-R166K LKYEGRVYHY  | 140  | 38    |
| >ABL1-R166K SSPGQRSISLF | 1464  | >ABL1-R166K SSPGQRSISLK | 55   | 1409  |
| >ABL1-R166K SSPGQRSISLF | 11408 | >ABL1-R166K SSPGQRSISLK | 489  | 10919 |
| >ABL1-R166K SSPGQRSISLF | 370   | >ABL1-R166K SSPGQRSISLK | 5114 | 4744  |
| >ABL1-R166K SSPGQRSISLF | 121   | >ABL1-R166K SSPGQRSISLK | 460  | 339   |
| >ABL1-R166K SLRYEGRV    | 961   | >ABL1-R166K SLKYEGRV    | 436  | 525   |
| >ABL1-R166K SLRYEGRV    | 77    | >ABL1-R166K SLKYEGRV    | 33   | 44    |
| >ABL1-R166K SLRYEGRV    | 144   | >ABL1-R166K SLKYEGRV    | 308  | 164   |
| >ABL1-R166K SLRYEGRV    | 478   | >ABL1-R166K SLKYEGRV    | 1122 | 644   |
| >ABL1-R166K SLRYEGRV    | 12    | >ABL1-R166K SLKYEGRV    | 15   | 3     |
| >ABL1-R166K SLRYEGRVYH  | 93    | >ABL1-R166K SLKYEGRVYH  | 160  | 67    |
| >ABL1-R166K SLRYEGRVY   | 259   | >ABL1-R166K SLKYEGRVY   | 142  | 117   |
| >ABL1-R166K SLRYEGRVYH  | 100   | >ABL1-R166K SLKYEGRVYH  | 61   | 39    |
| >ABL1-R166K SLRYEGRVYH  | 92    | >ABL1-R166K SLKYEGRVYH  | 85   | 7     |
| >ABL1-R166K SLRYEGRVY   | 52    | >ABL1-R166K SLKYEGRVY   | 52   | 0     |
| >ABL1-R166K SLRYEGRVYH  | 42    | >ABL1-R166K SLKYEGRVYH  | 41   | 1     |
| >ABL1-R166K SLRYEGRVY   | 50    | >ABL1-R166K SLKYEGRVY   | 74   | 24    |
| >ABL1-R166K SLRYEGRVYH  | 192   | >ABL1-R166K SLKYEGRVYH  | 296  | 104   |
| >ABL1-R166K SLRYEGRVY   | 84    | >ABL1-R166K SLKYEGRVY   | 162  | 78    |
| >ABL1-R166K SLRYEGRVYH  | 159   | >ABL1-R166K SLKYEGRVYH  | 343  | 184   |
| >ABL1-R166K SLRYEGRVY   | 330   | >ABL1-R166K SLKYEGRVY   | 823  | 493   |
| >ABL1-R166K ISLRYEGR    | 458   | >ABL1-R166K ISLKYEGR    | 958  | 500   |
| >ABL1-R166K ISLRYEGRV   | 77    | >ABL1-R166K ISLKYEGRV   | 136  | 59    |
| >ABL1-R166K ISLRYEGRVY  | 172   | >ABL1-R166K ISLKYEGRVY  | 146  | 26    |
| >ABL1-R166K ISLRYEGRVY  | 91    | >ABL1-R166K ISLKYEGRVY  | 87   | 4     |
| >ABL1-R166K ISLRYEGR    | 69    | >ABL1-R166K ISLKYEGR    | 116  | 47    |
| >ABL1-R166K ISLRYEGR    | 311   | >ABL1-R166K ISLKYEGR    | 293  | 18    |
| >ABL1-R166K ISLRYEGRVY  | 68    | >ABL1-R166K ISLKYEGRVY  | 66   | 2     |



|                         |       |                         |      |       |
|-------------------------|-------|-------------------------|------|-------|
| >ABL1-R166K ISLRYEGRVY  | 9     | >ABL1-R166K ISLKYEGRVY  | 7    | 2     |
| >ABL1-R166K ISLRYEGRVY  | 168   | >ABL1-R166K ISLKYEGRVY  | 252  | 84    |
| >ABL1-R166K ISLRYEGRV   | 691   | >ABL1-R166K ISLKYEGRV   | 459  | 232   |
| >ABL1-R166K ISLRYEGRVY  | 486   | >ABL1-R166K ISLKYEGRVY  | 1613 | 1127  |
| >ABL1-R166K SISLRYEGRV  | 553   | >ABL1-R166K SISLKYEGRV  | 463  | 90    |
| >ABL1-R166K SISLRYEGRV  | 61    | >ABL1-R166K SISLKYEGRV  | 80   | 19    |
| >ABL1-R166K SISLRYEGR   | 164   | >ABL1-R166K SISLKYEGR   | 266  | 102   |
| >ABL1-R166K SISLRYEGR   | 157   | >ABL1-R166K SISLKYEGR   | 247  | 90    |
| >ABL1-R166K SISLRYEGRVY | 339   | >ABL1-R166K SISLKYEGRVY | 465  | 126   |
| >ABL1-R166K SISLRYEGR   | 476   | >ABL1-R166K SISLKYEGR   | 576  | 100   |
| >ABL1-R166K RSISLRYEGR  | 160   | >ABL1-R166K RSISLKYEGR  | 182  | 22    |
| >ABL1-R166K RSISLRYEGR  | 10    | >ABL1-R166K RSISLKYEGR  | 12   | 2     |
| >ABL1-R166K RSISLRYEGR  | 35    | >ABL1-R166K RSISLKYEGR  | 63   | 28    |
| >ABL1-R166K RSISLRYEGRV | 214   | >ABL1-R166K RSISLKYEGRV | 194  | 20    |
| >ABL1-R166K RSISLRYEGRV | 342   | >ABL1-R166K RSISLKYEGRV | 325  | 17    |
| >ABL1-R166K RSISLRYEGR  | 184   | >ABL1-R166K RSISLKYEGR  | 187  | 3     |
| >ABL1-R166K QRSISLRY    | 406   | >ABL1-R166K QRSISLKY    | 254  | 152   |
| >ABL1-R166K GQRSISLR    | 3395  | >ABL1-R166K GQRSISLK    | 141  | 3254  |
| >ABL1-R166K GQRSISLR    | 8303  | >ABL1-R166K GQRSISLK    | 412  | 7891  |
| >ABL1-R166K GQRSISLRY   | 63    | >ABL1-R166K GQRSISLKY   | 70   | 7     |
| >ABL1-R166K GQRSISLR    | 2371  | >ABL1-R166K GQRSISLK    | 22   | 2349  |
| >ABL1-R166K GQRSISLRY   | 179   | >ABL1-R166K GQRSISLKY   | 185  | 6     |
| >ABL1-R166K GQRSISLR    | 27    | >ABL1-R166K GQRSISLK    | 561  | 534   |
| >ABL1-R166K GQRSISLRY   | 280   | >ABL1-R166K GQRSISLKY   | 683  | 403   |
| >ABL1-R166K GQRSISLRY   | 45    | >ABL1-R166K GQRSISLKY   | 61   | 16    |
| >ABL1-R166K GQRSISLRY   | 411   | >ABL1-R166K GQRSISLKY   | 270  | 141   |
| >ABL1-R166K GQRSISLRY   | 23    | >ABL1-R166K GQRSISLKY   | 14   | 9     |
| >ABL1-R166K GQRSISLRY   | 104   | >ABL1-R166K GQRSISLKY   | 171  | 67    |
| >ABL1-R166K SPGQRSISLRY | 104   | >ABL1-R166K SPGQRSISLKY | 187  | 83    |
| >ABL1-R166K SPGQRSISLRY | 72    | >ABL1-R166K SPGQRSISLKY | 66   | 6     |
| >ABL1-R166K SPGQRSISLRY | 380   | >ABL1-R166K SPGQRSISLKY | 269  | 111   |
| >ABL1-R328M RECNRQEVN.  | 928   | >ABL1-R328M MECNRQEVN   | 196  | 732   |
| >ABL1-R328M RECNRQEV    | 211   | >ABL1-R328M MECNRQEV    | 703  | 492   |
| >ABL1-R328M RECNRQEVN.  | 182   | >ABL1-R328M MECNRQEVN   | 623  | 441   |
| >ABL1-R328M RECNRQEV    | 405   | >ABL1-R328M MECNRQEV    | 914  | 509   |
| >ABL1-R328M RECNRQEVN.  | 303   | >ABL1-R328M MECNRQEVN   | 644  | 341   |
| >ABL1-R328M RECNRQEV    | 298   | >ABL1-R328M MECNRQEV    | 128  | 170   |
| >ABL1-R328M RECNRQEVN.  | 163   | >ABL1-R328M MECNRQEVN   | 61   | 102   |
| >ABL1-R328M RECNRQEVN.  | 25    | >ABL1-R328M MECNRQEVN   | 51   | 26    |
| >ABL1-R328M LRECNRQEV   | 26694 | >ABL1-R328M LMECNRQEV   | 276  | 26418 |
| >ABL1-R328M LRECNRQEV   | 20245 | >ABL1-R328M LMECNRQEV   | 393  | 19852 |
| >ABL1-R328M LRECNRQEV   | 20222 | >ABL1-R328M LMECNRQEV   | 19   | 20203 |
| >ABL1-R328M LRECNRQEV   | 18442 | >ABL1-R328M LMECNRQEV   | 11   | 18431 |

|                        |       |                        |       |       |
|------------------------|-------|------------------------|-------|-------|
| >ABL1-R328M LRECNRQEV  | 23903 | >ABL1-R328M LMECNRQEV  | 492   | 23411 |
| >ABL1-R328M LRECNRQEV  | 14730 | >ABL1-R328M LMECNRQEV  | 3     | 14727 |
| >ABL1-R328M LRECNRQEV  | 33715 | >ABL1-R328M LMECNRQEV  | 174   | 33541 |
| >ABL1-R328M MTYGNLLDYI | 15724 | >ABL1-R328M MTYGNLLDYI | 137   | 15587 |
| >ABL1-R328M MTYGNLLDYI | 19482 | >ABL1-R328M MTYGNLLDYI | 455   | 19027 |
| >ABL1-R328M MTYGNLLDYI | 6946  | >ABL1-R328M MTYGNLLDYI | 205   | 6741  |
| >ABL1-R328M MTYGNLLDYI | 16613 | >ABL1-R328M MTYGNLLDYI | 402   | 16211 |
| >ABL1-R328M MTYGNLLDYI | 14668 | >ABL1-R328M MTYGNLLDYI | 373   | 14295 |
| >ABL1-R328M MTYGNLLDYI | 265   | >ABL1-R328M MTYGNLLDYI | 10783 | 10518 |
| >ABL1-R328M MTYGNLLDYI | 21    | >ABL1-R328M MTYGNLLDYI | 2438  | 2417  |
| >ABL1-R328M MTYGNLLDYI | 14730 | >ABL1-R328M MTYGNLLDYI | 303   | 14427 |
| >ABL1-R328M MTYGNLLDYI | 14572 | >ABL1-R328M MTYGNLLDYI | 118   | 14454 |
| >ABL1-R328M MTYGNLLDYI | 720   | >ABL1-R328M MTYGNLLDYI | 65    | 655   |
| >ABL1-R328M MTYGNLLDYI | 13    | >ABL1-R328M MTYGNLLDYI | 3491  | 3478  |
| >ABL1-R328M MTYGNLLDYI | 3515  | >ABL1-R328M MTYGNLLDYI | 260   | 3255  |
| >ABL1-R328M MTYGNLLDYI | 36    | >ABL1-R328M MTYGNLLDYI | 8190  | 8154  |
| >ABL1-R328M MTYGNLLDYI | 2     | >ABL1-R328M MTYGNLLDYI | 253   | 251   |
| >ABL1-R328M MTYGNLLDYI | 2371  | >ABL1-R328M MTYGNLLDYI | 53    | 2318  |
| >ABL1-R328M MTYGNLLDYI | 12705 | >ABL1-R328M MTYGNLLDYI | 205   | 12500 |
| >ABL1-R328M MTYGNLLDYI | 2684  | >ABL1-R328M MTYGNLLDYI | 6     | 2678  |
| >ABL1-R328M MTYGNLLDYI | 13709 | >ABL1-R328M MTYGNLLDYI | 135   | 13574 |
| >ABL1-R328M MTYGNLLDYI | 10214 | >ABL1-R328M MTYGNLLDYI | 236   | 9978  |
| >ABL1-R328M MTYGNLLDYI | 14791 | >ABL1-R328M MTYGNLLDYI | 43    | 14748 |
| >ABL1-R328M MTYGNLLDYI | 7560  | >ABL1-R328M MTYGNLLDYI | 83    | 7477  |
| >ABL1-R328M MTYGNLLDYI | 3562  | >ABL1-R328M MTYGNLLDYI | 24    | 3538  |
| >ABL1-R328M MTYGNLLDYI | 450   | >ABL1-R328M MTYGNLLDYI | 4508  | 4058  |
| >ABL1-R328M MTYGNLLDYI | 37    | >ABL1-R328M MTYGNLLDYI | 16192 | 16155 |
| >ABL1-R328M MTYGNLLDYI | 33038 | >ABL1-R328M MTYGNLLDYI | 344   | 32694 |
| >ABL1-R328M YLRECNRQ   | 13019 | >ABL1-R328M YLMECNRQ   | 315   | 12704 |
| >ABL1-R328M YLRECNRQEV | 269   | >ABL1-R328M YLMECNRQEV | 10    | 259   |
| >ABL1-R328M YLRECNRQ   | 1652  | >ABL1-R328M YLMECNRQ   | 25    | 1627  |
| >ABL1-R328M YLRECNRQEV | 55    | >ABL1-R328M YLMECNRQEV | 8     | 47    |
| >ABL1-R328M YLRECNRQEV | 52    | >ABL1-R328M YLMECNRQEV | 9     | 43    |
| >ABL1-R328M YLRECNRQEV | 1621  | >ABL1-R328M YLMECNRQEV | 62    | 1559  |
| >ABL1-R328M YLRECNRQ   | 4081  | >ABL1-R328M YLMECNRQ   | 325   | 3756  |
| >ABL1-R328M YLRECNRQEV | 4     | >ABL1-R328M YLMECNRQEV | 2     | 2     |
| >ABL1-R328M YLRECNRQ   | 11412 | >ABL1-R328M YLMECNRQ   | 384   | 11028 |
| >ABL1-R328M YLRECNRQEV | 9     | >ABL1-R328M YLMECNRQEV | 2     | 7     |
| >ABL1-R328M YLRECNRQEV | 16    | >ABL1-R328M YLMECNRQEV | 6     | 10    |
| >ABL1-R328M YLRECNRQEV | 38    | >ABL1-R328M YLMECNRQEV | 2     | 36    |
| >ABL1-R328M YLRECNRQ   | 41    | >ABL1-R328M YLMECNRQ   | 11    | 30    |
| >ABL1-R328M YLRECNRQEV | 2     | >ABL1-R328M YLMECNRQEV | 1     | 1     |
| >ABL1-R328M YLRECNRQEV | 2222  | >ABL1-R328M YLMECNRQEV | 114   | 2108  |

|                        |       |                        |       |       |
|------------------------|-------|------------------------|-------|-------|
| >ABL1-R328MYLRECNRQEV  | 1929  | >ABL1-R328MYLMECNRQE'  | 50    | 1879  |
| >ABL1-R328MYLRECNRQEV  | 280   | >ABL1-R328MYLMECNRQE'  | 229   | 51    |
| >ABL1-R328MDYLRECNR    | 14    | >ABL1-R328MDYLMECNR    | 11    | 3     |
| >ABL1-R328MDYLRECNR    | 80    | >ABL1-R328MDYLMECNR    | 58    | 22    |
| >ABL1-R328MLLDYLREC    | 619   | >ABL1-R328MLLDYLMEC    | 148   | 471   |
| >ABL1-R328MLLDYLREC    | 933   | >ABL1-R328MLLDYLMEC    | 147   | 786   |
| >ABL1-R328MLLDYLRECNR  | 161   | >ABL1-R328MLLDYLMECNF  | 201   | 40    |
| >ABL1-R328MNLDDYLREC   | 2735  | >ABL1-R328MNLDDYLMEC   | 125   | 2610  |
| >ABL1-R328MNLDDYLREC   | 2014  | >ABL1-R328MNLDDYLMEC   | 336   | 1678  |
| >ABL1-R328MNLDDYLREC   | 449   | >ABL1-R328MNLDDYLMEC   | 41    | 408   |
| >ABL1-R328MNLDDYLREC   | 25    | >ABL1-R328MNLDDYLMEC   | 9     | 16    |
| >ABL1-R328MNLDDYLREC   | 210   | >ABL1-R328MNLDDYLMEC   | 19    | 191   |
| >ABL1-R328MNLDDYLREC   | 242   | >ABL1-R328MNLDDYLMEC   | 38    | 204   |
| >ABL1-R328MNLDDYLREC   | 115   | >ABL1-R328MNLDDYLMEC   | 8     | 107   |
| >ABL1-R328MNLDDYLRECN  | 364   | >ABL1-R328MNLDDYLMECN  | 303   | 61    |
| >ABL1-R328MNLDDYLRECN  | 78    | >ABL1-R328MNLDDYLMECN  | 63    | 15    |
| >ABL1-R328MNLDDYLRECN  | 486   | >ABL1-R328MNLDDYLMECN  | 195   | 291   |
| >ABL1-R328MNLDDYLRECN  | 136   | >ABL1-R328MNLDDYLMECN  | 92    | 44    |
| >ABL1-R328MYGNLLDYLR   | 127   | >ABL1-R328MYGNLLDYLM   | 19291 | 19164 |
| >ABL1-R328MYGNLLDYLR   | 161   | >ABL1-R328MYGNLLDYLM   | 30007 | 29846 |
| >ABL1-R328MYGNLLDYLR   | 15695 | >ABL1-R328MYGNLLDYLM   | 155   | 15540 |
| >ABL1-R328MYGNLLDYLR   | 54    | >ABL1-R328MYGNLLDYLM   | 26933 | 26879 |
| >ABL1-R328MTYGNLLDYLR  | 2379  | >ABL1-R328MTYGNLLDYLM  | 130   | 2249  |
| >ABL1-R328MTYGNLLDYLR  | 227   | >ABL1-R328MTYGNLLDYLM  | 26735 | 26508 |
| >ABL1-R328MTYGNLLDYLR  | 480   | >ABL1-R328MTYGNLLDYLM  | 29036 | 28556 |
| >ABL1-R328MTYGNLLDYLR  | 433   | >ABL1-R328MTYGNLLDYLM  | 35595 | 35162 |
| >ABL1-R328MTYGNLLDYLR  | 17    | >ABL1-R328MTYGNLLDYLM  | 6008  | 5991  |
| >ABL1-R328MTYGNLLDYLR  | 6178  | >ABL1-R328MTYGNLLDYLM  | 196   | 5982  |
| >ABL1-R732\$RSVTLPRDL  | 17    | >ABL1-R732\$SSVTLPRDL  | 567   | 550   |
| >ABL1-R732\$WRSVTLPR   | 5151  | >ABL1-R732\$WSSVTLPR   | 135   | 5016  |
| >ABL1-R732\$WRSVTLPRDI | 26555 | >ABL1-R732\$WSSVTLPRDI | 233   | 26322 |
| >ABL1-R732\$WRSVTLPR   | 110   | >ABL1-R732\$WSSVTLPR   | 13930 | 13820 |
| >ABL1-R732\$WRSVTLPRDI | 38    | >ABL1-R732\$WSSVTLPRDI | 16808 | 16770 |
| >ABL1-R732\$WRSVTLPRDI | 446   | >ABL1-R732\$WSSVTLPRDI | 7829  | 7383  |
| >ABL1-R732\$WRSVTLPRDI | 5248  | >ABL1-R732\$WSSVTLPRDI | 50    | 5198  |
| >ABL1-R732\$WRSVTLPRDI | 112   | >ABL1-R732\$WSSVTLPRDI | 14030 | 13918 |
| >ABL1-R732\$WRSVTLPRDI | 67    | >ABL1-R732\$WSSVTLPRDI | 10518 | 10451 |
| >ABL1-R732\$WRSVTLPR   | 454   | >ABL1-R732\$WSSVTLPR   | 722   | 268   |
| >ABL1-R732\$EWRVTLPR   | 471   | >ABL1-R732\$EWSSVTLPR  | 1499  | 1028  |
| >ABL1-R732\$EWRVTLPR   | 85    | >ABL1-R732\$EWSSVTLPR  | 246   | 161   |
| >ABL1-R732\$EWRVTLPR   | 613   | >ABL1-R732\$EWSSVTLPR  | 90    | 523   |
| >ABL1-R732\$EWRVTLPR   | 15    | >ABL1-R732\$EWSSVTLPR  | 12    | 3     |
| >ABL1-R732\$EWRVTLPRC  | 387   | >ABL1-R732\$EWSSVTLPRC | 303   | 84    |

|                        |      |                        |       |       |
|------------------------|------|------------------------|-------|-------|
| >ABL1-R732S TEWRSVTL   | 52   | >ABL1-R732S TEWSSVTL   | 63    | 11    |
| >ABL1-R732S TEWRSVTL   | 562  | >ABL1-R732S TEWSSVTL   | 240   | 322   |
| >ABL1-R732S TEWRSVTL   | 177  | >ABL1-R732S TEWSSVTL   | 98    | 79    |
| >ABL1-R732S TEWRSVTL   | 862  | >ABL1-R732S TEWSSVTL   | 205   | 657   |
| >ABL1-R732S TEWRSVTL   | 98   | >ABL1-R732S TEWSSVTL   | 40    | 58    |
| >ABL1-R732S TEWRSVTL   | 151  | >ABL1-R732S TEWSSVTL   | 133   | 18    |
| >ABL1-R732S TEWRSVTLPR | 501  | >ABL1-R732S TEWSSVTLPR | 362   | 139   |
| >ABL1-R732S TEWRSVTL   | 944  | >ABL1-R732S TEWSSVTL   | 465   | 479   |
| >ABL1-R732S TEWRSVTLPR | 82   | >ABL1-R732S TEWSSVTLPR | 63    | 19    |
| >ABL1-R732S DTEWRSVTL  | 317  | >ABL1-R732S DTEWSSVTL  | 515   | 198   |
| >ABL1-R732S DTEWRSVTLF | 19   | >ABL1-R732S DTEWSSVTLF | 35    | 16    |
| >ABL1-R732S DTEWRSVTLF | 12   | >ABL1-R732S DTEWSSVTLF | 7     | 5     |
| >ABL1-R732S DTEWRSVTL  | 1133 | >ABL1-R732S DTEWSSVTL  | 255   | 878   |
| >ABL1-R732S DTEWRSVTL  | 477  | >ABL1-R732S DTEWSSVTL  | 117   | 360   |
| >ABL1-R732S DTEWRSVTLF | 481  | >ABL1-R732S DTEWSSVTLF | 656   | 175   |
| >ABL1-R732S KDTEWRSV   | 660  | >ABL1-R732S KDTEWSSV   | 229   | 431   |
| >ABL1-R732S KDTEWRSVTI | 1124 | >ABL1-R732S KDTEWSSVTI | 435   | 689   |
| >ABL1-R732S AKDTEWRSV  | 1034 | >ABL1-R732S AKDTEWSSV  | 357   | 677   |
| >ABL1-R732S AKDTEWRSV  | 175  | >ABL1-R732S AKDTEWSSV  | 70    | 105   |
| >ABL1-R732S GAKDTEWRS  | 1153 | >ABL1-R732S GAKDTEWSS  | 355   | 798   |
| >ABL1-R732S GAKDTEWRS  | 673  | >ABL1-R732S GAKDTEWSS  | 159   | 514   |
| >ABL1-R732S GAKDTEWR   | 171  | >ABL1-R732S GAKDTEWS   | 21076 | 20905 |
| >ABL1-R732S GAKDTEWR   | 359  | >ABL1-R732S GAKDTEWS   | 32477 | 32118 |
| >ABL1-R732S HGAKDTEWR  | 140  | >ABL1-R732S HGAKDTEWS  | 27667 | 27527 |
| >ABL1-R732S HGAKDTEWR  | 1749 | >ABL1-R732S HGAKDTEWS  | 471   | 1278  |
| >ABL1-R732S HGAKDTEWR  | 132  | >ABL1-R732S HGAKDTEWS  | 32057 | 31925 |
| >ABL1-S417Y SIKSDVWAF  | 182  | >ABL1-S417Y YIKSDVWAF  | 31    | 151   |
| >ABL1-S417Y SIKSDVWA   | 3020 | >ABL1-S417Y YIKSDVWA   | 481   | 2539  |
| >ABL1-S417Y SIKSDVWAF  | 167  | >ABL1-S417Y YIKSDVWAF  | 28    | 139   |
| >ABL1-S417Y SIKSDVWA   | 350  | >ABL1-S417Y YIKSDVWA   | 45    | 305   |
| >ABL1-S417Y SIKSDVWAF  | 13   | >ABL1-S417Y YIKSDVWAF  | 4     | 9     |
| >ABL1-S417Y SIKSDVWAF  | 1578 | >ABL1-S417Y YIKSDVWAF  | 134   | 1444  |
| >ABL1-S417Y SIKSDVWAF  | 23   | >ABL1-S417Y YIKSDVWAF  | 7     | 16    |
| >ABL1-S417Y SIKSDVWAF  | 25   | >ABL1-S417Y YIKSDVWAF  | 5     | 20    |
| >ABL1-S417Y SIKSDVWAF  | 68   | >ABL1-S417Y YIKSDVWAF  | 9     | 59    |
| >ABL1-S417Y SIKSDVWAF  | 52   | >ABL1-S417Y YIKSDVWAF  | 20    | 32    |
| >ABL1-S417Y SIKSDVWAF  | 312  | >ABL1-S417Y YIKSDVWAF  | 6     | 306   |
| >ABL1-S417Y SIKSDVWA   | 867  | >ABL1-S417Y YIKSDVWA   | 70    | 797   |
| >ABL1-S417Y SIKSDVWAF  | 4    | >ABL1-S417Y YIKSDVWAF  | 2     | 2     |
| >ABL1-S417Y SIKSDVWAF  | 1516 | >ABL1-S417Y YIKSDVWAF  | 254   | 1262  |
| >ABL1-S417Y SIKSDVWAF  | 38   | >ABL1-S417Y YIKSDVWAF  | 24    | 14    |
| >ABL1-S417Y SIKSDVWAF  | 444  | >ABL1-S417Y YIKSDVWAF  | 250   | 194   |
| >ABL1-S417Y SIKSDVWAF  | 93   | >ABL1-S417Y YIKSDVWAF  | 34    | 59    |

|                         |       |                         |       |       |
|-------------------------|-------|-------------------------|-------|-------|
| >ABL1-S417Y SIKSDVWAF   | 652   | >ABL1-S417Y YIKSDVWAF   | 236   | 416   |
| >ABL1-S417Y SIKSDVWAF   | 107   | >ABL1-S417Y YIKSDVWAF   | 52    | 55    |
| >ABL1-S417Y SIKSDVWAF   | 1804  | >ABL1-S417Y YIKSDVWAF   | 421   | 1383  |
| >ABL1-S417Y SIKSDVWAF   | 69    | >ABL1-S417Y YIKSDVWAF   | 12    | 57    |
| >ABL1-S417Y SIKSDVWAF   | 3970  | >ABL1-S417Y YIKSDVWAF   | 378   | 3592  |
| >ABL1-S417Y FSIKSDVW    | 7438  | >ABL1-S417Y FYIKSDVW    | 64    | 7374  |
| >ABL1-S417Y FSIKSDVWAF  | 1744  | >ABL1-S417Y FYIKSDVWAF  | 12    | 1732  |
| >ABL1-S417Y FSIKSDVW    | 14085 | >ABL1-S417Y FYIKSDVW    | 443   | 13642 |
| >ABL1-S417Y FSIKSDVWAF  | 3155  | >ABL1-S417Y FYIKSDVWAF  | 39    | 3116  |
| >ABL1-S417Y FSIKSDVW    | 10437 | >ABL1-S417Y FYIKSDVW    | 9     | 10428 |
| >ABL1-S417Y FSIKSDVWA   | 23082 | >ABL1-S417Y FYIKSDVWA   | 462   | 22620 |
| >ABL1-S417Y FSIKSDVWAF  | 196   | >ABL1-S417Y FYIKSDVWAF  | 4     | 192   |
| >ABL1-S417Y FSIKSDVWAF  | 25    | >ABL1-S417Y FYIKSDVWAF  | 130   | 105   |
| >ABL1-S417Y FSIKSDVWAF  | 352   | >ABL1-S417Y FYIKSDVWAF  | 43    | 309   |
| >ABL1-S417Y FSIKSDVWA   | 485   | >ABL1-S417Y FYIKSDVWA   | 8284  | 7799  |
| >ABL1-S417Y FSIKSDVWAF  | 63    | >ABL1-S417Y FYIKSDVWAF  | 2791  | 2728  |
| >ABL1-S417Y FSIKSDVWAF  | 6     | >ABL1-S417Y FYIKSDVWAF  | 37    | 31    |
| >ABL1-S417Y FSIKSDVW    | 6     | >ABL1-S417Y FYIKSDVW    | 3166  | 3160  |
| >ABL1-S417Y FSIKSDVWAF  | 6     | >ABL1-S417Y FYIKSDVWAF  | 14169 | 14163 |
| >ABL1-S417Y FSIKSDVWAF  | 301   | >ABL1-S417Y FYIKSDVWAF  | 3518  | 3217  |
| >ABL1-S417Y FSIKSDVW    | 208   | >ABL1-S417Y FYIKSDVW    | 1223  | 1015  |
| >ABL1-S417Y FSIKSDVW    | 76    | >ABL1-S417Y FYIKSDVW    | 17045 | 16969 |
| >ABL1-S417Y FSIKSDVW    | 10    | >ABL1-S417Y FYIKSDVW    | 1559  | 1549  |
| >ABL1-S417Y FSIKSDVWAF  | 35    | >ABL1-S417Y FYIKSDVWAF  | 12624 | 12589 |
| >ABL1-S417Y FSIKSDVW    | 166   | >ABL1-S417Y FYIKSDVW    | 15167 | 15001 |
| >ABL1-S417Y FSIKSDVW    | 34    | >ABL1-S417Y FYIKSDVW    | 96    | 62    |
| >ABL1-S417Y FSIKSDVWAF  | 382   | >ABL1-S417Y FYIKSDVWAF  | 1205  | 823   |
| >ABL1-S417Y FSIKSDVW    | 179   | >ABL1-S417Y FYIKSDVW    | 722   | 543   |
| >ABL1-S417Y APESLAYNKF: | 13117 | >ABL1-S417Y APESLAYNKF' | 282   | 12835 |
| >ABL1-S417Y APESLAYNKF: | 22885 | >ABL1-S417Y APESLAYNKF' | 494   | 22391 |
| >ABL1-S417Y APESLAYNKF: | 23649 | >ABL1-S417Y APESLAYNKF' | 80    | 23569 |
| >ABL1-S417Y APESLAYNKF: | 19129 | >ABL1-S417Y APESLAYNKF' | 469   | 18660 |
| >ABL1-S417Y KFSIKSDVWA  | 304   | >ABL1-S417Y KFYIKSDVWA  | 42    | 262   |
| >ABL1-S417Y KFSIKSDVWA  | 346   | >ABL1-S417Y KFYIKSDVWA  | 276   | 70    |
| >ABL1-S417Y KFSIKSDVW   | 599   | >ABL1-S417Y KFYIKSDVW   | 383   | 216   |
| >ABL1-S417Y KFSIKSDVWA  | 16    | >ABL1-S417Y KFYIKSDVWA  | 14    | 2     |
| >ABL1-S417Y KFSIKSDVWA  | 878   | >ABL1-S417Y KFYIKSDVWA  | 88    | 790   |
| >ABL1-S417Y KFSIKSDVWA  | 1366  | >ABL1-S417Y KFYIKSDVWA  | 307   | 1059  |
| >ABL1-S417Y KFSIKSDVW   | 145   | >ABL1-S417Y KFYIKSDVW   | 85    | 60    |
| >ABL1-S417Y KFSIKSDV    | 401   | >ABL1-S417Y KFYIKSDV    | 371   | 30    |
| >ABL1-S417Y KFSIKSDVWA  | 942   | >ABL1-S417Y KFYIKSDVWA  | 160   | 782   |
| >ABL1-S417Y KFSIKSDVWA  | 183   | >ABL1-S417Y KFYIKSDVWA  | 188   | 5     |
| >ABL1-S417Y NKFSIKSDV   | 159   | >ABL1-S417Y NKFYIKSDV   | 186   | 27    |

|                         |       |                         |      |       |
|-------------------------|-------|-------------------------|------|-------|
| >ABL1-S417Y NKFSIKSDVW  | 443   | >ABL1-S417Y NKFYIKSDVW  | 516  | 73    |
| >ABL1-S417Y AYNKFSIKSD\ | 431   | >ABL1-S417Y AYNKFYIKSD\ | 566  | 135   |
| >ABL1-S417Y AYNKFSIK    | 226   | >ABL1-S417Y AYNKFYIK    | 88   | 138   |
| >ABL1-S417Y AYNKFSIK    | 24    | >ABL1-S417Y AYNKFYIK    | 24   | 0     |
| >ABL1-S417Y AYNKFSIK    | 232   | >ABL1-S417Y AYNKFYIK    | 42   | 190   |
| >ABL1-S417Y AYNKFSIK    | 616   | >ABL1-S417Y AYNKFYIK    | 209  | 407   |
| >ABL1-S417Y AYNKFSIK    | 1255  | >ABL1-S417Y AYNKFYIK    | 156  | 1099  |
| >ABL1-S417Y LAYNKFSI    | 147   | >ABL1-S417Y LAYNKFYI    | 51   | 96    |
| >ABL1-S417Y LAYNKFSI    | 298   | >ABL1-S417Y LAYNKFYI    | 46   | 252   |
| >ABL1-S417Y LAYNKFSIK   | 62    | >ABL1-S417Y LAYNKFYIK   | 121  | 59    |
| >ABL1-S417Y LAYNKFSIK   | 56    | >ABL1-S417Y LAYNKFYIK   | 20   | 36    |
| >ABL1-S417Y LAYNKFSIK   | 267   | >ABL1-S417Y LAYNKFYIK   | 30   | 237   |
| >ABL1-S417Y LAYNKFSIK   | 107   | >ABL1-S417Y LAYNKFYIK   | 65   | 42    |
| >ABL1-S417Y LAYNKFSI    | 1421  | >ABL1-S417Y LAYNKFYI    | 381  | 1040  |
| >ABL1-S417Y LAYNKFSI    | 1191  | >ABL1-S417Y LAYNKFYI    | 407  | 784   |
| >ABL1-S417Y LAYNKFSI    | 435   | >ABL1-S417Y LAYNKFYI    | 1335 | 900   |
| >ABL1-S417Y LAYNKFSI    | 363   | >ABL1-S417Y LAYNKFYI    | 895  | 532   |
| >ABL1-S417Y LAYNKFSI    | 229   | >ABL1-S417Y LAYNKFYI    | 464  | 235   |
| >ABL1-S417Y LAYNKFSI    | 375   | >ABL1-S417Y LAYNKFYI    | 393  | 18    |
| >ABL1-S417Y LAYNKFSI    | 357   | >ABL1-S417Y LAYNKFYI    | 224  | 133   |
| >ABL1-S417Y LAYNKFSI    | 927   | >ABL1-S417Y LAYNKFYI    | 300  | 627   |
| >ABL1-S417Y LAYNKFSIK   | 651   | >ABL1-S417Y LAYNKFYIK   | 181  | 470   |
| >ABL1-S417Y LAYNKFSI    | 21    | >ABL1-S417Y LAYNKFYI    | 32   | 11    |
| >ABL1-S417Y SLAYNKFSI   | 4376  | >ABL1-S417Y SLAYNKFYI   | 408  | 3968  |
| >ABL1-S417Y SLAYNKFSI   | 71    | >ABL1-S417Y SLAYNKFYI   | 28   | 43    |
| >ABL1-S417Y SLAYNKFSI   | 20    | >ABL1-S417Y SLAYNKFYI   | 7    | 13    |
| >ABL1-S417Y SLAYNKFSI   | 89    | >ABL1-S417Y SLAYNKFYI   | 91   | 2     |
| >ABL1-S417Y SLAYNKFSI   | 382   | >ABL1-S417Y SLAYNKFYI   | 165  | 217   |
| >ABL1-S417Y SLAYNKFSI   | 25    | >ABL1-S417Y SLAYNKFYI   | 6    | 19    |
| >ABL1-S417Y SLAYNKFSI   | 21    | >ABL1-S417Y SLAYNKFYI   | 10   | 11    |
| >ABL1-S417Y SLAYNKFSI   | 27    | >ABL1-S417Y SLAYNKFYI   | 11   | 16    |
| >ABL1-S417Y SLAYNKFSI   | 135   | >ABL1-S417Y SLAYNKFYI   | 29   | 106   |
| >ABL1-S417Y SLAYNKFSI   | 9     | >ABL1-S417Y SLAYNKFYI   | 9    | 0     |
| >ABL1-S417Y SLAYNKFSIK  | 17    | >ABL1-S417Y SLAYNKFYIK  | 22   | 5     |
| >ABL1-S417Y SLAYNKFSIK  | 41    | >ABL1-S417Y SLAYNKFYIK  | 17   | 24    |
| >ABL1-S417Y SLAYNKFS    | 18861 | >ABL1-S417Y SLAYNKFY    | 37   | 18824 |
| >ABL1-S417Y SLAYNKFS    | 14729 | >ABL1-S417Y SLAYNKFY    | 26   | 14703 |
| >ABL1-S417Y SLAYNKFSI   | 134   | >ABL1-S417Y SLAYNKFYI   | 1939 | 1805  |
| >ABL1-S417Y SLAYNKFSIK  | 660   | >ABL1-S417Y SLAYNKFYIK  | 359  | 301   |
| >ABL1-S417Y SLAYNKFSI   | 196   | >ABL1-S417Y SLAYNKFYI   | 49   | 147   |
| >ABL1-S417Y SLAYNKFSI   | 1018  | >ABL1-S417Y SLAYNKFYI   | 281  | 737   |
| >ABL1-S417Y SLAYNKFS    | 23137 | >ABL1-S417Y SLAYNKFY    | 64   | 23073 |
| >ABL1-S417Y SLAYNKFS    | 17076 | >ABL1-S417Y SLAYNKFY    | 251  | 16825 |

|                         |       |                         |       |       |
|-------------------------|-------|-------------------------|-------|-------|
| >ABL1-S417Y SLAYNKFS    | 21475 | >ABL1-S417Y SLAYNKFY    | 145   | 21330 |
| >ABL1-S417Y SLAYNKFS    | 32224 | >ABL1-S417Y SLAYNKFY    | 362   | 31862 |
| >ABL1-S417Y SLAYNKFSIK  | 1158  | >ABL1-S417Y SLAYNKFYIK  | 425   | 733   |
| >ABL1-S417Y SLAYNKFSIK  | 815   | >ABL1-S417Y SLAYNKFYIK  | 240   | 575   |
| >ABL1-S417Y ESLAYNKFSIK | 320   | >ABL1-S417Y ESLAYNKFYIK | 148   | 172   |
| >ABL1-S417Y ESLAYNKFS   | 11886 | >ABL1-S417Y ESLAYNKFY   | 13    | 11873 |
| >ABL1-S417Y ESLAYNKFS   | 20348 | >ABL1-S417Y ESLAYNKFY   | 58    | 20290 |
| >ABL1-S417Y ESLAYNKFSIK | 57    | >ABL1-S417Y ESLAYNKFYIK | 57    | 0     |
| >ABL1-S417Y ESLAYNKFSI  | 156   | >ABL1-S417Y ESLAYNKFYI  | 60    | 96    |
| >ABL1-S417Y ESLAYNKFSI  | 33    | >ABL1-S417Y ESLAYNKFYI  | 19    | 14    |
| >ABL1-S417Y ESLAYNKFS   | 18896 | >ABL1-S417Y ESLAYNKFY   | 425   | 18471 |
| >ABL1-S417Y ESLAYNKFS   | 12284 | >ABL1-S417Y ESLAYNKFY   | 16    | 12268 |
| >ABL1-S417Y ESLAYNKFSIK | 738   | >ABL1-S417Y ESLAYNKFYIK | 346   | 392   |
| >ABL1-S417Y ESLAYNKFSI  | 281   | >ABL1-S417Y ESLAYNKFYI  | 826   | 545   |
| >ABL1-S417Y PESLAYNKFSI | 43    | >ABL1-S417Y PESLAYNKFYI | 32    | 11    |
| >ABL1-S417Y PESLAYNKFSI | 249   | >ABL1-S417Y PESLAYNKFYI | 321   | 72    |
| >ABL1-T315I·TEFMTYGNL   | 491   | >ABL1-T315I·IEFMTYGNL   | 233   | 258   |
| >ABL1-T315I·TEFMTYGNL   | 36    | >ABL1-T315I·IEFMTYGNL   | 27    | 9     |
| >ABL1-T315I·TEFMTYGNLI  | 13    | >ABL1-T315I·IEFMTYGNLI  | 13    | 0     |
| >ABL1-T315I·TEFMTYGNL   | 1780  | >ABL1-T315I·IEFMTYGNL   | 306   | 1474  |
| >ABL1-T315I·TEFMTYGNLI  | 1122  | >ABL1-T315I·IEFMTYGNLI  | 168   | 954   |
| >ABL1-T315I·TEFMTYGNL   | 378   | >ABL1-T315I·IEFMTYGNL   | 216   | 162   |
| >ABL1-T315I·TEFMTYGNLI  | 396   | >ABL1-T315I·IEFMTYGNLI  | 4155  | 3759  |
| >ABL1-T315I·TEFMTYGNL   | 13    | >ABL1-T315I·IEFMTYGNL   | 11    | 2     |
| >ABL1-T315I·TEFMTYGNLI  | 202   | >ABL1-T315I·IEFMTYGNLI  | 131   | 71    |
| >ABL1-T315I·TEFMTYGNL   | 103   | >ABL1-T315I·IEFMTYGNL   | 164   | 61    |
| >ABL1-T315I·TEFMTYGNLI  | 278   | >ABL1-T315I·IEFMTYGNLI  | 255   | 23    |
| >ABL1-T315I·TEFMTYGNLI  | 381   | >ABL1-T315I·IEFMTYGNLI  | 522   | 141   |
| >ABL1-T315I·TEFMTYGNL   | 120   | >ABL1-T315I·IEFMTYGNL   | 42    | 78    |
| >ABL1-T315I·TEFMTYGNLI  | 11    | >ABL1-T315I·IEFMTYGNLI  | 14    | 3     |
| >ABL1-T315I·ITEFMTYGNL  | 616   | >ABL1-T315I·IIEFMTYGNLI | 152   | 464   |
| >ABL1-T315I·ITEFMTYGNL  | 434   | >ABL1-T315I·IIEFMTYGNL  | 2946  | 2512  |
| >ABL1-T315I·ITEFMTYGNL  | 458   | >ABL1-T315I·IIEFMTYGNL  | 2745  | 2287  |
| >ABL1-T315I·ITEFMTYGNL  | 54    | >ABL1-T315I·IIEFMTYGNL  | 11105 | 11051 |
| >ABL1-T315I·ITEFMTYGNL  | 175   | >ABL1-T315I·IIEFMTYGNLI | 13180 | 13005 |
| >ABL1-T315I·ITEFMTYGNL  | 324   | >ABL1-T315I·IIEFMTYGNL  | 14621 | 14297 |
| >ABL1-T315I·ITEFMTYGNL  | 31    | >ABL1-T315I·IIEFMTYGNLI | 3466  | 3435  |
| >ABL1-T315I·ITEFMTYGNL  | 257   | >ABL1-T315I·IIEFMTYGNL  | 11904 | 11647 |
| >ABL1-T315I·ITEFMTYGNL  | 31    | >ABL1-T315I·IIEFMTYGNLI | 1286  | 1255  |
| >ABL1-T315I·CTREPPFYIIT | 363   | >ABL1-T315I·CTREPPFYIII | 19    | 344   |
| >ABL1-T315I·CTREPPFYIIT | 15171 | >ABL1-T315I·CTREPPFYIII | 11    | 15160 |
| >ABL1-T315I·IITEFMTY    | 4229  | >ABL1-T315I·IIIEFMTY    | 452   | 3777  |
| >ABL1-T315I·IITEFMTYGNL | 144   | >ABL1-T315I·IIIEFMTYGNL | 33    | 111   |

|                         |      |                         |      |      |
|-------------------------|------|-------------------------|------|------|
| >ABL1-T315I·IITEFMTYGNI | 997  | >ABL1-T315I·IIIEFMTYGNI | 260  | 737  |
| >ABL1-T315I·IITEFMTYG   | 869  | >ABL1-T315I·IIIEFMTYG   | 323  | 546  |
| >ABL1-T315I·IITEFMTYGNI | 118  | >ABL1-T315I·IIIEFMTYGNI | 66   | 52   |
| >ABL1-T315I·IITEFMTYGNI | 138  | >ABL1-T315I·IIIEFMTYGNI | 27   | 111  |
| >ABL1-T315I·IITEFMTYG   | 1618 | >ABL1-T315I·IIIEFMTYG   | 350  | 1268 |
| >ABL1-T315I·IITEFMTYGNI | 388  | >ABL1-T315I·IIIEFMTYGNI | 92   | 296  |
| >ABL1-T315I·IITEFMTYGNI | 366  | >ABL1-T315I·IIIEFMTYGNI | 110  | 256  |
| >ABL1-T315I·IITEFMTYGNI | 155  | >ABL1-T315I·IIIEFMTYGNI | 209  | 54   |
| >ABL1-T315I·IITEFMTY    | 1364 | >ABL1-T315I·IIIEFMTY    | 298  | 1066 |
| >ABL1-T315I·IITEFMTY    | 633  | >ABL1-T315I·IIIEFMTY    | 215  | 418  |
| >ABL1-T315I·IITEFMTY    | 577  | >ABL1-T315I·IIIEFMTY    | 40   | 537  |
| >ABL1-T315I·IITEFMTYGNI | 4492 | >ABL1-T315I·IIIEFMTYGNI | 249  | 4243 |
| >ABL1-T315I·IITEFMTY    | 4865 | >ABL1-T315I·IIIEFMTY    | 333  | 4532 |
| >ABL1-T315I·IITEFMTY    | 69   | >ABL1-T315I·IIIEFMTY    | 20   | 49   |
| >ABL1-T315I·IITEFMTY    | 133  | >ABL1-T315I·IIIEFMTY    | 132  | 1    |
| >ABL1-T315I·IITEFMTYGNI | 1266 | >ABL1-T315I·IIIEFMTYGNI | 331  | 935  |
| >ABL1-T315I·IITEFMTY    | 41   | >ABL1-T315I·IIIEFMTY    | 42   | 1    |
| >ABL1-T315I·IITEFMTY    | 1433 | >ABL1-T315I·IIIEFMTY    | 116  | 1317 |
| >ABL1-T315I·IITEFMTY    | 375  | >ABL1-T315I·IIIEFMTY    | 115  | 260  |
| >ABL1-T315I·IITEFMTY    | 409  | >ABL1-T315I·IIIEFMTY    | 83   | 326  |
| >ABL1-T315I·IITEFMTY    | 401  | >ABL1-T315I·IIIEFMTY    | 277  | 124  |
| >ABL1-T315I·IITEFMTY    | 121  | >ABL1-T315I·IIIEFMTY    | 48   | 73   |
| >ABL1-T315I·YIITEFMT    | 393  | >ABL1-T315I·YIIIEFMT    | 661  | 268  |
| >ABL1-T315I·YIITEFMT    | 62   | >ABL1-T315I·YIIIEFMT    | 115  | 53   |
| >ABL1-T315I·YIITEFMTYG  | 520  | >ABL1-T315I·YIIIEFMTYG  | 456  | 64   |
| >ABL1-T315I·YIITEFMTY   | 74   | >ABL1-T315I·YIIIEFMTY   | 47   | 27   |
| >ABL1-T315I·YIITEFMTY   | 44   | >ABL1-T315I·YIIIEFMTY   | 90   | 46   |
| >ABL1-T315I·YIITEFMTY   | 8    | >ABL1-T315I·YIIIEFMTY   | 70   | 62   |
| >ABL1-T315I·YIITEFMTY   | 456  | >ABL1-T315I·YIIIEFMTY   | 1899 | 1443 |
| >ABL1-T315I·YIITEFMTY   | 9    | >ABL1-T315I·YIIIEFMTY   | 8    | 1    |
| >ABL1-T315I·YIITEFMTY   | 348  | >ABL1-T315I·YIIIEFMTY   | 544  | 196  |
| >ABL1-T315I·YIITEFMTY   | 16   | >ABL1-T315I·YIIIEFMTY   | 14   | 2    |
| >ABL1-T315I·YIITEFMTY   | 52   | >ABL1-T315I·YIIIEFMTY   | 58   | 6    |
| >ABL1-T315I·YIITEFMTY   | 22   | >ABL1-T315I·YIIIEFMTY   | 72   | 50   |
| >ABL1-T315I·YIITEFMTY   | 433  | >ABL1-T315I·YIIIEFMTY   | 104  | 329  |
| >ABL1-T315I·YIITEFMTY   | 91   | >ABL1-T315I·YIIIEFMTY   | 126  | 35   |
| >ABL1-T315I·YIITEFMTY   | 241  | >ABL1-T315I·YIIIEFMTY   | 445  | 204  |
| >ABL1-T315I·YIITEFMTY   | 51   | >ABL1-T315I·YIIIEFMTY   | 53   | 2    |
| >ABL1-T315I·FYIITEFM    | 84   | >ABL1-T315I·FYIIIEFM    | 94   | 10   |
| >ABL1-T315I·FYIITEFMTY  | 435  | >ABL1-T315I·FYIIIEFMTY  | 839  | 404  |
| >ABL1-T315I·FYIITEFM    | 412  | >ABL1-T315I·FYIIIEFM    | 164  | 248  |
| >ABL1-T315I·FYIITEFM    | 251  | >ABL1-T315I·FYIIIEFM    | 219  | 32   |
| >ABL1-T315I·FYIITEFM    | 22   | >ABL1-T315I·FYIIIEFM    | 21   | 1    |



|                         |       |                         |      |       |
|-------------------------|-------|-------------------------|------|-------|
| >ABL1-T315I·FYIITEFMT   | 203   | >ABL1-T315I·FYIIIEFMT   | 153  | 50    |
| >ABL1-T315I·FYIITEFMTY  | 32    | >ABL1-T315I·FYIIIEFMTY  | 30   | 2     |
| >ABL1-T315I·FYIITEFMTY  | 550   | >ABL1-T315I·FYIIIEFMTY  | 493  | 57    |
| >ABL1-T315I·FYIITEFMTY  | 655   | >ABL1-T315I·FYIIIEFMTY  | 470  | 185   |
| >ABL1-T315I·FYIITEFM    | 660   | >ABL1-T315I·FYIIIEFM    | 456  | 204   |
| >ABL1-T315I·FYIITEFMTY  | 23    | >ABL1-T315I·FYIIIEFMTY  | 25   | 2     |
| >ABL1-T315I·FYIITEFMTY  | 124   | >ABL1-T315I·FYIIIEFMTY  | 103  | 21    |
| >ABL1-T315I·FYIITEFMTY  | 114   | >ABL1-T315I·FYIIIEFMTY  | 39   | 75    |
| >ABL1-T315I·FYIITEFMTY  | 308   | >ABL1-T315I·FYIIIEFMTY  | 767  | 459   |
| >ABL1-T315I·PFYIITEF    | 48    | >ABL1-T315I·PFYIIIEF    | 44   | 4     |
| >ABL1-T315I·PFYIITEF    | 105   | >ABL1-T315I·PFYIIIEF    | 71   | 34    |
| >ABL1-T315I·PFYIITEFMTY | 11    | >ABL1-T315I·PFYIIIEFMTY | 14   | 3     |
| >ABL1-T315I·PFYIITEFMTY | 339   | >ABL1-T315I·PFYIIIEFMTY | 994  | 655   |
| >ABL1-T315I·PPFYIITEF   | 19    | >ABL1-T315I·PPFYIIIEF   | 10   | 9     |
| >ABL1-T315I·PPFYIITEFM  | 13    | >ABL1-T315I·PPFYIIIEFM  | 8    | 5     |
| >ABL1-T315I·PPFYIITEF   | 290   | >ABL1-T315I·PPFYIIIEF   | 494  | 204   |
| >ABL1-T315I·PPFYIITEF   | 110   | >ABL1-T315I·PPFYIIIEF   | 66   | 44    |
| >ABL1-T315I·PPFYIITEF   | 161   | >ABL1-T315I·PPFYIIIEF   | 165  | 4     |
| >ABL1-T315I·PPFYIITEF   | 114   | >ABL1-T315I·PPFYIIIEF   | 102  | 12    |
| >ABL1-T315I·PPFYIITEF   | 48    | >ABL1-T315I·PPFYIIIEF   | 26   | 22    |
| >ABL1-T315I·EPPFYIITEF  | 447   | >ABL1-T315I·EPPFYIIIEF  | 285  | 162   |
| >ABL1-T315I·EPPFYIITEFM | 438   | >ABL1-T315I·EPPFYIIIEFM | 280  | 158   |
| >ABL1-T315I·EPPFYIITEFM | 419   | >ABL1-T315I·EPPFYIIIEFM | 888  | 469   |
| >ABL1-T315I·EPPFYIIT    | 13052 | >ABL1-T315I·EPPFYIII    | 449  | 12603 |
| >ABL1-T315I·EPPFYIITEFM | 513   | >ABL1-T315I·EPPFYIIIEFM | 231  | 282   |
| >ABL1-T315I·EPPFYIITEF  | 399   | >ABL1-T315I·EPPFYIIIEF  | 279  | 120   |
| >ABL1-T315I·REPPFYIIT   | 12066 | >ABL1-T315I·REPPFYIII   | 42   | 12024 |
| >ABL1-T315I·REPPFYIITEF | 117   | >ABL1-T315I·REPPFYIIIEF | 69   | 48    |
| >ABL1-T315I·REPPFYIITEF | 64    | >ABL1-T315I·REPPFYIIIEF | 91   | 27    |
| >ABL1-T315I·REPPFYIITEF | 414   | >ABL1-T315I·REPPFYIIIEF | 284  | 130   |
| >ABL1-T315I·REPPFYIIT   | 4849  | >ABL1-T315I·REPPFYIII   | 42   | 4807  |
| >ABL1-T315I·REPPFYIITEF | 811   | >ABL1-T315I·REPPFYIIIEF | 305  | 506   |
| >ABL1-T315I·REPPFYIIT   | 399   | >ABL1-T315I·REPPFYIII   | 231  | 168   |
| >ABL1-T315I·REPPFYIITEF | 176   | >ABL1-T315I·REPPFYIIIEF | 217  | 41    |
| >ABL1-T315I·REPPFYIITEF | 648   | >ABL1-T315I·REPPFYIIIEF | 416  | 232   |
| >ABL1-T315I·REPPFYIIT   | 7053  | >ABL1-T315I·REPPFYIII   | 129  | 6924  |
| >ABL1-T315I·REPPFYIIT   | 347   | >ABL1-T315I·REPPFYIII   | 11   | 336   |
| >ABL1-T315I·REPPFYIITEF | 72    | >ABL1-T315I·REPPFYIIIEF | 61   | 11    |
| >ABL1-T315I·REPPFYIIT   | 35212 | >ABL1-T315I·REPPFYIII   | 139  | 35073 |
| >ABL1-T315I·TREPPFYIIT  | 7841  | >ABL1-T315I·TREPPFYIII  | 432  | 7409  |
| >ABL1-T315I·TREPPFYIIT  | 1763  | >ABL1-T315I·TREPPFYIII  | 473  | 1290  |
| >ABL1-T315I·TEPFMTYGNL  | 491   | >ABL1-T315I·NEPFMTYGNL  | 2700 | 2209  |
| >ABL1-T315I·TEPFMTYGNL  | 36    | >ABL1-T315I·NEPFMTYGNL  | 23   | 13    |

|                        |      |                        |       |       |
|------------------------|------|------------------------|-------|-------|
| >ABL1-T315MTEFMTYGNNL  | 13   | >ABL1-T315MNEFMTYGNNL  | 10    | 3     |
| >ABL1-T315MTEFMTYGN    | 1016 | >ABL1-T315MNEFMTYGN    | 228   | 788   |
| >ABL1-T315MTEFMTYGNL   | 378  | >ABL1-T315MNEFMTYGNL   | 77    | 301   |
| >ABL1-T315MTEFMTYGNNL  | 396  | >ABL1-T315MNEFMTYGNNL  | 431   | 35    |
| >ABL1-T315MTEFMTYGNL   | 13   | >ABL1-T315MNEFMTYGNL   | 35    | 22    |
| >ABL1-T315MTEFMTYGNNL  | 202  | >ABL1-T315MNEFMTYGNNL  | 269   | 67    |
| >ABL1-T315MTEFMTYGNL   | 103  | >ABL1-T315MNEFMTYGNL   | 336   | 233   |
| >ABL1-T315MTEFMTYGNNL  | 278  | >ABL1-T315MNEFMTYGNNL  | 541   | 263   |
| >ABL1-T315MTEFMTYGNL   | 625  | >ABL1-T315MNEFMTYGNL   | 458   | 167   |
| >ABL1-T315MTEFMTYGNL   | 799  | >ABL1-T315MNEFMTYGNL   | 415   | 384   |
| >ABL1-T315MTEFMTYGNNL  | 381  | >ABL1-T315MNEFMTYGNNL  | 206   | 175   |
| >ABL1-T315MTEFMTYGNL   | 120  | >ABL1-T315MNEFMTYGNL   | 229   | 109   |
| >ABL1-T315MTEFMTYGNNL  | 11   | >ABL1-T315MNEFMTYGNNL  | 13    | 2     |
| >ABL1-T315MITEFMTYGNL  | 434  | >ABL1-T315MINEFMTYGNL  | 5472  | 5038  |
| >ABL1-T315MITEFMTYGNL  | 458  | >ABL1-T315MINEFMTYGNL  | 13457 | 12999 |
| >ABL1-T315MITEFMTYGNL  | 54   | >ABL1-T315MINEFMTYGNL  | 21383 | 21329 |
| >ABL1-T315MITEFMTYGNL  | 175  | >ABL1-T315MINEFMTYGNL  | 21964 | 21789 |
| >ABL1-T315MITEFMTYGNL  | 324  | >ABL1-T315MINEFMTYGNL  | 21008 | 20684 |
| >ABL1-T315MITEFMTYGNL  | 31   | >ABL1-T315MINEFMTYGNL  | 6370  | 6339  |
| >ABL1-T315MITEFMTYGNL  | 257  | >ABL1-T315MINEFMTYGNL  | 20831 | 20574 |
| >ABL1-T315MITEFMTYGNL  | 31   | >ABL1-T315MINEFMTYGNL  | 1316  | 1285  |
| >ABL1-T315MCTREPPFYIIT | 363  | >ABL1-T315MCTREPPFYIIN | 690   | 327   |
| >ABL1-T315MIITEFMTYGNI | 144  | >ABL1-T315MIINEFMTYGN  | 150   | 6     |
| >ABL1-T315MIITEFMTYG   | 869  | >ABL1-T315MIINEFMTYG   | 362   | 507   |
| >ABL1-T315MIITEFMTYGNI | 118  | >ABL1-T315MIINEFMTYGN  | 47    | 71    |
| >ABL1-T315MIITEFMTYGNI | 138  | >ABL1-T315MIINEFMTYGN  | 23    | 115   |
| >ABL1-T315MIITEFMTYGNI | 388  | >ABL1-T315MIINEFMTYGN  | 497   | 109   |
| >ABL1-T315MIITEFMTYGNI | 366  | >ABL1-T315MIINEFMTYGN  | 109   | 257   |
| >ABL1-T315MIITEFMTYGNI | 155  | >ABL1-T315MIINEFMTYGN  | 249   | 94    |
| >ABL1-T315MIITEFMTY    | 1315 | >ABL1-T315MIINEFMTY    | 274   | 1041  |
| >ABL1-T315MIITEFMTY    | 1364 | >ABL1-T315MIINEFMTY    | 319   | 1045  |
| >ABL1-T315MIITEFMTY    | 69   | >ABL1-T315MIINEFMTY    | 79    | 10    |
| >ABL1-T315MIITEFMTY    | 133  | >ABL1-T315MIINEFMTY    | 63    | 70    |
| >ABL1-T315MIITEFMTY    | 41   | >ABL1-T315MIINEFMTY    | 42    | 1     |
| >ABL1-T315MIITEFMTY    | 1433 | >ABL1-T315MIINEFMTY    | 141   | 1292  |
| >ABL1-T315MIITEFMTY    | 375  | >ABL1-T315MIINEFMTY    | 191   | 184   |
| >ABL1-T315MIITEFMTY    | 409  | >ABL1-T315MIINEFMTY    | 335   | 74    |
| >ABL1-T315MIITEFMTY    | 401  | >ABL1-T315MIINEFMTY    | 390   | 11    |
| >ABL1-T315MIITEFMTY    | 121  | >ABL1-T315MIINEFMTY    | 60    | 61    |
| >ABL1-T315MYIITEFMT    | 393  | >ABL1-T315MYIINEFMT    | 358   | 35    |
| >ABL1-T315MYIITEFMT    | 62   | >ABL1-T315MYIINEFMT    | 48    | 14    |
| >ABL1-T315MYIITEFMTY   | 744  | >ABL1-T315MYIINEFMTY   | 340   | 404   |
| >ABL1-T315MYIITEFMTYG  | 520  | >ABL1-T315MYIINEFMTYG  | 439   | 81    |

|                                      |      |                                      |      |     |
|--------------------------------------|------|--------------------------------------|------|-----|
| >ABL1-T315N <sup>M</sup> YIITEFMT    | 1227 | >ABL1-T315N <sup>M</sup> YIINEFMT    | 448  | 779 |
| >ABL1-T315N <sup>M</sup> YIITEFMT    | 1028 | >ABL1-T315N <sup>M</sup> YIINEFMT    | 490  | 538 |
| >ABL1-T315N <sup>M</sup> YIITEFMTY   | 623  | >ABL1-T315N <sup>M</sup> YIINEFMTY   | 378  | 245 |
| >ABL1-T315N <sup>M</sup> YIITEFMTY   | 74   | >ABL1-T315N <sup>M</sup> YIINEFMTY   | 41   | 33  |
| >ABL1-T315N <sup>M</sup> YIITEFMTY   | 44   | >ABL1-T315N <sup>M</sup> YIINEFMTY   | 19   | 25  |
| >ABL1-T315N <sup>M</sup> YIITEFMTY   | 8    | >ABL1-T315N <sup>M</sup> YIINEFMTY   | 18   | 10  |
| >ABL1-T315N <sup>M</sup> YIITEFMTY   | 456  | >ABL1-T315N <sup>M</sup> YIINEFMTY   | 497  | 41  |
| >ABL1-T315N <sup>M</sup> YIITEFMTY   | 9    | >ABL1-T315N <sup>M</sup> YIINEFMTY   | 9    | 0   |
| >ABL1-T315N <sup>M</sup> YIITEFMTY   | 556  | >ABL1-T315N <sup>M</sup> YIINEFMTY   | 458  | 98  |
| >ABL1-T315N <sup>M</sup> YIITEFMTY   | 348  | >ABL1-T315N <sup>M</sup> YIINEFMTY   | 259  | 89  |
| >ABL1-T315N <sup>M</sup> YIITEFMTY   | 16   | >ABL1-T315N <sup>M</sup> YIINEFMTY   | 14   | 2   |
| >ABL1-T315N <sup>M</sup> YIITEFMTY   | 52   | >ABL1-T315N <sup>M</sup> YIINEFMTY   | 37   | 15  |
| >ABL1-T315N <sup>M</sup> YIITEFMTY   | 696  | >ABL1-T315N <sup>M</sup> YIINEFMTY   | 361  | 335 |
| >ABL1-T315N <sup>M</sup> YIITEFMTY   | 22   | >ABL1-T315N <sup>M</sup> YIINEFMTY   | 17   | 5   |
| >ABL1-T315N <sup>M</sup> YIITEFMTY   | 433  | >ABL1-T315N <sup>M</sup> YIINEFMTY   | 350  | 83  |
| >ABL1-T315N <sup>M</sup> YIITEFMTY   | 91   | >ABL1-T315N <sup>M</sup> YIINEFMTY   | 100  | 9   |
| >ABL1-T315N <sup>M</sup> YIITEFMTY   | 241  | >ABL1-T315N <sup>M</sup> YIINEFMTY   | 113  | 128 |
| >ABL1-T315N <sup>M</sup> YIITEFMTY   | 51   | >ABL1-T315N <sup>M</sup> YIINEFMTY   | 31   | 20  |
| >ABL1-T315N <sup>M</sup> FYIITEFM    | 84   | >ABL1-T315N <sup>M</sup> FYIINEFM    | 118  | 34  |
| >ABL1-T315N <sup>M</sup> FYIITEFMTY  | 435  | >ABL1-T315N <sup>M</sup> FYIINEFMTY  | 383  | 52  |
| >ABL1-T315N <sup>M</sup> FYIITEFM    | 412  | >ABL1-T315N <sup>M</sup> FYIINEFM    | 535  | 123 |
| >ABL1-T315N <sup>M</sup> FYIITEFM    | 251  | >ABL1-T315N <sup>M</sup> FYIINEFM    | 258  | 7   |
| >ABL1-T315N <sup>M</sup> FYIITEFM    | 22   | >ABL1-T315N <sup>M</sup> FYIINEFM    | 24   | 2   |
| >ABL1-T315N <sup>M</sup> FYIITEFMT   | 203  | >ABL1-T315N <sup>M</sup> FYIINEFMT   | 114  | 89  |
| >ABL1-T315N <sup>M</sup> FYIITEFMTY  | 32   | >ABL1-T315N <sup>M</sup> FYIINEFMTY  | 21   | 11  |
| >ABL1-T315N <sup>M</sup> FYIITEFMTY  | 550  | >ABL1-T315N <sup>M</sup> FYIINEFMTY  | 317  | 233 |
| >ABL1-T315N <sup>M</sup> FYIITEFMTY  | 23   | >ABL1-T315N <sup>M</sup> FYIINEFMTY  | 31   | 8   |
| >ABL1-T315N <sup>M</sup> FYIITEFMTY  | 124  | >ABL1-T315N <sup>M</sup> FYIINEFMTY  | 176  | 52  |
| >ABL1-T315N <sup>M</sup> FYIITEFMTY  | 114  | >ABL1-T315N <sup>M</sup> FYIINEFMTY  | 184  | 70  |
| >ABL1-T315N <sup>M</sup> FYIITEFMTY  | 308  | >ABL1-T315N <sup>M</sup> FYIINEFMTY  | 419  | 111 |
| >ABL1-T315N <sup>M</sup> PFYIITEF    | 48   | >ABL1-T315N <sup>M</sup> PFYIINEF    | 50   | 2   |
| >ABL1-T315N <sup>M</sup> PFYIITEF    | 105  | >ABL1-T315N <sup>M</sup> PFYIINEF    | 90   | 15  |
| >ABL1-T315N <sup>M</sup> PFYIITEFMTY | 11   | >ABL1-T315N <sup>M</sup> PFYIINEFMTY | 14   | 3   |
| >ABL1-T315N <sup>M</sup> PFYIITEFMTY | 339  | >ABL1-T315N <sup>M</sup> PFYIINEFMTY | 1027 | 688 |
| >ABL1-T315N <sup>M</sup> PPFYIITEF   | 19   | >ABL1-T315N <sup>M</sup> PPFYIINEF   | 42   | 23  |
| >ABL1-T315N <sup>M</sup> PPFYIITEFM  | 13   | >ABL1-T315N <sup>M</sup> PPFYIINEFM  | 14   | 1   |
| >ABL1-T315N <sup>M</sup> PPFYIITEF   | 290  | >ABL1-T315N <sup>M</sup> PPFYIINEF   | 450  | 160 |
| >ABL1-T315N <sup>M</sup> PPFYIITEF   | 110  | >ABL1-T315N <sup>M</sup> PPFYIINEF   | 175  | 65  |
| >ABL1-T315N <sup>M</sup> PPFYIITEF   | 161  | >ABL1-T315N <sup>M</sup> PPFYIINEF   | 320  | 159 |
| >ABL1-T315N <sup>M</sup> PPFYIITEF   | 114  | >ABL1-T315N <sup>M</sup> PPFYIINEF   | 78   | 36  |
| >ABL1-T315N <sup>M</sup> PPFYIITEF   | 48   | >ABL1-T315N <sup>M</sup> PPFYIINEF   | 59   | 11  |
| >ABL1-T315N <sup>M</sup> EPPFYIITEF  | 447  | >ABL1-T315N <sup>M</sup> EPPFYIINEF  | 425  | 22  |
| >ABL1-T315N <sup>M</sup> EPPFYIITEFM | 438  | >ABL1-T315N <sup>M</sup> EPPFYIINEFM | 653  | 215 |

|                         |      |                         |      |      |
|-------------------------|------|-------------------------|------|------|
| >ABL1-T315M EPPFYIITEFM | 419  | >ABL1-T315M EPPFYIINEFM | 875  | 456  |
| >ABL1-T315M EPPFYIITEF  | 399  | >ABL1-T315M EPPFYIINEF  | 522  | 123  |
| >ABL1-T315M REPPFYIITEF | 117  | >ABL1-T315M REPPFYIINEF | 59   | 58   |
| >ABL1-T315M REPPFYIITEF | 64   | >ABL1-T315M REPPFYIINEF | 88   | 24   |
| >ABL1-T315M REPPFYIITEF | 414  | >ABL1-T315M REPPFYIINEF | 656  | 242  |
| >ABL1-T315M REPPFYIIT   | 399  | >ABL1-T315M REPPFYIIN   | 5553 | 5154 |
| >ABL1-T315M REPPFYIITEF | 176  | >ABL1-T315M REPPFYIINEF | 208  | 32   |
| >ABL1-T315M REPPFYIIT   | 347  | >ABL1-T315M REPPFYIIN   | 3640 | 3293 |
| >ABL1-T315M REPPFYIITEF | 72   | >ABL1-T315M REPPFYIINEF | 125  | 53   |
| >ABL1-T389A MTGDTYTA    | 439  | >ABL1-T389A MAGDTYTA    | 1255 | 816  |
| >ABL1-T389A MTGDTYTA    | 396  | >ABL1-T389A MAGDTYTA    | 650  | 254  |
| >ABL1-T389A MTGDTYTA    | 300  | >ABL1-T389A MAGDTYTA    | 1197 | 897  |
| >ABL1-T389A MTGDTYTA    | 47   | >ABL1-T389A MAGDTYTA    | 487  | 440  |
| >ABL1-T389A MTGDTYTAH   | 146  | >ABL1-T389A MAGDTYTAH   | 1343 | 1197 |
| >ABL1-T389A MTGDTYTA    | 234  | >ABL1-T389A MAGDTYTA    | 1513 | 1279 |
| >ABL1-T389A MTGDTYTAH   | 138  | >ABL1-T389A MAGDTYTAH   | 944  | 806  |
| >ABL1-T389A MTGDTYTAH   | 1754 | >ABL1-T389A MAGDTYTAH   | 176  | 1578 |
| >ABL1-T389A LMTGDTYT    | 1252 | >ABL1-T389A LMAGDTYT    | 220  | 1032 |
| >ABL1-T389A LMTGDTYTA   | 47   | >ABL1-T389A LMAGDTYTA   | 18   | 29   |
| >ABL1-T389A LMTGDTYTAI  | 98   | >ABL1-T389A LMAGDTYTAI  | 30   | 68   |
| >ABL1-T389A LMTGDTYT    | 164  | >ABL1-T389A LMAGDTYT    | 19   | 145  |
| >ABL1-T389A LMTGDTYTA   | 18   | >ABL1-T389A LMAGDTYTA   | 5    | 13   |
| >ABL1-T389A LMTGDTYTAI  | 20   | >ABL1-T389A LMAGDTYTAI  | 5    | 15   |
| >ABL1-T389A LMTGDTYT    | 524  | >ABL1-T389A LMAGDTYT    | 45   | 479  |
| >ABL1-T389A LMTGDTYTA   | 38   | >ABL1-T389A LMAGDTYTA   | 7    | 31   |
| >ABL1-T389A LMTGDTYTAI  | 19   | >ABL1-T389A LMAGDTYTAI  | 5    | 14   |
| >ABL1-T389A LMTGDTYT    | 729  | >ABL1-T389A LMAGDTYT    | 227  | 502  |
| >ABL1-T389A LMTGDTYTA   | 137  | >ABL1-T389A LMAGDTYTA   | 51   | 86   |
| >ABL1-T389A LMTGDTYTAI  | 69   | >ABL1-T389A LMAGDTYTAI  | 29   | 40   |
| >ABL1-T389A LMTGDTYT    | 148  | >ABL1-T389A LMAGDTYT    | 53   | 95   |
| >ABL1-T389A LMTGDTYTA   | 10   | >ABL1-T389A LMAGDTYTA   | 5    | 5    |
| >ABL1-T389A LMTGDTYTAI  | 31   | >ABL1-T389A LMAGDTYTAI  | 14   | 17   |
| >ABL1-T389A LMTGDTYTA   | 6    | >ABL1-T389A LMAGDTYTA   | 5    | 1    |
| >ABL1-T389A LMTGDTYTAI  | 24   | >ABL1-T389A LMAGDTYTAI  | 17   | 7    |
| >ABL1-T389A LMTGDTYT    | 261  | >ABL1-T389A LMAGDTYT    | 106  | 155  |
| >ABL1-T389A LMTGDTYTA   | 25   | >ABL1-T389A LMAGDTYTA   | 15   | 10   |
| >ABL1-T389A LMTGDTYTAI  | 43   | >ABL1-T389A LMAGDTYTAI  | 23   | 20   |
| >ABL1-T389A LMTGDTYT    | 806  | >ABL1-T389A LMAGDTYT    | 99   | 707  |
| >ABL1-T389A LMTGDTYTA   | 12   | >ABL1-T389A LMAGDTYTA   | 3    | 9    |
| >ABL1-T389A LMTGDTYTAI  | 77   | >ABL1-T389A LMAGDTYTAI  | 10   | 67   |
| >ABL1-T389A LMTGDTYT    | 12   | >ABL1-T389A LMAGDTYT    | 11   | 1    |
| >ABL1-T389A LMTGDTYTA   | 3    | >ABL1-T389A LMAGDTYTA   | 3    | 0    |
| >ABL1-T389A LMTGDTYTAI  | 4    | >ABL1-T389A LMAGDTYTAI  | 4    | 0    |

|                        |      |                        |     |      |
|------------------------|------|------------------------|-----|------|
| >ABL1-T389A LMTGDTYTAI | 2888 | >ABL1-T389A LMAGDTYTAI | 293 | 2595 |
| >ABL1-T389A LMTGDTYTAI | 1695 | >ABL1-T389A LMAGDTYTAI | 189 | 1506 |
| >ABL1-T389A RLMTGDTYT  | 144  | >ABL1-T389A RLMAGDTYT  | 68  | 76   |
| >ABL1-T389A RLMTGDTYT/ | 16   | >ABL1-T389A RLMAGDTYT/ | 15  | 1    |
| >ABL1-T389A RLMTGDTYT  | 222  | >ABL1-T389A RLMAGDTYT  | 69  | 153  |
| >ABL1-T389A RLMTGDTYT/ | 10   | >ABL1-T389A RLMAGDTYT/ | 9   | 1    |
| >ABL1-T389A RLMTGDTYT  | 62   | >ABL1-T389A RLMAGDTYT  | 32  | 30   |
| >ABL1-T389A RLMTGDTYT/ | 31   | >ABL1-T389A RLMAGDTYT/ | 23  | 8    |
| >ABL1-T389A RLMTGDTYT  | 134  | >ABL1-T389A RLMAGDTYT  | 55  | 79   |
| >ABL1-T389A RLMTGDTYT/ | 82   | >ABL1-T389A RLMAGDTYT/ | 93  | 11   |
| >ABL1-T389A RLMTGDTYT  | 309  | >ABL1-T389A RLMAGDTYT  | 99  | 210  |
| >ABL1-T389A RLMTGDTYT/ | 23   | >ABL1-T389A RLMAGDTYT/ | 11  | 12   |
| >ABL1-T389A RLMTGDTYT  | 417  | >ABL1-T389A RLMAGDTYT  | 366 | 51   |
| >ABL1-T389A RLMTGDTYT/ | 10   | >ABL1-T389A RLMAGDTYT/ | 8   | 2    |
| >ABL1-T389A RLMTGDTYT  | 674  | >ABL1-T389A RLMAGDTYT  | 357 | 317  |
| >ABL1-T389A RLMTGDTYT/ | 61   | >ABL1-T389A RLMAGDTYT/ | 36  | 25   |
| >ABL1-T389A RLMTGDTYT  | 486  | >ABL1-T389A RLMAGDTYT  | 343 | 143  |
| >ABL1-T389A RLMTGDTYT/ | 23   | >ABL1-T389A RLMAGDTYT/ | 17  | 6    |
| >ABL1-T389A RLMTGDTYT  | 134  | >ABL1-T389A RLMAGDTYT  | 58  | 76   |
| >ABL1-T389A RLMTGDTYT/ | 11   | >ABL1-T389A RLMAGDTYT/ | 7   | 4    |
| >ABL1-T389A RLMTGDTY   | 578  | >ABL1-T389A RLMAGDTY   | 395 | 183  |
| >ABL1-T389A RLMTGDTYT/ | 337  | >ABL1-T389A RLMAGDTYT/ | 244 | 93   |
| >ABL1-T389A RLMTGDTY   | 329  | >ABL1-T389A RLMAGDTY   | 304 | 25   |
| >ABL1-T389A RLMTGDTY   | 63   | >ABL1-T389A RLMAGDTY   | 75  | 12   |
| >ABL1-T389A RLMTGDTY   | 88   | >ABL1-T389A RLMAGDTY   | 69  | 19   |
| >ABL1-T389A RLMTGDTYT/ | 123  | >ABL1-T389A RLMAGDTYT/ | 96  | 27   |
| >ABL1-T389A RLMTGDTY   | 116  | >ABL1-T389A RLMAGDTY   | 52  | 64   |
| >ABL1-T389A RLMTGDTY   | 60   | >ABL1-T389A RLMAGDTY   | 52  | 8    |
| >ABL1-T389A RLMTGDTYT/ | 947  | >ABL1-T389A RLMAGDTYT/ | 337 | 610  |
| >ABL1-T389A RLMTGDTYT/ | 497  | >ABL1-T389A RLMAGDTYT/ | 168 | 329  |
| >ABL1-T389A RLMTGDTY   | 80   | >ABL1-T389A RLMAGDTY   | 37  | 43   |
| >ABL1-T389A RLMTGDTY   | 62   | >ABL1-T389A RLMAGDTY   | 68  | 6    |
| >ABL1-T389A RLMTGDTYT/ | 389  | >ABL1-T389A RLMAGDTYT/ | 407 | 18   |
| >ABL1-T389A RLMTGDTY   | 74   | >ABL1-T389A RLMAGDTY   | 44  | 30   |
| >ABL1-T389A RLMTGDTY   | 602  | >ABL1-T389A RLMAGDTY   | 437 | 165  |
| >ABL1-T389A SRLMTGDTY  | 47   | >ABL1-T389A SRLMAGDTY  | 119 | 72   |
| >ABL1-T389A SRLMTGDTY/ | 590  | >ABL1-T389A SRLMAGDTY/ | 413 | 177  |
| >ABL1-T389A SRLMTGDTY  | 386  | >ABL1-T389A SRLMAGDTY  | 836 | 450  |
| >ABL1-T389A LSRLMTGDTY | 183  | >ABL1-T389A LSRLMAGDTY | 203 | 20   |
| >ABL1-T389A LSRLMTGDTY | 127  | >ABL1-T389A LSRLMAGDTY | 178 | 51   |
| >ABL1-T389A LSRLMTGDTY | 436  | >ABL1-T389A LSRLMAGDTY | 664 | 228  |
| >ABL1-T389A LSRLMTGDTY | 6    | >ABL1-T389A LSRLMAGDTY | 5   | 1    |
| >ABL1-T389A LSRLMTGDTY | 47   | >ABL1-T389A LSRLMAGDTY | 40  | 7    |

|                         |       |                         |       |       |
|-------------------------|-------|-------------------------|-------|-------|
| >ABL1-T389A GLSRLMTGD`  | 456   | >ABL1-T389A GLSRLMAGD`  | 1448  | 992   |
| >ABL1-T389A GLSRLMTGD`  | 266   | >ABL1-T389A GLSRLMAGD`  | 238   | 28    |
| >ABL1-T389A GLSRLMTGD`  | 217   | >ABL1-T389A GLSRLMAGD`  | 131   | 86    |
| >ABL1-T389A GLSRLMTGD`  | 181   | >ABL1-T389A GLSRLMAGD`  | 162   | 19    |
| >ABL1-T389A GLSRLMTGD`  | 82    | >ABL1-T389A GLSRLMAGD`  | 144   | 62    |
| >ABL1-T495F TMFQESSI    | 175   | >ABL1-T495F RMFQESSI    | 91    | 84    |
| >ABL1-T495F TMFQESSI    | 52    | >ABL1-T495F RMFQESSI    | 41    | 11    |
| >ABL1-T495F TMFQESSI    | 25    | >ABL1-T495F RMFQESSI    | 15    | 10    |
| >ABL1-T495F TMFQESSI    | 681   | >ABL1-T495F RMFQESSI    | 241   | 440   |
| >ABL1-T495F TMFQESSI    | 12    | >ABL1-T495F RMFQESSI    | 4     | 8     |
| >ABL1-T495F TMFQESSI    | 79    | >ABL1-T495F RMFQESSI    | 27    | 52    |
| >ABL1-T495F TMFQESSI    | 46    | >ABL1-T495F RMFQESSI    | 25    | 21    |
| >ABL1-T495F TMFQESSI    | 620   | >ABL1-T495F RMFQESSI    | 435   | 185   |
| >ABL1-T495F TMFQESSI    | 22    | >ABL1-T495F RMFQESSI    | 19    | 3     |
| >ABL1-T495F TMFQESSI    | 164   | >ABL1-T495F RMFQESSI    | 14    | 150   |
| >ABL1-T495F TMFQESSISD  | 6169  | >ABL1-T495F RMFQESSISD  | 484   | 5685  |
| >ABL1-T495F TMFQESSI    | 424   | >ABL1-T495F RMFQESSI    | 86    | 338   |
| >ABL1-T495F TMFQESSI    | 66    | >ABL1-T495F RMFQESSI    | 9     | 57    |
| >ABL1-T495F TMFQESSIS   | 1414  | >ABL1-T495F RMFQESSIS   | 136   | 1278  |
| >ABL1-T495F TMFQESSI    | 5612  | >ABL1-T495F RMFQESSI    | 149   | 5463  |
| >ABL1-T495F TMFQESSI    | 285   | >ABL1-T495F RMFQESSI    | 39    | 246   |
| >ABL1-T495F ETMFQESSI   | 458   | >ABL1-T495F ERMFQESSI   | 20268 | 19810 |
| >ABL1-T495F ETMFQESSI   | 155   | >ABL1-T495F ERMFQESSI   | 22702 | 22547 |
| >ABL1-T495F ETMFQESSI   | 469   | >ABL1-T495F ERMFQESSI   | 20997 | 20528 |
| >ABL1-T495F ETMFQESS    | 61    | >ABL1-T495F ERMFQESS    | 12177 | 12116 |
| >ABL1-T495F ETMFQESSI   | 10    | >ABL1-T495F ERMFQESSI   | 5591  | 5581  |
| >ABL1-T495F ETMFQESSI   | 110   | >ABL1-T495F ERMFQESSI   | 18393 | 18283 |
| >ABL1-T495F ETMFQESSI   | 352   | >ABL1-T495F ERMFQESSI   | 26352 | 26000 |
| >ABL1-T495F ETMFQESSI   | 451   | >ABL1-T495F ERMFQESSI   | 21120 | 20669 |
| >ABL1-T495F ETMFQESSI   | 204   | >ABL1-T495F ERMFQESSI   | 9735  | 9531  |
| >ABL1-T495F SFAEIHQAFE` | 14399 | >ABL1-T495F SFAEIHQAFEI | 21    | 14378 |
| >ABL1-T495F SFAEIHQAFE` | 27067 | >ABL1-T495F SFAEIHQAFEI | 156   | 26911 |
| >ABL1-T495F SFAEIHQAFE` | 17959 | >ABL1-T495F SFAEIHQAFEI | 36    | 17923 |
| >ABL1-T495F SFAEIHQAFE` | 28781 | >ABL1-T495F SFAEIHQAFEI | 77    | 28704 |
| >ABL1-T495F FETMFQESSI  | 8     | >ABL1-T495F FERMFQESSI  | 11    | 3     |
| >ABL1-T495F FETMFQESSI  | 1092  | >ABL1-T495F FERMFQESSI  | 200   | 892   |
| >ABL1-T495F FETMFQESSI  | 410   | >ABL1-T495F FERMFQESSI  | 782   | 372   |
| >ABL1-T495F FETMFQES    | 224   | >ABL1-T495F FERMFQES    | 112   | 112   |
| >ABL1-T495F FETMFQESS   | 186   | >ABL1-T495F FERMFQESS   | 92    | 94    |
| >ABL1-T495F FETMFQESSI  | 155   | >ABL1-T495F FERMFQESSI  | 174   | 19    |
| >ABL1-T495F FETMFQESSI! | 547   | >ABL1-T495F FERMFQESSI! | 272   | 275   |
| >ABL1-T495F FETMFQESSI  | 8     | >ABL1-T495F FERMFQESSI  | 5     | 3     |
| >ABL1-T495F AFETMFQESS  | 72    | >ABL1-T495F AFERMFQESS  | 133   | 61    |

|                       |       |                       |      |       |
|-----------------------|-------|-----------------------|------|-------|
| >ABL1-T495FQAFETMFQ   | 218   | >ABL1-T495FQAFERMFQ   | 307  | 89    |
| >ABL1-T495FHQAFETMF   | 93    | >ABL1-T495FHQAFERMF   | 194  | 101   |
| >ABL1-T495FHQAFETMF   | 6     | >ABL1-T495FHQAFERMF   | 11   | 5     |
| >ABL1-T495FIHQAFETM   | 311   | >ABL1-T495FIHQAFERM   | 1531 | 1220  |
| >ABL1-T495FIHQAFETMF  | 17    | >ABL1-T495FIHQAFERMF  | 51   | 34    |
| >ABL1-T495FEIHQAFETM  | 15    | >ABL1-T495FEIHQAFERM  | 16   | 1     |
| >ABL1-T495FEIHQAFETMF | 87    | >ABL1-T495FEIHQAFERMF | 72   | 15    |
| >ABL1-T495FEIHQAFETM  | 11    | >ABL1-T495FEIHQAFERM  | 42   | 31    |
| >ABL1-T495FEIHQAFETMF | 478   | >ABL1-T495FEIHQAFERMF | 403  | 75    |
| >ABL1-T495FEIHQAFET   | 28294 | >ABL1-T495FEIHQAFER   | 132  | 28162 |
| >ABL1-T495FEIHQAFET   | 7308  | >ABL1-T495FEIHQAFER   | 5    | 7303  |
| >ABL1-T495FEIHQAFETMF | 218   | >ABL1-T495FEIHQAFERMF | 275  | 57    |
| >ABL1-T495FEIHQAFETM  | 714   | >ABL1-T495FEIHQAFERM  | 463  | 251   |
| >ABL1-T495FEIHQAFET   | 30226 | >ABL1-T495FEIHQAFER   | 87   | 30139 |
| >ABL1-T495FAEIHQAFETM | 461   | >ABL1-T495FAEIHQAFERN | 1771 | 1310  |
| >ABL1-T495FAEIHQAFETM | 41    | >ABL1-T495FAEIHQAFERN | 75   | 34    |
| >ABL1-T495FAEIHQAFETM | 288   | >ABL1-T495FAEIHQAFERN | 527  | 239   |
| >ABL1-T495FAEIHQAFETM | 58    | >ABL1-T495FAEIHQAFERN | 122  | 64    |
| >ABL1-T495FAEIHQAFET  | 89    | >ABL1-T495FAEIHQAFER  | 1630 | 1541  |
| >ABL1-T495FAEIHQAFETM | 82    | >ABL1-T495FAEIHQAFERN | 317  | 235   |
| >ABL1-T495FAEIHQAFETM | 73    | >ABL1-T495FAEIHQAFERN | 132  | 59    |
| >ABL1-T495FAEIHQAFETM | 42    | >ABL1-T495FAEIHQAFERN | 100  | 58    |
| >ABL1-T495FAEIHQAFETM | 210   | >ABL1-T495FAEIHQAFERN | 148  | 62    |
| >ABL1-T495FAEIHQAFET  | 216   | >ABL1-T495FAEIHQAFER  | 195  | 21    |
| >ABL1-T495FAEIHQAFETM | 115   | >ABL1-T495FAEIHQAFERN | 250  | 135   |
| >ABL1-T495FAEIHQAFETM | 25    | >ABL1-T495FAEIHQAFERN | 21   | 4     |
| >ABL1-T495FAEIHQAFET  | 20    | >ABL1-T495FAEIHQAFER  | 525  | 505   |
| >ABL1-T495FAEIHQAFETM | 240   | >ABL1-T495FAEIHQAFERN | 1495 | 1255  |
| >ABL1-T495FAEIHQAFETM | 467   | >ABL1-T495FAEIHQAFERN | 543  | 76    |
| >ABL1-T495FAEIHQAFET  | 83    | >ABL1-T495FAEIHQAFER  | 723  | 640   |
| >ABL1-T495FAEIHQAFETM | 20    | >ABL1-T495FAEIHQAFERN | 23   | 3     |
| >ABL1-T495FAEIHQAFETM | 35    | >ABL1-T495FAEIHQAFERN | 89   | 54    |
| >ABL1-T495FAEIHQAFET  | 30654 | >ABL1-T495FAEIHQAFER  | 35   | 30619 |
| >ABL1-T495FAEIHQAFETI | 50    | >ABL1-T495FAEIHQAFERI | 289  | 239   |
| >ABL1-T984TTLPSASSAL  | 23    | >ABL1-T984TTLPSASSAL  | 23   | 0     |
| >ABL1-T984TTLPSASSALA | 97    | >ABL1-T984TTLPSASSALA | 97   | 0     |
| >ABL1-T984TTLPSASSA   | 24    | >ABL1-T984TTLPSASSA   | 24   | 0     |
| >ABL1-T984TTLPSASSAL  | 22    | >ABL1-T984TTLPSASSAL  | 22   | 0     |
| >ABL1-T984TTLPSASSALA | 90    | >ABL1-T984TTLPSASSALA | 90   | 0     |
| >ABL1-T984TTLPSASSAL  | 174   | >ABL1-T984TTLPSASSAL  | 174  | 0     |
| >ABL1-T984TTLPSASSAL  | 297   | >ABL1-T984TTLPSASSAL  | 297  | 0     |
| >ABL1-T984TTLPSASSAL  | 340   | >ABL1-T984TTLPSASSAL  | 340  | 0     |
| >ABL1-T984TTLPSASSA   | 40    | >ABL1-T984TTLPSASSA   | 40   | 0     |

|                         |     |                         |     |   |
|-------------------------|-----|-------------------------|-----|---|
| >ABL1-T984T TLPSASSAL   | 24  | >ABL1-T984T TLPSASSAL   | 24  | 0 |
| >ABL1-T984T TLPSASSALA  | 49  | >ABL1-T984T TLPSASSALA  | 49  | 0 |
| >ABL1-T984T TLPSASSAL   | 24  | >ABL1-T984T TLPSASSAL   | 24  | 0 |
| >ABL1-T984T TLPSASSALA  | 370 | >ABL1-T984T TLPSASSALA  | 370 | 0 |
| >ABL1-T984T STLPSASSAL  | 275 | >ABL1-T984T STLPSASSAL  | 275 | 0 |
| >ABL1-T984T STLPSASSAL  | 273 | >ABL1-T984T STLPSASSAL  | 273 | 0 |
| >ABL1-T984T STLPSASSA   | 267 | >ABL1-T984T STLPSASSA   | 267 | 0 |
| >ABL1-T984T STLPSASSAL  | 114 | >ABL1-T984T STLPSASSAL  | 114 | 0 |
| >ABL1-T984T STLPSASSALA | 220 | >ABL1-T984T STLPSASSALA | 220 | 0 |
| >ABL1-T984T STLPSASSAL  | 428 | >ABL1-T984T STLPSASSAL  | 428 | 0 |
| >ABL1-T984T STLPSASSA   | 172 | >ABL1-T984T STLPSASSA   | 172 | 0 |
| >ABL1-T984T STLPSASSAL  | 397 | >ABL1-T984T STLPSASSAL  | 397 | 0 |
| >ABL1-T984T STLPSASSALA | 60  | >ABL1-T984T STLPSASSALA | 60  | 0 |
| >ABL1-T984T STLPSASSALA | 227 | >ABL1-T984T STLPSASSALA | 227 | 0 |
| >ABL1-T984T STLPSASSA   | 158 | >ABL1-T984T STLPSASSA   | 158 | 0 |
| >ABL1-T984T STLPSASSAL  | 42  | >ABL1-T984T STLPSASSAL  | 42  | 0 |
| >ABL1-T984T STLPSASSALA | 108 | >ABL1-T984T STLPSASSALA | 108 | 0 |
| >ABL1-T984T STLPSASSAL  | 161 | >ABL1-T984T STLPSASSAL  | 161 | 0 |
| >ABL1-T984T STLPSASS    | 285 | >ABL1-T984T STLPSASS    | 285 | 0 |
| >ABL1-T984T STLPSASSA   | 30  | >ABL1-T984T STLPSASSA   | 30  | 0 |
| >ABL1-T984T STLPSASSAL  | 4   | >ABL1-T984T STLPSASSAL  | 4   | 0 |
| >ABL1-T984T STLPSASSALA | 122 | >ABL1-T984T STLPSASSALA | 122 | 0 |
| >ABL1-T984T STLPSASSAL  | 418 | >ABL1-T984T STLPSASSAL  | 418 | 0 |
| >ABL1-T984T STLPSASSAL  | 214 | >ABL1-T984T STLPSASSAL  | 214 | 0 |
| >ABL1-T984T STLPSASSA   | 41  | >ABL1-T984T STLPSASSA   | 41  | 0 |
| >ABL1-T984T STLPSASSAL  | 81  | >ABL1-T984T STLPSASSAL  | 81  | 0 |
| >ABL1-T984T STLPSASSALA | 140 | >ABL1-T984T STLPSASSALA | 140 | 0 |
| >ABL1-T984T STLPSASSA   | 391 | >ABL1-T984T STLPSASSA   | 391 | 0 |
| >ABL1-T984T VPSTLPSASSA | 390 | >ABL1-T984T VPSTLPSASSA | 390 | 0 |
| >ABL1-T984T VPSTLPSAS   | 313 | >ABL1-T984T VPSTLPSAS   | 313 | 0 |
| >ABL1-T984T VPSTLPSA    | 171 | >ABL1-T984T VPSTLPSA    | 171 | 0 |
| >ABL1-T984T APVPSTLPS   | 277 | >ABL1-T984T APVPSTLPS   | 277 | 0 |
| >ABL1-T984T APVPSTLPS   | 167 | >ABL1-T984T APVPSTLPS   | 167 | 0 |
| >ABL1-T984T APVPSTLPSA  | 252 | >ABL1-T984T APVPSTLPSA  | 252 | 0 |
| >ABL1-T984T PAPVPSTL    | 461 | >ABL1-T984T PAPVPSTL    | 461 | 0 |
| >ABL1-T984T SPAPVPSTL   | 96  | >ABL1-T984T SPAPVPSTL   | 96  | 0 |
| >ABL1-T984T SPAPVPSTL   | 391 | >ABL1-T984T SPAPVPSTL   | 391 | 0 |
| >ABL1-T984T SPAPVPSTL   | 28  | >ABL1-T984T SPAPVPSTL   | 28  | 0 |
| >ABL1-T984T SPAPVPSTL   | 149 | >ABL1-T984T SPAPVPSTL   | 149 | 0 |
| >ABL1-T984T SPAPVPSTLP  | 174 | >ABL1-T984T SPAPVPSTLP  | 174 | 0 |
| >ABL1-T984T SPAPVPSTL   | 40  | >ABL1-T984T SPAPVPSTL   | 40  | 0 |
| >ABL1-T984T SPAPVPSTL   | 103 | >ABL1-T984T SPAPVPSTL   | 103 | 0 |
| >ABL1-T984T SPAPVPSTL   | 475 | >ABL1-T984T SPAPVPSTL   | 475 | 0 |



|                         |      |                         |      |      |
|-------------------------|------|-------------------------|------|------|
| >ABL1-T984T ISPAPVPSTL  | 51   | >ABL1-T984T ISPAPVPSTL  | 51   | 0    |
| >ABL1-T984T ISPAPVPST   | 67   | >ABL1-T984T ISPAPVPST   | 67   | 0    |
| >ABL1-T984T ISPAPVPSTL  | 3    | >ABL1-T984T ISPAPVPSTL  | 3    | 0    |
| >ABL1-T984T ISPAPVPSTLP | 25   | >ABL1-T984T ISPAPVPSTLP | 25   | 0    |
| >ABL1-T984T ISPAPVPSTL  | 45   | >ABL1-T984T ISPAPVPSTL  | 45   | 0    |
| >ABL1-V299L VQLLGVCTR   | 198  | >ABL1-V299L LQLLGVCTR   | 152  | 46   |
| >ABL1-V299L VQLLGVCTR   | 667  | >ABL1-V299L LQLLGVCTR   | 397  | 270  |
| >ABL1-V299L LVQLLGVCTR  | 61   | >ABL1-V299L LLQLLGVCTR  | 74   | 13   |
| >ABL1-V299L LVQLLGVCTR  | 318  | >ABL1-V299L LLQLLGVCTR  | 2308 | 1990 |
| >ABL1-V299L VMKEIKHPNI  | 199  | >ABL1-V299L VMKEIKHPNI  | 786  | 587  |
| >ABL1-V299L VMKEIKHPNI  | 22   | >ABL1-V299L VMKEIKHPNI  | 24   | 2    |
| >ABL1-V299L VMKEIKHPNI  | 4    | >ABL1-V299L VMKEIKHPNI  | 17   | 13   |
| >ABL1-V299L VMKEIKHPNI  | 374  | >ABL1-V299L VMKEIKHPNI  | 2988 | 2614 |
| >ABL1-V299L VMKEIKHPNI  | 7    | >ABL1-V299L VMKEIKHPNI  | 70   | 63   |
| >ABL1-V299L VMKEIKHPNI  | 22   | >ABL1-V299L VMKEIKHPNI  | 177  | 155  |
| >ABL1-V299L VMKEIKHPNI  | 61   | >ABL1-V299L VMKEIKHPNI  | 1227 | 1166 |
| >ABL1-V299L VMKEIKHPNI  | 136  | >ABL1-V299L VMKEIKHPNI  | 1855 | 1719 |
| >ABL1-V299L VMKEIKHPNI  | 4    | >ABL1-V299L VMKEIKHPNI  | 16   | 12   |
| >ABL1-V299L NLVQLLGV    | 191  | >ABL1-V299L NLLQLLGV    | 36   | 155  |
| >ABL1-V299L NLVQLLGV    | 58   | >ABL1-V299L NLLQLLGV    | 108  | 50   |
| >ABL1-V299L NLVQLLGV    | 15   | >ABL1-V299L NLLQLLGV    | 44   | 29   |
| >ABL1-V299L NLVQLLGV    | 22   | >ABL1-V299L NLLQLLGV    | 15   | 7    |
| >ABL1-V299L NLVQLLGV    | 8    | >ABL1-V299L NLLQLLGV    | 3    | 5    |
| >ABL1-V299L NLVQLLGV    | 20   | >ABL1-V299L NLLQLLGV    | 7    | 13   |
| >ABL1-V299L NLVQLLGV    | 27   | >ABL1-V299L NLLQLLGV    | 8    | 19   |
| >ABL1-V299L NLVQLLGV    | 54   | >ABL1-V299L NLLQLLGV    | 6    | 48   |
| >ABL1-V299L NLVQLLGV    | 4    | >ABL1-V299L NLLQLLGV    | 3    | 1    |
| >ABL1-V299L NLVQLLGVCT  | 392  | >ABL1-V299L NLLQLLGVCT  | 145  | 247  |
| >ABL1-V299L NLVQLLGVCT  | 165  | >ABL1-V299L NLLQLLGVCT  | 666  | 501  |
| >ABL1-V299L NLVQLLGV    | 82   | >ABL1-V299L NLLQLLGV    | 20   | 62   |
| >ABL1-V299L NLVQLLGVCT  | 204  | >ABL1-V299L NLLQLLGVCT  | 141  | 63   |
| >ABL1-V299L HPNLVQLL    | 200  | >ABL1-V299L HPNLLQLL    | 1227 | 1027 |
| >ABL1-V299L HPNLVQLL    | 286  | >ABL1-V299L HPNLLQLL    | 290  | 4    |
| >ABL1-V299L HPNLVQLL    | 492  | >ABL1-V299L HPNLLQLL    | 647  | 155  |
| >ABL1-V299L HPNLVQLL    | 319  | >ABL1-V299L HPNLLQLL    | 660  | 341  |
| >ABL1-V299L HPNLVQLL    | 298  | >ABL1-V299L HPNLLQLL    | 273  | 25   |
| >ABL1-V299L HPNLVQLLGV  | 29   | >ABL1-V299L HPNLLQLLGV  | 38   | 9    |
| >ABL1-V299L IKHPNLVQL   | 29   | >ABL1-V299L IKHPNLLQL   | 46   | 17   |
| >ABL1-V299L IKHPNLVQLL  | 29   | >ABL1-V299L IKHPNLLQLL  | 50   | 21   |
| >ABL1-V299L EIKHPNLV    | 73   | >ABL1-V299L EIKHPNLL    | 702  | 629  |
| >ABL1-V299L EIKHPNLV    | 354  | >ABL1-V299L EIKHPNLL    | 3647 | 3293 |
| >ABL1-V299L KEIKHPNLV   | 1005 | >ABL1-V299L KEIKHPNLL   | 70   | 935  |
| >ABL1-V299L KEIKHPNLVQ  | 50   | >ABL1-V299L KEIKHPNLLQI | 57   | 7    |

|                        |     |                         |       |       |
|------------------------|-----|-------------------------|-------|-------|
| >ABL1-V299L KEIKHPNLV  | 369 | >ABL1-V299L KEIKHPNLL   | 128   | 241   |
| >ABL1-V299L KEIKHPNLVQ | 53  | >ABL1-V299L KEIKHPNLLQI | 36    | 17    |
| >ABL1-V299L KEIKHPNLV  | 5   | >ABL1-V299L KEIKHPNLL   | 6     | 1     |
| >ABL1-V299L KEIKHPNLVQ | 5   | >ABL1-V299L KEIKHPNLLQI | 5     | 0     |
| >ABL1-V304<VCTREPPFY   | 296 | >ABL1-V304<GCTREPPFY    | 683   | 387   |
| >ABL1-V304<VCTREPPFY   | 77  | >ABL1-V304<GCTREPPFY    | 1072  | 995   |
| >ABL1-V304<GVCTREPPFY  | 401 | >ABL1-V304<GGCTREPPFY   | 6104  | 5703  |
| >ABL1-V304<GVCTREPPFY  | 229 | >ABL1-V304<GGCTREPPFY   | 20267 | 20038 |
| >ABL1-V304<LGVCTREPPF  | 255 | >ABL1-V304<LGGCTREPPF   | 331   | 76    |
| >ABL1-V304<LGVCTREPPF  | 125 | >ABL1-V304<LGGCTREPPF   | 710   | 585   |
| >ABL1-V304<LLGVCTREPP  | 86  | >ABL1-V304<LLGGCTREPP   | 78    | 8     |
| >ABL1-V304<LLGVCTREPP  | 183 | >ABL1-V304<LLGGCTREPP   | 488   | 305   |
| >ABL1-V304<QLLGVCTR    | 411 | >ABL1-V304<QLLGGCTR     | 761   | 350   |
| >ABL1-V304<QLLGVCTR    | 195 | >ABL1-V304<QLLGGCTR     | 507   | 312   |
| >ABL1-V304<QLLGVCTR    | 368 | >ABL1-V304<QLLGGCTR     | 1562  | 1194  |
| >ABL1-V304<QLLGVCTR    | 177 | >ABL1-V304<QLLGGCTR     | 264   | 87    |
| >ABL1-V304<VQLLGVCTR   | 198 | >ABL1-V304<VQLLGGCTR    | 325   | 127   |
| >ABL1-V304<LVQLLGVCTR  | 61  | >ABL1-V304<LVQLLGGCTR   | 74    | 13    |
| >ABL1-V304<LVQLLGVCTR  | 562 | >ABL1-V304<LVQLLGGCTR   | 427   | 135   |
| >ABL1-V304<LVQLLGVCTR  | 318 | >ABL1-V304<LVQLLGGCTR   | 163   | 155   |
| >ABL1-V304<NLVQLLGV    | 191 | >ABL1-V304<NLVQLLGG     | 21019 | 20828 |
| >ABL1-V304<NLVQLLGV    | 58  | >ABL1-V304<NLVQLLGG     | 4564  | 4506  |
| >ABL1-V304<NLVQLLGV    | 15  | >ABL1-V304<NLVQLLGG     | 6508  | 6493  |
| >ABL1-V304<NLVQLLGV    | 22  | >ABL1-V304<NLVQLLGG     | 8349  | 8327  |
| >ABL1-V304<NLVQLLGV    | 8   | >ABL1-V304<NLVQLLGG     | 12124 | 12116 |
| >ABL1-V304<NLVQLLGV    | 20  | >ABL1-V304<NLVQLLGG     | 15448 | 15428 |
| >ABL1-V304<NLVQLLGV    | 27  | >ABL1-V304<NLVQLLGG     | 18434 | 18407 |
| >ABL1-V304<NLVQLLGV    | 54  | >ABL1-V304<NLVQLLGG     | 24355 | 24301 |
| >ABL1-V304<NLVQLLGV    | 4   | >ABL1-V304<NLVQLLGG     | 18821 | 18817 |
| >ABL1-V304<NLVQLLGVCT  | 392 | >ABL1-V304<NLVQLLGGCT   | 582   | 190   |
| >ABL1-V304<NLVQLLGVCT  | 165 | >ABL1-V304<NLVQLLGGCT   | 276   | 111   |
| >ABL1-V304<NLVQLLGV    | 82  | >ABL1-V304<NLVQLLGG     | 18746 | 18664 |
| >ABL1-V304<NLVQLLGVCT  | 204 | >ABL1-V304<NLVQLLGGCT   | 313   | 109   |
| >ABL1-V304<HPNLVQLLGV  | 29  | >ABL1-V304<HPNLVQLLGG   | 769   | 740   |
| >ABL1-V339L VLLYMATQI  | 170 | >ABL1-V339L LLLYMATQI   | 111   | 59    |
| >ABL1-V339L VLLYMATQI  | 525 | >ABL1-V339L LLLYMATQI   | 251   | 274   |
| >ABL1-V339L VLLYMATQI  | 104 | >ABL1-V339L LLLYMATQI   | 69    | 35    |
| >ABL1-V339L VLLYMATQI  | 574 | >ABL1-V339L LLLYMATQI   | 324   | 250   |
| >ABL1-V339L VLLYMATQI  | 52  | >ABL1-V339L LLLYMATQI   | 63    | 11    |
| >ABL1-V339L VLLYMATQI  | 178 | >ABL1-V339L LLLYMATQI   | 159   | 19    |
| >ABL1-V339L VLLYMATQI  | 44  | >ABL1-V339L LLLYMATQI   | 68    | 24    |
| >ABL1-V339L VLLYMATQI  | 57  | >ABL1-V339L LLLYMATQI   | 63    | 6     |
| >ABL1-V339L VLLYMATQ   | 155 | >ABL1-V339L LLLYMATQ    | 100   | 55    |

|                        |       |                        |      |       |
|------------------------|-------|------------------------|------|-------|
| >ABL1-V339L VLLYMATQI  | 17    | >ABL1-V339L LLLYMATQI  | 14   | 3     |
| >ABL1-V339L VLLYMATQI  | 47    | >ABL1-V339L LLLYMATQI  | 91   | 44    |
| >ABL1-V339L VVLLYMAT   | 269   | >ABL1-V339L VLLLYMAT   | 845  | 576   |
| >ABL1-V339L VVLLYMATQI | 3488  | >ABL1-V339L VLLLYMATQI | 249  | 3239  |
| >ABL1-V339L VVLLYMATQI | 1960  | >ABL1-V339L VLLLYMATQI | 306  | 1654  |
| >ABL1-V339L VVLLYMATQI | 2175  | >ABL1-V339L VLLLYMATQI | 362  | 1813  |
| >ABL1-V339L VVLLYMAT   | 5962  | >ABL1-V339L VLLLYMAT   | 97   | 5865  |
| >ABL1-V339L VVLLYMATQ  | 11817 | >ABL1-V339L VLLLYMATQ  | 483  | 11334 |
| >ABL1-V339L VVLLYMATQI | 750   | >ABL1-V339L VLLLYMATQI | 13   | 737   |
| >ABL1-V339L VVLLYMATQI | 4796  | >ABL1-V339L VLLLYMATQI | 92   | 4704  |
| >ABL1-V339L VVLLYMATQI | 3686  | >ABL1-V339L VLLLYMATQI | 34   | 3652  |
| >ABL1-V339L VVLLYMATQI | 2198  | >ABL1-V339L VLLLYMATQI | 33   | 2165  |
| >ABL1-V339L VVLLYMAT   | 15702 | >ABL1-V339L VLLLYMAT   | 133  | 15569 |
| >ABL1-V339L VVLLYMATQ  | 13902 | >ABL1-V339L VLLLYMATQ  | 81   | 13821 |
| >ABL1-V339L VVLLYMATQI | 2325  | >ABL1-V339L VLLLYMATQI | 12   | 2313  |
| >ABL1-V339L VVLLYMATQI | 261   | >ABL1-V339L VLLLYMATQI | 1793 | 1532  |
| >ABL1-V339L AVVLLYMA   | 392   | >ABL1-V339L AVLLLYMA   | 264  | 128   |
| >ABL1-V339L AVVLLYMATC | 664   | >ABL1-V339L AVLLLYMATC | 463  | 201   |
| >ABL1-V339L AVVLLYMATC | 334   | >ABL1-V339L AVLLLYMATC | 103  | 231   |
| >ABL1-V339L NAVVLLYM   | 201   | >ABL1-V339L NAVLLYM    | 244  | 43    |
| >ABL1-V339L NAVVLLYMA  | 142   | >ABL1-V339L NAVLLYMA   | 150  | 8     |
| >ABL1-V339L VNAVLLYM   | 1371  | >ABL1-V339L VNAVLLYM   | 338  | 1033  |
| >ABL1-V339L VNAVLLY    | 46    | >ABL1-V339L VNAVLLY    | 28   | 18    |
| >ABL1-V339L VNAVLLY    | 438   | >ABL1-V339L VNAVLLY    | 374  | 64    |
| >ABL1-V339L VNAVLLY    | 46    | >ABL1-V339L VNAVLLY    | 31   | 15    |
| >ABL1-V339L EVNAVLLY   | 155   | >ABL1-V339L EVNAVLLY   | 119  | 36    |
| >ABL1-V339L EVNAVLLY   | 267   | >ABL1-V339L EVNAVLLY   | 327  | 60    |
| >ABL1-V339L EVNAVLLY   | 425   | >ABL1-V339L EVNAVLLY   | 178  | 247   |
| >ABL1-V339L EVNAVLLY   | 28    | >ABL1-V339L EVNAVLLY   | 21   | 7     |
| >ABL1-V339L EVNAVLLY   | 42    | >ABL1-V339L EVNAVLLY   | 21   | 21    |
| >ABL1-V339L EVNAVLLYM  | 22    | >ABL1-V339L EVNAVLLYM  | 15   | 7     |
| >ABL1-V339L EVNAVLLY   | 459   | >ABL1-V339L EVNAVLLY   | 371  | 88    |
| >ABL1-V339L EVNAVLLYM  | 440   | >ABL1-V339L EVNAVLLYM  | 373  | 67    |
| >ABL1-V339L EVNAVLLY   | 27    | >ABL1-V339L EVNAVLLY   | 17   | 10    |
| >ABL1-V339L EVNAVLLY   | 961   | >ABL1-V339L EVNAVLLY   | 489  | 472   |
| >ABL1-V339L EVNAVLLY   | 39    | >ABL1-V339L EVNAVLLY   | 70   | 31    |
| >ABL1-V339L EVNAVLL    | 8     | >ABL1-V339L EVNAVLL    | 17   | 9     |
| >ABL1-V339L EVNAVLLYM  | 193   | >ABL1-V339L EVNAVLLYM  | 585  | 392   |
| >ABL1-V339L EVNAVLLYM  | 10    | >ABL1-V339L EVNAVLLYM  | 11   | 1     |
| >ABL1-V339L EVNAVLL    | 57    | >ABL1-V339L EVNAVLL    | 59   | 2     |
| >ABL1-V339L EVNAVLLYM  | 22    | >ABL1-V339L EVNAVLLYM  | 21   | 1     |
| >ABL1-V339L EVNAVLLYM  | 50    | >ABL1-V339L EVNAVLLYM  | 51   | 1     |
| >ABL1-V339L EVNAVLLY   | 7     | >ABL1-V339L EVNAVLLY   | 6    | 1     |

|                       |      |                        |      |      |
|-----------------------|------|------------------------|------|------|
| >ABL1-V339L EVNAVLLY  | 470  | >ABL1-V339L EVNAVLLY   | 903  | 433  |
| >ABL1-V339L EVNAVLLY  | 152  | >ABL1-V339L EVNAVLLY   | 125  | 27   |
| >ABL1-V339L QEVNAVVL  | 11   | >ABL1-V339L QEVNAVLL   | 7    | 4    |
| >ABL1-V339L QEVNAVLL  | 157  | >ABL1-V339L QEVNAVLLL  | 100  | 57   |
| >ABL1-V339L QEVNAVLLY | 178  | >ABL1-V339L QEVNAVLLLY | 162  | 16   |
| >ABL1-V339L QEVNAVLLY | 251  | >ABL1-V339L QEVNAVLLLY | 59   | 192  |
| >ABL1-V339L QEVNAVVL  | 263  | >ABL1-V339L QEVNAVLL   | 615  | 352  |
| >ABL1-V339L QEVNAVLL  | 375  | >ABL1-V339L QEVNAVLLL  | 304  | 71   |
| >ABL1-V339L QEVNAVLLY | 152  | >ABL1-V339L QEVNAVLLLY | 126  | 26   |
| >ABL1-V339L QEVNAVVL  | 190  | >ABL1-V339L QEVNAVLL   | 1127 | 937  |
| >ABL1-V339L QEVNAVVL  | 13   | >ABL1-V339L QEVNAVLL   | 15   | 2    |
| >ABL1-V339L QEVNAVLL  | 14   | >ABL1-V339L QEVNAVLLL  | 18   | 4    |
| >ABL1-V339L QEVNAVLLY | 82   | >ABL1-V339L QEVNAVLLLY | 106  | 24   |
| >ABL1-V339L QEVNAVVL  | 212  | >ABL1-V339L QEVNAVLL   | 345  | 133  |
| >ABL1-V339L QEVNAVLL  | 210  | >ABL1-V339L QEVNAVLLL  | 88   | 122  |
| >ABL1-V339L QEVNAVLLY | 388  | >ABL1-V339L QEVNAVLLLY | 210  | 178  |
| >ABL1-V339L QEVNAVLLY | 96   | >ABL1-V339L QEVNAVLLLY | 116  | 20   |
| >ABL1-V339L QEVNAVVL  | 389  | >ABL1-V339L QEVNAVLL   | 172  | 217  |
| >ABL1-V339L QEVNAVLL  | 140  | >ABL1-V339L QEVNAVLLL  | 84   | 56   |
| >ABL1-V339L QEVNAVLLY | 37   | >ABL1-V339L QEVNAVLLLY | 34   | 3    |
| >ABL1-V339L QEVNAVLLY | 114  | >ABL1-V339L QEVNAVLLLY | 90   | 24   |
| >ABL1-V339L QEVNAVVL  | 164  | >ABL1-V339L QEVNAVLL   | 150  | 14   |
| >ABL1-V339L QEVNAVLL  | 11   | >ABL1-V339L QEVNAVLLL  | 16   | 5    |
| >ABL1-V339L QEVNAVLLY | 44   | >ABL1-V339L QEVNAVLLLY | 49   | 5    |
| >ABL1-V339L RQEVNAV   | 173  | >ABL1-V339L RQEVNAV    | 1270 | 1097 |
| >ABL1-V339L RQEVNAVLI | 569  | >ABL1-V339L RQEVNAVLLL | 413  | 156  |
| >ABL1-V339L RQEVNAVLI | 90   | >ABL1-V339L RQEVNAVLLL | 62   | 28   |
| >ABL1-V339L RQEVNAVLI | 203  | >ABL1-V339L RQEVNAVLLL | 335  | 132  |
| >ABL1-V339L RQEVNAV   | 781  | >ABL1-V339L RQEVNAV    | 312  | 469  |
| >ABL1-V339L RQEVNAVVL | 115  | >ABL1-V339L RQEVNAVLL  | 565  | 450  |
| >ABL1-V339L RQEVNAVLI | 319  | >ABL1-V339L RQEVNAVLLL | 609  | 290  |
| >ABL1-V339L RQEVNAVLI | 104  | >ABL1-V339L RQEVNAVLLL | 207  | 103  |
| >ABL1-V339L RQEVNAV   | 1497 | >ABL1-V339L RQEVNAV    | 79   | 1418 |
| >ABL1-V339L RQEVNAVVL | 27   | >ABL1-V339L RQEVNAVLL  | 176  | 149  |
| >ABL1-V339L RQEVNAVLI | 156  | >ABL1-V339L RQEVNAVLLL | 317  | 161  |
| >ABL1-V339L RQEVNAV   | 2089 | >ABL1-V339L RQEVNAV    | 179  | 1910 |
| >ABL1-V339L RQEVNAVVL | 90   | >ABL1-V339L RQEVNAVLL  | 139  | 49   |
| >ABL1-V339L RQEVNAV   | 5559 | >ABL1-V339L RQEVNAV    | 333  | 5226 |
| >ABL1-V339L RQEVNAVVL | 197  | >ABL1-V339L RQEVNAVLL  | 160  | 37   |
| >ABL1-V339L RQEVNAVLI | 139  | >ABL1-V339L RQEVNAVLLL | 226  | 87   |
| >ABL1-V339L RQEVNAV   | 862  | >ABL1-V339L RQEVNAV    | 134  | 728  |
| >ABL1-V339L RQEVNAVVL | 258  | >ABL1-V339L RQEVNAVLL  | 157  | 101  |
| >ABL1-V339L RQEVNAVLI | 686  | >ABL1-V339L RQEVNAVLLL | 158  | 528  |

|                        |      |                        |      |      |
|------------------------|------|------------------------|------|------|
| >ABL1-V339L RQEVNAVVL  | 59   | >ABL1-V339L RQEVNAVLL  | 19   | 40   |
| >ABL1-V339L RQEVNAVVLI | 765  | >ABL1-V339L RQEVNAVLLL | 229  | 536  |
| >ABL1-V339L RQEVNAVVLI | 197  | >ABL1-V339L RQEVNAVLLL | 159  | 38   |
| >ABL1-V339L RQEVNAVVLI | 243  | >ABL1-V339L RQEVNAVLLL | 190  | 53   |
| >ABL1-V339L NRQEVNAV   | 200  | >ABL1-V339L NRQEVNAVLI | 152  | 48   |
| >ABL1-V339L NRQEVNAV   | 328  | >ABL1-V339L NRQEVNAVLI | 312  | 16   |
| >ABL1-V339L NRQEVNAV   | 106  | >ABL1-V339L NRQEVNAVLI | 13   | 93   |
| >ABL1-V339L NRQEVNAV   | 11   | >ABL1-V339L NRQEVNAVLI | 28   | 17   |
| >ABL1-V339L NRQEVNAV   | 35   | >ABL1-V339L NRQEVNAVLI | 48   | 13   |
| >ABL1-V339L NRQEVNAV   | 1352 | >ABL1-V339L NRQEVNAVLI | 200  | 1152 |
| >ABL1-V339L NRQEVNAV   | 275  | >ABL1-V339L NRQEVNAVLI | 216  | 59   |
| >ABL1-V339L NRQEVNAV   | 107  | >ABL1-V339L NRQEVNAVLI | 71   | 36   |
| >ABL1-V339L NRQEVNAV   | 1323 | >ABL1-V339L NRQEVNAVLI | 77   | 1246 |
| >ABL1-V339L NRQEVNAV   | 120  | >ABL1-V339L NRQEVNAVLI | 110  | 10   |
| >ABL1-V339L NRQEVNAV   | 20   | >ABL1-V339L NRQEVNAVLI | 14   | 6    |
| >ABL1-V371/LVGENHLV    | 173  | >ABL1-V371/LAGENHLV    | 804  | 631  |
| >ABL1-V371/LVGENHLV    | 361  | >ABL1-V371/LAGENHLV    | 2777 | 2416 |
| >ABL1-V371/LVGENHLVK\  | 318  | >ABL1-V371/LAGENHLVK\  | 1093 | 775  |
| >ABL1-V371/LVGENHLV    | 140  | >ABL1-V371/LAGENHLV    | 843  | 703  |
| >ABL1-V371/LVGENHLVK\  | 494  | >ABL1-V371/LAGENHLVK\  | 1313 | 819  |
| >ABL1-V371/LVGENHLV    | 21   | >ABL1-V371/LAGENHLV    | 95   | 74   |
| >ABL1-V371/LVGENHLVK\  | 17   | >ABL1-V371/LAGENHLVK\  | 78   | 61   |
| >ABL1-V371/LVGENHLV    | 93   | >ABL1-V371/LAGENHLV    | 1133 | 1040 |
| >ABL1-V371/LVGENHLVK\  | 125  | >ABL1-V371/LAGENHLVK\  | 1651 | 1526 |
| >ABL1-V371/LVGENHLV    | 128  | >ABL1-V371/LAGENHLV    | 1319 | 1191 |
| >ABL1-V371/LVGENHLVK\  | 187  | >ABL1-V371/LAGENHLVK\  | 2018 | 1831 |
| >ABL1-V371/LVGENHLV    | 120  | >ABL1-V371/LAGENHLV    | 1887 | 1767 |
| >ABL1-V371/LVGENHLVK\  | 245  | >ABL1-V371/LAGENHLVK\  | 4101 | 3856 |
| >ABL1-V371/LVGENHLV    | 5    | >ABL1-V371/LAGENHLV    | 24   | 19   |
| >ABL1-V371/LVGENHLVK\  | 5    | >ABL1-V371/LAGENHLVK\  | 41   | 36   |
| >ABL1-V371/LVGENHLVK   | 127  | >ABL1-V371/LAGENHLVK   | 836  | 709  |
| >ABL1-V371/LVGENHLVK   | 290  | >ABL1-V371/LAGENHLVK   | 1133 | 843  |
| >ABL1-V371/LVGENHLV    | 87   | >ABL1-V371/LAGENHLV    | 242  | 155  |
| >ABL1-V371/LVGENHLVK\  | 236  | >ABL1-V371/LAGENHLVK\  | 595  | 359  |
| >ABL1-V371/CLVGENHLV   | 111  | >ABL1-V371/CLAGENHLV   | 29   | 82   |
| >ABL1-V371/CLVGENHLVK  | 147  | >ABL1-V371/CLAGENHLVK  | 42   | 105  |
| >ABL1-V371/CLVGENHL    | 64   | >ABL1-V371/CLAGENHL    | 14   | 50   |
| >ABL1-V371/CLVGENHLV   | 10   | >ABL1-V371/CLAGENHLV   | 4    | 6    |
| >ABL1-V371/CLVGENHLVK  | 23   | >ABL1-V371/CLAGENHLVK  | 6    | 17   |
| >ABL1-V371/CLVGENHL    | 1112 | >ABL1-V371/CLAGENHL    | 359  | 753  |
| >ABL1-V371/CLVGENHLV   | 58   | >ABL1-V371/CLAGENHLV   | 17   | 41   |
| >ABL1-V371/CLVGENHLVK  | 41   | >ABL1-V371/CLAGENHLVK  | 14   | 27   |
| >ABL1-V371/CLVGENHLV   | 245  | >ABL1-V371/CLAGENHLV   | 217  | 28   |

|                        |      |                         |      |      |
|------------------------|------|-------------------------|------|------|
| >ABL1-V371/CLVGENHLVκ  | 147  | >ABL1-V371/CLAGENHLVκ   | 147  | 0    |
| >ABL1-V371/CLVGENHLV   | 17   | >ABL1-V371/CLAGENHLV    | 13   | 4    |
| >ABL1-V371/CLVGENHLVκ  | 12   | >ABL1-V371/CLAGENHLVκ   | 11   | 1    |
| >ABL1-V371/CLVGENHLV   | 41   | >ABL1-V371/CLAGENHLV    | 40   | 1    |
| >ABL1-V371/CLVGENHLVκ  | 43   | >ABL1-V371/CLAGENHLVκ   | 41   | 2    |
| >ABL1-V371/CLVGENHL    | 1742 | >ABL1-V371/CLAGENHL     | 379  | 1363 |
| >ABL1-V371/CLVGENHLV   | 55   | >ABL1-V371/CLAGENHLV    | 18   | 37   |
| >ABL1-V371/CLVGENHLVκ  | 67   | >ABL1-V371/CLAGENHLVκ   | 21   | 46   |
| >ABL1-V371/CLVGENHL    | 1704 | >ABL1-V371/CLAGENHL     | 302  | 1402 |
| >ABL1-V371/CLVGENHLV   | 20   | >ABL1-V371/CLAGENHLV    | 4    | 16   |
| >ABL1-V371/CLVGENHLVκ  | 31   | >ABL1-V371/CLAGENHLVκ   | 5    | 26   |
| >ABL1-V371/CLVGENHL    | 29   | >ABL1-V371/CLAGENHL     | 15   | 14   |
| >ABL1-V371/CLVGENHLV   | 3    | >ABL1-V371/CLAGENHLV    | 2    | 1    |
| >ABL1-V371/CLVGENHLVκ  | 3    | >ABL1-V371/CLAGENHLVκ   | 2    | 1    |
| >ABL1-V371/CLVGENHLVκ  | 136  | >ABL1-V371/CLAGENHLVκ   | 125  | 11   |
| >ABL1-V371/CLVGENHLVκ  | 365  | >ABL1-V371/CLAGENHLVκ   | 323  | 42   |
| >ABL1-V371/CLVGENHLV   | 1144 | >ABL1-V371/CLAGENHLV    | 240  | 904  |
| >ABL1-V371/NCLVGENHL\  | 489  | >ABL1-V371/NCLAGENHL\   | 221  | 268  |
| >ABL1-V371/ARNCLVGENI  | 294  | >ABL1-V371/ARNCLAGENI   | 301  | 7    |
| >ABL1-V371/ARNCLVGENI  | 159  | >ABL1-V371/ARNCLAGENI   | 232  | 73   |
| >ABL1-V371/AARNCLVG    | 652  | >ABL1-V371/AARNCLAG     | 408  | 244  |
| >ABL1-V371/LAARNCLV    | 55   | >ABL1-V371/LAARNCLA     | 7483 | 7428 |
| >ABL1-V371/LAARNCLV    | 387  | >ABL1-V371/LAARNCLA     | 4026 | 3639 |
| >ABL1-V371/DLAARNCLV   | 198  | >ABL1-V371/DLAARNCLA    | 2024 | 1826 |
| >ABL1-V371/DLAARNCLV   | 142  | >ABL1-V371/DLAARNCLA    | 6330 | 6188 |
| >ABL1-V371/DLAARNCLV   | 33   | >ABL1-V371/DLAARNCLA    | 2106 | 2073 |
| >ABL1-V371/DLAARNCLV   | 85   | >ABL1-V371/DLAARNCLA    | 4401 | 4316 |
| >ABL1-V371/DLAARNCLV   | 12   | >ABL1-V371/DLAARNCLA    | 247  | 235  |
| >ABL1-V371/DLAARNCLV   | 200  | >ABL1-V371/DLAARNCLA    | 1959 | 1759 |
| >ABL1-V371/DLAARNCLV   | 355  | >ABL1-V371/DLAARNCLA    | 7076 | 6721 |
| >ABL1-V371/RDLAARNCLV  | 89   | >ABL1-V371/RDLAARNCLA   | 2391 | 2302 |
| >ABL1-V379I VADFGLSRL  | 120  | >ABL1-V379I IADFGLSRL   | 71   | 49   |
| >ABL1-V379I VADFGLSRLM | 464  | >ABL1-V379I IADFGLSRLM  | 280  | 184  |
| >ABL1-V379I VADFGLSRL  | 179  | >ABL1-V379I IADFGLSRL   | 98   | 81   |
| >ABL1-V379I KVADFGLSRL | 46   | >ABL1-V379I KIADFGLSRL  | 28   | 18   |
| >ABL1-V379I KVADFGLSRL | 351  | >ABL1-V379I KIADFGLSRLM | 152  | 199  |
| >ABL1-V379I KVADFGLSRL | 101  | >ABL1-V379I KIADFGLSRL  | 59   | 42   |
| >ABL1-V379I KVADFGLSRL | 307  | >ABL1-V379I KIADFGLSRL  | 279  | 28   |
| >ABL1-V379I KVADFGLSRL | 217  | >ABL1-V379I KIADFGLSRL  | 64   | 153  |
| >ABL1-V379I KVADFGLSRL | 965  | >ABL1-V379I KIADFGLSRL  | 321  | 644  |
| >ABL1-V379I KVADFGLSRL | 51   | >ABL1-V379I KIADFGLSRL  | 17   | 34   |
| >ABL1-V379I KVADFGLSR  | 309  | >ABL1-V379I KIADFGLSR   | 274  | 35   |
| >ABL1-V379I KVADFGLSR  | 27   | >ABL1-V379I KIADFGLSR   | 56   | 29   |

|                        |     |                         |      |      |
|------------------------|-----|-------------------------|------|------|
| >ABL1-V379I KVADFGLSR  | 59  | >ABL1-V379I KIADFGLSR   | 87   | 28   |
| >ABL1-V379I KVADFGLSR  | 145 | >ABL1-V379I KIADFGLSR   | 326  | 181  |
| >ABL1-V379I KVADFGLSRL | 67  | >ABL1-V379I KIADFGLSRL  | 333  | 266  |
| >ABL1-V379I KVADFGLSRL | 317 | >ABL1-V379I KIADFGLSRLM | 1255 | 938  |
| >ABL1-V379I KVADFGLSRL | 44  | >ABL1-V379I KIADFGLSRLM | 167  | 123  |
| >ABL1-V379I KVADFGLSR  | 21  | >ABL1-V379I KIADFGLSR   | 14   | 7    |
| >ABL1-V379I CLVGENHLVK | 147 | >ABL1-V379I CLVGENHLVK  | 759  | 612  |
| >ABL1-V379I CLVGENHLVK | 23  | >ABL1-V379I CLVGENHLVK  | 68   | 45   |
| >ABL1-V379I CLVGENHLVK | 41  | >ABL1-V379I CLVGENHLVK  | 176  | 135  |
| >ABL1-V379I CLVGENHLVK | 147 | >ABL1-V379I CLVGENHLVK  | 954  | 807  |
| >ABL1-V379I CLVGENHLVK | 12  | >ABL1-V379I CLVGENHLVK  | 157  | 145  |
| >ABL1-V379I CLVGENHLVK | 43  | >ABL1-V379I CLVGENHLVK  | 431  | 388  |
| >ABL1-V379I CLVGENHLVK | 67  | >ABL1-V379I CLVGENHLVK  | 2024 | 1957 |
| >ABL1-V379I CLVGENHLVK | 31  | >ABL1-V379I CLVGENHLVK  | 1088 | 1057 |
| >ABL1-V379I CLVGENHLVK | 3   | >ABL1-V379I CLVGENHLVK  | 40   | 37   |
| >ABL1-V379I VKVADFGL   | 477 | >ABL1-V379I VKIADFGL    | 358  | 119  |
| >ABL1-V379I VKVADFGLSR | 341 | >ABL1-V379I VKIADFGLSR  | 247  | 94   |
| >ABL1-V379I VKVADFGLSR | 345 | >ABL1-V379I VKIADFGLSRI | 244  | 101  |
| >ABL1-V379I LVKVADFGLS | 257 | >ABL1-V379I LVKIADFGLSF | 354  | 97   |
| >ABL1-V379I LVKVADFGLS | 64  | >ABL1-V379I LVKIADFGLSF | 73   | 9    |
| >ABL1-V379I LVKVADFGLS | 358 | >ABL1-V379I LVKIADFGLSF | 481  | 123  |
| >ABL1-V379I LVKVADFGLS | 133 | >ABL1-V379I LVKIADFGLSF | 134  | 1    |
| >ABL1-V379I HLVKVADFGL | 418 | >ABL1-V379I HLVKIADFGL  | 343  | 75   |
| >ABL1-V379I HLVKVADFGL | 73  | >ABL1-V379I HLVKIADFGL  | 64   | 9    |
| >ABL1-V379I HLVKVADFGL | 71  | >ABL1-V379I HLVKIADFGL  | 126  | 55   |
| >ABL1-V379I HLVKVADFGL | 37  | >ABL1-V379I HLVKIADFGL  | 41   | 4    |
| >ABL1-V379I HLVKVADFGL | 36  | >ABL1-V379I HLVKIADFGL  | 52   | 16   |
| >ABL1-V379I HLVKVADFGL | 31  | >ABL1-V379I HLVKIADFGL  | 24   | 7    |
| >ABL1-V379I HLVKVADF   | 416 | >ABL1-V379I HLVKIADF    | 630  | 214  |
| >ABL1-V379I HLVKVADF   | 257 | >ABL1-V379I HLVKIADF    | 293  | 36   |
| >ABL1-V379I NHLVKVADFG | 224 | >ABL1-V379I NHLVKIADFG  | 356  | 132  |
| >ABL1-V379I GENHLVKV   | 375 | >ABL1-V379I GENHLVKI    | 175  | 200  |
| >ABL1-V379I GENHLVKV   | 247 | >ABL1-V379I GENHLVKI    | 187  | 60   |
| >ABL1-V379I GENHLVKVA  | 86  | >ABL1-V379I GENHLVKIA   | 102  | 16   |
| >ABL1-V379I GENHLVKVAI | 476 | >ABL1-V379I GENHLVKIAD  | 485  | 9    |
| >ABL1-V379I GENHLVKVAI | 147 | >ABL1-V379I GENHLVKIAD  | 140  | 7    |
| >ABL1-V379I GENHLVKVAI | 79  | >ABL1-V379I GENHLVKIAD  | 65   | 14   |
| >ABL1-V379I GENHLVKV   | 299 | >ABL1-V379I GENHLVKI    | 1275 | 976  |
| >ABL1-V379I GENHLVKVA  | 58  | >ABL1-V379I GENHLVKIA   | 142  | 84   |
| >ABL1-V379I GENHLVKV   | 704 | >ABL1-V379I GENHLVKI    | 70   | 634  |
| >ABL1-V379I GENHLVKVAI | 116 | >ABL1-V379I GENHLVKIAD  | 106  | 10   |
| >ABL1-V379I LVGENHLVKI | 318 | >ABL1-V379I LVGENHLVKI  | 1220 | 902  |
| >ABL1-V379I LVGENHLVKI | 494 | >ABL1-V379I LVGENHLVKI  | 2296 | 1802 |

|                        |      |                        |      |      |
|------------------------|------|------------------------|------|------|
| >ABL1-V379I LVGENHLVK\ | 17   | >ABL1-V379I LVGENHLVKI | 228  | 211  |
| >ABL1-V379I LVGENHLVK\ | 125  | >ABL1-V379I LVGENHLVKI | 1356 | 1231 |
| >ABL1-V379I LVGENHLVK\ | 187  | >ABL1-V379I LVGENHLVKI | 4202 | 4015 |
| >ABL1-V379I LVGENHLVK\ | 245  | >ABL1-V379I LVGENHLVKI | 5443 | 5198 |
| >ABL1-V379I LVGENHLVK\ | 5    | >ABL1-V379I LVGENHLVKI | 535  | 530  |
| >ABL1-V379I LVGENHLVK\ | 236  | >ABL1-V379I LVGENHLVKI | 1390 | 1154 |
| >ABL1-Y253F YGGEVYEGVW | 1213 | >ABL1-Y253F FGEVYEGVW  | 268  | 945  |
| >ABL1-Y253F YGGEVYEGVW | 157  | >ABL1-Y253F FGEVYEGVW  | 48   | 109  |
| >ABL1-Y253F QYGEVYEGV  | 434  | >ABL1-Y253F QFGEVYEGV  | 453  | 19   |
| >ABL1-Y253F QYGEVYEGV\ | 277  | >ABL1-Y253F QFGEVYEGV\ | 2304 | 2027 |
| >ABL1-Y253F QYGEVYEGV  | 92   | >ABL1-Y253F QFGEVYEGV  | 3041 | 2949 |
| >ABL1-Y253F QYGEVYEGV\ | 17   | >ABL1-Y253F QFGEVYEGV\ | 216  | 199  |
| >ABL1-Y253F QYGEVYEGV\ | 450  | >ABL1-Y253F QFGEVYEGV\ | 1039 | 589  |
| >ABL1-Y253F TMKHKLGGG  | 76   | >ABL1-Y253F TMKHKLGGG  | 2520 | 2444 |
| >ABL1-Y253F TMKHKLGGG  | 32   | >ABL1-Y253F TMKHKLGGG  | 4607 | 4575 |
| >ABL1-Y253F TMKHKLGGG  | 69   | >ABL1-Y253F TMKHKLGGG  | 72   | 3    |
| >ABL1-Y253F TMKHKLGGG  | 77   | >ABL1-Y253F TMKHKLGGG  | 166  | 89   |
| >ABL1-Y253F TMKHKLGGG  | 1620 | >ABL1-Y253F TMKHKLGGG  | 315  | 1305 |
| >ABL1-Y253F GQYGEVYEG\ | 170  | >ABL1-Y253F GQFGEVYEG\ | 172  | 2    |
| >ABL1-Y253F GQYGEVYEG\ | 44   | >ABL1-Y253F GQFGEVYEG\ | 52   | 8    |
| >ABL1-Y253F GQYGEVYEG\ | 58   | >ABL1-Y253F GQFGEVYEG\ | 70   | 12   |
| >ABL1-Y253F GQYGEVYEG\ | 109  | >ABL1-Y253F GQFGEVYEG\ | 116  | 7    |
| >ABL1-Y253F GQYGEVYEG\ | 6    | >ABL1-Y253F GQFGEVYEG\ | 7    | 1    |
| >ABL1-Y253F GQYGEVYEG\ | 21   | >ABL1-Y253F GQFGEVYEG\ | 25   | 4    |
| >ABL1-Y253F GQYGEVYEG\ | 13   | >ABL1-Y253F GQFGEVYEG\ | 15   | 2    |
| >ABL1-Y253F GQYGEVYEG\ | 66   | >ABL1-Y253F GQFGEVYEG\ | 93   | 27   |
| >ABL1-Y253F GQYGEVYEG\ | 58   | >ABL1-Y253F GQFGEVYEG\ | 27   | 31   |
| >ABL1-Y253F GGQYGEVY   | 341  | >ABL1-Y253F GGQFGEVY   | 380  | 39   |
| >ABL1-Y253F GGGQYGEVY  | 235  | >ABL1-Y253F GGGQFGEVY  | 354  | 119  |
| >ABL1-Y253F GGGQYGEVY  | 326  | >ABL1-Y253F GGGQFGEVY  | 170  | 156  |
| >ABL1-Y253F LGGGQYGEV\ | 272  | >ABL1-Y253F LGGGQFGEV\ | 182  | 90   |
| >ABL1-Y253F KLGGGQYGE\ | 212  | >ABL1-Y253F KLGGGQFGE\ | 80   | 132  |
| >ABL1-Y253F KLGGGQYGE\ | 90   | >ABL1-Y253F KLGGGQFGE\ | 75   | 15   |
| >ABL1-Y253F KLGGGQYGE\ | 56   | >ABL1-Y253F KLGGGQFGE\ | 33   | 23   |
| >ABL1-Y253F KLGGGQYGE\ | 3    | >ABL1-Y253F KLGGGQFGE\ | 3    | 0    |
| >ABL1-Y253F KLGGGQYGE\ | 16   | >ABL1-Y253F KLGGGQFGE\ | 12   | 4    |
| >ABL1-Y253F KLGGGQYGE\ | 7    | >ABL1-Y253F KLGGGQFGE\ | 7    | 0    |
| >ABL1-Y253F KLGGGQYGE\ | 19   | >ABL1-Y253F KLGGGQFGE\ | 17   | 2    |
| >ABL1-Y253F KLGGGQYGE\ | 2    | >ABL1-Y253F KLGGGQFGE\ | 2    | 0    |
| >ABL1-Y253F KLGGGQYGE\ | 128  | >ABL1-Y253F KLGGGQFGE\ | 143  | 15   |
| >ABL1-Y253F KLGGGQYGE\ | 64   | >ABL1-Y253F KLGGGQFGE\ | 62   | 2    |
| >ABL1-Y253F KLGGGQYGE\ | 37   | >ABL1-Y253F KLGGGQFGE\ | 29   | 8    |
| >ABL1-Y253F KLGGGQYGE\ | 87   | >ABL1-Y253F KLGGGQFGE\ | 97   | 10   |



|                        |      |                        |       |       |
|------------------------|------|------------------------|-------|-------|
| >ABL1-Y253F KLGGGQYGE' | 354  | >ABL1-Y253F KLGGGQFGE' | 280   | 74    |
| >ABL1-Y253F KLGGGQYGE' | 385  | >ABL1-Y253F KLGGGQFGE' | 424   | 39    |
| >ABL1-Y253F HKLGGGQY   | 132  | >ABL1-Y253F HKLGGGQF   | 326   | 194   |
| >ABL1-Y253F HKLGGGQY   | 100  | >ABL1-Y253F HKLGGGQF   | 28    | 72    |
| >ABL1-Y253F KHKLGGGQY  | 241  | >ABL1-Y253F KHKLGGGQF  | 11159 | 10918 |
| >ABL1-Y253F MKHKLGGGC  | 221  | >ABL1-Y253F MKHKLGGGC  | 7728  | 7507  |
| >ABL1-Y253F MKHKLGGGC  | 35   | >ABL1-Y253F MKHKLGGGC  | 13    | 22    |
| >ABL1-Y253F MKHKLGGGC  | 330  | >ABL1-Y253F MKHKLGGGC  | 220   | 110   |
| >ABL1-Y253F YGEVYEGVW  | 157  | >ABL1-Y253F HGEVYEGVW  | 56    | 101   |
| >ABL1-Y253F QYGEVYEGV  | 434  | >ABL1-Y253F QHGEVYEGV  | 3595  | 3161  |
| >ABL1-Y253F QYGEVYEGV' | 277  | >ABL1-Y253F QHGEVYEGV' | 11999 | 11722 |
| >ABL1-Y253F QYGEVYEGV  | 92   | >ABL1-Y253F QHGEVYEGV  | 16056 | 15964 |
| >ABL1-Y253F QYGEVYEGV' | 17   | >ABL1-Y253F QHGEVYEGV' | 9546  | 9529  |
| >ABL1-Y253F QYGEVYEGV' | 2168 | >ABL1-Y253F QHGEVYEGV' | 232   | 1936  |
| >ABL1-Y253F QYGEVYEGV' | 450  | >ABL1-Y253F QHGEVYEGV' | 6401  | 5951  |
| >ABL1-Y253F TMKHKLGGG  | 76   | >ABL1-Y253F TMKHKLGGG  | 8749  | 8673  |
| >ABL1-Y253F TMKHKLGGG  | 32   | >ABL1-Y253F TMKHKLGGG  | 7178  | 7146  |
| >ABL1-Y253F TMKHKLGGG  | 69   | >ABL1-Y253F TMKHKLGGG  | 3980  | 3911  |
| >ABL1-Y253F TMKHKLGGG  | 77   | >ABL1-Y253F TMKHKLGGG  | 2895  | 2818  |
| >ABL1-Y253F GQYGEVYEG' | 170  | >ABL1-Y253F GQHGEVYEG  | 1673  | 1503  |
| >ABL1-Y253F GQYGEVYEG' | 44   | >ABL1-Y253F GQHGEVYEG  | 331   | 287   |
| >ABL1-Y253F GQYGEVYEG' | 58   | >ABL1-Y253F GQHGEVYEG  | 374   | 316   |
| >ABL1-Y253F GQYGEVYEG' | 109  | >ABL1-Y253F GQHGEVYEG  | 722   | 613   |
| >ABL1-Y253F GQYGEVYEG' | 6    | >ABL1-Y253F GQHGEVYEG  | 27    | 21    |
| >ABL1-Y253F GQYGEVYEG' | 21   | >ABL1-Y253F GQHGEVYEG  | 148   | 127   |
| >ABL1-Y253F GQYGEVYEG' | 13   | >ABL1-Y253F GQHGEVYEG  | 123   | 110   |
| >ABL1-Y253F GQYGEVYEG' | 66   | >ABL1-Y253F GQHGEVYEG  | 377   | 311   |
| >ABL1-Y253F GQYGEVYEG' | 58   | >ABL1-Y253F GQHGEVYEG  | 162   | 104   |
| >ABL1-Y253F GGQYGEVY   | 341  | >ABL1-Y253F GGQHGEVY   | 556   | 215   |
| >ABL1-Y253F GGGQYGEVY  | 235  | >ABL1-Y253F GGGQHGEVY  | 185   | 50    |
| >ABL1-Y253F GGGQYGEVY  | 326  | >ABL1-Y253F GGGQHGEVY  | 1677  | 1351  |
| >ABL1-Y253F LGGGQYGEV' | 272  | >ABL1-Y253F LGGGQHGEV  | 195   | 77    |
| >ABL1-Y253F KLGGGQYGE' | 212  | >ABL1-Y253F KLGGGQHGE  | 409   | 197   |
| >ABL1-Y253F KLGGGQYGE' | 90   | >ABL1-Y253F KLGGGQHGE  | 173   | 83    |
| >ABL1-Y253F KLGGGQYGE' | 56   | >ABL1-Y253F KLGGGQHGE  | 107   | 51    |
| >ABL1-Y253F KLGGGQYGE' | 3    | >ABL1-Y253F KLGGGQHGE  | 3     | 0     |
| >ABL1-Y253F KLGGGQYGE' | 16   | >ABL1-Y253F KLGGGQHGE  | 29    | 13    |
| >ABL1-Y253F KLGGGQYGE' | 7    | >ABL1-Y253F KLGGGQHGE  | 8     | 1     |
| >ABL1-Y253F KLGGGQYGE' | 19   | >ABL1-Y253F KLGGGQHGE  | 37    | 18    |
| >ABL1-Y253F KLGGGQYGE  | 2895 | >ABL1-Y253F KLGGGQHGE  | 406   | 2489  |
| >ABL1-Y253F KLGGGQYGE' | 2    | >ABL1-Y253F KLGGGQHGE  | 2     | 0     |
| >ABL1-Y253F KLGGGQYGE' | 128  | >ABL1-Y253F KLGGGQHGE  | 169   | 41    |
| >ABL1-Y253F KLGGGQYGE' | 64   | >ABL1-Y253F KLGGGQHGE  | 78    | 14    |

|                         |     |                         |       |       |
|-------------------------|-----|-------------------------|-------|-------|
| >ABL1-Y253F KLGGGQYGE'  | 37  | >ABL1-Y253F KLGGGQHGE   | 59    | 22    |
| >ABL1-Y253F KLGGGQYGE'  | 87  | >ABL1-Y253F KLGGGQHGE   | 88    | 1     |
| >ABL1-Y253F KLGGGQYGE'  | 354 | >ABL1-Y253F KLGGGQHGE   | 224   | 130   |
| >ABL1-Y253F KLGGGQYGE'  | 385 | >ABL1-Y253F KLGGGQHGE   | 555   | 170   |
| >ABL1-Y253F HKLGGGQY    | 132 | >ABL1-Y253F HKLGGGQH    | 6552  | 6420  |
| >ABL1-Y253F HKLGGGQY    | 100 | >ABL1-Y253F HKLGGGQH    | 4511  | 4411  |
| >ABL1-Y253F KHKLGGGQY   | 241 | >ABL1-Y253F KHKLGGGQH   | 14121 | 13880 |
| >ABL1-Y253F MKHKLGGGC   | 221 | >ABL1-Y253F MKHKLGGGC   | 22249 | 22028 |
| >ABL1-Y253F MKHKLGGGC   | 35  | >ABL1-Y253F MKHKLGGGC   | 1672  | 1637  |
| >ABL1-Y253F MKHKLGGGC   | 330 | >ABL1-Y253F MKHKLGGGC   | 2407  | 2077  |
| >ABL1-Y353F YLEKKNFI    | 313 | >ABL1-Y353F HLEKKNFI    | 7350  | 7037  |
| >ABL1-Y353F YLEKKNFI    | 23  | >ABL1-Y353F HLEKKNFI    | 235   | 212   |
| >ABL1-Y353F YLEKKNFI    | 306 | >ABL1-Y353F HLEKKNFI    | 4790  | 4484  |
| >ABL1-Y353F YLEKKNFI    | 57  | >ABL1-Y353F HLEKKNFI    | 2798  | 2741  |
| >ABL1-Y353F YLEKKNFI    | 24  | >ABL1-Y353F HLEKKNFI    | 677   | 653   |
| >ABL1-Y353F YLEKKNFI    | 146 | >ABL1-Y353F HLEKKNFI    | 5159  | 5013  |
| >ABL1-Y353F YLEKKNFI    | 19  | >ABL1-Y353F HLEKKNFI    | 507   | 488   |
| >ABL1-Y353F YLEKKNFIHR  | 517 | >ABL1-Y353F HLEKKNFIHR  | 375   | 142   |
| >ABL1-Y353F YLEKKNFIHR  | 398 | >ABL1-Y353F HLEKKNFIHR  | 746   | 348   |
| >ABL1-Y353F YLEKKNFIHR  | 68  | >ABL1-Y353F HLEKKNFIHR  | 26    | 42    |
| >ABL1-Y353F EYLEKKNFI   | 117 | >ABL1-Y353F EHLEKKNFI   | 39    | 78    |
| >ABL1-Y353F EYLEKKNF    | 213 | >ABL1-Y353F EHLEKKNF    | 10924 | 10711 |
| >ABL1-Y353F EYLEKKNF    | 27  | >ABL1-Y353F EHLEKKNF    | 12253 | 12226 |
| >ABL1-Y353F EYLEKKNFI   | 86  | >ABL1-Y353F EHLEKKNFI   | 20493 | 20407 |
| >ABL1-Y353F EYLEKKNFIHF | 154 | >ABL1-Y353F EHLEKKNFIHI | 8438  | 8284  |
| >ABL1-Y353F EYLEKKNFIHF | 10  | >ABL1-Y353F EHLEKKNFIHI | 1018  | 1008  |
| >ABL1-Y353F EYLEKKNFIHF | 172 | >ABL1-Y353F EHLEKKNFIHI | 1147  | 975   |
| >ABL1-Y353F EYLEKKNFIHF | 13  | >ABL1-Y353F EHLEKKNFIHI | 126   | 113   |
| >ABL1-Y353F MATQISSAM   | 56  | >ABL1-Y353F MATQISSAM   | 9207  | 9151  |
| >ABL1-Y353F MATQISSAM   | 140 | >ABL1-Y353F MATQISSAM   | 14952 | 14812 |
| >ABL1-Y353F MATQISSAM   | 43  | >ABL1-Y353F MATQISSAM   | 353   | 310   |
| >ABL1-Y353F MATQISSAM   | 122 | >ABL1-Y353F MATQISSAM   | 16881 | 16759 |
| >ABL1-Y353F MATQISSAM   | 86  | >ABL1-Y353F MATQISSAM   | 5009  | 4923  |
| >ABL1-Y353F MATQISSAM   | 9   | >ABL1-Y353F MATQISSAM   | 2968  | 2959  |
| >ABL1-Y353F MATQISSAM   | 8   | >ABL1-Y353F MATQISSAM   | 67    | 59    |
| >ABL1-Y353F MATQISSAM   | 191 | >ABL1-Y353F MATQISSAM   | 14148 | 13957 |
| >ABL1-Y353F MATQISSAM   | 73  | >ABL1-Y353F MATQISSAM   | 6287  | 6214  |
| >ABL1-Y353F MATQISSAM   | 37  | >ABL1-Y353F MATQISSAM   | 757   | 720   |
| >ABL1-Y353F MATQISSAM   | 94  | >ABL1-Y353F MATQISSAM   | 24315 | 24221 |
| >ABL1-Y353F MATQISSAM   | 115 | >ABL1-Y353F MATQISSAM   | 5047  | 4932  |
| >ABL1-Y353F MEYLEKKNF   | 21  | >ABL1-Y353F MEHLEKKNF   | 143   | 122   |
| >ABL1-Y353F MEYLEKKNFI  | 4   | >ABL1-Y353F MEHLEKKNFI  | 5     | 1     |
| >ABL1-Y353F MEYLEKKNF   | 77  | >ABL1-Y353F MEHLEKKNF   | 330   | 253   |

|                         |     |                         |      |     |
|-------------------------|-----|-------------------------|------|-----|
| >ABL1-Y353F MEYLEKKNF   | 31  | >ABL1-Y353F MEHLEKKNF   | 102  | 71  |
| >ABL1-Y353F MEYLEKKNFI  | 277 | >ABL1-Y353F MEHLEKKNFI  | 705  | 428 |
| >ABL1-Y353F MEYLEKKNF   | 183 | >ABL1-Y353F MEHLEKKNF   | 485  | 302 |
| >ABL1-Y353F MEYLEKKNFI  | 483 | >ABL1-Y353F MEHLEKKNFI  | 851  | 368 |
| >ABL1-Y353F MEYLEKKNF   | 120 | >ABL1-Y353F MEHLEKKNF   | 188  | 68  |
| >ABL1-Y353F MEYLEKKNFI  | 28  | >ABL1-Y353F MEHLEKKNFI  | 120  | 92  |
| >ABL1-Y353F AMEYLEKKNF  | 277 | >ABL1-Y353F AMEHLEKKNF  | 373  | 96  |
| >ABL1-Y353F AMEYLEKK    | 414 | >ABL1-Y353F AMEHLEKK    | 663  | 249 |
| >ABL1-Y353F AMEYLEKKNF  | 194 | >ABL1-Y353F AMEHLEKKNF  | 158  | 36  |
| >ABL1-Y353F SAMEYLEK    | 691 | >ABL1-Y353F SAMEHLEK    | 486  | 205 |
| >ABL1-Y353F SAMEYLEK    | 9   | >ABL1-Y353F SAMEHLEK    | 12   | 3   |
| >ABL1-Y353F SAMEYLEKK   | 14  | >ABL1-Y353F SAMEHLEKK   | 19   | 5   |
| >ABL1-Y353F SAMEYLEKKN  | 888 | >ABL1-Y353F SAMEHLEKKN  | 417  | 471 |
| >ABL1-Y353F SAMEYLEK    | 327 | >ABL1-Y353F SAMEHLEK    | 248  | 79  |
| >ABL1-Y353F SAMEYLEK    | 93  | >ABL1-Y353F SAMEHLEK    | 128  | 35  |
| >ABL1-Y353F SAMEYLEKK   | 60  | >ABL1-Y353F SAMEHLEKK   | 131  | 71  |
| >ABL1-Y353F SAMEYLEKKN  | 99  | >ABL1-Y353F SAMEHLEKKN  | 129  | 30  |
| >ABL1-Y353F SAMEYLEKKN  | 23  | >ABL1-Y353F SAMEHLEKKN  | 30   | 7   |
| >ABL1-Y353F SAMEYLEK    | 147 | >ABL1-Y353F SAMEHLEK    | 124  | 23  |
| >ABL1-Y353F SAMEYLEKK   | 270 | >ABL1-Y353F SAMEHLEKK   | 181  | 89  |
| >ABL1-Y353F SSAMEYLEK   | 9   | >ABL1-Y353F SSAMEHLEK   | 11   | 2   |
| >ABL1-Y353F SSAMEYLEKK  | 16  | >ABL1-Y353F SSAMEHLEKK  | 28   | 12  |
| >ABL1-Y353F SSAMEYLEK   | 224 | >ABL1-Y353F SSAMEHLEK   | 125  | 99  |
| >ABL1-Y353F SSAMEYLEK   | 222 | >ABL1-Y353F SSAMEHLEK   | 119  | 103 |
| >ABL1-Y353F SSAMEYLEKK  | 35  | >ABL1-Y353F SSAMEHLEKK  | 61   | 26  |
| >ABL1-Y353F SSAMEYLEK   | 81  | >ABL1-Y353F SSAMEHLEK   | 83   | 2   |
| >ABL1-Y353F SSAMEYLEKK  | 121 | >ABL1-Y353F SSAMEHLEKK  | 117  | 4   |
| >ABL1-Y353F ISSAMEYL    | 102 | >ABL1-Y353F ISSAMEHL    | 651  | 549 |
| >ABL1-Y353F ISSAMEYLEK  | 61  | >ABL1-Y353F ISSAMEHLEK  | 77   | 16  |
| >ABL1-Y353F ISSAMEYLEKI | 685 | >ABL1-Y353F ISSAMEHLEKI | 497  | 188 |
| >ABL1-Y353F ISSAMEYLEK  | 7   | >ABL1-Y353F ISSAMEHLEK  | 10   | 3   |
| >ABL1-Y353F ISSAMEYLEKI | 24  | >ABL1-Y353F ISSAMEHLEKI | 32   | 8   |
| >ABL1-Y353F ISSAMEYLEK  | 354 | >ABL1-Y353F ISSAMEHLEK  | 249  | 105 |
| >ABL1-Y353F ISSAMEYLEK  | 50  | >ABL1-Y353F ISSAMEHLEK  | 99   | 49  |
| >ABL1-Y353F ISSAMEYLEKI | 80  | >ABL1-Y353F ISSAMEHLEKI | 100  | 20  |
| >ABL1-Y353F ISSAMEYL    | 24  | >ABL1-Y353F ISSAMEHL    | 26   | 2   |
| >ABL1-Y353F ISSAMEYL    | 93  | >ABL1-Y353F ISSAMEHL    | 102  | 9   |
| >ABL1-Y353F ISSAMEYLEK  | 366 | >ABL1-Y353F ISSAMEHLEK  | 370  | 4   |
| >ABL1-Y353F QISSAMEYL   | 6   | >ABL1-Y353F QISSAMEHL   | 35   | 29  |
| >ABL1-Y353F QISSAMEYL   | 398 | >ABL1-Y353F QISSAMEHL   | 1157 | 759 |
| >ABL1-Y353F QISSAMEYL   | 126 | >ABL1-Y353F QISSAMEHL   | 530  | 404 |
| >ABL1-Y353F QISSAMEYLE  | 380 | >ABL1-Y353F QISSAMEHLE  | 535  | 155 |
| >ABL1-Y353F QISSAMEYLE  | 33  | >ABL1-Y353F QISSAMEHLE  | 54   | 21  |

|                        |     |                        |       |       |
|------------------------|-----|------------------------|-------|-------|
| >ABL1-Y353F QISSAMEY   | 287 | >ABL1-Y353F QISSAMEH   | 11152 | 10865 |
| >ABL1-Y353F QISSAMEYL  | 166 | >ABL1-Y353F QISSAMEHL  | 167   | 1     |
| >ABL1-Y353F QISSAMEY   | 65  | >ABL1-Y353F QISSAMEH   | 9171  | 9106  |
| >ABL1-Y353F QISSAMEY   | 148 | >ABL1-Y353F QISSAMEH   | 13900 | 13752 |
| >ABL1-Y353F QISSAMEYLE | 148 | >ABL1-Y353F QISSAMEHLE | 138   | 10    |
| >ABL1-Y353F QISSAMEYL  | 28  | >ABL1-Y353F QISSAMEHL  | 73    | 45    |
| >ABL1-Y353F QISSAMEYL  | 238 | >ABL1-Y353F QISSAMEHL  | 1377  | 1139  |
| >ABL1-Y353F QISSAMEY   | 128 | >ABL1-Y353F QISSAMEH   | 16861 | 16733 |
| >ABL1-Y353F QISSAMEY   | 293 | >ABL1-Y353F QISSAMEH   | 13284 | 12991 |
| >ABL1-Y353F QISSAMEY   | 483 | >ABL1-Y353F QISSAMEH   | 7671  | 7188  |
| >ABL1-Y353F QISSAMEY   | 212 | >ABL1-Y353F QISSAMEH   | 30662 | 30450 |
| >ABL1-Y353F TQISSAMEYL | 442 | >ABL1-Y353F TQISSAMEHL | 1889  | 1447  |
| >ABL1-Y353F TQISSAMEYL | 31  | >ABL1-Y353F TQISSAMEHL | 185   | 154   |
| >ABL1-Y353F TQISSAMEYL | 135 | >ABL1-Y353F TQISSAMEHL | 621   | 486   |
| >ABL1-Y353F TQISSAMEYL | 189 | >ABL1-Y353F TQISSAMEHL | 679   | 490   |
| >ABL1-Y353F TQISSAMEY  | 186 | >ABL1-Y353F TQISSAMEH  | 2597  | 2411  |
| >ABL1-Y353F TQISSAMEYL | 410 | >ABL1-Y353F TQISSAMEHL | 411   | 1     |
| >ABL1-Y353F TQISSAMEY  | 106 | >ABL1-Y353F TQISSAMEH  | 13376 | 13270 |
| >ABL1-Y353F TQISSAMEY  | 302 | >ABL1-Y353F TQISSAMEH  | 18905 | 18603 |
| >ABL1-Y353F TQISSAMEY  | 156 | >ABL1-Y353F TQISSAMEH  | 15907 | 15751 |
| >ABL1-Y353F TQISSAMEY  | 48  | >ABL1-Y353F TQISSAMEH  | 1503  | 1455  |
| >ABL1-Y353F TQISSAMEYL | 347 | >ABL1-Y353F TQISSAMEHL | 136   | 211   |
| >ABL1-Y353F TQISSAMEY  | 164 | >ABL1-Y353F TQISSAMEH  | 6279  | 6115  |
| >ABL1-Y353F TQISSAMEY  | 3   | >ABL1-Y353F TQISSAMEH  | 67    | 64    |
| >ABL1-Y353F TQISSAMEYL | 42  | >ABL1-Y353F TQISSAMEHL | 46    | 4     |
| >ABL1-Y353F TQISSAMEYL | 61  | >ABL1-Y353F TQISSAMEHL | 77    | 16    |
| >ABL1-Y353F ATQISSAMEY | 30  | >ABL1-Y353F ATQISSAMEF | 8904  | 8874  |
| >ABL1-Y353F ATQISSAMEY | 392 | >ABL1-Y353F ATQISSAMEF | 2464  | 2072  |
| >ABL1-Y353F ATQISSAMEY | 59  | >ABL1-Y353F ATQISSAMEF | 3601  | 3542  |
| >ABL1-Y353F ATQISSAMEY | 136 | >ABL1-Y353F ATQISSAMEF | 12851 | 12715 |
| >ABL1-Y353F ATQISSAMEY | 68  | >ABL1-Y353F ATQISSAMEF | 8727  | 8659  |
| >ABL1-Y353F ATQISSAMEY | 263 | >ABL1-Y353F ATQISSAMEF | 18373 | 18110 |
| >ABL1-Y353F ATQISSAMEY | 146 | >ABL1-Y353F ATQISSAMEF | 8210  | 8064  |
| >ABL1-Y353F ATQISSAMEY | 257 | >ABL1-Y353F ATQISSAMEF | 7186  | 6929  |
| >ABL1-Y353F ATQISSAMEY | 3   | >ABL1-Y353F ATQISSAMEF | 70    | 67    |
| >ABL1-Y353F ATQISSAMEY | 9   | >ABL1-Y353F ATQISSAMEF | 9     | 0     |
| >ABL1-Y353F ATQISSAMEY | 32  | >ABL1-Y353F ATQISSAMEF | 165   | 133   |
| >ABL1-Y353F ATQISSAMEY | 18  | >ABL1-Y353F ATQISSAMEF | 797   | 779   |
| >ABL1-Y353F ATQISSAMEY | 200 | >ABL1-Y353F ATQISSAMEF | 800   | 600   |
| >ABL1-Y353F ATQISSAMEY | 285 | >ABL1-Y353F ATQISSAMEF | 167   | 118   |
| >ABL2-A1901TADGKVVV    | 377 | >ABL2-A1901TTDGKVVV    | 233   | 144   |
| >ABL2-A1901TADGKVVV    | 87  | >ABL2-A1901TTDGKVVV    | 26    | 61    |
| >ABL2-A1901TADGKVVV    | 504 | >ABL2-A1901TTDGKVVV    | 109   | 395   |

|                        |     |                       |      |      |
|------------------------|-----|-----------------------|------|------|
| >ABL2-A1901TADGKVYV    | 336 | >ABL2-A1901TTDGKVYV   | 259  | 77   |
| >ABL2-A1901TADGKVYV    | 240 | >ABL2-A1901TTDGKVYV   | 31   | 209  |
| >ABL2-A1901TADGKVYV    | 105 | >ABL2-A1901TTDGKVYV   | 21   | 84   |
| >ABL2-A1901RVYHYRINTT, | 106 | >ABL2-A1901RVYHYRINTT | 1183 | 1077 |
| >ABL2-A1901RVYHYRINTT, | 229 | >ABL2-A1901RVYHYRINTT | 1524 | 1295 |
| >ABL2-A1901RVYHYRINTT, | 42  | >ABL2-A1901RVYHYRINTT | 768  | 726  |
| >ABL2-A1901RVYHYRINTT, | 142 | >ABL2-A1901RVYHYRINTT | 173  | 31   |
| >ABL2-A1901TTADGKVYV   | 434 | >ABL2-A1901TTTDGKVYV  | 2184 | 1750 |
| >ABL2-A1901TTADGKVYV   | 195 | >ABL2-A1901TTTDGKVYV  | 2237 | 2042 |
| >ABL2-A1901TTADGKVYV   | 384 | >ABL2-A1901TTTDGKVYV  | 3007 | 2623 |
| >ABL2-A1901TTADGKVYV   | 49  | >ABL2-A1901TTTDGKVYV  | 133  | 84   |
| >ABL2-A1901TTADGKVYV   | 37  | >ABL2-A1901TTTDGKVYV  | 102  | 65   |
| >ABL2-A1901TTADGKVYV   | 57  | >ABL2-A1901TTTDGKVYV  | 140  | 83   |
| >ABL2-A1901TTADGKVYV   | 420 | >ABL2-A1901TTTDGKVYV  | 3142 | 2722 |
| >ABL2-A1901TTADGKVYV   | 12  | >ABL2-A1901TTTDGKVYV  | 14   | 2    |
| >ABL2-A1901TTADGKVY    | 77  | >ABL2-A1901TTTDGKVY   | 365  | 288  |
| >ABL2-A1901TTADGKVY    | 50  | >ABL2-A1901TTTDGKVY   | 117  | 67   |
| >ABL2-A1901TTADGKVY    | 110 | >ABL2-A1901TTTDGKVY   | 253  | 143  |
| >ABL2-A1901TTADGKVY    | 119 | >ABL2-A1901TTTDGKVY   | 265  | 146  |
| >ABL2-A1901TTADGKVY    | 292 | >ABL2-A1901TTTDGKVY   | 954  | 662  |
| >ABL2-A1901TTADGKVYV   | 6   | >ABL2-A1901TTTDGKVYV  | 7    | 1    |
| >ABL2-A1901TTADGKVYVT  | 255 | >ABL2-A1901TTTDGKVYVT | 616  | 361  |
| >ABL2-A1901TTADGKVYVT  | 10  | >ABL2-A1901TTTDGKVYVT | 28   | 18   |
| >ABL2-A1901TTADGKVYV   | 6   | >ABL2-A1901TTTDGKVYV  | 14   | 8    |
| >ABL2-A1901TTADGKVYVT  | 118 | >ABL2-A1901TTTDGKVYVT | 729  | 611  |
| >ABL2-A1901TTADGKVY    | 327 | >ABL2-A1901TTTDGKVY   | 3350 | 3023 |
| >ABL2-A1901TTADGKVY    | 13  | >ABL2-A1901TTTDGKVY   | 21   | 8    |
| >ABL2-A1901TTADGKVY    | 20  | >ABL2-A1901TTTDGKVY   | 13   | 7    |
| >ABL2-A1901NTTADGKVY\  | 494 | >ABL2-A1901NTTTDGKVY\ | 767  | 273  |
| >ABL2-A1901NTTADGKVY   | 260 | >ABL2-A1901NTTTDGKVY  | 144  | 116  |
| >ABL2-A1901NTTADGKV    | 45  | >ABL2-A1901NTTTDGKV   | 83   | 38   |
| >ABL2-A1901NTTADGKVY\  | 37  | >ABL2-A1901NTTTDGKVY\ | 79   | 42   |
| >ABL2-A1901NTTADGKVY\  | 77  | >ABL2-A1901NTTTDGKVY\ | 166  | 89   |
| >ABL2-A1901NTTADGKVY   | 392 | >ABL2-A1901NTTTDGKVY  | 1409 | 1017 |
| >ABL2-A1901NTTADGKVY   | 347 | >ABL2-A1901NTTTDGKVY  | 951  | 604  |
| >ABL2-A1901NTTADGKVY   | 167 | >ABL2-A1901NTTTDGKVY  | 116  | 51   |
| >ABL2-A1901RINTTADGKV  | 642 | >ABL2-A1901RINTTTDGKV | 396  | 246  |
| >ABL2-A1901RINTTADGKV  | 452 | >ABL2-A1901RINTTTDGKV | 276  | 176  |
| >ABL2-A1901RINTTADGKV  | 546 | >ABL2-A1901RINTTTDGKV | 360  | 186  |
| >ABL2-A1901RINTTADGK   | 202 | >ABL2-A1901RINTTTDGK  | 136  | 66   |
| >ABL2-A1901RINTTADGK   | 81  | >ABL2-A1901RINTTTDGK  | 40   | 41   |
| >ABL2-A1901RINTTADGK   | 192 | >ABL2-A1901RINTTTDGK  | 74   | 118  |
| >ABL2-A1901RINTTADGKV  | 148 | >ABL2-A1901RINTTTDGKV | 127  | 21   |

|                        |      |                         |       |       |
|------------------------|------|-------------------------|-------|-------|
| >ABL2-A1901RINTTADGKV  | 479  | >ABL2-A1901RINTTTDGGK   | 322   | 157   |
| >ABL2-A1901RINTTADGKV  | 139  | >ABL2-A1901RINTTTDGGK   | 107   | 32    |
| >ABL2-A1901RINTTADGKV  | 238  | >ABL2-A1901RINTTTDGGK   | 199   | 39    |
| >ABL2-A1901RINTTADGKV  | 392  | >ABL2-A1901RINTTTDGGK   | 856   | 464   |
| >ABL2-A1901RINTTADGKV  | 385  | >ABL2-A1901RINTTTDGGK   | 597   | 212   |
| >ABL2-A1901YRINTTADGK  | 426  | >ABL2-A1901YRINTTTDGGK  | 323   | 103   |
| >ABL2-A1901YRINTTADGK  | 255  | >ABL2-A1901YRINTTTDGGK  | 255   | 0     |
| >ABL2-A1901HYRINTTA    | 10   | >ABL2-A1901HYRINTTT     | 168   | 158   |
| >ABL2-A1901HYRINTTADG  | 66   | >ABL2-A1901HYRINTTTDGG  | 244   | 178   |
| >ABL2-A1901HYRINTTADG  | 5    | >ABL2-A1901HYRINTTTDGG  | 5     | 0     |
| >ABL2-A1901HYRINTTADG  | 355  | >ABL2-A1901HYRINTTTDGG  | 231   | 124   |
| >ABL2-A1901YHYRINTTA   | 248  | >ABL2-A1901YHYRINTTT    | 1305  | 1057  |
| >ABL2-A1901YHYRINTTA   | 142  | >ABL2-A1901YHYRINTTT    | 163   | 21    |
| >ABL2-A1901YHYRINTTAD  | 619  | >ABL2-A1901YHYRINTTTD   | 499   | 120   |
| >ABL2-A1901VYHYRINTTA  | 398  | >ABL2-A1901VYHYRINTTT   | 272   | 126   |
| >ABL2-E63Q- KENLLGAT   | 397  | >ABL2-E63Q- KQNLLGAT    | 19902 | 19505 |
| >ABL2-E63Q- KENLLGAT   | 98   | >ABL2-E63Q- KQNLLGAT    | 7449  | 7351  |
| >ABL2-E63Q- KENLLGAT   | 224  | >ABL2-E63Q- KQNLLGAT    | 14529 | 14305 |
| >ABL2-E63Q- SSKENLLGA  | 86   | >ABL2-E63Q- SSKQNLLGA   | 177   | 91    |
| >ABL2-E63Q- WSSKENLL   | 57   | >ABL2-E63Q- WSSKQNLL    | 18    | 39    |
| >ABL2-E63Q- WSSKENLLG  | 680  | >ABL2-E63Q- WSSKQNLLG   | 361   | 319   |
| >ABL2-E63Q- RWSSKENLL  | 803  | >ABL2-E63Q- RWSSKQNLL   | 391   | 412   |
| >ABL2-E63Q- RWSSKENL   | 111  | >ABL2-E63Q- RWSSKQNL    | 85    | 26    |
| >ABL2-E63Q- RWSSKENLL  | 104  | >ABL2-E63Q- RWSSKQNLL   | 74    | 30    |
| >ABL2-E63Q- RWSSKENL   | 177  | >ABL2-E63Q- RWSSKQNL    | 202   | 25    |
| >ABL2-E63Q- RWSSKENLL  | 111  | >ABL2-E63Q- RWSSKQNLL   | 106   | 5     |
| >ABL2-E63Q- RWSSKENLLC | 159  | >ABL2-E63Q- RWSSKQNLLC  | 152   | 7     |
| >ABL2-E63Q- IRWSSKENL  | 43   | >ABL2-E63Q- IRWSSKQNL   | 16    | 27    |
| >ABL2-E63Q- IRWSSKENLL | 117  | >ABL2-E63Q- IRWSSKQNLL  | 67    | 50    |
| >ABL2-E63Q- IRWSSKENL  | 145  | >ABL2-E63Q- IRWSSKQNL   | 130   | 15    |
| >ABL2-E63Q- IRWSSKENLL | 66   | >ABL2-E63Q- IRWSSKQNLL  | 58    | 8     |
| >ABL2-E63Q- IRWSSKEN   | 389  | >ABL2-E63Q- IRWSSKQN    | 325   | 64    |
| >ABL2-E63Q- IRWSSKENLL | 369  | >ABL2-E63Q- IRWSSKQNLL  | 312   | 57    |
| >ABL2-E63Q- IRWSSKENLL | 215  | >ABL2-E63Q- IRWSSKQNLL  | 256   | 41    |
| >ABL2-E63Q- IRWSSKENL  | 153  | >ABL2-E63Q- IRWSSKQNL   | 72    | 81    |
| >ABL2-E63Q- IRWSSKENLL | 229  | >ABL2-E63Q- IRWSSKQNLL  | 215   | 14    |
| >ABL2-E63Q- AIRWSSKENL | 340  | >ABL2-E63Q- AIRWSSKQNI  | 139   | 201   |
| >ABL2-E63Q- AIRWSSKENL | 430  | >ABL2-E63Q- AIRWSSKQNI  | 283   | 147   |
| >ABL2-E63Q- AIRWSSKE   | 2856 | >ABL2-E63Q- AIRWSSKQ    | 396   | 2460  |
| >ABL2-E63Q- AIRWSSKENL | 316  | >ABL2-E63Q- AIRWSSKQNI  | 55    | 261   |
| >ABL2-E63Q- AIRWSSKENL | 94   | >ABL2-E63Q- AIRWSSKQNI  | 39    | 55    |
| >ABL2-E63Q- AIRWSSKENL | 472  | >ABL2-E63Q- AIRWSSKQNI  | 183   | 289   |
| >ABL2-E63Q- EAIRWSSKEN | 132  | >ABL2-E63Q- EAIRWSSKQNI | 176   | 44    |

|                         |       |                         |       |       |
|-------------------------|-------|-------------------------|-------|-------|
| >ABL2-E63Q- EAIRWSSKEN  | 55    | >ABL2-E63Q- EAIRWSSKQ   | 179   | 124   |
| >ABL2-E63Q- EAIRWSSKEN  | 75    | >ABL2-E63Q- EAIRWSSKQ   | 76    | 1     |
| >ABL2-P451L PGIDLSQV    | 6823  | >ABL2-P451L LGIDLSQV    | 425   | 6398  |
| >ABL2-P451L PGIDLSQV    | 7764  | >ABL2-P451L LGIDLSQV    | 269   | 7495  |
| >ABL2-P451L PGIDLSQVY   | 1508  | >ABL2-P451L LGIDLSQVY   | 51    | 1457  |
| >ABL2-P451L PGIDLSQVY   | 11339 | >ABL2-P451L LGIDLSQVY   | 175   | 11164 |
| >ABL2-P451L PGIDLSQVY   | 1810  | >ABL2-P451L LGIDLSQVY   | 63    | 1747  |
| >ABL2-P451L PGIDLSQVY   | 9958  | >ABL2-P451L LGIDLSQVY   | 197   | 9761  |
| >ABL2-P451L PGIDLSQVY   | 1234  | >ABL2-P451L LGIDLSQVY   | 215   | 1019  |
| >ABL2-P451L YPGIDLSQV   | 19364 | >ABL2-P451L YLGIDLSQV   | 30    | 19334 |
| >ABL2-P451L YPGIDLSQV   | 19666 | >ABL2-P451L YLGIDLSQV   | 7     | 19659 |
| >ABL2-P451L YPGIDLSQV   | 10817 | >ABL2-P451L YLGIDLSQV   | 4     | 10813 |
| >ABL2-P451L YPGIDLSQV   | 11330 | >ABL2-P451L YLGIDLSQV   | 23    | 11307 |
| >ABL2-P451L YPGIDLSQV   | 3721  | >ABL2-P451L YLGIDLSQV   | 2     | 3719  |
| >ABL2-P451L YPGIDLSQV   | 13345 | >ABL2-P451L YLGIDLSQV   | 3     | 13342 |
| >ABL2-P451L YPGIDLSQV   | 7510  | >ABL2-P451L YLGIDLSQV   | 5     | 7505  |
| >ABL2-P451L YPGIDLSQV   | 15608 | >ABL2-P451L YLGIDLSQV   | 2     | 15606 |
| >ABL2-P451L YPGIDLSQ    | 34001 | >ABL2-P451L YLGIDLSQ    | 18    | 33983 |
| >ABL2-P451L YPGIDLSQV   | 3404  | >ABL2-P451L YLGIDLSQV   | 1     | 3403  |
| >ABL2-P451L YPGIDLSQVY  | 36048 | >ABL2-P451L YLGIDLSQVY  | 257   | 35791 |
| >ABL2-P451L YPGIDLSQV   | 1651  | >ABL2-P451L YLGIDLSQV   | 462   | 1189  |
| >ABL2-P451L YPGIDLSQVY  | 2884  | >ABL2-P451L YLGIDLSQVY  | 42    | 2842  |
| >ABL2-P451L YPGIDLSQVY  | 3214  | >ABL2-P451L YLGIDLSQVY  | 52    | 3162  |
| >ABL2-P451L YPGIDLSQVY  | 958   | >ABL2-P451L YLGIDLSQVY  | 76    | 882   |
| >ABL2-P451L YPGIDLSQVY  | 26    | >ABL2-P451L YLGIDLSQVY  | 16089 | 16063 |
| >ABL2-P451L YPGIDLSQVY  | 90    | >ABL2-P451L YLGIDLSQVY  | 8027  | 7937  |
| >ABL2-P451L YPGIDLSQVY  | 6376  | >ABL2-P451L YLGIDLSQVY  | 462   | 5914  |
| >ABL2-P451L YPGIDLSQVY  | 74    | >ABL2-P451L YLGIDLSQVY  | 3453  | 3379  |
| >ABL2-P451L EIATYGMSPY  | 20002 | >ABL2-P451L EIATYGMSPY  | 201   | 19801 |
| >ABL2-P451L EIATYGMSPY  | 22547 | >ABL2-P451L EIATYGMSPY  | 305   | 22242 |
| >ABL2-P451L EIATYGMSPY  | 10136 | >ABL2-P451L EIATYGMSPY  | 300   | 9836  |
| >ABL2-P451L EIATYGMSPY  | 14680 | >ABL2-P451L EIATYGMSPY  | 163   | 14517 |
| >ABL2-P451L EIATYGMSPY  | 7855  | >ABL2-P451L EIATYGMSPY  | 47    | 7808  |
| >ABL2-P451L EIATYGMSPY  | 4767  | >ABL2-P451L EIATYGMSPY  | 14    | 4753  |
| >ABL2-P451L PYPGIDLSQV  | 275   | >ABL2-P451L PYLGIDLSQV  | 406   | 131   |
| >ABL2-P451L PYPGIDLSQV  | 273   | >ABL2-P451L PYLGIDLSQV  | 51    | 222   |
| >ABL2-P451L SPYPGIDL    | 7     | >ABL2-P451L SPYLGIDL    | 13    | 6     |
| >ABL2-P451L SPYPGIDLSQ\ | 122   | >ABL2-P451L SPYLGIDLSQ\ | 494   | 372   |
| >ABL2-P451L SPYPGIDLSQ\ | 224   | >ABL2-P451L SPYLGIDLSQ\ | 397   | 173   |
| >ABL2-P451L SPYPGIDL    | 65    | >ABL2-P451L SPYLGIDL    | 95    | 30    |
| >ABL2-P451L SPYPGIDLSQ\ | 285   | >ABL2-P451L SPYLGIDLSQ\ | 335   | 50    |
| >ABL2-P451L SPYPGIDLSQ\ | 336   | >ABL2-P451L SPYLGIDLSQ\ | 603   | 267   |
| >ABL2-P451L SPYPGIDLS   | 986   | >ABL2-P451L SPYLGIDLS   | 488   | 498   |

|                         |       |                         |     |       |
|-------------------------|-------|-------------------------|-----|-------|
| >ABL2-P451L SPYPGIDLSQ\ | 256   | >ABL2-P451L SPYLGIDLSQ\ | 144 | 112   |
| >ABL2-P451L MSPYPGIDL   | 5     | >ABL2-P451L MSPYLGIDL   | 8   | 3     |
| >ABL2-P451L MSPYPGIDLS  | 65    | >ABL2-P451L MSPYLGIDLS  | 124 | 59    |
| >ABL2-P451L GMSPYPGI    | 75    | >ABL2-P451L GMSPYLG I   | 61  | 14    |
| >ABL2-P451L GMSPYPGI    | 42    | >ABL2-P451L GMSPYLG I   | 21  | 21    |
| >ABL2-P451L GMSPYPGIDL  | 76    | >ABL2-P451L GMSPYLGIDL  | 78  | 2     |
| >ABL2-P451L GMSPYPGIDL  | 467   | >ABL2-P451L GMSPYLGIDL  | 231 | 236   |
| >ABL2-P451L GMSPYPGI    | 11    | >ABL2-P451L GMSPYLG I   | 8   | 3     |
| >ABL2-P451L GMSPYPGIDL  | 799   | >ABL2-P451L GMSPYLGIDL  | 484 | 315   |
| >ABL2-P451L GMSPYPGI    | 178   | >ABL2-P451L GMSPYLG I   | 66  | 112   |
| >ABL2-P451L GMSPYPGI    | 8     | >ABL2-P451L GMSPYLG I   | 12  | 4     |
| >ABL2-P451L GMSPYPGIDL  | 101   | >ABL2-P451L GMSPYLGIDL  | 125 | 24    |
| >ABL2-P451L GMSPYPGI    | 19    | >ABL2-P451L GMSPYLG I   | 16  | 3     |
| >ABL2-P451L GMSPYPGIDL  | 116   | >ABL2-P451L GMSPYLGIDL  | 65  | 51    |
| >ABL2-P451L GMSPYPGI    | 28    | >ABL2-P451L GMSPYLG I   | 37  | 9     |
| >ABL2-P451L GMSPYPGIDL  | 192   | >ABL2-P451L GMSPYLGIDL  | 107 | 85    |
| >ABL2-P451L GMSPYPGI    | 133   | >ABL2-P451L GMSPYLG I   | 382 | 249   |
| >ABL2-P451L GMSPYPGI    | 17    | >ABL2-P451L GMSPYLG I   | 14  | 3     |
| >ABL2-P451L GMSPYPGIDL  | 39    | >ABL2-P451L GMSPYLGIDL  | 21  | 18    |
| >ABL2-P451L YGMSPYPGI   | 232   | >ABL2-P451L YGMSPYLG I  | 416 | 184   |
| >ABL2-P451L YGMSPYPGI   | 68    | >ABL2-P451L YGMSPYLG I  | 278 | 210   |
| >ABL2-P451L YGMSPYPGI   | 197   | >ABL2-P451L YGMSPYLG I  | 250 | 53    |
| >ABL2-P451L TYGMSPYP    | 18026 | >ABL2-P451L TYGMSPYL    | 475 | 17551 |
| >ABL2-P451L TYGMSPYP    | 10528 | >ABL2-P451L TYGMSPYL    | 361 | 10167 |
| >ABL2-P451L TYGMSPYP    | 9975  | >ABL2-P451L TYGMSPYL    | 26  | 9949  |
| >ABL2-P451L TYGMSPYPGI  | 59    | >ABL2-P451L TYGMSPYLG I | 37  | 22    |
| >ABL2-P451L TYGMSPYPGI  | 1321  | >ABL2-P451L TYGMSPYLG I | 319 | 1002  |
| >ABL2-P451L ATYGMSPYP   | 2779  | >ABL2-P451L ATYGMSPYL   | 58  | 2721  |
| >ABL2-P451L ATYGMSPYP(  | 116   | >ABL2-P451L ATYGMSPYLC  | 180 | 64    |
| >ABL2-P451L ATYGMSPYP   | 38194 | >ABL2-P451L ATYGMSPYL   | 234 | 37960 |
| >ABL2-P451L ATYGMSPYP   | 20940 | >ABL2-P451L ATYGMSPYL   | 70  | 20870 |
| >ABL2-P451L ATYGMSPYP   | 13170 | >ABL2-P451L ATYGMSPYL   | 54  | 13116 |
| >ABL2-P451L ATYGMSPYP   | 18283 | >ABL2-P451L ATYGMSPYL   | 421 | 17862 |
| >ABL2-P451L ATYGMSPYP(  | 308   | >ABL2-P451L ATYGMSPYLC  | 234 | 74    |
| >ABL2-P451L ATYGMSPYP   | 9675  | >ABL2-P451L ATYGMSPYL   | 28  | 9647  |
| >ABL2-P451L ATYGMSPYP(  | 78    | >ABL2-P451L ATYGMSPYLC  | 120 | 42    |
| >ABL2-P451L ATYGMSPYP   | 6871  | >ABL2-P451L ATYGMSPYL   | 15  | 6856  |
| >ABL2-P451L ATYGMSPYP(  | 28    | >ABL2-P451L ATYGMSPYLC  | 46  | 18    |
| >ABL2-P451L ATYGMSPYP   | 13642 | >ABL2-P451L ATYGMSPYL   | 25  | 13617 |
| >ABL2-P451L ATYGMSPYP(  | 122   | >ABL2-P451L ATYGMSPYLC  | 341 | 219   |
| >ABL2-P451L ATYGMSPYP   | 22440 | >ABL2-P451L ATYGMSPYL   | 26  | 22414 |
| >ABL2-P451L ATYGMSPYP(  | 313   | >ABL2-P451L ATYGMSPYLC  | 695 | 382   |
| >ABL2-P451L ATYGMSPYP   | 20540 | >ABL2-P451L ATYGMSPYL   | 189 | 20351 |



|                        |       |                        |      |       |
|------------------------|-------|------------------------|------|-------|
| >ABL2-P451L ATYGMSPYP  | 732   | >ABL2-P451L ATYGMSPYL  | 45   | 687   |
| >ABL2-P451L ATYGMSPYP  | 136   | >ABL2-P451L ATYGMSPYLC | 202  | 66    |
| >ABL2-P451L ATYGMSPYP  | 5424  | >ABL2-P451L ATYGMSPYL  | 115  | 5309  |
| >ABL2-P451L ATYGMSPYP  | 283   | >ABL2-P451L ATYGMSPYLC | 1328 | 1045  |
| >ABL2-P451L ATYGMSPYP  | 77    | >ABL2-P451L ATYGMSPYLC | 37   | 40    |
| >ABL2-P451L ATYGMSPYP  | 10374 | >ABL2-P451L ATYGMSPYL  | 75   | 10299 |
| >ABL2-P451L ATYGMSPYP  | 37    | >ABL2-P451L ATYGMSPYLC | 83   | 46    |
| >ABL2-P451L ATYGMSPYP  | 4950  | >ABL2-P451L ATYGMSPYL  | 4    | 4946  |
| >ABL2-P451L ATYGMSPYP  | 10    | >ABL2-P451L ATYGMSPYLC | 8    | 2     |
| >ABL2-P451L ATYGMSPYP  | 3330  | >ABL2-P451L ATYGMSPYL  | 15   | 3315  |
| >ABL2-P451L ATYGMSPYP  | 196   | >ABL2-P451L ATYGMSPYLC | 249  | 53    |
| >ABL2-P451L ATYGMSPYP  | 6675  | >ABL2-P451L ATYGMSPYL  | 60   | 6615  |
| >ABL2-P451L ATYGMSPYP  | 554   | >ABL2-P451L ATYGMSPYLC | 381  | 173   |
| >ABL2-P451L ATYGMSPYP  | 21361 | >ABL2-P451L ATYGMSPYL  | 167  | 21194 |
| >ABL2-P451L ATYGMSPYP  | 15    | >ABL2-P451L ATYGMSPYLC | 19   | 4     |
| >ABL2-P451L IATYGMSPYP | 23112 | >ABL2-P451L IATYGMSPYL | 412  | 22700 |
| >ABL2-P451L IATYGMSPYP | 16719 | >ABL2-P451L IATYGMSPYL | 31   | 16688 |
| >ABL2-P451L IATYGMSPYP | 10277 | >ABL2-P451L IATYGMSPYL | 110  | 10167 |
| >ABL2-R483I RACWKWSPA  | 195   | >ABL2-R483I IACWKWSPA  | 4496 | 4301  |
| >ABL2-R483I RACWKWSPA  | 21    | >ABL2-R483I IACWKWSPA  | 117  | 96    |
| >ABL2-R483I RACWKWSPA  | 1087  | >ABL2-R483I IACWKWSPA  | 133  | 954   |
| >ABL2-R483I RACWKWSPA  | 507   | >ABL2-R483I IACWKWSPA  | 87   | 420   |
| >ABL2-R483I RACWKWSPA  | 166   | >ABL2-R483I IACWKWSPA  | 655  | 489   |
| >ABL2-R483I MRACWKWS   | 10484 | >ABL2-R483I MIACWKWSF  | 227  | 10257 |
| >ABL2-R483I MRACWKWS   | 9829  | >ABL2-R483I MIACWKWSF  | 131  | 9698  |
| >ABL2-R483I MRACWKWS   | 8115  | >ABL2-R483I MIACWKWSF  | 271  | 7844  |
| >ABL2-R483I MRACWKWS   | 9794  | >ABL2-R483I MIACWKWSF  | 58   | 9736  |
| >ABL2-R483I MRACWKWS   | 19063 | >ABL2-R483I MIACWKWSF  | 158  | 18905 |
| >ABL2-R483I MRACWKWS   | 14064 | >ABL2-R483I MIACWKWSF  | 185  | 13879 |
| >ABL2-R483I MRACWKWS   | 10407 | >ABL2-R483I MIACWKWSF  | 81   | 10326 |
| >ABL2-R483I LMRACWKW   | 3126  | >ABL2-R483I LMIACWKWS  | 40   | 3086  |
| >ABL2-R483I LMRACWKW   | 1161  | >ABL2-R483I LMIACWKWS  | 52   | 1109  |
| >ABL2-R483I LMRACWKW   | 16    | >ABL2-R483I LMIACWKWS  | 7    | 9     |
| >ABL2-R483I LMRACWKW   | 635   | >ABL2-R483I LMIACWKWS  | 19   | 616   |
| >ABL2-R483I LMRACWKW   | 533   | >ABL2-R483I LMIACWKWS  | 51   | 482   |
| >ABL2-R483I LMRACWKW   | 4967  | >ABL2-R483I LMIACWKWS  | 268  | 4699  |
| >ABL2-R483I LMRACWKW   | 3855  | >ABL2-R483I LMIACWKWS  | 334  | 3521  |
| >ABL2-R483I LMRACWKW   | 104   | >ABL2-R483I LMIACWKWS  | 46   | 58    |
| >ABL2-R483I LMRACWKW   | 1702  | >ABL2-R483I LMIACWKW   | 253  | 1449  |
| >ABL2-R483I LMRACWKW   | 26    | >ABL2-R483I LMIACWKWS  | 4531 | 4505  |
| >ABL2-R483I LMRACWKW   | 185   | >ABL2-R483I LMIACWKWS  | 186  | 1     |
| >ABL2-R483I LMRACWKW   | 349   | >ABL2-R483I LMIACWKWS  | 485  | 136   |
| >ABL2-R483I LMRACWKW   | 123   | >ABL2-R483I LMIACWKW   | 162  | 39    |

|                        |      |                        |      |      |
|------------------------|------|------------------------|------|------|
| >ABL2-R483I·LMRACWKW   | 5661 | >ABL2-R483I·LMIACWKW   | 464  | 5197 |
| >ABL2-R483I·LMRACWKW   | 856  | >ABL2-R483I·LMIACWKWS  | 335  | 521  |
| >ABL2-R483I·LMRACWKW   | 55   | >ABL2-R483I·LMIACWKW   | 59   | 4    |
| >ABL2-R483I·LMRACWKW   | 119  | >ABL2-R483I·LMIACWKW   | 14   | 105  |
| >ABL2-R483I·LMRACWKW   | 4250 | >ABL2-R483I·LMIACWKW   | 389  | 3861 |
| >ABL2-R483I·LMRACWKW   | 178  | >ABL2-R483I·LMIACWKW   | 152  | 26   |
| >ABL2-R483I·ELMRACWK   | 244  | >ABL2-R483I·ELMIACWK   | 594  | 350  |
| >ABL2-R483I·ELMRACWK   | 29   | >ABL2-R483I·ELMIACWK   | 23   | 6    |
| >ABL2-R483I·ELMRACWKV  | 362  | >ABL2-R483I·ELMIACWKW  | 959  | 597  |
| >ABL2-R483I·ELMRACWKV  | 412  | >ABL2-R483I·ELMIACWKW  | 1274 | 862  |
| >ABL2-R483I·YELMRACW   | 71   | >ABL2-R483I·YELMIACW   | 32   | 39   |
| >ABL2-R483I·YELMRACWK  | 126  | >ABL2-R483I·YELMIACWK  | 114  | 12   |
| >ABL2-R483I·YELMRACWK  | 67   | >ABL2-R483I·YELMIACWK\ | 77   | 10   |
| >ABL2-R483I·YELMRACWK  | 150  | >ABL2-R483I·YELMIACWK\ | 152  | 2    |
| >ABL2-R483I·YELMRACW   | 88   | >ABL2-R483I·YELMIACW   | 34   | 54   |
| >ABL2-R483I·YELMRACW   | 70   | >ABL2-R483I·YELMIACW   | 58   | 12   |
| >ABL2-R483I·YELMRACWK  | 97   | >ABL2-R483I·YELMIACWK\ | 59   | 38   |
| >ABL2-R483I·YELMRACW   | 78   | >ABL2-R483I·YELMIACW   | 22   | 56   |
| >ABL2-R483I·YELMRACWK  | 306  | >ABL2-R483I·YELMIACWK\ | 111  | 195  |
| >ABL2-R483I·YELMRACW   | 571  | >ABL2-R483I·YELMIACW   | 116  | 455  |
| >ABL2-R483I·YELMRACWK  | 14   | >ABL2-R483I·YELMIACWK\ | 10   | 4    |
| >ABL2-R483I·YELMRACW   | 193  | >ABL2-R483I·YELMIACW   | 45   | 148  |
| >ABL2-R483I·YELMRACWK  | 324  | >ABL2-R483I·YELMIACWK\ | 144  | 180  |
| >ABL2-R483I·VYELMRACW  | 609  | >ABL2-R483I·VYELMIACW  | 321  | 288  |
| >ABL2-R483I·VYELMRACW  | 120  | >ABL2-R483I·VYELMIACWI | 91   | 29   |
| >ABL2-R483I·VYELMRACW  | 1082 | >ABL2-R483I·VYELMIACW  | 470  | 612  |
| >ABL2-R483I·VYELMRACW  | 262  | >ABL2-R483I·VYELMIACWI | 183  | 79   |
| >ABL2-R483I·VYELMRACW  | 117  | >ABL2-R483I·VYELMIACWI | 88   | 29   |
| >ABL2-R483I·KVYELMRA   | 179  | >ABL2-R483I·KVYELMIA   | 165  | 14   |
| >ABL2-R483I·KVYELMRA   | 31   | >ABL2-R483I·KVYELMIA   | 31   | 0    |
| >ABL2-R483I·KVYELMRA   | 28   | >ABL2-R483I·KVYELMIA   | 21   | 7    |
| >ABL2-R483I·KVYELMRAC  | 427  | >ABL2-R483I·KVYELMIAC  | 45   | 382  |
| >ABL2-R483I·KVYELMRA   | 92   | >ABL2-R483I·KVYELMIA   | 277  | 185  |
| >ABL2-R483I·KVYELMRAC  | 406  | >ABL2-R483I·KVYELMIAC  | 83   | 323  |
| >ABL2-R483I·KVYELMRA   | 688  | >ABL2-R483I·KVYELMIA   | 444  | 244  |
| >ABL2-R483I·KVYELMRAC\ | 31   | >ABL2-R483I·KVYELMIACV | 30   | 1    |
| >ABL2-R483I·KVYELMRAC\ | 20   | >ABL2-R483I·KVYELMIACV | 15   | 5    |
| >ABL2-R483I·KVYELMRA   | 211  | >ABL2-R483I·KVYELMIA   | 101  | 110  |
| >ABL2-R483I·KVYELMRAC\ | 12   | >ABL2-R483I·KVYELMIACV | 11   | 1    |
| >ABL2-R483I·KVYELMRAC\ | 55   | >ABL2-R483I·KVYELMIACV | 44   | 11   |
| >ABL2-R483I·KVYELMRAC  | 273  | >ABL2-R483I·KVYELMIAC  | 185  | 88   |
| >ABL2-R483I·KVYELMRAC\ | 81   | >ABL2-R483I·KVYELMIACV | 63   | 18   |
| >ABL2-R483I·KVYELMRAC\ | 280  | >ABL2-R483I·KVYELMIACV | 87   | 193  |

|                         |      |                         |       |       |
|-------------------------|------|-------------------------|-------|-------|
| >ABL2-R483I·KVEELMRAC\  | 19   | >ABL2-R483I·KVEELMIACV  | 11    | 8     |
| >ABL2-R483I·KVEELMRAC\  | 97   | >ABL2-R483I·KVEELMIACV  | 110   | 13    |
| >ABL2-R483I·KVEELMRAC\  | 35   | >ABL2-R483I·KVEELMIACV  | 21    | 14    |
| >ABL2-R483I·KVEELMRAC\  | 831  | >ABL2-R483I·KVEELMIACV  | 232   | 599   |
| >ABL2-R483I·KVEELMRAC\  | 218  | >ABL2-R483I·KVEELMIACV  | 97    | 121   |
| >ABL2-R483I·PPKVYELMR/  | 840  | >ABL2-R483I·PPKVYELMIA  | 444   | 396   |
| >ABL2-R483I·CPPKVYELMF  | 170  | >ABL2-R483I·CPPKVYELMI. | 52    | 118   |
| >ABL2-T717A TPRLIKKTL   | 54   | >ABL2-T717A APRLIKKTL   | 22    | 32    |
| >ABL2-T717A TPRLIKKTLGL | 32   | >ABL2-T717A APRLIKKTLGL | 19    | 13    |
| >ABL2-T717A TPRLIKKTL   | 119  | >ABL2-T717A APRLIKKTL   | 154   | 35    |
| >ABL2-T717A TPRLIKKTLGL | 292  | >ABL2-T717A APRLIKKTLGL | 369   | 77    |
| >ABL2-T717A FTPRLIKK    | 361  | >ABL2-T717A FAPRLIKK    | 3137  | 2776  |
| >ABL2-T717A FTPRLIKK    | 171  | >ABL2-T717A FAPRLIKK    | 492   | 321   |
| >ABL2-T717A FTPRLIKKT   | 229  | >ABL2-T717A FAPRLIKKT   | 4050  | 3821  |
| >ABL2-T717A FTPRLIKKTL  | 6    | >ABL2-T717A FAPRLIKKTL  | 47    | 41    |
| >ABL2-T717A FTPRLIKKTLG | 207  | >ABL2-T717A FAPRLIKKTLG | 2356  | 2149  |
| >ABL2-T717A FTPRLIKKTL  | 316  | >ABL2-T717A FAPRLIKKTL  | 13481 | 13165 |
| >ABL2-T717A FFTPRLIKKTL | 1321 | >ABL2-T717A FFAPRLIKKTL | 172   | 1149  |
| >ABL2-T717A FFTPRLIKKTL | 74   | >ABL2-T717A FFAPRLIKKTL | 56    | 18    |
| >ABL2-T717A FFTPRLIK    | 743  | >ABL2-T717A FFAPRLIK    | 388   | 355   |
| >ABL2-T717A FFTPRLIKK   | 771  | >ABL2-T717A FFAPRLIKK   | 396   | 375   |
| >ABL2-T717A GFFTPRLIK   | 342  | >ABL2-T717A GFFAPRLIK   | 242   | 100   |
| >ABL2-T717A GFFTPRLIKK  | 178  | >ABL2-T717A GFFAPRLIKK  | 140   | 38    |
| >ABL2-T717A GFFTPRLIK   | 94   | >ABL2-T717A GFFAPRLIK   | 62    | 32    |
| >ABL2-T717A GFFTPRLIKK  | 203  | >ABL2-T717A GFFAPRLIKK  | 146   | 57    |
| >ABL2-T717A GFFTPRLIK   | 123  | >ABL2-T717A GFFAPRLIK   | 74    | 49    |
| >ABL2-T717A GFFTPRLIKK  | 200  | >ABL2-T717A GFFAPRLIKK  | 131   | 69    |
| >ABL2-T717A GFFTPRLIK   | 775  | >ABL2-T717A GFFAPRLIK   | 499   | 276   |
| >ABL2-T717A GFFTPRLIKK  | 342  | >ABL2-T717A GFFAPRLIKK  | 203   | 139   |
| >ABL2-T717A GFFTPRLIKK  | 1142 | >ABL2-T717A GFFAPRLIKK  | 477   | 665   |
| >ABL2-T717A TGFFTPRL    | 452  | >ABL2-T717A TGFFAPRL    | 407   | 45    |
| >ABL2-T717A TGFFTPRLIKK | 492  | >ABL2-T717A TGFFAPRLIKK | 462   | 30    |
| >ABL2-T717A TGFFTPRLIKK | 69   | >ABL2-T717A TGFFAPRLIKK | 76    | 7     |
| >ABL2-T717A TGFFTPRLIK  | 451  | >ABL2-T717A TGFFAPRLIK  | 419   | 32    |
| >ABL2-T717A TGFFTPRLIKK | 416  | >ABL2-T717A TGFFAPRLIKK | 406   | 10    |
| >ABL2-T717A TGFFTPRLI   | 424  | >ABL2-T717A TGFFAPRLI   | 436   | 12    |
| >ABL2-T717A ITGFFTPRL   | 52   | >ABL2-T717A ITGFFAPRL   | 68    | 16    |
| >ABL2-T717A ITGFFTPRLIK | 90   | >ABL2-T717A ITGFFAPRLIK | 108   | 18    |
| >ABL2-T717A ITGFFTPR    | 68   | >ABL2-T717A ITGFFAPR    | 89    | 21    |
| >ABL2-T717A ITGFFTPRLIK | 17   | >ABL2-T717A ITGFFAPRLIK | 22    | 5     |
| >ABL2-T717A ITGFFTPRLIK | 107  | >ABL2-T717A ITGFFAPRLIK | 160   | 53    |
| >ABL2-T717A ITGFFTPR    | 16   | >ABL2-T717A ITGFFAPR    | 21    | 5     |
| >ABL2-T717A ITGFFTPRL   | 343  | >ABL2-T717A ITGFFAPRL   | 1202  | 859   |

|                                      |       |                                      |     |       |
|--------------------------------------|-------|--------------------------------------|-----|-------|
| >ABL2-T717A <sup>A</sup> ITGFFTPRLI  | 341   | >ABL2-T717A <sup>A</sup> ITGFFAPRLI  | 787 | 446   |
| >ABL2-T717A <sup>A</sup> ITGFFTPR    | 75    | >ABL2-T717A <sup>A</sup> ITGFFAPR    | 89  | 14    |
| >ABL2-T717A <sup>A</sup> ITGFFTPR    | 26    | >ABL2-T717A <sup>A</sup> ITGFFAPR    | 22  | 4     |
| >ABL2-T717A <sup>A</sup> ITGFFTPRLIK | 173   | >ABL2-T717A <sup>A</sup> ITGFFAPRLIK | 189 | 16    |
| >ABL2-T717A <sup>A</sup> ITGFFTPRL   | 29    | >ABL2-T717A <sup>A</sup> ITGFFAPRL   | 12  | 17    |
| >ABL2-T717A <sup>A</sup> ITGFFTPRLI  | 776   | >ABL2-T717A <sup>A</sup> ITGFFAPRLI  | 476 | 300   |
| >ABL2-T717A <sup>A</sup> ITGFFTPRL   | 87    | >ABL2-T717A <sup>A</sup> ITGFFAPRL   | 86  | 1     |
| >ABL2-T717A <sup>A</sup> ITGFFTPRLI  | 268   | >ABL2-T717A <sup>A</sup> ITGFFAPRLI  | 235 | 33    |
| >ABL2-T717A <sup>A</sup> ITGFFTPRL   | 226   | >ABL2-T717A <sup>A</sup> ITGFFAPRL   | 73  | 153   |
| >ABL2-T717A <sup>A</sup> ITGFFTPRLI  | 386   | >ABL2-T717A <sup>A</sup> ITGFFAPRLI  | 264 | 122   |
| >ABL2-T717A <sup>A</sup> ITGFFTPR    | 225   | >ABL2-T717A <sup>A</sup> ITGFFAPR    | 334 | 109   |
| >ABL2-T717A <sup>A</sup> ITGFFTPRLIK | 479   | >ABL2-T717A <sup>A</sup> ITGFFAPRLIK | 590 | 111   |
| >ABL2-T717A <sup>A</sup> ITGFFTPR    | 41    | >ABL2-T717A <sup>A</sup> ITGFFAPR    | 48  | 7     |
| >ABL2-T717A <sup>A</sup> ITGFFTPRLI  | 27    | >ABL2-T717A <sup>A</sup> ITGFFAPRLI  | 36  | 9     |
| >ABL2-T717A <sup>A</sup> GITGFFTPRL  | 212   | >ABL2-T717A <sup>A</sup> GITGFFAPRL  | 392 | 180   |
| >ABL2-T717A <sup>A</sup> GITGFFTPRL  | 420   | >ABL2-T717A <sup>A</sup> GITGFFAPRL  | 391 | 29    |
| >ABL2-T717A <sup>A</sup> GITGFFTPRL  | 422   | >ABL2-T717A <sup>A</sup> GITGFFAPRL  | 581 | 159   |
| >ABL2-T717A <sup>A</sup> GITGFFTPRL  | 16    | >ABL2-T717A <sup>A</sup> GITGFFAPRL  | 20  | 4     |
| >ABL2-T717A <sup>A</sup> GITGFFTPR   | 134   | >ABL2-T717A <sup>A</sup> GITGFFAPR   | 116 | 18    |
| >ABL2-T717A <sup>A</sup> GITGFFTPR   | 32    | >ABL2-T717A <sup>A</sup> GITGFFAPR   | 24  | 8     |
| >ABL2-T717A <sup>A</sup> GITGFFTPR   | 308   | >ABL2-T717A <sup>A</sup> GITGFFAPR   | 175 | 133   |
| >ABL2-T717A <sup>A</sup> GITGFFTPR   | 101   | >ABL2-T717A <sup>A</sup> GITGFFAPR   | 71  | 30    |
| >ABL2-T717A <sup>A</sup> GITGFFTPR   | 43    | >ABL2-T717A <sup>A</sup> GITGFFAPR   | 35  | 8     |
| >ABL2-T717A <sup>A</sup> SGITGFFTPRL | 372   | >ABL2-T717A <sup>A</sup> SGITGFFAPRI | 453 | 81    |
| >ABL2-T717A <sup>A</sup> SGITGFFT    | 2665  | >ABL2-T717A <sup>A</sup> SGITGFFA    | 268 | 2397  |
| >ABL2-T717A <sup>A</sup> SGITGFFTPR  | 124   | >ABL2-T717A <sup>A</sup> SGITGFFAPR  | 53  | 71    |
| >ABL2-T717A <sup>A</sup> SGITGFFTPR  | 732   | >ABL2-T717A <sup>A</sup> SGITGFFAPR  | 435 | 297   |
| >ABL2-T717A <sup>A</sup> SGITGFFTPR  | 261   | >ABL2-T717A <sup>A</sup> SGITGFFAPR  | 347 | 86    |
| >ABL2-T717A <sup>A</sup> SGITGFFTPR  | 65    | >ABL2-T717A <sup>A</sup> SGITGFFAPR  | 57  | 8     |
| >ABL2-T717A <sup>A</sup> WSGITGFFTP  | 191   | >ABL2-T717A <sup>A</sup> WSGITGFFAP  | 137 | 54    |
| >ABL2-T717A <sup>A</sup> WSGITGFFTP  | 398   | >ABL2-T717A <sup>A</sup> WSGITGFFAP  | 309 | 89    |
| >ABL2-T717A <sup>A</sup> WSGITGFFTP  | 157   | >ABL2-T717A <sup>A</sup> WSGITGFFAP  | 140 | 17    |
| >ABL2-T717A <sup>A</sup> GWSGITGFFT  | 2203  | >ABL2-T717A <sup>A</sup> GWSGITGFFA  | 391 | 1812  |
| >ABL2-T717A <sup>A</sup> GWSGITGFFT  | 598   | >ABL2-T717A <sup>A</sup> GWSGITGFFA  | 420 | 178   |
| >AFF1-Q120 <sup>Δ</sup> HYTRQGFQQ    | 3615  | >AFF1-Q120 <sup>Δ</sup> HYTRQGFQQ    | 18  | 3597  |
| >AFF1-Q120 <sup>Δ</sup> HYTRQGFQQ    | 8336  | >AFF1-Q120 <sup>Δ</sup> HYTRQGFQQ    | 306 | 8030  |
| >AFF1-Q120 <sup>Δ</sup> HYTRQGFQQ    | 2204  | >AFF1-Q120 <sup>Δ</sup> HYTRQGFQQ    | 213 | 1991  |
| >AFF1-Q120 <sup>Δ</sup> QLQELTKT     | 1589  | >AFF1-Q120 <sup>Δ</sup> QLKELTKT     | 405 | 1184  |
| >AFF1-Q120 <sup>Δ</sup> GFQQLQEL     | 53    | >AFF1-Q120 <sup>Δ</sup> GFQQLKEL     | 138 | 85    |
| >AFF1-Q120 <sup>Δ</sup> RQGFQQLQ     | 19761 | >AFF1-Q120 <sup>Δ</sup> RQGFQQLK     | 208 | 19553 |
| >AFF1-Q120 <sup>Δ</sup> RQGFQQLQ     | 26108 | >AFF1-Q120 <sup>Δ</sup> RQGFQQLK     | 108 | 26000 |
| >AFF1-Q120 <sup>Δ</sup> RQGFQQLQ     | 10894 | >AFF1-Q120 <sup>Δ</sup> RQGFQQLK     | 251 | 10643 |
| >AFF1-Q120 <sup>Δ</sup> RQGFQQLQ     | 9193  | >AFF1-Q120 <sup>Δ</sup> RQGFQQLK     | 427 | 8766  |

|                        |       |                        |      |       |
|------------------------|-------|------------------------|------|-------|
| >AFF1-Q120<RQGFQQLQE   | 437   | >AFF1-Q120<RQGFQQLKEI  | 1338 | 901   |
| >AFF1-Q120<RQGFQQLQE   | 306   | >AFF1-Q120<RQGFQQLKEI  | 437  | 131   |
| >AFF1-Q120<RQGFQQLQE   | 425   | >AFF1-Q120<RQGFQQLKEI  | 675  | 250   |
| >AFF1-Q120<TRQGFQQLQ   | 2373  | >AFF1-Q120<TRQGFQQLK   | 70   | 2303  |
| >AFF1-Q120<TRQGFQQLQ   | 247   | >AFF1-Q120<TRQGFQQLKI  | 214  | 33    |
| >AFF1-Q120<TRQGFQQLQ   | 383   | >AFF1-Q120<TRQGFQQLKI  | 962  | 579   |
| >AFF1-Q120<TRQGFQQLQ   | 135   | >AFF1-Q120<TRQGFQQLKI  | 177  | 42    |
| >AFF1-Q120<TRQGFQQLQ   | 6254  | >AFF1-Q120<TRQGFQQLK   | 458  | 5796  |
| >AFF1-Q120<TRQGFQQLQ   | 78    | >AFF1-Q120<TRQGFQQLKI  | 92   | 14    |
| >AFF1-Q120<YTRQGFQQLI  | 33738 | >AFF1-Q120<YTRQGFQQLI  | 161  | 33577 |
| >AFF1-Q120<YTRQGFQQLI  | 624   | >AFF1-Q120<YTRQGFQQLI  | 7    | 617   |
| >AFF1-Q120<YTRQGFQQLI  | 27842 | >AFF1-Q120<YTRQGFQQLI  | 164  | 27678 |
| >AFF3-D1117DYFKNSSKA   | 5012  | >AFF3-D1117HYFKNSSKA   | 425  | 4587  |
| >AFF3-D1117DYFKNSSK    | 2273  | >AFF3-D1117HYFKNSSK    | 7    | 2266  |
| >AFF3-D1117DYFKNSSKA   | 12924 | >AFF3-D1117HYFKNSSKA   | 103  | 12821 |
| >AFF3-D1117DYFKNSSKAA  | 11534 | >AFF3-D1117HYFKNSSKAA  | 62   | 11472 |
| >AFF3-D1117DYFKNSSK    | 8917  | >AFF3-D1117HYFKNSSK    | 328  | 8589  |
| >AFF3-D1117DYFKNSSK    | 112   | >AFF3-D1117HYFKNSSK    | 424  | 312   |
| >AFF3-D1117DYFKNSSK    | 92    | >AFF3-D1117HYFKNSSK    | 116  | 24    |
| >AFF3-D1117DYFKNSSK    | 910   | >AFF3-D1117HYFKNSSK    | 55   | 855   |
| >AFF3-D1117DYFKNSSKAA  | 5809  | >AFF3-D1117HYFKNSSKAA  | 323  | 5486  |
| >AFF3-D1117IDYFKNSSKA/ | 5640  | >AFF3-D1117IHYFKNSSKA/ | 408  | 5232  |
| >AFF3-D1117LIDYFKNSSK  | 33    | >AFF3-D1117LIHYFKNSSK  | 20   | 13    |
| >AFF3-D1117LIDYFKNSSK  | 120   | >AFF3-D1117LIHYFKNSSK  | 158  | 38    |
| >AFF3-D1117LIDYFKNSSK  | 7556  | >AFF3-D1117LIHYFKNSSK  | 18   | 7538  |
| >AFF3-D1117LIDYFKNSSK  | 1041  | >AFF3-D1117LIHYFKNSSK  | 444  | 597   |
| >AFF3-D1117ALIDYFKNS   | 276   | >AFF3-D1117ALIHYFKNS   | 1458 | 1182  |
| >AFF3-D1117ALIDYFKNS   | 399   | >AFF3-D1117ALIHYFKNS   | 1160 | 761   |
| >AFF3-D1117ALIDYFKNS   | 377   | >AFF3-D1117ALIHYFKNS   | 7652 | 7275  |
| >AFF3-D1117ALIDYFKNSS  | 290   | >AFF3-D1117ALIHYFKNSS  | 5035 | 4745  |
| >AFF3-D1117ALIDYFKNSSk | 265   | >AFF3-D1117ALIHYFKNSSk | 4518 | 4253  |
| >AFF3-D1117ALIDYFKNSSk | 137   | >AFF3-D1117ALIHYFKNSSk | 68   | 69    |
| >AFF3-D1117ALIDYFKNSSk | 34    | >AFF3-D1117ALIHYFKNSSk | 52   | 18    |
| >AFF3-D1117ALIDYFKNSSk | 629   | >AFF3-D1117ALIHYFKNSSk | 345  | 284   |
| >AFF3-D1117KALIDYFK    | 670   | >AFF3-D1117KALIHYFK    | 101  | 569   |
| >AFF3-D1117KALIDYFK    | 26    | >AFF3-D1117KALIHYFK    | 13   | 13    |
| >AFF3-D1117KALIDYFK    | 21    | >AFF3-D1117KALIHYFK    | 6    | 15    |
| >AFF3-D1117KALIDYFK    | 27    | >AFF3-D1117KALIHYFK    | 9    | 18    |
| >AFF3-D1117KALIDYFK    | 415   | >AFF3-D1117KALIHYFK    | 187  | 228   |
| >AFF3-D1117KALIDYFK    | 190   | >AFF3-D1117KALIHYFK    | 97   | 93    |
| >AFF3-D1117SKALIDYFK   | 2077  | >AFF3-D1117SKALIHYFK   | 446  | 1631  |
| >AFF3-D1117SKALIDYFK   | 232   | >AFF3-D1117SKALIHYFK   | 126  | 106   |
| >AFF3-D1117SKALIDYF    | 74    | >AFF3-D1117SKALIHYF    | 21   | 53    |

|                        |      |                        |     |      |
|------------------------|------|------------------------|-----|------|
| >AFF3-D1117YSKALIDY    | 733  | >AFF3-D1117YSKALIHY    | 390 | 343  |
| >AFF3-D1117YSKALIDYFK  | 264  | >AFF3-D1117YSKALIHYFK  | 49  | 215  |
| >AFF3-D1117YSKALIDYFK  | 22   | >AFF3-D1117YSKALIHYFK  | 16  | 6    |
| >AFF3-D1117YSKALIDYF   | 813  | >AFF3-D1117YSKALIHYF   | 435 | 378  |
| >AFF3-D1117YSKALIDY    | 442  | >AFF3-D1117YSKALIHY    | 713 | 271  |
| >AFF3-D1117YSKALIDY    | 257  | >AFF3-D1117YSKALIHY    | 49  | 208  |
| >AFF3-D1117YSKALIDYF   | 150  | >AFF3-D1117YSKALIHYF   | 116 | 34   |
| >AFF3-D1117YSKALIDY    | 235  | >AFF3-D1117YSKALIHY    | 128 | 107  |
| >AFF3-D1117YSKALIDYFK  | 26   | >AFF3-D1117YSKALIHYFK  | 6   | 20   |
| >AFF3-D1117YSKALIDY    | 715  | >AFF3-D1117YSKALIHY    | 293 | 422  |
| >AFF3-D1117YSKALIDYFK  | 155  | >AFF3-D1117YSKALIHYFK  | 38  | 117  |
| >AFF3-D1117YSKALIDYFK  | 2075 | >AFF3-D1117YSKALIHYFK  | 425 | 1650 |
| >AFF3-D1117YSKALIDYFK  | 5    | >AFF3-D1117YSKALIHYFK  | 6   | 1    |
| >AFF3-D1117YSKALIDY    | 456  | >AFF3-D1117YSKALIHY    | 131 | 325  |
| >AFF3-D1117YSKALIDY    | 125  | >AFF3-D1117YSKALIHY    | 48  | 77   |
| >AFF3-D1117YSKALIDYF   | 87   | >AFF3-D1117YSKALIHYF   | 59  | 28   |
| >AFF3-D1117YSKALIDY    | 122  | >AFF3-D1117YSKALIHY    | 62  | 60   |
| >AFF3-D1117YSKALIDYF   | 96   | >AFF3-D1117YSKALIHYF   | 26  | 70   |
| >AFF3-D1117YSKALIDY    | 13   | >AFF3-D1117YSKALIHY    | 6   | 7    |
| >AFF3-D1117YSKALIDYF   | 11   | >AFF3-D1117YSKALIHYF   | 5   | 6    |
| >AFF3-D1117YSKALIDYF   | 675  | >AFF3-D1117YSKALIHYF   | 121 | 554  |
| >AFF3-D1117YSKALIDYF   | 133  | >AFF3-D1117YSKALIHYF   | 29  | 104  |
| >AFF3-D1117YSKALIDYF   | 103  | >AFF3-D1117YSKALIHYF   | 22  | 81   |
| >AFF3-D1117YSKALIDY    | 163  | >AFF3-D1117YSKALIHY    | 111 | 52   |
| >AFF3-D1117YSKALIDYF   | 27   | >AFF3-D1117YSKALIHYF   | 31  | 4    |
| >AFF3-D1117KYSKALIDYFK | 143  | >AFF3-D1117KYSKALIHYFK | 74  | 69   |
| >AFF3-D1117KYSKALIDYF  | 147  | >AFF3-D1117KYSKALIHYF  | 29  | 118  |
| >AFF3-D1117KYSKALIDYFK | 706  | >AFF3-D1117KYSKALIHYFK | 476 | 230  |
| >AFF3-D1117KYSKALIDYF  | 116  | >AFF3-D1117KYSKALIHYF  | 52  | 64   |
| >AFF3-D1117KYSKALIDY   | 336  | >AFF3-D1117KYSKALIHY   | 146 | 190  |
| >AFF3-D1117KYSKALIDYF  | 4    | >AFF3-D1117KYSKALIHYF  | 4   | 0    |
| >AFF3-D1117KYSKALIDYFK | 775  | >AFF3-D1117KYSKALIHYFK | 466 | 309  |
| >AFF3-D1117KYSKALIDY   | 386  | >AFF3-D1117KYSKALIHY   | 372 | 14   |
| >AFF3-D1117KYSKALIDYF  | 895  | >AFF3-D1117KYSKALIHYF  | 362 | 533  |
| >AFF3-D1117KYSKALIDY   | 935  | >AFF3-D1117KYSKALIHY   | 74  | 861  |
| >AFF3-D1117KYSKALIDYFK | 8    | >AFF3-D1117KYSKALIHYFK | 4   | 4    |
| >AFF3-D1117KYSKALIDY   | 148  | >AFF3-D1117KYSKALIHY   | 88  | 60   |
| >AFF3-D1117KYSKALIDYF  | 1671 | >AFF3-D1117KYSKALIHYF  | 443 | 1228 |
| >AFF3-D1117KYSKALIDYFK | 45   | >AFF3-D1117KYSKALIHYFK | 18  | 27   |
| >AFF3-D1117KYSKALIDY   | 73   | >AFF3-D1117KYSKALIHY   | 41  | 32   |
| >AFF3-D1117KYSKALIDYF  | 699  | >AFF3-D1117KYSKALIHYF  | 396 | 303  |
| >AFF3-D1117KYSKALIDY   | 101  | >AFF3-D1117KYSKALIHY   | 97  | 4    |
| >AFF3-D1117KYSKALIDYFK | 19   | >AFF3-D1117KYSKALIHYFK | 14  | 5    |

|                         |       |                        |      |       |
|-------------------------|-------|------------------------|------|-------|
| >AFF3-D1117KYSKALIDYF   | 820   | >AFF3-D1117KYSKALIHYP  | 386  | 434   |
| >AFF3-D1117KYSKALIDYF   | 720   | >AFF3-D1117KYSKALIHYP  | 472  | 248   |
| >AFF3-D1117KYSKALIDYFK  | 360   | >AFF3-D1117KYSKALIHYPK | 265  | 95    |
| >AFF3-D1117VKYSKALIDY   | 383   | >AFF3-D1117VKYSKALIHYP | 395  | 12    |
| >AFF3-D1117VKYSKALIDY   | 577   | >AFF3-D1117VKYSKALIHYP | 242  | 335   |
| >AFF3-D1117VKYSKALID    | 6078  | >AFF3-D1117VKYSKALIH   | 79   | 5999  |
| >AFF3-D1117VKYSKALIDY   | 6     | >AFF3-D1117VKYSKALIHYP | 4    | 2     |
| >AFF3-D1117VKYSKALIDYF  | 4     | >AFF3-D1117VKYSKALIHYP | 3    | 1     |
| >AFF3-D1117AVKYSKALID\  | 185   | >AFF3-D1117AVKYSKALIH\ | 50   | 135   |
| >AFF3-D1117AVKYSKALID\  | 130   | >AFF3-D1117AVKYSKALIH\ | 23   | 107   |
| >AFF3-D1117AVKYSKALID\  | 150   | >AFF3-D1117AVKYSKALIH\ | 116  | 34    |
| >AFF3-D1117AVKYSKALID\  | 278   | >AFF3-D1117AVKYSKALIH\ | 74   | 204   |
| >AFF3-D1117AVKYSKALID\  | 694   | >AFF3-D1117AVKYSKALIH\ | 271  | 423   |
| >AFF3-T220I-TQERPPAMA   | 445   | >AFF3-T220I-IQERPPAMA/ | 1011 | 566   |
| >AFF3-T220I-TQERPPAM    | 1296  | >AFF3-T220I-IQERPPAM   | 161  | 1135  |
| >AFF3-T220I-TQERPPAM    | 233   | >AFF3-T220I-IQERPPAM   | 2982 | 2749  |
| >AFF3-T220I-QTQERPPAM   | 213   | >AFF3-T220I-QIQERPPAM  | 1702 | 1489  |
| >AFF3-T220I-QTQERPPAM   | 155   | >AFF3-T220I-QIQERPPAM  | 2312 | 2157  |
| >AFF3-T220I-QTQERPPAM   | 471   | >AFF3-T220I-QIQERPPAM  | 1710 | 1239  |
| >AFF3-T220I-QTQERPPAM   | 50    | >AFF3-T220I-QIQERPPAM  | 7706 | 7656  |
| >AFF3-T220I-QTQERPPAM   | 138   | >AFF3-T220I-QIQERPPAM/ | 7166 | 7028  |
| >AFF3-T220I-QVCNVEVGLI  | 15060 | >AFF3-T220I-QVCNVEVGLI | 239  | 14821 |
| >AFF3-T220I-LQTQERPPA   | 358   | >AFF3-T220I-LQIQERPPA  | 64   | 294   |
| >AFF3-T220I-LQTQERPPAM  | 1673  | >AFF3-T220I-LQIQERPPAM | 269  | 1404  |
| >AFF3-T220I-LQTQERPPA   | 2500  | >AFF3-T220I-LQIQERPPA  | 164  | 2336  |
| >AFF3-T220I-LQTQERPPAM  | 361   | >AFF3-T220I-LQIQERPPAM | 50   | 311   |
| >AFF3-T220I-LQTQERPPA   | 1552  | >AFF3-T220I-LQIQERPPA  | 329  | 1223  |
| >AFF3-T220I-LQTQERPPAM  | 45    | >AFF3-T220I-LQIQERPPAM | 12   | 33    |
| >AFF3-T220I-LQTQERPPAM  | 1024  | >AFF3-T220I-LQIQERPPAM | 133  | 891   |
| >AFF3-T220I-GLQTQERPPA/ | 395   | >AFF3-T220I-GLQIQERPPA | 766  | 371   |
| >AFF3-T220I-GLQTQERPPA/ | 180   | >AFF3-T220I-GLQIQERPPA | 183  | 3     |
| >AFF3-T220I-EVGLQTQER   | 656   | >AFF3-T220I-EVGLQIQER  | 281  | 375   |
| >AFF3-T220I-EVGLQTQER   | 54    | >AFF3-T220I-EVGLQIQER  | 71   | 17    |
| >AFF3-T220I-VEVGLQTQ    | 336   | >AFF3-T220I-VEVGLQIQ   | 834  | 498   |
| >AFF3-T220I-NVEVGLQTQ   | 243   | >AFF3-T220I-NVEVGLQIQE | 316  | 73    |
| >AFF3-T220I-CNVEVGLQT   | 34420 | >AFF3-T220I-CNVEVGLQI  | 198  | 34222 |
| >AFF3-V670M-VTCEKRRTRG  | 200   | >AFF3-V670M-MTCEKRRTRC | 153  | 47    |
| >AFF3-V670M-VTCEKRRTR   | 67    | >AFF3-V670M-MTCEKRRTR  | 16   | 51    |
| >AFF3-V670M-VTCEKRRTR   | 97    | >AFF3-V670M-MTCEKRRTR  | 22   | 75    |
| >AFF3-V670M-VTCEKRRTR   | 713   | >AFF3-V670M-MTCEKRRTR  | 14   | 699   |
| >AFF3-V670M-VTCEKRRTRG  | 12962 | >AFF3-V670M-MTCEKRRTRC | 310  | 12652 |
| >AFF3-V670M-VTCEKRRTRG  | 43    | >AFF3-V670M-MTCEKRRTRC | 29   | 14    |
| >AFF3-V670M-VTCEKRRTRG  | 2163  | >AFF3-V670M-MTCEKRRTRC | 448  | 1715  |

|                        |      |                       |      |      |
|------------------------|------|-----------------------|------|------|
| >AFF3-V670MSVTCEKRR    | 1203 | >AFF3-V670MSMTCEKRR   | 397  | 806  |
| >AFF3-V670MSVTCEKRRTR  | 78   | >AFF3-V670MSMTCEKRRTF | 39   | 39   |
| >AFF3-V670MSVTCEKRR    | 161  | >AFF3-V670MSMTCEKRR   | 1084 | 923  |
| >AFF3-V670MSVTCEKRRTR  | 1376 | >AFF3-V670MSMTCEKRRTF | 228  | 1148 |
| >AFF3-V670MSVTCEKRR    | 895  | >AFF3-V670MSMTCEKRR   | 186  | 709  |
| >AFF3-V670MSHRKELRSSI  | 55   | >AFF3-V670MSHRKELRSSI | 89   | 34   |
| >AFF3-V670MSHRKELRSSI  | 1338 | >AFF3-V670MSHRKELRSSI | 357  | 981  |
| >AFF3-V670MSHRKELRSSI  | 2173 | >AFF3-V670MSHRKELRSSI | 28   | 2145 |
| >AFF3-V670MSHRKELRSSI  | 1613 | >AFF3-V670MSHRKELRSSI | 102  | 1511 |
| >AFF3-V670MSVTCEKR     | 2864 | >AFF3-V670MSMTCEKR    | 174  | 2690 |
| >AFF3-V670MSVTCEKR     | 441  | >AFF3-V670MSMTCEKR    | 124  | 317  |
| >AFF3-V670MSVTCEKRR    | 888  | >AFF3-V670MSMTCEKRR   | 257  | 631  |
| >AFF3-V670MSVTCEKRRTI  | 241  | >AFF3-V670MSMTCEKRRTI | 75   | 166  |
| >AFF3-V670MSVTCEKR     | 72   | >AFF3-V670MSMTCEKR    | 56   | 16   |
| >AFF3-V670MSVTCEKRR    | 406  | >AFF3-V670MSMTCEKRR   | 269  | 137  |
| >AFF3-V670MSVTCEKRRTI  | 272  | >AFF3-V670MSMTCEKRRTI | 185  | 87   |
| >AFF3-V670MSVTCEKR     | 697  | >AFF3-V670MSMTCEKR    | 324  | 373  |
| >AFF3-V670MSVTCEKRR    | 935  | >AFF3-V670MSMTCEKRR   | 387  | 548  |
| >AFF3-V670MSVTCEKRR    | 524  | >AFF3-V670MSMTCEKRR   | 404  | 120  |
| >AFF3-V670MRSSVTCEK    | 262  | >AFF3-V670MRSSMTCEK   | 231  | 31   |
| >AFF3-V670MRSSVTCEK    | 23   | >AFF3-V670MRSSMTCEK   | 18   | 5    |
| >AFF3-V670MRSSVTCEK    | 20   | >AFF3-V670MRSSMTCEK   | 19   | 1    |
| >AFF3-V670MRSSVTCEK    | 228  | >AFF3-V670MRSSMTCEK   | 235  | 7    |
| >AFF3-V670MRSSVTCEKR   | 38   | >AFF3-V670MRSSMTCEKR  | 33   | 5    |
| >AFF3-V670MRSSVTCEKRR  | 40   | >AFF3-V670MRSSMTCEKRF | 22   | 18   |
| >AFF3-V670MRSSVTCEKR   | 271  | >AFF3-V670MRSSMTCEKR  | 192  | 79   |
| >AFF3-V670MRSSVTCEK    | 297  | >AFF3-V670MRSSMTCEK   | 208  | 89   |
| >AFF3-V670MRSSVTCEKF   | 165  | >AFF3-V670MRSSMTCEK   | 110  | 55   |
| >AFF3-V670MRSSVTCEK    | 426  | >AFF3-V670MRSSMTCEK   | 289  | 137  |
| >AFF3-V670MRSSVTCEKF   | 58   | >AFF3-V670MRSSMTCEK   | 61   | 3    |
| >AFF3-V670MKELRSSVTCEI | 382  | >AFF3-V670MKELRSSMTCE | 211  | 171  |
| >AFF3-V670MKELRSSVT    | 182  | >AFF3-V670MKELRSSMT   | 204  | 22   |
| >AFF3-V670MKELRSSVT    | 153  | >AFF3-V670MKELRSSMT   | 364  | 211  |
| >AFF3-V670MKELRSSVTC   | 405  | >AFF3-V670MKELRSSMTC  | 736  | 331  |
| >AFF3-V670MKELRSSVTC   | 387  | >AFF3-V670MKELRSSMTC  | 432  | 45   |
| >AFF3-V670MRKELRSSV    | 970  | >AFF3-V670MRKELRSSM   | 218  | 752  |
| >AFF3-V670MRKELRSSV    | 631  | >AFF3-V670MRKELRSSM   | 201  | 430  |
| >AFF3-V670MRKELRSSV    | 147  | >AFF3-V670MRKELRSSM   | 44   | 103  |
| >AFF3-V670MRKELRSSVT   | 202  | >AFF3-V670MRKELRSSMT  | 205  | 3    |
| >AFF3-V670MRKELRSSV    | 228  | >AFF3-V670MRKELRSSM   | 155  | 73   |
| >AFF3-V670MSHRKELRSSV  | 846  | >AFF3-V670MSHRKELRSSM | 176  | 670  |
| >AFF4-G539E GSESGRGR   | 3681 | >AFF4-G539E ESESGRGR  | 61   | 3620 |
| >AFF4-G539E IQKGESEGR  | 411  | >AFF4-G539E IQKESEGR  | 375  | 36   |



|                        |      |                        |       |       |
|------------------------|------|------------------------|-------|-------|
| >AFF4-G539EIQKGESESGR  | 760  | >AFF4-G539EIQKESESGR   | 272   | 488   |
| >AFF4-G539EIQKGESESGRG | 880  | >AFF4-G539EIQKESESGRG  | 357   | 523   |
| >AFF4-G539ETIQKGESESGR | 462  | >AFF4-G539ETIQKESESGR  | 962   | 500   |
| >AFF4-G539ETIQKGESESGR | 229  | >AFF4-G539ETIQKESESGR  | 496   | 267   |
| >AFF4-G539EKTIQKGESESG | 71   | >AFF4-G539EKTIQKESESGF | 93    | 22    |
| >AFF4-G539EKTIQKGESESG | 129  | >AFF4-G539EKTIQKESESGF | 88    | 41    |
| >AFF4-G539EKTIQKGESES  | 342  | >AFF4-G539EKTIQKESES   | 1125  | 783   |
| >AFF4-G539EKTIQKGESESG | 431  | >AFF4-G539EKTIQKESESGF | 830   | 399   |
| >AFF4-G539EKTIQKGESESG | 403  | >AFF4-G539EKTIQKESESGF | 393   | 10    |
| >AFF4-S178CRSSSPGKPKQA | 406  | >AFF4-S178CRSSSPGKPKQA | 3696  | 3290  |
| >AFF4-S178CRSSSPGKPKQA | 89   | >AFF4-S178CRSSSPGKPKQA | 1047  | 958   |
| >AFF4-S178CRSSSPGKPKQA | 99   | >AFF4-S178CRSSSPGKPKQA | 16428 | 16329 |
| >AFF4-S178CKSRSSSPGK   | 49   | >AFF4-S178CKSRCSSPGK   | 58    | 9     |
| >AFF4-S178CKSRSSSPGK   | 288  | >AFF4-S178CKSRCSSPGK   | 399   | 111   |
| >AFF4-S178CKSRSSSPG    | 5    | >AFF4-S178CKSRCSSPG    | 6     | 1     |
| >AFF4-S178CKSRSSSPGK   | 3    | >AFF4-S178CKSRCSSPGK   | 3     | 0     |
| >AFF4-S178CKSRSSSPGPK  | 25   | >AFF4-S178CKSRCSSPGPK  | 23    | 2     |
| >AFF4-S178CKSRSSSPGPK  | 10   | >AFF4-S178CKSRCSSPGPK  | 9     | 1     |
| >AFF4-S178CKSRSSSPGK   | 292  | >AFF4-S178CKSRCSSPGK   | 672   | 380   |
| >AFF4-S178CKSRSSSPG    | 209  | >AFF4-S178CKSRCSSPG    | 296   | 87    |
| >AFF4-S178CKSRSSSPGK   | 328  | >AFF4-S178CKSRCSSPGK   | 278   | 50    |
| >AFF4-S178CKSRSSSPGPK  | 96   | >AFF4-S178CKSRCSSPGPK  | 98    | 2     |
| >AFF4-S178CKSKRSSSP    | 340  | >AFF4-S178CKSKRCSSP    | 1011  | 671   |
| >AFF4-S178CKSKRSSSPG   | 394  | >AFF4-S178CKSKRCSSPG   | 1264  | 870   |
| >AFF4-S178CKSKRSSSPGK  | 294  | >AFF4-S178CKSKRCSSPGK  | 514   | 220   |
| >AFF4-S178CHSKSRSSSPG  | 104  | >AFF4-S178CHSKSRCSSPG  | 145   | 41    |
| >AFF4-S178CHSKSRSSS    | 54   | >AFF4-S178CHSKSRCSS    | 92    | 38    |
| >AFF4-S178CHSKSRSSSP   | 116  | >AFF4-S178CHSKSRCSSP   | 1059  | 943   |
| >AFF4-S178CHSKSRSSSPG  | 20   | >AFF4-S178CHSKSRCSSPG  | 92    | 72    |
| >AFF4-S178CHSKSRSSSPG  | 3    | >AFF4-S178CHSKSRCSSPG  | 5     | 2     |
| >AFF4-S178CHSKSRSSSPG  | 255  | >AFF4-S178CHSKSRCSSPG  | 293   | 38    |
| >AFF4-S178CHSKSRSSSPG  | 213  | >AFF4-S178CHSKSRCSSPG  | 227   | 14    |
| >AFF4-S178CSEHSKRSS    | 614  | >AFF4-S178CSEHSKRCS    | 279   | 335   |
| >AFF4-S757TASEKVSNIK   | 118  | >AFF4-S757TATEKVSNIK   | 69    | 49    |
| >AFF4-S757TASEKVSNIKGG | 857  | >AFF4-S757TATEKVSNIKGG | 408   | 449   |
| >AFF4-S757TASEKVSNIK   | 519  | >AFF4-S757TATEKVSNIK   | 236   | 283   |
| >AFF4-S757TASEKVSNIKGG | 890  | >AFF4-S757TATEKVSNIKGG | 413   | 477   |
| >AFF4-S757TASEKVSNIKGG | 710  | >AFF4-S757TATEKVSNIKGG | 342   | 368   |
| >AFF4-S757TASEKVSNIK   | 2338 | >AFF4-S757TATEKVSNIK   | 408   | 1930  |
| >AFF4-S757TASEKVSNIKGG | 1037 | >AFF4-S757TATEKVSNIKGG | 191   | 846   |
| >AFF4-S757TASEKVSNIK   | 533  | >AFF4-S757TATEKVSNIK   | 311   | 222   |
| >AFF4-S757TQASEKVSNIK  | 444  | >AFF4-S757TQATEKVSNIK  | 1474  | 1030  |
| >AFF4-S757TQASEKVSNIK  | 190  | >AFF4-S757TQATEKVSNIK  | 199   | 9     |

|                        |      |                        |      |      |
|------------------------|------|------------------------|------|------|
| >AFF4-S757T KQASEKVSNK | 297  | >AFF4-S757T KQATEKVSNK | 326  | 29   |
| >AFF4-S757T KQASEKVSNK | 215  | >AFF4-S757T KQATEKVSNK | 386  | 171  |
| >AFF4-S757T AQKQASEKV  | 653  | >AFF4-S757T AQKQATEKV  | 346  | 307  |
| >AFF4-S757T AQKQASEKV  | 341  | >AFF4-S757T AQKQATEKV  | 294  | 47   |
| >AFF4-S757T AQKQASEK   | 77   | >AFF4-S757T AQKQATEK   | 166  | 89   |
| >AFF4-S757T AQKQASEKV  | 448  | >AFF4-S757T AQKQATEKV  | 1014 | 566  |
| >AFF4-S757T AQKQASEK   | 475  | >AFF4-S757T AQKQATEK   | 607  | 132  |
| >AFF4-S757T AQKQASEKV  | 429  | >AFF4-S757T AQKQATEKV  | 598  | 169  |
| >AFF4-S757T EAQKQASEK  | 52   | >AFF4-S757T EAQKQATEK  | 76   | 24   |
| >AFF4-S757T EAQKQASEK\ | 209  | >AFF4-S757T EAQKQATEK\ | 157  | 52   |
| >AFF4-S757T REAQKQASEI | 297  | >AFF4-S757T REAQKQATEI | 246  | 51   |
| >AFF4-S757T REAQKQASEI | 157  | >AFF4-S757T REAQKQATEI | 138  | 19   |
| >AFF4-S757T REAQKQAS   | 300  | >AFF4-S757T REAQKQAT   | 83   | 217  |
| >AFF4-S757T REAQKQASEI | 255  | >AFF4-S757T REAQKQATEI | 253  | 2    |
| >AFF4-S757T REAQKQASEI | 11   | >AFF4-S757T REAQKQATEI | 9    | 2    |
| >AFF4-S757T HTREAQKQA  | 18   | >AFF4-S757T HTREAQKQA  | 32   | 14   |
| >AFF4-S757T HTREAQKQA  | 87   | >AFF4-S757T HTREAQKQA  | 119  | 32   |
| >AKAP9-A27:AEKLQEEL    | 1305 | >AKAP9-A27:TEKLQEEL    | 284  | 1021 |
| >AKAP9-A27:AEKLQEELL   | 914  | >AKAP9-A27:TEKLQEELL   | 139  | 775  |
| >AKAP9-A27:AEKLQEELLV  | 509  | >AKAP9-A27:TEKLQEELLV  | 87   | 422  |
| >AKAP9-A27:AEKLQEEL    | 328  | >AKAP9-A27:TEKLQEEL    | 860  | 532  |
| >AKAP9-A27:AEKLQEEL    | 47   | >AKAP9-A27:TEKLQEEL    | 114  | 67   |
| >AKAP9-A27:AEKLQEELL   | 155  | >AKAP9-A27:TEKLQEELL   | 442  | 287  |
| >AKAP9-A27:AEKLQEELLV  | 231  | >AKAP9-A27:TEKLQEELLV  | 3124 | 2893 |
| >AKAP9-A27:AEKLQEELL   | 24   | >AKAP9-A27:TEKLQEELL   | 209  | 185  |
| >AKAP9-A27:AEKLQEELLV  | 210  | >AKAP9-A27:TEKLQEELLV  | 1024 | 814  |
| >AKAP9-A27:KAEKLQEEL   | 7653 | >AKAP9-A27:KTEKLQEEL   | 256  | 7397 |
| >AKAP9-A27:KAEKLQEEL   | 3397 | >AKAP9-A27:KTEKLQEEL   | 259  | 3138 |
| >AKAP9-A27:KAEKLQEELL  | 5212 | >AKAP9-A27:KTEKLQEELL  | 463  | 4749 |
| >AKAP9-A27:KAEKLQEEL   | 3667 | >AKAP9-A27:KTEKLQEEL   | 180  | 3487 |
| >AKAP9-A27:KAEKLQEELL\ | 6188 | >AKAP9-A27:KTEKLQEELL\ | 392  | 5796 |
| >AKAP9-A27:KEKAEKLQEE  | 216  | >AKAP9-A27:KEKTEKLQEEI | 364  | 148  |
| >AKAP9-A27:KEKAEKLQEE  | 42   | >AKAP9-A27:KEKTEKLQEEI | 129  | 87   |
| >AKAP9-A27:KEKAEKLQEE  | 127  | >AKAP9-A27:KEKTEKLQEEI | 72   | 55   |
| >AKAP9-A27:SYKEKAEKL   | 59   | >AKAP9-A27:SYKEKTEKL   | 24   | 35   |
| >AKAP9-A27:SYKEKAEK    | 21   | >AKAP9-A27:SYKEKTEK    | 39   | 18   |
| >AKAP9-A27:SYKEKAEK    | 355  | >AKAP9-A27:SYKEKTEK    | 293  | 62   |
| >AKAP9-A27:ASYKEKAEK   | 151  | >AKAP9-A27:ASYKEKTEK   | 135  | 16   |
| >AKAP9-A27:ASYKEKAEK   | 33   | >AKAP9-A27:ASYKEKTEK   | 38   | 5    |
| >AKAP9-A27:ASYKEKAEK   | 174  | >AKAP9-A27:ASYKEKTEK   | 1177 | 1003 |
| >AKAP9-A27:ASYKEKAEKL  | 22   | >AKAP9-A27:ASYKEKTEKL  | 38   | 16   |
| >AKAP9-A27:ASYKEKAEK   | 299  | >AKAP9-A27:ASYKEKTEK   | 198  | 101  |
| >AKAP9-A27:LASYKEKAEK  | 518  | >AKAP9-A27:LASYKEKTEK  | 281  | 237  |

|                          |       |                         |      |       |
|--------------------------|-------|-------------------------|------|-------|
| >AKAP9-A27: LASYKEKA EK  | 235   | >AKAP9-A27: LASYKEKTEK  | 441  | 206   |
| >AKAP9-A27: LASYKEKA EKI | 368   | >AKAP9-A27: LASYKEKTEKL | 532  | 164   |
| >AKAP9-A27: ELASYKEKA    | 276   | >AKAP9-A27: ELASYKEKT   | 3883 | 3607  |
| >AKAP9-A27: ELASYKEKA EI | 21    | >AKAP9-A27: ELASYKEKTEK | 26   | 5     |
| >AKAP9-A27: ELASYKEKA    | 262   | >AKAP9-A27: ELASYKEKT   | 4354 | 4092  |
| >AKAP9-A27: AELASYKEKA   | 147   | >AKAP9-A27: AELASYKEKT  | 772  | 625   |
| >AKAP9-A27: AELASYKEKA I | 254   | >AKAP9-A27: AELASYKEKTI | 622  | 368   |
| >AKAP9-A27: AELASYKEKA   | 290   | >AKAP9-A27: AELASYKEKT  | 293  | 3     |
| >AKAP9-D23: TTDNKVIEEK   | 977   | >AKAP9-D23: TTHNKVIEEK  | 390  | 587   |
| >AKAP9-D23: TTDNKVIEEK   | 48    | >AKAP9-D23: TTHNKVIEEK  | 63   | 15    |
| >AKAP9-D23: TTDNKVIEEK   | 10899 | >AKAP9-D23: TTHNKVIEEK  | 81   | 10818 |
| >AKAP9-D23: TTDNKVIEEK   | 191   | >AKAP9-D23: TTHNKVIEEK  | 69   | 122   |
| >AKAP9-D23: TTDNKVIEEK   | 485   | >AKAP9-D23: TTHNKVIEEK  | 484  | 1     |
| >AKAP9-D23: ITTDNKVIEEK  | 78    | >AKAP9-D23: ITTHNKVIEEK | 130  | 52    |
| >AKAP9-D23: ITTDNKVIEEK  | 19    | >AKAP9-D23: ITTHNKVIEEK | 30   | 11    |
| >AKAP9-D23: ITTDNKVI     | 141   | >AKAP9-D23: ITTHNKVI    | 140  | 1     |
| >AKAP9-D23: ITTDNKVI     | 692   | >AKAP9-D23: ITTHNKVI    | 322  | 370   |
| >AKAP9-D23: ITTDNKVIEEK  | 784   | >AKAP9-D23: ITTHNKVIEEK | 455  | 329   |
| >AKAP9-D23: ITTDNKVI     | 138   | >AKAP9-D23: ITTHNKVI    | 107  | 31    |
| >AKAP9-D23: KITTDNKV     | 1033  | >AKAP9-D23: KITTHNKV    | 251  | 782   |
| >AKAP9-D23: KITTDNKV     | 395   | >AKAP9-D23: KITTHNKV    | 847  | 452   |
| >AKAP9-D23: KITTDNKV     | 72    | >AKAP9-D23: KITTHNKV    | 61   | 11    |
| >AKAP9-D23: KITTDNKVI    | 854   | >AKAP9-D23: KITTHNKVI   | 304  | 550   |
| >AKAP9-D23: LKITTDNK     | 812   | >AKAP9-D23: LKITTHNK    | 170  | 642   |
| >AKAP9-D23: LKITTDNKV    | 195   | >AKAP9-D23: LKITTHNKV   | 41   | 154   |
| >AKAP9-D23: LKITTDNKVI   | 35    | >AKAP9-D23: LKITTHNKVI  | 17   | 18    |
| >AKAP9-D23: QLKITTDNKV   | 384   | >AKAP9-D23: QLKITTHNKV  | 636  | 252   |
| >AKAP9-D23: QLKITTDNKV   | 260   | >AKAP9-D23: QLKITTHNKV  | 141  | 119   |
| >AKAP9-D23: QLKITTDNKV   | 27    | >AKAP9-D23: QLKITTHNKV  | 9    | 18    |
| >AKAP9-D23: QLKITTDNK    | 2313  | >AKAP9-D23: QLKITTHNK   | 268  | 2045  |
| >AKAP9-D23: QLKITTDNK    | 220   | >AKAP9-D23: QLKITTHNK   | 19   | 201   |
| >AKAP9-D23: QLKITTDNK    | 5682  | >AKAP9-D23: QLKITTHNK   | 391  | 5291  |
| >AKAP9-D23: QLKITTDNKV   | 1596  | >AKAP9-D23: QLKITTHNKV  | 191  | 1405  |
| >AKAP9-D23: QQLKITTDNK   | 90    | >AKAP9-D23: QQLKITTHNK  | 68   | 22    |
| >AKAP9-D23: QQLKITTDNK   | 866   | >AKAP9-D23: QQLKITTHNK  | 261  | 605   |
| >AKAP9-D23: QQLKITTDNK   | 576   | >AKAP9-D23: QQLKITTHNK  | 255  | 321   |
| >AKAP9-D23: QQLKITTD     | 10394 | >AKAP9-D23: QQLKITTH    | 428  | 9966  |
| >AKAP9-D23: QQLKITTDNK   | 377   | >AKAP9-D23: QQLKITTHNK  | 181  | 196   |
| >AKAP9-D23: QQLKITTDNK   | 1307  | >AKAP9-D23: QQLKITTHNK  | 272  | 1035  |
| >AKAP9-D23: QQQLKITTDN   | 650   | >AKAP9-D23: QQQLKITTHN  | 216  | 434   |
| >AKAP9-E26: LLELQKLL     | 737   | >AKAP9-E26: LLDLQKLL    | 407  | 330   |
| >AKAP9-E26: LLELQKLL     | 3702  | >AKAP9-E26: LLDLQKLL    | 266  | 3436  |
| >AKAP9-E26: LLELQKLL     | 8844  | >AKAP9-E26: LLDLQKLL    | 369  | 8475  |

|                                     |       |                                      |       |       |
|-------------------------------------|-------|--------------------------------------|-------|-------|
| >AKAP9-E26 <sup>5</sup> LLELQKLL    | 50    | >AKAP9-E26 <sup>5</sup> LLDLQKLL     | 31    | 19    |
| >AKAP9-E26 <sup>5</sup> KLELQKLL    | 22    | >AKAP9-E26 <sup>5</sup> KLLDLQKL     | 20    | 2     |
| >AKAP9-E26 <sup>5</sup> KLELQKLL    | 33    | >AKAP9-E26 <sup>5</sup> KLLDLQKLL    | 28    | 5     |
| >AKAP9-E26 <sup>5</sup> KLELQKLL    | 36    | >AKAP9-E26 <sup>5</sup> KLLDLQKL     | 27    | 9     |
| >AKAP9-E26 <sup>5</sup> KLELQKLL    | 81    | >AKAP9-E26 <sup>5</sup> KLLDLQKLL    | 51    | 30    |
| >AKAP9-E26 <sup>5</sup> KLELQKLL    | 175   | >AKAP9-E26 <sup>5</sup> KLLDLQKL     | 159   | 16    |
| >AKAP9-E26 <sup>5</sup> KLELQKLL    | 442   | >AKAP9-E26 <sup>5</sup> KLLDLQKLL    | 434   | 8     |
| >AKAP9-E26 <sup>5</sup> KLELQKLL    | 45    | >AKAP9-E26 <sup>5</sup> KLLDLQKL     | 46    | 1     |
| >AKAP9-E26 <sup>5</sup> KLELQKLL    | 292   | >AKAP9-E26 <sup>5</sup> KLLDLQKLL    | 316   | 24    |
| >AKAP9-E26 <sup>5</sup> KLELQKLL    | 3     | >AKAP9-E26 <sup>5</sup> KLLDLQKL     | 4     | 1     |
| >AKAP9-E26 <sup>5</sup> KLELQKLL    | 6     | >AKAP9-E26 <sup>5</sup> KLLDLQKLL    | 9     | 3     |
| >AKAP9-E26 <sup>5</sup> KLELQKLLLEC | 304   | >AKAP9-E26 <sup>5</sup> KLLDLQKLLLEC | 454   | 150   |
| >AKAP9-E26 <sup>5</sup> KLELQKLL    | 8     | >AKAP9-E26 <sup>5</sup> KLLDLQKL     | 7     | 1     |
| >AKAP9-E26 <sup>5</sup> KLELQKLL    | 27    | >AKAP9-E26 <sup>5</sup> KLLDLQKLL    | 29    | 2     |
| >AKAP9-E26 <sup>5</sup> KLELQKLL    | 8     | >AKAP9-E26 <sup>5</sup> KLLDLQKL     | 8     | 0     |
| >AKAP9-E26 <sup>5</sup> KLELQKLL    | 14    | >AKAP9-E26 <sup>5</sup> KLLDLQKLL    | 17    | 3     |
| >AKAP9-E26 <sup>5</sup> KLELQKLL    | 9     | >AKAP9-E26 <sup>5</sup> KLLDLQKL     | 7     | 2     |
| >AKAP9-E26 <sup>5</sup> KLELQKLL    | 37    | >AKAP9-E26 <sup>5</sup> KLLDLQKLL    | 30    | 7     |
| >AKAP9-E26 <sup>5</sup> KLELQKLL    | 4     | >AKAP9-E26 <sup>5</sup> KLLDLQKL     | 3     | 1     |
| >AKAP9-E26 <sup>5</sup> KLELQKLL    | 11    | >AKAP9-E26 <sup>5</sup> KLLDLQKLL    | 6     | 5     |
| >AKAP9-E26 <sup>5</sup> KLELQKLL    | 127   | >AKAP9-E26 <sup>5</sup> KLLDLQKL     | 199   | 72    |
| >AKAP9-E26 <sup>5</sup> KLELQKLL    | 218   | >AKAP9-E26 <sup>5</sup> KLLDLQKLL    | 382   | 164   |
| >AKAP9-E26 <sup>5</sup> KKLELQKL    | 136   | >AKAP9-E26 <sup>5</sup> KKLLDLQKL    | 147   | 11    |
| >AKAP9-E26 <sup>5</sup> KKLELQKLL   | 216   | >AKAP9-E26 <sup>5</sup> KKLLDLQKLL   | 250   | 34    |
| >AKAP9-E26 <sup>5</sup> KEKKLLEL    | 141   | >AKAP9-E26 <sup>5</sup> KEKKLLDL     | 233   | 92    |
| >AKAP9-E26 <sup>5</sup> KEKKLLELQKI | 238   | >AKAP9-E26 <sup>5</sup> KEKKLLDLQKI  | 168   | 70    |
| >AKAP9-E26 <sup>5</sup> KEKKLLEL    | 17    | >AKAP9-E26 <sup>5</sup> KEKKLLDL     | 33    | 16    |
| >AKAP9-E26 <sup>5</sup> KEKKLLELQKI | 71    | >AKAP9-E26 <sup>5</sup> KEKKLLDLQKI  | 72    | 1     |
| >AKAP9-E26 <sup>5</sup> KEKKLLELQ   | 234   | >AKAP9-E26 <sup>5</sup> KEKKLLDLQ    | 240   | 6     |
| >AKAP9-E26 <sup>5</sup> KEKKLLELQKI | 8     | >AKAP9-E26 <sup>5</sup> KEKKLLDLQKI  | 9     | 1     |
| >AKAP9-E26 <sup>5</sup> LEKEKKLLEL  | 145   | >AKAP9-E26 <sup>5</sup> LEKEKKLLDL   | 278   | 133   |
| >AKAP9-E26 <sup>5</sup> LEKEKKLLEL  | 406   | >AKAP9-E26 <sup>5</sup> LEKEKKLLDL   | 689   | 283   |
| >AKAP9-E26 <sup>5</sup> VLEKEKKLLEL | 30    | >AKAP9-E26 <sup>5</sup> VLEKEKKLLDL  | 97    | 67    |
| >AKAP9-E33( ELQVLESEK\              | 898   | >AKAP9-E33( QLQVLESEK'               | 117   | 781   |
| >AKAP9-E33( ELQVLESEK\              | 134   | >AKAP9-E33( QLQVLESEK'               | 78    | 56    |
| >AKAP9-E33( ELQVLESEK\              | 266   | >AKAP9-E33( QLQVLESEK'               | 80    | 186   |
| >AKAP9-E33( ELQVLESEK\              | 281   | >AKAP9-E33( QLQVLESEK'               | 292   | 11    |
| >AKAP9-E33( ELQVLESEK\              | 25    | >AKAP9-E33( QLQVLESEK'               | 42    | 17    |
| >AKAP9-E33( ELQVLESEK\              | 17    | >AKAP9-E33( QLQVLESEK'               | 10    | 7     |
| >AKAP9-E33( LELQVLLES               | 9953  | >AKAP9-E33( LQLQVLLES                | 144   | 9809  |
| >AKAP9-E33( LELQVLLESEK             | 15891 | >AKAP9-E33( LQLQVLLESEI              | 367   | 15524 |
| >AKAP9-E33( LELQVLLES               | 352   | >AKAP9-E33( LQLQVLLES                | 15494 | 15142 |
| >AKAP9-E33( LELQVLLES               | 221   | >AKAP9-E33( LQLQVLLES                | 14884 | 14663 |

|                        |      |                        |       |       |
|------------------------|------|------------------------|-------|-------|
| >AKAP9-E33(NLELQVLL    | 232  | >AKAP9-E33(NLQLQVLL    | 141   | 91    |
| >AKAP9-E33(NLELQVLL    | 2400 | >AKAP9-E33(NLQLQVLL    | 334   | 2066  |
| >AKAP9-E33(NLELQVLL    | 210  | >AKAP9-E33(NLQLQVLL    | 102   | 108   |
| >AKAP9-E33(RNLELQVLL   | 100  | >AKAP9-E33(RNLQLQVLL   | 167   | 67    |
| >AKAP9-E33(RNLELQVLL   | 317  | >AKAP9-E33(RNLQLQVLL   | 178   | 139   |
| >AKAP9-E33(RNLELQVLL   | 281  | >AKAP9-E33(RNLQLQVLL   | 108   | 173   |
| >AKAP9-E33(GRNLELQV    | 1057 | >AKAP9-E33(GRNQLQV     | 378   | 679   |
| >AKAP9-E33(GRNLELQVL   | 888  | >AKAP9-E33(GRNQLQVLI   | 363   | 525   |
| >AKAP9-E33(GRNLELQVLL  | 41   | >AKAP9-E33(GRNQLQVLLI  | 30    | 11    |
| >AKAP9-E33(GRNLELQVLL  | 642  | >AKAP9-E33(GRNQLQVLLI  | 470   | 172   |
| >AKAP9-E33(GRNLELQVL   | 172  | >AKAP9-E33(GRNQLQVLI   | 89    | 83    |
| >AKAP9-E33(GRNLELQVLL  | 171  | >AKAP9-E33(GRNQLQVLLI  | 110   | 61    |
| >AKAP9-E33(EEQGRNLELC  | 673  | >AKAP9-E33(EEQGRNLQLC  | 476   | 197   |
| >AKAP9-E33(EEQGRNLEL   | 413  | >AKAP9-E33(EEQGRNLQL   | 464   | 51    |
| >AKAP9-E33(EEQGRNLEL   | 421  | >AKAP9-E33(EEQGRNLQL   | 1020  | 599   |
| >AKAP9-E33(EEQGRNLEL   | 442  | >AKAP9-E33(EEQGRNLQL   | 1835  | 1393  |
| >AKAP9-E33(EEQGRNLELC  | 111  | >AKAP9-E33(EEQGRNLQLC  | 112   | 1     |
| >AKAP9-E33(SEEQGRNLEL  | 272  | >AKAP9-E33(SEEQGRNLQI  | 261   | 11    |
| >AKAP9-E33(SEEQGRNLEL  | 147  | >AKAP9-E33(SEEQGRNLQI  | 120   | 27    |
| >AKAP9-E33(SEEQGRNLEL  | 256  | >AKAP9-E33(SEEQGRNLQI  | 194   | 62    |
| >AKAP9-E33(SEEQGRNLEL  | 262  | >AKAP9-E33(SEEQGRNLQI  | 292   | 30    |
| >AKAP9-E33(SEEQGRNLEL  | 305  | >AKAP9-E33(SEEQGRNLQI  | 300   | 5     |
| >AKAP9-E33(LSEEQGRNLE  | 67   | >AKAP9-E33(LSEEQGRNLC  | 36    | 31    |
| >AKAP9-L134LEKTKLEEQV  | 94   | >AKAP9-L134FEKTKLEEQV  | 53    | 41    |
| >AKAP9-L134LEKTKLEEQV  | 1615 | >AKAP9-L134FEKTKLEEQV  | 313   | 1302  |
| >AKAP9-L134DLEKTKLEEQ' | 66   | >AKAP9-L134DFEKTKLEEQ' | 20690 | 20624 |
| >AKAP9-L134HKSklSSLQD  | 65   | >AKAP9-L134HKSklSSLQD  | 6     | 59    |
| >AKAP9-L134SLQDLEKTKL  | 134  | >AKAP9-L134SLQDFEKTkl  | 54    | 80    |
| >AKAP9-L134SLQDLEKTKL  | 498  | >AKAP9-L134SLQDFEKTkl  | 267   | 231   |
| >AKAP9-L134SLQDLEKT    | 474  | >AKAP9-L134SLQDFEKT    | 312   | 162   |
| >AKAP9-L134SLQDLEKTKL  | 119  | >AKAP9-L134SLQDFEKTkl  | 51    | 68    |
| >AKAP9-L134SLQDLEKTKL  | 264  | >AKAP9-L134SLQDFEKTkl  | 202   | 62    |
| >AKAP9-L134SLQDLEKTKL  | 131  | >AKAP9-L134SLQDFEKTkl  | 148   | 17    |
| >AKAP9-L134SLQDLEKT    | 61   | >AKAP9-L134SLQDFEKT    | 46    | 15    |
| >AKAP9-L134SLQDLEKTKL  | 5    | >AKAP9-L134SLQDFEKTkl  | 4     | 1     |
| >AKAP9-L134SLQDLEKTK   | 493  | >AKAP9-L134SLQDFEKTk   | 150   | 343   |
| >AKAP9-L134SSLQDLEK    | 33   | >AKAP9-L134SSLQDFEK    | 17    | 16    |
| >AKAP9-L134SSLQDLEKTK  | 51   | >AKAP9-L134SSLQDFEKTk  | 39    | 12    |
| >AKAP9-L134SSLQDLEKTKI | 123  | >AKAP9-L134SSLQDFEKTki | 247   | 124   |
| >AKAP9-L134SSLQDLEKTKI | 307  | >AKAP9-L134SSLQDFEKTki | 213   | 94    |
| >AKAP9-L134SSLQDLEK    | 88   | >AKAP9-L134SSLQDFEK    | 50    | 38    |
| >AKAP9-L134SSLQDLEKTK  | 193  | >AKAP9-L134SSLQDFEKTk  | 78    | 115   |
| >AKAP9-L134SSLQDLEKTKI | 571  | >AKAP9-L134SSLQDFEKTki | 461   | 110   |

|                         |      |                         |       |       |
|-------------------------|------|-------------------------|-------|-------|
| >AKAP9-L134LSSLQDLEK    | 98   | >AKAP9-L134LSSLQDFEK    | 39    | 59    |
| >AKAP9-L134LSSLQDLEKTF  | 702  | >AKAP9-L134LSSLQDFEKTf  | 360   | 342   |
| >AKAP9-L134LSSLQDLEK    | 1099 | >AKAP9-L134LSSLQDFEK    | 164   | 935   |
| >AKAP9-L134KLSSLQDL     | 231  | >AKAP9-L134KLSSLQDF     | 13778 | 13547 |
| >AKAP9-L134KLSSLQDL     | 10   | >AKAP9-L134KLSSLQDF     | 930   | 920   |
| >AKAP9-L134KLSSLQDLEKf  | 80   | >AKAP9-L134KLSSLQDFEKf  | 91    | 11    |
| >AKAP9-L134KLSSLQDL     | 68   | >AKAP9-L134KLSSLQDF     | 5303  | 5235  |
| >AKAP9-L134KLSSLQDL     | 170  | >AKAP9-L134KLSSLQDF     | 9198  | 9028  |
| >AKAP9-L134KLSSLQDL     | 162  | >AKAP9-L134KLSSLQDF     | 13219 | 13057 |
| >AKAP9-L134KLSSLQDL     | 63   | >AKAP9-L134KLSSLQDF     | 12935 | 12872 |
| >AKAP9-L134KLSSLQDL     | 11   | >AKAP9-L134KLSSLQDF     | 6428  | 6417  |
| >AKAP9-L134KLSSLQDLEK   | 46   | >AKAP9-L134KLSSLQDFEK   | 95    | 49    |
| >AKAP9-L134KLSSLQDLEK   | 34   | >AKAP9-L134KLSSLQDFEK   | 33    | 1     |
| >AKAP9-L134KLSSLQDLEK   | 325  | >AKAP9-L134KLSSLQDFEK   | 383   | 58    |
| >AKAP9-L134KLSSLQDLEK   | 1409 | >AKAP9-L134KLSSLQDFEK   | 476   | 933   |
| >AKAP9-L134KLSSLQDL     | 672  | >AKAP9-L134KLSSLQDF     | 145   | 527   |
| >AKAP9-L134KLSSLQDL     | 7560 | >AKAP9-L134KLSSLQDF     | 328   | 7232  |
| >AKAP9-L134KLSSLQDL     | 974  | >AKAP9-L134KLSSLQDF     | 46    | 928   |
| >AKAP9-L134KLSSLQDLEK   | 200  | >AKAP9-L134KLSSLQDFEK   | 123   | 77    |
| >AKAP9-L134SKLSSLQDL    | 13   | >AKAP9-L134SKLSSLQDF    | 2     | 11    |
| >AKAP9-L134SKLSSLQDLEKf | 369  | >AKAP9-L134SKLSSLQDFEKf | 548   | 179   |
| >AKAP9-L134KSKLSSLQDL   | 23   | >AKAP9-L134KSKLSSLQDF   | 282   | 259   |
| >AKAP9-L134KSKLSSLQDLE  | 867  | >AKAP9-L134KSKLSSLQDFE  | 342   | 525   |
| >AKAP9-L134KSKLSSLQDL   | 5341 | >AKAP9-L134KSKLSSLQDF   | 252   | 5089  |
| >AKAP9-L134KSKLSSLQDL   | 327  | >AKAP9-L134KSKLSSLQDF   | 16    | 311   |
| >AKAP9-L134KSKLSSLQDL   | 8    | >AKAP9-L134KSKLSSLQDF   | 4     | 4     |
| >AKAP9-L134KSKLSSLQDL   | 2153 | >AKAP9-L134KSKLSSLQDF   | 156   | 1997  |
| >AKAP9-L134KSKLSSLQDL   | 1021 | >AKAP9-L134KSKLSSLQDF   | 136   | 885   |
| >AKAP9-M24MTFMKNVL      | 357  | >AKAP9-M24ITFMKNVL      | 1402  | 1045  |
| >AKAP9-M24MTFMKNVLK     | 40   | >AKAP9-M24ITFMKNVLK     | 45    | 5     |
| >AKAP9-M24MTFMKNVLK     | 10   | >AKAP9-M24ITFMKNVLK     | 12    | 2     |
| >AKAP9-M24MTFMKNVLK     | 6    | >AKAP9-M24ITFMKNVLK     | 20    | 14    |
| >AKAP9-M24MTFMKNVLK     | 14   | >AKAP9-M24ITFMKNVLK     | 35    | 21    |
| >AKAP9-M24MTFMKNVL      | 94   | >AKAP9-M24ITFMKNVL      | 196   | 102   |
| >AKAP9-M24MTFMKNVLK     | 69   | >AKAP9-M24ITFMKNVLK     | 171   | 102   |
| >AKAP9-M24MTFMKNVLK     | 2    | >AKAP9-M24ITFMKNVLK     | 5     | 3     |
| >AKAP9-M24MTFMKNVL      | 15   | >AKAP9-M24ITFMKNVL      | 759   | 744   |
| >AKAP9-M24MTFMKNVLK     | 232  | >AKAP9-M24ITFMKNVLKE    | 7028  | 6796  |
| >AKAP9-M24MTFMKNVL      | 484  | >AKAP9-M24ITFMKNVL      | 3897  | 3413  |
| >AKAP9-M24MTFMKNVL      | 352  | >AKAP9-M24ITFMKNVL      | 479   | 127   |
| >AKAP9-M24MTFMKNVL      | 11   | >AKAP9-M24ITFMKNVL      | 11    | 0     |
| >AKAP9-M24MTFMKNVLK     | 316  | >AKAP9-M24ITFMKNVLK     | 256   | 60    |
| >AKAP9-M24MTFMKNVL      | 146  | >AKAP9-M24ITFMKNVL      | 354   | 208   |

|                      |      |                      |      |      |
|----------------------|------|----------------------|------|------|
| >AKAP9-M24EMTFMKNV   | 376  | >AKAP9-M24EITFMKNV   | 7723 | 7347 |
| >AKAP9-M24EMTFMKNV   | 337  | >AKAP9-M24EITFMKNV   | 8609 | 8272 |
| >AKAP9-M24EMTFMKNV   | 305  | >AKAP9-M24EITFMKNV   | 8805 | 8500 |
| >AKAP9-M24EMTFMKNV   | 22   | >AKAP9-M24EITFMKNV   | 1179 | 1157 |
| >AKAP9-M24EMTFMKNVL  | 81   | >AKAP9-M24EITFMKNVLK | 137  | 56   |
| >AKAP9-M24EMTFMKNVL  | 82   | >AKAP9-M24EITFMKNVLK | 72   | 10   |
| >AKAP9-M24EMTFMKNVL  | 28   | >AKAP9-M24EITFMKNVLK | 15   | 13   |
| >AKAP9-M24EMTFMKNV   | 255  | >AKAP9-M24EITFMKNV   | 28   | 227  |
| >AKAP9-M24EMTFMKNVL  | 1891 | >AKAP9-M24EITFMKNVL  | 239  | 1652 |
| >AKAP9-M24EMTFMKNV   | 297  | >AKAP9-M24EITFMKNV   | 125  | 172  |
| >AKAP9-M24EEMTFMKNV  | 8    | >AKAP9-M24EEITFMKNV  | 16   | 8    |
| >AKAP9-M24EEMTFMKNV  | 29   | >AKAP9-M24EEITFMKNVL | 88   | 59   |
| >AKAP9-M24EEMTFMKNV  | 283  | >AKAP9-M24EEITFMKNVL | 213  | 70   |
| >AKAP9-M24EEMTFMKNV  | 145  | >AKAP9-M24EEITFMKNVL | 369  | 224  |
| >AKAP9-M24EEMTFMKNV  | 495  | >AKAP9-M24EEITFMKNV  | 863  | 368  |
| >AKAP9-M24EEMTFMKNV  | 385  | >AKAP9-M24EEITFMKNV  | 823  | 438  |
| >AKAP9-M24EEMTFMKNV  | 159  | >AKAP9-M24EEITFMKNV  | 157  | 2    |
| >AKAP9-M24EEMTFMKNV  | 531  | >AKAP9-M24EEITFMKNVL | 292  | 239  |
| >AKAP9-M24EEMTFMKN   | 142  | >AKAP9-M24EEITFMKN   | 412  | 270  |
| >AKAP9-M24EEMTFMKNV  | 17   | >AKAP9-M24EEITFMKNV  | 40   | 23   |
| >AKAP9-M24EEMTFMKNV  | 417  | >AKAP9-M24EEITFMKNVL | 1076 | 659  |
| >AKAP9-M24EEMTFMKNV  | 12   | >AKAP9-M24EEITFMKNV  | 23   | 11   |
| >AKAP9-M24EEMTFMKNV  | 253  | >AKAP9-M24EEITFMKNVL | 235  | 18   |
| >AKAP9-M24NEEMTFMKN  | 17   | >AKAP9-M24NEEITFMKNV | 22   | 5    |
| >AKAP9-M24NEEMTFMKN  | 56   | >AKAP9-M24NEEITFMKNV | 89   | 33   |
| >AKAP9-M24NEEMTFMKN  | 211  | >AKAP9-M24NEEITFMKNV | 243  | 32   |
| >AKAP9-M24NEEMTFMKN  | 325  | >AKAP9-M24NEEITFMKNV | 525  | 200  |
| >AKAP9-M24NEEMTFMKN  | 120  | >AKAP9-M24NEEITFMKNV | 227  | 107  |
| >AKAP9-M24NEEMTFMKN  | 26   | >AKAP9-M24NEEITFMKNV | 115  | 89   |
| >AKAP9-M24TANEEMTFM  | 37   | >AKAP9-M24TANEEITFMK | 35   | 2    |
| >AKAP9-M24TANEEMTFM  | 133  | >AKAP9-M24TANEEITFM  | 814  | 681  |
| >AKAP9-M24TANEEMTFM  | 38   | >AKAP9-M24TANEEITFMK | 27   | 11   |
| >AKAP9-M24TANEEMTFM  | 272  | >AKAP9-M24TANEEITFM  | 649  | 377  |
| >AKAP9-M24TANEEMTF   | 335  | >AKAP9-M24TANEEITF   | 528  | 193  |
| >AKAP9-M24TANEEMTF   | 53   | >AKAP9-M24TANEEITF   | 86   | 33   |
| >AKAP9-M24TANEEMTFM  | 419  | >AKAP9-M24TANEEITFM  | 1479 | 1060 |
| >AKAP9-M24TANEEMTF   | 62   | >AKAP9-M24TANEEITF   | 37   | 25   |
| >AKAP9-M24TANEEMTF   | 705  | >AKAP9-M24TANEEITF   | 422  | 283  |
| >AKAP9-M24TANEEMTF   | 337  | >AKAP9-M24TANEEITF   | 570  | 233  |
| >AKAP9-M24ETANEEMTFI | 70   | >AKAP9-M24ETANEEITFM | 86   | 16   |
| >AKAP9-M24ETANEEMTF  | 161  | >AKAP9-M24ETANEEITF  | 325  | 164  |
| >AKAP9-M24ETANEEMTF  | 48   | >AKAP9-M24ETANEEITF  | 102  | 54   |
| >AKAP9-M24ETANEEMTF  | 25   | >AKAP9-M24ETANEEITF  | 15   | 10   |

|                        |      |                        |       |       |
|------------------------|------|------------------------|-------|-------|
| >AKAP9-M24ETANEEMTFI   | 4    | >AKAP9-M24ETANEEITFM   | 4     | 0     |
| >AKAP9-M24ETANEEMTFI   | 262  | >AKAP9-M24ETANEEITFM   | 235   | 27    |
| >AKAP9-M24ETANEEMTF    | 314  | >AKAP9-M24ETANEEITF    | 300   | 14    |
| >AKAP9-M24ETANEEMTF    | 456  | >AKAP9-M24ETANEEITF    | 721   | 265   |
| >AKAP9-M24ETANEEMTFI   | 2    | >AKAP9-M24ETANEEITFM   | 2     | 0     |
| >AKAP9-M24ETANEEMTFI   | 329  | >AKAP9-M24ETANEEITFM   | 365   | 36    |
| >AKAP9-M24ETANEEMTFI   | 74   | >AKAP9-M24ETANEEITFM   | 106   | 32    |
| >AKAP9-M24ETANEEMTF    | 418  | >AKAP9-M24ETANEEITF    | 990   | 572   |
| >AKAP9-M24ETANEEMTF    | 46   | >AKAP9-M24ETANEEITF    | 44    | 2     |
| >AKAP9-M24ETANEEMTFI   | 258  | >AKAP9-M24ETANEEITFM   | 509   | 251   |
| >AKAP9-M24ETANEEMTF    | 537  | >AKAP9-M24ETANEEITF    | 172   | 365   |
| >AKAP9-M24ETANEEMTF    | 278  | >AKAP9-M24ETANEEITF    | 783   | 505   |
| >AKAP9-M24ETANEEMTFI   | 83   | >AKAP9-M24ETANEEITFM   | 107   | 24    |
| >AKAP9-M24ETANEEMTFI   | 285  | >AKAP9-M24ETANEEITFM   | 407   | 122   |
| >AKAP9-M24VETANEEMTI   | 221  | >AKAP9-M24VETANEEITFI  | 314   | 93    |
| >AKAP9-M24VETANEEMTI   | 229  | >AKAP9-M24VETANEEITF   | 405   | 176   |
| >AKAP9-M24VETANEEM     | 190  | >AKAP9-M24VETANEEI     | 97    | 93    |
| >AKAP9-M24VETANEEMTI   | 347  | >AKAP9-M24VETANEEITFI  | 338   | 9     |
| >AKAP9-M24VETANEEMTI   | 493  | >AKAP9-M24VETANEEITFI  | 548   | 55    |
| >AKAP9-M24VETANEEM     | 3834 | >AKAP9-M24VETANEEI     | 224   | 3610  |
| >AKAP9-M24VETANEEMTI   | 568  | >AKAP9-M24VETANEEITFI  | 436   | 132   |
| >AKAP9-M24QVETANEEM    | 5431 | >AKAP9-M24QVETANEEI    | 286   | 5145  |
| >AKAP9-M24QVETANEEM    | 373  | >AKAP9-M24QVETANEEIT   | 207   | 166   |
| >AKAP9-M24QQVETANEEI   | 6394 | >AKAP9-M24QQVETANEEI   | 484   | 5910  |
| >AKAP9-M24QQVETANEEI   | 313  | >AKAP9-M24QQVETANEEI   | 3549  | 3236  |
| >AKAP9-M24QQVETANEEI   | 32   | >AKAP9-M24QQVETANEEI   | 108   | 76    |
| >AKAP9-M24QQVETANEEI   | 395  | >AKAP9-M24QQVETANEEI   | 1192  | 797   |
| >AKAP9-Q11 QKIHQLEL    | 44   | >AKAP9-Q11 HKIHQLEL    | 47    | 3     |
| >AKAP9-Q11 QKIHQLELQT  | 29   | >AKAP9-Q11 HKIHQLELQT  | 26    | 3     |
| >AKAP9-Q11 QKIHQLEL    | 1974 | >AKAP9-Q11 HKIHQLEL    | 235   | 1739  |
| >AKAP9-Q11 LQKIHQLEL   | 304  | >AKAP9-Q11 LHKIHQLEL   | 1277  | 973   |
| >AKAP9-Q11 LQKIHQLEL   | 139  | >AKAP9-Q11 LHKIHQLEL   | 20364 | 20225 |
| >AKAP9-Q11 LQKIHQLEL   | 73   | >AKAP9-Q11 LHKIHQLEL   | 1070  | 997   |
| >AKAP9-Q11 ELQKIHQL    | 369  | >AKAP9-Q11 ELHKIHQL    | 329   | 40    |
| >AKAP9-Q11 ELQKIHQL    | 202  | >AKAP9-Q11 ELHKIHQL    | 72    | 130   |
| >AKAP9-Q11 ELQKIHQLEL  | 924  | >AKAP9-Q11 ELHKIHQLEL  | 350   | 574   |
| >AKAP9-Q11 ELQKIHQL    | 147  | >AKAP9-Q11 ELHKIHQL    | 696   | 549   |
| >AKAP9-Q11 ELQKIHQL    | 17   | >AKAP9-Q11 ELHKIHQL    | 14    | 3     |
| >AKAP9-Q11 ELQKIHQLEL  | 67   | >AKAP9-Q11 ELHKIHQLEL  | 50    | 17    |
| >AKAP9-Q11 ELQKIHQL    | 437  | >AKAP9-Q11 ELHKIHQL    | 152   | 285   |
| >AKAP9-Q11 KELQKIHQL   | 75   | >AKAP9-Q11 KELHKIHQL   | 74    | 1     |
| >AKAP9-Q11 KELQKIHQLEI | 333  | >AKAP9-Q11 KELHKIHQLEI | 322   | 11    |
| >AKAP9-Q11 KELQKIHQL   | 97   | >AKAP9-Q11 KELHKIHQL   | 81    | 16    |



|                        |     |                        |     |     |
|------------------------|-----|------------------------|-----|-----|
| >AKAP9-Q11 KELQKIHQLEI | 72  | >AKAP9-Q11 KELHKIHQLEI | 62  | 10  |
| >AKAP9-Q11 KELQKIHQL   | 33  | >AKAP9-Q11 KELHKIHQL   | 45  | 12  |
| >AKAP9-Q11 KELQKIHQLEI | 15  | >AKAP9-Q11 KELHKIHQLEI | 17  | 2   |
| >AKAP9-Q11 KELQKIHQL   | 464 | >AKAP9-Q11 KELHKIHQL   | 571 | 107 |
| >AKAP9-Q11 KELQKIHQLEI | 445 | >AKAP9-Q11 KELHKIHQLEI | 532 | 87  |
| >AKAP9-Q11 KELQKIHQL   | 8   | >AKAP9-Q11 KELHKIHQL   | 13  | 5   |
| >AKAP9-Q11 KELQKIHQLEI | 20  | >AKAP9-Q11 KELHKIHQLEI | 37  | 17  |
| >AKAP9-Q11 KIKELQKIHQL | 448 | >AKAP9-Q11 KIKELHKIHQL | 547 | 99  |
| >AKAP9-Q11 KIKELQKI    | 254 | >AKAP9-Q11 KIKELHKI    | 177 | 77  |
| >AKAP9-Q11 KIKELQKIHQL | 237 | >AKAP9-Q11 KIKELHKIHQL | 203 | 34  |
| >AKAP9-Q11 KIKELQKIHQL | 105 | >AKAP9-Q11 KIKELHKIHQL | 144 | 39  |
| >AKAP9-Q11 KIKELQKI    | 69  | >AKAP9-Q11 KIKELHKI    | 45  | 24  |
| >AKAP9-Q11 KIKELQKIHQ  | 182 | >AKAP9-Q11 KIKELHKIHQ  | 102 | 80  |
| >AKAP9-Q11 KIKELQKIHQL | 161 | >AKAP9-Q11 KIKELHKIHQL | 60  | 101 |
| >AKAP9-Q11 KIKELQKI    | 669 | >AKAP9-Q11 KIKELHKI    | 357 | 312 |
| >AKAP9-Q11 EEKIKELQKI  | 135 | >AKAP9-Q11 EEKIKELHKI  | 76  | 59  |
| >AKAP9-Q11 EEKIKELQKI  | 143 | >AKAP9-Q11 EEKIKELHKI  | 324 | 181 |
| >AKAP9-Q11 QEEKIKELQKI | 23  | >AKAP9-Q11 QEEKIKELHKI | 13  | 10  |
| >AKAP9-Q11 QEEKIKELQKI | 294 | >AKAP9-Q11 QEEKIKELHKI | 190 | 104 |
| >AKAP9-Q11 QEEKIKELQKI | 27  | >AKAP9-Q11 QEEKIKELHKI | 33  | 6   |
| >AKAP9-R17·RLLKILLEV   | 9   | >AKAP9-R17·KLLKILLEV   | 8   | 1   |
| >AKAP9-R17·RLLKILLEVV  | 44  | >AKAP9-R17·KLLKILLEVV  | 41  | 3   |
| >AKAP9-R17·RLLKILLEV   | 19  | >AKAP9-R17·KLLKILLEV   | 13  | 6   |
| >AKAP9-R17·RLLKILLEVV  | 97  | >AKAP9-R17·KLLKILLEVV  | 72  | 25  |
| >AKAP9-R17·RLLKILLEV   | 19  | >AKAP9-R17·KLLKILLEV   | 20  | 1   |
| >AKAP9-R17·RLLKILLEVV  | 36  | >AKAP9-R17·KLLKILLEVV  | 34  | 2   |
| >AKAP9-R17·RLLKILLEV   | 8   | >AKAP9-R17·KLLKILLEV   | 5   | 3   |
| >AKAP9-R17·RLLKILLEVV  | 76  | >AKAP9-R17·KLLKILLEVV  | 65  | 11  |
| >AKAP9-R17·RLLKILLEV   | 2   | >AKAP9-R17·KLLKILLEV   | 2   | 0   |
| >AKAP9-R17·RLLKILLEVV  | 2   | >AKAP9-R17·KLLKILLEVV  | 2   | 0   |
| >AKAP9-R17·RLLKILLEV   | 4   | >AKAP9-R17·KLLKILLEV   | 4   | 0   |
| >AKAP9-R17·RLLKILLEVV  | 4   | >AKAP9-R17·KLLKILLEVV  | 4   | 0   |
| >AKAP9-R17·RLLKILLEV   | 5   | >AKAP9-R17·KLLKILLEV   | 5   | 0   |
| >AKAP9-R17·RLLKILLEVV  | 6   | >AKAP9-R17·KLLKILLEVV  | 6   | 0   |
| >AKAP9-R17·RLLKILLEV   | 3   | >AKAP9-R17·KLLKILLEV   | 3   | 0   |
| >AKAP9-R17·RLLKILLEVV  | 4   | >AKAP9-R17·KLLKILLEVV  | 4   | 0   |
| >AKAP9-R17·RLLKILLEV   | 2   | >AKAP9-R17·KLLKILLEV   | 2   | 0   |
| >AKAP9-R17·RLLKILLEVV  | 5   | >AKAP9-R17·KLLKILLEVV  | 4   | 1   |
| >AKAP9-R17·RLLKILLEVVK | 50  | >AKAP9-R17·KLLKILLEVVK | 52  | 2   |
| >AKAP9-R17·RLLKILLEVVK | 79  | >AKAP9-R17·KLLKILLEVVK | 93  | 14  |
| >AKAP9-R17·RLLKILLEVVK | 67  | >AKAP9-R17·KLLKILLEVVK | 72  | 5   |
| >AKAP9-R17·RLLKILLEVVK | 245 | >AKAP9-R17·KLLKILLEVVK | 287 | 42  |
| >AKAP9-R17·RLLKILLEV   | 234 | >AKAP9-R17·KLLKILLEV   | 213 | 21  |

|                         |      |                         |       |       |
|-------------------------|------|-------------------------|-------|-------|
| >AKAP9-R17·RLLKILLEVV   | 270  | >AKAP9-R17·KLLKILLEVV   | 248   | 22    |
| >AKAP9-R17·RLLKILLEV    | 498  | >AKAP9-R17·KLLKILLEV    | 698   | 200   |
| >AKAP9-R17·RLLKILLEVVVK | 202  | >AKAP9-R17·KLLKILLEVVVK | 108   | 94    |
| >AKAP9-R17·NRLLKILL     | 215  | >AKAP9-R17·NKLLKILL     | 10195 | 9980  |
| >AKAP9-R17·NRLLKILLEV   | 350  | >AKAP9-R17·NKLLKILLEV   | 17469 | 17119 |
| >AKAP9-R17·NRLLKILL     | 374  | >AKAP9-R17·NKLLKILL     | 1052  | 678   |
| >AKAP9-R17·NRLLKILL     | 329  | >AKAP9-R17·NKLLKILL     | 9139  | 8810  |
| >AKAP9-R17·NRLLKILL     | 311  | >AKAP9-R17·NKLLKILL     | 6474  | 6163  |
| >AKAP9-R17·NRLLKILLEV   | 300  | >AKAP9-R17·NKLLKILLEV   | 10118 | 9818  |
| >AKAP9-R17·ERYALQKANF   | 386  | >AKAP9-R17·ERYALQKANF   | 1494  | 1108  |
| >AKAP9-R17·ERYALQKANF   | 546  | >AKAP9-R17·ERYALQKANF   | 323   | 223   |
| >AKAP9-R17·ERYALQKANF   | 240  | >AKAP9-R17·ERYALQKANF   | 3860  | 3620  |
| >AKAP9-R17·KANNRLLK     | 49   | >AKAP9-R17·KANNKLLK     | 68    | 19    |
| >AKAP9-R17·KANNRLLK     | 25   | >AKAP9-R17·KANNKLLK     | 34    | 9     |
| >AKAP9-R17·KANNRLLK     | 8    | >AKAP9-R17·KANNKLLK     | 13    | 5     |
| >AKAP9-R17·KANNRLLKI    | 214  | >AKAP9-R17·KANNKLLKI    | 419   | 205   |
| >AKAP9-R17·KANNRLLKILL  | 492  | >AKAP9-R17·KANNKLLKILL  | 773   | 281   |
| >AKAP9-R17·KANNRLLK     | 53   | >AKAP9-R17·KANNKLLK     | 87    | 34    |
| >AKAP9-R17·KANNRLLKI    | 354  | >AKAP9-R17·KANNKLLKI    | 432   | 78    |
| >AKAP9-R17·KANNRLLKI    | 179  | >AKAP9-R17·KANNKLLKI    | 151   | 28    |
| >AKAP9-R17·KANNRLLKIL   | 386  | >AKAP9-R17·KANNKLLKIL   | 319   | 67    |
| >AKAP9-R17·KANNRLLKI    | 193  | >AKAP9-R17·KANNKLLKI    | 213   | 20    |
| >AKAP9-R17·KANNRLLKI    | 154  | >AKAP9-R17·KANNKLLKI    | 278   | 124   |
| >AKAP9-R17·QKANNRLL     | 218  | >AKAP9-R17·QKANNKLL     | 213   | 5     |
| >AKAP9-R17·QKANNRLLKI   | 320  | >AKAP9-R17·QKANNKLLKI   | 621   | 301   |
| >AKAP9-R17·QKANNRLLKI   | 89   | >AKAP9-R17·QKANNKLLKI   | 142   | 53    |
| >AKAP9-R17·LQKANNRLLK   | 322  | >AKAP9-R17·LQKANNKLLK   | 375   | 53    |
| >AKAP9-R17·LQKANNRLLK   | 312  | >AKAP9-R17·LQKANNKLLK   | 336   | 24    |
| >AKAP9-R17·LQKANNRLLK   | 17   | >AKAP9-R17·LQKANNKLLK   | 34    | 17    |
| >AKAP9-R17·LQKANNRLL    | 169  | >AKAP9-R17·LQKANNKL     | 425   | 256   |
| >AKAP9-R17·LQKANNRLL    | 296  | >AKAP9-R17·LQKANNKLL    | 443   | 147   |
| >AKAP9-R17·LQKANNRLL    | 127  | >AKAP9-R17·LQKANNKL     | 76    | 51    |
| >AKAP9-R17·LQKANNRLL    | 98   | >AKAP9-R17·LQKANNKLL    | 61    | 37    |
| >AKAP9-R17·LQKANNRLLK   | 172  | >AKAP9-R17·LQKANNKLLK   | 176   | 4     |
| >AKAP9-R17·ALQKANNRLL   | 38   | >AKAP9-R17·ALQKANNKL    | 42    | 4     |
| >AKAP9-R17·ALQKANNRLLI  | 460  | >AKAP9-R17·ALQKANNKLLI  | 732   | 272   |
| >AKAP9-R17·ALQKANNRLL   | 368  | >AKAP9-R17·ALQKANNKL    | 383   | 15    |
| >AKAP9-R17·ALQKANNRLL   | 16   | >AKAP9-R17·ALQKANNKL    | 25    | 9     |
| >AKAP9-R17·ALQKANNRLLI  | 41   | >AKAP9-R17·ALQKANNKLLI  | 34    | 7     |
| >AKAP9-R17·ALQKANNRR    | 6329 | >AKAP9-R17·ALQKANNK     | 286   | 6043  |
| >AKAP9-R17·ALQKANNRLLI  | 100  | >AKAP9-R17·ALQKANNKLLI  | 117   | 17    |
| >AKAP9-R17·ALQKANNRR    | 4040 | >AKAP9-R17·ALQKANNK     | 175   | 3865  |
| >AKAP9-R17·ALQKANNRLLI  | 45   | >AKAP9-R17·ALQKANNKLLI  | 55    | 10    |

|                       |       |                       |       |       |
|-----------------------|-------|-----------------------|-------|-------|
| >AKAP9-R17·ALQKANNR   | 9645  | >AKAP9-R17·ALQKANNK   | 413   | 9232  |
| >AKAP9-R17·ALQKANNRLI | 71    | >AKAP9-R17·ALQKANNKLI | 182   | 111   |
| >AKAP9-R17·ALQKANNR   | 286   | >AKAP9-R17·ALQKANNK   | 5741  | 5455  |
| >AKAP9-R17·YALQKANNRI | 374   | >AKAP9-R17·YALQKANNKI | 412   | 38    |
| >AKAP9-R17·YALQKANNR  | 83    | >AKAP9-R17·YALQKANNK  | 391   | 308   |
| >AKAP9-R17·YALQKANNRI | 52    | >AKAP9-R17·YALQKANNKI | 76    | 24    |
| >AKAP9-R17·YALQKANNRI | 72    | >AKAP9-R17·YALQKANNKI | 49    | 23    |
| >AKAP9-R17·YALQKANNR  | 399   | >AKAP9-R17·YALQKANNK  | 6733  | 6334  |
| >AKAP9-R17·RYALQKANNI | 121   | >AKAP9-R17·RYALQKANNI | 249   | 128   |
| >AKAP9-R17·RYALQKANNI | 365   | >AKAP9-R17·RYALQKANNI | 398   | 33    |
| >AKAP9-R17·RYALQKANNI | 16    | >AKAP9-R17·RYALQKANNI | 12    | 4     |
| >AKAP9-R17·RYALQKANNI | 3434  | >AKAP9-R17·RYALQKANNI | 38    | 3396  |
| >AKAP9-R17·RYALQKANNI | 73    | >AKAP9-R17·RYALQKANNI | 1467  | 1394  |
| >AKAP9-R17·RYALQKANNI | 17    | >AKAP9-R17·RYALQKANNI | 160   | 143   |
| >AKAP9-V27·VRDHLAEAK  | 2038  | >AKAP9-V27·FRDHLAEAK  | 353   | 1685  |
| >AKAP9-V27·QVRDHLAEA  | 59    | >AKAP9-V27·QFRDHLAEA  | 4268  | 4209  |
| >AKAP9-V27·QVRDHLAEA  | 462   | >AKAP9-V27·QFRDHLAEA  | 12134 | 11672 |
| >AKAP9-V27·QVRDHLAEA  | 22    | >AKAP9-V27·QFRDHLAEA  | 86    | 64    |
| >AKAP9-V27·QVRDHLAEA  | 13    | >AKAP9-V27·QFRDHLAEA  | 38    | 25    |
| >AKAP9-V27·QVRDHLAEA  | 416   | >AKAP9-V27·QFRDHLAEA  | 1901  | 1485  |
| >AKAP9-V27·MTSLQKDLSC | 159   | >AKAP9-V27·MTSLQKDLSC | 9985  | 9826  |
| >AKAP9-V27·MTSLQKDLSC | 166   | >AKAP9-V27·MTSLQKDLSC | 14189 | 14023 |
| >AKAP9-V27·MTSLQKDLSC | 171   | >AKAP9-V27·MTSLQKDLSC | 32900 | 32729 |
| >AKAP9-V27·MTSLQKDLSC | 15    | >AKAP9-V27·MTSLQKDLSC | 9401  | 9386  |
| >AKAP9-V27·MTSLQKDLSC | 241   | >AKAP9-V27·MTSLQKDLSC | 16269 | 16028 |
| >AKAP9-V27·MTSLQKDLSC | 585   | >AKAP9-V27·MTSLQKDLSC | 8     | 577   |
| >AKAP9-V27·MTSLQKDLSC | 12793 | >AKAP9-V27·MTSLQKDLSC | 163   | 12630 |
| >AKAP9-V27·MTSLQKDLSC | 138   | >AKAP9-V27·MTSLQKDLSC | 13    | 125   |
| >AKAP9-V27·SQVRDHLAE/ | 2118  | >AKAP9-V27·SQFRDHLAE/ | 433   | 1685  |
| >AKAP9-V27·SQVRDHLAE/ | 412   | >AKAP9-V27·SQFRDHLAE/ | 113   | 299   |
| >AKAP9-V27·SQVRDHLA   | 105   | >AKAP9-V27·SQFRDHLA   | 55    | 50    |
| >AKAP9-V27·SQVRDHLAE/ | 346   | >AKAP9-V27·SQFRDHLAE/ | 230   | 116   |
| >AKAP9-V27·SQVRDHLAE/ | 247   | >AKAP9-V27·SQFRDHLAE/ | 32    | 215   |
| >AKAP9-V27·SQVRDHLAE/ | 1140  | >AKAP9-V27·SQFRDHLAE/ | 318   | 822   |
| >AKAP9-V27·SQVRDHLAE/ | 1048  | >AKAP9-V27·SQFRDHLAE/ | 127   | 921   |
| >AKAP9-V27·SQVRDHLAE/ | 572   | >AKAP9-V27·SQFRDHLAE/ | 72    | 500   |
| >AKAP9-V27·LSQVRDHL   | 336   | >AKAP9-V27·LSQFRDHL   | 379   | 43    |
| >AKAP9-V27·DLSQVRDHL/ | 1240  | >AKAP9-V27·DLSQFRDHL/ | 394   | 846   |
| >AKAP9-V27·LQKDLSQV   | 345   | >AKAP9-V27·LQKDLSQF   | 12206 | 11861 |
| >AKAP9-V27·LQKDLSQV   | 15    | >AKAP9-V27·LQKDLSQF   | 6945  | 6930  |
| >AKAP9-V27·LQKDLSQV   | 44    | >AKAP9-V27·LQKDLSQF   | 1535  | 1491  |
| >AKAP9-V27·LQKDLSQV   | 84    | >AKAP9-V27·LQKDLSQF   | 30386 | 30302 |
| >AKAP9-V27·LQKDLSQVR  | 81    | >AKAP9-V27·LQKDLSQFR  | 15    | 66    |

|                       |       |                        |       |       |
|-----------------------|-------|------------------------|-------|-------|
| >AKAP9-V27·LQKDLSQV   | 203   | >AKAP9-V27·LQKDLSQF    | 29    | 174   |
| >AKAP9-V27·LQKDLSQV   | 239   | >AKAP9-V27·LQKDLSQF    | 6     | 233   |
| >AKAP9-V27·LQKDLSQVR  | 418   | >AKAP9-V27·LQKDLSQFR   | 939   | 521   |
| >AKAP9-V27·LQKDLSQVR  | 596   | >AKAP9-V27·LQKDLSQFR   | 213   | 383   |
| >AKAP9-V27·SLQKDLSQV  | 58    | >AKAP9-V27·SLQKDLSQF   | 15823 | 15765 |
| >AKAP9-V27·SLQKDLSQV  | 23    | >AKAP9-V27·SLQKDLSQF   | 4223  | 4200  |
| >AKAP9-V27·SLQKDLSQV  | 7     | >AKAP9-V27·SLQKDLSQF   | 4910  | 4903  |
| >AKAP9-V27·SLQKDLSQV  | 144   | >AKAP9-V27·SLQKDLSQF   | 7023  | 6879  |
| >AKAP9-V27·SLQKDLSQV  | 5     | >AKAP9-V27·SLQKDLSQF   | 4290  | 4285  |
| >AKAP9-V27·SLQKDLSQV  | 7     | >AKAP9-V27·SLQKDLSQF   | 11536 | 11529 |
| >AKAP9-V27·SLQKDLSQV  | 10    | >AKAP9-V27·SLQKDLSQF   | 12751 | 12741 |
| >AKAP9-V27·SLQKDLSQV  | 22    | >AKAP9-V27·SLQKDLSQF   | 16176 | 16154 |
| >AKAP9-V27·SLQKDLSQV  | 2     | >AKAP9-V27·SLQKDLSQF   | 1567  | 1565  |
| >AKAP9-V27·SLQKDLSQVR | 1250  | >AKAP9-V27·SLQKDLSQFR  | 90    | 1160  |
| >AKAP9-V27·SLQKDLSQV  | 6843  | >AKAP9-V27·SLQKDLSQF   | 111   | 6732  |
| >AKAP9-V27·SLQKDLSQV  | 6439  | >AKAP9-V27·SLQKDLSQF   | 179   | 6260  |
| >AKAP9-V27·SLQKDLSQV  | 8831  | >AKAP9-V27·SLQKDLSQF   | 310   | 8521  |
| >AKAP9-V27·SLQKDLSQV  | 1738  | >AKAP9-V27·SLQKDLSQF   | 64    | 1674  |
| >AKAP9-V27·SLQKDLSQVR | 1251  | >AKAP9-V27·SLQKDLSQFR  | 233   | 1018  |
| >AKAP9-V27·TSLQKDLSQV | 8180  | >AKAP9-V27·TSLQKDLSQF  | 322   | 7858  |
| >AKAP9-V27·TSLQKDLSQV | 660   | >AKAP9-V27·TSLQKDLSQF  | 106   | 554   |
| >AKAP9-V27·TSLQKDLSQV | 2158  | >AKAP9-V27·TSLQKDLSQF  | 296   | 1862  |
| >AKAP9-V27·TSLQKDLSQV | 421   | >AKAP9-V27·TSLQKDLSQF  | 71    | 350   |
| >AKAP9-V27·TSLQKDLSQV | 10545 | >AKAP9-V27·TSLQKDLSQF  | 483   | 10062 |
| >AKAP9-V27·TSLQKDLSQV | 480   | >AKAP9-V27·TSLQKDLSQF  | 5     | 475   |
| >AKAP9-V27·TSLQKDLSQV | 15511 | >AKAP9-V27·TSLQKDLSQF  | 229   | 15282 |
| >AKAP9-V27·TSLQKDLSQV | 5237  | >AKAP9-V27·TSLQKDLSQF  | 406   | 4831  |
| >AKAP9-V27·TSLQKDLSQV | 541   | >AKAP9-V27·TSLQKDLSQF  | 192   | 349   |
| >AKT1-D32Y·DGTFIGYK   | 156   | >AKT1-D32Y·YGTFIGYK    | 113   | 43    |
| >AKT1-D32Y·NDGTFIGY   | 4903  | >AKT1-D32Y·NYGTFIGY    | 245   | 4658  |
| >AKT1-D32Y·NDGTFIGYKE | 18048 | >AKT1-D32Y·NYGTFIGYKEI | 190   | 17858 |
| >AKT1-D32Y·NDGTFIGYK  | 2328  | >AKT1-D32Y·NYGTFIGYK   | 462   | 1866  |
| >AKT1-D32Y·NDGTFIGY   | 6777  | >AKT1-D32Y·NYGTFIGY    | 202   | 6575  |
| >AKT1-D32Y·NDGTFIGYK  | 1485  | >AKT1-D32Y·NYGTFIGYK   | 22    | 1463  |
| >AKT1-D32Y·NDGTFIGYKE | 1261  | >AKT1-D32Y·NYGTFIGYKEI | 25    | 1236  |
| >AKT1-D32Y·WRPRYFLLKN | 19707 | >AKT1-D32Y·WRPRYFLLKN  | 281   | 19426 |
| >AKT1-D32Y·WRPRYFLLKN | 8208  | >AKT1-D32Y·WRPRYFLLKN  | 279   | 7929  |
| >AKT1-D32Y·WRPRYFLLKN | 3459  | >AKT1-D32Y·WRPRYFLLKN  | 197   | 3262  |
| >AKT1-D32Y·KNDGTFIGYK | 4018  | >AKT1-D32Y·KNYGTFIGYK  | 251   | 3767  |
| >AKT1-D32Y·KNDGTFIGY  | 3917  | >AKT1-D32Y·KNYGTFIGY   | 164   | 3753  |
| >AKT1-D32Y·KNDGTFIGY  | 2002  | >AKT1-D32Y·KNYGTFIGY   | 196   | 1806  |
| >AKT1-D32Y·KNDGTFIGYK | 3292  | >AKT1-D32Y·KNYGTFIGYK  | 37    | 3255  |
| >AKT1-D32Y·KNDGTFIGYK | 5383  | >AKT1-D32Y·KNYGTFIGYK  | 487   | 4896  |

|                         |       |                         |     |       |
|-------------------------|-------|-------------------------|-----|-------|
| >AKT1-D32Y-KNDGTFIGY    | 10925 | >AKT1-D32Y-KNYGTFIGY    | 401 | 10524 |
| >AKT1-D32Y-KNDGTFIGY    | 7323  | >AKT1-D32Y-KNYGTFIGY    | 214 | 7109  |
| >AKT1-D32Y-KNDGTFIGYK   | 805   | >AKT1-D32Y-KNYGTFIGYK   | 52  | 753   |
| >AKT1-D32Y-LKNDGTFI     | 202   | >AKT1-D32Y-LKNYGTFI     | 58  | 144   |
| >AKT1-D32Y-LKNDGTFIGY   | 27    | >AKT1-D32Y-LKNYGTFIGY   | 11  | 16    |
| >AKT1-D32Y-LLKNDGTFI    | 90    | >AKT1-D32Y-LLKNYGTFI    | 23  | 67    |
| >AKT1-D32Y-LLKNDGTFI    | 11    | >AKT1-D32Y-LLKNYGTFI    | 6   | 5     |
| >AKT1-D32Y-LLKNDGTFI    | 331   | >AKT1-D32Y-LLKNYGTFI    | 64  | 267   |
| >AKT1-D32Y-LLKNDGTFI    | 197   | >AKT1-D32Y-LLKNYGTFI    | 200 | 3     |
| >AKT1-D32Y-LLKNDGTFI    | 25    | >AKT1-D32Y-LLKNYGTFI    | 13  | 12    |
| >AKT1-D32Y-LLKNDGTFIG\` | 314   | >AKT1-D32Y-LLKNYGTFIG\` | 189 | 125   |
| >AKT1-D32Y-LLKNDGTFIG\` | 203   | >AKT1-D32Y-LLKNYGTFIG\` | 253 | 50    |
| >AKT1-D32Y-LLKNDGTF     | 38    | >AKT1-D32Y-LLKNYGT      | 32  | 6     |
| >AKT1-D32Y-LLKNDGTFIG\` | 46    | >AKT1-D32Y-LLKNYGTFIG\` | 40  | 6     |
| >AKT1-D32Y-LLKNDGTF     | 104   | >AKT1-D32Y-LLKNYGT      | 153 | 49    |
| >AKT1-D32Y-LLKNDGTFIG\` | 128   | >AKT1-D32Y-LLKNYGTFIG\` | 132 | 4     |
| >AKT1-D32Y-LLKNDGTF     | 86    | >AKT1-D32Y-LLKNYGT      | 28  | 58    |
| >AKT1-D32Y-LLKNDGTFI    | 578   | >AKT1-D32Y-LLKNYGTFI    | 174 | 404   |
| >AKT1-D32Y-LLKNDGTFIG\` | 113   | >AKT1-D32Y-LLKNYGTFIG\` | 46  | 67    |
| >AKT1-D32Y-LLKNDGTFIG\` | 843   | >AKT1-D32Y-LLKNYGTFIG\` | 484 | 359   |
| >AKT1-D32Y-FLLKNDGTFI   | 311   | >AKT1-D32Y-FLLKNYGTFI   | 389 | 78    |
| >AKT1-D32Y-FLLKNDGT     | 511   | >AKT1-D32Y-FLLKNYGT     | 70  | 441   |
| >AKT1-D32Y-FLLKNDGTFI   | 22    | >AKT1-D32Y-FLLKNYGTFI   | 19  | 3     |
| >AKT1-D32Y-FLLKNDGT     | 403   | >AKT1-D32Y-FLLKNYGT     | 117 | 286   |
| >AKT1-D32Y-FLLKNDGTFI   | 37    | >AKT1-D32Y-FLLKNYGTFI   | 20  | 17    |
| >AKT1-D32Y-FLLKNDGT     | 1044  | >AKT1-D32Y-FLLKNYGT     | 227 | 817   |
| >AKT1-D32Y-FLLKNDGTFI   | 35    | >AKT1-D32Y-FLLKNYGTFI   | 25  | 10    |
| >AKT1-D32Y-FLLKNDGT     | 219   | >AKT1-D32Y-FLLKNYGT     | 76  | 143   |
| >AKT1-D32Y-FLLKNDGTFI   | 66    | >AKT1-D32Y-FLLKNYGTFI   | 51  | 15    |
| >AKT1-D32Y-FLLKNDGT     | 37    | >AKT1-D32Y-FLLKNYGT     | 9   | 28    |
| >AKT1-D32Y-FLLKNDGTF    | 298   | >AKT1-D32Y-FLLKNYGT     | 68  | 230   |
| >AKT1-D32Y-FLLKNDGTFI   | 4     | >AKT1-D32Y-FLLKNYGTFI   | 2   | 2     |
| >AKT1-D32Y-FLLKNDGTFIG  | 479   | >AKT1-D32Y-FLLKNYGTFIG  | 416 | 63    |
| >AKT1-D32Y-FLLKNDGT     | 78    | >AKT1-D32Y-FLLKNYGT     | 24  | 54    |
| >AKT1-D32Y-FLLKNDGTFI   | 4     | >AKT1-D32Y-FLLKNYGTFI   | 4   | 0     |
| >AKT1-D32Y-FLLKNDGTFIG  | 377   | >AKT1-D32Y-FLLKNYGTFIG  | 521 | 144   |
| >AKT1-D32Y-FLLKNDGT     | 95    | >AKT1-D32Y-FLLKNYGT     | 51  | 44    |
| >AKT1-D32Y-FLLKNDGTFI   | 6     | >AKT1-D32Y-FLLKNYGTFI   | 6   | 0     |
| >AKT1-D32Y-FLLKNDGT     | 377   | >AKT1-D32Y-FLLKNYGT     | 75  | 302   |
| >AKT1-D32Y-FLLKNDGTFI   | 20    | >AKT1-D32Y-FLLKNYGTFI   | 12  | 8     |
| >AKT1-D32Y-FLLKNDGT     | 64    | >AKT1-D32Y-FLLKNYGT     | 16  | 48    |
| >AKT1-D32Y-FLLKNDGTFI   | 7     | >AKT1-D32Y-FLLKNYGTFI   | 5   | 2     |
| >AKT1-D32Y-FLLKNDGTF    | 816   | >AKT1-D32Y-FLLKNYGT     | 152 | 664   |

|                         |       |                         |      |       |
|-------------------------|-------|-------------------------|------|-------|
| >AKT1-D32Y- FLLKNDGTF   | 132   | >AKT1-D32Y- FLLKNYGTF   | 10   | 122   |
| >AKT1-D32Y- FLLKNDGTFI  | 1201  | >AKT1-D32Y- FLLKNYGTFI  | 164  | 1037  |
| >AKT1-D32Y- FLLKNDGTF   | 194   | >AKT1-D32Y- FLLKNYGTF   | 169  | 25    |
| >AKT1-D32Y- FLLKNDGTF   | 18    | >AKT1-D32Y- FLLKNYGTF   | 34   | 16    |
| >AKT1-D32Y- FLLKNDGTF   | 101   | >AKT1-D32Y- FLLKNYGTF   | 21   | 80    |
| >AKT1-D32Y- FLLKNDGTFI  | 888   | >AKT1-D32Y- FLLKNYGTFI  | 264  | 624   |
| >AKT1-D32Y- FLLKNDGTF   | 115   | >AKT1-D32Y- FLLKNYGTF   | 593  | 478   |
| >AKT1-D32Y- YFLLKNDGTF  | 56    | >AKT1-D32Y- YFLLKNYGTF  | 34   | 22    |
| >AKT1-D32Y- YFLLKNDGTF  | 236   | >AKT1-D32Y- YFLLKNYGTF  | 334  | 98    |
| >AKT1-D32Y- YFLLKNDGTFI | 1246  | >AKT1-D32Y- YFLLKNYGTFI | 474  | 772   |
| >AKT1-D32Y- YFLLKNDGTF  | 8     | >AKT1-D32Y- YFLLKNYGTF  | 6    | 2     |
| >AKT1-D32Y- YFLLKNDGTFI | 86    | >AKT1-D32Y- YFLLKNYGTFI | 65   | 21    |
| >AKT1-D32Y- YFLLKNDGTF  | 274   | >AKT1-D32Y- YFLLKNYGTF  | 416  | 142   |
| >AKT1-D32Y- RYFLLKNDGT  | 1776  | >AKT1-D32Y- RYFLLKNYGTI | 413  | 1363  |
| >AKT1-D32Y- RYFLLKNDGT  | 580   | >AKT1-D32Y- RYFLLKNYGTI | 384  | 196   |
| >AKT1-D32Y- RYFLLKNDGT  | 85    | >AKT1-D32Y- RYFLLKNYGTI | 54   | 31    |
| >AKT1-D32Y- RYFLLKNDGT  | 143   | >AKT1-D32Y- RYFLLKNYGTI | 51   | 92    |
| >AKT1-D32Y- RYFLLKND    | 1598  | >AKT1-D32Y- RYFLLKNY    | 160  | 1438  |
| >AKT1-D32Y- RYFLLKNDGT  | 5     | >AKT1-D32Y- RYFLLKNYGTI | 4    | 1     |
| >AKT1-D32Y- RYFLLKND    | 24263 | >AKT1-D32Y- RYFLLKNY    | 216  | 24047 |
| >AKT1-D32Y- RYFLLKND    | 26245 | >AKT1-D32Y- RYFLLKNY    | 409  | 25836 |
| >AKT1-D32Y- RYFLLKNDGT  | 83    | >AKT1-D32Y- RYFLLKNYGTI | 112  | 29    |
| >AKT1-D32Y- RYFLLKND    | 26657 | >AKT1-D32Y- RYFLLKNY    | 134  | 26523 |
| >AKT1-D32Y- RYFLLKNDGT  | 486   | >AKT1-D32Y- RYFLLKNYGTI | 192  | 294   |
| >AKT1-D32Y- RYFLLKNDGT  | 538   | >AKT1-D32Y- RYFLLKNYGTI | 249  | 289   |
| >AKT1-D32Y- RYFLLKND    | 35207 | >AKT1-D32Y- RYFLLKNY    | 190  | 35017 |
| >AKT1-D32Y- RYFLLKNDGT  | 3757  | >AKT1-D32Y- RYFLLKNYGT  | 374  | 3383  |
| >AKT1-D32Y- RYFLLKNDG   | 1438  | >AKT1-D32Y- RYFLLKNYG   | 397  | 1041  |
| >AKT1-D32Y- RYFLLKNDGT  | 833   | >AKT1-D32Y- RYFLLKNYGTI | 329  | 504   |
| >AKT1-D32Y- RPRYFLLKND  | 22727 | >AKT1-D32Y- RPRYFLLKNY  | 187  | 22540 |
| >AKT1-E17K- EYIKTWRPRY  | 7019  | >AKT1-E17K- KYIKTWRPRY  | 478  | 6541  |
| >AKT1-E17K- EYIKTWRPRY  | 68    | >AKT1-E17K- KYIKTWRPRY  | 20   | 48    |
| >AKT1-E17K- EYIKTWRPRY  | 52    | >AKT1-E17K- KYIKTWRPRY  | 22   | 30    |
| >AKT1-E17K- EYIKTWRPRY  | 28    | >AKT1-E17K- KYIKTWRPRY  | 7    | 21    |
| >AKT1-E17K- EYIKTWRPRY  | 12    | >AKT1-E17K- KYIKTWRPRY  | 883  | 871   |
| >AKT1-E17K- EYIKTWRPRY  | 48    | >AKT1-E17K- KYIKTWRPRY  | 4234 | 4186  |
| >AKT1-E17K- EYIKTWRPRY  | 40    | >AKT1-E17K- KYIKTWRPRY  | 39   | 1     |
| >AKT1-E17K- EYIKTWRPR   | 12951 | >AKT1-E17K- KYIKTWRPR   | 39   | 12912 |
| >AKT1-E17K- EYIKTWRPRY  | 14322 | >AKT1-E17K- KYIKTWRPRY  | 148  | 14174 |
| >AKT1-E17K- EYIKTWRPRY  | 271   | >AKT1-E17K- KYIKTWRPRY  | 86   | 185   |
| >AKT1-E17K- EYIKTWRPR   | 324   | >AKT1-E17K- KYIKTWRPR   | 11   | 313   |
| >AKT1-E17K- EYIKTWRPR   | 21    | >AKT1-E17K- KYIKTWRPR   | 1088 | 1067  |
| >AKT1-E17K- EYIKTWRPR   | 136   | >AKT1-E17K- KYIKTWRPR   | 8466 | 8330  |

|                        |      |                        |       |       |
|------------------------|------|------------------------|-------|-------|
| >AKT1-E17K- EYIKTWRPRY | 7463 | >AKT1-E17K- KYIKTWRPRY | 499   | 6964  |
| >AKT1-E17K- EYIKTWRPRY | 1537 | >AKT1-E17K- KYIKTWRPRY | 237   | 1300  |
| >AKT1-E17K- EYIKTWRPR  | 16   | >AKT1-E17K- KYIKTWRPR  | 9     | 7     |
| >AKT1-E17K- EYIKTWRPRY | 1223 | >AKT1-E17K- KYIKTWRPRY | 139   | 1084  |
| >AKT1-E17K- GEYIKTWRPR | 325  | >AKT1-E17K- GKYIKTWRPF | 344   | 19    |
| >AKT1-E17K- GEYIKTWRPR | 431  | >AKT1-E17K- GKYIKTWRPF | 221   | 210   |
| >AKT1-E17K- GEYIKTWRPR | 752  | >AKT1-E17K- GKYIKTWRPF | 357   | 395   |
| >AKT1-E17K- GEYIKTWRPR | 4630 | >AKT1-E17K- GKYIKTWRPF | 141   | 4489  |
| >AKT1-E17K- GEYIKTWRPR | 307  | >AKT1-E17K- GKYIKTWRPF | 21179 | 20872 |
| >AKT1-E17K- GEYIKTWRPR | 117  | >AKT1-E17K- GKYIKTWRPF | 19102 | 18985 |
| >AKT1-E17K- GEYIKTWRPR | 473  | >AKT1-E17K- GKYIKTWRPF | 649   | 176   |
| >AKT1-E17K- RGEYIKTWRP | 7003 | >AKT1-E17K- RGKYIKTWRP | 156   | 6847  |
| >AKT1-E17K- RGEYIKTWR  | 49   | >AKT1-E17K- RGKYIKTWR  | 12    | 37    |
| >AKT1-E17K- RGEYIKTWRP | 54   | >AKT1-E17K- RGKYIKTWRP | 11    | 43    |
| >AKT1-E17K- RGEYIKTW   | 638  | >AKT1-E17K- RGKYIKTW   | 346   | 292   |
| >AKT1-E17K- RGEYIKTW   | 399  | >AKT1-E17K- RGKYIKTW   | 69    | 330   |
| >AKT1-E17K- RGEYIKTWR  | 217  | >AKT1-E17K- RGKYIKTWR  | 164   | 53    |
| >AKT1-E17K- RGEYIKTWRP | 115  | >AKT1-E17K- RGKYIKTWRP | 88    | 27    |
| >AKT1-E17K- KRGEYIKTWR | 98   | >AKT1-E17K- KRGKYIKTWR | 41    | 57    |
| >AKT1-E17K- KRGEYIKTWR | 54   | >AKT1-E17K- KRGKYIKTWR | 75    | 21    |
| >AKT1-E17K- KRGEYIKT   | 163  | >AKT1-E17K- KRGKYIKT   | 92    | 71    |
| >AKT1-E17K- KRGEYIKTW  | 549  | >AKT1-E17K- KRGKYIKTW  | 274   | 275   |
| >AKT1-E17K- KRGEYIKTWR | 240  | >AKT1-E17K- KRGKYIKTWR | 187   | 53    |
| >AKT1-E17K- KRGEYIKTWR | 138  | >AKT1-E17K- KRGKYIKTWR | 209   | 71    |
| >AKT1-E17K- KRGEYIKTWR | 80   | >AKT1-E17K- KRGKYIKTWR | 55    | 25    |
| >AKT1-E17K- HKRGEYIK   | 69   | >AKT1-E17K- HKRGEYIK   | 27    | 42    |
| >AKT1-E17K- HKRGEYIKTW | 242  | >AKT1-E17K- HKRGEYIKTW | 361   | 119   |
| >AKT1-E17K- HKRGEYIKTW | 309  | >AKT1-E17K- HKRGEYIKTW | 364   | 55    |
| >AKT1-E17K- LHKRGEYIKT | 36   | >AKT1-E17K- LHKRGEYIKT | 71    | 35    |
| >AKT1-E17K- WLHKRGEYI  | 95   | >AKT1-E17K- WLHKRGEYI  | 1749  | 1654  |
| >AKT1-E17K- WLHKRGEYI  | 97   | >AKT1-E17K- WLHKRGEYI  | 164   | 67    |
| >AKT1-E17K- WLHKRGEYI  | 10   | >AKT1-E17K- WLHKRGEYI  | 33    | 23    |
| >AKT1-E17K- WLHKRGEYI  | 150  | >AKT1-E17K- WLHKRGEYI  | 805   | 655   |
| >AKT1-E17K- WLHKRGEYI  | 160  | >AKT1-E17K- WLHKRGEYI  | 658   | 498   |
| >AKT1-E17K- WLHKRGEYI  | 51   | >AKT1-E17K- WLHKRGEYI  | 144   | 93    |
| >AKT1-E17K- WLHKRGEYIK | 312  | >AKT1-E17K- WLHKRGEYIK | 455   | 143   |
| >AKT1-E17K- WLHKRGEYIK | 763  | >AKT1-E17K- WLHKRGEYIK | 318   | 445   |
| >AKT1-E17K- WLHKRGEY   | 291  | >AKT1-E17K- WLHKRGEY   | 359   | 68    |
| >AKT1-E17K- WLHKRGEY   | 506  | >AKT1-E17K- WLHKRGEY   | 492   | 14    |
| >AKT1-E17K- WLHKRGEY   | 382  | >AKT1-E17K- WLHKRGEY   | 1327  | 945   |
| >AKT1-E17K- WLHKRGEYI  | 408  | >AKT1-E17K- WLHKRGEYI  | 83    | 325   |
| >AKT1-E17K- WLHKRGEY   | 117  | >AKT1-E17K- WLHKRGEY   | 434   | 317   |
| >AKT1-E17K- WLHKRGEY   | 49   | >AKT1-E17K- WLHKRGEY   | 47    | 2     |

|                         |       |                          |       |       |
|-------------------------|-------|--------------------------|-------|-------|
| >AKT1-E17K- WLHKRGEY    | 640   | >AKT1-E17K- WLHKRGKY     | 355   | 285   |
| >AKT1-E17K- WLHKRGEYIK  | 159   | >AKT1-E17K- WLHKRGKYIK   | 99    | 60    |
| >AKT1-E17K- GWLHKRGEY   | 227   | >AKT1-E17K- GWLHKRGKY    | 443   | 216   |
| >AKT1-E17K- GWLHKRGEY   | 121   | >AKT1-E17K- GWLHKRGKY    | 140   | 19    |
| >AKT1-E17K- GWLHKRGEY   | 79    | >AKT1-E17K- GWLHKRGKY    | 86    | 7     |
| >AKT1-E17K- GWLHKRGEY   | 620   | >AKT1-E17K- GWLHKRGKY    | 384   | 236   |
| >AKT1-E17K- GWLHKRGEY   | 323   | >AKT1-E17K- GWLHKRGKY    | 717   | 394   |
| >AKT1-E17K- EGWLHKRGE   | 295   | >AKT1-E17K- EGWLHKRGK    | 265   | 30    |
| >AKT1-E17K- KEGWLHKRG   | 384   | >AKT1-E17K- KEGWLHKRG    | 364   | 20    |
| >AKT1-E17K- KEGWLHKRG   | 474   | >AKT1-E17K- KEGWLHKRG    | 723   | 249   |
| >AKT1-E49K- EAPLNNFSV   | 7499  | >AKT1-E49K- KAPLNNFSV    | 309   | 7190  |
| >AKT1-E49K- EAPLNNFSVA  | 1387  | >AKT1-E49K- KAPLNNFSVA   | 408   | 979   |
| >AKT1-E49K- EAPLNNFSV   | 3260  | >AKT1-E49K- KAPLNNFSV    | 73    | 3187  |
| >AKT1-E49K- EAPLNNFSV   | 11    | >AKT1-E49K- KAPLNNFSV    | 1373  | 1362  |
| >AKT1-E49K- EAPLNNFSV   | 50    | >AKT1-E49K- KAPLNNFSV    | 4619  | 4569  |
| >AKT1-E49K- EAPLNNFSV   | 1694  | >AKT1-E49K- KAPLNNFSV    | 170   | 1524  |
| >AKT1-E49K- REAPLNNFSV  | 181   | >AKT1-E49K- RKAPLNNFSV   | 7437  | 7256  |
| >AKT1-E49K- REAPLNNF    | 55    | >AKT1-E49K- RKAPLNNF     | 4     | 51    |
| >AKT1-E49K- REAPLNNFSV  | 2377  | >AKT1-E49K- RKAPLNNFSV   | 65    | 2312  |
| >AKT1-E49K- REAPLNNFSV  | 2958  | >AKT1-E49K- RKAPLNNFSV   | 89    | 2869  |
| >AKT1-E49K- REAPLNNF    | 178   | >AKT1-E49K- RKAPLNNF     | 19458 | 19280 |
| >AKT1-E49K- REAPLNNFSV  | 437   | >AKT1-E49K- RKAPLNNFSV   | 22022 | 21585 |
| >AKT1-E49K- REAPLNNF    | 257   | >AKT1-E49K- RKAPLNNF     | 29538 | 29281 |
| >AKT1-E49K- REAPLNNFSV  | 67    | >AKT1-E49K- RKAPLNNFSV   | 20280 | 20213 |
| >AKT1-E49K- REAPLNNFSV  | 119   | >AKT1-E49K- RKAPLNNFSV   | 26035 | 25916 |
| >AKT1-E49K- REAPLNNF    | 231   | >AKT1-E49K- RKAPLNNF     | 21795 | 21564 |
| >AKT1-E49K- REAPLNNFSV  | 407   | >AKT1-E49K- RKAPLNNFSV   | 17802 | 17395 |
| >AKT1-E49K- REAPLNNFSV  | 17    | >AKT1-E49K- RKAPLNNFSV   | 12550 | 12533 |
| >AKT1-E49K- REAPLNNFSV  | 22    | >AKT1-E49K- RKAPLNNFSV   | 10342 | 10320 |
| >AKT1-E49K- REAPLNNFSV  | 441   | >AKT1-E49K- RKAPLNNFSV   | 29450 | 29009 |
| >AKT1-E49K- KERPDVDQ    | 12925 | >AKT1-E49K- KERPDVDQ     | 159   | 12766 |
| >AKT1-E49K- QREAPLNNF   | 340   | >AKT1-E49K- QRKAPLNNF    | 35    | 305   |
| >AKT1-E49K- QREAPLNNF   | 481   | >AKT1-E49K- QRKAPLNNF    | 846   | 365   |
| >AKT1-E49K- DQREAPLNNI  | 108   | >AKT1-E49K- DQRKAPLNN    | 290   | 182   |
| >AKT1-E49K- DQREAPLNNI  | 34    | >AKT1-E49K- DQRKAPLNN    | 23    | 11    |
| >AKT1-E49K- DVDQREAPL   | 2001  | >AKT1-E49K- DVDQRKAPL    | 480   | 1521  |
| >AKT1-E49K- RPQDQDQRE   | 346   | >AKT1-E49K- RPQDQDQRK    | 451   | 105   |
| >AKT1-F35L-1 FIGYKERPQD | 178   | >AKT1-F35L-1 LIGYKERPQD' | 1497  | 1319  |
| >AKT1-F35L-1 FIGYKERPQD | 194   | >AKT1-F35L-1 LIGYKERPQD' | 1240  | 1046  |
| >AKT1-F35L-1 FIGYKERPQD | 412   | >AKT1-F35L-1 LIGYKERPQD' | 2461  | 2049  |
| >AKT1-F35L-1 FIGYKERPQD | 389   | >AKT1-F35L-1 LIGYKERPQD' | 2628  | 2239  |
| >AKT1-F35L-1 FIGYKERPQD | 36    | >AKT1-F35L-1 LIGYKERPQD' | 162   | 126   |
| >AKT1-F35L-1 TFIGYKER   | 47    | >AKT1-F35L-1 TLIGYKER    | 168   | 121   |



|                         |       |                          |      |       |
|-------------------------|-------|--------------------------|------|-------|
| >AKT1-F35L-1TFIGYKER    | 101   | >AKT1-F35L-1TLIGYKER     | 564  | 463   |
| >AKT1-F35L-1TFIGYKER    | 164   | >AKT1-F35L-1TLIGYKER     | 76   | 88    |
| >AKT1-F35L-1TFIGYKER    | 147   | >AKT1-F35L-1TLIGYKER     | 581  | 434   |
| >AKT1-F35L-1RYFLLKNDGT  | 580   | >AKT1-F35L-1RYFLLKNDGT   | 15   | 565   |
| >AKT1-F35L-1RYFLLKNDGT  | 85    | >AKT1-F35L-1RYFLLKNDGT   | 721  | 636   |
| >AKT1-F35L-1RYFLLKNDGT  | 143   | >AKT1-F35L-1RYFLLKNDGT   | 539  | 396   |
| >AKT1-F35L-1RYFLLKNDGT  | 5     | >AKT1-F35L-1RYFLLKNDGT   | 7    | 2     |
| >AKT1-F35L-1RYFLLKNDGT  | 83    | >AKT1-F35L-1RYFLLKNDGT   | 318  | 235   |
| >AKT1-F35L-1RYFLLKNDGT  | 486   | >AKT1-F35L-1RYFLLKNDGT   | 4854 | 4368  |
| >AKT1-F35L-1RYFLLKNDGT  | 833   | >AKT1-F35L-1RYFLLKNDGT   | 225  | 608   |
| >AKT1-F35L-1GTFIGYKER   | 38    | >AKT1-F35L-1GTLIGYKER    | 85   | 47    |
| >AKT1-F35L-1GTFIGYKER   | 157   | >AKT1-F35L-1GTLIGYKER    | 2247 | 2090  |
| >AKT1-F35L-1GTFIGYKER   | 68    | >AKT1-F35L-1GTLIGYKER    | 107  | 39    |
| >AKT1-F35L-1DGTFIGYK    | 156   | >AKT1-F35L-1DGTLYGYK     | 681  | 525   |
| >AKT1-F35L-1LKNDGTFI    | 202   | >AKT1-F35L-1LKNDGTLI     | 232  | 30    |
| >AKT1-F35L-1LKNDGTFIGY  | 27    | >AKT1-F35L-1LKNDGTLYGY   | 37   | 10    |
| >AKT1-F35L-1LLKNDGTFI   | 90    | >AKT1-F35L-1LLKNDGTLI    | 242  | 152   |
| >AKT1-F35L-1LLKNDGTF    | 6820  | >AKT1-F35L-1LLKNDGTL     | 74   | 6746  |
| >AKT1-F35L-1LLKNDGTFI   | 11    | >AKT1-F35L-1LLKNDGTLI    | 13   | 2     |
| >AKT1-F35L-1LLKNDGTFI   | 331   | >AKT1-F35L-1LLKNDGTLI    | 1241 | 910   |
| >AKT1-F35L-1LLKNDGTF    | 15206 | >AKT1-F35L-1LLKNDGTL     | 271  | 14935 |
| >AKT1-F35L-1LLKNDGTFI   | 197   | >AKT1-F35L-1LLKNDGTLI    | 1047 | 850   |
| >AKT1-F35L-1LLKNDGTF    | 9112  | >AKT1-F35L-1LLKNDGTL     | 13   | 9099  |
| >AKT1-F35L-1LLKNDGTFI   | 25    | >AKT1-F35L-1LLKNDGTLI    | 31   | 6     |
| >AKT1-F35L-1LLKNDGTFIG' | 314   | >AKT1-F35L-1LLKNDGTLYGY' | 404  | 90    |
| >AKT1-F35L-1LLKNDGTFIG' | 203   | >AKT1-F35L-1LLKNDGTLYGY' | 239  | 36    |
| >AKT1-F35L-1LLKNDGTF    | 38    | >AKT1-F35L-1LLKNDGTL     | 427  | 389   |
| >AKT1-F35L-1LLKNDGTFIG' | 46    | >AKT1-F35L-1LLKNDGTLYGY' | 60   | 14    |
| >AKT1-F35L-1LLKNDGTF    | 104   | >AKT1-F35L-1LLKNDGTL     | 1905 | 1801  |
| >AKT1-F35L-1LLKNDGTFIG' | 128   | >AKT1-F35L-1LLKNDGTLYGY' | 133  | 5     |
| >AKT1-F35L-1LLKNDGTF    | 86    | >AKT1-F35L-1LLKNDGTL     | 1730 | 1644  |
| >AKT1-F35L-1LLKNDGTFIG' | 113   | >AKT1-F35L-1LLKNDGTLYGY' | 241  | 128   |
| >AKT1-F35L-1FLLKNDGTF   | 2218  | >AKT1-F35L-1FLLKNDGTL    | 276  | 1942  |
| >AKT1-F35L-1FLLKNDGTFI  | 311   | >AKT1-F35L-1FLLKNDGTLI   | 1588 | 1277  |
| >AKT1-F35L-1FLLKNDGTF   | 12058 | >AKT1-F35L-1FLLKNDGTL    | 131  | 11927 |
| >AKT1-F35L-1FLLKNDGTFI  | 22    | >AKT1-F35L-1FLLKNDGTLI   | 46   | 24    |
| >AKT1-F35L-1FLLKNDGTF   | 5097  | >AKT1-F35L-1FLLKNDGTL    | 192  | 4905  |
| >AKT1-F35L-1FLLKNDGTFI  | 37    | >AKT1-F35L-1FLLKNDGTLI   | 46   | 9     |
| >AKT1-F35L-1FLLKNDGTF   | 7786  | >AKT1-F35L-1FLLKNDGTL    | 116  | 7670  |
| >AKT1-F35L-1FLLKNDGTFI  | 35    | >AKT1-F35L-1FLLKNDGTLI   | 38   | 3     |
| >AKT1-F35L-1FLLKNDGTF   | 1503  | >AKT1-F35L-1FLLKNDGTL    | 194  | 1309  |
| >AKT1-F35L-1FLLKNDGTFI  | 66    | >AKT1-F35L-1FLLKNDGTLI   | 89   | 23    |
| >AKT1-F35L-1FLLKNDGTF   | 298   | >AKT1-F35L-1FLLKNDGTL    | 6    | 292   |

|                          |       |                          |       |       |
|--------------------------|-------|--------------------------|-------|-------|
| >AKT1-F35L-1 FLLKNDGTFI  | 4     | >AKT1-F35L-i FLLKNDGTLI  | 6     | 2     |
| >AKT1-F35L-1 FLLKNDGTFIC | 479   | >AKT1-F35L-i FLLKNDGTLIC | 1230  | 751   |
| >AKT1-F35L-1 FLLKNDGTF   | 623   | >AKT1-F35L-i FLLKNDGTL   | 4     | 619   |
| >AKT1-F35L-1 FLLKNDGTFI  | 4     | >AKT1-F35L-i FLLKNDGTLI  | 6     | 2     |
| >AKT1-F35L-1 FLLKNDGTFIC | 377   | >AKT1-F35L-i FLLKNDGTLIC | 1729  | 1352  |
| >AKT1-F35L-1 FLLKNDGTF   | 4793  | >AKT1-F35L-i FLLKNDGTL   | 11    | 4782  |
| >AKT1-F35L-1 FLLKNDGTFI  | 6     | >AKT1-F35L-i FLLKNDGTLI  | 10    | 4     |
| >AKT1-F35L-1 FLLKNDGTF   | 12603 | >AKT1-F35L-i FLLKNDGTL   | 77    | 12526 |
| >AKT1-F35L-1 FLLKNDGTFI  | 20    | >AKT1-F35L-i FLLKNDGTLI  | 87    | 67    |
| >AKT1-F35L-1 FLLKNDGTF   | 2702  | >AKT1-F35L-i FLLKNDGTL   | 5     | 2697  |
| >AKT1-F35L-1 FLLKNDGTFI  | 7     | >AKT1-F35L-i FLLKNDGTLI  | 8     | 1     |
| >AKT1-F35L-1 FLLKNDGTF   | 132   | >AKT1-F35L-i FLLKNDGTL   | 2866  | 2734  |
| >AKT1-F35L-1 FLLKNDGTF   | 194   | >AKT1-F35L-i FLLKNDGTL   | 4197  | 4003  |
| >AKT1-F35L-1 FLLKNDGTF   | 18    | >AKT1-F35L-i FLLKNDGTL   | 172   | 154   |
| >AKT1-F35L-1 FLLKNDGTF   | 101   | >AKT1-F35L-i FLLKNDGTL   | 2388  | 2287  |
| >AKT1-F35L-1 FLLKNDGTF   | 115   | >AKT1-F35L-i FLLKNDGTL   | 2478  | 2363  |
| >AKT1-F35L-1 YFLLKNDGTF  | 56    | >AKT1-F35L-i YFLLKNDGTL  | 1058  | 1002  |
| >AKT1-F35L-1 YFLLKNDGTF  | 236   | >AKT1-F35L-i YFLLKNDGTL  | 6082  | 5846  |
| >AKT1-F35L-1 YFLLKNDGTF  | 8     | >AKT1-F35L-i YFLLKNDGTL  | 36    | 28    |
| >AKT1-F35L-1 YFLLKNDGTF  | 86    | >AKT1-F35L-i YFLLKNDGTL  | 196   | 110   |
| >AKT1-F35L-1 YFLLKNDGTF  | 274   | >AKT1-F35L-i YFLLKNDGTL  | 2161  | 1887  |
| >AKT1-K39N- FIGYKERPQD   | 178   | >AKT1-K39N- FIGYNERPQD   | 205   | 27    |
| >AKT1-K39N- FIGYKERPQD   | 194   | >AKT1-K39N- FIGYNERPQD   | 94    | 100   |
| >AKT1-K39N- FIGYKERPQD   | 412   | >AKT1-K39N- FIGYNERPQD   | 138   | 274   |
| >AKT1-K39N- FIGYKERPQD   | 389   | >AKT1-K39N- FIGYNERPQD   | 306   | 83    |
| >AKT1-K39N- FIGYKERPQD   | 36    | >AKT1-K39N- FIGYNERPQD   | 19    | 17    |
| >AKT1-K39N- TFIGYKER     | 47    | >AKT1-K39N- TFIGYNER     | 44    | 3     |
| >AKT1-K39N- TFIGYKER     | 101   | >AKT1-K39N- TFIGYNER     | 52    | 49    |
| >AKT1-K39N- TFIGYKER     | 164   | >AKT1-K39N- TFIGYNER     | 52    | 112   |
| >AKT1-K39N- TFIGYKER     | 147   | >AKT1-K39N- TFIGYNER     | 165   | 18    |
| >AKT1-K39N- GTFIGYKER    | 668   | >AKT1-K39N- GTFIGYNER    | 114   | 554   |
| >AKT1-K39N- GTFIGYKER    | 38    | >AKT1-K39N- GTFIGYNER    | 19    | 19    |
| >AKT1-K39N- GTFIGYKER    | 1577  | >AKT1-K39N- GTFIGYNER    | 463   | 1114  |
| >AKT1-K39N- GTFIGYKER    | 157   | >AKT1-K39N- GTFIGYNER    | 41    | 116   |
| >AKT1-K39N- GTFIGYKER    | 68    | >AKT1-K39N- GTFIGYNER    | 87    | 19    |
| >AKT1-K39N- DGTFIGYK     | 156   | >AKT1-K39N- DGTFIGYN     | 19099 | 18943 |
| >AKT1-P42T- PQDQVDQREA   | 4985  | >AKT1-P42T- TQDQVDQREA   | 69    | 4916  |
| >AKT1-P42T- RPQDQVDQR    | 24729 | >AKT1-P42T- RTQDQVDQR    | 339   | 24390 |
| >AKT1-P42T- RPQDQVDQR    | 4665  | >AKT1-P42T- RTQDQVDQR    | 39    | 4626  |
| >AKT1-P42T- RPQDQVDQR    | 7944  | >AKT1-P42T- RTQDQVDQR    | 122   | 7822  |
| >AKT1-P42T- RPQDQVDQRE   | 346   | >AKT1-P42T- RTQDQVDQRE   | 24409 | 24063 |
| >AKT1-P42T- ERPQDQVDQR   | 2379  | >AKT1-P42T- ERTQDQVDQR   | 474   | 1905  |
| >AKT1-P42T- KERPQDQVDQ   | 524   | >AKT1-P42T- KERTQDQVDQ   | 446   | 78    |

|                         |      |                         |       |       |
|-------------------------|------|-------------------------|-------|-------|
| >AKT1-P42T- FIGYKERPQD' | 178  | >AKT1-P42T- FIGYKERTQD' | 161   | 17    |
| >AKT1-P42T- FIGYKERPQD' | 194  | >AKT1-P42T- FIGYKERTQD' | 249   | 55    |
| >AKT1-P42T- FIGYKERPQD' | 412  | >AKT1-P42T- FIGYKERTQD' | 271   | 141   |
| >AKT1-P42T- FIGYKERPQD' | 389  | >AKT1-P42T- FIGYKERTQD' | 283   | 106   |
| >AKT1-P42T- FIGYKERPQD' | 36   | >AKT1-P42T- FIGYKERTQD' | 21    | 15    |
| >ALK-A1168F ALIISKFNHQ  | 407  | >ALK-A1168F PLIISKFNHQ  | 6979  | 6572  |
| >ALK-A1168F EALIISKF    | 42   | >ALK-A1168F EPLIISKF    | 13303 | 13261 |
| >ALK-A1168F EALIISKF    | 346  | >ALK-A1168F EPLIISKF    | 64    | 282   |
| >ALK-A1168F EALIISKF    | 2980 | >ALK-A1168F EPLIISKF    | 141   | 2839  |
| >ALK-A1168F EALIISKF    | 4408 | >ALK-A1168F EPLIISKF    | 45    | 4363  |
| >ALK-A1168F EQDELDFLMI  | 85   | >ALK-A1168F EQDELDFLMI  | 7034  | 6949  |
| >ALK-A1168F MEALIISKF   | 92   | >ALK-A1168F MEPLIISKF   | 298   | 206   |
| >ALK-A1168F MEALIISKFN  | 251  | >ALK-A1168F MEPLIISKFN  | 618   | 367   |
| >ALK-A1168F MEALIISK    | 330  | >ALK-A1168F MEPLIISK    | 3536  | 3206  |
| >ALK-A1168F MEALIISKF   | 252  | >ALK-A1168F MEPLIISKF   | 1423  | 1171  |
| >ALK-A1168F MEALIISKF   | 21   | >ALK-A1168F MEPLIISKF   | 101   | 80    |
| >ALK-A1168F MEALIISKF   | 402  | >ALK-A1168F MEPLIISKF   | 2048  | 1646  |
| >ALK-A1168F MEALIISKF   | 69   | >ALK-A1168F MEPLIISKF   | 557   | 488   |
| >ALK-A1168F MEALIISK    | 414  | >ALK-A1168F MEPLIISK    | 10846 | 10432 |
| >ALK-A1168F MEALIISKF   | 360  | >ALK-A1168F MEPLIISKF   | 4223  | 3863  |
| >ALK-A1168F MEALIISKF   | 12   | >ALK-A1168F MEPLIISKF   | 26    | 14    |
| >ALK-A1168F LMEALIISK   | 109  | >ALK-A1168F LMEPLIISK   | 156   | 47    |
| >ALK-A1168F LMEALIISK   | 58   | >ALK-A1168F LMEPLIISK   | 77    | 19    |
| >ALK-A1168F LMEALIISKF  | 1497 | >ALK-A1168F LMEPLIISKF  | 415   | 1082  |
| >ALK-A1168F LMEALIISKF  | 327  | >ALK-A1168F LMEPLIISKF  | 355   | 28    |
| >ALK-A1168F LMEALIISKF  | 151  | >ALK-A1168F LMEPLIISKF  | 156   | 5     |
| >ALK-A1168F LMEALIISKF  | 824  | >ALK-A1168F LMEPLIISKF  | 185   | 639   |
| >ALK-A1168F LMEALIISKF  | 415  | >ALK-A1168F LMEPLIISKF  | 532   | 117   |
| >ALK-A1168F FLMEALII    | 7    | >ALK-A1168F FLMEPLII    | 8     | 1     |
| >ALK-A1168F FLMEALIIS   | 21   | >ALK-A1168F FLMEPLIIS   | 36    | 15    |
| >ALK-A1168F FLMEALIISK  | 42   | >ALK-A1168F FLMEPLIISK  | 75    | 33    |
| >ALK-A1168F FLMEALIISKF | 50   | >ALK-A1168F FLMEPLIISKF | 79    | 29    |
| >ALK-A1168F FLMEALII    | 3    | >ALK-A1168F FLMEPLII    | 5     | 2     |
| >ALK-A1168F FLMEALIIS   | 7    | >ALK-A1168F FLMEPLIIS   | 25    | 18    |
| >ALK-A1168F FLMEALIISK  | 60   | >ALK-A1168F FLMEPLIISK  | 95    | 35    |
| >ALK-A1168F FLMEALIISKF | 8    | >ALK-A1168F FLMEPLIISKF | 17    | 9     |
| >ALK-A1168F FLMEALII    | 3    | >ALK-A1168F FLMEPLII    | 3     | 0     |
| >ALK-A1168F FLMEALIIS   | 14   | >ALK-A1168F FLMEPLIIS   | 31    | 17    |
| >ALK-A1168F FLMEALIISK  | 226  | >ALK-A1168F FLMEPLIISK  | 226   | 0     |
| >ALK-A1168F FLMEALIISKF | 16   | >ALK-A1168F FLMEPLIISKF | 30    | 14    |
| >ALK-A1168F FLMEALII    | 5    | >ALK-A1168F FLMEPLII    | 8     | 3     |
| >ALK-A1168F FLMEALIIS   | 13   | >ALK-A1168F FLMEPLIIS   | 25    | 12    |
| >ALK-A1168F FLMEALIISK  | 186  | >ALK-A1168F FLMEPLIISK  | 172   | 14    |

|                         |     |                         |     |     |
|-------------------------|-----|-------------------------|-----|-----|
| >ALK-A1168F FLMEALIISKF | 22  | >ALK-A1168F FLMEPLIISKF | 33  | 11  |
| >ALK-A1168F FLMEALII    | 4   | >ALK-A1168F FLMEPLII    | 2   | 2   |
| >ALK-A1168F FLMEALIIS   | 43  | >ALK-A1168F FLMEPLIIS   | 16  | 27  |
| >ALK-A1168F FLMEALIISK  | 46  | >ALK-A1168F FLMEPLIISK  | 24  | 22  |
| >ALK-A1168F FLMEALIISKF | 18  | >ALK-A1168F FLMEPLIISKF | 11  | 7   |
| >ALK-A1168F FLMEALII    | 3   | >ALK-A1168F FLMEPLII    | 3   | 0   |
| >ALK-A1168F FLMEALIIS   | 32  | >ALK-A1168F FLMEPLIIS   | 54  | 22  |
| >ALK-A1168F FLMEALIISK  | 277 | >ALK-A1168F FLMEPLIISK  | 361 | 84  |
| >ALK-A1168F FLMEALIISKF | 90  | >ALK-A1168F FLMEPLIISKF | 116 | 26  |
| >ALK-A1168F FLMEALII    | 9   | >ALK-A1168F FLMEPLII    | 10  | 1   |
| >ALK-A1168F FLMEALIIS   | 269 | >ALK-A1168F FLMEPLIIS   | 753 | 484 |
| >ALK-A1168F FLMEALII    | 3   | >ALK-A1168F FLMEPLII    | 4   | 1   |
| >ALK-A1168F FLMEALIIS   | 208 | >ALK-A1168F FLMEPLIIS   | 686 | 478 |
| >ALK-A1168F FLMEALIISKF | 81  | >ALK-A1168F FLMEPLIISKF | 175 | 94  |
| >ALK-A1168F FLMEALII    | 3   | >ALK-A1168F FLMEPLII    | 4   | 1   |
| >ALK-A1168F FLMEALIIS   | 25  | >ALK-A1168F FLMEPLIIS   | 42  | 17  |
| >ALK-A1168F FLMEALIISK  | 12  | >ALK-A1168F FLMEPLIISK  | 13  | 1   |
| >ALK-A1168F FLMEALIISKF | 31  | >ALK-A1168F FLMEPLIISKF | 42  | 11  |
| >ALK-A1168F FLMEALIISK  | 29  | >ALK-A1168F FLMEPLIISK  | 36  | 7   |
| >ALK-A1168F FLMEALIISK  | 26  | >ALK-A1168F FLMEPLIISK  | 28  | 2   |
| >ALK-A1168F FLMEALIISKF | 129 | >ALK-A1168F FLMEPLIISKF | 249 | 120 |
| >ALK-A1168F FLMEALIISKF | 228 | >ALK-A1168F FLMEPLIISKF | 379 | 151 |
| >ALK-A1168F FLMEALIISKF | 494 | >ALK-A1168F FLMEPLIISKF | 263 | 231 |
| >ALK-A1168F FLMEALIISK  | 149 | >ALK-A1168F FLMEPLIISK  | 118 | 31  |
| >ALK-A1168F FLMEALII    | 89  | >ALK-A1168F FLMEPLII    | 88  | 1   |
| >ALK-A1168F FLMEALIISKF | 110 | >ALK-A1168F FLMEPLIISKF | 164 | 54  |
| >ALK-A1168F FLMEALIISKF | 40  | >ALK-A1168F FLMEPLIISKF | 26  | 14  |
| >ALK-A1168F FLMEALIISKF | 19  | >ALK-A1168F FLMEPLIISKF | 17  | 2   |
| >ALK-A1168F FLMEALIISKF | 233 | >ALK-A1168F FLMEPLIISKF | 177 | 56  |
| >ALK-A1168F FLMEALIISKF | 327 | >ALK-A1168F FLMEPLIISKF | 850 | 523 |
| >ALK-A1168F FLMEALIISKF | 389 | >ALK-A1168F FLMEPLIISKF | 231 | 158 |
| >ALK-A1168F DFLMEALIISK | 239 | >ALK-A1168F DFLMEPLIISK | 170 | 69  |
| >ALK-A1168F LDFLMEALI   | 33  | >ALK-A1168F LDFLMEPLI   | 42  | 9   |
| >ALK-A1168F LDFLMEALII  | 54  | >ALK-A1168F LDFLMEPLII  | 179 | 125 |
| >ALK-A1168F LDFLMEAL    | 99  | >ALK-A1168F LDFLMEPL    | 43  | 56  |
| >ALK-A1168F LDFLMEALI   | 860 | >ALK-A1168F LDFLMEPLI   | 142 | 718 |
| >ALK-A1168F LDFLMEAL    | 271 | >ALK-A1168F LDFLMEPL    | 133 | 138 |
| >ALK-A1168F LDFLMEALI   | 37  | >ALK-A1168F LDFLMEPLI   | 26  | 11  |
| >ALK-A1168F LDFLMEALII  | 374 | >ALK-A1168F LDFLMEPLII  | 473 | 99  |
| >ALK-A1168F LDFLMEALI   | 37  | >ALK-A1168F LDFLMEPLI   | 61  | 24  |
| >ALK-A1168F LDFLMEALII  | 30  | >ALK-A1168F LDFLMEPLII  | 54  | 24  |
| >ALK-A1168F ELDFLMEAL   | 193 | >ALK-A1168F ELDFLMEPL   | 177 | 16  |
| >ALK-A1168F ELDFLMEALI  | 443 | >ALK-A1168F ELDFLMEPLI  | 902 | 459 |

|                         |      |                         |       |       |
|-------------------------|------|-------------------------|-------|-------|
| >ALK-A1168F ELDFLMEA    | 312  | >ALK-A1168F ELDFLMEP    | 14617 | 14305 |
| >ALK-A1168F ELDFLMEAL   | 139  | >ALK-A1168F ELDFLMEPL   | 144   | 5     |
| >ALK-A1168F ELDFLMEALI  | 472  | >ALK-A1168F ELDFLMEPLI  | 432   | 40    |
| >ALK-A1168F ELDFLMEAL   | 1288 | >ALK-A1168F ELDFLMEPL   | 436   | 852   |
| >ALK-A1168F ELDFLMEALI  | 1404 | >ALK-A1168F ELDFLMEPLI  | 361   | 1043  |
| >ALK-A1168F ELDFLMEAL   | 454  | >ALK-A1168F ELDFLMEPL   | 491   | 37    |
| >ALK-A1168F ELDFLMEAL   | 622  | >ALK-A1168F ELDFLMEPL   | 139   | 483   |
| >ALK-A1168F ELDFLMEA    | 280  | >ALK-A1168F ELDFLMEP    | 12668 | 12388 |
| >ALK-A1168F ELDFLMEAL   | 78   | >ALK-A1168F ELDFLMEPL   | 26    | 52    |
| >ALK-A1168F ELDFLMEALI  | 298  | >ALK-A1168F ELDFLMEPLI  | 161   | 137   |
| >ALK-A1168F ELDFLMEALII | 394  | >ALK-A1168F ELDFLMEPLII | 476   | 82    |
| >ALK-A1168F DELDFLMEAL  | 172  | >ALK-A1168F DELDFLMEPL  | 92    | 80    |
| >ALK-A1168F DELDFLMEAL  | 7    | >ALK-A1168F DELDFLMEPL  | 9     | 2     |
| >ALK-A1168F DELDFLMEA   | 12   | >ALK-A1168F DELDFLMEP   | 53    | 41    |
| >ALK-A1168F DELDFLMEAL  | 57   | >ALK-A1168F DELDFLMEPL  | 56    | 1     |
| >ALK-A1168F DELDFLMEAL  | 613  | >ALK-A1168F DELDFLMEPL  | 352   | 261   |
| >ALK-A1168F DELDFLMEAL  | 630  | >ALK-A1168F DELDFLMEPL  | 468   | 162   |
| >ALK-A1168F DELDFLMEA   | 152  | >ALK-A1168F DELDFLMEP   | 14100 | 13948 |
| >ALK-A1168F DELDFLMEAL  | 25   | >ALK-A1168F DELDFLMEPL  | 18    | 7     |
| >ALK-A1234TIACGCQYL     | 881  | >ALK-A1234TITCGCQYL     | 297   | 584   |
| >ALK-A1234TIACGCQYL     | 265  | >ALK-A1234TITCGCQYL     | 22    | 243   |
| >ALK-A1234TDIACGCQY     | 379  | >ALK-A1234TDITCGCQY     | 888   | 509   |
| >ALK-A1234TDIACGCQY     | 394  | >ALK-A1234TDITCGCQY     | 828   | 434   |
| >ALK-A1234TDIACGCQYL    | 145  | >ALK-A1234TDITCGCQYL    | 681   | 536   |
| >ALK-A1234TDIACGCQYL    | 169  | >ALK-A1234TDITCGCQYL    | 1133  | 964   |
| >ALK-A1234TRDIACGCQY    | 396  | >ALK-A1234TRDITCGCQY    | 1310  | 914   |
| >ALK-A1234TRDIACGCQYL   | 308  | >ALK-A1234TRDITCGCQYL   | 129   | 179   |
| >ALK-A1234TARDIACGCQY   | 402  | >ALK-A1234TARDITCGCQY   | 362   | 40    |
| >ALK-A1234TVARDIACGCC   | 168  | >ALK-A1234TVARDITCGCC   | 143   | 25    |
| >ALK-A1234TVARDIACGCC   | 488  | >ALK-A1234TVARDITCGCC   | 452   | 36    |
| >ALK-A1234TVARDIACGCC   | 11   | >ALK-A1234TVARDITCGCC   | 13    | 2     |
| >ALK-A1234TVARDIACGCC   | 119  | >ALK-A1234TVARDITCGCC   | 186   | 67    |
| >ALK-A1234TLLHWARDIA    | 260  | >ALK-A1234TLLHWARDIT    | 2589  | 2329  |
| >ALK-A1234TLLHWARDIAC   | 568  | >ALK-A1234TLLHWARDITC   | 202   | 366   |
| >ALK-A877S- AAGGGGGW    | 99   | >ALK-A877S- ASGGGGGW    | 16    | 83    |
| >ALK-A877S- AAGGGGGW    | 1388 | >ALK-A877S- ASGGGGGW    | 454   | 934   |
| >ALK-A877S- VLGLNGNSG/  | 333  | >ALK-A877S- VLGLNGNSG/  | 7214  | 6881  |
| >ALK-A877S- VLGLNGNSG/  | 328  | >ALK-A877S- VLGLNGNSG/  | 12469 | 12141 |
| >ALK-A877S- VLGLNGNSG/  | 236  | >ALK-A877S- VLGLNGNSG/  | 11880 | 11644 |
| >ALK-A877S- GAAGGGGG\   | 59   | >ALK-A877S- GASGGGGGV   | 59    | 0     |
| >ALK-A877S- GAAGGGGG\   | 68   | >ALK-A877S- GASGGGGGV   | 52    | 16    |
| >ALK-A877S- NSGAAGGGC   | 222  | >ALK-A877S- NSGASGGGG   | 100   | 122   |
| >ALK-A877S- GLNGNSGAA   | 378  | >ALK-A877S- GLNGNSGAS   | 5819  | 5441  |

|                        |      |                         |      |      |
|------------------------|------|-------------------------|------|------|
| >ALK-A877S- GLNGNSGAA  | 19   | >ALK-A877S- GLNGNSGAS   | 2026 | 2007 |
| >ALK-A877S- GLNGNSGAA  | 63   | >ALK-A877S- GLNGNSGAS   | 2638 | 2575 |
| >ALK-A877S- GLNGNSGAA  | 114  | >ALK-A877S- GLNGNSGAS   | 8542 | 8428 |
| >ALK-A877S- GLNGNSGAA  | 45   | >ALK-A877S- GLNGNSGAS   | 6950 | 6905 |
| >ALK-D1091†DYNPNYCF    | 163  | >ALK-D1091†NYNPNYCF     | 49   | 114  |
| >ALK-D1091†DYNPNYCF    | 261  | >ALK-D1091†NYNPNYCF     | 175  | 86   |
| >ALK-D1091†DYNPNYCF    | 183  | >ALK-D1091†NYNPNYCF     | 22   | 161  |
| >ALK-D1091†DYNPNYCFA(  | 105  | >ALK-D1091†NYNPNYCFA(   | 550  | 445  |
| >ALK-D1091†DYNPNYCFA(  | 564  | >ALK-D1091†NYNPNYCFA(   | 141  | 423  |
| >ALK-D1091†TDYNPNYCF   | 285  | >ALK-D1091†TNYNPNYCF    | 66   | 219  |
| >ALK-D1091†MTDYNPNY    | 9    | >ALK-D1091†MTNYPNPNY    | 81   | 72   |
| >ALK-D1091†MTDYNPNYC   | 218  | >ALK-D1091†MTNYPNPNYC   | 1277 | 1059 |
| >ALK-D1091†MTDYNPNYC   | 242  | >ALK-D1091†MTNYPNPNYC   | 5552 | 5310 |
| >ALK-D1091†MTDYNPNYC   | 1293 | >ALK-D1091†MTNYPNPNYC   | 417  | 876  |
| >ALK-D1091†MTDYNPNYC   | 3283 | >ALK-D1091†MTNYPNPNYC   | 260  | 3023 |
| >ALK-D1091†MTDYNPNY    | 728  | >ALK-D1091†MTNYPNPNY    | 167  | 561  |
| >ALK-D1091†MTDYNPNY    | 3240 | >ALK-D1091†MTNYPNPNY    | 122  | 3118 |
| >ALK-D1091†MTDYNPNYC   | 8121 | >ALK-D1091†MTNYPNPNYC   | 385  | 7736 |
| >ALK-D1091†MTDYNPNY    | 69   | >ALK-D1091†MTNYPNPNY    | 18   | 51   |
| >ALK-D1091†MTDYNPNYC   | 280  | >ALK-D1091†MTNYPNPNYC   | 376  | 96   |
| >ALK-D1091†MTDYNPNY    | 9892 | >ALK-D1091†MTNYPNPNY    | 424  | 9468 |
| >ALK-D1091†MTDYNPNYC   | 1195 | >ALK-D1091†MTNYPNPNYC   | 15   | 1180 |
| >ALK-D1091†MTDYNPNY    | 99   | >ALK-D1091†MTNYPNPNY    | 18   | 81   |
| >ALK-D1091†MTDYNPNYC   | 228  | >ALK-D1091†MTNYPNPNYC   | 56   | 172  |
| >ALK-D1091†MTDYNPNY    | 488  | >ALK-D1091†MTNYPNPNY    | 52   | 436  |
| >ALK-D1091†MTDYNPNYC   | 2166 | >ALK-D1091†MTNYPNPNYC   | 125  | 2041 |
| >ALK-D1091†MTDYNPNYC   | 46   | >ALK-D1091†MTNYPNPNYC   | 8    | 38   |
| >ALK-D1091†MTDYNPNYC   | 204  | >ALK-D1091†MTNYPNPNYC   | 375  | 171  |
| >ALK-D1091†MTDYNPNY    | 373  | >ALK-D1091†MTNYPNPNY    | 242  | 131  |
| >ALK-D1091†MTDYNPNY    | 6562 | >ALK-D1091†MTNYPNPNY    | 382  | 6180 |
| >ALK-D1091†MTDYNPNYC   | 8136 | >ALK-D1091†MTNYPNPNYC   | 492  | 7644 |
| >ALK-D1091†MTDYNPNY    | 2244 | >ALK-D1091†MTNYPNPNY    | 119  | 2125 |
| >ALK-D1091†MTDYNPNYC   | 649  | >ALK-D1091†MTNYPNPNYC   | 30   | 619  |
| >ALK-D1091†MTDYNPNY    | 11   | >ALK-D1091†MTNYPNPNY    | 6    | 5    |
| >ALK-D1091†MTDYNPNYC   | 58   | >ALK-D1091†MTNYPNPNYC   | 23   | 35   |
| >ALK-D1091†MTDYNPNY    | 472  | >ALK-D1091†MTNYPNPNY    | 203  | 269  |
| >ALK-D1091†MTDYNPNY    | 1064 | >ALK-D1091†MTNYPNPNY    | 172  | 892  |
| >ALK-D1091†MTDYNPNYC   | 616  | >ALK-D1091†MTNYPNPNYC   | 116  | 500  |
| >ALK-D1091†MTDYNPNYC   | 114  | >ALK-D1091†MTNYPNPNYC   | 65   | 49   |
| >ALK-D1091†MTDYNPNY    | 443  | >ALK-D1091†MTNYPNPNY    | 852  | 409  |
| >ALK-D1091†IMTDYNPNYC( | 18   | >ALK-D1091†IMTNYPNPNYC( | 34   | 16   |
| >ALK-D1091†IMTDYNPNYC( | 119  | >ALK-D1091†IMTNYPNPNYC( | 248  | 129  |
| >ALK-D1091†IMTDYNPNYC( | 138  | >ALK-D1091†IMTNYPNPNYC( | 714  | 576  |

|                       |      |                       |      |      |
|-----------------------|------|-----------------------|------|------|
| >ALK-D1091†IMTDYNPNY  | 233  | >ALK-D1091†IMTNYNPNY  | 2945 | 2712 |
| >ALK-D1091†IMTDYNPNY( | 22   | >ALK-D1091†IMTNYNPNY( | 100  | 78   |
| >ALK-D1091†IMTDYNPNY( | 544  | >ALK-D1091†IMTNYNPNY( | 353  | 191  |
| >ALK-D1091†IMTDYNPNY  | 15   | >ALK-D1091†IMTNYNPNY  | 20   | 5    |
| >ALK-D1091†IMTDYNPNY( | 299  | >ALK-D1091†IMTNYNPNY( | 607  | 308  |
| >ALK-D1091†IMTDYNPNY  | 12   | >ALK-D1091†IMTNYNPNY  | 11   | 1    |
| >ALK-D1091†IMTDYNPNY  | 666  | >ALK-D1091†IMTNYNPNY  | 348  | 318  |
| >ALK-D1091†IMTDYNPNY  | 317  | >ALK-D1091†IMTNYNPNY  | 330  | 13   |
| >ALK-D1091†IMTDYNPNY( | 378  | >ALK-D1091†IMTNYNPNY( | 367  | 11   |
| >ALK-D1091†IMTDYNPNY  | 465  | >ALK-D1091†IMTNYNPNY  | 267  | 198  |
| >ALK-D1091†IMTDYNPNY( | 782  | >ALK-D1091†IMTNYNPNY( | 496  | 286  |
| >ALK-D1091†IMTDYNPNY  | 29   | >ALK-D1091†IMTNYNPNY  | 14   | 15   |
| >ALK-D1091†IMTDYNPNY( | 10   | >ALK-D1091†IMTNYNPNY( | 6    | 4    |
| >ALK-D1091†IMTDYNPNY  | 196  | >ALK-D1091†IMTNYNPNY  | 606  | 410  |
| >ALK-D1091†IMTDYNPNY  | 476  | >ALK-D1091†IMTNYNPNY  | 795  | 319  |
| >ALK-D1091†TIMTDYNPN\ | 472  | >ALK-D1091†TIMTNYNPN\ | 353  | 119  |
| >ALK-D1091†TIMTDYNPN\ | 172  | >ALK-D1091†TIMTNYNPN\ | 103  | 69   |
| >ALK-D1091†TIMTDYNPN\ | 20   | >ALK-D1091†TIMTNYNPN\ | 29   | 9    |
| >ALK-D1091†TIMTDYNPN\ | 532  | >ALK-D1091†TIMTNYNPN\ | 271  | 261  |
| >ALK-D1091†TIMTDYNPN\ | 420  | >ALK-D1091†TIMTNYNPN\ | 249  | 171  |
| >ALK-D1091†TIMTDYNPN\ | 651  | >ALK-D1091†TIMTNYNPN\ | 381  | 270  |
| >ALK-D1091†STIMTDYNPN | 56   | >ALK-D1091†STIMTNYNPN | 35   | 21   |
| >ALK-D1091†STIMTDYNPN | 198  | >ALK-D1091†STIMTNYNPN | 201  | 3    |
| >ALK-D1091†STIMTDYNPN | 6    | >ALK-D1091†STIMTNYNPN | 6    | 0    |
| >ALK-D1091†STIMTDYNPN | 49   | >ALK-D1091†STIMTNYNPN | 30   | 19   |
| >ALK-D1091†STIMTDYNPN | 21   | >ALK-D1091†STIMTNYNPN | 25   | 4    |
| >ALK-D1091†STIMTDYNPN | 21   | >ALK-D1091†STIMTNYNPN | 19   | 2    |
| >ALK-D1091†STIMTDYNPN | 128  | >ALK-D1091†STIMTNYNPN | 109  | 19   |
| >ALK-D1091†STIMTDYNPN | 248  | >ALK-D1091†STIMTNYNPN | 176  | 72   |
| >ALK-D1091†STIMTDYNPN | 212  | >ALK-D1091†STIMTNYNPN | 194  | 18   |
| >ALK-D1091†STIMTDYNPN | 481  | >ALK-D1091†STIMTNYNPN | 201  | 280  |
| >ALK-D1091†STIMTDYNPN | 5    | >ALK-D1091†STIMTNYNPN | 5    | 0    |
| >ALK-D1091†STIMTDYNPN | 84   | >ALK-D1091†STIMTNYNPN | 41   | 43   |
| >ALK-D1091†TSTIMTDY   | 1093 | >ALK-D1091†TSTIMTNY   | 432  | 661  |
| >ALK-D1091†TSTIMTDY   | 301  | >ALK-D1091†TSTIMTNY   | 337  | 36   |
| >ALK-D1091†TSTIMTDY   | 221  | >ALK-D1091†TSTIMTNY   | 181  | 40   |
| >ALK-D1091†TSTIMTDY   | 41   | >ALK-D1091†TSTIMTNY   | 13   | 28   |
| >ALK-D1091†TSTIMTDY   | 76   | >ALK-D1091†TSTIMTNY   | 43   | 33   |
| >ALK-D1091†RTSTIMTDY  | 90   | >ALK-D1091†RTSTIMTNY  | 215  | 125  |
| >ALK-D1091†RTSTIMTDY  | 346  | >ALK-D1091†RTSTIMTNY  | 99   | 247  |
| >ALK-D1091†RTSTIMTDY  | 245  | >ALK-D1091†RTSTIMTNY  | 51   | 194  |
| >ALK-D1091†RTSTIMTDY  | 461  | >ALK-D1091†RTSTIMTNY  | 573  | 112  |
| >ALK-D1091†RTSTIMTDY  | 94   | >ALK-D1091†RTSTIMTNY  | 29   | 65   |

|                         |      |                        |       |       |
|-------------------------|------|------------------------|-------|-------|
| >ALK-D1091†RTSTIMTDY    | 90   | >ALK-D1091†RTSTIMTNY   | 129   | 39    |
| >ALK-D1091†RTSTIMTDY    | 29   | >ALK-D1091†RTSTIMTNY   | 29    | 0     |
| >ALK-D1091†RTSTIMTDY    | 241  | >ALK-D1091†RTSTIMTNY   | 185   | 56    |
| >ALK-D1091†RTSTIMTDY    | 12   | >ALK-D1091†RTSTIMTNY   | 9     | 3     |
| >ALK-D1091†RTSTIMTDY    | 352  | >ALK-D1091†RTSTIMTNY   | 232   | 120   |
| >ALK-D1091†RTSTIMTDY    | 5    | >ALK-D1091†RTSTIMTNY   | 3     | 2     |
| >ALK-D1091†RTSTIMTDY    | 628  | >ALK-D1091†RTSTIMTNY   | 157   | 471   |
| >ALK-D1091†RTSTIMTDY    | 5    | >ALK-D1091†RTSTIMTNY   | 3     | 2     |
| >ALK-D1091†RTSTIMTDY    | 2284 | >ALK-D1091†RTSTIMTNY   | 385   | 1899  |
| >ALK-D1091†LRTSTIMTDY   | 71   | >ALK-D1091†LRTSTIMTNY  | 50    | 21    |
| >ALK-D1091†LRTSTIMTDY   | 174  | >ALK-D1091†LRTSTIMTNY  | 111   | 63    |
| >ALK-D1091†KLRTSTIMTD'  | 69   | >ALK-D1091†KLRTSTIMTN' | 43    | 26    |
| >ALK-D1091†KLRTSTIMTD   | 88   | >ALK-D1091†KLRTSTIMTN  | 28    | 60    |
| >ALK-D1091†KLRTSTIMTD'  | 115  | >ALK-D1091†KLRTSTIMTN' | 28    | 87    |
| >ALK-D1091†KLRTSTIMTD'  | 176  | >ALK-D1091†KLRTSTIMTN' | 171   | 5     |
| >ALK-D1091†KLRTSTIMTD'  | 45   | >ALK-D1091†KLRTSTIMTN' | 32    | 13    |
| >ALK-D1091†KLRTSTIMTD'  | 175  | >ALK-D1091†KLRTSTIMTN' | 157   | 18    |
| >ALK-D1091†KLRTSTIMTD'  | 24   | >ALK-D1091†KLRTSTIMTN' | 18    | 6     |
| >ALK-D1091†KLRTSTIMTD'  | 124  | >ALK-D1091†KLRTSTIMTN' | 33    | 91    |
| >ALK-D1091†KLRTSTIMTD'  | 370  | >ALK-D1091†KLRTSTIMTN' | 198   | 172   |
| >ALK-F1174C FNHQIVRCI   | 345  | >ALK-F1174C CNHQIVRCI  | 2856  | 2511  |
| >ALK-F1174C FNHQIVR     | 329  | >ALK-F1174C CNHQIVR    | 1401  | 1072  |
| >ALK-F1174C FNHQIVR     | 308  | >ALK-F1174C CNHQIVR    | 162   | 146   |
| >ALK-F1174C KFNHQIV     | 410  | >ALK-F1174C KCNHQIV    | 1641  | 1231  |
| >ALK-F1174C KFNHQIVR    | 320  | >ALK-F1174C KCNHQIVR   | 1477  | 1157  |
| >ALK-F1174C KFNHQIVR    | 9    | >ALK-F1174C KCNHQIVR   | 157   | 148   |
| >ALK-F1174C KFNHQIVR    | 17   | >ALK-F1174C KCNHQIVR   | 52    | 35    |
| >ALK-F1174C FLMEALIISKF | 50   | >ALK-F1174C FLMEALIISK | 52    | 2     |
| >ALK-F1174C FLMEALIISKF | 8    | >ALK-F1174C FLMEALIISK | 17    | 9     |
| >ALK-F1174C FLMEALIISKF | 16   | >ALK-F1174C FLMEALIISK | 11    | 5     |
| >ALK-F1174C FLMEALIISKF | 22   | >ALK-F1174C FLMEALIISK | 25    | 3     |
| >ALK-F1174C FLMEALIISKF | 18   | >ALK-F1174C FLMEALIISK | 4     | 14    |
| >ALK-F1174C FLMEALIISKF | 90   | >ALK-F1174C FLMEALIISK | 9     | 81    |
| >ALK-F1174C FLMEALIISKF | 757  | >ALK-F1174C FLMEALIISK | 44    | 713   |
| >ALK-F1174C FLMEALIISKF | 81   | >ALK-F1174C FLMEALIISK | 5     | 76    |
| >ALK-F1174C FLMEALIISKF | 31   | >ALK-F1174C FLMEALIISK | 4     | 27    |
| >ALK-F1174C FLMEALIISKF | 129  | >ALK-F1174C FLMEALIISK | 18283 | 18154 |
| >ALK-F1174C FLMEALIISKF | 228  | >ALK-F1174C FLMEALIISK | 9687  | 9459  |
| >ALK-F1174C FLMEALIISKF | 494  | >ALK-F1174C FLMEALIISK | 27575 | 27081 |
| >ALK-F1174C FLMEALIISKF | 110  | >ALK-F1174C FLMEALIISK | 14080 | 13970 |
| >ALK-F1174C FLMEALIISKF | 40   | >ALK-F1174C FLMEALIISK | 9095  | 9055  |
| >ALK-F1174C FLMEALIISKF | 19   | >ALK-F1174C FLMEALIISK | 8730  | 8711  |
| >ALK-F1174C FLMEALIISKF | 233  | >ALK-F1174C FLMEALIISK | 23789 | 23556 |



|                         |      |                         |       |       |
|-------------------------|------|-------------------------|-------|-------|
| >ALK-F1174C FLMEALIISKF | 327  | >ALK-F1174C FLMEALIISKC | 16607 | 16280 |
| >ALK-F1174C FLMEALIISKF | 389  | >ALK-F1174C FLMEALIISKC | 17990 | 17601 |
| >ALK-F1174C SKFNHQNI    | 12   | >ALK-F1174C SKCNHQNI    | 243   | 231   |
| >ALK-F1174C SKFNHQNIV   | 17   | >ALK-F1174C SKCNHQNIV   | 414   | 397   |
| >ALK-F1174C SKFNHQNIVF  | 61   | >ALK-F1174C SKCNHQNIVF  | 1275  | 1214  |
| >ALK-F1174C SKFNHQNIVR  | 370  | >ALK-F1174C SKCNHQNIVR  | 1192  | 822   |
| >ALK-F1174C ISKFNHQNI   | 21   | >ALK-F1174C ISKCNHQNI   | 27    | 6     |
| >ALK-F1174C ISKFNHQNIV  | 73   | >ALK-F1174C ISKCNHQNIV  | 101   | 28    |
| >ALK-F1174C ISKFNHQNIVI | 91   | >ALK-F1174C ISKCNHQNIV  | 128   | 37    |
| >ALK-F1174C ISKFNHQNIVI | 21   | >ALK-F1174C ISKCNHQNIV  | 28    | 7     |
| >ALK-F1174C ISKFNHQNIVI | 139  | >ALK-F1174C ISKCNHQNIV  | 335   | 196   |
| >ALK-F1174C ISKFNHQNI   | 311  | >ALK-F1174C ISKCNHQNI   | 87    | 224   |
| >ALK-F1174C ISKFNHQNIV  | 930  | >ALK-F1174C ISKCNHQNIV  | 321   | 609   |
| >ALK-F1174C ISKFNHQNI   | 42   | >ALK-F1174C ISKCNHQNI   | 69    | 27    |
| >ALK-F1174C ISKFNHQNI   | 854  | >ALK-F1174C ISKCNHQNI   | 472   | 382   |
| >ALK-F1174C IISKFNHQNIV | 35   | >ALK-F1174C IISKCNHQNIV | 43    | 8     |
| >ALK-F1174C IISKFNHQNI  | 359  | >ALK-F1174C IISKCNHQNI  | 919   | 560   |
| >ALK-F1174C IISKFNHQNIV | 68   | >ALK-F1174C IISKCNHQNIV | 85    | 17    |
| >ALK-F1174C IISKFNHQNIV | 452  | >ALK-F1174C IISKCNHQNIV | 1606  | 1154  |
| >ALK-F1174C IISKFNHQNIV | 29   | >ALK-F1174C IISKCNHQNIV | 38    | 9     |
| >ALK-F1174C LIISKFNHQNI | 367  | >ALK-F1174C LIISKCNHQNI | 951   | 584   |
| >ALK-F1174C LIISKFNHQNI | 355  | >ALK-F1174C LIISKCNHQNI | 568   | 213   |
| >ALK-F1174C LIISKFNHQNI | 108  | >ALK-F1174C LIISKCNHQNI | 172   | 64    |
| >ALK-F1174C LIISKFNHQNI | 496  | >ALK-F1174C LIISKCNHQNI | 1505  | 1009  |
| >ALK-F1174C ALIISKFNHQ  | 407  | >ALK-F1174C ALIISKCNHQ  | 522   | 115   |
| >ALK-F1174C EALIISKF    | 42   | >ALK-F1174C EALIISKC    | 17589 | 17547 |
| >ALK-F1174C EALIISKF    | 346  | >ALK-F1174C EALIISKC    | 18761 | 18415 |
| >ALK-F1174C MEALIISKF   | 92   | >ALK-F1174C MEALIISKC   | 3284  | 3192  |
| >ALK-F1174C MEALIISKFN  | 251  | >ALK-F1174C MEALIISKCN  | 1047  | 796   |
| >ALK-F1174C MEALIISKF   | 252  | >ALK-F1174C MEALIISKC   | 20173 | 19921 |
| >ALK-F1174C MEALIISKF   | 21   | >ALK-F1174C MEALIISKC   | 2678  | 2657  |
| >ALK-F1174C MEALIISKF   | 402  | >ALK-F1174C MEALIISKC   | 7565  | 7163  |
| >ALK-F1174C MEALIISKF   | 69   | >ALK-F1174C MEALIISKC   | 2993  | 2924  |
| >ALK-F1174C MEALIISKF   | 1375 | >ALK-F1174C MEALIISKC   | 435   | 940   |
| >ALK-F1174C MEALIISKF   | 360  | >ALK-F1174C MEALIISKC   | 20054 | 19694 |
| >ALK-F1174C MEALIISKF   | 12   | >ALK-F1174C MEALIISKC   | 37    | 25    |
| >ALK-F1174C LMEALIISKF  | 3260 | >ALK-F1174C LMEALIISKC  | 349   | 2911  |
| >ALK-F1174C LMEALIISKF  | 3713 | >ALK-F1174C LMEALIISKC  | 78    | 3635  |
| >ALK-F1174C LMEALIISKF  | 327  | >ALK-F1174C LMEALIISKC  | 17052 | 16725 |
| >ALK-F1174C LMEALIISKF  | 151  | >ALK-F1174C LMEALIISKC  | 14001 | 13850 |
| >ALK-F1174C LMEALIISKF  | 415  | >ALK-F1174C LMEALIISKC  | 25522 | 25107 |
| >ALK-F1174I- FNHQNIVRCI | 345  | >ALK-F1174I- INHQNIVRCI | 812   | 467   |
| >ALK-F1174I- FNHQNIVR   | 329  | >ALK-F1174I- INHQNIVR   | 1264  | 935   |

|                        |       |                        |       |       |
|------------------------|-------|------------------------|-------|-------|
| >ALK-F1174I-FNHQNI     | 308   | >ALK-F1174I-INHQNI     | 220   | 88    |
| >ALK-F1174I-KFNHQNI    | 2299  | >ALK-F1174I-KINHQNI    | 236   | 2063  |
| >ALK-F1174I-KFNHQNI    | 8094  | >ALK-F1174I-KINHQNI    | 43    | 8051  |
| >ALK-F1174I-KFNHQNI    | 8882  | >ALK-F1174I-KINHQNI    | 370   | 8512  |
| >ALK-F1174I-KFNHQNI    | 10526 | >ALK-F1174I-KINHQNI    | 482   | 10044 |
| >ALK-F1174I-KFNHQNI    | 9838  | >ALK-F1174I-KINHQNI    | 169   | 9669  |
| >ALK-F1174I-KFNHQNI    | 7132  | >ALK-F1174I-KINHQNI    | 318   | 6814  |
| >ALK-F1174I-KFNHQNI    | 410   | >ALK-F1174I-KINHQNI    | 299   | 111   |
| >ALK-F1174I-KFNHQNI    | 320   | >ALK-F1174I-KINHQNI    | 231   | 89    |
| >ALK-F1174I-KFNHQNI    | 554   | >ALK-F1174I-KINHQNI    | 421   | 133   |
| >ALK-F1174I-KFNHQNI    | 9     | >ALK-F1174I-KINHQNI    | 19    | 10    |
| >ALK-F1174I-KFNHQNI    | 1302  | >ALK-F1174I-KINHQNI    | 137   | 1165  |
| >ALK-F1174I-KFNHQNI    | 17    | >ALK-F1174I-KINHQNI    | 37    | 20    |
| >ALK-F1174I-FLMEALISKI | 50    | >ALK-F1174I-FLMEALISKI | 7     | 43    |
| >ALK-F1174I-FLMEALISKI | 8     | >ALK-F1174I-FLMEALISKI | 2     | 6     |
| >ALK-F1174I-FLMEALISKI | 16    | >ALK-F1174I-FLMEALISKI | 2     | 14    |
| >ALK-F1174I-FLMEALISKI | 22    | >ALK-F1174I-FLMEALISKI | 5     | 17    |
| >ALK-F1174I-FLMEALISKI | 18    | >ALK-F1174I-FLMEALISKI | 2     | 16    |
| >ALK-F1174I-FLMEALISKI | 90    | >ALK-F1174I-FLMEALISKI | 3     | 87    |
| >ALK-F1174I-FLMEALISKI | 757   | >ALK-F1174I-FLMEALISKI | 6     | 751   |
| >ALK-F1174I-FLMEALISKI | 81    | >ALK-F1174I-FLMEALISKI | 2     | 79    |
| >ALK-F1174I-FLMEALISKI | 31    | >ALK-F1174I-FLMEALISKI | 2     | 29    |
| >ALK-F1174I-FLMEALISKI | 129   | >ALK-F1174I-FLMEALISKI | 3397  | 3268  |
| >ALK-F1174I-FLMEALISKI | 228   | >ALK-F1174I-FLMEALISKI | 6366  | 6138  |
| >ALK-F1174I-FLMEALISKI | 494   | >ALK-F1174I-FLMEALISKI | 9228  | 8734  |
| >ALK-F1174I-FLMEALISKI | 8356  | >ALK-F1174I-FLMEALISKI | 170   | 8186  |
| >ALK-F1174I-FLMEALISKI | 7246  | >ALK-F1174I-FLMEALISKI | 45    | 7201  |
| >ALK-F1174I-FLMEALISKI | 110   | >ALK-F1174I-FLMEALISKI | 3984  | 3874  |
| >ALK-F1174I-FLMEALISKI | 40    | >ALK-F1174I-FLMEALISKI | 1453  | 1413  |
| >ALK-F1174I-FLMEALISKI | 19    | >ALK-F1174I-FLMEALISKI | 903   | 884   |
| >ALK-F1174I-FLMEALISKI | 233   | >ALK-F1174I-FLMEALISKI | 9065  | 8832  |
| >ALK-F1174I-FLMEALISKI | 327   | >ALK-F1174I-FLMEALISKI | 12295 | 11968 |
| >ALK-F1174I-FLMEALISKI | 389   | >ALK-F1174I-FLMEALISKI | 2916  | 2527  |
| >ALK-F1174I-SKFNHQNI   | 12    | >ALK-F1174I-SKFNHQNI   | 56    | 44    |
| >ALK-F1174I-SKFNHQNI   | 17    | >ALK-F1174I-SKFNHQNI   | 90    | 73    |
| >ALK-F1174I-SKFNHQNI   | 61    | >ALK-F1174I-SKFNHQNI   | 316   | 255   |
| >ALK-F1174I-SKFNHQNI   | 370   | >ALK-F1174I-SKFNHQNI   | 1502  | 1132  |
| >ALK-F1174I-ISKFNHQNI  | 21    | >ALK-F1174I-ISKFNHQNI  | 32    | 11    |
| >ALK-F1174I-ISKFNHQNI  | 73    | >ALK-F1174I-ISKFNHQNI  | 125   | 52    |
| >ALK-F1174I-ISKFNHQNI  | 91    | >ALK-F1174I-ISKFNHQNI  | 161   | 70    |
| >ALK-F1174I-ISKFNHQNI  | 21    | >ALK-F1174I-ISKFNHQNI  | 25    | 4     |
| >ALK-F1174I-ISKFNHQNI  | 139   | >ALK-F1174I-ISKFNHQNI  | 373   | 234   |
| >ALK-F1174I-ISKFNHQNI  | 311   | >ALK-F1174I-ISKFNHQNI  | 373   | 62    |

|                         |       |                         |       |       |
|-------------------------|-------|-------------------------|-------|-------|
| >ALK-F1174I-ISKFNHQNI   | 42    | >ALK-F1174I-ISKINHQNI   | 18    | 24    |
| >ALK-F1174I-IISKFNHQNIV | 35    | >ALK-F1174I-IISKINHQNIV | 25    | 10    |
| >ALK-F1174I-IISKFNHQNI  | 359   | >ALK-F1174I-IISKINHQNI  | 791   | 432   |
| >ALK-F1174I-IISKFNHQNIV | 68    | >ALK-F1174I-IISKINHQNIV | 62    | 6     |
| >ALK-F1174I-IISKFNHQNIV | 452   | >ALK-F1174I-IISKINHQNIV | 785   | 333   |
| >ALK-F1174I-IISKFNHQNIV | 777   | >ALK-F1174I-IISKINHQNIV | 484   | 293   |
| >ALK-F1174I-IISKFNHQNIV | 29    | >ALK-F1174I-IISKINHQNIV | 33    | 4     |
| >ALK-F1174I-IISKFNHQNIV | 888   | >ALK-F1174I-IISKINHQNIV | 428   | 460   |
| >ALK-F1174I-LIISKFNHQNI | 367   | >ALK-F1174I-LIISKINHQNI | 1011  | 644   |
| >ALK-F1174I-LIISKFNHQNI | 355   | >ALK-F1174I-LIISKINHQNI | 317   | 38    |
| >ALK-F1174I-LIISKFNHQNI | 108   | >ALK-F1174I-LIISKINHQNI | 91    | 17    |
| >ALK-F1174I-LIISKFNHQNI | 1119  | >ALK-F1174I-LIISKINHQNI | 486   | 633   |
| >ALK-F1174I-LIISKFNHQNI | 683   | >ALK-F1174I-LIISKINHQNI | 342   | 341   |
| >ALK-F1174I-LIISKFNHQNI | 496   | >ALK-F1174I-LIISKINHQNI | 1428  | 932   |
| >ALK-F1174I-ALIISKFNHQ  | 407   | >ALK-F1174I-ALIISKINHQ  | 342   | 65    |
| >ALK-F1174I-EALIISKF    | 15539 | >ALK-F1174I-EALIISKI    | 266   | 15273 |
| >ALK-F1174I-EALIISKF    | 8385  | >ALK-F1174I-EALIISKI    | 61    | 8324  |
| >ALK-F1174I-EALIISKF    | 42    | >ALK-F1174I-EALIISKI    | 2639  | 2597  |
| >ALK-F1174I-EALIISKF    | 346   | >ALK-F1174I-EALIISKI    | 11358 | 11012 |
| >ALK-F1174I-MEALIISKF   | 92    | >ALK-F1174I-MEALIISKI   | 6     | 86    |
| >ALK-F1174I-MEALIISKFN  | 251   | >ALK-F1174I-MEALIISKIN  | 2111  | 1860  |
| >ALK-F1174I-MEALIISKF   | 17982 | >ALK-F1174I-MEALIISKI   | 495   | 17487 |
| >ALK-F1174I-MEALIISKF   | 252   | >ALK-F1174I-MEALIISKI   | 5834  | 5582  |
| >ALK-F1174I-MEALIISKF   | 21    | >ALK-F1174I-MEALIISKI   | 807   | 786   |
| >ALK-F1174I-MEALIISKF   | 549   | >ALK-F1174I-MEALIISKI   | 128   | 421   |
| >ALK-F1174I-MEALIISKF   | 402   | >ALK-F1174I-MEALIISKI   | 2040  | 1638  |
| >ALK-F1174I-MEALIISKF   | 69    | >ALK-F1174I-MEALIISKI   | 529   | 460   |
| >ALK-F1174I-MEALIISKF   | 1375  | >ALK-F1174I-MEALIISKI   | 241   | 1134  |
| >ALK-F1174I-MEALIISKF   | 360   | >ALK-F1174I-MEALIISKI   | 3737  | 3377  |
| >ALK-F1174I-MEALIISKF   | 12    | >ALK-F1174I-MEALIISKI   | 3     | 9     |
| >ALK-F1174I-LMEALIISKF  | 5225  | >ALK-F1174I-LMEALIISKI  | 100   | 5125  |
| >ALK-F1174I-LMEALIISKF  | 6465  | >ALK-F1174I-LMEALIISKI  | 70    | 6395  |
| >ALK-F1174I-LMEALIISKF  | 3260  | >ALK-F1174I-LMEALIISKI  | 30    | 3230  |
| >ALK-F1174I-LMEALIISKF  | 10181 | >ALK-F1174I-LMEALIISKI  | 207   | 9974  |
| >ALK-F1174I-LMEALIISKF  | 3713  | >ALK-F1174I-LMEALIISKI  | 12    | 3701  |
| >ALK-F1174I-LMEALIISKF  | 327   | >ALK-F1174I-LMEALIISKI  | 7634  | 7307  |
| >ALK-F1174I-LMEALIISKF  | 151   | >ALK-F1174I-LMEALIISKI  | 3014  | 2863  |
| >ALK-F1174I-LMEALIISKF  | 415   | >ALK-F1174I-LMEALIISKI  | 9113  | 8698  |
| >ALK-F1174L FNHQNIVRCI  | 345   | >ALK-F1174L LNHQNIVRCI  | 680   | 335   |
| >ALK-F1174L FNHQNIVR    | 329   | >ALK-F1174L LNHQNIVR    | 1378  | 1049  |
| >ALK-F1174L FNHQNIVR    | 308   | >ALK-F1174L LNHQNIVR    | 371   | 63    |
| >ALK-F1174L KFNHQNIV    | 13363 | >ALK-F1174L KLNHQNIV    | 144   | 13219 |
| >ALK-F1174L KFNHQNIV    | 2299  | >ALK-F1174L KLNHQNIV    | 17    | 2282  |

|                         |       |                         |      |       |
|-------------------------|-------|-------------------------|------|-------|
| >ALK-F1174L KFNHQIVRC   | 7625  | >ALK-F1174L KLNHQIVRC   | 191  | 7434  |
| >ALK-F1174L KFNHQIV     | 8094  | >ALK-F1174L KLNHQIV     | 7    | 8087  |
| >ALK-F1174L KFNHQIVRC   | 13745 | >ALK-F1174L KLNHQIVRC   | 86   | 13659 |
| >ALK-F1174L KFNHQIV     | 9201  | >ALK-F1174L KLNHQIV     | 422  | 8779  |
| >ALK-F1174L KFNHQIV     | 11359 | >ALK-F1174L KLNHQIV     | 20   | 11339 |
| >ALK-F1174L KFNHQIVRC   | 19639 | >ALK-F1174L KLNHQIVRC   | 164  | 19475 |
| >ALK-F1174L KFNHQIVRC   | 18268 | >ALK-F1174L KLNHQIVRC   | 124  | 18144 |
| >ALK-F1174L KFNHQIV     | 8882  | >ALK-F1174L KLNHQIV     | 9    | 8873  |
| >ALK-F1174L KFNHQIVRC   | 18302 | >ALK-F1174L KLNHQIVRC   | 89   | 18213 |
| >ALK-F1174L KFNHQIV     | 10526 | >ALK-F1174L KLNHQIV     | 18   | 10508 |
| >ALK-F1174L KFNHQIVRC   | 20262 | >ALK-F1174L KLNHQIVRC   | 227  | 20035 |
| >ALK-F1174L KFNHQIV     | 19132 | >ALK-F1174L KLNHQIV     | 168  | 18964 |
| >ALK-F1174L KFNHQIV     | 9838  | >ALK-F1174L KLNHQIV     | 8    | 9830  |
| >ALK-F1174L KFNHQIVRC   | 29621 | >ALK-F1174L KLNHQIVRC   | 164  | 29457 |
| >ALK-F1174L KFNHQIVR    | 7132  | >ALK-F1174L KLNHQIVR    | 123  | 7009  |
| >ALK-F1174L KFNHQIV     | 410   | >ALK-F1174L KLNHQIV     | 911  | 501   |
| >ALK-F1174L KFNHQIVR    | 320   | >ALK-F1174L KLNHQIVR    | 739  | 419   |
| >ALK-F1174L KFNHQIVR    | 9     | >ALK-F1174L KLNHQIVR    | 20   | 11    |
| >ALK-F1174L KFNHQIVRC   | 1302  | >ALK-F1174L KLNHQIVRC   | 120  | 1182  |
| >ALK-F1174L KFNHQIVR    | 17    | >ALK-F1174L KLNHQIVR    | 42   | 25    |
| >ALK-F1174L FLMEALIISKF | 50    | >ALK-F1174L FLMEALIISKL | 7    | 43    |
| >ALK-F1174L FLMEALIISKF | 8     | >ALK-F1174L FLMEALIISKL | 2    | 6     |
| >ALK-F1174L FLMEALIISKF | 16    | >ALK-F1174L FLMEALIISKL | 2    | 14    |
| >ALK-F1174L FLMEALIISKF | 22    | >ALK-F1174L FLMEALIISKL | 5    | 17    |
| >ALK-F1174L FLMEALIISKF | 18    | >ALK-F1174L FLMEALIISKL | 2    | 16    |
| >ALK-F1174L FLMEALIISKF | 90    | >ALK-F1174L FLMEALIISKL | 3    | 87    |
| >ALK-F1174L FLMEALIISKF | 757   | >ALK-F1174L FLMEALIISKL | 5    | 752   |
| >ALK-F1174L FLMEALIISKF | 81    | >ALK-F1174L FLMEALIISKL | 2    | 79    |
| >ALK-F1174L FLMEALIISKF | 31    | >ALK-F1174L FLMEALIISKL | 2    | 29    |
| >ALK-F1174L FLMEALIISKF | 129   | >ALK-F1174L FLMEALIISKL | 2648 | 2519  |
| >ALK-F1174L FLMEALIISKF | 228   | >ALK-F1174L FLMEALIISKL | 2030 | 1802  |
| >ALK-F1174L FLMEALIISKF | 494   | >ALK-F1174L FLMEALIISKL | 2965 | 2471  |
| >ALK-F1174L FLMEALIISKF | 8356  | >ALK-F1174L FLMEALIISKL | 325  | 8031  |
| >ALK-F1174L FLMEALIISKF | 7246  | >ALK-F1174L FLMEALIISKL | 78   | 7168  |
| >ALK-F1174L FLMEALIISKF | 110   | >ALK-F1174L FLMEALIISKL | 1878 | 1768  |
| >ALK-F1174L FLMEALIISKF | 40    | >ALK-F1174L FLMEALIISKL | 661  | 621   |
| >ALK-F1174L FLMEALIISKF | 19    | >ALK-F1174L FLMEALIISKL | 569  | 550   |
| >ALK-F1174L FLMEALIISKF | 233   | >ALK-F1174L FLMEALIISKL | 3292 | 3059  |
| >ALK-F1174L FLMEALIISKF | 327   | >ALK-F1174L FLMEALIISKL | 5202 | 4875  |
| >ALK-F1174L FLMEALIISKF | 7887  | >ALK-F1174L FLMEALIISKL | 347  | 7540  |
| >ALK-F1174L FLMEALIISKF | 389   | >ALK-F1174L FLMEALIISKL | 1797 | 1408  |
| >ALK-F1174L SKFNHQNI    | 12    | >ALK-F1174L SKLNHQNI    | 50   | 38    |
| >ALK-F1174L SKFNHQIV    | 17    | >ALK-F1174L SKLNHQIV    | 83   | 66    |

|                         |       |                         |      |       |
|-------------------------|-------|-------------------------|------|-------|
| >ALK-F1174L SKFNHQNIVR  | 61    | >ALK-F1174L SKLNHQNIVR  | 302  | 241   |
| >ALK-F1174L SKFNHQNIVR  | 370   | >ALK-F1174L SKLNHQNIVR  | 714  | 344   |
| >ALK-F1174L ISKFNHQNI   | 21    | >ALK-F1174L ISKLNHQNI   | 37   | 16    |
| >ALK-F1174L ISKFNHQNIV  | 73    | >ALK-F1174L ISKLNHQNIV  | 142  | 69    |
| >ALK-F1174L ISKFNHQNIVI | 91    | >ALK-F1174L ISKLNHQNIVI | 184  | 93    |
| >ALK-F1174L ISKFNHQNIVI | 21    | >ALK-F1174L ISKLNHQNIVI | 31   | 10    |
| >ALK-F1174L ISKFNHQNIVI | 139   | >ALK-F1174L ISKLNHQNIVI | 497  | 358   |
| >ALK-F1174L ISKFNHQNI   | 311   | >ALK-F1174L ISKLNHQNI   | 544  | 233   |
| >ALK-F1174L ISKFNHQNI   | 42    | >ALK-F1174L ISKLNHQNI   | 41   | 1     |
| >ALK-F1174L IISKFNHQNIV | 35    | >ALK-F1174L IISKLNHQNIV | 49   | 14    |
| >ALK-F1174L IISKFNHQNI  | 359   | >ALK-F1174L IISKLNHQNI  | 705  | 346   |
| >ALK-F1174L IISKFNHQNIV | 68    | >ALK-F1174L IISKLNHQNIV | 100  | 32    |
| >ALK-F1174L IISKFNHQNIV | 452   | >ALK-F1174L IISKLNHQNIV | 924  | 472   |
| >ALK-F1174L IISKFNHQNIV | 29    | >ALK-F1174L IISKLNHQNIV | 45   | 16    |
| >ALK-F1174L LIISKFNHQNI | 367   | >ALK-F1174L LIISKLNHQNI | 707  | 340   |
| >ALK-F1174L LIISKFNHQNI | 355   | >ALK-F1174L LIISKLNHQNI | 299  | 56    |
| >ALK-F1174L LIISKFNHQNI | 108   | >ALK-F1174L LIISKLNHQNI | 85   | 23    |
| >ALK-F1174L LIISKFNHQNI | 496   | >ALK-F1174L LIISKLNHQNI | 1576 | 1080  |
| >ALK-F1174L ALIISKFNHQ  | 407   | >ALK-F1174L ALIISKLNHQ  | 558  | 151   |
| >ALK-F1174L EALIISKF    | 8385  | >ALK-F1174L EALIISKL    | 102  | 8283  |
| >ALK-F1174L EALIISKF    | 42    | >ALK-F1174L EALIISKL    | 641  | 599   |
| >ALK-F1174L EALIISKF    | 346   | >ALK-F1174L EALIISKL    | 4624 | 4278  |
| >ALK-F1174L MEALIISKF   | 92    | >ALK-F1174L MEALIISKL   | 27   | 65    |
| >ALK-F1174L MEALIISKFN  | 251   | >ALK-F1174L MEALIISKLN  | 778  | 527   |
| >ALK-F1174L MEALIISKF   | 6506  | >ALK-F1174L MEALIISKL   | 397  | 6109  |
| >ALK-F1174L MEALIISKF   | 252   | >ALK-F1174L MEALIISKL   | 4277 | 4025  |
| >ALK-F1174L MEALIISKF   | 21    | >ALK-F1174L MEALIISKL   | 152  | 131   |
| >ALK-F1174L MEALIISKF   | 549   | >ALK-F1174L MEALIISKL   | 35   | 514   |
| >ALK-F1174L MEALIISKF   | 866   | >ALK-F1174L MEALIISKL   | 297  | 569   |
| >ALK-F1174L MEALIISKF   | 402   | >ALK-F1174L MEALIISKL   | 2287 | 1885  |
| >ALK-F1174L MEALIISKF   | 69    | >ALK-F1174L MEALIISKL   | 326  | 257   |
| >ALK-F1174L MEALIISKF   | 360   | >ALK-F1174L MEALIISKL   | 1977 | 1617  |
| >ALK-F1174L MEALIISKF   | 12    | >ALK-F1174L MEALIISKL   | 5    | 7     |
| >ALK-F1174L LMEALIISKF  | 5225  | >ALK-F1174L LMEALIISKL  | 56   | 5169  |
| >ALK-F1174L LMEALIISKF  | 6465  | >ALK-F1174L LMEALIISKL  | 108  | 6357  |
| >ALK-F1174L LMEALIISKF  | 3260  | >ALK-F1174L LMEALIISKL  | 33   | 3227  |
| >ALK-F1174L LMEALIISKF  | 10181 | >ALK-F1174L LMEALIISKL  | 181  | 10000 |
| >ALK-F1174L LMEALIISKF  | 19218 | >ALK-F1174L LMEALIISKL  | 425  | 18793 |
| >ALK-F1174L LMEALIISKF  | 3713  | >ALK-F1174L LMEALIISKL  | 5    | 3708  |
| >ALK-F1174L LMEALIISKF  | 327   | >ALK-F1174L LMEALIISKL  | 4523 | 4196  |
| >ALK-F1174L LMEALIISKF  | 151   | >ALK-F1174L LMEALIISKL  | 2142 | 1991  |
| >ALK-F1174L LMEALIISKF  | 415   | >ALK-F1174L LMEALIISKL  | 4775 | 4360  |
| >ALK-F1174S FNHQNIVRCI  | 345   | >ALK-F1174S SNHQNIVRCI  | 746  | 401   |

|                         |      |                         |       |       |
|-------------------------|------|-------------------------|-------|-------|
| >ALK-F1174S FNHQIVR     | 329  | >ALK-F1174S SNHQIVR     | 1021  | 692   |
| >ALK-F1174S FNHQIVR     | 308  | >ALK-F1174S SNHQIVR     | 271   | 37    |
| >ALK-F1174S KFNHQIV     | 410  | >ALK-F1174S KSNHQIV     | 108   | 302   |
| >ALK-F1174S KFNHQIVR    | 320  | >ALK-F1174S KSNHQIVR    | 84    | 236   |
| >ALK-F1174S KFNHQIVRC   | 554  | >ALK-F1174S KSNHQIVRC   | 171   | 383   |
| >ALK-F1174S KFNHQIVR    | 9    | >ALK-F1174S KSNHQIVR    | 15    | 6     |
| >ALK-F1174S KFNHQIVRC   | 1302 | >ALK-F1174S KSNHQIVRC   | 168   | 1134  |
| >ALK-F1174S KFNHQIVR    | 17   | >ALK-F1174S KSNHQIVR    | 108   | 91    |
| >ALK-F1174S KFNHQIVRC   | 9740 | >ALK-F1174S KSNHQIVRC   | 94    | 9646  |
| >ALK-F1174S FLMEALIISKF | 50   | >ALK-F1174S FLMEALIISKS | 36    | 14    |
| >ALK-F1174S FLMEALIISKF | 8    | >ALK-F1174S FLMEALIISKS | 6     | 2     |
| >ALK-F1174S FLMEALIISKF | 16   | >ALK-F1174S FLMEALIISKS | 8     | 8     |
| >ALK-F1174S FLMEALIISKF | 22   | >ALK-F1174S FLMEALIISKS | 39    | 17    |
| >ALK-F1174S FLMEALIISKF | 18   | >ALK-F1174S FLMEALIISKS | 23    | 5     |
| >ALK-F1174S FLMEALIISKF | 90   | >ALK-F1174S FLMEALIISKS | 87    | 3     |
| >ALK-F1174S FLMEALIISKF | 757  | >ALK-F1174S FLMEALIISKS | 259   | 498   |
| >ALK-F1174S FLMEALIISKF | 81   | >ALK-F1174S FLMEALIISKS | 104   | 23    |
| >ALK-F1174S FLMEALIISKF | 31   | >ALK-F1174S FLMEALIISKS | 17    | 14    |
| >ALK-F1174S FLMEALIISKF | 129  | >ALK-F1174S FLMEALIISKS | 19519 | 19390 |
| >ALK-F1174S FLMEALIISKF | 228  | >ALK-F1174S FLMEALIISKS | 15049 | 14821 |
| >ALK-F1174S FLMEALIISKF | 494  | >ALK-F1174S FLMEALIISKS | 24966 | 24472 |
| >ALK-F1174S FLMEALIISKF | 110  | >ALK-F1174S FLMEALIISKS | 12379 | 12269 |
| >ALK-F1174S FLMEALIISKF | 40   | >ALK-F1174S FLMEALIISKS | 8144  | 8104  |
| >ALK-F1174S FLMEALIISKF | 19   | >ALK-F1174S FLMEALIISKS | 10923 | 10904 |
| >ALK-F1174S FLMEALIISKF | 233  | >ALK-F1174S FLMEALIISKS | 23511 | 23278 |
| >ALK-F1174S FLMEALIISKF | 327  | >ALK-F1174S FLMEALIISKS | 13210 | 12883 |
| >ALK-F1174S FLMEALIISKF | 389  | >ALK-F1174S FLMEALIISKS | 15936 | 15547 |
| >ALK-F1174S SKFNHQNI    | 12   | >ALK-F1174S SKSNHQNI    | 82    | 70    |
| >ALK-F1174S SKFNHQIV    | 17   | >ALK-F1174S SKSNHQIV    | 161   | 144   |
| >ALK-F1174S SKFNHQIVR   | 61   | >ALK-F1174S SKSNHQIVR   | 565   | 504   |
| >ALK-F1174S SKFNHQIVR   | 370  | >ALK-F1174S SKSNHQIVR   | 1731  | 1361  |
| >ALK-F1174S ISKFNHQNI   | 21   | >ALK-F1174S ISKSNHQNI   | 26    | 5     |
| >ALK-F1174S ISKFNHQIV   | 73   | >ALK-F1174S ISKSNHQIV   | 102   | 29    |
| >ALK-F1174S ISKFNHQNIV  | 91   | >ALK-F1174S ISKSNHQNIV  | 130   | 39    |
| >ALK-F1174S ISKFNHQNIV  | 21   | >ALK-F1174S ISKSNHQNIV  | 20    | 1     |
| >ALK-F1174S ISKFNHQNIV  | 139  | >ALK-F1174S ISKSNHQNIV  | 233   | 94    |
| >ALK-F1174S ISKFNHQNI   | 311  | >ALK-F1174S ISKSNHQNI   | 76    | 235   |
| >ALK-F1174S ISKFNHQIV   | 930  | >ALK-F1174S ISKSNHQIV   | 224   | 706   |
| >ALK-F1174S ISKFNHQNI   | 42   | >ALK-F1174S ISKSNHQNI   | 68    | 26    |
| >ALK-F1174S ISKFNHQNI   | 854  | >ALK-F1174S ISKSNHQNI   | 326   | 528   |
| >ALK-F1174S IISKFNHQIV  | 35   | >ALK-F1174S IISKSNHQIV  | 81    | 46    |
| >ALK-F1174S IISKFNHQNI  | 359  | >ALK-F1174S IISKSNHQNI  | 946   | 587   |
| >ALK-F1174S IISKFNHQIV  | 68   | >ALK-F1174S IISKSNHQIV  | 77    | 9     |

|                         |       |                         |       |       |
|-------------------------|-------|-------------------------|-------|-------|
| >ALK-F1174S IISKFNHQNIV | 452   | >ALK-F1174S IISKSNHQNIV | 1070  | 618   |
| >ALK-F1174S IISKFNHQNIV | 29    | >ALK-F1174S IISKSNHQNIV | 33    | 4     |
| >ALK-F1174S LIISKFNHQNI | 367   | >ALK-F1174S LIISKSNHQNI | 941   | 574   |
| >ALK-F1174S LIISKFNHQNI | 355   | >ALK-F1174S LIISKSNHQNI | 387   | 32    |
| >ALK-F1174S LIISKFNHQNI | 108   | >ALK-F1174S LIISKSNHQNI | 136   | 28    |
| >ALK-F1174S LIISKFNHQNI | 496   | >ALK-F1174S LIISKSNHQNI | 1374  | 878   |
| >ALK-F1174S ALIISKFNHQ  | 407   | >ALK-F1174S ALIISKSNHQ  | 698   | 291   |
| >ALK-F1174S EALIISKF    | 42    | >ALK-F1174S EALIISKS    | 15921 | 15879 |
| >ALK-F1174S EALIISKF    | 346   | >ALK-F1174S EALIISKS    | 15854 | 15508 |
| >ALK-F1174S MEALIISKF   | 92    | >ALK-F1174S MEALIISKS   | 3417  | 3325  |
| >ALK-F1174S MEALIISKFN  | 251   | >ALK-F1174S MEALIISKSN  | 1245  | 994   |
| >ALK-F1174S MEALIISKF   | 252   | >ALK-F1174S MEALIISKS   | 21726 | 21474 |
| >ALK-F1174S MEALIISKF   | 21    | >ALK-F1174S MEALIISKS   | 1795  | 1774  |
| >ALK-F1174S MEALIISKF   | 402   | >ALK-F1174S MEALIISKS   | 7647  | 7245  |
| >ALK-F1174S MEALIISKF   | 69    | >ALK-F1174S MEALIISKS   | 2241  | 2172  |
| >ALK-F1174S MEALIISKF   | 1375  | >ALK-F1174S MEALIISKS   | 307   | 1068  |
| >ALK-F1174S MEALIISKF   | 360   | >ALK-F1174S MEALIISKS   | 16774 | 16414 |
| >ALK-F1174S MEALIISKF   | 12    | >ALK-F1174S MEALIISKS   | 226   | 214   |
| >ALK-F1174S LMEALIISKF  | 327   | >ALK-F1174S LMEALIISKS  | 16067 | 15740 |
| >ALK-F1174S LMEALIISKF  | 151   | >ALK-F1174S LMEALIISKS  | 18180 | 18029 |
| >ALK-F1174S LMEALIISKF  | 415   | >ALK-F1174S LMEALIISKS  | 25205 | 24790 |
| >ALK-F1174V FNHQNIVRCI  | 345   | >ALK-F1174V VNHQNIVRCI  | 1468  | 1123  |
| >ALK-F1174V FNHQNIVR    | 329   | >ALK-F1174V VNHQNIVR    | 3053  | 2724  |
| >ALK-F1174V FNHQNIVR    | 308   | >ALK-F1174V VNHQNIVR    | 483   | 175   |
| >ALK-F1174V KFNHQNIV    | 8094  | >ALK-F1174V KVNHQNIV    | 107   | 7987  |
| >ALK-F1174V KFNHQNIVR   | 7132  | >ALK-F1174V KVNHQNIVR   | 363   | 6769  |
| >ALK-F1174V KFNHQNIVR   | 10350 | >ALK-F1174V KVNHQNIVR   | 271   | 10079 |
| >ALK-F1174V KFNHQNIV    | 410   | >ALK-F1174V KVNHQNIV    | 83    | 327   |
| >ALK-F1174V KFNHQNIVR   | 320   | >ALK-F1174V KVNHQNIVR   | 65    | 255   |
| >ALK-F1174V KFNHQNIVRC  | 554   | >ALK-F1174V KVNHQNIVRC  | 139   | 415   |
| >ALK-F1174V KFNHQNIVR   | 9     | >ALK-F1174V KVNHQNIVR   | 15    | 6     |
| >ALK-F1174V KFNHQNIVRC  | 1302  | >ALK-F1174V KVNHQNIVRC  | 105   | 1197  |
| >ALK-F1174V KFNHQNIVR   | 17    | >ALK-F1174V KVNHQNIVR   | 64    | 47    |
| >ALK-F1174V FLMEALIISKF | 50    | >ALK-F1174V FLMEALIISKV | 6     | 44    |
| >ALK-F1174V FLMEALIISKF | 8     | >ALK-F1174V FLMEALIISKV | 2     | 6     |
| >ALK-F1174V FLMEALIISKF | 16    | >ALK-F1174V FLMEALIISKV | 2     | 14    |
| >ALK-F1174V FLMEALIISKF | 22    | >ALK-F1174V FLMEALIISKV | 3     | 19    |
| >ALK-F1174V FLMEALIISKF | 18    | >ALK-F1174V FLMEALIISKV | 1     | 17    |
| >ALK-F1174V FLMEALIISKF | 90    | >ALK-F1174V FLMEALIISKV | 2     | 88    |
| >ALK-F1174V FLMEALIISKF | 757   | >ALK-F1174V FLMEALIISKV | 4     | 753   |
| >ALK-F1174V FLMEALIISKF | 81    | >ALK-F1174V FLMEALIISKV | 1     | 80    |
| >ALK-F1174V FLMEALIISKF | 31    | >ALK-F1174V FLMEALIISKV | 1     | 30    |
| >ALK-F1174V FLMEALIISKF | 129   | >ALK-F1174V FLMEALIISKV | 13460 | 13331 |

|                         |       |                         |       |       |
|-------------------------|-------|-------------------------|-------|-------|
| >ALK-F1174V FLMEALIISKF | 228   | >ALK-F1174V FLMEALIISKV | 3503  | 3275  |
| >ALK-F1174V FLMEALIISKF | 494   | >ALK-F1174V FLMEALIISKV | 11638 | 11144 |
| >ALK-F1174V FLMEALIISKF | 8356  | >ALK-F1174V FLMEALIISKV | 52    | 8304  |
| >ALK-F1174V FLMEALIISKF | 7246  | >ALK-F1174V FLMEALIISKV | 12    | 7234  |
| >ALK-F1174V FLMEALIISKF | 110   | >ALK-F1174V FLMEALIISKV | 4563  | 4453  |
| >ALK-F1174V FLMEALIISKF | 40    | >ALK-F1174V FLMEALIISKV | 1149  | 1109  |
| >ALK-F1174V FLMEALIISKF | 19    | >ALK-F1174V FLMEALIISKV | 1179  | 1160  |
| >ALK-F1174V FLMEALIISKF | 233   | >ALK-F1174V FLMEALIISKV | 15464 | 15231 |
| >ALK-F1174V FLMEALIISKF | 327   | >ALK-F1174V FLMEALIISKV | 14858 | 14531 |
| >ALK-F1174V FLMEALIISKF | 389   | >ALK-F1174V FLMEALIISKV | 4195  | 3806  |
| >ALK-F1174V SKFNHQNI    | 12    | >ALK-F1174V SKVNHQNI    | 80    | 68    |
| >ALK-F1174V SKFNHQNIV   | 17    | >ALK-F1174V SKVNHQNIV   | 134   | 117   |
| >ALK-F1174V SKFNHQNIVF  | 61    | >ALK-F1174V SKVNHQNIVF  | 480   | 419   |
| >ALK-F1174V SKFNHQNIVR  | 370   | >ALK-F1174V SKVNHQNIVR  | 1242  | 872   |
| >ALK-F1174V ISKFNHQNI   | 21    | >ALK-F1174V ISKVNHQNI   | 24    | 3     |
| >ALK-F1174V ISKFNHQNIV  | 73    | >ALK-F1174V ISKVNHQNIV  | 90    | 17    |
| >ALK-F1174V ISKFNHQNIVI | 91    | >ALK-F1174V ISKVNHQNIVI | 112   | 21    |
| >ALK-F1174V ISKFNHQNIVI | 21    | >ALK-F1174V ISKVNHQNIVI | 22    | 1     |
| >ALK-F1174V ISKFNHQNIVI | 139   | >ALK-F1174V ISKVNHQNIVI | 380   | 241   |
| >ALK-F1174V ISKFNHQNI   | 311   | >ALK-F1174V ISKVNHQNI   | 197   | 114   |
| >ALK-F1174V ISKFNHQNI   | 42    | >ALK-F1174V ISKVNHQNI   | 35    | 7     |
| >ALK-F1174V IISKFNHQNIV | 35    | >ALK-F1174V IISKVNHQNIV | 46    | 11    |
| >ALK-F1174V IISKFNHQNI  | 359   | >ALK-F1174V IISKVNHQNI  | 1094  | 735   |
| >ALK-F1174V IISKFNHQNIV | 68    | >ALK-F1174V IISKVNHQNIV | 79    | 11    |
| >ALK-F1174V IISKFNHQNIV | 452   | >ALK-F1174V IISKVNHQNIV | 396   | 56    |
| >ALK-F1174V IISKFNHQNIV | 811   | >ALK-F1174V IISKVNHQNIV | 404   | 407   |
| >ALK-F1174V IISKFNHQNIV | 29    | >ALK-F1174V IISKVNHQNIV | 42    | 13    |
| >ALK-F1174V LIISKFNHQNI | 367   | >ALK-F1174V LIISKVNHQNI | 982   | 615   |
| >ALK-F1174V LIISKFNHQNI | 355   | >ALK-F1174V LIISKVNHQNI | 340   | 15    |
| >ALK-F1174V LIISKFNHQNI | 108   | >ALK-F1174V LIISKVNHQNI | 85    | 23    |
| >ALK-F1174V LIISKFNHQNI | 496   | >ALK-F1174V LIISKVNHQNI | 1417  | 921   |
| >ALK-F1174V ALIISKFNHQ  | 407   | >ALK-F1174V ALIISKVNHQ  | 454   | 47    |
| >ALK-F1174V EALIISKF    | 15539 | >ALK-F1174V EALIISKV    | 57    | 15482 |
| >ALK-F1174V EALIISKF    | 8385  | >ALK-F1174V EALIISKV    | 11    | 8374  |
| >ALK-F1174V EALIISKF    | 42    | >ALK-F1174V EALIISKV    | 8476  | 8434  |
| >ALK-F1174V EALIISKF    | 346   | >ALK-F1174V EALIISKV    | 13948 | 13602 |
| >ALK-F1174V MEALIISKF   | 92    | >ALK-F1174V MEALIISKV   | 15    | 77    |
| >ALK-F1174V MEALIISKFN  | 251   | >ALK-F1174V MEALIISKVN  | 2398  | 2147  |
| >ALK-F1174V MEALIISKF   | 6506  | >ALK-F1174V MEALIISKV   | 281   | 6225  |
| >ALK-F1174V MEALIISKF   | 17982 | >ALK-F1174V MEALIISKV   | 89    | 17893 |
| >ALK-F1174V MEALIISKF   | 252   | >ALK-F1174V MEALIISKV   | 7304  | 7052  |
| >ALK-F1174V MEALIISKF   | 21    | >ALK-F1174V MEALIISKV   | 533   | 512   |
| >ALK-F1174V MEALIISKF   | 549   | >ALK-F1174V MEALIISKV   | 343   | 206   |



|                        |       |                        |      |       |
|------------------------|-------|------------------------|------|-------|
| >ALK-F1174VMEALIISKF   | 402   | >ALK-F1174VMEALIISKV   | 3506 | 3104  |
| >ALK-F1174VMEALIISKF   | 69    | >ALK-F1174VMEALIISKV   | 691  | 622   |
| >ALK-F1174VMEALIISKF   | 1375  | >ALK-F1174VMEALIISKV   | 67   | 1308  |
| >ALK-F1174VMEALIISKF   | 360   | >ALK-F1174VMEALIISKV   | 5168 | 4808  |
| >ALK-F1174VMEALIISKF   | 12    | >ALK-F1174VMEALIISKV   | 4    | 8     |
| >ALK-F1174VLMEALIISKF  | 8275  | >ALK-F1174VLMEALIISKV  | 163  | 8112  |
| >ALK-F1174VLMEALIISKF  | 5225  | >ALK-F1174VLMEALIISKV  | 57   | 5168  |
| >ALK-F1174VLMEALIISKF  | 6465  | >ALK-F1174VLMEALIISKV  | 26   | 6439  |
| >ALK-F1174VLMEALIISKF  | 15521 | >ALK-F1174VLMEALIISKV  | 269  | 15252 |
| >ALK-F1174VLMEALIISKF  | 3260  | >ALK-F1174VLMEALIISKV  | 4    | 3256  |
| >ALK-F1174VLMEALIISKF  | 10181 | >ALK-F1174VLMEALIISKV  | 16   | 10165 |
| >ALK-F1174VLMEALIISKF  | 19218 | >ALK-F1174VLMEALIISKV  | 23   | 19195 |
| >ALK-F1174VLMEALIISKF  | 19501 | >ALK-F1174VLMEALIISKV  | 48   | 19453 |
| >ALK-F1174VLMEALIISKF  | 3713  | >ALK-F1174VLMEALIISKV  | 2    | 3711  |
| >ALK-F1174VLMEALIISKF  | 327   | >ALK-F1174VLMEALIISKV  | 8439 | 8112  |
| >ALK-F1174VLMEALIISKF  | 151   | >ALK-F1174VLMEALIISKV  | 3835 | 3684  |
| >ALK-F1174VLMEALIISKF  | 415   | >ALK-F1174VLMEALIISKV  | 7481 | 7066  |
| >ALK-F1245CFIHRDIAA    | 64    | >ALK-F1245CFIHRDIAA    | 2131 | 2067  |
| >ALK-F1245CFIHRDIAA    | 85    | >ALK-F1245CFIHRDIAA    | 8471 | 8386  |
| >ALK-F1245CFIHRDIAA    | 182   | >ALK-F1245CFIHRDIAA    | 6995 | 6813  |
| >ALK-F1245CFIHRDIAA    | 99    | >ALK-F1245CFIHRDIAA    | 6537 | 6438  |
| >ALK-F1245CFIHRDIAAR   | 340   | >ALK-F1245CFIHRDIAAR   | 94   | 246   |
| >ALK-F1245CFIHRDIAAR   | 468   | >ALK-F1245CFIHRDIAAR   | 678  | 210   |
| >ALK-F1245CFIHRDIAAR   | 38    | >ALK-F1245CFIHRDIAAR   | 174  | 136   |
| >ALK-F1245CFIHRDIAAR   | 875   | >ALK-F1245CFIHRDIAAR   | 422  | 453   |
| >ALK-F1245CFIHRDIAAR   | 50    | >ALK-F1245CFIHRDIAAR   | 470  | 420   |
| >ALK-F1245CFIHRDIAAR   | 85    | >ALK-F1245CFIHRDIAAR   | 2986 | 2901  |
| >ALK-F1245CFIHRDIAAR   | 72    | >ALK-F1245CFIHRDIAAR   | 3293 | 3221  |
| >ALK-F1245CFIHRDIAAR   | 32    | >ALK-F1245CFIHRDIAAR   | 87   | 55    |
| >ALK-F1245CNHFIHRDIAA  | 480   | >ALK-F1245CNHFIHRDIAA  | 3297 | 2817  |
| >ALK-F1245CEENHFIHRDI  | 16    | >ALK-F1245CEENHFIHRDI  | 29   | 13    |
| >ALK-F1245CEENHFIHR    | 134   | >ALK-F1245CEENHFIHR    | 365  | 231   |
| >ALK-F1245CEENHFIHRDI  | 376   | >ALK-F1245CEENHFIHRDI  | 205  | 171   |
| >ALK-F1245CEENHFIHRDI/ | 442   | >ALK-F1245CEENHFIHRDI/ | 506  | 64    |
| >ALK-F1245CEENHFIHRDI  | 66    | >ALK-F1245CEENHFIHRDI  | 160  | 94    |
| >ALK-F1245CEENHFIHRD   | 468   | >ALK-F1245CEENHFIHRD   | 590  | 122   |
| >ALK-F1245CEENHFIHRDI  | 157   | >ALK-F1245CEENHFIHRDI  | 1130 | 973   |
| >ALK-F1245CEENHFIHRD   | 361   | >ALK-F1245CEENHFIHRD   | 3080 | 2719  |
| >ALK-F1245CEENHFIHRDI  | 356   | >ALK-F1245CEENHFIHRDI  | 690  | 334   |
| >ALK-F1245CEENHFIHRDI/ | 13    | >ALK-F1245CEENHFIHRDI/ | 31   | 18    |
| >ALK-F1245CEENHFIHR    | 88    | >ALK-F1245CEENHFIHR    | 200  | 112   |
| >ALK-F1245CLEENHFIHRD  | 63    | >ALK-F1245CLEENHFIHRD  | 52   | 11    |
| >ALK-F1245CLEENHFIHRD  | 125   | >ALK-F1245CLEENHFIHRD  | 271  | 146   |

|                         |     |                         |       |       |
|-------------------------|-----|-------------------------|-------|-------|
| >ALK-F1245C LEENHFIHRD  | 85  | >ALK-F1245C LEENHCIHRD  | 104   | 19    |
| >ALK-F1245C LEENHFIHR   | 326 | >ALK-F1245C LEENHCIHR   | 1718  | 1392  |
| >ALK-F1245C YLEENHFI    | 26  | >ALK-F1245C YLEENHCI    | 110   | 84    |
| >ALK-F1245C YLEENHFI    | 6   | >ALK-F1245C YLEENHCI    | 29    | 23    |
| >ALK-F1245C YLEENHFI    | 43  | >ALK-F1245C YLEENHCI    | 384   | 341   |
| >ALK-F1245C YLEENHFI    | 26  | >ALK-F1245C YLEENHCI    | 267   | 241   |
| >ALK-F1245C YLEENHFI    | 3   | >ALK-F1245C YLEENHCI    | 9     | 6     |
| >ALK-F1245C YLEENHFI    | 3   | >ALK-F1245C YLEENHCI    | 5     | 2     |
| >ALK-F1245C YLEENHFI    | 14  | >ALK-F1245C YLEENHCI    | 36    | 22    |
| >ALK-F1245C YLEENHFI    | 14  | >ALK-F1245C YLEENHCI    | 40    | 26    |
| >ALK-F1245C YLEENHFI    | 2   | >ALK-F1245C YLEENHCI    | 4     | 2     |
| >ALK-F1245C YLEENHFIHRI | 165 | >ALK-F1245C YLEENHCIHRI | 172   | 7     |
| >ALK-F1245C YLEENHFI    | 228 | >ALK-F1245C YLEENHCI    | 2118  | 1890  |
| >ALK-F1245C YLEENHFIHR  | 667 | >ALK-F1245C YLEENHCIHR  | 463   | 204   |
| >ALK-F1245C YLEENHFIHR  | 104 | >ALK-F1245C YLEENHCIHR  | 190   | 86    |
| >ALK-F1245C QYLEENHFI   | 420 | >ALK-F1245C QYLEENHCI   | 2191  | 1771  |
| >ALK-F1245C QYLEENHFI   | 334 | >ALK-F1245C QYLEENHCI   | 1391  | 1057  |
| >ALK-F1245C QYLEENHF    | 36  | >ALK-F1245C QYLEENHC    | 15161 | 15125 |
| >ALK-F1245C QYLEENHFI   | 46  | >ALK-F1245C QYLEENHCI   | 61    | 15    |
| >ALK-F1245C QYLEENHF    | 291 | >ALK-F1245C QYLEENHC    | 15574 | 15283 |
| >ALK-F1245C QYLEENHFI   | 144 | >ALK-F1245C QYLEENHCI   | 273   | 129   |
| >ALK-F1245C QYLEENHF    | 5   | >ALK-F1245C QYLEENHC    | 1043  | 1038  |
| >ALK-F1245C QYLEENHFI   | 6   | >ALK-F1245C QYLEENHCI   | 40    | 34    |
| >ALK-F1245C QYLEENHFIH  | 482 | >ALK-F1245C QYLEENHCIH  | 1387  | 905   |
| >ALK-F1245C QYLEENHFIH  | 113 | >ALK-F1245C QYLEENHCIH  | 352   | 239   |
| >ALK-F1245C QYLEENHFIH  | 46  | >ALK-F1245C QYLEENHCIH  | 90    | 44    |
| >ALK-F1245C QYLEENHFIH  | 11  | >ALK-F1245C QYLEENHCIH  | 15    | 4     |
| >ALK-F1245C QYLEENHFI   | 260 | >ALK-F1245C QYLEENHCI   | 1467  | 1207  |
| >ALK-F1245C CQYLEENHFI  | 171 | >ALK-F1245C CQYLEENHCI  | 464   | 293   |
| >ALK-F1245C CQYLEENHFI  | 268 | >ALK-F1245C CQYLEENHCI  | 1240  | 972   |
| >ALK-F1245C CQYLEENHF   | 427 | >ALK-F1245C CQYLEENHC   | 15372 | 14945 |
| >ALK-F1245C CQYLEENHF   | 16  | >ALK-F1245C CQYLEENHC   | 6964  | 6948  |
| >ALK-F1245I- FIHRDIAA   | 64  | >ALK-F1245I- IHRDIAA    | 870   | 806   |
| >ALK-F1245I- FIHRDIAA   | 85  | >ALK-F1245I- IHRDIAA    | 1484  | 1399  |
| >ALK-F1245I- FIHRDIAA   | 182 | >ALK-F1245I- IHRDIAA    | 1447  | 1265  |
| >ALK-F1245I- FIHRDIAA   | 99  | >ALK-F1245I- IHRDIAA    | 1236  | 1137  |
| >ALK-F1245I- FIHRDIAAR  | 340 | >ALK-F1245I- IHRDIAAR   | 37    | 303   |
| >ALK-F1245I- FIHRDIAAR  | 468 | >ALK-F1245I- IHRDIAAR   | 411   | 57    |
| >ALK-F1245I- FIHRDIAAR  | 38  | >ALK-F1245I- IHRDIAAR   | 133   | 95    |
| >ALK-F1245I- FIHRDIAAR  | 875 | >ALK-F1245I- IHRDIAAR   | 482   | 393   |
| >ALK-F1245I- HFIHRDIAAR | 50  | >ALK-F1245I- HIIHRDIAAR | 89    | 39    |
| >ALK-F1245I- HFIHRDIAAR | 85  | >ALK-F1245I- HIIHRDIAAR | 230   | 145   |
| >ALK-F1245I- HFIHRDIAAR | 72  | >ALK-F1245I- HIIHRDIAAR | 21    | 51    |

|                         |       |                          |      |       |
|-------------------------|-------|--------------------------|------|-------|
| >ALK-F1245I-HFIHRDIAAR  | 32    | >ALK-F1245I-HIIHRDIAAR   | 68   | 36    |
| >ALK-F1245I-CGCQYLEENF  | 16824 | >ALK-F1245I-CGCQYLEENF   | 218  | 16606 |
| >ALK-F1245I-NHFIHRDIAA  | 480   | >ALK-F1245I-NHIIHRDIAAF  | 1074 | 594   |
| >ALK-F1245I-EENHFIHRDI  | 16    | >ALK-F1245I-EENHIIIHRDI  | 15   | 1     |
| >ALK-F1245I-EENHFIHR    | 134   | >ALK-F1245I-EENHIIHR     | 118  | 16    |
| >ALK-F1245I-EENHFIHRDI  | 376   | >ALK-F1245I-EENHIIIHRDI  | 487  | 111   |
| >ALK-F1245I-EENHFIHRDI/ | 442   | >ALK-F1245I-EENHIIIHRDIA | 694  | 252   |
| >ALK-F1245I-EENHFIHRDI  | 66    | >ALK-F1245I-EENHIIIHRDI  | 167  | 101   |
| >ALK-F1245I-EENHFIHRD   | 468   | >ALK-F1245I-EENHIIHRD    | 441  | 27    |
| >ALK-F1245I-EENHFIHRDI  | 157   | >ALK-F1245I-EENHIIIHRDI  | 568  | 411   |
| >ALK-F1245I-EENHFIHRD   | 361   | >ALK-F1245I-EENHIIHRD    | 942  | 581   |
| >ALK-F1245I-EENHFIHRDI  | 356   | >ALK-F1245I-EENHIIIHRDI  | 835  | 479   |
| >ALK-F1245I-EENHFIHRDI/ | 13    | >ALK-F1245I-EENHIIIHRDIA | 19   | 6     |
| >ALK-F1245I-EENHFIHR    | 88    | >ALK-F1245I-EENHIIHR     | 256  | 168   |
| >ALK-F1245I-LEENHFIHRD  | 63    | >ALK-F1245I-LEENHIIIHRDI | 66   | 3     |
| >ALK-F1245I-LEENHFIHRD  | 125   | >ALK-F1245I-LEENHIIIHRDI | 254  | 129   |
| >ALK-F1245I-LEENHFIHRD  | 85    | >ALK-F1245I-LEENHIIIHRDI | 68   | 17    |
| >ALK-F1245I-LEENHFIHR   | 326   | >ALK-F1245I-LEENHIIHR    | 790  | 464   |
| >ALK-F1245I-YLEENHFI    | 26    | >ALK-F1245I-YLEENHII     | 132  | 106   |
| >ALK-F1245I-YLEENHFI    | 6     | >ALK-F1245I-YLEENHII     | 35   | 29    |
| >ALK-F1245I-YLEENHFI    | 43    | >ALK-F1245I-YLEENHII     | 117  | 74    |
| >ALK-F1245I-YLEENHFI    | 26    | >ALK-F1245I-YLEENHII     | 227  | 201   |
| >ALK-F1245I-YLEENHFI    | 3     | >ALK-F1245I-YLEENHII     | 11   | 8     |
| >ALK-F1245I-YLEENHFI    | 3     | >ALK-F1245I-YLEENHII     | 5    | 2     |
| >ALK-F1245I-YLEENHFI    | 14    | >ALK-F1245I-YLEENHII     | 75   | 61    |
| >ALK-F1245I-YLEENHFI    | 14    | >ALK-F1245I-YLEENHII     | 128  | 114   |
| >ALK-F1245I-YLEENHFI    | 2     | >ALK-F1245I-YLEENHII     | 3    | 1     |
| >ALK-F1245I-YLEENHFIHRI | 165   | >ALK-F1245I-YLEENHIIIHRC | 258  | 93    |
| >ALK-F1245I-YLEENHFI    | 228   | >ALK-F1245I-YLEENHII     | 1596 | 1368  |
| >ALK-F1245I-YLEENHFIHR  | 104   | >ALK-F1245I-YLEENHIIIHR  | 149  | 45    |
| >ALK-F1245I-QYLEENHF    | 10834 | >ALK-F1245I-QYLEENHI     | 98   | 10736 |
| >ALK-F1245I-QYLEENHFI   | 420   | >ALK-F1245I-QYLEENHII    | 1280 | 860   |
| >ALK-F1245I-QYLEENHFI   | 334   | >ALK-F1245I-QYLEENHII    | 2466 | 2132  |
| >ALK-F1245I-QYLEENHF    | 36    | >ALK-F1245I-QYLEENHI     | 155  | 119   |
| >ALK-F1245I-QYLEENHFI   | 46    | >ALK-F1245I-QYLEENHII    | 45   | 1     |
| >ALK-F1245I-QYLEENHF    | 291   | >ALK-F1245I-QYLEENHI     | 572  | 281   |
| >ALK-F1245I-QYLEENHFI   | 144   | >ALK-F1245I-QYLEENHII    | 274  | 130   |
| >ALK-F1245I-QYLEENHF    | 5     | >ALK-F1245I-QYLEENHI     | 10   | 5     |
| >ALK-F1245I-QYLEENHFI   | 6     | >ALK-F1245I-QYLEENHII    | 12   | 6     |
| >ALK-F1245I-QYLEENHFIH  | 482   | >ALK-F1245I-QYLEENHIIIHF | 932  | 450   |
| >ALK-F1245I-QYLEENHFIH  | 113   | >ALK-F1245I-QYLEENHIIIHF | 212  | 99    |
| >ALK-F1245I-QYLEENHFIH  | 46    | >ALK-F1245I-QYLEENHIIIHF | 90   | 44    |
| >ALK-F1245I-QYLEENHFIH  | 11    | >ALK-F1245I-QYLEENHIIIHF | 13   | 2     |

|                         |       |                         |      |       |
|-------------------------|-------|-------------------------|------|-------|
| >ALK-F1245I-QYLEENHFI   | 260   | >ALK-F1245I-QYLEENHII   | 1415 | 1155  |
| >ALK-F1245I-CQYLEENHFI  | 171   | >ALK-F1245I-CQYLEENHII  | 861  | 690   |
| >ALK-F1245I-CQYLEENHFI  | 268   | >ALK-F1245I-CQYLEENHII  | 1323 | 1055  |
| >ALK-F1245I-CQYLEENHF   | 427   | >ALK-F1245I-CQYLEENHI   | 7907 | 7480  |
| >ALK-F1245I-CQYLEENHF   | 16    | >ALK-F1245I-CQYLEENHI   | 552  | 536   |
| >ALK-F1245I-CQYLEENHFI  | 667   | >ALK-F1245I-CQYLEENHII  | 383  | 284   |
| >ALK-F1245I-CQYLEENHF   | 2401  | >ALK-F1245I-CQYLEENHI   | 483  | 1918  |
| >ALK-F1245L-FIHRDIAA    | 64    | >ALK-F1245L-LIHRDIAA    | 745  | 681   |
| >ALK-F1245L-FIHRDIAA    | 85    | >ALK-F1245L-LIHRDIAA    | 1431 | 1346  |
| >ALK-F1245L-FIHRDIAA    | 182   | >ALK-F1245L-LIHRDIAA    | 1441 | 1259  |
| >ALK-F1245L-FIHRDIAA    | 99    | >ALK-F1245L-LIHRDIAA    | 625  | 526   |
| >ALK-F1245L-FIHRDIAAR   | 340   | >ALK-F1245L-LIHRDIAAR   | 46   | 294   |
| >ALK-F1245L-FIHRDIAAR   | 468   | >ALK-F1245L-LIHRDIAAR   | 735  | 267   |
| >ALK-F1245L-FIHRDIAAR   | 38    | >ALK-F1245L-LIHRDIAAR   | 178  | 140   |
| >ALK-F1245L-HFIHRDIA    | 16902 | >ALK-F1245L-HLIHRDIA    | 414  | 16488 |
| >ALK-F1245L-HFIHRDIAA   | 17235 | >ALK-F1245L-HLIHRDIAA   | 282  | 16953 |
| >ALK-F1245L-HFIHRDIAA   | 17960 | >ALK-F1245L-HLIHRDIAA   | 120  | 17840 |
| >ALK-F1245L-HFIHRDIAA   | 31472 | >ALK-F1245L-HLIHRDIAA   | 476  | 30996 |
| >ALK-F1245L-HFIHRDIAAR  | 50    | >ALK-F1245L-HLIHRDIAAR  | 126  | 76    |
| >ALK-F1245L-HFIHRDIAAR  | 85    | >ALK-F1245L-HLIHRDIAAR  | 380  | 295   |
| >ALK-F1245L-HFIHRDIAAR  | 72    | >ALK-F1245L-HLIHRDIAAR  | 104  | 32    |
| >ALK-F1245L-HFIHRDIAAR  | 32    | >ALK-F1245L-HLIHRDIAAR  | 100  | 68    |
| >ALK-F1245L-NHFIHRDIAA  | 480   | >ALK-F1245L-NHLIHRDIAA  | 6008 | 5528  |
| >ALK-F1245L-EENHFIHRDI  | 16    | >ALK-F1245L-EENHLIHRDI  | 15   | 1     |
| >ALK-F1245L-EENHFIHR    | 134   | >ALK-F1245L-EENHLIHR    | 300  | 166   |
| >ALK-F1245L-EENHFIHRDI  | 376   | >ALK-F1245L-EENHLIHRDI  | 366  | 10    |
| >ALK-F1245L-EENHFIHRDI/ | 442   | >ALK-F1245L-EENHLIHRDI/ | 472  | 30    |
| >ALK-F1245L-EENHFIHRDI  | 66    | >ALK-F1245L-EENHLIHRDI  | 77   | 11    |
| >ALK-F1245L-EENHFIHRD   | 468   | >ALK-F1245L-EENHLIHRD   | 495  | 27    |
| >ALK-F1245L-EENHFIHRDI  | 157   | >ALK-F1245L-EENHLIHRDI  | 342  | 185   |
| >ALK-F1245L-EENHFIHRD   | 361   | >ALK-F1245L-EENHLIHRD   | 1066 | 705   |
| >ALK-F1245L-EENHFIHRDI  | 356   | >ALK-F1245L-EENHLIHRDI  | 640  | 284   |
| >ALK-F1245L-EENHFIHRDI/ | 13    | >ALK-F1245L-EENHLIHRDI/ | 20   | 7     |
| >ALK-F1245L-EENHFIHR    | 88    | >ALK-F1245L-EENHLIHR    | 393  | 305   |
| >ALK-F1245L-LEENHFIHRD  | 63    | >ALK-F1245L-LEENHLIHRDI | 45   | 18    |
| >ALK-F1245L-LEENHFIHRD  | 125   | >ALK-F1245L-LEENHLIHRDI | 233  | 108   |
| >ALK-F1245L-LEENHFIHRD  | 85    | >ALK-F1245L-LEENHLIHRDI | 61   | 24    |
| >ALK-F1245L-LEENHFIHR   | 326   | >ALK-F1245L-LEENHLIHR   | 2065 | 1739  |
| >ALK-F1245L-YLEENHFI    | 26    | >ALK-F1245L-YLEENHLI    | 49   | 23    |
| >ALK-F1245L-YLEENHFI    | 6     | >ALK-F1245L-YLEENHLI    | 14   | 8     |
| >ALK-F1245L-YLEENHFI    | 43    | >ALK-F1245L-YLEENHLI    | 57   | 14    |
| >ALK-F1245L-YLEENHFI    | 26    | >ALK-F1245L-YLEENHLI    | 97   | 71    |
| >ALK-F1245L-YLEENHFI    | 3     | >ALK-F1245L-YLEENHLI    | 6    | 3     |

|                         |       |                         |      |       |
|-------------------------|-------|-------------------------|------|-------|
| >ALK-F1245L YLEENHFI    | 3     | >ALK-F1245L YLEENHLI    | 6    | 3     |
| >ALK-F1245L YLEENHFI    | 14    | >ALK-F1245L YLEENHLI    | 47   | 33    |
| >ALK-F1245L YLEENHFI    | 14    | >ALK-F1245L YLEENHLI    | 101  | 87    |
| >ALK-F1245L YLEENHFI    | 2     | >ALK-F1245L YLEENHLI    | 3    | 1     |
| >ALK-F1245L YLEENHFIHRI | 165   | >ALK-F1245L YLEENHLIHRI | 326  | 161   |
| >ALK-F1245L YLEENHFI    | 228   | >ALK-F1245L YLEENHLI    | 708  | 480   |
| >ALK-F1245L YLEENHFIHR  | 104   | >ALK-F1245L YLEENHLIHR  | 228  | 124   |
| >ALK-F1245L QYLEENHF    | 10834 | >ALK-F1245L QYLEENHL    | 342  | 10492 |
| >ALK-F1245L QYLEENHFI   | 420   | >ALK-F1245L QYLEENHLI   | 1742 | 1322  |
| >ALK-F1245L QYLEENHFI   | 334   | >ALK-F1245L QYLEENHLI   | 972  | 638   |
| >ALK-F1245L QYLEENHF    | 36    | >ALK-F1245L QYLEENHL    | 372  | 336   |
| >ALK-F1245L QYLEENHFI   | 46    | >ALK-F1245L QYLEENHLI   | 33   | 13    |
| >ALK-F1245L QYLEENHF    | 291   | >ALK-F1245L QYLEENHL    | 1340 | 1049  |
| >ALK-F1245L QYLEENHFI   | 144   | >ALK-F1245L QYLEENHLI   | 103  | 41    |
| >ALK-F1245L QYLEENHF    | 5     | >ALK-F1245L QYLEENHL    | 9    | 4     |
| >ALK-F1245L QYLEENHFI   | 6     | >ALK-F1245L QYLEENHLI   | 10   | 4     |
| >ALK-F1245L QYLEENHFIH  | 482   | >ALK-F1245L QYLEENHLIH  | 925  | 443   |
| >ALK-F1245L QYLEENHFIH  | 113   | >ALK-F1245L QYLEENHLIH  | 187  | 74    |
| >ALK-F1245L QYLEENHFIH  | 46    | >ALK-F1245L QYLEENHLIH  | 79   | 33    |
| >ALK-F1245L QYLEENHFIH  | 11    | >ALK-F1245L QYLEENHLIH  | 14   | 3     |
| >ALK-F1245L QYLEENHFI   | 260   | >ALK-F1245L QYLEENHLI   | 889  | 629   |
| >ALK-F1245L CQYLEENHF   | 818   | >ALK-F1245L CQYLEENHL   | 378  | 440   |
| >ALK-F1245L CQYLEENHFI  | 171   | >ALK-F1245L CQYLEENHLI  | 362  | 191   |
| >ALK-F1245L CQYLEENHFI  | 268   | >ALK-F1245L CQYLEENHLI  | 436  | 168   |
| >ALK-F1245L CQYLEENHF   | 427   | >ALK-F1245L CQYLEENHL   | 5561 | 5134  |
| >ALK-F1245L CQYLEENHF   | 16    | >ALK-F1245L CQYLEENHL   | 352  | 336   |
| >ALK-F1245V FIHRDIAA    | 64    | >ALK-F1245V VIHRDIAA    | 1154 | 1090  |
| >ALK-F1245V FIHRDIAA    | 85    | >ALK-F1245V VIHRDIAA    | 2149 | 2064  |
| >ALK-F1245V FIHRDIAA    | 182   | >ALK-F1245V VIHRDIAA    | 1257 | 1075  |
| >ALK-F1245V FIHRDIAA    | 99    | >ALK-F1245V VIHRDIAA    | 949  | 850   |
| >ALK-F1245V FIHRDIAAR   | 340   | >ALK-F1245V VIHRDIAAR   | 60   | 280   |
| >ALK-F1245V FIHRDIAAR   | 468   | >ALK-F1245V VIHRDIAAR   | 972  | 504   |
| >ALK-F1245V FIHRDIAAR   | 38    | >ALK-F1245V VIHRDIAAR   | 429  | 391   |
| >ALK-F1245V HFIHRDIAAR  | 50    | >ALK-F1245V HVIHRDIAAR  | 106  | 56    |
| >ALK-F1245V HFIHRDIAAR  | 85    | >ALK-F1245V HVIHRDIAAR  | 302  | 217   |
| >ALK-F1245V HFIHRDIAAR  | 72    | >ALK-F1245V HVIHRDIAAR  | 15   | 57    |
| >ALK-F1245V HFIHRDIA    | 14234 | >ALK-F1245V HVIHRDIA    | 261  | 13973 |
| >ALK-F1245V HFIHRDIAA   | 11167 | >ALK-F1245V HVIHRDIAA   | 129  | 11038 |
| >ALK-F1245V HFIHRDIAAR  | 32    | >ALK-F1245V HVIHRDIAAR  | 163  | 131   |
| >ALK-F1245V NHFIHRDIAA  | 480   | >ALK-F1245V NHVIHRDIAA  | 1739 | 1259  |
| >ALK-F1245V EENHFIHRDI  | 16    | >ALK-F1245V EENHVIHRDI  | 16   | 0     |
| >ALK-F1245V EENHFIHR    | 134   | >ALK-F1245V EENHVIHR    | 133  | 1     |
| >ALK-F1245V EENHFIHRDI  | 376   | >ALK-F1245V EENHVIHRDI  | 486  | 110   |

|                         |      |                         |      |      |
|-------------------------|------|-------------------------|------|------|
| >ALK-F1245V EENHFIHRDI/ | 442  | >ALK-F1245V EENHVIHRDI/ | 988  | 546  |
| >ALK-F1245V EENHFIHRDI  | 66   | >ALK-F1245V EENHVIHRDI  | 162  | 96   |
| >ALK-F1245V EENHFIHRD   | 468  | >ALK-F1245V EENHVIHRD   | 559  | 91   |
| >ALK-F1245V EENHFIHRDI  | 157  | >ALK-F1245V EENHVIHRDI  | 697  | 540  |
| >ALK-F1245V EENHFIHRD   | 361  | >ALK-F1245V EENHVIHRD   | 1080 | 719  |
| >ALK-F1245V EENHFIHRDI  | 356  | >ALK-F1245V EENHVIHRDI  | 807  | 451  |
| >ALK-F1245V EENHFIHRDI/ | 13   | >ALK-F1245V EENHVIHRDI/ | 21   | 8    |
| >ALK-F1245V EENHFIHR    | 88   | >ALK-F1245V EENHVIHR    | 718  | 630  |
| >ALK-F1245V LEENHFIHRD  | 63   | >ALK-F1245V LEENHVIHRD  | 60   | 3    |
| >ALK-F1245V LEENHFIHRD  | 125  | >ALK-F1245V LEENHVIHRD  | 287  | 162  |
| >ALK-F1245V LEENHFIHRD  | 85   | >ALK-F1245V LEENHVIHRD  | 66   | 19   |
| >ALK-F1245V LEENHFIHR   | 326  | >ALK-F1245V LEENHVIHR   | 1327 | 1001 |
| >ALK-F1245V YLEENHFI    | 26   | >ALK-F1245V YLEENHVI    | 141  | 115  |
| >ALK-F1245V YLEENHFI    | 6    | >ALK-F1245V YLEENHVI    | 35   | 29   |
| >ALK-F1245V YLEENHFI    | 43   | >ALK-F1245V YLEENHVI    | 132  | 89   |
| >ALK-F1245V YLEENHFI    | 26   | >ALK-F1245V YLEENHVI    | 191  | 165  |
| >ALK-F1245V YLEENHFI    | 3    | >ALK-F1245V YLEENHVI    | 6    | 3    |
| >ALK-F1245V YLEENHFI    | 3    | >ALK-F1245V YLEENHVI    | 5    | 2    |
| >ALK-F1245V YLEENHFI    | 14   | >ALK-F1245V YLEENHVI    | 62   | 48   |
| >ALK-F1245V YLEENHFI    | 14   | >ALK-F1245V YLEENHVI    | 74   | 60   |
| >ALK-F1245V YLEENHFI    | 2    | >ALK-F1245V YLEENHVI    | 3    | 1    |
| >ALK-F1245V YLEENHFIHR  | 165  | >ALK-F1245V YLEENHVIHR  | 259  | 94   |
| >ALK-F1245V YLEENHFI    | 228  | >ALK-F1245V YLEENHVI    | 1504 | 1276 |
| >ALK-F1245V YLEENHFIHR  | 104  | >ALK-F1245V YLEENHVIHR  | 179  | 75   |
| >ALK-F1245V QYLEENHFI   | 420  | >ALK-F1245V QYLEENHVI   | 321  | 99   |
| >ALK-F1245V QYLEENHFI   | 334  | >ALK-F1245V QYLEENHVI   | 2827 | 2493 |
| >ALK-F1245V QYLEENHF    | 36   | >ALK-F1245V QYLEENHV    | 2758 | 2722 |
| >ALK-F1245V QYLEENHFI   | 46   | >ALK-F1245V QYLEENHVI   | 42   | 4    |
| >ALK-F1245V QYLEENHF    | 291  | >ALK-F1245V QYLEENHV    | 4369 | 4078 |
| >ALK-F1245V QYLEENHFI   | 144  | >ALK-F1245V QYLEENHVI   | 219  | 75   |
| >ALK-F1245V QYLEENHF    | 5    | >ALK-F1245V QYLEENHV    | 161  | 156  |
| >ALK-F1245V QYLEENHFI   | 6    | >ALK-F1245V QYLEENHVI   | 8    | 2    |
| >ALK-F1245V QYLEENHFH   | 482  | >ALK-F1245V QYLEENHVIH  | 796  | 314  |
| >ALK-F1245V QYLEENHFH   | 113  | >ALK-F1245V QYLEENHVIH  | 275  | 162  |
| >ALK-F1245V QYLEENHFH   | 46   | >ALK-F1245V QYLEENHVIH  | 124  | 78   |
| >ALK-F1245V QYLEENHFH   | 11   | >ALK-F1245V QYLEENHVIH  | 14   | 3    |
| >ALK-F1245V QYLEENHFI   | 260  | >ALK-F1245V QYLEENHVI   | 1493 | 1233 |
| >ALK-F1245V CQYLEENHFI  | 171  | >ALK-F1245V CQYLEENHVI  | 927  | 756  |
| >ALK-F1245V CQYLEENHFI  | 268  | >ALK-F1245V CQYLEENHVI  | 1050 | 782  |
| >ALK-F1245V CQYLEENHF   | 4690 | >ALK-F1245V CQYLEENHV   | 264  | 4426 |
| >ALK-F1245V CQYLEENHF   | 427  | >ALK-F1245V CQYLEENHV   | 8817 | 8390 |
| >ALK-F1245V CQYLEENHF   | 16   | >ALK-F1245V CQYLEENHV   | 629  | 613  |
| >ALK-F1245V CQYLEENHFI  | 667  | >ALK-F1245V CQYLEENHVI  | 301  | 366  |

|                         |     |                         |       |       |
|-------------------------|-----|-------------------------|-------|-------|
| >ALK-F1245V CQYLEENHFII | 874 | >ALK-F1245V CQYLEENHVI  | 404   | 470   |
| >ALK-I1171N ISKFNHQNI   | 21  | >ALK-I1171N NSKFNHQNI   | 308   | 287   |
| >ALK-I1171N ISKFNHQNIV  | 73  | >ALK-I1171N NSKFNHQNIV  | 1364  | 1291  |
| >ALK-I1171N ISKFNHQNIVI | 91  | >ALK-I1171N NSKFNHQNIV  | 1866  | 1775  |
| >ALK-I1171N ISKFNHQNIVI | 21  | >ALK-I1171N NSKFNHQNIV  | 97    | 76    |
| >ALK-I1171N ISKFNHQNIVI | 511 | >ALK-I1171N NSKFNHQNIV  | 304   | 207   |
| >ALK-I1171N ISKFNHQNIVI | 139 | >ALK-I1171N NSKFNHQNIV  | 63    | 76    |
| >ALK-I1171N ISKFNHQNI   | 311 | >ALK-I1171N NSKFNHQNI   | 4626  | 4315  |
| >ALK-I1171N ISKFNHQNI   | 42  | >ALK-I1171N NSKFNHQNI   | 3854  | 3812  |
| >ALK-I1171N IISKFNHQNIV | 35  | >ALK-I1171N INSKFNHQNI  | 3683  | 3648  |
| >ALK-I1171N IISKFNHQNI  | 359 | >ALK-I1171N INSKFNHQNI  | 11705 | 11346 |
| >ALK-I1171N IISKFNHQNIV | 68  | >ALK-I1171N INSKFNHQNI  | 14802 | 14734 |
| >ALK-I1171N IISKFNHQNIV | 452 | >ALK-I1171N INSKFNHQNI  | 17910 | 17458 |
| >ALK-I1171N IISKFNHQNIV | 29  | >ALK-I1171N INSKFNHQNI  | 18116 | 18087 |
| >ALK-I1171N ELDFLMEALII | 394 | >ALK-I1171N ELDFLMEALII | 19309 | 18915 |
| >ALK-I1171N LIISKFNHQNI | 367 | >ALK-I1171N LINSKFNHQNI | 1859  | 1492  |
| >ALK-I1171N LIISKFNHQNI | 355 | >ALK-I1171N LINSKFNHQNI | 408   | 53    |
| >ALK-I1171N LIISKFNHQNI | 108 | >ALK-I1171N LINSKFNHQNI | 105   | 3     |
| >ALK-I1171N LIISKFNHQNI | 496 | >ALK-I1171N LINSKFNHQNI | 1055  | 559   |
| >ALK-I1171N ALIISKFNHQ  | 407 | >ALK-I1171N ALINSKFNHQ  | 224   | 183   |
| >ALK-I1171N EALIISKF    | 42  | >ALK-I1171N EALINSKF    | 27    | 15    |
| >ALK-I1171N EALIISKF    | 346 | >ALK-I1171N EALINSKF    | 313   | 33    |
| >ALK-I1171N MEALIISKF   | 92  | >ALK-I1171N MEALINSKF   | 245   | 153   |
| >ALK-I1171N MEALIISKFN  | 251 | >ALK-I1171N MEALINSKFN  | 471   | 220   |
| >ALK-I1171N MEALIISK    | 330 | >ALK-I1171N MEALINSK    | 308   | 22    |
| >ALK-I1171N MEALIISKF   | 252 | >ALK-I1171N MEALINSKF   | 225   | 27    |
| >ALK-I1171N MEALIISKF   | 21  | >ALK-I1171N MEALINSKF   | 33    | 12    |
| >ALK-I1171N MEALIISKF   | 549 | >ALK-I1171N MEALINSKF   | 311   | 238   |
| >ALK-I1171N MEALIISKF   | 402 | >ALK-I1171N MEALINSKF   | 560   | 158   |
| >ALK-I1171N MEALIISKF   | 69  | >ALK-I1171N MEALINSKF   | 92    | 23    |
| >ALK-I1171N MEALIISK    | 414 | >ALK-I1171N MEALINSK    | 898   | 484   |
| >ALK-I1171N MEALIISKF   | 360 | >ALK-I1171N MEALINSKF   | 180   | 180   |
| >ALK-I1171N MEALIISKF   | 12  | >ALK-I1171N MEALINSKF   | 47    | 35    |
| >ALK-I1171N LMEALIISK   | 109 | >ALK-I1171N LMEALINSK   | 396   | 287   |
| >ALK-I1171N LMEALIISK   | 58  | >ALK-I1171N LMEALINSK   | 299   | 241   |
| >ALK-I1171N LMEALIISKF  | 327 | >ALK-I1171N LMEALINSKF  | 351   | 24    |
| >ALK-I1171N LMEALIISKF  | 949 | >ALK-I1171N LMEALINSKF  | 431   | 518   |
| >ALK-I1171N LMEALIISKF  | 151 | >ALK-I1171N LMEALINSKF  | 143   | 8     |
| >ALK-I1171N LMEALIISKF  | 415 | >ALK-I1171N LMEALINSKF  | 386   | 29    |
| >ALK-I1171N FLMEALII    | 7   | >ALK-I1171N FLMEALIN    | 1262  | 1255  |
| >ALK-I1171N FLMEALIIS   | 21  | >ALK-I1171N FLMEALINS   | 15    | 6     |
| >ALK-I1171N FLMEALIISK  | 42  | >ALK-I1171N FLMEALINSK  | 141   | 99    |
| >ALK-I1171N FLMEALIISKF | 50  | >ALK-I1171N FLMEALINSKI | 83    | 33    |

|                         |     |                         |       |       |
|-------------------------|-----|-------------------------|-------|-------|
| >ALK-I1171N FLMEALII    | 3   | >ALK-I1171N FLMEALIN    | 142   | 139   |
| >ALK-I1171N FLMEALIIS   | 7   | >ALK-I1171N FLMEALINS   | 4     | 3     |
| >ALK-I1171N FLMEALIISK  | 60  | >ALK-I1171N FLMEALINSK  | 89    | 29    |
| >ALK-I1171N FLMEALIISKF | 8   | >ALK-I1171N FLMEALINSKI | 8     | 0     |
| >ALK-I1171N FLMEALII    | 3   | >ALK-I1171N FLMEALIN    | 673   | 670   |
| >ALK-I1171N FLMEALIIS   | 14  | >ALK-I1171N FLMEALINS   | 9     | 5     |
| >ALK-I1171N FLMEALIISK  | 226 | >ALK-I1171N FLMEALINSK  | 228   | 2     |
| >ALK-I1171N FLMEALIISKF | 16  | >ALK-I1171N FLMEALINSKI | 30    | 14    |
| >ALK-I1171N FLMEALII    | 5   | >ALK-I1171N FLMEALIN    | 533   | 528   |
| >ALK-I1171N FLMEALIIS   | 13  | >ALK-I1171N FLMEALINS   | 10    | 3     |
| >ALK-I1171N FLMEALIISK  | 186 | >ALK-I1171N FLMEALINSK  | 362   | 176   |
| >ALK-I1171N FLMEALIISKF | 22  | >ALK-I1171N FLMEALINSKI | 26    | 4     |
| >ALK-I1171N FLMEALII    | 4   | >ALK-I1171N FLMEALIN    | 588   | 584   |
| >ALK-I1171N FLMEALIIS   | 43  | >ALK-I1171N FLMEALINS   | 14    | 29    |
| >ALK-I1171N FLMEALIISK  | 46  | >ALK-I1171N FLMEALINSK  | 85    | 39    |
| >ALK-I1171N FLMEALIISKF | 18  | >ALK-I1171N FLMEALINSKI | 44    | 26    |
| >ALK-I1171N FLMEALII    | 3   | >ALK-I1171N FLMEALIN    | 1504  | 1501  |
| >ALK-I1171N FLMEALIIS   | 32  | >ALK-I1171N FLMEALINS   | 27    | 5     |
| >ALK-I1171N FLMEALIISK  | 277 | >ALK-I1171N FLMEALINSK  | 309   | 32    |
| >ALK-I1171N FLMEALIISKF | 90  | >ALK-I1171N FLMEALINSKI | 143   | 53    |
| >ALK-I1171N FLMEALII    | 9   | >ALK-I1171N FLMEALIN    | 4301  | 4292  |
| >ALK-I1171N FLMEALIIS   | 269 | >ALK-I1171N FLMEALINS   | 107   | 162   |
| >ALK-I1171N FLMEALII    | 3   | >ALK-I1171N FLMEALIN    | 6690  | 6687  |
| >ALK-I1171N FLMEALIIS   | 208 | >ALK-I1171N FLMEALINS   | 58    | 150   |
| >ALK-I1171N FLMEALIISKF | 81  | >ALK-I1171N FLMEALINSKI | 128   | 47    |
| >ALK-I1171N FLMEALII    | 3   | >ALK-I1171N FLMEALIN    | 689   | 686   |
| >ALK-I1171N FLMEALIIS   | 25  | >ALK-I1171N FLMEALINS   | 14    | 11    |
| >ALK-I1171N FLMEALIISK  | 12  | >ALK-I1171N FLMEALINSK  | 18    | 6     |
| >ALK-I1171N FLMEALIISKF | 31  | >ALK-I1171N FLMEALINSKI | 71    | 40    |
| >ALK-I1171N FLMEALIISK  | 29  | >ALK-I1171N FLMEALINSK  | 71    | 42    |
| >ALK-I1171N FLMEALIISK  | 26  | >ALK-I1171N FLMEALINSK  | 58    | 32    |
| >ALK-I1171N FLMEALIISKF | 129 | >ALK-I1171N FLMEALINSKI | 238   | 109   |
| >ALK-I1171N FLMEALIISKF | 228 | >ALK-I1171N FLMEALINSKI | 531   | 303   |
| >ALK-I1171N FLMEALIISKF | 494 | >ALK-I1171N FLMEALINSKI | 1061  | 567   |
| >ALK-I1171N FLMEALIISK  | 149 | >ALK-I1171N FLMEALINSK  | 348   | 199   |
| >ALK-I1171N FLMEALII    | 89  | >ALK-I1171N FLMEALIN    | 14896 | 14807 |
| >ALK-I1171N FLMEALIISKF | 110 | >ALK-I1171N FLMEALINSKI | 120   | 10    |
| >ALK-I1171N FLMEALIISKF | 40  | >ALK-I1171N FLMEALINSKI | 29    | 11    |
| >ALK-I1171N FLMEALIISKF | 19  | >ALK-I1171N FLMEALINSKI | 18    | 1     |
| >ALK-I1171N FLMEALIISKF | 233 | >ALK-I1171N FLMEALINSKI | 245   | 12    |
| >ALK-I1171N FLMEALIISKF | 327 | >ALK-I1171N FLMEALINSKI | 280   | 47    |
| >ALK-I1171N FLMEALIISKF | 389 | >ALK-I1171N FLMEALINSKI | 349   | 40    |
| >ALK-I1171N DFLMEALIISK | 239 | >ALK-I1171N DFLMEALINS  | 301   | 62    |



|                         |       |                         |       |       |
|-------------------------|-------|-------------------------|-------|-------|
| >ALK-I1171N LDFLMEALII  | 54    | >ALK-I1171N LDFLMEALIN  | 28014 | 27960 |
| >ALK-I1171N LDFLMEALII  | 374   | >ALK-I1171N LDFLMEALIN  | 36199 | 35825 |
| >ALK-I1171N LDFLMEALII  | 30    | >ALK-I1171N LDFLMEALIN  | 12055 | 12025 |
| >ALK-K1062M KHQELQAM    | 1168  | >ALK-K1062M MHQELQAM    | 63    | 1105  |
| >ALK-K1062M KHQELQAMC   | 1911  | >ALK-K1062M MHQELQAM    | 99    | 1812  |
| >ALK-K1062M RKHQELQA    | 18113 | >ALK-K1062M RMHQELQA    | 132   | 17981 |
| >ALK-K1062M RKHQELQAM   | 20258 | >ALK-K1062M RMHQELQAM   | 213   | 20045 |
| >ALK-K1062M RKHQELQA    | 21958 | >ALK-K1062M RMHQELQA    | 42    | 21916 |
| >ALK-K1062M RKHQELQAM   | 20743 | >ALK-K1062M RMHQELQAM   | 34    | 20709 |
| >ALK-K1062M RKHQELQAM   | 23784 | >ALK-K1062M RMHQELQAM   | 97    | 23687 |
| >ALK-K1062M RKHQELQAM   | 23939 | >ALK-K1062M RMHQELQAM   | 393   | 23546 |
| >ALK-K1062M RKHQELQA    | 24169 | >ALK-K1062M RMHQELQA    | 497   | 23672 |
| >ALK-K1062M RKHQELQA    | 30080 | >ALK-K1062M RMHQELQA    | 38    | 30042 |
| >ALK-K1062M RKHQELQAM   | 32818 | >ALK-K1062M RMHQELQAM   | 250   | 32568 |
| >ALK-K1062M RKHQELQAM   | 33019 | >ALK-K1062M RMHQELQAM   | 171   | 32848 |
| >ALK-K1062M RKHQELQA    | 5402  | >ALK-K1062M RMHQELQA    | 263   | 5139  |
| >ALK-K1062M RKHQELQAM   | 4940  | >ALK-K1062M RMHQELQAM   | 285   | 4655  |
| >ALK-K1062M RKHQELQAM   | 7110  | >ALK-K1062M RMHQELQAM   | 36    | 7074  |
| >ALK-K1062M RKHQELQAM   | 12211 | >ALK-K1062M RMHQELQAM   | 79    | 12132 |
| >ALK-K1062M RKHQELQAM   | 6     | >ALK-K1062M RMHQELQAM   | 12    | 6     |
| >ALK-K1062M RKHQELQAM   | 14    | >ALK-K1062M RMHQELQAM   | 32    | 18    |
| >ALK-K1062M RKHQELQAM   | 14640 | >ALK-K1062M RMHQELQAM   | 207   | 14433 |
| >ALK-K1062M RKHQELQAM   | 6691  | >ALK-K1062M RMHQELQAM   | 69    | 6622  |
| >ALK-K1062M FSGIMIVYRRI | 24145 | >ALK-K1062M FSGIMIVYRRI | 365   | 23780 |
| >ALK-K1062M FSGIMIVYRRI | 21037 | >ALK-K1062M FSGIMIVYRRI | 134   | 20903 |
| >ALK-K1062M RRKHQELQAI  | 21    | >ALK-K1062M RRMHQELQA   | 10    | 11    |
| >ALK-K1062M RRKHQELQ    | 1242  | >ALK-K1062M RRMHQELQ    | 109   | 1133  |
| >ALK-K1062M RRKHQELQA   | 485   | >ALK-K1062M RRMHQELQA   | 57    | 428   |
| >ALK-K1062M RRKHQELQAI  | 24    | >ALK-K1062M RRMHQELQA   | 15    | 9     |
| >ALK-K1062M RRKHQELQAI  | 762   | >ALK-K1062M RRMHQELQA   | 76    | 686   |
| >ALK-K1062M RRKHQELQAI  | 14417 | >ALK-K1062M RRMHQELQA   | 360   | 14057 |
| >ALK-K1062M RRKHQELQ    | 532   | >ALK-K1062M RRMHQELQ    | 153   | 379   |
| >ALK-K1062M RRKHQELQA   | 261   | >ALK-K1062M RRMHQELQA   | 157   | 104   |
| >ALK-K1062M RRKHQELQAI  | 75    | >ALK-K1062M RRMHQELQA   | 51    | 24    |
| >ALK-K1062M RRKHQELQAI  | 379   | >ALK-K1062M RRMHQELQA   | 215   | 164   |
| >ALK-K1062M RRKHQELQAI  | 52    | >ALK-K1062M RRMHQELQA   | 37    | 15    |
| >ALK-K1062M YRRKHQEL    | 96    | >ALK-K1062M YRRMHQEL    | 97    | 1     |
| >ALK-K1062M YRRKHQELQ/  | 169   | >ALK-K1062M YRRMHQELQ   | 122   | 47    |
| >ALK-K1062M YRRKHQEL    | 60    | >ALK-K1062M YRRMHQEL    | 45    | 15    |
| >ALK-K1062M YRRKHQELQ/  | 22    | >ALK-K1062M YRRMHQELQ   | 20    | 2     |
| >ALK-K1062M YRRKHQEL    | 452   | >ALK-K1062M YRRMHQEL    | 487   | 35    |
| >ALK-K1062M YRRKHQELQ/  | 705   | >ALK-K1062M YRRMHQELQ   | 436   | 269   |
| >ALK-K1062M YRRKHQELQ/  | 153   | >ALK-K1062M YRRMHQELQ   | 176   | 23    |

|                         |       |                         |       |       |
|-------------------------|-------|-------------------------|-------|-------|
| >ALK-K1062M VYRRKHQEL   | 381   | >ALK-K1062M VYRRMHQEL   | 459   | 78    |
| >ALK-K1062M VYRRKHQEL   | 6369  | >ALK-K1062M VYRRMHQEL   | 231   | 6138  |
| >ALK-K1062M VYRRKHQEL   | 258   | >ALK-K1062M VYRRMHQEL   | 71    | 187   |
| >ALK-K1062M VYRRKHQEL   | 290   | >ALK-K1062M VYRRMHQEL   | 153   | 137   |
| >ALK-K1062M VYRRKHQEL   | 24    | >ALK-K1062M VYRRMHQEL   | 19    | 5     |
| >ALK-K1062M VYRRKHQEL   | 28    | >ALK-K1062M VYRRMHQEL   | 25    | 3     |
| >ALK-K1062M VYRRKHQELC  | 525   | >ALK-K1062M VYRRMHQEL   | 492   | 33    |
| >ALK-K1062M VYRRKHQELC  | 29    | >ALK-K1062M VYRRMHQEL   | 27    | 2     |
| >ALK-K1062M VYRRKHQEL   | 301   | >ALK-K1062M VYRRMHQEL   | 3014  | 2713  |
| >ALK-K1062M VYRRKHQEL   | 491   | >ALK-K1062M VYRRMHQEL   | 352   | 139   |
| >ALK-K1062M IVYRRKHQEL  | 277   | >ALK-K1062M IVYRRMHQEI  | 197   | 80    |
| >ALK-K1062M IVYRRKHQEL  | 46    | >ALK-K1062M IVYRRMHQEI  | 28    | 18    |
| >ALK-K1062M IVYRRKHQEL  | 320   | >ALK-K1062M IVYRRMHQEI  | 82    | 238   |
| >ALK-K1062M MIVYRRKHQI  | 208   | >ALK-K1062M MIVYRRMHC   | 191   | 17    |
| >ALK-K1062M MIVYRRKHQI  | 395   | >ALK-K1062M MIVYRRMHC   | 182   | 213   |
| >ALK-K1062M MIVYRRKHQI  | 433   | >ALK-K1062M MIVYRRMHC   | 159   | 274   |
| >ALK-K1062M MIVYRRKHQI  | 267   | >ALK-K1062M MIVYRRMHC   | 72    | 195   |
| >ALK-K1062M MIVYRRKHQI  | 33    | >ALK-K1062M MIVYRRMHC   | 71    | 38    |
| >ALK-K1062M IMIVYRRK    | 755   | >ALK-K1062M IMIVYRRM    | 7     | 748   |
| >ALK-K1062M IMIVYRRK    | 106   | >ALK-K1062M IMIVYRRM    | 19446 | 19340 |
| >ALK-K1062M IMIVYRRK    | 101   | >ALK-K1062M IMIVYRRM    | 21801 | 21700 |
| >ALK-K1062M IMIVYRRK    | 217   | >ALK-K1062M IMIVYRRM    | 9861  | 9644  |
| >ALK-K1062M IMIVYRRK    | 15894 | >ALK-K1062M IMIVYRRM    | 269   | 15625 |
| >ALK-K1062M IMIVYRRK    | 2026  | >ALK-K1062M IMIVYRRM    | 83    | 1943  |
| >ALK-K1062M GIMIVYRRK   | 128   | >ALK-K1062M GIMIVYRRM   | 19152 | 19024 |
| >ALK-K1062M GIMIVYRRK   | 29    | >ALK-K1062M GIMIVYRRM   | 19090 | 19061 |
| >ALK-L560F-1 LRGNVSLVL  | 627   | >ALK-L560F-1 FRGNVSLVL  | 348   | 279   |
| >ALK-L560F-1 LRGNVSLVL  | 574   | >ALK-L560F-1 FRGNVSLVL  | 212   | 362   |
| >ALK-L560F-1 LRGNVSLVL  | 636   | >ALK-L560F-1 FRGNVSLVL  | 35    | 601   |
| >ALK-L560F-1 LRGNVSLVL  | 646   | >ALK-L560F-1 FRGNVSLVL  | 221   | 425   |
| >ALK-L560F-1 LRGNVSLVL  | 194   | >ALK-L560F-1 FRGNVSLVL  | 290   | 96    |
| >ALK-L560F-1 VLRGNVSLVL | 410   | >ALK-L560F-1 VFRGNVSLVL | 19145 | 18735 |
| >ALK-L560F-1 VLRGNVSL   | 180   | >ALK-L560F-1 VFRGNVSL   | 8848  | 8668  |
| >ALK-L560F-1 VLRGNVSLV  | 64    | >ALK-L560F-1 VFRGNVSLV  | 4057  | 3993  |
| >ALK-L560F-1 VLRGNVSLVL | 327   | >ALK-L560F-1 VFRGNVSLVL | 16194 | 15867 |
| >ALK-L560F-1 VLRGNVSLVL | 65    | >ALK-L560F-1 VFRGNVSLVL | 4433  | 4368  |
| >ALK-L560F-1 VLRGNVSL   | 78    | >ALK-L560F-1 VFRGNVSL   | 15175 | 15097 |
| >ALK-L560F-1 VLRGNVSLV  | 4     | >ALK-L560F-1 VFRGNVSLV  | 2575  | 2571  |
| >ALK-L560F-1 VLRGNVSLVL | 325   | >ALK-L560F-1 VFRGNVSLVL | 19478 | 19153 |
| >ALK-L560F-1 VLRGNVSLVL | 8     | >ALK-L560F-1 VFRGNVSLVL | 3894  | 3886  |
| >ALK-L560F-1 VLRGNVSLVL | 488   | >ALK-L560F-1 VFRGNVSLVL | 9222  | 8734  |
| >ALK-L560F-1 VLRGNVSL   | 34    | >ALK-L560F-1 VFRGNVSL   | 13855 | 13821 |
| >ALK-L560F-1 VLRGNVSLV  | 3     | >ALK-L560F-1 VFRGNVSLV  | 2390  | 2387  |

|                         |      |                         |       |       |
|-------------------------|------|-------------------------|-------|-------|
| >ALK-L560F-\ VLRGNVSLVL | 35   | >ALK-L560F-\ VFRGNVSLVL | 13209 | 13174 |
| >ALK-L560F-\ VLRGNVSLVL | 6    | >ALK-L560F-\ VFRGNVSLVL | 3431  | 3425  |
| >ALK-L560F-\ VLRGNVSL   | 233  | >ALK-L560F-\ VFRGNVSL   | 22257 | 22024 |
| >ALK-L560F-\ VLRGNVSLV  | 20   | >ALK-L560F-\ VFRGNVSLV  | 16651 | 16631 |
| >ALK-L560F-\ VLRGNVSLVL | 336  | >ALK-L560F-\ VFRGNVSLVL | 22451 | 22115 |
| >ALK-L560F-\ VLRGNVSLVL | 24   | >ALK-L560F-\ VFRGNVSLVL | 16719 | 16695 |
| >ALK-L560F-\ VLRGNVSLV  | 18   | >ALK-L560F-\ VFRGNVSLV  | 11275 | 11257 |
| >ALK-L560F-\ VLRGNVSLVL | 412  | >ALK-L560F-\ VFRGNVSLVL | 20853 | 20441 |
| >ALK-L560F-\ VLRGNVSLVL | 18   | >ALK-L560F-\ VFRGNVSLVL | 10893 | 10875 |
| >ALK-L560F-\ VLRGNVSLV  | 14   | >ALK-L560F-\ VFRGNVSLV  | 14938 | 14924 |
| >ALK-L560F-\ VLRGNVSLVL | 32   | >ALK-L560F-\ VFRGNVSLVL | 16246 | 16214 |
| >ALK-L560F-\ VLRGNVSL   | 3    | >ALK-L560F-\ VFRGNVSL   | 5221  | 5218  |
| >ALK-L560F-\ VLRGNVSLV  | 2    | >ALK-L560F-\ VFRGNVSLV  | 149   | 147   |
| >ALK-L560F-\ VLRGNVSLVL | 5    | >ALK-L560F-\ VFRGNVSLVL | 9273  | 9268  |
| >ALK-L560F-\ VLRGNVSLVL | 2    | >ALK-L560F-\ VFRGNVSLVL | 212   | 210   |
| >ALK-L560F-\ VLRGNVSLV  | 953  | >ALK-L560F-\ VFRGNVSLV  | 493   | 460   |
| >ALK-L560F-\ VLRGNVSLVL | 638  | >ALK-L560F-\ VFRGNVSLVL | 312   | 326   |
| >ALK-L560F-\ VLRGNVSL   | 299  | >ALK-L560F-\ VFRGNVSL   | 1997  | 1698  |
| >ALK-L560F-\ VLRGNVSLVL | 236  | >ALK-L560F-\ VFRGNVSLVL | 4883  | 4647  |
| >ALK-L560F-\ LRMSWLIRG\ | 428  | >ALK-L560F-\ LRMSWLIRG\ | 38    | 390   |
| >ALK-L560F-\ LRMSWLIRG\ | 25   | >ALK-L560F-\ LRMSWLIRG\ | 30    | 5     |
| >ALK-L560F-\ LRMSWLIRG\ | 47   | >ALK-L560F-\ LRMSWLIRG\ | 992   | 945   |
| >ALK-L560F-\ LRMSWLIRG\ | 1850 | >ALK-L560F-\ LRMSWLIRG\ | 348   | 1502  |
| >ALK-L560F-\ LRMSWLIRG\ | 140  | >ALK-L560F-\ LRMSWLIRG\ | 502   | 362   |
| >ALK-L560F-\ LRMSWLIRG\ | 32   | >ALK-L560F-\ LRMSWLIRG\ | 98    | 66    |
| >ALK-L560F-\ GVLRGNVSL  | 4483 | >ALK-L560F-\ GVFRGNVSL  | 441   | 4042  |
| >ALK-L560F-\ GVLRGNVSL\ | 398  | >ALK-L560F-\ GVFRGNVSL\ | 152   | 246   |
| >ALK-L560F-\ GVLRGNVSL\ | 114  | >ALK-L560F-\ GVFRGNVSL\ | 48    | 66    |
| >ALK-L560F-\ GVLRGNVSL  | 243  | >ALK-L560F-\ GVFRGNVSL  | 227   | 16    |
| >ALK-L560F-\ GVLRGNVSL\ | 40   | >ALK-L560F-\ GVFRGNVSL\ | 24    | 16    |
| >ALK-L560F-\ GVLRGNVSL\ | 73   | >ALK-L560F-\ GVFRGNVSL\ | 135   | 62    |
| >ALK-L560F-\ GVLRGNVSL\ | 30   | >ALK-L560F-\ GVFRGNVSL\ | 29    | 1     |
| >ALK-L560F-\ GVLRGNVSL\ | 304  | >ALK-L560F-\ GVFRGNVSL\ | 1931  | 1627  |
| >ALK-L560F-\ GVLRGNVSL  | 267  | >ALK-L560F-\ GVFRGNVSL  | 107   | 160   |
| >ALK-L560F-\ GVLRGNVSL\ | 12   | >ALK-L560F-\ GVFRGNVSL\ | 9     | 3     |
| >ALK-L560F-\ GVLRGNVSL  | 211  | >ALK-L560F-\ GVFRGNVSL  | 54    | 157   |
| >ALK-L560F-\ GVLRGNVSL\ | 593  | >ALK-L560F-\ GVFRGNVSL\ | 118   | 475   |
| >ALK-L560F-\ GVLRGNVSL\ | 3290 | >ALK-L560F-\ GVFRGNVSL\ | 348   | 2942  |
| >ALK-L560F-\ GVLRGNVSL\ | 4233 | >ALK-L560F-\ GVFRGNVSL\ | 494   | 3739  |
| >ALK-L560F-\ GVLRGNVSL  | 1281 | >ALK-L560F-\ GVFRGNVSL  | 284   | 997   |
| >ALK-L560F-\ GVLRGNVSL\ | 383  | >ALK-L560F-\ GVFRGNVSL\ | 87    | 296   |
| >ALK-L560F-\ IRGVLRGNVS | 738  | >ALK-L560F-\ IRGVFRGNVS | 422   | 316   |
| >ALK-L560F-\ IRGVLRGNVS | 94   | >ALK-L560F-\ IRGVFRGNVS | 96    | 2     |

|                         |      |                         |       |       |
|-------------------------|------|-------------------------|-------|-------|
| >ALK-L560F-\ LIRGVLRGNV | 213  | >ALK-L560F-\ LIRGVFRGNV | 216   | 3     |
| >ALK-L560F-\ LIRGVLRGNV | 36   | >ALK-L560F-\ LIRGVFRGNV | 33    | 3     |
| >ALK-L560F-\ LIRGVLRGNV | 233  | >ALK-L560F-\ LIRGVFRGNV | 150   | 83    |
| >ALK-L560F-\ WLIRGVLRGN | 295  | >ALK-L560F-\ WLIRGVFRGN | 188   | 107   |
| >ALK-L560F-\ WLIRGVLRGN | 103  | >ALK-L560F-\ WLIRGVFRGN | 51    | 52    |
| >ALK-L560F-\ WLIRGVLRGN | 9    | >ALK-L560F-\ WLIRGVFRGN | 7     | 2     |
| >ALK-L560F-\ WLIRGVLRGN | 84   | >ALK-L560F-\ WLIRGVFRGN | 51    | 33    |
| >ALK-L560F-\ WLIRGVLRG  | 1778 | >ALK-L560F-\ WLIRGVFRG  | 337   | 1441  |
| >ALK-L560F-\ WLIRGVLRGN | 16   | >ALK-L560F-\ WLIRGVFRGN | 10    | 6     |
| >ALK-L560F-\ WLIRGVLRGN | 58   | >ALK-L560F-\ WLIRGVFRGN | 40    | 18    |
| >ALK-L560F-\ WLIRGVLRGN | 36   | >ALK-L560F-\ WLIRGVFRGN | 35    | 1     |
| >ALK-L560F-\ WLIRGVLRGN | 134  | >ALK-L560F-\ WLIRGVFRGN | 87    | 47    |
| >ALK-L560F-\ WLIRGVLRG  | 787  | >ALK-L560F-\ WLIRGVFRG  | 272   | 515   |
| >ALK-L560F-\ WLIRGVLRGN | 3    | >ALK-L560F-\ WLIRGVFRGN | 3     | 0     |
| >ALK-L560F-\ WLIRGVLR   | 1068 | >ALK-L560F-\ WLIRGVFR   | 213   | 855   |
| >ALK-L560F-\ WLIRGVLR   | 1524 | >ALK-L560F-\ WLIRGVFR   | 432   | 1092  |
| >ALK-L560F-\ WLIRGVLR   | 173  | >ALK-L560F-\ WLIRGVFR   | 60    | 113   |
| >ALK-L560F-\ WLIRGVLRGN | 353  | >ALK-L560F-\ WLIRGVFRGN | 135   | 218   |
| >ALK-L560F-\ WLIRGVLRGN | 488  | >ALK-L560F-\ WLIRGVFRGN | 208   | 280   |
| >ALK-L560F-\ WLIRGVLR   | 461  | >ALK-L560F-\ WLIRGVFR   | 282   | 179   |
| >ALK-L560F-\ SWLIRGVL   | 3665 | >ALK-L560F-\ SWLIRGVF   | 480   | 3185  |
| >ALK-L560F-\ SWLIRGVL   | 133  | >ALK-L560F-\ SWLIRGVF   | 13    | 120   |
| >ALK-L560F-\ SWLIRGVLR  | 49   | >ALK-L560F-\ SWLIRGVFR  | 22    | 27    |
| >ALK-L560F-\ SWLIRGVLR  | 16   | >ALK-L560F-\ SWLIRGVFR  | 15    | 1     |
| >ALK-L560F-\ SWLIRGVL   | 58   | >ALK-L560F-\ SWLIRGVF   | 109   | 51    |
| >ALK-L560F-\ SWLIRGVLR  | 359  | >ALK-L560F-\ SWLIRGVFR  | 74    | 285   |
| >ALK-L560F-\ SWLIRGVLRG | 417  | >ALK-L560F-\ SWLIRGVFRG | 285   | 132   |
| >ALK-L560F-\ MSWLIRGVLI | 471  | >ALK-L560F-\ MSWLIRGVFI | 209   | 262   |
| >ALK-L560F-\ MSWLIRGVLI | 8    | >ALK-L560F-\ MSWLIRGVFI | 5     | 3     |
| >ALK-L560F-\ MSWLIRGVLI | 100  | >ALK-L560F-\ MSWLIRGVFI | 29    | 71    |
| >ALK-L560F-\ MSWLIRGVLI | 16   | >ALK-L560F-\ MSWLIRGVFI | 10    | 6     |
| >ALK-L560F-\ MSWLIRGVL  | 87   | >ALK-L560F-\ MSWLIRGVF  | 11673 | 11586 |
| >ALK-L560F-\ MSWLIRGVL  | 2236 | >ALK-L560F-\ MSWLIRGVF  | 131   | 2105  |
| >ALK-L560F-\ MSWLIRGVL  | 126  | >ALK-L560F-\ MSWLIRGVF  | 11    | 115   |
| >ALK-L560F-\ MSWLIRGVL  | 1330 | >ALK-L560F-\ MSWLIRGVF  | 83    | 1247  |
| >ALK-L560F-\ MSWLIRGVL  | 4372 | >ALK-L560F-\ MSWLIRGVF  | 424   | 3948  |
| >ALK-L560F-\ MSWLIRGVL  | 4693 | >ALK-L560F-\ MSWLIRGVF  | 163   | 4530  |
| >ALK-L560F-\ MSWLIRGVL  | 139  | >ALK-L560F-\ MSWLIRGVF  | 31    | 108   |
| >ALK-L560F-\ MSWLIRGVL  | 1976 | >ALK-L560F-\ MSWLIRGVF  | 270   | 1706  |
| >ALK-L560F-\ MSWLIRGVLI | 84   | >ALK-L560F-\ MSWLIRGVFI | 53    | 31    |
| >ALK-L560F-\ MSWLIRGVL  | 108  | >ALK-L560F-\ MSWLIRGVF  | 1742  | 1634  |
| >ALK-L560F-\ RMSWLIRGV  | 122  | >ALK-L560F-\ RMSWLIRGV  | 10234 | 10112 |
| >ALK-L560F-\ RMSWLIRGV  | 185  | >ALK-L560F-\ RMSWLIRGV  | 8760  | 8575  |

|                        |       |                        |       |       |
|------------------------|-------|------------------------|-------|-------|
| >ALK-L560F-\ RMSWLIRGV | 47    | >ALK-L560F-r RMSWLIRGV | 1716  | 1669  |
| >ALK-L560F-\ RMSWLIRGV | 330   | >ALK-L560F-r RMSWLIRGV | 18724 | 18394 |
| >ALK-L560F-\ RMSWLIRGV | 43    | >ALK-L560F-r RMSWLIRGV | 14150 | 14107 |
| >ALK-L560F-\ RMSWLIRGV | 74    | >ALK-L560F-r RMSWLIRGV | 59    | 15    |
| >ALK-L560F-\ RMSWLIRGV | 137   | >ALK-L560F-r RMSWLIRGV | 69    | 68    |
| >ALK-L560F-\ RMSWLIRGV | 2895  | >ALK-L560F-r RMSWLIRGV | 210   | 2685  |
| >ALK-L560F-\ RMSWLIRGV | 7     | >ALK-L560F-r RMSWLIRGV | 6     | 1     |
| >ALK-L560F-\ RMSWLIRGV | 200   | >ALK-L560F-r RMSWLIRGV | 56    | 144   |
| >ALK-L560F-\ RMSWLIRGV | 828   | >ALK-L560F-r RMSWLIRGV | 284   | 544   |
| >ALK-L560F-\ RMSWLIRGV | 346   | >ALK-L560F-r RMSWLIRGV | 162   | 184   |
| >ALK-L560F-\ RMSWLIRGV | 433   | >ALK-L560F-r RMSWLIRGV | 49    | 384   |
| >ALK-L560F-\ RMSWLIRGV | 1355  | >ALK-L560F-r RMSWLIRGV | 58    | 1297  |
| >ALK-L560F-\ RMSWLIRGV | 2894  | >ALK-L560F-r RMSWLIRGV | 402   | 2492  |
| >ALK-L560F-\ RMSWLIRGV | 198   | >ALK-L560F-r RMSWLIRGV | 3043  | 2845  |
| >ALK-L560F-\ RMSWLIRGV | 3257  | >ALK-L560F-r RMSWLIRGV | 162   | 3095  |
| >ALK-L560F-\ RMSWLIRGV | 255   | >ALK-L560F-r RMSWLIRGV | 43    | 212   |
| >ALK-L560F-\ RMSWLIRGV | 26    | >ALK-L560F-r RMSWLIRGV | 23    | 3     |
| >ALK-M1166 MEALIISKF   | 92    | >ALK-M1166 REALIISKF   | 907   | 815   |
| >ALK-M1166 MEALIISKFN  | 251   | >ALK-M1166 REALIISKFN  | 921   | 670   |
| >ALK-M1166 MEALIISK    | 330   | >ALK-M1166 REALIISK    | 10022 | 9692  |
| >ALK-M1166 MEALIISKF   | 252   | >ALK-M1166 REALIISKF   | 200   | 52    |
| >ALK-M1166 MEALIISKF   | 21    | >ALK-M1166 REALIISKF   | 183   | 162   |
| >ALK-M1166 MEALIISKF   | 549   | >ALK-M1166 REALIISKF   | 142   | 407   |
| >ALK-M1166 MEALIISKF   | 866   | >ALK-M1166 REALIISKF   | 242   | 624   |
| >ALK-M1166 MEALIISKF   | 402   | >ALK-M1166 REALIISKF   | 1012  | 610   |
| >ALK-M1166 MEALIISKF   | 69    | >ALK-M1166 REALIISKF   | 191   | 122   |
| >ALK-M1166 MEALIISK    | 414   | >ALK-M1166 REALIISK    | 1195  | 781   |
| >ALK-M1166 MEALIISKF   | 360   | >ALK-M1166 REALIISKF   | 235   | 125   |
| >ALK-M1166 MEALIISKF   | 12    | >ALK-M1166 REALIISKF   | 8     | 4     |
| >ALK-M1166 LMEALIISK   | 109   | >ALK-M1166 LREALIISK   | 19517 | 19408 |
| >ALK-M1166 LMEALIISK   | 58    | >ALK-M1166 LREALIISK   | 14667 | 14609 |
| >ALK-M1166 LMEALIISKF  | 327   | >ALK-M1166 LREALIISKF  | 18187 | 17860 |
| >ALK-M1166 LMEALIISKF  | 151   | >ALK-M1166 LREALIISKF  | 310   | 159   |
| >ALK-M1166 LMEALIISK   | 12721 | >ALK-M1166 LREALIISK   | 228   | 12493 |
| >ALK-M1166 LMEALIISKF  | 22572 | >ALK-M1166 LREALIISKF  | 105   | 22467 |
| >ALK-M1166 LMEALIISKF  | 415   | >ALK-M1166 LREALIISKF  | 2846  | 2431  |
| >ALK-M1166 LMEALIISK   | 23860 | >ALK-M1166 LREALIISK   | 214   | 23646 |
| >ALK-M1166 CSEQDELDFL  | 27483 | >ALK-M1166 CSEQDELDFL  | 176   | 27307 |
| >ALK-M1166 FLMEALII    | 7     | >ALK-M1166 FLREALII    | 127   | 120   |
| >ALK-M1166 FLMEALIIS   | 21    | >ALK-M1166 FLREALIIS   | 2883  | 2862  |
| >ALK-M1166 FLMEALIISK  | 42    | >ALK-M1166 FLREALIISK  | 1401  | 1359  |
| >ALK-M1166 FLMEALIISKF | 50    | >ALK-M1166 FLREALIISKF | 6930  | 6880  |
| >ALK-M1166 FLMEALII    | 3     | >ALK-M1166 FLREALII    | 48    | 45    |

|                        |      |                        |       |       |
|------------------------|------|------------------------|-------|-------|
| >ALK-M1166 FLMEALIIS   | 7    | >ALK-M1166 FLREALIIS   | 410   | 403   |
| >ALK-M1166 FLMEALIISK  | 60   | >ALK-M1166 FLREALIISK  | 1608  | 1548  |
| >ALK-M1166 FLMEALIISKF | 8    | >ALK-M1166 FLREALIISKF | 217   | 209   |
| >ALK-M1166 FLMEALII    | 3    | >ALK-M1166 FLREALII    | 6     | 3     |
| >ALK-M1166 FLMEALIIS   | 14   | >ALK-M1166 FLREALIIS   | 90    | 76    |
| >ALK-M1166 FLMEALIISK  | 226  | >ALK-M1166 FLREALIISK  | 1994  | 1768  |
| >ALK-M1166 FLMEALIISKF | 16   | >ALK-M1166 FLREALIISKF | 102   | 86    |
| >ALK-M1166 FLMEALII    | 5    | >ALK-M1166 FLREALII    | 73    | 68    |
| >ALK-M1166 FLMEALIIS   | 13   | >ALK-M1166 FLREALIIS   | 752   | 739   |
| >ALK-M1166 FLMEALIISK  | 186  | >ALK-M1166 FLREALIISK  | 4812  | 4626  |
| >ALK-M1166 FLMEALIISKF | 22   | >ALK-M1166 FLREALIISKF | 632   | 610   |
| >ALK-M1166 FLMEALII    | 4    | >ALK-M1166 FLREALII    | 25    | 21    |
| >ALK-M1166 FLMEALIIS   | 43   | >ALK-M1166 FLREALIIS   | 1331  | 1288  |
| >ALK-M1166 FLMEALIISK  | 46   | >ALK-M1166 FLREALIISK  | 978   | 932   |
| >ALK-M1166 FLMEALIISKF | 18   | >ALK-M1166 FLREALIISKF | 477   | 459   |
| >ALK-M1166 FLMEALII    | 3    | >ALK-M1166 FLREALII    | 25    | 22    |
| >ALK-M1166 FLMEALIIS   | 32   | >ALK-M1166 FLREALIIS   | 3851  | 3819  |
| >ALK-M1166 FLMEALIISK  | 277  | >ALK-M1166 FLREALIISK  | 9802  | 9525  |
| >ALK-M1166 FLMEALIISKF | 90   | >ALK-M1166 FLREALIISKF | 4946  | 4856  |
| >ALK-M1166 FLMEALII    | 9    | >ALK-M1166 FLREALII    | 61    | 52    |
| >ALK-M1166 FLMEALIIS   | 269  | >ALK-M1166 FLREALIIS   | 4956  | 4687  |
| >ALK-M1166 FLMEALII    | 3    | >ALK-M1166 FLREALII    | 595   | 592   |
| >ALK-M1166 FLMEALIIS   | 208  | >ALK-M1166 FLREALIIS   | 18346 | 18138 |
| >ALK-M1166 FLMEALIISKF | 81   | >ALK-M1166 FLREALIISKF | 10916 | 10835 |
| >ALK-M1166 FLMEALII    | 3    | >ALK-M1166 FLREALII    | 6     | 3     |
| >ALK-M1166 FLMEALIIS   | 25   | >ALK-M1166 FLREALIIS   | 152   | 127   |
| >ALK-M1166 FLMEALIISK  | 12   | >ALK-M1166 FLREALIISK  | 53    | 41    |
| >ALK-M1166 FLMEALIISKF | 31   | >ALK-M1166 FLREALIISKF | 165   | 134   |
| >ALK-M1166 FLMEALIISK  | 29   | >ALK-M1166 FLREALIISK  | 139   | 110   |
| >ALK-M1166 FLMEALIISK  | 26   | >ALK-M1166 FLREALIISK  | 419   | 393   |
| >ALK-M1166 FLMEALIISKF | 129  | >ALK-M1166 FLREALIISKF | 2967  | 2838  |
| >ALK-M1166 FLMEALIISKF | 228  | >ALK-M1166 FLREALIISKF | 1905  | 1677  |
| >ALK-M1166 FLMEALIISKF | 494  | >ALK-M1166 FLREALIISKF | 2620  | 2126  |
| >ALK-M1166 FLMEALIISK  | 3090 | >ALK-M1166 FLREALIISK  | 35    | 3055  |
| >ALK-M1166 FLMEALIISK  | 149  | >ALK-M1166 FLREALIISK  | 1908  | 1759  |
| >ALK-M1166 FLMEALII    | 89   | >ALK-M1166 FLREALII    | 4386  | 4297  |
| >ALK-M1166 FLMEALIISKF | 110  | >ALK-M1166 FLREALIISKF | 118   | 8     |
| >ALK-M1166 FLMEALIISKF | 40   | >ALK-M1166 FLREALIISKF | 59    | 19    |
| >ALK-M1166 FLMEALIISKF | 19   | >ALK-M1166 FLREALIISKF | 21    | 2     |
| >ALK-M1166 FLMEALIISKF | 233  | >ALK-M1166 FLREALIISKF | 130   | 103   |
| >ALK-M1166 FLMEALIISKF | 327  | >ALK-M1166 FLREALIISKF | 2421  | 2094  |
| >ALK-M1166 FLMEALIISKF | 389  | >ALK-M1166 FLREALIISKF | 232   | 157   |
| >ALK-M1166 DFLMEALIISK | 239  | >ALK-M1166 DFLREALIISK | 458   | 219   |

|                        |       |                        |       |       |
|------------------------|-------|------------------------|-------|-------|
| >ALK-M1166 LDFLMEALI   | 33    | >ALK-M1166 LDFLREALI   | 38    | 5     |
| >ALK-M1166 LDFLMEALII  | 54    | >ALK-M1166 LDFLREALII  | 60    | 6     |
| >ALK-M1166 LDFLMEAL    | 99    | >ALK-M1166 LDFLREAL    | 378   | 279   |
| >ALK-M1166 LDFLMEAL    | 271   | >ALK-M1166 LDFLREAL    | 1745  | 1474  |
| >ALK-M1166 LDFLMEALI   | 37    | >ALK-M1166 LDFLREALI   | 108   | 71    |
| >ALK-M1166 LDFLMEALII  | 374   | >ALK-M1166 LDFLREALII  | 2149  | 1775  |
| >ALK-M1166 LDFLMEALI   | 37    | >ALK-M1166 LDFLREALI   | 40    | 3     |
| >ALK-M1166 LDFLMEALII  | 30    | >ALK-M1166 LDFLREALII  | 33    | 3     |
| >ALK-M1166 ELDFLMEAL   | 193   | >ALK-M1166 ELDFLREAL   | 770   | 577   |
| >ALK-M1166 ELDFLMEALI  | 443   | >ALK-M1166 ELDFLREALI  | 1159  | 716   |
| >ALK-M1166 ELDFLMEA    | 312   | >ALK-M1166 ELDFLREA    | 1279  | 967   |
| >ALK-M1166 ELDFLMEAL   | 139   | >ALK-M1166 ELDFLREAL   | 1411  | 1272  |
| >ALK-M1166 ELDFLMEALI  | 472   | >ALK-M1166 ELDFLREALI  | 1507  | 1035  |
| >ALK-M1166 ELDFLMEAL   | 454   | >ALK-M1166 ELDFLREAL   | 2973  | 2519  |
| >ALK-M1166 ELDFLMEA    | 280   | >ALK-M1166 ELDFLREA    | 2941  | 2661  |
| >ALK-M1166 ELDFLMEAL   | 78    | >ALK-M1166 ELDFLREAL   | 912   | 834   |
| >ALK-M1166 ELDFLMEALI  | 298   | >ALK-M1166 ELDFLREALI  | 1174  | 876   |
| >ALK-M1166 ELDFLMEALII | 394   | >ALK-M1166 ELDFLREALII | 1141  | 747   |
| >ALK-M1166 DELDFLMEAL  | 172   | >ALK-M1166 DELDFLREAL  | 134   | 38    |
| >ALK-M1166 DELDFLMEAL  | 7     | >ALK-M1166 DELDFLREALI | 7     | 0     |
| >ALK-M1166 DELDFLME    | 74    | >ALK-M1166 DELDFLRE    | 239   | 165   |
| >ALK-M1166 DELDFLMEA   | 12    | >ALK-M1166 DELDFLREA   | 15    | 3     |
| >ALK-M1166 DELDFLMEAL  | 57    | >ALK-M1166 DELDFLREALI | 113   | 56    |
| >ALK-M1166 DELDFLMEA   | 152   | >ALK-M1166 DELDFLREA   | 290   | 138   |
| >ALK-M1166 DELDFLMEAL  | 25    | >ALK-M1166 DELDFLREALI | 72    | 47    |
| >ALK-M1166 QDELDFLM    | 379   | >ALK-M1166 QDELDFLR    | 7020  | 6641  |
| >ALK-M1166 EQDELDFLM   | 294   | >ALK-M1166 EQDELDFLR   | 16464 | 16170 |
| >ALK-M1166 EQDELDFLMI  | 85    | >ALK-M1166 EQDELDFLRE  | 333   | 248   |
| >ALK-M1166 EQDELDFLM   | 31558 | >ALK-M1166 EQDELDFLR   | 417   | 31141 |
| >ALK-M1166 EQDELDFLM   | 30983 | >ALK-M1166 EQDELDFLR   | 140   | 30843 |
| >ALK-M1166 EQDELDFLM   | 33436 | >ALK-M1166 EQDELDFLR   | 398   | 33038 |
| >ALK-M1166 SEQDELDFLV  | 380   | >ALK-M1166 SEQDELDFLR  | 11934 | 11554 |
| >ALK-M1166 SEQDELDFLV  | 223   | >ALK-M1166 SEQDELDFLR  | 1128  | 905   |
| >ALK-M1166 SEQDELDFLV  | 81    | >ALK-M1166 SEQDELDFLR  | 3299  | 3218  |
| >ALK-M1166 SEQDELDFLV  | 194   | >ALK-M1166 SEQDELDFLR  | 5377  | 5183  |
| >ALK-M1166 SEQDELDFLV  | 250   | >ALK-M1166 SEQDELDFLR  | 577   | 327   |
| >ALK-M1166 SEQDELDFLV  | 396   | >ALK-M1166 SEQDELDFLR  | 25337 | 24941 |
| >ALK-P496L-1 PHTPWQV   | 7966  | >ALK-P496L-1 LHTPWQV   | 334   | 7632  |
| >ALK-P496L-1 SPHTPWQV  | 108   | >ALK-P496L-1 SLHTPWQV  | 31586 | 31478 |
| >ALK-P496L-1 SPHTPWQV  | 21675 | >ALK-P496L-1 SLHTPWQV  | 21    | 21654 |
| >ALK-P496L-1 SPHTPWQV  | 28651 | >ALK-P496L-1 SLHTPWQV  | 45    | 28606 |
| >ALK-P496L-1 SPHTPWQV  | 21415 | >ALK-P496L-1 SLHTPWQV  | 28    | 21387 |
| >ALK-P496L-1 SPHTPWQV  | 14748 | >ALK-P496L-1 SLHTPWQV  | 228   | 14520 |

|                         |       |                         |       |       |
|-------------------------|-------|-------------------------|-------|-------|
| >ALK-P496L-1 SPHTPQWQV  | 2606  | >ALK-P496L-1 SLHTPQWQV  | 2     | 2604  |
| >ALK-P496L-1 SPHTPQWQV  | 25762 | >ALK-P496L-1 SLHTPQWQV  | 90    | 25672 |
| >ALK-P496L-1 SPHTPQWQV  | 17873 | >ALK-P496L-1 SLHTPQWQV  | 8     | 17865 |
| >ALK-P496L-1 SPHTPQWQV  | 8543  | >ALK-P496L-1 SLHTPQWQV  | 5     | 8538  |
| >ALK-P496L-1 SPHTPQWQV  | 19749 | >ALK-P496L-1 SLHTPQWQV  | 10    | 19739 |
| >ALK-P496L-1 SPHTPQWQ   | 35070 | >ALK-P496L-1 SLHTPQWQ   | 76    | 34994 |
| >ALK-P496L-1 SPHTPQWQV  | 4284  | >ALK-P496L-1 SLHTPQWQV  | 2     | 4282  |
| >ALK-P496L-1 SPHTPQWQV  | 33829 | >ALK-P496L-1 SLHTPQWQV  | 22    | 33807 |
| >ALK-P496L-1 SPHTPQWQV  | 1881  | >ALK-P496L-1 SLHTPQWQV  | 173   | 1708  |
| >ALK-P496L-1 SPHTPQWQV  | 683   | >ALK-P496L-1 SLHTPQWQV  | 243   | 440   |
| >ALK-P496L-1 SPHTPQWQV  | 8976  | >ALK-P496L-1 SLHTPQWQV  | 121   | 8855  |
| >ALK-P496L-1 SPHTPQWQV  | 756   | >ALK-P496L-1 SLHTPQWQV  | 251   | 505   |
| >ALK-P496L-1 LSPHTPQWQ  | 846   | >ALK-P496L-1 LSLHTPQWQ  | 99    | 747   |
| >ALK-P496L-1 LSPHTPQWQ  | 1303  | >ALK-P496L-1 LSLHTPQWQ  | 120   | 1183  |
| >ALK-P496L-1 LSPHTPQWQ  | 238   | >ALK-P496L-1 LSLHTPQWQ  | 852   | 614   |
| >ALK-P496L-1 LSPHTPQWQ  | 4930  | >ALK-P496L-1 LSLHTPQWQ  | 156   | 4774  |
| >ALK-P496L-1 LSPHTPQW   | 27    | >ALK-P496L-1 LSLHTPQW   | 4     | 23    |
| >ALK-P496L-1 LSPHTPQWQ  | 5471  | >ALK-P496L-1 LSLHTPQWQ  | 205   | 5266  |
| >ALK-P496L-1 LSPHTPQW   | 3739  | >ALK-P496L-1 LSLHTPQW   | 493   | 3246  |
| >ALK-P496L-1 LSPHTPQW   | 121   | >ALK-P496L-1 LSLHTPQW   | 39    | 82    |
| >ALK-P496L-1 LSPHTPQW   | 35    | >ALK-P496L-1 LSLHTPQW   | 10    | 25    |
| >ALK-P496L-1 LSPHTPQWQ  | 30    | >ALK-P496L-1 LSLHTPQWQ  | 10458 | 10428 |
| >ALK-P496L-1 LSPHTPQW   | 1282  | >ALK-P496L-1 LSLHTPQW   | 90    | 1192  |
| >ALK-P496L-1 TSPHTPQWQ  | 15    | >ALK-P496L-1 TSLHTPQWQ  | 28    | 13    |
| >ALK-P496L-1 TSPHTPQWQ  | 10    | >ALK-P496L-1 TSLHTPQWQ  | 13    | 3     |
| >ALK-P496L-1 TSPHTPQWQ  | 9     | >ALK-P496L-1 TSLHTPQWQ  | 15    | 6     |
| >ALK-P496L-1 TSPHTPQWQ  | 31    | >ALK-P496L-1 TSLHTPQWQ  | 121   | 90    |
| >ALK-P496L-1 TSPHTPQWQ  | 3     | >ALK-P496L-1 TSLHTPQWQ  | 8     | 5     |
| >ALK-P496L-1 TSPHTPQWQ  | 11    | >ALK-P496L-1 TSLHTPQWQ  | 26    | 15    |
| >ALK-P496L-1 TSPHTPQWQ  | 6     | >ALK-P496L-1 TSLHTPQWQ  | 11    | 5     |
| >ALK-P496L-1 TSPHTPQWQ  | 3     | >ALK-P496L-1 TSLHTPQWQ  | 4     | 1     |
| >ALK-P496L-1 TSPHTPQ    | 272   | >ALK-P496L-1 TSLHTPQ    | 2526  | 2254  |
| >ALK-P496L-1 TSPHTPQWQ  | 88    | >ALK-P496L-1 TSLHTPQWQ  | 736   | 648   |
| >ALK-P496L-1 TSPHTPQWQ  | 2     | >ALK-P496L-1 TSLHTPQWQ  | 3     | 1     |
| >ALK-P496L-1 TSPHTPQWQ  | 113   | >ALK-P496L-1 TSLHTPQWQ  | 357   | 244   |
| >ALK-P496L-1 TSPHTPQWQ  | 38    | >ALK-P496L-1 TSLHTPQWQ  | 75    | 37    |
| >ALK-P496L-1 TSPHTPQW   | 78    | >ALK-P496L-1 TSLHTPQW   | 744   | 666   |
| >ALK-P496L-1 TSPHTPQW   | 49    | >ALK-P496L-1 TSLHTPQW   | 285   | 236   |
| >ALK-P496L-1 GTLSPHTPQV | 579   | >ALK-P496L-1 GTLSLHTPQV | 299   | 280   |
| >ALK-P496L-1 GTLSPHTPQV | 4     | >ALK-P496L-1 GTLSLHTPQV | 6     | 2     |
| >ALK-P496L-1 GTLSPHTPQV | 83    | >ALK-P496L-1 GTLSLHTPQV | 100   | 17    |
| >ALK-P496L-1 GTLSPHTPQV | 27    | >ALK-P496L-1 GTLSLHTPQV | 21    | 6     |
| >ALK-P496L-1 GTLSPHTPQ  | 225   | >ALK-P496L-1 GTLSLHTPQ  | 187   | 38    |



|                        |       |                        |       |       |
|------------------------|-------|------------------------|-------|-------|
| >ALK-P496L-1GTLSPHTPQV | 170   | >ALK-P496L-1GTLSLHTPQV | 154   | 16    |
| >ALK-P496L-1QGTLSPHTPC | 399   | >ALK-P496L-1QGTLSLHTPC | 456   | 57    |
| >ALK-P496L-1QGTLSPHTPC | 67    | >ALK-P496L-1QGTLSLHTPC | 110   | 43    |
| >ALK-P496L-1WTQGTLSL   | 19988 | >ALK-P496L-1WTQGTLSL   | 426   | 19562 |
| >ALK-P496L-1WTQGTLSL   | 28799 | >ALK-P496L-1WTQGTLSL   | 479   | 28320 |
| >ALK-P496L-1WTQGTLSL   | 15775 | >ALK-P496L-1WTQGTLSL   | 19    | 15756 |
| >ALK-P496L-1WTQGTLSL   | 5646  | >ALK-P496L-1WTQGTLSL   | 102   | 5544  |
| >ALK-P496L-1WTQGTLSLH  | 18    | >ALK-P496L-1WTQGTLSLH  | 4     | 14    |
| >ALK-P496L-1WTQGTLSL   | 24802 | >ALK-P496L-1WTQGTLSL   | 471   | 24331 |
| >ALK-P496L-1GWTQGTLSL  | 14334 | >ALK-P496L-1GWTQGTLSL  | 80    | 14254 |
| >ALK-P496L-1GWTQGTLSL  | 1023  | >ALK-P496L-1GWTQGTLSL  | 325   | 698   |
| >ALK-P542R-PIKSSPCEL   | 7684  | >ALK-P542R-RIKSSPCEL   | 256   | 7428  |
| >ALK-P542R-PIKSSPCEL   | 3254  | >ALK-P542R-RIKSSPCEL   | 424   | 2830  |
| >ALK-P542R-PIKSSPCEL   | 2901  | >ALK-P542R-RIKSSPCEL   | 15    | 2886  |
| >ALK-P542R-PIKSSPCELR  | 8512  | >ALK-P542R-RIKSSPCELR  | 274   | 8238  |
| >ALK-P542R-PIKSSPCELRM | 5390  | >ALK-P542R-RIKSSPCELRM | 64    | 5326  |
| >ALK-P542R-PIKSSPCELR  | 4559  | >ALK-P542R-RIKSSPCELR  | 74    | 4485  |
| >ALK-P542R-PIKSSPCELR  | 1400  | >ALK-P542R-RIKSSPCELR  | 125   | 1275  |
| >ALK-P542R-PIKSSPCELRM | 13170 | >ALK-P542R-RIKSSPCELRM | 493   | 12677 |
| >ALK-P542R-PIKSSPCEL   | 2281  | >ALK-P542R-RIKSSPCEL   | 158   | 2123  |
| >ALK-P542R-PIKSSPCEL   | 21270 | >ALK-P542R-RIKSSPCEL   | 216   | 21054 |
| >ALK-P542R-PIKSSPCELRM | 18718 | >ALK-P542R-RIKSSPCELRM | 136   | 18582 |
| >ALK-P542R-PIKSSPCELRM | 13235 | >ALK-P542R-RIKSSPCELRM | 393   | 12842 |
| >ALK-P542R-PIKSSPCELR  | 1319  | >ALK-P542R-RIKSSPCELR  | 62    | 1257  |
| >ALK-P542R-PIKSSPCELR  | 1883  | >ALK-P542R-RIKSSPCELR  | 154   | 1729  |
| >ALK-P542R-APIKSSPCEL  | 21    | >ALK-P542R-ARIKSSPCEL  | 9846  | 9825  |
| >ALK-P542R-APIKSSPC    | 234   | >ALK-P542R-ARIKSSPC    | 24708 | 24474 |
| >ALK-P542R-APIKSSPCEL  | 200   | >ALK-P542R-ARIKSSPCEL  | 31068 | 30868 |
| >ALK-P542R-APIKSSPCEL  | 816   | >ALK-P542R-ARIKSSPCEL  | 41    | 775   |
| >ALK-P542R-APIKSSPCEL  | 24453 | >ALK-P542R-ARIKSSPCEL  | 53    | 24400 |
| >ALK-P542R-APIKSSPCEL  | 417   | >ALK-P542R-ARIKSSPCEL  | 38218 | 37801 |
| >ALK-P542R-APIKSSPCEL  | 243   | >ALK-P542R-ARIKSSPCEL  | 104   | 139   |
| >ALK-P542R-APIKSSPCEL  | 25439 | >ALK-P542R-ARIKSSPCEL  | 214   | 25225 |
| >ALK-P542R-ATVTSATFPA  | 19784 | >ALK-P542R-ATVTSATFPA  | 92    | 19692 |
| >ALK-P542R-ATVTSATFPA  | 21103 | >ALK-P542R-ATVTSATFPA  | 36    | 21067 |
| >ALK-P542R-ATVTSATFPA  | 29405 | >ALK-P542R-ATVTSATFPA  | 23    | 29382 |
| >ALK-P542R-ATVTSATFPA  | 4475  | >ALK-P542R-ATVTSATFPA  | 107   | 4368  |
| >ALK-P542R-FPAPIKSSPCE | 480   | >ALK-P542R-FPARIKSSPCE | 1315  | 835   |
| >ALK-P542R-FPAPIKSS    | 42    | >ALK-P542R-FPARIKSS    | 61    | 19    |
| >ALK-P542R-FPAPIKSSP   | 76    | >ALK-P542R-FPARIKSSP   | 94    | 18    |
| >ALK-P542R-FPAPIKSSPC  | 98    | >ALK-P542R-FPARIKSSPC  | 537   | 439   |
| >ALK-P542R-FPAPIKSSPCE | 367   | >ALK-P542R-FPARIKSSPCE | 389   | 22    |
| >ALK-P542R-ATFPAPIK    | 69    | >ALK-P542R-ATFPARIK    | 87    | 18    |

|                         |       |                         |      |       |
|-------------------------|-------|-------------------------|------|-------|
| >ALK-P542R- ATFPAPIK    | 13    | >ALK-P542R- ATFPARIK    | 17   | 4     |
| >ALK-P542R- ATFPAPIK    | 7     | >ALK-P542R- ATFPARIK    | 9    | 2     |
| >ALK-P542R- ATFPAPIKS   | 342   | >ALK-P542R- ATFPARIKS   | 113  | 229   |
| >ALK-P542R- ATFPAPIKSS  | 675   | >ALK-P542R- ATFPARIKSS  | 290  | 385   |
| >ALK-P542R- ATFPAPIK    | 59    | >ALK-P542R- ATFPARIK    | 76   | 17    |
| >ALK-P542R- ATFPAPIKSS  | 430   | >ALK-P542R- ATFPARIKSS  | 764  | 334   |
| >ALK-P542R- ATFPAPIK    | 51    | >ALK-P542R- ATFPARIK    | 68   | 17    |
| >ALK-P542R- ATFPAPIKS   | 460   | >ALK-P542R- ATFPARIKS   | 2163 | 1703  |
| >ALK-P542R- SATFPAPIK   | 87    | >ALK-P542R- SATFPARIK   | 386  | 299   |
| >ALK-P542R- SATFPAPIK   | 462   | >ALK-P542R- SATFPARIK   | 2120 | 1658  |
| >ALK-P542R- SATFPAPIK   | 187   | >ALK-P542R- SATFPARIK   | 512  | 325   |
| >ALK-P542R- SATFPAPI    | 67    | >ALK-P542R- SATFPARI    | 258  | 191   |
| >ALK-P542R- SATFPAPI    | 216   | >ALK-P542R- SATFPARI    | 2180 | 1964  |
| >ALK-P542R- SATFPAPI    | 85    | >ALK-P542R- SATFPARI    | 109  | 24    |
| >ALK-P542R- TSATFPAPI   | 487   | >ALK-P542R- TSATFPARI   | 727  | 240   |
| >ALK-P542R- TSATFPAPIK  | 481   | >ALK-P542R- TSATFPARIK  | 357  | 124   |
| >ALK-P542R- TSATFPAP    | 20782 | >ALK-P542R- TSATFPAR    | 151  | 20631 |
| >ALK-P542R- TSATFPAPIK  | 28    | >ALK-P542R- TSATFPARIK  | 75   | 47    |
| >ALK-P542R- TSATFPAPIK  | 429   | >ALK-P542R- TSATFPARIK  | 1586 | 1157  |
| >ALK-P542R- TSATFPAP    | 21965 | >ALK-P542R- TSATFPAR    | 58   | 21907 |
| >ALK-P542R- TSATFPAPI   | 241   | >ALK-P542R- TSATFPARI   | 1873 | 1632  |
| >ALK-P542R- TSATFPAP    | 20017 | >ALK-P542R- TSATFPAR    | 7    | 20010 |
| >ALK-P542R- TSATFPAPIK  | 27    | >ALK-P542R- TSATFPARIK  | 74   | 47    |
| >ALK-P542R- TSATFPAPI   | 6     | >ALK-P542R- TSATFPARI   | 13   | 7     |
| >ALK-P542R- TSATFPAPI   | 84    | >ALK-P542R- TSATFPARI   | 693  | 609   |
| >ALK-P542R- TSATFPAPI   | 232   | >ALK-P542R- TSATFPARI   | 240  | 8     |
| >ALK-P542R- TSATFPAPI   | 971   | >ALK-P542R- TSATFPARI   | 426  | 545   |
| >ALK-P542R- TSATFPAPI   | 129   | >ALK-P542R- TSATFPARI   | 329  | 200   |
| >ALK-P542R- TSATFPAP    | 12342 | >ALK-P542R- TSATFPAR    | 165  | 12177 |
| >ALK-P542R- TSATFPAPIK  | 289   | >ALK-P542R- TSATFPARIK  | 355  | 66    |
| >ALK-P542R- TSATFPAPI   | 26    | >ALK-P542R- TSATFPARI   | 30   | 4     |
| >ALK-P542R- VTSATFPAPI  | 302   | >ALK-P542R- VTSATFPARI  | 1125 | 823   |
| >ALK-P542R- VTSATFPAPI  | 117   | >ALK-P542R- VTSATFPARI  | 437  | 320   |
| >ALK-P542R- VTSATFPAPI  | 313   | >ALK-P542R- VTSATFPARI  | 2030 | 1717  |
| >ALK-P542R- VTSATFPAPIK | 108   | >ALK-P542R- VTSATFPARIK | 158  | 50    |
| >ALK-P542R- VTSATFPAP   | 18288 | >ALK-P542R- VTSATFPAR   | 48   | 18240 |
| >ALK-P542R- VTSATFPAPIK | 14    | >ALK-P542R- VTSATFPARIK | 26   | 12    |
| >ALK-P542R- VTSATFPAPI  | 363   | >ALK-P542R- VTSATFPARI  | 1647 | 1284  |
| >ALK-P542R- VTSATFPAPIK | 53    | >ALK-P542R- VTSATFPARIK | 150  | 97    |
| >ALK-P542R- VTSATFPAP   | 19071 | >ALK-P542R- VTSATFPAR   | 23   | 19048 |
| >ALK-P542R- VTSATFPAPI  | 207   | >ALK-P542R- VTSATFPARI  | 1159 | 952   |
| >ALK-P542R- VTSATFPAP   | 32360 | >ALK-P542R- VTSATFPAR   | 45   | 32315 |
| >ALK-P542R- VTSATFPAPIK | 225   | >ALK-P542R- VTSATFPARIK | 507  | 282   |

|                         |       |                         |       |       |
|-------------------------|-------|-------------------------|-------|-------|
| >ALK-P542R- VTSATFPAPI  | 135   | >ALK-P542R- VTSATFPARI  | 251   | 116   |
| >ALK-P542R- VTSATFPAPI  | 180   | >ALK-P542R- VTSATFPARI  | 1158  | 978   |
| >ALK-P542R- VTSATFPAPI  | 30    | >ALK-P542R- VTSATFPARI  | 32    | 2     |
| >ALK-P542R- VTSATFPAPI  | 344   | >ALK-P542R- VTSATFPARI  | 181   | 163   |
| >ALK-P542R- VTSATFPAPI  | 41    | >ALK-P542R- VTSATFPARI  | 71    | 30    |
| >ALK-P542R- VTSATFPAPI  | 125   | >ALK-P542R- VTSATFPARI  | 116   | 9     |
| >ALK-P542R- VTSATFPAP   | 14460 | >ALK-P542R- VTSATFPAR   | 242   | 14218 |
| >ALK-P542R- VTSATFPAPI  | 35    | >ALK-P542R- VTSATFPARI  | 36    | 1     |
| >ALK-P542R- TVTSATFPAP  | 251   | >ALK-P542R- TVTSATFPAR  | 1072  | 821   |
| >ALK-P542R- TVTSATFPAP  | 205   | >ALK-P542R- TVTSATFPAR  | 1043  | 838   |
| >ALK-P542R- TVTSATFPAP  | 30172 | >ALK-P542R- TVTSATFPAR  | 66    | 30106 |
| >ALK-P542R- TVTSATFPAP  | 33683 | >ALK-P542R- TVTSATFPAR  | 185   | 33498 |
| >ALK-P542R- TVTSATFPAP  | 357   | >ALK-P542R- TVTSATFPAR  | 1743  | 1386  |
| >ALK-P542R- TVTSATFPAP  | 28875 | >ALK-P542R- TVTSATFPAR  | 15    | 28860 |
| >ALK-P542R- TVTSATFPAP  | 6     | >ALK-P542R- TVTSATFPAR  | 10    | 4     |
| >ALK-P542R- TVTSATFPAP  | 22    | >ALK-P542R- TVTSATFPAR  | 121   | 99    |
| >ALK-P542R- TVTSATFPAP  | 35978 | >ALK-P542R- TVTSATFPAR  | 384   | 35594 |
| >ALK-R1061C RKHQELQAM   | 6     | >ALK-R1061C QKHQELQAM   | 16    | 10    |
| >ALK-R1061C RKHQELQAM   | 14    | >ALK-R1061C QKHQELQAM   | 59    | 45    |
| >ALK-R1061C RRKHQELQA   | 865   | >ALK-R1061C RQKHQELQA   | 75    | 790   |
| >ALK-R1061C RRKHQELQAI  | 2242  | >ALK-R1061C RQKHQELQA   | 258   | 1984  |
| >ALK-R1061C RRKHQELQAI  | 11164 | >ALK-R1061C RQKHQELQA   | 37    | 11127 |
| >ALK-R1061C RRKHQELQA   | 1676  | >ALK-R1061C RQKHQELQA   | 347   | 1329  |
| >ALK-R1061C RRKHQELQAI  | 21    | >ALK-R1061C RQKHQELQA   | 6     | 15    |
| >ALK-R1061C RRKHQELQA   | 485   | >ALK-R1061C RQKHQELQA   | 6362  | 5877  |
| >ALK-R1061C RRKHQELQAI  | 24    | >ALK-R1061C RQKHQELQA   | 1781  | 1757  |
| >ALK-R1061C RRKHQELQAI  | 8938  | >ALK-R1061C RQKHQELQA   | 408   | 8530  |
| >ALK-R1061C RRKHQELQA   | 261   | >ALK-R1061C RQKHQELQA   | 5416  | 5155  |
| >ALK-R1061C RRKHQELQAI  | 75    | >ALK-R1061C RQKHQELQA   | 2258  | 2183  |
| >ALK-R1061C RRKHQELQAI  | 379   | >ALK-R1061C RQKHQELQA   | 6008  | 5629  |
| >ALK-R1061C RRKHQELQAI  | 52    | >ALK-R1061C RQKHQELQA   | 1261  | 1209  |
| >ALK-R1061C AFSGIMIVYRI | 13    | >ALK-R1061C AFSGIMIVYRI | 8825  | 8812  |
| >ALK-R1061C AFSGIMIVYRI | 228   | >ALK-R1061C AFSGIMIVYRI | 25756 | 25528 |
| >ALK-R1061C AFSGIMIVYRI | 356   | >ALK-R1061C AFSGIMIVYRI | 19942 | 19586 |
| >ALK-R1061C AFSGIMIVYRI | 77    | >ALK-R1061C AFSGIMIVYRI | 10228 | 10151 |
| >ALK-R1061C YRRKHQEL    | 96    | >ALK-R1061C YRQKHQEL    | 862   | 766   |
| >ALK-R1061C YRRKHQELQ/  | 169   | >ALK-R1061C YRQKHQELQ/  | 1218  | 1049  |
| >ALK-R1061C YRRKHQEL    | 60    | >ALK-R1061C YRQKHQEL    | 273   | 213   |
| >ALK-R1061C YRRKHQELQ/  | 22    | >ALK-R1061C YRQKHQELQ/  | 108   | 86    |
| >ALK-R1061C YRRKHQEL    | 452   | >ALK-R1061C YRQKHQEL    | 126   | 326   |
| >ALK-R1061C YRRKHQELQ/  | 153   | >ALK-R1061C YRQKHQELQ/  | 53    | 100   |
| >ALK-R1061C YRRKHQEL    | 2306  | >ALK-R1061C YRQKHQEL    | 293   | 2013  |
| >ALK-R1061C YRRKHQELQ/  | 1669  | >ALK-R1061C YRQKHQELQ/  | 217   | 1452  |

|                        |      |                        |       |       |
|------------------------|------|------------------------|-------|-------|
| >ALK-R1061CYRRKHQELQ/  | 1335 | >ALK-R1061CYRQKHQELQ   | 482   | 853   |
| >ALK-R1061CVYRRKHQEL   | 381  | >ALK-R1061CVYRQKHQEL   | 612   | 231   |
| >ALK-R1061CVYRRKHQEL   | 258  | >ALK-R1061CVYRQKHQEL   | 380   | 122   |
| >ALK-R1061CVYRRKHQEL   | 290  | >ALK-R1061CVYRQKHQEL   | 501   | 211   |
| >ALK-R1061CVYRRKHQEL   | 24   | >ALK-R1061CVYRQKHQEL   | 22    | 2     |
| >ALK-R1061CVYRRKHQEL   | 28   | >ALK-R1061CVYRQKHQEL   | 230   | 202   |
| >ALK-R1061CVYRRKHQELC  | 29   | >ALK-R1061CVYRQKHQELC  | 141   | 112   |
| >ALK-R1061CVYRRKHQEL   | 301  | >ALK-R1061CVYRQKHQEL   | 605   | 304   |
| >ALK-R1061CVYRRKHQEL   | 491  | >ALK-R1061CVYRQKHQEL   | 334   | 157   |
| >ALK-R1061CIVYRRKHQEL  | 277  | >ALK-R1061CIVYRQKHQEL  | 211   | 66    |
| >ALK-R1061CIVYRRKHQEL  | 46   | >ALK-R1061CIVYRQKHQEL  | 42    | 4     |
| >ALK-R1061CIVYRRKHQEL  | 320  | >ALK-R1061CIVYRQKHQEL  | 264   | 56    |
| >ALK-R1061CMIVYRRKHQI  | 208  | >ALK-R1061CMIVYRQKHQ   | 259   | 51    |
| >ALK-R1061CMIVYRRKHQI  | 395  | >ALK-R1061CMIVYRQKHQ   | 180   | 215   |
| >ALK-R1061CMIVYRRKHQI  | 433  | >ALK-R1061CMIVYRQKHQ   | 320   | 113   |
| >ALK-R1061CMIVYRRKHQI  | 267  | >ALK-R1061CMIVYRQKHQ   | 333   | 66    |
| >ALK-R1061CMIVYRRKHQI  | 33   | >ALK-R1061CMIVYRQKHQ   | 59    | 26    |
| >ALK-R1061CIMIVYRRK    | 106  | >ALK-R1061CIMIVYRQK    | 113   | 7     |
| >ALK-R1061CIMIVYRRK    | 101  | >ALK-R1061CIMIVYRQK    | 70    | 31    |
| >ALK-R1061CIMIVYRRK    | 217  | >ALK-R1061CIMIVYRQK    | 191   | 26    |
| >ALK-R1061CIMIVYRRK    | 760  | >ALK-R1061CIMIVYRQK    | 448   | 312   |
| >ALK-R1061CIMIVYRRKH   | 1048 | >ALK-R1061CIMIVYRQKH   | 292   | 756   |
| >ALK-R1061CGIMIVYRRK   | 128  | >ALK-R1061CGIMIVYRQK   | 137   | 9     |
| >ALK-R1061CGIMIVYRR    | 91   | >ALK-R1061CGIMIVYRQ    | 14166 | 14075 |
| >ALK-R1061CGIMIVYRRK   | 29   | >ALK-R1061CGIMIVYRQK   | 24    | 5     |
| >ALK-R1061CGIMIVYRR    | 32   | >ALK-R1061CGIMIVYRQ    | 9687  | 9655  |
| >ALK-R1061CGIMIVYRR    | 131  | >ALK-R1061CGIMIVYRQ    | 10417 | 10286 |
| >ALK-R1061CGIMIVYRR    | 452  | >ALK-R1061CGIMIVYRQ    | 24319 | 23867 |
| >ALK-R1061CSGIMIVYRR   | 42   | >ALK-R1061CSGIMIVYRQ   | 16149 | 16107 |
| >ALK-R1061CSGIMIVYRR   | 71   | >ALK-R1061CSGIMIVYRQ   | 8735  | 8664  |
| >ALK-R1061CSGIMIVYRR   | 107  | >ALK-R1061CSGIMIVYRQ   | 11652 | 11545 |
| >ALK-R1061CFSGIMIVYRRI | 574  | >ALK-R1061CFSGIMIVYRQ  | 438   | 136   |
| >ALK-R1061CFSGIMIVYRR  | 24   | >ALK-R1061CFSGIMIVYRQ  | 11091 | 11067 |
| >ALK-R1061CFSGIMIVYRR  | 398  | >ALK-R1061CFSGIMIVYRQ  | 21949 | 21551 |
| >ALK-R1061CFSGIMIVYRR  | 12   | >ALK-R1061CFSGIMIVYRQ  | 15750 | 15738 |
| >ALK-R1061CFSGIMIVYRRI | 533  | >ALK-R1061CFSGIMIVYRQ  | 372   | 161   |
| >ALK-R1061CFSGIMIVYRR  | 254  | >ALK-R1061CFSGIMIVYRQ  | 19350 | 19096 |
| >ALK-R1275L RDIYRASYY  | 515  | >ALK-R1275L LDIYRASYY  | 142   | 373   |
| >ALK-R1275L RDIYRASYYR | 33   | >ALK-R1275L LDIYRASYYR | 128   | 95    |
| >ALK-R1275L RDIYRASYYR | 857  | >ALK-R1275L LDIYRASYYR | 225   | 632   |
| >ALK-R1275L RDIYRASYYR | 936  | >ALK-R1275L LDIYRASYYR | 351   | 585   |
| >ALK-R1275L RDIYRASYY  | 404  | >ALK-R1275L LDIYRASYY  | 767   | 363   |
| >ALK-R1275L RDIYRASYY  | 447  | >ALK-R1275L LDIYRASYY  | 883   | 436   |

|                         |       |                         |       |       |
|-------------------------|-------|-------------------------|-------|-------|
| >ALK-R1275L RDIYRASYY   | 33    | >ALK-R1275L LDIYRASYY   | 54    | 21    |
| >ALK-R1275L RDIYRASYYR  | 489   | >ALK-R1275L LDIYRASYYR  | 4581  | 4092  |
| >ALK-R1275L RDIYRASYYR  | 65    | >ALK-R1275L LDIYRASYYR  | 548   | 483   |
| >ALK-R1275L ARDIYRASYY  | 10545 | >ALK-R1275L ALDIYRASYY  | 231   | 10314 |
| >ALK-R1275L ARDIYRASYY  | 3447  | >ALK-R1275L ALDIYRASYY  | 76    | 3371  |
| >ALK-R1275L ARDIYRASYY  | 4944  | >ALK-R1275L ALDIYRASYY  | 145   | 4799  |
| >ALK-R1275L ARDIYRASYYI | 17281 | >ALK-R1275L ALDIYRASYYF | 490   | 16791 |
| >ALK-R1275L ARDIYRASYY  | 313   | >ALK-R1275L ALDIYRASYY  | 75    | 238   |
| >ALK-R1275L ARDIYRASYY  | 445   | >ALK-R1275L ALDIYRASYY  | 60    | 385   |
| >ALK-R1275L ARDIYRASYY  | 243   | >ALK-R1275L ALDIYRASYY  | 42    | 201   |
| >ALK-R1275L ARDIYRASYYI | 3673  | >ALK-R1275L ALDIYRASYYF | 26    | 3647  |
| >ALK-R1275L ARDIYRASYY  | 5739  | >ALK-R1275L ALDIYRASYY  | 490   | 5249  |
| >ALK-R1275L ARDIYRASYY  | 93    | >ALK-R1275L ALDIYRASYY  | 26513 | 26420 |
| >ALK-R1275L ARDIYRASYY  | 2521  | >ALK-R1275L ALDIYRASYY  | 293   | 2228  |
| >ALK-R1275L ARDIYRASYYI | 1112  | >ALK-R1275L ALDIYRASYYF | 359   | 753   |
| >ALK-R1275L VAKIGDFGM,  | 58    | >ALK-R1275L VAKIGDFGM,  | 15677 | 15619 |
| >ALK-R1275L VAKIGDFGM,  | 249   | >ALK-R1275L VAKIGDFGM,  | 24667 | 24418 |
| >ALK-R1275L VAKIGDFGM,  | 402   | >ALK-R1275L VAKIGDFGM,  | 34210 | 33808 |
| >ALK-R1275L VAKIGDFGM,  | 14897 | >ALK-R1275L VAKIGDFGM,  | 70    | 14827 |
| >ALK-R1275L MARDIYRA    | 11229 | >ALK-R1275L MALDIYRA    | 310   | 10919 |
| >ALK-R1275L MARDIYRA    | 5205  | >ALK-R1275L MALDIYRA    | 116   | 5089  |
| >ALK-R1275L MARDIYRA    | 5504  | >ALK-R1275L MALDIYRA    | 183   | 5321  |
| >ALK-R1275L MARDIYRASYY | 5400  | >ALK-R1275L MALDIYRASYY | 297   | 5103  |
| >ALK-R1275L MARDIYRASYY | 411   | >ALK-R1275L MALDIYRASYY | 1128  | 717   |
| >ALK-R1275L MARDIYRASYY | 59    | >ALK-R1275L MALDIYRASYY | 17    | 42    |
| >ALK-R1275L MARDIYRA    | 38    | >ALK-R1275L MALDIYRA    | 3646  | 3608  |
| >ALK-R1275L MARDIYRAS   | 75    | >ALK-R1275L MALDIYRAS   | 6118  | 6043  |
| >ALK-R1275L MARDIYRASYY | 15    | >ALK-R1275L MALDIYRASYY | 1285  | 1270  |
| >ALK-R1275L MARDIYRASYY | 20    | >ALK-R1275L MALDIYRASYY | 1777  | 1757  |
| >ALK-R1275L MARDIYRASYY | 455   | >ALK-R1275L MALDIYRASYY | 251   | 204   |
| >ALK-R1275L MARDIYRASYY | 121   | >ALK-R1275L MALDIYRASYY | 102   | 19    |
| >ALK-R1275L MARDIYRASYY | 215   | >ALK-R1275L MALDIYRASYY | 99    | 116   |
| >ALK-R1275L MARDIYRA    | 397   | >ALK-R1275L MALDIYRA    | 50    | 347   |
| >ALK-R1275L MARDIYRA    | 9538  | >ALK-R1275L MALDIYRA    | 247   | 9291  |
| >ALK-R1275L MARDIYRASYY | 78    | >ALK-R1275L MALDIYRASYY | 267   | 189   |
| >ALK-R1275L MARDIYRASYY | 155   | >ALK-R1275L MALDIYRASYY | 794   | 639   |
| >ALK-R1275L MARDIYRASYY | 31    | >ALK-R1275L MALDIYRASYY | 45    | 14    |
| >ALK-R1275L MARDIYRASYY | 52    | >ALK-R1275L MALDIYRASYY | 78    | 26    |
| >ALK-R1275L MARDIYRASYY | 9     | >ALK-R1275L MALDIYRASYY | 10    | 1     |
| >ALK-R1275L MARDIYRASYY | 8     | >ALK-R1275L MALDIYRASYY | 11    | 3     |
| >ALK-R1275L MARDIYRASYY | 54    | >ALK-R1275L MALDIYRASYY | 21    | 33    |
| >ALK-R1275L MARDIYRASYY | 2541  | >ALK-R1275L MALDIYRASYY | 296   | 2245  |
| >ALK-R1275L MARDIYRA    | 185   | >ALK-R1275L MALDIYRA    | 101   | 84    |

|                        |       |                        |      |       |
|------------------------|-------|------------------------|------|-------|
| >ALK-R1275L MARDIYRAS  | 756   | >ALK-R1275L MALDIYRAS  | 460  | 296   |
| >ALK-R1275L MARDIYRASY | 480   | >ALK-R1275L MALDIYRASY | 716  | 236   |
| >ALK-R1275L MARDIYRASY | 6103  | >ALK-R1275L MALDIYRASY | 426  | 5677  |
| >ALK-R1275L MARDIYRASY | 482   | >ALK-R1275L MALDIYRASY | 1487 | 1005  |
| >ALK-R1275L MARDIYRASY | 13    | >ALK-R1275L MALDIYRASY | 27   | 14    |
| >ALK-R1275L MARDIYRASY | 521   | >ALK-R1275L MALDIYRASY | 271  | 250   |
| >ALK-R1275L GMARDIYRA  | 43    | >ALK-R1275L GMALDIYRA  | 49   | 6     |
| >ALK-R1275L GMARDIYRA  | 16    | >ALK-R1275L GMALDIYRA  | 13   | 3     |
| >ALK-R1275L GMARDIYRA  | 19    | >ALK-R1275L GMALDIYRA  | 31   | 12    |
| >ALK-R1275L GMARDIYRA  | 13    | >ALK-R1275L GMALDIYRA  | 33   | 20    |
| >ALK-R1275L GMARDIYRA  | 13    | >ALK-R1275L GMALDIYRA  | 23   | 10    |
| >ALK-R1275L GMARDIYRA  | 36    | >ALK-R1275L GMALDIYRA  | 51   | 15    |
| >ALK-R1275L GMARDIYRA  | 174   | >ALK-R1275L GMALDIYRA  | 91   | 83    |
| >ALK-R1275L GMARDIYRA  | 8     | >ALK-R1275L GMALDIYRA  | 23   | 15    |
| >ALK-R1275L GMARDIYR   | 395   | >ALK-R1275L GMALDIYR   | 421  | 26    |
| >ALK-R1275L GMARDIYRA  | 27    | >ALK-R1275L GMALDIYRAS | 20   | 7     |
| >ALK-R1275L GMARDIYRA  | 12    | >ALK-R1275L GMALDIYRAS | 15   | 3     |
| >ALK-R1275L GMARDIYR   | 19    | >ALK-R1275L GMALDIYR   | 33   | 14    |
| >ALK-R1275L GMARDIYR   | 195   | >ALK-R1275L GMALDIYR   | 186  | 9     |
| >ALK-R1275L GMARDIYRA  | 56    | >ALK-R1275L GMALDIYRAS | 73   | 17    |
| >ALK-R1275L GMARDIYRA  | 445   | >ALK-R1275L GMALDIYRAS | 737  | 292   |
| >ALK-R1275L GMARDIYRA  | 83    | >ALK-R1275L GMALDIYRAS | 265  | 182   |
| >ALK-R1275L GMARDIYRA  | 366   | >ALK-R1275L GMALDIYRAS | 374  | 8     |
| >ALK-R1275L GMARDIYR   | 152   | >ALK-R1275L GMALDIYR   | 94   | 58    |
| >ALK-R1275L FGMARDIYR  | 1187  | >ALK-R1275L FGMALDIYR  | 322  | 865   |
| >ALK-R1275L FGMARDIYR  | 340   | >ALK-R1275L FGMALDIYR  | 465  | 125   |
| >ALK-R1275L FGMARDIYR  | 68    | >ALK-R1275L FGMALDIYR  | 40   | 28    |
| >ALK-R1275L FGMARDIY   | 608   | >ALK-R1275L FGMALDIY   | 466  | 142   |
| >ALK-R1275L FGMARDIY   | 165   | >ALK-R1275L FGMALDIY   | 248  | 83    |
| >ALK-R1275L FGMARDIY   | 93    | >ALK-R1275L FGMALDIY   | 43   | 50    |
| >ALK-R1275L FGMARDIYR  | 33    | >ALK-R1275L FGMALDIYR  | 24   | 9     |
| >ALK-R1275L DFGMARDIYI | 167   | >ALK-R1275L DFGMALDIYF | 345  | 178   |
| >ALK-R1275L DFGMARDIYI | 15    | >ALK-R1275L DFGMALDIYF | 19   | 4     |
| >ALK-R1275L DFGMARDIYI | 66    | >ALK-R1275L DFGMALDIYF | 59   | 7     |
| >ALK-R1275L DFGMARDIYI | 369   | >ALK-R1275L DFGMALDIYF | 970  | 601   |
| >ALK-R1275L DFGMARDIYI | 60    | >ALK-R1275L DFGMALDIYF | 70   | 10    |
| >ALK-R1275L GDFGMARDI  | 557   | >ALK-R1275L GDFGMALDI  | 138  | 419   |
| >ALK-R1275L GDFGMARDI  | 284   | >ALK-R1275L GDFGMALDI  | 67   | 217   |
| >ALK-R1275L GDFGMARDI  | 559   | >ALK-R1275L GDFGMALDI  | 273  | 286   |
| >ALK-R1275L GDFGMARDI  | 271   | >ALK-R1275L GDFGMALDI  | 73   | 198   |
| >ALK-R1275L IGDFGMARD  | 177   | >ALK-R1275L IGDFGMALDI | 182  | 5     |
| >ALK-R1275L IGDFGMARD  | 381   | >ALK-R1275L IGDFGMALDI | 280  | 101   |
| >ALK-R1275L KIGDFGMAR  | 23174 | >ALK-R1275L KIGDFGMAL  | 455  | 22719 |

|                         |       |                        |       |       |
|-------------------------|-------|------------------------|-------|-------|
| >ALK-R1275L KIGDFGMAR   | 19080 | >ALK-R1275L KIGDFGMAL  | 117   | 18963 |
| >ALK-R1275L KIGDFGMAR   | 19670 | >ALK-R1275L KIGDFGMAL  | 449   | 19221 |
| >ALK-R1275L KIGDFGMAR   | 23256 | >ALK-R1275L KIGDFGMAL  | 164   | 23092 |
| >ALK-R1275L KIGDFGMAR   | 15671 | >ALK-R1275L KIGDFGMAL  | 39    | 15632 |
| >ALK-R1275L KIGDFGMAR   | 21040 | >ALK-R1275L KIGDFGMAL  | 233   | 20807 |
| >ALK-R1275L KIGDFGMAR   | 20065 | >ALK-R1275L KIGDFGMAL  | 72    | 19993 |
| >ALK-R1275L KIGDFGMAR   | 124   | >ALK-R1275L KIGDFGMAL  | 14700 | 14576 |
| >ALK-R1275L KIGDFGMAR   | 44    | >ALK-R1275L KIGDFGMAL  | 12449 | 12405 |
| >ALK-R1275L KIGDFGMAR   | 6665  | >ALK-R1275L KIGDFGMAL  | 114   | 6551  |
| >ALK-R1275L KIGDFGMARI  | 137   | >ALK-R1275L KIGDFGMALI | 77    | 60    |
| >ALK-R1275L KIGDFGMAR   | 15    | >ALK-R1275L KIGDFGMAL  | 9180  | 9165  |
| >ALK-R1275L AKIGDFGMAI  | 366   | >ALK-R1275L AKIGDFGMAI | 18773 | 18407 |
| >ALK-R1275L AKIGDFGMAI  | 279   | >ALK-R1275L AKIGDFGMAI | 39    | 240   |
| >ALK-R1275L AKIGDFGMAI  | 15538 | >ALK-R1275L AKIGDFGMAI | 96    | 15442 |
| >ALK-R1275C RDIYRASYY   | 515   | >ALK-R1275C QDIYRASYY  | 241   | 274   |
| >ALK-R1275C RDIYRASYYR  | 33    | >ALK-R1275C QDIYRASYYR | 193   | 160   |
| >ALK-R1275C RDIYRASYYR  | 857   | >ALK-R1275C QDIYRASYYR | 306   | 551   |
| >ALK-R1275C RDIYRASYYR  | 936   | >ALK-R1275C QDIYRASYYR | 344   | 592   |
| >ALK-R1275C RDIYRASYY   | 404   | >ALK-R1275C QDIYRASYY  | 1300  | 896   |
| >ALK-R1275C RDIYRASYY   | 447   | >ALK-R1275C QDIYRASYY  | 1426  | 979   |
| >ALK-R1275C RDIYRASYY   | 33    | >ALK-R1275C QDIYRASYY  | 168   | 135   |
| >ALK-R1275C RDIYRASYYR  | 489   | >ALK-R1275C QDIYRASYYR | 2171  | 1682  |
| >ALK-R1275C RDIYRASYYR  | 65    | >ALK-R1275C QDIYRASYYR | 221   | 156   |
| >ALK-R1275C ARDIYRASYYI | 17281 | >ALK-R1275C AQDIYRASYY | 439   | 16842 |
| >ALK-R1275C ARDIYRASYY  | 313   | >ALK-R1275C AQDIYRASYY | 140   | 173   |
| >ALK-R1275C ARDIYRASYY  | 445   | >ALK-R1275C AQDIYRASYY | 88    | 357   |
| >ALK-R1275C ARDIYRASYY  | 243   | >ALK-R1275C AQDIYRASYY | 46    | 197   |
| >ALK-R1275C ARDIYRASYYI | 3673  | >ALK-R1275C AQDIYRASYY | 23    | 3650  |
| >ALK-R1275C ARDIYRASYY  | 16949 | >ALK-R1275C AQDIYRASYY | 166   | 16783 |
| >ALK-R1275C ARDIYRASYY  | 18558 | >ALK-R1275C AQDIYRASYY | 374   | 18184 |
| >ALK-R1275C ARDIYRASYY  | 681   | >ALK-R1275C AQDIYRASYY | 142   | 539   |
| >ALK-R1275C ARDIYRASYY  | 849   | >ALK-R1275C AQDIYRASYY | 205   | 644   |
| >ALK-R1275C ARDIYRASYY  | 93    | >ALK-R1275C AQDIYRASYY | 9132  | 9039  |
| >ALK-R1275C ARDIYRASYYI | 1112  | >ALK-R1275C AQDIYRASYY | 419   | 693   |
| >ALK-R1275C VAKIGDFGM,  | 58    | >ALK-R1275C VAKIGDFGM, | 15591 | 15533 |
| >ALK-R1275C VAKIGDFGM,  | 249   | >ALK-R1275C VAKIGDFGM, | 24142 | 23893 |
| >ALK-R1275C VAKIGDFGM,  | 402   | >ALK-R1275C VAKIGDFGM, | 20787 | 20385 |
| >ALK-R1275C MARDIYRASYY | 5400  | >ALK-R1275C MAQDIYRAS` | 355   | 5045  |
| >ALK-R1275C MARDIYRASYY | 411   | >ALK-R1275C MAQDIYRAS` | 366   | 45    |
| >ALK-R1275C MARDIYRASYY | 59    | >ALK-R1275C MAQDIYRAS` | 50    | 9     |
| >ALK-R1275C MARDIYRAS   | 38    | >ALK-R1275C MAQDIYRAS  | 7448  | 7410  |
| >ALK-R1275C MARDIYRAS   | 75    | >ALK-R1275C MAQDIYRAS  | 10081 | 10006 |
| >ALK-R1275C MARDIYRAS   | 15    | >ALK-R1275C MAQDIYRAS` | 3984  | 3969  |

|                        |     |                        |      |      |
|------------------------|-----|------------------------|------|------|
| >ALK-R1275C MARDIYRASY | 20  | >ALK-R1275C MAQDIYRAS` | 4922 | 4902 |
| >ALK-R1275C MARDIYRASY | 455 | >ALK-R1275C MAQDIYRAS` | 156  | 299  |
| >ALK-R1275C MARDIYRASY | 121 | >ALK-R1275C MAQDIYRAS` | 63   | 58   |
| >ALK-R1275C MARDIYRASY | 215 | >ALK-R1275C MAQDIYRAS` | 106  | 109  |
| >ALK-R1275C MARDIYRA   | 397 | >ALK-R1275C MAQDIYRA   | 75   | 322  |
| >ALK-R1275C MARDIYRASY | 78  | >ALK-R1275C MAQDIYRAS` | 115  | 37   |
| >ALK-R1275C MARDIYRASY | 155 | >ALK-R1275C MAQDIYRAS` | 263  | 108  |
| >ALK-R1275C MARDIYRASY | 31  | >ALK-R1275C MAQDIYRAS` | 203  | 172  |
| >ALK-R1275C MARDIYRASY | 52  | >ALK-R1275C MAQDIYRAS` | 340  | 288  |
| >ALK-R1275C MARDIYRASY | 9   | >ALK-R1275C MAQDIYRAS` | 43   | 34   |
| >ALK-R1275C MARDIYRASY | 8   | >ALK-R1275C MAQDIYRAS` | 34   | 26   |
| >ALK-R1275C MARDIYRASY | 54  | >ALK-R1275C MAQDIYRAS` | 41   | 13   |
| >ALK-R1275C MARDIYRA   | 185 | >ALK-R1275C MAQDIYRA   | 941  | 756  |
| >ALK-R1275C MARDIYRASY | 480 | >ALK-R1275C MAQDIYRAS` | 2111 | 1631 |
| >ALK-R1275C MARDIYRASY | 482 | >ALK-R1275C MAQDIYRAS` | 330  | 152  |
| >ALK-R1275C MARDIYRASY | 13  | >ALK-R1275C MAQDIYRAS` | 36   | 23   |
| >ALK-R1275C MARDIYRASY | 521 | >ALK-R1275C MAQDIYRAS` | 104  | 417  |
| >ALK-R1275C GMARDIYRA  | 43  | >ALK-R1275C GMAQDIYRA  | 33   | 10   |
| >ALK-R1275C GMARDIYRA  | 16  | >ALK-R1275C GMAQDIYRA  | 10   | 6    |
| >ALK-R1275C GMARDIYRA  | 19  | >ALK-R1275C GMAQDIYRA  | 18   | 1    |
| >ALK-R1275C GMARDIYRA  | 515 | >ALK-R1275C GMAQDIYRA  | 325  | 190  |
| >ALK-R1275C GMARDIYRA  | 13  | >ALK-R1275C GMAQDIYRA  | 8    | 5    |
| >ALK-R1275C GMARDIYRA  | 13  | >ALK-R1275C GMAQDIYRA  | 17   | 4    |
| >ALK-R1275C GMARDIYRA  | 36  | >ALK-R1275C GMAQDIYRA  | 19   | 17   |
| >ALK-R1275C GMARDIYRA  | 174 | >ALK-R1275C GMAQDIYRA  | 88   | 86   |
| >ALK-R1275C GMARDIYRA  | 8   | >ALK-R1275C GMAQDIYRA  | 6    | 2    |
| >ALK-R1275C GMARDIYR   | 395 | >ALK-R1275C GMAQDIYR   | 924  | 529  |
| >ALK-R1275C GMARDIYRA! | 27  | >ALK-R1275C GMAQDIYRA  | 18   | 9    |
| >ALK-R1275C GMARDIYRA! | 12  | >ALK-R1275C GMAQDIYRA  | 9    | 3    |
| >ALK-R1275C GMARDIYR   | 19  | >ALK-R1275C GMAQDIYR   | 65   | 46   |
| >ALK-R1275C GMARDIYR   | 195 | >ALK-R1275C GMAQDIYR   | 184  | 11   |
| >ALK-R1275C GMARDIYRA! | 56  | >ALK-R1275C GMAQDIYRA  | 42   | 14   |
| >ALK-R1275C GMARDIYRA! | 445 | >ALK-R1275C GMAQDIYRA  | 248  | 197  |
| >ALK-R1275C GMARDIYRA! | 83  | >ALK-R1275C GMAQDIYRA  | 138  | 55   |
| >ALK-R1275C GMARDIYRA! | 366 | >ALK-R1275C GMAQDIYRA  | 385  | 19   |
| >ALK-R1275C GMARDIYR   | 152 | >ALK-R1275C GMAQDIYR   | 63   | 89   |
| >ALK-R1275C FGMARDIYR  | 340 | >ALK-R1275C FGMAQDIYR  | 946  | 606  |
| >ALK-R1275C FGMARDIYR  | 68  | >ALK-R1275C FGMAQDIYR  | 80   | 12   |
| >ALK-R1275C FGMARDIY   | 165 | >ALK-R1275C FGMAQDIY   | 148  | 17   |
| >ALK-R1275C FGMARDIY   | 93  | >ALK-R1275C FGMAQDIY   | 34   | 59   |
| >ALK-R1275C FGMARDIYR  | 33  | >ALK-R1275C FGMAQDIYR  | 34   | 1    |
| >ALK-R1275C DFGMARDIYI | 167 | >ALK-R1275C DFGMAQDIY  | 554  | 387  |
| >ALK-R1275C DFGMARDIYI | 15  | >ALK-R1275C DFGMAQDIY  | 17   | 2    |



|                         |       |                         |       |       |
|-------------------------|-------|-------------------------|-------|-------|
| >ALK-R1275C DFGMARDIYI  | 66    | >ALK-R1275C DFGMAQDIY   | 72    | 6     |
| >ALK-R1275C DFGMARDIYI  | 369   | >ALK-R1275C DFGMAQDIY   | 302   | 67    |
| >ALK-R1275C DFGMARDIYI  | 60    | >ALK-R1275C DFGMAQDIY   | 75    | 15    |
| >ALK-R1275C GDFGMARDI   | 557   | >ALK-R1275C GDFGMAQDI   | 352   | 205   |
| >ALK-R1275C GDFGMARDI   | 284   | >ALK-R1275C GDFGMAQDI   | 106   | 178   |
| >ALK-R1275C GDFGMARDI   | 559   | >ALK-R1275C GDFGMAQDI   | 473   | 86    |
| >ALK-R1275C GDFGMARDI   | 271   | >ALK-R1275C GDFGMAQDI   | 180   | 91    |
| >ALK-R1275C IGDFGMARD   | 177   | >ALK-R1275C IGDFGMAQD   | 177   | 0     |
| >ALK-R1275C IGDFGMARD   | 381   | >ALK-R1275C IGDFGMAQD   | 429   | 48    |
| >ALK-R1275C KIGDFGMARI  | 2374  | >ALK-R1275C KIGDFGMAQ   | 488   | 1886  |
| >ALK-R1275C KIGDFGMAR   | 124   | >ALK-R1275C KIGDFGMAQ   | 14176 | 14052 |
| >ALK-R1275C KIGDFGMAR   | 44    | >ALK-R1275C KIGDFGMAQ   | 12560 | 12516 |
| >ALK-R1275C KIGDFGMARI  | 137   | >ALK-R1275C KIGDFGMAQ   | 122   | 15    |
| >ALK-R1275C KIGDFGMAR   | 15    | >ALK-R1275C KIGDFGMAQ   | 844   | 829   |
| >ALK-R1275C AKIGDFGMAI  | 366   | >ALK-R1275C AKIGDFGMAI  | 22419 | 22053 |
| >ALK-R1275C AKIGDFGMAI  | 279   | >ALK-R1275C AKIGDFGMAI  | 833   | 554   |
| >ALK-R401Q- FRVALEYI    | 15009 | >ALK-R401Q- FQVALEYI    | 29    | 14980 |
| >ALK-R401Q- FRVALEYI    | 573   | >ALK-R401Q- FQVALEYI    | 7     | 566   |
| >ALK-R401Q- FRVALEYI    | 9514  | >ALK-R401Q- FQVALEYI    | 43    | 9471  |
| >ALK-R401Q- FRVALEYI    | 798   | >ALK-R401Q- FQVALEYI    | 3     | 795   |
| >ALK-R401Q- FRVALEYIS   | 24854 | >ALK-R401Q- FQVALEYIS   | 355   | 24499 |
| >ALK-R401Q- FRVALEYISSG | 18432 | >ALK-R401Q- FQVALEYISSC | 130   | 18302 |
| >ALK-R401Q- FRVALEYI    | 5148  | >ALK-R401Q- FQVALEYI    | 54    | 5094  |
| >ALK-R401Q- FRVALEYI    | 12944 | >ALK-R401Q- FQVALEYI    | 130   | 12814 |
| >ALK-R401Q- FRVALEYISSG | 20059 | >ALK-R401Q- FQVALEYISSC | 466   | 19593 |
| >ALK-R401Q- FRVALEYI    | 652   | >ALK-R401Q- FQVALEYI    | 121   | 531   |
| >ALK-R401Q- FRVALEYI    | 160   | >ALK-R401Q- FQVALEYI    | 3419  | 3259  |
| >ALK-R401Q- FRVALEYI    | 1061  | >ALK-R401Q- FQVALEYI    | 119   | 942   |
| >ALK-R401Q- GRIGRPDNP   | 312   | >ALK-R401Q- GRIGRPDNP   | 3709  | 3397  |
| >ALK-R401Q- PFRVALEYI   | 1533  | >ALK-R401Q- PFQVALEYI   | 432   | 1101  |
| >ALK-R401Q- PFRVALEYI   | 3022  | >ALK-R401Q- PFQVALEYI   | 354   | 2668  |
| >ALK-R401Q- PFRVALEY    | 77    | >ALK-R401Q- PFQVALEY    | 64    | 13    |
| >ALK-R401Q- NPFRVALEYI  | 195   | >ALK-R401Q- NPFQVALEYI  | 189   | 6     |
| >ALK-R401Q- NPFRVALEYI  | 12    | >ALK-R401Q- NPFQVALEYI  | 15    | 3     |
| >ALK-R401Q- NPFRVALEY   | 371   | >ALK-R401Q- NPFQVALEY   | 190   | 181   |
| >ALK-R401Q- NPFRVALEYI  | 434   | >ALK-R401Q- NPFQVALEYI  | 292   | 142   |
| >ALK-R401Q- NPFRVALEY   | 66    | >ALK-R401Q- NPFQVALEY   | 152   | 86    |
| >ALK-R401Q- NPFRVALEY   | 196   | >ALK-R401Q- NPFQVALEY   | 113   | 83    |
| >ALK-R401Q- NPFRVALEY   | 11    | >ALK-R401Q- NPFQVALEY   | 8     | 3     |
| >ALK-R401Q- NPFRVALEYIS | 664   | >ALK-R401Q- NPFQVALEYIS | 182   | 482   |
| >ALK-R401Q- NPFRVALEY   | 143   | >ALK-R401Q- NPFQVALEY   | 99    | 44    |
| >ALK-R401Q- NPFRVALEY   | 8     | >ALK-R401Q- NPFQVALEY   | 8     | 0     |
| >ALK-R401Q- NPFRVALEY   | 108   | >ALK-R401Q- NPFQVALEY   | 128   | 20    |

|                         |       |                         |       |       |
|-------------------------|-------|-------------------------|-------|-------|
| >ALK-R401Q- PDNPFPRVAL  | 2897  | >ALK-R401Q- PDNPFQVAL   | 425   | 2472  |
| >ALK-R401Q- RPDNPFPRV   | 1665  | >ALK-R401Q- RPDNPFQV    | 423   | 1242  |
| >ALK-R401Q- RPDNPFPRV   | 377   | >ALK-R401Q- RPDNPFQV    | 263   | 114   |
| >ALK-R401Q- RPDNPFPRVA  | 51    | >ALK-R401Q- RPDNPFQVA   | 100   | 49    |
| >ALK-R401Q- RPDNPFPRVAL | 21    | >ALK-R401Q- RPDNPFQVA   | 37    | 16    |
| >ALK-R401Q- RPDNPFPRVAL | 168   | >ALK-R401Q- RPDNPFQVA   | 144   | 24    |
| >ALK-R401Q- RPDNPFPRVA  | 145   | >ALK-R401Q- RPDNPFQVA   | 181   | 36    |
| >ALK-R401Q- RPDNPFPRVAL | 203   | >ALK-R401Q- RPDNPFQVA   | 230   | 27    |
| >ALK-R401Q- GRPDNPFPRV/ | 28    | >ALK-R401Q- GRPDNPFQV.  | 44    | 16    |
| >ALK-R401Q- IGRPDNPFPR  | 310   | >ALK-R401Q- IGRPDNPFQ   | 818   | 508   |
| >ALK-R401Q- IGRPDNPFPR  | 441   | >ALK-R401Q- IGRPDNPFQ   | 21993 | 21552 |
| >ALK-R401Q- RIGRPDNPFPR | 25    | >ALK-R401Q- RIGRPDNPFPC | 21    | 4     |
| >ALK-R401Q- RIGRPDNPFPR | 243   | >ALK-R401Q- RIGRPDNPFPC | 223   | 20    |
| >ALK-R401Q- RIGRPDNPFPR | 190   | >ALK-R401Q- RIGRPDNPFPC | 100   | 90    |
| >ALK-R401Q- RIGRPDNPFPR | 504   | >ALK-R401Q- RIGRPDNPFPC | 240   | 264   |
| >ALK-R401Q- RIGRPDNPFPR | 32    | >ALK-R401Q- RIGRPDNPFPC | 27    | 5     |
| >ALK-R401Q- RIGRPDNPFPR | 165   | >ALK-R401Q- RIGRPDNPFPC | 27563 | 27398 |
| >ALK-R401Q- RIGRPDNPFPR | 136   | >ALK-R401Q- RIGRPDNPFPC | 8175  | 8039  |
| >ALK-R401Q- RIGRPDNPFPR | 54    | >ALK-R401Q- RIGRPDNPFPC | 8224  | 8170  |
| >ALK-S225R- SSLESPTNM   | 138   | >ALK-S225R- RSLESPTNM   | 667   | 529   |
| >ALK-S225R- SSLESPTNM   | 496   | >ALK-S225R- RSLESPTNM   | 821   | 325   |
| >ALK-S225R- SSLESPTNMP  | 1203  | >ALK-S225R- RSLESPTNMF  | 128   | 1075  |
| >ALK-S225R- SSLESPTNM   | 423   | >ALK-S225R- RSLESPTNM   | 4746  | 4323  |
| >ALK-S225R- SSLESPTNM   | 99    | >ALK-S225R- RSLESPTNM   | 18    | 81    |
| >ALK-S225R- SSLESPTN    | 3742  | >ALK-S225R- RSLESPTN    | 365   | 3377  |
| >ALK-S225R- SSLESPTNM   | 6     | >ALK-S225R- RSLESPTNM   | 3     | 3     |
| >ALK-S225R- SSLESPTNMP  | 3576  | >ALK-S225R- RSLESPTNMF  | 249   | 3327  |
| >ALK-S225R- SSLESPTNM   | 2095  | >ALK-S225R- RSLESPTNM   | 30    | 2065  |
| >ALK-S225R- SSLESPTNM   | 173   | >ALK-S225R- RSLESPTNM   | 129   | 44    |
| >ALK-S225R- SSLESPTNM   | 826   | >ALK-S225R- RSLESPTNM   | 300   | 526   |
| >ALK-S225R- HSSLESPTNM  | 964   | >ALK-S225R- HRSLESPTNM  | 367   | 597   |
| >ALK-S225R- HSSLESPTNM  | 13    | >ALK-S225R- HRSLESPTNM  | 22063 | 22050 |
| >ALK-S225R- HSSLESPTNM  | 16036 | >ALK-S225R- HRSLESPTNM  | 34    | 16002 |
| >ALK-S225R- HSSLESPTNM  | 25    | >ALK-S225R- HRSLESPTNM  | 650   | 625   |
| >ALK-S225R- LLFQIFGTGH! | 14683 | >ALK-S225R- LLFQIFGTGHI | 214   | 14469 |
| >ALK-S225R- LLFQIFGTGH! | 14350 | >ALK-S225R- LLFQIFGTGHI | 68    | 14282 |
| >ALK-S225R- LLFQIFGTGH! | 22329 | >ALK-S225R- LLFQIFGTGHI | 108   | 22221 |
| >ALK-S225R- LLFQIFGTGH! | 17333 | >ALK-S225R- LLFQIFGTGHI | 66    | 17267 |
| >ALK-S225R- LLFQIFGTGH! | 17102 | >ALK-S225R- LLFQIFGTGHI | 72    | 17030 |
| >ALK-S225R- GHSSLESPTN  | 660   | >ALK-S225R- GHRLESPTN   | 258   | 402   |
| >ALK-S225R- GHSSLESPTN  | 1088  | >ALK-S225R- GHRLESPTN   | 362   | 726   |
| >ALK-S225R- FGTGHSSL    | 485   | >ALK-S225R- FGTGHSSL    | 3142  | 2657  |
| >ALK-S225R- QIFGTGHSSL  | 104   | >ALK-S225R- QIFGTGHSSL  | 447   | 343   |

|                                     |       |                                     |      |       |
|-------------------------------------|-------|-------------------------------------|------|-------|
| >ALK-S225R- <sup>-</sup> QIFGTGHSSL | 64    | >ALK-S225R- <sup>-</sup> QIFGTGHRSL | 188  | 124   |
| >ALK-S225R- <sup>-</sup> QIFGTGHSSL | 144   | >ALK-S225R- <sup>-</sup> QIFGTGHRSL | 294  | 150   |
| >ALK-S225R- <sup>-</sup> QIFGTGHSSL | 33    | >ALK-S225R- <sup>-</sup> QIFGTGHRSL | 210  | 177   |
| >ALK-S225R- <sup>-</sup> QIFGTGHS   | 20200 | >ALK-S225R- <sup>-</sup> QIFGTGHR   | 149  | 20051 |
| >ALK-S225R- <sup>-</sup> QIFGTGHSSL | 87    | >ALK-S225R- <sup>-</sup> QIFGTGHRSL | 77   | 10    |
| >ALK-S225R- <sup>-</sup> QIFGTGHS   | 31439 | >ALK-S225R- <sup>-</sup> QIFGTGHR   | 488  | 30951 |
| >ALK-S225R- <sup>-</sup> QIFGTGHS   | 14358 | >ALK-S225R- <sup>-</sup> QIFGTGHR   | 34   | 14324 |
| >ALK-S225R- <sup>-</sup> QIFGTGHSSL | 447   | >ALK-S225R- <sup>-</sup> QIFGTGHRSL | 1074 | 627   |
| >ALK-S225R- <sup>-</sup> QIFGTGHSSL | 444   | >ALK-S225R- <sup>-</sup> QIFGTGHRSL | 1470 | 1026  |
| >ALK-S225R- <sup>-</sup> QIFGTGHSSL | 364   | >ALK-S225R- <sup>-</sup> QIFGTGHRSL | 1652 | 1288  |
| >ALK-S225R- <sup>-</sup> QIFGTGHS   | 20393 | >ALK-S225R- <sup>-</sup> QIFGTGHR   | 46   | 20347 |
| >ALK-S225R- <sup>-</sup> FQIFGTGHSS | 210   | >ALK-S225R- <sup>-</sup> FQIFGTGHRS | 695  | 485   |
| >ALK-S225R- <sup>-</sup> FQIFGTGHSS | 35    | >ALK-S225R- <sup>-</sup> FQIFGTGHRS | 135  | 100   |
| >ALK-S225R- <sup>-</sup> FQIFGTGHSS | 12    | >ALK-S225R- <sup>-</sup> FQIFGTGHRS | 39   | 27    |
| >ALK-S225R- <sup>-</sup> FQIFGTGHS  | 141   | >ALK-S225R- <sup>-</sup> FQIFGTGHR  | 3259 | 3118  |
| >ALK-S225R- <sup>-</sup> FQIFGTGHSS | 5     | >ALK-S225R- <sup>-</sup> FQIFGTGHRS | 10   | 5     |
| >ALK-S225R- <sup>-</sup> FQIFGTGHSS | 467   | >ALK-S225R- <sup>-</sup> FQIFGTGHRS | 1383 | 916   |
| >ALK-S225R- <sup>-</sup> FQIFGTGHS  | 27939 | >ALK-S225R- <sup>-</sup> FQIFGTGHR  | 400  | 27539 |
| >ALK-S225R- <sup>-</sup> FQIFGTGHSS | 46    | >ALK-S225R- <sup>-</sup> FQIFGTGHRS | 68   | 22    |
| >ALK-S225R- <sup>-</sup> FQIFGTGHSS | 247   | >ALK-S225R- <sup>-</sup> FQIFGTGHRS | 574  | 327   |
| >ALK-S225R- <sup>-</sup> FQIFGTGHSS | 21    | >ALK-S225R- <sup>-</sup> FQIFGTGHRS | 41   | 20    |
| >ALK-S225R- <sup>-</sup> FQIFGTGHSS | 16    | >ALK-S225R- <sup>-</sup> FQIFGTGHRS | 32   | 16    |
| >ALK-S225R- <sup>-</sup> FQIFGTGHSS | 396   | >ALK-S225R- <sup>-</sup> FQIFGTGHRS | 642  | 246   |
| >ALK-S225R- <sup>-</sup> FQIFGTGHSS | 226   | >ALK-S225R- <sup>-</sup> FQIFGTGHRS | 430  | 204   |
| >ALK-S225R- <sup>-</sup> LFQIFGTGHS | 18772 | >ALK-S225R- <sup>-</sup> LFQIFGTGHR | 57   | 18715 |
| >ALK-S225R- <sup>-</sup> LFQIFGTGHS | 21455 | >ALK-S225R- <sup>-</sup> LFQIFGTGHR | 279  | 21176 |
| >ALK-S225R- <sup>-</sup> LFQIFGTGHS | 24575 | >ALK-S225R- <sup>-</sup> LFQIFGTGHR | 485  | 24090 |
| >ALK-S225R- <sup>-</sup> LFQIFGTGHS | 29653 | >ALK-S225R- <sup>-</sup> LFQIFGTGHR | 183  | 29470 |
| >ALK-S631I- <sup>-</sup> vSLDCYLTI  | 23    | >ALK-S631I- <sup>-</sup> nIILDCYLTI | 22   | 1     |
| >ALK-S631I- <sup>-</sup> vSLDCYLTI  | 121   | >ALK-S631I- <sup>-</sup> nIILDCYLTI | 106  | 15    |
| >ALK-S631I- <sup>-</sup> vSLDCYLTI  | 120   | >ALK-S631I- <sup>-</sup> nIILDCYLTI | 122  | 2     |
| >ALK-S631I- <sup>-</sup> vSLDCYLTI  | 300   | >ALK-S631I- <sup>-</sup> nIILDCYLTI | 141  | 159   |
| >ALK-S631I- <sup>-</sup> vSLDCYLTI  | 5     | >ALK-S631I- <sup>-</sup> nIILDCYLTI | 5    | 0     |
| >ALK-S631I- <sup>-</sup> vSLDCYLTI  | 7     | >ALK-S631I- <sup>-</sup> nIILDCYLTI | 8    | 1     |
| >ALK-S631I- <sup>-</sup> vSLDCYLTI  | 14    | >ALK-S631I- <sup>-</sup> nIILDCYLTI | 39   | 25    |
| >ALK-S631I- <sup>-</sup> vSLDCYLTI  | 273   | >ALK-S631I- <sup>-</sup> nIILDCYLTI | 64   | 209   |
| >ALK-S631I- <sup>-</sup> vSLDCYLTI  | 26    | >ALK-S631I- <sup>-</sup> nIILDCYLTI | 24   | 2     |
| >ALK-S631I- <sup>-</sup> vISLDCYLTI | 90    | >ALK-S631I- <sup>-</sup> nIILDCYLTI | 153  | 63    |
| >ALK-S631I- <sup>-</sup> vISLDCYLT  | 6780  | >ALK-S631I- <sup>-</sup> nIILDCYLT  | 230  | 6550  |
| >ALK-S631I- <sup>-</sup> vISLDCYLTI | 818   | >ALK-S631I- <sup>-</sup> nIILDCYLTI | 25   | 793   |
| >ALK-S631I- <sup>-</sup> vISLDCYLTI | 4605  | >ALK-S631I- <sup>-</sup> nIILDCYLTI | 177  | 4428  |
| >ALK-S631I- <sup>-</sup> vISLDCYLT  | 4388  | >ALK-S631I- <sup>-</sup> nIILDCYLT  | 214  | 4174  |
| >ALK-S631I- <sup>-</sup> vISLDCYLTI | 219   | >ALK-S631I- <sup>-</sup> nIILDCYLTI | 14   | 205   |

|                          |       |                          |      |       |
|--------------------------|-------|--------------------------|------|-------|
| >ALK-S631I-v ISLDCYLTI   | 2167  | >ALK-S631I-n IILDCYLTI   | 26   | 2141  |
| >ALK-S631I-v ISLDCYLTI   | 11277 | >ALK-S631I-n IILDCYLTI   | 93   | 11184 |
| >ALK-S631I-v ISLDCYLTI   | 10616 | >ALK-S631I-n IILDCYLTI   | 156  | 10460 |
| >ALK-S631I-v ISLDCYLTI   | 13493 | >ALK-S631I-n IILDCYLTI   | 44   | 13449 |
| >ALK-S631I-v ISLDCYLTI   | 13806 | >ALK-S631I-n IILDCYLTI   | 23   | 13783 |
| >ALK-S631I-v ISLDCYLTI   | 246   | >ALK-S631I-n IILDCYLTI   | 263  | 17    |
| >ALK-S631I-v ISLDCYLTI   | 387   | >ALK-S631I-n IILDCYLTI   | 540  | 153   |
| >ALK-S631I-v ISLDCYLTI   | 158   | >ALK-S631I-n IILDCYLTI   | 766  | 608   |
| >ALK-S631I-v ISLDCYLTI   | 9     | >ALK-S631I-n IILDCYLTI   | 2996 | 2987  |
| >ALK-S631I-v ISLDCYLTI   | 71    | >ALK-S631I-n IILDCYLTI   | 3301 | 3230  |
| >ALK-S631I-v ISLDCYLTI   | 90    | >ALK-S631I-n IILDCYLTI   | 1362 | 1272  |
| >ALK-S631I-v ISLDCYLTI   | 11    | >ALK-S631I-n IILDCYLTI   | 877  | 866   |
| >ALK-S631I-v AIVAFDNISIS | 6117  | >ALK-S631I-n AIVAFDNISIS | 405  | 5712  |
| >ALK-S631I-v AIVAFDNISIS | 5565  | >ALK-S631I-n AIVAFDNISIS | 148  | 5417  |
| >ALK-S631I-v AIVAFDNISIS | 7980  | >ALK-S631I-n AIVAFDNISIS | 318  | 7662  |
| >ALK-S631I-v SISLDCYL    | 1100  | >ALK-S631I-n SIILDCYL    | 298  | 802   |
| >ALK-S631I-v SISLDCYLTI  | 339   | >ALK-S631I-n SIILDCYLTI  | 177  | 162   |
| >ALK-S631I-v SISLDCYL    | 36    | >ALK-S631I-n SIILDCYL    | 103  | 67    |
| >ALK-S631I-v SISLDCYLTI  | 140   | >ALK-S631I-n SIILDCYLTI  | 181  | 41    |
| >ALK-S631I-v SISLDCYLTI  | 166   | >ALK-S631I-n SIILDCYLTI  | 155  | 11    |
| >ALK-S631I-v SISLDCYL    | 690   | >ALK-S631I-n SIILDCYL    | 131  | 559   |
| >ALK-S631I-v SISLDCYLTI  | 143   | >ALK-S631I-n SIILDCYLTI  | 69   | 74    |
| >ALK-S631I-v SISLDCYL    | 887   | >ALK-S631I-n SIILDCYL    | 460  | 427   |
| >ALK-S631I-v SISLDCYL    | 296   | >ALK-S631I-n SIILDCYL    | 358  | 62    |
| >ALK-S631I-v SISLDCYL    | 198   | >ALK-S631I-n SIILDCYL    | 211  | 13    |
| >ALK-S631I-v SISLDCYLTI  | 875   | >ALK-S631I-n SIILDCYLTI  | 440  | 435   |
| >ALK-S631I-v ISISLDCYL   | 332   | >ALK-S631I-n ISIILDCYL   | 466  | 134   |
| >ALK-S631I-v ISISLDCYLTI | 277   | >ALK-S631I-n ISIILDCYLTI | 404  | 127   |
| >ALK-S631I-v ISISLDCY    | 44    | >ALK-S631I-n ISIILDCY    | 227  | 183   |
| >ALK-S631I-v ISISLDCY    | 244   | >ALK-S631I-n ISIILDCY    | 306  | 62    |
| >ALK-S631I-v ISISLDCY    | 89    | >ALK-S631I-n ISIILDCY    | 139  | 50    |
| >ALK-S631I-v ISISLDCY    | 254   | >ALK-S631I-n ISIILDCY    | 728  | 474   |
| >ALK-S631I-v ISISLDCY    | 218   | >ALK-S631I-n ISIILDCY    | 1009 | 791   |
| >ALK-S631I-v ISISLDCYLTI | 308   | >ALK-S631I-n ISIILDCYLTI | 944  | 636   |
| >ALK-S631I-v ISISLDCY    | 22    | >ALK-S631I-n ISIILDCY    | 19   | 3     |
| >ALK-S631I-v ISISLDCYL   | 14    | >ALK-S631I-n ISIILDCYL   | 6    | 8     |
| >ALK-S631I-v ISISLDCYLTI | 17    | >ALK-S631I-n ISIILDCYLTI | 9    | 8     |
| >ALK-S631I-v ISISLDCY    | 461   | >ALK-S631I-n ISIILDCY    | 762  | 301   |
| >ALK-S631I-v ISISLDCY    | 144   | >ALK-S631I-n ISIILDCY    | 280  | 136   |
| >ALK-S631I-v ISISLDCYL   | 23    | >ALK-S631I-n ISIILDCYL   | 34   | 11    |
| >ALK-S631I-v ISISLDCYLTI | 23    | >ALK-S631I-n ISIILDCYLTI | 31   | 8     |
| >ALK-S631I-v ISISLDCY    | 213   | >ALK-S631I-n ISIILDCY    | 582  | 369   |
| >ALK-S631I-v ISISLDCYLTI | 230   | >ALK-S631I-n ISIILDCYLTI | 935  | 705   |

|                          |       |                          |       |       |
|--------------------------|-------|--------------------------|-------|-------|
| >ALK-S631I-v ISISLDCYLTI | 34    | >ALK-S631I-n ISIILDCYLTI | 50    | 16    |
| >ALK-S631I-v NISISLDCYL  | 70    | >ALK-S631I-n NISIILDCYL  | 81    | 11    |
| >ALK-S631I-v NISISLDCYL  | 474   | >ALK-S631I-n NISIILDCYL  | 498   | 24    |
| >ALK-S631I-v NISISLDCYL  | 444   | >ALK-S631I-n NISIILDCYL  | 388   | 56    |
| >ALK-S631I-v NISISLDCY   | 1069  | >ALK-S631I-n NISIILDCY   | 486   | 583   |
| >ALK-S631I-v DNISISLDCY  | 171   | >ALK-S631I-n DNISIILDCY  | 54    | 117   |
| >ALK-S631I-v FDNISISL    | 251   | >ALK-S631I-n FDNISIIL    | 611   | 360   |
| >ALK-S631I-v FDNISISL    | 920   | >ALK-S631I-n FDNISIIL    | 497   | 423   |
| >ALK-S631I-v VAFDNISIS   | 4172  | >ALK-S631I-n VAFDNISII   | 282   | 3890  |
| >ALK-S631I-v VAFDNISISL  | 234   | >ALK-S631I-n VAFDNISIIL  | 742   | 508   |
| >ALK-S631I-v VAFDNISIS   | 9006  | >ALK-S631I-n VAFDNISII   | 216   | 8790  |
| >ALK-S631I-v VAFDNISIS   | 8933  | >ALK-S631I-n VAFDNISII   | 496   | 8437  |
| >ALK-S631I-v VAFDNISIS   | 7003  | >ALK-S631I-n VAFDNISII   | 135   | 6868  |
| >ALK-S631I-v VAFDNISISL  | 63    | >ALK-S631I-n VAFDNISIIL  | 302   | 239   |
| >ALK-S631I-v VAFDNISIS   | 15666 | >ALK-S631I-n VAFDNISII   | 394   | 15272 |
| >ALK-S631I-v VAFDNISISL  | 59    | >ALK-S631I-n VAFDNISIIL  | 241   | 182   |
| >ALK-S631I-v VAFDNISIS   | 6618  | >ALK-S631I-n VAFDNISII   | 293   | 6325  |
| >ALK-S631I-v VAFDNISISL  | 147   | >ALK-S631I-n VAFDNISIIL  | 298   | 151   |
| >ALK-S631I-v VAFDNISIS   | 8769  | >ALK-S631I-n VAFDNISII   | 108   | 8661  |
| >ALK-S631I-v VAFDNISISL  | 21    | >ALK-S631I-n VAFDNISIIL  | 79    | 58    |
| >ALK-S631I-v VAFDNISIS   | 2883  | >ALK-S631I-n VAFDNISII   | 266   | 2617  |
| >ALK-S631I-v VAFDNISIS   | 28475 | >ALK-S631I-n VAFDNISII   | 32    | 28443 |
| >ALK-S631I-v IVAFDNISISL | 60    | >ALK-S631I-n IVAFDNISIIL | 153   | 93    |
| >ALK-S631I-v IVAFDNISISL | 151   | >ALK-S631I-n IVAFDNISIIL | 779   | 628   |
| >ALK-S631I-v IVAFDNISISL | 370   | >ALK-S631I-n IVAFDNISIIL | 1440  | 1070  |
| >ALK-S631I-v IVAFDNISISL | 118   | >ALK-S631I-n IVAFDNISIIL | 365   | 247   |
| >ALK-S631I-v IVAFDNISIS  | 32501 | >ALK-S631I-n IVAFDNISII  | 92    | 32409 |
| >ALK-V1135E VSGMPNDPS    | 144   | >ALK-V1135E ESGMPNDPS    | 1910  | 1766  |
| >ALK-V1135E GAFGEVYEGC   | 320   | >ALK-V1135E GAFGEVYEGC   | 24882 | 24562 |
| >ALK-V1135E GAFGEVYEGC   | 76    | >ALK-V1135E GAFGEVYEGC   | 25748 | 25672 |
| >ALK-V1135E GAFGEVYEGC   | 422   | >ALK-V1135E GAFGEVYEGC   | 25055 | 24633 |
| >ALK-V1135E GAFGEVYEGC   | 96    | >ALK-V1135E GAFGEVYEGC   | 34765 | 34669 |
| >ALK-V1135E YEGQVSGM     | 224   | >ALK-V1135E YEGQESGM     | 1410  | 1186  |
| >ALK-V1135E YEGQVSGM     | 82    | >ALK-V1135E YEGQESGM     | 855   | 773   |
| >ALK-V1135E EVYEGQVSGI   | 336   | >ALK-V1135E EVYEGQESGI   | 729   | 393   |
| >ALK-V1135E EVYEGQVSGI   | 4     | >ALK-V1135E EVYEGQESGI   | 5     | 1     |
| >ALK-V1135E EVYEGQVSGI   | 8     | >ALK-V1135E EVYEGQESGI   | 17    | 9     |
| >ALK-V1135E EVYEGQVSGI   | 409   | >ALK-V1135E EVYEGQESGI   | 771   | 362   |
| >ALK-V1135E EVYEGQVSGI   | 9     | >ALK-V1135E EVYEGQESGI   | 26    | 17    |
| >ALK-V1135E EVYEGQVSGI   | 199   | >ALK-V1135E EVYEGQESGI   | 661   | 462   |
| >ALK-V1135E GEVYEGQV     | 307   | >ALK-V1135E GEVYEGQE     | 7655  | 7348  |
| >ALK-V1135E GEVYEGQV     | 203   | >ALK-V1135E GEVYEGQE     | 7207  | 7004  |
| >ALK-V1135E GEVYEGQVSC   | 96    | >ALK-V1135E GEVYEGQESC   | 113   | 17    |

|                        |      |                        |       |       |
|------------------------|------|------------------------|-------|-------|
| >ALK-V1135E GEVYEGQVSC | 455  | >ALK-V1135E GEVYEGQESC | 742   | 287   |
| >ALK-V1135E GEVYEGQV   | 373  | >ALK-V1135E GEVYEGQE   | 24418 | 24045 |
| >ALK-V1135E GEVYEGQVSC | 41   | >ALK-V1135E GEVYEGQESC | 138   | 97    |
| >ALK-V1135E AFGEVYEGQV | 418  | >ALK-V1135E AFGEVYEGQE | 28469 | 28051 |
| >ALK-V757M VSVLGIFNL   | 1915 | >ALK-V757M MSVLGIFNL   | 305   | 1610  |
| >ALK-V757M VSVLGIFNL   | 799  | >ALK-V757M MSVLGIFNL   | 151   | 648   |
| >ALK-V757M VSVLGIFNLEK | 776  | >ALK-V757M MSVLGIFNLE  | 334   | 442   |
| >ALK-V757M VSVLGIFNLEK | 23   | >ALK-V757M MSVLGIFNLE  | 15    | 8     |
| >ALK-V757M VSVLGIFNLEK | 1641 | >ALK-V757M MSVLGIFNLE  | 81    | 1560  |
| >ALK-V757M VSVLGIFNLEK | 544  | >ALK-V757M MSVLGIFNLE  | 20    | 524   |
| >ALK-V757M VSVLGIFNL   | 3248 | >ALK-V757M MSVLGIFNL   | 26    | 3222  |
| >ALK-V757M VSVLGIFNL   | 4443 | >ALK-V757M MSVLGIFNL   | 421   | 4022  |
| >ALK-V757M VSVLGIFNL   | 6    | >ALK-V757M MSVLGIFNL   | 6     | 0     |
| >ALK-V757M VSVLGIFNL   | 831  | >ALK-V757M MSVLGIFNL   | 142   | 689   |
| >ALK-V757M VSVLGIFNL   | 352  | >ALK-V757M MSVLGIFNL   | 476   | 124   |
| >ALK-V757M VSVLGIFNLEK | 540  | >ALK-V757M MSVLGIFNLE  | 488   | 52    |
| >ALK-V757M GSVVLGIFNL  | 2178 | >ALK-V757M GMSVLGIFNL  | 169   | 2009  |
| >ALK-V757M GSVVLGIFNL  | 242  | >ALK-V757M GMSVLGIFNL  | 34    | 208   |
| >ALK-V757M GSVVLGIFNL  | 955  | >ALK-V757M GMSVLGIFNL  | 165   | 790   |
| >ALK-V757M GSVVLGIFNL  | 844  | >ALK-V757M GMSVLGIFNL  | 460   | 384   |
| >ALK-V757M GSVVLGIFNL  | 3834 | >ALK-V757M GMSVLGIFNL  | 35    | 3799  |
| >ALK-V757M GSVVLGIFNL  | 2880 | >ALK-V757M GMSVLGIFNL  | 20    | 2860  |
| >ALK-V757M GSVVLGIFNL  | 833  | >ALK-V757M GMSVLGIFNL  | 14    | 819   |
| >ALK-V757M GSVVLGIFNL  | 4753 | >ALK-V757M GMSVLGIFNL  | 119   | 4634  |
| >ALK-V757M GSVVLGIFNL  | 1145 | >ALK-V757M GMSVLGIFNL  | 15    | 1130  |
| >ALK-V757M GSVVLGIF    | 1757 | >ALK-V757M GMSVLGIF    | 138   | 1619  |
| >ALK-V757M GSVVLGIF    | 4220 | >ALK-V757M GMSVLGIF    | 179   | 4041  |
| >ALK-V757M HGSVVLGIFN  | 1998 | >ALK-V757M HGMSVLGIFN  | 439   | 1559  |
| >ALK-V757M HGSVVLGIFN  | 1452 | >ALK-V757M HGMSVLGIFN  | 454   | 998   |
| >ALK-V757M HGSVVLGIF   | 127  | >ALK-V757M HGMSVLGIF   | 74    | 53    |
| >ALK-V757M SHGVSVLGIF  | 573  | >ALK-V757M SHGMSVLGIF  | 432   | 141   |
| >ALK-V757M RSHGVSVL    | 46   | >ALK-V757M RSHGMSVL    | 38    | 8     |
| >ALK-V757M RSHGVSVLG   | 51   | >ALK-V757M RSHGMSVLG   | 37    | 14    |
| >ALK-V757M RSHGVSVLGI  | 12   | >ALK-V757M RSHGMSVLG   | 11    | 1     |
| >ALK-V757M RSHGVSVLGI  | 579  | >ALK-V757M RSHGMSVLG   | 451   | 128   |
| >ALK-V757M RSHGVSVL    | 114  | >ALK-V757M RSHGMSVL    | 173   | 59    |
| >ALK-V757M RSHGVSVLGI  | 32   | >ALK-V757M RSHGMSVLG   | 29    | 3     |
| >ALK-V757M RSHGVSVLGI  | 84   | >ALK-V757M RSHGMSVLG   | 88    | 4     |
| >ALK-V757M RSHGVSVL    | 474  | >ALK-V757M RSHGMSVL    | 583   | 109   |
| >ALK-V757M RSHGVSVLGI  | 187  | >ALK-V757M RSHGMSVLG   | 177   | 10    |
| >ALK-V757M RSHGVSVL    | 312  | >ALK-V757M RSHGMSVL    | 446   | 134   |
| >ALK-V757M RSHGVSVLGI  | 105  | >ALK-V757M RSHGMSVLG   | 112   | 7     |
| >ALK-V757M RSHGVSVL    | 6    | >ALK-V757M RSHGMSVL    | 4     | 2     |

|                       |      |                      |     |      |
|-----------------------|------|----------------------|-----|------|
| >ALK-V757M RSHGVSVLGI | 8    | >ALK-V757M RSHGMSVLG | 5   | 3    |
| >ALK-V757M RSHGVSVLGI | 6    | >ALK-V757M RSHGMSVLG | 5   | 1    |
| >ALK-V757M RSHGVSVLGI | 146  | >ALK-V757M RSHGMSVLG | 296 | 150  |
| >ALK-V757M RSHGVSVL   | 176  | >ALK-V757M RSHGMSVL  | 850 | 674  |
| >ALK-V757M RSHGVSVLGI | 58   | >ALK-V757M RSHGMSVLG | 160 | 102  |
| >ALK-V757M RSHGVSVLGI | 24   | >ALK-V757M RSHGMSVLG | 47  | 23   |
| >ALK-V757M RSHGVSVL   | 33   | >ALK-V757M RSHGMSVL  | 34  | 1    |
| >ALK-V757M RSHGVSVLGI | 1114 | >ALK-V757M RSHGMSVLG | 423 | 691  |
| >ALK-V757M RSHGVSVLGI | 13   | >ALK-V757M RSHGMSVLG | 14  | 1    |
| >ALK-V757M RSHGVSVL   | 104  | >ALK-V757M RSHGMSVL  | 111 | 7    |
| >ALK-V757M RSHGVSVLGI | 76   | >ALK-V757M RSHGMSVLG | 71  | 5    |
| >ALK-V757M MRSHGVS    | 49   | >ALK-V757M MRSHGMSV  | 66  | 17   |
| >ALK-V757M MRSHGVS    | 17   | >ALK-V757M MRSHGMSV  | 35  | 18   |
| >ALK-V757M MRSHGVS    | 87   | >ALK-V757M MRSHGMSV  | 119 | 32   |
| >ALK-V757M MRSHGVS    | 363  | >ALK-V757M MRSHGMSV  | 454 | 91   |
| >ALK-V757M MRSHGVS    | 327  | >ALK-V757M MRSHGMSV  | 408 | 81   |
| >ALK-V757M MRSHGVS    | 9    | >ALK-V757M MRSHGMSV  | 11  | 2    |
| >ALK-V757M MRSHGVS    | 627  | >ALK-V757M MRSHGMSV  | 230 | 397  |
| >ALK-V757M MRSHGVS    | 433  | >ALK-V757M MRSHGMSV  | 589 | 156  |
| >ALK-V757M MRSHGVS    | 71   | >ALK-V757M MRSHGMSV  | 148 | 77   |
| >ALK-V757M MRSHGVS    | 244  | >ALK-V757M MRSHGMSV  | 488 | 244  |
| >ALK-V757M MRSHGVS    | 2209 | >ALK-V757M MRSHGMSV  | 357 | 1852 |
| >ALK-V757M MRSHGVS    | 394  | >ALK-V757M MRSHGMSV  | 156 | 238  |
| >ALK-V757M MRSHGVS    | 189  | >ALK-V757M MRSHGMSV  | 127 | 62   |
| >ALK-V757M MMRSHGVS   | 145  | >ALK-V757M MMRSHGMS  | 163 | 18   |
| >ALK-V757M MMRSHGVS   | 18   | >ALK-V757M MMRSHGMS  | 25  | 7    |
| >ALK-V757M MMRSHGVS   | 68   | >ALK-V757M MMRSHGMS  | 61  | 7    |
| >ALK-V757M MMRSHGVS   | 3    | >ALK-V757M MMRSHGMS  | 2   | 1    |
| >ALK-V757M MMRSHGVS   | 45   | >ALK-V757M MMRSHGMS  | 44  | 1    |
| >ALK-V757M MMRSHGVS   | 102  | >ALK-V757M MMRSHGMS  | 124 | 22   |
| >ALK-V757M MMRSHGVS   | 4    | >ALK-V757M MMRSHGMS  | 5   | 1    |
| >ALK-V757M MMRSHGVS   | 38   | >ALK-V757M MMRSHGMS  | 87  | 49   |
| >ALK-V757M MMRSHGVS   | 25   | >ALK-V757M MMRSHGMS  | 29  | 4    |
| >ALK-V757M MMRSHGVS   | 312  | >ALK-V757M MMRSHGMS  | 487 | 175  |
| >ALK-V757M MMRSHGVS   | 83   | >ALK-V757M MMRSHGMS  | 112 | 29   |
| >ALK-V757M MMRSHGVS   | 2    | >ALK-V757M MMRSHGMS  | 2   | 0    |
| >ALK-V757M MMRSHGVS   | 8    | >ALK-V757M MMRSHGMS  | 10  | 2    |
| >ALK-V757M MMRSHGVS   | 199  | >ALK-V757M MMRSHGMS  | 170 | 29   |
| >ALK-V757M MMRSHGVS   | 21   | >ALK-V757M MMRSHGMS  | 9   | 12   |
| >ALK-V757M MMRSHGVS   | 61   | >ALK-V757M MMRSHGMS  | 40  | 21   |
| >ALK-V757M MMRSHGVS   | 89   | >ALK-V757M MMRSHGMS  | 49  | 40   |
| >ALK-V757M MMRSHGVS   | 84   | >ALK-V757M MMRSHGMS  | 112 | 28   |
| >ALK-V757M MMRSHGVS   | 26   | >ALK-V757M MMRSHGMS  | 17  | 9    |

|                      |      |                     |      |      |
|----------------------|------|---------------------|------|------|
| >ALK-V757M MMRSHGVS\ | 50   | >ALK-V757M MMRSHGMS | 54   | 4    |
| >ALK-V757M MMRSHGVS\ | 29   | >ALK-V757M MMRSHGMS | 34   | 5    |
| >ALK-V757M MMRSHGVS\ | 394  | >ALK-V757M MMRSHGMS | 398  | 4    |
| >ALK-V757M MMRSHGVS\ | 228  | >ALK-V757M MMRSHGMS | 203  | 25   |
| >ALK-V757M MMRSHGVS\ | 6    | >ALK-V757M MMRSHGMS | 6    | 0    |
| >ALK-V757M MMRSHGVS\ | 5    | >ALK-V757M MMRSHGMS | 6    | 1    |
| >ALK-V757M MMRSHGVS\ | 217  | >ALK-V757M MMRSHGMS | 136  | 81   |
| >ALK-V757M MMRSHGVS\ | 261  | >ALK-V757M MMRSHGMS | 331  | 70   |
| >ALK-V757M TMMRSHGV  | 40   | >ALK-V757M TMMRSHGM | 447  | 407  |
| >ALK-V757M TMMRSHGV\ | 28   | >ALK-V757M TMMRSHGM | 13   | 15   |
| >ALK-V757M TMMRSHGV\ | 492  | >ALK-V757M TMMRSHGM | 573  | 81   |
| >ALK-V757M TMMRSHGV  | 12   | >ALK-V757M TMMRSHGM | 173  | 161  |
| >ALK-V757M TMMRSHGV\ | 44   | >ALK-V757M TMMRSHGM | 19   | 25   |
| >ALK-V757M TMMRSHGV\ | 74   | >ALK-V757M TMMRSHGM | 64   | 10   |
| >ALK-V757M TMMRSHGV  | 5    | >ALK-V757M TMMRSHGM | 158  | 153  |
| >ALK-V757M TMMRSHGV\ | 14   | >ALK-V757M TMMRSHGM | 9    | 5    |
| >ALK-V757M TMMRSHGV\ | 22   | >ALK-V757M TMMRSHGM | 23   | 1    |
| >ALK-V757M TMMRSHGV  | 24   | >ALK-V757M TMMRSHGM | 479  | 455  |
| >ALK-V757M TMMRSHGV\ | 103  | >ALK-V757M TMMRSHGM | 46   | 57   |
| >ALK-V757M TMMRSHGV  | 4    | >ALK-V757M TMMRSHGM | 136  | 132  |
| >ALK-V757M TMMRSHGV\ | 5    | >ALK-V757M TMMRSHGM | 5    | 0    |
| >ALK-V757M TMMRSHGV\ | 49   | >ALK-V757M TMMRSHGM | 88   | 39   |
| >ALK-V757M TMMRSHGV  | 5    | >ALK-V757M TMMRSHGM | 117  | 112  |
| >ALK-V757M TMMRSHGV\ | 9    | >ALK-V757M TMMRSHGM | 10   | 1    |
| >ALK-V757M TMMRSHGV\ | 64   | >ALK-V757M TMMRSHGM | 102  | 38   |
| >ALK-V757M TMMRSHGV  | 14   | >ALK-V757M TMMRSHGM | 1833 | 1819 |
| >ALK-V757M TMMRSHGV\ | 34   | >ALK-V757M TMMRSHGM | 31   | 3    |
| >ALK-V757M TMMRSHGV  | 5    | >ALK-V757M TMMRSHGM | 83   | 78   |
| >ALK-V757M TMMRSHGV\ | 14   | >ALK-V757M TMMRSHGM | 13   | 1    |
| >ALK-V757M TMMRSHGV\ | 98   | >ALK-V757M TMMRSHGM | 336  | 238  |
| >ALK-V757M TMMRSHGV  | 2    | >ALK-V757M TMMRSHGM | 124  | 122  |
| >ALK-V757M TMMRSHGV\ | 3    | >ALK-V757M TMMRSHGM | 3    | 0    |
| >ALK-V757M TMMRSHGV\ | 25   | >ALK-V757M TMMRSHGM | 32   | 7    |
| >ALK-V757M TMMRSHGV  | 83   | >ALK-V757M TMMRSHGM | 5561 | 5478 |
| >ALK-V757M TMMRSHGV\ | 207  | >ALK-V757M TMMRSHGM | 119  | 88   |
| >ALK-V757M TMMRSHGV  | 23   | >ALK-V757M TMMRSHGM | 268  | 245  |
| >ALK-V757M TMMRSHGV\ | 129  | >ALK-V757M TMMRSHGM | 62   | 67   |
| >ALK-V757M TMMRSHGV\ | 360  | >ALK-V757M TMMRSHGM | 577  | 217  |
| >ALK-V757M TMMRSHGV  | 1507 | >ALK-V757M TMMRSHGM | 115  | 1392 |
| >ALK-V757M TMMRSHGV\ | 219  | >ALK-V757M TMMRSHGM | 301  | 82   |
| >ALK-V757M TMMRSHGV\ | 77   | >ALK-V757M TMMRSHGM | 121  | 44   |
| >ALK-V757M TMMRSHGV  | 978  | >ALK-V757M TMMRSHGM | 140  | 838  |
| >ALK-V757M TMMRSHGV\ | 345  | >ALK-V757M TMMRSHGM | 308  | 37   |



|                        |      |                        |       |       |
|------------------------|------|------------------------|-------|-------|
| >ALK-V757M TMMRSHGV    | 614  | >ALK-V757M TMMRSHGM    | 121   | 493   |
| >ALK-V757M TMMRSHGV    | 47   | >ALK-V757M TMMRSHGM    | 50    | 3     |
| >ALK-V757M TMMRSHGV    | 39   | >ALK-V757M TMMRSHGM    | 65    | 26    |
| >ALK-V757M TMMRSHGV    | 22   | >ALK-V757M TMMRSHGM    | 35    | 13    |
| >ALK-V757M NTMMRSHG    | 187  | >ALK-V757M NTMMRSHG    | 3143  | 2956  |
| >ALK-V757M NTMMRSHG    | 267  | >ALK-V757M NTMMRSHG    | 308   | 41    |
| >ALK-V757M NTMMRSHG    | 81   | >ALK-V757M NTMMRSHG    | 4649  | 4568  |
| >ALK-V757M NTMMRSHG    | 102  | >ALK-V757M NTMMRSHG    | 49    | 53    |
| >ALK-V757M NTMMRSHG    | 39   | >ALK-V757M NTMMRSHG    | 1802  | 1763  |
| >ALK-V757M NTMMRSHG    | 62   | >ALK-V757M NTMMRSHG    | 70    | 8     |
| >ALK-V757M NTMMRSHG    | 337  | >ALK-V757M NTMMRSHG    | 12675 | 12338 |
| >ALK-V757M NTMMRSHG    | 172  | >ALK-V757M NTMMRSHG    | 7174  | 7002  |
| >ALK-V757M NTMMRSHG    | 176  | >ALK-V757M NTMMRSHG    | 7419  | 7243  |
| >ALK-V757M NTMMRSHG    | 339  | >ALK-V757M NTMMRSHG    | 24557 | 24218 |
| >ALK-V757M NTMMRSHG    | 4491 | >ALK-V757M NTMMRSHG    | 114   | 4377  |
| >ALK-V757M NTMMRSHG    | 2779 | >ALK-V757M NTMMRSHG    | 54    | 2725  |
| >ALK-V757M NTMMRSHG    | 6    | >ALK-V757M NTMMRSHG    | 113   | 107   |
| >ALK-V757M NTMMRSHG    | 10   | >ALK-V757M NTMMRSHG    | 9     | 1     |
| >ALK-V757M NTMMRSHG    | 5    | >ALK-V757M NTMMRSHG    | 30    | 25    |
| >ALK-V757M NTMMRSHG    | 14   | >ALK-V757M NTMMRSHG    | 10    | 4     |
| >ALK-V757M NTMMRSHG    | 207  | >ALK-V757M NTMMRSHG    | 129   | 78    |
| >ALK-V757M NTMMRSHG    | 183  | >ALK-V757M NTMMRSHG    | 112   | 71    |
| >ALK-V757M NTMMRSHG    | 1429 | >ALK-V757M NTMMRSHG    | 33    | 1396  |
| >ALK-Y1278S YRASYYRK   | 35   | >ALK-Y1278S SRASYYRK   | 111   | 76    |
| >ALK-Y1278S IYRASYYRK  | 2139 | >ALK-Y1278S ISRASYYRK  | 92    | 2047  |
| >ALK-Y1278S IYRASYYRK  | 2411 | >ALK-Y1278S ISRASYYRK  | 61    | 2350  |
| >ALK-Y1278S IYRASYYRK  | 80   | >ALK-Y1278S ISRASYYRK  | 7393  | 7313  |
| >ALK-Y1278S IYRASYYR   | 13   | >ALK-Y1278S ISRASYYR   | 13    | 0     |
| >ALK-Y1278S IYRASYYRK  | 4    | >ALK-Y1278S ISRASYYRK  | 4     | 0     |
| >ALK-Y1278S IYRASYYRKG | 120  | >ALK-Y1278S ISRASYYRKG | 120   | 0     |
| >ALK-Y1278S IYRASYYRKG | 191  | >ALK-Y1278S ISRASYYRKG | 190   | 1     |
| >ALK-Y1278S IYRASYYR   | 6    | >ALK-Y1278S ISRASYYR   | 7     | 1     |
| >ALK-Y1278S IYRASYYRK  | 27   | >ALK-Y1278S ISRASYYRK  | 27    | 0     |
| >ALK-Y1278S IYRASYYR   | 11   | >ALK-Y1278S ISRASYYR   | 46    | 35    |
| >ALK-Y1278S IYRASYYRK  | 327  | >ALK-Y1278S ISRASYYRK  | 2802  | 2475  |
| >ALK-Y1278S IYRASYYR   | 531  | >ALK-Y1278S ISRASYYR   | 57    | 474   |
| >ALK-Y1278S IYRASYYRK  | 1417 | >ALK-Y1278S ISRASYYRK  | 473   | 944   |
| >ALK-Y1278S IYRASYYR   | 11   | >ALK-Y1278S ISRASYYR   | 100   | 89    |
| >ALK-Y1278S IYRASYYRK  | 112  | >ALK-Y1278S ISRASYYRK  | 6903  | 6791  |
| >ALK-Y1278S IGDFGMARD  | 177  | >ALK-Y1278S IGDFGMARD  | 20484 | 20307 |
| >ALK-Y1278S IGDFGMARD  | 381  | >ALK-Y1278S IGDFGMARD  | 21249 | 20868 |
| >ALK-Y1278S DIYRASYYRK | 59   | >ALK-Y1278S DISRASYYRK | 245   | 186   |
| >ALK-Y1278S DIYRASYYRK | 50   | >ALK-Y1278S DISRASYYRK | 53    | 3     |

|                         |     |                         |      |      |
|-------------------------|-----|-------------------------|------|------|
| >ALK-Y1278S DIYRASYY    | 80  | >ALK-Y1278S DISRASYY    | 455  | 375  |
| >ALK-Y1278S DIYRASYY    | 35  | >ALK-Y1278S DISRASYY    | 189  | 154  |
| >ALK-Y1278S DIYRASYY    | 81  | >ALK-Y1278S DISRASYY    | 274  | 193  |
| >ALK-Y1278S DIYRASYY    | 365 | >ALK-Y1278S DISRASYY    | 236  | 129  |
| >ALK-Y1278S DIYRASYYR   | 32  | >ALK-Y1278S DISRASYYR   | 151  | 119  |
| >ALK-Y1278S DIYRASYYR   | 12  | >ALK-Y1278S DISRASYYR   | 18   | 6    |
| >ALK-Y1278S DIYRASYYRK  | 446 | >ALK-Y1278S DISRASYYRK  | 1695 | 1249 |
| >ALK-Y1278S DIYRASYY    | 75  | >ALK-Y1278S DISRASYY    | 219  | 144  |
| >ALK-Y1278S DIYRASYYR   | 4   | >ALK-Y1278S DISRASYYR   | 5    | 1    |
| >ALK-Y1278S DIYRASYYRK  | 29  | >ALK-Y1278S DISRASYYRK  | 90   | 61   |
| >ALK-Y1278S DIYRASYY    | 366 | >ALK-Y1278S DISRASYY    | 2711 | 2345 |
| >ALK-Y1278S DIYRASYY    | 524 | >ALK-Y1278S DISRASYY    | 273  | 251  |
| >ALK-Y1278S DIYRASYYR   | 19  | >ALK-Y1278S DISRASYYR   | 49   | 30   |
| >ALK-Y1278S RDIYRASYYR  | 33  | >ALK-Y1278S RDISRASYYR  | 43   | 10   |
| >ALK-Y1278S RDIYRASYY   | 404 | >ALK-Y1278S RDISRASYY   | 331  | 73   |
| >ALK-Y1278S RDIYRASYY   | 447 | >ALK-Y1278S RDISRASYY   | 480  | 33   |
| >ALK-Y1278S RDIYRASYY   | 33  | >ALK-Y1278S RDISRASYY   | 17   | 16   |
| >ALK-Y1278S RDIYRASYYR  | 489 | >ALK-Y1278S RDISRASYYR  | 931  | 442  |
| >ALK-Y1278S RDIYRASYYR  | 65  | >ALK-Y1278S RDISRASYYR  | 52   | 13   |
| >ALK-Y1278S ARDIYRASYY  | 313 | >ALK-Y1278S ARDISRASYY  | 902  | 589  |
| >ALK-Y1278S ARDIYRASYY  | 445 | >ALK-Y1278S ARDISRASYY  | 592  | 147  |
| >ALK-Y1278S ARDIYRASYY  | 243 | >ALK-Y1278S ARDISRASYY  | 383  | 140  |
| >ALK-Y1278S ARDIYRASYY  | 681 | >ALK-Y1278S ARDISRASYY  | 490  | 191  |
| >ALK-Y1278S ARDIYRASYY  | 93  | >ALK-Y1278S ARDISRASYY  | 166  | 73   |
| >ALK-Y1278S MARDIYRASYY | 411 | >ALK-Y1278S MARDISRASYY | 573  | 162  |
| >ALK-Y1278S MARDIYRASYY | 59  | >ALK-Y1278S MARDISRASYY | 70   | 11   |
| >ALK-Y1278S MARDIYRASYY | 38  | >ALK-Y1278S MARDISRASYY | 36   | 2    |
| >ALK-Y1278S MARDIYRASYY | 75  | >ALK-Y1278S MARDISRASYY | 77   | 2    |
| >ALK-Y1278S MARDIYRASYY | 15  | >ALK-Y1278S MARDISRASYY | 14   | 1    |
| >ALK-Y1278S MARDIYRASYY | 20  | >ALK-Y1278S MARDISRASYY | 21   | 1    |
| >ALK-Y1278S MARDIYRASYY | 455 | >ALK-Y1278S MARDISRASYY | 419  | 36   |
| >ALK-Y1278S MARDIYRASYY | 121 | >ALK-Y1278S MARDISRASYY | 91   | 30   |
| >ALK-Y1278S MARDIYRASYY | 215 | >ALK-Y1278S MARDISRASYY | 224  | 9    |
| >ALK-Y1278S MARDIYRASYY | 397 | >ALK-Y1278S MARDISRASYY | 1298 | 901  |
| >ALK-Y1278S MARDIYRASYY | 78  | >ALK-Y1278S MARDISRASYY | 56   | 22   |
| >ALK-Y1278S MARDIYRASYY | 155 | >ALK-Y1278S MARDISRASYY | 100  | 55   |
| >ALK-Y1278S MARDIYRASYY | 31  | >ALK-Y1278S MARDISRASYY | 31   | 0    |
| >ALK-Y1278S MARDIYRASYY | 52  | >ALK-Y1278S MARDISRASYY | 64   | 12   |
| >ALK-Y1278S MARDIYRASYY | 9   | >ALK-Y1278S MARDISRASYY | 5    | 4    |
| >ALK-Y1278S MARDIYRASYY | 8   | >ALK-Y1278S MARDISRASYY | 5    | 3    |
| >ALK-Y1278S MARDIYRASYY | 54  | >ALK-Y1278S MARDISRASYY | 38   | 16   |
| >ALK-Y1278S MARDIYRASYY | 185 | >ALK-Y1278S MARDISRASYY | 933  | 748  |
| >ALK-Y1278S MARDIYRASYY | 522 | >ALK-Y1278S MARDISRASYY | 436  | 86   |

|                        |       |                        |       |       |
|------------------------|-------|------------------------|-------|-------|
| >ALK-Y1278S MARDIYRASY | 480   | >ALK-Y1278S MARDISRASY | 456   | 24    |
| >ALK-Y1278S MARDIYRASY | 482   | >ALK-Y1278S MARDISRASY | 330   | 152   |
| >ALK-Y1278S MARDIYRASY | 13    | >ALK-Y1278S MARDISRASY | 10    | 3     |
| >ALK-Y1278S MARDIYRASY | 521   | >ALK-Y1278S MARDISRASY | 317   | 204   |
| >ALK-Y1278S GMARDIYRA  | 43    | >ALK-Y1278S GMARDISRA  | 912   | 869   |
| >ALK-Y1278S GMARDIYRA  | 16    | >ALK-Y1278S GMARDISRA  | 81    | 65    |
| >ALK-Y1278S GMARDIYRA  | 19    | >ALK-Y1278S GMARDISRA  | 9     | 10    |
| >ALK-Y1278S GMARDIYRA  | 13    | >ALK-Y1278S GMARDISRA  | 47    | 34    |
| >ALK-Y1278S GMARDIYRA  | 13    | >ALK-Y1278S GMARDISRA  | 131   | 118   |
| >ALK-Y1278S GMARDIYRA  | 36    | >ALK-Y1278S GMARDISRA  | 110   | 74    |
| >ALK-Y1278S GMARDIYRA  | 174   | >ALK-Y1278S GMARDISRA  | 1427  | 1253  |
| >ALK-Y1278S GMARDIYRA  | 8     | >ALK-Y1278S GMARDISRA  | 9     | 1     |
| >ALK-Y1278S GMARDIYR   | 395   | >ALK-Y1278S GMARDISR   | 2482  | 2087  |
| >ALK-Y1278S GMARDIYRA' | 27    | >ALK-Y1278S GMARDISRA' | 59    | 32    |
| >ALK-Y1278S GMARDIYRA' | 12    | >ALK-Y1278S GMARDISRA' | 14    | 2     |
| >ALK-Y1278S GMARDIYR   | 19    | >ALK-Y1278S GMARDISR   | 171   | 152   |
| >ALK-Y1278S GMARDIYR   | 195   | >ALK-Y1278S GMARDISR   | 659   | 464   |
| >ALK-Y1278S GMARDIYRA' | 56    | >ALK-Y1278S GMARDISRA' | 46    | 10    |
| >ALK-Y1278S GMARDIYRA' | 445   | >ALK-Y1278S GMARDISRA' | 174   | 271   |
| >ALK-Y1278S GMARDIYRA' | 83    | >ALK-Y1278S GMARDISRA' | 45    | 38    |
| >ALK-Y1278S GMARDIYRA' | 366   | >ALK-Y1278S GMARDISRA' | 708   | 342   |
| >ALK-Y1278S GMARDIYR   | 152   | >ALK-Y1278S GMARDISR   | 1987  | 1835  |
| >ALK-Y1278S FGMARDIYR  | 340   | >ALK-Y1278S FGMARDISR  | 3876  | 3536  |
| >ALK-Y1278S FGMARDIYR  | 68    | >ALK-Y1278S FGMARDISR  | 358   | 290   |
| >ALK-Y1278S FGMARDIY   | 165   | >ALK-Y1278S FGMARDIS   | 23832 | 23667 |
| >ALK-Y1278S FGMARDIY   | 93    | >ALK-Y1278S FGMARDIS   | 14541 | 14448 |
| >ALK-Y1278S FGMARDIYR  | 33    | >ALK-Y1278S FGMARDISR  | 453   | 420   |
| >ALK-Y1278S DFGMARDIYI | 167   | >ALK-Y1278S DFGMARDISF | 929   | 762   |
| >ALK-Y1278S DFGMARDIYI | 15    | >ALK-Y1278S DFGMARDISF | 36    | 21    |
| >ALK-Y1278S DFGMARDIYI | 66    | >ALK-Y1278S DFGMARDISF | 547   | 481   |
| >ALK-Y1278S DFGMARDIYI | 369   | >ALK-Y1278S DFGMARDISF | 2073  | 1704  |
| >ALK-Y1278S DFGMARDIYI | 60    | >ALK-Y1278S DFGMARDISF | 393   | 333   |
| >APC-A1296\ ADSANTLQI  | 51    | >APC-A1296\ VDSANTLQI  | 240   | 189   |
| >APC-A1296\ ADSANTLQI  | 28    | >APC-A1296\ VDSANTLQI  | 42    | 14    |
| >APC-A1296\ EADSANTL   | 76    | >APC-A1296\ EVDSANTL   | 26    | 50    |
| >APC-A1296\ EADSANTLQI | 20    | >APC-A1296\ EVDSANTLQI | 9     | 11    |
| >APC-A1296\ EADSANTLQI | 1175  | >APC-A1296\ EVDSANTLQI | 364   | 811   |
| >APC-A1296\ EIGCNQTTQE | 7621  | >APC-A1296\ EIGCNQTTQE | 229   | 7392  |
| >APC-A1296\ EIGCNQTTQE | 8217  | >APC-A1296\ EIGCNQTTQE | 462   | 7755  |
| >APC-A1296\ EIGCNQTTQE | 11056 | >APC-A1296\ EIGCNQTTQE | 208   | 10848 |
| >APC-A1296\ EIGCNQTTQE | 10231 | >APC-A1296\ EIGCNQTTQE | 106   | 10125 |
| >APC-A1296\ EIGCNQTTQE | 1097  | >APC-A1296\ EIGCNQTTQE | 77    | 1020  |
| >APC-A1296\ EIGCNQTTQE | 874   | >APC-A1296\ EIGCNQTTQE | 27    | 847   |

|                        |     |                        |      |      |
|------------------------|-----|------------------------|------|------|
| >APC-A1296\QEADSANTL   | 61  | >APC-A1296\QEVDSANTL   | 208  | 147  |
| >APC-A1296\QEADSANTLC  | 8   | >APC-A1296\QEVDSANTLC  | 14   | 6    |
| >APC-A1296\QEADSANTL   | 863 | >APC-A1296\QEVDSANTL   | 410  | 453  |
| >APC-A1296\QEADSANTL   | 107 | >APC-A1296\QEVDSANTL   | 116  | 9    |
| >APC-A1296\QEADSANTL   | 16  | >APC-A1296\QEVDSANTL   | 12   | 4    |
| >APC-A1296\QEADSANTLC  | 140 | >APC-A1296\QEVDSANTLC  | 115  | 25   |
| >APC-A1296\QEADSANTL   | 720 | >APC-A1296\QEVDSANTL   | 298  | 422  |
| >APC-A1296\QEADSANT    | 246 | >APC-A1296\QEVDSANT    | 439  | 193  |
| >APC-A1296\QEADSANTL   | 257 | >APC-A1296\QEVDSANTL   | 153  | 104  |
| >APC-A1296\QEADSANTLC  | 11  | >APC-A1296\QEVDSANTLC  | 8    | 3    |
| >APC-A1296\TQEADSANTL  | 13  | >APC-A1296\TQEVDSANTL  | 28   | 15   |
| >APC-A1296\TTQEADSA    | 326 | >APC-A1296\TTQEVDSA    | 123  | 203  |
| >APC-A1296\TTQEADSANT  | 155 | >APC-A1296\TTQEVDSANT  | 82   | 73   |
| >APC-A1296\TTQEADSANT  | 38  | >APC-A1296\TTQEVDSANT  | 120  | 82   |
| >APC-A1296\TTQEADSANT  | 241 | >APC-A1296\TTQEVDSANT  | 379  | 138  |
| >APC-A1296\TTQEADSANT  | 259 | >APC-A1296\TTQEVDSANT  | 130  | 129  |
| >APC-A1305\AEIKEKIGT   | 89  | >APC-A1305\GEIKEKIGT   | 1010 | 921  |
| >APC-A1305\AEIKEKIGT   | 381 | >APC-A1305\GEIKEKIGT   | 325  | 56   |
| >APC-A1305\QIAEIKEKI   | 163 | >APC-A1305\QIGEIKEKI   | 2777 | 2614 |
| >APC-A1305\QIAEIKEK    | 86  | >APC-A1305\QIGEIKEK    | 1378 | 1292 |
| >APC-A1305\QIAEIKEKI   | 23  | >APC-A1305\QIGEIKEKI   | 931  | 908  |
| >APC-A1305\QIAEIKEKI   | 287 | >APC-A1305\QIGEIKEKI   | 1887 | 1600 |
| >APC-A1305\LQIAEIKEKI  | 295 | >APC-A1305\LQIGEIKEKI  | 1003 | 708  |
| >APC-A1305\TLQIAEIKEKI | 633 | >APC-A1305\TLQIGEIKEKI | 435  | 198  |
| >APC-A1305\TLQIAEIKEKI | 251 | >APC-A1305\TLQIGEIKEKI | 133  | 118  |
| >APC-A1305\TLQIAEIK    | 288 | >APC-A1305\TLQIGEIK    | 365  | 77   |
| >APC-A1305\TLQIAEIKEK  | 478 | >APC-A1305\TLQIGEIKEK  | 747  | 269  |
| >APC-A1305\NTLQIAEIK   | 22  | >APC-A1305\NTLQIGEIK   | 71   | 49   |
| >APC-A1305\NTLQIAEIKEK | 73  | >APC-A1305\NTLQIGEIKEK | 135  | 62   |
| >APC-A1305\NTLQIAEI    | 28  | >APC-A1305\NTLQIGEI    | 85   | 57   |
| >APC-A1305\NTLQIAEI    | 15  | >APC-A1305\NTLQIGEI    | 46   | 31   |
| >APC-A1305\NTLQIAEI    | 111 | >APC-A1305\NTLQIGEI    | 92   | 19   |
| >APC-A1305\ANTLQIAEI   | 624 | >APC-A1305\ANTLQIGEI   | 318  | 306  |
| >APC-A1305\SANTLQIAEIK | 65  | >APC-A1305\SANTLQIGEIK | 78   | 13   |
| >APC-A1305\SANTLQIAEIK | 180 | >APC-A1305\SANTLQIGEIK | 337  | 157  |
| >APC-A1305\DSANTLQIAE  | 172 | >APC-A1305\DSANTLQIGE  | 443  | 271  |
| >APC-A1358\AKSPSKSGA   | 495 | >APC-A1358\EKSPSKSGA   | 2920 | 2425 |
| >APC-A1358\SSGAKSPSK   | 281 | >APC-A1358\SSGEKSPSK   | 678  | 397  |
| >APC-A1358\SSGAKSPSK   | 42  | >APC-A1358\SSGEKSPSK   | 70   | 28   |
| >APC-A1358\SSGAKSPSK   | 33  | >APC-A1358\SSGEKSPSK   | 86   | 53   |
| >APC-A1358\FSSGAKSPSK  | 282 | >APC-A1358\FSSGEKSPSK  | 908  | 626  |
| >APC-A1358\FSSGAKSPSK  | 31  | >APC-A1358\FSSGEKSPSK  | 68   | 37   |
| >APC-A1358\FSSGAKSPSK  | 89  | >APC-A1358\FSSGEKSPSK  | 253  | 164  |

|                                    |      |                                    |       |       |
|------------------------------------|------|------------------------------------|-------|-------|
| >APC-A1358I EFSSGAKSPSI            | 280  | >APC-A1358I EFSSGEKSPSI            | 342   | 62    |
| >APC-A1358I AVEFSSGAK              | 376  | >APC-A1358I AVEFSSGEK              | 619   | 243   |
| >APC-A1358I AVEFSSGAK              | 64   | >APC-A1358I AVEFSSGEK              | 64    | 0     |
| >APC-A1358I AVEFSSGAK              | 77   | >APC-A1358I AVEFSSGEK              | 133   | 56    |
| >APC-A1358I KAVEFSSGA              | 348  | >APC-A1358I KAVEFSSGE              | 20152 | 19804 |
| >APC-A1358I KAVEFSSGA              | 53   | >APC-A1358I KAVEFSSGE              | 11754 | 11701 |
| >APC-A1358I KAVEFSSGAK             | 275  | >APC-A1358I KAVEFSSGEK             | 300   | 25    |
| >APC-A1358I KAVEFSSGAK             | 255  | >APC-A1358I KAVEFSSGEK             | 204   | 51    |
| >APC-A1358I KAVEFSSGAK             | 29   | >APC-A1358I KAVEFSSGEK             | 44    | 15    |
| >APC-A1366I AQTPKSPPEH             | 410  | >APC-A1366I VQTPKSPPEH             | 259   | 151   |
| >APC-A1366I AQTPKSPPEH             | 87   | >APC-A1366I VQTPKSPPEH             | 114   | 27    |
| >APC-A1366I AQTPKSPPEH             | 22   | >APC-A1366I VQTPKSPPEH             | 35    | 13    |
| >APC-A1366I KSGAQTPK               | 96   | >APC-A1366I KSGVQTPK               | 169   | 73    |
| >APC-A1366I KSGAQTPK               | 34   | >APC-A1366I KSGVQTPK               | 46    | 12    |
| >APC-A1366I KSGAQTPK               | 20   | >APC-A1366I KSGVQTPK               | 31    | 11    |
| >APC-A1366I KSGAQTPK               | 209  | >APC-A1366I KSGVQTPK               | 170   | 39    |
| >APC-A1366I PSKSGAQTPK             | 41   | >APC-A1366I PSKSGVQTPK             | 52    | 11    |
| >APC-A1366I SPSKSGAQ               | 459  | >APC-A1366I SPSKSGVQ               | 1141  | 682   |
| >APC-A1366I SPSKSGAQT              | 251  | >APC-A1366I SPSKSGVQT              | 300   | 49    |
| >APC-A1366I AKSPSKSGA              | 495  | >APC-A1366I AKSPSKSGV              | 109   | 386   |
| >APC-A1470 <sup>-</sup> AAVNAAVQR  | 417  | >APC-A1470 <sup>+</sup> TAVNAAVQR  | 1716  | 1299  |
| >APC-A1470 <sup>-</sup> AAVNAAVQR  | 51   | >APC-A1470 <sup>+</sup> TAVNAAVQR  | 430   | 379   |
| >APC-A1470 <sup>-</sup> AAVNAAVQR  | 43   | >APC-A1470 <sup>+</sup> TAVNAAVQR  | 6     | 37    |
| >APC-A1470 <sup>-</sup> AAVNAAVQR  | 345  | >APC-A1470 <sup>+</sup> TAVNAAVQR  | 80    | 265   |
| >APC-A1470 <sup>-</sup> AAVNAAVQR  | 1469 | >APC-A1470 <sup>+</sup> TAVNAAVQR  | 98    | 1371  |
| >APC-A1470 <sup>-</sup> QAAVNAAV   | 910  | >APC-A1470 <sup>+</sup> QTAVNAAV   | 362   | 548   |
| >APC-A1470 <sup>-</sup> QAAVNAAV   | 580  | >APC-A1470 <sup>+</sup> QTAVNAAV   | 352   | 228   |
| >APC-A1470 <sup>-</sup> QAAVNAAVC  | 28   | >APC-A1470 <sup>+</sup> QTAVNAAVQ  | 11    | 17    |
| >APC-A1470 <sup>-</sup> QAAVNAAV   | 24   | >APC-A1470 <sup>+</sup> QTAVNAAV   | 8     | 16    |
| >APC-A1470 <sup>-</sup> QAAVNAAVC  | 55   | >APC-A1470 <sup>+</sup> QTAVNAAVQ  | 14    | 41    |
| >APC-A1470 <sup>-</sup> QAAVNAAV   | 55   | >APC-A1470 <sup>+</sup> QTAVNAAV   | 13    | 42    |
| >APC-A1470 <sup>-</sup> QAAVNAAVC  | 208  | >APC-A1470 <sup>+</sup> QTAVNAAVQ  | 31    | 177   |
| >APC-A1470 <sup>-</sup> QAAVNAAVC  | 2954 | >APC-A1470 <sup>+</sup> QTAVNAAVQ  | 202   | 2752  |
| >APC-A1470 <sup>-</sup> QAAVNAAVC  | 1766 | >APC-A1470 <sup>+</sup> QTAVNAAVQ  | 261   | 1505  |
| >APC-A1470 <sup>-</sup> AEKRESGPKC | 59   | >APC-A1470 <sup>+</sup> AEKRESGPKC | 453   | 394   |
| >APC-A1470 <sup>-</sup> KQAAVNAAV  | 25   | >APC-A1470 <sup>+</sup> KQTAVNAAV  | 80    | 55    |
| >APC-A1470 <sup>-</sup> KQAAVNAA   | 56   | >APC-A1470 <sup>+</sup> KQTAVNAA   | 747   | 691   |
| >APC-A1470 <sup>-</sup> KQAAVNAAV  | 8    | >APC-A1470 <sup>+</sup> KQTAVNAAV  | 50    | 42    |
| >APC-A1470 <sup>-</sup> KQAAVNAA   | 87   | >APC-A1470 <sup>+</sup> KQTAVNAA   | 620   | 533   |
| >APC-A1470 <sup>-</sup> KQAAVNAAV  | 15   | >APC-A1470 <sup>+</sup> KQTAVNAAV  | 79    | 64    |
| >APC-A1470 <sup>-</sup> KQAAVNAA   | 11   | >APC-A1470 <sup>+</sup> KQTAVNAA   | 19    | 8     |
| >APC-A1470 <sup>-</sup> KQAAVNAAV  | 4    | >APC-A1470 <sup>+</sup> KQTAVNAAV  | 5     | 1     |
| >APC-A1470 <sup>-</sup> KQAAVNAAV  | 35   | >APC-A1470 <sup>+</sup> KQTAVNAAV  | 77    | 42    |

|                       |      |                       |      |      |
|-----------------------|------|-----------------------|------|------|
| >APC-A1470`KQAAVNAAV  | 86   | >APC-A1470`KQTAVNAAV  | 148  | 62   |
| >APC-A1470`KQAAVNAAV  | 111  | >APC-A1470`KQTAVNAAV  | 301  | 190  |
| >APC-A1470`KQAAVNAAV  | 21   | >APC-A1470`KQTAVNAAV  | 21   | 0    |
| >APC-A1470`KQAAVNAA   | 300  | >APC-A1470`KQTAVNAA   | 3055 | 2755 |
| >APC-A1470`KQAAVNAAV  | 135  | >APC-A1470`KQTAVNAAV  | 1268 | 1133 |
| >APC-A1470`KQAAVNAAV  | 444  | >APC-A1470`KQTAVNAAV  | 3904 | 3460 |
| >APC-A1470`KQAAVNAA   | 250  | >APC-A1470`KQTAVNAA   | 606  | 356  |
| >APC-A1470`KQAAVNAAV  | 53   | >APC-A1470`KQTAVNAAV  | 135  | 82   |
| >APC-A1470`KQAAVNAAV  | 348  | >APC-A1470`KQTAVNAAV  | 847  | 499  |
| >APC-A1470`KQAAVNAAV  | 141  | >APC-A1470`KQTAVNAAV  | 872  | 731  |
| >APC-A1470`KQAAVNAAV  | 45   | >APC-A1470`KQTAVNAAV  | 55   | 10   |
| >APC-A1470`GPKQAAVNA  | 159  | >APC-A1470`GPKQTAVNA  | 177  | 18   |
| >APC-A1470`SGPKQAAV   | 280  | >APC-A1470`SGPKQTAV   | 473  | 193  |
| >APC-A1470`ESGPKQAAV  | 78   | >APC-A1470`ESGPKQTAV  | 205  | 127  |
| >APC-A1470`RESGPKQAA  | 341  | >APC-A1470`RESGPKQTA  | 491  | 150  |
| >APC-A1470`RESGPKQAA\ | 223  | >APC-A1470`RESGPKQTA\ | 173  | 50   |
| >APC-A1470`RESGPKQA   | 93   | >APC-A1470`RESGPKQT   | 624  | 531  |
| >APC-A1470`RESGPKQAA  | 20   | >APC-A1470`RESGPKQTA  | 43   | 23   |
| >APC-A1470`RESGPKQAA\ | 341  | >APC-A1470`RESGPKQTA\ | 328  | 13   |
| >APC-A1470`RESGPKQAA\ | 138  | >APC-A1470`RESGPKQTA\ | 64   | 74   |
| >APC-A1470`KRESGPKQA\ | 621  | >APC-A1470`KRESGPKQTA | 468  | 153  |
| >APC-A1475\AAVQRVQV   | 1854 | >APC-A1475\AVVQRVQV   | 237  | 1617 |
| >APC-A1475\AAVQRVQV   | 683  | >APC-A1475\AVVQRVQV   | 106  | 577  |
| >APC-A1475\AAVQRVQV   | 1362 | >APC-A1475\AVVQRVQV   | 272  | 1090 |
| >APC-A1475\AAVQRVQV   | 70   | >APC-A1475\AVVQRVQV   | 8    | 62   |
| >APC-A1475\AAVQRVQVL  | 3678 | >APC-A1475\AVVQRVQVL  | 286  | 3392 |
| >APC-A1475\AAVQRVQVL  | 2541 | >APC-A1475\AVVQRVQVL  | 67   | 2474 |
| >APC-A1475\AAVQRVQVL  | 36   | >APC-A1475\AVVQRVQVL  | 314  | 278  |
| >APC-A1475\NAAVQRVQV  | 30   | >APC-A1475\NAVQRVQV   | 86   | 56   |
| >APC-A1475\NAAVQRVQV  | 258  | >APC-A1475\NAVQRVQV   | 383  | 125  |
| >APC-A1475\AVNAAVQRV  | 735  | >APC-A1475\AVNAVQRV   | 392  | 343  |
| >APC-A1475\AVNAAVQRV  | 81   | >APC-A1475\AVNAVQRV   | 57   | 24   |
| >APC-A1475\AVNAAVQRV  | 239  | >APC-A1475\AVNAVQRV   | 179  | 60   |
| >APC-A1475\AVNAAVQRV  | 9    | >APC-A1475\AVNAVQRV   | 9    | 0    |
| >APC-A1475\AVNAAVQRV  | 62   | >APC-A1475\AVNAVQRV   | 60   | 2    |
| >APC-A1475\AVNAAVQRV  | 103  | >APC-A1475\AVNAVQRV   | 112  | 9    |
| >APC-A1475\AVNAAVQRV  | 268  | >APC-A1475\AVNAVQRV   | 286  | 18   |
| >APC-A1475\AVNAAVQRV  | 25   | >APC-A1475\AVNAVQRV   | 7    | 18   |
| >APC-A1475\AVNAAVQRV  | 152  | >APC-A1475\AVNAVQRV   | 63   | 89   |
| >APC-A1475\AVNAAVQRV  | 81   | >APC-A1475\AVNAVQRV   | 37   | 44   |
| >APC-A1475\AVNAAVQRV  | 244  | >APC-A1475\AVNAVQRV   | 152  | 92   |
| >APC-A1475\AVNAAVQRV  | 84   | >APC-A1475\AVNAVQRV   | 144  | 60   |
| >APC-A1475\AVNAAVQRV  | 4    | >APC-A1475\AVNAVQRV   | 5    | 1    |

|                      |       |                       |     |       |
|----------------------|-------|-----------------------|-----|-------|
| >APC-A1475\AVNAAVQRV | 9     | >APC-A1475\AVNAVVRV   | 9   | 0     |
| >APC-A1475\AVNAAVQR  | 135   | >APC-A1475\AVNAVVR    | 74  | 61    |
| >APC-A1475\AVNAAVQRV | 344   | >APC-A1475\AVNAVVRV   | 841 | 497   |
| >APC-A1475\AVNAAVQR  | 36    | >APC-A1475\AVNAVVR    | 17  | 19    |
| >APC-A1475\AVNAAVQR  | 86    | >APC-A1475\AVNAVVR    | 57  | 29    |
| >APC-A1475\AVNAAVQRV | 122   | >APC-A1475\AVNAVVRV   | 45  | 77    |
| >APC-A1475\AVNAAVQRV | 127   | >APC-A1475\AVNAVVRV   | 67  | 60    |
| >APC-A1475\AAVNAAVQR | 417   | >APC-A1475\AAVNNAVVR  | 89  | 328   |
| >APC-A1475\AAVNAAVQR | 51    | >APC-A1475\AAVNNAVVR  | 32  | 19    |
| >APC-A1475\AAVNAAVQR | 553   | >APC-A1475\AAVNNAVVR  | 176 | 377   |
| >APC-A1475\AAVNAAVQR | 43    | >APC-A1475\AAVNNAVVR  | 39  | 4     |
| >APC-A1475\AAVNAAVQR | 345   | >APC-A1475\AAVNNAVVR  | 137 | 208   |
| >APC-A1475\AAVNAAVQR | 694   | >APC-A1475\AAVNNAVVR  | 400 | 294   |
| >APC-A1475\QAAVNAAVC | 28    | >APC-A1475\QAAVNNAVVC | 30  | 2     |
| >APC-A1475\QAAVNAAV  | 24    | >APC-A1475\QAAVNNAV   | 46  | 22    |
| >APC-A1475\QAAVNAAVC | 55    | >APC-A1475\QAAVNNAVVC | 52  | 3     |
| >APC-A1475\QAAVNAAV  | 55    | >APC-A1475\QAAVNNAV   | 289 | 234   |
| >APC-A1475\QAAVNAAVC | 208   | >APC-A1475\QAAVNNAVVC | 292 | 84    |
| >APC-A1475\KQAAVNAA  | 695   | >APC-A1475\KQAAVNNAV  | 37  | 658   |
| >APC-A1475\KQAAVNAAV | 25    | >APC-A1475\KQAAVNNAV  | 49  | 24    |
| >APC-A1475\KQAAVNAA  | 56    | >APC-A1475\KQAAVNNAV  | 10  | 46    |
| >APC-A1475\KQAAVNAAV | 8     | >APC-A1475\KQAAVNNAV  | 20  | 12    |
| >APC-A1475\KQAAVNAA  | 87    | >APC-A1475\KQAAVNNAV  | 13  | 74    |
| >APC-A1475\KQAAVNAAV | 15    | >APC-A1475\KQAAVNNAV  | 41  | 26    |
| >APC-A1475\KQAAVNAA  | 11    | >APC-A1475\KQAAVNNAV  | 5   | 6     |
| >APC-A1475\KQAAVNAAV | 4     | >APC-A1475\KQAAVNNAV  | 9   | 5     |
| >APC-A1475\KQAAVNAA  | 2882  | >APC-A1475\KQAAVNNAV  | 67  | 2815  |
| >APC-A1475\KQAAVNAAV | 35    | >APC-A1475\KQAAVNNAV  | 77  | 42    |
| >APC-A1475\KQAAVNAA  | 4968  | >APC-A1475\KQAAVNNAV  | 150 | 4818  |
| >APC-A1475\KQAAVNAAV | 86    | >APC-A1475\KQAAVNNAV  | 216 | 130   |
| >APC-A1475\KQAAVNAA  | 6878  | >APC-A1475\KQAAVNNAV  | 97  | 6781  |
| >APC-A1475\KQAAVNAAV | 111   | >APC-A1475\KQAAVNNAV  | 97  | 14    |
| >APC-A1475\KQAAVNAAV | 21    | >APC-A1475\KQAAVNNAV  | 15  | 6     |
| >APC-A1475\KQAAVNAA  | 300   | >APC-A1475\KQAAVNNAV  | 271 | 29    |
| >APC-A1475\KQAAVNAAV | 135   | >APC-A1475\KQAAVNNAV  | 129 | 6     |
| >APC-A1475\KQAAVNAAV | 444   | >APC-A1475\KQAAVNNAV  | 607 | 163   |
| >APC-A1475\KQAAVNAA  | 250   | >APC-A1475\KQAAVNNAV  | 46  | 204   |
| >APC-A1475\KQAAVNAAV | 53    | >APC-A1475\KQAAVNNAV  | 94  | 41    |
| >APC-A1475\KQAAVNAAV | 348   | >APC-A1475\KQAAVNNAV  | 299 | 49    |
| >APC-A1475\KQAAVNAA  | 8912  | >APC-A1475\KQAAVNNAV  | 434 | 8478  |
| >APC-A1475\KQAAVNAAV | 141   | >APC-A1475\KQAAVNNAV  | 184 | 43    |
| >APC-A1475\KQAAVNAAV | 45    | >APC-A1475\KQAAVNNAV  | 48  | 3     |
| >APC-A1475\GPKQAAVNA | 17353 | >APC-A1475\GPKQAAVNA  | 451 | 16902 |

|                        |      |                        |      |      |
|------------------------|------|------------------------|------|------|
| >APC-A1475\GPKQAAVNA   | 159  | >APC-A1475\GPKQAAVNA   | 474  | 315  |
| >APC-A1508\ALSLDEPFI   | 159  | >APC-A1508\VLSLDEPFI   | 229  | 70   |
| >APC-A1508\ALSLDEPFI   | 37   | >APC-A1508\VLSLDEPFI   | 74   | 37   |
| >APC-A1508\ALSLDEPFI   | 465  | >APC-A1508\VLSLDEPFI   | 654  | 189  |
| >APC-A1508\ALSLDEPFI   | 156  | >APC-A1508\VLSLDEPFI   | 112  | 44   |
| >APC-A1508\ALSLDEPFI   | 169  | >APC-A1508\VLSLDEPFI   | 188  | 19   |
| >APC-A1508\ALSLDEPFI   | 17   | >APC-A1508\VLSLDEPFI   | 14   | 3    |
| >APC-A1508\ALSLDEPFI   | 74   | >APC-A1508\VLSLDEPFI   | 24   | 50   |
| >APC-A1508\ALSLDEPFI   | 25   | >APC-A1508\VLSLDEPFI   | 28   | 3    |
| >APC-A1508\ALSLDEPFIQ  | 386  | >APC-A1508\VLSLDEPFIQ  | 445  | 59   |
| >APC-A1508\ALSLDEPFIQK | 135  | >APC-A1508\VLSLDEPFIQK | 126  | 9    |
| >APC-A1508\ALSLDEPFIQK | 41   | >APC-A1508\VLSLDEPFIQK | 69   | 28   |
| >APC-A1508\ALSLDEPF    | 164  | >APC-A1508\VLSLDEPF    | 246  | 82   |
| >APC-A1508\ALSLDEPF    | 276  | >APC-A1508\VLSLDEPF    | 419  | 143  |
| >APC-A1508\SALSLEPFI   | 192  | >APC-A1508\SVLSLEPFI   | 4029 | 3837 |
| >APC-A1508\SALSLEPFI   | 462  | >APC-A1508\SVLSLEPFI   | 241  | 221  |
| >APC-A1508\SALSLEPFI   | 498  | >APC-A1508\SVLSLEPFI   | 168  | 330  |
| >APC-A1508\SALSLEPFI   | 243  | >APC-A1508\SVLSLEPFI   | 120  | 123  |
| >APC-A1508\SALSLEPFI   | 1466 | >APC-A1508\SVLSLEPFI   | 293  | 1173 |
| >APC-A1508\SALSLEPFI   | 372  | >APC-A1508\SVLSLEPFI   | 47   | 325  |
| >APC-A1508\SALSLEPF    | 4489 | >APC-A1508\SVLSLEPF    | 187  | 4302 |
| >APC-A1508\SALSLEPF    | 592  | >APC-A1508\SVLSLEPF    | 47   | 545  |
| >APC-A1508\SALSLEPFI   | 675  | >APC-A1508\SVLSLEPFI   | 224  | 451  |
| >APC-A1508\SALSLEPF    | 171  | >APC-A1508\SVLSLEPF    | 107  | 64   |
| >APC-A1508\SALSLEPF    | 133  | >APC-A1508\SVLSLEPF    | 567  | 434  |
| >APC-A1508\SALSLEPF    | 80   | >APC-A1508\SVLSLEPF    | 743  | 663  |
| >APC-A1508\SALSLEPF    | 35   | >APC-A1508\SVLSLEPF    | 90   | 55   |
| >APC-A1508\SALSLEPF    | 626  | >APC-A1508\SVLSLEPF    | 301  | 325  |
| >APC-A1508\DFGSCSSSLA  | 4805 | >APC-A1508\DFGSCSSSLA  | 454  | 4351 |
| >APC-A1508\LSALSLEPFI  | 267  | >APC-A1508\LSVLSLEPFI  | 754  | 487  |
| >APC-A1508\LSALSLEPF   | 1207 | >APC-A1508\LSVLSLEPF   | 275  | 932  |
| >APC-A1508\LSALSLEPF   | 77   | >APC-A1508\LSVLSLEPF   | 89   | 12   |
| >APC-A1508\LSALSLEPF   | 101  | >APC-A1508\LSVLSLEPF   | 80   | 21   |
| >APC-A1508\LSALSLEPF   | 7    | >APC-A1508\LSVLSLEPF   | 4    | 3    |
| >APC-A1508\LSALSLEPFI  | 255  | >APC-A1508\LSVLSLEPFI  | 100  | 155  |
| >APC-A1508\LSALSLEPF   | 40   | >APC-A1508\LSVLSLEPF   | 56   | 16   |
| >APC-A1508\LSALSLEPFI  | 281  | >APC-A1508\LSVLSLEPFI  | 552  | 271  |
| >APC-A1508\LSALSLEPF   | 103  | >APC-A1508\LSVLSLEPF   | 225  | 122  |
| >APC-A1508\LSALSLEPFI  | 33   | >APC-A1508\LSVLSLEPFI  | 116  | 83   |
| >APC-A1508\SLSALSLEPF  | 166  | >APC-A1508\SLSVLSLEPF  | 613  | 447  |
| >APC-A1508\SLSALSLEPF  | 91   | >APC-A1508\SLSVLSLEPF  | 175  | 84   |
| >APC-A1508\SLSALSLEPF  | 32   | >APC-A1508\SLSVLSLEPF  | 41   | 9    |
| >APC-A1508\SLSALSLEPF  | 131  | >APC-A1508\SLSVLSLEPF  | 279  | 148  |



|                        |      |                        |      |      |
|------------------------|------|------------------------|------|------|
| >APC-A1508\SLSALSLEDPF | 141  | >APC-A1508\SLSVLSLEDPF | 180  | 39   |
| >APC-A1508\SLSALSLEDPF | 480  | >APC-A1508\SLSVLSLEDPF | 840  | 360  |
| >APC-A1508\SSLSALS     | 210  | >APC-A1508\SSLSVLSL    | 103  | 107  |
| >APC-A1508\SSLSALS     | 860  | >APC-A1508\SSLSVLSL    | 349  | 511  |
| >APC-A1508\SSLSALS     | 257  | >APC-A1508\SSLSVLSL    | 318  | 61   |
| >APC-A1508\SSLSALS     | 10   | >APC-A1508\SSLSVLSL    | 31   | 21   |
| >APC-A1508\SSLSALS     | 303  | >APC-A1508\SSLSVLSL    | 136  | 167  |
| >APC-A1508\SSLSALS     | 114  | >APC-A1508\SSLSVLSL    | 144  | 30   |
| >APC-A1508\SSLSALS     | 813  | >APC-A1508\SSLSVLSL    | 407  | 406  |
| >APC-A1508\SSLSALS     | 4    | >APC-A1508\SSLSVLSL    | 5    | 1    |
| >APC-A1508\SSLSALS     | 196  | >APC-A1508\SSLSVLSL    | 182  | 14   |
| >APC-A1508\SSLSALS     | 266  | >APC-A1508\SSLSVLSL    | 683  | 417  |
| >APC-A1508\SSLSALS     | 426  | >APC-A1508\SSLSVLSL    | 482  | 56   |
| >APC-A1508\CSSLSALS    | 699  | >APC-A1508\CSSLSVLSL   | 417  | 282  |
| >APC-A1508\CSSLSALS    | 245  | >APC-A1508\CSSLSVL     | 424  | 179  |
| >APC-A1508\CSSLSALS    | 60   | >APC-A1508\CSSLSVLSL   | 114  | 54   |
| >APC-A1508\CSSLSALS    | 334  | >APC-A1508\CSSLSVLSL   | 307  | 27   |
| >APC-A1508\CSSLSALS    | 128  | >APC-A1508\CSSLSVLSL   | 151  | 23   |
| >APC-A1508\CSSLSALS    | 888  | >APC-A1508\CSSLSVL     | 425  | 463  |
| >APC-A1508\CSSLSALS    | 168  | >APC-A1508\CSSLSVLSL   | 245  | 77   |
| >APC-A1508\CSSLSALS    | 76   | >APC-A1508\CSSLSVL     | 65   | 11   |
| >APC-A1508\CSSLSALS    | 42   | >APC-A1508\CSSLSVLSL   | 44   | 2    |
| >APC-A1508\SCSSLSALS   | 406  | >APC-A1508\SCSSLSVL    | 1436 | 1030 |
| >APC-A1508\SCSSLSALS   | 46   | >APC-A1508\SCSSLSVL    | 14   | 32   |
| >APC-A1508\SCSSLSALS   | 197  | >APC-A1508\SCSSLSVLSL  | 245  | 48   |
| >APC-A1508\FSCSSLSA    | 2936 | >APC-A1508\FSCSSLSV    | 354  | 2582 |
| >APC-A1508\FSCSSLSALS  | 134  | >APC-A1508\FSCSSLSVL   | 275  | 141  |
| >APC-A1508\FSCSSLSA    | 3277 | >APC-A1508\FSCSSLSV    | 489  | 2788 |
| >APC-A1508\FSCSSLSALS  | 250  | >APC-A1508\FSCSSLSVL   | 561  | 311  |
| >APC-A1508\FSCSSLSA    | 867  | >APC-A1508\FSCSSLSV    | 64   | 803  |
| >APC-A1508\FSCSSLSALS  | 228  | >APC-A1508\FSCSSLSVL   | 651  | 423  |
| >APC-A1508\FSCSSLSALS  | 306  | >APC-A1508\FSCSSLSVL   | 655  | 349  |
| >APC-A1508\FSCSSLSA    | 309  | >APC-A1508\FSCSSLSV    | 271  | 38   |
| >APC-A1508\FSCSSLSALS  | 175  | >APC-A1508\FSCSSLSVL   | 165  | 10   |
| >APC-A1508\FSCSSLSA    | 291  | >APC-A1508\FSCSSLSV    | 63   | 228  |
| >APC-A1508\FSCSSLSALS  | 32   | >APC-A1508\FSCSSLSVL   | 44   | 12   |
| >APC-A1508\FSCSSLSA    | 979  | >APC-A1508\FSCSSLSV    | 101  | 878  |
| >APC-A1508\FSCSSLSALS  | 10   | >APC-A1508\FSCSSLSVL   | 12   | 2    |
| >APC-A1508\FSCSSLSALS  | 72   | >APC-A1508\FSCSSLSVL   | 95   | 23   |
| >APC-A1508\FSCSSLSALS  | 266  | >APC-A1508\FSCSSLSVL   | 187  | 79   |
| >APC-A1508\FSCSSLSALS  | 728  | >APC-A1508\FSCSSLSVL   | 308  | 420  |
| >APC-A1508\FSCSSLSA    | 2933 | >APC-A1508\FSCSSLSV    | 305  | 2628 |
| >APC-A1508\FSCSSLSALS  | 43   | >APC-A1508\FSCSSLSVL   | 32   | 11   |

|                       |      |                       |       |       |
|-----------------------|------|-----------------------|-------|-------|
| >APC-A1508\GFSCSSLSAL | 318  | >APC-A1508\GFSCSSLSVL | 662   | 344   |
| >APC-A1508\GFSCSSLSAL | 362  | >APC-A1508\GFSCSSLSVL | 107   | 255   |
| >APC-A465S-AMNELGGL   | 278  | >APC-A465S-SMNELGGL   | 194   | 84    |
| >APC-A465S-AMNELGGLQ  | 145  | >APC-A465S-SMNELGGLQ  | 113   | 32    |
| >APC-A465S-AMNELGGL   | 11   | >APC-A465S-SMNELGGL   | 12    | 1     |
| >APC-A465S-AMNELGGLQ  | 19   | >APC-A465S-SMNELGGLQ  | 21    | 2     |
| >APC-A465S-AMNELGGL   | 7    | >APC-A465S-SMNELGGL   | 8     | 1     |
| >APC-A465S-AMNELGGLQ  | 346  | >APC-A465S-SMNELGGLQ  | 213   | 133   |
| >APC-A465S-AMNELGGLQ  | 5    | >APC-A465S-SMNELGGLQ  | 6     | 1     |
| >APC-A465S-AMNELGGL   | 173  | >APC-A465S-SMNELGGL   | 236   | 63    |
| >APC-A465S-AMNELGGLQ  | 78   | >APC-A465S-SMNELGGLQ  | 111   | 33    |
| >APC-A465S-AMNELGGL   | 6    | >APC-A465S-SMNELGGL   | 5     | 1     |
| >APC-A465S-AMNELGGLQ  | 16   | >APC-A465S-SMNELGGLQ  | 13    | 3     |
| >APC-A465S-AMNELGGLQ  | 4    | >APC-A465S-SMNELGGLQ  | 3     | 1     |
| >APC-A465S-AMNELGGL   | 20   | >APC-A465S-SMNELGGL   | 19    | 1     |
| >APC-A465S-AMNELGGLQ  | 533  | >APC-A465S-SMNELGGLQ  | 404   | 129   |
| >APC-A465S-AMNELGGLQ  | 12   | >APC-A465S-SMNELGGLQ  | 12    | 0     |
| >APC-A465S-AMNELGGL   | 30   | >APC-A465S-SMNELGGL   | 17    | 13    |
| >APC-A465S-AMNELGGLQ  | 47   | >APC-A465S-SMNELGGLQ  | 23    | 24    |
| >APC-A465S-AMNELGGLQ  | 26   | >APC-A465S-SMNELGGLQ  | 15    | 11    |
| >APC-A465S-AMNELGGL   | 145  | >APC-A465S-SMNELGGL   | 267   | 122   |
| >APC-A465S-AMNELGGLQ  | 163  | >APC-A465S-SMNELGGLQ  | 272   | 109   |
| >APC-A465S-AMNELGGL   | 8    | >APC-A465S-SMNELGGL   | 11    | 3     |
| >APC-A465S-AMNELGGLQ  | 19   | >APC-A465S-SMNELGGLQ  | 26    | 7     |
| >APC-A465S-AMNELGGLQ  | 14   | >APC-A465S-SMNELGGLQ  | 17    | 3     |
| >APC-A465S-AMNELGGLQ  | 272  | >APC-A465S-SMNELGGLQ  | 340   | 68    |
| >APC-A465S-AMNELGGLQ  | 435  | >APC-A465S-SMNELGGLQ  | 511   | 76    |
| >APC-A465S-AMNELGGLQ  | 358  | >APC-A465S-SMNELGGLQ  | 889   | 531   |
| >APC-A465S-HAMNELGGL  | 168  | >APC-A465S-HSMNELGGL  | 187   | 19    |
| >APC-A465S-HAMNELGGL  | 1358 | >APC-A465S-HSMNELGGL  | 295   | 1063  |
| >APC-A465S-HAMNELGGL  | 357  | >APC-A465S-HSMNELGGL  | 734   | 377   |
| >APC-A465S-HAMNELGGL  | 299  | >APC-A465S-HSMNELGGL  | 42    | 257   |
| >APC-A465S-KLSFDEEHRH | 422  | >APC-A465S-KLSFDEEHRH | 6119  | 5697  |
| >APC-A465S-KLSFDEEHRH | 418  | >APC-A465S-KLSFDEEHRH | 11126 | 10708 |
| >APC-A465S-HRHAMNEL   | 692  | >APC-A465S-HRHSMNEL   | 345   | 347   |
| >APC-A465S-HRHAMNEL   | 226  | >APC-A465S-HRHSMNEL   | 280   | 54    |
| >APC-A465S-HRHAMNELC  | 241  | >APC-A465S-HRHSMNELG  | 380   | 139   |
| >APC-A465S-HRHAMNELC  | 85   | >APC-A465S-HRHSMNELG  | 93    | 8     |
| >APC-A465S-HRHAMNEL   | 39   | >APC-A465S-HRHSMNEL   | 51    | 12    |
| >APC-A465S-HRHAMNELC  | 333  | >APC-A465S-HRHSMNELG  | 521   | 188   |
| >APC-A465S-HRHAMNELC  | 81   | >APC-A465S-HRHSMNELG  | 117   | 36    |
| >APC-A465S-EHRHAMNEL  | 1889 | >APC-A465S-EHRHSMNEL  | 402   | 1487  |
| >APC-A465S-EEHRHAMNE  | 127  | >APC-A465S-EEHRHSMNE  | 157   | 30    |

|                        |       |                        |       |       |
|------------------------|-------|------------------------|-------|-------|
| >APC-A465S- EEHRHAMN   | 232   | >APC-A465S- EEHRHSMN   | 374   | 142   |
| >APC-A465S- DEEHRHAMN  | 280   | >APC-A465S- DEEHRHSMN  | 276   | 4     |
| >APC-A465S- DEEHRHAM   | 41    | >APC-A465S- DEEHRHSM   | 59    | 18    |
| >APC-A465S- FDEEHRHAM  | 300   | >APC-A465S- FDEEHRHSM  | 1317  | 1017  |
| >APC-A465S- LSFDEEHRHA | 361   | >APC-A465S- LSFDEEHRHS | 366   | 5     |
| >APC-A465S- LSFDEEHRHA | 94    | >APC-A465S- LSFDEEHRHS | 113   | 19    |
| >APC-A465S- LSFDEEHRHA | 19    | >APC-A465S- LSFDEEHRHS | 15    | 4     |
| >APC-A465S- LSFDEEHRHA | 107   | >APC-A465S- LSFDEEHRHS | 402   | 295   |
| >APC-A465S- LSFDEEHRHA | 1382  | >APC-A465S- LSFDEEHRHS | 301   | 1081  |
| >APC-A465S- LSFDEEHRHA | 410   | >APC-A465S- LSFDEEHRHS | 154   | 256   |
| >APC-A465S- LSFDEEHRHA | 233   | >APC-A465S- LSFDEEHRHS | 112   | 121   |
| >APC-A465S- LSFDEEHRHA | 808   | >APC-A465S- LSFDEEHRHS | 327   | 481   |
| >APC-D1297, DSANTLQI   | 5456  | >APC-D1297, ASANTLQI   | 285   | 5171  |
| >APC-D1297, DSANTLQIAE | 172   | >APC-D1297, ASANTLQIAE | 1694  | 1522  |
| >APC-D1297, DSANTLQI   | 4260  | >APC-D1297, ASANTLQI   | 49    | 4211  |
| >APC-D1297, DSANTLQIAE | 6285  | >APC-D1297, ASANTLQIAE | 86    | 6199  |
| >APC-D1297, DSANTLQI   | 6807  | >APC-D1297, ASANTLQI   | 319   | 6488  |
| >APC-D1297, DSANTLQI   | 315   | >APC-D1297, ASANTLQI   | 26    | 289   |
| >APC-D1297, DSANTLQIAE | 732   | >APC-D1297, ASANTLQIAE | 43    | 689   |
| >APC-D1297, ADSANTLQI  | 20606 | >APC-D1297, AASANTLQI  | 250   | 20356 |
| >APC-D1297, ADSANTLQI  | 17790 | >APC-D1297, AASANTLQI  | 127   | 17663 |
| >APC-D1297, ADSANTLQI  | 20299 | >APC-D1297, AASANTLQI  | 227   | 20072 |
| >APC-D1297, ADSANTLQI  | 51    | >APC-D1297, AASANTLQI  | 5976  | 5925  |
| >APC-D1297, ADSANTLQI  | 4098  | >APC-D1297, AASANTLQI  | 296   | 3802  |
| >APC-D1297, ADSANTLQI  | 28    | >APC-D1297, AASANTLQI  | 18108 | 18080 |
| >APC-D1297, EADSANTLQ  | 2132  | >APC-D1297, EAASANTLQ  | 77    | 2055  |
| >APC-D1297, EADSANTL   | 3470  | >APC-D1297, EAASANTL   | 24    | 3446  |
| >APC-D1297, EADSANTLQI | 1683  | >APC-D1297, EAASANTLQI | 173   | 1510  |
| >APC-D1297, EADSANTLQI | 8316  | >APC-D1297, EAASANTLQI | 221   | 8095  |
| >APC-D1297, EADSANTL   | 76    | >APC-D1297, EAASANTL   | 63    | 13    |
| >APC-D1297, EADSANTLQI | 20    | >APC-D1297, EAASANTLQI | 16    | 4     |
| >APC-D1297, EADSANTL   | 935   | >APC-D1297, EAASANTL   | 278   | 657   |
| >APC-D1297, EADSANTLQI | 671   | >APC-D1297, EAASANTLQI | 220   | 451   |
| >APC-D1297, QEADSANTL  | 61    | >APC-D1297, QEAASANTL  | 59    | 2     |
| >APC-D1297, QEADSANTLC | 8     | >APC-D1297, QEAASANTLC | 8     | 0     |
| >APC-D1297, QEADSANTL  | 107   | >APC-D1297, QEAASANTL  | 41    | 66    |
| >APC-D1297, QEADSANTL  | 16    | >APC-D1297, QEAASANTL  | 17    | 1     |
| >APC-D1297, QEADSANTLC | 140   | >APC-D1297, QEAASANTLC | 165   | 25    |
| >APC-D1297, QEADSANT   | 246   | >APC-D1297, QEAASANT   | 105   | 141   |
| >APC-D1297, QEADSANTL  | 1157  | >APC-D1297, QEAASANTL  | 344   | 813   |
| >APC-D1297, QEADSANTLC | 1257  | >APC-D1297, QEAASANTLC | 477   | 780   |
| >APC-D1297, QEADSANTL  | 257   | >APC-D1297, QEAASANTL  | 270   | 13    |
| >APC-D1297, QEADSANTLC | 11    | >APC-D1297, QEAASANTLC | 11    | 0     |

|                        |       |                        |     |       |
|------------------------|-------|------------------------|-----|-------|
| >APC-D1297,TQEADSANTI  | 13    | >APC-D1297,TQEAASANTI  | 11  | 2     |
| >APC-D1297,TTQEADSA    | 326   | >APC-D1297,TTQEAASA    | 189 | 137   |
| >APC-D1297,TTQEADSANT  | 155   | >APC-D1297,TTQEAASANT  | 166 | 11    |
| >APC-D1297,TTQEADSA    | 2881  | >APC-D1297,TTQEAASA    | 379 | 2502  |
| >APC-D1297,TTQEADSANT  | 751   | >APC-D1297,TTQEAASANT  | 161 | 590   |
| >APC-D1297,TTQEADSANT  | 38    | >APC-D1297,TTQEAASANT  | 19  | 19    |
| >APC-D1297,TTQEADSANT  | 241   | >APC-D1297,TTQEAASANT  | 85  | 156   |
| >APC-D1297,TTQEADSANT  | 259   | >APC-D1297,TTQEAASANT  | 129 | 130   |
| >APC-D1297,TTQEADSANT  | 509   | >APC-D1297,TTQEAASANT  | 414 | 95    |
| >APC-D1422IDLDPSPGQTM  | 2551  | >APC-D1422IHLPDSPGQTM  | 431 | 2120  |
| >APC-D1422IDLDPSPGQT   | 9910  | >APC-D1422IHLPDSPGQT   | 455 | 9455  |
| >APC-D1422IDLDPSPGQTM  | 1549  | >APC-D1422IHLPDSPGQTM  | 141 | 1408  |
| >APC-D1422IDLDPSPGQ    | 1631  | >APC-D1422IHLPDSPGQ    | 112 | 1519  |
| >APC-D1422IDLDPSPGQT   | 4491  | >APC-D1422IHLPDSPGQT   | 298 | 4193  |
| >APC-D1422IDLDPSPGQTM  | 1099  | >APC-D1422IHLPDSPGQTM  | 54  | 1045  |
| >APC-D1422IDLDPSPGQTM  | 1508  | >APC-D1422IHLPDSPGQTM  | 235 | 1273  |
| >APC-D1422ISDLPDSPGQT  | 3995  | >APC-D1422ISHLPDSPGQT  | 131 | 3864  |
| >APC-D1422ISDLPDSPGQT  | 14165 | >APC-D1422ISHLPDSPGQT  | 233 | 13932 |
| >APC-D1422IISPSDLPDS   | 1538  | >APC-D1422IISPSHLPDS   | 136 | 1402  |
| >APC-D1422IISPSDLPDSPC | 2131  | >APC-D1422IISPSHLPDSPC | 498 | 1633  |
| >APC-D1422IGIISPSDL    | 1620  | >APC-D1422IGIISPSHL    | 416 | 1204  |
| >APC-D1422IGIISPSDL    | 804   | >APC-D1422IGIISPSHL    | 259 | 545   |
| >APC-D1422IGIISPSDL    | 1150  | >APC-D1422IGIISPSHL    | 333 | 817   |
| >APC-D1422IVSGIISPSDL  | 101   | >APC-D1422IVSGIISPSHL  | 41  | 60    |
| >APC-D1422IVSGIISPSDL  | 299   | >APC-D1422IVSGIISPSHL  | 476 | 177   |
| >APC-D1422IVSGIISPSDL  | 1682  | >APC-D1422IVSGIISPSHL  | 230 | 1452  |
| >APC-D1422IMVSGIISPSDI | 55    | >APC-D1422IMVSGIISPSHI | 15  | 40    |
| >APC-D1422IMVSGIISPSDI | 57    | >APC-D1422IMVSGIISPSHI | 25  | 32    |
| >APC-D1422IMVSGIISPSDI | 1119  | >APC-D1422IMVSGIISPSHI | 176 | 943   |
| >APC-D1422IMVSGIISPSDI | 1309  | >APC-D1422IMVSGIISPSHI | 330 | 979   |
| >APC-D1422IMVSGIISPSDI | 69    | >APC-D1422IMVSGIISPSHI | 33  | 36    |
| >APC-D1422IMVSGIISPSDI | 32    | >APC-D1422IMVSGIISPSHI | 9   | 23    |
| >APC-D1422IMVSGIISPSDI | 367   | >APC-D1422IMVSGIISPSHI | 231 | 136   |
| >APC-D1422IDLDPSPGQT   | 9910  | >APC-D1422INLPDSPGQT   | 479 | 9431  |
| >APC-D1422IDLDPSPGQTM  | 1549  | >APC-D1422INLPDSPGQTM  | 248 | 1301  |
| >APC-D1422IDLDPSPGQ    | 1631  | >APC-D1422INLPDSPGQ    | 483 | 1148  |
| >APC-D1422IDLDPSPGQTM  | 1099  | >APC-D1422INLPDSPGQTM  | 273 | 826   |
| >APC-D1422IDLDPSPGQTM  | 1508  | >APC-D1422INLPDSPGQTM  | 378 | 1130  |
| >APC-D1422ISDLPDSPGQT  | 650   | >APC-D1422ISNLPDSPGQT  | 316 | 334   |
| >APC-D1422IGIISPSDL    | 1620  | >APC-D1422IGIISPSNL    | 312 | 1308  |
| >APC-D1422IGIISPSDL    | 804   | >APC-D1422IGIISPSNL    | 202 | 602   |
| >APC-D1422ISGIISPSDL   | 1805  | >APC-D1422ISGIISPSNL   | 482 | 1323  |
| >APC-D1422IVSGIISPSDL  | 101   | >APC-D1422IVSGIISPSNL  | 31  | 70    |

|                        |       |                        |      |       |
|------------------------|-------|------------------------|------|-------|
| >APC-D1422 VSGIISPSDL  | 299   | >APC-D1422 VSGIISPSNL  | 189  | 110   |
| >APC-D1422 MVSGIISPSDI | 55    | >APC-D1422 MVSGIISPSNI | 12   | 43    |
| >APC-D1422 MVSGIISPSDI | 57    | >APC-D1422 MVSGIISPSNI | 20   | 37    |
| >APC-D1422 MVSGIISPSDI | 1309  | >APC-D1422 MVSGIISPSNI | 371  | 938   |
| >APC-D1422 MVSGIISPSDI | 69    | >APC-D1422 MVSGIISPSNI | 39   | 30    |
| >APC-D1422 MVSGIISPSDI | 32    | >APC-D1422 MVSGIISPSNI | 9    | 23    |
| >APC-D1422 MVSGIISPSDI | 1129  | >APC-D1422 MVSGIISPSNI | 313  | 816   |
| >APC-D1422 MVSGIISPSDI | 367   | >APC-D1422 MVSGIISPSNI | 179  | 188   |
| >APC-D1425 DSPGQTMPP   | 191   | >APC-D1425 ASPGQTMPP   | 2510 | 2319  |
| >APC-D1425 LPDSPGQTM   | 355   | >APC-D1425 LPASPGQTM   | 538  | 183   |
| >APC-D1425 LPDSPGQT    | 3799  | >APC-D1425 LPASPGQT    | 409  | 3390  |
| >APC-D1425 LPDSPGQTM   | 36    | >APC-D1425 LPASPGQTM   | 15   | 21    |
| >APC-D1425 LPDSPGQTM   | 5313  | >APC-D1425 LPASPGQTM   | 330  | 4983  |
| >APC-D1425 LPDSPGQTM   | 37    | >APC-D1425 LPASPGQTM   | 15   | 22    |
| >APC-D1425 LPDSPGQTM   | 996   | >APC-D1425 LPASPGQTM   | 269  | 727   |
| >APC-D1425 LPDSPGQTM   | 559   | >APC-D1425 LPASPGQTM   | 390  | 169   |
| >APC-D1425 LPDSPGQT    | 939   | >APC-D1425 LPASPGQT    | 100  | 839   |
| >APC-D1425 LPDSPGQTM   | 1024  | >APC-D1425 LPASPGQTM   | 168  | 856   |
| >APC-D1425 LPDSPGQTM   | 248   | >APC-D1425 LPASPGQTM   | 62   | 186   |
| >APC-D1425 LPDSPGQTM   | 721   | >APC-D1425 LPASPGQTM   | 72   | 649   |
| >APC-D1425 DLPDSPGQTM  | 751   | >APC-D1425 DLPASPGQTM  | 385  | 366   |
| >APC-D1425 SDLPDSPGQT  | 650   | >APC-D1425 SDLPASPGQT  | 490  | 160   |
| >APC-D1425 ISPSDLPDS   | 1538  | >APC-D1425 ISPSDLPAS   | 484  | 1054  |
| >APC-D1425 IISPSDLPD   | 23061 | >APC-D1425 IISPSDLPA   | 494  | 22567 |
| >APC-D1425 IISPSDLPD   | 21777 | >APC-D1425 IISPSDLPA   | 279  | 21498 |
| >APC-D1425 GIISPSDLPD  | 14385 | >APC-D1425 GIISPSDLPA  | 198  | 14187 |
| >APC-D1425 GIISPSDLPD  | 18719 | >APC-D1425 GIISPSDLPA  | 311  | 18408 |
| >APC-D1425 GIISPSDLPD  | 19274 | >APC-D1425 GIISPSDLPA  | 474  | 18800 |
| >APC-D67H-l DLLERLKE   | 7257  | >APC-D67H-r HLLERLKE   | 60   | 7197  |
| >APC-D67H-l DLLERLKE   | 6539  | >APC-D67H-r HLLERLKE   | 97   | 6442  |
| >APC-D67H-l DLLERLKE   | 3418  | >APC-D67H-r HLLERLKE   | 91   | 3327  |
| >APC-D67H-l DLLERLKE   | 3351  | >APC-D67H-r HLLERLKE   | 149  | 3202  |
| >APC-D67H-l DLLERLKE   | 5215  | >APC-D67H-r HLLERLKE   | 117  | 5098  |
| >APC-D67H-l DLLERLKE   | 5965  | >APC-D67H-r HLLERLKE   | 408  | 5557  |
| >APC-D67H-l DLLERLKE   | 5617  | >APC-D67H-r HLLERLKE   | 117  | 5500  |
| >APC-D67H-l DLLERLKE   | 7229  | >APC-D67H-r HLLERLKE   | 385  | 6844  |
| >APC-D67H-l DLLERLKE   | 71    | >APC-D67H-r HLLERLKE   | 7    | 64    |
| >APC-D67H-l DLLERLKE   | 275   | >APC-D67H-r HLLERLKE   | 25   | 250   |
| >APC-D67H-l DLLERLKE   | 501   | >APC-D67H-r HLLERLKE   | 11   | 490   |
| >APC-D67H-l DLLERLKE   | 883   | >APC-D67H-r HLLERLKE   | 27   | 856   |
| >APC-D67H-l DLLERLKE   | 246   | >APC-D67H-r HLLERLKE   | 31   | 215   |
| >APC-D67H-l DLLERLKE   | 212   | >APC-D67H-r HLLERLKE   | 29   | 183   |
| >APC-D67H-l DLLERLKE   | 207   | >APC-D67H-r HLLERLKE   | 94   | 113   |

|                         |       |                          |      |       |
|-------------------------|-------|--------------------------|------|-------|
| >APC-D67H-\ DLLERLKELNI | 278   | >APC-D67H-r HLLERLKELNI  | 123  | 155   |
| >APC-D67H-\ DLLERLKEL   | 65    | >APC-D67H-r HLLERLKEL    | 5    | 60    |
| >APC-D67H-\ DLLERLKELNI | 147   | >APC-D67H-r HLLERLKELNI  | 10   | 137   |
| >APC-D67H-\ DLLERLKEL   | 240   | >APC-D67H-r HLLERLKEL    | 105  | 135   |
| >APC-D67H-\ DLLERLKELNI | 678   | >APC-D67H-r HLLERLKELNI  | 281  | 397   |
| >APC-D67H-\ DEAMASSGQ   | 451   | >APC-D67H-r DEAMASSGQ    | 148  | 303   |
| >APC-D67H-\ QIDLLERLK   | 15736 | >APC-D67H-r QIHLLERLK    | 366  | 15370 |
| >APC-D67H-\ GQIDLLERL   | 141   | >APC-D67H-r GQIHLLERL    | 912  | 771   |
| >APC-D67H-\ GQIDLLERL   | 42    | >APC-D67H-r GQIHLLERL    | 117  | 75    |
| >APC-D67H-\ GQIDLLERL   | 278   | >APC-D67H-r GQIHLLERL    | 526  | 248   |
| >APC-D67H-\ GQIDLLERL   | 11    | >APC-D67H-r GQIHLLERL    | 24   | 13    |
| >APC-D67H-\ GQIDLLERL   | 435   | >APC-D67H-r GQIHLLERL    | 3239 | 2804  |
| >APC-D67H-\ GQIDLLERL   | 425   | >APC-D67H-r GQIHLLERL    | 1880 | 1455  |
| >APC-D67H-\ GQIDLLERLK  | 351   | >APC-D67H-r GQIHLLERLK   | 522  | 171   |
| >APC-D67H-\ GQIDLLER    | 356   | >APC-D67H-r GQIHLLER     | 171  | 185   |
| >APC-D67H-\ GQIDLLERL   | 391   | >APC-D67H-r GQIHLLERL    | 457  | 66    |
| >APC-D67H-\ SGQIDLLER   | 990   | >APC-D67H-r SGQIHLLER    | 368  | 622   |
| >APC-D67H-\ SSGQIDLLER  | 279   | >APC-D67H-r SSGQIHLLER   | 265  | 14    |
| >APC-D67H-\ SSGQIDLLER  | 649   | >APC-D67H-r SSGQIHLLER   | 223  | 426   |
| >APC-D67H-\ SSGQIDLLER  | 255   | >APC-D67H-r SSGQIHLLER   | 415  | 160   |
| >APC-D67H-\ SSGQIDLLERL | 485   | >APC-D67H-r SSGQIHLLERL  | 222  | 263   |
| >APC-D67H-\ SSGQIDLLER  | 638   | >APC-D67H-r SSGQIHLLER   | 259  | 379   |
| >APC-D67H-\ SSGQIDLLER  | 698   | >APC-D67H-r SSGQIHLLER   | 449  | 249   |
| >APC-D67H-\ ASSGQIDLL   | 162   | >APC-D67H-r ASSGQIHLL    | 88   | 74    |
| >APC-D67H-\ ASSGQIDLLEF | 273   | >APC-D67H-r ASSGQIHLLLEF | 115  | 158   |
| >APC-D67H-\ ASSGQIDLLEF | 716   | >APC-D67H-r ASSGQIHLLLEF | 111  | 605   |
| >APC-D67H-\ ASSGQIDL    | 156   | >APC-D67H-r ASSGQIHL     | 44   | 112   |
| >APC-D67H-\ ASSGQIDLL   | 394   | >APC-D67H-r ASSGQIHLL    | 52   | 342   |
| >APC-D67H-\ ASSGQIDLL   | 270   | >APC-D67H-r ASSGQIHLL    | 35   | 235   |
| >APC-D67H-\ ASSGQIDLLEF | 155   | >APC-D67H-r ASSGQIHLLLEF | 91   | 64    |
| >APC-D67H-\ MASSGQIDLL  | 98    | >APC-D67H-r MASSGQIHLL   | 76   | 22    |
| >APC-D67H-\ MASSGQIDLL  | 2224  | >APC-D67H-r MASSGQIHLL   | 130  | 2094  |
| >APC-D67H-\ MASSGQIDL   | 1131  | >APC-D67H-r MASSGQIHL    | 92   | 1039  |
| >APC-D67H-\ MASSGQIDLL  | 371   | >APC-D67H-r MASSGQIHLL   | 197  | 174   |
| >APC-D67H-\ MASSGQIDL   | 939   | >APC-D67H-r MASSGQIHL    | 267  | 672   |
| >APC-D67H-\ MASSGQIDLL  | 1275  | >APC-D67H-r MASSGQIHLL   | 264  | 1011  |
| >APC-D67H-\ MASSGQID    | 6292  | >APC-D67H-r MASSGQIH     | 165  | 6127  |
| >APC-D67H-\ MASSGQIDL   | 199   | >APC-D67H-r MASSGQIHL    | 506  | 307   |
| >APC-D67H-\ MASSGQIDLL  | 1917  | >APC-D67H-r MASSGQIHLL   | 383  | 1534  |
| >APC-D67H-\ MASSGQIDL   | 1991  | >APC-D67H-r MASSGQIHL    | 80   | 1911  |
| >APC-D67H-\ MASSGQIDLL  | 734   | >APC-D67H-r MASSGQIHLL   | 92   | 642   |
| >APC-D67H-\ MASSGQIDLL  | 1476  | >APC-D67H-r MASSGQIHLL   | 348  | 1128  |
| >APC-D67H-\ AMASSGQIDI  | 104   | >APC-D67H-r AMASSGQIH    | 52   | 52    |

|                        |       |                        |      |       |
|------------------------|-------|------------------------|------|-------|
| >APC-D67H-\ AMASSGQIDI | 77    | >APC-D67H-r AMASSGQIHI | 36   | 41    |
| >APC-D67H-\ AMASSGQIDI | 4     | >APC-D67H-r AMASSGQIHI | 4    | 0     |
| >APC-D67H-\ AMASSGQIDI | 628   | >APC-D67H-r AMASSGQIHI | 386  | 242   |
| >APC-D67H-\ AMASSGQIDI | 14    | >APC-D67H-r AMASSGQIHI | 9    | 5     |
| >APC-D67H-\ AMASSGQIDI | 200   | >APC-D67H-r AMASSGQIHI | 108  | 92    |
| >APC-D67H-\ AMASSGQIDI | 119   | >APC-D67H-r AMASSGQIHI | 28   | 91    |
| >APC-D67H-\ AMASSGQIDI | 24    | >APC-D67H-r AMASSGQIHI | 12   | 12    |
| >APC-D67H-\ AMASSGQIDI | 207   | >APC-D67H-r AMASSGQIHI | 39   | 168   |
| >APC-D67H-\ AMASSGQIDI | 75    | >APC-D67H-r AMASSGQIHI | 25   | 50    |
| >APC-D67H-\ AMASSGQIDI | 32    | >APC-D67H-r AMASSGQIHI | 13   | 19    |
| >APC-D67H-\ AMASSGQIDI | 22    | >APC-D67H-r AMASSGQIHI | 14   | 8     |
| >APC-D67H-\ AMASSGQIDI | 307   | >APC-D67H-r AMASSGQIHI | 91   | 216   |
| >APC-D67H-\ AMASSGQIDI | 97    | >APC-D67H-r AMASSGQIHI | 29   | 68    |
| >APC-D67H-\ AMASSGQIDI | 6     | >APC-D67H-r AMASSGQIHI | 4    | 2     |
| >APC-D67H-\ AMASSGQIDI | 7     | >APC-D67H-r AMASSGQIHI | 3    | 4     |
| >APC-D67H-\ AMASSGQIDI | 800   | >APC-D67H-r AMASSGQIHI | 130  | 670   |
| >APC-D67H-\ AMASSGQID  | 13664 | >APC-D67H-r AMASSGQIH  | 409  | 13255 |
| >APC-D67H-\ AMASSGQID  | 1916  | >APC-D67H-r AMASSGQIH  | 41   | 1875  |
| >APC-D67H-\ AMASSGQIDI | 33    | >APC-D67H-r AMASSGQIHI | 26   | 7     |
| >APC-D67H-\ AMASSGQIDI | 145   | >APC-D67H-r AMASSGQIHI | 67   | 78    |
| >APC-D67H-\ AMASSGQIDI | 1183  | >APC-D67H-r AMASSGQIHI | 201  | 982   |
| >APC-D67H-\ AMASSGQIDI | 1846  | >APC-D67H-r AMASSGQIHI | 464  | 1382  |
| >APC-D67H-\ EAMASSGQIF | 146   | >APC-D67H-r EAMASSGQIF | 24   | 122   |
| >APC-D67H-\ EAMASSGQIF | 145   | >APC-D67H-r EAMASSGQIF | 33   | 112   |
| >APC-D67H-\ EAMASSGQIF | 844   | >APC-D67H-r EAMASSGQIF | 372  | 472   |
| >APC-D798G DYVFDTNR    | 3666  | >APC-D798G GYVFDTNR    | 347  | 3319  |
| >APC-D798G DYVFDTNR    | 19    | >APC-D798G GYVFDTNR    | 1682 | 1663  |
| >APC-D798G DYVFDTNR    | 77    | >APC-D798G GYVFDTNR    | 1227 | 1150  |
| >APC-D798G DYVFDTNR    | 111   | >APC-D798G GYVFDTNR    | 141  | 30    |
| >APC-D798G GDYVFDTNR   | 4105  | >APC-D798G GGYVFDTNR   | 200  | 3905  |
| >APC-D798G KQRHKQSLYC  | 1290  | >APC-D798G KQRHKQSLYC  | 290  | 1000  |
| >APC-D798G YGDYVFDTNF  | 2939  | >APC-D798G YGGYVFDTNF  | 421  | 2518  |
| >APC-D798G LYGDYVFDT   | 1792  | >APC-D798G LYGGYVFDT   | 438  | 1354  |
| >APC-D798G LYGDYVFDTM  | 1174  | >APC-D798G LYGGYVFDTM  | 491  | 683   |
| >APC-D798G LYGDYVFDTM  | 64    | >APC-D798G LYGGYVFDTM  | 85   | 21    |
| >APC-D798G LYGDYVFDTM  | 160   | >APC-D798G LYGGYVFDTM  | 185  | 25    |
| >APC-D798G LYGDYVFDTM  | 33    | >APC-D798G LYGGYVFDTM  | 34   | 1     |
| >APC-D798G SLYGDYVFDT  | 81    | >APC-D798G SLYGGYVFDT  | 100  | 19    |
| >APC-D798G SLYGDYVFDT  | 39    | >APC-D798G SLYGGYVFDT  | 34   | 5     |
| >APC-D798G SLYGDYVFDT  | 117   | >APC-D798G SLYGGYVFDT  | 110  | 7     |
| >APC-D798G SLYGDYVFDT  | 365   | >APC-D798G SLYGGYVFDT  | 681  | 316   |
| >APC-D798G SLYGDYVF    | 88    | >APC-D798G SLYGGYVF    | 38   | 50    |
| >APC-D798G SLYGDYVFD   | 480   | >APC-D798G SLYGGYVFD   | 266  | 214   |

|                       |      |                       |      |      |
|-----------------------|------|-----------------------|------|------|
| >APC-D798G SLYGDYVFDT | 14   | >APC-D798G SLYGGYVFDT | 11   | 3    |
| >APC-D798G SLYGDYVFDT | 251  | >APC-D798G SLYGGYVFDT | 172  | 79   |
| >APC-D798G SLYGDYVFDT | 448  | >APC-D798G SLYGGYVFDT | 846  | 398  |
| >APC-D798G SLYGDYVFDT | 14   | >APC-D798G SLYGGYVFDT | 12   | 2    |
| >APC-D798G SLYGDYVF   | 326  | >APC-D798G SLYGGYVF   | 166  | 160  |
| >APC-D798G SLYGDYVFD  | 697  | >APC-D798G SLYGGYVFD  | 349  | 348  |
| >APC-D798G SLYGDYVFDT | 6    | >APC-D798G SLYGGYVFDT | 4    | 2    |
| >APC-D798G SLYGDYVF   | 525  | >APC-D798G SLYGGYVF   | 472  | 53   |
| >APC-D798G SLYGDYVF   | 330  | >APC-D798G SLYGGYVF   | 167  | 163  |
| >APC-D798G SLYGDYVF   | 37   | >APC-D798G SLYGGYVF   | 37   | 0    |
| >APC-D798G SLYGDYVF   | 61   | >APC-D798G SLYGGYVF   | 45   | 16   |
| >APC-D798G SLYGDYVF   | 46   | >APC-D798G SLYGGYVF   | 19   | 27   |
| >APC-D798G SLYGDYVF   | 56   | >APC-D798G SLYGGYVF   | 25   | 31   |
| >APC-D798G SLYGDYVF   | 1077 | >APC-D798G SLYGGYVF   | 292  | 785  |
| >APC-D798G QSLYGDYVF  | 32   | >APC-D798G QSLYGGYVF  | 48   | 16   |
| >APC-D798G QSLYGDYV   | 175  | >APC-D798G QSLYGGYV   | 364  | 189  |
| >APC-D798G QSLYGDYV   | 309  | >APC-D798G QSLYGGYV   | 139  | 170  |
| >APC-D798G QSLYGDYVF  | 292  | >APC-D798G QSLYGGYVF  | 148  | 144  |
| >APC-D798G QSLYGDYVF  | 77   | >APC-D798G QSLYGGYVF  | 19   | 58   |
| >APC-D798G QSLYGDYVF  | 7    | >APC-D798G QSLYGGYVF  | 8    | 1    |
| >APC-D798G QSLYGDYVF  | 96   | >APC-D798G QSLYGGYVF  | 525  | 429  |
| >APC-D798G QSLYGDYVF  | 65   | >APC-D798G QSLYGGYVF  | 305  | 240  |
| >APC-D798G QSLYGDYVF  | 151  | >APC-D798G QSLYGGYVF  | 33   | 118  |
| >APC-D798G KQSLYGDYV  | 255  | >APC-D798G KQSLYGGYV  | 887  | 632  |
| >APC-D798G KQSLYGDYV  | 29   | >APC-D798G KQSLYGGYV  | 144  | 115  |
| >APC-D798G KQSLYGDYV  | 164  | >APC-D798G KQSLYGGYV  | 58   | 106  |
| >APC-D798G KQSLYGDYV  | 7    | >APC-D798G KQSLYGGYV  | 14   | 7    |
| >APC-D798G KQSLYGDYV  | 131  | >APC-D798G KQSLYGGYV  | 202  | 71   |
| >APC-D798G KQSLYGDYV  | 216  | >APC-D798G KQSLYGGYV  | 1105 | 889  |
| >APC-D798G KQSLYGDYV  | 323  | >APC-D798G KQSLYGGYV  | 1627 | 1304 |
| >APC-D798G KQSLYGDYVF | 131  | >APC-D798G KQSLYGGYVF | 126  | 5    |
| >APC-D798G KQSLYGDYVF | 396  | >APC-D798G KQSLYGGYVF | 666  | 270  |
| >APC-D798G KQSLYGDYVF | 417  | >APC-D798G KQSLYGGYVF | 478  | 61   |
| >APC-D798G KQSLYGDY   | 70   | >APC-D798G KQSLYGGY   | 37   | 33   |
| >APC-D798G KQSLYGDYVF | 361  | >APC-D798G KQSLYGGYVF | 626  | 265  |
| >APC-D798G KQSLYGDY   | 168  | >APC-D798G KQSLYGGY   | 87   | 81   |
| >APC-D798G KQSLYGDYVF | 58   | >APC-D798G KQSLYGGYVF | 48   | 10   |
| >APC-D798G KQSLYGDY   | 46   | >APC-D798G KQSLYGGY   | 69   | 23   |
| >APC-D798G KQSLYGDYV  | 409  | >APC-D798G KQSLYGGYV  | 621  | 212  |
| >APC-D798G KQSLYGDYVF | 7    | >APC-D798G KQSLYGGYVF | 5    | 2    |
| >APC-D798G HKQSLYGDY  | 346  | >APC-D798G HKQSLYGGY  | 236  | 110  |
| >APC-D798G HKQSLYGDY  | 138  | >APC-D798G HKQSLYGGY  | 219  | 81   |
| >APC-D798G HKQSLYGDY\ | 15   | >APC-D798G HKQSLYGGY\ | 9    | 6    |



|                         |       |                         |       |       |
|-------------------------|-------|-------------------------|-------|-------|
| >APC-D798G RHKQSLYGD\   | 210   | >APC-D798G RHKQSLYGG\   | 317   | 107   |
| >APC-D798G RHKQSLYGD\   | 139   | >APC-D798G RHKQSLYGG\   | 216   | 77    |
| >APC-D798G RHKQSLYGD\   | 203   | >APC-D798G RHKQSLYGG\   | 168   | 35    |
| >APC-D798G QRHKQSLYGI   | 373   | >APC-D798G QRHKQSLYGI   | 548   | 175   |
| >APC-D798G QRHKQSLYGI   | 292   | >APC-D798G QRHKQSLYGI   | 387   | 95    |
| >APC-D798G QRHKQSLYGI   | 1200  | >APC-D798G QRHKQSLYGI   | 253   | 947   |
| >APC-E1209\ TEHMSSSS    | 293   | >APC-E1209\ TVHMSSSS    | 38542 | 38249 |
| >APC-E1209\ TEHMSSSSSEN | 272   | >APC-E1209\ TVHMSSSSSEN | 38718 | 38446 |
| >APC-E1209\ TEHMSSSS    | 432   | >APC-E1209\ TVHMSSSS    | 38334 | 37902 |
| >APC-E1209\ TEHMSSSSSEN | 133   | >APC-E1209\ TVHMSSSSSEN | 37969 | 37836 |
| >APC-E1209\ KSSSGQSSKT' | 7673  | >APC-E1209\ KSSSGQSSKT' | 495   | 7178  |
| >APC-E1209\ KSSSGQSSKT' | 8160  | >APC-E1209\ KSSSGQSSKT' | 200   | 7960  |
| >APC-E1209\ KSSSGQSSKT' | 1273  | >APC-E1209\ KSSSGQSSKT' | 38    | 1235  |
| >APC-E1209\ KSSSGQSSKT' | 1401  | >APC-E1209\ KSSSGQSSKT' | 81    | 1320  |
| >APC-E1209\ KTEHMSSS    | 1765  | >APC-E1209\ KTVHMSSS    | 200   | 1565  |
| >APC-E1209\ KTEHMSSSS   | 1344  | >APC-E1209\ KTVHMSSSS   | 153   | 1191  |
| >APC-E1209\ KTEHMSSSSE  | 1160  | >APC-E1209\ KTVHMSSSSE  | 147   | 1013  |
| >APC-E1209\ KTEHMSSSSE  | 1980  | >APC-E1209\ KTVHMSSSSE  | 238   | 1742  |
| >APC-E1209\ KTEHMSSSS   | 140   | >APC-E1209\ KTVHMSSSS   | 93    | 47    |
| >APC-E1209\ KTEHMSSSSE  | 240   | >APC-E1209\ KTVHMSSSSE  | 170   | 70    |
| >APC-E1209\ SSKTEHMSS   | 71    | >APC-E1209\ SSKTVHMSS   | 30    | 41    |
| >APC-E1209\ SSKTEHMSSS  | 337   | >APC-E1209\ SSKTVHMSSS  | 162   | 175   |
| >APC-E1209\ SSKTEHMSSS  | 192   | >APC-E1209\ SSKTVHMSSS  | 100   | 92    |
| >APC-E1209\ SSKTEHMSSS  | 985   | >APC-E1209\ SSKTVHMSSS  | 323   | 662   |
| >APC-E1209\ QSSKTEHM    | 1412  | >APC-E1209\ QSSKTVHM    | 479   | 933   |
| >APC-E1209\ QSSKTEHM    | 334   | >APC-E1209\ QSSKTVHM    | 81    | 253   |
| >APC-E1209\ QSSKTEHM    | 408   | >APC-E1209\ QSSKTVHM    | 418   | 10    |
| >APC-E1209\ QSSKTEHM    | 209   | >APC-E1209\ QSSKTVHM    | 68    | 141   |
| >APC-E1209\ GQSSKTEHM   | 95    | >APC-E1209\ GQSSKTVHM   | 82    | 13    |
| >APC-E1209\ GQSSKTEHM   | 499   | >APC-E1209\ GQSSKTVHM   | 98    | 401   |
| >APC-E1209\ SGQSSKTEHM  | 478   | >APC-E1209\ SGQSSKTVHM  | 216   | 262   |
| >APC-E1209\ SSGQSSKTEH  | 300   | >APC-E1209\ SSGQSSKTVH  | 290   | 10    |
| >APC-E1209\ SSGQSSKTE   | 3801  | >APC-E1209\ SSGQSSKTV   | 271   | 3530  |
| >APC-E1209\ SSGQSSKTEH  | 109   | >APC-E1209\ SSGQSSKTVH  | 52    | 57    |
| >APC-E1209\ SSGQSSKTEH  | 405   | >APC-E1209\ SSGQSSKTVH  | 471   | 66    |
| >APC-E1209\ SSSGQSSKTE  | 2743  | >APC-E1209\ SSSGQSSKTV  | 131   | 2612  |
| >APC-E1209\ SSSGQSSKTE  | 1805  | >APC-E1209\ SSSGQSSKTV  | 81    | 1724  |
| >APC-E1209\ SSSGQSSKTEI | 229   | >APC-E1209\ SSSGQSSKTV  | 84    | 145   |
| >APC-E1284† AEDEIGCNQT  | 341   | >APC-E1284† AKDEIGCNQT  | 31749 | 31408 |
| >APC-E1284† AEDEIGCNQT  | 482   | >APC-E1284† AKDEIGCNQT  | 19829 | 19347 |
| >APC-E1284† AEDEIGCNQT  | 358   | >APC-E1284† AKDEIGCNQT  | 31250 | 30892 |
| >APC-E1284† CSSLSSLSSAE | 20658 | >APC-E1284† CSSLSSLSSAK | 211   | 20447 |
| >APC-E1284† CSSLSSLSSAE | 21849 | >APC-E1284† CSSLSSLSSAK | 29    | 21820 |

|                        |       |                        |       |       |
|------------------------|-------|------------------------|-------|-------|
| >APC-E1284†CSSLSSLSSAE | 15312 | >APC-E1284†CSSLSSLSSAK | 227   | 15085 |
| >APC-E1284†CSSLSSLSSAE | 20069 | >APC-E1284†CSSLSSLSSAK | 254   | 19815 |
| >APC-E1284†LSSAEDEI    | 316   | >APC-E1284†LSSAKDEI    | 836   | 520   |
| >APC-E1284†LSSAEDEI    | 129   | >APC-E1284†LSSAKDEI    | 121   | 8     |
| >APC-E1284†SLSSAEDEI   | 336   | >APC-E1284†SLSSAKDEI   | 1191  | 855   |
| >APC-E1284†SLSSAEDEI   | 15    | >APC-E1284†SLSSAKDEI   | 41    | 26    |
| >APC-E1284†SLSSAEDEI   | 265   | >APC-E1284†SLSSAKDEI   | 277   | 12    |
| >APC-E1284†SLSSAEDEI   | 88    | >APC-E1284†SLSSAKDEI   | 108   | 20    |
| >APC-E1284†SLSSAEDEIGC | 454   | >APC-E1284†SLSSAKDEIGC | 801   | 347   |
| >APC-E1284†SLSSAEDEI   | 303   | >APC-E1284†SLSSAKDEI   | 699   | 396   |
| >APC-E1284†SLSSAEDEI   | 22    | >APC-E1284†SLSSAKDEI   | 37    | 15    |
| >APC-E1284†SLSSAEDEI   | 43    | >APC-E1284†SLSSAKDEI   | 42    | 1     |
| >APC-E1284†SLSSAEDEIGC | 89    | >APC-E1284†SLSSAKDEIGC | 135   | 46    |
| >APC-E1284†SSLSSAEDEI  | 234   | >APC-E1284†SSLSSAKDEI  | 242   | 8     |
| >APC-E1284†SSLSSAEDEI  | 466   | >APC-E1284†SSLSSAKDEI  | 342   | 124   |
| >APC-E1284†LSSLSSAE    | 21247 | >APC-E1284†LSSLSSAK    | 232   | 21015 |
| >APC-E1284†LSSLSSAE    | 23649 | >APC-E1284†LSSLSSAK    | 43    | 23606 |
| >APC-E1284†LSSLSSAE    | 14944 | >APC-E1284†LSSLSSAK    | 169   | 14775 |
| >APC-E1284†LSSLSSAE    | 19520 | >APC-E1284†LSSLSSAK    | 197   | 19323 |
| >APC-E1284†LSSLSSAEDEI | 232   | >APC-E1284†LSSLSSAKDEI | 269   | 37    |
| >APC-E1284†LSSLSSAEDEI | 116   | >APC-E1284†LSSLSSAKDEI | 82    | 34    |
| >APC-E1284†SLSSLSSAE   | 16460 | >APC-E1284†SLSSLSSAK   | 41    | 16419 |
| >APC-E1284†SLSSLSSAE   | 19963 | >APC-E1284†SLSSLSSAK   | 25    | 19938 |
| >APC-E1284†SLSSLSSAE   | 20692 | >APC-E1284†SLSSLSSAK   | 306   | 20386 |
| >APC-E1284†SSLSSLSSAE  | 17735 | >APC-E1284†SSLSSLSSAK  | 41    | 17694 |
| >APC-E1284†SSLSSLSSAE  | 24811 | >APC-E1284†SSLSSLSSAK  | 10    | 24801 |
| >APC-E1284†SSLSSLSSAE  | 10777 | >APC-E1284†SSLSSLSSAK  | 22    | 10755 |
| >APC-E1284†SSLSSLSSAE  | 23411 | >APC-E1284†SSLSSLSSAK  | 113   | 23298 |
| >APC-E1284†SSLSSLSSAE  | 5641  | >APC-E1284†SSLSSLSSAK  | 119   | 5522  |
| >APC-E1306†EIKEKIGTRSA | 1820  | >APC-E1306†KIKEKIGTRSA | 52    | 1768  |
| >APC-E1306†EIKEKIGTR   | 15583 | >APC-E1306†KIKEKIGTR   | 166   | 15417 |
| >APC-E1306†EIKEKIGTRSA | 10326 | >APC-E1306†KIKEKIGTRSA | 17    | 10309 |
| >APC-E1306†EIKEKIGTR   | 1251  | >APC-E1306†KIKEKIGTR   | 17    | 1234  |
| >APC-E1306†EIKEKIGTR   | 31    | >APC-E1306†KIKEKIGTR   | 1928  | 1897  |
| >APC-E1306†EIKEKIGTR   | 35    | >APC-E1306†KIKEKIGTR   | 3019  | 2984  |
| >APC-E1306†EIKEKIGTR   | 1069  | >APC-E1306†KIKEKIGTR   | 119   | 950   |
| >APC-E1306†AEIKEKIGT   | 89    | >APC-E1306†AKIKEKIGT   | 22039 | 21950 |
| >APC-E1306†AEIKEKIGT   | 381   | >APC-E1306†AKIKEKIGT   | 31369 | 30988 |
| >APC-E1306†IAEIKEKIGTR | 1652  | >APC-E1306†IAKIKEKIGTR | 99    | 1553  |
| >APC-E1306†IAEIKEKIGTR | 2549  | >APC-E1306†IAKIKEKIGTR | 350   | 2199  |
| >APC-E1306†QIAEIKEKI   | 163   | >APC-E1306†QIAKIKEKI   | 704   | 541   |
| >APC-E1306†QIAEIKEK    | 86    | >APC-E1306†QIAKIKEK    | 119   | 33    |
| >APC-E1306†QIAEIKEKI   | 23    | >APC-E1306†QIAKIKEKI   | 59    | 36    |

|                        |       |                        |       |       |
|------------------------|-------|------------------------|-------|-------|
| >APC-E1306†QIAEIKEKI   | 287   | >APC-E1306†QIAKIKEKI   | 3444  | 3157  |
| >APC-E1306†LQIAEIKEKI  | 295   | >APC-E1306†LQIAKIKEKI  | 465   | 170   |
| >APC-E1306†TLQIAEIKEKI | 251   | >APC-E1306†TLQIAKIKEKI | 388   | 137   |
| >APC-E1306†TLQIAEIKEK  | 1144  | >APC-E1306†TLQIAKIKEK  | 405   | 739   |
| >APC-E1306†TLQIAEIK    | 288   | >APC-E1306†TLQIAKIK    | 555   | 267   |
| >APC-E1306†TLQIAEIKEK  | 478   | >APC-E1306†TLQIAKIKEK  | 524   | 46    |
| >APC-E1306†NTLQIAEIK   | 22    | >APC-E1306†NTLQIAKIK   | 126   | 104   |
| >APC-E1306†NTLQIAEIKEK | 73    | >APC-E1306†NTLQIAKIKEK | 141   | 68    |
| >APC-E1306†NTLQIAEI    | 28    | >APC-E1306†NTLQIAKI    | 131   | 103   |
| >APC-E1306†NTLQIAEI    | 15    | >APC-E1306†NTLQIAKI    | 29    | 14    |
| >APC-E1306†NTLQIAEI    | 111   | >APC-E1306†NTLQIAKI    | 66    | 45    |
| >APC-E1306†SANTLQIAE   | 21465 | >APC-E1306†SANTLQIAK   | 272   | 21193 |
| >APC-E1306†SANTLQIAE   | 19408 | >APC-E1306†SANTLQIAK   | 22    | 19386 |
| >APC-E1306†SANTLQIAEIK | 65    | >APC-E1306†SANTLQIAKIK | 134   | 69    |
| >APC-E1306†SANTLQIAE   | 13294 | >APC-E1306†SANTLQIAK   | 60    | 13234 |
| >APC-E1306†SANTLQIAEIK | 1082  | >APC-E1306†SANTLQIAKIK | 459   | 623   |
| >APC-E1306†SANTLQIAE   | 23829 | >APC-E1306†SANTLQIAK   | 359   | 23470 |
| >APC-E1306†SANTLQIAEIK | 180   | >APC-E1306†SANTLQIAKIK | 561   | 381   |
| >APC-E1306†DSANTLQIAE  | 33854 | >APC-E1306†DSANTLQIAK  | 220   | 33634 |
| >APC-E1306†DSANTLQIAE  | 24673 | >APC-E1306†DSANTLQIAK  | 53    | 24620 |
| >APC-E1306†DSANTLQIAE  | 172   | >APC-E1306†DSANTLQIAK  | 479   | 307   |
| >APC-E1306†DSANTLQIAE  | 732   | >APC-E1306†DSANTLQIAK  | 404   | 328   |
| >APC-E1309†EKIGTRSA    | 4164  | >APC-E1309†KKIGTRSA    | 361   | 3803  |
| >APC-E1309†KEKIGTRSA   | 2418  | >APC-E1309†KKKIGTRSA   | 402   | 2016  |
| >APC-E1309†KEKIGTRSA   | 87    | >APC-E1309†KKKIGTRSA   | 28933 | 28846 |
| >APC-E1309†KEKIGTRSA   | 67    | >APC-E1309†KKKIGTRSA   | 20895 | 20828 |
| >APC-E1309†IKEKIGTRSA  | 4782  | >APC-E1309†IKKKIGTRSA  | 318   | 4464  |
| >APC-E1309†EIKEKIGTR   | 31    | >APC-E1309†EIKKKIGTR   | 53    | 22    |
| >APC-E1309†EIKEKIGTR   | 35    | >APC-E1309†EIKKKIGTR   | 50    | 15    |
| >APC-E1309†EIKEKIGTRSA | 600   | >APC-E1309†EIKKKIGTRSA | 219   | 381   |
| >APC-E1309†AEIKEKIGT   | 89    | >APC-E1309†AEIKKKIGT   | 101   | 12    |
| >APC-E1309†AEIKEKIGT   | 381   | >APC-E1309†AEIKKKIGT   | 772   | 391   |
| >APC-E1309†QIAEIKEKI   | 163   | >APC-E1309†QIAEIKKKI   | 2799  | 2636  |
| >APC-E1309†QIAEIKEK    | 86    | >APC-E1309†QIAEIKKK    | 158   | 72    |
| >APC-E1309†QIAEIKEKI   | 23    | >APC-E1309†QIAEIKKKI   | 416   | 393   |
| >APC-E1309†QIAEIKEKI   | 287   | >APC-E1309†QIAEIKKKI   | 1742  | 1455  |
| >APC-E1309†LQIAEIKE    | 28029 | >APC-E1309†LQIAEIKK    | 298   | 27731 |
| >APC-E1309†LQIAEIKEKI  | 295   | >APC-E1309†LQIAEIKKKI  | 236   | 59    |
| >APC-E1309†TLQIAEIKEKI | 251   | >APC-E1309†TLQIAEIKKKI | 646   | 395   |
| >APC-E1309†TLQIAEIKE   | 25563 | >APC-E1309†TLQIAEIKK   | 107   | 25456 |
| >APC-E1309†TLQIAEIKEK  | 478   | >APC-E1309†TLQIAEIKKK  | 601   | 123   |
| >APC-E1309†NTLQIAEIKE  | 31208 | >APC-E1309†NTLQIAEIKK  | 58    | 31150 |
| >APC-E1309†NTLQIAEIKE  | 25164 | >APC-E1309†NTLQIAEIKK  | 52    | 25112 |

|                        |       |                        |       |       |
|------------------------|-------|------------------------|-------|-------|
| >APC-E1309†NTLQIAEIKEK | 73    | >APC-E1309†NTLQIAEIKKK | 93    | 20    |
| >APC-E1317(AEDPVSEV    | 16442 | >APC-E1317(AQDPVSEV    | 121   | 16321 |
| >APC-E1317(AEDPVSEVPA  | 15239 | >APC-E1317(AQDPVSEVP/  | 80    | 15159 |
| >APC-E1317(AEDPVSEV    | 8110  | >APC-E1317(AQDPVSEV    | 192   | 7918  |
| >APC-E1317(AEDPVSEVPA  | 9825  | >APC-E1317(AQDPVSEVP/  | 326   | 9499  |
| >APC-E1317(AEDPVSEV    | 12879 | >APC-E1317(AQDPVSEV    | 321   | 12558 |
| >APC-E1317(AEDPVSEV    | 923   | >APC-E1317(AQDPVSEV    | 7     | 916   |
| >APC-E1317(AEDPVSEVPA  | 287   | >APC-E1317(AQDPVSEVP/  | 6     | 281   |
| >APC-E1317(AEDPVSEV    | 754   | >APC-E1317(AQDPVSEV    | 17    | 737   |
| >APC-E1317(AEDPVSEVPA  | 565   | >APC-E1317(AQDPVSEVP/  | 15    | 550   |
| >APC-E1317(AEDPVSEV    | 11629 | >APC-E1317(AQDPVSEV    | 152   | 11477 |
| >APC-E1317(AEDPVSEVPA  | 8715  | >APC-E1317(AQDPVSEVP/  | 72    | 8643  |
| >APC-E1317(AEDPVSEV    | 1417  | >APC-E1317(AQDPVSEV    | 33    | 1384  |
| >APC-E1317(AEDPVSEVPA  | 1002  | >APC-E1317(AQDPVSEVP/  | 28    | 974   |
| >APC-E1317(AEDPVSEV    | 3980  | >APC-E1317(AQDPVSEV    | 251   | 3729  |
| >APC-E1317(AEDPVSEVPA  | 5698  | >APC-E1317(AQDPVSEVP/  | 477   | 5221  |
| >APC-E1317(AEDPVSEVPA  | 3297  | >APC-E1317(AQDPVSEVP/  | 265   | 3032  |
| >APC-E1317(AEDPVSEV    | 380   | >APC-E1317(AQDPVSEV    | 8095  | 7715  |
| >APC-E1317(AEDPVSEVPA  | 84    | >APC-E1317(AQDPVSEVP/  | 3843  | 3759  |
| >APC-E1317(AEDPVSEV    | 242   | >APC-E1317(AQDPVSEV    | 15807 | 15565 |
| >APC-E1317(AEDPVSEVPA  | 36    | >APC-E1317(AQDPVSEVP/  | 1618  | 1582  |
| >APC-E1317(AEDPVSEVPA  | 92    | >APC-E1317(AQDPVSEVP/  | 9811  | 9719  |
| >APC-E1317(AEDPVSEV    | 438   | >APC-E1317(AQDPVSEV    | 6127  | 5689  |
| >APC-E1317(AEDPVSEVPA  | 50    | >APC-E1317(AQDPVSEVP/  | 9756  | 9706  |
| >APC-E1317(SAEDPVSEV   | 1441  | >APC-E1317(SAQDPVSEV   | 195   | 1246  |
| >APC-E1317(SAEDPVSEV   | 586   | >APC-E1317(SAQDPVSEV   | 296   | 290   |
| >APC-E1317(SAEDPVSEV   | 135   | >APC-E1317(SAQDPVSEV   | 24    | 111   |
| >APC-E1317(SAEDPVSEV   | 26    | >APC-E1317(SAQDPVSEV   | 10    | 16    |
| >APC-E1317(SAEDPVSEV   | 155   | >APC-E1317(SAQDPVSEV   | 59    | 96    |
| >APC-E1317(SAEDPVSEV   | 215   | >APC-E1317(SAQDPVSEV   | 102   | 113   |
| >APC-E1317(RSAEDPVSEV  | 150   | >APC-E1317(RSAQDPVSEV  | 885   | 735   |
| >APC-E1317(RSAEDPVSEV  | 115   | >APC-E1317(RSAQDPVSEV  | 247   | 132   |
| >APC-E1317(RSAEDPVSEV  | 419   | >APC-E1317(RSAQDPVSEV  | 430   | 11    |
| >APC-E1317(RSAEDPVSEV  | 73    | >APC-E1317(RSAQDPVSEV  | 63    | 10    |
| >APC-E1317(RSAEDPVSEV  | 415   | >APC-E1317(RSAQDPVSEV  | 659   | 244   |
| >APC-E1317(GTRSAEDPV   | 344   | >APC-E1317(GTRSAQDPV   | 67    | 277   |
| >APC-E1317(GTRSAEDPVS  | 1058  | >APC-E1317(GTRSAQDPV!  | 308   | 750   |
| >APC-E1317(GTRSAEDPV   | 611   | >APC-E1317(GTRSAQDPV   | 416   | 195   |
| >APC-E1317(KIGTRSAEDP' | 376   | >APC-E1317(KIGTRSAQDP  | 258   | 118   |
| >APC-E1317(KIGTRSAEDP' | 335   | >APC-E1317(KIGTRSAQDP  | 178   | 157   |
| >APC-E1317(KIGTRSAEDP' | 306   | >APC-E1317(KIGTRSAQDP  | 253   | 53    |
| >APC-E1317(KIGTRSAEDP' | 189   | >APC-E1317(KIGTRSAQDP  | 160   | 29    |
| >APC-E1317(KIGTRSAEDP' | 224   | >APC-E1317(KIGTRSAQDP  | 204   | 20    |

|                        |       |                        |      |       |
|------------------------|-------|------------------------|------|-------|
| >APC-E1317(KIGTRSAEDP' | 146   | >APC-E1317(KIGTRSAQDP  | 136  | 10    |
| >APC-E1317(KIGTRSAEDP' | 144   | >APC-E1317(KIGTRSAQDP  | 104  | 40    |
| >APC-E1353\EFSSGAKSPSI | 280   | >APC-E1353\VFSSGAKSPSI | 5174 | 4894  |
| >APC-E1353\VEFSSGAK    | 4593  | >APC-E1353\VVFSSGAK    | 38   | 4555  |
| >APC-E1353\VEFSSGAK    | 7875  | >APC-E1353\VVFSSGAK    | 15   | 7860  |
| >APC-E1353\VEFSSGAK    | 10748 | >APC-E1353\VVFSSGAK    | 84   | 10664 |
| >APC-E1353\VEFSSGAK    | 6105  | >APC-E1353\VVFSSGAK    | 46   | 6059  |
| >APC-E1353\AVEFSSGA    | 3271  | >APC-E1353\AVVFSSGA    | 170  | 3101  |
| >APC-E1353\AVEFSSGA    | 4863  | >APC-E1353\AVVFSSGA    | 395  | 4468  |
| >APC-E1353\AVEFSSGAK   | 376   | >APC-E1353\AVVFSSGAK   | 112  | 264   |
| >APC-E1353\AVEFSSGAK   | 64    | >APC-E1353\AVVFSSGAK   | 29   | 35    |
| >APC-E1353\AVEFSSGAK   | 77    | >APC-E1353\AVVFSSGAK   | 27   | 50    |
| >APC-E1353\AVEFSSGAK   | 864   | >APC-E1353\AVVFSSGAK   | 231  | 633   |
| >APC-E1353\AVEFSSGAK   | 847   | >APC-E1353\AVVFSSGAK   | 418  | 429   |
| >APC-E1353\KAVEFSSGA   | 348   | >APC-E1353\KAVVFSSGA   | 2170 | 1822  |
| >APC-E1353\KAVEFSSGA   | 53    | >APC-E1353\KAVVFSSGA   | 560  | 507   |
| >APC-E1353\KAVEFSSGAK  | 275   | >APC-E1353\KAVVFSSGAK  | 117  | 158   |
| >APC-E1353\KAVEFSSGAK  | 255   | >APC-E1353\KAVVFSSGAK  | 198  | 57    |
| >APC-E1353\KAVEFSSGAK  | 29    | >APC-E1353\KAVVFSSGAK  | 19   | 10    |
| >APC-E1353\ARHKAVEF    | 11    | >APC-E1353\ARHKAVVF    | 8    | 3     |
| >APC-E1353\ARHKAVEF    | 140   | >APC-E1353\ARHKAVVF    | 110  | 30    |
| >APC-E1353\SARHKAVE    | 3166  | >APC-E1353\SARHKAVV    | 63   | 3103  |
| >APC-E1353\SARHKAVEFS  | 336   | >APC-E1353\SARHKAVVFS  | 55   | 281   |
| >APC-E1353\SARHKAVEFS  | 491   | >APC-E1353\SARHKAVVFS  | 209  | 282   |
| >APC-E1353\SARHKAVEF   | 1152  | >APC-E1353\SARHKAVVF   | 366  | 786   |
| >APC-E1353\SARHKAVE    | 6457  | >APC-E1353\SARHKAVV    | 316  | 6141  |
| >APC-E1353\SARHKAVEF   | 1069  | >APC-E1353\SARHKAVVF   | 379  | 690   |
| >APC-E1353\SARHKAVEF   | 532   | >APC-E1353\SARHKAVVF   | 145  | 387   |
| >APC-E1353\SARHKAVEF   | 41    | >APC-E1353\SARHKAVVF   | 32   | 9     |
| >APC-E1353\SARHKAVEF   | 5     | >APC-E1353\SARHKAVVF   | 5    | 0     |
| >APC-E1353\SARHKAVEF   | 701   | >APC-E1353\SARHKAVVF   | 278  | 423   |
| >APC-E1353\ESARHKAVEF  | 44    | >APC-E1353\ESARHKAVVF  | 42   | 2     |
| >APC-E1353\ESARHKAVE   | 21602 | >APC-E1353\ESARHKAVV   | 34   | 21568 |
| >APC-E1353\ESARHKAVE   | 20574 | >APC-E1353\ESARHKAVV   | 322  | 20252 |
| >APC-E1353\ESARHKAVEF  | 278   | >APC-E1353\ESARHKAVVF  | 213  | 65    |
| >APC-E1353\ESARHKAVEF  | 60    | >APC-E1353\ESARHKAVVF  | 82   | 22    |
| >APC-E1353\SESARHKAVE  | 22744 | >APC-E1353\SESARHKAVV  | 217  | 22527 |
| >APC-E1353\SESARHKAVE  | 1177  | >APC-E1353\SESARHKAVV  | 368  | 809   |
| >APC-E1353\SESARHKAVE  | 97    | >APC-E1353\SESARHKAVV  | 85   | 12    |
| >APC-E1353\SESARHKAVE  | 252   | >APC-E1353\SESARHKAVV  | 215  | 37    |
| >APC-E1353\SESARHKAVE  | 116   | >APC-E1353\SESARHKAVV  | 305  | 189   |
| >APC-E1353\SESARHKAVE  | 183   | >APC-E1353\SESARHKAVV  | 298  | 115   |
| >APC-E1353\SESARHKAVE  | 1235  | >APC-E1353\SESARHKAVV  | 233  | 1002  |

|                       |       |                        |       |       |
|-----------------------|-------|------------------------|-------|-------|
| >APC-E1374†EHYVQETPL  | 684   | >APC-E1374†KH YVQETPL  | 166   | 518   |
| >APC-E1374†EHYVQETPL  | 878   | >APC-E1374†KH YVQETPL  | 69    | 809   |
| >APC-E1374†EHYVQETPLM | 1609  | >APC-E1374†KH YVQETPLM | 179   | 1430  |
| >APC-E1374†EHYVQETPLM | 62    | >APC-E1374†KH YVQETPLM | 6     | 56    |
| >APC-E1374†EHYVQETP   | 494   | >APC-E1374†KH YVQETP   | 1110  | 616   |
| >APC-E1374†EHYVQETPL  | 84    | >APC-E1374†KH YVQETPL  | 171   | 87    |
| >APC-E1374†EHYVQETPLM | 217   | >APC-E1374†KH YVQETPLM | 454   | 237   |
| >APC-E1374†EHYVQETPL  | 105   | >APC-E1374†KH YVQETPL  | 400   | 295   |
| >APC-E1374†PEHYVQETPL | 8071  | >APC-E1374†PKH YVQETPL | 284   | 7787  |
| >APC-E1374†PEHYVQETPL | 210   | >APC-E1374†PKH YVQETPL | 25330 | 25120 |
| >APC-E1374†PEHYVQETPL | 228   | >APC-E1374†PKH YVQETPL | 24512 | 24284 |
| >APC-E1374†KSPPEHYV   | 436   | >APC-E1374†KSPPKHYV    | 640   | 204   |
| >APC-E1374†KSPPEHYV   | 40    | >APC-E1374†KSPPKHYV    | 11    | 29    |
| >APC-E1374†KSPPEHYVQ  | 23    | >APC-E1374†KSPPKHYVQ   | 85    | 62    |
| >APC-E1374†KSPPEHYVQE | 235   | >APC-E1374†KSPPKHYVQE  | 590   | 355   |
| >APC-E1374†PKSPPEHY   | 190   | >APC-E1374†KSPPKHY     | 139   | 51    |
| >APC-E1374†TPKSPPEHYV | 100   | >APC-E1374†TPKSPPKHYV  | 116   | 16    |
| >APC-E1374†TPKSPPEHYV | 137   | >APC-E1374†TPKSPPKHYV  | 88    | 49    |
| >APC-E1374†QTPKSPPEHY | 274   | >APC-E1374†QTPKSPPKHY  | 427   | 153   |
| >APC-E1374†QTPKSPPEHY | 238   | >APC-E1374†QTPKSPPKHY  | 297   | 59    |
| >APC-E1374†QTPKSPPE   | 27650 | >APC-E1374†QTPKSPPK    | 213   | 27437 |
| >APC-E1374†QTPKSPPEHY | 32    | >APC-E1374†QTPKSPPKHY  | 54    | 22    |
| >APC-E1374†QTPKSPPEHY | 125   | >APC-E1374†QTPKSPPKHY  | 130   | 5     |
| >APC-E1374†QTPKSPPEHY | 337   | >APC-E1374†QTPKSPPKHY  | 380   | 43    |
| >APC-E1374†QTPKSPPE   | 14269 | >APC-E1374†QTPKSPPK    | 127   | 14142 |
| >APC-E1374†QTPKSPPE   | 23782 | >APC-E1374†QTPKSPPK    | 467   | 23315 |
| >APC-E1374†QTPKSPPEHY | 25    | >APC-E1374†QTPKSPPKHY  | 30    | 5     |
| >APC-E1374†QTPKSPPEHY | 75    | >APC-E1374†QTPKSPPKHY  | 41    | 34    |
| >APC-E1374†QTPKSPPEHY | 293   | >APC-E1374†QTPKSPPKHY  | 122   | 171   |
| >APC-E1374†QTPKSPPEHY | 9     | >APC-E1374†QTPKSPPKHY  | 7     | 2     |
| >APC-E1374†QTPKSPPEHY | 106   | >APC-E1374†QTPKSPPKHY  | 113   | 7     |
| >APC-E1374†AQTPKSPPE  | 26232 | >APC-E1374†AQTPKSPPK   | 117   | 26115 |
| >APC-E1374†AQTPKSPPE  | 12839 | >APC-E1374†AQTPKSPPK   | 39    | 12800 |
| >APC-E1374†AQTPKSPPEH | 410   | >APC-E1374†AQTPKSPPK†  | 568   | 158   |
| >APC-E1374†AQTPKSPPEH | 87    | >APC-E1374†AQTPKSPPK†  | 154   | 67    |
| >APC-E1374†AQTPKSPPEH | 22    | >APC-E1374†AQTPKSPPK†  | 16    | 6     |
| >APC-E1374†GAQTPKSPPE | 33877 | >APC-E1374†GAQTPKSPPK  | 343   | 33534 |
| >APC-E1374†GAQTPKSPPE | 15278 | >APC-E1374†GAQTPKSPPK  | 398   | 14880 |
| >APC-E1464[ESGPKQAAV  | 78    | >APC-E1464[DSGPKQAAV   | 707   | 629   |
| >APC-E1464[RESGPKQAA  | 341   | >APC-E1464[RDSGPKQAA   | 21742 | 21401 |
| >APC-E1464[RESGPKQAA\ | 223   | >APC-E1464[RDSGPKQAA'  | 21132 | 20909 |
| >APC-E1464[RESGPKQA   | 93    | >APC-E1464[RDSGPKQA    | 18157 | 18064 |
| >APC-E1464[RESGPKQAA  | 20    | >APC-E1464[RDSGPKQAA   | 3430  | 3410  |

|                         |       |                          |       |       |
|-------------------------|-------|--------------------------|-------|-------|
| >APC-E1464[ RESGPKQAA\  | 341   | >APC-E1464[ RDSGPKQAA'   | 6871  | 6530  |
| >APC-E1464[ RESGPKQAA\  | 138   | >APC-E1464[ RDSGPKQAA'   | 9044  | 8906  |
| >APC-E1464[ AEKRESGPK   | 351   | >APC-E1464[ AEKRDSGPK    | 711   | 360   |
| >APC-E1464[ AEKRESGPKC  | 59    | >APC-E1464[ AEKRDSGPKC   | 48    | 11    |
| >APC-E1464† ESGPKQAAV   | 78    | >APC-E1464† KSGPKQAAV    | 10337 | 10259 |
| >APC-E1464† ESGPKQAAV   | 6219  | >APC-E1464† KSGPKQAAV    | 198   | 6021  |
| >APC-E1464† RESGPKQAA   | 11722 | >APC-E1464† RKSGPKQAA    | 481   | 11241 |
| >APC-E1464† RESGPKQAA\  | 3687  | >APC-E1464† RKSGPKQAA\   | 119   | 3568  |
| >APC-E1464† RESGPKQAA   | 341   | >APC-E1464† RKSGPKQAA    | 22696 | 22355 |
| >APC-E1464† RESGPKQAA\  | 223   | >APC-E1464† RKSGPKQAA\   | 27029 | 26806 |
| >APC-E1464† RESGPKQA    | 93    | >APC-E1464† RKSGPKQA     | 25958 | 25865 |
| >APC-E1464† RESGPKQAA   | 20    | >APC-E1464† RKSGPKQAA    | 9082  | 9062  |
| >APC-E1464† RESGPKQAA\  | 341   | >APC-E1464† RKSGPKQAA\   | 17291 | 16950 |
| >APC-E1464† RESGPKQAA\  | 138   | >APC-E1464† RKSGPKQAA\   | 22201 | 22063 |
| >APC-E1464† KNKAPTAEK†  | 8436  | >APC-E1464† KNKAPTAEK†   | 28    | 8408  |
| >APC-E1464† KRESGPKQA/  | 2074  | >APC-E1464† KRKSGPKQA/   | 212   | 1862  |
| >APC-E1464† KRESGPKQA/  | 621   | >APC-E1464† KRKSGPKQA/   | 442   | 179   |
| >APC-E1464† EKRESGPKQA/ | 529   | >APC-E1464† EKRSKSGPKQA/ | 351   | 178   |
| >APC-E1464† AEKRESGPK   | 351   | >APC-E1464† AEKRKSGPK    | 94    | 257   |
| >APC-E1464† AEKRESGPKC  | 59    | >APC-E1464† AEKRKSGPKC   | 62    | 3     |
| >APC-E771G- ETFDNIDNL   | 508   | >APC-E771G- GTFDNIDNL    | 32    | 476   |
| >APC-E771G- ETFDNIDNL   | 3248  | >APC-E771G- GTFDNIDNL    | 420   | 2828  |
| >APC-E771G- ETFDNIDNL   | 309   | >APC-E771G- GTFDNIDNL    | 38    | 271   |
| >APC-E771G- ETFDNIDNL   | 3896  | >APC-E771G- GTFDNIDNL    | 105   | 3791  |
| >APC-E771G- ETFDNIDNL   | 4308  | >APC-E771G- GTFDNIDNL    | 302   | 4006  |
| >APC-E771G- ETFDNIDNL   | 3888  | >APC-E771G- GTFDNIDNL    | 406   | 3482  |
| >APC-E771G- ETFDNIDNL   | 356   | >APC-E771G- GTFDNIDNL    | 13347 | 12991 |
| >APC-E771G- ETFDNIDNL   | 81    | >APC-E771G- GTFDNIDNL    | 10817 | 10736 |
| >APC-E771G- ETFDNIDNL   | 30    | >APC-E771G- GTFDNIDNL    | 3154  | 3124  |
| >APC-E771G- ETFDNIDNL   | 341   | >APC-E771G- GTFDNIDNL    | 13869 | 13528 |
| >APC-E771G- ETFDNIDN    | 444   | >APC-E771G- GTFDNIDN     | 10382 | 9938  |
| >APC-E771G- ETFDNIDNL   | 465   | >APC-E771G- GTFDNIDNL    | 7864  | 7399  |
| >APC-E771G- ETFDNIDNL   | 5     | >APC-E771G- GTFDNIDNL    | 270   | 265   |
| >APC-E771G- ETFDNIDNL   | 11    | >APC-E771G- GTFDNIDNL    | 4109  | 4098  |
| >APC-E771G- ETFDNIDNL   | 117   | >APC-E771G- GTFDNIDNL    | 39    | 78    |
| >APC-E771G- ETFDNIDNL   | 6091  | >APC-E771G- GTFDNIDNL    | 465   | 5626  |
| >APC-E771G- SETFDNIDNL  | 311   | >APC-E771G- SGTFDNIDNL   | 35742 | 35431 |
| >APC-E771G- LSETFDNI    | 43    | >APC-E771G- LSGTFDNI     | 47    | 4     |
| >APC-E771G- HLSETFDNI   | 254   | >APC-E771G- HLSGTFDNI    | 1430  | 1176  |
| >APC-E771G- HLSETFDNI   | 6     | >APC-E771G- HLSGTFDNI    | 8     | 2     |
| >APC-E771G- HLSETFDNI   | 19    | >APC-E771G- HLSGTFDNI    | 57    | 38    |
| >APC-E771G- HLSETFDNI   | 56    | >APC-E771G- HLSGTFDNI    | 354   | 298   |
| >APC-E771G- HLSETFDNI   | 29    | >APC-E771G- HLSGTFDNI    | 109   | 80    |

|                       |      |                        |      |      |
|-----------------------|------|------------------------|------|------|
| >APC-E771G-HLSETFDNI  | 10   | >APC-E771G-HLSGTFDNI   | 103  | 93   |
| >APC-E771G-HLSETFDNI  | 43   | >APC-E771G-HLSGTFDNI   | 120  | 77   |
| >APC-E771G-HLSETFDNI  | 80   | >APC-E771G-HLSGTFDNI   | 235  | 155  |
| >APC-E771G-HLSETFDNI  | 34   | >APC-E771G-HLSGTFDNI   | 30   | 4    |
| >APC-E771G-HLSETFDNI  | 348  | >APC-E771G-HLSGTFDNI   | 2179 | 1831 |
| >APC-E771G-AQHLSETFDN | 303  | >APC-E771G-AQHLSGTFDNI | 246  | 57   |
| >APC-E771G-AQHLSETF   | 56   | >APC-E771G-AQHLSGTF    | 41   | 15   |
| >APC-E771G-AQHLSETF   | 1095 | >APC-E771G-AQHLSGTF    | 271  | 824  |
| >APC-E771G-AQHLSETF   | 4    | >APC-E771G-AQHLSGTF    | 6    | 2    |
| >APC-E771G-AQHLSETFDN | 110  | >APC-E771G-AQHLSGTFDNI | 79   | 31   |
| >APC-E771G-DAQHLSETF  | 158  | >APC-E771G-DAQHLSGTF   | 136  | 22   |
| >APC-E771G-AELDAQHLSE | 62   | >APC-E771G-AELDAQHLSC  | 150  | 88   |
| >APC-E771G-AELDAQHLSE | 1325 | >APC-E771G-AELDAQHLSC  | 420  | 905  |
| >APC-E771G-AELDAQHLSE | 39   | >APC-E771G-AELDAQHLSC  | 48   | 9    |
| >APC-E771G-AELDAQHLSE | 37   | >APC-E771G-AELDAQHLSC  | 35   | 2    |
| >APC-E911G-ELHCVTDERM | 2440 | >APC-E911G-GLHCVTDERM  | 181  | 2259 |
| >APC-E911G-ELHCVTDERM | 1470 | >APC-E911G-GLHCVTDERM  | 251  | 1219 |
| >APC-E911G-ELHCVTDERM | 4639 | >APC-E911G-GLHCVTDERM  | 367  | 4272 |
| >APC-E911G-ELHCVTDER  | 178  | >APC-E911G-GLHCVTDER   | 7461 | 7283 |
| >APC-E911G-ELHCVTDER  | 7    | >APC-E911G-GLHCVTDER   | 364  | 357  |
| >APC-E911G-TELHCVTDER | 617  | >APC-E911G-TGLHCVTDER  | 484  | 133  |
| >APC-E911G-TTELHCVTDE | 611  | >APC-E911G-TTGLHCVTDE  | 403  | 208  |
| >APC-E911G-TTELHCVTDE | 12   | >APC-E911G-TTGLHCVTDE  | 19   | 7    |
| >APC-E911G-STTELHCV   | 457  | >APC-E911G-STTGLHCV    | 643  | 186  |
| >APC-E911G-STTELHCV   | 134  | >APC-E911G-STTGLHCV    | 300  | 166  |
| >APC-E911G-STTELHCV   | 68   | >APC-E911G-STTGLHCV    | 150  | 82   |
| >APC-E911G-STTELHCV   | 283  | >APC-E911G-STTGLHCV    | 1550 | 1267 |
| >APC-E911G-STTELHCV   | 26   | >APC-E911G-STTGLHCV    | 39   | 13   |
| >APC-E911G-STTELHCV   | 33   | >APC-E911G-STTGLHCV    | 22   | 11   |
| >APC-E911G-STTELHCV   | 24   | >APC-E911G-STTGLHCV    | 21   | 3    |
| >APC-E911G-STTELHCV   | 44   | >APC-E911G-STTGLHCV    | 203  | 159  |
| >APC-E911G-SSGSTTEL   | 408  | >APC-E911G-SSGTTGL     | 256  | 152  |
| >APC-E911G-SSGSTTELH  | 319  | >APC-E911G-SSGTTGLH    | 220  | 99   |
| >APC-E911G-SSGSTTEL   | 462  | >APC-E911G-SSGTTGL     | 423  | 39   |
| >APC-E911G-RSSGSTTEL  | 74   | >APC-E911G-RSSGTTGL    | 91   | 17   |
| >APC-E911G-RSSGSTTEL  | 193  | >APC-E911G-RSSGTTGL    | 535  | 342  |
| >APC-E911G-RSSGSTTE   | 406  | >APC-E911G-RSSGTTG     | 545  | 139  |
| >APC-E911G-RSSGSTTEL  | 3    | >APC-E911G-RSSGTTGL    | 3    | 0    |
| >APC-E911G-RSSGSTTELH | 235  | >APC-E911G-RSSGTTGLH   | 166  | 69   |
| >APC-E911G-RSSGSTTELH | 920  | >APC-E911G-RSSGTTGLH   | 469  | 451  |
| >APC-E911G-RSSGSTTEL  | 40   | >APC-E911G-RSSGTTGL    | 71   | 31   |
| >APC-E911G-RSSGSTTELH | 336  | >APC-E911G-RSSGTTGLH   | 1350 | 1014 |
| >APC-E911G-RSSGSTTELH | 333  | >APC-E911G-RSSGTTGLH   | 577  | 244  |



|                        |      |                        |       |       |
|------------------------|------|------------------------|-------|-------|
| >APC-E911G-RSSGSTTEL   | 131  | >APC-E911G-RSSGSTTGL   | 363   | 232   |
| >APC-E911G-RSSGSTTELH  | 837  | >APC-E911G-RSSGSTTGLH  | 246   | 591   |
| >APC-E911G-RSSGSTTEL   | 345  | >APC-E911G-RSSGSTTGL   | 314   | 31    |
| >APC-E911G-DRSSGSTTEL  | 465  | >APC-E911G-DRSSGSTTGL  | 776   | 311   |
| >APC-F1197SFSKSSSGQSSI | 675  | >APC-F1197SSKSSSGQSSI  | 202   | 473   |
| >APC-F1197SFSKSSSGQSSI | 1101 | >APC-F1197SSKSSSGQSSI  | 80    | 1021  |
| >APC-F1197SFSKSSSGQS   | 8307 | >APC-F1197SSKSSSGQS    | 455   | 7852  |
| >APC-F1197SFSKSSSGQSS  | 6546 | >APC-F1197SSKSSSGQSS   | 254   | 6292  |
| >APC-F1197SFSKSSSGQSSI | 56   | >APC-F1197SSKSSSGQSSI  | 5     | 51    |
| >APC-F1197SFSKSSSGQSSI | 78   | >APC-F1197SSKSSSGQSSI  | 270   | 192   |
| >APC-F1197SFSKSSSGQSSI | 472  | >APC-F1197SSKSSSGQSSI  | 1775  | 1303  |
| >APC-F1197SFSKSSSGQSSI | 608  | >APC-F1197SSKSSSGQSSI  | 455   | 153   |
| >APC-F1197SFSKSSSGQ    | 5448 | >APC-F1197SSKSSSGQ     | 452   | 4996  |
| >APC-F1197SIPSSQKQSFSS | 25   | >APC-F1197SIPSSQKQSFSS | 28019 | 27994 |
| >APC-F1197SIPSSQKQSFSS | 44   | >APC-F1197SIPSSQKQSFSS | 10429 | 10385 |
| >APC-F1197SIPSSQKQSFSS | 115  | >APC-F1197SIPSSQKQSFSS | 16611 | 16496 |
| >APC-F1197SIPSSQKQSFSS | 26   | >APC-F1197SIPSSQKQSFSS | 989   | 963   |
| >APC-F1197SIPSSQKQSFSS | 24   | >APC-F1197SIPSSQKQSFSS | 4934  | 4910  |
| >APC-F1197SIPSSQKQSFSS | 16   | >APC-F1197SIPSSQKQSFSS | 2277  | 2261  |
| >APC-F1197SIPSSQKQSFSS | 76   | >APC-F1197SIPSSQKQSFSS | 15494 | 15418 |
| >APC-F1197SFSKSSSGQ    | 428  | >APC-F1197SFSKSSSGQ    | 2527  | 2099  |
| >APC-F1197SFSKSSSG     | 157  | >APC-F1197SFSKSSSG     | 899   | 742   |
| >APC-F1197SFSKSSSGQ    | 265  | >APC-F1197SFSKSSSGQ    | 1337  | 1072  |
| >APC-F1197SQSFSSKSS    | 380  | >APC-F1197SQSFSSKSS    | 353   | 27    |
| >APC-F1197SQSFSSKSSS   | 579  | >APC-F1197SQSFSSKSSS   | 443   | 136   |
| >APC-F1197SQSFSSKSSSC  | 406  | >APC-F1197SQSFSSKSSSC  | 599   | 193   |
| >APC-F1197KQSFSSK      | 48   | >APC-F1197KQSFSSK      | 52    | 4     |
| >APC-F1197KQSFSSK      | 12   | >APC-F1197KQSFSSK      | 25    | 13    |
| >APC-F1197KQSFSSK      | 39   | >APC-F1197KQSFSSK      | 36    | 3     |
| >APC-F1197KQSFSSK      | 58   | >APC-F1197KQSFSSK      | 544   | 486   |
| >APC-F1197KQSFSSK      | 132  | >APC-F1197KQSFSSK      | 70    | 62    |
| >APC-F1197KQSFSSKSS    | 189  | >APC-F1197KQSFSSKSS    | 201   | 12    |
| >APC-F1197KQSFSSKSSS   | 292  | >APC-F1197KQSFSSKSSS   | 261   | 31    |
| >APC-F1197KQKQSFSS     | 1826 | >APC-F1197KQKQSFSS     | 479   | 1347  |
| >APC-F1197KQKQSFSSK    | 277  | >APC-F1197KQKQSFSSK    | 53    | 224   |
| >APC-F1197KQKQSFSSKS   | 567  | >APC-F1197KQKQSFSSKS   | 333   | 234   |
| >APC-F1197SQKQSFSSK    | 648  | >APC-F1197SQKQSFSSK    | 447   | 201   |
| >APC-F1197SQKQSFSSK    | 28   | >APC-F1197SQKQSFSSK    | 99    | 71    |
| >APC-F1197SQKQSFSSK    | 17   | >APC-F1197SQKQSFSSK    | 22    | 5     |
| >APC-F1197SQKQSFSSK    | 449  | >APC-F1197SQKQSFSSK    | 1483  | 1034  |
| >APC-F1197SQKQSFSS     | 22   | >APC-F1197SQKQSFSS     | 816   | 794   |
| >APC-F1197SQKQSFSS     | 1036 | >APC-F1197SQKQSFSS     | 169   | 867   |
| >APC-F1197SQKQSFSS     | 109  | >APC-F1197SQKQSFSS     | 13119 | 13010 |

|                          |       |                          |       |       |
|--------------------------|-------|--------------------------|-------|-------|
| >APC-F1197S SQKQSF SF    | 3     | >APC-F1197S SQKQSF SS    | 1424  | 1421  |
| >APC-F1197S SQKQSF SFS   | 541   | >APC-F1197S SQKQSF SSS   | 148   | 393   |
| >APC-F1197S SQKQSF SFSK  | 143   | >APC-F1197S SQKQSF SSSK  | 46    | 97    |
| >APC-F1197S SQKQSF SFSK  | 444   | >APC-F1197S SQKQSF SSSK  | 2271  | 1827  |
| >APC-F1197S SSQKQSF SFSI | 325   | >APC-F1197S SSQKQSF SSSI | 377   | 52    |
| >APC-F1197S SSQKQSF SFSI | 7     | >APC-F1197S SSQKQSF SSSI | 11    | 4     |
| >APC-F1197S SSQKQSF SFSI | 20    | >APC-F1197S SSQKQSF SSSI | 23    | 3     |
| >APC-F1197S SSQKQSF SFSI | 204   | >APC-F1197S SSQKQSF SSSI | 953   | 749   |
| >APC-F1197S SSQKQSF SF   | 114   | >APC-F1197S SSQKQSF SS   | 14412 | 14298 |
| >APC-F1197S SSQKQSF SFSI | 361   | >APC-F1197S SSQKQSF SSSI | 506   | 145   |
| >APC-F1197S SSQKQSF SF   | 67    | >APC-F1197S SSQKQSF SS   | 12673 | 12606 |
| >APC-F1197S SSQKQSF SF   | 88    | >APC-F1197S SSQKQSF SS   | 17042 | 16954 |
| >APC-F1197S SSQKQSF SF   | 7     | >APC-F1197S SSQKQSF SS   | 11927 | 11920 |
| >APC-F1197S SSQKQSF SF   | 232   | >APC-F1197S SSQKQSF SS   | 20848 | 20616 |
| >APC-F1197S SSQKQSF SF   | 108   | >APC-F1197S SSQKQSF SS   | 7853  | 7745  |
| >APC-F1197S SSQKQSF SF   | 413   | >APC-F1197S SSQKQSF SS   | 25372 | 24959 |
| >APC-F1197S SSQKQSF SFSI | 86    | >APC-F1197S SSQKQSF SSSI | 230   | 144   |
| >APC-F1197S PSSQKQSF SF  | 166   | >APC-F1197S PSSQKQSF SS  | 20587 | 20421 |
| >APC-F1197S PSSQKQSF SF  | 144   | >APC-F1197S PSSQKQSF SS  | 15004 | 14860 |
| >APC-F1354L FSSGAKSPSK   | 282   | >APC-F1354L LSSGAKSPSK   | 202   | 80    |
| >APC-F1354L FSSGAKSPSK   | 31    | >APC-F1354L LSSGAKSPSK   | 27    | 4     |
| >APC-F1354L FSSGAKSPSK   | 1035  | >APC-F1354L LSSGAKSPSK   | 49    | 986   |
| >APC-F1354L FSSGAKSPSK   | 89    | >APC-F1354L LSSGAKSPSK   | 485   | 396   |
| >APC-F1354L EFSSGAKSPSI  | 11258 | >APC-F1354L ELSSGAKSPSI  | 440   | 10818 |
| >APC-F1354L EFSSGAKSPSI  | 280   | >APC-F1354L ELSSGAKSPSI  | 140   | 140   |
| >APC-F1354L SESARHKAVE   | 1346  | >APC-F1354L SESARHKAVE   | 309   | 1037  |
| >APC-F1354L SESARHKAVE   | 97    | >APC-F1354L SESARHKAVE   | 3153  | 3056  |
| >APC-F1354L SESARHKAVE   | 252   | >APC-F1354L SESARHKAVE   | 2756  | 2504  |
| >APC-F1354L SESARHKAVE   | 872   | >APC-F1354L SESARHKAVE   | 69    | 803   |
| >APC-F1354L SESARHKAVE   | 751   | >APC-F1354L SESARHKAVE   | 232   | 519   |
| >APC-F1354L SESARHKAVE   | 116   | >APC-F1354L SESARHKAVE   | 485   | 369   |
| >APC-F1354L SESARHKAVE   | 183   | >APC-F1354L SESARHKAVE   | 1356  | 1173  |
| >APC-F1354L SESARHKAVE   | 884   | >APC-F1354L SESARHKAVE   | 390   | 494   |
| >APC-F1354L AVEFSSGAK    | 376   | >APC-F1354L AVELSSGAK    | 897   | 521   |
| >APC-F1354L AVEFSSGAK    | 64    | >APC-F1354L AVELSSGAK    | 136   | 72    |
| >APC-F1354L AVEFSSGAK    | 77    | >APC-F1354L AVELSSGAK    | 178   | 101   |
| >APC-F1354L KAVEFSSGA    | 348   | >APC-F1354L KAVELSSGA    | 507   | 159   |
| >APC-F1354L KAVEFSSGA    | 53    | >APC-F1354L KAVELSSGA    | 103   | 50    |
| >APC-F1354L KAVEFSSGAK   | 275   | >APC-F1354L KAVELSSGAK   | 675   | 400   |
| >APC-F1354L KAVEFSSGAK   | 255   | >APC-F1354L KAVELSSGAK   | 608   | 353   |
| >APC-F1354L KAVEFSSGAK   | 29    | >APC-F1354L KAVELSSGAK   | 60    | 31    |
| >APC-F1354L ARHKAVEF     | 11    | >APC-F1354L ARHKAVEL     | 170   | 159   |
| >APC-F1354L ARHKAVEF     | 140   | >APC-F1354L ARHKAVEL     | 113   | 27    |

|                        |       |                        |      |       |
|------------------------|-------|------------------------|------|-------|
| >APC-F1354L ARHKAVEF   | 7681  | >APC-F1354L ARHKAVEL   | 411  | 7270  |
| >APC-F1354L ARHKAVEF   | 1887  | >APC-F1354L ARHKAVEL   | 366  | 1521  |
| >APC-F1354L SARHKAVEF  | 1898  | >APC-F1354L SARHKAVEL  | 122  | 1776  |
| >APC-F1354L SARHKAVEFS | 336   | >APC-F1354L SARHKAVELS | 1134 | 798   |
| >APC-F1354L SARHKAVEFS | 491   | >APC-F1354L SARHKAVELS | 317  | 174   |
| >APC-F1354L SARHKAVEF  | 1152  | >APC-F1354L SARHKAVEL  | 184  | 968   |
| >APC-F1354L SARHKAVEF  | 1069  | >APC-F1354L SARHKAVEL  | 248  | 821   |
| >APC-F1354L SARHKAVEF  | 41    | >APC-F1354L SARHKAVEL  | 781  | 740   |
| >APC-F1354L SARHKAVEF  | 5     | >APC-F1354L SARHKAVEL  | 15   | 10    |
| >APC-F1354L ESARHKAVEF | 44    | >APC-F1354L ESARHKAVEL | 456  | 412   |
| >APC-F1354L ESARHKAVEF | 278   | >APC-F1354L ESARHKAVEL | 5229 | 4951  |
| >APC-F1354L ESARHKAVEF | 60    | >APC-F1354L ESARHKAVEL | 612  | 552   |
| >APC-F1491L FATESTPDGF | 143   | >APC-F1491L LATESTPDGF | 338  | 195   |
| >APC-F1491L FATESTPDGF | 26    | >APC-F1491L LATESTPDGF | 25   | 1     |
| >APC-F1491L FATESTPDGF | 188   | >APC-F1491L LATESTPDGF | 102  | 86    |
| >APC-F1491L HFATESTPDG | 13770 | >APC-F1491L HLATESTPDG | 396  | 13374 |
| >APC-F1491L HFATESTPDG | 96    | >APC-F1491L HLATESTPDG | 9317 | 9221  |
| >APC-F1491L HFATESTPDG | 5087  | >APC-F1491L HLATESTPDG | 435  | 4652  |
| >APC-F1491L HFATESTPDG | 850   | >APC-F1491L HLATESTPDG | 200  | 650   |
| >APC-F1491L HFATESTPDG | 1885  | >APC-F1491L HLATESTPDG | 164  | 1721  |
| >APC-F1491L HFATESTPDG | 387   | >APC-F1491L HLATESTPDG | 457  | 70    |
| >APC-F1491L VLPDADTLLH | 10465 | >APC-F1491L VLPDADTLLH | 83   | 10382 |
| >APC-F1491L VLPDADTLLH | 3098  | >APC-F1491L VLPDADTLLH | 37   | 3061  |
| >APC-F1491L VLPDADTLLH | 4289  | >APC-F1491L VLPDADTLLH | 50   | 4239  |
| >APC-F1491L VLPDADTLLH | 339   | >APC-F1491L VLPDADTLLH | 32   | 307   |
| >APC-F1491L VLPDADTLLH | 1907  | >APC-F1491L VLPDADTLLH | 24   | 1883  |
| >APC-F1491L VLPDADTLLH | 9414  | >APC-F1491L VLPDADTLLH | 35   | 9379  |
| >APC-F1491L VLPDADTLLH | 4936  | >APC-F1491L VLPDADTLLH | 12   | 4924  |
| >APC-F1491L VLPDADTLLH | 13169 | >APC-F1491L VLPDADTLLH | 107  | 13062 |
| >APC-F1491L VLPDADTLLH | 489   | >APC-F1491L VLPDADTLLH | 3    | 486   |
| >APC-F1491L VLPDADTLLH | 150   | >APC-F1491L VLPDADTLLH | 3789 | 3639  |
| >APC-F1491L VLPDADTLLH | 108   | >APC-F1491L VLPDADTLLH | 51   | 57    |
| >APC-F1491L LLHFATEST  | 310   | >APC-F1491L LLHLATEST  | 714  | 404   |
| >APC-F1491L LLHFATEST  | 170   | >APC-F1491L LLHLATEST  | 689  | 519   |
| >APC-F1491L LLHFATEST  | 177   | >APC-F1491L LLHLATEST  | 243  | 66    |
| >APC-F1491L TLLHFATEST | 278   | >APC-F1491L TLLHLATEST | 532  | 254   |
| >APC-F1491L TLLHFATEST | 321   | >APC-F1491L TLLHLATEST | 725  | 404   |
| >APC-F1491L TLLHFATEST | 100   | >APC-F1491L TLLHLATEST | 192  | 92    |
| >APC-F1491L TLLHFATEST | 460   | >APC-F1491L TLLHLATEST | 1097 | 637   |
| >APC-F1491L DTLLHFAT   | 332   | >APC-F1491L DTLLHLAT   | 1323 | 991   |
| >APC-F1491L ADTLLHFAT  | 194   | >APC-F1491L ADTLLHLAT  | 287  | 93    |
| >APC-F1491L DADTLLHFA  | 238   | >APC-F1491L DADTLLHLA  | 679  | 441   |
| >APC-F1491L PDADTLLHF  | 9100  | >APC-F1491L PDADTLLHL  | 443  | 8657  |

|                        |       |                        |      |       |
|------------------------|-------|------------------------|------|-------|
| >APC-F1491L LPDADTLLHF | 32    | >APC-F1491L LPDADTLLHL | 154  | 122   |
| >APC-F1491L LPDADTLLHF | 58    | >APC-F1491L LPDADTLLHL | 175  | 117   |
| >APC-F1491L LPDADTLLHF | 64    | >APC-F1491L LPDADTLLHL | 25   | 39    |
| >APC-F1491L LPDADTLLHF | 32    | >APC-F1491L LPDADTLLHL | 381  | 349   |
| >APC-G1120IGINQNVSQSI  | 152   | >APC-G1120IEINQNVSQSL  | 1246 | 1094  |
| >APC-G1120IGINQNVSQSI  | 54    | >APC-G1120IEINQNVSQSL  | 740  | 686   |
| >APC-G1120IGINQNVSQSI  | 13892 | >APC-G1120IEINQNVSQSL  | 150  | 13742 |
| >APC-G1120IHGINQNVSQ   | 2361  | >APC-G1120HEINQNVSQ    | 346  | 2015  |
| >APC-G1120IHGINQNVSQ   | 23915 | >APC-G1120HEINQNVSQ    | 285  | 23630 |
| >APC-G1120IHGINQNVSQ   | 1244  | >APC-G1120HEINQNVSQ    | 49   | 1195  |
| >APC-G1120IHGINQNVSQ   | 18815 | >APC-G1120HEINQNVSQ    | 8    | 18807 |
| >APC-G1120IHGINQNV     | 39094 | >APC-G1120HEINQNV      | 311  | 38783 |
| >APC-G1120IHGINQNVSQ   | 37949 | >APC-G1120HEINQNVSQ    | 482  | 37467 |
| >APC-G1120IHGINQNVSQ   | 24699 | >APC-G1120HEINQNVSQ    | 20   | 24679 |
| >APC-G1120IHGINQNVSQ   | 38902 | >APC-G1120HEINQNVSQ    | 309  | 38593 |
| >APC-G1120IHGINQNVSQ   | 23531 | >APC-G1120HEINQNVSQ    | 12   | 23519 |
| >APC-G1120ISNHGINQNV   | 536   | >APC-G1120ISNHEINQNV   | 455  | 81    |
| >APC-G1120IRVGSNHGI    | 250   | >APC-G1120IRVGSNHEI    | 115  | 135   |
| >APC-G1120INRVGSNHGI   | 171   | >APC-G1120INRVGSNHEI   | 99   | 72    |
| >APC-G1120IETNRVGSNH   | 307   | >APC-G1120IETNRVGSNHI  | 1775 | 1468  |
| >APC-G1120IETNRVGSNH   | 9     | >APC-G1120IETNRVGSNHI  | 9    | 0     |
| >APC-G1120IETNRVGSNH   | 17    | >APC-G1120IETNRVGSNHI  | 26   | 9     |
| >APC-G1312IGTRSAEDPV   | 344   | >APC-G1312IETRSAEDPV   | 5087 | 4743  |
| >APC-G1312IGTRSAEDPV   | 9349  | >APC-G1312IETRSAEDPV   | 32   | 9317  |
| >APC-G1312IGTRSAEDPV   | 11679 | >APC-G1312IETRSAEDPV   | 247  | 11432 |
| >APC-G1312IGTRSAEDPV   | 13847 | >APC-G1312IETRSAEDPV   | 68   | 13779 |
| >APC-G1312IKIGTRSAEDP  | 376   | >APC-G1312KIIETRSAEDP  | 826  | 450   |
| >APC-G1312IKIGTRSAEDP  | 335   | >APC-G1312KIIETRSAEDP  | 1181 | 846   |
| >APC-G1312IKIGTRSAEDP  | 306   | >APC-G1312KIIETRSAEDP  | 412  | 106   |
| >APC-G1312IKIGTRSAEDP  | 189   | >APC-G1312KIIETRSAEDP  | 1844 | 1655  |
| >APC-G1312IKIGTRSAEDP  | 224   | >APC-G1312KIIETRSAEDP  | 1125 | 901   |
| >APC-G1312IKIGTRSAEDP  | 146   | >APC-G1312KIIETRSAEDP  | 2565 | 2419  |
| >APC-G1312IKIGTRSAEDP  | 144   | >APC-G1312KIIETRSAEDP  | 354  | 210   |
| >APC-G1312IKEKIGTRSA   | 87    | >APC-G1312IKEKIIETRSA  | 274  | 187   |
| >APC-G1312IKEKIGTRSA   | 67    | >APC-G1312IKEKIIETRSA  | 162  | 95    |
| >APC-G1312EIKEKIGTR    | 31    | >APC-G1312EIKEKIIETR   | 34   | 3     |
| >APC-G1312EIKEKIGTR    | 35    | >APC-G1312EIKEKIIETR   | 18   | 17    |
| >APC-G1312EIKEKIGTRSA  | 600   | >APC-G1312EIKEKIIETRSA | 456  | 144   |
| >APC-G1312AEIKEKIGT    | 769   | >APC-G1312AEIKEKIIET   | 286  | 483   |
| >APC-G1312AEIKEKIGT    | 89    | >APC-G1312AEIKEKIIET   | 69   | 20    |
| >APC-G1312AEIKEKIGTRS  | 503   | >APC-G1312AEIKEKIIETRS | 465  | 38    |
| >APC-G1312AEIKEKIGT    | 381   | >APC-G1312AEIKEKIIET   | 354  | 27    |
| >APC-G1339,GSSLSESAR   | 433   | >APC-G1339,ASSLSSESAR  | 146  | 287   |

|                        |      |                        |      |      |
|------------------------|------|------------------------|------|------|
| >APC-G1339,GSSLSESAR   | 232  | >APC-G1339,ASSLSSESAR  | 82   | 150  |
| >APC-G1339,GSSLSESAR   | 294  | >APC-G1339,ASSLSSESAR  | 100  | 194  |
| >APC-G1339,GSSLSESARF  | 1049 | >APC-G1339,ASSLSSESARF | 230  | 819  |
| >APC-G1339,GSSLSESARF  | 496  | >APC-G1339,ASSLSSESARF | 1315 | 819  |
| >APC-G1339,QGSSLSESAI  | 532  | >APC-G1339,QASSLSSESAI | 18   | 514  |
| >APC-G1339,HPRTKSSRLQ  | 809  | >APC-G1339,HPRTKSSRLQ  | 15   | 794  |
| >APC-G1339,HPRTKSSRLQ  | 908  | >APC-G1339,HPRTKSSRLQ  | 207  | 701  |
| >APC-G1339,HPRTKSSRLQ  | 7450 | >APC-G1339,HPRTKSSRLQ  | 287  | 7163 |
| >APC-G1339,LQGSSLSES/  | 1541 | >APC-G1339,LQASSLSSES/ | 93   | 1448 |
| >APC-G1339,LQGSSLSES/  | 641  | >APC-G1339,LQASSLSSES/ | 56   | 585  |
| >APC-G1339,LQGSSLSES/  | 165  | >APC-G1339,LQASSLSSES/ | 26   | 139  |
| >APC-G1339,LQGSSLSS    | 865  | >APC-G1339,LQASSLSS    | 465  | 400  |
| >APC-G1339,LQGSSLSE    | 970  | >APC-G1339,LQASSLSE    | 463  | 507  |
| >APC-G1339,LQGSSLSES/  | 107  | >APC-G1339,LQASSLSSES/ | 73   | 34   |
| >APC-G1339,LQGSSLSS    | 1680 | >APC-G1339,LQASSLSS    | 293  | 1387 |
| >APC-G1339,LQGSSLSE    | 1844 | >APC-G1339,LQASSLSE    | 443  | 1401 |
| >APC-G1339,LQGSSLSES   | 1286 | >APC-G1339,LQASSLSSES  | 223  | 1063 |
| >APC-G1339,LQGSSLSES/  | 269  | >APC-G1339,LQASSLSSES/ | 41   | 228  |
| >APC-G1339,RLQGSSLSS   | 1029 | >APC-G1339,RLQASSLSS   | 436  | 593  |
| >APC-G1339,SRLQGSSL    | 146  | >APC-G1339,SRLQASSL    | 181  | 35   |
| >APC-G1339,SRLQGSSL    | 224  | >APC-G1339,SRLQASSL    | 120  | 104  |
| >APC-G1339,SRLQGSSL    | 45   | >APC-G1339,SRLQASSL    | 37   | 8    |
| >APC-G1339,SSRLQGSS    | 185  | >APC-G1339,SSRLQASS    | 85   | 100  |
| >APC-G1339,SSRLQGSSL   | 28   | >APC-G1339,SSRLQASSL   | 27   | 1    |
| >APC-G1339,SSRLQGSSLS  | 105  | >APC-G1339,SSRLQASSLS  | 69   | 36   |
| >APC-G1339,SSRLQGSSLS  | 34   | >APC-G1339,SSRLQASSLS  | 30   | 4    |
| >APC-G1339,SSRLQGSSL   | 141  | >APC-G1339,SSRLQASSL   | 458  | 317  |
| >APC-G1339,SSRLQGSSL   | 395  | >APC-G1339,SSRLQASSL   | 888  | 493  |
| >APC-G1339,SSRLQGSSL   | 6    | >APC-G1339,SSRLQASSL   | 5    | 1    |
| >APC-G1339,SSRLQGSSL   | 18   | >APC-G1339,SSRLQASSL   | 15   | 3    |
| >APC-G1339,SSRLQGSSL   | 468  | >APC-G1339,SSRLQASSL   | 544  | 76   |
| >APC-G1339,KSSRLQGSSL  | 390  | >APC-G1339,KSSRLQASSL  | 247  | 143  |
| >APC-G1339,KSSRLQGSSL  | 1029 | >APC-G1339,KSSRLQASSL  | 256  | 773  |
| >APC-G1339,KSSRLQGSSL  | 366  | >APC-G1339,KSSRLQASSL  | 325  | 41   |
| >APC-G1339,KSSRLQGSSL  | 23   | >APC-G1339,KSSRLQASSL  | 10   | 13   |
| >APC-G1339,KSSRLQGSSL  | 93   | >APC-G1339,KSSRLQASSL  | 41   | 52   |
| >APC-G1339,KSSRLQGSSL  | 108  | >APC-G1339,KSSRLQASSL  | 120  | 12   |
| >APC-G1339,KSSRLQGSSL  | 343  | >APC-G1339,KSSRLQASSLS | 433  | 90   |
| >APC-G1339,KSSRLQGSSL  | 181  | >APC-G1339,KSSRLQASSL  | 640  | 459  |
| >APC-G1339,TKSSRLQGSSI | 52   | >APC-G1339,TKSSRLQASSI | 49   | 3    |
| >APC-G1339,TKSSRLQGSSI | 375  | >APC-G1339,TKSSRLQASSI | 103  | 272  |
| >APC-G1339,RTKSSRLQG   | 7    | >APC-G1339,RTKSSRLQA   | 4    | 3    |
| >APC-G1339,RTKSSRLQGS  | 18   | >APC-G1339,RTKSSRLQAS  | 10   | 8    |

|                        |       |                        |      |       |
|------------------------|-------|------------------------|------|-------|
| >APC-G1339,RTKSSRLQGS  | 11    | >APC-G1339,RTKSSRLQAS! | 7    | 4     |
| >APC-G1339,RTKSSRLQG   | 711   | >APC-G1339,RTKSSRLQA   | 213  | 498   |
| >APC-G1357 GAKSPSKS    | 9312  | >APC-G1357 RAKSPSKS    | 410  | 8902  |
| >APC-G1357 GAKSPSKSG   | 7026  | >APC-G1357 RAKSPSKSG   | 147  | 6879  |
| >APC-G1357 GAKSPSKSGA  | 2462  | >APC-G1357 RAKSPSKSGA  | 36   | 2426  |
| >APC-G1357 GAKSPSKSGA  | 5999  | >APC-G1357 RAKSPSKSGA  | 154  | 5845  |
| >APC-G1357 SGAKSPSK    | 24386 | >APC-G1357 SRAKSPSK    | 343  | 24043 |
| >APC-G1357 ARHKAVEFSS  | 4228  | >APC-G1357 ARHKAVEFSS  | 475  | 3753  |
| >APC-G1357 ARHKAVEFSS  | 5163  | >APC-G1357 ARHKAVEFSS  | 137  | 5026  |
| >APC-G1357 SSGAKSPSK   | 281   | >APC-G1357 SSRAKSPSK   | 110  | 171   |
| >APC-G1357 SSGAKSPSK   | 42    | >APC-G1357 SSRAKSPSK   | 231  | 189   |
| >APC-G1357 SSGAKSPS    | 9273  | >APC-G1357 SSRAKSPS    | 30   | 9243  |
| >APC-G1357 SSGAKSPSK   | 33    | >APC-G1357 SSRAKSPSK   | 3    | 30    |
| >APC-G1357 SSGAKSPSKS  | 10944 | >APC-G1357 SSRAKSPSKS  | 54   | 10890 |
| >APC-G1357 SSGAKSPSKS  | 9495  | >APC-G1357 SSRAKSPSKS  | 32   | 9463  |
| >APC-G1357 FSSGAKSPSK  | 282   | >APC-G1357 FSSRAKSPSK  | 488  | 206   |
| >APC-G1357 FSSGAKSPSK  | 31    | >APC-G1357 FSSRAKSPSK  | 54   | 23    |
| >APC-G1357 FSSGAKSPSK  | 1035  | >APC-G1357 FSSRAKSPSK  | 346  | 689   |
| >APC-G1357 FSSGAKSPSK  | 89    | >APC-G1357 FSSRAKSPSK  | 510  | 421   |
| >APC-G1357 EFSSGAKSPSI | 280   | >APC-G1357 EFSSRAKSPSK | 279  | 1     |
| >APC-G1357 AVEFSSGAK   | 376   | >APC-G1357 AVEFSSRAK   | 837  | 461   |
| >APC-G1357 AVEFSSGAK   | 64    | >APC-G1357 AVEFSSRAK   | 114  | 50    |
| >APC-G1357 AVEFSSGAK   | 77    | >APC-G1357 AVEFSSRAK   | 57   | 20    |
| >APC-G1357 KAVEFSSGA   | 348   | >APC-G1357 KAVEFSSRA   | 1122 | 774   |
| >APC-G1357 KAVEFSSGA   | 53    | >APC-G1357 KAVEFSSRA   | 303  | 250   |
| >APC-G1357 KAVEFSSGAK  | 275   | >APC-G1357 KAVEFSSRAK  | 233  | 42    |
| >APC-G1357 KAVEFSSGAK  | 255   | >APC-G1357 KAVEFSSRAK  | 227  | 28    |
| >APC-G1357 KAVEFSSGAK  | 29    | >APC-G1357 KAVEFSSRAK  | 24   | 5     |
| >APC-G1357 KAVEFSSG    | 19092 | >APC-G1357 KAVEFSSR    | 32   | 19060 |
| >APC-G1357 KAVEFSSG    | 36592 | >APC-G1357 KAVEFSSR    | 93   | 36499 |
| >APC-G1357 KAVEFSSG    | 32478 | >APC-G1357 KAVEFSSR    | 82   | 32396 |
| >APC-G1357 HKAVEFSSG   | 2098  | >APC-G1357 HKAVEFSSR   | 141  | 1957  |
| >APC-G1357 HKAVEFSSGA  | 670   | >APC-G1357 HKAVEFSSRA  | 269  | 401   |
| >APC-G1357 RHKAVEFSSG  | 30375 | >APC-G1357 RHKAVEFSSR  | 247  | 30128 |
| >APC-G1365 KSGAQTPK    | 96    | >APC-G1365 KSDAQTPK    | 167  | 71    |
| >APC-G1365 KSGAQTPK    | 34    | >APC-G1365 KSDAQTPK    | 34   | 0     |
| >APC-G1365 KSGAQTPK    | 20    | >APC-G1365 KSDAQTPK    | 142  | 122   |
| >APC-G1365 KSGAQTPK    | 209   | >APC-G1365 KSDAQTPK    | 971  | 762   |
| >APC-G1365 PSKSGAQTPK  | 41    | >APC-G1365 PSKSDAQTPK  | 141  | 100   |
| >APC-G1365 SPSKSGAQ    | 459   | >APC-G1365 SPSKSDAQ    | 3407 | 2948  |
| >APC-G1365 SPSKSGAQT   | 251   | >APC-G1365 SPSKSDAQT   | 3768 | 3517  |
| >APC-G1365 AKSPSKSGA   | 495   | >APC-G1365 AKSPSKSDA   | 360  | 135   |
| >APC-G1416 GIISPSDL    | 4551  | >APC-G1416 DIISPSDL    | 103  | 4448  |

|                        |       |                        |       |       |
|------------------------|-------|------------------------|-------|-------|
| >APC-G1416 SGIISPSDL   | 24935 | >APC-G1416 SDIISPSDL   | 485   | 24450 |
| >APC-G1416 VSGIISPSDL  | 101   | >APC-G1416 VSDIISPSDL  | 47    | 54    |
| >APC-G1416 VSGIISPSDL  | 299   | >APC-G1416 VSDIISPSDL  | 584   | 285   |
| >APC-G1416 MVSGIISPS   | 144   | >APC-G1416 MVSDIISPS   | 66    | 78    |
| >APC-G1416 MVSGIISPSDI | 55    | >APC-G1416 MVSDIISPSDI | 35    | 20    |
| >APC-G1416 MVSGIISPS   | 225   | >APC-G1416 MVSDIISPS   | 72    | 153   |
| >APC-G1416 MVSGIISPSDI | 57    | >APC-G1416 MVSDIISPSDI | 27    | 30    |
| >APC-G1416 MVSGIISPS   | 853   | >APC-G1416 MVSDIISPS   | 190   | 663   |
| >APC-G1416 MVSGIISPSDI | 1119  | >APC-G1416 MVSDIISPSDI | 479   | 640   |
| >APC-G1416 MVSGIISPSDI | 69    | >APC-G1416 MVSDIISPSDI | 35    | 34    |
| >APC-G1416 MVSGIISPS   | 7     | >APC-G1416 MVSDIISPS   | 7     | 0     |
| >APC-G1416 MVSGIISPSDI | 32    | >APC-G1416 MVSDIISPSDI | 25    | 7     |
| >APC-G1416 MVSGIISPSDI | 367   | >APC-G1416 MVSDIISPSDI | 435   | 68    |
| >APC-G1416 GMVSGIISPS  | 414   | >APC-G1416 GMVSDIISPS  | 507   | 93    |
| >APC-G1416 GMVSGIISPS  | 440   | >APC-G1416 GMVSDIISPS  | 590   | 150   |
| >APC-G1416 SGMVSGII    | 145   | >APC-G1416 SGMVSDII    | 204   | 59    |
| >APC-G1416 CSGMVSGI    | 21    | >APC-G1416 CSGMVSDI    | 32    | 11    |
| >APC-G1416 CSGMVSGII   | 13    | >APC-G1416 CSGMVSDII   | 23    | 10    |
| >APC-G1416 EPCSGMVSG   | 1282  | >APC-G1416 EPCSGMVSDI  | 65    | 1217  |
| >APC-G1416 SEPCSGMVSG  | 55    | >APC-G1416 SEPCSGMVSDI | 54    | 1     |
| >APC-G1416 SEPCSGMVSG  | 34    | >APC-G1416 SEPCSGMVSDI | 37    | 3     |
| >APC-G1466 GPKQAAVNA   | 159   | >APC-G1466 EPKQAAVNA   | 748   | 589   |
| >APC-G1466 GPKQAAVNA   | 2021  | >APC-G1466 EPKQAAVNA   | 316   | 1705  |
| >APC-G1466 SGPKQAAV    | 280   | >APC-G1466 SEPKQAAV    | 9723  | 9443  |
| >APC-G1466 SGPKQAAV    | 38205 | >APC-G1466 SEPKQAAV    | 163   | 38042 |
| >APC-G1466 SGPKQAAVNA  | 18789 | >APC-G1466 SEPKQAAVNA  | 145   | 18644 |
| >APC-G1466 ESGPKQAAV   | 78    | >APC-G1466 ESEPKQAAV   | 171   | 93    |
| >APC-G1466 RESGPKQAA   | 341   | >APC-G1466 RESEPKQAA   | 1033  | 692   |
| >APC-G1466 RESGPKQAA   | 223   | >APC-G1466 RESEPKQAAV  | 259   | 36    |
| >APC-G1466 RESGPKQA    | 93    | >APC-G1466 RESEPKQA    | 159   | 66    |
| >APC-G1466 RESGPKQAA   | 20    | >APC-G1466 RESEPKQAA   | 31    | 11    |
| >APC-G1466 RESGPKQAA   | 341   | >APC-G1466 RESEPKQAAV  | 246   | 95    |
| >APC-G1466 RESGPKQAA   | 138   | >APC-G1466 RESEPKQAAV  | 106   | 32    |
| >APC-G1466 AEKRESGPK   | 351   | >APC-G1466 AEKRESEPK   | 2027  | 1676  |
| >APC-G1466 AEKRESGPKC  | 59    | >APC-G1466 AEKRESEPKQ  | 66    | 7     |
| >APC-G1466 GPKQAAVNA   | 4415  | >APC-G1466 RPKQAAVNA   | 106   | 4309  |
| >APC-G1466 GPKQAAVNA   | 159   | >APC-G1466 RPKQAAVNA   | 19    | 140   |
| >APC-G1466 GPKQAAVNA   | 2021  | >APC-G1466 RPKQAAVNA   | 172   | 1849  |
| >APC-G1466 SGPKQAAV    | 280   | >APC-G1466 SRPKQAAV    | 14985 | 14705 |
| >APC-G1466 KAPTAEKRES  | 35414 | >APC-G1466 KAPTAEKRES  | 487   | 34927 |
| >APC-G1466 ESGPKQAAV   | 78    | >APC-G1466 ESRPKQAAV   | 313   | 235   |
| >APC-G1466 ESGPKQAAV   | 6219  | >APC-G1466 ESRPKQAAV   | 227   | 5992  |
| >APC-G1466 RESGPKQAA   | 341   | >APC-G1466 RESRPKQAA   | 2275  | 1934  |

|                         |       |                         |      |       |
|-------------------------|-------|-------------------------|------|-------|
| >APC-G1466I RESGPKQAA\  | 223   | >APC-G1466I RESRPKQAA\  | 267  | 44    |
| >APC-G1466I RESGPKQA    | 93    | >APC-G1466I RESRPKQA    | 171  | 78    |
| >APC-G1466I RESGPKQAA   | 20    | >APC-G1466I RESRPKQAA   | 32   | 12    |
| >APC-G1466I RESGPKQAA\  | 341   | >APC-G1466I RESRPKQAA\  | 284  | 57    |
| >APC-G1466I RESGPKQAA\  | 138   | >APC-G1466I RESRPKQAA\  | 109  | 29    |
| >APC-G1466I KRESGPKQ    | 519   | >APC-G1466I KRESRPKQ    | 130  | 389   |
| >APC-G1466I AEKRESGPK   | 351   | >APC-G1466I AEKRESRPK   | 245  | 106   |
| >APC-G1466I AEKRESGPKC  | 59    | >APC-G1466I AEKRESRPKQ  | 68   | 9     |
| >APC-G1466I TAEKRESG    | 35414 | >APC-G1466I TAEKRESR    | 75   | 35339 |
| >APC-G1466I PTAEKRESG   | 38339 | >APC-G1466I PTAEKRESR   | 280  | 38059 |
| >APC-G1499I GFSCSSSL    | 1003  | >APC-G1499I RFSCSSSL    | 498  | 505   |
| >APC-G1499I GFSCSSLSAL  | 318   | >APC-G1499I RFSCSSLSAL  | 174  | 144   |
| >APC-G1499I GFSCSSSL    | 1245  | >APC-G1499I RFSCSSSL    | 88   | 1157  |
| >APC-G1499I GFSCSSLSAL  | 1138  | >APC-G1499I RFSCSSLSAL  | 95   | 1043  |
| >APC-G1499I GFSCSSLSA   | 3710  | >APC-G1499I RFSCSSLSA   | 60   | 3650  |
| >APC-G1499I GFSCSSLSAL  | 4062  | >APC-G1499I RFSCSSLSAL  | 402  | 3660  |
| >APC-G1499I GFSCSSLSAL  | 362   | >APC-G1499I RFSCSSLSAL  | 267  | 95    |
| >APC-G1499I GFSCSSSL    | 3048  | >APC-G1499I RFSCSSSL    | 324  | 2724  |
| >APC-G1499I GFSCSSLSAL  | 2409  | >APC-G1499I RFSCSSLSAL  | 267  | 2142  |
| >APC-G1499I DGFSCSSSL   | 1711  | >APC-G1499I DRFSCSSSL   | 94   | 1617  |
| >APC-G1499I DGFSCSSSL   | 4416  | >APC-G1499I DRFSCSSSL   | 53   | 4363  |
| >APC-G1499I DGFSCSSSL   | 132   | >APC-G1499I DRFSCSSSL   | 789  | 657   |
| >APC-G1499I DGFSCSSSL   | 33641 | >APC-G1499I DRFSCSSSL   | 364  | 33277 |
| >APC-G1499I TPDGFSCSSSI | 58    | >APC-G1499I TPDRFSCSSSI | 66   | 8     |
| >APC-G1499I TPDGFSCSSSI | 254   | >APC-G1499I TPDRFSCSSSI | 485  | 231   |
| >APC-G1499I TPDGFSCSSSI | 17    | >APC-G1499I TPDRFSCSSSI | 48   | 31    |
| >APC-G1499I TPDGFSCSSSI | 338   | >APC-G1499I TPDRFSCSSSI | 686  | 348   |
| >APC-G1499I STPDGFSC    | 39    | >APC-G1499I STPDRFSC    | 2441 | 2402  |
| >APC-G1499I STPDGFSCS   | 95    | >APC-G1499I STPDRFSCS   | 109  | 14    |
| >APC-G1499I STPDGFSCSS  | 125   | >APC-G1499I STPDRFSCSS  | 180  | 55    |
| >APC-G1499I STPDGFSCSS! | 137   | >APC-G1499I STPDRFSCSS! | 159  | 22    |
| >APC-G1499I TESTPDGF    | 388   | >APC-G1499I TESTPDRF    | 634  | 246   |
| >APC-G1499I ATESTPDG    | 42018 | >APC-G1499I ATESTPDR    | 364  | 41654 |
| >APC-G1499I ATESTPDGF   | 19    | >APC-G1499I ATESTPDRF   | 15   | 4     |
| >APC-G1499I ATESTPDGF   | 112   | >APC-G1499I ATESTPDRF   | 24   | 88    |
| >APC-G1499I ATESTPDG    | 11850 | >APC-G1499I ATESTPDR    | 177  | 11673 |
| >APC-G1499I FATESTPDG   | 27826 | >APC-G1499I FATESTPDR   | 14   | 27812 |
| >APC-G1499I FATESTPDGF  | 143   | >APC-G1499I FATESTPDRF  | 199  | 56    |
| >APC-G1499I FATESTPDGF  | 26    | >APC-G1499I FATESTPDRF  | 23   | 3     |
| >APC-G1499I FATESTPDGF  | 188   | >APC-G1499I FATESTPDRF  | 103  | 85    |
| >APC-G1499I HFATESTPDG  | 1282  | >APC-G1499I HFATESTPDR  | 278  | 1004  |
| >APC-G1499I HFATESTPDG  | 96    | >APC-G1499I HFATESTPDR  | 90   | 6     |
| >APC-G1499I HFATESTPDG  | 35864 | >APC-G1499I HFATESTPDR  | 122  | 35742 |



|                       |       |                       |     |       |
|-----------------------|-------|-----------------------|-----|-------|
| >APC-G1499IHFATESTPDG | 387   | >APC-G1499IHFATESTPDR | 598 | 211   |
| >APC-G1499IHFATESTPDG | 30674 | >APC-G1499IHFATESTPDR | 36  | 30638 |
| >APC-G1534IIMPPVQENDI | 34763 | >APC-G1534IIMPPVQENDI | 204 | 34559 |
| >APC-G53V-vGSIEDEAM   | 219   | >APC-G53V-rVSIEDEAM   | 44  | 175   |
| >APC-G53V-vGSIEDEAM   | 245   | >APC-G53V-rVSIEDEAM   | 51  | 194   |
| >APC-G53V-vGSIEDEAM   | 1382  | >APC-G53V-rVSIEDEAM   | 275 | 1107  |
| >APC-G53V-vQGSIEDEAM  | 246   | >APC-G53V-rQVSIEDEAM  | 86  | 160   |
| >APC-G53V-vNMKEVLKQLI | 14420 | >APC-G53V-rNMKEVLKQLI | 232 | 14188 |
| >APC-G53V-vNMKEVLKQLI | 5953  | >APC-G53V-rNMKEVLKQLI | 9   | 5944  |
| >APC-G53V-vNMKEVLKQLI | 13790 | >APC-G53V-rNMKEVLKQLI | 23  | 13767 |
| >APC-G53V-vNMKEVLKQLI | 19852 | >APC-G53V-rNMKEVLKQLI | 98  | 19754 |
| >APC-G53V-vNMKEVLKQLI | 23911 | >APC-G53V-rNMKEVLKQLI | 192 | 23719 |
| >APC-G53V-vNMKEVLKQLI | 23353 | >APC-G53V-rNMKEVLKQLI | 143 | 23210 |
| >APC-G53V-vNMKEVLKQLI | 24608 | >APC-G53V-rNMKEVLKQLI | 8   | 24600 |
| >APC-G53V-vLQGSIEDEA  | 732   | >APC-G53V-rLQVSIEDEA  | 195 | 537   |
| >APC-G53V-vLQGSIEDEAM | 768   | >APC-G53V-rLQVSIEDEAM | 419 | 349   |
| >APC-G53V-vLQGSIEDEA  | 2803  | >APC-G53V-rLQVSIEDEA  | 187 | 2616  |
| >APC-G53V-vLQGSIEDEAM | 2223  | >APC-G53V-rLQVSIEDEAM | 155 | 2068  |
| >APC-G53V-vLQGSIEDEAM | 151   | >APC-G53V-rLQVSIEDEAM | 131 | 20    |
| >APC-G53V-vLQGSIEDEAM | 408   | >APC-G53V-rLQVSIEDEAM | 54  | 354   |
| >APC-G53V-vQLQGSIEDEA | 63    | >APC-G53V-rQLQVSIEDEA | 450 | 387   |
| >APC-G53V-vQLQGSIEDEA | 398   | >APC-G53V-rQLQVSIEDEA | 622 | 224   |
| >APC-G53V-vKQLQGSIEDE | 31    | >APC-G53V-rKQLQVSIEDE | 30  | 1     |
| >APC-G53V-vLKQLQGSI   | 1008  | >APC-G53V-rLKQLQVSI   | 202 | 806   |
| >APC-G53V-vVLKQLQGSI  | 1405  | >APC-G53V-rVLKQLQVSI  | 330 | 1075  |
| >APC-G53V-vVLKQLQGSI  | 70    | >APC-G53V-rVLKQLQVSI  | 133 | 63    |
| >APC-G53V-vVLKQLQGSI  | 952   | >APC-G53V-rVLKQLQVSI  | 290 | 662   |
| >APC-G53V-vVLKQLQGSI  | 127   | >APC-G53V-rVLKQLQVSI  | 13  | 114   |
| >APC-G53V-vVLKQLQGSI  | 9053  | >APC-G53V-rVLKQLQVSI  | 426 | 8627  |
| >APC-G53V-vEVLKQLQG   | 24383 | >APC-G53V-rEVLKQLQV   | 437 | 23946 |
| >APC-G53V-vEVLKQLQG   | 25016 | >APC-G53V-rEVLKQLQV   | 267 | 24749 |
| >APC-G53V-vEVLKQLQG   | 35097 | >APC-G53V-rEVLKQLQV   | 187 | 34910 |
| >APC-G53V-vEVLKQLQGSI | 426   | >APC-G53V-rEVLKQLQVSI | 751 | 325   |
| >APC-G53V-vEVLKQLQGSI | 257   | >APC-G53V-rEVLKQLQVSI | 556 | 299   |
| >APC-G53V-vEVLKQLQGSI | 5158  | >APC-G53V-rEVLKQLQVSI | 480 | 4678  |
| >APC-G53V-vEVLKQLQG   | 19660 | >APC-G53V-rEVLKQLQV   | 191 | 19469 |
| >APC-G53V-vEVLKQLQG   | 9674  | >APC-G53V-rEVLKQLQV   | 6   | 9668  |
| >APC-G53V-vEVLKQLQGSI | 26    | >APC-G53V-rEVLKQLQVSI | 23  | 3     |
| >APC-G53V-vKEVLKQLQGS | 32    | >APC-G53V-rKEVLKQLQVS | 58  | 26    |
| >APC-G53V-vKEVLKQLQGS | 347   | >APC-G53V-rKEVLKQLQVS | 197 | 150   |
| >APC-G53V-vKEVLKQLQG  | 6530  | >APC-G53V-rKEVLKQLQV  | 98  | 6432  |
| >APC-G53V-vKEVLKQLQGS | 76    | >APC-G53V-rKEVLKQLQVS | 33  | 43    |
| >APC-G53V-vKEVLKQLQG  | 5399  | >APC-G53V-rKEVLKQLQV  | 30  | 5369  |

|                        |      |                        |      |      |
|------------------------|------|------------------------|------|------|
| >APC-G53V-v KEVLKQLQGS | 12   | >APC-G53V-r KEVLKQLQVS | 10   | 2    |
| >APC-G817C·GNMTVLSPYI  | 227  | >APC-G817C·CNMTVLSPYL  | 510  | 283  |
| >APC-G817C·GNMTVLSPY   | 534  | >APC-G817C·CNMTVLSPY   | 463  | 71   |
| >APC-G817C·GNMTVLSPY   | 296  | >APC-G817C·CNMTVLSPY   | 934  | 638  |
| >APC-G817C·GNMTVLSPY   | 761  | >APC-G817C·CNMTVLSPY   | 374  | 387  |
| >APC-G817C·GNMTVLSPY   | 26   | >APC-G817C·CNMTVLSPY   | 564  | 538  |
| >APC-G817C·TGNMTVLSP\  | 3960 | >APC-G817C·TCNMTVLSP\  | 434  | 3526 |
| >APC-G817C·TGNMTVLSP\  | 325  | >APC-G817C·TCNMTVLSP\  | 157  | 168  |
| >APC-G817C·TGNMTVLSP\  | 3220 | >APC-G817C·TCNMTVLSP\  | 422  | 2798 |
| >APC-G817C·TGNMTVLSP\  | 173  | >APC-G817C·TCNMTVLSP\  | 2646 | 2473 |
| >APC-G817C·NTGNMTVLS   | 129  | >APC-G817C·NTCNMTVLSI  | 233  | 104  |
| >APC-G817C·NTGNMTVLS   | 1590 | >APC-G817C·NTCNMTVLSI  | 372  | 1218 |
| >APC-G817C·NTGNMTVLS   | 343  | >APC-G817C·NTCNMTVLSI  | 90   | 253  |
| >APC-G817C·NTGNMTVLS   | 107  | >APC-G817C·NTCNMTVLSI  | 38   | 69   |
| >APC-G817C·NTGNMTVLS   | 60   | >APC-G817C·NTCNMTVLSI  | 36   | 24   |
| >APC-G817C·NTGNMTVLS   | 170  | >APC-G817C·NTCNMTVLSI  | 190  | 20   |
| >APC-G817C·NTGNMTVLS   | 432  | >APC-G817C·NTCNMTVLSI  | 310  | 122  |
| >APC-G817C·NTGNMTVLS   | 596  | >APC-G817C·NTCNMTVLSI  | 146  | 450  |
| >APC-G817C·NTGNMTVL    | 733  | >APC-G817C·NTCNMTVL    | 317  | 416  |
| >APC-G817C·NTGNMTVLS   | 69   | >APC-G817C·NTCNMTVLSI  | 134  | 65   |
| >APC-G817C·NTGNMTVLS   | 303  | >APC-G817C·NTCNMTVLSI  | 192  | 111  |
| >APC-G817C·NTGNMTVLS   | 745  | >APC-G817C·NTCNMTVLSI  | 95   | 650  |
| >APC-G817C·NTGNMTVLS   | 1005 | >APC-G817C·NTCNMTVLSI  | 496  | 509  |
| >APC-G817C·NTGNMTVLS   | 95   | >APC-G817C·NTCNMTVLSI  | 48   | 47   |
| >APC-G817C·FNTGNMTVL   | 298  | >APC-G817C·FNTCNMTVL   | 19   | 279  |
| >APC-G817C·FNTGNMTV    | 277  | >APC-G817C·FNTCNMTV    | 3883 | 3606 |
| >APC-G817C·FNTGNMTV    | 317  | >APC-G817C·FNTCNMTV    | 131  | 186  |
| >APC-G817C·FNTGNMTVL   | 423  | >APC-G817C·FNTCNMTVL   | 2023 | 1600 |
| >APC-G817C·NFNTGNMTV   | 495  | >APC-G817C·NFNTCNMTV   | 2913 | 2418 |
| >APC-G817C·NFNTGNMTV   | 218  | >APC-G817C·NFNTCNMTV   | 858  | 640  |
| >APC-G817C·DNFNTGNMT   | 1138 | >APC-G817C·DNFNTCNMT   | 372  | 766  |
| >APC-G817C·SDNFNTGNV   | 197  | >APC-G817C·SDNFNTCNM   | 216  | 19   |
| >APC-G817C·RSDNFNTGN   | 17   | >APC-G817C·RSDNFNTCNI  | 17   | 0    |
| >APC-G817C·RSDNFNTGN   | 1141 | >APC-G817C·RSDNFNTCNI  | 297  | 844  |
| >APC-G817C·RSDNFNTGN   | 27   | >APC-G817C·RSDNFNTCNI  | 42   | 15   |
| >APC-H1375'HYVQETPL    | 198  | >APC-H1375'YYVQETPL    | 126  | 72   |
| >APC-H1375'HYVQETPL    | 1056 | >APC-H1375'YYVQETPL    | 257  | 799  |
| >APC-H1375'HYVQETPLM   | 787  | >APC-H1375'YYVQETPLM   | 187  | 600  |
| >APC-H1375'HYVQETPLMI  | 41   | >APC-H1375'YYVQETPLMI  | 12   | 29   |
| >APC-H1375'HYVQETPL    | 1861 | >APC-H1375'YYVQETPL    | 470  | 1391 |
| >APC-H1375'HYVQETPLM   | 1356 | >APC-H1375'YYVQETPLM   | 232  | 1124 |
| >APC-H1375'HYVQETPLMI  | 53   | >APC-H1375'YYVQETPLMI  | 26   | 27   |
| >APC-H1375'HYVQETPL    | 45   | >APC-H1375'YYVQETPL    | 16   | 29   |

|                       |       |                       |      |       |
|-----------------------|-------|-----------------------|------|-------|
| >APC-H1375'HYVQETPLM  | 61    | >APC-H1375'YYVQETPLM  | 17   | 44    |
| >APC-H1375'HYVQETPLMI | 4     | >APC-H1375'YYVQETPLMF | 3    | 1     |
| >APC-H1375'HYVQETPLMI | 834   | >APC-H1375'YYVQETPLMF | 221  | 613   |
| >APC-H1375'HYVQETPLM  | 303   | >APC-H1375'YYVQETPLM  | 139  | 164   |
| >APC-H1375'HYVQETPLM  | 2869  | >APC-H1375'YYVQETPLM  | 353  | 2516  |
| >APC-H1375'HYVQETPLMI | 77    | >APC-H1375'YYVQETPLMF | 39   | 38    |
| >APC-H1375'HYVQETPLMI | 754   | >APC-H1375'YYVQETPLMF | 187  | 567   |
| >APC-H1375'HYVQETPL   | 464   | >APC-H1375'YYVQETPL   | 379  | 85    |
| >APC-H1375'EHYVQETPL  | 684   | >APC-H1375'EYYVQETPL  | 491  | 193   |
| >APC-H1375'EHYVQETPL  | 6836  | >APC-H1375'EYYVQETPL  | 149  | 6687  |
| >APC-H1375'EHYVQETPLM | 3170  | >APC-H1375'EYYVQETPLM | 94   | 3076  |
| >APC-H1375'EHYVQETPLM | 4755  | >APC-H1375'EYYVQETPLM | 206  | 4549  |
| >APC-H1375'EHYVQETPLM | 8207  | >APC-H1375'EYYVQETPLM | 21   | 8186  |
| >APC-H1375'EHYVQETPLM | 62    | >APC-H1375'EYYVQETPLM | 477  | 415   |
| >APC-H1375'EHYVQETP   | 494   | >APC-H1375'EYYVQETP   | 9436 | 8942  |
| >APC-H1375'EHYVQETPL  | 84    | >APC-H1375'EYYVQETPL  | 2575 | 2491  |
| >APC-H1375'EHYVQETPLM | 217   | >APC-H1375'EYYVQETPLM | 4125 | 3908  |
| >APC-H1375'EHYVQETPL  | 105   | >APC-H1375'EYYVQETPL  | 6023 | 5918  |
| >APC-H1375'GAQTPKSPPE | 18489 | >APC-H1375'GAQTPKSPPE | 324  | 18165 |
| >APC-H1375'GAQTPKSPPE | 17286 | >APC-H1375'GAQTPKSPPE | 276  | 17010 |
| >APC-H1375'GAQTPKSPPE | 4464  | >APC-H1375'GAQTPKSPPE | 298  | 4166  |
| >APC-H1375'PEHYVQETPL | 2231  | >APC-H1375'PEYYVQETPL | 328  | 1903  |
| >APC-H1375'PEHYVQETPL | 895   | >APC-H1375'PEYYVQETPL | 72   | 823   |
| >APC-H1375'PEHYVQETPL | 210   | >APC-H1375'PEYYVQETPL | 97   | 113   |
| >APC-H1375'PEHYVQETPL | 228   | >APC-H1375'PEYYVQETPL | 87   | 141   |
| >APC-H1375'KSPPEHYV   | 436   | >APC-H1375'KSPPEYYV   | 334  | 102   |
| >APC-H1375'KSPPEHYV   | 514   | >APC-H1375'KSPPEYYV   | 471  | 43    |
| >APC-H1375'KSPPEHYV   | 40    | >APC-H1375'KSPPEYYV   | 57   | 17    |
| >APC-H1375'KSPPEHYVQ  | 23    | >APC-H1375'KSPPEYYVQ  | 35   | 12    |
| >APC-H1375'KSPPEHYVQE | 235   | >APC-H1375'KSPPEYYVQE | 247  | 12    |
| >APC-H1375'PKSPPEHY   | 190   | >APC-H1375'PKSPPEYY   | 190  | 0     |
| >APC-H1375'TPKSPPEHYV | 100   | >APC-H1375'TPKSPPEYYV | 90   | 10    |
| >APC-H1375'TPKSPPEHYV | 137   | >APC-H1375'TPKSPPEYYV | 55   | 82    |
| >APC-H1375'TPKSPPEH   | 2858  | >APC-H1375'TPKSPPEY   | 100  | 2758  |
| >APC-H1375'TPKSPPEHYV | 818   | >APC-H1375'TPKSPPEYYV | 92   | 726   |
| >APC-H1375'QTPKSPPEHY | 274   | >APC-H1375'QTPKSPPEYY | 260  | 14    |
| >APC-H1375'QTPKSPPEHY | 238   | >APC-H1375'QTPKSPPEYY | 209  | 29    |
| >APC-H1375'QTPKSPPEH  | 8547  | >APC-H1375'QTPKSPPEY  | 84   | 8463  |
| >APC-H1375'QTPKSPPEHY | 32    | >APC-H1375'QTPKSPPEYY | 37   | 5     |
| >APC-H1375'QTPKSPPEH  | 9358  | >APC-H1375'QTPKSPPEY  | 272  | 9086  |
| >APC-H1375'QTPKSPPEHY | 125   | >APC-H1375'QTPKSPPEYY | 128  | 3     |
| >APC-H1375'QTPKSPPEHY | 337   | >APC-H1375'QTPKSPPEYY | 106  | 231   |
| >APC-H1375'QTPKSPPEHY | 751   | >APC-H1375'QTPKSPPEYY | 366  | 385   |

|                        |       |                         |      |       |
|------------------------|-------|-------------------------|------|-------|
| >APC-H1375' QTPKSPPEHY | 25    | >APC-H1375' QTPKSPPEYY' | 22   | 3     |
| >APC-H1375' QTPKSPPEHY | 75    | >APC-H1375' QTPKSPPEYY' | 152  | 77    |
| >APC-H1375' QTPKSPPEH  | 10004 | >APC-H1375' QTPKSPPEY   | 89   | 9915  |
| >APC-H1375' QTPKSPPEHY | 293   | >APC-H1375' QTPKSPPEYY  | 229  | 64    |
| >APC-H1375' QTPKSPPEHY | 835   | >APC-H1375' QTPKSPPEYY  | 109  | 726   |
| >APC-H1375' QTPKSPPEHY | 9     | >APC-H1375' QTPKSPPEYY' | 8    | 1     |
| >APC-H1375' QTPKSPPEHY | 106   | >APC-H1375' QTPKSPPEYY  | 42   | 64    |
| >APC-H1375' AQTPKSPPEH | 410   | >APC-H1375' AQTPKSPPEY  | 198  | 212   |
| >APC-H1375' AQTPKSPPEH | 6257  | >APC-H1375' AQTPKSPPEY  | 175  | 6082  |
| >APC-H1375' AQTPKSPPEH | 87    | >APC-H1375' AQTPKSPPEY  | 203  | 116   |
| >APC-H1375' AQTPKSPPEH | 1009  | >APC-H1375' AQTPKSPPEY  | 14   | 995   |
| >APC-H1375' AQTPKSPPEH | 22    | >APC-H1375' AQTPKSPPEY  | 21   | 1     |
| >APC-H1490' HFATESTPDG | 1282  | >APC-H1490' YFATESTPDG  | 363  | 919   |
| >APC-H1490' HFATESTPDG | 1846  | >APC-H1490' YFATESTPDG  | 461  | 1385  |
| >APC-H1490' HFATESTPDG | 96    | >APC-H1490' YFATESTPDG  | 24   | 72    |
| >APC-H1490' HFATESTPDG | 850   | >APC-H1490' YFATESTPDG  | 372  | 478   |
| >APC-H1490' HFATESTPDG | 387   | >APC-H1490' YFATESTPDG  | 202  | 185   |
| >APC-H1490' LHFATESTP  | 11418 | >APC-H1490' LYFATESTP   | 190  | 11228 |
| >APC-H1490' QVLPDADTLL | 10909 | >APC-H1490' QVLPDADTLL  | 240  | 10669 |
| >APC-H1490' QVLPDADTLL | 507   | >APC-H1490' QVLPDADTLL  | 11   | 496   |
| >APC-H1490' QVLPDADTLL | 17828 | >APC-H1490' QVLPDADTLL  | 384  | 17444 |
| >APC-H1490' QVLPDADTLL | 2118  | >APC-H1490' QVLPDADTLL  | 19   | 2099  |
| >APC-H1490' QVLPDADTLL | 16772 | >APC-H1490' QVLPDADTLL  | 205  | 16567 |
| >APC-H1490' QVLPDADTLL | 4357  | >APC-H1490' QVLPDADTLL  | 197  | 4160  |
| >APC-H1490' QVLPDADTLL | 5362  | >APC-H1490' QVLPDADTLL  | 344  | 5018  |
| >APC-H1490' LLHFATES   | 1560  | >APC-H1490' LLYFATES    | 284  | 1276  |
| >APC-H1490' LLHFATEST  | 310   | >APC-H1490' LLYFATEST   | 77   | 233   |
| >APC-H1490' LLHFATES   | 1121  | >APC-H1490' LLYFATES    | 151  | 970   |
| >APC-H1490' LLHFATEST  | 170   | >APC-H1490' LLYFATEST   | 28   | 142   |
| >APC-H1490' LLHFATES   | 3067  | >APC-H1490' LLYFATES    | 315  | 2752  |
| >APC-H1490' LLHFATEST  | 637   | >APC-H1490' LLYFATEST   | 51   | 586   |
| >APC-H1490' LLHFATEST  | 6011  | >APC-H1490' LLYFATEST   | 410  | 5601  |
| >APC-H1490' LLHFATEST  | 5105  | >APC-H1490' LLYFATEST   | 376  | 4729  |
| >APC-H1490' LLHFATES   | 1211  | >APC-H1490' LLYFATES    | 245  | 966   |
| >APC-H1490' LLHFATEST  | 177   | >APC-H1490' LLYFATEST   | 45   | 132   |
| >APC-H1490' TLLHFATEST | 278   | >APC-H1490' TLLYFATEST  | 158  | 120   |
| >APC-H1490' TLLHFATEST | 321   | >APC-H1490' TLLYFATEST  | 125  | 196   |
| >APC-H1490' TLLHFATEST | 100   | >APC-H1490' TLLYFATEST  | 62   | 38    |
| >APC-H1490' TLLHFATEST | 924   | >APC-H1490' TLLYFATEST  | 486  | 438   |
| >APC-H1490' TLLHFATEST | 460   | >APC-H1490' TLLYFATEST  | 1009 | 549   |
| >APC-H1490' DTLLHFAT   | 332   | >APC-H1490' DTLLYFAT    | 161  | 171   |
| >APC-H1490' DTLLHFATES | 670   | >APC-H1490' DTLLYFATEST | 362  | 308   |
| >APC-H1490' ADTLLHFAT  | 194   | >APC-H1490' ADTLLYFAT   | 195  | 1     |

|                        |       |                        |      |       |
|------------------------|-------|------------------------|------|-------|
| >APC-H1490' ADTLLHFAT  | 530   | >APC-H1490' ADTLLYFAT  | 473  | 57    |
| >APC-H1490' ADTLLHFA   | 1147  | >APC-H1490' ADTLLYFA   | 374  | 773   |
| >APC-H1490' DADTLLHFA  | 238   | >APC-H1490' DADTLLYFA  | 596  | 358   |
| >APC-H1490' PDADTLLH   | 9753  | >APC-H1490' PDADTLLY   | 114  | 9639  |
| >APC-H1490' LPDADTLLHF | 756   | >APC-H1490' LPDADTLLYF | 91   | 665   |
| >APC-H1490' LPDADTLLH  | 18518 | >APC-H1490' LPDADTLLY  | 151  | 18367 |
| >APC-H1490' LPDADTLLH  | 10847 | >APC-H1490' LPDADTLLY  | 305  | 10542 |
| >APC-H1490' LPDADTLLH  | 9770  | >APC-H1490' LPDADTLLY  | 46   | 9724  |
| >APC-H1490' LPDADTLLH  | 162   | >APC-H1490' LPDADTLLY  | 12   | 150   |
| >APC-H1490' LPDADTLLHF | 32    | >APC-H1490' LPDADTLLYF | 55   | 23    |
| >APC-H1490' LPDADTLLH  | 1573  | >APC-H1490' LPDADTLLY  | 14   | 1559  |
| >APC-H1490' LPDADTLLHF | 58    | >APC-H1490' LPDADTLLYF | 88   | 30    |
| >APC-H1490' LPDADTLLHF | 64    | >APC-H1490' LPDADTLLYF | 48   | 16    |
| >APC-H1490' LPDADTLLH  | 7173  | >APC-H1490' LPDADTLLY  | 59   | 7114  |
| >APC-H1490' LPDADTLLHF | 32    | >APC-H1490' LPDADTLLYF | 42   | 10    |
| >APC-H1490' VLPDADTLLH | 14703 | >APC-H1490' VLPDADTLLY | 79   | 14624 |
| >APC-H1490' VLPDADTLLH | 339   | >APC-H1490' VLPDADTLLY | 197  | 142   |
| >APC-H1490' VLPDADTLLH | 1907  | >APC-H1490' VLPDADTLLY | 267  | 1640  |
| >APC-H1490' VLPDADTLLH | 489   | >APC-H1490' VLPDADTLLY | 214  | 275   |
| >APC-H1490' VLPDADTLLH | 19172 | >APC-H1490' VLPDADTLLY | 134  | 19038 |
| >APC-H1490' VLPDADTLLH | 25484 | >APC-H1490' VLPDADTLLY | 383  | 25101 |
| >APC-H1490' VLPDADTLLH | 7020  | >APC-H1490' VLPDADTLLY | 70   | 6950  |
| >APC-H1490' VLPDADTLLH | 150   | >APC-H1490' VLPDADTLLY | 425  | 275   |
| >APC-H1490' VLPDADTLLH | 108   | >APC-H1490' VLPDADTLLY | 22   | 86    |
| >APC-H464Q HAMNELGGL   | 168   | >APC-H464Q QAMNELGGL   | 1534 | 1366  |
| >APC-H464Q HAMNELGGL   | 357   | >APC-H464Q QAMNELGGL   | 520  | 163   |
| >APC-H464Q HAMNELGGL   | 299   | >APC-H464Q QAMNELGGL   | 1044 | 745   |
| >APC-H464Q RHAMNELGC   | 13296 | >APC-H464Q RQAMNELGC   | 395  | 12901 |
| >APC-H464Q RHAMNELGC   | 21444 | >APC-H464Q RQAMNELGC   | 442  | 21002 |
| >APC-H464Q RHAMNELGC   | 2670  | >APC-H464Q RQAMNELGC   | 255  | 2415  |
| >APC-H464Q RHAMNELGC   | 9644  | >APC-H464Q RQAMNELGC   | 245  | 9399  |
| >APC-H464Q HRHAMNEL    | 226   | >APC-H464Q HRQAMNEL    | 196  | 30    |
| >APC-H464Q HRHAMNELC   | 241   | >APC-H464Q HRQAMNELC   | 201  | 40    |
| >APC-H464Q HRHAMNELC   | 85    | >APC-H464Q HRQAMNELC   | 76   | 9     |
| >APC-H464Q HRHAMNEL    | 39    | >APC-H464Q HRQAMNEL    | 73   | 34    |
| >APC-H464Q HRHAMNELC   | 333   | >APC-H464Q HRQAMNELC   | 707  | 374   |
| >APC-H464Q HRHAMNEL    | 819   | >APC-H464Q HRQAMNEL    | 279  | 540   |
| >APC-H464Q HRHAMNELC   | 1136  | >APC-H464Q HRQAMNELC   | 308  | 828   |
| >APC-H464Q HRHAMNELC   | 881   | >APC-H464Q HRQAMNELC   | 233  | 648   |
| >APC-H464Q HRHAMNEL    | 995   | >APC-H464Q HRQAMNEL    | 398  | 597   |
| >APC-H464Q HRHAMNELC   | 81    | >APC-H464Q HRQAMNELC   | 22   | 59    |
| >APC-H464Q EEHRHAMNE   | 127   | >APC-H464Q EEHRQAMNE   | 77   | 50    |
| >APC-H464Q EEHRHAMN    | 232   | >APC-H464Q EEHRQAMN    | 602  | 370   |

|                         |       |                         |       |       |
|-------------------------|-------|-------------------------|-------|-------|
| >APC-H464Q DEEHRHAMM    | 280   | >APC-H464Q DEEHRQAMM    | 184   | 96    |
| >APC-H464Q DEEHRHAM     | 41    | >APC-H464Q DEEHRQAM     | 150   | 109   |
| >APC-H464Q FDEEHRHAM    | 300   | >APC-H464Q FDEEHRQAM    | 1987  | 1687  |
| >APC-H464Q LSFDEEHRHA   | 600   | >APC-H464Q LSFDEEHRQA   | 342   | 258   |
| >APC-H464Q LSFDEEHRHA   | 361   | >APC-H464Q LSFDEEHRQA   | 291   | 70    |
| >APC-H464Q LSFDEEHRHA   | 94    | >APC-H464Q LSFDEEHRQA   | 52    | 42    |
| >APC-H464Q LSFDEEHRHA   | 19    | >APC-H464Q LSFDEEHRQA   | 19    | 0     |
| >APC-H464Q LSFDEEHRHA   | 107   | >APC-H464Q LSFDEEHRQA   | 113   | 6     |
| >APC-H464Q LSFDEEHRHA   | 410   | >APC-H464Q LSFDEEHRQA   | 1582  | 1172  |
| >APC-H464Q LSFDEEHRHA   | 233   | >APC-H464Q LSFDEEHRQA   | 211   | 22    |
| >APC-H464Q KLSFDEEHRH   | 422   | >APC-H464Q KLSFDEEHRQ   | 364   | 58    |
| >APC-H464Q KLSFDEEHRH   | 418   | >APC-H464Q KLSFDEEHRQ   | 352   | 66    |
| >APC-H464Q KLSFDEEHRH   | 11647 | >APC-H464Q KLSFDEEHRQ   | 378   | 11269 |
| >APC-H464Q KLSFDEEHRH   | 647   | >APC-H464Q KLSFDEEHRQ   | 310   | 337   |
| >APC-I1254F INQETIQTY   | 502   | >APC-I1254F FNQETIQTY   | 251   | 251   |
| >APC-I1254F INQETIQTY   | 603   | >APC-I1254F FNQETIQTY   | 96    | 507   |
| >APC-I1254F INQETIQTY   | 356   | >APC-I1254F FNQETIQTY   | 264   | 92    |
| >APC-I1254F INQETIQTY   | 231   | >APC-I1254F FNQETIQTY   | 186   | 45    |
| >APC-I1254F SINQETIQTY  | 202   | >APC-I1254F SFNQETIQTY  | 4743  | 4541  |
| >APC-I1254F SINQETIQTY  | 2546  | >APC-I1254F SFNQETIQTY  | 360   | 2186  |
| >APC-I1254F SINQETIQTY  | 193   | >APC-I1254F SFNQETIQTY  | 432   | 239   |
| >APC-I1254F SINQETIQTY  | 94    | >APC-I1254F SFNQETIQTY  | 787   | 693   |
| >APC-I1254F SINQETIQTY  | 62    | >APC-I1254F SFNQETIQTY  | 292   | 230   |
| >APC-I1254F QKAATCKVSS  | 482   | >APC-I1254F QKAATCKVSS  | 13991 | 13509 |
| >APC-I1254F QKAATCKVSS  | 347   | >APC-I1254F QKAATCKVSS  | 10823 | 10476 |
| >APC-I1254F QKAATCKVSS  | 24    | >APC-I1254F QKAATCKVSS  | 3     | 21    |
| >APC-I1254F SSINQETI    | 312   | >APC-I1254F SSFNQETI    | 1058  | 746   |
| >APC-I1254F SSINQETIQTY | 1347  | >APC-I1254F SSFNQETIQT' | 301   | 1046  |
| >APC-I1254F SSINQETIQTY | 26    | >APC-I1254F SSFNQETIQT' | 2229  | 2203  |
| >APC-I1254F SSINQETIQTY | 710   | >APC-I1254F SSFNQETIQT' | 470   | 240   |
| >APC-I1254F SSINQETIQTY | 138   | >APC-I1254F SSFNQETIQT' | 69    | 69    |
| >APC-I1254F SSINQETI    | 159   | >APC-I1254F SSFNQETI    | 26    | 133   |
| >APC-I1254F SSINQETIQTY | 1611  | >APC-I1254F SSFNQETIQT' | 184   | 1427  |
| >APC-I1254F SSINQETIQTY | 119   | >APC-I1254F SSFNQETIQT' | 93    | 26    |
| >APC-I1254F SSINQETI    | 2283  | >APC-I1254F SSFNQETI    | 499   | 1784  |
| >APC-I1254F SSINQETIQTY | 69    | >APC-I1254F SSFNQETIQT' | 14    | 55    |
| >APC-I1254F SSINQETI    | 331   | >APC-I1254F SSFNQETI    | 120   | 211   |
| >APC-I1254F SSINQETIQTY | 7     | >APC-I1254F SSFNQETIQT' | 5     | 2     |
| >APC-I1254F SSINQETIQTY | 385   | >APC-I1254F SSFNQETIQT' | 259   | 126   |
| >APC-I1254F SSINQETIQTY | 1166  | >APC-I1254F SSFNQETIQT' | 327   | 839   |
| >APC-I1254F SSINQETIQTY | 34    | >APC-I1254F SSFNQETIQT' | 7     | 27    |
| >APC-I1254F SSINQETIQTY | 470   | >APC-I1254F SSFNQETIQT' | 497   | 27    |
| >APC-I1254F SSINQETI    | 48    | >APC-I1254F SSFNQETI    | 14    | 34    |

|                         |      |                        |       |       |
|-------------------------|------|------------------------|-------|-------|
| >APC-I1254F VSSINQETI   | 44   | >APC-I1254F VSSFNQETI  | 186   | 142   |
| >APC-I1254F VSSINQETI   | 1971 | >APC-I1254F VSSFNQETI  | 278   | 1693  |
| >APC-I1254F VSSINQETI   | 119  | >APC-I1254F VSSFNQETI  | 326   | 207   |
| >APC-I1254F VSSINQETI   | 90   | >APC-I1254F VSSFNQETI  | 120   | 30    |
| >APC-I1254F VSSINQETI   | 82   | >APC-I1254F VSSFNQETI  | 135   | 53    |
| >APC-I1254F KVSSINQETI  | 278  | >APC-I1254F KVSSFNQETI | 98    | 180   |
| >APC-I1254F KVSSINQETI  | 13   | >APC-I1254F KVSSFNQETI | 12    | 1     |
| >APC-I1254F KVSSINQETI  | 229  | >APC-I1254F KVSSFNQETI | 200   | 29    |
| >APC-I1254F CKVSSINQET  | 1093 | >APC-I1254F CKVSSFNQET | 487   | 606   |
| >APC-I1254F CKVSSINQETI | 76   | >APC-I1254F CKVSSFNQET | 55    | 21    |
| >APC-I1254F ATCKVSSI    | 3085 | >APC-I1254F ATCKVSSF   | 80    | 3005  |
| >APC-I1254F ATCKVSSI    | 135  | >APC-I1254F ATCKVSSF   | 88    | 47    |
| >APC-I1254F ATCKVSSI    | 3681 | >APC-I1254F ATCKVSSF   | 62    | 3619  |
| >APC-I1254F ATCKVSSI    | 2696 | >APC-I1254F ATCKVSSF   | 108   | 2588  |
| >APC-I1254F ATCKVSSI    | 118  | >APC-I1254F ATCKVSSF   | 6     | 112   |
| >APC-I1254F ATCKVSSI    | 2356 | >APC-I1254F ATCKVSSF   | 260   | 2096  |
| >APC-I1254F ATCKVSSIN   | 230  | >APC-I1254F ATCKVSSFN  | 293   | 63    |
| >APC-I1254F ATCKVSSI    | 17   | >APC-I1254F ATCKVSSF   | 2809  | 2792  |
| >APC-I1254F AATCKVSSI   | 361  | >APC-I1254F AATCKVSSF  | 14289 | 13928 |
| >APC-I1254F AATCKVSSI   | 1223 | >APC-I1254F AATCKVSSF  | 30    | 1193  |
| >APC-I1254F AATCKVSSI   | 399  | >APC-I1254F AATCKVSSF  | 16    | 383   |
| >APC-I1254F AATCKVSSI   | 1434 | >APC-I1254F AATCKVSSF  | 129   | 1305  |
| >APC-I1254F AATCKVSSI   | 243  | >APC-I1254F AATCKVSSF  | 21406 | 21163 |
| >APC-I1254F KAATCKVSSI  | 9060 | >APC-I1254F KAATCKVSSF | 299   | 8761  |
| >APC-I1254F KAATCKVSSI  | 464  | >APC-I1254F KAATCKVSSF | 12    | 452   |
| >APC-I1254F KAATCKVSSI  | 386  | >APC-I1254F KAATCKVSSF | 24    | 362   |
| >APC-I1254F KAATCKVSSI  | 5753 | >APC-I1254F KAATCKVSSF | 340   | 5413  |
| >APC-I1254F KAATCKVSSI  | 256  | >APC-I1254F KAATCKVSSF | 40    | 216   |
| >APC-I1254F KAATCKVSSI  | 117  | >APC-I1254F KAATCKVSSF | 26308 | 26191 |
| >APC-I1259T IQTYCVEDTPI | 106  | >APC-I1259T TQTYCVEDTP | 222   | 116   |
| >APC-I1259T IQTYCVEDTPI | 47   | >APC-I1259T TQTYCVEDTP | 365   | 318   |
| >APC-I1259T CKVSSINQETI | 76   | >APC-I1259T CKVSSINQET | 1759  | 1683  |
| >APC-I1259T ETIQTYCV    | 29   | >APC-I1259T ETTQTYCV   | 873   | 844   |
| >APC-I1259T ETIQTYCVED  | 233  | >APC-I1259T ETTQTYCVED | 3575  | 3342  |
| >APC-I1259T ETIQTYCV    | 222  | >APC-I1259T ETTQTYCV   | 1869  | 1647  |
| >APC-I1259T ETIQTYCV    | 6    | >APC-I1259T ETTQTYCV   | 10    | 4     |
| >APC-I1259T ETIQTYCV    | 7    | >APC-I1259T ETTQTYCV   | 21    | 14    |
| >APC-I1259T QETIQTYCV   | 25   | >APC-I1259T QETTQTYCV  | 18    | 7     |
| >APC-I1259T QETIQTYCV   | 60   | >APC-I1259T QETTQTYCV  | 61    | 1     |
| >APC-I1259T QETIQTYCV   | 64   | >APC-I1259T QETTQTYCV  | 29    | 35    |
| >APC-I1259T NQETIQTY    | 522  | >APC-I1259T NQETTQTY   | 223   | 299   |
| >APC-I1259T NQETIQTY    | 584  | >APC-I1259T NQETTQTY   | 287   | 297   |
| >APC-I1259T NQETIQTYCV  | 748  | >APC-I1259T NQETTQTYC\ | 304   | 444   |

|                         |       |                        |       |       |
|-------------------------|-------|------------------------|-------|-------|
| >APC-I1259T INQETIQTY   | 502   | >APC-I1259T INQETTQTY  | 403   | 99    |
| >APC-I1259T INQETIQTY   | 603   | >APC-I1259T INQETTQTY  | 286   | 317   |
| >APC-I1259T INQETIQTY   | 356   | >APC-I1259T INQETTQTY  | 287   | 69    |
| >APC-I1259T INQETIQTY   | 231   | >APC-I1259T INQETTQTY  | 222   | 9     |
| >APC-I1259T SINQETIQTY  | 648   | >APC-I1259T SINQETTQTY | 484   | 164   |
| >APC-I1259T SINQETIQTY  | 202   | >APC-I1259T SINQETTQTY | 462   | 260   |
| >APC-I1259T SINQETIQTY  | 1096  | >APC-I1259T SINQETTQTY | 428   | 668   |
| >APC-I1259T SINQETIQTY  | 193   | >APC-I1259T SINQETTQTY | 75    | 118   |
| >APC-I1259T SINQETIQTY  | 94    | >APC-I1259T SINQETTQTY | 70    | 24    |
| >APC-I1259T SINQETIQTY  | 638   | >APC-I1259T SINQETTQTY | 373   | 265   |
| >APC-I1259T SINQETIQTY  | 62    | >APC-I1259T SINQETTQTY | 63    | 1     |
| >APC-I1259T SSINQETI    | 312   | >APC-I1259T SSINQETT   | 10954 | 10642 |
| >APC-I1259T SSINQETIQTY | 555   | >APC-I1259T SSINQETTQT | 466   | 89    |
| >APC-I1259T SSINQETIQTY | 26    | >APC-I1259T SSINQETTQT | 35    | 9     |
| >APC-I1259T SSINQETIQTY | 1203  | >APC-I1259T SSINQETTQT | 397   | 806   |
| >APC-I1259T SSINQETIQTY | 710   | >APC-I1259T SSINQETTQT | 397   | 313   |
| >APC-I1259T SSINQETIQTY | 138   | >APC-I1259T SSINQETTQT | 122   | 16    |
| >APC-I1259T SSINQETI    | 159   | >APC-I1259T SSINQETT   | 9340  | 9181  |
| >APC-I1259T SSINQETIQTY | 1611  | >APC-I1259T SSINQETTQT | 430   | 1181  |
| >APC-I1259T SSINQETIQTY | 119   | >APC-I1259T SSINQETTQT | 93    | 26    |
| >APC-I1259T SSINQETIQTY | 69    | >APC-I1259T SSINQETTQT | 62    | 7     |
| >APC-I1259T SSINQETI    | 331   | >APC-I1259T SSINQETT   | 10581 | 10250 |
| >APC-I1259T SSINQETIQTY | 7     | >APC-I1259T SSINQETTQT | 5     | 2     |
| >APC-I1259T SSINQETIQTY | 385   | >APC-I1259T SSINQETTQT | 160   | 225   |
| >APC-I1259T SSINQETIQTY | 34    | >APC-I1259T SSINQETTQT | 36    | 2     |
| >APC-I1259T SSINQETIQTY | 470   | >APC-I1259T SSINQETTQT | 312   | 158   |
| >APC-I1259T SSINQETI    | 48    | >APC-I1259T SSINQETT   | 27013 | 26965 |
| >APC-I1259T VSSINQETI   | 44    | >APC-I1259T VSSINQETT  | 9224  | 9180  |
| >APC-I1259T VSSINQETI   | 119   | >APC-I1259T VSSINQETT  | 6064  | 5945  |
| >APC-I1259T VSSINQETI   | 90    | >APC-I1259T VSSINQETT  | 12330 | 12240 |
| >APC-I1259T VSSINQETI   | 82    | >APC-I1259T VSSINQETT  | 31741 | 31659 |
| >APC-I1259T KVSSINQETI  | 278   | >APC-I1259T KVSSINQETT | 2469  | 2191  |
| >APC-I1259T KVSSINQETI  | 13    | >APC-I1259T KVSSINQETT | 915   | 902   |
| >APC-I1259T KVSSINQETI  | 229   | >APC-I1259T KVSSINQETT | 13676 | 13447 |
| >APC-I1307K IKEKIGTR    | 2261  | >APC-I1307K KKEKIGTR   | 463   | 1798  |
| >APC-I1307K EIKEKIGTR   | 31    | >APC-I1307K EKKEKIGTR  | 1025  | 994   |
| >APC-I1307K EIKEKIGTR   | 35    | >APC-I1307K EKKEKIGTR  | 1715  | 1680  |
| >APC-I1307K DSANTLQIAE  | 16120 | >APC-I1307K DSANTLQIAE | 21    | 16099 |
| >APC-I1307K DSANTLQIAE  | 172   | >APC-I1307K DSANTLQIAE | 20546 | 20374 |
| >APC-I1307K AEIKEKIGT   | 89    | >APC-I1307K AEKKEKIGT  | 149   | 60    |
| >APC-I1307K AEIKEKIGT   | 381   | >APC-I1307K AEKKEKIGT  | 1030  | 649   |
| >APC-I1307K QIAEIKEKI   | 163   | >APC-I1307K QIAEKKEKI  | 2105  | 1942  |
| >APC-I1307K QIAEIKEK    | 86    | >APC-I1307K QIAEKKEK   | 549   | 463   |



|                          |       |                         |       |       |
|--------------------------|-------|-------------------------|-------|-------|
| >APC-I1307K QIAEIKEKI    | 23    | >APC-I1307K QIAEKKEKI   | 379   | 356   |
| >APC-I1307K QIAEIKEKI    | 287   | >APC-I1307K QIAEKKEKI   | 3012  | 2725  |
| >APC-I1307K LQIAEIKEKI   | 295   | >APC-I1307K LQIAEKKEKI  | 580   | 285   |
| >APC-I1307K TLQIAEIKEKI  | 251   | >APC-I1307K TLQIAEKKEKI | 600   | 349   |
| >APC-I1307K TLQIAEIK     | 288   | >APC-I1307K TLQIAEKK    | 390   | 102   |
| >APC-I1307K TLQIAEIKEK   | 478   | >APC-I1307K TLQIAEKKEK  | 1043  | 565   |
| >APC-I1307K NTLQIAEI     | 29471 | >APC-I1307K NTLQIAEK    | 192   | 29279 |
| >APC-I1307K NTLQIAEI     | 15005 | >APC-I1307K NTLQIAEK    | 21    | 14984 |
| >APC-I1307K NTLQIAEIK    | 22    | >APC-I1307K NTLQIAEKK   | 17    | 5     |
| >APC-I1307K NTLQIAEIKEK  | 73    | >APC-I1307K NTLQIAEKKEI | 113   | 40    |
| >APC-I1307K NTLQIAEI     | 28    | >APC-I1307K NTLQIAEK    | 17477 | 17449 |
| >APC-I1307K NTLQIAEI     | 15    | >APC-I1307K NTLQIAEK    | 5025  | 5010  |
| >APC-I1307K NTLQIAEI     | 111   | >APC-I1307K NTLQIAEK    | 37712 | 37601 |
| >APC-I1307K SANTLQIAEI   | 34897 | >APC-I1307K SANTLQIAEK  | 101   | 34796 |
| >APC-I1307K SANTLQIAEIK  | 65    | >APC-I1307K SANTLQIAEKI | 53    | 12    |
| >APC-I1307K SANTLQIAEI   | 2860  | >APC-I1307K SANTLQIAEK  | 110   | 2750  |
| >APC-I1307K SANTLQIAEI   | 31311 | >APC-I1307K SANTLQIAEK  | 190   | 31121 |
| >APC-I1307K SANTLQIAEIK  | 180   | >APC-I1307K SANTLQIAEKI | 154   | 26    |
| >APC-I66L-wi QIDLLERL    | 1900  | >APC-I66L-m QLDLLERL    | 344   | 1556  |
| >APC-I66L-wi QIDLLERL    | 4626  | >APC-I66L-m QLDLLERL    | 292   | 4334  |
| >APC-I66L-wi QIDLLERL    | 8168  | >APC-I66L-m QLDLLERL    | 213   | 7955  |
| >APC-I66L-wi EDEAMASSG   | 363   | >APC-I66L-m EDEAMASSG   | 5947  | 5584  |
| >APC-I66L-wi EDEAMASSG   | 48    | >APC-I66L-m EDEAMASSG   | 438   | 390   |
| >APC-I66L-wi GQIDLLERL   | 141   | >APC-I66L-m GQLDLLERL   | 108   | 33    |
| >APC-I66L-wi GQIDLLERL   | 42    | >APC-I66L-m GQLDLLERL   | 142   | 100   |
| >APC-I66L-wi GQIDLLERL   | 278   | >APC-I66L-m GQLDLLERL   | 2033  | 1755  |
| >APC-I66L-wi GQIDLLERL   | 11    | >APC-I66L-m GQLDLLERL   | 14    | 3     |
| >APC-I66L-wi GQIDLLERL   | 435   | >APC-I66L-m GQLDLLERL   | 95    | 340   |
| >APC-I66L-wi GQIDLLERL   | 425   | >APC-I66L-m GQLDLLERL   | 193   | 232   |
| >APC-I66L-wi GQIDLLERLK  | 351   | >APC-I66L-m GQLDLLERLK  | 544   | 193   |
| >APC-I66L-wi GQIDLLER    | 356   | >APC-I66L-m GQLDLLER    | 222   | 134   |
| >APC-I66L-wi GQIDLLERL   | 391   | >APC-I66L-m GQLDLLERL   | 539   | 148   |
| >APC-I66L-wi SSGQIDLLER  | 279   | >APC-I66L-m SSGQLDLLER  | 259   | 20    |
| >APC-I66L-wi SSGQIDLLER  | 255   | >APC-I66L-m SSGQLDLLER  | 253   | 2     |
| >APC-I66L-wi SSGQIDLLERI | 485   | >APC-I66L-m SSGQLDLLERI | 543   | 58    |
| >APC-I66L-wi SSGQIDLLER  | 638   | >APC-I66L-m SSGQLDLLER  | 400   | 238   |
| >APC-I66L-wi ASSGQIDLL   | 162   | >APC-I66L-m ASSGQLDLL   | 150   | 12    |
| >APC-I66L-wi ASSGQIDLLEF | 273   | >APC-I66L-m ASSGQLDLLE  | 320   | 47    |
| >APC-I66L-wi ASSGQIDL    | 156   | >APC-I66L-m ASSGQLDL    | 78    | 78    |
| >APC-I66L-wi ASSGQIDLL   | 394   | >APC-I66L-m ASSGQLDLL   | 482   | 88    |
| >APC-I66L-wi ASSGQIDLL   | 270   | >APC-I66L-m ASSGQLDLL   | 595   | 325   |
| >APC-I66L-wi ASSGQIDLLEF | 155   | >APC-I66L-m ASSGQLDLLE  | 213   | 58    |
| >APC-I66L-wi MASSGQIDL   | 98    | >APC-I66L-m MASSGQLDLI  | 80    | 18    |

|                         |      |                       |      |      |
|-------------------------|------|-----------------------|------|------|
| >APC-I66L-wi MASSGQIDL  | 371  | >APC-I66L-m MASSGQLDL | 450  | 79   |
| >APC-I66L-wi MASSGQIDL  | 939  | >APC-I66L-m MASSGQLDL | 263  | 676  |
| >APC-I66L-wi MASSGQIDL  | 199  | >APC-I66L-m MASSGQLDL | 341  | 142  |
| >APC-I66L-wi MASSGQIDL  | 1991 | >APC-I66L-m MASSGQLDL | 425  | 1566 |
| >APC-I66L-wi MASSGQIDL  | 734  | >APC-I66L-m MASSGQLDL | 484  | 250  |
| >APC-I66L-wi AMASSGQI   | 483  | >APC-I66L-m AMASSGQL  | 382  | 101  |
| >APC-I66L-wi AMASSGQIDI | 104  | >APC-I66L-m AMASSGQLD | 79   | 25   |
| >APC-I66L-wi AMASSGQI   | 30   | >APC-I66L-m AMASSGQL  | 10   | 20   |
| >APC-I66L-wi AMASSGQIDI | 77   | >APC-I66L-m AMASSGQLD | 61   | 16   |
| >APC-I66L-wi AMASSGQIDI | 4    | >APC-I66L-m AMASSGQLD | 3    | 1    |
| >APC-I66L-wi AMASSGQI   | 10   | >APC-I66L-m AMASSGQL  | 14   | 4    |
| >APC-I66L-wi AMASSGQIDI | 628  | >APC-I66L-m AMASSGQLD | 322  | 306  |
| >APC-I66L-wi AMASSGQIDI | 14   | >APC-I66L-m AMASSGQLD | 12   | 2    |
| >APC-I66L-wi AMASSGQIDI | 200  | >APC-I66L-m AMASSGQLD | 119  | 81   |
| >APC-I66L-wi AMASSGQI   | 23   | >APC-I66L-m AMASSGQL  | 26   | 3    |
| >APC-I66L-wi AMASSGQIDI | 119  | >APC-I66L-m AMASSGQLD | 146  | 27   |
| >APC-I66L-wi AMASSGQIDI | 24   | >APC-I66L-m AMASSGQLD | 28   | 4    |
| >APC-I66L-wi AMASSGQI   | 293  | >APC-I66L-m AMASSGQL  | 284  | 9    |
| >APC-I66L-wi AMASSGQIDI | 207  | >APC-I66L-m AMASSGQLD | 405  | 198  |
| >APC-I66L-wi AMASSGQIDI | 75   | >APC-I66L-m AMASSGQLD | 72   | 3    |
| >APC-I66L-wi AMASSGQI   | 51   | >APC-I66L-m AMASSGQL  | 37   | 14   |
| >APC-I66L-wi AMASSGQIDI | 32   | >APC-I66L-m AMASSGQLD | 36   | 4    |
| >APC-I66L-wi AMASSGQIDI | 22   | >APC-I66L-m AMASSGQLD | 23   | 1    |
| >APC-I66L-wi AMASSGQI   | 160  | >APC-I66L-m AMASSGQL  | 100  | 60   |
| >APC-I66L-wi AMASSGQIDI | 307  | >APC-I66L-m AMASSGQLD | 443  | 136  |
| >APC-I66L-wi AMASSGQIDI | 97   | >APC-I66L-m AMASSGQLD | 114  | 17   |
| >APC-I66L-wi AMASSGQI   | 16   | >APC-I66L-m AMASSGQL  | 6    | 10   |
| >APC-I66L-wi AMASSGQIDI | 6    | >APC-I66L-m AMASSGQLD | 6    | 0    |
| >APC-I66L-wi AMASSGQIDI | 7    | >APC-I66L-m AMASSGQLD | 7    | 0    |
| >APC-I66L-wi AMASSGQI   | 478  | >APC-I66L-m AMASSGQL  | 188  | 290  |
| >APC-I66L-wi AMASSGQIDI | 800  | >APC-I66L-m AMASSGQLD | 442  | 358  |
| >APC-I66L-wi AMASSGQI   | 164  | >APC-I66L-m AMASSGQL  | 104  | 60   |
| >APC-I66L-wi AMASSGQIDI | 33   | >APC-I66L-m AMASSGQLD | 31   | 2    |
| >APC-I66L-wi AMASSGQIDI | 145  | >APC-I66L-m AMASSGQLD | 201  | 56   |
| >APC-I66L-wi AMASSGQI   | 435  | >APC-I66L-m AMASSGQL  | 6353 | 5918 |
| >APC-I66L-wi EAMASSGQI  | 22   | >APC-I66L-m EAMASSGQL | 32   | 10   |
| >APC-I66L-wi EAMASSGQIL | 146  | >APC-I66L-m EAMASSGQL | 359  | 213  |
| >APC-I66L-wi EAMASSGQI  | 17   | >APC-I66L-m EAMASSGQL | 24   | 7    |
| >APC-I66L-wi EAMASSGQIL | 145  | >APC-I66L-m EAMASSGQL | 199  | 54   |
| >APC-I66L-wi EAMASSGQI  | 272  | >APC-I66L-m EAMASSGQL | 44   | 228  |
| >APC-I66L-wi EAMASSGQIL | 844  | >APC-I66L-m EAMASSGQL | 419  | 425  |
| >APC-I66L-wi EAMASSGQI  | 214  | >APC-I66L-m EAMASSGQL | 4504 | 4290 |
| >APC-I66L-wi DEAMASSGQ  | 7    | >APC-I66L-m DEAMASSGQ | 33   | 26   |

|                          |       |                          |      |       |
|--------------------------|-------|--------------------------|------|-------|
| >APC-I66L-wi DEAMASSGQ   | 451   | >APC-I66L-m DEAMASSGQ    | 872  | 421   |
| >APC-I66L-wi DEAMASSGQ   | 586   | >APC-I66L-m DEAMASSGQ    | 376  | 210   |
| >APC-I66L-wi DEAMASSGQ   | 264   | >APC-I66L-m DEAMASSGQ    | 1966 | 1702  |
| >APC-I880T-\ ISTTAAQIAK  | 175   | >APC-I880T-r TSTTAAQIAK  | 394  | 219   |
| >APC-I880T-\ ISTTAAQIAK  | 35    | >APC-I880T-r TSTTAAQIAK  | 24   | 11    |
| >APC-I880T-\ ISTTAAQIAK  | 89    | >APC-I880T-r TSTTAAQIAK  | 189  | 100   |
| >APC-I880T-\ ISTTAAQIAK  | 253   | >APC-I880T-r TSTTAAQIAK  | 63   | 190   |
| >APC-I880T-\ ISTTAAQI    | 4552  | >APC-I880T-r TSTTAAQI    | 307  | 4245  |
| >APC-I880T-\ ISTTAAQIAKV | 799   | >APC-I880T-r TSTTAAQIAK' | 54   | 745   |
| >APC-I880T-\ ISTTAAQI    | 19    | >APC-I880T-r TSTTAAQI    | 152  | 133   |
| >APC-I880T-\ ISTTAAQIAKV | 235   | >APC-I880T-r TSTTAAQIAK' | 1528 | 1293  |
| >APC-I880T-\ ISTTAAQI    | 125   | >APC-I880T-r TSTTAAQI    | 1215 | 1090  |
| >APC-I880T-\ ISTTAAQI    | 404   | >APC-I880T-r TSTTAAQI    | 674  | 270   |
| >APC-I880T-\ ISTTAAQIAKV | 197   | >APC-I880T-r TSTTAAQIAK' | 320  | 123   |
| >APC-I880T-\ ISTTAAQI    | 1517  | >APC-I880T-r TSTTAAQI    | 487  | 1030  |
| >APC-I880T-\ ISTTAAQI    | 42    | >APC-I880T-r TSTTAAQI    | 60   | 18    |
| >APC-I880T-\ QISTTAAQIAI | 154   | >APC-I880T-r QTSTTAAQIA  | 210  | 56    |
| >APC-I880T-\ QISTTAAQIAI | 74    | >APC-I880T-r QTSTTAAQIA  | 34   | 40    |
| >APC-I880T-\ QISTTAAQIAI | 165   | >APC-I880T-r QTSTTAAQIA  | 29   | 136   |
| >APC-I880T-\ QISTTAAQI   | 1241  | >APC-I880T-r QTSTTAAQI   | 398  | 843   |
| >APC-I880T-\ QISTTAAQIAI | 134   | >APC-I880T-r QTSTTAAQIA  | 20   | 114   |
| >APC-I880T-\ QISTTAAQI   | 736   | >APC-I880T-r QTSTTAAQI   | 62   | 674   |
| >APC-I880T-\ QISTTAAQI   | 588   | >APC-I880T-r QTSTTAAQI   | 125  | 463   |
| >APC-I880T-\ QISTTAAQI   | 4809  | >APC-I880T-r QTSTTAAQI   | 16   | 4793  |
| >APC-I880T-\ QISTTAAQI   | 18230 | >APC-I880T-r QTSTTAAQI   | 277  | 17953 |
| >APC-I880T-\ QISTTAAQI   | 4232  | >APC-I880T-r QTSTTAAQI   | 135  | 4097  |
| >APC-I880T-\ QISTTAAQIAI | 5709  | >APC-I880T-r QTSTTAAQIA  | 362  | 5347  |
| >APC-I880T-\ QISTTAAQI   | 3556  | >APC-I880T-r QTSTTAAQI   | 39   | 3517  |
| >APC-I880T-\ LQISTTAAQI  | 503   | >APC-I880T-r LQTSTTAAQI  | 223  | 280   |
| >APC-I880T-\ LQISTTAA    | 320   | >APC-I880T-r LQTSTTAA    | 1215 | 895   |
| >APC-I880T-\ LQISTTAAQI  | 324   | >APC-I880T-r LQTSTTAAQI  | 1139 | 815   |
| >APC-I880T-\ LQISTTAA    | 43    | >APC-I880T-r LQTSTTAA    | 341  | 298   |
| >APC-I880T-\ LQISTTAAQI  | 249   | >APC-I880T-r LQTSTTAAQI  | 981  | 732   |
| >APC-I880T-\ LQISTTAAQIA | 308   | >APC-I880T-r LQTSTTAAQI  | 1727 | 1419  |
| >APC-I880T-\ LQISTTAA    | 11    | >APC-I880T-r LQTSTTAA    | 48   | 37    |
| >APC-I880T-\ LQISTTAAQI  | 252   | >APC-I880T-r LQTSTTAAQI  | 1625 | 1373  |
| >APC-I880T-\ LQISTTAAQIA | 64    | >APC-I880T-r LQTSTTAAQI  | 380  | 316   |
| >APC-I880T-\ LQISTTAA    | 74    | >APC-I880T-r LQTSTTAA    | 891  | 817   |
| >APC-I880T-\ LQISTTAAQ   | 90    | >APC-I880T-r LQTSTTAAQ   | 1031 | 941   |
| >APC-I880T-\ LQISTTAAQI  | 125   | >APC-I880T-r LQTSTTAAQI  | 1592 | 1467  |
| >APC-I880T-\ LQISTTAAQIA | 238   | >APC-I880T-r LQTSTTAAQI  | 2559 | 2321  |
| >APC-I880T-\ LQISTTAA    | 27    | >APC-I880T-r LQTSTTAA    | 92   | 65    |
| >APC-I880T-\ LQISTTAAQ   | 63    | >APC-I880T-r LQTSTTAAQ   | 275  | 212   |

|                          |       |                          |       |       |
|--------------------------|-------|--------------------------|-------|-------|
| >APC-I880T-\ LQISTTAAQI  | 19    | >APC-I880T-r LQTSTTAAQI  | 66    | 47    |
| >APC-I880T-\ LQISTTAAQI/ | 34    | >APC-I880T-r LQTSTTAAQI/ | 165   | 131   |
| >APC-I880T-\ LQISTTAAQI  | 204   | >APC-I880T-r LQTSTTAAQI  | 1511  | 1307  |
| >APC-I880T-\ GLQISTTA    | 404   | >APC-I880T-r GLQTSSTA    | 501   | 97    |
| >APC-I880T-\ GLQISTTAA   | 210   | >APC-I880T-r GLQTSSTAA   | 156   | 54    |
| >APC-I880T-\ GLQISTTAAQ  | 275   | >APC-I880T-r GLQTSSTAAC  | 184   | 91    |
| >APC-I880T-\ GLQISTTA    | 77    | >APC-I880T-r GLQTSSTA    | 41    | 36    |
| >APC-I880T-\ GLQISTTAA   | 29    | >APC-I880T-r GLQTSSTAA   | 14    | 15    |
| >APC-I880T-\ GLQISTTAAQ  | 74    | >APC-I880T-r GLQTSSTAAC  | 43    | 31    |
| >APC-I880T-\ GLQISTTA    | 374   | >APC-I880T-r GLQTSSTA    | 565   | 191   |
| >APC-I880T-\ GLQISTTAAQ  | 108   | >APC-I880T-r GLQTSSTAAC  | 143   | 35    |
| >APC-I880T-\ GLQISTTA    | 118   | >APC-I880T-r GLQTSSTA    | 46    | 72    |
| >APC-I880T-\ GLQISTTAA   | 159   | >APC-I880T-r GLQTSSTAA   | 52    | 107   |
| >APC-I880T-\ GLQISTTAAQ  | 44    | >APC-I880T-r GLQTSSTAAC  | 18    | 26    |
| >APC-I880T-\ GLQISTTA    | 334   | >APC-I880T-r GLQTSSTA    | 451   | 117   |
| >APC-I880T-\ GLQISTTAAQ  | 315   | >APC-I880T-r GLQTSSTAAC  | 429   | 114   |
| >APC-I880T-\ GLQISTTAAQ  | 1066  | >APC-I880T-r GLQTSSTAAC  | 435   | 631   |
| >APC-I880T-\ GLQISTTA    | 27    | >APC-I880T-r GLQTSSTA    | 24    | 3     |
| >APC-I880T-\ GLQISTTAA   | 51    | >APC-I880T-r GLQTSSTAA   | 49    | 2     |
| >APC-I880T-\ GLQISTTAAQ  | 24    | >APC-I880T-r GLQTSSTAAC  | 22    | 2     |
| >APC-I880T-\ KRGLQISTTA  | 315   | >APC-I880T-r KRGLQSTTA   | 465   | 150   |
| >APC-I880T-\ KRGLQIST    | 353   | >APC-I880T-r KRGLQST     | 216   | 137   |
| >APC-I880T-\ KRGLQISTTA  | 277   | >APC-I880T-r KRGLQSTTA   | 311   | 34    |
| >APC-I880T-\ KRGLQISTTA  | 361   | >APC-I880T-r KRGLQSTTA   | 520   | 159   |
| >APC-I880T-\ SSKRGLQI    | 32    | >APC-I880T-r SSKRGLQT    | 952   | 920   |
| >APC-I880T-\ SSKRGLQIS   | 377   | >APC-I880T-r SSKRGLQTS   | 238   | 139   |
| >APC-I880T-\ SSKRGLQIST  | 289   | >APC-I880T-r SSKRGLQST   | 1229  | 940   |
| >APC-I880T-\ SSKRGLQI    | 238   | >APC-I880T-r SSKRGLQT    | 7423  | 7185  |
| >APC-I880T-\ SSKRGLQI    | 70    | >APC-I880T-r SSKRGLQT    | 29794 | 29724 |
| >APC-I880T-\ TSSKRGLQI   | 156   | >APC-I880T-r TSSKRGLQT   | 7224  | 7068  |
| >APC-I880T-\ TSSKRGLQI   | 63    | >APC-I880T-r TSSKRGLQT   | 32796 | 32733 |
| >APC-I880T-\ GTSSKRGLQI  | 314   | >APC-I880T-r GTSSKRGLQT  | 7900  | 7586  |
| >APC-I880T-\ GTSSKRGLQI  | 201   | >APC-I880T-r GTSSKRGLQT  | 1775  | 1574  |
| >APC-I880T-\ GTSSKRGLQI  | 388   | >APC-I880T-r GTSSKRGLQT  | 31573 | 31185 |
| >APC-K1308E KEKIGTRSA    | 87    | >APC-K1308E EEKIGTRSA    | 687   | 600   |
| >APC-K1308E KEKIGTRSA    | 67    | >APC-K1308E EEKIGTRSA    | 25    | 42    |
| >APC-K1308E IKEKIGTRSA   | 10570 | >APC-K1308E IEEKIGTRSA   | 125   | 10445 |
| >APC-K1308E SANTLQIAEIK  | 65    | >APC-K1308E SANTLQIAEIE  | 23517 | 23452 |
| >APC-K1308E SANTLQIAEIK  | 180   | >APC-K1308E SANTLQIAEIE  | 16421 | 16241 |
| >APC-K1308E EIKEKIGTR    | 31    | >APC-K1308E EIEEKIGTR    | 171   | 140   |
| >APC-K1308E EIKEKIGTR    | 35    | >APC-K1308E EIEEKIGTR    | 47    | 12    |
| >APC-K1308E AEIKEKIGT    | 89    | >APC-K1308E AEIEEKIGT    | 56    | 33    |
| >APC-K1308E AEIKEKIGTRS  | 503   | >APC-K1308E AEIEEKIGTRS  | 351   | 152   |

|                        |       |                        |       |       |
|------------------------|-------|------------------------|-------|-------|
| >APC-K1308EAEIKEKIGT   | 381   | >APC-K1308EAEIEEKIGT   | 201   | 180   |
| >APC-K1308EQIAEIKEKI   | 163   | >APC-K1308EQIAEIEEKI   | 58    | 105   |
| >APC-K1308EQIAEIKEK    | 571   | >APC-K1308EQIAEIEEK    | 301   | 270   |
| >APC-K1308EQIAEIKEKI   | 808   | >APC-K1308EQIAEIEEKI   | 431   | 377   |
| >APC-K1308EQIAEIKEK    | 86    | >APC-K1308EQIAEIEEK    | 30    | 56    |
| >APC-K1308EQIAEIKEKI   | 23    | >APC-K1308EQIAEIEEKI   | 33    | 10    |
| >APC-K1308EQIAEIKEKI   | 287   | >APC-K1308EQIAEIEEKI   | 1374  | 1087  |
| >APC-K1308ELQIAEIKEKI  | 822   | >APC-K1308ELQIAEIEEKI  | 229   | 593   |
| >APC-K1308ELQIAEIKEK   | 1446  | >APC-K1308ELQIAEIEEK   | 459   | 987   |
| >APC-K1308ELQIAEIKEKI  | 295   | >APC-K1308ELQIAEIEEKI  | 292   | 3     |
| >APC-K1308ETLQIAEIKEKI | 251   | >APC-K1308ETLQIAEIEEKI | 207   | 44    |
| >APC-K1308ETLQIAEIK    | 288   | >APC-K1308ETLQIAEIE    | 26331 | 26043 |
| >APC-K1308ETLQIAEIKEK  | 478   | >APC-K1308ETLQIAEIEEK  | 214   | 264   |
| >APC-K1308ENTLQIAEIKEK | 882   | >APC-K1308ENTLQIAEIEEK | 429   | 453   |
| >APC-K1308ENTLQIAEIK   | 22    | >APC-K1308ENTLQIAEIE   | 5872  | 5850  |
| >APC-K1308ENTLQIAEIKEK | 73    | >APC-K1308ENTLQIAEIEEK | 24    | 49    |
| >APC-K1454EKNKAPTAEK   | 8     | >APC-K1454ENKAPTAEK    | 5130  | 5122  |
| >APC-K1454EKNKAPTAEKR  | 321   | >APC-K1454ENKAPTAEKR   | 2245  | 1924  |
| >APC-K1454EQTAQTKREVI  | 157   | >APC-K1454EQTAQTKREVI  | 24924 | 24767 |
| >APC-K1454EQTAQTKREVI  | 33    | >APC-K1454EQTAQTKREVI  | 7805  | 7772  |
| >APC-K1454EQTAQTKREVI  | 216   | >APC-K1454EQTAQTKREVI  | 9642  | 9426  |
| >APC-K1454EVPKNKAPTA   | 469   | >APC-K1454EVPENKAPTA   | 8913  | 8444  |
| >APC-K1454EVPKNKAPTA   | 433   | >APC-K1454EVPENKAPTA   | 752   | 319   |
| >APC-K1454EVPKNKAPT    | 301   | >APC-K1454EVPENKAPT    | 87    | 214   |
| >APC-K1454EVPKNKAPTA   | 1338  | >APC-K1454EVPENKAPTA   | 378   | 960   |
| >APC-K1454EVPKNKAPTA   | 2056  | >APC-K1454EVPENKAPTA   | 294   | 1762  |
| >APC-K1454EVPKNKAPT    | 484   | >APC-K1454EVPENKAPT    | 515   | 31    |
| >APC-K1454EVPKNKA      | 326   | >APC-K1454EVPENKA      | 247   | 79    |
| >APC-K1454EVPKNKAPT    | 80    | >APC-K1454EVPENKAPT    | 72    | 8     |
| >APC-K1454EQTKREVPK    | 247   | >APC-K1454EQTKREVPE    | 26021 | 25774 |
| >APC-K1454EQTKREVPKR   | 1025  | >APC-K1454EQTKREVPER   | 424   | 601   |
| >APC-K1454EQTKREVPK    | 6     | >APC-K1454EQTKREVPE    | 4123  | 4117  |
| >APC-K1454EQTKREVPKR   | 10    | >APC-K1454EQTKREVPER   | 29    | 19    |
| >APC-K1454EQTKREVPKR   | 233   | >APC-K1454EQTKREVPER   | 341   | 108   |
| >APC-K1454EQTKREVPK    | 266   | >APC-K1454EQTKREVPE    | 21122 | 20856 |
| >APC-K1454EAQTKREVPK   | 181   | >APC-K1454EAQTKREVPE   | 27265 | 27084 |
| >APC-K1454EAQTKREVPKR  | 697   | >APC-K1454EAQTKREVPER  | 374   | 323   |
| >APC-L1129SSLCQEDDY    | 2378  | >APC-L1129SSCQEDDY     | 338   | 2040  |
| >APC-L1129SSLCQEDDY    | 239   | >APC-L1129SSCQEDDY     | 150   | 89    |
| >APC-L1129SSLCQEDDY    | 472   | >APC-L1129SSCQEDDY     | 4217  | 3745  |
| >APC-L1129SSLCQEDDY    | 13662 | >APC-L1129SSCQEDDY     | 324   | 13338 |
| >APC-L1129SQSLCQEDDY   | 487   | >APC-L1129SQSSCQEDDY   | 310   | 177   |
| >APC-L1129SQSLCQEDDY   | 688   | >APC-L1129SQSSCQEDDY   | 253   | 435   |

|                         |       |                         |       |       |
|-------------------------|-------|-------------------------|-------|-------|
| >APC-L1129S SQSLCQEDDY  | 368   | >APC-L1129S SQSSCQEDDY  | 77    | 291   |
| >APC-L1129S VSQSLCQEDI  | 75    | >APC-L1129S VSQSSCQEDI  | 71    | 4     |
| >APC-L1129S VSQSLCQEDI  | 1309  | >APC-L1129S VSQSSCQEDI  | 496   | 813   |
| >APC-L1129S VSQSLCQEDI  | 385   | >APC-L1129S VSQSSCQEDI  | 97    | 288   |
| >APC-L1129S VSQSLCQEDI  | 159   | >APC-L1129S VSQSSCQEDI  | 244   | 85    |
| >APC-L1129S NQNVSQL     | 459   | >APC-L1129S NQNVQSS     | 7750  | 7291  |
| >APC-L1129S NQNVSQL     | 80    | >APC-L1129S NQNVQSS     | 3847  | 3767  |
| >APC-L1129S NQNVSQL     | 74    | >APC-L1129S NQNVQSS     | 19141 | 19067 |
| >APC-L1129S GINQNVQSI   | 152   | >APC-L1129S GINQNVQSS   | 10364 | 10212 |
| >APC-L1129S GINQNVQSI   | 54    | >APC-L1129S GINQNVQSS   | 15356 | 15302 |
| >APC-L1393F SLDSFESRSI  | 416   | >APC-L1393F SPDSFESRSI  | 27130 | 26714 |
| >APC-L1393F SLDSFESRSI  | 39    | >APC-L1393F SPDSFESRSI  | 14477 | 14438 |
| >APC-L1393F SLDSFESRSI  | 46    | >APC-L1393F SPDSFESRSI  | 15504 | 15458 |
| >APC-L1393F SLDSFESRSI  | 13    | >APC-L1393F SPDSFESRSI  | 18783 | 18770 |
| >APC-L1393F SLDSFESRSIA | 195   | >APC-L1393F SPDSFESRSIA | 26321 | 26126 |
| >APC-L1393F SLDSFESRSI  | 110   | >APC-L1393F SPDSFESRSI  | 23339 | 23229 |
| >APC-L1393F SLDSFESRSI  | 55    | >APC-L1393F SPDSFESRSI  | 23961 | 23906 |
| >APC-L1393F SLDSFESRSIA | 105   | >APC-L1393F SPDSFESRSIA | 24701 | 24596 |
| >APC-L1393F SLDSFESRSI  | 92    | >APC-L1393F SPDSFESRSI  | 34079 | 33987 |
| >APC-L1393F SLDSFESRSIA | 49    | >APC-L1393F SPDSFESRSIA | 32230 | 32181 |
| >APC-L1393F SLDSFESR    | 436   | >APC-L1393F SPDSFESR    | 2477  | 2041  |
| >APC-L1393F SLDSFESRSI  | 30929 | >APC-L1393F SPDSFESRSI  | 336   | 30593 |
| >APC-L1393F MFSRCTSVSS  | 80    | >APC-L1393F MFSRCTSVSS  | 13657 | 13577 |
| >APC-L1393F MFSRCTSVSS  | 65    | >APC-L1393F MFSRCTSVSS  | 9878  | 9813  |
| >APC-L1393F MFSRCTSVSS  | 444   | >APC-L1393F MFSRCTSVSS  | 15544 | 15100 |
| >APC-L1393F MFSRCTSVSS  | 251   | >APC-L1393F MFSRCTSVSS  | 967   | 716   |
| >APC-L1393F SSLDSFESR   | 64    | >APC-L1393F SSPDSFESR   | 1219  | 1155  |
| >APC-L1393F SSLDSFESR   | 44    | >APC-L1393F SSPDSFESR   | 710   | 666   |
| >APC-L1393F SSLDSFESRSI | 309   | >APC-L1393F SSPDSFESRSI | 1053  | 744   |
| >APC-L1393F SSLDSFESR   | 56    | >APC-L1393F SSPDSFESR   | 70    | 14    |
| >APC-L1393F SSLDSFESRSI | 77    | >APC-L1393F SSPDSFESRSI | 3047  | 2970  |
| >APC-L1393F SSLDSFESR   | 20288 | >APC-L1393F SSPDSFESR   | 255   | 20033 |
| >APC-L1393F SSLDSFESRS  | 21621 | >APC-L1393F SSPDSFESRS  | 413   | 21208 |
| >APC-L1393F SSLDSFESRSI | 3558  | >APC-L1393F SSPDSFESRSI | 10    | 3548  |
| >APC-L1393F SSLDSFESR   | 59    | >APC-L1393F SSPDSFESR   | 195   | 136   |
| >APC-L1393F SSLDSFESRSI | 16    | >APC-L1393F SSPDSFESRSI | 27    | 11    |
| >APC-L1393F VSSLDSFESR  | 208   | >APC-L1393F VSSPDSFESR  | 240   | 32    |
| >APC-L1393F VSSLDSFESR  | 106   | >APC-L1393F VSSPDSFESR  | 178   | 72    |
| >APC-L1393F VSSLDSFESR  | 228   | >APC-L1393F VSSPDSFESR  | 156   | 72    |
| >APC-L1393F VSSLDSFESR  | 706   | >APC-L1393F VSSPDSFESR  | 334   | 372   |
| >APC-L1393F SVSSLDSFESF | 83    | >APC-L1393F SVSSPDSFESF | 79    | 4     |
| >APC-L1393F SVSSLDSF    | 215   | >APC-L1393F SVSSPDSF    | 311   | 96    |
| >APC-L1393F SVSSLDSFESF | 66    | >APC-L1393F SVSSPDSFESF | 118   | 52    |

|                         |      |                         |       |       |
|-------------------------|------|-------------------------|-------|-------|
| >APC-L1393F SVSSLDSFESF | 8    | >APC-L1393F SVSSPDSFESF | 13    | 5     |
| >APC-L1393F SVSSLDSF    | 158  | >APC-L1393F SVSSPDSF    | 310   | 152   |
| >APC-L1393F SVSSLDSF    | 704  | >APC-L1393F SVSSPDSF    | 439   | 265   |
| >APC-L1393F SVSSLDSF    | 468  | >APC-L1393F SVSSPDSF    | 588   | 120   |
| >APC-L1393F TSVSSLDSF   | 6    | >APC-L1393F TSVSSPDSF   | 44    | 38    |
| >APC-L1393F TSVSSLDSF   | 273  | >APC-L1393F TSVSSPDSF   | 840   | 567   |
| >APC-L1393F TSVSSLDSF   | 61   | >APC-L1393F TSVSSPDSF   | 30    | 31    |
| >APC-L1393F TSVSSLDSF   | 7    | >APC-L1393F TSVSSPDSF   | 8     | 1     |
| >APC-L1393F TSVSSLDSF   | 136  | >APC-L1393F TSVSSPDSF   | 78    | 58    |
| >APC-L1393F TSVSSLDSF   | 53   | >APC-L1393F TSVSSPDSF   | 128   | 75    |
| >APC-L1393F CTSVSSLDSF  | 199  | >APC-L1393F CTSVSSPDSF  | 167   | 32    |
| >APC-L1393F CTSVSSLDSF  | 13   | >APC-L1393F CTSVSSPDSF  | 14    | 1     |
| >APC-L1393F CTSVSSLDSF  | 107  | >APC-L1393F CTSVSSPDSF  | 103   | 4     |
| >APC-L1393F CTSVSSLDSF  | 53   | >APC-L1393F CTSVSSPDSF  | 33    | 20    |
| >APC-L1393F RCTSVSSLDSF | 518  | >APC-L1393F RCTSVSSPDSI | 257   | 261   |
| >APC-L1393F RCTSVSSLDSF | 187  | >APC-L1393F RCTSVSSPDSI | 100   | 87    |
| >APC-L1393F RCTSVSSLDSF | 21   | >APC-L1393F RCTSVSSPDSI | 38    | 17    |
| >APC-L1393F SRCTSVSSL   | 304  | >APC-L1393F SRCTSVSSP   | 24400 | 24096 |
| >APC-L1393F SRCTSVSSL   | 39   | >APC-L1393F SRCTSVSSP   | 1239  | 1200  |
| >APC-L1393F SRCTSVSSL   | 34   | >APC-L1393F SRCTSVSSP   | 10455 | 10421 |
| >APC-L1393F SRCTSVSSL   | 43   | >APC-L1393F SRCTSVSSP   | 12726 | 12683 |
| >APC-L1393F FSRCTSVSSL  | 338  | >APC-L1393F FSRCTSVSSP  | 2882  | 2544  |
| >APC-L1393F FSRCTSVSSL  | 99   | >APC-L1393F FSRCTSVSSP  | 2441  | 2342  |
| >APC-L1393F FSRCTSVSSL  | 8    | >APC-L1393F FSRCTSVSSP  | 207   | 199   |
| >APC-L1393F FSRCTSVSSL  | 5    | >APC-L1393F FSRCTSVSSP  | 5274  | 5269  |
| >APC-L1393F FSRCTSVSSLE | 324  | >APC-L1393F FSRCTSVSSPI | 2341  | 2017  |
| >APC-L1393F FSRCTSVSSL  | 45   | >APC-L1393F FSRCTSVSSP  | 14139 | 14094 |
| >APC-L1482F LPDADTLL    | 505  | >APC-L1482F FPDADTLL    | 365   | 140   |
| >APC-L1482F LPDADTLL    | 227  | >APC-L1482F FPDADTLL    | 71    | 156   |
| >APC-L1482F LPDADTLLH   | 162  | >APC-L1482F FPDADTLLH   | 69    | 93    |
| >APC-L1482F LPDADTLLHF  | 32   | >APC-L1482F FPDADTLLHF  | 10    | 22    |
| >APC-L1482F LPDADTLL    | 1223 | >APC-L1482F FPDADTLL    | 58    | 1165  |
| >APC-L1482F LPDADTLL    | 60   | >APC-L1482F FPDADTLL    | 39    | 21    |
| >APC-L1482F LPDADTLLHF  | 58   | >APC-L1482F FPDADTLLHF  | 24    | 34    |
| >APC-L1482F LPDADTLLHF  | 64   | >APC-L1482F FPDADTLLHF  | 17    | 47    |
| >APC-L1482F LPDADTLL    | 583  | >APC-L1482F FPDADTLL    | 151   | 432   |
| >APC-L1482F LPDADTLLHF  | 32   | >APC-L1482F FPDADTLLHF  | 16    | 16    |
| >APC-L1482F VLPDADTL    | 442  | >APC-L1482F VFPDADTL    | 21282 | 20840 |
| >APC-L1482F VLPDADTLL   | 120  | >APC-L1482F VFPDADTLL   | 20001 | 19881 |
| >APC-L1482F VLPDADTL    | 59   | >APC-L1482F VFPDADTL    | 4570  | 4511  |
| >APC-L1482F VLPDADTLL   | 13   | >APC-L1482F VFPDADTLL   | 2406  | 2393  |
| >APC-L1482F VLPDADTL    | 150  | >APC-L1482F VFPDADTL    | 20087 | 19937 |
| >APC-L1482F VLPDADTLL   | 54   | >APC-L1482F VFPDADTLL   | 19239 | 19185 |

|                        |       |                        |       |       |
|------------------------|-------|------------------------|-------|-------|
| >APC-L1482F VLPDADTL   | 152   | >APC-L1482F VFPDADTL   | 10992 | 10840 |
| >APC-L1482F VLPDADTLL  | 93    | >APC-L1482F VFPDADTLL  | 10968 | 10875 |
| >APC-L1482F VLPDADTLLH | 339   | >APC-L1482F VFPDADTLLH | 14327 | 13988 |
| >APC-L1482F VLPDADTL   | 19    | >APC-L1482F VFPDADTL   | 10818 | 10799 |
| >APC-L1482F VLPDADTLL  | 95    | >APC-L1482F VFPDADTLL  | 16513 | 16418 |
| >APC-L1482F VLPDADTL   | 30    | >APC-L1482F VFPDADTL   | 17204 | 17174 |
| >APC-L1482F VLPDADTLL  | 247   | >APC-L1482F VFPDADTLL  | 22575 | 22328 |
| >APC-L1482F VLPDADTL   | 25    | >APC-L1482F VFPDADTL   | 10476 | 10451 |
| >APC-L1482F VLPDADTLL  | 23    | >APC-L1482F VFPDADTLL  | 11992 | 11969 |
| >APC-L1482F VLPDADTL   | 81    | >APC-L1482F VFPDADTL   | 18570 | 18489 |
| >APC-L1482F VLPDADTLL  | 419   | >APC-L1482F VFPDADTLL  | 21485 | 21066 |
| >APC-L1482F VLPDADTL   | 5     | >APC-L1482F VFPDADTL   | 6821  | 6816  |
| >APC-L1482F VLPDADTLL  | 4     | >APC-L1482F VFPDADTLL  | 5707  | 5703  |
| >APC-L1482F VLPDADTLLH | 489   | >APC-L1482F VFPDADTLLH | 30604 | 30115 |
| >APC-L1482F VLPDADTLLH | 617   | >APC-L1482F VFPDADTLLH | 44    | 573   |
| >APC-L1482F VLPDADTLLH | 3777  | >APC-L1482F VFPDADTLLH | 310   | 3467  |
| >APC-L1482F VLPDADTL   | 11947 | >APC-L1482F VFPDADTL   | 140   | 11807 |
| >APC-L1482F VLPDADTLLH | 2590  | >APC-L1482F VFPDADTLLH | 20    | 2570  |
| >APC-L1482F VLPDADTLLH | 150   | >APC-L1482F VFPDADTLLH | 3634  | 3484  |
| >APC-L1482F VLPDADTLL  | 29    | >APC-L1482F VFPDADTLL  | 166   | 137   |
| >APC-L1482F VLPDADTLLH | 108   | >APC-L1482F VFPDADTLLH | 554   | 446   |
| >APC-L1482F VNAAVQRVC  | 3894  | >APC-L1482F VNAAVQRVC  | 270   | 3624  |
| >APC-L1482F QVLPDADTL  | 2579  | >APC-L1482F QVFPDADTL  | 351   | 2228  |
| >APC-L1482F QVLPDADTLL | 287   | >APC-L1482F QVFPDADTLL | 106   | 181   |
| >APC-L1482F QVLPDADTL  | 243   | >APC-L1482F QVFPDADTL  | 181   | 62    |
| >APC-L1482F QVLPDADTLL | 463   | >APC-L1482F QVFPDADTLL | 795   | 332   |
| >APC-L1482F QVLPDADTLL | 507   | >APC-L1482F QVFPDADTLL | 235   | 272   |
| >APC-L1482F QVLPDADTL  | 448   | >APC-L1482F QVFPDADTL  | 76    | 372   |
| >APC-L1482F QVLPDADTL  | 3021  | >APC-L1482F QVFPDADTL  | 79    | 2942  |
| >APC-L1482F QVLPDADTL  | 425   | >APC-L1482F QVFPDADTL  | 769   | 344   |
| >APC-L1482F QVLPDADTL  | 1468  | >APC-L1482F QVFPDADTL  | 436   | 1032  |
| >APC-L1482F QVLPDADTL  | 2072  | >APC-L1482F QVFPDADTL  | 473   | 1599  |
| >APC-L1482F VQVLPDADTI | 163   | >APC-L1482F VQVFPDADTI | 166   | 3     |
| >APC-L1482F VQVLPDADTI | 468   | >APC-L1482F VQVFPDADTI | 324   | 144   |
| >APC-L1482F RVQVLPDAD` | 62    | >APC-L1482F RVQVFPDAD` | 41    | 21    |
| >APC-L1482F AVQRVQVL   | 1051  | >APC-L1482F AVQRVQVF   | 272   | 779   |
| >APC-L1482F AVQRVQVL   | 3021  | >APC-L1482F AVQRVQVF   | 148   | 2873  |
| >APC-L1482F AVQRVQVL   | 5164  | >APC-L1482F AVQRVQVF   | 422   | 4742  |
| >APC-L1482F AVQRVQVL   | 2343  | >APC-L1482F AVQRVQVF   | 340   | 2003  |
| >APC-L1482F AAVQRVQVL  | 2541  | >APC-L1482F AAVQRVQVF  | 293   | 2248  |
| >APC-L1482F AAVQRVQVL  | 1739  | >APC-L1482F AAVQRVQVF  | 66    | 1673  |
| >APC-L1482F AAVQRVQVL  | 759   | >APC-L1482F AAVQRVQVF  | 31    | 728   |
| >APC-L1482F AAVQRVQVL  | 36    | >APC-L1482F AAVQRVQVF  | 5     | 31    |



|                         |      |                         |       |       |
|-------------------------|------|-------------------------|-------|-------|
| >APC-L1482F NAAVQRVQV   | 6484 | >APC-L1482F NAAVQRVQV   | 348   | 6136  |
| >APC-L1488F LLHFATEST   | 5504 | >APC-L1488F FLHFATEST   | 390   | 5114  |
| >APC-L1488F LLHFATES    | 1560 | >APC-L1488F FLHFATES    | 74    | 1486  |
| >APC-L1488F LLHFATEST   | 310  | >APC-L1488F FLHFATEST   | 17    | 293   |
| >APC-L1488F LLHFATES    | 1121 | >APC-L1488F FLHFATES    | 80    | 1041  |
| >APC-L1488F LLHFATEST   | 170  | >APC-L1488F FLHFATEST   | 13    | 157   |
| >APC-L1488F LLHFATES    | 3067 | >APC-L1488F FLHFATES    | 438   | 2629  |
| >APC-L1488F LLHFATEST   | 637  | >APC-L1488F FLHFATEST   | 65    | 572   |
| >APC-L1488F LLHFATES    | 1211 | >APC-L1488F FLHFATES    | 181   | 1030  |
| >APC-L1488F LLHFATEST   | 177  | >APC-L1488F FLHFATEST   | 28    | 149   |
| >APC-L1488F TLLHFATEST  | 278  | >APC-L1488F TFLHFATEST  | 16976 | 16698 |
| >APC-L1488F TLLHFATEST  | 321  | >APC-L1488F TFLHFATEST  | 14697 | 14376 |
| >APC-L1488F TLLHFATEST  | 100  | >APC-L1488F TFLHFATEST  | 11144 | 11044 |
| >APC-L1488F TLLHFATEST  | 460  | >APC-L1488F TFLHFATEST  | 23476 | 23016 |
| >APC-L1488F RVQVLPDAD`  | 2889 | >APC-L1488F RVQVLPDAD`  | 195   | 2694  |
| >APC-L1488F RVQVLPDAD`  | 62   | >APC-L1488F RVQVLPDAD`  | 22    | 40    |
| >APC-L1488F RVQVLPDAD`  | 830  | >APC-L1488F RVQVLPDAD`  | 188   | 642   |
| >APC-L1488F RVQVLPDAD`  | 3892 | >APC-L1488F RVQVLPDAD`  | 184   | 3708  |
| >APC-L1488F RVQVLPDAD`  | 1011 | >APC-L1488F RVQVLPDAD`  | 175   | 836   |
| >APC-L1488F DTLLHFATE   | 9727 | >APC-L1488F DTFLHFATE   | 492   | 9235  |
| >APC-L1488F DTLLHFAT    | 5499 | >APC-L1488F DTFLHFAT    | 284   | 5215  |
| >APC-L1488F DTLLHFATES` | 3356 | >APC-L1488F DTFLHFATES` | 161   | 3195  |
| >APC-L1488F DTLLHFAT    | 332  | >APC-L1488F DTFLHFAT    | 624   | 292   |
| >APC-L1488F ADTLLHFAT   | 194  | >APC-L1488F ADTFLHFAT   | 223   | 29    |
| >APC-L1488F ADTLLHFA    | 607  | >APC-L1488F ADTFLHFA    | 398   | 209   |
| >APC-L1488F ADTLLHFAT   | 530  | >APC-L1488F ADTFLHFAT   | 457   | 73    |
| >APC-L1488F DADTLLHFA   | 238  | >APC-L1488F DADTFLHFA   | 60    | 178   |
| >APC-L1488F LPDADTLL    | 689  | >APC-L1488F LPDADTFL    | 38    | 651   |
| >APC-L1488F LPDADTLLHF  | 756  | >APC-L1488F LPDADTFLHF  | 167   | 589   |
| >APC-L1488F LPDADTLL    | 227  | >APC-L1488F LPDADTFL    | 250   | 23    |
| >APC-L1488F LPDADTLLH   | 162  | >APC-L1488F LPDADTFLH   | 109   | 53    |
| >APC-L1488F LPDADTLLHF  | 32   | >APC-L1488F LPDADTFLHF  | 37    | 5     |
| >APC-L1488F LPDADTLL    | 60   | >APC-L1488F LPDADTFL    | 96    | 36    |
| >APC-L1488F LPDADTLLHF  | 58   | >APC-L1488F LPDADTFLHF  | 49    | 9     |
| >APC-L1488F LPDADTLLHF. | 64   | >APC-L1488F LPDADTFLHF. | 35    | 29    |
| >APC-L1488F LPDADTLLHF  | 32   | >APC-L1488F LPDADTFLHF  | 17    | 15    |
| >APC-L1488F VLPDADTL    | 442  | >APC-L1488F VLPDADTF    | 17175 | 16733 |
| >APC-L1488F VLPDADTLL   | 120  | >APC-L1488F VLPDADTFL   | 63    | 57    |
| >APC-L1488F VLPDADTL    | 59   | >APC-L1488F VLPDADTF    | 5087  | 5028  |
| >APC-L1488F VLPDADTLL   | 13   | >APC-L1488F VLPDADTFL   | 8     | 5     |
| >APC-L1488F VLPDADTL    | 150  | >APC-L1488F VLPDADTF    | 9228  | 9078  |
| >APC-L1488F VLPDADTLL   | 54   | >APC-L1488F VLPDADTFL   | 38    | 16    |
| >APC-L1488F VLPDADTL    | 152  | >APC-L1488F VLPDADTF    | 1164  | 1012  |

|                         |      |                         |       |       |
|-------------------------|------|-------------------------|-------|-------|
| >APC-L1488F VLPDADTLL   | 93   | >APC-L1488F VLPDADTFL   | 24    | 69    |
| >APC-L1488F VLPDADTLLH  | 339  | >APC-L1488F VLPDADTFLH  | 222   | 117   |
| >APC-L1488F VLPDADTL    | 19   | >APC-L1488F VLPDADTF    | 2101  | 2082  |
| >APC-L1488F VLPDADTLL   | 95   | >APC-L1488F VLPDADTFL   | 25    | 70    |
| >APC-L1488F VLPDADTL    | 30   | >APC-L1488F VLPDADTF    | 8850  | 8820  |
| >APC-L1488F VLPDADTLL   | 247  | >APC-L1488F VLPDADTFL   | 45    | 202   |
| >APC-L1488F VLPDADTL    | 25   | >APC-L1488F VLPDADTF    | 7632  | 7607  |
| >APC-L1488F VLPDADTLL   | 23   | >APC-L1488F VLPDADTFL   | 8     | 15    |
| >APC-L1488F VLPDADTL    | 81   | >APC-L1488F VLPDADTF    | 11417 | 11336 |
| >APC-L1488F VLPDADTLL   | 419  | >APC-L1488F VLPDADTFL   | 38    | 381   |
| >APC-L1488F VLPDADTL    | 5    | >APC-L1488F VLPDADTF    | 1198  | 1193  |
| >APC-L1488F VLPDADTLL   | 4    | >APC-L1488F VLPDADTFL   | 4     | 0     |
| >APC-L1488F VLPDADTLLH  | 489  | >APC-L1488F VLPDADTFLH  | 564   | 75    |
| >APC-L1488F VLPDADTLLH  | 617  | >APC-L1488F VLPDADTFLH  | 358   | 259   |
| >APC-L1488F VLPDADTLLH  | 150  | >APC-L1488F VLPDADTFLH  | 96    | 54    |
| >APC-L1488F VLPDADTLL   | 29   | >APC-L1488F VLPDADTFL   | 54    | 25    |
| >APC-L1488F VLPDADTLLH  | 108  | >APC-L1488F VLPDADTFLH  | 61    | 47    |
| >APC-L1488F QVLPDADTLL  | 287  | >APC-L1488F QVLPDADTFL  | 210   | 77    |
| >APC-L1488F QVLPDADTL   | 243  | >APC-L1488F QVLPDADTF   | 1256  | 1013  |
| >APC-L1488F QVLPDADTLL  | 463  | >APC-L1488F QVLPDADTFL  | 312   | 151   |
| >APC-L1488F QVLPDADTL   | 3063 | >APC-L1488F QVLPDADTF   | 185   | 2878  |
| >APC-L1488F QVLPDADTL   | 1053 | >APC-L1488F QVLPDADTF   | 160   | 893   |
| >APC-L1488F QVLPDADTL   | 448  | >APC-L1488F QVLPDADTF   | 83    | 365   |
| >APC-L1488F QVLPDADTL   | 425  | >APC-L1488F QVLPDADTF   | 11242 | 10817 |
| >APC-L1488F QVLPDADTLL  | 897  | >APC-L1488F QVLPDADTFL  | 391   | 506   |
| >APC-L1488F QVLPDADTL   | 1468 | >APC-L1488F QVLPDADTF   | 71    | 1397  |
| >APC-L1488F QVLPDADTL   | 1710 | >APC-L1488F QVLPDADTF   | 83    | 1627  |
| >APC-L1488F QVLPDADTL   | 2072 | >APC-L1488F QVLPDADTF   | 292   | 1780  |
| >APC-L1488F VQVLPDADTI  | 163  | >APC-L1488F VQVLPDADTI  | 62    | 101   |
| >APC-L1488F VQVLPDADTI  | 3987 | >APC-L1488F VQVLPDADTI  | 260   | 3727  |
| >APC-L1488F VQVLPDADTI  | 688  | >APC-L1488F VQVLPDADTI  | 26    | 662   |
| >APC-L1488F VQVLPDADTI  | 468  | >APC-L1488F VQVLPDADTI  | 1946  | 1478  |
| >APC-L409V- LLEQIRAYC   | 25   | >APC-L409V- VLEQIRAYC   | 38    | 13    |
| >APC-L409V- LLEQIRAYCET | 35   | >APC-L409V- VLEQIRAYCET | 49    | 14    |
| >APC-L409V- LLEQIRAY    | 212  | >APC-L409V- VLEQIRAY    | 97    | 115   |
| >APC-L409V- LLEQIRAY    | 358  | >APC-L409V- VLEQIRAY    | 1117  | 759   |
| >APC-L409V- LLEQIRAY    | 367  | >APC-L409V- VLEQIRAY    | 355   | 12    |
| >APC-L409V- LLEQIRAY    | 394  | >APC-L409V- VLEQIRAY    | 741   | 347   |
| >APC-L409V- HLEQIRA     | 124  | >APC-L409V- HVLEQIRA    | 3449  | 3325  |
| >APC-L409V- HLEQIRA     | 340  | >APC-L409V- HVLEQIRA    | 7278  | 6938  |
| >APC-L409V- HLEQIRA     | 394  | >APC-L409V- HVLEQIRA    | 4731  | 4337  |
| >APC-L409V- HLEQIRA     | 296  | >APC-L409V- HVLEQIRA    | 704   | 408   |
| >APC-L409V- HLEQIRA     | 13   | >APC-L409V- HVLEQIRA    | 920   | 907   |

|                         |      |                         |      |      |
|-------------------------|------|-------------------------|------|------|
| >APC-L409V- HLLEQIRAYC  | 15   | >APC-L409V- HVLEQIRAYC  | 849  | 834  |
| >APC-L409V- HLLEQIRA    | 35   | >APC-L409V- HVLEQIRA    | 4362 | 4327 |
| >APC-L409V- HLLEQIRAYC  | 69   | >APC-L409V- HVLEQIRAYC  | 4438 | 4369 |
| >APC-L409V- HLLEQIRA    | 36   | >APC-L409V- HVLEQIRA    | 3533 | 3497 |
| >APC-L409V- HLLEQIRA    | 210  | >APC-L409V- HVLEQIRA    | 5840 | 5630 |
| >APC-L409V- HLLEQIRAYC  | 223  | >APC-L409V- HVLEQIRAYC  | 5537 | 5314 |
| >APC-L409V- HLLEQIRA    | 10   | >APC-L409V- HVLEQIRA    | 1514 | 1504 |
| >APC-L409V- HLLEQIRAYC  | 24   | >APC-L409V- HVLEQIRAYC  | 4511 | 4487 |
| >APC-L409V- HLLEQIRAY   | 299  | >APC-L409V- HVLEQIRAY   | 47   | 252  |
| >APC-L409V- HLLEQIRAY   | 460  | >APC-L409V- HVLEQIRAY   | 32   | 428  |
| >APC-L409V- HLLEQIRAY   | 138  | >APC-L409V- HVLEQIRAY   | 8    | 130  |
| >APC-L409V- HLLEQIRAY   | 246  | >APC-L409V- HVLEQIRAY   | 40   | 206  |
| >APC-L409V- HLLEQIRAY   | 413  | >APC-L409V- HVLEQIRAY   | 325  | 88   |
| >APC-L409V- HLLEQIRA    | 3553 | >APC-L409V- HVLEQIRA    | 477  | 3076 |
| >APC-L409V- HLLEQIRA    | 2058 | >APC-L409V- HVLEQIRA    | 352  | 1706 |
| >APC-L409V- HLLEQIRAY   | 222  | >APC-L409V- HVLEQIRAY   | 628  | 406  |
| >APC-L409V- HLLEQIRAY   | 34   | >APC-L409V- HVLEQIRAY   | 164  | 130  |
| >APC-L409V- HLLEQIRAY   | 231  | >APC-L409V- HVLEQIRAY   | 1475 | 1244 |
| >APC-L409V- HLLEQIRAY   | 610  | >APC-L409V- HVLEQIRAY   | 111  | 499  |
| >APC-L409V- HLLEQIRAY   | 94   | >APC-L409V- HVLEQIRAY   | 25   | 69   |
| >APC-L409V- HLLEQIRAY   | 25   | >APC-L409V- HVLEQIRAY   | 15   | 10   |
| >APC-L409V- RGRREIRVLH  | 24   | >APC-L409V- RGRREIRVLH' | 17   | 7    |
| >APC-L409V- LHLLEQIRAY  | 215  | >APC-L409V- LHVLEQIRAY  | 380  | 165  |
| >APC-L409V- VLHLLEQI    | 344  | >APC-L409V- VLHVLEQI    | 289  | 55   |
| >APC-L409V- VLHLLEQI    | 259  | >APC-L409V- VLHVLEQI    | 250  | 9    |
| >APC-L409V- VLHLLEQI    | 31   | >APC-L409V- VLHVLEQI    | 22   | 9    |
| >APC-L409V- VLHLLEQIRA  | 550  | >APC-L409V- VLHVLEQIRA  | 425  | 125  |
| >APC-L409V- VLHLLEQI    | 246  | >APC-L409V- VLHVLEQI    | 149  | 97   |
| >APC-L409V- VLHLLEQI    | 32   | >APC-L409V- VLHVLEQI    | 21   | 11   |
| >APC-L409V- VLHLLEQIRA  | 59   | >APC-L409V- VLHVLEQIRA  | 40   | 19   |
| >APC-L409V- VLHLLEQIRA\ | 461  | >APC-L409V- VLHVLEQIRA' | 204  | 257  |
| >APC-L409V- VLHLLEQIRA\ | 357  | >APC-L409V- VLHVLEQIRA' | 228  | 129  |
| >APC-L409V- VLHLLEQIRA\ | 333  | >APC-L409V- VLHVLEQIRA' | 159  | 174  |
| >APC-L409V- VLHLLEQIRA\ | 608  | >APC-L409V- VLHVLEQIRA' | 290  | 318  |
| >APC-L409V- RVLHLLEQI   | 36   | >APC-L409V- RVLHVLEQI   | 25   | 11   |
| >APC-L409V- RVLHLLEQIR/ | 419  | >APC-L409V- RVLHVLEQIR/ | 320  | 99   |
| >APC-L409V- RVLHLLEQI   | 154  | >APC-L409V- RVLHVLEQI   | 38   | 116  |
| >APC-L409V- RVLHLLEQIR/ | 237  | >APC-L409V- RVLHVLEQIR/ | 227  | 10   |
| >APC-L409V- RVLHLLEQIR  | 51   | >APC-L409V- RVLHVLEQIR  | 52   | 1    |
| >APC-L409V- RVLHLLEQI   | 21   | >APC-L409V- RVLHVLEQI   | 18   | 3    |
| >APC-L409V- RVLHLLEQI   | 169  | >APC-L409V- RVLHVLEQI   | 75   | 94   |
| >APC-L409V- RVLHLLEQI   | 471  | >APC-L409V- RVLHVLEQI   | 443  | 28   |
| >APC-L409V- RVLHLLEQIR  | 213  | >APC-L409V- RVLHVLEQIR  | 486  | 273  |

|                          |      |                         |      |      |
|--------------------------|------|-------------------------|------|------|
| >APC-L409V- RVLHLLLEQI   | 141  | >APC-L409V- RVLHVLEQI   | 79   | 62   |
| >APC-L409V- IRVLHLLEQI   | 329  | >APC-L409V- IRVLHVLEQI  | 354  | 25   |
| >APC-L409V- EIRVLHLL     | 1069 | >APC-L409V- EIRVLHVL    | 325  | 744  |
| >APC-L409V- REIRVLHLL    | 35   | >APC-L409V- REIRVLHVL   | 142  | 107  |
| >APC-L409V- REIRVLHL     | 1664 | >APC-L409V- REIRVLHV    | 256  | 1408 |
| >APC-L409V- REIRVLHLL    | 449  | >APC-L409V- REIRVLHVL   | 1453 | 1004 |
| >APC-L409V- REIRVLHLL    | 545  | >APC-L409V- REIRVLHVL   | 197  | 348  |
| >APC-L409V- REIRVLHLL    | 2948 | >APC-L409V- REIRVLHVL   | 396  | 2552 |
| >APC-L409V- REIRVLHL     | 12   | >APC-L409V- REIRVLHV    | 57   | 45   |
| >APC-L409V- REIRVLHLL    | 5    | >APC-L409V- REIRVLHVL   | 5    | 0    |
| >APC-L409V- REIRVLHL     | 88   | >APC-L409V- REIRVLHV    | 250  | 162  |
| >APC-L409V- REIRVLHLL    | 66   | >APC-L409V- REIRVLHVL   | 47   | 19   |
| >APC-L409V- REIRVLHL     | 212  | >APC-L409V- REIRVLHV    | 437  | 225  |
| >APC-L409V- REIRVLHLL    | 96   | >APC-L409V- REIRVLHVL   | 220  | 124  |
| >APC-L409V- REIRVLHL     | 2267 | >APC-L409V- REIRVLHV    | 219  | 2048 |
| >APC-L409V- REIRVLHLL    | 997  | >APC-L409V- REIRVLHVL   | 395  | 602  |
| >APC-L409V- REIRVLHL     | 118  | >APC-L409V- REIRVLHV    | 70   | 48   |
| >APC-L409V- REIRVLHLL    | 3    | >APC-L409V- REIRVLHVL   | 5    | 2    |
| >APC-L409V- REIRVLHLLLEC | 287  | >APC-L409V- REIRVLHVLEC | 438  | 151  |
| >APC-L409V- REIRVLHL     | 32   | >APC-L409V- REIRVLHV    | 196  | 164  |
| >APC-L409V- REIRVLHLL    | 163  | >APC-L409V- REIRVLHVL   | 273  | 110  |
| >APC-L409V- REIRVLHL     | 484  | >APC-L409V- REIRVLHV    | 3139 | 2655 |
| >APC-L409V- REIRVLHLL    | 56   | >APC-L409V- REIRVLHVL   | 217  | 161  |
| >APC-L409V- RREIRVLHL    | 114  | >APC-L409V- RREIRVLHV   | 275  | 161  |
| >APC-L409V- RREIRVLHLL   | 13   | >APC-L409V- RREIRVLHVL  | 15   | 2    |
| >APC-L409V- RREIRVLHLL   | 1980 | >APC-L409V- RREIRVLHVL  | 349  | 1631 |
| >APC-L409V- RREIRVLHL    | 24   | >APC-L409V- RREIRVLHV   | 54   | 30   |
| >APC-L409V- RREIRVLHLL   | 12   | >APC-L409V- RREIRVLHVL  | 14   | 2    |
| >APC-L409V- RREIRVLHLLLE | 92   | >APC-L409V- RREIRVLHVLE | 146  | 54   |
| >APC-L409V- RREIRVLHL    | 3    | >APC-L409V- RREIRVLHV   | 11   | 8    |
| >APC-L409V- RREIRVLHLL   | 11   | >APC-L409V- RREIRVLHVL  | 12   | 1    |
| >APC-L409V- RREIRVLHLLLE | 161  | >APC-L409V- RREIRVLHVLE | 278  | 117  |
| >APC-L409V- GRREIRVLHL   | 22   | >APC-L409V- GRREIRVLHV  | 134  | 112  |
| >APC-L409V- GRREIRVLHLI  | 59   | >APC-L409V- GRREIRVLHV  | 96   | 37   |
| >APC-L409V- GRREIRVLHL   | 60   | >APC-L409V- GRREIRVLHV  | 378  | 318  |
| >APC-L409V- GRREIRVLHLI  | 35   | >APC-L409V- GRREIRVLHV  | 47   | 12   |
| >APC-L409V- GRREIRVLHL   | 30   | >APC-L409V- GRREIRVLHV  | 110  | 80   |
| >APC-L409V- GRREIRVLHLI  | 6    | >APC-L409V- GRREIRVLHV  | 11   | 5    |
| >APC-L662V- LQTLLQHL     | 111  | >APC-L662V- VQTLLQHL    | 151  | 40   |
| >APC-L662V- LQTLLQHCLK   | 138  | >APC-L662V- VQTLLQHCLK  | 55   | 83   |
| >APC-L662V- LQTLLQHCLK   | 413  | >APC-L662V- VQTLLQHCLK  | 818  | 405  |
| >APC-L662V- CLQTLLQHL    | 247  | >APC-L662V- CVQTLLQHL   | 3011 | 2764 |
| >APC-L662V- CLQTLLQHKL   | 87   | >APC-L662V- CVQTLLQHKL  | 4588 | 4501 |

|                        |      |                         |      |      |
|------------------------|------|-------------------------|------|------|
| >APC-L662V- CLQTLQHL   | 30   | >APC-L662V- CVQTLQHL    | 5606 | 5576 |
| >APC-L662V- CLQTLQHLK  | 208  | >APC-L662V- CVQTLQHLK   | 426  | 218  |
| >APC-L662V- CLQTLQHLK  | 389  | >APC-L662V- CVQTLQHLK   | 141  | 248  |
| >APC-L662V- HRQILRENNC | 211  | >APC-L662V- HRQILRENNC  | 484  | 273  |
| >APC-L662V- HRQILRENNC | 359  | >APC-L662V- HRQILRENNC  | 3691 | 3332 |
| >APC-L662V- HRQILRENNC | 220  | >APC-L662V- HRQILRENNC  | 1137 | 917  |
| >APC-L662V- HRQILRENNC | 30   | >APC-L662V- HRQILRENNC  | 256  | 226  |
| >APC-L662V- ENNCLQTL   | 468  | >APC-L662V- ENNCVQTL    | 133  | 335  |
| >APC-L662V- RENNCQTL   | 410  | >APC-L662V- RENNCVQTL   | 161  | 249  |
| >APC-L662V- RENNCQTL   | 7    | >APC-L662V- RENNCVQTL   | 9    | 2    |
| >APC-L662V- RENNCQTL   | 37   | >APC-L662V- RENNCVQTL   | 59   | 22   |
| >APC-L662V- RENNCQTL   | 18   | >APC-L662V- RENNCVQTL   | 17   | 1    |
| >APC-L662V- RENNCQTL   | 75   | >APC-L662V- RENNCVQTL   | 62   | 13   |
| >APC-L662V- RENNCQTL   | 460  | >APC-L662V- RENNCVQTL   | 455  | 5    |
| >APC-L662V- RENNCQTL   | 534  | >APC-L662V- RENNCVQTL   | 410  | 124  |
| >APC-L662V- RENNCQTL   | 217  | >APC-L662V- RENNCVQTL   | 300  | 83   |
| >APC-L662V- RENNCQTL   | 261  | >APC-L662V- RENNCVQTL   | 193  | 68   |
| >APC-L662V- RENNCQTL   | 608  | >APC-L662V- RENNCVQTL   | 451  | 157  |
| >APC-L662V- RENNCQTL   | 314  | >APC-L662V- RENNCVQTL   | 328  | 14   |
| >APC-L662V- RENNCQTL   | 19   | >APC-L662V- RENNCVQTL   | 22   | 3    |
| >APC-L662V- RENNCQTL   | 62   | >APC-L662V- RENNCVQTL   | 63   | 1    |
| >APC-L662V- RENNCQTL   | 586  | >APC-L662V- RENNCVQTL   | 396  | 190  |
| >APC-L662V- LRENNCQTL  | 451  | >APC-L662V- LRENNCVQTL  | 462  | 11   |
| >APC-L662V- LRENNCQTL  | 220  | >APC-L662V- LRENNCVQTL  | 356  | 136  |
| >APC-L662V- LRENNCQTL  | 59   | >APC-L662V- LRENNCVQTL  | 93   | 34   |
| >APC-L662V- ILRENNCL   | 104  | >APC-L662V- ILRENNCV    | 93   | 11   |
| >APC-L662V- ILRENNCQTL | 141  | >APC-L662V- ILRENNCVQTL | 197  | 56   |
| >APC-L662V- ILRENNCL   | 574  | >APC-L662V- ILRENNCV    | 42   | 532  |
| >APC-L662V- ILRENNCQTL | 41   | >APC-L662V- ILRENNCVQTL | 46   | 5    |
| >APC-L662V- ILRENNCL   | 216  | >APC-L662V- ILRENNCV    | 22   | 194  |
| >APC-L662V- ILRENNCQTL | 16   | >APC-L662V- ILRENNCVQTL | 12   | 4    |
| >APC-L662V- ILRENNCL   | 164  | >APC-L662V- ILRENNCV    | 24   | 140  |
| >APC-L662V- ILRENNCQTL | 19   | >APC-L662V- ILRENNCVQTL | 19   | 0    |
| >APC-L662V- ILRENNCL   | 1163 | >APC-L662V- ILRENNCV    | 52   | 1111 |
| >APC-L662V- ILRENNCQTL | 287  | >APC-L662V- ILRENNCVQTL | 216  | 71   |
| >APC-L662V- ILRENNCL   | 1287 | >APC-L662V- ILRENNCV    | 55   | 1232 |
| >APC-L662V- ILRENNCQTL | 181  | >APC-L662V- ILRENNCVQTL | 123  | 58   |
| >APC-L662V- ILRENNCL   | 20   | >APC-L662V- ILRENNCV    | 4    | 16   |
| >APC-L662V- ILRENNCLQ  | 55   | >APC-L662V- ILRENNCVQ   | 94   | 39   |
| >APC-L662V- ILRENNCQTL | 51   | >APC-L662V- ILRENNCVQTL | 40   | 11   |
| >APC-L662V- ILRENNCQTL | 3    | >APC-L662V- ILRENNCVQTL | 3    | 0    |
| >APC-L662V- ILRENNCQTL | 793  | >APC-L662V- ILRENNCVQTL | 348  | 445  |
| >APC-L662V- ILRENNCL   | 495  | >APC-L662V- ILRENNCV    | 1138 | 643  |

|                         |       |                        |       |       |
|-------------------------|-------|------------------------|-------|-------|
| >APC-L662V- ILRENNCLQTI | 224   | >APC-L662V- ILRENNCVQT | 124   | 100   |
| >APC-L662V- ILRENNCLQTI | 451   | >APC-L662V- ILRENNCVQT | 351   | 100   |
| >APC-L662V- RQILRENNCL  | 2286  | >APC-L662V- RQILRENNCV | 481   | 1805  |
| >APC-L662V- RQILRENNCL  | 56    | >APC-L662V- RQILRENNCV | 153   | 97    |
| >APC-L662V- RQILRENNCL  | 198   | >APC-L662V- RQILRENNCV | 2283  | 2085  |
| >APC-L852M LERERGIGL    | 247   | >APC-L852M MERERGIGL   | 175   | 72    |
| >APC-L852M LERERGIGL    | 296   | >APC-L852M MERERGIGL   | 152   | 144   |
| >APC-L852M LERERGIGL    | 253   | >APC-L852M MERERGIGL   | 158   | 95    |
| >APC-L852M LERERGIGL    | 62    | >APC-L852M MERERGIGL   | 34    | 28    |
| >APC-L852M SLERERGIGL   | 744   | >APC-L852M SMERERGIGL  | 497   | 247   |
| >APC-L852M SLERERGI     | 378   | >APC-L852M SMERERGI    | 742   | 364   |
| >APC-L852M SLERERGIGL   | 35    | >APC-L852M SMERERGIGL  | 63    | 28    |
| >APC-L852M RSLERERGI    | 416   | >APC-L852M RSMERERGI   | 182   | 234   |
| >APC-L852M RSLERERGIGI  | 812   | >APC-L852M RSMERERGIC  | 321   | 491   |
| >APC-L852M RSLERERGI    | 23    | >APC-L852M RSMERERGI   | 19    | 4     |
| >APC-L852M RSLERERGIGI  | 6     | >APC-L852M RSMERERGIC  | 5     | 1     |
| >APC-L852M RSLERERGI    | 66    | >APC-L852M RSMERERGI   | 53    | 13    |
| >APC-L852M RSLERERGIGI  | 600   | >APC-L852M RSMERERGIC  | 371   | 229   |
| >APC-L852M RSEKDRSLER   | 305   | >APC-L852M RSEKDRSMEF  | 159   | 146   |
| >APC-L852M RSEKDRSL     | 76    | >APC-L852M RSEKDRSM    | 59    | 17    |
| >APC-L852M RSEKDRSL     | 147   | >APC-L852M RSEKDRSM    | 43    | 104   |
| >APC-L852M RSEKDRSL     | 318   | >APC-L852M RSEKDRSM    | 693   | 375   |
| >APC-L852M SSRSEKDRSL   | 442   | >APC-L852M SSRSEKDRSM  | 450   | 8     |
| >APC-L852M SSRSEKDRSL   | 109   | >APC-L852M SSRSEKDRSM  | 87    | 22    |
| >APC-L852M SSRSEKDRSL   | 1505  | >APC-L852M SSRSEKDRSM  | 137   | 1368  |
| >APC-L852M SSRSEKDRSLE  | 440   | >APC-L852M SSRSEKDRSM  | 360   | 80    |
| >APC-M1431 MPPSRSKTP    | 249   | >APC-M1431 RPPSRSKTP   | 302   | 53    |
| >APC-M1431 MPPSRSKTPF   | 1108  | >APC-M1431 RPPSRSKTPP  | 308   | 800   |
| >APC-M1431 MPPSRSKTPF   | 205   | >APC-M1431 RPPSRSKTPPI | 10102 | 9897  |
| >APC-M1431 TMPPSRSK     | 185   | >APC-M1431 TRPPSRSK    | 20832 | 20647 |
| >APC-M1431 TMPPSRSK     | 330   | >APC-M1431 TRPPSRSK    | 22346 | 22016 |
| >APC-M1431 QTMPPSRSK    | 103   | >APC-M1431 QTRPPSRSK   | 230   | 127   |
| >APC-M1431 QTMPPSRSK    | 26    | >APC-M1431 QTRPPSRSK   | 2323  | 2297  |
| >APC-M1431 QTMPPSRS     | 10019 | >APC-M1431 QTRPPSRS    | 417   | 9602  |
| >APC-M1431 QTMPPSRSK    | 33    | >APC-M1431 QTRPPSRSK   | 4     | 29    |
| >APC-M1431 QTMPPSRSK    | 8617  | >APC-M1431 QTRPPSRSKT  | 245   | 8372  |
| >APC-M1431 QTMPPSRSK    | 8858  | >APC-M1431 QTRPPSRSKT  | 340   | 8518  |
| >APC-M1431 QTMPPSRSK    | 296   | >APC-M1431 QTRPPSRSK   | 3166  | 2870  |
| >APC-M1431 QTMPPSRS     | 258   | >APC-M1431 QTRPPSRS    | 13419 | 13161 |
| >APC-M1431 QTMPPSRSK    | 392   | >APC-M1431 QTRPPSRSKT  | 210   | 182   |
| >APC-M1431 QTMPPSRSK    | 240   | >APC-M1431 QTRPPSRSK   | 1959  | 1719  |
| >APC-M1431 GQTMPPSRS    | 284   | >APC-M1431 GQTRPPSRSK  | 1372  | 1088  |
| >APC-M1431 DSPGQTMPP    | 191   | >APC-M1431 DSPGQTRPPS  | 524   | 333   |

|                       |       |                        |       |       |
|-----------------------|-------|------------------------|-------|-------|
| >APC-M1431 LPDSPGQTM  | 355   | >APC-M1431 LPDSPGQTR   | 39919 | 39564 |
| >APC-M1431 LPDSPGQTM  | 36    | >APC-M1431 LPDSPGQTR   | 11955 | 11919 |
| >APC-M1431 LPDSPGQTM  | 37    | >APC-M1431 LPDSPGQTR   | 6962  | 6925  |
| >APC-M1431 LPDSPGQTM  | 248   | >APC-M1431 LPDSPGQTR   | 17175 | 16927 |
| >APC-M1431 DLPDSPGQTF | 35500 | >APC-M1431 DLPDSPGQTF  | 246   | 35254 |
| >APC-N813S- NFNTGNMTV | 495   | >APC-N813S- SFNTGNMTV  | 58    | 437   |
| >APC-N813S- NFNTGNMTV | 218   | >APC-N813S- SFNTGNMTV  | 30    | 188   |
| >APC-N813S- NFNTGNMTV | 4614  | >APC-N813S- SFNTGNMTV  | 421   | 4193  |
| >APC-N813S- DNFNTGNM  | 793   | >APC-N813S- DNFNTGNM   | 148   | 645   |
| >APC-N813S- DNFNTGNM1 | 1138  | >APC-N813S- DNFNTGNM1  | 91    | 1047  |
| >APC-N813S- DNFNTGNM1 | 2723  | >APC-N813S- DNFNTGNM1  | 117   | 2606  |
| >APC-N813S- DNFNTGNM1 | 23478 | >APC-N813S- DNFNTGNM1  | 405   | 23073 |
| >APC-N813S- DNFNTGNM1 | 2400  | >APC-N813S- DNFNTGNM1  | 134   | 2266  |
| >APC-N813S- SDNFNTGNV | 197   | >APC-N813S- SDSNFNTGNV | 192   | 5     |
| >APC-N813S- RSDNFNTGN | 17    | >APC-N813S- RSDNFNTGN  | 14    | 3     |
| >APC-N813S- RSDNFNTGN | 27    | >APC-N813S- RSDNFNTGN  | 27    | 0     |
| >APC-N813S- RHDDNRSDN | 724   | >APC-N813S- RHDDNRSDN  | 480   | 244   |
| >APC-N813S- NRHDDNRSD | 376   | >APC-N813S- NRHDDNRSD  | 234   | 142   |
| >APC-N942D NSNRTCSMP' | 112   | >APC-N942D DSNRTCSMP'  | 1072  | 960   |
| >APC-N942D NSNRTCSMP' | 73    | >APC-N942D DSNRTCSMP'  | 383   | 310   |
| >APC-N942D NSNRTCSMP' | 254   | >APC-N942D DSNRTCSMP'  | 764   | 510   |
| >APC-N942D NSNRTCSMP' | 250   | >APC-N942D DSNRTCSMP'  | 264   | 14    |
| >APC-N942D ENSNRTCSM  | 292   | >APC-N942D EDSNRTCSM   | 1459  | 1167  |
| >APC-N942D SENSNRTC   | 191   | >APC-N942D SEDSNRTC    | 162   | 29    |
| >APC-N942D SENSNRTCSM | 104   | >APC-N942D SEDSNRTCSM  | 340   | 236   |
| >APC-N942D SENSNRTCS  | 436   | >APC-N942D SEDSNRTCS   | 3797  | 3361  |
| >APC-N942D KSENSNRTCS | 12    | >APC-N942D KSEDSNRTCS  | 9     | 3     |
| >APC-N942D KSENSNRTCS | 148   | >APC-N942D KSEDSNRTCS  | 266   | 118   |
| >APC-N942D TKSENSNR   | 480   | >APC-N942D TKSEDSNR    | 915   | 435   |
| >APC-N942D FTKSENSNR  | 222   | >APC-N942D FTKSEDSNR   | 515   | 293   |
| >APC-N942D FTKSENSNR  | 145   | >APC-N942D FTKSEDSNR   | 248   | 103   |
| >APC-N942D FTKSENSNR  | 7     | >APC-N942D FTKSEDSNR   | 9     | 2     |
| >APC-N942D NFTKSENSNR | 402   | >APC-N942D NFTKSEDSNR  | 1002  | 600   |
| >APC-N942D NFTKSENSNR | 264   | >APC-N942D NFTKSEDSNR  | 461   | 197   |
| >APC-N942D NFTKSENSNR | 144   | >APC-N942D NFTKSEDSNR  | 184   | 40    |
| >APC-N942D NFTKSENSNR | 232   | >APC-N942D NFTKSEDSNR  | 396   | 164   |
| >APC-N942D YNFTKSENSN | 49    | >APC-N942D YNFTKSEDSN  | 74    | 25    |
| >APC-N942D YNFTKSENSN | 257   | >APC-N942D YNFTKSEDSN  | 350   | 93    |
| >APC-P1319L PVSEVPAV  | 4864  | >APC-P1319L LVSEVPAV   | 53    | 4811  |
| >APC-P1319L PVSEVPAV  | 2064  | >APC-P1319L LVSEVPAV   | 36    | 2028  |
| >APC-P1319L PVSEVPAV  | 985   | >APC-P1319L LVSEVPAV   | 10    | 975   |
| >APC-P1319L PVSEVPAV  | 1158  | >APC-P1319L LVSEVPAV   | 13    | 1145  |
| >APC-P1319L PVSEVPAV  | 111   | >APC-P1319L LVSEVPAV   | 7     | 104   |

|                        |       |                        |       |       |
|------------------------|-------|------------------------|-------|-------|
| >APC-P1319I PVSEVPAV   | 3457  | >APC-P1319I LVSEVPAV   | 81    | 3376  |
| >APC-P1319I PVSEVPAV   | 309   | >APC-P1319I LVSEVPAV   | 29    | 280   |
| >APC-P1319I PVSEVPAV   | 289   | >APC-P1319I LVSEVPAV   | 22    | 267   |
| >APC-P1319I PVSEVPAV   | 190   | >APC-P1319I LVSEVPAV   | 5     | 185   |
| >APC-P1319I PVSEVPAV   | 1516  | >APC-P1319I LVSEVPAV   | 97    | 1419  |
| >APC-P1319I PVSEVPAV   | 509   | >APC-P1319I LVSEVPAV   | 50    | 459   |
| >APC-P1319I DPVSEVPAV  | 21359 | >APC-P1319I DLVSEVPAV  | 298   | 21061 |
| >APC-P1319I DPVSEVPAV  | 20975 | >APC-P1319I DLVSEVPAV  | 17    | 20958 |
| >APC-P1319I DPVSEVPAV  | 23882 | >APC-P1319I DLVSEVPAV  | 128   | 23754 |
| >APC-P1319I DPVSEVPAV  | 22149 | >APC-P1319I DLVSEVPAV  | 25    | 22124 |
| >APC-P1319I DPVSEVPAV  | 21306 | >APC-P1319I DLVSEVPAV  | 18    | 21288 |
| >APC-P1319I DPVSEVPAV  | 26711 | >APC-P1319I DLVSEVPAV  | 12    | 26699 |
| >APC-P1319I DPVSEVPAV  | 1597  | >APC-P1319I DLVSEVPAV  | 402   | 1195  |
| >APC-P1319I DPVSEVPAV  | 187   | >APC-P1319I DLVSEVPAV  | 61    | 126   |
| >APC-P1319I DPVSEVPA   | 320   | >APC-P1319I DLVSEVPA   | 13351 | 13031 |
| >APC-P1319I DPVSEVPAV  | 313   | >APC-P1319I DLVSEVPAV  | 14220 | 13907 |
| >APC-P1319I DPVSEVPA   | 196   | >APC-P1319I DLVSEVPA   | 27841 | 27645 |
| >APC-P1319I EDPVSEVPAV | 1124  | >APC-P1319I EDLVSEVPAV | 107   | 1017  |
| >APC-P1319I AEDPVSEV   | 4971  | >APC-P1319I AEDLVSEV   | 338   | 4633  |
| >APC-P1319I AEDPVSEVPA | 287   | >APC-P1319I AEDLVSEVPA | 977   | 690   |
| >APC-P1319I AEDPVSEV   | 380   | >APC-P1319I AEDLVSEV   | 367   | 13    |
| >APC-P1319I AEDPVSEVPA | 84    | >APC-P1319I AEDLVSEVPA | 102   | 18    |
| >APC-P1319I AEDPVSEV   | 931   | >APC-P1319I AEDLVSEV   | 453   | 478   |
| >APC-P1319I AEDPVSEVPA | 600   | >APC-P1319I AEDLVSEVPA | 345   | 255   |
| >APC-P1319I AEDPVSEVPA | 523   | >APC-P1319I AEDLVSEVPA | 453   | 70    |
| >APC-P1319I AEDPVSEVPA | 648   | >APC-P1319I AEDLVSEVPA | 450   | 198   |
| >APC-P1319I AEDPVSEV   | 242   | >APC-P1319I AEDLVSEV   | 217   | 25    |
| >APC-P1319I AEDPVSEVPA | 36    | >APC-P1319I AEDLVSEVPA | 27    | 9     |
| >APC-P1319I AEDPVSEVPA | 92    | >APC-P1319I AEDLVSEVPA | 95    | 3     |
| >APC-P1319I AEDPVSEV   | 438   | >APC-P1319I AEDLVSEV   | 219   | 219   |
| >APC-P1319I AEDPVSEVPA | 50    | >APC-P1319I AEDLVSEVPA | 18    | 32    |
| >APC-P1319I SAEDPVSEV  | 586   | >APC-P1319I SAEDLVSEV  | 265   | 321   |
| >APC-P1319I SAEDPVSEV  | 135   | >APC-P1319I SAEDLVSEV  | 266   | 131   |
| >APC-P1319I SAEDPVSEV  | 26    | >APC-P1319I SAEDLVSEV  | 25    | 1     |
| >APC-P1319I SAEDPVSEV  | 155   | >APC-P1319I SAEDLVSEV  | 283   | 128   |
| >APC-P1319I SAEDPVSEV  | 215   | >APC-P1319I SAEDLVSEV  | 567   | 352   |
| >APC-P1319I RSAEDPVSEV | 150   | >APC-P1319I RSAEDLVSEV | 200   | 50    |
| >APC-P1319I RSAEDPVSEV | 115   | >APC-P1319I RSAEDLVSEV | 160   | 45    |
| >APC-P1319I RSAEDPVSEV | 419   | >APC-P1319I RSAEDLVSEV | 737   | 318   |
| >APC-P1319I RSAEDPVSEV | 73    | >APC-P1319I RSAEDLVSEV | 72    | 1     |
| >APC-P1319I RSAEDPVSEV | 415   | >APC-P1319I RSAEDLVSEV | 541   | 126   |
| >APC-P1319I GTRSAEDPV  | 344   | >APC-P1319I GTRSAEDLV  | 793   | 449   |
| >APC-P1319I GTRSAEDP   | 21974 | >APC-P1319I GTRSAEDL   | 151   | 21823 |



|                         |       |                         |       |       |
|-------------------------|-------|-------------------------|-------|-------|
| >APC-P1319L GTRSAEDPV   | 611   | >APC-P1319L GTRSAEDLV   | 36    | 575   |
| >APC-P1319L KIGTRSAEDP' | 376   | >APC-P1319L KIGTRSAEDL\ | 285   | 91    |
| >APC-P1319L KIGTRSAEDP' | 335   | >APC-P1319L KIGTRSAEDL\ | 589   | 254   |
| >APC-P1319L KIGTRSAEDP' | 306   | >APC-P1319L KIGTRSAEDL\ | 718   | 412   |
| >APC-P1319L KIGTRSAEDP' | 189   | >APC-P1319L KIGTRSAEDL\ | 387   | 198   |
| >APC-P1319L KIGTRSAEDP' | 224   | >APC-P1319L KIGTRSAEDL\ | 771   | 547   |
| >APC-P1319L KIGTRSAEDP' | 146   | >APC-P1319L KIGTRSAEDL\ | 186   | 40    |
| >APC-P1319L KIGTRSAEDP' | 144   | >APC-P1319L KIGTRSAEDL\ | 112   | 32    |
| >APC-P1319\ PVSEVPAV    | 4864  | >APC-P1319\ TVSEVPAV    | 127   | 4737  |
| >APC-P1319\ PVSEVPAV    | 2064  | >APC-P1319\ TVSEVPAV    | 117   | 1947  |
| >APC-P1319\ PVSEVPAV    | 985   | >APC-P1319\ TVSEVPAV    | 20    | 965   |
| >APC-P1319\ PVSEVPAV    | 1158  | >APC-P1319\ TVSEVPAV    | 27    | 1131  |
| >APC-P1319\ PVSEVPAV    | 111   | >APC-P1319\ TVSEVPAV    | 22    | 89    |
| >APC-P1319\ PVSEVPAV    | 3457  | >APC-P1319\ TVSEVPAV    | 295   | 3162  |
| >APC-P1319\ PVSEVPAV    | 309   | >APC-P1319\ TVSEVPAV    | 61    | 248   |
| >APC-P1319\ PVSEVPAV    | 289   | >APC-P1319\ TVSEVPAV    | 83    | 206   |
| >APC-P1319\ PVSEVPAV    | 190   | >APC-P1319\ TVSEVPAV    | 22    | 168   |
| >APC-P1319\ PVSEVPAV    | 1516  | >APC-P1319\ TVSEVPAV    | 18    | 1498  |
| >APC-P1319\ PVSEVPAVS   | 16141 | >APC-P1319\ TVSEVPAVS   | 273   | 15868 |
| >APC-P1319\ PVSEVPAV    | 509   | >APC-P1319\ TVSEVPAV    | 12    | 497   |
| >APC-P1319\ DPVSEVPAV   | 16709 | >APC-P1319\ DTVSEVPAV   | 204   | 16505 |
| >APC-P1319\ DPVSEVPAV   | 1597  | >APC-P1319\ DTVSEVPAV   | 13    | 1584  |
| >APC-P1319\ DPVSEVPAVS  | 15243 | >APC-P1319\ DTVSEVPAVS  | 357   | 14886 |
| >APC-P1319\ DPVSEVPAVS  | 9582  | >APC-P1319\ DTVSEVPAVS  | 149   | 9433  |
| >APC-P1319\ DPVSEVPA    | 14860 | >APC-P1319\ DTVSEVPA    | 123   | 14737 |
| >APC-P1319\ DPVSEVPAV   | 13851 | >APC-P1319\ DTVSEVPAV   | 192   | 13659 |
| >APC-P1319\ DPVSEVPAV   | 187   | >APC-P1319\ DTVSEVPAV   | 8     | 179   |
| >APC-P1319\ DPVSEVPA    | 320   | >APC-P1319\ DTVSEVPA    | 13348 | 13028 |
| >APC-P1319\ DPVSEVPAV   | 313   | >APC-P1319\ DTVSEVPAV   | 14245 | 13932 |
| >APC-P1319\ DPVSEVPA    | 196   | >APC-P1319\ DTVSEVPA    | 29348 | 29152 |
| >APC-P1319\ EDPVSEVPAV  | 1124  | >APC-P1319\ EDTVSEVPAV  | 133   | 991   |
| >APC-P1319\ AEDPVSEVPA  | 287   | >APC-P1319\ AEDTVSEVPA  | 873   | 586   |
| >APC-P1319\ AEDPVSEV    | 380   | >APC-P1319\ AEDTVSEV    | 239   | 141   |
| >APC-P1319\ AEDPVSEVPA  | 84    | >APC-P1319\ AEDTVSEVPA  | 65    | 19    |
| >APC-P1319\ AEDPVSEV    | 242   | >APC-P1319\ AEDTVSEV    | 199   | 43    |
| >APC-P1319\ AEDPVSEVPA  | 36    | >APC-P1319\ AEDTVSEVPA  | 41    | 5     |
| >APC-P1319\ AEDPVSEVPA  | 92    | >APC-P1319\ AEDTVSEVPA  | 83    | 9     |
| >APC-P1319\ AEDPVSEV    | 438   | >APC-P1319\ AEDTVSEV    | 720   | 282   |
| >APC-P1319\ AEDPVSEVPA  | 50    | >APC-P1319\ AEDTVSEVPA  | 14    | 36    |
| >APC-P1319\ SAEDPVSEV   | 586   | >APC-P1319\ SAEDTVSEV   | 311   | 275   |
| >APC-P1319\ SAEDPVSEV   | 135   | >APC-P1319\ SAEDTVSEV   | 198   | 63    |
| >APC-P1319\ SAEDPVSEV   | 26    | >APC-P1319\ SAEDTVSEV   | 16    | 10    |
| >APC-P1319\ SAEDPVSEV   | 155   | >APC-P1319\ SAEDTVSEV   | 997   | 842   |

|                        |       |                        |       |       |
|------------------------|-------|------------------------|-------|-------|
| >APC-P13191SAEDPVSEV   | 215   | >APC-P13191SAEDTVSEV   | 492   | 277   |
| >APC-P13191RSAEDPVSEV  | 150   | >APC-P13191RSAEDTVSEV  | 255   | 105   |
| >APC-P13191RSAEDPVSEV  | 115   | >APC-P13191RSAEDTVSEV  | 72    | 43    |
| >APC-P13191RSAEDPVSEV  | 419   | >APC-P13191RSAEDTVSEV  | 323   | 96    |
| >APC-P13191RSAEDPVSEV  | 73    | >APC-P13191RSAEDTVSEV  | 65    | 8     |
| >APC-P13191RSAEDPVSEV  | 415   | >APC-P13191RSAEDTVSEV  | 524   | 109   |
| >APC-P13191GTRSAEDPV   | 344   | >APC-P13191GTRSAEDTV   | 913   | 569   |
| >APC-P13191GTRSAEDPV   | 611   | >APC-P13191GTRSAEDTV   | 40    | 571   |
| >APC-P13191KIGTRSAEDP' | 376   | >APC-P13191KIGTRSAEDT' | 779   | 403   |
| >APC-P13191KIGTRSAEDP' | 335   | >APC-P13191KIGTRSAEDT' | 528   | 193   |
| >APC-P13191KIGTRSAEDP' | 306   | >APC-P13191KIGTRSAEDT' | 580   | 274   |
| >APC-P13191KIGTRSAEDP' | 189   | >APC-P13191KIGTRSAEDT' | 135   | 54    |
| >APC-P13191KIGTRSAEDP' | 224   | >APC-P13191KIGTRSAEDT' | 149   | 75    |
| >APC-P13191KIGTRSAEDP' | 146   | >APC-P13191KIGTRSAEDT' | 104   | 42    |
| >APC-P13191KIGTRSAEDP' | 144   | >APC-P13191KIGTRSAEDT' | 66    | 78    |
| >APC-P1361LPSKSGAQTPK  | 3312  | >APC-P1361LSKSGAQTPK   | 328   | 2984  |
| >APC-P1361LPSKSGAQTPK  | 1769  | >APC-P1361LSKSGAQTPK   | 212   | 1557  |
| >APC-P1361LPSKSGAQTPK  | 41    | >APC-P1361LSKSGAQTPK   | 9     | 32    |
| >APC-P1361LSPSKSGAQT   | 22694 | >APC-P1361LSLSKSGAQT   | 277   | 22417 |
| >APC-P1361LSPSKSGAQT   | 35880 | >APC-P1361LSLSKSGAQT   | 103   | 35777 |
| >APC-P1361LSPSKSGAQTP  | 12305 | >APC-P1361LSLSKSGAQTP  | 46    | 12259 |
| >APC-P1361LSPSKSGAQTP  | 6174  | >APC-P1361LSLSKSGAQTP  | 36    | 6138  |
| >APC-P1361LSPSKSGAQTP  | 13634 | >APC-P1361LSLSKSGAQTP  | 341   | 13293 |
| >APC-P1361LSPSKSGAQ    | 459   | >APC-P1361LSLSKSGAQ    | 22359 | 21900 |
| >APC-P1361LSPSKSGAQT   | 251   | >APC-P1361LSLSKSGAQT   | 22991 | 22740 |
| >APC-P1361LKSPSKSGA    | 5013  | >APC-P1361KSLSKSGA     | 298   | 4715  |
| >APC-P1361LKSPSKSGAQT  | 3804  | >APC-P1361KSLSKSGAQT   | 173   | 3631  |
| >APC-P1361LAKSPSKSGA   | 495   | >APC-P1361AKSLSKSGA    | 1326  | 831   |
| >APC-P1361LSGAKSPSK    | 831   | >APC-P1361LSGAKSLSK    | 376   | 455   |
| >APC-P1361LSSGAKSPSK   | 281   | >APC-P1361LSSGAKSLSK   | 108   | 173   |
| >APC-P1361LSSGAKSPSK   | 42    | >APC-P1361LSSGAKSLSK   | 20    | 22    |
| >APC-P1361LSSGAKSPSK   | 33    | >APC-P1361LSSGAKSLSK   | 49    | 16    |
| >APC-P1361LFSSGAKSP    | 18809 | >APC-P1361LFSSGAKSL    | 422   | 18387 |
| >APC-P1361LFSSGAKSPSK  | 282   | >APC-P1361LFSSGAKSLSK  | 46    | 236   |
| >APC-P1361LFSSGAKSPSK  | 31    | >APC-P1361LFSSGAKSLSK  | 14    | 17    |
| >APC-P1361LFSSGAKSPSK  | 89    | >APC-P1361LFSSGAKSLSK  | 61    | 28    |
| >APC-P1361LFSSGAKSP    | 16537 | >APC-P1361LFSSGAKSL    | 25    | 16512 |
| >APC-P1361LFSSGAKSP    | 5328  | >APC-P1361LFSSGAKSL    | 91    | 5237  |
| >APC-P1361LFSSGAKSPS   | 3432  | >APC-P1361LFSSGAKSLS   | 287   | 3145  |
| >APC-P1361LFSSGAKSP    | 25231 | >APC-P1361LFSSGAKSL    | 444   | 24787 |
| >APC-P1361LEFSSGAKSPSI | 280   | >APC-P1361LEFSSGAKSLSK | 373   | 93    |
| >APC-P1361LEFSSGAKSP   | 5151  | >APC-P1361LEFSSGAKSL   | 114   | 5037  |
| >APC-P1361LEFSSGAKSP   | 1703  | >APC-P1361LEFSSGAKSL   | 32    | 1671  |

|                        |       |                        |       |       |
|------------------------|-------|------------------------|-------|-------|
| >APC-P1361L VEFSSGAKSP | 5700  | >APC-P1361L VEFSSGAKSL | 331   | 5369  |
| >APC-P1361L VEFSSGAKSP | 3531  | >APC-P1361L VEFSSGAKSL | 381   | 3150  |
| >APC-P1361L VEFSSGAKSP | 12329 | >APC-P1361L VEFSSGAKSL | 21    | 12308 |
| >APC-P1369F PKSPPEHY   | 190   | >APC-P1369F HKSPPEHY   | 17    | 173   |
| >APC-P1369F PKSPPEHYV  | 2847  | >APC-P1369F HKSPPEHYV  | 439   | 2408  |
| >APC-P1369F TPKSPPEHYV | 100   | >APC-P1369F THKSPPEHYV | 27719 | 27619 |
| >APC-P1369F TPKSPPEHYV | 137   | >APC-P1369F THKSPPEHYV | 20425 | 20288 |
| >APC-P1369F TPKSPPEHY  | 2947  | >APC-P1369F THKSPPEHY  | 308   | 2639  |
| >APC-P1369F QTPKSPPEHY | 274   | >APC-P1369F QTHKSPPEHY | 701   | 427   |
| >APC-P1369F QTPKSPPEHY | 238   | >APC-P1369F QTHKSPPEHY | 109   | 129   |
| >APC-P1369F QTPKSPPEHY | 500   | >APC-P1369F QTHKSPPEHY | 409   | 91    |
| >APC-P1369F QTPKSPPEHY | 32    | >APC-P1369F QTHKSPPEHY | 20    | 12    |
| >APC-P1369F QTPKSPPEHY | 125   | >APC-P1369F QTHKSPPEHY | 74    | 51    |
| >APC-P1369F QTPKSPPEHY | 337   | >APC-P1369F QTHKSPPEHY | 618   | 281   |
| >APC-P1369F QTPKSPPEHY | 7856  | >APC-P1369F QTHKSPPEHY | 99    | 7757  |
| >APC-P1369F QTPKSPPEHY | 25    | >APC-P1369F QTHKSPPEHY | 27    | 2     |
| >APC-P1369F QTPKSPPEHY | 75    | >APC-P1369F QTHKSPPEHY | 58    | 17    |
| >APC-P1369F QTPKSPPEHY | 1008  | >APC-P1369F QTHKSPPEHY | 108   | 900   |
| >APC-P1369F QTPKSPPEHY | 2894  | >APC-P1369F QTHKSPPEHY | 400   | 2494  |
| >APC-P1369F QTPKSPPEHY | 2071  | >APC-P1369F QTHKSPPEHY | 222   | 1849  |
| >APC-P1369F QTPKSPPEHY | 293   | >APC-P1369F QTHKSPPEHY | 13    | 280   |
| >APC-P1369F QTPKSPPEHY | 9     | >APC-P1369F QTHKSPPEHY | 1965  | 1956  |
| >APC-P1369F QTPKSPPEHY | 106   | >APC-P1369F QTHKSPPEHY | 82    | 24    |
| >APC-P1369F AQTPKSPPEH | 410   | >APC-P1369F AQTHKSPPEH | 379   | 31    |
| >APC-P1369F AQTPKSPPEH | 87    | >APC-P1369F AQTHKSPPEH | 97    | 10    |
| >APC-P1369F AQTPKSPPEH | 22    | >APC-P1369F AQTHKSPPEH | 18    | 4     |
| >APC-P1369F KSGAQTPK   | 96    | >APC-P1369F KSGAQTHK   | 98    | 2     |
| >APC-P1369F KSGAQTPK   | 34    | >APC-P1369F KSGAQTHK   | 99    | 65    |
| >APC-P1369F KSGAQTPK   | 20    | >APC-P1369F KSGAQTHK   | 35    | 15    |
| >APC-P1369F KSGAQTPK   | 209   | >APC-P1369F KSGAQTHK   | 171   | 38    |
| >APC-P1369F PSKSGAQTPK | 41    | >APC-P1369F PSKSGAQTHK | 72    | 31    |
| >APC-P1373S PEHYVQETPL | 2231  | >APC-P1373S SEHYVQETPL | 203   | 2028  |
| >APC-P1373S PEHYVQETPL | 895   | >APC-P1373S SEHYVQETPL | 59    | 836   |
| >APC-P1373S PEHYVQETPL | 2576  | >APC-P1373S SEHYVQETPL | 448   | 2128  |
| >APC-P1373S PEHYVQETPL | 1305  | >APC-P1373S SEHYVQETPL | 150   | 1155  |
| >APC-P1373S PEHYVQET   | 3419  | >APC-P1373S SEHYVQET   | 144   | 3275  |
| >APC-P1373S PEHYVQETPL | 210   | >APC-P1373S SEHYVQETPL | 63    | 147   |
| >APC-P1373S PEHYVQETPL | 4182  | >APC-P1373S SEHYVQETPL | 189   | 3993  |
| >APC-P1373S PEHYVQETPL | 3459  | >APC-P1373S SEHYVQETPL | 367   | 3092  |
| >APC-P1373S PEHYVQET   | 900   | >APC-P1373S SEHYVQET   | 24    | 876   |
| >APC-P1373S PEHYVQETPL | 9699  | >APC-P1373S SEHYVQETPL | 386   | 9313  |
| >APC-P1373S PEHYVQETPL | 9914  | >APC-P1373S SEHYVQETPL | 366   | 9548  |
| >APC-P1373S PEHYVQETPL | 5236  | >APC-P1373S SEHYVQETPL | 499   | 4737  |

|                                  |      |                                  |      |      |
|----------------------------------|------|----------------------------------|------|------|
| >APC-P1373 $\epsilon$ PEHYVQETPL | 228  | >APC-P1373 $\epsilon$ SEHYVQETPL | 24   | 204  |
| >APC-P1373 $\epsilon$ KSPPEHYV   | 436  | >APC-P1373 $\epsilon$ KSPSEHYV   | 785  | 349  |
| >APC-P1373 $\epsilon$ KSPPEHYV   | 40   | >APC-P1373 $\epsilon$ KSPSEHYV   | 291  | 251  |
| >APC-P1373 $\epsilon$ KSPPEHYVQ  | 23   | >APC-P1373 $\epsilon$ KSPSEHYVQ  | 32   | 9    |
| >APC-P1373 $\epsilon$ KSPPEHYVQE | 235  | >APC-P1373 $\epsilon$ KSPSEHYVQE | 302  | 67   |
| >APC-P1373 $\epsilon$ PKSPPEHY   | 190  | >APC-P1373 $\epsilon$ PKSPSEHY   | 100  | 90   |
| >APC-P1373 $\epsilon$ TPKSPPEHYV | 100  | >APC-P1373 $\epsilon$ TPKSPSEHYV | 61   | 39   |
| >APC-P1373 $\epsilon$ TPKSPPEHYV | 137  | >APC-P1373 $\epsilon$ TPKSPSEHYV | 133  | 4    |
| >APC-P1373 $\epsilon$ QTPKSPPEHY | 274  | >APC-P1373 $\epsilon$ QTPKSPSEHY | 369  | 95   |
| >APC-P1373 $\epsilon$ QTPKSPPEHY | 238  | >APC-P1373 $\epsilon$ QTPKSPSEHY | 435  | 197  |
| >APC-P1373 $\epsilon$ QTPKSPPEHY | 32   | >APC-P1373 $\epsilon$ QTPKSPSEHY | 43   | 11   |
| >APC-P1373 $\epsilon$ QTPKSPPEHY | 125  | >APC-P1373 $\epsilon$ QTPKSPSEHY | 130  | 5    |
| >APC-P1373 $\epsilon$ QTPKSPPEHY | 337  | >APC-P1373 $\epsilon$ QTPKSPSEHY | 432  | 95   |
| >APC-P1373 $\epsilon$ QTPKSPPEHY | 25   | >APC-P1373 $\epsilon$ QTPKSPSEHY | 15   | 10   |
| >APC-P1373 $\epsilon$ QTPKSPPEHY | 75   | >APC-P1373 $\epsilon$ QTPKSPSEHY | 229  | 154  |
| >APC-P1373 $\epsilon$ QTPKSPPEHY | 293  | >APC-P1373 $\epsilon$ QTPKSPSEHY | 156  | 137  |
| >APC-P1373 $\epsilon$ QTPKSPPEHY | 835  | >APC-P1373 $\epsilon$ QTPKSPSEHY | 478  | 357  |
| >APC-P1373 $\epsilon$ QTPKSPPEHY | 9    | >APC-P1373 $\epsilon$ QTPKSPSEHY | 11   | 2    |
| >APC-P1373 $\epsilon$ QTPKSPPEHY | 106  | >APC-P1373 $\epsilon$ QTPKSPSEHY | 135  | 29   |
| >APC-P1373 $\epsilon$ QTPKSPPEHY | 410  | >APC-P1373 $\epsilon$ QTPKSPSEHY | 258  | 152  |
| >APC-P1373 $\epsilon$ AQTPKSPPEH | 87   | >APC-P1373 $\epsilon$ AQTPKSPSEH | 48   | 39   |
| >APC-P1373 $\epsilon$ AQTPKSPPEH | 22   | >APC-P1373 $\epsilon$ AQTPKSPSEH | 21   | 1    |
| >APC-P1373 $\eta$ PEHYVQETPL     | 2231 | >APC-P1373 $\eta$ TEHYVQETPL     | 257  | 1974 |
| >APC-P1373 $\eta$ PEHYVQETPL     | 895  | >APC-P1373 $\eta$ TEHYVQETPL     | 63   | 832  |
| >APC-P1373 $\eta$ PEHYVQETPL     | 1305 | >APC-P1373 $\eta$ TEHYVQETPL     | 158  | 1147 |
| >APC-P1373 $\eta$ PEHYVQET       | 3419 | >APC-P1373 $\eta$ TEHYVQET       | 151  | 3268 |
| >APC-P1373 $\eta$ PEHYVQETPL     | 210  | >APC-P1373 $\eta$ TEHYVQETPL     | 73   | 137  |
| >APC-P1373 $\eta$ PEHYVQETPL     | 4182 | >APC-P1373 $\eta$ TEHYVQETPL     | 187  | 3995 |
| >APC-P1373 $\eta$ PEHYVQET       | 900  | >APC-P1373 $\eta$ TEHYVQET       | 58   | 842  |
| >APC-P1373 $\eta$ PEHYVQETPL     | 5236 | >APC-P1373 $\eta$ TEHYVQETPL     | 429  | 4807 |
| >APC-P1373 $\eta$ PEHYVQETPL     | 228  | >APC-P1373 $\eta$ TEHYVQETPL     | 38   | 190  |
| >APC-P1373 $\eta$ KSPPEHYV       | 436  | >APC-P1373 $\eta$ KSPTEHYV       | 1015 | 579  |
| >APC-P1373 $\eta$ KSPPEHYV       | 40   | >APC-P1373 $\eta$ KSPTEHYV       | 180  | 140  |
| >APC-P1373 $\eta$ KSPPEHYVQ      | 23   | >APC-P1373 $\eta$ KSPTEHYVQ      | 67   | 44   |
| >APC-P1373 $\eta$ KSPPEHYVQE     | 235  | >APC-P1373 $\eta$ KSPTEHYVQE     | 566  | 331  |
| >APC-P1373 $\eta$ PKSPPEHY       | 190  | >APC-P1373 $\eta$ PKSPTEHY       | 162  | 28   |
| >APC-P1373 $\eta$ TPKSPPEHYV     | 100  | >APC-P1373 $\eta$ TPKSPTEHYV     | 84   | 16   |
| >APC-P1373 $\eta$ TPKSPPEHYV     | 137  | >APC-P1373 $\eta$ TPKSPTEHYV     | 92   | 45   |
| >APC-P1373 $\eta$ QTPKSPPEHY     | 274  | >APC-P1373 $\eta$ QTPKSPTEHY     | 269  | 5    |
| >APC-P1373 $\eta$ QTPKSPPEHY     | 238  | >APC-P1373 $\eta$ QTPKSPTEHY     | 399  | 161  |
| >APC-P1373 $\eta$ QTPKSPPEHY     | 32   | >APC-P1373 $\eta$ QTPKSPTEHY     | 40   | 8    |
| >APC-P1373 $\eta$ QTPKSPPEHY     | 125  | >APC-P1373 $\eta$ QTPKSPTEHY     | 68   | 57   |
| >APC-P1373 $\eta$ QTPKSPPEHY     | 337  | >APC-P1373 $\eta$ QTPKSPTEHY     | 278  | 59   |

|                        |       |                        |      |       |
|------------------------|-------|------------------------|------|-------|
| >APC-P13731QTPKSPPEHY  | 25    | >APC-P13731QTPKSPTEHY  | 16   | 9     |
| >APC-P13731QTPKSPPEHY  | 75    | >APC-P13731QTPKSPTEHY  | 184  | 109   |
| >APC-P13731QTPKSPPEHY  | 293   | >APC-P13731QTPKSPTEHY  | 246  | 47    |
| >APC-P13731QTPKSPPEHY  | 835   | >APC-P13731QTPKSPTEHY  | 449  | 386   |
| >APC-P13731QTPKSPPEHY  | 9     | >APC-P13731QTPKSPTEHY  | 12   | 3     |
| >APC-P13731QTPKSPPEHY  | 106   | >APC-P13731QTPKSPTEHY  | 204  | 98    |
| >APC-P13731AQTPKSPPEH  | 410   | >APC-P13731AQTPKSPTEH  | 268  | 142   |
| >APC-P13731AQTPKSPPEH  | 87    | >APC-P13731AQTPKSPTEH  | 58   | 29    |
| >APC-P13731AQTPKSPPEH  | 22    | >APC-P13731AQTPKSPTEH  | 27   | 5     |
| >APC-P1420LSPSDLPDSP   | 34877 | >APC-P1420LSLSDLPDSP   | 301  | 34576 |
| >APC-P1420LSPSDLPDSPG  | 26441 | >APC-P1420LSLSDLPDSPG  | 488  | 25953 |
| >APC-P1420LSPSDLPDSPG  | 33563 | >APC-P1420LSLSDLPDSPG  | 379  | 33184 |
| >APC-P1420LSPSDLPDSPG  | 23544 | >APC-P1420LSLSDLPDSPG  | 201  | 23343 |
| >APC-P1420LSPSDLPDS    | 36113 | >APC-P1420LSLSDLPDS    | 499  | 35614 |
| >APC-P1420LSPSDLPDSPG  | 32063 | >APC-P1420LSLSDLPDSPG  | 33   | 32030 |
| >APC-P1420LCSGMVSGIISI | 17499 | >APC-P1420LCSGMVSGIISI | 88   | 17411 |
| >APC-P1420LGIISPSDL    | 1620  | >APC-P1420LGIISLSDL    | 237  | 1383  |
| >APC-P1420LGIISPSDL    | 804   | >APC-P1420LGIISLSDL    | 237  | 567   |
| >APC-P1420LVSGIISPSDL  | 101   | >APC-P1420LVSGIISLSDL  | 69   | 32    |
| >APC-P1420LVSGIISPSDL  | 299   | >APC-P1420LVSGIISLSDL  | 1033 | 734   |
| >APC-P1420LMVSGIISP    | 20858 | >APC-P1420LMVSGIISL    | 79   | 20779 |
| >APC-P1420LMVSGIISP    | 1552  | >APC-P1420LMVSGIISL    | 10   | 1542  |
| >APC-P1420LMVSGIISPS   | 144   | >APC-P1420LMVSGIISLS   | 110  | 34    |
| >APC-P1420LMVSGIISPSDI | 55    | >APC-P1420LMVSGIISLSDI | 23   | 32    |
| >APC-P1420LMVSGIISP    | 8179  | >APC-P1420LMVSGIISL    | 43   | 8136  |
| >APC-P1420LMVSGIISPS   | 225   | >APC-P1420LMVSGIISLS   | 558  | 333   |
| >APC-P1420LMVSGIISPSDI | 57    | >APC-P1420LMVSGIISLSDI | 33   | 24    |
| >APC-P1420LMVSGIISP    | 6137  | >APC-P1420LMVSGIISL    | 33   | 6104  |
| >APC-P1420LMVSGIISPSDI | 1119  | >APC-P1420LMVSGIISLSDI | 346  | 773   |
| >APC-P1420LMVSGIISP    | 16906 | >APC-P1420LMVSGIISL    | 113  | 16793 |
| >APC-P1420LMVSGIISP    | 23227 | >APC-P1420LMVSGIISL    | 252  | 22975 |
| >APC-P1420LMVSGIISP    | 14639 | >APC-P1420LMVSGIISL    | 9    | 14630 |
| >APC-P1420LMVSGIISPSDI | 69    | >APC-P1420LMVSGIISLSDI | 33   | 36    |
| >APC-P1420LMVSGIISP    | 11136 | >APC-P1420LMVSGIISL    | 291  | 10845 |
| >APC-P1420LMVSGIISPS   | 1004  | >APC-P1420LMVSGIISLS   | 304  | 700   |
| >APC-P1420LMVSGIISP    | 1489  | >APC-P1420LMVSGIISL    | 8    | 1481  |
| >APC-P1420LMVSGIISPS   | 7     | >APC-P1420LMVSGIISLS   | 13   | 6     |
| >APC-P1420LMVSGIISPSDI | 32    | >APC-P1420LMVSGIISLSDI | 27   | 5     |
| >APC-P1420LMVSGIISP    | 9974  | >APC-P1420LMVSGIISL    | 419  | 9555  |
| >APC-P1420LMVSGIISPS   | 4553  | >APC-P1420LMVSGIISLS   | 463  | 4090  |
| >APC-P1420LMVSGIISPSDI | 367   | >APC-P1420LMVSGIISLSDI | 165  | 202   |
| >APC-P1420LGMVSGIISP   | 17904 | >APC-P1420LGMVSGIISL   | 22   | 17882 |
| >APC-P1420LGMVSGIISP   | 4419  | >APC-P1420LGMVSGIISL   | 17   | 4402  |

|                        |       |                         |       |       |
|------------------------|-------|-------------------------|-------|-------|
| >APC-P1420L GMVSGIISPS | 414   | >APC-P1420L GMVSGIISLS  | 421   | 7     |
| >APC-P1420L GMVSGIISP  | 3877  | >APC-P1420L GMVSGIISL   | 11    | 3866  |
| >APC-P1420L GMVSGIISP  | 5891  | >APC-P1420L GMVSGIISL   | 27    | 5864  |
| >APC-P1420L GMVSGIISP  | 2456  | >APC-P1420L GMVSGIISL   | 4     | 2452  |
| >APC-P1420L GMVSGIISPS | 440   | >APC-P1420L GMVSGIISLS  | 826   | 386   |
| >APC-P1420L GMVSGIISP  | 5857  | >APC-P1420L GMVSGIISL   | 7     | 5850  |
| >APC-P1420L GMVSGIISP  | 9038  | >APC-P1420L GMVSGIISL   | 12    | 9026  |
| >APC-P1420L GMVSGIISP  | 21125 | >APC-P1420L GMVSGIISL   | 144   | 20981 |
| >APC-P1420L GMVSGIISP  | 5782  | >APC-P1420L GMVSGIISL   | 3     | 5779  |
| >APC-P1420L GMVSGIISP  | 5370  | >APC-P1420L GMVSGIISL   | 240   | 5130  |
| >APC-P1420L GMVSGIISP  | 3933  | >APC-P1420L GMVSGIISL   | 165   | 3768  |
| >APC-P1420L GMVSGIISP  | 20338 | >APC-P1420L GMVSGIISL   | 159   | 20179 |
| >APC-P1420L GMVSGIISP  | 19066 | >APC-P1420L GMVSGIISL   | 305   | 18761 |
| >APC-P1420L SGMVSGIISP | 21603 | >APC-P1420L SGMVSGIISL  | 423   | 21180 |
| >APC-P1432F MPPSRSKTP  | 249   | >APC-P1432F MHPSRSKTP   | 2629  | 2380  |
| >APC-P1432F MPPSRSKTPF | 205   | >APC-P1432F MHPSRSKTPF  | 19679 | 19474 |
| >APC-P1432F TMPPSRSK   | 185   | >APC-P1432F TMHPSRSK    | 58    | 127   |
| >APC-P1432F TMPPSRSK   | 330   | >APC-P1432F TMHPSRSK    | 59    | 271   |
| >APC-P1432F TMPPSRSK   | 3692  | >APC-P1432F TMHPSRSK    | 18    | 3674  |
| >APC-P1432F QTMPPSRSK  | 103   | >APC-P1432F QTMHPSRSK   | 85    | 18    |
| >APC-P1432F QTMPPSRSK  | 26    | >APC-P1432F QTMHPSRSK   | 43    | 17    |
| >APC-P1432F QTMPPSRSK  | 33    | >APC-P1432F QTMHPSRSK   | 39    | 6     |
| >APC-P1432F QTMPPSRSK  | 296   | >APC-P1432F QTMHPSRSK   | 330   | 34    |
| >APC-P1432F QTMPPSRS   | 258   | >APC-P1432F QTMHPSRS    | 452   | 194   |
| >APC-P1432F QTMPPSRSK  | 392   | >APC-P1432F QTMHPSRSK   | 1172  | 780   |
| >APC-P1432F QTMPPSRSK  | 240   | >APC-P1432F QTMHPSRSK   | 251   | 11    |
| >APC-P1432F GQTMPPSRS  | 510   | >APC-P1432F GQTMHPSRS   | 264   | 246   |
| >APC-P1432F GQTMPPSRS  | 284   | >APC-P1432F GQTMHPSRS   | 277   | 7     |
| >APC-P1432F GQTMPPSR   | 819   | >APC-P1432F GQTMHPSR    | 168   | 651   |
| >APC-P1432F DSPGQTMPP  | 893   | >APC-P1432F DSPGQTMHF   | 457   | 436   |
| >APC-P1432F DSPGQTMPP  | 191   | >APC-P1432F DSPGQTMHF   | 110   | 81    |
| >APC-P1432F LPDSPGQTM  | 4282  | >APC-P1432F LPDSPGQTM   | 279   | 4003  |
| >APC-P1439L PPPPPQTA   | 3174  | >APC-P1439L LPPPPQTA    | 33    | 3141  |
| >APC-P1439L TPPPPPQTA  | 23859 | >APC-P1439L TLPPPPQTA   | 181   | 23678 |
| >APC-P1439L TPPPPPQTA  | 24665 | >APC-P1439L TLPPPPQTA   | 34    | 24631 |
| >APC-P1439L TPPPPPQTA  | 25926 | >APC-P1439L TLPPPPQTA   | 349   | 25577 |
| >APC-P1439L TPPPPPQT   | 34913 | >APC-P1439L TLPPPPQT    | 129   | 34784 |
| >APC-P1439L TPPPPPQTA  | 30691 | >APC-P1439L TLPPPPQTA   | 19    | 30672 |
| >APC-P1439L TPPPPPQTAC | 35907 | >APC-P1439L TLPPPPPQTAC | 455   | 35452 |
| >APC-P1439L TPPPPPQTAC | 34433 | >APC-P1439L TLPPPPPQTAC | 74    | 34359 |
| >APC-P1439L QTMPPSRSK  | 4466  | >APC-P1439L QTMPPSRSK   | 45    | 4421  |
| >APC-P1439L QTMPPSRSK  | 12487 | >APC-P1439L QTMPPSRSK   | 135   | 12352 |
| >APC-P1439L QTMPPSRSK  | 8204  | >APC-P1439L QTMPPSRSK   | 302   | 7902  |

|                         |       |                        |       |       |
|-------------------------|-------|------------------------|-------|-------|
| >APC-P1439L QTMPPSRSK   | 8935  | >APC-P1439L QTMPPSRSK  | 438   | 8497  |
| >APC-P1439L QTMPPSRSK   | 4284  | >APC-P1439L QTMPPSRSK  | 5     | 4279  |
| >APC-P1439L QTMPPSRSK   | 5172  | >APC-P1439L QTMPPSRSK  | 62    | 5110  |
| >APC-P1439L QTMPPSRSK   | 10771 | >APC-P1439L QTMPPSRSK  | 58    | 10713 |
| >APC-P1439L KTPPPPPQTA  | 879   | >APC-P1439L KTLPPPPQTA | 82    | 797   |
| >APC-P1439L KTPPPPPQ    | 2013  | >APC-P1439L KTLPPPPQ   | 86    | 1927  |
| >APC-P1439L KTPPPPPQT   | 5123  | >APC-P1439L KTLPPPPQT  | 400   | 4723  |
| >APC-P1439L KTPPPPPQTA  | 656   | >APC-P1439L KTLPPPPQTA | 27    | 629   |
| >APC-P1439L KTPPPPPQ    | 5797  | >APC-P1439L KTLPPPPQ   | 157   | 5640  |
| >APC-P1439L KTPPPPPQT   | 2213  | >APC-P1439L KTLPPPPQT  | 43    | 2170  |
| >APC-P1439L KTPPPPPQTA  | 3039  | >APC-P1439L KTLPPPPQTA | 61    | 2978  |
| >APC-P1439L KTPPPPPQTA  | 5785  | >APC-P1439L KTLPPPPQTA | 187   | 5598  |
| >APC-P1439L KTPPPPPQT   | 180   | >APC-P1439L KTLPPPPQT  | 17576 | 17396 |
| >APC-P1439L KTPPPPPQTA  | 107   | >APC-P1439L KTLPPPPQTA | 15721 | 15614 |
| >APC-P1439L KTPPPPPQTA  | 131   | >APC-P1439L KTLPPPPQTA | 18602 | 18471 |
| >APC-P1439L RSKTTPPPP   | 32    | >APC-P1439L RSKTLPPP   | 28    | 4     |
| >APC-P1439L RSKTTPPPP   | 22    | >APC-P1439L RSKTLPPP   | 17    | 5     |
| >APC-P1439L RSKTTPPPPPQ | 9     | >APC-P1439L RSKTLPPPPQ | 9     | 0     |
| >APC-P1439L RSKTTPPPPPQ | 45    | >APC-P1439L RSKTLPPPPQ | 39    | 6     |
| >APC-P1439L PSRSKTTPPP  | 480   | >APC-P1439L PSRSKTLPP  | 866   | 386   |
| >APC-P1439L PSRSKTTPPP  | 387   | >APC-P1439L PSRSKTLPPP | 498   | 111   |
| >APC-P1439L MPPSRSKTP   | 249   | >APC-P1439L MPPSRSKTL  | 87    | 162   |
| >APC-P1439L MPPSRSKTP   | 38705 | >APC-P1439L MPPSRSKTL  | 65    | 38640 |
| >APC-P1439L MPPSRSKTP   | 19693 | >APC-P1439L MPPSRSKTL  | 46    | 19647 |
| >APC-P1439L MPPSRSKTP   | 2240  | >APC-P1439L MPPSRSKTL  | 28    | 2212  |
| >APC-P1439L MPPSRSKTPF  | 205   | >APC-P1439L MPPSRSKTLP | 800   | 595   |
| >APC-P1439L TMPPSRSKTP  | 1067  | >APC-P1439L TMPPSRSKTL | 272   | 795   |
| >APC-P1439L TMPPSRSKTP  | 17660 | >APC-P1439L TMPPSRSKTL | 28    | 17632 |
| >APC-P1439L TMPPSRSKTP  | 18683 | >APC-P1439L TMPPSRSKTL | 167   | 18516 |
| >APC-P1453L VPKNKAPTAE  | 16950 | >APC-P1453L VSKNKAPTAE | 241   | 16709 |
| >APC-P1453L VPKNKAPTA   | 15820 | >APC-P1453L VSKNKAPTA  | 148   | 15672 |
| >APC-P1453L VPKNKAPTAE  | 10205 | >APC-P1453L VSKNKAPTAE | 14    | 10191 |
| >APC-P1453L VPKNKAPTAE  | 11197 | >APC-P1453L VSKNKAPTAE | 464   | 10733 |
| >APC-P1453L VPKNKAPTA   | 469   | >APC-P1453L VSKNKAPTA  | 5512  | 5043  |
| >APC-P1453L VPKNKAPTA   | 433   | >APC-P1453L VSKNKAPTA  | 31277 | 30844 |
| >APC-P1453L EVPKNKAPT   | 301   | >APC-P1453L EVSKNKAPT  | 279   | 22    |
| >APC-P1453L REVPKNKAPT  | 484   | >APC-P1453L REVSKNKAPT | 366   | 118   |
| >APC-P1453L REVPKNKA    | 326   | >APC-P1453L REVSKNKA   | 197   | 129   |
| >APC-P1453L REVPKNKAPT  | 80    | >APC-P1453L REVSKNKAPT | 56    | 24    |
| >APC-P1453L QTKREVPK    | 247   | >APC-P1453L QTKREVSK   | 449   | 202   |
| >APC-P1453L QTKREVPK    | 6     | >APC-P1453L QTKREVSK   | 9     | 3     |
| >APC-P1453L QTKREVPKNK  | 10    | >APC-P1453L QTKREVSKNK | 10    | 0     |
| >APC-P1453L QTKREVPKNK  | 233   | >APC-P1453L QTKREVSKNK | 255   | 22    |

|                       |       |                       |       |       |
|-----------------------|-------|-----------------------|-------|-------|
| >APC-P1453QTKREVPK    | 266   | >APC-P1453QTKREVSK    | 179   | 87    |
| >APC-P1453AQTKREVPK   | 181   | >APC-P1453AQTKREVSK   | 423   | 242   |
| >APC-P1453QTAQTKREVI  | 157   | >APC-P1453QTAQTKREV   | 287   | 130   |
| >APC-P1453QTAQTKREVI  | 33    | >APC-P1453QTAQTKREV   | 30    | 3     |
| >APC-P1453QTAQTKREVI  | 216   | >APC-P1453QTAQTKREV   | 283   | 67    |
| >APC-P1609PSQLPVYK    | 173   | >APC-P1609LSQLPVYK    | 17    | 156   |
| >APC-P1609PSQLPVYK    | 2861  | >APC-P1609LSQLPVYK    | 417   | 2444  |
| >APC-P1609PSQLPVYK    | 5397  | >APC-P1609LSQLPVYK    | 280   | 5117  |
| >APC-P1609PSQLPVYKL   | 4900  | >APC-P1609LSQLPVYKL   | 32    | 4868  |
| >APC-P1609PSQLPVYKLL  | 9354  | >APC-P1609LSQLPVYKLL  | 135   | 9219  |
| >APC-P1609PSQLPVYKL   | 2048  | >APC-P1609LSQLPVYKL   | 141   | 1907  |
| >APC-P1609PSQLPVYKLL  | 1548  | >APC-P1609LSQLPVYKLL  | 108   | 1440  |
| >APC-P1609PSQLPVYKLL  | 4157  | >APC-P1609LSQLPVYKLL  | 128   | 4029  |
| >APC-P1609PSQLPVYKL   | 12118 | >APC-P1609LSQLPVYKL   | 498   | 11620 |
| >APC-P1609PSQLPVYKLL  | 6628  | >APC-P1609LSQLPVYKLL  | 408   | 6220  |
| >APC-P1609KPSQLPVYKL  | 22862 | >APC-P1609KLSQLPVYKL  | 105   | 22757 |
| >APC-P1609KPSQLPVYKLI | 23166 | >APC-P1609KLSQLPVYKLI | 214   | 22952 |
| >APC-P1609KPSQLPVYKL  | 7827  | >APC-P1609KLSQLPVYKL  | 13    | 7814  |
| >APC-P1609KPSQLPVYKLI | 20508 | >APC-P1609KLSQLPVYKLI | 13    | 20495 |
| >APC-P1609KPSQLPVYKL  | 21329 | >APC-P1609KLSQLPVYKL  | 129   | 21200 |
| >APC-P1609KPSQLPVYKLI | 22425 | >APC-P1609KLSQLPVYKLI | 57    | 22368 |
| >APC-P1609KPSQLPVYKL  | 18781 | >APC-P1609KLSQLPVYKL  | 7     | 18774 |
| >APC-P1609KPSQLPVYKLI | 23752 | >APC-P1609KLSQLPVYKLI | 34    | 23718 |
| >APC-P1609KPSQLPVYKL  | 22828 | >APC-P1609KLSQLPVYKL  | 23    | 22805 |
| >APC-P1609KPSQLPVYKLI | 25253 | >APC-P1609KLSQLPVYKLI | 377   | 24876 |
| >APC-P1609KPSQLPVYKL  | 21442 | >APC-P1609KLSQLPVYKL  | 20    | 21422 |
| >APC-P1609KPSQLPVYKLI | 23372 | >APC-P1609KLSQLPVYKLI | 76    | 23296 |
| >APC-P1609KPSQLPVYKL  | 23401 | >APC-P1609KLSQLPVYKL  | 28    | 23373 |
| >APC-P1609KPSQLPVYKL  | 30175 | >APC-P1609KLSQLPVYKL  | 10    | 30165 |
| >APC-P1609KPSQLPVYKLI | 32587 | >APC-P1609KLSQLPVYKLI | 22    | 32565 |
| >APC-P1609KPSQLPVY    | 19132 | >APC-P1609KLSQLPVY    | 314   | 18818 |
| >APC-P1609KPSQLPVYK   | 4485  | >APC-P1609KLSQLPVYK   | 31    | 4454  |
| >APC-P1609KPSQLPVYK   | 2929  | >APC-P1609KLSQLPVYK   | 29    | 2900  |
| >APC-P1609KPSQLPVY    | 4776  | >APC-P1609KLSQLPVY    | 241   | 4535  |
| >APC-P1609KPSQLPVYK   | 10446 | >APC-P1609KLSQLPVYK   | 67    | 10379 |
| >APC-P1609KPSQLPVY    | 232   | >APC-P1609KLSQLPVY    | 20    | 212   |
| >APC-P1609KPSQLPVYK   | 7789  | >APC-P1609KLSQLPVYK   | 168   | 7621  |
| >APC-P1609KPSQLPVYKL  | 5852  | >APC-P1609KLSQLPVYKL  | 35    | 5817  |
| >APC-P1609KPSQLPVY    | 3943  | >APC-P1609KLSQLPVY    | 65    | 3878  |
| >APC-P1609KPSQLPVYKL  | 213   | >APC-P1609KLSQLPVYKL  | 28630 | 28417 |
| >APC-P1609KPSQLPVYKLI | 289   | >APC-P1609KLSQLPVYKLI | 22168 | 21879 |
| >APC-P1609KPSQLPVY    | 7277  | >APC-P1609KLSQLPVY    | 94    | 7183  |
| >APC-P1609KPSQLPVY    | 1880  | >APC-P1609KLSQLPVY    | 263   | 1617  |



|                         |       |                         |       |       |
|-------------------------|-------|-------------------------|-------|-------|
| >APC-P1609I KPSQLPVY    | 30    | >APC-P1609I KLSQLPVY    | 4674  | 4644  |
| >APC-P1609I KPSQLPVY    | 211   | >APC-P1609I KLSQLPVY    | 29867 | 29656 |
| >APC-P1609I KPSQLPVY    | 49    | >APC-P1609I KLSQLPVY    | 3399  | 3350  |
| >APC-P1609I KPSQLPVYK   | 55    | >APC-P1609I KLSQLPVYK   | 20    | 35    |
| >APC-P1609I SKLPPPVARK  | 2549  | >APC-P1609I SKLPPPVARK  | 83    | 2466  |
| >APC-P1609I RKPSQLPVYK  | 1970  | >APC-P1609I RKLSQLPVYK  | 86    | 1884  |
| >APC-P1609I RKPSQLPVY   | 276   | >APC-P1609I RKLSQLPVY   | 105   | 171   |
| >APC-P1609I RKPSQLPV    | 95    | >APC-P1609I RKLSQLPV    | 11    | 84    |
| >APC-P1609I RKPSQLPVY   | 15    | >APC-P1609I RKLSQLPVY   | 3     | 12    |
| >APC-P1609I RKPSQLPVYK  | 662   | >APC-P1609I RKLSQLPVYK  | 103   | 559   |
| >APC-P1609I RKPSQLPVYK  | 157   | >APC-P1609I RKLSQLPVYK  | 15    | 142   |
| >APC-P1609I RKPSQLPVYK  | 3726  | >APC-P1609I RKLSQLPVYK  | 406   | 3320  |
| >APC-P1609I RKPSQLPVYK  | 4028  | >APC-P1609I RKLSQLPVYK  | 367   | 3661  |
| >APC-P1609I RKPSQLPVYK  | 718   | >APC-P1609I RKLSQLPVYK  | 266   | 452   |
| >APC-P1609I RKPSQLPVYK  | 452   | >APC-P1609I RKLSQLPVYK  | 229   | 223   |
| >APC-P1609I ARKPSQLPV   | 320   | >APC-P1609I ARKLSQLPV   | 859   | 539   |
| >APC-P1609I ARKPSQLPVY  | 25    | >APC-P1609I ARKLSQLPVY  | 48    | 23    |
| >APC-P1609I ARKPSQLPV   | 97    | >APC-P1609I ARKLSQLPV   | 261   | 164   |
| >APC-P1609I ARKPSQLPVY  | 24    | >APC-P1609I ARKLSQLPVY  | 60    | 36    |
| >APC-P1609I ARKPSQLPV   | 585   | >APC-P1609I ARKLSQLPV   | 398   | 187   |
| >APC-P1609I ARKPSQLPVY  | 86    | >APC-P1609I ARKLSQLPVY  | 45    | 41    |
| >APC-P1609I ARKPSQLPVY  | 256   | >APC-P1609I ARKLSQLPVY  | 202   | 54    |
| >APC-P1609I ARKPSQLPVY  | 350   | >APC-P1609I ARKLSQLPVY  | 599   | 249   |
| >APC-P1609I VARKPSQL    | 2353  | >APC-P1609I VARKLSQL    | 457   | 1896  |
| >APC-P1609I VARKPSQLPV  | 38    | >APC-P1609I VARKLSQLPV  | 38    | 0     |
| >APC-P1609I VARKPSQLPV  | 331   | >APC-P1609I VARKLSQLPV  | 287   | 44    |
| >APC-P1609I VARKPSQLPV  | 250   | >APC-P1609I VARKLSQLPV  | 169   | 81    |
| >APC-P1609I VARKPSQL    | 281   | >APC-P1609I VARKLSQL    | 556   | 275   |
| >APC-P1609I VARKPSQLPV  | 106   | >APC-P1609I VARKLSQLPV  | 99    | 7     |
| >APC-P1609I VARKPSQLPV  | 324   | >APC-P1609I VARKLSQLPV  | 713   | 389   |
| >APC-P1609I VARKPSQLPV  | 75    | >APC-P1609I VARKLSQLPV  | 126   | 51    |
| >APC-P1609I VARKPSQL    | 13    | >APC-P1609I VARKLSQL    | 20    | 7     |
| >APC-P1609I VARKPSQLPV  | 323   | >APC-P1609I VARKLSQLPV  | 642   | 319   |
| >APC-P1609I VARKPSQLPV  | 8     | >APC-P1609I VARKLSQLPV  | 11    | 3     |
| >APC-P1609I VARKPSQLPV  | 629   | >APC-P1609I VARKLSQLPV  | 363   | 266   |
| >APC-P1609I VARKPSQLPV  | 38    | >APC-P1609I VARKLSQLPV  | 38    | 0     |
| >APC-P1609I PVARKPSQLP  | 524   | >APC-P1609I PVARKLSQLP  | 495   | 29    |
| >APC-P1609I PVARKPSQL   | 4972  | >APC-P1609I PVARKLSQL   | 309   | 4663  |
| >APC-P1609I PPVARKPSQL  | 94    | >APC-P1609I PPVARKLSQL  | 138   | 44    |
| >APC-P1609I PPPVARKPSC  | 86    | >APC-P1609I PPPVARKLSQ  | 77    | 9     |
| >APC-P1609I LPPPVAR KP  | 23259 | >APC-P1609I LPPPVAR KL  | 490   | 22769 |
| >APC-P1609I LPPPVAR KP  | 16082 | >APC-P1609I LPPPVAR KL  | 55    | 16027 |
| >APC-P1609I KLPPPVAR KP | 6529  | >APC-P1609I KLPPPVAR KL | 19    | 6510  |

|                         |       |                         |       |       |
|-------------------------|-------|-------------------------|-------|-------|
| >APC-P1609I KLPPPVARKP  | 23399 | >APC-P1609I KLPPPVARKL  | 460   | 22939 |
| >APC-P1609I KLPPPVARKP  | 16831 | >APC-P1609I KLPPPVARKL  | 143   | 16688 |
| >APC-P1609I KLPPPVARKP  | 12065 | >APC-P1609I KLPPPVARKL  | 24    | 12041 |
| >APC-P1609I KLPPPVARKP  | 4922  | >APC-P1609I KLPPPVARKL  | 19    | 4903  |
| >APC-P2540I PINRSGTWK   | 713   | >APC-P2540I SINRSGTWK   | 62    | 651   |
| >APC-P2540I PINRSGTWK   | 2183  | >APC-P2540I SINRSGTWK   | 25    | 2158  |
| >APC-P2540I PINRSGTWKF  | 10189 | >APC-P2540I SINRSGTWKF  | 404   | 9785  |
| >APC-P2540I PINRSGTWK   | 4698  | >APC-P2540I SINRSGTWK   | 371   | 4327  |
| >APC-P2540I PINRSGTWKF  | 815   | >APC-P2540I SINRSGTWKF  | 39    | 776   |
| >APC-P2540I PINRSGTWKF  | 2033  | >APC-P2540I SINRSGTWKF  | 201   | 1832  |
| >APC-P2540I PINRSGTWK   | 8393  | >APC-P2540I SINRSGTWK   | 354   | 8039  |
| >APC-P2540I PINRSGTWKF  | 9326  | >APC-P2540I SINRSGTWKF  | 225   | 9101  |
| >APC-P2540I PINRSGTW    | 4983  | >APC-P2540I SINRSGTW    | 127   | 4856  |
| >APC-P2540I PINRSGTWKF  | 670   | >APC-P2540I SINRSGTWKF  | 79    | 591   |
| >APC-P2540I PINRSGTWKF  | 1053  | >APC-P2540I SINRSGTWKF  | 447   | 606   |
| >APC-P2540I LPINRSGTWK  | 859   | >APC-P2540I LSINRSGTWK  | 31    | 828   |
| >APC-P2540I LPINRSGTWK  | 2247  | >APC-P2540I LSINRSGTWK  | 15    | 2232  |
| >APC-P2540I LPINRSGTWK  | 2335  | >APC-P2540I LSINRSGTWK  | 262   | 2073  |
| >APC-P2540I LPINRSGTWK  | 3794  | >APC-P2540I LSINRSGTWK  | 50    | 3744  |
| >APC-P2540I LPINRSGTWK  | 2406  | >APC-P2540I LSINRSGTWK  | 393   | 2013  |
| >APC-P2540I LPINRSGTWK  | 975   | >APC-P2540I LSINRSGTWK  | 25    | 950   |
| >APC-P2540I LPINRSGTWK  | 1000  | >APC-P2540I LSINRSGTWK  | 47    | 953   |
| >APC-P2540I LPINRSGTW   | 292   | >APC-P2540I LSINRSGTW   | 22062 | 21770 |
| >APC-P2540I LPINRSGTW   | 1718  | >APC-P2540I LSINRSGTW   | 5     | 1713  |
| >APC-P2540I LPINRSGTW   | 213   | >APC-P2540I LSINRSGTW   | 9426  | 9213  |
| >APC-P2540I LPINRSGTW   | 17    | >APC-P2540I LSINRSGTW   | 998   | 981   |
| >APC-P2540I LPINRSGT    | 349   | >APC-P2540I LSINRSGT    | 27204 | 26855 |
| >APC-P2540I LPINRSGTWK  | 393   | >APC-P2540I LSINRSGTWK  | 26235 | 25842 |
| >APC-P2540I LPINRSGTW   | 9402  | >APC-P2540I LSINRSGTW   | 59    | 9343  |
| >APC-P2540I LPINRSGTW   | 8731  | >APC-P2540I LSINRSGTW   | 15    | 8716  |
| >APC-P2540I LPINRSGTW   | 5257  | >APC-P2540I LSINRSGTW   | 205   | 5052  |
| >APC-P2540I LPINRSGTW   | 5     | >APC-P2540I LSINRSGTW   | 275   | 270   |
| >APC-P2540I LPINRSGTW   | 35    | >APC-P2540I LSINRSGTW   | 61    | 26    |
| >APC-P2540I LPINRSGTWK  | 9205  | >APC-P2540I LSINRSGTWK  | 451   | 8754  |
| >APC-P2540I RSHSESPSRLI | 187   | >APC-P2540I RSHSESPSRLI | 55    | 132   |
| >APC-P2540I RLPINRSGT   | 614   | >APC-P2540I RLSINRSGT   | 428   | 186   |
| >APC-P2540I RLPINRSGTW  | 91    | >APC-P2540I RLSINRSGTW  | 38    | 53    |
| >APC-P2540I RLPINRSGTW  | 2269  | >APC-P2540I RLSINRSGTW  | 178   | 2091  |
| >APC-P2540I RLPINRSGTW  | 1677  | >APC-P2540I RLSINRSGTW  | 194   | 1483  |
| >APC-P2540I RLPINRSGTW  | 1563  | >APC-P2540I RLSINRSGTW  | 294   | 1269  |
| >APC-P2540I RLPINRSGTW  | 1241  | >APC-P2540I RLSINRSGTW  | 38    | 1203  |
| >APC-P2540I RLPINRSGTW  | 2452  | >APC-P2540I RLSINRSGTW  | 427   | 2025  |
| >APC-P2540I RLPINRSGTW  | 6882  | >APC-P2540I RLSINRSGTW  | 110   | 6772  |

|                         |       |                         |       |       |
|-------------------------|-------|-------------------------|-------|-------|
| >APC-P2540€ RLPINRSGTW  | 239   | >APC-P2540€ RLSINRSGTW  | 289   | 50    |
| >APC-P2540€ SRLPINRSGTV | 240   | >APC-P2540€ SRLSINRSGTV | 493   | 253   |
| >APC-P2540€ PSRLPINR    | 1218  | >APC-P2540€ PSRLSINR    | 401   | 817   |
| >APC-P2540€ ESPSRPLI    | 265   | >APC-P2540€ ESPSRLSI    | 263   | 2     |
| >APC-P2540€ ESPSRPLINR  | 1154  | >APC-P2540€ ESPSRLSINR  | 496   | 658   |
| >APC-P2540€ ESPSRPLINR  | 29    | >APC-P2540€ ESPSRLSINR  | 18    | 11    |
| >APC-P2540€ ESPSRPLI    | 168   | >APC-P2540€ ESPSRLSI    | 320   | 152   |
| >APC-P2540€ ESPSRPLI    | 665   | >APC-P2540€ ESPSRLSI    | 255   | 410   |
| >APC-P2540€ SESPSRLPI   | 21    | >APC-P2540€ SESPSRLSI   | 11    | 10    |
| >APC-P2540€ SESPSRLPI   | 105   | >APC-P2540€ SESPSRLSI   | 182   | 77    |
| >APC-P2540€ SESPSRLPI   | 92    | >APC-P2540€ SESPSRLSI   | 131   | 39    |
| >APC-P2540€ SESPSRLPI   | 222   | >APC-P2540€ SESPSRLSI   | 410   | 188   |
| >APC-P2540€ SESPSRLPI   | 57    | >APC-P2540€ SESPSRLSI   | 76    | 19    |
| >APC-P2540€ SESPSRLPINR | 427   | >APC-P2540€ SESPSRLSINR | 678   | 251   |
| >APC-P2540€ HSESPSRPLI  | 144   | >APC-P2540€ HSESPSRLSI  | 203   | 59    |
| >APC-P2540€ HSESPSRPLI  | 53    | >APC-P2540€ HSESPSRLSI  | 42    | 11    |
| >APC-P2540€ SHSESPSRPLI | 676   | >APC-P2540€ SHSESPSRLSI | 423   | 253   |
| >APC-P2540€ SHSESPSRPLI | 389   | >APC-P2540€ SHSESPSRLSI | 403   | 14    |
| >APC-P2540€ SHSESPSRPLI | 89    | >APC-P2540€ SHSESPSRLSI | 129   | 40    |
| >APC-P865S- PATENPGTSS  | 11051 | >APC-P865S- SATENPGTSS  | 202   | 10849 |
| >APC-P865S- PATENPGTSS  | 4333  | >APC-P865S- SATENPGTSS  | 143   | 4190  |
| >APC-P865S- HPATENPG    | 168   | >APC-P865S- HSATENPG    | 10044 | 9876  |
| >APC-P865S- HPATENPGT   | 459   | >APC-P865S- HSATENPGT   | 12613 | 12154 |
| >APC-P865S- HPATENPGT€  | 379   | >APC-P865S- HSATENPGT€  | 13152 | 12773 |
| >APC-P865S- GLGNYHPA    | 310   | >APC-P865S- GLGNYHSA    | 728   | 418   |
| >APC-P865S- GLGNYHPA    | 171   | >APC-P865S- GLGNYHSA    | 171   | 0     |
| >APC-P865S- GLGNYHPA    | 89    | >APC-P865S- GLGNYHSA    | 83    | 6     |
| >APC-P865S- GLGNYHPA    | 19    | >APC-P865S- GLGNYHSA    | 22    | 3     |
| >APC-P865S- GLGNYHPAT   | 77    | >APC-P865S- GLGNYHSAT   | 166   | 89    |
| >APC-P865S- GLGNYHPA    | 31    | >APC-P865S- GLGNYHSA    | 35    | 4     |
| >APC-P865S- GLGNYHPA    | 35    | >APC-P865S- GLGNYHSA    | 67    | 32    |
| >APC-P865S- GLGNYHPA    | 9     | >APC-P865S- GLGNYHSA    | 6     | 3     |
| >APC-P865S- GLGNYHPAT   | 116   | >APC-P865S- GLGNYHSAT   | 272   | 156   |
| >APC-P865S- IGLGNYHPA   | 331   | >APC-P865S- IGLGNYHSA   | 3792  | 3461  |
| >APC-Q1367  QTPKSPPEHY  | 274   | >APC-Q1367  HTPKSPPEHY  | 221   | 53    |
| >APC-Q1367  QTPKSPPEHY  | 238   | >APC-Q1367  HTPKSPPEHY  | 124   | 114   |
| >APC-Q1367  QTPKSPPEHY  | 1219  | >APC-Q1367  HTPKSPPEHY  | 287   | 932   |
| >APC-Q1367  QTPKSPPEHY  | 500   | >APC-Q1367  HTPKSPPEHY  | 173   | 327   |
| >APC-Q1367  QTPKSPPEHY  | 32    | >APC-Q1367  HTPKSPPEHY  | 39    | 7     |
| >APC-Q1367  QTPKSPPEHY  | 125   | >APC-Q1367  HTPKSPPEHY  | 77    | 48    |
| >APC-Q1367  QTPKSPPEHY  | 337   | >APC-Q1367  HTPKSPPEHY  | 171   | 166   |
| >APC-Q1367  QTPKSPPEHY  | 25    | >APC-Q1367  HTPKSPPEHY  | 16    | 9     |
| >APC-Q1367  QTPKSPPEHY  | 75    | >APC-Q1367  HTPKSPPEHY  | 48    | 27    |

|                       |      |                       |       |       |
|-----------------------|------|-----------------------|-------|-------|
| >APC-Q1367 QTPKSPPEHY | 1008 | >APC-Q1367 HTPKSPPEHY | 399   | 609   |
| >APC-Q1367 QTPKSPPEHY | 293  | >APC-Q1367 HTPKSPPEHY | 120   | 173   |
| >APC-Q1367 QTPKSPPEHY | 9    | >APC-Q1367 HTPKSPPEHY | 14    | 5     |
| >APC-Q1367 QTPKSPPEHY | 106  | >APC-Q1367 HTPKSPPEHY | 194   | 88    |
| >APC-Q1367 AQTPKSPPEH | 410  | >APC-Q1367 AHTPKSPPEH | 1438  | 1028  |
| >APC-Q1367 AQTPKSPPEH | 87   | >APC-Q1367 AHTPKSPPEH | 12717 | 12630 |
| >APC-Q1367 AQTPKSPPEH | 22   | >APC-Q1367 AHTPKSPPEH | 435   | 413   |
| >APC-Q1367 KSGAQTPK   | 96   | >APC-Q1367 KSGAHTPK   | 75    | 21    |
| >APC-Q1367 KSGAQTPK   | 34   | >APC-Q1367 KSGAHTPK   | 25    | 9     |
| >APC-Q1367 KSGAQTPK   | 20   | >APC-Q1367 KSGAHTPK   | 14    | 6     |
| >APC-Q1367 KSGAQTPK   | 209  | >APC-Q1367 KSGAHTPK   | 70    | 139   |
| >APC-Q1367 PSKSGAQTPK | 41   | >APC-Q1367 PSKSGAHTPK | 27    | 14    |
| >APC-Q1367 SPSKSGAQ   | 459  | >APC-Q1367 SPSKSGAH   | 359   | 100   |
| >APC-Q1367 SPSKSGAQT  | 251  | >APC-Q1367 SPSKSGAHT  | 501   | 250   |
| >APC-Q1367 SPSKSGAQ   | 2126 | >APC-Q1367 SPSKSGAH   | 273   | 1853  |
| >APC-Q1367 AKSPSKSGAC | 1338 | >APC-Q1367 AKSPSKSGAH | 380   | 958   |
| >APC-Q1429 QTMPPSRSK  | 103  | >APC-Q1429 RTMPPSRSK  | 34    | 69    |
| >APC-Q1429 QTMPPSRSK  | 26   | >APC-Q1429 RTMPPSRSK  | 13    | 13    |
| >APC-Q1429 QTMPPSRSK  | 33   | >APC-Q1429 RTMPPSRSK  | 5     | 28    |
| >APC-Q1429 QTMPPSRSK  | 3755 | >APC-Q1429 RTMPPSRSK  | 177   | 3578  |
| >APC-Q1429 QTMPPSRSK  | 4466 | >APC-Q1429 RTMPPSRSKT | 455   | 4011  |
| >APC-Q1429 QTMPPSRSK  | 296  | >APC-Q1429 RTMPPSRSK  | 1777  | 1481  |
| >APC-Q1429 QTMPPSRS   | 258  | >APC-Q1429 RTMPPSRS   | 5842  | 5584  |
| >APC-Q1429 QTMPPSRS   | 1206 | >APC-Q1429 RTMPPSRS   | 50    | 1156  |
| >APC-Q1429 QTMPPSRSK  | 4721 | >APC-Q1429 RTMPPSRSK  | 205   | 4516  |
| >APC-Q1429 QTMPPSRSK  | 392  | >APC-Q1429 RTMPPSRSKT | 18    | 374   |
| >APC-Q1429 QTMPPSRSK  | 4284 | >APC-Q1429 RTMPPSRSKT | 289   | 3995  |
| >APC-Q1429 QTMPPSRSK  | 240  | >APC-Q1429 RTMPPSRSK  | 572   | 332   |
| >APC-Q1429 GQTMPPSRS  | 284  | >APC-Q1429 GRTMPPSRS  | 7651  | 7367  |
| >APC-Q1429 PGQTMPPSR  | 7983 | >APC-Q1429 PGRTMPPSR  | 44    | 7939  |
| >APC-Q1429 DSPGQTMPP  | 893  | >APC-Q1429 DSPGRTMPP  | 335   | 558   |
| >APC-Q1429 DSPGQTMPP  | 191  | >APC-Q1429 DSPGRTMPP  | 167   | 24    |
| >APC-Q1429 LPDSPGQTM  | 355  | >APC-Q1429 LPDSPGRTM  | 3555  | 3200  |
| >APC-Q1429 LPDSPGQTM  | 36   | >APC-Q1429 LPDSPGRTM  | 19    | 17    |
| >APC-Q1429 LPDSPGQTM  | 37   | >APC-Q1429 LPDSPGRTM  | 52    | 15    |
| >APC-Q1429 LPDSPGQTM  | 248  | >APC-Q1429 LPDSPGRTM  | 324   | 76    |
| >APC-Q1429 LPDSPGQTM  | 721  | >APC-Q1429 LPDSPGRTM  | 383   | 338   |
| >APC-Q1477 QRVQVLPDA  | 954  | >APC-Q1477 HRVQVLPDA  | 498   | 456   |
| >APC-Q1477 AVQRVQVL   | 632  | >APC-Q1477 AVHRVQVL   | 439   | 193   |
| >APC-Q1477 AVQRVQVL   | 4238 | >APC-Q1477 AVHRVQVL   | 96    | 4142  |
| >APC-Q1477 AVQRVQVLP  | 2188 | >APC-Q1477 AVHRVQVLP  | 52    | 2136  |
| >APC-Q1477 AAVQRVQVL  | 810  | >APC-Q1477 AAVHRVQVL  | 395   | 415   |
| >APC-Q1477 AAVQRVQV   | 683  | >APC-Q1477 AAVHRVQV   | 429   | 254   |

|                      |      |                      |     |      |
|----------------------|------|----------------------|-----|------|
| >APC-Q1477 AAVQRVQV  | 70   | >APC-Q1477 AAVHRVQV  | 231 | 161  |
| >APC-Q1477 AAVQRVQVL | 759  | >APC-Q1477 AAVHRVQVL | 192 | 567  |
| >APC-Q1477 AAVQRVQVL | 36   | >APC-Q1477 AAVHRVQVL | 38  | 2    |
| >APC-Q1477 NAAVQRVQV | 30   | >APC-Q1477 NAAVHRVQV | 24  | 6    |
| >APC-Q1477 NAAVQRVQV | 258  | >APC-Q1477 NAAVHRVQV | 120 | 138  |
| >APC-Q1477 AVNAAVQRV | 735  | >APC-Q1477 AVNAAVHRV | 126 | 609  |
| >APC-Q1477 AVNAAVQRV | 81   | >APC-Q1477 AVNAAVHRV | 21  | 60   |
| >APC-Q1477 AVNAAVQRV | 239  | >APC-Q1477 AVNAAVHRV | 125 | 114  |
| >APC-Q1477 AVNAAVQRV | 9    | >APC-Q1477 AVNAAVHRV | 6   | 3    |
| >APC-Q1477 AVNAAVQRV | 62   | >APC-Q1477 AVNAAVHRV | 33  | 29   |
| >APC-Q1477 AVNAAVQRV | 103  | >APC-Q1477 AVNAAVHRV | 33  | 70   |
| >APC-Q1477 AVNAAVQRV | 268  | >APC-Q1477 AVNAAVHRV | 149 | 119  |
| >APC-Q1477 AVNAAVQRV | 25   | >APC-Q1477 AVNAAVHRV | 14  | 11   |
| >APC-Q1477 AVNAAVQRV | 152  | >APC-Q1477 AVNAAVHRV | 103 | 49   |
| >APC-Q1477 AVNAAVQRV | 2005 | >APC-Q1477 AVNAAVHRV | 360 | 1645 |
| >APC-Q1477 AVNAAVQRV | 81   | >APC-Q1477 AVNAAVHRV | 40  | 41   |
| >APC-Q1477 AVNAAVQRV | 244  | >APC-Q1477 AVNAAVHRV | 240 | 4    |
| >APC-Q1477 AVNAAVQRV | 84   | >APC-Q1477 AVNAAVHRV | 20  | 64   |
| >APC-Q1477 AVNAAVQRV | 518  | >APC-Q1477 AVNAAVHRV | 348 | 170  |
| >APC-Q1477 AVNAAVQRV | 4    | >APC-Q1477 AVNAAVHRV | 3   | 1    |
| >APC-Q1477 AVNAAVQRV | 9    | >APC-Q1477 AVNAAVHRV | 8   | 1    |
| >APC-Q1477 AVNAAVQR  | 135  | >APC-Q1477 AVNAAVHR  | 175 | 40   |
| >APC-Q1477 AVNAAVQRV | 344  | >APC-Q1477 AVNAAVHRV | 377 | 33   |
| >APC-Q1477 AVNAAVQR  | 36   | >APC-Q1477 AVNAAVHR  | 18  | 18   |
| >APC-Q1477 AVNAAVQR  | 86   | >APC-Q1477 AVNAAVHR  | 88  | 2    |
| >APC-Q1477 AVNAAVQRV | 122  | >APC-Q1477 AVNAAVHRV | 20  | 102  |
| >APC-Q1477 AVNAAVQRV | 127  | >APC-Q1477 AVNAAVHRV | 68  | 59   |
| >APC-Q1477 AVNAAVQRV | 860  | >APC-Q1477 AVNAAVHRV | 101 | 759  |
| >APC-Q1477 AVNAAVQRV | 627  | >APC-Q1477 AVNAAVHRV | 259 | 368  |
| >APC-Q1477 AAVNAAVQR | 417  | >APC-Q1477 AAVNAAVHR | 228 | 189  |
| >APC-Q1477 AAVNAAVQR | 51   | >APC-Q1477 AAVNAAVHR | 31  | 20   |
| >APC-Q1477 AAVNAAVQR | 553  | >APC-Q1477 AAVNAAVHR | 184 | 369  |
| >APC-Q1477 AAVNAAVQR | 43   | >APC-Q1477 AAVNAAVHR | 61  | 18   |
| >APC-Q1477 AAVNAAVQR | 345  | >APC-Q1477 AAVNAAVHR | 178 | 167  |
| >APC-Q1477 AAVNAAVQR | 1469 | >APC-Q1477 AAVNAAVHR | 409 | 1060 |
| >APC-Q1477 QAAVNAAVC | 934  | >APC-Q1477 QAAVNAAVH | 316 | 618  |
| >APC-Q1477 QAAVNAAVC | 28   | >APC-Q1477 QAAVNAAVH | 33  | 5    |
| >APC-Q1477 QAAVNAAVC | 55   | >APC-Q1477 QAAVNAAVH | 20  | 35   |
| >APC-Q1477 QAAVNAAVC | 208  | >APC-Q1477 QAAVNAAVH | 49  | 159  |
| >APC-Q1477 KQAAVNAAV | 21   | >APC-Q1477 KQAAVNAAV | 15  | 6    |
| >APC-Q1477 KQAAVNAAV | 444  | >APC-Q1477 KQAAVNAAV | 207 | 237  |
| >APC-Q1477 KQAAVNAAV | 1548 | >APC-Q1477 KQAAVNAAV | 262 | 1286 |
| >APC-Q1477 KQAAVNAAV | 348  | >APC-Q1477 KQAAVNAAV | 219 | 129  |

|                       |      |                       |       |       |
|-----------------------|------|-----------------------|-------|-------|
| >APC-Q1477 KQAAVNAAV  | 45   | >APC-Q1477 KQAAVNAAV  | 24    | 21    |
| >APC-R1171 RHVDQPIDY  | 501  | >APC-R1171 HHVDQPIDY  | 274   | 227   |
| >APC-R1171 RHVDQPIDY  | 179  | >APC-R1171 HHVDQPIDY  | 620   | 441   |
| >APC-R1171 RHVDQPIDYS | 3408 | >APC-R1171 HHVDQPIDYS | 396   | 3012  |
| >APC-R1171 RHVDQPIDYS | 77   | >APC-R1171 HHVDQPIDYS | 12    | 65    |
| >APC-R1171 KRHVDQPI   | 231  | >APC-R1171 KHHVDQPI   | 731   | 500   |
| >APC-R1171 KRHVDQPIDY | 77   | >APC-R1171 KHHVDQPIDY | 149   | 72    |
| >APC-R1171 KRHVDQPI   | 240  | >APC-R1171 KHHVDQPI   | 17819 | 17579 |
| >APC-R1171 KRHVDQPIDY | 26   | >APC-R1171 KHHVDQPIDY | 2217  | 2191  |
| >APC-R1171 KRHVDQPI   | 29   | >APC-R1171 KHHVDQPI   | 3312  | 3283  |
| >APC-R1171 KRHVDQPIDY | 495  | >APC-R1171 KHHVDQPIDY | 23864 | 23369 |
| >APC-R1171 KRHVDQPI   | 486  | >APC-R1171 KHHVDQPI   | 13728 | 13242 |
| >APC-R1171 NYSIKYNEEK | 224  | >APC-R1171 NYSIKYNEEK | 26274 | 26050 |
| >APC-R1171 NYSIKYNEEK | 441  | >APC-R1171 NYSIKYNEEK | 23136 | 22695 |
| >APC-R1171 NYSIKYNEEK | 141  | >APC-R1171 NYSIKYNEEK | 26153 | 26012 |
| >APC-R1171 EKRHVDQPI  | 155  | >APC-R1171 EKHHVDQPI  | 268   | 113   |
| >APC-R1171 EKRHVDQPIC | 40   | >APC-R1171 EKHHVDQPIC | 63    | 23    |
| >APC-R1171 EEKRHVDQPI | 58   | >APC-R1171 EEKHHVDQPI | 65    | 7     |
| >APC-R1171 EEKRHVDQPI | 722  | >APC-R1171 EEKHHVDQPI | 460   | 262   |
| >APC-R1171 EEKRHVDQPI | 92   | >APC-R1171 EEKHHVDQPI | 194   | 102   |
| >APC-R1171 NEEKRHVDQ  | 43   | >APC-R1171 NEEKHHVDQ  | 93    | 50    |
| >APC-R1171 NEEKRHVDQ  | 1198 | >APC-R1171 NEEKHHVDQ  | 475   | 723   |
| >APC-R1171 NEEKRHVDQ  | 678  | >APC-R1171 NEEKHHVDQ  | 307   | 371   |
| >APC-R1171 NEEKRHVDQ  | 399  | >APC-R1171 NEEKHHVDQ  | 212   | 187   |
| >APC-R1171 KYNEEKRHV  | 9121 | >APC-R1171 KYNEEKHHV  | 215   | 8906  |
| >APC-R1171 IKYNEEK    | 268  | >APC-R1171 IKYNEEKH   | 190   | 78    |
| >APC-R1171 IKYNEEK    | 255  | >APC-R1171 IKYNEEKHH  | 78    | 177   |
| >APC-R1171 IKYNEEK    | 45   | >APC-R1171 IKYNEEKHHV | 31    | 14    |
| >APC-R1171 SIKYNEEK   | 910  | >APC-R1171 SIKYNEEKHH | 53    | 857   |
| >APC-R1171 SIKYNEEK   | 269  | >APC-R1171 SIKYNEEKH  | 16672 | 16403 |
| >APC-R1171 SIKYNEEK   | 57   | >APC-R1171 SIKYNEEKH  | 13999 | 13942 |
| >APC-R1171 YSIKYNEEK  | 387  | >APC-R1171 YSIKYNEEKH | 19569 | 19182 |
| >APC-R1171 YSIKYNEEK  | 12   | >APC-R1171 YSIKYNEEKH | 6601  | 6589  |
| >APC-R1314 RSAEDPVSEV | 150  | >APC-R1314 KSAEDPVSEV | 140   | 10    |
| >APC-R1314 RSAEDPVSEV | 115  | >APC-R1314 KSAEDPVSEV | 648   | 533   |
| >APC-R1314 RSAEDPVSEV | 419  | >APC-R1314 KSAEDPVSEV | 675   | 256   |
| >APC-R1314 RSAEDPVSEV | 73   | >APC-R1314 KSAEDPVSEV | 169   | 96    |
| >APC-R1314 RSAEDPVSEV | 415  | >APC-R1314 KSAEDPVSEV | 1574  | 1159  |
| >APC-R1314 TRSAEDPVSE | 1568 | >APC-R1314 TKSAEDPVSE | 473   | 1095  |
| >APC-R1314 GTRSAEDPV  | 344  | >APC-R1314 GTKSAEDPV  | 1763  | 1419  |
| >APC-R1314 KIGTRSAEDP | 376  | >APC-R1314 KIGTKSAEDP | 360   | 16    |
| >APC-R1314 KIGTRSAEDP | 335  | >APC-R1314 KIGTKSAEDP | 343   | 8     |
| >APC-R1314 KIGTRSAEDP | 306  | >APC-R1314 KIGTKSAEDP | 520   | 214   |

|                         |      |                        |       |       |
|-------------------------|------|------------------------|-------|-------|
| >APC-R1314†KIGTRSAEDP\  | 189  | >APC-R1314†KIGTKSAEDP\ | 156   | 33    |
| >APC-R1314†KIGTRSAEDP\  | 224  | >APC-R1314†KIGTKSAEDP\ | 183   | 41    |
| >APC-R1314†KIGTRSAEDP\  | 146  | >APC-R1314†KIGTKSAEDP\ | 136   | 10    |
| >APC-R1314†KIGTRSAEDP\  | 144  | >APC-R1314†KIGTKSAEDP\ | 170   | 26    |
| >APC-R1314†KEKIGTRSA    | 87   | >APC-R1314†KEKIGTKSA   | 124   | 37    |
| >APC-R1314†KEKIGTRSA    | 67   | >APC-R1314†KEKIGTKSA   | 77    | 10    |
| >APC-R1314†KEKIGTRSA    | 577  | >APC-R1314†KEKIGTKSA   | 381   | 196   |
| >APC-R1314†EIKEKIGTR    | 31   | >APC-R1314†EIKEKIGTK   | 697   | 666   |
| >APC-R1314†EIKEKIGTR    | 35   | >APC-R1314†EIKEKIGTK   | 127   | 92    |
| >APC-R1314†EIKEKIGTRSA  | 600  | >APC-R1314†EIKEKIGTKSA | 486   | 114   |
| >APC-R1314†AEIKEKIGTR   | 625  | >APC-R1314†AEIKEKIGTK  | 480   | 145   |
| >APC-R141S- RSLLLADL    | 292  | >APC-R141S- SSLLADL    | 99    | 193   |
| >APC-R141S- RSLLLADLDK  | 132  | >APC-R141S- SSLLADLDK  | 322   | 190   |
| >APC-R141S- RSLLLADLDK  | 23   | >APC-R141S- SSLLADLDK  | 14    | 9     |
| >APC-R141S- RSLLLADLDK  | 74   | >APC-R141S- SSLLADLDK  | 953   | 879   |
| >APC-R141S- RSLLLADL    | 211  | >APC-R141S- SSLLADL    | 2456  | 2245  |
| >APC-R141S- RSLLLADL    | 6    | >APC-R141S- SSLLADL    | 64    | 58    |
| >APC-R141S- RSLLLADLDK  | 1175 | >APC-R141S- SSLLADLDK  | 255   | 920   |
| >APC-R141S- ERSLLADLD†  | 6185 | >APC-R141S- ESSLLADLD† | 90    | 6095  |
| >APC-R141S- KERSLLLA    | 410  | >APC-R141S- KESSLLA    | 12179 | 11769 |
| >APC-R141S- KERSLLLA    | 57   | >APC-R141S- KESSLLA    | 124   | 67    |
| >APC-R141S- KERSLLAD    | 363  | >APC-R141S- KESSLLAD   | 939   | 576   |
| >APC-R141S- KERSLLADL   | 215  | >APC-R141S- KESSLLADL  | 135   | 80    |
| >APC-R141S- KERSLLLA    | 94   | >APC-R141S- KESSLLA    | 37    | 57    |
| >APC-R141S- KERSLLAD    | 378  | >APC-R141S- KESSLLAD   | 684   | 306   |
| >APC-R141S- KERSLLADL   | 60   | >APC-R141S- KESSLLADL  | 52    | 8     |
| >APC-R141S- KERSLLADL†  | 272  | >APC-R141S- KESSLLADL† | 651   | 379   |
| >APC-R141S- LEKERSLL    | 235  | >APC-R141S- LEKESLL    | 41    | 194   |
| >APC-R141S- LEKERSLLL   | 31   | >APC-R141S- LEKESLLL   | 38    | 7     |
| >APC-R141S- LEKERSLL    | 592  | >APC-R141S- LEKESLL    | 167   | 425   |
| >APC-R141S- LEKERSLLL   | 401  | >APC-R141S- LEKESLLL   | 71    | 330   |
| >APC-R141S- LEKERSLL    | 238  | >APC-R141S- LEKESLL    | 154   | 84    |
| >APC-R141S- LEKERSLLL   | 170  | >APC-R141S- LEKESLLL   | 69    | 101   |
| >APC-R141S- LEKERSLLL   | 29   | >APC-R141S- LEKESLLL   | 28    | 1     |
| >APC-R141S- ELEKERSL    | 1059 | >APC-R141S- ELEKESL    | 237   | 822   |
| >APC-R141S- ELEKERSLL   | 357  | >APC-R141S- ELEKESLL   | 325   | 32    |
| >APC-R141S- ELEKERSLLL  | 303  | >APC-R141S- ELEKESLLL  | 261   | 42    |
| >APC-R141S- EELEKERSL   | 198  | >APC-R141S- EELEKESL   | 211   | 13    |
| >APC-R141S- EELEKERSLL  | 75   | >APC-R141S- EELEKESLL  | 66    | 9     |
| >APC-R141S- EELEKERSLLL | 59   | >APC-R141S- EELEKESLLL | 63    | 4     |
| >APC-R141S- EELEKERSLLL | 492  | >APC-R141S- EELEKESLLL | 221   | 271   |
| >APC-R141S- EELEKERSL   | 472  | >APC-R141S- EELEKESL   | 301   | 171   |
| >APC-R141S- EELEKERSLLL | 487  | >APC-R141S- EELEKESLLL | 297   | 190   |

|                          |       |                         |       |       |
|--------------------------|-------|-------------------------|-------|-------|
| >APC-R141S- EEELEKERSLLL | 320   | >APC-R141S- EEELEKESLLL | 246   | 74    |
| >APC-R141S- EEELEKERSLL  | 220   | >APC-R141S- EEELEKESLL  | 248   | 28    |
| >APC-R141S- EEELEKERSLLL | 720   | >APC-R141S- EEELEKESLLL | 481   | 239   |
| >APC-R141S- LEELEKERSL   | 206   | >APC-R141S- LEELEKESL   | 168   | 38    |
| >APC-R141S- LEELEKERSLL  | 85    | >APC-R141S- LEELEKESLL  | 53    | 32    |
| >APC-R141S- LEELEKERSL   | 918   | >APC-R141S- LEELEKESL   | 464   | 454   |
| >APC-R141S- LEELEKERSLL  | 234   | >APC-R141S- LEELEKESLL  | 159   | 75    |
| >APC-R141S- LEELEKERSL   | 571   | >APC-R141S- LEELEKESL   | 451   | 120   |
| >APC-R141S- LEELEKERSLL  | 253   | >APC-R141S- LEELEKESLL  | 237   | 16    |
| >APC-R141S- YLEELEKERSL  | 742   | >APC-R141S- YLEELEKESL  | 222   | 520   |
| >APC-R141S- YLEELEKERSL  | 63    | >APC-R141S- YLEELEKESL  | 18    | 45    |
| >APC-R141S- YLEELEKERSL  | 846   | >APC-R141S- YLEELEKESL  | 165   | 681   |
| >APC-R141S- YLEELEKERSL  | 19    | >APC-R141S- YLEELEKESL  | 11    | 8     |
| >APC-R141S- YLEELEKERSL  | 36    | >APC-R141S- YLEELEKESL  | 15    | 21    |
| >APC-R141S- YLEELEKERSL  | 227   | >APC-R141S- YLEELEKESL  | 61    | 166   |
| >APC-R141S- YLEELEKERSL  | 1737  | >APC-R141S- YLEELEKESL  | 464   | 1273  |
| >APC-R141S- YLEELEKERSL  | 4     | >APC-R141S- YLEELEKESL  | 2     | 2     |
| >APC-R141S- GYLEELEKER   | 459   | >APC-R141S- GYLEELEKES  | 31334 | 30875 |
| >APC-R1463\$RESGPKQAA    | 341   | >APC-R1463\$ESGPKQAA    | 2537  | 2196  |
| >APC-R1463\$RESGPKQAA\   | 223   | >APC-R1463\$ESGPKQAA\   | 489   | 266   |
| >APC-R1463\$RESGPKQA     | 93    | >APC-R1463\$ESGPKQA     | 57    | 36    |
| >APC-R1463\$RESGPKQAA    | 20    | >APC-R1463\$ESGPKQAA    | 14    | 6     |
| >APC-R1463\$RESGPKQAA\   | 341   | >APC-R1463\$ESGPKQAA\   | 169   | 172   |
| >APC-R1463\$RESGPKQAA\   | 138   | >APC-R1463\$ESGPKQAA\   | 732   | 594   |
| >APC-R1463\$KRESGPKQA/   | 27376 | >APC-R1463\$KESGPKQA/   | 426   | 26950 |
| >APC-R1463\$AEKRESGPK    | 351   | >APC-R1463\$AEKSESGPK   | 1085  | 734   |
| >APC-R1463\$AEKRESGPKC   | 59    | >APC-R1463\$AEKSESGPKQ  | 64    | 5     |
| >APC-R1463\$KAPTAEKR     | 272   | >APC-R1463\$KAPTAEKS    | 29754 | 29482 |
| >APC-R1463\$NKAPTAEKR    | 280   | >APC-R1463\$NKAPTAEKS   | 29299 | 29019 |
| >APC-R1463\$KNKAPTAEK/   | 321   | >APC-R1463\$KNKAPTAEKS  | 25080 | 24759 |
| >APC-R380P- RARASAAL     | 5     | >APC-R380P- PARASAAL    | 324   | 319   |
| >APC-R380P- RARASAALH    | 18    | >APC-R380P- PARASAALH   | 3555  | 3537  |
| >APC-R380P- RARASAALHN   | 20    | >APC-R380P- PARASAALHN  | 3326  | 3306  |
| >APC-R380P- RARASAALHN   | 4     | >APC-R380P- PARASAALHN  | 122   | 118   |
| >APC-R380P- RARASAAL     | 9     | >APC-R380P- PARASAAL    | 331   | 322   |
| >APC-R380P- RARASAALHN   | 151   | >APC-R380P- PARASAALHN  | 11314 | 11163 |
| >APC-R380P- RARASAAL     | 191   | >APC-R380P- PARASAAL    | 9263  | 9072  |
| >APC-R380P- RARASAAL     | 64    | >APC-R380P- PARASAAL    | 2649  | 2585  |
| >APC-R380P- RARASAALHN   | 347   | >APC-R380P- PARASAALHN  | 8472  | 8125  |
| >APC-R380P- RARASAAL     | 3     | >APC-R380P- PARASAAL    | 726   | 723   |
| >APC-R380P- RARASAALH    | 14    | >APC-R380P- PARASAALH   | 5929  | 5915  |
| >APC-R380P- RARASAALHN   | 361   | >APC-R380P- PARASAALHN  | 14648 | 14287 |
| >APC-R380P- RARASAALHN   | 6     | >APC-R380P- PARASAALHN  | 2713  | 2707  |



|                        |       |                        |       |       |
|------------------------|-------|------------------------|-------|-------|
| >APC-R380P- RARASAAL   | 339   | >APC-R380P- PARASAAL   | 10207 | 9868  |
| >APC-R380P- RARASAALH  | 215   | >APC-R380P- PARASAALH  | 13255 | 13040 |
| >APC-R380P- RARASAALHN | 132   | >APC-R380P- PARASAALHN | 7924  | 7792  |
| >APC-R380P- ARARASAAL  | 27187 | >APC-R380P- APARASAAL  | 28    | 27159 |
| >APC-R380P- ARARASAA   | 16363 | >APC-R380P- APARASAA   | 20    | 16343 |
| >APC-R380P- ARARASAAL  | 2382  | >APC-R380P- APARASAAL  | 11    | 2371  |
| >APC-R380P- ARARASAAL  | 92    | >APC-R380P- APARASAAL  | 2357  | 2265  |
| >APC-R380P- ARARASAAL  | 143   | >APC-R380P- APARASAAL  | 23679 | 23536 |
| >APC-R380P- ARARASAAL  | 14369 | >APC-R380P- APARASAAL  | 83    | 14286 |
| >APC-R380P- ARARASAAL  | 24    | >APC-R380P- APARASAAL  | 36    | 12    |
| >APC-R380P- ARARASAA   | 28393 | >APC-R380P- APARASAA   | 244   | 28149 |
| >APC-R380P- ARARASAA   | 21944 | >APC-R380P- APARASAA   | 352   | 21592 |
| >APC-R380P- ARARASAAL  | 854   | >APC-R380P- APARASAAL  | 14    | 840   |
| >APC-R380P- ARARASAAL  | 63    | >APC-R380P- APARASAAL  | 25979 | 25916 |
| >APC-R380P- LGNSRGSKEA | 237   | >APC-R380P- LGNSRGSKEA | 23715 | 23478 |
| >APC-R380P- EARARASA   | 4037  | >APC-R380P- EAPARASA   | 105   | 3932  |
| >APC-R380P- EARARASAA  | 8694  | >APC-R380P- EAPARASAA  | 322   | 8372  |
| >APC-R380P- EARARASAAL | 1634  | >APC-R380P- EAPARASAAL | 212   | 1422  |
| >APC-R380P- EARARASA   | 249   | >APC-R380P- EAPARASA   | 4676  | 4427  |
| >APC-R380P- EARARASAA  | 71    | >APC-R380P- EAPARASAA  | 1979  | 1908  |
| >APC-R380P- EARARASAAL | 67    | >APC-R380P- EAPARASAAL | 4387  | 4320  |
| >APC-R380P- EARARASAAL | 15286 | >APC-R380P- EAPARASAAL | 101   | 15185 |
| >APC-R380P- KEARARASAA | 240   | >APC-R380P- KEAPARASAA | 358   | 118   |
| >APC-R380P- KEARARASAA | 937   | >APC-R380P- KEAPARASAA | 337   | 600   |
| >APC-R380P- KEARARASAA | 17    | >APC-R380P- KEAPARASAA | 15    | 2     |
| >APC-R380P- KEARARASAA | 300   | >APC-R380P- KEAPARASAA | 388   | 88    |
| >APC-R380P- KEARARASA  | 47    | >APC-R380P- KEAPARASA  | 75    | 28    |
| >APC-R380P- KEARARASAA | 120   | >APC-R380P- KEAPARASAA | 109   | 11    |
| >APC-R380P- KEARARASAA | 55    | >APC-R380P- KEAPARASAA | 84    | 29    |
| >APC-R380P- GSKEARARA  | 76    | >APC-R380P- GSKEAPARA  | 206   | 130   |
| >APC-R380P- GSKEARARAS | 23    | >APC-R380P- GSKEAPARAS | 40    | 17    |
| >APC-R380P- GSKEARAR   | 142   | >APC-R380P- GSKEAPAR   | 187   | 45    |
| >APC-R380P- RGSKEARAR  | 526   | >APC-R380P- RGSKEAPAR  | 288   | 238   |
| >APC-R380P- NSRGSKEAR  | 386   | >APC-R380P- NSRGSKEAP  | 23765 | 23379 |
| >APC-R380P- NSRGSKEAR  | 263   | >APC-R380P- NSRGSKEAP  | 37186 | 36923 |
| >APC-R380P- NSRGSKEAR  | 323   | >APC-R380P- NSRGSKEAP  | 39743 | 39420 |
| >APC-R380P- NSRGSKEARA | 928   | >APC-R380P- NSRGSKEAPA | 408   | 520   |
| >APC-S1081I- STDDKHLKF | 64    | >APC-S1081I- ITDDKHLKF | 95    | 31    |
| >APC-S1081I- STDDKHLK  | 20    | >APC-S1081I- ITDDKHLK  | 36    | 16    |
| >APC-S1081I- STDDKHLK  | 300   | >APC-S1081I- ITDDKHLK  | 256   | 44    |
| >APC-S1081I- STDDKHLKF | 5     | >APC-S1081I- ITDDKHLKF | 3     | 2     |
| >APC-S1081I- STDDKHLKF | 148   | >APC-S1081I- ITDDKHLKF | 109   | 39    |
| >APC-S1081I- STDDKHLK  | 144   | >APC-S1081I- ITDDKHLK  | 496   | 352   |

|                        |       |                        |      |       |
|------------------------|-------|------------------------|------|-------|
| >APC-S1081  ESTDDKHL   | 452   | >APC-S1081  EITDDKHL   | 395  | 57    |
| >APC-S1081  ESTDDKHLKF | 285   | >APC-S1081  EITDDKHLKF | 250  | 35    |
| >APC-S1081  ESTDDKHLK  | 13    | >APC-S1081  EITDDKHLK  | 14   | 1     |
| >APC-S1081  ESTDDKHLKF | 61    | >APC-S1081  EITDDKHLKF | 7451 | 7390  |
| >APC-S1081  QSTTYPVYTE | 4626  | >APC-S1081  QSTTYPVYTE | 133  | 4493  |
| >APC-S1081  QSTTYPVYTE | 32299 | >APC-S1081  QSTTYPVYTE | 137  | 32162 |
| >APC-S1081  TESTDDKHLK | 253   | >APC-S1081  TEITDDKHLK | 127  | 126   |
| >APC-S1081  TESTDDKHL  | 465   | >APC-S1081  TEITDDKHL  | 232  | 233   |
| >APC-S1081  TESTDDKHLK | 549   | >APC-S1081  TEITDDKHLK | 149  | 400   |
| >APC-S1081  YTESTDDKHL | 326   | >APC-S1081  YTEITDDKHL | 459  | 133   |
| >APC-S1081  YTESTDDK   | 33    | >APC-S1081  YTEITDDK   | 42   | 9     |
| >APC-S1081  YTESTDDKHL | 12    | >APC-S1081  YTEITDDKHL | 19   | 7     |
| >APC-S1081  YTESTDDKHL | 169   | >APC-S1081  YTEITDDKHL | 51   | 118   |
| >APC-S1081  YTESTDDKH  | 115   | >APC-S1081  YTEITDDKH  | 735  | 620   |
| >APC-S1081  VYTESTDDKH | 71    | >APC-S1081  VYTEITDDKH | 47   | 24    |
| >APC-S1081  YPVYTEST   | 78    | >APC-S1081  YPVYTEIT   | 101  | 23    |
| >APC-S1081  YPVYTESTD  | 289   | >APC-S1081  YPVYTEITD  | 176  | 113   |
| >APC-S1081  YPVYTEST   | 358   | >APC-S1081  YPVYTEIT   | 232  | 126   |
| >APC-S1081  YPVYTESTD  | 693   | >APC-S1081  YPVYTEITD  | 413  | 280   |
| >APC-S1081  YPVYTESTDD | 349   | >APC-S1081  YPVYTEITDD | 151  | 198   |
| >APC-S1081  TYPVYTES   | 15943 | >APC-S1081  TYPVYTEI   | 109  | 15834 |
| >APC-S1081  TYPVYTES   | 7032  | >APC-S1081  TYPVYTEI   | 71   | 6961  |
| >APC-S1081  TYPVYTES   | 569   | >APC-S1081  TYPVYTEI   | 5    | 564   |
| >APC-S1081  TYPVYTEST  | 349   | >APC-S1081  TYPVYTEIT  | 841  | 492   |
| >APC-S1081  TYPVYTES   | 5271  | >APC-S1081  TYPVYTEI   | 255  | 5016  |
| >APC-S1081  TYPVYTES   | 26350 | >APC-S1081  TYPVYTEI   | 151  | 26199 |
| >APC-S1081  TYPVYTES   | 9569  | >APC-S1081  TYPVYTEI   | 220  | 9349  |
| >APC-S1081  TYPVYTES   | 5849  | >APC-S1081  TYPVYTEI   | 69   | 5780  |
| >APC-S1081  TYPVYTEST  | 499   | >APC-S1081  TYPVYTEIT  | 1732 | 1233  |
| >APC-S1081  TYPVYTES   | 4750  | >APC-S1081  TYPVYTEI   | 116  | 4634  |
| >APC-S1081  TYPVYTES   | 8995  | >APC-S1081  TYPVYTEI   | 107  | 8888  |
| >APC-S1081  TYPVYTES   | 17765 | >APC-S1081  TYPVYTEI   | 338  | 17427 |
| >APC-S1081  TYPVYTES   | 448   | >APC-S1081  TYPVYTEI   | 1172 | 724   |
| >APC-S1081  TYPVYTES   | 27    | >APC-S1081  TYPVYTEI   | 5    | 22    |
| >APC-S1081  TYPVYTEST  | 175   | >APC-S1081  TYPVYTEIT  | 521  | 346   |
| >APC-S1081  TYPVYTES   | 3784  | >APC-S1081  TYPVYTEI   | 19   | 3765  |
| >APC-S1081  TYPVYTEST  | 375   | >APC-S1081  TYPVYTEIT  | 1375 | 1000  |
| >APC-S1081  TYPVYTES   | 4766  | >APC-S1081  TYPVYTEI   | 74   | 4692  |
| >APC-S1081  TYPVYTES   | 14924 | >APC-S1081  TYPVYTEI   | 121  | 14803 |
| >APC-S1081  TYPVYTES   | 1081  | >APC-S1081  TYPVYTEI   | 66   | 1015  |
| >APC-S1081  TYPVYTES   | 12625 | >APC-S1081  TYPVYTEI   | 8    | 12617 |
| >APC-S1081  STTYPVYTES | 8808  | >APC-S1081  STTYPVYTEI | 132  | 8676  |
| >APC-S1081  STTYPVYTES | 6056  | >APC-S1081  STTYPVYTEI | 40   | 6016  |

|                         |       |                         |       |       |
|-------------------------|-------|-------------------------|-------|-------|
| >APC-S1081I-STTYPVYTES  | 149   | >APC-S1081I-STTYPVYTEIT | 506   | 357   |
| >APC-S1081I-STTYPVYTES  | 12363 | >APC-S1081I-STTYPVYTEI  | 269   | 12094 |
| >APC-S1081I-STTYPVYTES  | 10663 | >APC-S1081I-STTYPVYTEI  | 259   | 10404 |
| >APC-S1081I-STTYPVYTES  | 2614  | >APC-S1081I-STTYPVYTEI  | 129   | 2485  |
| >APC-S1081I-STTYPVYTES  | 1224  | >APC-S1081I-STTYPVYTEI  | 76    | 1148  |
| >APC-S1081I-STTYPVYTES  | 33834 | >APC-S1081I-STTYPVYTEI  | 148   | 33686 |
| >APC-S117L-I-SFPRRGFV   | 400   | >APC-S117L-I-LFPRRGFV   | 873   | 473   |
| >APC-S117L-I-GSFPRRGFV  | 13454 | >APC-S117L-I-GLFPRRGFV  | 172   | 13282 |
| >APC-S117L-I-GSFPRRGFV  | 4382  | >APC-S117L-I-GLFPRRGFV  | 19    | 4363  |
| >APC-S117L-I-GSFPRRGFV  | 4320  | >APC-S117L-I-GLFPRRGFV  | 9     | 4311  |
| >APC-S117L-I-GSFPRRGFV  | 2509  | >APC-S117L-I-GLFPRRGFV  | 173   | 2336  |
| >APC-S117L-I-GSFPRRGFV  | 6957  | >APC-S117L-I-GLFPRRGFV  | 9     | 6948  |
| >APC-S117L-I-GSFPRRGFV  | 19229 | >APC-S117L-I-GLFPRRGFV  | 70    | 19159 |
| >APC-S117L-I-GSFPRRGFV  | 9012  | >APC-S117L-I-GLFPRRGFV  | 9     | 9003  |
| >APC-S117L-I-GSFPRRGFV  | 8704  | >APC-S117L-I-GLFPRRGFV  | 5     | 8699  |
| >APC-S117L-I-GSFPRRGFV  | 222   | >APC-S117L-I-GLFPRRGFV  | 1516  | 1294  |
| >APC-S117L-I-GSFPRRGF   | 541   | >APC-S117L-I-GLFPRRGF   | 187   | 354   |
| >APC-S117L-I-GSFPRRGF   | 6962  | >APC-S117L-I-GLFPRRGF   | 235   | 6727  |
| >APC-S117L-I-GSFPRRGF   | 121   | >APC-S117L-I-GLFPRRGF   | 161   | 40    |
| >APC-S117L-I-GSFPRRGF   | 6     | >APC-S117L-I-GLFPRRGF   | 395   | 389   |
| >APC-S117L-I-GSFPRRGF   | 464   | >APC-S117L-I-GLFPRRGF   | 11465 | 11001 |
| >APC-S117L-I-GSFPRRGFV  | 136   | >APC-S117L-I-GLFPRRGFV  | 3486  | 3350  |
| >APC-S117L-I-GSFPRRGFV  | 295   | >APC-S117L-I-GLFPRRGFV  | 12662 | 12367 |
| >APC-S117L-I-PMGSFPRRG  | 49    | >APC-S117L-I-PMGLFPRRG  | 156   | 107   |
| >APC-S117L-I-PMGSFPRRG  | 206   | >APC-S117L-I-PMGLFPRRG  | 486   | 280   |
| >APC-S117L-I-PMGSFPRRG  | 58    | >APC-S117L-I-PMGLFPRRG  | 161   | 103   |
| >APC-S117L-I-PMGSFPRRG  | 402   | >APC-S117L-I-PMGLFPRRG  | 1827  | 1425  |
| >APC-S117L-I-PMGSFPRR   | 101   | >APC-S117L-I-PMGLFPRR   | 78    | 23    |
| >APC-S117L-I-VPMGSFPRR  | 306   | >APC-S117L-I-VPMGLFPRR  | 570   | 264   |
| >APC-S117L-I-VPMGSFPR   | 937   | >APC-S117L-I-VPMGLFPR   | 486   | 451   |
| >APC-S117L-I-VPMGSFPRR  | 29    | >APC-S117L-I-VPMGLFPRR  | 60    | 31    |
| >APC-S117L-I-VPMGSFPRR  | 217   | >APC-S117L-I-VPMGLFPRR  | 178   | 39    |
| >APC-S117L-I-VPMGSFPR   | 676   | >APC-S117L-I-VPMGLFPR   | 303   | 373   |
| >APC-S117L-I-VPMGSFPR   | 321   | >APC-S117L-I-VPMGLFPR   | 231   | 90    |
| >APC-S117L-I-VPMGSFPRR  | 1131  | >APC-S117L-I-VPMGLFPRR  | 353   | 778   |
| >APC-S117L-I-SPVPMGSF   | 126   | >APC-S117L-I-SPVPMGLF   | 406   | 280   |
| >APC-S117L-I-SPVPMGSFPF | 371   | >APC-S117L-I-SPVPMGLFPF | 217   | 154   |
| >APC-S117L-I-SPVPMGSFPF | 215   | >APC-S117L-I-SPVPMGLFPF | 359   | 144   |
| >APC-S117L-I-SPVPMGSF   | 21    | >APC-S117L-I-SPVPMGLF   | 130   | 109   |
| >APC-S117L-I-SPVPMGSF   | 45    | >APC-S117L-I-SPVPMGLF   | 136   | 91    |
| >APC-S117L-I-SPVPMGSF   | 58    | >APC-S117L-I-SPVPMGLF   | 303   | 245   |
| >APC-S117L-I-SPVPMGSF   | 415   | >APC-S117L-I-SPVPMGLF   | 410   | 5     |
| >APC-S117L-I-SPVPMGSFPF | 452   | >APC-S117L-I-SPVPMGLFPF | 307   | 145   |

|                                      |       |                                      |       |       |
|--------------------------------------|-------|--------------------------------------|-------|-------|
| >APC-S117L- <sup>-</sup> SPVPMGSFPF  | 1257  | >APC-S117L- <sub>-</sub> SPVPMGLFPF  | 482   | 775   |
| >APC-S117L- <sup>-</sup> CSPVPMGSF   | 579   | >APC-S117L- <sub>-</sub> CSPVPMGLF   | 360   | 219   |
| >APC-S117L- <sup>-</sup> CSPVPMGSF   | 163   | >APC-S117L- <sub>-</sub> CSPVPMGLF   | 516   | 353   |
| >APC-S117L- <sup>-</sup> CSPVPMGSFF  | 201   | >APC-S117L- <sub>-</sub> CSPVPMGLFF  | 130   | 71    |
| >APC-S117L- <sup>-</sup> CSPVPMGSF   | 261   | >APC-S117L- <sub>-</sub> CSPVPMGLF   | 533   | 272   |
| >APC-S117L- <sup>-</sup> CSPVPMGS    | 3582  | >APC-S117L- <sub>-</sub> CSPVPMGL    | 7     | 3575  |
| >APC-S117L- <sup>-</sup> CSPVPMGSF   | 13    | >APC-S117L- <sub>-</sub> CSPVPMGLF   | 3     | 10    |
| >APC-S117L- <sup>-</sup> CSPVPMGSFF  | 426   | >APC-S117L- <sub>-</sub> CSPVPMGLFF  | 172   | 254   |
| >APC-S117L- <sup>-</sup> CSPVPMGS    | 24977 | >APC-S117L- <sub>-</sub> CSPVPMGL    | 492   | 24485 |
| >APC-S117L- <sup>-</sup> ECSPVPMGS   | 1508  | >APC-S117L- <sub>-</sub> ECSPVPMGL   | 50    | 1458  |
| >APC-S117L- <sup>-</sup> GECSVPMG    | 374   | >APC-S117L- <sub>-</sub> GECSVPMG    | 269   | 105   |
| >APC-S117L- <sup>-</sup> GECSVPMG    | 3341  | >APC-S117L- <sub>-</sub> GECSVPMG    | 300   | 3041  |
| >APC-S117L- <sup>-</sup> GECSVPMG    | 356   | >APC-S117L- <sub>-</sub> GECSVPMG    | 454   | 98    |
| >APC-S117L- <sup>-</sup> GECSVPMG    | 482   | >APC-S117L- <sub>-</sub> GECSVPMG    | 338   | 144   |
| >APC-S117L- <sup>-</sup> GECSVPMG    | 944   | >APC-S117L- <sub>-</sub> GECSVPMG    | 446   | 498   |
| >APC-S117L- <sup>-</sup> GECSVPMG    | 5248  | >APC-S117L- <sub>-</sub> GECSVPMG    | 25    | 5223  |
| >APC-S117L- <sup>-</sup> GECSVPMG    | 59    | >APC-S117L- <sub>-</sub> GECSVPMG    | 48    | 11    |
| >APC-S1202C SGQSSKTEHM               | 478   | >APC-S1202C CGQSSKTEHM               | 4049  | 3571  |
| >APC-S1202C SSGQSSKTEH               | 300   | >APC-S1202C SCGQSSKTEH               | 9582  | 9282  |
| >APC-S1202C SSGQSSKTEH               | 109   | >APC-S1202C SCGQSSKTEH               | 16313 | 16204 |
| >APC-S1202C SSGQSSKTEH               | 405   | >APC-S1202C SCGQSSKTEH               | 8039  | 7634  |
| >APC-S1202C KQSF <sup>-</sup> FSKSSC | 292   | >APC-S1202C KQSF <sup>-</sup> FSKSSC | 236   | 56    |
| >APC-S1202C SSSGQSSK                 | 191   | >APC-S1202C SSCGQSSK                 | 487   | 296   |
| >APC-S1202C SSSGQSSK                 | 21    | >APC-S1202C SSCGQSSK                 | 21    | 0     |
| >APC-S1202C SSSGQSSK                 | 81    | >APC-S1202C SSCGQSSK                 | 112   | 31    |
| >APC-S1202C SSSGQSSK                 | 264   | >APC-S1202C SSCGQSSK                 | 471   | 207   |
| >APC-S1202C SSSGQSSKTEI              | 229   | >APC-S1202C SSCGQSSKTE               | 536   | 307   |
| >APC-S1202C SSSGQSSK                 | 387   | >APC-S1202C SSCGQSSK                 | 764   | 377   |
| >APC-S1202C KSSSGQSSK                | 52    | >APC-S1202C KSSCGQSSK                | 57    | 5     |
| >APC-S1202C KSSSGQSSK                | 43    | >APC-S1202C KSSCGQSSK                | 60    | 17    |
| >APC-S1202C KSSSGQSSK                | 11    | >APC-S1202C KSSCGQSSK                | 11    | 0     |
| >APC-S1202C KSSSGQSSK                | 402   | >APC-S1202C KSSCGQSSK                | 659   | 257   |
| >APC-S1202C KSSSGQSSK                | 305   | >APC-S1202C KSSCGQSSK                | 572   | 267   |
| >APC-S1202C SKSSSGQSS                | 76    | >APC-S1202C SKSSCGQSS                | 334   | 258   |
| >APC-S1202C SKSSSGQSSK               | 53    | >APC-S1202C SKSSCGQSSK               | 104   | 51    |
| >APC-S1202C FSKSSSGQSSI              | 56    | >APC-S1202C FSKSSCGQSSI              | 172   | 116   |
| >APC-S1202C FSKSSSGQSSI              | 78    | >APC-S1202C FSKSSCGQSSI              | 77    | 1     |
| >APC-S1202C FSKSSSGQSSI              | 472   | >APC-S1202C FSKSSCGQSSI              | 586   | 114   |
| >APC-S1202C FFSKSSSGQ                | 428   | >APC-S1202C FFSKSSCGQ                | 742   | 314   |
| >APC-S1202C FFSKSSSG                 | 157   | >APC-S1202C FFSKSSCG                 | 950   | 793   |
| >APC-S1202C FFSKSSSGQ                | 265   | >APC-S1202C FFSKSSCGQ                | 287   | 22    |
| >APC-S1202C SFSFSKSSS                | 1405  | >APC-S1202C SFSFSKSSC                | 357   | 1048  |
| >APC-S1202C QSF <sup>-</sup> FSKSSC  | 406   | >APC-S1202C QSF <sup>-</sup> FSKSSC  | 1601  | 1195  |

|                         |       |                         |       |       |
|-------------------------|-------|-------------------------|-------|-------|
| >APC-S1278F SSLSSAEDEI  | 234   | >APC-S1278F PSLSSAEDEI  | 4507  | 4273  |
| >APC-S1278F SSLSSAEDEI  | 466   | >APC-S1278F PSLSSAEDEI  | 10230 | 9764  |
| >APC-S1278F LSSLSSAEDEI | 232   | >APC-S1278F LPSLSSAEDEI | 17037 | 16805 |
| >APC-S1278F LSSLSSAE    | 12508 | >APC-S1278F LPSLSSAE    | 210   | 12298 |
| >APC-S1278F LSSLSSAEDEI | 7176  | >APC-S1278F LPSLSSAEDEI | 153   | 7023  |
| >APC-S1278F LSSLSSAEDEI | 14614 | >APC-S1278F LPSLSSAEDEI | 136   | 14478 |
| >APC-S1278F LSSLSSAEDEI | 10710 | >APC-S1278F LPSLSSAEDEI | 136   | 10574 |
| >APC-S1278F LSSLSSAEDEI | 116   | >APC-S1278F LPSLSSAEDEI | 4277  | 4161  |
| >APC-S1278F SLSSLSSA    | 171   | >APC-S1278F SLPSLSSA    | 474   | 303   |
| >APC-S1278F SLSSLSSA    | 9     | >APC-S1278F SLPSLSSA    | 71    | 62    |
| >APC-S1278F SLSSLSSA    | 6     | >APC-S1278F SLPSLSSA    | 11    | 5     |
| >APC-S1278F SLSSLSSA    | 644   | >APC-S1278F SLPSLSSA    | 468   | 176   |
| >APC-S1278F SLSSLSSA    | 74    | >APC-S1278F SLPSLSSA    | 65    | 9     |
| >APC-S1278F SLSSLSSA    | 249   | >APC-S1278F SLPSLSSA    | 751   | 502   |
| >APC-S1278F SLSSLSSA    | 39    | >APC-S1278F SLPSLSSA    | 51    | 12    |
| >APC-S1278F SLSSLSSA    | 7     | >APC-S1278F SLPSLSSA    | 10    | 3     |
| >APC-S1278F SSLSSLSSA   | 812   | >APC-S1278F SSLPSLSSA   | 252   | 560   |
| >APC-S1278F SSLSSLSSA   | 505   | >APC-S1278F SSLPSLSSA   | 245   | 260   |
| >APC-S1278F SSLSSLSSA   | 1410  | >APC-S1278F SSLPSLSSA   | 173   | 1237  |
| >APC-S1278F SSLSSLSSA   | 65    | >APC-S1278F SSLPSLSSA   | 145   | 80    |
| >APC-S1278F SSLSSLSSA   | 2214  | >APC-S1278F SSLPSLSSA   | 491   | 1723  |
| >APC-S1278F RCSSLSSLS   | 78    | >APC-S1278F RCSSLPSLS   | 208   | 130   |
| >APC-S1278F RCSSLSSLSSA | 168   | >APC-S1278F RCSSLPSLSSA | 322   | 154   |
| >APC-S1278F SRCSSLSSL   | 295   | >APC-S1278F SRCSSLPSL   | 10684 | 10389 |
| >APC-S1278F SRCSSLSSL   | 68    | >APC-S1278F SRCSSLPSL   | 196   | 128   |
| >APC-S1278F SRCSSLSSL   | 94    | >APC-S1278F SRCSSLPSL   | 127   | 33    |
| >APC-S1278F SRCSSLSSL   | 82    | >APC-S1278F SRCSSLPSL   | 106   | 24    |
| >APC-S1278F FSRCSSLSS   | 448   | >APC-S1278F FSRCSSLPS   | 223   | 225   |
| >APC-S1278F FSRCSSLSSL  | 318   | >APC-S1278F FSRCSSLPSL  | 91    | 227   |
| >APC-S1278F FSRCSSLSSL  | 88    | >APC-S1278F FSRCSSLPSL  | 131   | 43    |
| >APC-S1278F FSRCSSLSS   | 326   | >APC-S1278F FSRCSSLPS   | 341   | 15    |
| >APC-S1278F FSRCSSLSSL  | 9     | >APC-S1278F FSRCSSLPSL  | 13    | 4     |
| >APC-S1278F FSRCSSLSS   | 315   | >APC-S1278F FSRCSSLPS   | 231   | 84    |
| >APC-S1278F FSRCSSLSSL  | 3     | >APC-S1278F FSRCSSLPSL  | 4     | 1     |
| >APC-S1278F FSRCSSLSSL  | 198   | >APC-S1278F FSRCSSLPSL  | 609   | 411   |
| >APC-S1278F FSRCSSLSSLS | 77    | >APC-S1278F FSRCSSLPSLS | 138   | 61    |
| >APC-S1278F FSRCSSLSSL  | 40    | >APC-S1278F FSRCSSLPSL  | 96    | 56    |
| >APC-S1278F CFRCSSLSSL  | 66    | >APC-S1278F CFRCSSLPSL  | 66    | 0     |
| >APC-S130G-STGYLEEL     | 488   | >APC-S130G-GTGYLEEL     | 899   | 411   |
| >APC-S130G-STGYLEELEK   | 259   | >APC-S130G-GTGYLEELEK   | 500   | 241   |
| >APC-S130G-STGYLEELEK   | 19    | >APC-S130G-GTGYLEELEK   | 51    | 32    |
| >APC-S130G-STGYLEELEK   | 149   | >APC-S130G-GTGYLEELEK   | 1339  | 1190  |
| >APC-S130G-STGYLEEL     | 443   | >APC-S130G-GTGYLEEL     | 9871  | 9428  |

|                        |       |                        |       |       |
|------------------------|-------|------------------------|-------|-------|
| >APC-S130G-STGYLEELEK  | 378   | >APC-S130G-GTGYLEELEK  | 570   | 192   |
| >APC-S130G-ESTGYLEEL   | 23    | >APC-S130G-EGTGYLEEL   | 8954  | 8931  |
| >APC-S130G-ESTGYLEELEK | 34    | >APC-S130G-EGTGYLEELEI | 956   | 922   |
| >APC-S130G-ESTGYLEEL   | 44    | >APC-S130G-EGTGYLEEL   | 1063  | 1019  |
| >APC-S130G-RESTGYLEEL  | 111   | >APC-S130G-REGTGYLEEL  | 233   | 122   |
| >APC-S130G-RESTGYLEEL  | 44    | >APC-S130G-REGTGYLEEL  | 57    | 13    |
| >APC-S130G-SRESTGYLEEL | 283   | >APC-S130G-SREGTGYLEEL | 281   | 2     |
| >APC-S130G-SRESTGYLEEL | 366   | >APC-S130G-SREGTGYLEEL | 623   | 257   |
| >APC-S130G-SRESTGYLEEL | 165   | >APC-S130G-SREGTGYLEEL | 262   | 97    |
| >APC-S130G-GSRESTGYL   | 33    | >APC-S130G-GSREGTGYL   | 80    | 47    |
| >APC-S130G-GSRESTGY    | 430   | >APC-S130G-GSREGTGY    | 314   | 116   |
| >APC-S130G-GSRESTGY    | 109   | >APC-S130G-GSREGTGY    | 146   | 37    |
| >APC-S130G-GSRESTGY    | 4     | >APC-S130G-GSREGTGY    | 6     | 2     |
| >APC-S130G-GSRESTGYL   | 21    | >APC-S130G-GSREGTGYL   | 45    | 24    |
| >APC-S130G-GSRESTGYL   | 239   | >APC-S130G-GSREGTGYL   | 213   | 26    |
| >APC-S130G-FVNGSRESTG  | 70    | >APC-S130G-FVNGSREGTC  | 97    | 27    |
| >APC-S130G-FVNGSRESTG  | 363   | >APC-S130G-FVNGSREGTC  | 341   | 22    |
| >APC-S130G-FVNGSRESTG  | 85    | >APC-S130G-FVNGSREGTC  | 85    | 0     |
| >APC-S130G-FVNGSREST   | 495   | >APC-S130G-FVNGSREGT   | 327   | 168   |
| >APC-S130G-FVNGSRESTG  | 74    | >APC-S130G-FVNGSREGTC  | 100   | 26    |
| >APC-S130G-FVNGSRESTG  | 147   | >APC-S130G-FVNGSREGTC  | 117   | 30    |
| >APC-S130G-FVNGSRESTG  | 200   | >APC-S130G-FVNGSREGTC  | 263   | 63    |
| >APC-S130G-FVNGSRESTG  | 99    | >APC-S130G-FVNGSREGTC  | 176   | 77    |
| >APC-S130G-FVNGSRESTG  | 445   | >APC-S130G-FVNGSREGTC  | 477   | 32    |
| >APC-S1315L SAEDPVSEV  | 586   | >APC-S1315L LAEDPVSEV  | 452   | 134   |
| >APC-S1315L SAEDPVSEV  | 135   | >APC-S1315L LAEDPVSEV  | 169   | 34    |
| >APC-S1315L SAEDPVSEV  | 26    | >APC-S1315L LAEDPVSEV  | 12    | 14    |
| >APC-S1315L SAEDPVSEV  | 155   | >APC-S1315L LAEDPVSEV  | 459   | 304   |
| >APC-S1315L SAEDPVSEV  | 215   | >APC-S1315L LAEDPVSEV  | 854   | 639   |
| >APC-S1315L RSAEDPVSEV | 5010  | >APC-S1315L RLAEDPVSEV | 36    | 4974  |
| >APC-S1315L RSAEDPVSEV | 1055  | >APC-S1315L RLAEDPVSEV | 13    | 1042  |
| >APC-S1315L RSAEDPVSEV | 1012  | >APC-S1315L RLAEDPVSEV | 13    | 999   |
| >APC-S1315L RSAEDPVSEV | 1820  | >APC-S1315L RLAEDPVSEV | 163   | 1657  |
| >APC-S1315L RSAEDPVSEV | 150   | >APC-S1315L RLAEDPVSEV | 1     | 149   |
| >APC-S1315L RSAEDPVSEV | 6141  | >APC-S1315L RLAEDPVSEV | 3     | 6138  |
| >APC-S1315L RSAEDPVSEV | 1524  | >APC-S1315L RLAEDPVSEV | 4     | 1520  |
| >APC-S1315L RSAEDPVSEV | 10838 | >APC-S1315L RLAEDPVSEV | 2     | 10836 |
| >APC-S1315L RSAEDPVSEV | 1965  | >APC-S1315L RLAEDPVSEV | 2     | 1963  |
| >APC-S1315L RSAEDPVSEV | 115   | >APC-S1315L RLAEDPVSEV | 472   | 357   |
| >APC-S1315L RSAEDPVSEV | 992   | >APC-S1315L RLAEDPVSEV | 439   | 553   |
| >APC-S1315L RSAEDPVSEV | 419   | >APC-S1315L RLAEDPVSEV | 589   | 170   |
| >APC-S1315L RSAEDPVSEV | 73    | >APC-S1315L RLAEDPVSEV | 10694 | 10621 |
| >APC-S1315L RSAEDPVSEV | 415   | >APC-S1315L RLAEDPVSEV | 5240  | 4825  |

|                         |       |                         |       |       |
|-------------------------|-------|-------------------------|-------|-------|
| >APC-S1315L AEIKEKIGTRS | 13017 | >APC-S1315L AEIKEKIGTRL | 56    | 12961 |
| >APC-S1315L AEIKEKIGTRS | 1943  | >APC-S1315L AEIKEKIGTRL | 146   | 1797  |
| >APC-S1315L AEIKEKIGTRS | 1312  | >APC-S1315L AEIKEKIGTRL | 197   | 1115  |
| >APC-S1315L AEIKEKIGTRS | 1698  | >APC-S1315L AEIKEKIGTRL | 15    | 1683  |
| >APC-S1315L GTRSAEDPV   | 344   | >APC-S1315L GTRLAEDPV   | 443   | 99    |
| >APC-S1315L KIGTRSAEDP\ | 376   | >APC-S1315L KIGTRLAEDP\ | 337   | 39    |
| >APC-S1315L KIGTRSAEDP\ | 335   | >APC-S1315L KIGTRLAEDP\ | 217   | 118   |
| >APC-S1315L KIGTRSAEDP\ | 306   | >APC-S1315L KIGTRLAEDP\ | 126   | 180   |
| >APC-S1315L KIGTRSAEDP\ | 189   | >APC-S1315L KIGTRLAEDP\ | 176   | 13    |
| >APC-S1315L KIGTRSAEDP\ | 224   | >APC-S1315L KIGTRLAEDP\ | 177   | 47    |
| >APC-S1315L KIGTRSAEDP\ | 146   | >APC-S1315L KIGTRLAEDP\ | 158   | 12    |
| >APC-S1315L KIGTRSAEDP\ | 144   | >APC-S1315L KIGTRLAEDP\ | 132   | 12    |
| >APC-S1315L KEKIGTRS    | 3220  | >APC-S1315L KEKIGTRL    | 88    | 3132  |
| >APC-S1315L KEKIGTRS    | 21070 | >APC-S1315L KEKIGTRL    | 322   | 20748 |
| >APC-S1315L KEKIGTRS    | 1822  | >APC-S1315L KEKIGTRL    | 86    | 1736  |
| >APC-S1315L KEKIGTRSA   | 87    | >APC-S1315L KEKIGTRLA   | 314   | 227   |
| >APC-S1315L KEKIGTRSA   | 67    | >APC-S1315L KEKIGTRLA   | 114   | 47    |
| >APC-S1315L KEKIGTRSA   | 577   | >APC-S1315L KEKIGTRLA   | 356   | 221   |
| >APC-S1321\SEVPAVSQHF   | 1253  | >APC-S1321\NEVPAVSQHI   | 498   | 755   |
| >APC-S1321\SEVPAVSQ     | 1213  | >APC-S1321\NEVPAVSQ     | 104   | 1109  |
| >APC-S1321\SEVPAVSQH    | 1498  | >APC-S1321\NEVPAVSQH    | 121   | 1377  |
| >APC-S1321\SEVPAVSQHF   | 500   | >APC-S1321\NEVPAVSQHI   | 50    | 450   |
| >APC-S1321\SEVPAVSQHF   | 425   | >APC-S1321\NEVPAVSQHI   | 556   | 131   |
| >APC-S1321\VSEVPAVSQF   | 457   | >APC-S1321\VNEVPAVSQI   | 23589 | 23132 |
| >APC-S1321\PVSEVPAV     | 111   | >APC-S1321\PVNEVPAV     | 51    | 60    |
| >APC-S1321\PVSEVPAV     | 309   | >APC-S1321\PVNEVPAV     | 264   | 45    |
| >APC-S1321\PVSEVPAV     | 289   | >APC-S1321\PVNEVPAV     | 319   | 30    |
| >APC-S1321\PVSEVPAV     | 190   | >APC-S1321\PVNEVPAV     | 222   | 32    |
| >APC-S1321\PVSEVPAV     | 509   | >APC-S1321\PVNEVPAV     | 284   | 225   |
| >APC-S1321\DPVSEVPAV    | 187   | >APC-S1321\DPVNEVPAV    | 286   | 99    |
| >APC-S1321\DPVSEVPA     | 320   | >APC-S1321\DPVNEVPA     | 468   | 148   |
| >APC-S1321\DPVSEVPAV    | 313   | >APC-S1321\DPVNEVPAV    | 540   | 227   |
| >APC-S1321\DPVSEVPA     | 196   | >APC-S1321\DPVNEVPA     | 167   | 29    |
| >APC-S1321\AEDPVSEVPA   | 287   | >APC-S1321\AEDPVNEVP/   | 386   | 99    |
| >APC-S1321\AEDPVSEV     | 380   | >APC-S1321\AEDPVNEV     | 377   | 3     |
| >APC-S1321\AEDPVSEVPA   | 84    | >APC-S1321\AEDPVNEVP/   | 75    | 9     |
| >APC-S1321\AEDPVSEVPA   | 523   | >APC-S1321\AEDPVNEVP/   | 424   | 99    |
| >APC-S1321\AEDPVSEV     | 242   | >APC-S1321\AEDPVNEV     | 210   | 32    |
| >APC-S1321\AEDPVSEVPA   | 36    | >APC-S1321\AEDPVNEVP/   | 51    | 15    |
| >APC-S1321\AEDPVSEVPA   | 92    | >APC-S1321\AEDPVNEVP/   | 93    | 1     |
| >APC-S1321\AEDPVSEV     | 438   | >APC-S1321\AEDPVNEV     | 153   | 285   |
| >APC-S1321\AEDPVSEVPA   | 50    | >APC-S1321\AEDPVNEVP/   | 74    | 24    |
| >APC-S1321\SAEDPVSEV    | 135   | >APC-S1321\SAEDPVNEV    | 313   | 178   |

|                       |       |                        |       |       |
|-----------------------|-------|------------------------|-------|-------|
| >APC-S1321FSAEDPVSEV  | 26    | >APC-S1321FSAEDPVNEV   | 68    | 42    |
| >APC-S1321FSAEDPVSEV  | 155   | >APC-S1321FSAEDPVNEV   | 109   | 46    |
| >APC-S1321FSAEDPVSEV  | 215   | >APC-S1321FSAEDPVNEV   | 196   | 19    |
| >APC-S1321FRSAEDPVSEV | 150   | >APC-S1321FRSAEDPVNEV  | 295   | 145   |
| >APC-S1321FRSAEDPVSEV | 115   | >APC-S1321FRSAEDPVNEV  | 162   | 47    |
| >APC-S1321FRSAEDPVSEV | 419   | >APC-S1321FRSAEDPVNEV  | 697   | 278   |
| >APC-S1321FRSAEDPVSEV | 73    | >APC-S1321FRSAEDPVNEV  | 392   | 319   |
| >APC-S1321FRSAEDPVSEV | 415   | >APC-S1321FRSAEDPVNEV  | 618   | 203   |
| >APC-S1321FSEVPAVSQHF | 2509  | >APC-S1321FREVPASQHF   | 341   | 2168  |
| >APC-S1321FSEVPAVSQHF | 425   | >APC-S1321FREVPASQHF   | 79    | 346   |
| >APC-S1321FVSEVPAVSQF | 457   | >APC-S1321FVREVPASQF   | 26543 | 26086 |
| >APC-S1321FPVSEVPAV   | 111   | >APC-S1321FPVREVPAV    | 584   | 473   |
| >APC-S1321FPVSEVPAV   | 309   | >APC-S1321FPVREVPAV    | 4530  | 4221  |
| >APC-S1321FPVSEVPAV   | 289   | >APC-S1321FPVREVPAV    | 9175  | 8886  |
| >APC-S1321FPVSEVPAV   | 190   | >APC-S1321FPVREVPAV    | 563   | 373   |
| >APC-S1321FPVSEVPAV   | 12772 | >APC-S1321FPVREVPAV    | 308   | 12464 |
| >APC-S1321FDPVSEVPAV  | 187   | >APC-S1321FDPVREVPAV   | 472   | 285   |
| >APC-S1321FDPVSEVPA   | 320   | >APC-S1321FDPVREVPA    | 1048  | 728   |
| >APC-S1321FDPVSEVPAV  | 313   | >APC-S1321FDPVREVPAV   | 1012  | 699   |
| >APC-S1321FDPVSEVPA   | 196   | >APC-S1321FDPVREVPA    | 237   | 41    |
| >APC-S1321FAEDPVSEVPA | 287   | >APC-S1321FAEDPVREVPA  | 778   | 491   |
| >APC-S1321FAEDPVSEV   | 380   | >APC-S1321FAEDPVREV    | 679   | 299   |
| >APC-S1321FAEDPVSEVPA | 84    | >APC-S1321FAEDPVREVPA  | 123   | 39    |
| >APC-S1321FAEDPVSEVPA | 523   | >APC-S1321FAEDPVREVPA  | 456   | 67    |
| >APC-S1321FAEDPVSEV   | 242   | >APC-S1321FAEDPVREV    | 234   | 8     |
| >APC-S1321FAEDPVSEVPA | 36    | >APC-S1321FAEDPVREVPA  | 28    | 8     |
| >APC-S1321FAEDPVSEVPA | 92    | >APC-S1321FAEDPVREVPA  | 102   | 10    |
| >APC-S1321FAEDPVSEV   | 438   | >APC-S1321FAEDPVREV    | 168   | 270   |
| >APC-S1321FAEDPVSEVPA | 50    | >APC-S1321FAEDPVREVPA  | 52    | 2     |
| >APC-S1321FSAEDPVSEV  | 135   | >APC-S1321FSAEDPVREV   | 336   | 201   |
| >APC-S1321FSAEDPVSEV  | 26    | >APC-S1321FSAEDPVREV   | 367   | 341   |
| >APC-S1321FSAEDPVSEV  | 155   | >APC-S1321FSAEDPVREV   | 1739  | 1584  |
| >APC-S1321FSAEDPVSEV  | 215   | >APC-S1321FSAEDPVREV   | 1275  | 1060  |
| >APC-S1321FRSAEDPVSEV | 150   | >APC-S1321FRSAEDPVREV  | 296   | 146   |
| >APC-S1321FRSAEDPVS   | 19240 | >APC-S1321FRSAEDPVR    | 242   | 18998 |
| >APC-S1321FRSAEDPVS   | 35119 | >APC-S1321FRSAEDPVR    | 468   | 34651 |
| >APC-S1321FRSAEDPVSEV | 115   | >APC-S1321FRSAEDPVREV  | 357   | 242   |
| >APC-S1321FRSAEDPVSEV | 419   | >APC-S1321FRSAEDPVREV  | 1487  | 1068  |
| >APC-S1321FRSAEDPVSEV | 73    | >APC-S1321FRSAEDPVREV  | 173   | 100   |
| >APC-S1321FRSAEDPVSEV | 415   | >APC-S1321FRSAEDPVREV  | 1015  | 600   |
| >APC-S1321FGTRSAEDPVS | 1058  | >APC-S1321FGTRSAEDPVF  | 441   | 617   |
| >APC-S1341FSLSESARHK/ | 56    | >APC-S1341FRLSSESARHK/ | 87    | 31    |
| >APC-S1341FSLSESARHK/ | 68    | >APC-S1341FRLSSESARHK/ | 65    | 3     |



|                         |       |                         |       |       |
|-------------------------|-------|-------------------------|-------|-------|
| >APC-S1341F SLSESARHK/  | 404   | >APC-S1341F RLSESARHK/  | 486   | 82    |
| >APC-S1341F SLSESARHK/  | 112   | >APC-S1341F RLSESARHK/  | 555   | 443   |
| >APC-S1341F SLSESARHK/  | 7     | >APC-S1341F RLSESARHK/  | 17    | 10    |
| >APC-S1341F SLSESAR     | 1937  | >APC-S1341F RLSESAR     | 283   | 1654  |
| >APC-S1341F SLSESARHK   | 88    | >APC-S1341F RLSESARHK   | 48    | 40    |
| >APC-S1341F SLSESARHK   | 50    | >APC-S1341F RLSESARHK   | 120   | 70    |
| >APC-S1341F SLSESARHK   | 1160  | >APC-S1341F RLSESARHK   | 75    | 1085  |
| >APC-S1341F SLSESAR     | 450   | >APC-S1341F RLSESAR     | 44    | 406   |
| >APC-S1341F SLSESAR     | 129   | >APC-S1341F RLSESAR     | 982   | 853   |
| >APC-S1341F SLSESARHK   | 129   | >APC-S1341F RLSESARHK   | 71    | 58    |
| >APC-S1341F SLSESAR     | 1731  | >APC-S1341F RLSESAR     | 291   | 1440  |
| >APC-S1341F SSLSESARHK/ | 473   | >APC-S1341F SRLSESARHI  | 19917 | 19444 |
| >APC-S1341F SSLSESAR    | 239   | >APC-S1341F SRLSESAR    | 24111 | 23872 |
| >APC-S1341F SSLSESARHK/ | 38    | >APC-S1341F SRLSESARHI  | 15221 | 15183 |
| >APC-S1341F SSLSESARHK/ | 55    | >APC-S1341F SRLSESARHI  | 4963  | 4908  |
| >APC-S1341F SSLSESAR    | 77    | >APC-S1341F SRLSESAR    | 9348  | 9271  |
| >APC-S1341F SSLSESAR    | 69    | >APC-S1341F SRLSESAR    | 5497  | 5428  |
| >APC-S1341F SSLSESAR    | 382   | >APC-S1341F SRLSESAR    | 121   | 261   |
| >APC-S1341F SSLSESARH   | 294   | >APC-S1341F SRLSESARH   | 24955 | 24661 |
| >APC-S1341F SSLSESARHK/ | 19904 | >APC-S1341F SRLSESARHI  | 183   | 19721 |
| >APC-S1341F SSLSESAR    | 448   | >APC-S1341F SRLSESAR    | 13066 | 12618 |
| >APC-S1341F SSLSESARHK/ | 124   | >APC-S1341F SRLSESARHI  | 5416  | 5292  |
| >APC-S1341F RTKSSRLQGS  | 11    | >APC-S1341F RTKSSRLQGS  | 7     | 4     |
| >APC-S1341F RTKSSRLQGS  | 4487  | >APC-S1341F RTKSSRLQGS  | 8     | 4479  |
| >APC-S1341F RTKSSRLQGS  | 30437 | >APC-S1341F RTKSSRLQGS  | 154   | 30283 |
| >APC-S1341F GSSLSESAR   | 433   | >APC-S1341F GSRLSESAR   | 4796  | 4363  |
| >APC-S1341F GSSLSESA    | 9967  | >APC-S1341F GSRLSESA    | 123   | 9844  |
| >APC-S1341F GSSLSESAR   | 232   | >APC-S1341F GSRLSESAR   | 225   | 7     |
| >APC-S1341F GSSLSESAR   | 294   | >APC-S1341F GSRLSESAR   | 2465  | 2171  |
| >APC-S1341F GSSLSESARI  | 1049  | >APC-S1341F GSRLSESARI  | 158   | 891   |
| >APC-S1341F GSSLSESARI  | 496   | >APC-S1341F GSRLSESARI  | 146   | 350   |
| >APC-S1341F LQGSLSSES/  | 165   | >APC-S1341F LQGSRLSES/  | 181   | 16    |
| >APC-S1341F LQGSLSSES/  | 107   | >APC-S1341F LQGSRLSES/  | 182   | 75    |
| >APC-S1341F LQGSLSSES/  | 269   | >APC-S1341F LQGSRLSES/  | 1020  | 751   |
| >APC-S1341F SRLQGSSL    | 146   | >APC-S1341F SRLQGSRL    | 896   | 750   |
| >APC-S1341F SRLQGSSL    | 224   | >APC-S1341F SRLQGSRL    | 239   | 15    |
| >APC-S1341F SRLQGSSL    | 45    | >APC-S1341F SRLQGSRL    | 278   | 233   |
| >APC-S1341F SSRLQGSS    | 185   | >APC-S1341F SSRLQGSR    | 61    | 124   |
| >APC-S1341F SSRLQGSSL   | 28    | >APC-S1341F SSRLQGSRL   | 106   | 78    |
| >APC-S1341F SSRLQGSSLS  | 105   | >APC-S1341F SSRLQGSRLS  | 134   | 29    |
| >APC-S1341F SSRLQGSSLS/ | 34    | >APC-S1341F SSRLQGSRLS/ | 41    | 7     |
| >APC-S1341F SSRLQGSS    | 19847 | >APC-S1341F SSRLQGSR    | 129   | 19718 |
| >APC-S1341F SSRLQGSSL   | 141   | >APC-S1341F SSRLQGSRL   | 1899  | 1758  |

|                       |       |                        |       |       |
|-----------------------|-------|------------------------|-------|-------|
| >APC-S1341FSSRLQGSSL  | 395   | >APC-S1341FSSRLQGSRL   | 3489  | 3094  |
| >APC-S1341FSSRLQGSSL  | 6     | >APC-S1341FSSRLQGSRL   | 5     | 1     |
| >APC-S1341FSSRLQGSSL  | 18    | >APC-S1341FSSRLQGSRL   | 14    | 4     |
| >APC-S1341FSSRLQGSSL  | 468   | >APC-S1341FSSRLQGSRL   | 1150  | 682   |
| >APC-S1341FKSSRLQGSSL | 390   | >APC-S1341FKSSRLQGSRL  | 1132  | 742   |
| >APC-S1341FKSSRLQGSS  | 14975 | >APC-S1341FKSSRLQGSR   | 32    | 14943 |
| >APC-S1341FKSSRLQGSSL | 366   | >APC-S1341FKSSRLQGSRL  | 1918  | 1552  |
| >APC-S1341FKSSRLQGSSL | 23    | >APC-S1341FKSSRLQGSRL  | 19    | 4     |
| >APC-S1341FKSSRLQGSSL | 93    | >APC-S1341FKSSRLQGSRL  | 109   | 16    |
| >APC-S1341FKSSRLQGSSL | 108   | >APC-S1341FKSSRLQGSRL  | 271   | 163   |
| >APC-S1341FKSSRLQGSSL | 343   | >APC-S1341FKSSRLQGSRL  | 2839  | 2496  |
| >APC-S1341FKSSRLQGSSL | 181   | >APC-S1341FKSSRLQGSRL  | 422   | 241   |
| >APC-S1341FTKSSRLQGSS | 52    | >APC-S1341FTKSSRLQGSR  | 373   | 321   |
| >APC-S1341FTKSSRLQGSS | 375   | >APC-S1341FTKSSRLQGSR  | 1895  | 1520  |
| >APC-S1346FSARHKAVEFS | 336   | >APC-S1346F PARHKAVEFS | 4210  | 3874  |
| >APC-S1346FSARHKAVEFS | 491   | >APC-S1346F PARHKAVEFS | 5381  | 4890  |
| >APC-S1346FSARHKAVEF  | 41    | >APC-S1346F PARHKAVEF  | 227   | 186   |
| >APC-S1346FSARHKAVEF  | 5     | >APC-S1346F PARHKAVEF  | 221   | 216   |
| >APC-S1346FESARHKAVEF | 44    | >APC-S1346FEPARHKAVEF  | 1526  | 1482  |
| >APC-S1346FESARHKAV   | 67    | >APC-S1346FEPARHKAV    | 3204  | 3137  |
| >APC-S1346FESARHKAV   | 261   | >APC-S1346FEPARHKAV    | 373   | 112   |
| >APC-S1346FESARHKAV   | 22019 | >APC-S1346FEPARHKAV    | 89    | 21930 |
| >APC-S1346FESARHKAV   | 1616  | >APC-S1346FEPARHKAV    | 124   | 1492  |
| >APC-S1346FESARHKAVEF | 278   | >APC-S1346FEPARHKAVEF  | 2091  | 1813  |
| >APC-S1346FESARHKAVEF | 60    | >APC-S1346FEPARHKAVEF  | 22065 | 22005 |
| >APC-S1346FESARHKAVEF | 2984  | >APC-S1346FEPARHKAVEF  | 29    | 2955  |
| >APC-S1346FESARHKAVEF | 10139 | >APC-S1346FEPARHKAVEF  | 61    | 10078 |
| >APC-S1346FESARHKAV   | 177   | >APC-S1346FSEPARHKAV   | 151   | 26    |
| >APC-S1346FESARHKAVE  | 97    | >APC-S1346FSEPARHKAVE  | 823   | 726   |
| >APC-S1346FESARHKAVE  | 252   | >APC-S1346FSEPARHKAVE  | 2248  | 1996  |
| >APC-S1346FESARHKAV   | 447   | >APC-S1346FSEPARHKAV   | 1939  | 1492  |
| >APC-S1346FESARHKAVE  | 116   | >APC-S1346FSEPARHKAVE  | 699   | 583   |
| >APC-S1346FESARHKAVE  | 183   | >APC-S1346FSEPARHKAVE  | 1414  | 1231  |
| >APC-S1346FESARHKA    | 20    | >APC-S1346FSEPARHKA    | 920   | 900   |
| >APC-S1346FESARHKAV   | 27    | >APC-S1346FSEPARHKAV   | 1897  | 1870  |
| >APC-S1346FSSESARHK   | 324   | >APC-S1346FSSEPARHK    | 378   | 54    |
| >APC-S1346FSSESARHK   | 305   | >APC-S1346FSSEPARHK    | 237   | 68    |
| >APC-S1346FSSESARHK   | 550   | >APC-S1346FSSEPARHK    | 492   | 58    |
| >APC-S1346FLSSESARHK  | 481   | >APC-S1346FLSSEPARHK   | 532   | 51    |
| >APC-S1346FLSSESARHK  | 318   | >APC-S1346FLSSEPARHK   | 1390  | 1072  |
| >APC-S1346FLSSESARH   | 168   | >APC-S1346FLSSEPARH    | 588   | 420   |
| >APC-S1346FLSSESARHKA | 204   | >APC-S1346FLSSEPARHKA  | 440   | 236   |
| >APC-S1346FLSSESARHKA | 56    | >APC-S1346FLSSEPARHKA  | 72    | 16    |

|                          |       |                          |      |       |
|--------------------------|-------|--------------------------|------|-------|
| >APC-S1346F SLSSESARHK/  | 68    | >APC-S1346F SLSSEPARHK/  | 62   | 6     |
| >APC-S1346F SLSSESARHK/  | 404   | >APC-S1346F SLSSEPARHK/  | 244  | 160   |
| >APC-S1346F SLSSESARHK/  | 112   | >APC-S1346F SLSSEPARHK/  | 125  | 13    |
| >APC-S1346F SLSSESARHK/  | 7     | >APC-S1346F SLSSEPARHK/  | 8    | 1     |
| >APC-S1346F SLSSESARHK   | 88    | >APC-S1346F SLSSEPARHK   | 96   | 8     |
| >APC-S1346F SLSSESARHK   | 50    | >APC-S1346F SLSSEPARHK   | 61   | 11    |
| >APC-S1346F SLSSESAR     | 450   | >APC-S1346F SLSSEPAR     | 672  | 222   |
| >APC-S1346F SLSSESAR     | 129   | >APC-S1346F SLSSEPAR     | 290  | 161   |
| >APC-S1346F SLSSESARHK   | 129   | >APC-S1346F SLSSEPARHK   | 99   | 30    |
| >APC-S1346F SSSLSESARHK/ | 473   | >APC-S1346F SSSLSEPARHK/ | 599  | 126   |
| >APC-S1346F SSSLSESAR    | 239   | >APC-S1346F SSSLSEPAR    | 274  | 35    |
| >APC-S1346F SSSLSESARHK/ | 38    | >APC-S1346F SSSLSEPARHK/ | 47   | 9     |
| >APC-S1346F SSSLSESARHK/ | 55    | >APC-S1346F SSSLSEPARHK/ | 53   | 2     |
| >APC-S1346F SSSLSESAR    | 77    | >APC-S1346F SSSLSEPAR    | 108  | 31    |
| >APC-S1346F SSSLSESAR    | 69    | >APC-S1346F SSSLSEPAR    | 173  | 104   |
| >APC-S1346F SSSLSESAR    | 382   | >APC-S1346F SSSLSEPAR    | 902  | 520   |
| >APC-S1346F SSSLSESARH   | 294   | >APC-S1346F SSSLSEPARH   | 563  | 269   |
| >APC-S1346F SSSLSESAR    | 448   | >APC-S1346F SSSLSEPAR    | 204  | 244   |
| >APC-S1346F SSSLSESARHK/ | 124   | >APC-S1346F SSSLSEPARHK/ | 143  | 19    |
| >APC-S1346F GSSLSESAR    | 433   | >APC-S1346F GSSLSEPAR    | 513  | 80    |
| >APC-S1346F GSSLSESAR    | 232   | >APC-S1346F GSSLSEPAR    | 537  | 305   |
| >APC-S1346F GSSLSESAR    | 294   | >APC-S1346F GSSLSEPAR    | 804  | 510   |
| >APC-S1346F GSSLSESARH   | 496   | >APC-S1346F GSSLSEPARH   | 1035 | 539   |
| >APC-S1346F LQGSSLSES/   | 641   | >APC-S1346F LQGSSLSEPA/  | 458  | 183   |
| >APC-S1346F LQGSSLSES/   | 165   | >APC-S1346F LQGSSLSEPA/  | 115  | 50    |
| >APC-S1346F LQGSSLSES/   | 107   | >APC-S1346F LQGSSLSEPA/  | 83   | 24    |
| >APC-S1346F LQGSSLSES/   | 269   | >APC-S1346F LQGSSLSEPA/  | 245  | 24    |
| >APC-S1355F SSGAKSPSK    | 281   | >APC-S1355F PSGAKSPSK    | 5857 | 5576  |
| >APC-S1355F SSGAKSPSK    | 42    | >APC-S1355F PSGAKSPSK    | 4399 | 4357  |
| >APC-S1355F SSGAKSPSK    | 33    | >APC-S1355F PSGAKSPSK    | 607  | 574   |
| >APC-S1355F FSSGAKSPSK   | 282   | >APC-S1355F FPSGAKSPSK   | 5323 | 5041  |
| >APC-S1355F FSSGAKSPSK   | 31    | >APC-S1355F FPSGAKSPSK   | 3668 | 3637  |
| >APC-S1355F FSSGAKSPSK   | 89    | >APC-S1355F FPSGAKSPSK   | 1978 | 1889  |
| >APC-S1355F FSSGAKSPS    | 23086 | >APC-S1355F FPSGAKSPS    | 307  | 22779 |
| >APC-S1355F FSSGAKSPS    | 5745  | >APC-S1355F FPSGAKSPS    | 58   | 5687  |
| >APC-S1355F FSSGAKSP     | 21692 | >APC-S1355F FPSGAKSP     | 441  | 21251 |
| >APC-S1355F FSSGAKSPS    | 14095 | >APC-S1355F FPSGAKSPS    | 38   | 14057 |
| >APC-S1355F FSSGAKSPSK/  | 23351 | >APC-S1355F FPSGAKSPSK/  | 364  | 22987 |
| >APC-S1355F EFSSGAKSPSI  | 280   | >APC-S1355F EFPSGAKSPSI  | 1467 | 1187  |
| >APC-S1355F AVEFSSGAK    | 376   | >APC-S1355F AVEFPSGAK    | 455  | 79    |
| >APC-S1355F AVEFSSGAK    | 64    | >APC-S1355F AVEFPSGAK    | 93   | 29    |
| >APC-S1355F AVEFSSGAK    | 77    | >APC-S1355F AVEFPSGAK    | 319  | 242   |
| >APC-S1355F KAVEFSSGA    | 348   | >APC-S1355F KAVEFPSGA    | 314  | 34    |

|                         |       |                         |     |       |
|-------------------------|-------|-------------------------|-----|-------|
| >APC-S1355F KAVEFSSGA   | 53    | >APC-S1355F KAVEFPSGA   | 333 | 280   |
| >APC-S1355F KAVEFSSGAK  | 275   | >APC-S1355F KAVEFPSGAK  | 306 | 31    |
| >APC-S1355F KAVEFSSGAK  | 255   | >APC-S1355F KAVEFPSGAK  | 368 | 113   |
| >APC-S1355F KAVEFSSGAK  | 29    | >APC-S1355F KAVEFPSGAK  | 65  | 36    |
| >APC-S1355F SARHKAVEFS  | 336   | >APC-S1355F SARHKAVEFP  | 998 | 662   |
| >APC-S1355F SARHKAVEFS  | 491   | >APC-S1355F SARHKAVEFP  | 264 | 227   |
| >APC-S1360F SPSKSGAQ    | 459   | >APC-S1360F FPSKSGAQ    | 353 | 106   |
| >APC-S1360F SPSKSGAQ    | 251   | >APC-S1360F FPSKSGAQ    | 227 | 24    |
| >APC-S1360F SPSKSGAQ    | 2126  | >APC-S1360F FPSKSGAQ    | 142 | 1984  |
| >APC-S1360F SPSKSGAQTP  | 4050  | >APC-S1360F FPSKSGAQTP  | 327 | 3723  |
| >APC-S1360F SPSKSGAQ    | 11823 | >APC-S1360F FPSKSGAQ    | 472 | 11351 |
| >APC-S1360F SPSKSGAQ    | 9331  | >APC-S1360F FPSKSGAQ    | 72  | 9259  |
| >APC-S1360F SPSKSGAQTP  | 8907  | >APC-S1360F FPSKSGAQTP  | 322 | 8585  |
| >APC-S1360F KAVEFSSGAK  | 9988  | >APC-S1360F KAVEFSSGAK  | 23  | 9965  |
| >APC-S1360F KAVEFSSGAK  | 1669  | >APC-S1360F KAVEFSSGAK  | 3   | 1666  |
| >APC-S1360F KAVEFSSGAK  | 16050 | >APC-S1360F KAVEFSSGAK  | 430 | 15620 |
| >APC-S1360F KAVEFSSGAK  | 9461  | >APC-S1360F KAVEFSSGAK  | 79  | 9382  |
| >APC-S1360F KAVEFSSGAK  | 14783 | >APC-S1360F KAVEFSSGAK  | 20  | 14763 |
| >APC-S1360F KAVEFSSGAK  | 13359 | >APC-S1360F KAVEFSSGAK  | 163 | 13196 |
| >APC-S1360F AKSPSKSG    | 1880  | >APC-S1360F AKFPSKSG    | 307 | 1573  |
| >APC-S1360F AKSPSKSGA   | 495   | >APC-S1360F AKFPSKSGA   | 55  | 440   |
| >APC-S1360F AKSPSKSGAC  | 1338  | >APC-S1360F AKFPSKSGAC  | 227 | 1111  |
| >APC-S1360F AKSPSKSGAC  | 1452  | >APC-S1360F AKFPSKSGAC  | 172 | 1280  |
| >APC-S1360F SGAKSPSK    | 831   | >APC-S1360F SGAKFPSK    | 255 | 576   |
| >APC-S1360F SGAKSPSK    | 997   | >APC-S1360F SGAKFPSK    | 244 | 753   |
| >APC-S1360F SSGAKSPSK   | 281   | >APC-S1360F SSGAKFPSK   | 238 | 43    |
| >APC-S1360F SSGAKSPSK   | 42    | >APC-S1360F SSGAKFPSK   | 17  | 25    |
| >APC-S1360F SSGAKSPSK   | 33    | >APC-S1360F SSGAKFPSK   | 58  | 25    |
| >APC-S1360F SSGAKSPSK   | 1300  | >APC-S1360F SSGAKFPSK   | 159 | 1141  |
| >APC-S1360F FSSGAKSPSK  | 282   | >APC-S1360F FSSGAKFPSK  | 145 | 137   |
| >APC-S1360F FSSGAKSPSK  | 31    | >APC-S1360F FSSGAKFPSK  | 20  | 11    |
| >APC-S1360F FSSGAKSPSK  | 89    | >APC-S1360F FSSGAKFPSK  | 101 | 12    |
| >APC-S1360F EFSSGAKS    | 20130 | >APC-S1360F EFSSGAKF    | 233 | 19897 |
| >APC-S1360F EFSSGAKSPSI | 280   | >APC-S1360F EFSSGAKFPSI | 167 | 113   |
| >APC-S1360F VEFSSGAKS   | 19126 | >APC-S1360F VEFSSGAKF   | 313 | 18813 |
| >APC-S1360F VEFSSGAKS   | 21649 | >APC-S1360F VEFSSGAKF   | 382 | 21267 |
| >APC-S1360F VEFSSGAKS   | 3999  | >APC-S1360F VEFSSGAKF   | 5   | 3994  |
| >APC-S1360F VEFSSGAKS   | 4969  | >APC-S1360F VEFSSGAKF   | 40  | 4929  |
| >APC-S1360F VEFSSGAKSP: | 973   | >APC-S1360F VEFSSGAKFP: | 402 | 571   |
| >APC-S1360F VEFSSGAKS   | 9088  | >APC-S1360F VEFSSGAKF   | 119 | 8969  |
| >APC-S1360F VEFSSGAKS   | 2406  | >APC-S1360F VEFSSGAKF   | 53  | 2353  |
| >APC-S1360F VEFSSGAKS   | 14088 | >APC-S1360F VEFSSGAKF   | 253 | 13835 |
| >APC-S1360F VEFSSGAKS   | 3086  | >APC-S1360F VEFSSGAKF   | 115 | 2971  |

|                        |       |                        |       |       |
|------------------------|-------|------------------------|-------|-------|
| >APC-S1360F AVEFSSGAKS | 13862 | >APC-S1360F AVEFSSGAKF | 42    | 13820 |
| >APC-S1360F AVEFSSGAKS | 25830 | >APC-S1360F AVEFSSGAKF | 334   | 25496 |
| >APC-S1362F SKSGAQTPK  | 1687  | >APC-S1362F FKSGAQTPK  | 311   | 1376  |
| >APC-S1362F PSKSGAQTPK | 41    | >APC-S1362F PFKSGAQTPK | 129   | 88    |
| >APC-S1362F VEFSSGAKSP | 11652 | >APC-S1362F VEFSSGAKSP | 73    | 11579 |
| >APC-S1362F VEFSSGAKSP | 16431 | >APC-S1362F VEFSSGAKSP | 190   | 16241 |
| >APC-S1362F VEFSSGAKSP | 2153  | >APC-S1362F VEFSSGAKSP | 4     | 2149  |
| >APC-S1362F VEFSSGAKSP | 973   | >APC-S1362F VEFSSGAKSP | 12    | 961   |
| >APC-S1362F VEFSSGAKSP | 5998  | >APC-S1362F VEFSSGAKSP | 61    | 5937  |
| >APC-S1362F VEFSSGAKSP | 935   | >APC-S1362F VEFSSGAKSP | 210   | 725   |
| >APC-S1362F VEFSSGAKSP | 3413  | >APC-S1362F VEFSSGAKSP | 65    | 3348  |
| >APC-S1362F VEFSSGAKSP | 13391 | >APC-S1362F VEFSSGAKSP | 208   | 13183 |
| >APC-S1362F VEFSSGAKSP | 3775  | >APC-S1362F VEFSSGAKSP | 135   | 3640  |
| >APC-S1362F SPSKSGAQ   | 459   | >APC-S1362F SPFKSGAQ   | 1603  | 1144  |
| >APC-S1362F SPSKSGAQ   | 251   | >APC-S1362F SPFKSGAQ   | 674   | 423   |
| >APC-S1362F AKSPSKSGA  | 495   | >APC-S1362F AKSPFKSGA  | 802   | 307   |
| >APC-S1362F SGAKSPSK   | 831   | >APC-S1362F SGAKSPFK   | 111   | 720   |
| >APC-S1362F SGAKSPSK   | 942   | >APC-S1362F SGAKSPFK   | 282   | 660   |
| >APC-S1362F SGAKSPSK   | 997   | >APC-S1362F SGAKSPFK   | 414   | 583   |
| >APC-S1362F SSGAKSPSK  | 281   | >APC-S1362F SSGAKSPFK  | 94    | 187   |
| >APC-S1362F SSGAKSPSK  | 42    | >APC-S1362F SSGAKSPFK  | 14    | 28    |
| >APC-S1362F SSGAKSPSK  | 33    | >APC-S1362F SSGAKSPFK  | 12    | 21    |
| >APC-S1362F SSGAKSPS   | 14233 | >APC-S1362F SSGAKSPF   | 83    | 14150 |
| >APC-S1362F SSGAKSPS   | 23093 | >APC-S1362F SSGAKSPF   | 307   | 22786 |
| >APC-S1362F SSGAKSPS   | 10486 | >APC-S1362F SSGAKSPF   | 22    | 10464 |
| >APC-S1362F FSSGAKSPSK | 282   | >APC-S1362F FSSGAKSPFK | 83    | 199   |
| >APC-S1362F FSSGAKSPSK | 31    | >APC-S1362F FSSGAKSPFK | 14    | 17    |
| >APC-S1362F FSSGAKSPSK | 1035  | >APC-S1362F FSSGAKSPFK | 366   | 669   |
| >APC-S1362F FSSGAKSPSK | 89    | >APC-S1362F FSSGAKSPFK | 14    | 75    |
| >APC-S1362F FSSGAKSPS  | 10740 | >APC-S1362F FSSGAKSPF  | 50    | 10690 |
| >APC-S1362F FSSGAKSPS  | 22911 | >APC-S1362F FSSGAKSPF  | 424   | 22487 |
| >APC-S1362F FSSGAKSPS  | 13819 | >APC-S1362F FSSGAKSPF  | 24    | 13795 |
| >APC-S1362F FSSGAKSPS  | 10333 | >APC-S1362F FSSGAKSPF  | 6     | 10327 |
| >APC-S1362F FSSGAKSPS  | 5745  | >APC-S1362F FSSGAKSPF  | 51    | 5694  |
| >APC-S1362F FSSGAKSPS  | 3432  | >APC-S1362F FSSGAKSPF  | 18    | 3414  |
| >APC-S1362F EFSSGAKSPS | 32959 | >APC-S1362F EFSSGAKSPF | 381   | 32578 |
| >APC-S1362F EFSSGAKSPS | 280   | >APC-S1362F EFSSGAKSPF | 72    | 208   |
| >APC-S1362F EFSSGAKSPS | 23272 | >APC-S1362F EFSSGAKSPF | 480   | 22792 |
| >APC-S1364F KSGAQTPK   | 96    | >APC-S1364F KRGAQTPK   | 13985 | 13889 |
| >APC-S1364F KSGAQTPK   | 34    | >APC-S1364F KRGAQTPK   | 14326 | 14292 |
| >APC-S1364F KSGAQTPK   | 20    | >APC-S1364F KRGAQTPK   | 1574  | 1554  |
| >APC-S1364F KSGAQTPK   | 209   | >APC-S1364F KRGAQTPK   | 14581 | 14372 |
| >APC-S1364F KSGAQTPK   | 17092 | >APC-S1364F KRGAQTPK   | 245   | 16847 |

|                         |       |                         |       |       |
|-------------------------|-------|-------------------------|-------|-------|
| >APC-S1364F KSGAQTPK    | 9826  | >APC-S1364F KRGAQTPK    | 51    | 9775  |
| >APC-S1364F FSSGAKSPSKI | 14866 | >APC-S1364F FSSGAKSPSKI | 16    | 14850 |
| >APC-S1364F SKSGAQTPK   | 5766  | >APC-S1364F SKRGAQTPK   | 25    | 5741  |
| >APC-S1364F PSKSGAQTPK  | 41    | >APC-S1364F PSKRGAQTPK  | 20    | 21    |
| >APC-S1364F SPSKSGAQ    | 459   | >APC-S1364F SPSKRGAQ    | 166   | 293   |
| >APC-S1364F SPSKSGAQT   | 251   | >APC-S1364F SPSKRGAQT   | 130   | 121   |
| >APC-S1364F AKSPSKSGA   | 495   | >APC-S1364F AKSPSKRGA   | 1737  | 1242  |
| >APC-S1364F GAKSPSKS    | 20264 | >APC-S1364F GAKSPSKR    | 99    | 20165 |
| >APC-S1364F SSGAKSPSKS  | 25153 | >APC-S1364F SSGAKSPSKR  | 258   | 24895 |
| >APC-S1364F SSGAKSPSKS  | 34588 | >APC-S1364F SSGAKSPSKR  | 312   | 34276 |
| >APC-S1389F SVSSLDSF    | 5199  | >APC-S1389F FVSSLDSF    | 292   | 4907  |
| >APC-S1389F SVSSLDSF    | 2291  | >APC-S1389F FVSSLDSF    | 169   | 2122  |
| >APC-S1389F SVSSLDSFESF | 83    | >APC-S1389F FVSSLDSFESF | 1137  | 1054  |
| >APC-S1389F SVSSLDSF    | 2076  | >APC-S1389F FVSSLDSF    | 379   | 1697  |
| >APC-S1389F SVSSLDSF    | 215   | >APC-S1389F FVSSLDSF    | 344   | 129   |
| >APC-S1389F SVSSLDSFESF | 66    | >APC-S1389F FVSSLDSFESF | 581   | 515   |
| >APC-S1389F SVSSLDSFESF | 750   | >APC-S1389F FVSSLDSFESF | 326   | 424   |
| >APC-S1389F SVSSLDSFESF | 8     | >APC-S1389F FVSSLDSFESF | 5     | 3     |
| >APC-S1389F SVSSLDSF    | 158   | >APC-S1389F FVSSLDSF    | 99    | 59    |
| >APC-S1389F SVSSLDSF    | 704   | >APC-S1389F FVSSLDSF    | 165   | 539   |
| >APC-S1389F SVSSLDSF    | 468   | >APC-S1389F FVSSLDSF    | 64    | 404   |
| >APC-S1389F TSVSSLDSF   | 1195  | >APC-S1389F TFVSSLDSF   | 33    | 1162  |
| >APC-S1389F TSVSSLDSF   | 7249  | >APC-S1389F TFVSSLDSF   | 29    | 7220  |
| >APC-S1389F TSVSSLDSF   | 6     | >APC-S1389F TFVSSLDSF   | 48    | 42    |
| >APC-S1389F TSVSSLDSF   | 273   | >APC-S1389F TFVSSLDSF   | 2794  | 2521  |
| >APC-S1389F TSVSSLDSF   | 61    | >APC-S1389F TFVSSLDSF   | 859   | 798   |
| >APC-S1389F TSVSSLDSF   | 7     | >APC-S1389F TFVSSLDSF   | 17124 | 17117 |
| >APC-S1389F TSVSSLDSF   | 136   | >APC-S1389F TFVSSLDSF   | 13387 | 13251 |
| >APC-S1389F TSVSSLDSF   | 53    | >APC-S1389F TFVSSLDSF   | 1768  | 1715  |
| >APC-S1389F TSVSSLDSF   | 8784  | >APC-S1389F TFVSSLDSF   | 324   | 8460  |
| >APC-S1389F TSVSSLDSF   | 27947 | >APC-S1389F TFVSSLDSF   | 340   | 27607 |
| >APC-S1389F ETPLMFSRCT  | 3665  | >APC-S1389F ETPLMFSRCT  | 107   | 3558  |
| >APC-S1389F ETPLMFSRCT  | 9457  | >APC-S1389F ETPLMFSRCT  | 75    | 9382  |
| >APC-S1389F ETPLMFSRCT  | 10319 | >APC-S1389F ETPLMFSRCT  | 177   | 10142 |
| >APC-S1389F ETPLMFSRCT  | 491   | >APC-S1389F ETPLMFSRCT  | 4240  | 3749  |
| >APC-S1389F ETPLMFSRCT  | 21128 | >APC-S1389F ETPLMFSRCT  | 422   | 20706 |
| >APC-S1389F ETPLMFSRCT  | 1247  | >APC-S1389F ETPLMFSRCT  | 26    | 1221  |
| >APC-S1389F CTSVSSLDSF  | 672   | >APC-S1389F CTFVSSLDSF  | 276   | 396   |
| >APC-S1389F CTSVSSLDSF  | 6087  | >APC-S1389F CTFVSSLDSF  | 480   | 5607  |
| >APC-S1389F CTSVSSLDSF  | 798   | >APC-S1389F CTFVSSLDSF  | 273   | 525   |
| >APC-S1389F CTSVSSLDSF  | 199   | >APC-S1389F CTFVSSLDSF  | 21    | 178   |
| >APC-S1389F CTSVSSLDSF  | 13    | >APC-S1389F CTFVSSLDSF  | 5     | 8     |
| >APC-S1389F CTSVSSLDSF  | 107   | >APC-S1389F CTFVSSLDSF  | 89    | 18    |

|                         |       |                         |      |       |
|-------------------------|-------|-------------------------|------|-------|
| >APC-S1389F CTSVSSLDSF  | 53    | >APC-S1389F CTFVSSLDSF  | 147  | 94    |
| >APC-S1389F RCTSVSSLDSF | 518   | >APC-S1389F RCTFVSSLDSF | 296  | 222   |
| >APC-S1389F RCTSVSSLDSF | 187   | >APC-S1389F RCTFVSSLDSF | 618  | 431   |
| >APC-S1389F RCTSVSSLDSF | 21    | >APC-S1389F RCTFVSSLDSF | 35   | 14    |
| >APC-S1389F SRCTSVSSL   | 304   | >APC-S1389F SRCTFVSSL   | 2887 | 2583  |
| >APC-S1389F SRCTSVSSL   | 39    | >APC-S1389F SRCTFVSSL   | 96   | 57    |
| >APC-S1389F SRCTSVSSL   | 34    | >APC-S1389F SRCTFVSSL   | 50   | 16    |
| >APC-S1389F SRCTSVSSL   | 723   | >APC-S1389F SRCTFVSSL   | 175  | 548   |
| >APC-S1389F SRCTSVSSL   | 43    | >APC-S1389F SRCTFVSSL   | 12   | 31    |
| >APC-S1389F FSRCTSVSSL  | 338   | >APC-S1389F FSRCTFVSSL  | 513  | 175   |
| >APC-S1389F FSRCTSVSSL  | 99    | >APC-S1389F FSRCTFVSSL  | 145  | 46    |
| >APC-S1389F FSRCTSVSS   | 258   | >APC-S1389F FSRCTFVSS   | 128  | 130   |
| >APC-S1389F FSRCTSVSSL  | 8     | >APC-S1389F FSRCTFVSSL  | 7    | 1     |
| >APC-S1389F FSRCTSVSSL  | 5     | >APC-S1389F FSRCTFVSSL  | 10   | 5     |
| >APC-S1389F FSRCTSVSSLE | 324   | >APC-S1389F FSRCTFVSSLE | 318  | 6     |
| >APC-S1389F FSRCTSVSSL  | 45    | >APC-S1389F FSRCTFVSSL  | 69   | 24    |
| >APC-S1389F MFSRCTSV    | 92    | >APC-S1389F MFSRCTFV    | 24   | 68    |
| >APC-S1389F MFSRCTSVSS  | 80    | >APC-S1389F MFSRCTFVSS  | 34   | 46    |
| >APC-S1389F MFSRCTSV    | 194   | >APC-S1389F MFSRCTFV    | 205  | 11    |
| >APC-S1389F MFSRCTSVSS  | 65    | >APC-S1389F MFSRCTFVSS  | 37   | 28    |
| >APC-S1389F MFSRCTSV    | 1451  | >APC-S1389F MFSRCTFV    | 482  | 969   |
| >APC-S1389F MFSRCTSVSS  | 444   | >APC-S1389F MFSRCTFVSS  | 885  | 441   |
| >APC-S1389F MFSRCTSV    | 200   | >APC-S1389F MFSRCTFV    | 96   | 104   |
| >APC-S1389F MFSRCTSVSS  | 251   | >APC-S1389F MFSRCTFVSS  | 206  | 45    |
| >APC-S1389F LMFSRCTSV   | 118   | >APC-S1389F LMFSRCTFV   | 243  | 125   |
| >APC-S1389F LMFSRCTSV   | 10    | >APC-S1389F LMFSRCTFV   | 8    | 2     |
| >APC-S1389F LMFSRCTSV   | 3     | >APC-S1389F LMFSRCTFV   | 2    | 1     |
| >APC-S1389F LMFSRCTSVS  | 437   | >APC-S1389F LMFSRCTFVS  | 273  | 164   |
| >APC-S1389F LMFSRCTSV   | 3     | >APC-S1389F LMFSRCTFV   | 3    | 0     |
| >APC-S1389F LMFSRCTSVS  | 294   | >APC-S1389F LMFSRCTFVS  | 263  | 31    |
| >APC-S1389F LMFSRCTSV   | 12    | >APC-S1389F LMFSRCTFV   | 7    | 5     |
| >APC-S1389F LMFSRCTS    | 446   | >APC-S1389F LMFSRCTF    | 355  | 91    |
| >APC-S1389F LMFSRCTSV   | 3     | >APC-S1389F LMFSRCTFV   | 2    | 1     |
| >APC-S1389F LMFSRCTSVS  | 436   | >APC-S1389F LMFSRCTFVS  | 374  | 62    |
| >APC-S1389F LMFSRCTSV   | 16    | >APC-S1389F LMFSRCTFV   | 13   | 3     |
| >APC-S1389F LMFSRCTSV   | 7     | >APC-S1389F LMFSRCTFV   | 5    | 2     |
| >APC-S1389F LMFSRCTSV   | 14    | >APC-S1389F LMFSRCTFV   | 5    | 9     |
| >APC-S1389F LMFSRCTS    | 188   | >APC-S1389F LMFSRCTF    | 358  | 170   |
| >APC-S1389F LMFSRCTSV   | 2     | >APC-S1389F LMFSRCTFV   | 2    | 0     |
| >APC-S1389F LMFSRCTSVS  | 761   | >APC-S1389F LMFSRCTFVS  | 377  | 384   |
| >APC-S1389F LMFSRCTSVS  | 439   | >APC-S1389F LMFSRCTFVS  | 358  | 81    |
| >APC-S1389F LMFSRCTS    | 28068 | >APC-S1389F LMFSRCTF    | 388  | 27680 |
| >APC-S1389F LMFSRCTS    | 20743 | >APC-S1389F LMFSRCTF    | 414  | 20329 |

|                         |       |                         |      |       |
|-------------------------|-------|-------------------------|------|-------|
| >APC-S1389F LMFSRCTSV   | 3150  | >APC-S1389F LMFSRCTFV   | 439  | 2711  |
| >APC-S1389F LMFSRCTS    | 8677  | >APC-S1389F LMFSRCTF    | 82   | 8595  |
| >APC-S1389F LMFSRCTS    | 2721  | >APC-S1389F LMFSRCTF    | 192  | 2529  |
| >APC-S1389F LMFSRCTSV   | 57    | >APC-S1389F LMFSRCTFV   | 439  | 382   |
| >APC-S1389F LMFSRCTS    | 1003  | >APC-S1389F LMFSRCTF    | 22   | 981   |
| >APC-S1389F LMFSRCTSV   | 75    | >APC-S1389F LMFSRCTFV   | 360  | 285   |
| >APC-S1389F LMFSRCTSVS  | 350   | >APC-S1389F LMFSRCTFVS  | 1041 | 691   |
| >APC-S1389F LMFSRCTSVS  | 284   | >APC-S1389F LMFSRCTFVS  | 417  | 133   |
| >APC-S1389F LMFSRCTS    | 14424 | >APC-S1389F LMFSRCTF    | 132  | 14292 |
| >APC-S1389F LMFSRCTS    | 275   | >APC-S1389F LMFSRCTF    | 2    | 273   |
| >APC-S1389F LMFSRCTSV   | 10    | >APC-S1389F LMFSRCTFV   | 26   | 16    |
| >APC-S1389F LMFSRCTSVS  | 113   | >APC-S1389F LMFSRCTFVS  | 351  | 238   |
| >APC-S1389F LMFSRCTSVS  | 63    | >APC-S1389F LMFSRCTFVS  | 63   | 0     |
| >APC-S1389F LMFSRCTS    | 18542 | >APC-S1389F LMFSRCTF    | 55   | 18487 |
| >APC-S1389F PLMFSRCTSV  | 370   | >APC-S1389F PLMFSRCTFV  | 170  | 200   |
| >APC-S1389F PLMFSRCTSV  | 586   | >APC-S1389F PLMFSRCTFV  | 403  | 183   |
| >APC-S1389F PLMFSRCTSV  | 98    | >APC-S1389F PLMFSRCTFV  | 174  | 76    |
| >APC-S1389F PLMFSRCTSV  | 190   | >APC-S1389F PLMFSRCTFV  | 112  | 78    |
| >APC-S1389F PLMFSRCTSV  | 245   | >APC-S1389F PLMFSRCTFV  | 63   | 182   |
| >APC-S1389F PLMFSRCTSV  | 20    | >APC-S1389F PLMFSRCTFV  | 11   | 9     |
| >APC-S1389F PLMFSRCTSV  | 9     | >APC-S1389F PLMFSRCTFV  | 12   | 3     |
| >APC-S1389F PLMFSRCTS   | 21671 | >APC-S1389F PLMFSRCTF   | 381  | 21290 |
| >APC-S1389F PLMFSRCTS   | 17165 | >APC-S1389F PLMFSRCTF   | 473  | 16692 |
| >APC-S1389F PLMFSRCTS   | 15807 | >APC-S1389F PLMFSRCTF   | 64   | 15743 |
| >APC-S1389F TPLMFSRCTS  | 1376  | >APC-S1389F TPLMFSRCTF  | 351  | 1025  |
| >APC-S1389F TPLMFSRCTS  | 632   | >APC-S1389F TPLMFSRCTF  | 392  | 240   |
| >APC-S1389F TPLMFSRCTS  | 5275  | >APC-S1389F TPLMFSRCTF  | 152  | 5123  |
| >APC-S1389F TPLMFSRCTS  | 275   | >APC-S1389F TPLMFSRCTF  | 3621 | 3346  |
| >APC-S1389F TPLMFSRCTS  | 305   | >APC-S1389F TPLMFSRCTF  | 1410 | 1105  |
| >APC-S1389F TPLMFSRCTS  | 19729 | >APC-S1389F TPLMFSRCTF  | 219  | 19510 |
| >APC-S1389F TPLMFSRCTS  | 14465 | >APC-S1389F TPLMFSRCTF  | 258  | 14207 |
| >APC-S1389F TPLMFSRCTS  | 11032 | >APC-S1389F TPLMFSRCTF  | 448  | 10584 |
| >APC-S1389F TPLMFSRCTS  | 23477 | >APC-S1389F TPLMFSRCTF  | 410  | 23067 |
| >APC-S1389F TPLMFSRCTS  | 8430  | >APC-S1389F TPLMFSRCTF  | 26   | 8404  |
| >APC-S1395C(SFESRSIASSV | 383   | >APC-S1395C(CFESRSIASSV | 2306 | 1923  |
| >APC-S1395C(DSFESRSI    | 308   | >APC-S1395C(DCFESRSI    | 2189 | 1881  |
| >APC-S1395C(DSFESRSI    | 102   | >APC-S1395C(DCFESRSI    | 2086 | 1984  |
| >APC-S1395C(SLDSFESRSI  | 416   | >APC-S1395C(SLDCFESRSI  | 347  | 69    |
| >APC-S1395C(SLDSFESRSI  | 39    | >APC-S1395C(SLDCFESRSI  | 96   | 57    |
| >APC-S1395C(SLDSFESRSI  | 46    | >APC-S1395C(SLDCFESRSI  | 103  | 57    |
| >APC-S1395C(SLDSFESRSI  | 13    | >APC-S1395C(SLDCFESRSI  | 12   | 1     |
| >APC-S1395C(SLDSFESRSIA | 195   | >APC-S1395C(SLDCFESRSIA | 185  | 10    |
| >APC-S1395C(SLDSFESRSI  | 110   | >APC-S1395C(SLDCFESRSI  | 28   | 82    |



|                        |      |                        |      |      |
|------------------------|------|------------------------|------|------|
| >APC-S1395(SLDSFESRSIA | 1152 | >APC-S1395(SLDCFESRSIA | 250  | 902  |
| >APC-S1395(SLDSFESRSI  | 55   | >APC-S1395(SLDCFESRSI  | 98   | 43   |
| >APC-S1395(SLDSFESRSIA | 105  | >APC-S1395(SLDCFESRSIA | 228  | 123  |
| >APC-S1395(SLDSFESRSI  | 92   | >APC-S1395(SLDCFESRSI  | 376  | 284  |
| >APC-S1395(SLDSFESRSIA | 49   | >APC-S1395(SLDCFESRSIA | 198  | 149  |
| >APC-S1395(SLDSFESR    | 436  | >APC-S1395(SLDCFESR    | 649  | 213  |
| >APC-S1395(SSLDSFESRSI | 636  | >APC-S1395(SSLDCFESRSI | 481  | 155  |
| >APC-S1395(SSLDSFESR   | 64   | >APC-S1395(SSLDCFESR   | 117  | 53   |
| >APC-S1395(SSLDSFESR   | 44   | >APC-S1395(SSLDCFESR   | 33   | 11   |
| >APC-S1395(SSLDSFESRSI | 309  | >APC-S1395(SSLDCFESRSI | 354  | 45   |
| >APC-S1395(SSLDSFESR   | 774  | >APC-S1395(SSLDCFESR   | 393  | 381  |
| >APC-S1395(SSLDSFESR   | 56   | >APC-S1395(SSLDCFESR   | 126  | 70   |
| >APC-S1395(SSLDSFESRSI | 77   | >APC-S1395(SSLDCFESRSI | 327  | 250  |
| >APC-S1395(SSLDSFESRSI | 666  | >APC-S1395(SSLDCFESRSI | 383  | 283  |
| >APC-S1395(SSLDSFESR   | 59   | >APC-S1395(SSLDCFESR   | 61   | 2    |
| >APC-S1395(SSLDSFESR   | 613  | >APC-S1395(SSLDCFESR   | 91   | 522  |
| >APC-S1395(SSLDSFESRSI | 16   | >APC-S1395(SSLDCFESRSI | 14   | 2    |
| >APC-S1395(VSSLDSFESR  | 208  | >APC-S1395(VSSLDCFESR  | 399  | 191  |
| >APC-S1395(VSSLDSFESR  | 106  | >APC-S1395(VSSLDCFESR  | 96   | 10   |
| >APC-S1395(VSSLDSFESR  | 228  | >APC-S1395(VSSLDCFESR  | 943  | 715  |
| >APC-S1395(SVSSLDSFESF | 83   | >APC-S1395(SVSSLDCFESF | 111  | 28   |
| >APC-S1395(SVSSLDSF    | 215  | >APC-S1395(SVSSLDCF    | 300  | 85   |
| >APC-S1395(SVSSLDSFESF | 66   | >APC-S1395(SVSSLDCFESF | 58   | 8    |
| >APC-S1395(SVSSLDSFESF | 8    | >APC-S1395(SVSSLDCFESF | 11   | 3    |
| >APC-S1395(SVSSLDSF    | 158  | >APC-S1395(SVSSLDCF    | 681  | 523  |
| >APC-S1395(SVSSLDSF    | 468  | >APC-S1395(SVSSLDCF    | 911  | 443  |
| >APC-S1395(SVSSLDSFESF | 1013 | >APC-S1395(SVSSLDCFESF | 218  | 795  |
| >APC-S1395(TSVSSLDSF   | 6    | >APC-S1395(TSVSSLDCF   | 5    | 1    |
| >APC-S1395(TSVSSLDSF   | 273  | >APC-S1395(TSVSSLDCF   | 1902 | 1629 |
| >APC-S1395(TSVSSLDSF   | 61   | >APC-S1395(TSVSSLDCF   | 166  | 105  |
| >APC-S1395(TSVSSLDSF   | 7    | >APC-S1395(TSVSSLDCF   | 62   | 55   |
| >APC-S1395(TSVSSLDSF   | 136  | >APC-S1395(TSVSSLDCF   | 877  | 741  |
| >APC-S1395(TSVSSLDSF   | 53   | >APC-S1395(TSVSSLDCF   | 249  | 196  |
| >APC-S1395(CTSVSSLDSF  | 726  | >APC-S1395(CTSVSSLDCF  | 292  | 434  |
| >APC-S1395(CTSVSSLDSF  | 199  | >APC-S1395(CTSVSSLDCF  | 484  | 285  |
| >APC-S1395(CTSVSSLDSF  | 13   | >APC-S1395(CTSVSSLDCF  | 68   | 55   |
| >APC-S1395(CTSVSSLDSF  | 107  | >APC-S1395(CTSVSSLDCF  | 524  | 417  |
| >APC-S1395(CTSVSSLDSF  | 53   | >APC-S1395(CTSVSSLDCF  | 159  | 106  |
| >APC-S1395(RCTSVSSLDSF | 187  | >APC-S1395(RCTSVSSLDCI | 347  | 160  |
| >APC-S1395(RCTSVSSLDSF | 21   | >APC-S1395(RCTSVSSLDCI | 63   | 42   |
| >APC-S1398^ESRSIASSV   | 97   | >APC-S1398^ENRSIASSV   | 1291 | 1194 |
| >APC-S1398^ESRSIASSV   | 16   | >APC-S1398^ENRSIASSV   | 262  | 246  |
| >APC-S1398^FESRSIASSV  | 19   | >APC-S1398^FENRSIASSV  | 14   | 5    |

|                         |     |                         |     |     |
|-------------------------|-----|-------------------------|-----|-----|
| >APC-S1398M FESRSIASSV  | 261 | >APC-S1398M FENRSIASSV  | 336 | 75  |
| >APC-S1398M FESRSIASSV  | 243 | >APC-S1398M FENRSIASSV  | 262 | 19  |
| >APC-S1398M FESRSIASSV  | 162 | >APC-S1398M FENRSIASSV  | 177 | 15  |
| >APC-S1398M FESRSIASSV  | 9   | >APC-S1398M FENRSIASSV  | 12  | 3   |
| >APC-S1398M SFESRSIASSV | 383 | >APC-S1398M SFENRSIASSV | 787 | 404 |
| >APC-S1398M DSFESRSI    | 308 | >APC-S1398M DSFENRSI    | 329 | 21  |
| >APC-S1398M DSFESRSI    | 102 | >APC-S1398M DSFENRSI    | 146 | 44  |
| >APC-S1398M SLDSFESRSI  | 416 | >APC-S1398M SLDSFENRSI  | 368 | 48  |
| >APC-S1398M SLDSFESRSI  | 39  | >APC-S1398M SLDSFENRSI  | 37  | 2   |
| >APC-S1398M SLDSFESRSI  | 46  | >APC-S1398M SLDSFENRSI  | 71  | 25  |
| >APC-S1398M SLDSFESRSI  | 13  | >APC-S1398M SLDSFENRSI  | 20  | 7   |
| >APC-S1398M SLDSFESRSIA | 195 | >APC-S1398M SLDSFENRSIA | 196 | 1   |
| >APC-S1398M SLDSFESRSI  | 110 | >APC-S1398M SLDSFENRSI  | 205 | 95  |
| >APC-S1398M SLDSFESRSI  | 55  | >APC-S1398M SLDSFENRSI  | 102 | 47  |
| >APC-S1398M SLDSFESRSIA | 105 | >APC-S1398M SLDSFENRSIA | 130 | 25  |
| >APC-S1398M SLDSFESRSI  | 92  | >APC-S1398M SLDSFENRSI  | 153 | 61  |
| >APC-S1398M SLDSFESRSIA | 49  | >APC-S1398M SLDSFENRSIA | 63  | 14  |
| >APC-S1398M SLDSFESR    | 436 | >APC-S1398M SLDSFENR    | 473 | 37  |
| >APC-S1398M SSLDSFESR   | 64  | >APC-S1398M SSLDSFENR   | 48  | 16  |
| >APC-S1398M SSLDSFESR   | 44  | >APC-S1398M SSLDSFENR   | 27  | 17  |
| >APC-S1398M SSLDSFESRSI | 309 | >APC-S1398M SSLDSFENRSI | 483 | 174 |
| >APC-S1398M SSLDSFESR   | 56  | >APC-S1398M SSLDSFENR   | 59  | 3   |
| >APC-S1398M SSLDSFESRSI | 77  | >APC-S1398M SSLDSFENRSI | 133 | 56  |
| >APC-S1398M SSLDSFESR   | 59  | >APC-S1398M SSLDSFENR   | 48  | 11  |
| >APC-S1398M SSLDSFESR   | 613 | >APC-S1398M SSLDSFENR   | 281 | 332 |
| >APC-S1398M SSLDSFESRSI | 16  | >APC-S1398M SSLDSFENRSI | 19  | 3   |
| >APC-S1398M VSSLDSFESR  | 208 | >APC-S1398M VSSLDSFENR  | 196 | 12  |
| >APC-S1398M VSSLDSFESR  | 106 | >APC-S1398M VSSLDSFENR  | 65  | 41  |
| >APC-S1398M VSSLDSFESR  | 228 | >APC-S1398M VSSLDSFENR  | 142 | 86  |
| >APC-S1398M VSSLDSFESR  | 706 | >APC-S1398M VSSLDSFENR  | 448 | 258 |
| >APC-S1398M SVSSLDSFESF | 83  | >APC-S1398M SVSSLDSFENI | 65  | 18  |
| >APC-S1398M SVSSLDSFESF | 66  | >APC-S1398M SVSSLDSFENI | 40  | 26  |
| >APC-S1398M SVSSLDSFESF | 8   | >APC-S1398M SVSSLDSFENI | 8   | 0   |
| >APC-S1398M SVSSLDSFESF | 636 | >APC-S1398M SVSSLDSFENI | 469 | 167 |
| >APC-S1398T ERSIASSV    | 97  | >APC-S1398T ETRSIASSV   | 16  | 81  |
| >APC-S1398T ERSIASSV    | 582 | >APC-S1398T ETRSIASSV   | 30  | 552 |
| >APC-S1398T ERSIASSV    | 16  | >APC-S1398T ETRSIASSV   | 8   | 8   |
| >APC-S1398T FESRSIASSV  | 19  | >APC-S1398T FETRSIASSV  | 14  | 5   |
| >APC-S1398T FESRSIASSV  | 261 | >APC-S1398T FETRSIASSV  | 192 | 69  |
| >APC-S1398T FESRSIASSV  | 243 | >APC-S1398T FETRSIASSV  | 607 | 364 |
| >APC-S1398T FESRSIASSV  | 162 | >APC-S1398T FETRSIASSV  | 202 | 40  |
| >APC-S1398T FESRSIASSV  | 9   | >APC-S1398T FETRSIASSV  | 24  | 15  |
| >APC-S1398T SFESRSIASSV | 383 | >APC-S1398T SFETRSIASSV | 333 | 50  |

|                        |       |                        |      |       |
|------------------------|-------|------------------------|------|-------|
| >APC-S1398TDSFESRSI    | 308   | >APC-S1398TDSFETRSI    | 368  | 60    |
| >APC-S1398TDSFESRSI    | 102   | >APC-S1398TDSFETRSI    | 95   | 7     |
| >APC-S1398TSLDSFESRSI  | 416   | >APC-S1398TSLDSFETRSI  | 334  | 82    |
| >APC-S1398TSLDSFESRSI  | 39    | >APC-S1398TSLDSFETRSI  | 31   | 8     |
| >APC-S1398TSLDSFESRSI  | 46    | >APC-S1398TSLDSFETRSI  | 29   | 17    |
| >APC-S1398TSLDSFESRSI  | 13    | >APC-S1398TSLDSFETRSI  | 14   | 1     |
| >APC-S1398TSLDSFESRSIA | 195   | >APC-S1398TSLDSFETRSIA | 177  | 18    |
| >APC-S1398TSLDSFESRSI  | 110   | >APC-S1398TSLDSFETRSI  | 123  | 13    |
| >APC-S1398TSLDSFESRSI  | 55    | >APC-S1398TSLDSFETRSI  | 50   | 5     |
| >APC-S1398TSLDSFESRSIA | 105   | >APC-S1398TSLDSFETRSIA | 74   | 31    |
| >APC-S1398TSLDSFESRSI  | 92    | >APC-S1398TSLDSFETRSI  | 67   | 25    |
| >APC-S1398TSLDSFESRSIA | 49    | >APC-S1398TSLDSFETRSIA | 49   | 0     |
| >APC-S1398TSLDSFESRSI  | 945   | >APC-S1398TSLDSFETRSI  | 392  | 553   |
| >APC-S1398TSLDSFESR    | 436   | >APC-S1398TSLDSFETR    | 386  | 50    |
| >APC-S1398TSSLDSFESR   | 64    | >APC-S1398TSSLDSFETR   | 108  | 44    |
| >APC-S1398TSSLDSFESR   | 44    | >APC-S1398TSSLDSFETR   | 31   | 13    |
| >APC-S1398TSSLDSFESRSI | 309   | >APC-S1398TSSLDSFETRSI | 158  | 151   |
| >APC-S1398TSSLDSFESR   | 56    | >APC-S1398TSSLDSFETR   | 39   | 17    |
| >APC-S1398TSSLDSFESRSI | 77    | >APC-S1398TSSLDSFETRSI | 96   | 19    |
| >APC-S1398TSSLDSFESR   | 59    | >APC-S1398TSSLDSFETR   | 51   | 8     |
| >APC-S1398TSSLDSFESR   | 613   | >APC-S1398TSSLDSFETR   | 427  | 186   |
| >APC-S1398TSSLDSFESRSI | 16    | >APC-S1398TSSLDSFETRSI | 14   | 2     |
| >APC-S1398TVSSLDSFESR  | 208   | >APC-S1398TVSSLDSFETR  | 176  | 32    |
| >APC-S1398TVSSLDSFESR  | 106   | >APC-S1398TVSSLDSFETR  | 92   | 14    |
| >APC-S1398TVSSLDSFESR  | 228   | >APC-S1398TVSSLDSFETR  | 97   | 131   |
| >APC-S1398TVSSLDSFESR  | 83    | >APC-S1398TVSSLDSFETF  | 107  | 24    |
| >APC-S1398TVSSLDSFESR  | 66    | >APC-S1398TVSSLDSFETF  | 49   | 17    |
| >APC-S1398TVSSLDSFESR  | 8     | >APC-S1398TVSSLDSFETF  | 8    | 0     |
| >APC-S1434I·PSRSKTPPP  | 480   | >APC-S1434I·PIRSKTPPP  | 1273 | 793   |
| >APC-S1434I·PSRSKTPPPP | 387   | >APC-S1434I·PIRSKTPPPP | 1002 | 615   |
| >APC-S1434I·PDSPGQTMP  | 18466 | >APC-S1434I·PDSPGQTMP  | 129  | 18337 |
| >APC-S1434I·MPPSRSKTP  | 249   | >APC-S1434I·MPPIRSKTP  | 510  | 261   |
| >APC-S1434I·MPPSRSKT   | 907   | >APC-S1434I·MPPIRSKT   | 413  | 494   |
| >APC-S1434I·MPPSRSKTPF | 205   | >APC-S1434I·MPPIRSKTPP | 118  | 87    |
| >APC-S1434I·TMPPSRSK   | 185   | >APC-S1434I·TMPPIRSK   | 239  | 54    |
| >APC-S1434I·TMPPSRSK   | 330   | >APC-S1434I·TMPPIRSK   | 277  | 53    |
| >APC-S1434I·QTMPPSRSK  | 103   | >APC-S1434I·QTMPPIRSK  | 116  | 13    |
| >APC-S1434I·QTMPPSRSK  | 26    | >APC-S1434I·QTMPPIRSK  | 19   | 7     |
| >APC-S1434I·QTMPPSRSK  | 33    | >APC-S1434I·QTMPPIRSK  | 74   | 41    |
| >APC-S1434I·QTMPPSRSK  | 296   | >APC-S1434I·QTMPPIRSK  | 198  | 98    |
| >APC-S1434I·QTMPPSRRS  | 258   | >APC-S1434I·QTMPPIRS   | 248  | 10    |
| >APC-S1434I·QTMPPSRSK  | 392   | >APC-S1434I·QTMPPIRSKT | 1195 | 803   |
| >APC-S1434I·QTMPPSRSK  | 240   | >APC-S1434I·QTMPPIRSK  | 130  | 110   |

|                         |       |                         |      |       |
|-------------------------|-------|-------------------------|------|-------|
| >APC-S1434I·GQTMPPSR    | 284   | >APC-S1434I·GQTMPPIRS   | 360  | 76    |
| >APC-S1434I·SPGQTMPPS   | 12955 | >APC-S1434I·SPGQTMPP    | 373  | 12582 |
| >APC-S1434I·SPGQTMPPS   | 4475  | >APC-S1434I·SPGQTMPP    | 48   | 4427  |
| >APC-S1434I·DSPGQTMPP   | 191   | >APC-S1434I·DSPGQTMPP   | 307  | 116   |
| >APC-S1434I·DSPGQTMPP   | 11497 | >APC-S1434I·DSPGQTMPP   | 434  | 11063 |
| >APC-S1465F·SGPKQAAV    | 280   | >APC-S1465F·RGPKQAAV    | 1059 | 779   |
| >APC-S1465F·ESGPKQAAV   | 78    | >APC-S1465F·ERGPQAAV    | 8471 | 8393  |
| >APC-S1465F·RESGPKQAA   | 341   | >APC-S1465F·RERGPQAA    | 3401 | 3060  |
| >APC-S1465F·RESGPKQAA   | 981   | >APC-S1465F·RERGPQAA    | 435  | 546   |
| >APC-S1465F·RESGPKQAA\  | 223   | >APC-S1465F·RERGPQAA\   | 337  | 114   |
| >APC-S1465F·RESGPKQA    | 93    | >APC-S1465F·RERGPQA     | 222  | 129   |
| >APC-S1465F·RESGPKQAA   | 20    | >APC-S1465F·RERGPQAA    | 30   | 10    |
| >APC-S1465F·RESGPKQAA\  | 341   | >APC-S1465F·RERGPQAA\   | 752  | 411   |
| >APC-S1465F·RESGPKQAA\  | 138   | >APC-S1465F·RERGPQAA\   | 154  | 16    |
| >APC-S1465F·KRESGPKQ    | 519   | >APC-S1465F·KRERGPQ     | 130  | 389   |
| >APC-S1465F·KRESGPKQA/  | 1730  | >APC-S1465F·KRERGPQA/   | 449  | 1281  |
| >APC-S1465F·KRESGPKQA/  | 621   | >APC-S1465F·KRERGPQA/   | 341  | 280   |
| >APC-S1465F·AEKRESGPK   | 351   | >APC-S1465F·AEKRERGP    | 281  | 70    |
| >APC-S1465F·AEKRESGPKC  | 59    | >APC-S1465F·AEKRERGP    | 68   | 9     |
| >APC-S1465F·KAPTAEKRES  | 30582 | >APC-S1465F·KAPTAEKRE   | 289  | 30293 |
| >APC-S1495C·STPDGFSC    | 39    | >APC-S1495C·GTPDGFSC    | 90   | 51    |
| >APC-S1495C·STPDGFSCS   | 95    | >APC-S1495C·GTPDGFSCS   | 343  | 248   |
| >APC-S1495C·STPDGFSCSS  | 125   | >APC-S1495C·GTPDGFSCSS  | 484  | 359   |
| >APC-S1495C·STPDGFSCSS\ | 137   | >APC-S1495C·GTPDGFSCSS\ | 564  | 427   |
| >APC-S1495C·TESTPDGF    | 388   | >APC-S1495C·TEGTPDGF    | 978  | 590   |
| >APC-S1495C·ATESTPDGF   | 1010  | >APC-S1495C·ATEGTPDGF   | 267  | 743   |
| >APC-S1495C·ATESTPDGF   | 19    | >APC-S1495C·ATEGTPDGF   | 13   | 6     |
| >APC-S1495C·ATESTPDGF   | 112   | >APC-S1495C·ATEGTPDGF   | 276  | 164   |
| >APC-S1495C·FATESTPDGF  | 143   | >APC-S1495C·FATEGTPDGF  | 623  | 480   |
| >APC-S1495C·FATESTPDGF  | 26    | >APC-S1495C·FATEGTPDGF  | 43   | 17    |
| >APC-S1495C·FATESTPDGF  | 188   | >APC-S1495C·FATEGTPDGF  | 322  | 134   |
| >APC-S1495C·HFATESTPDG  | 96    | >APC-S1495C·HFATEGTPD   | 125  | 29    |
| >APC-S1495C·HFATESTPDG  | 387   | >APC-S1495C·HFATEGTPD   | 640  | 253   |
| >APC-S1495C·LLHFATEST   | 310   | >APC-S1495C·LLHFATEG    | 406  | 96    |
| >APC-S1495C·LLHFATEST   | 170   | >APC-S1495C·LLHFATEG    | 210  | 40    |
| >APC-S1495C·LLHFATEST   | 637   | >APC-S1495C·LLHFATEG    | 489  | 148   |
| >APC-S1495C·LLHFATEST   | 177   | >APC-S1495C·LLHFATEG    | 227  | 50    |
| >APC-S1495C·TLLHFATEST  | 278   | >APC-S1495C·TLLHFATEG   | 309  | 31    |
| >APC-S1495C·TLLHFATEST  | 321   | >APC-S1495C·TLLHFATEG   | 470  | 149   |
| >APC-S1495C·TLLHFATEST  | 100   | >APC-S1495C·TLLHFATEG   | 129  | 29    |
| >APC-S1495C·TLLHFATEST  | 460   | >APC-S1495C·TLLHFATEG   | 377  | 83    |
| >APC-S1495C·DTLLHFATES  | 670   | >APC-S1495C·DTLLHFATEG  | 344  | 326   |
| >APC-S1599L·SKLPPPVA    | 297   | >APC-S1599L·LKLPPPVA    | 132  | 165   |

|                        |       |                        |      |       |
|------------------------|-------|------------------------|------|-------|
| >APC-S1599L SKLPPPVAR  | 67    | >APC-S1599L LKLPPPVAR  | 34   | 33    |
| >APC-S1599L SKLPPPVARK | 691   | >APC-S1599L LKLPPPVARK | 323  | 368   |
| >APC-S1599L ASKLPPP    | 15692 | >APC-S1599L ALKLPPP    | 383  | 15309 |
| >APC-S1599L ASKLPPP    | 4660  | >APC-S1599L ALKLPPP    | 10   | 4650  |
| >APC-S1599L ASKLPPP    | 12840 | >APC-S1599L ALKLPPP    | 18   | 12822 |
| >APC-S1599L ASKLPPP    | 19917 | >APC-S1599L ALKLPPP    | 85   | 19832 |
| >APC-S1599L ASKLPPP    | 18108 | >APC-S1599L ALKLPPP    | 78   | 18030 |
| >APC-S1599L ASKLPPP    | 15336 | >APC-S1599L ALKLPPP    | 7    | 15329 |
| >APC-S1599L ASKLPPPVA  | 33459 | >APC-S1599L ALKLPPPVA  | 140  | 33319 |
| >APC-S1599L ASKLPPPVAR | 478   | >APC-S1599L ALKLPPPVAR | 82   | 396   |
| >APC-S1599L ASKLPPPVAR | 468   | >APC-S1599L ALKLPPPVAR | 1649 | 1181  |
| >APC-S1599L ASKLPPPVAR | 181   | >APC-S1599L ALKLPPPVAR | 459  | 278   |
| >APC-S1599L ASKLPPP    | 23    | >APC-S1599L ALKLPPP    | 146  | 123   |
| >APC-S1599L ASKLPPPVA  | 29    | >APC-S1599L ALKLPPPVA  | 245  | 216   |
| >APC-S1599L ASKLPPPVAR | 205   | >APC-S1599L ALKLPPPVAR | 1675 | 1470  |
| >APC-S1599L ASKLPPPVAR | 7     | >APC-S1599L ALKLPPPVAR | 21   | 14    |
| >APC-S1599L ASKLPPPVAR | 107   | >APC-S1599L ALKLPPPVAR | 176  | 69    |
| >APC-S1599L ASKLPPPVAR | 8157  | >APC-S1599L ALKLPPPVAR | 497  | 7660  |
| >APC-S1599L RKAKKPAQT/ | 753   | >APC-S1599L RKAKKPAQT/ | 16   | 737   |
| >APC-S1599L RKAKKPAQT/ | 13784 | >APC-S1599L RKAKKPAQT/ | 183  | 13601 |
| >APC-S1599L TASKLPPP   | 1913  | >APC-S1599L TALKLPPP   | 352  | 1561  |
| >APC-S1599L TASKLPPP   | 2278  | >APC-S1599L TALKLPPP   | 196  | 2082  |
| >APC-S1599L TASKLPPP   | 1460  | >APC-S1599L TALKLPPP   | 137  | 1323  |
| >APC-S1599L TASKLPPPVA | 258   | >APC-S1599L TALKLPPPVA | 95   | 163   |
| >APC-S1599L TASKLPPPVA | 858   | >APC-S1599L TALKLPPPVA | 382  | 476   |
| >APC-S1599L TASKLPPPVA | 41    | >APC-S1599L TALKLPPPVA | 166  | 125   |
| >APC-S1599L TASKLPPP   | 121   | >APC-S1599L TALKLPPP   | 849  | 728   |
| >APC-S1599L TASKLPPP   | 25    | >APC-S1599L TALKLPPP   | 7    | 18    |
| >APC-S1599L TASKLPPPVA | 799   | >APC-S1599L TALKLPPPVA | 272  | 527   |
| >APC-S1599L QTASKLPPP  | 412   | >APC-S1599L QTALKLPPP  | 1050 | 638   |
| >APC-S1599L QTASKLPPP  | 233   | >APC-S1599L QTALKLPPP  | 380  | 147   |
| >APC-S1599L QTASKLPPP  | 217   | >APC-S1599L QTALKLPPP  | 128  | 89    |
| >APC-S1599L QTASKLPPP  | 425   | >APC-S1599L QTALKLPPP  | 1742 | 1317  |
| >APC-S1599L QTASKLPPP  | 6     | >APC-S1599L QTALKLPPP  | 9    | 3     |
| >APC-S1599L QTASKLPPP  | 370   | >APC-S1599L QTALKLPPP  | 178  | 192   |
| >APC-S1599L AQTASKLPPP | 353   | >APC-S1599L AQTALKLPPP | 237  | 116   |
| >APC-S1599L AQTASKLPPP | 254   | >APC-S1599L AQTALKLPPP | 294  | 40    |
| >APC-S1599L AQTASKLPPP | 18    | >APC-S1599L AQTALKLPPP | 14   | 4     |
| >APC-S1599L AQTASKLPPP | 398   | >APC-S1599L AQTALKLPPP | 324  | 74    |
| >APC-S1599L AQTASKLPPP | 166   | >APC-S1599L AQTALKLPPP | 108  | 58    |
| >APC-S1599L AQTASKLPPP | 94    | >APC-S1599L AQTALKLPPP | 353  | 259   |
| >APC-S1599L KPAQTASKL  | 17    | >APC-S1599L KPAQTALKL  | 19   | 2     |
| >APC-S1599L KPAQTASKLP | 378   | >APC-S1599L KPAQTALKLP | 748  | 370   |

|                        |       |                        |      |       |
|------------------------|-------|------------------------|------|-------|
| >APC-S1599L KPAQTASKL  | 163   | >APC-S1599L KPAQTALKL  | 3884 | 3721  |
| >APC-S1599L KKPAQTAS   | 3295  | >APC-S1599L KKPAQTAL   | 76   | 3219  |
| >APC-S1599L KKPAQTASKL | 164   | >APC-S1599L KKPAQTALKL | 388  | 224   |
| >APC-S1599L AKKPAQTASK | 24    | >APC-S1599L AKKPAQTALK | 28   | 4     |
| >APC-S1599L AKKPAQTAS  | 568   | >APC-S1599L AKKPAQTAL  | 15   | 553   |
| >APC-S1599L AKKPAQTASK | 211   | >APC-S1599L AKKPAQTALK | 792  | 581   |
| >APC-S1599L AKKPAQTASK | 34    | >APC-S1599L AKKPAQTALK | 54   | 20    |
| >APC-S1599L KAKKPAQTAS | 199   | >APC-S1599L KAKKPAQTAL | 125  | 74    |
| >APC-S1599L KAKKPAQTAS | 988   | >APC-S1599L KAKKPAQTAL | 402  | 586   |
| >APC-S1599L KAKKPAQTAS | 323   | >APC-S1599L KAKKPAQTAL | 68   | 255   |
| >APC-S1599L KAKKPAQTAS | 4     | >APC-S1599L KAKKPAQTAL | 4    | 0     |
| >APC-S1599L KAKKPAQTAS | 163   | >APC-S1599L KAKKPAQTAL | 85   | 78    |
| >APC-S1599L KAKKPAQTAS | 5654  | >APC-S1599L KAKKPAQTAL | 160  | 5494  |
| >APC-S1599L KAKKPAQTAS | 12928 | >APC-S1599L KAKKPAQTAL | 50   | 12878 |
| >APC-S1842L SPHHYTPI   | 19    | >APC-S1842L LPHHYTPI   | 22   | 3     |
| >APC-S1842L SPHHYTPI   | 225   | >APC-S1842L LPHHYTPI   | 249  | 24    |
| >APC-S1842L SPHHYTPI   | 1170  | >APC-S1842L LPHHYTPI   | 202  | 968   |
| >APC-S1842L SPHHYTPI   | 3278  | >APC-S1842L LPHHYTPI   | 189  | 3089  |
| >APC-S1842L SPHHYTPI   | 2093  | >APC-S1842L LPHHYTPI   | 167  | 1926  |
| >APC-S1842L SPHHYTPI   | 1493  | >APC-S1842L LPHHYTPI   | 38   | 1455  |
| >APC-S1842L SPHHYPIEG  | 176   | >APC-S1842L LPHHYPIEG  | 56   | 120   |
| >APC-S1842L SPHHYTPI   | 2444  | >APC-S1842L LPHHYTPI   | 284  | 2160  |
| >APC-S1842L DSPHHYTPI  | 12068 | >APC-S1842L DLPHHYTPI  | 177  | 11891 |
| >APC-S1842L DSPHHYTPI  | 95    | >APC-S1842L DLPHHYTPI  | 330  | 235   |
| >APC-S1842L FDSPHHYTPI | 353   | >APC-S1842L FDLPHHYTPI | 203  | 150   |
| >APC-S1842L FDSPHHYTPI | 83    | >APC-S1842L FDLPHHYTPI | 50   | 33    |
| >APC-S1842L AFDSPHHY   | 101   | >APC-S1842L AFDLPHHY   | 119  | 18    |
| >APC-S1842L AFDSPHHY   | 204   | >APC-S1842L AFDLPHHY   | 657  | 453   |
| >APC-S1842L AFDSPHHY   | 345   | >APC-S1842L AFDLPHHY   | 534  | 189   |
| >APC-S1842L AFDSPHHY   | 137   | >APC-S1842L AFDLPHHY   | 234  | 97    |
| >APC-S1842L FAFDSPHHY  | 563   | >APC-S1842L FAFDLPHHY  | 452  | 111   |
| >APC-S1842L FAFDSPHHYT | 648   | >APC-S1842L FAFDLPHHYT | 312  | 336   |
| >APC-S1842L FAFDSPHHYT | 98    | >APC-S1842L FAFDLPHHYT | 85   | 13    |
| >APC-S1842L FAFDSPHHYT | 162   | >APC-S1842L FAFDLPHHYT | 134  | 28    |
| >APC-S1842L FAFDSPHHYT | 200   | >APC-S1842L FAFDLPHHYT | 129  | 71    |
| >APC-S1842L FAFDSPHHYT | 34    | >APC-S1842L FAFDLPHHYT | 39   | 5     |
| >APC-S1842L FAFDSPHHYT | 138   | >APC-S1842L FAFDLPHHYT | 274  | 136   |
| >APC-S1842L FAFDSPHHY  | 14    | >APC-S1842L FAFDLPHHY  | 9    | 5     |
| >APC-S1842L FAFDSPHHY  | 135   | >APC-S1842L FAFDLPHHY  | 104  | 31    |
| >APC-S1842L FAFDSPHHY  | 30    | >APC-S1842L FAFDLPHHY  | 43   | 13    |
| >APC-S1842L FAFDSPHHYT | 69    | >APC-S1842L FAFDLPHHYT | 57   | 12    |
| >APC-S1842L FAFDSPHHYT | 120   | >APC-S1842L FAFDLPHHYT | 125  | 5     |
| >APC-S1842L FAFDSPHHY  | 391   | >APC-S1842L FAFDLPHHY  | 50   | 341   |

|                         |       |                         |      |       |
|-------------------------|-------|-------------------------|------|-------|
| >APC-S1842L FAFDSPHHY   | 58    | >APC-S1842L FAFDLPHHY   | 87   | 29    |
| >APC-S1842L FAFDSPHHY   | 198   | >APC-S1842L FAFDLPHHY   | 1026 | 828   |
| >APC-S1842L FAFDSPHHY   | 13    | >APC-S1842L FAFDLPHHY   | 48   | 35    |
| >APC-S1842L FAFDSPHHY   | 5     | >APC-S1842L FAFDLPHHY   | 11   | 6     |
| >APC-S1842L FAFDSPHHY   | 25    | >APC-S1842L FAFDLPHHY   | 24   | 1     |
| >APC-S1842L FAFDSPHHY   | 82    | >APC-S1842L FAFDLPHHY   | 77   | 5     |
| >APC-S1842L FAFDSPHHY   | 192   | >APC-S1842L FAFDLPHHY   | 177  | 15    |
| >APC-S1842L FAFDSPHHY   | 271   | >APC-S1842L FAFDLPHHY   | 372  | 101   |
| >APC-S1842L FAFDSPHHY   | 30    | >APC-S1842L FAFDLPHHY   | 35   | 5     |
| >APC-S1842L FAFDSPHHY   | 690   | >APC-S1842L FAFDLPHHY   | 364  | 326   |
| >APC-S1842L SFAF DSPHHY | 173   | >APC-S1842L SFAF DLPHHY | 371  | 198   |
| >APC-S1842L SFAF DSPHHY | 758   | >APC-S1842L SFAF DLPHHY | 173  | 585   |
| >APC-S1842L SFAF DSPH   | 1960  | >APC-S1842L SFAF DLPH   | 447  | 1513  |
| >APC-S1842L SFAF DSPHHY | 63    | >APC-S1842L SFAF DLPHHY | 102  | 39    |
| >APC-S1842L SFAF DSPHHY | 227   | >APC-S1842L SFAF DLPHHY | 197  | 30    |
| >APC-S1842L SFAF DSPHHY | 48    | >APC-S1842L SFAF DLPHHY | 34   | 14    |
| >APC-S1842L GSFAF DSPH  | 840   | >APC-S1842L GSFAF DLPHH | 354  | 486   |
| >APC-S1842L GSFAF DSPH  | 799   | >APC-S1842L GSFAF DLPH  | 171  | 628   |
| >APC-S1842L GSFAF DSPH  | 93    | >APC-S1842L GSFAF DLPHH | 63   | 30    |
| >APC-S1842L GSFAF DSPH  | 26    | >APC-S1842L GSFAF DLPHH | 13   | 13    |
| >APC-S1842L GSFAF DSPH  | 23    | >APC-S1842L GSFAF DLPHH | 34   | 11    |
| >APC-S1842L GSFAF DSPH  | 1151  | >APC-S1842L GSFAF DLPHH | 243  | 908   |
| >APC-S1842L GSFAF DSPH  | 68    | >APC-S1842L GSFAF DLPHH | 80   | 12    |
| >APC-S1842L GSFAF DSPH  | 45    | >APC-S1842L GSFAF DLPHH | 116  | 71    |
| >APC-S1842L GSFAF DSPH  | 470   | >APC-S1842L GSFAF DLPH  | 437  | 33    |
| >APC-S1842L GSFAF DSPH  | 5     | >APC-S1842L GSFAF DLPHH | 6    | 1     |
| >APC-S1842L GSFAF DSPH  | 112   | >APC-S1842L GSFAF DLPHH | 113  | 1     |
| >APC-S1842L GSFAF DSPH  | 87    | >APC-S1842L GSFAF DLPHH | 51   | 36    |
| >APC-S1842L GSFAF DSPH  | 45    | >APC-S1842L GSFAF DLPH  | 1325 | 1280  |
| >APC-S1842L GSFAF DSPH  | 22    | >APC-S1842L GSFAF DLPHH | 41   | 19    |
| >APC-S1842L GSFAF DSPH  | 381   | >APC-S1842L GSFAF DLPHH | 313  | 68    |
| >APC-S1842L GSFAF DSPH  | 2243  | >APC-S1842L GSFAF DLPH  | 420  | 1823  |
| >APC-S1842L GSFAF DSPH  | 700   | >APC-S1842L GSFAF DLPHH | 323  | 377   |
| >APC-S1842L GSFAF DSPH  | 306   | >APC-S1842L GSFAF DLPHH | 193  | 113   |
| >APC-S1842L RVRGSFAFDS  | 19    | >APC-S1842L RVRGSFAFDL  | 8    | 11    |
| >APC-S1842L RVRGSFAFDS  | 32    | >APC-S1842L RVRGSFAFDL  | 38   | 6     |
| >APC-S1842L RVRGSFAFDS  | 6209  | >APC-S1842L RVRGSFAFDL  | 28   | 6181  |
| >APC-S2570L SSSSILSA    | 11359 | >APC-S2570L SLSSILSA    | 47   | 11312 |
| >APC-S2570L SSSSILSA    | 1571  | >APC-S2570L SLSSILSA    | 7    | 1564  |
| >APC-S2570L SSSSILSAS   | 8802  | >APC-S2570L SLSSILSAS   | 19   | 8783  |
| >APC-S2570L SSSSILSASS  | 13070 | >APC-S2570L SLSSILSASS  | 424  | 12646 |
| >APC-S2570L SSSSILSA    | 2357  | >APC-S2570L SLSSILSA    | 6    | 2351  |
| >APC-S2570L SSSSILSAS   | 11152 | >APC-S2570L SLSSILSAS   | 33   | 11119 |

|                         |       |                         |      |       |
|-------------------------|-------|-------------------------|------|-------|
| >APC-S2570L SSSSILSA    | 3466  | >APC-S2570L SLSSILSA    | 368  | 3098  |
| >APC-S2570L SSSSILSA    | 15403 | >APC-S2570L SLSSILSA    | 32   | 15371 |
| >APC-S2570L SSSSILSA    | 22663 | >APC-S2570L SLSSILSA    | 290  | 22373 |
| >APC-S2570L SSSSILSA    | 18845 | >APC-S2570L SLSSILSA    | 28   | 18817 |
| >APC-S2570L SSSSILSA    | 22502 | >APC-S2570L SLSSILSA    | 5    | 22497 |
| >APC-S2570L SSSSILSAS   | 109   | >APC-S2570L SLSSILSAS   | 2187 | 2078  |
| >APC-S2570L SSSSILSASSE | 143   | >APC-S2570L SLSSILSASSE | 2247 | 2104  |
| >APC-S2570L RVSTWRRRTG: | 1041  | >APC-S2570L RVSTWRRRTG: | 239  | 802   |
| >APC-S2570L RVSTWRRRTG: | 6664  | >APC-S2570L RVSTWRRRTG: | 257  | 6407  |
| >APC-S2570L RVSTWRRRTG: | 8670  | >APC-S2570L RVSTWRRRTG: | 49   | 8621  |
| >APC-S2570L RTGSSSSI    | 161   | >APC-S2570L RTGSLSSI    | 496  | 335   |
| >APC-S2570L RTGSSSSILSA | 74    | >APC-S2570L RTGSLSSILSA | 164  | 90    |
| >APC-S2570L RTGSSSSI    | 64    | >APC-S2570L RTGSLSSI    | 44   | 20    |
| >APC-S2570L RTGSSSSIL   | 820   | >APC-S2570L RTGSLSSIL   | 165  | 655   |
| >APC-S2570L RTGSSSSI    | 476   | >APC-S2570L RTGSLSSI    | 1693 | 1217  |
| >APC-S2570L RTGSSSSIL   | 164   | >APC-S2570L RTGSLSSIL   | 1025 | 861   |
| >APC-S2570L RTGSSSSI    | 11    | >APC-S2570L RTGSLSSI    | 37   | 26    |
| >APC-S2570L RTGSSSSIL   | 5     | >APC-S2570L RTGSLSSIL   | 17   | 12    |
| >APC-S2570L RTGSSSSILSA | 466   | >APC-S2570L RTGSLSSILSA | 1543 | 1077  |
| >APC-S2570L RTGSSSSI    | 350   | >APC-S2570L RTGSLSSI    | 402  | 52    |
| >APC-S2570L RTGSSSSIL   | 48    | >APC-S2570L RTGSLSSIL   | 82   | 34    |
| >APC-S2570L RTGSSSSI    | 86    | >APC-S2570L RTGSLSSI    | 163  | 77    |
| >APC-S2570L RTGSSSSIL   | 5     | >APC-S2570L RTGSLSSIL   | 4    | 1     |
| >APC-S2570L RTGSSSSILS  | 360   | >APC-S2570L RTGSLSSILS  | 330  | 30    |
| >APC-S2570L RTGSSSSI    | 7     | >APC-S2570L RTGSLSSI    | 7    | 0     |
| >APC-S2570L RTGSSSSIL   | 32    | >APC-S2570L RTGSLSSIL   | 48   | 16    |
| >APC-S2570L RRTGSSSSI   | 69    | >APC-S2570L RRTGSLSSI   | 171  | 102   |
| >APC-S2570L RRTGSSSSIL  | 44    | >APC-S2570L RRTGSLSSIL  | 121  | 77    |
| >APC-S2570L RRTGSSSS    | 415   | >APC-S2570L RRTGSLSS    | 228  | 187   |
| >APC-S2570L RRTGSSSSI   | 68    | >APC-S2570L RRTGSLSSI   | 50   | 18    |
| >APC-S2570L RRTGSSSSIL  | 16    | >APC-S2570L RRTGSLSSIL  | 13   | 3     |
| >APC-S2570L RRTGSSSSILS | 244   | >APC-S2570L RRTGSLSSILS | 206  | 38    |
| >APC-S2570L RRTGSSSSIL  | 136   | >APC-S2570L RRTGSLSSIL  | 350  | 214   |
| >APC-S2570L RRTGSSSSI   | 241   | >APC-S2570L RRTGSLSSI   | 157  | 84    |
| >APC-S2570L RRTGSSSSIL  | 53    | >APC-S2570L RRTGSLSSIL  | 60   | 7     |
| >APC-S2570L RRTGSSSSILS | 465   | >APC-S2570L RRTGSLSSILS | 365  | 100   |
| >APC-S2570L RRTGSSSSI   | 350   | >APC-S2570L RRTGSLSSI   | 125  | 225   |
| >APC-S2570L RRTGSSSSIL  | 47    | >APC-S2570L RRTGSLSSIL  | 30   | 17    |
| >APC-S2570L RRTGSSSSI   | 151   | >APC-S2570L RRTGSLSSI   | 243  | 92    |
| >APC-S2570L WRRRTGSSSSI | 23    | >APC-S2570L WRRRTGSLSSI | 44   | 21    |
| >APC-S2570L WRRRTGSSSSI | 18    | >APC-S2570L WRRRTGSLSSI | 35   | 17    |
| >APC-S2570L WRRRTGSSSSI | 171   | >APC-S2570L WRRRTGSLSSI | 95   | 76    |
| >APC-S2570L WRRRTGSSSSI | 57    | >APC-S2570L WRRRTGSLSSI | 61   | 4     |



|                        |       |                        |      |       |
|------------------------|-------|------------------------|------|-------|
| >APC-S2570L WRRTGSSSSI | 49    | >APC-S2570L WRRTGSLSSI | 115  | 66    |
| >APC-S2570L WRRTGSSSSI | 253   | >APC-S2570L WRRTGSLSSI | 164  | 89    |
| >APC-S2570L WRRTGSSSSI | 271   | >APC-S2570L WRRTGSLSSI | 131  | 140   |
| >APC-S2570L WRRTGSSSSI | 231   | >APC-S2570L WRRTGSLSSI | 124  | 107   |
| >APC-S2570L WRRTGSSSSI | 34    | >APC-S2570L WRRTGSLSSI | 19   | 15    |
| >APC-S2570L TWRRTGSSSI | 338   | >APC-S2570L TWRRTGSLSI | 389  | 51    |
| >APC-S2570L TWRRTGSSSI | 75    | >APC-S2570L TWRRTGSLSI | 121  | 46    |
| >APC-S2570L TWRRTGSS   | 866   | >APC-S2570L TWRRTGSL   | 212  | 654   |
| >APC-S2570L TWRRTGSSSI | 275   | >APC-S2570L TWRRTGSLSI | 206  | 69    |
| >APC-S2570L STWRRTGSS  | 5821  | >APC-S2570L STWRRTGSL  | 95   | 5726  |
| >APC-S2570L STWRRTGSS  | 12529 | >APC-S2570L STWRRTGSL  | 354  | 12175 |
| >APC-S2570L STWRRTGSS  | 17707 | >APC-S2570L STWRRTGSL  | 308  | 17399 |
| >APC-S2570L STWRRTGSS  | 8808  | >APC-S2570L STWRRTGSL  | 385  | 8423  |
| >APC-S2570L STWRRTGSS  | 9853  | >APC-S2570L STWRRTGSL  | 33   | 9820  |
| >APC-S2570L STWRRTGSS  | 5317  | >APC-S2570L STWRRTGSL  | 258  | 5059  |
| >APC-S2570L STWRRTGSS  | 5355  | >APC-S2570L STWRRTGSL  | 19   | 5336  |
| >APC-S2570L VSTWRRTGSI | 9605  | >APC-S2570L VSTWRRTGSI | 62   | 9543  |
| >APC-S2570L VSTWRRTGSI | 1378  | >APC-S2570L VSTWRRTGSI | 47   | 1331  |
| >APC-S2570L VSTWRRTGSI | 26850 | >APC-S2570L VSTWRRTGSI | 150  | 26700 |
| >APC-S2631FSSGATNGAES  | 68    | >APC-S2631FSSGATNGAES  | 1079 | 1011  |
| >APC-S2631FSSGATNGAES  | 986   | >APC-S2631FSSGATNGAES  | 294  | 692   |
| >APC-S2631FSPTNSTSQTV  | 28861 | >APC-S2631FSPTNSTSQTV  | 33   | 28828 |
| >APC-S2631FSPTNSTSQTV  | 8028  | >APC-S2631FSPTNSTSQTV  | 63   | 7965  |
| >APC-S2631FSPTNSTSQTV  | 20761 | >APC-S2631FSPTNSTSQTV  | 130  | 20631 |
| >APC-S2631FSPTNSTSQTV  | 2181  | >APC-S2631FSPTNSTSQTV  | 33   | 2148  |
| >APC-S2631FSPTNSTSQTV  | 22630 | >APC-S2631FSPTNSTSQTV  | 463  | 22167 |
| >APC-S2631FSPTNSTSQTV  | 10058 | >APC-S2631FSPTNSTSQTV  | 109  | 9949  |
| >APC-S2631FSPTNSTSQTV  | 10653 | >APC-S2631FSPTNSTSQTV  | 45   | 10608 |
| >APC-S2631FSPTNSTSQTV  | 24653 | >APC-S2631FSPTNSTSQTV  | 389  | 24264 |
| >APC-S2631FTVSSGATNG/  | 1120  | >APC-S2631FTVFSGATNG/  | 407  | 713   |
| >APC-S2631FTVSSGATNG/  | 493   | >APC-S2631FTVFSGATNG/  | 156  | 337   |
| >APC-S2631FTVSSGATNG/  | 500   | >APC-S2631FTVFSGATNG/  | 195  | 305   |
| >APC-S2631FTVSSGATNG/  | 892   | >APC-S2631FTVFSGATNG/  | 115  | 777   |
| >APC-S2631FQTVSSGATNK  | 50    | >APC-S2631FQTVFSGATNK  | 25   | 25    |
| >APC-S2631FQTVSSGATNK  | 365   | >APC-S2631FQTVFSGATNK  | 460  | 95    |
| >APC-S2631FQTVSSGATN   | 714   | >APC-S2631FQTVFSGATN   | 418  | 296   |
| >APC-S2631FSQTVSSGA    | 236   | >APC-S2631FSQTVFSGA    | 67   | 169   |
| >APC-S2631FTSQTVSSGA   | 370   | >APC-S2631FTSQTVFSGA   | 152  | 218   |
| >APC-S2631FSTSQTVSSGA  | 223   | >APC-S2631FSTSQTVFSGA  | 127  | 96    |
| >APC-S2631FSTSQTVSSGA  | 734   | >APC-S2631FSTSQTVFSGA  | 210  | 524   |
| >APC-S2631FSTSQTVSSGA  | 231   | >APC-S2631FSTSQTVFSGA  | 72   | 159   |
| >APC-S2631FSTSQTVSSG   | 233   | >APC-S2631FSTSQTVFSG   | 2774 | 2541  |
| >APC-S2631FSTSQTVSSGA  | 334   | >APC-S2631FSTSQTVFSGA  | 1297 | 963   |

|                        |       |                        |       |       |
|------------------------|-------|------------------------|-------|-------|
| >APC-S2631FNSTSQTVSSG  | 273   | >APC-S2631FNSTSQTVFSG  | 142   | 131   |
| >APC-S2631FNSTSQTVS    | 18725 | >APC-S2631FNSTSQTVF    | 140   | 18585 |
| >APC-S2631FNSTSQTVS    | 22874 | >APC-S2631FNSTSQTVF    | 161   | 22713 |
| >APC-S2631FNSTSQTVS    | 5302  | >APC-S2631FNSTSQTVF    | 66    | 5236  |
| >APC-S2631FTNSTSQTVS   | 18934 | >APC-S2631FTNSTSQTVF   | 81    | 18853 |
| >APC-S2631FPTNSTSQTVS  | 16746 | >APC-S2631FPTNSTSQTVF  | 123   | 16623 |
| >APC-S2631FPTNSTSQTVS  | 22413 | >APC-S2631FPTNSTSQTVF  | 255   | 22158 |
| >APC-S2631FPTNSTSQTVS  | 21893 | >APC-S2631FPTNSTSQTVF  | 252   | 21641 |
| >APC-S906Y-SSGSTTEL    | 12101 | >APC-S906Y-SYGSTTEL    | 8     | 12093 |
| >APC-S906Y-SSGSTTEL    | 14228 | >APC-S906Y-SYGSTTEL    | 9     | 14219 |
| >APC-S906Y-SSGSTTEL    | 408   | >APC-S906Y-SYGSTTEL    | 25926 | 25518 |
| >APC-S906Y-SSGSTTE LH  | 319   | >APC-S906Y-SYGSTTE LH  | 7017  | 6698  |
| >APC-S906Y-SSGSTTEL    | 12459 | >APC-S906Y-SYGSTTEL    | 395   | 12064 |
| >APC-S906Y-SSGSTTE LH  | 8226  | >APC-S906Y-SYGSTTE LH  | 214   | 8012  |
| >APC-S906Y-SSGSTTEL    | 462   | >APC-S906Y-SYGSTTEL    | 13687 | 13225 |
| >APC-S906Y-AIHTSQEDRS  | 26647 | >APC-S906Y-AIHTSQEDRS  | 341   | 26306 |
| >APC-S906Y-AIHTSQEDRS  | 26418 | >APC-S906Y-AIHTSQEDRS  | 174   | 26244 |
| >APC-S906Y-AIHTSQEDRS  | 17401 | >APC-S906Y-AIHTSQEDRS  | 253   | 17148 |
| >APC-S906Y-AIHTSQEDRS  | 18545 | >APC-S906Y-AIHTSQEDRS  | 418   | 18127 |
| >APC-S906Y-RSSGSTTEL   | 562   | >APC-S906Y-RSYGSTTEL   | 353   | 209   |
| >APC-S906Y-RSSGSTTE    | 1945  | >APC-S906Y-RSYGSTTE    | 325   | 1620  |
| >APC-S906Y-RSSGSTTEL   | 74    | >APC-S906Y-RSYGSTTEL   | 14    | 60    |
| >APC-S906Y-RSSGSTTEL   | 1024  | >APC-S906Y-RSYGSTTEL   | 382   | 642   |
| >APC-S906Y-RSSGSTTEL   | 193   | >APC-S906Y-RSYGSTTEL   | 29    | 164   |
| >APC-S906Y-RSSGSTTE    | 406   | >APC-S906Y-RSYGSTTE    | 37    | 369   |
| >APC-S906Y-RSSGSTTEL   | 3     | >APC-S906Y-RSYGSTTEL   | 2     | 1     |
| >APC-S906Y-RSSGSTTE LH | 235   | >APC-S906Y-RSYGSTTE LH | 24    | 211   |
| >APC-S906Y-RSSGSTTE LH | 920   | >APC-S906Y-RSYGSTTE LH | 77    | 843   |
| >APC-S906Y-RSSGSTTEL   | 3664  | >APC-S906Y-RSYGSTTEL   | 317   | 3347  |
| >APC-S906Y-RSSGSTTEL   | 1297  | >APC-S906Y-RSYGSTTEL   | 341   | 956   |
| >APC-S906Y-RSSGSTTEL   | 40    | >APC-S906Y-RSYGSTTEL   | 26    | 14    |
| >APC-S906Y-RSSGSTTE LH | 336   | >APC-S906Y-RSYGSTTE LH | 166   | 170   |
| >APC-S906Y-RSSGSTTE LH | 333   | >APC-S906Y-RSYGSTTE LH | 182   | 151   |
| >APC-S906Y-RSSGSTTEL   | 131   | >APC-S906Y-RSYGSTTEL   | 68    | 63    |
| >APC-S906Y-RSSGSTTEL   | 345   | >APC-S906Y-RSYGSTTEL   | 50    | 295   |
| >APC-S906Y-DRSSGSTTEL  | 465   | >APC-S906Y-DRSYGSTTEL  | 1289  | 824   |
| >APC-S906Y-QEDRSSGTT   | 720   | >APC-S906Y-QEDRSYGTT   | 371   | 349   |
| >APC-S906Y-TSQEDRSS    | 24452 | >APC-S906Y-TSQEDRSY    | 96    | 24356 |
| >APC-S906Y-TSQEDRSS    | 22463 | >APC-S906Y-TSQEDRSY    | 151   | 22312 |
| >APC-S906Y-HTSQEDRSS   | 18214 | >APC-S906Y-HTSQEDRSY   | 45    | 18169 |
| >APC-S906Y-HTSQEDRSS   | 20198 | >APC-S906Y-HTSQEDRSY   | 234   | 19964 |
| >APC-S906Y-HTSQEDRSS   | 28160 | >APC-S906Y-HTSQEDRSY   | 222   | 27938 |
| >APC-S906Y-HTSQEDRSS   | 25245 | >APC-S906Y-HTSQEDRSY   | 402   | 24843 |

|                         |       |                         |       |       |
|-------------------------|-------|-------------------------|-------|-------|
| >APC-S906Y- HTSQEDRSS   | 20583 | >APC-S906Y- HTSQEDRSY   | 75    | 20508 |
| >APC-S906Y- HTSQEDRSS   | 17691 | >APC-S906Y- HTSQEDRSY   | 271   | 17420 |
| >APC-S906Y- HTSQEDRSS   | 10618 | >APC-S906Y- HTSQEDRSY   | 17    | 10601 |
| >APC-S906Y- HTSQEDRSS   | 12781 | >APC-S906Y- HTSQEDRSY   | 136   | 12645 |
| >APC-S906Y- HTSQEDRSS   | 16668 | >APC-S906Y- HTSQEDRSY   | 298   | 16370 |
| >APC-S906Y- HTSQEDRSS   | 16530 | >APC-S906Y- HTSQEDRSY   | 436   | 16094 |
| >APC-S906Y- HTSQEDRSS   | 27883 | >APC-S906Y- HTSQEDRSY   | 144   | 27739 |
| >APC-S906Y- IHTSQEDRSS  | 16152 | >APC-S906Y- IHTSQEDRSY  | 489   | 15663 |
| >APC-S966R- SVSSSDGYGK  | 220   | >APC-S966R- RVSSSDGYGK  | 103   | 117   |
| >APC-S966R- SVSSSDGY    | 329   | >APC-S966R- RVSSSDGY    | 556   | 227   |
| >APC-S966R- SVSSSDGYGK  | 11    | >APC-S966R- RVSSSDGYGK  | 16    | 5     |
| >APC-S966R- SVSSSDGYGK  | 228   | >APC-S966R- RVSSSDGYGK  | 406   | 178   |
| >APC-S966R- SVSSSDGY    | 150   | >APC-S966R- RVSSSDGY    | 880   | 730   |
| >APC-S966R- SVSSSDGY    | 214   | >APC-S966R- RVSSSDGY    | 588   | 374   |
| >APC-S966R- SVSSSDGYGK  | 865   | >APC-S966R- RVSSSDGYGK  | 66    | 799   |
| >APC-S966R- SVSSSDGY    | 31    | >APC-S966R- RVSSSDGY    | 26    | 5     |
| >APC-S966R- SVSSSDGYGK  | 160   | >APC-S966R- RVSSSDGYGK  | 25    | 135   |
| >APC-S966R- SVSSSDGYGK  | 19    | >APC-S966R- RVSSSDGYGK  | 58    | 39    |
| >APC-S966R- SVSSSDGYGK  | 34    | >APC-S966R- RVSSSDGYGK  | 167   | 133   |
| >APC-S966R- SVSSSDGY    | 593   | >APC-S966R- RVSSSDGY    | 197   | 396   |
| >APC-S966R- SVSSSDGY    | 171   | >APC-S966R- RVSSSDGY    | 96    | 75    |
| >APC-S966R- SVSSSDGY    | 276   | >APC-S966R- RVSSSDGY    | 1434  | 1158  |
| >APC-S966R- SVSSSDGY    | 430   | >APC-S966R- RVSSSDGY    | 27    | 403   |
| >APC-S966R- SVSSSDGY    | 223   | >APC-S966R- RVSSSDGY    | 415   | 192   |
| >APC-S966R- SVSSSDGYGK  | 495   | >APC-S966R- RVSSSDGYGK  | 2549  | 2054  |
| >APC-S966R- SVSSSDGYGK  | 2867  | >APC-S966R- RVSSSDGYGK  | 476   | 2391  |
| >APC-S966R- NSVSSSDGYC  | 354   | >APC-S966R- NRVSSSDGYC  | 22963 | 22609 |
| >APC-S966R- NSVSSSDGY   | 72    | >APC-S966R- NRVSSSDGY   | 7342  | 7270  |
| >APC-S966R- NSVSSSDGY   | 344   | >APC-S966R- NRVSSSDGY   | 3605  | 3261  |
| >APC-S966R- NSVSSSDGYC  | 47    | >APC-S966R- NRVSSSDGYC  | 4033  | 3986  |
| >APC-S966R- NSVSSSDGY   | 347   | >APC-S966R- NRVSSSDGY   | 12368 | 12021 |
| >APC-S966R- NSVSSSDGY   | 921   | >APC-S966R- NRVSSSDGY   | 390   | 531   |
| >APC-S966R- NSVSSSDGY   | 21    | >APC-S966R- NRVSSSDGY   | 20563 | 20542 |
| >APC-S966R- NSVSSSDGY   | 186   | >APC-S966R- NRVSSSDGY   | 4871  | 4685  |
| >APC-S966R- NSVSSSDGY   | 477   | >APC-S966R- NRVSSSDGY   | 12316 | 11839 |
| >APC-S966R- YKRSSNDSL N | 85    | >APC-S966R- YKRSSNDSL N | 23    | 62    |
| >APC-S966R- LNSVSSSDGY  | 436   | >APC-S966R- LNRVSSSDGY  | 222   | 214   |
| >APC-S966R- LNSVSSSDGY  | 1122  | >APC-S966R- LNRVSSSDGY  | 326   | 796   |
| >APC-S966R- LNSVSSSDGY  | 910   | >APC-S966R- LNRVSSSDGY  | 351   | 559   |
| >APC-S966R- SLNSVSSS    | 109   | >APC-S966R- SLNRVSSS    | 303   | 194   |
| >APC-S966R- SLNSVSSSDG  | 439   | >APC-S966R- SLNRVSSSDG  | 1176  | 737   |
| >APC-S966R- SLNSVSSSDG  | 24    | >APC-S966R- SLNRVSSSDG  | 74    | 50    |
| >APC-S966R- SLNSVSSSDG  | 87    | >APC-S966R- SLNRVSSSDG  | 73    | 14    |

|                         |       |                         |      |       |
|-------------------------|-------|-------------------------|------|-------|
| >APC-S966R- SLNSVSSSDG  | 47    | >APC-S966R- SLNRVSSSDG  | 64   | 17    |
| >APC-S966R- SLNSVSSSDG  | 43    | >APC-S966R- SLNRVSSSDG  | 68   | 25    |
| >APC-S966R- SLNSVSSSDG  | 458   | >APC-S966R- SLNRVSSSDG  | 679  | 221   |
| >APC-S966R- SLNSVSSSDG  | 231   | >APC-S966R- SLNRVSSSDG  | 516  | 285   |
| >APC-S966R- SSNDLNSV    | 132   | >APC-S966R- SSNDLNRV    | 409  | 277   |
| >APC-S966R- SSNDLNSV    | 85    | >APC-S966R- SSNDLNRV    | 300  | 215   |
| >APC-S966R- SSNDLNSV    | 95    | >APC-S966R- SSNDLNRV    | 507  | 412   |
| >APC-S966R- SSNDLNS     | 13605 | >APC-S966R- SSNDLNR     | 65   | 13540 |
| >APC-S966R- SSNDLNS     | 17029 | >APC-S966R- SSNDLNR     | 72   | 16957 |
| >APC-S966R- SSNDLNS     | 27562 | >APC-S966R- SSNDLNR     | 104  | 27458 |
| >APC-S966R- SSNDLNSV    | 57    | >APC-S966R- SSNDLNRV    | 92   | 35    |
| >APC-S966R- SSNDLNSV    | 254   | >APC-S966R- SSNDLNRV    | 662  | 408   |
| >APC-S966R- SSNDLNS     | 8794  | >APC-S966R- SSNDLNR     | 261  | 8533  |
| >APC-S966R- RSSNDLNSV   | 482   | >APC-S966R- RSSNDLNRV   | 1463 | 981   |
| >APC-S966R- RSSNDLNSV   | 369   | >APC-S966R- RSSNDLNRV   | 1590 | 1221  |
| >APC-S966R- RSSNDLNS    | 16299 | >APC-S966R- RSSNDLNR    | 451  | 15848 |
| >APC-S966R- RSSNDLNS    | 15088 | >APC-S966R- RSSNDLNR    | 171  | 14917 |
| >APC-S966R- RSSNDLNSV   | 354   | >APC-S966R- RSSNDLNRV   | 983  | 629   |
| >APC-S966R- RSSNDLNS    | 18980 | >APC-S966R- RSSNDLNR    | 120  | 18860 |
| >APC-S966R- RSSNDLNSV   | 256   | >APC-S966R- RSSNDLNRV   | 391  | 135   |
| >APC-S966R- RSSNDLNSV   | 211   | >APC-S966R- RSSNDLNRV   | 1146 | 935   |
| >APC-S966R- RSSNDLNSV   | 252   | >APC-S966R- RSSNDLNRV   | 201  | 51    |
| >APC-S966R- RSSNDLNSV   | 98    | >APC-S966R- RSSNDLNRV   | 210  | 112   |
| >APC-S966R- RSSNDLNSV   | 281   | >APC-S966R- RSSNDLNRV   | 2592 | 2311  |
| >APC-S966R- RSSNDLNS    | 8977  | >APC-S966R- RSSNDLNR    | 282  | 8695  |
| >APC-S966R- RSSNDLNS    | 34774 | >APC-S966R- RSSNDLNR    | 348  | 34426 |
| >APC-S966R- KRSSNDLNS   | 207   | >APC-S966R- KRSSNDLNR   | 818  | 611   |
| >APC-S966R- KRSSNDLNS   | 7034  | >APC-S966R- KRSSNDLNR   | 405  | 6629  |
| >APC-S966R- KRSSNDLNS   | 22042 | >APC-S966R- KRSSNDLNR   | 150  | 21892 |
| >APC-T1301\$TLQIAEIKEKI | 633   | >APC-T1301\$SLQIAEIKEKI | 118  | 515   |
| >APC-T1301\$TLQIAEIKEKI | 1483  | >APC-T1301\$SLQIAEIKEKI | 171  | 1312  |
| >APC-T1301\$TLQIAEIKEKI | 251   | >APC-T1301\$SLQIAEIKEKI | 55   | 196   |
| >APC-T1301\$TLQIAEIK    | 288   | >APC-T1301\$SLQIAEIK    | 157  | 131   |
| >APC-T1301\$TLQIAEIKEK  | 478   | >APC-T1301\$SLQIAEIKEK  | 205  | 273   |
| >APC-T1301\$NTLQIAEIK   | 22    | >APC-T1301\$NSLQIAEIK   | 94   | 72    |
| >APC-T1301\$NTLQIAEIKEK | 73    | >APC-T1301\$NSLQIAEIKEK | 317  | 244   |
| >APC-T1301\$NTLQIAEI    | 28    | >APC-T1301\$NSLQIAEI    | 361  | 333   |
| >APC-T1301\$NTLQIAEI    | 15    | >APC-T1301\$NSLQIAEI    | 229  | 214   |
| >APC-T1301\$NTLQIAEI    | 569   | >APC-T1301\$NSLQIAEI    | 429  | 140   |
| >APC-T1301\$NTLQIAEI    | 111   | >APC-T1301\$NSLQIAEI    | 148  | 37    |
| >APC-T1301\$SANTLQIAEI  | 735   | >APC-T1301\$SANSLQIAEI  | 477  | 258   |
| >APC-T1301\$SANTLQIAEIK | 65    | >APC-T1301\$SANSLQIAEIK | 66   | 1     |
| >APC-T1301\$SANTLQIAEIK | 180   | >APC-T1301\$SANSLQIAEIK | 108  | 72    |

|                         |      |                         |      |      |
|-------------------------|------|-------------------------|------|------|
| >APC-T1301\$DSANTLQIAE  | 172  | >APC-T1301\$DSANSLQIAE  | 126  | 46   |
| >APC-T1301\$DSANTLQI    | 315  | >APC-T1301\$DSANSLQI    | 365  | 50   |
| >APC-T1301\$ADSANTLQI   | 51   | >APC-T1301\$ADSANSLQI   | 140  | 89   |
| >APC-T1301\$ADSANTLQI   | 28   | >APC-T1301\$ADSANSLQI   | 36   | 8    |
| >APC-T1301\$EADSANTL    | 76   | >APC-T1301\$EADSANSL    | 68   | 8    |
| >APC-T1301\$EADSANTLQI  | 20   | >APC-T1301\$EADSANSLQI  | 24   | 4    |
| >APC-T1301\$QEADSANTL   | 61   | >APC-T1301\$QEADSANSL   | 37   | 24   |
| >APC-T1301\$QEADSANTLC  | 8    | >APC-T1301\$QEADSANSLC  | 9    | 1    |
| >APC-T1301\$QEADSANTL   | 107  | >APC-T1301\$QEADSANSL   | 123  | 16   |
| >APC-T1301\$QEADSANTL   | 16   | >APC-T1301\$QEADSANSL   | 24   | 8    |
| >APC-T1301\$QEADSANTLC  | 140  | >APC-T1301\$QEADSANSLC  | 160  | 20   |
| >APC-T1301\$QEADSANT    | 246  | >APC-T1301\$QEADSANS    | 1098 | 852  |
| >APC-T1301\$QEADSANTL   | 257  | >APC-T1301\$QEADSANSL   | 227  | 30   |
| >APC-T1301\$QEADSANTLC  | 11   | >APC-T1301\$QEADSANSLC  | 14   | 3    |
| >APC-T1301\$TQEADSANTI  | 13   | >APC-T1301\$TQEADSANSI  | 14   | 1    |
| >APC-T1301\$TTQEADSANTI | 155  | >APC-T1301\$TTQEADSANSI | 91   | 64   |
| >APC-T1301\$TTQEADSANTI | 38   | >APC-T1301\$TTQEADSANSI | 68   | 30   |
| >APC-T1301\$TTQEADSANTI | 241  | >APC-T1301\$TTQEADSANSI | 300  | 59   |
| >APC-T1301\$TTQEADSANTI | 259  | >APC-T1301\$TTQEADSANSI | 547  | 288  |
| >APC-T1301\$TTQEADSANTI | 509  | >APC-T1301\$TTQEADSANSI | 482  | 27   |
| >APC-T1313/ TRSAEDPVSE  | 1568 | >APC-T1313/ ARSAEDPVSE  | 481  | 1087 |
| >APC-T1313/ GTRSAEDPV   | 344  | >APC-T1313/ GARSADPV    | 1857 | 1513 |
| >APC-T1313/ QIAEIKEKIGT | 1261 | >APC-T1313/ QIAEIKEKIGA | 138  | 1123 |
| >APC-T1313/ KIGTRSAEDP' | 844  | >APC-T1313/ KIGARSAEDP' | 485  | 359  |
| >APC-T1313/ KIGTRSAEDP' | 376  | >APC-T1313/ KIGARSAEDP' | 149  | 227  |
| >APC-T1313/ KIGTRSAEDP' | 335  | >APC-T1313/ KIGARSAEDP' | 203  | 132  |
| >APC-T1313/ KIGTRSAEDP' | 306  | >APC-T1313/ KIGARSAEDP' | 144  | 162  |
| >APC-T1313/ KIGTRSAEDP' | 189  | >APC-T1313/ KIGARSAEDP' | 79   | 110  |
| >APC-T1313/ KIGTRSAEDP' | 224  | >APC-T1313/ KIGARSAEDP' | 180  | 44   |
| >APC-T1313/ KIGTRSAEDP' | 146  | >APC-T1313/ KIGARSAEDP' | 72   | 74   |
| >APC-T1313/ KIGTRSAEDP' | 144  | >APC-T1313/ KIGARSAEDP' | 81   | 63   |
| >APC-T1313/ KEKIGTRSA   | 87   | >APC-T1313/ KEKIGARSA   | 189  | 102  |
| >APC-T1313/ KEKIGTRSA   | 67   | >APC-T1313/ KEKIGARSA   | 59   | 8    |
| >APC-T1313/ EIKEKIGTR   | 31   | >APC-T1313/ EIKEKIGAR   | 29   | 2    |
| >APC-T1313/ EIKEKIGTR   | 35   | >APC-T1313/ EIKEKIGAR   | 64   | 29   |
| >APC-T1313/ AEIKEKIGT   | 89   | >APC-T1313/ AEIKEKIGA   | 17   | 72   |
| >APC-T1313/ AEIKEKIGTRS | 503  | >APC-T1313/ AEIKEKIGARS | 417  | 86   |
| >APC-T1313/ AEIKEKIGT   | 381  | >APC-T1313/ AEIKEKIGA   | 570  | 189  |
| >APC-T1368I TPKSPPEHYV  | 100  | >APC-T1368I IPKSPPEHYV  | 56   | 44   |
| >APC-T1368I TPKSPPEHYV  | 137  | >APC-T1368I IPKSPPEHYV  | 510  | 373  |
| >APC-T1368I TPKSPPEHY   | 2947 | >APC-T1368I IPKSPPEHY   | 425  | 2522 |
| >APC-T1368I QTPKSPPEHY  | 274  | >APC-T1368I QIPKSPPEHY  | 4177 | 3903 |
| >APC-T1368I QTPKSPPEHY  | 1215 | >APC-T1368I QIPKSPPEHY  | 489  | 726  |

|                        |       |                         |       |       |
|------------------------|-------|-------------------------|-------|-------|
| >APC-T1368I QTPKSPPEHY | 238   | >APC-T1368I QIPKSPPEHY  | 58    | 180   |
| >APC-T1368I QTPKSPPEHY | 1219  | >APC-T1368I QIPKSPPEHY  | 157   | 1062  |
| >APC-T1368I QTPKSPPEHY | 500   | >APC-T1368I QIPKSPPEHY  | 25    | 475   |
| >APC-T1368I QTPKSPPEHY | 32    | >APC-T1368I QIPKSPPEHY  | 204   | 172   |
| >APC-T1368I QTPKSPPEHY | 125   | >APC-T1368I QIPKSPPEHY  | 1760  | 1635  |
| >APC-T1368I QTPKSPPEHY | 337   | >APC-T1368I QIPKSPPEHY  | 965   | 628   |
| >APC-T1368I QTPKSPPEHY | 25    | >APC-T1368I QIPKSPPEHY  | 97    | 72    |
| >APC-T1368I QTPKSPPEHY | 75    | >APC-T1368I QIPKSPPEHY  | 300   | 225   |
| >APC-T1368I QTPKSPPEHY | 293   | >APC-T1368I QIPKSPPEHY  | 15363 | 15070 |
| >APC-T1368I QTPKSPPEHY | 9     | >APC-T1368I QIPKSPPEHY  | 1198  | 1189  |
| >APC-T1368I QTPKSPPEHY | 106   | >APC-T1368I QIPKSPPEHY  | 2709  | 2603  |
| >APC-T1368I AKSPSKSGAC | 1452  | >APC-T1368I AKSPSKSGAC  | 53    | 1399  |
| >APC-T1368I AQTPKSPPEH | 4582  | >APC-T1368I AQIPKSPPEH' | 329   | 4253  |
| >APC-T1368I AQTPKSPPEH | 1500  | >APC-T1368I AQIPKSPPEH' | 346   | 1154  |
| >APC-T1368I AQTPKSPPEH | 410   | >APC-T1368I AQIPKSPPEH' | 334   | 76    |
| >APC-T1368I AQTPKSPPEH | 87    | >APC-T1368I AQIPKSPPEH' | 30    | 57    |
| >APC-T1368I AQTPKSPPEH | 1009  | >APC-T1368I AQIPKSPPEH  | 224   | 785   |
| >APC-T1368I AQTPKSPPEH | 22    | >APC-T1368I AQIPKSPPEH' | 8     | 14    |
| >APC-T1368I KSGAQTPK   | 96    | >APC-T1368I KSGAQIPK    | 88    | 8     |
| >APC-T1368I KSGAQTPK   | 34    | >APC-T1368I KSGAQIPK    | 21    | 13    |
| >APC-T1368I KSGAQTPK   | 20    | >APC-T1368I KSGAQIPK    | 9     | 11    |
| >APC-T1368I KSGAQTPK   | 209   | >APC-T1368I KSGAQIPK    | 228   | 19    |
| >APC-T1368I PSKSGAQTPK | 41    | >APC-T1368I PSKSGAQIPK  | 16    | 25    |
| >APC-T1368I SPSKSGAQT  | 18815 | >APC-T1368I SPSKSGAQI   | 286   | 18529 |
| >APC-T1368I SPSKSGAQT  | 251   | >APC-T1368I SPSKSGAQI   | 37    | 214   |
| >APC-T1368I KSPSKSGAQT | 3804  | >APC-T1368I KSPSKSGAQI  | 174   | 3630  |
| >APC-T1368I KSPSKSGAQT | 1814  | >APC-T1368I KSPSKSGAQI  | 22    | 1792  |
| >APC-T1368I KSPSKSGAQT | 19427 | >APC-T1368I KSPSKSGAQI  | 49    | 19378 |
| >APC-T1537I ETESEQPK   | 24    | >APC-T1537I EKESEQPK    | 6471  | 6447  |
| >APC-V1323I VPAVSQHPR  | 1078  | >APC-V1323I IPAVSQHPR   | 354   | 724   |
| >APC-V1323I EVPAVSQHPR | 369   | >APC-V1323I EIPAVSQHPR  | 319   | 50    |
| >APC-V1323I EVPAVSQHPR | 279   | >APC-V1323I EIPAVSQHPR  | 227   | 52    |
| >APC-V1323I EVPAVSQHPR | 6     | >APC-V1323I EIPAVSQHPR  | 8     | 2     |
| >APC-V1323I EVPAVSQHPR | 254   | >APC-V1323I EIPAVSQHPR  | 99    | 155   |
| >APC-V1323I SEVPAVSQHF | 425   | >APC-V1323I SEIPAVSQHP  | 516   | 91    |
| >APC-V1323I VSEVPAVSQH | 457   | >APC-V1323I VSEIPAVSQH  | 231   | 226   |
| >APC-V1323I PVSEVPAV   | 111   | >APC-V1323I PVSEIPAV    | 191   | 80    |
| >APC-V1323I PVSEVPAV   | 309   | >APC-V1323I PVSEIPAV    | 569   | 260   |
| >APC-V1323I PVSEVPAV   | 289   | >APC-V1323I PVSEIPAV    | 183   | 106   |
| >APC-V1323I PVSEVPAV   | 190   | >APC-V1323I PVSEIPAV    | 107   | 83    |
| >APC-V1323I PVSEVPAV   | 509   | >APC-V1323I PVSEIPAV    | 401   | 108   |
| >APC-V1323I DPVSEVPAV  | 187   | >APC-V1323I DPVSEIPAV   | 169   | 18    |
| >APC-V1323I DPVSEVPA   | 320   | >APC-V1323I DPVSEIPA    | 279   | 41    |

|                         |       |                         |      |       |
|-------------------------|-------|-------------------------|------|-------|
| >APC-V1323I DPVSEVPAV   | 313   | >APC-V1323I DPVSEIPAV   | 530  | 217   |
| >APC-V1323I DPVSEVPA    | 196   | >APC-V1323I DPVSEIPA    | 208  | 12    |
| >APC-V1323I AEDPVSEVPA  | 287   | >APC-V1323I AEDPVSEIPA\ | 204  | 83    |
| >APC-V1323I AEDPVSEV    | 380   | >APC-V1323I AEDPVSEI    | 157  | 223   |
| >APC-V1323I AEDPVSEVPA  | 84    | >APC-V1323I AEDPVSEIPA\ | 63   | 21    |
| >APC-V1323I AEDPVSEV    | 242   | >APC-V1323I AEDPVSEI    | 957  | 715   |
| >APC-V1323I AEDPVSEVPA  | 36    | >APC-V1323I AEDPVSEIPA  | 40   | 4     |
| >APC-V1323I AEDPVSEVPA  | 92    | >APC-V1323I AEDPVSEIPA\ | 92   | 0     |
| >APC-V1323I AEDPVSEV    | 438   | >APC-V1323I AEDPVSEI    | 55   | 383   |
| >APC-V1323I AEDPVSEVPA  | 50    | >APC-V1323I AEDPVSEIPA\ | 49   | 1     |
| >APC-V1323I SAEDPVSEV   | 135   | >APC-V1323I SAEDPVSEI   | 1818 | 1683  |
| >APC-V1323I SAEDPVSEV   | 26    | >APC-V1323I SAEDPVSEI   | 3075 | 3049  |
| >APC-V1323I SAEDPVSEV   | 155   | >APC-V1323I SAEDPVSEI   | 957  | 802   |
| >APC-V1323I SAEDPVSEV   | 215   | >APC-V1323I SAEDPVSEI   | 1644 | 1429  |
| >APC-V1323I SAEDPVSEV   | 10893 | >APC-V1323I SAEDPVSEI   | 141  | 10752 |
| >APC-V1323I RSAEDPVSEV  | 150   | >APC-V1323I RSAEDPVSEI  | 2022 | 1872  |
| >APC-V1323I RSAEDPVSEV  | 2350  | >APC-V1323I RSAEDPVSEI  | 197  | 2153  |
| >APC-V1323I RSAEDPVSEV  | 115   | >APC-V1323I RSAEDPVSEI  | 449  | 334   |
| >APC-V1323I RSAEDPVSEV  | 419   | >APC-V1323I RSAEDPVSEI  | 279  | 140   |
| >APC-V1323I RSAEDPVSEV  | 73    | >APC-V1323I RSAEDPVSEI  | 15   | 58    |
| >APC-V1323I RSAEDPVSEV  | 2973  | >APC-V1323I RSAEDPVSEI  | 58   | 2915  |
| >APC-V1323I RSAEDPVSEV  | 415   | >APC-V1323I RSAEDPVSEI  | 509  | 94    |
| >APC-V1323I RSAEDPVSEV  | 2161  | >APC-V1323I RSAEDPVSEI  | 54   | 2107  |
| >APC-V1326/ VSQHPRTK    | 159   | >APC-V1326/ ASQHPRTK    | 110  | 49    |
| >APC-V1326/ VSQHPRTK    | 1078  | >APC-V1326/ ASQHPRTK    | 93   | 985   |
| >APC-V1326/ VSQHPRTKSS  | 65    | >APC-V1326/ ASQHPRTKSS  | 45   | 20    |
| >APC-V1326/ VSQHPRTK    | 2028  | >APC-V1326/ ASQHPRTK    | 320  | 1708  |
| >APC-V1326/ AVSQHPRTK   | 232   | >APC-V1326/ AASQHPRTK   | 1572 | 1340  |
| >APC-V1326/ AVSQHPRTK   | 127   | >APC-V1326/ AASQHPRTK   | 568  | 441   |
| >APC-V1326/ AVSQHPRTK   | 136   | >APC-V1326/ AASQHPRTK   | 543  | 407   |
| >APC-V1326/ AVSQHPRTK   | 126   | >APC-V1326/ AASQHPRTK   | 125  | 1     |
| >APC-V1326/ AEDPVSEVPA  | 287   | >APC-V1326/ AEDPVSEVPA  | 2474 | 2187  |
| >APC-V1326/ AEDPVSEVPA  | 84    | >APC-V1326/ AEDPVSEVPA  | 3015 | 2931  |
| >APC-V1326/ AEDPVSEVPA  | 92    | >APC-V1326/ AEDPVSEVPA  | 27   | 65    |
| >APC-V1326/ AEDPVSEVPA  | 50    | >APC-V1326/ AEDPVSEVPA  | 1726 | 1676  |
| >APC-V1326/ VPAVSQHPR   | 1629  | >APC-V1326/ VPAASQHPR   | 335  | 1294  |
| >APC-V1326/ EVPAVSQHPI  | 369   | >APC-V1326/ EVPAASQHPI  | 551  | 182   |
| >APC-V1326/ EVPAVSQHPI  | 279   | >APC-V1326/ EVPAASQHPI  | 726  | 447   |
| >APC-V1326/ EVPAVSQHPI  | 6     | >APC-V1326/ EVPAASQHPI  | 9    | 3     |
| >APC-V1326/ EVPAVSQHPI  | 254   | >APC-V1326/ EVPAASQHPI  | 147  | 107   |
| >APC-V1326/ SEVPAVSQHF  | 425   | >APC-V1326/ SEVPAASQHF  | 370  | 55    |
| >APC-V1326/ VSEVPAVSQHF | 457   | >APC-V1326/ VSEVPAASQHF | 241  | 216   |
| >APC-V1326/ PVSEVPAV    | 111   | >APC-V1326/ PVSEVPAA    | 4236 | 4125  |

|                        |       |                        |       |       |
|------------------------|-------|------------------------|-------|-------|
| >APC-V1326/PVSEVPAV    | 309   | >APC-V1326/PVSEVPAA    | 10158 | 9849  |
| >APC-V1326/PVSEVPAV    | 289   | >APC-V1326/PVSEVPAA    | 8464  | 8175  |
| >APC-V1326/PVSEVPAV    | 190   | >APC-V1326/PVSEVPAA    | 10974 | 10784 |
| >APC-V1326/DPVSEVPAV   | 187   | >APC-V1326/DPVSEVPAA   | 5294  | 5107  |
| >APC-V1326/DPVSEVPAV   | 313   | >APC-V1326/DPVSEVPAA   | 146   | 167   |
| >APC-V1326/DPVSEVPAV   | 1204  | >APC-V1326/DPVSEVPAA   | 215   | 989   |
| >APC-V1326/VSQHPRTK    | 159   | >APC-V1326/MSQHPRTK    | 89    | 70    |
| >APC-V1326/VSQHPRTK    | 1078  | >APC-V1326/MSQHPRTK    | 56    | 1022  |
| >APC-V1326/VSQHPRTK    | 2613  | >APC-V1326/MSQHPRTK    | 451   | 2162  |
| >APC-V1326/VSQHPRTKSS  | 65    | >APC-V1326/MSQHPRTKS!  | 21    | 44    |
| >APC-V1326/VSQHPRTKSS  | 882   | >APC-V1326/MSQHPRTKS!  | 166   | 716   |
| >APC-V1326/VSQHPRTK    | 8295  | >APC-V1326/MSQHPRTK    | 471   | 7824  |
| >APC-V1326/VSQHPRTKSS  | 1773  | >APC-V1326/MSQHPRTKS!  | 52    | 1721  |
| >APC-V1326/AVSQHPRT    | 14643 | >APC-V1326/AMSQHPRT    | 411   | 14232 |
| >APC-V1326/AVSQHPRT    | 8670  | >APC-V1326/AMSQHPRT    | 138   | 8532  |
| >APC-V1326/AVSQHPRTK   | 232   | >APC-V1326/AMSQHPRTK   | 91    | 141   |
| >APC-V1326/AVSQHPRTK   | 127   | >APC-V1326/AMSQHPRTK   | 146   | 19    |
| >APC-V1326/AVSQHPRTK   | 136   | >APC-V1326/AMSQHPRTK   | 734   | 598   |
| >APC-V1326/AVSQHPRTK   | 126   | >APC-V1326/AMSQHPRTK   | 241   | 115   |
| >APC-V1326/AEDPVSEVPA  | 287   | >APC-V1326/AEDPVSEVPA  | 6076  | 5789  |
| >APC-V1326/AEDPVSEVPA  | 84    | >APC-V1326/AEDPVSEVPA  | 72    | 12    |
| >APC-V1326/AEDPVSEVPA  | 523   | >APC-V1326/AEDPVSEVPA  | 374   | 149   |
| >APC-V1326/AEDPVSEVPA  | 92    | >APC-V1326/AEDPVSEVPA  | 1144  | 1052  |
| >APC-V1326/AEDPVSEVPA  | 50    | >APC-V1326/AEDPVSEVPA  | 162   | 112   |
| >APC-V1326/PAVSQHPR    | 883   | >APC-V1326/PAMSQHPR    | 227   | 656   |
| >APC-V1326/EVPAVSQH    | 754   | >APC-V1326/EVPAMSQH    | 379   | 375   |
| >APC-V1326/EVPAVSQHPI  | 369   | >APC-V1326/EVPAMSQHP   | 238   | 131   |
| >APC-V1326/EVPAVSQHPI  | 279   | >APC-V1326/EVPAMSQHP   | 330   | 51    |
| >APC-V1326/EVPAVSQHPI  | 6     | >APC-V1326/EVPAMSQHP   | 7     | 1     |
| >APC-V1326/EVPAVSQHPI  | 254   | >APC-V1326/EVPAMSQHP   | 139   | 115   |
| >APC-V1326/SEVPAVSQHF  | 425   | >APC-V1326/SEVPAMSQH   | 396   | 29    |
| >APC-V1326/VSEVPAVSQHF | 457   | >APC-V1326/VSEVPAMSQ   | 301   | 156   |
| >APC-V1326/PVSEVPAV    | 111   | >APC-V1326/PVSEVPAM    | 6049  | 5938  |
| >APC-V1326/PVSEVPAV    | 309   | >APC-V1326/PVSEVPAM    | 14972 | 14663 |
| >APC-V1326/PVSEVPAV    | 289   | >APC-V1326/PVSEVPAM    | 8933  | 8644  |
| >APC-V1326/PVSEVPAV    | 190   | >APC-V1326/PVSEVPAM    | 17923 | 17733 |
| >APC-V1326/DPVSEVPAV   | 1597  | >APC-V1326/DPVSEVPAM   | 27    | 1570  |
| >APC-V1326/DPVSEVPAV   | 187   | >APC-V1326/DPVSEVPAM   | 2654  | 2467  |
| >APC-V1326/DPVSEVPAV   | 313   | >APC-V1326/DPVSEVPAM   | 11    | 302   |
| >APC-V1326/DPVSEVPAV   | 2795  | >APC-V1326/DPVSEVPAM   | 488   | 2307  |
| >APC-V1352/VEFSSGAKSP! | 973   | >APC-V1352/IEFSSGAKSPS | 368   | 605   |
| >APC-V1352/AVEFSSGAK   | 376   | >APC-V1352/AIEFSSGAK   | 338   | 38    |
| >APC-V1352/AVEFSSGAK   | 64    | >APC-V1352/AIEFSSGAK   | 107   | 43    |



|                        |       |                        |      |       |
|------------------------|-------|------------------------|------|-------|
| >APC-V1352 AVEFSSGAK   | 77    | >APC-V1352 AIEFSSGAK   | 257  | 180   |
| >APC-V1352 LSSESARHKA' | 550   | >APC-V1352 LSSESARHKA  | 318  | 232   |
| >APC-V1352 LSSESARHKA' | 204   | >APC-V1352 LSSESARHKA  | 36   | 168   |
| >APC-V1352 LSSESARHKA' | 2690  | >APC-V1352 LSSESARHKA  | 36   | 2654  |
| >APC-V1352 KAVEFSSGA   | 348   | >APC-V1352 KAIEFSSGA   | 147  | 201   |
| >APC-V1352 KAVEFSSGA   | 53    | >APC-V1352 KAIEFSSGA   | 33   | 20    |
| >APC-V1352 KAVEFSSGAK  | 275   | >APC-V1352 KAIEFSSGAK  | 142  | 133   |
| >APC-V1352 KAVEFSSGAK  | 255   | >APC-V1352 KAIEFSSGAK  | 90   | 165   |
| >APC-V1352 KAVEFSSGAK  | 29    | >APC-V1352 KAIEFSSGAK  | 19   | 10    |
| >APC-V1352 ARHKAVEF    | 11    | >APC-V1352 ARHKAIEF    | 18   | 7     |
| >APC-V1352 ARHKAVEF    | 140   | >APC-V1352 ARHKAIEF    | 130  | 10    |
| >APC-V1352 SARHKAVEFS  | 336   | >APC-V1352 SARHKAIEFS  | 236  | 100   |
| >APC-V1352 SARHKAVEFS  | 491   | >APC-V1352 SARHKAIEFS  | 331  | 160   |
| >APC-V1352 SARHKAVEF   | 41    | >APC-V1352 SARHKAIEF   | 79   | 38    |
| >APC-V1352 SARHKAVEF   | 5     | >APC-V1352 SARHKAIEF   | 5    | 0     |
| >APC-V1352 ESARHKAVEF  | 44    | >APC-V1352 ESARHKAIEF  | 35   | 9     |
| >APC-V1352 ESARHKAV    | 67    | >APC-V1352 ESARHKAI    | 360  | 293   |
| >APC-V1352 ESARHKAVEF  | 505   | >APC-V1352 ESARHKAIEFS | 445  | 60    |
| >APC-V1352 ESARHKAV    | 261   | >APC-V1352 ESARHKAI    | 1540 | 1279  |
| >APC-V1352 ESARHKAVEF  | 278   | >APC-V1352 ESARHKAIEF  | 506  | 228   |
| >APC-V1352 ESARHKAVEF  | 60    | >APC-V1352 ESARHKAIEF  | 77   | 17    |
| >APC-V1352 ESARHKAV    | 12471 | >APC-V1352 ESARHKAI    | 346  | 12125 |
| >APC-V1352 SESARHKAV   | 177   | >APC-V1352 SESARHKAI   | 22   | 155   |
| >APC-V1352 SESARHKAV   | 547   | >APC-V1352 SESARHKAI   | 359  | 188   |
| >APC-V1352 SESARHKAVE  | 97    | >APC-V1352 SESARHKAIEF | 170  | 73    |
| >APC-V1352 SESARHKAVE  | 252   | >APC-V1352 SESARHKAIEF | 202  | 50    |
| >APC-V1352 SESARHKAV   | 447   | >APC-V1352 SESARHKAI   | 345  | 102   |
| >APC-V1352 SESARHKAV   | 546   | >APC-V1352 SESARHKAI   | 328  | 218   |
| >APC-V1352 SESARHKAVE  | 116   | >APC-V1352 SESARHKAIEF | 111  | 5     |
| >APC-V1352 SESARHKAVE  | 183   | >APC-V1352 SESARHKAIEF | 153  | 30    |
| >APC-V1352 SESARHKAV   | 27    | >APC-V1352 SESARHKAI   | 83   | 56    |
| >APC-V1352 SESARHKAV   | 1335  | >APC-V1352 SESARHKAI   | 245  | 1090  |
| >APC-V1414 VSGIISPSDL  | 101   | >APC-V1414 ISGIISPSDL  | 55   | 46    |
| >APC-V1414 VSGIISPSDL  | 299   | >APC-V1414 ISGIISPSDL  | 662  | 363   |
| >APC-V1414 MVSGIISPS   | 144   | >APC-V1414 MISGIISPS   | 48   | 96    |
| >APC-V1414 MVSGIISPSDI | 55    | >APC-V1414 MISGIISPSDL | 24   | 31    |
| >APC-V1414 MVSGIISPS   | 225   | >APC-V1414 MISGIISPS   | 88   | 137   |
| >APC-V1414 MVSGIISPSDI | 57    | >APC-V1414 MISGIISPSDL | 25   | 32    |
| >APC-V1414 MVSGIISPSDI | 1309  | >APC-V1414 MISGIISPSDL | 442  | 867   |
| >APC-V1414 MVSGIISPSDI | 69    | >APC-V1414 MISGIISPSDL | 24   | 45    |
| >APC-V1414 MVSGIISPS   | 7     | >APC-V1414 MISGIISPS   | 15   | 8     |
| >APC-V1414 MVSGIISPSDI | 32    | >APC-V1414 MISGIISPSDL | 93   | 61    |
| >APC-V1414 MVSGIISPSDI | 367   | >APC-V1414 MISGIISPSDL | 1366 | 999   |

|                        |      |                        |      |      |
|------------------------|------|------------------------|------|------|
| >APC-V1414I SVQSEPCSGM | 374  | >APC-V1414I SVQSEPCSGM | 2529 | 2155 |
| >APC-V1414I SVQSEPCSGM | 240  | >APC-V1414I SVQSEPCSGM | 2562 | 2322 |
| >APC-V1414I SVQSEPCSGM | 123  | >APC-V1414I SVQSEPCSGM | 6805 | 6682 |
| >APC-V1414I SVQSEPCSGM | 7549 | >APC-V1414I SVQSEPCSGM | 184  | 7365 |
| >APC-V1414I GMVSGIISPS | 414  | >APC-V1414I GMISGIISPS | 201  | 213  |
| >APC-V1414I GMVSGIISPS | 813  | >APC-V1414I GMISGIISPS | 415  | 398  |
| >APC-V1414I GMVSGIISPS | 440  | >APC-V1414I GMISGIISPS | 287  | 153  |
| >APC-V1414I SGMVSGII   | 145  | >APC-V1414I SGMISGII   | 147  | 2    |
| >APC-V1414I CSGMVSGI   | 21   | >APC-V1414I CSGMISGI   | 19   | 2    |
| >APC-V1414I CSGMVSGII  | 13   | >APC-V1414I CSGMISGII  | 13   | 0    |
| >APC-V1414I SEPCSGMV   | 25   | >APC-V1414I SEPCSGMI   | 13   | 12   |
| >APC-V1414I SEPCSGMVSC | 55   | >APC-V1414I SEPCSGMISG | 64   | 9    |
| >APC-V1414I SEPCSGMVSC | 34   | >APC-V1414I SEPCSGMISG | 33   | 1    |
| >APC-V1414I QSEPCSGMV  | 3068 | >APC-V1414I QSEPCSGMI  | 460  | 2608 |
| >APC-V1414I QSEPCSGMV  | 254  | >APC-V1414I QSEPCSGMI  | 179  | 75   |
| >APC-V1414I QSEPCSGMV  | 656  | >APC-V1414I QSEPCSGMI  | 18   | 638  |
| >APC-V1414I VQSEPCSGM  | 124  | >APC-V1414I VQSEPCSGM  | 1478 | 1354 |
| >APC-V1472I AVNAAVQRV  | 735  | >APC-V1472I AINAAVQRV  | 341  | 394  |
| >APC-V1472I AVNAAVQRV  | 81   | >APC-V1472I AINAAVQRV  | 31   | 50   |
| >APC-V1472I AVNAAVQRV  | 239  | >APC-V1472I AINAAVQRV  | 91   | 148  |
| >APC-V1472I AVNAAVQRV  | 9    | >APC-V1472I AINAAVQRV  | 5    | 4    |
| >APC-V1472I AVNAAVQRV  | 62   | >APC-V1472I AINAAVQRV  | 28   | 34   |
| >APC-V1472I AVNAAVQRV  | 103  | >APC-V1472I AINAAVQRV  | 128  | 25   |
| >APC-V1472I AVNAAVQRV  | 268  | >APC-V1472I AINAAVQRV  | 302  | 34   |
| >APC-V1472I AVNAAVQRV  | 25   | >APC-V1472I AINAAVQRV  | 10   | 15   |
| >APC-V1472I AVNAAVQRV  | 152  | >APC-V1472I AINAAVQRV  | 55   | 97   |
| >APC-V1472I AVNAAVQRV  | 81   | >APC-V1472I AINAAVQRV  | 30   | 51   |
| >APC-V1472I AVNAAVQRV  | 244  | >APC-V1472I AINAAVQRV  | 92   | 152  |
| >APC-V1472I AVNAAVQRV  | 84   | >APC-V1472I AINAAVQRV  | 34   | 50   |
| >APC-V1472I AVNAAVQRV  | 518  | >APC-V1472I AINAAVQRV  | 257  | 261  |
| >APC-V1472I AVNAAVQRV  | 4    | >APC-V1472I AINAAVQRV  | 3    | 1    |
| >APC-V1472I AVNAAVQRV  | 9    | >APC-V1472I AINAAVQRV  | 5    | 4    |
| >APC-V1472I AVNAAVQR   | 135  | >APC-V1472I AINAAVQR   | 295  | 160  |
| >APC-V1472I AVNAAVQRV  | 344  | >APC-V1472I AINAAVQRV  | 1075 | 731  |
| >APC-V1472I AVNAAVQR   | 36   | >APC-V1472I AINAAVQR   | 62   | 26   |
| >APC-V1472I AVNAAVQR   | 86   | >APC-V1472I AINAAVQR   | 190  | 104  |
| >APC-V1472I AVNAAVQRV  | 122  | >APC-V1472I AINAAVQRV  | 597  | 475  |
| >APC-V1472I AVNAAVQRV  | 127  | >APC-V1472I AINAAVQRV  | 565  | 438  |
| >APC-V1472I KRESGPKQA/ | 621  | >APC-V1472I KRESGPKQA/ | 376  | 245  |
| >APC-V1472I AAVNAAVQR  | 417  | >APC-V1472I AAINAAVQR\ | 264  | 153  |
| >APC-V1472I AAVNAAVQR  | 51   | >APC-V1472I AAINAAVQR\ | 44   | 7    |
| >APC-V1472I AAVNAAVQR  | 553  | >APC-V1472I AAINAAVQR  | 314  | 239  |
| >APC-V1472I AAVNAAVQR  | 43   | >APC-V1472I AAINAAVQR  | 30   | 13   |

|                         |       |                          |     |       |
|-------------------------|-------|--------------------------|-----|-------|
| >APC-V1472I AAVNAAVQR   | 345   | >APC-V1472I AAINAAVQR\   | 305 | 40    |
| >APC-V1472I QAAVNAAVC   | 28    | >APC-V1472I QAAINAAVQ    | 21  | 7     |
| >APC-V1472I QAAVNAAV    | 24    | >APC-V1472I QAAINAAV     | 23  | 1     |
| >APC-V1472I QAAVNAAVC   | 55    | >APC-V1472I QAAINAAVQ    | 57  | 2     |
| >APC-V1472I QAAVNAAV    | 55    | >APC-V1472I QAAINAAV     | 47  | 8     |
| >APC-V1472I QAAVNAAVC   | 208   | >APC-V1472I QAAINAAVQ    | 197 | 11    |
| >APC-V1472I KQAAVNAA    | 695   | >APC-V1472I KQAAINAA     | 489 | 206   |
| >APC-V1472I KQAAVNAAV   | 25    | >APC-V1472I KQAAINAAV    | 19  | 6     |
| >APC-V1472I KQAAVNAA    | 56    | >APC-V1472I KQAAINAA     | 29  | 27    |
| >APC-V1472I KQAAVNAAV   | 8     | >APC-V1472I KQAAINAAV    | 4   | 4     |
| >APC-V1472I KQAAVNAA    | 87    | >APC-V1472I KQAAINAA     | 77  | 10    |
| >APC-V1472I KQAAVNAAV   | 15    | >APC-V1472I KQAAINAAV    | 12  | 3     |
| >APC-V1472I KQAAVNAA    | 11    | >APC-V1472I KQAAINAA     | 11  | 0     |
| >APC-V1472I KQAAVNAAV   | 4     | >APC-V1472I KQAAINAAV    | 5   | 1     |
| >APC-V1472I KQAAVNAAV   | 35    | >APC-V1472I KQAAINAAV    | 89  | 54    |
| >APC-V1472I KQAAVNAAV   | 86    | >APC-V1472I KQAAINAAV    | 80  | 6     |
| >APC-V1472I KQAAVNAAV   | 111   | >APC-V1472I KQAAINAAV    | 313 | 202   |
| >APC-V1472I KQAAVNAAV   | 1378  | >APC-V1472I KQAAINAAV    | 462 | 916   |
| >APC-V1472I KQAAVNAAV   | 21    | >APC-V1472I KQAAINAAV(   | 19  | 2     |
| >APC-V1472I KQAAVNAAV   | 555   | >APC-V1472I KQAAINAAV    | 246 | 309   |
| >APC-V1472I KQAAVNAA    | 300   | >APC-V1472I KQAAINAA     | 435 | 135   |
| >APC-V1472I KQAAVNAAV   | 135   | >APC-V1472I KQAAINAAV    | 179 | 44    |
| >APC-V1472I KQAAVNAAV   | 444   | >APC-V1472I KQAAINAAV(   | 589 | 145   |
| >APC-V1472I KQAAVNAA    | 250   | >APC-V1472I KQAAINAA     | 284 | 34    |
| >APC-V1472I KQAAVNAAV   | 53    | >APC-V1472I KQAAINAAV    | 57  | 4     |
| >APC-V1472I KQAAVNAAV   | 348   | >APC-V1472I KQAAINAAV(   | 363 | 15    |
| >APC-V1472I KQAAVNAAV   | 141   | >APC-V1472I KQAAINAAV    | 207 | 66    |
| >APC-V1472I KQAAVNAAV   | 45    | >APC-V1472I KQAAINAAV(   | 29  | 16    |
| >APC-V1472I GPKQAAVNA   | 159   | >APC-V1472I GPKQAAINA/   | 187 | 28    |
| >APC-V1472I SGPKQAAV    | 280   | >APC-V1472I SGPKQAAI     | 79  | 201   |
| >APC-V1472I ESGPKQAAV   | 78    | >APC-V1472I ESGPKQAAI    | 407 | 329   |
| >APC-V1472I ESGPKQAAV   | 11417 | >APC-V1472I ESGPKQAAI    | 205 | 11212 |
| >APC-V1472I RESGPKQAA\  | 223   | >APC-V1472I RESGPKQAAI   | 166 | 57    |
| >APC-V1472I RESGPKQAA\  | 341   | >APC-V1472I RESGPKQAAI   | 613 | 272   |
| >APC-V1472I RESGPKQAA\  | 138   | >APC-V1472I RESGPKQAAI   | 21  | 117   |
| >APC-V890I-I VMEEVSAI   | 377   | >APC-V890I-I IMEEVSAI    | 229 | 148   |
| >APC-V890I-I VMEEVSAI   | 80    | >APC-V890I-I IMEEVSAI    | 37  | 43    |
| >APC-V890I-I VMEEVSAI   | 40    | >APC-V890I-I IMEEVSAI    | 30  | 10    |
| >APC-V890I-I VMEEVSAI   | 220   | >APC-V890I-I IMEEVSAI    | 144 | 76    |
| >APC-V890I-I VMEEVSAI   | 7     | >APC-V890I-I IMEEVSAI    | 8   | 1     |
| >APC-V890I-I VMEEVSAIHT | 312   | >APC-V890I-I IMEEVSAIHT  | 382 | 70    |
| >APC-V890I-I VMEEVSAIHT | 169   | >APC-V890I-I IMEEVSAIHT( | 207 | 38    |
| >APC-V890I-I VMEEVSAI   | 13    | >APC-V890I-I IMEEVSAI    | 17  | 4     |

|                          |      |                          |      |      |
|--------------------------|------|--------------------------|------|------|
| >APC-V890I-1 VMEEVSAI    | 192  | >APC-V890I-1 IMEEVSAI    | 370  | 178  |
| >APC-V890I-1 VMEEVSAI    | 444  | >APC-V890I-1 IMEEVSAI    | 463  | 19   |
| >APC-V890I-1 VMEEVSAI    | 22   | >APC-V890I-1 IMEEVSAI    | 29   | 7    |
| >APC-V890I-1 VMEEVSAIHT  | 421  | >APC-V890I-1 IMEEVSAIHT  | 613  | 192  |
| >APC-V890I-1 VMEEVSAIHT  | 254  | >APC-V890I-1 IMEEVSAIHT  | 353  | 99   |
| >APC-V890I-1 KVMEEVSA    | 97   | >APC-V890I-1 KIMEEVSA    | 58   | 39   |
| >APC-V890I-1 KVMEEVSAI   | 34   | >APC-V890I-1 KIMEEVSAI   | 22   | 12   |
| >APC-V890I-1 KVMEEVSA    | 167  | >APC-V890I-1 KIMEEVSA    | 67   | 100  |
| >APC-V890I-1 KVMEEVSAI   | 24   | >APC-V890I-1 KIMEEVSAI   | 12   | 12   |
| >APC-V890I-1 KVMEEVSA    | 103  | >APC-V890I-1 KIMEEVSA    | 49   | 54   |
| >APC-V890I-1 KVMEEVSAI   | 6    | >APC-V890I-1 KIMEEVSAI   | 4    | 2    |
| >APC-V890I-1 KVMEEVSAIH  | 944  | >APC-V890I-1 KIMEEVSAIH  | 482  | 462  |
| >APC-V890I-1 KVMEEVSA    | 19   | >APC-V890I-1 KIMEEVSA    | 21   | 2    |
| >APC-V890I-1 KVMEEVSAI   | 10   | >APC-V890I-1 KIMEEVSAI   | 10   | 0    |
| >APC-V890I-1 KVMEEVSAIH  | 100  | >APC-V890I-1 KIMEEVSAIH  | 102  | 2    |
| >APC-V890I-1 KVMEEVSA    | 554  | >APC-V890I-1 KIMEEVSA    | 153  | 401  |
| >APC-V890I-1 KVMEEVSAI   | 32   | >APC-V890I-1 KIMEEVSAI   | 11   | 21   |
| >APC-V890I-1 KVMEEVSA    | 576  | >APC-V890I-1 KIMEEVSA    | 266  | 310  |
| >APC-V890I-1 KVMEEVSAI   | 23   | >APC-V890I-1 KIMEEVSAI   | 14   | 9    |
| >APC-V890I-1 KVMEEVSAI   | 1434 | >APC-V890I-1 KIMEEVSAI   | 490  | 944  |
| >APC-V890I-1 KVMEEVSAI   | 82   | >APC-V890I-1 KIMEEVSAI   | 30   | 52   |
| >APC-V890I-1 KVMEEVSA    | 1339 | >APC-V890I-1 KIMEEVSA    | 334  | 1005 |
| >APC-V890I-1 KVMEEVSAI   | 1477 | >APC-V890I-1 KIMEEVSAI   | 410  | 1067 |
| >APC-V890I-1 KVMEEVSAI   | 14   | >APC-V890I-1 KIMEEVSAI   | 17   | 3    |
| >APC-V890I-1 KVMEEVSAI   | 717  | >APC-V890I-1 KIMEEVSAI   | 426  | 291  |
| >APC-V890I-1 KVMEEVSAI   | 410  | >APC-V890I-1 KIMEEVSAI   | 1530 | 1120 |
| >APC-V890I-1 KVMEEVSAI   | 238  | >APC-V890I-1 KIMEEVSAI   | 1211 | 973  |
| >APC-V890I-1 ISTTAAQIAKV | 235  | >APC-V890I-1 ISTTAAQIAKI | 34   | 201  |
| >APC-V890I-1 ISTTAAQIAKV | 8421 | >APC-V890I-1 ISTTAAQIAKI | 334  | 8087 |
| >APC-V890I-1 ISTTAAQIAKV | 197  | >APC-V890I-1 ISTTAAQIAKI | 104  | 93   |
| >APC-V890I-1 ISTTAAQIAKV | 4382 | >APC-V890I-1 ISTTAAQIAKI | 67   | 4315 |
| >APC-V890I-1 AKVMEEVSA   | 183  | >APC-V890I-1 AKIMEEVSA   | 133  | 50   |
| >APC-V890I-1 AKVMEEVSAI  | 18   | >APC-V890I-1 AKIMEEVSAI  | 14   | 4    |
| >APC-V890I-1 AKVMEEVSAI  | 417  | >APC-V890I-1 AKIMEEVSAIH | 282  | 135  |
| >APC-V890I-1 AKVMEEVSAI  | 820  | >APC-V890I-1 AKIMEEVSAI  | 198  | 622  |
| >APC-V890I-1 QIAKVMEEV   | 432  | >APC-V890I-1 QIAKIMEEV   | 353  | 79   |
| >APC-V890I-1 QIAKVMEEV   | 12   | >APC-V890I-1 QIAKIMEEV   | 6    | 6    |
| >APC-V890I-1 QIAKVMEEV   | 539  | >APC-V890I-1 QIAKIMEEV   | 233  | 306  |
| >APC-V890I-1 QIAKVMEEV   | 73   | >APC-V890I-1 QIAKIMEEV   | 54   | 19   |
| >APC-V890I-1 QIAKVMEEV   | 28   | >APC-V890I-1 QIAKIMEEV   | 32   | 4    |
| >APC-V890I-1 QIAKVMEEV   | 91   | >APC-V890I-1 QIAKIMEEV   | 303  | 212  |
| >APC-V890I-1 QIAKVMEEV   | 186  | >APC-V890I-1 QIAKIMEEV   | 430  | 244  |
| >APC-V890I-1 QIAKVMEEV   | 110  | >APC-V890I-1 QIAKIMEEV   | 66   | 44   |

|                         |      |                          |       |       |
|-------------------------|------|--------------------------|-------|-------|
| >APC-V890I-I QIAKVMEEV  | 7    | >APC-V890I-I QIAKIMEEV   | 6     | 1     |
| >APC-V890I-I QIAKVMEEVS | 215  | >APC-V890I-I QIAKIMEEVS  | 156   | 59    |
| >APC-V890I-I QIAKVMEEV  | 46   | >APC-V890I-I QIAKIMEEV   | 31    | 15    |
| >APC-V890I-I AQIAKVMEEV | 266  | >APC-V890I-I AQIAKIMEEV  | 224   | 42    |
| >APC-V890I-I AQIAKVMEEV | 75   | >APC-V890I-I AQIAKIMEEV  | 69    | 6     |
| >APC-V890I-I AQIAKVMEEV | 191  | >APC-V890I-I AQIAKIMEEV  | 175   | 16    |
| >APC-V890I-I AQIAKVMEEV | 58   | >APC-V890I-I AQIAKIMEEV  | 69    | 11    |
| >APC-V890I-I AQIAKVMEEV | 268  | >APC-V890I-I AQIAKIMEEV  | 232   | 36    |
| >APC-V890I-I AQIAKVMEEV | 294  | >APC-V890I-I AQIAKIMEEV  | 389   | 95    |
| >APC-V890I-I AQIAKVMEEV | 449  | >APC-V890I-I AQIAKIMEEV  | 292   | 157   |
| >APC-V890I-I AQIAKVMEEV | 163  | >APC-V890I-I AQIAKIMEEV  | 188   | 25    |
| >APC-V890I-I AAQIAKVM   | 253  | >APC-V890I-I AAQIAKIM    | 512   | 259   |
| >APC-V890I-I TAAQIAKV   | 395  | >APC-V890I-I TAAQIAKI    | 16049 | 15654 |
| >APC-V890I-I TAAQIAKV   | 13   | >APC-V890I-I TAAQIAKI    | 37    | 24    |
| >APC-V890I-I TAAQIAKV   | 63   | >APC-V890I-I TAAQIAKI    | 551   | 488   |
| >APC-V890I-I TAAQIAKVM  | 193  | >APC-V890I-I TAAQIAKIM   | 300   | 107   |
| >APC-V890I-I TAAQIAKVM  | 162  | >APC-V890I-I TAAQIAKIM   | 181   | 19    |
| >APC-V890I-I TAAQIAKV   | 6004 | >APC-V890I-I TAAQIAKI    | 97    | 5907  |
| >APC-V890I-I TTAAQIAKV  | 51   | >APC-V890I-I TTAAQIAKI   | 271   | 220   |
| >APC-V890I-I TTAAQIAKV  | 24   | >APC-V890I-I TTAAQIAKI   | 215   | 191   |
| >APC-V890I-I TTAAQIAKV  | 211  | >APC-V890I-I TTAAQIAKI   | 2014  | 1803  |
| >APC-V890I-I TTAAQIAKV  | 219  | >APC-V890I-I TTAAQIAKI   | 2880  | 2661  |
| >APC-V890I-I TTAAQIAKV  | 60   | >APC-V890I-I TTAAQIAKI   | 9949  | 9889  |
| >APC-V890I-I TTAAQIAKV  | 820  | >APC-V890I-I TTAAQIAKI   | 477   | 343   |
| >APC-V890I-I TTAAQIAKVM | 45   | >APC-V890I-I TTAAQIAKIM  | 64    | 19    |
| >APC-V890I-I TTAAQIAKV  | 4    | >APC-V890I-I TTAAQIAKI   | 6     | 2     |
| >APC-V890I-I TTAAQIAKV  | 11   | >APC-V890I-I TTAAQIAKI   | 71    | 60    |
| >APC-V890I-I TTAAQIAKV  | 369  | >APC-V890I-I TTAAQIAKI   | 56    | 313   |
| >APC-V890I-I TTAAQIAKVM | 20   | >APC-V890I-I TTAAQIAKIM  | 36    | 16    |
| >APC-V890I-I TTAAQIAKV  | 262  | >APC-V890I-I TTAAQIAKI   | 118   | 144   |
| >APC-V890I-I TTAAQIAKVM | 146  | >APC-V890I-I TTAAQIAKIM  | 86    | 60    |
| >APC-V890I-I TTAAQIAKVM | 30   | >APC-V890I-I TTAAQIAKIM  | 27    | 3     |
| >APC-V890I-I TTAAQIAKV  | 4236 | >APC-V890I-I TTAAQIAKI   | 49    | 4187  |
| >APC-V890I-I STTAAQIAKV | 128  | >APC-V890I-I STTAAQIAKI  | 525   | 397   |
| >APC-V890I-I STTAAQIAKV | 212  | >APC-V890I-I STTAAQIAKI  | 2733  | 2521  |
| >APC-V890I-I STTAAQIAKV | 98   | >APC-V890I-I STTAAQIAKI  | 3486  | 3388  |
| >APC-V890I-I STTAAQIAKV | 46   | >APC-V890I-I STTAAQIAKI  | 6091  | 6045  |
| >APC-V890I-I STTAAQIAKV | 266  | >APC-V890I-I STTAAQIAKIM | 412   | 146   |
| >APC-V890I-I STTAAQIAKV | 22   | >APC-V890I-I STTAAQIAKI  | 41    | 19    |
| >APC-V890I-I STTAAQIAKV | 50   | >APC-V890I-I STTAAQIAKI  | 505   | 455   |
| >APC-V890I-I STTAAQIAKV | 536  | >APC-V890I-I STTAAQIAKI  | 114   | 422   |
| >APC-V890I-I STTAAQIAKV | 39   | >APC-V890I-I STTAAQIAKIM | 70    | 31    |
| >APC-V890I-I STTAAQIAKV | 111  | >APC-V890I-I STTAAQIAKI  | 59    | 52    |

|                         |       |                          |       |       |
|-------------------------|-------|--------------------------|-------|-------|
| >APC-V890I-I STTAAQIAKV | 55    | >APC-V890I-I STTAAQIAKIM | 36    | 19    |
| >APC-V890I-I STTAAQIAKV | 81    | >APC-V890I-I STTAAQIAKI  | 94    | 13    |
| >APC-V890I-I STTAAQIAKV | 20    | >APC-V890I-I STTAAQIAKIM | 20    | 0     |
| >APC-V890I-I STTAAQIAKV | 2050  | >APC-V890I-I STTAAQIAKI  | 72    | 1978  |
| >APC-W593L LWNLSAHC     | 34472 | >APC-W593L LLNLSAHC      | 68    | 34404 |
| >APC-W593L LWNLSAHCT    | 35620 | >APC-W593L LLNLSAHCT     | 128   | 35492 |
| >APC-W593L STLKSVLSALV  | 21387 | >APC-W593L STLKSVLSALL   | 381   | 21006 |
| >APC-W593L STLKSVLSALV  | 5788  | >APC-W593L STLKSVLSALL   | 222   | 5566  |
| >APC-W593L STLKSVLSALV  | 443   | >APC-W593L STLKSVLSALL   | 712   | 269   |
| >APC-W593L STLKSVLSALV  | 12809 | >APC-W593L STLKSVLSALL   | 75    | 12734 |
| >APC-W593L STLKSVLSALV  | 4     | >APC-W593L STLKSVLSALL   | 8     | 4     |
| >APC-W593L STLKSVLSALV  | 45    | >APC-W593L STLKSVLSALL   | 6837  | 6792  |
| >APC-W593L STLKSVLSALV  | 13    | >APC-W593L STLKSVLSALL   | 2482  | 2469  |
| >APC-W593L STLKSVLSALV  | 838   | >APC-W593L STLKSVLSALL   | 67    | 771   |
| >APC-W593L STLKSVLSALV  | 34    | >APC-W593L STLKSVLSALL   | 21    | 13    |
| >APC-W593L STLKSVLSALV  | 344   | >APC-W593L STLKSVLSALL   | 19500 | 19156 |
| >APC-W593L STLKSVLSALV  | 29798 | >APC-W593L STLKSVLSALL   | 160   | 29638 |
| >APC-W593L ALWNLSAHC    | 12    | >APC-W593L ALLNLSAHC     | 25    | 13    |
| >APC-W593L ALWNLSAHC    | 59    | >APC-W593L ALLNLSAHCT    | 176   | 117   |
| >APC-W593L ALWNLSAHC    | 33    | >APC-W593L ALLNLSAHC     | 33    | 0     |
| >APC-W593L ALWNLSAHC    | 199   | >APC-W593L ALLNLSAHCT    | 211   | 12    |
| >APC-W593L ALWNLSAHC    | 35    | >APC-W593L ALLNLSAHC     | 82    | 47    |
| >APC-W593L ALWNLSAHC    | 33    | >APC-W593L ALLNLSAHCT    | 78    | 45    |
| >APC-W593L ALWNLSAHC    | 353   | >APC-W593L ALLNLSAHC     | 539   | 186   |
| >APC-W593L ALWNLSAHC    | 165   | >APC-W593L ALLNLSAHCT    | 283   | 118   |
| >APC-W593L ALWNLSAHC    | 15    | >APC-W593L ALLNLSAHC     | 27    | 12    |
| >APC-W593L ALWNLSAHC    | 26    | >APC-W593L ALLNLSAHCT    | 50    | 24    |
| >APC-W593L SALWNLSA     | 786   | >APC-W593L SALLNLSA      | 412   | 374   |
| >APC-W593L SALWNLSA     | 240   | >APC-W593L SALLNLSA      | 987   | 747   |
| >APC-W593L SALWNLSA     | 208   | >APC-W593L SALLNLSA      | 2880  | 2672  |
| >APC-W593L SALWNLSAH    | 381   | >APC-W593L SALLNLSAH     | 1732  | 1351  |
| >APC-W593L VLSALWNL     | 26    | >APC-W593L VLSALLNL      | 39    | 13    |
| >APC-W593L VLSALWNLSA   | 159   | >APC-W593L VLSALLNLSA    | 145   | 14    |
| >APC-W593L VLSALWNL     | 4     | >APC-W593L VLSALLNL      | 6     | 2     |
| >APC-W593L VLSALWNLS    | 147   | >APC-W593L VLSALLNLS     | 35    | 112   |
| >APC-W593L VLSALWNLSA   | 75    | >APC-W593L VLSALLNLSA    | 42    | 33    |
| >APC-W593L VLSALWNL     | 23    | >APC-W593L VLSALLNL      | 16    | 7     |
| >APC-W593L VLSALWNLS    | 2435  | >APC-W593L VLSALLNLS     | 287   | 2148  |
| >APC-W593L VLSALWNLSA   | 102   | >APC-W593L VLSALLNLSA    | 65    | 37    |
| >APC-W593L VLSALWNL     | 45    | >APC-W593L VLSALLNL      | 177   | 132   |
| >APC-W593L VLSALWNLSA   | 571   | >APC-W593L VLSALLNLSA    | 368   | 203   |
| >APC-W593L VLSALWNL     | 10    | >APC-W593L VLSALLNL      | 28    | 18    |
| >APC-W593L VLSALWNLSA   | 84    | >APC-W593L VLSALLNLSA    | 159   | 75    |

|                       |      |                        |       |       |
|-----------------------|------|------------------------|-------|-------|
| >APC-W593L VLSALWNL   | 34   | >APC-W593L VLSALLNL    | 68    | 34    |
| >APC-W593L VLSALWNL   | 13   | >APC-W593L VLSALLNL    | 30    | 17    |
| >APC-W593L VLSALWNLSA | 115  | >APC-W593L VLSALLNLSA  | 188   | 73    |
| >APC-W593L VLSALWNL   | 20   | >APC-W593L VLSALLNL    | 33    | 13    |
| >APC-W593L VLSALWNL   | 4    | >APC-W593L VLSALLNL    | 4     | 0     |
| >APC-W593L VLSALWNLSA | 15   | >APC-W593L VLSALLNLSA  | 15    | 0     |
| >APC-W593L SVLSALWNL  | 2653 | >APC-W593L SVLSALLNL   | 367   | 2286  |
| >APC-W593L SVLSALWNL  | 19   | >APC-W593L SVLSALLNL   | 103   | 84    |
| >APC-W593L SVLSALWNLS | 142  | >APC-W593L SVLSALLNLSA | 498   | 356   |
| >APC-W593L SVLSALWNL  | 37   | >APC-W593L SVLSALLNL   | 484   | 447   |
| >APC-W593L SVLSALWNL  | 5    | >APC-W593L SVLSALLNL   | 32    | 27    |
| >APC-W593L SVLSALWNLS | 33   | >APC-W593L SVLSALLNLSA | 74    | 41    |
| >APC-W593L SVLSALWNL  | 20   | >APC-W593L SVLSALLNL   | 497   | 477   |
| >APC-W593L SVLSALWNLS | 293  | >APC-W593L SVLSALLNLSA | 1762  | 1469  |
| >APC-W593L SVLSALWNL  | 32   | >APC-W593L SVLSALLNL   | 1848  | 1816  |
| >APC-W593L SVLSALWNL  | 11   | >APC-W593L SVLSALLNL   | 97    | 86    |
| >APC-W593L SVLSALWNLS | 195  | >APC-W593L SVLSALLNLSA | 862   | 667   |
| >APC-W593L SVLSALWNL  | 24   | >APC-W593L SVLSALLNL   | 2116  | 2092  |
| >APC-W593L SVLSALWNL  | 13   | >APC-W593L SVLSALLNL   | 320   | 307   |
| >APC-W593L SVLSALWNLS | 359  | >APC-W593L SVLSALLNLSA | 2379  | 2020  |
| >APC-W593L SVLSALWNL  | 275  | >APC-W593L SVLSALLNL   | 2878  | 2603  |
| >APC-W593L SVLSALWNL  | 68   | >APC-W593L SVLSALLNL   | 175   | 107   |
| >APC-W593L SVLSALWNL  | 2294 | >APC-W593L SVLSALLNL   | 486   | 1808  |
| >APC-W593L SVLSALWNLS | 290  | >APC-W593L SVLSALLNLSA | 142   | 148   |
| >APC-W593L SVLSALWNL  | 321  | >APC-W593L SVLSALLNL   | 4079  | 3758  |
| >APC-W593L SVLSALWNL  | 7    | >APC-W593L SVLSALLNL   | 35    | 28    |
| >APC-W593L SVLSALWNLS | 44   | >APC-W593L SVLSALLNLSA | 210   | 166   |
| >APC-W593L KSVLSALWNL | 262  | >APC-W593L KSVLSALLNL  | 588   | 326   |
| >APC-W593L KSVLSALW   | 3    | >APC-W593L KSVLSALL    | 3     | 0     |
| >APC-W593L KSVLSALWN  | 53   | >APC-W593L KSVLSALLN   | 242   | 189   |
| >APC-W593L KSVLSALWNL | 4    | >APC-W593L KSVLSALLNL  | 3     | 1     |
| >APC-W593L KSVLSALW   | 34   | >APC-W593L KSVLSALL    | 1138  | 1104  |
| >APC-W593L KSVLSALW   | 8    | >APC-W593L KSVLSALL    | 38    | 30    |
| >APC-W593L KSVLSALWNL | 41   | >APC-W593L KSVLSALLNL  | 48    | 7     |
| >APC-W593L KSVLSALW   | 7967 | >APC-W593L KSVLSALL    | 45    | 7922  |
| >APC-W593L KSVLSALWNL | 174  | >APC-W593L KSVLSALLNL  | 262   | 88    |
| >APC-W593L KSVLSALW   | 489  | >APC-W593L KSVLSALL    | 259   | 230   |
| >APC-W593L KSVLSALWNL | 374  | >APC-W593L KSVLSALLNL  | 226   | 148   |
| >APC-W593L KSVLSALW   | 428  | >APC-W593L KSVLSALL    | 25803 | 25375 |
| >APC-W593L LKSVLSALW  | 767  | >APC-W593L LKSVLSALL   | 194   | 573   |
| >APC-W593L LKSVLSALWN | 119  | >APC-W593L LKSVLSALLNL | 74    | 45    |
| >APC-W593L LKSVLSALW  | 133  | >APC-W593L LKSVLSALL   | 19464 | 19331 |
| >APC-W593L LKSVLSALW  | 16   | >APC-W593L LKSVLSALL   | 4442  | 4426  |

|                        |       |                        |       |       |
|------------------------|-------|------------------------|-------|-------|
| >APC-W593L TLKSVLSALW  | 11035 | >APC-W593L TLKSVLSALL  | 26    | 11009 |
| >APC-W593L TLKSVLSALW  | 12655 | >APC-W593L TLKSVLSALL  | 49    | 12606 |
| >APC-W593L TLKSVLSALW  | 19011 | >APC-W593L TLKSVLSALL  | 33    | 18978 |
| >APC-Y1027(YSLKYSDEQL  | 350   | >APC-Y1027(CSLKYSDEQL  | 2553  | 2203  |
| >APC-Y1027(YSLKYSDEQL  | 10    | >APC-Y1027(CSLKYSDEQL  | 204   | 194   |
| >APC-Y1027(NYSLKYSDEQ  | 42    | >APC-Y1027(NCSLKYSDEQ  | 20640 | 20598 |
| >APC-Y1027(PINYSKY     | 110   | >APC-Y1027(PINCSKY     | 186   | 76    |
| >APC-Y1027(PINYSKY     | 452   | >APC-Y1027(PINCSKY     | 1510  | 1058  |
| >APC-Y1027(PINYSKY     | 593   | >APC-Y1027(PINCSKY     | 396   | 197   |
| >APC-Y1027(TPINYSKY    | 49    | >APC-Y1027(TPINCSKY    | 88    | 39    |
| >APC-Y1027(TPINYSK     | 275   | >APC-Y1027(TPINCSK     | 433   | 158   |
| >APC-Y1027(TPINYSKY    | 398   | >APC-Y1027(TPINCSKY    | 805   | 407   |
| >APC-Y1027(TPINYSKY    | 15    | >APC-Y1027(TPINCSKY    | 11    | 4     |
| >APC-Y1027(TPINYSKY    | 50    | >APC-Y1027(TPINCSKY    | 19    | 31    |
| >APC-Y1027(TPINYSKY    | 474   | >APC-Y1027(TPINCSKY    | 1512  | 1038  |
| >APC-Y1027(TPINYSKY    | 17    | >APC-Y1027(TPINCSKY    | 190   | 173   |
| >APC-Y1027(TPINYSKY    | 101   | >APC-Y1027(TPINCSKY    | 122   | 21    |
| >APC-Y1027(DTPINYSKY   | 108   | >APC-Y1027(DTPINCSKY   | 197   | 89    |
| >APC-Y1027(DTPINYSKY   | 35    | >APC-Y1027(DTPINCSKY   | 86    | 51    |
| >APC-Y1027(DTPINYSKY   | 132   | >APC-Y1027(DTPINCSKY   | 134   | 2     |
| >APC-Y1027(DTPINYSKY   | 392   | >APC-Y1027(DTPINCSKY   | 1024  | 632   |
| >APC-Y1027(DTPINYSKY   | 121   | >APC-Y1027(DTPINCSKY   | 183   | 62    |
| >APC-Y1027(DTPINYSK    | 30    | >APC-Y1027(DTPINCSK    | 24    | 6     |
| >APC-Y1027(DTPINYSL    | 46    | >APC-Y1027(DTPINCSL    | 244   | 198   |
| >APC-Y1027(DTPINYSKY   | 57    | >APC-Y1027(DTPINCSKY   | 39    | 18    |
| >APC-Y1027(LDTPINYSKY  | 120   | >APC-Y1027(LDTPINCSKY  | 455   | 335   |
| >APC-Y1027(LDTPINYSL   | 423   | >APC-Y1027(LDTPINCSL   | 1032  | 609   |
| >APC-Y1027(ELDTPINY    | 303   | >APC-Y1027(ELDTPINC    | 21219 | 20916 |
| >APC-Y1027(ELDTPINYSL  | 100   | >APC-Y1027(ELDTPINCSL  | 325   | 225   |
| >APC-Y1027(ELDTPINYSL  | 29    | >APC-Y1027(ELDTPINCSL  | 60    | 31    |
| >APC-Y1027(ELDTPINYSL  | 58    | >APC-Y1027(ELDTPINCSL  | 296   | 238   |
| >APC-Y1027(ELDTPINYSL  | 228   | >APC-Y1027(ELDTPINCSL  | 209   | 19    |
| >APC-Y1027(ELDTPINYSL  | 29    | >APC-Y1027(ELDTPINCSL  | 68    | 39    |
| >APC-Y1027(ELDTPINYSL  | 61    | >APC-Y1027(ELDTPINCSL  | 41    | 20    |
| >APC-Y1027(ELDTPINYSK  | 180   | >APC-Y1027(ELDTPINCSK  | 169   | 11    |
| >APC-Y1027(ELDTPINYSL  | 330   | >APC-Y1027(ELDTPINCSL  | 726   | 396   |
| >APC-Y1027(ELDTPINYSL  | 58    | >APC-Y1027(ELDTPINCSL  | 162   | 104   |
| >APC-Y1027(ELDTPINY    | 293   | >APC-Y1027(ELDTPINC    | 38003 | 37710 |
| >APC-Y1027(GELDTPINYSI | 11    | >APC-Y1027(GELDTPINCSI | 15    | 4     |
| >APC-Y1027(GELDTPINYSI | 23    | >APC-Y1027(GELDTPINCSI | 27    | 4     |
| >APC-Y1027(GELDTPINY   | 100   | >APC-Y1027(GELDTPINC   | 1302  | 1202  |
| >APC-Y1027(GELDTPINYSI | 308   | >APC-Y1027(GELDTPINCSI | 377   | 69    |
| >APC-Y1027(GELDTPINY   | 53    | >APC-Y1027(GELDTPINC   | 3373  | 3320  |



|                         |      |                         |       |       |
|-------------------------|------|-------------------------|-------|-------|
| >APC-Y1027C GELDTPINYSI | 256  | >APC-Y1027C GELDTPINCSI | 487   | 231   |
| >APC-Y1027C GELDTPINY   | 598  | >APC-Y1027C GELDTPINC   | 151   | 447   |
| >APC-Y1027C GELDTPINYSI | 18   | >APC-Y1027C GELDTPINCSI | 17    | 1     |
| >APC-Y1102F HFGQQECVSI  | 259  | >APC-Y1102F HFGQQECVSI  | 14358 | 14099 |
| >APC-Y1102F HFGQQECVSI  | 373  | >APC-Y1102F HFGQQECVSI  | 11214 | 10841 |
| >APC-Y1102F HFGQQECVSI  | 162  | >APC-Y1102F HFGQQECVSI  | 4261  | 4099  |
| >APC-Y1102F SPYRSRGA    | 127  | >APC-Y1102F SPHRSRGA    | 146   | 19    |
| >APC-Y1102F VSPYRSRGA   | 175  | >APC-Y1102F VSPHRSRGA   | 198   | 23    |
| >APC-Y1102F VSPYRSRGA   | 451  | >APC-Y1102F VSPHRSRGA   | 590   | 139   |
| >APC-Y1102F CVSPYRSR    | 143  | >APC-Y1102F CVSPHRSR    | 174   | 31    |
| >APC-Y1102F CVSPYRSR    | 93   | >APC-Y1102F CVSPHRSR    | 110   | 17    |
| >APC-Y1102F QECVSPYR    | 213  | >APC-Y1102F QECVSPHR    | 917   | 704   |
| >APC-Y1102F QQECVSPYR   | 203  | >APC-Y1102F QQECVSPHR   | 848   | 645   |
| >APC-Y1102F QQECVSPY    | 84   | >APC-Y1102F QQECVSPH    | 4160  | 4076  |
| >APC-Y1102F QQECVSPY    | 219  | >APC-Y1102F QQECVSPH    | 7519  | 7300  |
| >APC-Y1102F QQECVSPY    | 66   | >APC-Y1102F QQECVSPH    | 2141  | 2075  |
| >APC-Y1102F QQECVSPY    | 451  | >APC-Y1102F QQECVSPH    | 7463  | 7012  |
| >APC-Y1102F QQECVSPYR   | 126  | >APC-Y1102F QQECVSPHR   | 647   | 521   |
| >APC-Y1102F GQQECVSPY   | 137  | >APC-Y1102F GQQECVSPH   | 17166 | 17029 |
| >APC-Y1102F GQQECVSPYI  | 320  | >APC-Y1102F GQQECVSPH   | 1110  | 790   |
| >APC-Y1102F GQQECVSPY   | 29   | >APC-Y1102F GQQECVSPH   | 237   | 208   |
| >APC-Y1102F GQQECVSPY   | 141  | >APC-Y1102F GQQECVSPH   | 5994  | 5853  |
| >APC-Y1102F GQQECVSPY   | 11   | >APC-Y1102F GQQECVSPH   | 1001  | 990   |
| >APC-Y1102F FGQQECVSPY  | 425  | >APC-Y1102F FGQQECVSPH  | 1219  | 794   |
| >APC-Y1102F FGQQECVSPY  | 86   | >APC-Y1102F FGQQECVSPH  | 6177  | 6091  |
| >APC-Y1102F FGQQECVSPY  | 331  | >APC-Y1102F FGQQECVSPH  | 10686 | 10355 |
| >APC-Y1102F FGQQECVSPY  | 474  | >APC-Y1102F FGQQECVSPH  | 8658  | 8184  |
| >APC-Y1102F FGQQECVSPY  | 329  | >APC-Y1102F FGQQECVSPH  | 1251  | 922   |
| >ARID1A-A14 QQLPPAQPQ   | 102  | >ARID1A-A14 QQLPPAQPQ   | 29    | 73    |
| >ARID1A-A14 QQLPPAQPQ   | 3687 | >ARID1A-A14 QQLPPAQPQ   | 88    | 3599  |
| >ARID1A-A14 QQLPPAQPQ   | 5649 | >ARID1A-A14 QQLPPAQPQ   | 274   | 5375  |
| >ARID1A-A14 QQLPPAQPQ   | 5578 | >ARID1A-A14 QQLPPAQPQ   | 355   | 5223  |
| >ARID1A-A14 QQLPPAQPQ   | 143  | >ARID1A-A14 QQLPPAQPQ   | 25    | 118   |
| >ARID1A-A14 QPASQQQAA   | 465  | >ARID1A-A14 QPVSQQQAA   | 3072  | 2607  |
| >ARID1A-A14 QPASQQQAA   | 221  | >ARID1A-A14 QPVSQQQAA   | 184   | 37    |
| >ARID1A-A14 QPASQQQAA   | 546  | >ARID1A-A14 QPVSQQQAA   | 286   | 260   |
| >ARID1A-A14 QPASQQQAA   | 294  | >ARID1A-A14 QPVSQQQAA   | 528   | 234   |
| >ARID1A-A14 PPAQPQPA    | 872  | >ARID1A-A14 PPAQPQPV    | 388   | 484   |
| >ARID1A-A14 LPPAQPQPA   | 2976 | >ARID1A-A14 LPPAQPQPV   | 170   | 2806  |
| >ARID1A-A14 LPPAQPQPA   | 27   | >ARID1A-A14 LPPAQPQPV   | 90    | 63    |
| >ARID1A-A14 QLPPAQPQP,  | 1448 | >ARID1A-A14 QLPPAQPQP'  | 238   | 1210  |
| >ARID1A-A14 QLPPAQPQP,  | 1189 | >ARID1A-A14 QLPPAQPQP'  | 168   | 1021  |
| >ARID1A-A14 QLPPAQPQP,  | 613  | >ARID1A-A14 QLPPAQPQP'  | 11    | 602   |

|                        |       |                        |       |       |
|------------------------|-------|------------------------|-------|-------|
| >ARID1A-A14QLPPAQQP,   | 3699  | >ARID1A-A14QLPPAQQP'   | 112   | 3587  |
| >ARID1A-A14QLPPAQQP,   | 658   | >ARID1A-A14QLPPAQQP'   | 18    | 640   |
| >ARID1A-A14QLPPAQQP,   | 4415  | >ARID1A-A14QLPPAQQP'   | 52    | 4363  |
| >ARID1A-A14QLPPAQQP,   | 43    | >ARID1A-A14QLPPAQQP'   | 4     | 39    |
| >ARID1A-G4:GHGYPGQPY   | 200   | >ARID1A-G4:EHGYPGQPY   | 218   | 18    |
| >ARID1A-G4:QGHGYPGQF   | 577   | >ARID1A-G4:QEHGYPGQP   | 471   | 106   |
| >ARID1A-G4:QGHGYPGQF   | 175   | >ARID1A-G4:QEHGYPGQP   | 188   | 13    |
| >ARID1A-G4:QGHGYPGQF   | 1722  | >ARID1A-G4:QEHGYPGQP   | 344   | 1378  |
| >ARID1A-G4:QGHGYPGQF   | 20996 | >ARID1A-G4:QEHGYPGQP   | 159   | 20837 |
| >ARID1A-G4:QGHGYPGQF   | 25298 | >ARID1A-G4:QEHGYPGQP   | 139   | 25159 |
| >ARID1A-G4:QGHGYPGQ    | 38772 | >ARID1A-G4:QEHGYPGQ    | 326   | 38446 |
| >ARID1A-G4:QGHGYPGQF   | 39985 | >ARID1A-G4:QEHGYPGQP   | 416   | 39569 |
| >ARID1A-G4:QQGHGYPGC   | 39    | >ARID1A-G4:QQEHGYPGC   | 95    | 56    |
| >ARID1A-G4:QQGHGYPGC   | 59    | >ARID1A-G4:QQEHGYPGC   | 50    | 9     |
| >ARID1A-G4:QQGHGYPGC   | 13    | >ARID1A-G4:QQEHGYPGC   | 49    | 36    |
| >ARID1A-G4:GPQQGHGY    | 480   | >ARID1A-G4:GPQQEHGY    | 798   | 318   |
| >ARID1A-G4:GPQQGHGY    | 305   | >ARID1A-G4:GPQQEHGY    | 3572  | 3267  |
| >ARID1A-G4:GPQQGHGY    | 301   | >ARID1A-G4:GPQQEHGY    | 289   | 12    |
| >ARID1A-G4:SGPQQGHGY   | 173   | >ARID1A-G4:SGPQQEHGY   | 139   | 34    |
| >ARID1A-G4:SGPQQGHGY   | 462   | >ARID1A-G4:SGPQQEHGY   | 3460  | 2998  |
| >ARID1A-G4:PPSGPQQGH   | 483   | >ARID1A-G4:PPSGPQQEH   | 290   | 193   |
| >ARID1A-K11KIQPPSPA    | 246   | >ARID1A-K11TIQPPSPA    | 7666  | 7420  |
| >ARID1A-K11KIQPPSPA    | 12459 | >ARID1A-K11TIQPPSPA    | 432   | 12027 |
| >ARID1A-K11AAADSKKSQF  | 159   | >ARID1A-K11AAADSKKSQF  | 26636 | 26477 |
| >ARID1A-K11AAADSKKSQF  | 149   | >ARID1A-K11AAADSKKSQF  | 12439 | 12290 |
| >ARID1A-K11QPKIQPPSPA  | 555   | >ARID1A-K11QPTIQPPSPA  | 483   | 72    |
| >ARID1A-K11SQPKIQPPSP, | 375   | >ARID1A-K11SQPTIQPPSP, | 294   | 81    |
| >ARID1A-K11KSQPKIQPPS  | 402   | >ARID1A-K11KSQPTIQPPS  | 178   | 224   |
| >ARID1A-K11KKSQPKIQPP  | 1101  | >ARID1A-K11KKSQPTIQPP  | 377   | 724   |
| >ARID1A-K11SKKSQPKI    | 160   | >ARID1A-K11SKKSQPTI    | 51    | 109   |
| >ARID1A-K11SKKSQPKIQPI | 803   | >ARID1A-K11SKKSQPTIQPI | 361   | 442   |
| >ARID1A-K11DSKKSQPK    | 104   | >ARID1A-K11DSKKSQPT    | 10008 | 9904  |
| >ARID1A-K11ADSKKSQPKI  | 149   | >ARID1A-K11ADSKKSQPTI  | 87    | 62    |
| >ARID1A-K11AADSKKSQPK  | 222   | >ARID1A-K11AADSKKSQPT  | 33979 | 33757 |
| >ARID1A-K11AADSKKSQPK  | 773   | >ARID1A-K11AADSKKSQPT  | 409   | 364   |
| >ARID1A-L20LHWAVCPSA   | 264   | >ARID1A-L20PHWAVCPSA   | 12260 | 11996 |
| >ARID1A-L20LLHWAVCPSA  | 151   | >ARID1A-L20LPHWAVCPSA  | 24726 | 24575 |
| >ARID1A-L20LLHWAVCPSA  | 254   | >ARID1A-L20LPHWAVCPSA  | 25527 | 25273 |
| >ARID1A-L20LLHWAVCPS   | 229   | >ARID1A-L20LPHWAVCPS   | 21732 | 21503 |
| >ARID1A-L20LLHWAVCPSA  | 114   | >ARID1A-L20LPHWAVCPSA  | 20750 | 20636 |
| >ARID1A-L20LLHWAVCPSA  | 416   | >ARID1A-L20LPHWAVCPSA  | 13072 | 12656 |
| >ARID1A-L20LLHWAVCPS   | 48    | >ARID1A-L20LPHWAVCPS   | 22528 | 22480 |
| >ARID1A-L20LLHWAVCPSA  | 8     | >ARID1A-L20LPHWAVCPSA  | 15296 | 15288 |

|                        |       |                        |       |       |
|------------------------|-------|------------------------|-------|-------|
| >ARID1A-L20 LLHWAVCPS/ | 26    | >ARID1A-L20 LPHWAVCPS, | 22865 | 22839 |
| >ARID1A-L20 LLHWAVCPS/ | 314   | >ARID1A-L20 LPHWAVCPS, | 22863 | 22549 |
| >ARID1A-L20 LLHWAVCPS  | 49    | >ARID1A-L20 LPHWAVCPS  | 34813 | 34764 |
| >ARID1A-L20 LLHWAVCPS/ | 4     | >ARID1A-L20 LPHWAVCPS, | 21957 | 21953 |
| >ARID1A-L20 LLHWAVCPS  | 11775 | >ARID1A-L20 LPHWAVCPS  | 63    | 11712 |
| >ARID1A-L20 LLHWAVCPS/ | 15203 | >ARID1A-L20 LPHWAVCPS, | 146   | 15057 |
| >ARID1A-L20 LLHWAVCP   | 27737 | >ARID1A-L20 LPHWAVCP   | 353   | 27384 |
| >ARID1A-L20 LLHWAVCPS  | 14323 | >ARID1A-L20 LPHWAVCPS  | 20    | 14303 |
| >ARID1A-L20 LLHWAVCPS/ | 29710 | >ARID1A-L20 LPHWAVCPS, | 186   | 29524 |
| >ARID1A-L20 LLHWAVCPS/ | 26722 | >ARID1A-L20 LPHWAVCPS, | 80    | 26642 |
| >ARID1A-L20 GLLHWAVCP  | 33    | >ARID1A-L20 GLPHWAVCP  | 272   | 239   |
| >ARID1A-L20 GLLHWAVCP  | 164   | >ARID1A-L20 GLPHWAVCP  | 73    | 91    |
| >ARID1A-L20 GLLHWAVCP  | 72    | >ARID1A-L20 GLPHWAVCP  | 328   | 256   |
| >ARID1A-L20 GLLHWAVC   | 36    | >ARID1A-L20 GLPHWAVC   | 273   | 237   |
| >ARID1A-L20 GLLHWAVCP  | 105   | >ARID1A-L20 GLPHWAVCP  | 807   | 702   |
| >ARID1A-L20 GLLHWAVCP  | 13    | >ARID1A-L20 GLPHWAVCP  | 74    | 61    |
| >ARID1A-L20 GLLHWAVC   | 77    | >ARID1A-L20 GLPHWAVC   | 1477  | 1400  |
| >ARID1A-L20 GLLHWAVCP  | 269   | >ARID1A-L20 GLPHWAVCP  | 3846  | 3577  |
| >ARID1A-L20 GLLHWAVCP  | 21    | >ARID1A-L20 GLPHWAVCP  | 285   | 264   |
| >ARID1A-L20 GLLHWAVC   | 470   | >ARID1A-L20 GLPHWAVC   | 2712  | 2242  |
| >ARID1A-L20 GLLHWAVCP  | 224   | >ARID1A-L20 GLPHWAVCP  | 1369  | 1145  |
| >ARID1A-L20 GLLHWAVCP  | 11    | >ARID1A-L20 GLPHWAVCP  | 35    | 24    |
| >ARID1A-L20 GLLHWAVCP  | 161   | >ARID1A-L20 GLPHWAVCP  | 5439  | 5278  |
| >ARID1A-L20 GLLHWAVC   | 87    | >ARID1A-L20 GLPHWAVC   | 174   | 87    |
| >ARID1A-L20 GLLHWAVCP  | 475   | >ARID1A-L20 GLPHWAVCP  | 975   | 500   |
| >ARID1A-L20 GLLHWAVCP  | 12    | >ARID1A-L20 GLPHWAVCP  | 19    | 7     |
| >ARID1A-L20 DGLLHWAV   | 697   | >ARID1A-L20 DGLPHWAV   | 233   | 464   |
| >ARID1A-L20 LDGLLHWAV  | 310   | >ARID1A-L20 LDGLPHWAV  | 3387  | 3077  |
| >ARID1A-L20 LDGLLHWAV  | 285   | >ARID1A-L20 LDGLPHWAV  | 617   | 332   |
| >ARID1A-L20 VLDGLLHWA  | 24    | >ARID1A-L20 VLDGLPHWA  | 60    | 36    |
| >ARID1A-L20 VLDGLLHWA  | 24    | >ARID1A-L20 VLDGLPHWA  | 24    | 0     |
| >ARID1A-L20 VLDGLLHWA  | 23    | >ARID1A-L20 VLDGLPHWA  | 109   | 86    |
| >ARID1A-L20 VLDGLLHWA  | 63    | >ARID1A-L20 VLDGLPHWA  | 59    | 4     |
| >ARID1A-L20 VLDGLLHWA  | 86    | >ARID1A-L20 VLDGLPHWA  | 288   | 202   |
| >ARID1A-L20 VLDGLLHWA  | 131   | >ARID1A-L20 VLDGLPHWA  | 123   | 8     |
| >ARID1A-L20 VLDGLLHWA  | 92    | >ARID1A-L20 VLDGLPHWA  | 1982  | 1890  |
| >ARID1A-L20 VLDGLLHWA  | 61    | >ARID1A-L20 VLDGLPHWA  | 99    | 38    |
| >ARID1A-L20 VLDGLLHWA  | 5     | >ARID1A-L20 VLDGLPHWA  | 5     | 0     |
| >ARID1A-L20 VLDGLLHWA  | 1     | >ARID1A-L20 VLDGLPHWA  | 1     | 0     |
| >ARID1A-L20 VLDGLLHWA  | 29    | >ARID1A-L20 VLDGLPHWA  | 21    | 8     |
| >ARID1A-L20 VLDGLLHWA  | 54    | >ARID1A-L20 VLDGLPHWA  | 122   | 68    |
| >ARID1A-L20 VLDGLLHWA  | 3     | >ARID1A-L20 VLDGLPHWA  | 3     | 0     |
| >ARID1A-L20 VLDGLLHWA  | 10    | >ARID1A-L20 VLDGLPHWA  | 11    | 1     |

|                        |      |                        |       |       |
|------------------------|------|------------------------|-------|-------|
| >ARID1A-L20 VLDGLLHWA` | 4    | >ARID1A-L20 VLDGLPHWA  | 4     | 0     |
| >ARID1A-L20 VLDGLLHWA  | 16   | >ARID1A-L20 VLDGLPHWA  | 26    | 10    |
| >ARID1A-L20 VLDGLLHWA` | 2    | >ARID1A-L20 VLDGLPHWA  | 3     | 1     |
| >ARID1A-L20 VLDGLLHWA` | 427  | >ARID1A-L20 VLDGLPHWA  | 452   | 25    |
| >ARID1A-L20 VLDGLLHWA  | 2    | >ARID1A-L20 VLDGLPHWA  | 4     | 2     |
| >ARID1A-L20 VLDGLLHWA` | 2    | >ARID1A-L20 VLDGLPHWA  | 2     | 0     |
| >ARID1A-L20 VLDGLLHWA` | 34   | >ARID1A-L20 VLDGLPHWA  | 32    | 2     |
| >ARID1A-L20 VLDGLLHWA` | 312  | >ARID1A-L20 VLDGLPHWA  | 312   | 0     |
| >ARID1A-L20 VLDGLLHW   | 67   | >ARID1A-L20 VLDGLPHW   | 83    | 16    |
| >ARID1A-L20 PVLDGLLHW, | 36   | >ARID1A-L20 PVLDGLPHW  | 42    | 6     |
| >ARID1A-L20 PVLDGLLHW, | 21   | >ARID1A-L20 PVLDGLPHW  | 14    | 7     |
| >ARID1A-L20 PVLDGLLHW, | 353  | >ARID1A-L20 PVLDGLPHW  | 288   | 65    |
| >ARID1A-L20 PVLDGLLHW, | 48   | >ARID1A-L20 PVLDGLPHW  | 48    | 0     |
| >ARID1A-L20 PVLDGLLHW, | 49   | >ARID1A-L20 PVLDGLPHW  | 32    | 17    |
| >ARID1A-L20 PVLDGLLHW, | 355  | >ARID1A-L20 PVLDGLPHW  | 429   | 74    |
| >ARID1A-L20 PVLDGLLHW, | 14   | >ARID1A-L20 PVLDGLPHW  | 12    | 2     |
| >ARID1A-L20 PVLDGLLHW, | 33   | >ARID1A-L20 PVLDGLPHW  | 15    | 18    |
| >ARID1A-L20 LPVLDGLL   | 269  | >ARID1A-L20 LPVLDGLP   | 25371 | 25102 |
| >ARID1A-L20 LPVLDGLL   | 267  | >ARID1A-L20 LPVLDGLP   | 6993  | 6726  |
| >ARID1A-L20 LPVLDGLLH  | 265  | >ARID1A-L20 LPVLDGLPH  | 34    | 231   |
| >ARID1A-L20 LPVLDGLLHM | 61   | >ARID1A-L20 LPVLDGLPHV | 88    | 27    |
| >ARID1A-L20 LPVLDGLL   | 113  | >ARID1A-L20 LPVLDGLP   | 5126  | 5013  |
| >ARID1A-L20 LPVLDGLLHM | 24   | >ARID1A-L20 LPVLDGLPHV | 38    | 14    |
| >ARID1A-L20 LPVLDGLL   | 1501 | >ARID1A-L20 LPVLDGLP   | 282   | 1219  |
| >ARID1A-L20 LPVLDGLLHM | 10   | >ARID1A-L20 LPVLDGLPHV | 12    | 2     |
| >ARID1A-L20 LPVLDGLLHM | 6    | >ARID1A-L20 LPVLDGLPHV | 7     | 1     |
| >ARID1A-N2(NISGQLDLSP` | 1034 | >ARID1A-N2(DISGQLDLSP` | 190   | 844   |
| >ARID1A-N2(NISGQLDLSP` | 485  | >ARID1A-N2(DISGQLDLSP` | 88    | 397   |
| >ARID1A-N2(NISGQLDLSP` | 37   | >ARID1A-N2(DISGQLDLSP` | 9     | 28    |
| >ARID1A-N2(NISGQLDLSP` | 159  | >ARID1A-N2(DISGQLDLSP` | 349   | 190   |
| >ARID1A-N2(NISGQLDLSP` | 421  | >ARID1A-N2(DISGQLDLSP` | 614   | 193   |
| >ARID1A-N2(NISGQLDLSP` | 434  | >ARID1A-N2(DISGQLDLSP` | 3664  | 3230  |
| >ARID1A-N2(NISGQLDLSP` | 431  | >ARID1A-N2(DISGQLDLSP` | 1523  | 1092  |
| >ARID1A-N2(NISGQLDLSP` | 222  | >ARID1A-N2(DISGQLDLSP` | 260   | 38    |
| >ARID1A-N2(ANISGQLDL   | 170  | >ARID1A-N2(ADISGQLDL   | 600   | 430   |
| >ARID1A-N2(LANISGQL    | 46   | >ARID1A-N2(LADISGQL    | 91    | 45    |
| >ARID1A-N2(LANISGQLDL  | 124  | >ARID1A-N2(LADISGQLDL  | 227   | 103   |
| >ARID1A-N2(TLANISGQL   | 683  | >ARID1A-N2(TLADISGQL   | 123   | 560   |
| >ARID1A-N2(TLANISGQLD  | 570  | >ARID1A-N2(TLADISGQLD  | 163   | 407   |
| >ARID1A-N2(TLANISGQ    | 465  | >ARID1A-N2(TLADISGQ    | 99    | 366   |
| >ARID1A-N2(TLANISGQL   | 8    | >ARID1A-N2(TLADISGQL   | 4     | 4     |
| >ARID1A-N2(TLANISGQLD  | 36   | >ARID1A-N2(TLADISGQLD  | 15    | 21    |
| >ARID1A-N2(TLANISGQL   | 17   | >ARID1A-N2(TLADISGQL   | 8     | 9     |

|                       |      |                        |      |      |
|-----------------------|------|------------------------|------|------|
| >ARID1A-N2(TLANISGQLD | 73   | >ARID1A-N2(TLADISGQLD  | 33   | 40   |
| >ARID1A-N2(TLANISGQL  | 93   | >ARID1A-N2(TLADISGQL   | 34   | 59   |
| >ARID1A-N2(TLANISGQLD | 626  | >ARID1A-N2(TLADISGQLD  | 247  | 379  |
| >ARID1A-N2(TLANISGQL  | 893  | >ARID1A-N2(TLADISGQL   | 288  | 605  |
| >ARID1A-N2(TLANISGQL  | 89   | >ARID1A-N2(TLADISGQL   | 50   | 39   |
| >ARID1A-N2(TLANISGQLD | 84   | >ARID1A-N2(TLADISGQLD  | 52   | 32   |
| >ARID1A-N2(TLANISGQL  | 71   | >ARID1A-N2(TLADISGQL   | 17   | 54   |
| >ARID1A-N2(TLANISGQLD | 363  | >ARID1A-N2(TLADISGQLD  | 87   | 276  |
| >ARID1A-N2(TLANISGQ   | 218  | >ARID1A-N2(TLADISGQ    | 40   | 178  |
| >ARID1A-N2(TLANISGQL  | 16   | >ARID1A-N2(TLADISGQL   | 5    | 11   |
| >ARID1A-N2(TLANISGQLD | 15   | >ARID1A-N2(TLADISGQLD  | 5    | 10   |
| >ARID1A-N2(TLANISGQL  | 102  | >ARID1A-N2(TLADISGQL   | 31   | 71   |
| >ARID1A-N2(TLANISGQL  | 874  | >ARID1A-N2(TLADISGQL   | 169  | 705  |
| >ARID1A-N2(VTLANISGQL | 127  | >ARID1A-N2(VTLADISGQL  | 184  | 57   |
| >ARID1A-N2(VTLANISGQL | 359  | >ARID1A-N2(VTLADISGQL  | 423  | 64   |
| >ARID1A-N2(VTLANISGQL | 7    | >ARID1A-N2(VTLADISGQL  | 9    | 2    |
| >ARID1A-N2(VTLANISGQL | 79   | >ARID1A-N2(VTLADISGQL  | 143  | 64   |
| >ARID1A-N2(TLVTLANI   | 462  | >ARID1A-N2(TLVTLADI    | 1693 | 1231 |
| >ARID1A-N2(TLVTLANI   | 68   | >ARID1A-N2(TLVTLADI    | 307  | 239  |
| >ARID1A-N2(TLVTLANI   | 30   | >ARID1A-N2(TLVTLADI    | 87   | 57   |
| >ARID1A-N2(TLVTLANI   | 434  | >ARID1A-N2(TLVTLADI    | 811  | 377  |
| >ARID1A-N2(TLVTLANI   | 232  | >ARID1A-N2(TLVTLADI    | 841  | 609  |
| >ARID1A-N2(TLVTLANI   | 179  | >ARID1A-N2(TLVTLADI    | 501  | 322  |
| >ARID1A-N2(TLVTLANI   | 104  | >ARID1A-N2(TLVTLADI    | 220  | 116  |
| >ARID1A-N2(NTLVTLANI  | 278  | >ARID1A-N2(NTLVTLADI   | 1737 | 1459 |
| >ARID1A-N2(NTLVTLANI  | 12   | >ARID1A-N2(NTLVTLADI   | 79   | 67   |
| >ARID1A-N2(NTLVTLANI  | 245  | >ARID1A-N2(NTLVTLADI   | 1109 | 864  |
| >ARID1A-N2(NTLVTLANI  | 71   | >ARID1A-N2(NTLVTLADI   | 168  | 97   |
| >ARID1A-N2(RENTLVTLAN | 17   | >ARID1A-N2(RENTLVTLAD  | 16   | 1    |
| >ARID1A-N2(RENTLVTLAN | 76   | >ARID1A-N2(RENTLVTLAD  | 97   | 21   |
| >ARID1A-N2(RENTLVTLAN | 173  | >ARID1A-N2(RENTLVTLAD  | 293  | 120  |
| >ARID1A-N2(RENTLVTLAN | 4    | >ARID1A-N2(RENTLVTLAD  | 4    | 0    |
| >ARID1A-P1€PPPPPPSEL  | 434  | >ARID1A-P1€SPPPPPPSEL  | 85   | 349  |
| >ARID1A-P1€PPPPPPSEL  | 3103 | >ARID1A-P1€SPPPPPPSEL  | 100  | 3003 |
| >ARID1A-P1€PPPPPPSEL  | 4903 | >ARID1A-P1€SPPPPPPSEL  | 401  | 4502 |
| >ARID1A-P1€NPPPPPPSEL | 3817 | >ARID1A-P1€NSPPPPPPSEL | 40   | 3777 |
| >ARID1A-P1€SLGNPPPPPP | 196  | >ARID1A-P1€SLGNSPPPPPP | 402  | 206  |
| >ARID1A-R1C RKMWVDRI  | 316  | >ARID1A-R1C RKMWVDRI   | 168  | 148  |
| >ARID1A-R1C RKMWVDRI  | 171  | >ARID1A-R1C RKMWVDRI   | 174  | 3    |
| >ARID1A-R1C RKMWVDRI  | 52   | >ARID1A-R1C RKMWVDRI   | 86   | 34   |
| >ARID1A-R1C RKMWVDRI  | 255  | >ARID1A-R1C RKMWVDRI   | 521  | 266  |
| >ARID1A-R1C RKMWVDRI  | 4    | >ARID1A-R1C RKMWVDRI   | 5    | 1    |
| >ARID1A-R1C RKMWVDRI  | 307  | >ARID1A-R1C RKMWVDRI   | 1601 | 1294 |

|                        |       |                        |       |       |
|------------------------|-------|------------------------|-------|-------|
| >ARID1A-R1C RKMWVDRYL  | 262   | >ARID1A-R1C KKMWVDRYL  | 1503  | 1241  |
| >ARID1A-R1C RKMWVDRYL  | 488   | >ARID1A-R1C KKMWVDRYL  | 2276  | 1788  |
| >ARID1A-R1C RKMWVDRYL  | 263   | >ARID1A-R1C KKMWVDRYL  | 735   | 472   |
| >ARID1A-R1C RKMWVDRYL  | 415   | >ARID1A-R1C KKMWVDRYL  | 999   | 584   |
| >ARID1A-R1C RKMWVDRYL  | 314   | >ARID1A-R1C KKMWVDRYL  | 1833  | 1519  |
| >ARID1A-R1C RKMWVDRYL  | 242   | >ARID1A-R1C KKMWVDRYL  | 1161  | 919   |
| >ARID1A-R1C ERKMWVDR\  | 895   | >ARID1A-R1C EKKMWVDR\  | 376   | 519   |
| >ARID1A-R1C ERKMWVDR\  | 65    | >ARID1A-R1C EKKMWVDR\  | 7036  | 6971  |
| >ARID1A-R1C ERKMWVDR\  | 232   | >ARID1A-R1C EKKMWVDR\  | 8563  | 8331  |
| >ARID1A-R1C KLYELGGPEI | 415   | >ARID1A-R1C KLYELGGPEI | 162   | 253   |
| >ARID1A-R1C KLYELGGPEI | 1371  | >ARID1A-R1C KLYELGGPEI | 340   | 1031  |
| >ARID1A-R1C KLYELGGPEI | 91    | >ARID1A-R1C KLYELGGPEI | 30    | 61    |
| >ARID1A-R1C KLYELGGPEI | 1874  | >ARID1A-R1C KLYELGGPEI | 80    | 1794  |
| >ARID1A-R1C KLYELGGPEI | 6950  | >ARID1A-R1C KLYELGGPEI | 139   | 6811  |
| >ARID1A-R1C KLYELGGPEI | 38    | >ARID1A-R1C KLYELGGPEI | 529   | 491   |
| >ARID1A-R1C KLYELGGPEI | 115   | >ARID1A-R1C KLYELGGPEI | 3748  | 3633  |
| >ARID1A-R1C EPERKMWVC  | 136   | >ARID1A-R1C EPEKKMWVC  | 114   | 22    |
| >ARID1A-R1C EPERKMWVC  | 350   | >ARID1A-R1C EPEKKMWVC  | 184   | 166   |
| >ARID1A-R1C EPERKMWVC  | 226   | >ARID1A-R1C EPEKKMWVC  | 265   | 39    |
| >ARID1A-R1C GEPERKMW\  | 82    | >ARID1A-R1C GEPEKKMW\  | 227   | 145   |
| >ARID1A-R1C GEPERKMW   | 271   | >ARID1A-R1C GEPEKKMW   | 345   | 74    |
| >ARID1A-R1C GEPERKMW   | 535   | >ARID1A-R1C GEPEKKMW   | 472   | 63    |
| >ARID1A-R1C GEPERKMW\  | 411   | >ARID1A-R1C GEPEKKMW\  | 1176  | 765   |
| >ARID1A-R1C ELGGEPER   | 322   | >ARID1A-R1C ELGGEPEK   | 1339  | 1017  |
| >ARID1A-R1C YELGGEPERK | 124   | >ARID1A-R1C YELGGEPEKK | 152   | 28    |
| >ARID1A-R1C YELGGEPERK | 106   | >ARID1A-R1C YELGGEPEKK | 142   | 36    |
| >ARID1A-R1C YELGGEPERK | 404   | >ARID1A-R1C YELGGEPEKK | 502   | 98    |
| >ARID1A-R1C YELGGEPERK | 126   | >ARID1A-R1C YELGGEPEKK | 95    | 31    |
| >ARID1A-S19SNTIRSLSF   | 484   | >ARID1A-S19PNTIRSLSF   | 3703  | 3219  |
| >ARID1A-S19VSNTIRSL    | 31866 | >ARID1A-S19VPNTIRSL    | 383   | 31483 |
| >ARID1A-S19VSNTIRSLSF  | 26999 | >ARID1A-S19VPNTIRSLSF  | 80    | 26919 |
| >ARID1A-S19VSNTIRSLSFV | 23003 | >ARID1A-S19VPNTIRSLSFV | 57    | 22946 |
| >ARID1A-S19VSNTIRSLSFV | 466   | >ARID1A-S19VPNTIRSLSFV | 7527  | 7061  |
| >ARID1A-S19VSNTIRSLSF  | 378   | >ARID1A-S19VPNTIRSLSF  | 13336 | 12958 |
| >ARID1A-S19VSNTIRSLSFV | 113   | >ARID1A-S19VPNTIRSLSFV | 3496  | 3383  |
| >ARID1A-S19VSNTIRSL    | 15226 | >ARID1A-S19VPNTIRSL    | 24    | 15202 |
| >ARID1A-S19VSNTIRSLSF  | 24122 | >ARID1A-S19VPNTIRSLSF  | 244   | 23878 |
| >ARID1A-S19VSNTIRSLSFV | 26219 | >ARID1A-S19VPNTIRSLSFV | 377   | 25842 |
| >ARID1A-S19VSNTIRSLSF  | 209   | >ARID1A-S19VPNTIRSLSF  | 9016  | 8807  |
| >ARID1A-S19VSNTIRSLSF  | 29    | >ARID1A-S19VPNTIRSLSF  | 278   | 249   |
| >ARID1A-S19VSNTIRSL    | 181   | >ARID1A-S19VPNTIRSL    | 22323 | 22142 |
| >ARID1A-S19VSNTIRSLSF  | 10    | >ARID1A-S19VPNTIRSLSF  | 7316  | 7306  |
| >ARID1A-S19VSNTIRSLSF  | 18482 | >ARID1A-S19VPNTIRSLSF  | 488   | 17994 |

|                         |       |                         |       |       |
|-------------------------|-------|-------------------------|-------|-------|
| >ARID1A-S19 VSNTIRSLSF  | 40    | >ARID1A-S19 VPNTIRSLSF  | 17312 | 17272 |
| >ARID1A-S19 VSNTIRSL    | 254   | >ARID1A-S19 VPNTIRSL    | 5747  | 5493  |
| >ARID1A-S19 VSNTIRSLSF  | 66    | >ARID1A-S19 VPNTIRSLSF  | 9001  | 8935  |
| >ARID1A-S19 VSNTIRSLSFV | 45    | >ARID1A-S19 VPNTIRSLSFV | 1635  | 1590  |
| >ARID1A-S19 VSNTIRSLSF  | 11564 | >ARID1A-S19 VPNTIRSLSF  | 263   | 11301 |
| >ARID1A-S19 VSNTIRSLSF  | 16221 | >ARID1A-S19 VPNTIRSLSF  | 146   | 16075 |
| >ARID1A-S19 CVSNTIRSLSF | 563   | >ARID1A-S19 CVPNTIRSLSF | 83    | 480   |
| >ARID1A-S19 CVSNTIRSLSF | 221   | >ARID1A-S19 CVPNTIRSLSF | 1463  | 1242  |
| >ARID1A-S19 CVSNTIRSLSF | 237   | >ARID1A-S19 CVPNTIRSLSF | 1264  | 1027  |
| >ARID1A-S19 CVSNTIRSL   | 10679 | >ARID1A-S19 CVPNTIRSL   | 78    | 10601 |
| >ARID1A-S19 CVSNTIRSLSF | 14571 | >ARID1A-S19 CVPNTIRSLSF | 317   | 14254 |
| >ARID1A-S19 VCVSNTIR    | 486   | >ARID1A-S19 VCVPNTIR    | 447   | 39    |
| >ARID1A-S19 CVCVSNTIR   | 289   | >ARID1A-S19 CVCVPNTIR   | 297   | 8     |
| >ARID1A-S19 CVCVSNTIR   | 68    | >ARID1A-S19 CVCVPNTIR   | 154   | 86    |
| >ARID1A-S19 CVCVSNTI    | 73    | >ARID1A-S19 CVCVPNTI    | 65    | 8     |
| >ARID1A-S19 CVCVSNTIRSI | 660   | >ARID1A-S19 CVCVPNTIRSI | 483   | 177   |
| >ARID1A-S19 RCVCVSNTIR  | 312   | >ARID1A-S19 RCVCVPNTIR  | 1364  | 1052  |
| >ARID1A-S19 RCVCVSNTI   | 35    | >ARID1A-S19 RCVCVPNTI   | 37    | 2     |
| >ARID1A-S19 RCVCVSNTI   | 208   | >ARID1A-S19 RCVCVPNTI   | 474   | 266   |
| >ARID1A-S19 RCVCVSNTIR  | 115   | >ARID1A-S19 RCVCVPNTIR  | 109   | 6     |
| >ARID1A-S19 RCVCVSNTI   | 438   | >ARID1A-S19 RCVCVPNTI   | 563   | 125   |
| >ARID1A-S19 KRCVCVSNTI  | 398   | >ARID1A-S19 KRCVCVPNTI  | 586   | 188   |
| >ARID1A-S19 KRCVCVSNTI  | 122   | >ARID1A-S19 KRCVCVPNTI  | 36    | 86    |
| >ARID1A-S19 KRCVCVSNTI  | 163   | >ARID1A-S19 KRCVCVPNTI  | 103   | 60    |
| >ARID1A-S19 KRCVCVSNTI  | 282   | >ARID1A-S19 KRCVCVPNTI  | 135   | 147   |
| >ARID1A-S19 KRCVCVSNTII | 123   | >ARID1A-S19 KRCVCVPNTII | 120   | 3     |
| >ARID1A-S19 AKRCVCVS    | 487   | >ARID1A-S19 AKRCVCVP    | 466   | 21    |
| >ARID1A-S19 AKRCVCVSN   | 441   | >ARID1A-S19 AKRCVCVSN   | 502   | 61    |
| >ARID1A-S19 AKRCVCVSN   | 258   | >ARID1A-S19 AKRCVCVSN   | 521   | 263   |
| >ARID1A-S19 AKRCVCVSN   | 17    | >ARID1A-S19 AKRCVCVSN   | 18    | 1     |
| >ARID1A-Y13 YSVPYSTG    | 325   | >ARID1A-Y13 HSPYYSTG    | 816   | 491   |
| >ARID1A-Y13 YSVPYSTGQ   | 63    | >ARID1A-Y13 HSPYYSTGQ   | 144   | 81    |
| >ARID1A-Y13 YSVPYSTGQC  | 337   | >ARID1A-Y13 HSPYYSTGQC  | 866   | 529   |
| >ARID1A-Y13 YSVPYSTGQC  | 125   | >ARID1A-Y13 HSPYYSTGQC  | 291   | 166   |
| >ARID1A-Y13 MYSVPYST    | 402   | >ARID1A-Y13 MHSPYST     | 12364 | 11962 |
| >ARID1A-Y13 EMYSVPYS    | 32    | >ARID1A-Y13 EMHSPYS     | 373   | 341   |
| >ARID1A-Y13 EMYSVPYST   | 10    | >ARID1A-Y13 EMHSPYST    | 81    | 71    |
| >ARID1A-Y13 EMYSVPYSTC  | 387   | >ARID1A-Y13 EMHSPYSTC   | 3182  | 2795  |
| >ARID1A-Y13 EMYSVPYSTC  | 240   | >ARID1A-Y13 EMHSPYSTC   | 2512  | 2272  |
| >ARID1A-Y13 EMYSVPYST   | 288   | >ARID1A-Y13 EMHSPYST    | 4563  | 4275  |
| >ARID1A-Y13 EMYSVPYSTC  | 398   | >ARID1A-Y13 EMHSPYSTC   | 2224  | 1826  |
| >ARID1A-Y13 EMYSVPYST   | 409   | >ARID1A-Y13 EMHSPYST    | 5776  | 5367  |
| >ARID1A-Y13 GEMYSVPY    | 79    | >ARID1A-Y13 GEMHSPY     | 79    | 0     |

|                        |       |                        |       |       |
|------------------------|-------|------------------------|-------|-------|
| >ARID1A-Y13 GEMYSVPY   | 45    | >ARID1A-Y13 GEMHSVPY   | 53    | 8     |
| >ARID1A-Y13 GEMYSVPY   | 151   | >ARID1A-Y13 GEMHSVPY   | 331   | 180   |
| >ARID1A-Y13 GEMYSVPYS  | 313   | >ARID1A-Y13 GEMHSVPYS  | 285   | 28    |
| >ARID1A-Y13 GEMYSVPYST | 120   | >ARID1A-Y13 GEMHSVPYS  | 250   | 130   |
| >ARID1A-Y13 GEMYSVPY   | 125   | >ARID1A-Y13 GEMHSVPY   | 122   | 3     |
| >ARID1A-Y13 GEMYSVPY   | 54    | >ARID1A-Y13 GEMHSVPY   | 48    | 6     |
| >ARID1A-Y13 GEMYSVPYS  | 410   | >ARID1A-Y13 GEMHSVPYS  | 327   | 83    |
| >ARID1A-Y13 GEMYSVPY   | 190   | >ARID1A-Y13 GEMHSVPY   | 465   | 275   |
| >ARID1A-Y13 GEMYSVPYS  | 55    | >ARID1A-Y13 GEMHSVPYS  | 119   | 64    |
| >ARID1A-Y13 GEMYSVPYST | 335   | >ARID1A-Y13 GEMHSVPYS  | 990   | 655   |
| >ARID1A-Y13 GEMYSVPYST | 401   | >ARID1A-Y13 GEMHSVPYS  | 739   | 338   |
| >ARID1A-Y13 GEMYSVPY   | 363   | >ARID1A-Y13 GEMHSVPY   | 3000  | 2637  |
| >ARID1A-Y13 GEMYSVPYS  | 33    | >ARID1A-Y13 GEMHSVPYS  | 52    | 19    |
| >ARID1A-Y13 GEMYSVPYST | 74    | >ARID1A-Y13 GEMHSVPYS  | 258   | 184   |
| >ARID1A-Y13 GEMYSVPYST | 174   | >ARID1A-Y13 GEMHSVPYS  | 205   | 31    |
| >ARID1A-Y13 EGEMYSVPY  | 34    | >ARID1A-Y13 EGEMHSVPY  | 38    | 4     |
| >ARID1A-Y13 HEGEMYSV   | 209   | >ARID1A-Y13 HEGEMHSV   | 94    | 115   |
| >ARID1A-Y13 HEGEMYSVP  | 191   | >ARID1A-Y13 HEGEMHSVP  | 141   | 50    |
| >ARID1A-Y13 HEGEMYSV   | 273   | >ARID1A-Y13 HEGEMHSV   | 222   | 51    |
| >ARID1A-Y13 HEGEMYSVP  | 625   | >ARID1A-Y13 HEGEMHSVP  | 483   | 142   |
| >ARID1A-Y13 HEGEMYSV   | 366   | >ARID1A-Y13 HEGEMHSV   | 348   | 18    |
| >ARID1A-Y13 HEGEMYSV   | 40    | >ARID1A-Y13 HEGEMHSV   | 61    | 21    |
| >ARID1A-Y13 HEGEMYSVP  | 628   | >ARID1A-Y13 HEGEMHSVP  | 480   | 148   |
| >ARID1A-Y13 HEGEMYSVP  | 437   | >ARID1A-Y13 HEGEMHSVP  | 371   | 66    |
| >ARID1A-Y13 HEGEMYSVP  | 169   | >ARID1A-Y13 HEGEMHSVP  | 352   | 183   |
| >ARID1A-Y13 HEGEMYSV   | 79    | >ARID1A-Y13 HEGEMHSV   | 91    | 12    |
| >ARID1A-Y13 HEGEMYSVP  | 314   | >ARID1A-Y13 HEGEMHSVP  | 375   | 61    |
| >ARID1A-Y13 RHEGEMYSV  | 585   | >ARID1A-Y13 RHEGEMHSV  | 398   | 187   |
| >ARID1A-Y13 RHEGEMYSV  | 120   | >ARID1A-Y13 RHEGEMHSV  | 258   | 138   |
| >ARID1A-Y13 KRHEGEMY   | 66    | >ARID1A-Y13 KRHEGEMH   | 2174  | 2108  |
| >ARID1A-Y13 AKRHEGEMY  | 6     | >ARID1A-Y13 AKRHEGEMH  | 133   | 127   |
| >ARID1A-Y13 AKRHEGEMY  | 30    | >ARID1A-Y13 AKRHEGEMH  | 35    | 5     |
| >ARNT-P607: PPVTIVQPSA | 8322  | >ARNT-P607: SPVTIVQPSA | 335   | 7987  |
| >ARNT-P607: PPVTIVQPSA | 2979  | >ARNT-P607: SPVTIVQPSA | 362   | 2617  |
| >ARNT-P607: PPVTIVQPSA | 1494  | >ARNT-P607: SPVTIVQPSA | 30    | 1464  |
| >ARNT-P607: APPVTIVQPS | 447   | >ARNT-P607: ASPVTIVQPS | 30010 | 29563 |
| >ARNT-P607: APPVTIVQ   | 5068  | >ARNT-P607: ASPVTIVQ   | 147   | 4921  |
| >ARNT-P607: APPVTIVQP  | 13873 | >ARNT-P607: ASPVTIVQP  | 344   | 13529 |
| >ARNT-P607: APPVTIVQPS | 14563 | >ARNT-P607: ASPVTIVQPS | 308   | 14255 |
| >ARNT-P607: APPVTIVQPS | 13009 | >ARNT-P607: ASPVTIVQPS | 446   | 12563 |
| >ARNT-P607: AENFRNSGLA | 1671  | >ARNT-P607: AENFRNSGLA | 433   | 1238  |
| >ARNT-P607: AENFRNSGLA | 704   | >ARNT-P607: AENFRNSGLA | 98    | 606   |
| >ARNT-P607: LAPPVTIV   | 1957  | >ARNT-P607: LASPVTIV   | 334   | 1623  |



|                        |      |                        |       |       |
|------------------------|------|------------------------|-------|-------|
| >ARNT-P607!LAPPVTIV    | 538  | >ARNT-P607!LASPVTIV    | 165   | 373   |
| >ARNT-P607!LAPPVTIV    | 344  | >ARNT-P607!LASPVTIV    | 309   | 35    |
| >ARNT-P607!LAPPVTIV    | 129  | >ARNT-P607!LASPVTIV    | 74    | 55    |
| >ARNT-P607!LAPPVTIV    | 159  | >ARNT-P607!LASPVTIV    | 164   | 5     |
| >ARNT-P607!LAPPVTIV    | 174  | >ARNT-P607!LASPVTIV    | 18255 | 18081 |
| >ARNT-P607!LAPPVTIVQ   | 125  | >ARNT-P607!LASPVTIVQ   | 12484 | 12359 |
| >ARNT-P607!LAPPVTIVQP  | 472  | >ARNT-P607!LASPVTIVQP  | 18493 | 18021 |
| >ARNT-P607!LAPPVTIVQP! | 430  | >ARNT-P607!LASPVTIVQP! | 18679 | 18249 |
| >ARNT-P607!GLAPPVTI    | 96   | >ARNT-P607!GLASPVTI    | 91    | 5     |
| >ARNT-P607!GLAPPVTIV   | 41   | >ARNT-P607!GLASPVTIV   | 32    | 9     |
| >ARNT-P607!GLAPPVTI    | 43   | >ARNT-P607!GLASPVTI    | 32    | 11    |
| >ARNT-P607!GLAPPVTIV   | 9    | >ARNT-P607!GLASPVTIV   | 8     | 1     |
| >ARNT-P607!GLAPPVTI    | 12   | >ARNT-P607!GLASPVTI    | 11    | 1     |
| >ARNT-P607!GLAPPVTIV   | 3    | >ARNT-P607!GLASPVTIV   | 3     | 0     |
| >ARNT-P607!GLAPPVTI    | 463  | >ARNT-P607!GLASPVTI    | 1231  | 768   |
| >ARNT-P607!GLAPPVTIV   | 51   | >ARNT-P607!GLASPVTIV   | 152   | 101   |
| >ARNT-P607!GLAPPVTI    | 6    | >ARNT-P607!GLASPVTI    | 7     | 1     |
| >ARNT-P607!GLAPPVTIV   | 4    | >ARNT-P607!GLASPVTIV   | 4     | 0     |
| >ARNT-P607!GLAPPVTI    | 14   | >ARNT-P607!GLASPVTI    | 18    | 4     |
| >ARNT-P607!GLAPPVTIV   | 7    | >ARNT-P607!GLASPVTIV   | 10    | 3     |
| >ARNT-P607!GLAPPVTI    | 12   | >ARNT-P607!GLASPVTI    | 15    | 3     |
| >ARNT-P607!GLAPPVTIV   | 5    | >ARNT-P607!GLASPVTIV   | 6     | 1     |
| >ARNT-P607!GLAPPVTI    | 105  | >ARNT-P607!GLASPVTI    | 113   | 8     |
| >ARNT-P607!GLAPPVTIV   | 10   | >ARNT-P607!GLASPVTIV   | 10    | 0     |
| >ARNT-P607!GLAPPVTI    | 7    | >ARNT-P607!GLASPVTI    | 11    | 4     |
| >ARNT-P607!GLAPPVTIV   | 2    | >ARNT-P607!GLASPVTIV   | 2     | 0     |
| >ARNT-P607!GLAPPVTIVQ  | 104  | >ARNT-P607!GLASPVTIVQ  | 283   | 179   |
| >ARNT-P607!GLAPPVTI    | 306  | >ARNT-P607!GLASPVTI    | 202   | 104   |
| >ARNT-P607!SGLAPPVTI   | 5404 | >ARNT-P607!SGLASPVTI   | 227   | 5177  |
| >ARNT-P607!SGLAPPVTI   | 132  | >ARNT-P607!SGLASPVTI   | 281   | 149   |
| >ARNT-P607!NSGLAPPV    | 1903 | >ARNT-P607!NSGLASPV    | 367   | 1536  |
| >ARNT-P607!NSGLAPPV    | 136  | >ARNT-P607!NSGLASPV    | 296   | 160   |
| >ARNT-P607!NSGLAPPVTI  | 206  | >ARNT-P607!NSGLASPVTI  | 145   | 61    |
| >ARNT-P607!RNSGLAPPVT  | 82   | >ARNT-P607!RNSGLASPVT  | 113   | 31    |
| >ARNT-P607!RNSGLAPPVT  | 231  | >ARNT-P607!RNSGLASPVT  | 197   | 34    |
| >ARNT-P607!FRNSGLAPPV  | 499  | >ARNT-P607!FRNSGLASPV  | 610   | 111   |
| >ARNT-P607!FRNSGLAPPV  | 242  | >ARNT-P607!FRNSGLASPV  | 129   | 113   |
| >ARNT-P607!FRNSGLAPPV  | 56   | >ARNT-P607!FRNSGLASPV  | 52    | 4     |
| >ARNT-P607!NFRNSGLAPP  | 318  | >ARNT-P607!NFRNSGLASP  | 903   | 585   |
| >ASXL1-E110EATNPLVMQ   | 232  | >ASXL1-E110DATNPLVMQ   | 1302  | 1070  |
| >ASXL1-E110EATNPLVMQ   | 54   | >ASXL1-E110DATNPLVMQ   | 508   | 454   |
| >ASXL1-E110EATNPLVMQ   | 83   | >ASXL1-E110DATNPLVMQ   | 466   | 383   |
| >ASXL1-E110EATNPLVMQ   | 255  | >ASXL1-E110DATNPLVMQ   | 1330  | 1075  |

|                        |       |                        |       |       |
|------------------------|-------|------------------------|-------|-------|
| >ASXL1-E110 EATNPLVM   | 206   | >ASXL1-E110 DATNPLVM   | 491   | 285   |
| >ASXL1-E110 VEATNPLV   | 171   | >ASXL1-E110 VDATNPLV   | 8926  | 8755  |
| >ASXL1-E110 VEATNPLVM  | 197   | >ASXL1-E110 VDATNPLVM  | 6381  | 6184  |
| >ASXL1-E110 VEATNPLVM  | 448   | >ASXL1-E110 VDATNPLVM  | 21821 | 21373 |
| >ASXL1-E110 VEATNPLVM  | 179   | >ASXL1-E110 VDATNPLVM  | 19218 | 19039 |
| >ASXL1-E110 VEATNPLVM  | 188   | >ASXL1-E110 VDATNPLVM  | 8238  | 8050  |
| >ASXL1-E110 VEATNPLVM  | 19    | >ASXL1-E110 VDATNPLVM  | 792   | 773   |
| >ASXL1-E110 VEATNPLV   | 6104  | >ASXL1-E110 VDATNPLV   | 119   | 5985  |
| >ASXL1-E110 SVEATNPLV  | 1430  | >ASXL1-E110 SVDATNPLV  | 53    | 1377  |
| >ASXL1-E110 SVEATNPL   | 578   | >ASXL1-E110 SVDATNPL   | 267   | 311   |
| >ASXL1-E110 SVEATNPL   | 861   | >ASXL1-E110 SVDATNPL   | 97    | 764   |
| >ASXL1-E110 SVEATNPLV  | 211   | >ASXL1-E110 SVDATNPLV  | 23    | 188   |
| >ASXL1-E110 SVEATNPLV  | 951   | >ASXL1-E110 SVDATNPLV  | 37    | 914   |
| >ASXL1-E110 SVEATNPL   | 11370 | >ASXL1-E110 SVDATNPL   | 479   | 10891 |
| >ASXL1-E110 SVEATNPLV  | 377   | >ASXL1-E110 SVDATNPLV  | 12    | 365   |
| >ASXL1-E110 SVEATNPLV  | 48    | >ASXL1-E110 SVDATNPLV  | 38    | 10    |
| >ASXL1-E110 SVEATNPL   | 1166  | >ASXL1-E110 SVDATNPL   | 52    | 1114  |
| >ASXL1-E110 SVEATNPLV  | 91    | >ASXL1-E110 SVDATNPLV  | 8     | 83    |
| >ASXL1-E110 SVEATNPL   | 574   | >ASXL1-E110 SVDATNPL   | 249   | 325   |
| >ASXL1-E110 SVEATNPLVM | 118   | >ASXL1-E110 SVDATNPLVM | 208   | 90    |
| >ASXL1-E110 SSVEATNPL  | 465   | >ASXL1-E110 SSVDATNPL  | 6328  | 5863  |
| >ASXL1-E110 SSVEATNPLV | 204   | >ASXL1-E110 SSVDATNPLV | 1297  | 1093  |
| >ASXL1-E110 SSVEATNPL  | 255   | >ASXL1-E110 SSVDATNPL  | 229   | 26    |
| >ASXL1-E110 SSVEATNPL  | 204   | >ASXL1-E110 SSVDATNPL  | 175   | 29    |
| >ASXL1-E110 SSVEATNPL  | 141   | >ASXL1-E110 SSVDATNPL  | 177   | 36    |
| >ASXL1-E110 SSVEATNPLV | 239   | >ASXL1-E110 SSVDATNPLV | 206   | 33    |
| >ASXL1-E110 SSVEATNPL  | 103   | >ASXL1-E110 SSVDATNPL  | 142   | 39    |
| >ASXL1-E110 SSVEATNPLV | 69    | >ASXL1-E110 SSVDATNPLV | 89    | 20    |
| >ASXL1-E110 SSVEATNPL  | 451   | >ASXL1-E110 SSVDATNPL  | 2046  | 1595  |
| >ASXL1-E110 SSVEATNPL  | 22    | >ASXL1-E110 SSVDATNPL  | 18    | 4     |
| >ASXL1-E110 SSVEATNPLV | 69    | >ASXL1-E110 SSVDATNPLV | 83    | 14    |
| >ASXL1-E110 SSVEATNPL  | 72    | >ASXL1-E110 SSVDATNPL  | 147   | 75    |
| >ASXL1-E110 SSVEATNPLV | 21    | >ASXL1-E110 SSVDATNPLV | 32    | 11    |
| >ASXL1-E110 SSVEATNPLV | 449   | >ASXL1-E110 SSVDATNPLV | 341   | 108   |
| >ASXL1-E110 SSVEATNPLV | 487   | >ASXL1-E110 SSVDATNPLV | 644   | 157   |
| >ASXL1-E110 SSVEATNPL  | 42    | >ASXL1-E110 SSVDATNPL  | 25    | 17    |
| >ASXL1-E110 SSVEATNPLV | 18    | >ASXL1-E110 SSVDATNPLV | 12    | 6     |
| >ASXL1-E110 SSVEATNPLV | 449   | >ASXL1-E110 SSVDATNPLV | 612   | 163   |
| >ASXL1-E110 SSVEATNPL  | 164   | >ASXL1-E110 SSVDATNPL  | 299   | 135   |
| >ASXL1-E110 SSVEATNPL  | 102   | >ASXL1-E110 SSVDATNPL  | 80    | 22    |
| >ASXL1-E110 SSVEATNPLV | 154   | >ASXL1-E110 SSVDATNPLV | 131   | 23    |
| >ASXL1-E110 SSVEATNPLV | 496   | >ASXL1-E110 SSVDATNPLV | 431   | 65    |
| >ASXL1-E110 SSVEATNPLV | 296   | >ASXL1-E110 SSVDATNPLV | 117   | 179   |

|                        |      |                        |       |       |
|------------------------|------|------------------------|-------|-------|
| >ASXL1-E110 GSSVEATNPL | 202  | >ASXL1-E110 GSSVDATNPL | 294   | 92    |
| >ASXL1-E110 GSSVEATNPL | 433  | >ASXL1-E110 GSSVDATNPL | 479   | 46    |
| >ASXL1-E110 MPGSSVEA   | 218  | >ASXL1-E110 MPGSSVDA   | 644   | 426   |
| >ASXL1-E110 MPGSSVEAT  | 79   | >ASXL1-E110 MPGSSVDAT  | 40    | 39    |
| >ASXL1-E110 MPGSSVEA   | 55   | >ASXL1-E110 MPGSSVDA   | 95    | 40    |
| >ASXL1-E110 MPGSSVEAT  | 953  | >ASXL1-E110 MPGSSVDAT  | 166   | 787   |
| >ASXL1-E110 SMPGSSVEA  | 222  | >ASXL1-E110 SMPGSSVDA  | 3101  | 2879  |
| >ASXL1-E110 SMPGSSVEA  | 94   | >ASXL1-E110 SMPGSSVDA  | 1430  | 1336  |
| >ASXL1-E110 SMPGSSVEAT | 446  | >ASXL1-E110 SMPGSSVDA  | 736   | 290   |
| >ASXL1-E110 SMPGSSVEA  | 57   | >ASXL1-E110 SMPGSSVDA  | 245   | 188   |
| >ASXL1-E110 SMPGSSVEAT | 267  | >ASXL1-E110 SMPGSSVDA  | 390   | 123   |
| >ASXL1-E110 SMPGSSVEA  | 360  | >ASXL1-E110 SMPGSSVDA  | 2040  | 1680  |
| >ASXL1-E110 SMPGSSVEA  | 23   | >ASXL1-E110 SMPGSSVDA  | 276   | 253   |
| >ASXL1-E110 SMPGSSVEAT | 77   | >ASXL1-E110 SMPGSSVDA  | 184   | 107   |
| >ASXL1-E110 SMPGSSVEA  | 428  | >ASXL1-E110 SMPGSSVDA  | 2371  | 1943  |
| >ASXL1-E110 SMPGSSVEA  | 17   | >ASXL1-E110 SMPGSSVDA  | 58    | 41    |
| >ASXL1-E110 SMPGSSVEA  | 6    | >ASXL1-E110 SMPGSSVDA  | 18    | 12    |
| >ASXL1-E110 SMPGSSVEAT | 108  | >ASXL1-E110 SMPGSSVDA  | 338   | 230   |
| >ASXL1-E110 LSMPGSSVEA | 362  | >ASXL1-E110 LSMPGSSVD/ | 864   | 502   |
| >ASXL1-E110 LSMPGSSVE  | 461  | >ASXL1-E110 LSMPGSSVD  | 1374  | 913   |
| >ASXL1-E110 LSMPGSSVEA | 189  | >ASXL1-E110 LSMPGSSVD/ | 645   | 456   |
| >ASXL1-E110 LSMPGSSVEA | 360  | >ASXL1-E110 LSMPGSSVD/ | 663   | 303   |
| >ASXL1-E110 LSMPGSSVE  | 145  | >ASXL1-E110 LSMPGSSVD  | 460   | 315   |
| >ASXL1-E110 CLSMPGSSVE | 456  | >ASXL1-E110 CLSMPGSSVI | 2438  | 1982  |
| >ASXL1-E110 CLSMPGSSVE | 211  | >ASXL1-E110 CLSMPGSSVI | 566   | 355   |
| >ASXL1-E110 CLSMPGSSVE | 80   | >ASXL1-E110 CLSMPGSSVI | 298   | 218   |
| >ASXL1-G137GGPLKANA    | 376  | >ASXL1-G137GDPLKANA    | 15092 | 14716 |
| >ASXL1-G137FVGGPLKA    | 911  | >ASXL1-G137FVGDPLKA    | 418   | 493   |
| >ASXL1-G137FVGGPLKAN/  | 441  | >ASXL1-G137FVGDPLKAN/  | 443   | 2     |
| >ASXL1-G137FVGGPLKA    | 1175 | >ASXL1-G137FVGDPLKA    | 370   | 805   |
| >ASXL1-G137FVGGPLKAN/  | 467  | >ASXL1-G137FVGDPLKAN/  | 362   | 105   |
| >ASXL1-G137FVGGPLKA    | 423  | >ASXL1-G137FVGDPLKA    | 257   | 166   |
| >ASXL1-G137FVGGPLKAN/  | 638  | >ASXL1-G137FVGDPLKAN/  | 346   | 292   |
| >ASXL1-G137FVGGPLKA    | 215  | >ASXL1-G137FVGDPLKA    | 112   | 103   |
| >ASXL1-G137FVGGPLKAN/  | 176  | >ASXL1-G137FVGDPLKAN/  | 78    | 98    |
| >ASXL1-G137KTFVGGPL    | 233  | >ASXL1-G137KTFVGDPL    | 3491  | 3258  |
| >ASXL1-G137KTFVGGPL    | 1357 | >ASXL1-G137KTFVGDPL    | 480   | 877   |
| >ASXL1-G137KTFVGGPLKA  | 291  | >ASXL1-G137KTFVGDPLKA  | 600   | 309   |
| >ASXL1-G137KTFVGGPL    | 332  | >ASXL1-G137KTFVGDPL    | 154   | 178   |
| >ASXL1-G137KTFVGGPLK   | 37   | >ASXL1-G137KTFVGDPLK   | 59    | 22    |
| >ASXL1-G137KTFVGGPLK   | 17   | >ASXL1-G137KTFVGDPLK   | 28    | 11    |
| >ASXL1-G137KTFVGGPL    | 48   | >ASXL1-G137KTFVGDPL    | 269   | 221   |
| >ASXL1-G137KTFVGGPLK   | 4    | >ASXL1-G137KTFVGDPLK   | 5     | 1     |

|                       |      |                       |       |       |
|-----------------------|------|-----------------------|-------|-------|
| >ASXL1-G137KTFVGGPLKA | 23   | >ASXL1-G137KTFVGDPLKA | 64    | 41    |
| >ASXL1-G137KTFVGGPLK  | 38   | >ASXL1-G137KTFVGDPLK  | 57    | 19    |
| >ASXL1-G137KTFVGGPL   | 57   | >ASXL1-G137KTFVGDPL   | 20    | 37    |
| >ASXL1-G137KTFVGGPLK  | 276  | >ASXL1-G137KTFVGDPLK  | 127   | 149   |
| >ASXL1-G137KTFVGGPL   | 468  | >ASXL1-G137KTFVGDPL   | 708   | 240   |
| >ASXL1-G137KTFVGGPL   | 4    | >ASXL1-G137KTFVGDPL   | 5     | 1     |
| >ASXL1-G137KTFVGGPLKA | 67   | >ASXL1-G137KTFVGDPLKA | 193   | 126   |
| >ASXL1-G137KTFVGGPL   | 1217 | >ASXL1-G137KTFVGDPL   | 402   | 815   |
| >ASXL1-G137KTFVGGPLK  | 492  | >ASXL1-G137KTFVGDPLK  | 2189  | 1697  |
| >ASXL1-G137KTFVGGPLKA | 409  | >ASXL1-G137KTFVGDPLKA | 676   | 267   |
| >ASXL1-G137KTFVGGPLK  | 225  | >ASXL1-G137KTFVGDPLK  | 271   | 46    |
| >ASXL1-G137KTFVGGPL   | 31   | >ASXL1-G137KTFVGDPL   | 49    | 18    |
| >ASXL1-G137NEKTFVGGPL | 120  | >ASXL1-G137NEKTFVGDPL | 119   | 1     |
| >ASXL1-G137NEKTFVGGPL | 458  | >ASXL1-G137NEKTFVGDPL | 543   | 85    |
| >ASXL1-G137NEKTFVGGPL | 444  | >ASXL1-G137NEKTFVGDPL | 571   | 127   |
| >ASXL1-L139LVGHLEGMP  | 357  | >ASXL1-L139VVGHLEGMP  | 936   | 579   |
| >ASXL1-L139LVGHLEGMP  | 359  | >ASXL1-L139VVGHLEGMP  | 529   | 170   |
| >ASXL1-L139LVGHLEGMP  | 97   | >ASXL1-L139VVGHLEGMP  | 119   | 22    |
| >ASXL1-L139LVGHLEGMP  | 114  | >ASXL1-L139VVGHLEGMP  | 94    | 20    |
| >ASXL1-L139LVGHLEGMP  | 60   | >ASXL1-L139VVGHLEGMP  | 46    | 14    |
| >ASXL1-L139LVGHLEGMP  | 49   | >ASXL1-L139VVGHLEGMP  | 68    | 19    |
| >ASXL1-L139LVGHLEGMP  | 310  | >ASXL1-L139VVGHLEGMP  | 657   | 347   |
| >ASXL1-L139LVGHLEGMP  | 120  | >ASXL1-L139VVGHLEGMP  | 308   | 188   |
| >ASXL1-L139ELVGHLEGM  | 341  | >ASXL1-L139EVVGHLEGM  | 5874  | 5533  |
| >ASXL1-L139ELVGHLEGM  | 328  | >ASXL1-L139EVVGHLEGM  | 12117 | 11789 |
| >ASXL1-L139ELVGHLEGM  | 474  | >ASXL1-L139EVVGHLEGM  | 19133 | 18659 |
| >ASXL1-L139ELVGHLEGM  | 1080 | >ASXL1-L139EVVGHLEGM  | 96    | 984   |
| >ASXL1-L139ELVGHLEGM  | 1835 | >ASXL1-L139EVVGHLEGM  | 366   | 1469  |
| >ASXL1-L139ELVGHLEGM  | 13   | >ASXL1-L139EVVGHLEGM  | 5     | 8     |
| >ASXL1-L139ELVGHLEGM  | 77   | >ASXL1-L139EVVGHLEGM  | 14    | 63    |
| >ASXL1-L139ELVGHLEGM  | 2    | >ASXL1-L139EVVGHLEGM  | 1     | 1     |
| >ASXL1-L139ELVGHLEGM  | 5912 | >ASXL1-L139EVVGHLEGM  | 416   | 5496  |
| >ASXL1-L139ELVGHLEGM  | 16   | >ASXL1-L139EVVGHLEGM  | 3     | 13    |
| >ASXL1-L139ELVGHLEGM  | 172  | >ASXL1-L139EVVGHLEGM  | 29    | 143   |
| >ASXL1-L139ELVGHLEGM  | 1328 | >ASXL1-L139EVVGHLEGM  | 205   | 1123  |
| >ASXL1-L139ELVGHLEGM  | 2656 | >ASXL1-L139EVVGHLEGM  | 71    | 2585  |
| >ASXL1-L139ELVGHLEGM  | 241  | >ASXL1-L139EVVGHLEGM  | 37    | 204   |
| >ASXL1-L139ELVGHLEGM  | 174  | >ASXL1-L139EVVGHLEGM  | 468   | 294   |
| >ASXL1-L139ELVGHLEGM  | 440  | >ASXL1-L139EVVGHLEGM  | 2457  | 2017  |
| >ASXL1-L139ELVGHLEGM  | 308  | >ASXL1-L139EVVGHLEGM  | 1582  | 1274  |
| >ASXL1-L139ELVGHLEGM  | 622  | >ASXL1-L139EVVGHLEGM  | 145   | 477   |
| >ASXL1-L139RKATGHSPLE | 7    | >ASXL1-L139RKATGHSPLE | 12    | 5     |
| >ASXL1-L139RKATGHSPLE | 296  | >ASXL1-L139RKATGHSPLE | 3289  | 2993  |

|                         |      |                        |      |      |
|-------------------------|------|------------------------|------|------|
| >ASXL1-L139 RKATGHSPLE  | 363  | >ASXL1-L139 RKATGHSPLE | 6816 | 6453 |
| >ASXL1-L139 RKATGHSPLE  | 133  | >ASXL1-L139 RKATGHSPLE | 616  | 483  |
| >ASXL1-L139 RKATGHSPLE  | 156  | >ASXL1-L139 RKATGHSPLE | 1654 | 1498 |
| >ASXL1-L139 LELVGHLE    | 113  | >ASXL1-L139 LEVVGHLE   | 143  | 30   |
| >ASXL1-L139 LELVGHLEGM  | 378  | >ASXL1-L139 LEVVGHLEGM | 1300 | 922  |
| >ASXL1-L139 SPLELVGHL   | 111  | >ASXL1-L139 SPLEVVGHL  | 59   | 52   |
| >ASXL1-L139 SPLELVGHL   | 393  | >ASXL1-L139 SPLEVVGHL  | 351  | 42   |
| >ASXL1-L139 SPLELVGHL   | 335  | >ASXL1-L139 SPLEVVGHL  | 373  | 38   |
| >ASXL1-L139 SPLELVGHL   | 593  | >ASXL1-L139 SPLEVVGHL  | 452  | 141  |
| >ASXL1-L139 HSPLELVGHL  | 31   | >ASXL1-L139 HSPLEVVGHL | 30   | 1    |
| >ASXL1-L139 HSPLELVGHL  | 316  | >ASXL1-L139 HSPLEVVGHL | 314  | 2    |
| >ASXL1-L139 TGHSPLELV   | 135  | >ASXL1-L139 TGHSPLEV   | 591  | 456  |
| >ASXL1-L139 ATGHSPLELV  | 399  | >ASXL1-L139 ATGHSPLEV  | 665  | 266  |
| >ASXL1-L139 ATGHSPLEL   | 3189 | >ASXL1-L139 ATGHSPLEV  | 183  | 3006 |
| >ASXL1-L139 ATGHSPLELV  | 184  | >ASXL1-L139 ATGHSPLEV  | 193  | 9    |
| >ASXL1-L139 ATGHSPLEL   | 10   | >ASXL1-L139 ATGHSPLEV  | 285  | 275  |
| >ASXL1-L139 KATGHSPLEL  | 1285 | >ASXL1-L139 KATGHSPLEV | 211  | 1074 |
| >ASXL1-L139 KATGHSPLEL' | 76   | >ASXL1-L139 KATGHSPLEV | 210  | 134  |
| >ASXL1-L139 KATGHSPLEL  | 5357 | >ASXL1-L139 KATGHSPLEV | 464  | 4893 |
| >ASXL1-L139 KATGHSPLEL' | 464  | >ASXL1-L139 KATGHSPLEV | 505  | 41   |
| >ASXL1-L139 KATGHSPLEL  | 3661 | >ASXL1-L139 KATGHSPLEV | 153  | 3508 |
| >ASXL1-L139 KATGHSPLEL' | 169  | >ASXL1-L139 KATGHSPLEV | 265  | 96   |
| >ASXL1-L139 KATGHSPLEL  | 19   | >ASXL1-L139 KATGHSPLEV | 522  | 503  |
| >ASXL1-L139 KATGHSPLEL  | 97   | >ASXL1-L139 KATGHSPLEV | 1929 | 1832 |
| >ASXL1-L139 KATGHSPLEL' | 296  | >ASXL1-L139 KATGHSPLEV | 1102 | 806  |
| >ASXL1-N811ADNGPILSLV   | 186  | >ASXL1-N811ADDGPILSLV  | 223  | 37   |
| >ASXL1-N811VPADNGPI     | 26   | >ASXL1-N811VPADDGPI    | 46   | 20   |
| >ASXL1-N811VPADNGPIL    | 39   | >ASXL1-N811VPADDGPIL   | 61   | 22   |
| >ASXL1-N811VPADNGPILS   | 24   | >ASXL1-N811VPADDGPILS  | 29   | 5    |
| >ASXL1-N811VPADNGPI     | 776  | >ASXL1-N811VPADDGPI    | 384  | 392  |
| >ASXL1-N811VPADNGPIL    | 625  | >ASXL1-N811VPADDGPIL   | 384  | 241  |
| >ASXL1-N811VPADNGPILS   | 464  | >ASXL1-N811VPADDGPILS  | 334  | 130  |
| >ASXL1-N811VPADNGPI     | 462  | >ASXL1-N811VPADDGPI    | 609  | 147  |
| >ASXL1-N811VPADNGPIL    | 1281 | >ASXL1-N811VPADDGPIL   | 463  | 818  |
| >ASXL1-N811VPADNGPILS   | 971  | >ASXL1-N811VPADDGPILS  | 470  | 501  |
| >ASXL1-N811TVPADNGPI    | 16   | >ASXL1-N811TVPADDGPI   | 18   | 2    |
| >ASXL1-N811TVPADNGPIL   | 97   | >ASXL1-N811TVPADDGPIL  | 294  | 197  |
| >ASXL1-N811GPTVPADNG    | 280  | >ASXL1-N811GPTVPADDG   | 561  | 281  |
| >ASXL1-P132PMPLPAEIPP'  | 2703 | >ASXL1-P132RMPLPAEIPP  | 114  | 2589 |
| >ASXL1-P132PMPLPAEIPP'  | 4050 | >ASXL1-P132RMPLPAEIPP  | 373  | 3677 |
| >ASXL1-P132PMPLPAEI     | 4064 | >ASXL1-P132RMPLPAEI    | 136  | 3928 |
| >ASXL1-P132PMPLPAEIPP'  | 1171 | >ASXL1-P132RMPLPAEIPP  | 24   | 1147 |
| >ASXL1-P132PMPLPAEIPP'  | 1023 | >ASXL1-P132RMPLPAEIPP  | 22   | 1001 |

|                         |       |                         |       |       |
|-------------------------|-------|-------------------------|-------|-------|
| >ASXL1-P132 PMPLPAEI    | 477   | >ASXL1-P132 RMPLPAEI    | 19    | 458   |
| >ASXL1-P132 PMPLPAEIPP  | 36    | >ASXL1-P132 RMPLPAEIPP  | 4     | 32    |
| >ASXL1-P132 PMPLPAEI    | 6167  | >ASXL1-P132 RMPLPAEI    | 323   | 5844  |
| >ASXL1-P132 PMPLPAEIPP  | 822   | >ASXL1-P132 RMPLPAEIPP  | 25    | 797   |
| >ASXL1-P132 PMPLPAEI    | 3146  | >ASXL1-P132 RMPLPAEI    | 390   | 2756  |
| >ASXL1-P132 PMPLPAEIPP  | 66    | >ASXL1-P132 RMPLPAEIPP  | 13    | 53    |
| >ASXL1-P132 PMPLPAEIPP  | 169   | >ASXL1-P132 RMPLPAEIPP  | 38    | 131   |
| >ASXL1-P132 PMPLPAEI    | 1710  | >ASXL1-P132 RMPLPAEI    | 222   | 1488  |
| >ASXL1-P132 PMPLPAEIPP  | 30    | >ASXL1-P132 RMPLPAEIPP  | 10    | 20    |
| >ASXL1-P132 PMPLPAEI    | 6235  | >ASXL1-P132 RMPLPAEI    | 103   | 6132  |
| >ASXL1-P132 PMPLPAEIPP  | 2550  | >ASXL1-P132 RMPLPAEIPP  | 183   | 2367  |
| >ASXL1-P132 DPMPLPAEI   | 452   | >ASXL1-P132 DRMPLPAEI   | 11949 | 11497 |
| >ASXL1-P132 DPMPLPAEI   | 37034 | >ASXL1-P132 DRMPLPAEI   | 340   | 36694 |
| >ASXL1-P132 ATLQRPRPAC  | 22815 | >ASXL1-P132 ATLQRPRPAC  | 193   | 22622 |
| >ASXL1-P132 ATLQRPRPAC  | 4191  | >ASXL1-P132 ATLQRPRPAC  | 74    | 4117  |
| >ASXL1-P132 ADPMPLPAEI  | 737   | >ASXL1-P132 ADRMPLPAEI  | 134   | 603   |
| >ASXL1-P132 ADPMPLPAEI  | 554   | >ASXL1-P132 ADRMPLPAEI  | 221   | 333   |
| >ASXL1-P132 RPADPMPL    | 11    | >ASXL1-P132 RPADRMPL    | 8     | 3     |
| >ASXL1-P132 RPADPMPLP,  | 144   | >ASXL1-P132 RPADRMPLP,  | 165   | 21    |
| >ASXL1-P132 RPADPMPLP,  | 263   | >ASXL1-P132 RPADRMPLP,  | 201   | 62    |
| >ASXL1-P132 RPADPMPL    | 497   | >ASXL1-P132 RPADRMPL    | 1082  | 585   |
| >ASXL1-P132 RPADPMPL    | 158   | >ASXL1-P132 RPADRMPL    | 184   | 26    |
| >ASXL1-P132 RPADPMPLP,  | 404   | >ASXL1-P132 RPADRMPLP,  | 608   | 204   |
| >ASXL1-P132 RPRPADPM    | 7     | >ASXL1-P132 RPRPADRM    | 11    | 4     |
| >ASXL1-P132 RPRPADPMP   | 20    | >ASXL1-P132 RPRPADRMP   | 12    | 8     |
| >ASXL1-P132 RPRPADPM    | 47    | >ASXL1-P132 RPRPADRM    | 495   | 448   |
| >ASXL1-P132 QRPRPADPM   | 562   | >ASXL1-P132 QRPRPADRM   | 388   | 174   |
| >ASXL1-P132 QRPRPADPM   | 378   | >ASXL1-P132 QRPRPADRM   | 275   | 103   |
| >ASXL1-P132 LQRPRPADP   | 22228 | >ASXL1-P132 LQRPRPADR   | 97    | 22131 |
| >ASXL1-P132 LQRPRPADP   | 58    | >ASXL1-P132 LQRPRPADR   | 189   | 131   |
| >ASXL1-P132 LQRPRPADP   | 1962  | >ASXL1-P132 LQRPRPADR   | 470   | 1492  |
| >ASXL1-P132 LQRPRPADP   | 15    | >ASXL1-P132 LQRPRPADR   | 108   | 93    |
| >ASXL1-P132 TLQRPRPADF  | 34855 | >ASXL1-P132 TLQRPRPADF  | 178   | 34677 |
| >ASXL1-P132 TLQRPRPADF  | 454   | >ASXL1-P132 TLQRPRPADF  | 2085  | 1631  |
| >ATIC-L384F- GLHLSQKR   | 576   | >ATIC-L384F- GFHLSQKR   | 145   | 431   |
| >ATIC-L384F- DENEVRTLFG | 75    | >ATIC-L384F- DENEVRTLFG | 337   | 262   |
| >ATIC-L384F- DENEVRTLFG | 12    | >ATIC-L384F- DENEVRTLFG | 4     | 8     |
| >ATIC-L384F- DENEVRTLFG | 274   | >ATIC-L384F- DENEVRTLFG | 2174  | 1900  |
| >ATIC-L384F- DENEVRTLFG | 739   | >ATIC-L384F- DENEVRTLFG | 114   | 625   |
| >ATIC-L384F- FGLHLSQK   | 4172  | >ATIC-L384F- FGFHLSQK   | 204   | 3968  |
| >ATIC-L384F- FGLHLSQKR  | 3143  | >ATIC-L384F- FGFHLSQKR  | 186   | 2957  |
| >ATIC-L384F- FGLHLSQKR  | 442   | >ATIC-L384F- FGFHLSQKR  | 184   | 258   |
| >ATIC-L384F- LFGHLSQKR  | 176   | >ATIC-L384F- LFGHLSQKR  | 90    | 86    |

|                        |      |                        |     |      |
|------------------------|------|------------------------|-----|------|
| >ATIC-L384F-LFGLHLSQKR | 1436 | >ATIC-L384F-LFGFHLSQKR | 346 | 1090 |
| >ATIC-L384F-LFGLHLSQKR | 226  | >ATIC-L384F-LFGFHLSQKR | 283 | 57   |
| >ATIC-L384F-TLFGHLHS   | 164  | >ATIC-L384F-TLFGFHLS   | 109 | 55   |
| >ATIC-L384F-TLFGHLHSQ  | 817  | >ATIC-L384F-TLFGFHLSQ  | 378 | 439  |
| >ATIC-L384F-TLFGHLHS   | 422  | >ATIC-L384F-TLFGFHLS   | 272 | 150  |
| >ATIC-L384F-TLFGHLHSQ  | 1004 | >ATIC-L384F-TLFGFHLSQ  | 353 | 651  |
| >ATIC-L384F-TLFGHLHS   | 150  | >ATIC-L384F-TLFGFHLS   | 107 | 43   |
| >ATIC-L384F-TLFGHLHSQ  | 46   | >ATIC-L384F-TLFGFHLSQ  | 21  | 25   |
| >ATIC-L384F-TLFGHLHSQK | 574  | >ATIC-L384F-TLFGFHLSQK | 300 | 274  |
| >ATIC-L384F-TLFGHLHSQK | 22   | >ATIC-L384F-TLFGFHLSQK | 17  | 5    |
| >ATIC-L384F-TLFGHLHSQK | 225  | >ATIC-L384F-TLFGFHLSQK | 168 | 57   |
| >ATIC-L384F-TLFGHLHSQK | 61   | >ATIC-L384F-TLFGFHLSQK | 37  | 24   |
| >ATIC-L384F-TLFGHLHSQK | 525  | >ATIC-L384F-TLFGFHLSQK | 246 | 279  |
| >ATIC-L384F-TLFGHLHSQ  | 537  | >ATIC-L384F-TLFGFHLSQ  | 468 | 69   |
| >ATIC-L384F-TLFGHLHSQK | 816  | >ATIC-L384F-TLFGFHLSQK | 378 | 438  |
| >ATIC-L384F-TLFGHLHSQK | 58   | >ATIC-L384F-TLFGFHLSQK | 47  | 11   |
| >ATIC-L384F-TLFGHLHSQ  | 538  | >ATIC-L384F-TLFGFHLSQ  | 347 | 191  |
| >ATIC-L384F-TLFGHLHSQK | 175  | >ATIC-L384F-TLFGFHLSQK | 132 | 43   |
| >ATIC-L384F-TLFGHLHSQK | 61   | >ATIC-L384F-TLFGFHLSQK | 47  | 14   |
| >ATIC-L384F-TLFGHLHSQK | 30   | >ATIC-L384F-TLFGFHLSQK | 18  | 12   |
| >ATIC-L384F-TLFGHLHSQK | 1580 | >ATIC-L384F-TLFGFHLSQK | 423 | 1157 |
| >ATIC-L384F-TLFGHLHSQK | 53   | >ATIC-L384F-TLFGFHLSQK | 39  | 14   |
| >ATIC-L384F-RTLFGHL    | 158  | >ATIC-L384F-RTLFGFHL   | 34  | 124  |
| >ATIC-L384F-RTLFGHL    | 509  | >ATIC-L384F-RTLFGFHL   | 237 | 272  |
| >ATIC-L384F-RTLFGHLHSQ | 46   | >ATIC-L384F-RTLFGFHLSQ | 38  | 8    |
| >ATIC-L384F-RTLFGHLHSQ | 12   | >ATIC-L384F-RTLFGFHLSQ | 10  | 2    |
| >ATIC-L384F-RTLFGHL    | 54   | >ATIC-L384F-RTLFGFHL   | 66  | 12   |
| >ATIC-L384F-RTLFGHLHS  | 330  | >ATIC-L384F-RTLFGFHLS  | 246 | 84   |
| >ATIC-L384F-RTLFGHLHSQ | 91   | >ATIC-L384F-RTLFGFHLSQ | 61  | 30   |
| >ATIC-L384F-RTLFGHLHSQ | 7    | >ATIC-L384F-RTLFGFHLSQ | 6   | 1    |
| >ATIC-L384F-RTLFGHL    | 1555 | >ATIC-L384F-RTLFGFHL   | 174 | 1381 |
| >ATIC-L384F-RTLFGHLHSQ | 27   | >ATIC-L384F-RTLFGFHLSQ | 19  | 8    |
| >ATIC-L384F-RTLFGHL    | 91   | >ATIC-L384F-RTLFGFHL   | 56  | 35   |
| >ATIC-L384F-RTLFGHLHSQ | 330  | >ATIC-L384F-RTLFGFHLSQ | 254 | 76   |
| >ATIC-L384F-RTLFGHLHSQ | 414  | >ATIC-L384F-RTLFGFHLSQ | 232 | 182  |
| >ATIC-L384F-RTLFGHL    | 941  | >ATIC-L384F-RTLFGFHL   | 237 | 704  |
| >ATIC-L384F-RTLFGHL    | 3    | >ATIC-L384F-RTLFGFHL   | 4   | 1    |
| >ATIC-L384F-RTLFGHLHSQ | 135  | >ATIC-L384F-RTLFGFHLSQ | 227 | 92   |
| >ATIC-L384F-RTLFGHL    | 163  | >ATIC-L384F-RTLFGFHL   | 127 | 36   |
| >ATIC-L384F-RTLFGHL    | 1568 | >ATIC-L384F-RTLFGFHL   | 463 | 1105 |
| >ATIC-L384F-RTLFGHL    | 119  | >ATIC-L384F-RTLFGFHL   | 180 | 61   |
| >ATIC-L384F-RTLFGHLHS  | 436  | >ATIC-L384F-RTLFGFHLS  | 302 | 134  |
| >ATIC-L384F-RTLFGHLHSQ | 272  | >ATIC-L384F-RTLFGFHLSQ | 189 | 83   |

|                        |       |                         |       |       |
|------------------------|-------|-------------------------|-------|-------|
| >ATIC-L384F-RTLFGHLHS  | 3010  | >ATIC-L384F-RTLFGFHLS   | 416   | 2594  |
| >ATIC-L384F-RTLFGHLHSQ | 186   | >ATIC-L384F-RTLFGFHLSQ  | 105   | 81    |
| >ATIC-L384F-RTLFGHLHL  | 100   | >ATIC-L384F-RTLFGFHHL   | 69    | 31    |
| >ATIC-L384F-VRTLFGHLHL | 94    | >ATIC-L384F-VRTLFGFHHL  | 69    | 25    |
| >ATIC-L384F-VRTLFGHLHL | 238   | >ATIC-L384F-VRTLFGFHHL  | 676   | 438   |
| >ATIC-L384F-VRTLFGHLHL | 25    | >ATIC-L384F-VRTLFGFHHL  | 99    | 74    |
| >ATIC-L384F-EVRTLFGF   | 1978  | >ATIC-L384F-EVRTLFGF    | 164   | 1814  |
| >ATIC-L384F-EVRTLFGF   | 104   | >ATIC-L384F-EVRTLFGF    | 15    | 89    |
| >ATIC-L384F-EVRTLFGFH  | 1790  | >ATIC-L384F-EVRTLFGFH   | 98    | 1692  |
| >ATIC-L384F-EVRTLFGHL  | 341   | >ATIC-L384F-EVRTLFGFHHL | 174   | 167   |
| >ATIC-L384F-EVRTLFGF   | 73    | >ATIC-L384F-EVRTLFGF    | 44    | 29    |
| >ATIC-L384F-EVRTLFGFH  | 393   | >ATIC-L384F-EVRTLFGFH   | 145   | 248   |
| >ATIC-L384F-EVRTLFGHL  | 193   | >ATIC-L384F-EVRTLFGFHHL | 308   | 115   |
| >ATIC-L384F-EVRTLFGF   | 228   | >ATIC-L384F-EVRTLFGF    | 13127 | 12899 |
| >ATIC-L384F-EVRTLFGHL  | 1289  | >ATIC-L384F-EVRTLFGFHHL | 317   | 972   |
| >ATIC-L384F-EVRTLFGF   | 274   | >ATIC-L384F-EVRTLFGF    | 11655 | 11381 |
| >ATIC-L384F-NEVRTLFGF  | 55    | >ATIC-L384F-NEVRTLFGF   | 208   | 153   |
| >ATIC-L384F-NEVRTLFGFH | 207   | >ATIC-L384F-NEVRTLFGFH  | 162   | 45    |
| >ATIC-L384F-NEVRTLFGF  | 35    | >ATIC-L384F-NEVRTLFGF   | 8     | 27    |
| >ATIC-L384F-NEVRTLFGFH | 79    | >ATIC-L384F-NEVRTLFGFH  | 53    | 26    |
| >ATIC-L384F-NEVRTLFGF  | 38    | >ATIC-L384F-NEVRTLFGF   | 374   | 336   |
| >ATIC-L384F-NEVRTLFGFH | 113   | >ATIC-L384F-NEVRTLFGFH  | 64    | 49    |
| >ATIC-L384F-NEVRTLFGF  | 1736  | >ATIC-L384F-NEVRTLFGF   | 336   | 1400  |
| >ATIC-L384F-NEVRTLFGF  | 139   | >ATIC-L384F-NEVRTLFGF   | 28    | 111   |
| >ATIC-L384F-NEVRTLFGFH | 156   | >ATIC-L384F-NEVRTLFGFH  | 138   | 18    |
| >ATIC-L384F-NEVRTLFGF  | 30    | >ATIC-L384F-NEVRTLFGF   | 122   | 92    |
| >ATIC-L384F-NEVRTLFGFH | 146   | >ATIC-L384F-NEVRTLFGFH  | 53    | 93    |
| >ATIC-S34F-vASGGTAKALF | 95    | >ATIC-S34F-rAFGGTAKALF  | 47    | 48    |
| >ATIC-S34F-vASGGTAKALF | 2508  | >ATIC-S34F-rAFGGTAKALF  | 240   | 2268  |
| >ATIC-S34F-vASGGTAKALF | 153   | >ATIC-S34F-rAFGGTAKALF  | 516   | 363   |
| >ATIC-S34F-vASGGTAKAL  | 30    | >ATIC-S34F-rAFGGTAKAL   | 25091 | 25061 |
| >ATIC-S34F-vASGGTAKALF | 2018  | >ATIC-S34F-rAFGGTAKALF  | 94    | 1924  |
| >ATIC-S34F-vASGGTAKALF | 5469  | >ATIC-S34F-rAFGGTAKALF  | 229   | 5240  |
| >ATIC-S34F-vLTALGLNLVA | 12835 | >ATIC-S34F-rLTALGLNLVA  | 55    | 12780 |
| >ATIC-S34F-vLTALGLNLVA | 14603 | >ATIC-S34F-rLTALGLNLVA  | 185   | 14418 |
| >ATIC-S34F-vLTALGLNLVA | 20809 | >ATIC-S34F-rLTALGLNLVA  | 189   | 20620 |
| >ATIC-S34F-vLTALGLNLVA | 10258 | >ATIC-S34F-rLTALGLNLVA  | 8     | 10250 |
| >ATIC-S34F-vLTALGLNLVA | 13444 | >ATIC-S34F-rLTALGLNLVA  | 423   | 13021 |
| >ATIC-S34F-vLTALGLNLVA | 21283 | >ATIC-S34F-rLTALGLNLVA  | 435   | 20848 |
| >ATIC-S34F-vLTALGLNLVA | 7025  | >ATIC-S34F-rLTALGLNLVA  | 205   | 6820  |
| >ATIC-S34F-vLTALGLNLVA | 7691  | >ATIC-S34F-rLTALGLNLVA  | 92    | 7599  |
| >ATIC-S34F-vVASGGTAKA  | 1405  | >ATIC-S34F-rVAFGGTAKA   | 490   | 915   |
| >ATIC-S34F-vVASGGTAK   | 737   | >ATIC-S34F-rVAFGGTAK    | 150   | 587   |



|                         |       |                         |     |       |
|-------------------------|-------|-------------------------|-----|-------|
| >ATIC-S34F-v VASGGTAK   | 250   | >ATIC-S34F-r VAFGGTAK   | 44  | 206   |
| >ATIC-S34F-v VASGGTAKAI | 186   | >ATIC-S34F-r VAFGGTAKAI | 29  | 157   |
| >ATIC-S34F-v VASGGTAKAI | 574   | >ATIC-S34F-r VAFGGTAKAI | 119 | 455   |
| >ATIC-S34F-v VASGGTAK   | 939   | >ATIC-S34F-r VAFGGTAK   | 127 | 812   |
| >ATIC-S34F-v VASGGTAKAI | 54    | >ATIC-S34F-r VAFGGTAKAI | 13  | 41    |
| >ATIC-S34F-v VASGGTAKAI | 3112  | >ATIC-S34F-r VAFGGTAKAI | 427 | 2685  |
| >ATIC-S34F-v VASGGTAKAI | 40    | >ATIC-S34F-r VAFGGTAKAI | 13  | 27    |
| >ATIC-S34F-v LVASGGTAKA | 370   | >ATIC-S34F-r LVAFGGTAKA | 493 | 123   |
| >ATIC-S34F-v LVASGGTA   | 130   | >ATIC-S34F-r LVAFGGTA   | 150 | 20    |
| >ATIC-S34F-v LVASGGTAKA | 344   | >ATIC-S34F-r LVAFGGTAKA | 892 | 548   |
| >ATIC-S34F-v LVASGGTAKA | 390   | >ATIC-S34F-r LVAFGGTAKA | 418 | 28    |
| >ATIC-S34F-v LVASGGTAKA | 270   | >ATIC-S34F-r LVAFGGTAKA | 798 | 528   |
| >ATIC-S34F-v LVASGGTAK  | 143   | >ATIC-S34F-r LVAFGGTAK  | 147 | 4     |
| >ATIC-S34F-v LVASGGTAK  | 128   | >ATIC-S34F-r LVAFGGTAK  | 94  | 34    |
| >ATIC-S34F-v LVASGGTAK  | 143   | >ATIC-S34F-r LVAFGGTAK  | 89  | 54    |
| >ATIC-S34F-v LVASGGTAKA | 53    | >ATIC-S34F-r LVAFGGTAKA | 115 | 62    |
| >ATIC-S34F-v LVASGGTAKA | 479   | >ATIC-S34F-r LVAFGGTAKA | 838 | 359   |
| >ATIC-S34F-v NLVASGGTAI | 325   | >ATIC-S34F-r NLVAFGGTAI | 148 | 177   |
| >ATIC-S34F-v NLVASGGT   | 604   | >ATIC-S34F-r NLVAFGGT   | 469 | 135   |
| >ATIC-S34F-v NLVASGGTA  | 57    | >ATIC-S34F-r NLVAFGGTA  | 53  | 4     |
| >ATIC-S34F-v NLVASGGTAI | 35    | >ATIC-S34F-r NLVAFGGTAI | 32  | 3     |
| >ATIC-S34F-v NLVASGGTA  | 1404  | >ATIC-S34F-r NLVAFGGTA  | 299 | 1105  |
| >ATIC-S34F-v NLVASGGTAI | 906   | >ATIC-S34F-r NLVAFGGTAI | 338 | 568   |
| >ATIC-S34F-v NLVASGGTAI | 180   | >ATIC-S34F-r NLVAFGGTAI | 162 | 18    |
| >ATIC-S34F-v NLVASGGTAI | 139   | >ATIC-S34F-r NLVAFGGTAI | 62  | 77    |
| >ATIC-S34F-v NLVASGGTAI | 490   | >ATIC-S34F-r NLVAFGGTAI | 272 | 218   |
| >ATIC-S34F-v NLVASGGTAI | 177   | >ATIC-S34F-r NLVAFGGTAI | 76  | 101   |
| >ATIC-S34F-v GLNLVASGGI | 1130  | >ATIC-S34F-r GLNLVAFGGI | 472 | 658   |
| >ATIC-S34F-v GLNLVASGGI | 37    | >ATIC-S34F-r GLNLVAFGGI | 55  | 18    |
| >ATIC-S34F-v GLNLVASGGI | 269   | >ATIC-S34F-r GLNLVAFGGI | 93  | 176   |
| >ATIC-S34F-v GLNLVASGGI | 507   | >ATIC-S34F-r GLNLVAFGGI | 245 | 262   |
| >ATIC-S34F-v GLNLVASGGI | 359   | >ATIC-S34F-r GLNLVAFGGI | 175 | 184   |
| >ATIC-S34F-v GLNLVASGGI | 377   | >ATIC-S34F-r GLNLVAFGGI | 249 | 128   |
| >ATIC-S34F-v LGLNLVAS   | 18836 | >ATIC-S34F-r LGLNLVAF   | 441 | 18395 |
| >ATIC-S34F-v LGLNLVAS   | 18793 | >ATIC-S34F-r LGLNLVAF   | 64  | 18729 |
| >ATIC-S34F-v LGLNLVAS   | 12125 | >ATIC-S34F-r LGLNLVAF   | 272 | 11853 |
| >ATIC-S34F-v ALGLNLVAS  | 14122 | >ATIC-S34F-r ALGLNLVAF  | 106 | 14016 |
| >ATIC-S34F-v ALGLNLVAS  | 14045 | >ATIC-S34F-r ALGLNLVAF  | 193 | 13852 |
| >ATIC-S34F-v ALGLNLVAS  | 21893 | >ATIC-S34F-r ALGLNLVAF  | 145 | 21748 |
| >ATIC-S34F-v TALGLNLVAS | 18166 | >ATIC-S34F-r TALGLNLVAF | 250 | 17916 |
| >ATIC-S34F-v TALGLNLVAS | 25378 | >ATIC-S34F-r TALGLNLVAF | 211 | 25167 |
| >ATIC-S34F-v TALGLNLVAS | 16805 | >ATIC-S34F-r TALGLNLVAF | 59  | 16746 |
| >ATM-A1309AQQRETATK     | 153   | >ATM-A1309TQQRETATK     | 184 | 31    |

|                       |      |                       |      |      |
|-----------------------|------|-----------------------|------|------|
| >ATM-A1309 AQQRETATK\ | 496  | >ATM-A1309 TQQRETATK\ | 798  | 302  |
| >ATM-A1309 AQQRETATK\ | 48   | >ATM-A1309 TQQRETATK\ | 62   | 14   |
| >ATM-A1309 AQQRETATK\ | 427  | >ATM-A1309 TQQRETATK\ | 253  | 174  |
| >ATM-A1309 AQQRETATK\ | 297  | >ATM-A1309 TQQRETATK\ | 1318 | 1021 |
| >ATM-A1309 AQQRETATK\ | 12   | >ATM-A1309 TQQRETATK\ | 60   | 48   |
| >ATM-A1309 MAQQRETAT  | 164  | >ATM-A1309 MTQQRETAT  | 116  | 48   |
| >ATM-A1309 MAQQRETAT  | 1435 | >ATM-A1309 MTQQRETAT  | 303  | 1132 |
| >ATM-A1309 MAQQRETAT  | 431  | >ATM-A1309 MTQQRETAT  | 67   | 364  |
| >ATM-A1309 MAQQRETAT  | 578  | >ATM-A1309 MTQQRETAT  | 117  | 461  |
| >ATM-A1309 MAQQRETAT  | 166  | >ATM-A1309 MTQQRETAT  | 58   | 108  |
| >ATM-A1309 MAQQRETAT  | 1860 | >ATM-A1309 MTQQRETAT  | 204  | 1656 |
| >ATM-A1309 MAQQRETAT  | 2621 | >ATM-A1309 MTQQRETAT  | 255  | 2366 |
| >ATM-A1309 MAQQRETAT  | 4427 | >ATM-A1309 MTQQRETAT  | 257  | 4170 |
| >ATM-A1309 GMAQQRET/  | 357  | >ATM-A1309 GMTQQRETA  | 2668 | 2311 |
| >ATM-A1309 GMAQQRET/  | 301  | >ATM-A1309 GMTQQRETA  | 697  | 396  |
| >ATM-A1309 GMAQQRET/  | 50   | >ATM-A1309 GMTQQRETA  | 53   | 3    |
| >ATM-A1309 GMAQQRET/  | 226  | >ATM-A1309 GMTQQRETA  | 677  | 451  |
| >ATM-A1309 GMAQQRET/  | 217  | >ATM-A1309 GMTQQRETA  | 460  | 243  |
| >ATM-A1309 DSGMAQQR   | 620  | >ATM-A1309 DSGMTQQR   | 385  | 235  |
| >ATM-A1309 DSGMAQQR   | 155  | >ATM-A1309 DSGMTQQR   | 130  | 25   |
| >ATM-A1309 GTRDSGMA   | 54   | >ATM-A1309 GTRDSGMT   | 1299 | 1245 |
| >ATM-A1309 GTRDSGMAC  | 76   | >ATM-A1309 GTRDSGMTC  | 78   | 2    |
| >ATM-A1309 GTRDSGMAC  | 198  | >ATM-A1309 GTRDSGMTC  | 606  | 408  |
| >ATM-A1309 GTRDSGMAC  | 125  | >ATM-A1309 GTRDSGMTC  | 75   | 50   |
| >ATM-A1309 GTRDSGMAC  | 146  | >ATM-A1309 GTRDSGMTC  | 91   | 55   |
| >ATM-A1309 GTRDSGMAC  | 500  | >ATM-A1309 GTRDSGMTC  | 393  | 107  |
| >ATM-A1309 GTRDSGMAC  | 1366 | >ATM-A1309 GTRDSGMTC  | 279  | 1087 |
| >ATM-A1309 GTRDSGMAC  | 166  | >ATM-A1309 GTRDSGMTC  | 251  | 85   |
| >ATM-A1309 GTRDSGMAC  | 393  | >ATM-A1309 GTRDSGMTC  | 64   | 329  |
| >ATM-A1309 GTRDSGMAC  | 484  | >ATM-A1309 GTRDSGMTC  | 606  | 122  |
| >ATM-A1742 ATKTGHSF   | 177  | >ATM-A1742 PTKTGHSF   | 731  | 554  |
| >ATM-A1742 ATKTGHSF   | 328  | >ATM-A1742 PTKTGHSF   | 5984 | 5656 |
| >ATM-A1742 ATKTGHSFW  | 154  | >ATM-A1742 PTKTGHSFW  | 3955 | 3801 |
| >ATM-A1742 ATKTGHSFW\ | 15   | >ATM-A1742 PTKTGHSFW\ | 376  | 361  |
| >ATM-A1742 ATKTGHSF   | 84   | >ATM-A1742 PTKTGHSF   | 3142 | 3058 |
| >ATM-A1742 ATKTGHSF   | 35   | >ATM-A1742 PTKTGHSF   | 643  | 608  |
| >ATM-A1742 ATKTGHSF   | 4    | >ATM-A1742 PTKTGHSF   | 276  | 272  |
| >ATM-A1742 ATKTGHSFW  | 10   | >ATM-A1742 PTKTGHSFW  | 280  | 270  |
| >ATM-A1742 ATKTGHSFW\ | 99   | >ATM-A1742 PTKTGHSFW\ | 9244 | 9145 |
| >ATM-A1742 ATKTGHSFW  | 87   | >ATM-A1742 PTKTGHSFW  | 462  | 375  |
| >ATM-A1742 ATKTGHSFW  | 380  | >ATM-A1742 PTKTGHSFW  | 7094 | 6714 |
| >ATM-A1742 ATKTGHSF   | 149  | >ATM-A1742 PTKTGHSF   | 1740 | 1591 |
| >ATM-A1742 ATKTGHSF   | 292  | >ATM-A1742 PTKTGHSF   | 2217 | 1925 |

|                        |       |                        |       |       |
|------------------------|-------|------------------------|-------|-------|
| >ATM-A1742 ATKTGHSFW   | 9     | >ATM-A1742 PTKTGHSFW   | 413   | 404   |
| >ATM-A1742 ATKTGHSFWI  | 287   | >ATM-A1742 PTKTGHSFWI  | 2641  | 2354  |
| >ATM-A1742 LATKTGHSF   | 22712 | >ATM-A1742 LPTKTGHSF   | 40    | 22672 |
| >ATM-A1742 LATKTGHSF   | 1753  | >ATM-A1742 LPTKTGHSF   | 16    | 1737  |
| >ATM-A1742 LATKTGHSF   | 324   | >ATM-A1742 LPTKTGHSF   | 7799  | 7475  |
| >ATM-A1742 LATKTGHSF   | 21    | >ATM-A1742 LPTKTGHSF   | 92    | 71    |
| >ATM-A1742 LATKTGHSF   | 15    | >ATM-A1742 LPTKTGHSF   | 9241  | 9226  |
| >ATM-A1742 LATKTGHSFM  | 28    | >ATM-A1742 LPTKTGHSFM  | 5219  | 5191  |
| >ATM-A1742 LATKTGHSF   | 167   | >ATM-A1742 LPTKTGHSF   | 39    | 128   |
| >ATM-A1742 LATKTGHSF   | 811   | >ATM-A1742 LPTKTGHSF   | 36    | 775   |
| >ATM-A1742 LATKTGHSFM  | 8456  | >ATM-A1742 LPTKTGHSFM  | 134   | 8322  |
| >ATM-A1742 LATKTGHSF   | 305   | >ATM-A1742 LPTKTGHSF   | 16841 | 16536 |
| >ATM-A1742 LATKTGHSFM  | 52    | >ATM-A1742 LPTKTGHSFM  | 4187  | 4135  |
| >ATM-A1742 LATKTGHSF   | 47    | >ATM-A1742 LPTKTGHSF   | 16262 | 16215 |
| >ATM-A1742 LATKTGHSFM  | 15    | >ATM-A1742 LPTKTGHSFM  | 2795  | 2780  |
| >ATM-A1742 LATKTGHSF   | 205   | >ATM-A1742 LPTKTGHSF   | 2762  | 2557  |
| >ATM-A1742 LATKTGHSF   | 133   | >ATM-A1742 LPTKTGHSF   | 505   | 372   |
| >ATM-A1742 LATKTGHSF   | 681   | >ATM-A1742 LPTKTGHSF   | 21    | 660   |
| >ATM-A1742 LATKTGHSF   | 5443  | >ATM-A1742 LPTKTGHSF   | 61    | 5382  |
| >ATM-A1742 LATKTGHSFM  | 183   | >ATM-A1742 LPTKTGHSFM  | 9     | 174   |
| >ATM-A1742 LATKTGHSFM  | 138   | >ATM-A1742 LPTKTGHSFM  | 105   | 33    |
| >ATM-A1742 ILATKTGHSF  | 73    | >ATM-A1742 ILPTKTGHSF  | 444   | 371   |
| >ATM-A1742 ILATKTGHSF  | 209   | >ATM-A1742 ILPTKTGHSF  | 591   | 382   |
| >ATM-A1742 ILATKTGHSF  | 40    | >ATM-A1742 ILPTKTGHSF  | 214   | 174   |
| >ATM-A1742 ILATKTGHSFV | 490   | >ATM-A1742 ILPTKTGHSFV | 3619  | 3129  |
| >ATM-A1742 ILATKTGHSFV | 158   | >ATM-A1742 ILPTKTGHSFV | 7534  | 7376  |
| >ATM-A1742 ILATKTGHSF  | 9642  | >ATM-A1742 ILPTKTGHSF  | 354   | 9288  |
| >ATM-A1742 ILATKTGHSFV | 453   | >ATM-A1742 ILPTKTGHSFV | 2387  | 1934  |
| >ATM-A1742 NILATKTGHSI | 145   | >ATM-A1742 NILPTKTGHSI | 271   | 126   |
| >ATM-A1742 NILATKTGHSI | 250   | >ATM-A1742 NILPTKTGHSI | 284   | 34    |
| >ATM-A1742 CLKNILAT    | 346   | >ATM-A1742 CLKNILPT    | 294   | 52    |
| >ATM-A1742 CLKNILATK   | 151   | >ATM-A1742 CLKNILPTK   | 186   | 35    |
| >ATM-A1742 CLKNILATK   | 52    | >ATM-A1742 CLKNILPTK   | 27    | 25    |
| >ATM-A1742 CLKNILATK   | 130   | >ATM-A1742 CLKNILPTK   | 512   | 382   |
| >ATM-A1742 CLKNILATK   | 478   | >ATM-A1742 CLKNILPTK   | 968   | 490   |
| >ATM-A1742 VTCLKNILATK | 30    | >ATM-A1742 VTCLKNILPTK | 28    | 2     |
| >ATM-A1742 VTCLKNILATK | 298   | >ATM-A1742 VTCLKNILPTK | 183   | 115   |
| >ATM-A1742 VTCLKNILATK | 242   | >ATM-A1742 VTCLKNILPTK | 441   | 199   |
| >ATM-A1945 AQSCAAHFT/  | 47    | >ATM-A1945 TQSCAAHFT/  | 125   | 78    |
| >ATM-A1945 AQSCAAHFT/  | 74    | >ATM-A1945 TQSCAAHFT/  | 159   | 85    |
| >ATM-A1945 AQSCAAHF    | 246   | >ATM-A1945 TQSCAAHF    | 506   | 260   |
| >ATM-A1945 AQSCAAHFT   | 100   | >ATM-A1945 TQSCAAHFT   | 201   | 101   |
| >ATM-A1945 AQSCAAHFT/  | 9     | >ATM-A1945 TQSCAAHFT/  | 15    | 6     |

|                       |       |                       |      |       |
|-----------------------|-------|-----------------------|------|-------|
| >ATM-A1945 AQSCAAHF   | 32    | >ATM-A1945 TQSCAAHF   | 44   | 12    |
| >ATM-A1945 AQSCAAHFT/ | 457   | >ATM-A1945 TQSCAAHFT/ | 1463 | 1006  |
| >ATM-A1945 AQSCAAHFT/ | 88    | >ATM-A1945 TQSCAAHFT/ | 189  | 101   |
| >ATM-A1945 AQSCAAHF   | 5     | >ATM-A1945 TQSCAAHF   | 12   | 7     |
| >ATM-A1945 AQSCAAHFT/ | 355   | >ATM-A1945 TQSCAAHFT/ | 2203 | 1848  |
| >ATM-A1945 AQSCAAHFT/ | 11    | >ATM-A1945 TQSCAAHFT/ | 35   | 24    |
| >ATM-A1945 AQSCAAHFT/ | 46    | >ATM-A1945 TQSCAAHFT/ | 20   | 26    |
| >ATM-A1945 AQSCAAHFT/ | 108   | >ATM-A1945 TQSCAAHFT/ | 478  | 370   |
| >ATM-A1945 VAQSCAAHF  | 213   | >ATM-A1945 VTQSCAAHF  | 123  | 90    |
| >ATM-A1945 VAQSCAAHF  | 11871 | >ATM-A1945 VTQSCAAHF  | 339  | 11532 |
| >ATM-A1945 VAQSCAAHF  | 144   | >ATM-A1945 VTQSCAAHF  | 111  | 33    |
| >ATM-A1945 VAQSCAAHF  | 97    | >ATM-A1945 VTQSCAAHF  | 202  | 105   |
| >ATM-A1945 VAQSCAAHF  | 12    | >ATM-A1945 VTQSCAAHF  | 4    | 8     |
| >ATM-A1945 VAQSCAAHF  | 539   | >ATM-A1945 VTQSCAAHF  | 311  | 228   |
| >ATM-A1945 VAQSCAAHF  | 102   | >ATM-A1945 VTQSCAAHF  | 78   | 24    |
| >ATM-A1945 VAQSCAAHF  | 1968  | >ATM-A1945 VTQSCAAHF  | 114  | 1854  |
| >ATM-A1945 VAQSCAAHF  | 145   | >ATM-A1945 VTQSCAAHF  | 8    | 137   |
| >ATM-A1945 VAQSCAAHF  | 6449  | >ATM-A1945 VTQSCAAHF  | 474  | 5975  |
| >ATM-A1945 KVAQSCAA   | 379   | >ATM-A1945 KVTQSCAA   | 2897 | 2518  |
| >ATM-A1945 KVAQSCAA   | 171   | >ATM-A1945 KVTQSCAA   | 497  | 326   |
| >ATM-A1945 KVAQSCAAH  | 422   | >ATM-A1945 KVTQSCAAH  | 1249 | 827   |
| >ATM-A1945 KVAQSCAAH  | 217   | >ATM-A1945 KVTQSCAAH  | 549  | 332   |
| >ATM-A1945 KVAQSCAA   | 507   | >ATM-A1945 KVTQSCAA   | 418  | 89    |
| >ATM-A1945 KVAQSCAAH  | 45    | >ATM-A1945 KVTQSCAAH  | 264  | 219   |
| >ATM-A1945 KVAQSCAAH  | 122   | >ATM-A1945 KVTQSCAAH  | 249  | 127   |
| >ATM-A1945 KVAQSCAAH  | 12    | >ATM-A1945 KVTQSCAAH  | 17   | 5     |
| >ATM-A1945 KVAQSCAAH  | 25    | >ATM-A1945 KVTQSCAAH  | 41   | 16    |
| >ATM-A1945 AKVAQSCA   | 413   | >ATM-A1945 AKVTQSCA   | 295  | 118   |
| >ATM-A1945 AKVAQSCAA  | 131   | >ATM-A1945 AKVTQSCAA  | 110  | 21    |
| >ATM-A1945 AKVAQSCAAI | 120   | >ATM-A1945 AKVTQSCAAI | 100  | 20    |
| >ATM-A1945 AKVAQSCAAI | 5     | >ATM-A1945 AKVTQSCAAI | 4    | 1     |
| >ATM-A1945 VAKVAQSCA/ | 187   | >ATM-A1945 VAKVTQSCA/ | 207  | 20    |
| >ATM-A1945 EVAKVAQS   | 90    | >ATM-A1945 EVAKVTQS   | 101  | 11    |
| >ATM-A1945 EVAKVAQSC  | 641   | >ATM-A1945 EVAKVTQSC  | 210  | 431   |
| >ATM-A1945 EVAKVAQSC/ | 462   | >ATM-A1945 EVAKVTQSC/ | 196  | 266   |
| >ATM-A1945 EVAKVAQSC/ | 18    | >ATM-A1945 EVAKVTQSC/ | 15   | 3     |
| >ATM-A1945 EVAKVAQSC/ | 77    | >ATM-A1945 EVAKVTQSC/ | 72   | 5     |
| >ATM-A1945 LEVAKVAQ   | 459   | >ATM-A1945 LEVAKVTQ   | 607  | 148   |
| >ATM-A1945 LEVAKVAQSC | 520   | >ATM-A1945 LEVAKVTQSC | 330  | 190   |
| >ATM-A1945 LEVAKVAQSC | 195   | >ATM-A1945 LEVAKVTQSC | 203  | 8     |
| >ATM-A1945 YLEVAKVAQS | 663   | >ATM-A1945 YLEVAKVTQS | 491  | 172   |
| >ATM-A1945 YLEVAKVA   | 47    | >ATM-A1945 YLEVAKVT   | 436  | 389   |
| >ATM-A1945 YLEVAKVAQ  | 228   | >ATM-A1945 YLEVAKVTQ  | 67   | 161   |

|                        |      |                        |     |      |
|------------------------|------|------------------------|-----|------|
| >ATM-A1945 YLEVAKVAQS  | 318  | >ATM-A1945 YLEVAKVTQS  | 354 | 36   |
| >ATM-A1945 YLEVAKVAQS  | 27   | >ATM-A1945 YLEVAKVTQS  | 18  | 9    |
| >ATM-A2274 AIFQIKQYNS\ | 652  | >ATM-A2274 TIFQIKQYNS\ | 449 | 203  |
| >ATM-A2274 AIFQIKQYNS\ | 208  | >ATM-A2274 TIFQIKQYNS\ | 533 | 325  |
| >ATM-A2274 AIFQIKQYNS\ | 17   | >ATM-A2274 TIFQIKQYNS\ | 33  | 16   |
| >ATM-A2274 AIFQIKQYNS\ | 28   | >ATM-A2274 TIFQIKQYNS\ | 57  | 29   |
| >ATM-A2274 AIFQIKQYNS\ | 55   | >ATM-A2274 TIFQIKQYNS\ | 147 | 92   |
| >ATM-A2274 AIFQIKQYNS\ | 10   | >ATM-A2274 TIFQIKQYNS\ | 34  | 24   |
| >ATM-A2274 AIFQIKQYNS\ | 28   | >ATM-A2274 TIFQIKQYNS\ | 82  | 54   |
| >ATM-A2274 AIFQIKQYNS\ | 4    | >ATM-A2274 TIFQIKQYNS\ | 9   | 5    |
| >ATM-A2274 AIFQIKQY    | 204  | >ATM-A2274 TIFQIKQY    | 100 | 104  |
| >ATM-A2274 AIFQIKQY    | 333  | >ATM-A2274 TIFQIKQY    | 536 | 203  |
| >ATM-A2274 AIFQIKQY    | 3255 | >ATM-A2274 TIFQIKQY    | 235 | 3020 |
| >ATM-A2274 AIFQIKQYNS\ | 148  | >ATM-A2274 TIFQIKQYNS\ | 13  | 135  |
| >ATM-A2274 AIFQIKQYNS\ | 696  | >ATM-A2274 TIFQIKQYNS\ | 40  | 656  |
| >ATM-A2274 AIFQIKQY    | 255  | >ATM-A2274 TIFQIKQY    | 600 | 345  |
| >ATM-A2274 AIFQIKQY    | 854  | >ATM-A2274 TIFQIKQY    | 438 | 416  |
| >ATM-A2274 AIFQIKQY    | 105  | >ATM-A2274 TIFQIKQY    | 510 | 405  |
| >ATM-A2274 AIFQIKQY    | 218  | >ATM-A2274 TIFQIKQY    | 935 | 717  |
| >ATM-A2274 RAIFQIKQY   | 211  | >ATM-A2274 RTIFQIKQY   | 7   | 204  |
| >ATM-A2274 RAIFQIKQY   | 985  | >ATM-A2274 RTIFQIKQY   | 135 | 850  |
| >ATM-A2274 RAIFQIKQY   | 7650 | >ATM-A2274 RTIFQIKQY   | 199 | 7451 |
| >ATM-A2274 RAIFQIKQY   | 2825 | >ATM-A2274 RTIFQIKQY   | 246 | 2579 |
| >ATM-A2274 RAIFQIKQY   | 336  | >ATM-A2274 RTIFQIKQY   | 247 | 89   |
| >ATM-A2274 RAIFQIKQY   | 374  | >ATM-A2274 RTIFQIKQY   | 565 | 191  |
| >ATM-A2274 RAIFQIKQY   | 4    | >ATM-A2274 RTIFQIKQY   | 3   | 1    |
| >ATM-A2274 RAIFQIKQY   | 249  | >ATM-A2274 RTIFQIKQY   | 147 | 102  |
| >ATM-A2274 RAIFQIKQY   | 626  | >ATM-A2274 RTIFQIKQY   | 448 | 178  |
| >ATM-A2274 RAIFQIKQY   | 1074 | >ATM-A2274 RTIFQIKQY   | 58  | 1016 |
| >ATM-A2274 ERAIFQIKQY  | 200  | >ATM-A2274 ERTIFQIKQY  | 155 | 45   |
| >ATM-A2274 PERAIFQIKQ\ | 365  | >ATM-A2274 PERTIFQIKQY | 376 | 11   |
| >ATM-A2274 PERAIFQI    | 108  | >ATM-A2274 PERTIFQI    | 127 | 19   |
| >ATM-A2274 LPERAIFQI   | 5    | >ATM-A2274 LPERTIFQI   | 42  | 37   |
| >ATM-A2274 LPERAIFQI   | 138  | >ATM-A2274 LPERTIFQI   | 150 | 12   |
| >ATM-A2274 LPERAIFQI   | 74   | >ATM-A2274 LPERTIFQI   | 46  | 28   |
| >ATM-A2274 LPERAIFQI   | 245  | >ATM-A2274 LPERTIFQI   | 261 | 16   |
| >ATM-A2274 LPERAIFQI   | 128  | >ATM-A2274 LPERTIFQI   | 90  | 38   |
| >ATM-A2274 QLPERAIFQI  | 235  | >ATM-A2274 QLPERTIFQI  | 188 | 47   |
| >ATM-A2274 QLPERAIFQI  | 14   | >ATM-A2274 QLPERTIFQI  | 9   | 5    |
| >ATM-A2274 QLPERAIFQI  | 128  | >ATM-A2274 QLPERTIFQI  | 60  | 68   |
| >ATM-A2274 QLPERAIFQI  | 57   | >ATM-A2274 QLPERTIFQI  | 39  | 18   |
| >ATM-A2274 QLPERAIFQI  | 96   | >ATM-A2274 QLPERTIFQI  | 52  | 44   |
| >ATM-A2274 QLPERAIFQ   | 746  | >ATM-A2274 QLPERTIFQ   | 449 | 297  |

|                       |       |                       |       |       |
|-----------------------|-------|-----------------------|-------|-------|
| >ATM-A2274QLPERAIFQI  | 14    | >ATM-A2274QLPERTIFQI  | 10    | 4     |
| >ATM-A2274QLPERAIFQI  | 654   | >ATM-A2274QLPERTIFQI  | 290   | 364   |
| >ATM-A2274QLPERAIFQI  | 291   | >ATM-A2274QLPERTIFQI  | 326   | 35    |
| >ATM-A2274TQLPERAIFQI | 326   | >ATM-A2274TQLPERTIFQI | 342   | 16    |
| >ATM-A2274TQLPERAI    | 264   | >ATM-A2274TQLPERTI    | 364   | 100   |
| >ATM-A2274TQLPERAIFQI | 31    | >ATM-A2274TQLPERTIFQI | 34    | 3     |
| >ATM-A2274TQLPERAIF   | 311   | >ATM-A2274TQLPERTIF   | 439   | 128   |
| >ATM-A2274TQLPERAI    | 241   | >ATM-A2274TQLPERTI    | 346   | 105   |
| >ATM-A2274TQLPERAIF   | 7     | >ATM-A2274TQLPERTIF   | 5     | 2     |
| >ATM-A2274TQLPERAIFQI | 682   | >ATM-A2274TQLPERTIFQI | 405   | 277   |
| >ATM-A2274NTQLPERAIF  | 313   | >ATM-A2274NTQLPERTIF  | 458   | 145   |
| >ATM-A2274NTQLPERAIF  | 80    | >ATM-A2274NTQLPERTIF  | 72    | 8     |
| >ATM-A2274NTQLPERAI   | 790   | >ATM-A2274NTQLPERTI   | 340   | 450   |
| >ATM-A2274KNTQLPERAI  | 595   | >ATM-A2274KNTQLPERTII | 382   | 213   |
| >ATM-A2274KNTQLPERAI  | 611   | >ATM-A2274KNTQLPERTII | 317   | 294   |
| >ATM-A2274FKNTQLPERA  | 54    | >ATM-A2274FKNTQLPERT  | 99    | 45    |
| >ATM-A2420RAKEEVGLL   | 320   | >ATM-A2420RPKEEVGLL   | 15602 | 15282 |
| >ATM-A2420RAKEEVGLLR  | 171   | >ATM-A2420RPKEEVGLLR  | 14477 | 14306 |
| >ATM-A2420RAKEEVGLLR  | 127   | >ATM-A2420RPKEEVGLLR  | 1108  | 981   |
| >ATM-A2420RAKEEVGLLR  | 367   | >ATM-A2420RPKEEVGLLR  | 7832  | 7465  |
| >ATM-A2420RAKEEVGL    | 12290 | >ATM-A2420RPKEEVGL    | 192   | 12098 |
| >ATM-A2420RAKEEVGLL   | 15470 | >ATM-A2420RPKEEVGLL   | 319   | 15151 |
| >ATM-A2420RAKEEVGL    | 35    | >ATM-A2420RPKEEVGL    | 14907 | 14872 |
| >ATM-A2420RAKEEVGLL   | 81    | >ATM-A2420RPKEEVGLL   | 15296 | 15215 |
| >ATM-A2420RAKEEVGLLR  | 526   | >ATM-A2420RPKEEVGLLR  | 390   | 136   |
| >ATM-A2420KRAKEEVGL   | 492   | >ATM-A2420KRPKEEVGL   | 1719  | 1227  |
| >ATM-A2420KRAKEEVGL   | 278   | >ATM-A2420KRPKEEVGL   | 2361  | 2083  |
| >ATM-A2420KRAKEEVGLL  | 73    | >ATM-A2420KRPKEEVGLL  | 305   | 232   |
| >ATM-A2420KRAKEEVGLL  | 176   | >ATM-A2420KRPKEEVGLL  | 1448  | 1272  |
| >ATM-A2420KRAKEEVGL   | 151   | >ATM-A2420KRPKEEVGL   | 318   | 167   |
| >ATM-A2420KRAKEEVGLL  | 153   | >ATM-A2420KRPKEEVGLL  | 119   | 34    |
| >ATM-A2420KRAKEEVGLL  | 460   | >ATM-A2420KRPKEEVGLL  | 1018  | 558   |
| >ATM-A2420KRAKEEVGL   | 308   | >ATM-A2420KRPKEEVGL   | 585   | 277   |
| >ATM-A2420KRAKEEVGLL  | 140   | >ATM-A2420KRPKEEVGLL  | 179   | 39    |
| >ATM-A2420KRAKEEVGLL  | 79    | >ATM-A2420KRPKEEVGLL  | 79    | 0     |
| >ATM-A2420LKRAKEEV    | 248   | >ATM-A2420LKRPEEV     | 244   | 4     |
| >ATM-A2420LKRAKEEVGL  | 84    | >ATM-A2420LKRPEEVGL   | 90    | 6     |
| >ATM-A2420LKRAKEEVGL  | 521   | >ATM-A2420LKRPEEVGL   | 469   | 52    |
| >ATM-A2420LLKRAKEEV   | 231   | >ATM-A2420LLKRPKEEV   | 1250  | 1019  |
| >ATM-A2420LLKRAKEEVG  | 252   | >ATM-A2420LLKRPKEEVG  | 759   | 507   |
| >ATM-A2420LLKRAKEEV   | 110   | >ATM-A2420LLKRPKEEV   | 415   | 305   |
| >ATM-A2420LLKRAKEEV   | 88    | >ATM-A2420LLKRPKEEV   | 29    | 59    |
| >ATM-A2420LLKRAKEEV   | 370   | >ATM-A2420LLKRPKEEV   | 1208  | 838   |

|                       |      |                       |     |      |
|-----------------------|------|-----------------------|-----|------|
| >ATM-A2420 LLKRAKEEV  | 4    | >ATM-A2420 LLKRPKEEV  | 5   | 1    |
| >ATM-A2420 LLKRAKEEVG | 14   | >ATM-A2420 LLKRPKEEVG | 16  | 2    |
| >ATM-A2420 ALLKRAKEEV | 459  | >ATM-A2420 ALLKRPKEEV | 323 | 136  |
| >ATM-A2420 ALLKRAKEEV | 180  | >ATM-A2420 ALLKRPKEEV | 161 | 19   |
| >ATM-A2420 ALLKRAKEEV | 4    | >ATM-A2420 ALLKRPKEEV | 3   | 1    |
| >ATM-A2420 ALLKRAKEEV | 25   | >ATM-A2420 ALLKRPKEEV | 25  | 0    |
| >ATM-A2420 ALLKRAKEEV | 9    | >ATM-A2420 ALLKRPKEEV | 9   | 0    |
| >ATM-A2420 ALLKRAKEEV | 26   | >ATM-A2420 ALLKRPKEEV | 27  | 1    |
| >ATM-A2420 ALLKRAKEEV | 3    | >ATM-A2420 ALLKRPKEEV | 4   | 1    |
| >ATM-A2420 QALLKRAK   | 821  | >ATM-A2420 QALLKRPK   | 277 | 544  |
| >ATM-A2420 QALLKRAKEE | 832  | >ATM-A2420 QALLKRPKEE | 498 | 334  |
| >ATM-A2420 KQALLKRAK  | 1105 | >ATM-A2420 KQALLKRPK  | 329 | 776  |
| >ATM-A2420 KQALLKRAK  | 384  | >ATM-A2420 KQALLKRPK  | 153 | 231  |
| >ATM-A2420 KQALLKRAK  | 867  | >ATM-A2420 KQALLKRPK  | 331 | 536  |
| >ATM-A2622 ALCDAYII   | 84   | >ATM-A2622 VLCDAYII   | 109 | 25   |
| >ATM-A2622 ALCDAYIIL  | 71   | >ATM-A2622 VLCDAYIIL  | 94  | 23   |
| >ATM-A2622 ALCDAYIILA | 68   | >ATM-A2622 VLCDAYIILA | 78  | 10   |
| >ATM-A2622 ALCDAYII   | 39   | >ATM-A2622 VLCDAYII   | 75  | 36   |
| >ATM-A2622 ALCDAYIIL  | 27   | >ATM-A2622 VLCDAYIIL  | 52  | 25   |
| >ATM-A2622 ALCDAYIILA | 29   | >ATM-A2622 VLCDAYIILA | 54  | 25   |
| >ATM-A2622 ALCDAYII   | 65   | >ATM-A2622 VLCDAYII   | 104 | 39   |
| >ATM-A2622 ALCDAYIIL  | 93   | >ATM-A2622 VLCDAYIIL  | 177 | 84   |
| >ATM-A2622 ALCDAYIILA | 80   | >ATM-A2622 VLCDAYIILA | 161 | 81   |
| >ATM-A2622 ALCDAYII   | 227  | >ATM-A2622 VLCDAYII   | 298 | 71   |
| >ATM-A2622 ALCDAYIIL  | 135  | >ATM-A2622 VLCDAYIIL  | 214 | 79   |
| >ATM-A2622 ALCDAYIILA | 229  | >ATM-A2622 VLCDAYIILA | 312 | 83   |
| >ATM-A2622 ALCDAYII   | 23   | >ATM-A2622 VLCDAYII   | 19  | 4    |
| >ATM-A2622 ALCDAYIIL  | 30   | >ATM-A2622 VLCDAYIIL  | 24  | 6    |
| >ATM-A2622 ALCDAYIILA | 17   | >ATM-A2622 VLCDAYIILA | 14  | 3    |
| >ATM-A2622 ALCDAYII   | 67   | >ATM-A2622 VLCDAYII   | 58  | 9    |
| >ATM-A2622 ALCDAYIIL  | 170  | >ATM-A2622 VLCDAYIIL  | 169 | 1    |
| >ATM-A2622 ALCDAYII   | 118  | >ATM-A2622 VLCDAYII   | 107 | 11   |
| >ATM-A2622 ALCDAYIIL  | 51   | >ATM-A2622 VLCDAYIIL  | 49  | 2    |
| >ATM-A2622 ALCDAYIILA | 100  | >ATM-A2622 VLCDAYIILA | 93  | 7    |
| >ATM-A2622 ALCDAYII   | 381  | >ATM-A2622 VLCDAYII   | 106 | 275  |
| >ATM-A2622 ALCDAYIIL  | 447  | >ATM-A2622 VLCDAYIIL  | 125 | 322  |
| >ATM-A2622 ALCDAYIILA | 1186 | >ATM-A2622 VLCDAYIILA | 412 | 774  |
| >ATM-A2622 ALCDAYII   | 9    | >ATM-A2622 VLCDAYII   | 10  | 1    |
| >ATM-A2622 ALCDAYIIL  | 3    | >ATM-A2622 VLCDAYIIL  | 4   | 1    |
| >ATM-A2622 ALCDAYIILA | 5    | >ATM-A2622 VLCDAYIILA | 5   | 0    |
| >ATM-A2622 EALCDAYI   | 3302 | >ATM-A2622 EVLCDAYI   | 491 | 2811 |
| >ATM-A2622 EALCDAYI   | 5950 | >ATM-A2622 EVLCDAYI   | 389 | 5561 |
| >ATM-A2622 EALCDAYIIL | 5001 | >ATM-A2622 EVLCDAYIIL | 190 | 4811 |

|                        |      |                        |      |      |
|------------------------|------|------------------------|------|------|
| >ATM-A2622 EALCDAYI    | 41   | >ATM-A2622 EVLCDAYI    | 13   | 28   |
| >ATM-A2622 EALCDAYII   | 330  | >ATM-A2622 EVLCDAYII   | 61   | 269  |
| >ATM-A2622 EALCDAYIILA | 326  | >ATM-A2622 EVLCDAYIILA | 59   | 267  |
| >ATM-A2622 EALCDAYI    | 21   | >ATM-A2622 EVLCDAYI    | 10   | 11   |
| >ATM-A2622 EALCDAYII   | 35   | >ATM-A2622 EVLCDAYII   | 15   | 20   |
| >ATM-A2622 EALCDAYIIL  | 43   | >ATM-A2622 EVLCDAYIIL  | 18   | 25   |
| >ATM-A2622 EALCDAYIILA | 55   | >ATM-A2622 EVLCDAYIILA | 21   | 34   |
| >ATM-A2622 RRPQMVRVS   | 1094 | >ATM-A2622 RRPQMVRVS   | 384  | 710  |
| >ATM-A2622 RRPQMVRVS   | 254  | >ATM-A2622 RRPQMVRVS   | 75   | 179  |
| >ATM-A2622 RRPQMVRVS   | 230  | >ATM-A2622 RRPQMVRVS   | 37   | 193  |
| >ATM-A2622 VEALCDAYI   | 23   | >ATM-A2622 VEVLCDAYI   | 71   | 48   |
| >ATM-A2622 VEALCDAYII  | 24   | >ATM-A2622 VEVLCDAYII  | 62   | 38   |
| >ATM-A2622 VEALCDAYIIL | 482  | >ATM-A2622 VEVLCDAYIIL | 1564 | 1082 |
| >ATM-A2622 VEALCDAY    | 60   | >ATM-A2622 VEVLCDAY    | 30   | 30   |
| >ATM-A2622 VEALCDAYIIL | 334  | >ATM-A2622 VEVLCDAYIIL | 159  | 175  |
| >ATM-A2622 VEALCDAYI   | 538  | >ATM-A2622 VEVLCDAYI   | 353  | 185  |
| >ATM-A2622 VEALCDAYIIL | 24   | >ATM-A2622 VEVLCDAYIIL | 20   | 4    |
| >ATM-A2622 VEALCDAYII  | 171  | >ATM-A2622 VEVLCDAYII  | 167  | 4    |
| >ATM-A2622 VEALCDAYIIL | 494  | >ATM-A2622 VEVLCDAYIIL | 196  | 298  |
| >ATM-A2622 VEALCDAY    | 379  | >ATM-A2622 VEVLCDAY    | 185  | 194  |
| >ATM-A2622 VEALCDAYI   | 35   | >ATM-A2622 VEVLCDAYI   | 26   | 9    |
| >ATM-A2622 VEALCDAYII  | 38   | >ATM-A2622 VEVLCDAYII  | 36   | 2    |
| >ATM-A2622 VEALCDAYIIL | 91   | >ATM-A2622 VEVLCDAYIIL | 65   | 26   |
| >ATM-A2622 SVEALCDAYI  | 401  | >ATM-A2622 SVEVLCDAYI  | 830  | 429  |
| >ATM-A2622 SVEALCDAYI  | 466  | >ATM-A2622 SVEVLCDAYI  | 548  | 82   |
| >ATM-A2622 SVEALCDAY   | 189  | >ATM-A2622 SVEVLCDAY   | 195  | 6    |
| >ATM-A2622 SVEALCDAYI  | 288  | >ATM-A2622 SVEVLCDAYI  | 1947 | 1659 |
| >ATM-A2622 SVEALCDAY   | 144  | >ATM-A2622 SVEVLCDAY   | 267  | 123  |
| >ATM-A2622 SVEALCDAY   | 201  | >ATM-A2622 SVEVLCDAY   | 222  | 21   |
| >ATM-A2622 SVEALCDAY   | 259  | >ATM-A2622 SVEVLCDAY   | 683  | 424  |
| >ATM-A2622 SVEALCDAY   | 453  | >ATM-A2622 SVEVLCDAY   | 461  | 8    |
| >ATM-A2622 RSVEALCDAY  | 171  | >ATM-A2622 RSVEVLCDAY  | 145  | 26   |
| >ATM-A2622 RSVEALCDAY  | 51   | >ATM-A2622 RSVEVLCDAY  | 101  | 50   |
| >ATM-A2622 RSVEALCDAY  | 349  | >ATM-A2622 RSVEVLCDAY  | 857  | 508  |
| >ATM-A2622 RSVEALCDAY  | 48   | >ATM-A2622 RSVEVLCDAY  | 45   | 3    |
| >ATM-A2622 RSVEALCDAY  | 86   | >ATM-A2622 RSVEVLCDAY  | 121  | 35   |
| >ATM-A2622 RSVEALCDAY  | 157  | >ATM-A2622 RSVEVLCDAY  | 253  | 96   |
| >ATM-A2622 RSVEALCDAY  | 6    | >ATM-A2622 RSVEVLCDAY  | 10   | 4    |
| >ATM-A2622 RSVEALCDAY  | 13   | >ATM-A2622 RSVEVLCDAY  | 24   | 11   |
| >ATM-A2622 RSVEALCDAY  | 122  | >ATM-A2622 RSVEVLCDAY  | 63   | 59   |
| >ATM-A2622 RSVEALCDAY  | 26   | >ATM-A2622 RSVEVLCDAY  | 18   | 8    |
| >ATM-A2622 RSVEALCDAY  | 245  | >ATM-A2622 RSVEVLCDAY  | 283  | 38   |
| >ATM-A2622 RSVEALCDAY  | 30   | >ATM-A2622 RSVEVLCDAY  | 34   | 4    |



|                        |       |                        |       |       |
|------------------------|-------|------------------------|-------|-------|
| >ATM-A2622 VRSVEALCDA  | 278   | >ATM-A2622 VRSVEVLCDA  | 229   | 49    |
| >ATM-A2622 MVRVSVEAL   | 487   | >ATM-A2622 MVRVSVEVL   | 1405  | 918   |
| >ATM-A2622 MVRVSVEAL   | 449   | >ATM-A2622 MVRVSVEVL   | 1286  | 837   |
| >ATM-A2622 MVRVSVEAL   | 82    | >ATM-A2622 MVRVSVEVL   | 142   | 60    |
| >ATM-A2622 MVRVSVEALC  | 496   | >ATM-A2622 MVRVSVEVLC  | 891   | 395   |
| >ATM-A2622 MVRVSVEALCI | 18    | >ATM-A2622 MVRVSVEVLCI | 28    | 10    |
| >ATM-A2622 MVRVSVEAL   | 283   | >ATM-A2622 MVRVSVEVL   | 675   | 392   |
| >ATM-A2622 MVRVSVEAL   | 75    | >ATM-A2622 MVRVSVEVL   | 262   | 187   |
| >ATM-A2622 QMVRVSVEA   | 2575  | >ATM-A2622 QMVRVSVEV   | 216   | 2359  |
| >ATM-A2622 QMVRVSVEA   | 274   | >ATM-A2622 QMVRVSVEV   | 30    | 244   |
| >ATM-A2622 QMVRVSVEAL  | 30    | >ATM-A2622 QMVRVSVEVL  | 131   | 101   |
| >ATM-A2622 QMVRVSVEA   | 157   | >ATM-A2622 QMVRVSVEV   | 21    | 136   |
| >ATM-A2622 QMVRVSVEAL  | 83    | >ATM-A2622 QMVRVSVEVL  | 273   | 190   |
| >ATM-A2622 QMVRVSVEA   | 325   | >ATM-A2622 QMVRVSVEV   | 28    | 297   |
| >ATM-A2622 QMVRVSVEAL  | 151   | >ATM-A2622 QMVRVSVEVL  | 1013  | 862   |
| >ATM-A2622 QMVRVSVEA   | 327   | >ATM-A2622 QMVRVSVEV   | 7     | 320   |
| >ATM-A2622 QMVRVSVEAL  | 36    | >ATM-A2622 QMVRVSVEVL  | 90    | 54    |
| >ATM-A2622 QMVRVSVEA   | 1180  | >ATM-A2622 QMVRVSVEV   | 16    | 1164  |
| >ATM-A2622 QMVRVSVEAL  | 116   | >ATM-A2622 QMVRVSVEVL  | 290   | 174   |
| >ATM-A2622 QMVRVSVEA   | 2281  | >ATM-A2622 QMVRVSVEV   | 36    | 2245  |
| >ATM-A2622 QMVRVSVEA   | 5971  | >ATM-A2622 QMVRVSVEV   | 71    | 5900  |
| >ATM-A2622 QMVRVSVEA   | 106   | >ATM-A2622 QMVRVSVEV   | 4     | 102   |
| >ATM-A2622 QMVRVSVEAL  | 69    | >ATM-A2622 QMVRVSVEVL  | 80    | 11    |
| >ATM-A2622 QMVRVSVEAL  | 227   | >ATM-A2622 QMVRVSVEVL  | 435   | 208   |
| >ATM-A2622 QMVRVSVEA   | 4220  | >ATM-A2622 QMVRVSVEV   | 460   | 3760  |
| >ATM-A2622 QMVRVSVEAL  | 161   | >ATM-A2622 QMVRVSVEVL  | 158   | 3     |
| >ATM-A2622 QMVRVSVEA   | 504   | >ATM-A2622 QMVRVSVEV   | 107   | 397   |
| >ATM-A2622 QMVRVSVEAL  | 21    | >ATM-A2622 QMVRVSVEVL  | 31    | 10    |
| >ATM-A2622 QMVRVSVEAL  | 459   | >ATM-A2622 QMVRVSVEVL  | 661   | 202   |
| >ATM-A2622 PQMVRVSVEA  | 1627  | >ATM-A2622 PQMVRVSVEV  | 152   | 1475  |
| >ATM-A2622 PQMVRVSVEA  | 1688  | >ATM-A2622 PQMVRVSVEV  | 499   | 1189  |
| >ATM-A2622 PQMVRVSVEA  | 100   | >ATM-A2622 PQMVRVSVEV  | 179   | 79    |
| >ATM-A2622 RPQMVRVSVE  | 100   | >ATM-A2622 RPQMVRVSVE  | 25    | 75    |
| >ATM-A2622 RPQMVRVSVE  | 10    | >ATM-A2622 RPQMVRVSVE  | 17    | 7     |
| >ATM-A2622 RPQMVRVSVE  | 50    | >ATM-A2622 RPQMVRVSVE  | 126   | 76    |
| >ATM-A2622 RPQMVRVSVE  | 161   | >ATM-A2622 RPQMVRVSVE  | 501   | 340   |
| >ATM-A3006 AERVLMRLQI  | 284   | >ATM-A3006 PERVLMRLQI  | 5112  | 4828  |
| >ATM-A3006 AERVLMRL    | 47    | >ATM-A3006 PERVLMRL    | 1962  | 1915  |
| >ATM-A3006 AERVLMRL    | 398   | >ATM-A3006 PERVLMRL    | 20301 | 19903 |
| >ATM-A3006 VAERVLMR    | 387   | >ATM-A3006 VPERVLMR    | 5591  | 5204  |
| >ATM-A3006 VAERVLMRL   | 21839 | >ATM-A3006 VPERVLMRL   | 492   | 21347 |
| >ATM-A3006 KVAERVLMRI  | 117   | >ATM-A3006 KVPERVLMRI  | 415   | 298   |
| >ATM-A3006 KVAERVLMRI  | 490   | >ATM-A3006 KVPERVLMRI  | 1184  | 694   |

|                       |      |                       |       |       |
|-----------------------|------|-----------------------|-------|-------|
| >ATM-A3006 KVAERVLM   | 271  | >ATM-A3006 KVPERVLM   | 837   | 566   |
| >ATM-A3006 KVAERVLMRI | 423  | >ATM-A3006 KVPERVLMRI | 424   | 1     |
| >ATM-A3006 KVAERVLMRI | 140  | >ATM-A3006 KVPERVLMRI | 223   | 83    |
| >ATM-A3006 KVAERVLMRI | 375  | >ATM-A3006 KVPERVLMRI | 1226  | 851   |
| >ATM-A3006 KVAERVLMRI | 109  | >ATM-A3006 KVPERVLMRI | 319   | 210   |
| >ATM-A3006 KVAERVLMR  | 96   | >ATM-A3006 KVPERVLMR  | 562   | 466   |
| >ATM-A3006 KVAERVLMR  | 63   | >ATM-A3006 KVPERVLMR  | 543   | 480   |
| >ATM-A3006 KVAERVLMR  | 55   | >ATM-A3006 KVPERVLMR  | 254   | 199   |
| >ATM-A3006 KVAERVLMRI | 249  | >ATM-A3006 KVPERVLMRI | 274   | 25    |
| >ATM-A3006 KVAERVLMR  | 156  | >ATM-A3006 KVPERVLMR  | 1577  | 1421  |
| >ATM-A3006 KVAERVLMRI | 256  | >ATM-A3006 KVPERVLMRI | 3763  | 3507  |
| >ATM-A3006 KVAERVLMRI | 342  | >ATM-A3006 KVPERVLMRI | 14216 | 13874 |
| >ATM-A3006 KVAERVLM   | 4768 | >ATM-A3006 KVPERVLM   | 75    | 4693  |
| >ATM-A3006 KVAERVLMRI | 9830 | >ATM-A3006 KVPERVLMRI | 131   | 9699  |
| >ATM-A3006 KVAERVLMR  | 101  | >ATM-A3006 KVPERVLMR  | 98    | 3     |
| >ATM-A3006 FDKVAERV   | 338  | >ATM-A3006 FDKVPERV   | 1123  | 785   |
| >ATM-A3006 SFDKVAERV  | 593  | >ATM-A3006 SFDKVPERV  | 211   | 382   |
| >ATM-A3006 SFDKVAER   | 276  | >ATM-A3006 SFDKVPER   | 539   | 263   |
| >ATM-A3006 QSFDKVAERV | 422  | >ATM-A3006 QSFDKVPERV | 512   | 90    |
| >ATM-A3006 QSFDKVAERV | 487  | >ATM-A3006 QSFDKVPERV | 278   | 209   |
| >ATM-A3006 QSFDKVAER  | 535  | >ATM-A3006 QSFDKVPER  | 410   | 125   |
| >ATM-A3006 QSFDKVAER  | 24   | >ATM-A3006 QSFDKVPER  | 71    | 47    |
| >ATM-A3006 QSFDKVAER  | 179  | >ATM-A3006 QSFDKVPER  | 1123  | 944   |
| >ATM-A3006 QSFDKVAER  | 8    | >ATM-A3006 QSFDKVPER  | 16    | 8     |
| >ATM-A3006 QSFDKVAERV | 135  | >ATM-A3006 QSFDKVPERV | 1547  | 1412  |
| >ATM-A3006 QSFDKVAERV | 421  | >ATM-A3006 QSFDKVPERV | 486   | 65    |
| >ATM-A3006 QSFDKVAERV | 163  | >ATM-A3006 QSFDKVPERV | 395   | 232   |
| >ATM-A3006 QSFDKVAERV | 18   | >ATM-A3006 QSFDKVPERV | 18    | 0     |
| >ATM-A3006 QSFDKVAER  | 295  | >ATM-A3006 QSFDKVPER  | 143   | 152   |
| >ATM-A3006 DQSFDKVAEF | 407  | >ATM-A3006 DQSFDKVPEF | 1806  | 1399  |
| >ATM-A3006 DQSFDKVAEF | 216  | >ATM-A3006 DQSFDKVPEF | 1073  | 857   |
| >ATM-A3006 AERVLMRLQI | 284  | >ATM-A3006 VERVLMRLQI | 2439  | 2155  |
| >ATM-A3006 AERVLMRL   | 47   | >ATM-A3006 VERVLMRL   | 196   | 149   |
| >ATM-A3006 AERVLMRL   | 398  | >ATM-A3006 VERVLMRL   | 8981  | 8583  |
| >ATM-A3006 VAERVLMR   | 841  | >ATM-A3006 VVERVLMR   | 432   | 409   |
| >ATM-A3006 VAERVLMR   | 387  | >ATM-A3006 VVERVLMR   | 302   | 85    |
| >ATM-A3006 SDIDQSFDKV | 2211 | >ATM-A3006 SDIDQSFDKV | 76    | 2135  |
| >ATM-A3006 KVAERVLMRI | 117  | >ATM-A3006 KVVERVLMRI | 286   | 169   |
| >ATM-A3006 KVAERVLMRI | 490  | >ATM-A3006 KVVERVLMRI | 558   | 68    |
| >ATM-A3006 KVAERVLM   | 271  | >ATM-A3006 KVVERVLM   | 200   | 71    |
| >ATM-A3006 KVAERVLMRI | 423  | >ATM-A3006 KVVERVLMRI | 203   | 220   |
| >ATM-A3006 KVAERVLMRI | 140  | >ATM-A3006 KVVERVLMRI | 188   | 48    |
| >ATM-A3006 KVAERVLMRI | 375  | >ATM-A3006 KVVERVLMRI | 1587  | 1212  |

|                       |       |                       |     |      |
|-----------------------|-------|-----------------------|-----|------|
| >ATM-A3006 KVAERVLMRI | 109   | >ATM-A3006 KVVERVLMRI | 259 | 150  |
| >ATM-A3006 KVAERVLMR  | 96    | >ATM-A3006 KVVERVLMR  | 279 | 183  |
| >ATM-A3006 KVAERVLMR  | 63    | >ATM-A3006 KVVERVLMR  | 106 | 43   |
| >ATM-A3006 KVAERVLMR  | 55    | >ATM-A3006 KVVERVLMR  | 55  | 0    |
| >ATM-A3006 KVAERVLMRI | 249   | >ATM-A3006 KVVERVLMRI | 322 | 73   |
| >ATM-A3006 KVAERVLMR  | 156   | >ATM-A3006 KVVERVLMR  | 304 | 148  |
| >ATM-A3006 KVAERVLM   | 761   | >ATM-A3006 KVVERVLM   | 249 | 512  |
| >ATM-A3006 KVAERVLMRI | 256   | >ATM-A3006 KVVERVLMRI | 92  | 164  |
| >ATM-A3006 KVAERVLMRI | 342   | >ATM-A3006 KVVERVLMRI | 617 | 275  |
| >ATM-A3006 KVAERVLMR  | 101   | >ATM-A3006 KVVERVLMR  | 86  | 15   |
| >ATM-A3006 FDKVAERV   | 338   | >ATM-A3006 FDKVVERV   | 682 | 344  |
| >ATM-A3006 SFDKVAERV  | 593   | >ATM-A3006 SFDKVVERV  | 134 | 459  |
| >ATM-A3006 SFDKVAERV  | 622   | >ATM-A3006 SFDKVVERV  | 130 | 492  |
| >ATM-A3006 SFDKVAER   | 276   | >ATM-A3006 SFDKVVER   | 223 | 53   |
| >ATM-A3006 SFDKVAER   | 893   | >ATM-A3006 SFDKVVER   | 387 | 506  |
| >ATM-A3006 QSFDKVAER\ | 422   | >ATM-A3006 QSFDKVVER\ | 574 | 152  |
| >ATM-A3006 QSFDKVAER\ | 487   | >ATM-A3006 QSFDKVVER\ | 238 | 249  |
| >ATM-A3006 QSFDKVAER  | 535   | >ATM-A3006 QSFDKVVER  | 320 | 215  |
| >ATM-A3006 QSFDKVAER  | 24    | >ATM-A3006 QSFDKVVER  | 33  | 9    |
| >ATM-A3006 QSFDKVAER\ | 1064  | >ATM-A3006 QSFDKVVER\ | 392 | 672  |
| >ATM-A3006 QSFDKVAER  | 179   | >ATM-A3006 QSFDKVVER  | 315 | 136  |
| >ATM-A3006 QSFDKVAER  | 8     | >ATM-A3006 QSFDKVVER  | 8   | 0    |
| >ATM-A3006 QSFDKVAER\ | 135   | >ATM-A3006 QSFDKVVER\ | 171 | 36   |
| >ATM-A3006 QSFDKVAER\ | 421   | >ATM-A3006 QSFDKVVER\ | 597 | 176  |
| >ATM-A3006 QSFDKVAER\ | 163   | >ATM-A3006 QSFDKVVER\ | 302 | 139  |
| >ATM-A3006 QSFDKVAER\ | 18    | >ATM-A3006 QSFDKVVER\ | 34  | 16   |
| >ATM-A3006 QSFDKVAER  | 295   | >ATM-A3006 QSFDKVVER  | 114 | 181  |
| >ATM-A3006 QSFDKVAER  | 516   | >ATM-A3006 QSFDKVVER  | 228 | 288  |
| >ATM-A3006 DQSFDKVAEF | 407   | >ATM-A3006 DQSFDKVVEF | 553 | 146  |
| >ATM-A3006 DQSFDKVAEF | 216   | >ATM-A3006 DQSFDKVVEF | 296 | 80   |
| >ATM-A3006 IDQSFDKVA  | 10290 | >ATM-A3006 IDQSFDKVV  | 439 | 9851 |
| >ATM-A350T ADICHQVF   | 201   | >ATM-A350T TDICHQVF   | 814 | 613  |
| >ATM-A350T MADICHQVF  | 9981  | >ATM-A350T MTDICHQVF  | 393 | 9588 |
| >ATM-A350T MADICHQV   | 1049  | >ATM-A350T MTDICHQV   | 372 | 677  |
| >ATM-A350T MADICHQV   | 542   | >ATM-A350T MTDICHQV   | 200 | 342  |
| >ATM-A350T MADICHQV   | 213   | >ATM-A350T MTDICHQV   | 135 | 78   |
| >ATM-A350T MADICHQV   | 149   | >ATM-A350T MTDICHQV   | 46  | 103  |
| >ATM-A350T MADICHQV   | 885   | >ATM-A350T MTDICHQV   | 190 | 695  |
| >ATM-A350T MADICHQV   | 49    | >ATM-A350T MTDICHQV   | 39  | 10   |
| >ATM-A350T MADICHQV   | 298   | >ATM-A350T MTDICHQV   | 40  | 258  |
| >ATM-A350T MADICHQV   | 67    | >ATM-A350T MTDICHQV   | 16  | 51   |
| >ATM-A350T MADICHQVF  | 373   | >ATM-A350T MTDICHQVF  | 517 | 144  |
| >ATM-A350T MADICHQV   | 2595  | >ATM-A350T MTDICHQV   | 362 | 2233 |

|                       |      |                       |      |      |
|-----------------------|------|-----------------------|------|------|
| >ATM-A350T MADICHQVF  | 19   | >ATM-A350T MTDICHQVF  | 4    | 15   |
| >ATM-A350T MADICHQVF  | 31   | >ATM-A350T MTDICHQVF  | 380  | 349  |
| >ATM-A350T MADICHQVF  | 783  | >ATM-A350T MTDICHQVF  | 455  | 328  |
| >ATM-A350T MADICHQVF  | 214  | >ATM-A350T MTDICHQVF  | 168  | 46   |
| >ATM-A350T MADICHQVF  | 3519 | >ATM-A350T MTDICHQVF  | 385  | 3134 |
| >ATM-A350T MADICHQVF  | 523  | >ATM-A350T MTDICHQVF  | 28   | 495  |
| >ATM-A350T AVKENLIELM | 68   | >ATM-A350T AVKENLIELM | 1694 | 1626 |
| >ATM-A350T LMADICHQV  | 8    | >ATM-A350T LMTDICHQV  | 11   | 3    |
| >ATM-A350T LMADICHQ   | 55   | >ATM-A350T LMTDICHQ   | 461  | 406  |
| >ATM-A350T LMADICHQV  | 2    | >ATM-A350T LMTDICHQV  | 3    | 1    |
| >ATM-A350T LMADICHQV  | 68   | >ATM-A350T LMTDICHQV  | 556  | 488  |
| >ATM-A350T LMADICHQV  | 2    | >ATM-A350T LMTDICHQV  | 5    | 3    |
| >ATM-A350T LMADICHQV  | 6    | >ATM-A350T LMTDICHQV  | 9    | 3    |
| >ATM-A350T LMADICHQ   | 401  | >ATM-A350T LMTDICHQ   | 995  | 594  |
| >ATM-A350T LMADICHQV  | 2    | >ATM-A350T LMTDICHQV  | 2    | 0    |
| >ATM-A350T LMADICHQV  | 4    | >ATM-A350T LMTDICHQV  | 5    | 1    |
| >ATM-A350T LMADICHQ   | 213  | >ATM-A350T LMTDICHQ   | 523  | 310  |
| >ATM-A350T LMADICHQV  | 5    | >ATM-A350T LMTDICHQV  | 5    | 0    |
| >ATM-A350T LMADICHQV  | 2    | >ATM-A350T LMTDICHQV  | 2    | 0    |
| >ATM-A350T LMADICHQ   | 7    | >ATM-A350T LMTDICHQ   | 8    | 1    |
| >ATM-A350T LMADICHQV  | 1    | >ATM-A350T LMTDICHQV  | 1    | 0    |
| >ATM-A350T LMADICHQV  | 185  | >ATM-A350T LMTDICHQV  | 216  | 31   |
| >ATM-A350T LMADICHQV  | 492  | >ATM-A350T LMTDICHQV  | 587  | 95   |
| >ATM-A350T LMADICHQV  | 62   | >ATM-A350T LMTDICHQV  | 346  | 284  |
| >ATM-A350T LMADICHQV  | 29   | >ATM-A350T LMTDICHQV  | 170  | 141  |
| >ATM-A350T LMADICHQV  | 27   | >ATM-A350T LMTDICHQV  | 70   | 43   |
| >ATM-A350T LMADICHQV  | 10   | >ATM-A350T LMTDICHQV  | 20   | 10   |
| >ATM-A350T LMADICHQV  | 235  | >ATM-A350T LMTDICHQV  | 520  | 285  |
| >ATM-A350T ELMADICHQ  | 51   | >ATM-A350T ELMTDICHQ  | 72   | 21   |
| >ATM-A350T ELMADICHQ  | 51   | >ATM-A350T ELMTDICHQ  | 64   | 13   |
| >ATM-A350T ELMADICHQ  | 28   | >ATM-A350T ELMTDICHQ  | 39   | 11   |
| >ATM-A350T ELMADICHQ  | 192  | >ATM-A350T ELMTDICHQ  | 177  | 15   |
| >ATM-A350T ELMADICHQ  | 4    | >ATM-A350T ELMTDICHQ  | 7    | 3    |
| >ATM-A350T ELMADICHQ  | 11   | >ATM-A350T ELMTDICHQ  | 12   | 1    |
| >ATM-A350T ELMADICHQ  | 9    | >ATM-A350T ELMTDICHQ  | 13   | 4    |
| >ATM-A350T ELMADICHQ  | 2    | >ATM-A350T ELMTDICHQ  | 2    | 0    |
| >ATM-A350T ELMADICHQ  | 141  | >ATM-A350T ELMTDICHQ  | 325  | 184  |
| >ATM-A350T ELMADICHQ  | 2    | >ATM-A350T ELMTDICHQ  | 2    | 0    |
| >ATM-A350T ELMADICHQ  | 112  | >ATM-A350T ELMTDICHQ  | 67   | 45   |
| >ATM-A350T ELMADICHQ  | 26   | >ATM-A350T ELMTDICHQ  | 45   | 19   |
| >ATM-A350T ELMADICHQ  | 6    | >ATM-A350T ELMTDICHQ  | 9    | 3    |
| >ATM-A350T ELMADICHQ  | 66   | >ATM-A350T ELMTDICHQ  | 113  | 47   |
| >ATM-A350T ELMADICHQ  | 372  | >ATM-A350T ELMTDICHQ  | 1097 | 725  |

|                       |       |                       |      |       |
|-----------------------|-------|-----------------------|------|-------|
| >ATM-A350T ELMADICHQ\ | 69    | >ATM-A350T ELMTDICHQ\ | 58   | 11    |
| >ATM-A350T IELMADIC   | 319   | >ATM-A350T IELMTDIC   | 1276 | 957   |
| >ATM-A350T IELMADICHQ | 23    | >ATM-A350T IELMTDICHQ | 22   | 1     |
| >ATM-A350T IELMADICH  | 346   | >ATM-A350T IELMTDICH  | 667  | 321   |
| >ATM-A350T IELMADICHQ | 148   | >ATM-A350T IELMTDICHQ | 231  | 83    |
| >ATM-A350T IELMADICHQ | 234   | >ATM-A350T IELMTDICHQ | 326  | 92    |
| >ATM-A350T IELMADICHQ | 256   | >ATM-A350T IELMTDICHQ | 292  | 36    |
| >ATM-A350T IELMADICHQ | 20    | >ATM-A350T IELMTDICHQ | 29   | 9     |
| >ATM-A350T NLIELMADI  | 71    | >ATM-A350T NLIELMTDI  | 142  | 71    |
| >ATM-A350T NLIELMADI  | 43    | >ATM-A350T NLIELMTDI  | 43   | 0     |
| >ATM-A350T NLIELMADI  | 9     | >ATM-A350T NLIELMTDI  | 8    | 1     |
| >ATM-A350T NLIELMADI  | 59    | >ATM-A350T NLIELMTDI  | 68   | 9     |
| >ATM-A350T NLIELMADI  | 96    | >ATM-A350T NLIELMTDI  | 271  | 175   |
| >ATM-A350T NLIELMADI  | 31    | >ATM-A350T NLIELMTDI  | 126  | 95    |
| >ATM-A350T NLIELMADI  | 547   | >ATM-A350T NLIELMTDI  | 449  | 98    |
| >ATM-A350T NLIELMADI  | 159   | >ATM-A350T NLIELMTDI  | 243  | 84    |
| >ATM-A350T NLIELMADI  | 227   | >ATM-A350T NLIELMTDI  | 500  | 273   |
| >ATM-A350T NLIELMADI  | 141   | >ATM-A350T NLIELMTDI  | 381  | 240   |
| >ATM-A350T KENLIELMAD | 22    | >ATM-A350T KENLIELMTD | 24   | 2     |
| >ATM-A350T KENLIELMAD | 380   | >ATM-A350T KENLIELMTD | 453  | 73    |
| >ATM-A350T KENLIELMA  | 48    | >ATM-A350T KENLIELMT  | 52   | 4     |
| >ATM-A350T KENLIELMAD | 127   | >ATM-A350T KENLIELMTD | 48   | 79    |
| >ATM-A350T KENLIELMA  | 62    | >ATM-A350T KENLIELMT  | 434  | 372   |
| >ATM-A350T KENLIELMAD | 13    | >ATM-A350T KENLIELMTD | 12   | 1     |
| >ATM-C2349 CLENPAVI   | 834   | >ATM-C2349 WLENPAVI   | 52   | 782   |
| >ATM-C2349 CLENPAVI   | 506   | >ATM-C2349 WLENPAVI   | 87   | 419   |
| >ATM-C2349 CLENPAVI   | 525   | >ATM-C2349 WLENPAVI   | 46   | 479   |
| >ATM-C2349 CLENPAVIMC | 4184  | >ATM-C2349 WLENPAVIM  | 417  | 3767  |
| >ATM-C2349 CLENPAVIMC | 1194  | >ATM-C2349 WLENPAVIM  | 65   | 1129  |
| >ATM-C2349 CLENPAVIM  | 4514  | >ATM-C2349 WLENPAVIM  | 365  | 4149  |
| >ATM-C2349 CLENPAVIM  | 3365  | >ATM-C2349 WLENPAVIM  | 121  | 3244  |
| >ATM-C2349 TCLENPAVI  | 313   | >ATM-C2349 TWLENPAVI  | 8334 | 8021  |
| >ATM-C2349 TCLENPAV   | 123   | >ATM-C2349 TWLENPAV   | 570  | 447   |
| >ATM-C2349 TCLENPAVI  | 7845  | >ATM-C2349 TWLENPAVI  | 76   | 7769  |
| >ATM-C2349 TCLENPAVI  | 10013 | >ATM-C2349 TWLENPAVI  | 211  | 9802  |
| >ATM-C2349 TCLENPAVI  | 19493 | >ATM-C2349 TWLENPAVI  | 253  | 19240 |
| >ATM-C2349 TCLENPAV   | 24    | >ATM-C2349 TWLENPAV   | 508  | 484   |
| >ATM-C2349 TCLENPAV   | 32903 | >ATM-C2349 TWLENPAV   | 83   | 32820 |
| >ATM-C2349 TCLENPAVI  | 36829 | >ATM-C2349 TWLENPAVI  | 172  | 36657 |
| >ATM-C2349 TCLENPAVIM | 38371 | >ATM-C2349 TWLENPAVIM | 444  | 37927 |
| >ATM-C2349 RVCGNWLAE  | 565   | >ATM-C2349 RVCGNWLAE  | 30   | 535   |
| >ATM-C2349 RVCGNWLAE  | 11995 | >ATM-C2349 RVCGNWLAE  | 26   | 11969 |
| >ATM-C2349 RVCGNWLAE  | 21291 | >ATM-C2349 RVCGNWLAE  | 134  | 21157 |

|                        |       |                       |      |       |
|------------------------|-------|-----------------------|------|-------|
| >ATM-C2349 RVCGNWLAE   | 17017 | >ATM-C2349 RVCGNWLAE  | 19   | 16998 |
| >ATM-C2349 ETCLENPAV   | 340   | >ATM-C2349 ETWLENPAV  | 1574 | 1234  |
| >ATM-C2349 ETCLENPAVI  | 304   | >ATM-C2349 ETWLENPAVI | 1201 | 897   |
| >ATM-C2349 ETCLENPAVII | 24    | >ATM-C2349 ETWLENPAVI | 103  | 79    |
| >ATM-C2349 ETCLENPAVII | 212   | >ATM-C2349 ETWLENPAVI | 430  | 218   |
| >ATM-C2349 ETCLENPAVI  | 4136  | >ATM-C2349 ETWLENPAVI | 460  | 3676  |
| >ATM-C2349 ETCLENPA    | 227   | >ATM-C2349 ETWLENPA   | 83   | 144   |
| >ATM-C2349 ETCLENPAV   | 606   | >ATM-C2349 ETWLENPAV  | 158  | 448   |
| >ATM-C2349 ETCLENPA    | 3160  | >ATM-C2349 ETWLENPA   | 51   | 3109  |
| >ATM-C2349 ETCLENPAV   | 35    | >ATM-C2349 ETWLENPAV  | 4    | 31    |
| >ATM-C2349 ETCLENPAVI  | 950   | >ATM-C2349 ETWLENPAVI | 18   | 932   |
| >ATM-C2349 ETCLENPAVII | 2031  | >ATM-C2349 ETWLENPAVI | 43   | 1988  |
| >ATM-C2349 ETCLENPAVI  | 1708  | >ATM-C2349 ETWLENPAVI | 420  | 1288  |
| >ATM-C2349 ETCLENPAVII | 444   | >ATM-C2349 ETWLENPAVI | 92   | 352   |
| >ATM-C2349 ETCLENPAVII | 3657  | >ATM-C2349 ETWLENPAVI | 440  | 3217  |
| >ATM-C2349 ETCLENPAVI  | 51    | >ATM-C2349 ETWLENPAVI | 33   | 18    |
| >ATM-C2349 AETCLENPAV  | 271   | >ATM-C2349 AETWLENPA' | 239  | 32    |
| >ATM-C2349 AETCLENPAV  | 352   | >ATM-C2349 AETWLENPA' | 637  | 285   |
| >ATM-C2349 AETCLENPAV  | 79    | >ATM-C2349 AETWLENPA' | 28   | 51    |
| >ATM-C2349 AETCLENPA   | 90    | >ATM-C2349 AETWLENPA  | 87   | 3     |
| >ATM-C2349 AETCLENPAV  | 748   | >ATM-C2349 AETWLENPA' | 162  | 586   |
| >ATM-C2349 AETCLENPAV  | 499   | >ATM-C2349 AETWLENPA' | 267  | 232   |
| >ATM-C2349 AETCLENPAV  | 285   | >ATM-C2349 AETWLENPA' | 170  | 115   |
| >ATM-C2349 AETCLENPAV  | 808   | >ATM-C2349 AETWLENPA' | 439  | 369   |
| >ATM-C2349 AETCLENPA   | 12    | >ATM-C2349 AETWLENPA  | 6    | 6     |
| >ATM-C2349 AETCLENPAV  | 392   | >ATM-C2349 AETWLENPA' | 114  | 278   |
| >ATM-C2349 AETCLENPAV  | 84    | >ATM-C2349 AETWLENPA' | 67   | 17    |
| >ATM-C2349 AETCLENPAV  | 42    | >ATM-C2349 AETWLENPA' | 62   | 20    |
| >ATM-C2349 AETCLENPAV  | 15    | >ATM-C2349 AETWLENPA' | 12   | 3     |
| >ATM-C2349 LAETCLENPA' | 574   | >ATM-C2349 LAETWLENP/ | 311  | 263   |
| >ATM-C2349 LAETCLENPA' | 1045  | >ATM-C2349 LAETWLENP/ | 267  | 778   |
| >ATM-C2349 WLAETCLENF  | 64    | >ATM-C2349 WLAETWLEN  | 54   | 10    |
| >ATM-C2349 WLAETCLE    | 1073  | >ATM-C2349 WLAETWLE   | 390  | 683   |
| >ATM-C2349 WLAETCLENF  | 11    | >ATM-C2349 WLAETWLEN  | 13   | 2     |
| >ATM-C2349 WLAETCLENF  | 10    | >ATM-C2349 WLAETWLEN  | 11   | 1     |
| >ATM-C2349 WLAETCLENF  | 26    | >ATM-C2349 WLAETWLEN  | 18   | 8     |
| >ATM-C2349 WLAETCLENF  | 35    | >ATM-C2349 WLAETWLEN  | 14   | 21    |
| >ATM-C2349 WLAETCLENF  | 82    | >ATM-C2349 WLAETWLEN  | 83   | 1     |
| >ATM-C2349 WLAETCLENF  | 27    | >ATM-C2349 WLAETWLEN  | 16   | 11    |
| >ATM-C2349 WLAETCLENF  | 97    | >ATM-C2349 WLAETWLEN  | 88   | 9     |
| >ATM-C2349 WLAETCLE    | 888   | >ATM-C2349 WLAETWLE   | 393  | 495   |
| >ATM-C2349 WLAETCLENF  | 16    | >ATM-C2349 WLAETWLEN  | 11   | 5     |
| >ATM-C2349 WLAETCLENF  | 511   | >ATM-C2349 WLAETWLEN  | 422  | 89    |

|                        |       |                        |     |       |
|------------------------|-------|------------------------|-----|-------|
| >ATM-C2349 NWLAETCL    | 979   | >ATM-C2349 NWLAETWL    | 110 | 869   |
| >ATM-C2349 NWLAETCLE   | 1051  | >ATM-C2349 NWLAETWLE   | 462 | 589   |
| >ATM-C2349 NWLAETCL    | 304   | >ATM-C2349 NWLAETWL    | 214 | 90    |
| >ATM-C2349 NWLAETCLE   | 1199  | >ATM-C2349 NWLAETWLE   | 362 | 837   |
| >ATM-C2349 NWLAETCLEP  | 1110  | >ATM-C2349 NWLAETWLE   | 382 | 728   |
| >ATM-C2349 CGNWAETC    | 30904 | >ATM-C2349 CGNWAETM    | 353 | 30551 |
| >ATM-C2349 CGNWAETC    | 18329 | >ATM-C2349 CGNWAETM    | 19  | 18310 |
| >ATM-C2349 CGNWAETC    | 35680 | >ATM-C2349 CGNWAETM    | 313 | 35367 |
| >ATM-C540Y CCLTLALTTSI | 1535  | >ATM-C540Y YCLTLALTTSI | 304 | 1231  |
| >ATM-C540Y CCLTLALTTSI | 9349  | >ATM-C540Y YCLTLALTTSI | 428 | 8921  |
| >ATM-C540Y CCLTLALTTSI | 4704  | >ATM-C540Y YCLTLALTTSI | 271 | 4433  |
| >ATM-C540Y CCLTLALTTSI | 151   | >ATM-C540Y YCLTLALTTSI | 867 | 716   |
| >ATM-C540Y VCCLTLAL    | 27726 | >ATM-C540Y VYCLTLAL    | 221 | 27505 |
| >ATM-C540Y VCCLTLAL    | 20904 | >ATM-C540Y VYCLTLAL    | 34  | 20870 |
| >ATM-C540Y VCCLTLAL    | 5968  | >ATM-C540Y VYCLTLAL    | 239 | 5729  |
| >ATM-C540Y SACRPSCPAV  | 27760 | >ATM-C540Y SACRPSCPAV  | 415 | 27345 |
| >ATM-C540Y SACRPSCPAV  | 15321 | >ATM-C540Y SACRPSCPAV  | 114 | 15207 |
| >ATM-C540Y SACRPSCPAV  | 10409 | >ATM-C540Y SACRPSCPAV  | 311 | 10098 |
| >ATM-C540Y SACRPSCPAV  | 17676 | >ATM-C540Y SACRPSCPAV  | 89  | 17587 |
| >ATM-C540Y SACRPSCPAV  | 17555 | >ATM-C540Y SACRPSCPAV  | 264 | 17291 |
| >ATM-C540Y SACRPSCPAV  | 19623 | >ATM-C540Y SACRPSCPAV  | 223 | 19400 |
| >ATM-C540Y AVCCLTAL    | 8038  | >ATM-C540Y AVYCLTLAL   | 154 | 7884  |
| >ATM-C540Y AVCCLTAL    | 3554  | >ATM-C540Y AVYCLTLA    | 280 | 3274  |
| >ATM-C540Y AVCCLTAL    | 1568  | >ATM-C540Y AVYCLTLAL   | 112 | 1456  |
| >ATM-C540Y AVCCLTAL    | 1728  | >ATM-C540Y AVYCLTLA    | 208 | 1520  |
| >ATM-C540Y AVCCLTAL    | 749   | >ATM-C540Y AVYCLTLAL   | 126 | 623   |
| >ATM-C540Y AVCCLTALT   | 2000  | >ATM-C540Y AVYCLTLALT  | 432 | 1568  |
| >ATM-C540Y AVCCLTAL    | 404   | >ATM-C540Y AVYCLTLA    | 24  | 380   |
| >ATM-C540Y AVCCLTAL    | 996   | >ATM-C540Y AVYCLTLAL   | 68  | 928   |
| >ATM-C540Y AVCCLTALT   | 714   | >ATM-C540Y AVYCLTLALT  | 165 | 549   |
| >ATM-C540Y AVCCLTAL    | 488   | >ATM-C540Y AVYCLTLA    | 66  | 422   |
| >ATM-C540Y AVCCLTAL    | 220   | >ATM-C540Y AVYCLTLAL   | 46  | 174   |
| >ATM-C540Y AVCCLTALT   | 1355  | >ATM-C540Y AVYCLTLALT  | 496 | 859   |
| >ATM-C540Y AVCCLTAL    | 1434  | >ATM-C540Y AVYCLTLAL   | 86  | 1348  |
| >ATM-C540Y AVCCLTAL    | 5999  | >ATM-C540Y AVYCLTLAL   | 254 | 5745  |
| >ATM-C540Y AVCCLTAL    | 65    | >ATM-C540Y AVYCLTLAL   | 15  | 50    |
| >ATM-C540Y AVCCLTALT   | 1854  | >ATM-C540Y AVYCLTLALT  | 227 | 1627  |
| >ATM-C540Y AVCCLTAL    | 5654  | >ATM-C540Y AVYCLTLAL   | 204 | 5450  |
| >ATM-C540Y AVCCLTAL    | 4605  | >ATM-C540Y AVYCLTLAL   | 175 | 4430  |
| >ATM-C540Y AVCCLTAL    | 700   | >ATM-C540Y AVYCLTLAL   | 203 | 497   |
| >ATM-C540Y AVCCLTAL    | 2683  | >ATM-C540Y AVYCLTLAL   | 272 | 2411  |
| >ATM-C540Y AVCCLTAL    | 3219  | >ATM-C540Y AVYCLTLAL   | 301 | 2918  |
| >ATM-C540Y AVCCLTAL    | 2542  | >ATM-C540Y AVYCLTLAL   | 460 | 2082  |

|                       |       |                       |     |       |
|-----------------------|-------|-----------------------|-----|-------|
| >ATM-C540Y CPAVCCLTL  | 59    | >ATM-C540Y CPAVYCLTL  | 83  | 24    |
| >ATM-C540Y CPAVCCLTLA | 19    | >ATM-C540Y CPAVYCLTLA | 21  | 2     |
| >ATM-C540Y CPAVCCLTL  | 78    | >ATM-C540Y CPAVYCLTL  | 126 | 48    |
| >ATM-C540Y CPAVCCLTLA | 26    | >ATM-C540Y CPAVYCLTLA | 32  | 6     |
| >ATM-C540Y CPAVCCLTLA | 302   | >ATM-C540Y CPAVYCLTLA | 176 | 126   |
| >ATM-C540Y CPAVCCLTL  | 128   | >ATM-C540Y CPAVYCLTL  | 334 | 206   |
| >ATM-C540Y CPAVCCLTLA | 151   | >ATM-C540Y CPAVYCLTLA | 306 | 155   |
| >ATM-C540Y CPAVCCLT   | 56    | >ATM-C540Y CPAVYCLT   | 89  | 33    |
| >ATM-C540Y CPAVCCLTLA | 210   | >ATM-C540Y CPAVYCLTLA | 81  | 129   |
| >ATM-C540Y CPAVCCLTL  | 2706  | >ATM-C540Y CPAVYCLTL  | 169 | 2537  |
| >ATM-C540Y CPAVCCLTLA | 987   | >ATM-C540Y CPAVYCLTLA | 158 | 829   |
| >ATM-C540Y CPAVCCLTLA | 344   | >ATM-C540Y CPAVYCLTLA | 308 | 36    |
| >ATM-C540Y SCPAVCCLTL | 239   | >ATM-C540Y SCPAVYCLTL | 100 | 139   |
| >ATM-C540Y PSCPAVCCLT | 479   | >ATM-C540Y PSCPAVYCLT | 497 | 18    |
| >ATM-C540Y RPSCPAVCC  | 136   | >ATM-C540Y RPSCPAVYCL | 64  | 72    |
| >ATM-C540Y RPSCPAVC   | 14583 | >ATM-C540Y RPSCPAVY   | 271 | 14312 |
| >ATM-C540Y RPSCPAVC   | 4867  | >ATM-C540Y RPSCPAVY   | 22  | 4845  |
| >ATM-C540Y RPSCPAVC   | 31147 | >ATM-C540Y RPSCPAVY   | 196 | 30951 |
| >ATM-C540Y CRPSCPAVC  | 5274  | >ATM-C540Y CRPSCPAVY  | 319 | 4955  |
| >ATM-C540Y CRPSCPAVC  | 30815 | >ATM-C540Y CRPSCPAVY  | 390 | 30425 |
| >ATM-C540Y CRPSCPAVC  | 7253  | >ATM-C540Y CRPSCPAVY  | 377 | 6876  |
| >ATM-C540Y CRPSCPAVCC | 280   | >ATM-C540Y CRPSCPAVYC | 242 | 38    |
| >ATM-C540Y ACRPSCPAVC | 2282  | >ATM-C540Y ACRPSCPAVY | 209 | 2073  |
| >ATM-C540Y ACRPSCPAVC | 6209  | >ATM-C540Y ACRPSCPAVY | 104 | 6105  |
| >ATM-C540Y ACRPSCPAVC | 19342 | >ATM-C540Y ACRPSCPAVY | 136 | 19206 |
| >ATM-C540Y ACRPSCPAVC | 28955 | >ATM-C540Y ACRPSCPAVY | 450 | 28505 |
| >ATM-D1208DFMASHLDY   | 888   | >ATM-D1208HFMASHLDY   | 166 | 722   |
| >ATM-D1208DFMASHLDY   | 3060  | >ATM-D1208HFMASHLDY   | 129 | 2931  |
| >ATM-D1208DFMASHLDY   | 1162  | >ATM-D1208HFMASHLDY   | 22  | 1140  |
| >ATM-D1208DFMASHLDY   | 13    | >ATM-D1208HFMASHLDY   | 7   | 6     |
| >ATM-D1208DFMASHLDY   | 673   | >ATM-D1208HFMASHLDY   | 342 | 331   |
| >ATM-D1208DFMASHLDY   | 288   | >ATM-D1208HFMASHLDY   | 12  | 276   |
| >ATM-D1208DFMASHLDY   | 7235  | >ATM-D1208HFMASHLDY   | 303 | 6932  |
| >ATM-D1208DFMASHLDY   | 240   | >ATM-D1208HFMASHLDY   | 49  | 191   |
| >ATM-D1208DFMASHLDY   | 1521  | >ATM-D1208HFMASHLDY   | 318 | 1203  |
| >ATM-D1208DFMASHLDY   | 624   | >ATM-D1208HFMASHLDY   | 118 | 506   |
| >ATM-D1208DFMASHLDY   | 340   | >ATM-D1208HFMASHLDY   | 147 | 193   |
| >ATM-D1208EDFMASHLD'  | 438   | >ATM-D1208EHFMASHLD'  | 920 | 482   |
| >ATM-D1208EDFMASHLD'  | 669   | >ATM-D1208EHFMASHLD'  | 329 | 340   |
| >ATM-D1208EDFMASHLD'  | 1788  | >ATM-D1208EHFMASHLD'  | 105 | 1683  |
| >ATM-D1208EDFMASHL    | 13989 | >ATM-D1208EHFMASHL    | 418 | 13571 |
| >ATM-D1208EDFMASHLD'  | 11436 | >ATM-D1208EHFMASHLD'  | 182 | 11254 |
| >ATM-D1208EDFMASHL    | 7156  | >ATM-D1208EHFMASHL    | 97  | 7059  |



|                       |       |                         |       |       |
|-----------------------|-------|-------------------------|-------|-------|
| >ATM-D1208 EDFMASHLD' | 11187 | >ATM-D1208 EHFMAHSHLD'  | 359   | 10828 |
| >ATM-D1208 EDFMASHLD' | 480   | >ATM-D1208 EHFMAHSHLD'  | 16919 | 16439 |
| >ATM-D1208 LEDFMASHL  | 540   | >ATM-D1208 LEHFMAHSHL   | 196   | 344   |
| >ATM-D1208 LEDFMASHLL | 633   | >ATM-D1208 LEHFMAHSHLL  | 153   | 480   |
| >ATM-D1208 LEDFMASHLL | 402   | >ATM-D1208 LEHFMAHSHLL  | 325   | 77    |
| >ATM-D1208 LEDFMASHLL | 5746  | >ATM-D1208 LEHFMAHSHLL  | 385   | 5361  |
| >ATM-D1208 LEDFMASHLL | 5336  | >ATM-D1208 LEHFMAHSHLL  | 359   | 4977  |
| >ATM-D1208 LEDFMASH   | 1178  | >ATM-D1208 LEHFMAHSH    | 306   | 872   |
| >ATM-D1208 LEDFMASHLL | 112   | >ATM-D1208 LEHFMAHSHLL  | 36    | 76    |
| >ATM-D1208 LEDFMASHL  | 37    | >ATM-D1208 LEHFMAHSHL   | 36    | 1     |
| >ATM-D1208 LEDFMASHL  | 2391  | >ATM-D1208 LEHFMAHSHL   | 283   | 2108  |
| >ATM-D1208 LEDFMASHLL | 521   | >ATM-D1208 LEHFMAHSHLL  | 167   | 354   |
| >ATM-D1208 LEDFMASHL  | 236   | >ATM-D1208 LEHFMAHSHL   | 30    | 206   |
| >ATM-D1208 RLEDFMASHI | 45    | >ATM-D1208 RLEHFMAHSHI  | 257   | 212   |
| >ATM-D1208 RLEDFMASHI | 254   | >ATM-D1208 RLEHFMAHSHI  | 595   | 341   |
| >ATM-D1208 RLEDFMASHI | 82    | >ATM-D1208 RLEHFMAHSHI  | 406   | 324   |
| >ATM-D1208 RLEDFMASHI | 56    | >ATM-D1208 RLEHFMAHSHI  | 201   | 145   |
| >ATM-D1208 RLEDFMASHI | 7     | >ATM-D1208 RLEHFMAHSHI  | 39    | 32    |
| >ATM-D1208 RRLEDFMAS  | 463   | >ATM-D1208 RRLEHFMAH    | 236   | 227   |
| >ATM-D1208 RRLEDFMAS  | 244   | >ATM-D1208 RRLEHFMAH    | 145   | 99    |
| >ATM-D1208 RRLEDFMAS  | 45    | >ATM-D1208 RRLEHFMAH    | 39    | 6     |
| >ATM-D1208 RRLEDFMA   | 77    | >ATM-D1208 RRLEHFMA     | 56    | 21    |
| >ATM-D1208 RRLEDFMAS  | 157   | >ATM-D1208 RRLEHFMAH    | 95    | 62    |
| >ATM-D1208 RRLEDFMAS  | 99    | >ATM-D1208 RRLEHFMAH    | 109   | 10    |
| >ATM-D1208 RRLEDFMAS  | 21    | >ATM-D1208 RRLEHFMAH    | 16    | 5     |
| >ATM-D1208 RRLEDFMAS  | 501   | >ATM-D1208 RRLEHFMAH    | 397   | 104   |
| >ATM-D1208 RRLEDFMA   | 146   | >ATM-D1208 RRLEHFMA     | 213   | 67    |
| >ATM-D1208 RRLEDFMAS  | 404   | >ATM-D1208 RRLEHFMAH    | 249   | 155   |
| >ATM-D1208 RRLEDFMAS  | 250   | >ATM-D1208 RRLEHFMAH    | 254   | 4     |
| >ATM-D1208 RRLEDFMAS  | 31    | >ATM-D1208 RRLEHFMAH    | 26    | 5     |
| >ATM-D1208 RRLEDFMAS  | 581   | >ATM-D1208 RRLEHFMAH    | 140   | 441   |
| >ATM-D1208 RRLEDFMAS  | 182   | >ATM-D1208 RRLEHFMAH    | 267   | 85    |
| >ATM-D1208 RRLEDFMAS  | 6     | >ATM-D1208 RRLEHFMAH    | 4     | 2     |
| >ATM-D1208 YRRLEDFM   | 1078  | >ATM-D1208 YRRLEHFMAH   | 408   | 670   |
| >ATM-D1208 YRRLEDFM   | 610   | >ATM-D1208 YRRLEHFMAH   | 194   | 416   |
| >ATM-D1208 GYRRLEDF   | 168   | >ATM-D1208 GYRRLEHFMAH  | 56    | 112   |
| >ATM-D1208 GYRRLEDF   | 14    | >ATM-D1208 GYRRLEHFMAH  | 9     | 5     |
| >ATM-D1208 GYRRLEDFM  | 683   | >ATM-D1208 GYRRLEHFMAH  | 344   | 339   |
| >ATM-D1208 GYRRLEDFM  | 913   | >ATM-D1208 GYRRLEHFMAH  | 61    | 852   |
| >ATM-D1208 GYRRLEDFM, | 527   | >ATM-D1208 GYRRLEHFMAH, | 54    | 473   |
| >ATM-D1208 GYRRLEDFM, | 735   | >ATM-D1208 GYRRLEHFMAH, | 189   | 546   |
| >ATM-D1208 FGYRRLEDF  | 310   | >ATM-D1208 FGYRRLEHFMAH | 183   | 127   |
| >ATM-D1208 FGYRRLEDF  | 994   | >ATM-D1208 FGYRRLEHFMAH | 234   | 760   |

|                       |       |                       |     |       |
|-----------------------|-------|-----------------------|-----|-------|
| >ATM-D1208 FGYRRLEDFM | 591   | >ATM-D1208 FGYRRLEHFM | 438 | 153   |
| >ATM-D1208 FGYRRLEDF  | 1186  | >ATM-D1208 FGYRRLEHF  | 497 | 689   |
| >ATM-D1208 FGYRRLEDF  | 1956  | >ATM-D1208 FGYRRLEHF  | 163 | 1793  |
| >ATM-D1208 FGYRRLEDF  | 241   | >ATM-D1208 FGYRRLEHF  | 125 | 116   |
| >ATM-D1208 TFGYRRLEDF | 91    | >ATM-D1208 TFGYRRLEHF | 46  | 45    |
| >ATM-D1208 ETFGYRRLED | 428   | >ATM-D1208 ETFGYRRLEH | 775 | 347   |
| >ATM-D1208 ETFGYRRLED | 95    | >ATM-D1208 ETFGYRRLEH | 51  | 44    |
| >ATM-D1208 ETFGYRRLED | 35    | >ATM-D1208 ETFGYRRLEH | 11  | 24    |
| >ATM-D1208 ETFGYRRLED | 83    | >ATM-D1208 ETFGYRRLEH | 118 | 35    |
| >ATM-D1208 ETFGYRRLED | 111   | >ATM-D1208 ETFGYRRLEH | 246 | 135   |
| >ATM-D1208 ETFGYRRLED | 441   | >ATM-D1208 ETFGYRRLEH | 235 | 206   |
| >ATM-D1208 ETFGYRRLED | 54    | >ATM-D1208 ETFGYRRLEH | 21  | 33    |
| >ATM-D1208 ETFGYRRLED | 231   | >ATM-D1208 ETFGYRRLEH | 138 | 93    |
| >ATM-D126E DTVKDSSNGA | 370   | >ATM-D126E ETVKDSSNGA | 81  | 289   |
| >ATM-D126E DTVKDSSNGA | 2907  | >ATM-D126E ETVKDSSNGA | 470 | 2437  |
| >ATM-D126E DTVKDSSNGA | 84    | >ATM-D126E ETVKDSSNGA | 16  | 68    |
| >ATM-D126E DTVKDSSNGA | 1385  | >ATM-D126E ETVKDSSNGA | 409 | 976   |
| >ATM-D126E DTVKDSSNGA | 1075  | >ATM-D126E ETVKDSSNGA | 176 | 899   |
| >ATM-D126E DTVKDSSNGA | 108   | >ATM-D126E ETVKDSSNGA | 20  | 88    |
| >ATM-D126E DTVKDSSNGA | 414   | >ATM-D126E ETVKDSSNGA | 63  | 351   |
| >ATM-D126E DTVKDSSNGA | 204   | >ATM-D126E ETVKDSSNGA | 34  | 170   |
| >ATM-D126E DTVKDSSNGA | 738   | >ATM-D126E ETVKDSSNGA | 231 | 507   |
| >ATM-D126E MDTVKDSSN  | 14219 | >ATM-D126E METVKDSSN  | 67  | 14152 |
| >ATM-D126E LLNYIMDT   | 3501  | >ATM-D126E LLNYIMET   | 431 | 3070  |
| >ATM-D126E LLNYIMDTV  | 35    | >ATM-D126E LLNYIMETV  | 26  | 9     |
| >ATM-D126E LLNYIMDT   | 400   | >ATM-D126E LLNYIMET   | 56  | 344   |
| >ATM-D126E LLNYIMDTV  | 5     | >ATM-D126E LLNYIMETV  | 5   | 0     |
| >ATM-D126E LLNYIMDT   | 137   | >ATM-D126E LLNYIMET   | 52  | 85    |
| >ATM-D126E LLNYIMDTV  | 7     | >ATM-D126E LLNYIMETV  | 7   | 0     |
| >ATM-D126E LLNYIMDTV  | 77    | >ATM-D126E LLNYIMETV  | 61  | 16    |
| >ATM-D126E LLNYIMDT   | 2747  | >ATM-D126E LLNYIMET   | 397 | 2350  |
| >ATM-D126E LLNYIMDTV  | 6     | >ATM-D126E LLNYIMETV  | 4   | 2     |
| >ATM-D126E LLNYIMDTV  | 5     | >ATM-D126E LLNYIMETV  | 6   | 1     |
| >ATM-D126E LLNYIMDTV  | 18    | >ATM-D126E LLNYIMETV  | 18  | 0     |
| >ATM-D126E LLNYIMDTV  | 14    | >ATM-D126E LLNYIMETV  | 9   | 5     |
| >ATM-D126E LLNYIMDT   | 443   | >ATM-D126E LLNYIMET   | 91  | 352   |
| >ATM-D126E LLNYIMDTV  | 4     | >ATM-D126E LLNYIMETV  | 3   | 1     |
| >ATM-D126E LLNYIMDTVK | 92    | >ATM-D126E LLNYIMETVK | 71  | 21    |
| >ATM-D126E LLNYIMDTVK | 178   | >ATM-D126E LLNYIMETVK | 189 | 11    |
| >ATM-D126E LLNYIMDTV  | 848   | >ATM-D126E LLNYIMETV  | 431 | 417   |
| >ATM-D126E LLNYIMDTV  | 117   | >ATM-D126E LLNYIMETV  | 58  | 59    |
| >ATM-D126E ELLNYIMDTV | 53    | >ATM-D126E ELLNYIMETV | 35  | 18    |
| >ATM-D126E ELLNYIMDTV | 55    | >ATM-D126E ELLNYIMETV | 39  | 16    |

|                        |       |                        |      |       |
|------------------------|-------|------------------------|------|-------|
| >ATM-D126E ELLNYIMDTV  | 45    | >ATM-D126E ELLNYIMETV  | 36   | 9     |
| >ATM-D126E ELLNYIMDTV  | 123   | >ATM-D126E ELLNYIMETV  | 128  | 5     |
| >ATM-D126E ELLNYIMDT   | 606   | >ATM-D126E ELLNYIMET   | 28   | 578   |
| >ATM-D126E ELLNYIMDTV  | 3     | >ATM-D126E ELLNYIMETV  | 2    | 1     |
| >ATM-D126E ELLNYIMDTV  | 7     | >ATM-D126E ELLNYIMETV  | 6    | 1     |
| >ATM-D126E ELLNYIMDTV  | 9     | >ATM-D126E ELLNYIMETV  | 8    | 1     |
| >ATM-D126E ELLNYIMDT   | 1316  | >ATM-D126E ELLNYIMET   | 270  | 1046  |
| >ATM-D126E ELLNYIMDTV  | 4     | >ATM-D126E ELLNYIMETV  | 3    | 1     |
| >ATM-D126E ELLNYIMDT   | 284   | >ATM-D126E ELLNYIMET   | 53   | 231   |
| >ATM-D126E ELLNYIMDTV  | 5     | >ATM-D126E ELLNYIMETV  | 3    | 2     |
| >ATM-D126E ELLNYIMDTV  | 193   | >ATM-D126E ELLNYIMETV  | 174  | 19    |
| >ATM-D126E ELLNYIMDTV  | 99    | >ATM-D126E ELLNYIMETV  | 164  | 65    |
| >ATM-D126E ELLNYIMDT   | 2947  | >ATM-D126E ELLNYIMET   | 339  | 2608  |
| >ATM-D126E ELLNYIMDTV  | 8     | >ATM-D126E ELLNYIMETV  | 6    | 2     |
| >ATM-D126E QELLNYIMDT  | 21    | >ATM-D126E QELLNYIMET  | 29   | 8     |
| >ATM-D126E QELLNYIMDT  | 813   | >ATM-D126E QELLNYIMET  | 451  | 362   |
| >ATM-D126E QELLNYIMDT  | 122   | >ATM-D126E QELLNYIMET  | 96   | 26    |
| >ATM-D126E QELLNYIMDT  | 458   | >ATM-D126E QELLNYIMET  | 275  | 183   |
| >ATM-D126E QELLNYIMDT  | 267   | >ATM-D126E QELLNYIMET  | 296  | 29    |
| >ATM-D126E QELLNYIMDT  | 893   | >ATM-D126E QELLNYIMET  | 466  | 427   |
| >ATM-D126E QELLNYIMDT  | 85    | >ATM-D126E QELLNYIMET  | 84   | 1     |
| >ATM-D126E QELLNYIMDT  | 247   | >ATM-D126E QELLNYIMET  | 276  | 29    |
| >ATM-D126E QELLNYIMDT  | 24    | >ATM-D126E QELLNYIMET  | 20   | 4     |
| >ATM-D1682 DFSTIAIQHSK | 9041  | >ATM-D1682 HFSTIAIQHSK | 68   | 8973  |
| >ATM-D1682 DFSTIAIQHSK | 7228  | >ATM-D1682 HFSTIAIQHSK | 293  | 6935  |
| >ATM-D1682 DFSTIAIQHSK | 206   | >ATM-D1682 HFSTIAIQHSK | 770  | 564   |
| >ATM-D1682 DFSTIAIQHSK | 73    | >ATM-D1682 HFSTIAIQHSK | 83   | 10    |
| >ATM-D1682 DFSTIAIQHSK | 3616  | >ATM-D1682 HFSTIAIQHSK | 148  | 3468  |
| >ATM-D1682 IDFSTIAI    | 455   | >ATM-D1682 IHFSTIAI    | 16   | 439   |
| >ATM-D1682 IDFSTIAIQ   | 3993  | >ATM-D1682 IHFSTIAIQ   | 469  | 3524  |
| >ATM-D1682 IDFSTIAIQH  | 4373  | >ATM-D1682 IHFSTIAIQH  | 412  | 3961  |
| >ATM-D1682 IDFSTIAI    | 9363  | >ATM-D1682 IHFSTIAI    | 107  | 9256  |
| >ATM-D1682 IDFSTIAI    | 340   | >ATM-D1682 IHFSTIAI    | 6278 | 5938  |
| >ATM-D1682 IDFSTIAI    | 25035 | >ATM-D1682 IHFSTIAI    | 262  | 24773 |
| >ATM-D1682 IDFSTIAI    | 59    | >ATM-D1682 IHFSTIAI    | 9244 | 9185  |
| >ATM-D1682 PIDFSTIAI   | 16074 | >ATM-D1682 PIHFSTIAI   | 337  | 15737 |
| >ATM-D1682 GPIDFSTI    | 123   | >ATM-D1682 GPIHFSTI    | 167  | 44    |
| >ATM-D1682 GPIDFSTIA   | 153   | >ATM-D1682 GPIHFSTIA   | 137  | 16    |
| >ATM-D1682 GPIDFSTIAI  | 371   | >ATM-D1682 GPIHFSTIAI  | 498  | 127   |
| >ATM-D1682 GPIDFSTI    | 723   | >ATM-D1682 GPIHFSTI    | 422  | 301   |
| >ATM-D1682 VGPIDFSTI   | 446   | >ATM-D1682 VGPIHFSTI   | 248  | 198   |
| >ATM-D1682 VGPIDFSTIAI | 182   | >ATM-D1682 VGPIHFSTIAI | 129  | 53    |
| >ATM-D1682 VGPIDFSTI   | 3573  | >ATM-D1682 VGPIHFSTI   | 201  | 3372  |

|                       |       |                        |       |       |
|-----------------------|-------|------------------------|-------|-------|
| >ATM-D1682VGPIDFSTI   | 111   | >ATM-D1682VGPIHFSTI    | 14    | 97    |
| >ATM-D1682VGPIDFSTIAI | 159   | >ATM-D1682VGPIHFSTIAI  | 38    | 121   |
| >ATM-D1682VGPIDFSTI   | 539   | >ATM-D1682VGPIHFSTI    | 499   | 40    |
| >ATM-D1682EVGPIDFS    | 205   | >ATM-D1682EVGPIHFS     | 107   | 98    |
| >ATM-D1682EVGPIDFST   | 113   | >ATM-D1682EVGPIHFST    | 126   | 13    |
| >ATM-D1682EVGPIDFSTI  | 404   | >ATM-D1682EVGPIHFSTI   | 309   | 95    |
| >ATM-D1682EVGPIDFSTIA | 75    | >ATM-D1682EVGPIHFSTIA  | 82    | 7     |
| >ATM-D1682EVGPIDFST   | 3307  | >ATM-D1682EVGPIHFST    | 352   | 2955  |
| >ATM-D1682EVGPIDFSTI  | 166   | >ATM-D1682EVGPIHFSTI   | 37    | 129   |
| >ATM-D1682GEVGPIDFSTI | 644   | >ATM-D1682GEVGPPIHFSTI | 428   | 216   |
| >ATM-D1682GEVGPIDF    | 61    | >ATM-D1682GEVGPPIHF    | 54    | 7     |
| >ATM-D1682GEVGPIDFSTI | 19    | >ATM-D1682GEVGPPIHFSTI | 18    | 1     |
| >ATM-D1682GEVGPIDFST  | 275   | >ATM-D1682GEVGPPIHFST  | 187   | 88    |
| >ATM-D1682GEVGPIDFSTI | 251   | >ATM-D1682GEVGPPIHFSTI | 165   | 86    |
| >ATM-D1682GEVGPIDF    | 470   | >ATM-D1682GEVGPPIHF    | 345   | 125   |
| >ATM-D1682GEVGPIDF    | 78    | >ATM-D1682GEVGPPIHF    | 94    | 16    |
| >ATM-D1682GEVGPIDFSTI | 635   | >ATM-D1682GEVGPPIHFSTI | 450   | 185   |
| >ATM-D1682GEVGPIDFS   | 776   | >ATM-D1682GEVGPPIHFS   | 179   | 597   |
| >ATM-D1682GEVGPIDFSTI | 514   | >ATM-D1682GEVGPPIHFSTI | 280   | 234   |
| >ATM-D1682GEVGPIDFSTI | 6     | >ATM-D1682GEVGPPIHFSTI | 6     | 0     |
| >ATM-D1682CLGEVGPIDF: | 634   | >ATM-D1682CLGEVGPPIHF: | 200   | 434   |
| >ATM-D1682DFSTIAIQH   | 4842  | >ATM-D1682YFSTIAIQH    | 157   | 4685  |
| >ATM-D1682DFSTIAIQHSK | 206   | >ATM-D1682YFSTIAIQHSK  | 1577  | 1371  |
| >ATM-D1682DFSTIAIQHSK | 73    | >ATM-D1682YFSTIAIQHSK  | 52    | 21    |
| >ATM-D1682IDFSTIAI    | 3598  | >ATM-D1682IYFSTIAI     | 401   | 3197  |
| >ATM-D1682IDFSTIAI    | 14260 | >ATM-D1682IYFSTIAI     | 16    | 14244 |
| >ATM-D1682IDFSTIAI    | 14073 | >ATM-D1682IYFSTIAI     | 52    | 14021 |
| >ATM-D1682IDFSTIAI    | 23564 | >ATM-D1682IYFSTIAI     | 230   | 23334 |
| >ATM-D1682IDFSTIAI    | 24506 | >ATM-D1682IYFSTIAI     | 13    | 24493 |
| >ATM-D1682IDFSTIAI    | 12845 | >ATM-D1682IYFSTIAI     | 359   | 12486 |
| >ATM-D1682IDFSTIAI    | 3835  | >ATM-D1682IYFSTIAI     | 148   | 3687  |
| >ATM-D1682IDFSTIAI    | 455   | >ATM-D1682IYFSTIAI     | 202   | 253   |
| >ATM-D1682IDFSTIAI    | 340   | >ATM-D1682IYFSTIAI     | 12996 | 12656 |
| >ATM-D1682IDFSTIAI    | 32436 | >ATM-D1682IYFSTIAI     | 295   | 32141 |
| >ATM-D1682IDFSTIAI    | 59    | >ATM-D1682IYFSTIAI     | 13959 | 13900 |
| >ATM-D1682GSCLGEVGP   | 28598 | >ATM-D1682GSCLGEVGP    | 128   | 28470 |
| >ATM-D1682GSCLGEVGP   | 24654 | >ATM-D1682GSCLGEVGP    | 68    | 24586 |
| >ATM-D1682GSCLGEVGP   | 22427 | >ATM-D1682GSCLGEVGP    | 106   | 22321 |
| >ATM-D1682PIDFSTIAI   | 1585  | >ATM-D1682PIYFSTIAI    | 110   | 1475  |
| >ATM-D1682GPIDFSTI    | 123   | >ATM-D1682GPIYFSTI     | 133   | 10    |
| >ATM-D1682GPIDFSTIA   | 153   | >ATM-D1682GPIYFSTIA    | 104   | 49    |
| >ATM-D1682GPIDFSTI    | 899   | >ATM-D1682GPIYFSTI     | 166   | 733   |
| >ATM-D1682GPIDFSTIAI  | 371   | >ATM-D1682GPIYFSTIAI   | 468   | 97    |

|                       |       |                       |      |       |
|-----------------------|-------|-----------------------|------|-------|
| >ATM-D1682VGPIDFSTI   | 446   | >ATM-D1682VGPIYFSTI   | 262  | 184   |
| >ATM-D1682VGPIDFSTIAI | 182   | >ATM-D1682VGPIYFSTIAI | 133  | 49    |
| >ATM-D1682VGPIDFSTI   | 3573  | >ATM-D1682VGPIYFSTI   | 92   | 3481  |
| >ATM-D1682VGPIDFSTI   | 111   | >ATM-D1682VGPIYFSTI   | 12   | 99    |
| >ATM-D1682VGPIDFSTIAI | 159   | >ATM-D1682VGPIYFSTIAI | 32   | 127   |
| >ATM-D1682EVGPIDFS    | 205   | >ATM-D1682EVGPIYFS    | 47   | 158   |
| >ATM-D1682EVGPIDFST   | 113   | >ATM-D1682EVGPIYFST   | 56   | 57    |
| >ATM-D1682EVGPIDFSTI  | 404   | >ATM-D1682EVGPIYFSTI  | 153  | 251   |
| >ATM-D1682EVGPIDFSTIA | 75    | >ATM-D1682EVGPIYFSTIA | 57   | 18    |
| >ATM-D1682EVGPIDFST   | 3307  | >ATM-D1682EVGPIYFST   | 204  | 3103  |
| >ATM-D1682EVGPIDFSTI  | 166   | >ATM-D1682EVGPIYFSTI  | 24   | 142   |
| >ATM-D1682EVGPIDFSTIA | 1306  | >ATM-D1682EVGPIYFSTIA | 446  | 860   |
| >ATM-D1682GEVGPIDFSTI | 644   | >ATM-D1682GEVGPYFSTI  | 380  | 264   |
| >ATM-D1682GEVGPIDF    | 61    | >ATM-D1682GEVGPYIF    | 30   | 31    |
| >ATM-D1682GEVGPIDFSTI | 19    | >ATM-D1682GEVGPYIFSTI | 19   | 0     |
| >ATM-D1682GEVGPIDFST  | 275   | >ATM-D1682GEVGPYIFST  | 102  | 173   |
| >ATM-D1682GEVGPIDFSTI | 251   | >ATM-D1682GEVGPYIFSTI | 98   | 153   |
| >ATM-D1682GEVGPIDF    | 470   | >ATM-D1682GEVGPYIF    | 512  | 42    |
| >ATM-D1682GEVGPIDF    | 78    | >ATM-D1682GEVGPYIF    | 51   | 27    |
| >ATM-D1682GEVGPIDFSTI | 635   | >ATM-D1682GEVGPYIFSTI | 346  | 289   |
| >ATM-D1682GEVGPIDFS   | 776   | >ATM-D1682GEVGPYIFS   | 154  | 622   |
| >ATM-D1682GEVGPIDFSTI | 514   | >ATM-D1682GEVGPYIFSTI | 191  | 323   |
| >ATM-D1682GEVGPIDFSTI | 6     | >ATM-D1682GEVGPYIFSTI | 5    | 1     |
| >ATM-D1682LGEVGPID    | 33790 | >ATM-D1682LGEVGPIY    | 444  | 33346 |
| >ATM-D1682CLGEVGPIDF  | 4300  | >ATM-D1682CLGEVGPIYF  | 235  | 4065  |
| >ATM-D1682CLGEVGPIDF  | 634   | >ATM-D1682CLGEVGPIYFS | 183  | 451   |
| >ATM-D1682CLGEVGPID   | 25338 | >ATM-D1682CLGEVGPIY   | 409  | 24929 |
| >ATM-D1682CLGEVGPID   | 26282 | >ATM-D1682CLGEVGPIY   | 134  | 26148 |
| >ATM-D1682CLGEVGPID   | 25950 | >ATM-D1682CLGEVGPIY   | 145  | 25805 |
| >ATM-D1682SCLGEVGPID  | 31568 | >ATM-D1682SCLGEVGPIY  | 440  | 31128 |
| >ATM-D1853DTNESWRNL   | 152   | >ATM-D1853NTNESWRNL   | 634  | 482   |
| >ATM-D1853DTNESWRNL   | 342   | >ATM-D1853NTNESWRNL   | 1265 | 923   |
| >ATM-D1853DTNESWRNL   | 618   | >ATM-D1853NTNESWRNL   | 258  | 360   |
| >ATM-D1853DTNESWRNL   | 923   | >ATM-D1853NTNESWRNL   | 368  | 555   |
| >ATM-D1853DTNESWRNL   | 562   | >ATM-D1853NTNESWRNL   | 463  | 99    |
| >ATM-D1853DTNESWRNL   | 180   | >ATM-D1853NTNESWRNL   | 151  | 29    |
| >ATM-D1853DTNESWRNL   | 1052  | >ATM-D1853NTNESWRNL   | 371  | 681   |
| >ATM-D1853QDTNESWR    | 1752  | >ATM-D1853QNTNESWR    | 400  | 1352  |
| >ATM-D1853LQDTNESWR   | 4017  | >ATM-D1853LQNTNESWR   | 220  | 3797  |
| >ATM-D1853LQDTNESW    | 6192  | >ATM-D1853LQNTNESW    | 408  | 5784  |
| >ATM-D1853LQDTNESW    | 2637  | >ATM-D1853LQNTNESW    | 118  | 2519  |
| >ATM-D1853LQDTNESWR   | 1360  | >ATM-D1853LQNTNESWR   | 61   | 1299  |
| >ATM-D1853LQDTNESW    | 1118  | >ATM-D1853LQNTNESW    | 221  | 897   |

|                       |       |                       |      |       |
|-----------------------|-------|-----------------------|------|-------|
| >ATM-D1853LQDTNESW    | 622   | >ATM-D1853LQNTNESW    | 292  | 330   |
| >ATM-D1853LQDTNESW    | 403   | >ATM-D1853LQNTNESW    | 98   | 305   |
| >ATM-D1853LLQDTNES    | 172   | >ATM-D1853LLQNTNES    | 1151 | 979   |
| >ATM-D1853LLQDTNESWI  | 251   | >ATM-D1853LLQNTNESWI  | 1616 | 1365  |
| >ATM-D1853LLQDTNESWI  | 279   | >ATM-D1853LLQNTNESWI  | 202  | 77    |
| >ATM-D1853LLQDTNESW   | 1318  | >ATM-D1853LLQNTNESW   | 451  | 867   |
| >ATM-D1853LLQDTNESW   | 268   | >ATM-D1853LLQNTNESW   | 250  | 18    |
| >ATM-D1853LLQDTNESW   | 483   | >ATM-D1853LLQNTNESW   | 1177 | 694   |
| >ATM-D1853LLQDTNESW   | 135   | >ATM-D1853LLQNTNESW   | 167  | 32    |
| >ATM-D1853ILLQDTNESW  | 227   | >ATM-D1853ILLQNTNESW  | 111  | 116   |
| >ATM-D1853ILLQDTNESW  | 431   | >ATM-D1853ILLQNTNESW  | 251  | 180   |
| >ATM-D1853ILLQDTNESW  | 323   | >ATM-D1853ILLQNTNESW  | 114  | 209   |
| >ATM-D1853ILLQDTNESW  | 287   | >ATM-D1853ILLQNTNESW  | 270  | 17    |
| >ATM-D1853ILLQDTNESW  | 83    | >ATM-D1853ILLQNTNESW  | 65   | 18    |
| >ATM-D1853ILLQDTNESW  | 348   | >ATM-D1853ILLQNTNESW  | 449  | 101   |
| >ATM-D1853ILLQDTNESW  | 225   | >ATM-D1853ILLQNTNESW  | 292  | 67    |
| >ATM-D1853ILLQDTNESW  | 210   | >ATM-D1853ILLQNTNESW  | 135  | 75    |
| >ATM-D1853HDILLQDT    | 915   | >ATM-D1853HDILLQNT    | 457  | 458   |
| >ATM-D1853LIHDILLQDT  | 575   | >ATM-D1853LIHDILLQNT  | 309  | 266   |
| >ATM-D1853YLIHDILLQDT | 180   | >ATM-D1853YLIHDILLQNT | 48   | 132   |
| >ATM-D1853YLIHDILLQDT | 215   | >ATM-D1853YLIHDILLQNT | 42   | 173   |
| >ATM-D1853YLIHDILLQDT | 31    | >ATM-D1853YLIHDILLQNT | 14   | 17    |
| >ATM-D1853YLIHDILLQDT | 183   | >ATM-D1853YLIHDILLQNT | 89   | 94    |
| >ATM-D1853YLIHDILLQDT | 196   | >ATM-D1853YLIHDILLQNT | 45   | 151   |
| >ATM-D1853YLIHDILLQDT | 140   | >ATM-D1853YLIHDILLQNT | 55   | 85    |
| >ATM-D1853YLIHDILLQDT | 392   | >ATM-D1853YLIHDILLQNT | 192  | 200   |
| >ATM-D1853YLIHDILLQD  | 876   | >ATM-D1853YLIHDILLQN  | 433  | 443   |
| >ATM-D1853YLIHDILLQDT | 17    | >ATM-D1853YLIHDILLQNT | 9    | 8     |
| >ATM-D1853DTNESWRNL   | 152   | >ATM-D1853VTNESWRNL   | 2008 | 1856  |
| >ATM-D1853DTNESWRNL   | 342   | >ATM-D1853VTNESWRNL   | 3368 | 3026  |
| >ATM-D1853DTNESWRNL   | 180   | >ATM-D1853VTNESWRNL   | 2567 | 2387  |
| >ATM-D1853DTNESWRNL   | 1052  | >ATM-D1853VTNESWRNL   | 11   | 1041  |
| >ATM-D1853DTNESWRNL   | 4430  | >ATM-D1853VTNESWRNL   | 125  | 4305  |
| >ATM-D1853DTNESWRNL   | 3261  | >ATM-D1853VTNESWRNL   | 57   | 3204  |
| >ATM-D1853QDTNESWR    | 1752  | >ATM-D1853QVTNESWR    | 18   | 1734  |
| >ATM-D1853QDTNESWRN   | 16570 | >ATM-D1853QVTNESWRN   | 230  | 16340 |
| >ATM-D1853LQDTNESW    | 2637  | >ATM-D1853LQVTNESW    | 82   | 2555  |
| >ATM-D1853LQDTNESWR   | 1360  | >ATM-D1853LQVTNESWR   | 44   | 1316  |
| >ATM-D1853LQDTNESW    | 1118  | >ATM-D1853LQVTNESW    | 342  | 776   |
| >ATM-D1853LQDTNESW    | 622   | >ATM-D1853LQVTNESW    | 286  | 336   |
| >ATM-D1853LQDTNESW    | 403   | >ATM-D1853LQVTNESW    | 47   | 356   |
| >ATM-D1853LLQDTNES    | 172   | >ATM-D1853LLQVTNES    | 3450 | 3278  |
| >ATM-D1853LLQDTNESWI  | 251   | >ATM-D1853LLQVTNESWI  | 3740 | 3489  |

|                        |       |                        |     |       |
|------------------------|-------|------------------------|-----|-------|
| >ATM-D1853 LLQDTNESWI  | 279   | >ATM-D1853 LLQVTNESWI  | 276 | 3     |
| >ATM-D1853 LLQDTNESW   | 268   | >ATM-D1853 LLQVTNESW   | 496 | 228   |
| >ATM-D1853 LLQDTNESW   | 483   | >ATM-D1853 LLQVTNESW   | 741 | 258   |
| >ATM-D1853 LLQDTNESW   | 135   | >ATM-D1853 LLQVTNESW   | 68  | 67    |
| >ATM-D1853 ILLQDTNES   | 1330  | >ATM-D1853 ILLQVTNES   | 243 | 1087  |
| >ATM-D1853 ILLQDTNESW  | 1662  | >ATM-D1853 ILLQVTNESW  | 408 | 1254  |
| >ATM-D1853 ILLQDTNESW  | 227   | >ATM-D1853 ILLQVTNESW  | 81  | 146   |
| >ATM-D1853 ILLQDTNESW  | 1254  | >ATM-D1853 ILLQVTNESW  | 282 | 972   |
| >ATM-D1853 ILLQDTNESW  | 431   | >ATM-D1853 ILLQVTNESW  | 139 | 292   |
| >ATM-D1853 ILLQDTNESW  | 323   | >ATM-D1853 ILLQVTNESW  | 227 | 96    |
| >ATM-D1853 ILLQDTNESW  | 287   | >ATM-D1853 ILLQVTNESW  | 204 | 83    |
| >ATM-D1853 ILLQDTNESW  | 83    | >ATM-D1853 ILLQVTNESW  | 26  | 57    |
| >ATM-D1853 ILLQDTNESW  | 348   | >ATM-D1853 ILLQVTNESW  | 380 | 32    |
| >ATM-D1853 ILLQDTNESW  | 225   | >ATM-D1853 ILLQVTNESW  | 325 | 100   |
| >ATM-D1853 ILLQDTNESW  | 210   | >ATM-D1853 ILLQVTNESW  | 203 | 7     |
| >ATM-D1853 HDILLQDT    | 915   | >ATM-D1853 HDILLQVT    | 337 | 578   |
| >ATM-D1853 LIHDILLQD   | 20263 | >ATM-D1853 LIHDILLQV   | 29  | 20234 |
| >ATM-D1853 LIHDILLQD   | 7015  | >ATM-D1853 LIHDILLQV   | 23  | 6992  |
| >ATM-D1853 LIHDILLQD   | 12293 | >ATM-D1853 LIHDILLQV   | 6   | 12287 |
| >ATM-D1853 LIHDILLQD   | 17382 | >ATM-D1853 LIHDILLQV   | 15  | 17367 |
| >ATM-D1853 LIHDILLQD   | 13790 | >ATM-D1853 LIHDILLQV   | 4   | 13786 |
| >ATM-D1853 LIHDILLQD   | 25209 | >ATM-D1853 LIHDILLQV   | 211 | 24998 |
| >ATM-D1853 LIHDILLQD   | 23138 | >ATM-D1853 LIHDILLQV   | 31  | 23107 |
| >ATM-D1853 LIHDILLQD   | 24364 | >ATM-D1853 LIHDILLQV   | 25  | 24339 |
| >ATM-D1853 LIHDILLQD   | 12787 | >ATM-D1853 LIHDILLQV   | 2   | 12785 |
| >ATM-D1853 LIHDILLQDT  | 575   | >ATM-D1853 LIHDILLQVT  | 439 | 136   |
| >ATM-D1853 LIHDILLQD   | 19056 | >ATM-D1853 LIHDILLQV   | 206 | 18850 |
| >ATM-D1853 LIHDILLQD   | 21800 | >ATM-D1853 LIHDILLQV   | 296 | 21504 |
| >ATM-D1853 YLIHDILLQD  | 601   | >ATM-D1853 YLIHDILLQV  | 10  | 591   |
| >ATM-D1853 YLIHDILLQDT | 180   | >ATM-D1853 YLIHDILLQVT | 85  | 95    |
| >ATM-D1853 YLIHDILLQD  | 3245  | >ATM-D1853 YLIHDILLQV  | 21  | 3224  |
| >ATM-D1853 YLIHDILLQDT | 215   | >ATM-D1853 YLIHDILLQVT | 131 | 84    |
| >ATM-D1853 YLIHDILLQD  | 2960  | >ATM-D1853 YLIHDILLQV  | 11  | 2949  |
| >ATM-D1853 YLIHDILLQDT | 31    | >ATM-D1853 YLIHDILLQVT | 24  | 7     |
| >ATM-D1853 YLIHDILLQD  | 2441  | >ATM-D1853 YLIHDILLQV  | 22  | 2419  |
| >ATM-D1853 YLIHDILLQDT | 183   | >ATM-D1853 YLIHDILLQVT | 98  | 85    |
| >ATM-D1853 YLIHDILLQD  | 1586  | >ATM-D1853 YLIHDILLQV  | 1   | 1585  |
| >ATM-D1853 YLIHDILLQDT | 196   | >ATM-D1853 YLIHDILLQVT | 44  | 152   |
| >ATM-D1853 YLIHDILLQD  | 5626  | >ATM-D1853 YLIHDILLQV  | 3   | 5623  |
| >ATM-D1853 YLIHDILLQDT | 140   | >ATM-D1853 YLIHDILLQVT | 49  | 91    |
| >ATM-D1853 YLIHDILLQD  | 8697  | >ATM-D1853 YLIHDILLQV  | 4   | 8693  |
| >ATM-D1853 YLIHDILLQDT | 392   | >ATM-D1853 YLIHDILLQVT | 356 | 36    |
| >ATM-D1853 YLIHDILLQD  | 20378 | >ATM-D1853 YLIHDILLQV  | 3   | 20375 |

|                       |       |                       |       |       |
|-----------------------|-------|-----------------------|-------|-------|
| >ATM-D1853YLIHDILLQD  | 876   | >ATM-D1853YLIHDILLQV  | 1     | 875   |
| >ATM-D1853YLIHDILLQDT | 17    | >ATM-D1853YLIHDILLQVT | 13    | 4     |
| >ATM-D1853YLIHDILLQD  | 20179 | >ATM-D1853YLIHDILLQV  | 85    | 20094 |
| >ATM-D1853YLIHDILLQD  | 15280 | >ATM-D1853YLIHDILLQV  | 246   | 15034 |
| >ATM-D2708DGKERRQL    | 838   | >ATM-D2708NGKERRQL    | 287   | 551   |
| >ATM-D2708DGKERRQLV   | 1588  | >ATM-D2708NGKERRQLV   | 462   | 1126  |
| >ATM-D2708GSDGKERR    | 5175  | >ATM-D2708GSNGKERR    | 200   | 4975  |
| >ATM-D2708GSDGKERRQI  | 992   | >ATM-D2708GSNGKERRQI  | 469   | 523   |
| >ATM-D2708IIDCVGSDGK  | 171   | >ATM-D2708IIDCVGSNGK  | 127   | 44    |
| >ATM-D2708KIIDCVGSDGI | 464   | >ATM-D2708KIIDCVGSNGI | 153   | 311   |
| >ATM-D2708KIIDCVGSDGI | 63    | >ATM-D2708KIIDCVGSNGI | 51    | 12    |
| >ATM-D2708KIIDCVGSDGI | 817   | >ATM-D2708KIIDCVGSNGI | 129   | 688   |
| >ATM-D2708KIIDCVGSDGI | 489   | >ATM-D2708KIIDCVGSNGI | 355   | 134   |
| >ATM-D2725DAVMQQVFC   | 249   | >ATM-D2725GAVMQQVFC   | 8775  | 8526  |
| >ATM-D2725DAVMQQVF    | 1340  | >ATM-D2725GAVMQQVF    | 249   | 1091  |
| >ATM-D2725DAVMQQVF    | 1272  | >ATM-D2725GAVMQQVF    | 36    | 1236  |
| >ATM-D2725DAVMQQVFC   | 1090  | >ATM-D2725GAVMQQVFC   | 55    | 1035  |
| >ATM-D2725DAVMQQVF    | 178   | >ATM-D2725GAVMQQVF    | 1106  | 928   |
| >ATM-D2725QDAVMQQV    | 220   | >ATM-D2725QGAVMQQV    | 18865 | 18645 |
| >ATM-D2725RQDAVMQQ    | 145   | >ATM-D2725RQGAVMQQ    | 919   | 774   |
| >ATM-D2725RQDAVMQQ    | 492   | >ATM-D2725RQGAVMQQ    | 486   | 6     |
| >ATM-D2725RQDAVMQQ    | 342   | >ATM-D2725RQGAVMQQ    | 124   | 218   |
| >ATM-D2725RQDAVMQQ    | 6     | >ATM-D2725RQGAVMQQ    | 21    | 15    |
| >ATM-D2725RQDAVMQQ    | 17    | >ATM-D2725RQGAVMQQ    | 37    | 20    |
| >ATM-D2725RQDAVMQQ    | 66    | >ATM-D2725RQGAVMQQ    | 181   | 115   |
| >ATM-D2725RQDAVMQQ    | 589   | >ATM-D2725RQGAVMQQ    | 298   | 291   |
| >ATM-D2725RQDAVMQQ    | 103   | >ATM-D2725RQGAVMQQ    | 33    | 70    |
| >ATM-D2725RQDAVMQQ    | 30    | >ATM-D2725RQGAVMQQ    | 6     | 24    |
| >ATM-D2725LRQDAVMQC   | 394   | >ATM-D2725LRQGAVMQC   | 928   | 534   |
| >ATM-D2725LRQDAVMQC   | 39    | >ATM-D2725LRQGAVMQC   | 74    | 35    |
| >ATM-D2725LRQDAVMQC   | 334   | >ATM-D2725LRQGAVMQC   | 155   | 179   |
| >ATM-D2725LRQDAVMQC   | 448   | >ATM-D2725LRQGAVMQC   | 452   | 4     |
| >ATM-D2725LRQDAVMQC   | 127   | >ATM-D2725LRQGAVMQC   | 222   | 95    |
| >ATM-D2725DLRQDAVMC   | 471   | >ATM-D2725DLRQGAVMC   | 318   | 153   |
| >ATM-D2725DLRQDAVMC   | 742   | >ATM-D2725DLRQGAVMC   | 411   | 331   |
| >ATM-D2725DLRQDAVMC   | 14    | >ATM-D2725DLRQGAVMC   | 10    | 4     |
| >ATM-D2725DLRQDAVM    | 996   | >ATM-D2725DLRQGAVM    | 466   | 530   |
| >ATM-D2725DDLQRQDAV   | 373   | >ATM-D2725DDLQRQGAV   | 340   | 33    |
| >ATM-D2725RDDLRQDAV   | 83    | >ATM-D2725RDDLRQGAV   | 56    | 27    |
| >ATM-D2725KGRDDLQRQD  | 254   | >ATM-D2725KGRDDLQRQG  | 125   | 129   |
| >ATM-D2725KGRDDLQRQD  | 694   | >ATM-D2725KGRDDLQRQG  | 183   | 511   |
| >ATM-D2725DAVMQQVFC   | 249   | >ATM-D2725VAVMQQVFC   | 2846  | 2597  |
| >ATM-D2725DAVMQQVF    | 8437  | >ATM-D2725VAVMQQVF    | 415   | 8022  |



|                       |       |                       |       |       |
|-----------------------|-------|-----------------------|-------|-------|
| >ATM-D2725 DAVMQQVF   | 1340  | >ATM-D2725 VAVMQQVF   | 53    | 1287  |
| >ATM-D2725 DAVMQQVF   | 1272  | >ATM-D2725 VAVMQQVF   | 13    | 1259  |
| >ATM-D2725 DAVMQQVFC  | 1090  | >ATM-D2725 VAVMQQVFC  | 19    | 1071  |
| >ATM-D2725 DAVMQQVF   | 178   | >ATM-D2725 VAVMQQVF   | 150   | 28    |
| >ATM-D2725 DAVMQQVF   | 9074  | >ATM-D2725 VAVMQQVF   | 95    | 8979  |
| >ATM-D2725 DAVMQQVFC  | 9683  | >ATM-D2725 VAVMQQVFC  | 160   | 9523  |
| >ATM-D2725 QDAVMQQV   | 11471 | >ATM-D2725 QVAVMQQV   | 307   | 11164 |
| >ATM-D2725 QDAVMQQV   | 14595 | >ATM-D2725 QVAVMQQV   | 431   | 14164 |
| >ATM-D2725 QDAVMQQV   | 16260 | >ATM-D2725 QVAVMQQV   | 432   | 15828 |
| >ATM-D2725 QDAVMQQV   | 23048 | >ATM-D2725 QVAVMQQV   | 55    | 22993 |
| >ATM-D2725 QDAVMQQV   | 24667 | >ATM-D2725 QVAVMQQV   | 263   | 24404 |
| >ATM-D2725 QDAVMQQV   | 3965  | >ATM-D2725 QVAVMQQV   | 22    | 3943  |
| >ATM-D2725 QDAVMQQV   | 10311 | >ATM-D2725 QVAVMQQV   | 80    | 10231 |
| >ATM-D2725 QDAVMQQV   | 15327 | >ATM-D2725 QVAVMQQV   | 497   | 14830 |
| >ATM-D2725 QDAVMQQV   | 9899  | >ATM-D2725 QVAVMQQV   | 378   | 9521  |
| >ATM-D2725 QDAVMQQV   | 4683  | >ATM-D2725 QVAVMQQV   | 382   | 4301  |
| >ATM-D2725 QDAVMQQV   | 17142 | >ATM-D2725 QVAVMQQV   | 265   | 16877 |
| >ATM-D2725 QDAVMQQV   | 5603  | >ATM-D2725 QVAVMQQV   | 444   | 5159  |
| >ATM-D2725 QDAVMQQV   | 220   | >ATM-D2725 QVAVMQQV   | 24174 | 23954 |
| >ATM-D2725 LVKGRDDLRC | 23732 | >ATM-D2725 LVKGRDDLRC | 231   | 23501 |
| >ATM-D2725 LVKGRDDLRC | 34320 | >ATM-D2725 LVKGRDDLRC | 41    | 34279 |
| >ATM-D2725 RQDAVMQQ'  | 145   | >ATM-D2725 RQVAVMQQ'  | 409   | 264   |
| >ATM-D2725 RQDAVMQQ'  | 492   | >ATM-D2725 RQVAVMQQ'  | 133   | 359   |
| >ATM-D2725 RQDAVMQQ'  | 342   | >ATM-D2725 RQVAVMQQ'  | 24    | 318   |
| >ATM-D2725 RQDAVMQQ'  | 6     | >ATM-D2725 RQVAVMQQ'  | 5     | 1     |
| >ATM-D2725 RQDAVMQQ'  | 17    | >ATM-D2725 RQVAVMQQ'  | 38    | 21    |
| >ATM-D2725 RQDAVMQQ'  | 66    | >ATM-D2725 RQVAVMQQ'  | 322   | 256   |
| >ATM-D2725 RQDAVMQQ'  | 589   | >ATM-D2725 RQVAVMQQ'  | 227   | 362   |
| >ATM-D2725 RQDAVMQQ'  | 7006  | >ATM-D2725 RQVAVMQQ'  | 416   | 6590  |
| >ATM-D2725 RQDAVMQQ'  | 103   | >ATM-D2725 RQVAVMQQ'  | 34    | 69    |
| >ATM-D2725 RQDAVMQQ'  | 1797  | >ATM-D2725 RQVAVMQQ'  | 128   | 1669  |
| >ATM-D2725 RQDAVMQQ'  | 30    | >ATM-D2725 RQVAVMQQ'  | 3     | 27    |
| >ATM-D2725 RQDAVMQQ'  | 995   | >ATM-D2725 RQVAVMQQ'  | 240   | 755   |
| >ATM-D2725 RQDAVMQQ'  | 2831  | >ATM-D2725 RQVAVMQQ'  | 377   | 2454  |
| >ATM-D2725 RQDAVMQQ'  | 1992  | >ATM-D2725 RQVAVMQQ'  | 277   | 1715  |
| >ATM-D2725 RQDAVMQQ'  | 776   | >ATM-D2725 RQVAVMQQ'  | 210   | 566   |
| >ATM-D2725 RQDAVMQQ'  | 2540  | >ATM-D2725 RQVAVMQQ'  | 387   | 2153  |
| >ATM-D2725 LRQDAVMQC  | 394   | >ATM-D2725 LRQVAVMQC  | 6696  | 6302  |
| >ATM-D2725 LRQDAVMQC  | 39    | >ATM-D2725 LRQVAVMQC  | 30    | 9     |
| >ATM-D2725 LRQDAVMQC  | 334   | >ATM-D2725 LRQVAVMQC  | 208   | 126   |
| >ATM-D2725 LRQDAVMQC  | 448   | >ATM-D2725 LRQVAVMQC  | 373   | 75    |
| >ATM-D2725 LRQDAVMQC  | 127   | >ATM-D2725 LRQVAVMQC  | 62    | 65    |
| >ATM-D2725 DLRQDAVMC  | 471   | >ATM-D2725 DLRQVAVMC  | 144   | 327   |

|                        |       |                        |       |       |
|------------------------|-------|------------------------|-------|-------|
| >ATM-D2725 DLRQDAVMC   | 742   | >ATM-D2725 DLRQVAVMC   | 294   | 448   |
| >ATM-D2725 DLRQDAVMC   | 14    | >ATM-D2725 DLRQVAVMC   | 14    | 0     |
| >ATM-D2725 DDLRQDAV    | 373   | >ATM-D2725 DDLRQVAV    | 460   | 87    |
| >ATM-D2725 RDDLRQDAV   | 83    | >ATM-D2725 RDDLRQVAV   | 146   | 63    |
| >ATM-D2725 GRDDLQDA    | 1563  | >ATM-D2725 GRDDLQVA    | 400   | 1163  |
| >ATM-D2725 GRDDLQDA    | 1312  | >ATM-D2725 GRDDLQVA    | 486   | 826   |
| >ATM-D2725 KGRDDLQD    | 254   | >ATM-D2725 KGRDDLQV    | 82    | 172   |
| >ATM-D2725 KGRDDLQD    | 694   | >ATM-D2725 KGRDDLQV    | 125   | 569   |
| >ATM-E1991 EKSKEETGISL | 189   | >ATM-E1991 DKSKEETGISL | 695   | 506   |
| >ATM-E1991 SEKSKEETGI  | 267   | >ATM-E1991 SDKSKEETGI  | 6789  | 6522  |
| >ATM-E1991 SEKSKEET    | 437   | >ATM-E1991 SDKSKEET    | 28879 | 28442 |
| >ATM-E1991 SEKSKEETGI  | 52    | >ATM-E1991 SDKSKEETGI  | 3075  | 3023  |
| >ATM-E1991 SEKSKEETGI  | 11931 | >ATM-E1991 SDKSKEETGI  | 381   | 11550 |
| >ATM-E1991 LSEKSKEETGI | 228   | >ATM-E1991 LSDKSKEETGI | 389   | 161   |
| >ATM-E1991 SLSEKSKEET  | 405   | >ATM-E1991 SLSDKSKEET  | 662   | 257   |
| >ATM-E1991 SLSEKSKEET  | 92    | >ATM-E1991 SLSDKSKEET  | 37    | 55    |
| >ATM-E1991 SSLSEKSK    | 59    | >ATM-E1991 SSLSDKSK    | 85    | 26    |
| >ATM-E1991 SSLSEKSK    | 335   | >ATM-E1991 SSLSDKSK    | 499   | 164   |
| >ATM-E1991 SSLSEKSK    | 237   | >ATM-E1991 SSLSDKSK    | 223   | 14    |
| >ATM-E1991 ISSLSEKSK   | 358   | >ATM-E1991 ISSLSDKSK   | 614   | 256   |
| >ATM-E1991 TISSLSEK    | 174   | >ATM-E1991 TISSLSDK    | 252   | 78    |
| >ATM-E1991 TISSLSEKSK  | 482   | >ATM-E1991 TISSLSDKSK  | 654   | 172   |
| >ATM-E1991 TISSLSEK    | 20    | >ATM-E1991 TISSLSDK    | 36    | 16    |
| >ATM-E1991 TISSLSEKSK  | 62    | >ATM-E1991 TISSLSDKSK  | 59    | 3     |
| >ATM-E1991 TISSLSEK    | 23    | >ATM-E1991 TISSLSDK    | 56    | 33    |
| >ATM-E1991 TISSLSEKSK  | 113   | >ATM-E1991 TISSLSDKSK  | 75    | 38    |
| >ATM-E1991 TTISSLSEK   | 202   | >ATM-E1991 TTISSLSDK   | 326   | 124   |
| >ATM-E1991 TTISSLSEK   | 9     | >ATM-E1991 TTISSLSDK   | 12    | 3     |
| >ATM-E1991 TTISSLSEKSK | 22    | >ATM-E1991 TTISSLSDKSK | 29    | 7     |
| >ATM-E1991 TTISSLSEK   | 160   | >ATM-E1991 TTISSLSDK   | 340   | 180   |
| >ATM-E1991 TTISSLSEK   | 410   | >ATM-E1991 TTISSLSDK   | 1704  | 1294  |
| >ATM-E1991 TTISSLSEK   | 422   | >ATM-E1991 TTISSLSDK   | 3551  | 3129  |
| >ATM-E1991 TTISSLSEK   | 3     | >ATM-E1991 TTISSLSDK   | 6     | 3     |
| >ATM-E1991 TTISSLSEKSK | 9     | >ATM-E1991 TTISSLSDKSK | 9     | 0     |
| >ATM-E1991 TTISSLSEK   | 261   | >ATM-E1991 TTISSLSDK   | 266   | 5     |
| >ATM-E1991 TTISSLSEKSK | 472   | >ATM-E1991 TTISSLSDKSK | 527   | 55    |
| >ATM-E1991 STTISSLSEK  | 83    | >ATM-E1991 STTISSLSDK  | 156   | 73    |
| >ATM-E1991 STTISSLSEK  | 10    | >ATM-E1991 STTISSLSDK  | 15    | 5     |
| >ATM-E1991 STTISSLSEK  | 50    | >ATM-E1991 STTISSLSDK  | 175   | 125   |
| >ATM-E1991 STTISSLSEK  | 31    | >ATM-E1991 STTISSLSDK  | 71    | 40    |
| >ATM-E1991 STTISSLSEK  | 112   | >ATM-E1991 STTISSLSDK  | 117   | 5     |
| >ATM-E1991 QSTTISSLSEK | 75    | >ATM-E1991 QSTTISSLSDK | 263   | 188   |
| >ATM-E1991 QSTTISSLSEK | 28    | >ATM-E1991 QSTTISSLSDK | 81    | 53    |

|                        |       |                        |       |       |
|------------------------|-------|------------------------|-------|-------|
| >ATM-E2164 ESVYSLYPT   | 62    | >ATM-E2164 KSVYSLYPT   | 7568  | 7506  |
| >ATM-E2164 ESVYSLYPTL  | 13    | >ATM-E2164 KSVYSLYPTL  | 650   | 637   |
| >ATM-E2164 ESVYSLYPTL  | 15334 | >ATM-E2164 KSVYSLYPTL  | 198   | 15136 |
| >ATM-E2164 ESVYSLYPTL  | 3372  | >ATM-E2164 KSVYSLYPTL  | 59    | 3313  |
| >ATM-E2164 ESVYSLYPT   | 41    | >ATM-E2164 KSVYSLYPT   | 6691  | 6650  |
| >ATM-E2164 ESVYSLYPTL  | 215   | >ATM-E2164 KSVYSLYPTL  | 4493  | 4278  |
| >ATM-E2164 ESVYSLYPTL  | 122   | >ATM-E2164 KSVYSLYPTL  | 5987  | 5865  |
| >ATM-E2164 ESVYSLYPTL  | 1106  | >ATM-E2164 KSVYSLYPTL  | 82    | 1024  |
| >ATM-E2164 ESVYSLYPT   | 5336  | >ATM-E2164 KSVYSLYPT   | 126   | 5210  |
| >ATM-E2164 ESVYSLYPTL  | 24    | >ATM-E2164 KSVYSLYPTL  | 4     | 20    |
| >ATM-E2164 ESVYSLYPTL  | 7643  | >ATM-E2164 KSVYSLYPTL  | 32    | 7611  |
| >ATM-E2164 ESVYSLYPTL  | 996   | >ATM-E2164 KSVYSLYPTL  | 142   | 854   |
| >ATM-E2164 LESVYSLYPTL | 195   | >ATM-E2164 LKSVYSLYPTL | 9329  | 9134  |
| >ATM-E2164 LESVYSLY    | 394   | >ATM-E2164 LKSVYSLY    | 402   | 8     |
| >ATM-E2164 LESVYSLY    | 334   | >ATM-E2164 LKSVYSLY    | 7     | 327   |
| >ATM-E2164 LESVYSLYPTL | 616   | >ATM-E2164 LKSVYSLYPTL | 21    | 595   |
| >ATM-E2164 LESVYSLY    | 43    | >ATM-E2164 LKSVYSLY    | 9218  | 9175  |
| >ATM-E2164 LESVYSLYPTL | 70    | >ATM-E2164 LKSVYSLYPTL | 15141 | 15071 |
| >ATM-E2164 LESVYSLYPTL | 1371  | >ATM-E2164 LKSVYSLYPTL | 480   | 891   |
| >ATM-E2164 LESVYSLYPTL | 13    | >ATM-E2164 LKSVYSLYPTL | 14523 | 14510 |
| >ATM-E2164 LESVYSLYPT  | 338   | >ATM-E2164 LKSVYSLYPT  | 29163 | 28825 |
| >ATM-E2164 LESVYSLYPTL | 76    | >ATM-E2164 LKSVYSLYPTL | 22884 | 22808 |
| >ATM-E2164 LESVYSLY    | 276   | >ATM-E2164 LKSVYSLY    | 15341 | 15065 |
| >ATM-E2164 LESVYSLY    | 174   | >ATM-E2164 LKSVYSLY    | 21651 | 21477 |
| >ATM-E2164 LESVYSLYPTL | 46    | >ATM-E2164 LKSVYSLYPTL | 11938 | 11892 |
| >ATM-E2164 EVEEMCKRSL  | 4447  | >ATM-E2164 EVEEMCKRSL  | 15    | 4432  |
| >ATM-E2164 SLESVYSLY   | 196   | >ATM-E2164 SLKSVYSLY   | 10390 | 10194 |
| >ATM-E2164 SLESVYSL    | 126   | >ATM-E2164 SLKSVYSL    | 178   | 52    |
| >ATM-E2164 SLESVYSL    | 10    | >ATM-E2164 SLKSVYSL    | 11    | 1     |
| >ATM-E2164 SLESVYSLYPT | 157   | >ATM-E2164 SLKSVYSLYPT | 176   | 19    |
| >ATM-E2164 SLESVYSL    | 219   | >ATM-E2164 SLKSVYSL    | 9     | 210   |
| >ATM-E2164 SLESVYSLYPT | 913   | >ATM-E2164 SLKSVYSLYPT | 28    | 885   |
| >ATM-E2164 SLESVYSL    | 18    | >ATM-E2164 SLKSVYSL    | 34    | 16    |
| >ATM-E2164 SLESVYSL    | 48    | >ATM-E2164 SLKSVYSL    | 94    | 46    |
| >ATM-E2164 SLESVYSL    | 69    | >ATM-E2164 SLKSVYSL    | 158   | 89    |
| >ATM-E2164 SLESVYSL    | 5     | >ATM-E2164 SLKSVYSL    | 6     | 1     |
| >ATM-E2164 SLESVYSLY   | 794   | >ATM-E2164 SLKSVYSLY   | 147   | 647   |
| >ATM-E2164 SLESVYSLY   | 73    | >ATM-E2164 SLKSVYSLY   | 52    | 21    |
| >ATM-E2164 SLESVYSLY   | 67    | >ATM-E2164 SLKSVYSLY   | 33    | 34    |
| >ATM-E2164 SLESVYSLY   | 65    | >ATM-E2164 SLKSVYSLY   | 48    | 17    |
| >ATM-E2164 SLESVYSL    | 1864  | >ATM-E2164 SLKSVYSL    | 56    | 1808  |
| >ATM-E2164 SLESVYSL    | 7247  | >ATM-E2164 SLKSVYSL    | 385   | 6862  |
| >ATM-E2164 SLESVYSLY   | 1711  | >ATM-E2164 SLKSVYSLY   | 79    | 1632  |

|                        |      |                        |      |      |
|------------------------|------|------------------------|------|------|
| >ATM-E2164 SLESVYSLY   | 215  | >ATM-E2164 SLKSVYSLY   | 104  | 111  |
| >ATM-E2164 SLESVYSL    | 5236 | >ATM-E2164 SLKSVYSL    | 459  | 4777 |
| >ATM-E2164 SLESVYSLY   | 2562 | >ATM-E2164 SLKSVYSLY   | 144  | 2418 |
| >ATM-E2164 SLESVYSLY   | 6    | >ATM-E2164 SLKSVYSLY   | 5    | 1    |
| >ATM-E2164 SLESVYSLY   | 153  | >ATM-E2164 SLKSVYSLY   | 320  | 167  |
| >ATM-E2164 RSLESVYSLY  | 113  | >ATM-E2164 RSLKSVYSLY  | 217  | 104  |
| >ATM-E2164 RSLESVYSL   | 194  | >ATM-E2164 RSLKSVYSL   | 2262 | 2068 |
| >ATM-E2164 RSLESVYSL   | 86   | >ATM-E2164 RSLKSVYSL   | 880  | 794  |
| >ATM-E2164 RSLESVYSL   | 146  | >ATM-E2164 RSLKSVYSL   | 2584 | 2438 |
| >ATM-E2164 RSLESVYSLY  | 253  | >ATM-E2164 RSLKSVYSLY  | 162  | 91   |
| >ATM-E2164 RSLESVYSLY  | 156  | >ATM-E2164 RSLKSVYSLY  | 188  | 32   |
| >ATM-E2164 RSLESVYSLY  | 279  | >ATM-E2164 RSLKSVYSLY  | 231  | 48   |
| >ATM-E2164 RSLESVYS    | 454  | >ATM-E2164 RSLKSVYS    | 183  | 271  |
| >ATM-E2164 RSLESVYSL   | 177  | >ATM-E2164 RSLKSVYSL   | 76   | 101  |
| >ATM-E2164 RSLESVYSLY  | 230  | >ATM-E2164 RSLKSVYSLY  | 114  | 116  |
| >ATM-E2164 RSLESVYSLYP | 407  | >ATM-E2164 RSLKSVYSLYP | 212  | 195  |
| >ATM-E2164 RSLESVYSLY  | 8    | >ATM-E2164 RSLKSVYSLY  | 7    | 1    |
| >ATM-E2164 RSLESVYSL   | 13   | >ATM-E2164 RSLKSVYSL   | 18   | 5    |
| >ATM-E2164 RSLESVYSLY  | 131  | >ATM-E2164 RSLKSVYSLY  | 52   | 79   |
| >ATM-E2164 RSLESVYSLY  | 206  | >ATM-E2164 RSLKSVYSLY  | 185  | 21   |
| >ATM-E2164 RSLESVYSL   | 22   | >ATM-E2164 RSLKSVYSL   | 15   | 7    |
| >ATM-E2164 RSLESVYSLY  | 15   | >ATM-E2164 RSLKSVYSLY  | 10   | 5    |
| >ATM-E2164 RSLESVYS    | 437  | >ATM-E2164 RSLKSVYS    | 724  | 287  |
| >ATM-E2164 RSLESVYSL   | 3    | >ATM-E2164 RSLKSVYSL   | 3    | 0    |
| >ATM-E2164 RSLESVYSLY  | 3    | >ATM-E2164 RSLKSVYSLY  | 3    | 0    |
| >ATM-E2164 RSLESVYSL   | 426  | >ATM-E2164 RSLKSVYSL   | 1293 | 867  |
| >ATM-E2164 RSLESVYSL   | 499  | >ATM-E2164 RSLKSVYSL   | 658  | 159  |
| >ATM-E2164 RSLESVYSL   | 154  | >ATM-E2164 RSLKSVYSL   | 142  | 12   |
| >ATM-E2164 RSLESVYSLY  | 90   | >ATM-E2164 RSLKSVYSLY  | 86   | 4    |
| >ATM-E2164 RSLESVYSL   | 24   | >ATM-E2164 RSLKSVYSL   | 30   | 6    |
| >ATM-E2164 RSLESVYSLY  | 15   | >ATM-E2164 RSLKSVYSLY  | 17   | 2    |
| >ATM-E2164 RSLESVYSL   | 344  | >ATM-E2164 RSLKSVYSL   | 578  | 234  |
| >ATM-E2164 RSLESVYSL   | 1375 | >ATM-E2164 RSLKSVYSL   | 294  | 1081 |
| >ATM-E2164 RSLESVYSLY  | 29   | >ATM-E2164 RSLKSVYSLY  | 36   | 7    |
| >ATM-E2164 RSLESVYSL   | 95   | >ATM-E2164 RSLKSVYSL   | 123  | 28   |
| >ATM-E2164 KRSLESVY    | 302  | >ATM-E2164 KRSLKSVY    | 378  | 76   |
| >ATM-E2164 KRSLESVYSLY | 296  | >ATM-E2164 KRSLKSVYSLY | 360  | 64   |
| >ATM-E2164 KRSLESVY    | 83   | >ATM-E2164 KRSLKSVY    | 166  | 83   |
| >ATM-E2164 KRSLESVYSL  | 147  | >ATM-E2164 KRSLKSVYSL  | 256  | 109  |
| >ATM-E2164 KRSLESVYSLY | 91   | >ATM-E2164 KRSLKSVYSLY | 168  | 77   |
| >ATM-E2164 KRSLESVYSL  | 59   | >ATM-E2164 KRSLKSVYSL  | 56   | 3    |
| >ATM-E2164 KRSLESVYSLY | 598  | >ATM-E2164 KRSLKSVYSLY | 459  | 139  |
| >ATM-E2164 KRSLESVYSL  | 265  | >ATM-E2164 KRSLKSVYSL  | 697  | 432  |

|                        |       |                        |       |       |
|------------------------|-------|------------------------|-------|-------|
| >ATM-E2164 KRSLESVYSLY | 313   | >ATM-E2164 KRSLKSVYSLY | 299   | 14    |
| >ATM-E2164 KRSLESVYSL  | 189   | >ATM-E2164 KRSLKSVYSL  | 130   | 59    |
| >ATM-E2164 KRSLESVYSLY | 471   | >ATM-E2164 KRSLKSVYSLY | 315   | 156   |
| >ATM-E2164 KRSLESVYSL  | 194   | >ATM-E2164 KRSLKSVYSL  | 149   | 45    |
| >ATM-E2164 KRSLESVYSLY | 635   | >ATM-E2164 KRSLKSVYSLY | 387   | 248   |
| >ATM-E2164 CKRSLESV    | 101   | >ATM-E2164 CKRSLKSV    | 79    | 22    |
| >ATM-E2164 CKRSLESVY   | 6     | >ATM-E2164 CKRSLKSVY   | 7     | 1     |
| >ATM-E2164 CKRSLESVYSL | 16    | >ATM-E2164 CKRSLKSVYSL | 19    | 3     |
| >ATM-E2164 CKRSLESVY   | 101   | >ATM-E2164 CKRSLKSVY   | 51    | 50    |
| >ATM-E2164 MCKRSLESV   | 822   | >ATM-E2164 MCKRSLKSV   | 111   | 711   |
| >ATM-E2164 MCKRSLESVY  | 615   | >ATM-E2164 MCKRSLKSVY  | 247   | 368   |
| >ATM-E2164 MCKRSLESV   | 1098  | >ATM-E2164 MCKRSLKSV   | 200   | 898   |
| >ATM-E2164 MCKRSLESVY  | 164   | >ATM-E2164 MCKRSLKSVY  | 139   | 25    |
| >ATM-E2164 EMCKRSLESV  | 92    | >ATM-E2164 EMCKRSLKSV  | 136   | 44    |
| >ATM-E2164 EMCKRSLESV  | 25    | >ATM-E2164 EMCKRSLKSV  | 66    | 41    |
| >ATM-E2164 EMCKRSLESV  | 256   | >ATM-E2164 EMCKRSLKSV  | 890   | 634   |
| >ATM-E2164 EMCKRSLESV  | 291   | >ATM-E2164 EMCKRSLKSV  | 1375  | 1084  |
| >ATM-E2164 EMCKRSLESV  | 18    | >ATM-E2164 EMCKRSLKSV  | 30    | 12    |
| >ATM-E2164 EMCKRSLE    | 20310 | >ATM-E2164 EMCKRSLK    | 167   | 20143 |
| >ATM-E2164 EMCKRSLE    | 27356 | >ATM-E2164 EMCKRSLK    | 393   | 26963 |
| >ATM-E2164 EMCKRSLESV  | 458   | >ATM-E2164 EMCKRSLKSV  | 694   | 236   |
| >ATM-E2164 EMCKRSLESV  | 285   | >ATM-E2164 EMCKRSLKSV  | 297   | 12    |
| >ATM-E2164 EMCKRSLE    | 6417  | >ATM-E2164 EMCKRSLK    | 214   | 6203  |
| >ATM-E2164 EMCKRSLE    | 9508  | >ATM-E2164 EMCKRSLK    | 71    | 9437  |
| >ATM-E2164 EMCKRSLESV  | 363   | >ATM-E2164 EMCKRSLKSV  | 505   | 142   |
| >ATM-E2164 EMCKRSLESV  | 66    | >ATM-E2164 EMCKRSLKSV  | 72    | 6     |
| >ATM-E2164 EMCKRSLESV  | 346   | >ATM-E2164 EMCKRSLKSV  | 297   | 49    |
| >ATM-E2164 EMCKRSLESV  | 186   | >ATM-E2164 EMCKRSLKSV  | 277   | 91    |
| >ATM-E2164 EEMCKRSLES  | 68    | >ATM-E2164 EEMCKRSLKS  | 29    | 39    |
| >ATM-E2164 EEMCKRSLES  | 285   | >ATM-E2164 EEMCKRSLKS  | 2372  | 2087  |
| >ATM-E2164 EEMCKRSLES  | 49    | >ATM-E2164 EEMCKRSLKS  | 60    | 11    |
| >ATM-E2164 EEMCKRSLES  | 47    | >ATM-E2164 EEMCKRSLKS  | 101   | 54    |
| >ATM-E2423 EVGLLREHK   | 3686  | >ATM-E2423 GVGLLREHK   | 219   | 3467  |
| >ATM-E2423 EVGLLREHK   | 49    | >ATM-E2423 GVGLLREHK   | 3606  | 3557  |
| >ATM-E2423 EEVGLLREHK  | 38    | >ATM-E2423 EGVGLLREHK  | 11406 | 11368 |
| >ATM-E2423 EEVGLLREH   | 451   | >ATM-E2423 EGVGLLREH   | 25572 | 25121 |
| >ATM-E2423 EEVGLLREHK  | 398   | >ATM-E2423 EGVGLLREHK  | 23286 | 22888 |
| >ATM-E2423 EEVGLLREH   | 367   | >ATM-E2423 EGVGLLREH   | 38309 | 37942 |
| >ATM-E2423 EEVGLLREHK  | 420   | >ATM-E2423 EGVGLLREHK  | 38675 | 38255 |
| >ATM-E2423 EEVGLLREHK  | 259   | >ATM-E2423 EGVGLLREHK  | 39128 | 38869 |
| >ATM-E2423 EEVGLLREHK  | 149   | >ATM-E2423 EGVGLLREHK  | 33136 | 32987 |
| >ATM-E2423 KEEVGLLR    | 219   | >ATM-E2423 KEGVGLLR    | 600   | 381   |
| >ATM-E2423 KEEVGLLR    | 586   | >ATM-E2423 KEGVGLLR    | 203   | 383   |

|                       |       |                       |      |       |
|-----------------------|-------|-----------------------|------|-------|
| >ATM-E2423 RAKEEVGLL  | 889   | >ATM-E2423 RAKEGVGLL  | 368  | 521   |
| >ATM-E2423 RAKEEVGL   | 971   | >ATM-E2423 RAKEGVGL   | 290  | 681   |
| >ATM-E2423 RAKEEVGLL  | 320   | >ATM-E2423 RAKEGVGLL  | 86   | 234   |
| >ATM-E2423 RAKEEVGLLR | 171   | >ATM-E2423 RAKEGVGLLR | 71   | 100   |
| >ATM-E2423 RAKEEVGLLR | 127   | >ATM-E2423 RAKEGVGLLR | 72   | 55    |
| >ATM-E2423 RAKEEVGLLR | 367   | >ATM-E2423 RAKEGVGLLR | 195  | 172   |
| >ATM-E2423 RAKEEVGL   | 35    | >ATM-E2423 RAKEGVGL   | 14   | 21    |
| >ATM-E2423 RAKEEVGLL  | 81    | >ATM-E2423 RAKEGVGLL  | 29   | 52    |
| >ATM-E2423 KRAKEEVGL  | 492   | >ATM-E2423 KRAKEGVGL  | 176  | 316   |
| >ATM-E2423 KRAKEEVGL  | 278   | >ATM-E2423 KRAKEGVGL  | 132  | 146   |
| >ATM-E2423 KRAKEEVGLL | 73    | >ATM-E2423 KRAKEGVGLL | 48   | 25    |
| >ATM-E2423 KRAKEEVGLL | 176   | >ATM-E2423 KRAKEGVGLL | 112  | 64    |
| >ATM-E2423 KRAKEEVGL  | 151   | >ATM-E2423 KRAKEGVGL  | 116  | 35    |
| >ATM-E2423 KRAKEEVGLL | 153   | >ATM-E2423 KRAKEGVGLL | 68   | 85    |
| >ATM-E2423 KRAKEEVGLL | 460   | >ATM-E2423 KRAKEGVGLL | 387  | 73    |
| >ATM-E2423 KRAKEEVGL  | 308   | >ATM-E2423 KRAKEGVGL  | 160  | 148   |
| >ATM-E2423 KRAKEEVGLL | 140   | >ATM-E2423 KRAKEGVGLL | 71   | 69    |
| >ATM-E2423 KRAKEEVGLL | 79    | >ATM-E2423 KRAKEGVGLL | 76   | 3     |
| >ATM-E2423 LKRAKEEV   | 248   | >ATM-E2423 LKRAKEGV   | 903  | 655   |
| >ATM-E2423 LKRAKEEVGL | 84    | >ATM-E2423 LKRAKEGVGL | 95   | 11    |
| >ATM-E2423 LLKRAKEEV  | 231   | >ATM-E2423 LLKRAKEGV  | 318  | 87    |
| >ATM-E2423 LLKRAKEEVG | 252   | >ATM-E2423 LLKRAKEGVG | 265  | 13    |
| >ATM-E2423 LLKRAKEEV  | 110   | >ATM-E2423 LLKRAKEGV  | 73   | 37    |
| >ATM-E2423 LLKRAKEEVG | 1075  | >ATM-E2423 LLKRAKEGVG | 446  | 629   |
| >ATM-E2423 LLKRAKEEV  | 88    | >ATM-E2423 LLKRAKEGV  | 77   | 11    |
| >ATM-E2423 LLKRAKEEV  | 677   | >ATM-E2423 LLKRAKEGV  | 411  | 266   |
| >ATM-E2423 LLKRAKEEV  | 370   | >ATM-E2423 LLKRAKEGV  | 519  | 149   |
| >ATM-E2423 LLKRAKEEV  | 4     | >ATM-E2423 LLKRAKEGV  | 4    | 0     |
| >ATM-E2423 LLKRAKEEVG | 14    | >ATM-E2423 LLKRAKEGVG | 14   | 0     |
| >ATM-E2423 ALLKRAKEEV | 512   | >ATM-E2423 ALLKRAKEGV | 498  | 14    |
| >ATM-E2423 ALLKRAKEEV | 459   | >ATM-E2423 ALLKRAKEGV | 387  | 72    |
| >ATM-E2423 ALLKRAKEEV | 180   | >ATM-E2423 ALLKRAKEGV | 126  | 54    |
| >ATM-E2423 ALLKRAKEEV | 4     | >ATM-E2423 ALLKRAKEGV | 4    | 0     |
| >ATM-E2423 ALLKRAKEEV | 25    | >ATM-E2423 ALLKRAKEGV | 19   | 6     |
| >ATM-E2423 ALLKRAKEEV | 9     | >ATM-E2423 ALLKRAKEGV | 8    | 1     |
| >ATM-E2423 ALLKRAKEEV | 26    | >ATM-E2423 ALLKRAKEGV | 15   | 11    |
| >ATM-E2423 ALLKRAKEEV | 3     | >ATM-E2423 ALLKRAKEGV | 4    | 1     |
| >ATM-E2423 QALLKRAKEE | 832   | >ATM-E2423 QALLKRAKEG | 401  | 431   |
| >ATM-E2423 EVGLLREHK  | 3686  | >ATM-E2423 KVGLLREHK  | 211  | 3475  |
| >ATM-E2423 EVGLLREHK  | 14476 | >ATM-E2423 KVGLLREHK  | 290  | 14186 |
| >ATM-E2423 EVGLLREHK  | 8942  | >ATM-E2423 KVGLLREHK  | 154  | 8788  |
| >ATM-E2423 EVGLLREHKI | 9821  | >ATM-E2423 KVGLLREHKI | 299  | 9522  |
| >ATM-E2423 EVGLLREHK  | 49    | >ATM-E2423 KVGLLREHK  | 4800 | 4751  |

|                       |       |                       |       |       |
|-----------------------|-------|-----------------------|-------|-------|
| >ATM-E2423 EEVGLLREHK | 38    | >ATM-E2423 EKVGLLREHK | 3142  | 3104  |
| >ATM-E2423 EEVGLLREH  | 451   | >ATM-E2423 EKVGLLREH  | 23681 | 23230 |
| >ATM-E2423 EEVGLLREHK | 398   | >ATM-E2423 EKVGLLREHK | 21066 | 20668 |
| >ATM-E2423 EEVGLLREH  | 367   | >ATM-E2423 EKVGLLREH  | 25302 | 24935 |
| >ATM-E2423 EEVGLLREHK | 420   | >ATM-E2423 EKVGLLREHK | 26395 | 25975 |
| >ATM-E2423 EEVGLLREHK | 259   | >ATM-E2423 EKVGLLREHK | 29711 | 29452 |
| >ATM-E2423 EEVGLLREHK | 149   | >ATM-E2423 EKVGLLREHK | 21785 | 21636 |
| >ATM-E2423 KEEVGLLR   | 219   | >ATM-E2423 KEKVGLL    | 109   | 110   |
| >ATM-E2423 KEEVGLLREH | 10353 | >ATM-E2423 KEKVGLLREH | 411   | 9942  |
| >ATM-E2423 KEEVGLLR   | 5618  | >ATM-E2423 KEKVGLL    | 499   | 5119  |
| >ATM-E2423 KEEVGLLR   | 586   | >ATM-E2423 KEKVGLL    | 385   | 201   |
| >ATM-E2423 RAKEEVGL   | 971   | >ATM-E2423 RAKEKVGL   | 322   | 649   |
| >ATM-E2423 RAKEEVGLL  | 320   | >ATM-E2423 RAKEKVGLL  | 87    | 233   |
| >ATM-E2423 RAKEEVGLLR | 171   | >ATM-E2423 RAKEKVGLLR | 65    | 106   |
| >ATM-E2423 RAKEEVGLLR | 127   | >ATM-E2423 RAKEKVGLLR | 41    | 86    |
| >ATM-E2423 RAKEEVGLLR | 367   | >ATM-E2423 RAKEKVGLLR | 481   | 114   |
| >ATM-E2423 RAKEEVGL   | 35    | >ATM-E2423 RAKEKVGL   | 30    | 5     |
| >ATM-E2423 RAKEEVGLL  | 81    | >ATM-E2423 RAKEKVGLL  | 39    | 42    |
| >ATM-E2423 KRAKEEVGL  | 492   | >ATM-E2423 KRAKEKVGL  | 699   | 207   |
| >ATM-E2423 KRAKEEVGL  | 278   | >ATM-E2423 KRAKEKVGL  | 180   | 98    |
| >ATM-E2423 KRAKEEVGLL | 73    | >ATM-E2423 KRAKEKVGLL | 68    | 5     |
| >ATM-E2423 KRAKEEVGLL | 176   | >ATM-E2423 KRAKEKVGLL | 135   | 41    |
| >ATM-E2423 KRAKEEVGL  | 151   | >ATM-E2423 KRAKEKVGL  | 101   | 50    |
| >ATM-E2423 KRAKEEVGLL | 153   | >ATM-E2423 KRAKEKVGLL | 117   | 36    |
| >ATM-E2423 KRAKEEVGLL | 460   | >ATM-E2423 KRAKEKVGLL | 315   | 145   |
| >ATM-E2423 KRAKEEVGL  | 308   | >ATM-E2423 KRAKEKVGL  | 109   | 199   |
| >ATM-E2423 KRAKEEVGLL | 140   | >ATM-E2423 KRAKEKVGLL | 108   | 32    |
| >ATM-E2423 KRAKEEVGLL | 79    | >ATM-E2423 KRAKEKVGLL | 59    | 20    |
| >ATM-E2423 LKRAKEEV   | 248   | >ATM-E2423 LKRAKEKV   | 462   | 214   |
| >ATM-E2423 LKRAKEEVGL | 84    | >ATM-E2423 LKRAKEKVGL | 91    | 7     |
| >ATM-E2423 LLKRAKEEV  | 231   | >ATM-E2423 LLKRAKEKV  | 677   | 446   |
| >ATM-E2423 LLKRAKEEVG | 252   | >ATM-E2423 LLKRAKEKVG | 549   | 297   |
| >ATM-E2423 LLKRAKEEV  | 110   | >ATM-E2423 LLKRAKEKV  | 208   | 98    |
| >ATM-E2423 LLKRAKEEV  | 88    | >ATM-E2423 LLKRAKEKV  | 227   | 139   |
| >ATM-E2423 LLKRAKEEV  | 370   | >ATM-E2423 LLKRAKEKV  | 905   | 535   |
| >ATM-E2423 LLKRAKEEV  | 4     | >ATM-E2423 LLKRAKEKV  | 5     | 1     |
| >ATM-E2423 LLKRAKEEVG | 14    | >ATM-E2423 LLKRAKEKVG | 15    | 1     |
| >ATM-E2423 LLKRAKEE   | 12698 | >ATM-E2423 LLKRAKEK   | 69    | 12629 |
| >ATM-E2423 ALLKRAKEEV | 459   | >ATM-E2423 ALLKRAKEKV | 617   | 158   |
| >ATM-E2423 ALLKRAKEEV | 180   | >ATM-E2423 ALLKRAKEKV | 299   | 119   |
| >ATM-E2423 ALLKRAKEEV | 4     | >ATM-E2423 ALLKRAKEKV | 6     | 2     |
| >ATM-E2423 ALLKRAKEEV | 25    | >ATM-E2423 ALLKRAKEKV | 54    | 29    |
| >ATM-E2423 ALLKRAKEEV | 9     | >ATM-E2423 ALLKRAKEKV | 10    | 1     |

|                       |       |                       |       |       |
|-----------------------|-------|-----------------------|-------|-------|
| >ATM-E2423 ALLKRAKEEV | 26    | >ATM-E2423 ALLKRAKEKV | 38    | 12    |
| >ATM-E2423 ALLKRAKEEV | 3     | >ATM-E2423 ALLKRAKEKV | 4     | 1     |
| >ATM-E2423 ALLKRAKEE  | 20655 | >ATM-E2423 ALLKRAKEK  | 113   | 20542 |
| >ATM-E848C EVEDQSSMN  | 401   | >ATM-E848C QVEDQSSMN  | 2938  | 2537  |
| >ATM-E848C EVEDQSSM   | 88    | >ATM-E848C QVEDQSSM   | 4202  | 4114  |
| >ATM-E848C EVEDQSSMN  | 55    | >ATM-E848C QVEDQSSMN  | 2414  | 2359  |
| >ATM-E848C EVEDQSSM   | 193   | >ATM-E848C QVEDQSSM   | 3333  | 3140  |
| >ATM-E848C EVEDQSSMN  | 134   | >ATM-E848C QVEDQSSMN  | 1647  | 1513  |
| >ATM-E848C EVEDQSSMN  | 135   | >ATM-E848C QVEDQSSMN  | 1451  | 1316  |
| >ATM-E848C EVEDQSSM   | 491   | >ATM-E848C QVEDQSSM   | 738   | 247   |
| >ATM-E848C EVEDQSSMN  | 431   | >ATM-E848C QVEDQSSMN  | 97    | 334   |
| >ATM-E848C MEVEDQSSV  | 17661 | >ATM-E848C MQVEDQSSN  | 405   | 17256 |
| >ATM-E848C MEVEDQSSV  | 4289  | >ATM-E848C MQVEDQSSN  | 52    | 4237  |
| >ATM-E848C MEVEDQSSV  | 9194  | >ATM-E848C MQVEDQSSN  | 111   | 9083  |
| >ATM-E848C MEVEDQSS   | 10942 | >ATM-E848C MQVEDQSS   | 265   | 10677 |
| >ATM-E848C MEVEDQSSV  | 3257  | >ATM-E848C MQVEDQSSN  | 30    | 3227  |
| >ATM-E848C MEVEDQSSV  | 1702  | >ATM-E848C MQVEDQSSN  | 24    | 1678  |
| >ATM-E848C MEVEDQSSV  | 2112  | >ATM-E848C MQVEDQSSN  | 61    | 2051  |
| >ATM-E848C MEVEDQSSV  | 8766  | >ATM-E848C MQVEDQSSN  | 478   | 8288  |
| >ATM-E848C MEVEDQSSV  | 273   | >ATM-E848C MQVEDQSSN  | 6     | 267   |
| >ATM-E848C MEVEDQSSV  | 365   | >ATM-E848C MQVEDQSSN  | 10    | 355   |
| >ATM-E848C MEVEDQSSV  | 49    | >ATM-E848C MQVEDQSSN  | 5455  | 5406  |
| >ATM-E848C MEVEDQSSV  | 157   | >ATM-E848C MQVEDQSSN  | 10509 | 10352 |
| >ATM-E848C MEVEDQSSV  | 457   | >ATM-E848C MQVEDQSSN  | 148   | 309   |
| >ATM-E848C MEVEDQSSV  | 658   | >ATM-E848C MQVEDQSSN  | 53    | 605   |
| >ATM-E848C MEVEDQSSV  | 298   | >ATM-E848C MQVEDQSSN  | 32    | 266   |
| >ATM-E848C MEVEDQSSV  | 94    | >ATM-E848C MQVEDQSSN  | 7566  | 7472  |
| >ATM-E848C MEVEDQSSV  | 15    | >ATM-E848C MQVEDQSSN  | 1139  | 1124  |
| >ATM-E848C MEVEDQSSV  | 150   | >ATM-E848C MQVEDQSSN  | 13647 | 13497 |
| >ATM-E848C MEVEDQSSV  | 117   | >ATM-E848C MQVEDQSSN  | 10234 | 10117 |
| >ATM-E848C MEVEDQSSV  | 484   | >ATM-E848C MQVEDQSSN  | 13862 | 13378 |
| >ATM-E848C MEVEDQSSV  | 442   | >ATM-E848C MQVEDQSSN  | 18235 | 17793 |
| >ATM-E848C MEVEDQSSV  | 194   | >ATM-E848C MQVEDQSSN  | 10898 | 10704 |
| >ATM-E848C MEVEDQSSV  | 3130  | >ATM-E848C MQVEDQSSN  | 155   | 2975  |
| >ATM-E848C MEVEDQSSV  | 81    | >ATM-E848C MQVEDQSSN  | 11170 | 11089 |
| >ATM-E848C MEVEDQSSV  | 28    | >ATM-E848C MQVEDQSSN  | 4989  | 4961  |
| >ATM-E848C LMEVEDQSSI | 1927  | >ATM-E848C LMQVEDQSS  | 341   | 1586  |
| >ATM-E848C LMEVEDQSSI | 424   | >ATM-E848C LMQVEDQSS  | 168   | 256   |
| >ATM-E848C LMEVEDQSSI | 522   | >ATM-E848C LMQVEDQSS  | 56    | 466   |
| >ATM-E848C LMEVEDQSSI | 932   | >ATM-E848C LMQVEDQSS  | 115   | 817   |
| >ATM-E848C LMEVEDQSSI | 276   | >ATM-E848C LMQVEDQSS  | 93    | 183   |
| >ATM-E848C NLMEVEDQS  | 141   | >ATM-E848C NLMQVEDQS  | 1021  | 880   |
| >ATM-E848C NLMEVEDQS  | 34    | >ATM-E848C NLMQVEDQS  | 95    | 61    |



|                        |     |                        |      |      |
|------------------------|-----|------------------------|------|------|
| >ATM-E848C NLMEVEDQS   | 133 | >ATM-E848C NLMQVEDQS   | 533  | 400  |
| >ATM-E848C NLMEVEDQS   | 418 | >ATM-E848C NLMQVEDQS   | 2415 | 1997 |
| >ATM-E848C NLMEVEDQS   | 60  | >ATM-E848C NLMQVEDQS   | 324  | 264  |
| >ATM-E848C NLMEVEDQS   | 40  | >ATM-E848C NLMQVEDQS   | 444  | 404  |
| >ATM-E848C NLMEVEDQS   | 21  | >ATM-E848C NLMQVEDQS   | 87   | 66   |
| >ATM-E848C NLMEVEDQS   | 268 | >ATM-E848C NLMQVEDQS   | 624  | 356  |
| >ATM-E848C NLMEVEDQS   | 417 | >ATM-E848C NLMQVEDQS   | 455  | 38   |
| >ATM-E848C DTNGNLMEV   | 456 | >ATM-E848C DTNGNLMQ\   | 436  | 20   |
| >ATM-E848C DTNGNLMEV   | 12  | >ATM-E848C DTNGNLMQ\   | 21   | 9    |
| >ATM-E848C DTNGNLMEV   | 16  | >ATM-E848C DTNGNLMQ\   | 12   | 4    |
| >ATM-F1463 FVLRDVIYTLI | 393 | >ATM-F1463 LVLRDVIYTLI | 3028 | 2635 |
| >ATM-F1463 FVLRDVIYT   | 178 | >ATM-F1463 LVLRDVIYT   | 2495 | 2317 |
| >ATM-F1463 FVLRDVIYTL  | 33  | >ATM-F1463 LVLRDVIYTL  | 134  | 101  |
| >ATM-F1463 FVLRDVIYTLI | 53  | >ATM-F1463 LVLRDVIYTLI | 699  | 646  |
| >ATM-F1463 FVLRDVIYTL  | 29  | >ATM-F1463 LVLRDVIYTL  | 78   | 49   |
| >ATM-F1463 FVLRDVIYTLI | 98  | >ATM-F1463 LVLRDVIYTLI | 1083 | 985  |
| >ATM-F1463 FVLRDVIYTL  | 127 | >ATM-F1463 LVLRDVIYTL  | 388  | 261  |
| >ATM-F1463 FVLRDVIYTLI | 74  | >ATM-F1463 LVLRDVIYTLI | 705  | 631  |
| >ATM-F1463 FVLRDVIYT   | 28  | >ATM-F1463 LVLRDVIYT   | 371  | 343  |
| >ATM-F1463 FVLRDVIYTL  | 24  | >ATM-F1463 LVLRDVIYTL  | 54   | 30   |
| >ATM-F1463 FVLRDVIYTLI | 10  | >ATM-F1463 LVLRDVIYTLI | 79   | 69   |
| >ATM-F1463 FVLRDVIYT   | 57  | >ATM-F1463 LVLRDVIYT   | 496  | 439  |
| >ATM-F1463 FVLRDVIYTL  | 4   | >ATM-F1463 LVLRDVIYTL  | 14   | 10   |
| >ATM-F1463 FVLRDVIYTLI | 52  | >ATM-F1463 LVLRDVIYTLI | 387  | 335  |
| >ATM-F1463 FVLRDVIYTL  | 6   | >ATM-F1463 LVLRDVIYTL  | 29   | 23   |
| >ATM-F1463 FVLRDVIYTLI | 311 | >ATM-F1463 LVLRDVIYTLI | 2734 | 2423 |
| >ATM-F1463 FVLRDVIYTL  | 14  | >ATM-F1463 LVLRDVIYTL  | 94   | 80   |
| >ATM-F1463 FVLRDVIYTLI | 103 | >ATM-F1463 LVLRDVIYTLI | 1240 | 1137 |
| >ATM-F1463 FVLRDVIYTL  | 9   | >ATM-F1463 LVLRDVIYTL  | 36   | 27   |
| >ATM-F1463 FVLRDVIYTLI | 419 | >ATM-F1463 LVLRDVIYTLI | 1657 | 1238 |
| >ATM-F1463 FVLRDVIYTL  | 7   | >ATM-F1463 LVLRDVIYTL  | 22   | 15   |
| >ATM-F1463 FVLRDVIYTLI | 101 | >ATM-F1463 LVLRDVIYTLI | 681  | 580  |
| >ATM-F1463 FVLRDVIYTL  | 451 | >ATM-F1463 LVLRDVIYTL  | 1347 | 896  |
| >ATM-F1463 FVLRDVIY    | 88  | >ATM-F1463 LVLRDVIY    | 270  | 182  |
| >ATM-F1463 FVLRDVIYTL  | 299 | >ATM-F1463 LVLRDVIYTL  | 887  | 588  |
| >ATM-F1463 FVLRDVIY    | 52  | >ATM-F1463 LVLRDVIY    | 221  | 169  |
| >ATM-F1463 FVLRDVIYTL  | 431 | >ATM-F1463 LVLRDVIYTL  | 261  | 170  |
| >ATM-F1463 FVLRDVIYTLI | 159 | >ATM-F1463 LVLRDVIYTLI | 1259 | 1100 |
| >ATM-F1463 FVLRDVIYTL  | 45  | >ATM-F1463 LVLRDVIYTL  | 450  | 405  |
| >ATM-F1463 FVLRDVIYTLI | 49  | >ATM-F1463 LVLRDVIYTLI | 678  | 629  |
| >ATM-F1463 FVLRDVIY    | 379 | >ATM-F1463 LVLRDVIY    | 823  | 444  |
| >ATM-F1463 FVLRDVIY    | 344 | >ATM-F1463 LVLRDVIY    | 2140 | 1796 |
| >ATM-F1463 FVLRDVIY    | 306 | >ATM-F1463 LVLRDVIY    | 651  | 345  |

|                        |       |                        |       |       |
|------------------------|-------|------------------------|-------|-------|
| >ATM-F1463 FVLRDVIY    | 70    | >ATM-F1463 LVLRDVIY    | 167   | 97    |
| >ATM-F1463 FVLRDVIYTLI | 422   | >ATM-F1463 LVLRDVIYTLI | 323   | 99    |
| >ATM-F1463 AFVLRDVIYTL | 9750  | >ATM-F1463 ALVLRDVIYTL | 180   | 9570  |
| >ATM-F1463 AFVLRDVIYTL | 1251  | >ATM-F1463 ALVLRDVIYTL | 65    | 1186  |
| >ATM-F1463 AFVLRDVIY   | 16931 | >ATM-F1463 ALVLRDVIY   | 434   | 16497 |
| >ATM-F1463 AFVLRDVIYTL | 11844 | >ATM-F1463 ALVLRDVIYTL | 209   | 11635 |
| >ATM-F1463 AFVLRDVIYTL | 3805  | >ATM-F1463 ALVLRDVIYTL | 497   | 3308  |
| >ATM-F1463 AFVLRDVIYTL | 5817  | >ATM-F1463 ALVLRDVIYTL | 51    | 5766  |
| >ATM-F1463 AFVLRDVIYTL | 9317  | >ATM-F1463 ALVLRDVIYTL | 29    | 9288  |
| >ATM-F1463 AFVLRDVIYTL | 10592 | >ATM-F1463 ALVLRDVIYTL | 78    | 10514 |
| >ATM-F1463 AFVLRDVIYTL | 19250 | >ATM-F1463 ALVLRDVIYTL | 344   | 18906 |
| >ATM-F1463 AFVLRDVI    | 30845 | >ATM-F1463 ALVLRDVI    | 238   | 30607 |
| >ATM-F1463 AFVLRDVIY   | 29439 | >ATM-F1463 ALVLRDVIY   | 246   | 29193 |
| >ATM-F1463 AFVLRDVIYTL | 9125  | >ATM-F1463 ALVLRDVIYTL | 9     | 9116  |
| >ATM-F1463 AFVLRDVIYTL | 489   | >ATM-F1463 ALVLRDVIYTL | 15280 | 14791 |
| >ATM-F1463 AFVLRDVIY   | 230   | >ATM-F1463 ALVLRDVIY   | 873   | 643   |
| >ATM-F1463 AFVLRDVIYTL | 2656  | >ATM-F1463 ALVLRDVIYTL | 149   | 2507  |
| >ATM-F1463 AFVLRDVIYTL | 480   | >ATM-F1463 ALVLRDVIYTL | 2300  | 1820  |
| >ATM-F1463 IKSGLGGAW/  | 11    | >ATM-F1463 IKSGLGGAW/  | 186   | 175   |
| >ATM-F1463 IKSGLGGAW/  | 1763  | >ATM-F1463 IKSGLGGAW/  | 93    | 1670  |
| >ATM-F1463 WAFVLRDVI   | 206   | >ATM-F1463 WALVLRDVI   | 74    | 132   |
| >ATM-F1463 WAFVLRDVIY  | 397   | >ATM-F1463 WALVLRDVIY  | 1447  | 1050  |
| >ATM-F1463 WAFVLRDV    | 208   | >ATM-F1463 WALVLRDV    | 3627  | 3419  |
| >ATM-F1463 WAFVLRDVI   | 153   | >ATM-F1463 WALVLRDVI   | 3336  | 3183  |
| >ATM-F1463 WAFVLRDVIY  | 488   | >ATM-F1463 WALVLRDVIY  | 3119  | 2631  |
| >ATM-F1463 WAFVLRDVIY  | 78    | >ATM-F1463 WALVLRDVIY  | 376   | 298   |
| >ATM-F1463 WAFVLRDVIY  | 93    | >ATM-F1463 WALVLRDVIY  | 239   | 146   |
| >ATM-F1463 WAFVLRDVI   | 304   | >ATM-F1463 WALVLRDVI   | 773   | 469   |
| >ATM-F1463 WAFVLRDVIY  | 239   | >ATM-F1463 WALVLRDVIY  | 336   | 97    |
| >ATM-F1463 WAFVLRDVI   | 490   | >ATM-F1463 WALVLRDVI   | 1744  | 1254  |
| >ATM-F1463 WAFVLRDVI   | 200   | >ATM-F1463 WALVLRDVI   | 615   | 415   |
| >ATM-F1463 AWAFVLRDV   | 443   | >ATM-F1463 AWALVLRDV   | 513   | 70    |
| >ATM-F1463 AWAFVLRDV   | 235   | >ATM-F1463 AWALVLRDV   | 568   | 333   |
| >ATM-F1463 AWAFVLRDV   | 125   | >ATM-F1463 AWALVLRDV   | 355   | 230   |
| >ATM-F1463 AWAFVLRDV   | 387   | >ATM-F1463 AWALVLRDV   | 454   | 67    |
| >ATM-F1463 GAWAFVLRD   | 193   | >ATM-F1463 GAWALVLRD   | 412   | 219   |
| >ATM-F1463 GAWAFVLRD   | 123   | >ATM-F1463 GAWALVLRD   | 276   | 153   |
| >ATM-F1463 GAWAFVLRD   | 407   | >ATM-F1463 GAWALVLRD   | 345   | 62    |
| >ATM-F1463 GAWAFVLR    | 185   | >ATM-F1463 GAWALVLR    | 613   | 428   |
| >ATM-F1463 GAWAFVLR    | 18    | >ATM-F1463 GAWALVLR    | 24    | 6     |
| >ATM-F1463 GAWAFVLR    | 338   | >ATM-F1463 GAWALVLR    | 627   | 289   |
| >ATM-F1463 GAWAFVLR    | 171   | >ATM-F1463 GAWALVLR    | 413   | 242   |
| >ATM-F1463 GAWAFVLR    | 443   | >ATM-F1463 GAWALVLR    | 1926  | 1483  |

|                      |       |                      |      |       |
|----------------------|-------|----------------------|------|-------|
| >ATM-F1463 GAWAFVLR  | 82    | >ATM-F1463 GAWALVLR  | 247  | 165   |
| >ATM-F1463 GAWAFVLRD | 129   | >ATM-F1463 GAWALVLRD | 244  | 115   |
| >ATM-F1463 GGAWAFVLR | 336   | >ATM-F1463 GGAWALVLR | 1053 | 717   |
| >ATM-F1463 GGAWAFVLR | 212   | >ATM-F1463 GGAWALVLR | 423  | 211   |
| >ATM-F1463 GGAWAFVLR | 194   | >ATM-F1463 GGAWALVLR | 1177 | 983   |
| >ATM-F1463 LGGAWAFVL | 99    | >ATM-F1463 LGGAWALVL | 184  | 85    |
| >ATM-F1463 GLGGAWAF  | 11466 | >ATM-F1463 GLGGAWAL  | 124  | 11342 |
| >ATM-F1463 GLGGAWAFV | 27    | >ATM-F1463 GLGGAWALV | 42   | 15    |
| >ATM-F1463 GLGGAWAFV | 330   | >ATM-F1463 GLGGAWALV | 665  | 335   |
| >ATM-F1463 GLGGAWAF  | 2007  | >ATM-F1463 GLGGAWAL  | 24   | 1983  |
| >ATM-F1463 GLGGAWAFV | 11    | >ATM-F1463 GLGGAWALV | 17   | 6     |
| >ATM-F1463 GLGGAWAFV | 58    | >ATM-F1463 GLGGAWALV | 97   | 39    |
| >ATM-F1463 GLGGAWAF  | 12686 | >ATM-F1463 GLGGAWAL  | 343  | 12343 |
| >ATM-F1463 GLGGAWAFV | 23    | >ATM-F1463 GLGGAWALV | 26   | 3     |
| >ATM-F1463 GLGGAWAF  | 2021  | >ATM-F1463 GLGGAWAL  | 185  | 1836  |
| >ATM-F1463 GLGGAWAFV | 38    | >ATM-F1463 GLGGAWALV | 100  | 62    |
| >ATM-F1463 GLGGAWAF  | 542   | >ATM-F1463 GLGGAWAL  | 8    | 534   |
| >ATM-F1463 GLGGAWAFV | 3     | >ATM-F1463 GLGGAWALV | 5    | 2     |
| >ATM-F1463 GLGGAWAFV | 11    | >ATM-F1463 GLGGAWALV | 28   | 17    |
| >ATM-F1463 GLGGAWAF  | 2043  | >ATM-F1463 GLGGAWAL  | 13   | 2030  |
| >ATM-F1463 GLGGAWAFV | 6     | >ATM-F1463 GLGGAWALV | 17   | 11    |
| >ATM-F1463 GLGGAWAFV | 16    | >ATM-F1463 GLGGAWALV | 78   | 62    |
| >ATM-F1463 GLGGAWAF  | 4383  | >ATM-F1463 GLGGAWAL  | 10   | 4373  |
| >ATM-F1463 GLGGAWAFV | 4     | >ATM-F1463 GLGGAWALV | 5    | 1     |
| >ATM-F1463 GLGGAWAFV | 9     | >ATM-F1463 GLGGAWALV | 18   | 9     |
| >ATM-F1463 GLGGAWAF  | 12291 | >ATM-F1463 GLGGAWAL  | 35   | 12256 |
| >ATM-F1463 GLGGAWAFV | 3     | >ATM-F1463 GLGGAWALV | 8    | 5     |
| >ATM-F1463 GLGGAWAFV | 17    | >ATM-F1463 GLGGAWALV | 203  | 186   |
| >ATM-F1463 GLGGAWAF  | 775   | >ATM-F1463 GLGGAWAL  | 4    | 771   |
| >ATM-F1463 GLGGAWAFV | 3     | >ATM-F1463 GLGGAWALV | 3    | 0     |
| >ATM-F1463 GLGGAWAFV | 5     | >ATM-F1463 GLGGAWALV | 8    | 3     |
| >ATM-F1463 GLGGAWAFV | 162   | >ATM-F1463 GLGGAWALV | 330  | 168   |
| >ATM-F1463 GLGGAWAF  | 233   | >ATM-F1463 GLGGAWAL  | 4834 | 4601  |
| >ATM-F1463 GLGGAWAF  | 403   | >ATM-F1463 GLGGAWAL  | 6180 | 5777  |
| >ATM-F1463 GLGGAWAFV | 265   | >ATM-F1463 GLGGAWALV | 727  | 462   |
| >ATM-F1463 SGLGGAWAF | 666   | >ATM-F1463 SGLGGAWAL | 88   | 578   |
| >ATM-F1463 SGLGGAWAF | 9730  | >ATM-F1463 SGLGGAWAL | 467  | 9263  |
| >ATM-F1463 SGLGGAWAF | 71    | >ATM-F1463 SGLGGAWAL | 225  | 154   |
| >ATM-F1463 SGLGGAWAF | 16383 | >ATM-F1463 SGLGGAWAL | 460  | 15923 |
| >ATM-F1463 SGLGGAWAF | 22    | >ATM-F1463 SGLGGAWAL | 75   | 53    |
| >ATM-F1463 SGLGGAWAF | 214   | >ATM-F1463 SGLGGAWAL | 247  | 33    |
| >ATM-F1463 SGLGGAWAF | 348   | >ATM-F1463 SGLGGAWAL | 785  | 437   |
| >ATM-F1463 SGLGGAWAF | 466   | >ATM-F1463 SGLGGAWAL | 7703 | 7237  |

|                        |      |                        |      |      |
|------------------------|------|------------------------|------|------|
| >ATM-F1463 SGLGGAWAF   | 251  | >ATM-F1463 SGLGGAWAL   | 3668 | 3417 |
| >ATM-F1463 SGLGGAWAF   | 3842 | >ATM-F1463 SGLGGAWAL   | 75   | 3767 |
| >ATM-F1463 SGLGGAWAF   | 101  | >ATM-F1463 SGLGGAWAL   | 140  | 39   |
| >ATM-F1463 KSGLGGAWA   | 478  | >ATM-F1463 KSGLGGAWA   | 1500 | 1022 |
| >ATM-F1463 KSGLGGAWA   | 225  | >ATM-F1463 KSGLGGAWA   | 726  | 501  |
| >ATM-F1463 KSGLGGAWA   | 138  | >ATM-F1463 KSGLGGAWA   | 526  | 388  |
| >ATM-F1463 KSGLGGAWA   | 313  | >ATM-F1463 KSGLGGAWA   | 6414 | 6101 |
| >ATM-F1463 KSGLGGAWA   | 13   | >ATM-F1463 KSGLGGAWA   | 17   | 4    |
| >ATM-F1463 KSGLGGAWA   | 430  | >ATM-F1463 KSGLGGAWA   | 655  | 225  |
| >ATM-F1463 KSGLGGAWA   | 70   | >ATM-F1463 KSGLGGAWA   | 1180 | 1110 |
| >ATM-F1463 KSGLGGAWA   | 250  | >ATM-F1463 KSGLGGAWA   | 2772 | 2522 |
| >ATM-F1463 FVLRDVIYTLI | 393  | >ATM-F1463 SVLRDVIYTLI | 943  | 550  |
| >ATM-F1463 FVLRDVIYTL  | 178  | >ATM-F1463 SVLRDVIYTL  | 2213 | 2035 |
| >ATM-F1463 FVLRDVIYTL  | 33   | >ATM-F1463 SVLRDVIYTL  | 108  | 75   |
| >ATM-F1463 FVLRDVIYTLI | 53   | >ATM-F1463 SVLRDVIYTLI | 621  | 568  |
| >ATM-F1463 FVLRDVIYTL  | 29   | >ATM-F1463 SVLRDVIYTL  | 80   | 51   |
| >ATM-F1463 FVLRDVIYTLI | 98   | >ATM-F1463 SVLRDVIYTLI | 1613 | 1515 |
| >ATM-F1463 FVLRDVIYTL  | 127  | >ATM-F1463 SVLRDVIYTL  | 275  | 148  |
| >ATM-F1463 FVLRDVIYTLI | 74   | >ATM-F1463 SVLRDVIYTLI | 867  | 793  |
| >ATM-F1463 FVLRDVIYTL  | 28   | >ATM-F1463 SVLRDVIYTL  | 497  | 469  |
| >ATM-F1463 FVLRDVIYTL  | 24   | >ATM-F1463 SVLRDVIYTL  | 50   | 26   |
| >ATM-F1463 FVLRDVIYTLI | 10   | >ATM-F1463 SVLRDVIYTLI | 93   | 83   |
| >ATM-F1463 FVLRDVIYTL  | 57   | >ATM-F1463 SVLRDVIYTL  | 416  | 359  |
| >ATM-F1463 FVLRDVIYTL  | 4    | >ATM-F1463 SVLRDVIYTL  | 13   | 9    |
| >ATM-F1463 FVLRDVIYTLI | 52   | >ATM-F1463 SVLRDVIYTLI | 322  | 270  |
| >ATM-F1463 FVLRDVIYTL  | 6    | >ATM-F1463 SVLRDVIYTL  | 28   | 22   |
| >ATM-F1463 FVLRDVIYTLI | 311  | >ATM-F1463 SVLRDVIYTLI | 2865 | 2554 |
| >ATM-F1463 FVLRDVIYTL  | 14   | >ATM-F1463 SVLRDVIYTL  | 31   | 17   |
| >ATM-F1463 FVLRDVIYTLI | 103  | >ATM-F1463 SVLRDVIYTLI | 371  | 268  |
| >ATM-F1463 FVLRDVIYTL  | 9    | >ATM-F1463 SVLRDVIYTL  | 159  | 150  |
| >ATM-F1463 FVLRDVIYTLI | 419  | >ATM-F1463 SVLRDVIYTLI | 5195 | 4776 |
| >ATM-F1463 FVLRDVIYTL  | 7    | >ATM-F1463 SVLRDVIYTL  | 47   | 40   |
| >ATM-F1463 FVLRDVIYTLI | 101  | >ATM-F1463 SVLRDVIYTLI | 999  | 898  |
| >ATM-F1463 FVLRDVIYTL  | 451  | >ATM-F1463 SVLRDVIYTL  | 2240 | 1789 |
| >ATM-F1463 FVLRDVIY    | 88   | >ATM-F1463 SVLRDVIY    | 70   | 18   |
| >ATM-F1463 FVLRDVIYTL  | 299  | >ATM-F1463 SVLRDVIYTL  | 149  | 150  |
| >ATM-F1463 FVLRDVIY    | 52   | >ATM-F1463 SVLRDVIY    | 305  | 253  |
| >ATM-F1463 FVLRDVIYTL  | 431  | >ATM-F1463 SVLRDVIYTL  | 64   | 367  |
| >ATM-F1463 FVLRDVIYTLI | 159  | >ATM-F1463 SVLRDVIYTLI | 506  | 347  |
| >ATM-F1463 FVLRDVIYTL  | 45   | >ATM-F1463 SVLRDVIYTL  | 116  | 71   |
| >ATM-F1463 FVLRDVIYTLI | 49   | >ATM-F1463 SVLRDVIYTLI | 161  | 112  |
| >ATM-F1463 FVLRDVIY    | 379  | >ATM-F1463 SVLRDVIY    | 137  | 242  |
| >ATM-F1463 FVLRDVIY    | 344  | >ATM-F1463 SVLRDVIY    | 1172 | 828  |

|                        |       |                        |       |       |
|------------------------|-------|------------------------|-------|-------|
| >ATM-F1463 FVLRDVIY    | 306   | >ATM-F1463 SVLRDVIY    | 1573  | 1267  |
| >ATM-F1463 FVLRDVIY    | 70    | >ATM-F1463 SVLRDVIY    | 858   | 788   |
| >ATM-F1463 FVLRDVIYTLI | 422   | >ATM-F1463 SVLRDVIYTLI | 266   | 156   |
| >ATM-F1463 AFVLRDVIYTL | 489   | >ATM-F1463 ASVLRDVIYTL | 17893 | 17404 |
| >ATM-F1463 AFVLRDVIY   | 230   | >ATM-F1463 ASVLRDVIY   | 2546  | 2316  |
| >ATM-F1463 AFVLRDVIYTL | 2656  | >ATM-F1463 ASVLRDVIYTL | 235   | 2421  |
| >ATM-F1463 AFVLRDVIY   | 21363 | >ATM-F1463 ASVLRDVIY   | 6     | 21357 |
| >ATM-F1463 AFVLRDVIYTL | 22116 | >ATM-F1463 ASVLRDVIYTL | 16    | 22100 |
| >ATM-F1463 AFVLRDVIYTL | 480   | >ATM-F1463 ASVLRDVIYTL | 6832  | 6352  |
| >ATM-F1463 AFVLRDVI    | 16430 | >ATM-F1463 ASVLRDVI    | 207   | 16223 |
| >ATM-F1463 IKSGLGGAW/  | 11    | >ATM-F1463 IKSGLGGAW/  | 6715  | 6704  |
| >ATM-F1463 WAFVLRDVI   | 206   | >ATM-F1463 WASVLRDVI   | 2870  | 2664  |
| >ATM-F1463 WAFVLRDVIY  | 397   | >ATM-F1463 WASVLRDVIY  | 831   | 434   |
| >ATM-F1463 WAFVLRDV    | 208   | >ATM-F1463 WASVLRDV    | 896   | 688   |
| >ATM-F1463 WAFVLRDVI   | 153   | >ATM-F1463 WASVLRDVI   | 737   | 584   |
| >ATM-F1463 WAFVLRDVIY  | 488   | >ATM-F1463 WASVLRDVIY  | 1253  | 765   |
| >ATM-F1463 WAFVLRDVIY  | 78    | >ATM-F1463 WASVLRDVIY  | 835   | 757   |
| >ATM-F1463 WAFVLRDVIY  | 93    | >ATM-F1463 WASVLRDVIY  | 516   | 423   |
| >ATM-F1463 WAFVLRDVI   | 304   | >ATM-F1463 WASVLRDVI   | 942   | 638   |
| >ATM-F1463 WAFVLRDVIY  | 239   | >ATM-F1463 WASVLRDVIY  | 77    | 162   |
| >ATM-F1463 WAFVLRDVI   | 490   | >ATM-F1463 WASVLRDVI   | 4148  | 3658  |
| >ATM-F1463 WAFVLRDVI   | 200   | >ATM-F1463 WASVLRDVI   | 661   | 461   |
| >ATM-F1463 AWAFVLRDV   | 443   | >ATM-F1463 AWASVLRDV   | 201   | 242   |
| >ATM-F1463 AWAFVLRDV   | 235   | >ATM-F1463 AWASVLRDV   | 378   | 143   |
| >ATM-F1463 AWAFVLRDV   | 125   | >ATM-F1463 AWASVLRDV   | 91    | 34    |
| >ATM-F1463 AWAFVLRDV   | 387   | >ATM-F1463 AWASVLRDV   | 314   | 73    |
| >ATM-F1463 AWAFVLRDV   | 1174  | >ATM-F1463 AWASVLRDV   | 489   | 685   |
| >ATM-F1463 GAWAFVLRD   | 193   | >ATM-F1463 GAWASVLRD   | 490   | 297   |
| >ATM-F1463 GAWAFVLRD   | 123   | >ATM-F1463 GAWASVLRD   | 252   | 129   |
| >ATM-F1463 GAWAFVLRD   | 407   | >ATM-F1463 GAWASVLRD   | 426   | 19    |
| >ATM-F1463 GAWAFVLR    | 185   | >ATM-F1463 GAWASVLR    | 512   | 327   |
| >ATM-F1463 GAWAFVLR    | 18    | >ATM-F1463 GAWASVLR    | 36    | 18    |
| >ATM-F1463 GAWAFVLR    | 338   | >ATM-F1463 GAWASVLR    | 1133  | 795   |
| >ATM-F1463 GAWAFVLR    | 171   | >ATM-F1463 GAWASVLR    | 274   | 103   |
| >ATM-F1463 GAWAFVLR    | 443   | >ATM-F1463 GAWASVLR    | 1946  | 1503  |
| >ATM-F1463 GAWAFVLR    | 82    | >ATM-F1463 GAWASVLR    | 353   | 271   |
| >ATM-F1463 GAWAFVLRD   | 129   | >ATM-F1463 GAWASVLRD   | 156   | 27    |
| >ATM-F1463 GGAWAFVLR   | 336   | >ATM-F1463 GGAWASVLR   | 2216  | 1880  |
| >ATM-F1463 GGAWAFVLR   | 212   | >ATM-F1463 GGAWASVLR   | 311   | 99    |
| >ATM-F1463 GGAWAFVLR   | 194   | >ATM-F1463 GGAWASVLR   | 944   | 750   |
| >ATM-F1463 LGGAWAFVL   | 4215  | >ATM-F1463 LGGAWASVL   | 263   | 3952  |
| >ATM-F1463 LGGAWAFVL   | 99    | >ATM-F1463 LGGAWASVL   | 251   | 152   |
| >ATM-F1463 GLGGAWAFV   | 27    | >ATM-F1463 GLGGAWASV   | 53    | 26    |

|                      |      |                      |       |       |
|----------------------|------|----------------------|-------|-------|
| >ATM-F1463 GLGGAWAFV | 330  | >ATM-F1463 GLGGAWASV | 2245  | 1915  |
| >ATM-F1463 GLGGAWAFV | 11   | >ATM-F1463 GLGGAWASV | 25    | 14    |
| >ATM-F1463 GLGGAWAFV | 58   | >ATM-F1463 GLGGAWASV | 100   | 42    |
| >ATM-F1463 GLGGAWAFV | 23   | >ATM-F1463 GLGGAWASV | 18    | 5     |
| >ATM-F1463 GLGGAWAFV | 38   | >ATM-F1463 GLGGAWASV | 81    | 43    |
| >ATM-F1463 GLGGAWAFV | 3    | >ATM-F1463 GLGGAWASV | 3     | 0     |
| >ATM-F1463 GLGGAWAFV | 11   | >ATM-F1463 GLGGAWASV | 23    | 12    |
| >ATM-F1463 GLGGAWAFV | 6    | >ATM-F1463 GLGGAWASV | 8     | 2     |
| >ATM-F1463 GLGGAWAFV | 16   | >ATM-F1463 GLGGAWASV | 49    | 33    |
| >ATM-F1463 GLGGAWAFV | 4    | >ATM-F1463 GLGGAWASV | 5     | 1     |
| >ATM-F1463 GLGGAWAFV | 9    | >ATM-F1463 GLGGAWASV | 21    | 12    |
| >ATM-F1463 GLGGAWAFV | 3    | >ATM-F1463 GLGGAWASV | 5     | 2     |
| >ATM-F1463 GLGGAWAFV | 17   | >ATM-F1463 GLGGAWASV | 106   | 89    |
| >ATM-F1463 GLGGAWAF  | 775  | >ATM-F1463 GLGGAWAS  | 401   | 374   |
| >ATM-F1463 GLGGAWAFV | 3    | >ATM-F1463 GLGGAWASV | 2     | 1     |
| >ATM-F1463 GLGGAWAFV | 5    | >ATM-F1463 GLGGAWASV | 6     | 1     |
| >ATM-F1463 GLGGAWAFV | 162  | >ATM-F1463 GLGGAWASV | 584   | 422   |
| >ATM-F1463 GLGGAWAF  | 233  | >ATM-F1463 GLGGAWAS  | 17486 | 17253 |
| >ATM-F1463 GLGGAWAF  | 403  | >ATM-F1463 GLGGAWAS  | 22871 | 22468 |
| >ATM-F1463 GLGGAWAFV | 265  | >ATM-F1463 GLGGAWASV | 655   | 390   |
| >ATM-F1463 SGLGGAWAF | 71   | >ATM-F1463 SGLGGAWAS | 139   | 68    |
| >ATM-F1463 SGLGGAWAF | 22   | >ATM-F1463 SGLGGAWAS | 77    | 55    |
| >ATM-F1463 SGLGGAWAF | 214  | >ATM-F1463 SGLGGAWAS | 171   | 43    |
| >ATM-F1463 SGLGGAWAF | 348  | >ATM-F1463 SGLGGAWAS | 631   | 283   |
| >ATM-F1463 SGLGGAWAF | 466  | >ATM-F1463 SGLGGAWAS | 24065 | 23599 |
| >ATM-F1463 SGLGGAWAF | 251  | >ATM-F1463 SGLGGAWAS | 14674 | 14423 |
| >ATM-F1463 SGLGGAWAF | 101  | >ATM-F1463 SGLGGAWAS | 156   | 55    |
| >ATM-F1463 SGLGGAWAF | 1593 | >ATM-F1463 SGLGGAWAS | 209   | 1384  |
| >ATM-F1463 KSLGGAWA  | 478  | >ATM-F1463 KSLGGAWA  | 1083  | 605   |
| >ATM-F1463 KSLGGAWA  | 225  | >ATM-F1463 KSLGGAWA  | 609   | 384   |
| >ATM-F1463 KSLGGAWA  | 138  | >ATM-F1463 KSLGGAWA  | 12530 | 12392 |
| >ATM-F1463 KSLGGAWA  | 313  | >ATM-F1463 KSLGGAWA  | 24522 | 24209 |
| >ATM-F1463 KSLGGAWA  | 13   | >ATM-F1463 KSLGGAWA  | 6920  | 6907  |
| >ATM-F1463 KSLGGAWA  | 430  | >ATM-F1463 KSLGGAWA  | 213   | 217   |
| >ATM-F1463 KSLGGAWA  | 70   | >ATM-F1463 KSLGGAWA  | 17014 | 16944 |
| >ATM-F1463 KSLGGAWA  | 250  | >ATM-F1463 KSLGGAWA  | 20920 | 20670 |
| >ATM-F2732 FQMCNTLL  | 72   | >ATM-F2732 LQMCNTLL  | 518   | 446   |
| >ATM-F2732 FQMCNTLL  | 11   | >ATM-F2732 LQMCNTLL  | 51    | 40    |
| >ATM-F2732 FQMCNTLL  | 4    | >ATM-F2732 LQMCNTLL  | 22    | 18    |
| >ATM-F2732 FQMCNTLL  | 12   | >ATM-F2732 LQMCNTLL  | 88    | 76    |
| >ATM-F2732 FQMCNTLL  | 3    | >ATM-F2732 LQMCNTLL  | 10    | 7     |
| >ATM-F2732 FQMCNTLLQ | 78   | >ATM-F2732 LQMCNTLLQ | 997   | 919   |
| >ATM-F2732 FQMCNTLLQ | 363  | >ATM-F2732 LQMCNTLLQ | 2022  | 1659  |

|                       |       |                       |       |       |
|-----------------------|-------|-----------------------|-------|-------|
| >ATM-F2732 FQMCNTLL   | 266   | >ATM-F2732 LQMCNTLL   | 2002  | 1736  |
| >ATM-F2732 FQMCNTLL   | 27    | >ATM-F2732 LQMCNTLL   | 188   | 161   |
| >ATM-F2732 FQMCNTLLQ  | 319   | >ATM-F2732 LQMCNTLLQ  | 263   | 56    |
| >ATM-F2732 FQMCNTLLQ  | 83    | >ATM-F2732 LQMCNTLLQ  | 67    | 16    |
| >ATM-F2732 FQMCNTLLQ  | 72    | >ATM-F2732 LQMCNTLLQ  | 44    | 28    |
| >ATM-F2732 FQMCNTLLQ  | 205   | >ATM-F2732 LQMCNTLLQ  | 511   | 306   |
| >ATM-F2732 FQMCNTLLQ  | 74    | >ATM-F2732 LQMCNTLLQ  | 408   | 334   |
| >ATM-F2732 FQMCNTLL   | 176   | >ATM-F2732 LQMCNTLL   | 136   | 40    |
| >ATM-F2732 FQMCNTLL   | 11    | >ATM-F2732 LQMCNTLL   | 14    | 3     |
| >ATM-F2732 FQMCNTLLQ  | 307   | >ATM-F2732 LQMCNTLLQ  | 560   | 253   |
| >ATM-F2732 FQMCNTLLQ  | 59    | >ATM-F2732 LQMCNTLLQ  | 123   | 64    |
| >ATM-F2732 FQMCNTLL   | 14    | >ATM-F2732 LQMCNTLL   | 186   | 172   |
| >ATM-F2732 FQMCNTLL   | 281   | >ATM-F2732 LQMCNTLL   | 413   | 132   |
| >ATM-F2732 FQMCNTLLQ  | 163   | >ATM-F2732 LQMCNTLLQ  | 204   | 41    |
| >ATM-F2732 VFQMCNTL   | 369   | >ATM-F2732 VLQMCNTL   | 3943  | 3574  |
| >ATM-F2732 VFQMCNTL   | 19617 | >ATM-F2732 VLQMCNTL   | 222   | 19395 |
| >ATM-F2732 VFQMCNTLL  | 17453 | >ATM-F2732 VLQMCNTLL  | 71    | 17382 |
| >ATM-F2732 VFQMCNTL   | 6750  | >ATM-F2732 VLQMCNTL   | 124   | 6626  |
| >ATM-F2732 VFQMCNTLL  | 3114  | >ATM-F2732 VLQMCNTLL  | 22    | 3092  |
| >ATM-F2732 VFQMCNTL   | 17103 | >ATM-F2732 VLQMCNTL   | 386   | 16717 |
| >ATM-F2732 VFQMCNTLL  | 17617 | >ATM-F2732 VLQMCNTLL  | 162   | 17455 |
| >ATM-F2732 VFQMCNTL   | 21439 | >ATM-F2732 VLQMCNTL   | 257   | 21182 |
| >ATM-F2732 VFQMCNTL   | 18846 | >ATM-F2732 VLQMCNTL   | 58    | 18788 |
| >ATM-F2732 VFQMCNTLL  | 23183 | >ATM-F2732 VLQMCNTLL  | 275   | 22908 |
| >ATM-F2732 VFQMCNTL   | 20070 | >ATM-F2732 VLQMCNTL   | 246   | 19824 |
| >ATM-F2732 VFQMCNTL   | 14844 | >ATM-F2732 VLQMCNTL   | 7     | 14837 |
| >ATM-F2732 VFQMCNTLL  | 16132 | >ATM-F2732 VLQMCNTLL  | 11    | 16121 |
| >ATM-F2732 VFQMCNTLLQ | 32595 | >ATM-F2732 VLQMCNTLLQ | 392   | 32203 |
| >ATM-F2732 VFQMCNTL   | 117   | >ATM-F2732 VLQMCNTL   | 2576  | 2459  |
| >ATM-F2732 VFQMCNTLL  | 214   | >ATM-F2732 VLQMCNTLL  | 4781  | 4567  |
| >ATM-F2732 VFQMCNTL   | 395   | >ATM-F2732 VLQMCNTL   | 15586 | 15191 |
| >ATM-F2732 VFQMCNTLLQ | 41    | >ATM-F2732 VLQMCNTLLQ | 153   | 112   |
| >ATM-F2732 VFQMCNTLLQ | 183   | >ATM-F2732 VLQMCNTLLQ | 829   | 646   |
| >ATM-F2732 VFQMCNTLLQ | 133   | >ATM-F2732 VLQMCNTLLQ | 560   | 427   |
| >ATM-F2732 VFQMCNTL   | 456   | >ATM-F2732 VLQMCNTL   | 16588 | 16132 |
| >ATM-F2732 LRQDAVMQC  | 39    | >ATM-F2732 LRQDAVMQC  | 496   | 457   |
| >ATM-F2732 LRQDAVMQC  | 334   | >ATM-F2732 LRQDAVMQC  | 278   | 56    |
| >ATM-F2732 LRQDAVMQC  | 6318  | >ATM-F2732 LRQDAVMQC  | 365   | 5953  |
| >ATM-F2732 LRQDAVMQC  | 1384  | >ATM-F2732 LRQDAVMQC  | 421   | 963   |
| >ATM-F2732 LRQDAVMQC  | 127   | >ATM-F2732 LRQDAVMQC  | 39    | 88    |
| >ATM-F2732 QVFQMCNTL  | 99    | >ATM-F2732 QVLQMCNTL  | 570   | 471   |
| >ATM-F2732 QVFQMCNTL  | 281   | >ATM-F2732 QVLQMCNTL  | 290   | 9     |
| >ATM-F2732 QVFQMCNTL  | 454   | >ATM-F2732 QVLQMCNTL  | 2866  | 2412  |

|                      |     |                      |      |      |
|----------------------|-----|----------------------|------|------|
| >ATM-F2732 QVFQMCNTL | 321 | >ATM-F2732 QVLQMCNTL | 770  | 449  |
| >ATM-F2732 QVFQMCNTL | 865 | >ATM-F2732 QVLQMCNTL | 497  | 368  |
| >ATM-F2732 QVFQMCNTL | 277 | >ATM-F2732 QVLQMCNTL | 294  | 17   |
| >ATM-F2732 QVFQMCNTL | 39  | >ATM-F2732 QVLQMCNTL | 132  | 93   |
| >ATM-F2732 QVFQMCNTL | 177 | >ATM-F2732 QVLQMCNTL | 965  | 788  |
| >ATM-F2732 QVFQMCNTL | 363 | >ATM-F2732 QVLQMCNTL | 8100 | 7737 |
| >ATM-F2732 QVFQMCNTL | 187 | >ATM-F2732 QVLQMCNTL | 4048 | 3861 |
| >ATM-F2732 QVFQMCNTL | 44  | >ATM-F2732 QVLQMCNTL | 228  | 184  |
| >ATM-F2732 QVFQMCNTL | 351 | >ATM-F2732 QVLQMCNTL | 521  | 170  |
| >ATM-F2732 QQVFQMCN' | 317 | >ATM-F2732 QQVLQMCN' | 675  | 358  |
| >ATM-F2732 QQVFQMCN' | 136 | >ATM-F2732 QQVLQMCN' | 143  | 7    |
| >ATM-F2732 QQVFQMCN' | 202 | >ATM-F2732 QQVLQMCN' | 370  | 168  |
| >ATM-F2732 QQVFQMCN' | 263 | >ATM-F2732 QQVLQMCN' | 450  | 187  |
| >ATM-F2732 MQQVFQMC  | 408 | >ATM-F2732 MQQVLQMC  | 607  | 199  |
| >ATM-F2732 MQQVFQMC  | 126 | >ATM-F2732 MQQVLQMC  | 176  | 50   |
| >ATM-F2732 MQQVFQMC  | 462 | >ATM-F2732 MQQVLQMC  | 351  | 111  |
| >ATM-F2732 MQQVFQMC  | 41  | >ATM-F2732 MQQVLQMC  | 87   | 46   |
| >ATM-F2732 MQQVFQMC  | 102 | >ATM-F2732 MQQVLQMC  | 108  | 6    |
| >ATM-F2732 MQQVFQMC  | 395 | >ATM-F2732 MQQVLQMC  | 399  | 4    |
| >ATM-F2732 VMQQVFQM  | 302 | >ATM-F2732 VMQQVLQM  | 755  | 453  |
| >ATM-F2732 VMQQVFQM  | 485 | >ATM-F2732 VMQQVLQM  | 1183 | 698  |
| >ATM-F2732 VMQQVFQM  | 15  | >ATM-F2732 VMQQVLQM  | 27   | 12   |
| >ATM-F2732 VMQQVFQM  | 27  | >ATM-F2732 VMQQVLQM  | 15   | 12   |
| >ATM-F2732 VMQQVFQM  | 203 | >ATM-F2732 VMQQVLQM  | 172  | 31   |
| >ATM-F2732 VMQQVFQM  | 239 | >ATM-F2732 VMQQVLQM  | 802  | 563  |
| >ATM-F2732 VMQQVFQM  | 166 | >ATM-F2732 VMQQVLQM  | 438  | 272  |
| >ATM-F2732 VMQQVFQM  | 71  | >ATM-F2732 VMQQVLQM  | 254  | 183  |
| >ATM-F2732 VMQQVFQM  | 25  | >ATM-F2732 VMQQVLQM  | 42   | 17   |
| >ATM-F2732 VMQQVFQM  | 97  | >ATM-F2732 VMQQVLQM  | 68   | 29   |
| >ATM-F2732 VMQQVFQM  | 145 | >ATM-F2732 VMQQVLQM  | 121  | 24   |
| >ATM-F2732 VMQQVFQM  | 136 | >ATM-F2732 VMQQVLQM  | 119  | 17   |
| >ATM-F2732 AVMQQVFQI | 242 | >ATM-F2732 AVMQQVLQI | 1871 | 1629 |
| >ATM-F2732 AVMQQVFQI | 204 | >ATM-F2732 AVMQQVLQI | 1839 | 1635 |
| >ATM-F2732 AVMQQVFQI | 125 | >ATM-F2732 AVMQQVLQI | 1454 | 1329 |
| >ATM-F2732 AVMQQVFQI | 198 | >ATM-F2732 AVMQQVLQI | 2787 | 2589 |
| >ATM-F2732 AVMQQVFQI | 15  | >ATM-F2732 AVMQQVLQI | 19   | 4    |
| >ATM-F2732 AVMQQVFQI | 489 | >ATM-F2732 AVMQQVLQI | 713  | 224  |
| >ATM-F2732 AVMQQVFQI | 402 | >ATM-F2732 AVMQQVLQI | 2546 | 2144 |
| >ATM-F2732 AVMQQVFQI | 430 | >ATM-F2732 AVMQQVLQI | 181  | 249  |
| >ATM-F2732 AVMQQVFQI | 35  | >ATM-F2732 AVMQQVLQI | 25   | 10   |
| >ATM-F2732 DAVMQQVFC | 249 | >ATM-F2732 DAVMQQVLC | 521  | 272  |
| >ATM-F2732 DAVMQQVF  | 178 | >ATM-F2732 DAVMQQVL  | 2871 | 2693 |
| >ATM-F2732 RQDAVMQQ  | 103 | >ATM-F2732 RQDAVMQQ  | 1285 | 1182 |



|                        |       |                        |       |       |
|------------------------|-------|------------------------|-------|-------|
| >ATM-F2732 RQDAVMQQ    | 30    | >ATM-F2732 RQDAVMQQ    | 497   | 467   |
| >ATM-F2732 RQDAVMQQ    | 995   | >ATM-F2732 RQDAVMQQ    | 499   | 496   |
| >ATM-F2732 RQDAVMQQ    | 1324  | >ATM-F2732 RQDAVMQQ    | 47    | 1277  |
| >ATM-F2732 RQDAVMQQ    | 1992  | >ATM-F2732 RQDAVMQQ    | 149   | 1843  |
| >ATM-F2732 RQDAVMQQ    | 2597  | >ATM-F2732 RQDAVMQQ    | 357   | 2240  |
| >ATM-F2732 RQDAVMQQ    | 1291  | >ATM-F2732 RQDAVMQQ    | 261   | 1030  |
| >ATM-F570S FSLKESIMK   | 1095  | >ATM-F570S SSLKESIMK   | 260   | 835   |
| >ATM-F570S FSLKESIMK   | 87    | >ATM-F570S SSLKESIMK   | 14    | 73    |
| >ATM-F570S FSLKESIMK   | 2003  | >ATM-F570S SSLKESIMK   | 31    | 1972  |
| >ATM-F570S FSLKESIMK   | 409   | >ATM-F570S SSLKESIMK   | 1295  | 886   |
| >ATM-F570S FSLKESIM    | 124   | >ATM-F570S SSLKESIM    | 531   | 407   |
| >ATM-F570S FSLKESIM    | 69    | >ATM-F570S SSLKESIM    | 69    | 0     |
| >ATM-F570S FSLKESIMKW  | 6     | >ATM-F570S SSLKESIMKW  | 8     | 2     |
| >ATM-F570S FSLKESIMKW  | 35    | >ATM-F570S SSLKESIMKW  | 27    | 8     |
| >ATM-F570S FSLKESIMKW  | 50    | >ATM-F570S SSLKESIMKW  | 48    | 2     |
| >ATM-F570S FSLKESIMKW  | 11    | >ATM-F570S SSLKESIMKW  | 17    | 6     |
| >ATM-F570S FSLKESIM    | 250   | >ATM-F570S SSLKESIM    | 2173  | 1923  |
| >ATM-F570S FSLKESIMKW  | 159   | >ATM-F570S SSLKESIMKW  | 122   | 37    |
| >ATM-F570S FSLKESIMKW  | 24    | >ATM-F570S SSLKESIMKW  | 444   | 420   |
| >ATM-F570S FSLKESIMK   | 1606  | >ATM-F570S SSLKESIMK   | 132   | 1474  |
| >ATM-F570S FSLKESIMKW  | 452   | >ATM-F570S SSLKESIMKW  | 391   | 61    |
| >ATM-F570S SFSLKESI    | 340   | >ATM-F570S SSSLKESI    | 12147 | 11807 |
| >ATM-F570S SFSLKESIMK  | 254   | >ATM-F570S SSSLKESIMK  | 81    | 173   |
| >ATM-F570S SFSLKESIMK  | 48    | >ATM-F570S SSSLKESIMK  | 8     | 40    |
| >ATM-F570S SFSLKESIMKV | 468   | >ATM-F570S SSSLKESIMKV | 16950 | 16482 |
| >ATM-F570S SFSLKESIMK  | 1117  | >ATM-F570S SSSLKESIMK  | 356   | 761   |
| >ATM-F570S SFSLKESIMK  | 533   | >ATM-F570S SSSLKESIMK  | 152   | 381   |
| >ATM-F570S SFSLKESIM   | 26090 | >ATM-F570S SSSLKESIM   | 135   | 25955 |
| >ATM-F570S SFSLKESIMKV | 6947  | >ATM-F570S SSSLKESIMKV | 8     | 6939  |
| >ATM-F570S SFSLKESIMKV | 18886 | >ATM-F570S SSSLKESIMKV | 100   | 18786 |
| >ATM-F570S SFSLKESIMKV | 3018  | >ATM-F570S SSSLKESIMKV | 33    | 2985  |
| >ATM-F570S SFSLKESIM   | 509   | >ATM-F570S SSSLKESIM   | 13    | 496   |
| >ATM-F570S SFSLKESIMK  | 14886 | >ATM-F570S SSSLKESIMK  | 251   | 14635 |
| >ATM-F570S SFSLKESI    | 7576  | >ATM-F570S SSSLKESI    | 76    | 7500  |
| >ATM-F570S EQNMCEVNF   | 161   | >ATM-F570S EQNMCEVNF   | 14072 | 13911 |
| >ATM-F570S EQNMCEVNF   | 16    | >ATM-F570S EQNMCEVNF   | 7116  | 7100  |
| >ATM-F570S RSFSLKESIMK | 55    | >ATM-F570S RSSSLKESIMK | 130   | 75    |
| >ATM-F570S RSFSLKESIMK | 9     | >ATM-F570S RSSSLKESIMK | 21    | 12    |
| >ATM-F570S RSFSLKESIMK | 14    | >ATM-F570S RSSSLKESIMK | 38    | 24    |
| >ATM-F570S RSFSLKESIMK | 67    | >ATM-F570S RSSSLKESIMK | 420   | 353   |
| >ATM-F570S RSFSLKESI   | 14    | >ATM-F570S RSSSLKESI   | 92    | 78    |
| >ATM-F570S RSFSLKESIMK | 133   | >ATM-F570S RSSSLKESIMK | 825   | 692   |
| >ATM-F570S RSFSLKESI   | 144   | >ATM-F570S RSSSLKESI   | 932   | 788   |

|                        |       |                        |       |       |
|------------------------|-------|------------------------|-------|-------|
| >ATM-F570S·RSFSLKESIM  | 32    | >ATM-F570S·RSSSLKESIM  | 262   | 230   |
| >ATM-F570S·RSFSLKESI   | 42    | >ATM-F570S·RSSSLKESI   | 401   | 359   |
| >ATM-F570S·RSFSLKESIM  | 8     | >ATM-F570S·RSSSLKESIM  | 24    | 16    |
| >ATM-F570S·RSFSLKESIM  | 292   | >ATM-F570S·RSSSLKESIM  | 1810  | 1518  |
| >ATM-F570S·RSFSLKESI   | 46    | >ATM-F570S·RSSSLKESI   | 48    | 2     |
| >ATM-F570S·RSFSLKESIM  | 80    | >ATM-F570S·RSSSLKESIM  | 81    | 1     |
| >ATM-F570S·RSFSLKESI   | 16    | >ATM-F570S·RSSSLKESI   | 70    | 54    |
| >ATM-F570S·RSFSLKESIM  | 34    | >ATM-F570S·RSSSLKESIM  | 20    | 14    |
| >ATM-F570S·RSFSLKESIMk | 331   | >ATM-F570S·RSSSLKESIMk | 1554  | 1223  |
| >ATM-F570S·RSFSLKESIMk | 208   | >ATM-F570S·RSSSLKESIMk | 625   | 417   |
| >ATM-F570S·RSFSLKESI   | 8     | >ATM-F570S·RSSSLKESI   | 20    | 12    |
| >ATM-F570S·NRSFSLKESIM | 1099  | >ATM-F570S·NRSSSLKESIM | 440   | 659   |
| >ATM-F570S·VNRSFSLK    | 39    | >ATM-F570S·VNRSSSLK    | 28    | 11    |
| >ATM-F570S·EVNRSFSLK   | 84    | >ATM-F570S·EVNRSSSLK   | 98    | 14    |
| >ATM-F570S·EVNRSFSLK   | 31    | >ATM-F570S·EVNRSSSLK   | 71    | 40    |
| >ATM-F570S·EVNRSFSLK   | 4     | >ATM-F570S·EVNRSSSLK   | 5     | 1     |
| >ATM-F570S·EVNRSFSL    | 19    | >ATM-F570S·EVNRSSSL    | 47    | 28    |
| >ATM-F570S·EVNRSFSL    | 46    | >ATM-F570S·EVNRSSSL    | 229   | 183   |
| >ATM-F570S·CEVNRSFSL   | 401   | >ATM-F570S·CEVNRSSSL   | 1464  | 1063  |
| >ATM-F570S·CEVNRSFSL   | 49    | >ATM-F570S·CEVNRSSSL   | 322   | 273   |
| >ATM-F570S·CEVNRSFSL   | 116   | >ATM-F570S·CEVNRSSSL   | 206   | 90    |
| >ATM-F570S·CEVNRSFSL   | 464   | >ATM-F570S·CEVNRSSSL   | 423   | 41    |
| >ATM-F570S·CEVNRSFSL   | 32    | >ATM-F570S·CEVNRSSSL   | 54    | 22    |
| >ATM-F570S·NMCEVNRSF   | 118   | >ATM-F570S·NMCEVNRSS   | 766   | 648   |
| >ATM-F570S·NMCEVNRSF   | 33    | >ATM-F570S·NMCEVNRSS   | 65    | 32    |
| >ATM-F570S·NMCEVNRSF   | 118   | >ATM-F570S·NMCEVNRSS   | 58    | 60    |
| >ATM-F570S·NMCEVNRSF   | 117   | >ATM-F570S·NMCEVNRSS   | 823   | 706   |
| >ATM-F570S·NMCEVNRSF   | 11    | >ATM-F570S·NMCEVNRSS   | 21    | 10    |
| >ATM-F570S·NMCEVNRSF   | 76    | >ATM-F570S·NMCEVNRSS   | 286   | 210   |
| >ATM-F570S·NMCEVNRSF   | 249   | >ATM-F570S·NMCEVNRSS   | 1147  | 898   |
| >ATM-F570S·NMCEVNRSF   | 137   | >ATM-F570S·NMCEVNRSS   | 968   | 831   |
| >ATM-F570S·NMCEVNRSF   | 58    | >ATM-F570S·NMCEVNRSS   | 107   | 49    |
| >ATM-F570S·NMCEVNRSF   | 107   | >ATM-F570S·NMCEVNRSS   | 12585 | 12478 |
| >ATM-F570S·NMCEVNRSF   | 1031  | >ATM-F570S·NMCEVNRSS   | 498   | 533   |
| >ATM-F570S·NMCEVNRSF   | 161   | >ATM-F570S·NMCEVNRSS   | 16384 | 16223 |
| >ATM-F570S·NMCEVNRSF   | 131   | >ATM-F570S·NMCEVNRSS   | 19418 | 19287 |
| >ATM-F570S·NMCEVNRSF   | 69    | >ATM-F570S·NMCEVNRSS   | 101   | 32    |
| >ATM-F570S·QNMCEVNRSE  | 74    | >ATM-F570S·QNMCEVNRSE  | 15151 | 15077 |
| >ATM-F858L·LFNDYPDSSV  | 8538  | >ATM-F858L·LLNDYPDSSV  | 41    | 8497  |
| >ATM-F858L·LFNDYPDSS   | 10066 | >ATM-F858L·LLNDYPDSS   | 77    | 9989  |
| >ATM-F858L·LFNDYPDSSV  | 1249  | >ATM-F858L·LLNDYPDSSV  | 12    | 1237  |
| >ATM-F858L·LFNDYPDSSV  | 15478 | >ATM-F858L·LLNDYPDSSV  | 367   | 15111 |
| >ATM-F858L·LFNDYPDSS   | 18232 | >ATM-F858L·LLNDYPDSS   | 188   | 18044 |

|                       |       |                       |      |       |
|-----------------------|-------|-----------------------|------|-------|
| >ATM-F858L·LFNDYPDSSV | 2753  | >ATM-F858L·LLNDYPDSSV | 16   | 2737  |
| >ATM-F858L·LFNDYPDSSV | 19036 | >ATM-F858L·LLNDYPDSSV | 267  | 18769 |
| >ATM-F858L·LFNDYPDSSV | 5548  | >ATM-F858L·LLNDYPDSSV | 297  | 5251  |
| >ATM-F858L·LFNDYPDSS  | 19149 | >ATM-F858L·LLNDYPDSS  | 106  | 19043 |
| >ATM-F858L·LFNDYPDSSV | 440   | >ATM-F858L·LLNDYPDSSV | 2    | 438   |
| >ATM-F858L·LFNDYPDSSV | 21683 | >ATM-F858L·LLNDYPDSSV | 450  | 21233 |
| >ATM-F858L·LFNDYPDSSV | 6251  | >ATM-F858L·LLNDYPDSSV | 4    | 6247  |
| >ATM-F858L·LFNDYPDSSV | 5200  | >ATM-F858L·LLNDYPDSSV | 10   | 5190  |
| >ATM-F858L·LFNDYPDSSV | 6565  | >ATM-F858L·LLNDYPDSSV | 6    | 6559  |
| >ATM-F858L·LFNDYPDSS  | 28509 | >ATM-F858L·LLNDYPDSS  | 202  | 28307 |
| >ATM-F858L·LFNDYPDSS  | 30531 | >ATM-F858L·LLNDYPDSS  | 264  | 30267 |
| >ATM-F858L·LFNDYPDSSV | 134   | >ATM-F858L·LLNDYPDSSV | 2    | 132   |
| >ATM-F858L·LFNDYPDSSV | 28759 | >ATM-F858L·LLNDYPDSSV | 228  | 28531 |
| >ATM-F858L·EVEDQSSMN  | 401   | >ATM-F858L·EVEDQSSMN  | 2093 | 1692  |
| >ATM-F858L·EVEDQSSMN  | 55    | >ATM-F858L·EVEDQSSMN  | 587  | 532   |
| >ATM-F858L·EVEDQSSMN  | 134   | >ATM-F858L·EVEDQSSMN  | 1105 | 971   |
| >ATM-F858L·EVEDQSSMN  | 13843 | >ATM-F858L·EVEDQSSMN  | 158  | 13685 |
| >ATM-F858L·EVEDQSSMN  | 12485 | >ATM-F858L·EVEDQSSMN  | 353  | 12132 |
| >ATM-F858L·EVEDQSSMN  | 431   | >ATM-F858L·EVEDQSSMN  | 2717 | 2286  |
| >ATM-F858L·NLFNDYPDSS | 53    | >ATM-F858L·NLLNDYPDSS | 112  | 59    |
| >ATM-F858L·NLFNDYPDSS | 27    | >ATM-F858L·NLLNDYPDSS | 289  | 262   |
| >ATM-F858L·NLFNDYPDSS | 13    | >ATM-F858L·NLLNDYPDSS | 63   | 50    |
| >ATM-F858L·NLFNDYPDSS | 85    | >ATM-F858L·NLLNDYPDSS | 75   | 10    |
| >ATM-F858L·NLFNDYPDSS | 5     | >ATM-F858L·NLLNDYPDSS | 7    | 2     |
| >ATM-F858L·NLFNDYPDSS | 9     | >ATM-F858L·NLLNDYPDSS | 7    | 2     |
| >ATM-F858L·NLFNDYPDSS | 9     | >ATM-F858L·NLLNDYPDSS | 10   | 1     |
| >ATM-F858L·NLFNDYPDSS | 26    | >ATM-F858L·NLLNDYPDSS | 8    | 18    |
| >ATM-F858L·NLFNDYPDSS | 5     | >ATM-F858L·NLLNDYPDSS | 5    | 0     |
| >ATM-F858L·NLFNDYPDSS | 179   | >ATM-F858L·NLLNDYPDSS | 1592 | 1413  |
| >ATM-F858L·NLFNDYPDSS | 250   | >ATM-F858L·NLLNDYPDSS | 136  | 114   |
| >ATM-F858L·SMNLFNDY   | 42    | >ATM-F858L·SMNLLNDY   | 55   | 13    |
| >ATM-F858L·SMNLFNDY   | 24    | >ATM-F858L·SMNLLNDY   | 29   | 5     |
| >ATM-F858L·SMNLFNDY   | 89    | >ATM-F858L·SMNLLNDY   | 105  | 16    |
| >ATM-F858L·SMNLFNDY   | 152   | >ATM-F858L·SMNLLNDY   | 168  | 16    |
| >ATM-F858L·SMNLFNDY   | 232   | >ATM-F858L·SMNLLNDY   | 535  | 303   |
| >ATM-F858L·SMNLFNDY   | 113   | >ATM-F858L·SMNLLNDY   | 409  | 296   |
| >ATM-F858L·SSMNLFNDY  | 344   | >ATM-F858L·SSMNLLNDY  | 580  | 236   |
| >ATM-F858L·SSMNLFNDY  | 34    | >ATM-F858L·SSMNLLNDY  | 116  | 82    |
| >ATM-F858L·SSMNLFNDY  | 881   | >ATM-F858L·SSMNLLNDY  | 386  | 495   |
| >ATM-F858L·SSMNLFNDY  | 397   | >ATM-F858L·SSMNLLNDY  | 39   | 358   |
| >ATM-F858L·SSMNLFNDY  | 175   | >ATM-F858L·SSMNLLNDY  | 816  | 641   |
| >ATM-F858L·SSMNLFNDY  | 136   | >ATM-F858L·SSMNLLNDY  | 302  | 166   |
| >ATM-F858L·SSMNLFNDY  | 38    | >ATM-F858L·SSMNLLNDY  | 34   | 4     |

|                        |       |                        |       |       |
|------------------------|-------|------------------------|-------|-------|
| >ATM-F858L·SSMNLFN DY  | 170   | >ATM-F858L·SSMNL LN DY | 308   | 138   |
| >ATM-F858L·SSMNL FN DY | 108   | >ATM-F858L·SSMNL LN DY | 271   | 163   |
| >ATM-F858L·SSMNL FN DY | 67    | >ATM-F858L·SSMNL LN DY | 242   | 175   |
| >ATM-F858L·SSMNL FN DY | 540   | >ATM-F858L·SSMNL LN DY | 172   | 368   |
| >ATM-F858L·SSMNL FN DY | 12    | >ATM-F858L·SSMNL LN DY | 14    | 2     |
| >ATM-F858L·SSMNL FN DY | 121   | >ATM-F858L·SSMNL LN DY | 880   | 759   |
| >ATM-F858L·QSSMNL FN D | 59    | >ATM-F858L·QSSMNL LN D | 54    | 5     |
| >ATM-F858L·QSSMNL FN D | 917   | >ATM-F858L·QSSMNL LN D | 374   | 543   |
| >ATM-F858L·QSSMNL FN D | 104   | >ATM-F858L·QSSMNL LN D | 108   | 4     |
| >ATM-F858L·QSSMNL FN D | 376   | >ATM-F858L·QSSMNL LN D | 557   | 181   |
| >ATM-F858L·QSSMNL FN D | 200   | >ATM-F858L·QSSMNL LN D | 100   | 100   |
| >ATM-F858L·QSSMNL FN D | 129   | >ATM-F858L·QSSMNL LN D | 70    | 59    |
| >ATM-F858L·DQSSMNL FN  | 198   | >ATM-F858L·DQSSMNL LN  | 218   | 20    |
| >ATM-F858L·DQSSMNL F   | 143   | >ATM-F858L·DQSSMNL L   | 2450  | 2307  |
| >ATM-F858L·DQSSMNL FN  | 308   | >ATM-F858L·DQSSMNL LN  | 551   | 243   |
| >ATM-F858L·EDQSSMNL F  | 7599  | >ATM-F858L·EDQSSMNL L  | 351   | 7248  |
| >ATM-F858L·VEDQSSMNL   | 811   | >ATM-F858L·VEDQSSMNL   | 210   | 601   |
| >ATM-F858L·VEDQSSMNL   | 1545  | >ATM-F858L·VEDQSSMNL   | 417   | 1128  |
| >ATM-F858L·VEDQSSMNL   | 436   | >ATM-F858L·VEDQSSMNL   | 3548  | 3112  |
| >ATM-F858L·VEDQSSMNL   | 153   | >ATM-F858L·VEDQSSMNL   | 54    | 99    |
| >ATM-G138F GADCSNILLK  | 705   | >ATM-G138F RADCSNILLK  | 177   | 528   |
| >ATM-G138F GADCSNILLK  | 92    | >ATM-G138F RADCSNILLK  | 51    | 41    |
| >ATM-G138F GADCSNILLK  | 7292  | >ATM-G138F RADCSNILLK  | 236   | 7056  |
| >ATM-G138F GADCSNIL    | 5593  | >ATM-G138F RADCSNIL    | 378   | 5215  |
| >ATM-G138F GADCSNILL   | 2844  | >ATM-G138F RADCSNILL   | 135   | 2709  |
| >ATM-G138F GADCSNIL    | 6685  | >ATM-G138F RADCSNIL    | 180   | 6505  |
| >ATM-G138F YGADCSNI    | 292   | >ATM-G138F YRADCSNI    | 2347  | 2055  |
| >ATM-G138F YGADCSNIL   | 43    | >ATM-G138F YRADCSNIL   | 400   | 357   |
| >ATM-G138F YGADCSNILLI | 495   | >ATM-G138F YRADCSNILLI | 1647  | 1152  |
| >ATM-G138F YGADCSNI    | 4799  | >ATM-G138F YRADCSNI    | 237   | 4562  |
| >ATM-G138F YGADCSNIL   | 3088  | >ATM-G138F YRADCSNIL   | 171   | 2917  |
| >ATM-G138F YGADCSNILL  | 4938  | >ATM-G138F YRADCSNILL  | 213   | 4725  |
| >ATM-G138F YGADCSNILL  | 23284 | >ATM-G138F YRADCSNILL  | 49    | 23235 |
| >ATM-G138F YGADCSNILLI | 18589 | >ATM-G138F YRADCSNILLI | 123   | 18466 |
| >ATM-G138F YGADCSNIL   | 320   | >ATM-G138F YRADCSNIL   | 9     | 311   |
| >ATM-G138F YGADCSNILL  | 872   | >ATM-G138F YRADCSNILL  | 14    | 858   |
| >ATM-G138F YGADCSNIL   | 473   | >ATM-G138F YRADCSNIL   | 11898 | 11425 |
| >ATM-G138F YGADCSNILL  | 231   | >ATM-G138F YRADCSNILL  | 7511  | 7280  |
| >ATM-G138F YGADCSNIL   | 197   | >ATM-G138F YRADCSNIL   | 1158  | 961   |
| >ATM-G138F YGADCSNIL   | 30945 | >ATM-G138F YRADCSNIL   | 173   | 30772 |
| >ATM-G138F YGADCSNILL  | 29407 | >ATM-G138F YRADCSNILL  | 388   | 29019 |
| >ATM-G138F YGADCSNILLI | 30452 | >ATM-G138F YRADCSNILLI | 255   | 30197 |
| >ATM-G138F YGADCSNI    | 423   | >ATM-G138F YRADCSNI    | 1931  | 1508  |

|                       |       |                       |     |       |
|-----------------------|-------|-----------------------|-----|-------|
| >ATM-G138FIYGADCSNI   | 10    | >ATM-G138FIYRADCSNI   | 7   | 3     |
| >ATM-G138FIYGADCSNIL  | 653   | >ATM-G138FIYRADCSNIL  | 452 | 201   |
| >ATM-G138FIYGADCSNI   | 143   | >ATM-G138FIYRADCSNI   | 186 | 43    |
| >ATM-G138FIYGADCSNILL | 348   | >ATM-G138FIYRADCSNILL | 497 | 149   |
| >ATM-G138FIYGADCSNI   | 326   | >ATM-G138FIYRADCSNI   | 669 | 343   |
| >ATM-G138FIYGADCSNILL | 309   | >ATM-G138FIYRADCSNILL | 610 | 301   |
| >ATM-G138FIYGADCSNI   | 61    | >ATM-G138FIYRADCSNI   | 338 | 277   |
| >ATM-G138FIYGADCSNIL  | 67    | >ATM-G138FIYRADCSNIL  | 373 | 306   |
| >ATM-G138FIYGADCSNILL | 67    | >ATM-G138FIYRADCSNILL | 334 | 267   |
| >ATM-G138FIYGADCSNI   | 15760 | >ATM-G138FIYRADCSNI   | 377 | 15383 |
| >ATM-G138FIYGADCSNIL  | 15345 | >ATM-G138FIYRADCSNIL  | 329 | 15016 |
| >ATM-G138FIYGADCSNILL | 10930 | >ATM-G138FIYRADCSNILL | 103 | 10827 |
| >ATM-G138FAIYGADCSNII | 308   | >ATM-G138FAIYRADCSNII | 171 | 137   |
| >ATM-G138FAIYGADCSNI  | 157   | >ATM-G138FAIYRADCSNI  | 461 | 304   |
| >ATM-G138FAIYGADCSNII | 65    | >ATM-G138FAIYRADCSNII | 220 | 155   |
| >ATM-G138FAIYGADCSNI  | 52    | >ATM-G138FAIYRADCSNI  | 75  | 23    |
| >ATM-G138FAIYGADCSNII | 228   | >ATM-G138FAIYRADCSNII | 396 | 168   |
| >ATM-G138FAIYGADCSNII | 275   | >ATM-G138FAIYRADCSNII | 673 | 398   |
| >ATM-G138FAIYGADCSNI  | 152   | >ATM-G138FAIYRADCSNI  | 430 | 278   |
| >ATM-G138FAIYGADCSNII | 399   | >ATM-G138FAIYRADCSNII | 973 | 574   |
| >ATM-G138FAIYGADCSNI  | 180   | >ATM-G138FAIYRADCSNI  | 502 | 322   |
| >ATM-G138FAIYGADCSNII | 178   | >ATM-G138FAIYRADCSNII | 497 | 319   |
| >ATM-G138FAIYGADCSNI  | 46    | >ATM-G138FAIYRADCSNI  | 175 | 129   |
| >ATM-G138FAIYGADCSNII | 24    | >ATM-G138FAIYRADCSNII | 73  | 49    |
| >ATM-G138FAIYGADCSNI  | 471   | >ATM-G138FAIYRADCSNI  | 901 | 430   |
| >ATM-G138FAIYGADCSNII | 436   | >ATM-G138FAIYRADCSNII | 964 | 528   |
| >ATM-G138FGAIYGADCSN  | 490   | >ATM-G138FGAIYRADCSN  | 543 | 53    |
| >ATM-G138FSSNGAIYG    | 16985 | >ATM-G138FSSNGAIYR    | 32  | 16953 |
| >ATM-G138FSSNGAIYG    | 15902 | >ATM-G138FSSNGAIYR    | 21  | 15881 |
| >ATM-G138FSSNGAIYG    | 27153 | >ATM-G138FSSNGAIYR    | 23  | 27130 |
| >ATM-G138FSSNGAIYGA   | 69    | >ATM-G138FSSNGAIYRA   | 132 | 63    |
| >ATM-G138FSSNGAIYG    | 19326 | >ATM-G138FSSNGAIYR    | 437 | 18889 |
| >ATM-G138FSSNGAIYG    | 33720 | >ATM-G138FSSNGAIYR    | 263 | 33457 |
| >ATM-G138FDSSNGAIYG   | 28766 | >ATM-G138FDSSNGAIYR   | 60  | 28706 |
| >ATM-G138FDSSNGAIYG   | 19380 | >ATM-G138FDSSNGAIYR   | 8   | 19372 |
| >ATM-G138FKDSSNGAIYG  | 29473 | >ATM-G138FKDSSNGAIYR  | 229 | 29244 |
| >ATM-G138FKDSSNGAIYG  | 28419 | >ATM-G138FKDSSNGAIYR  | 151 | 28268 |
| >ATM-G2023GGKMLQPI    | 2620  | >ATM-G2023RGKMLQPI    | 34  | 2586  |
| >ATM-G2023GGKMLQPITF  | 5698  | >ATM-G2023RGKMLQPITF  | 102 | 5596  |
| >ATM-G2023GGKMLQPITF  | 2864  | >ATM-G2023RGKMLQPITF  | 264 | 2600  |
| >ATM-G2023GGKMLQPITF  | 2595  | >ATM-G2023RGKMLQPITF  | 154 | 2441  |
| >ATM-G2023GGGKMLQPI   | 22781 | >ATM-G2023GRGKMLQPI   | 459 | 22322 |
| >ATM-G2023GGGKMLQPI   | 28966 | >ATM-G2023GRGKMLQPI   | 236 | 28730 |

|                       |       |                        |      |       |
|-----------------------|-------|------------------------|------|-------|
| >ATM-G2023 LYGCGGGKM  | 141   | >ATM-G2023 LYGCGRGKM   | 147  | 6     |
| >ATM-G2023 LYGCGGGKM  | 12    | >ATM-G2023 LYGCGRGKM   | 14   | 2     |
| >ATM-G2023 SLYGCGGGK  | 414   | >ATM-G2023 SLYGCGRGKM  | 556  | 142   |
| >ATM-G2023 SLYGCGGGK  | 76    | >ATM-G2023 SLYGCGRGKM  | 86   | 10    |
| >ATM-G2023 SLYGCGGGK  | 114   | >ATM-G2023 SLYGCGRGKM  | 130  | 16    |
| >ATM-G2023 SLYGCGGGK  | 139   | >ATM-G2023 SLYGCGRGKM  | 154  | 15    |
| >ATM-G2023 SLYGCGGGK  | 45    | >ATM-G2023 SLYGCGRGKM  | 68   | 23    |
| >ATM-G2023 SLYGCGGGK  | 41    | >ATM-G2023 SLYGCGRGKM  | 123  | 82    |
| >ATM-G2023 SLYGCGGGK  | 6     | >ATM-G2023 SLYGCGRGKM  | 7    | 1     |
| >ATM-G2023 SLYGCGGGK  | 240   | >ATM-G2023 SLYGCGRGKM  | 349  | 109   |
| >ATM-G2023 SLYGCGGGK  | 151   | >ATM-G2023 SLYGCGRGKM  | 430  | 279   |
| >ATM-G2023 SLYGCGGGK  | 16    | >ATM-G2023 SLYGCGRGKM  | 22   | 6     |
| >ATM-G2023 SLYGCGGGK  | 76    | >ATM-G2023 SLYGCGRGKM  | 75   | 1     |
| >ATM-G2023 SLYGCGGGK  | 5     | >ATM-G2023 SLYGCGRGKM  | 6    | 1     |
| >ATM-G2023 SLYGCGGGK  | 33    | >ATM-G2023 SLYGCGRGK   | 40   | 7     |
| >ATM-G2023 SLYGCGGGK  | 79    | >ATM-G2023 SLYGCGRGK   | 132  | 53    |
| >ATM-G2023 SLYGCGGGK  | 62    | >ATM-G2023 SLYGCGRGKM  | 165  | 103   |
| >ATM-G2023 SLYGCGGGK  | 193   | >ATM-G2023 SLYGCGRGKM  | 323  | 130   |
| >ATM-G2023 SLYGCGGGK  | 122   | >ATM-G2023 SLYGCGRGKM  | 159  | 37    |
| >ATM-G2023 DSLYGCGGGI | 399   | >ATM-G2023 DSLYGCGRGK  | 315  | 84    |
| >ATM-G2023 DSLYGCGG   | 25149 | >ATM-G2023 DSLYGCGR    | 61   | 25088 |
| >ATM-G2023 DSLYGCGG   | 35580 | >ATM-G2023 DSLYGCGR    | 93   | 35487 |
| >ATM-G2023 DSLYGCGGGI | 377   | >ATM-G2023 DSLYGCGRGK  | 401  | 24    |
| >ATM-G2063 GIIQALQNL  | 92    | >ATM-G2063 EIIQALQNL   | 1701 | 1609  |
| >ATM-G2063 GIIQALQNLG | 337   | >ATM-G2063 EIIQALQNLGI | 3400 | 3063  |
| >ATM-G2063 GIIQALQNL  | 153   | >ATM-G2063 EIIQALQNL   | 3455 | 3302  |
| >ATM-G2063 GIIQALQNLG | 494   | >ATM-G2063 EIIQALQNLGI | 5162 | 4668  |
| >ATM-G2063 GIIQALQNL  | 242   | >ATM-G2063 EIIQALQNL   | 2857 | 2615  |
| >ATM-G2063 GIIQALQNLG | 198   | >ATM-G2063 EIIQALQNLGI | 1875 | 1677  |
| >ATM-G2063 GIIQALQNL  | 99    | >ATM-G2063 EIIQALQNL   | 1201 | 1102  |
| >ATM-G2063 GIIQALQNLG | 314   | >ATM-G2063 EIIQALQNLGI | 2671 | 2357  |
| >ATM-G2063 GIIQALQNL  | 13912 | >ATM-G2063 EIIQALQNL   | 339  | 13573 |
| >ATM-G2063 GIIQALQNLG | 11666 | >ATM-G2063 EIIQALQNLGI | 170  | 11496 |
| >ATM-G2063 GIIQALQNL  | 263   | >ATM-G2063 EIIQALQNL   | 3    | 260   |
| >ATM-G2063 GIIQALQNLG | 2353  | >ATM-G2063 EIIQALQNLGI | 17   | 2336  |
| >ATM-G2063 GIIQALQNL  | 9149  | >ATM-G2063 EIIQALQNL   | 56   | 9093  |
| >ATM-G2063 GIIQALQNLG | 8467  | >ATM-G2063 EIIQALQNLGI | 62   | 8405  |
| >ATM-G2063 GIIQALQNL  | 14154 | >ATM-G2063 EIIQALQNL   | 204  | 13950 |
| >ATM-G2063 GIIQALQNLG | 15047 | >ATM-G2063 EIIQALQNLGI | 233  | 14814 |
| >ATM-G2063 GIIQALQNL  | 10261 | >ATM-G2063 EIIQALQNL   | 37   | 10224 |
| >ATM-G2063 GIIQALQNLG | 8839  | >ATM-G2063 EIIQALQNLGI | 38   | 8801  |
| >ATM-G2063 AGIIQALQNL | 34962 | >ATM-G2063 AEIIQALQNL  | 258  | 34704 |
| >ATM-G2063 AGIIQALQNL | 26707 | >ATM-G2063 AEIIQALQNL  | 343  | 26364 |

|                       |       |                        |      |       |
|-----------------------|-------|------------------------|------|-------|
| >ATM-G2063 AGIIQALQ   | 38596 | >ATM-G2063 AEIIQALQ    | 429  | 38167 |
| >ATM-G2063 AGIIQALQNL | 29768 | >ATM-G2063 AEIIQALQNL  | 377  | 29391 |
| >ATM-G2063 AGIIQALQNL | 16195 | >ATM-G2063 AEIIQALQNL  | 15   | 16180 |
| >ATM-G2063 RQAGIIQA   | 860   | >ATM-G2063 RQAEIIQA    | 275  | 585   |
| >ATM-G2063 RQAGIIQAL  | 279   | >ATM-G2063 RQAEIIQAL   | 63   | 216   |
| >ATM-G2063 RQAGIIQA   | 343   | >ATM-G2063 RQAEIIQA    | 245  | 98    |
| >ATM-G2063 RQAGIIQAL  | 12    | >ATM-G2063 RQAEIIQAL   | 9    | 3     |
| >ATM-G2063 RQAGIIQA   | 155   | >ATM-G2063 RQAEIIQA    | 87   | 68    |
| >ATM-G2063 RQAGIIQAL  | 55    | >ATM-G2063 RQAEIIQAL   | 21   | 34    |
| >ATM-G2063 RQAGIIQA   | 23    | >ATM-G2063 RQAEIIQA    | 14   | 9     |
| >ATM-G2063 RQAGIIQAL  | 6     | >ATM-G2063 RQAEIIQAL   | 5    | 1     |
| >ATM-G2063 RQAGIIQA   | 676   | >ATM-G2063 RQAEIIQA    | 321  | 355   |
| >ATM-G2063 RQAGIIQAL  | 126   | >ATM-G2063 RQAEIIQAL   | 41   | 85    |
| >ATM-G2063 RQAGIIQAL  | 1818  | >ATM-G2063 RQAEIIQAL   | 212  | 1606  |
| >ATM-G2063 RQAGIIQAL  | 38    | >ATM-G2063 RQAEIIQAL   | 78   | 40    |
| >ATM-G2063 RQAGIIQAL  | 82    | >ATM-G2063 RQAEIIQAL   | 81   | 1     |
| >ATM-G2063 RQAGIIQAL  | 37    | >ATM-G2063 RQAEIIQAL   | 13   | 24    |
| >ATM-G2063 RQAGIIQAL  | 100   | >ATM-G2063 RQAEIIQAL   | 166  | 66    |
| >ATM-G2063 RQAGIIQAL  | 34    | >ATM-G2063 RQAEIIQAL   | 28   | 6     |
| >ATM-G2063 RQAGIIQAL  | 34    | >ATM-G2063 RQAEIIQAL   | 113  | 79    |
| >ATM-G2063 RQAGIIQAL  | 41    | >ATM-G2063 RQAEIIQAL   | 44   | 3     |
| >ATM-G2063 RQAGIIQA   | 574   | >ATM-G2063 RQAEIIQA    | 291  | 283   |
| >ATM-G2063 RQAGIIQAL  | 338   | >ATM-G2063 RQAEIIQAL   | 321  | 17    |
| >ATM-G2063 RQAGIIQAL  | 122   | >ATM-G2063 RQAEIIQAL   | 44   | 78    |
| >ATM-G2063 TRQAGIIQAL | 60    | >ATM-G2063 TRQAEIIQAL  | 69   | 9     |
| >ATM-G2063 TRQAGIIQAL | 17    | >ATM-G2063 TRQAEIIQAL  | 28   | 11    |
| >ATM-G2063 TRQAGIIQAL | 151   | >ATM-G2063 TRQAEIIQAL  | 140  | 11    |
| >ATM-G2063 TRQAGIIQAL | 53    | >ATM-G2063 TRQAEIIQAL  | 53   | 0     |
| >ATM-G2063 STRQAGIIQA | 480   | >ATM-G2063 STRQAEIIQAL | 502  | 22    |
| >ATM-G2063 STRQAGIIQA | 341   | >ATM-G2063 STRQAEIIQAL | 717  | 376   |
| >ATM-G2063 STRQAGII   | 18    | >ATM-G2063 STRQAEII    | 85   | 67    |
| >ATM-G2063 STRQAGIIQ  | 58    | >ATM-G2063 STRQAEIIQ   | 157  | 99    |
| >ATM-G2063 STRQAGIIQA | 8     | >ATM-G2063 STRQAEIIQA  | 14   | 6     |
| >ATM-G2063 STRQAGIIQA | 19    | >ATM-G2063 STRQAEIIQAL | 29   | 10    |
| >ATM-G2063 STRQAGIIQA | 86    | >ATM-G2063 STRQAEIIQAL | 371  | 285   |
| >ATM-G2063 STRQAGII   | 62    | >ATM-G2063 STRQAEII    | 159  | 97    |
| >ATM-G2063 STRQAGIIQA | 11    | >ATM-G2063 STRQAEIIQAL | 17   | 6     |
| >ATM-G2063 STRQAGIIQ  | 296   | >ATM-G2063 STRQAEIIQ   | 1121 | 825   |
| >ATM-G2063 STRQAGIIQA | 50    | >ATM-G2063 STRQAEIIQAL | 117  | 67    |
| >ATM-G2063 STRQAGII   | 27    | >ATM-G2063 STRQAEII    | 61   | 34    |
| >ATM-G2063 SSTRQAGI   | 489   | >ATM-G2063 SSTRQAEI    | 914  | 425   |
| >ATM-G2063 SSTRQAGII  | 486   | >ATM-G2063 SSTRQAEII   | 670  | 184   |
| >ATM-G2063 SSTRQAGI   | 69    | >ATM-G2063 SSTRQAEI    | 88   | 19    |

|                        |      |                        |     |      |
|------------------------|------|------------------------|-----|------|
| >ATM-G2063 SSTRQAGII   | 26   | >ATM-G2063 SSTRQAEII   | 42  | 16   |
| >ATM-G2063 PSSTRQAGII  | 171  | >ATM-G2063 PSSTRQAEII  | 619 | 448  |
| >ATM-G2063 IPSSTRQAGI  | 675  | >ATM-G2063 IPSSTRQAEI  | 94  | 581  |
| >ATM-G2063 IPSSTRQAGI  | 130  | >ATM-G2063 IPSSTRQAEI  | 120 | 10   |
| >ATM-G2063 IPSSTRQAGII | 47   | >ATM-G2063 IPSSTRQAEII | 200 | 153  |
| >ATM-G2063 IPSSTRQAGII | 223  | >ATM-G2063 IPSSTRQAEII | 170 | 53   |
| >ATM-G2063 IPSSTRQAGII | 265  | >ATM-G2063 IPSSTRQAEII | 102 | 163  |
| >ATM-G2063 IPSSTRQAGI  | 559  | >ATM-G2063 IPSSTRQAEI  | 494 | 65   |
| >ATM-G2063 AIPSSTRQAG  | 175  | >ATM-G2063 AIPSSTRQAEI | 237 | 62   |
| >ATM-G2695 GVNLPKIIDC\ | 810  | >ATM-G2695 AVNLPKIIDC\ | 346 | 464  |
| >ATM-G2695 SFKAEFRLAG\ | 3167 | >ATM-G2695 SFKAEFRLAG\ | 320 | 2847 |
| >ATM-G2695 AGGVNLPK    | 831  | >ATM-G2695 AGAVNLPK    | 349 | 482  |
| >ATM-G2695 LAGGVNLPK   | 89   | >ATM-G2695 LAGAVNLPK   | 51  | 38   |
| >ATM-G2695 LAGGVNLPK   | 1172 | >ATM-G2695 LAGAVNLPK   | 407 | 765  |
| >ATM-G2695 LAGGVNLPKI  | 247  | >ATM-G2695 LAGAVNLPKI  | 198 | 49   |
| >ATM-G2695 RLAGGVNL    | 84   | >ATM-G2695 RLAGAVNL    | 64  | 20   |
| >ATM-G2695 RLAGGVNLPk  | 50   | >ATM-G2695 RLAGAVNLPk  | 52  | 2    |
| >ATM-G2695 RLAGGVNL    | 8    | >ATM-G2695 RLAGAVNL    | 6   | 2    |
| >ATM-G2695 RLAGGVNLP   | 375  | >ATM-G2695 RLAGAVNLP   | 144 | 231  |
| >ATM-G2695 RLAGGVNLPk  | 21   | >ATM-G2695 RLAGAVNLPk  | 13  | 8    |
| >ATM-G2695 RLAGGVNL    | 12   | >ATM-G2695 RLAGAVNL    | 12  | 0    |
| >ATM-G2695 RLAGGVNLPk  | 7    | >ATM-G2695 RLAGAVNLPk  | 8   | 1    |
| >ATM-G2695 RLAGGVNL    | 135  | >ATM-G2695 RLAGAVNL    | 108 | 27   |
| >ATM-G2695 RLAGGVNLPk  | 52   | >ATM-G2695 RLAGAVNLPk  | 60  | 8    |
| >ATM-G2695 RLAGGVNL    | 11   | >ATM-G2695 RLAGAVNL    | 16  | 5    |
| >ATM-G2695 RLAGGVNLPk  | 7    | >ATM-G2695 RLAGAVNLPk  | 9   | 2    |
| >ATM-G2695 RLAGGVNL    | 62   | >ATM-G2695 RLAGAVNL    | 74  | 12   |
| >ATM-G2695 RLAGGVNLPk  | 58   | >ATM-G2695 RLAGAVNLPk  | 81  | 23   |
| >ATM-G2695 RLAGGVNL    | 12   | >ATM-G2695 RLAGAVNL    | 12  | 0    |
| >ATM-G2695 RLAGGVNLPk  | 12   | >ATM-G2695 RLAGAVNLPk  | 13  | 1    |
| >ATM-G2695 RLAGGVNL    | 31   | >ATM-G2695 RLAGAVNL    | 16  | 15   |
| >ATM-G2695 RLAGGVNLPk  | 14   | >ATM-G2695 RLAGAVNLPk  | 13  | 1    |
| >ATM-G2695 RLAGGVNL    | 4    | >ATM-G2695 RLAGAVNL    | 4   | 0    |
| >ATM-G2695 RLAGGVNLPk  | 5    | >ATM-G2695 RLAGAVNLPk  | 6   | 1    |
| >ATM-G2695 RLAGGVNLPk  | 12   | >ATM-G2695 RLAGAVNLPk  | 11  | 1    |
| >ATM-G2695 RLAGGVNLPk  | 26   | >ATM-G2695 RLAGAVNLPk  | 20  | 6    |
| >ATM-G2695 RLAGGVNLPk  | 48   | >ATM-G2695 RLAGAVNLPk  | 23  | 25   |
| >ATM-G2695 RLAGGVNL    | 125  | >ATM-G2695 RLAGAVNL    | 65  | 60   |
| >ATM-G2695 RLAGGVNLPk  | 142  | >ATM-G2695 RLAGAVNLPk  | 142 | 0    |
| >ATM-G2695 RLAGGVNLPk  | 290  | >ATM-G2695 RLAGAVNLPk  | 196 | 94   |
| >ATM-G2695 RLAGGVNLPk  | 131  | >ATM-G2695 RLAGAVNLPk  | 112 | 19   |
| >ATM-G2695 RLAGGVNLPk  | 744  | >ATM-G2695 RLAGAVNLPk  | 453 | 291  |
| >ATM-G2695 FRLAGGVNL   | 33   | >ATM-G2695 FRLAGAVNL   | 66  | 33   |



|                       |       |                       |      |       |
|-----------------------|-------|-----------------------|------|-------|
| >ATM-G2695 FRLAGGVNL  | 37    | >ATM-G2695 FRLAGAVNL  | 31   | 6     |
| >ATM-G2695 FRLAGGVNLF | 20    | >ATM-G2695 FRLAGAVNLF | 19   | 1     |
| >ATM-G2695 FRLAGGVNL  | 15    | >ATM-G2695 FRLAGAVNL  | 8    | 7     |
| >ATM-G2695 FRLAGGVNL  | 335   | >ATM-G2695 FRLAGAVNL  | 229  | 106   |
| >ATM-G2695 FRLAGGVNL  | 265   | >ATM-G2695 FRLAGAVNL  | 154  | 111   |
| >ATM-G2695 AEFRLAGGV  | 21    | >ATM-G2695 AEFRLAGAV  | 29   | 8     |
| >ATM-G2695 AEFRLAGGVN | 552   | >ATM-G2695 AEFRLAGAVN | 272  | 280   |
| >ATM-G2695 AEFRLAGGVN | 322   | >ATM-G2695 AEFRLAGAVN | 375  | 53    |
| >ATM-G2695 AEFRLAGGV  | 25    | >ATM-G2695 AEFRLAGAV  | 16   | 9     |
| >ATM-G2695 AEFRLAGGVN | 8     | >ATM-G2695 AEFRLAGAVN | 7    | 1     |
| >ATM-G2695 AEFRLAGG   | 4777  | >ATM-G2695 AEFRLAGA   | 148  | 4629  |
| >ATM-G2695 AEFRLAGGV  | 181   | >ATM-G2695 AEFRLAGAV  | 49   | 132   |
| >ATM-G2695 AEFRLAGGVN | 27    | >ATM-G2695 AEFRLAGAVN | 26   | 1     |
| >ATM-G2695 AEFRLAGG   | 607   | >ATM-G2695 AEFRLAGA   | 223  | 384   |
| >ATM-G2695 AEFRLAGGV  | 96    | >ATM-G2695 AEFRLAGAV  | 81   | 15    |
| >ATM-G2695 AEFRLAGGVN | 48    | >ATM-G2695 AEFRLAGAVN | 39   | 9     |
| >ATM-G2695 AEFRLAGG   | 780   | >ATM-G2695 AEFRLAGA   | 13   | 767   |
| >ATM-G2695 AEFRLAGGV  | 59    | >ATM-G2695 AEFRLAGAV  | 22   | 37    |
| >ATM-G2695 AEFRLAGGVN | 368   | >ATM-G2695 AEFRLAGAVN | 359  | 9     |
| >ATM-G2695 AEFRLAGGVN | 543   | >ATM-G2695 AEFRLAGAVN | 346  | 197   |
| >ATM-G2695 AEFRLAGGV  | 6     | >ATM-G2695 AEFRLAGAV  | 7    | 1     |
| >ATM-G2695 AEFRLAGGVN | 9     | >ATM-G2695 AEFRLAGAVN | 7    | 2     |
| >ATM-G2695 FKAEFRLAGG | 368   | >ATM-G2695 FKAEFRLAGA | 277  | 91    |
| >ATM-G2695 FKAEFRLAGG | 14740 | >ATM-G2695 FKAEFRLAGA | 479  | 14261 |
| >ATM-G2695 FKAEFRLAGG | 200   | >ATM-G2695 FKAEFRLAGA | 161  | 39    |
| >ATM-G2695 FKAEFRLAGG | 400   | >ATM-G2695 FKAEFRLAGA | 551  | 151   |
| >ATM-G2695 FKAEFRLAGG | 377   | >ATM-G2695 FKAEFRLAGA | 83   | 294   |
| >ATM-G2695 FKAEFRLAGG | 962   | >ATM-G2695 FKAEFRLAGA | 96   | 866   |
| >ATM-G2867 GLGDRHVQN  | 488   | >ATM-G2867 ELGDRHVQN  | 2664 | 2176  |
| >ATM-G2867 GLGDRHVQN  | 49    | >ATM-G2867 ELGDRHVQN  | 660  | 611   |
| >ATM-G2867 GLGDRHVQN  | 15    | >ATM-G2867 ELGDRHVQN  | 90   | 75    |
| >ATM-G2867 GLGDRHVQN  | 133   | >ATM-G2867 ELGDRHVQN  | 864  | 731   |
| >ATM-G2867 GLGDRHVQN  | 29    | >ATM-G2867 ELGDRHVQN  | 947  | 918   |
| >ATM-G2867 GLGDRHVQN  | 49    | >ATM-G2867 ELGDRHVQN  | 1559 | 1510  |
| >ATM-G2867 GLGDRHVQN  | 39    | >ATM-G2867 ELGDRHVQN  | 649  | 610   |
| >ATM-G2867 GLGDRHVQN  | 74    | >ATM-G2867 ELGDRHVQN  | 1160 | 1086  |
| >ATM-G2867 GLGDRHVQN  | 518   | >ATM-G2867 ELGDRHVQN  | 238  | 280   |
| >ATM-G2867 GLGDRHVQ   | 58    | >ATM-G2867 ELGDRHVQ   | 477  | 419   |
| >ATM-G2867 GLGDRHVQN  | 6     | >ATM-G2867 ELGDRHVQN  | 26   | 20    |
| >ATM-G2867 GLGDRHVQN  | 10    | >ATM-G2867 ELGDRHVQN  | 49   | 39    |
| >ATM-G2867 GLGDRHVQN  | 10686 | >ATM-G2867 ELGDRHVQN  | 473  | 10213 |
| >ATM-G2867 LGLGDRHVQ  | 10068 | >ATM-G2867 LELGDRHVQ  | 47   | 10021 |
| >ATM-G2867 LGLGDRHVQ  | 21208 | >ATM-G2867 LELGDRHVQ  | 72   | 21136 |

|                       |       |                       |      |       |
|-----------------------|-------|-----------------------|------|-------|
| >ATM-G2867LGLGDRHVQI  | 26516 | >ATM-G2867LELGDRHVQI  | 457  | 26059 |
| >ATM-G2867LGLGDRHV    | 24247 | >ATM-G2867LELGDRHV    | 493  | 23754 |
| >ATM-G2867LGLGDRHVQI  | 24157 | >ATM-G2867LELGDRHVQI  | 90   | 24067 |
| >ATM-G2867LGLGDRHVQI  | 39389 | >ATM-G2867LELGDRHVQI  | 305  | 39084 |
| >ATM-G2867LGLGDRHV    | 28445 | >ATM-G2867LELGDRHV    | 287  | 28158 |
| >ATM-G2867LGLGDRHVQI  | 24028 | >ATM-G2867LELGDRHVQI  | 33   | 23995 |
| >ATM-G2867ILGLGDRHV   | 89    | >ATM-G2867ILELGDRHV   | 934  | 845   |
| >ATM-G2867ILGLGDRHV   | 152   | >ATM-G2867ILELGDRHV   | 748  | 596   |
| >ATM-G2867ILGLGDRHV   | 41    | >ATM-G2867ILELGDRHV   | 785  | 744   |
| >ATM-G2867ILGLGDRHV   | 228   | >ATM-G2867ILELGDRHV   | 5781 | 5553  |
| >ATM-G2867ILGLGDRHV   | 15    | >ATM-G2867ILELGDRHV   | 30   | 15    |
| >ATM-G2867YILGLGDRHV  | 71    | >ATM-G2867YILELGDRHV  | 56   | 15    |
| >ATM-G2867YILGLGDRHV  | 152   | >ATM-G2867YILELGDRHV  | 151  | 1     |
| >ATM-G2867YILGLGDRHV  | 44    | >ATM-G2867YILELGDRHV  | 48   | 4     |
| >ATM-G2867YILGLGDRHV  | 49    | >ATM-G2867YILELGDRHV  | 48   | 1     |
| >ATM-G2867YILGLGDRHV  | 6     | >ATM-G2867YILELGDRHV  | 4    | 2     |
| >ATM-G2867YILGLGDRHV  | 32    | >ATM-G2867YILELGDRHV  | 9    | 23    |
| >ATM-G2867YILGLGDRHV  | 10    | >ATM-G2867YILELGDRHV  | 8    | 2     |
| >ATM-G2867YILGLGDRHV  | 51    | >ATM-G2867YILELGDRHV  | 24   | 27    |
| >ATM-G2867YILGLGDRHV  | 5     | >ATM-G2867YILELGDRHV  | 5    | 0     |
| >ATM-G2867YILGLGDRHV  | 236   | >ATM-G2867YILELGDRHV  | 281  | 45    |
| >ATM-G2867YILGLGDR    | 382   | >ATM-G2867YILELGDR    | 327  | 55    |
| >ATM-G2867YILGLGDRHV  | 391   | >ATM-G2867YILELGDRHV  | 66   | 325   |
| >ATM-G2867YILGLGDR    | 493   | >ATM-G2867YILELGDR    | 663  | 170   |
| >ATM-G2867GYILGLGDRH  | 450   | >ATM-G2867GYILELGDRH' | 3280 | 2830  |
| >ATM-G2867IVGYILGL    | 682   | >ATM-G2867IVGYILEL    | 296  | 386   |
| >ATM-G2867IVGYILGLGDF | 234   | >ATM-G2867IVGYILELGDR | 184  | 50    |
| >ATM-G2867SIVGYILGL   | 305   | >ATM-G2867SIVGYILEL   | 667  | 362   |
| >ATM-G2867SIVGYILGL   | 45    | >ATM-G2867SIVGYILEL   | 25   | 20    |
| >ATM-G2867SIVGYILGL   | 49    | >ATM-G2867SIVGYILEL   | 27   | 22    |
| >ATM-G2867SIVGYILGL   | 88    | >ATM-G2867SIVGYILEL   | 115  | 27    |
| >ATM-G2867SIVGYILGL   | 18    | >ATM-G2867SIVGYILEL   | 31   | 13    |
| >ATM-G2867SIVGYILGL   | 13    | >ATM-G2867SIVGYILEL   | 13   | 0     |
| >ATM-G2867SIVGYILGL   | 154   | >ATM-G2867SIVGYILEL   | 116  | 38    |
| >ATM-G2867SIVGYILGL   | 9     | >ATM-G2867SIVGYILEL   | 7    | 2     |
| >ATM-G2867SIVGYILGL   | 132   | >ATM-G2867SIVGYILEL   | 190  | 58    |
| >ATM-G2867SIVGYILGL   | 345   | >ATM-G2867SIVGYILEL   | 772  | 427   |
| >ATM-G2867SSIVGYILGL  | 10    | >ATM-G2867SSIVGYILEL  | 12   | 2     |
| >ATM-G2867SSIVGYILGL  | 253   | >ATM-G2867SSIVGYILEL  | 218  | 35    |
| >ATM-G2867TSSIVGYILGL | 488   | >ATM-G2867TSSIVGYILEL | 452  | 36    |
| >ATM-G2867TSSIVGYILGL | 45    | >ATM-G2867TSSIVGYILEL | 64   | 19    |
| >ATM-G2867TSSIVGYILGL | 181   | >ATM-G2867TSSIVGYILEL | 254  | 73    |
| >ATM-G2925GVFRRCCCK   | 64    | >ATM-G2925DVFRRCCCK   | 1527 | 1463  |

|                       |      |                       |      |      |
|-----------------------|------|-----------------------|------|------|
| >ATM-G2925 GVFRRCCCK  | 30   | >ATM-G2925 DVFRRCCCK  | 807  | 777  |
| >ATM-G2925 GVFRRCCCK  | 60   | >ATM-G2925 DVFRRCCCK  | 1738 | 1678 |
| >ATM-G2925 GVFRRCCCK  | 282  | >ATM-G2925 DVFRRCCCK  | 4202 | 3920 |
| >ATM-G2925 GVFRRCCCK  | 3835 | >ATM-G2925 DVFRRCCCK  | 42   | 3793 |
| >ATM-G2925 GVFRRCCCK  | 115  | >ATM-G2925 DVFRRCCCK  | 10   | 105  |
| >ATM-G2925 GVFRRCCCKT | 40   | >ATM-G2925 DVFRRCCCKT | 1602 | 1562 |
| >ATM-G2925 GVFRRCCCK  | 339  | >ATM-G2925 DVFRRCCCK  | 1963 | 1624 |
| >ATM-G2925 GVEGVFRR   | 146  | >ATM-G2925 GVEDVFRR   | 141  | 5    |
| >ATM-G2925 GVEGVFRR   | 271  | >ATM-G2925 GVEDVFRR   | 170  | 101  |
| >ATM-G2925 TGVEGVFR   | 79   | >ATM-G2925 TGVEDVFR   | 70   | 9    |
| >ATM-G2925 TGVEGVFRR  | 81   | >ATM-G2925 TGVEDVFRR  | 118  | 37   |
| >ATM-G2925 TGVEGVFR   | 449  | >ATM-G2925 TGVEDVFR   | 274  | 175  |
| >ATM-G2925 ITGVEGVFR  | 86   | >ATM-G2925 ITGVEDVFR  | 142  | 56   |
| >ATM-G2925 ITGVEGVFR  | 441  | >ATM-G2925 ITGVEDVFR  | 236  | 205  |
| >ATM-G2925 ITGVEGVFR  | 55   | >ATM-G2925 ITGVEDVFR  | 17   | 38   |
| >ATM-G2925 ITGVEGVFRR | 463  | >ATM-G2925 ITGVEDVFRR | 288  | 175  |
| >ATM-G2925 ITGVEGVF   | 26   | >ATM-G2925 ITGVEDVF   | 66   | 40   |
| >ATM-G2925 ITGVEGVF   | 802  | >ATM-G2925 ITGVEDVF   | 252  | 550  |
| >ATM-G2925 ITGVEGVFR  | 366  | >ATM-G2925 ITGVEDVFR  | 138  | 228  |
| >ATM-G2925 GITGVEGV   | 209  | >ATM-G2925 GITGVEDV   | 839  | 630  |
| >ATM-G2925 GITGVEGV   | 178  | >ATM-G2925 GITGVEDV   | 914  | 736  |
| >ATM-G2925 GITGVEGV   | 191  | >ATM-G2925 GITGVEDV   | 1616 | 1425 |
| >ATM-G2925 GITGVEGV   | 24   | >ATM-G2925 GITGVEDV   | 190  | 166  |
| >ATM-G2925 GITGVEGV   | 447  | >ATM-G2925 GITGVEDV   | 2051 | 1604 |
| >ATM-G2925 GITGVEGV   | 20   | >ATM-G2925 GITGVEDV   | 38   | 18   |
| >ATM-G2925 GITGVEGV   | 7    | >ATM-G2925 GITGVEDV   | 11   | 4    |
| >ATM-G2925 GITGVEGVFR | 352  | >ATM-G2925 GITGVEDVFR | 570  | 218  |
| >ATM-G2925 GITGVEGVFR | 151  | >ATM-G2925 GITGVEDVFR | 307  | 156  |
| >ATM-G2925 GITGVEGVFR | 431  | >ATM-G2925 GITGVEDVFR | 786  | 355  |
| >ATM-G2925 GITGVEGVFR | 151  | >ATM-G2925 GITGVEDVFR | 358  | 207  |
| >ATM-G2925 GITGVEGVFR | 16   | >ATM-G2925 GITGVEDVFR | 17   | 1    |
| >ATM-G2925 GITGVEGVFR | 131  | >ATM-G2925 GITGVEDVFR | 120  | 11   |
| >ATM-G2925 GITGVEGVF  | 201  | >ATM-G2925 GITGVEDVF  | 415  | 214  |
| >ATM-G2925 MGITGVEGV  | 91   | >ATM-G2925 MGITGVEDV  | 1312 | 1221 |
| >ATM-G2925 MGITGVEGV  | 198  | >ATM-G2925 MGITGVEDV  | 280  | 82   |
| >ATM-G2925 MGITGVEGV  | 32   | >ATM-G2925 MGITGVEDV  | 28   | 4    |
| >ATM-G2925 MGITGVEGV  | 21   | >ATM-G2925 MGITGVEDV  | 260  | 239  |
| >ATM-G2925 MGITGVEGV  | 379  | >ATM-G2925 MGITGVEDV  | 786  | 407  |
| >ATM-G2925 MGITGVEGV  | 416  | >ATM-G2925 MGITGVEDV  | 311  | 105  |
| >ATM-G2925 MGITGVEGV  | 248  | >ATM-G2925 MGITGVEDV  | 198  | 50   |
| >ATM-G2925 GMGITGVEG' | 342  | >ATM-G2925 GMGITGVED' | 1231 | 889  |
| >ATM-G2925 GMGITGVEG' | 114  | >ATM-G2925 GMGITGVED' | 381  | 267  |
| >ATM-G2925 GMGITGVEG' | 45   | >ATM-G2925 GMGITGVED' | 151  | 106  |

|                       |       |                       |      |       |
|-----------------------|-------|-----------------------|------|-------|
| >ATM-G2925 GMGITGVEG' | 3     | >ATM-G2925 GMGITGVED' | 9    | 6     |
| >ATM-G2925 GMGITGVEG' | 5     | >ATM-G2925 GMGITGVED' | 13   | 8     |
| >ATM-G2925 GMGITGVEG' | 6     | >ATM-G2925 GMGITGVED' | 8    | 2     |
| >ATM-G2925 GMGITGVEG' | 18    | >ATM-G2925 GMGITGVED' | 151  | 133   |
| >ATM-G2925 GMGITGVEG' | 4     | >ATM-G2925 GMGITGVED' | 6    | 2     |
| >ATM-G2925 GMGITGVEG' | 105   | >ATM-G2925 GMGITGVED' | 168  | 63    |
| >ATM-G2925 GMGITGVEG' | 539   | >ATM-G2925 GMGITGVED' | 388  | 151   |
| >ATM-G2925 DGMGITGVE' | 32    | >ATM-G2925 DGMGITGVE  | 250  | 218   |
| >ATM-G2925 GVFRRCCEKT | 712   | >ATM-G2925 VVFRRCCEKT | 45   | 667   |
| >ATM-G2925 GVFRRCCEK  | 64    | >ATM-G2925 VVFRRCCEK  | 47   | 17    |
| >ATM-G2925 GVFRRCCEK  | 30    | >ATM-G2925 VVFRRCCEK  | 34   | 4     |
| >ATM-G2925 GVFRRCCEK  | 60    | >ATM-G2925 VVFRRCCEK  | 67   | 7     |
| >ATM-G2925 GVFRRCCEK  | 282   | >ATM-G2925 VVFRRCCEK  | 230  | 52    |
| >ATM-G2925 GVFRRCCEK  | 115   | >ATM-G2925 VVFRRCCEK  | 54   | 61    |
| >ATM-G2925 GVFRRCCEKT | 40    | >ATM-G2925 VVFRRCCEKT | 59   | 19    |
| >ATM-G2925 GVFRRCCEK  | 339   | >ATM-G2925 VVFRRCCEK  | 1528 | 1189  |
| >ATM-G2925 EGVFRRCCEK | 15255 | >ATM-G2925 EVVFRRCCEK | 148  | 15107 |
| >ATM-G2925 EGVFRRCCEK | 20537 | >ATM-G2925 EVVFRRCCEK | 169  | 20368 |
| >ATM-G2925 EGVFRRCCEK | 5241  | >ATM-G2925 EVVFRRCCEK | 23   | 5218  |
| >ATM-G2925 GVEGVFRR   | 146   | >ATM-G2925 GVEVVFRR   | 61   | 85    |
| >ATM-G2925 GVEGVFRR   | 271   | >ATM-G2925 GVEVVFRR   | 212  | 59    |
| >ATM-G2925 TGVEGVFRR  | 1047  | >ATM-G2925 TGVEVVFRR  | 464  | 583   |
| >ATM-G2925 TGVEGVFRR  | 787   | >ATM-G2925 TGVEVVFRR  | 288  | 499   |
| >ATM-G2925 TGVEGVFRR  | 79    | >ATM-G2925 TGVEVVFRR  | 19   | 60    |
| >ATM-G2925 TGVEGVFRR  | 81    | >ATM-G2925 TGVEVVFRR  | 18   | 63    |
| >ATM-G2925 TGVEGVFRR  | 449   | >ATM-G2925 TGVEVVFRR  | 270  | 179   |
| >ATM-G2925 ITGVEGVFRR | 668   | >ATM-G2925 ITGVEVVFRR | 380  | 288   |
| >ATM-G2925 ITGVEGVFRR | 86    | >ATM-G2925 ITGVEVVFRR | 51   | 35    |
| >ATM-G2925 ITGVEGVFRR | 667   | >ATM-G2925 ITGVEVVFRR | 232  | 435   |
| >ATM-G2925 ITGVEGVFRR | 441   | >ATM-G2925 ITGVEVVFRR | 226  | 215   |
| >ATM-G2925 ITGVEGVFRR | 55    | >ATM-G2925 ITGVEVVFRR | 26   | 29    |
| >ATM-G2925 ITGVEGVFRR | 463   | >ATM-G2925 ITGVEVVFRR | 123  | 340   |
| >ATM-G2925 ITGVEGVF   | 1326  | >ATM-G2925 ITGVEVVF   | 381  | 945   |
| >ATM-G2925 ITGVEGVF   | 26    | >ATM-G2925 ITGVEVVF   | 18   | 8     |
| >ATM-G2925 ITGVEGVF   | 802   | >ATM-G2925 ITGVEVVF   | 174  | 628   |
| >ATM-G2925 ITGVEGVFRR | 566   | >ATM-G2925 ITGVEVVFRR | 388  | 178   |
| >ATM-G2925 ITGVEGVFRR | 366   | >ATM-G2925 ITGVEVVFRR | 175  | 191   |
| >ATM-G2925 GITGVEGV   | 209   | >ATM-G2925 GITGVEVV   | 450  | 241   |
| >ATM-G2925 GITGVEGV   | 178   | >ATM-G2925 GITGVEVV   | 493  | 315   |
| >ATM-G2925 GITGVEGV   | 191   | >ATM-G2925 GITGVEVV   | 533  | 342   |
| >ATM-G2925 GITGVEGV   | 24    | >ATM-G2925 GITGVEVV   | 38   | 14    |
| >ATM-G2925 GITGVEGV   | 447   | >ATM-G2925 GITGVEVV   | 662  | 215   |
| >ATM-G2925 GITGVEGV   | 20    | >ATM-G2925 GITGVEVV   | 23   | 3     |

|                       |       |                       |      |       |
|-----------------------|-------|-----------------------|------|-------|
| >ATM-G2925 GITGVEGV   | 7     | >ATM-G2925 GITGVEVV   | 8    | 1     |
| >ATM-G2925 GITGVEGVFR | 352   | >ATM-G2925 GITGVEVVFR | 399  | 47    |
| >ATM-G2925 GITGVEGVFR | 151   | >ATM-G2925 GITGVEVVFR | 146  | 5     |
| >ATM-G2925 GITGVEGVFR | 431   | >ATM-G2925 GITGVEVVFR | 217  | 214   |
| >ATM-G2925 GITGVEGVFR | 151   | >ATM-G2925 GITGVEVVFR | 191  | 40    |
| >ATM-G2925 GITGVEGVFR | 16    | >ATM-G2925 GITGVEVVFR | 21   | 5     |
| >ATM-G2925 GITGVEGVFR | 131   | >ATM-G2925 GITGVEVVFR | 55   | 76    |
| >ATM-G2925 GITGVEGVF  | 201   | >ATM-G2925 GITGVEVVF  | 733  | 532   |
| >ATM-G2925 MGITGVEG   | 21260 | >ATM-G2925 MGITGVEV   | 238  | 21022 |
| >ATM-G2925 MGITGVEGV  | 91    | >ATM-G2925 MGITGVEVV  | 404  | 313   |
| >ATM-G2925 MGITGVEGV\ | 198   | >ATM-G2925 MGITGVEVVI | 144  | 54    |
| >ATM-G2925 MGITGVEGV\ | 32    | >ATM-G2925 MGITGVEVVI | 21   | 11    |
| >ATM-G2925 MGITGVEG   | 14468 | >ATM-G2925 MGITGVEV   | 68   | 14400 |
| >ATM-G2925 MGITGVEGV  | 21    | >ATM-G2925 MGITGVEVV  | 79   | 58    |
| >ATM-G2925 MGITGVEGV\ | 379   | >ATM-G2925 MGITGVEVVI | 239  | 140   |
| >ATM-G2925 MGITGVEGV\ | 886   | >ATM-G2925 MGITGVEVVI | 126  | 760   |
| >ATM-G2925 MGITGVEGV\ | 416   | >ATM-G2925 MGITGVEVVI | 171  | 245   |
| >ATM-G2925 MGITGVEGV\ | 248   | >ATM-G2925 MGITGVEVVI | 209  | 39    |
| >ATM-G2925 GMGITGVEG' | 342   | >ATM-G2925 GMGITGVEV' | 653  | 311   |
| >ATM-G2925 GMGITGVEG  | 15182 | >ATM-G2925 GMGITGVEV  | 258  | 14924 |
| >ATM-G2925 GMGITGVEG' | 114   | >ATM-G2925 GMGITGVEV' | 205  | 91    |
| >ATM-G2925 GMGITGVEG  | 18454 | >ATM-G2925 GMGITGVEV  | 180  | 18274 |
| >ATM-G2925 GMGITGVEG' | 45    | >ATM-G2925 GMGITGVEV' | 101  | 56    |
| >ATM-G2925 GMGITGVEG  | 4674  | >ATM-G2925 GMGITGVEV  | 4    | 4670  |
| >ATM-G2925 GMGITGVEG' | 3     | >ATM-G2925 GMGITGVEV' | 4    | 1     |
| >ATM-G2925 GMGITGVEG  | 9806  | >ATM-G2925 GMGITGVEV  | 7    | 9799  |
| >ATM-G2925 GMGITGVEG' | 5     | >ATM-G2925 GMGITGVEV' | 6    | 1     |
| >ATM-G2925 GMGITGVEG  | 7505  | >ATM-G2925 GMGITGVEV  | 6    | 7499  |
| >ATM-G2925 GMGITGVEG' | 6     | >ATM-G2925 GMGITGVEV' | 8    | 2     |
| >ATM-G2925 GMGITGVEG  | 25017 | >ATM-G2925 GMGITGVEV  | 140  | 24877 |
| >ATM-G2925 GMGITGVEG' | 18    | >ATM-G2925 GMGITGVEV' | 39   | 21    |
| >ATM-G2925 GMGITGVEG  | 16456 | >ATM-G2925 GMGITGVEV  | 5    | 16451 |
| >ATM-G2925 GMGITGVEG' | 4     | >ATM-G2925 GMGITGVEV' | 6    | 2     |
| >ATM-G2925 GMGITGVEG' | 105   | >ATM-G2925 GMGITGVEV' | 91   | 14    |
| >ATM-G2925 GMGITGVEG' | 539   | >ATM-G2925 GMGITGVEV' | 95   | 444   |
| >ATM-G2925 DGMGITGVE\ | 32    | >ATM-G2925 DGMGITGVE' | 95   | 63    |
| >ATM-G3051 FPGWKAWV   | 462   | >ATM-G3051 FPVWKAWV   | 128  | 334   |
| >ATM-G3051 FPGWKAWV   | 305   | >ATM-G3051 FPVWKAWV   | 146  | 159   |
| >ATM-G3051 FPGWKAWV   | 966   | >ATM-G3051 FPVWKAWV   | 274  | 692   |
| >ATM-G3051 FPGWKAWV   | 63    | >ATM-G3051 FPVWKAWV   | 11   | 52    |
| >ATM-G3051 LFPGWKAW\  | 208   | >ATM-G3051 LFPVWKAW\  | 1432 | 1224  |
| >ATM-G3051 LFPGWKAW\  | 14    | >ATM-G3051 LFPVWKAW\  | 96   | 82    |
| >ATM-G3051 LFPGWKAW   | 80    | >ATM-G3051 LFPVWKAW   | 157  | 77    |

|                      |      |                     |      |      |
|----------------------|------|---------------------|------|------|
| >ATM-G3051RLFPGWKA   | 70   | >ATM-G3051RLFPVWKA  | 36   | 34   |
| >ATM-G3051RLFPGWKAW  | 29   | >ATM-G3051RLFPVWKAW | 42   | 13   |
| >ATM-G3051RLFPGWKA   | 114  | >ATM-G3051RLFPVWKA  | 31   | 83   |
| >ATM-G3051RLFPGWKAW  | 45   | >ATM-G3051RLFPVWKAW | 71   | 26   |
| >ATM-G3051RLFPGWKA   | 28   | >ATM-G3051RLFPVWKA  | 16   | 12   |
| >ATM-G3051RLFPGWKAW  | 40   | >ATM-G3051RLFPVWKAW | 46   | 6    |
| >ATM-G3051RLFPGWKA   | 27   | >ATM-G3051RLFPVWKA  | 29   | 2    |
| >ATM-G3051RLFPGWKAW  | 223  | >ATM-G3051RLFPVWKAW | 173  | 50   |
| >ATM-G3051RLFPGWKA   | 5    | >ATM-G3051RLFPVWKA  | 3    | 2    |
| >ATM-G3051RLFPGWKAW  | 2    | >ATM-G3051RLFPVWKAW | 2    | 0    |
| >ATM-G3051RLFPGWKA   | 78   | >ATM-G3051RLFPVWKA  | 66   | 12   |
| >ATM-G3051RLFPGWKAW  | 17   | >ATM-G3051RLFPVWKAW | 18   | 1    |
| >ATM-G3051RLFPGWKA   | 14   | >ATM-G3051RLFPVWKA  | 9    | 5    |
| >ATM-G3051RLFPGWKAW  | 5    | >ATM-G3051RLFPVWKAW | 5    | 0    |
| >ATM-G3051RLFPGWKA   | 756  | >ATM-G3051RLFPVWKA  | 326  | 430  |
| >ATM-G3051RLFPGWKAW  | 13   | >ATM-G3051RLFPVWKAW | 18   | 5    |
| >ATM-G3051RLFPGWKA   | 7    | >ATM-G3051RLFPVWKA  | 8    | 1    |
| >ATM-G3051RLFPGWKAW  | 2    | >ATM-G3051RLFPVWKAW | 3    | 1    |
| >ATM-G3051RLFPGWKAW  | 148  | >ATM-G3051RLFPVWKAW | 42   | 106  |
| >ATM-G3051RLFPGWKAW  | 215  | >ATM-G3051RLFPVWKAW | 354  | 139  |
| >ATM-G3051RLFPGWKAW  | 249  | >ATM-G3051RLFPVWKAW | 1311 | 1062 |
| >ATM-G3051RLFPGWKAW  | 169  | >ATM-G3051RLFPVWKAW | 245  | 76   |
| >ATM-G3051RLFPGWKAW  | 13   | >ATM-G3051RLFPVWKAW | 19   | 6    |
| >ATM-G3051RLFPGWKAW  | 79   | >ATM-G3051RLFPVWKAW | 47   | 32   |
| >ATM-G3051RLFPGWKAW  | 153  | >ATM-G3051RLFPVWKAW | 41   | 112  |
| >ATM-G3051RLFPGWKAW  | 231  | >ATM-G3051RLFPVWKAW | 338  | 107  |
| >ATM-G3051RLFPGWKAW  | 405  | >ATM-G3051RLFPVWKAW | 627  | 222  |
| >ATM-G3051SRLFPGWK   | 456  | >ATM-G3051SRLFVWK   | 324  | 132  |
| >ATM-G3051SRLFPGWKA\ | 470  | >ATM-G3051SRLFVWKA\ | 361  | 109  |
| >ATM-G3051SRLFPGWKA\ | 763  | >ATM-G3051SRLFVWKA\ | 420  | 343  |
| >ATM-G3051LSRLFPGWK  | 345  | >ATM-G3051LSRLFVWK  | 289  | 56   |
| >ATM-G3051LSRLFPGWK  | 7    | >ATM-G3051LSRLFVWK  | 6    | 1    |
| >ATM-G3051LSRLFPGWKA | 141  | >ATM-G3051LSRLFVWKA | 90   | 51   |
| >ATM-G3051LSRLFPGWK  | 2367 | >ATM-G3051LSRLFVWK  | 492  | 1875 |
| >ATM-G3051LSRLFPGW   | 6    | >ATM-G3051LSRLFVW   | 6    | 0    |
| >ATM-G3051LSRLFPGWKA | 10   | >ATM-G3051LSRLFVWKA | 10   | 0    |
| >ATM-G3051LSRLFPGW   | 39   | >ATM-G3051LSRLFVW   | 35   | 4    |
| >ATM-G3051LSRLFPGWKA | 38   | >ATM-G3051LSRLFVWKA | 31   | 7    |
| >ATM-G3051LSRLFPGW   | 50   | >ATM-G3051LSRLFVW   | 22   | 28   |
| >ATM-G3051LSRLFPGWKA | 370  | >ATM-G3051LSRLFVWKA | 177  | 193  |
| >ATM-G3051LSRLFPGWKA | 288  | >ATM-G3051LSRLFVWKA | 492  | 204  |
| >ATM-G3051LSRLFPGW   | 453  | >ATM-G3051LSRLFVW   | 664  | 211  |
| >ATM-G3051LSRLFPGWK  | 583  | >ATM-G3051LSRLFVWK  | 306  | 277  |

|                        |       |                        |     |       |
|------------------------|-------|------------------------|-----|-------|
| >ATM-G3051NLSRLFPG     | 15228 | >ATM-G3051NLSRLFPV     | 24  | 15204 |
| >ATM-G3051NLSRLFPG     | 1073  | >ATM-G3051NLSRLFPV     | 8   | 1065  |
| >ATM-G3051NLSRLFPGWf   | 219   | >ATM-G3051NLSRLFPVWf   | 107 | 112   |
| >ATM-G3051NLSRLFPG     | 5611  | >ATM-G3051NLSRLFPV     | 8   | 5603  |
| >ATM-G3051NLSRLFPGWf   | 302   | >ATM-G3051NLSRLFPVWf   | 114 | 188   |
| >ATM-G3051NLSRLFPG     | 5340  | >ATM-G3051NLSRLFPV     | 11  | 5329  |
| >ATM-G3051NLSRLFPGWf   | 619   | >ATM-G3051NLSRLFPVWf   | 461 | 158   |
| >ATM-G3051NLSRLFPG     | 11879 | >ATM-G3051NLSRLFPV     | 9   | 11870 |
| >ATM-G3051NLSRLFPGWf   | 261   | >ATM-G3051NLSRLFPVWf   | 141 | 120   |
| >ATM-G3051NLSRLFPG     | 8369  | >ATM-G3051NLSRLFPV     | 8   | 8361  |
| >ATM-G3051NLSRLFPGWf   | 507   | >ATM-G3051NLSRLFPVWf   | 349 | 158   |
| >ATM-G3051NLSRLFPG     | 16536 | >ATM-G3051NLSRLFPV     | 12  | 16524 |
| >ATM-G3051NLSRLFPGWf   | 372   | >ATM-G3051NLSRLFPVWf   | 232 | 140   |
| >ATM-G3051NLSRLFPG     | 21551 | >ATM-G3051NLSRLFPV     | 9   | 21542 |
| >ATM-G3051NLSRLFPGWf   | 1313  | >ATM-G3051NLSRLFPVWf   | 384 | 929   |
| >ATM-G3051NLSRLFPG     | 14758 | >ATM-G3051NLSRLFPV     | 3   | 14755 |
| >ATM-G3051NLSRLFPGWf   | 54    | >ATM-G3051NLSRLFPVWf   | 33  | 21    |
| >ATM-G3051NLSRLFPGWf   | 138   | >ATM-G3051NLSRLFPVWf   | 79  | 59    |
| >ATM-G3051NLSRLFPGWf   | 322   | >ATM-G3051NLSRLFPVWf   | 63  | 259   |
| >ATM-G3051NLSRLFPGWf   | 1182  | >ATM-G3051NLSRLFPVWf   | 370 | 812   |
| >ATM-G3051NLSRLFPGWf   | 1253  | >ATM-G3051NLSRLFPVWf   | 133 | 1120  |
| >ATM-G3051NLSRLFPG     | 10626 | >ATM-G3051NLSRLFPV     | 72  | 10554 |
| >ATM-G3051NLSRLFPG     | 18325 | >ATM-G3051NLSRLFPV     | 49  | 18276 |
| >ATM-G3051NLSRLFPGW    | 2670  | >ATM-G3051NLSRLFPVW    | 480 | 2190  |
| >ATM-G3051KNLSRLFPG    | 4756  | >ATM-G3051KNLSRLFPV    | 316 | 4440  |
| >ATM-G3051KNLSRLFPG    | 12852 | >ATM-G3051KNLSRLFPV    | 109 | 12743 |
| >ATM-G3051KNLSRLFPGM   | 209   | >ATM-G3051KNLSRLFPVM   | 132 | 77    |
| >ATM-G3051KNLSRLFPGM   | 803   | >ATM-G3051KNLSRLFPVM   | 322 | 481   |
| >ATM-G3051KNLSRLFPGM   | 114   | >ATM-G3051KNLSRLFPVM   | 49  | 65    |
| >ATM-G3051KNLSRLFPGM   | 642   | >ATM-G3051KNLSRLFPVM   | 175 | 467   |
| >ATM-H138C HFPSHVIKATf | 139   | >ATM-H138C YFPSHVIKATf | 63  | 76    |
| >ATM-H138C HFPSHVIKATf | 107   | >ATM-H138C YFPSHVIKATf | 35  | 72    |
| >ATM-H138C HFPSHVIKATf | 7     | >ATM-H138C YFPSHVIKATf | 4   | 3     |
| >ATM-H138C HFPSHVIKATf | 1413  | >ATM-H138C YFPSHVIKATf | 54  | 1359  |
| >ATM-H138C HFPSHVIK    | 188   | >ATM-H138C YFPSHVIK    | 662 | 474   |
| >ATM-H138C PHFPSHVI    | 16935 | >ATM-H138C PYFPSHVI    | 301 | 16634 |
| >ATM-H138C PHFPSHVI    | 3743  | >ATM-H138C PYFPSHVI    | 68  | 3675  |
| >ATM-H138C PHFPSHVIK   | 10954 | >ATM-H138C PYFPSHVIK   | 488 | 10466 |
| >ATM-H138C PHFPSHVI    | 8255  | >ATM-H138C PYFPSHVI    | 266 | 7989  |
| >ATM-H138C PHFPSHVI    | 14965 | >ATM-H138C PYFPSHVI    | 24  | 14941 |
| >ATM-H138C PHFPSHVIK   | 5197  | >ATM-H138C PYFPSHVIK   | 49  | 5148  |
| >ATM-H138C PHFPSHVIK   | 6095  | >ATM-H138C PYFPSHVIK   | 109 | 5986  |
| >ATM-H138C PPHFPSHVI   | 457   | >ATM-H138C PPHYFPSHVI  | 642 | 185   |

|                        |       |                        |     |       |
|------------------------|-------|------------------------|-----|-------|
| >ATM-H138C PPHFPSHV    | 4935  | >ATM-H138C PPYFPSHV    | 431 | 4504  |
| >ATM-H138C PPHFPSHVI   | 1033  | >ATM-H138C PPYFPSHVI   | 86  | 947   |
| >ATM-H138C PPHFPSHVIK/ | 1559  | >ATM-H138C PPYFPSHVIK/ | 350 | 1209  |
| >ATM-H138C NPPHFPSHVI  | 475   | >ATM-H138C NPPYFPSHVI  | 376 | 99    |
| >ATM-H138C NPPHFPSHV   | 703   | >ATM-H138C NPPYFPSHV   | 479 | 224   |
| >ATM-H138C PNPPHFPSHV  | 559   | >ATM-H138C PNPPYFPSHV  | 438 | 121   |
| >ATM-H138C APNPPHFPSH  | 155   | >ATM-H138C APNPPYFPSH  | 292 | 137   |
| >ATM-H138C APNPPHFPS   | 1211  | >ATM-H138C APNPPYFPS   | 273 | 938   |
| >ATM-H138C DPAPNPPHF   | 1078  | >ATM-H138C DPAPNPPYF   | 66  | 1012  |
| >ATM-H138C DPAPNPPH    | 154   | >ATM-H138C DPAPNPPY    | 17  | 137   |
| >ATM-H138C DPAPNPPHF   | 245   | >ATM-H138C DPAPNPPYF   | 196 | 49    |
| >ATM-H138C DLDPAPNPPH  | 13011 | >ATM-H138C DLDPAPNPPY  | 488 | 12523 |
| >ATM-H2872 RHVQNILI    | 16123 | >ATM-H2872 RQVQNILI    | 24  | 16099 |
| >ATM-H2872 RHVQNILI    | 1448  | >ATM-H2872 RQVQNILI    | 108 | 1340  |
| >ATM-H2872 RHVQNILI    | 5236  | >ATM-H2872 RQVQNILI    | 280 | 4956  |
| >ATM-H2872 RHVQNILI    | 11227 | >ATM-H2872 RQVQNILI    | 346 | 10881 |
| >ATM-H2872 RHVQNILI    | 670   | >ATM-H2872 RQVQNILI    | 69  | 601   |
| >ATM-H2872 GDRHVQNI    | 274   | >ATM-H2872 GDRQVQNI    | 71  | 203   |
| >ATM-H2872 GDRHVQNI    | 403   | >ATM-H2872 GDRQVQNI    | 610 | 207   |
| >ATM-H2872 GDRHVQNILI  | 121   | >ATM-H2872 GDRQVQNILI  | 194 | 73    |
| >ATM-H2872 GLGDRHVQN   | 488   | >ATM-H2872 GLGDRQVQN   | 674 | 186   |
| >ATM-H2872 GLGDRHVQN   | 49    | >ATM-H2872 GLGDRQVQN   | 38  | 11    |
| >ATM-H2872 GLGDRHVQN   | 15    | >ATM-H2872 GLGDRQVQN   | 23  | 8     |
| >ATM-H2872 GLGDRHVQN   | 133   | >ATM-H2872 GLGDRQVQN   | 156 | 23    |
| >ATM-H2872 GLGDRHVQN   | 29    | >ATM-H2872 GLGDRQVQN   | 18  | 11    |
| >ATM-H2872 GLGDRHVQN   | 49    | >ATM-H2872 GLGDRQVQN   | 33  | 16    |
| >ATM-H2872 GLGDRHVQN   | 39    | >ATM-H2872 GLGDRQVQN   | 22  | 17    |
| >ATM-H2872 GLGDRHVQN   | 74    | >ATM-H2872 GLGDRQVQN   | 48  | 26    |
| >ATM-H2872 GLGDRHVQN   | 518   | >ATM-H2872 GLGDRQVQN   | 188 | 330   |
| >ATM-H2872 GLGDRHVQ    | 58    | >ATM-H2872 GLGDRQVQ    | 112 | 54    |
| >ATM-H2872 GLGDRHVQN   | 6     | >ATM-H2872 GLGDRQVQN   | 6   | 0     |
| >ATM-H2872 GLGDRHVQN   | 10    | >ATM-H2872 GLGDRQVQN   | 8   | 2     |
| >ATM-H2872 ILGLGDRHV   | 89    | >ATM-H2872 ILGLGDRQV   | 44  | 45    |
| >ATM-H2872 ILGLGDRHV   | 152   | >ATM-H2872 ILGLGDRQV   | 470 | 318   |
| >ATM-H2872 ILGLGDRHV   | 41    | >ATM-H2872 ILGLGDRQV   | 55  | 14    |
| >ATM-H2872 ILGLGDRHV   | 228   | >ATM-H2872 ILGLGDRQV   | 71  | 157   |
| >ATM-H2872 ILGLGDRHV   | 15    | >ATM-H2872 ILGLGDRQV   | 10  | 5     |
| >ATM-H2872 YILGLGDRHV  | 71    | >ATM-H2872 YILGLGDRQV  | 107 | 36    |
| >ATM-H2872 YILGLGDRHV  | 152   | >ATM-H2872 YILGLGDRQV  | 172 | 20    |
| >ATM-H2872 YILGLGDRHV  | 44    | >ATM-H2872 YILGLGDRQV  | 59  | 15    |
| >ATM-H2872 YILGLGDRHV  | 49    | >ATM-H2872 YILGLGDRQV  | 52  | 3     |
| >ATM-H2872 YILGLGDRHV  | 6     | >ATM-H2872 YILGLGDRQV  | 4   | 2     |
| >ATM-H2872 YILGLGDRHV  | 32    | >ATM-H2872 YILGLGDRQV  | 88  | 56    |



|                      |      |                      |      |     |
|----------------------|------|----------------------|------|-----|
| >ATM-H2872YILGLGDRHV | 10   | >ATM-H2872YILGLGDRQV | 11   | 1   |
| >ATM-H2872YILGLGDRHV | 51   | >ATM-H2872YILGLGDRQV | 18   | 33  |
| >ATM-H2872YILGLGDRHV | 5    | >ATM-H2872YILGLGDRQV | 4    | 1   |
| >ATM-H2872YILGLGDRHV | 236  | >ATM-H2872YILGLGDRQV | 708  | 472 |
| >ATM-H2872YILGLGDRHV | 391  | >ATM-H2872YILGLGDRQV | 210  | 181 |
| >ATM-H2872GYILGLGDRH | 450  | >ATM-H2872GYILGLGDRQ | 789  | 339 |
| >ATM-H996CHVVKNLGQSI | 34   | >ATM-H996CQVVKNLGQS  | 208  | 174 |
| >ATM-H996CHVVKNLGQSI | 7    | >ATM-H996CQVVKNLGQS  | 6    | 1   |
| >ATM-H996CHVVKNLGQSI | 204  | >ATM-H996CQVVKNLGQS  | 440  | 236 |
| >ATM-H996CHVVKNLGQSI | 462  | >ATM-H996CQVVKNLGQS  | 1417 | 955 |
| >ATM-H996CHVVKNLGQSI | 451  | >ATM-H996CQVVKNLGQS  | 426  | 25  |
| >ATM-H996CVLHVVKNL   | 453  | >ATM-H996CVLQVVKNL   | 520  | 67  |
| >ATM-H996CVLHVVKNL   | 370  | >ATM-H996CVLQVVKNL   | 1127 | 757 |
| >ATM-H996CVLHVVKNL   | 42   | >ATM-H996CVLQVVKNL   | 123  | 81  |
| >ATM-H996CVLHVVKNL   | 1073 | >ATM-H996CVLQVVKNL   | 412  | 661 |
| >ATM-H996CVLHVVKNL   | 265  | >ATM-H996CVLQVVKNL   | 516  | 251 |
| >ATM-H996CVLHVVKNL   | 26   | >ATM-H996CVLQVVKNL   | 29   | 3   |
| >ATM-H996CHVLHVVKNL  | 656  | >ATM-H996CHVLQVVKNL  | 427  | 229 |
| >ATM-H996CNHVLHVVKNL | 274  | >ATM-H996CNHVLQVVKN  | 345  | 71  |
| >ATM-H996CLNHVLHVVK  | 170  | >ATM-H996CLNHVLQVVK  | 660  | 490 |
| >ATM-H996CILNHVLHV   | 22   | >ATM-H996CILNHVLQV   | 26   | 4   |
| >ATM-H996CILNHVLHV   | 20   | >ATM-H996CILNHVLQVV  | 57   | 37  |
| >ATM-H996CILNHVLHV   | 8    | >ATM-H996CILNHVLQV   | 8    | 0   |
| >ATM-H996CILNHVLHV   | 5    | >ATM-H996CILNHVLQVV  | 11   | 6   |
| >ATM-H996CILNHVLHV   | 3    | >ATM-H996CILNHVLQV   | 3    | 0   |
| >ATM-H996CILNHVLHV   | 3    | >ATM-H996CILNHVLQVV  | 4    | 1   |
| >ATM-H996CILNHVLHV   | 22   | >ATM-H996CILNHVLQV   | 66   | 44  |
| >ATM-H996CILNHVLHV   | 20   | >ATM-H996CILNHVLQVV  | 42   | 22  |
| >ATM-H996CILNHVLHV   | 2    | >ATM-H996CILNHVLQV   | 2    | 0   |
| >ATM-H996CILNHVLHV   | 2    | >ATM-H996CILNHVLQVV  | 2    | 0   |
| >ATM-H996CILNHVLHV   | 6    | >ATM-H996CILNHVLQV   | 11   | 5   |
| >ATM-H996CILNHVLHV   | 3    | >ATM-H996CILNHVLQVV  | 6    | 3   |
| >ATM-H996CILNHVLHV   | 6    | >ATM-H996CILNHVLQV   | 7    | 1   |
| >ATM-H996CILNHVLHV   | 6    | >ATM-H996CILNHVLQVV  | 8    | 2   |
| >ATM-H996CILNHVLHV   | 11   | >ATM-H996CILNHVLQV   | 4    | 7   |
| >ATM-H996CILNHVLHV   | 3    | >ATM-H996CILNHVLQVV  | 7    | 4   |
| >ATM-H996CILNHVLHV   | 2    | >ATM-H996CILNHVLQV   | 2    | 0   |
| >ATM-H996CILNHVLHV   | 2    | >ATM-H996CILNHVLQVV  | 2    | 0   |
| >ATM-H996CILNHVLHVVK | 41   | >ATM-H996CILNHVLQVVK | 74   | 33  |
| >ATM-H996CILNHVLHVVK | 153  | >ATM-H996CILNHVLQVVK | 243  | 90  |
| >ATM-H996CILNHVLHV   | 43   | >ATM-H996CILNHVLQV   | 46   | 3   |
| >ATM-H996CILNHVLHV   | 91   | >ATM-H996CILNHVLQVV  | 119  | 28  |
| >ATM-H996CILNHVLHV   | 235  | >ATM-H996CILNHVLQVV  | 458  | 223 |

|                        |      |                        |      |      |
|------------------------|------|------------------------|------|------|
| >ATM-H996C TILNHVLHV   | 26   | >ATM-H996C TILNHVLQV   | 22   | 4    |
| >ATM-H996C TILNHVLHVV  | 40   | >ATM-H996C TILNHVLQVV  | 62   | 22   |
| >ATM-H996C TILNHVLHV   | 13   | >ATM-H996C TILNHVLQV   | 27   | 14   |
| >ATM-H996C TILNHVLHVV  | 78   | >ATM-H996C TILNHVLQVV  | 149  | 71   |
| >ATM-H996C TILNHVLHV   | 9    | >ATM-H996C TILNHVLQV   | 6    | 3    |
| >ATM-H996C TILNHVLHVV  | 7    | >ATM-H996C TILNHVLQVV  | 8    | 1    |
| >ATM-H996C TILNHVLHV   | 69   | >ATM-H996C TILNHVLQV   | 291  | 222  |
| >ATM-H996C TILNHVLHVV  | 25   | >ATM-H996C TILNHVLQVV  | 81   | 56   |
| >ATM-H996C TILNHVLHV   | 15   | >ATM-H996C TILNHVLQV   | 19   | 4    |
| >ATM-H996C TILNHVLHVV  | 19   | >ATM-H996C TILNHVLQVV  | 30   | 11   |
| >ATM-H996C TILNHVLHV   | 119  | >ATM-H996C TILNHVLQV   | 25   | 94   |
| >ATM-H996C TILNHVLHVV  | 24   | >ATM-H996C TILNHVLQVV  | 52   | 28   |
| >ATM-H996C TILNHVLHV   | 13   | >ATM-H996C TILNHVLQV   | 7    | 6    |
| >ATM-H996C TILNHVLHVV  | 8    | >ATM-H996C TILNHVLQVV  | 13   | 5    |
| >ATM-H996C TILNHVLHVV  | 119  | >ATM-H996C TILNHVLQVV  | 102  | 17   |
| >ATM-H996C TILNHVLHVV  | 22   | >ATM-H996C TILNHVLQVV  | 25   | 3    |
| >ATM-H996C TILNHVLHVV  | 222  | >ATM-H996C TILNHVLQVV  | 547  | 325  |
| >ATM-H996C TILNHVLHVV  | 356  | >ATM-H996C TILNHVLQVV  | 411  | 55   |
| >ATM-H996C TILNHVLHVV  | 498  | >ATM-H996C TILNHVLQVV  | 878  | 380  |
| >ATM-H996C TILNHVLHV   | 22   | >ATM-H996C TILNHVLQV   | 13   | 9    |
| >ATM-H996C TILNHVLHVV  | 18   | >ATM-H996C TILNHVLQVV  | 54   | 36   |
| >ATM-H996C KTILNHVLHV  | 167  | >ATM-H996C KTILNHVLQV  | 209  | 42   |
| >ATM-H996C KTILNHVLHV' | 328  | >ATM-H996C KTILNHVLQV' | 457  | 129  |
| >ATM-H996C KTILNHVLHV  | 112  | >ATM-H996C KTILNHVLQV  | 115  | 3    |
| >ATM-H996C KTILNHVLHV' | 71   | >ATM-H996C KTILNHVLQV' | 135  | 64   |
| >ATM-H996C KTILNHVLHV  | 215  | >ATM-H996C KTILNHVLQV  | 123  | 92   |
| >ATM-H996C KTILNHVLHV' | 102  | >ATM-H996C KTILNHVLQV' | 186  | 84   |
| >ATM-H996C KTILNHVLHV  | 322  | >ATM-H996C KTILNHVLQV  | 834  | 512  |
| >ATM-H996C KTILNHVLHV' | 95   | >ATM-H996C KTILNHVLQV' | 288  | 193  |
| >ATM-H996C KTILNHVLHV' | 491  | >ATM-H996C KTILNHVLQV' | 1194 | 703  |
| >ATM-H996C KTILNHVLH   | 1562 | >ATM-H996C KTILNHVLQ   | 434  | 1128 |
| >ATM-H996C KTILNHVLHV  | 58   | >ATM-H996C KTILNHVLQV  | 121  | 63   |
| >ATM-H996C KTILNHVLHV' | 236  | >ATM-H996C KTILNHVLQV' | 219  | 17   |
| >ATM-H996C KTILNHVLH   | 348  | >ATM-H996C KTILNHVLQ   | 2002 | 1654 |
| >ATM-H996C KTILNHVLHV  | 487  | >ATM-H996C KTILNHVLQV  | 157  | 330  |
| >ATM-H996C KTILNHVLHV' | 255  | >ATM-H996C KTILNHVLQV' | 336  | 81   |
| >ATM-H996C KTILNHVLHV' | 231  | >ATM-H996C KTILNHVLQV' | 682  | 451  |
| >ATM-H996C KTILNHVLHV  | 859  | >ATM-H996C KTILNHVLQV  | 462  | 397  |
| >ATM-H996C KTILNHVLH   | 176  | >ATM-H996C KTILNHVLQ   | 1731 | 1555 |
| >ATM-H996C KTILNHVLHV  | 38   | >ATM-H996C KTILNHVLQV  | 16   | 22   |
| >ATM-H996C KTILNHVLHV' | 108  | >ATM-H996C KTILNHVLQV' | 99   | 9    |
| >ATM-H996C KTILNHVLHV  | 465  | >ATM-H996C KTILNHVLQV  | 174  | 291  |
| >ATM-I1407! ILSKSPDSYQ | 552  | >ATM-I1407! SLSKSPDSYQ | 488  | 64   |

|                        |      |                        |       |       |
|------------------------|------|------------------------|-------|-------|
| >ATM-I1407!ILSKSPDSYQK | 71   | >ATM-I1407!SLSKSPDSYQI | 105   | 34    |
| >ATM-I1407!ILSKSPDSYQK | 62   | >ATM-I1407!SLSKSPDSYQI | 24    | 38    |
| >ATM-I1407!ILSKSPDSY   | 87   | >ATM-I1407!SLSKSPDSY   | 113   | 26    |
| >ATM-I1407!ILSKSPDSY   | 449  | >ATM-I1407!SLSKSPDSY   | 219   | 230   |
| >ATM-I1407!ILSKSPDSY   | 146  | >ATM-I1407!SLSKSPDSY   | 124   | 22    |
| >ATM-I1407!ILSKSPDSY   | 187  | >ATM-I1407!SLSKSPDSY   | 95    | 92    |
| >ATM-I1407!ILSKSPDSY   | 48   | >ATM-I1407!SLSKSPDSY   | 180   | 132   |
| >ATM-I1407!EILSKSPDSY  | 2253 | >ATM-I1407!ESLSKSPDSY  | 336   | 1917  |
| >ATM-I1407!EILSKSPDSY  | 33   | >ATM-I1407!ESLSKSPDSY  | 34    | 1     |
| >ATM-I1407!EILSKSPDSY  | 114  | >ATM-I1407!ESLSKSPDSY  | 96    | 18    |
| >ATM-I1407!EILSKSPDSY  | 4216 | >ATM-I1407!ESLSKSPDSY  | 35    | 4181  |
| >ATM-I1407!HKTKLKSILEI | 320  | >ATM-I1407!HKTKLKSILES | 4964  | 4644  |
| >ATM-I1407!LEILSKSP    | 417  | >ATM-I1407!LESLSKSP    | 516   | 99    |
| >ATM-I1407!LEILSKSPDSY | 378  | >ATM-I1407!LESLSKSPDSY | 685   | 307   |
| >ATM-I1407!LEILSKSPDSY | 226  | >ATM-I1407!LESLSKSPDSY | 429   | 203   |
| >ATM-I1407!LEILSKSPDSY | 41   | >ATM-I1407!LESLSKSPDSY | 70    | 29    |
| >ATM-I1407!LEILSKSPDSY | 314  | >ATM-I1407!LESLSKSPDSY | 418   | 104   |
| >ATM-I1407!LEILSKSPDSY | 239  | >ATM-I1407!LESLSKSPDSY | 929   | 690   |
| >ATM-I1407!SILEILSK    | 106  | >ATM-I1407!SILESLSK    | 84    | 22    |
| >ATM-I1407!SILEILSK    | 11   | >ATM-I1407!SILESLSK    | 11    | 0     |
| >ATM-I1407!SILEILSK    | 137  | >ATM-I1407!SILESLSK    | 53    | 84    |
| >ATM-I1407!SILEILSK    | 470  | >ATM-I1407!SILESLSK    | 963   | 493   |
| >ATM-I1407!KSILEILSK   | 173  | >ATM-I1407!KSILESLSK   | 156   | 17    |
| >ATM-I1407!KSILEILSK   | 13   | >ATM-I1407!KSILESLSK   | 16    | 3     |
| >ATM-I1407!KSILEILSK   | 21   | >ATM-I1407!KSILESLSK   | 12    | 9     |
| >ATM-I1407!KSILEILSK   | 372  | >ATM-I1407!KSILESLSK   | 786   | 414   |
| >ATM-I1407!LKSILEIL    | 329  | >ATM-I1407!LKSILES     | 154   | 175   |
| >ATM-I1407!KLKSILEI    | 92   | >ATM-I1407!KLKSILES    | 8503  | 8411  |
| >ATM-I1407!KLKSILEIL   | 378  | >ATM-I1407!KLKSILESL   | 112   | 266   |
| >ATM-I1407!KLKSILEI    | 31   | >ATM-I1407!KLKSILES    | 945   | 914   |
| >ATM-I1407!KLKSILEIL   | 12   | >ATM-I1407!KLKSILESL   | 5     | 7     |
| >ATM-I1407!KLKSILEI    | 8    | >ATM-I1407!KLKSILES    | 687   | 679   |
| >ATM-I1407!KLKSILEIL   | 14   | >ATM-I1407!KLKSILESL   | 6     | 8     |
| >ATM-I1407!KLKSILEIL   | 871  | >ATM-I1407!KLKSILESL   | 158   | 713   |
| >ATM-I1407!KLKSILEI    | 78   | >ATM-I1407!KLKSILES    | 7785  | 7707  |
| >ATM-I1407!KLKSILEIL   | 642  | >ATM-I1407!KLKSILESL   | 76    | 566   |
| >ATM-I1407!KLKSILEI    | 207  | >ATM-I1407!KLKSILES    | 16448 | 16241 |
| >ATM-I1407!KLKSILEIL   | 280  | >ATM-I1407!KLKSILESL   | 128   | 152   |
| >ATM-I1407!KLKSILEI    | 33   | >ATM-I1407!KLKSILES    | 4546  | 4513  |
| >ATM-I1407!KLKSILEIL   | 62   | >ATM-I1407!KLKSILESL   | 11    | 51    |
| >ATM-I1407!KLKSILEILSK | 52   | >ATM-I1407!KLKSILESLSK | 48    | 4     |
| >ATM-I1407!KLKSILEILSK | 215  | >ATM-I1407!KLKSILESLSK | 237   | 22    |
| >ATM-I1407!KLKSILEI    | 70   | >ATM-I1407!KLKSILES    | 724   | 654   |

|                        |      |                        |       |       |
|------------------------|------|------------------------|-------|-------|
| >ATM-I1407!KLKSILEILSK | 8    | >ATM-I1407!KLKSILELSK  | 7     | 1     |
| >ATM-I1407!KLKSILEILSK | 138  | >ATM-I1407!KLKSILELSK  | 209   | 71    |
| >ATM-I1407!KLKSILEI    | 176  | >ATM-I1407!KLKSILES    | 14230 | 14054 |
| >ATM-I1407!KLKSILEIL   | 300  | >ATM-I1407!KLKSILESL   | 51    | 249   |
| >ATM-I1407!TKLKSILEI   | 46   | >ATM-I1407!TKLKSILES   | 1657  | 1611  |
| >ATM-I1407!TKLKSILEIL  | 75   | >ATM-I1407!TKLKSILESL  | 48    | 27    |
| >ATM-I1407!TKLKSILEIL  | 365  | >ATM-I1407!TKLKSILESL  | 375   | 10    |
| >ATM-I1407!KTKLKSILEI  | 5    | >ATM-I1407!KTKLKSILES  | 14    | 9     |
| >ATM-I1407!KTKLKSILEIL | 54   | >ATM-I1407!KTKLKSILESL | 31    | 23    |
| >ATM-I1407!KTKLKSILEI  | 249  | >ATM-I1407!KTKLKSILES  | 16895 | 16646 |
| >ATM-I1407!KTKLKSILEIL | 418  | >ATM-I1407!KTKLKSILESL | 118   | 300   |
| >ATM-I1407!KTKLKSILEI  | 15   | >ATM-I1407!KTKLKSILES  | 1326  | 1311  |
| >ATM-I1407!KTKLKSILEIL | 42   | >ATM-I1407!KTKLKSILESL | 20    | 22    |
| >ATM-I1407!KTKLKSILEI  | 251  | >ATM-I1407!KTKLKSILES  | 5823  | 5572  |
| >ATM-I1407!KTKLKSILEIL | 130  | >ATM-I1407!KTKLKSILESL | 193   | 63    |
| >ATM-I1407!ILSKSPDSYQK | 71   | >ATM-I1407!ILSKSPDSYQI | 116   | 45    |
| >ATM-I1407!ILSKSPDSYQK | 62   | >ATM-I1407!ILSKSPDSYQI | 35    | 27    |
| >ATM-I1407!ILSKSPDSY   | 87   | >ATM-I1407!ILSKSPDSY   | 207   | 120   |
| >ATM-I1407!ILSKSPDSYQK | 585  | >ATM-I1407!ILSKSPDSYQI | 215   | 370   |
| >ATM-I1407!ILSKSPDSY   | 449  | >ATM-I1407!ILSKSPDSY   | 595   | 146   |
| >ATM-I1407!ILSKSPDSY   | 146  | >ATM-I1407!ILSKSPDSY   | 270   | 124   |
| >ATM-I1407!ILSKSPDSY   | 187  | >ATM-I1407!ILSKSPDSY   | 148   | 39    |
| >ATM-I1407!ILSKSPDSY   | 48   | >ATM-I1407!ILSKSPDSY   | 433   | 385   |
| >ATM-I1407!EILSKSPDSY  | 2253 | >ATM-I1407!EILSKSPDSY  | 196   | 2057  |
| >ATM-I1407!EILSKSPDSY  | 637  | >ATM-I1407!EILSKSPDSY  | 110   | 527   |
| >ATM-I1407!EILSKSPDSY  | 1813 | >ATM-I1407!EILSKSPDSY  | 457   | 1356  |
| >ATM-I1407!EILSKSPDSY  | 33   | >ATM-I1407!EILSKSPDSY  | 7     | 26    |
| >ATM-I1407!EILSKSPDSYQ | 2024 | >ATM-I1407!EILSKSPDSYC | 339   | 1685  |
| >ATM-I1407!EILSKSPDSY  | 114  | >ATM-I1407!EILSKSPDSY  | 12    | 102   |
| >ATM-I1407!EILSKSPDSYQ | 2060 | >ATM-I1407!EILSKSPDSYC | 332   | 1728  |
| >ATM-I1407!EILSKSPDSY  | 4216 | >ATM-I1407!EILSKSPDSY  | 26    | 4190  |
| >ATM-I1407!EILSKSPDSY  | 8610 | >ATM-I1407!EILSKSPDSY  | 429   | 8181  |
| >ATM-I1407!HKTCLKSILEI | 320  | >ATM-I1407!HKTCLKSILET | 5155  | 4835  |
| >ATM-I1407!LEILSKSP    | 417  | >ATM-I1407!LEILSKSP    | 493   | 76    |
| >ATM-I1407!LEILSKSPDSY | 842  | >ATM-I1407!LEILSKSPDSY | 427   | 415   |
| >ATM-I1407!LEILSKSPDSY | 378  | >ATM-I1407!LEILSKSPDSY | 3978  | 3600  |
| >ATM-I1407!LEILSKSPDSY | 226  | >ATM-I1407!LEILSKSPDSY | 868   | 642   |
| >ATM-I1407!LEILSKSPDSY | 41   | >ATM-I1407!LEILSKSPDSY | 118   | 77    |
| >ATM-I1407!LEILSKSPDSY | 314  | >ATM-I1407!LEILSKSPDSY | 370   | 56    |
| >ATM-I1407!LEILSKSPDSY | 239  | >ATM-I1407!LEILSKSPDSY | 732   | 493   |
| >ATM-I1407!SILEILSK    | 106  | >ATM-I1407!SILELSK     | 118   | 12    |
| >ATM-I1407!SILEILSK    | 11   | >ATM-I1407!SILELSK     | 12    | 1     |
| >ATM-I1407!SILEILSK    | 137  | >ATM-I1407!SILELSK     | 51    | 86    |

|                         |      |                        |       |       |
|-------------------------|------|------------------------|-------|-------|
| >ATM-I1407I SILEILSK    | 470  | >ATM-I1407I SILELSK    | 931   | 461   |
| >ATM-I1407I KSILEILSK   | 173  | >ATM-I1407I KSILELSK   | 152   | 21    |
| >ATM-I1407I KSILEILSK   | 13   | >ATM-I1407I KSILELSK   | 12    | 1     |
| >ATM-I1407I KSILEILSK   | 21   | >ATM-I1407I KSILELSK   | 15    | 6     |
| >ATM-I1407I KSILEILSK   | 372  | >ATM-I1407I KSILELSK   | 461   | 89    |
| >ATM-I1407I LKSILEIL    | 329  | >ATM-I1407I LKSILEL    | 227   | 102   |
| >ATM-I1407I KLKSILEI    | 92   | >ATM-I1407I KLKSILET   | 2029  | 1937  |
| >ATM-I1407I KLKSILEIL   | 378  | >ATM-I1407I KLKSILEL   | 172   | 206   |
| >ATM-I1407I KLKSILEI    | 31   | >ATM-I1407I KLKSILET   | 388   | 357   |
| >ATM-I1407I KLKSILEIL   | 12   | >ATM-I1407I KLKSILEL   | 10    | 2     |
| >ATM-I1407I KLKSILEI    | 8    | >ATM-I1407I KLKSILET   | 82    | 74    |
| >ATM-I1407I KLKSILEIL   | 14   | >ATM-I1407I KLKSILEL   | 10    | 4     |
| >ATM-I1407I KLKSILEIL   | 871  | >ATM-I1407I KLKSILEL   | 290   | 581   |
| >ATM-I1407I KLKSILEI    | 78   | >ATM-I1407I KLKSILET   | 2471  | 2393  |
| >ATM-I1407I KLKSILEIL   | 642  | >ATM-I1407I KLKSILEL   | 46    | 596   |
| >ATM-I1407I KLKSILEI    | 207  | >ATM-I1407I KLKSILET   | 9459  | 9252  |
| >ATM-I1407I KLKSILEIL   | 280  | >ATM-I1407I KLKSILEL   | 46    | 234   |
| >ATM-I1407I KLKSILEI    | 33   | >ATM-I1407I KLKSILET   | 396   | 363   |
| >ATM-I1407I KLKSILEIL   | 62   | >ATM-I1407I KLKSILEL   | 10    | 52    |
| >ATM-I1407I KLKSILEILSK | 52   | >ATM-I1407I KLKSILELSK | 50    | 2     |
| >ATM-I1407I KLKSILEILSK | 215  | >ATM-I1407I KLKSILELSK | 204   | 11    |
| >ATM-I1407I KLKSILEI    | 70   | >ATM-I1407I KLKSILET   | 1394  | 1324  |
| >ATM-I1407I KLKSILEILSK | 8    | >ATM-I1407I KLKSILELSK | 7     | 1     |
| >ATM-I1407I KLKSILEILSK | 138  | >ATM-I1407I KLKSILELSK | 145   | 7     |
| >ATM-I1407I KLKSILEI    | 176  | >ATM-I1407I KLKSILET   | 11156 | 10980 |
| >ATM-I1407I KLKSILEIL   | 300  | >ATM-I1407I KLKSILEL   | 24    | 276   |
| >ATM-I1407I KLKSILEIL   | 537  | >ATM-I1407I KLKSILEL   | 336   | 201   |
| >ATM-I1407I TKLKSILEI   | 46   | >ATM-I1407I TKLKSILET  | 1414  | 1368  |
| >ATM-I1407I TKLKSILEIL  | 75   | >ATM-I1407I TKLKSILEL  | 63    | 12    |
| >ATM-I1407I TKLKSILEIL  | 365  | >ATM-I1407I TKLKSILEL  | 331   | 34    |
| >ATM-I1407I KTKLKSILEI  | 5    | >ATM-I1407I KTKLKSILET | 26    | 21    |
| >ATM-I1407I KTKLKSILEIL | 54   | >ATM-I1407I KTKLKSILEL | 40    | 14    |
| >ATM-I1407I KTKLKSILEI  | 249  | >ATM-I1407I KTKLKSILET | 13610 | 13361 |
| >ATM-I1407I KTKLKSILEIL | 418  | >ATM-I1407I KTKLKSILEL | 63    | 355   |
| >ATM-I1407I KTKLKSILEI  | 15   | >ATM-I1407I KTKLKSILET | 564   | 549   |
| >ATM-I1407I KTKLKSILEIL | 42   | >ATM-I1407I KTKLKSILEL | 11    | 31    |
| >ATM-I1407I KTKLKSILEI  | 251  | >ATM-I1407I KTKLKSILET | 2976  | 2725  |
| >ATM-I1407I KTKLKSILEIL | 130  | >ATM-I1407I KTKLKSILEL | 101   | 29    |
| >ATM-I1469I IYTLIHYI    | 73   | >ATM-I1469I MYTLIHYI   | 172   | 99    |
| >ATM-I1469I IYTLIHYI    | 1090 | >ATM-I1469I MYTLIHYI   | 246   | 844   |
| >ATM-I1469I IYTLIHYI    | 79   | >ATM-I1469I MYTLIHYI   | 48    | 31    |
| >ATM-I1469I IYTLIHYI    | 63   | >ATM-I1469I MYTLIHYI   | 166   | 103   |
| >ATM-I1469I IYTLIHYI    | 20   | >ATM-I1469I MYTLIHYI   | 8     | 12    |

|                         |      |                         |      |      |
|-------------------------|------|-------------------------|------|------|
| >ATM-I1469I IYTLIHYNQR  | 27   | >ATM-I1469I MYTLIHYNQ   | 10   | 17   |
| >ATM-I1469I IYTLIHYNQR  | 21   | >ATM-I1469I MYTLIHYNQ   | 13   | 8    |
| >ATM-I1469I IYTLIHYNQR  | 122  | >ATM-I1469I MYTLIHYNQ   | 16   | 106  |
| >ATM-I1469I IYTLIHYI    | 6359 | >ATM-I1469I MYTLIHYI    | 152  | 6207 |
| >ATM-I1469I IYTLIHYNQR  | 36   | >ATM-I1469I MYTLIHYNQ   | 26   | 10   |
| >ATM-I1469I IYTLIHYI    | 366  | >ATM-I1469I MYTLIHYI    | 53   | 313  |
| >ATM-I1469I VIYTLIHYI   | 3086 | >ATM-I1469I VMYTLIHYI   | 115  | 2971 |
| >ATM-I1469I VIYTLIHYI   | 206  | >ATM-I1469I VMYTLIHYI   | 70   | 136  |
| >ATM-I1469I VIYTLIHYINQ | 993  | >ATM-I1469I VMYTLIHYINI | 391  | 602  |
| >ATM-I1469I VIYTLIHYI   | 416  | >ATM-I1469I VMYTLIHYI   | 167  | 249  |
| >ATM-I1469I VIYTLIHYI   | 21   | >ATM-I1469I VMYTLIHYI   | 8    | 13   |
| >ATM-I1469I VIYTLIHYI   | 41   | >ATM-I1469I VMYTLIHYI   | 8    | 33   |
| >ATM-I1469I VIYTLIHYI   | 13   | >ATM-I1469I VMYTLIHYI   | 5    | 8    |
| >ATM-I1469I VIYTLIHYI   | 44   | >ATM-I1469I VMYTLIHYI   | 36   | 8    |
| >ATM-I1469I VIYTLIHY    | 5359 | >ATM-I1469I VMYTLIHY    | 191  | 5168 |
| >ATM-I1469I VIYTLIHYI   | 3    | >ATM-I1469I VMYTLIHYI   | 1    | 2    |
| >ATM-I1469I VIYTLIHYIN  | 6312 | >ATM-I1469I VMYTLIHYIN  | 382  | 5930 |
| >ATM-I1469I VIYTLIHYINQ | 2206 | >ATM-I1469I VMYTLIHYINI | 98   | 2108 |
| >ATM-I1469I VIYTLIHYI   | 46   | >ATM-I1469I VMYTLIHYI   | 4    | 42   |
| >ATM-I1469I VIYTLIHYI   | 14   | >ATM-I1469I VMYTLIHYI   | 5    | 9    |
| >ATM-I1469I VIYTLIHYINQ | 6471 | >ATM-I1469I VMYTLIHYINI | 321  | 6150 |
| >ATM-I1469I VIYTLIHYI   | 35   | >ATM-I1469I VMYTLIHYI   | 3    | 32   |
| >ATM-I1469I VIYTLIHYI   | 8    | >ATM-I1469I VMYTLIHYI   | 2    | 6    |
| >ATM-I1469I VIYTLIHYINQ | 1821 | >ATM-I1469I VMYTLIHYINI | 55   | 1766 |
| >ATM-I1469I VIYTLIHY    | 84   | >ATM-I1469I VMYTLIHY    | 48   | 36   |
| >ATM-I1469I VIYTLIHY    | 208  | >ATM-I1469I VMYTLIHY    | 246  | 38   |
| >ATM-I1469I VIYTLIHY    | 49   | >ATM-I1469I VMYTLIHY    | 356  | 307  |
| >ATM-I1469I VIYTLIHY    | 30   | >ATM-I1469I VMYTLIHY    | 10   | 20   |
| >ATM-I1469I VIYTLIHY    | 64   | >ATM-I1469I VMYTLIHY    | 19   | 45   |
| >ATM-I1469I VIYTLIHYI   | 1180 | >ATM-I1469I VMYTLIHYI   | 320  | 860  |
| >ATM-I1469I VIYTLIHYI   | 897  | >ATM-I1469I VMYTLIHYI   | 446  | 451  |
| >ATM-I1469I VIYTLIHYI   | 134  | >ATM-I1469I VMYTLIHYI   | 1585 | 1451 |
| >ATM-I1469I VIYTLIHYI   | 129  | >ATM-I1469I VMYTLIHYI   | 320  | 191  |
| >ATM-I1469I VIYTLIHY    | 50   | >ATM-I1469I VMYTLIHY    | 27   | 23   |
| >ATM-I1469I VIYTLIHY    | 153  | >ATM-I1469I VMYTLIHY    | 42   | 111  |
| >ATM-I1469I VIYTLIHY    | 1600 | >ATM-I1469I VMYTLIHY    | 208  | 1392 |
| >ATM-I1469I VIYTLIHY    | 330  | >ATM-I1469I VMYTLIHY    | 8    | 322  |
| >ATM-I1469I VIYTLIHYI   | 2006 | >ATM-I1469I VMYTLIHYI   | 102  | 1904 |
| >ATM-I1469I VIYTLIHY    | 186  | >ATM-I1469I VMYTLIHY    | 95   | 91   |
| >ATM-I1469I VIYTLIHY    | 1041 | >ATM-I1469I VMYTLIHY    | 347  | 694  |
| >ATM-I1469I VIYTLIHYI   | 328  | >ATM-I1469I VMYTLIHYI   | 110  | 218  |
| >ATM-I1469I GAWAFVLRD   | 8689 | >ATM-I1469I GAWAFVLRD   | 226  | 8463 |
| >ATM-I1469I GAWAFVLRD   | 2105 | >ATM-I1469I GAWAFVLRD   | 276  | 1829 |

|                         |      |                        |      |      |
|-------------------------|------|------------------------|------|------|
| >ATM-I1469I GAWAFVLRD   | 129  | >ATM-I1469I GAWAFVLRD  | 3501 | 3372 |
| >ATM-I1469I DVIYTLIHYI  | 1151 | >ATM-I1469I DVMYTLIHYI | 253  | 898  |
| >ATM-I1469I DVIYTLIHYI  | 661  | >ATM-I1469I DVMYTLIHYI | 219  | 442  |
| >ATM-I1469I DVIYTLIHYI  | 363  | >ATM-I1469I DVMYTLIHYI | 134  | 229  |
| >ATM-I1469I DVIYTLIHYI  | 263  | >ATM-I1469I DVMYTLIHYI | 156  | 107  |
| >ATM-I1469I DVIYTLIHYI  | 7097 | >ATM-I1469I DVMYTLIHYI | 237  | 6860 |
| >ATM-I1469I DVIYTLIHY   | 156  | >ATM-I1469I DVMYTLIHY  | 303  | 147  |
| >ATM-I1469I DVIYTLIHY   | 14   | >ATM-I1469I DVMYTLIHY  | 24   | 10   |
| >ATM-I1469I DVIYTLIH    | 141  | >ATM-I1469I DVMYTLIH   | 1124 | 983  |
| >ATM-I1469I DVIYTLIHY   | 2    | >ATM-I1469I DVMYTLIHY  | 3    | 1    |
| >ATM-I1469I DVIYTLIHYI  | 12   | >ATM-I1469I DVMYTLIHYI | 75   | 63   |
| >ATM-I1469I DVIYTLIHY   | 64   | >ATM-I1469I DVMYTLIHY  | 268  | 204  |
| >ATM-I1469I DVIYTLIHY   | 43   | >ATM-I1469I DVMYTLIHY  | 112  | 69   |
| >ATM-I1469I DVIYTLIHY   | 204  | >ATM-I1469I DVMYTLIHY  | 208  | 4    |
| >ATM-I1469I DVIYTLIHYI  | 62   | >ATM-I1469I DVMYTLIHYI | 51   | 11   |
| >ATM-I1469I DVIYTLIHYI  | 18   | >ATM-I1469I DVMYTLIHYI | 10   | 8    |
| >ATM-I1469I RDVIYTLIHYI | 271  | >ATM-I1469I RDVMYTLIHY | 154  | 117  |
| >ATM-I1469I RDVIYTLIHY  | 344  | >ATM-I1469I RDVMYTLIHY | 293  | 51   |
| >ATM-I1469I RDVIYTLIHY  | 270  | >ATM-I1469I RDVMYTLIHY | 248  | 22   |
| >ATM-I1469I RDVIYTLI    | 472  | >ATM-I1469I RDVMYTLI   | 257  | 215  |
| >ATM-I1469I RDVIYTLIHYI | 329  | >ATM-I1469I RDVMYTLIHY | 227  | 102  |
| >ATM-I1469I RDVIYTLI    | 117  | >ATM-I1469I RDVMYTLI   | 277  | 160  |
| >ATM-I1469I RDVIYTLIHYI | 45   | >ATM-I1469I RDVMYTLIHY | 47   | 2    |
| >ATM-I1469I RDVIYTLI    | 29   | >ATM-I1469I RDVMYTLI   | 28   | 1    |
| >ATM-I1469I RDVIYTLIHYI | 34   | >ATM-I1469I RDVMYTLIHY | 38   | 4    |
| >ATM-I1469I LRDVIYTL    | 223  | >ATM-I1469I LRDVMYTL   | 221  | 2    |
| >ATM-I1469I LRDVIYTLI   | 361  | >ATM-I1469I LRDVMYTLI  | 184  | 177  |
| >ATM-I1469I VLRDVIYTL   | 38   | >ATM-I1469I VLRDVMYTL  | 52   | 14   |
| >ATM-I1469I VLRDVIYTL   | 29   | >ATM-I1469I VLRDVMYTL  | 26   | 3    |
| >ATM-I1469I VLRDVIYTLI  | 126  | >ATM-I1469I VLRDVMYTLI | 148  | 22   |
| >ATM-I1469I VLRDVIYTL   | 145  | >ATM-I1469I VLRDVMYTL  | 65   | 80   |
| >ATM-I1469I VLRDVIYTL   | 16   | >ATM-I1469I VLRDVMYTL  | 19   | 3    |
| >ATM-I1469I VLRDVIYTLI  | 229  | >ATM-I1469I VLRDVMYTLI | 256  | 27   |
| >ATM-I1469I VLRDVIYTL   | 294  | >ATM-I1469I VLRDVMYTL  | 294  | 0    |
| >ATM-I1469I VLRDVIYTL   | 22   | >ATM-I1469I VLRDVMYTL  | 53   | 31   |
| >ATM-I1469I VLRDVIYTL   | 2    | >ATM-I1469I VLRDVMYTL  | 4    | 2    |
| >ATM-I1469I VLRDVIYTLI  | 18   | >ATM-I1469I VLRDVMYTLI | 40   | 22   |
| >ATM-I1469I VLRDVIYTL   | 4    | >ATM-I1469I VLRDVMYTL  | 7    | 3    |
| >ATM-I1469I VLRDVIYTLI  | 188  | >ATM-I1469I VLRDVMYTLI | 326  | 138  |
| >ATM-I1469I VLRDVIYTL   | 481  | >ATM-I1469I VLRDVMYTL  | 972  | 491  |
| >ATM-I1469I VLRDVIYTL   | 12   | >ATM-I1469I VLRDVMYTL  | 30   | 18   |
| >ATM-I1469I VLRDVIYTLI  | 97   | >ATM-I1469I VLRDVMYTLI | 209  | 112  |
| >ATM-I1469I VLRDVIYTL   | 9    | >ATM-I1469I VLRDVMYTL  | 103  | 94   |

|                         |     |                        |     |     |
|-------------------------|-----|------------------------|-----|-----|
| >ATM-I1469I VLRDVIYT    | 12  | >ATM-I1469I VLRDVMYT   | 15  | 3   |
| >ATM-I1469I VLRDVIYTL   | 2   | >ATM-I1469I VLRDVMYTL  | 3   | 1   |
| >ATM-I1469I VLRDVIYTLI  | 6   | >ATM-I1469I VLRDVMYTLI | 8   | 2   |
| >ATM-I1469I VLRDVIYTL   | 444 | >ATM-I1469I VLRDVMYTL  | 581 | 137 |
| >ATM-I1469I FVLRDVIYTLI | 393 | >ATM-I1469I FVLRDVMYTL | 170 | 223 |
| >ATM-I1469I FVLRDVIYT   | 178 | >ATM-I1469I FVLRDVMYT  | 202 | 24  |
| >ATM-I1469I FVLRDVIYTL  | 33  | >ATM-I1469I FVLRDVMYTL | 38  | 5   |
| >ATM-I1469I FVLRDVIYTLI | 53  | >ATM-I1469I FVLRDVMYTL | 56  | 3   |
| >ATM-I1469I FVLRDVIYTL  | 29  | >ATM-I1469I FVLRDVMYTL | 28  | 1   |
| >ATM-I1469I FVLRDVIYTLI | 98  | >ATM-I1469I FVLRDVMYTL | 146 | 48  |
| >ATM-I1469I FVLRDVIYTL  | 127 | >ATM-I1469I FVLRDVMYTL | 156 | 29  |
| >ATM-I1469I FVLRDVIYTLI | 74  | >ATM-I1469I FVLRDVMYTL | 50  | 24  |
| >ATM-I1469I FVLRDVIYT   | 28  | >ATM-I1469I FVLRDVMYT  | 31  | 3   |
| >ATM-I1469I FVLRDVIYTL  | 24  | >ATM-I1469I FVLRDVMYTL | 28  | 4   |
| >ATM-I1469I FVLRDVIYTLI | 10  | >ATM-I1469I FVLRDVMYTL | 10  | 0   |
| >ATM-I1469I FVLRDVIYT   | 57  | >ATM-I1469I FVLRDVMYT  | 89  | 32  |
| >ATM-I1469I FVLRDVIYTL  | 4   | >ATM-I1469I FVLRDVMYTL | 6   | 2   |
| >ATM-I1469I FVLRDVIYTLI | 52  | >ATM-I1469I FVLRDVMYTL | 79  | 27  |
| >ATM-I1469I FVLRDVIYTL  | 6   | >ATM-I1469I FVLRDVMYTL | 7   | 1   |
| >ATM-I1469I FVLRDVIYTLI | 311 | >ATM-I1469I FVLRDVMYTL | 356 | 45  |
| >ATM-I1469I FVLRDVIYTL  | 14  | >ATM-I1469I FVLRDVMYTL | 23  | 9   |
| >ATM-I1469I FVLRDVIYTLI | 103 | >ATM-I1469I FVLRDVMYTL | 137 | 34  |
| >ATM-I1469I FVLRDVIYTL  | 9   | >ATM-I1469I FVLRDVMYTL | 25  | 16  |
| >ATM-I1469I FVLRDVIYTLI | 419 | >ATM-I1469I FVLRDVMYTL | 497 | 78  |
| >ATM-I1469I FVLRDVIYT   | 587 | >ATM-I1469I FVLRDVMYT  | 312 | 275 |
| >ATM-I1469I FVLRDVIYTL  | 7   | >ATM-I1469I FVLRDVMYTL | 10  | 3   |
| >ATM-I1469I FVLRDVIYTLI | 101 | >ATM-I1469I FVLRDVMYTL | 76  | 25  |
| >ATM-I1469I FVLRDVIYTL  | 451 | >ATM-I1469I FVLRDVMYTL | 322 | 129 |
| >ATM-I1469I FVLRDVIY    | 88  | >ATM-I1469I FVLRDVMY   | 93  | 5   |
| >ATM-I1469I FVLRDVIYTL  | 299 | >ATM-I1469I FVLRDVMYTL | 147 | 152 |
| >ATM-I1469I FVLRDVIY    | 52  | >ATM-I1469I FVLRDVMY   | 19  | 33  |
| >ATM-I1469I FVLRDVIYTL  | 431 | >ATM-I1469I FVLRDVMYTL | 568 | 137 |
| >ATM-I1469I FVLRDVIYTL  | 512 | >ATM-I1469I FVLRDVMYTL | 379 | 133 |
| >ATM-I1469I FVLRDVIYTLI | 159 | >ATM-I1469I FVLRDVMYTL | 196 | 37  |
| >ATM-I1469I FVLRDVIYTL  | 45  | >ATM-I1469I FVLRDVMYTL | 31  | 14  |
| >ATM-I1469I FVLRDVIYTLI | 49  | >ATM-I1469I FVLRDVMYTL | 66  | 17  |
| >ATM-I1469I FVLRDVIY    | 379 | >ATM-I1469I FVLRDVMY   | 255 | 124 |
| >ATM-I1469I FVLRDVIY    | 344 | >ATM-I1469I FVLRDVMY   | 344 | 0   |
| >ATM-I1469I FVLRDVIY    | 306 | >ATM-I1469I FVLRDVMY   | 371 | 65  |
| >ATM-I1469I FVLRDVIY    | 70  | >ATM-I1469I FVLRDVMY   | 106 | 36  |
| >ATM-I1469I FVLRDVIYTL  | 507 | >ATM-I1469I FVLRDVMYTL | 458 | 49  |
| >ATM-I1469I FVLRDVIYTLI | 422 | >ATM-I1469I FVLRDVMYTL | 643 | 221 |
| >ATM-I1469I AFVLRDVIYTL | 489 | >ATM-I1469I AFVLRDVMY  | 480 | 9   |



|                         |      |                         |      |      |
|-------------------------|------|-------------------------|------|------|
| >ATM-I1469I AFVLRDVIY   | 230  | >ATM-I1469I AFVLRDVMY   | 52   | 178  |
| >ATM-I1469I AFVLRDVIYTL | 480  | >ATM-I1469I AFVLRDVMY   | 516  | 36   |
| >ATM-I1469I WAFVLRDVI   | 206  | >ATM-I1469I WAFVLRDVM   | 56   | 150  |
| >ATM-I1469I WAFVLRDVIY  | 397  | >ATM-I1469I WAFVLRDVM   | 330  | 67   |
| >ATM-I1469I WAFVLRDVIY  | 594  | >ATM-I1469I WAFVLRDVM   | 325  | 269  |
| >ATM-I1469I WAFVLRDVIY  | 929  | >ATM-I1469I WAFVLRDVM   | 386  | 543  |
| >ATM-I1469I WAFVLRDVI   | 153  | >ATM-I1469I WAFVLRDVM   | 2183 | 2030 |
| >ATM-I1469I WAFVLRDVIY  | 488  | >ATM-I1469I WAFVLRDVM   | 400  | 88   |
| >ATM-I1469I WAFVLRDVIY  | 78   | >ATM-I1469I WAFVLRDVM   | 118  | 40   |
| >ATM-I1469I WAFVLRDVIY  | 93   | >ATM-I1469I WAFVLRDVM   | 45   | 48   |
| >ATM-I1469I WAFVLRDVI   | 1668 | >ATM-I1469I WAFVLRDVM   | 31   | 1637 |
| >ATM-I1469I WAFVLRDVI   | 304  | >ATM-I1469I WAFVLRDVM   | 37   | 267  |
| >ATM-I1469I WAFVLRDVIY  | 239  | >ATM-I1469I WAFVLRDVM   | 175  | 64   |
| >ATM-I1469I WAFVLRDVI   | 490  | >ATM-I1469I WAFVLRDVM   | 6439 | 5949 |
| >ATM-I1469I WAFVLRDVI   | 200  | >ATM-I1469I WAFVLRDVM   | 3831 | 3631 |
| >ATM-I1469I AWAFVLRDV   | 443  | >ATM-I1469I AWAFVLRDV   | 3619 | 3176 |
| >ATM-I1469I AWAFVLRDV   | 235  | >ATM-I1469I AWAFVLRDV   | 84   | 151  |
| >ATM-I1469I AWAFVLRDV   | 125  | >ATM-I1469I AWAFVLRDV   | 122  | 3    |
| >ATM-I1681\IDFSTIAI     | 455  | >ATM-I1681\IDFSTIAI     | 1118 | 663  |
| >ATM-I1681\IDFSTIAI     | 340  | >ATM-I1681\IDFSTIAI     | 328  | 12   |
| >ATM-I1681\IDFSTIAI     | 59   | >ATM-I1681\IDFSTIAI     | 55   | 4    |
| >ATM-I1681\GPIDFSTI     | 123  | >ATM-I1681\GPVDFSTI     | 132  | 9    |
| >ATM-I1681\GPIDFSTIA    | 153  | >ATM-I1681\GPVDFSTIA    | 168  | 15   |
| >ATM-I1681\GPIDFSTIAI   | 371  | >ATM-I1681\GPVDFSTIAI   | 416  | 45   |
| >ATM-I1681\VGPIIDFSTI   | 446  | >ATM-I1681\VGPIIDFSTI   | 555  | 109  |
| >ATM-I1681\VGPIIDFSTIAI | 182  | >ATM-I1681\VGPIIDFSTIAI | 212  | 30   |
| >ATM-I1681\VGPIIDFSTI   | 111  | >ATM-I1681\VGPIIDFSTI   | 250  | 139  |
| >ATM-I1681\VGPIIDFSTIAI | 159  | >ATM-I1681\VGPIIDFSTIAI | 309  | 150  |
| >ATM-I1681\EVGPIIDFS    | 205  | >ATM-I1681\EVGPIIDFS    | 358  | 153  |
| >ATM-I1681\EVGPIIDFST   | 113  | >ATM-I1681\EVGPIIDFST   | 214  | 101  |
| >ATM-I1681\EVGPIIDFSTI  | 404  | >ATM-I1681\EVGPIIDFSTI  | 632  | 228  |
| >ATM-I1681\EVGPIIDFSTIA | 75   | >ATM-I1681\EVGPIIDFSTIA | 108  | 33   |
| >ATM-I1681\EVGPIIDFSTI  | 166  | >ATM-I1681\EVGPIIDFSTI  | 214  | 48   |
| >ATM-I1681\GEVGPIDF     | 61   | >ATM-I1681\GEVGPVDF     | 90   | 29   |
| >ATM-I1681\GEVGPIDFSTI  | 19   | >ATM-I1681\GEVGPVDFSTI  | 21   | 2    |
| >ATM-I1681\GEVGPIDFST   | 275  | >ATM-I1681\GEVGPVDFSTI  | 244  | 31   |
| >ATM-I1681\GEVGPIDFSTI  | 251  | >ATM-I1681\GEVGPVDFSTI  | 266  | 15   |
| >ATM-I1681\GEVGPIDF     | 470  | >ATM-I1681\GEVGPVDF     | 509  | 39   |
| >ATM-I1681\GEVGPIDF     | 78   | >ATM-I1681\GEVGPVDF     | 101  | 23   |
| >ATM-I1681\GEVGPIDFSTI  | 6    | >ATM-I1681\GEVGPVDFSTI  | 6    | 0    |
| >ATM-I1681\CLGEVGPI     | 859  | >ATM-I1681\CLGEVGPV     | 264  | 595  |
| >ATM-I1681\CLGEVGPI     | 613  | >ATM-I1681\CLGEVGPV     | 163  | 450  |
| >ATM-I1681\CLGEVGPI     | 95   | >ATM-I1681\CLGEVGPV     | 21   | 74   |

|                       |      |                       |       |       |
|-----------------------|------|-----------------------|-------|-------|
| >ATM-I1681\CLGEVGPI   | 2164 | >ATM-I1681\CLGEVGPV   | 393   | 1771  |
| >ATM-I1681\CLGEVGPI   | 19   | >ATM-I1681\CLGEVGPV   | 4     | 15    |
| >ATM-I1681\CLGEVGPI   | 73   | >ATM-I1681\CLGEVGPV   | 12    | 61    |
| >ATM-I1681\CLGEVGPI   | 218  | >ATM-I1681\CLGEVGPV   | 20    | 198   |
| >ATM-I1681\CLGEVGPI   | 406  | >ATM-I1681\CLGEVGPV   | 17    | 389   |
| >ATM-I1681\CLGEVGPI   | 316  | >ATM-I1681\CLGEVGPV   | 6     | 310   |
| >ATM-I1681\SCLGEVGPI  | 2132 | >ATM-I1681\SCLGEVGPV  | 165   | 1967  |
| >ATM-I1681\SCLGEVGPI  | 6152 | >ATM-I1681\SCLGEVGPV  | 474   | 5678  |
| >ATM-I1681\SCLGEVGPI  | 2956 | >ATM-I1681\SCLGEVGPV  | 467   | 2489  |
| >ATM-I1681\GSCLGEVGPI | 250  | >ATM-I1681\GSCLGEVGPV | 12823 | 12573 |
| >ATM-I2076\ILSVYKGL   | 305  | >ATM-I2076\SLSVYKGL   | 248   | 57    |
| >ATM-I2076\ILSVYKGL   | 18   | >ATM-I2076\SLSVYKGL   | 12    | 6     |
| >ATM-I2076\ILSVYKGL   | 43   | >ATM-I2076\SLSVYKGL   | 40    | 3     |
| >ATM-I2076\ILSVYKGL   | 387  | >ATM-I2076\SLSVYKGL   | 544   | 157   |
| >ATM-I2076\ILSVYKGL   | 52   | >ATM-I2076\SLSVYKGL   | 43    | 9     |
| >ATM-I2076\ILSVYKGL   | 227  | >ATM-I2076\SLSVYKGL   | 140   | 87    |
| >ATM-I2076\ILSVYKGL   | 1020 | >ATM-I2076\SLSVYKGL   | 148   | 872   |
| >ATM-I2076\ILSVYKGL   | 89   | >ATM-I2076\SLSVYKGL   | 636   | 547   |
| >ATM-I2076\ILSVYKGL   | 8    | >ATM-I2076\SLSVYKGL   | 8     | 0     |
| >ATM-I2076\ILSVYKGLDY | 40   | >ATM-I2076\SLSVYKGLDY | 45    | 5     |
| >ATM-I2076\ILSVYKGLDY | 199  | >ATM-I2076\SLSVYKGLDY | 250   | 51    |
| >ATM-I2076\ILSVYKGLDY | 51   | >ATM-I2076\SLSVYKGLDY | 32    | 19    |
| >ATM-I2076\ILSVYKGLDY | 373  | >ATM-I2076\SLSVYKGLDY | 304   | 69    |
| >ATM-I2076\ILSVYKGLDY | 658  | >ATM-I2076\SLSVYKGLDY | 335   | 323   |
| >ATM-I2076\ILSVYKGLDY | 244  | >ATM-I2076\SLSVYKGLDY | 873   | 629   |
| >ATM-I2076\ILSVYKGLDY | 742  | >ATM-I2076\SLSVYKGLDY | 323   | 419   |
| >ATM-I2076\HILSVYKGL  | 322  | >ATM-I2076\HLSVYKGL   | 3105  | 2783  |
| >ATM-I2076\HILSVYKGL  | 344  | >ATM-I2076\HLSVYKGL   | 5955  | 5611  |
| >ATM-I2076\HILSVYKGL  | 194  | >ATM-I2076\HLSVYKGL   | 9072  | 8878  |
| >ATM-I2076\HILSVYK    | 54   | >ATM-I2076\HLSVYK     | 82    | 28    |
| >ATM-I2076\HILSVYK    | 17   | >ATM-I2076\HLSVYK     | 12    | 5     |
| >ATM-I2076\HILSVYK    | 25   | >ATM-I2076\HLSVYK     | 14    | 11    |
| >ATM-I2076\HILSVYK    | 78   | >ATM-I2076\HLSVYK     | 44    | 34    |
| >ATM-I2076\HILSVYK    | 329  | >ATM-I2076\HLSVYK     | 476   | 147   |
| >ATM-I2076\HILSVYK    | 36   | >ATM-I2076\HLSVYK     | 31    | 5     |
| >ATM-I2076\HILSVYKGL  | 191  | >ATM-I2076\HLSVYKGL   | 457   | 266   |
| >ATM-I2076\HILSVYKGL  | 4682 | >ATM-I2076\HLSVYKGL   | 27    | 4655  |
| >ATM-I2076\HILSVYK    | 4314 | >ATM-I2076\HLSVYK     | 330   | 3984  |
| >ATM-I2076\HILSVYK    | 118  | >ATM-I2076\HLSVYK     | 901   | 783   |
| >ATM-I2076\QALQNLGLCF | 52   | >ATM-I2076\QALQNLGLCF | 10367 | 10315 |
| >ATM-I2076\QALQNLGLCF | 278  | >ATM-I2076\QALQNLGLCF | 11613 | 11335 |
| >ATM-I2076\QALQNLGLCF | 425  | >ATM-I2076\QALQNLGLCF | 34203 | 33778 |
| >ATM-I2076\CHILSVYL   | 236  | >ATM-I2076\CHLSVYL    | 520   | 284   |

|                        |      |                        |      |      |
|------------------------|------|------------------------|------|------|
| >ATM-I2076:LCHILSVYL   | 981  | >ATM-I2076:LCHSLSVYL   | 301  | 680  |
| >ATM-I2076:LCHILSVYLK  | 82   | >ATM-I2076:LCHSLSVYLK  | 69   | 13   |
| >ATM-I2076:LCHILSVY    | 640  | >ATM-I2076:LCHSLSVY    | 431  | 209  |
| >ATM-I2076:LCHILSVY    | 1583 | >ATM-I2076:LCHSLSVY    | 301  | 1282 |
| >ATM-I2076:GLCHILSV    | 32   | >ATM-I2076:GLCHSLSV    | 68   | 36   |
| >ATM-I2076:GLCHILSVYL  | 114  | >ATM-I2076:GLCHSLSVYL  | 95   | 19   |
| >ATM-I2076:GLCHILSV    | 21   | >ATM-I2076:GLCHSLSV    | 37   | 16   |
| >ATM-I2076:GLCHILSVYL  | 63   | >ATM-I2076:GLCHSLSVYL  | 51   | 12   |
| >ATM-I2076:GLCHILSV    | 8    | >ATM-I2076:GLCHSLSV    | 8    | 0    |
| >ATM-I2076:GLCHILSVYL  | 164  | >ATM-I2076:GLCHSLSVYL  | 139  | 25   |
| >ATM-I2076:GLCHILSV    | 62   | >ATM-I2076:GLCHSLSV    | 99   | 37   |
| >ATM-I2076:GLCHILSV    | 4    | >ATM-I2076:GLCHSLSV    | 7    | 3    |
| >ATM-I2076:GLCHILSVYL  | 13   | >ATM-I2076:GLCHSLSVYL  | 15   | 2    |
| >ATM-I2076:GLCHILSV    | 22   | >ATM-I2076:GLCHSLSV    | 24   | 2    |
| >ATM-I2076:GLCHILSVYL  | 51   | >ATM-I2076:GLCHSLSVYL  | 39   | 12   |
| >ATM-I2076:GLCHILSV    | 15   | >ATM-I2076:GLCHSLSV    | 19   | 4    |
| >ATM-I2076:GLCHILSVYL  | 56   | >ATM-I2076:GLCHSLSVYL  | 64   | 8    |
| >ATM-I2076:GLCHILSV    | 226  | >ATM-I2076:GLCHSLSV    | 519  | 293  |
| >ATM-I2076:GLCHILSV    | 3    | >ATM-I2076:GLCHSLSV    | 3    | 0    |
| >ATM-I2076:GLCHILSVYL  | 13   | >ATM-I2076:GLCHSLSVYL  | 13   | 0    |
| >ATM-I2076:GLCHILSVYLK | 71   | >ATM-I2076:GLCHSLSVYLI | 60   | 11   |
| >ATM-I2076:GLCHILSVYLK | 21   | >ATM-I2076:GLCHSLSVYLI | 19   | 2    |
| >ATM-I2076:GLCHILSVY   | 76   | >ATM-I2076:GLCHSLSVY   | 272  | 196  |
| >ATM-I2076:GLCHILSVY   | 33   | >ATM-I2076:GLCHSLSVY   | 60   | 27   |
| >ATM-I2076:GLCHILSVY   | 255  | >ATM-I2076:GLCHSLSVY   | 2288 | 2033 |
| >ATM-I2076:GLCHILSVY   | 74   | >ATM-I2076:GLCHSLSVY   | 40   | 34   |
| >ATM-I2076:GLCHILSVY   | 694  | >ATM-I2076:GLCHSLSVY   | 145  | 549  |
| >ATM-I2076:GLCHILSVY   | 661  | >ATM-I2076:GLCHSLSVY   | 159  | 502  |
| >ATM-I2076:GLCHILSVY   | 16   | >ATM-I2076:GLCHSLSVY   | 29   | 13   |
| >ATM-I2076:GLCHILSVY   | 559  | >ATM-I2076:GLCHSLSVY   | 451  | 108  |
| >ATM-I2076:LGLCHILSV   | 101  | >ATM-I2076:LGLCHSLSV   | 368  | 267  |
| >ATM-I2076:LGLCHILSV   | 265  | >ATM-I2076:LGLCHSLSV   | 1384 | 1119 |
| >ATM-I2076:LGLCHILSV   | 372  | >ATM-I2076:LGLCHSLSV   | 296  | 76   |
| >ATM-I2076:LGLCHILSVY  | 169  | >ATM-I2076:LGLCHSLSVY  | 88   | 81   |
| >ATM-I2076:LGLCHILSVY  | 305  | >ATM-I2076:LGLCHSLSVY  | 127  | 178  |
| >ATM-I2076:LGLCHILSVY  | 823  | >ATM-I2076:LGLCHSLSVY  | 231  | 592  |
| >ATM-I2076:NLGLCHILSV  | 40   | >ATM-I2076:NLGLCHSLSV  | 82   | 42   |
| >ATM-I2076:NLGLCHIL    | 365  | >ATM-I2076:NLGLCHSL    | 136  | 229  |
| >ATM-I2076:NLGLCHILSV  | 44   | >ATM-I2076:NLGLCHSLSV  | 45   | 1    |
| >ATM-I2076:NLGLCHILSV  | 32   | >ATM-I2076:NLGLCHSLSV  | 48   | 16   |
| >ATM-I2076:NLGLCHILSV  | 230  | >ATM-I2076:NLGLCHSLSV  | 578  | 348  |
| >ATM-I2076:NLGLCHILSV  | 36   | >ATM-I2076:NLGLCHSLSV  | 85   | 49   |
| >ATM-I2076:NLGLCHIL    | 501  | >ATM-I2076:NLGLCHSL    | 299  | 202  |

|                         |      |                         |       |       |
|-------------------------|------|-------------------------|-------|-------|
| >ATM-I2076\$NLGLCHILSV  | 34   | >ATM-I2076\$NLGLCHSLSV  | 43    | 9     |
| >ATM-I2076\$NLGLCHILSV  | 86   | >ATM-I2076\$NLGLCHSLSV  | 144   | 58    |
| >ATM-I2076\$NLGLCHIL    | 520  | >ATM-I2076\$NLGLCHSL    | 139   | 381   |
| >ATM-I2076\$NLGLCHILSV  | 28   | >ATM-I2076\$NLGLCHSLSV  | 33    | 5     |
| >ATM-I2076\$NLGLCHIL    | 142  | >ATM-I2076\$NLGLCHSL    | 42    | 100   |
| >ATM-I2076\$NLGLCHILSV  | 9    | >ATM-I2076\$NLGLCHSLSV  | 12    | 3     |
| >ATM-I2076\$NLGLCHILSV\ | 262  | >ATM-I2076\$NLGLCHSLSV  | 459   | 197   |
| >ATM-I2076\$NLGLCHILSV\ | 379  | >ATM-I2076\$NLGLCHSLSV  | 288   | 91    |
| >ATM-I2076\$NLGLCHILSV\ | 203  | >ATM-I2076\$NLGLCHSLSV  | 451   | 248   |
| >ATM-I2076\$NLGLCHILSV\ | 519  | >ATM-I2076\$NLGLCHSLSV  | 282   | 237   |
| >ATM-I2076\$NLGLCHILSV\ | 1258 | >ATM-I2076\$NLGLCHSLSV  | 465   | 793   |
| >ATM-I2076\$LQNLGLCHI   | 274  | >ATM-I2076\$LQNLGLCHS   | 26902 | 26628 |
| >ATM-I2076\$LQNLGLCHIL  | 1176 | >ATM-I2076\$LQNLGLCHSL  | 304   | 872   |
| >ATM-I2076\$LQNLGLCHI   | 217  | >ATM-I2076\$LQNLGLCHS   | 7270  | 7053  |
| >ATM-I2076\$LQNLGLCHI   | 28   | >ATM-I2076\$LQNLGLCHS   | 1186  | 1158  |
| >ATM-I2076\$LQNLGLCHI   | 123  | >ATM-I2076\$LQNLGLCHS   | 1152  | 1029  |
| >ATM-I2076\$LQNLGLCHIL  | 468  | >ATM-I2076\$LQNLGLCHSL  | 123   | 345   |
| >ATM-I2076\$LQNLGLCHIL  | 470  | >ATM-I2076\$LQNLGLCHSL  | 271   | 199   |
| >ATM-I2076\$ALQNLGLCHI  | 253  | >ATM-I2076\$ALQNLGLCH\$ | 89    | 164   |
| >ATM-I2076\$ALQNLGLCHI  | 153  | >ATM-I2076\$ALQNLGLCH\$ | 6221  | 6068  |
| >ATM-I2076\$ALQNLGLCHI  | 85   | >ATM-I2076\$ALQNLGLCH\$ | 41    | 44    |
| >ATM-I2076\$ALQNLGLCHI  | 57   | >ATM-I2076\$ALQNLGLCH\$ | 4167  | 4110  |
| >ATM-I2076\$ALQNLGLCHI  | 623  | >ATM-I2076\$ALQNLGLCH\$ | 218   | 405   |
| >ATM-I2076\$ALQNLGLCHI  | 27   | >ATM-I2076\$ALQNLGLCH\$ | 3500  | 3473  |
| >ATM-I2076\$ALQNLGLCHI  | 179  | >ATM-I2076\$ALQNLGLCH\$ | 34    | 145   |
| >ATM-I2076\$ALQNLGLCHI  | 20   | >ATM-I2076\$ALQNLGLCH\$ | 4870  | 4850  |
| >ATM-I2076\$ALQNLGLCHI  | 44   | >ATM-I2076\$ALQNLGLCH\$ | 24    | 20    |
| >ATM-I2076\$ALQNLGLCHI  | 31   | >ATM-I2076\$ALQNLGLCH\$ | 4196  | 4165  |
| >ATM-I2076\$ALQNLGLCHI  | 112  | >ATM-I2076\$ALQNLGLCH\$ | 62    | 50    |
| >ATM-I2076\$ALQNLGLCHI  | 761  | >ATM-I2076\$ALQNLGLCH\$ | 218   | 543   |
| >ATM-I2076\$ALQNLGLCHI  | 11   | >ATM-I2076\$ALQNLGLCH\$ | 877   | 866   |
| >ATM-I2076\$ALQNLGLCHI  | 6    | >ATM-I2076\$ALQNLGLCH\$ | 4     | 2     |
| >ATM-I2076\$ALQNLGLCHI  | 1229 | >ATM-I2076\$ALQNLGLCH\$ | 338   | 891   |
| >ATM-I2356fIMQTYLEKA    | 64   | >ATM-I2356fFMQTYLEKA    | 12    | 52    |
| >ATM-I2356fIMQTYLEKAV   | 856  | >ATM-I2356fFMQTYLEKA\   | 112   | 744   |
| >ATM-I2356fIMQTYLEKA    | 41   | >ATM-I2356fFMQTYLEKA    | 5     | 36    |
| >ATM-I2356fIMQTYLEKAV   | 197  | >ATM-I2356fFMQTYLEKA\   | 33    | 164   |
| >ATM-I2356fIMQTYLEKA    | 43   | >ATM-I2356fFMQTYLEKA    | 5     | 38    |
| >ATM-I2356fIMQTYLEKAV   | 132  | >ATM-I2356fFMQTYLEKA\   | 33    | 99    |
| >ATM-I2356fIMQTYLEKA    | 285  | >ATM-I2356fFMQTYLEKA    | 22    | 263   |
| >ATM-I2356fIMQTYLEKAV   | 1233 | >ATM-I2356fFMQTYLEKA\   | 115   | 1118  |
| >ATM-I2356fIMQTYLEKA    | 42   | >ATM-I2356fFMQTYLEKA    | 7     | 35    |
| >ATM-I2356fIMQTYLEKAV   | 8    | >ATM-I2356fFMQTYLEKA\   | 3     | 5     |

|                       |       |                       |       |       |
|-----------------------|-------|-----------------------|-------|-------|
| >ATM-I2356FIMQTYLEKA  | 236   | >ATM-I2356FFMQTYLEKA  | 14    | 222   |
| >ATM-I2356FIMQTYLEKAV | 14    | >ATM-I2356FFMQTYLEKA\ | 3     | 11    |
| >ATM-I2356FIMQTYLEKA  | 2719  | >ATM-I2356FFMQTYLEKA  | 186   | 2533  |
| >ATM-I2356FIMQTYLEKAV | 216   | >ATM-I2356FFMQTYLEKA\ | 28    | 188   |
| >ATM-I2356FIMQTYLEKA  | 319   | >ATM-I2356FFMQTYLEKA  | 46    | 273   |
| >ATM-I2356FIMQTYLEKAV | 57    | >ATM-I2356FFMQTYLEKA\ | 19    | 38    |
| >ATM-I2356FIMQTYLEK   | 5235  | >ATM-I2356FFMQTYLEK   | 340   | 4895  |
| >ATM-I2356FIMQTYLEKA  | 35    | >ATM-I2356FFMQTYLEKA  | 6     | 29    |
| >ATM-I2356FIMQTYLEKAV | 6     | >ATM-I2356FFMQTYLEKA\ | 2     | 4     |
| >ATM-I2356FIMQTYLEK   | 133   | >ATM-I2356FFMQTYLEK   | 747   | 614   |
| >ATM-I2356FIMQTYLEK   | 19    | >ATM-I2356FFMQTYLEK   | 45    | 26    |
| >ATM-I2356FIMQTYLEK   | 314   | >ATM-I2356FFMQTYLEK   | 1973  | 1659  |
| >ATM-I2356FIMQTYLEKAV | 170   | >ATM-I2356FFMQTYLEKA\ | 135   | 35    |
| >ATM-I2356FVIMQTYLEKA | 291   | >ATM-I2356FVFMQTYLEK/ | 5232  | 4941  |
| >ATM-I2356FVIMQTYLEKA | 434   | >ATM-I2356FVFMQTYLEK/ | 2923  | 2489  |
| >ATM-I2356FVIMQTYLEKA | 158   | >ATM-I2356FVFMQTYLEK/ | 6531  | 6373  |
| >ATM-I2356FVIMQTYLEKA | 93    | >ATM-I2356FVFMQTYLEK/ | 7026  | 6933  |
| >ATM-I2356FVIMQTYLEKA | 277   | >ATM-I2356FVFMQTYLEK/ | 9200  | 8923  |
| >ATM-I2356FVIMQTYLEKA | 162   | >ATM-I2356FVFMQTYLEK/ | 4165  | 4003  |
| >ATM-I2356FVIMQTYLEKA | 407   | >ATM-I2356FVFMQTYLEK/ | 11528 | 11121 |
| >ATM-I2356FVIMQTYLEKA | 33    | >ATM-I2356FVFMQTYLEK/ | 2216  | 2183  |
| >ATM-I2356FVIMQTYLEKA | 371   | >ATM-I2356FVFMQTYLEK/ | 9898  | 9527  |
| >ATM-I2356FVIMQTYLEKA | 337   | >ATM-I2356FVFMQTYLEK/ | 6045  | 5708  |
| >ATM-I2356FVIMQTYLEKA | 116   | >ATM-I2356FVFMQTYLEK/ | 8760  | 8644  |
| >ATM-I2356FVIMQTYLEKA | 352   | >ATM-I2356FVFMQTYLEK/ | 15719 | 15367 |
| >ATM-I2356FVIMQTYLEKA | 26    | >ATM-I2356FVFMQTYLEK/ | 2259  | 2233  |
| >ATM-I2356FVIMQTYLEK  | 69    | >ATM-I2356FVFMQTYLEK  | 1790  | 1721  |
| >ATM-I2356FVIMQTYLEK  | 13    | >ATM-I2356FVFMQTYLEK  | 80    | 67    |
| >ATM-I2356FVIMQTYLEK  | 7128  | >ATM-I2356FVFMQTYLEK  | 163   | 6965  |
| >ATM-I2356FVIMQTYLEK  | 293   | >ATM-I2356FVFMQTYLEK  | 393   | 100   |
| >ATM-I2356FVIMQTYLEKA | 20632 | >ATM-I2356FVFMQTYLEK/ | 449   | 20183 |
| >ATM-I2356FAETCLENPAV | 271   | >ATM-I2356FAETCLENPAV | 11278 | 11007 |
| >ATM-I2356FAETCLENPAV | 4208  | >ATM-I2356FAETCLENPAV | 141   | 4067  |
| >ATM-I2356FAETCLENPAV | 79    | >ATM-I2356FAETCLENPAV | 233   | 154   |
| >ATM-I2356FAETCLENPAV | 499   | >ATM-I2356FAETCLENPAV | 608   | 109   |
| >ATM-I2356FAETCLENPAV | 1527  | >ATM-I2356FAETCLENPAV | 365   | 1162  |
| >ATM-I2356FAETCLENPAV | 926   | >ATM-I2356FAETCLENPAV | 96    | 830   |
| >ATM-I2356FAETCLENPAV | 84    | >ATM-I2356FAETCLENPAV | 579   | 495   |
| >ATM-I2356FAETCLENPAV | 15    | >ATM-I2356FAETCLENPAV | 263   | 248   |
| >ATM-I2356FVIMQTYL    | 938   | >ATM-I2356FVFMQTYL    | 246   | 692   |
| >ATM-I2356FVIMQTYL    | 391   | >ATM-I2356FVFMQTYL    | 128   | 263   |
| >ATM-I2356FVIMQTYL    | 66    | >ATM-I2356FVFMQTYL    | 24    | 42    |
| >ATM-I2356FVIMQTYLEK  | 831   | >ATM-I2356FVFMQTYLEK  | 216   | 615   |

|                         |      |                         |       |       |
|-------------------------|------|-------------------------|-------|-------|
| >ATM-I2356f AVIMQTYL    | 260  | >ATM-I2356f AVFMQTYL    | 198   | 62    |
| >ATM-I2356f AVIMQTYLEK  | 507  | >ATM-I2356f AVFMQTYLEf  | 393   | 114   |
| >ATM-I2356f AVIMQTYL    | 62   | >ATM-I2356f AVFMQTYL    | 82    | 20    |
| >ATM-I2356f AVIMQTYLEK  | 237  | >ATM-I2356f AVFMQTYLEf  | 261   | 24    |
| >ATM-I2356f AVIMQTYL    | 992  | >ATM-I2356f AVFMQTYL    | 109   | 883   |
| >ATM-I2356f AVIMQTYL    | 2790 | >ATM-I2356f AVFMQTYL    | 260   | 2530  |
| >ATM-I2356f AVIMQTYL    | 141  | >ATM-I2356f AVFMQTYL    | 40    | 101   |
| >ATM-I2356f AVIMQTYLEK  | 22   | >ATM-I2356f AVFMQTYLEf  | 17    | 5     |
| >ATM-I2356f AVIMQTYLEK  | 5    | >ATM-I2356f AVFMQTYLEf  | 5     | 0     |
| >ATM-I2356f AVIMQTYL    | 85   | >ATM-I2356f AVFMQTYL    | 7743  | 7658  |
| >ATM-I2356f AVIMQTYL    | 2571 | >ATM-I2356f AVFMQTYL    | 422   | 2149  |
| >ATM-I2356f AVIMQTYLEK  | 22   | >ATM-I2356f AVFMQTYLEf  | 8     | 14    |
| >ATM-I2356f AVIMQTYL    | 1747 | >ATM-I2356f AVFMQTYL    | 204   | 1543  |
| >ATM-I2356f AVIMQTYLEK  | 117  | >ATM-I2356f AVFMQTYLEf  | 79    | 38    |
| >ATM-I2356f AVIMQTYL    | 415  | >ATM-I2356f AVFMQTYL    | 185   | 230   |
| >ATM-I2356f AVIMQTYL    | 1061 | >ATM-I2356f AVFMQTYL    | 442   | 619   |
| >ATM-I2356f AVIMQTYLEK  | 163  | >ATM-I2356f AVFMQTYLEf  | 84    | 79    |
| >ATM-I2356f PAVIMQTY    | 413  | >ATM-I2356f PAVFMQTY    | 645   | 232   |
| >ATM-I2356f PAVIMQTY    | 525  | >ATM-I2356f PAVFMQTY    | 390   | 135   |
| >ATM-I2356f NPAVIMQTYI  | 91   | >ATM-I2356f NPAVFMQTY   | 179   | 88    |
| >ATM-I2356f NPAVIMQTY   | 1394 | >ATM-I2356f NPAVFMQTY   | 353   | 1041  |
| >ATM-I2356f NPAVIMQTY   | 377  | >ATM-I2356f NPAVFMQTY   | 227   | 150   |
| >ATM-I2356f NPAVIMQTY   | 14   | >ATM-I2356f NPAVFMQTY   | 14    | 0     |
| >ATM-I2356f NPAVIMQTY   | 155  | >ATM-I2356f NPAVFMQTY   | 136   | 19    |
| >ATM-I2356f NPAVIMQTY   | 5    | >ATM-I2356f NPAVFMQTY   | 5     | 0     |
| >ATM-I2356f NPAVIMQTY   | 309  | >ATM-I2356f NPAVFMQTY   | 156   | 153   |
| >ATM-I2356f ENPAVIMQTY  | 1510 | >ATM-I2356f ENPAVFMQTY  | 446   | 1064  |
| >ATM-I2356f ENPAVIMQTY  | 79   | >ATM-I2356f ENPAVFMQTY  | 50    | 29    |
| >ATM-I2356f LENPAVIM    | 277  | >ATM-I2356f LENPAVFM    | 215   | 62    |
| >ATM-I2356f LENPAVIMQTY | 124  | >ATM-I2356f LENPAVFMQTY | 106   | 18    |
| >ATM-I2356f LENPAVIMQTY | 163  | >ATM-I2356f LENPAVFMQTY | 128   | 35    |
| >ATM-I2356f LENPAVIM    | 135  | >ATM-I2356f LENPAVFM    | 147   | 12    |
| >ATM-I2356f LENPAVIMQTY | 390  | >ATM-I2356f LENPAVFMQTY | 208   | 182   |
| >ATM-I2356f LENPAVIMQTY | 10   | >ATM-I2356f LENPAVFMQTY | 9     | 1     |
| >ATM-I2356f LENPAVIM    | 176  | >ATM-I2356f LENPAVFM    | 205   | 29    |
| >ATM-I2356f LENPAVIMQTY | 713  | >ATM-I2356f LENPAVFMQTY | 344   | 369   |
| >ATM-I2356f LENPAVIMQTY | 176  | >ATM-I2356f LENPAVFMQTY | 180   | 4     |
| >ATM-I2356f LENPAVIM    | 770  | >ATM-I2356f LENPAVFM    | 338   | 432   |
| >ATM-I2356f LENPAVIMQTY | 98   | >ATM-I2356f LENPAVFMQTY | 91    | 7     |
| >ATM-I2356f LENPAVIM    | 146  | >ATM-I2356f LENPAVFM    | 64    | 82    |
| >ATM-I2356f LENPAVIMQTY | 532  | >ATM-I2356f LENPAVFMQTY | 498   | 34    |
| >ATM-I2356f TCLENPAVI   | 313  | >ATM-I2356f TCLENPAVF   | 10600 | 10287 |
| >ATM-I2356f TCLENPAVIM  | 1666 | >ATM-I2356f TCLENPAVFN  | 254   | 1412  |

|                        |      |                       |       |       |
|------------------------|------|-----------------------|-------|-------|
| >ATM-I2356fETCLENPAVI  | 304  | >ATM-I2356fETCLENPAVF | 13    | 291   |
| >ATM-I2356fETCLENPAVII | 24   | >ATM-I2356fETCLENPAVF | 8     | 16    |
| >ATM-I2356fETCLENPAVI  | 3638 | >ATM-I2356fETCLENPAVF | 330   | 3308  |
| >ATM-I2356fETCLENPAVII | 212  | >ATM-I2356fETCLENPAVF | 71    | 141   |
| >ATM-I2356fETCLENPAVII | 2031 | >ATM-I2356fETCLENPAVF | 332   | 1699  |
| >ATM-I2356fETCLENPAVI  | 1708 | >ATM-I2356fETCLENPAVF | 27    | 1681  |
| >ATM-I2356fETCLENPAVII | 444  | >ATM-I2356fETCLENPAVF | 249   | 195   |
| >ATM-I2356fETCLENPAVI  | 2852 | >ATM-I2356fETCLENPAVF | 121   | 2731  |
| >ATM-I2356fETCLENPAVI  | 51   | >ATM-I2356fETCLENPAVF | 18415 | 18364 |
| >ATM-I2888fHIDLGVAF    | 8224 | >ATM-I2888fHTDLGVAF   | 165   | 8059  |
| >ATM-I2888fHIDLGVAF    | 979  | >ATM-I2888fHTDLGVAF   | 304   | 675   |
| >ATM-I2888fHIDLGVAF    | 3382 | >ATM-I2888fHTDLGVAF   | 12    | 3370  |
| >ATM-I2888fHIDLGVAF    | 323  | >ATM-I2888fHTDLGVAF   | 390   | 67    |
| >ATM-I2888fHIDLGVAF    | 2689 | >ATM-I2888fHTDLGVAF   | 102   | 2587  |
| >ATM-I2888fVHIDLGVAF   | 14   | >ATM-I2888fVHTDLGVAF  | 41    | 27    |
| >ATM-I2888fVHIDLGVAF   | 325  | >ATM-I2888fVHTDLGVAF  | 2614  | 2289  |
| >ATM-I2888fLVHIDLGV    | 189  | >ATM-I2888fLVHTDLGV   | 104   | 85    |
| >ATM-I2888fLVHIDLGVA   | 927  | >ATM-I2888fLVHTDLGVA  | 452   | 475   |
| >ATM-I2888fLVHIDLGV    | 127  | >ATM-I2888fLVHTDLGV   | 116   | 11    |
| >ATM-I2888fLVHIDLGV    | 154  | >ATM-I2888fLVHTDLGV   | 221   | 67    |
| >ATM-I2888fLVHIDLGV    | 20   | >ATM-I2888fLVHTDLGV   | 19    | 1     |
| >ATM-I2888fLVHIDLGVAF  | 789  | >ATM-I2888fLVHTDLGVAF | 149   | 640   |
| >ATM-I2888fLVHIDLGV    | 535  | >ATM-I2888fLVHTDLGV   | 456   | 79    |
| >ATM-I2888fLVHIDLGVAF  | 105  | >ATM-I2888fLVHTDLGVAF | 99    | 6     |
| >ATM-I2888fLVHIDLGVAF  | 261  | >ATM-I2888fLVHTDLGVAF | 100   | 161   |
| >ATM-I2888fLVHIDLGVAF  | 356  | >ATM-I2888fLVHTDLGVAF | 1081  | 725   |
| >ATM-I2888fELVHIDLGV   | 380  | >ATM-I2888fELVHTDLGV  | 1479  | 1099  |
| >ATM-I2888fELVHIDLGV   | 417  | >ATM-I2888fELVHTDLGV  | 772   | 355   |
| >ATM-I2888fELVHIDLGV   | 284  | >ATM-I2888fELVHTDLGV  | 487   | 203   |
| >ATM-I2888fELVHIDLGV   | 93   | >ATM-I2888fELVHTDLGV  | 87    | 6     |
| >ATM-I2888fELVHIDLGV   | 153  | >ATM-I2888fELVHTDLGV  | 89    | 64    |
| >ATM-I2888fELVHIDLGV   | 53   | >ATM-I2888fELVHTDLGV  | 46    | 7     |
| >ATM-I2888fELVHIDLGV   | 229  | >ATM-I2888fELVHTDLGV  | 391   | 162   |
| >ATM-I2888fELVHIDLGV   | 14   | >ATM-I2888fELVHTDLGV  | 14    | 0     |
| >ATM-I2888fELVHIDLGVA  | 254  | >ATM-I2888fELVHTDLGVA | 653   | 399   |
| >ATM-I2888fELVHIDLGVA  | 239  | >ATM-I2888fELVHTDLGVA | 220   | 19    |
| >ATM-I2888fELVHIDLGVA  | 383  | >ATM-I2888fELVHTDLGVA | 928   | 545   |
| >ATM-I2888fELVHIDLGV   | 39   | >ATM-I2888fELVHTDLGV  | 327   | 288   |
| >ATM-I2888fELVHIDLGV   | 207  | >ATM-I2888fELVHTDLGV  | 244   | 37    |
| >ATM-I2888fELVHIDLGVA  | 231  | >ATM-I2888fELVHTDLGVA | 130   | 101   |
| >ATM-I2888fELVHIDLGVA  | 641  | >ATM-I2888fELVHTDLGVA | 292   | 349   |
| >ATM-I2888fELVHIDLGVA  | 121  | >ATM-I2888fELVHTDLGVA | 54    | 67    |
| >ATM-I2888fELVHIDLGVA  | 115  | >ATM-I2888fELVHTDLGVA | 140   | 25    |

|                        |      |                        |       |       |
|------------------------|------|------------------------|-------|-------|
| >ATM-I28881AELVHIDLGV  | 635  | >ATM-I28881AELVHTDLGV  | 382   | 253   |
| >ATM-I28881AELVHIDL    | 22   | >ATM-I28881AELVHTDL    | 42    | 20    |
| >ATM-I28881AELVHIDL    | 37   | >ATM-I28881AELVHTDL    | 40    | 3     |
| >ATM-I28881AELVHIDLGV  | 174  | >ATM-I28881AELVHTDLGV  | 236   | 62    |
| >ATM-I28881AELVHIDL    | 154  | >ATM-I28881AELVHTDL    | 243   | 89    |
| >ATM-I28881AELVHIDLGV  | 329  | >ATM-I28881AELVHTDLGV  | 750   | 421   |
| >ATM-I28881AELVHIDL    | 151  | >ATM-I28881AELVHTDL    | 271   | 120   |
| >ATM-I28881AELVHIDLG   | 457  | >ATM-I28881AELVHTDLG   | 738   | 281   |
| >ATM-I28881AELVHIDLGV  | 265  | >ATM-I28881AELVHTDLGV  | 674   | 409   |
| >ATM-I28881AELVHIDLGV  | 10   | >ATM-I28881AELVHTDLGV  | 10    | 0     |
| >ATM-I28881AELVHIDL    | 889  | >ATM-I28881AELVHTDL    | 458   | 431   |
| >ATM-I28881AELVHIDLG   | 154  | >ATM-I28881AELVHTDLG   | 156   | 2     |
| >ATM-I28881AELVHIDLGV  | 12   | >ATM-I28881AELVHTDLGV  | 12    | 0     |
| >ATM-I28881AELVHIDLGV  | 94   | >ATM-I28881AELVHTDLGV  | 74    | 20    |
| >ATM-I28881QSAELVHI    | 42   | >ATM-I28881QSAELVHT    | 1651  | 1609  |
| >ATM-I28881QSAELVHI    | 326  | >ATM-I28881QSAELVHT    | 5042  | 4716  |
| >ATM-I28881QSAELVHIDL  | 358  | >ATM-I28881QSAELVHTDL  | 192   | 166   |
| >ATM-I28881QSAELVHI    | 367  | >ATM-I28881QSAELVHT    | 16012 | 15645 |
| >ATM-I28881QSAELVHIDL  | 332  | >ATM-I28881QSAELVHTDL  | 841   | 509   |
| >ATM-I28881QSAELVHI    | 47   | >ATM-I28881QSAELVHT    | 31303 | 31256 |
| >ATM-I28881EQSAELVHI   | 246  | >ATM-I28881EQSAELVHT   | 2972  | 2726  |
| >ATM-I28881EQSAELVHID  | 459  | >ATM-I28881EQSAELVHTC  | 1145  | 686   |
| >ATM-I28881NEQSAELVHI  | 74   | >ATM-I28881NEQSAELVHT  | 14562 | 14488 |
| >ATM-I28881NEQSAELVHI  | 524  | >ATM-I28881NEQSAELVHT  | 220   | 304   |
| >ATM-I28881NEQSAELVHI  | 16   | >ATM-I28881NEQSAELVHT  | 3043  | 3027  |
| >ATM-I352T- ICHQVFNEDT | 1927 | >ATM-I352T- TCHQVFNED` | 466   | 1461  |
| >ATM-I352T- ICHQVFNEDT | 427  | >ATM-I352T- TCHQVFNED` | 629   | 202   |
| >ATM-I352T- KENLIELMAD | 22   | >ATM-I352T- KENLIELMAD | 7820  | 7798  |
| >ATM-I352T- KENLIELMAD | 380  | >ATM-I352T- KENLIELMAD | 13402 | 13022 |
| >ATM-I352T- KENLIELMAD | 127  | >ATM-I352T- KENLIELMAD | 273   | 146   |
| >ATM-I352T- KENLIELMAD | 1340 | >ATM-I352T- KENLIELMAD | 458   | 882   |
| >ATM-I352T- KENLIELMAD | 13   | >ATM-I352T- KENLIELMAD | 588   | 575   |
| >ATM-I352T- ADICHQVF   | 201  | >ATM-I352T- ADTCHQVF   | 680   | 479   |
| >ATM-I352T- MADICHQV   | 213  | >ATM-I352T- MADTCHQV   | 213   | 0     |
| >ATM-I352T- MADICHQV   | 149  | >ATM-I352T- MADTCHQV   | 204   | 55    |
| >ATM-I352T- MADICHQV   | 49   | >ATM-I352T- MADTCHQV   | 48    | 1     |
| >ATM-I352T- MADICHQV   | 298  | >ATM-I352T- MADTCHQV   | 237   | 61    |
| >ATM-I352T- MADICHQV   | 67   | >ATM-I352T- MADTCHQV   | 68    | 1     |
| >ATM-I352T- MADICHQVF  | 373  | >ATM-I352T- MADTCHQVF  | 145   | 228   |
| >ATM-I352T- MADICHQVF  | 19   | >ATM-I352T- MADTCHQVF  | 72    | 53    |
| >ATM-I352T- MADICHQVF  | 31   | >ATM-I352T- MADTCHQVF  | 32    | 1     |
| >ATM-I352T- MADICHQVF  | 214  | >ATM-I352T- MADTCHQVF  | 146   | 68    |
| >ATM-I352T- MADICHQVF  | 523  | >ATM-I352T- MADTCHQVF  | 286   | 237   |



|                        |     |                        |     |     |
|------------------------|-----|------------------------|-----|-----|
| >ATM-I352T- LMADICHQV  | 8   | >ATM-I352T- LMADTCHQV  | 10  | 2   |
| >ATM-I352T- LMADICHQ   | 55  | >ATM-I352T- LMADTCHQ   | 240 | 185 |
| >ATM-I352T- LMADICHQV  | 2   | >ATM-I352T- LMADTCHQV  | 3   | 1   |
| >ATM-I352T- LMADICHQV  | 68  | >ATM-I352T- LMADTCHQV  | 333 | 265 |
| >ATM-I352T- LMADICHQV  | 2   | >ATM-I352T- LMADTCHQV  | 3   | 1   |
| >ATM-I352T- LMADICHQV  | 6   | >ATM-I352T- LMADTCHQV  | 7   | 1   |
| >ATM-I352T- LMADICHQ   | 401 | >ATM-I352T- LMADTCHQ   | 702 | 301 |
| >ATM-I352T- LMADICHQV  | 2   | >ATM-I352T- LMADTCHQV  | 2   | 0   |
| >ATM-I352T- LMADICHQV  | 4   | >ATM-I352T- LMADTCHQV  | 3   | 1   |
| >ATM-I352T- LMADICHQ   | 213 | >ATM-I352T- LMADTCHQ   | 261 | 48  |
| >ATM-I352T- LMADICHQV  | 5   | >ATM-I352T- LMADTCHQV  | 5   | 0   |
| >ATM-I352T- LMADICHQV  | 2   | >ATM-I352T- LMADTCHQV  | 2   | 0   |
| >ATM-I352T- LMADICHQ   | 7   | >ATM-I352T- LMADTCHQ   | 8   | 1   |
| >ATM-I352T- LMADICHQV  | 1   | >ATM-I352T- LMADTCHQV  | 1   | 0   |
| >ATM-I352T- LMADICHQV  | 185 | >ATM-I352T- LMADTCHQV  | 176 | 9   |
| >ATM-I352T- LMADICHQV  | 492 | >ATM-I352T- LMADTCHQV  | 494 | 2   |
| >ATM-I352T- LMADICHQV  | 62  | >ATM-I352T- LMADTCHQV  | 844 | 782 |
| >ATM-I352T- LMADICHQV  | 29  | >ATM-I352T- LMADTCHQV  | 32  | 3   |
| >ATM-I352T- LMADICHQ   | 614 | >ATM-I352T- LMADTCHQ   | 379 | 235 |
| >ATM-I352T- LMADICHQV  | 27  | >ATM-I352T- LMADTCHQV  | 22  | 5   |
| >ATM-I352T- LMADICHQV  | 596 | >ATM-I352T- LMADTCHQV  | 276 | 320 |
| >ATM-I352T- LMADICHQV  | 10  | >ATM-I352T- LMADTCHQV  | 6   | 4   |
| >ATM-I352T- LMADICHQV  | 558 | >ATM-I352T- LMADTCHQV  | 254 | 304 |
| >ATM-I352T- LMADICHQV  | 235 | >ATM-I352T- LMADTCHQV  | 141 | 94  |
| >ATM-I352T- ELMADICHQ\ | 51  | >ATM-I352T- ELMADTCHQ  | 70  | 19  |
| >ATM-I352T- ELMADICHQ\ | 51  | >ATM-I352T- ELMADTCHQ  | 58  | 7   |
| >ATM-I352T- ELMADICHQ\ | 28  | >ATM-I352T- ELMADTCHQ  | 30  | 2   |
| >ATM-I352T- ELMADICHQ\ | 192 | >ATM-I352T- ELMADTCHQ  | 227 | 35  |
| >ATM-I352T- ELMADICHQ\ | 4   | >ATM-I352T- ELMADTCHQ  | 6   | 2   |
| >ATM-I352T- ELMADICHQ\ | 11  | >ATM-I352T- ELMADTCHQ  | 10  | 1   |
| >ATM-I352T- ELMADICHQ\ | 9   | >ATM-I352T- ELMADTCHQ  | 10  | 1   |
| >ATM-I352T- ELMADICHQ\ | 2   | >ATM-I352T- ELMADTCHQ  | 2   | 0   |
| >ATM-I352T- ELMADICHQ  | 141 | >ATM-I352T- ELMADTCHQ  | 382 | 241 |
| >ATM-I352T- ELMADICHQ\ | 2   | >ATM-I352T- ELMADTCHQ  | 2   | 0   |
| >ATM-I352T- ELMADICHQ\ | 112 | >ATM-I352T- ELMADTCHQ  | 122 | 10  |
| >ATM-I352T- ELMADICHQ\ | 26  | >ATM-I352T- ELMADTCHQ  | 32  | 6   |
| >ATM-I352T- ELMADICHQ\ | 6   | >ATM-I352T- ELMADTCHQ  | 5   | 1   |
| >ATM-I352T- ELMADICHQ\ | 66  | >ATM-I352T- ELMADTCHQ  | 62  | 4   |
| >ATM-I352T- ELMADICHQ\ | 372 | >ATM-I352T- ELMADTCHQ  | 247 | 125 |
| >ATM-I352T- ELMADICHQ\ | 69  | >ATM-I352T- ELMADTCHQ  | 48  | 21  |
| >ATM-I352T- IELMADIC   | 319 | >ATM-I352T- IELMADTC   | 478 | 159 |
| >ATM-I352T- IELMADICHQ | 23  | >ATM-I352T- IELMADTCHC | 22  | 1   |
| >ATM-I352T- IELMADICH  | 346 | >ATM-I352T- IELMADTCH  | 587 | 241 |

|                        |      |                        |       |       |
|------------------------|------|------------------------|-------|-------|
| >ATM-I352T- IELMADICHQ | 148  | >ATM-I352T- IELMADTCHC | 190   | 42    |
| >ATM-I352T- IELMADICHQ | 234  | >ATM-I352T- IELMADTCHC | 439   | 205   |
| >ATM-I352T- IELMADICHQ | 256  | >ATM-I352T- IELMADTCHC | 299   | 43    |
| >ATM-I352T- IELMADICHQ | 20   | >ATM-I352T- IELMADTCHC | 23    | 3     |
| >ATM-I352T- NLIELMADI  | 71   | >ATM-I352T- NLIELMADT  | 1527  | 1456  |
| >ATM-I352T- NLIELMADI  | 43   | >ATM-I352T- NLIELMADT  | 459   | 416   |
| >ATM-I352T- NLIELMADI  | 9    | >ATM-I352T- NLIELMADT  | 84    | 75    |
| >ATM-I352T- NLIELMADI  | 59   | >ATM-I352T- NLIELMADT  | 830   | 771   |
| >ATM-I352T- NLIELMADI  | 96   | >ATM-I352T- NLIELMADT  | 2868  | 2772  |
| >ATM-I352T- NLIELMADIC | 2343 | >ATM-I352T- NLIELMADTC | 472   | 1871  |
| >ATM-I352T- NLIELMADI  | 31   | >ATM-I352T- NLIELMADT  | 2036  | 2005  |
| >ATM-I352T- NLIELMADIC | 855  | >ATM-I352T- NLIELMADTC | 187   | 668   |
| >ATM-I352T- NLIELMADI  | 159  | >ATM-I352T- NLIELMADT  | 1799  | 1640  |
| >ATM-I352T- NLIELMADI  | 227  | >ATM-I352T- NLIELMADT  | 5032  | 4805  |
| >ATM-I352T- NLIELMADI  | 141  | >ATM-I352T- NLIELMADT  | 3549  | 3408  |
| >ATM-K1454 KSGLGGAWA   | 478  | >ATM-K1454 NSGLGGAWA   | 1857  | 1379  |
| >ATM-K1454 KSGLGGAWA   | 225  | >ATM-K1454 NSGLGGAWA   | 10254 | 10029 |
| >ATM-K1454 KSGLGGAWA   | 138  | >ATM-K1454 NSGLGGAWA   | 8057  | 7919  |
| >ATM-K1454 KSGLGGAWA   | 8511 | >ATM-K1454 NSGLGGAWA   | 345   | 8166  |
| >ATM-K1454 KSGLGGAWA   | 313  | >ATM-K1454 NSGLGGAWA   | 3993  | 3680  |
| >ATM-K1454 KSGLGGAW    | 26   | >ATM-K1454 NSGLGGAW    | 621   | 595   |
| >ATM-K1454 KSGLGGAWA   | 13   | >ATM-K1454 NSGLGGAWA   | 276   | 263   |
| >ATM-K1454 KSGLGGAWA   | 430  | >ATM-K1454 NSGLGGAWA   | 15297 | 14867 |
| >ATM-K1454 KSGLGGAW    | 221  | >ATM-K1454 NSGLGGAW    | 5730  | 5509  |
| >ATM-K1454 KSGLGGAW    | 25   | >ATM-K1454 NSGLGGAW    | 3598  | 3573  |
| >ATM-K1454 KSGLGGAWA   | 70   | >ATM-K1454 NSGLGGAWA   | 10321 | 10251 |
| >ATM-K1454 KSGLGGAWA   | 250  | >ATM-K1454 NSGLGGAWA   | 1630  | 1380  |
| >ATM-K1454 IKSGLGGAWA  | 11   | >ATM-K1454 INSGLGGAWA  | 662   | 651   |
| >ATM-K1454 IKSGLGGAW   | 38   | >ATM-K1454 INSGLGGAW   | 146   | 108   |
| >ATM-K1454 LLKDIKSGL   | 3799 | >ATM-K1454 LLKDINSGL   | 492   | 3307  |
| >ATM-K1454 LLKDIKSGL   | 29   | >ATM-K1454 LLKDINSGL   | 6     | 23    |
| >ATM-K1454 LLKDIKSGL   | 14   | >ATM-K1454 LLKDINSGL   | 5     | 9     |
| >ATM-K1454 LLKDIKSGL   | 161  | >ATM-K1454 LLKDINSGL   | 97    | 64    |
| >ATM-K1454 LLKDIKSGL   | 296  | >ATM-K1454 LLKDINSGL   | 72    | 224   |
| >ATM-K1454 LLKDIKSGL   | 1231 | >ATM-K1454 LLKDINSGL   | 231   | 1000  |
| >ATM-K1454 LLKDIKSGL   | 3    | >ATM-K1454 LLKDINSGL   | 3     | 0     |
| >ATM-K1454 LLKDIKSGL   | 1577 | >ATM-K1454 LLKDINSGL   | 484   | 1093  |
| >ATM-K1454 LLLKDIKSGL  | 271  | >ATM-K1454 LLLKDINSGL  | 94    | 177   |
| >ATM-K1454 LLLKDIKSGL  | 53   | >ATM-K1454 LLLKDINSGL  | 25    | 28    |
| >ATM-K1454 LLLKDIKSGL  | 89   | >ATM-K1454 LLLKDINSGL  | 55    | 34    |
| >ATM-K1454 LLLKDIKSGL  | 478  | >ATM-K1454 LLLKDINSGL  | 158   | 320   |
| >ATM-K1454 LLLKDIKSGL  | 7    | >ATM-K1454 LLLKDINSGL  | 6     | 1     |
| >ATM-K1454 LLLKDIKSGL  | 18   | >ATM-K1454 LLLKDINSGL  | 7     | 11    |

|                        |       |                        |       |       |
|------------------------|-------|------------------------|-------|-------|
| >ATM-K1454 LLLKDIKSGL  | 20    | >ATM-K1454 LLLKDINSGL  | 12    | 8     |
| >ATM-K1454 LLLKDIKSGL  | 14    | >ATM-K1454 LLLKDINSGL  | 6     | 8     |
| >ATM-K1454 LLLKDIKSGL  | 4     | >ATM-K1454 LLLKDINSGL  | 4     | 0     |
| >ATM-K1454 SLLLKDIKSGL | 506   | >ATM-K1454 SLLLKDINSGL | 181   | 325   |
| >ATM-K1454 SLLLKDIKSGL | 270   | >ATM-K1454 SLLLKDINSGL | 113   | 157   |
| >ATM-K1454 SLLLKDIKSGL | 783   | >ATM-K1454 SLLLKDINSGL | 397   | 386   |
| >ATM-K1454 SLLLKDIKSGL | 35    | >ATM-K1454 SLLLKDINSGL | 29    | 6     |
| >ATM-K1454 SLLLKDIKSGL | 58    | >ATM-K1454 SLLLKDINSGL | 30    | 28    |
| >ATM-K1454 SLLLKDIKSGL | 16    | >ATM-K1454 SLLLKDINSGL | 14    | 2     |
| >ATM-K1454 SLLLKDIKSGL | 162   | >ATM-K1454 SLLLKDINSGL | 86    | 76    |
| >ATM-K1454 SLLLKDIKSGL | 14    | >ATM-K1454 SLLLKDINSGL | 15    | 1     |
| >ATM-K1454 SLLLKDIK    | 234   | >ATM-K1454 SLLLKDIN    | 25924 | 25690 |
| >ATM-K1454 VSLLLKDIK   | 170   | >ATM-K1454 VSLLLKDIN   | 27019 | 26849 |
| >ATM-K1454 FVSLLLKDIK  | 128   | >ATM-K1454 FVSLLLKDIN  | 34474 | 34346 |
| >ATM-K1454 FVSLLLKDIK  | 105   | >ATM-K1454 FVSLLLKDIN  | 23812 | 23707 |
| >ATM-K1994 KEETGISL    | 84    | >ATM-K1994 EEETGISL    | 37    | 47    |
| >ATM-K1994 KEETGISL    | 9     | >ATM-K1994 EEETGISL    | 28    | 19    |
| >ATM-K1994 KEETGISLQDI | 25    | >ATM-K1994 EEETGISLQDI | 147   | 122   |
| >ATM-K1994 KEETGISL    | 258   | >ATM-K1994 EEETGISL    | 1924  | 1666  |
| >ATM-K1994 KEETGISLQDI | 20    | >ATM-K1994 EEETGISLQDI | 356   | 336   |
| >ATM-K1994 SKEETGIS    | 26664 | >ATM-K1994 SEEETGIS    | 251   | 26413 |
| >ATM-K1994 SKEETGISL   | 17710 | >ATM-K1994 SEEETGISL   | 375   | 17335 |
| >ATM-K1994 SKEETGISL   | 296   | >ATM-K1994 SEEETGISL   | 6985  | 6689  |
| >ATM-K1994 SKEETGISL   | 17782 | >ATM-K1994 SEEETGISL   | 178   | 17604 |
| >ATM-K1994 SKEETGISL   | 49    | >ATM-K1994 SEEETGISL   | 123   | 74    |
| >ATM-K1994 SKEETGISL   | 10785 | >ATM-K1994 SEEETGISL   | 10    | 10775 |
| >ATM-K1994 SKEETGISL   | 28519 | >ATM-K1994 SEEETGISL   | 219   | 28300 |
| >ATM-K1994 SKEETGISL   | 24746 | >ATM-K1994 SEEETGISL   | 489   | 24257 |
| >ATM-K1994 TTISSLSEKSK | 22    | >ATM-K1994 TTISSLSEKSE | 19135 | 19113 |
| >ATM-K1994 TTISSLSEKSK | 9     | >ATM-K1994 TTISSLSEKSE | 2212  | 2203  |
| >ATM-K1994 TTISSLSEKSK | 472   | >ATM-K1994 TTISSLSEKSE | 10909 | 10437 |
| >ATM-K1994 KSKEETGI    | 218   | >ATM-K1994 KSEEETGI    | 9872  | 9654  |
| >ATM-K1994 KSKEETGIS   | 495   | >ATM-K1994 KSEEETGIS   | 13000 | 12505 |
| >ATM-K1994 KSKEETGISL  | 22    | >ATM-K1994 KSEEETGISL  | 3518  | 3496  |
| >ATM-K1994 KSKEETGISLC | 198   | >ATM-K1994 KSEEETGISLC | 9346  | 9148  |
| >ATM-K1994 KSKEETGISL  | 380   | >ATM-K1994 KSEEETGISL  | 4395  | 4015  |
| >ATM-K1994 KSKEETGI    | 76    | >ATM-K1994 KSEEETGI    | 195   | 119   |
| >ATM-K1994 KSKEETGISL  | 20    | >ATM-K1994 KSEEETGISL  | 40    | 20    |
| >ATM-K1994 KSKEETGI    | 191   | >ATM-K1994 KSEEETGI    | 110   | 81    |
| >ATM-K1994 EKSKEETGISL | 189   | >ATM-K1994 EKSEEETGISL | 306   | 117   |
| >ATM-K1994 EKSKEETGISL | 728   | >ATM-K1994 EKSEEETGISL | 325   | 403   |
| >ATM-K1994 SEKSKEETGI  | 267   | >ATM-K1994 SEKSEEETGI  | 366   | 99    |
| >ATM-K1994 SEKSKEET    | 437   | >ATM-K1994 SEKSEEET    | 344   | 93    |

|                          |       |                          |       |       |
|--------------------------|-------|--------------------------|-------|-------|
| >ATM-K1994 SEKSKEETGI    | 52    | >ATM-K1994 SEKSEETGI     | 37    | 15    |
| >ATM-K1994 LSEKSKEETGI   | 228   | >ATM-K1994 LSEKSEETGI    | 297   | 69    |
| >ATM-K1994 SLSEKSKEET    | 1249  | >ATM-K1994 SLSEKSEET     | 391   | 858   |
| >ATM-K1994 SLSEKSKEET    | 405   | >ATM-K1994 SLSEKSEET     | 209   | 196   |
| >ATM-K1994 SLSEKSKEET    | 844   | >ATM-K1994 SLSEKSEET     | 259   | 585   |
| >ATM-K1994 SLSEKSKEET    | 92    | >ATM-K1994 SLSEKSEET     | 57    | 35    |
| >ATM-K1994 SSLSEKSK      | 59    | >ATM-K1994 SSLSEKSE      | 25593 | 25534 |
| >ATM-K1994 SSLSEKSK      | 335   | >ATM-K1994 SSLSEKSE      | 15593 | 15258 |
| >ATM-K1994 SSLSEKSK      | 237   | >ATM-K1994 SSLSEKSE      | 8358  | 8121  |
| >ATM-K1994 ISSLSEKSK     | 358   | >ATM-K1994 ISSLSEKSE     | 26867 | 26509 |
| >ATM-K1994 TISSLSEKSK    | 482   | >ATM-K1994 TISSLSEKSE    | 28310 | 27828 |
| >ATM-K1994 TISSLSEKSK    | 62    | >ATM-K1994 TISSLSEKSE    | 32619 | 32557 |
| >ATM-K1994 TISSLSEKSK    | 113   | >ATM-K1994 TISSLSEKSE    | 27849 | 27736 |
| >ATM-K2717 KGRDDLROD     | 254   | >ATM-K2717 MGRDDLROD     | 1141  | 887   |
| >ATM-K2717 VKGRDDLROD    | 30883 | >ATM-K2717 VMGRDDLROD    | 66    | 30817 |
| >ATM-K2717 LVKGRDDLROD   | 166   | >ATM-K2717 LVMGRDDLROD   | 323   | 157   |
| >ATM-K2717 LVKGRDDLROD   | 265   | >ATM-K2717 LVMGRDDLROD   | 244   | 21    |
| >ATM-K2717 LVKGRDDLROD   | 59    | >ATM-K2717 LVMGRDDLROD   | 19    | 40    |
| >ATM-K2717 QLVKGRDDLROD  | 451   | >ATM-K2717 QLVVMGRDDLROD | 234   | 217   |
| >ATM-K2717 QLVKGRDDLROD  | 554   | >ATM-K2717 QLVVMGRDDLROD | 146   | 408   |
| >ATM-K2717 RQLVKGRDDLROD | 39    | >ATM-K2717 RQLVMGRDDLROD | 36    | 3     |
| >ATM-K2717 RQLVKGRDDLROD | 122   | >ATM-K2717 RQLVMGRDDLROD | 83    | 39    |
| >ATM-K2717 RQLVKGRDDLROD | 374   | >ATM-K2717 RQLVMGRDDLROD | 221   | 153   |
| >ATM-K2717 RQLVKGRDDLROD | 303   | >ATM-K2717 RQLVMGRDDLROD | 247   | 56    |
| >ATM-K2717 RRQLVKGRDI    | 56    | >ATM-K2717 RRQLVMGRDI    | 53    | 3     |
| >ATM-K2717 RRQLVKGRDI    | 194   | >ATM-K2717 RRQLVMGRDI    | 162   | 32    |
| >ATM-K2717 RRQLVKGRDI    | 108   | >ATM-K2717 RRQLVMGRDI    | 101   | 7     |
| >ATM-K2717 RRQLVKGRDI    | 223   | >ATM-K2717 RRQLVMGRDI    | 237   | 14    |
| >ATM-K2717 RRQLVKGRDI    | 102   | >ATM-K2717 RRQLVMGRDI    | 74    | 28    |
| >ATM-K2717 RRQLVKGRDI    | 20    | >ATM-K2717 RRQLVMGRDI    | 21    | 1     |
| >ATM-K2717 RRQLVKGRDI    | 981   | >ATM-K2717 RRQLVMGRDI    | 383   | 598   |
| >ATM-K2717 RRQLVKGRDI    | 482   | >ATM-K2717 RRQLVMGRDI    | 238   | 244   |
| >ATM-K2717 RRQLVKGRDI    | 14    | >ATM-K2717 RRQLVMGRDI    | 15    | 1     |
| >ATM-K2717 RRQLVKGRDI    | 591   | >ATM-K2717 RRQLVMGRDI    | 490   | 101   |
| >ATM-K2717 ERRQLVKGRDI   | 562   | >ATM-K2717 ERRQLVMGRDI   | 374   | 188   |
| >ATM-K2717 KERRQLVK      | 3059  | >ATM-K2717 KERRQLVM      | 131   | 2928  |
| >ATM-K2717 KERRQLVK      | 11    | >ATM-K2717 KERRQLVM      | 648   | 637   |
| >ATM-K2717 KERRQLVK      | 5571  | >ATM-K2717 KERRQLVM      | 314   | 5257  |
| >ATM-K2717 KERRQLVK      | 2012  | >ATM-K2717 KERRQLVM      | 52    | 1960  |
| >ATM-K2717 KERRQLVKGF    | 202   | >ATM-K2717 KERRQLVMG     | 170   | 32    |
| >ATM-K3018 KGVEEGTVLS    | 180   | >ATM-K3018 NGVEEGTVLS    | 753   | 573   |
| >ATM-K3018 LKGVEEGTVL    | 346   | >ATM-K3018 LNGVEEGTVL    | 7965  | 7619  |
| >ATM-K3018 RVLMLRQEKI    | 132   | >ATM-K3018 RVLMLRQEKI    | 17328 | 17196 |

|                          |      |                          |       |       |
|--------------------------|------|--------------------------|-------|-------|
| >ATM-K3018 RVLMLRQEKI    | 60   | >ATM-K3018 RVLMLRQEKI    | 20113 | 20053 |
| >ATM-K3018 RVLMLRQEKI    | 10   | >ATM-K3018 RVLMLRQEKI    | 3090  | 3080  |
| >ATM-K3018 RVLMLRQEKI    | 130  | >ATM-K3018 RVLMLRQEKI    | 8601  | 8471  |
| >ATM-K3018 KLKGVVEEGLV   | 1177 | >ATM-K3018 KLNGVVEEGLV   | 404   | 773   |
| >ATM-K3018 KLKGVVEEGLV   | 3793 | >ATM-K3018 KLNGVVEEGLV   | 465   | 3328  |
| >ATM-K3018 KLKGVVEEGLV   | 2330 | >ATM-K3018 KLNGVVEEGLV   | 381   | 1949  |
| >ATM-K3018 KLKGVVEEGLV   | 97   | >ATM-K3018 KLNGVVEEGLV   | 72    | 25    |
| >ATM-K3018 KLKGVVEEGLV   | 125  | >ATM-K3018 KLNGVVEEGLV   | 16    | 109   |
| >ATM-K3018 KLKGVVEEGLV   | 57   | >ATM-K3018 KLNGVVEEGLV   | 67    | 10    |
| >ATM-K3018 KLKGVVEEGLV   | 147  | >ATM-K3018 KLNGVVEEGLV   | 76    | 71    |
| >ATM-K3018 KLKGVVEEGLV   | 1499 | >ATM-K3018 KLNGVVEEGLV   | 52    | 1447  |
| >ATM-K3018 KLKGVVEEGLV   | 28   | >ATM-K3018 KLNGVVEEGLV   | 4     | 24    |
| >ATM-K3018 KLKGVVEEGLV   | 262  | >ATM-K3018 KLNGVVEEGLV   | 13    | 249   |
| >ATM-K3018 KLKGVVEEGLV   | 118  | >ATM-K3018 KLNGVVEEGLV   | 16    | 102   |
| >ATM-K3018 KLKGVVEEGLV   | 1145 | >ATM-K3018 KLNGVVEEGLV   | 114   | 1031  |
| >ATM-K3018 KLKGVVEEGLV   | 7314 | >ATM-K3018 KLNGVVEEGLV   | 269   | 7045  |
| >ATM-K3018 KLKGVVEEGLV   | 95   | >ATM-K3018 KLNGVVEEGLV   | 11    | 84    |
| >ATM-K3018 KLKGVVEEGLV   | 1015 | >ATM-K3018 KLNGVVEEGLV   | 27    | 988   |
| >ATM-K3018 KLKGVVEEGLV   | 2285 | >ATM-K3018 KLNGVVEEGLV   | 39    | 2246  |
| >ATM-K3018 KLKGVVEEGLV   | 9701 | >ATM-K3018 KLNGVVEEGLV   | 280   | 9421  |
| >ATM-K3018 KLKGVVEEGLV   | 1414 | >ATM-K3018 KLNGVVEEGLV   | 279   | 1135  |
| >ATM-K3018 KLKGVVEEGLV   | 6    | >ATM-K3018 KLNGVVEEGLV   | 4     | 2     |
| >ATM-K3018 KLKGVVEEGLV   | 27   | >ATM-K3018 KLNGVVEEGLV   | 11    | 16    |
| >ATM-K3018 KLKGVVEEGLV   | 684  | >ATM-K3018 KLNGVVEEGLV   | 81    | 603   |
| >ATM-K3018 QEKLVVEEGLV   | 195  | >ATM-K3018 QEKLVVEEGLV   | 49    | 146   |
| >ATM-K3018 LQEKLVVEEGLV  | 517  | >ATM-K3018 LQEKLVVEEGLV  | 82    | 435   |
| >ATM-K3018 RLQEKLVVEEGLV | 100  | >ATM-K3018 RLQEKLVVEEGLV | 19    | 81    |
| >ATM-K3018 RLQEKLVVEEGLV | 106  | >ATM-K3018 RLQEKLVVEEGLV | 9     | 97    |
| >ATM-K3018 RLQEKLVVEEGLV | 5    | >ATM-K3018 RLQEKLVVEEGLV | 3     | 2     |
| >ATM-K3018 RLQEKLVVEEGLV | 88   | >ATM-K3018 RLQEKLVVEEGLV | 12    | 76    |
| >ATM-K3018 RLQEKLVVEEGLV | 3    | >ATM-K3018 RLQEKLVVEEGLV | 2     | 1     |
| >ATM-K3018 RLQEKLVVEEGLV | 3    | >ATM-K3018 RLQEKLVVEEGLV | 2     | 1     |
| >ATM-K3018 RLQEKLVVEEGLV | 20   | >ATM-K3018 RLQEKLVVEEGLV | 10    | 10    |
| >ATM-K3018 RLQEKLVVEEGLV | 14   | >ATM-K3018 RLQEKLVVEEGLV | 6     | 8     |
| >ATM-K3018 RLQEKLVVEEGLV | 2    | >ATM-K3018 RLQEKLVVEEGLV | 2     | 0     |
| >ATM-K3018 MRLQEKLK      | 157  | >ATM-K3018 MRLQEKLK      | 4151  | 3994  |
| >ATM-K3018 LMRLQEKLK     | 1814 | >ATM-K3018 LMRLQEKLK     | 361   | 1453  |
| >ATM-K3018 LMRLQEKLK     | 70   | >ATM-K3018 LMRLQEKLK     | 41    | 29    |
| >ATM-K3018 LMRLQEKLK     | 115  | >ATM-K3018 LMRLQEKLK     | 88    | 27    |
| >ATM-K3018 LMRLQEKLK     | 338  | >ATM-K3018 LMRLQEKLK     | 97    | 241   |
| >ATM-K3018 LMRLQEKLK     | 942  | >ATM-K3018 LMRLQEKLK     | 394   | 548   |
| >ATM-K3018 LMRLQEKLK     | 9    | >ATM-K3018 LMRLQEKLK     | 7     | 2     |
| >ATM-K3018 LMRLQEKLK     | 26   | >ATM-K3018 LMRLQEKLK     | 8840  | 8814  |

|                         |      |                        |       |       |
|-------------------------|------|------------------------|-------|-------|
| >ATM-K3018 VLMRLQEKLK   | 129  | >ATM-K3018 VLMRLQEKLK  | 25542 | 25413 |
| >ATM-K3018 VLMRLQEKLK   | 314  | >ATM-K3018 VLMRLQEKLK  | 35487 | 35173 |
| >ATM-L1322 LKSENLLGKQ   | 208  | >ATM-L1322 IKSENLLGKQI | 134   | 74    |
| >ATM-L1322 MLKSENLL     | 8    | >ATM-L1322 MIKSENLL    | 80    | 72    |
| >ATM-L1322 MLKSENLL     | 30   | >ATM-L1322 MIKSENLL    | 307   | 277   |
| >ATM-L1322 MLKSENLL     | 12   | >ATM-L1322 MIKSENLL    | 980   | 968   |
| >ATM-L1322 MLKSENLLGK   | 42   | >ATM-L1322 MIKSENLLGK  | 56    | 14    |
| >ATM-L1322 MLKSENLLGK   | 157  | >ATM-L1322 MIKSENLLGK  | 80    | 77    |
| >ATM-L1322 MLKSENLL     | 1330 | >ATM-L1322 MIKSENLL    | 445   | 885   |
| >ATM-L1322 MLKSENLLGK   | 15   | >ATM-L1322 MIKSENLLGK  | 9     | 6     |
| >ATM-L1322 MLKSENLLGK   | 931  | >ATM-L1322 MIKSENLLGK  | 128   | 803   |
| >ATM-L1322 MLKSENLL     | 367  | >ATM-L1322 MIKSENLL    | 991   | 624   |
| >ATM-L1322 RETATKVYDM   | 413  | >ATM-L1322 RETATKVYDM  | 21    | 392   |
| >ATM-L1322 RETATKVYDM   | 5    | >ATM-L1322 RETATKVYDM  | 10    | 5     |
| >ATM-L1322 RETATKVYDM   | 81   | >ATM-L1322 RETATKVYDM  | 169   | 88    |
| >ATM-L1322 RETATKVYDM   | 79   | >ATM-L1322 RETATKVYDM  | 14    | 65    |
| >ATM-L1322 DMLKSEN      | 352  | >ATM-L1322 DMIKSEN     | 3116  | 2764  |
| >ATM-L1322 DMLKSEN      | 266  | >ATM-L1322 DMIKSEN     | 4929  | 4663  |
| >ATM-L1322 DMLKSENLLC   | 1092 | >ATM-L1322 DMIKSENLLG  | 149   | 943   |
| >ATM-L1322 YDMLKSEN     | 151  | >ATM-L1322 YDMIKSEN    | 227   | 76    |
| >ATM-L1322 YDMLKSENLL   | 424  | >ATM-L1322 YDMIKSENLL  | 417   | 7     |
| >ATM-L1322 VYDMLKSENI   | 371  | >ATM-L1322 VYDMIKSEN   | 345   | 26    |
| >ATM-L1322 VYDMLKSENI   | 368  | >ATM-L1322 VYDMIKSEN   | 360   | 8     |
| >ATM-L1322 KVVYDMLKSENI | 123  | >ATM-L1322 KVVYDMIKSEN | 162   | 39    |
| >ATM-L1322 KVVYDMLKSENI | 197  | >ATM-L1322 KVVYDMIKSEN | 193   | 4     |
| >ATM-L1322 KVVYDMLKSENI | 68   | >ATM-L1322 KVVYDMIKSEN | 72    | 4     |
| >ATM-L1322 KVVYDMLKSENI | 74   | >ATM-L1322 KVVYDMIKSEN | 77    | 3     |
| >ATM-L1322 KVVYDMLKSENI | 82   | >ATM-L1322 KVVYDMIKSEN | 98    | 16    |
| >ATM-L1322 KVVYDMLKSENI | 139  | >ATM-L1322 KVVYDMIKSEN | 71    | 68    |
| >ATM-L1322 KVVYDMLKSENI | 520  | >ATM-L1322 KVVYDMIKSEN | 319   | 201   |
| >ATM-L1322 KVVYDMLKSENI | 77   | >ATM-L1322 KVVYDMIKSEN | 53    | 24    |
| >ATM-L1322 KVVYDMLKSENI | 32   | >ATM-L1322 KVVYDMIKSEN | 34    | 2     |
| >ATM-L1322 KVVYDMLKSENI | 22   | >ATM-L1322 KVVYDMIKSEN | 18    | 4     |
| >ATM-L1322 ATKVVYDMLK   | 340  | >ATM-L1322 ATKVVYDMLK  | 1726  | 1386  |
| >ATM-L1322 ATKVVYDMLK   | 21   | >ATM-L1322 ATKVVYDMLK  | 49    | 28    |
| >ATM-L1322 ATKVVYDML    | 395  | >ATM-L1322 ATKVVYDML   | 133   | 262   |
| >ATM-L1322 ATKVVYDMLK   | 4    | >ATM-L1322 ATKVVYDMLK  | 4     | 0     |
| >ATM-L1322 ATKVVYDMLK   | 496  | >ATM-L1322 ATKVVYDMLK  | 467   | 29    |
| >ATM-L1322 ATKVVYDMLK   | 69   | >ATM-L1322 ATKVVYDMLK  | 253   | 184   |
| >ATM-L1322 ATKVVYDMLK   | 133  | >ATM-L1322 ATKVVYDMLK  | 506   | 373   |
| >ATM-L1322 ATKVVYDML    | 128  | >ATM-L1322 ATKVVYDML   | 695   | 567   |
| >ATM-L1322 ATKVVYDMLK   | 134  | >ATM-L1322 ATKVVYDMLK  | 158   | 24    |
| >ATM-L1322 ATKVVYDML    | 2794 | >ATM-L1322 ATKVVYDML   | 126   | 2668  |

|                        |       |                        |       |       |
|------------------------|-------|------------------------|-------|-------|
| >ATM-L1322 TATKVYDMLI  | 44    | >ATM-L1322 TATKVYDMIK  | 86    | 42    |
| >ATM-L1322 TATKVYDMLI  | 25    | >ATM-L1322 TATKVYDMIK  | 81    | 56    |
| >ATM-L1322 TATKVYDML   | 149   | >ATM-L1322 TATKVYDMI   | 75    | 74    |
| >ATM-L1322 TATKVYDML   | 5228  | >ATM-L1322 TATKVYDMI   | 268   | 4960  |
| >ATM-L1322 ETATKVYDMI  | 106   | >ATM-L1322 ETATKVYDMI  | 312   | 206   |
| >ATM-L1322 ETATKVYDMI  | 22    | >ATM-L1322 ETATKVYDMI  | 136   | 114   |
| >ATM-L1322 ETATKVYDMI  | 3     | >ATM-L1322 ETATKVYDMI  | 4     | 1     |
| >ATM-L1322 ETATKVYDMI  | 70    | >ATM-L1322 ETATKVYDMI  | 50    | 20    |
| >ATM-L1322 ETATKVYDMI  | 83    | >ATM-L1322 ETATKVYDMI  | 53    | 30    |
| >ATM-L1322 ETATKVYDMI  | 436   | >ATM-L1322 ETATKVYDMI  | 523   | 87    |
| >ATM-L1322 ETATKVYDMI  | 5719  | >ATM-L1322 ETATKVYDMI  | 436   | 5283  |
| >ATM-L1322 LKSENLLGKQ  | 208   | >ATM-L1322 PKSENLLGKQ  | 2980  | 2772  |
| >ATM-L1322 MLKSENLL    | 8     | >ATM-L1322 MPKSENLL    | 20880 | 20872 |
| >ATM-L1322 MLKSENLL    | 30    | >ATM-L1322 MPKSENLL    | 19391 | 19361 |
| >ATM-L1322 MLKSENLL    | 12    | >ATM-L1322 MPKSENLL    | 30768 | 30756 |
| >ATM-L1322 MLKSENLLGK  | 42    | >ATM-L1322 MPKSENLLGK  | 5139  | 5097  |
| >ATM-L1322 MLKSENLLGK  | 157   | >ATM-L1322 MPKSENLLGK  | 8041  | 7884  |
| >ATM-L1322 MLKSENLLGK  | 15    | >ATM-L1322 MPKSENLLGK  | 5130  | 5115  |
| >ATM-L1322 MLKSENLL    | 18253 | >ATM-L1322 MPKSENLL    | 402   | 17851 |
| >ATM-L1322 MLKSENLL    | 367   | >ATM-L1322 MPKSENLL    | 392   | 25    |
| >ATM-L1322 MLKSENLL    | 29996 | >ATM-L1322 MPKSENLL    | 364   | 29632 |
| >ATM-L1322 RETATKVYDM  | 413   | >ATM-L1322 RETATKVYDM  | 16276 | 15863 |
| >ATM-L1322 RETATKVYDM  | 5     | >ATM-L1322 RETATKVYDM  | 270   | 265   |
| >ATM-L1322 RETATKVYDM  | 81    | >ATM-L1322 RETATKVYDM  | 3763  | 3682  |
| >ATM-L1322 RETATKVYDM  | 79    | >ATM-L1322 RETATKVYDM  | 3556  | 3477  |
| >ATM-L1322 DMLKSEN     | 352   | >ATM-L1322 DMPKSEN     | 3824  | 3472  |
| >ATM-L1322 DMLKSEN     | 266   | >ATM-L1322 DMPKSEN     | 6029  | 5763  |
| >ATM-L1322 YDMLKSEN    | 151   | >ATM-L1322 YDMPKSEN    | 829   | 678   |
| >ATM-L1322 YDMLKSENLL  | 424   | >ATM-L1322 YDMPKSENLL  | 465   | 41    |
| >ATM-L1322 VYDMLKSENI  | 371   | >ATM-L1322 VYDMPKSENI  | 481   | 110   |
| >ATM-L1322 VYDMLKSENI  | 368   | >ATM-L1322 VYDMPKSENI  | 639   | 271   |
| >ATM-L1322 KVVYDMLKSEI | 123   | >ATM-L1322 KVVYDMPKSEI | 274   | 151   |
| >ATM-L1322 KVVYDMLKSEI | 197   | >ATM-L1322 KVVYDMPKSEI | 331   | 134   |
| >ATM-L1322 KVVYDMLKSEI | 68    | >ATM-L1322 KVVYDMPKSEI | 113   | 45    |
| >ATM-L1322 KVVYDMLKSEI | 74    | >ATM-L1322 KVVYDMPKSEI | 112   | 38    |
| >ATM-L1322 KVVYDMLKSEI | 82    | >ATM-L1322 KVVYDMPKSEI | 328   | 246   |
| >ATM-L1322 KVVYDMLKSEI | 139   | >ATM-L1322 KVVYDMPKSEI | 99    | 40    |
| >ATM-L1322 KVVYDMLKSEI | 77    | >ATM-L1322 KVVYDMPKSEI | 116   | 39    |
| >ATM-L1322 KVVYDMLKSEI | 32    | >ATM-L1322 KVVYDMPKSEI | 25    | 7     |
| >ATM-L1322 KVVYDMLKSEI | 22    | >ATM-L1322 KVVYDMPKSEI | 19    | 3     |
| >ATM-L1322 ATKVYDMLK   | 340   | >ATM-L1322 ATKVYDMPK   | 832   | 492   |
| >ATM-L1322 ATKVYDMLK   | 21    | >ATM-L1322 ATKVYDMPK   | 26    | 5     |
| >ATM-L1322 ATKVYDML    | 395   | >ATM-L1322 ATKVYDMP    | 3363  | 2968  |

|                        |      |                        |       |       |
|------------------------|------|------------------------|-------|-------|
| >ATM-L1322 ATKVYDMLK   | 4    | >ATM-L1322 ATKVYDMPK   | 4     | 0     |
| >ATM-L1322 ATKVYDMLK   | 496  | >ATM-L1322 ATKVYDMPK   | 292   | 204   |
| >ATM-L1322 ATKVYDMLK   | 69   | >ATM-L1322 ATKVYDMPK   | 44    | 25    |
| >ATM-L1322 ATKVYDMLK   | 133  | >ATM-L1322 ATKVYDMPK   | 432   | 299   |
| >ATM-L1322 ATKVYDML    | 128  | >ATM-L1322 ATKVYDMP    | 22542 | 22414 |
| >ATM-L1322 ATKVYDMLK   | 134  | >ATM-L1322 ATKVYDMPK   | 156   | 22    |
| >ATM-L1322 TATKVYDMLI  | 44   | >ATM-L1322 TATKVYDMP   | 60    | 16    |
| >ATM-L1322 TATKVYDMLI  | 25   | >ATM-L1322 TATKVYDMP   | 34    | 9     |
| >ATM-L1322 TATKVYDML   | 149  | >ATM-L1322 TATKVYDMP   | 15163 | 15014 |
| >ATM-L1322 ETATKVYDMI  | 106  | >ATM-L1322 ETATKVYDMI  | 103   | 3     |
| >ATM-L1322 ETATKVYDMI  | 22   | >ATM-L1322 ETATKVYDMI  | 4873  | 4851  |
| >ATM-L1322 ETATKVYDMI  | 3    | >ATM-L1322 ETATKVYDMI  | 3     | 0     |
| >ATM-L1322 ETATKVYDMI  | 70   | >ATM-L1322 ETATKVYDMI  | 18300 | 18230 |
| >ATM-L1322 ETATKVYDMI  | 83   | >ATM-L1322 ETATKVYDMI  | 7625  | 7542  |
| >ATM-L1322 ETATKVYDMI  | 436  | >ATM-L1322 ETATKVYDMI  | 437   | 1     |
| >ATM-L1472 LIHYINQR    | 49   | >ATM-L1472 FIHYINQR    | 349   | 300   |
| >ATM-L1472 LIHYINQR    | 329  | >ATM-L1472 FIHYINQR    | 189   | 140   |
| >ATM-L1472 LIHYINQR    | 21   | >ATM-L1472 FIHYINQR    | 7     | 14    |
| >ATM-L1472 LIHYINQR    | 372  | >ATM-L1472 FIHYINQR    | 315   | 57    |
| >ATM-L1472 TLIHYINQR   | 57   | >ATM-L1472 TFIHYINQR   | 20    | 37    |
| >ATM-L1472 TLIHYINQR   | 147  | >ATM-L1472 TFIHYINQR   | 40    | 107   |
| >ATM-L1472 TLIHYINQR   | 17   | >ATM-L1472 TFIHYINQR   | 32    | 15    |
| >ATM-L1472 TLIHYINQR   | 494  | >ATM-L1472 TFIHYINQR   | 125   | 369   |
| >ATM-L1472 AFVLRDVIYTL | 874  | >ATM-L1472 AFVLRDVIYTF | 71    | 803   |
| >ATM-L1472 AFVLRDVIYTL | 1955 | >ATM-L1472 AFVLRDVIYTF | 274   | 1681  |
| >ATM-L1472 AFVLRDVIYTL | 489  | >ATM-L1472 AFVLRDVIYTF | 43    | 446   |
| >ATM-L1472 AFVLRDVIYTL | 480  | >ATM-L1472 AFVLRDVIYTF | 802   | 322   |
| >ATM-L1472 YTLIHYINQR  | 101  | >ATM-L1472 YTFIHYINQR  | 81    | 20    |
| >ATM-L1472 YTLIHYINQR  | 509  | >ATM-L1472 YTFIHYINQR  | 343   | 166   |
| >ATM-L1472 YTLIHYINQ   | 7076 | >ATM-L1472 YTFIHYINQ   | 221   | 6855  |
| >ATM-L1472 YTLIHYINQR  | 16   | >ATM-L1472 YTFIHYINQR  | 5     | 11    |
| >ATM-L1472 YTLIHYINQ   | 353  | >ATM-L1472 YTFIHYINQ   | 147   | 206   |
| >ATM-L1472 YTLIHYINQR  | 121  | >ATM-L1472 YTFIHYINQR  | 75    | 46    |
| >ATM-L1472 YTLIHYINQR  | 351  | >ATM-L1472 YTFIHYINQR  | 189   | 162   |
| >ATM-L1472 IYTLIHYI    | 73   | >ATM-L1472 IYTFIHYI    | 162   | 89    |
| >ATM-L1472 IYTLIHYI    | 79   | >ATM-L1472 IYTFIHYI    | 40    | 39    |
| >ATM-L1472 IYTLIHYI    | 63   | >ATM-L1472 IYTFIHYI    | 48    | 15    |
| >ATM-L1472 IYTLIHYI    | 20   | >ATM-L1472 IYTFIHYI    | 16    | 4     |
| >ATM-L1472 IYTLIHYINQR | 27   | >ATM-L1472 IYTFIHYINQR | 19    | 8     |
| >ATM-L1472 IYTLIHYINQR | 21   | >ATM-L1472 IYTFIHYINQR | 21    | 0     |
| >ATM-L1472 IYTLIHYINQR | 122  | >ATM-L1472 IYTFIHYINQR | 47    | 75    |
| >ATM-L1472 IYTLIHYINQR | 36   | >ATM-L1472 IYTFIHYINQR | 36    | 0     |
| >ATM-L1472 IYTLIHYI    | 366  | >ATM-L1472 IYTFIHYI    | 206   | 160   |



|                         |      |                        |     |      |
|-------------------------|------|------------------------|-----|------|
| >ATM-L1472 VIYTLIH Y    | 1554 | >ATM-L1472 VIYTFIHY    | 43  | 1511 |
| >ATM-L1472 VIYTLIH YI   | 206  | >ATM-L1472 VIYTFIHYI   | 38  | 168  |
| >ATM-L1472 VIYTLIH YINQ | 993  | >ATM-L1472 VIYTFIHYINQ | 284 | 709  |
| >ATM-L1472 VIYTLIH YI   | 416  | >ATM-L1472 VIYTFIHYI   | 324 | 92   |
| >ATM-L1472 VIYTLIH YI   | 21   | >ATM-L1472 VIYTFIHYI   | 16  | 5    |
| >ATM-L1472 VIYTLIH YI   | 41   | >ATM-L1472 VIYTFIHYI   | 20  | 21   |
| >ATM-L1472 VIYTLIH YI   | 13   | >ATM-L1472 VIYTFIHYI   | 11  | 2    |
| >ATM-L1472 VIYTLIH YI   | 44   | >ATM-L1472 VIYTFIHYI   | 40  | 4    |
| >ATM-L1472 VIYTLIH YI   | 3    | >ATM-L1472 VIYTFIHYI   | 2   | 1    |
| >ATM-L1472 VIYTLIH YI   | 46   | >ATM-L1472 VIYTFIHYI   | 35  | 11   |
| >ATM-L1472 VIYTLIH YI   | 14   | >ATM-L1472 VIYTFIHYI   | 16  | 2    |
| >ATM-L1472 VIYTLIH YI   | 35   | >ATM-L1472 VIYTFIHYI   | 17  | 18   |
| >ATM-L1472 VIYTLIH YI   | 8    | >ATM-L1472 VIYTFIHYI   | 6   | 2    |
| >ATM-L1472 VIYTLIH Y    | 84   | >ATM-L1472 VIYTFIHY    | 63  | 21   |
| >ATM-L1472 VIYTLIH Y    | 208  | >ATM-L1472 VIYTFIHY    | 76  | 132  |
| >ATM-L1472 VIYTLIH Y    | 49   | >ATM-L1472 VIYTFIHY    | 96  | 47   |
| >ATM-L1472 VIYTLIH Y    | 30   | >ATM-L1472 VIYTFIHY    | 25  | 5    |
| >ATM-L1472 VIYTLIH Y    | 64   | >ATM-L1472 VIYTFIHY    | 54  | 10   |
| >ATM-L1472 VIYTLIH YI   | 134  | >ATM-L1472 VIYTFIHYI   | 99  | 35   |
| >ATM-L1472 VIYTLIH YI   | 129  | >ATM-L1472 VIYTFIHYI   | 39  | 90   |
| >ATM-L1472 VIYTLIH Y    | 50   | >ATM-L1472 VIYTFIHY    | 42  | 8    |
| >ATM-L1472 VIYTLIH Y    | 153  | >ATM-L1472 VIYTFIHY    | 136 | 17   |
| >ATM-L1472 VIYTLIH Y    | 330  | >ATM-L1472 VIYTFIHY    | 85  | 245  |
| >ATM-L1472 VIYTLIH Y    | 186  | >ATM-L1472 VIYTFIHY    | 277 | 91   |
| >ATM-L1472 VIYTLIH YI   | 328  | >ATM-L1472 VIYTFIHYI   | 401 | 73   |
| >ATM-L1472 DVIYTLIH YI  | 363  | >ATM-L1472 DVIYTFIHYI  | 345 | 18   |
| >ATM-L1472 DVIYTLIH YI  | 263  | >ATM-L1472 DVIYTFIHYI  | 211 | 52   |
| >ATM-L1472 DVIYTLIH Y   | 156  | >ATM-L1472 DVIYTFIHY   | 293 | 137  |
| >ATM-L1472 DVIYTLIH Y   | 14   | >ATM-L1472 DVIYTFIHY   | 23  | 9    |
| >ATM-L1472 DVIYTLIH     | 141  | >ATM-L1472 DVIYTFIH    | 263 | 122  |
| >ATM-L1472 DVIYTLIH Y   | 2    | >ATM-L1472 DVIYTFIHY   | 3   | 1    |
| >ATM-L1472 DVIYTLIH YI  | 12   | >ATM-L1472 DVIYTFIHYI  | 27  | 15   |
| >ATM-L1472 DVIYTLIH Y   | 64   | >ATM-L1472 DVIYTFIHY   | 18  | 46   |
| >ATM-L1472 DVIYTLIH Y   | 43   | >ATM-L1472 DVIYTFIHY   | 29  | 14   |
| >ATM-L1472 DVIYTLIH     | 1768 | >ATM-L1472 DVIYTFIH    | 362 | 1406 |
| >ATM-L1472 DVIYTLIH Y   | 204  | >ATM-L1472 DVIYTFIHY   | 96  | 108  |
| >ATM-L1472 DVIYTLIH YI  | 62   | >ATM-L1472 DVIYTFIHYI  | 29  | 33   |
| >ATM-L1472 DVIYTLIH YI  | 18   | >ATM-L1472 DVIYTFIHYI  | 12  | 6    |
| >ATM-L1472 DVIYTLIH Y   | 586  | >ATM-L1472 DVIYTFIHY   | 383 | 203  |
| >ATM-L1472 RDVIYTLIH YI | 271  | >ATM-L1472 RDVIYTFIHYI | 228 | 43   |
| >ATM-L1472 RDVIYTLIH Y  | 344  | >ATM-L1472 RDVIYTFIHY  | 343 | 1    |
| >ATM-L1472 RDVIYTLIH Y  | 270  | >ATM-L1472 RDVIYTFIHY  | 353 | 83   |
| >ATM-L1472 RDVIYTLI     | 472  | >ATM-L1472 RDVIYTFI    | 275 | 197  |

|                        |      |                        |      |      |
|------------------------|------|------------------------|------|------|
| >ATM-L1472 RDVIYTLIHYI | 329  | >ATM-L1472 RDVIYTFIHYI | 329  | 0    |
| >ATM-L1472 RDVIYTLI    | 117  | >ATM-L1472 RDVIYTFI    | 84   | 33   |
| >ATM-L1472 RDVIYTLIHYI | 45   | >ATM-L1472 RDVIYTFIHYI | 30   | 15   |
| >ATM-L1472 RDVIYTLI    | 29   | >ATM-L1472 RDVIYTFI    | 33   | 4    |
| >ATM-L1472 RDVIYTLIHYI | 34   | >ATM-L1472 RDVIYTFIHYI | 31   | 3    |
| >ATM-L1472 LRDVIYTLI   | 793  | >ATM-L1472 LRDVIYTFI   | 245  | 548  |
| >ATM-L1472 LRDVIYTL    | 2406 | >ATM-L1472 LRDVIYTF    | 338  | 2068 |
| >ATM-L1472 LRDVIYTL    | 223  | >ATM-L1472 LRDVIYTF    | 3630 | 3407 |
| >ATM-L1472 LRDVIYTLI   | 361  | >ATM-L1472 LRDVIYTFI   | 636  | 275  |
| >ATM-L1472 VLRDVIYTL   | 38   | >ATM-L1472 VLRDVIYTF   | 4667 | 4629 |
| >ATM-L1472 VLRDVIYTLI  | 1040 | >ATM-L1472 VLRDVIYTFI  | 374  | 666  |
| >ATM-L1472 VLRDVIYTL   | 29   | >ATM-L1472 VLRDVIYTF   | 897  | 868  |
| >ATM-L1472 VLRDVIYTLI  | 126  | >ATM-L1472 VLRDVIYTFI  | 92   | 34   |
| >ATM-L1472 VLRDVIYTL   | 16   | >ATM-L1472 VLRDVIYTF   | 1947 | 1931 |
| >ATM-L1472 VLRDVIYTLI  | 229  | >ATM-L1472 VLRDVIYTFI  | 196  | 33   |
| >ATM-L1472 VLRDVIYTL   | 294  | >ATM-L1472 VLRDVIYTF   | 3537 | 3243 |
| >ATM-L1472 VLRDVIYTL   | 2    | >ATM-L1472 VLRDVIYTF   | 31   | 29   |
| >ATM-L1472 VLRDVIYTLI  | 18   | >ATM-L1472 VLRDVIYTFI  | 9    | 9    |
| >ATM-L1472 VLRDVIYTL   | 4    | >ATM-L1472 VLRDVIYTF   | 1013 | 1009 |
| >ATM-L1472 VLRDVIYTLI  | 188  | >ATM-L1472 VLRDVIYTFI  | 61   | 127  |
| >ATM-L1472 VLRDVIYTL   | 12   | >ATM-L1472 VLRDVIYTF   | 6784 | 6772 |
| >ATM-L1472 VLRDVIYTLI  | 97   | >ATM-L1472 VLRDVIYTFI  | 30   | 67   |
| >ATM-L1472 VLRDVIYTL   | 9    | >ATM-L1472 VLRDVIYTF   | 6950 | 6941 |
| >ATM-L1472 VLRDVIYTLI  | 509  | >ATM-L1472 VLRDVIYTFI  | 118  | 391  |
| >ATM-L1472 VLRDVIYTL   | 2    | >ATM-L1472 VLRDVIYTF   | 115  | 113  |
| >ATM-L1472 VLRDVIYTLI  | 6    | >ATM-L1472 VLRDVIYTFI  | 6    | 0    |
| >ATM-L1472 VLRDVIYTL   | 1846 | >ATM-L1472 VLRDVIYTF   | 65   | 1781 |
| >ATM-L1472 VLRDVIYTLI  | 1032 | >ATM-L1472 VLRDVIYTFI  | 299  | 733  |
| >ATM-L1472 VLRDVIYTL   | 444  | >ATM-L1472 VLRDVIYTF   | 84   | 360  |
| >ATM-L1472 VLRDVIYTL   | 747  | >ATM-L1472 VLRDVIYTF   | 63   | 684  |
| >ATM-L1472 VLRDVIYTL   | 1541 | >ATM-L1472 VLRDVIYTF   | 67   | 1474 |
| >ATM-L1472 VLRDVIYTL   | 2573 | >ATM-L1472 VLRDVIYTF   | 186  | 2387 |
| >ATM-L1472 VLRDVIYTL   | 1602 | >ATM-L1472 VLRDVIYTF   | 259  | 1343 |
| >ATM-L1472 FVLRDVIYTLI | 393  | >ATM-L1472 FVLRDVIYTFI | 108  | 285  |
| >ATM-L1472 FVLRDVIYTL  | 33   | >ATM-L1472 FVLRDVIYTF  | 638  | 605  |
| >ATM-L1472 FVLRDVIYTLI | 53   | >ATM-L1472 FVLRDVIYTFI | 36   | 17   |
| >ATM-L1472 FVLRDVIYTL  | 29   | >ATM-L1472 FVLRDVIYTF  | 1464 | 1435 |
| >ATM-L1472 FVLRDVIYTLI | 98   | >ATM-L1472 FVLRDVIYTFI | 52   | 46   |
| >ATM-L1472 FVLRDVIYTL  | 127  | >ATM-L1472 FVLRDVIYTF  | 4648 | 4521 |
| >ATM-L1472 FVLRDVIYTLI | 74   | >ATM-L1472 FVLRDVIYTFI | 65   | 9    |
| >ATM-L1472 FVLRDVIYTL  | 24   | >ATM-L1472 FVLRDVIYTF  | 388  | 364  |
| >ATM-L1472 FVLRDVIYTLI | 10   | >ATM-L1472 FVLRDVIYTFI | 6    | 4    |
| >ATM-L1472 FVLRDVIYTL  | 4    | >ATM-L1472 FVLRDVIYTF  | 166  | 162  |

|                        |      |                        |       |       |
|------------------------|------|------------------------|-------|-------|
| >ATM-L1472 FVLRDVIYTLI | 52   | >ATM-L1472 FVLRDVIYTFI | 18    | 34    |
| >ATM-L1472 FVLRDVIYTL  | 6    | >ATM-L1472 FVLRDVIYTF  | 1419  | 1413  |
| >ATM-L1472 FVLRDVIYTLI | 311  | >ATM-L1472 FVLRDVIYTFI | 88    | 223   |
| >ATM-L1472 FVLRDVIYTL  | 14   | >ATM-L1472 FVLRDVIYTF  | 6622  | 6608  |
| >ATM-L1472 FVLRDVIYTLI | 103  | >ATM-L1472 FVLRDVIYTFI | 30    | 73    |
| >ATM-L1472 FVLRDVIYTL  | 9    | >ATM-L1472 FVLRDVIYTF  | 4577  | 4568  |
| >ATM-L1472 FVLRDVIYTLI | 419  | >ATM-L1472 FVLRDVIYTFI | 55    | 364   |
| >ATM-L1472 FVLRDVIYTL  | 7    | >ATM-L1472 FVLRDVIYTF  | 4089  | 4082  |
| >ATM-L1472 FVLRDVIYTLI | 101  | >ATM-L1472 FVLRDVIYTFI | 81    | 20    |
| >ATM-L1472 FVLRDVIYTL  | 451  | >ATM-L1472 FVLRDVIYTF  | 22    | 429   |
| >ATM-L1472 FVLRDVIYTL  | 299  | >ATM-L1472 FVLRDVIYTF  | 32    | 267   |
| >ATM-L1472 FVLRDVIYTL  | 431  | >ATM-L1472 FVLRDVIYTF  | 119   | 312   |
| >ATM-L1472 FVLRDVIYTLI | 159  | >ATM-L1472 FVLRDVIYTFI | 79    | 80    |
| >ATM-L1472 FVLRDVIYTL  | 45   | >ATM-L1472 FVLRDVIYTF  | 4383  | 4338  |
| >ATM-L1472 FVLRDVIYTLI | 49   | >ATM-L1472 FVLRDVIYTFI | 23    | 26    |
| >ATM-L1472 FVLRDVIYTL  | 6875 | >ATM-L1472 FVLRDVIYTF  | 462   | 6413  |
| >ATM-L1472 FVLRDVIYTL  | 1695 | >ATM-L1472 FVLRDVIYTF  | 55    | 1640  |
| >ATM-L1472 FVLRDVIYTL  | 4168 | >ATM-L1472 FVLRDVIYTF  | 387   | 3781  |
| >ATM-L1472 FVLRDVIYTL  | 2580 | >ATM-L1472 FVLRDVIYTF  | 135   | 2445  |
| >ATM-L1472 FVLRDVIYTL  | 2662 | >ATM-L1472 FVLRDVIYTF  | 307   | 2355  |
| >ATM-L1472 FVLRDVIYTL  | 3174 | >ATM-L1472 FVLRDVIYTF  | 424   | 2750  |
| >ATM-L1472 FVLRDVIYTLI | 422  | >ATM-L1472 FVLRDVIYTFI | 285   | 137   |
| >ATM-L1910 LAVVDYMRR   | 2384 | >ATM-L1910 HAVVDYMRR   | 254   | 2130  |
| >ATM-L1910 LAVVDYMR    | 151  | >ATM-L1910 HAVVDYMR    | 59    | 92    |
| >ATM-L1910 LAVVDYMRR   | 385  | >ATM-L1910 HAVVDYMRR   | 103   | 282   |
| >ATM-L1910 LAVVDYMR    | 508  | >ATM-L1910 HAVVDYMR    | 89    | 419   |
| >ATM-L1910 LAVVDYMRR   | 1337 | >ATM-L1910 HAVVDYMRR   | 196   | 1141  |
| >ATM-L1910 LAVVDYMR    | 34   | >ATM-L1910 HAVVDYMR    | 15    | 19    |
| >ATM-L1910 LAVVDYMRR   | 94   | >ATM-L1910 HAVVDYMRR   | 31    | 63    |
| >ATM-L1910 LAVVDYMRR   | 404  | >ATM-L1910 HAVVDYMRR   | 136   | 268   |
| >ATM-L1910 LAVVDYMR    | 1890 | >ATM-L1910 HAVVDYMR    | 257   | 1633  |
| >ATM-L1910 LAVVDYMRR   | 2846 | >ATM-L1910 HAVVDYMRR   | 435   | 2411  |
| >ATM-L1910 MLAVVDYM    | 50   | >ATM-L1910 MHAVVDYM    | 21249 | 21199 |
| >ATM-L1910 MLAVVDYM    | 6    | >ATM-L1910 MHAVVDYM    | 1623  | 1617  |
| >ATM-L1910 MLAVVDYMF   | 282  | >ATM-L1910 MHAVVDYMF   | 21215 | 20933 |
| >ATM-L1910 MLAVVDYM    | 120  | >ATM-L1910 MHAVVDYM    | 19642 | 19522 |
| >ATM-L1910 MLAVVDYM    | 246  | >ATM-L1910 MHAVVDYM    | 16123 | 15877 |
| >ATM-L1910 MLAVVDYM    | 18   | >ATM-L1910 MHAVVDYM    | 17113 | 17095 |
| >ATM-L1910 MLAVVDYM    | 165  | >ATM-L1910 MHAVVDYM    | 22069 | 21904 |
| >ATM-L1910 MLAVVDYM    | 41   | >ATM-L1910 MHAVVDYM    | 22172 | 22131 |
| >ATM-L1910 MLAVVDYM    | 43   | >ATM-L1910 MHAVVDYM    | 20885 | 20842 |
| >ATM-L1910 MLAVVDYM    | 50   | >ATM-L1910 MHAVVDYM    | 34816 | 34766 |
| >ATM-L1910 MLAVVDYMF   | 460  | >ATM-L1910 MHAVVDYMF   | 35955 | 35495 |

|                        |       |                        |       |       |
|------------------------|-------|------------------------|-------|-------|
| >ATM-L1910 MLAVVDYMF   | 23    | >ATM-L1910 MHAVVDYMF   | 581   | 558   |
| >ATM-L1910 MLAVVDYMF   | 163   | >ATM-L1910 MHAVVDYMF   | 1601  | 1438  |
| >ATM-L1910 MLAVVDYMF   | 38    | >ATM-L1910 MHAVVDYMF   | 2525  | 2487  |
| >ATM-L1910 MLAVVDYMF   | 3     | >ATM-L1910 MHAVVDYMF   | 19    | 16    |
| >ATM-L1910 MLAVVDYMF   | 13    | >ATM-L1910 MHAVVDYMF   | 850   | 837   |
| >ATM-L1910 MLAVVDYMF   | 159   | >ATM-L1910 MHAVVDYMF   | 6537  | 6378  |
| >ATM-L1910 MLAVVDYMF   | 11227 | >ATM-L1910 MHAVVDYMF   | 110   | 11117 |
| >ATM-L1910 MLAVVDYMF   | 253   | >ATM-L1910 MHAVVDYMF   | 553   | 300   |
| >ATM-L1910 MLAVVDYMF   | 328   | >ATM-L1910 MHAVVDYMF   | 865   | 537   |
| >ATM-L1910 CLDKKSQRTM  | 110   | >ATM-L1910 CLDKKSQRTM  | 26883 | 26773 |
| >ATM-L1910 TMLAVVDYMF  | 1298  | >ATM-L1910 TMHAVVDYMF  | 480   | 818   |
| >ATM-L1910 TMLAVVDYMF  | 31    | >ATM-L1910 TMHAVVDYMF  | 165   | 134   |
| >ATM-L1910 TMLAVVDYMF  | 73    | >ATM-L1910 TMHAVVDYMF  | 39    | 34    |
| >ATM-L1910 TMLAVVDYMF  | 462   | >ATM-L1910 TMHAVVDYMF  | 110   | 352   |
| >ATM-L1910 TMLAVVDYMF  | 117   | >ATM-L1910 TMHAVVDYMF  | 1608  | 1491  |
| >ATM-L1910 TMLAVVDYMF  | 3     | >ATM-L1910 TMHAVVDYMF  | 7     | 4     |
| >ATM-L1910 TMLAVVDYMF  | 60    | >ATM-L1910 TMHAVVDYMF  | 331   | 271   |
| >ATM-L1910 TMLAVVDYMF  | 25    | >ATM-L1910 TMHAVVDYMF  | 148   | 123   |
| >ATM-L1910 TMLAVVDYMF  | 10    | >ATM-L1910 TMHAVVDYMF  | 442   | 432   |
| >ATM-L1910 TMLAVVDYMF  | 434   | >ATM-L1910 TMHAVVDYMF  | 354   | 80    |
| >ATM-L1910 TMLAVVDYMF  | 92    | >ATM-L1910 TMHAVVDYMF  | 413   | 321   |
| >ATM-L1910 TMLAVVDYMF  | 75    | >ATM-L1910 TMHAVVDYMF  | 151   | 76    |
| >ATM-L1910 TMLAVVDYMF  | 383   | >ATM-L1910 TMHAVVDYMF  | 458   | 75    |
| >ATM-L1910 TMLAVVDY    | 32    | >ATM-L1910 TMHAVVDY    | 57    | 25    |
| >ATM-L1910 TMLAVVDY    | 233   | >ATM-L1910 TMHAVVDY    | 192   | 41    |
| >ATM-L1910 TMLAVVDYMF  | 37    | >ATM-L1910 TMHAVVDYMF  | 74    | 37    |
| >ATM-L1910 TMLAVVDYMF  | 23    | >ATM-L1910 TMHAVVDYMF  | 21    | 2     |
| >ATM-L1910 TMLAVVDYMF  | 218   | >ATM-L1910 TMHAVVDYMF  | 329   | 111   |
| >ATM-L1910 TMLAVVDYMF  | 113   | >ATM-L1910 TMHAVVDYMF  | 245   | 132   |
| >ATM-L1910 TMLAVVDYMF  | 9     | >ATM-L1910 TMHAVVDYMF  | 9     | 0     |
| >ATM-L1910 TMLAVVDYMF  | 70    | >ATM-L1910 TMHAVVDYMF  | 30    | 40    |
| >ATM-L1910 TMLAVVDYMF  | 182   | >ATM-L1910 TMHAVVDYMF  | 4953  | 4771  |
| >ATM-L1910 TMLAVVDY    | 109   | >ATM-L1910 TMHAVVDY    | 136   | 27    |
| >ATM-L1910 TMLAVVDY    | 166   | >ATM-L1910 TMHAVVDY    | 83    | 83    |
| >ATM-L1910 TMLAVVDYMF  | 959   | >ATM-L1910 TMHAVVDYMF  | 260   | 699   |
| >ATM-L1910 TMLAVVDY    | 125   | >ATM-L1910 TMHAVVDY    | 113   | 12    |
| >ATM-L1910 TMLAVVDY    | 50    | >ATM-L1910 TMHAVVDY    | 59    | 9     |
| >ATM-L1910 TMLAVVDYMF  | 438   | >ATM-L1910 TMHAVVDYMF  | 1870  | 1432  |
| >ATM-L1910 TMLAVVDYMF  | 323   | >ATM-L1910 TMHAVVDYMF  | 288   | 35    |
| >ATM-L1910 TMLAVVDYMF  | 65    | >ATM-L1910 TMHAVVDYMF  | 82    | 17    |
| >ATM-L1910 TMLAVVDYMF  | 98    | >ATM-L1910 TMHAVVDYMF  | 133   | 35    |
| >ATM-L1910 RTMLAVVDYMF | 331   | >ATM-L1910 RTMHAVVDYMF | 529   | 198   |
| >ATM-L1910 RTMLAVVDYMF | 162   | >ATM-L1910 RTMHAVVDYMF | 326   | 164   |

|                       |     |                      |      |      |
|-----------------------|-----|----------------------|------|------|
| >ATM-L1910 RTMLAVVDYI | 310 | >ATM-L1910 RTMHAVVDY | 554  | 244  |
| >ATM-L1910 RTMLAVVDY  | 671 | >ATM-L1910 RTMHAVVDY | 243  | 428  |
| >ATM-L1910 RTMLAVVDY  | 79  | >ATM-L1910 RTMHAVVDY | 92   | 13   |
| >ATM-L1910 RTMLAVVDYI | 24  | >ATM-L1910 RTMHAVVDY | 25   | 1    |
| >ATM-L1910 RTMLAVVDY  | 107 | >ATM-L1910 RTMHAVVDY | 53   | 54   |
| >ATM-L1910 RTMLAVVDYI | 53  | >ATM-L1910 RTMHAVVDY | 38   | 15   |
| >ATM-L1910 RTMLAVVDY  | 574 | >ATM-L1910 RTMHAVVDY | 301  | 273  |
| >ATM-L1910 RTMLAVVDY  | 726 | >ATM-L1910 RTMHAVVDY | 305  | 421  |
| >ATM-L1910 RTMLAVVDYI | 282 | >ATM-L1910 RTMHAVVDY | 146  | 136  |
| >ATM-L1910 RTMLAVVDYI | 864 | >ATM-L1910 RTMHAVVDY | 481  | 383  |
| >ATM-L1910 RTMLAVVDY  | 636 | >ATM-L1910 RTMHAVVDY | 143  | 493  |
| >ATM-L1910 RTMLAVVDYI | 10  | >ATM-L1910 RTMHAVVDY | 10   | 0    |
| >ATM-L1910 RTMLAVVDY  | 22  | >ATM-L1910 RTMHAVVDY | 15   | 7    |
| >ATM-L1910 RTMLAVVDYI | 177 | >ATM-L1910 RTMHAVVDY | 114  | 63   |
| >ATM-L1910 RTMLAVVDYI | 654 | >ATM-L1910 RTMHAVVDY | 389  | 265  |
| >ATM-L1910 RTMLAVVDYI | 272 | >ATM-L1910 RTMHAVVDY | 305  | 33   |
| >ATM-L1910 RTMLAVVDYI | 14  | >ATM-L1910 RTMHAVVDY | 12   | 2    |
| >ATM-L1910 RTMLAVVDYI | 156 | >ATM-L1910 RTMHAVVDY | 68   | 88   |
| >ATM-L1910 RTMLAVVDY  | 309 | >ATM-L1910 RTMHAVVDY | 77   | 232  |
| >ATM-L1910 RTMLAVVDY  | 133 | >ATM-L1910 RTMHAVVDY | 64   | 69   |
| >ATM-L1910 RTMLAVVDYI | 585 | >ATM-L1910 RTMHAVVDY | 227  | 358  |
| >ATM-L1910 RTMLAVVDY  | 84  | >ATM-L1910 RTMHAVVDY | 17   | 67   |
| >ATM-L1910 RTMLAVVDYI | 978 | >ATM-L1910 RTMHAVVDY | 188  | 790  |
| >ATM-L1910 RTMLAVVDY  | 3   | >ATM-L1910 RTMHAVVDY | 3    | 0    |
| >ATM-L1910 RTMLAVVDYI | 6   | >ATM-L1910 RTMHAVVDY | 5    | 1    |
| >ATM-L1910 RTMLAVVDY  | 269 | >ATM-L1910 RTMHAVVDY | 158  | 111  |
| >ATM-L1910 RTMLAVVDYI | 236 | >ATM-L1910 RTMHAVVDY | 172  | 64   |
| >ATM-L1910 RTMLAVVDY  | 205 | >ATM-L1910 RTMHAVVDY | 54   | 151  |
| >ATM-L1910 RTMLAVVDYI | 33  | >ATM-L1910 RTMHAVVDY | 21   | 12   |
| >ATM-L1910 RTMLAVVDYI | 234 | >ATM-L1910 RTMHAVVDY | 419  | 185  |
| >ATM-L1910 RTMLAVVDY  | 251 | >ATM-L1910 RTMHAVVDY | 135  | 116  |
| >ATM-L1910 RTMLAVVDYI | 19  | >ATM-L1910 RTMHAVVDY | 29   | 10   |
| >ATM-L1910 RTMLAVVDYI | 576 | >ATM-L1910 RTMHAVVDY | 335  | 241  |
| >ATM-L1910 RTMLAVVDYI | 95  | >ATM-L1910 RTMHAVVDY | 114  | 19   |
| >ATM-L1910 QRTMLAVVD  | 206 | >ATM-L1910 QRTMHAVVI | 107  | 99   |
| >ATM-L1910 QRTMLAVV   | 320 | >ATM-L1910 QRTMHAVV  | 900  | 580  |
| >ATM-L1910 QRTMLAVVD  | 118 | >ATM-L1910 QRTMHAVVI | 281  | 163  |
| >ATM-L1910 QRTMLAVVD  | 128 | >ATM-L1910 QRTMHAVVI | 242  | 114  |
| >ATM-L1910 SQRTMLAV   | 45  | >ATM-L1910 SQRTMHAV  | 89   | 44   |
| >ATM-L1910 SQRTMLAVV  | 30  | >ATM-L1910 SQRTMHAVV | 354  | 324  |
| >ATM-L1910 SQRTMLAV   | 27  | >ATM-L1910 SQRTMHAV  | 81   | 54   |
| >ATM-L1910 SQRTMLAVV  | 70  | >ATM-L1910 SQRTMHAVV | 1833 | 1763 |
| >ATM-L1910 SQRTMLAV   | 109 | >ATM-L1910 SQRTMHAV  | 96   | 13   |

|                         |      |                         |       |       |
|-------------------------|------|-------------------------|-------|-------|
| >ATM-L1910 SQRTMLAVV    | 175  | >ATM-L1910 SQRTMHAVV    | 36    | 139   |
| >ATM-L1910 SQRTMLAV     | 337  | >ATM-L1910 SQRTMHAV     | 459   | 122   |
| >ATM-L1910 SQRTMLAVV    | 206  | >ATM-L1910 SQRTMHAVV    | 146   | 60    |
| >ATM-L1910 SQRTMLAVV    | 55   | >ATM-L1910 SQRTMHAVV    | 49    | 6     |
| >ATM-L1910 SQRTMLAVV    | 522  | >ATM-L1910 SQRTMHAVV    | 324   | 198   |
| >ATM-L1910 SQRTMLAV     | 59   | >ATM-L1910 SQRTMHAV     | 59    | 0     |
| >ATM-L1910 SQRTMLAVV    | 172  | >ATM-L1910 SQRTMHAVV    | 75    | 97    |
| >ATM-L1910 SQRTMLAVV    | 9    | >ATM-L1910 SQRTMHAVV    | 6     | 3     |
| >ATM-L1910 KSQRTMLA     | 21   | >ATM-L1910 KSQRTMHA     | 23    | 2     |
| >ATM-L1910 KSQRTMLAV    | 29   | >ATM-L1910 KSQRTMHAV    | 65    | 36    |
| >ATM-L1910 KSQRTMLAV'   | 86   | >ATM-L1910 KSQRTMHAV    | 53    | 33    |
| >ATM-L1910 KSQRTMLAV    | 488  | >ATM-L1910 KSQRTMHAV    | 667   | 179   |
| >ATM-L1910 KSQRTMLAV    | 462  | >ATM-L1910 KSQRTMHAV    | 803   | 341   |
| >ATM-L1910 KSQRTMLAV    | 91   | >ATM-L1910 KSQRTMHAV    | 256   | 165   |
| >ATM-L1910 KSQRTMLAV'   | 226  | >ATM-L1910 KSQRTMHAV    | 301   | 75    |
| >ATM-L1910 KSQRTMLAV'   | 220  | >ATM-L1910 KSQRTMHAV    | 448   | 228   |
| >ATM-L1910 KKSQRTML     | 44   | >ATM-L1910 KKSQRTMH     | 467   | 423   |
| >ATM-L1910 KKSQRTMLA    | 880  | >ATM-L1910 KKSQRTMHA    | 418   | 462   |
| >ATM-L1910 KKSQRTMLA'   | 45   | >ATM-L1910 KKSQRTMHA    | 57    | 12    |
| >ATM-L1910 KKSQRTMLA'   | 149  | >ATM-L1910 KKSQRTMHA    | 88    | 61    |
| >ATM-L1910 KKSQRTML     | 467  | >ATM-L1910 KKSQRTMH     | 5969  | 5502  |
| >ATM-L1939' LEVAKVAQ    | 459  | >ATM-L1939' VEVAKVAQ    | 1505  | 1046  |
| >ATM-L1939' LEVAKVAQSC  | 195  | >ATM-L1939' VEVAKVAQSC  | 151   | 44    |
| >ATM-L1939' YLEVAKVA    | 47   | >ATM-L1939' YVEVAKVA    | 7580  | 7533  |
| >ATM-L1939' YLEVAKVAQ   | 228  | >ATM-L1939' YVEVAKVAQ   | 16464 | 16236 |
| >ATM-L1939' YLEVAKVAQS  | 318  | >ATM-L1939' YVEVAKVAQSC | 17605 | 17287 |
| >ATM-L1939' YLEVAKVAQS  | 27   | >ATM-L1939' YVEVAKVAQSC | 7000  | 6973  |
| >ATM-L1939' NDAFWLDLN   | 1156 | >ATM-L1939' NDAFWLDLN   | 134   | 1022  |
| >ATM-L1939' NYLEVAKV    | 407  | >ATM-L1939' NYVEVAKV    | 2409  | 2002  |
| >ATM-L1939' NYLEVAKV    | 151  | >ATM-L1939' NYVEVAKV    | 1090  | 939   |
| >ATM-L1939' DLNYLEVAKV  | 216  | >ATM-L1939' DLNYVEVAKV  | 334   | 118   |
| >ATM-L1939' DLNYLEVAKV  | 256  | >ATM-L1939' DLNYVEVAKV  | 97    | 159   |
| >ATM-L1939' DLNYLEVAKV  | 154  | >ATM-L1939' DLNYVEVAKV  | 82    | 72    |
| >ATM-L1939' DLNYLEVAKV  | 84   | >ATM-L1939' DLNYVEVAKV  | 64    | 20    |
| >ATM-L1939' DLNYLEVAKV  | 56   | >ATM-L1939' DLNYVEVAKV  | 51    | 5     |
| >ATM-L1939' DLNYLEVAK   | 262  | >ATM-L1939' DLNYVEVAK   | 135   | 127   |
| >ATM-L1939' DLNYLEVAK   | 151  | >ATM-L1939' DLNYVEVAK   | 37    | 114   |
| >ATM-L1939' LDLNYLEV    | 815  | >ATM-L1939' LDLNYVEV    | 290   | 525   |
| >ATM-L1939' LDLNYLEVAK' | 195  | >ATM-L1939' LDLNYVEVAK  | 217   | 22    |
| >ATM-L1939' LDLNYLEV    | 72   | >ATM-L1939' LDLNYVEV    | 81    | 9     |
| >ATM-L1939' LDLNYLEVAK' | 72   | >ATM-L1939' LDLNYVEVAK  | 62    | 10    |
| >ATM-L1939' WLDLNYLEV   | 41   | >ATM-L1939' WLDLNYVEV   | 41    | 0     |
| >ATM-L1939' WLDLNYLEV/  | 445  | >ATM-L1939' WLDLNYVEV/  | 1201  | 756   |

|                        |      |                        |     |      |
|------------------------|------|------------------------|-----|------|
| >ATM-L1939' WLDLNYLEV  | 102  | >ATM-L1939' WLDLNYVEV  | 35  | 67   |
| >ATM-L1939' WLDLNYLEV/ | 237  | >ATM-L1939' WLDLNYVEV, | 458 | 221  |
| >ATM-L1939' WLDLNYLEV  | 204  | >ATM-L1939' WLDLNYVEV  | 218 | 14   |
| >ATM-L1939' WLDLNYLEV/ | 382  | >ATM-L1939' WLDLNYVEV, | 788 | 406  |
| >ATM-L1939' WLDLNYLEV  | 49   | >ATM-L1939' WLDLNYVEV  | 41  | 8    |
| >ATM-L1939' WLDLNYLEV  | 3    | >ATM-L1939' WLDLNYVEV  | 3   | 0    |
| >ATM-L1939' WLDLNYLEV/ | 37   | >ATM-L1939' WLDLNYVEV, | 26  | 11   |
| >ATM-L1939' WLDLNYLEV  | 6    | >ATM-L1939' WLDLNYVEV  | 5   | 1    |
| >ATM-L1939' WLDLNYLEV/ | 100  | >ATM-L1939' WLDLNYVEV, | 85  | 15   |
| >ATM-L1939' WLDLNYLEV  | 7    | >ATM-L1939' WLDLNYVEV  | 6   | 1    |
| >ATM-L1939' WLDLNYLEV/ | 195  | >ATM-L1939' WLDLNYVEV, | 129 | 66   |
| >ATM-L1939' WLDLNYLEV  | 4    | >ATM-L1939' WLDLNYVEV  | 3   | 1    |
| >ATM-L1939' WLDLNYLEV/ | 144  | >ATM-L1939' WLDLNYVEV, | 72  | 72   |
| >ATM-L1939' WLDLNYLEV  | 3    | >ATM-L1939' WLDLNYVEV  | 2   | 1    |
| >ATM-L1939' WLDLNYLEV/ | 50   | >ATM-L1939' WLDLNYVEV, | 45  | 5    |
| >ATM-L1939' WLDLNYLEV  | 189  | >ATM-L1939' WLDLNYVEV  | 156 | 33   |
| >ATM-L1939' FWLDLNYL   | 367  | >ATM-L1939' FWLDLNYV   | 75  | 292  |
| >ATM-L1939' FWLDLNYL   | 22   | >ATM-L1939' FWLDLNYV   | 18  | 4    |
| >ATM-L1939' FWLDLNYLEV | 365  | >ATM-L1939' FWLDLNYVE\ | 535 | 170  |
| >ATM-L1939' FWLDLNYL   | 26   | >ATM-L1939' FWLDLNYV   | 10  | 16   |
| >ATM-L1939' FWLDLNYLEV | 117  | >ATM-L1939' FWLDLNYVE\ | 196 | 79   |
| >ATM-L1939' FWLDLNYLEV | 124  | >ATM-L1939' FWLDLNYVE\ | 262 | 138  |
| >ATM-L1939' FWLDLNYL   | 336  | >ATM-L1939' FWLDLNYV   | 22  | 314  |
| >ATM-L1939' FWLDLNYLEV | 59   | >ATM-L1939' FWLDLNYVE\ | 47  | 12   |
| >ATM-L1939' FWLDLNYL   | 1468 | >ATM-L1939' FWLDLNYV   | 144 | 1324 |
| >ATM-L1939' FWLDLNYLEV | 719  | >ATM-L1939' FWLDLNYVE\ | 411 | 308  |
| >ATM-L1939' FWLDLNYL   | 1331 | >ATM-L1939' FWLDLNYV   | 63  | 1268 |
| >ATM-L1939' FWLDLNYLEV | 109  | >ATM-L1939' FWLDLNYVE\ | 92  | 17   |
| >ATM-L1939' FWLDLNYL   | 2148 | >ATM-L1939' FWLDLNYV   | 92  | 2056 |
| >ATM-L1939' FWLDLNYLEV | 108  | >ATM-L1939' FWLDLNYVE\ | 79  | 29   |
| >ATM-L1939' FWLDLNYL   | 16   | >ATM-L1939' FWLDLNYV   | 428 | 412  |
| >ATM-L1939' FWLDLNYLEV | 147  | >ATM-L1939' FWLDLNYVE\ | 112 | 35   |
| >ATM-L1939' FWLDLNYL   | 3696 | >ATM-L1939' FWLDLNYV   | 372 | 3324 |
| >ATM-L1939' FWLDLNYLE  | 371  | >ATM-L1939' FWLDLNYVE  | 584 | 213  |
| >ATM-L1939' FWLDLNYL   | 43   | >ATM-L1939' FWLDLNYV   | 54  | 11   |
| >ATM-L1939' FWLDLNYLE  | 241  | >ATM-L1939' FWLDLNYVE  | 306 | 65   |
| >ATM-L1939' FWLDLNYLEV | 182  | >ATM-L1939' FWLDLNYVE\ | 297 | 115  |
| >ATM-L1939' FWLDLNYLEV | 111  | >ATM-L1939' FWLDLNYVE\ | 117 | 6    |
| >ATM-L1939' AFWLDLNYL  | 379  | >ATM-L1939' AFWLDLNYV  | 259 | 120  |
| >ATM-L1939' AFWLDLNYL  | 2106 | >ATM-L1939' AFWLDLNYV  | 343 | 1763 |
| >ATM-L1939' AFWLDLNYL  | 3341 | >ATM-L1939' AFWLDLNYV  | 254 | 3087 |
| >ATM-L1939' AFWLDLNYLE | 574  | >ATM-L1939' AFWLDLNYVI | 463 | 111  |
| >ATM-L1939' AFWLDLNYL  | 3614 | >ATM-L1939' AFWLDLNYV  | 174 | 3440 |

|                        |      |                        |       |       |
|------------------------|------|------------------------|-------|-------|
| >ATM-L1939' AFWLDLNYLE | 364  | >ATM-L1939' AFWLDLNYVI | 299   | 65    |
| >ATM-L1939' AFWLDLNYL  | 7663 | >ATM-L1939' AFWLDLNYV  | 353   | 7310  |
| >ATM-L1939' AFWLDLNYLE | 303  | >ATM-L1939' AFWLDLNYVI | 209   | 94    |
| >ATM-L1939' AFWLDLNYL  | 173  | >ATM-L1939' AFWLDLNYV  | 3745  | 3572  |
| >ATM-L1939' AFWLDLNYLE | 486  | >ATM-L1939' AFWLDLNYVI | 955   | 469   |
| >ATM-L1939' DAFWLDLNYI | 1268 | >ATM-L1939' DAFWLDLNY' | 350   | 918   |
| >ATM-L1939' DAFWLDLNYI | 1354 | >ATM-L1939' DAFWLDLNY' | 298   | 1056  |
| >ATM-L1939' DAFWLDLNYI | 1542 | >ATM-L1939' DAFWLDLNY' | 318   | 1224  |
| >ATM-L1939' DAFWLDLNYI | 479  | >ATM-L1939' DAFWLDLNY' | 1440  | 961   |
| >ATM-L1939' DAFWLDLNYI | 558  | >ATM-L1939' DAFWLDLNY' | 104   | 454   |
| >ATM-L1939' DAFWLDLNYI | 197  | >ATM-L1939' DAFWLDLNY' | 20    | 177   |
| >ATM-L2004 LLEIYRS     | 452  | >ATM-L2004 RLEIYRS     | 608   | 156   |
| >ATM-L2004 LLEIYRSI    | 43   | >ATM-L2004 RLEIYRSI    | 55    | 12    |
| >ATM-L2004 LLEIYRS     | 394  | >ATM-L2004 RLEIYRS     | 902   | 508   |
| >ATM-L2004 LLEIYRSI    | 155  | >ATM-L2004 RLEIYRSI    | 150   | 5     |
| >ATM-L2004 LLEIYRSI    | 28   | >ATM-L2004 RLEIYRSI    | 20    | 8     |
| >ATM-L2004 LLEIYRSI    | 75   | >ATM-L2004 RLEIYRSI    | 61    | 14    |
| >ATM-L2004 LLEIYRS     | 28   | >ATM-L2004 RLEIYRS     | 29    | 1     |
| >ATM-L2004 LLEIYRSI    | 3    | >ATM-L2004 RLEIYRSI    | 3     | 0     |
| >ATM-L2004 LLEIYRSI    | 9    | >ATM-L2004 RLEIYRSI    | 11    | 2     |
| >ATM-L2004 LLEIYRSI    | 23   | >ATM-L2004 RLEIYRSI    | 32    | 9     |
| >ATM-L2004 LLEIYRSI    | 9    | >ATM-L2004 RLEIYRSI    | 22    | 13    |
| >ATM-L2004 LLEIYRS     | 97   | >ATM-L2004 RLEIYRS     | 685   | 588   |
| >ATM-L2004 LLEIYRSI    | 8    | >ATM-L2004 RLEIYRSI    | 27    | 19    |
| >ATM-L2004 LLEIYRSI    | 6707 | >ATM-L2004 RLEIYRSI    | 371   | 6336  |
| >ATM-L2004 LLEIYRSI    | 508  | >ATM-L2004 RLEIYRSI    | 11    | 497   |
| >ATM-L2004 LLEIYRSI    | 710  | >ATM-L2004 RLEIYRSI    | 356   | 354   |
| >ATM-L2004 LLEIYRSI    | 926  | >ATM-L2004 RLEIYRSI    | 272   | 654   |
| >ATM-L2004 DLLLEIYRSI  | 486  | >ATM-L2004 DRLEIYRSI   | 19660 | 19174 |
| >ATM-L2004 DLLLEIYRSI  | 315  | >ATM-L2004 DRLEIYRSI   | 27624 | 27309 |
| >ATM-L2004 DLLLEIYRSI  | 368  | >ATM-L2004 DRLEIYRSI   | 23038 | 22670 |
| >ATM-L2004 DLLLEIYR    | 15   | >ATM-L2004 DRLEIYR     | 446   | 431   |
| >ATM-L2004 DLLLEIYR    | 136  | >ATM-L2004 DRLEIYR     | 3288  | 3152  |
| >ATM-L2004 DLLLEIYR    | 52   | >ATM-L2004 DRLEIYR     | 194   | 142   |
| >ATM-L2004 KEETGISLQDI | 25   | >ATM-L2004 KEETGISLQDI | 14418 | 14393 |
| >ATM-L2004 KEETGISLQDI | 20   | >ATM-L2004 KEETGISLQDI | 1637  | 1617  |
| >ATM-L2004 QDLLLEIYRSI | 81   | >ATM-L2004 QDRLEIYRSI  | 304   | 223   |
| >ATM-L2004 QDLLLEIYR   | 80   | >ATM-L2004 QDRLEIYR    | 427   | 347   |
| >ATM-L2004 QDLLLEIYRSI | 182  | >ATM-L2004 QDRLEIYRSI  | 729   | 547   |
| >ATM-L2004 LQDLLLEIY   | 117  | >ATM-L2004 LQDRLEIY    | 141   | 24    |
| >ATM-L2004 LQDLLLEI    | 39   | >ATM-L2004 LQDRLEI     | 23    | 16    |
| >ATM-L2004 LQDLLLEIYR  | 287  | >ATM-L2004 LQDRLEIYR   | 469   | 182   |
| >ATM-L2004 LQDLLLEIY   | 906  | >ATM-L2004 LQDRLEIY    | 406   | 500   |



|                          |       |                         |      |       |
|--------------------------|-------|-------------------------|------|-------|
| >ATM-L2004 LQDLLLLLEIYR  | 461   | >ATM-L2004 LQDRLLLEIYR  | 673  | 212   |
| >ATM-L2004 SLQDLLLLLEIY  | 223   | >ATM-L2004 SLQDRLLLEIY  | 148  | 75    |
| >ATM-L2004 SLQDLLLLLEI   | 11    | >ATM-L2004 SLQDRLLLEI   | 14   | 3     |
| >ATM-L2004 SLQDLLLLLEI   | 15    | >ATM-L2004 SLQDRLLLEI   | 29   | 14    |
| >ATM-L2004 SLQDLLLLLEI   | 16    | >ATM-L2004 SLQDRLLLEI   | 12   | 4     |
| >ATM-L2004 SLQDLLLLLEI   | 55    | >ATM-L2004 SLQDRLLLEI   | 53   | 2     |
| >ATM-L2004 SLQDLLLLLEI   | 5     | >ATM-L2004 SLQDRLLLEI   | 7    | 2     |
| >ATM-L2004 SLQDLLLLLEI   | 8     | >ATM-L2004 SLQDRLLLEI   | 10   | 2     |
| >ATM-L2004 SLQDLLLLLEI   | 11    | >ATM-L2004 SLQDRLLLEI   | 21   | 10    |
| >ATM-L2004 SLQDLLLLLEI   | 151   | >ATM-L2004 SLQDRLLLEI   | 681  | 530   |
| >ATM-L2004 SLQDLLLLLEI   | 3     | >ATM-L2004 SLQDRLLLEI   | 3    | 0     |
| >ATM-L2004 SLQDLLLLLEIYR | 91    | >ATM-L2004 SLQDRLLLEIYR | 103  | 12    |
| >ATM-L2004 SLQDLLLLLEIY  | 543   | >ATM-L2004 SLQDRLLLEIY  | 468  | 75    |
| >ATM-L2004 SLQDLLLLLEIYR | 39    | >ATM-L2004 SLQDRLLLEIYR | 34   | 5     |
| >ATM-L2004 SLQDLLLLLEIYR | 305   | >ATM-L2004 SLQDRLLLEIYR | 192  | 113   |
| >ATM-L2004 SLQDLLLLLEIYR | 427   | >ATM-L2004 SLQDRLLLEIYR | 513  | 86    |
| >ATM-L2004 SLQDLLLLLEIY  | 41    | >ATM-L2004 SLQDRLLLEIY  | 50   | 9     |
| >ATM-L2004 SLQDLLLLLEIY  | 121   | >ATM-L2004 SLQDRLLLEIY  | 129  | 8     |
| >ATM-L2004 SLQDLLLLLEIY  | 450   | >ATM-L2004 SLQDRLLLEIY  | 250  | 200   |
| >ATM-L2004 SLQDLLLLLEIY  | 185   | >ATM-L2004 SLQDRLLLEIY  | 139  | 46    |
| >ATM-L2004 SLQDLLLLLEIYR | 57    | >ATM-L2004 SLQDRLLLEIYR | 84   | 27    |
| >ATM-L2004 ISLQDLLLL     | 452   | >ATM-L2004 ISLQDRLL     | 327  | 125   |
| >ATM-L2004 ISLQDLLLLLEI  | 174   | >ATM-L2004 ISLQDRLLLEI  | 414  | 240   |
| >ATM-L2004 ISLQDLLLLLEIY | 227   | >ATM-L2004 ISLQDRLLLEIY | 833  | 606   |
| >ATM-L2004 ISLQDLLLLLEIY | 174   | >ATM-L2004 ISLQDRLLLEIY | 255  | 81    |
| >ATM-L2004 ISLQDLLLLLEIY | 113   | >ATM-L2004 ISLQDRLLLEIY | 95   | 18    |
| >ATM-L2004 ISLQDLLLLLEIY | 445   | >ATM-L2004 ISLQDRLLLEIY | 771  | 326   |
| >ATM-L2004 ISLQDLLLLLEIY | 275   | >ATM-L2004 ISLQDRLLLEIY | 169  | 106   |
| >ATM-L2004 ISLQDLLLL     | 15    | >ATM-L2004 ISLQDRLL     | 41   | 26    |
| >ATM-L2004 ISLQDLLLLLEI  | 26    | >ATM-L2004 ISLQDRLLLEI  | 42   | 16    |
| >ATM-L2004 ISLQDLLLLLEIY | 10    | >ATM-L2004 ISLQDRLLLEIY | 15   | 5     |
| >ATM-L2004 ISLQDLLLLLEIY | 296   | >ATM-L2004 ISLQDRLLLEIY | 206  | 90    |
| >ATM-L2004 ISLQDLLLL     | 215   | >ATM-L2004 ISLQDRLL     | 3745 | 3530  |
| >ATM-L2004 ISLQDLLLLLEI  | 105   | >ATM-L2004 ISLQDRLLLEI  | 295  | 190   |
| >ATM-L2004 ISLQDLLLLLEIY | 59    | >ATM-L2004 ISLQDRLLLEIY | 70   | 11    |
| >ATM-L2004 ISLQDLLLLLEIY | 13    | >ATM-L2004 ISLQDRLLLEIY | 15   | 2     |
| >ATM-L2004 ISLQDLLLLLEI  | 96    | >ATM-L2004 ISLQDRLLLEI  | 246  | 150   |
| >ATM-L2004 GISLQDLL      | 158   | >ATM-L2004 GISLQDRLL    | 585  | 427   |
| >ATM-L2004 TGISLQDL      | 36198 | >ATM-L2004 TGISLQDR     | 494  | 35704 |
| >ATM-L2004 ETGISLQDL     | 326   | >ATM-L2004 ETGISLQDR    | 8563 | 8237  |
| >ATM-L2004 ETGISLQDLL    | 754   | >ATM-L2004 ETGISLQDRLL  | 279  | 475   |
| >ATM-L2004 ETGISLQDL     | 25135 | >ATM-L2004 ETGISLQDR    | 35   | 25100 |
| >ATM-L2004 ETGISLQDLLL   | 355   | >ATM-L2004 ETGISLQDRLLI | 973  | 618   |

|                        |       |                        |       |       |
|------------------------|-------|------------------------|-------|-------|
| >ATM-L2004 EETGISLQDLL | 113   | >ATM-L2004 EETGISLQDRI | 945   | 832   |
| >ATM-L2004 EETGISLQDLL | 29    | >ATM-L2004 EETGISLQDRI | 78    | 49    |
| >ATM-L2004 EETGISLQDLL | 308   | >ATM-L2004 EETGISLQDRI | 452   | 144   |
| >ATM-L2004 EETGISLQDLL | 160   | >ATM-L2004 EETGISLQDRI | 301   | 141   |
| >ATM-L2417 LKRAKEEV    | 248   | >ATM-L2417 PKRAKEEV    | 4435  | 4187  |
| >ATM-L2417 LKRAKEEVGL  | 84    | >ATM-L2417 PKRAKEEVGL  | 1988  | 1904  |
| >ATM-L2417 LLKRAKEEV   | 25221 | >ATM-L2417 LPKRAKEEV   | 39    | 25182 |
| >ATM-L2417 LLKRAKEEVG  | 26967 | >ATM-L2417 LPKRAKEEVG  | 141   | 26826 |
| >ATM-L2417 LLKRAKEEV   | 231   | >ATM-L2417 LPKRAKEEV   | 32692 | 32461 |
| >ATM-L2417 LLKRAKEEVG  | 252   | >ATM-L2417 LPKRAKEEVG  | 34116 | 33864 |
| >ATM-L2417 LLKRAKEEV   | 110   | >ATM-L2417 LPKRAKEEV   | 21572 | 21462 |
| >ATM-L2417 LLKRAKEEV   | 88    | >ATM-L2417 LPKRAKEEV   | 25095 | 25007 |
| >ATM-L2417 LLKRAKEEV   | 370   | >ATM-L2417 LPKRAKEEV   | 25182 | 24812 |
| >ATM-L2417 LLKRAKEEV   | 4     | >ATM-L2417 LPKRAKEEV   | 20174 | 20170 |
| >ATM-L2417 LLKRAKEEVG  | 14    | >ATM-L2417 LPKRAKEEVG  | 30896 | 30882 |
| >ATM-L2417 LLKRAKEEVG  | 19479 | >ATM-L2417 LPKRAKEEVG  | 454   | 19025 |
| >ATM-L2417 SSEFENKQAL  | 487   | >ATM-L2417 SSEFENKQAL  | 22136 | 21649 |
| >ATM-L2417 SSEFENKQAL  | 392   | >ATM-L2417 SSEFENKQAL  | 13113 | 12721 |
| >ATM-L2417 ALLKRAKEEV  | 459   | >ATM-L2417 ALPKRAKEEV  | 1162  | 703   |
| >ATM-L2417 ALLKRAKEEV  | 180   | >ATM-L2417 ALPKRAKEEV  | 595   | 415   |
| >ATM-L2417 ALLKRAKEEV  | 4     | >ATM-L2417 ALPKRAKEEV  | 18    | 14    |
| >ATM-L2417 ALLKRAKEEV  | 25    | >ATM-L2417 ALPKRAKEEV  | 456   | 431   |
| >ATM-L2417 ALLKRAKEEV  | 9     | >ATM-L2417 ALPKRAKEEV  | 25    | 16    |
| >ATM-L2417 ALLKRAKEEV  | 26    | >ATM-L2417 ALPKRAKEEV  | 1226  | 1200  |
| >ATM-L2417 ALLKRAKEEV  | 3     | >ATM-L2417 ALPKRAKEEV  | 6     | 3     |
| >ATM-L2417 QALLKRAK    | 821   | >ATM-L2417 QALPKRAK    | 385   | 436   |
| >ATM-L2417 QALLKRAKEE  | 821   | >ATM-L2417 QALPKRAKEE  | 234   | 587   |
| >ATM-L2417 QALLKRAKEE  | 832   | >ATM-L2417 QALPKRAKEE  | 313   | 519   |
| >ATM-L2417 KQALLKRAK   | 384   | >ATM-L2417 KQALPKRAK   | 1167  | 783   |
| >ATM-L2417 ENKQALLKR   | 421   | >ATM-L2417 ENKQALPKR   | 345   | 76    |
| >ATM-L2417 FENKQALL    | 14    | >ATM-L2417 FENKQALP    | 348   | 334   |
| >ATM-L2417 FENKQALL    | 109   | >ATM-L2417 FENKQALP    | 11026 | 10917 |
| >ATM-L2417 FENKQALL    | 156   | >ATM-L2417 FENKQALP    | 7576  | 7420  |
| >ATM-L2417 FENKQALL    | 210   | >ATM-L2417 FENKQALP    | 9433  | 9223  |
| >ATM-L2417 EFENKQALLK  | 190   | >ATM-L2417 EFENKQALPK  | 210   | 20    |
| >ATM-L2417 EFENKQALLK  | 291   | >ATM-L2417 EFENKQALPK  | 252   | 39    |
| >ATM-L2417 EFENKQALLK  | 234   | >ATM-L2417 EFENKQALPK  | 564   | 330   |
| >ATM-L2417 SEFENKQALL  | 25    | >ATM-L2417 SEFENKQALP  | 4060  | 4035  |
| >ATM-L2417 SEFENKQALL  | 1778  | >ATM-L2417 SEFENKQALP  | 318   | 1460  |
| >ATM-L2417 SEFENKQALL  | 137   | >ATM-L2417 SEFENKQALP  | 3518  | 3381  |
| >ATM-L2417 SEFENKQALL  | 210   | >ATM-L2417 SEFENKQALP  | 2315  | 2105  |
| >ATM-L2417 SEFENKQALL  | 1793  | >ATM-L2417 SEFENKQALP  | 472   | 1321  |
| >ATM-L2417 SEFENKQALL  | 131   | >ATM-L2417 SEFENKQALP  | 4621  | 4490  |

|                        |       |                        |       |       |
|------------------------|-------|------------------------|-------|-------|
| >ATM-L2417 SEFENKQALL  | 116   | >ATM-L2417 SEFENKQALP  | 2989  | 2873  |
| >ATM-L2417 SEFENKQALL  | 489   | >ATM-L2417 SEFENKQALP  | 486   | 3     |
| >ATM-L2417 SEFENKQALL  | 217   | >ATM-L2417 SEFENKQALP  | 26139 | 25922 |
| >ATM-L2427 LREHKIQTNR  | 496   | >ATM-L2427 RREHKIQTNR  | 28    | 468   |
| >ATM-L2427 LREHKIQT    | 2161  | >ATM-L2427 RREHKIQT    | 29    | 2132  |
| >ATM-L2427 LREHKIQTN   | 7999  | >ATM-L2427 RREHKIQTN   | 141   | 7858  |
| >ATM-L2427 LREHKIQTNR  | 11311 | >ATM-L2427 RREHKIQTNR  | 248   | 11063 |
| >ATM-L2427 LREHKIQTNR  | 6661  | >ATM-L2427 RREHKIQTNR  | 199   | 6462  |
| >ATM-L2427 LREHKIQTNR  | 2473  | >ATM-L2427 RREHKIQTNR  | 125   | 2348  |
| >ATM-L2427 LREHKIQTNR  | 3896  | >ATM-L2427 RREHKIQTNR  | 350   | 3546  |
| >ATM-L2427 LREHKIQTNR  | 2492  | >ATM-L2427 RREHKIQTNR  | 390   | 2102  |
| >ATM-L2427 LLREHKIQT   | 45    | >ATM-L2427 LRREHKIQT   | 32530 | 32485 |
| >ATM-L2427 LLREHKIQTNI | 330   | >ATM-L2427 LRREHKIQTN  | 21615 | 21285 |
| >ATM-L2427 LLREHKIQTNI | 27    | >ATM-L2427 LRREHKIQTN  | 5197  | 5170  |
| >ATM-L2427 LLREHKIQTNI | 186   | >ATM-L2427 LRREHKIQTN  | 5839  | 5653  |
| >ATM-L2427 GLLREHKI    | 22    | >ATM-L2427 GLRREHKI    | 1200  | 1178  |
| >ATM-L2427 GLLREHKI    | 38    | >ATM-L2427 GLRREHKI    | 1817  | 1779  |
| >ATM-L2427 GLLREHKI    | 39    | >ATM-L2427 GLRREHKI    | 2916  | 2877  |
| >ATM-L2427 GLLREHKI    | 22    | >ATM-L2427 GLRREHKI    | 65    | 43    |
| >ATM-L2427 GLLREHKIQT  | 282   | >ATM-L2427 GLRREHKIQT  | 1121  | 839   |
| >ATM-L2427 EVGLLREHK   | 49    | >ATM-L2427 EVGLRREHK   | 100   | 51    |
| >ATM-L2427 EEVGLLREHK  | 38    | >ATM-L2427 EEVGLRREHK  | 58    | 20    |
| >ATM-L2427 EEVGLLREH   | 451   | >ATM-L2427 EEVGLRREH   | 651   | 200   |
| >ATM-L2427 EEVGLLREHK  | 398   | >ATM-L2427 EEVGLRREHK  | 530   | 132   |
| >ATM-L2427 EEVGLLREH   | 367   | >ATM-L2427 EEVGLRREH   | 1002  | 635   |
| >ATM-L2427 EEVGLLREHK  | 420   | >ATM-L2427 EEVGLRREHK  | 639   | 219   |
| >ATM-L2427 EEVGLLREHK  | 259   | >ATM-L2427 EEVGLRREHK  | 294   | 35    |
| >ATM-L2427 EEVGLLREHK  | 149   | >ATM-L2427 EEVGLRREHK  | 399   | 250   |
| >ATM-L2427 KEEVGLLR    | 219   | >ATM-L2427 KEEVGLRR    | 2499  | 2280  |
| >ATM-L2427 RAKEEVGLL   | 320   | >ATM-L2427 RAKEEVGLR   | 542   | 222   |
| >ATM-L2427 RAKEEVGLLR  | 171   | >ATM-L2427 RAKEEVGLRR  | 453   | 282   |
| >ATM-L2427 RAKEEVGLL   | 15584 | >ATM-L2427 RAKEEVGLR   | 55    | 15529 |
| >ATM-L2427 RAKEEVGLLR  | 127   | >ATM-L2427 RAKEEVGLRR  | 171   | 44    |
| >ATM-L2427 RAKEEVGLLR  | 367   | >ATM-L2427 RAKEEVGLRR  | 2101  | 1734  |
| >ATM-L2427 RAKEEVGLL   | 81    | >ATM-L2427 RAKEEVGLR   | 14645 | 14564 |
| >ATM-L2427 KRAKEEVGLL  | 73    | >ATM-L2427 KRAKEEVGLR  | 188   | 115   |
| >ATM-L2427 KRAKEEVGLL  | 176   | >ATM-L2427 KRAKEEVGLR  | 232   | 56    |
| >ATM-L2427 KRAKEEVGLL  | 153   | >ATM-L2427 KRAKEEVGLR  | 1144  | 991   |
| >ATM-L2427 KRAKEEVGLL  | 460   | >ATM-L2427 KRAKEEVGLR  | 880   | 420   |
| >ATM-L2427 KRAKEEVGLL  | 140   | >ATM-L2427 KRAKEEVGLR  | 1071  | 931   |
| >ATM-L2427 KRAKEEVGLL  | 28750 | >ATM-L2427 KRAKEEVGLR  | 138   | 28612 |
| >ATM-L2427 KRAKEEVGLL  | 79    | >ATM-L2427 KRAKEEVGLR  | 99    | 20    |
| >ATM-L2445 LELDELALRAI | 139   | >ATM-L2445 PELDELALRAI | 1710  | 1571  |

|                         |       |                         |       |       |
|-------------------------|-------|-------------------------|-------|-------|
| >ATM-L2445 LELEDELAL    | 81    | >ATM-L2445 PELEDELAL    | 1514  | 1433  |
| >ATM-L2445 LELEDELALRAI | 28    | >ATM-L2445 PELEDELALRAI | 427   | 399   |
| >ATM-L2445 LELEDELAL    | 35    | >ATM-L2445 PELEDELAL    | 443   | 408   |
| >ATM-L2445 LELEDELALRAI | 52    | >ATM-L2445 PELEDELALRAI | 787   | 735   |
| >ATM-L2445 LELEDELAL    | 89    | >ATM-L2445 PELEDELAL    | 2118  | 2029  |
| >ATM-L2445 LELEDELALRAI | 108   | >ATM-L2445 PELEDELALRAI | 2570  | 2462  |
| >ATM-L2445 LELEDELALRAI | 24    | >ATM-L2445 PELEDELALRAI | 247   | 223   |
| >ATM-L2445 ELELEDELALR  | 302   | >ATM-L2445 EPELEDELALR  | 2724  | 2422  |
| >ATM-L2445 ELELEDELAL   | 8056  | >ATM-L2445 EPELEDELAL   | 44    | 8012  |
| >ATM-L2445 ELELEDELAL   | 33148 | >ATM-L2445 EPELEDELAL   | 250   | 32898 |
| >ATM-L2445 NRYTVKQRI    | 209   | >ATM-L2445 NRYTVKQRI    | 5109  | 4900  |
| >ATM-L2445 NRYTVKQRI    | 125   | >ATM-L2445 NRYTVKQRI    | 18567 | 18442 |
| >ATM-L2445 NRYTVKQRI    | 419   | >ATM-L2445 NRYTVKQRI    | 158   | 261   |
| >ATM-L2445 NRYTVKQRI    | 60    | >ATM-L2445 NRYTVKQRI    | 2334  | 2274  |
| >ATM-L2445 NRYTVKQRI    | 25    | >ATM-L2445 NRYTVKQRI    | 5937  | 5912  |
| >ATM-L2445 RELEDEL      | 9     | >ATM-L2445 REPEDEL      | 126   | 117   |
| >ATM-L2445 RELEDEL      | 18    | >ATM-L2445 REPEDEL      | 129   | 111   |
| >ATM-L2445 RELEDELA     | 70    | >ATM-L2445 REPEDELA     | 1158  | 1088  |
| >ATM-L2445 RELEDELAL    | 162   | >ATM-L2445 REPEDELAL    | 172   | 10    |
| >ATM-L2445 RELEDEL      | 385   | >ATM-L2445 REPEDEL      | 4988  | 4603  |
| >ATM-L2445 RELEDELA     | 132   | >ATM-L2445 REPEDELA     | 5247  | 5115  |
| >ATM-L2445 RELEDELAL    | 188   | >ATM-L2445 REPEDELAL    | 467   | 279   |
| >ATM-L2445 RELEDEL      | 77    | >ATM-L2445 REPEDEL      | 2295  | 2218  |
| >ATM-L2445 RELEDELA     | 41    | >ATM-L2445 REPEDELA     | 412   | 371   |
| >ATM-L2445 RELEDELAL    | 29    | >ATM-L2445 REPEDELAL    | 418   | 389   |
| >ATM-L2445 RELEDELALF   | 117   | >ATM-L2445 REPEDELALF   | 810   | 693   |
| >ATM-L2445 RELEDELALF   | 98    | >ATM-L2445 REPEDELALF   | 185   | 87    |
| >ATM-L2445 QRELEDELA    | 653   | >ATM-L2445 QREPEDELA    | 387   | 266   |
| >ATM-L2445 QRELEDEL     | 380   | >ATM-L2445 QREPEDEL     | 323   | 57    |
| >ATM-L2445 QRELEDELA    | 223   | >ATM-L2445 QREPEDELA    | 188   | 35    |
| >ATM-L2445 VQRELEDEL    | 406   | >ATM-L2445 VQREPEDEL    | 188   | 218   |
| >ATM-L2445 KVQRELELDE   | 475   | >ATM-L2445 KVQREPELDE   | 1752  | 1277  |
| >ATM-L2445 VKVQRELEL    | 272   | >ATM-L2445 VKVQREPEL    | 395   | 123   |
| >ATM-L2445 YTVKVQRELE   | 511   | >ATM-L2445 YTVKVQREPE   | 339   | 172   |
| >ATM-L2445 YTVKVQRELE   | 592   | >ATM-L2445 YTVKVQREPE   | 338   | 254   |
| >ATM-L2445 YTVKVQREL    | 276   | >ATM-L2445 YTVKVQREP    | 20788 | 20512 |
| >ATM-L2445 YTVKVQRELE   | 615   | >ATM-L2445 YTVKVQREPE   | 166   | 449   |
| >ATM-L2445 YTVKVQREL    | 113   | >ATM-L2445 YTVKVQREP    | 10954 | 10841 |
| >ATM-L2445 YTVKVQRELE   | 409   | >ATM-L2445 YTVKVQREPE   | 629   | 220   |
| >ATM-L2445 YTVKVQREL    | 75    | >ATM-L2445 YTVKVQREP    | 21239 | 21164 |
| >ATM-L2445 YTVKVQRELE   | 22    | >ATM-L2445 YTVKVQREPE   | 28    | 6     |
| >ATM-L2445 YTVKVQREL    | 81    | >ATM-L2445 YTVKVQREP    | 4690  | 4609  |
| >ATM-L2445 YTVKVQRELE   | 118   | >ATM-L2445 YTVKVQREPE   | 151   | 33    |

|                        |       |                         |       |       |
|------------------------|-------|-------------------------|-------|-------|
| >ATM-L2445 YTVKVQREL   | 172   | >ATM-L2445 YTVKVQREP    | 18408 | 18236 |
| >ATM-L2445 RYTVKVQREL  | 300   | >ATM-L2445 RYTVKVQREF   | 26608 | 26308 |
| >ATM-L2445 RYTVKVQREL  | 10    | >ATM-L2445 RYTVKVQREF   | 1453  | 1443  |
| >ATM-L2722 LRQDAVMQ    | 394   | >ATM-L2722 RRQDAVMQ     | 2612  | 2218  |
| >ATM-L2722 LRQDAVMQ    | 39    | >ATM-L2722 RRQDAVMQ     | 14    | 25    |
| >ATM-L2722 LRQDAVMQ    | 3292  | >ATM-L2722 RRQDAVMQ     | 463   | 2829  |
| >ATM-L2722 LRQDAVMQ    | 1627  | >ATM-L2722 RRQDAVMQ     | 53    | 1574  |
| >ATM-L2722 LRQDAVMQ    | 334   | >ATM-L2722 RRQDAVMQ     | 58    | 276   |
| >ATM-L2722 LRQDAVMQ    | 7458  | >ATM-L2722 RRQDAVMQ     | 69    | 7389  |
| >ATM-L2722 LRQDAVMQ    | 12714 | >ATM-L2722 RRQDAVMQ     | 324   | 12390 |
| >ATM-L2722 LRQDAVMQ    | 3285  | >ATM-L2722 RRQDAVMQ     | 54    | 3231  |
| >ATM-L2722 LRQDAVMQ    | 1384  | >ATM-L2722 RRQDAVMQ     | 49    | 1335  |
| >ATM-L2722 LRQDAVMQ    | 448   | >ATM-L2722 RRQDAVMQ     | 35    | 413   |
| >ATM-L2722 LRQDAVMQ    | 127   | >ATM-L2722 RRQDAVMQ     | 19    | 108   |
| >ATM-L2722 DLRQDAVM    | 471   | >ATM-L2722 DRRQDAVM     | 26919 | 26448 |
| >ATM-L2722 DLRQDAVM    | 14    | >ATM-L2722 DRRQDAVM     | 24075 | 24061 |
| >ATM-L2722 RRQLVKGRDI  | 194   | >ATM-L2722 RRQLVKGRDI   | 290   | 96    |
| >ATM-L2722 RRQLVKGRDI  | 20    | >ATM-L2722 RRQLVKGRDI   | 119   | 99    |
| >ATM-L2722 RRQLVKGRDI  | 14    | >ATM-L2722 RRQLVKGRDI   | 208   | 194   |
| >ATM-L2722 DDLRQDAV    | 373   | >ATM-L2722 DRRRQDAV     | 1451  | 1078  |
| >ATM-L2722 RDDLRQDAV   | 83    | >ATM-L2722 RDDRRQDAV    | 186   | 103   |
| >ATM-L2722 KGRDDLRRQD  | 254   | >ATM-L2722 KGRDDRRQD    | 106   | 148   |
| >ATM-L2722 KGRDDLRRQD  | 694   | >ATM-L2722 KGRDDRRQD    | 301   | 393   |
| >ATM-L2722 LVKGRDDL    | 166   | >ATM-L2722 LVKGRDDR     | 333   | 167   |
| >ATM-L2722 LVKGRDDL    | 265   | >ATM-L2722 LVKGRDDR     | 722   | 457   |
| >ATM-L2722 LVKGRDDL    | 34498 | >ATM-L2722 LVKGRDDR     | 261   | 34237 |
| >ATM-L2722 LVKGRDDL    | 59    | >ATM-L2722 LVKGRDDR     | 158   | 99    |
| >ATM-L2722 QLVKGRDDL   | 451   | >ATM-L2722 QLVKGRDDR    | 28796 | 28345 |
| >ATM-L2722 RQLVKGRDD   | 19375 | >ATM-L2722 RQLVKGRDD    | 249   | 19126 |
| >ATM-L2722 RQLVKGRDD   | 39    | >ATM-L2722 RQLVKGRDD    | 60    | 21    |
| >ATM-L2722 RQLVKGRDD   | 122   | >ATM-L2722 RQLVKGRDD    | 1089  | 967   |
| >ATM-L2722 RQLVKGRDD   | 374   | >ATM-L2722 RQLVKGRDD    | 17153 | 16779 |
| >ATM-L2722 RQLVKGRDD   | 303   | >ATM-L2722 RQLVKGRDD    | 560   | 257   |
| >ATM-L2890' EQSAELVHID | 459   | >ATM-L2890' EQSAELVHID' | 5529  | 5070  |
| >ATM-L2890' HIDLGVA    | 323   | >ATM-L2890' HIDVGVAF    | 366   | 43    |
| >ATM-L2890' VHIDLGVA   | 1085  | >ATM-L2890' VHIDVGVAF   | 420   | 665   |
| >ATM-L2890' VHIDLGVA   | 14    | >ATM-L2890' VHIDVGVAF   | 12    | 2     |
| >ATM-L2890' VHIDLGVA   | 325   | >ATM-L2890' VHIDVGVAF   | 286   | 39    |
| >ATM-L2890' LVHIDLGV   | 189   | >ATM-L2890' LVHIDVGV    | 202   | 13    |
| >ATM-L2890' LVHIDLGV   | 127   | >ATM-L2890' LVHIDVGV    | 205   | 78    |
| >ATM-L2890' LVHIDLGV   | 154   | >ATM-L2890' LVHIDVGV    | 90    | 64    |
| >ATM-L2890' LVHIDLGV   | 20    | >ATM-L2890' LVHIDVGV    | 17    | 3     |
| >ATM-L2890' LVHIDLGV   | 535   | >ATM-L2890' LVHIDVGV    | 159   | 376   |

|                         |      |                         |       |       |
|-------------------------|------|-------------------------|-------|-------|
| >ATM-L2890' LVHIDLGVAF  | 105  | >ATM-L2890' LVHIDVGVAF  | 76    | 29    |
| >ATM-L2890' LVHIDLGVAF  | 261  | >ATM-L2890' LVHIDVGVAF  | 186   | 75    |
| >ATM-L2890' LVHIDLGVAF  | 356  | >ATM-L2890' LVHIDVGVAF  | 421   | 65    |
| >ATM-L2890' ELVHIDLGV   | 380  | >ATM-L2890' ELVHIDVGV   | 138   | 242   |
| >ATM-L2890' ELVHIDLGV   | 417  | >ATM-L2890' ELVHIDVGV   | 519   | 102   |
| >ATM-L2890' ELVHIDLGV   | 284  | >ATM-L2890' ELVHIDVGV   | 273   | 11    |
| >ATM-L2890' ELVHIDLGV   | 93   | >ATM-L2890' ELVHIDVGV   | 60    | 33    |
| >ATM-L2890' ELVHIDLGV   | 153  | >ATM-L2890' ELVHIDVGV   | 67    | 86    |
| >ATM-L2890' ELVHIDLGV   | 53   | >ATM-L2890' ELVHIDVGV   | 36    | 17    |
| >ATM-L2890' ELVHIDLGV   | 229  | >ATM-L2890' ELVHIDVGV   | 109   | 120   |
| >ATM-L2890' ELVHIDLGV   | 14   | >ATM-L2890' ELVHIDVGV   | 11    | 3     |
| >ATM-L2890' ELVHIDLGVA  | 254  | >ATM-L2890' ELVHIDVGV   | 218   | 36    |
| >ATM-L2890' ELVHIDLGVA  | 239  | >ATM-L2890' ELVHIDVGV   | 213   | 26    |
| >ATM-L2890' ELVHIDLGVA  | 383  | >ATM-L2890' ELVHIDVGV   | 268   | 115   |
| >ATM-L2890' ELVHIDLGV   | 39   | >ATM-L2890' ELVHIDVGV   | 13    | 26    |
| >ATM-L2890' ELVHIDLGV   | 207  | >ATM-L2890' ELVHIDVGV   | 172   | 35    |
| >ATM-L2890' ELVHIDLGVA  | 231  | >ATM-L2890' ELVHIDVGV   | 268   | 37    |
| >ATM-L2890' ELVHIDLGVA  | 121  | >ATM-L2890' ELVHIDVGV   | 108   | 13    |
| >ATM-L2890' ELVHIDLGVA  | 115  | >ATM-L2890' ELVHIDVGV   | 121   | 6     |
| >ATM-L2890' AELVHIDL    | 22   | >ATM-L2890' AELVHIDV    | 191   | 169   |
| >ATM-L2890' AELVHIDL    | 37   | >ATM-L2890' AELVHIDV    | 105   | 68    |
| >ATM-L2890' AELVHIDLGV  | 174  | >ATM-L2890' AELVHIDVGV  | 172   | 2     |
| >ATM-L2890' AELVHIDL    | 154  | >ATM-L2890' AELVHIDV    | 338   | 184   |
| >ATM-L2890' AELVHIDLGV  | 329  | >ATM-L2890' AELVHIDVGV  | 390   | 61    |
| >ATM-L2890' AELVHIDL    | 151  | >ATM-L2890' AELVHIDV    | 19    | 132   |
| >ATM-L2890' AELVHIDLG   | 457  | >ATM-L2890' AELVHIDVG   | 141   | 316   |
| >ATM-L2890' AELVHIDLGV  | 265  | >ATM-L2890' AELVHIDVGV  | 233   | 32    |
| >ATM-L2890' AELVHIDLGV  | 10   | >ATM-L2890' AELVHIDVGV  | 9     | 1     |
| >ATM-L2890' AELVHIDL    | 889  | >ATM-L2890' AELVHIDV    | 307   | 582   |
| >ATM-L2890' AELVHIDLG   | 154  | >ATM-L2890' AELVHIDVG   | 410   | 256   |
| >ATM-L2890' AELVHIDLGV  | 12   | >ATM-L2890' AELVHIDVGV  | 10    | 2     |
| >ATM-L2890' AELVHIDLGV  | 94   | >ATM-L2890' AELVHIDVGV  | 140   | 46    |
| >ATM-L2890' QSAELVHIDL  | 539  | >ATM-L2890' QSAELVHIDV  | 67    | 472   |
| >ATM-L2890' QSAELVHIDL  | 1336 | >ATM-L2890' QSAELVHIDV  | 166   | 1170  |
| >ATM-L2890' QSAELVHIDL  | 358  | >ATM-L2890' QSAELVHIDV  | 8596  | 8238  |
| >ATM-L2890' QSAELVHIDL  | 332  | >ATM-L2890' QSAELVHIDV  | 2267  | 1935  |
| >ATM-L3017' LKGVVEEGTVL | 346  | >ATM-L3017' PKGVVEEGTVL | 3619  | 3273  |
| >ATM-L3017' KLKGVVEEGTV | 97   | >ATM-L3017' KPKGVEEGTV  | 20747 | 20650 |
| >ATM-L3017' KLKGVVEEGTV | 125  | >ATM-L3017' KPKGVEEGTV  | 29286 | 29161 |
| >ATM-L3017' KLKGVVEEGTV | 57   | >ATM-L3017' KPKGVEEGTV  | 16020 | 15963 |
| >ATM-L3017' KLKGVVEEGTV | 147  | >ATM-L3017' KPKGVEEGTV  | 22099 | 21952 |
| >ATM-L3017' KLKGVVEEGTV | 28   | >ATM-L3017' KPKGVEEGTV  | 18956 | 18928 |
| >ATM-L3017' KLKGVVEEGTV | 262  | >ATM-L3017' KPKGVEEGTV  | 26897 | 26635 |

|                        |       |                        |       |       |
|------------------------|-------|------------------------|-------|-------|
| >ATM-L3017 KLKGVVEEGTV | 118   | >ATM-L3017 KPKGVVEEGTV | 23526 | 23408 |
| >ATM-L3017 KLKGVVEEGTV | 95    | >ATM-L3017 KPKGVVEEGTV | 22720 | 22625 |
| >ATM-L3017 KLKGVVEEGTV | 6     | >ATM-L3017 KPKGVVEEGTV | 25953 | 25947 |
| >ATM-L3017 KLKGVVEEGTV | 27    | >ATM-L3017 KPKGVVEEGTV | 31901 | 31874 |
| >ATM-L3017 KLKGVVEEGTV | 27843 | >ATM-L3017 KPKGVVEEGTV | 212   | 27631 |
| >ATM-L3017 KLKGVVEEGTV | 7435  | >ATM-L3017 KPKGVVEEGTV | 76    | 7359  |
| >ATM-L3017 QEKLKGV     | 195   | >ATM-L3017 QEKPKGV     | 3592  | 3397  |
| >ATM-L3017 RLQEKLKGV   | 100   | >ATM-L3017 RLQEKPKGV   | 441   | 341   |
| >ATM-L3017 RLQEKLKGV   | 106   | >ATM-L3017 RLQEKPKGV   | 729   | 623   |
| >ATM-L3017 RLQEKLKGV   | 5     | >ATM-L3017 RLQEKPKGV   | 9     | 4     |
| >ATM-L3017 RLQEKLKGV   | 88    | >ATM-L3017 RLQEKPKGV   | 3794  | 3706  |
| >ATM-L3017 RLQEKLKGV   | 3     | >ATM-L3017 RLQEKPKGV   | 3     | 0     |
| >ATM-L3017 RLQEKLKGV   | 3     | >ATM-L3017 RLQEKPKGV   | 6     | 3     |
| >ATM-L3017 RLQEKLKGV   | 20    | >ATM-L3017 RLQEKPKGV   | 29    | 9     |
| >ATM-L3017 RLQEKLKGV   | 14    | >ATM-L3017 RLQEKPKGV   | 28    | 14    |
| >ATM-L3017 RLQEKLKGV   | 2     | >ATM-L3017 RLQEKPKGV   | 7     | 5     |
| >ATM-L3017 MRLQEKLK    | 157   | >ATM-L3017 MRLQEKP     | 171   | 14    |
| >ATM-L3017 MRLQEKLKGV  | 757   | >ATM-L3017 MRLQEKPKGV  | 273   | 484   |
| >ATM-L3017 LMRLQEKLKGV | 70    | >ATM-L3017 LMRLQEKPKGV | 80    | 10    |
| >ATM-L3017 LMRLQEKLKGV | 115   | >ATM-L3017 LMRLQEKPKGV | 101   | 14    |
| >ATM-L3017 LMRLQEKLKGV | 338   | >ATM-L3017 LMRLQEKPKGV | 445   | 107   |
| >ATM-L3017 LMRLQEKL    | 65    | >ATM-L3017 LMRLQEKP    | 28054 | 27989 |
| >ATM-L3017 LMRLQEKLKGV | 9     | >ATM-L3017 LMRLQEKPKGV | 15    | 6     |
| >ATM-L3017 LMRLQEKLK   | 26    | >ATM-L3017 LMRLQEKP    | 13    | 13    |
| >ATM-L3017 VLMRLQEKL   | 124   | >ATM-L3017 VLMRLQEKP   | 21613 | 21489 |
| >ATM-L3017 VLMRLQEKL   | 11    | >ATM-L3017 VLMRLQEKP   | 2353  | 2342  |
| >ATM-L3017 VLMRLQEKL   | 291   | >ATM-L3017 VLMRLQEKP   | 17404 | 17113 |
| >ATM-L3017 VLMRLQEKL   | 18    | >ATM-L3017 VLMRLQEKP   | 9224  | 9206  |
| >ATM-L3017 VLMRLQEKL   | 63    | >ATM-L3017 VLMRLQEKP   | 18598 | 18535 |
| >ATM-L3017 VLMRLQEKL   | 67    | >ATM-L3017 VLMRLQEKP   | 17948 | 17881 |
| >ATM-L3017 VLMRLQEKL   | 8     | >ATM-L3017 VLMRLQEKP   | 18421 | 18413 |
| >ATM-L3017 VLMRLQEKL   | 6     | >ATM-L3017 VLMRLQEKP   | 11808 | 11802 |
| >ATM-L3017 VLMRLQEKLK  | 129   | >ATM-L3017 VLMRLQEKP   | 164   | 35    |
| >ATM-L3017 VLMRLQEKLK  | 314   | >ATM-L3017 VLMRLQEKP   | 445   | 131   |
| >ATM-L3017 RVLMLQEKL   | 132   | >ATM-L3017 RVLMLQEKP   | 212   | 80    |
| >ATM-L3017 RVLMLQEKL   | 60    | >ATM-L3017 RVLMLQEKP   | 55    | 5     |
| >ATM-L3017 RVLMLQEKL   | 10    | >ATM-L3017 RVLMLQEKP   | 7     | 3     |
| >ATM-L3017 RVLMLQEKL   | 130   | >ATM-L3017 RVLMLQEKP   | 91    | 39    |
| >ATM-L3017 RVLMLQEKL   | 177   | >ATM-L3017 RVLMLQEKP   | 7489  | 7312  |
| >ATM-L3017 RVLMLQEKL   | 205   | >ATM-L3017 RVLMLQEKP   | 20861 | 20656 |
| >ATM-M104(MALVNCLKTL   | 406   | >ATM-M104(MALVNCLKTL   | 386   | 20    |
| >ATM-M104(MALVNCLKTL   | 41    | >ATM-M104(MALVNCLKTL   | 27    | 14    |
| >ATM-M104(MALVNCLKTL   | 555   | >ATM-M104(MALVNCLKTL   | 241   | 314   |

|                        |      |                        |      |      |
|------------------------|------|------------------------|------|------|
| >ATM-M104I MALVNCLKTI  | 380  | >ATM-M104I VALVNCLKTL  | 2052 | 1672 |
| >ATM-M104I MALVNCLK    | 485  | >ATM-M104I VALVNCLK    | 1191 | 706  |
| >ATM-M104I MALVNCLK    | 48   | >ATM-M104I VALVNCLK    | 80   | 32   |
| >ATM-M104I MALVNCLK    | 35   | >ATM-M104I VALVNCLK    | 617  | 582  |
| >ATM-M104I MALVNCLK    | 419  | >ATM-M104I VALVNCLK    | 2257 | 1838 |
| >ATM-M104I MALVNCLK    | 38   | >ATM-M104I VALVNCLK    | 841  | 803  |
| >ATM-M104I MALVNCLKTI  | 331  | >ATM-M104I VALVNCLKTL  | 1023 | 692  |
| >ATM-M104I MALVNCLKTI  | 20   | >ATM-M104I VALVNCLKTL  | 42   | 22   |
| >ATM-M104I MALVNCLKTI  | 218  | >ATM-M104I VALVNCLKTL  | 513  | 295  |
| >ATM-M104I RMALVNCL    | 147  | >ATM-M104I RVALVNCL    | 4100 | 3953 |
| >ATM-M104I RMALVNCLK   | 222  | >ATM-M104I RVALVNCLKT  | 4154 | 3932 |
| >ATM-M104I RMALVNCL    | 10   | >ATM-M104I RVALVNCL    | 200  | 190  |
| >ATM-M104I RMALVNCLK   | 44   | >ATM-M104I RVALVNCLKT  | 707  | 663  |
| >ATM-M104I RMALVNCL    | 97   | >ATM-M104I RVALVNCL    | 2066 | 1969 |
| >ATM-M104I RMALVNCLK   | 39   | >ATM-M104I RVALVNCLKT  | 892  | 853  |
| >ATM-M104I RMALVNCL    | 403  | >ATM-M104I RVALVNCL    | 656  | 253  |
| >ATM-M104I RMALVNCLK   | 394  | >ATM-M104I RVALVNCLKT  | 436  | 42   |
| >ATM-M104I RMALVNCL    | 60   | >ATM-M104I RVALVNCL    | 6694 | 6634 |
| >ATM-M104I RMALVNCLK   | 26   | >ATM-M104I RVALVNCLKT  | 3632 | 3606 |
| >ATM-M104I RMALVNCL    | 86   | >ATM-M104I RVALVNCL    | 9669 | 9583 |
| >ATM-M104I RMALVNCLK   | 68   | >ATM-M104I RVALVNCLKT  | 7228 | 7160 |
| >ATM-M104I RMALVNCL    | 31   | >ATM-M104I RVALVNCL    | 3153 | 3122 |
| >ATM-M104I RMALVNCLK   | 75   | >ATM-M104I RVALVNCLKT  | 5075 | 5000 |
| >ATM-M104I RMALVNCL    | 75   | >ATM-M104I RVALVNCL    | 7417 | 7342 |
| >ATM-M104I RMALVNCLK   | 113  | >ATM-M104I RVALVNCLKT  | 6644 | 6531 |
| >ATM-M104I RMALVNCL    | 107  | >ATM-M104I RVALVNCL    | 8822 | 8715 |
| >ATM-M104I RMALVNCLK   | 36   | >ATM-M104I RVALVNCLKT  | 4710 | 4674 |
| >ATM-M104I RMALVNCLK   | 36   | >ATM-M104I RVALVNCLK   | 61   | 25   |
| >ATM-M104I RMALVNCLK   | 18   | >ATM-M104I RVALVNCLK   | 22   | 4    |
| >ATM-M104I RMALVNCLK   | 46   | >ATM-M104I RVALVNCLK   | 14   | 32   |
| >ATM-M104I RMALVNCLK   | 65   | >ATM-M104I RVALVNCLK   | 147  | 82   |
| >ATM-M104I RMALVNCL    | 426  | >ATM-M104I RVALVNCL    | 721  | 295  |
| >ATM-M104I RMALVNCLK   | 74   | >ATM-M104I RVALVNCLKT  | 112  | 38   |
| >ATM-M104I RMALVNCLK   | 317  | >ATM-M104I RVALVNCLK   | 31   | 286  |
| >ATM-M104I RMALVNCL    | 235  | >ATM-M104I RVALVNCL    | 5827 | 5592 |
| >ATM-M104I RMALVNCLK   | 239  | >ATM-M104I RVALVNCLKT  | 4115 | 3876 |
| >ATM-M104I RMALVNCLK   | 796  | >ATM-M104I RVALVNCLKT  | 378  | 418  |
| >ATM-M104I RMALVNCL    | 517  | >ATM-M104I RVALVNCL    | 130  | 387  |
| >ATM-M104I RMALVNCLK   | 3450 | >ATM-M104I RVALVNCLKT  | 393  | 3057 |
| >ATM-M104I RMALVNCLK   | 244  | >ATM-M104I RVALVNCLK   | 1705 | 1461 |
| >ATM-M104I KERKYIFSVRN | 244  | >ATM-M104I KERKYIFSVRV | 940  | 696  |
| >ATM-M104I KERKYIFSVRN | 44   | >ATM-M104I KERKYIFSVRV | 60   | 16   |
| >ATM-M104I KERKYIFSVRN | 1392 | >ATM-M104I KERKYIFSVRV | 108  | 1284 |



|                       |      |                       |      |      |
|-----------------------|------|-----------------------|------|------|
| >ATM-M104IKERKYIFSVRM | 12   | >ATM-M104IKERKYIFSVRV | 6    | 6    |
| >ATM-M104IVRMALVNCL   | 225  | >ATM-M104IVRVALVNCL   | 489  | 264  |
| >ATM-M104IVRMALVNCL   | 81   | >ATM-M104IVRVALVNCL   | 518  | 437  |
| >ATM-M104IVRMALVNCL   | 208  | >ATM-M104IVRVALVNCLK  | 377  | 169  |
| >ATM-M104IVRMALVNCL   | 31   | >ATM-M104IVRVALVNCL   | 103  | 72   |
| >ATM-M104IVRMALVNCL   | 289  | >ATM-M104IVRVALVNCL   | 820  | 531  |
| >ATM-M104IVRMALVNCL   | 17   | >ATM-M104IVRVALVNCL   | 53   | 36   |
| >ATM-M104ISVRMALVNC   | 129  | >ATM-M104ISVRVALVNCL  | 159  | 30   |
| >ATM-M104ISVRMALVNC   | 71   | >ATM-M104ISVRVALVNCL  | 94   | 23   |
| >ATM-M104ISVRMALVN    | 237  | >ATM-M104ISVRVALVN    | 287  | 50   |
| >ATM-M104ISVRMALVNC   | 128  | >ATM-M104ISVRVALVNC   | 150  | 22   |
| >ATM-M104ISVRMALVNC   | 32   | >ATM-M104ISVRVALVNCL  | 33   | 1    |
| >ATM-M104ISVRMALVNC   | 3    | >ATM-M104ISVRVALVNCL  | 3    | 0    |
| >ATM-M104ISVRMALVNC   | 286  | >ATM-M104ISVRVALVNCL  | 303  | 17   |
| >ATM-M104ISVRMALVNC   | 129  | >ATM-M104ISVRVALVNCL  | 168  | 39   |
| >ATM-M104IFSVRMALVNC  | 444  | >ATM-M104IFSVRVALVNC  | 3506 | 3062 |
| >ATM-M104IFSVRMALV    | 269  | >ATM-M104IFSVRVALV    | 387  | 118  |
| >ATM-M104IFSVRMALV    | 171  | >ATM-M104IFSVRVALV    | 123  | 48   |
| >ATM-M104IFSVRMALVNC  | 525  | >ATM-M104IFSVRVALVNC  | 372  | 153  |
| >ATM-M104IFSVRMALV    | 226  | >ATM-M104IFSVRVALV    | 201  | 25   |
| >ATM-M104IFSVRMALV    | 35   | >ATM-M104IFSVRVALV    | 21   | 14   |
| >ATM-M104IFSVRMALV    | 1903 | >ATM-M104IFSVRVALV    | 391  | 1512 |
| >ATM-M104IFSVRMALV    | 44   | >ATM-M104IFSVRVALV    | 27   | 17   |
| >ATM-M104IFSVRMALV    | 284  | >ATM-M104IFSVRVALV    | 256  | 28   |
| >ATM-M104IFSVRMALVNC  | 540  | >ATM-M104IFSVRVALVNC  | 469  | 71   |
| >ATM-M104IFSVRMALV    | 383  | >ATM-M104IFSVRVALV    | 1223 | 840  |
| >ATM-M104IFSVRMALVNC  | 328  | >ATM-M104IFSVRVALVNC  | 751  | 423  |
| >ATM-M104IFSVRMALVNC  | 227  | >ATM-M104IFSVRVALVNC  | 174  | 53   |
| >ATM-M104IFSVRMALVNC  | 1047 | >ATM-M104IFSVRVALVNC  | 471  | 576  |
| >ATM-M104IFSVRMALV    | 379  | >ATM-M104IFSVRVALV    | 492  | 113  |
| >ATM-M104IFSVRMALV    | 342  | >ATM-M104IFSVRVALV    | 263  | 79   |
| >ATM-M104IYIFSVRMA    | 121  | >ATM-M104IYIFSVRVA    | 294  | 173  |
| >ATM-M104IYIFSVRMAL   | 32   | >ATM-M104IYIFSVRVAL   | 34   | 2    |
| >ATM-M104IYIFSVRMALV  | 33   | >ATM-M104IYIFSVRVALV  | 35   | 2    |
| >ATM-M104IYIFSVRMA    | 189  | >ATM-M104IYIFSVRVA    | 330  | 141  |
| >ATM-M104IYIFSVRMAL   | 15   | >ATM-M104IYIFSVRVAL   | 11   | 4    |
| >ATM-M104IYIFSVRMALV  | 16   | >ATM-M104IYIFSVRVALV  | 18   | 2    |
| >ATM-M104IYIFSVRMA    | 26   | >ATM-M104IYIFSVRVA    | 47   | 21   |
| >ATM-M104IYIFSVRMAL   | 25   | >ATM-M104IYIFSVRVAL   | 71   | 46   |
| >ATM-M104IYIFSVRMALV  | 11   | >ATM-M104IYIFSVRVALV  | 11   | 0    |
| >ATM-M104IYIFSVRMA    | 161  | >ATM-M104IYIFSVRVA    | 233  | 72   |
| >ATM-M104IYIFSVRMAL   | 34   | >ATM-M104IYIFSVRVAL   | 36   | 2    |
| >ATM-M104IYIFSVRMALV  | 45   | >ATM-M104IYIFSVRVALV  | 48   | 3    |

|                       |     |                       |     |     |
|-----------------------|-----|-----------------------|-----|-----|
| >ATM-M104(YIFSVRMA    | 18  | >ATM-M104(YIFSVRVA    | 32  | 14  |
| >ATM-M104(YIFSVRMAL   | 11  | >ATM-M104(YIFSVRVAL   | 9   | 2   |
| >ATM-M104(YIFSVRMALV  | 3   | >ATM-M104(YIFSVRVALV  | 2   | 1   |
| >ATM-M104(YIFSVRMALV  | 43  | >ATM-M104(YIFSVRVALV  | 35  | 8   |
| >ATM-M104(YIFSVRMA    | 153 | >ATM-M104(YIFSVRVA    | 285 | 132 |
| >ATM-M104(YIFSVRMAL   | 67  | >ATM-M104(YIFSVRVAL   | 53  | 14  |
| >ATM-M104(YIFSVRMALV  | 9   | >ATM-M104(YIFSVRVALV  | 7   | 2   |
| >ATM-M104(YIFSVRMALV  | 84  | >ATM-M104(YIFSVRVALV  | 35  | 49  |
| >ATM-M104(YIFSVRMA    | 80  | >ATM-M104(YIFSVRVA    | 123 | 43  |
| >ATM-M104(YIFSVRMAL   | 7   | >ATM-M104(YIFSVRVAL   | 8   | 1   |
| >ATM-M104(YIFSVRMALV  | 2   | >ATM-M104(YIFSVRVALV  | 2   | 0   |
| >ATM-M104(YIFSVRMAL   | 115 | >ATM-M104(YIFSVRVAL   | 40  | 75  |
| >ATM-M104(YIFSVRMA    | 228 | >ATM-M104(YIFSVRVA    | 354 | 126 |
| >ATM-M104(YIFSVRMAL   | 13  | >ATM-M104(YIFSVRVAL   | 19  | 6   |
| >ATM-M104(YIFSVRMALV  | 27  | >ATM-M104(YIFSVRVALV  | 33  | 6   |
| >ATM-M104(YIFSVRMAL   | 115 | >ATM-M104(YIFSVRVAL   | 218 | 103 |
| >ATM-M104(YIFSVRMALV  | 15  | >ATM-M104(YIFSVRVALV  | 24  | 9   |
| >ATM-M104(YIFSVRMAL   | 271 | >ATM-M104(YIFSVRVAL   | 658 | 387 |
| >ATM-M104(YIFSVRMAL   | 276 | >ATM-M104(YIFSVRVAL   | 271 | 5   |
| >ATM-M104(YIFSVRMAL   | 27  | >ATM-M104(YIFSVRVAL   | 30  | 3   |
| >ATM-M104(YIFSVRMAL   | 23  | >ATM-M104(YIFSVRVAL   | 17  | 6   |
| >ATM-M104(YIFSVRMAL   | 115 | >ATM-M104(YIFSVRVAL   | 354 | 239 |
| >ATM-M104(YIFSVRMAL   | 87  | >ATM-M104(YIFSVRVAL   | 46  | 41  |
| >ATM-M104(KYIFSVRM    | 174 | >ATM-M104(KYIFSVRV    | 185 | 11  |
| >ATM-M104(KYIFSVRMAL  | 7   | >ATM-M104(KYIFSVRVAL  | 7   | 0   |
| >ATM-M104(KYIFSVRMAL' | 405 | >ATM-M104(KYIFSVRVALV | 442 | 37  |
| >ATM-M104(KYIFSVRM    | 269 | >ATM-M104(KYIFSVRV    | 287 | 18  |
| >ATM-M104(KYIFSVRMAL' | 399 | >ATM-M104(KYIFSVRVALV | 398 | 1   |
| >ATM-M104(KYIFSVRM    | 374 | >ATM-M104(KYIFSVRV    | 481 | 107 |
| >ATM-M104(KYIFSVRMAL' | 274 | >ATM-M104(KYIFSVRVALV | 193 | 81  |
| >ATM-M104(KYIFSVRM    | 129 | >ATM-M104(KYIFSVRV    | 320 | 191 |
| >ATM-M104(KYIFSVRMAL  | 10  | >ATM-M104(KYIFSVRVAL  | 14  | 4   |
| >ATM-M104(KYIFSVRM    | 779 | >ATM-M104(KYIFSVRV    | 478 | 301 |
| >ATM-M104(KYIFSVRMA   | 260 | >ATM-M104(KYIFSVRVA   | 217 | 43  |
| >ATM-M104(KYIFSVRMAL  | 127 | >ATM-M104(KYIFSVRVAL  | 333 | 206 |
| >ATM-M104(KYIFSVRMAL' | 142 | >ATM-M104(KYIFSVRVALV | 145 | 3   |
| >ATM-M104(KYIFSVRMAL  | 233 | >ATM-M104(KYIFSVRVAL  | 108 | 125 |
| >ATM-M104(KYIFSVRMAL' | 396 | >ATM-M104(KYIFSVRVALV | 475 | 79  |
| >ATM-M104(KYIFSVRM    | 287 | >ATM-M104(KYIFSVRV    | 293 | 6   |
| >ATM-M104(KYIFSVRMA   | 230 | >ATM-M104(KYIFSVRVA   | 249 | 19  |
| >ATM-M104(KYIFSVRMAL  | 332 | >ATM-M104(KYIFSVRVAL  | 362 | 30  |
| >ATM-M104(KYIFSVRMAL' | 273 | >ATM-M104(KYIFSVRVALV | 252 | 21  |
| >ATM-M104(RKYIFSVRM   | 73  | >ATM-M104(RKYIFSVRV   | 299 | 226 |

|                      |       |                       |      |       |
|----------------------|-------|-----------------------|------|-------|
| >ATM-M104IRKYIFSVRMA | 359   | >ATM-M104IRKYIFSVRVAL | 373  | 14    |
| >ATM-M104IRKYIFSVRM  | 10399 | >ATM-M104IRKYIFSVRV   | 232  | 10167 |
| >ATM-M104IRKYIFSVRMA | 426   | >ATM-M104IRKYIFSVRVAL | 197  | 229   |
| >ATM-M104IRKYIFSVRM  | 5     | >ATM-M104IRKYIFSVRV   | 14   | 9     |
| >ATM-M104IRKYIFSVRMA | 29    | >ATM-M104IRKYIFSVRVA  | 21   | 8     |
| >ATM-M104IRKYIFSVRMA | 4     | >ATM-M104IRKYIFSVRVAL | 4    | 0     |
| >ATM-M104IRKYIFSVRM  | 157   | >ATM-M104IRKYIFSVRV   | 920  | 763   |
| >ATM-M104IRKYIFSVRMA | 348   | >ATM-M104IRKYIFSVRVAL | 234  | 114   |
| >ATM-M104IRKYIFSVRMA | 122   | >ATM-M104IRKYIFSVRVAL | 102  | 20    |
| >ATM-M104IRKYIFSVRM  | 463   | >ATM-M104IRKYIFSVRV   | 1683 | 1220  |
| >ATM-M104IRKYIFSVRMA | 44    | >ATM-M104IRKYIFSVRVAL | 42   | 2     |
| >ATM-M104IRKYIFSVRM  | 1667  | >ATM-M104IRKYIFSVRV   | 484  | 1183  |
| >ATM-M104IRKYIFSVRM  | 272   | >ATM-M104IRKYIFSVRV   | 247  | 25    |
| >ATM-M104IRKYIFSVRMA | 58    | >ATM-M104IRKYIFSVRVAL | 60   | 2     |
| >ATM-M104IRKYIFSVRMA | 83    | >ATM-M104IRKYIFSVRVAL | 61   | 22    |
| >ATM-M191IMRRQKRPS   | 255   | >ATM-M191IIRRQKRPS    | 3422 | 3167  |
| >ATM-M191IYMRRQKRPS  | 540   | >ATM-M191IYIRRQKRPS   | 374  | 166   |
| >ATM-M191IYMRRQKRPS: | 243   | >ATM-M191IYIRRQKRPS   | 171  | 72    |
| >ATM-M191IYMRRQKRPS  | 430   | >ATM-M191IYIRRQKRPS   | 1135 | 705   |
| >ATM-M191IYMRRQKRPS: | 68    | >ATM-M191IYIRRQKRPS:  | 137  | 69    |
| >ATM-M191IQRTMLAVVD  | 5566  | >ATM-M191IQRTMLAVVD   | 265  | 5301  |
| >ATM-M191IQRTMLAVVD  | 128   | >ATM-M191IQRTMLAVVD   | 257  | 129   |
| >ATM-M191IQRTMLAVVD  | 848   | >ATM-M191IQRTMLAVVD   | 488  | 360   |
| >ATM-M191IDYMRRQKR   | 327   | >ATM-M191IDYIRRQKR    | 797  | 470   |
| >ATM-M191IDYMRRQKR   | 10    | >ATM-M191IDYIRRQKR    | 14   | 4     |
| >ATM-M191IDYMRRQKR   | 155   | >ATM-M191IDYIRRQKR    | 221  | 66    |
| >ATM-M191IVVDYMRRQK  | 141   | >ATM-M191IVVDYIRRQK   | 176  | 35    |
| >ATM-M191IVVDYMRRQK  | 137   | >ATM-M191IVVDYIRRQKR  | 134  | 3     |
| >ATM-M191IAVVDYMRR   | 71    | >ATM-M191IAVVDYIRRQK  | 73   | 2     |
| >ATM-M191IAVVDYMRR   | 108   | >ATM-M191IAVVDYIRR    | 166  | 58    |
| >ATM-M191IAVVDYMRR   | 89    | >ATM-M191IAVVDYIRRQK  | 81   | 8     |
| >ATM-M191IAVVDYMRR   | 73    | >ATM-M191IAVVDYIRRQ   | 587  | 514   |
| >ATM-M191IAVVDYMRR   | 153   | >ATM-M191IAVVDYIRRQK  | 173  | 20    |
| >ATM-M191IAVVDYMRR   | 65    | >ATM-M191IAVVDYIRR    | 73   | 8     |
| >ATM-M191IAVVDYMRR   | 392   | >ATM-M191IAVVDYIRRQK  | 272  | 120   |
| >ATM-M191IAVVDYMRR   | 47    | >ATM-M191IAVVDYIRRQK  | 56   | 9     |
| >ATM-M191IAVVDYMRR   | 66    | >ATM-M191IAVVDYIRR    | 80   | 14    |
| >ATM-M191IAVVDYMRR   | 557   | >ATM-M191IAVVDYIRRQK  | 411  | 146   |
| >ATM-M191IAVVDYMRR   | 139   | >ATM-M191IAVVDYIRRQK  | 131  | 8     |
| >ATM-M191IAVVDYMRR   | 211   | >ATM-M191IAVVDYIRR    | 384  | 173   |
| >ATM-M191IAVVDYMRR   | 308   | >ATM-M191IAVVDYIRRQK  | 567  | 259   |
| >ATM-M191ILAVVDYMR   | 151   | >ATM-M191ILAVVDYIR    | 202  | 51    |
| >ATM-M191ILAVVDYMR   | 385   | >ATM-M191ILAVVDYIRR   | 426  | 41    |

|                     |      |                      |      |      |
|---------------------|------|----------------------|------|------|
| >ATM-M191 LAVVDYMR  | 34   | >ATM-M191 LAVVDYIR   | 86   | 52   |
| >ATM-M191 LAVVDYMRR | 94   | >ATM-M191 LAVVDYIRR  | 164  | 70   |
| >ATM-M191 LAVVDYMRR | 404  | >ATM-M191 LAVVDYIRRQ | 367  | 37   |
| >ATM-M191 MLAVVDYM  | 50   | >ATM-M191 MLAVVDYI   | 21   | 29   |
| >ATM-M191 MLAVVDYM  | 6    | >ATM-M191 MLAVVDYI   | 3    | 3    |
| >ATM-M191 MLAVVDYMF | 282  | >ATM-M191 MLAVVDYIRF | 278  | 4    |
| >ATM-M191 MLAVVDYM  | 120  | >ATM-M191 MLAVVDYI   | 12   | 108  |
| >ATM-M191 MLAVVDYM  | 246  | >ATM-M191 MLAVVDYI   | 56   | 190  |
| >ATM-M191 MLAVVDYM  | 18   | >ATM-M191 MLAVVDYI   | 5    | 13   |
| >ATM-M191 MLAVVDYM  | 165  | >ATM-M191 MLAVVDYI   | 15   | 150  |
| >ATM-M191 MLAVVDYM  | 41   | >ATM-M191 MLAVVDYI   | 11   | 30   |
| >ATM-M191 MLAVVDYM  | 43   | >ATM-M191 MLAVVDYI   | 14   | 29   |
| >ATM-M191 MLAVVDYM  | 50   | >ATM-M191 MLAVVDYI   | 11   | 39   |
| >ATM-M191 MLAVVDYMF | 460  | >ATM-M191 MLAVVDYIRF | 227  | 233  |
| >ATM-M191 MLAVVDYMF | 23   | >ATM-M191 MLAVVDYIR  | 24   | 1    |
| >ATM-M191 MLAVVDYMF | 163  | >ATM-M191 MLAVVDYIRF | 284  | 121  |
| >ATM-M191 MLAVVDYMF | 38   | >ATM-M191 MLAVVDYIR  | 103  | 65   |
| >ATM-M191 MLAVVDYMF | 3    | >ATM-M191 MLAVVDYIR  | 6    | 3    |
| >ATM-M191 MLAVVDYMF | 13   | >ATM-M191 MLAVVDYIRF | 12   | 1    |
| >ATM-M191 MLAVVDYM  | 159  | >ATM-M191 MLAVVDYI   | 19   | 140  |
| >ATM-M191 MLAVVDYMF | 253  | >ATM-M191 MLAVVDYIR  | 183  | 70   |
| >ATM-M191 MLAVVDYMF | 328  | >ATM-M191 MLAVVDYIRF | 306  | 22   |
| >ATM-M191 TMLAVVDYN | 2291 | >ATM-M191 TMLAVVDYI  | 376  | 1915 |
| >ATM-M191 TMLAVVDYN | 31   | >ATM-M191 TMLAVVDYI  | 14   | 17   |
| >ATM-M191 TMLAVVDYN | 73   | >ATM-M191 TMLAVVDYI  | 21   | 52   |
| >ATM-M191 TMLAVVDYN | 462  | >ATM-M191 TMLAVVDYI  | 30   | 432  |
| >ATM-M191 TMLAVVDYN | 117  | >ATM-M191 TMLAVVDYI  | 28   | 89   |
| >ATM-M191 TMLAVVDYN | 3    | >ATM-M191 TMLAVVDYI  | 2    | 1    |
| >ATM-M191 TMLAVVDYN | 60   | >ATM-M191 TMLAVVDYI  | 9    | 51   |
| >ATM-M191 TMLAVVDYN | 25   | >ATM-M191 TMLAVVDYI  | 10   | 15   |
| >ATM-M191 TMLAVVDYN | 10   | >ATM-M191 TMLAVVDYI  | 4    | 6    |
| >ATM-M191 TMLAVVDYN | 622  | >ATM-M191 TMLAVVDYI  | 66   | 556  |
| >ATM-M191 TMLAVVDYN | 434  | >ATM-M191 TMLAVVDYIR | 615  | 181  |
| >ATM-M191 TMLAVVDYN | 92   | >ATM-M191 TMLAVVDYIR | 166  | 74   |
| >ATM-M191 TMLAVVDYN | 75   | >ATM-M191 TMLAVVDYIR | 107  | 32   |
| >ATM-M191 TMLAVVDYN | 383  | >ATM-M191 TMLAVVDYI  | 4742 | 4359 |
| >ATM-M191 TMLAVVDYN | 37   | >ATM-M191 TMLAVVDYIR | 64   | 27   |
| >ATM-M191 TMLAVVDYN | 23   | >ATM-M191 TMLAVVDYIR | 23   | 0    |
| >ATM-M191 TMLAVVDYN | 218  | >ATM-M191 TMLAVVDYIR | 375  | 157  |
| >ATM-M191 TMLAVVDYN | 113  | >ATM-M191 TMLAVVDYIR | 156  | 43   |
| >ATM-M191 TMLAVVDYN | 9    | >ATM-M191 TMLAVVDYIR | 17   | 8    |
| >ATM-M191 TMLAVVDYN | 70   | >ATM-M191 TMLAVVDYIR | 94   | 24   |
| >ATM-M191 TMLAVVDYN | 2469 | >ATM-M191 TMLAVVDYI  | 218  | 2251 |

|                      |      |                      |      |      |
|----------------------|------|----------------------|------|------|
| >ATM-M191ITMLAVVDYM  | 182  | >ATM-M191ITMLAVVDYI  | 84   | 98   |
| >ATM-M191ITMLAVVDYM  | 438  | >ATM-M191ITMLAVVDYI  | 579  | 141  |
| >ATM-M191ITMLAVVDYM  | 323  | >ATM-M191ITMLAVVDYIR | 450  | 127  |
| >ATM-M191ITMLAVVDYM  | 65   | >ATM-M191ITMLAVVDYIR | 54   | 11   |
| >ATM-M191ITMLAVVDYM  | 98   | >ATM-M191ITMLAVVDYIR | 93   | 5    |
| >ATM-M191IRTMLAVVDYI | 331  | >ATM-M191IRTMLAVVDYI | 117  | 214  |
| >ATM-M191IRTMLAVVDYI | 162  | >ATM-M191IRTMLAVVDYI | 90   | 72   |
| >ATM-M191IRTMLAVVDYI | 732  | >ATM-M191IRTMLAVVDYI | 138  | 594  |
| >ATM-M191IRTMLAVVDYI | 310  | >ATM-M191IRTMLAVVDYI | 109  | 201  |
| >ATM-M191IRTMLAVVDYI | 1771 | >ATM-M191IRTMLAVVDYI | 252  | 1519 |
| >ATM-M191IRTMLAVVDYI | 24   | >ATM-M191IRTMLAVVDYI | 37   | 13   |
| >ATM-M191IRTMLAVVDYI | 4478 | >ATM-M191IRTMLAVVDYI | 463  | 4015 |
| >ATM-M191IRTMLAVVDYI | 53   | >ATM-M191IRTMLAVVDYI | 2068 | 2015 |
| >ATM-M191IRTMLAVVDYI | 282  | >ATM-M191IRTMLAVVDYI | 104  | 178  |
| >ATM-M191IRTMLAVVDYI | 10   | >ATM-M191IRTMLAVVDYI | 11   | 1    |
| >ATM-M191IRTMLAVVDYI | 177  | >ATM-M191IRTMLAVVDYI | 26   | 151  |
| >ATM-M191IRTMLAVVDYI | 272  | >ATM-M191IRTMLAVVDYI | 695  | 423  |
| >ATM-M191IRTMLAVVDYI | 14   | >ATM-M191IRTMLAVVDYI | 29   | 15   |
| >ATM-M191IRTMLAVVDYI | 156  | >ATM-M191IRTMLAVVDYI | 27   | 129  |
| >ATM-M191IRTMLAVVDYI | 6    | >ATM-M191IRTMLAVVDYI | 19   | 13   |
| >ATM-M191IRTMLAVVDYI | 236  | >ATM-M191IRTMLAVVDYI | 1132 | 896  |
| >ATM-M191IRTMLAVVDYI | 33   | >ATM-M191IRTMLAVVDYI | 39   | 6    |
| >ATM-M191IRTMLAVVDYI | 234  | >ATM-M191IRTMLAVVDYI | 452  | 218  |
| >ATM-M191IRTMLAVVDYI | 19   | >ATM-M191IRTMLAVVDYI | 151  | 132  |
| >ATM-M191IRTMLAVVDYI | 95   | >ATM-M191IRTMLAVVDYI | 81   | 14   |
| >ATM-M1L-vMSLVLNDLL  | 483  | >ATM-M1L-nLSLVLNDLL  | 1056 | 573  |
| >ATM-M1L-vMSLVLNDL   | 150  | >ATM-M1L-nLSLVLNDL   | 365  | 215  |
| >ATM-M1L-vMSLVLNDLL  | 191  | >ATM-M1L-nLSLVLNDLL  | 471  | 280  |
| >ATM-M1L-vMSLVLNDLLI | 118  | >ATM-M1L-nLSLVLNDLLI | 253  | 135  |
| >ATM-M1L-vMSLVLNDLL  | 246  | >ATM-M1L-nLSLVLNDLL  | 493  | 247  |
| >ATM-M1L-vMSLVLNDLLI | 50   | >ATM-M1L-nLSLVLNDLLI | 101  | 51   |
| >ATM-M1L-vMSLVLNDL   | 464  | >ATM-M1L-nLSLVLNDL   | 744  | 280  |
| >ATM-M1L-vMSLVLNDLL  | 74   | >ATM-M1L-nLSLVLNDLL  | 80   | 6    |
| >ATM-M1L-vMSLVLNDLLI | 76   | >ATM-M1L-nLSLVLNDLLI | 48   | 28   |
| >ATM-M261IMVRSVEAL   | 487  | >ATM-M261IVRSVEAL    | 1859 | 1372 |
| >ATM-M261IMVRSVEAL   | 449  | >ATM-M261IVRSVEAL    | 1560 | 1111 |
| >ATM-M261IMVRSVEAL   | 82   | >ATM-M261IVRSVEAL    | 663  | 581  |
| >ATM-M261IMVRSVEALC  | 496  | >ATM-M261IVRSVEALC   | 2429 | 1933 |
| >ATM-M261IMVRSVEALCI | 18   | >ATM-M261IVRSVEALCD  | 96   | 78   |
| >ATM-M261IMVRSVEAL   | 283  | >ATM-M261IVRSVEAL    | 7229 | 6946 |
| >ATM-M261IMVRSVEAL   | 75   | >ATM-M261IVRSVEAL    | 201  | 126  |
| >ATM-M261IQMVRSVEA   | 274  | >ATM-M261IQIVRSVEA   | 3536 | 3262 |
| >ATM-M261IQMVRSVEAL  | 30   | >ATM-M261IQIVRSVEAL  | 420  | 390  |

|                       |      |                       |      |      |
|-----------------------|------|-----------------------|------|------|
| >ATM-M261 QMVRSVEA    | 157  | >ATM-M261 QIVRSVEA    | 1945 | 1788 |
| >ATM-M261 QMVRSVEAL   | 83   | >ATM-M261 QIVRSVEAL   | 1244 | 1161 |
| >ATM-M261 QMVRSVEA    | 325  | >ATM-M261 QIVRSVEA    | 937  | 612  |
| >ATM-M261 QMVRSVEAL   | 151  | >ATM-M261 QIVRSVEAL   | 473  | 322  |
| >ATM-M261 QMVRSVEA    | 327  | >ATM-M261 QIVRSVEA    | 7844 | 7517 |
| >ATM-M261 QMVRSVEAL   | 36   | >ATM-M261 QIVRSVEAL   | 1846 | 1810 |
| >ATM-M261 QMVRSVEAL   | 116  | >ATM-M261 QIVRSVEAL   | 7855 | 7739 |
| >ATM-M261 QMVRSVEA    | 106  | >ATM-M261 QIVRSVEA    | 4740 | 4634 |
| >ATM-M261 QMVRSVEAL   | 69   | >ATM-M261 QIVRSVEAL   | 2222 | 2153 |
| >ATM-M261 QMVRSVEAL   | 227  | >ATM-M261 QIVRSVEAL   | 41   | 186  |
| >ATM-M261 QMVRSVEAL   | 3019 | >ATM-M261 QIVRSVEAL   | 395  | 2624 |
| >ATM-M261 QMVRSVEAL   | 161  | >ATM-M261 QIVRSVEAL   | 1986 | 1825 |
| >ATM-M261 QMVRSVEAL   | 21   | >ATM-M261 QIVRSVEAL   | 747  | 726  |
| >ATM-M261 QMVRSVEAL   | 459  | >ATM-M261 QIVRSVEAL   | 4850 | 4391 |
| >ATM-M261 PQMVRSVEA   | 100  | >ATM-M261 PQIVRSVEAL  | 188  | 88   |
| >ATM-M261 RPQMVRVS    | 12   | >ATM-M261 RPQIVRSV    | 18   | 6    |
| >ATM-M261 RPQMVRVSVE  | 189  | >ATM-M261 RPQIVRSVE   | 494  | 305  |
| >ATM-M261 RPQMVRVSVE  | 100  | >ATM-M261 RPQIVRSVEA  | 204  | 104  |
| >ATM-M261 RPQMVRVSVE  | 10   | >ATM-M261 RPQIVRSVEA  | 11   | 1    |
| >ATM-M261 RPQMVRVSVE  | 50   | >ATM-M261 RPQIVRSVEA  | 34   | 16   |
| >ATM-M261 RPQMVRVSVE  | 161  | >ATM-M261 RPQIVRSVEA  | 180  | 19   |
| >ATM-M261 RRPQMVRVS   | 243  | >ATM-M261 RRPQIVRSV   | 197  | 46   |
| >ATM-M261 RRPQMVRVS   | 104  | >ATM-M261 RRPQIVRSV   | 124  | 20   |
| >ATM-M261 RRPQMVRVS   | 202  | >ATM-M261 RRPQIVRSVE  | 208  | 6    |
| >ATM-M261 RRPQMVRVS   | 254  | >ATM-M261 RRPQIVRSVE  | 289  | 35   |
| >ATM-M261 RRPQMVRVS   | 29   | >ATM-M261 RRPQIVRSV   | 39   | 10   |
| >ATM-M261 RRPQMVRVS   | 230  | >ATM-M261 RRPQIVRSVE  | 292  | 62   |
| >ATM-M261 SRRPQMVRVS' | 605  | >ATM-M261 SRRPQIVRSV  | 485  | 120  |
| >ATM-M261 SRRPQMVRVS' | 697  | >ATM-M261 SRRPQIVRSV  | 486  | 211  |
| >ATM-M261 RSRRPQMVR   | 206  | >ATM-M261 RSRRPQIVR   | 330  | 124  |
| >ATM-M261 RSRRPQMVR   | 5    | >ATM-M261 RSRRPQIV    | 4    | 1    |
| >ATM-M261 RSRRPQMVR   | 5    | >ATM-M261 RSRRPQIVR   | 5    | 0    |
| >ATM-M261 RSRRPQMVR   | 9    | >ATM-M261 RSRRPQIVRS  | 9    | 0    |
| >ATM-M261 RSRRPQMVR   | 4    | >ATM-M261 RSRRPQIVRS' | 4    | 0    |
| >ATM-M261 RSRRPQMVR   | 17   | >ATM-M261 RSRRPQIVR   | 16   | 1    |
| >ATM-M261 RSRRPQMVR   | 259  | >ATM-M261 RSRRPQIVRS' | 407  | 148  |
| >ATM-M261 RSRRPQMVR   | 198  | >ATM-M261 RSRRPQIV    | 176  | 22   |
| >ATM-M261 RSRRPQMVR   | 221  | >ATM-M261 RSRRPQIVR   | 654  | 433  |
| >ATM-M261 RSRRPQMVR   | 113  | >ATM-M261 RSRRPQIVRS' | 152  | 39   |
| >ATM-M261 RSRRPQMVR   | 55   | >ATM-M261 RSRRPQIV    | 148  | 93   |
| >ATM-M261 RSRRPQMVR   | 434  | >ATM-M261 RSRRPQIVRS  | 810  | 376  |
| >ATM-M261 RSRRPQMVR   | 51   | >ATM-M261 RSRRPQIVRS' | 70   | 19   |
| >ATM-M261 RSRRPQMVR   | 420  | >ATM-M261 RSRRPQIV    | 382  | 38   |

|                        |       |                        |      |       |
|------------------------|-------|------------------------|------|-------|
| >ATM-M261 RSRRPQMVR    | 149   | >ATM-M261 RSRRPQIVRS'  | 184  | 35    |
| >ATM-M261 IRSRRPQM     | 379   | >ATM-M261 IRSRRPQI     | 785  | 406   |
| >ATM-M261 IRSRRPQMV    | 382   | >ATM-M261 IRSRRPQIV    | 299  | 83    |
| >ATM-M261 IRSRRPQM     | 229   | >ATM-M261 IRSRRPQI     | 505  | 276   |
| >ATM-M261 IRSRRPQMVF   | 507   | >ATM-M261 IRSRRPQIVR   | 331  | 176   |
| >ATM-M261 IRSRRPQM     | 346   | >ATM-M261 IRSRRPQI     | 233  | 113   |
| >ATM-M261 IRSRRPQMV    | 248   | >ATM-M261 IRSRRPQIV    | 453  | 205   |
| >ATM-M261 IRSRRPQMVF   | 376   | >ATM-M261 IRSRRPQIVR   | 509  | 133   |
| >ATM-M261 TIRSRRPQM    | 401   | >ATM-M261 TIRSRRPQI    | 1436 | 1035  |
| >ATM-M261 TIRSRRPQMV   | 67    | >ATM-M261 TIRSRRPQIV   | 123  | 56    |
| >ATM-M261 TIRSRRPQM    | 30    | >ATM-M261 TIRSRRPQI    | 14   | 16    |
| >ATM-M261 TIRSRRPQMV   | 65    | >ATM-M261 TIRSRRPQIV   | 50   | 15    |
| >ATM-M261 TIRSRRPQMV   | 87    | >ATM-M261 TIRSRRPQIVR  | 113  | 26    |
| >ATM-M261 TIRSRRPQMV   | 36    | >ATM-M261 TIRSRRPQIVR  | 36   | 0     |
| >ATM-M261 TIRSRRPQMV   | 94    | >ATM-M261 TIRSRRPQIVR  | 129  | 35    |
| >ATM-M261 TIRSRRPQMV   | 139   | >ATM-M261 TIRSRRPQIVR  | 162  | 23    |
| >ATM-M261 TIRSRRPQM    | 49    | >ATM-M261 TIRSRRPQI    | 55   | 6     |
| >ATM-M261 CTIRSRRPQM   | 35    | >ATM-M261 CTIRSRRPQI   | 2174 | 2139  |
| >ATM-M261 CTIRSRRPQM   | 4493  | >ATM-M261 CTIRSRRPQI   | 441  | 4052  |
| >ATM-M261 CTIRSRRPQM   | 117   | >ATM-M261 CTIRSRRPQIV  | 332  | 215   |
| >ATM-M261 CTIRSRRPQM   | 76    | >ATM-M261 CTIRSRRPQI   | 599  | 523   |
| >ATM-M261 CTIRSRRPQM   | 122   | >ATM-M261 CTIRSRRPQI   | 4655 | 4533  |
| >ATM-N1739 NILATKTGHSI | 798   | >ATM-N1739 TILATKTGHSF | 486  | 312   |
| >ATM-N1739 NILATKTGHSI | 145   | >ATM-N1739 TILATKTGHSF | 205  | 60    |
| >ATM-N1739 NILATKTGHSI | 250   | >ATM-N1739 TILATKTGHSF | 144  | 106   |
| >ATM-N1739 KNILATKT    | 24279 | >ATM-N1739 KTILATKT    | 362  | 23917 |
| >ATM-N1739 KNILATKTGH  | 22586 | >ATM-N1739 KTILATKTGH  | 71   | 22515 |
| >ATM-N1739 CLKNILAT    | 346   | >ATM-N1739 CLKTILAT    | 437  | 91    |
| >ATM-N1739 CLKNILATK   | 151   | >ATM-N1739 CLKTILATK   | 162  | 11    |
| >ATM-N1739 CLKNILATK   | 52    | >ATM-N1739 CLKTILATK   | 50   | 2     |
| >ATM-N1739 CLKNILATK   | 130   | >ATM-N1739 CLKTILATK   | 223  | 93    |
| >ATM-N1739 CLKNILATK   | 478   | >ATM-N1739 CLKTILATK   | 492  | 14    |
| >ATM-N1739 VTCLKNILATK | 573   | >ATM-N1739 VTCLKTILATK | 343  | 230   |
| >ATM-N1739 VTCLKNILATK | 30    | >ATM-N1739 VTCLKTILATK | 24   | 6     |
| >ATM-N1739 VTCLKNILATK | 298   | >ATM-N1739 VTCLKTILATK | 261  | 37    |
| >ATM-N1739 VTCLKNILATK | 529   | >ATM-N1739 VTCLKTILATK | 477  | 52    |
| >ATM-N1739 VTCLKNILATK | 242   | >ATM-N1739 VTCLKTILATK | 247  | 5     |
| >ATM-N1739 VTCLKNIL    | 325   | >ATM-N1739 VTCLKTIL    | 97   | 228   |
| >ATM-N1739 AVTCLKNIL   | 439   | >ATM-N1739 AVTCLKTIL   | 194  | 245   |
| >ATM-N1739 AAVTCLKNI   | 882   | >ATM-N1739 AAVTCLKTI   | 280  | 602   |
| >ATM-N1739 AAVTCLKNI   | 1087  | >ATM-N1739 AAVTCLKTI   | 415  | 672   |
| >ATM-N1739 SAAVTCLKNII | 598   | >ATM-N1739 SAAVTCLKTIL | 348  | 250   |
| >ATM-N1739 SAAVTCLKNI  | 914   | >ATM-N1739 SAAVTCLKTI  | 477  | 437   |

|                       |       |                       |     |       |
|-----------------------|-------|-----------------------|-----|-------|
| >ATM-N1739RSAAVTCLKN  | 145   | >ATM-N1739RSAAVTCLKT  | 34  | 111   |
| >ATM-N1739RSAAVTCLKN  | 24    | >ATM-N1739RSAAVTCLKT  | 13  | 11    |
| >ATM-N1739RSAAVTCLKN  | 59    | >ATM-N1739RSAAVTCLKT  | 31  | 28    |
| >ATM-N1739RSAAVTCLKN  | 1389  | >ATM-N1739RSAAVTCLKT  | 259 | 1130  |
| >ATM-N1739RSAAVTCLKN  | 16    | >ATM-N1739RSAAVTCLKT  | 10  | 6     |
| >ATM-N1801NHDIWIKTL   | 236   | >ATM-N1801YHDIWIKTL   | 193 | 43    |
| >ATM-N1801NHDIWIKTL   | 49    | >ATM-N1801YHDIWIKTL   | 24  | 25    |
| >ATM-N1801ENHDIWIKTL  | 25616 | >ATM-N1801EYHDIWIKTL  | 87  | 25529 |
| >ATM-N1801ENHDIWIK    | 12387 | >ATM-N1801EYHDIWIK    | 235 | 12152 |
| >ATM-N1801ENHDIWIK    | 232   | >ATM-N1801EYHDIWIK    | 134 | 98    |
| >ATM-N1801ENHDIWIK    | 2796  | >ATM-N1801EYHDIWIK    | 63  | 2733  |
| >ATM-N1801ENHDIWIKTL  | 20760 | >ATM-N1801EYHDIWIKTL  | 365 | 20395 |
| >ATM-N1801DINLWIPLSEF | 18188 | >ATM-N1801DINLWIPLSEY | 266 | 17922 |
| >ATM-N1801DINLWIPLSEF | 23291 | >ATM-N1801DINLWIPLSEY | 38  | 23253 |
| >ATM-N1801DINLWIPLSEF | 23894 | >ATM-N1801DINLWIPLSEY | 327 | 23567 |
| >ATM-N1801DINLWIPLSEF | 25202 | >ATM-N1801DINLWIPLSEY | 252 | 24950 |
| >ATM-N1801SENHDIWI    | 40    | >ATM-N1801SEYHDIWI    | 22  | 18    |
| >ATM-N1801SENHDIWIKT  | 198   | >ATM-N1801SEYHDIWIKTI | 44  | 154   |
| >ATM-N1801SENHDIWIKT  | 1656  | >ATM-N1801SEYHDIWIKTI | 394 | 1262  |
| >ATM-N1801SENHDIWI    | 177   | >ATM-N1801SEYHDIWI    | 55  | 122   |
| >ATM-N1801SENHDIWIKT  | 204   | >ATM-N1801SEYHDIWIKTI | 76  | 128   |
| >ATM-N1801SENHDIWIKT  | 918   | >ATM-N1801SEYHDIWIKT  | 479 | 439   |
| >ATM-N1801SENHDIWIKT  | 249   | >ATM-N1801SEYHDIWIKTI | 113 | 136   |
| >ATM-N1801SENHDIWIKT  | 305   | >ATM-N1801SEYHDIWIKT  | 156 | 149   |
| >ATM-N1801SENHDIWI    | 272   | >ATM-N1801SEYHDIWI    | 235 | 37    |
| >ATM-N1801SENHDIWIKT  | 629   | >ATM-N1801SEYHDIWIKT  | 140 | 489   |
| >ATM-N1801SENHDIWIKT  | 240   | >ATM-N1801SEYHDIWIKTI | 174 | 66    |
| >ATM-N1801SENHDIWI    | 208   | >ATM-N1801SEYHDIWI    | 164 | 44    |
| >ATM-N1801SENHDIWIKT  | 602   | >ATM-N1801SEYHDIWIKT  | 172 | 430   |
| >ATM-N1801SENHDIWI    | 2054  | >ATM-N1801SEYHDIWI    | 386 | 1668  |
| >ATM-N1801SENHDIWIKT  | 282   | >ATM-N1801SEYHDIWIKTI | 22  | 260   |
| >ATM-N1801LSENHDIWIK  | 339   | >ATM-N1801LSEYHDIWIK  | 335 | 4     |
| >ATM-N1801LSENHDIW    | 56    | >ATM-N1801LSEYHDIW    | 64  | 8     |
| >ATM-N1801LSENHDIW    | 321   | >ATM-N1801LSEYHDIW    | 300 | 21    |
| >ATM-N1801LSENHDIW    | 92    | >ATM-N1801LSEYHDIW    | 74  | 18    |
| >ATM-N1801LSENHDIW    | 130   | >ATM-N1801LSEYHDIW    | 103 | 27    |
| >ATM-N1801LSENHDIW    | 68    | >ATM-N1801LSEYHDIW    | 80  | 12    |
| >ATM-N1801LSENHDIWIK  | 488   | >ATM-N1801LSEYHDIWIK  | 528 | 40    |
| >ATM-N1801LSENHDIWI   | 63    | >ATM-N1801LSEYHDIWI   | 38  | 25    |
| >ATM-N1801PLSENHDI    | 1388  | >ATM-N1801PLSEYHDI    | 432 | 956   |
| >ATM-N1801PLSENHDI    | 522   | >ATM-N1801PLSEYHDI    | 269 | 253   |
| >ATM-N1801PLSENHDIWI  | 221   | >ATM-N1801PLSEYHDIWI  | 177 | 44    |
| >ATM-N1801PLSENHDI    | 105   | >ATM-N1801PLSEYHDI    | 77  | 28    |



|                      |       |                       |     |       |
|----------------------|-------|-----------------------|-----|-------|
| >ATM-N1801PLSENHDIWI | 135   | >ATM-N1801PLSEYHDIWI  | 174 | 39    |
| >ATM-N1801IPLSENHDI  | 13    | >ATM-N1801IPLSEYHDI   | 9   | 4     |
| >ATM-N1801IPLSENHDIW | 50    | >ATM-N1801IPLSEYHDIWI | 43  | 7     |
| >ATM-N1801IPLSENHDI  | 293   | >ATM-N1801IPLSEYHDI   | 126 | 167   |
| >ATM-N1801IPLSENHDIW | 193   | >ATM-N1801IPLSEYHDIWI | 123 | 70    |
| >ATM-N1801IPLSENHDI  | 68    | >ATM-N1801IPLSEYHDI   | 66  | 2     |
| >ATM-N1801IPLSENHDIW | 131   | >ATM-N1801IPLSEYHDIW  | 149 | 18    |
| >ATM-N1801IPLSENHDIW | 82    | >ATM-N1801IPLSEYHDIWI | 85  | 3     |
| >ATM-N1801IPLSENHDI  | 714   | >ATM-N1801IPLSEYHDI   | 128 | 586   |
| >ATM-N1801IPLSENHDIW | 5     | >ATM-N1801IPLSEYHDIW  | 4   | 1     |
| >ATM-N1801IPLSENHDIW | 578   | >ATM-N1801IPLSEYHDIWI | 243 | 335   |
| >ATM-N1801IPLSENHDIW | 145   | >ATM-N1801IPLSEYHDIW  | 106 | 39    |
| >ATM-N1801LWIPLSENHD | 67    | >ATM-N1801LWIPLSEYHD  | 54  | 13    |
| >ATM-N1801LWIPLSENHD | 334   | >ATM-N1801LWIPLSEYHD  | 152 | 182   |
| >ATM-N1801LWIPLSENHD | 39    | >ATM-N1801LWIPLSEYHD  | 15  | 24    |
| >ATM-N1801LWIPLSEN   | 14484 | >ATM-N1801LWIPLSEY    | 18  | 14466 |
| >ATM-N1801LWIPLSEN   | 23543 | >ATM-N1801LWIPLSEY    | 123 | 23420 |
| >ATM-N1801LWIPLSEN   | 555   | >ATM-N1801LWIPLSEY    | 270 | 285   |
| >ATM-N1801LWIPLSENH  | 709   | >ATM-N1801LWIPLSEYH   | 132 | 577   |
| >ATM-N1801LWIPLSENHD | 112   | >ATM-N1801LWIPLSEYHD  | 75  | 37    |
| >ATM-N1801NLWIPLSEN  | 19664 | >ATM-N1801NLWIPLSEY   | 39  | 19625 |
| >ATM-N1801NLWIPLSEN  | 21692 | >ATM-N1801NLWIPLSEY   | 171 | 21521 |
| >ATM-N1801NLWIPLSEN  | 11870 | >ATM-N1801NLWIPLSEY   | 42  | 11828 |
| >ATM-N1801NLWIPLSEN  | 17680 | >ATM-N1801NLWIPLSEY   | 458 | 17222 |
| >ATM-N1801NLWIPLSEN  | 22810 | >ATM-N1801NLWIPLSEY   | 426 | 22384 |
| >ATM-N1801INLWIPLSEN | 28641 | >ATM-N1801INLWIPLSEY  | 301 | 28340 |
| >ATM-N750kNSLMQCAGE  | 12610 | >ATM-N750kKSLMQCAGE   | 364 | 12246 |
| >ATM-N750kNSLMQCAGE  | 7023  | >ATM-N750kKSLMQCAGE   | 63  | 6960  |
| >ATM-N750kNSLMQCAGE  | 3881  | >ATM-N750kKSLMQCAGE   | 306 | 3575  |
| >ATM-N750kNSLMQCAGE  | 2656  | >ATM-N750kKSLMQCAGE   | 22  | 2634  |
| >ATM-N750kNSLMQCAGE  | 14895 | >ATM-N750kKSLMQCAGE   | 219 | 14676 |
| >ATM-N750kNSLMQCAGE  | 125   | >ATM-N750kKSLMQCAGE   | 27  | 98    |
| >ATM-N750kAYKSELFQKA | 3970  | >ATM-N750kAYKSELFQKA  | 9   | 3961  |
| >ATM-N750kAYKSELFQKA | 13879 | >ATM-N750kAYKSELFQKA  | 312 | 13567 |
| >ATM-N750kKANSLMQCA  | 1860  | >ATM-N750kKAKSLMQCA   | 61  | 1799  |
| >ATM-N750kKANSLMQCA  | 3546  | >ATM-N750kKAKSLMQCA   | 164 | 3382  |
| >ATM-N750kQKANSLMQC  | 375   | >ATM-N750kQKAKSLMQC   | 518 | 143   |
| >ATM-N750kFQKANSLM   | 389   | >ATM-N750kFQKAKSLM    | 615 | 226   |
| >ATM-N750kFQKANSLMQ  | 166   | >ATM-N750kFQKAKSLMQ   | 146 | 20    |
| >ATM-N750kFQKANSLM   | 164   | >ATM-N750kFQKAKSLM    | 465 | 301   |
| >ATM-N750kFQKANSLMQ  | 143   | >ATM-N750kFQKAKSLMQ   | 229 | 86    |
| >ATM-N750kFQKANSLM   | 47    | >ATM-N750kFQKAKSLM    | 69  | 22    |
| >ATM-N750kFQKANSLMQ  | 233   | >ATM-N750kFQKAKSLMQ   | 407 | 174   |

|                        |       |                        |       |       |
|------------------------|-------|------------------------|-------|-------|
| >ATM-N750k FQKANSMLMQ  | 228   | >ATM-N750k FQKAKSLMQ   | 327   | 99    |
| >ATM-N750k FQKANSMLM   | 69    | >ATM-N750k FQKAKSLM    | 226   | 157   |
| >ATM-N750k FQKANSML    | 14    | >ATM-N750k FQKAKSLM    | 45    | 31    |
| >ATM-N750k FQKANSMLMQ  | 173   | >ATM-N750k FQKAKSLMQ   | 442   | 269   |
| >ATM-N750k LFQKANSL    | 52    | >ATM-N750k LFQKAKSL    | 122   | 70    |
| >ATM-N750k LFQKANSMLM  | 52    | >ATM-N750k LFQKAKSLM   | 63    | 11    |
| >ATM-N750k ELFQKANSL   | 144   | >ATM-N750k ELFQKAKSL   | 1615  | 1471  |
| >ATM-N750k ELFQKANSMLM | 347   | >ATM-N750k ELFQKAKSLM  | 1079  | 732   |
| >ATM-N750k ELFQKANSL   | 172   | >ATM-N750k ELFQKAKSL   | 304   | 132   |
| >ATM-N750k ELFQKANSL   | 35    | >ATM-N750k ELFQKAKSL   | 69    | 34    |
| >ATM-N750k ELFQKANSL   | 89    | >ATM-N750k ELFQKAKSL   | 907   | 818   |
| >ATM-N750k ELFQKANSMLM | 94    | >ATM-N750k ELFQKAKSLM  | 354   | 260   |
| >ATM-N750k ELFQKANSL   | 365   | >ATM-N750k ELFQKAKSL   | 784   | 419   |
| >ATM-N750k ELFQKANSL   | 54    | >ATM-N750k ELFQKAKSL   | 41    | 13    |
| >ATM-N750k SELFQKAN    | 318   | >ATM-N750k SELFQKAK    | 221   | 97    |
| >ATM-N750k SELFQKANSL  | 42    | >ATM-N750k SELFQKAKSL  | 27    | 15    |
| >ATM-N750k SELFQKANSLI | 58    | >ATM-N750k SELFQKAKSLI | 31    | 27    |
| >ATM-N750k SELFQKANSL  | 260   | >ATM-N750k SELFQKAKSL  | 281   | 21    |
| >ATM-N750k SELFQKANSL  | 336   | >ATM-N750k SELFQKAKSL  | 335   | 1     |
| >ATM-N750k SELFQKANSL  | 302   | >ATM-N750k SELFQKAKSL  | 495   | 193   |
| >ATM-N750k SELFQKANSL  | 374   | >ATM-N750k SELFQKAKSL  | 497   | 123   |
| >ATM-N750k SELFQKANSLI | 318   | >ATM-N750k SELFQKAKSLI | 335   | 17    |
| >ATM-N750k SELFQKANSL  | 108   | >ATM-N750k SELFQKAKSL  | 98    | 10    |
| >ATM-N750k SELFQKANSLI | 244   | >ATM-N750k SELFQKAKSLI | 345   | 101   |
| >ATM-N750k KSELFQKAN   | 11873 | >ATM-N750k KSELFQKAK   | 86    | 11787 |
| >ATM-N750k KSELFQKANS  | 433   | >ATM-N750k KSELFQKAKSI | 742   | 309   |
| >ATM-N750k KSELFQKANS  | 52    | >ATM-N750k KSELFQKAKSI | 24    | 28    |
| >ATM-N750k KSELFQKANS  | 635   | >ATM-N750k KSELFQKAKSI | 491   | 144   |
| >ATM-N750k YKSELFQKAN  | 1195  | >ATM-N750k YKSELFQKAK  | 126   | 1069  |
| >ATM-P1054 PYSKWAIL    | 325   | >ATM-P1054 RYSKWAIL    | 68    | 257   |
| >ATM-P1054 PYSKWAILNV  | 979   | >ATM-P1054 RYSKWAILNV  | 149   | 830   |
| >ATM-P1054 PYSKWAIL    | 223   | >ATM-P1054 RYSKWAIL    | 11    | 212   |
| >ATM-P1054 PYSKWAILNV  | 1114  | >ATM-P1054 RYSKWAILNV  | 29    | 1085  |
| >ATM-P1054 PYSKWAILNV  | 442   | >ATM-P1054 RYSKWAILNV  | 15    | 427   |
| >ATM-P1054 PYSKWAILNV  | 10976 | >ATM-P1054 RYSKWAILNV  | 218   | 10758 |
| >ATM-P1054 PYSKWAILNV  | 11525 | >ATM-P1054 RYSKWAILNV  | 216   | 11309 |
| >ATM-P1054 PYSKWAILNV  | 708   | >ATM-P1054 RYSKWAILNV  | 121   | 587   |
| >ATM-P1054 PYSKWAIL    | 2593  | >ATM-P1054 RYSKWAIL    | 241   | 2352  |
| >ATM-P1054 PYSKWAILNV  | 724   | >ATM-P1054 RYSKWAILNV  | 66    | 658   |
| >ATM-P1054 PYSKWAILNV  | 2537  | >ATM-P1054 RYSKWAILNV  | 215   | 2322  |
| >ATM-P1054 DPYSKWAILN  | 356   | >ATM-P1054 DRYSKWAILN  | 28238 | 27882 |
| >ATM-P1054 DPYSKWAILN  | 218   | >ATM-P1054 DRYSKWAILN  | 8700  | 8482  |
| >ATM-P1054 DPYSKWAIL   | 319   | >ATM-P1054 DRYSKWAIL   | 2921  | 2602  |

|                        |       |                        |       |       |
|------------------------|-------|------------------------|-------|-------|
| >ATM-P1054 DPYSKWAILN  | 253   | >ATM-P1054 DRYSKWAILN  | 21535 | 21282 |
| >ATM-P1054 DPYSKWAI    | 462   | >ATM-P1054 DRYSKWAI    | 28150 | 27688 |
| >ATM-P1054 DPYSKWAIL   | 25610 | >ATM-P1054 DRYSKWAIL   | 347   | 25263 |
| >ATM-P1054 DPYSKWAIL   | 35029 | >ATM-P1054 DRYSKWAIL   | 367   | 34662 |
| >ATM-P1054 NCLKTLLEAD  | 35454 | >ATM-P1054 NCLKTLLEAD  | 460   | 34994 |
| >ATM-P1054 ADPYSKWAI   | 93    | >ATM-P1054 ADRYSKWAI   | 52    | 41    |
| >ATM-P1054 EADPYSKWA   | 32    | >ATM-P1054 EADRYSKWA   | 58    | 26    |
| >ATM-P1054 EADPYSKW    | 106   | >ATM-P1054 EADRYSKW    | 1446  | 1340  |
| >ATM-P1054 EADPYSKW    | 487   | >ATM-P1054 EADRYSKW    | 597   | 110   |
| >ATM-P1054 EADPYSKW    | 308   | >ATM-P1054 EADRYSKW    | 396   | 88    |
| >ATM-P1054 EADPYSKW    | 227   | >ATM-P1054 EADRYSKW    | 189   | 38    |
| >ATM-P1054 LEADPYSKW/  | 1584  | >ATM-P1054 LEADRYSKW/  | 226   | 1358  |
| >ATM-P1054 LEADPYSKW/  | 122   | >ATM-P1054 LEADRYSKW/  | 19    | 103   |
| >ATM-P1054 LEADPYSKW/  | 208   | >ATM-P1054 LEADRYSKW/  | 212   | 4     |
| >ATM-P1054 LEADPYSKW/  | 38    | >ATM-P1054 LEADRYSKW/  | 78    | 40    |
| >ATM-P1054 LEADPYSKW   | 83    | >ATM-P1054 LEADRYSKW   | 104   | 21    |
| >ATM-P1054 LEADPYSKW   | 181   | >ATM-P1054 LEADRYSKW   | 154   | 27    |
| >ATM-P1054 LEADPYSKW   | 315   | >ATM-P1054 LEADRYSKW   | 288   | 27    |
| >ATM-P1054 LEADPYSKW/  | 33    | >ATM-P1054 LEADRYSKW/  | 28    | 5     |
| >ATM-P1054 LEADPYSKW   | 58    | >ATM-P1054 LEADRYSKW   | 56    | 2     |
| >ATM-P1054 LLEADPYSKW  | 284   | >ATM-P1054 LLEADRYSKW  | 517   | 233   |
| >ATM-P1054 LLEADPYSKW  | 28    | >ATM-P1054 LLEADRYSKW  | 31    | 3     |
| >ATM-P1054 LLEADPYSKW  | 771   | >ATM-P1054 LLEADRYSKW  | 470   | 301   |
| >ATM-P1054 LLEADPYSKW  | 185   | >ATM-P1054 LLEADRYSKW  | 151   | 34    |
| >ATM-P1054 TLLEADPYS   | 159   | >ATM-P1054 TLLEADRY    | 6036  | 5877  |
| >ATM-P1054 TLLEADPYS   | 137   | >ATM-P1054 TLLEADRY    | 929   | 792   |
| >ATM-P1054 TLLEADPYS   | 74    | >ATM-P1054 TLLEADRY    | 3156  | 3082  |
| >ATM-P1054 TLLEADPYSK  | 247   | >ATM-P1054 TLLEADRYSK  | 273   | 26    |
| >ATM-P1054 TLLEADPYSK  | 33    | >ATM-P1054 TLLEADRYSK  | 55    | 22    |
| >ATM-P1054 TLLEADPY    | 129   | >ATM-P1054 TLLEADRY    | 195   | 66    |
| >ATM-P1054 TLLEADPY    | 321   | >ATM-P1054 TLLEADRY    | 1902  | 1581  |
| >ATM-P1054 TLLEADPY    | 71    | >ATM-P1054 TLLEADRY    | 178   | 107   |
| >ATM-P1054 TLLEADPYSK\ | 240   | >ATM-P1054 TLLEADRYSK\ | 330   | 90    |
| >ATM-P1054 TLLEADPY    | 89    | >ATM-P1054 TLLEADRY    | 1217  | 1128  |
| >ATM-P1054 KTLLEADPYS\ | 461   | >ATM-P1054 KTLLEADRY\  | 450   | 11    |
| >ATM-P1054 KTLLEADPYS\ | 23    | >ATM-P1054 KTLLEADRY\  | 26    | 3     |
| >ATM-P1054 KTLLEADPY   | 388   | >ATM-P1054 KTLLEADRY   | 504   | 116   |
| >ATM-P1054 KTLLEADPYS\ | 27    | >ATM-P1054 KTLLEADRY\  | 28    | 1     |
| >ATM-P1054 KTLLEADPY   | 504   | >ATM-P1054 KTLLEADRY   | 256   | 248   |
| >ATM-P1054 KTLLEADP    | 22033 | >ATM-P1054 KTLLEADR    | 138   | 21895 |
| >ATM-P1054 KTLLEADPYS\ | 618   | >ATM-P1054 KTLLEADRY\  | 289   | 329   |
| >ATM-P1054 KTLLEADPY   | 87    | >ATM-P1054 KTLLEADRY   | 595   | 508   |
| >ATM-P1054 KTLLEADPYS\ | 356   | >ATM-P1054 KTLLEADRY\  | 759   | 403   |

|                        |       |                        |       |       |
|------------------------|-------|------------------------|-------|-------|
| >ATM-P1054 KTLLEADPY   | 458   | >ATM-P1054 KTLLEADRY   | 271   | 187   |
| >ATM-P1054 KTLLEADPY   | 6     | >ATM-P1054 KTLLEADRY   | 5     | 1     |
| >ATM-P1054 KTLLEADPY   | 518   | >ATM-P1054 KTLLEADRY   | 313   | 205   |
| >ATM-P1054 KTLLEADPY   | 764   | >ATM-P1054 KTLLEADRY   | 321   | 443   |
| >ATM-P1054 KTLLEADPY   | 273   | >ATM-P1054 KTLLEADRY   | 34    | 239   |
| >ATM-P1054 KTLLEADPYSI | 351   | >ATM-P1054 KTLLEADRYSI | 627   | 276   |
| >ATM-P1054 KTLLEADP    | 33131 | >ATM-P1054 KTLLEADR    | 133   | 32998 |
| >ATM-P1054 LKTLLEADPY  | 201   | >ATM-P1054 LKTLLEADRY  | 1263  | 1062  |
| >ATM-P1054 CLKTLLEADP\ | 636   | >ATM-P1054 CLKTLLEADR\ | 406   | 230   |
| >ATM-P1054 CLKTLLEADP  | 34728 | >ATM-P1054 CLKTLLEADR  | 235   | 34493 |
| >ATM-P1054 CLKTLLEADP\ | 299   | >ATM-P1054 CLKTLLEADR\ | 1640  | 1341  |
| >ATM-P1054 CLKTLLEADP\ | 403   | >ATM-P1054 CLKTLLEADR\ | 126   | 277   |
| >ATM-P2699 LPKIIDCV    | 131   | >ATM-P2699 LRKIIDCV    | 26101 | 25970 |
| >ATM-P2699 LPKIIDCVG   | 319   | >ATM-P2699 LRKIIDCVG   | 29597 | 29278 |
| >ATM-P2699 EFRLAGGVNL  | 20914 | >ATM-P2699 EFRLAGGVNL  | 30    | 20884 |
| >ATM-P2699 EFRLAGGVNL  | 37265 | >ATM-P2699 EFRLAGGVNL  | 354   | 36911 |
| >ATM-P2699 NLPKIIDCV   | 425   | >ATM-P2699 NLRKIIDCV   | 3574  | 3149  |
| >ATM-P2699 NLPKIIDCV   | 23    | >ATM-P2699 NLRKIIDCV   | 94    | 71    |
| >ATM-P2699 NLPKIIDCV   | 145   | >ATM-P2699 NLRKIIDCV   | 154   | 9     |
| >ATM-P2699 NLPKIIDCV   | 252   | >ATM-P2699 NLRKIIDCV   | 3157  | 2905  |
| >ATM-P2699 NLPKIIDCV   | 32    | >ATM-P2699 NLRKIIDCV   | 192   | 160   |
| >ATM-P2699 NLPKIIDCV   | 42    | >ATM-P2699 NLRKIIDCV   | 200   | 158   |
| >ATM-P2699 NLPKIIDCV   | 18    | >ATM-P2699 NLRKIIDCV   | 125   | 107   |
| >ATM-P2699 NLPKIIDCV   | 16    | >ATM-P2699 NLRKIIDCV   | 271   | 255   |
| >ATM-P2699 NLPKIIDCV   | 31    | >ATM-P2699 NLRKIIDCV   | 45    | 14    |
| >ATM-P2699 NLPKIIDCV   | 84    | >ATM-P2699 NLRKIIDCV   | 2677  | 2593  |
| >ATM-P2699 LAGGVNLPK   | 89    | >ATM-P2699 LAGGVNLRK   | 305   | 216   |
| >ATM-P2699 LAGGVNLP    | 31837 | >ATM-P2699 LAGGVNLR    | 93    | 31744 |
| >ATM-P2699 LAGGVNLPKI  | 247   | >ATM-P2699 LAGGVNLRKI  | 267   | 20    |
| >ATM-P2699 RLAGGVNLP†  | 50    | >ATM-P2699 RLAGGVNLR†  | 567   | 517   |
| >ATM-P2699 RLAGGVNLP   | 375   | >ATM-P2699 RLAGGVNLR   | 1533  | 1158  |
| >ATM-P2699 RLAGGVNLP†  | 21    | >ATM-P2699 RLAGGVNLR†  | 44    | 23    |
| >ATM-P2699 RLAGGVNLP†  | 7     | >ATM-P2699 RLAGGVNLR†  | 8     | 1     |
| >ATM-P2699 RLAGGVNLP†  | 52    | >ATM-P2699 RLAGGVNLR†  | 481   | 429   |
| >ATM-P2699 RLAGGVNLP†  | 7     | >ATM-P2699 RLAGGVNLR†  | 15    | 8     |
| >ATM-P2699 RLAGGVNLP†  | 58    | >ATM-P2699 RLAGGVNLR†  | 224   | 166   |
| >ATM-P2699 RLAGGVNLP†  | 12    | >ATM-P2699 RLAGGVNLR†  | 88    | 76    |
| >ATM-P2699 RLAGGVNLP†  | 14    | >ATM-P2699 RLAGGVNLR†  | 146   | 132   |
| >ATM-P2699 RLAGGVNLP†  | 5     | >ATM-P2699 RLAGGVNLR†  | 18    | 13    |
| >ATM-P2699 RLAGGVNLP   | 15226 | >ATM-P2699 RLAGGVNLR   | 129   | 15097 |
| >ATM-P2699 RLAGGVNLP†  | 12    | >ATM-P2699 RLAGGVNLR†  | 16    | 4     |
| >ATM-P2699 RLAGGVNLP†  | 26    | >ATM-P2699 RLAGGVNLR†  | 43    | 17    |
| >ATM-P2699 RLAGGVNLP†  | 48    | >ATM-P2699 RLAGGVNLR†  | 261   | 213   |

|                       |       |                       |       |       |
|-----------------------|-------|-----------------------|-------|-------|
| >ATM-P2699 RLAGGVNLP  | 20877 | >ATM-P2699 RLAGGVNLR  | 61    | 20816 |
| >ATM-P2699 RLAGGVNLP† | 142   | >ATM-P2699 RLAGGVNLR† | 117   | 25    |
| >ATM-P2699 RLAGGVNLP  | 38247 | >ATM-P2699 RLAGGVNLR  | 483   | 37764 |
| >ATM-P2699 RLAGGVNLP† | 290   | >ATM-P2699 RLAGGVNLR† | 745   | 455   |
| >ATM-P2699 RLAGGVNLP† | 131   | >ATM-P2699 RLAGGVNLR† | 199   | 68    |
| >ATM-P2699 RLAGGVNLP  | 35133 | >ATM-P2699 RLAGGVNLR  | 243   | 34890 |
| >ATM-P2699 FRLAGGVNLF | 8699  | >ATM-P2699 FRLAGGVNLF | 154   | 8545  |
| >ATM-P2699 FRLAGGVNLF | 20    | >ATM-P2699 FRLAGGVNLF | 27    | 7     |
| >ATM-P2842 PAIWFEKRL  | 198   | >ATM-P2842 RAIWFEKRL  | 116   | 82    |
| >ATM-P2842 PAIWFEKRLA | 289   | >ATM-P2842 RAIWFEKRLA | 241   | 48    |
| >ATM-P2842 PAIWFEKRLA | 1009  | >ATM-P2842 RAIWFEKRLA | 127   | 882   |
| >ATM-P2842 PAIWFEKR   | 2671  | >ATM-P2842 RAIWFEKR   | 15    | 2656  |
| >ATM-P2842 PAIWFEKR   | 309   | >ATM-P2842 RAIWFEKR   | 56    | 253   |
| >ATM-P2842 PAIWFEKRLA | 9404  | >ATM-P2842 RAIWFEKRLA | 364   | 9040  |
| >ATM-P2842 PAIWFEKRLA | 2905  | >ATM-P2842 RAIWFEKRLA | 120   | 2785  |
| >ATM-P2842 PAIWFEKRL  | 7411  | >ATM-P2842 RAIWFEKRL  | 13    | 7398  |
| >ATM-P2842 PAIWFEKRLA | 3077  | >ATM-P2842 RAIWFEKRLA | 7     | 3070  |
| >ATM-P2842 PAIWFEKRLA | 165   | >ATM-P2842 RAIWFEKRLA | 56    | 109   |
| >ATM-P2842 PAIWFEKRLA | 17068 | >ATM-P2842 RAIWFEKRLA | 107   | 16961 |
| >ATM-P2842 PAIWFEKR   | 359   | >ATM-P2842 RAIWFEKR   | 51    | 308   |
| >ATM-P2842 DPAIWFEKR  | 361   | >ATM-P2842 DRAIWFEKR  | 1857  | 1496  |
| >ATM-P2842 DPAIWFEK   | 390   | >ATM-P2842 DRAIWFEK   | 1357  | 967   |
| >ATM-P2842 DPAIWFEKR  | 386   | >ATM-P2842 DRAIWFEKR  | 1220  | 834   |
| >ATM-P2842 DPAIWFEKRL | 205   | >ATM-P2842 DRAIWFEKRL | 27128 | 26923 |
| >ATM-P2842 RYFCMEKFLD | 1179  | >ATM-P2842 RYFCMEKFLD | 494   | 685   |
| >ATM-P2842 RYFCMEKFLD | 14623 | >ATM-P2842 RYFCMEKFLD | 27    | 14596 |
| >ATM-P2842 RYFCMEKFLD | 34961 | >ATM-P2842 RYFCMEKFLD | 492   | 34469 |
| >ATM-P2842 RYFCMEKFLD | 4125  | >ATM-P2842 RYFCMEKFLD | 10    | 4115  |
| >ATM-P2842 LDPAIWFEK  | 13751 | >ATM-P2842 LDRAIWFEK  | 197   | 13554 |
| >ATM-P2842 FLDPAIWF   | 301   | >ATM-P2842 FLDRAIWF   | 810   | 509   |
| >ATM-P2842 FLDPAIWF   | 168   | >ATM-P2842 FLDRAIWFE  | 729   | 561   |
| >ATM-P2842 FLDPAIWF   | 132   | >ATM-P2842 FLDRAIWF   | 306   | 174   |
| >ATM-P2842 FLDPAIWF   | 30    | >ATM-P2842 FLDRAIWFE  | 172   | 142   |
| >ATM-P2842 FLDPAIWF   | 66    | >ATM-P2842 FLDRAIWF   | 260   | 194   |
| >ATM-P2842 FLDPAIWF   | 63    | >ATM-P2842 FLDRAIWFE  | 418   | 355   |
| >ATM-P2842 FLDPAIWF   | 28    | >ATM-P2842 FLDRAIWF   | 67    | 39    |
| >ATM-P2842 FLDPAIWF   | 17    | >ATM-P2842 FLDRAIWFE  | 37    | 20    |
| >ATM-P2842 FLDPAIWFEK | 27    | >ATM-P2842 FLDRAIWFEK | 55    | 28    |
| >ATM-P2842 FLDPAIWFEK | 198   | >ATM-P2842 FLDRAIWFEK | 365   | 167   |
| >ATM-P2842 FLDPAIWFE  | 129   | >ATM-P2842 FLDRAIWFE  | 194   | 65    |
| >ATM-P2842 FLDPAIWF   | 365   | >ATM-P2842 FLDRAIWF   | 1063  | 698   |
| >ATM-P2842 FLDPAIWFE  | 30    | >ATM-P2842 FLDRAIWFE  | 100   | 70    |
| >ATM-P2842 FLDPAIWFEK | 54    | >ATM-P2842 FLDRAIWFEK | 160   | 106   |

|                       |       |                       |      |       |
|-----------------------|-------|-----------------------|------|-------|
| >ATM-P2842 FLDPAIWF   | 44    | >ATM-P2842 FLDRAIWF   | 102  | 58    |
| >ATM-P2842 FLDPAIWFE  | 11    | >ATM-P2842 FLDRAIWFE  | 40   | 29    |
| >ATM-P2842 FLDPAIWFEK | 14    | >ATM-P2842 FLDRAIWFEK | 34   | 20    |
| >ATM-P2842 FLDPAIWFEK | 133   | >ATM-P2842 FLDRAIWFEK | 395  | 262   |
| >ATM-P2842 FLDPAIWFEK | 161   | >ATM-P2842 FLDRAIWFEK | 233  | 72    |
| >ATM-P2842 FLDPAIWFEK | 55    | >ATM-P2842 FLDRAIWFEK | 100  | 45    |
| >ATM-P2842 FLDPAIWFEK | 146   | >ATM-P2842 FLDRAIWFEK | 500  | 354   |
| >ATM-P2842 FLDPAIWFEK | 300   | >ATM-P2842 FLDRAIWFEK | 324  | 24    |
| >ATM-P2842 KFLDPAIWFE | 97    | >ATM-P2842 KFLDRAIWFE | 122  | 25    |
| >ATM-P2842 KFLDPAIWF  | 926   | >ATM-P2842 KFLDRAIWF  | 365  | 561   |
| >ATM-P2842 KFLDPAIWF  | 18    | >ATM-P2842 KFLDRAIWF  | 18   | 0     |
| >ATM-P2842 KFLDPAIWFE | 23    | >ATM-P2842 KFLDRAIWFE | 14   | 9     |
| >ATM-P2842 KFLDPAIWFE | 39    | >ATM-P2842 KFLDRAIWFE | 20   | 19    |
| >ATM-P2842 KFLDPAIW   | 62    | >ATM-P2842 KFLDRAIW   | 130  | 68    |
| >ATM-P2842 KFLDPAIWF  | 459   | >ATM-P2842 KFLDRAIWF  | 1502 | 1043  |
| >ATM-P2842 KFLDPAIWFE | 539   | >ATM-P2842 KFLDRAIWFE | 377  | 162   |
| >ATM-P2842 KFLDPAIWFE | 40    | >ATM-P2842 KFLDRAIWFE | 29   | 11    |
| >ATM-P2842 EKFLDPAI   | 336   | >ATM-P2842 EKFLDRAI   | 498  | 162   |
| >ATM-P2842 EKFLDPAIWF | 32    | >ATM-P2842 EKFLDRAIWF | 48   | 16    |
| >ATM-P2842 EKFLDPAIW  | 468   | >ATM-P2842 EKFLDRAIW  | 421  | 47    |
| >ATM-P2842 MEKFLDPAI  | 254   | >ATM-P2842 MEKFLDRAI  | 122  | 132   |
| >ATM-P2842 MEKFLDPAI  | 378   | >ATM-P2842 MEKFLDRAI  | 462  | 84    |
| >ATM-P2842 MEKFLDPAIM | 38    | >ATM-P2842 MEKFLDRAIV | 38   | 0     |
| >ATM-P2842 MEKFLDPAI  | 83    | >ATM-P2842 MEKFLDRAI  | 183  | 100   |
| >ATM-P2842 MEKFLDPAIM | 271   | >ATM-P2842 MEKFLDRAIV | 542  | 271   |
| >ATM-P2842 MEKFLDPA   | 68    | >ATM-P2842 MEKFLDRA   | 736  | 668   |
| >ATM-P2842 MEKFLDPAI  | 54    | >ATM-P2842 MEKFLDRAI  | 107  | 53    |
| >ATM-P2842 MEKFLDPAIM | 28    | >ATM-P2842 MEKFLDRAIV | 36   | 8     |
| >ATM-P2842 MEKFLDPAIM | 340   | >ATM-P2842 MEKFLDRAIV | 408  | 68    |
| >ATM-P2842 MEKFLDPAIM | 115   | >ATM-P2842 MEKFLDRAIV | 144  | 29    |
| >ATM-P2842 MEKFLDPAIM | 60    | >ATM-P2842 MEKFLDRAIV | 58   | 2     |
| >ATM-P2842 MEKFLDPA   | 14    | >ATM-P2842 MEKFLDRA   | 33   | 19    |
| >ATM-P2842 MEKFLDPAI  | 90    | >ATM-P2842 MEKFLDRAI  | 257  | 167   |
| >ATM-P2842 MEKFLDPAIM | 377   | >ATM-P2842 MEKFLDRAIV | 697  | 320   |
| >ATM-P2842 MEKFLDPAI  | 16    | >ATM-P2842 MEKFLDRAI  | 135  | 119   |
| >ATM-P2842 MEKFLDPAIM | 209   | >ATM-P2842 MEKFLDRAIV | 344  | 135   |
| >ATM-P2842 CMEKFLDPA  | 261   | >ATM-P2842 CMEKFLDRA  | 696  | 435   |
| >ATM-P2842 CMEKFLDPAI | 475   | >ATM-P2842 CMEKFLDRAI | 2241 | 1766  |
| >ATM-P2842 CMEKFLDPAI | 62    | >ATM-P2842 CMEKFLDRAI | 63   | 1     |
| >ATM-P2842 CMEKFLDP   | 32086 | >ATM-P2842 CMEKFLDR   | 61   | 32025 |
| >ATM-P2842 FCMEKFLDPA | 206   | >ATM-P2842 FCMEKFLDR  | 1621 | 1415  |
| >ATM-P2842 FCMEKFLDPA | 195   | >ATM-P2842 FCMEKFLDR  | 678  | 483   |
| >ATM-P2842 FCMEKFLDPA | 350   | >ATM-P2842 FCMEKFLDR  | 712  | 362   |

|                        |       |                        |       |       |
|------------------------|-------|------------------------|-------|-------|
| >ATM-P2842 FCMEKFLDPA  | 409   | >ATM-P2842 FCMEKFLDRA  | 1246  | 837   |
| >ATM-P2842 FCMEKFLDPA  | 72    | >ATM-P2842 FCMEKFLDRA  | 232   | 160   |
| >ATM-P2842 FCMEKFLDPA  | 260   | >ATM-P2842 FCMEKFLDRA  | 1139  | 879   |
| >ATM-P2842 FCMEKFLDPA  | 461   | >ATM-P2842 FCMEKFLDRA  | 2251  | 1790  |
| >ATM-P2842 FCMEKFLDPA  | 265   | >ATM-P2842 FCMEKFLDRA  | 213   | 52    |
| >ATM-P2842 FCMEKFLDP   | 33394 | >ATM-P2842 FCMEKFLDR   | 164   | 33230 |
| >ATM-P2842 YFCMEKFLDP  | 26267 | >ATM-P2842 YFCMEKFLDR  | 52    | 26215 |
| >ATM-P2842 YFCMEKFLDP  | 18346 | >ATM-P2842 YFCMEKFLDR  | 52    | 18294 |
| >ATM-P2842 YFCMEKFLDP  | 30534 | >ATM-P2842 YFCMEKFLDR  | 44    | 30490 |
| >ATM-P604S PHLVLEKIL   | 10542 | >ATM-P604S SHLVLEKIL   | 374   | 10168 |
| >ATM-P604S FPHLVLEKILV | 4155  | >ATM-P604S FSHLVLEKILV | 390   | 3765  |
| >ATM-P604S FPHLVLEK    | 12643 | >ATM-P604S FSHLVLEK    | 86    | 12557 |
| >ATM-P604S FPHLVLEK    | 1887  | >ATM-P604S FSHLVLEK    | 90    | 1797  |
| >ATM-P604S FPHLVLEKI   | 5241  | >ATM-P604S FSHLVLEKI   | 170   | 5071  |
| >ATM-P604S FPHLVLEKILV | 2929  | >ATM-P604S FSHLVLEKILV | 154   | 2775  |
| >ATM-P604S FPHLVLEKIL  | 171   | >ATM-P604S FSHLVLEKIL  | 21450 | 21279 |
| >ATM-P604S FPHLVLEKIL  | 86    | >ATM-P604S FSHLVLEKIL  | 19832 | 19746 |
| >ATM-P604S FPHLVLEKI   | 202   | >ATM-P604S FSHLVLEKI   | 16883 | 16681 |
| >ATM-P604S FPHLVLEKILV | 463   | >ATM-P604S FSHLVLEKILV | 17815 | 17352 |
| >ATM-P604S FPHLVLEKI   | 88    | >ATM-P604S FSHLVLEKI   | 12761 | 12673 |
| >ATM-P604S FPHLVLEKIL  | 358   | >ATM-P604S FSHLVLEKIL  | 14904 | 14546 |
| >ATM-P604S FPHLVLEKILV | 344   | >ATM-P604S FSHLVLEKILV | 22756 | 22412 |
| >ATM-P604S FPHLVLEK    | 422   | >ATM-P604S FSHLVLEK    | 23402 | 22980 |
| >ATM-P604S FPHLVLEKI   | 106   | >ATM-P604S FSHLVLEKI   | 22507 | 22401 |
| >ATM-P604S FPHLVLEKIL  | 185   | >ATM-P604S FSHLVLEKIL  | 20879 | 20694 |
| >ATM-P604S FPHLVLEKILV | 12    | >ATM-P604S FSHLVLEKILV | 5236  | 5224  |
| >ATM-P604S FPHLVLEKI   | 2459  | >ATM-P604S FSHLVLEKI   | 45    | 2414  |
| >ATM-P604S EVPPILHSNFF | 600   | >ATM-P604S EVPPILHSNFS | 31    | 569   |
| >ATM-P604S NFPHLVLEKI  | 48    | >ATM-P604S NFSHLVLEKI  | 294   | 246   |
| >ATM-P604S NFPHLVLEKIL | 239   | >ATM-P604S NFSHLVLEKIL | 1237  | 998   |
| >ATM-P604S SNFPHLV     | 217   | >ATM-P604S SNFSHLV     | 62    | 155   |
| >ATM-P604S SNFPHLVLEK  | 634   | >ATM-P604S SNFSHLVLEK  | 452   | 182   |
| >ATM-P604S SNFPHLVLEK  | 451   | >ATM-P604S SNFSHLVLEK  | 789   | 338   |
| >ATM-P604S SNFPHLV     | 713   | >ATM-P604S SNFSHLV     | 335   | 378   |
| >ATM-P604S SNFPHLV     | 752   | >ATM-P604S SNFSHLV     | 388   | 364   |
| >ATM-P604S SNFPHLVLEKI | 574   | >ATM-P604S SNFSHLVLEKI | 264   | 310   |
| >ATM-P604S SNFPHLVLEK  | 97    | >ATM-P604S SNFSHLVLEK  | 125   | 28    |
| >ATM-P604S SNFPHLV     | 337   | >ATM-P604S SNFSHLV     | 1009  | 672   |
| >ATM-P604S SNFPHLVLEKI | 31    | >ATM-P604S SNFSHLVLEKI | 91    | 60    |
| >ATM-P604S HSNFPHLVLE  | 72    | >ATM-P604S HSNFSHLVLE  | 67    | 5     |
| >ATM-P604S HSNFPHLVLE  | 18    | >ATM-P604S HSNFSHLVLE  | 14    | 4     |
| >ATM-P604S HSNFPHLV    | 329   | >ATM-P604S HSNFSHLV    | 97    | 232   |
| >ATM-P604S HSNFPHLV    | 234   | >ATM-P604S HSNFSHLV    | 60    | 174   |

|                        |      |                        |      |      |
|------------------------|------|------------------------|------|------|
| >ATM-P604S HSNFPHLVLE  | 11   | >ATM-P604S HSNFSHLVLE  | 8    | 3    |
| >ATM-P604S HSNFPHLVLE  | 427  | >ATM-P604S HSNFSHLVLE  | 304  | 123  |
| >ATM-P604S HSNFPHLVLE  | 135  | >ATM-P604S HSNFSHLVLE  | 62   | 73   |
| >ATM-P604S HSNFPHLV    | 19   | >ATM-P604S HSNFSHLV    | 27   | 8    |
| >ATM-P604S HSNFPHLV    | 108  | >ATM-P604S HSNFSHLV    | 166  | 58   |
| >ATM-P604S HSNFPHLVL   | 951  | >ATM-P604S HSNFSHLVL   | 292  | 659  |
| >ATM-P604S HSNFPHLVL   | 16   | >ATM-P604S HSNFSHLVL   | 6    | 10   |
| >ATM-P604S HSNFPHLVL   | 1007 | >ATM-P604S HSNFSHLVL   | 247  | 760  |
| >ATM-P604S HSNFPHLVL   | 254  | >ATM-P604S HSNFSHLVL   | 499  | 245  |
| >ATM-P604S LHSNFPHL    | 776  | >ATM-P604S LHSNFSHL    | 487  | 289  |
| >ATM-P604S LHSNFPHLV   | 810  | >ATM-P604S LHSNFSHLV   | 242  | 568  |
| >ATM-P604S LHSNFPHL    | 273  | >ATM-P604S LHSNFSHL    | 140  | 133  |
| >ATM-P604S LHSNFPHLVL  | 157  | >ATM-P604S LHSNFSHLVL  | 109  | 48   |
| >ATM-P604S LHSNFPHLVL  | 45   | >ATM-P604S LHSNFSHLVL  | 28   | 17   |
| >ATM-P604S LHSNFPHLV   | 855  | >ATM-P604S LHSNFSHLV   | 456  | 399  |
| >ATM-P604S ILHSNFPHL   | 90   | >ATM-P604S ILHSNFSHL   | 122  | 32   |
| >ATM-P604S ILHSNFPHL   | 186  | >ATM-P604S ILHSNFSHL   | 1544 | 1358 |
| >ATM-P604S ILHSNFPHL   | 63   | >ATM-P604S ILHSNFSHL   | 418  | 355  |
| >ATM-P604S ILHSNFPHLV  | 57   | >ATM-P604S ILHSNFSHLV  | 101  | 44   |
| >ATM-P604S ILHSNFPHLVL | 474  | >ATM-P604S ILHSNFSHLVL | 775  | 301  |
| >ATM-P604S ILHSNFPHL   | 42   | >ATM-P604S ILHSNFSHL   | 21   | 21   |
| >ATM-P604S ILHSNFPHLV  | 16   | >ATM-P604S ILHSNFSHLV  | 18   | 2    |
| >ATM-P604S ILHSNFPHLVL | 233  | >ATM-P604S ILHSNFSHLVL | 124  | 109  |
| >ATM-P604S ILHSNFPHL   | 45   | >ATM-P604S ILHSNFSHL   | 12   | 33   |
| >ATM-P604S ILHSNFPHLV  | 12   | >ATM-P604S ILHSNFSHLV  | 17   | 5    |
| >ATM-P604S ILHSNFPHLVL | 200  | >ATM-P604S ILHSNFSHLVL | 82   | 118  |
| >ATM-P604S ILHSNFPHL   | 30   | >ATM-P604S ILHSNFSHL   | 158  | 128  |
| >ATM-P604S ILHSNFPHLV  | 327  | >ATM-P604S ILHSNFSHLV  | 309  | 18   |
| >ATM-P604S ILHSNFPHL   | 8    | >ATM-P604S ILHSNFSHL   | 12   | 4    |
| >ATM-P604S ILHSNFPHLV  | 2    | >ATM-P604S ILHSNFSHLV  | 2    | 0    |
| >ATM-P604S ILHSNFPHLVL | 14   | >ATM-P604S ILHSNFSHLVL | 22   | 8    |
| >ATM-P604S ILHSNFPHL   | 24   | >ATM-P604S ILHSNFSHL   | 21   | 3    |
| >ATM-P604S ILHSNFPHLV  | 5    | >ATM-P604S ILHSNFSHLV  | 4    | 1    |
| >ATM-P604S ILHSNFPHLVL | 171  | >ATM-P604S ILHSNFSHLVL | 155  | 16   |
| >ATM-P604S ILHSNFPHL   | 21   | >ATM-P604S ILHSNFSHL   | 180  | 159  |
| >ATM-P604S ILHSNFPHLV  | 7    | >ATM-P604S ILHSNFSHLV  | 10   | 3    |
| >ATM-P604S ILHSNFPHLVL | 358  | >ATM-P604S ILHSNFSHLVL | 652  | 294  |
| >ATM-P604S ILHSNFPHL   | 142  | >ATM-P604S ILHSNFSHL   | 890  | 748  |
| >ATM-P604S ILHSNFPHLV  | 7    | >ATM-P604S ILHSNFSHLV  | 9    | 2    |
| >ATM-P604S ILHSNFPHL   | 4    | >ATM-P604S ILHSNFSHL   | 4    | 0    |
| >ATM-P604S ILHSNFPHLV  | 2    | >ATM-P604S ILHSNFSHLV  | 2    | 0    |
| >ATM-P604S ILHSNFPHLVL | 9    | >ATM-P604S ILHSNFSHLVL | 7    | 2    |
| >ATM-P604S ILHSNFPHL   | 366  | >ATM-P604S ILHSNFSHL   | 150  | 216  |



|                        |       |                        |      |       |
|------------------------|-------|------------------------|------|-------|
| >ATM-P604S ILHSNFPHLVL | 728   | >ATM-P604S ILHSNFSHLVL | 304  | 424   |
| >ATM-P604S ILHSNFPHL   | 296   | >ATM-P604S ILHSNFSHL   | 181  | 115   |
| >ATM-P604S ILHSNFPHLVL | 282   | >ATM-P604S ILHSNFSHLVL | 175  | 107   |
| >ATM-P604S ILHSNFPHL   | 112   | >ATM-P604S ILHSNFSHL   | 41   | 71    |
| >ATM-P604S ILHSNFPHLV  | 547   | >ATM-P604S ILHSNFSHLV  | 352  | 195   |
| >ATM-P604S ILHSNFPHLVL | 79    | >ATM-P604S ILHSNFSHLVL | 42   | 37    |
| >ATM-P604S PILHSNFPHL\ | 80    | >ATM-P604S PILHSNFSHL\ | 119  | 39    |
| >ATM-P604S PILHSNFPHL\ | 118   | >ATM-P604S PILHSNFSHL\ | 110  | 8     |
| >ATM-P604S PILHSNFPHL\ | 175   | >ATM-P604S PILHSNFSHL\ | 127  | 48    |
| >ATM-P604S PILHSNFPHL\ | 71    | >ATM-P604S PILHSNFSHL\ | 48   | 23    |
| >ATM-P604S PILHSNFPHL\ | 172   | >ATM-P604S PILHSNFSHL\ | 143  | 29    |
| >ATM-P604S PPILHSNFPHI | 177   | >ATM-P604S PPILHSNFSHI | 427  | 250   |
| >ATM-Q112&QEGMREMS\    | 1408  | >ATM-Q112&REGMREMS\    | 197  | 1211  |
| >ATM-Q112&QEGMREMS\    | 34    | >ATM-Q112&REGMREMS\    | 44   | 10    |
| >ATM-Q112&TAFENAYLKA   | 15031 | >ATM-Q112&TAFENAYLKA   | 61   | 14970 |
| >ATM-Q112&TAFENAYLKA   | 21296 | >ATM-Q112&TAFENAYLKA   | 252  | 21044 |
| >ATM-Q112&TAFENAYLKA   | 951   | >ATM-Q112&TAFENAYLKA   | 7    | 944   |
| >ATM-Q112&TAFENAYLKA   | 16855 | >ATM-Q112&TAFENAYLKA   | 326  | 16529 |
| >ATM-Q112&KAQEGMREN    | 6271  | >ATM-Q112&KAREGMREN    | 20   | 6251  |
| >ATM-Q112&KAQEGMREN    | 11599 | >ATM-Q112&KAREGMREN    | 294  | 11305 |
| >ATM-Q112&KAQEGMREN    | 9155  | >ATM-Q112&KAREGMREN    | 87   | 9068  |
| >ATM-Q112&KAQEGMREN    | 1175  | >ATM-Q112&KAREGMREN    | 33   | 1142  |
| >ATM-Q112&KAQEGMREN    | 15    | >ATM-Q112&KAREGMREN    | 5    | 10    |
| >ATM-Q112&KAQEGMREN    | 3068  | >ATM-Q112&KAREGMREN    | 287  | 2781  |
| >ATM-Q112&KAQEGMREN    | 1319  | >ATM-Q112&KAREGMREN    | 432  | 887   |
| >ATM-Q112&KAQEGMREN    | 2253  | >ATM-Q112&KAREGMREN    | 447  | 1806  |
| >ATM-Q112&LKAQEGMRE    | 57    | >ATM-Q112&LKAREGMREI   | 35   | 22    |
| >ATM-Q112&YLKAQEGM     | 99    | >ATM-Q112&YLKAREGM     | 246  | 147   |
| >ATM-Q112&YLKAQEGMR    | 402   | >ATM-Q112&YLKAREGMRI   | 537  | 135   |
| >ATM-Q112&YLKAQEGM     | 119   | >ATM-Q112&YLKAREGM     | 162  | 43    |
| >ATM-Q112&YLKAQEGMR    | 96    | >ATM-Q112&YLKAREGMRI   | 77   | 19    |
| >ATM-Q112&YLKAQEGM     | 471   | >ATM-Q112&YLKAREGM     | 1240 | 769   |
| >ATM-Q112&YLKAQEGM     | 31    | >ATM-Q112&YLKAREGM     | 44   | 13    |
| >ATM-Q112&YLKAQEGMR    | 95    | >ATM-Q112&YLKAREGMRI   | 109  | 14    |
| >ATM-Q112&YLKAQEGMR    | 931   | >ATM-Q112&YLKAREGMRI   | 333  | 598   |
| >ATM-Q112&YLKAQEGMR    | 836   | >ATM-Q112&YLKAREGMRI   | 154  | 682   |
| >ATM-Q112&YLKAQEGMR    | 379   | >ATM-Q112&YLKAREGMRI   | 264  | 115   |
| >ATM-Q112&YLKAQEGM     | 1734  | >ATM-Q112&YLKAREGM     | 157  | 1577  |
| >ATM-Q112&YLKAQEGMR    | 1313  | >ATM-Q112&YLKAREGMRI   | 189  | 1124  |
| >ATM-Q112&YLKAQEGM     | 175   | >ATM-Q112&YLKAREGM     | 182  | 7     |
| >ATM-Q112&YLKAQEGMR    | 220   | >ATM-Q112&YLKAREGMRI   | 232  | 12    |
| >ATM-Q112&YLKAQEGM     | 188   | >ATM-Q112&YLKAREGM     | 210  | 22    |
| >ATM-Q112&YLKAQEGMR    | 136   | >ATM-Q112&YLKAREGMRI   | 133  | 3     |

|                      |       |                       |       |       |
|----------------------|-------|-----------------------|-------|-------|
| >ATM-Q112&AYLKAQEGM  | 375   | >ATM-Q112&AYLKAREGM   | 145   | 230   |
| >ATM-Q112&AYLKAQEG   | 444   | >ATM-Q112&AYLKAREG    | 789   | 345   |
| >ATM-Q112&AYLKAQEGM  | 43    | >ATM-Q112&AYLKAREGM   | 51    | 8     |
| >ATM-Q112&AYLKAQEGM  | 414   | >ATM-Q112&AYLKAREGMI  | 551   | 137   |
| >ATM-Q112&AYLKAQEGM  | 977   | >ATM-Q112&AYLKAREGMI  | 275   | 702   |
| >ATM-Q112&AYLKAQEGM  | 243   | >ATM-Q112&AYLKAREGMI  | 224   | 19    |
| >ATM-Q112&NAYLKAQEGI | 258   | >ATM-Q112&NAYLKAREGM  | 175   | 83    |
| >ATM-Q112&NAYLKAQEGI | 47    | >ATM-Q112&NAYLKAREGM  | 58    | 11    |
| >ATM-Q112&ENAYLKAQ   | 8714  | >ATM-Q112&ENAYLKAR    | 38    | 8676  |
| >ATM-Q112&FENAYLKAQ  | 316   | >ATM-Q112&FENAYLKAR   | 686   | 370   |
| >ATM-Q112&AFENAYLKAC | 24438 | >ATM-Q112&AFENAYLKAR  | 234   | 24204 |
| >ATM-Q2442QRELELDEL  | 380   | >ATM-Q2442PRELELDEL   | 3812  | 3432  |
| >ATM-Q2442QRELELDELA | 223   | >ATM-Q2442PRELELDELAL | 2248  | 2025  |
| >ATM-Q2442VQRELELDEL | 406   | >ATM-Q2442VPRELELDEL  | 11423 | 11017 |
| >ATM-Q2442KVQRELELDE | 475   | >ATM-Q2442KVPRELELDEI | 174   | 301   |
| >ATM-Q2442VKVQRELEL  | 272   | >ATM-Q2442VKVPRELEL   | 155   | 117   |
| >ATM-Q2442YTVKVQREL  | 515   | >ATM-Q2442YTVKVPREL   | 141   | 374   |
| >ATM-Q2442YTVKVQRELE | 592   | >ATM-Q2442YTVKVPRELEI | 302   | 290   |
| >ATM-Q2442YTVKVQREL  | 276   | >ATM-Q2442YTVKVPREL   | 488   | 212   |
| >ATM-Q2442YTVKVQREL  | 113   | >ATM-Q2442YTVKVPREL   | 193   | 80    |
| >ATM-Q2442YTVKVQRELE | 409   | >ATM-Q2442YTVKVPRELEI | 417   | 8     |
| >ATM-Q2442YTVKVQREL  | 75    | >ATM-Q2442YTVKVPREL   | 49    | 26    |
| >ATM-Q2442YTVKVQRELE | 22    | >ATM-Q2442YTVKVPRELEI | 17    | 5     |
| >ATM-Q2442YTVKVQREL  | 81    | >ATM-Q2442YTVKVPREL   | 103   | 22    |
| >ATM-Q2442YTVKVQRELE | 118   | >ATM-Q2442YTVKVPRELEI | 131   | 13    |
| >ATM-Q2442YTVKVQREL  | 172   | >ATM-Q2442YTVKVPREL   | 9628  | 9456  |
| >ATM-Q2442RYTVKVQREL | 300   | >ATM-Q2442RYTVKVPREL  | 1401  | 1101  |
| >ATM-Q2442RYTVKVQREL | 10    | >ATM-Q2442RYTVKVPREL  | 13    | 3     |
| >ATM-Q2442RYTVKVQR   | 10    | >ATM-Q2442RYTVKVPR    | 7     | 3     |
| >ATM-Q2442RYTVKVQR   | 826   | >ATM-Q2442RYTVKVPR    | 312   | 514   |
| >ATM-Q2442RYTVKVQR   | 28    | >ATM-Q2442RYTVKVPR    | 17    | 11    |
| >ATM-Q2442NRYTVKVQR  | 258   | >ATM-Q2442NRYTVKVPR   | 432   | 174   |
| >ATM-Q2442NRYTVKVQR  | 196   | >ATM-Q2442NRYTVKVPR   | 117   | 79    |
| >ATM-Q2442NRYTVKVQRI | 209   | >ATM-Q2442NRYTVKVPRE  | 235   | 26    |
| >ATM-Q2442NRYTVKVQRI | 125   | >ATM-Q2442NRYTVKVPRE  | 62    | 63    |
| >ATM-Q2442NRYTVKVQ   | 523   | >ATM-Q2442NRYTVKVP    | 245   | 278   |
| >ATM-Q2442NRYTVKVQRI | 397   | >ATM-Q2442NRYTVKVPRE  | 160   | 237   |
| >ATM-Q2442NRYTVKVQRI | 419   | >ATM-Q2442NRYTVKVPRE  | 687   | 268   |
| >ATM-Q2442NRYTVKVQRI | 60    | >ATM-Q2442NRYTVKVPRE  | 62    | 2     |
| >ATM-Q2442NRYTVKVQRI | 25    | >ATM-Q2442NRYTVKVPRE  | 19    | 6     |
| >ATM-Q2442NRYTVKVQR  | 321   | >ATM-Q2442NRYTVKVPR   | 60    | 261   |
| >ATM-Q2442TNRYTVKVQF | 1040  | >ATM-Q2442TNRYTVKVPR  | 492   | 548   |
| >ATM-Q2442TNRYTVKVQF | 1285  | >ATM-Q2442TNRYTVKVPR  | 384   | 901   |

|                        |      |                        |       |       |
|------------------------|------|------------------------|-------|-------|
| >ATM-Q2442 QTNRYTVKVF  | 297  | >ATM-Q2442 QTNRYTVKVF  | 168   | 129   |
| >ATM-Q2442 QTNRYTVKVF  | 12   | >ATM-Q2442 QTNRYTVKVF  | 9     | 3     |
| >ATM-Q2442 QTNRYTVKVF  | 473  | >ATM-Q2442 QTNRYTVKVF  | 173   | 300   |
| >ATM-Q2442 QTNRYTVKVF  | 12   | >ATM-Q2442 QTNRYTVKVF  | 15    | 3     |
| >ATM-Q2442 QTNRYTVKVF  | 734  | >ATM-Q2442 QTNRYTVKVF  | 166   | 568   |
| >ATM-Q747F QKANSMLMQC  | 375  | >ATM-Q747F HKANSMLMQC  | 338   | 37    |
| >ATM-Q747F FQKANSML    | 389  | >ATM-Q747F FHKANSML    | 16108 | 15719 |
| >ATM-Q747F FQKANSMLQ   | 166  | >ATM-Q747F FHKANSMLQ   | 12919 | 12753 |
| >ATM-Q747F FQKANSML    | 164  | >ATM-Q747F FHKANSML    | 22853 | 22689 |
| >ATM-Q747F FQKANSMLQ   | 143  | >ATM-Q747F FHKANSMLQ   | 22848 | 22705 |
| >ATM-Q747F FQKANSML    | 47   | >ATM-Q747F FHKANSML    | 12055 | 12008 |
| >ATM-Q747F FQKANSMLQ   | 233  | >ATM-Q747F FHKANSMLQ   | 21960 | 21727 |
| >ATM-Q747F FQKANSMLQ   | 228  | >ATM-Q747F FHKANSMLQ   | 20320 | 20092 |
| >ATM-Q747F FQKANSML    | 69   | >ATM-Q747F FHKANSML    | 2391  | 2322  |
| >ATM-Q747F FQKANSML    | 14   | >ATM-Q747F FHKANSML    | 235   | 221   |
| >ATM-Q747F FQKANSMLQ   | 173  | >ATM-Q747F FHKANSMLQ   | 2926  | 2753  |
| >ATM-Q747F LFQKANSL    | 52   | >ATM-Q747F LFHKANSL    | 66    | 14    |
| >ATM-Q747F LFQKANSML   | 8157 | >ATM-Q747F LFHKANSML   | 495   | 7662  |
| >ATM-Q747F LFQKANSML   | 52   | >ATM-Q747F LFHKANSML   | 72    | 20    |
| >ATM-Q747F ELFQKANSL   | 144  | >ATM-Q747F ELFHKANSL   | 110   | 34    |
| >ATM-Q747F ELFQKANSML  | 347  | >ATM-Q747F ELFHKANSML  | 833   | 486   |
| >ATM-Q747F ELFQKANSL   | 172  | >ATM-Q747F ELFHKANSL   | 339   | 167   |
| >ATM-Q747F ELFQKANSL   | 1029 | >ATM-Q747F ELFHKANSL   | 407   | 622   |
| >ATM-Q747F ELFQKANSL   | 35   | >ATM-Q747F ELFHKANSL   | 93    | 58    |
| >ATM-Q747F ELFQKANSL   | 89   | >ATM-Q747F ELFHKANSL   | 815   | 726   |
| >ATM-Q747F ELFQKANSML  | 94   | >ATM-Q747F ELFHKANSML  | 588   | 494   |
| >ATM-Q747F ELFQKANSL   | 365  | >ATM-Q747F ELFHKANSL   | 282   | 83    |
| >ATM-Q747F ELFQKANSL   | 599  | >ATM-Q747F ELFHKANSL   | 175   | 424   |
| >ATM-Q747F ELFQKANSL   | 54   | >ATM-Q747F ELFHKANSL   | 79    | 25    |
| >ATM-Q747F SELFQKAN    | 318  | >ATM-Q747F SELFHKAN    | 301   | 17    |
| >ATM-Q747F SELFQKANSL  | 42   | >ATM-Q747F SELFHKANSL  | 67    | 25    |
| >ATM-Q747F SELFQKANSLI | 58   | >ATM-Q747F SELFHKANSLI | 88    | 30    |
| >ATM-Q747F SELFQKANSL  | 260  | >ATM-Q747F SELFHKANSL  | 274   | 14    |
| >ATM-Q747F SELFQKANSLI | 745  | >ATM-Q747F SELFHKANSLI | 485   | 260   |
| >ATM-Q747F SELFQKANSL  | 336  | >ATM-Q747F SELFHKANSL  | 388   | 52    |
| >ATM-Q747F SELFQKANSL  | 302  | >ATM-Q747F SELFHKANSL  | 346   | 44    |
| >ATM-Q747F SELFQKANSL  | 374  | >ATM-Q747F SELFHKANSL  | 432   | 58    |
| >ATM-Q747F SELFQKANSLI | 318  | >ATM-Q747F SELFHKANSLI | 395   | 77    |
| >ATM-Q747F SELFQKANSL  | 108  | >ATM-Q747F SELFHKANSL  | 45    | 63    |
| >ATM-Q747F SELFQKANSLI | 244  | >ATM-Q747F SELFHKANSLI | 109   | 135   |
| >ATM-Q747F KSELFQKANS  | 433  | >ATM-Q747F KSELFHKANS  | 314   | 119   |
| >ATM-Q747F KSELFQKANS  | 52   | >ATM-Q747F KSELFHKANS  | 31    | 21    |
| >ATM-Q747F KSELFQKANS  | 701  | >ATM-Q747F KSELFHKANS  | 459   | 242   |

|                        |      |                        |       |       |
|------------------------|------|------------------------|-------|-------|
| >ATM-Q747F YKSELFQKA   | 283  | >ATM-Q747F YKSELFHKA   | 760   | 477   |
| >ATM-Q747F AYKSELFQK   | 457  | >ATM-Q747F AYKSELFHK   | 750   | 293   |
| >ATM-Q747F AYKSELFQ    | 309  | >ATM-Q747F AYKSELFH    | 1064  | 755   |
| >ATM-Q747F AYKSELFQK   | 10   | >ATM-Q747F AYKSELFHK   | 7     | 3     |
| >ATM-Q747F AYKSELFQKA  | 176  | >ATM-Q747F AYKSELFHKA  | 163   | 13    |
| >ATM-Q747F AYKSELFQK   | 60   | >ATM-Q747F AYKSELFHK   | 30    | 30    |
| >ATM-Q747F AYKSELFQK   | 295  | >ATM-Q747F AYKSELFHK   | 291   | 4     |
| >ATM-Q747F EAYKSELFQK  | 173  | >ATM-Q747F EAYKSELFHK  | 123   | 50    |
| >ATM-Q747F EAYKSELFQ   | 107  | >ATM-Q747F EAYKSELFH   | 184   | 77    |
| >ATM-Q747F EAYKSELFQK  | 18   | >ATM-Q747F EAYKSELFHK  | 21    | 3     |
| >ATM-Q747F EAYKSELFQK  | 1166 | >ATM-Q747F EAYKSELFHK  | 357   | 809   |
| >ATM-Q747F EAYKSELFQK  | 560  | >ATM-Q747F EAYKSELFHK  | 172   | 388   |
| >ATM-Q747F EEAYKSELFQI | 195  | >ATM-Q747F EEAYKSELFHI | 261   | 66    |
| >ATM-R1086 RMLAAESINR  | 1095 | >ATM-R1086 LMLAAESINR  | 445   | 650   |
| >ATM-R1086 RMLAAESI    | 56   | >ATM-R1086 LMLAAESI    | 43    | 13    |
| >ATM-R1086 RMLAAESINR  | 54   | >ATM-R1086 LMLAAESINR  | 43    | 11    |
| >ATM-R1086 RMLAAESI    | 176  | >ATM-R1086 LMLAAESI    | 86    | 90    |
| >ATM-R1086 RMLAAESINR  | 45   | >ATM-R1086 LMLAAESINR  | 31    | 14    |
| >ATM-R1086 RMLAAESI    | 80   | >ATM-R1086 LMLAAESI    | 74    | 6     |
| >ATM-R1086 RMLAAESINR  | 108  | >ATM-R1086 LMLAAESINR  | 99    | 9     |
| >ATM-R1086 RMLAAESI    | 33   | >ATM-R1086 LMLAAESI    | 32    | 1     |
| >ATM-R1086 RMLAAESINR  | 97   | >ATM-R1086 LMLAAESINR  | 101   | 4     |
| >ATM-R1086 RMLAAESI    | 5    | >ATM-R1086 LMLAAESI    | 5     | 0     |
| >ATM-R1086 RMLAAESINR  | 7    | >ATM-R1086 LMLAAESINR  | 7     | 0     |
| >ATM-R1086 RMLAAESI    | 16   | >ATM-R1086 LMLAAESI    | 15    | 1     |
| >ATM-R1086 RMLAAESINR  | 22   | >ATM-R1086 LMLAAESINR  | 19    | 3     |
| >ATM-R1086 RMLAAESI    | 20   | >ATM-R1086 LMLAAESI    | 18    | 2     |
| >ATM-R1086 RMLAAESINR  | 16   | >ATM-R1086 LMLAAESINR  | 17    | 1     |
| >ATM-R1086 RMLAAESI    | 21   | >ATM-R1086 LMLAAESI    | 8     | 13    |
| >ATM-R1086 RMLAAESINR  | 30   | >ATM-R1086 LMLAAESINR  | 10    | 20    |
| >ATM-R1086 RMLAAESI    | 47   | >ATM-R1086 LMLAAESI    | 11    | 36    |
| >ATM-R1086 RMLAAESINR  | 10   | >ATM-R1086 LMLAAESINR  | 4     | 6     |
| >ATM-R1086 RMLAAESINR  | 101  | >ATM-R1086 LMLAAESINR  | 385   | 284   |
| >ATM-R1086 RMLAAESINR  | 106  | >ATM-R1086 LMLAAESINR  | 203   | 97    |
| >ATM-R1086 RMLAAESINR  | 464  | >ATM-R1086 LMLAAESINR  | 6378  | 5914  |
| >ATM-R1086 RMLAAESINR  | 22   | >ATM-R1086 LMLAAESINR  | 88    | 66    |
| >ATM-R1086 RMLAAESI    | 22   | >ATM-R1086 LMLAAESI    | 611   | 589   |
| >ATM-R1086 RMLAAESINR  | 440  | >ATM-R1086 LMLAAESINR  | 10608 | 10168 |
| >ATM-R1086 RMLAAESINR  | 222  | >ATM-R1086 LMLAAESINR  | 82    | 140   |
| >ATM-R1086 RMLAAESI    | 42   | >ATM-R1086 LMLAAESI    | 69    | 27    |
| >ATM-R1086 RMLAAESINR  | 183  | >ATM-R1086 LMLAAESINR  | 480   | 297   |
| >ATM-R1086 RMLAAESINR  | 49   | >ATM-R1086 LMLAAESINR  | 95    | 46    |
| >ATM-R1086 RMLAAESINR  | 236  | >ATM-R1086 LMLAAESINR  | 2233  | 1997  |

|                       |       |                       |       |       |
|-----------------------|-------|-----------------------|-------|-------|
| >ATM-R1086 RMLAAESI   | 297   | >ATM-R1086 LMLAAESI   | 3764  | 3467  |
| >ATM-R1086 RMLAAESINR | 178   | >ATM-R1086 LMLAAESINR | 1737  | 1559  |
| >ATM-R1086 RMLAAESI   | 294   | >ATM-R1086 LMLAAESI   | 2103  | 1809  |
| >ATM-R1086 RMLAAESINR | 123   | >ATM-R1086 LMLAAESINR | 1374  | 1251  |
| >ATM-R1086 RMLAAESINR | 24    | >ATM-R1086 LMLAAESINR | 124   | 100   |
| >ATM-R1086 RMLAAESI   | 251   | >ATM-R1086 LMLAAESI   | 768   | 517   |
| >ATM-R1086 VRMLAAESI  | 246   | >ATM-R1086 VLMLAAESI  | 1585  | 1339  |
| >ATM-R1086 VRMLAAESI  | 22641 | >ATM-R1086 VLMLAAESI  | 116   | 22525 |
| >ATM-R1086 VRMLAAESI  | 14013 | >ATM-R1086 VLMLAAESI  | 37    | 13976 |
| >ATM-R1086 VRMLAAESI  | 17369 | >ATM-R1086 VLMLAAESI  | 40    | 17329 |
| >ATM-R1086 VRMLAAESI  | 9994  | >ATM-R1086 VLMLAAESI  | 171   | 9823  |
| >ATM-R1086 VRMLAAESI  | 23925 | >ATM-R1086 VLMLAAESI  | 41    | 23884 |
| >ATM-R1086 VRMLAAESI  | 22148 | >ATM-R1086 VLMLAAESI  | 41    | 22107 |
| >ATM-R1086 VRMLAAESI  | 24757 | >ATM-R1086 VLMLAAESI  | 155   | 24602 |
| >ATM-R1086 VRMLAAESI  | 18471 | >ATM-R1086 VLMLAAESI  | 7     | 18464 |
| >ATM-R1086 VRMLAAESI  | 34259 | >ATM-R1086 VLMLAAESI  | 43    | 34216 |
| >ATM-R1086 VRMLAAESIN | 20553 | >ATM-R1086 VLMLAAESIN | 434   | 20119 |
| >ATM-R1086 VRMLAAESIN | 21468 | >ATM-R1086 VLMLAAESIN | 481   | 20987 |
| >ATM-R1086 VRMLAAESI  | 12016 | >ATM-R1086 VLMLAAESI  | 112   | 11904 |
| >ATM-R1086 VRMLAAESI  | 115   | >ATM-R1086 VLMLAAESI  | 19018 | 18903 |
| >ATM-R1086 VRMLAAESIN | 126   | >ATM-R1086 VLMLAAESIN | 19432 | 19306 |
| >ATM-R1086 VRMLAAESIN | 1399  | >ATM-R1086 VLMLAAESIN | 461   | 938   |
| >ATM-R1086 QFLADNHHQ  | 7564  | >ATM-R1086 QFLADNHHQ  | 94    | 7470  |
| >ATM-R1086 QFLADNHHQ  | 91    | >ATM-R1086 QFLADNHHQ  | 14604 | 14513 |
| >ATM-R1086 QFLADNHHQ  | 476   | >ATM-R1086 QFLADNHHQ  | 29040 | 28564 |
| >ATM-R1086 QFLADNHHQ  | 38    | >ATM-R1086 QFLADNHHQ  | 19006 | 18968 |
| >ATM-R1086 QVRMLAAES  | 126   | >ATM-R1086 QVLMLAAESI | 5990  | 5864  |
| >ATM-R1086 QVRMLAAES  | 642   | >ATM-R1086 QVLMLAAESI | 60    | 582   |
| >ATM-R1086 QVRMLAAES  | 6904  | >ATM-R1086 QVLMLAAESI | 106   | 6798  |
| >ATM-R1086 HQVRMLAAE  | 133   | >ATM-R1086 HQVLMMLAAE | 110   | 23    |
| >ATM-R1086 HQVRMLAA   | 42    | >ATM-R1086 HQVLMMLAA  | 44    | 2     |
| >ATM-R1086 HQVRMLAAE  | 31    | >ATM-R1086 HQVLMMLAAE | 30    | 1     |
| >ATM-R1086 HQVRMLAAE  | 212   | >ATM-R1086 HQVLMMLAAE | 613   | 401   |
| >ATM-R1086 HQVRMLAAE  | 548   | >ATM-R1086 HQVLMMLAAE | 432   | 116   |
| >ATM-R1086 HQVRMLAAE  | 323   | >ATM-R1086 HQVLMMLAAE | 200   | 123   |
| >ATM-R1086 NHHQVRML   | 191   | >ATM-R1086 NHHQVLML   | 331   | 140   |
| >ATM-R1086 NHHQVRML   | 108   | >ATM-R1086 NHHQVLML   | 47    | 61    |
| >ATM-R1086 ADNHHQVRM  | 1403  | >ATM-R1086 ADNHHQVLM  | 335   | 1068  |
| >ATM-R1086 ADNHHQVRM  | 439   | >ATM-R1086 ADNHHQVLM  | 154   | 285   |
| >ATM-R1086 LADNHHQVR  | 406   | >ATM-R1086 LADNHHQVL  | 19453 | 19047 |
| >ATM-R1086 LADNHHQVR  | 1309  | >ATM-R1086 LADNHHQVL  | 475   | 834   |
| >ATM-R1086 LADNHHQVR  | 1106  | >ATM-R1086 LADNHHQVL  | 380   | 726   |
| >ATM-R1086 FLADNHHQV  | 9441  | >ATM-R1086 FLADNHHQV  | 96    | 9345  |

|                       |       |                       |       |       |
|-----------------------|-------|-----------------------|-------|-------|
| >ATM-R1086 FLADNHHQV  | 21    | >ATM-R1086 FLADNHHQV  | 14    | 7     |
| >ATM-R1086 FLADNHHQV  | 3699  | >ATM-R1086 FLADNHHQV  | 15    | 3684  |
| >ATM-R1086 FLADNHHQV  | 3     | >ATM-R1086 FLADNHHQV  | 2     | 1     |
| >ATM-R1086 FLADNHHQV  | 7779  | >ATM-R1086 FLADNHHQV  | 84    | 7695  |
| >ATM-R1086 FLADNHHQV  | 16    | >ATM-R1086 FLADNHHQV  | 10    | 6     |
| >ATM-R1086 FLADNHHQV  | 58    | >ATM-R1086 FLADNHHQV  | 25    | 33    |
| >ATM-R1086 FLADNHHQV  | 707   | >ATM-R1086 FLADNHHQV  | 2     | 705   |
| >ATM-R1086 FLADNHHQV  | 7     | >ATM-R1086 FLADNHHQV  | 9     | 2     |
| >ATM-R1086 FLADNHHQV  | 8337  | >ATM-R1086 FLADNHHQV  | 5     | 8332  |
| >ATM-R1086 FLADNHHQV  | 19    | >ATM-R1086 FLADNHHQV  | 17    | 2     |
| >ATM-R1086 FLADNHHQV  | 6634  | >ATM-R1086 FLADNHHQV  | 9     | 6625  |
| >ATM-R1086 FLADNHHQV  | 39    | >ATM-R1086 FLADNHHQV  | 23    | 16    |
| >ATM-R1086 FLADNHHQV  | 13606 | >ATM-R1086 FLADNHHQV  | 6     | 13600 |
| >ATM-R1086 FLADNHHQV  | 13    | >ATM-R1086 FLADNHHQV  | 15    | 2     |
| >ATM-R1086 FLADNHHQV  | 33    | >ATM-R1086 FLADNHHQV  | 2     | 31    |
| >ATM-R1086 FLADNHHQV  | 2     | >ATM-R1086 FLADNHHQV  | 3     | 1     |
| >ATM-R1086 FLADNHHQV  | 662   | >ATM-R1086 FLADNHHQV  | 158   | 504   |
| >ATM-R1086 FLADNHHQV  | 437   | >ATM-R1086 FLADNHHQV  | 33180 | 32743 |
| >ATM-R1086 FLADNHHQV  | 354   | >ATM-R1086 FLADNHHQV  | 328   | 26    |
| >ATM-R1086 FLADNHHQV  | 9999  | >ATM-R1086 FLADNHHQV  | 232   | 9767  |
| >ATM-R1086 FLADNHHQV  | 332   | >ATM-R1086 FLADNHHQV  | 463   | 131   |
| >ATM-R1086 FLADNHHQV  | 6577  | >ATM-R1086 FLADNHHQV  | 402   | 6175  |
| >ATM-R1086 FLADNHHQV  | 570   | >ATM-R1086 FLADNHHQV  | 470   | 100   |
| >ATM-R1086 FLADNHHQV  | 3521  | >ATM-R1086 FLADNHHQV  | 346   | 3175  |
| >ATM-R1086 FLADNHHQV  | 16044 | >ATM-R1086 FLADNHHQV  | 93    | 15951 |
| >ATM-R1086 FLADNHHQV  | 355   | >ATM-R1086 FLADNHHQV  | 31921 | 31566 |
| >ATM-R2263 RTFKNTQL   | 1265  | >ATM-R2263 STFKNTQL   | 425   | 840   |
| >ATM-R2263 RTFKNTQL   | 476   | >ATM-R2263 STFKNTQL   | 218   | 258   |
| >ATM-R2263 RTFKNTQL   | 546   | >ATM-R2263 STFKNTQL   | 446   | 100   |
| >ATM-R2263 RTFKNTQLPE | 216   | >ATM-R2263 STFKNTQLPE | 1335  | 1119  |
| >ATM-R2263 RTFKNTQLPE | 58    | >ATM-R2263 STFKNTQLPE | 34    | 24    |
| >ATM-R2263 RTFKNTQL   | 114   | >ATM-R2263 STFKNTQL   | 1712  | 1598  |
| >ATM-R2263 RTFKNTQLP  | 216   | >ATM-R2263 STFKNTQLP  | 2687  | 2471  |
| >ATM-R2263 RTFKNTQLPE | 201   | >ATM-R2263 STFKNTQLPE | 2153  | 1952  |
| >ATM-R2263 RTFKNTQLPE | 23    | >ATM-R2263 STFKNTQLPE | 335   | 312   |
| >ATM-R2263 RTFKNTQLPE | 9     | >ATM-R2263 STFKNTQLPE | 18    | 9     |
| >ATM-R2263 RTFKNTQL   | 9     | >ATM-R2263 STFKNTQL   | 40    | 31    |
| >ATM-R2263 RTFKNTQLPE | 137   | >ATM-R2263 STFKNTQLPE | 1369  | 1232  |
| >ATM-R2263 RTFKNTQLPE | 23    | >ATM-R2263 STFKNTQLPE | 6     | 17    |
| >ATM-R2263 RTFKNTQL   | 1458  | >ATM-R2263 STFKNTQL   | 56    | 1402  |
| >ATM-R2263 RTFKNTQL   | 3006  | >ATM-R2263 STFKNTQL   | 231   | 2775  |
| >ATM-R2263 RTFKNTQL   | 173   | >ATM-R2263 STFKNTQL   | 856   | 683   |
| >ATM-R2263 RTFKNTQL   | 3     | >ATM-R2263 STFKNTQL   | 10    | 7     |

|                        |       |                        |       |       |
|------------------------|-------|------------------------|-------|-------|
| >ATM-R2263 RTFKNTQLPE  | 406   | >ATM-R2263 STFKNTQLPE  | 4994  | 4588  |
| >ATM-R2263 RTFKNTQL    | 385   | >ATM-R2263 STFKNTQL    | 6775  | 6390  |
| >ATM-R2263 RTFKNTQL    | 243   | >ATM-R2263 STFKNTQL    | 7821  | 7578  |
| >ATM-R2263 RTFKNTQL    | 251   | >ATM-R2263 STFKNTQL    | 4605  | 4354  |
| >ATM-R2263 RTFKNTQL    | 95    | >ATM-R2263 STFKNTQL    | 8900  | 8805  |
| >ATM-R2263 RTFKNTQLPE  | 194   | >ATM-R2263 STFKNTQLPE  | 65    | 129   |
| >ATM-R2263 RTFKNTQLPE  | 76    | >ATM-R2263 STFKNTQLPE  | 286   | 210   |
| >ATM-R2263 RTFKNTQL    | 32    | >ATM-R2263 STFKNTQL    | 68    | 36    |
| >ATM-R2263 ARTFKNTQL   | 22038 | >ATM-R2263 ASTFKNTQL   | 14    | 22024 |
| >ATM-R2263 ARTFKNTQL   | 10720 | >ATM-R2263 ASTFKNTQL   | 267   | 10453 |
| >ATM-R2263 ARTFKNTQL   | 421   | >ATM-R2263 ASTFKNTQL   | 21157 | 20736 |
| >ATM-R2263 ARTFKNTQL   | 174   | >ATM-R2263 ASTFKNTQL   | 29349 | 29175 |
| >ATM-R2263 KHLVELSILAR | 180   | >ATM-R2263 KHLVELSILAS | 25671 | 25491 |
| >ATM-R2263 LARTFKNTQL  | 94    | >ATM-R2263 LASTFKNTQL  | 529   | 435   |
| >ATM-R2263 ILARTFKNTQI | 542   | >ATM-R2263 ILASTFKNTQI | 169   | 373   |
| >ATM-R2263 ILARTFKNT   | 1760  | >ATM-R2263 ILASTFKNT   | 495   | 1265  |
| >ATM-R2263 ILARTFKNTQI | 15    | >ATM-R2263 ILASTFKNTQI | 7     | 8     |
| >ATM-R2263 ILARTFKNT   | 731   | >ATM-R2263 ILASTFKNT   | 197   | 534   |
| >ATM-R2263 ILARTFKNTQI | 31    | >ATM-R2263 ILASTFKNTQI | 14    | 17    |
| >ATM-R2263 ILARTFKNTQI | 74    | >ATM-R2263 ILASTFKNTQI | 44    | 30    |
| >ATM-R2263 ILARTFKNTQI | 160   | >ATM-R2263 ILASTFKNTQI | 91    | 69    |
| >ATM-R2263 ILARTFKNTQI | 82    | >ATM-R2263 ILASTFKNTQI | 28    | 54    |
| >ATM-R2263 ILARTFKNT   | 589   | >ATM-R2263 ILASTFKNT   | 479   | 110   |
| >ATM-R2263 ILARTFKNTQ  | 311   | >ATM-R2263 ILASTFKNTQ  | 261   | 50    |
| >ATM-R2263 ILARTFKNTQI | 6     | >ATM-R2263 ILASTFKNTQI | 5     | 1     |
| >ATM-R2263 ILARTFKNTQI | 496   | >ATM-R2263 ILASTFKNTQI | 269   | 227   |
| >ATM-R2263 SILARTFKNT  | 625   | >ATM-R2263 SILASTFKNT  | 345   | 280   |
| >ATM-R2263 SILARTFK    | 40    | >ATM-R2263 SILASTFK    | 40    | 0     |
| >ATM-R2263 SILARTFK    | 8     | >ATM-R2263 SILASTFK    | 7     | 1     |
| >ATM-R2263 SILARTFK    | 17    | >ATM-R2263 SILASTFK    | 16    | 1     |
| >ATM-R2263 SILARTFK    | 55    | >ATM-R2263 SILASTFK    | 212   | 157   |
| >ATM-R2263 SILARTFK    | 109   | >ATM-R2263 SILASTFK    | 76    | 33    |
| >ATM-R2263 SILARTFK    | 479   | >ATM-R2263 SILASTFK    | 637   | 158   |
| >ATM-R2263 LSILARTFK   | 309   | >ATM-R2263 LSILASTFK   | 219   | 90    |
| >ATM-R2263 LSILARTFK   | 21    | >ATM-R2263 LSILASTFK   | 18    | 3     |
| >ATM-R2263 LSILARTFK   | 42    | >ATM-R2263 LSILASTFK   | 48    | 6     |
| >ATM-R2263 LSILARTFK   | 142   | >ATM-R2263 LSILASTFK   | 980   | 838   |
| >ATM-R2263 LSILARTFK   | 15    | >ATM-R2263 LSILASTFK   | 18    | 3     |
| >ATM-R2263 LSILARTF    | 144   | >ATM-R2263 LSILASTF    | 52    | 92    |
| >ATM-R2263 LSILARTF    | 45    | >ATM-R2263 LSILASTF    | 18    | 27    |
| >ATM-R2263 LSILARTF    | 4     | >ATM-R2263 LSILASTF    | 3     | 1     |
| >ATM-R2263 LSILARTF    | 749   | >ATM-R2263 LSILASTF    | 145   | 604   |
| >ATM-R2263 LSILARTF    | 195   | >ATM-R2263 LSILASTF    | 344   | 149   |

|                        |       |                        |       |       |
|------------------------|-------|------------------------|-------|-------|
| >ATM-R2263 LSILARTF    | 110   | >ATM-R2263 LSILASTF    | 34    | 76    |
| >ATM-R2263 LSILARTF    | 89    | >ATM-R2263 LSILASTF    | 169   | 80    |
| >ATM-R2263 ELSILARTFK  | 98    | >ATM-R2263 ELSILASTFK  | 56    | 42    |
| >ATM-R2263 ELSILARTFK  | 127   | >ATM-R2263 ELSILASTFK  | 71    | 56    |
| >ATM-R2263 ELSILARTFK  | 39    | >ATM-R2263 ELSILASTFK  | 26    | 13    |
| >ATM-R2263 ELSILARTF   | 1812  | >ATM-R2263 ELSILASTF   | 446   | 1366  |
| >ATM-R2263 ELSILARTF   | 1488  | >ATM-R2263 ELSILASTF   | 448   | 1040  |
| >ATM-R2263 ELSILARTF   | 1654  | >ATM-R2263 ELSILASTF   | 421   | 1233  |
| >ATM-R2263 ELSILARTF   | 4143  | >ATM-R2263 ELSILASTF   | 131   | 4012  |
| >ATM-R2263 VELSILARTF  | 239   | >ATM-R2263 VELSILASTF  | 185   | 54    |
| >ATM-R2263 VELSILARTF  | 102   | >ATM-R2263 VELSILASTF  | 31    | 71    |
| >ATM-R2263 VELSILARTF  | 110   | >ATM-R2263 VELSILASTF  | 142   | 32    |
| >ATM-R2263 VELSILARTF  | 157   | >ATM-R2263 VELSILASTF  | 98    | 59    |
| >ATM-R2263 VELSILART   | 41    | >ATM-R2263 VELSILAST   | 37    | 4     |
| >ATM-R2263 VELSILARTF  | 117   | >ATM-R2263 VELSILASTF  | 79    | 38    |
| >ATM-R2263 LVELSILAR   | 281   | >ATM-R2263 LVELSILAS   | 30792 | 30511 |
| >ATM-R2263 LVELSILARTF | 57    | >ATM-R2263 LVELSILASTF | 28    | 29    |
| >ATM-R2263 LVELSILARTF | 576   | >ATM-R2263 LVELSILASTF | 215   | 361   |
| >ATM-R2263 LVELSILARTF | 372   | >ATM-R2263 LVELSILASTF | 45    | 327   |
| >ATM-R2263 HVELSILART  | 849   | >ATM-R2263 HVELSILAST  | 448   | 401   |
| >ATM-R2263 HVELSILART  | 113   | >ATM-R2263 HVELSILAST  | 67    | 46    |
| >ATM-R2263 HVELSILART  | 145   | >ATM-R2263 HVELSILAST  | 58    | 87    |
| >ATM-R2263 HVELSILART  | 608   | >ATM-R2263 HVELSILAST  | 152   | 456   |
| >ATM-R2263 HVELSILART  | 224   | >ATM-R2263 HVELSILAST  | 193   | 31    |
| >ATM-R2263 HVELSILART  | 933   | >ATM-R2263 HVELSILAST  | 328   | 605   |
| >ATM-R2263 HVELSILART  | 68    | >ATM-R2263 HVELSILAST  | 61    | 7     |
| >ATM-R2263 HVELSILAR   | 74    | >ATM-R2263 HVELSILAS   | 29687 | 29613 |
| >ATM-R2263 HVELSILAR   | 188   | >ATM-R2263 HVELSILAS   | 18863 | 18675 |
| >ATM-R2263 HVELSILAR   | 39    | >ATM-R2263 HVELSILAS   | 22438 | 22399 |
| >ATM-R23Q- RKKEVEKFK   | 86    | >ATM-R23Q- QKKEVEKFK   | 3654  | 3568  |
| >ATM-R23Q- RKKEVEKFKR  | 183   | >ATM-R23Q- QKKEVEKFKR  | 1118  | 935   |
| >ATM-R23Q- RKKEVEKF    | 6     | >ATM-R23Q- QKKEVEKF    | 22    | 16    |
| >ATM-R23Q- RKKEVEKFKR  | 116   | >ATM-R23Q- QKKEVEKFKR  | 670   | 554   |
| >ATM-R23Q- ERKKEVEKFKI | 1352  | >ATM-R23Q- EQKKEVEKFK  | 409   | 943   |
| >ATM-R23Q- ERKKEVEKF   | 20340 | >ATM-R23Q- EQKKEVEKF   | 328   | 20012 |
| >ATM-R23Q- ERKKEVEKF   | 310   | >ATM-R23Q- EQKKEVEKF   | 43    | 267   |
| >ATM-R23Q- RQLEHDRATE  | 3651  | >ATM-R23Q- RQLEHDRATE  | 490   | 3161  |
| >ATM-R23Q- RQLEHDRATE  | 20    | >ATM-R23Q- RQLEHDRATE  | 9857  | 9837  |
| >ATM-R23Q- RQLEHDRATE  | 270   | >ATM-R23Q- RQLEHDRATE  | 881   | 611   |
| >ATM-R23Q- RQLEHDRATE  | 483   | >ATM-R23Q- RQLEHDRATE  | 5176  | 4693  |
| >ATM-R23Q- RQLEHDRATE  | 137   | >ATM-R23Q- RQLEHDRATE  | 14146 | 14009 |
| >ATM-R23Q- TERKKEVEKF  | 293   | >ATM-R23Q- TEQKKEVEKF  | 254   | 39    |
| >ATM-R23Q- ATERKKEVEK  | 343   | >ATM-R23Q- ATEQKKEVEK  | 192   | 151   |



|                        |       |                        |       |       |
|------------------------|-------|------------------------|-------|-------|
| >ATM-R23Q- ATERKKEVEK  | 55    | >ATM-R23Q- ATEQKKEVEK  | 19    | 36    |
| >ATM-R23Q- ATERKKEVEK  | 225   | >ATM-R23Q- ATEQKKEVEK  | 184   | 41    |
| >ATM-R23Q- ATERKKEVEK  | 575   | >ATM-R23Q- ATEQKKEVEK  | 436   | 139   |
| >ATM-R23Q- RATERKKEVE  | 330   | >ATM-R23Q- RATEQKKEVE  | 333   | 3     |
| >ATM-R23Q- HDRATERK    | 465   | >ATM-R23Q- HDRATEQK    | 356   | 109   |
| >ATM-R23Q- HDRATERKK   | 249   | >ATM-R23Q- HDRATEQKK   | 196   | 53    |
| >ATM-R23Q- HDRATERKKE  | 517   | >ATM-R23Q- HDRATEQKKI  | 353   | 164   |
| >ATM-R2443 RELELDEL    | 886   | >ATM-R2443 QELELDEL    | 256   | 630   |
| >ATM-R2443 RELELDEL    | 9     | >ATM-R2443 QELELDEL    | 44    | 35    |
| >ATM-R2443 RELELDEL    | 18    | >ATM-R2443 QELELDEL    | 80    | 62    |
| >ATM-R2443 RELELDELA   | 70    | >ATM-R2443 QELELDELA   | 540   | 470   |
| >ATM-R2443 RELELDELAL  | 162   | >ATM-R2443 QELELDELAL  | 294   | 132   |
| >ATM-R2443 RELELDEL    | 385   | >ATM-R2443 QELELDEL    | 386   | 1     |
| >ATM-R2443 RELELDELAL  | 509   | >ATM-R2443 QELELDELAL  | 238   | 271   |
| >ATM-R2443 RELELDELA   | 132   | >ATM-R2443 QELELDELA   | 122   | 10    |
| >ATM-R2443 RELELDELAL  | 188   | >ATM-R2443 QELELDELAL  | 2261  | 2073  |
| >ATM-R2443 RELELDEL    | 77    | >ATM-R2443 QELELDEL    | 227   | 150   |
| >ATM-R2443 RELELDELA   | 41    | >ATM-R2443 QELELDELA   | 340   | 299   |
| >ATM-R2443 RELELDELAL  | 29    | >ATM-R2443 QELELDELAL  | 199   | 170   |
| >ATM-R2443 RELELDELALF | 117   | >ATM-R2443 QELELDELALF | 1097  | 980   |
| >ATM-R2443 RELELDELALF | 98    | >ATM-R2443 QELELDELALF | 336   | 238   |
| >ATM-R2443 QRELELDEL   | 22792 | >ATM-R2443 QQELELDEL   | 493   | 22299 |
| >ATM-R2443 QRELELDEL   | 380   | >ATM-R2443 QQELELDEL   | 13073 | 12693 |
| >ATM-R2443 QRELELDELA  | 223   | >ATM-R2443 QQELELDELA  | 7048  | 6825  |
| >ATM-R2443 QTNRYTVKVC  | 297   | >ATM-R2443 QTNRYTVKVC  | 17000 | 16703 |
| >ATM-R2443 QTNRYTVKVC  | 12    | >ATM-R2443 QTNRYTVKVC  | 7279  | 7267  |
| >ATM-R2443 QTNRYTVKVC  | 473   | >ATM-R2443 QTNRYTVKVC  | 25361 | 24888 |
| >ATM-R2443 QTNRYTVKVC  | 12    | >ATM-R2443 QTNRYTVKVC  | 1888  | 1876  |
| >ATM-R2443 VQRELELDEL  | 1518  | >ATM-R2443 VQQELELDEL  | 327   | 1191  |
| >ATM-R2443 VQRELELDEL  | 406   | >ATM-R2443 VQQELELDEL  | 1827  | 1421  |
| >ATM-R2443 KVQRELELDE  | 605   | >ATM-R2443 KVQQELELDE  | 371   | 234   |
| >ATM-R2443 KVQRELELDE  | 475   | >ATM-R2443 KVQQELELDE  | 386   | 89    |
| >ATM-R2443 VKVQRELEL   | 272   | >ATM-R2443 VKVQQELEL   | 229   | 43    |
| >ATM-R2443 YTVKVQREL   | 636   | >ATM-R2443 YTVKVQQEL   | 92    | 544   |
| >ATM-R2443 YTVKVQRELE  | 704   | >ATM-R2443 YTVKVQQELE  | 325   | 379   |
| >ATM-R2443 YTVKVQREL   | 2070  | >ATM-R2443 YTVKVQQEL   | 260   | 1810  |
| >ATM-R2443 YTVKVQRELE  | 511   | >ATM-R2443 YTVKVQQELE  | 293   | 218   |
| >ATM-R2443 YTVKVQREL   | 515   | >ATM-R2443 YTVKVQQEL   | 118   | 397   |
| >ATM-R2443 YTVKVQRELE  | 592   | >ATM-R2443 YTVKVQQELE  | 329   | 263   |
| >ATM-R2443 YTVKVQREL   | 3876  | >ATM-R2443 YTVKVQQEL   | 453   | 3423  |
| >ATM-R2443 YTVKVQREL   | 5766  | >ATM-R2443 YTVKVQQEL   | 489   | 5277  |
| >ATM-R2443 YTVKVQREL   | 276   | >ATM-R2443 YTVKVQQEL   | 186   | 90    |
| >ATM-R2443 YTVKVQRELE  | 615   | >ATM-R2443 YTVKVQQELE  | 340   | 275   |

|                        |       |                        |       |       |
|------------------------|-------|------------------------|-------|-------|
| >ATM-R2443 YTVKVQREL   | 113   | >ATM-R2443 YTVKVQQEL   | 54    | 59    |
| >ATM-R2443 YTVKVQRELE  | 409   | >ATM-R2443 YTVKVQQELE  | 285   | 124   |
| >ATM-R2443 YTVKVQREL   | 1141  | >ATM-R2443 YTVKVQQEL   | 360   | 781   |
| >ATM-R2443 YTVKVQREL   | 75    | >ATM-R2443 YTVKVQQEL   | 46    | 29    |
| >ATM-R2443 YTVKVQRELE  | 22    | >ATM-R2443 YTVKVQQELE  | 20    | 2     |
| >ATM-R2443 YTVKVQREL   | 3699  | >ATM-R2443 YTVKVQQEL   | 442   | 3257  |
| >ATM-R2443 YTVKVQREL   | 81    | >ATM-R2443 YTVKVQQEL   | 62    | 19    |
| >ATM-R2443 YTVKVQRELE  | 118   | >ATM-R2443 YTVKVQQELE  | 131   | 13    |
| >ATM-R2443 YTVKVQREL   | 172   | >ATM-R2443 YTVKVQQEL   | 292   | 120   |
| >ATM-R2443 RYTVKVQREL  | 300   | >ATM-R2443 RYTVKVQQEI  | 135   | 165   |
| >ATM-R2443 RYTVKVQREL  | 10    | >ATM-R2443 RYTVKVQQEI  | 6     | 4     |
| >ATM-R2443 RYTVKVQR    | 10    | >ATM-R2443 RYTVKVQQ    | 4414  | 4404  |
| >ATM-R2443 RYTVKVQR    | 28    | >ATM-R2443 RYTVKVQQ    | 4186  | 4158  |
| >ATM-R2443 NRYTVKVQR   | 258   | >ATM-R2443 NRYTVKVQQ   | 16318 | 16060 |
| >ATM-R2443 NRYTVKVQRI  | 746   | >ATM-R2443 NRYTVKVQQ   | 446   | 300   |
| >ATM-R2443 NRYTVKVQR   | 196   | >ATM-R2443 NRYTVKVQQ   | 3168  | 2972  |
| >ATM-R2443 NRYTVKVQRI  | 209   | >ATM-R2443 NRYTVKVQQ   | 305   | 96    |
| >ATM-R2443 NRYTVKVQRI  | 125   | >ATM-R2443 NRYTVKVQQ   | 46    | 79    |
| >ATM-R2443 NRYTVKVQR   | 523   | >ATM-R2443 NRYTVKVQQ   | 218   | 305   |
| >ATM-R2443 NRYTVKVQRI  | 397   | >ATM-R2443 NRYTVKVQQ   | 449   | 52    |
| >ATM-R2443 NRYTVKVQRI  | 419   | >ATM-R2443 NRYTVKVQQ   | 499   | 80    |
| >ATM-R2443 NRYTVKVQRI  | 60    | >ATM-R2443 NRYTVKVQQ   | 76    | 16    |
| >ATM-R2443 NRYTVKVQRI  | 25    | >ATM-R2443 NRYTVKVQQ   | 46    | 21    |
| >ATM-R2443 NRYTVKVQR   | 321   | >ATM-R2443 NRYTVKVQQ   | 25282 | 24961 |
| >ATM-R2453 RALKEDRKRF  | 117   | >ATM-R2453 PALKEDRKRF  | 3368  | 3251  |
| >ATM-R2453 RALKEDRKRF  | 9     | >ATM-R2453 PALKEDRKRF  | 5613  | 5604  |
| >ATM-R2453 RALKEDRKRF  | 93    | >ATM-R2453 PALKEDRKRF  | 19257 | 19164 |
| >ATM-R2453 RALKEDRKRF  | 92    | >ATM-R2453 PALKEDRKRF  | 8794  | 8702  |
| >ATM-R2453 RALKEDRKR   | 165   | >ATM-R2453 PALKEDRKR   | 3636  | 3471  |
| >ATM-R2453 LRALKEDRKR  | 23730 | >ATM-R2453 LPALKEDRKR  | 343   | 23387 |
| >ATM-R2453 LRALKEDRKR  | 21993 | >ATM-R2453 LPALKEDRKR  | 143   | 21850 |
| >ATM-R2453 LRALKEDRKR  | 30586 | >ATM-R2453 LPALKEDRKR  | 456   | 30130 |
| >ATM-R2453 LRALKEDRKR  | 23979 | >ATM-R2453 LPALKEDRKR  | 330   | 23649 |
| >ATM-R2453 RELELDELALF | 117   | >ATM-R2453 RELELDELALF | 187   | 70    |
| >ATM-R2453 RELELDELALF | 98    | >ATM-R2453 RELELDELALF | 31213 | 31115 |
| >ATM-R2453 ALRALKEDRK  | 171   | >ATM-R2453 ALPALKEDRK  | 14489 | 14318 |
| >ATM-R2453 ALRALKEDR   | 243   | >ATM-R2453 ALPALKEDR   | 4353  | 4110  |
| >ATM-R2453 ALRALKEDRK  | 269   | >ATM-R2453 ALPALKEDRK  | 3481  | 3212  |
| >ATM-R2453 ELALRALK    | 218   | >ATM-R2453 ELALPALK    | 277   | 59    |
| >ATM-R2453 ELALRALK    | 26    | >ATM-R2453 ELALPALK    | 37    | 11    |
| >ATM-R2453 ELALRALKEDI | 59    | >ATM-R2453 ELALPALKEDI | 62    | 3     |
| >ATM-R2453 DELALRAL    | 147   | >ATM-R2453 DELALPAL    | 1249  | 1102  |
| >ATM-R2453 DELALRAL    | 7     | >ATM-R2453 DELALPAL    | 8     | 1     |

|                        |      |                        |       |       |
|------------------------|------|------------------------|-------|-------|
| >ATM-R2453 DELALRALK   | 156  | >ATM-R2453 DELALPALK   | 796   | 640   |
| >ATM-R2453 DELALRALKEI | 67   | >ATM-R2453 DELALPALKEI | 126   | 59    |
| >ATM-R2453 DELALRAL    | 559  | >ATM-R2453 DELALPAL    | 335   | 224   |
| >ATM-R2453 DELALRAL    | 452  | >ATM-R2453 DELALPAL    | 320   | 132   |
| >ATM-R2453 ELDELALRAL  | 1635 | >ATM-R2453 ELDELALPAL  | 217   | 1418  |
| >ATM-R2453 ELDELALRAL  | 398  | >ATM-R2453 ELDELALPAL  | 211   | 187   |
| >ATM-R2453 ELDELALRA   | 4551 | >ATM-R2453 ELDELALPA   | 339   | 4212  |
| >ATM-R2453 ELDELALRAL  | 2106 | >ATM-R2453 ELDELALPAL  | 297   | 1809  |
| >ATM-R2453 ELDELALRA   | 99   | >ATM-R2453 ELDELALPA   | 72    | 27    |
| >ATM-R2453 ELDELALRAL  | 44   | >ATM-R2453 ELDELALPAL  | 18    | 26    |
| >ATM-R2453 ELDELALRA   | 2107 | >ATM-R2453 ELDELALPA   | 493   | 1614  |
| >ATM-R2453 ELDELALRAL  | 247  | >ATM-R2453 ELDELALPAL  | 60    | 187   |
| >ATM-R2453 ELDELALRA   | 152  | >ATM-R2453 ELDELALPA   | 70    | 82    |
| >ATM-R2453 ELDELALRAL  | 293  | >ATM-R2453 ELDELALPAL  | 26    | 267   |
| >ATM-R2453 ELDELALRAL  | 198  | >ATM-R2453 ELDELALPAL  | 24    | 174   |
| >ATM-R2453 ELDELALRA   | 217  | >ATM-R2453 ELDELALPA   | 470   | 253   |
| >ATM-R2453 ELDELALRAL  | 331  | >ATM-R2453 ELDELALPAL  | 40    | 291   |
| >ATM-R2453 ELDELALR    | 244  | >ATM-R2453 ELDELALP    | 32949 | 32705 |
| >ATM-R2453 ELDELALR    | 74   | >ATM-R2453 ELDELALP    | 34048 | 33974 |
| >ATM-R2453 ELDELALRALR | 192  | >ATM-R2453 ELDELALPALR | 355   | 163   |
| >ATM-R2453 ELDELALRA   | 136  | >ATM-R2453 ELDELALPA   | 18    | 118   |
| >ATM-R2453 ELDELALRAL  | 108  | >ATM-R2453 ELDELALPAL  | 11    | 97    |
| >ATM-R2453 ELDELALRAL  | 1398 | >ATM-R2453 ELDELALPAL  | 335   | 1063  |
| >ATM-R2453 LELDELALRAL | 139  | >ATM-R2453 LELDELALPAL | 244   | 105   |
| >ATM-R2453 LELDELALRAL | 968  | >ATM-R2453 LELDELALPAL | 219   | 749   |
| >ATM-R2453 LELDELALRAL | 28   | >ATM-R2453 LELDELALPAL | 24    | 4     |
| >ATM-R2453 LELDELALRAL | 52   | >ATM-R2453 LELDELALPAL | 28    | 24    |
| >ATM-R2453 LELDELALRAL | 108  | >ATM-R2453 LELDELALPAL | 73    | 35    |
| >ATM-R2453 LELDELALRAL | 24   | >ATM-R2453 LELDELALPAL | 10    | 14    |
| >ATM-R2453 ELELDELALR  | 302  | >ATM-R2453 ELELDELALP  | 37784 | 37482 |
| >ATM-R2486 FRLCSLWL    | 1191 | >ATM-R2486 FGLCSLWL    | 132   | 1059  |
| >ATM-R2486 FRLCSLWL    | 137  | >ATM-R2486 FGLCSLWL    | 4081  | 3944  |
| >ATM-R2486 FRLCSLWL    | 76   | >ATM-R2486 FGLCSLWL    | 20999 | 20923 |
| >ATM-R2486 FRLCSLWLEN  | 422  | >ATM-R2486 FGLCSLWLEN  | 24108 | 23686 |
| >ATM-R2486 FRLCSLWL    | 154  | >ATM-R2486 FGLCSLWL    | 6993  | 6839  |
| >ATM-R2486 SGEEHDMW    | 223  | >ATM-R2486 SGEEHDMW    | 33070 | 32847 |
| >ATM-R2486 VFRLCSLW    | 515  | >ATM-R2486 VFGLCSLW    | 342   | 173   |
| >ATM-R2486 VFRLCSLW    | 872  | >ATM-R2486 VFGLCSLW    | 386   | 486   |
| >ATM-R2486 WVFRLCSL    | 198  | >ATM-R2486 WVFGLCSL    | 1274  | 1076  |
| >ATM-R2486 WVFRLCSL    | 477  | >ATM-R2486 WVFGLCSL    | 157   | 320   |
| >ATM-R2486 WVFRLCSLW   | 894  | >ATM-R2486 WVFGLCSLW   | 297   | 597   |
| >ATM-R2486 WVFRLCSL    | 118  | >ATM-R2486 WVFGLCSL    | 35    | 83    |
| >ATM-R2486 WVFRLCSLW   | 324  | >ATM-R2486 WVFGLCSLW   | 117   | 207   |

|                       |      |                       |       |       |
|-----------------------|------|-----------------------|-------|-------|
| >ATM-R2486 WVFRLCSL   | 247  | >ATM-R2486 WVFGLCSL   | 137   | 110   |
| >ATM-R2486 WVFRLCSLW  | 349  | >ATM-R2486 WVFGLCSLW  | 220   | 129   |
| >ATM-R2486 WVFRLCSL   | 30   | >ATM-R2486 WVFGLCSL   | 16    | 14    |
| >ATM-R2486 WVFRLCSLW  | 171  | >ATM-R2486 WVFGLCSLW  | 74    | 97    |
| >ATM-R2486 WVFRLCSL   | 174  | >ATM-R2486 WVFGLCSL   | 59    | 115   |
| >ATM-R2486 WVFRLCSLW  | 917  | >ATM-R2486 WVFGLCSLW  | 355   | 562   |
| >ATM-R2486 WVFRLCSL   | 617  | >ATM-R2486 WVFGLCSL   | 188   | 429   |
| >ATM-R2486 WVFRLCSL   | 51   | >ATM-R2486 WVFGLCSL   | 17    | 34    |
| >ATM-R2486 WVFRLCSLW  | 161  | >ATM-R2486 WVFGLCSLW  | 50    | 111   |
| >ATM-R2486 WVFRLCSL   | 87   | >ATM-R2486 WVFGLCSL   | 37    | 50    |
| >ATM-R2486 WVFRLCSL   | 536  | >ATM-R2486 WVFGLCSL   | 276   | 260   |
| >ATM-R2486 WVFRLCSLW  | 210  | >ATM-R2486 WVFGLCSLW  | 85    | 125   |
| >ATM-R2486 WVFRLCSLW  | 1003 | >ATM-R2486 WVFGLCSLW  | 367   | 636   |
| >ATM-R2486 WVFRLCSLW  | 240  | >ATM-R2486 WVFGLCSLW  | 256   | 16    |
| >ATM-R2486 WVFRLCSLW  | 34   | >ATM-R2486 WVFGLCSLW  | 61    | 27    |
| >ATM-R2486 WVFRLCSLW  | 4    | >ATM-R2486 WVFGLCSLW  | 4     | 0     |
| >ATM-R2486 WVFRLCSLW  | 63   | >ATM-R2486 WVFGLCSLW  | 73    | 10    |
| >ATM-R2486 WVFRLCSLW  | 649  | >ATM-R2486 WVFGLCSLW  | 236   | 413   |
| >ATM-R2486 MWVFRCLCSL | 272  | >ATM-R2486 MWVFRCLCSL | 2267  | 1995  |
| >ATM-R2486 MWVFRCLCSL | 449  | >ATM-R2486 MWVFRCLCSL | 323   | 126   |
| >ATM-R2486 MWVFRCLCSL | 506  | >ATM-R2486 MWVFRCLCSL | 443   | 63    |
| >ATM-R2486 MWVFRCLCSL | 560  | >ATM-R2486 MWVFRCLCSL | 254   | 306   |
| >ATM-R2486 MWVFRCLCSL | 83   | >ATM-R2486 MWVFRCLCSL | 80    | 3     |
| >ATM-R2486 MWVFRCLCSL | 329  | >ATM-R2486 MWVFRCLCSL | 248   | 81    |
| >ATM-R2486 MWVFRCLCSL | 110  | >ATM-R2486 MWVFRCLCSL | 158   | 48    |
| >ATM-R2486 MWVFRCLCSL | 368  | >ATM-R2486 MWVFRCLCSL | 186   | 182   |
| >ATM-R2486 MWVFRCLCSL | 742  | >ATM-R2486 MWVFRCLCSL | 446   | 296   |
| >ATM-R2486 MWVFRCLCSL | 290  | >ATM-R2486 MWVFRCLCSL | 178   | 112   |
| >ATM-R2486 MWVFRCLCSL | 177  | >ATM-R2486 MWVFRCLCSL | 12327 | 12150 |
| >ATM-R2486 MWVFRCLCSL | 88   | >ATM-R2486 MWVFRCLCSL | 94    | 6     |
| >ATM-R2486 MWVFRCLCS  | 121  | >ATM-R2486 MWVFRCLCS  | 142   | 21    |
| >ATM-R2486 MWVFRCLCSL | 21   | >ATM-R2486 MWVFRCLCSL | 22    | 1     |
| >ATM-R2486 MWVFRCLCSL | 53   | >ATM-R2486 MWVFRCLCSL | 51    | 2     |
| >ATM-R2486 DMWVFRCLCS | 278  | >ATM-R2486 DMWVFRCLCS | 182   | 96    |
| >ATM-R2486 DMWVFRCLCS | 124  | >ATM-R2486 DMWVFRCLCS | 67    | 57    |
| >ATM-R2486 DMWVFRCLCS | 120  | >ATM-R2486 DMWVFRCLCS | 31    | 89    |
| >ATM-R2486 DMWVFRCLCS | 958  | >ATM-R2486 DMWVFRCLCS | 314   | 644   |
| >ATM-R2486 DMWVFRCLCS | 149  | >ATM-R2486 DMWVFRCLCS | 42    | 107   |
| >ATM-R2486 DMWVFRCLCS | 184  | >ATM-R2486 DMWVFRCLCS | 42    | 142   |
| >ATM-R2486 DMWVFRCLCS | 74   | >ATM-R2486 DMWVFRCLCS | 59    | 15    |
| >ATM-R2486 DMWVFRCLCS | 561  | >ATM-R2486 DMWVFRCLCS | 271   | 290   |
| >ATM-R2486 DMWVFRCLCS | 579  | >ATM-R2486 DMWVFRCLCS | 373   | 206   |
| >ATM-R2486 HDMWVFRCL  | 579  | >ATM-R2486 HDMWVFRCL  | 282   | 297   |

|                       |      |                       |       |       |
|-----------------------|------|-----------------------|-------|-------|
| >ATM-R2486 HDMWVFRL   | 536  | >ATM-R2486 HDMWVFGL   | 408   | 128   |
| >ATM-R2486 HDMWVFRL   | 269  | >ATM-R2486 HDMWVFGL   | 310   | 41    |
| >ATM-R2486 HDMWVFRL   | 127  | >ATM-R2486 HDMWVFGL   | 139   | 12    |
| >ATM-R2486 HDMWVFRL   | 614  | >ATM-R2486 HDMWVFGL   | 266   | 348   |
| >ATM-R2486 HDMWVFRL   | 49   | >ATM-R2486 HDMWVFGL   | 33    | 16    |
| >ATM-R2486 EHDMWVFR   | 234  | >ATM-R2486 EHDMWVFG   | 39339 | 39105 |
| >ATM-R2486 EHDMWVFRI  | 36   | >ATM-R2486 EHDMWVFG   | 28    | 8     |
| >ATM-R2486 EHDMWVFR   | 477  | >ATM-R2486 EHDMWVFG   | 35482 | 35005 |
| >ATM-R2486 EEHDMWVFF  | 607  | >ATM-R2486 EEHDMWVFC  | 260   | 347   |
| >ATM-R2486 EEHDMWVFF  | 178  | >ATM-R2486 EEHDMWVFC  | 30143 | 29965 |
| >ATM-R2486 EEHDMWVFF  | 31   | >ATM-R2486 EEHDMWVFC  | 30374 | 30343 |
| >ATM-R2486 EEHDMWVFF  | 214  | >ATM-R2486 EEHDMWVFC  | 119   | 95    |
| >ATM-R2486 EEHDMWVFF  | 470  | >ATM-R2486 EEHDMWVFC  | 365   | 105   |
| >ATM-R2486 EEHDMWVFF  | 202  | >ATM-R2486 EEHDMWVFC  | 397   | 195   |
| >ATM-R2486 EEHDMWVFF  | 220  | >ATM-R2486 EEHDMWVFC  | 74    | 146   |
| >ATM-R2486 EEHDMWVFF  | 62   | >ATM-R2486 EEHDMWVFC  | 85    | 23    |
| >ATM-R2486 EEHDMWVFF  | 68   | >ATM-R2486 EEHDMWVFC  | 28144 | 28076 |
| >ATM-R2486 GEEHDMWV   | 24   | >ATM-R2486 GEEHDMWV   | 11    | 13    |
| >ATM-R2486 GEEHDMWV   | 432  | >ATM-R2486 GEEHDMWV   | 304   | 128   |
| >ATM-R2486 GEEHDMWV   | 3087 | >ATM-R2486 GEEHDMWV   | 397   | 2690  |
| >ATM-R2486 GEEHDMWV   | 22   | >ATM-R2486 GEEHDMWV   | 21    | 1     |
| >ATM-R2713 RQLVKGRDDI | 39   | >ATM-R2713 KQLVKGRDDI | 46    | 7     |
| >ATM-R2713 RQLVKGRDDI | 122  | >ATM-R2713 KQLVKGRDDI | 221   | 99    |
| >ATM-R2713 RQLVKGRDDI | 374  | >ATM-R2713 KQLVKGRDDI | 2191  | 1817  |
| >ATM-R2713 RQLVKGRDDI | 303  | >ATM-R2713 KQLVKGRDDI | 184   | 119   |
| >ATM-R2713 RRQLVKGR   | 56   | >ATM-R2713 RKQLVKGR   | 1031  | 975   |
| >ATM-R2713 RRQLVKGRDI | 194  | >ATM-R2713 RKQLVKGRDI | 5252  | 5058  |
| >ATM-R2713 RRQLVKGR   | 108  | >ATM-R2713 RKQLVKGR   | 3861  | 3753  |
| >ATM-R2713 RRQLVKGRD  | 223  | >ATM-R2713 RKQLVKGRD  | 5755  | 5532  |
| >ATM-R2713 RRQLVKGRDI | 102  | >ATM-R2713 RKQLVKGRDI | 3258  | 3156  |
| >ATM-R2713 RRQLVKGRDI | 20   | >ATM-R2713 RKQLVKGRDI | 175   | 155   |
| >ATM-R2713 RRQLVKGRDI | 482  | >ATM-R2713 RKQLVKGRDI | 12836 | 12354 |
| >ATM-R2713 RRQLVKGRDI | 14   | >ATM-R2713 RKQLVKGRDI | 283   | 269   |
| >ATM-R2713 ERRQLVKGR  | 562  | >ATM-R2713 ERKQLVKGR  | 409   | 153   |
| >ATM-R2713 KERRQLVK   | 11   | >ATM-R2713 KERKQLVK   | 19    | 8     |
| >ATM-R2713 KERRQLVKG  | 900  | >ATM-R2713 KERKQLVKG  | 440   | 460   |
| >ATM-R2713 KERRQLVKGF | 202  | >ATM-R2713 KERKQLVKGF | 116   | 86    |
| >ATM-R2832 RYFCMEKFL  | 56   | >ATM-R2832 CYFCMEKFL  | 38    | 18    |
| >ATM-R2832 RYFCMEKF   | 18   | >ATM-R2832 CYFCMEKF   | 18    | 0     |
| >ATM-R2832 RYFCMEKFL  | 187  | >ATM-R2832 CYFCMEKFL  | 199   | 12    |
| >ATM-R2832 RYFCMEKF   | 118  | >ATM-R2832 CYFCMEKF   | 292   | 174   |
| >ATM-R2832 RYFCMEKF   | 5    | >ATM-R2832 CYFCMEKF   | 5     | 0     |
| >ATM-R2832 RYFCMEKFL  | 8    | >ATM-R2832 CYFCMEKFL  | 10    | 2     |

|                       |      |                       |       |       |
|-----------------------|------|-----------------------|-------|-------|
| >ATM-R2832 RYFCMEKFL  | 233  | >ATM-R2832 CYFCMEKFL  | 8028  | 7795  |
| >ATM-R2832 RYFCMEKF   | 59   | >ATM-R2832 CYFCMEKF   | 5106  | 5047  |
| >ATM-R2832 RYFCMEKF   | 93   | >ATM-R2832 CYFCMEKF   | 652   | 559   |
| >ATM-R2832 RYFCMEKFL  | 228  | >ATM-R2832 CYFCMEKFL  | 850   | 622   |
| >ATM-R2832 FRYFCMEKFL | 361  | >ATM-R2832 FCYFCMEKFL | 2722  | 2361  |
| >ATM-R2832 FRYFCMEKFL | 1097 | >ATM-R2832 FCYFCMEKFL | 277   | 820   |
| >ATM-R2832 FRYFCMEK   | 547  | >ATM-R2832 FCYFCMEK   | 349   | 198   |
| >ATM-R2832 FRYFCMEK   | 462  | >ATM-R2832 FCYFCMEK   | 4279  | 3817  |
| >ATM-R2832 FRYFCMEKF  | 22   | >ATM-R2832 FCYFCMEKF  | 173   | 151   |
| >ATM-R2832 FRYFCMEKFL | 224  | >ATM-R2832 FCYFCMEKFL | 2703  | 2479  |
| >ATM-R2832 FRYFCMEK   | 209  | >ATM-R2832 FCYFCMEK   | 24586 | 24377 |
| >ATM-R2832 FRYFCMEKF  | 364  | >ATM-R2832 FCYFCMEKF  | 23403 | 23039 |
| >ATM-R2832 FRYFCMEKFL | 23   | >ATM-R2832 FCYFCMEKFL | 18117 | 18094 |
| >ATM-R2832 FRYFCMEKFL | 433  | >ATM-R2832 FCYFCMEKFL | 27312 | 26879 |
| >ATM-R2832 FRYFCMEKF  | 500  | >ATM-R2832 FCYFCMEKF  | 58    | 442   |
| >ATM-R2832 FRYFCMEKF  | 381  | >ATM-R2832 FCYFCMEKF  | 28609 | 28228 |
| >ATM-R2832 FRYFCMEKFL | 237  | >ATM-R2832 FCYFCMEKFL | 27837 | 27600 |
| >ATM-R2832 FRYFCMEKF  | 290  | >ATM-R2832 FCYFCMEKF  | 33620 | 33330 |
| >ATM-R2832 FRYFCMEKFL | 72   | >ATM-R2832 FCYFCMEKFL | 24487 | 24415 |
| >ATM-R2832 FRYFCMEKF  | 209  | >ATM-R2832 FCYFCMEKF  | 13999 | 13790 |
| >ATM-R2832 DVCQNFQPV  | 16   | >ATM-R2832 DVCQNFQPV  | 17985 | 17969 |
| >ATM-R2832 DVCQNFQPV  | 9    | >ATM-R2832 DVCQNFQPV  | 21647 | 21638 |
| >ATM-R2832 DVCQNFQPV  | 108  | >ATM-R2832 DVCQNFQPV  | 33601 | 33493 |
| >ATM-R2832 VFRYFCMEK  | 2130 | >ATM-R2832 VFCYFCMEK  | 123   | 2007  |
| >ATM-R2832 VFRYFCMEKF | 1149 | >ATM-R2832 VFCYFCMEKF | 488   | 661   |
| >ATM-R2832 VFRYFCMEKF | 1477 | >ATM-R2832 VFCYFCMEKF | 483   | 994   |
| >ATM-R2832 VFRYFCMEKF | 163  | >ATM-R2832 VFCYFCMEKF | 59    | 104   |
| >ATM-R2832 VFRYFCMEK  | 10   | >ATM-R2832 VFCYFCMEK  | 1652  | 1642  |
| >ATM-R2832 VFRYFCMEKF | 417  | >ATM-R2832 VFCYFCMEKF | 11347 | 10930 |
| >ATM-R2832 VFRYFCMEK  | 288  | >ATM-R2832 VFCYFCMEK  | 712   | 424   |
| >ATM-R2832 VFRYFCMEK  | 194  | >ATM-R2832 VFCYFCMEK  | 331   | 137   |
| >ATM-R2832 VFRYFCMEKF | 405  | >ATM-R2832 VFCYFCMEKF | 1672  | 1267  |
| >ATM-R2832 VFRYFCMEKF | 970  | >ATM-R2832 VFCYFCMEKF | 455   | 515   |
| >ATM-R2832 VFRYFCMEKF | 247  | >ATM-R2832 VFCYFCMEKF | 386   | 139   |
| >ATM-R2832 PVFRYFCMEK | 235  | >ATM-R2832 PVFCYFCMEK | 170   | 65    |
| >ATM-R2832 PVFRYFCMEK | 57   | >ATM-R2832 PVFCYFCMEK | 30    | 27    |
| >ATM-R2832 PVFRYFCMEK | 718  | >ATM-R2832 PVFCYFCMEK | 499   | 219   |
| >ATM-R2832 PVFRYFCMEK | 87   | >ATM-R2832 PVFCYFCMEK | 201   | 114   |
| >ATM-R2832 PVFRYFCMEK | 626  | >ATM-R2832 PVFCYFCMEK | 174   | 452   |
| >ATM-R2832 PVFRYFCMEK | 556  | >ATM-R2832 PVFCYFCMEK | 362   | 194   |
| >ATM-R2832 PVFRYFCMEK | 581  | >ATM-R2832 PVFCYFCMEK | 351   | 230   |
| >ATM-R2832 QPVFRYFCM  | 4442 | >ATM-R2832 QPVFCYFCM  | 337   | 4105  |
| >ATM-R2832 QPVFRYFCM  | 456  | >ATM-R2832 QPVFCYFCM  | 6867  | 6411  |

|                        |      |                        |       |       |
|------------------------|------|------------------------|-------|-------|
| >ATM-R2832 QPVFRYFCM   | 120  | >ATM-R2832 QPVFCYFCM   | 23    | 97    |
| >ATM-R2832 QPVFRYFCM   | 963  | >ATM-R2832 QPVFCYFCM   | 110   | 853   |
| >ATM-R2832 FQPVFRYFCM  | 519  | >ATM-R2832 FQPVFCYFCM  | 379   | 140   |
| >ATM-R2832 FQPVFRYF    | 75   | >ATM-R2832 FQPVFCYF    | 22    | 53    |
| >ATM-R2832 FQPVFRYFC   | 152  | >ATM-R2832 FQPVFCYFC   | 39    | 113   |
| >ATM-R2832 FQPVFRYFCM  | 280  | >ATM-R2832 FQPVFCYFCM  | 165   | 115   |
| >ATM-R2832 FQPVFRYF    | 165  | >ATM-R2832 FQPVFCYF    | 101   | 64    |
| >ATM-R2832 FQPVFRYF    | 203  | >ATM-R2832 FQPVFCYF    | 90    | 113   |
| >ATM-R2832 FQPVFRYF    | 472  | >ATM-R2832 FQPVFCYF    | 549   | 77    |
| >ATM-R2832 FQPVFRYF    | 9    | >ATM-R2832 FQPVFCYF    | 9     | 0     |
| >ATM-R2832 FQPVFRYFCM  | 109  | >ATM-R2832 FQPVFCYFCM  | 97    | 12    |
| >ATM-R2832 FQPVFRYF    | 666  | >ATM-R2832 FQPVFCYF    | 97    | 569   |
| >ATM-R2832 NFQPVFRYF   | 20   | >ATM-R2832 NFQPVFCYF   | 23    | 3     |
| >ATM-R2832 NFQPVFRYFC  | 659  | >ATM-R2832 NFQPVFCYFC  | 316   | 343   |
| >ATM-R2832 NFQPVFRYF   | 207  | >ATM-R2832 NFQPVFCYF   | 184   | 23    |
| >ATM-R2832 NFQPVFRYF   | 6    | >ATM-R2832 NFQPVFCYF   | 5     | 1     |
| >ATM-R2832 NFQPVFRY    | 32   | >ATM-R2832 NFQPVFCY    | 51    | 19    |
| >ATM-R2832 NFQPVFRY    | 433  | >ATM-R2832 NFQPVFCY    | 1246  | 813   |
| >ATM-R2832 QNFQPVFRY   | 115  | >ATM-R2832 QNFQPVFCY   | 208   | 93    |
| >ATM-R2832 QNFQPVFR    | 52   | >ATM-R2832 QNFQPVFC    | 31892 | 31840 |
| >ATM-R2832 QNFQPVFRYF  | 1520 | >ATM-R2832 QNFQPVFCYF  | 494   | 1026  |
| >ATM-R2832 QNFQPVFRY   | 741  | >ATM-R2832 QNFQPVFCY   | 197   | 544   |
| >ATM-R2832 QNFQPVFRYF  | 62   | >ATM-R2832 QNFQPVFCYF  | 42    | 20    |
| >ATM-R2832 QNFQPVFRY   | 222  | >ATM-R2832 QNFQPVFCY   | 1223  | 1001  |
| >ATM-R2832 QNFQPVFRY   | 188  | >ATM-R2832 QNFQPVFCY   | 835   | 647   |
| >ATM-R2832 QNFQPVFR    | 44   | >ATM-R2832 QNFQPVFC    | 30825 | 30781 |
| >ATM-R2832 CQNFQPVFR   | 17   | >ATM-R2832 CQNFQPVFC   | 17924 | 17907 |
| >ATM-R2832 CQNFQPVFR'  | 359  | >ATM-R2832 CQNFQPVFC'  | 373   | 14    |
| >ATM-R2832 CQNFQPVFR'  | 373  | >ATM-R2832 CQNFQPVFC'  | 347   | 26    |
| >ATM-R2832 CQNFQPVFR'  | 302  | >ATM-R2832 CQNFQPVFC'  | 139   | 163   |
| >ATM-R2832 CQNFQPVFR'  | 133  | >ATM-R2832 CQNFQPVFC'  | 51    | 82    |
| >ATM-R2832 CQNFQPVFR'  | 17   | >ATM-R2832 CQNFQPVFC'  | 13    | 4     |
| >ATM-R2832 CQNFQPVFR   | 53   | >ATM-R2832 CQNFQPVFC   | 34185 | 34132 |
| >ATM-R2832 VCQNFQPVFI  | 119  | >ATM-R2832 VCQNFQPVFI  | 302   | 183   |
| >ATM-R2832 VCQNFQPVFI  | 84   | >ATM-R2832 VCQNFQPVFI  | 22947 | 22863 |
| >ATM-R2832 VCQNFQPVFI  | 434  | >ATM-R2832 VCQNFQPVFI  | 431   | 3     |
| >ATM-R2832 VCQNFQPVFI  | 154  | >ATM-R2832 VCQNFQPVFI  | 598   | 444   |
| >ATM-R2832 VCQNFQPVFI  | 217  | >ATM-R2832 VCQNFQPVFI  | 35718 | 35501 |
| >ATM-R2912 RDIVDGMGI   | 120  | >ATM-R2912 KDIVDGMGI   | 241   | 121   |
| >ATM-R2912 RDIVDGMGI   | 74   | >ATM-R2912 KDIVDGMGI   | 81    | 7     |
| >ATM-R2912 LTRDIVDGMCI | 416  | >ATM-R2912 LTKDIVDGMCI | 199   | 217   |
| >ATM-R2912 LTRDIVDGM   | 1143 | >ATM-R2912 LTKDIVDGM   | 412   | 731   |
| >ATM-R2912 LTRDIVDGM   | 133  | >ATM-R2912 LTKDIVDGM   | 222   | 89    |

|                        |      |                        |      |      |
|------------------------|------|------------------------|------|------|
| >ATM-R2912 LTRDIVDGM   | 387  | >ATM-R2912 LTKDIVDGM   | 3002 | 2615 |
| >ATM-R2912 LTRDIVDGMK  | 113  | >ATM-R2912 LTKDIVDGMK  | 633  | 520  |
| >ATM-R2912 LTRDIVDGMK  | 735  | >ATM-R2912 LTKDIVDGMK  | 290  | 445  |
| >ATM-R2912 LTRDIVDGM   | 11   | >ATM-R2912 LTKDIVDGM   | 49   | 38   |
| >ATM-R2912 LTRDIVDGMK  | 32   | >ATM-R2912 LTKDIVDGMK  | 196  | 164  |
| >ATM-R2912 LTRDIVDGM   | 20   | >ATM-R2912 LTKDIVDGM   | 67   | 47   |
| >ATM-R2912 LTRDIVDGMK  | 179  | >ATM-R2912 LTKDIVDGMK  | 702  | 523  |
| >ATM-R2912 LTRDIVDGMK  | 145  | >ATM-R2912 LTKDIVDGMK  | 229  | 84   |
| >ATM-R2912 RLTRDIVDGM  | 163  | >ATM-R2912 RLTKDIVDGM  | 220  | 57   |
| >ATM-R2912 RLTRDIVDGM  | 302  | >ATM-R2912 RLTKDIVDGM  | 406  | 104  |
| >ATM-R2912 RLTRDIVDGM  | 483  | >ATM-R2912 RLTKDIVDGM  | 333  | 150  |
| >ATM-R2912 RLTRDIVDGM  | 122  | >ATM-R2912 RLTKDIVDGM  | 224  | 102  |
| >ATM-R2912 FRLTRDIV    | 394  | >ATM-R2912 FRLTKDIV    | 944  | 550  |
| >ATM-R2912 FRLTRDIVG   | 46   | >ATM-R2912 FRLTKDIVG   | 75   | 29   |
| >ATM-R2912 FRLTRDIV    | 485  | >ATM-R2912 FRLTKDIV    | 1056 | 571  |
| >ATM-R2912 FRLTRDIVG   | 396  | >ATM-R2912 FRLTKDIVG   | 712  | 316  |
| >ATM-R2912 VPFRLTRDI   | 373  | >ATM-R2912 VPFRLTKDI   | 185  | 188  |
| >ATM-R2912 VPFRLTRDI   | 88   | >ATM-R2912 VPFRLTKDI   | 21   | 67   |
| >ATM-R2912 VPFRLTRDIV  | 278  | >ATM-R2912 VPFRLTKDIV  | 327  | 49   |
| >ATM-R2912 VPFRLTRDIV  | 520  | >ATM-R2912 VPFRLTKDIV  | 452  | 68   |
| >ATM-R2912 TVPFRLTR    | 5498 | >ATM-R2912 TVPFRLTK    | 330  | 5168 |
| >ATM-R2912 TVPFRLTR    | 928  | >ATM-R2912 TVPFRLTK    | 62   | 866  |
| >ATM-R2912 TVPFRLTR    | 262  | >ATM-R2912 TVPFRLTK    | 4679 | 4417 |
| >ATM-R2912 TVPFRLTR    | 276  | >ATM-R2912 TVPFRLTK    | 6591 | 6315 |
| >ATM-R2912 TVPFRLTR    | 53   | >ATM-R2912 TVPFRLTK    | 117  | 64   |
| >ATM-R2912 TVPFRLTRDI  | 40   | >ATM-R2912 TVPFRLTKDIV | 78   | 38   |
| >ATM-R2912 TVPFRLTR    | 480  | >ATM-R2912 TVPFRLTK    | 7150 | 6670 |
| >ATM-R2912 ETVPFRLTR   | 1140 | >ATM-R2912 ETVPFRLTK   | 71   | 1069 |
| >ATM-R2912 ETVPFRLTR   | 289  | >ATM-R2912 ETVPFRLTK   | 4505 | 4216 |
| >ATM-R2912 ETVPFRLTR   | 27   | >ATM-R2912 ETVPFRLTK   | 600  | 573  |
| >ATM-R2912 ETVPFRLTR   | 2    | >ATM-R2912 ETVPFRLTK   | 4    | 2    |
| >ATM-R2912 ETVPFRLTRDI | 38   | >ATM-R2912 ETVPFRLTKDI | 50   | 12   |
| >ATM-R2912 ETVPFRLTRDI | 170  | >ATM-R2912 ETVPFRLTKDI | 199  | 29   |
| >ATM-R2912 ETVPFRLTR   | 557  | >ATM-R2912 ETVPFRLTK   | 425  | 132  |
| >ATM-R2912 ETVPFRLTR   | 69   | >ATM-R2912 ETVPFRLTK   | 1651 | 1582 |
| >ATM-R2912 ETVPFRLTRDI | 258  | >ATM-R2912 ETVPFRLTKDI | 247  | 11   |
| >ATM-R3008 RVLMLRQEK   | 101  | >ATM-R3008 CVLMRLQEK   | 806  | 705  |
| >ATM-R3008 RVLMLRQEKI  | 132  | >ATM-R3008 CVLMRLQEKI  | 976  | 844  |
| >ATM-R3008 RVLMLRQEK   | 43   | >ATM-R3008 CVLMRLQEK   | 128  | 85   |
| >ATM-R3008 RVLMLRQEKI  | 60   | >ATM-R3008 CVLMRLQEKI  | 162  | 102  |
| >ATM-R3008 RVLMLRQEK   | 7    | >ATM-R3008 CVLMRLQEK   | 147  | 140  |
| >ATM-R3008 RVLMLRQEKI  | 10   | >ATM-R3008 CVLMRLQEKI  | 380  | 370  |
| >ATM-R3008 RVLMLRQEK   | 32   | >ATM-R3008 CVLMRLQEK   | 1026 | 994  |



|                       |      |                       |       |       |
|-----------------------|------|-----------------------|-------|-------|
| >ATM-R3008 RVLMLRQEKI | 130  | >ATM-R3008 CVLMLRQEKI | 2178  | 2048  |
| >ATM-R3008 RVLMLRQEKI | 177  | >ATM-R3008 CVLMLRQEKI | 12072 | 11895 |
| >ATM-R3008 RVLMLRQEKI | 205  | >ATM-R3008 CVLMLRQEKI | 9889  | 9684  |
| >ATM-R3008 ERVLMRLQE  | 286  | >ATM-R3008 ECVLMRLQE  | 31506 | 31220 |
| >ATM-R3008 AERVLMRLQ  | 284  | >ATM-R3008 AECVLMRLQ  | 10290 | 10006 |
| >ATM-R3008 AERVLMRL   | 621  | >ATM-R3008 AECVLMRL   | 46    | 575   |
| >ATM-R3008 AERVLMRL   | 47   | >ATM-R3008 AECVLMRL   | 246   | 199   |
| >ATM-R3008 AERVLMRL   | 608  | >ATM-R3008 AECVLMRL   | 272   | 336   |
| >ATM-R3008 AERVLMRL   | 398  | >ATM-R3008 AECVLMRL   | 295   | 103   |
| >ATM-R3008 AERVLMRLQ  | 619  | >ATM-R3008 AECVLMRLQ  | 426   | 193   |
| >ATM-R3008 VAERVLMR   | 387  | >ATM-R3008 VAECVLMR   | 305   | 82    |
| >ATM-R3008 KVAERVLM   | 1107 | >ATM-R3008 KVAECVLM   | 183   | 924   |
| >ATM-R3008 KVAERVLMR  | 1409 | >ATM-R3008 KVAECVLMR  | 427   | 982   |
| >ATM-R3008 KVAERVLM   | 714  | >ATM-R3008 KVAECVLM   | 136   | 578   |
| >ATM-R3008 KVAERVLMR  | 117  | >ATM-R3008 KVAECVLMR  | 32    | 85    |
| >ATM-R3008 KVAERVLMR  | 490  | >ATM-R3008 KVAECVLMR  | 282   | 208   |
| >ATM-R3008 KVAERVLM   | 271  | >ATM-R3008 KVAECVLM   | 93    | 178   |
| >ATM-R3008 KVAERVLMR  | 423  | >ATM-R3008 KVAECVLMR  | 158   | 265   |
| >ATM-R3008 KVAERVLMR  | 140  | >ATM-R3008 KVAECVLMR  | 138   | 2     |
| >ATM-R3008 KVAERVLMR  | 375  | >ATM-R3008 KVAECVLMR  | 317   | 58    |
| >ATM-R3008 KVAERVLMR  | 109  | >ATM-R3008 KVAECVLMR  | 118   | 9     |
| >ATM-R3008 KVAERVLMR  | 96   | >ATM-R3008 KVAECVLMR  | 160   | 64    |
| >ATM-R3008 KVAERVLMR  | 63   | >ATM-R3008 KVAECVLMR  | 80    | 17    |
| >ATM-R3008 KVAERVLMR  | 55   | >ATM-R3008 KVAECVLMR  | 60    | 5     |
| >ATM-R3008 KVAERVLMR  | 249  | >ATM-R3008 KVAECVLMR  | 443   | 194   |
| >ATM-R3008 KVAERVLMR  | 156  | >ATM-R3008 KVAECVLMR  | 154   | 2     |
| >ATM-R3008 KVAERVLMR  | 256  | >ATM-R3008 KVAECVLMR  | 400   | 144   |
| >ATM-R3008 KVAERVLM   | 592  | >ATM-R3008 KVAECVLM   | 369   | 223   |
| >ATM-R3008 KVAERVLMR  | 342  | >ATM-R3008 KVAECVLMR  | 209   | 133   |
| >ATM-R3008 KVAERVLMR  | 101  | >ATM-R3008 KVAECVLMR  | 33    | 68    |
| >ATM-R3008 FDKVAERV   | 2564 | >ATM-R3008 FDKVAECV   | 437   | 2127  |
| >ATM-R3008 FDKVAERV   | 338  | >ATM-R3008 FDKVAECV   | 347   | 9     |
| >ATM-R3008 SFDKVAERV  | 622  | >ATM-R3008 SFDKVAECV  | 207   | 415   |
| >ATM-R3008 SFDKVAER   | 276  | >ATM-R3008 SFDKVAEC   | 23983 | 23707 |
| >ATM-R3008 QSFDKVAER\ | 422  | >ATM-R3008 QSFDKVAEC\ | 284   | 138   |
| >ATM-R3008 QSFDKVAER\ | 487  | >ATM-R3008 QSFDKVAEC\ | 1383  | 896   |
| >ATM-R3008 QSFDKVAER  | 24   | >ATM-R3008 QSFDKVAEC  | 18529 | 18505 |
| >ATM-R3008 QSFDKVAER  | 179  | >ATM-R3008 QSFDKVAEC  | 32711 | 32532 |
| >ATM-R3008 QSFDKVAER  | 8    | >ATM-R3008 QSFDKVAEC  | 18808 | 18800 |
| >ATM-R3008 QSFDKVAER\ | 135  | >ATM-R3008 QSFDKVAEC\ | 128   | 7     |
| >ATM-R3008 QSFDKVAER\ | 421  | >ATM-R3008 QSFDKVAEC\ | 1192  | 771   |
| >ATM-R3008 QSFDKVAER\ | 163  | >ATM-R3008 QSFDKVAEC\ | 1459  | 1296  |
| >ATM-R3008 QSFDKVAER\ | 18   | >ATM-R3008 QSFDKVAEC\ | 10    | 8     |

|                       |      |                       |       |       |
|-----------------------|------|-----------------------|-------|-------|
| >ATM-R3008 QSFDKVAER  | 295  | >ATM-R3008 QSFDKVAEC  | 21416 | 21121 |
| >ATM-R3008 DQSFDKVAEF | 407  | >ATM-R3008 DQSFDKVAEC | 34355 | 33948 |
| >ATM-R3008 DQSFDKVAEF | 216  | >ATM-R3008 DQSFDKVAEC | 38586 | 38370 |
| >ATM-R3008 RVLMRLQEK  | 101  | >ATM-R3008 HVLMRLQEK  | 212   | 111   |
| >ATM-R3008 RVLMRLQEKI | 132  | >ATM-R3008 HVLMRLQEKI | 290   | 158   |
| >ATM-R3008 RVLMRLQEK  | 43   | >ATM-R3008 HVLMRLQEK  | 166   | 123   |
| >ATM-R3008 RVLMRLQEKI | 60   | >ATM-R3008 HVLMRLQEKI | 231   | 171   |
| >ATM-R3008 RVLMRLQEK  | 7    | >ATM-R3008 HVLMRLQEK  | 12    | 5     |
| >ATM-R3008 RVLMRLQEKI | 10   | >ATM-R3008 HVLMRLQEKI | 21    | 11    |
| >ATM-R3008 RVLMRLQEK  | 32   | >ATM-R3008 HVLMRLQEK  | 136   | 104   |
| >ATM-R3008 RVLMRLQEKI | 130  | >ATM-R3008 HVLMRLQEKI | 501   | 371   |
| >ATM-R3008 RVLMRLQEKI | 177  | >ATM-R3008 HVLMRLQEKI | 2217  | 2040  |
| >ATM-R3008 RVLMRLQEK  | 9149 | >ATM-R3008 HVLMRLQEK  | 484   | 8665  |
| >ATM-R3008 RVLMRLQEKI | 5614 | >ATM-R3008 HVLMRLQEKI | 467   | 5147  |
| >ATM-R3008 RVLMRLQEKI | 205  | >ATM-R3008 HVLMRLQEKI | 1901  | 1696  |
| >ATM-R3008 ERVLMRLQEI | 286  | >ATM-R3008 EHVLMRLQEI | 16348 | 16062 |
| >ATM-R3008 AERVLMRLQI | 284  | >ATM-R3008 AEHVLMRLQ  | 2642  | 2358  |
| >ATM-R3008 AERVLMRL   | 621  | >ATM-R3008 AEHVLMRL   | 31    | 590   |
| >ATM-R3008 AERVLMRL   | 47   | >ATM-R3008 AEHVLMRL   | 42    | 5     |
| >ATM-R3008 AERVLMRLQ  | 694  | >ATM-R3008 AEHVLMRLQ  | 411   | 283   |
| >ATM-R3008 AERVLMRL   | 608  | >ATM-R3008 AEHVLMRL   | 258   | 350   |
| >ATM-R3008 AERVLMRL   | 398  | >ATM-R3008 AEHVLMRL   | 84    | 314   |
| >ATM-R3008 AERVLMRLQ  | 919  | >ATM-R3008 AEHVLMRLQ  | 183   | 736   |
| >ATM-R3008 AERVLMRLQI | 609  | >ATM-R3008 AEHVLMRLQ  | 308   | 301   |
| >ATM-R3008 AERVLMRLQI | 619  | >ATM-R3008 AEHVLMRLQ  | 118   | 501   |
| >ATM-R3008 AERVLMRL   | 731  | >ATM-R3008 AEHVLMRL   | 451   | 280   |
| >ATM-R3008 VAERVLMR   | 387  | >ATM-R3008 VAEHVLMR   | 480   | 93    |
| >ATM-R3008 KVAERVLM   | 714  | >ATM-R3008 KVAEHVLM   | 221   | 493   |
| >ATM-R3008 KVAERVLMRI | 117  | >ATM-R3008 KVAEHVLMR  | 75    | 42    |
| >ATM-R3008 KVAERVLMRI | 490  | >ATM-R3008 KVAEHVLMR  | 318   | 172   |
| >ATM-R3008 KVAERVLM   | 271  | >ATM-R3008 KVAEHVLM   | 152   | 119   |
| >ATM-R3008 KVAERVLMRI | 423  | >ATM-R3008 KVAEHVLMR  | 254   | 169   |
| >ATM-R3008 KVAERVLMRI | 140  | >ATM-R3008 KVAEHVLMR  | 81    | 59    |
| >ATM-R3008 KVAERVLMRI | 375  | >ATM-R3008 KVAEHVLMR  | 411   | 36    |
| >ATM-R3008 KVAERVLMRI | 109  | >ATM-R3008 KVAEHVLMR  | 135   | 26    |
| >ATM-R3008 KVAERVLMR  | 96   | >ATM-R3008 KVAEHVLMR  | 84    | 12    |
| >ATM-R3008 KVAERVLMR  | 63   | >ATM-R3008 KVAEHVLMR  | 81    | 18    |
| >ATM-R3008 KVAERVLM   | 3041 | >ATM-R3008 KVAEHVLM   | 467   | 2574  |
| >ATM-R3008 KVAERVLMR  | 55   | >ATM-R3008 KVAEHVLMR  | 44    | 11    |
| >ATM-R3008 KVAERVLMRI | 249  | >ATM-R3008 KVAEHVLMR  | 192   | 57    |
| >ATM-R3008 KVAERVLMR  | 156  | >ATM-R3008 KVAEHVLMR  | 135   | 21    |
| >ATM-R3008 KVAERVLMRI | 256  | >ATM-R3008 KVAEHVLMR  | 252   | 4     |
| >ATM-R3008 KVAERVLM   | 592  | >ATM-R3008 KVAEHVLM   | 239   | 353   |

|                        |      |                        |       |       |
|------------------------|------|------------------------|-------|-------|
| >ATM-R3008 KVAERVLMRI  | 342  | >ATM-R3008 KVAEHLMR    | 184   | 158   |
| >ATM-R3008 KVAERVLMR   | 1298 | >ATM-R3008 KVAEHLMR    | 463   | 835   |
| >ATM-R3008 KVAERVLMR   | 101  | >ATM-R3008 KVAEHLMR    | 86    | 15    |
| >ATM-R3008 DKVAERVL    | 1571 | >ATM-R3008 DKVAEHL     | 227   | 1344  |
| >ATM-R3008 FDKVAERV    | 338  | >ATM-R3008 FDKVAEHV    | 316   | 22    |
| >ATM-R3008 SFDKVAERV   | 622  | >ATM-R3008 SFDKVAEHV   | 122   | 500   |
| >ATM-R3008 SFDKVAER    | 276  | >ATM-R3008 SFDKVAEH    | 16286 | 16010 |
| >ATM-R3008 QSFDKVAER\  | 422  | >ATM-R3008 QSFDKVAEH\  | 536   | 114   |
| >ATM-R3008 QSFDKVAER\  | 487  | >ATM-R3008 QSFDKVAEH\  | 627   | 140   |
| >ATM-R3008 QSFDKVAER   | 24   | >ATM-R3008 QSFDKVAEH   | 5255  | 5231  |
| >ATM-R3008 QSFDKVAER   | 179  | >ATM-R3008 QSFDKVAEH   | 23031 | 22852 |
| >ATM-R3008 QSFDKVAER   | 8    | >ATM-R3008 QSFDKVAEH   | 1705  | 1697  |
| >ATM-R3008 QSFDKVAER\  | 135  | >ATM-R3008 QSFDKVAEH\  | 103   | 32    |
| >ATM-R3008 QSFDKVAER\  | 1511 | >ATM-R3008 QSFDKVAEH\  | 259   | 1252  |
| >ATM-R3008 QSFDKVAER\  | 421  | >ATM-R3008 QSFDKVAEH\  | 270   | 151   |
| >ATM-R3008 QSFDKVAER   | 1873 | >ATM-R3008 QSFDKVAEH   | 56    | 1817  |
| >ATM-R3008 QSFDKVAER\  | 163  | >ATM-R3008 QSFDKVAEH\  | 347   | 184   |
| >ATM-R3008 QSFDKVAER\  | 18   | >ATM-R3008 QSFDKVAEH\  | 13    | 5     |
| >ATM-R3008 QSFDKVAER   | 295  | >ATM-R3008 QSFDKVAEH   | 2220  | 1925  |
| >ATM-R3008 DQSFDKVAEF  | 407  | >ATM-R3008 DQSFDKVAEF  | 21726 | 21319 |
| >ATM-R3008 DQSFDKVAEF  | 216  | >ATM-R3008 DQSFDKVAEF  | 22275 | 22059 |
| >ATM-R337C FRNIAVKENLI | 168  | >ATM-R337C FCNIAVKENLI | 1078  | 910   |
| >ATM-R337C FRNIAVKENL  | 224  | >ATM-R337C FCNIAVKENL  | 31230 | 31006 |
| >ATM-R337C FRNIAVKENLI | 416  | >ATM-R337C FCNIAVKENLI | 23469 | 23053 |
| >ATM-R337C FRNIAVKENL  | 478  | >ATM-R337C FCNIAVKENL  | 33150 | 32672 |
| >ATM-R337C GSRGKYSSGF  | 39   | >ATM-R337C GSRGKYSSGF  | 551   | 512   |
| >ATM-R337C GSRGKYSSGF  | 33   | >ATM-R337C GSRGKYSSGF  | 20567 | 20534 |
| >ATM-R337C GFRNIAVK    | 13   | >ATM-R337C GFCNIAVK    | 3347  | 3334  |
| >ATM-R337C GFRNIAVK    | 292  | >ATM-R337C GFCNIAVK    | 700   | 408   |
| >ATM-R337C SGFRNIAV    | 779  | >ATM-R337C SGFCNIAV    | 354   | 425   |
| >ATM-R337C SGFRNIAV    | 356  | >ATM-R337C SGFCNIAV    | 209   | 147   |
| >ATM-R337C SGFRNIAVK   | 169  | >ATM-R337C SGFCNIAVK   | 186   | 17    |
| >ATM-R337C SGFRNIAVK   | 104  | >ATM-R337C SGFCNIAVK   | 316   | 212   |
| >ATM-R337C SGFRNIAV    | 784  | >ATM-R337C SGFCNIAV    | 131   | 653   |
| >ATM-R337C SGFRNIAVK   | 658  | >ATM-R337C SGFCNIAVK   | 478   | 180   |
| >ATM-R337C SSGFRNIAVK  | 118  | >ATM-R337C SSGFCNIAVK  | 134   | 16    |
| >ATM-R337C SSGFRNIAVK  | 123  | >ATM-R337C SSGFCNIAVK  | 139   | 16    |
| >ATM-R337C SSGFRNIAVK  | 149  | >ATM-R337C SSGFCNIAVK  | 566   | 417   |
| >ATM-R337C SSGFRNIAVK  | 649  | >ATM-R337C SSGFCNIAVK  | 278   | 371   |
| >ATM-R337C SSGFRNIAV   | 1783 | >ATM-R337C SSGFCNIAV   | 299   | 1484  |
| >ATM-R337C YSSGFRNIAV  | 269  | >ATM-R337C YSSGFCNIAV  | 67    | 202   |
| >ATM-R337C YSSGFRNI    | 1413 | >ATM-R337C YSSGFCNI    | 300   | 1113  |
| >ATM-R337C YSSGFRNIA   | 2044 | >ATM-R337C YSSGFCNIA   | 471   | 1573  |

|                        |       |                        |       |       |
|------------------------|-------|------------------------|-------|-------|
| >ATM-R337C YSSGFRNIAV  | 180   | >ATM-R337C YSSGFCNIAV  | 139   | 41    |
| >ATM-R337C YSSGFRNIAV  | 329   | >ATM-R337C YSSGFCNIAV  | 194   | 135   |
| >ATM-R337C YSSGFRNIAV  | 77    | >ATM-R337C YSSGFCNIAV  | 40    | 37    |
| >ATM-R337C YSSGFRNIAVI | 61    | >ATM-R337C YSSGFCNIAVI | 77    | 16    |
| >ATM-R337C YSSGFRNIAVI | 381   | >ATM-R337C YSSGFCNIAVI | 1320  | 939   |
| >ATM-R337C YSSGFRNIAVI | 20    | >ATM-R337C YSSGFCNIAVI | 20    | 0     |
| >ATM-R337C YSSGFRNI    | 316   | >ATM-R337C YSSGFCNI    | 203   | 113   |
| >ATM-R337C YSSGFRNIAV  | 26    | >ATM-R337C YSSGFCNIAV  | 19    | 7     |
| >ATM-R337C YSSGFRNIAV  | 459   | >ATM-R337C YSSGFCNIAV  | 382   | 77    |
| >ATM-R337C YSSGFRNI    | 273   | >ATM-R337C YSSGFCNI    | 99    | 174   |
| >ATM-R337C YSSGFRNIAV  | 515   | >ATM-R337C YSSGFCNIAV  | 288   | 227   |
| >ATM-R337C YSSGFRNI    | 100   | >ATM-R337C YSSGFCNI    | 170   | 70    |
| >ATM-R337C YSSGFRNIA   | 558   | >ATM-R337C YSSGFCNIA   | 279   | 279   |
| >ATM-R337C YSSGFRNIAV  | 91    | >ATM-R337C YSSGFCNIAV  | 55    | 36    |
| >ATM-R337C YSSGFRNI    | 64    | >ATM-R337C YSSGFCNI    | 81    | 17    |
| >ATM-R337C KYSSGFRNI   | 13    | >ATM-R337C KYSSGFCNI   | 10    | 3     |
| >ATM-R337C KYSSGFRNIA\ | 94    | >ATM-R337C KYSSGFCNIA\ | 146   | 52    |
| >ATM-R337C KYSSGFRNI   | 73    | >ATM-R337C KYSSGFCNI   | 118   | 45    |
| >ATM-R337C KYSSGFRNI   | 115   | >ATM-R337C KYSSGFCNI   | 100   | 15    |
| >ATM-R337C KYSSGFRNI   | 10    | >ATM-R337C KYSSGFCNI   | 8     | 2     |
| >ATM-R337C KYSSGFRNIA\ | 331   | >ATM-R337C KYSSGFCNIA\ | 302   | 29    |
| >ATM-R337C KYSSGFRNI   | 322   | >ATM-R337C KYSSGFCNI   | 124   | 198   |
| >ATM-R337C KYSSGFRNIA  | 153   | >ATM-R337C KYSSGFCNIA  | 393   | 240   |
| >ATM-R337C KYSSGFRNIA\ | 157   | >ATM-R337C KYSSGFCNIA\ | 207   | 50    |
| >ATM-R337C KYSSGFRNI   | 409   | >ATM-R337C KYSSGFCNI   | 405   | 4     |
| >ATM-R337C KYSSGFRNIA\ | 470   | >ATM-R337C KYSSGFCNIA\ | 505   | 35    |
| >ATM-R337C KYSSGFRNI   | 227   | >ATM-R337C KYSSGFCNI   | 307   | 80    |
| >ATM-R337C KYSSGFRNIA\ | 99    | >ATM-R337C KYSSGFCNIA\ | 119   | 20    |
| >ATM-R337C GKYSSGFR    | 356   | >ATM-R337C GKYSSGFC    | 1921  | 1565  |
| >ATM-R337C GKYSSGFRNI  | 15    | >ATM-R337C GKYSSGFCNI  | 13    | 2     |
| >ATM-R337C GKYSSGFRNI\ | 129   | >ATM-R337C GKYSSGFCNI\ | 116   | 13    |
| >ATM-R337C RGKYSSGFR   | 21    | >ATM-R337C RGKYSSGFC   | 262   | 241   |
| >ATM-R337C RGKYSSGFRN  | 34    | >ATM-R337C RGKYSSGFCN  | 22    | 12    |
| >ATM-R337C RGKYSSGFR   | 18    | >ATM-R337C RGKYSSGFC   | 19482 | 19464 |
| >ATM-R337C RGKYSSGFR   | 344   | >ATM-R337C RGKYSSGFC   | 36778 | 36434 |
| >ATM-R337C RGKYSSGFRN  | 478   | >ATM-R337C RGKYSSGFCN  | 796   | 318   |
| >ATM-R337C SRGKYSSGFR  | 304   | >ATM-R337C SRGKYSSGFC  | 4503  | 4199  |
| >ATM-R337F RNIAVKENL   | 10864 | >ATM-R337F HNIHAVKENL  | 368   | 10496 |
| >ATM-R337F FRNIAVKENLI | 168   | >ATM-R337F FHNIHAVKENL | 111   | 57    |
| >ATM-R337F FRNIAVKENL  | 224   | >ATM-R337F FHNIHAVKENL | 15023 | 14799 |
| >ATM-R337F FRNIAVKENLI | 416   | >ATM-R337F FHNIHAVKENL | 20042 | 19626 |
| >ATM-R337F FRNIAVKENL  | 478   | >ATM-R337F FHNIHAVKENL | 26083 | 25605 |
| >ATM-R337F GSRGKYSSGF  | 39    | >ATM-R337F GSRGKYSSGF  | 360   | 321   |

|                        |      |                         |      |      |
|------------------------|------|-------------------------|------|------|
| >ATM-R337F GSRGKYSSGF  | 33   | >ATM-R337F GSRGKYSSGF   | 6336 | 6303 |
| >ATM-R337F GSRGKYSSGF  | 1001 | >ATM-R337F GSRGKYSSGF   | 56   | 945  |
| >ATM-R337F GFRNIAVKEN  | 2864 | >ATM-R337F GFHNIHAVKEN  | 420  | 2444 |
| >ATM-R337F GFRNIAVK    | 13   | >ATM-R337F GFHNIHAVK    | 99   | 86   |
| >ATM-R337F GFRNIAVK    | 292  | >ATM-R337F GFHNIHAVK    | 529  | 237  |
| >ATM-R337F SGFRNIAV    | 779  | >ATM-R337F SGFHNIHAV    | 423  | 356  |
| >ATM-R337F SGFRNIAV    | 356  | >ATM-R337F SGFHNIHAV    | 365  | 9    |
| >ATM-R337F SGFRNIAVK   | 169  | >ATM-R337F SGFHNIHAVK   | 253  | 84   |
| >ATM-R337F SGFRNIAVK   | 104  | >ATM-R337F SGFHNIHAVK   | 208  | 104  |
| >ATM-R337F SGFRNIAV    | 784  | >ATM-R337F SGFHNIHAV    | 277  | 507  |
| >ATM-R337F SGFRNIAVK   | 658  | >ATM-R337F SGFHNIHAVK   | 327  | 331  |
| >ATM-R337F SSGFRNIAVK  | 118  | >ATM-R337F SSGFHNIHAVK  | 115  | 3    |
| >ATM-R337F SSGFRNIAVK  | 123  | >ATM-R337F SSGFHNIHAVK  | 116  | 7    |
| >ATM-R337F SSGFRNIAVK  | 149  | >ATM-R337F SSGFHNIHAVK  | 198  | 49   |
| >ATM-R337F SSGFRNIAVK  | 649  | >ATM-R337F SSGFHNIHAVK  | 276  | 373  |
| >ATM-R337F SSGFRNIAVK  | 587  | >ATM-R337F SSGFHNIHAVK  | 336  | 251  |
| >ATM-R337F YSSGFRNIAV  | 269  | >ATM-R337F YSSGFHNIHAV  | 210  | 59   |
| >ATM-R337F YSSGFRNI    | 1413 | >ATM-R337F YSSGFHNI     | 157  | 1256 |
| >ATM-R337F YSSGFRNIAV  | 180  | >ATM-R337F YSSGFHNIHAV  | 123  | 57   |
| >ATM-R337F YSSGFRNIAV  | 329  | >ATM-R337F YSSGFHNIHAV  | 294  | 35   |
| >ATM-R337F YSSGFRNIAV  | 77   | >ATM-R337F YSSGFHNIHAV  | 82   | 5    |
| >ATM-R337F YSSGFRNIAV  | 835  | >ATM-R337F YSSGFHNIHAV  | 226  | 609  |
| >ATM-R337F YSSGFRNIAVI | 61   | >ATM-R337F YSSGFHNIHAV  | 59   | 2    |
| >ATM-R337F YSSGFRNIAVI | 381  | >ATM-R337F YSSGFHNIHAV  | 347  | 34   |
| >ATM-R337F YSSGFRNIAVI | 20   | >ATM-R337F YSSGFHNIHAV  | 19   | 1    |
| >ATM-R337F YSSGFRNI    | 316  | >ATM-R337F YSSGFHNI     | 59   | 257  |
| >ATM-R337F YSSGFRNIAV  | 26   | >ATM-R337F YSSGFHNIHAV  | 27   | 1    |
| >ATM-R337F YSSGFRNI    | 3004 | >ATM-R337F YSSGFHNI     | 356  | 2648 |
| >ATM-R337F YSSGFRNIAV  | 459  | >ATM-R337F YSSGFHNIHAV  | 140  | 319  |
| >ATM-R337F YSSGFRNIAV  | 783  | >ATM-R337F YSSGFHNIHAV  | 481  | 302  |
| >ATM-R337F YSSGFRNI    | 273  | >ATM-R337F YSSGFHNI     | 93   | 180  |
| >ATM-R337F YSSGFRNI    | 5706 | >ATM-R337F YSSGFHNI     | 446  | 5260 |
| >ATM-R337F YSSGFRNIA   | 2646 | >ATM-R337F YSSGFHNIHAV  | 407  | 2239 |
| >ATM-R337F YSSGFRNIAV  | 515  | >ATM-R337F YSSGFHNIHAV  | 126  | 389  |
| >ATM-R337F YSSGFRNI    | 100  | >ATM-R337F YSSGFHNI     | 157  | 57   |
| >ATM-R337F YSSGFRNIA   | 558  | >ATM-R337F YSSGFHNIHAV  | 286  | 272  |
| >ATM-R337F YSSGFRNIAV  | 91   | >ATM-R337F YSSGFHNIHAV  | 68   | 23   |
| >ATM-R337F YSSGFRNI    | 64   | >ATM-R337F YSSGFHNI     | 69   | 5    |
| >ATM-R337F KYSSGFRNI   | 13   | >ATM-R337F KYSSGFHNI    | 10   | 3    |
| >ATM-R337F KYSSGFRNIA\ | 94   | >ATM-R337F KYSSGFHNIHAV | 196  | 102  |
| >ATM-R337F KYSSGFRNIA\ | 1337 | >ATM-R337F KYSSGFHNIHAV | 478  | 859  |
| >ATM-R337F KYSSGFRNI   | 73   | >ATM-R337F KYSSGFHNI    | 13   | 60   |
| >ATM-R337F KYSSGFRNI   | 115  | >ATM-R337F KYSSGFHNI    | 39   | 76   |

|                        |       |                         |       |       |
|------------------------|-------|-------------------------|-------|-------|
| >ATM-R337F KYSSGFRNI   | 10    | >ATM-R337F KYSSGFHNI    | 5     | 5     |
| >ATM-R337F KYSSGFRNIA\ | 331   | >ATM-R337F KYSSGFHNIA'  | 156   | 175   |
| >ATM-R337F KYSSGFRNI   | 322   | >ATM-R337F KYSSGFHNI    | 257   | 65    |
| >ATM-R337F KYSSGFRNIA  | 153   | >ATM-R337F KYSSGFHNIA   | 118   | 35    |
| >ATM-R337F KYSSGFRNIA\ | 157   | >ATM-R337F KYSSGFHNIA'  | 159   | 2     |
| >ATM-R337F KYSSGFRNI   | 3815  | >ATM-R337F KYSSGFHNI    | 385   | 3430  |
| >ATM-R337F KYSSGFRNI   | 409   | >ATM-R337F KYSSGFHNI    | 202   | 207   |
| >ATM-R337F KYSSGFRNIA  | 4067  | >ATM-R337F KYSSGFHNIA   | 454   | 3613  |
| >ATM-R337F KYSSGFRNIA\ | 470   | >ATM-R337F KYSSGFHNIA'  | 392   | 78    |
| >ATM-R337F KYSSGFRNI   | 227   | >ATM-R337F KYSSGFHNI    | 105   | 122   |
| >ATM-R337F KYSSGFRNIA  | 714   | >ATM-R337F KYSSGFHNIA   | 442   | 272   |
| >ATM-R337F KYSSGFRNIA\ | 99    | >ATM-R337F KYSSGFHNIA'  | 90    | 9     |
| >ATM-R337F GKYSSGFR    | 356   | >ATM-R337F GKYSSGFH     | 283   | 73    |
| >ATM-R337F GKYSSGFRNI  | 15    | >ATM-R337F GKYSSGFHNI   | 12    | 3     |
| >ATM-R337F GKYSSGFRNI\ | 129   | >ATM-R337F GKYSSGFHNIA' | 81    | 48    |
| >ATM-R337F RGKYSSGFR   | 21    | >ATM-R337F RGKYSSGFH    | 200   | 179   |
| >ATM-R337F RGKYSSGFRNI | 34    | >ATM-R337F RGKYSSGFHNI  | 31    | 3     |
| >ATM-R337F RGKYSSGFR   | 18    | >ATM-R337F RGKYSSGFH    | 5709  | 5691  |
| >ATM-R337F RGKYSSGFR   | 344   | >ATM-R337F RGKYSSGFH    | 31375 | 31031 |
| >ATM-R337F RGKYSSGFRNI | 478   | >ATM-R337F RGKYSSGFHNI  | 597   | 119   |
| >ATM-R337F SRGKYSSGFR  | 304   | >ATM-R337F SRGKYSSGFH   | 2083  | 1779  |
| >ATM-R337S FRNIAVKENLI | 168   | >ATM-R337S FSNIAVKENLI  | 383   | 215   |
| >ATM-R337S FRNIAVKENL  | 25413 | >ATM-R337S FSNIAVKENL   | 140   | 25273 |
| >ATM-R337S FRNIAVKENL  | 224   | >ATM-R337S FSNIAVKENL   | 27494 | 27270 |
| >ATM-R337S FRNIAVKENLI | 416   | >ATM-R337S FSNIAVKENLI  | 19515 | 19099 |
| >ATM-R337S FRNIAVKENL  | 478   | >ATM-R337S FSNIAVKENL   | 27066 | 26588 |
| >ATM-R337S FRNIAVKENLI | 8784  | >ATM-R337S FSNIAVKENLI  | 146   | 8638  |
| >ATM-R337S GSRGKYSSGF  | 39    | >ATM-R337S GSRGKYSSGF   | 102   | 63    |
| >ATM-R337S GSRGKYSSGF  | 33    | >ATM-R337S GSRGKYSSGF   | 16173 | 16140 |
| >ATM-R337S GFRNIAVK    | 13    | >ATM-R337S GFSNIAVK     | 3177  | 3164  |
| >ATM-R337S GFRNIAVK    | 292   | >ATM-R337S GFSNIAVK     | 1108  | 816   |
| >ATM-R337S SGFRNIAV    | 356   | >ATM-R337S SGFSNIAV     | 215   | 141   |
| >ATM-R337S SGFRNIAVK   | 169   | >ATM-R337S SGFSNIAVK    | 117   | 52    |
| >ATM-R337S SGFRNIAVK   | 104   | >ATM-R337S SGFSNIAVK    | 337   | 233   |
| >ATM-R337S SGFRNIAVK   | 807   | >ATM-R337S SGFSNIAVK    | 333   | 474   |
| >ATM-R337S SGFRNIAV    | 784   | >ATM-R337S SGFSNIAV     | 344   | 440   |
| >ATM-R337S SGFRNIAVK   | 658   | >ATM-R337S SGFSNIAVK    | 481   | 177   |
| >ATM-R337S SSGFRNIAVK  | 118   | >ATM-R337S SSGFSNIAVK   | 257   | 139   |
| >ATM-R337S SSGFRNIAVK  | 123   | >ATM-R337S SSGFSNIAVK   | 102   | 21    |
| >ATM-R337S SSGFRNIAVK  | 149   | >ATM-R337S SSGFSNIAVK   | 155   | 6     |
| >ATM-R337S SSGFRNIAVK  | 649   | >ATM-R337S SSGFSNIAVK   | 438   | 211   |
| >ATM-R337S SSGFRNIAVK  | 587   | >ATM-R337S SSGFSNIAVK   | 488   | 99    |
| >ATM-R337S YSSGFRNI    | 1026  | >ATM-R337S YSSGFSNI     | 457   | 569   |

|                        |      |                        |       |       |
|------------------------|------|------------------------|-------|-------|
| >ATM-R337S YSSGFRNIAV  | 269  | >ATM-R337S YSSGFSNIAV  | 150   | 119   |
| >ATM-R337S YSSGFRNI    | 1413 | >ATM-R337S YSSGFSNI    | 177   | 1236  |
| >ATM-R337S YSSGFRNIA   | 2044 | >ATM-R337S YSSGFSNIA   | 213   | 1831  |
| >ATM-R337S YSSGFRNIAV  | 180  | >ATM-R337S YSSGFSNIAV  | 95    | 85    |
| >ATM-R337S YSSGFRNIAV  | 329  | >ATM-R337S YSSGFSNIAV  | 155   | 174   |
| >ATM-R337S YSSGFRNIAV  | 77   | >ATM-R337S YSSGFSNIAV  | 57    | 20    |
| >ATM-R337S YSSGFRNIAV  | 835  | >ATM-R337S YSSGFSNIAV  | 281   | 554   |
| >ATM-R337S YSSGFRNIAV\ | 61   | >ATM-R337S YSSGFSNIAV\ | 53    | 8     |
| >ATM-R337S YSSGFRNIAV\ | 381  | >ATM-R337S YSSGFSNIAV\ | 511   | 130   |
| >ATM-R337S YSSGFRNIAV\ | 20   | >ATM-R337S YSSGFSNIAV\ | 21    | 1     |
| >ATM-R337S YSSGFRNI    | 316  | >ATM-R337S YSSGFSNI    | 87    | 229   |
| >ATM-R337S YSSGFRNIAV  | 26   | >ATM-R337S YSSGFSNIAV  | 18    | 8     |
| >ATM-R337S YSSGFRNIAV  | 459  | >ATM-R337S YSSGFSNIAV  | 126   | 333   |
| >ATM-R337S YSSGFRNI    | 1045 | >ATM-R337S YSSGFSNI    | 368   | 677   |
| >ATM-R337S YSSGFRNIAV  | 783  | >ATM-R337S YSSGFSNIAV  | 322   | 461   |
| >ATM-R337S YSSGFRNI    | 273  | >ATM-R337S YSSGFSNI    | 43    | 230   |
| >ATM-R337S YSSGFRNIAV  | 515  | >ATM-R337S YSSGFSNIAV  | 167   | 348   |
| >ATM-R337S YSSGFRNI    | 100  | >ATM-R337S YSSGFSNI    | 171   | 71    |
| >ATM-R337S YSSGFRNIA   | 558  | >ATM-R337S YSSGFSNIA   | 364   | 194   |
| >ATM-R337S YSSGFRNIAV  | 91   | >ATM-R337S YSSGFSNIAV  | 64    | 27    |
| >ATM-R337S YSSGFRNI    | 64   | >ATM-R337S YSSGFSNI    | 29    | 35    |
| >ATM-R337S YSSGFRNIAV  | 3754 | >ATM-R337S YSSGFSNIAV  | 423   | 3331  |
| >ATM-R337S KYSSGFRNI   | 13   | >ATM-R337S KYSSGFSNI   | 3     | 10    |
| >ATM-R337S KYSSGFRNIA\ | 94   | >ATM-R337S KYSSGFSNIA\ | 32    | 62    |
| >ATM-R337S KYSSGFRNI   | 73   | >ATM-R337S KYSSGFSNI   | 34    | 39    |
| >ATM-R337S KYSSGFRNI   | 115  | >ATM-R337S KYSSGFSNI   | 64    | 51    |
| >ATM-R337S KYSSGFRNI   | 10   | >ATM-R337S KYSSGFSNI   | 7     | 3     |
| >ATM-R337S KYSSGFRNIA\ | 331  | >ATM-R337S KYSSGFSNIA\ | 235   | 96    |
| >ATM-R337S KYSSGFRNI   | 322  | >ATM-R337S KYSSGFSNI   | 326   | 4     |
| >ATM-R337S KYSSGFRNIA  | 153  | >ATM-R337S KYSSGFSNIA  | 169   | 16    |
| >ATM-R337S KYSSGFRNIA\ | 157  | >ATM-R337S KYSSGFSNIA\ | 147   | 10    |
| >ATM-R337S KYSSGFRNI   | 409  | >ATM-R337S KYSSGFSNI   | 417   | 8     |
| >ATM-R337S KYSSGFRNIA\ | 470  | >ATM-R337S KYSSGFSNIA\ | 531   | 61    |
| >ATM-R337S KYSSGFRN    | 978  | >ATM-R337S KYSSGFSN    | 453   | 525   |
| >ATM-R337S KYSSGFRNI   | 227  | >ATM-R337S KYSSGFSNI   | 245   | 18    |
| >ATM-R337S KYSSGFRNIA\ | 99   | >ATM-R337S KYSSGFSNIA\ | 84    | 15    |
| >ATM-R337S GKYSSGFR    | 356  | >ATM-R337S GKYSSGFS    | 1841  | 1485  |
| >ATM-R337S GKYSSGFRN   | 2343 | >ATM-R337S GKYSSGFSN   | 385   | 1958  |
| >ATM-R337S GKYSSGFRNI  | 15   | >ATM-R337S GKYSSGFSNI  | 6     | 9     |
| >ATM-R337S GKYSSGFRNI\ | 129  | >ATM-R337S GKYSSGFSNI\ | 66    | 63    |
| >ATM-R337S RGKYSSGFR   | 21   | >ATM-R337S RGKYSSGFS   | 47    | 26    |
| >ATM-R337S RGKYSSGFRN  | 34   | >ATM-R337S RGKYSSGFSN  | 35    | 1     |
| >ATM-R337S RGKYSSGFR   | 18   | >ATM-R337S RGKYSSGFS   | 15559 | 15541 |

|                        |       |                        |       |       |
|------------------------|-------|------------------------|-------|-------|
| >ATM-R337S RGKYSSGFR   | 344   | >ATM-R337S RGKYSSGFS   | 33297 | 32953 |
| >ATM-R337S RGKYSSGFRN  | 478   | >ATM-R337S RGKYSSGFSN  | 283   | 195   |
| >ATM-R337S SRGKYSSGFR  | 304   | >ATM-R337S SRGKYSSGFS  | 7011  | 6707  |
| >ATM-R717V RCSRLLVGV   | 2095  | >ATM-R717V WCSRLLVGV   | 435   | 1660  |
| >ATM-R717V RCSRLLVGV   | 5144  | >ATM-R717V WCSRLLVGV   | 300   | 4844  |
| >ATM-R717V VRCSRLLVGV  | 23400 | >ATM-R717V VWCSRLLVGV  | 289   | 23111 |
| >ATM-R717V VRCSRLLVGV  | 384   | >ATM-R717V VWCSRLLVGV  | 12194 | 11810 |
| >ATM-R717V VRCSRLLVGV  | 48    | >ATM-R717V VWCSRLLVGV  | 16333 | 16285 |
| >ATM-R717V VRCSRLLV    | 32487 | >ATM-R717V VWCSRLLV    | 230   | 32257 |
| >ATM-R717V VRCSRLLVGV  | 34417 | >ATM-R717V VWCSRLLVGV  | 184   | 34233 |
| >ATM-R717V SEITNSETLVR | 5404  | >ATM-R717V SEITNSETLVV | 68    | 5336  |
| >ATM-R717V SEITNSETLVR | 2008  | >ATM-R717V SEITNSETLVV | 22    | 1986  |
| >ATM-R717V SEITNSETLVR | 2067  | >ATM-R717V SEITNSETLVV | 193   | 1874  |
| >ATM-R717V SEITNSETLVR | 33694 | >ATM-R717V SEITNSETLVV | 388   | 33306 |
| >ATM-R717V SEITNSETLVR | 386   | >ATM-R717V SEITNSETLVV | 32387 | 32001 |
| >ATM-R717V LVRCRLLV    | 12659 | >ATM-R717V LVWCSRLLV   | 70    | 12589 |
| >ATM-R717V LVRCRLLVGV  | 6821  | >ATM-R717V LVWCSRLLVGV | 41    | 6780  |
| >ATM-R717V LVRCRLLV    | 420   | >ATM-R717V LVWCSRLLV   | 581   | 161   |
| >ATM-R717V LVRCRLLVGV  | 157   | >ATM-R717V LVWCSRLLVGV | 271   | 114   |
| >ATM-R717V LVRCRLLV    | 1922  | >ATM-R717V LVWCSRLLV   | 97    | 1825  |
| >ATM-R717V LVRCRLLVGV  | 371   | >ATM-R717V LVWCSRLLVGV | 34    | 337   |
| >ATM-R717V LVRCRLLV    | 6244  | >ATM-R717V LVWCSRLLV   | 148   | 6096  |
| >ATM-R717V LVRCRLLVGV  | 1135  | >ATM-R717V LVWCSRLLVGV | 18    | 1117  |
| >ATM-R717V LVRCRLLVGV  | 1924  | >ATM-R717V LVWCSRLLVGV | 65    | 1859  |
| >ATM-R717V LVRCRLLV    | 14988 | >ATM-R717V LVWCSRLLV   | 384   | 14604 |
| >ATM-R717V LVRCRLLVGV  | 6901  | >ATM-R717V LVWCSRLLVGV | 57    | 6844  |
| >ATM-R717V LVRCRLLVGV  | 10050 | >ATM-R717V LVWCSRLLVGV | 89    | 9961  |
| >ATM-R717V LVRCRLLV    | 245   | >ATM-R717V LVWCSRLLV   | 28    | 217   |
| >ATM-R717V LVRCRLLVGV  | 73    | >ATM-R717V LVWCSRLLVGV | 10    | 63    |
| >ATM-R717V LVRCRLL     | 24    | >ATM-R717V LVWCSRLL    | 5295  | 5271  |
| >ATM-R717V LVRCRLLV    | 7     | >ATM-R717V LVWCSRLLV   | 1032  | 1025  |
| >ATM-R717V LVRCRLLVGV  | 51    | >ATM-R717V LVWCSRLLVGV | 7028  | 6977  |
| >ATM-R717V LVRCRLLVGV  | 27    | >ATM-R717V LVWCSRLLVGV | 4653  | 4626  |
| >ATM-R717V LVRCRLLV    | 3023  | >ATM-R717V LVWCSRLLV   | 83    | 2940  |
| >ATM-R717V LVRCRLLVGV  | 949   | >ATM-R717V LVWCSRLLVGV | 34    | 915   |
| >ATM-R717V LVRCRLLV    | 5452  | >ATM-R717V LVWCSRLLV   | 101   | 5351  |
| >ATM-R717V LVRCRLLVGV  | 1743  | >ATM-R717V LVWCSRLLVGV | 27    | 1716  |
| >ATM-R717V LVRCRLL     | 116   | >ATM-R717V LVWCSRLL    | 2352  | 2236  |
| >ATM-R717V LVRCRLLV    | 399   | >ATM-R717V LVWCSRLLV   | 1619  | 1220  |
| >ATM-R717V TLVRCRLL    | 1867  | >ATM-R717V TLVWCSRLL   | 274   | 1593  |
| >ATM-R717V TLVRCRLLV   | 212   | >ATM-R717V TLVWCSRLLV  | 65    | 147   |
| >ATM-R717V TLVRCRLL    | 121   | >ATM-R717V TLVWCSRLL   | 60    | 61    |
| >ATM-R717V TLVRCRLL    | 156   | >ATM-R717V TLVWCSRLL   | 68    | 88    |



|                        |      |                         |     |      |
|------------------------|------|-------------------------|-----|------|
| >ATM-R717V TLVRCRLLV   | 56   | >ATM-R717V TLVWCSRLLV   | 33  | 23   |
| >ATM-R717V TLVRCRSL    | 183  | >ATM-R717V TLVWCSRSL    | 76  | 107  |
| >ATM-R717V TLVRCRLL    | 419  | >ATM-R717V TLVWCSRLL    | 165 | 254  |
| >ATM-R717V TLVRCRLLV   | 34   | >ATM-R717V TLVWCSRLLV   | 43  | 9    |
| >ATM-R717V TLVRCRLLV   | 317  | >ATM-R717V TLVWCSRLLV   | 151 | 166  |
| >ATM-R717V TLVRCRSL    | 945  | >ATM-R717V TLVWCSRSL    | 76  | 869  |
| >ATM-R717V TLVRCRLL    | 2381 | >ATM-R717V TLVWCSRLL    | 321 | 2060 |
| >ATM-R717V TLVRCRLLV   | 206  | >ATM-R717V TLVWCSRLLV   | 38  | 168  |
| >ATM-R717V TLVRCRLLV   | 249  | >ATM-R717V TLVWCSRLLV   | 290 | 41   |
| >ATM-R717V TLVRCRSL    | 2640 | >ATM-R717V TLVWCSRSL    | 437 | 2203 |
| >ATM-R717V TLVRCRLLV   | 202  | >ATM-R717V TLVWCSRLLV   | 61  | 141  |
| >ATM-R717V TLVRCRLLV   | 1665 | >ATM-R717V TLVWCSRLLV   | 464 | 1201 |
| >ATM-R717V TLVRCRSL    | 22   | >ATM-R717V TLVWCSRSL    | 7   | 15   |
| >ATM-R717V TLVRCRLL    | 161  | >ATM-R717V TLVWCSRLL    | 36  | 125  |
| >ATM-R717V TLVRCRLLV   | 9    | >ATM-R717V TLVWCSRLLV   | 4   | 5    |
| >ATM-R717V TLVRCRLLV   | 1818 | >ATM-R717V TLVWCSRLLV   | 405 | 1413 |
| >ATM-R717V ETLVRCRSL   | 1350 | >ATM-R717V ETLVWCSRSL   | 147 | 1203 |
| >ATM-R717V ETLVRCRSL   | 216  | >ATM-R717V ETLVWCSRSL   | 182 | 34   |
| >ATM-R717V ETLVRCRSL   | 10   | >ATM-R717V ETLVWCSRSL   | 8   | 2    |
| >ATM-R717V ETLVRCRSL   | 6    | >ATM-R717V ETLVWCSRSL   | 6   | 0    |
| >ATM-R717V ETLVRCRSL   | 1053 | >ATM-R717V ETLVWCSRSL   | 170 | 883  |
| >ATM-R717V ETLVRCRSLV  | 69   | >ATM-R717V ETLVWCSRSLV  | 24  | 45   |
| >ATM-R717V ETLVRCRSL   | 569  | >ATM-R717V ETLVWCSRSL   | 10  | 559  |
| >ATM-R717V ETLVRCRSL   | 436  | >ATM-R717V ETLVWCSRSL   | 28  | 408  |
| >ATM-R717V ETLVRCRSLV  | 15   | >ATM-R717V ETLVWCSRSLV  | 4   | 11   |
| >ATM-R717V ETLVRCRSL   | 34   | >ATM-R717V ETLVWCSRSL   | 42  | 8    |
| >ATM-R717V ETLVRCRSL   | 206  | >ATM-R717V ETLVWCSRSL   | 203 | 3    |
| >ATM-R717V ETLVRCRSL   | 56   | >ATM-R717V ETLVWCSRSL   | 19  | 37   |
| >ATM-R717V ETLVRCRSLV  | 881  | >ATM-R717V ETLVWCSRSLV  | 396 | 485  |
| >ATM-R717V ETLVRCRSL   | 1941 | >ATM-R717V ETLVWCSRSL   | 423 | 1518 |
| >ATM-R717V SETLVRCRSL  | 34   | >ATM-R717V SETLVWCSRSL  | 164 | 130  |
| >ATM-R717V SETLVRCRSL  | 34   | >ATM-R717V SETLVWCSRSL  | 32  | 2    |
| >ATM-R717V SETLVRCRSL  | 12   | >ATM-R717V SETLVWCSRSL  | 13  | 1    |
| >ATM-R717V SETLVRCRSL  | 380  | >ATM-R717V SETLVWCSRSL  | 903 | 523  |
| >ATM-R717V SETLVRCRSL  | 119  | >ATM-R717V SETLVWCSRSL  | 47  | 72   |
| >ATM-R717V SETLVRCRSL  | 464  | >ATM-R717V SETLVWCSRSL  | 610 | 146  |
| >ATM-R717V SETLVRCRSL  | 173  | >ATM-R717V SETLVWCSRSL  | 137 | 36   |
| >ATM-R717V SETLVRCRSL  | 982  | >ATM-R717V SETLVWCSRSL  | 320 | 662  |
| >ATM-R717V SETLVRCRSL  | 680  | >ATM-R717V SETLVWCSRSL  | 137 | 543  |
| >ATM-R717V SETLVRCRSL  | 75   | >ATM-R717V SETLVWCSRSL  | 39  | 36   |
| >ATM-R717V NSETLVRCRSL | 88   | >ATM-R717V NSETLVWCSRSL | 194 | 106  |
| >ATM-R717V NSETLVRCRSL | 374  | >ATM-R717V NSETLVWCSRSL | 781 | 407  |
| >ATM-R717V NSETLVRCRSL | 131  | >ATM-R717V NSETLVWCSRSL | 89  | 42   |

|                        |       |                       |       |       |
|------------------------|-------|-----------------------|-------|-------|
| >ATM-R717V NSETLVRCSR  | 435   | >ATM-R717V NSETLVWCSF | 342   | 93    |
| >ATM-R717V TNSETLVR    | 259   | >ATM-R717V TNSETLVW   | 34206 | 33947 |
| >ATM-R717V TNSETLVRCSI | 85    | >ATM-R717V TNSETLVWCS | 91    | 6     |
| >ATM-R717V TNSETLVR    | 22496 | >ATM-R717V TNSETLVW   | 382   | 22114 |
| >ATM-R717V TNSETLVR    | 33872 | >ATM-R717V TNSETLVW   | 451   | 33421 |
| >ATM-R717V ITNSETLVR   | 124   | >ATM-R717V ITNSETLVW  | 21404 | 21280 |
| >ATM-R717V ITNSETLVR   | 167   | >ATM-R717V ITNSETLVW  | 19639 | 19472 |
| >ATM-R717V ITNSETLVR   | 8532  | >ATM-R717V ITNSETLVW  | 174   | 8358  |
| >ATM-R717V ITNSETLVR   | 43    | >ATM-R717V ITNSETLVW  | 20025 | 19982 |
| >ATM-R717V ITNSETLVR   | 9012  | >ATM-R717V ITNSETLVW  | 5     | 9007  |
| >ATM-R717V ITNSETLVR   | 33749 | >ATM-R717V ITNSETLVW  | 202   | 33547 |
| >ATM-R717V ITNSETLVR   | 19936 | >ATM-R717V ITNSETLVW  | 44    | 19892 |
| >ATM-R717V ITNSETLVR   | 14934 | >ATM-R717V ITNSETLVW  | 9     | 14925 |
| >ATM-R717V ITNSETLVR   | 4802  | >ATM-R717V ITNSETLVW  | 288   | 4514  |
| >ATM-R717V ITNSETLVR   | 31816 | >ATM-R717V ITNSETLVW  | 67    | 31749 |
| >ATM-R717V ITNSETLVR   | 256   | >ATM-R717V ITNSETLVW  | 34102 | 33846 |
| >ATM-R717V EITNSETLVR  | 33    | >ATM-R717V EITNSETLVW | 27826 | 27793 |
| >ATM-R717V EITNSETLVR  | 22904 | >ATM-R717V EITNSETLVW | 444   | 22460 |
| >ATM-R717V EITNSETLVR  | 414   | >ATM-R717V EITNSETLVW | 33628 | 33214 |
| >ATM-S1179 SVKENGLEPH  | 3890  | >ATM-S1179 FVKENGLEPH | 393   | 3497  |
| >ATM-S1179 SVKENGLEPH  | 2683  | >ATM-S1179 FVKENGLEPH | 124   | 2559  |
| >ATM-S1179 SVKENGLEPH  | 585   | >ATM-S1179 FVKENGLEPH | 39    | 546   |
| >ATM-S1179 SVKENGLEPH  | 145   | >ATM-S1179 FVKENGLEPH | 4495  | 4350  |
| >ATM-S1179 KSVKENGL    | 27    | >ATM-S1179 KFKVENGL   | 23821 | 23794 |
| >ATM-S1179 KSVKENGL    | 23397 | >ATM-S1179 KFKVENGL   | 353   | 23044 |
| >ATM-S1179 EKQALFALCK  | 16460 | >ATM-S1179 EKQALFALCK | 137   | 16323 |
| >ATM-S1179 CKSVKENGL   | 7100  | >ATM-S1179 CKFKVENGL  | 362   | 6738  |
| >ATM-S1179 ALCKSVKENG  | 83    | >ATM-S1179 ALCKFKVENG | 53    | 30    |
| >ATM-S1179 ALCKSVKENG  | 420   | >ATM-S1179 ALCKFKVENG | 445   | 25    |
| >ATM-S1179 ALCKSVKENG  | 119   | >ATM-S1179 ALCKFKVENG | 56    | 63    |
| >ATM-S1179 ALCKSVKENG  | 20    | >ATM-S1179 ALCKFKVENG | 16    | 4     |
| >ATM-S1179 FALCKSVK    | 1502  | >ATM-S1179 FALCKFVK   | 274   | 1228  |
| >ATM-S1179 FALCKSVK    | 382   | >ATM-S1179 FALCKFVK   | 223   | 159   |
| >ATM-S1179 LFALCKSV    | 1079  | >ATM-S1179 LFALCKFV   | 279   | 800   |
| >ATM-S1179 LFALCKSVK   | 907   | >ATM-S1179 LFALCKFVK  | 102   | 805   |
| >ATM-S1179 LFALCKSVK   | 2003  | >ATM-S1179 LFALCKFVK  | 349   | 1654  |
| >ATM-S1179 LFALCKSV    | 1083  | >ATM-S1179 LFALCKFV   | 496   | 587   |
| >ATM-S1179 ALFALCKSV   | 26    | >ATM-S1179 ALFALCKFV  | 16    | 10    |
| >ATM-S1179 ALFALCKS    | 348   | >ATM-S1179 ALFALCKF   | 454   | 106   |
| >ATM-S1179 ALFALCKSV   | 12    | >ATM-S1179 ALFALCKFV  | 5     | 7     |
| >ATM-S1179 ALFALCKSV   | 7     | >ATM-S1179 ALFALCKFV  | 9     | 2     |
| >ATM-S1179 ALFALCKSV   | 135   | >ATM-S1179 ALFALCKFV  | 48    | 87    |
| >ATM-S1179 ALFALCKS    | 417   | >ATM-S1179 ALFALCKF   | 346   | 71    |

|                        |       |                        |      |       |
|------------------------|-------|------------------------|------|-------|
| >ATM-S1179 ALFALCKSV   | 4     | >ATM-S1179 ALFALCKFV   | 3    | 1     |
| >ATM-S1179 ALFALCKSV   | 56    | >ATM-S1179 ALFALCKFV   | 36   | 20    |
| >ATM-S1179 ALFALCKSV   | 11    | >ATM-S1179 ALFALCKFV   | 7    | 4     |
| >ATM-S1179 ALFALCKSV   | 71    | >ATM-S1179 ALFALCKFV   | 29   | 42    |
| >ATM-S1179 ALFALCKS    | 246   | >ATM-S1179 ALFALCKF    | 495  | 249   |
| >ATM-S1179 ALFALCKSV   | 2     | >ATM-S1179 ALFALCKFV   | 3    | 1     |
| >ATM-S1179 ALFALCKSVK  | 20    | >ATM-S1179 ALFALCKFVK  | 28   | 8     |
| >ATM-S1179 ALFALCKSVK  | 76    | >ATM-S1179 ALFALCKFVK  | 32   | 44    |
| >ATM-S1179 ALFALCKSVK  | 604   | >ATM-S1179 ALFALCKFVK  | 380  | 224   |
| >ATM-S1179 ALFALCKSVK  | 965   | >ATM-S1179 ALFALCKFVK  | 215  | 750   |
| >ATM-S1179 ALFALCKS    | 8376  | >ATM-S1179 ALFALCKF    | 58   | 8318  |
| >ATM-S1179 ALFALCKSV   | 308   | >ATM-S1179 ALFALCKFV   | 3742 | 3434  |
| >ATM-S1179 ALFALCKS    | 12652 | >ATM-S1179 ALFALCKF    | 76   | 12576 |
| >ATM-S1179 ALFALCKS    | 24144 | >ATM-S1179 ALFALCKF    | 450  | 23694 |
| >ATM-S1179 ALFALCKS    | 8674  | >ATM-S1179 ALFALCKF    | 19   | 8655  |
| >ATM-S1179 ALFALCKSV   | 178   | >ATM-S1179 ALFALCKFV   | 629  | 451   |
| >ATM-S1179 ALFALCKS    | 21400 | >ATM-S1179 ALFALCKF    | 184  | 21216 |
| >ATM-S1179 ALFALCKSVK  | 451   | >ATM-S1179 ALFALCKFVK  | 123  | 328   |
| >ATM-S1179 QALFALCKSV  | 422   | >ATM-S1179 QALFALCKFV  | 118  | 304   |
| >ATM-S1179 QALFALCKSV  | 490   | >ATM-S1179 QALFALCKFV  | 388  | 102   |
| >ATM-S1179 QALFALCKSV  | 567   | >ATM-S1179 QALFALCKFV  | 312  | 255   |
| >ATM-S1179 QALFALCKSV  | 120   | >ATM-S1179 QALFALCKFV  | 80   | 40    |
| >ATM-S1179 QALFALCKS   | 25954 | >ATM-S1179 QALFALCKF   | 335  | 25619 |
| >ATM-S1179 QALFALCKS   | 13051 | >ATM-S1179 QALFALCKF   | 23   | 13028 |
| >ATM-S1179 KQALFALCKS' | 408   | >ATM-S1179 KQALFALCKF' | 88   | 320   |
| >ATM-S1179 KQALFALCKS' | 591   | >ATM-S1179 KQALFALCKF' | 275  | 316   |
| >ATM-S1179 KQALFALCKS' | 217   | >ATM-S1179 KQALFALCKF' | 64   | 153   |
| >ATM-S1179 KQALFALCKS' | 147   | >ATM-S1179 KQALFALCKF' | 150  | 3     |
| >ATM-S1179 KQALFALCKS' | 17    | >ATM-S1179 KQALFALCKF' | 10   | 7     |
| >ATM-S1179 KQALFALCKS' | 1717  | >ATM-S1179 KQALFALCKF' | 395  | 1322  |
| >ATM-S1179 KQALFALCKS  | 17058 | >ATM-S1179 KQALFALCKF  | 226  | 16832 |
| >ATM-S1179 KQALFALCKS  | 11819 | >ATM-S1179 KQALFALCKF  | 193  | 11626 |
| >ATM-S1179 KQALFALCKS  | 5186  | >ATM-S1179 KQALFALCKF  | 10   | 5176  |
| >ATM-S1179 KQALFALCKS' | 81    | >ATM-S1179 KQALFALCKF' | 213  | 132   |
| >ATM-S1179 KQALFALCKS  | 27031 | >ATM-S1179 KQALFALCKF  | 470  | 26561 |
| >ATM-S1905 SQRTMLAV    | 45    | >ATM-S1905 LQRTMLAV    | 44   | 1     |
| >ATM-S1905 SQRTMLAVV   | 30    | >ATM-S1905 LQRTMLAVV   | 28   | 2     |
| >ATM-S1905 SQRTMLAV    | 27    | >ATM-S1905 LQRTMLAV    | 32   | 5     |
| >ATM-S1905 SQRTMLAVV   | 70    | >ATM-S1905 LQRTMLAVV   | 81   | 11    |
| >ATM-S1905 SQRTMLAV    | 109   | >ATM-S1905 LQRTMLAV    | 313  | 204   |
| >ATM-S1905 SQRTMLAVV   | 175   | >ATM-S1905 LQRTMLAVV   | 493  | 318   |
| >ATM-S1905 SQRTMLAV    | 337   | >ATM-S1905 LQRTMLAV    | 158  | 179   |
| >ATM-S1905 SQRTMLAVV   | 206   | >ATM-S1905 LQRTMLAVV   | 108  | 98    |

|                       |       |                       |       |       |
|-----------------------|-------|-----------------------|-------|-------|
| >ATM-S1905 SQRTMLAVV  | 55    | >ATM-S1905 LQRTMLAVV\ | 51    | 4     |
| >ATM-S1905 SQRTMLAV   | 59    | >ATM-S1905 LQRTMLAV   | 27    | 32    |
| >ATM-S1905 SQRTMLAVV  | 172   | >ATM-S1905 LQRTMLAVV  | 73    | 99    |
| >ATM-S1905 SQRTMLAVV  | 9     | >ATM-S1905 LQRTMLAVV\ | 6     | 3     |
| >ATM-S1905 KSQRTMLA   | 17777 | >ATM-S1905 KLQRTMLA   | 204   | 17573 |
| >ATM-S1905 KSQRTMLAV  | 9039  | >ATM-S1905 KLQRTMLAV  | 28    | 9011  |
| >ATM-S1905 KSQRTMLAV\ | 10881 | >ATM-S1905 KLQRTMLAV\ | 229   | 10652 |
| >ATM-S1905 KSQRTMLA   | 18389 | >ATM-S1905 KLQRTMLA   | 401   | 17988 |
| >ATM-S1905 KSQRTMLAV  | 11623 | >ATM-S1905 KLQRTMLAV  | 118   | 11505 |
| >ATM-S1905 KSQRTMLAV\ | 7116  | >ATM-S1905 KLQRTMLAV\ | 172   | 6944  |
| >ATM-S1905 KSQRTMLA   | 9592  | >ATM-S1905 KLQRTMLA   | 66    | 9526  |
| >ATM-S1905 KSQRTMLAV  | 4124  | >ATM-S1905 KLQRTMLAV  | 14    | 4110  |
| >ATM-S1905 KSQRTMLAV\ | 1957  | >ATM-S1905 KLQRTMLAV\ | 25    | 1932  |
| >ATM-S1905 KSQRTMLAV  | 854   | >ATM-S1905 KLQRTMLAV  | 29    | 825   |
| >ATM-S1905 KSQRTMLAV\ | 3119  | >ATM-S1905 KLQRTMLAV\ | 282   | 2837  |
| >ATM-S1905 KSQRTMLA   | 22326 | >ATM-S1905 KLQRTMLA   | 318   | 22008 |
| >ATM-S1905 KSQRTMLAV  | 5096  | >ATM-S1905 KLQRTMLAV  | 5     | 5091  |
| >ATM-S1905 KSQRTMLAV\ | 5975  | >ATM-S1905 KLQRTMLAV\ | 6     | 5969  |
| >ATM-S1905 KSQRTMLA   | 21355 | >ATM-S1905 KLQRTMLA   | 163   | 21192 |
| >ATM-S1905 KSQRTMLAV  | 8134  | >ATM-S1905 KLQRTMLAV  | 4     | 8130  |
| >ATM-S1905 KSQRTMLAV\ | 7257  | >ATM-S1905 KLQRTMLAV\ | 4     | 7253  |
| >ATM-S1905 KSQRTMLAV  | 16798 | >ATM-S1905 KLQRTMLAV  | 23    | 16775 |
| >ATM-S1905 KSQRTMLAV\ | 16266 | >ATM-S1905 KLQRTMLAV\ | 22    | 16244 |
| >ATM-S1905 KSQRTMLAV  | 21527 | >ATM-S1905 KLQRTMLAV  | 177   | 21350 |
| >ATM-S1905 KSQRTMLAV\ | 17263 | >ATM-S1905 KLQRTMLAV\ | 30    | 17233 |
| >ATM-S1905 KSQRTMLA   | 30134 | >ATM-S1905 KLQRTMLA   | 43    | 30091 |
| >ATM-S1905 KSQRTMLAV  | 14727 | >ATM-S1905 KLQRTMLAV  | 4     | 14723 |
| >ATM-S1905 KSQRTMLAV\ | 10408 | >ATM-S1905 KLQRTMLAV\ | 4     | 10404 |
| >ATM-S1905 KSQRTMLA   | 21    | >ATM-S1905 KLQRTMLA   | 143   | 122   |
| >ATM-S1905 KSQRTMLAV  | 29    | >ATM-S1905 KLQRTMLAV  | 246   | 217   |
| >ATM-S1905 KSQRTMLAV\ | 86    | >ATM-S1905 KLQRTMLAV\ | 715   | 629   |
| >ATM-S1905 KSQRTMLAV  | 488   | >ATM-S1905 KLQRTMLAV  | 313   | 175   |
| >ATM-S1905 KSQRTMLAV  | 462   | >ATM-S1905 KLQRTMLAV  | 747   | 285   |
| >ATM-S1905 KSQRTMLAV  | 91    | >ATM-S1905 KLQRTMLAV  | 14362 | 14271 |
| >ATM-S1905 KSQRTMLAV\ | 226   | >ATM-S1905 KLQRTMLAV\ | 16307 | 16081 |
| >ATM-S1905 KSQRTMLAV\ | 220   | >ATM-S1905 KLQRTMLAV\ | 3677  | 3457  |
| >ATM-S1905 HFFRCCLDKK | 18372 | >ATM-S1905 HFFRCCLDKK | 397   | 17975 |
| >ATM-S1905 HFFRCCLDKK | 14226 | >ATM-S1905 HFFRCCLDKK | 180   | 14046 |
| >ATM-S1905 KKSQRTML   | 44    | >ATM-S1905 KKLQRTML   | 26    | 18    |
| >ATM-S1905 KKSQRTMLA\ | 45    | >ATM-S1905 KKLQRTMLA\ | 28    | 17    |
| >ATM-S1905 KKSQRTMLA\ | 149   | >ATM-S1905 KKLQRTMLA\ | 79    | 70    |
| >ATM-S1905 KKSQRTML   | 467   | >ATM-S1905 KKLQRTML   | 179   | 288   |
| >ATM-S1905 KKSQRTMLA\ | 1426  | >ATM-S1905 KKLQRTMLA\ | 452   | 974   |

|                        |     |                        |      |      |
|------------------------|-----|------------------------|------|------|
| >ATM-S1905 CLDKKSQRTM  | 110 | >ATM-S1905 CLDKKLQRTM  | 100  | 10   |
| >ATM-S1905 CCLDKKSQR   | 425 | >ATM-S1905 CCLDKKLQR   | 59   | 366  |
| >ATM-S1905 RCCLDKKSQR  | 128 | >ATM-S1905 RCCLDKKLQR  | 112  | 16   |
| >ATM-S1905 RCCLDKKSQR  | 365 | >ATM-S1905 RCCLDKKLQR  | 94   | 271  |
| >ATM-S207C SKFLDFFSKAI | 140 | >ATM-S207C CKFLDFFSKAI | 644  | 504  |
| >ATM-S207C SKFLDFFSK   | 336 | >ATM-S207C CKFLDFFSK   | 2605 | 2269 |
| >ATM-S207C SKFLDFFSK   | 275 | >ATM-S207C CKFLDFFSK   | 444  | 169  |
| >ATM-S207C SKFLDFFSKA  | 240 | >ATM-S207C CKFLDFFSKA  | 374  | 134  |
| >ATM-S207C SKFLDFFSKAI | 14  | >ATM-S207C CKFLDFFSKAI | 28   | 14   |
| >ATM-S207C SKFLDFFSK   | 94  | >ATM-S207C CKFLDFFSK   | 409  | 315  |
| >ATM-S207C SKFLDFFSKAI | 340 | >ATM-S207C CKFLDFFSKAI | 140  | 200  |
| >ATM-S207C NSKFLDFFSK  | 58  | >ATM-S207C NCKFLDFFSK  | 4755 | 4697 |
| >ATM-S207C NSKFLDFFSK  | 143 | >ATM-S207C NCKFLDFFSK  | 1775 | 1632 |
| >ATM-S207C NSKFLDFFSK  | 335 | >ATM-S207C NCKFLDFFSK  | 1371 | 1036 |
| >ATM-S207C NSKFLDFFSK  | 47  | >ATM-S207C NCKFLDFFSK  | 2552 | 2505 |
| >ATM-S207C NSKFLDFFSK  | 463 | >ATM-S207C NCKFLDFFSK  | 5779 | 5316 |
| >ATM-S207C LNSKFLDF    | 215 | >ATM-S207C LNCKFLDF    | 551  | 336  |
| >ATM-S207C LNSKFLDFF   | 271 | >ATM-S207C LNCKFLDFF   | 628  | 357  |
| >ATM-S207C GLNSKFLDF   | 370 | >ATM-S207C GLNCKFLDF   | 540  | 170  |
| >ATM-S207C GLNSKFLDF   | 190 | >ATM-S207C GLNCKFLDF   | 173  | 17   |
| >ATM-S207C GLNSKFLDF   | 258 | >ATM-S207C GLNCKFLDF   | 388  | 130  |
| >ATM-S207C TDGLNSKFL   | 188 | >ATM-S207C TDGLNCKFL   | 119  | 69   |
| >ATM-S207C QTDGLNSK    | 172 | >ATM-S207C QTDGLNCK    | 222  | 50   |
| >ATM-S207C QTDGLNSKF   | 279 | >ATM-S207C QTDGLNCKF   | 145  | 134  |
| >ATM-S207C QTDGLNSK    | 394 | >ATM-S207C QTDGLNCK    | 354  | 40   |
| >ATM-S207C QTDGLNSKF   | 19  | >ATM-S207C QTDGLNCKF   | 38   | 19   |
| >ATM-S207C QTDGLNSKFL  | 114 | >ATM-S207C QTDGLNCKFL  | 321  | 207  |
| >ATM-S207C QTDGLNSKFL  | 485 | >ATM-S207C QTDGLNCKFL  | 848  | 363  |
| >ATM-S207C QTDGLNSKF   | 6   | >ATM-S207C QTDGLNCKF   | 311  | 305  |
| >ATM-S207C QTDGLNSKFL  | 430 | >ATM-S207C QTDGLNCKFL  | 3425 | 2995 |
| >ATM-S207C SQTDGLNSKF  | 359 | >ATM-S207C SQTDGLNCKF  | 586  | 227  |
| >ATM-S207C SQTDGLNSKF  | 28  | >ATM-S207C SQTDGLNCKF  | 40   | 12   |
| >ATM-S207C SQTDGLNSK   | 235 | >ATM-S207C SQTDGLNCK   | 185  | 50   |
| >ATM-S207C SQTDGLNSKF  | 344 | >ATM-S207C SQTDGLNCKF  | 395  | 51   |
| >ATM-S207C SQTDGLNSKF  | 127 | >ATM-S207C SQTDGLNCKF  | 422  | 295  |
| >ATM-S207C SQTDGLNSKF  | 32  | >ATM-S207C SQTDGLNCKF  | 85   | 53   |
| >ATM-S207C CSQTDGLNSK  | 409 | >ATM-S207C CSQTDGLNCK  | 829  | 420  |
| >ATM-S207C CSQTDGLNSK  | 313 | >ATM-S207C CSQTDGLNCK  | 498  | 185  |
| >ATM-S207C CSQTDGLNSK  | 80  | >ATM-S207C CSQTDGLNCK  | 109  | 29   |
| >ATM-S207C CSQTDGLNSK  | 119 | >ATM-S207C CSQTDGLNCK  | 2140 | 2021 |
| >ATM-S2375 SDELRNGK    | 69  | >ATM-S2375 ISDELRNGK   | 278  | 209  |
| >ATM-S2375 SDELRNGKM   | 157 | >ATM-S2375 ISDELRNGKM  | 698  | 541  |
| >ATM-S2375 SDELRNGKM   | 676 | >ATM-S2375 ISDELRNGKM  | 122  | 554  |

|                        |       |                         |      |       |
|------------------------|-------|-------------------------|------|-------|
| >ATM-S2375 SSDELNRNGKM | 50    | >ATM-S2375 ISDELNRNGKM  | 148  | 98    |
| >ATM-S2375 ESSDELNRNGK | 319   | >ATM-S2375 EISDELNRNGKI | 59   | 260   |
| >ATM-S2375 ESSDELNRNGK | 176   | >ATM-S2375 EISDELNRNGKI | 169  | 7     |
| >ATM-S2375 ESSDELNRNGK | 190   | >ATM-S2375 EISDELNRNGK  | 206  | 16    |
| >ATM-S2375 VEVAGNYDG   | 23546 | >ATM-S2375 VEVAGNYDG    | 268  | 23278 |
| >ATM-S2375 VEVAGNYDG   | 11311 | >ATM-S2375 VEVAGNYDG    | 98   | 11213 |
| >ATM-S2375 VEVAGNYDG   | 2806  | >ATM-S2375 VEVAGNYDG    | 282  | 2524  |
| >ATM-S2375 VEVAGNYDG   | 8150  | >ATM-S2375 VEVAGNYDG    | 23   | 8127  |
| >ATM-S2375 DGESSDEL    | 369   | >ATM-S2375 DGEISDEL     | 601  | 232   |
| >ATM-S2375 NYDGESSDEL  | 94    | >ATM-S2375 NYDGEISDEL   | 44   | 50    |
| >ATM-S2375 NYDGESSDEL  | 325   | >ATM-S2375 NYDGEISDEL   | 239  | 86    |
| >ATM-S2375 VAGNYDGES   | 37113 | >ATM-S2375 VAGNYDGEI    | 490  | 36623 |
| >ATM-S2375 EVAGNYDGEI  | 2202  | >ATM-S2375 EVAGNYDGEI   | 190  | 2012  |
| >ATM-S2375 EVAGNYDGEI  | 10268 | >ATM-S2375 EVAGNYDGEI   | 97   | 10171 |
| >ATM-S2375 EVAGNYDGEI  | 99    | >ATM-S2375 EVAGNYDGEI   | 377  | 278   |
| >ATM-S2375 EVAGNYDGEI  | 9046  | >ATM-S2375 EVAGNYDGEI   | 101  | 8945  |
| >ATM-S2394 SDTQYQRI    | 65    | >ATM-S2394 LDTQYQRI     | 92   | 27    |
| >ATM-S2394 FSDTQYQRI   | 11514 | >ATM-S2394 FLDTQYQRI    | 35   | 11479 |
| >ATM-S2394 FSDTQYQRI   | 6183  | >ATM-S2394 FLDTQYQRI    | 18   | 6165  |
| >ATM-S2394 FSDTQYQRI   | 12458 | >ATM-S2394 FLDTQYQRI    | 55   | 12403 |
| >ATM-S2394 FSDTQYQRI   | 6166  | >ATM-S2394 FLDTQYQRI    | 185  | 5981  |
| >ATM-S2394 FSDTQYQRI   | 4582  | >ATM-S2394 FLDTQYQRI    | 5    | 4577  |
| >ATM-S2394 FSDTQYQRI   | 19211 | >ATM-S2394 FLDTQYQRI    | 10   | 19201 |
| >ATM-S2394 FSDTQYQRI   | 14161 | >ATM-S2394 FLDTQYQRI    | 15   | 14146 |
| >ATM-S2394 FSDTQYQRI   | 22448 | >ATM-S2394 FLDTQYQRI    | 54   | 22394 |
| >ATM-S2394 FSDTQYQRI   | 20257 | >ATM-S2394 FLDTQYQRI    | 4    | 20253 |
| >ATM-S2394 FSDTQYQR    | 156   | >ATM-S2394 FLDTQYQR     | 439  | 283   |
| >ATM-S2394 FSDTQYQRI   | 195   | >ATM-S2394 FLDTQYQRI    | 9645 | 9450  |
| >ATM-S2394 MKAFSLARF   | 14441 | >ATM-S2394 MKAFSLARF    | 326  | 14115 |
| >ATM-S2394 MKAFSLARF   | 3827  | >ATM-S2394 MKAFSLARF    | 83   | 3744  |
| >ATM-S2394 MKAFSLARF   | 18531 | >ATM-S2394 MKAFSLARF    | 475  | 18056 |
| >ATM-S2394 RFSDTQYQRI  | 55    | >ATM-S2394 RFLDTQYQRI   | 17   | 38    |
| >ATM-S2394 RFSDTQYQRI  | 565   | >ATM-S2394 RFLDTQYQRI   | 197  | 368   |
| >ATM-S2394 RFSDTQYQR   | 6     | >ATM-S2394 RFLDTQYQR    | 6    | 0     |
| >ATM-S2394 RFSDTQYQR   | 533   | >ATM-S2394 RFLDTQYQR    | 213  | 320   |
| >ATM-S2394 RFSDTQYQ    | 373   | >ATM-S2394 RFLDTQYQ     | 110  | 263   |
| >ATM-S2394 RFSDTQYQR   | 14    | >ATM-S2394 RFLDTQYQR    | 12   | 2     |
| >ATM-S2394 ARFSDTQY    | 11    | >ATM-S2394 ARFLDTQY     | 63   | 52    |
| >ATM-S2394 ARFSDTQYQF  | 414   | >ATM-S2394 ARFLDTQYQF   | 1635 | 1221  |
| >ATM-S2394 ARFSDTQYQF  | 60    | >ATM-S2394 ARFLDTQYQF   | 295  | 235   |
| >ATM-S2394 ARFSDTQY    | 112   | >ATM-S2394 ARFLDTQY     | 99   | 13    |
| >ATM-S2394 ARFSDTQYQF  | 58    | >ATM-S2394 ARFLDTQYQF   | 45   | 13    |
| >ATM-S2394 ARFSDTQYQF  | 90    | >ATM-S2394 ARFLDTQYQF   | 96   | 6     |

|                        |      |                        |      |      |
|------------------------|------|------------------------|------|------|
| >ATM-S2394 ARFSDTQYQF  | 454  | >ATM-S2394 ARFLDTQYQF  | 250  | 204  |
| >ATM-S2394 ARFSDTQYQF  | 530  | >ATM-S2394 ARFLDTQYQF  | 488  | 42   |
| >ATM-S2394 LARFSDTQY   | 944  | >ATM-S2394 LARFLDTQY   | 343  | 601  |
| >ATM-S2394 LARFSDTQYC  | 29   | >ATM-S2394 LARFLDTQYC  | 22   | 7    |
| >ATM-S2394 LARFSDTQYC  | 147  | >ATM-S2394 LARFLDTQYC  | 89   | 58   |
| >ATM-S2394 LARFSDTQYC  | 78   | >ATM-S2394 LARFLDTQYC  | 108  | 30   |
| >ATM-S2394 LARFSDTQY   | 84   | >ATM-S2394 LARFLDTQY   | 139  | 55   |
| >ATM-S2394 LARFSDTQY   | 162  | >ATM-S2394 LARFLDTQY   | 1265 | 1103 |
| >ATM-S2394 LARFSDTQY   | 4    | >ATM-S2394 LARFLDTQY   | 9    | 5    |
| >ATM-S2394 LARFSDTQY   | 38   | >ATM-S2394 LARFLDTQY   | 41   | 3    |
| >ATM-S2394 LARFSDTQY   | 42   | >ATM-S2394 LARFLDTQY   | 29   | 13   |
| >ATM-S2394 SLARFSDT    | 498  | >ATM-S2394 SLARFLDT    | 510  | 12   |
| >ATM-S2394 SLARFSDTQ   | 391  | >ATM-S2394 SLARFLDTQ   | 157  | 234  |
| >ATM-S2394 SLARFSDTQY  | 101  | >ATM-S2394 SLARFLDTQY  | 79   | 22   |
| >ATM-S2394 SLARFSDT    | 305  | >ATM-S2394 SLARFLDT    | 416  | 111  |
| >ATM-S2394 SLARFSDTQY  | 449  | >ATM-S2394 SLARFLDTQY  | 393  | 56   |
| >ATM-S2394 SLARFSDTQY  | 316  | >ATM-S2394 SLARFLDTQY  | 400  | 84   |
| >ATM-S2394 SLARFSDT    | 162  | >ATM-S2394 SLARFLDT    | 136  | 26   |
| >ATM-S2394 SLARFSDTQ   | 278  | >ATM-S2394 SLARFLDTQ   | 105  | 173  |
| >ATM-S2394 SLARFSDTQY  | 43   | >ATM-S2394 SLARFLDTQY  | 36   | 7    |
| >ATM-S2394 SLARFSDTQY  | 148  | >ATM-S2394 SLARFLDTQY  | 250  | 102  |
| >ATM-S2394 SLARFSDTQY  | 84   | >ATM-S2394 SLARFLDTQY  | 83   | 1    |
| >ATM-S2394 SLARFSDTQY  | 122  | >ATM-S2394 SLARFLDTQY  | 63   | 59   |
| >ATM-S2394 SLARFSDTQY  | 93   | >ATM-S2394 SLARFLDTQY  | 165  | 72   |
| >ATM-S2394 SLARFSDTQY  | 54   | >ATM-S2394 SLARFLDTQY  | 143  | 89   |
| >ATM-S2394 SLARFSDTQY  | 475  | >ATM-S2394 SLARFLDTQY  | 1098 | 623  |
| >ATM-S2394 SLARFSDTQY  | 154  | >ATM-S2394 SLARFLDTQY  | 240  | 86   |
| >ATM-S2394 SLARFSDTQY  | 283  | >ATM-S2394 SLARFLDTQY  | 518  | 235  |
| >ATM-S2394 LSLARFSDTQ' | 144  | >ATM-S2394 LSLARFLDTQ' | 61   | 83   |
| >ATM-S2394 LSLARFSDTQ' | 123  | >ATM-S2394 LSLARFLDTQ' | 152  | 29   |
| >ATM-S2394 LSLARFSDTQ' | 74   | >ATM-S2394 LSLARFLDTQ' | 171  | 97   |
| >ATM-S2394 LSLARFSDTQ' | 4    | >ATM-S2394 LSLARFLDTQ' | 4    | 0    |
| >ATM-S2394 LSLARFSDTQ' | 125  | >ATM-S2394 LSLARFLDTQ' | 74   | 51   |
| >ATM-S2394 LSLARFSDTQ' | 16   | >ATM-S2394 LSLARFLDTQ' | 40   | 24   |
| >ATM-S2394 FLSLARFS    | 5919 | >ATM-S2394 FLSLARFL    | 65   | 5854 |
| >ATM-S2394 FLSLARFSDT  | 832  | >ATM-S2394 FLSLARFLDT  | 231  | 601  |
| >ATM-S2394 FLSLARFS    | 94   | >ATM-S2394 FLSLARFL    | 3    | 91   |
| >ATM-S2394 FLSLARFSDT  | 156  | >ATM-S2394 FLSLARFLDT  | 154  | 2    |
| >ATM-S2394 FLSLARFSDTC | 84   | >ATM-S2394 FLSLARFLDTC | 60   | 24   |
| >ATM-S2394 FLSLARFS    | 927  | >ATM-S2394 FLSLARFL    | 18   | 909  |
| >ATM-S2394 FLSLARFSDT  | 81   | >ATM-S2394 FLSLARFLDT  | 105  | 24   |
| >ATM-S2394 FLSLARFS    | 3615 | >ATM-S2394 FLSLARFL    | 131  | 3484 |
| >ATM-S2394 FLSLARFSDT  | 650  | >ATM-S2394 FLSLARFLDT  | 378  | 272  |

|                        |       |                        |       |       |
|------------------------|-------|------------------------|-------|-------|
| >ATM-S2394 FLSLARFS    | 4334  | >ATM-S2394 FLSLARFL    | 42    | 4292  |
| >ATM-S2394 FLSLARFS    | 12938 | >ATM-S2394 FLSLARFL    | 67    | 12871 |
| >ATM-S2394 FLSLARFS    | 5812  | >ATM-S2394 FLSLARFL    | 27    | 5785  |
| >ATM-S2394 FLSLARFS    | 14662 | >ATM-S2394 FLSLARFL    | 34    | 14628 |
| >ATM-S2394 FLSLARFS    | 1601  | >ATM-S2394 FLSLARFL    | 6     | 1595  |
| >ATM-S2394 FLSLARFSDT  | 44    | >ATM-S2394 FLSLARFLDT  | 62    | 18    |
| >ATM-S2394 FLSLARFSDTC | 66    | >ATM-S2394 FLSLARFLDTC | 46    | 20    |
| >ATM-S2394 AFLSLARFS   | 9898  | >ATM-S2394 AFLSLARFL   | 100   | 9798  |
| >ATM-S2394 AFLSLARFS   | 13945 | >ATM-S2394 AFLSLARFL   | 335   | 13610 |
| >ATM-S2394 AFLSLARFS   | 854   | >ATM-S2394 AFLSLARFL   | 90    | 764   |
| >ATM-S2394 KAFSLARFS   | 12847 | >ATM-S2394 KAFSLARFL   | 358   | 12489 |
| >ATM-S2394 KAFSLARFS   | 492   | >ATM-S2394 KAFSLARFL   | 112   | 380   |
| >ATM-S2394 KAFSLARFS   | 1747  | >ATM-S2394 KAFSLARFL   | 9     | 1738  |
| >ATM-S2394 KAFSLARFS   | 6479  | >ATM-S2394 KAFSLARFL   | 230   | 6249  |
| >ATM-S2408 SEFENKQA    | 136   | >ATM-S2408 LEFENKQA    | 629   | 493   |
| >ATM-S2408 SEFENKQAL   | 69    | >ATM-S2408 LEFENKQAL   | 77    | 8     |
| >ATM-S2408 SEFENKQALL  | 25    | >ATM-S2408 LEFENKQALL  | 29    | 4     |
| >ATM-S2408 SEFENKQAL   | 413   | >ATM-S2408 LEFENKQAL   | 148   | 265   |
| >ATM-S2408 SEFENKQA    | 1897  | >ATM-S2408 LEFENKQA    | 376   | 1521  |
| >ATM-S2408 SEFENKQAL   | 17    | >ATM-S2408 LEFENKQAL   | 7     | 10    |
| >ATM-S2408 SEFENKQALL  | 1778  | >ATM-S2408 LEFENKQALL  | 410   | 1368  |
| >ATM-S2408 SEFENKQAL   | 77    | >ATM-S2408 LEFENKQAL   | 263   | 186   |
| >ATM-S2408 SEFENKQAL   | 11    | >ATM-S2408 LEFENKQAL   | 9     | 2     |
| >ATM-S2408 SEFENKQALL  | 137   | >ATM-S2408 LEFENKQALL  | 189   | 52    |
| >ATM-S2408 SEFENKQA    | 205   | >ATM-S2408 LEFENKQA    | 226   | 21    |
| >ATM-S2408 SEFENKQAL   | 28    | >ATM-S2408 LEFENKQAL   | 34    | 6     |
| >ATM-S2408 SEFENKQALL  | 210   | >ATM-S2408 LEFENKQALL  | 353   | 143   |
| >ATM-S2408 SEFENKQAL   | 370   | >ATM-S2408 LEFENKQAL   | 685   | 315   |
| >ATM-S2408 SEFENKQALL  | 131   | >ATM-S2408 LEFENKQALL  | 1461  | 1330  |
| >ATM-S2408 SEFENKQAL   | 156   | >ATM-S2408 LEFENKQAL   | 380   | 224   |
| >ATM-S2408 SEFENKQALL  | 116   | >ATM-S2408 LEFENKQALL  | 1811  | 1695  |
| >ATM-S2408 SEFENKQA    | 167   | >ATM-S2408 LEFENKQA    | 2323  | 2156  |
| >ATM-S2408 SEFENKQALL  | 489   | >ATM-S2408 LEFENKQALL  | 6506  | 6017  |
| >ATM-S2408 SEFENKQAL   | 49    | >ATM-S2408 LEFENKQAL   | 46    | 3     |
| >ATM-S2408 SEFENKQALL  | 217   | >ATM-S2408 LEFENKQALL  | 254   | 37    |
| >ATM-S2408 SSEFENKQAL  | 9458  | >ATM-S2408 SLEFENKQALL | 55    | 9403  |
| >ATM-S2408 SSEFENKQAL  | 29226 | >ATM-S2408 SLEFENKQAL  | 52    | 29174 |
| >ATM-S2408 SSEFENKQAL  | 28977 | >ATM-S2408 SLEFENKQALL | 48    | 28929 |
| >ATM-S2408 SSEFENKQAL  | 487   | >ATM-S2408 SLEFENKQALL | 17143 | 16656 |
| >ATM-S2408 SSEFENKQAL  | 392   | >ATM-S2408 SLEFENKQALL | 6917  | 6525  |
| >ATM-S2408 YQRIENYMKS  | 8944  | >ATM-S2408 YQRIENYMKS  | 369   | 8575  |
| >ATM-S2408 YQRIENYMKS  | 11454 | >ATM-S2408 YQRIENYMKS  | 494   | 10960 |
| >ATM-S2408 YQRIENYMKS  | 3253  | >ATM-S2408 YQRIENYMKS  | 158   | 3095  |



|                        |       |                        |      |       |
|------------------------|-------|------------------------|------|-------|
| >ATM-S2408 YQRIENYMKS  | 483   | >ATM-S2408 YQRIENYMKS  | 12   | 471   |
| >ATM-S2408 KSSEFENKQA  | 1081  | >ATM-S2408 KSLEFENKQA  | 114  | 967   |
| >ATM-S2408 KSSEFENK    | 267   | >ATM-S2408 KSLEFENK    | 332  | 65    |
| >ATM-S2408 KSSEFENK    | 19    | >ATM-S2408 KSLEFENK    | 20   | 1     |
| >ATM-S2408 KSSEFENK    | 134   | >ATM-S2408 KSLEFENK    | 54   | 80    |
| >ATM-S2408 KSSEFENK    | 555   | >ATM-S2408 KSLEFENK    | 217  | 338   |
| >ATM-S2408 KSSEFENKQA  | 352   | >ATM-S2408 KSLEFENKQA  | 83   | 269   |
| >ATM-S2408 KSSEFENKQA  | 393   | >ATM-S2408 KSLEFENKQA  | 206  | 187   |
| >ATM-S2408 KSSEFENKQA  | 54    | >ATM-S2408 KSLEFENKQA  | 29   | 25    |
| >ATM-S2408 KSSEFENK    | 244   | >ATM-S2408 KSLEFENK    | 183  | 61    |
| >ATM-S2408 MKSSEFENK   | 150   | >ATM-S2408 MKSLEFENK   | 1419 | 1269  |
| >ATM-S2408 MKSSEFENKC  | 275   | >ATM-S2408 MKSLEFENKC  | 1790 | 1515  |
| >ATM-S2408 YMKSSSEFENK | 166   | >ATM-S2408 YMKSLSEFENK | 234  | 68    |
| >ATM-S2408 YMKSSSEFENK | 504   | >ATM-S2408 YMKSLSEFENK | 369  | 135   |
| >ATM-S2408 YMKSSSEFENK | 271   | >ATM-S2408 YMKSLSEFENK | 294  | 23    |
| >ATM-S2408 YMKSSSEFENK | 188   | >ATM-S2408 YMKSLSEFENK | 101  | 87    |
| >ATM-S2408 YMKSSSEFENK | 119   | >ATM-S2408 YMKSLSEFENK | 504  | 385   |
| >ATM-S2408 NYMKSSSEF   | 31    | >ATM-S2408 NYMKSLSEF   | 24   | 7     |
| >ATM-S2408 NYMKSSSEFEN | 172   | >ATM-S2408 NYMKSLSEFEN | 131  | 41    |
| >ATM-S2408 NYMKSSSEF   | 94    | >ATM-S2408 NYMKSLSEF   | 69   | 25    |
| >ATM-S2408 NYMKSSSEF   | 5     | >ATM-S2408 NYMKSLSEF   | 4    | 1     |
| >ATM-S2408 NYMKSSSEFEN | 350   | >ATM-S2408 NYMKSLSEFEN | 455  | 105   |
| >ATM-S2408 NYMKSSSEF   | 265   | >ATM-S2408 NYMKSLSEF   | 543  | 278   |
| >ATM-S2408 NYMKSSSEFEN | 316   | >ATM-S2408 NYMKSLSEFEN | 361  | 45    |
| >ATM-S2408 ENYMKSSSEF  | 299   | >ATM-S2408 ENYMKSLSEF  | 546  | 247   |
| >ATM-S2408 ENYMKSSSEF  | 180   | >ATM-S2408 ENYMKSLSEF  | 351  | 171   |
| >ATM-S2408 IENYMKSS    | 629   | >ATM-S2408 IENYMKSL    | 27   | 602   |
| >ATM-S2408 IENYMKSSSEF | 113   | >ATM-S2408 IENYMKSLSEF | 112  | 1     |
| >ATM-S2408 IENYMKSSSEF | 411   | >ATM-S2408 IENYMKSLSEF | 642  | 231   |
| >ATM-S2408 IENYMKSSSEF | 38    | >ATM-S2408 IENYMKSLSEF | 81   | 43    |
| >ATM-S2408 IENYMKSS    | 3764  | >ATM-S2408 IENYMKSL    | 320  | 3444  |
| >ATM-S2408 IENYMKSS    | 18172 | >ATM-S2408 IENYMKSL    | 88   | 18084 |
| >ATM-S2408 IENYMKSS    | 1905  | >ATM-S2408 IENYMKSL    | 117  | 1788  |
| >ATM-S2408 IENYMKSSSEF | 158   | >ATM-S2408 IENYMKSLSEF | 155  | 3     |
| >ATM-S2408 IENYMKSSSEF | 61    | >ATM-S2408 IENYMKSLSEF | 73   | 12    |
| >ATM-S2408 IENYMKSSSEF | 106   | >ATM-S2408 IENYMKSLSEF | 77   | 29    |
| >ATM-S2408 RIENYMKSSSE | 476   | >ATM-S2408 RIENYMKSLSE | 163  | 313   |
| >ATM-S2408 RIENYMKSSSE | 374   | >ATM-S2408 RIENYMKSLSE | 610  | 236   |
| >ATM-S2408 RIENYMKSSSE | 81    | >ATM-S2408 RIENYMKSLSE | 61   | 20    |
| >ATM-S2408 RIENYMKSSSE | 81    | >ATM-S2408 RIENYMKSLSE | 716  | 635   |
| >ATM-S2408 QRIENYMKSS  | 2803  | >ATM-S2408 QRIENYMKSL  | 156  | 2647  |
| >ATM-S2408 QRIENYMKSS  | 7361  | >ATM-S2408 QRIENYMKSL  | 113  | 7248  |
| >ATM-S2408 QRIENYMKSS  | 17043 | >ATM-S2408 QRIENYMKSL  | 123  | 16920 |

|                        |       |                        |       |       |
|------------------------|-------|------------------------|-------|-------|
| >ATM-S2408 QRIENYMKSS  | 8250  | >ATM-S2408 QRIENYMKSL  | 425   | 7825  |
| >ATM-S2408 QRIENYMKSS  | 2287  | >ATM-S2408 QRIENYMKSL  | 114   | 2173  |
| >ATM-S2859 SSIVGYIL    | 212   | >ATM-S2859 FSIVGYIL    | 124   | 88    |
| >ATM-S2859 SSIVGYIL    | 478   | >ATM-S2859 FSIVGYIL    | 1426  | 948   |
| >ATM-S2859 SSIVGYILGL  | 740   | >ATM-S2859 FSIVGYILGL  | 197   | 543   |
| >ATM-S2859 SSIVGYIL    | 4171  | >ATM-S2859 FSIVGYIL    | 333   | 3838  |
| >ATM-S2859 SSIVGYILGL  | 501   | >ATM-S2859 FSIVGYILGL  | 122   | 379   |
| >ATM-S2859 SSIVGYIL    | 1180  | >ATM-S2859 FSIVGYIL    | 295   | 885   |
| >ATM-S2859 SSIVGYIL    | 72    | >ATM-S2859 FSIVGYIL    | 60    | 12    |
| >ATM-S2859 SSIVGYILGL  | 10    | >ATM-S2859 FSIVGYILGL  | 11    | 1     |
| >ATM-S2859 SSIVGYIL    | 1033  | >ATM-S2859 FSIVGYIL    | 118   | 915   |
| >ATM-S2859 SSIVGYILGL  | 2700  | >ATM-S2859 FSIVGYILGL  | 392   | 2308  |
| >ATM-S2859 SSIVGYIL    | 1940  | >ATM-S2859 FSIVGYIL    | 288   | 1652  |
| >ATM-S2859 SSIVGYILGL  | 2098  | >ATM-S2859 FSIVGYILGL  | 339   | 1759  |
| >ATM-S2859 SSIVGYIL    | 26    | >ATM-S2859 FSIVGYIL    | 7     | 19    |
| >ATM-S2859 SSIVGYILGL  | 253   | >ATM-S2859 FSIVGYILGL  | 470   | 217   |
| >ATM-S2859 SSIVGYIL    | 345   | >ATM-S2859 FSIVGYIL    | 554   | 209   |
| >ATM-S2859 SSIVGYILGL  | 1013  | >ATM-S2859 FSIVGYILGL  | 455   | 558   |
| >ATM-S2859 TSSIVGYI    | 16115 | >ATM-S2859 TFSIVGYI    | 207   | 15908 |
| >ATM-S2859 TSSIVGYI    | 41    | >ATM-S2859 TFSIVGYI    | 2898  | 2857  |
| >ATM-S2859 TSSIVGYILGL | 488   | >ATM-S2859 TFSIVGYILGL | 10366 | 9878  |
| >ATM-S2859 TSSIVGYILGL | 45    | >ATM-S2859 TFSIVGYILGL | 23247 | 23202 |
| >ATM-S2859 TSSIVGYIL   | 50    | >ATM-S2859 TFSIVGYIL   | 6847  | 6797  |
| >ATM-S2859 TSSIVGYILGL | 181   | >ATM-S2859 TFSIVGYILGL | 11562 | 11381 |
| >ATM-S2859 TSSIVGYIL   | 491   | >ATM-S2859 TFSIVGYIL   | 8607  | 8116  |
| >ATM-S2859 TSSIVGYI    | 61    | >ATM-S2859 TFSIVGYI    | 10567 | 10506 |
| >ATM-S2859 RLAYTRSVAT  | 409   | >ATM-S2859 RLAYTRSVAT  | 773   | 364   |
| >ATM-S2859 RLAYTRSVAT  | 2115  | >ATM-S2859 RLAYTRSVAT  | 19    | 2096  |
| >ATM-S2859 RLAYTRSVAT  | 2666  | >ATM-S2859 RLAYTRSVAT  | 29    | 2637  |
| >ATM-S2859 RLAYTRSVAT  | 24173 | >ATM-S2859 RLAYTRSVAT  | 493   | 23680 |
| >ATM-S2859 RLAYTRSVAT  | 2086  | >ATM-S2859 RLAYTRSVAT  | 4     | 2082  |
| >ATM-S2859 RLAYTRSVAT  | 13573 | >ATM-S2859 RLAYTRSVAT  | 29    | 13544 |
| >ATM-S2859 RLAYTRSVAT  | 19438 | >ATM-S2859 RLAYTRSVAT  | 129   | 19309 |
| >ATM-S2859 RLAYTRSVAT  | 6599  | >ATM-S2859 RLAYTRSVAT  | 72    | 6527  |
| >ATM-S2859 RLAYTRSVAT  | 14805 | >ATM-S2859 RLAYTRSVAT  | 169   | 14636 |
| >ATM-S2859 ATSSIVGY    | 79    | >ATM-S2859 ATFSIVGY    | 969   | 890   |
| >ATM-S2859 ATSSIVGYI   | 2242  | >ATM-S2859 ATFSIVGYI   | 197   | 2045  |
| >ATM-S2859 ATSSIVGYI   | 23    | >ATM-S2859 ATFSIVGYI   | 36    | 13    |
| >ATM-S2859 ATSSIVGYIL  | 158   | >ATM-S2859 ATFSIVGYIL  | 84    | 74    |
| >ATM-S2859 ATSSIVGYI   | 35    | >ATM-S2859 ATFSIVGYI   | 28    | 7     |
| >ATM-S2859 ATSSIVGYI   | 981   | >ATM-S2859 ATFSIVGYI   | 183   | 798   |
| >ATM-S2859 ATSSIVGYIL  | 928   | >ATM-S2859 ATFSIVGYIL  | 326   | 602   |
| >ATM-S2859 ATSSIVGYI   | 248   | >ATM-S2859 ATFSIVGYI   | 17    | 231   |

|                        |      |                        |     |      |
|------------------------|------|------------------------|-----|------|
| >ATM-S2859 ATSSIVGYIL  | 2250 | >ATM-S2859 ATFSIVGYIL  | 152 | 2098 |
| >ATM-S2859 ATSSIVGY    | 1413 | >ATM-S2859 ATFSIVGY    | 267 | 1146 |
| >ATM-S2859 ATSSIVGY    | 102  | >ATM-S2859 ATFSIVGY    | 33  | 69   |
| >ATM-S2859 ATSSIVGY    | 671  | >ATM-S2859 ATFSIVGY    | 145 | 526  |
| >ATM-S2859 ATSSIVGY    | 35   | >ATM-S2859 ATFSIVGY    | 55  | 20   |
| >ATM-S2859 ATSSIVGY    | 3349 | >ATM-S2859 ATFSIVGY    | 328 | 3021 |
| >ATM-S2859 ATSSIVGY    | 127  | >ATM-S2859 ATFSIVGY    | 39  | 88   |
| >ATM-S2859 ATSSIVGYI   | 700  | >ATM-S2859 ATFSIVGYI   | 112 | 588  |
| >ATM-S2859 ATSSIVGY    | 25   | >ATM-S2859 ATFSIVGY    | 21  | 4    |
| >ATM-S2859 ATSSIVGY    | 1222 | >ATM-S2859 ATFSIVGY    | 48  | 1174 |
| >ATM-S2859 ATSSIVGYI   | 1349 | >ATM-S2859 ATFSIVGYI   | 94  | 1255 |
| >ATM-S2859 ATSSIVGYIL  | 381  | >ATM-S2859 ATFSIVGYIL  | 29  | 352  |
| >ATM-S2859 ATSSIVGY    | 617  | >ATM-S2859 ATFSIVGY    | 69  | 548  |
| >ATM-S2859 ATSSIVGYI   | 12   | >ATM-S2859 ATFSIVGYI   | 8   | 4    |
| >ATM-S2859 ATSSIVGYIL  | 154  | >ATM-S2859 ATFSIVGYIL  | 89  | 65   |
| >ATM-S2859 ATSSIVGYI   | 778  | >ATM-S2859 ATFSIVGYI   | 136 | 642  |
| >ATM-S2859 ATSSIVGY    | 411  | >ATM-S2859 ATFSIVGY    | 214 | 197  |
| >ATM-S2859 ATSSIVGY    | 247  | >ATM-S2859 ATFSIVGY    | 114 | 133  |
| >ATM-S2859 ATSSIVGY    | 570  | >ATM-S2859 ATFSIVGY    | 63  | 507  |
| >ATM-S2859 ATSSIVGYIL  | 2266 | >ATM-S2859 ATFSIVGYIL  | 336 | 1930 |
| >ATM-S2859 ATSSIVGY    | 7    | >ATM-S2859 ATFSIVGY    | 4   | 3    |
| >ATM-S2859 ATSSIVGYI   | 717  | >ATM-S2859 ATFSIVGYI   | 110 | 607  |
| >ATM-S2859 ATSSIVGYIL  | 218  | >ATM-S2859 ATFSIVGYIL  | 31  | 187  |
| >ATM-S2859 ATSSIVGYI   | 142  | >ATM-S2859 ATFSIVGYI   | 244 | 102  |
| >ATM-S2859 ATSSIVGYIL  | 25   | >ATM-S2859 ATFSIVGYIL  | 48  | 23   |
| >ATM-S2859 ATSSIVGY    | 191  | >ATM-S2859 ATFSIVGY    | 602 | 411  |
| >ATM-S2859 ATSSIVGYI   | 59   | >ATM-S2859 ATFSIVGYI   | 14  | 45   |
| >ATM-S2859 ATSSIVGYIL  | 138  | >ATM-S2859 ATFSIVGYIL  | 646 | 508  |
| >ATM-S2859 ATSSIVGY    | 643  | >ATM-S2859 ATFSIVGY    | 227 | 416  |
| >ATM-S2859 ATSSIVGYI   | 1500 | >ATM-S2859 ATFSIVGYI   | 460 | 1040 |
| >ATM-S2859 ATSSIVGYI   | 30   | >ATM-S2859 ATFSIVGYI   | 10  | 20   |
| >ATM-S2859 VATSSIVGY   | 206  | >ATM-S2859 VATFSIVGY   | 353 | 147  |
| >ATM-S2859 VATSSIVGYI  | 158  | >ATM-S2859 VATFSIVGYI  | 98  | 60   |
| >ATM-S2859 VATSSIVGY   | 167  | >ATM-S2859 VATFSIVGY   | 977 | 810  |
| >ATM-S2859 VATSSIVGY   | 10   | >ATM-S2859 VATFSIVGY   | 12  | 2    |
| >ATM-S2859 VATSSIVGY   | 178  | >ATM-S2859 VATFSIVGY   | 267 | 89   |
| >ATM-S2859 VATSSIVGYI  | 200  | >ATM-S2859 VATFSIVGYI  | 605 | 405  |
| >ATM-S2859 VATSSIVGYIL | 36   | >ATM-S2859 VATFSIVGYIL | 102 | 66   |
| >ATM-S2859 SVATSSIVGY  | 215  | >ATM-S2859 SVATFSIVGY  | 553 | 338  |
| >ATM-S2859 SVATSSIV    | 1026 | >ATM-S2859 SVATFSIV    | 345 | 681  |
| >ATM-S2859 SVATSSIVGYI | 865  | >ATM-S2859 SVATFSIVGYI | 338 | 527  |
| >ATM-S2859 SVATSSIV    | 170  | >ATM-S2859 SVATFSIV    | 58  | 112  |
| >ATM-S2859 SVATSSIVGYI | 104  | >ATM-S2859 SVATFSIVGYI | 36  | 68   |

|                        |      |                        |      |      |
|------------------------|------|------------------------|------|------|
| >ATM-S2859 SVATSSIV    | 27   | >ATM-S2859 SVATFSIV    | 21   | 6    |
| >ATM-S2859 SVATSSIVGYI | 60   | >ATM-S2859 SVATFSIVGYI | 56   | 4    |
| >ATM-S2859 SVATSSIV    | 124  | >ATM-S2859 SVATFSIV    | 31   | 93   |
| >ATM-S2859 SVATSSIVGYI | 247  | >ATM-S2859 SVATFSIVGYI | 179  | 68   |
| >ATM-S2859 SVATSSIV    | 738  | >ATM-S2859 SVATFSIV    | 308  | 430  |
| >ATM-S2859 SVATSSIVGYI | 463  | >ATM-S2859 SVATFSIVGYI | 191  | 272  |
| >ATM-S2859 SVATSSIV    | 106  | >ATM-S2859 SVATFSIV    | 99   | 7    |
| >ATM-S2859 SVATSSIV    | 34   | >ATM-S2859 SVATFSIV    | 24   | 10   |
| >ATM-S2859 SVATSSIVGY  | 726  | >ATM-S2859 SVATFSIVGY  | 267  | 459  |
| >ATM-S2859 SVATSSIVGY  | 269  | >ATM-S2859 SVATFSIVGY  | 150  | 119  |
| >ATM-S2859 SVATSSIVGY  | 22   | >ATM-S2859 SVATFSIVGY  | 29   | 7    |
| >ATM-S2859 SVATSSIVGY  | 214  | >ATM-S2859 SVATFSIVGY  | 150  | 64   |
| >ATM-S2859 SVATSSIVGY  | 385  | >ATM-S2859 SVATFSIVGY  | 273  | 112  |
| >ATM-S2859 SVATSSIVGY  | 268  | >ATM-S2859 SVATFSIVGY  | 109  | 159  |
| >ATM-S2859 SVATSSIV    | 26   | >ATM-S2859 SVATFSIV    | 19   | 7    |
| >ATM-S2859 SVATSSIVGYI | 11   | >ATM-S2859 SVATFSIVGYI | 9    | 2    |
| >ATM-S2859 SVATSSIV    | 163  | >ATM-S2859 SVATFSIV    | 55   | 108  |
| >ATM-S2859 SVATSSIVGYI | 130  | >ATM-S2859 SVATFSIVGYI | 49   | 81   |
| >ATM-S2859 SVATSSIVGY  | 277  | >ATM-S2859 SVATFSIVGY  | 83   | 194  |
| >ATM-S2859 SVATSSIVGY  | 112  | >ATM-S2859 SVATFSIVGY  | 212  | 100  |
| >ATM-S2859 SVATSSIVGY  | 293  | >ATM-S2859 SVATFSIVGY  | 396  | 103  |
| >ATM-S2859 SVATSSIVGY  | 104  | >ATM-S2859 SVATFSIVGY  | 352  | 248  |
| >ATM-S2859 SVATSSIVGY  | 138  | >ATM-S2859 SVATFSIVGY  | 84   | 54   |
| >ATM-S2859 SVATSSIVGYI | 174  | >ATM-S2859 SVATFSIVGYI | 93   | 81   |
| >ATM-S2859 RSVATSSI    | 1333 | >ATM-S2859 RSVATFSI    | 90   | 1243 |
| >ATM-S2859 RSVATSSIV   | 924  | >ATM-S2859 RSVATFSIV   | 97   | 827  |
| >ATM-S2859 RSVATSSIVG\ | 646  | >ATM-S2859 RSVATFSIVG\ | 348  | 298  |
| >ATM-S2859 RSVATSSIVG\ | 176  | >ATM-S2859 RSVATFSIVG\ | 101  | 75   |
| >ATM-S2859 RSVATSSIVG\ | 716  | >ATM-S2859 RSVATFSIVG\ | 371  | 345  |
| >ATM-S2859 RSVATSSI    | 75   | >ATM-S2859 RSVATFSI    | 78   | 3    |
| >ATM-S2859 RSVATSSIV   | 110  | >ATM-S2859 RSVATFSIV   | 234  | 124  |
| >ATM-S2859 RSVATSSIVG\ | 102  | >ATM-S2859 RSVATFSIVG\ | 112  | 10   |
| >ATM-S2859 RSVATSSI    | 58   | >ATM-S2859 RSVATFSI    | 33   | 25   |
| >ATM-S2859 RSVATSSIVG\ | 592  | >ATM-S2859 RSVATFSIVG\ | 473  | 119  |
| >ATM-S2859 RSVATSSIVG\ | 52   | >ATM-S2859 RSVATFSIVG\ | 55   | 3    |
| >ATM-S2859 RSVATSSI    | 61   | >ATM-S2859 RSVATFSI    | 113  | 52   |
| >ATM-S2859 RSVATSSIV   | 49   | >ATM-S2859 RSVATFSIV   | 30   | 19   |
| >ATM-S2859 RSVATSSIVG\ | 13   | >ATM-S2859 RSVATFSIVG\ | 14   | 1    |
| >ATM-S2859 RSVATSSI    | 4    | >ATM-S2859 RSVATFSI    | 6    | 2    |
| >ATM-S2859 RSVATSSIV   | 12   | >ATM-S2859 RSVATFSIV   | 69   | 57   |
| >ATM-S2859 RSVATSSIVG  | 448  | >ATM-S2859 RSVATFSIVG  | 1955 | 1507 |
| >ATM-S2859 RSVATSSIVG\ | 2    | >ATM-S2859 RSVATFSIVG\ | 3    | 1    |
| >ATM-S2859 RSVATSSIVG\ | 240  | >ATM-S2859 RSVATFSIVG\ | 290  | 50   |

|                        |       |                        |      |       |
|------------------------|-------|------------------------|------|-------|
| >ATM-S2859 RSVATSSI    | 24    | >ATM-S2859 RSVATFSI    | 16   | 8     |
| >ATM-S2859 RSVATSSIV   | 392   | >ATM-S2859 RSVATFSIV   | 678  | 286   |
| >ATM-S2859 RSVATSSIVG\ | 22    | >ATM-S2859 RSVATFSIVG\ | 30   | 8     |
| >ATM-S2859 RSVATSSIV   | 778   | >ATM-S2859 RSVATFSIV   | 187  | 591   |
| >ATM-S2859 RSVATSSI    | 28    | >ATM-S2859 RSVATFSI    | 27   | 1     |
| >ATM-S2859 RSVATSSIV   | 14    | >ATM-S2859 RSVATFSIV   | 12   | 2     |
| >ATM-S2859 RSVATSSIVG\ | 52    | >ATM-S2859 RSVATFSIVG\ | 58   | 6     |
| >ATM-S2859 RSVATSSI    | 9     | >ATM-S2859 RSVATFSI    | 11   | 2     |
| >ATM-S2859 RSVATSSIV   | 353   | >ATM-S2859 RSVATFSIV   | 456  | 103   |
| >ATM-S2859 TRSVATSSI   | 422   | >ATM-S2859 TRSVATFSI   | 1267 | 845   |
| >ATM-S2859 TRSVATSSI   | 1241  | >ATM-S2859 TRSVATFSI   | 392  | 849   |
| >ATM-S2859 TRSVATSSI   | 279   | >ATM-S2859 TRSVATFSI   | 145  | 134   |
| >ATM-S2859 TRSVATSSIV  | 196   | >ATM-S2859 TRSVATFSIV  | 233  | 37    |
| >ATM-S2859 YTRSVATSSI  | 221   | >ATM-S2859 YTRSVATFSI  | 120  | 101   |
| >ATM-S2859 YTRSVATSSI  | 66    | >ATM-S2859 YTRSVATFSI  | 207  | 141   |
| >ATM-S2859 YTRSVATSSIV | 23    | >ATM-S2859 YTRSVATFSIV | 20   | 3     |
| >ATM-S2859 YTRSVATSSI  | 1111  | >ATM-S2859 YTRSVATFSI  | 338  | 773   |
| >ATM-S2859 YTRSVATSSIV | 686   | >ATM-S2859 YTRSVATFSIV | 156  | 530   |
| >ATM-S2859 YTRSVATSSI  | 1263  | >ATM-S2859 YTRSVATFSI  | 413  | 850   |
| >ATM-S2859 YTRSVATSSIV | 291   | >ATM-S2859 YTRSVATFSIV | 239  | 52    |
| >ATM-S2859 YTRSVATSSIV | 108   | >ATM-S2859 YTRSVATFSIV | 102  | 6     |
| >ATM-S2859 YTRSVATS    | 9672  | >ATM-S2859 YTRSVATF    | 241  | 9431  |
| >ATM-S2859 YTRSVATS    | 9349  | >ATM-S2859 YTRSVATF    | 52   | 9297  |
| >ATM-S2859 YTRSVATS    | 476   | >ATM-S2859 YTRSVATF    | 1326 | 850   |
| >ATM-S2859 YTRSVATSSI  | 45    | >ATM-S2859 YTRSVATFSI  | 31   | 14    |
| >ATM-S2859 YTRSVATSSIV | 94    | >ATM-S2859 YTRSVATFSIV | 105  | 11    |
| >ATM-S2859 YTRSVATS    | 18456 | >ATM-S2859 YTRSVATF    | 352  | 18104 |
| >ATM-S2859 YTRSVATSSI  | 702   | >ATM-S2859 YTRSVATFSI  | 289  | 413   |
| >ATM-S2859 YTRSVATSSI  | 173   | >ATM-S2859 YTRSVATFSI  | 90   | 83    |
| >ATM-S2859 YTRSVATSSIV | 469   | >ATM-S2859 YTRSVATFSIV | 292  | 177   |
| >ATM-S2859 YTRSVATSSI  | 653   | >ATM-S2859 YTRSVATFSI  | 117  | 536   |
| >ATM-S2859 YTRSVATSSIV | 420   | >ATM-S2859 YTRSVATFSIV | 303  | 117   |
| >ATM-S2859 YTRSVATS    | 6867  | >ATM-S2859 YTRSVATF    | 36   | 6831  |
| >ATM-S2859 YTRSVATSSI  | 487   | >ATM-S2859 YTRSVATFSI  | 1387 | 900   |
| >ATM-S2859 YTRSVATS    | 4717  | >ATM-S2859 YTRSVATF    | 10   | 4707  |
| >ATM-S2859 YTRSVATSSI  | 94    | >ATM-S2859 YTRSVATFSI  | 285  | 191   |
| >ATM-S2859 YTRSVATSSIV | 116   | >ATM-S2859 YTRSVATFSIV | 110  | 6     |
| >ATM-S2859 YTRSVATS    | 363   | >ATM-S2859 YTRSVATF    | 3    | 360   |
| >ATM-S2859 YTRSVATSSI  | 13    | >ATM-S2859 YTRSVATFSI  | 16   | 3     |
| >ATM-S2859 YTRSVATSSIV | 77    | >ATM-S2859 YTRSVATFSIV | 228  | 151   |
| >ATM-S2859 YTRSVATS    | 14585 | >ATM-S2859 YTRSVATF    | 400  | 14185 |
| >ATM-S2859 YTRSVATS    | 17928 | >ATM-S2859 YTRSVATF    | 207  | 17721 |
| >ATM-S2859 YTRSVATS    | 21185 | >ATM-S2859 YTRSVATF    | 496  | 20689 |

|                        |       |                        |       |       |
|------------------------|-------|------------------------|-------|-------|
| >ATM-S2859 YTRSVATSSI  | 255   | >ATM-S2859 YTRSVATFSI  | 96    | 159   |
| >ATM-S2859 YTRSVATSSIV | 278   | >ATM-S2859 YTRSVATFSIV | 136   | 142   |
| >ATM-S2859 YTRSVATS    | 7031  | >ATM-S2859 YTRSVATF    | 38    | 6993  |
| >ATM-S2859 YTRSVATSS   | 14    | >ATM-S2859 YTRSVATFS   | 13    | 1     |
| >ATM-S2859 YTRSVATSSI  | 43    | >ATM-S2859 YTRSVATFSI  | 47    | 4     |
| >ATM-S2859 YTRSVATSSIV | 2     | >ATM-S2859 YTRSVATFSIV | 2     | 0     |
| >ATM-S2859 YTRSVATSSI  | 32    | >ATM-S2859 YTRSVATFSI  | 112   | 80    |
| >ATM-S2859 AYTRSVATSSI | 3     | >ATM-S2859 AYTRSVATFSI | 12    | 9     |
| >ATM-S2859 AYTRSVATS   | 24465 | >ATM-S2859 AYTRSVATF   | 110   | 24355 |
| >ATM-S2859 AYTRSVATS   | 10116 | >ATM-S2859 AYTRSVATF   | 56    | 10060 |
| >ATM-S2859 AYTRSVATSSI | 396   | >ATM-S2859 AYTRSVATFSI | 160   | 236   |
| >ATM-S2859 AYTRSVATS   | 3407  | >ATM-S2859 AYTRSVATF   | 5     | 3402  |
| >ATM-S2859 AYTRSVATSSI | 13    | >ATM-S2859 AYTRSVATFSI | 8     | 5     |
| >ATM-S2859 AYTRSVATSSI | 323   | >ATM-S2859 AYTRSVATFSI | 247   | 76    |
| >ATM-S2859 AYTRSVATS   | 18784 | >ATM-S2859 AYTRSVATF   | 102   | 18682 |
| >ATM-S2859 AYTRSVATS   | 22341 | >ATM-S2859 AYTRSVATF   | 283   | 22058 |
| >ATM-S2859 LAYTRSVATS  | 8170  | >ATM-S2859 LAYTRSVATF  | 42    | 8128  |
| >ATM-S2859 LAYTRSVATS  | 2718  | >ATM-S2859 LAYTRSVATF  | 5     | 2713  |
| >ATM-S2859 LAYTRSVATS  | 1470  | >ATM-S2859 LAYTRSVATF  | 3     | 1467  |
| >ATM-S2859 LAYTRSVATS  | 15207 | >ATM-S2859 LAYTRSVATF  | 305   | 14902 |
| >ATM-S2859 LAYTRSVATS  | 14120 | >ATM-S2859 LAYTRSVATF  | 71    | 14049 |
| >ATM-S2859 LAYTRSVATS  | 22741 | >ATM-S2859 LAYTRSVATF  | 172   | 22569 |
| >ATM-S2859 LAYTRSVATS  | 20267 | >ATM-S2859 LAYTRSVATF  | 314   | 19953 |
| >ATM-S2859 LAYTRSVATS  | 17246 | >ATM-S2859 LAYTRSVATF  | 256   | 16990 |
| >ATM-S707P SEITNSETL   | 222   | >ATM-S707P PEITNSETL   | 13187 | 12965 |
| >ATM-S707P SEITNSETL   | 178   | >ATM-S707P PEITNSETL   | 4089  | 3911  |
| >ATM-S707P SEITNSETLV  | 62    | >ATM-S707P PEITNSETLV  | 1188  | 1126  |
| >ATM-S707P SEITNSETL   | 338   | >ATM-S707P PEITNSETL   | 7624  | 7286  |
| >ATM-S707P SEITNSETL   | 11    | >ATM-S707P PEITNSETL   | 55    | 44    |
| >ATM-S707P SEITNSETLV  | 476   | >ATM-S707P PEITNSETLV  | 1980  | 1504  |
| >ATM-S707P SEITNSETLV  | 331   | >ATM-S707P PEITNSETLV  | 10717 | 10386 |
| >ATM-S707P SEITNSETL   | 404   | >ATM-S707P PEITNSETL   | 3953  | 3549  |
| >ATM-S707P SEITNSETLV  | 261   | >ATM-S707P PEITNSETLV  | 8081  | 7820  |
| >ATM-S707P SEITNSET    | 192   | >ATM-S707P PEITNSET    | 7501  | 7309  |
| >ATM-S707P SEITNSETLV  | 227   | >ATM-S707P PEITNSETLV  | 7046  | 6819  |
| >ATM-S707P SEITNSETL   | 13    | >ATM-S707P PEITNSETL   | 152   | 139   |
| >ATM-S707P SEITNSETLV  | 42    | >ATM-S707P PEITNSETLV  | 739   | 697   |
| >ATM-S707P SEITNSETLVR | 386   | >ATM-S707P PEITNSETLVR | 955   | 569   |
| >ATM-S707P SSEITNSETL  | 23646 | >ATM-S707P SPEITNSETL  | 190   | 23456 |
| >ATM-S707P SSEITNSETL  | 42    | >ATM-S707P SPEITNSETL  | 18682 | 18640 |
| >ATM-S707P SSEITNSETL  | 183   | >ATM-S707P SPEITNSETL  | 16768 | 16585 |
| >ATM-S707P SSEITNSETLV | 143   | >ATM-S707P SPEITNSETLV | 3713  | 3570  |
| >ATM-S707P YSSEITNSETL | 1323  | >ATM-S707P YSPEITNSETL | 304   | 1019  |

|                        |       |                        |      |       |
|------------------------|-------|------------------------|------|-------|
| >ATM-S707P YSSEITNSETL | 21    | >ATM-S707P YSPEITNSETL | 140  | 119   |
| >ATM-S707P YSSEITNSETL | 219   | >ATM-S707P YSPEITNSETL | 246  | 27    |
| >ATM-S707P YSSEITNSETL | 241   | >ATM-S707P YSPEITNSETL | 218  | 23    |
| >ATM-S707P YSSEITNSET  | 428   | >ATM-S707P YSPEITNSET  | 621  | 193   |
| >ATM-S707P YSSEITNSETL | 55    | >ATM-S707P YSPEITNSETL | 55   | 0     |
| >ATM-S707P YSSEITNSETL | 341   | >ATM-S707P YSPEITNSETL | 2258 | 1917  |
| >ATM-S707P YSSEITNSETL | 31    | >ATM-S707P YSPEITNSETL | 627  | 596   |
| >ATM-S707P YSSEITNSETL | 313   | >ATM-S707P YSPEITNSETL | 3116 | 2803  |
| >ATM-S707P YSSEITNSETL | 203   | >ATM-S707P YSPEITNSETL | 3774 | 3571  |
| >ATM-S707P YSSEITNSE   | 8005  | >ATM-S707P YSPEITNSE   | 126  | 7879  |
| >ATM-S707P YSSEITNSET  | 17607 | >ATM-S707P YSPEITNSET  | 339  | 17268 |
| >ATM-S707P YSSEITNSETL | 102   | >ATM-S707P YSPEITNSETL | 3    | 99    |
| >ATM-S707P YSSEITNSETL | 110   | >ATM-S707P YSPEITNSETL | 1967 | 1857  |
| >ATM-S707P YSSEITNSETL | 292   | >ATM-S707P YSPEITNSETL | 457  | 165   |
| >ATM-S707P LLNNYSSEI   | 33    | >ATM-S707P LLNNYSPEI   | 13   | 20    |
| >ATM-S707P LLNNYSSEI   | 7     | >ATM-S707P LLNNYSPEI   | 16   | 9     |
| >ATM-S707P LLNNYSSEIT  | 501   | >ATM-S707P LLNNYSPEIT  | 497  | 4     |
| >ATM-S707P LLNNYSSEI   | 4     | >ATM-S707P LLNNYSPEI   | 10   | 6     |
| >ATM-S707P LLNNYSSEIT  | 548   | >ATM-S707P LLNNYSPEIT  | 283  | 265   |
| >ATM-S707P LLNNYSSEI   | 344   | >ATM-S707P LLNNYSPEI   | 85   | 259   |
| >ATM-S707P LLNNYSSEI   | 4     | >ATM-S707P LLNNYSPEI   | 3    | 1     |
| >ATM-S707P LLNNYSSEIT  | 648   | >ATM-S707P LLNNYSPEIT  | 348  | 300   |
| >ATM-S707P LLNNYSSEI   | 8     | >ATM-S707P LLNNYSPEI   | 9    | 1     |
| >ATM-S707P LLNNYSSEI   | 41    | >ATM-S707P LLNNYSPEI   | 11   | 30    |
| >ATM-S707P LLNNYSSEI   | 40    | >ATM-S707P LLNNYSPEI   | 11   | 29    |
| >ATM-S707P LLNNYSSEI   | 4     | >ATM-S707P LLNNYSPEI   | 3    | 1     |
| >ATM-S707P LLNNYSSEIT  | 153   | >ATM-S707P LLNNYSPEIT  | 162  | 9     |
| >ATM-S707P LLNNYSSEI   | 256   | >ATM-S707P LLNNYSPEI   | 524  | 268   |
| >ATM-S707P LLNNYSSEI   | 150   | >ATM-S707P LLNNYSPEI   | 404  | 254   |
| >ATM-S707P QLLNNYSSEI  | 158   | >ATM-S707P QLLNNYSPEI  | 68   | 90    |
| >ATM-S707P QLLNNYSSEI  | 46    | >ATM-S707P QLLNNYSPEI  | 102  | 56    |
| >ATM-S707P QLLNNYSSEI  | 48    | >ATM-S707P QLLNNYSPEI  | 167  | 119   |
| >ATM-S707P QLLNNYSSEI  | 454   | >ATM-S707P QLLNNYSPEI  | 248  | 206   |
| >ATM-S707P QLLNNYSSEI  | 7     | >ATM-S707P QLLNNYSPEI  | 6    | 1     |
| >ATM-S707P QLLNNYSSEI  | 9     | >ATM-S707P QLLNNYSPEI  | 10   | 1     |
| >ATM-S707P QLLNNYSSEI  | 71    | >ATM-S707P QLLNNYSPEI  | 26   | 45    |
| >ATM-S707P QLLNNYSSEI  | 34    | >ATM-S707P QLLNNYSPEI  | 22   | 12    |
| >ATM-S707P QLLNNYSSEI  | 14    | >ATM-S707P QLLNNYSPEI  | 13   | 1     |
| >ATM-S707P QLLNNYSSEI  | 474   | >ATM-S707P QLLNNYSPEI  | 376  | 98    |
| >ATM-S707P QLLNNYSSEI  | 332   | >ATM-S707P QLLNNYSPEI  | 79   | 253   |
| >ATM-S707P QLLNNYSSEI  | 167   | >ATM-S707P QLLNNYSPEI  | 311  | 144   |
| >ATM-S707P EQLLNNYSSE  | 162   | >ATM-S707P EQLLNNYSPE  | 248  | 86    |
| >ATM-S707P EQLLNNYSSE  | 751   | >ATM-S707P EQLLNNYSPE  | 311  | 440   |

|                       |       |                       |      |       |
|-----------------------|-------|-----------------------|------|-------|
| >ATM-S707P EQLLNYSSE  | 297   | >ATM-S707P EQLLNYSPE  | 546  | 249   |
| >ATM-S707P SEQLLNYS   | 455   | >ATM-S707P SEQLLNYS   | 459  | 4     |
| >ATM-S707P SEQLLNYS   | 160   | >ATM-S707P SEQLLNYS   | 277  | 117   |
| >ATM-S978P SLYRRDQDV  | 482   | >ATM-S978P PLYRRDQDV  | 6107 | 5625  |
| >ATM-S978P SLYRRDQDV  | 52    | >ATM-S978P PLYRRDQDV  | 2818 | 2766  |
| >ATM-S978P SLYRRDQDV  | 12    | >ATM-S978P PLYRRDQDV  | 241  | 229   |
| >ATM-S978P SLYRRDQDV  | 248   | >ATM-S978P PLYRRDQDV  | 5217 | 4969  |
| >ATM-S978P SLYRRDQDV  | 55    | >ATM-S978P PLYRRDQDV  | 3368 | 3313  |
| >ATM-S978P SLYRRDQDV  | 7     | >ATM-S978P PLYRRDQDV  | 51   | 44    |
| >ATM-S978P SLYRRDQDV  | 4     | >ATM-S978P PLYRRDQDV  | 16   | 12    |
| >ATM-S978P SLYRRDQDV  | 117   | >ATM-S978P PLYRRDQDV  | 2517 | 2400  |
| >ATM-S978P SLYRRDQDV  | 65    | >ATM-S978P PLYRRDQDV  | 1046 | 981   |
| >ATM-S978P SLYRRDQDV  | 105   | >ATM-S978P PLYRRDQDV  | 7808 | 7703  |
| >ATM-S978P SLYRRDQDV  | 153   | >ATM-S978P PLYRRDQDV  | 1796 | 1643  |
| >ATM-S978P CSLYRRDQDV | 23683 | >ATM-S978P CPLYRRDQDV | 358  | 23325 |
| >ATM-S978P NVCSLYRR   | 51    | >ATM-S978P NVCPLYRR   | 63   | 12    |
| >ATM-S978P NVCSLYRR   | 46    | >ATM-S978P NVCPLYRR   | 58   | 12    |
| >ATM-S978P NVCSLYRR   | 20    | >ATM-S978P NVCPLYRR   | 42   | 22    |
| >ATM-S978P NVCSLYRR   | 202   | >ATM-S978P NVCPLYRR   | 185  | 17    |
| >ATM-S978P SNVCSLYRR  | 397   | >ATM-S978P SNVCPLYRR  | 655  | 258   |
| >ATM-S978P SNVCSLYR   | 194   | >ATM-S978P SNVCPLYR   | 566  | 372   |
| >ATM-S978P SNVCSLYRR  | 216   | >ATM-S978P SNVCPLYRR  | 893  | 677   |
| >ATM-S978P SNVCSLYR   | 73    | >ATM-S978P SNVCPLYR   | 71   | 2     |
| >ATM-S978P SNVCSLYRR  | 327   | >ATM-S978P SNVCPLYRR  | 289  | 38    |
| >ATM-S978P LSNVCSLY   | 64    | >ATM-S978P LSNVCPLY   | 91   | 27    |
| >ATM-S978P LSNVCSLYR  | 441   | >ATM-S978P LSNVCPLYR  | 728  | 287   |
| >ATM-S978P LSNVCSLYR  | 88    | >ATM-S978P LSNVCPLYR  | 99   | 11    |
| >ATM-S978P LSNVCSLYRR | 235   | >ATM-S978P LSNVCPLYRR | 288  | 53    |
| >ATM-S978P LSNVCSLY   | 86    | >ATM-S978P LSNVCPLY   | 55   | 31    |
| >ATM-S978P LSNVCSLY   | 22    | >ATM-S978P LSNVCPLY   | 23   | 1     |
| >ATM-S978P LSNVCSLYR  | 12    | >ATM-S978P LSNVCPLYR  | 14   | 2     |
| >ATM-S978P LSNVCSLYRR | 12    | >ATM-S978P LSNVCPLYRR | 43   | 31    |
| >ATM-S978P LSNVCSLYRR | 376   | >ATM-S978P LSNVCPLYRR | 1499 | 1123  |
| >ATM-S978P LSNVCSLYR  | 104   | >ATM-S978P LSNVCPLYR  | 181  | 77    |
| >ATM-S978P LSNVCSLYRR | 38    | >ATM-S978P LSNVCPLYRR | 55   | 17    |
| >ATM-S978P LSNVCSLY   | 148   | >ATM-S978P LSNVCPLY   | 412  | 264   |
| >ATM-S978P LSNVCSLY   | 174   | >ATM-S978P LSNVCPLY   | 371  | 197   |
| >ATM-S978P LSNVCSLY   | 11    | >ATM-S978P LSNVCPLY   | 16   | 5     |
| >ATM-S978P LSNVCSLY   | 64    | >ATM-S978P LSNVCPLY   | 41   | 23    |
| >ATM-S978P LSNVCSLY   | 61    | >ATM-S978P LSNVCPLY   | 120  | 59    |
| >ATM-S978P LSNVCSLY   | 295   | >ATM-S978P LSNVCPLY   | 365  | 70    |
| >ATM-S978P LSNVCSLYR  | 877   | >ATM-S978P LSNVCPLYR  | 414  | 463   |
| >ATM-S978P LSNVCSLYR  | 104   | >ATM-S978P LSNVCPLYR  | 89   | 15    |



|                        |      |                       |      |      |
|------------------------|------|-----------------------|------|------|
| >ATM-S978P PLSNVCSL    | 146  | >ATM-S978P PLSNVCP    | 137  | 9    |
| >ATM-S978P PLSNVCSL    | 127  | >ATM-S978P PLSNVCP    | 103  | 24   |
| >ATM-S978P PLSNVCSL    | 182  | >ATM-S978P PLSNVCP    | 91   | 91   |
| >ATM-S978P PLSNVCSL    | 163  | >ATM-S978P PLSNVCP    | 184  | 21   |
| >ATM-S978P PLSNVCSL    | 19   | >ATM-S978P PLSNVCP    | 27   | 8    |
| >ATM-S978P PLSNVCSLYR  | 440  | >ATM-S978P PLSNVCP    | 853  | 413  |
| >ATM-S978P PLSNVCSLY   | 55   | >ATM-S978P PLSNVCP    | 36   | 19   |
| >ATM-S978P PLSNVCSLY   | 76   | >ATM-S978P PLSNVCP    | 56   | 20   |
| >ATM-S978P PLSNVCSLYR  | 185  | >ATM-S978P PLSNVCP    | 233  | 48   |
| >ATM-S978P PLSNVCSLY   | 171  | >ATM-S978P PLSNVCP    | 5298 | 5127 |
| >ATM-S978P PLSNVCSLY   | 275  | >ATM-S978P PLSNVCP    | 436  | 161  |
| >ATM-S978P PLSNVCSLYR  | 94   | >ATM-S978P PLSNVCP    | 73   | 21   |
| >ATM-S978P PLSNVCSLYR  | 324  | >ATM-S978P PLSNVCP    | 264  | 60   |
| >ATM-S978P KPLSNVCSL   | 5286 | >ATM-S978P KPLSNVCP   | 440  | 4846 |
| >ATM-S978P KPLSNVCSL   | 110  | >ATM-S978P KPLSNVCP   | 1071 | 961  |
| >ATM-S978P KPLSNVCSLYI | 211  | >ATM-S978P KPLSNVCP   | 197  | 14   |
| >ATM-S978P KPLSNVCSL   | 32   | >ATM-S978P KPLSNVCP   | 20   | 12   |
| >ATM-S978P KPLSNVCSL   | 446  | >ATM-S978P KPLSNVCP   | 377  | 69   |
| >ATM-S978P KPLSNVCSLY  | 326  | >ATM-S978P KPLSNVCP   | 576  | 250  |
| >ATM-S978P KPLSNVCSLY  | 327  | >ATM-S978P KPLSNVCP   | 731  | 404  |
| >ATM-S978P KPLSNVCSL   | 481  | >ATM-S978P KPLSNVCP   | 222  | 259  |
| >ATM-S978P KPLSNVCSLY  | 389  | >ATM-S978P KPLSNVCP   | 752  | 363  |
| >ATM-S978P KPLSNVCSL   | 358  | >ATM-S978P KPLSNVCP   | 418  | 60   |
| >ATM-S978P KPLSNVCSLY  | 240  | >ATM-S978P KPLSNVCP   | 335  | 95   |
| >ATM-S978P KPLSNVCSLYI | 17   | >ATM-S978P KPLSNVCP   | 13   | 4    |
| >ATM-S978P LKPLSNVCSL  | 103  | >ATM-S978P LKPLSNVCP  | 91   | 12   |
| >ATM-S978P LKPLSNVCSLY | 60   | >ATM-S978P LKPLSNVCP  | 112  | 52   |
| >ATM-S978P LLKPLSNVCSL | 37   | >ATM-S978P LLKPLSNVCP | 30   | 7    |
| >ATM-S978P LLKPLSNVCSL | 15   | >ATM-S978P LLKPLSNVCP | 12   | 3    |
| >ATM-S978P LLKPLSNVCSL | 99   | >ATM-S978P LLKPLSNVCP | 92   | 7    |
| >ATM-S978P LLKPLSNVCSL | 84   | >ATM-S978P LLKPLSNVCP | 53   | 31   |
| >ATM-S978P LLKPLSNVCSL | 4    | >ATM-S978P LLKPLSNVCP | 5    | 1    |
| >ATM-S978P LLKPLSNVCSL | 751  | >ATM-S978P LLKPLSNVCP | 398  | 353  |
| >ATM-S978P LLKPLSNVCSL | 76   | >ATM-S978P LLKPLSNVCP | 96   | 20   |
| >ATM-S978P LLKPLSNVCSL | 59   | >ATM-S978P LLKPLSNVCP | 47   | 12   |
| >ATM-S978P LLKPLSNVCSL | 382  | >ATM-S978P LLKPLSNVCP | 360  | 22   |
| >ATM-T1743 TKTGHSFWEI  | 1563 | >ATM-T1743 IKTGHSFWEI | 279  | 1284 |
| >ATM-T1743 TKTGHSFWEI  | 382  | >ATM-T1743 IKTGHSFWEI | 52   | 330  |
| >ATM-T1743 TKTGHSFW    | 457  | >ATM-T1743 IKTGHSFW   | 49   | 408  |
| >ATM-T1743 ATKTGHSFW   | 867  | >ATM-T1743 AIKTGHSFWE | 101  | 766  |
| >ATM-T1743 ATKTGHSFW   | 627  | >ATM-T1743 AIKTGHSFWE | 289  | 338  |
| >ATM-T1743 ATKTGHSFW   | 4949 | >ATM-T1743 AIKTGHSFWE | 178  | 4771 |
| >ATM-T1743 ATKTGHSF    | 177  | >ATM-T1743 AIKTGHSF   | 1541 | 1364 |

|                        |       |                        |       |       |
|------------------------|-------|------------------------|-------|-------|
| >ATM-T1743 ATKTGHSF    | 328   | >ATM-T1743 AIKTGHSF    | 1637  | 1309  |
| >ATM-T1743 ATKTGHSFW   | 154   | >ATM-T1743 AIKTGHSFW   | 848   | 694   |
| >ATM-T1743 ATKTGHSFW   | 15    | >ATM-T1743 AIKTGHSFWE  | 62    | 47    |
| >ATM-T1743 ATKTGHSF    | 84    | >ATM-T1743 AIKTGHSF    | 69    | 15    |
| >ATM-T1743 ATKTGHSF    | 35    | >ATM-T1743 AIKTGHSF    | 53    | 18    |
| >ATM-T1743 ATKTGHSF    | 4     | >ATM-T1743 AIKTGHSF    | 432   | 428   |
| >ATM-T1743 ATKTGHSFW   | 10    | >ATM-T1743 AIKTGHSFW   | 371   | 361   |
| >ATM-T1743 ATKTGHSFW   | 99    | >ATM-T1743 AIKTGHSFWE  | 10994 | 10895 |
| >ATM-T1743 ATKTGHSFW   | 87    | >ATM-T1743 AIKTGHSFW   | 1965  | 1878  |
| >ATM-T1743 ATKTGHSFW   | 380   | >ATM-T1743 AIKTGHSFW   | 5144  | 4764  |
| >ATM-T1743 ATKTGHSF    | 149   | >ATM-T1743 AIKTGHSF    | 14777 | 14628 |
| >ATM-T1743 ATKTGHSF    | 292   | >ATM-T1743 AIKTGHSF    | 5913  | 5621  |
| >ATM-T1743 ATKTGHSFW   | 9     | >ATM-T1743 AIKTGHSFW   | 442   | 433   |
| >ATM-T1743 ATKTGHSFW   | 287   | >ATM-T1743 AIKTGHSFWE  | 9086  | 8799  |
| >ATM-T1743 AVTCLKNILAI | 15878 | >ATM-T1743 AVTCLKNILAI | 486   | 15392 |
| >ATM-T1743 LATKTGHSF   | 324   | >ATM-T1743 LAIKTGHSF   | 37    | 287   |
| >ATM-T1743 LATKTGHSF   | 21    | >ATM-T1743 LAIKTGHSF   | 8     | 13    |
| >ATM-T1743 LATKTGHSF   | 15    | >ATM-T1743 LAIKTGHSF   | 7     | 8     |
| >ATM-T1743 LATKTGHSFW  | 28    | >ATM-T1743 LAIKTGHSFW  | 11    | 17    |
| >ATM-T1743 LATKTGHSF   | 167   | >ATM-T1743 LAIKTGHSF   | 111   | 56    |
| >ATM-T1743 LATKTGHSF   | 811   | >ATM-T1743 LAIKTGHSF   | 465   | 346   |
| >ATM-T1743 LATKTGHSF   | 305   | >ATM-T1743 LAIKTGHSF   | 143   | 162   |
| >ATM-T1743 LATKTGHSFW  | 52    | >ATM-T1743 LAIKTGHSFW  | 42    | 10    |
| >ATM-T1743 LATKTGHSF   | 47    | >ATM-T1743 LAIKTGHSF   | 27    | 20    |
| >ATM-T1743 LATKTGHSFW  | 15    | >ATM-T1743 LAIKTGHSFW  | 13    | 2     |
| >ATM-T1743 LATKTGHSF   | 205   | >ATM-T1743 LAIKTGHSF   | 1476  | 1271  |
| >ATM-T1743 LATKTGHSF   | 133   | >ATM-T1743 LAIKTGHSF   | 223   | 90    |
| >ATM-T1743 LATKTGHSF   | 681   | >ATM-T1743 LAIKTGHSF   | 240   | 441   |
| >ATM-T1743 LATKTGHSFW  | 183   | >ATM-T1743 LAIKTGHSFW  | 100   | 83    |
| >ATM-T1743 LATKTGHSFW  | 138   | >ATM-T1743 LAIKTGHSFW  | 150   | 12    |
| >ATM-T1743 ILATKTGHSF  | 73    | >ATM-T1743 ILAIKTGHSF  | 78    | 5     |
| >ATM-T1743 ILATKTGHSF  | 209   | >ATM-T1743 ILAIKTGHSF  | 236   | 27    |
| >ATM-T1743 ILATKTGHSF  | 40    | >ATM-T1743 ILAIKTGHSF  | 96    | 56    |
| >ATM-T1743 ILATKTGHSF  | 750   | >ATM-T1743 ILAIKTGHSF  | 227   | 523   |
| >ATM-T1743 ILATKTGHSFW | 490   | >ATM-T1743 ILAIKTGHSFW | 172   | 318   |
| >ATM-T1743 ILATKTGHSFW | 158   | >ATM-T1743 ILAIKTGHSFW | 202   | 44    |
| >ATM-T1743 ILATKTGHSFW | 453   | >ATM-T1743 ILAIKTGHSFW | 812   | 359   |
| >ATM-T1743 NILATKTGHSI | 145   | >ATM-T1743 NILAIKTGHSF | 301   | 156   |
| >ATM-T1743 NILATKTGHSI | 250   | >ATM-T1743 NILAIKTGHSF | 555   | 305   |
| >ATM-T1743 CLKNILAT    | 346   | >ATM-T1743 CLKNILAI    | 33    | 313   |
| >ATM-T1743 CLKNILAT    | 10113 | >ATM-T1743 CLKNILAI    | 356   | 9757  |
| >ATM-T1743 CLKNILAT    | 3280  | >ATM-T1743 CLKNILAI    | 319   | 2961  |
| >ATM-T1743 CLKNILATK   | 151   | >ATM-T1743 CLKNILAIK   | 222   | 71    |

|                        |       |                        |       |       |
|------------------------|-------|------------------------|-------|-------|
| >ATM-T1743 CLKNILATK   | 52    | >ATM-T1743 CLKNILAIK   | 80    | 28    |
| >ATM-T1743 CLKNILATK   | 130   | >ATM-T1743 CLKNILAIK   | 280   | 150   |
| >ATM-T1743 CLKNILATK   | 478   | >ATM-T1743 CLKNILAIK   | 911   | 433   |
| >ATM-T1743 VTCLKNILATK | 30    | >ATM-T1743 VTCLKNILAIK | 30    | 0     |
| >ATM-T1743 VTCLKNILATK | 298   | >ATM-T1743 VTCLKNILAIK | 424   | 126   |
| >ATM-T1743 VTCLKNILATK | 242   | >ATM-T1743 VTCLKNILAIK | 379   | 137   |
| >ATM-T1743 VTCLKNILAT  | 4521  | >ATM-T1743 VTCLKNILAI  | 110   | 4411  |
| >ATM-T1743 VTCLKNILAT  | 27772 | >ATM-T1743 VTCLKNILAI  | 169   | 27603 |
| >ATM-T1953 TALLYAEI    | 60    | >ATM-T1953 RALLYAEI    | 111   | 51    |
| >ATM-T1953 TALLYAEIYA  | 280   | >ATM-T1953 RALLYAEIYA  | 207   | 73    |
| >ATM-T1953 TALLYAEI    | 916   | >ATM-T1953 RALLYAEI    | 373   | 543   |
| >ATM-T1953 TALLYAEIYA  | 372   | >ATM-T1953 RALLYAEIYA  | 316   | 56    |
| >ATM-T1953 TALLYAEI    | 8610  | >ATM-T1953 RALLYAEI    | 457   | 8153  |
| >ATM-T1953 TALLYAEIYA  | 5568  | >ATM-T1953 RALLYAEIYA  | 203   | 5365  |
| >ATM-T1953 TALLYAEI    | 111   | >ATM-T1953 RALLYAEI    | 2546  | 2435  |
| >ATM-T1953 TALLYAEIY   | 1606  | >ATM-T1953 RALLYAEIY   | 105   | 1501  |
| >ATM-T1953 TALLYAEI    | 1333  | >ATM-T1953 RALLYAEI    | 26    | 1307  |
| >ATM-T1953 TALLYAEIY   | 148   | >ATM-T1953 RALLYAEIY   | 10    | 138   |
| >ATM-T1953 TALLYAEIY   | 197   | >ATM-T1953 RALLYAEIY   | 700   | 503   |
| >ATM-T1953 TALLYAEI    | 7000  | >ATM-T1953 RALLYAEI    | 240   | 6760  |
| >ATM-T1953 TALLYAEIY   | 4021  | >ATM-T1953 RALLYAEIY   | 70    | 3951  |
| >ATM-T1953 TALLYAEIY   | 296   | >ATM-T1953 RALLYAEIY   | 69    | 227   |
| >ATM-T1953 TALLYAEI    | 683   | >ATM-T1953 RALLYAEI    | 98    | 585   |
| >ATM-T1953 FTALLYAEI   | 209   | >ATM-T1953 FRALLYAEI   | 93    | 116   |
| >ATM-T1953 FTALLYAEIY  | 31    | >ATM-T1953 FRALLYAEIY  | 5431  | 5400  |
| >ATM-T1953 FTALLYAEI   | 171   | >ATM-T1953 FRALLYAEI   | 15024 | 14853 |
| >ATM-T1953 FTALLYAEIYA | 288   | >ATM-T1953 FRALLYAEIYA | 16232 | 15944 |
| >ATM-T1953 FTALLYAEI   | 10    | >ATM-T1953 FRALLYAEI   | 470   | 460   |
| >ATM-T1953 FTALLYAEIYA | 35    | >ATM-T1953 FRALLYAEIYA | 2216  | 2181  |
| >ATM-T1953 FTALLYAEI   | 31    | >ATM-T1953 FRALLYAEI   | 5666  | 5635  |
| >ATM-T1953 FTALLYAEIYA | 261   | >ATM-T1953 FRALLYAEIYA | 9756  | 9495  |
| >ATM-T1953 FTALLYAEI   | 90    | >ATM-T1953 FRALLYAEI   | 3297  | 3207  |
| >ATM-T1953 FTALLYAEIYA | 113   | >ATM-T1953 FRALLYAEIYA | 6002  | 5889  |
| >ATM-T1953 FTALLYAEIY  | 453   | >ATM-T1953 FRALLYAEIY  | 20303 | 19850 |
| >ATM-T1953 FTALLYAEIY  | 87    | >ATM-T1953 FRALLYAEIY  | 19803 | 19716 |
| >ATM-T1953 FTALLYAEIY  | 129   | >ATM-T1953 FRALLYAEIY  | 1034  | 905   |
| >ATM-T1953 FTALLYAEIY  | 382   | >ATM-T1953 FRALLYAEIY  | 6244  | 5862  |
| >ATM-T1953 FTALLYAEIY  | 75    | >ATM-T1953 FRALLYAEIY  | 7911  | 7836  |
| >ATM-T1953 FTALLYAEI   | 5     | >ATM-T1953 FRALLYAEI   | 1651  | 1646  |
| >ATM-T1953 FTALLYAEIYA | 10    | >ATM-T1953 FRALLYAEIYA | 4618  | 4608  |
| >ATM-T1953 FTALLYAEI   | 32    | >ATM-T1953 FRALLYAEI   | 13461 | 13429 |
| >ATM-T1953 FTALLYAEIYA | 265   | >ATM-T1953 FRALLYAEIYA | 17131 | 16866 |
| >ATM-T1953 FTALLYAEIY  | 442   | >ATM-T1953 FRALLYAEIY  | 5574  | 5132  |

|                        |       |                        |       |       |
|------------------------|-------|------------------------|-------|-------|
| >ATM-T1953 FTALLYAEIY  | 584   | >ATM-T1953 FRALLYAEIY  | 121   | 463   |
| >ATM-T1953 FTALLYAEI   | 147   | >ATM-T1953 FRALLYAEI   | 26737 | 26590 |
| >ATM-T1953 FTALLYAEIY  | 15    | >ATM-T1953 FRALLYAEIY  | 25802 | 25787 |
| >ATM-T1953 FTALLYAEI   | 18924 | >ATM-T1953 FRALLYAEI   | 87    | 18837 |
| >ATM-T1953 FTALLYAEIY  | 21218 | >ATM-T1953 FRALLYAEIY  | 75    | 21143 |
| >ATM-T1953 FTALLYAEI   | 12887 | >ATM-T1953 FRALLYAEI   | 392   | 12495 |
| >ATM-T1953 FTALLYAEI   | 440   | >ATM-T1953 FRALLYAEI   | 21306 | 20866 |
| >ATM-T1953 FTALLYAEIY  | 151   | >ATM-T1953 FRALLYAEIY  | 20539 | 20388 |
| >ATM-T1953 FTALLYAEI   | 94    | >ATM-T1953 FRALLYAEI   | 30705 | 30611 |
| >ATM-T1953 FTALLYAEI   | 352   | >ATM-T1953 FRALLYAEI   | 15141 | 14789 |
| >ATM-T1953 FTALLYAEIY  | 23    | >ATM-T1953 FRALLYAEIY  | 2339  | 2316  |
| >ATM-T1953 FTALLYAEI   | 22093 | >ATM-T1953 FRALLYAEI   | 443   | 21650 |
| >ATM-T1953 FTALLYAEI   | 29818 | >ATM-T1953 FRALLYAEI   | 190   | 29628 |
| >ATM-T1953 FTALLYAEI   | 32    | >ATM-T1953 FRALLYAEI   | 4980  | 4948  |
| >ATM-T1953 KVAQSCAAHI  | 422   | >ATM-T1953 KVAQSCAAHI  | 16538 | 16116 |
| >ATM-T1953 KVAQSCAAHI  | 14715 | >ATM-T1953 KVAQSCAAHI  | 246   | 14469 |
| >ATM-T1953 KVAQSCAAHI  | 16624 | >ATM-T1953 KVAQSCAAHI  | 112   | 16512 |
| >ATM-T1953 KVAQSCAAHI  | 13414 | >ATM-T1953 KVAQSCAAHI  | 23    | 13391 |
| >ATM-T1953 KVAQSCAAHI  | 10240 | >ATM-T1953 KVAQSCAAHI  | 14    | 10226 |
| >ATM-T1953 KVAQSCAAHI  | 17482 | >ATM-T1953 KVAQSCAAHI  | 31    | 17451 |
| >ATM-T1953 HFTALLYAEI  | 37    | >ATM-T1953 HFRALLYAEI  | 130   | 93    |
| >ATM-T1953 HFTALLYAEIY | 35    | >ATM-T1953 HFRALLYAEIY | 58    | 23    |
| >ATM-T1953 HFTALLYA    | 973   | >ATM-T1953 HFRALLYA    | 6     | 967   |
| >ATM-T1953 HFTALLYAEI  | 3147  | >ATM-T1953 HFRALLYAEI  | 9     | 3138  |
| >ATM-T1953 HFTALLYAEIY | 12738 | >ATM-T1953 HFRALLYAEIY | 348   | 12390 |
| >ATM-T1953 HFTALLYAEIY | 64    | >ATM-T1953 HFRALLYAEIY | 183   | 119   |
| >ATM-T1953 HFTALLYAEIY | 601   | >ATM-T1953 HFRALLYAEIY | 268   | 333   |
| >ATM-T1953 HFTALLYAEIY | 459   | >ATM-T1953 HFRALLYAEIY | 1601  | 1142  |
| >ATM-T1953 HFTALLYAEIY | 62    | >ATM-T1953 HFRALLYAEIY | 114   | 52    |
| >ATM-T1953 HFTALLYA    | 445   | >ATM-T1953 HFRALLYA    | 797   | 352   |
| >ATM-T1953 AHFTALLYAEI | 420   | >ATM-T1953 AHFRALLYAE  | 406   | 14    |
| >ATM-T1953 AHFTALLY    | 22    | >ATM-T1953 AHFRALLY    | 39    | 17    |
| >ATM-T1953 AHFTALLY    | 394   | >ATM-T1953 AHFRALLY    | 810   | 416   |
| >ATM-T1953 AHFTALLY    | 71    | >ATM-T1953 AHFRALLY    | 49    | 22    |
| >ATM-T1953 AHFTALLY    | 31    | >ATM-T1953 AHFRALLY    | 37    | 6     |
| >ATM-T1953 AHFTALLYAEI | 157   | >ATM-T1953 AHFRALLYAE  | 185   | 28    |
| >ATM-T1953 AHFTALLYAEI | 254   | >ATM-T1953 AHFRALLYAE  | 879   | 625   |
| >ATM-T1953 AHFTALLY    | 311   | >ATM-T1953 AHFRALLY    | 540   | 229   |
| >ATM-T1953 AAHFTALLY   | 1390  | >ATM-T1953 AAHFRALLY   | 437   | 953   |
| >ATM-T1953 AAHFTALLY   | 178   | >ATM-T1953 AAHFRALLY   | 228   | 50    |
| >ATM-T1953 AAHFTALLY   | 14    | >ATM-T1953 AAHFRALLY   | 21    | 7     |
| >ATM-T1953 AAHFTALL    | 92    | >ATM-T1953 AAHFRALL    | 107   | 15    |
| >ATM-T1953 AAHFTALLY   | 95    | >ATM-T1953 AAHFRALLY   | 165   | 70    |

|                       |       |                       |      |       |
|-----------------------|-------|-----------------------|------|-------|
| >ATM-T1953 AAHFTALLYA | 12    | >ATM-T1953 AAHFRALLYA | 15   | 3     |
| >ATM-T1953 AAHFTALLY  | 295   | >ATM-T1953 AAHFRALLY  | 782  | 487   |
| >ATM-T1953 AAHFTALLY  | 12    | >ATM-T1953 AAHFRALLY  | 10   | 2     |
| >ATM-T1953 AAHFTALLY  | 351   | >ATM-T1953 AAHFRALLY  | 1438 | 1087  |
| >ATM-T1953 AAHFTALL   | 86    | >ATM-T1953 AAHFRALL   | 184  | 98    |
| >ATM-T1953 AAHFTALLY  | 7     | >ATM-T1953 AAHFRALLY  | 9    | 2     |
| >ATM-T1953 AAHFTALLY  | 126   | >ATM-T1953 AAHFRALLY  | 365  | 239   |
| >ATM-T1953 AAHFTALLY  | 339   | >ATM-T1953 AAHFRALLY  | 417  | 78    |
| >ATM-T1953 CAAHFTALL  | 97    | >ATM-T1953 CAAHFRALL  | 71   | 26    |
| >ATM-T1953 CAAHFTAL   | 247   | >ATM-T1953 CAAHFRAL   | 2208 | 1961  |
| >ATM-T1953 CAAHFTALL  | 59    | >ATM-T1953 CAAHFRALL  | 484  | 425   |
| >ATM-T1953 CAAHFTALLY | 84    | >ATM-T1953 CAAHFRALLY | 170  | 86    |
| >ATM-T1953 CAAHFTALLY | 307   | >ATM-T1953 CAAHFRALLY | 612  | 305   |
| >ATM-T1953 CAAHFTAL   | 96    | >ATM-T1953 CAAHFRAL   | 361  | 265   |
| >ATM-T1953 CAAHFTALL  | 20    | >ATM-T1953 CAAHFRALL  | 26   | 6     |
| >ATM-T1953 CAAHFTALLY | 82    | >ATM-T1953 CAAHFRALLY | 111  | 29    |
| >ATM-T1953 CAAHFTALLY | 14    | >ATM-T1953 CAAHFRALLY | 49   | 35    |
| >ATM-T1953 CAAHFTAL   | 416   | >ATM-T1953 CAAHFRAL   | 960  | 544   |
| >ATM-T1953 CAAHFTALLY | 419   | >ATM-T1953 CAAHFRALLY | 609  | 190   |
| >ATM-T1953 CAAHFTALLY | 80    | >ATM-T1953 CAAHFRALLY | 186  | 106   |
| >ATM-T1953 CAAHFTAL   | 184   | >ATM-T1953 CAAHFRAL   | 842  | 658   |
| >ATM-T1953 CAAHFTALL  | 439   | >ATM-T1953 CAAHFRALL  | 2588 | 2149  |
| >ATM-T1953 CAAHFTALLY | 56    | >ATM-T1953 CAAHFRALLY | 262  | 206   |
| >ATM-T1953 CAAHFTALL  | 39    | >ATM-T1953 CAAHFRALL  | 129  | 90    |
| >ATM-T1953 CAAHFTAL   | 100   | >ATM-T1953 CAAHFRAL   | 167  | 67    |
| >ATM-T1953 CAAHFTALL  | 39    | >ATM-T1953 CAAHFRALL  | 88   | 49    |
| >ATM-T1953 SCAAHFTAL  | 78    | >ATM-T1953 SCAAHFRAL  | 1095 | 1017  |
| >ATM-T1953 SCAAHFTALL | 23    | >ATM-T1953 SCAAHFRALL | 34   | 11    |
| >ATM-T1953 SCAAHFTALL | 15    | >ATM-T1953 SCAAHFRALL | 20   | 5     |
| >ATM-T1953 SCAAHFTAL  | 53    | >ATM-T1953 SCAAHFRAL  | 58   | 5     |
| >ATM-T1953 SCAAHFTALL | 458   | >ATM-T1953 SCAAHFRALL | 912  | 454   |
| >ATM-T1953 SCAAHFTALL | 111   | >ATM-T1953 SCAAHFRALL | 260  | 149   |
| >ATM-T1953 SCAAHFTALL | 466   | >ATM-T1953 SCAAHFRALL | 701  | 235   |
| >ATM-T1953 QSCAAHFT   | 20050 | >ATM-T1953 QSCAAHFR   | 147  | 19903 |
| >ATM-T1953 QSCAAHFT   | 17131 | >ATM-T1953 QSCAAHFR   | 23   | 17108 |
| >ATM-T1953 QSCAAHFT   | 29337 | >ATM-T1953 QSCAAHFR   | 279  | 29058 |
| >ATM-T1953 QSCAAHFT   | 12535 | >ATM-T1953 QSCAAHFR   | 9    | 12526 |
| >ATM-T1953 QSCAAHFTAL | 367   | >ATM-T1953 QSCAAHFRAI | 469  | 102   |
| >ATM-T1953 QSCAAHFTAL | 451   | >ATM-T1953 QSCAAHFRAI | 1024 | 573   |
| >ATM-T1953 QSCAAHFTAL | 68    | >ATM-T1953 QSCAAHFRAI | 129  | 61    |
| >ATM-T1953 QSCAAHFTAL | 30    | >ATM-T1953 QSCAAHFRAI | 63   | 33    |
| >ATM-T1953 QSCAAHFTAL | 393   | >ATM-T1953 QSCAAHFRAI | 566  | 173   |
| >ATM-T1953 QSCAAHFTAL | 53    | >ATM-T1953 QSCAAHFRAI | 104  | 51    |

|                       |       |                       |      |       |
|-----------------------|-------|-----------------------|------|-------|
| >ATM-T1953 QSCAAHFT   | 29821 | >ATM-T1953 QSCAAHFR   | 108  | 29713 |
| >ATM-T1953 QSCAAHFTAL | 55    | >ATM-T1953 QSCAAHFRAI | 81   | 26    |
| >ATM-T1953 QSCAAHFTAL | 264   | >ATM-T1953 QSCAAHFRAI | 517  | 253   |
| >ATM-T1953 AQSCAAHFT/ | 47    | >ATM-T1953 AQSCAAHFR/ | 235  | 188   |
| >ATM-T1953 AQSCAAHFT/ | 74    | >ATM-T1953 AQSCAAHFR/ | 273  | 199   |
| >ATM-T1953 AQSCAAHFT  | 100   | >ATM-T1953 AQSCAAHFR  | 6935 | 6835  |
| >ATM-T1953 AQSCAAHFT/ | 9     | >ATM-T1953 AQSCAAHFR/ | 34   | 25    |
| >ATM-T1953 AQSCAAHFT  | 19625 | >ATM-T1953 AQSCAAHFR  | 206  | 19419 |
| >ATM-T1953 AQSCAAHFT  | 19784 | >ATM-T1953 AQSCAAHFR  | 49   | 19735 |
| >ATM-T1953 AQSCAAHFT  | 35986 | >ATM-T1953 AQSCAAHFR  | 382  | 35604 |
| >ATM-T1953 AQSCAAHFT/ | 457   | >ATM-T1953 AQSCAAHFR/ | 1282 | 825   |
| >ATM-T1953 AQSCAAHFT/ | 88    | >ATM-T1953 AQSCAAHFR/ | 118  | 30    |
| >ATM-T1953 AQSCAAHFT/ | 355   | >ATM-T1953 AQSCAAHFR/ | 1949 | 1594  |
| >ATM-T1953 AQSCAAHFT/ | 11    | >ATM-T1953 AQSCAAHFR/ | 15   | 4     |
| >ATM-T1953 AQSCAAHFT/ | 46    | >ATM-T1953 AQSCAAHFR/ | 92   | 46    |
| >ATM-T1953 AQSCAAHFT/ | 108   | >ATM-T1953 AQSCAAHFR/ | 257  | 149   |
| >ATM-T1953 AQSCAAHFT  | 31870 | >ATM-T1953 AQSCAAHFR  | 276  | 31594 |
| >ATM-T1953 VAQSCAAHF  | 15100 | >ATM-T1953 VAQSCAAHFI | 31   | 15069 |
| >ATM-T1953 VAQSCAAHF  | 19969 | >ATM-T1953 VAQSCAAHFI | 77   | 19892 |
| >ATM-T1953 VAQSCAAHF  | 33632 | >ATM-T1953 VAQSCAAHFI | 103  | 33529 |
| >ATM-T1953 VAQSCAAHF  | 34383 | >ATM-T1953 VAQSCAAHFI | 386  | 33997 |
| >ATM-T2396 TQYQRIENYM | 330   | >ATM-T2396 SQYQRIENYM | 172  | 158   |
| >ATM-T2396 TQYQRIENYM | 320   | >ATM-T2396 SQYQRIENYM | 292  | 28    |
| >ATM-T2396 TQYQRIENYM | 29    | >ATM-T2396 SQYQRIENYM | 19   | 10    |
| >ATM-T2396 TQYQRIENYM | 369   | >ATM-T2396 SQYQRIENYM | 1122 | 753   |
| >ATM-T2396 TQYQRIENY  | 57    | >ATM-T2396 SQYQRIENY  | 39   | 18    |
| >ATM-T2396 TQYQRIENYM | 272   | >ATM-T2396 SQYQRIENYM | 118  | 154   |
| >ATM-T2396 TQYQRIENY  | 115   | >ATM-T2396 SQYQRIENY  | 82   | 33    |
| >ATM-T2396 TQYQRIENY  | 22    | >ATM-T2396 SQYQRIENY  | 9    | 13    |
| >ATM-T2396 TQYQRIENYM | 105   | >ATM-T2396 SQYQRIENYM | 35   | 70    |
| >ATM-T2396 TQYQRIENYM | 1321  | >ATM-T2396 SQYQRIENYM | 433  | 888   |
| >ATM-T2396 TQYQRIENYM | 620   | >ATM-T2396 SQYQRIENYM | 488  | 132   |
| >ATM-T2396 DTQYQRIENY | 131   | >ATM-T2396 DSQYQRIENY | 260  | 129   |
| >ATM-T2396 DTQYQRIENY | 439   | >ATM-T2396 DSQYQRIENY | 9505 | 9066  |
| >ATM-T2396 DTQYQRIENY | 21    | >ATM-T2396 DSQYQRIENY | 143  | 122   |
| >ATM-T2396 DTQYQRIENY | 68    | >ATM-T2396 DSQYQRIENY | 620  | 552   |
| >ATM-T2396 DTQYQRIENY | 215   | >ATM-T2396 DSQYQRIENY | 215  | 0     |
| >ATM-T2396 DTQYQRIENY | 79    | >ATM-T2396 DSQYQRIENY | 155  | 76    |
| >ATM-T2396 SDTQYQRI   | 65    | >ATM-T2396 SDSQYQRI   | 103  | 38    |
| >ATM-T2396 FSDTQYQR   | 156   | >ATM-T2396 FSQYQRI    | 108  | 48    |
| >ATM-T2396 FSDTQYQRI  | 195   | >ATM-T2396 FSDSQYQRI  | 106  | 89    |
| >ATM-T2396 RFSQYQRI   | 55    | >ATM-T2396 RFSQYQRI   | 64   | 9     |
| >ATM-T2396 RFSQYQRI   | 6     | >ATM-T2396 RFSQYQRI   | 7    | 1     |

|                        |      |                        |      |      |
|------------------------|------|------------------------|------|------|
| >ATM-T2396 RFSDTQYQ    | 373  | >ATM-T2396 RFSDSQYQ    | 867  | 494  |
| >ATM-T2396 RFSDTQYQR   | 14   | >ATM-T2396 RFSDSQYQR   | 16   | 2    |
| >ATM-T2396 ARFSDTQY    | 814  | >ATM-T2396 ARFSDSQY    | 338  | 476  |
| >ATM-T2396 ARFSDTQY    | 11   | >ATM-T2396 ARFSDSQY    | 9    | 2    |
| >ATM-T2396 ARFSDTQYQ   | 539  | >ATM-T2396 ARFSDSQYQ   | 394  | 145  |
| >ATM-T2396 ARFSDTQYQF  | 414  | >ATM-T2396 ARFSDSQYQF  | 295  | 119  |
| >ATM-T2396 ARFSDTQYQF  | 60   | >ATM-T2396 ARFSDSQYQF  | 45   | 15   |
| >ATM-T2396 ARFSDTQY    | 112  | >ATM-T2396 ARFSDSQY    | 135  | 23   |
| >ATM-T2396 ARFSDTQYQF  | 58   | >ATM-T2396 ARFSDSQYQF  | 86   | 28   |
| >ATM-T2396 ARFSDTQYQF  | 90   | >ATM-T2396 ARFSDSQYQF  | 82   | 8    |
| >ATM-T2396 ARFSDTQYQF  | 454  | >ATM-T2396 ARFSDSQYQF  | 771  | 317  |
| >ATM-T2396 LARFSDTQYC  | 570  | >ATM-T2396 LARFSDSQYC  | 350  | 220  |
| >ATM-T2396 LARFSDTQYC  | 608  | >ATM-T2396 LARFSDSQYC  | 474  | 134  |
| >ATM-T2396 LARFSDTQY   | 1934 | >ATM-T2396 LARFSDSQY   | 406  | 1528 |
| >ATM-T2396 LARFSDTQYC  | 29   | >ATM-T2396 LARFSDSQYC  | 35   | 6    |
| >ATM-T2396 LARFSDTQYC  | 147  | >ATM-T2396 LARFSDSQYC  | 149  | 2    |
| >ATM-T2396 LARFSDTQYC  | 78   | >ATM-T2396 LARFSDSQYC  | 66   | 12   |
| >ATM-T2396 LARFSDTQY   | 84   | >ATM-T2396 LARFSDSQY   | 74   | 10   |
| >ATM-T2396 LARFSDTQY   | 1445 | >ATM-T2396 LARFSDSQY   | 463  | 982  |
| >ATM-T2396 LARFSDTQY   | 162  | >ATM-T2396 LARFSDSQY   | 120  | 42   |
| >ATM-T2396 LARFSDTQY   | 4    | >ATM-T2396 LARFSDSQY   | 3    | 1    |
| >ATM-T2396 LARFSDTQY   | 38   | >ATM-T2396 LARFSDSQY   | 40   | 2    |
| >ATM-T2396 LARFSDTQY   | 42   | >ATM-T2396 LARFSDSQY   | 10   | 32   |
| >ATM-T2396 SLARFSDT    | 498  | >ATM-T2396 SLARFSDS    | 1349 | 851  |
| >ATM-T2396 SLARFSDTQ   | 391  | >ATM-T2396 SLARFSDSQ   | 140  | 251  |
| >ATM-T2396 SLARFSDTQY  | 101  | >ATM-T2396 SLARFSDSQY  | 110  | 9    |
| >ATM-T2396 SLARFSDT    | 305  | >ATM-T2396 SLARFSDS    | 2034 | 1729 |
| >ATM-T2396 SLARFSDTQY  | 449  | >ATM-T2396 SLARFSDSQY  | 519  | 70   |
| >ATM-T2396 SLARFSDTQY  | 316  | >ATM-T2396 SLARFSDSQY  | 373  | 57   |
| >ATM-T2396 SLARFSDT    | 162  | >ATM-T2396 SLARFSDS    | 2049 | 1887 |
| >ATM-T2396 SLARFSDTQ   | 278  | >ATM-T2396 SLARFSDSQ   | 320  | 42   |
| >ATM-T2396 SLARFSDTQY  | 43   | >ATM-T2396 SLARFSDSQY  | 55   | 12   |
| >ATM-T2396 SLARFSDTQY  | 148  | >ATM-T2396 SLARFSDSQY  | 209  | 61   |
| >ATM-T2396 SLARFSDTQY  | 84   | >ATM-T2396 SLARFSDSQY  | 46   | 38   |
| >ATM-T2396 SLARFSDTQY  | 122  | >ATM-T2396 SLARFSDSQY  | 95   | 27   |
| >ATM-T2396 SLARFSDTQY  | 93   | >ATM-T2396 SLARFSDSQY  | 77   | 16   |
| >ATM-T2396 SLARFSDTQY  | 54   | >ATM-T2396 SLARFSDSQY  | 33   | 21   |
| >ATM-T2396 SLARFSDTQY  | 475  | >ATM-T2396 SLARFSDSQY  | 358  | 117  |
| >ATM-T2396 SLARFSDTQY  | 154  | >ATM-T2396 SLARFSDSQY  | 139  | 15   |
| >ATM-T2396 SLARFSDTQY  | 283  | >ATM-T2396 SLARFSDSQY  | 308  | 25   |
| >ATM-T2396 LSLARFSDTQ' | 144  | >ATM-T2396 LSLARFSDSQ' | 118  | 26   |
| >ATM-T2396 LSLARFSDTQ' | 638  | >ATM-T2396 LSLARFSDSQ' | 220  | 418  |
| >ATM-T2396 LSLARFSDTQ' | 123  | >ATM-T2396 LSLARFSDSQ' | 107  | 16   |

|                        |       |                        |       |       |
|------------------------|-------|------------------------|-------|-------|
| >ATM-T2396 LSLARFSDTQ' | 74    | >ATM-T2396 LSLARFSDSQ' | 62    | 12    |
| >ATM-T2396 LSLARFSDTQ' | 4     | >ATM-T2396 LSLARFSDSQ' | 4     | 0     |
| >ATM-T2396 LSLARFSDTQ' | 125   | >ATM-T2396 LSLARFSDSQ' | 166   | 41    |
| >ATM-T2396 LSLARFSDTQ' | 16    | >ATM-T2396 LSLARFSDSQ' | 7     | 9     |
| >ATM-T2396 FLSLARFSDT  | 156   | >ATM-T2396 FLSLARFSDS  | 1249  | 1093  |
| >ATM-T2396 FLSLARFSDTQ | 84    | >ATM-T2396 FLSLARFSDSC | 42    | 42    |
| >ATM-T2396 FLSLARFSDT  | 81    | >ATM-T2396 FLSLARFSDS  | 1260  | 1179  |
| >ATM-T2396 FLSLARFSDT  | 44    | >ATM-T2396 FLSLARFSDS  | 633   | 589   |
| >ATM-T2396 FLSLARFSDTQ | 66    | >ATM-T2396 FLSLARFSDSC | 75    | 9     |
| >ATM-T2438 TVKVQREL    | 1091  | >ATM-T2438 KVKVQREL    | 19    | 1072  |
| >ATM-T2438 TVKVQRELEL  | 1104  | >ATM-T2438 KVKVQRELEL  | 23    | 1081  |
| >ATM-T2438 YTVKVQREL   | 276   | >ATM-T2438 YKVKVQREL   | 22604 | 22328 |
| >ATM-T2438 YTVKVQREL   | 113   | >ATM-T2438 YKVKVQREL   | 14374 | 14261 |
| >ATM-T2438 YTVKVQRELE  | 409   | >ATM-T2438 YKVKVQRELE  | 16930 | 16521 |
| >ATM-T2438 YTVKVQREL   | 2171  | >ATM-T2438 YKVKVQREL   | 46    | 2125  |
| >ATM-T2438 YTVKVQRELE  | 1933  | >ATM-T2438 YKVKVQRELE  | 39    | 1894  |
| >ATM-T2438 YTVKVQREL   | 75    | >ATM-T2438 YKVKVQREL   | 25475 | 25400 |
| >ATM-T2438 YTVKVQRELE  | 22    | >ATM-T2438 YKVKVQRELE  | 20578 | 20556 |
| >ATM-T2438 YTVKVQRELE  | 6313  | >ATM-T2438 YKVKVQRELE  | 259   | 6054  |
| >ATM-T2438 YTVKVQREL   | 81    | >ATM-T2438 YKVKVQREL   | 8201  | 8120  |
| >ATM-T2438 YTVKVQRELE  | 118   | >ATM-T2438 YKVKVQRELE  | 10113 | 9995  |
| >ATM-T2438 YTVKVQREL   | 172   | >ATM-T2438 YKVKVQREL   | 876   | 704   |
| >ATM-T2438 REHKIQTNRY  | 10228 | >ATM-T2438 REHKIQTNRY  | 96    | 10132 |
| >ATM-T2438 REHKIQTNRY  | 63    | >ATM-T2438 REHKIQTNRY  | 884   | 821   |
| >ATM-T2438 REHKIQTNRY  | 84    | >ATM-T2438 REHKIQTNRY  | 1498  | 1414  |
| >ATM-T2438 REHKIQTNRY  | 471   | >ATM-T2438 REHKIQTNRY  | 2923  | 2452  |
| >ATM-T2438 RYTVKVQREL  | 300   | >ATM-T2438 RYKVKVQREL  | 687   | 387   |
| >ATM-T2438 RYTVKVQREL  | 10    | >ATM-T2438 RYKVKVQREL  | 13    | 3     |
| >ATM-T2438 RYTVKVQR    | 3891  | >ATM-T2438 RYKVKVQR    | 44    | 3847  |
| >ATM-T2438 RYTVKVQREL  | 2635  | >ATM-T2438 RYKVKVQREL  | 24    | 2611  |
| >ATM-T2438 RYTVKVQR    | 10    | >ATM-T2438 RYKVKVQR    | 5     | 5     |
| >ATM-T2438 RYTVKVQR    | 826   | >ATM-T2438 RYKVKVQR    | 341   | 485   |
| >ATM-T2438 RYTVKVQR    | 28    | >ATM-T2438 RYKVKVQR    | 31    | 3     |
| >ATM-T2438 NRYTVKVQR   | 258   | >ATM-T2438 NRYKVKVQR   | 307   | 49    |
| >ATM-T2438 NRYTVKVQR   | 196   | >ATM-T2438 NRYKVKVQR   | 153   | 43    |
| >ATM-T2438 NRYTVKVQRI  | 209   | >ATM-T2438 NRYKVKVQRI  | 160   | 49    |
| >ATM-T2438 NRYTVKVQRI  | 125   | >ATM-T2438 NRYKVKVQRI  | 228   | 103   |
| >ATM-T2438 NRYTVKVQ    | 523   | >ATM-T2438 NRYKVKVQ    | 366   | 157   |
| >ATM-T2438 NRYTVKVQR   | 523   | >ATM-T2438 NRYKVKVQR   | 342   | 181   |
| >ATM-T2438 NRYTVKVQRI  | 397   | >ATM-T2438 NRYKVKVQRI  | 285   | 112   |
| >ATM-T2438 NRYTVKVQRI  | 419   | >ATM-T2438 NRYKVKVQRI  | 305   | 114   |
| >ATM-T2438 NRYTVKVQRI  | 60    | >ATM-T2438 NRYKVKVQRI  | 63    | 3     |
| >ATM-T2438 NRYTVKVQRI  | 25    | >ATM-T2438 NRYKVKVQRI  | 28    | 3     |



|                       |       |                       |      |       |
|-----------------------|-------|-----------------------|------|-------|
| >ATM-T2438 NRYTVKVKQR | 321   | >ATM-T2438 NRYKVKVQR  | 318  | 3     |
| >ATM-T2438 QTNRYTVK   | 181   | >ATM-T2438 QTNRYKVK   | 812  | 631   |
| >ATM-T2438 QTNRYTVK   | 32    | >ATM-T2438 QTNRYKVK   | 94   | 62    |
| >ATM-T2438 QTNRYTVKVK | 297   | >ATM-T2438 QTNRYKVKVK | 673  | 376   |
| >ATM-T2438 QTNRYTVK   | 72    | >ATM-T2438 QTNRYKVK   | 88   | 16    |
| >ATM-T2438 QTNRYTVK   | 153   | >ATM-T2438 QTNRYKVK   | 337  | 184   |
| >ATM-T2438 QTNRYTVKVK | 12    | >ATM-T2438 QTNRYKVKVK | 11   | 1     |
| >ATM-T2438 QTNRYTVKV  | 239   | >ATM-T2438 QTNRYKVKV  | 2090 | 1851  |
| >ATM-T2438 QTNRYTVKVK | 473   | >ATM-T2438 QTNRYKVKVK | 455  | 18    |
| >ATM-T2438 QTNRYTVK   | 75    | >ATM-T2438 QTNRYKVK   | 334  | 259   |
| >ATM-T2438 QTNRYTVKVK | 12    | >ATM-T2438 QTNRYKVKVK | 19   | 7     |
| >ATM-T2438 QTNRYTVKV  | 15    | >ATM-T2438 QTNRYKVKV  | 56   | 41    |
| >ATM-T2438 QTNRYTVKV  | 23    | >ATM-T2438 QTNRYKVKV  | 134  | 111   |
| >ATM-T2438 QTNRYTVK   | 476   | >ATM-T2438 QTNRYKVK   | 557  | 81    |
| >ATM-T2438 IQTNRYTV   | 318   | >ATM-T2438 IQTNRYKV   | 1209 | 891   |
| >ATM-T2438 IQTNRYTV   | 17    | >ATM-T2438 IQTNRYKV   | 160  | 143   |
| >ATM-T2438 IQTNRYTV   | 340   | >ATM-T2438 IQTNRYKV   | 1105 | 765   |
| >ATM-T2438 IQTNRYTV   | 464   | >ATM-T2438 IQTNRYKV   | 3278 | 2814  |
| >ATM-T2438 IQTNRYTV   | 299   | >ATM-T2438 IQTNRYKV   | 1155 | 856   |
| >ATM-T2438 IQTNRYTVKV | 441   | >ATM-T2438 IQTNRYKVKV | 1476 | 1035  |
| >ATM-T2438 IQTNRYTVK  | 401   | >ATM-T2438 IQTNRYKVK  | 2460 | 2059  |
| >ATM-T2438 IQTNRYTVK  | 429   | >ATM-T2438 IQTNRYKVK  | 2084 | 1655  |
| >ATM-T2438 IQTNRYTVK  | 335   | >ATM-T2438 IQTNRYKVK  | 1424 | 1089  |
| >ATM-T2438 IQTNRYTV   | 106   | >ATM-T2438 IQTNRYKV   | 341  | 235   |
| >ATM-T2438 IQTNRYTVK  | 193   | >ATM-T2438 IQTNRYKVK  | 446  | 253   |
| >ATM-T2438 IQTNRYTVKV | 91    | >ATM-T2438 IQTNRYKVKV | 195  | 104   |
| >ATM-T2438 KIQTNRYSV  | 400   | >ATM-T2438 KIQTNRYSV  | 1266 | 866   |
| >ATM-T2438 KIQTNRYSVK | 399   | >ATM-T2438 KIQTNRYSVK | 1937 | 1538  |
| >ATM-T2438 KIQTNRYSV  | 111   | >ATM-T2438 KIQTNRYSV  | 399  | 288   |
| >ATM-T2438 KIQTNRYSVK | 138   | >ATM-T2438 KIQTNRYSVK | 310  | 172   |
| >ATM-T2438 KIQTNRYSV  | 18    | >ATM-T2438 KIQTNRYSV  | 150  | 132   |
| >ATM-T2438 KIQTNRYSVK | 98    | >ATM-T2438 KIQTNRYSVK | 421  | 323   |
| >ATM-T2438 KIQTNRYSV  | 17    | >ATM-T2438 KIQTNRYSV  | 34   | 17    |
| >ATM-T2438 KIQTNRYSVK | 18    | >ATM-T2438 KIQTNRYSVK | 32   | 14    |
| >ATM-T2438 KIQTNRYS   | 20835 | >ATM-T2438 KIQTNRYS   | 116  | 20719 |
| >ATM-T2438 KIQTNRYSVK | 55    | >ATM-T2438 KIQTNRYSVK | 132  | 77    |
| >ATM-T2438 KIQTNRYS   | 20726 | >ATM-T2438 KIQTNRYS   | 34   | 20692 |
| >ATM-T2438 KIQTNRYSVK | 96    | >ATM-T2438 KIQTNRYSVK | 335  | 239   |
| >ATM-T2438 KIQTNRYS   | 3505  | >ATM-T2438 KIQTNRYS   | 11   | 3494  |
| >ATM-T2438 KIQTNRYSV  | 464   | >ATM-T2438 KIQTNRYSV  | 1194 | 730   |
| >ATM-T2438 KIQTNRYSVK | 29    | >ATM-T2438 KIQTNRYSVK | 24   | 5     |
| >ATM-T2438 KIQTNRYS   | 9672  | >ATM-T2438 KIQTNRYS   | 56   | 9616  |
| >ATM-T2438 KIQTNRYSVK | 338   | >ATM-T2438 KIQTNRYSVK | 474  | 136   |

|                        |      |                        |      |      |
|------------------------|------|------------------------|------|------|
| >ATM-T2438 KIQTNRYTV   | 69   | >ATM-T2438 KIQTNRYKV   | 578  | 509  |
| >ATM-T2438 KIQTNRYTVK  | 217  | >ATM-T2438 KIQTNRYKVK  | 1103 | 886  |
| >ATM-T2438 KIQTNRYT    | 9606 | >ATM-T2438 KIQTNRYK    | 217  | 9389 |
| >ATM-T2438 HKIQTNRYTV  | 87   | >ATM-T2438 HKIQTNRYKV  | 257  | 170  |
| >ATM-T2438 HKIQTNRYTV  | 260  | >ATM-T2438 HKIQTNRYKV  | 356  | 96   |
| >ATM-T2438 HKIQTNRYTV  | 146  | >ATM-T2438 HKIQTNRYKV  | 1532 | 1386 |
| >ATM-T2666 VVPTMEIKV   | 1047 | >ATM-T2666 VVPAMEIKV   | 414  | 633  |
| >ATM-T2666 VVPTMEIKV   | 50   | >ATM-T2666 VVPAMEIKV   | 25   | 25   |
| >ATM-T2666 VVPTMEIK    | 284  | >ATM-T2666 VVPAMEIK    | 198  | 86   |
| >ATM-T2666 VVVPTMEI    | 350  | >ATM-T2666 VVVPAMEI    | 502  | 152  |
| >ATM-T2666 VVVPTMEI    | 46   | >ATM-T2666 VVVPAMEI    | 40   | 6    |
| >ATM-T2666 VVVPTMEIKV  | 335  | >ATM-T2666 VVVPAMEIKV  | 668  | 333  |
| >ATM-T2666 VVVPTMEIKV  | 268  | >ATM-T2666 VVVPAMEIKV  | 386  | 118  |
| >ATM-T2666 VVVPTMEIKV  | 374  | >ATM-T2666 VVVPAMEIKV  | 352  | 22   |
| >ATM-T2666 VVVPTMEIKV  | 17   | >ATM-T2666 VVVPAMEIKV  | 16   | 1    |
| >ATM-T2666 VVVPTMEIK   | 46   | >ATM-T2666 VVVPAMEIK   | 62   | 16   |
| >ATM-T2666 VVVPTMEIK   | 330  | >ATM-T2666 VVVPAMEIK   | 357  | 27   |
| >ATM-T2666 VVVPTMEI    | 88   | >ATM-T2666 VVVPAMEI    | 67   | 21   |
| >ATM-T2666 VVVPTMEI    | 442  | >ATM-T2666 VVVPAMEI    | 343  | 99   |
| >ATM-T2666 DVVVPTMEIK  | 43   | >ATM-T2666 DVVVPAMEIK  | 41   | 2    |
| >ATM-T2666 DVVVPTMEI   | 10   | >ATM-T2666 DVVVPAMEI   | 22   | 12   |
| >ATM-T2666 DVVVPTMEIK  | 47   | >ATM-T2666 DVVVPAMEIK  | 58   | 11   |
| >ATM-T2666 DVVVPTMEI   | 23   | >ATM-T2666 DVVVPAMEI   | 31   | 8    |
| >ATM-T2666 DVVVPTMEIK  | 71   | >ATM-T2666 DVVVPAMEIK  | 67   | 4    |
| >ATM-T2666 EDVVVPTME   | 130  | >ATM-T2666 EDVVPAME    | 91   | 39   |
| >ATM-T2666 LEDVVVPTMI  | 34   | >ATM-T2666 LEDVVPAM    | 38   | 4    |
| >ATM-T2666 LEDVVVPTM   | 145  | >ATM-T2666 LEDVVPAM    | 104  | 41   |
| >ATM-T2666 LEDVVVPTM   | 137  | >ATM-T2666 LEDVVPAM    | 109  | 28   |
| >ATM-T2666 LEDVVVPTMI  | 112  | >ATM-T2666 LEDVVPAM    | 80   | 32   |
| >ATM-T2666 LEDVVVPTM   | 85   | >ATM-T2666 LEDVVPAM    | 60   | 25   |
| >ATM-T2666 LEDVVVPTMI  | 16   | >ATM-T2666 LEDVVPAM    | 28   | 12   |
| >ATM-T2666 NLEDVVVPT   | 2176 | >ATM-T2666 NLEDVVVPA   | 236  | 1940 |
| >ATM-T2666 NLEDVVVPT   | 275  | >ATM-T2666 NLEDVVVPA   | 37   | 238  |
| >ATM-T2666 NLEDVVVPT   | 767  | >ATM-T2666 NLEDVVVPA   | 54   | 713  |
| >ATM-T2666 NLEDVVVPT   | 1571 | >ATM-T2666 NLEDVVVPA   | 213  | 1358 |
| >ATM-T2666 NLEDVVVPT   | 401  | >ATM-T2666 NLEDVVVPA   | 49   | 352  |
| >ATM-T2666 NLEDVVVPTM  | 99   | >ATM-T2666 NLEDVVVPA   | 135  | 36   |
| >ATM-T2666 NLEDVVVPT   | 1708 | >ATM-T2666 NLEDVVVPA   | 96   | 1612 |
| >ATM-T2666 NLEDVVVPTM  | 235  | >ATM-T2666 NLEDVVVPA   | 402  | 167  |
| >ATM-T2666 NLEDVVVPT   | 457  | >ATM-T2666 NLEDVVVPA   | 37   | 420  |
| >ATM-T2666 NLEDVVVPTM  | 141  | >ATM-T2666 NLEDVVVPA   | 418  | 277  |
| >ATM-T2666 NLEDVVVPT   | 3703 | >ATM-T2666 NLEDVVVPA   | 492  | 3211 |
| >ATM-T2947 TIVEVLLYDPL | 523  | >ATM-T2947 SIVEVLLYDPL | 465  | 58   |

|                        |      |                        |      |      |
|------------------------|------|------------------------|------|------|
| >ATM-T2947 TIVEVLLYDPL | 392  | >ATM-T2947 SIVEVLLYDPL | 158  | 234  |
| >ATM-T2947 TIVEVLLYDPL | 66   | >ATM-T2947 SIVEVLLYDPL | 31   | 35   |
| >ATM-T2947 TIVEVLLYDPL | 141  | >ATM-T2947 SIVEVLLYDPL | 85   | 56   |
| >ATM-T2947 TIVEVLLYDPL | 24   | >ATM-T2947 SIVEVLLYDPL | 14   | 10   |
| >ATM-T2947 TIVEVLLYDPL | 156  | >ATM-T2947 SIVEVLLYDPL | 38   | 118  |
| >ATM-T2947 TIVEVLLYDPL | 1077 | >ATM-T2947 SIVEVLLYDPL | 302  | 775  |
| >ATM-T2947 TIVEVLLYDPL | 623  | >ATM-T2947 SIVEVLLYDPL | 84   | 539  |
| >ATM-T2947 TIVEVLLYDPL | 1183 | >ATM-T2947 SIVEVLLYDPL | 316  | 867  |
| >ATM-T2947 TIVEVLLY    | 239  | >ATM-T2947 SIVEVLLY    | 134  | 105  |
| >ATM-T2947 TIVEVLLY    | 44   | >ATM-T2947 SIVEVLLY    | 61   | 17   |
| >ATM-T2947 TIVEVLLY    | 41   | >ATM-T2947 SIVEVLLY    | 44   | 3    |
| >ATM-T2947 TIVEVLLYDPL | 175  | >ATM-T2947 SIVEVLLYDPL | 195  | 20   |
| >ATM-T2947 TIVEVLLY    | 17   | >ATM-T2947 SIVEVLLY    | 16   | 1    |
| >ATM-T2947 TIVEVLLY    | 897  | >ATM-T2947 SIVEVLLY    | 494  | 403  |
| >ATM-T2947 TIVEVLLYDPL | 26   | >ATM-T2947 SIVEVLLYDPL | 70   | 44   |
| >ATM-T2947 TIVEVLLYDPL | 64   | >ATM-T2947 SIVEVLLYDPL | 96   | 32   |
| >ATM-T2947 TIVEVLLY    | 20   | >ATM-T2947 SIVEVLLY    | 9    | 11   |
| >ATM-T2947 TIVEVLLY    | 1103 | >ATM-T2947 SIVEVLLY    | 448  | 655  |
| >ATM-T2947 LTIVEVLLY   | 51   | >ATM-T2947 LSIVEVLLY   | 72   | 21   |
| >ATM-T2947 LTIVEVLLY   | 239  | >ATM-T2947 LSIVEVLLY   | 918  | 679  |
| >ATM-T2947 LTIVEVLLY   | 277  | >ATM-T2947 LSIVEVLLY   | 4969 | 4692 |
| >ATM-T2947 LTIVEVLLY   | 52   | >ATM-T2947 LSIVEVLLY   | 412  | 360  |
| >ATM-T2947 LTIVEVLLY   | 8    | >ATM-T2947 LSIVEVLLY   | 16   | 8    |
| >ATM-T2947 LTIVEVLLY   | 373  | >ATM-T2947 LSIVEVLLY   | 391  | 18   |
| >ATM-T2947 LTIVEVLLY   | 10   | >ATM-T2947 LSIVEVLLY   | 49   | 39   |
| >ATM-T2947 LTIVEVLLY   | 170  | >ATM-T2947 LSIVEVLLY   | 136  | 34   |
| >ATM-T2947 LTIVEVLLY   | 827  | >ATM-T2947 LSIVEVLLY   | 271  | 556  |
| >ATM-T2947 LTIVEVLL    | 35   | >ATM-T2947 LSIVEVLL    | 52   | 17   |
| >ATM-T2947 LTIVEVLLY   | 4    | >ATM-T2947 LSIVEVLLY   | 4    | 0    |
| >ATM-T2947 LTIVEVLLY   | 810  | >ATM-T2947 LSIVEVLLY   | 385  | 425  |
| >ATM-T2947 LTIVEVLL    | 346  | >ATM-T2947 LSIVEVLL    | 174  | 172  |
| >ATM-T2947 LTIVEVLLY   | 28   | >ATM-T2947 LSIVEVLLY   | 22   | 6    |
| >ATM-T2947 LTIVEVLL    | 282  | >ATM-T2947 LSIVEVLL    | 847  | 565  |
| >ATM-T2947 LTIVEVLLY   | 73   | >ATM-T2947 LSIVEVLLY   | 213  | 140  |
| >ATM-T2947 LTIVEVLLY   | 482  | >ATM-T2947 LSIVEVLLY   | 812  | 330  |
| >ATM-T2947 LLTIVEVLLY  | 525  | >ATM-T2947 LLSIVEVLLY  | 183  | 342  |
| >ATM-T2947 LLTIVEVL    | 887  | >ATM-T2947 LLSIVEVL    | 444  | 443  |
| >ATM-T2947 LLTIVEVLL   | 531  | >ATM-T2947 LLSIVEVLL   | 238  | 293  |
| >ATM-T2947 LLTIVEVL    | 90   | >ATM-T2947 LLSIVEVL    | 20   | 70   |
| >ATM-T2947 LLTIVEVLL   | 57   | >ATM-T2947 LLSIVEVLL   | 12   | 45   |
| >ATM-T2947 LLTIVEVL    | 742  | >ATM-T2947 LLSIVEVL    | 207  | 535  |
| >ATM-T2947 LLTIVEVL    | 28   | >ATM-T2947 LLSIVEVL    | 23   | 5    |
| >ATM-T2947 LLTIVEVLL   | 60   | >ATM-T2947 LLSIVEVLL   | 44   | 16   |

|                        |      |                        |     |      |
|------------------------|------|------------------------|-----|------|
| >ATM-T2947 LLTIVEVL    | 348  | >ATM-T2947 LLSIVEVL    | 253 | 95   |
| >ATM-T2947 LLTIVEVL    | 41   | >ATM-T2947 LLSIVEVL    | 52  | 11   |
| >ATM-T2947 LLTIVEVLL   | 25   | >ATM-T2947 LLSIVEVLL   | 31  | 6    |
| >ATM-T2947 LLTIVEVL    | 597  | >ATM-T2947 LLSIVEVL    | 198 | 399  |
| >ATM-T2947 LLTIVEVL    | 6    | >ATM-T2947 LLSIVEVL    | 7   | 1    |
| >ATM-T2947 LLTIVEVLL   | 7    | >ATM-T2947 LLSIVEVLL   | 7   | 0    |
| >ATM-T2947 LLTIVEVLLY  | 160  | >ATM-T2947 LLSIVEVLLY  | 70  | 90   |
| >ATM-T2947 LLTIVEVLLY  | 568  | >ATM-T2947 LLSIVEVLLY  | 196 | 372  |
| >ATM-T2947 LLTIVEVLLY  | 29   | >ATM-T2947 LLSIVEVLLY  | 35  | 6    |
| >ATM-T2947 LLTIVEVLLY  | 2126 | >ATM-T2947 LLSIVEVLLY  | 300 | 1826 |
| >ATM-T2947 LLTIVEVLLY  | 131  | >ATM-T2947 LLSIVEVLLY  | 103 | 28   |
| >ATM-T2947 TLLTIVEV    | 9    | >ATM-T2947 TLLSIVEV    | 9   | 0    |
| >ATM-T2947 TLLTIVEVL   | 58   | >ATM-T2947 TLLSIVEVL   | 41  | 17   |
| >ATM-T2947 TLLTIVEVLL  | 107  | >ATM-T2947 TLLSIVEVLL  | 80  | 27   |
| >ATM-T2947 TLLTIVEV    | 15   | >ATM-T2947 TLLSIVEV    | 9   | 6    |
| >ATM-T2947 TLLTIVEVL   | 50   | >ATM-T2947 TLLSIVEVL   | 27  | 23   |
| >ATM-T2947 TLLTIVEVLL  | 36   | >ATM-T2947 TLLSIVEVLL  | 19  | 17   |
| >ATM-T2947 TLLTIVEV    | 25   | >ATM-T2947 TLLSIVEV    | 15  | 10   |
| >ATM-T2947 TLLTIVEVL   | 342  | >ATM-T2947 TLLSIVEVL   | 184 | 158  |
| >ATM-T2947 TLLTIVEVLL  | 317  | >ATM-T2947 TLLSIVEVLL  | 191 | 126  |
| >ATM-T2947 TLLTIVEV    | 22   | >ATM-T2947 TLLSIVEV    | 16  | 6    |
| >ATM-T2947 TLLTIVEVL   | 352  | >ATM-T2947 TLLSIVEVL   | 267 | 85   |
| >ATM-T2947 TLLTIVEVLL  | 488  | >ATM-T2947 TLLSIVEVLL  | 486 | 2    |
| >ATM-T2947 TLLTIVEV    | 2    | >ATM-T2947 TLLSIVEV    | 2   | 0    |
| >ATM-T2947 TLLTIVEVL   | 10   | >ATM-T2947 TLLSIVEVL   | 5   | 5    |
| >ATM-T2947 TLLTIVEVLL  | 20   | >ATM-T2947 TLLSIVEVLL  | 10  | 10   |
| >ATM-T2947 TLLTIVEV    | 5    | >ATM-T2947 TLLSIVEV    | 4   | 1    |
| >ATM-T2947 TLLTIVEVL   | 32   | >ATM-T2947 TLLSIVEVL   | 26  | 6    |
| >ATM-T2947 TLLTIVEVLL  | 90   | >ATM-T2947 TLLSIVEVLL  | 75  | 15   |
| >ATM-T2947 TLLTIVEV    | 5    | >ATM-T2947 TLLSIVEV    | 4   | 1    |
| >ATM-T2947 TLLTIVEVL   | 33   | >ATM-T2947 TLLSIVEVL   | 18  | 15   |
| >ATM-T2947 TLLTIVEVLL  | 22   | >ATM-T2947 TLLSIVEVLL  | 14  | 8    |
| >ATM-T2947 TLLTIVEV    | 2    | >ATM-T2947 TLLSIVEV    | 2   | 0    |
| >ATM-T2947 TLLTIVEVL   | 6    | >ATM-T2947 TLLSIVEVL   | 5   | 1    |
| >ATM-T2947 TLLTIVEVLL  | 52   | >ATM-T2947 TLLSIVEVLL  | 30  | 22   |
| >ATM-T2947 TLLTIVEV    | 2    | >ATM-T2947 TLLSIVEV    | 2   | 0    |
| >ATM-T2947 TLLTIVEVL   | 18   | >ATM-T2947 TLLSIVEVL   | 11  | 7    |
| >ATM-T2947 TLLTIVEVLL  | 16   | >ATM-T2947 TLLSIVEVLL  | 11  | 5    |
| >ATM-T2947 TLLTIVEVLLY | 462  | >ATM-T2947 TLLSIVEVLLY | 430 | 32   |
| >ATM-T2947 TLLTIVEVLLY | 473  | >ATM-T2947 TLLSIVEVLLY | 383 | 90   |
| >ATM-T2947 TLLTIVEVLLY | 16   | >ATM-T2947 TLLSIVEVLLY | 13  | 3    |
| >ATM-T2947 TLLTIVEVLLY | 494  | >ATM-T2947 TLLSIVEVLLY | 259 | 235  |
| >ATM-T2947 TLLTIVEVL   | 242  | >ATM-T2947 TLLSIVEVL   | 198 | 44   |

|                        |       |                        |     |       |
|------------------------|-------|------------------------|-----|-------|
| >ATM-T2947 TLLTIVEV    | 128   | >ATM-T2947 TLLSIVEV    | 96  | 32    |
| >ATM-T2947 TLLTIVEV    | 45    | >ATM-T2947 TLLSIVEV    | 28  | 17    |
| >ATM-T2947 TLLTIVEVLLY | 9     | >ATM-T2947 TLLSIVEVLLY | 8   | 1     |
| >ATM-T2947 TLLTIVEVL   | 511   | >ATM-T2947 TLLSIVEVL   | 422 | 89    |
| >ATM-T2947 TLLTIVEVLLY | 963   | >ATM-T2947 TLLSIVEVLLY | 374 | 589   |
| >ATM-T2947 ETLLTIVEV   | 135   | >ATM-T2947 ETLLSIVEV   | 286 | 151   |
| >ATM-T2947 ETLLTIVEV   | 204   | >ATM-T2947 ETLLSIVEV   | 479 | 275   |
| >ATM-T2947 ETLLTIVEV   | 437   | >ATM-T2947 ETLLSIVEV   | 745 | 308   |
| >ATM-T2947 ETLLTIVEVL  | 35    | >ATM-T2947 ETLLSIVEVL  | 30  | 5     |
| >ATM-T2947 ETLLTIVEV   | 10    | >ATM-T2947 ETLLSIVEV   | 7   | 3     |
| >ATM-T2947 ETLLTIVEVL  | 573   | >ATM-T2947 ETLLSIVEVL  | 386 | 187   |
| >ATM-T2947 ETLLTIVEVLL | 91    | >ATM-T2947 ETLLSIVEVLL | 54  | 37    |
| >ATM-T2947 ETLLTIVEV   | 4     | >ATM-T2947 ETLLSIVEV   | 5   | 1     |
| >ATM-T2947 ETLLTIVEVL  | 44    | >ATM-T2947 ETLLSIVEVL  | 49  | 5     |
| >ATM-T2947 ETLLTIVEVLL | 54    | >ATM-T2947 ETLLSIVEVLL | 65  | 11    |
| >ATM-T2947 ETLLTIVEV   | 1241  | >ATM-T2947 ETLLSIVEV   | 467 | 774   |
| >ATM-T2947 ETLLTIVEVL  | 237   | >ATM-T2947 ETLLSIVEVL  | 103 | 134   |
| >ATM-T2947 ETLLTIVEVLL | 265   | >ATM-T2947 ETLLSIVEVLL | 123 | 142   |
| >ATM-T2947 QETLLTIV    | 28    | >ATM-T2947 QETLLSIV    | 27  | 1     |
| >ATM-T2947 QETLLTIVEV  | 30    | >ATM-T2947 QETLLSIVEV  | 42  | 12    |
| >ATM-T2947 QETLLTIVEVL | 72    | >ATM-T2947 QETLLSIVEVL | 117 | 45    |
| >ATM-T2947 QETLLTIV    | 455   | >ATM-T2947 QETLLSIV    | 500 | 45    |
| >ATM-T2947 QETLLTIVEV  | 1218  | >ATM-T2947 QETLLSIVEV  | 498 | 720   |
| >ATM-T2947 QETLLTIVEVL | 28    | >ATM-T2947 QETLLSIVEVL | 26  | 2     |
| >ATM-T2947 QETLLTIV    | 358   | >ATM-T2947 QETLLSIV    | 421 | 63    |
| >ATM-T2947 QETLLTIVEV  | 176   | >ATM-T2947 QETLLSIVEV  | 132 | 44    |
| >ATM-T2947 QETLLTIVEVL | 173   | >ATM-T2947 QETLLSIVEVL | 166 | 7     |
| >ATM-T2947 QETLLTIVEV  | 641   | >ATM-T2947 QETLLSIVEV  | 277 | 364   |
| >ATM-T2947 QETLLTIVEV  | 487   | >ATM-T2947 QETLLSIVEV  | 294 | 193   |
| >ATM-T2947 QETLLTIV    | 267   | >ATM-T2947 QETLLSIV    | 309 | 42    |
| >ATM-T2947 QETLLTIVEV  | 401   | >ATM-T2947 QETLLSIVEV  | 268 | 133   |
| >ATM-T2947 QETLLTIV    | 233   | >ATM-T2947 QETLLSIV    | 467 | 234   |
| >ATM-T2947 QETLLTIVEV  | 268   | >ATM-T2947 QETLLSIVEV  | 430 | 162   |
| >ATM-T2947 QETLLTIVEVL | 39    | >ATM-T2947 QETLLSIVEVL | 61  | 22    |
| >ATM-T2947 SQETLLTIV   | 361   | >ATM-T2947 SQETLLSIV   | 283 | 78    |
| >ATM-T2947 SQETLLTI    | 91    | >ATM-T2947 SQETLLSI    | 73  | 18    |
| >ATM-T2947 SQETLLTIV   | 28    | >ATM-T2947 SQETLLSIV   | 48  | 20    |
| >ATM-T2947 SQETLLTIVEV | 18    | >ATM-T2947 SQETLLSIVEV | 20  | 2     |
| >ATM-T2947 NSQETLLTI   | 49    | >ATM-T2947 NSQETLLSI   | 60  | 11    |
| >ATM-T2947 MRNSQETLLT  | 185   | >ATM-T2947 MRNSQETLLS  | 155 | 30    |
| >ATM-T2947 MRNSQETLLT  | 324   | >ATM-T2947 MRNSQETLLS  | 284 | 40    |
| >ATM-V1941 VAKVAQSCA   | 187   | >ATM-V1941 LAKVAQSCA   | 74  | 113   |
| >ATM-V1941 EVAKVAQSCA  | 11472 | >ATM-V1941 ELAKVAQSCA  | 437 | 11035 |

|                       |       |                       |      |       |
|-----------------------|-------|-----------------------|------|-------|
| >ATM-V1941 EVAKVAQSC/ | 15270 | >ATM-V1941 ELAKVAQSCA | 492  | 14778 |
| >ATM-V1941 EVAKVAQSC/ | 13025 | >ATM-V1941 ELAKVAQSCA | 305  | 12720 |
| >ATM-V1941 EVAKVAQSC/ | 16570 | >ATM-V1941 ELAKVAQSCA | 187  | 16383 |
| >ATM-V1941 EVAKVAQS   | 90    | >ATM-V1941 ELAKVAQS   | 2319 | 2229  |
| >ATM-V1941 EVAKVAQSC/ | 462   | >ATM-V1941 ELAKVAQSCA | 2474 | 2012  |
| >ATM-V1941 EVAKVAQSC/ | 18    | >ATM-V1941 ELAKVAQSCA | 237  | 219   |
| >ATM-V1941 EVAKVAQSC/ | 77    | >ATM-V1941 ELAKVAQSCA | 501  | 424   |
| >ATM-V1941 AFWLDLNYLE | 364   | >ATM-V1941 AFWLDLNYLE | 4627 | 4263  |
| >ATM-V1941 AFWLDLNYLE | 303   | >ATM-V1941 AFWLDLNYLE | 7527 | 7224  |
| >ATM-V1941 AFWLDLNYLE | 1553  | >ATM-V1941 AFWLDLNYLE | 58   | 1495  |
| >ATM-V1941 AFWLDLNYLE | 486   | >ATM-V1941 AFWLDLNYLE | 335  | 151   |
| >ATM-V1941 LEVAKVAQ   | 459   | >ATM-V1941 LELAKVAQ   | 397  | 62    |
| >ATM-V1941 LEVAKVAQSC | 520   | >ATM-V1941 LELAKVAQSC | 249  | 271   |
| >ATM-V1941 LEVAKVAQSC | 195   | >ATM-V1941 LELAKVAQSC | 149  | 46    |
| >ATM-V1941 YLEVAKVA   | 47    | >ATM-V1941 YLELAKVA   | 65   | 18    |
| >ATM-V1941 YLEVAKVAQ  | 228   | >ATM-V1941 YLELAKVAQ  | 368  | 140   |
| >ATM-V1941 YLEVAKVAQS | 318   | >ATM-V1941 YLELAKVAQS | 461  | 143   |
| >ATM-V1941 YLEVAKVAQS | 27    | >ATM-V1941 YLELAKVAQS | 41   | 14    |
| >ATM-V1941 NYLEVAKV   | 407   | >ATM-V1941 NYLELAKV   | 1124 | 717   |
| >ATM-V1941 NYLEVAKV   | 151   | >ATM-V1941 NYLELAKV   | 192  | 41    |
| >ATM-V1941 DLNYLEVAKV | 216   | >ATM-V1941 DLNYLELAKV | 112  | 104   |
| >ATM-V1941 DLNYLEVAKV | 256   | >ATM-V1941 DLNYLELAKV | 399  | 143   |
| >ATM-V1941 DLNYLEVAKV | 154   | >ATM-V1941 DLNYLELAKV | 235  | 81    |
| >ATM-V1941 DLNYLEVAKV | 84    | >ATM-V1941 DLNYLELAKV | 150  | 66    |
| >ATM-V1941 DLNYLEVAKV | 56    | >ATM-V1941 DLNYLELAKV | 73   | 17    |
| >ATM-V1941 DLNYLEVAK  | 262   | >ATM-V1941 DLNYLELAK  | 752  | 490   |
| >ATM-V1941 DLNYLEVAK  | 151   | >ATM-V1941 DLNYLELAK  | 478  | 327   |
| >ATM-V1941 LDLNYLEV   | 678   | >ATM-V1941 LDLNYLEL   | 217  | 461   |
| >ATM-V1941 LDLNYLEVAK | 195   | >ATM-V1941 LDLNYLELAK | 146  | 49    |
| >ATM-V1941 LDLNYLEV   | 72    | >ATM-V1941 LDLNYLEL   | 364  | 292   |
| >ATM-V1941 LDLNYLEVAK | 72    | >ATM-V1941 LDLNYLELAK | 78   | 6     |
| >ATM-V1941 WLDLNYLEV  | 41    | >ATM-V1941 WLDLNYLEL  | 136  | 95    |
| >ATM-V1941 WLDLNYLEV/ | 445   | >ATM-V1941 WLDLNYLELA | 263  | 182   |
| >ATM-V1941 WLDLNYLEV  | 102   | >ATM-V1941 WLDLNYLEL  | 167  | 65    |
| >ATM-V1941 WLDLNYLEV/ | 237   | >ATM-V1941 WLDLNYLELA | 93   | 144   |
| >ATM-V1941 WLDLNYLEV  | 204   | >ATM-V1941 WLDLNYLEL  | 1321 | 1117  |
| >ATM-V1941 WLDLNYLEV/ | 382   | >ATM-V1941 WLDLNYLELA | 242  | 140   |
| >ATM-V1941 WLDLNYLEV  | 49    | >ATM-V1941 WLDLNYLEL  | 466  | 417   |
| >ATM-V1941 WLDLNYLEV  | 3     | >ATM-V1941 WLDLNYLEL  | 14   | 11    |
| >ATM-V1941 WLDLNYLEV/ | 37    | >ATM-V1941 WLDLNYLELA | 36   | 1     |
| >ATM-V1941 WLDLNYLEV  | 6     | >ATM-V1941 WLDLNYLEL  | 28   | 22    |
| >ATM-V1941 WLDLNYLEV/ | 100   | >ATM-V1941 WLDLNYLELA | 153  | 53    |
| >ATM-V1941 WLDLNYLEV  | 7     | >ATM-V1941 WLDLNYLEL  | 34   | 27    |

|                       |      |                       |      |      |
|-----------------------|------|-----------------------|------|------|
| >ATM-V1941 WLDLNYLEV/ | 195  | >ATM-V1941 WLDLNYLELA | 153  | 42   |
| >ATM-V1941 WLDLNYLEV  | 4    | >ATM-V1941 WLDLNYLEL  | 27   | 23   |
| >ATM-V1941 WLDLNYLEV/ | 144  | >ATM-V1941 WLDLNYLELA | 187  | 43   |
| >ATM-V1941 WLDLNYLEV  | 3    | >ATM-V1941 WLDLNYLEL  | 8    | 5    |
| >ATM-V1941 WLDLNYLEV/ | 50   | >ATM-V1941 WLDLNYLELA | 32   | 18   |
| >ATM-V1941 WLDLNYLEV  | 189  | >ATM-V1941 WLDLNYLEL  | 1139 | 950  |
| >ATM-V1941 FWLDLNYLEV | 365  | >ATM-V1941 FWLDLNYLEL | 87   | 278  |
| >ATM-V1941 FWLDLNYLEV | 117  | >ATM-V1941 FWLDLNYLEL | 407  | 290  |
| >ATM-V1941 FWLDLNYLEV | 124  | >ATM-V1941 FWLDLNYLEL | 46   | 78   |
| >ATM-V1941 FWLDLNYLEV | 59   | >ATM-V1941 FWLDLNYLEL | 896  | 837  |
| >ATM-V1941 FWLDLNYLEV | 109  | >ATM-V1941 FWLDLNYLEL | 2265 | 2156 |
| >ATM-V1941 FWLDLNYLEV | 108  | >ATM-V1941 FWLDLNYLEL | 2390 | 2282 |
| >ATM-V1941 FWLDLNYLEV | 1329 | >ATM-V1941 FWLDLNYLEL | 89   | 1240 |
| >ATM-V1941 FWLDLNYLEV | 147  | >ATM-V1941 FWLDLNYLEL | 10   | 137  |
| >ATM-V1941 FWLDLNYLEV | 182  | >ATM-V1941 FWLDLNYLEL | 139  | 43   |
| >ATM-V1941 FWLDLNYLEV | 111  | >ATM-V1941 FWLDLNYLEL | 96   | 15   |
| >ATM-V2424 EVGLLREHK  | 49   | >ATM-V2424 EGGLLREHK  | 2857 | 2808 |
| >ATM-V2424 EEVGLLREHK | 38   | >ATM-V2424 EEGLLREHK  | 42   | 4    |
| >ATM-V2424 EEVGLLREH  | 451  | >ATM-V2424 EEGLLREH   | 2891 | 2440 |
| >ATM-V2424 EEVGLLREHK | 398  | >ATM-V2424 EEGLLREHK  | 2576 | 2178 |
| >ATM-V2424 EEVGLLREH  | 367  | >ATM-V2424 EEGLLREH   | 948  | 581  |
| >ATM-V2424 EEVGLLREHK | 420  | >ATM-V2424 EEGLLREHK  | 1121 | 701  |
| >ATM-V2424 EEVGLLREHK | 259  | >ATM-V2424 EEGLLREHK  | 197  | 62   |
| >ATM-V2424 EEVGLLREHK | 149  | >ATM-V2424 EEGLLREHK  | 898  | 749  |
| >ATM-V2424 KEEVGLLR   | 219  | >ATM-V2424 KEEGLLR    | 756  | 537  |
| >ATM-V2424 KEEVGLLR   | 586  | >ATM-V2424 KEEGLLR    | 288  | 298  |
| >ATM-V2424 RAKEEVGLL  | 320  | >ATM-V2424 RAKEEGLL   | 500  | 180  |
| >ATM-V2424 RAKEEVGLLR | 171  | >ATM-V2424 RAKEEGLLR  | 200  | 29   |
| >ATM-V2424 RAKEEVGLLR | 127  | >ATM-V2424 RAKEEGLLR  | 308  | 181  |
| >ATM-V2424 RAKEEVGLLR | 367  | >ATM-V2424 RAKEEGLLR  | 1394 | 1027 |
| >ATM-V2424 RAKEEVGL   | 35   | >ATM-V2424 RAKEEGGL   | 63   | 28   |
| >ATM-V2424 RAKEEVGL   | 81   | >ATM-V2424 RAKEEGGL   | 134  | 53   |
| >ATM-V2424 KRAKEEVGL  | 492  | >ATM-V2424 KRAKEEGGL  | 2721 | 2229 |
| >ATM-V2424 KRAKEEVGL  | 278  | >ATM-V2424 KRAKEEGGL  | 561  | 283  |
| >ATM-V2424 KRAKEEVGLL | 73   | >ATM-V2424 KRAKEEGGL  | 65   | 8    |
| >ATM-V2424 KRAKEEVGLL | 176  | >ATM-V2424 KRAKEEGGL  | 247  | 71   |
| >ATM-V2424 KRAKEEVGL  | 151  | >ATM-V2424 KRAKEEGGL  | 348  | 197  |
| >ATM-V2424 KRAKEEVGLL | 153  | >ATM-V2424 KRAKEEGGL  | 149  | 4    |
| >ATM-V2424 KRAKEEVGLL | 460  | >ATM-V2424 KRAKEEGGL  | 668  | 208  |
| >ATM-V2424 KRAKEEVGL  | 308  | >ATM-V2424 KRAKEEGGL  | 573  | 265  |
| >ATM-V2424 KRAKEEVGLL | 140  | >ATM-V2424 KRAKEEGGL  | 132  | 8    |
| >ATM-V2424 KRAKEEVGLL | 79   | >ATM-V2424 KRAKEEGGL  | 161  | 82   |
| >ATM-V2424 LKRAKEEV   | 248  | >ATM-V2424 LKRAKEEG   | 9271 | 9023 |

|                       |      |                       |       |       |
|-----------------------|------|-----------------------|-------|-------|
| >ATM-V2424 LKRAKEEVGL | 84   | >ATM-V2424 LKRAKEEGGL | 920   | 836   |
| >ATM-V2424 LLKRAKEEV  | 231  | >ATM-V2424 LLKRAKEEG  | 18824 | 18593 |
| >ATM-V2424 LLKRAKEEVG | 252  | >ATM-V2424 LLKRAKEEGG | 758   | 506   |
| >ATM-V2424 LLKRAKEEV  | 110  | >ATM-V2424 LLKRAKEEG  | 20663 | 20553 |
| >ATM-V2424 LLKRAKEEV  | 88   | >ATM-V2424 LLKRAKEEG  | 22882 | 22794 |
| >ATM-V2424 LLKRAKEEV  | 370  | >ATM-V2424 LLKRAKEEG  | 25332 | 24962 |
| >ATM-V2424 LLKRAKEEV  | 4    | >ATM-V2424 LLKRAKEEG  | 11951 | 11947 |
| >ATM-V2424 LLKRAKEEVG | 14   | >ATM-V2424 LLKRAKEEGG | 42    | 28    |
| >ATM-V2424 ALLKRAKEEV | 459  | >ATM-V2424 ALLKRAKEEG | 20270 | 19811 |
| >ATM-V2424 ALLKRAKEEV | 180  | >ATM-V2424 ALLKRAKEEG | 19862 | 19682 |
| >ATM-V2424 ALLKRAKEEV | 4    | >ATM-V2424 ALLKRAKEEG | 7242  | 7238  |
| >ATM-V2424 ALLKRAKEEV | 25   | >ATM-V2424 ALLKRAKEEG | 18748 | 18723 |
| >ATM-V2424 ALLKRAKEEV | 9    | >ATM-V2424 ALLKRAKEEG | 12998 | 12989 |
| >ATM-V2424 ALLKRAKEEV | 26   | >ATM-V2424 ALLKRAKEEG | 22979 | 22953 |
| >ATM-V2424 ALLKRAKEEV | 3    | >ATM-V2424 ALLKRAKEEG | 10634 | 10631 |
| >ATM-V245A AVNFRIRV   | 99   | >ATM-V245A AANFRIRV   | 813   | 714   |
| >ATM-V245A AVNFRIRVCE | 204  | >ATM-V245A AANFRIRVCE | 1915  | 1711  |
| >ATM-V245A AVNFRIRV   | 203  | >ATM-V245A AANFRIRV   | 1047  | 844   |
| >ATM-V245A AVNFRIRV   | 34   | >ATM-V245A AANFRIRV   | 486   | 452   |
| >ATM-V245A AVNFRIRVCE | 262  | >ATM-V245A AANFRIRVCE | 3718  | 3456  |
| >ATM-V245A AVNFRIRV   | 274  | >ATM-V245A AANFRIRV   | 1383  | 1109  |
| >ATM-V245A AVNFRIRVCE | 1813 | >ATM-V245A AANFRIRVCE | 183   | 1630  |
| >ATM-V245A ALTIFLKTAV | 99   | >ATM-V245A ALTIFLKTAA | 1189  | 1090  |
| >ATM-V245A ALTIFLKTAV | 50   | >ATM-V245A ALTIFLKTAA | 308   | 258   |
| >ATM-V245A ALTIFLKTAV | 19   | >ATM-V245A ALTIFLKTAA | 94    | 75    |
| >ATM-V245A ALTIFLKTAV | 138  | >ATM-V245A ALTIFLKTAA | 1525  | 1387  |
| >ATM-V245A ALTIFLKTAV | 6    | >ATM-V245A ALTIFLKTAA | 174   | 168   |
| >ATM-V245A ALTIFLKTAV | 18   | >ATM-V245A ALTIFLKTAA | 1771  | 1753  |
| >ATM-V245A ALTIFLKTAV | 14   | >ATM-V245A ALTIFLKTAA | 551   | 537   |
| >ATM-V245A ALTIFLKTAV | 138  | >ATM-V245A ALTIFLKTAA | 10632 | 10494 |
| >ATM-V245A ALTIFLKTAV | 2    | >ATM-V245A ALTIFLKTAA | 17    | 15    |
| >ATM-V245A LAVNFRIRV  | 83   | >ATM-V245A LAANFRIRV  | 249   | 166   |
| >ATM-V245A LAVNFRIRV  | 96   | >ATM-V245A LAANFRIRV  | 42    | 54    |
| >ATM-V245A LAVNFRIR   | 122  | >ATM-V245A LAANFRIR   | 116   | 6     |
| >ATM-V245A LAVNFRIR   | 91   | >ATM-V245A LAANFRIR   | 50    | 41    |
| >ATM-V245A LAVNFRIRV  | 144  | >ATM-V245A LAANFRIRV  | 49    | 95    |
| >ATM-V245A LAVNFRIRV  | 788  | >ATM-V245A LAANFRIRV  | 484   | 304   |
| >ATM-V245A TLAVNFRI   | 214  | >ATM-V245A TLAANFRI   | 67    | 147   |
| >ATM-V245A TLAVNFIRV  | 266  | >ATM-V245A TLAANFRIRV | 123   | 143   |
| >ATM-V245A TLAVNFRI   | 40   | >ATM-V245A TLAANFRI   | 14    | 26    |
| >ATM-V245A TLAVNFIRV  | 129  | >ATM-V245A TLAANFRIRV | 48    | 81    |
| >ATM-V245A TLAVNFRI   | 105  | >ATM-V245A TLAANFRI   | 26    | 79    |
| >ATM-V245A TLAVNFIRV  | 131  | >ATM-V245A TLAANFRIRV | 55    | 76    |



|                      |     |                      |      |     |
|----------------------|-----|----------------------|------|-----|
| >ATM-V245A TLAVNFRI  | 476 | >ATM-V245A TLAANFRI  | 148  | 328 |
| >ATM-V245A TLAVNFRI  | 478 | >ATM-V245A TLAANFRI  | 448  | 30  |
| >ATM-V245A TLAVNFRI  | 83  | >ATM-V245A TLAANFRI  | 32   | 51  |
| >ATM-V245A TLAVNFRI  | 41  | >ATM-V245A TLAANFRI  | 13   | 28  |
| >ATM-V245A TLAVNFRI  | 223 | >ATM-V245A TLAANFRI  | 102  | 121 |
| >ATM-V245A TLAVNFRI  | 190 | >ATM-V245A TLAANFRI  | 104  | 86  |
| >ATM-V245A TLAVNFRI  | 195 | >ATM-V245A TLAANFRI  | 96   | 99  |
| >ATM-V245A TLAVNFRI  | 55  | >ATM-V245A TLAANFRI  | 28   | 27  |
| >ATM-V245A TLAVNFRI  | 152 | >ATM-V245A TLAANFRI  | 75   | 77  |
| >ATM-V245A TLAVNFRI  | 90  | >ATM-V245A TLAANFRI  | 49   | 41  |
| >ATM-V245A TLAVNFRI  | 30  | >ATM-V245A TLAANFRI  | 13   | 17  |
| >ATM-V245A TLAVNFRI  | 4   | >ATM-V245A TLAANFRI  | 3    | 1   |
| >ATM-V245A TLAVNFRI  | 323 | >ATM-V245A TLAANFRI  | 326  | 3   |
| >ATM-V245A TLAVNFRI  | 196 | >ATM-V245A TLAANFRI  | 122  | 74  |
| >ATM-V245A TLAVNFRI  | 133 | >ATM-V245A TLAANFRI  | 42   | 91  |
| >ATM-V245A TLAVNFRI  | 332 | >ATM-V245A TLAANFRI  | 54   | 278 |
| >ATM-V245A TLAVNFRI  | 662 | >ATM-V245A TLAANFRI  | 317  | 345 |
| >ATM-V245A TLAVNFRI  | 409 | >ATM-V245A TLAANFRI  | 204  | 205 |
| >ATM-V245A TLAVNFRI  | 819 | >ATM-V245A TLAANFRI  | 246  | 573 |
| >ATM-V245A KTLAVNFRI | 55  | >ATM-V245A KTLAANFRI | 77   | 22  |
| >ATM-V245A KTLAVNFRI | 80  | >ATM-V245A KTLAANFRI | 99   | 19  |
| >ATM-V245A KTLAVNFRI | 34  | >ATM-V245A KTLAANFRI | 38   | 4   |
| >ATM-V245A KTLAVNFRI | 62  | >ATM-V245A KTLAANFRI | 71   | 9   |
| >ATM-V245A KTLAVNFRI | 29  | >ATM-V245A KTLAANFRI | 172  | 143 |
| >ATM-V245A KTLAVNFRI | 15  | >ATM-V245A KTLAANFRI | 36   | 21  |
| >ATM-V245A KTLAVNFRI | 229 | >ATM-V245A KTLAANFRI | 720  | 491 |
| >ATM-V245A KTLAVNFRI | 63  | >ATM-V245A KTLAANFRI | 94   | 31  |
| >ATM-V245A KTLAVNFRI | 262 | >ATM-V245A KTLAANFRI | 225  | 37  |
| >ATM-V245A KTLAVNFRI | 201 | >ATM-V245A KTLAANFRI | 306  | 105 |
| >ATM-V245A KTLAVNFRI | 321 | >ATM-V245A KTLAANFRI | 259  | 62  |
| >ATM-V245A KTLAVNFRI | 19  | >ATM-V245A KTLAANFRI | 33   | 14  |
| >ATM-V245A KTLAVNFRI | 574 | >ATM-V245A KTLAANFRI | 332  | 242 |
| >ATM-V245A KTLAVNFRI | 33  | >ATM-V245A KTLAANFRI | 20   | 13  |
| >ATM-V245A KTLAVNFRI | 47  | >ATM-V245A KTLAANFRI | 17   | 30  |
| >ATM-V245A KTLAVNFRI | 163 | >ATM-V245A KTLAANFRI | 59   | 104 |
| >ATM-V245A KTLAVNFRI | 30  | >ATM-V245A KTLAANFRI | 15   | 15  |
| >ATM-V245A KTLAVNFRI | 6   | >ATM-V245A KTLAANFRI | 8    | 2   |
| >ATM-V245A KTLAVNFRI | 17  | >ATM-V245A KTLAANFRI | 21   | 4   |
| >ATM-V245A KTLAVNFRI | 488 | >ATM-V245A KTLAANFRI | 1015 | 527 |
| >ATM-V245A KTLAVNFRI | 6   | >ATM-V245A KTLAANFRI | 11   | 5   |
| >ATM-V245A KTLAVNFRI | 78  | >ATM-V245A KTLAANFRI | 161  | 83  |
| >ATM-V245A KTLAVNFRI | 237 | >ATM-V245A KTLAANFRI | 952  | 715 |
| >ATM-V245A KTLAVNFRI | 26  | >ATM-V245A KTLAANFRI | 45   | 19  |

|                      |      |                      |      |      |
|----------------------|------|----------------------|------|------|
| >ATM-V245AKTLAVNFRI  | 305  | >ATM-V245AKTLAANFRI  | 1090 | 785  |
| >ATM-V245AKTLAVNFRI\ | 175  | >ATM-V245AKTLAANFRI\ | 380  | 205  |
| >ATM-V245AKTLAVNFRI  | 100  | >ATM-V245AKTLAANFRI  | 68   | 32   |
| >ATM-V245AKTLAVNFRI\ | 57   | >ATM-V245AKTLAANFRI\ | 46   | 11   |
| >ATM-V245AKTLAVNFRI  | 13   | >ATM-V245AKTLAANFRI  | 6    | 7    |
| >ATM-V245AKTLAVNFRI\ | 167  | >ATM-V245AKTLAANFRI\ | 57   | 110  |
| >ATM-V245AKTLAVNFRI  | 507  | >ATM-V245AKTLAANFRI  | 461  | 46   |
| >ATM-V245AKTLAVNFRI  | 11   | >ATM-V245AKTLAANFRI  | 15   | 4    |
| >ATM-V245AKTLAVNFRI  | 123  | >ATM-V245AKTLAANFRI  | 321  | 198  |
| >ATM-V245AKTLAVNFRI\ | 222  | >ATM-V245AKTLAANFRI\ | 447  | 225  |
| >ATM-V245AKTLAVNFRI  | 418  | >ATM-V245AKTLAANFRI  | 374  | 44   |
| >ATM-V245AKTLAVNFR   | 29   | >ATM-V245AKTLAANFR   | 23   | 6    |
| >ATM-V245AKTLAVNFRI  | 56   | >ATM-V245AKTLAANFRI  | 41   | 15   |
| >ATM-V245AKTLAVNFRI  | 29   | >ATM-V245AKTLAANFRI  | 29   | 0    |
| >ATM-V245AKTLAVNFR   | 518  | >ATM-V245AKTLAANFR   | 458  | 60   |
| >ATM-V245AKTLAVNF    | 11   | >ATM-V245AKTLAANF    | 19   | 8    |
| >ATM-V245AKTLAVNFRI  | 53   | >ATM-V245AKTLAANFRI  | 51   | 2    |
| >ATM-V245AKTLAVNF    | 448  | >ATM-V245AKTLAANF    | 308  | 140  |
| >ATM-V245AKTLAVNFRI  | 11   | >ATM-V245AKTLAANFRI  | 10   | 1    |
| >ATM-V245AKTLAVNF    | 1343 | >ATM-V245AKTLAANF    | 277  | 1066 |
| >ATM-V245AKTLAVNFRI  | 8    | >ATM-V245AKTLAANFRI  | 7    | 1    |
| >ATM-V245AKTLAVNFRI  | 251  | >ATM-V245AKTLAANFRI  | 245  | 6    |
| >ATM-V245AKTLAVNFRI  | 35   | >ATM-V245AKTLAANFRI  | 51   | 16   |
| >ATM-V245AKTLAVNFRI  | 43   | >ATM-V245AKTLAANFRI  | 38   | 5    |
| >ATM-V245AKTLAVNFRI  | 233  | >ATM-V245AKTLAANFRI  | 367  | 134  |
| >ATM-V245AKTLAVNFRI  | 530  | >ATM-V245AKTLAANFRI  | 316  | 214  |
| >ATM-V245AKTLAVNFRI  | 6    | >ATM-V245AKTLAANFRI  | 6    | 0    |
| >ATM-V245AKTLAVNFR   | 47   | >ATM-V245AKTLAANFR   | 43   | 4    |
| >ATM-V245AKTLAVNFR   | 45   | >ATM-V245AKTLAANFR   | 45   | 0    |
| >ATM-V245AKTLAVNFR   | 69   | >ATM-V245AKTLAANFR   | 53   | 16   |
| >ATM-V245AKTLAVNF    | 186  | >ATM-V245AKTLAANF    | 104  | 82   |
| >ATM-V245AKTLAVNF    | 452  | >ATM-V245AKTLAANF    | 232  | 220  |
| >ATM-V245AKTLAVNF    | 13   | >ATM-V245AKTLAANF    | 24   | 11   |
| >ATM-V245AKTLAVNF    | 1963 | >ATM-V245AKTLAANF    | 461  | 1502 |
| >ATM-V245AKTLAVNFR   | 180  | >ATM-V245AKTLAANFR   | 222  | 42   |
| >ATM-V245AKTLAV      | 430  | >ATM-V245AKTLAAN     | 9478 | 9048 |
| >ATM-V245AKTLAVNF    | 62   | >ATM-V245AKTLAANF    | 61   | 1    |
| >ATM-V245AKTLAVNF    | 226  | >ATM-V245AKTLAANF    | 229  | 3    |
| >ATM-V245AKTLAVNF    | 11   | >ATM-V245AKTLAANF    | 17   | 6    |
| >ATM-V245AKTLAVNF    | 183  | >ATM-V245AKTLAANF    | 218  | 35   |
| >ATM-V245AKTLAVNFR   | 13   | >ATM-V245AKTLAANFR   | 17   | 4    |
| >ATM-V245AKTLAVNFR   | 27   | >ATM-V245AKTLAANFR   | 30   | 3    |
| >ATM-V245AKTLAVNFR   | 310  | >ATM-V245AKTLAANFR   | 286  | 24   |

|                        |      |                        |       |       |
|------------------------|------|------------------------|-------|-------|
| >ATM-V245A IFLKTLAVNF  | 107  | >ATM-V245A IFLKTLAANF  | 170   | 63    |
| >ATM-V245A IFLKTLAVNFR | 36   | >ATM-V245A IFLKTLAANFR | 32    | 4     |
| >ATM-V245A TIFLKTAV    | 381  | >ATM-V245A TIFLKTAA    | 2203  | 1822  |
| >ATM-V245A TIFLKTAVNF  | 240  | >ATM-V245A TIFLKTLAANF | 184   | 56    |
| >ATM-V245A TIFLKTAV    | 177  | >ATM-V245A TIFLKTAA    | 3518  | 3341  |
| >ATM-V245A TIFLKTAV    | 176  | >ATM-V245A TIFLKTAA    | 1843  | 1667  |
| >ATM-V245A TIFLKTAV    | 45   | >ATM-V245A TIFLKTAA    | 277   | 232   |
| >ATM-V245A TIFLKTAV    | 98   | >ATM-V245A TIFLKTAA    | 950   | 852   |
| >ATM-V245A TIFLKTAV    | 108  | >ATM-V245A TIFLKTAA    | 4625  | 4517  |
| >ATM-V245A TIFLKTAV    | 266  | >ATM-V245A TIFLKTAA    | 11334 | 11068 |
| >ATM-V245A TIFLKTAV    | 75   | >ATM-V245A TIFLKTAA    | 7248  | 7173  |
| >ATM-V245A TIFLKTAV    | 256  | >ATM-V245A TIFLKTAA    | 1934  | 1678  |
| >ATM-V245A TIFLKTAVNF  | 32   | >ATM-V245A TIFLKTLAANF | 84    | 52    |
| >ATM-V245A TIFLKTAV    | 45   | >ATM-V245A TIFLKTAA    | 746   | 701   |
| >ATM-V245A TIFLKTAV    | 134  | >ATM-V245A TIFLKTAA    | 4857  | 4723  |
| >ATM-V245A TIFLKTAVNF  | 274  | >ATM-V245A TIFLKTLAANF | 507   | 233   |
| >ATM-V245A TIFLKTAVNF  | 248  | >ATM-V245A TIFLKTLAANF | 121   | 127   |
| >ATM-V245A LTIFLKTAV   | 163  | >ATM-V245A LTIFLKTAA   | 727   | 564   |
| >ATM-V245A LTIFLKTAV   | 72   | >ATM-V245A LTIFLKTAA   | 233   | 161   |
| >ATM-V245A LTIFLKTAV   | 61   | >ATM-V245A LTIFLKTAA   | 263   | 202   |
| >ATM-V245A LTIFLKTAV   | 152  | >ATM-V245A LTIFLKTAA   | 3858  | 3706  |
| >ATM-V245A LTIFLKTAV   | 475  | >ATM-V245A LTIFLKTAA   | 4168  | 3693  |
| >ATM-V245A LTIFLKTAV   | 172  | >ATM-V245A LTIFLKTAA   | 1391  | 1219  |
| >ATM-V410A VPWLQIATQI  | 250  | >ATM-V410A APWLQIATQI  | 308   | 58    |
| >ATM-V410A VPWLQIATQI  | 617  | >ATM-V410A APWLQIATQI  | 373   | 244   |
| >ATM-V410A VPWLQIATQI  | 974  | >ATM-V410A APWLQIATQI  | 437   | 537   |
| >ATM-V410A VPWLQIAT    | 67   | >ATM-V410A APWLQIAT    | 164   | 97    |
| >ATM-V410A VPWLQIATQ   | 292  | >ATM-V410A APWLQIATQ   | 917   | 625   |
| >ATM-V410A VPWLQIATQI  | 94   | >ATM-V410A APWLQIATQI  | 418   | 324   |
| >ATM-V410A VPWLQIATQI  | 217  | >ATM-V410A APWLQIATQI  | 378   | 161   |
| >ATM-V410A VPWLQIAT    | 62   | >ATM-V410A APWLQIAT    | 353   | 291   |
| >ATM-V410A VPWLQIATQI  | 290  | >ATM-V410A APWLQIATQI  | 1785  | 1495  |
| >ATM-V410A LVPWLQIATC  | 67   | >ATM-V410A LAPWLQIATC  | 1416  | 1349  |
| >ATM-V410A LVPWLQIATC  | 491  | >ATM-V410A LAPWLQIATC  | 2467  | 1976  |
| >ATM-V410A LVPWLQIATC  | 47   | >ATM-V410A LAPWLQIATC  | 10    | 37    |
| >ATM-V410A LQKSQNDFDI  | 409  | >ATM-V410A LQKSQNDFDI  | 3623  | 3214  |
| >ATM-V410A LQKSQNDFDI  | 153  | >ATM-V410A LQKSQNDFDI  | 1575  | 1422  |
| >ATM-V410A LQKSQNDFDI  | 80   | >ATM-V410A LQKSQNDFDI  | 521   | 441   |
| >ATM-V410A DLVPWLQIA   | 1064 | >ATM-V410A DLAPWLQIA   | 331   | 733   |
| >ATM-V410A DLVPWLQI    | 117  | >ATM-V410A DLAPWLQI    | 88    | 29    |
| >ATM-V410A DLVPWLQI    | 393  | >ATM-V410A DLAPWLQI    | 87    | 306   |
| >ATM-V410A DLVPWLQIA   | 963  | >ATM-V410A DLAPWLQIA   | 197   | 766   |
| >ATM-V410A DLVPWLQI    | 683  | >ATM-V410A DLAPWLQI    | 95    | 588   |

|                       |      |                       |       |       |
|-----------------------|------|-----------------------|-------|-------|
| >ATM-V410A DLVPWLQIA  | 1535 | >ATM-V410A DLAPWLQIA  | 234   | 1301  |
| >ATM-V410A DLVPWLQI   | 68   | >ATM-V410A DLAPWLQI   | 34    | 34    |
| >ATM-V410A DLVPWLQIA  | 45   | >ATM-V410A DLAPWLQIA  | 19    | 26    |
| >ATM-V410A DLVPWLQIAT | 1061 | >ATM-V410A DLAPWLQIAT | 479   | 582   |
| >ATM-V410A DLVPWLQIAT | 311  | >ATM-V410A DLAPWLQIAT | 131   | 180   |
| >ATM-V410A DLVPWLQI   | 178  | >ATM-V410A DLAPWLQI   | 93    | 85    |
| >ATM-V410A FDLVPWLQI  | 52   | >ATM-V410A FDLAPWLQI  | 61    | 9     |
| >ATM-V410A FDLVPWLQI  | 78   | >ATM-V410A FDLAPWLQI  | 96    | 18    |
| >ATM-V410A DFDLVPWLQ  | 260  | >ATM-V410A DFDLAPWLQ  | 355   | 95    |
| >ATM-V410A NDFDLVPWLQ | 209  | >ATM-V410A NDFDLAPWLQ | 172   | 37    |
| >ATM-V410A NDFDLVPW   | 424  | >ATM-V410A NDFDLAPW   | 564   | 140   |
| >ATM-V410A NDFDLVPW   | 444  | >ATM-V410A NDFDLAPW   | 496   | 52    |
| >ATM-V410A NDFDLVPWL  | 67   | >ATM-V410A NDFDLAPWL  | 125   | 58    |
| >ATM-V410A NDFDLVPWL  | 293  | >ATM-V410A NDFDLAPWL  | 205   | 88    |
| >ATM-V410A SQNDFDLV   | 91   | >ATM-V410A SQNDFDLA   | 1859  | 1768  |
| >ATM-V410A SQNDFDLVP  | 102  | >ATM-V410A SQNDFDLAP  | 175   | 73    |
| >ATM-V410A SQNDFDLV   | 44   | >ATM-V410A SQNDFDLA   | 513   | 469   |
| >ATM-V410A SQNDFDLVP  | 95   | >ATM-V410A SQNDFDLAP  | 132   | 37    |
| >ATM-V410A SQNDFDLV   | 49   | >ATM-V410A SQNDFDLA   | 575   | 526   |
| >ATM-V410A SQNDFDLVP  | 341  | >ATM-V410A SQNDFDLAP  | 786   | 445   |
| >ATM-V410A SQNDFDLV   | 7    | >ATM-V410A SQNDFDLA   | 23    | 16    |
| >ATM-V410A SQNDFDLVP  | 20   | >ATM-V410A SQNDFDLAP  | 18    | 2     |
| >ATM-V410A SQNDFDLV   | 74   | >ATM-V410A SQNDFDLA   | 2526  | 2452  |
| >ATM-V410A SQNDFDLVP  | 144  | >ATM-V410A SQNDFDLAP  | 257   | 113   |
| >ATM-V410A SQNDFDLV   | 218  | >ATM-V410A SQNDFDLA   | 6383  | 6165  |
| >ATM-V410A SQNDFDLV   | 75   | >ATM-V410A SQNDFDLA   | 4235  | 4160  |
| >ATM-V410A SQNDFDLVP  | 221  | >ATM-V410A SQNDFDLAP  | 454   | 233   |
| >ATM-V410A SQNDFDLV   | 316  | >ATM-V410A SQNDFDLA   | 14534 | 14218 |
| >ATM-V410A SQNDFDLVP  | 441  | >ATM-V410A SQNDFDLAP  | 1174  | 733   |
| >ATM-V410A SQNDFDLVP  | 149  | >ATM-V410A SQNDFDLAP  | 121   | 28    |
| >ATM-V410A SQNDFDLVP  | 361  | >ATM-V410A SQNDFDLAP  | 577   | 216   |
| >ATM-V410A SQNDFDLVP  | 399  | >ATM-V410A SQNDFDLAP  | 385   | 14    |
| >ATM-V410A SQNDFDLVP  | 254  | >ATM-V410A SQNDFDLAP  | 373   | 119   |
| >ATM-V410A KSQNDFDLV  | 232  | >ATM-V410A KSQNDFDLA  | 1807  | 1575  |
| >ATM-V410A KSQNDFDLVF | 56   | >ATM-V410A KSQNDFDLAF | 150   | 94    |
| >ATM-V410A KSQNDFDLVF | 67   | >ATM-V410A KSQNDFDLAF | 49    | 18    |
| >ATM-V410A KSQNDFDLVF | 47   | >ATM-V410A KSQNDFDLAF | 44    | 3     |
| >ATM-V410A KSQNDFDLVF | 18   | >ATM-V410A KSQNDFDLAF | 15    | 3     |
| >ATM-V410A KSQNDFDLVF | 832  | >ATM-V410A KSQNDFDLAF | 181   | 651   |
| >ATM-Y1475 YINQRPSCI  | 53   | >ATM-Y1475 CINQRPSCI  | 1616  | 1563  |
| >ATM-Y1475 YINQRPSCI  | 184  | >ATM-Y1475 CINQRPSCI  | 9911  | 9727  |
| >ATM-Y1475 YINQRPSC   | 234  | >ATM-Y1475 CINQRPSC   | 12342 | 12108 |
| >ATM-Y1475 YINQRPSCI  | 411  | >ATM-Y1475 CINQRPSCI  | 11079 | 10668 |

|                        |      |                        |       |       |
|------------------------|------|------------------------|-------|-------|
| >ATM-Y1475 YINQRPSCI   | 101  | >ATM-Y1475 CINQRPSCI   | 774   | 673   |
| >ATM-Y1475 YINQRPSCIM  | 330  | >ATM-Y1475 CINQRPSCIM  | 4099  | 3769  |
| >ATM-Y1475 YINQRPSCIM  | 156  | >ATM-Y1475 CINQRPSCIM  | 1732  | 1576  |
| >ATM-Y1475 HYINQRPSCI  | 53   | >ATM-Y1475 HCINQRPSCI  | 21535 | 21482 |
| >ATM-Y1475 HYINQRPSCI  | 80   | >ATM-Y1475 HCINQRPSCI  | 22359 | 22279 |
| >ATM-Y1475 HYINQRPSCII | 211  | >ATM-Y1475 HCINQRPSCII | 24051 | 23840 |
| >ATM-Y1475 HYINQRPSCII | 388  | >ATM-Y1475 HCINQRPSCII | 3813  | 3425  |
| >ATM-Y1475 IHYINQRPSCI | 118  | >ATM-Y1475 IHCINQRPSCI | 1021  | 903   |
| >ATM-Y1475 IHYINQRPSCI | 234  | >ATM-Y1475 IHCINQRPSCI | 2497  | 2263  |
| >ATM-Y1475 LIHYINQR    | 49   | >ATM-Y1475 LIHCINQR    | 129   | 80    |
| >ATM-Y1475 LIHYINQR    | 329  | >ATM-Y1475 LIHCINQR    | 578   | 249   |
| >ATM-Y1475 LIHYINQR    | 21   | >ATM-Y1475 LIHCINQR    | 43    | 22    |
| >ATM-Y1475 LIHYINQR    | 372  | >ATM-Y1475 LIHCINQR    | 144   | 228   |
| >ATM-Y1475 TLIHYINQR   | 57   | >ATM-Y1475 TLIHCINQR   | 119   | 62    |
| >ATM-Y1475 TLIHYINQR   | 147  | >ATM-Y1475 TLIHCINQR   | 175   | 28    |
| >ATM-Y1475 TLIHYINQR   | 17   | >ATM-Y1475 TLIHCINQR   | 38    | 21    |
| >ATM-Y1475 TLIHYINQR   | 494  | >ATM-Y1475 TLIHCINQR   | 125   | 369   |
| >ATM-Y1475 YTLIHYINQR  | 101  | >ATM-Y1475 YTLIHCINQR  | 88    | 13    |
| >ATM-Y1475 YTLIHYINQR  | 16   | >ATM-Y1475 YTLIHCINQR  | 42    | 26    |
| >ATM-Y1475 YTLIHYINQ   | 353  | >ATM-Y1475 YTLIHCINQ   | 850   | 497   |
| >ATM-Y1475 YTLIHYINQR  | 121  | >ATM-Y1475 YTLIHCINQR  | 156   | 35    |
| >ATM-Y1475 YTLIHYINQR  | 351  | >ATM-Y1475 YTLIHCINQR  | 303   | 48    |
| >ATM-Y1475 IYTLIHYI    | 73   | >ATM-Y1475 IYTLIHCI    | 352   | 279   |
| >ATM-Y1475 IYTLIHYI    | 79   | >ATM-Y1475 IYTLIHCI    | 143   | 64    |
| >ATM-Y1475 IYTLIHYI    | 63   | >ATM-Y1475 IYTLIHCI    | 72    | 9     |
| >ATM-Y1475 IYTLIHYI    | 20   | >ATM-Y1475 IYTLIHCI    | 193   | 173   |
| >ATM-Y1475 IYTLIHYINQR | 27   | >ATM-Y1475 IYTLIHCINQR | 46    | 19    |
| >ATM-Y1475 IYTLIHYINQR | 21   | >ATM-Y1475 IYTLIHCINQR | 27    | 6     |
| >ATM-Y1475 IYTLIHYINQR | 122  | >ATM-Y1475 IYTLIHCINQR | 185   | 63    |
| >ATM-Y1475 IYTLIHYINQR | 36   | >ATM-Y1475 IYTLIHCINQR | 30    | 6     |
| >ATM-Y1475 IYTLIHYI    | 366  | >ATM-Y1475 IYTLIHCI    | 1301  | 935   |
| >ATM-Y1475 VIYTLIHY    | 1554 | >ATM-Y1475 VIYTLIHC    | 224   | 1330  |
| >ATM-Y1475 VIYTLIHYI   | 206  | >ATM-Y1475 VIYTLIHCI   | 1046  | 840   |
| >ATM-Y1475 VIYTLIHYI   | 416  | >ATM-Y1475 VIYTLIHCI   | 584   | 168   |
| >ATM-Y1475 VIYTLIHYI   | 21   | >ATM-Y1475 VIYTLIHCI   | 104   | 83    |
| >ATM-Y1475 VIYTLIHYI   | 41   | >ATM-Y1475 VIYTLIHCI   | 267   | 226   |
| >ATM-Y1475 VIYTLIHYI   | 13   | >ATM-Y1475 VIYTLIHCI   | 124   | 111   |
| >ATM-Y1475 VIYTLIHYI   | 44   | >ATM-Y1475 VIYTLIHCI   | 287   | 243   |
| >ATM-Y1475 VIYTLIHY    | 5359 | >ATM-Y1475 VIYTLIHC    | 177   | 5182  |
| >ATM-Y1475 VIYTLIHYI   | 3    | >ATM-Y1475 VIYTLIHCI   | 19    | 16    |
| >ATM-Y1475 VIYTLIHYI   | 46   | >ATM-Y1475 VIYTLIHCI   | 204   | 158   |
| >ATM-Y1475 VIYTLIHYI   | 14   | >ATM-Y1475 VIYTLIHCI   | 35    | 21    |
| >ATM-Y1475 VIYTLIHYI   | 35   | >ATM-Y1475 VIYTLIHCI   | 354   | 319   |

|                         |     |                         |       |       |
|-------------------------|-----|-------------------------|-------|-------|
| >ATM-Y1475 VIYTLIHYI    | 8   | >ATM-Y1475 VIYTLIHCI    | 41    | 33    |
| >ATM-Y1475 VIYTLIH Y    | 84  | >ATM-Y1475 VIYTLIHC     | 17587 | 17503 |
| >ATM-Y1475 VIYTLIH Y    | 208 | >ATM-Y1475 VIYTLIHC     | 23881 | 23673 |
| >ATM-Y1475 VIYTLIH Y    | 49  | >ATM-Y1475 VIYTLIHC     | 26727 | 26678 |
| >ATM-Y1475 VIYTLIH Y    | 30  | >ATM-Y1475 VIYTLIHC     | 19175 | 19145 |
| >ATM-Y1475 VIYTLIH Y    | 64  | >ATM-Y1475 VIYTLIHC     | 21330 | 21266 |
| >ATM-Y1475 VIYTLIH YI   | 134 | >ATM-Y1475 VIYTLIHCI    | 1921  | 1787  |
| >ATM-Y1475 VIYTLIH YI   | 129 | >ATM-Y1475 VIYTLIHCI    | 3553  | 3424  |
| >ATM-Y1475 VIYTLIH Y    | 50  | >ATM-Y1475 VIYTLIHC     | 24609 | 24559 |
| >ATM-Y1475 VIYTLIH Y    | 153 | >ATM-Y1475 VIYTLIHC     | 15681 | 15528 |
| >ATM-Y1475 VIYTLIH Y    | 330 | >ATM-Y1475 VIYTLIHC     | 11077 | 10747 |
| >ATM-Y1475 VIYTLIH Y    | 186 | >ATM-Y1475 VIYTLIHC     | 22026 | 21840 |
| >ATM-Y1475 VIYTLIH YI   | 328 | >ATM-Y1475 VIYTLIHCI    | 5303  | 4975  |
| >ATM-Y1475 DVIYTLIH YI  | 363 | >ATM-Y1475 DVIYTLIHCI   | 1907  | 1544  |
| >ATM-Y1475 DVIYTLIH YI  | 263 | >ATM-Y1475 DVIYTLIHCI   | 1265  | 1002  |
| >ATM-Y1475 DVIYTLIH Y   | 156 | >ATM-Y1475 DVIYTLIHC    | 17863 | 17707 |
| >ATM-Y1475 DVIYTLIH Y   | 14  | >ATM-Y1475 DVIYTLIHC    | 8425  | 8411  |
| >ATM-Y1475 DVIYTLIH Y   | 2   | >ATM-Y1475 DVIYTLIHC    | 313   | 311   |
| >ATM-Y1475 DVIYTLIH YI  | 12  | >ATM-Y1475 DVIYTLIHCI   | 15    | 3     |
| >ATM-Y1475 DVIYTLIH Y   | 64  | >ATM-Y1475 DVIYTLIHC    | 22178 | 22114 |
| >ATM-Y1475 DVIYTLIH Y   | 43  | >ATM-Y1475 DVIYTLIHC    | 19443 | 19400 |
| >ATM-Y1475 DVIYTLIH Y   | 204 | >ATM-Y1475 DVIYTLIHC    | 19810 | 19606 |
| >ATM-Y1475 DVIYTLIH YI  | 62  | >ATM-Y1475 DVIYTLIHCI   | 170   | 108   |
| >ATM-Y1475 DVIYTLIH YI  | 18  | >ATM-Y1475 DVIYTLIHCI   | 265   | 247   |
| >ATM-Y1475 RDVIYTLIH YI | 271 | >ATM-Y1475 RDVIYTLIHCI  | 323   | 52    |
| >ATM-Y1475 RDVIYTLIH Y  | 344 | >ATM-Y1475 RDVIYTLIHC   | 31036 | 30692 |
| >ATM-Y1475 RDVIYTLIH Y  | 270 | >ATM-Y1475 RDVIYTLIHC   | 26217 | 25947 |
| >ATM-Y1475 RDVIYTLIH YI | 329 | >ATM-Y1475 RDVIYTLIHCI  | 263   | 66    |
| >ATM-Y1475 RDVIYTLIH YI | 45  | >ATM-Y1475 RDVIYTLIHCI  | 43    | 2     |
| >ATM-Y1475 RDVIYTLIH YI | 34  | >ATM-Y1475 RDVIYTLIHCI  | 50    | 16    |
| >ATM-Y1961 HFTALLYAEI Y | 35  | >ATM-Y1961 HFTALLYAEIC  | 18681 | 18646 |
| >ATM-Y1961 HFTALLYAEI Y | 64  | >ATM-Y1961 HFTALLYAEIC  | 26959 | 26895 |
| >ATM-Y1961 HFTALLYAEI Y | 459 | >ATM-Y1961 HFTALLYAEIC  | 17795 | 17336 |
| >ATM-Y1961 HFTALLYAEI Y | 62  | >ATM-Y1961 HFTALLYAEIC  | 31843 | 31781 |
| >ATM-Y1961 EIYADKKSM    | 173 | >ATM-Y1961 EICADKKSM    | 142   | 31    |
| >ATM-Y1961 AEIYADKKSM   | 278 | >ATM-Y1961 AEICADKKSM   | 1771  | 1493  |
| >ATM-Y1961 AEIYADKKSM   | 235 | >ATM-Y1961 AEICADKKSM   | 415   | 180   |
| >ATM-Y1961 AEIYADKK S   | 487 | >ATM-Y1961 AEICADKKS    | 434   | 53    |
| >ATM-Y1961 AEIYADKKSM   | 379 | >ATM-Y1961 AEICADKKSM   | 2294  | 1915  |
| >ATM-Y1961 AEIYADKKSM   | 25  | >ATM-Y1961 AEICADKKSM   | 32    | 7     |
| >ATM-Y1961 YAEIYADK     | 178 | >ATM-Y1961 YAEICADK     | 229   | 51    |
| >ATM-Y1961 YAEIYADKK    | 124 | >ATM-Y1961 YAEICADKK    | 253   | 129   |
| >ATM-Y1961 YAEIYADKKS I | 139 | >ATM-Y1961 YAEICADKKS I | 266   | 127   |

|                        |      |                        |       |       |
|------------------------|------|------------------------|-------|-------|
| >ATM-Y1961 YAEIYADKKS  | 232  | >ATM-Y1961 YAEICADKKS  | 205   | 27    |
| >ATM-Y1961 YAEIYADKKS  | 652  | >ATM-Y1961 YAEICADKKS  | 399   | 253   |
| >ATM-Y1961 LYAEIYADK   | 470  | >ATM-Y1961 LYAEICADK   | 849   | 379   |
| >ATM-Y1961 LYAEIYADK   | 330  | >ATM-Y1961 LYAEICADK   | 239   | 91    |
| >ATM-Y1961 LLYAEIYA    | 15   | >ATM-Y1961 LLYAEICA    | 52    | 37    |
| >ATM-Y1961 LLYAEIYA    | 12   | >ATM-Y1961 LLYAEICA    | 62    | 50    |
| >ATM-Y1961 LLYAEIYAD   | 185  | >ATM-Y1961 LLYAEICAD   | 937   | 752   |
| >ATM-Y1961 LLYAEIYA    | 11   | >ATM-Y1961 LLYAEICA    | 63    | 52    |
| >ATM-Y1961 LLYAEIYA    | 49   | >ATM-Y1961 LLYAEICA    | 244   | 195   |
| >ATM-Y1961 LLYAEIYA    | 3    | >ATM-Y1961 LLYAEICA    | 15    | 12    |
| >ATM-Y1961 LLYAEIYAD   | 166  | >ATM-Y1961 LLYAEICAD   | 239   | 73    |
| >ATM-Y1961 LLYAEIYA    | 17   | >ATM-Y1961 LLYAEICA    | 80    | 63    |
| >ATM-Y1961 LLYAEIYA    | 9    | >ATM-Y1961 LLYAEICA    | 15    | 6     |
| >ATM-Y1961 LLYAEIYA    | 93   | >ATM-Y1961 LLYAEICA    | 590   | 497   |
| >ATM-Y1961 LLYAEIYA    | 4    | >ATM-Y1961 LLYAEICA    | 11    | 7     |
| >ATM-Y1961 LLYAEIYAD   | 1547 | >ATM-Y1961 LLYAEICAD   | 370   | 1177  |
| >ATM-Y1961 LLYAEIYADK  | 150  | >ATM-Y1961 LLYAEICADK  | 148   | 2     |
| >ATM-Y1961 LLYAEIYADKK | 500  | >ATM-Y1961 LLYAEICADKK | 440   | 60    |
| >ATM-Y1961 LLYAEIYADK  | 31   | >ATM-Y1961 LLYAEICADK  | 43    | 12    |
| >ATM-Y1961 LLYAEIYADKK | 49   | >ATM-Y1961 LLYAEICADKK | 51    | 2     |
| >ATM-Y1961 LLYAEIYADK  | 116  | >ATM-Y1961 LLYAEICADK  | 175   | 59    |
| >ATM-Y1961 LLYAEIYADKK | 90   | >ATM-Y1961 LLYAEICADKK | 173   | 83    |
| >ATM-Y1961 LLYAEIYADK  | 121  | >ATM-Y1961 LLYAEICADK  | 132   | 11    |
| >ATM-Y1961 LLYAEIYADKK | 324  | >ATM-Y1961 LLYAEICADKK | 569   | 245   |
| >ATM-Y1961 ALLYAEIYA   | 37   | >ATM-Y1961 ALLYAEICA   | 236   | 199   |
| >ATM-Y1961 ALLYAEIYA   | 223  | >ATM-Y1961 ALLYAEICA   | 1774  | 1551  |
| >ATM-Y1961 ALLYAEIYA   | 213  | >ATM-Y1961 ALLYAEICA   | 1383  | 1170  |
| >ATM-Y1961 ALLYAEIYA   | 29   | >ATM-Y1961 ALLYAEICA   | 669   | 640   |
| >ATM-Y1961 ALLYAEIYA   | 52   | >ATM-Y1961 ALLYAEICA   | 368   | 316   |
| >ATM-Y1961 ALLYAEIYA   | 16   | >ATM-Y1961 ALLYAEICA   | 42    | 26    |
| >ATM-Y1961 ALLYAEIYA   | 117  | >ATM-Y1961 ALLYAEICA   | 789   | 672   |
| >ATM-Y1961 ALLYAEIYA   | 36   | >ATM-Y1961 ALLYAEICA   | 180   | 144   |
| >ATM-Y1961 ALLYAEIYADK | 181  | >ATM-Y1961 ALLYAEICADK | 273   | 92    |
| >ATM-Y1961 ALLYAEIYADK | 134  | >ATM-Y1961 ALLYAEICADK | 339   | 205   |
| >ATM-Y1961 ALLYAEIY    | 182  | >ATM-Y1961 ALLYAEIC    | 23746 | 23564 |
| >ATM-Y1961 ALLYAEIYADK | 250  | >ATM-Y1961 ALLYAEICADK | 1055  | 805   |
| >ATM-Y1961 ALLYAEIY    | 220  | >ATM-Y1961 ALLYAEIC    | 29783 | 29563 |
| >ATM-Y1961 ALLYAEIY    | 348  | >ATM-Y1961 ALLYAEIC    | 26054 | 25706 |
| >ATM-Y1961 ALLYAEIY    | 428  | >ATM-Y1961 ALLYAEIC    | 17411 | 16983 |
| >ATM-Y1961 ALLYAEIY    | 418  | >ATM-Y1961 ALLYAEIC    | 28650 | 28232 |
| >ATM-Y1961 ALLYAEIY    | 79   | >ATM-Y1961 ALLYAEIC    | 10931 | 10852 |
| >ATM-Y1961 TALLYAEIYA  | 280  | >ATM-Y1961 TALLYAEICA  | 2215  | 1935  |
| >ATM-Y1961 TALLYAEIYA  | 372  | >ATM-Y1961 TALLYAEICA  | 2022  | 1650  |

|                        |       |                        |       |       |
|------------------------|-------|------------------------|-------|-------|
| >ATM-Y1961 TALLYAEIY   | 148   | >ATM-Y1961 TALLYAEIC   | 21283 | 21135 |
| >ATM-Y1961 TALLYAEIY   | 197   | >ATM-Y1961 TALLYAEIC   | 18180 | 17983 |
| >ATM-Y1961 TALLYAEIY   | 296   | >ATM-Y1961 TALLYAEIC   | 24356 | 24060 |
| >ATM-Y1961 FTALLYAEIY  | 31    | >ATM-Y1961 FTALLYAEIC  | 20548 | 20517 |
| >ATM-Y1961 FTALLYAEIYA | 288   | >ATM-Y1961 FTALLYAEICA | 1597  | 1309  |
| >ATM-Y1961 FTALLYAEIYA | 35    | >ATM-Y1961 FTALLYAEICA | 213   | 178   |
| >ATM-Y1961 FTALLYAEIYA | 261   | >ATM-Y1961 FTALLYAEICA | 1139  | 878   |
| >ATM-Y1961 FTALLYAEIYA | 113   | >ATM-Y1961 FTALLYAEICA | 635   | 522   |
| >ATM-Y1961 FTALLYAEIY  | 453   | >ATM-Y1961 FTALLYAEIC  | 19075 | 18622 |
| >ATM-Y1961 FTALLYAEIY  | 87    | >ATM-Y1961 FTALLYAEIC  | 30744 | 30657 |
| >ATM-Y1961 FTALLYAEIY  | 129   | >ATM-Y1961 FTALLYAEIC  | 26774 | 26645 |
| >ATM-Y1961 FTALLYAEIY  | 382   | >ATM-Y1961 FTALLYAEIC  | 30510 | 30128 |
| >ATM-Y1961 FTALLYAEIY  | 75    | >ATM-Y1961 FTALLYAEIC  | 20645 | 20570 |
| >ATM-Y1961 FTALLYAEIYA | 10    | >ATM-Y1961 FTALLYAEICA | 46    | 36    |
| >ATM-Y1961 FTALLYAEIYA | 265   | >ATM-Y1961 FTALLYAEICA | 2348  | 2083  |
| >ATM-Y1961 FTALLYAEIY  | 442   | >ATM-Y1961 FTALLYAEIC  | 24811 | 24369 |
| >ATM-Y1961 FTALLYAEIY  | 15    | >ATM-Y1961 FTALLYAEIC  | 15004 | 14989 |
| >ATM-Y1961 FTALLYAEIY  | 151   | >ATM-Y1961 FTALLYAEIC  | 11335 | 11184 |
| >ATM-Y1961 FTALLYAEIY  | 23    | >ATM-Y1961 FTALLYAEIC  | 4514  | 4491  |
| >ATM-Y2019 LYGCGGGKM   | 141   | >ATM-Y2019 LSGCGGGKM   | 22362 | 22221 |
| >ATM-Y2019 LYGCGGGKM   | 12    | >ATM-Y2019 LSGCGGGKM   | 16788 | 16776 |
| >ATM-Y2019 LYGCGGGKM   | 24920 | >ATM-Y2019 LSGCGGGKM   | 184   | 24736 |
| >ATM-Y2019 LYGCGGGKM   | 25145 | >ATM-Y2019 LSGCGGGKM   | 137   | 25008 |
| >ATM-Y2019 LYGCGGGKM   | 3291  | >ATM-Y2019 LSGCGGGKM   | 56    | 3235  |
| >ATM-Y2019 LYGCGGGKM   | 25234 | >ATM-Y2019 LSGCGGGKM   | 383   | 24851 |
| >ATM-Y2019 YRSIGEPDSL  | 179   | >ATM-Y2019 YRSIGEPDSL  | 21563 | 21384 |
| >ATM-Y2019 YRSIGEPDSL  | 403   | >ATM-Y2019 YRSIGEPDSL  | 25786 | 25383 |
| >ATM-Y2019 YRSIGEPDSL  | 239   | >ATM-Y2019 YRSIGEPDSL  | 8911  | 8672  |
| >ATM-Y2019 YRSIGEPDSL  | 198   | >ATM-Y2019 YRSIGEPDSL  | 14023 | 13825 |
| >ATM-Y2019 SLYGCGGGK   | 414   | >ATM-Y2019 SLSGCGGGK   | 2258  | 1844  |
| >ATM-Y2019 SLYGCGGGK   | 76    | >ATM-Y2019 SLSGCGGGK   | 201   | 125   |
| >ATM-Y2019 SLYGCGGGK   | 114   | >ATM-Y2019 SLSGCGGGK   | 41    | 73    |
| >ATM-Y2019 SLYGCGGGK   | 139   | >ATM-Y2019 SLSGCGGGK   | 505   | 366   |
| >ATM-Y2019 SLYGCGGGK   | 45    | >ATM-Y2019 SLSGCGGGK   | 131   | 86    |
| >ATM-Y2019 SLYGCGGGK   | 41    | >ATM-Y2019 SLSGCGGGK   | 1023  | 982   |
| >ATM-Y2019 SLYGCGGGK   | 6     | >ATM-Y2019 SLSGCGGGK   | 72    | 66    |
| >ATM-Y2019 SLYGCGGGK   | 240   | >ATM-Y2019 SLSGCGGGK   | 1130  | 890   |
| >ATM-Y2019 SLYGCGGGK   | 151   | >ATM-Y2019 SLSGCGGGK   | 1545  | 1394  |
| >ATM-Y2019 SLYGCGGGK   | 16    | >ATM-Y2019 SLSGCGGGK   | 86    | 70    |
| >ATM-Y2019 SLYGCGGGK   | 76    | >ATM-Y2019 SLSGCGGGK   | 349   | 273   |
| >ATM-Y2019 SLYGCGGGK   | 5     | >ATM-Y2019 SLSGCGGGK   | 8     | 3     |
| >ATM-Y2019 SLYGCGGGK   | 33    | >ATM-Y2019 SLSGCGGGK   | 104   | 71    |
| >ATM-Y2019 SLYGCGGGK   | 79    | >ATM-Y2019 SLSGCGGGK   | 273   | 194   |



|                        |      |                        |       |       |
|------------------------|------|------------------------|-------|-------|
| >ATM-Y2019 SLYGCGGGK   | 62   | >ATM-Y2019 SLSGCGGGK   | 468   | 406   |
| >ATM-Y2019 SLYGCGGGK   | 193  | >ATM-Y2019 SLSGCGGGK   | 1838  | 1645  |
| >ATM-Y2019 SLYGCGGGK   | 122  | >ATM-Y2019 SLSGCGGGK   | 95    | 27    |
| >ATM-Y2019 DSLYGCGGGI  | 399  | >ATM-Y2019 DSLSGCGGGI  | 1197  | 798   |
| >ATM-Y2019 DSLYGCGGGI  | 582  | >ATM-Y2019 DSLSGCGGGI  | 460   | 122   |
| >ATM-Y2019 DSLYGCGGGI  | 377  | >ATM-Y2019 DSLSGCGGGI  | 228   | 149   |
| >ATM-Y2019 GEPDSLYGC   | 117  | >ATM-Y2019 GEPDSLSGC   | 170   | 53    |
| >ATM-Y2019 IGEPDSLY    | 285  | >ATM-Y2019 IGEPDSLS    | 25314 | 25029 |
| >ATM-Y2019 SIGEPDSLYGC | 278  | >ATM-Y2019 SIGEPDSLSGC | 710   | 432   |
| >ATM-Y2019 SIGEPDSLY   | 75   | >ATM-Y2019 SIGEPDSLS   | 19810 | 19735 |
| >ATM-Y2019 SIGEPDSLY   | 246  | >ATM-Y2019 SIGEPDSLS   | 21560 | 21314 |
| >ATM-Y2019 SIGEPDSLY   | 139  | >ATM-Y2019 SIGEPDSLS   | 25387 | 25248 |
| >ATM-Y2019 SIGEPDSLY   | 124  | >ATM-Y2019 SIGEPDSLS   | 18188 | 18064 |
| >ATM-Y2019 SIGEPDSLY   | 139  | >ATM-Y2019 SIGEPDSLS   | 14152 | 14013 |
| >ATM-Y2019 RSIGEPDSLY  | 454  | >ATM-Y2019 RSIGEPDSLS  | 32258 | 31804 |
| >ATM-Y2019 RSIGEPDSLY  | 55   | >ATM-Y2019 RSIGEPDSLS  | 18940 | 18885 |
| >ATM-Y2019 RSIGEPDSLY  | 231  | >ATM-Y2019 RSIGEPDSLS  | 28253 | 28022 |
| >ATM-Y2019 RSIGEPDSLY  | 11   | >ATM-Y2019 RSIGEPDSLS  | 7903  | 7892  |
| >ATM-Y2019 RSIGEPDSLY  | 309  | >ATM-Y2019 RSIGEPDSLS  | 17223 | 16914 |
| >ATM-Y2019 RSIGEPDSLY  | 485  | >ATM-Y2019 RSIGEPDSLS  | 16940 | 16455 |
| >ATM-Y2019 RSIGEPDSLY  | 4    | >ATM-Y2019 RSIGEPDSLS  | 2079  | 2075  |
| >ATM-Y2019 RSIGEPDSLY  | 127  | >ATM-Y2019 RSIGEPDSLS  | 9897  | 9770  |
| >ATM-Y2019 RSIGEPDSLY  | 26   | >ATM-Y2019 RSIGEPDSLS  | 9885  | 9859  |
| >ATM-Y2019 RSIGEPDSLY  | 41   | >ATM-Y2019 RSIGEPDSLS  | 9062  | 9021  |
| >ATM-Y2954 YDPLFDWTM   | 937  | >ATM-Y2954 CDPLFDWTM   | 262   | 675   |
| >ATM-Y2954 LYDPLFDW    | 431  | >ATM-Y2954 LCDPLFDW    | 24588 | 24157 |
| >ATM-Y2954 LYDPLFDW    | 389  | >ATM-Y2954 LCDPLFDW    | 20688 | 20299 |
| >ATM-Y2954 LYDPLFDW    | 18   | >ATM-Y2954 LCDPLFDW    | 19197 | 19179 |
| >ATM-Y2954 LYDPLFDWTM  | 33   | >ATM-Y2954 LCDPLFDWTM  | 19207 | 19174 |
| >ATM-Y2954 LYDPLFDW    | 819  | >ATM-Y2954 LCDPLFDW    | 389   | 430   |
| >ATM-Y2954 LYDPLFDWTM  | 443  | >ATM-Y2954 LCDPLFDWTM  | 14882 | 14439 |
| >ATM-Y2954 TLLTIVEVLLY | 5988 | >ATM-Y2954 TLLTIVEVLLC | 215   | 5773  |
| >ATM-Y2954 TLLTIVEVLLY | 6836 | >ATM-Y2954 TLLTIVEVLLC | 333   | 6503  |
| >ATM-Y2954 TLLTIVEVLLY | 462  | >ATM-Y2954 TLLTIVEVLLC | 19275 | 18813 |
| >ATM-Y2954 TLLTIVEVLLY | 473  | >ATM-Y2954 TLLTIVEVLLC | 24485 | 24012 |
| >ATM-Y2954 TLLTIVEVLLY | 16   | >ATM-Y2954 TLLTIVEVLLC | 14577 | 14561 |
| >ATM-Y2954 TLLTIVEVLLY | 494  | >ATM-Y2954 TLLTIVEVLLC | 31498 | 31004 |
| >ATM-Y2954 TLLTIVEVLLY | 9    | >ATM-Y2954 TLLTIVEVLLC | 21082 | 21073 |
| >ATM-Y2954 LLYDPLFDWT  | 17   | >ATM-Y2954 LLC DPLFDWT | 65    | 48    |
| >ATM-Y2954 LLYDPLFDWT  | 72   | >ATM-Y2954 LLC DPLFDWT | 459   | 387   |
| >ATM-Y2954 LLYDPLFDWT  | 54   | >ATM-Y2954 LLC DPLFDWT | 156   | 102   |
| >ATM-Y2954 LLYDPLFDWT  | 94   | >ATM-Y2954 LLC DPLFDWT | 472   | 378   |
| >ATM-Y2954 LLYDPLFDWT  | 61   | >ATM-Y2954 LLC DPLFDWT | 1020  | 959   |

|                       |     |                        |      |      |
|-----------------------|-----|------------------------|------|------|
| >ATM-Y2954 LLYDPLFDWT | 80  | >ATM-Y2954 LLCDPFLFDWT | 192  | 112  |
| >ATM-Y2954 LLYDPLFDWT | 25  | >ATM-Y2954 LLCDPFLFDWT | 95   | 70   |
| >ATM-Y2954 LLYDPLFD   | 141 | >ATM-Y2954 LLCDPFLFD   | 1870 | 1729 |
| >ATM-Y2954 LLYDPLFDW  | 292 | >ATM-Y2954 LLCDPFLFDW  | 4168 | 3876 |
| >ATM-Y2954 LLYDPLFDWT | 8   | >ATM-Y2954 LLCDPFLFDWT | 74   | 66   |
| >ATM-Y2954 LLYDPLFDWT | 2   | >ATM-Y2954 LLCDPFLFDWT | 7    | 5    |
| >ATM-Y2954 LLYDPLFDWT | 443 | >ATM-Y2954 LLCDPFLFDWT | 6013 | 5570 |
| >ATM-Y2954 LLYDPLFDWT | 5   | >ATM-Y2954 LLCDPFLFDWT | 67   | 62   |
| >ATM-Y2954 LLYDPLFDWT | 64  | >ATM-Y2954 LLCDPFLFDWT | 2347 | 2283 |
| >ATM-Y2954 LLYDPLFDWT | 9   | >ATM-Y2954 LLCDPFLFDWT | 201  | 192  |
| >ATM-Y2954 LLYDPLFDWT | 18  | >ATM-Y2954 LLCDPFLFDWT | 117  | 99   |
| >ATM-Y2954 LLYDPLFD   | 347 | >ATM-Y2954 LLCDPFLFD   | 3295 | 2948 |
| >ATM-Y2954 LLYDPLFDW  | 135 | >ATM-Y2954 LLCDPFLFDW  | 1333 | 1198 |
| >ATM-Y2954 LLYDPLFDWT | 6   | >ATM-Y2954 LLCDPFLFDWT | 20   | 14   |
| >ATM-Y2954 LLYDPLFDWT | 3   | >ATM-Y2954 LLCDPFLFDWT | 5    | 2    |
| >ATM-Y2954 LLYDPLFDWT | 336 | >ATM-Y2954 LLCDPFLFDWT | 5631 | 5295 |
| >ATM-Y2954 LLYDPLFDWT | 297 | >ATM-Y2954 LLCDPFLFDWT | 844  | 547  |
| >ATM-Y2954 LLYDPLFDWT | 351 | >ATM-Y2954 LLCDPFLFDWT | 4054 | 3703 |
| >ATM-Y2954 LLYDPLFDWT | 377 | >ATM-Y2954 LLCDPFLFDWT | 4458 | 4081 |
| >ATM-Y2954 LLYDPLFDW  | 27  | >ATM-Y2954 LLCDPFLFDW  | 304  | 277  |
| >ATM-Y2954 LLYDPLFDWT | 200 | >ATM-Y2954 LLCDPFLFDWT | 2047 | 1847 |
| >ATM-Y2954 LLYDPLFDWT | 316 | >ATM-Y2954 LLCDPFLFDWT | 1349 | 1033 |
| >ATM-Y2954 LLYDPLFDW  | 158 | >ATM-Y2954 LLCDPFLFDW  | 2048 | 1890 |
| >ATM-Y2954 LLYDPLFDW  | 385 | >ATM-Y2954 LLCDPFLFDW  | 3415 | 3030 |
| >ATM-Y2954 LLYDPLFDW  | 326 | >ATM-Y2954 LLCDPFLFDW  | 1854 | 1528 |
| >ATM-Y2954 VLLYDPLFDW | 327 | >ATM-Y2954 VLLCDPLFDW  | 61   | 266  |
| >ATM-Y2954 VLLYDPLFDW | 711 | >ATM-Y2954 VLLCDPLFDW  | 449  | 262  |
| >ATM-Y2954 VLLYDPLFDW | 521 | >ATM-Y2954 VLLCDPLFDW  | 499  | 22   |
| >ATM-Y2954 VLLYDPLF   | 329 | >ATM-Y2954 VLLCDPLF    | 158  | 171  |
| >ATM-Y2954 VLLYDPLF   | 179 | >ATM-Y2954 VLLCDPLF    | 379  | 200  |
| >ATM-Y2954 VLLYDPLF   | 92  | >ATM-Y2954 VLLCDPLF    | 114  | 22   |
| >ATM-Y2954 VLLYDPLFDW | 371 | >ATM-Y2954 VLLCDPLFDW  | 679  | 308  |
| >ATM-Y2954 EVLLYDPL   | 163 | >ATM-Y2954 EVLLCDPL    | 406  | 243  |
| >ATM-Y2954 EVLLYDPLF  | 65  | >ATM-Y2954 EVLLCDPLF   | 149  | 84   |
| >ATM-Y2954 EVLLYDPL   | 93  | >ATM-Y2954 EVLLCDPL    | 105  | 12   |
| >ATM-Y2954 EVLLYDPL   | 22  | >ATM-Y2954 EVLLCDPL    | 144  | 122  |
| >ATM-Y2954 EVLLYDPLF  | 315 | >ATM-Y2954 EVLLCDPLF   | 266  | 49   |
| >ATM-Y2954 VEVLLYDPL  | 71  | >ATM-Y2954 VEVLLCDPL   | 51   | 20   |
| >ATM-Y2954 VEVLLYDPL  | 108 | >ATM-Y2954 VEVLLCDPL   | 287  | 179  |
| >ATM-Y2954 VEVLLYDPL  | 21  | >ATM-Y2954 VEVLLCDPL   | 41   | 20   |
| >ATM-Y2954 VEVLLYDPL  | 24  | >ATM-Y2954 VEVLLCDPL   | 30   | 6    |
| >ATM-Y2954 VEVLLYDPLF | 298 | >ATM-Y2954 VEVLLCDPLF  | 151  | 147  |
| >ATM-Y2954 VEVLLYDPLF | 104 | >ATM-Y2954 VEVLLCDPLF  | 96   | 8    |

|                        |      |                        |       |       |
|------------------------|------|------------------------|-------|-------|
| >ATM-Y2954 VEVLLYDPL   | 18   | >ATM-Y2954 VEVLLCDPL   | 18    | 0     |
| >ATM-Y2954 VEVLLYDPLF  | 213  | >ATM-Y2954 VEVLLCDPLF  | 2644  | 2431  |
| >ATM-Y2954 IVEVLLYDPLF | 312  | >ATM-Y2954 IVEVLLCDPLF | 292   | 20    |
| >ATM-Y2954 TIVEVLLYDPL | 392  | >ATM-Y2954 TIVEVLLCDPL | 514   | 122   |
| >ATM-Y2954 TIVEVLLYDPL | 66   | >ATM-Y2954 TIVEVLLCDPL | 109   | 43    |
| >ATM-Y2954 TIVEVLLYDPL | 141  | >ATM-Y2954 TIVEVLLCDPL | 301   | 160   |
| >ATM-Y2954 TIVEVLLYDPL | 24   | >ATM-Y2954 TIVEVLLCDPL | 35    | 11    |
| >ATM-Y2954 TIVEVLLYDPL | 156  | >ATM-Y2954 TIVEVLLCDPL | 530   | 374   |
| >ATM-Y2954 TIVEVLLY    | 239  | >ATM-Y2954 TIVEVLLC    | 23902 | 23663 |
| >ATM-Y2954 TIVEVLLY    | 44   | >ATM-Y2954 TIVEVLLC    | 9870  | 9826  |
| >ATM-Y2954 TIVEVLLY    | 41   | >ATM-Y2954 TIVEVLLC    | 19890 | 19849 |
| >ATM-Y2954 TIVEVLLYDPL | 175  | >ATM-Y2954 TIVEVLLCDPL | 360   | 185   |
| >ATM-Y2954 TIVEVLLY    | 17   | >ATM-Y2954 TIVEVLLC    | 16292 | 16275 |
| >ATM-Y2954 TIVEVLLYDPL | 26   | >ATM-Y2954 TIVEVLLCDPL | 58    | 32    |
| >ATM-Y2954 TIVEVLLYDPL | 64   | >ATM-Y2954 TIVEVLLCDPL | 220   | 156   |
| >ATM-Y2954 TIVEVLLY    | 20   | >ATM-Y2954 TIVEVLLC    | 22894 | 22874 |
| >ATM-Y2954 LTIVEVLLY   | 51   | >ATM-Y2954 LTIVEVLLC   | 15984 | 15933 |
| >ATM-Y2954 LTIVEVLLY   | 239  | >ATM-Y2954 LTIVEVLLC   | 24700 | 24461 |
| >ATM-Y2954 LTIVEVLLY   | 277  | >ATM-Y2954 LTIVEVLLC   | 17969 | 17692 |
| >ATM-Y2954 LTIVEVLLY   | 52   | >ATM-Y2954 LTIVEVLLC   | 24682 | 24630 |
| >ATM-Y2954 LTIVEVLLY   | 8    | >ATM-Y2954 LTIVEVLLC   | 12725 | 12717 |
| >ATM-Y2954 LTIVEVLLY   | 373  | >ATM-Y2954 LTIVEVLLC   | 29983 | 29610 |
| >ATM-Y2954 LTIVEVLLY   | 10   | >ATM-Y2954 LTIVEVLLC   | 21462 | 21452 |
| >ATM-Y2954 LTIVEVLLY   | 170  | >ATM-Y2954 LTIVEVLLC   | 16942 | 16772 |
| >ATM-Y2954 LTIVEVLLY   | 4    | >ATM-Y2954 LTIVEVLLC   | 4520  | 4516  |
| >ATM-Y2954 LTIVEVLLY   | 28   | >ATM-Y2954 LTIVEVLLC   | 1358  | 1330  |
| >ATM-Y2954 LTIVEVLLY   | 73   | >ATM-Y2954 LTIVEVLLC   | 12440 | 12367 |
| >ATM-Y2954 LTIVEVLLY   | 482  | >ATM-Y2954 LTIVEVLLC   | 39535 | 39053 |
| >ATM-Y2954 LLTIVEVLLY  | 3004 | >ATM-Y2954 LLTIVEVLLC  | 52    | 2952  |
| >ATM-Y2954 LLTIVEVLLY  | 160  | >ATM-Y2954 LLTIVEVLLC  | 27828 | 27668 |
| >ATM-Y2954 LLTIVEVLLY  | 29   | >ATM-Y2954 LLTIVEVLLC  | 23435 | 23406 |
| >ATM-Y2954 LLTIVEVLLY  | 131  | >ATM-Y2954 LLTIVEVLLC  | 19882 | 19751 |
| >ATM-Y332C YSSGFRNIAV  | 269  | >ATM-Y332C CSSGFRNIAV  | 4411  | 4142  |
| >ATM-Y332C YSSGFRNIAV  | 180  | >ATM-Y332C CSSGFRNIAV  | 2188  | 2008  |
| >ATM-Y332C YSSGFRNIAV  | 329  | >ATM-Y332C CSSGFRNIAV  | 3578  | 3249  |
| >ATM-Y332C YSSGFRNIAV  | 77   | >ATM-Y332C CSSGFRNIAV  | 1417  | 1340  |
| >ATM-Y332C YSSGFRNIAV  | 61   | >ATM-Y332C CSSGFRNIAV  | 50    | 11    |
| >ATM-Y332C YSSGFRNIAV  | 381  | >ATM-Y332C CSSGFRNIAV  | 315   | 66    |
| >ATM-Y332C YSSGFRNIAV  | 20   | >ATM-Y332C CSSGFRNIAV  | 103   | 83    |
| >ATM-Y332C YSSGFRNI    | 316  | >ATM-Y332C CSSGFRNI    | 1132  | 816   |
| >ATM-Y332C YSSGFRNIAV  | 26   | >ATM-Y332C CSSGFRNIAV  | 81    | 55    |
| >ATM-Y332C YSSGFRNIAV  | 459  | >ATM-Y332C CSSGFRNIAV  | 8393  | 7934  |
| >ATM-Y332C YSSGFRNI    | 273  | >ATM-Y332C CSSGFRNI    | 6692  | 6419  |

|                         |     |                        |       |       |
|-------------------------|-----|------------------------|-------|-------|
| >ATM-Y332C YSSGFRNI     | 100 | >ATM-Y332C CSSGFRNI    | 1379  | 1279  |
| >ATM-Y332C YSSGFRNIAV   | 91  | >ATM-Y332C CSSGFRNIAV  | 878   | 787   |
| >ATM-Y332C YSSGFRNI     | 64  | >ATM-Y332C CSSGFRNI    | 19    | 45    |
| >ATM-Y332C KYSSGFRNI    | 13  | >ATM-Y332C KCSSGFRNI   | 17133 | 17120 |
| >ATM-Y332C KYSSGFRNIA\  | 94  | >ATM-Y332C KCSSGFRNIA\ | 24083 | 23989 |
| >ATM-Y332C KYSSGFRNI    | 73  | >ATM-Y332C KCSSGFRNI   | 15881 | 15808 |
| >ATM-Y332C KYSSGFRNI    | 115 | >ATM-Y332C KCSSGFRNI   | 15348 | 15233 |
| >ATM-Y332C KYSSGFRNI    | 10  | >ATM-Y332C KCSSGFRNI   | 15992 | 15982 |
| >ATM-Y332C KYSSGFRNIA\  | 331 | >ATM-Y332C KCSSGFRNIA\ | 23139 | 22808 |
| >ATM-Y332C KYSSGFRNI    | 322 | >ATM-Y332C KCSSGFRNI   | 3371  | 3049  |
| >ATM-Y332C KYSSGFRNIA   | 153 | >ATM-Y332C KCSSGFRNIA  | 2060  | 1907  |
| >ATM-Y332C KYSSGFRNIA\  | 157 | >ATM-Y332C KCSSGFRNIA\ | 1934  | 1777  |
| >ATM-Y332C KYSSGFRNI    | 409 | >ATM-Y332C KCSSGFRNI   | 11501 | 11092 |
| >ATM-Y332C KYSSGFRNIA\  | 470 | >ATM-Y332C KCSSGFRNIA\ | 12747 | 12277 |
| >ATM-Y332C KYSSGFRNI    | 227 | >ATM-Y332C KCSSGFRNI   | 20217 | 19990 |
| >ATM-Y332C KYSSGFRNIA\  | 99  | >ATM-Y332C KCSSGFRNIA\ | 20239 | 20140 |
| >ATM-Y332C EISHIGSRGKY  | 289 | >ATM-Y332C EISHIGSRGKC | 18484 | 18195 |
| >ATM-Y332C EISHIGSRGKY  | 49  | >ATM-Y332C EISHIGSRGKC | 12472 | 12423 |
| >ATM-Y332C EISHIGSRGKY  | 208 | >ATM-Y332C EISHIGSRGKC | 30723 | 30515 |
| >ATM-Y332C EISHIGSRGKY  | 64  | >ATM-Y332C EISHIGSRGKC | 25707 | 25643 |
| >ATM-Y332C EISHIGSRGKY  | 268 | >ATM-Y332C EISHIGSRGKC | 22255 | 21987 |
| >ATM-Y332C GK YSSGFR    | 356 | >ATM-Y332C GKCSSGFR    | 3507  | 3151  |
| >ATM-Y332C GK YSSGFRNI  | 15  | >ATM-Y332C GKCSSGFRNI  | 220   | 205   |
| >ATM-Y332C GK YSSGFRNI, | 129 | >ATM-Y332C GKCSSGFRNI, | 1368  | 1239  |
| >ATM-Y332C RGKYSSGFR    | 21  | >ATM-Y332C RGKCSSGFR   | 25    | 4     |
| >ATM-Y332C RGKYSSGFRN   | 34  | >ATM-Y332C RGKCSSGFRN  | 39    | 5     |
| >ATM-Y332C RGKYSSGFR    | 18  | >ATM-Y332C RGKCSSGFR   | 25    | 7     |
| >ATM-Y332C RGKYSSGF     | 76  | >ATM-Y332C RGKCSSGF    | 86    | 10    |
| >ATM-Y332C RGKYSSGF     | 55  | >ATM-Y332C RGKCSSGF    | 67    | 12    |
| >ATM-Y332C RGKYSSGF     | 37  | >ATM-Y332C RGKCSSGF    | 47    | 10    |
| >ATM-Y332C RGKYSSGFR    | 344 | >ATM-Y332C RGKCSSGFR   | 120   | 224   |
| >ATM-Y332C RGKYSSGFRN   | 478 | >ATM-Y332C RGKCSSGFRN  | 571   | 93    |
| >ATM-Y332C SRGKYSSGFR   | 550 | >ATM-Y332C SRGKCSSGFR  | 424   | 126   |
| >ATM-Y332C SRGKYSSGF    | 49  | >ATM-Y332C SRGKCSSGF   | 87    | 38    |
| >ATM-Y332C SRGKYSSGFR   | 304 | >ATM-Y332C SRGKCSSGFR  | 193   | 111   |
| >ATM-Y332C SRGKYSSGF    | 180 | >ATM-Y332C SRGKCSSGF   | 274   | 94    |
| >ATM-Y332C SRGKYSSGFR   | 549 | >ATM-Y332C SRGKCSSGFR  | 222   | 327   |
| >ATM-Y332C GSRGKYSSG    | 373 | >ATM-Y332C GSRGKCSSG   | 2336  | 1963  |
| >ATM-Y332C GSRGKYSSGF   | 39  | >ATM-Y332C GSRGKCSSGF  | 120   | 81    |
| >ATM-Y332C GSRGKYSSGF   | 33  | >ATM-Y332C GSRGKCSSGF  | 72    | 39    |
| >ATM-Y332C GSRGKYSSGF   | 171 | >ATM-Y332C GSRGKCSSGF  | 174   | 3     |
| >ATM-Y332C GSRGKYSSGF   | 187 | >ATM-Y332C GSRGKCSSGF  | 350   | 163   |
| >ATM-Y332C GSRGKYSSGF   | 4   | >ATM-Y332C GSRGKCSSGF  | 4     | 0     |

|                        |       |                        |       |       |
|------------------------|-------|------------------------|-------|-------|
| >ATM-Y332C GSRGKYSSG   | 709   | >ATM-Y332C GSRGKCSSG   | 348   | 361   |
| >ATM-Y332C GSRGKYSSGF  | 67    | >ATM-Y332C GSRGKCSSGF  | 48    | 19    |
| >ATM-Y332C IGSRGKYSSGI | 363   | >ATM-Y332C IGSRGKCSSGI | 388   | 25    |
| >ATM-Y332C IGSRGKYSSGI | 124   | >ATM-Y332C IGSRGKCSSGI | 128   | 4     |
| >ATM-Y332C HIGSRGKY    | 453   | >ATM-Y332C HIGSRGKC    | 25471 | 25018 |
| >ATM-Y332C HIGSRGKY    | 161   | >ATM-Y332C HIGSRGKC    | 26350 | 26189 |
| >ATM-Y332C HIGSRGKY    | 331   | >ATM-Y332C HIGSRGKC    | 27059 | 26728 |
| >ATM-Y332C HIGSRGKY    | 493   | >ATM-Y332C HIGSRGKC    | 28266 | 27773 |
| >ATM-Y332C HIGSRGKY    | 349   | >ATM-Y332C HIGSRGKC    | 39050 | 38701 |
| >ATM-Y332C SHIGSRGKY   | 153   | >ATM-Y332C SHIGSRGKC   | 27946 | 27793 |
| >ATM-Y332C SHIGSRGKY   | 40    | >ATM-Y332C SHIGSRGKC   | 17219 | 17179 |
| >ATM-Y332C ISHIGSRGKY  | 3     | >ATM-Y332C ISHIGSRGKC  | 2733  | 2730  |
| >ATM-Y332C ISHIGSRGKY  | 58    | >ATM-Y332C ISHIGSRGKC  | 15468 | 15410 |
| >BAP1-C91W CATHALLSV   | 712   | >BAP1-C91W WATHALLSV   | 179   | 533   |
| >BAP1-C91W CATHALLSV   | 125   | >BAP1-C91W WATHALLSV   | 20    | 105   |
| >BAP1-C91W CATHALLSVLI | 2960  | >BAP1-C91W WATHALLSVI  | 375   | 2585  |
| >BAP1-C91W CATHALLSV   | 2986  | >BAP1-C91W WATHALLSV   | 138   | 2848  |
| >BAP1-C91W CATHALLSV   | 488   | >BAP1-C91W WATHALLSV   | 128   | 360   |
| >BAP1-C91W CATHALLSVLI | 950   | >BAP1-C91W WATHALLSVI  | 286   | 664   |
| >BAP1-C91W CATHALLSV   | 4459  | >BAP1-C91W WATHALLSV   | 270   | 4189  |
| >BAP1-C91W CATHALLSVL  | 1638  | >BAP1-C91W WATHALLSVI  | 253   | 1385  |
| >BAP1-C91W CATHALLSVLI | 2623  | >BAP1-C91W WATHALLSVI  | 475   | 2148  |
| >BAP1-C91W CATHALLSVLI | 2997  | >BAP1-C91W WATHALLSVI  | 348   | 2649  |
| >BAP1-C91W CATHALLSVLI | 201   | >BAP1-C91W WATHALLSVI  | 396   | 195   |
| >BAP1-C91W CATHALLSVLI | 8740  | >BAP1-C91W WATHALLSVI  | 481   | 8259  |
| >BAP1-C91W CATHALLSVL  | 148   | >BAP1-C91W WATHALLSVI  | 205   | 57    |
| >BAP1-C91W CATHALLSVLI | 392   | >BAP1-C91W WATHALLSVI  | 4335  | 3943  |
| >BAP1-C91W SCATHALLSV  | 262   | >BAP1-C91W SWATHALLSV  | 1362  | 1100  |
| >BAP1-C91W SCATHALL    | 14492 | >BAP1-C91W SWATHALL    | 451   | 14041 |
| >BAP1-C91W SCATHALLSVI | 19842 | >BAP1-C91W SWATHALLSV  | 332   | 19510 |
| >BAP1-C91W SCATHALLSVI | 219   | >BAP1-C91W SWATHALLSV  | 2118  | 1899  |
| >BAP1-C91W SCATHALL    | 31624 | >BAP1-C91W SWATHALL    | 115   | 31509 |
| >BAP1-C91W SCATHALLSV  | 21440 | >BAP1-C91W SWATHALLSV  | 76    | 21364 |
| >BAP1-C91W SCATHALLSVI | 33461 | >BAP1-C91W SWATHALLSV  | 104   | 33357 |
| >BAP1-C91W FFAHQLIPNSI | 10640 | >BAP1-C91W FFAHQLIPNSI | 94    | 10546 |
| >BAP1-C91W NSCATHALLS  | 1182  | >BAP1-C91W NSWATHALLS  | 284   | 898   |
| >BAP1-C91W NSCATHAL    | 940   | >BAP1-C91W NSWATHAL    | 289   | 651   |
| >BAP1-C91W NSCATHALL   | 1570  | >BAP1-C91W NSWATHALL   | 407   | 1163  |
| >BAP1-C91W NSCATHALLS  | 423   | >BAP1-C91W NSWATHALLS  | 118   | 305   |
| >BAP1-C91W NSCATHAL    | 3098  | >BAP1-C91W NSWATHAL    | 62    | 3036  |
| >BAP1-C91W NSCATHALL   | 6340  | >BAP1-C91W NSWATHALL   | 145   | 6195  |
| >BAP1-C91W NSCATHALLS  | 982   | >BAP1-C91W NSWATHALLS  | 20    | 962   |
| >BAP1-C91W NSCATHAL    | 704   | >BAP1-C91W NSWATHAL    | 144   | 560   |

|                        |      |                       |     |      |
|------------------------|------|-----------------------|-----|------|
| >BAP1-C91W NSCATHALL   | 281  | >BAP1-C91W NSWATHALL  | 62  | 219  |
| >BAP1-C91W NSCATHAL    | 3681 | >BAP1-C91W NSWATHAL   | 438 | 3243 |
| >BAP1-C91W NSCATHAL    | 67   | >BAP1-C91W NSWATHAL   | 115 | 48   |
| >BAP1-C91W NSCATHALL   | 398  | >BAP1-C91W NSWATHALL  | 688 | 290  |
| >BAP1-C91W NSCATHALL   | 187  | >BAP1-C91W NSWATHALL  | 86  | 101  |
| >BAP1-C91W NSCATHALL   | 1037 | >BAP1-C91W NSWATHALL  | 322 | 715  |
| >BAP1-C91W IPNSCATHAL  | 10   | >BAP1-C91W IPNSWATHAI | 67  | 57   |
| >BAP1-C91W IPNSCATHALI | 54   | >BAP1-C91W IPNSWATHAI | 462 | 408  |
| >BAP1-C91W IPNSCATHAL  | 897  | >BAP1-C91W IPNSWATHAI | 334 | 563  |
| >BAP1-C91W IPNSCATHALI | 45   | >BAP1-C91W IPNSWATHAI | 84  | 39   |
| >BAP1-C91W IPNSCATH    | 56   | >BAP1-C91W IPNSWATH   | 45  | 11   |
| >BAP1-C91W IPNSCATHALI | 363  | >BAP1-C91W IPNSWATHAI | 424 | 61   |
| >BAP1-C91W IPNSCATHAL  | 126  | >BAP1-C91W IPNSWATHAI | 51  | 75   |
| >BAP1-C91W IPNSCATHALI | 1149 | >BAP1-C91W IPNSWATHAI | 435 | 714  |
| >BAP1-C91W IPNSCATHALI | 85   | >BAP1-C91W IPNSWATHAI | 106 | 21   |
| >BAP1-C91W IPNSCATHA   | 19   | >BAP1-C91W IPNSWATHA  | 35  | 16   |
| >BAP1-C91W IPNSCATHAL  | 335  | >BAP1-C91W IPNSWATHAI | 151 | 184  |
| >BAP1-C91W IPNSCATHAL  | 159  | >BAP1-C91W IPNSWATHAI | 99  | 60   |
| >BAP1-C91W IPNSCATHALI | 484  | >BAP1-C91W IPNSWATHAI | 279 | 205  |
| >BAP1-C91W LIPNSCATHAI | 151  | >BAP1-C91W LIPNSWATHA | 208 | 57   |
| >BAP1-C91W LIPNSCATHAI | 173  | >BAP1-C91W LIPNSWATHA | 210 | 37   |
| >BAP1-C91W LIPNSCAT    | 4410 | >BAP1-C91W LIPNSWAT   | 341 | 4069 |
| >BAP1-C91W LIPNSCATHAI | 133  | >BAP1-C91W LIPNSWATHA | 59  | 74   |
| >BAP1-C91W LIPNSCATHAI | 421  | >BAP1-C91W LIPNSWATHA | 134 | 287  |
| >BAP1-C91W LIPNSCATHA  | 591  | >BAP1-C91W LIPNSWATHA | 293 | 298  |
| >BAP1-C91W LIPNSCATHAI | 35   | >BAP1-C91W LIPNSWATHA | 26  | 9    |
| >BAP1-C91W LIPNSCATHAI | 43   | >BAP1-C91W LIPNSWATHA | 53  | 10   |
| >BAP1-C91W QLIPNSCAT   | 6779 | >BAP1-C91W QLIPNSWAT  | 481 | 6298 |
| >BAP1-C91W QLIPNSCATH  | 1421 | >BAP1-C91W QLIPNSWATH | 369 | 1052 |
| >BAP1-C91W QLIPNSCA    | 461  | >BAP1-C91W QLIPNSWA   | 96  | 365  |
| >BAP1-C91W QLIPNSCAT   | 1562 | >BAP1-C91W QLIPNSWAT  | 173 | 1389 |
| >BAP1-C91W QLIPNSCATH  | 151  | >BAP1-C91W QLIPNSWATH | 105 | 46   |
| >BAP1-C91W QLIPNSCA    | 308  | >BAP1-C91W QLIPNSWA   | 45  | 263  |
| >BAP1-C91W QLIPNSCATH  | 42   | >BAP1-C91W QLIPNSWATH | 27  | 15   |
| >BAP1-C91W QLIPNSCA    | 1470 | >BAP1-C91W QLIPNSWA   | 283 | 1187 |
| >BAP1-C91W QLIPNSCAT   | 760  | >BAP1-C91W QLIPNSWAT  | 63  | 697  |
| >BAP1-C91W QLIPNSCATH  | 117  | >BAP1-C91W QLIPNSWATH | 42  | 75   |
| >BAP1-C91W QLIPNSCA    | 912  | >BAP1-C91W QLIPNSWA   | 215 | 697  |
| >BAP1-C91W QLIPNSCAT   | 452  | >BAP1-C91W QLIPNSWAT  | 79  | 373  |
| >BAP1-C91W QLIPNSCATH  | 613  | >BAP1-C91W QLIPNSWATH | 116 | 497  |
| >BAP1-C91W QLIPNSCA    | 260  | >BAP1-C91W QLIPNSWA   | 322 | 62   |
| >BAP1-C91W QLIPNSCAT   | 234  | >BAP1-C91W QLIPNSWAT  | 20  | 214  |
| >BAP1-C91W QLIPNSCATH  | 125  | >BAP1-C91W QLIPNSWATH | 50  | 75   |

|                        |       |                        |       |       |
|------------------------|-------|------------------------|-------|-------|
| >BAP1-C91W QLIPNSCATH  | 1053  | >BAP1-C91W QLIPNSWATH  | 280   | 773   |
| >BAP1-C91W QLIPNSCA    | 88    | >BAP1-C91W QLIPNSWA    | 18    | 70    |
| >BAP1-C91W QLIPNSCAT   | 96    | >BAP1-C91W QLIPNSWAT   | 23    | 73    |
| >BAP1-C91W QLIPNSCATH  | 30    | >BAP1-C91W QLIPNSWATH  | 12    | 18    |
| >BAP1-C91W HQLIPNSCAT  | 952   | >BAP1-C91W HQLIPNSWA   | 420   | 532   |
| >BAP1-C91W HQLIPNSC    | 2080  | >BAP1-C91W HQLIPNSW    | 175   | 1905  |
| >BAP1-C91W HQLIPNSCAT  | 312   | >BAP1-C91W HQLIPNSWA   | 360   | 48    |
| >BAP1-C91W FAHQLIPNSC  | 21801 | >BAP1-C91W FAHQLIPNSW  | 30    | 21771 |
| >BAP1-C91W FAHQLIPNSC  | 22930 | >BAP1-C91W FAHQLIPNSW  | 148   | 22782 |
| >BAP1-C91W FAHQLIPNSC  | 18736 | >BAP1-C91W FAHQLIPNSW  | 26    | 18710 |
| >BAP1-C91W FAHQLIPNSC  | 20795 | >BAP1-C91W FAHQLIPNSW  | 72    | 20723 |
| >BAP1-D672\DEFICTFI    | 70    | >BAP1-D672\GEFICTFI    | 169   | 99    |
| >BAP1-D672\DEFICTFISM  | 95    | >BAP1-D672\GEFICTFISM  | 222   | 127   |
| >BAP1-D672\DEFICTFISML | 38    | >BAP1-D672\GEFICTFISML | 69    | 31    |
| >BAP1-D672\DEFICTFISM  | 1877  | >BAP1-D672\GEFICTFISM  | 418   | 1459  |
| >BAP1-D672\DEFICTFI    | 42    | >BAP1-D672\GEFICTFI    | 7600  | 7558  |
| >BAP1-D672\DEFICTFIS   | 29    | >BAP1-D672\GEFICTFIS   | 6381  | 6352  |
| >BAP1-D672\DEFICTFISM  | 150   | >BAP1-D672\GEFICTFISM  | 1622  | 1472  |
| >BAP1-D672\DEFICTFISML | 9     | >BAP1-D672\GEFICTFISML | 1309  | 1300  |
| >BAP1-D672\DEFICTFI    | 1341  | >BAP1-D672\GEFICTFI    | 39    | 1302  |
| >BAP1-D672\DEFICTFISML | 245   | >BAP1-D672\GEFICTFISML | 10    | 235   |
| >BAP1-D672\DEFICTFI    | 520   | >BAP1-D672\GEFICTFI    | 19    | 501   |
| >BAP1-D672\DEFICTFIS   | 2018  | >BAP1-D672\GEFICTFIS   | 60    | 1958  |
| >BAP1-D672\DEFICTFISM  | 254   | >BAP1-D672\GEFICTFISM  | 112   | 142   |
| >BAP1-D672\DEFICTFISML | 157   | >BAP1-D672\GEFICTFISML | 10    | 147   |
| >BAP1-D672\DEFICTFISML | 1110  | >BAP1-D672\GEFICTFISML | 379   | 731   |
| >BAP1-D672\DEFICTFI    | 276   | >BAP1-D672\GEFICTFI    | 131   | 145   |
| >BAP1-D672\DEFICTFIS   | 883   | >BAP1-D672\GEFICTFIS   | 402   | 481   |
| >BAP1-D672\DEFICTFISML | 145   | >BAP1-D672\GEFICTFISML | 75    | 70    |
| >BAP1-D672\DEFICTFISML | 6532  | >BAP1-D672\GEFICTFISML | 282   | 6250  |
| >BAP1-D672\DEFICTFI    | 376   | >BAP1-D672\GEFICTFI    | 13    | 363   |
| >BAP1-D672\DEFICTFIS   | 2015  | >BAP1-D672\GEFICTFIS   | 50    | 1965  |
| >BAP1-D672\DEFICTFISM  | 1162  | >BAP1-D672\GEFICTFISM  | 88    | 1074  |
| >BAP1-D672\DEFICTFISML | 52    | >BAP1-D672\GEFICTFISML | 3     | 49    |
| >BAP1-D672\YDEFICTFI   | 44    | >BAP1-D672\YGEFICTFI   | 299   | 255   |
| >BAP1-D672\YDEFICTF    | 2500  | >BAP1-D672\YGEFICTF    | 429   | 2071  |
| >BAP1-D672\YDEFICTFISM | 2869  | >BAP1-D672\YGEFICTFISM | 499   | 2370  |
| >BAP1-D672\YDEFICTFI   | 457   | >BAP1-D672\YGEFICTFI   | 181   | 276   |
| >BAP1-D672\YDEFICTFISM | 180   | >BAP1-D672\YGEFICTFISM | 65    | 115   |
| >BAP1-D672\YDEFICTFI   | 494   | >BAP1-D672\YGEFICTFI   | 21281 | 20787 |
| >BAP1-D672\NYDEFICTFI  | 207   | >BAP1-D672\NYGEFICTFI  | 105   | 102   |
| >BAP1-D672\NYDEFICTFI  | 190   | >BAP1-D672\NYGEFICTFI  | 158   | 32    |
| >BAP1-D672\NYDEFICTF   | 661   | >BAP1-D672\NYGEFICTF   | 120   | 541   |

|                        |      |                        |      |      |
|------------------------|------|------------------------|------|------|
| >BAP1-D672(NYDEFICTF   | 615  | >BAP1-D672(NYGEFICTF   | 164  | 451  |
| >BAP1-D672(NYDEFICTF   | 11   | >BAP1-D672(NYGEFICTF   | 6    | 5    |
| >BAP1-D672(NYDEFICTFI  | 163  | >BAP1-D672(NYGEFICTFI  | 28   | 135  |
| >BAP1-D672(HNYDEFICTFI | 64   | >BAP1-D672(HNYGEFICTFI | 81   | 17   |
| >BAP1-D672(HNYDEFICTF  | 409  | >BAP1-D672(HNYGEFICTF  | 565  | 156  |
| >BAP1-D672(HNYDEFICTF  | 42   | >BAP1-D672(HNYGEFICTF  | 88   | 46   |
| >BAP1-D672(HNYDEFICTFI | 126  | >BAP1-D672(HNYGEFICTFI | 138  | 12   |
| >BAP1-D672(THNYDEFICTI | 102  | >BAP1-D672(THNYGEFICTI | 101  | 1    |
| >BAP1-D672(RTHNYDEFI   | 435  | >BAP1-D672(RTHNYGEFI   | 138  | 297  |
| >BAP1-D672(RTHNYDEF    | 81   | >BAP1-D672(RTHNYGEF    | 79   | 2    |
| >BAP1-D672(RTHNYDEF    | 1654 | >BAP1-D672(RTHNYGEF    | 321  | 1333 |
| >BAP1-D672(RTHNYDEFI   | 33   | >BAP1-D672(RTHNYGEFI   | 15   | 18   |
| >BAP1-D672(RTHNYDEFIC  | 531  | >BAP1-D672(RTHNYGEFIC  | 339  | 192  |
| >BAP1-D672(RTHNYDEF    | 36   | >BAP1-D672(RTHNYGEF    | 137  | 101  |
| >BAP1-D672(RTHNYDEFI   | 142  | >BAP1-D672(RTHNYGEFI   | 185  | 43   |
| >BAP1-D672(RTHNYDEFI   | 376  | >BAP1-D672(RTHNYGEFI   | 1604 | 1228 |
| >BAP1-D672(RTHNYDEF    | 229  | >BAP1-D672(RTHNYGEF    | 112  | 117  |
| >BAP1-D672(RTHNYDEF    | 49   | >BAP1-D672(RTHNYGEF    | 38   | 11   |
| >BAP1-D672(RTHNYDEF    | 5    | >BAP1-D672(RTHNYGEF    | 4    | 1    |
| >BAP1-D672(RTHNYDEFI   | 49   | >BAP1-D672(RTHNYGEFI   | 28   | 21   |
| >BAP1-D672(RTHNYDEF    | 499  | >BAP1-D672(RTHNYGEF    | 703  | 204  |
| >BAP1-D672(RTHNYDEF    | 135  | >BAP1-D672(RTHNYGEF    | 440  | 305  |
| >BAP1-D672(RTHNYDEFI   | 1854 | >BAP1-D672(RTHNYGEFI   | 481  | 1373 |
| >BAP1-D672(RTHNYDEF    | 193  | >BAP1-D672(RTHNYGEF    | 76   | 117  |
| >BAP1-D672(RTHNYDEFI   | 321  | >BAP1-D672(RTHNYGEFI   | 76   | 245  |
| >BAP1-D672(RTHNYDEFI   | 13   | >BAP1-D672(RTHNYGEFI   | 9    | 4    |
| >BAP1-D672(RRTHNYDEF   | 12   | >BAP1-D672(RRTHNYGEF   | 17   | 5    |
| >BAP1-D672(RRTHNYDEFI  | 459  | >BAP1-D672(RRTHNYGEFI  | 259  | 200  |
| >BAP1-D672(RRTHNYDEF   | 196  | >BAP1-D672(RRTHNYGEF   | 90   | 106  |
| >BAP1-D672(RRTHNYDEFI  | 26   | >BAP1-D672(RRTHNYGEFI  | 23   | 3    |
| >BAP1-D672(RRTHNYDE    | 199  | >BAP1-D672(RRTHNYGE    | 520  | 321  |
| >BAP1-D672(RRTHNYDEF   | 96   | >BAP1-D672(RRTHNYGEF   | 86   | 10   |
| >BAP1-D672(RRTHNYDEFI  | 103  | >BAP1-D672(RRTHNYGEFI  | 113  | 10   |
| >BAP1-D672(RRTHNYDEFI  | 266  | >BAP1-D672(RRTHNYGEFI  | 216  | 50   |
| >BAP1-D672(RRTHNYDEF   | 88   | >BAP1-D672(RRTHNYGEF   | 46   | 42   |
| >BAP1-D672(RRTHNYDEFI  | 56   | >BAP1-D672(RRTHNYGEFI  | 51   | 5    |
| >BAP1-D672(RRTHNYDEF   | 272  | >BAP1-D672(RRTHNYGEF   | 301  | 29   |
| >BAP1-D672(QRRTHNYDEI  | 20   | >BAP1-D672(QRRTHNYGEI  | 26   | 6    |
| >BAP1-D672(QRRTHNYDEI  | 729  | >BAP1-D672(QRRTHNYGEI  | 429  | 300  |
| >BAP1-D672(QRRTHNYDEI  | 498  | >BAP1-D672(QRRTHNYGEI  | 156  | 342  |
| >BAP1-D672(QRRTHNYDEI  | 483  | >BAP1-D672(QRRTHNYGEI  | 316  | 167  |
| >BAP1-D672(QRRTHNYDEI  | 2738 | >BAP1-D672(QRRTHNYGEI  | 425  | 2313 |
| >BAP1-D672(QRRTHNYDEI  | 1034 | >BAP1-D672(QRRTHNYGEI  | 474  | 560  |



|                        |       |                        |       |       |
|------------------------|-------|------------------------|-------|-------|
| >BAP1-D672(DQRRTHNYD   | 27    | >BAP1-D672(DQRRTHNYG   | 34    | 7     |
| >BAP1-G128IGYAIGNAPEL  | 587   | >BAP1-G128IRYAIGNAPEL  | 367   | 220   |
| >BAP1-G128IGYAIGNAPEL  | 1536  | >BAP1-G128IRYAIGNAPEL  | 330   | 1206  |
| >BAP1-G128IGYAIGNAPEL  | 1793  | >BAP1-G128IRYAIGNAPEL  | 369   | 1424  |
| >BAP1-G128IGYAIGNAPEL  | 34    | >BAP1-G128IRYAIGNAPEL  | 8     | 26    |
| >BAP1-G128IKGYAIGNAPE  | 1328  | >BAP1-G128IKRYAIGNAPE  | 42    | 1286  |
| >BAP1-G128IKGYAIGNAPE  | 213   | >BAP1-G128IKRYAIGNAPE  | 13207 | 12994 |
| >BAP1-G128IKGYAIGNA    | 23926 | >BAP1-G128IKRYAIGNA    | 126   | 23800 |
| >BAP1-G128IKGYAIGNAPE  | 21114 | >BAP1-G128IKRYAIGNAPE  | 44    | 21070 |
| >BAP1-G128IKGYAIGNAPE  | 7877  | >BAP1-G128IKRYAIGNAPE  | 130   | 7747  |
| >BAP1-G128IKGYAIGNA    | 28812 | >BAP1-G128IKRYAIGNA    | 296   | 28516 |
| >BAP1-G128IKGYAIGNAP   | 26762 | >BAP1-G128IKRYAIGNAP   | 414   | 26348 |
| >BAP1-G128IKGYAIGNAPE  | 2978  | >BAP1-G128IKRYAIGNAPE  | 20    | 2958  |
| >BAP1-G128IKGYAIGNAPE  | 8261  | >BAP1-G128IKRYAIGNAPE  | 10    | 8251  |
| >BAP1-G128IFTKGFSPESK  | 22898 | >BAP1-G128IFTKGFSPESK  | 238   | 22660 |
| >BAP1-G128IFTKGFSPESK  | 27123 | >BAP1-G128IFTKGFSPESK  | 181   | 26942 |
| >BAP1-G128IFTKGFSPESK  | 19830 | >BAP1-G128IFTKGFSPESK  | 11    | 19819 |
| >BAP1-G128IPESKGYAI    | 300   | >BAP1-G128IPESKRYAI    | 3956  | 3656  |
| >BAP1-G128IPESKGYAI    | 428   | >BAP1-G128IPESKRYAI    | 2225  | 1797  |
| >BAP1-G128IPESKGYAI    | 218   | >BAP1-G128IPESKRYAI    | 1412  | 1194  |
| >BAP1-G128IPESKGYAI    | 1172  | >BAP1-G128IPESKRYAI    | 236   | 936   |
| >BAP1-G128IPESKGYAI    | 24    | >BAP1-G128IPESKRYAI    | 16    | 8     |
| >BAP1-G128IPESKGYAI    | 477   | >BAP1-G128IPESKRYAI    | 55    | 422   |
| >BAP1-G128IPESKGYAI    | 330   | >BAP1-G128IPESKRYAI    | 342   | 12    |
| >BAP1-G128IFSPESKGYAI  | 207   | >BAP1-G128IFSPESKRYAI  | 502   | 295   |
| >BAP1-G128IFSPESKGYA   | 280   | >BAP1-G128IFSPESKRYA   | 1752  | 1472  |
| >BAP1-G128IFSPESKGYAI  | 135   | >BAP1-G128IFSPESKRYAI  | 120   | 15    |
| >BAP1-G128IFSPESKGY    | 42    | >BAP1-G128IFSPESKRY    | 36    | 6     |
| >BAP1-G128IFSPESKGY    | 382   | >BAP1-G128IFSPESKRY    | 91    | 291   |
| >BAP1-G128IFSPESKGYA   | 753   | >BAP1-G128IFSPESKRYA   | 313   | 440   |
| >BAP1-G128IFSPESKGYAI  | 15    | >BAP1-G128IFSPESKRYAI  | 15    | 0     |
| >BAP1-G128IFSPESKGYAIC | 242   | >BAP1-G128IFSPESKRYAIC | 189   | 53    |
| >BAP1-G128IFSPESKGYAI  | 76    | >BAP1-G128IFSPESKRYAI  | 195   | 119   |
| >BAP1-G128IGFSPESKGYA  | 537   | >BAP1-G128IGFSPESKRYA  | 474   | 63    |
| >BAP1-G128IGFSPESKGY   | 116   | >BAP1-G128IGFSPESKRY   | 83    | 33    |
| >BAP1-G128IGFSPESKGY   | 1206  | >BAP1-G128IGFSPESKRY   | 301   | 905   |
| >BAP1-G128IKGFSPESKGY  | 605   | >BAP1-G128IKGFSPESKRY  | 369   | 236   |
| >BAP1-G128IKGFSPESKG   | 22020 | >BAP1-G128IKGFSPESKR   | 95    | 21925 |
| >BAP1-G128IKGFSPESKGY  | 181   | >BAP1-G128IKGFSPESKRY  | 269   | 88    |
| >BAP1-G128IKGFSPESKGY  | 34    | >BAP1-G128IKGFSPESKRY  | 30    | 4     |
| >BAP1-G128IKGFSPESKG   | 33696 | >BAP1-G128IKGFSPESKR   | 136   | 33560 |
| >BAP1-G128ITKGFSPESKG  | 221   | >BAP1-G128ITKGFSPESKR  | 308   | 87    |
| >BAP1-H169(HFVSYVPI    | 187   | >BAP1-H169(QFVSYVPI    | 401   | 214   |

|                        |       |                        |      |       |
|------------------------|-------|------------------------|------|-------|
| >BAP1-H169(HFVSYVPI    | 258   | >BAP1-H169(QFVSYVPI    | 721  | 463   |
| >BAP1-H169(HFVSYVPITGI | 25    | >BAP1-H169(QFVSYVPITGI | 103  | 78    |
| >BAP1-H169(HFVSYVPITGI | 64    | >BAP1-H169(QFVSYVPITGI | 493  | 429   |
| >BAP1-H169(HFVSYVPITGI | 77    | >BAP1-H169(QFVSYVPITGI | 222  | 145   |
| >BAP1-H169(HFVSYVPITGI | 36    | >BAP1-H169(QFVSYVPITGI | 99   | 63    |
| >BAP1-H169(HFVSYVPI    | 347   | >BAP1-H169(QFVSYVPI    | 285  | 62    |
| >BAP1-H169(FHFVSYVPI   | 561   | >BAP1-H169(FQFVSYVPI   | 29   | 532   |
| >BAP1-H169(FHFVSYVPI   | 157   | >BAP1-H169(FQFVSYVPI   | 204  | 47    |
| >BAP1-H169(FHFVSYVPI   | 324   | >BAP1-H169(FQFVSYVPI   | 154  | 170   |
| >BAP1-H169(FHFVSYVPI   | 13143 | >BAP1-H169(FQFVSYVPI   | 21   | 13122 |
| >BAP1-H169(FHFVSYVPI   | 1131  | >BAP1-H169(FQFVSYVPI   | 19   | 1112  |
| >BAP1-H169(FHFVSYVPI   | 7668  | >BAP1-H169(FQFVSYVPI   | 18   | 7650  |
| >BAP1-H169(FHFVSYVPI   | 1364  | >BAP1-H169(FQFVSYVPI   | 6    | 1358  |
| >BAP1-H169(FHFVSYVPIT  | 9406  | >BAP1-H169(FQFVSYVPIT  | 193  | 9213  |
| >BAP1-H169(FHFVSYVPI   | 6220  | >BAP1-H169(FQFVSYVPI   | 87   | 6133  |
| >BAP1-H169(FHFVSYVPI   | 9199  | >BAP1-H169(FQFVSYVPI   | 101  | 9098  |
| >BAP1-H169(FHFVSYVPI   | 10472 | >BAP1-H169(FQFVSYVPI   | 246  | 10226 |
| >BAP1-H169(FHFVSYVPI   | 3177  | >BAP1-H169(FQFVSYVPI   | 351  | 2826  |
| >BAP1-H169(FHFVSYVPI   | 14412 | >BAP1-H169(FQFVSYVPI   | 53   | 14359 |
| >BAP1-H169(FHFVSYVPI   | 8646  | >BAP1-H169(FQFVSYVPI   | 363  | 8283  |
| >BAP1-H169(FHFVSYVP    | 755   | >BAP1-H169(FQFVSYVP    | 48   | 707   |
| >BAP1-H169(FHFVSYVPI   | 5     | >BAP1-H169(FQFVSYVPI   | 2    | 3     |
| >BAP1-H169(FHFVSYVPIT  | 418   | >BAP1-H169(FQFVSYVPIT  | 25   | 393   |
| >BAP1-H169(FHFVSYVPITC | 1583  | >BAP1-H169(FQFVSYVPITC | 117  | 1466  |
| >BAP1-H169(FHFVSYVPI   | 336   | >BAP1-H169(FQFVSYVPI   | 4847 | 4511  |
| >BAP1-H169(FHFVSYVPI   | 7195  | >BAP1-H169(FQFVSYVPI   | 332  | 6863  |
| >BAP1-H169(FHFVSYVPI   | 20    | >BAP1-H169(FQFVSYVPI   | 26   | 6     |
| >BAP1-H169(FHFVSYVPIT  | 458   | >BAP1-H169(FQFVSYVPIT  | 905  | 447   |
| >BAP1-H169(FHFVSYVPI   | 7522  | >BAP1-H169(FQFVSYVPI   | 316  | 7206  |
| >BAP1-H169(FHFVSYVPI   | 4886  | >BAP1-H169(FQFVSYVPI   | 492  | 4394  |
| >BAP1-H169(FHFVSYVPI   | 3063  | >BAP1-H169(FQFVSYVPI   | 130  | 2933  |
| >BAP1-H169(FHFVSYVPI   | 1237  | >BAP1-H169(FQFVSYVPI   | 397  | 840   |
| >BAP1-H169(FHFVSYVPI   | 138   | >BAP1-H169(FQFVSYVPI   | 2450 | 2312  |
| >BAP1-H169(FHFVSYVPI   | 1329  | >BAP1-H169(FQFVSYVPI   | 241  | 1088  |
| >BAP1-H169(AFHFVSYV    | 202   | >BAP1-H169(AFQFVSYV    | 310  | 108   |
| >BAP1-H169(AFHFVSYV    | 132   | >BAP1-H169(AFQFVSYV    | 353  | 221   |
| >BAP1-H169(AFHFVSYVP   | 180   | >BAP1-H169(AFQFVSYVP   | 114  | 66    |
| >BAP1-H169(AFHFVSYV    | 99    | >BAP1-H169(AFQFVSYV    | 3752 | 3653  |
| >BAP1-H169(AFHFVSYVP   | 27    | >BAP1-H169(AFQFVSYVP   | 1028 | 1001  |
| >BAP1-H169(AFHFVSYVP   | 380   | >BAP1-H169(AFQFVSYVP   | 360  | 20    |
| >BAP1-H169(EAFHFVSYV   | 126   | >BAP1-H169(EAFQFVSYV   | 203  | 77    |
| >BAP1-H169(EAFHFVSYVP  | 86    | >BAP1-H169(EAFQFVSYVP  | 99   | 13    |
| >BAP1-H169(EAFHFVSYV   | 331   | >BAP1-H169(EAFQFVSYV   | 516  | 185   |

|                       |     |                       |      |     |
|-----------------------|-----|-----------------------|------|-----|
| >BAP1-H169(EAFHFVSYV  | 222 | >BAP1-H169(EAFQFVSYV  | 633  | 411 |
| >BAP1-H169(EAFHFVSYV  | 223 | >BAP1-H169(EAFQFVSYV  | 365  | 142 |
| >BAP1-H169(EAFHFVSYV  | 23  | >BAP1-H169(EAFQFVSYV  | 13   | 10  |
| >BAP1-H169(EAFHFVSYV  | 587 | >BAP1-H169(EAFQFVSYV  | 351  | 236 |
| >BAP1-H169(EAFHFVSYV  | 865 | >BAP1-H169(EAFQFVSYV  | 234  | 631 |
| >BAP1-H169(EAFHFVSY   | 105 | >BAP1-H169(EAFQFVSY   | 98   | 7   |
| >BAP1-H169(EAFHFVSY   | 91  | >BAP1-H169(EAFQFVSY   | 110  | 19  |
| >BAP1-H169(EAFHFVSY   | 381 | >BAP1-H169(EAFQFVSY   | 317  | 64  |
| >BAP1-H169(EAFHFVSY   | 450 | >BAP1-H169(EAFQFVSY   | 84   | 366 |
| >BAP1-H169(EAFHFVSY   | 27  | >BAP1-H169(EAFQFVSY   | 23   | 4   |
| >BAP1-H169(EAFHFVSYV  | 275 | >BAP1-H169(EAFQFVSYV  | 237  | 38  |
| >BAP1-H169(EAFHFVSYV  | 6   | >BAP1-H169(EAFQFVSYV  | 6    | 0   |
| >BAP1-H169(EAFHFVSYVP | 6   | >BAP1-H169(EAFQFVSYVP | 7    | 1   |
| >BAP1-H169(EAFHFVSYV  | 5   | >BAP1-H169(EAFQFVSYV  | 4    | 1   |
| >BAP1-H169(EAFHFVSYVP | 13  | >BAP1-H169(EAFQFVSYVP | 10   | 3   |
| >BAP1-H169(EAFHFVSY   | 163 | >BAP1-H169(EAFQFVSY   | 170  | 7   |
| >BAP1-H169(EAFHFVSY   | 14  | >BAP1-H169(EAFQFVSY   | 31   | 17  |
| >BAP1-H169(EAFHFVSYV  | 154 | >BAP1-H169(EAFQFVSYV  | 633  | 479 |
| >BAP1-H169(EAFHFVSYVP | 52  | >BAP1-H169(EAFQFVSYVP | 154  | 102 |
| >BAP1-H169(EAFHFVSY   | 47  | >BAP1-H169(EAFQFVSY   | 45   | 2   |
| >BAP1-H169(EAFHFVSY   | 26  | >BAP1-H169(EAFQFVSY   | 22   | 4   |
| >BAP1-H169(EAFHFVSYVP | 82  | >BAP1-H169(EAFQFVSYVP | 77   | 5   |
| >BAP1-H169(MEAFHFVSY\ | 50  | >BAP1-H169(MEAFQFVSY\ | 28   | 22  |
| >BAP1-H169(MEAFHFVSY  | 60  | >BAP1-H169(MEAFQFVSY  | 100  | 40  |
| >BAP1-H169(MEAFHFVSY\ | 359 | >BAP1-H169(MEAFQFVSY\ | 638  | 279 |
| >BAP1-H169(MEAFHFVSY  | 57  | >BAP1-H169(MEAFQFVSY  | 88   | 31  |
| >BAP1-H169(MEAFHFVSY  | 29  | >BAP1-H169(MEAFQFVSY  | 42   | 13  |
| >BAP1-H169(MEAFHFVS   | 495 | >BAP1-H169(MEAFQFVS   | 1278 | 783 |
| >BAP1-H169(MEAFHFVSY  | 7   | >BAP1-H169(MEAFQFVSY  | 9    | 2   |
| >BAP1-H169(MEAFHFVSY  | 217 | >BAP1-H169(MEAFQFVSY  | 232  | 15  |
| >BAP1-H169(MEAFHFVSY\ | 135 | >BAP1-H169(MEAFQFVSY\ | 119  | 16  |
| >BAP1-H169(MEAFHFVSY\ | 170 | >BAP1-H169(MEAFQFVSY\ | 143  | 27  |
| >BAP1-H169(MEAFHFVSY  | 50  | >BAP1-H169(MEAFQFVSY  | 84   | 34  |
| >BAP1-H169(MEAFHFVSY\ | 186 | >BAP1-H169(MEAFQFVSY\ | 158  | 28  |
| >BAP1-H169(MEAFHFVS   | 12  | >BAP1-H169(MEAFQFVS   | 26   | 14  |
| >BAP1-H169(MEAFHFVSY  | 68  | >BAP1-H169(MEAFQFVSY  | 151  | 83  |
| >BAP1-H169(MEAFHFVSY\ | 156 | >BAP1-H169(MEAFQFVSY\ | 204  | 48  |
| >BAP1-H169(MEAFHFVSY\ | 134 | >BAP1-H169(MEAFQFVSY\ | 298  | 164 |
| >BAP1-H169(MEAFHFVSY  | 467 | >BAP1-H169(MEAFQFVSY  | 993  | 526 |
| >BAP1-H169(MEAFHFVSY\ | 25  | >BAP1-H169(MEAFQFVSY\ | 49   | 24  |
| >BAP1-H169(TMEAFHFVS\ | 533 | >BAP1-H169(TMEAFQFVS\ | 242  | 291 |
| >BAP1-H169(TMEAFHFV   | 47  | >BAP1-H169(TMEAFQFV   | 73   | 26  |
| >BAP1-H169(TMEAFHFVS\ | 47  | >BAP1-H169(TMEAFQFVS\ | 34   | 13  |

|                       |     |                       |      |      |
|-----------------------|-----|-----------------------|------|------|
| >BAP1-H169(TMEAFHFV   | 7   | >BAP1-H169(TMEAFQFV   | 10   | 3    |
| >BAP1-H169(TMEAFHFVS) | 8   | >BAP1-H169(TMEAFQFVS) | 7    | 1    |
| >BAP1-H169(TMEAFHFV   | 60  | >BAP1-H169(TMEAFQFV   | 81   | 21   |
| >BAP1-H169(TMEAFHFVS) | 22  | >BAP1-H169(TMEAFQFVS) | 23   | 1    |
| >BAP1-H169(TMEAFHFV   | 29  | >BAP1-H169(TMEAFQFV   | 39   | 10   |
| >BAP1-H169(TMEAFHFVS) | 74  | >BAP1-H169(TMEAFQFVS) | 75   | 1    |
| >BAP1-H169(TMEAFHFV   | 7   | >BAP1-H169(TMEAFQFV   | 10   | 3    |
| >BAP1-H169(TMEAFHFVS) | 3   | >BAP1-H169(TMEAFQFVS) | 3    | 0    |
| >BAP1-H169(TMEAFHFV   | 12  | >BAP1-H169(TMEAFQFV   | 18   | 6    |
| >BAP1-H169(TMEAFHFVS) | 12  | >BAP1-H169(TMEAFQFVS) | 9    | 3    |
| >BAP1-H169(TMEAFHFV   | 21  | >BAP1-H169(TMEAFQFV   | 24   | 3    |
| >BAP1-H169(TMEAFHFVS) | 28  | >BAP1-H169(TMEAFQFVS) | 23   | 5    |
| >BAP1-H169(TMEAFHFV   | 46  | >BAP1-H169(TMEAFQFV   | 72   | 26   |
| >BAP1-H169(TMEAFHFVS) | 33  | >BAP1-H169(TMEAFQFVS) | 13   | 20   |
| >BAP1-H169(TMEAFHFV   | 3   | >BAP1-H169(TMEAFQFV   | 3    | 0    |
| >BAP1-H169(TMEAFHFVS) | 3   | >BAP1-H169(TMEAFQFVS) | 2    | 1    |
| >BAP1-H169(TMEAFHFVS) | 184 | >BAP1-H169(TMEAFQFVS) | 123  | 61   |
| >BAP1-H169(TMEAFHFVS) | 99  | >BAP1-H169(TMEAFQFVS) | 80   | 19   |
| >BAP1-H169(TMEAFHFV   | 232 | >BAP1-H169(TMEAFQFV   | 493  | 261  |
| >BAP1-H169(TMEAFHFVS) | 254 | >BAP1-H169(TMEAFQFVS) | 265  | 11   |
| >BAP1-H169(TMEAFHFV   | 57  | >BAP1-H169(TMEAFQFV   | 278  | 221  |
| >BAP1-H169(TMEAFHFVS) | 104 | >BAP1-H169(TMEAFQFVS) | 134  | 30   |
| >BAP1-H169(TMEAFHFVS) | 229 | >BAP1-H169(TMEAFQFVS) | 186  | 43   |
| >BAP1-H169(TMEAFHFVS) | 108 | >BAP1-H169(TMEAFQFVS) | 179  | 71   |
| >BAP1-H169(TMEAFHFVS) | 96  | >BAP1-H169(TMEAFQFVS) | 123  | 27   |
| >BAP1-H169(TMEAFHFVS) | 134 | >BAP1-H169(TMEAFQFVS) | 223  | 89   |
| >BAP1-H169(RTMEAFHFV! | 437 | >BAP1-H169(RTMEAFQFV! | 701  | 264  |
| >BAP1-H169(RTMEAFHFV  | 9   | >BAP1-H169(RTMEAFQFV  | 15   | 6    |
| >BAP1-H169(RTMEAFHFV  | 6   | >BAP1-H169(RTMEAFQFV  | 12   | 6    |
| >BAP1-H169(RTMEAFHFV  | 8   | >BAP1-H169(RTMEAFQFV  | 12   | 4    |
| >BAP1-H169(RTMEAFHF   | 26  | >BAP1-H169(RTMEAFQF   | 61   | 35   |
| >BAP1-H169(RTMEAFHFV  | 2   | >BAP1-H169(RTMEAFQFV  | 3    | 1    |
| >BAP1-H169(RTMEAFHFV! | 144 | >BAP1-H169(RTMEAFQFV! | 288  | 144  |
| >BAP1-H169(RTMEAFHFV  | 4   | >BAP1-H169(RTMEAFQFV  | 6    | 2    |
| >BAP1-H169(RTMEAFHFV  | 5   | >BAP1-H169(RTMEAFQFV  | 15   | 10   |
| >BAP1-H169(RTMEAFHFV  | 10  | >BAP1-H169(RTMEAFQFV  | 16   | 6    |
| >BAP1-H169(RTMEAFHFV  | 5   | >BAP1-H169(RTMEAFQFV  | 18   | 13   |
| >BAP1-H169(RTMEAFHFV  | 14  | >BAP1-H169(RTMEAFQFV  | 42   | 28   |
| >BAP1-H169(RTMEAFHFV! | 71  | >BAP1-H169(RTMEAFQFV! | 97   | 26   |
| >BAP1-H169(RTMEAFHFV  | 257 | >BAP1-H169(RTMEAFQFV  | 2170 | 1913 |
| >BAP1-H169(RTMEAFHFV! | 10  | >BAP1-H169(RTMEAFQFV! | 15   | 5    |
| >BAP1-H169(RTMEAFHF   | 128 | >BAP1-H169(RTMEAFQF   | 262  | 134  |
| >BAP1-H169(RTMEAFHF   | 183 | >BAP1-H169(RTMEAFQF   | 184  | 1    |

|                       |      |                       |      |      |
|-----------------------|------|-----------------------|------|------|
| >BAP1-H169(RTMEAFHF   | 16   | >BAP1-H169(RTMEAFQF   | 14   | 2    |
| >BAP1-H169(RTMEAFHFV! | 63   | >BAP1-H169(RTMEAFQFV! | 106  | 43   |
| >BAP1-H169(RTMEAFHF   | 88   | >BAP1-H169(RTMEAFQF   | 283  | 195  |
| >BAP1-H169(RTMEAFHFV! | 19   | >BAP1-H169(RTMEAFQFV! | 33   | 14   |
| >BAP1-H169(RTMEAFHFV! | 46   | >BAP1-H169(RTMEAFQFV! | 40   | 6    |
| >BAP1-H169(RTMEAFHFV! | 64   | >BAP1-H169(RTMEAFQFV! | 128  | 64   |
| >BAP1-H169(RTMEAFHFV  | 11   | >BAP1-H169(RTMEAFQFV  | 11   | 0    |
| >BAP1-H169(RTMEAFHFV! | 144  | >BAP1-H169(RTMEAFQFV! | 292  | 148  |
| >BAP1-H169(RTMEAFHFV! | 53   | >BAP1-H169(RTMEAFQFV! | 46   | 7    |
| >BAP1-H169(RTMEAFHFV! | 43   | >BAP1-H169(RTMEAFQFV! | 67   | 24   |
| >BAP1-H169(RTMEAFHFV  | 110  | >BAP1-H169(RTMEAFQFV  | 317  | 207  |
| >BAP1-H169(RTMEAFHFV! | 388  | >BAP1-H169(RTMEAFQFV! | 726  | 338  |
| >BAP1-H169(RTMEAFHF   | 12   | >BAP1-H169(RTMEAFQF   | 8    | 4    |
| >BAP1-H169(RTMEAFHFV! | 18   | >BAP1-H169(RTMEAFQFV! | 20   | 2    |
| >BAP1-H169(RTMEAFHFV! | 410  | >BAP1-H169(RTMEAFQFV! | 790  | 380  |
| >BAP1-H169(RTMEAFHFV  | 5    | >BAP1-H169(RTMEAFQFV  | 13   | 8    |
| >BAP1-H169(RTMEAFHFV  | 3    | >BAP1-H169(RTMEAFQFV  | 6    | 3    |
| >BAP1-H169(RTMEAFHFV! | 52   | >BAP1-H169(RTMEAFQFV! | 45   | 7    |
| >BAP1-H169(RTMEAFHF   | 51   | >BAP1-H169(RTMEAFQF   | 100  | 49   |
| >BAP1-H169(RTMEAFHFV! | 36   | >BAP1-H169(RTMEAFQFV! | 37   | 1    |
| >BAP1-H169(RTMEAFHF   | 25   | >BAP1-H169(RTMEAFQF   | 34   | 9    |
| >BAP1-H169(RTMEAFHFV  | 1167 | >BAP1-H169(RTMEAFQFV  | 406  | 761  |
| >BAP1-H169(RTMEAFHFV! | 18   | >BAP1-H169(RTMEAFQFV! | 16   | 2    |
| >BAP1-H169(RTMEAFHF   | 3    | >BAP1-H169(RTMEAFQF   | 2    | 1    |
| >BAP1-H169(RTMEAFHFV  | 107  | >BAP1-H169(RTMEAFQFV  | 89   | 18   |
| >BAP1-H169(RTMEAFHFV! | 3    | >BAP1-H169(RTMEAFQFV! | 3    | 0    |
| >BAP1-H169(RTMEAFHF   | 48   | >BAP1-H169(RTMEAFQF   | 46   | 2    |
| >BAP1-H169(RTMEAFHFV! | 129  | >BAP1-H169(RTMEAFQFV! | 98   | 31   |
| >BAP1-H169(RTMEAFHF   | 10   | >BAP1-H169(RTMEAFQF   | 10   | 0    |
| >BAP1-H169(RTMEAFHFV  | 477  | >BAP1-H169(RTMEAFQFV  | 2523 | 2046 |
| >BAP1-H169(RTMEAFHFV! | 33   | >BAP1-H169(RTMEAFQFV! | 45   | 12   |
| >BAP1-H169(RTMEAFHF   | 259  | >BAP1-H169(RTMEAFQF   | 282  | 23   |
| >BAP1-H169(RTMEAFHFV  | 19   | >BAP1-H169(RTMEAFQFV  | 85   | 66   |
| >BAP1-H169(RTMEAFHF   | 165  | >BAP1-H169(RTMEAFQF   | 225  | 60   |
| >BAP1-H169(RTMEAFHFV  | 413  | >BAP1-H169(RTMEAFQFV  | 325  | 88   |
| >BAP1-H169(RTMEAFHFV! | 27   | >BAP1-H169(RTMEAFQFV! | 24   | 3    |
| >BAP1-H169(RTMEAFHFV! | 93   | >BAP1-H169(RTMEAFQFV! | 136  | 43   |
| >BAP1-H169(RTMEAFHFV! | 245  | >BAP1-H169(RTMEAFQFV! | 641  | 396  |
| >BAP1-H169(RTMEAFHFV  | 329  | >BAP1-H169(RTMEAFQFV  | 190  | 139  |
| >BAP1-H169(VRTMEAFHF  | 110  | >BAP1-H169(VRTMEAFQF  | 182  | 72   |
| >BAP1-H169(VRTMEAFHF  | 302  | >BAP1-H169(VRTMEAFQF  | 394  | 92   |
| >BAP1-H169(VRTMEAFHF! | 354  | >BAP1-H169(VRTMEAFQF! | 248  | 106  |
| >BAP1-H169(AVRTMEAFH  | 474  | >BAP1-H169(AVRTMEAFQ  | 1123 | 649  |

|                       |      |                       |       |       |
|-----------------------|------|-----------------------|-------|-------|
| >BAP1-H169(AVRTMEAFH  | 110  | >BAP1-H169(AVRTMEAFQ  | 157   | 47    |
| >BAP1-H169(AVRTMEAFH  | 111  | >BAP1-H169(AVRTMEAFQ  | 190   | 79    |
| >BAP1-H169(AVRTMEAFH  | 14   | >BAP1-H169(AVRTMEAFQ  | 24    | 10    |
| >BAP1-H169(AVRTMEAFH  | 306  | >BAP1-H169(AVRTMEAFQ  | 751   | 445   |
| >BAP1-H169(AVRTMEAFH  | 81   | >BAP1-H169(AVRTMEAFQ  | 28    | 53    |
| >BAP1-H169(AVRTMEAFH  | 234  | >BAP1-H169(AVRTMEAFQ  | 504   | 270   |
| >BAP1-H169(AVRTMEAFH  | 6    | >BAP1-H169(AVRTMEAFQ  | 6     | 0     |
| >BAP1-H169(AVRTMEAFH  | 278  | >BAP1-H169(AVRTMEAFQ  | 921   | 643   |
| >BAP1-H169(AVRTMEAFH  | 335  | >BAP1-H169(AVRTMEAFQ  | 540   | 205   |
| >BAP1-H169(AVRTMEAFH  | 40   | >BAP1-H169(AVRTMEAFQ  | 17    | 23    |
| >BAP1-H169(AVRTMEAFH  | 1048 | >BAP1-H169(AVRTMEAFQ  | 385   | 663   |
| >BAP1-H169(SAVRTMEAFI | 111  | >BAP1-H169(SAVRTMEAFQ | 239   | 128   |
| >BAP1-H169(SAVRTMEAFI | 295  | >BAP1-H169(SAVRTMEAFQ | 989   | 694   |
| >BAP1-H169(SAVRTMEAFI | 119  | >BAP1-H169(SAVRTMEAFQ | 182   | 63    |
| >BAP1-H169(SAVRTMEAFI | 16   | >BAP1-H169(SAVRTMEAFQ | 9     | 7     |
| >BAP1-H169(SAVRTMEAFI | 61   | >BAP1-H169(SAVRTMEAFQ | 63    | 2     |
| >BAP1-H169(SAVRTMEAFI | 847  | >BAP1-H169(SAVRTMEAFQ | 258   | 589   |
| >BAP1-R227(CFNLMAVVP  | 16   | >BAP1-R227(CFNLMAVVP  | 233   | 217   |
| >BAP1-R227(CFNLMAVVP  | 81   | >BAP1-R227(CFNLMAVVP  | 271   | 190   |
| >BAP1-R227(IRFNLMV    | 2881 | >BAP1-R227(ICFNLMV    | 385   | 2496  |
| >BAP1-R227(IRFNLMV    | 1234 | >BAP1-R227(ICFNLMV    | 67    | 1167  |
| >BAP1-R227(IRFNLMVV   | 2494 | >BAP1-R227(ICFNLMVV   | 162   | 2332  |
| >BAP1-R227(IRFNLMV    | 3717 | >BAP1-R227(ICFNLMV    | 396   | 3321  |
| >BAP1-R227(IRFNLMV    | 5349 | >BAP1-R227(ICFNLMV    | 409   | 4940  |
| >BAP1-R227(IRFNLMVV   | 5312 | >BAP1-R227(ICFNLMVV   | 468   | 4844  |
| >BAP1-R227(IRFNLMV    | 46   | >BAP1-R227(ICFNLMV    | 629   | 583   |
| >BAP1-R227(IRFNLMVV   | 110  | >BAP1-R227(ICFNLMVV   | 1415  | 1305  |
| >BAP1-R227(IRFNLMV    | 108  | >BAP1-R227(ICFNLMV    | 25045 | 24937 |
| >BAP1-R227(IRFNLMVV   | 86   | >BAP1-R227(ICFNLMVV   | 24295 | 24209 |
| >BAP1-R227(IRFNLMVVF  | 478  | >BAP1-R227(ICFNLMVVF  | 27186 | 26708 |
| >BAP1-R227(IRFNLMVV   | 592  | >BAP1-R227(ICFNLMVV   | 63    | 529   |
| >BAP1-R227(IRFNLMVV   | 157  | >BAP1-R227(ICFNLMVV   | 33150 | 32993 |
| >BAP1-R227(ATAGEPYHDI | 476  | >BAP1-R227(ATAGEPYHDI | 22978 | 22502 |
| >BAP1-R227(ATAGEPYHDI | 382  | >BAP1-R227(ATAGEPYHDI | 23945 | 23563 |
| >BAP1-R227(ATAGEPYHDI | 38   | >BAP1-R227(ATAGEPYHDI | 34039 | 34001 |
| >BAP1-R227(ATAGEPYHDI | 104  | >BAP1-R227(ATAGEPYHDI | 8371  | 8267  |
| >BAP1-R227(DIRFNLMV   | 593  | >BAP1-R227(DICFNLMV   | 76    | 517   |
| >BAP1-R227(DIRFNLMV\  | 1646 | >BAP1-R227(DICFNLMV\  | 409   | 1237  |
| >BAP1-R227(DIRFNLMV   | 438  | >BAP1-R227(DICFNLMV   | 185   | 253   |
| >BAP1-R227(HDIRFNLM\  | 1666 | >BAP1-R227(HDICFNLM\  | 466   | 1200  |
| >BAP1-R227(HDIRFNLM   | 479  | >BAP1-R227(HDICFNLM   | 830   | 351   |
| >BAP1-R227(HDIRFNLMA  | 226  | >BAP1-R227(HDICFNLMA  | 693   | 467   |
| >BAP1-R227(HDIRFNLMA\ | 311  | >BAP1-R227(HDICFNLMA\ | 822   | 511   |

|                        |     |                        |       |       |
|------------------------|-----|------------------------|-------|-------|
| >BAP1-R227(HDIRFNLMA\  | 329 | >BAP1-R227(HDICFNLMA\  | 326   | 3     |
| >BAP1-R227(HDIRFNLMA\  | 184 | >BAP1-R227(HDICFNLMA\  | 168   | 16    |
| >BAP1-R227(HDIRFNLMA\  | 119 | >BAP1-R227(HDICFNLMA\  | 113   | 6     |
| >BAP1-R227(YHDIRFNLM   | 492 | >BAP1-R227(YHDICFNLM   | 1462  | 970   |
| >BAP1-R227(YHDIRFNL    | 56  | >BAP1-R227(YHDICFNL    | 62    | 6     |
| >BAP1-R227(YHDIRFNLM   | 163 | >BAP1-R227(YHDICFNLM   | 74    | 89    |
| >BAP1-R227(YHDIRFNLM/  | 127 | >BAP1-R227(YHDICFNLM/  | 84    | 43    |
| >BAP1-R227(PYHDIRFNL   | 135 | >BAP1-R227(PYHDICFNL   | 61    | 74    |
| >BAP1-R227(PYHDIRFNL   | 65  | >BAP1-R227(PYHDICFNL   | 62    | 3     |
| >BAP1-R227(PYHDIRFNLM  | 282 | >BAP1-R227(PYHDICFNLM  | 130   | 152   |
| >BAP1-R227(EPYHDIRFNL  | 315 | >BAP1-R227(EPYHDICFNL  | 348   | 33    |
| >BAP1-R227(EPYHDIRFNL  | 160 | >BAP1-R227(EPYHDICFNL  | 106   | 54    |
| >BAP1-R227(EPYHDIRF    | 15  | >BAP1-R227(EPYHDICF    | 12    | 3     |
| >BAP1-R227(EPYHDIRFNLI | 72  | >BAP1-R227(EPYHDICFNLI | 32    | 40    |
| >BAP1-R227(EPYHDIRFNLI | 447 | >BAP1-R227(EPYHDICFNLI | 485   | 38    |
| >BAP1-R227(EPYHDIRF    | 51  | >BAP1-R227(EPYHDICF    | 45    | 6     |
| >BAP1-R227(EPYHDIRFNLI | 176 | >BAP1-R227(EPYHDICFNLI | 54    | 122   |
| >BAP1-R227(EPYHDIRF    | 17  | >BAP1-R227(EPYHDICF    | 13    | 4     |
| >BAP1-R227(EPYHDIRFNL  | 134 | >BAP1-R227(EPYHDICFNL  | 122   | 12    |
| >BAP1-R227(EPYHDIRFNLI | 319 | >BAP1-R227(EPYHDICFNLI | 228   | 91    |
| >BAP1-R227(GEPYHDIRFN  | 128 | >BAP1-R227(GEPYHDICFN  | 133   | 5     |
| >BAP1-R227(GEPYHDIRFN  | 359 | >BAP1-R227(GEPYHDICFN  | 337   | 22    |
| >BAP1-R227(GEPYHDIRF   | 207 | >BAP1-R227(GEPYHDICF   | 276   | 69    |
| >BAP1-R227(GEPYHDIRFN  | 29  | >BAP1-R227(GEPYHDICFN  | 29    | 0     |
| >BAP1-R227(TAGEPYHDIR  | 668 | >BAP1-R227(TAGEPYHDIC  | 387   | 281   |
| >BAP1-S172FSYVPITGRL   | 4   | >BAP1-S172FRYVPITGRL   | 17    | 13    |
| >BAP1-S172FSYVPITGRL   | 256 | >BAP1-S172FRYVPITGRL   | 69    | 187   |
| >BAP1-S172FSYVPITGRLF  | 12  | >BAP1-S172FRYVPITGRLF  | 8     | 4     |
| >BAP1-S172FSYVPITGRL   | 577 | >BAP1-S172FRYVPITGRL   | 201   | 376   |
| >BAP1-S172FSYVPITGRLF  | 41  | >BAP1-S172FRYVPITGRLF  | 32    | 9     |
| >BAP1-S172FSYVPITGRL   | 10  | >BAP1-S172FRYVPITGRL   | 6     | 4     |
| >BAP1-S172FSYVPITGRLF  | 8   | >BAP1-S172FRYVPITGRLF  | 6     | 2     |
| >BAP1-S172FSYVPITGRLF  | 218 | >BAP1-S172FRYVPITGRLF  | 302   | 84    |
| >BAP1-S172FSYVPITGR    | 70  | >BAP1-S172FRYVPITGR    | 18    | 52    |
| >BAP1-S172FSYVPITGR    | 377 | >BAP1-S172FRYVPITGR    | 1090  | 713   |
| >BAP1-S172FSYVPITGR    | 245 | >BAP1-S172FRYVPITGR    | 1393  | 1148  |
| >BAP1-S172FSYVPITGR    | 25  | >BAP1-S172FRYVPITGR    | 13    | 12    |
| >BAP1-S172FSYVPITGRLF  | 370 | >BAP1-S172FRYVPITGRLF  | 861   | 491   |
| >BAP1-S172FSYVPITGRL   | 185 | >BAP1-S172FRYVPITGRL   | 178   | 7     |
| >BAP1-S172FSYVPITGRLE  | 203 | >BAP1-S172FRYVPITGRLE  | 189   | 14    |
| >BAP1-S172FVSYPITGRLF  | 89  | >BAP1-S172FVRYVPITGRLF | 1681  | 1592  |
| >BAP1-S172FVSYPITGR    | 353 | >BAP1-S172FVRYVPITGR   | 16159 | 15806 |
| >BAP1-S172FVSYPITGR    | 250 | >BAP1-S172FVRYVPITGR   | 22372 | 22122 |

|                        |       |                        |       |       |
|------------------------|-------|------------------------|-------|-------|
| >BAP1-S172FVSYVPITGRL  | 395   | >BAP1-S172FVRYVPITGRL  | 7576  | 7181  |
| >BAP1-S172FVSYVPITGR   | 34    | >BAP1-S172FVRYVPITGR   | 9517  | 9483  |
| >BAP1-S172FVSYVPITGR   | 141   | >BAP1-S172FVRYVPITGR   | 5475  | 5334  |
| >BAP1-S172FVSYVPITGRLF | 18    | >BAP1-S172FVRYVPITGRLF | 11    | 7     |
| >BAP1-S172FVSYVPITGRL  | 6     | >BAP1-S172FVRYVPITGRL  | 17179 | 17173 |
| >BAP1-S172FVSYVPITGRLF | 3     | >BAP1-S172FVRYVPITGRLF | 10685 | 10682 |
| >BAP1-S172FVSYVPITGR   | 20616 | >BAP1-S172FVRYVPITGR   | 104   | 20512 |
| >BAP1-S172FVSYVPITGRL  | 16307 | >BAP1-S172FVRYVPITGRL  | 34    | 16273 |
| >BAP1-S172FVSYVPITGRLF | 16149 | >BAP1-S172FVRYVPITGRLF | 164   | 15985 |
| >BAP1-S172FVSYVPITGRLF | 275   | >BAP1-S172FVRYVPITGRLF | 23205 | 22930 |
| >BAP1-S172FVSYVPITGRLF | 184   | >BAP1-S172FVRYVPITGRLF | 20805 | 20621 |
| >BAP1-S172FVSYVPITGRLF | 154   | >BAP1-S172FVRYVPITGRLF | 18512 | 18358 |
| >BAP1-S172FVSYVPITGRL  | 224   | >BAP1-S172FVRYVPITGRL  | 16327 | 16103 |
| >BAP1-S172FVSYVPITGRLF | 14    | >BAP1-S172FVRYVPITGRLF | 1006  | 992   |
| >BAP1-S172FVSYVPITGRL  | 19838 | >BAP1-S172FVRYVPITGRL  | 220   | 19618 |
| >BAP1-S172FVSYVPITGRLF | 14698 | >BAP1-S172FVRYVPITGRLF | 215   | 14483 |
| >BAP1-S172FVSYVPITGRL  | 9578  | >BAP1-S172FVRYVPITGRL  | 48    | 9530  |
| >BAP1-S172FVSYVPITGRLF | 18624 | >BAP1-S172FVRYVPITGRLF | 30    | 18594 |
| >BAP1-S172FVSYVPITGRL  | 402   | >BAP1-S172FVRYVPITGRI  | 5067  | 4665  |
| >BAP1-S172FVSYVPITGRI  | 20    | >BAP1-S172FVRYVPITGRI  | 949   | 929   |
| >BAP1-S172FVSYVPITGRI  | 65    | >BAP1-S172FVRYVPITGRI  | 216   | 151   |
| >BAP1-S172FVSYVPITGRI  | 327   | >BAP1-S172FVRYVPITGRI  | 2299  | 1972  |
| >BAP1-S172FVSYVPITGR   | 361   | >BAP1-S172FVRYVPITGR   | 3575  | 3214  |
| >BAP1-S172FVSYVPITGR   | 535   | >BAP1-S172FVRYVPITGR   | 442   | 93    |
| >BAP1-S172FVSYVPITGR   | 7     | >BAP1-S172FVRYVPITGR   | 32    | 25    |
| >BAP1-S172FVSYVPITGRI  | 12    | >BAP1-S172FVRYVPITGRI  | 329   | 317   |
| >BAP1-S172FVSYVPITGRI  | 7101  | >BAP1-S172FVRYVPITGRI  | 300   | 6801  |
| >BAP1-S172FVSYVPITGRI  | 469   | >BAP1-S172FVRYVPITGRI  | 161   | 308   |
| >BAP1-S172FHFVSYVPI    | 187   | >BAP1-S172FHFVRYVPI    | 350   | 163   |
| >BAP1-S172FHFVSYVPI    | 258   | >BAP1-S172FHFVRYVPI    | 322   | 64    |
| >BAP1-S172FHFVSYVPITGI | 25    | >BAP1-S172FHFVRYVPITGI | 25    | 0     |
| >BAP1-S172FHFVSYVPITGI | 64    | >BAP1-S172FHFVRYVPITGI | 71    | 7     |
| >BAP1-S172FHFVSYVPITGI | 77    | >BAP1-S172FHFVRYVPITGI | 134   | 57    |
| >BAP1-S172FHFVSYVPITGI | 36    | >BAP1-S172FHFVRYVPITGI | 51    | 15    |
| >BAP1-S172FHFVSYVPI    | 347   | >BAP1-S172FHFVRYVPI    | 681   | 334   |
| >BAP1-S172FHFVSYVPI    | 157   | >BAP1-S172FHFVRYVPI    | 38    | 119   |
| >BAP1-S172FHFVSYVPI    | 324   | >BAP1-S172FHFVRYVPI    | 185   | 139   |
| >BAP1-S172FHFVSYVPI    | 5     | >BAP1-S172FHFVRYVPI    | 13    | 8     |
| >BAP1-S172FHFVSYVPIT   | 418   | >BAP1-S172FHFVRYVPIT   | 1472  | 1054  |
| >BAP1-S172FHFVSYVPI    | 336   | >BAP1-S172FHFVRYVPI    | 277   | 59    |
| >BAP1-S172FHFVSYVPI    | 20    | >BAP1-S172FHFVRYVPI    | 29    | 9     |
| >BAP1-S172FHFVSYVPIT   | 458   | >BAP1-S172FHFVRYVPIT   | 1124  | 666   |
| >BAP1-S172FHFVSYVPI    | 138   | >BAP1-S172FHFVRYVPI    | 914   | 776   |



|                         |       |                         |      |       |
|-------------------------|-------|-------------------------|------|-------|
| >BAP1-S172F AFHFVSYV    | 202   | >BAP1-S172F AFHFVRYV    | 1266 | 1064  |
| >BAP1-S172F AFHFVSYV    | 132   | >BAP1-S172F AFHFVRYV    | 557  | 425   |
| >BAP1-S172F AFHFVSYVPI  | 180   | >BAP1-S172F AFHFVRYVPI  | 239  | 59    |
| >BAP1-S172F AFHFVSYV    | 99    | >BAP1-S172F AFHFVRYV    | 93   | 6     |
| >BAP1-S172F AFHFVSYVPI  | 27    | >BAP1-S172F AFHFVRYVPI  | 27   | 0     |
| >BAP1-S172F AFHFVSYVPI  | 380   | >BAP1-S172F AFHFVRYVPI  | 610  | 230   |
| >BAP1-S172F AFHFVSYV    | 603   | >BAP1-S172F AFHFVRYV    | 385  | 218   |
| >BAP1-S172F EAFHFVSYV   | 126   | >BAP1-S172F EAFHFVRYV   | 307  | 181   |
| >BAP1-S172F EAFHFVSYVPI | 86    | >BAP1-S172F EAFHFVRYVPI | 67   | 19    |
| >BAP1-S172F EAFHFVSYV   | 331   | >BAP1-S172F EAFHFVRYV   | 1474 | 1143  |
| >BAP1-S172F EAFHFVSYV   | 222   | >BAP1-S172F EAFHFVRYV   | 1582 | 1360  |
| >BAP1-S172F EAFHFVSYV   | 223   | >BAP1-S172F EAFHFVRYV   | 2166 | 1943  |
| >BAP1-S172F EAFHFVSYV   | 23    | >BAP1-S172F EAFHFVRYV   | 60   | 37    |
| >BAP1-S172F EAFHFVSY    | 105   | >BAP1-S172F EAFHFVRY    | 1161 | 1056  |
| >BAP1-S172F EAFHFVSY    | 91    | >BAP1-S172F EAFHFVRY    | 198  | 107   |
| >BAP1-S172F EAFHFVSY    | 381   | >BAP1-S172F EAFHFVRY    | 454  | 73    |
| >BAP1-S172F EAFHFVSY    | 450   | >BAP1-S172F EAFHFVRY    | 1537 | 1087  |
| >BAP1-S172F EAFHFVSYVPI | 646   | >BAP1-S172F EAFHFVRYVPI | 454  | 192   |
| >BAP1-S172F EAFHFVSY    | 27    | >BAP1-S172F EAFHFVRY    | 47   | 20    |
| >BAP1-S172F EAFHFVSYV   | 275   | >BAP1-S172F EAFHFVRYV   | 1955 | 1680  |
| >BAP1-S172F EAFHFVSYV   | 6     | >BAP1-S172F EAFHFVRYV   | 7    | 1     |
| >BAP1-S172F EAFHFVSYVPI | 6     | >BAP1-S172F EAFHFVRYVPI | 7    | 1     |
| >BAP1-S172F EAFHFVSYV   | 5     | >BAP1-S172F EAFHFVRYV   | 12   | 7     |
| >BAP1-S172F EAFHFVSYVPI | 13    | >BAP1-S172F EAFHFVRYVPI | 27   | 14    |
| >BAP1-S172F EAFHFVSY    | 163   | >BAP1-S172F EAFHFVRY    | 777  | 614   |
| >BAP1-S172F EAFHFVSY    | 14    | >BAP1-S172F EAFHFVRY    | 86   | 72    |
| >BAP1-S172F EAFHFVSYV   | 154   | >BAP1-S172F EAFHFVRYV   | 776  | 622   |
| >BAP1-S172F EAFHFVSYVPI | 52    | >BAP1-S172F EAFHFVRYVPI | 160  | 108   |
| >BAP1-S172F EAFHFVSY    | 47    | >BAP1-S172F EAFHFVRY    | 40   | 7     |
| >BAP1-S172F EAFHFVSY    | 26    | >BAP1-S172F EAFHFVRY    | 57   | 31    |
| >BAP1-S172F EAFHFVSYVPI | 82    | >BAP1-S172F EAFHFVRYVPI | 131  | 49    |
| >BAP1-S172F MEAFHFVSY\  | 50    | >BAP1-S172F MEAFHFVRY\  | 56   | 6     |
| >BAP1-S172F MEAFHFVSY   | 60    | >BAP1-S172F MEAFHFVRY   | 53   | 7     |
| >BAP1-S172F MEAFHFVS    | 19735 | >BAP1-S172F MEAFHFVR    | 146  | 19589 |
| >BAP1-S172F MEAFHFVS    | 18019 | >BAP1-S172F MEAFHFVR    | 29   | 17990 |
| >BAP1-S172F MEAFHFVSY\  | 359   | >BAP1-S172F MEAFHFVRY\  | 1247 | 888   |
| >BAP1-S172F MEAFHFVSY   | 57    | >BAP1-S172F MEAFHFVRY   | 199  | 142   |
| >BAP1-S172F MEAFHFVSY   | 29    | >BAP1-S172F MEAFHFVRY   | 241  | 212   |
| >BAP1-S172F MEAFHFVS    | 495   | >BAP1-S172F MEAFHFVR    | 404  | 91    |
| >BAP1-S172F MEAFHFVSY   | 7     | >BAP1-S172F MEAFHFVRY   | 26   | 19    |
| >BAP1-S172F MEAFHFVSY   | 217   | >BAP1-S172F MEAFHFVRY   | 868  | 651   |
| >BAP1-S172F MEAFHFVSY\  | 135   | >BAP1-S172F MEAFHFVRY\  | 162  | 27    |
| >BAP1-S172F MEAFHFVSY\  | 170   | >BAP1-S172F MEAFHFVRY\  | 118  | 52    |

|                        |       |                       |     |       |
|------------------------|-------|-----------------------|-----|-------|
| >BAP1-S172FMEAFHFVSY   | 50    | >BAP1-S172FMEAFHFVRY  | 61  | 11    |
| >BAP1-S172FMEAFHFVSY\  | 186   | >BAP1-S172FMEAFHFVRY\ | 265 | 79    |
| >BAP1-S172FMEAFHFVSV   | 12    | >BAP1-S172FMEAFHFVR   | 77  | 65    |
| >BAP1-S172FMEAFHFVSY   | 68    | >BAP1-S172FMEAFHFVRY  | 100 | 32    |
| >BAP1-S172FMEAFHFVSY\  | 156   | >BAP1-S172FMEAFHFVRY\ | 160 | 4     |
| >BAP1-S172FMEAFHFVSY\  | 134   | >BAP1-S172FMEAFHFVRY\ | 177 | 43    |
| >BAP1-S172FMEAFHFVSY   | 467   | >BAP1-S172FMEAFHFVRY  | 475 | 8     |
| >BAP1-S172FMEAFHFVSY\  | 25    | >BAP1-S172FMEAFHFVRY\ | 30  | 5     |
| >BAP1-S172FMEAFHFVSV   | 26788 | >BAP1-S172FMEAFHFVR   | 138 | 26650 |
| >BAP1-S172FTMEAFHFVSV\ | 533   | >BAP1-S172FTMEAFHFVR\ | 453 | 80    |
| >BAP1-S172FTMEAFHFVSV\ | 47    | >BAP1-S172FTMEAFHFVR\ | 135 | 88    |
| >BAP1-S172FTMEAFHFVSV\ | 8     | >BAP1-S172FTMEAFHFVR\ | 27  | 19    |
| >BAP1-S172FTMEAFHFVSV\ | 22    | >BAP1-S172FTMEAFHFVR\ | 67  | 45    |
| >BAP1-S172FTMEAFHFVSV\ | 74    | >BAP1-S172FTMEAFHFVR\ | 271 | 197   |
| >BAP1-S172FTMEAFHFVSV\ | 3     | >BAP1-S172FTMEAFHFVR\ | 5   | 2     |
| >BAP1-S172FTMEAFHFVSV\ | 12    | >BAP1-S172FTMEAFHFVR\ | 34  | 22    |
| >BAP1-S172FTMEAFHFVSV\ | 28    | >BAP1-S172FTMEAFHFVR\ | 87  | 59    |
| >BAP1-S172FTMEAFHFVSV\ | 33    | >BAP1-S172FTMEAFHFVR\ | 152 | 119   |
| >BAP1-S172FTMEAFHFVSV\ | 3     | >BAP1-S172FTMEAFHFVR\ | 5   | 2     |
| >BAP1-S172FTMEAFHFVSV  | 13764 | >BAP1-S172FTMEAFHFVR  | 137 | 13627 |
| >BAP1-S172FTMEAFHFVSV\ | 184   | >BAP1-S172FTMEAFHFVR\ | 148 | 36    |
| >BAP1-S172FTMEAFHFVSV\ | 99    | >BAP1-S172FTMEAFHFVR\ | 156 | 57    |
| >BAP1-S172FTMEAFHFVSV  | 6012  | >BAP1-S172FTMEAFHFVR  | 7   | 6005  |
| >BAP1-S172FTMEAFHFVSV  | 21717 | >BAP1-S172FTMEAFHFVR  | 81  | 21636 |
| >BAP1-S172FTMEAFHFVSV  | 15835 | >BAP1-S172FTMEAFHFVR  | 18  | 15817 |
| >BAP1-S172FTMEAFHFVSV\ | 254   | >BAP1-S172FTMEAFHFVR\ | 813 | 559   |
| >BAP1-S172FTMEAFHFVSV\ | 104   | >BAP1-S172FTMEAFHFVR\ | 324 | 220   |
| >BAP1-S172FTMEAFHFVSV\ | 229   | >BAP1-S172FTMEAFHFVR\ | 155 | 74    |
| >BAP1-S172FTMEAFHFVSV\ | 108   | >BAP1-S172FTMEAFHFVR\ | 326 | 218   |
| >BAP1-S172FTMEAFHFVSV\ | 96    | >BAP1-S172FTMEAFHFVR\ | 196 | 100   |
| >BAP1-S172FTMEAFHFVSV\ | 134   | >BAP1-S172FTMEAFHFVR\ | 724 | 590   |
| >BAP1-S172FTMEAFHFVSV  | 18454 | >BAP1-S172FTMEAFHFVR  | 33  | 18421 |
| >BAP1-S172FRTMEAFHFV!  | 437   | >BAP1-S172FRTMEAFHFVI | 199 | 238   |
| >BAP1-S172FRTMEAFHFV!  | 144   | >BAP1-S172FRTMEAFHFVI | 675 | 531   |
| >BAP1-S172FRTMEAFHFV!  | 13652 | >BAP1-S172FRTMEAFHFVI | 250 | 13402 |
| >BAP1-S172FRTMEAFHFV!  | 71    | >BAP1-S172FRTMEAFHFVI | 76  | 5     |
| >BAP1-S172FRTMEAFHFV!  | 16882 | >BAP1-S172FRTMEAFHFVI | 15  | 16867 |
| >BAP1-S172FRTMEAFHFV!  | 10    | >BAP1-S172FRTMEAFHFVI | 13  | 3     |
| >BAP1-S172FRTMEAFHFV!  | 63    | >BAP1-S172FRTMEAFHFVI | 547 | 484   |
| >BAP1-S172FRTMEAFHFV!  | 19    | >BAP1-S172FRTMEAFHFVI | 16  | 3     |
| >BAP1-S172FRTMEAFHFV!  | 46    | >BAP1-S172FRTMEAFHFVI | 150 | 104   |
| >BAP1-S172FRTMEAFHFV!  | 64    | >BAP1-S172FRTMEAFHFVI | 58  | 6     |
| >BAP1-S172FRTMEAFHFV!  | 144   | >BAP1-S172FRTMEAFHFVI | 53  | 91    |

|                       |       |                        |       |       |
|-----------------------|-------|------------------------|-------|-------|
| >BAP1-S172FRTMEAFHFV! | 53    | >BAP1-S172FRTMEAFHFVI  | 157   | 104   |
| >BAP1-S172FRTMEAFHFV! | 43    | >BAP1-S172FRTMEAFHFVI  | 69    | 26    |
| >BAP1-S172FRTMEAFHFV! | 2275  | >BAP1-S172FRTMEAFHFVI  | 4     | 2271  |
| >BAP1-S172FRTMEAFHFV! | 388   | >BAP1-S172FRTMEAFHFVI  | 303   | 85    |
| >BAP1-S172FRTMEAFHFV! | 18    | >BAP1-S172FRTMEAFHFVI  | 50    | 32    |
| >BAP1-S172FRTMEAFHFV! | 21682 | >BAP1-S172FRTMEAFHFVI  | 235   | 21447 |
| >BAP1-S172FRTMEAFHFV! | 24816 | >BAP1-S172FRTMEAFHFVI  | 19    | 24797 |
| >BAP1-S172FRTMEAFHFV! | 410   | >BAP1-S172FRTMEAFHFVI  | 604   | 194   |
| >BAP1-S172FRTMEAFHFV! | 52    | >BAP1-S172FRTMEAFHFVI  | 38    | 14    |
| >BAP1-S172FRTMEAFHFV! | 36    | >BAP1-S172FRTMEAFHFVI  | 63    | 27    |
| >BAP1-S172FRTMEAFHFV! | 18    | >BAP1-S172FRTMEAFHFVI  | 90    | 72    |
| >BAP1-S172FRTMEAFHFV! | 3     | >BAP1-S172FRTMEAFHFVI  | 3     | 0     |
| >BAP1-S172FRTMEAFHFV! | 129   | >BAP1-S172FRTMEAFHFVI  | 134   | 5     |
| >BAP1-S172FRTMEAFHFV! | 33    | >BAP1-S172FRTMEAFHFVI  | 41    | 8     |
| >BAP1-S172FRTMEAFHFV! | 27    | >BAP1-S172FRTMEAFHFVI  | 21    | 6     |
| >BAP1-S172FRTMEAFHFV! | 93    | >BAP1-S172FRTMEAFHFVI  | 386   | 293   |
| >BAP1-S172FRTMEAFHFV! | 1759  | >BAP1-S172FRTMEAFHFVI  | 148   | 1611  |
| >BAP1-S172FRTMEAFHFV! | 245   | >BAP1-S172FRTMEAFHFVI  | 200   | 45    |
| >BAP1-S172FRTMEAFHFV! | 14263 | >BAP1-S172FRTMEAFHFVI  | 45    | 14218 |
| >BCAR3-P40 PPKPCKVPF  | 518   | >BCAR3-P40 SPKPCKVPF   | 101   | 417   |
| >BCAR3-P40 PPKPCKVPFL | 43    | >BCAR3-P40 SPKPCKVPFL  | 16    | 27    |
| >BCAR3-P40 PPKPCKVPF  | 419   | >BCAR3-P40 SPKPCKVPF   | 23    | 396   |
| >BCAR3-P40 PPKPCKVPF  | 1035  | >BCAR3-P40 SPKPCKVPF   | 249   | 786   |
| >BCAR3-P40 PPKPCKVPF  | 685   | >BCAR3-P40 SPKPCKVPF   | 86    | 599   |
| >BCAR3-P40 PPPKPKVPF  | 245   | >BCAR3-P40 PSPKPKVPF   | 570   | 325   |
| >BCAR3-P40 PPPKPKVPF  | 332   | >BCAR3-P40 PSPKPKVPF   | 818   | 486   |
| >BCAR3-P40 PPPKPKVPF  | 43    | >BCAR3-P40 PSPKPKVPF   | 13590 | 13547 |
| >BCAR3-P40 PPPKPKV    | 3403  | >BCAR3-P40 PSPKPKV     | 84    | 3319  |
| >BCAR3-P40 PPPKPKVPF  | 7806  | >BCAR3-P40 PSPKPKVPF   | 117   | 7689  |
| >BCAR3-P40 PPPKPKVPF  | 751   | >BCAR3-P40 PSPKPKVPF   | 13    | 738   |
| >BCAR3-P40 KPPPKPCKVP | 143   | >BCAR3-P40 KPSPKPKVP   | 37    | 106   |
| >BCAR3-P40 KPPPKPCKVP | 1096  | >BCAR3-P40 KPSPKPKVP   | 223   | 873   |
| >BCAR3-P40 KPPPKPCKVP | 836   | >BCAR3-P40 KPSPKPKVP   | 124   | 712   |
| >BCAR3-P40 KPPPKPCKVP | 7954  | >BCAR3-P40 KPSPKPKVP   | 483   | 7471  |
| >BCAR3-P40 QLCPKPPPK  | 237   | >BCAR3-P40 QLCPKPSPK   | 134   | 103   |
| >BCAR3-P40 QLCPKPPPK  | 137   | >BCAR3-P40 QLCPKPSPK   | 118   | 19    |
| >BCAR3-P40 QLCPKPPPK  | 199   | >BCAR3-P40 QLCPKPSPK   | 1018  | 819   |
| >BCAR3-P40 SQLCPKPPPK | 196   | >BCAR3-P40 SQLCPKPSPK  | 50    | 146   |
| >BCAR3-P40 SQLCPKPPPK | 51    | >BCAR3-P40 SQLCPKPSPK  | 47    | 4     |
| >BCAR3-P40 SQLCPKPPPK | 103   | >BCAR3-P40 SQLCPKPSPK  | 325   | 222   |
| >BCAR3-P40 SQLCPKPPPK | 397   | >BCAR3-P40 SQLCPKPSPK  | 226   | 171   |
| >BCAR3-Q19 QHFKINRTVL | 146   | >BCAR3-Q19 EHFKINRTVLF | 16    | 130   |
| >BCAR3-Q19 QHFKINRTVL | 127   | >BCAR3-Q19 EHFKINRTVL  | 559   | 432   |

|                       |       |                       |       |       |
|-----------------------|-------|-----------------------|-------|-------|
| >BCAR3-Q19 QHFKINRTV  | 295   | >BCAR3-Q19 EHFkinrtv  | 180   | 115   |
| >BCAR3-Q19 QHFKINRTVL | 139   | >BCAR3-Q19 EHFkinrtvl | 94    | 45    |
| >BCAR3-Q19 QHFKINRTVL | 49    | >BCAR3-Q19 EHFkinrtvl | 40    | 9     |
| >BCAR3-Q19 QHFKINRTVL | 44    | >BCAR3-Q19 EHFkinrtvl | 57    | 13    |
| >BCAR3-Q19 AQHFKINRTV | 376   | >BCAR3-Q19 AEHFkinrtv | 9342  | 8966  |
| >BCAR3-Q19 AQHFKINR   | 28    | >BCAR3-Q19 AEHFkinr   | 1958  | 1930  |
| >BCAR3-Q19 AQHFKINRTV | 324   | >BCAR3-Q19 AEHFkinrtv | 10552 | 10228 |
| >BCAR3-Q19 AQHFKINRTV | 381   | >BCAR3-Q19 AEHFkinrtv | 8084  | 7703  |
| >BCAR3-Q19 AQHFKINRTV | 74    | >BCAR3-Q19 AEHFkinrtv | 2510  | 2436  |
| >BCAR3-Q19 AQHFKINRTV | 2334  | >BCAR3-Q19 AEHFkinrtv | 57    | 2277  |
| >BCAR3-Q19 AQHFKINRT  | 14630 | >BCAR3-Q19 AEHFkinrt  | 334   | 14296 |
| >BCAR3-Q19 AQHFKINRTV | 21643 | >BCAR3-Q19 AEHFkinrtv | 128   | 21515 |
| >BCAR3-Q19 AQHFKINRTV | 2285  | >BCAR3-Q19 AEHFkinrtv | 27    | 2258  |
| >BCAR3-Q19 AQHFKINRTV | 3240  | >BCAR3-Q19 AEHFkinrtv | 42    | 3198  |
| >BCAR3-Q19 AQHFKINRTV | 15602 | >BCAR3-Q19 AEHFkinrtv | 221   | 15381 |
| >BCAR3-Q19 AQHFKINRT  | 3989  | >BCAR3-Q19 AEHFkinrt  | 44    | 3945  |
| >BCAR3-Q19 AQHFKINRTV | 6100  | >BCAR3-Q19 AEHFkinrtv | 104   | 5996  |
| >BCAR3-Q19 AQHFKINRTV | 11293 | >BCAR3-Q19 AEHFkinrtv | 152   | 11141 |
| >BCAR3-Q19 AQHFKINRT  | 18400 | >BCAR3-Q19 AEHFkinrt  | 465   | 17935 |
| >BCAR3-Q19 AQHFKINRTV | 13221 | >BCAR3-Q19 AEHFkinrtv | 108   | 13113 |
| >BCAR3-Q19 AQHFKINRTV | 3421  | >BCAR3-Q19 AEHFkinrtv | 34    | 3387  |
| >BCAR3-Q19 LAQHFKINR  | 25    | >BCAR3-Q19 LAEHfkInR  | 125   | 100   |
| >BCAR3-Q19 LAQHFKINR  | 310   | >BCAR3-Q19 LAEHfkInR  | 1151  | 841   |
| >BCAR3-Q19 LAQHFKINR  | 320   | >BCAR3-Q19 LAEHfkInR  | 291   | 29    |
| >BCAR3-Q19 LAQHFKINR  | 376   | >BCAR3-Q19 LAEHfkInR  | 362   | 14    |
| >BCAR3-Q19 NLAQHFKI   | 567   | >BCAR3-Q19 NLAEHFKI   | 89    | 478   |
| >BCAR3-Q19 NLAQHFKI   | 28    | >BCAR3-Q19 NLAEHFKI   | 11    | 17    |
| >BCAR3-Q19 NLAQHFKINR | 574   | >BCAR3-Q19 NLAEHFKINR | 192   | 382   |
| >BCAR3-Q19 NLAQHFKI   | 50    | >BCAR3-Q19 NLAEHFKI   | 18    | 32    |
| >BCAR3-Q19 NLAQHFKINR | 294   | >BCAR3-Q19 NLAEHFKINR | 58    | 236   |
| >BCAR3-Q19 NLAQHFKI   | 390   | >BCAR3-Q19 NLAEHFKI   | 60    | 330   |
| >BCAR3-Q19 NLAQHFKI   | 102   | >BCAR3-Q19 NLAEHFKI   | 26    | 76    |
| >BCAR3-Q19 NLAQHFKI   | 498   | >BCAR3-Q19 NLAEHFKI   | 59    | 439   |
| >BCAR3-Q19 NLAQHFKI   | 356   | >BCAR3-Q19 NLAEHFKI   | 107   | 249   |
| >BCAR3-Q19 NLAQHFKI   | 497   | >BCAR3-Q19 NLAEHFKI   | 74    | 423   |
| >BCAR3-Q19 NLAQHFKI   | 67    | >BCAR3-Q19 NLAEHFKI   | 33    | 34    |
| >BCAR3-Q19 NLAQHFKINR | 98    | >BCAR3-Q19 NLAEHFKINR | 139   | 41    |
| >BCAR3-Q19 NLAQHFKINR | 487   | >BCAR3-Q19 NLAEHFKINR | 380   | 107   |
| >BCAR3-Q19 NLAQHFKINR | 50    | >BCAR3-Q19 NLAEHFKINR | 32    | 18    |
| >BCAR3-Q19 NLAQHFKI   | 912   | >BCAR3-Q19 NLAEHFKI   | 313   | 599   |
| >BCAR3-Q19 NLAQHFKI   | 318   | >BCAR3-Q19 NLAEHFKI   | 83    | 235   |
| >BCAR3-Q19 NLAQHFKINR | 53    | >BCAR3-Q19 NLAEHFKINR | 93    | 40    |
| >BCAR3-Q19 KNLAQHFK   | 231   | >BCAR3-Q19 KNLAEHFK   | 369   | 138   |

|                             |      |                             |      |      |
|-----------------------------|------|-----------------------------|------|------|
| >BCAR3-Q19 KNLAQHFK         | 14   | >BCAR3-Q19 KNLAEHFK         | 50   | 36   |
| >BCAR3-Q19 KNLAQHFK         | 176  | >BCAR3-Q19 KNLAEHFK         | 965  | 789  |
| >BCAR3-Q19 KNLAQHFKIN       | 22   | >BCAR3-Q19 KNLAEHFKIN       | 50   | 28   |
| >BCAR3-Q19 KNLAQHFK         | 170  | >BCAR3-Q19 KNLAEHFK         | 188  | 18   |
| >BCAR3-Q19 KNLAQHFKIN       | 25   | >BCAR3-Q19 KNLAEHFKIN       | 24   | 1    |
| >BCAR3-Q19 KNLAQHFKI        | 604  | >BCAR3-Q19 KNLAEHFKI        | 457  | 147  |
| >BCAR3-Q19 WKNLAQHF         | 9    | >BCAR3-Q19 WKNLAEHF         | 15   | 6    |
| >BCAR3-Q19 QWKNLAQHI        | 331  | >BCAR3-Q19 QWKNLAEHF        | 369  | 38   |
| >BCAR3-Q19 QWKNLAQHI        | 28   | >BCAR3-Q19 QWKNLAEHF        | 31   | 3    |
| >BCAR3-Q19 QWKNLAQHI        | 308  | >BCAR3-Q19 QWKNLAEHF        | 359  | 51   |
| >BCAR3-Q19 QWKNLAQHI        | 31   | >BCAR3-Q19 QWKNLAEHF        | 152  | 121  |
| >BCAR3-Q19 QWKNLAQHI        | 52   | >BCAR3-Q19 QWKNLAEHF        | 64   | 12   |
| >BCAR3-Q19 CQWKNLAQF        | 438  | >BCAR3-Q19 CQWKNLAEH        | 1073 | 635  |
| >BCAR3-Q19 CQWKNLAQF        | 112  | >BCAR3-Q19 CQWKNLAEH        | 131  | 19   |
| >BCAR3-Q19 CQWKNLAQF        | 448  | >BCAR3-Q19 CQWKNLAEH        | 484  | 36   |
| >BCAR3-Q19 CQWKNLAQF        | 99   | >BCAR3-Q19 CQWKNLAEH        | 180  | 81   |
| >BCAR3-Q19 CQWKNLAQF        | 102  | >BCAR3-Q19 CQWKNLAEH        | 105  | 3    |
| >BCAR3-Q19 CQWKNLAQF        | 771  | >BCAR3-Q19 CQWKNLAEH        | 387  | 384  |
| >BCAR3-Q19 CQWKNLAQF        | 4    | >BCAR3-Q19 CQWKNLAEH        | 6    | 2    |
| >BCAR3-Q19 CQWKNLAQF        | 175  | >BCAR3-Q19 CQWKNLAEH        | 216  | 41   |
| >BCAR3-Q19 LTCQWKNLA        | 249  | >BCAR3-Q19 LTCQWKNLA        | 438  | 189  |
| >BCL11A-A1 $\xi$ AQNTHGLRI  | 426  | >BCL11A-A1 $\xi$ TQNTHGLRI  | 928  | 502  |
| >BCL11A-A1 $\xi$ AQNTHGLRIY | 140  | >BCL11A-A1 $\xi$ TQNTHGLRIY | 378  | 238  |
| >BCL11A-A1 $\xi$ AQNTHGLR   | 27   | >BCL11A-A1 $\xi$ TQNTHGLR   | 35   | 8    |
| >BCL11A-A1 $\xi$ AQNTHGLRIY | 60   | >BCL11A-A1 $\xi$ TQNTHGLRIY | 99   | 39   |
| >BCL11A-A1 $\xi$ AQNTHGLRIY | 394  | >BCL11A-A1 $\xi$ TQNTHGLRIY | 221  | 173  |
| >BCL11A-A1 $\xi$ AQNTHGLRI  | 99   | >BCL11A-A1 $\xi$ TQNTHGLRI  | 539  | 440  |
| >BCL11A-A1 $\xi$ AQNTHGLRIY | 10   | >BCL11A-A1 $\xi$ TQNTHGLRIY | 50   | 40   |
| >BCL11A-A1 $\xi$ AQNTHGLRIY | 66   | >BCL11A-A1 $\xi$ TQNTHGLRIY | 311  | 245  |
| >BCL11A-A1 $\xi$ AQNTHGLRIY | 902  | >BCL11A-A1 $\xi$ TQNTHGLRIY | 231  | 671  |
| >BCL11A-A1 $\xi$ HAQNTHGLR  | 7522 | >BCL11A-A1 $\xi$ HTQNTHGLR  | 264  | 7258 |
| >BCL11A-A1 $\xi$ HAQNTHGLR  | 2370 | >BCL11A-A1 $\xi$ HTQNTHGLR  | 56   | 2314 |
| >BCL11A-A1 $\xi$ HAQNTHGLR  | 4208 | >BCL11A-A1 $\xi$ HTQNTHGLR  | 131  | 4077 |
| >BCL11A-A1 $\xi$ HAQNTHGLR  | 2151 | >BCL11A-A1 $\xi$ HTQNTHGLR  | 378  | 1773 |
| >BCL11A-A1 $\xi$ HAQNTHGLR  | 1722 | >BCL11A-A1 $\xi$ HTQNTHGLR  | 262  | 1460 |
| >BCL11A-A1 $\xi$ HAQNTHGLR  | 1042 | >BCL11A-A1 $\xi$ HTQNTHGLR  | 189  | 853  |
| >BCL11A-A1 $\xi$ HAQNTHGLR  | 170  | >BCL11A-A1 $\xi$ HTQNTHGLR  | 50   | 120  |
| >BCL11A-A1 $\xi$ HAQNTHGLR  | 22   | >BCL11A-A1 $\xi$ HTQNTHGLR  | 10   | 12   |
| >BCL11A-A1 $\xi$ HAQNTHGLR  | 91   | >BCL11A-A1 $\xi$ HTQNTHGLR  | 40   | 51   |
| >BCL11A-A1 $\xi$ HAQNTHGLR  | 39   | >BCL11A-A1 $\xi$ HTQNTHGLR  | 13   | 26   |
| >BCL11A-A1 $\xi$ HAQNTHGL   | 2144 | >BCL11A-A1 $\xi$ HTQNTHGL   | 266  | 1878 |
| >BCL11A-A1 $\xi$ HAQNTHGL   | 799  | >BCL11A-A1 $\xi$ HTQNTHGL   | 165  | 634  |
| >BCL11A-A1 $\xi$ HAQNTHGLR  | 2790 | >BCL11A-A1 $\xi$ HTQNTHGLR  | 343  | 2447 |

|                       |     |                       |      |      |
|-----------------------|-----|-----------------------|------|------|
| >BCL11A-A1£HAQNTHGLR  | 405 | >BCL11A-A1£HTQNTHGLR  | 402  | 3    |
| >BCL11A-A1£HAQNTHGL   | 406 | >BCL11A-A1£HTQNTHGL   | 28   | 378  |
| >BCL11A-A1£HAQNTHGLR  | 930 | >BCL11A-A1£HTQNTHGLR  | 58   | 872  |
| >BCL11A-A1£HAQNTHGLR  | 209 | >BCL11A-A1£HTQNTHGLR  | 21   | 188  |
| >BCL11A-A1£HAQNTHGLR  | 267 | >BCL11A-A1£HTQNTHGLR  | 5007 | 4740 |
| >BCL11A-A1£HAQNTHGLR  | 224 | >BCL11A-A1£HTQNTHGLR  | 12   | 212  |
| >BCL11A-A1£HAQNTHGLR  | 234 | >BCL11A-A1£HTQNTHGLR  | 60   | 174  |
| >BCL11A-A1£FTSAWFLLQF | 166 | >BCL11A-A1£FTSAWFLLQF | 1215 | 1049 |
| >BCL11A-A1£FTSAWFLLQF | 36  | >BCL11A-A1£FTSAWFLLQF | 290  | 254  |
| >BCL11A-A1£FTSAWFLLQF | 43  | >BCL11A-A1£FTSAWFLLQF | 580  | 537  |
| >BCL11A-A1£FTSAWFLLQF | 15  | >BCL11A-A1£FTSAWFLLQF | 84   | 69   |
| >BCL11A-A1£FTSAWFLLQF | 320 | >BCL11A-A1£FTSAWFLLQF | 1777 | 1457 |
| >BCL11A-A1£FTSAWFLLQF | 375 | >BCL11A-A1£FTSAWFLLQF | 2898 | 2523 |
| >BCL11A-A1£FTSAWFLLQF | 18  | >BCL11A-A1£FTSAWFLLQF | 280  | 262  |
| >BCL11A-A1£FTSAWFLLQF | 137 | >BCL11A-A1£FTSAWFLLQF | 814  | 677  |
| >BCL11A-A1£QHAQNTHGL  | 35  | >BCL11A-A1£QHTQNTHGL  | 160  | 125  |
| >BCL11A-A1£QHAQNTHGL  | 265 | >BCL11A-A1£QHTQNTHGL  | 346  | 81   |
| >BCL11A-A1£LQHAQNTHG  | 38  | >BCL11A-A1£LQHTQNTHG  | 51   | 13   |
| >BCL11A-A1£LQHAQNTH   | 441 | >BCL11A-A1£LQHTQNTH   | 1355 | 914  |
| >BCL11A-A1£LQHAQNTHG  | 189 | >BCL11A-A1£LQHTQNTHG  | 613  | 424  |
| >BCL11A-A1£LQHAQNTHG  | 141 | >BCL11A-A1£LQHTQNTHG  | 378  | 237  |
| >BCL11A-A1£LQHAQNTH   | 267 | >BCL11A-A1£LQHTQNTH   | 191  | 76   |
| >BCL11A-A1£LQHAQNTHG  | 75  | >BCL11A-A1£LQHTQNTHG  | 70   | 5    |
| >BCL11A-A1£LQHAQNTHG  | 296 | >BCL11A-A1£LQHTQNTHG  | 517  | 221  |
| >BCL11A-A1£LQHAQNTHG  | 467 | >BCL11A-A1£LQHTQNTHG  | 452  | 15   |
| >BCL11A-A1£LLQHAQNTH  | 175 | >BCL11A-A1£LLQHTQNTH  | 226  | 51   |
| >BCL11A-A1£LLQHAQNTH  | 16  | >BCL11A-A1£LLQHTQNTH  | 28   | 12   |
| >BCL11A-A1£LLQHAQNTH  | 85  | >BCL11A-A1£LLQHTQNTH  | 101  | 16   |
| >BCL11A-A1£LLQHAQNTH  | 36  | >BCL11A-A1£LLQHTQNTH  | 23   | 13   |
| >BCL11A-A1£LLQHAQNTH  | 6   | >BCL11A-A1£LLQHTQNTH  | 5    | 1    |
| >BCL11A-A1£LLQHAQNTH  | 137 | >BCL11A-A1£LLQHTQNTH  | 125  | 12   |
| >BCL11A-A1£LLQHAQNTH  | 26  | >BCL11A-A1£LLQHTQNTH  | 30   | 4    |
| >BCL11A-A1£LLQHAQNT   | 200 | >BCL11A-A1£LLQHTQNT   | 142  | 58   |
| >BCL11A-A1£LLQHAQNTH  | 3   | >BCL11A-A1£LLQHTQNTH  | 3    | 0    |
| >BCL11A-A1£FLLQHAQNT  | 387 | >BCL11A-A1£FLLQHTQNT  | 97   | 290  |
| >BCL11A-A1£FLLQHAQNT  | 286 | >BCL11A-A1£FLLQHTQNT  | 55   | 231  |
| >BCL11A-A1£FLLQHAQNT  | 108 | >BCL11A-A1£FLLQHTQNT  | 29   | 79   |
| >BCL11A-A1£FLLQHAQNT  | 211 | >BCL11A-A1£FLLQHTQNT  | 148  | 63   |
| >BCL11A-A1£FLLQHAQNT  | 199 | >BCL11A-A1£FLLQHTQNT  | 301  | 102  |
| >BCL11A-A1£FLLQHAQNT  | 21  | >BCL11A-A1£FLLQHTQNT  | 15   | 6    |
| >BCL11A-A1£FLLQHAQNT  | 530 | >BCL11A-A1£FLLQHTQNT  | 476  | 54   |
| >BCL11A-A1£FLLQHAQNT  | 298 | >BCL11A-A1£FLLQHTQNT  | 127  | 171  |
| >BCL11A-A1£FLLQHAQNT  | 96  | >BCL11A-A1£FLLQHTQNT  | 51   | 45   |

|                       |       |                        |     |       |
|-----------------------|-------|------------------------|-----|-------|
| >BCL11A-A1:FLLQHAQNT  | 431   | >BCL11A-A1:FLLQHTQNT   | 100 | 331   |
| >BCL11A-A1:FLLQHAQN   | 313   | >BCL11A-A1:FLLQHTQN    | 313 | 0     |
| >BCL11A-A1:FLLQHAQNT  | 9     | >BCL11A-A1:FLLQHTQNT   | 6   | 3     |
| >BCL11A-A1:AWFLLQHA   | 210   | >BCL11A-A1:AWFLLQHT    | 452 | 242   |
| >BCL11A-A1:AWFLLQHAQ  | 112   | >BCL11A-A1:AWFLLQHTQ   | 183 | 71    |
| >BCL11A-A1:TSAWFLLQH  | 535   | >BCL11A-A1:TSAWFLLQH   | 418 | 117   |
| >BCL11A-A1:TSAWFLLQH  | 123   | >BCL11A-A1:TSAWFLLQH   | 376 | 253   |
| >BCL11A-G5:GFGLSLEAAR | 422   | >BCL11A-G5:SFGLSLEAAR  | 91  | 331   |
| >BCL11A-G5:GFGLSLEAAR | 1873  | >BCL11A-G5:SFGLSLEAAR  | 246 | 1627  |
| >BCL11A-G5:GFGLSLEAAR | 2098  | >BCL11A-G5:SFGLSLEAAR  | 422 | 1676  |
| >BCL11A-G5:GFGLSLEAAR | 1397  | >BCL11A-G5:SFGLSLEAAR  | 194 | 1203  |
| >BCL11A-G5:YGFGLSLEA  | 3576  | >BCL11A-G5:YSFGLSLEA   | 323 | 3253  |
| >BCL11A-G5:YGFGLSLEA  | 616   | >BCL11A-G5:YSFGLSLEA   | 229 | 387   |
| >BCL11A-G5:YGFGLSLEAA | 2613  | >BCL11A-G5:YSFGLSLEAA  | 309 | 2304  |
| >BCL11A-G5:YGFGLSLEAA | 1961  | >BCL11A-G5:YSFGLSLEAA  | 230 | 1731  |
| >BCL11A-G5:YGFGLSLEA  | 507   | >BCL11A-G5:YSFGLSLEA   | 173 | 334   |
| >BCL11A-G5:YGFGLSLEAA | 681   | >BCL11A-G5:YSFGLSLEAA  | 110 | 571   |
| >BCL11A-G5:YGFGLSLEAA | 9998  | >BCL11A-G5:YSFGLSLEAAF | 379 | 9619  |
| >BCL11A-G5:YGFGLSLEAA | 690   | >BCL11A-G5:YSFGLSLEAAF | 51  | 639   |
| >BCL11A-G5:YGFGLSLEAA | 2116  | >BCL11A-G5:YSFGLSLEAAF | 62  | 2054  |
| >BCL11A-G5:YGFGLSLEAA | 61    | >BCL11A-G5:YSFGLSLEAAF | 4   | 57    |
| >BCL11A-G5:YGFGLSLEA  | 3378  | >BCL11A-G5:YSFGLSLEA   | 170 | 3208  |
| >BCL11A-G5:YGFGLSLEAA | 8926  | >BCL11A-G5:YSFGLSLEAA  | 176 | 8750  |
| >BCL11A-G5:YGFGLSLEA  | 14425 | >BCL11A-G5:YSFGLSLEA   | 201 | 14224 |
| >BCL11A-G5:YGFGLSLEA  | 3819  | >BCL11A-G5:YSFGLSLEA   | 309 | 3510  |
| >BCL11A-G5:YGFGLSLEAA | 122   | >BCL11A-G5:YSFGLSLEAAF | 252 | 130   |
| >BCL11A-G5:DYGFGLSL   | 359   | >BCL11A-G5:DYSFGLSL    | 460 | 101   |
| >BCL11A-G5:DYGFGLSL   | 448   | >BCL11A-G5:DYSFGLSL    | 344 | 104   |
| >BCL11A-G5:VDYGFGLSL  | 365   | >BCL11A-G5:VDYSFGLSL   | 238 | 127   |
| >BCL11A-G5:VDYGFGLSL  | 1641  | >BCL11A-G5:VDYSFGLSL   | 230 | 1411  |
| >BCL11A-G5:VDYGFGLSL  | 158   | >BCL11A-G5:VDYSFGLSL   | 185 | 27    |
| >BCL11A-G5:RVDYGFGLSL | 491   | >BCL11A-G5:RVDYSFGLSL  | 658 | 167   |
| >BCL11A-G5:RVDYGFGL   | 37    | >BCL11A-G5:RVDYSFGL    | 40  | 3     |
| >BCL11A-G5:RVDYGFGLSL | 321   | >BCL11A-G5:RVDYSFGLSL  | 236 | 85    |
| >BCL11A-G5:RVDYGFGL   | 758   | >BCL11A-G5:RVDYSFGL    | 449 | 309   |
| >BCL11A-G5:RVDYGFGLSL | 222   | >BCL11A-G5:RVDYSFGLSL  | 295 | 73    |
| >BCL11A-G5:RVDYGFGL   | 670   | >BCL11A-G5:RVDYSFGL    | 285 | 385   |
| >BCL11A-G5:RVDYGFGLSL | 612   | >BCL11A-G5:RVDYSFGLSL  | 361 | 251   |
| >BCL11A-G5:ERVDYGFGL  | 134   | >BCL11A-G5:ERVDYSFGL   | 43  | 91    |
| >BCL11A-G5:ERVDYGFGLS | 65    | >BCL11A-G5:ERVDYSFGLS  | 42  | 23    |
| >BCL11A-G5:SERVDYGF   | 542   | >BCL11A-G5:SERVDYSF    | 381 | 161   |
| >BCL11A-G5:SERVDYGF   | 1811  | >BCL11A-G5:SERVDYSF    | 498 | 1313  |
| >BCL11A-G5:SERVDYGF   | 578   | >BCL11A-G5:SERVDYSF    | 73  | 505   |

|                        |       |                        |      |       |
|------------------------|-------|------------------------|------|-------|
| >BCL11A-G5:SERVDYGF    | 180   | >BCL11A-G5:SERVDYSF    | 60   | 120   |
| >BCL11A-G5:SERVDYGF    | 646   | >BCL11A-G5:SERVDYSF    | 181  | 465   |
| >BCL11A-G5:SERVDYGFGL  | 118   | >BCL11A-G5:SERVDYSFGL  | 76   | 42    |
| >BCL11A-G5:SERVDYGF    | 602   | >BCL11A-G5:SERVDYSF    | 420  | 182   |
| >BCL11A-G5:SERVDYGF    | 383   | >BCL11A-G5:SERVDYSF    | 338  | 45    |
| >BCL11A-G5:SERVDYGFGL  | 102   | >BCL11A-G5:SERVDYSFGL  | 138  | 36    |
| >BCL11A-G5:ESERVDYGF   | 711   | >BCL11A-G5:ESERVDYSF   | 287  | 424   |
| >BCL11A-G5:ESERVDYGF   | 1282  | >BCL11A-G5:ESERVDYSF   | 456  | 826   |
| >BCL11A-G5:TESERVDYGF  | 829   | >BCL11A-G5:TESERVDYSF  | 488  | 341   |
| >BCL11A-G5:TESERVDYGF  | 712   | >BCL11A-G5:TESERVDYSF  | 329  | 383   |
| >BCL11A-G5:TESERVDYGF  | 675   | >BCL11A-G5:TESERVDYSF  | 311  | 364   |
| >BCL11A-G5:TESERVDYGF  | 193   | >BCL11A-G5:TESERVDYSF  | 272  | 79    |
| >BCL11A-G5:LTESERVDYGF | 45    | >BCL11A-G5:LTESERVDYSF | 59   | 14    |
| >BCL11A-G5:LTESERVDYGF | 1187  | >BCL11A-G5:LTESERVDYSF | 489  | 698   |
| >BCL11A-G5:LTESERVDYGF | 311   | >BCL11A-G5:LTESERVDYSF | 121  | 190   |
| >BCL11A-H1:HAQNTHGL    | 8405  | >BCL11A-H1:YAQNTHGL    | 375  | 8030  |
| >BCL11A-H1:HAQNTHGL    | 4939  | >BCL11A-H1:YAQNTHGL    | 158  | 4781  |
| >BCL11A-H1:HAQNTHGLR   | 2151  | >BCL11A-H1:YAQNTHGLR   | 330  | 1821  |
| >BCL11A-H1:HAQNTHGLR   | 170   | >BCL11A-H1:YAQNTHGLR   | 288  | 118   |
| >BCL11A-H1:HAQNTHGLR   | 22    | >BCL11A-H1:YAQNTHGLR   | 91   | 69    |
| >BCL11A-H1:HAQNTHGLR   | 91    | >BCL11A-H1:YAQNTHGLR   | 186  | 95    |
| >BCL11A-H1:HAQNTHGLR   | 39    | >BCL11A-H1:YAQNTHGLR   | 22   | 17    |
| >BCL11A-H1:HAQNTHGL    | 799   | >BCL11A-H1:YAQNTHGL    | 413  | 386   |
| >BCL11A-H1:HAQNTHGLR   | 701   | >BCL11A-H1:YAQNTHGLR   | 180  | 521   |
| >BCL11A-H1:HAQNTHGLR   | 405   | >BCL11A-H1:YAQNTHGLR   | 157  | 248   |
| >BCL11A-H1:HAQNTHGLR   | 1045  | >BCL11A-H1:YAQNTHGLR   | 217  | 828   |
| >BCL11A-H1:HAQNTHGL    | 406   | >BCL11A-H1:YAQNTHGL    | 151  | 255   |
| >BCL11A-H1:HAQNTHGLR   | 930   | >BCL11A-H1:YAQNTHGLR   | 373  | 557   |
| >BCL11A-H1:HAQNTHGLR   | 209   | >BCL11A-H1:YAQNTHGLR   | 68   | 141   |
| >BCL11A-H1:HAQNTHGLR   | 267   | >BCL11A-H1:YAQNTHGLR   | 114  | 153   |
| >BCL11A-H1:HAQNTHGLR   | 224   | >BCL11A-H1:YAQNTHGLR   | 31   | 193   |
| >BCL11A-H1:HAQNTHGLR   | 234   | >BCL11A-H1:YAQNTHGLR   | 110  | 124   |
| >BCL11A-H1:QHAQNTHGL   | 14933 | >BCL11A-H1:QYAQNTHGL   | 148  | 14785 |
| >BCL11A-H1:QHAQNTHGL   | 16687 | >BCL11A-H1:QYAQNTHGL   | 272  | 16415 |
| >BCL11A-H1:QHAQNTHGL   | 18017 | >BCL11A-H1:QYAQNTHGL   | 428  | 17589 |
| >BCL11A-H1:QHAQNTHGL   | 12624 | >BCL11A-H1:QYAQNTHGL   | 353  | 12271 |
| >BCL11A-H1:QHAQNTHGL   | 7614  | >BCL11A-H1:QYAQNTHGL   | 184  | 7430  |
| >BCL11A-H1:QHAQNTHGL   | 7918  | >BCL11A-H1:QYAQNTHGL   | 7    | 7911  |
| >BCL11A-H1:QHAQNTHGL   | 12390 | >BCL11A-H1:QYAQNTHGL   | 17   | 12373 |
| >BCL11A-H1:QHAQNTHGL   | 35    | >BCL11A-H1:QYAQNTHGL   | 1745 | 1710  |
| >BCL11A-H1:QHAQNTHGL   | 265   | >BCL11A-H1:QYAQNTHGL   | 21   | 244   |
| >BCL11A-H1:PFTSAWFLC   | 870   | >BCL11A-H1:PFTSAWFLC   | 9    | 861   |
| >BCL11A-H1:PFTSAWFLC   | 7749  | >BCL11A-H1:PFTSAWFLC   | 97   | 7652  |



|                      |      |                      |     |      |
|----------------------|------|----------------------|-----|------|
| >BCL11A-H1{LQHAQNTHG | 732  | >BCL11A-H1{LQYAQNTHG | 92  | 640  |
| >BCL11A-H1{LQHAQNTHG | 912  | >BCL11A-H1{LQYAQNTHG | 136 | 776  |
| >BCL11A-H1{LQHAQNTHG | 1077 | >BCL11A-H1{LQYAQNTHG | 129 | 948  |
| >BCL11A-H1{LQHAQNTHG | 1166 | >BCL11A-H1{LQYAQNTHG | 177 | 989  |
| >BCL11A-H1{LQHAQNTHG | 1850 | >BCL11A-H1{LQYAQNTHG | 361 | 1489 |
| >BCL11A-H1{LQHAQNTHG | 38   | >BCL11A-H1{LQYAQNTHG | 20  | 18   |
| >BCL11A-H1{LQHAQNTH  | 441  | >BCL11A-H1{LQYAQNTH  | 174 | 267  |
| >BCL11A-H1{LQHAQNTHG | 189  | >BCL11A-H1{LQYAQNTHG | 100 | 89   |
| >BCL11A-H1{LQHAQNTHG | 141  | >BCL11A-H1{LQYAQNTHG | 75  | 66   |
| >BCL11A-H1{LQHAQNTHG | 1436 | >BCL11A-H1{LQYAQNTHG | 475 | 961  |
| >BCL11A-H1{LQHAQNTH  | 267  | >BCL11A-H1{LQYAQNTH  | 54  | 213  |
| >BCL11A-H1{LQHAQNTHG | 75   | >BCL11A-H1{LQYAQNTHG | 19  | 56   |
| >BCL11A-H1{LQHAQNTHG | 1870 | >BCL11A-H1{LQYAQNTHG | 436 | 1434 |
| >BCL11A-H1{LQHAQNTHG | 296  | >BCL11A-H1{LQYAQNTHG | 149 | 147  |
| >BCL11A-H1{LQHAQNTHG | 1415 | >BCL11A-H1{LQYAQNTHG | 335 | 1080 |
| >BCL11A-H1{LQHAQNTHG | 467  | >BCL11A-H1{LQYAQNTHG | 192 | 275  |
| >BCL11A-H1{LLQHAQNTH | 175  | >BCL11A-H1{LLQYAQNTH | 144 | 31   |
| >BCL11A-H1{LLQHAQNTH | 16   | >BCL11A-H1{LLQYAQNTH | 14  | 2    |
| >BCL11A-H1{LLQHAQNTH | 85   | >BCL11A-H1{LLQYAQNTH | 160 | 75   |
| >BCL11A-H1{LLQHAQNTH | 36   | >BCL11A-H1{LLQYAQNTH | 83  | 47   |
| >BCL11A-H1{LLQHAQNTH | 6    | >BCL11A-H1{LLQYAQNTH | 8   | 2    |
| >BCL11A-H1{LLQHAQNTH | 137  | >BCL11A-H1{LLQYAQNTH | 275 | 138  |
| >BCL11A-H1{LLQHAQNTH | 26   | >BCL11A-H1{LLQYAQNTH | 29  | 3    |
| >BCL11A-H1{LLQHAQNT  | 200  | >BCL11A-H1{LLQYAQNT  | 411 | 211  |
| >BCL11A-H1{LLQHAQNTH | 3    | >BCL11A-H1{LLQYAQNTH | 5   | 2    |
| >BCL11A-H1{FLLQHAQNT | 387  | >BCL11A-H1{FLLQYAQNT | 70  | 317  |
| >BCL11A-H1{FLLQHAQNT | 286  | >BCL11A-H1{FLLQYAQNT | 100 | 186  |
| >BCL11A-H1{FLLQHAQNT | 870  | >BCL11A-H1{FLLQYAQNT | 422 | 448  |
| >BCL11A-H1{FLLQHAQNT | 108  | >BCL11A-H1{FLLQYAQNT | 185 | 77   |
| >BCL11A-H1{FLLQHAQNT | 211  | >BCL11A-H1{FLLQYAQNT | 91  | 120  |
| >BCL11A-H1{FLLQHAQN  | 199  | >BCL11A-H1{FLLQYAQN  | 100 | 99   |
| >BCL11A-H1{FLLQHAQNT | 21   | >BCL11A-H1{FLLQYAQNT | 9   | 12   |
| >BCL11A-H1{FLLQHAQNT | 530  | >BCL11A-H1{FLLQYAQNT | 265 | 265  |
| >BCL11A-H1{FLLQHAQNT | 298  | >BCL11A-H1{FLLQYAQNT | 147 | 151  |
| >BCL11A-H1{FLLQHAQNT | 96   | >BCL11A-H1{FLLQYAQNT | 44  | 52   |
| >BCL11A-H1{FLLQHAQNT | 431  | >BCL11A-H1{FLLQYAQNT | 155 | 276  |
| >BCL11A-H1{FLLQHAQN  | 313  | >BCL11A-H1{FLLQYAQN  | 174 | 139  |
| >BCL11A-H1{FLLQHAQNT | 9    | >BCL11A-H1{FLLQYAQNT | 5   | 4    |
| >BCL11A-H1{FLLQHAQNT | 752  | >BCL11A-H1{FLLQYAQNT | 414 | 338  |
| >BCL11A-H1{AWFLLQHAQ | 844  | >BCL11A-H1{AWFLLQYAQ | 429 | 415  |
| >BCL11A-H1{AWFLLQHA  | 210  | >BCL11A-H1{AWFLLQYA  | 71  | 139  |
| >BCL11A-H1{AWFLLQHAQ | 112  | >BCL11A-H1{AWFLLQYAQ | 155 | 43   |
| >BCL11A-H1{AWFLLQHAQ | 539  | >BCL11A-H1{AWFLLQYAQ | 472 | 67   |

|                       |       |                       |     |       |
|-----------------------|-------|-----------------------|-----|-------|
| >BCL11A-H1{SAWFLLQHA  | 2549  | >BCL11A-H1{SAWFLLQYA  | 420 | 2129  |
| >BCL11A-H1{SAWFLLQHA  | 1950  | >BCL11A-H1{SAWFLLQYA  | 169 | 1781  |
| >BCL11A-H1{SAWFLLQH   | 4270  | >BCL11A-H1{SAWFLLQY   | 474 | 3796  |
| >BCL11A-H1{SAWFLLQH   | 1303  | >BCL11A-H1{SAWFLLQY   | 15  | 1288  |
| >BCL11A-H1{SAWFLLQH   | 14148 | >BCL11A-H1{SAWFLLQY   | 191 | 13957 |
| >BCL11A-H1{SAWFLLQHA  | 1924  | >BCL11A-H1{SAWFLLQYA  | 451 | 1473  |
| >BCL11A-H1{SAWFLLQHA  | 1493  | >BCL11A-H1{SAWFLLQYA  | 341 | 1152  |
| >BCL11A-H1{SAWFLLQH   | 13300 | >BCL11A-H1{SAWFLLQY   | 43  | 13257 |
| >BCL11A-H1{SAWFLLQH   | 2193  | >BCL11A-H1{SAWFLLQY   | 14  | 2179  |
| >BCL11A-H1{SAWFLLQH   | 2143  | >BCL11A-H1{SAWFLLQY   | 71  | 2072  |
| >BCL11A-H1{TSAWFLLQH  | 13743 | >BCL11A-H1{TSAWFLLQY  | 29  | 13714 |
| >BCL11A-H1{TSAWFLLQH  | 231   | >BCL11A-H1{TSAWFLLQY  | 26  | 205   |
| >BCL11A-H1{TSAWFLLQH  | 15316 | >BCL11A-H1{TSAWFLLQY  | 403 | 14913 |
| >BCL11A-H1{TSAWFLLQH  | 7904  | >BCL11A-H1{TSAWFLLQY  | 53  | 7851  |
| >BCL11A-H1{TSAWFLLQH  | 2313  | >BCL11A-H1{TSAWFLLQY  | 13  | 2300  |
| >BCL11A-H1{TSAWFLLQH  | 10524 | >BCL11A-H1{TSAWFLLQY  | 65  | 10459 |
| >BCL11A-H1{TSAWFLLQH  | 1761  | >BCL11A-H1{TSAWFLLQY  | 237 | 1524  |
| >BCL11A-H1{TSAWFLLQH/ | 123   | >BCL11A-H1{TSAWFLLQY/ | 43  | 80    |
| >BCL11A-H1{TSAWFLLQH/ | 579   | >BCL11A-H1{TSAWFLLQY/ | 179 | 400   |
| >BCL11A-H1{TSAWFLLQH  | 12005 | >BCL11A-H1{TSAWFLLQY  | 88  | 11917 |
| >BCL11A-H1{TSAWFLLQH  | 887   | >BCL11A-H1{TSAWFLLQY  | 6   | 881   |
| >BCL11A-H1{TSAWFLLQH  | 8606  | >BCL11A-H1{TSAWFLLQY  | 371 | 8235  |
| >BCL11A-H1{TSAWFLLQH  | 2519  | >BCL11A-H1{TSAWFLLQY  | 29  | 2490  |
| >BCL11A-H1{TSAWFLLQH  | 809   | >BCL11A-H1{TSAWFLLQY  | 43  | 766   |
| >BCL11A-H1{TSAWFLLQH  | 12272 | >BCL11A-H1{TSAWFLLQY  | 132 | 12140 |
| >BCL11A-H1{FTSAWFLLQH | 3068  | >BCL11A-H1{FTSAWFLLQY | 16  | 3052  |
| >BCL11A-H1{FTSAWFLLQH | 166   | >BCL11A-H1{FTSAWFLLQY | 40  | 126   |
| >BCL11A-H1{FTSAWFLLQH | 36    | >BCL11A-H1{FTSAWFLLQY | 10  | 26    |
| >BCL11A-H1{FTSAWFLLQH | 43    | >BCL11A-H1{FTSAWFLLQY | 22  | 21    |
| >BCL11A-H1{FTSAWFLLQH | 15    | >BCL11A-H1{FTSAWFLLQY | 10  | 5     |
| >BCL11A-H1{FTSAWFLLQH | 320   | >BCL11A-H1{FTSAWFLLQY | 45  | 275   |
| >BCL11A-H1{FTSAWFLLQH | 687   | >BCL11A-H1{FTSAWFLLQY | 310 | 377   |
| >BCL11A-H1{FTSAWFLLQH | 375   | >BCL11A-H1{FTSAWFLLQY | 175 | 200   |
| >BCL11A-H1{FTSAWFLLQH | 2952  | >BCL11A-H1{FTSAWFLLQY | 129 | 2823  |
| >BCL11A-H1{FTSAWFLLQH | 1972  | >BCL11A-H1{FTSAWFLLQY | 40  | 1932  |
| >BCL11A-H1{FTSAWFLLQH | 9410  | >BCL11A-H1{FTSAWFLLQY | 180 | 9230  |
| >BCL11A-H1{FTSAWFLLQH | 5864  | >BCL11A-H1{FTSAWFLLQY | 191 | 5673  |
| >BCL11A-H1{FTSAWFLLQH | 10090 | >BCL11A-H1{FTSAWFLLQY | 111 | 9979  |
| >BCL11A-H1{FTSAWFLLQH | 5801  | >BCL11A-H1{FTSAWFLLQY | 25  | 5776  |
| >BCL11A-H1{FTSAWFLLQH | 16220 | >BCL11A-H1{FTSAWFLLQY | 95  | 16125 |
| >BCL11A-H1{FTSAWFLLQH | 973   | >BCL11A-H1{FTSAWFLLQY | 76  | 897   |
| >BCL11A-H1{FTSAWFLLQH | 18    | >BCL11A-H1{FTSAWFLLQY | 10  | 8     |
| >BCL11A-H1{FTSAWFLLQH | 137   | >BCL11A-H1{FTSAWFLLQY | 42  | 95    |

|                       |       |                       |       |       |
|-----------------------|-------|-----------------------|-------|-------|
| >BCL11A-H1{FTSAWFLLQF | 2756  | >BCL11A-H1{FTSAWFLLQY | 8     | 2748  |
| >BCL11A-H1{FTSAWFLLQF | 4455  | >BCL11A-H1{FTSAWFLLQY | 97    | 4358  |
| >BCL11A-H1{FTSAWFLLQF | 8623  | >BCL11A-H1{FTSAWFLLQY | 293   | 8330  |
| >BCL11A-H1{FTSAWFLLQF | 697   | >BCL11A-H1{FTSAWFLLQY | 5     | 692   |
| >BCL11A-H1{FTSAWFLLQF | 2535  | >BCL11A-H1{FTSAWFLLQY | 23    | 2512  |
| >BCL11A-H1{FTSAWFLLQF | 926   | >BCL11A-H1{FTSAWFLLQY | 22    | 904   |
| >BCL11A-P3C PMAMEPPA  | 6873  | >BCL11A-P3C SMAMEPPA  | 64    | 6809  |
| >BCL11A-P3C PMAMEPPAN | 12429 | >BCL11A-P3C SMAMEPPAN | 224   | 12205 |
| >BCL11A-P3C PMAMEPPA  | 4238  | >BCL11A-P3C SMAMEPPA  | 116   | 4122  |
| >BCL11A-P3C PMAMEPPAN | 8155  | >BCL11A-P3C SMAMEPPAN | 351   | 7804  |
| >BCL11A-P3C PMAMEPPA  | 2011  | >BCL11A-P3C SMAMEPPA  | 28    | 1983  |
| >BCL11A-P3C PMAMEPPAN | 7783  | >BCL11A-P3C SMAMEPPAN | 206   | 7577  |
| >BCL11A-P3C PMAMEPPA  | 10071 | >BCL11A-P3C SMAMEPPA  | 292   | 9779  |
| >BCL11A-P3C PMAMEPPA  | 1204  | >BCL11A-P3C SMAMEPPA  | 44    | 1160  |
| >BCL11A-P3C PMAMEPPAN | 966   | >BCL11A-P3C SMAMEPPAN | 48    | 918   |
| >BCL11A-P3C PMAMEPPA  | 7271  | >BCL11A-P3C SMAMEPPA  | 372   | 6899  |
| >BCL11A-P3C PMAMEPPA  | 553   | >BCL11A-P3C SMAMEPPA  | 14    | 539   |
| >BCL11A-P3C PMAMEPPAN | 3503  | >BCL11A-P3C SMAMEPPAN | 99    | 3404  |
| >BCL11A-P3C PMAMEPPAN | 2525  | >BCL11A-P3C SMAMEPPAN | 452   | 2073  |
| >BCL11A-P3C PMAMEPPA  | 421   | >BCL11A-P3C SMAMEPPA  | 27    | 394   |
| >BCL11A-P3C PMAMEPPAN | 2977  | >BCL11A-P3C SMAMEPPAN | 203   | 2774  |
| >BCL11A-P3C PMAMEPPAN | 1076  | >BCL11A-P3C SMAMEPPAN | 350   | 726   |
| >BCL11A-P3C PMAMEPPAN | 4470  | >BCL11A-P3C SMAMEPPAN | 132   | 4338  |
| >BCL11A-P3C PMAMEPPAN | 3929  | >BCL11A-P3C SMAMEPPAN | 137   | 3792  |
| >BCL11A-P3C PMAMEPPAN | 512   | >BCL11A-P3C SMAMEPPAN | 39    | 473   |
| >BCL11A-P3C PMAMEPPAN | 44    | >BCL11A-P3C SMAMEPPAN | 8     | 36    |
| >BCL11A-P3C PMAMEPPAN | 2408  | >BCL11A-P3C SMAMEPPAN | 273   | 2135  |
| >BCL11A-P3C NPMAMEPPA | 106   | >BCL11A-P3C NSMAMEPPA | 22689 | 22583 |
| >BCL11A-P3C NPMAMEPPA | 7852  | >BCL11A-P3C NSMAMEPPA | 445   | 7407  |
| >BCL11A-P3C NPMAMEPPA | 173   | >BCL11A-P3C NSMAMEPPA | 21415 | 21242 |
| >BCL11A-P3C NPMAMEPPA | 219   | >BCL11A-P3C NSMAMEPPA | 27464 | 27245 |
| >BCL11A-P3C NPMAMEPPA | 23466 | >BCL11A-P3C NSMAMEPPA | 322   | 23144 |
| >BCL11A-P3C NPMAMEPPA | 92    | >BCL11A-P3C NSMAMEPPA | 5638  | 5546  |
| >BCL11A-P3C NPMAMEPPA | 144   | >BCL11A-P3C NSMAMEPPA | 28767 | 28623 |
| >BCL11A-P3C NPMAMEPPA | 24    | >BCL11A-P3C NSMAMEPPA | 268   | 244   |
| >BCL11A-P3C NPMAMEPPA | 11    | >BCL11A-P3C NSMAMEPPA | 3088  | 3077  |
| >BCL11A-P3C NPMAMEPPA | 12381 | >BCL11A-P3C NSMAMEPPA | 144   | 12237 |
| >BCL11A-P3C RLNPNAMEF | 252   | >BCL11A-P3C RLNSNAMEF | 203   | 49    |
| >BCL11A-P3C RLNPNAMEF | 287   | >BCL11A-P3C RLNSNAMEF | 243   | 44    |
| >BCL11A-P3C RLNPNAMEF | 19    | >BCL11A-P3C RLNSNAMEF | 19    | 0     |
| >BCL11A-P3C RLNPNAMEF | 265   | >BCL11A-P3C RLNSNAMEF | 682   | 417   |
| >BCL11A-P3C RLNPNAMEF | 82    | >BCL11A-P3C RLNSNAMEF | 98    | 16    |
| >BCL11A-P3C RLNPNAMEF | 329   | >BCL11A-P3C RLNSNAMEF | 453   | 124   |

|                        |      |                        |       |       |
|------------------------|------|------------------------|-------|-------|
| >BCL11A-P3C RLNP MAMEF | 55   | >BCL11A-P3C RLNSMAMEF  | 75    | 20    |
| >BCL11A-P3C RLNP MAMEF | 14   | >BCL11A-P3C RLNSMAMEF  | 25    | 11    |
| >BCL11A-P3C RLNP MAMEF | 121  | >BCL11A-P3C RLNSMAMEF  | 205   | 84    |
| >BCL11A-P3C LRLNP MAM  | 24   | >BCL11A-P3C LRLNSMAM   | 14    | 10    |
| >BCL11A-P3C LRLNP MAM  | 113  | >BCL11A-P3C LRLNSMAM   | 97    | 16    |
| >BCL11A-P3C LRLNP MAM  | 446  | >BCL11A-P3C LRLNSMAM   | 232   | 214   |
| >BCL11A-P3C VLRLNPMA   | 537  | >BCL11A-P3C VLRLNSMA   | 191   | 346   |
| >BCL11A-P3C VLRLNPMA   | 79   | >BCL11A-P3C VLRLNSMA   | 99    | 20    |
| >BCL11A-P3C VLRLNPMA   | 337  | >BCL11A-P3C VLRLNSMA   | 568   | 231   |
| >BCL11A-P3C VLRLNPMAV  | 335  | >BCL11A-P3C VLRLNSMAM  | 145   | 190   |
| >BCL11A-P3C VLRLNPMAV  | 773  | >BCL11A-P3C VLRLNSMAM  | 168   | 605   |
| >BCL11A-P3C VLRLNPMAV  | 528  | >BCL11A-P3C VLRLNSMAM  | 237   | 291   |
| >BCL11A-P3C VLRLNPMAV  | 897  | >BCL11A-P3C VLRLNSMAM  | 100   | 797   |
| >BCL11A-P3C VLRLNPMAV  | 1435 | >BCL11A-P3C VLRLNSMAM  | 419   | 1016  |
| >BCL11A-P3C VLRLNPMAV  | 94   | >BCL11A-P3C VLRLNSMAM  | 84    | 10    |
| >BCL11A-P3C RVLRLNP M  | 194  | >BCL11A-P3C RVLRLNSM   | 422   | 228   |
| >BCL11A-P3C RVLRLNPMA  | 321  | >BCL11A-P3C RVLRLNSMA  | 1300  | 979   |
| >BCL11A-P3C RVLRLNP M  | 326  | >BCL11A-P3C RVLRLNSM   | 494   | 168   |
| >BCL11A-P3C RVLRLNP M  | 27   | >BCL11A-P3C RVLRLNSM   | 59    | 32    |
| >BCL11A-P3C RVLRLNPMA  | 14   | >BCL11A-P3C RVLRLNSMA  | 45    | 31    |
| >BCL11A-P3C RVLRLNPMAI | 22   | >BCL11A-P3C RVLRLNSMAI | 26    | 4     |
| >BCL11A-P3C RVLRLNP M  | 149  | >BCL11A-P3C RVLRLNSM   | 158   | 9     |
| >BCL11A-P3C RVLRLNPMAI | 80   | >BCL11A-P3C RVLRLNSMAI | 83    | 3     |
| >BCL11A-P3C RVLRLNP M  | 546  | >BCL11A-P3C RVLRLNSM   | 426   | 120   |
| >BCL11A-P3C RVLRLNPMAI | 1637 | >BCL11A-P3C RVLRLNSMAI | 452   | 1185  |
| >BCL11A-P3C RVLRLNPMAI | 286  | >BCL11A-P3C RVLRLNSMAI | 191   | 95    |
| >BCL11A-P3C RVLRLNP M  | 492  | >BCL11A-P3C RVLRLNSM   | 495   | 3     |
| >BCL11A-P3C RVLRLNPMAI | 413  | >BCL11A-P3C RVLRLNSMAI | 184   | 229   |
| >BCL11A-P3C RVLRLNPMAI | 387  | >BCL11A-P3C RVLRLNSMAI | 617   | 230   |
| >BCL11A-P3C RVLRLNP M  | 668  | >BCL11A-P3C RVLRLNSM   | 228   | 440   |
| >BCL11A-P3C RVLRLNPMA  | 4130 | >BCL11A-P3C RVLRLNSMA  | 126   | 4004  |
| >BCL11A-P3C RVLRLNPMAI | 59   | >BCL11A-P3C RVLRLNSMAI | 73    | 14    |
| >BCL11A-P3C FDRVRLNP M | 381  | >BCL11A-P3C FDRVRLNSM  | 516   | 135   |
| >BCL11A-R74 RSDTCEYCGK | 191  | >BCL11A-R74 CSDTCEYCGK | 1244  | 1053  |
| >BCL11A-R74 RSDTCEYCGK | 102  | >BCL11A-R74 CSDTCEYCGK | 312   | 210   |
| >BCL11A-R74 RSDTCEYCGK | 394  | >BCL11A-R74 CSDTCEYCGK | 2588  | 2194  |
| >BCL11A-R74 RRSDTCEYCG | 2422 | >BCL11A-R74 RCSDTCEYCG | 350   | 2072  |
| >BCL11A-R74 RRSDTCEY   | 41   | >BCL11A-R74 RCSDTCEY   | 885   | 844   |
| >BCL11A-R74 RRSDTCEYCG | 251  | >BCL11A-R74 RCSDTCEYCG | 23263 | 23012 |
| >BCL11A-R74 RRSDTCEYCG | 482  | >BCL11A-R74 RCSDTCEYCG | 26395 | 25913 |
| >BCL11A-R74 GRRSDTCEY  | 69   | >BCL11A-R74 GRCSDTCEY  | 311   | 242   |
| >BCL11A-R74 KEGRRSDTCE | 440  | >BCL11A-R74 KEGRCSDTCE | 607   | 167   |
| >BCL11A-R74 KEGRRSDTCE | 590  | >BCL11A-R74 KEGRCSDTCE | 497   | 93    |

|                       |       |                       |       |       |
|-----------------------|-------|-----------------------|-------|-------|
| >BCL11A-R74KEGRRSDTCE | 850   | >BCL11A-R74KEGRCSDTCE | 306   | 544   |
| >BCL11A-S14SAHGALIPT  | 2053  | >BCL11A-S14FAHGALIPT  | 134   | 1919  |
| >BCL11A-S14SAHGALIPT  | 448   | >BCL11A-S14FAHGALIPT  | 7758  | 7310  |
| >BCL11A-S14SAHGALIPT  | 4568  | >BCL11A-S14FAHGALIPT  | 430   | 4138  |
| >BCL11A-S14SAHGALIPT  | 17368 | >BCL11A-S14FAHGALIPT  | 106   | 17262 |
| >BCL11A-S14RSAHGALI   | 2435  | >BCL11A-S14RFAHGALI   | 164   | 2271  |
| >BCL11A-S14RSAHGALI   | 13622 | >BCL11A-S14RFAHGALI   | 163   | 13459 |
| >BCL11A-S14RSAHGALI   | 373   | >BCL11A-S14RFAHGALI   | 1324  | 951   |
| >BCL11A-S14RSAHGALI   | 8     | >BCL11A-S14RFAHGALI   | 18919 | 18911 |
| >BCL11A-S14RSAHGALIPT | 168   | >BCL11A-S14RFAHGALIPT | 26566 | 26398 |
| >BCL11A-S14RSAHGALI   | 31    | >BCL11A-S14RFAHGALI   | 4981  | 4950  |
| >BCL11A-S14RSAHGALI   | 76    | >BCL11A-S14RFAHGALI   | 22397 | 22321 |
| >BCL11A-S14RSAHGALI   | 25    | >BCL11A-S14RFAHGALI   | 2764  | 2739  |
| >BCL11A-S14RSAHGALI   | 8     | >BCL11A-S14RFAHGALI   | 822   | 814   |
| >BCL11A-S14LHWRLSSPF  | 6098  | >BCL11A-S14LHWRLSSPF  | 20    | 6078  |
| >BCL11A-S14LHWRLSSPF  | 15581 | >BCL11A-S14LHWRLSSPF  | 270   | 15311 |
| >BCL11A-S14PRSAHGALI  | 1720  | >BCL11A-S14PRFAHGALI  | 366   | 1354  |
| >BCL11A-S14SPRSAHGAL  | 19    | >BCL11A-S14SPRFAHGAL  | 421   | 402   |
| >BCL11A-S14SPRSAHGA   | 27    | >BCL11A-S14SPRFAHGA   | 44    | 17    |
| >BCL11A-S14SPRSAHGAL  | 6     | >BCL11A-S14SPRFAHGAL  | 5     | 1     |
| >BCL11A-S14SPRSAHGALI | 15    | >BCL11A-S14SPRFAHGALI | 19    | 4     |
| >BCL11A-S14SPRSAHGAL  | 295   | >BCL11A-S14SPRFAHGAL  | 307   | 12    |
| >BCL11A-S14SPRSAHGAL  | 424   | >BCL11A-S14SPRFAHGAL  | 704   | 280   |
| >BCL11A-S14SPRSAHGALI | 159   | >BCL11A-S14SPRFAHGALI | 315   | 156   |
| >BCL11A-S14SSPRSAHGAL | 733   | >BCL11A-S14SSPRFAHGAL | 313   | 420   |
| >BCL11A-S14SSPRSAHGAL | 3470  | >BCL11A-S14SSPRFAHGAL | 339   | 3131  |
| >BCL11A-S14SSPRSAHGA  | 1614  | >BCL11A-S14SSPRFAHGA  | 494   | 1120  |
| >BCL11A-S14SSPRSAHGAL | 443   | >BCL11A-S14SSPRFAHGAL | 175   | 268   |
| >BCL11A-S14SSPRSAHGA  | 446   | >BCL11A-S14SSPRFAHGA  | 122   | 324   |
| >BCL11A-S14SSPRSAHGAL | 7     | >BCL11A-S14SSPRFAHGAL | 5     | 2     |
| >BCL11A-S14SSPRSAHGAL | 3     | >BCL11A-S14SSPRFAHGAL | 2     | 1     |
| >BCL11A-S14SSPRSAHGAL | 436   | >BCL11A-S14SSPRFAHGAL | 246   | 190   |
| >BCL11A-S14SSPRSAHGAL | 51    | >BCL11A-S14SSPRFAHGAL | 39    | 12    |
| >BCL11A-S14LSSPRSAHGA | 345   | >BCL11A-S14LSSPRFAHGA | 418   | 73    |
| >BCL11A-S14LSSPRSAH   | 485   | >BCL11A-S14LSSPRFAH   | 1279  | 794   |
| >BCL11A-S14LSSPRSAHGA | 14    | >BCL11A-S14LSSPRFAHGA | 24    | 10    |
| >BCL11A-S14LSSPRSAHGA | 280   | >BCL11A-S14LSSPRFAHGA | 182   | 98    |
| >BCL11A-S14LSSPRSAHGA | 429   | >BCL11A-S14LSSPRFAHGA | 439   | 10    |
| >BCL11A-S14LSSPRSAHGA | 72    | >BCL11A-S14LSSPRFAHGA | 75    | 3     |
| >BCL11A-S14GLSSPRSA   | 892   | >BCL11A-S14GLSSPRFA   | 215   | 677   |
| >BCL11A-S14GLSSPRSAHG | 263   | >BCL11A-S14GLSSPRFAHG | 99    | 164   |
| >BCL11A-S14GLSSPRSA   | 67    | >BCL11A-S14GLSSPRFA   | 94    | 27    |
| >BCL11A-S14GLSSPRSAHG | 66    | >BCL11A-S14GLSSPRFAHG | 90    | 24    |

|                       |       |                       |      |       |
|-----------------------|-------|-----------------------|------|-------|
| >BCL11A-S14GLSSPRSA   | 571   | >BCL11A-S14GLSSPRFA   | 221  | 350   |
| >BCL11A-S14GLSSPRSAHG | 245   | >BCL11A-S14GLSSPRFAHG | 84   | 161   |
| >BCL11A-S14GLSSPRSAHG | 279   | >BCL11A-S14GLSSPRFAHG | 154  | 125   |
| >BCL11A-S14GLSSPRSA   | 2153  | >BCL11A-S14GLSSPRFA   | 331  | 1822  |
| >BCL11A-S14GLSSPRSAHG | 306   | >BCL11A-S14GLSSPRFAHG | 137  | 169   |
| >BCL11A-S14GLSSPRSA   | 106   | >BCL11A-S14GLSSPRFA   | 109  | 3     |
| >BCL11A-S14GLSSPRSAHG | 14    | >BCL11A-S14GLSSPRFAHG | 10   | 4     |
| >BCL11A-S14GLSSPRSAH  | 309   | >BCL11A-S14GLSSPRFAH  | 5210 | 4901  |
| >BCL11A-S14RGLSSPRSA  | 643   | >BCL11A-S14RGLSSPRFA  | 151  | 492   |
| >BCL11A-S14RGLSSPRS   | 17040 | >BCL11A-S14RGLSSPRF   | 56   | 16984 |
| >BCL11A-S14RGLSSPRS   | 12202 | >BCL11A-S14RGLSSPRF   | 11   | 12191 |
| >BCL11A-S14RGLSSPRS   | 20603 | >BCL11A-S14RGLSSPRF   | 295  | 20308 |
| >BCL11A-S14WRGLSSPRS  | 18287 | >BCL11A-S14WRGLSSPRF  | 259  | 18028 |
| >BCL11A-S14WRGLSSPRS/ | 324   | >BCL11A-S14WRGLSSPRF/ | 142  | 182   |
| >BCL11A-S14WRGLSSPRS/ | 1067  | >BCL11A-S14WRGLSSPRF/ | 438  | 629   |
| >BCL11A-S14WRGLSSPRS/ | 1057  | >BCL11A-S14WRGLSSPRF/ | 408  | 649   |
| >BCL11A-S14HWRGLSSPR! | 34439 | >BCL11A-S14HWRGLSSPRI | 154  | 34285 |
| >BCL11A-S14HWRGLSSPR! | 31301 | >BCL11A-S14HWRGLSSPRI | 306  | 30995 |
| >BCL11A-S14HWRGLSSPR! | 16887 | >BCL11A-S14HWRGLSSPRI | 88   | 16799 |
| >BCL11A-S14HWRGLSSPR! | 179   | >BCL11A-S14HWRGLSSPRI | 576  | 397   |
| >BCL11A-S14HWRGLSSPR! | 21    | >BCL11A-S14HWRGLSSPRI | 11   | 10    |
| >BCL11A-S14HWRGLSSPR! | 206   | >BCL11A-S14HWRGLSSPRI | 63   | 143   |
| >BCL11A-S39SNLVVHRR   | 254   | >BCL11A-S39NNLVVHRR   | 1558 | 1304  |
| >BCL11A-S39SNLVVHRR   | 877   | >BCL11A-S39NNLVVHRR   | 424  | 453   |
| >BCL11A-S39QSNLVVHR   | 25    | >BCL11A-S39QNNLVVHR   | 685  | 660   |
| >BCL11A-S39QSNLVVHRR  | 31    | >BCL11A-S39QNNLVVHRR  | 989  | 958   |
| >BCL11A-S39QSNLVVHR   | 408   | >BCL11A-S39QNNLVVHR   | 6953 | 6545  |
| >BCL11A-S39QSNLVVHR   | 53    | >BCL11A-S39QNNLVVHR   | 437  | 384   |
| >BCL11A-S39QSNLVVHRR  | 26    | >BCL11A-S39QNNLVVHRR  | 227  | 201   |
| >BCL11A-S39QSNLVVHR   | 620   | >BCL11A-S39QNNLVVHR   | 449  | 171   |
| >BCL11A-S39FQSNLVVHR  | 145   | >BCL11A-S39FQNNLVVHR  | 36   | 109   |
| >BCL11A-S39FQSNLVVHRF | 47    | >BCL11A-S39FQNNLVVHR  | 77   | 30    |
| >BCL11A-S39FQSNLVVHR  | 271   | >BCL11A-S39FQNNLVVHR  | 476  | 205   |
| >BCL11A-S39FQSNLVVHRF | 158   | >BCL11A-S39FQNNLVVHR  | 760  | 602   |
| >BCL11A-S39FQSNLVVH   | 234   | >BCL11A-S39FQNNLVVH   | 209  | 25    |
| >BCL11A-S39FQSNLVVH   | 110   | >BCL11A-S39FQNNLVVH   | 116  | 6     |
| >BCL11A-S39FQSNLVVHR  | 128   | >BCL11A-S39FQNNLVVHR  | 124  | 4     |
| >BCL11A-S39FQSNLVVHR  | 583   | >BCL11A-S39FQNNLVVHR  | 437  | 146   |
| >BCL11A-S39FQSNLVVHR  | 182   | >BCL11A-S39FQNNLVVHR  | 219  | 37    |
| >BCL11A-S39KFQSNLVVHF | 9     | >BCL11A-S39KFQNNLVVH  | 8    | 1     |
| >BCL11A-S39KFQSNLVVHF | 7     | >BCL11A-S39KFQNNLVVH  | 7    | 0     |
| >BCL11A-S39KFQSNLVVHF | 104   | >BCL11A-S39KFQNNLVVH  | 111  | 7     |
| >BCL11A-S39KFQSNLVVHF | 14    | >BCL11A-S39KFQNNLVVH  | 16   | 2     |

|                          |     |                          |     |     |
|--------------------------|-----|--------------------------|-----|-----|
| >BCL11A-S39 KFKFQSNL     | 22  | >BCL11A-S39 KFKFQSNL     | 25  | 3   |
| >BCL11A-S39 KFKFQSNLV    | 284 | >BCL11A-S39 KFKFQSNLV    | 498 | 214 |
| >BCL11A-S39 KFKFQSNLVV   | 159 | >BCL11A-S39 KFKFQSNLVV   | 228 | 69  |
| >BCL11A-S39 KFKFQSNLVVH  | 165 | >BCL11A-S39 KFKFQSNLVVH  | 308 | 143 |
| >BCL11A-S39 KFKFQSNLVVHf | 519 | >BCL11A-S39 KFKFQSNLVVHf | 409 | 110 |
| >BCL11A-S39 KFKFQSNLVVHf | 612 | >BCL11A-S39 KFKFQSNLVVHf | 298 | 314 |
| >BCL11A-S39 KFKFQSNLVVHf | 410 | >BCL11A-S39 KFKFQSNLVVHf | 438 | 28  |
| >BCL11A-S39 KFKFQSNLVVHf | 94  | >BCL11A-S39 KFKFQSNLVVHf | 108 | 14  |
| >BCL11A-S39 KFKFQSNLVVHf | 11  | >BCL11A-S39 KFKFQSNLVVHf | 20  | 9   |
| >BCL11A-S39 KFKFQSNLVVHf | 4   | >BCL11A-S39 KFKFQSNLVVHf | 7   | 3   |
| >BCL11A-S39 KFKFQSNLVVHf | 9   | >BCL11A-S39 KFKFQSNLVVHf | 13  | 4   |
| >BCL11A-S39 KFKFQSNLVVHf | 14  | >BCL11A-S39 KFKFQSNLVVHf | 22  | 8   |
| >BCL11A-S39 KFKFQSNLVVHf | 234 | >BCL11A-S39 KFKFQSNLVVHf | 373 | 139 |
| >BCL11A-S39 KFKFQSNLVVHf | 34  | >BCL11A-S39 KFKFQSNLVVHf | 42  | 8   |
| >BCL11A-S39 KFKFQSNLVVHf | 90  | >BCL11A-S39 KFKFQSNLVVHf | 67  | 23  |
| >BCL11A-S39 KFKFQSNLVVHf | 194 | >BCL11A-S39 KFKFQSNLVVHf | 391 | 197 |
| >BCL11A-S39 KFKFQSNLVVHf | 377 | >BCL11A-S39 KFKFQSNLVVHf | 636 | 259 |
| >BCL11A-S39 KFKFQSNLVVHf | 24  | >BCL11A-S39 KFKFQSNLVVHf | 21  | 3   |
| >BCL11A-S39 KFKFQSNLVVHf | 242 | >BCL11A-S39 KFKFQSNLVVHf | 270 | 28  |
| >BCL11A-S39 KFKFQSNLVVHf | 49  | >BCL11A-S39 KFKFQSNLVVHf | 26  | 23  |
| >BCL11A-S39 KFKFQSNLVVHf | 216 | >BCL11A-S39 KFKFQSNLVVHf | 200 | 16  |
| >BCL11A-S39 KFKFQSNLVVHf | 311 | >BCL11A-S39 KFKFQSNLVVHf | 274 | 37  |
| >BCL11A-S39 KFKFQSNLVVHf | 84  | >BCL11A-S39 KFKFQSNLVVHf | 131 | 47  |
| >BCL11A-S39 KFKFQSNLVVHf | 489 | >BCL11A-S39 KFKFQSNLVVHf | 854 | 365 |
| >BCL11A-S39 KFKFQSNLVVHf | 277 | >BCL11A-S39 KFKFQSNLVVHf | 293 | 16  |
| >BCL11A-S39 KFKFQSNLVVHf | 198 | >BCL11A-S39 KFKFQSNLVVHf | 222 | 24  |
| >BCL11A-S39 KFKFQSNLVVHf | 63  | >BCL11A-S39 KFKFQSNLVVHf | 114 | 51  |
| >BCL11A-S39 KFKFQSNLVVHf | 41  | >BCL11A-S39 KFKFQSNLVVHf | 41  | 0   |
| >BCL11A-S39 KFKFQSNLVVHf | 122 | >BCL11A-S39 KFKFQSNLVVHf | 247 | 125 |
| >BCL11A-S39 KFKFQSNLVVHf | 124 | >BCL11A-S39 KFKFQSNLVVHf | 156 | 32  |
| >BCL11A-S39 KFKFQSNLVVHf | 28  | >BCL11A-S39 KFKFQSNLVVHf | 22  | 6   |
| >BCL11A-S39 KFKFQSNLVVHf | 12  | >BCL11A-S39 KFKFQSNLVVHf | 13  | 1   |
| >BCL11A-S39 KFKFQSNLVVHf | 18  | >BCL11A-S39 KFKFQSNLVVHf | 18  | 0   |
| >BCL11A-S39 KFKFQSNLVVHf | 298 | >BCL11A-S39 KFKFQSNLVVHf | 502 | 204 |
| >BCL11A-S39 KFKFQSNLVVHf | 305 | >BCL11A-S39 KFKFQSNLVVHf | 857 | 552 |
| >BCL11A-S39 KFKFQSNLVVHf | 14  | >BCL11A-S39 KFKFQSNLVVHf | 8   | 6   |
| >BCL11A-S39 KFKFQSNLVVHf | 62  | >BCL11A-S39 KFKFQSNLVVHf | 51  | 11  |
| >BCL11A-S39 KFKFQSNLVVHf | 44  | >BCL11A-S39 KFKFQSNLVVHf | 27  | 17  |
| >BCL11A-S39 KFKFQSNLVVHf | 454 | >BCL11A-S39 KFKFQSNLVVHf | 316 | 138 |
| >BCL11A-S39 KFKFQSNLVVHf | 525 | >BCL11A-S39 KFKFQSNLVVHf | 391 | 134 |
| >BCL11A-S39 KFKFQSNLVVHf | 409 | >BCL11A-S39 KFKFQSNLVVHf | 369 | 40  |
| >BCL11A-S39 KFKFQSNLVVHf | 243 | >BCL11A-S39 KFKFQSNLVVHf | 295 | 52  |
| >BCL11A-S39 KFKFQSNLVVHf | 60  | >BCL11A-S39 KFKFQSNLVVHf | 150 | 90  |

|                        |      |                        |     |      |
|------------------------|------|------------------------|-----|------|
| >BCL11A-S39 KTFKFQSNLV | 98   | >BCL11A-S39 KTFKFQNNLV | 192 | 94   |
| >BCL11A-S39 KTFKFQSNL  | 5    | >BCL11A-S39 KTFKFQNNL  | 17  | 12   |
| >BCL11A-S39 KTFKFQSNLV | 193  | >BCL11A-S39 KTFKFQNNLV | 798 | 605  |
| >BCL11A-S39 KTFKFQSNLV | 32   | >BCL11A-S39 KTFKFQNNLV | 99  | 67   |
| >BCL11A-S39 KTFKFQSNL  | 171  | >BCL11A-S39 KTFKFQNNL  | 182 | 11   |
| >BCL11A-S39 KTFKFQSNL  | 91   | >BCL11A-S39 KTFKFQNNL  | 164 | 73   |
| >BCL11A-S39 KTFKFQSNLV | 464  | >BCL11A-S39 KTFKFQNNLV | 755 | 291  |
| >BCL11A-S39 KTFKFQSNL  | 490  | >BCL11A-S39 KTFKFQNNL  | 303 | 187  |
| >BCL11A-S39 KTFKFQSNL  | 5    | >BCL11A-S39 KTFKFQNNL  | 27  | 22   |
| >BCL11A-S39 KTFKFQSNLV | 227  | >BCL11A-S39 KTFKFQNNLV | 643 | 416  |
| >BCL11A-S39 KTFKFQSNLV | 15   | >BCL11A-S39 KTFKFQNNLV | 41  | 26   |
| >BCL11A-S39 KTFKFQSNL  | 25   | >BCL11A-S39 KTFKFQNNL  | 76  | 51   |
| >BCL11A-S39 KTFKFQSNLV | 128  | >BCL11A-S39 KTFKFQNNLV | 221 | 93   |
| >BCL11A-S55 SMQHFSEAF  | 406  | >BCL11A-S55 FMQHFSEAF  | 922 | 516  |
| >BCL11A-S55 SMQHFSEAFI | 459  | >BCL11A-S55 FMQHFSEAFI | 714 | 255  |
| >BCL11A-S55 SMQHFSEA   | 121  | >BCL11A-S55 FMQHFSEA   | 17  | 104  |
| >BCL11A-S55 SMQHFSEA   | 68   | >BCL11A-S55 FMQHFSEA   | 6   | 62   |
| >BCL11A-S55 SMQHFSEAF  | 850  | >BCL11A-S55 FMQHFSEAF  | 40  | 810  |
| >BCL11A-S55 SMQHFSEAFI | 2391 | >BCL11A-S55 FMQHFSEAFI | 127 | 2264 |
| >BCL11A-S55 SMQHFSEA   | 28   | >BCL11A-S55 FMQHFSEA   | 5   | 23   |
| >BCL11A-S55 SMQHFSEA   | 665  | >BCL11A-S55 FMQHFSEA   | 37  | 628  |
| >BCL11A-S55 SMQHFSEAF  | 2713 | >BCL11A-S55 FMQHFSEAF  | 228 | 2485 |
| >BCL11A-S55 SMQHFSEA   | 42   | >BCL11A-S55 FMQHFSEA   | 8   | 34   |
| >BCL11A-S55 SMQHFSEAF  | 1034 | >BCL11A-S55 FMQHFSEAF  | 117 | 917  |
| >BCL11A-S55 SMQHFSEAFI | 2272 | >BCL11A-S55 FMQHFSEAFI | 409 | 1863 |
| >BCL11A-S55 SMQHFSEA   | 99   | >BCL11A-S55 FMQHFSEA   | 10  | 89   |
| >BCL11A-S55 SMQHFSEAF  | 4234 | >BCL11A-S55 FMQHFSEAF  | 417 | 3817 |
| >BCL11A-S55 SMQHFSEAFI | 2889 | >BCL11A-S55 FMQHFSEAFI | 287 | 2602 |
| >BCL11A-S55 SMQHFSEA   | 219  | >BCL11A-S55 FMQHFSEA   | 83  | 136  |
| >BCL11A-S55 SMQHFSEA   | 6569 | >BCL11A-S55 FMQHFSEA   | 397 | 6172 |
| >BCL11A-S55 SMQHFSEA   | 28   | >BCL11A-S55 FMQHFSEA   | 6   | 22   |
| >BCL11A-S55 SMQHFSEAFI | 993  | >BCL11A-S55 FMQHFSEAFI | 63  | 930  |
| >BCL11A-S55 SMQHFSEAF  | 459  | >BCL11A-S55 FMQHFSEAF  | 133 | 326  |
| >BCL11A-S55 SMQHFSEAF  | 1099 | >BCL11A-S55 FMQHFSEAF  | 198 | 901  |
| >BCL11A-S55 SMQHFSEAFI | 378  | >BCL11A-S55 FMQHFSEAFI | 624 | 246  |
| >BCL11A-S55 SMQHFSEAF  | 16   | >BCL11A-S55 FMQHFSEAF  | 74  | 58   |
| >BCL11A-S55 SMQHFSEAFI | 1507 | >BCL11A-S55 FMQHFSEAFI | 357 | 1150 |
| >BCL11A-S55 SMQHFSEA   | 568  | >BCL11A-S55 FMQHFSEA   | 326 | 242  |
| >BCL11A-S55 SMQHFSEAF  | 21   | >BCL11A-S55 FMQHFSEAF  | 20  | 1    |
| >BCL11A-S55 SMQHFSEAF  | 24   | >BCL11A-S55 FMQHFSEAF  | 12  | 12   |
| >BCL11A-S55 SMQHFSEA   | 588  | >BCL11A-S55 FMQHFSEA   | 176 | 412  |
| >BCL11A-S55 SMQHFSEAF  | 6    | >BCL11A-S55 FMQHFSEAF  | 4   | 2    |
| >BCL11A-S55 SMQHFSEAFI | 1268 | >BCL11A-S55 FMQHFSEAFI | 382 | 886  |



|                        |      |                        |       |       |
|------------------------|------|------------------------|-------|-------|
| >BCL11A-S55 SMQHFSEAF  | 518  | >BCL11A-S55 FMQHFSEAF  | 64    | 454   |
| >BCL11A-S55 SSMQHFSEA  | 260  | >BCL11A-S55 SFMQHFSEA  | 1460  | 1200  |
| >BCL11A-S55 SSMQHFSEAI | 168  | >BCL11A-S55 SFMQHFSEAI | 5583  | 5415  |
| >BCL11A-S55 SSMQHFSEAI | 5544 | >BCL11A-S55 SFMQHFSEAI | 227   | 5317  |
| >BCL11A-S55 SSMQHFSEAI | 3814 | >BCL11A-S55 SFMQHFSEAI | 242   | 3572  |
| >BCL11A-S55 SSMQHFSEAI | 571  | >BCL11A-S55 SFMQHFSEAI | 5     | 566   |
| >BCL11A-S55 SSMQHFSEAI | 42   | >BCL11A-S55 SFMQHFSEAI | 1007  | 965   |
| >BCL11A-S55 SSMQHFSEAI | 992  | >BCL11A-S55 SFMQHFSEAI | 209   | 783   |
| >BCL11A-S55 SSMQHFSEAI | 47   | >BCL11A-S55 SFMQHFSEAI | 372   | 325   |
| >BCL11A-S55 SSMQHFSEA  | 165  | >BCL11A-S55 SFMQHFSEA  | 167   | 2     |
| >BCL11A-S55 SSMQHFSEAI | 25   | >BCL11A-S55 SFMQHFSEAI | 70    | 45    |
| >BCL11A-S55 SSMQHFSEAI | 846  | >BCL11A-S55 SFMQHFSEAI | 106   | 740   |
| >BCL11A-S55 SSMQHFSEAI | 8    | >BCL11A-S55 SFMQHFSEAI | 127   | 119   |
| >BCL11A-S55 SSMQHFSEAI | 8    | >BCL11A-S55 SFMQHFSEAI | 20142 | 20134 |
| >BCL11A-S55 SSMQHFSEAI | 268  | >BCL11A-S55 SFMQHFSEAI | 15929 | 15661 |
| >BCL11A-S55 SSMQHFSEAI | 108  | >BCL11A-S55 SFMQHFSEAI | 7893  | 7785  |
| >BCL11A-S55 SSMQHFSEAI | 275  | >BCL11A-S55 SFMQHFSEAI | 5562  | 5287  |
| >BCL11A-S55 SSMQHFSE   | 314  | >BCL11A-S55 SFMQHFSE   | 4646  | 4332  |
| >BCL11A-S55 SSMQHFSEA  | 249  | >BCL11A-S55 SFMQHFSEA  | 5198  | 4949  |
| >BCL11A-S55 SSMQHFSEAI | 399  | >BCL11A-S55 SFMQHFSEAI | 5915  | 5516  |
| >BCL11A-S55 SSMQHFSEAI | 293  | >BCL11A-S55 SFMQHFSEAI | 2844  | 2551  |
| >BCL11A-S55 LSSMQHFSE/ | 3389 | >BCL11A-S55 LSFMQHFSE/ | 207   | 3182  |
| >BCL11A-S55 LSSMQHFSE/ | 618  | >BCL11A-S55 LSFMQHFSE/ | 50    | 568   |
| >BCL11A-S55 LSSMQHFSE/ | 43   | >BCL11A-S55 LSFMQHFSE/ | 28    | 15    |
| >BCL11A-S55 LSSMQHFSE/ | 2541 | >BCL11A-S55 LSFMQHFSE/ | 331   | 2210  |
| >BCL11A-S55 LSSMQHFSE/ | 15   | >BCL11A-S55 LSFMQHFSE/ | 4     | 11    |
| >BCL11A-S55 LSSMQHFSE/ | 6    | >BCL11A-S55 LSFMQHFSE/ | 4     | 2     |
| >BCL11A-S55 LSSMQHFSE/ | 128  | >BCL11A-S55 LSFMQHFSE/ | 88    | 40    |
| >BCL11A-S55 LSSMQHFSE/ | 1424 | >BCL11A-S55 LSFMQHFSE/ | 261   | 1163  |
| >BCL11A-S55 LSSMQHFSE/ | 67   | >BCL11A-S55 LSFMQHFSE/ | 67    | 0     |
| >BCL11A-S55 LSSMQHFSE/ | 119  | >BCL11A-S55 LSFMQHFSE/ | 32    | 87    |
| >BCL11A-S55 LSSMQHFSE/ | 1194 | >BCL11A-S55 LSFMQHFSE/ | 288   | 906   |
| >BCL11A-S55 VLSSMQHFSE | 187  | >BCL11A-S55 VLFSMQHFSE | 331   | 144   |
| >BCL11A-S55 VLSSMQHFS  | 64   | >BCL11A-S55 VLFSMQHFS  | 154   | 90    |
| >BCL11A-S55 VLSSMQHFSE | 13   | >BCL11A-S55 VLFSMQHFSE | 18    | 5     |
| >BCL11A-S55 VLSSMQHFSE | 10   | >BCL11A-S55 VLFSMQHFSE | 13    | 3     |
| >BCL11A-S55 VLSSMQHFSE | 86   | >BCL11A-S55 VLFSMQHFSE | 165   | 79    |
| >BCL11A-S55 VLSSMQHFSE | 399  | >BCL11A-S55 VLFSMQHFSE | 544   | 145   |
| >BCL11A-S55 VLSSMQHFSE | 119  | >BCL11A-S55 VLFSMQHFSE | 254   | 135   |
| >BCL11A-S55 VLSSMQHFSE | 210  | >BCL11A-S55 VLFSMQHFSE | 287   | 77    |
| >BCL11A-S55 VLSSMQHFS  | 49   | >BCL11A-S55 VLFSMQHFS  | 218   | 169   |
| >BCL11A-S55 VLSSMQHFSE | 4    | >BCL11A-S55 VLFSMQHFSE | 7     | 3     |
| >BCL11A-S55 VLSSMQHF   | 75   | >BCL11A-S55 VLFSMQHF   | 115   | 40    |

|                       |       |                       |     |       |
|-----------------------|-------|-----------------------|-----|-------|
| >BCL11A-S55 VLSSMQHF  | 63    | >BCL11A-S55 VLFSMQHF  | 214 | 151   |
| >BCL11A-S55 MVLSSMQHF | 555   | >BCL11A-S55 MVLSFMQHF | 24  | 531   |
| >BCL11A-S55 MVLSSMQHF | 158   | >BCL11A-S55 MVLSFMQHF | 117 | 41    |
| >BCL11A-S55 MVLSSMQH  | 343   | >BCL11A-S55 MVLSFMQH  | 151 | 192   |
| >BCL11A-S55 MVLSSMQHF | 85    | >BCL11A-S55 MVLSFMQHF | 151 | 66    |
| >BCL11A-S55 MVLSSMQHF | 114   | >BCL11A-S55 MVLSFMQHF | 66  | 48    |
| >BCL11A-S55 MVLSSMQHF | 6     | >BCL11A-S55 MVLSFMQHF | 8   | 2     |
| >BCL11A-S55 MVLSSMQHF | 639   | >BCL11A-S55 MVLSFMQHF | 222 | 417   |
| >BCL11A-S55 MVLSSMQHF | 3994  | >BCL11A-S55 MVLSFMQHF | 482 | 3512  |
| >BCL11A-S55 MVLSSMQHF | 62    | >BCL11A-S55 MVLSFMQHF | 154 | 92    |
| >BCL11A-S55 MVLSSMQHF | 9     | >BCL11A-S55 MVLSFMQHF | 18  | 9     |
| >BCL11A-S55 MVLSSMQHF | 6     | >BCL11A-S55 MVLSFMQHF | 19  | 13    |
| >BCL11A-S55 MVLSSMQHF | 441   | >BCL11A-S55 MVLSFMQHF | 447 | 6     |
| >BCL11A-S55 MVLSSMQHF | 115   | >BCL11A-S55 MVLSFMQHF | 159 | 44    |
| >BCL11A-S55 MVLSSMQHF | 133   | >BCL11A-S55 MVLSFMQHF | 71  | 62    |
| >BCL11A-S55 GMVLSSMQH | 1197  | >BCL11A-S55 GMVLSFMQH | 384 | 813   |
| >BCL11A-S55 GMVLSSMQH | 36    | >BCL11A-S55 GMVLSFMQH | 41  | 5     |
| >BCL11A-S55 GMVLSSMQH | 14    | >BCL11A-S55 GMVLSFMQH | 16  | 2     |
| >BCL11A-S55 GMVLSSMQH | 45    | >BCL11A-S55 GMVLSFMQH | 185 | 140   |
| >BCL11A-S55 QGMVLSSMC | 219   | >BCL11A-S55 QGMVLSFMC | 421 | 202   |
| >BCL11A-S55 QGMVLSSMC | 170   | >BCL11A-S55 QGMVLSFMC | 328 | 158   |
| >BCL11A-S55 QGMVLSSMC | 178   | >BCL11A-S55 QGMVLSFMC | 362 | 184   |
| >BCL11A-S55 MQGMVLSSM | 1198  | >BCL11A-S55 MQGMVLSFM | 118 | 1080  |
| >BCL11A-S55 MQGMVLSSM | 995   | >BCL11A-S55 MQGMVLSFM | 351 | 644   |
| >BCL11A-S55 MQGMVLSSM | 99    | >BCL11A-S55 MQGMVLSFM | 61  | 38    |
| >BCL11A-S55 MQGMVLSS  | 2287  | >BCL11A-S55 MQGMVLSF  | 26  | 2261  |
| >BCL11A-S55 MQGMVLSSM | 35    | >BCL11A-S55 MQGMVLSFM | 88  | 53    |
| >BCL11A-S55 MQGMVLSS  | 4856  | >BCL11A-S55 MQGMVLSF  | 5   | 4851  |
| >BCL11A-S55 MQGMVLSSM | 33    | >BCL11A-S55 MQGMVLSFM | 138 | 105   |
| >BCL11A-S55 VMQGMVLSI | 717   | >BCL11A-S55 VMQGMVLSI | 340 | 377   |
| >BCL11A-S55 VMQGMVLSI | 247   | >BCL11A-S55 VMQGMVLSI | 174 | 73    |
| >BCL11A-S55 VMQGMVLSI | 214   | >BCL11A-S55 VMQGMVLSI | 360 | 146   |
| >BCL11A-S55 VMQGMVLSI | 31    | >BCL11A-S55 VMQGMVLSI | 21  | 10    |
| >BCL11A-S55 VMQGMVLSI | 263   | >BCL11A-S55 VMQGMVLSI | 184 | 79    |
| >BCL11A-S55 VMQGMVLSI | 741   | >BCL11A-S55 VMQGMVLSI | 160 | 581   |
| >BCL11A-S55 VMQGMVLSI | 98    | >BCL11A-S55 VMQGMVLSI | 41  | 57    |
| >BCL11A-S55 VMQGMVLSI | 222   | >BCL11A-S55 VMQGMVLSI | 510 | 288   |
| >BCL11A-S55 VMQGMVLSI | 16    | >BCL11A-S55 VMQGMVLSI | 17  | 1     |
| >BCL11A-S55 VMQGMVLSI | 110   | >BCL11A-S55 VMQGMVLSI | 56  | 54    |
| >BCL11A-S55 VMQGMVLSI | 30119 | >BCL11A-S55 VMQGMVLSI | 268 | 29851 |
| >BCL11A-S55 VMQGMVLSI | 27271 | >BCL11A-S55 VMQGMVLSI | 496 | 26775 |
| >BCL11A-S55 VMQGMVLSI | 21499 | >BCL11A-S55 VMQGMVLSI | 173 | 21326 |
| >BCL11A-S55 VMQGMVLSI | 11321 | >BCL11A-S55 VMQGMVLSI | 209 | 11112 |

|                         |       |                         |       |       |
|-------------------------|-------|-------------------------|-------|-------|
| >BCL11A-S55 VMQGMVLSI   | 4052  | >BCL11A-S55 VMQGMVLSI   | 28    | 4024  |
| >BCL11A-S55 VMQGMVLSI   | 2876  | >BCL11A-S55 VMQGMVLSI   | 27    | 2849  |
| >BCL11A-S55 VMQGMVLSI   | 48    | >BCL11A-S55 VMQGMVLSI   | 129   | 81    |
| >BCL11A-S55 VMQGMVLSI   | 22517 | >BCL11A-S55 VMQGMVLSI   | 325   | 22192 |
| >BCL11A-S55 VMQGMVLSI   | 13625 | >BCL11A-S55 VMQGMVLSI   | 36    | 13589 |
| >BCL11A-S55 VMQGMVLSI   | 364   | >BCL11A-S55 VMQGMVLSI   | 1251  | 887   |
| >BCL11A-S55 VMQGMVLSI   | 17524 | >BCL11A-S55 VMQGMVLSI   | 92    | 17432 |
| >BCL11A-S55 VMQGMVLSI   | 20957 | >BCL11A-S55 VMQGMVLSI   | 163   | 20794 |
| >BCL11A-S55 VMQGMVLSI   | 109   | >BCL11A-S55 VMQGMVLSI   | 91    | 18    |
| >BCL11A-S55 DVMQGMVL    | 2925  | >BCL11A-S55 DVMQGMVL    | 54    | 2871  |
| >BCL11A-S55 DVMQGMVL    | 66    | >BCL11A-S55 DVMQGMVL    | 946   | 880   |
| >BCL11A-S55 DVMQGMVL    | 14380 | >BCL11A-S55 DVMQGMVL    | 368   | 14012 |
| >BCL11A-S55 DVMQGMVL    | 13    | >BCL11A-S55 DVMQGMVL    | 11    | 2     |
| >BCL11A-S55 DVMQGMVL    | 2529  | >BCL11A-S55 DVMQGMVL    | 7     | 2522  |
| >BCL11A-S55 DVMQGMVL    | 4     | >BCL11A-S55 DVMQGMVL    | 3     | 1     |
| >BCL11A-S55 DVMQGMVL    | 11660 | >BCL11A-S55 DVMQGMVL    | 118   | 11542 |
| >BCL11A-S55 DVMQGMVL    | 33    | >BCL11A-S55 DVMQGMVL    | 39    | 6     |
| >BCL11A-S55 DVMQGMVL    | 14816 | >BCL11A-S55 DVMQGMVL    | 199   | 14617 |
| >BCL11A-S55 DVMQGMVL    | 387   | >BCL11A-S55 DVMQGMVL    | 145   | 242   |
| >BCL11A-S55 DVMQGMVL    | 87    | >BCL11A-S55 DVMQGMVL    | 58    | 29    |
| >BCL11A-S55 DVMQGMVL    | 480   | >BCL11A-S55 DVMQGMVL    | 2203  | 1723  |
| >BCL11A-S55 DVMQGMVL    | 249   | >BCL11A-S55 DVMQGMVL    | 213   | 36    |
| >BCL11B-P4C PFLSTPPL    | 1957  | >BCL11B-P4C SFLSTPPL    | 326   | 1631  |
| >BCL11B-P4C PFLSTPPLPPM | 4177  | >BCL11B-P4C SFLSTPPLPPM | 470   | 3707  |
| >BCL11B-P4C PFLSTPPL    | 1344  | >BCL11B-P4C SFLSTPPL    | 112   | 1232  |
| >BCL11B-P4C PFLSTPPLP   | 3557  | >BCL11B-P4C SFLSTPPLP   | 336   | 3221  |
| >BCL11B-P4C PFLSTPPLPPM | 1431  | >BCL11B-P4C SFLSTPPLPPM | 114   | 1317  |
| >BCL11B-P4C SPFLSTPPL   | 11275 | >BCL11B-P4C SSFLSTPPL   | 409   | 10866 |
| >BCL11B-P4C SPFLSTPPL   | 1901  | >BCL11B-P4C SSFLSTPPL   | 56    | 1845  |
| >BCL11B-P4C SPFLSTPPL   | 41    | >BCL11B-P4C SSFLSTPPL   | 18950 | 18909 |
| >BCL11B-P4C SPFLSTPPL   | 14116 | >BCL11B-P4C SSFLSTPPL   | 54    | 14062 |
| >BCL11B-P4C SPFLSTPPL   | 12544 | >BCL11B-P4C SSFLSTPPL   | 123   | 12421 |
| >BCL11B-P4C SPFLSTPPL   | 301   | >BCL11B-P4C SSFLSTPPL   | 188   | 113   |
| >BCL11B-P4C SPFLSTPPL   | 20    | >BCL11B-P4C SSFLSTPPL   | 7586  | 7566  |
| >BCL11B-P4C SPFLSTPPL   | 13153 | >BCL11B-P4C SSFLSTPPL   | 459   | 12694 |
| >BCL11B-P4C SPFLSTPPL   | 1008  | >BCL11B-P4C SSFLSTPPL   | 53    | 955   |
| >BCL11B-P4C SPFLSTPPL   | 8021  | >BCL11B-P4C SSFLSTPPL   | 5     | 8016  |
| >BCL11B-P4C SPFLSTPPL   | 47    | >BCL11B-P4C SSFLSTPPL   | 2628  | 2581  |
| >BCL11B-P4C SPFLSTPPL   | 34    | >BCL11B-P4C SSFLSTPPL   | 405   | 371   |
| >BCL11B-P4C SPFLSTPPL   | 6367  | >BCL11B-P4C SSFLSTPPL   | 158   | 6209  |
| >BCL11B-P4C SPFLSTPPL   | 3109  | >BCL11B-P4C SSFLSTPPL   | 77    | 3032  |
| >BCL11B-P4C KSPFLSTPPL  | 503   | >BCL11B-P4C KSSFLSTPPL  | 56    | 447   |
| >BCL11B-P4C KSPFLSTPPL  | 38    | >BCL11B-P4C KSSFLSTPPL  | 31    | 7     |

|                         |       |                         |       |       |
|-------------------------|-------|-------------------------|-------|-------|
| >BCL11B-P4C KSPFLSTPPL  | 1982  | >BCL11B-P4C KSSFLSTPPL  | 255   | 1727  |
| >BCL11B-P4C KSPFLSTPPL  | 62    | >BCL11B-P4C KSSFLSTPPL  | 5     | 57    |
| >BCL11B-P4C KSPFLSTPPL  | 10268 | >BCL11B-P4C KSSFLSTPPL  | 113   | 10155 |
| >BCL11B-P4C KSPFLSTPPL  | 6     | >BCL11B-P4C KSSFLSTPPL  | 487   | 481   |
| >BCL11B-P4C KSPFLSTPPLP | 442   | >BCL11B-P4C KSSFLSTPPLP | 19027 | 18585 |
| >BCL11B-P4C KSPFLSTPPL  | 922   | >BCL11B-P4C KSSFLSTPPL  | 152   | 770   |
| >BCL11B-P4C KSPFLSTPPL  | 241   | >BCL11B-P4C KSSFLSTPPL  | 190   | 51    |
| >BCL11B-P4C PKSPFLSTPPL | 154   | >BCL11B-P4C PKSSFLSTPPL | 80    | 74    |
| >BCL11B-P4C SPKSPFLST   | 260   | >BCL11B-P4C SPKSSFLST   | 459   | 199   |
| >BCL11B-P4C PSPKSPFL    | 21    | >BCL11B-P4C PSPKSSFL    | 17    | 4     |
| >BCL11B-P4C PSPKSPFLS   | 881   | >BCL11B-P4C PSPKSSFLS   | 189   | 692   |
| >BCL11B-P4C QPSPKSPFL   | 189   | >BCL11B-P4C QPSPKSSFL   | 1970  | 1781  |
| >BCL11B-P4C QPSPKSPF    | 88    | >BCL11B-P4C QPSPKSSF    | 87    | 1     |
| >BCL11B-P4C QPSPKSPFL   | 1002  | >BCL11B-P4C QPSPKSSFL   | 223   | 779   |
| >BCL11B-P4C QPSPKSPF    | 472   | >BCL11B-P4C QPSPKSSF    | 437   | 35    |
| >BCL11B-P4C QPSPKSPF    | 36    | >BCL11B-P4C QPSPKSSF    | 78    | 42    |
| >BCL11B-P4C QPSPKSPF    | 66    | >BCL11B-P4C QPSPKSSF    | 72    | 6     |
| >BCL11B-P4C FQPSPKSPFL  | 125   | >BCL11B-P4C FQPSPKSSFL  | 66    | 59    |
| >BCL11B-P4C FQPSPKSPFL  | 847   | >BCL11B-P4C FQPSPKSSFL  | 310   | 537   |
| >BCL11B-P4C FQPSPKSPF   | 251   | >BCL11B-P4C FQPSPKSSF   | 430   | 179   |
| >BCL11B-P4C FQPSPKSPFL  | 89    | >BCL11B-P4C FQPSPKSSFL  | 163   | 74    |
| >BCL11B-P4C FQPSPKSPFLS | 659   | >BCL11B-P4C FQPSPKSSFLS | 344   | 315   |
| >BCL11B-P4C FQPSPKSPFL  | 236   | >BCL11B-P4C FQPSPKSSFL  | 400   | 164   |
| >BCL11B-P4C FQPSPKSPFL  | 466   | >BCL11B-P4C FQPSPKSSFL  | 1935  | 1469  |
| >BCL11B-P4C FQPSPKSPF   | 45    | >BCL11B-P4C FQPSPKSSF   | 57    | 12    |
| >BCL11B-P4C FQPSPKSPF   | 18    | >BCL11B-P4C FQPSPKSSF   | 28    | 10    |
| >BCL11B-P4C FQPSPKSPF   | 3     | >BCL11B-P4C FQPSPKSSF   | 3     | 0     |
| >BCL11B-P4C FQPSPKSPFL  | 153   | >BCL11B-P4C FQPSPKSSFL  | 74    | 79    |
| >BCL11B-P4C FQPSPKSPFL  | 438   | >BCL11B-P4C FQPSPKSSFL  | 469   | 31    |
| >BCL11B-P4C PFQPSPKSPF  | 579   | >BCL11B-P4C PFQPSPKSSF  | 224   | 355   |
| >BCL11B-P4C NPFQPSPKSP  | 518   | >BCL11B-P4C NPFQPSPKSS  | 73    | 445   |
| >BCL11B-P4C NPFQPSPKSP  | 37    | >BCL11B-P4C NPFQPSPKSS  | 53    | 16    |
| >BCL11B-P4C NPFQPSPKSP  | 69    | >BCL11B-P4C NPFQPSPKSS  | 120   | 51    |
| >BCL11B-P4C NPFQPSPKSP  | 79    | >BCL11B-P4C NPFQPSPKSS  | 93    | 14    |
| >BCL11B-P4C NPFQPSPKSP  | 18    | >BCL11B-P4C NPFQPSPKSS  | 34    | 16    |
| >BCL11B-P4C NPFQPSPKSP  | 978   | >BCL11B-P4C NPFQPSPKSS  | 397   | 581   |
| >BCL11B-P4C NPFQPSPKSP  | 561   | >BCL11B-P4C NPFQPSPKSS  | 142   | 419   |
| >BCL11B-P4C NPFQPSPKSP  | 25    | >BCL11B-P4C NPFQPSPKSS  | 39    | 14    |
| >BCL11B-P6€ PLGDILVFI   | 317   | >BCL11B-P6€ HLGDILVFI   | 16    | 301   |
| >BCL11B-P6€ PLGDILVFI   | 27    | >BCL11B-P6€ HLGDILVFI   | 4     | 23    |
| >BCL11B-P6€ PLGDILVFI   | 686   | >BCL11B-P6€ HLGDILVFI   | 22    | 664   |
| >BCL11B-P6€ PLGDILVFI   | 863   | >BCL11B-P6€ HLGDILVFI   | 23    | 840   |
| >BCL11B-P6€ PLGDILVFI   | 21    | >BCL11B-P6€ HLGDILVFI   | 7     | 14    |

|                         |      |                         |       |       |
|-------------------------|------|-------------------------|-------|-------|
| >BCL11B-P6€ PLGDILVFI   | 106  | >BCL11B-P6€ HLGDILVFI   | 5     | 101   |
| >BCL11B-P6€ PLGDILVFI   | 35   | >BCL11B-P6€ HLGDILVFI   | 11    | 24    |
| >BCL11B-P6€ PLGDILVFI   | 9    | >BCL11B-P6€ HLGDILVFI   | 4     | 5     |
| >BCL11B-P6€ PLGDILVFI   | 26   | >BCL11B-P6€ HLGDILVFI   | 4     | 22    |
| >BCL11B-P6€ PLGDILVFI   | 8796 | >BCL11B-P6€ HLGDILVFI   | 111   | 8685  |
| >BCL11B-P6€ PLGDILVFI   | 4152 | >BCL11B-P6€ HLGDILVFI   | 244   | 3908  |
| >BCL11B-P6€ PLGDILVF    | 2679 | >BCL11B-P6€ HLGDILVF    | 102   | 2577  |
| >BCL11B-P6€ FPLGDILVFI  | 792  | >BCL11B-P6€ FHLGDILVFI  | 187   | 605   |
| >BCL11B-P6€ FPLGDILVFI  | 67   | >BCL11B-P6€ FHLGDILVFI  | 27330 | 27263 |
| >BCL11B-P6€ FPLGDILV    | 474  | >BCL11B-P6€ FHLGDILV    | 449   | 25    |
| >BCL11B-P6€ FPLGDILVFI  | 141  | >BCL11B-P6€ FHLGDILVFI  | 171   | 30    |
| >BCL11B-P6€ FPLGDILV    | 695  | >BCL11B-P6€ FHLGDILV    | 368   | 327   |
| >BCL11B-P6€ FPLGDILV    | 1096 | >BCL11B-P6€ FHLGDILV    | 360   | 736   |
| >BCL11B-P6€ FPLGDILV    | 1171 | >BCL11B-P6€ FHLGDILV    | 320   | 851   |
| >BCL11B-P6€ FPLGDILVF   | 1092 | >BCL11B-P6€ FHLGDILVF   | 47    | 1045  |
| >BCL11B-P6€ FPLGDILV    | 348  | >BCL11B-P6€ FHLGDILV    | 12698 | 12350 |
| >BCL11B-P6€ FPLGDILVFI  | 267  | >BCL11B-P6€ FHLGDILVFI  | 12081 | 11814 |
| >BCL11B-P6€ FPLGDILVF   | 219  | >BCL11B-P6€ FHLGDILVF   | 24322 | 24103 |
| >BCL11B-P6€ FPLGDILVF   | 335  | >BCL11B-P6€ FHLGDILVF   | 35    | 300   |
| >BCL11B-P6€ FPLGDILVF   | 9    | >BCL11B-P6€ FHLGDILVF   | 1808  | 1799  |
| >BCL11B-P6€ FPLGDILVFI  | 436  | >BCL11B-P6€ FHLGDILVFI  | 34983 | 34547 |
| >BCL11B-P6€ FPLGDILV    | 993  | >BCL11B-P6€ FHLGDILV    | 115   | 878   |
| >BCL11B-P6€ FPLGDILVF   | 216  | >BCL11B-P6€ FHLGDILVF   | 35    | 181   |
| >BCL11B-P6€ FPLGDILVFI  | 994  | >BCL11B-P6€ FHLGDILVFI  | 141   | 853   |
| >BCL11B-P6€ FPLGDILV    | 243  | >BCL11B-P6€ FHLGDILV    | 11899 | 11656 |
| >BCL11B-P6€ FPLGDILV    | 74   | >BCL11B-P6€ FHLGDILV    | 13198 | 13124 |
| >BCL11B-P6€ FPLGDILVF   | 12   | >BCL11B-P6€ FHLGDILVF   | 2016  | 2004  |
| >BCL11B-P6€ FPLGDILVFI  | 58   | >BCL11B-P6€ FHLGDILVFI  | 11319 | 11261 |
| >BCL11B-P6€ FPLGDILV    | 11   | >BCL11B-P6€ FHLGDILV    | 3857  | 3846  |
| >BCL11B-P6€ FPLGDILVFI  | 116  | >BCL11B-P6€ FHLGDILVFI  | 14860 | 14744 |
| >BCL11B-P6€ FPLGDILVFIE | 148  | >BCL11B-P6€ FHLGDILVFIE | 13344 | 13196 |
| >BCL11B-P6€ FPLGDILV    | 112  | >BCL11B-P6€ FHLGDILV    | 19398 | 19286 |
| >BCL11B-P6€ FPLGDILVF   | 5    | >BCL11B-P6€ FHLGDILVF   | 1010  | 1005  |
| >BCL11B-P6€ FPLGDILVFI  | 41   | >BCL11B-P6€ FHLGDILVFI  | 14472 | 14431 |
| >BCL11B-P6€ FPLGDILVF   | 4212 | >BCL11B-P6€ FHLGDILVF   | 170   | 4042  |
| >BCL11B-P6€ LTCGQCQMM   | 9887 | >BCL11B-P6€ LTCGQCQMM   | 414   | 9473  |
| >BCL11B-P6€ NFPLGDILVF  | 216  | >BCL11B-P6€ NFHLGDILVF  | 1026  | 810   |
| >BCL11B-P6€ NFPLGDILVF  | 367  | >BCL11B-P6€ NFHLGDILVF  | 6255  | 5888  |
| >BCL11B-P6€ NFPLGDIL    | 389  | >BCL11B-P6€ NFHLGDIL    | 1275  | 886   |
| >BCL11B-P6€ NFPLGDILVF  | 14   | >BCL11B-P6€ NFHLGDILVF  | 34    | 20    |
| >BCL11B-P6€ NFPLGDILVFI | 84   | >BCL11B-P6€ NFHLGDILVFI | 317   | 233   |
| >BCL11B-P6€ MNFPLGDILV  | 328  | >BCL11B-P6€ MNFHLGDILV  | 523   | 195   |
| >BCL11B-P6€ MNFPLGDILV  | 358  | >BCL11B-P6€ MNFHLGDILV  | 815   | 457   |

|                         |     |                          |      |      |
|-------------------------|-----|--------------------------|------|------|
| >BCL11B-P6€ MNFPLGDILV  | 297 | >BCL11B-P6€ MNFHLGDILV   | 840  | 543  |
| >BCL11B-P6€ MNFPLGDILV  | 117 | >BCL11B-P6€ MNFHLGDILV   | 114  | 3    |
| >BCL11B-P6€ MNFPLGDILV  | 18  | >BCL11B-P6€ MNFHLGDILV   | 13   | 5    |
| >BCL11B-P6€ MNFPLGDILV  | 224 | >BCL11B-P6€ MNFHLGDILV   | 282  | 58   |
| >BCL11B-P6€ MNFPLGDIL   | 252 | >BCL11B-P6€ MNFHLGDIL    | 313  | 61   |
| >BCL11B-P6€ MNFPLGDILV  | 120 | >BCL11B-P6€ MNFHLGDILV   | 147  | 27   |
| >BCL11B-P6€ MNFPLGDILV  | 250 | >BCL11B-P6€ MNFHLGDILV   | 540  | 290  |
| >BCL11B-P6€ MNFPLGDI    | 60  | >BCL11B-P6€ MNFHLGDI     | 250  | 190  |
| >BCL11B-P6€ QMNFPPLGDII | 451 | >BCL11B-P6€ QMNFPPLGDI   | 233  | 218  |
| >BCL11B-P6€ QMNFPPLGDII | 131 | >BCL11B-P6€ QMNFPPLGDI   | 43   | 88   |
| >BCL11B-P6€ QMNFPPLGDI  | 66  | >BCL11B-P6€ QMNFPPLGDI   | 12   | 54   |
| >BCL11B-P6€ QMNFPPLGDII | 26  | >BCL11B-P6€ QMNFPPLGDI   | 11   | 15   |
| >BCL11B-P6€ QMNFPPLGDII | 340 | >BCL11B-P6€ QMNFPPLGDI   | 200  | 140  |
| >BCL11B-P6€ QMNFPPLGDII | 19  | >BCL11B-P6€ QMNFPPLGDI   | 29   | 10   |
| >BCL11B-P6€ QMNFPPLGDII | 90  | >BCL11B-P6€ QMNFPPLGDI   | 71   | 19   |
| >BCL11B-P6€ QMNFPPLGDII | 96  | >BCL11B-P6€ QMNFPPLGDI   | 129  | 33   |
| >BCL11B-P6€ QMNFPPLGDII | 126 | >BCL11B-P6€ QMNFPPLGDI   | 187  | 61   |
| >BCL11B-P6€ QMNFPPLGDII | 22  | >BCL11B-P6€ QMNFPPLGDI   | 22   | 0    |
| >BCL11B-P6€ QMNFPPLGDII | 396 | >BCL11B-P6€ QMNFPPLGDI   | 1140 | 744  |
| >BCL11B-P6€ CQMNFPPLGD  | 180 | >BCL11B-P6€ CQMNFPPLGCE  | 304  | 124  |
| >BCL11B-P6€ CQMNFPPLGD  | 74  | >BCL11B-P6€ CQMNFPPLGCE  | 132  | 58   |
| >BCL11B-P6€ CQMNFPPLGD  | 404 | >BCL11B-P6€ CQMNFPPLGCE  | 593  | 189  |
| >BCL11B-P6€ CQMNFPPLGD  | 260 | >BCL11B-P6€ CQMNFPPLGCE  | 222  | 38   |
| >BCL11B-P6€ CQMNFPPLGD  | 300 | >BCL11B-P6€ CQMNFPPLGCE  | 308  | 8    |
| >BCL11B-P6€ CQMNFPPLGD  | 57  | >BCL11B-P6€ CQMNFPPLGCE  | 54   | 3    |
| >BCL11B-P6€ CQMNFPPLGD  | 138 | >BCL11B-P6€ CQMNFPPLGCE  | 184  | 46   |
| >BCL11B-P6€ CQMNFPPLGD  | 492 | >BCL11B-P6€ CQMNFPPLGCE  | 444  | 48   |
| >BCL11B-P6€ GQCQMNFPPL  | 47  | >BCL11B-P6€ GQCQMNFPPLHI | 110  | 63   |
| >BCL11B-P6€ GQCQMNFPPL  | 226 | >BCL11B-P6€ GQCQMNFPPLHI | 392  | 166  |
| >BCL11B-P6€ GQCQMNFPPL  | 82  | >BCL11B-P6€ GQCQMNFPPLHI | 1539 | 1457 |
| >BCL11B-P6€ GQCQMNFPPL  | 270 | >BCL11B-P6€ GQCQMNFPPLHI | 821  | 551  |
| >BCL11B-P6€ GQCQMNFPPL  | 424 | >BCL11B-P6€ GQCQMNFPPLHI | 306  | 118  |
| >BCL2-A85T- ALSPVPPV    | 11  | >BCL2-A85T- TLSPVPPV     | 14   | 3    |
| >BCL2-A85T- ALSPVPPVV   | 22  | >BCL2-A85T- TLSPVPPVV    | 34   | 12   |
| >BCL2-A85T- ALSPVPPVVH  | 47  | >BCL2-A85T- TLSPVPPVVH   | 93   | 46   |
| >BCL2-A85T- ALSPVPPV    | 7   | >BCL2-A85T- TLSPVPPV     | 11   | 4    |
| >BCL2-A85T- ALSPVPPVV   | 20  | >BCL2-A85T- TLSPVPPVV    | 43   | 23   |
| >BCL2-A85T- ALSPVPPVVH  | 10  | >BCL2-A85T- TLSPVPPVVH   | 18   | 8    |
| >BCL2-A85T- ALSPVPPV    | 3   | >BCL2-A85T- TLSPVPPV     | 4    | 1    |
| >BCL2-A85T- ALSPVPPVV   | 5   | >BCL2-A85T- TLSPVPPVV    | 8    | 3    |
| >BCL2-A85T- ALSPVPPVVH  | 19  | >BCL2-A85T- TLSPVPPVVH   | 38   | 19   |
| >BCL2-A85T- ALSPVPPV    | 14  | >BCL2-A85T- TLSPVPPV     | 28   | 14   |
| >BCL2-A85T- ALSPVPPVV   | 88  | >BCL2-A85T- TLSPVPPVV    | 250  | 162  |

|                        |      |                        |      |      |
|------------------------|------|------------------------|------|------|
| >BCL2-A85T- ALSPVPPVVH | 110  | >BCL2-A85T- TLSPVPPVVH | 288  | 178  |
| >BCL2-A85T- ALSPVPPV   | 2    | >BCL2-A85T- TLSPVPPV   | 3    | 1    |
| >BCL2-A85T- ALSPVPPVV  | 2    | >BCL2-A85T- TLSPVPPVV  | 3    | 1    |
| >BCL2-A85T- ALSPVPPVVH | 6    | >BCL2-A85T- TLSPVPPVVH | 16   | 10   |
| >BCL2-A85T- ALSPVPPV   | 5    | >BCL2-A85T- TLSPVPPV   | 9    | 4    |
| >BCL2-A85T- ALSPVPPVV  | 8    | >BCL2-A85T- TLSPVPPVV  | 20   | 12   |
| >BCL2-A85T- ALSPVPPVVH | 25   | >BCL2-A85T- TLSPVPPVVH | 70   | 45   |
| >BCL2-A85T- ALSPVPPV   | 4    | >BCL2-A85T- TLSPVPPV   | 5    | 1    |
| >BCL2-A85T- ALSPVPPVV  | 4    | >BCL2-A85T- TLSPVPPVV  | 5    | 1    |
| >BCL2-A85T- ALSPVPPVVH | 8    | >BCL2-A85T- TLSPVPPVVH | 15   | 7    |
| >BCL2-A85T- ALSPVPPV   | 4    | >BCL2-A85T- TLSPVPPV   | 5    | 1    |
| >BCL2-A85T- ALSPVPPVV  | 4    | >BCL2-A85T- TLSPVPPVV  | 5    | 1    |
| >BCL2-A85T- ALSPVPPVVH | 42   | >BCL2-A85T- TLSPVPPVVH | 71   | 29   |
| >BCL2-A85T- ALSPVPPV   | 2    | >BCL2-A85T- TLSPVPPV   | 2    | 0    |
| >BCL2-A85T- ALSPVPPVV  | 3    | >BCL2-A85T- TLSPVPPVV  | 5    | 2    |
| >BCL2-A85T- ALSPVPPVVH | 3    | >BCL2-A85T- TLSPVPPVVH | 6    | 3    |
| >BCL2-A85T- ALSPVPPV   | 1489 | >BCL2-A85T- TLSPVPPV   | 88   | 1401 |
| >BCL2-A85T- ALSPVPPVVH | 3982 | >BCL2-A85T- TLSPVPPVVH | 249  | 3733 |
| >BCL2-A85T- ALSPVPPV   | 549  | >BCL2-A85T- TLSPVPPV   | 45   | 504  |
| >BCL2-A85T- PALSPVPPV  | 133  | >BCL2-A85T- PTLSPVPPV  | 35   | 98   |
| >BCL2-A85T- PALSPVPPVV | 273  | >BCL2-A85T- PTLSPVPPVV | 66   | 207  |
| >BCL2-A85T- PALSPVPPV  | 577  | >BCL2-A85T- PTLSPVPPV  | 112  | 465  |
| >BCL2-A85T- PALSPVPPVV | 1014 | >BCL2-A85T- PTLSPVPPVV | 206  | 808  |
| >BCL2-A85T- PALSPVPPV  | 737  | >BCL2-A85T- PTLSPVPPV  | 419  | 318  |
| >BCL2-A85T- PALSPVPPV  | 13   | >BCL2-A85T- PTLSPVPPV  | 6    | 7    |
| >BCL2-A85T- PALSPVPPVV | 299  | >BCL2-A85T- PTLSPVPPVV | 54   | 245  |
| >BCL2-A85T- GPALSPVPPV | 438  | >BCL2-A85T- GPTLSPVPPV | 2373 | 1935 |
| >BCL2-A85T- GPALSPVPPV | 463  | >BCL2-A85T- GPTLSPVPPV | 595  | 132  |
| >BCL2-A85T- AGPALSPVP  | 404  | >BCL2-A85T- AGPTLSPVP  | 348  | 56   |
| >BCL2-A85T- AGPALSPVP  | 178  | >BCL2-A85T- AGPTLSPVP  | 257  | 79   |
| >BCL2-A85T- AAGPALSPV  | 60   | >BCL2-A85T- AAGPTLSPV  | 73   | 13   |
| >BCL2-A85T- AAGPALSPV  | 43   | >BCL2-A85T- AAGPTLSPV  | 46   | 3    |
| >BCL2-A85T- AAGPALSPV  | 412  | >BCL2-A85T- AAGPTLSPV  | 183  | 229  |
| >BCL2-A85T- AAGPALSPV  | 41   | >BCL2-A85T- AAGPTLSPV  | 42   | 1    |
| >BCL2-A85T- AAAGPALSPV | 183  | >BCL2-A85T- AAAGPTLSPV | 160  | 23   |
| >BCL2-A85T- AAAGPALSPV | 67   | >BCL2-A85T- AAAGPTLSPV | 46   | 21   |
| >BCL2-A85T- AAAGPALSPV | 132  | >BCL2-A85T- AAAGPTLSPV | 100  | 32   |
| >BCL2-A85T- AAAGPALSPV | 170  | >BCL2-A85T- AAAGPTLSPV | 107  | 63   |
| >BCL2-A85T- AAAGPALSPV | 712  | >BCL2-A85T- AAAGPTLSPV | 493  | 219  |
| >BCL2-A85T- AAAGPALSPV | 28   | >BCL2-A85T- AAAGPTLSPV | 20   | 8    |
| >BCL2-A85T- AAAGPALSPV | 194  | >BCL2-A85T- AAAGPTLSPV | 95   | 99   |
| >BCL2-A85T- AAAGPALSPV | 99   | >BCL2-A85T- AAAGPTLSPV | 90   | 9    |
| >BCL2-A85T- GAAAGPALSF | 128  | >BCL2-A85T- GAAAGPTLSF | 165  | 37   |

|                         |       |                         |       |       |
|-------------------------|-------|-------------------------|-------|-------|
| >BCL2-A85T- GAAAGPALSF  | 13    | >BCL2-A85T- GAAAGPTLSF  | 13    | 0     |
| >BCL2-A85T- GAAAGPALSF  | 88    | >BCL2-A85T- GAAAGPTLSF  | 96    | 8     |
| >BCL2-A85T- GAAAGPALSF  | 367   | >BCL2-A85T- GAAAGPTLSF  | 394   | 27    |
| >BCL2-A85T- GAAAGPALSF  | 428   | >BCL2-A85T- GAAAGPTLSF  | 383   | 45    |
| >BCL2-A85T- GAAAGPALSF  | 122   | >BCL2-A85T- GAAAGPTLSF  | 139   | 17    |
| >BCL2-A85T- GAAAGPALSF  | 163   | >BCL2-A85T- GAAAGPTLSF  | 342   | 179   |
| >BCL2-A85T- GAAAGPAL    | 486   | >BCL2-A85T- GAAAGPTL    | 159   | 327   |
| >BCL2-A85T- APGAAAGPA   | 6     | >BCL2-A85T- APGAAAGPTI  | 6     | 0     |
| >BCL2-A85T- APGAAAGPA   | 36    | >BCL2-A85T- APGAAAGPT   | 76    | 40    |
| >BCL2-A85T- APGAAAGPA   | 80    | >BCL2-A85T- APGAAAGPTI  | 119   | 39    |
| >BCL2-A85T- AAPGAAAGP   | 612   | >BCL2-A85T- AAPGAAAGP   | 478   | 134   |
| >BCL2-A85T- AAPGAAAGP   | 1083  | >BCL2-A85T- AAPGAAAGP   | 356   | 727   |
| >BCL2-A85T- AAPGAAAGP   | 8     | >BCL2-A85T- AAPGAAAGP   | 7     | 1     |
| >BCL3-P420A PPAFLPFAGV  | 898   | >BCL3-P420A APAFLPFAGV  | 233   | 665   |
| >BCL3-P420A PPAFLPFAGV  | 1864  | >BCL3-P420A APAFLPFAGV  | 135   | 1729  |
| >BCL3-P420A PPAFLPFAGV  | 325   | >BCL3-P420A APAFLPFAGV  | 26    | 299   |
| >BCL3-P420A PPAFLPFAGV  | 3939  | >BCL3-P420A APAFLPFAGV  | 153   | 3786  |
| >BCL3-P420A PPAFLPFA    | 643   | >BCL3-P420A APAFLPFA    | 361   | 282   |
| >BCL3-P420A PPAFLPFAGV  | 3085  | >BCL3-P420A APAFLPFAGV  | 429   | 2656  |
| >BCL3-P420A SPPAFLPFAG  | 6415  | >BCL3-P420A SAPAFLPFAG  | 233   | 6182  |
| >BCL3-P420A SPPAFLPF    | 46    | >BCL3-P420A SAPAFLPF    | 17157 | 17111 |
| >BCL3-P420A SPPAFLPFAG  | 15202 | >BCL3-P420A SAPAFLPFAG  | 487   | 14715 |
| >BCL3-P420A SPPAFLPFAG  | 11281 | >BCL3-P420A SAPAFLPFAG  | 192   | 11089 |
| >BCL3-P420A SPPAFLPFA   | 3925  | >BCL3-P420A SAPAFLPFA   | 31    | 3894  |
| >BCL3-P420A SPPAFLPFAG  | 1484  | >BCL3-P420A SAPAFLPFAG  | 14    | 1470  |
| >BCL3-P420A SPPAFLPFAG  | 3990  | >BCL3-P420A SAPAFLPFAG  | 74    | 3916  |
| >BCL3-P420A SPPAFLPFAG  | 7993  | >BCL3-P420A SAPAFLPFAG  | 399   | 7594  |
| >BCL3-P420A SPPAFLPFAG  | 8634  | >BCL3-P420A SAPAFLPFAG  | 92    | 8542  |
| >BCL3-P420A SPPAFLPFAG  | 481   | >BCL3-P420A SAPAFLPFAG  | 22    | 459   |
| >BCL3-P420A SPPAFLPFAG  | 176   | >BCL3-P420A SAPAFLPFAG  | 30    | 146   |
| >BCL3-P420A SPPAFLPF    | 201   | >BCL3-P420A SAPAFLPF    | 13049 | 12848 |
| >BCL3-P420A SPPAFLPF    | 8648  | >BCL3-P420A SAPAFLPF    | 332   | 8316  |
| >BCL3-P420A SPPAFLPF    | 909   | >BCL3-P420A SAPAFLPF    | 172   | 737   |
| >BCL3-P420A SPPAFLPF    | 77    | >BCL3-P420A SAPAFLPF    | 419   | 342   |
| >BCL3-P420A SPPAFLPFA   | 205   | >BCL3-P420A SAPAFLPFA   | 16169 | 15964 |
| >BCL3-P420A SPPAFLPF    | 435   | >BCL3-P420A SAPAFLPF    | 328   | 107   |
| >BCL3-P420A SPPAFLPFA   | 239   | >BCL3-P420A SAPAFLPFA   | 16    | 223   |
| >BCL3-P420A SPPAFLPFAG  | 4741  | >BCL3-P420A SAPAFLPFAG  | 393   | 4348  |
| >BCL3-P420A SPPAFLPFAG  | 30    | >BCL3-P420A SAPAFLPFAG  | 5     | 25    |
| >BCL3-P420A PPNFFLPSPSF | 3681  | >BCL3-P420A PPNFFLPSPSF | 405   | 3276  |
| >BCL3-P420A PSPPAFLPF   | 1338  | >BCL3-P420A PSAPAFLPF   | 177   | 1161  |
| >BCL3-P420A PSPPAFLPF   | 275   | >BCL3-P420A PSAPAFLPF   | 63    | 212   |
| >BCL3-P420A PSPPAFLPF   | 1264  | >BCL3-P420A PSAPAFLPF   | 40    | 1224  |



|                         |       |                         |      |       |
|-------------------------|-------|-------------------------|------|-------|
| >BCL3-P420A PSPPAFLP    | 25    | >BCL3-P420A PSAPAFLP    | 2711 | 2686  |
| >BCL3-P420A PSPPAFLPF   | 3     | >BCL3-P420A PSAPAFLPF   | 84   | 81    |
| >BCL3-P420A PSPPAFLPFA  | 25    | >BCL3-P420A PSAPAFLPFA  | 1999 | 1974  |
| >BCL3-P420A SPSPPAFL    | 123   | >BCL3-P420A SPSAPAFL    | 22   | 101   |
| >BCL3-P420A SPSPPAFLPF  | 204   | >BCL3-P420A SPSAPAFLPF  | 75   | 129   |
| >BCL3-P420A SPSPPAFL    | 68    | >BCL3-P420A SPSAPAFL    | 87   | 19    |
| >BCL3-P420A SPSPPAFLPF  | 118   | >BCL3-P420A SPSAPAFLPF  | 53   | 65    |
| >BCL3-P420A SPSPPAFLPF  | 216   | >BCL3-P420A SPSAPAFLPF  | 208  | 8     |
| >BCL3-P420A SPSPPAFLPF  | 204   | >BCL3-P420A SPSAPAFLPF  | 289  | 85    |
| >BCL3-P420A SPSPPAFL    | 654   | >BCL3-P420A SPSAPAFL    | 220  | 434   |
| >BCL3-P420A SPSPPAFLPF  | 404   | >BCL3-P420A SPSAPAFLPF  | 534  | 130   |
| >BCL3-P420A SPSPPAFLPF/ | 353   | >BCL3-P420A SPSAPAFLPF/ | 211  | 142   |
| >BCL3-P420A SPSPPAFLPF  | 59    | >BCL3-P420A SPSAPAFLPF  | 44   | 15    |
| >BCL3-P420A SPSPPAFLPF  | 225   | >BCL3-P420A SPSAPAFLPF  | 255  | 30    |
| >BCL3-P420A SPSPPAFLPF  | 277   | >BCL3-P420A SPSAPAFLPF  | 497  | 220   |
| >BCL3-P420A PSPSPPAF    | 229   | >BCL3-P420A PSPSAPAF    | 322  | 93    |
| >BCL3-P420A PSPSPPAFL   | 22665 | >BCL3-P420A PSPSAPAFL   | 373  | 22292 |
| >BCL3-P420A PSPSPPAFLPF | 329   | >BCL3-P420A PSPSAPAFLPF | 368  | 39    |
| >BCL3-P420A PSPSPPAF    | 104   | >BCL3-P420A PSPSAPAF    | 105  | 1     |
| >BCL3-P420A PSPSPPAFL   | 4     | >BCL3-P420A PSPSAPAFL   | 4    | 0     |
| >BCL3-P420A PSPSPPAFLP  | 184   | >BCL3-P420A PSPSAPAFLP  | 232  | 48    |
| >BCL3-P420A PSPSPPAFLPF | 6     | >BCL3-P420A PSPSAPAFLPF | 7    | 1     |
| >BCL3-P420A LPSPPAF     | 31    | >BCL3-P420A LPSPSAPAF   | 24   | 7     |
| >BCL3-P420A LPSPPAFL    | 42    | >BCL3-P420A LPSPSAPAFL  | 12   | 30    |
| >BCL3-P420A LPSPPA      | 286   | >BCL3-P420A LPSPSAPA    | 102  | 184   |
| >BCL3-P420A LPSPPAF     | 87    | >BCL3-P420A LPSPSAPAF   | 44   | 43    |
| >BCL3-P420A LPSPPAF     | 25    | >BCL3-P420A LPSPSAPAF   | 32   | 7     |
| >BCL3-P420A LPSPPAF     | 1378  | >BCL3-P420A LPSPSAPAF   | 332  | 1046  |
| >BCL3-P420A LPSPPA      | 105   | >BCL3-P420A LPSPSAPA    | 83   | 22    |
| >BCL3-P420A LPSPPAF     | 10    | >BCL3-P420A LPSPSAPAF   | 9    | 1     |
| >BCL3-P420A LPSPPAF     | 59    | >BCL3-P420A LPSPSAPAF   | 80   | 21    |
| >BCL3-P420A LPSPPA      | 12    | >BCL3-P420A LPSPSAPA    | 14   | 2     |
| >BCL3-P420A LPSPPAF     | 741   | >BCL3-P420A LPSPSAPAF   | 30   | 711   |
| >BCL3-P420A LPSPPAF     | 408   | >BCL3-P420A LPSPSAPAF   | 47   | 361   |
| >BCL3-P420A FLPSPPAF    | 443   | >BCL3-P420A FLPSPSAPAF  | 363  | 80    |
| >BCL3-P420A FLPSPPA     | 16    | >BCL3-P420A FLPSPSAPA   | 24   | 8     |
| >BCL3-P420A FLPSPPAFL   | 14    | >BCL3-P420A FLPSPSAPAFL | 14   | 0     |
| >BCL3-P420A FLPSPPA     | 62    | >BCL3-P420A FLPSPSAPA   | 18   | 44    |
| >BCL3-P420A FLPSPPAFL   | 5     | >BCL3-P420A FLPSPSAPAFL | 3    | 2     |
| >BCL3-P420A FLPSPPA     | 10    | >BCL3-P420A FLPSPSAPA   | 5    | 5     |
| >BCL3-P420A FLPSPPAFL   | 8     | >BCL3-P420A FLPSPSAPAFL | 5    | 3     |
| >BCL3-P420A FLPSPPA     | 13    | >BCL3-P420A FLPSPSAPA   | 22   | 9     |
| >BCL3-P420A FLPSPPAFL   | 29    | >BCL3-P420A FLPSPSAPAFL | 24   | 5     |

|                         |       |                         |       |       |
|-------------------------|-------|-------------------------|-------|-------|
| >BCL3-P420A FLPSPSPPA   | 5     | >BCL3-P420A FLPSPSAPA   | 5     | 0     |
| >BCL3-P420A FLPSPSPPAF  | 66    | >BCL3-P420A FLPSPSAPAF  | 125   | 59    |
| >BCL3-P420A FLPSPSPPAFL | 2     | >BCL3-P420A FLPSPSAPAFL | 2     | 0     |
| >BCL3-P420A FLPSPSPPA   | 67    | >BCL3-P420A FLPSPSAPA   | 26    | 41    |
| >BCL3-P420A FLPSPSPPAFL | 8     | >BCL3-P420A FLPSPSAPAFL | 6     | 2     |
| >BCL3-P420A FLPSPSPPA   | 11    | >BCL3-P420A FLPSPSAPA   | 26    | 15    |
| >BCL3-P420A FLPSPSPPAFL | 7     | >BCL3-P420A FLPSPSAPAFL | 8     | 1     |
| >BCL3-P420A FLPSPSPPA   | 216   | >BCL3-P420A FLPSPSAPA   | 197   | 19    |
| >BCL3-P420A FLPSPSPPAFL | 7     | >BCL3-P420A FLPSPSAPAFL | 7     | 0     |
| >BCL3-P420A FLPSPSPPA   | 6     | >BCL3-P420A FLPSPSAPA   | 4     | 2     |
| >BCL3-P420A FLPSPSPPAF  | 314   | >BCL3-P420A FLPSPSAPAF  | 306   | 8     |
| >BCL3-P420A FLPSPSPPAFL | 4     | >BCL3-P420A FLPSPSAPAFL | 3     | 1     |
| >BCL3-P420A FLPSPSPPAF  | 571   | >BCL3-P420A FLPSPSAPAF  | 337   | 234   |
| >BCL3-P420A FLPSPSPPA   | 1076  | >BCL3-P420A FLPSPSAPA   | 50    | 1026  |
| >BCL3-P420A FLPSPSPPAFL | 206   | >BCL3-P420A FLPSPSAPAFL | 102   | 104   |
| >BCL3-P420A FLPSPSPPA   | 376   | >BCL3-P420A FLPSPSAPA   | 874   | 498   |
| >BCL3-P420A FLPSPSPPAF  | 96    | >BCL3-P420A FLPSPSAPAF  | 62    | 34    |
| >BCL3-P420A FLPSPSPPAF  | 47    | >BCL3-P420A FLPSPSAPAF  | 32    | 15    |
| >BCL3-P420A FLPSPSPPAF  | 13    | >BCL3-P420A FLPSPSAPAF  | 15    | 2     |
| >BCL3-P420A FLPSPSPPAF  | 73    | >BCL3-P420A FLPSPSAPAF  | 23    | 50    |
| >BCL3-P420A FLPSPSPPAFL | 6     | >BCL3-P420A FLPSPSAPAFL | 5     | 1     |
| >BCL3-P420A FFLPSPSPPA  | 299   | >BCL3-P420A FFLPSPSAPA  | 572   | 273   |
| >BCL3-P420A FFLPSPSPPAF | 20    | >BCL3-P420A FFLPSPSAPAF | 32    | 12    |
| >BCL3-P420A FFLPSPSPPAF | 8     | >BCL3-P420A FFLPSPSAPAF | 6     | 2     |
| >BCL3-P420A FFLPSPSPPAF | 44    | >BCL3-P420A FFLPSPSAPAF | 48    | 4     |
| >BCL3-P420A FFLPSPSPPAF | 80    | >BCL3-P420A FFLPSPSAPAF | 70    | 10    |
| >BCL3-P420A FFLPSPSPPAF | 16    | >BCL3-P420A FFLPSPSAPAF | 18    | 2     |
| >BCL3-P420A FFLPSPSPPAF | 39    | >BCL3-P420A FFLPSPSAPAF | 32    | 7     |
| >BCL3-P420A FFLPSPSP    | 1257  | >BCL3-P420A FFLPSPSA    | 346   | 911   |
| >BCL3-P420A FFLPSPSPPA  | 130   | >BCL3-P420A FFLPSPSAPA  | 386   | 256   |
| >BCL3-P420A FFLPSPSPPAF | 378   | >BCL3-P420A FFLPSPSAPAF | 365   | 13    |
| >BCL3-R145V RLVNLFQQ    | 137   | >BCL3-R145V WLVNLFQQ    | 39    | 98    |
| >BCL3-R145V RLVNLFQQG   | 50    | >BCL3-R145V WLVNLFQQG   | 3523  | 3473  |
| >BCL3-R145V RLVNLFQQG   | 108   | >BCL3-R145V WLVNLFQQG   | 339   | 231   |
| >BCL3-R145V HRLVNLFQQ   | 392   | >BCL3-R145V HWLVNLFQC   | 17734 | 17342 |
| >BCL3-R145V HRLVNLFQQ   | 171   | >BCL3-R145V HWLVNLFQC   | 12746 | 12575 |
| >BCL3-R145V HRLVNLFQ    | 10162 | >BCL3-R145V HWLVNLFQ    | 135   | 10027 |
| >BCL3-R145V HRLVNLFQ    | 27135 | >BCL3-R145V HWLVNLFQ    | 117   | 27018 |
| >BCL3-R145V VVQGNLPAV   | 167   | >BCL3-R145V VVQGNLPAV   | 21943 | 21776 |
| >BCL3-R145V VVQGNLPAV   | 23215 | >BCL3-R145V VVQGNLPAV   | 139   | 23076 |
| >BCL3-R145V VVQGNLPAV   | 22045 | >BCL3-R145V VVQGNLPAV   | 65    | 21980 |
| >BCL3-R145V VHRLVNLF    | 3080  | >BCL3-R145V VHWLVNLF    | 353   | 2727  |
| >BCL3-R145V VHRLVNLF    | 134   | >BCL3-R145V VHWLVNLF    | 94    | 40    |

|                        |      |                       |      |      |
|------------------------|------|-----------------------|------|------|
| >BCL3-R145VAVHRLVNL    | 150  | >BCL3-R145VAVHWLVNL   | 438  | 288  |
| >BCL3-R145VAVHRLVNL    | 856  | >BCL3-R145VAVHWLVNL   | 462  | 394  |
| >BCL3-R145VAVHRLVNL    | 718  | >BCL3-R145VAVHWLVNL   | 353  | 365  |
| >BCL3-R145VAVHRLVNL    | 1713 | >BCL3-R145VAVHWLVNL   | 484  | 1229 |
| >BCL3-R145VAVHRLVNL    | 2074 | >BCL3-R145VAVHWLVNL   | 156  | 1918 |
| >BCL3-R145VAVHRLVNL    | 448  | >BCL3-R145VAVHWLVNL   | 56   | 392  |
| >BCL3-R145VAVHRLVNLF   | 90   | >BCL3-R145VAVHWLVNLF  | 178  | 88   |
| >BCL3-R145VAVHRLVNL    | 73   | >BCL3-R145VAVHWLVNL   | 557  | 484  |
| >BCL3-R145VAVHRLVNLF   | 44   | >BCL3-R145VAVHWLVNLF  | 221  | 177  |
| >BCL3-R145VAVHRLVNLF   | 357  | >BCL3-R145VAVHWLVNLF  | 1684 | 1327 |
| >BCL3-R145VAVHRLVNL    | 533  | >BCL3-R145VAVHWLVNL   | 163  | 370  |
| >BCL3-R145VAVHRLVNLF   | 334  | >BCL3-R145VAVHWLVNLF  | 94   | 240  |
| >BCL3-R145VAVHRLVNLF   | 497  | >BCL3-R145VAVHWLVNLF  | 2224 | 1727 |
| >BCL3-R145VAVHRLVNLF   | 140  | >BCL3-R145VAVHWLVNLF  | 131  | 9    |
| >BCL3-R145V LPAVHRLV   | 47   | >BCL3-R145V LPAVHWLV  | 361  | 314  |
| >BCL3-R145V LPAVHRLVNL | 240  | >BCL3-R145V LPAVHWLVN | 543  | 303  |
| >BCL3-R145V LPAVHRLVNL | 86   | >BCL3-R145V LPAVHWLVN | 140  | 54   |
| >BCL3-R145V LPAVHRLVNL | 28   | >BCL3-R145V LPAVHWLVN | 16   | 12   |
| >BCL3-R145V LPAVHRLV   | 321  | >BCL3-R145V LPAVHWLV  | 164  | 157  |
| >BCL3-R145V LPAVHRLVNL | 842  | >BCL3-R145V LPAVHWLVN | 362  | 480  |
| >BCL3-R145V LPAVHRLV   | 2474 | >BCL3-R145V LPAVHWLV  | 368  | 2106 |
| >BCL3-R145V LPAVHRLVNL | 65   | >BCL3-R145V LPAVHWLVN | 42   | 23   |
| >BCL3-R145V LPAVHRLV   | 33   | >BCL3-R145V LPAVHWLV  | 20   | 13   |
| >BCL3-R145V LPAVHRLVN  | 1257 | >BCL3-R145V LPAVHWLVN | 475  | 782  |
| >BCL3-R145V LPAVHRLVNL | 76   | >BCL3-R145V LPAVHWLVN | 58   | 18   |
| >BCL3-R145V LPAVHRLVNL | 179  | >BCL3-R145V LPAVHWLVN | 57   | 122  |
| >BCL3-R145V LPAVHRLVNL | 30   | >BCL3-R145V LPAVHWLVN | 21   | 9    |
| >BCL3-R145V NLPVHRL    | 817  | >BCL3-R145V NLPVHWL   | 175  | 642  |
| >BCL3-R145V NLPVHRLV   | 3241 | >BCL3-R145V NLPVHWLV  | 26   | 3215 |
| >BCL3-R145V NLPVHRLVN  | 1276 | >BCL3-R145V NLPVHWLV  | 133  | 1143 |
| >BCL3-R145V NLPVHRL    | 63   | >BCL3-R145V NLPVHWL   | 17   | 46   |
| >BCL3-R145V NLPVHRLV   | 216  | >BCL3-R145V NLPVHWLV  | 7    | 209  |
| >BCL3-R145V NLPVHRLVN  | 79   | >BCL3-R145V NLPVHWLV  | 21   | 58   |
| >BCL3-R145V NLPVHRL    | 181  | >BCL3-R145V NLPVHWL   | 74   | 107  |
| >BCL3-R145V NLPVHRLV   | 49   | >BCL3-R145V NLPVHWLV  | 19   | 30   |
| >BCL3-R145V NLPVHRLVN  | 172  | >BCL3-R145V NLPVHWLV  | 103  | 69   |
| >BCL3-R145V NLPVHRL    | 1759 | >BCL3-R145V NLPVHWL   | 279  | 1480 |
| >BCL3-R145V NLPVHRLV   | 2699 | >BCL3-R145V NLPVHWLV  | 12   | 2687 |
| >BCL3-R145V NLPVHRLVN  | 1265 | >BCL3-R145V NLPVHWLV  | 166  | 1099 |
| >BCL3-R145V NLPVHRL    | 36   | >BCL3-R145V NLPVHWL   | 17   | 19   |
| >BCL3-R145V NLPVHRLV   | 17   | >BCL3-R145V NLPVHWLV  | 3    | 14   |
| >BCL3-R145V NLPVHRLVN  | 171  | >BCL3-R145V NLPVHWLV  | 21   | 150  |
| >BCL3-R145V NLPVHRL    | 715  | >BCL3-R145V NLPVHWL   | 315  | 400  |

|                      |      |                      |       |       |
|----------------------|------|----------------------|-------|-------|
| >BCL3-R145VNLPAVHRLV | 1790 | >BCL3-R145VNLPAVHWLV | 17    | 1773  |
| >BCL3-R145VNLPAVHRLV | 1267 | >BCL3-R145VNLPAVHWLV | 135   | 1132  |
| >BCL3-R145VNLPAVHRL  | 300  | >BCL3-R145VNLPAVHWL  | 52    | 248   |
| >BCL3-R145VNLPAVHRLV | 212  | >BCL3-R145VNLPAVHWLV | 6     | 206   |
| >BCL3-R145VNLPAVHRLV | 756  | >BCL3-R145VNLPAVHWLV | 53    | 703   |
| >BCL3-R145VNLPAVHRL  | 378  | >BCL3-R145VNLPAVHWL  | 187   | 191   |
| >BCL3-R145VNLPAVHRLV | 2874 | >BCL3-R145VNLPAVHWLV | 19    | 2855  |
| >BCL3-R145VNLPAVHRLV | 3058 | >BCL3-R145VNLPAVHWLV | 272   | 2786  |
| >BCL3-R145VNLPAVHRL  | 24   | >BCL3-R145VNLPAVHWL  | 9     | 15    |
| >BCL3-R145VNLPAVHRLV | 33   | >BCL3-R145VNLPAVHWLV | 3     | 30    |
| >BCL3-R145VNLPAVHRLV | 135  | >BCL3-R145VNLPAVHWLV | 15    | 120   |
| >BCL3-R145VNLPAVHRL  | 391  | >BCL3-R145VNLPAVHWL  | 285   | 106   |
| >BCL3-R145VNLPAVHRLV | 162  | >BCL3-R145VNLPAVHWLV | 16    | 146   |
| >BCL3-R145VNLPAVHRLV | 815  | >BCL3-R145VNLPAVHWLV | 154   | 661   |
| >BCL3-R145VNLPAVHRLV | 6149 | >BCL3-R145VNLPAVHWLV | 166   | 5983  |
| >BCL3-R145VNLPAVHRLV | 402  | >BCL3-R145VNLPAVHWLV | 69    | 333   |
| >BCL3-R145VNLPAVHRLV | 579  | >BCL3-R145VNLPAVHWLV | 204   | 375   |
| >BCL3-R145VGNLPAVHRL | 5848 | >BCL3-R145VGNLPAVHWL | 393   | 5455  |
| >BCL3-R145VGNLPAVHRL | 3542 | >BCL3-R145VGNLPAVHWL | 464   | 3078  |
| >BCL3-R145VGNLPAVHRL | 4718 | >BCL3-R145VGNLPAVHWL | 299   | 4419  |
| >BCL3-R145VQGNLPAVHR | 272  | >BCL3-R145VQGNLPAVHM | 33949 | 33677 |
| >BCL3-R145VQGNLPAVH  | 1053 | >BCL3-R145VQGNLPAVH  | 402   | 651   |
| >BCL3-R145VQGNLPAVH  | 379  | >BCL3-R145VQGNLPAVH  | 297   | 82    |
| >BCL3-R145VQGNLPAVH  | 230  | >BCL3-R145VQGNLPAVH  | 32523 | 32293 |
| >BCL6-G159SGREVVENNL | 477  | >BCL6-G159SGREVVENNL | 90    | 387   |
| >BCL6-G159SGREVVENNL | 221  | >BCL6-G159SGREVVENNL | 264   | 43    |
| >BCL6-G159SGREVVENNL | 52   | >BCL6-G159SGREVVENNL | 108   | 56    |
| >BCL6-G159SGREVVENNL | 28   | >BCL6-G159SGREVVENNL | 60    | 32    |
| >BCL6-G159SGREVVEN   | 3042 | >BCL6-G159SGREVVEN   | 270   | 2772  |
| >BCL6-G159SGREVVENNL | 486  | >BCL6-G159SGREVVENNL | 25    | 461   |
| >BCL6-G159SGREVVENNL | 1828 | >BCL6-G159SGREVVENNL | 125   | 1703  |
| >BCL6-G159SGREVVENNL | 4000 | >BCL6-G159SGREVVENNL | 462   | 3538  |
| >BCL6-G159SGREVVENNL | 2764 | >BCL6-G159SGREVVENNL | 17    | 2747  |
| >BCL6-G159SGREVVENNL | 7248 | >BCL6-G159SGREVVENNL | 451   | 6797  |
| >BCL6-G159SYRGREVVEN | 686  | >BCL6-G159SYRGREVVEN | 152   | 534   |
| >BCL6-G159SYRGREVVEN | 757  | >BCL6-G159SYRGREVVEN | 310   | 447   |
| >BCL6-G159SYRGREVVEN | 2929 | >BCL6-G159SYRGREVVEN | 213   | 2716  |
| >BCL6-G159SYRGREVV   | 117  | >BCL6-G159SYRGREVV   | 76    | 41    |
| >BCL6-G159SMAYRGREV  | 289  | >BCL6-G159SMAYRSREV  | 230   | 59    |
| >BCL6-G159SMAYRGREV  | 431  | >BCL6-G159SMAYRSREV  | 476   | 45    |
| >BCL6-G159SMAYRGREV  | 83   | >BCL6-G159SMAYRSREV  | 111   | 28    |
| >BCL6-G159SMAYRGREVV | 340  | >BCL6-G159SMAYRSREVV | 494   | 154   |
| >BCL6-G159SMAYRGREV  | 60   | >BCL6-G159SMAYRSREV  | 69    | 9     |

|                         |       |                         |      |       |
|-------------------------|-------|-------------------------|------|-------|
| >BCL6-G159S MAYRGREVV   | 50    | >BCL6-G159S MAYRSREVV   | 72   | 22    |
| >BCL6-G159S MAYRGREV    | 68    | >BCL6-G159S MAYRSREV    | 28   | 40    |
| >BCL6-G159S MAYRGREVV   | 17    | >BCL6-G159S MAYRSREVV   | 15   | 2     |
| >BCL6-G159S MAYRGREV    | 301   | >BCL6-G159S MAYRSREV    | 203  | 98    |
| >BCL6-G159S MAYRGREVV   | 464   | >BCL6-G159S MAYRSREVV   | 665  | 201   |
| >BCL6-G159S MAYRGREV    | 418   | >BCL6-G159S MAYRSREV    | 165  | 253   |
| >BCL6-G159S MAYRGREVV   | 272   | >BCL6-G159S MAYRSREVV   | 47   | 225   |
| >BCL6-G159S IMAYRGREV   | 397   | >BCL6-G159S IMAYRSREV   | 89   | 308   |
| >BCL6-G159S IMAYRGREV   | 35    | >BCL6-G159S IMAYRSREV   | 13   | 22    |
| >BCL6-G159S IMAYRGREVV  | 141   | >BCL6-G159S IMAYRSREVV  | 93   | 48    |
| >BCL6-G159S IMAYRGREV   | 11    | >BCL6-G159S IMAYRSREV   | 6    | 5     |
| >BCL6-G159S IMAYRGREVV  | 113   | >BCL6-G159S IMAYRSREVV  | 109  | 4     |
| >BCL6-G159S IMAYRGREV   | 595   | >BCL6-G159S IMAYRSREV   | 267  | 328   |
| >BCL6-G159S IMAYRGREV   | 16    | >BCL6-G159S IMAYRSREV   | 15   | 1     |
| >BCL6-G159S IMAYRGREVV  | 29    | >BCL6-G159S IMAYRSREVV  | 35   | 6     |
| >BCL6-G159S IMAYRGREV   | 140   | >BCL6-G159S IMAYRSREV   | 60   | 80    |
| >BCL6-G159S IMAYRGREVV  | 156   | >BCL6-G159S IMAYRSREVV  | 113  | 43    |
| >BCL6-G159S IMAYRGREV   | 92    | >BCL6-G159S IMAYRSREV   | 54   | 38    |
| >BCL6-G159S IMAYRGREVV  | 80    | >BCL6-G159S IMAYRSREVV  | 78   | 2     |
| >BCL6-G159S IMAYRGREV   | 451   | >BCL6-G159S IMAYRSREV   | 78   | 373   |
| >BCL6-G159S IMAYRGREVV  | 157   | >BCL6-G159S IMAYRSREVV  | 69   | 88    |
| >BCL6-G159S IMAYRGREV   | 13    | >BCL6-G159S IMAYRSREV   | 9    | 4     |
| >BCL6-G159S IMAYRGREVV  | 12    | >BCL6-G159S IMAYRSREVV  | 11   | 1     |
| >BCL6-G159S IMAYRGREV   | 512   | >BCL6-G159S IMAYRSREV   | 381  | 131   |
| >BCL6-G159S IMAYRGREVV  | 114   | >BCL6-G159S IMAYRSREVV  | 134  | 20    |
| >BCL6-G159S IMAYRGREV   | 101   | >BCL6-G159S IMAYRSREV   | 66   | 35    |
| >BCL6-G159S IMAYRGREVV  | 347   | >BCL6-G159S IMAYRSREVV  | 169  | 178   |
| >BCL6-G159S DIMAYRGREV  | 706   | >BCL6-G159S DIMAYRSREV  | 403  | 303   |
| >BCL6-G159S DIMAYRGR    | 33    | >BCL6-G159S DIMAYRSR    | 19   | 14    |
| >BCL6-G159S DIMAYRGR    | 28    | >BCL6-G159S DIMAYRSR    | 24   | 4     |
| >BCL6-G159S DIMAYRGREVV | 262   | >BCL6-G159S DIMAYRSREVV | 336  | 74    |
| >BCL6-G159S DIMAYRGREV  | 23    | >BCL6-G159S DIMAYRSREV  | 20   | 3     |
| >BCL6-G159S DIMAYRGREVV | 134   | >BCL6-G159S DIMAYRSREVV | 66   | 68    |
| >BCL6-G159S DIMAYRGREV  | 101   | >BCL6-G159S DIMAYRSREV  | 104  | 3     |
| >BCL6-G159S MPQDIMAYR   | 363   | >BCL6-G159S MPQDIMAYR   | 327  | 36    |
| >BCL6-G159S MPQDIMAYR   | 47    | >BCL6-G159S MPQDIMAYR   | 29   | 18    |
| >BCL6-S359F ASGSPPAK    | 451   | >BCL6-S359F AFGSPPAK    | 4515 | 4064  |
| >BCL6-S359F ASGSPPAK    | 52    | >BCL6-S359F AFGSPPAK    | 1977 | 1925  |
| >BCL6-S359F ASGSPPAK    | 213   | >BCL6-S359F AFGSPPAK    | 710  | 497   |
| >BCL6-S359F ASGSPPAK    | 281   | >BCL6-S359F AFGSPPAK    | 3328 | 3047  |
| >BCL6-S359F SSKNACILQA  | 447   | >BCL6-S359F SSKNACILQA  | 1317 | 870   |
| >BCL6-S359F SSKNACILQA  | 11458 | >BCL6-S359F SSKNACILQA  | 61   | 11397 |
| >BCL6-S359F SSKNACILQA  | 9714  | >BCL6-S359F SSKNACILQA  | 22   | 9692  |

|                         |       |                         |      |       |
|-------------------------|-------|-------------------------|------|-------|
| >BCL6-S359F SSKNACILQA  | 20618 | >BCL6-S359F SSKNACILQA  | 33   | 20585 |
| >BCL6-S359F SSKNACILQA  | 5167  | >BCL6-S359F SSKNACILQA  | 30   | 5137  |
| >BCL6-S359F QASGSPPAK   | 1455  | >BCL6-S359F QAFGSPPAK   | 268  | 1187  |
| >BCL6-S359F QASGSPPAK   | 240   | >BCL6-S359F QAFGSPPAK   | 52   | 188   |
| >BCL6-S359F QASGSPPAK   | 190   | >BCL6-S359F QAFGSPPAK   | 32   | 158   |
| >BCL6-S359F QASGSPPAK   | 518   | >BCL6-S359F QAFGSPPAK   | 61   | 457   |
| >BCL6-S359F QASGSPPA    | 2237  | >BCL6-S359F QAFGSPPA    | 462  | 1775  |
| >BCL6-S359F QASGSPPA    | 1872  | >BCL6-S359F QAFGSPPA    | 341  | 1531  |
| >BCL6-S359F QASGSPPAK   | 729   | >BCL6-S359F QAFGSPPAK   | 186  | 543   |
| >BCL6-S359F LQASGSPPA   | 223   | >BCL6-S359F LQAFGSPPA   | 531  | 308   |
| >BCL6-S359F LQASGSPPA   | 318   | >BCL6-S359F LQAFGSPPA   | 571  | 253   |
| >BCL6-S359F LQASGSPPA   | 78    | >BCL6-S359F LQAFGSPPA   | 94   | 16    |
| >BCL6-S359F LQASGSPPA   | 11    | >BCL6-S359F LQAFGSPPA   | 12   | 1     |
| >BCL6-S359F LQASGSPPAK  | 957   | >BCL6-S359F LQAFGSPPAK  | 277  | 680   |
| >BCL6-S359F LQASGSPPAK  | 266   | >BCL6-S359F LQAFGSPPAK  | 176  | 90    |
| >BCL6-S359F LQASGSPP    | 288   | >BCL6-S359F LQAFGSPP    | 393  | 105   |
| >BCL6-S359F LQASGSPPA   | 61    | >BCL6-S359F LQAFGSPPA   | 67   | 6     |
| >BCL6-S359F LQASGSPP    | 296   | >BCL6-S359F LQAFGSPP    | 1035 | 739   |
| >BCL6-S359F LQASGSPPA   | 122   | >BCL6-S359F LQAFGSPPA   | 727  | 605   |
| >BCL6-S359F LQASGSPPAK  | 107   | >BCL6-S359F LQAFGSPPAK  | 336  | 229   |
| >BCL6-S359F ILQASGSPPA  | 1628  | >BCL6-S359F ILQAFGSPPA  | 418  | 1210  |
| >BCL6-S359F ILQASGSPPA  | 350   | >BCL6-S359F ILQAFGSPPA  | 134  | 216   |
| >BCL6-S359F ILQASGSPPA  | 184   | >BCL6-S359F ILQAFGSPPA  | 67   | 117   |
| >BCL6-S359F ILQASGSPPA  | 1111  | >BCL6-S359F ILQAFGSPPA  | 397  | 714   |
| >BCL6-S359F ILQASGSPPA  | 77    | >BCL6-S359F ILQAFGSPPA  | 32   | 45    |
| >BCL6-S359F ILQASGSPPA  | 103   | >BCL6-S359F ILQAFGSPPA  | 94   | 9     |
| >BCL6-S359F ILQASGSPPA  | 216   | >BCL6-S359F ILQAFGSPPA  | 215  | 1     |
| >BCL6-S359F ILQASGSPPA  | 15    | >BCL6-S359F ILQAFGSPPA  | 14   | 1     |
| >BCL6-S359F ILQASGSPPAI | 61    | >BCL6-S359F ILQAFGSPPAI | 67   | 6     |
| >BCL6-S359F ILQASGSPPAI | 63    | >BCL6-S359F ILQAFGSPPAI | 43   | 20    |
| >BCL6-S359F ILQASGSPPAI | 413   | >BCL6-S359F ILQAFGSPPAI | 470  | 57    |
| >BCL6-S359F ILQASGSPPA  | 200   | >BCL6-S359F ILQAFGSPPA  | 327  | 127   |
| >BCL6-S359F CILQASGSPPA | 315   | >BCL6-S359F CILQAFGSPPA | 105  | 210   |
| >BCL6-S359F NACILQAS    | 9613  | >BCL6-S359F NACILQAF    | 144  | 9469  |
| >BCL6-S359F KNACILQAS   | 20625 | >BCL6-S359F KNACILQAF   | 323  | 20302 |
| >BCL6-S359F KNACILQAS   | 15681 | >BCL6-S359F KNACILQAF   | 33   | 15648 |
| >BCL6-S359F SKNACILQAS  | 1829  | >BCL6-S359F SKNACILQAF  | 4    | 1825  |
| >BCL6-Y293F PYFFPCDKASK | 225   | >BCL6-Y293F PFFPCDKASK  | 736  | 511   |
| >BCL6-Y293F PAAPSARNAF  | 995   | >BCL6-Y293F PAAPSARNAF  | 225  | 770   |
| >BCL6-Y293F PAAPSARNAF  | 96    | >BCL6-Y293F PAAPSARNAF  | 65   | 31    |
| >BCL6-Y293F PAAPSARNAF  | 195   | >BCL6-Y293F PAAPSARNAF  | 461  | 266   |
| >BCL6-Y293F APYFFPCDKA  | 258   | >BCL6-Y293F APFFPCDKA   | 696  | 438   |
| >BCL6-Y293F NAPYFFPCDK  | 317   | >BCL6-Y293F NAPFFPCDK   | 328  | 11    |

|                        |      |                        |       |       |
|------------------------|------|------------------------|-------|-------|
| >BCL6-Y293F NAPYFPCDKA | 142  | >BCL6-Y293F NAPFFPCDKA | 136   | 6     |
| >BCL6-Y293F SARNAPYF   | 114  | >BCL6-Y293F SARNAPFF   | 69    | 45    |
| >BCL6-Y293F SARNAPYFP  | 70   | >BCL6-Y293F SARNAPFFP  | 40    | 30    |
| >BCL6-Y293F SARNAPYFPC | 147  | >BCL6-Y293F SARNAPFFPC | 174   | 27    |
| >BCL6-Y293F SARNAPYF   | 321  | >BCL6-Y293F SARNAPFF   | 506   | 185   |
| >BCL6-Y293F SARNAPYF   | 36   | >BCL6-Y293F SARNAPFF   | 47    | 11    |
| >BCL6-Y293F SARNAPYF   | 15   | >BCL6-Y293F SARNAPFF   | 20    | 5     |
| >BCL6-Y293F PSARNAPY   | 198  | >BCL6-Y293F PSARNAPF   | 14469 | 14271 |
| >BCL6-Y293F PSARNAPY   | 276  | >BCL6-Y293F PSARNAPF   | 1003  | 727   |
| >BCL6-Y293F PSARNAPYF  | 430  | >BCL6-Y293F PSARNAPFF  | 214   | 216   |
| >BCL6-Y293F PSARNAPY   | 254  | >BCL6-Y293F PSARNAPF   | 14267 | 14013 |
| >BCL6-Y293F PSARNAPY   | 1567 | >BCL6-Y293F PSARNAPF   | 359   | 1208  |
| >BCL6-Y293F PSARNAPY   | 608  | >BCL6-Y293F PSARNAPF   | 374   | 234   |
| >BCL6-Y293F PSARNAPYF  | 439  | >BCL6-Y293F PSARNAPFF  | 818   | 379   |
| >BCL6-Y293F APSARNAPYF | 20   | >BCL6-Y293F APSARNAPFF | 23    | 3     |
| >BCL6-Y293F APSARNAPY  | 81   | >BCL6-Y293F APSARNAPF  | 9     | 72    |
| >BCL6-Y293F APSARNAPY  | 454  | >BCL6-Y293F APSARNAPF  | 1364  | 910   |
| >BCL6-Y293F APSARNAPY  | 1077 | >BCL6-Y293F APSARNAPF  | 182   | 895   |
| >BCL6-Y293F APSARNAPYF | 499  | >BCL6-Y293F APSARNAPFF | 623   | 124   |
| >BCL6-Y293F APSARNAPY  | 32   | >BCL6-Y293F APSARNAPF  | 81    | 49    |
| >BCL6-Y293F APSARNAPY  | 19   | >BCL6-Y293F APSARNAPF  | 37    | 18    |
| >BCL6-Y293F APSARNAPYF | 610  | >BCL6-Y293F APSARNAPFF | 382   | 228   |
| >BCL6-Y293F APSARNAPY  | 1777 | >BCL6-Y293F APSARNAPF  | 449   | 1328  |
| >BCL6-Y293F AAPSARNAP\ | 42   | >BCL6-Y293F AAPSARNAPf | 62    | 20    |
| >BCL6-Y293F AAPSARNAP\ | 233  | >BCL6-Y293F AAPSARNAPf | 6705  | 6472  |
| >BCL6-Y293F AAPSARNAP\ | 235  | >BCL6-Y293F AAPSARNAPf | 275   | 40    |
| >BCL6-Y293F AAPSARNAP\ | 442  | >BCL6-Y293F AAPSARNAPf | 94    | 348   |
| >BCL6-Y293F AAPSARNAP\ | 205  | >BCL6-Y293F AAPSARNAPf | 278   | 73    |
| >BCL6-Y293F AAPSARNAP\ | 698  | >BCL6-Y293F AAPSARNAPf | 14    | 684   |
| >BCL6-Y293F AAPSARNAP\ | 7    | >BCL6-Y293F AAPSARNAPf | 8     | 1     |
| >BCL9-L587V GLSGVSWPD  | 116  | >BCL9-L587V GVSGVSWPD  | 1098  | 982   |
| >BCL9-L587V GLSGVSWP   | 465  | >BCL9-L587V GVSGVSWP   | 9746  | 9281  |
| >BCL9-L587V GLSGVSWPD  | 373  | >BCL9-L587V GVSGVSWPD  | 6553  | 6180  |
| >BCL9-L587V GLSGVSWPD  | 13   | >BCL9-L587V GVSGVSWPD  | 344   | 331   |
| >BCL9-L587V GLSGVSWPD  | 10   | >BCL9-L587V GVSGVSWPD  | 214   | 204   |
| >BCL9-L587V GLSGVSWPD  | 390  | >BCL9-L587V GVSGVSWPD  | 637   | 247   |
| >BCL9-L587V GLSGVSWPD  | 4    | >BCL9-L587V GVSGVSWPD  | 99    | 95    |
| >BCL9-L587V GLSGVSWPD  | 9    | >BCL9-L587V GVSGVSWPD  | 430   | 421   |
| >BCL9-L587V GLSGVSWPD  | 6    | >BCL9-L587V GVSGVSWPD  | 54    | 48    |
| >BCL9-L587V GLSGVSWPD  | 16   | >BCL9-L587V GVSGVSWPD  | 885   | 869   |
| >BCL9-L587V GLSGVSWPD  | 3    | >BCL9-L587V GVSGVSWPD  | 42    | 39    |
| >BCL9-L587V NVPNPASRPC | 3323 | >BCL9-L587V NVPNPASRPC | 204   | 3119  |
| >BCL9-L587V NVPNPASRPC | 167  | >BCL9-L587V NVPNPASRPC | 26    | 141   |

|                        |       |                        |      |      |
|------------------------|-------|------------------------|------|------|
| >BCL9-L587V NVPNPASRPK | 699   | >BCL9-L587V NVPNPASRPK | 53   | 646  |
| >BCL9-L587V RPGLSGVSW  | 38    | >BCL9-L587V RPGVSGVSW  | 44   | 6    |
| >BCL9-L587V RPGLSGVSW  | 265   | >BCL9-L587V RPGVSGVSW  | 211  | 54   |
| >BCL9-L587V RPGLSGVSW  | 127   | >BCL9-L587V RPGVSGVSW  | 70   | 57   |
| >BCL9-L587V ASRPGLSGV  | 157   | >BCL9-L587V ASRPGVSGV  | 142  | 15   |
| >BCL9-L587V ASRPGLSG   | 39    | >BCL9-L587V ASRPGVSG   | 59   | 20   |
| >BCL9-L587V ASRPGLSGV  | 22    | >BCL9-L587V ASRPGVSGV  | 24   | 2    |
| >BCL9-L587V ASRPGLSGVS | 96    | >BCL9-L587V ASRPGVSGVS | 99   | 3    |
| >BCL9-L587V ASRPGLSGVS | 587   | >BCL9-L587V ASRPGVSGVS | 349  | 238  |
| >BCL9-L587V ASRPGLSGVS | 297   | >BCL9-L587V ASRPGVSGVS | 164  | 133  |
| >BCL9-L587V ASRPGLSGV  | 13    | >BCL9-L587V ASRPGVSGV  | 8    | 5    |
| >BCL9-L587V ASRPGLSGVS | 3     | >BCL9-L587V ASRPGVSGVS | 2    | 1    |
| >BCL9-L587V ASRPGLSGVS | 45    | >BCL9-L587V ASRPGVSGVS | 41   | 4    |
| >BCL9-L587V ASRPGLSGVS | 153   | >BCL9-L587V ASRPGVSGVS | 77   | 76   |
| >BCL9-L587V ASRPGLSGV  | 54    | >BCL9-L587V ASRPGVSGV  | 97   | 43   |
| >BCL9-L587V ASRPGLSGVS | 139   | >BCL9-L587V ASRPGVSGVS | 181  | 42   |
| >BCL9-L587V NPASRPGL   | 1418  | >BCL9-L587V NPASRPGV   | 235  | 1183 |
| >BCL9-L587V NPASRPGLSC | 351   | >BCL9-L587V NPASRPGVSC | 452  | 101  |
| >BCL9-L587V NPASRPGL   | 28    | >BCL9-L587V NPASRPGV   | 90   | 62   |
| >BCL9-L587V NPASRPGLSC | 87    | >BCL9-L587V NPASRPGVSC | 77   | 10   |
| >BCL9-L587V NPASRPGL   | 297   | >BCL9-L587V NPASRPGV   | 4678 | 4381 |
| >BCL9-L587V VPNPASRPGL | 31    | >BCL9-L587V VPNPASRPGL | 113  | 82   |
| >BCL9-L587V VPNPASRPGL | 198   | >BCL9-L587V VPNPASRPGL | 318  | 120  |
| >BCR-A138T- ASGERDDR   | 4483  | >BCR-A138T- TSGERDDR   | 322  | 4161 |
| >BCR-A138T- AASGERDDR  | 1062  | >BCR-A138T- ATSGERDDR  | 222  | 840  |
| >BCR-A138T- AAASGERDDI | 406   | >BCR-A138T- AATSGERDDI | 1150 | 744  |
| >BCR-A138T- GAAASGER   | 138   | >BCR-A138T- GAATSGER   | 160  | 22   |
| >BCR-A138T- GAAASGERDI | 309   | >BCR-A138T- GAATSGERDI | 350  | 41   |
| >BCR-A138T- RPGAAASGEF | 667   | >BCR-A138T- RPGAATSGEF | 391  | 276  |
| >BCR-A138T- RRPGAAASGI | 258   | >BCR-A138T- RRPGAATSGE | 270  | 12   |
| >BCR-A138T- TARRPGAAA  | 56    | >BCR-A138T- TARRPGAAT  | 1731 | 1675 |
| >BCR-A138T- TARRPGAAA  | 494   | >BCR-A138T- TARRPGAATS | 1618 | 1124 |
| >BCR-A138T- TARRPGAAA  | 121   | >BCR-A138T- TARRPGAAT  | 732  | 611  |
| >BCR-A426E- ADGSFGTPPC | 10327 | >BCR-A426E- EDGSFGTPPC | 485  | 9842 |
| >BCR-A426E- HGDADGSF   | 521   | >BCR-A426E- HGDEDGSF   | 439  | 82   |
| >BCR-A426E- FHGDADGSF  | 407   | >BCR-A426E- FHGDEDGSF  | 200  | 207  |
| >BCR-A426E- AFHGADADGS | 31    | >BCR-A426E- AFHGDEDGSI | 42   | 11   |
| >BCR-A426E- GAFHGADADG | 88    | >BCR-A426E- GAFHGDEDG  | 142  | 54   |
| >BCR-A426E- GAFHGADADG | 253   | >BCR-A426E- GAFHGDEDG  | 315  | 62   |
| >BCR-A426E- GAFHGADADG | 12    | >BCR-A426E- GAFHGDEDG  | 26   | 14   |
| >BCR-A426E- GAFHGADADG | 144   | >BCR-A426E- GAFHGDEDG  | 271  | 127  |
| >BCR-A426E- GAFHGADADG | 155   | >BCR-A426E- GAFHGDEDG  | 222  | 67   |
| >BCR-A426E- GEGAFHGDA  | 442   | >BCR-A426E- GEGAFHGDE  | 7307 | 6865 |



|                        |      |                        |      |      |
|------------------------|------|------------------------|------|------|
| >BCR-A426E- GEGAFHGDA  | 19   | >BCR-A426E- GEGAFHGDE  | 2078 | 2059 |
| >BCR-D451N HQDGLPYI    | 207  | >BCR-D451N HQNGLPYI    | 571  | 364  |
| >BCR-D451N HQDGLPYI    | 995  | >BCR-D451N HQNGLPYI    | 307  | 688  |
| >BCR-D451N HQDGLPYI    | 5389 | >BCR-D451N HQNGLPYI    | 348  | 5041 |
| >BCR-D451N HQDGLPYI    | 27   | >BCR-D451N HQNGLPYI    | 56   | 29   |
| >BCR-D451N HQDGLPYI    | 140  | >BCR-D451N HQNGLPYI    | 265  | 125  |
| >BCR-D451N RHQDGLPY    | 424  | >BCR-D451N RHQNGLPY    | 598  | 174  |
| >BCR-D451N RHQDGLPY    | 433  | >BCR-D451N RHQNGLPY    | 370  | 63   |
| >BCR-D451N RHQDGLPY    | 453  | >BCR-D451N RHQNGLPY    | 295  | 158  |
| >BCR-D451N RHQDGLPY    | 152  | >BCR-D451N RHQNGLPY    | 51   | 101  |
| >BCR-D451N RHQDGLPYI   | 998  | >BCR-D451N RHQNGLPYI   | 481  | 517  |
| >BCR-D451N RRHQDGLPYI  | 1095 | >BCR-D451N RRHQNGLPYI  | 263  | 832  |
| >BCR-D451N RRHQDGLPY   | 152  | >BCR-D451N RRHQNGLPY   | 127  | 25   |
| >BCR-D451N RRHQDGLPY   | 608  | >BCR-D451N RRHQNGLPY   | 458  | 150  |
| >BCR-D451N RRHQDGLPY   | 8    | >BCR-D451N RRHQNGLPY   | 6    | 2    |
| >BCR-D451N RRHQDGLPYI  | 214  | >BCR-D451N RRHQNGLPYI  | 150  | 64   |
| >BCR-D451N RRHQDGLPY   | 73   | >BCR-D451N RRHQNGLPY   | 49   | 24   |
| >BCR-D451N RRHQDGLPYI  | 19   | >BCR-D451N RRHQNGLPYI  | 17   | 2    |
| >BCR-D451N RRHQDGLP    | 294  | >BCR-D451N RRHQNGLP    | 188  | 106  |
| >BCR-D451N RRHQDGLPY   | 139  | >BCR-D451N RRHQNGLPY   | 136  | 3    |
| >BCR-D451N RRHQDGLPYI  | 24   | >BCR-D451N RRHQNGLPYI  | 21   | 3    |
| >BCR-D451N RRHQDGLPY   | 450  | >BCR-D451N RRHQNGLPY   | 291  | 159  |
| >BCR-D451N RRHQDGLPYI  | 22   | >BCR-D451N RRHQNGLPYI  | 21   | 1    |
| >BCR-D451N QRRHQDGLP   | 899  | >BCR-D451N QRRHQNGLP   | 381  | 518  |
| >BCR-D451N QRRHQDGL    | 1357 | >BCR-D451N QRRHQNGL    | 457  | 900  |
| >BCR-D451N QRRHQDGLP   | 55   | >BCR-D451N QRRHQNGLP   | 30   | 25   |
| >BCR-D451N QRRHQDGLP   | 84   | >BCR-D451N QRRHQNGLP   | 46   | 38   |
| >BCR-D451N QRRHQDGLP   | 733  | >BCR-D451N QRRHQNGLP   | 418  | 315  |
| >BCR-D451N EQRRHQDGL   | 243  | >BCR-D451N EQRRHQNGL   | 314  | 71   |
| >BCR-D451N EQRRHQDGL   | 382  | >BCR-D451N EQRRHQNGL   | 179  | 203  |
| >BCR-D451N EQRRHQDGL   | 59   | >BCR-D451N EQRRHQNGL   | 52   | 7    |
| >BCR-D451N EQRRHQDGL   | 171  | >BCR-D451N EQRRHQNGL   | 130  | 41   |
| >BCR-D451N EQRRHQDGL   | 20   | >BCR-D451N EQRRHQNGL   | 11   | 9    |
| >BCR-D451N AEEQRRHQD   | 52   | >BCR-D451N AEEQRRHQN   | 99   | 47   |
| >BCR-D451N AEEQRRHQD   | 572  | >BCR-D451N AEEQRRHQN   | 445  | 127  |
| >BCR-D451N AEEQRRHQD   | 199  | >BCR-D451N AEEQRRHQN   | 181  | 18   |
| >BCR-D451N AEEQRRHQD   | 47   | >BCR-D451N AEEQRRHQN   | 52   | 5    |
| >BCR-S400P- SEATIVGV   | 171  | >BCR-S400P- PEATIVGV   | 5048 | 4877 |
| >BCR-S400P- SEATIVGV   | 265  | >BCR-S400P- PEATIVGV   | 2434 | 2169 |
| >BCR-S400P- SEATIVGV   | 46   | >BCR-S400P- PEATIVGV   | 2492 | 2446 |
| >BCR-S400P- SEATIVGVRK | 165  | >BCR-S400P- PEATIVGVRK | 7225 | 7060 |
| >BCR-S400P- SEATIVGV   | 165  | >BCR-S400P- PEATIVGV   | 2105 | 1940 |
| >BCR-S400P- SEATIVGVRK | 189  | >BCR-S400P- PEATIVGVRK | 2182 | 1993 |

|                         |       |                         |       |       |
|-------------------------|-------|-------------------------|-------|-------|
| >BCR-S400P- VSEATIVGVR  | 114   | >BCR-S400P- VPEATIVGVR  | 15304 | 15190 |
| >BCR-S400P- VVSEATIV    | 200   | >BCR-S400P- VVPEATIV    | 1701  | 1501  |
| >BCR-S400P- VVSEATIVGV  | 283   | >BCR-S400P- VVPEATIVGV  | 979   | 696   |
| >BCR-S400P- VVSEATIV    | 32    | >BCR-S400P- VVPEATIV    | 99    | 67    |
| >BCR-S400P- VVSEATIVGV  | 83    | >BCR-S400P- VVPEATIVGV  | 238   | 155   |
| >BCR-S400P- VVSEATIV    | 56    | >BCR-S400P- VVPEATIV    | 66    | 10    |
| >BCR-S400P- VVSEATIVGV  | 118   | >BCR-S400P- VVPEATIVGV  | 110   | 8     |
| >BCR-S400P- VVSEATIV    | 253   | >BCR-S400P- VVPEATIV    | 213   | 40    |
| >BCR-S400P- VVSEATIVGV  | 11    | >BCR-S400P- VVPEATIVGV  | 10    | 1     |
| >BCR-S400P- VVSEATIV    | 452   | >BCR-S400P- VVPEATIV    | 1150  | 698   |
| >BCR-S400P- VVSEATIVGV  | 37    | >BCR-S400P- VVPEATIVGV  | 101   | 64    |
| >BCR-S400P- VVSEATIV    | 118   | >BCR-S400P- VVPEATIV    | 157   | 39    |
| >BCR-S400P- VVSEATIVGV  | 16    | >BCR-S400P- VVPEATIVGV  | 18    | 2     |
| >BCR-S400P- VVSEATIV    | 132   | >BCR-S400P- VVPEATIV    | 743   | 611   |
| >BCR-S400P- VVSEATIVGV  | 7     | >BCR-S400P- VVPEATIVGV  | 27    | 20    |
| >BCR-S400P- VVSEATIV    | 11    | >BCR-S400P- VVPEATIV    | 19    | 8     |
| >BCR-S400P- VVSEATIVGV  | 4     | >BCR-S400P- VVPEATIVGV  | 5     | 1     |
| >BCR-S400P- VVSEATIVGV  | 80    | >BCR-S400P- VVPEATIVGV  | 466   | 386   |
| >BCR-S400P- VVSEATIV    | 332   | >BCR-S400P- VVPEATIV    | 326   | 6     |
| >BCR-S400P- VVSEATIVGV  | 98    | >BCR-S400P- VVPEATIVGV  | 101   | 3     |
| >BCR-S400P- VVSEATIVGV  | 64    | >BCR-S400P- VVPEATIVGV  | 276   | 212   |
| >BCR-S400P- VVSEATIV    | 7402  | >BCR-S400P- VVPEATIV    | 24    | 7378  |
| >BCR-S400P- VVSEATIVGV  | 11529 | >BCR-S400P- VVPEATIVGV  | 97    | 11432 |
| >BCR-S400P- VVVSEATIVG' | 433   | >BCR-S400P- VVVPEATIVG  | 431   | 2     |
| >BCR-S400P- VVVSEATIV   | 123   | >BCR-S400P- VVVPEATIV   | 136   | 13    |
| >BCR-S400P- VVVSEATIVG' | 62    | >BCR-S400P- VVVPEATIVG  | 66    | 4     |
| >BCR-S400P- VVVSEATI    | 394   | >BCR-S400P- VVVPEATI    | 164   | 230   |
| >BCR-S400P- VVVSEATIV   | 162   | >BCR-S400P- VVVPEATIV   | 82    | 80    |
| >BCR-S400P- VVVSEATIVG' | 20    | >BCR-S400P- VVVPEATIVG  | 13    | 7     |
| >BCR-S400P- VVVSEATIVG' | 73    | >BCR-S400P- VVVPEATIVG  | 63    | 10    |
| >BCR-S400P- VVVSEATIVG' | 455   | >BCR-S400P- VVVPEATIVG  | 333   | 122   |
| >BCR-S400P- VVVSEATIVG' | 192   | >BCR-S400P- VVVPEATIVG  | 149   | 43    |
| >BCR-S400P- VVVSEATIVG' | 414   | >BCR-S400P- VVVPEATIVG  | 540   | 126   |
| >BCR-S400P- VVVSEATIV   | 74    | >BCR-S400P- VVVPEATIV   | 28    | 46    |
| >BCR-S400P- VVVSEATIVG' | 11    | >BCR-S400P- VVVPEATIVG  | 7     | 4     |
| >BCR-S400P- VVVSEATIVG' | 232   | >BCR-S400P- VVVPEATIVG  | 143   | 89    |
| >BCR-S400P- VVVSEATIVG' | 375   | >BCR-S400P- VVVPEATIVG  | 445   | 70    |
| >BCR-S400P- VVVSEATI    | 1151  | >BCR-S400P- VVVPEATI    | 221   | 930   |
| >BCR-S400P- CPVVVSEATI  | 496   | >BCR-S400P- CPVVVPEATI  | 410   | 86    |
| >BCR-S400P- CPVVVSEAT   | 184   | >BCR-S400P- CPVVVPEAT   | 718   | 534   |
| >BCR-S400P- CPVVVSEATI\ | 228   | >BCR-S400P- CPVVVPEATI\ | 255   | 27    |
| >BCR-S400P- CPVVVSEATI\ | 421   | >BCR-S400P- CPVVVPEATI\ | 469   | 48    |
| >BCR-S400P- CPVVVSEA    | 20    | >BCR-S400P- CPVVVPEA    | 16    | 4     |

|                        |      |                        |       |       |
|------------------------|------|------------------------|-------|-------|
| >BCR-S400P- CPVVVSEAT  | 153  | >BCR-S400P- CPVVVPEAT  | 201   | 48    |
| >BCR-S400P- CPVVVSEATI | 63   | >BCR-S400P- CPVVVPEATI | 73    | 10    |
| >BCR-S400P- RHRHCPVVV  | 408  | >BCR-S400P- RHRHCPVVVI | 371   | 37    |
| >BIRC3-G297 FCCDGLRCV  | 494  | >BIRC3-G297 FCCDDGLRCV | 345   | 149   |
| >BIRC3-G297 CFCCDGLR   | 403  | >BIRC3-G297 CFCCDDGLR  | 238   | 165   |
| >BIRC3-G297 CFCCDGLR   | 198  | >BIRC3-G297 CFCCDDGLR  | 94    | 104   |
| >BIRC3-G297 KCFCCDGLF  | 260  | >BIRC3-G297 KCFCCDDGLF | 554   | 294   |
| >BIRC3-G297 KCFCCDGLF  | 23   | >BIRC3-G297 KCFCCDDGLF | 18    | 5     |
| >BIRC3-S248 SNLSMQTHA  | 117  | >BIRC3-S248 CNLSMQTHA  | 272   | 155   |
| >BIRC3-S248 VSNLSMQTH  | 41   | >BIRC3-S248 VCNLSMQTH  | 11257 | 11216 |
| >BIRC3-S248 QLQDTSRYTV | 5542 | >BIRC3-S248 QLQDTSRYTV | 378   | 5164  |
| >BIRC3-S248 TVSNLSMQTI | 41   | >BIRC3-S248 TVCNLSMQTI | 238   | 197   |
| >BIRC3-S248 YTVSNLSM   | 279  | >BIRC3-S248 YTVCNLSM   | 218   | 61    |
| >BIRC3-S248 YTVSNLSM   | 136  | >BIRC3-S248 YTVCNLSM   | 114   | 22    |
| >BIRC3-S248 YTVSNLSMQ  | 147  | >BIRC3-S248 YTVCNLSMQ  | 137   | 10    |
| >BIRC3-S248 YTVSNLSM   | 156  | >BIRC3-S248 YTVCNLSM   | 209   | 53    |
| >BIRC3-S248 YTVSNLSMQ  | 226  | >BIRC3-S248 YTVCNLSMQ  | 398   | 172   |
| >BIRC3-S248 YTVSNLSMQ  | 109  | >BIRC3-S248 YTVCNLSMQ  | 174   | 65    |
| >BIRC3-S248 YTVSNLSM   | 24   | >BIRC3-S248 YTVCNLSM   | 66    | 42    |
| >BIRC3-S248 YTVSNLSM   | 6    | >BIRC3-S248 YTVCNLSM   | 11    | 5     |
| >BIRC3-S248 YTVSNLSMQ  | 12   | >BIRC3-S248 YTVCNLSMQ  | 34    | 22    |
| >BIRC3-S248 YTVSNLSMQ  | 8    | >BIRC3-S248 YTVCNLSMQ  | 17    | 9     |
| >BIRC3-S248 YTVSNLSM   | 108  | >BIRC3-S248 YTVCNLSM   | 75    | 33    |
| >BIRC3-S248 YTVSNLSMQ  | 143  | >BIRC3-S248 YTVCNLSMQ  | 236   | 93    |
| >BIRC3-S248 YTVSNLSM   | 1245 | >BIRC3-S248 YTVCNLSM   | 487   | 758   |
| >BIRC3-S248 YTVSNLSMQ  | 320  | >BIRC3-S248 YTVCNLSMQ  | 503   | 183   |
| >BIRC3-S248 YTVSNLSM   | 97   | >BIRC3-S248 YTVCNLSM   | 98    | 1     |
| >BIRC3-S248 YTVSNLSMQ  | 507  | >BIRC3-S248 YTVCNLSMQ  | 351   | 156   |
| >BIRC3-S248 YTVSNLSM   | 132  | >BIRC3-S248 YTVCNLSM   | 145   | 13    |
| >BIRC3-S248 YTVSNLSM   | 76   | >BIRC3-S248 YTVCNLSM   | 134   | 58    |
| >BIRC3-S248 YTVSNLSM   | 4    | >BIRC3-S248 YTVCNLSM   | 5     | 1     |
| >BIRC3-S248 YTVSNLSMQ  | 387  | >BIRC3-S248 YTVCNLSMQ  | 460   | 73    |
| >BIRC3-S248 YTVSNLSMQ  | 29   | >BIRC3-S248 YTVCNLSMQ  | 32    | 3     |
| >BIRC3-S248 YTVSNLSM   | 247  | >BIRC3-S248 YTVCNLSM   | 164   | 83    |
| >BIRC3-S248 YTVSNLSM   | 442  | >BIRC3-S248 YTVCNLSM   | 1633  | 1191  |
| >BIRC3-S248 YTVSNLSM   | 224  | >BIRC3-S248 YTVCNLSM   | 957   | 733   |
| >BIRC3-S248 YTVSNLSM   | 29   | >BIRC3-S248 YTVCNLSM   | 46    | 17    |
| >BIRC3-S248 YTVSNLSMQ  | 13   | >BIRC3-S248 YTVCNLSMQ  | 19    | 6     |
| >BIRC3-S248 YTVSNLSMQ  | 17   | >BIRC3-S248 YTVCNLSMQ  | 25    | 8     |
| >BIRC3-S248 RYTVSNLSM  | 67   | >BIRC3-S248 RYTVCNLSM  | 1115  | 1048  |
| >BIRC3-S248 RYTVSNLSM  | 107  | >BIRC3-S248 RYTVCNLSM  | 98    | 9     |
| >BIRC3-S248 RYTVSNLSM  | 336  | >BIRC3-S248 RYTVCNLSM  | 327   | 9     |
| >BIRC3-S248 RYTVSNLSM  | 100  | >BIRC3-S248 RYTVCNLSM  | 759   | 659   |

|                         |       |                         |      |       |
|-------------------------|-------|-------------------------|------|-------|
| >BIRC3-S248 RYTVSNLSM   | 193   | >BIRC3-S248 RYTVCNLSM   | 568  | 375   |
| >BIRC3-S248 SRYTVSNL    | 246   | >BIRC3-S248 SRYTVCNL    | 175  | 71    |
| >BIRC3-S248 SRYTVSNL    | 60    | >BIRC3-S248 SRYTVCNL    | 150  | 90    |
| >BIRC3-S248 SRYTVSNLSM  | 23    | >BIRC3-S248 SRYTVCNLSM  | 46   | 23    |
| >BIRC3-S248 SRYTVSNL    | 132   | >BIRC3-S248 SRYTVCNL    | 281  | 149   |
| >BIRC3-S248 SRYTVSNLSM  | 61    | >BIRC3-S248 SRYTVCNLSM  | 76   | 15    |
| >BIRC3-S248 SRYTVSNL    | 95    | >BIRC3-S248 SRYTVCNL    | 339  | 244   |
| >BIRC3-S248 SRYTVSNLSM  | 53    | >BIRC3-S248 SRYTVCNLSM  | 157  | 104   |
| >BIRC3-S248 SRYTVSNLSM  | 559   | >BIRC3-S248 SRYTVCNLSM  | 425  | 134   |
| >BIRC3-S248 SRYTVSNL    | 191   | >BIRC3-S248 SRYTVCNL    | 223  | 32    |
| >BIRC3-S248 SRYTVSNLSM  | 324   | >BIRC3-S248 SRYTVCNLSM  | 285  | 39    |
| >BIRC3-S248 SRYTVSNL    | 359   | >BIRC3-S248 SRYTVCNL    | 902  | 543   |
| >BIRC3-S248 SRYTVSNLS   | 631   | >BIRC3-S248 SRYTVCNLS   | 415  | 216   |
| >BIRC3-S248 SRYTVSNLSM  | 414   | >BIRC3-S248 SRYTVCNLSM  | 467  | 53    |
| >BIRC3-S248 SRYTVSNLSM  | 505   | >BIRC3-S248 SRYTVCNLSM  | 452  | 53    |
| >BIRC3-S248 TSRYTVSNL   | 49    | >BIRC3-S248 TSRYTVCNL   | 24   | 25    |
| >BIRC3-S248 TSRYTVSNLS  | 139   | >BIRC3-S248 TSRYTVCNLS  | 314  | 175   |
| >BIRC3-S248 TSRYTVSNLSI | 19    | >BIRC3-S248 TSRYTVCNLSI | 26   | 7     |
| >BIRC3-S248 TSRYTVSNLSI | 165   | >BIRC3-S248 TSRYTVCNLSI | 208  | 43    |
| >BIRC3-S248 TSRYTVSNL   | 91    | >BIRC3-S248 TSRYTVCNL   | 273  | 182   |
| >BIRC3-S248 TSRYTVSNLSI | 49    | >BIRC3-S248 TSRYTVCNLSI | 85   | 36    |
| >BIRC3-S248 TSRYTVSNL   | 6     | >BIRC3-S248 TSRYTVCNL   | 7    | 1     |
| >BIRC3-S248 TSRYTVSNLSI | 5     | >BIRC3-S248 TSRYTVCNLSI | 7    | 2     |
| >BIRC3-S248 TSRYTVSNL   | 19    | >BIRC3-S248 TSRYTVCNL   | 1423 | 1404  |
| >BIRC3-S248 TSRYTVSNLSI | 15    | >BIRC3-S248 TSRYTVCNLSI | 38   | 23    |
| >BIRC3-S248 DTSRYTVSNL  | 143   | >BIRC3-S248 DTSRYTVCNL  | 651  | 508   |
| >BIRC3-S248 DTSRYTVSNL  | 91    | >BIRC3-S248 DTSRYTVCNL  | 91   | 0     |
| >BIRC3-S248 DTSRYTVSNL  | 261   | >BIRC3-S248 DTSRYTVCNL  | 263  | 2     |
| >BIRC3-T536 TEDVSDLPV   | 171   | >BIRC3-T536 REDVSDLPV   | 22   | 149   |
| >BIRC3-T536 TEDVSDLPV   | 476   | >BIRC3-T536 REDVSDLPV   | 150  | 326   |
| >BIRC3-T536 TEDVSDLPV   | 1141  | >BIRC3-T536 REDVSDLPV   | 105  | 1036  |
| >BIRC3-T536 FVQQDIKIYIP | 26180 | >BIRC3-T536 FVQQDIKIYIP | 376  | 25804 |
| >BIRC3-T536 FVQQDIKIYIP | 27731 | >BIRC3-T536 FVQQDIKIYIP | 163  | 27568 |
| >BIRC3-T536 FVQQDIKIYIP | 32380 | >BIRC3-T536 FVQQDIKIYIP | 202  | 32178 |
| >BIRC3-T536 IPTEDVSDL   | 477   | >BIRC3-T536 IPREDVSDL   | 32   | 445   |
| >BIRC3-T536 IPTEDVSDLP  | 232   | >BIRC3-T536 IPREDVSDLP  | 21   | 211   |
| >BIRC3-T536 IPTEDVSDL   | 249   | >BIRC3-T536 IPREDVSDL   | 1344 | 1095  |
| >BIRC3-T536 IPTEDVSDLP  | 172   | >BIRC3-T536 IPREDVSDLP  | 783  | 611   |
| >BIRC3-T536 IPTEDVSDL   | 270   | >BIRC3-T536 IPREDVSDL   | 2147 | 1877  |
| >BIRC3-T536 IPTEDVSDLP  | 369   | >BIRC3-T536 IPREDVSDLP  | 3750 | 3381  |
| >BIRC3-T536 IPTEDVSDLP  | 315   | >BIRC3-T536 IPREDVSDLP  | 363  | 48    |
| >BIRC3-T536 IPTEDVSDL   | 277   | >BIRC3-T536 IPREDVSDL   | 1732 | 1455  |
| >BIRC3-T536 YIPTEDVSDL  | 311   | >BIRC3-T536 YIPREDVSDL  | 819  | 508   |

|                         |       |                         |      |       |
|-------------------------|-------|-------------------------|------|-------|
| >BIRC3-T536 YIPTEDVSDL  | 492   | >BIRC3-T536 YIPREDVSDL  | 620  | 128   |
| >BIRC3-T536 YIPTEDVSDL  | 57    | >BIRC3-T536 YIPREDVSDL  | 40   | 17    |
| >BIRC3-T536 KYIPTEDV    | 58    | >BIRC3-T536 KYIPREDV    | 69   | 11    |
| >BIRC3-T536 KYIPTEDVSDI | 5     | >BIRC3-T536 KYIPREDVSDI | 7    | 2     |
| >BIRC3-T536 KYIPTEDVSDI | 198   | >BIRC3-T536 KYIPREDVSDI | 423  | 225   |
| >BIRC3-T536 KYIPTEDVSDI | 400   | >BIRC3-T536 KYIPREDVSDI | 347  | 53    |
| >BIRC3-T536 KYIPTEDV    | 165   | >BIRC3-T536 KYIPREDV    | 394  | 229   |
| >BIRC3-T536 KYIPTEDVSDI | 12    | >BIRC3-T536 KYIPREDVSDI | 15   | 3     |
| >BIRC3-T536 KYIPTEDV    | 188   | >BIRC3-T536 KYIPREDV    | 230  | 42    |
| >BIRC3-T536 KYIPTEDVS   | 457   | >BIRC3-T536 KYIPREDVS   | 1488 | 1031  |
| >BIRC3-T536 KYIPTEDVSDI | 186   | >BIRC3-T536 KYIPREDVSDI | 362  | 176   |
| >BIRC3-T536 IKYIPTEDV   | 36    | >BIRC3-T536 IKYIPREDV   | 53   | 17    |
| >BIRC3-T536 QDIKYIPTED\ | 233   | >BIRC3-T536 QDIKYIPRED\ | 418  | 185   |
| >BIRC3-T536 QDIKYIPT    | 31619 | >BIRC3-T536 QDIKYIPR    | 284  | 31335 |
| >BIRC3-T536 QDIKYIPTED\ | 132   | >BIRC3-T536 QDIKYIPRED\ | 417  | 285   |
| >BIRC3-T536 QQDIKYIPT   | 21772 | >BIRC3-T536 QQDIKYIPR   | 302  | 21470 |
| >BIRC3-T536 QQDIKYIPT   | 32509 | >BIRC3-T536 QQDIKYIPR   | 178  | 32331 |
| >BIRC3-T536 VQQDIKYIPT  | 21575 | >BIRC3-T536 VQQDIKYIPR  | 60   | 21515 |
| >BIRC3-T536 VQQDIKYIPT  | 23449 | >BIRC3-T536 VQQDIKYIPR  | 213  | 23236 |
| >BIRC3-T536 VQQDIKYIPT  | 29553 | >BIRC3-T536 VQQDIKYIPR  | 110  | 29443 |
| >BLM-I1279\ ISVLQKYSEW  | 5     | >BLM-I1279\ VSVLQKYSEW  | 6    | 1     |
| >BLM-I1279\ ISVLQKYSEW  | 43    | >BLM-I1279\ VSVLQKYSEW  | 65   | 22    |
| >BLM-I1279\ ISVLQKYSEW  | 14    | >BLM-I1279\ VSVLQKYSEW  | 17   | 3     |
| >BLM-I1279\ ISVLQKYSEW  | 435   | >BLM-I1279\ VSVLQKYSEW  | 865  | 430   |
| >BLM-I1279\ ISVLQKYSEW  | 393   | >BLM-I1279\ VSVLQKYSEW  | 1862 | 1469  |
| >BLM-I1279\ VISVLQKY    | 300   | >BLM-I1279\ VSVLQKY     | 158  | 142   |
| >BLM-I1279\ VISVLQKY    | 87    | >BLM-I1279\ VSVLQKY     | 70   | 17    |
| >BLM-I1279\ VISVLQKY    | 653   | >BLM-I1279\ VSVLQKY     | 265  | 388   |
| >BLM-I1279\ VISVLQKY    | 1584  | >BLM-I1279\ VSVLQKY     | 448  | 1136  |
| >BLM-I1279\ VISVLQKYSEV | 597   | >BLM-I1279\ VSVLQKYSE   | 153  | 444   |
| >BLM-I1279\ VISVLQKYSEV | 39    | >BLM-I1279\ VSVLQKYSE   | 27   | 12    |
| >BLM-I1279\ EVISVLQK    | 92    | >BLM-I1279\ EVSVLQK     | 241  | 149   |
| >BLM-I1279\ EVISVLQKY   | 30    | >BLM-I1279\ EVSVLQKY    | 42   | 12    |
| >BLM-I1279\ EVISVLQKY   | 6     | >BLM-I1279\ EVSVLQKY    | 7    | 1     |
| >BLM-I1279\ EVISVLQK    | 231   | >BLM-I1279\ EVSVLQK     | 530  | 299   |
| >BLM-I1279\ EVISVLQKY   | 2     | >BLM-I1279\ EVSVLQKY    | 2    | 0     |
| >BLM-I1279\ EVISVLQKYS  | 154   | >BLM-I1279\ EVSVLQKYS   | 356  | 202   |
| >BLM-I1279\ EVISVLQKYSE | 213   | >BLM-I1279\ EVSVLQKYS   | 438  | 225   |
| >BLM-I1279\ EVISVLQKY   | 72    | >BLM-I1279\ EVSVLQKY    | 168  | 96    |
| >BLM-I1279\ EVISVLQKY   | 242   | >BLM-I1279\ EVSVLQKY    | 535  | 293   |
| >BLM-I1279\ EVISVLQK    | 4     | >BLM-I1279\ EVSVLQK     | 5    | 1     |
| >BLM-I1279\ EVISVLQKY   | 52    | >BLM-I1279\ EVSVLQKY    | 85   | 33    |
| >BLM-I1279\ EVISVLQKY   | 781   | >BLM-I1279\ EVSVLQKY    | 478  | 303   |

|                       |      |                       |     |      |
|-----------------------|------|-----------------------|-----|------|
| >BLM-I1279\AEVISVLQKY | 501  | >BLM-I1279\AEVSVLQKY  | 281 | 220  |
| >BLM-I1279\AEVISVLQKY | 148  | >BLM-I1279\AEVSVLQKY  | 164 | 16   |
| >BLM-I1279\AEVISVLQ   | 318  | >BLM-I1279\AEVSVLQ    | 344 | 26   |
| >BLM-I1279\AEVISVLQKY | 62   | >BLM-I1279\AEVSVLQKY  | 53  | 9    |
| >BLM-I1279\AEVISVLQKY | 354  | >BLM-I1279\AEVSVLQKY  | 376 | 22   |
| >BLM-I1279\AEVISVLQ   | 531  | >BLM-I1279\AEVSVLQ    | 492 | 39   |
| >BLM-I1279\AEVISVLQKY | 170  | >BLM-I1279\AEVSVLQKY  | 150 | 20   |
| >BLM-I1279\AEVISVLQKY | 324  | >BLM-I1279\AEVSVLQKY  | 328 | 4    |
| >BLM-I1279\GAEVISVLQK | 368  | >BLM-I1279\GAEVSVLQK  | 336 | 32   |
| >BLM-I1279\GAEVISVLQK | 213  | >BLM-I1279\GAEVSVLQK  | 243 | 30   |
| >BLM-I1279\YGAEVISV   | 262  | >BLM-I1279\YGAEVSV    | 366 | 104  |
| >BLM-I1279\YGAEVISV   | 84   | >BLM-I1279\YGAEVSV    | 54  | 30   |
| >BLM-I1279\YGAEVISVL  | 180  | >BLM-I1279\YGAEVSVL   | 189 | 9    |
| >BLM-I1279\YGAEVISV   | 387  | >BLM-I1279\YGAEVSV    | 306 | 81   |
| >BLM-I1279\YGAEVISV   | 24   | >BLM-I1279\YGAEVSV    | 29  | 5    |
| >BLM-I1279\YGAEVISVL  | 342  | >BLM-I1279\YGAEVSVL   | 665 | 323  |
| >BLM-I1279\YGAEVISV   | 25   | >BLM-I1279\YGAEVSV    | 31  | 6    |
| >BLM-I1279\YGAEVISVL  | 206  | >BLM-I1279\YGAEVSVL   | 288 | 82   |
| >BLM-I1279\YGAEVISV   | 36   | >BLM-I1279\YGAEVSV    | 39  | 3    |
| >BLM-I1279\YGAEVISV   | 41   | >BLM-I1279\YGAEVSV    | 44  | 3    |
| >BLM-I1279\YGAEVISVLQ | 171  | >BLM-I1279\YGAEVSVLC  | 180 | 9    |
| >BLM-I1279\YGAEVISV   | 111  | >BLM-I1279\YGAEVSV    | 87  | 24   |
| >BLM-I1279\YGAEVISVL  | 465  | >BLM-I1279\YGAEVSVL   | 612 | 147  |
| >BLM-I1279\YGAEVISV   | 293  | >BLM-I1279\YGAEVSV    | 362 | 69   |
| >BLM-I1279\YGAEVISVL  | 186  | >BLM-I1279\YGAEVSVL   | 113 | 73   |
| >BLM-I1279\YGAEVISVL  | 143  | >BLM-I1279\YGAEVSVL   | 137 | 6    |
| >BLM-I1279\YGAEVISVL  | 569  | >BLM-I1279\YGAEVSVL   | 395 | 174  |
| >BLM-I1279\KYGAEISVL  | 67   | >BLM-I1279\KYGAEVSVL  | 39  | 28   |
| >BLM-I1279\KYGAEISV   | 119  | >BLM-I1279\KYGAEVSV   | 52  | 67   |
| >BLM-I1279\KYGAEISVL  | 7    | >BLM-I1279\KYGAEVSVL  | 6   | 1    |
| >BLM-I1279\KYGAEISVLC | 103  | >BLM-I1279\KYGAEVSVL  | 139 | 36   |
| >BLM-I1279\EKYGAEISV  | 262  | >BLM-I1279\EKYGAEVSV  | 139 | 123  |
| >BLM-I1279\EKYGAEISVI | 113  | >BLM-I1279\EKYGAEVSV  | 92  | 21   |
| >BLM-I1279\EKYGAEISVI | 36   | >BLM-I1279\EKYGAEVSV  | 27  | 9    |
| >BLM-I1279\LEKYGAEVI  | 41   | >BLM-I1279\LEKYGAEVV  | 251 | 210  |
| >BLM-I1279\LEKYGAEISV | 257  | >BLM-I1279\LEKYGAEVVS | 255 | 2    |
| >BLM-I1279\LEKYGAEVI  | 33   | >BLM-I1279\LEKYGAEVV  | 64  | 31   |
| >BLM-I1279\LEKYGAEISV | 181  | >BLM-I1279\LEKYGAEVVS | 194 | 13   |
| >BLM-I1279\LEKYGAEISV | 446  | >BLM-I1279\LEKYGAEVVS | 569 | 123  |
| >BLM-I1279\LEKYGAEVI  | 20   | >BLM-I1279\LEKYGAEVV  | 50  | 30   |
| >BLM-I1279\LEKYGAEISV | 24   | >BLM-I1279\LEKYGAEVVS | 22  | 2    |
| >BLM-I1279\KLEKYGAEVI | 1747 | >BLM-I1279\KLEKYGAEVV | 468 | 1279 |
| >BLM-I1279\KLEKYGAEVI | 276  | >BLM-I1279\KLEKYGAEVV | 20  | 256  |

|                        |       |                        |       |       |
|------------------------|-------|------------------------|-------|-------|
| >BLM-I1279\KLEKYGAEVI  | 279   | >BLM-I1279\KLEKYGAEVV  | 27    | 252   |
| >BLM-I1279\KLEKYGAEVI  | 2650  | >BLM-I1279\KLEKYGAEVV  | 104   | 2546  |
| >BLM-I1279\KLEKYGAEVI  | 340   | >BLM-I1279\KLEKYGAEVV  | 12    | 328   |
| >BLM-I1279\KLEKYGAEVI  | 470   | >BLM-I1279\KLEKYGAEVV  | 3330  | 2860  |
| >BLM-R85S-v RVKDFFKNA  | 335   | >BLM-R85S-r SVKDFFKNA  | 387   | 52    |
| >BLM-R85S-v RVKDFFKNAF | 102   | >BLM-R85S-r SVKDFFKNAP | 110   | 8     |
| >BLM-R85S-v RVKDFFKN   | 460   | >BLM-R85S-r SVKDFFKN   | 3993  | 3533  |
| >BLM-R85S-v RVKDFFKNA  | 7     | >BLM-R85S-r SVKDFFKNA  | 48    | 41    |
| >BLM-R85S-v RVKDFFKNAF | 114   | >BLM-R85S-r SVKDFFKNAP | 1826  | 1712  |
| >BLM-R85S-v RVKDFFKNAF | 5     | >BLM-R85S-r SVKDFFKNAP | 13    | 8     |
| >BLM-R85S-v RVKDFFKNAF | 3655  | >BLM-R85S-r SVKDFFKNAP | 286   | 3369  |
| >BLM-R85S-v QRVKDFFK   | 13664 | >BLM-R85S-r QSVKDFFK   | 29    | 13635 |
| >BLM-R85S-v QRVKDFFK   | 3232  | >BLM-R85S-r QSVKDFFK   | 32    | 3200  |
| >BLM-R85S-v QRVKDFFK   | 162   | >BLM-R85S-r QSVKDFFK   | 18329 | 18167 |
| >BLM-R85S-v QRVKDFFK   | 2421  | >BLM-R85S-r QSVKDFFK   | 132   | 2289  |
| >BLM-R85S-v EPLPNTTNQC | 498   | >BLM-R85S-r EPLPNTTNQC | 34005 | 33507 |
| >BLM-R85S-v QQRVKDFFK  | 1369  | >BLM-R85S-r QQSVKDFFK  | 56    | 1313  |
| >BLM-R85S-v QQRVKDFFK  | 16    | >BLM-R85S-r QQSVKDFFK  | 3378  | 3362  |
| >BLM-R85S-v QQRVKDFFK  | 74    | >BLM-R85S-r QQSVKDFFK  | 246   | 172   |
| >BLM-R85S-v QQRVKDF    | 279   | >BLM-R85S-r QQSVKDF    | 557   | 278   |
| >BLM-R85S-v QQRVKDF    | 48    | >BLM-R85S-r QQSVKDF    | 133   | 85    |
| >BLM-R85S-v NQQRVKDF   | 440   | >BLM-R85S-r NQQSVKDF   | 1189  | 749   |
| >BLM-R85S-v NQQRVKDF   | 543   | >BLM-R85S-r NQQSVKDFI  | 152   | 391   |
| >BLM-R85S-v NQQRVKDF   | 2036  | >BLM-R85S-r NQQSVKDFI  | 348   | 1688  |
| >BLM-R85S-v NQQRVKDF   | 886   | >BLM-R85S-r NQQSVKDF   | 485   | 401   |
| >BLM-R85S-v NQQRVKDF   | 129   | >BLM-R85S-r NQQSVKDF   | 55    | 74    |
| >BLM-R85S-v NQQRVKDF   | 717   | >BLM-R85S-r NQQSVKDF   | 423   | 294   |
| >BLM-R85S-v TTNQQRVK   | 691   | >BLM-R85S-r TTNQQSVK   | 256   | 435   |
| >BLM-R85S-v TTNQQRVK   | 68    | >BLM-R85S-r TTNQQSVK   | 30    | 38    |
| >BLM-R85S-v TTNQQRVKD  | 203   | >BLM-R85S-r TTNQQSVKD  | 207   | 4     |
| >BLM-R85S-v TTNQQRVK   | 305   | >BLM-R85S-r TTNQQSVK   | 330   | 25    |
| >BLM-R85S-v TTNQQRVK   | 112   | >BLM-R85S-r TTNQQSVK   | 40    | 72    |
| >BLM-R85S-v TTNQQRVKD  | 1026  | >BLM-R85S-r TTNQQSVKD  | 470   | 556   |
| >BLM-R85S-v TTNQQRVKD  | 29    | >BLM-R85S-r TTNQQSVKD  | 11    | 18    |
| >BLM-R85S-v TTNQQRVKD  | 252   | >BLM-R85S-r TTNQQSVKD  | 97    | 155   |
| >BLM-R85S-v TTNQQRVKD  | 185   | >BLM-R85S-r TTNQQSVKD  | 116   | 69    |
| >BLM-R85S-v NTTNQQRVK  | 1292  | >BLM-R85S-r NTTNQQSVK  | 477   | 815   |
| >BLM-R85S-v NTTNQQRVK  | 262   | >BLM-R85S-r NTTNQQSVK  | 35    | 227   |
| >BLM-R85S-v NTTNQQRV   | 50    | >BLM-R85S-r NTTNQQSV   | 36    | 14    |
| >BLM-R85S-v NTTNQQRV   | 581   | >BLM-R85S-r NTTNQQSV   | 181   | 400   |
| >BLM-R85S-v NTTNQQRVK  | 453   | >BLM-R85S-r NTTNQQSVK  | 183   | 270   |
| >BLM-R85S-v LPNTTNQQR' | 575   | >BLM-R85S-r LPNTTNQQS\ | 315   | 260   |
| >BLM-R85S-v LPNTTNQQR' | 2699  | >BLM-R85S-r LPNTTNQQS\ | 287   | 2412  |

|                        |      |                        |       |       |
|------------------------|------|------------------------|-------|-------|
| >BLM-R85S-v PLPNTTNQQI | 39   | >BLM-R85S-r PLPNTTNQQI | 32    | 7     |
| >BLM-R85S-v PLPNTTNQQI | 1051 | >BLM-R85S-r PLPNTTNQQI | 446   | 605   |
| >BLM-R85S-v PLPNTTNQQI | 63   | >BLM-R85S-r PLPNTTNQQI | 43    | 20    |
| >BLM-R85S-v PLPNTTNQQI | 73   | >BLM-R85S-r PLPNTTNQQI | 42    | 31    |
| >BLM-R85S-v PLPNTTNQQI | 6    | >BLM-R85S-r PLPNTTNQQI | 5     | 1     |
| >BLM-T830M TATANPRV    | 3394 | >BLM-T830M MATANPRV    | 378   | 3016  |
| >BLM-T830M TATANPRV    | 497  | >BLM-T830M MATANPRV    | 53    | 444   |
| >BLM-T830M TATANPRVQI  | 163  | >BLM-T830M MATANPRVC   | 193   | 30    |
| >BLM-T830M TATANPRVQI  | 1919 | >BLM-T830M MATANPRVC   | 117   | 1802  |
| >BLM-T830M TATANPRVQI  | 110  | >BLM-T830M MATANPRVC   | 51    | 59    |
| >BLM-T830M TATANPRV    | 161  | >BLM-T830M MATANPRV    | 47    | 114   |
| >BLM-T830M TATANPRV    | 285  | >BLM-T830M MATANPRV    | 182   | 103   |
| >BLM-T830M LTATANPRV   | 556  | >BLM-T830M LMATANPRV   | 13    | 543   |
| >BLM-T830M LTATANPRV   | 400  | >BLM-T830M LMATANPRV   | 11    | 389   |
| >BLM-T830M LTATANPRV   | 815  | >BLM-T830M LMATANPRV   | 9     | 806   |
| >BLM-T830M LTATANPRV   | 358  | >BLM-T830M LMATANPRV   | 25    | 333   |
| >BLM-T830M LTATANPRV   | 582  | >BLM-T830M LMATANPRV   | 5     | 577   |
| >BLM-T830M LTATANPRV   | 6824 | >BLM-T830M LMATANPRV   | 22    | 6802  |
| >BLM-T830M LTATANPRV   | 342  | >BLM-T830M LMATANPRV   | 6     | 336   |
| >BLM-T830M LTATANPRV   | 1758 | >BLM-T830M LMATANPRV   | 3     | 1755  |
| >BLM-T830M LTATANPRV   | 58   | >BLM-T830M LMATANPRV   | 2     | 56    |
| >BLM-T830M LTATANPRVC  | 161  | >BLM-T830M LMATANPRV   | 55    | 106   |
| >BLM-T830M LTATANPRVC  | 47   | >BLM-T830M LMATANPRV   | 99    | 52    |
| >BLM-T830M LTATANPRVC  | 95   | >BLM-T830M LMATANPRV   | 712   | 617   |
| >BLM-T830M LTATANPR    | 132  | >BLM-T830M LMATANPR    | 72    | 60    |
| >BLM-T830M LTATANPR    | 7    | >BLM-T830M LMATANPR    | 64    | 57    |
| >BLM-T830M LTATANPRVC  | 14   | >BLM-T830M LMATANPRV   | 193   | 179   |
| >BLM-T830M LTATANPRV   | 54   | >BLM-T830M LMATANPRV   | 2215  | 2161  |
| >BLM-T830M LTATANPRV   | 26   | >BLM-T830M LMATANPRV   | 295   | 269   |
| >BLM-T830M LTATANPR    | 8159 | >BLM-T830M LMATANPR    | 424   | 7735  |
| >BLM-T830M LTATANPRV   | 215  | >BLM-T830M LMATANPRV   | 13111 | 12896 |
| >BLM-T830M LTATANPR    | 645  | >BLM-T830M LMATANPR    | 88    | 557   |
| >BLM-T830M KFPSVPVMAI  | 7130 | >BLM-T830M KFPSVPVMAI  | 491   | 6639  |
| >BLM-T830M KFPSVPVMAI  | 4498 | >BLM-T830M KFPSVPVMAI  | 388   | 4110  |
| >BLM-T830M KFPSVPVMAI  | 3801 | >BLM-T830M KFPSVPVMAI  | 29    | 3772  |
| >BLM-T830M KFPSVPVMAI  | 1131 | >BLM-T830M KFPSVPVMAI  | 311   | 820   |
| >BLM-T830M ALTATANPRV  | 293  | >BLM-T830M ALMATANPR   | 16    | 277   |
| >BLM-T830M ALTATANPR   | 2878 | >BLM-T830M ALMATANPR   | 280   | 2598  |
| >BLM-T830M ALTATANPRV  | 127  | >BLM-T830M ALMATANPR   | 19    | 108   |
| >BLM-T830M ALTATANPRV  | 160  | >BLM-T830M ALMATANPR   | 23    | 137   |
| >BLM-T830M ALTATANPRV  | 553  | >BLM-T830M ALMATANPR   | 79    | 474   |
| >BLM-T830M ALTATANPRV  | 6    | >BLM-T830M ALMATANPR   | 3     | 3     |
| >BLM-T830M ALTATANPRV  | 23   | >BLM-T830M ALMATANPR   | 5     | 18    |



|                       |      |                      |      |      |
|-----------------------|------|----------------------|------|------|
| >BLM-T830M ALTATANPRV | 7    | >BLM-T830M ALMATANPR | 7    | 0    |
| >BLM-T830M ALTATANPRV | 18   | >BLM-T830M ALMATANPR | 2    | 16   |
| >BLM-T830M ALTATANPRV | 2    | >BLM-T830M ALMATANPR | 2    | 0    |
| >BLM-T830M ALTATANPR  | 3001 | >BLM-T830M ALMATANPR | 302  | 2699 |
| >BLM-T830M ALTATANPR  | 1809 | >BLM-T830M ALMATANPR | 85   | 1724 |
| >BLM-T830M ALTATANPR  | 272  | >BLM-T830M ALMATANPR | 77   | 195  |
| >BLM-T830M ALTATANPRV | 1814 | >BLM-T830M ALMATANPR | 190  | 1624 |
| >BLM-T830M ALTATANPR  | 753  | >BLM-T830M ALMATANPR | 353  | 400  |
| >BLM-T830M MALTATANP  | 143  | >BLM-T830M MALMATANP | 202  | 59   |
| >BLM-T830M MALTATANP  | 52   | >BLM-T830M MALMATANP | 41   | 11   |
| >BLM-T830M MALTATANP  | 120  | >BLM-T830M MALMATANP | 80   | 40   |
| >BLM-T830M MALTATANP  | 319  | >BLM-T830M MALMATANP | 223  | 96   |
| >BLM-T830M MALTATANP  | 101  | >BLM-T830M MALMATANP | 126  | 25   |
| >BLM-T830M MALTATANP  | 39   | >BLM-T830M MALMATANP | 33   | 6    |
| >BLM-T830M MALTATANP  | 902  | >BLM-T830M MALMATANP | 378  | 524  |
| >BLM-T830M MALTATANP  | 417  | >BLM-T830M MALMATANP | 374  | 43   |
| >BLM-T830M MALTATANP  | 283  | >BLM-T830M MALMATANP | 250  | 33   |
| >BLM-T830M MALTATANP  | 42   | >BLM-T830M MALMATANP | 35   | 7    |
| >BLM-T830M MALTATANP  | 662  | >BLM-T830M MALMATANP | 246  | 416  |
| >BLM-T830M MALTATANP  | 22   | >BLM-T830M MALMATANP | 16   | 6    |
| >BLM-T830M MALTATANP  | 82   | >BLM-T830M MALMATANP | 157  | 75   |
| >BLM-T830M MALTATANP  | 9    | >BLM-T830M MALMATANP | 11   | 2    |
| >BLM-T830M MALTATANP  | 1068 | >BLM-T830M MALMATANP | 427  | 641  |
| >BLM-T830M MALTATANP  | 82   | >BLM-T830M MALMATANP | 121  | 39   |
| >BLM-T830M VMALTATA   | 520  | >BLM-T830M VMALMATA  | 358  | 162  |
| >BLM-T830M VMALTATA   | 156  | >BLM-T830M VMALMATA  | 108  | 48   |
| >BLM-T830M VMALTATA   | 17   | >BLM-T830M VMALMATA  | 13   | 4    |
| >BLM-T830M VMALTATA   | 54   | >BLM-T830M VMALMATA  | 120  | 66   |
| >BLM-T830M VMALTATA   | 115  | >BLM-T830M VMALMATA  | 232  | 117  |
| >BLM-T830M VMALTATA   | 62   | >BLM-T830M VMALMATA  | 111  | 49   |
| >BLM-T830M VMALTATA   | 57   | >BLM-T830M VMALMATA  | 193  | 136  |
| >BLM-T830M VMALTATA   | 18   | >BLM-T830M VMALMATA  | 19   | 1    |
| >BLM-T830M VMALTATAN  | 104  | >BLM-T830M VMALMATAN | 79   | 25   |
| >BLM-T830M VMALTATAN  | 184  | >BLM-T830M VMALMATAN | 157  | 27   |
| >BLM-T830M VMALTATAN  | 146  | >BLM-T830M VMALMATAN | 151  | 5    |
| >BLM-T830M VPVMALTAT  | 136  | >BLM-T830M VPVMALMAT | 242  | 106  |
| >BLM-T830M VPVMALTA   | 354  | >BLM-T830M VPVMALMA  | 1838 | 1484 |
| >BLM-T830M VPVMALTAT  | 97   | >BLM-T830M VPVMALMAT | 199  | 102  |
| >BLM-T830M VPVMALTAT, | 507  | >BLM-T830M VPVMALMAT | 492  | 15   |
| >BLM-T830M VPVMALTA   | 62   | >BLM-T830M VPVMALMA  | 94   | 32   |
| >BLM-T830M VPVMALTAT  | 206  | >BLM-T830M VPVMALMAT | 179  | 27   |
| >BLM-T830M VPVMALTAT, | 17   | >BLM-T830M VPVMALMAT | 15   | 2    |
| >BLM-T830M SVPVMALTA  | 980  | >BLM-T830M SVPVMALMA | 376  | 604  |

|                       |       |                       |      |       |
|-----------------------|-------|-----------------------|------|-------|
| >BLM-T830M SVPVMALTA  | 467   | >BLM-T830M SVPVMALMA  | 434  | 33    |
| >BLM-T830M SVPVMALT   | 10320 | >BLM-T830M SVPVMALM   | 20   | 10300 |
| >BLM-T830M PSVPVMALT  | 12647 | >BLM-T830M PSVPVMALM  | 69   | 12578 |
| >BLM-T830M PSVPVMALT  | 12380 | >BLM-T830M PSVPVMALM  | 206  | 12174 |
| >BLM-T830M PSVPVMALT  | 6090  | >BLM-T830M PSVPVMALM  | 84   | 6006  |
| >BLM-T830M PSVPVMALT  | 12432 | >BLM-T830M PSVPVMALM  | 351  | 12081 |
| >BLM-T830M FPSVPVMALT | 3851  | >BLM-T830M FPSVPVMALM | 125  | 3726  |
| >BLM-T830M FPSVPVMALT | 1266  | >BLM-T830M FPSVPVMALM | 32   | 1234  |
| >BLM-T830M FPSVPVMALT | 119   | >BLM-T830M FPSVPVMALM | 545  | 426   |
| >BLM-T830M FPSVPVMALT | 9064  | >BLM-T830M FPSVPVMALM | 223  | 8841  |
| >BLM-T830M FPSVPVMALT | 1799  | >BLM-T830M FPSVPVMALM | 154  | 1645  |
| >BLM-T830M FPSVPVMALT | 473   | >BLM-T830M FPSVPVMALM | 721  | 248   |
| >BLM-T830M FPSVPVMALT | 47    | >BLM-T830M FPSVPVMALM | 121  | 74    |
| >BLM-T830M FPSVPVMALT | 7     | >BLM-T830M FPSVPVMALM | 8    | 1     |
| >BLM-T830M FPSVPVMALT | 3918  | >BLM-T830M FPSVPVMALM | 182  | 3736  |
| >BMPR1A-F5 FLKCYCSG   | 369   | >BMPR1A-F5 YLKCYCSG   | 1153 | 784   |
| >BMPR1A-F5 FLKCYCSG   | 243   | >BMPR1A-F5 YLKCYCSG   | 397  | 154   |
| >BMPR1A-F5 FLKCYCSGHC | 480   | >BMPR1A-F5 YLKCYCSGHC | 431  | 49    |
| >BMPR1A-F5 FLKCYCSG   | 135   | >BMPR1A-F5 YLKCYCSG   | 143  | 8     |
| >BMPR1A-F5 FLKCYCSG   | 631   | >BMPR1A-F5 YLKCYCSG   | 381  | 250   |
| >BMPR1A-F5 FLKCYCSGH  | 1330  | >BMPR1A-F5 YLKCYCSGH  | 411  | 919   |
| >BMPR1A-F5 VTLAPEDTLP | 10165 | >BMPR1A-F5 VTLAPEDTLP | 118  | 10047 |
| >BMPR1A-F5 VTLAPEDTLP | 253   | >BMPR1A-F5 VTLAPEDTLP | 82   | 171   |
| >BMPR1A-F5 VTLAPEDTLP | 632   | >BMPR1A-F5 VTLAPEDTLP | 54   | 578   |
| >BMPR1A-F5 VTLAPEDTLP | 1197  | >BMPR1A-F5 VTLAPEDTLP | 46   | 1151  |
| >BMPR1A-F5 VTLAPEDTLP | 12041 | >BMPR1A-F5 VTLAPEDTLP | 318  | 11723 |
| >BMPR1A-F5 VTLAPEDTLP | 49    | >BMPR1A-F5 VTLAPEDTLP | 723  | 674   |
| >BMPR1A-F5 VTLAPEDTLP | 2938  | >BMPR1A-F5 VTLAPEDTLP | 39   | 2899  |
| >BMPR1A-F5 VTLAPEDTLP | 486   | >BMPR1A-F5 VTLAPEDTLP | 388  | 98    |
| >BMPR1A-F5 VTLAPEDTLP | 61    | >BMPR1A-F5 VTLAPEDTLP | 315  | 254   |
| >BMPR1A-F5 VTLAPEDTLP | 4     | >BMPR1A-F5 VTLAPEDTLP | 5    | 1     |
| >BMPR1A-F5 VTLAPEDTLP | 373   | >BMPR1A-F5 VTLAPEDTLP | 190  | 183   |
| >BMPR1A-F5 VTLAPEDTLP | 96    | >BMPR1A-F5 VTLAPEDTLP | 421  | 325   |
| >BMPR1A-F5 VTLAPEDTLP | 247   | >BMPR1A-F5 VTLAPEDTLP | 175  | 72    |
| >BMPR1A-F5 LPFLKCYCSG | 345   | >BMPR1A-F5 LPYLKCYCSG | 231  | 114   |
| >BMPR1A-F5 LPFLKCYC   | 475   | >BMPR1A-F5 LPYLKCYC   | 293  | 182   |
| >BMPR1A-F5 LPFLKCYCS  | 177   | >BMPR1A-F5 LPYLKCYCS  | 98   | 79    |
| >BMPR1A-F5 TLPFLKCYC  | 417   | >BMPR1A-F5 TLPYLKCYC  | 1301 | 884   |
| >BMPR1A-F5 TLPFLKCYC  | 405   | >BMPR1A-F5 TLPYLKCYC  | 1023 | 618   |
| >BMPR1A-F5 DTLPFLKCY  | 167   | >BMPR1A-F5 DTLPYLKCY  | 181  | 14    |
| >BMPR1A-F5 DTLPFLKCY  | 7     | >BMPR1A-F5 DTLPYLKCY  | 6    | 1     |
| >BMPR1A-F5 DTLPFLKCY  | 144   | >BMPR1A-F5 DTLPYLKCY  | 163  | 19    |
| >BMPR1A-F5 DTLPFLKCY  | 419   | >BMPR1A-F5 DTLPYLKCY  | 355  | 64    |

|                        |      |                        |      |      |
|------------------------|------|------------------------|------|------|
| >BMPR1A-F5 DTLPFLKCY   | 205  | >BMPR1A-F5 DTLPYLKCY   | 100  | 105  |
| >BMPR1A-F5 APEDTLPFL   | 70   | >BMPR1A-F5 APEDTLPYL   | 50   | 20   |
| >BMPR1A-F5 APEDTLPF    | 72   | >BMPR1A-F5 APEDTLPY    | 1352 | 1280 |
| >BMPR1A-F5 APEDTLPF    | 37   | >BMPR1A-F5 APEDTLPY    | 19   | 18   |
| >BMPR1A-F5 APEDTLPF    | 487  | >BMPR1A-F5 APEDTLPY    | 329  | 158  |
| >BMPR1A-F5 APEDTLPF    | 232  | >BMPR1A-F5 APEDTLPY    | 59   | 173  |
| >BMPR1A-F5 APEDTLPF    | 58   | >BMPR1A-F5 APEDTLPY    | 207  | 149  |
| >BMPR1A-F5 LAPEDTLPFL  | 439  | >BMPR1A-F5 LAPEDTLPYL  | 186  | 253  |
| >BMPR1A-F5 LAPEDTLPFL  | 279  | >BMPR1A-F5 LAPEDTLPYL  | 135  | 144  |
| >BMPR1A-F5 LAPEDTLPFL  | 71   | >BMPR1A-F5 LAPEDTLPYL  | 52   | 19   |
| >BMPR1A-F5 LAPEDTLPFL  | 622  | >BMPR1A-F5 LAPEDTLPYL  | 215  | 407  |
| >BMPR1A-F5 LAPEDTLPFL  | 448  | >BMPR1A-F5 LAPEDTLPYL  | 264  | 184  |
| >BMPR1A-F5 LAPEDTLPFL  | 279  | >BMPR1A-F5 LAPEDTLPYL  | 437  | 158  |
| >BMPR1A-F5 LAPEDTLPF   | 8525 | >BMPR1A-F5 LAPEDTLPY   | 185  | 8340 |
| >BMPR1A-F5 LAPEDTLPFL  | 481  | >BMPR1A-F5 LAPEDTLPYL  | 641  | 160  |
| >BMPR1A-F5 LAPEDTLPF   | 173  | >BMPR1A-F5 LAPEDTLPY   | 138  | 35   |
| >BMPR1A-F5 LAPEDTLPF   | 283  | >BMPR1A-F5 LAPEDTLPY   | 1031 | 748  |
| >BMPR1A-F5 LAPEDTLPF   | 17   | >BMPR1A-F5 LAPEDTLPY   | 12   | 5    |
| >BMPR1A-F5 LAPEDTLPF   | 35   | >BMPR1A-F5 LAPEDTLPY   | 2761 | 2726 |
| >BMPR1A-F5 LAPEDTLPFL  | 6    | >BMPR1A-F5 LAPEDTLPYL  | 5    | 1    |
| >BMPR1A-F5 TLAPEDTLPFL | 34   | >BMPR1A-F5 TLAPEDTLPYL | 27   | 7    |
| >BMPR1A-F5 TLAPEDTLPFL | 4    | >BMPR1A-F5 TLAPEDTLPYL | 4    | 0    |
| >BMPR1A-F5 TLAPEDTLPFL | 24   | >BMPR1A-F5 TLAPEDTLPYL | 22   | 2    |
| >BMPR1A-F5 TLAPEDTLPFL | 31   | >BMPR1A-F5 TLAPEDTLPYL | 32   | 1    |
| >BMPR1A-F5 TLAPEDTLPFL | 59   | >BMPR1A-F5 TLAPEDTLPYL | 30   | 29   |
| >BMPR1A-F5 TLAPEDTLPFL | 65   | >BMPR1A-F5 TLAPEDTLPYL | 41   | 24   |
| >BMPR1A-F5 TLAPEDTLPFL | 12   | >BMPR1A-F5 TLAPEDTLPYL | 13   | 1    |
| >BMPR1A-F5 TLAPEDTLPFL | 34   | >BMPR1A-F5 TLAPEDTLPYL | 23   | 11   |
| >BMPR1A-F5 TLAPEDTLPFL | 6    | >BMPR1A-F5 TLAPEDTLPYL | 5    | 1    |
| >BMPR1A-F5 TLAPEDTLPF  | 1847 | >BMPR1A-F5 TLAPEDTLPY  | 198  | 1649 |
| >BMPR1A-F5 TLAPEDTLPFL | 689  | >BMPR1A-F5 TLAPEDTLPYL | 479  | 210  |
| >BMPR1A-F5 TLAPEDTLPF  | 5207 | >BMPR1A-F5 TLAPEDTLPY  | 44   | 5163 |
| >BMPR1A-F5 TLAPEDTLPF  | 74   | >BMPR1A-F5 TLAPEDTLPY  | 66   | 8    |
| >BMPR1A-F5 TLAPEDTLPF  | 192  | >BMPR1A-F5 TLAPEDTLPY  | 92   | 100  |
| >BMPR1A-F5 TLAPEDTLPF  | 179  | >BMPR1A-F5 TLAPEDTLPY  | 810  | 631  |
| >BMPR1A-R4RWNSDECLR    | 53   | >BMPR1A-R4QWNSDECLR    | 1155 | 1102 |
| >BMPR1A-R4RWNSDECLR    | 18   | >BMPR1A-R4QWNSDECLR    | 33   | 15   |
| >BMPR1A-R4RWNSDECL     | 383  | >BMPR1A-R4QWNSDECL     | 612  | 229  |
| >BMPR1A-R4RWNSDECLR    | 186  | >BMPR1A-R4QWNSDECLR    | 319  | 133  |
| >BMPR1A-R4NRWNSDECL    | 713  | >BMPR1A-R4NQWNSDECL    | 154  | 559  |
| >BMPR1A-R4NRWNSDECL    | 395  | >BMPR1A-R4NQWNSDECL    | 8183 | 7788 |
| >BMPR1A-R4NRWNSDEC     | 148  | >BMPR1A-R4NQWNSDEC     | 1820 | 1672 |
| >BMPR1A-R4NRWNSDECL    | 90   | >BMPR1A-R4NQWNSDECL    | 1002 | 912  |

|                       |       |                       |       |       |
|-----------------------|-------|-----------------------|-------|-------|
| >BMPR1A-R4NRWNSDECL   | 309   | >BMPR1A-R4NQWNSDECL   | 118   | 191   |
| >BMPR1A-R4RPIVSNRW    | 468   | >BMPR1A-R4RPIVSNQW    | 271   | 197   |
| >BMPR1A-R4RPIVSNRW    | 515   | >BMPR1A-R4RPIVSNQW    | 373   | 142   |
| >BMPR1A-R4RPIVSNRW    | 173   | >BMPR1A-R4RPIVSNQW    | 159   | 14    |
| >BMPR1A-R4RPIVSNRW    | 491   | >BMPR1A-R4RPIVSNQW    | 134   | 357   |
| >BMPR1A-R4RPIVSNRW    | 25    | >BMPR1A-R4RPIVSNQW    | 17    | 8     |
| >BMPR1A-R4RPIVSNRW    | 466   | >BMPR1A-R4RPIVSNQW    | 636   | 170   |
| >BMPR1A-R4LRPIVSNRW   | 166   | >BMPR1A-R4LRPIVSNQW   | 423   | 257   |
| >BMPR1A-R4RLRPIVSNR   | 8135  | >BMPR1A-R4RLRPIVSNQ   | 326   | 7809  |
| >BMPR1A-R4RLRPIVSNR   | 62    | >BMPR1A-R4RLRPIVSNQ   | 7300  | 7238  |
| >BMPR1A-R4RLRPIVSNR   | 21    | >BMPR1A-R4RLRPIVSNQ   | 55    | 34    |
| >BMPR1A-R4RLRPIVSNRW  | 333   | >BMPR1A-R4RLRPIVSNQW  | 279   | 54    |
| >BMPR1A-R4RLRPIVSNR   | 10    | >BMPR1A-R4RLRPIVSNQ   | 2176  | 2166  |
| >BMPR1A-R4RLRPIVSNRW  | 606   | >BMPR1A-R4RLRPIVSNQW  | 317   | 289   |
| >BMPR1A-R4RLRPIVSNRW  | 10    | >BMPR1A-R4RLRPIVSNQW  | 9     | 1     |
| >BMPR1A-R4RLRPIVSNRW  | 61    | >BMPR1A-R4RLRPIVSNQW  | 62    | 1     |
| >BMPR1A-R4RLRPIVSNRW  | 136   | >BMPR1A-R4RLRPIVSNQW  | 62    | 74    |
| >BMPR1A-R4RLRPIVSNR   | 150   | >BMPR1A-R4RLRPIVSNQ   | 15151 | 15001 |
| >BMPR1A-R4KRLRPIVSNR  | 58    | >BMPR1A-R4KRLRPIVSNQ  | 14763 | 14705 |
| >BMPR1A-R4KRLRPIVSNR  | 252   | >BMPR1A-R4KRLRPIVSNQ  | 1079  | 827   |
| >BMPR1A-R4KRLRPIVSNR\ | 604   | >BMPR1A-R4KRLRPIVSNQ' | 376   | 228   |
| >BMPR1A-R4KRLRPIVSNR  | 31    | >BMPR1A-R4KRLRPIVSNQ  | 174   | 143   |
| >BMPR1A-R4KRLRPIVSNR  | 152   | >BMPR1A-R4KRLRPIVSNQ  | 205   | 53    |
| >BMPR1A-R4KRLRPIVSNR\ | 265   | >BMPR1A-R4KRLRPIVSNQ' | 312   | 47    |
| >BMPR1A-R4KRLRPIVSNR  | 159   | >BMPR1A-R4KRLRPIVSNQ  | 599   | 440   |
| >BMPR1A-R4KRLRPIVSNR  | 117   | >BMPR1A-R4KRLRPIVSNQ  | 9800  | 9683  |
| >BMPR1A-T5TLAKMVESQI  | 336   | >BMPR1A-T5MLAKMVESC   | 49    | 287   |
| >BMPR1A-T5TLAKMVES    | 567   | >BMPR1A-T5MLAKMVES    | 36    | 531   |
| >BMPR1A-T5TLAKMVESQ   | 476   | >BMPR1A-T5MLAKMVESC   | 34    | 442   |
| >BMPR1A-T5TLAKMVESQI  | 25    | >BMPR1A-T5MLAKMVESC   | 5     | 20    |
| >BMPR1A-T5TLAKMVES    | 1801  | >BMPR1A-T5MLAKMVES    | 215   | 1586  |
| >BMPR1A-T5TLAKMVESQI  | 14    | >BMPR1A-T5MLAKMVESC   | 5     | 9     |
| >BMPR1A-T5TLAKMVESQI  | 771   | >BMPR1A-T5MLAKMVESC   | 98    | 673   |
| >BMPR1A-T5TLAKMVESQI  | 74    | >BMPR1A-T5MLAKMVESC   | 11    | 63    |
| >BMPR1A-T5TLAKMVESQI  | 126   | >BMPR1A-T5MLAKMVESC   | 25    | 101   |
| >BMPR1A-T5TLAKMVESQI  | 14    | >BMPR1A-T5MLAKMVESC   | 8     | 6     |
| >BMPR1A-T5TLAKMVESQI  | 29    | >BMPR1A-T5MLAKMVESC   | 6     | 23    |
| >BMPR1A-T5TLAKMVES    | 3598  | >BMPR1A-T5MLAKMVES    | 216   | 3382  |
| >BMPR1A-T5TLAKMVESQ   | 423   | >BMPR1A-T5MLAKMVESC   | 27    | 396   |
| >BMPR1A-T5TLAKMVESQI  | 4     | >BMPR1A-T5MLAKMVESC   | 2     | 2     |
| >BMPR1A-T5TLAKMVESQI  | 679   | >BMPR1A-T5MLAKMVESC   | 295   | 384   |
| >BMPR1A-T5KTLAKMVES   | 13941 | >BMPR1A-T5KMLAKMVES   | 426   | 13515 |
| >BMPR1A-T5KTLAKMVES   | 5280  | >BMPR1A-T5KMLAKMVES   | 477   | 4803  |

|                        |       |                        |       |       |
|------------------------|-------|------------------------|-------|-------|
| >BMPR1A-T5 KTLAKMVES   | 13978 | >BMPR1A-T5 KMLAKMVES   | 239   | 13739 |
| >BMPR1A-T5 KTLAKMVESC  | 13630 | >BMPR1A-T5 KMLAKMVES   | 314   | 13316 |
| >BMPR1A-T5 KTLAKMVESC  | 277   | >BMPR1A-T5 KMLAKMVES   | 444   | 167   |
| >BMPR1A-T5 KTLAKMVES   | 207   | >BMPR1A-T5 KMLAKMVES   | 13088 | 12881 |
| >BMPR1A-T5 KTLAKMVESC  | 427   | >BMPR1A-T5 KMLAKMVES   | 14403 | 13976 |
| >BMPR1A-T5 SRLTALRIKKT | 864   | >BMPR1A-T5 SRLTALRIKKN | 38    | 826   |
| >BMPR1A-T5 SRLTALRIKKT | 7104  | >BMPR1A-T5 SRLTALRIKKN | 307   | 6797  |
| >BMPR1A-T5 KKTLAKMV    | 1035  | >BMPR1A-T5 KKMLAKMV    | 103   | 932   |
| >BMPR1A-T5 IKKTLAKMV   | 557   | >BMPR1A-T5 IKKMLAKMV   | 339   | 218   |
| >BMPR1A-T5 IKKTLAKM    | 42    | >BMPR1A-T5 IKKMLAKM    | 58    | 16    |
| >BMPR1A-T5 IKKTLAKMV   | 109   | >BMPR1A-T5 IKKMLAKMV   | 116   | 7     |
| >BMPR1A-T5 RIKKTLAKMV  | 567   | >BMPR1A-T5 RIKKMLAKM\  | 414   | 153   |
| >BMPR1A-T5 RIKKTLAK    | 57    | >BMPR1A-T5 RIKKMLAK    | 52    | 5     |
| >BMPR1A-T5 RIKKTLAK    | 112   | >BMPR1A-T5 RIKKMLAK    | 77    | 35    |
| >BMPR1A-T5 RIKKTLAK    | 3     | >BMPR1A-T5 RIKKMLAK    | 4     | 1     |
| >BMPR1A-T5 RIKKTLAKM   | 17    | >BMPR1A-T5 RIKKMLAKM   | 34    | 17    |
| >BMPR1A-T5 RIKKTLAKMV  | 34    | >BMPR1A-T5 RIKKMLAKM\  | 56    | 22    |
| >BMPR1A-T5 RIKKTLAKMV  | 316   | >BMPR1A-T5 RIKKMLAKM\  | 609   | 293   |
| >BMPR1A-T5 RIKKTLAK    | 63    | >BMPR1A-T5 RIKKMLAK    | 44    | 19    |
| >BMPR1A-T5 RIKKTLAKM   | 202   | >BMPR1A-T5 RIKKMLAKM   | 350   | 148   |
| >BMPR1A-T5 RIKKTLAKM   | 159   | >BMPR1A-T5 RIKKMLAKM   | 158   | 1     |
| >BMPR1A-T5 LRIKKTAKM   | 382   | >BMPR1A-T5 LRIKKMLAKN  | 637   | 255   |
| >BMPR1A-T5 LRIKKTAK    | 128   | >BMPR1A-T5 LRIKKMLAK   | 112   | 16    |
| >BMPR1A-T5 LRIKKTAKM   | 114   | >BMPR1A-T5 LRIKKMLAKN  | 187   | 73    |
| >BMPR1A-T5 LRIKKTAKM\  | 311   | >BMPR1A-T5 LRIKKMLAKN  | 279   | 32    |
| >BMPR1A-T5 LRIKKTAKM   | 305   | >BMPR1A-T5 LRIKKMLAKN  | 310   | 5     |
| >BMPR1A-T5 ALRIKKTLA   | 381   | >BMPR1A-T5 ALRIKKMLA   | 608   | 227   |
| >BMPR1A-T5 ALRIKKTTL   | 23    | >BMPR1A-T5 ALRIKKML    | 43    | 20    |
| >BMPR1A-T5 ALRIKKTLA   | 84    | >BMPR1A-T5 ALRIKKMLA   | 68    | 16    |
| >BMPR1A-T5 ALRIKKTAKM  | 284   | >BMPR1A-T5 ALRIKKMLAK  | 229   | 55    |
| >BMPR1A-T5 ALRIKKTAK   | 26    | >BMPR1A-T5 ALRIKKMLAK  | 22    | 4     |
| >BMPR1A-T5 ALRIKKTAK   | 197   | >BMPR1A-T5 ALRIKKMLAK  | 139   | 58    |
| >BMPR1A-T5 ALRIKKTLA   | 392   | >BMPR1A-T5 ALRIKKMLA   | 25    | 367   |
| >BMPR1A-T5 ALRIKKTAK   | 7     | >BMPR1A-T5 ALRIKKMLAK  | 5     | 2     |
| >BMPR1A-T5 ALRIKKTAKM  | 307   | >BMPR1A-T5 ALRIKKMLAK  | 176   | 131   |
| >BMPR1A-T5 ALRIKKTTL   | 48    | >BMPR1A-T5 ALRIKKML    | 119   | 71    |
| >BMPR1A-T5 ALRIKKTLA   | 815   | >BMPR1A-T5 ALRIKKMLA   | 440   | 375   |
| >BMPR1A-T5 ALRIKKTAKM  | 346   | >BMPR1A-T5 ALRIKKMLAK  | 227   | 119   |
| >BMPR1A-T5 TALRIKKTAK  | 85    | >BMPR1A-T5 TALRIKKMLA  | 68    | 17    |
| >BMPR1A-T5 TALRIKKTAK  | 227   | >BMPR1A-T5 TALRIKKMLA  | 330   | 103   |
| >BMPR1A-T5 LTALRIKKT   | 3603  | >BMPR1A-T5 LTALRIKKM   | 13    | 3590  |
| >BMPR1A-T5 LTALRIKKTTL | 24    | >BMPR1A-T5 LTALRIKKML  | 52    | 28    |
| >BMPR1A-T5 LTALRIKKTTL | 529   | >BMPR1A-T5 LTALRIKKML  | 307   | 222   |

|                       |       |                        |      |       |
|-----------------------|-------|------------------------|------|-------|
| >BMPR1A-T5 LTALRIKKT  | 12183 | >BMPR1A-T5 LTALRIKKM   | 147  | 12036 |
| >BMPR1A-T5 LTALRIKKT  | 45    | >BMPR1A-T5 LTALRIKKML  | 35   | 10    |
| >BMPR1A-T5 RTALRIKKT  | 468   | >BMPR1A-T5 RTALRIKKM   | 359  | 109   |
| >BMPR1A-T5 RTALRIKKT  | 321   | >BMPR1A-T5 RTALRIKKM   | 419  | 98    |
| >BMPR1A-T5 RTALRIKKT  | 481   | >BMPR1A-T5 RTALRIKKM   | 655  | 174   |
| >BMPR1A-T5 RTALRIKKT  | 17    | >BMPR1A-T5 RTALRIKKM   | 35   | 18    |
| >BMPR1A-T5 RTALRIKKT  | 120   | >BMPR1A-T5 RTALRIKKM   | 903  | 783   |
| >BMPR1A-T5 RTALRIKKT  | 13631 | >BMPR1A-T5 RTALRIKKM   | 124  | 13507 |
| >BMPR1A-T5 RTALRIKKT  | 655   | >BMPR1A-T5 RTALRIKKM   | 425  | 230   |
| >BRAF-A598 ATVKSRWSG  | 2758  | >BRAF-A598 TTVKSRWSG   | 365  | 2393  |
| >BRAF-A598 ATVKSRWSG  | 451   | >BRAF-A598 TTVKSRWSG   | 589  | 138   |
| >BRAF-A598 LATVKSRW   | 36    | >BRAF-A598 LTTVKSRW    | 7    | 29    |
| >BRAF-A598 LATVKSRW   | 86    | >BRAF-A598 LTTVKSRW    | 2399 | 2313  |
| >BRAF-A598 LATVKSRW   | 73    | >BRAF-A598 LTTVKSRW    | 59   | 14    |
| >BRAF-A598 LATVKSRW   | 22    | >BRAF-A598 LTTVKSRW    | 21   | 1     |
| >BRAF-A598 LATVKSRW   | 172   | >BRAF-A598 LTTVKSRW    | 866  | 694   |
| >BRAF-A598 LATVKSRW   | 130   | >BRAF-A598 LTTVKSRW    | 1650 | 1520  |
| >BRAF-A598 LTVKIGDFGL | 229   | >BRAF-A598 LTVKIGDFGL  | 1977 | 1748  |
| >BRAF-A598 LTVKIGDFGL | 380   | >BRAF-A598 LTVKIGDFGL  | 328  | 52    |
| >BRAF-A598 GLATVKSRW  | 242   | >BRAF-A598 GLTTVKSRW   | 229  | 13    |
| >BRAF-A598 FGLATVKSRM | 98    | >BRAF-A598 FGLTTVKSRM  | 161  | 63    |
| >BRAF-A598 FGLATVKSRM | 499   | >BRAF-A598 FGLTTVKSRM  | 816  | 317   |
| >BRAF-A598 FGLATVKSRM | 45    | >BRAF-A598 FGLTTVKSRM  | 98   | 53    |
| >BRAF-A598 FGLATVKSRM | 215   | >BRAF-A598 FGLTTVKSRM  | 216  | 1     |
| >BRAF-A598 DFGLATVKSR | 205   | >BRAF-A598 DFGLTTVKSR  | 219  | 14    |
| >BRAF-A598 DFGLATVKSR | 246   | >BRAF-A598 DFGLTTVKSR  | 192  | 54    |
| >BRAF-A598 GDFGLATV   | 393   | >BRAF-A598 GDFGLTTV    | 119  | 274   |
| >BRAF-A598 GDFGLATV   | 227   | >BRAF-A598 GDFGLTTV    | 348  | 121   |
| >BRAF-A598 IGDFGLATV  | 253   | >BRAF-A598 IGDFGLTTV   | 305  | 52    |
| >BRAF-A598 KIGDFGLATV | 53    | >BRAF-A598 KIGDFGLTTV  | 62   | 9     |
| >BRAF-A598 KIGDFGLATV | 34    | >BRAF-A598 KIGDFGLTTV  | 39   | 5     |
| >BRAF-A598 KIGDFGLATV | 12    | >BRAF-A598 KIGDFGLTTV  | 14   | 2     |
| >BRAF-A598 KIGDFGLATV | 59    | >BRAF-A598 KIGDFGLTTV  | 60   | 1     |
| >BRAF-A598 KIGDFGLATV | 4     | >BRAF-A598 KIGDFGLTTV  | 6    | 2     |
| >BRAF-A598 KIGDFGLATV | 15    | >BRAF-A598 KIGDFGLTTV  | 27   | 12    |
| >BRAF-A598 KIGDFGLATV | 16    | >BRAF-A598 KIGDFGLTTV  | 15   | 1     |
| >BRAF-A598 KIGDFGLATV | 30    | >BRAF-A598 KIGDFGLTTV  | 68   | 38    |
| >BRAF-A598 KIGDFGLATV | 4     | >BRAF-A598 KIGDFGLTTV  | 4    | 0     |
| >BRAF-A598 KIGDFGLATV | 129   | >BRAF-A598 KIGDFGLTTVI | 108  | 21    |
| >BRAF-A598 KIGDFGLATV | 57    | >BRAF-A598 KIGDFGLTTVI | 40   | 17    |
| >BRAF-A598 KIGDFGLATV | 563   | >BRAF-A598 KIGDFGLTTVI | 347  | 216   |
| >BRAF-A598 KIGDFGLATV | 509   | >BRAF-A598 KIGDFGLTTV  | 315  | 194   |
| >BRAF-A598 KIGDFGLATV | 132   | >BRAF-A598 KIGDFGLTTVI | 83   | 49    |

|                      |      |                      |      |      |
|----------------------|------|----------------------|------|------|
| >BRAFA598VKIGDFGLAT  | 144  | >BRAFA598VKIGDFGLTT  | 166  | 22   |
| >BRAFA598\ATVKSRWSG  | 451  | >BRAFA598\VTVKSRWSG  | 287  | 164  |
| >BRAFA598\LATVKSRW   | 36   | >BRAFA598\LTVVKSRW   | 161  | 125  |
| >BRAFA598\LATVKSRW   | 86   | >BRAFA598\LTVVKSRW   | 862  | 776  |
| >BRAFA598\LATVKSRW   | 73   | >BRAFA598\LTVVKSRW   | 603  | 530  |
| >BRAFA598\LATVKSRW   | 22   | >BRAFA598\LTVVKSRW   | 64   | 42   |
| >BRAFA598\LATVKSRW   | 172  | >BRAFA598\LTVVKSRW   | 1347 | 1175 |
| >BRAFA598\LATVKSRW   | 130  | >BRAFA598\LTVVKSRW   | 1723 | 1593 |
| >BRAFA598\LTVKIGDFGL | 1495 | >BRAFA598\LTVKIGDFGL | 243  | 1252 |
| >BRAFA598\LTVKIGDFGL | 2158 | >BRAFA598\LTVKIGDFGL | 358  | 1800 |
| >BRAFA598\LTVKIGDFGL | 986  | >BRAFA598\LTVKIGDFGL | 91   | 895  |
| >BRAFA598\LTVKIGDFGL | 229  | >BRAFA598\LTVKIGDFGL | 34   | 195  |
| >BRAFA598\LTVKIGDFGL | 4855 | >BRAFA598\LTVKIGDFGL | 247  | 4608 |
| >BRAFA598\LTVKIGDFGL | 3240 | >BRAFA598\LTVKIGDFGL | 332  | 2908 |
| >BRAFA598\LTVKIGDFGL | 380  | >BRAFA598\LTVKIGDFGL | 52   | 328  |
| >BRAFA598\GLATVKSRW  | 242  | >BRAFA598\GLVTVKSRW  | 275  | 33   |
| >BRAFA598\FGLATVKSRM | 98   | >BRAFA598\FGLVTVKSRM | 102  | 4    |
| >BRAFA598\FGLATVKSRM | 499  | >BRAFA598\FGLVTVKSRM | 649  | 150  |
| >BRAFA598\FGLATVKSRM | 45   | >BRAFA598\FGLVTVKSRM | 70   | 25   |
| >BRAFA598\FGLATVKSRM | 215  | >BRAFA598\FGLVTVKSRM | 172  | 43   |
| >BRAFA598\DFGLATVK   | 1319 | >BRAFA598\DFGLVTVK   | 341  | 978  |
| >BRAFA598\DFGLATVKSR | 205  | >BRAFA598\DFGLVTVKSR | 81   | 124  |
| >BRAFA598\DFGLATVKSR | 246  | >BRAFA598\DFGLVTVKSR | 374  | 128  |
| >BRAFA598\GDFGLATV   | 393  | >BRAFA598\GDFGLVTV   | 181  | 212  |
| >BRAFA598\GDFGLATV   | 594  | >BRAFA598\GDFGLVTV   | 305  | 289  |
| >BRAFA598\GDFGLATV   | 227  | >BRAFA598\GDFGLVTV   | 360  | 133  |
| >BRAFA598\IGDFGLATV  | 253  | >BRAFA598\IGDFGLVTV  | 385  | 132  |
| >BRAFA598\KIGDFGLA   | 2562 | >BRAFA598\KIGDFGLV   | 271  | 2291 |
| >BRAFA598\KIGDFGLATV | 53   | >BRAFA598\KIGDFGLVTV | 57   | 4    |
| >BRAFA598\KIGDFGLA   | 1135 | >BRAFA598\KIGDFGLV   | 124  | 1011 |
| >BRAFA598\KIGDFGLATV | 34   | >BRAFA598\KIGDFGLVTV | 54   | 20   |
| >BRAFA598\KIGDFGLA   | 701  | >BRAFA598\KIGDFGLV   | 65   | 636  |
| >BRAFA598\KIGDFGLATV | 12   | >BRAFA598\KIGDFGLVTV | 21   | 9    |
| >BRAFA598\KIGDFGLA   | 554  | >BRAFA598\KIGDFGLV   | 50   | 504  |
| >BRAFA598\KIGDFGLATV | 59   | >BRAFA598\KIGDFGLVTV | 59   | 0    |
| >BRAFA598\KIGDFGLA   | 900  | >BRAFA598\KIGDFGLV   | 21   | 879  |
| >BRAFA598\KIGDFGLATV | 4    | >BRAFA598\KIGDFGLVTV | 5    | 1    |
| >BRAFA598\KIGDFGLA   | 7285 | >BRAFA598\KIGDFGLV   | 268  | 7017 |
| >BRAFA598\KIGDFGLATV | 15   | >BRAFA598\KIGDFGLVTV | 20   | 5    |
| >BRAFA598\KIGDFGLA   | 4116 | >BRAFA598\KIGDFGLV   | 67   | 4049 |
| >BRAFA598\KIGDFGLATV | 16   | >BRAFA598\KIGDFGLVTV | 14   | 2    |
| >BRAFA598\KIGDFGLATV | 30   | >BRAFA598\KIGDFGLVTV | 47   | 17   |
| >BRAFA598\KIGDFGLA   | 1379 | >BRAFA598\KIGDFGLV   | 14   | 1365 |

|                       |       |                       |     |       |
|-----------------------|-------|-----------------------|-----|-------|
| >BRAFA598\KIGDFGLATV  | 4     | >BRAFA598\KIGDFGLVTV  | 4   | 0     |
| >BRAFA598\KIGDFGLATV  | 129   | >BRAFA598\KIGDFGLVTV  | 128 | 1     |
| >BRAFA598\KIGDFGLATV  | 57    | >BRAFA598\KIGDFGLVTV  | 47  | 10    |
| >BRAFA598\KIGDFGLATV  | 509   | >BRAFA598\KIGDFGLVTV  | 195 | 314   |
| >BRAFA598\KIGDFGLATV  | 132   | >BRAFA598\KIGDFGLVTV  | 120 | 12    |
| >BRAFA598\VKIGDFGLAT  | 144   | >BRAFA598\VKIGDFGLVTV | 182 | 38    |
| >BRAFA598\VKIGDFGLAT  | 835   | >BRAFA598\VKIGDFGLVTV | 458 | 377   |
| >BRAFA598\TVKIGDFGLA  | 1266  | >BRAFA598\TVKIGDFGLV  | 180 | 1086  |
| >BRAFA598\TVKIGDFGLA  | 1654  | >BRAFA598\TVKIGDFGLV  | 224 | 1430  |
| >BRAFD587\DLTVKIGDFG  | 14353 | >BRAFD587\ALTVKIGDFG  | 497 | 13856 |
| >BRAFD587\DLTVKIGDFG  | 4602  | >BRAFD587\ALTVKIGDFG  | 76  | 4526  |
| >BRAFD587\DLTVKIGDFG  | 9274  | >BRAFD587\ALTVKIGDFG  | 434 | 8840  |
| >BRAFD587\DLTVKIGDFG  | 8154  | >BRAFD587\ALTVKIGDFG  | 310 | 7844  |
| >BRAFD587\DLTVKIGDFG  | 3196  | >BRAFD587\ALTVKIGDFG  | 111 | 3085  |
| >BRAFD587\DLTVKIGDFG  | 2678  | >BRAFD587\ALTVKIGDFG  | 104 | 2574  |
| >BRAFD587\DLTVKIGDFG  | 765   | >BRAFD587\ALTVKIGDFG  | 42  | 723   |
| >BRAFD587\DLTVKIGDFG  | 1666  | >BRAFD587\ALTVKIGDFG  | 472 | 1194  |
| >BRAFD587\DLTVKIGDFG  | 205   | >BRAFD587\ALTVKIGDFG  | 6   | 199   |
| >BRAFD587\HEDLTVKI    | 12    | >BRAFD587\HEALTVKI    | 11  | 1     |
| >BRAFD587\HEDLTVKIGD  | 858   | >BRAFD587\HEALTVKIGD  | 138 | 720   |
| >BRAFD587\HEDLTVKIGD  | 812   | >BRAFD587\HEALTVKIGD  | 285 | 527   |
| >BRAFD587\HEDLTVKI    | 114   | >BRAFD587\HEALTVKI    | 80  | 34    |
| >BRAFD587\HEDLTVKIGD  | 1094  | >BRAFD587\HEALTVKIGD  | 405 | 689   |
| >BRAFD587\HEDLTVKI    | 157   | >BRAFD587\HEALTVKI    | 53  | 104   |
| >BRAFD587\HEDLTVKIGD  | 888   | >BRAFD587\HEALTVKIGD  | 114 | 774   |
| >BRAFD587\FLHEDLTV    | 9     | >BRAFD587\FLHEALTV    | 9   | 0     |
| >BRAFD587\FLHEDLTVKI  | 66    | >BRAFD587\FLHEALTVKI  | 78  | 12    |
| >BRAFD587\FLHEDLTV    | 6     | >BRAFD587\FLHEALTV    | 5   | 1     |
| >BRAFD587\FLHEDLTVK   | 539   | >BRAFD587\FLHEALTVK   | 292 | 247   |
| >BRAFD587\FLHEDLTVKI  | 14    | >BRAFD587\FLHEALTVKI  | 16  | 2     |
| >BRAFD587\FLHEDLTV    | 3     | >BRAFD587\FLHEALTV    | 3   | 0     |
| >BRAFD587\FLHEDLTVK   | 332   | >BRAFD587\FLHEALTVK   | 216 | 116   |
| >BRAFD587\FLHEDLTVKI  | 24    | >BRAFD587\FLHEALTVKI  | 22  | 2     |
| >BRAFD587\FLHEDLTVKIC | 334   | >BRAFD587\FLHEALTVKIC | 262 | 72    |
| >BRAFD587\FLHEDLTV    | 7     | >BRAFD587\FLHEALTV    | 6   | 1     |
| >BRAFD587\FLHEDLTVKI  | 101   | >BRAFD587\FLHEALTVKI  | 146 | 45    |
| >BRAFD587\FLHEDLTV    | 1     | >BRAFD587\FLHEALTV    | 1   | 0     |
| >BRAFD587\FLHEDLTVK   | 368   | >BRAFD587\FLHEALTVK   | 390 | 22    |
| >BRAFD587\FLHEDLTVKI  | 2     | >BRAFD587\FLHEALTVKI  | 2   | 0     |
| >BRAFD587\FLHEDLTV    | 3     | >BRAFD587\FLHEALTV    | 3   | 0     |
| >BRAFD587\FLHEDLTVKI  | 4     | >BRAFD587\FLHEALTVKI  | 5   | 1     |
| >BRAFD587\FLHEDLTV    | 4     | >BRAFD587\FLHEALTV    | 4   | 0     |
| >BRAFD587\FLHEDLTVKI  | 7     | >BRAFD587\FLHEALTVKI  | 7   | 0     |



|                       |       |                       |      |       |
|-----------------------|-------|-----------------------|------|-------|
| >BRAFD587,FLHEDLTV    | 6     | >BRAFD587,FLHEALTV    | 3    | 3     |
| >BRAFD587,FLHEDLTVKI  | 13    | >BRAFD587,FLHEALTVKI  | 15   | 2     |
| >BRAFD587,FLHEDLTV    | 1     | >BRAFD587,FLHEALTV    | 1    | 0     |
| >BRAFD587,FLHEDLTVK   | 39    | >BRAFD587,FLHEALTVK   | 36   | 3     |
| >BRAFD587,FLHEDLTVKI  | 2     | >BRAFD587,FLHEALTVKI  | 2    | 0     |
| >BRAFD587,FLHEDLTVK   | 836   | >BRAFD587,FLHEALTVK   | 253  | 583   |
| >BRAFD587,FLHEDLTVK   | 957   | >BRAFD587,FLHEALTVK   | 456  | 501   |
| >BRAFD587,FLHEDLTV    | 561   | >BRAFD587,FLHEALTV    | 145  | 416   |
| >BRAFD587,FLHEDLTVKI  | 414   | >BRAFD587,FLHEALTVKI  | 1994 | 1580  |
| >BRAFD587,IFLHEDLTVK  | 1802  | >BRAFD587,IFLHEALTVK  | 360  | 1442  |
| >BRAFD587,IFLHEDLTVKI | 68    | >BRAFD587,IFLHEALTVKI | 84   | 16    |
| >BRAFD587,IFLHEDLTVKI | 604   | >BRAFD587,IFLHEALTVKI | 372  | 232   |
| >BRAFD587,IFLHEDLTVKI | 91    | >BRAFD587,IFLHEALTVKI | 61   | 30    |
| >BRAFD587,NIFLHEDLTV  | 106   | >BRAFD587,NIFLHEALTV  | 209  | 103   |
| >BRAFD587,NIFLHEDL    | 629   | >BRAFD587,NIFLHEAL    | 127  | 502   |
| >BRAFD587,NIFLHEDLTV  | 125   | >BRAFD587,NIFLHEALTV  | 193  | 68    |
| >BRAFD587,NIFLHEDLTV  | 99    | >BRAFD587,NIFLHEALTV  | 64   | 35    |
| >BRAFD587,NIFLHEDLTV  | 155   | >BRAFD587,NIFLHEALTV  | 228  | 73    |
| >BRAFD587,NIFLHEDLTV  | 353   | >BRAFD587,NIFLHEALTV  | 154  | 199   |
| >BRAFD587,NIFLHEDLTV  | 756   | >BRAFD587,NIFLHEALTV  | 497  | 259   |
| >BRAFD587,NIFLHEDLTV  | 473   | >BRAFD587,NIFLHEALTV  | 521  | 48    |
| >BRAFD587,NIFLHEDLTV  | 225   | >BRAFD587,NIFLHEALTV  | 94   | 131   |
| >BRAFD587,NIFLHEDLTVK | 1040  | >BRAFD587,NIFLHEALTVK | 322  | 718   |
| >BRAFD587,NIFLHEDLTVK | 333   | >BRAFD587,NIFLHEALTVK | 212  | 121   |
| >BRAFD587,NIFLHEDLTVK | 61    | >BRAFD587,NIFLHEALTVK | 41   | 20    |
| >BRAFD587,NIFLHEDL    | 1424  | >BRAFD587,NIFLHEAL    | 242  | 1182  |
| >BRAFD587,NIFLHEDLTV  | 1441  | >BRAFD587,NIFLHEALTV  | 177  | 1264  |
| >BRAFD587,NNIFLHEDL   | 3736  | >BRAFD587,NNIFLHEAL   | 425  | 3311  |
| >BRAFD587,KSNNIFLHED  | 3941  | >BRAFD587,KSNNIFLHEA  | 96   | 3845  |
| >BRAFD587,KSNNIFLHEDI | 30    | >BRAFD587,KSNNIFLHEAI | 16   | 14    |
| >BRAFD587,KSNNIFLHEDI | 981   | >BRAFD587,KSNNIFLHEAI | 355  | 626   |
| >BRAFD587,KSNNIFLHEDI | 370   | >BRAFD587,KSNNIFLHEAI | 123  | 247   |
| >BRAFD587,KSNNIFLHEDI | 298   | >BRAFD587,KSNNIFLHEAI | 117  | 181   |
| >BRAFD587,KSNNIFLHEDI | 617   | >BRAFD587,KSNNIFLHEAI | 230  | 387   |
| >BRAFD587IDLTVKIGDFG  | 765   | >BRAFD587IELTVKIGDFGI | 391  | 374   |
| >BRAFD587IDLTVKIGDFG  | 205   | >BRAFD587IELTVKIGDFGI | 53   | 152   |
| >BRAFD587IEDLTVKIG    | 8848  | >BRAFD587IEELTVKIG    | 293  | 8555  |
| >BRAFD587IEDLTVKIGDF  | 6281  | >BRAFD587IEELTVKIGDF  | 396  | 5885  |
| >BRAFD587IEDLTVKIGDF  | 9642  | >BRAFD587IEELTVKIGDF  | 443  | 9199  |
| >BRAFD587IEDLTVKIGDF  | 13879 | >BRAFD587IEELTVKIGDF  | 369  | 13510 |
| >BRAFD587IEDLTVKIGDF  | 14664 | >BRAFD587IEELTVKIGDF  | 489  | 14175 |
| >BRAFD587IHEDLTVKI    | 12    | >BRAFD587IHEELTVKI    | 13   | 1     |
| >BRAFD587IHEDLTVKIGD  | 858   | >BRAFD587IHEELTVKIGDI | 336  | 522   |

|                       |      |                       |     |      |
|-----------------------|------|-----------------------|-----|------|
| >BRAFD587IHEDLTVKI    | 114  | >BRAFD587IHEELTVKI    | 74  | 40   |
| >BRAFD587IHEDLTVKI    | 157  | >BRAFD587IHEELTVKI    | 129 | 28   |
| >BRAFD587IHEDLTVKIGD  | 888  | >BRAFD587IHEELTVKIGDI | 463 | 425  |
| >BRAFD587IFLHEDLTV    | 9    | >BRAFD587IFLHEELTV    | 9   | 0    |
| >BRAFD587IFLHEDLTVKI  | 66   | >BRAFD587IFLHEELTVKI  | 53  | 13   |
| >BRAFD587IFLHEDLTV    | 6    | >BRAFD587IFLHEELTV    | 6   | 0    |
| >BRAFD587IFLHEDLTVK   | 539  | >BRAFD587IFLHEELTVK   | 374 | 165  |
| >BRAFD587IFLHEDLTVKI  | 14   | >BRAFD587IFLHEELTVKI  | 17  | 3    |
| >BRAFD587IFLHEDLTV    | 3    | >BRAFD587IFLHEELTV    | 3   | 0    |
| >BRAFD587IFLHEDLTVK   | 332  | >BRAFD587IFLHEELTVK   | 465 | 133  |
| >BRAFD587IFLHEDLTVKI  | 24   | >BRAFD587IFLHEELTVKI  | 23  | 1    |
| >BRAFD587IFLHEDLTVKIG | 334  | >BRAFD587IFLHEELTVKIG | 397 | 63   |
| >BRAFD587IFLHEDLTV    | 7    | >BRAFD587IFLHEELTV    | 9   | 2    |
| >BRAFD587IFLHEDLTVKI  | 101  | >BRAFD587IFLHEELTVKI  | 127 | 26   |
| >BRAFD587IFLHEDLTV    | 1    | >BRAFD587IFLHEELTV    | 1   | 0    |
| >BRAFD587IFLHEDLTVK   | 368  | >BRAFD587IFLHEELTVK   | 461 | 93   |
| >BRAFD587IFLHEDLTVKI  | 2    | >BRAFD587IFLHEELTVKI  | 2   | 0    |
| >BRAFD587IFLHEDLTV    | 3    | >BRAFD587IFLHEELTV    | 3   | 0    |
| >BRAFD587IFLHEDLTVKI  | 4    | >BRAFD587IFLHEELTVKI  | 4   | 0    |
| >BRAFD587IFLHEDLTV    | 4    | >BRAFD587IFLHEELTV    | 4   | 0    |
| >BRAFD587IFLHEDLTVKI  | 7    | >BRAFD587IFLHEELTVKI  | 7   | 0    |
| >BRAFD587IFLHEDLTV    | 6    | >BRAFD587IFLHEELTV    | 6   | 0    |
| >BRAFD587IFLHEDLTVKI  | 13   | >BRAFD587IFLHEELTVKI  | 22  | 9    |
| >BRAFD587IFLHEDLTV    | 1    | >BRAFD587IFLHEELTV    | 1   | 0    |
| >BRAFD587IFLHEDLTVK   | 39   | >BRAFD587IFLHEELTVK   | 56  | 17   |
| >BRAFD587IFLHEDLTVKI  | 2    | >BRAFD587IFLHEELTVKI  | 2   | 0    |
| >BRAFD587IFLHEDLTVKI  | 414  | >BRAFD587IFLHEELTVKI  | 215 | 199  |
| >BRAFD587IIFLHEDLTVKI | 68   | >BRAFD587IIFLHEELTVKI | 94  | 26   |
| >BRAFD587IIFLHEDLTVKI | 91   | >BRAFD587IIFLHEELTVKI | 73  | 18   |
| >BRAFD587INIFLHEDLTV  | 106  | >BRAFD587INIFLHEELTV  | 135 | 29   |
| >BRAFD587INIFLHEDL    | 629  | >BRAFD587INIFLHEEL    | 95  | 534  |
| >BRAFD587INIFLHEDLTV  | 125  | >BRAFD587INIFLHEELTV  | 142 | 17   |
| >BRAFD587INIFLHEDLTV  | 99   | >BRAFD587INIFLHEELTV  | 110 | 11   |
| >BRAFD587INIFLHEDLTV  | 155  | >BRAFD587INIFLHEELTV  | 269 | 114  |
| >BRAFD587INIFLHEDLTV  | 353  | >BRAFD587INIFLHEELTV  | 218 | 135  |
| >BRAFD587INIFLHEDLTV  | 473  | >BRAFD587INIFLHEELTV  | 525 | 52   |
| >BRAFD587INIFLHEDLTV  | 225  | >BRAFD587INIFLHEELTV  | 135 | 90   |
| >BRAFD587INIFLHEDLTVK | 333  | >BRAFD587INIFLHEELTVK | 321 | 12   |
| >BRAFD587INIFLHEDLTVK | 61   | >BRAFD587INIFLHEELTVK | 60  | 1    |
| >BRAFD587INIFLHEDL    | 1424 | >BRAFD587INIFLHEEL    | 175 | 1249 |
| >BRAFD587INNIFLHEDL   | 3736 | >BRAFD587INNIFLHEEL   | 253 | 3483 |
| >BRAFD587IKSNNIFLHEDL | 30   | >BRAFD587IKSNNIFLHEEL | 28  | 2    |
| >BRAFD587IKSNNIFLHEDL | 370  | >BRAFD587IKSNNIFLHEEL | 98  | 272  |

|                       |      |                       |      |      |
|-----------------------|------|-----------------------|------|------|
| >BRAFD587IKSNNIFLHEDI | 298  | >BRAFD587IKSNNIFLHEEI | 56   | 242  |
| >BRAFD587IKSNNIFLHEDI | 617  | >BRAFD587IKSNNIFLHEEI | 180  | 437  |
| >BRAFD587IDLTVKIGDFG  | 4602 | >BRAFD587INLTVKIGDFG  | 224  | 4378 |
| >BRAFD587IDLTVKIGDFG  | 2678 | >BRAFD587INLTVKIGDFG  | 221  | 2457 |
| >BRAFD587IDLTVKIGDFG  | 765  | >BRAFD587INLTVKIGDFG  | 293  | 472  |
| >BRAFD587IDLTVKIGDFG  | 205  | >BRAFD587INLTVKIGDFG  | 48   | 157  |
| >BRAFD587IHEDLTVKI    | 12   | >BRAFD587IHENLTVKI    | 12   | 0    |
| >BRAFD587IHEDLTVKIGD  | 858  | >BRAFD587IHENLTVKIGD  | 315  | 543  |
| >BRAFD587IHEDLTVKIGD  | 812  | >BRAFD587IHENLTVKIGD  | 351  | 461  |
| >BRAFD587IHEDLTVKI    | 114  | >BRAFD587IHENLTVKI    | 242  | 128  |
| >BRAFD587IHEDLTVKI    | 1404 | >BRAFD587IHENLTVKI    | 276  | 1128 |
| >BRAFD587IHEDLTVKIGD  | 2416 | >BRAFD587IHENLTVKIGD  | 463  | 1953 |
| >BRAFD587IHEDLTVKIGD  | 1543 | >BRAFD587IHENLTVKIGD  | 365  | 1178 |
| >BRAFD587IHEDLTVKIGD  | 1094 | >BRAFD587IHENLTVKIGD  | 326  | 768  |
| >BRAFD587IHEDLTVKI    | 157  | >BRAFD587IHENLTVKI    | 67   | 90   |
| >BRAFD587IHEDLTVKIGD  | 888  | >BRAFD587IHENLTVKIGD  | 348  | 540  |
| >BRAFD587IFLHEDLTV    | 9    | >BRAFD587IFLHENLTV    | 9    | 0    |
| >BRAFD587IFLHEDLTVKI  | 66   | >BRAFD587IFLHENLTVKI  | 76   | 10   |
| >BRAFD587IFLHEDLTV    | 6    | >BRAFD587IFLHENLTV    | 5    | 1    |
| >BRAFD587IFLHEDLTVKI  | 14   | >BRAFD587IFLHENLTVKI  | 21   | 7    |
| >BRAFD587IFLHEDLTV    | 3    | >BRAFD587IFLHENLTV    | 3    | 0    |
| >BRAFD587IFLHEDLTVK   | 332  | >BRAFD587IFLHENLTVK   | 342  | 10   |
| >BRAFD587IFLHEDLTVKI  | 24   | >BRAFD587IFLHENLTVKI  | 20   | 4    |
| >BRAFD587IFLHEDLTVKIC | 334  | >BRAFD587IFLHENLTVKIC | 340  | 6    |
| >BRAFD587IFLHEDLTV    | 7    | >BRAFD587IFLHENLTV    | 7    | 0    |
| >BRAFD587IFLHEDLTVKI  | 101  | >BRAFD587IFLHENLTVKI  | 172  | 71   |
| >BRAFD587IFLHEDLTV    | 1    | >BRAFD587IFLHENLTV    | 1    | 0    |
| >BRAFD587IFLHEDLTVK   | 368  | >BRAFD587IFLHENLTVK   | 151  | 217  |
| >BRAFD587IFLHEDLTVKI  | 2    | >BRAFD587IFLHENLTVKI  | 2    | 0    |
| >BRAFD587IFLHEDLTVKIC | 706  | >BRAFD587IFLHENLTVKIC | 385  | 321  |
| >BRAFD587IFLHEDLTV    | 3    | >BRAFD587IFLHENLTV    | 2    | 1    |
| >BRAFD587IFLHEDLTVKI  | 4    | >BRAFD587IFLHENLTVKI  | 4    | 0    |
| >BRAFD587IFLHEDLTV    | 4    | >BRAFD587IFLHENLTV    | 4    | 0    |
| >BRAFD587IFLHEDLTVKI  | 7    | >BRAFD587IFLHENLTVKI  | 8    | 1    |
| >BRAFD587IFLHEDLTV    | 6    | >BRAFD587IFLHENLTV    | 4    | 2    |
| >BRAFD587IFLHEDLTVKI  | 13   | >BRAFD587IFLHENLTVKI  | 14   | 1    |
| >BRAFD587IFLHEDLTV    | 1    | >BRAFD587IFLHENLTV    | 1    | 0    |
| >BRAFD587IFLHEDLTVK   | 39   | >BRAFD587IFLHENLTVK   | 23   | 16   |
| >BRAFD587IFLHEDLTVKI  | 2    | >BRAFD587IFLHENLTVKI  | 2    | 0    |
| >BRAFD587IFLHEDLTVK   | 836  | >BRAFD587IFLHENLTVK   | 278  | 558  |
| >BRAFD587IFLHEDLTV    | 561  | >BRAFD587IFLHENLTV    | 218  | 343  |
| >BRAFD587IFLHEDLTVKI  | 414  | >BRAFD587IFLHENLTVKI  | 1254 | 840  |
| >BRAFD587IFLHEDLTVK   | 1802 | >BRAFD587IFLHENLTVK   | 464  | 1338 |

|                       |       |                       |       |       |
|-----------------------|-------|-----------------------|-------|-------|
| >BRAFD587IIFLHEDLTVKI | 68    | >BRAFD587IIFLHENLTVKI | 57    | 11    |
| >BRAFD587IIFLHEDLTVKI | 604   | >BRAFD587IIFLHENLTVKI | 340   | 264   |
| >BRAFD587IIFLHEDLTVKI | 91    | >BRAFD587IIFLHENLTVKI | 74    | 17    |
| >BRAFD587INIFLHEDLTV  | 106   | >BRAFD587INIFLHENLTV  | 95    | 11    |
| >BRAFD587INIFLHEDL    | 629   | >BRAFD587INIFLHENL    | 138   | 491   |
| >BRAFD587INIFLHEDLTV  | 125   | >BRAFD587INIFLHENLTV  | 150   | 25    |
| >BRAFD587INIFLHEDLTV  | 99    | >BRAFD587INIFLHENLTV  | 63    | 36    |
| >BRAFD587INIFLHEDLTV  | 155   | >BRAFD587INIFLHENLTV  | 146   | 9     |
| >BRAFD587INIFLHEDLTV  | 353   | >BRAFD587INIFLHENLTV  | 284   | 69    |
| >BRAFD587INIFLHEDLTV  | 473   | >BRAFD587INIFLHENLTV  | 785   | 312   |
| >BRAFD587INIFLHEDLTV  | 225   | >BRAFD587INIFLHENLTV  | 171   | 54    |
| >BRAFD587INIFLHEDLTV† | 1040  | >BRAFD587INIFLHENLTV† | 428   | 612   |
| >BRAFD587INIFLHEDLTV† | 333   | >BRAFD587INIFLHENLTV† | 245   | 88    |
| >BRAFD587INIFLHEDLTV† | 61    | >BRAFD587INIFLHENLTV† | 48    | 13    |
| >BRAFD587INIFLHEDL    | 1424  | >BRAFD587INIFLHENL    | 266   | 1158  |
| >BRAFD587INIFLHEDLTV  | 1441  | >BRAFD587INIFLHENLTV  | 324   | 1117  |
| >BRAFD587INNIFLHEDL   | 3736  | >BRAFD587INNIFLHENL   | 466   | 3270  |
| >BRAFD587INNIFLHEDLT  | 764   | >BRAFD587INNIFLHENLT  | 432   | 332   |
| >BRAFD587IKSNNIFLHEDI | 30    | >BRAFD587IKSNNIFLHEN  | 27    | 3     |
| >BRAFD587IKSNNIFLHEDI | 370   | >BRAFD587IKSNNIFLHEN  | 91    | 279   |
| >BRAFD587IKSNNIFLHEDI | 298   | >BRAFD587IKSNNIFLHEN  | 77    | 221   |
| >BRAFD587IKSNNIFLHEDI | 617   | >BRAFD587IKSNNIFLHEN  | 293   | 324   |
| >BRAFD594IDFGLATVKSR  | 205   | >BRAFD594IEFGLATVKSR  | 612   | 407   |
| >BRAFD594IDFGLATVKSR  | 246   | >BRAFD594IEFGLATVKSR  | 68    | 178   |
| >BRAFD594IGDFGLATV    | 2255  | >BRAFD594IGEFGLATV    | 331   | 1924  |
| >BRAFD594IGDFGLATV    | 8235  | >BRAFD594IGEFGLATV    | 11    | 8224  |
| >BRAFD594IGDFGLATV    | 393   | >BRAFD594IGEFGLATV    | 86    | 307   |
| >BRAFD594IGDFGLATVK   | 3037  | >BRAFD594IGEFGLATVK   | 427   | 2610  |
| >BRAFD594IGDFGLATV    | 13269 | >BRAFD594IGEFGLATV    | 194   | 13075 |
| >BRAFD594IGDFGLATVKS  | 17812 | >BRAFD594IGEFGLATVKS  | 343   | 17469 |
| >BRAFD594IGDFGLATV    | 21425 | >BRAFD594IGEFGLATV    | 158   | 21267 |
| >BRAFD594IGDFGLATV    | 594   | >BRAFD594IGEFGLATV    | 128   | 466   |
| >BRAFD594IGDFGLATV    | 227   | >BRAFD594IGEFGLATV    | 10457 | 10230 |
| >BRAFD594IIGDFGLATV   | 253   | >BRAFD594IIGEFGLATV   | 1339  | 1086  |
| >BRAFD594IKIGDFGLATV  | 53    | >BRAFD594IKIGEFGLATV  | 64    | 11    |
| >BRAFD594IKIGDFGLATV  | 34    | >BRAFD594IKIGEFGLATV  | 44    | 10    |
| >BRAFD594IKIGDFGLATV  | 12    | >BRAFD594IKIGEFGLATV  | 12    | 0     |
| >BRAFD594IKIGDFGLATV  | 59    | >BRAFD594IKIGEFGLATV  | 66    | 7     |
| >BRAFD594IKIGDFGLATV  | 4     | >BRAFD594IKIGEFGLATV  | 4     | 0     |
| >BRAFD594IKIGDFGLATV  | 15    | >BRAFD594IKIGEFGLATV  | 13    | 2     |
| >BRAFD594IKIGDFGLATV  | 16    | >BRAFD594IKIGEFGLATV  | 14    | 2     |
| >BRAFD594IKIGDFGLATV  | 30    | >BRAFD594IKIGEFGLATV  | 30    | 0     |
| >BRAFD594IKIGDFGLATV  | 4     | >BRAFD594IKIGEFGLATV  | 5     | 1     |

|                      |      |                       |       |       |
|----------------------|------|-----------------------|-------|-------|
| >BRAFD594IKIGDFGLATV | 129  | >BRAFD594IKIGEFGLATVI | 91    | 38    |
| >BRAFD594IKIGDFGLATV | 57   | >BRAFD594IKIGEFGLATVI | 76    | 19    |
| >BRAFD594IKIGDFGLATV | 509  | >BRAFD594IKIGEFGLATV  | 365   | 144   |
| >BRAFD594IKIGDFGLATV | 814  | >BRAFD594IKIGEFGLATV  | 460   | 354   |
| >BRAFD594IKIGDFGLATV | 132  | >BRAFD594IKIGEFGLATVI | 239   | 107   |
| >BRAFD594IVKIGDFGLAT | 144  | >BRAFD594IVKIGEFGLAT  | 180   | 36    |
| >BRAFD594ILTVKIGDFGL | 354  | >BRAFD594ILTVKIGEFGL  | 696   | 342   |
| >BRAFD594ILTVKIGDF   | 154  | >BRAFD594ILTVKIGEF    | 113   | 41    |
| >BRAFD594ILTVKIGDFGL | 229  | >BRAFD594ILTVKIGEFGL  | 235   | 6     |
| >BRAFD594ILTVKIGDF   | 899  | >BRAFD594ILTVKIGEF    | 259   | 640   |
| >BRAFD594ILTVKIGDF   | 636  | >BRAFD594ILTVKIGEF    | 404   | 232   |
| >BRAFD594ILTVKIGDF   | 13   | >BRAFD594ILTVKIGEF    | 6     | 7     |
| >BRAFD594ILTVKIGDFGL | 24   | >BRAFD594ILTVKIGEFGL  | 21    | 3     |
| >BRAFD594ILTVKIGDF   | 2073 | >BRAFD594ILTVKIGEF    | 443   | 1630  |
| >BRAFD594ILTVKIGDFGL | 424  | >BRAFD594ILTVKIGEFGL  | 464   | 40    |
| >BRAFD594ILTVKIGDF   | 118  | >BRAFD594ILTVKIGEF    | 83    | 35    |
| >BRAFD594ILTVKIGDFGL | 380  | >BRAFD594ILTVKIGEFGL  | 383   | 3     |
| >BRAFD594ILTVKIGDFG  | 205  | >BRAFD594ILTVKIGEFGI  | 139   | 66    |
| >BRAFD594IHEDLTVKIGD | 858  | >BRAFD594IHEDLTVKIGEI | 470   | 388   |
| >BRAFD594IHEDLTVKIGD | 812  | >BRAFD594IHEDLTVKIGEI | 267   | 545   |
| >BRAFD594IDFGLATVKSR | 205  | >BRAFD594IDFGLATVKSR  | 5286  | 5081  |
| >BRAFD594IDFGLATVKSR | 246  | >BRAFD594IDFGLATVKSR  | 308   | 62    |
| >BRAFD594IGDFGLATV   | 2255 | >BRAFD594IGDFGLATV    | 385   | 1870  |
| >BRAFD594IGDFGLATV   | 2088 | >BRAFD594IGDFGLATV    | 332   | 1756  |
| >BRAFD594IGDFGLATV   | 3633 | >BRAFD594IGDFGLATV    | 340   | 3293  |
| >BRAFD594IGDFGLATV   | 393  | >BRAFD594IGDFGLATV    | 31016 | 30623 |
| >BRAFD594IGDFGLATV   | 227  | >BRAFD594IGDFGLATV    | 18828 | 18601 |
| >BRAFD594IGDFGLATV   | 253  | >BRAFD594IGDFGLATV    | 1499  | 1246  |
| >BRAFD594IKIGDFGLATV | 53   | >BRAFD594IKIGGFGLATV  | 82    | 29    |
| >BRAFD594IKIGDFGLATV | 34   | >BRAFD594IKIGGFGLATV  | 47    | 13    |
| >BRAFD594IKIGDFGLATV | 12   | >BRAFD594IKIGGFGLATV  | 12    | 0     |
| >BRAFD594IKIGDFGLATV | 59   | >BRAFD594IKIGGFGLATV  | 68    | 9     |
| >BRAFD594IKIGDFGLATV | 4    | >BRAFD594IKIGGFGLATV  | 6     | 2     |
| >BRAFD594IKIGDFGLATV | 15   | >BRAFD594IKIGGFGLATV  | 42    | 27    |
| >BRAFD594IKIGDFGLATV | 16   | >BRAFD594IKIGGFGLATV  | 23    | 7     |
| >BRAFD594IKIGDFGLATV | 30   | >BRAFD594IKIGGFGLATV  | 61    | 31    |
| >BRAFD594IKIGDFGLATV | 4    | >BRAFD594IKIGGFGLATV  | 5     | 1     |
| >BRAFD594IKIGDFGLATV | 129  | >BRAFD594IKIGGFGLATV  | 89    | 40    |
| >BRAFD594IKIGDFGLATV | 57   | >BRAFD594IKIGGFGLATV  | 79    | 22    |
| >BRAFD594IKIGDFGLATV | 509  | >BRAFD594IKIGGFGLATV  | 184   | 325   |
| >BRAFD594IKIGDFGLATV | 132  | >BRAFD594IKIGGFGLATV  | 182   | 50    |
| >BRAFD594IVKIGDFGLAT | 144  | >BRAFD594IVKIGGFGLAT  | 92    | 52    |
| >BRAFD594IVKIGDFGLAT | 785  | >BRAFD594IVKIGGFGLAT  | 444   | 341   |

|                       |       |                        |       |       |
|-----------------------|-------|------------------------|-------|-------|
| >BRAFD594(LTVKIGDFGL  | 354   | >BRAFD594(LTVKIGGFGL   | 279   | 75    |
| >BRAFD594(LTVKIGDF    | 1554  | >BRAFD594(LTVKIGGF     | 81    | 1473  |
| >BRAFD594(LTVKIGDF    | 154   | >BRAFD594(LTVKIGGF     | 69    | 85    |
| >BRAFD594(LTVKIGDFGL/ | 229   | >BRAFD594(LTVKIGGFGL/  | 209   | 20    |
| >BRAFD594(LTVKIGDFGL  | 1233  | >BRAFD594(LTVKIGGFGL   | 364   | 869   |
| >BRAFD594(LTVKIGDF    | 899   | >BRAFD594(LTVKIGGF     | 304   | 595   |
| >BRAFD594(LTVKIGDF    | 13    | >BRAFD594(LTVKIGGF     | 5     | 8     |
| >BRAFD594(LTVKIGDFGL  | 24    | >BRAFD594(LTVKIGGFGL   | 15    | 9     |
| >BRAFD594(LTVKIGDFGL  | 424   | >BRAFD594(LTVKIGGFGL   | 210   | 214   |
| >BRAFD594(LTVKIGDF    | 118   | >BRAFD594(LTVKIGGF     | 141   | 23    |
| >BRAFD594(LTVKIGDFGL  | 949   | >BRAFD594(LTVKIGGFGL   | 278   | 671   |
| >BRAFD594(LTVKIGDFGL/ | 380   | >BRAFD594(LTVKIGGFGL/  | 212   | 168   |
| >BRAFD594(DLTVKIGDFG  | 205   | >BRAFD594(DLTVKIGGFG   | 156   | 49    |
| >BRAFD594(HEDLTVKIGD  | 812   | >BRAFD594(HEDLTVKIGG   | 468   | 344   |
| >BRAFD594IDFGLATVKSR  | 1561  | >BRAFD594IKFGLATVKSR   | 50    | 1511  |
| >BRAFD594IDFGLATVKSR  | 205   | >BRAFD594IKFGLATVKSR   | 4283  | 4078  |
| >BRAFD594IDFGLATVKSR  | 12304 | >BRAFD594IKFGLATVKSR   | 441   | 11863 |
| >BRAFD594IDFGLATVKSR  | 4722  | >BRAFD594IKFGLATVKSR   | 250   | 4472  |
| >BRAFD594IDFGLATVK    | 6838  | >BRAFD594IKFGLATVK     | 95    | 6743  |
| >BRAFD594IDFGLATVKSR  | 246   | >BRAFD594IKFGLATVKSR   | 15    | 231   |
| >BRAFD594IGDFGLATV    | 2088  | >BRAFD594IGKDFGLATV    | 335   | 1753  |
| >BRAFD594IGDFGLATV    | 17644 | >BRAFD594IGKDFGLATV    | 435   | 17209 |
| >BRAFD594IGDFGLATVKS  | 17113 | >BRAFD594IGKDFGLATVKS  | 475   | 16638 |
| >BRAFD594IGDFGLATV    | 393   | >BRAFD594IGKDFGLATV    | 17787 | 17394 |
| >BRAFD594IGDFGLATV    | 227   | >BRAFD594IGKDFGLATV    | 23497 | 23270 |
| >BRAFD594IIGDFGLATV   | 253   | >BRAFD594IIGKDFGLATV   | 2105  | 1852  |
| >BRAFD594IIGDFGLATVK  | 15596 | >BRAFD594IIGKDFGLATVK  | 408   | 15188 |
| >BRAFD594IKIGDFGLATV  | 53    | >BRAFD594IKIGKDFGLATV  | 264   | 211   |
| >BRAFD594IKIGDFGLATV  | 34    | >BRAFD594IKIGKDFGLATV  | 142   | 108   |
| >BRAFD594IKIGDFGLATV  | 12    | >BRAFD594IKIGKDFGLATV  | 16    | 4     |
| >BRAFD594IKIGDFGLATV  | 59    | >BRAFD594IKIGKDFGLATV  | 196   | 137   |
| >BRAFD594IKIGDFGLATV  | 4     | >BRAFD594IKIGKDFGLATV  | 12    | 8     |
| >BRAFD594IKIGDFGLATV  | 15    | >BRAFD594IKIGKDFGLATV  | 49    | 34    |
| >BRAFD594IKIGDFGLATV  | 16    | >BRAFD594IKIGKDFGLATV  | 37    | 21    |
| >BRAFD594IKIGDFGLATV  | 30    | >BRAFD594IKIGKDFGLATV  | 298   | 268   |
| >BRAFD594IKIGDFGLATV  | 4     | >BRAFD594IKIGKDFGLATV  | 17    | 13    |
| >BRAFD594IKIGDFGLATV  | 129   | >BRAFD594IKIGKDFGLATVI | 73    | 56    |
| >BRAFD594IKIGDFGLATV  | 57    | >BRAFD594IKIGKDFGLATVI | 86    | 29    |
| >BRAFD594IKIGDFGLATV  | 563   | >BRAFD594IKIGKDFGLATVI | 365   | 198   |
| >BRAFD594IKIGDFGLATV  | 132   | >BRAFD594IKIGKDFGLATVI | 141   | 9     |
| >BRAFD594IVKIGDFGLAT  | 144   | >BRAFD594IVKIGKDFGLAT  | 279   | 135   |
| >BRAFD594LTVKIGDFGL   | 354   | >BRAFD594LTVKIGKDFGL   | 1045  | 691   |
| >BRAFD594LTVKIGDF     | 154   | >BRAFD594LTVKIGKDF     | 178   | 24    |

|                       |      |                       |       |       |
|-----------------------|------|-----------------------|-------|-------|
| >BRAFD594ILTVKIGDFGL/ | 229  | >BRAFD594ILTVKIGKFGL/ | 494   | 265   |
| >BRAFD594ILTVKIGDF    | 13   | >BRAFD594ILTVKIGKF    | 5     | 8     |
| >BRAFD594ILTVKIGDFGL  | 24   | >BRAFD594ILTVKIGKFGL  | 16    | 8     |
| >BRAFD594ILTVKIGDFGL  | 424  | >BRAFD594ILTVKIGKFGL  | 449   | 25    |
| >BRAFD594ILTVKIGDF    | 118  | >BRAFD594ILTVKIGKF    | 83    | 35    |
| >BRAFD594ILTVKIGDFGL  | 949  | >BRAFD594ILTVKIGKFGL  | 435   | 514   |
| >BRAFD594ILTVKIGDFGL/ | 380  | >BRAFD594ILTVKIGKFGL/ | 444   | 64    |
| >BRAFD594ILTVKIGDFG   | 205  | >BRAFD594ILTVKIGKFGI  | 167   | 38    |
| >BRAFD594IHEDLTVKIGD  | 812  | >BRAFD594IHEDLTVKIGKI | 407   | 405   |
| >BRAFD594IDFGLATVKSR  | 205  | >BRAFD594IDFGLATVKSR  | 462   | 257   |
| >BRAFD594IDFGLATVKSR  | 246  | >BRAFD594IDFGLATVKSR  | 66    | 180   |
| >BRAFD594IGDFGLATV    | 393  | >BRAFD594IGNFGLATV    | 14114 | 13721 |
| >BRAFD594IGDFGLATV    | 227  | >BRAFD594IGNFGLATV    | 9500  | 9273  |
| >BRAFD594IIGDFGLATV   | 253  | >BRAFD594IIGNFGLATV   | 539   | 286   |
| >BRAFD594IKIGDFGLATV  | 53   | >BRAFD594IKIGNFGLATV  | 78    | 25    |
| >BRAFD594IKIGDFGLATV  | 34   | >BRAFD594IKIGNFGLATV  | 39    | 5     |
| >BRAFD594IKIGDFGLATV  | 12   | >BRAFD594IKIGNFGLATV  | 12    | 0     |
| >BRAFD594IKIGDFGLATV  | 59   | >BRAFD594IKIGNFGLATV  | 78    | 19    |
| >BRAFD594IKIGDFGLATV  | 4    | >BRAFD594IKIGNFGLATV  | 7     | 3     |
| >BRAFD594IKIGDFGLATV  | 15   | >BRAFD594IKIGNFGLATV  | 22    | 7     |
| >BRAFD594IKIGDFGLATV  | 16   | >BRAFD594IKIGNFGLATV  | 23    | 7     |
| >BRAFD594IKIGDFGLATV  | 30   | >BRAFD594IKIGNFGLATV  | 92    | 62    |
| >BRAFD594IKIGDFGLATV  | 4    | >BRAFD594IKIGNFGLATV  | 8     | 4     |
| >BRAFD594IKIGDFGLATV  | 129  | >BRAFD594IKIGNFGLATV  | 73    | 56    |
| >BRAFD594IKIGDFGLATV  | 57   | >BRAFD594IKIGNFGLATV  | 60    | 3     |
| >BRAFD594IKIGDFGLATV  | 563  | >BRAFD594IKIGNFGLATV  | 416   | 147   |
| >BRAFD594IKIGDFGLATV  | 509  | >BRAFD594IKIGNFGLATV  | 178   | 331   |
| >BRAFD594IKIGDFGLATV  | 132  | >BRAFD594IKIGNFGLATV  | 285   | 153   |
| >BRAFD594IVKIGDFGLAT  | 144  | >BRAFD594IVKIGNFGLAT  | 196   | 52    |
| >BRAFD594ITVKIGDFGLA  | 1518 | >BRAFD594ITVKIGNFGLA  | 300   | 1218  |
| >BRAFD594ITVKIGDFGL   | 653  | >BRAFD594ITVKIGNFGL   | 399   | 254   |
| >BRAFD594ILTVKIGDFGL  | 354  | >BRAFD594ILTVKIGNFGL  | 301   | 53    |
| >BRAFD594ILTVKIGDF    | 154  | >BRAFD594ILTVKIGNF    | 73    | 81    |
| >BRAFD594ILTVKIGDFGL/ | 229  | >BRAFD594ILTVKIGNFGL/ | 150   | 79    |
| >BRAFD594ILTVKIGDFGL  | 1233 | >BRAFD594ILTVKIGNFGL  | 230   | 1003  |
| >BRAFD594ILTVKIGDF    | 636  | >BRAFD594ILTVKIGNF    | 343   | 293   |
| >BRAFD594ILTVKIGDF    | 13   | >BRAFD594ILTVKIGNF    | 6     | 7     |
| >BRAFD594ILTVKIGDFGL  | 24   | >BRAFD594ILTVKIGNFGL  | 24    | 0     |
| >BRAFD594ILTVKIGDFGL  | 424  | >BRAFD594ILTVKIGNFGL  | 131   | 293   |
| >BRAFD594ILTVKIGDF    | 118  | >BRAFD594ILTVKIGNF    | 61    | 57    |
| >BRAFD594ILTVKIGDFGL  | 949  | >BRAFD594ILTVKIGNFGL  | 258   | 691   |
| >BRAFD594ILTVKIGDFGL/ | 380  | >BRAFD594ILTVKIGNFGL/ | 352   | 28    |
| >BRAFD594ILTVKIGDFG   | 205  | >BRAFD594ILTVKIGNFG   | 158   | 47    |

|                     |       |                     |       |       |
|---------------------|-------|---------------------|-------|-------|
| >BRAFD594DFGLATVKSR | 1561  | >BRAFD594VFGLATVKSR | 493   | 1068  |
| >BRAFD594DFGLATVKSR | 205   | >BRAFD594VFGLATVKSR | 1236  | 1031  |
| >BRAFD594DFGLATVKSR | 246   | >BRAFD594VFGLATVKSR | 128   | 118   |
| >BRAFD594GDFGLATV   | 15166 | >BRAFD594GVFGLATV   | 69    | 15097 |
| >BRAFD594GDFGLATV   | 2687  | >BRAFD594GVFGLATV   | 40    | 2647  |
| >BRAFD594GDFGLATV   | 4925  | >BRAFD594GVFGLATV   | 21    | 4904  |
| >BRAFD594GDFGLATV   | 2255  | >BRAFD594GVFGLATV   | 17    | 2238  |
| >BRAFD594GDFGLATV   | 2088  | >BRAFD594GVFGLATV   | 8     | 2080  |
| >BRAFD594GDFGLATV   | 9661  | >BRAFD594GVFGLATV   | 34    | 9627  |
| >BRAFD594GDFGLATV   | 3633  | >BRAFD594GVFGLATV   | 13    | 3620  |
| >BRAFD594GDFGLATV   | 20349 | >BRAFD594GVFGLATV   | 479   | 19870 |
| >BRAFD594GDFGLATV   | 4803  | >BRAFD594GVFGLATV   | 4     | 4799  |
| >BRAFD594GDFGLATVK  | 12331 | >BRAFD594GVFGLATVK  | 84    | 12247 |
| >BRAFD594GDFGLATVK  | 8290  | >BRAFD594GVFGLATVK  | 16    | 8274  |
| >BRAFD594GDFGLATVKS | 22655 | >BRAFD594GVFGLATVKS | 262   | 22393 |
| >BRAFD594GDFGLATVKS | 11859 | >BRAFD594GVFGLATVKS | 204   | 11655 |
| >BRAFD594GDFGLATV   | 12921 | >BRAFD594GVFGLATV   | 243   | 12678 |
| >BRAFD594GDFGLATVK  | 8294  | >BRAFD594GVFGLATVK  | 79    | 8215  |
| >BRAFD594GDFGLATVKS | 4813  | >BRAFD594GVFGLATVKS | 59    | 4754  |
| >BRAFD594GDFGLATV   | 15119 | >BRAFD594GVFGLATV   | 149   | 14970 |
| >BRAFD594GDFGLATV   | 393   | >BRAFD594GVFGLATV   | 31394 | 31001 |
| >BRAFD594GDFGLATVK  | 3033  | >BRAFD594GVFGLATVK  | 394   | 2639  |
| >BRAFD594GDFGLATV   | 227   | >BRAFD594GVFGLATV   | 26210 | 25983 |
| >BRAFD594IGDFGLATV  | 253   | >BRAFD594IGVFGLATV  | 114   | 139   |
| >BRAFD594KIGDFGLATV | 53    | >BRAFD594KIGVFGLATV | 169   | 116   |
| >BRAFD594KIGDFGLATV | 34    | >BRAFD594KIGVFGLATV | 126   | 92    |
| >BRAFD594KIGDFGLATV | 12    | >BRAFD594KIGVFGLATV | 18    | 6     |
| >BRAFD594KIGDFGLATV | 59    | >BRAFD594KIGVFGLATV | 100   | 41    |
| >BRAFD594KIGDFGLATV | 4     | >BRAFD594KIGVFGLATV | 17    | 13    |
| >BRAFD594KIGDFGLATV | 15    | >BRAFD594KIGVFGLATV | 48    | 33    |
| >BRAFD594KIGDFGLATV | 16    | >BRAFD594KIGVFGLATV | 47    | 31    |
| >BRAFD594KIGDFGLATV | 30    | >BRAFD594KIGVFGLATV | 198   | 168   |
| >BRAFD594KIGDFGLATV | 4     | >BRAFD594KIGVFGLATV | 18    | 14    |
| >BRAFD594KIGDFGLATV | 129   | >BRAFD594KIGVFGLATV | 118   | 11    |
| >BRAFD594KIGDFGLATV | 57    | >BRAFD594KIGVFGLATV | 87    | 30    |
| >BRAFD594KIGDFGLATV | 563   | >BRAFD594KIGVFGLATV | 399   | 164   |
| >BRAFD594KIGDFGLATV | 132   | >BRAFD594KIGVFGLATV | 333   | 201   |
| >BRAFD594VKIGDFGLAT | 144   | >BRAFD594VKIGVFGLAT | 112   | 32    |
| >BRAFD594TVKIGDFGLA | 1518  | >BRAFD594TVKIGVFGLA | 465   | 1053  |
| >BRAFD594TVKIGDFGL  | 653   | >BRAFD594TVKIGVFGL  | 323   | 330   |
| >BRAFD594TVKIGDFGLA | 1654  | >BRAFD594TVKIGVFGLA | 418   | 1236  |
| >BRAFD594LTVKIGDFGL | 354   | >BRAFD594LTVKIGVFGL | 334   | 20    |
| >BRAFD594LTVKIGDF   | 154   | >BRAFD594LTVKIGVF   | 102   | 52    |



|                      |       |                      |       |       |
|----------------------|-------|----------------------|-------|-------|
| >BRAFD594LTVKIGDFGL/ | 229   | >BRAFD594LTVKIGVFGL/ | 94    | 135   |
| >BRAFD594LTVKIGDFGL  | 1233  | >BRAFD594LTVKIGVFGL  | 220   | 1013  |
| >BRAFD594LTVKIGDF    | 899   | >BRAFD594LTVKIGVF    | 96    | 803   |
| >BRAFD594LTVKIGDF    | 636   | >BRAFD594LTVKIGVF    | 263   | 373   |
| >BRAFD594LTVKIGDF    | 13    | >BRAFD594LTVKIGVF    | 6     | 7     |
| >BRAFD594LTVKIGDFGL  | 24    | >BRAFD594LTVKIGVFGL  | 11    | 13    |
| >BRAFD594LTVKIGDF    | 2073  | >BRAFD594LTVKIGVF    | 249   | 1824  |
| >BRAFD594LTVKIGDFGL  | 424   | >BRAFD594LTVKIGVFGL  | 129   | 295   |
| >BRAFD594LTVKIGDF    | 118   | >BRAFD594LTVKIGVF    | 27    | 91    |
| >BRAFD594LTVKIGDFGL/ | 380   | >BRAFD594LTVKIGVFGL/ | 260   | 120   |
| >BRAFD594DLTVKIGD    | 29474 | >BRAFD594DLTVKIGV    | 267   | 29207 |
| >BRAFD594DLTVKIGD    | 23617 | >BRAFD594DLTVKIGV    | 87    | 23530 |
| >BRAFD594DLTVKIGDFG  | 765   | >BRAFD594DLTVKIGVFG  | 446   | 319   |
| >BRAFD594DLTVKIGD    | 27287 | >BRAFD594DLTVKIGV    | 256   | 27031 |
| >BRAFD594DLTVKIGDFG  | 1666  | >BRAFD594DLTVKIGVFG  | 310   | 1356  |
| >BRAFD594DLTVKIGD    | 30756 | >BRAFD594DLTVKIGV    | 20    | 30736 |
| >BRAFD594DLTVKIGDFG  | 205   | >BRAFD594DLTVKIGVFG  | 90    | 115   |
| >BRAFD594HEDLTVKIGD  | 15816 | >BRAFD594HEDLTVKIGV  | 66    | 15750 |
| >BRAFD594HEDLTVKIGD  | 812   | >BRAFD594HEDLTVKIGV  | 223   | 589   |
| >BRAFD594HEDLTVKIGD  | 23959 | >BRAFD594HEDLTVKIGV  | 274   | 23685 |
| >BRAFE586HEDLTVKI    | 12    | >BRAFE586HKDLTVKI    | 9667  | 9655  |
| >BRAFE586HEDLTVKI    | 114   | >BRAFE586HKDLTVKI    | 19232 | 19118 |
| >BRAFE586HEDLTVKI    | 157   | >BRAFE586HKDLTVKI    | 5432  | 5275  |
| >BRAFE586DLKSNNIFLHI | 8179  | >BRAFE586DLKSNNIFLHI | 228   | 7951  |
| >BRAFE586DLKSNNIFLHI | 21523 | >BRAFE586DLKSNNIFLHI | 368   | 21155 |
| >BRAFE586FLHEDLTV    | 9     | >BRAFE586FLHKDLTV    | 14    | 5     |
| >BRAFE586FLHEDLTVKI  | 66    | >BRAFE586FLHKDLTVKI  | 251   | 185   |
| >BRAFE586FLHEDLTV    | 6     | >BRAFE586FLHKDLTV    | 11    | 5     |
| >BRAFE586FLHEDLTVKI  | 14    | >BRAFE586FLHKDLTVKI  | 33    | 19    |
| >BRAFE586FLHEDLTV    | 3     | >BRAFE586FLHKDLTV    | 4     | 1     |
| >BRAFE586FLHEDLTVK   | 332   | >BRAFE586FLHKDLTVK   | 2512  | 2180  |
| >BRAFE586FLHEDLTVKI  | 24    | >BRAFE586FLHKDLTVKI  | 34    | 10    |
| >BRAFE586FLHEDLTVKIC | 334   | >BRAFE586FLHKDLTVKIC | 1606  | 1272  |
| >BRAFE586FLHEDLTV    | 7     | >BRAFE586FLHKDLTV    | 21    | 14    |
| >BRAFE586FLHEDLTVKI  | 101   | >BRAFE586FLHKDLTVKI  | 322   | 221   |
| >BRAFE586FLHEDLTV    | 1     | >BRAFE586FLHKDLTV    | 2     | 1     |
| >BRAFE586FLHEDLTVK   | 368   | >BRAFE586FLHKDLTVK   | 4224  | 3856  |
| >BRAFE586FLHEDLTVKI  | 2     | >BRAFE586FLHKDLTVKI  | 6     | 4     |
| >BRAFE586FLHEDLTV    | 3     | >BRAFE586FLHKDLTV    | 3     | 0     |
| >BRAFE586FLHEDLTVKI  | 4     | >BRAFE586FLHKDLTVKI  | 10    | 6     |
| >BRAFE586FLHEDLTV    | 4     | >BRAFE586FLHKDLTV    | 5     | 1     |
| >BRAFE586FLHEDLTVKI  | 7     | >BRAFE586FLHKDLTVKI  | 17    | 10    |
| >BRAFE586FLHEDLTV    | 6     | >BRAFE586FLHKDLTV    | 24    | 18    |

|                      |       |                      |       |       |
|----------------------|-------|----------------------|-------|-------|
| >BRAFE586FLHEDLTVKI  | 13    | >BRAFE586FLHKDLTVKI  | 162   | 149   |
| >BRAFE586FLHEDLTV    | 1     | >BRAFE586FLHKDLTV    | 2     | 1     |
| >BRAFE586FLHEDLTVK   | 39    | >BRAFE586FLHKDLTVK   | 397   | 358   |
| >BRAFE586FLHEDLTVKI  | 2     | >BRAFE586FLHKDLTVKI  | 4     | 2     |
| >BRAFE586FLHEDLTVKI  | 414   | >BRAFE586FLHKDLTVKI  | 738   | 324   |
| >BRAFE586IFLHEDLTVKI | 68    | >BRAFE586IFLHKDLTVKI | 110   | 42    |
| >BRAFE586IFLHEDLTVKI | 91    | >BRAFE586IFLHKDLTVKI | 172   | 81    |
| >BRAFE586NIFLHEDLTV  | 106   | >BRAFE586NIFLHKDLTV  | 225   | 119   |
| >BRAFE586NIFLHEDLTV  | 125   | >BRAFE586NIFLHKDLTV  | 266   | 141   |
| >BRAFE586NIFLHEDLTV  | 99    | >BRAFE586NIFLHKDLTV  | 140   | 41    |
| >BRAFE586NIFLHEDLTV  | 155   | >BRAFE586NIFLHKDLTV  | 316   | 161   |
| >BRAFE586NIFLHEDLTV  | 353   | >BRAFE586NIFLHKDLTV  | 368   | 15    |
| >BRAFE586NIFLHEDLTV  | 473   | >BRAFE586NIFLHKDLTV  | 783   | 310   |
| >BRAFE586NIFLHEDLTV  | 225   | >BRAFE586NIFLHKDLTV  | 242   | 17    |
| >BRAFE586NIFLHEDLTV  | 333   | >BRAFE586NIFLHKDLTV  | 300   | 33    |
| >BRAFE586NIFLHEDLTV  | 61    | >BRAFE586NIFLHKDLTV  | 76    | 15    |
| >BRAFE586SNNIFLHE    | 23685 | >BRAFE586SNNIFLHK    | 230   | 23455 |
| >BRAFE586SNNIFLHE    | 13206 | >BRAFE586SNNIFLHK    | 377   | 12829 |
| >BRAFE586KSNNIFLHE   | 11486 | >BRAFE586KSNNIFLHK   | 34    | 11452 |
| >BRAFE586KSNNIFLHE   | 9779  | >BRAFE586KSNNIFLHK   | 8     | 9771  |
| >BRAFE586KSNNIFLHE   | 2677  | >BRAFE586KSNNIFLHK   | 5     | 2672  |
| >BRAFE586KSNNIFLHE   | 962   | >BRAFE586KSNNIFLHK   | 13    | 949   |
| >BRAFE586KSNNIFLHEDI | 30    | >BRAFE586KSNNIFLHKD  | 64    | 34    |
| >BRAFE586KSNNIFLHEDI | 370   | >BRAFE586KSNNIFLHKD  | 166   | 204   |
| >BRAFE586KSNNIFLHEDI | 298   | >BRAFE586KSNNIFLHKD  | 1341  | 1043  |
| >BRAFE586KSNNIFLHE   | 5560  | >BRAFE586KSNNIFLHK   | 144   | 5416  |
| >BRAFE586KSNNIFLHE   | 18211 | >BRAFE586KSNNIFLHK   | 308   | 17903 |
| >BRAFE586LKSNNIFLHE  | 3562  | >BRAFE586LKSNNIFLHK  | 485   | 3077  |
| >BRAFE611EQLSGSILWN  | 53    | >BRAFE611DQLSGSILWN  | 209   | 156   |
| >BRAFE611EQLSGSILWN  | 307   | >BRAFE611DQLSGSILWN  | 1332  | 1025  |
| >BRAFE611EQLSGSILWN  | 355   | >BRAFE611DQLSGSILWN  | 1241  | 886   |
| >BRAFE611EQLSGSILWN  | 399   | >BRAFE611DQLSGSILWN  | 2183  | 1784  |
| >BRAFE611EQLSGSIL    | 51    | >BRAFE611DQLSGSIL    | 234   | 183   |
| >BRAFE611EQLSGSILWN  | 277   | >BRAFE611DQLSGSILWN  | 755   | 478   |
| >BRAFE611EQLSGSIL    | 28    | >BRAFE611DQLSGSIL    | 125   | 97    |
| >BRAFE611EQLSGSILW   | 460   | >BRAFE611DQLSGSILW   | 1681  | 1221  |
| >BRAFE611EQLSGSILW   | 245   | >BRAFE611DQLSGSILW   | 373   | 128   |
| >BRAFE611FEQLSGSI    | 4     | >BRAFE611FDQLSGSI    | 45    | 41    |
| >BRAFE611FEQLSGSIL   | 177   | >BRAFE611FDQLSGSIL   | 4934  | 4757  |
| >BRAFE611FEQLSGSILW  | 377   | >BRAFE611FDQLSGSILW  | 8092  | 7715  |
| >BRAFE611FEQLSGSILW  | 129   | >BRAFE611FDQLSGSILW  | 3844  | 3715  |
| >BRAFE611FEQLSGSIL   | 436   | >BRAFE611FDQLSGSIL   | 3917  | 3481  |
| >BRAFE611FEQLSGSI    | 277   | >BRAFE611FDQLSGSI    | 20299 | 20022 |

|                      |      |                      |       |       |
|----------------------|------|----------------------|-------|-------|
| >BRAFE611[FEQLSGSIL  | 34   | >BRAFE611[FDQLSGSIL  | 13573 | 13539 |
| >BRAFE611[FEQLSGSILW | 243  | >BRAFE611[FDQLSGSILW | 19340 | 19097 |
| >BRAFE611[FEQLSGSI   | 176  | >BRAFE611[FDQLSGSI   | 2677  | 2501  |
| >BRAFE611[FEQLSGSIL  | 71   | >BRAFE611[FDQLSGSIL  | 1293  | 1222  |
| >BRAFE611[FEQLSGSILW | 385  | >BRAFE611[FDQLSGSILW | 4134  | 3749  |
| >BRAFE611[FEQLSGSILW | 72   | >BRAFE611[FDQLSGSILW | 2036  | 1964  |
| >BRAFE611[FEQLSGSILW | 288  | >BRAFE611[FDQLSGSILW | 12057 | 11769 |
| >BRAFE611[FEQLSGSI   | 36   | >BRAFE611[FDQLSGSI   | 208   | 172   |
| >BRAFE611[FEQLSGSIL  | 81   | >BRAFE611[FDQLSGSIL  | 3605  | 3524  |
| >BRAFE611[FEQLSGSILW | 217  | >BRAFE611[FDQLSGSILW | 7453  | 7236  |
| >BRAFE611[FEQLSGSILW | 311  | >BRAFE611[FDQLSGSILW | 1225  | 914   |
| >BRAFE611[FEQLSGSI   | 3651 | >BRAFE611[FDQLSGSI   | 72    | 3579  |
| >BRAFE611[KSRWSGSHQ  | 23   | >BRAFE611[KSRWSGSHQ  | 50    | 27    |
| >BRAFE611[KSRWSGSHQ  | 186  | >BRAFE611[KSRWSGSHQ  | 520   | 334   |
| >BRAFE611[QFEQLSGSI  | 496  | >BRAFE611[QFDQLSGSI  | 3292  | 2796  |
| >BRAFE611[HQFEQLSGSI | 34   | >BRAFE611[HQFDQLSGSI | 82    | 48    |
| >BRAFE611[HQFEQLSGSI | 583  | >BRAFE611[HQFDQLSGSI | 427   | 156   |
| >BRAFE611[HQFEQLSGSI | 256  | >BRAFE611[HQFDQLSGSI | 197   | 59    |
| >BRAFE611[HQFEQLSGSI | 308  | >BRAFE611[HQFDQLSGSI | 281   | 27    |
| >BRAFE611[HQFEQLSGSI | 196  | >BRAFE611[HQFDQLSGSI | 197   | 1     |
| >BRAFE611[HQFEQLSGS  | 121  | >BRAFE611[HQFDQLSGS  | 137   | 16    |
| >BRAFE611[HQFEQLSGSI | 89   | >BRAFE611[HQFDQLSGSI | 98    | 9     |
| >BRAFE611[HQFEQLSGSI | 412  | >BRAFE611[HQFDQLSGSI | 616   | 204   |
| >BRAFE611[HQFEQLSGSI | 432  | >BRAFE611[HQFDQLSGSI | 584   | 152   |
| >BRAFE611[HQFEQLSGSI | 442  | >BRAFE611[HQFDQLSGSI | 624   | 182   |
| >BRAFE611[HQFEQLSG   | 625  | >BRAFE611[HQFDQLSG   | 472   | 153   |
| >BRAFE611[HQFEQLSGSI | 185  | >BRAFE611[HQFDQLSGSI | 148   | 37    |
| >BRAFE611[HQFEQLSGSI | 183  | >BRAFE611[HQFDQLSGSI | 147   | 36    |
| >BRAFE611[HQFEQLSGSI | 157  | >BRAFE611[HQFDQLSGSI | 256   | 99    |
| >BRAFE611[HQFEQLSGSI | 70   | >BRAFE611[HQFDQLSGSI | 94    | 24    |
| >BRAFE611[HQFEQLSGSI | 8    | >BRAFE611[HQFDQLSGSI | 10    | 2     |
| >BRAFE611[HQFEQLSGSI | 195  | >BRAFE611[HQFDQLSGSI | 342   | 147   |
| >BRAFE611[HQFEQLSGSI | 16   | >BRAFE611[HQFDQLSGSI | 23    | 7     |
| >BRAFE611[HQFEQLSGSI | 388  | >BRAFE611[HQFDQLSGSI | 355   | 33    |
| >BRAFE611[HQFEQLSGSI | 485  | >BRAFE611[HQFDQLSGSI | 735   | 250   |
| >BRAFE611[HQFEQLSGSI | 111  | >BRAFE611[HQFDQLSGSI | 147   | 36    |
| >BRAFE611[GSHQFEQL   | 406  | >BRAFE611[GSHQFDQL   | 1274  | 868   |
| >BRAFE611[GSHQFEQL   | 240  | >BRAFE611[GSHQFDQL   | 367   | 127   |
| >BRAFE611[RWSGSHQFE  | 328  | >BRAFE611[RWSGSHQFD  | 555   | 227   |
| >BRAFE611[RWSGSHQFE  | 14   | >BRAFE611[RWSGSHQFD  | 13    | 1     |
| >BRAFE611[RWSGSHQFE  | 57   | >BRAFE611[RWSGSHQFD  | 84    | 27    |
| >BRAFE611[RWSGSHQFE  | 116  | >BRAFE611[RWSGSHQFD  | 88    | 28    |
| >BRAFE611[SRWSGSHQF  | 327  | >BRAFE611[SRWSGSHQF  | 783   | 456   |

|                         |     |                         |       |       |
|-------------------------|-----|-------------------------|-------|-------|
| >BRAFF-E611ISRWSGSHQF   | 698 | >BRAFF-E611ISRWSGSHQF   | 466   | 232   |
| >BRAFF-F468CFGTVYKWKW   | 51  | >BRAFF-F468CFGTVYKWKW   | 57    | 6     |
| >BRAFF-F468CSFGTVYKGV   | 365 | >BRAFF-F468CSFGTVYKGV   | 18736 | 18371 |
| >BRAFF-F468CTVGQRIGSGS  | 183 | >BRAFF-F468CTVGQRIGSGS  | 18292 | 18109 |
| >BRAFF-F468CGSFGTVYK    | 62  | >BRAFF-F468CGSFGTVYK    | 410   | 348   |
| >BRAFF-F468CGSFGTVYKKG  | 119 | >BRAFF-F468CGSFGTVYKKG  | 287   | 168   |
| >BRAFF-F468CGSFGTVYK    | 6   | >BRAFF-F468CGSFGTVYK    | 10    | 4     |
| >BRAFF-F468CGSFGTVYKKG  | 39  | >BRAFF-F468CGSFGTVYKKG  | 62    | 23    |
| >BRAFF-F468CGSFGTVYK    | 37  | >BRAFF-F468CGSFGTVYK    | 257   | 220   |
| >BRAFF-F468CGSFGTVYKKG  | 338 | >BRAFF-F468CGSFGTVYKKG  | 1821  | 1483  |
| >BRAFF-F468CGSFGTVYK    | 89  | >BRAFF-F468CGSFGTVYK    | 402   | 313   |
| >BRAFF-F468CGSFGTVYK    | 25  | >BRAFF-F468CGSFGTVYK    | 478   | 453   |
| >BRAFF-F468CGSFGTVYKKG  | 9   | >BRAFF-F468CGSFGTVYKKG  | 15    | 6     |
| >BRAFF-F468CGSFGTVYKKG  | 40  | >BRAFF-F468CGSFGTVYKKG  | 324   | 284   |
| >BRAFF-F468CGSFGTVYKKG  | 29  | >BRAFF-F468CGSFGTVYKKG  | 151   | 122   |
| >BRAFF-F468CGSFGTVYKKG  | 90  | >BRAFF-F468CGSFGTVYKKG  | 1129  | 1039  |
| >BRAFF-F468CGSFGTVYKKG  | 103 | >BRAFF-F468CGSFGTVYKKG  | 1532  | 1429  |
| >BRAFF-F468CGSFGTVYK    | 74  | >BRAFF-F468CGSFGTVYK    | 216   | 142   |
| >BRAFF-F468CGSFGTVYKKG  | 141 | >BRAFF-F468CGSFGTVYKKG  | 790   | 649   |
| >BRAFF-F468CSGSFGTVYK   | 41  | >BRAFF-F468CSGSFGTVYK   | 99    | 58    |
| >BRAFF-F468CSGSFGTVYK   | 331 | >BRAFF-F468CSGSFGTVYK   | 517   | 186   |
| >BRAFF-F468CSGSFGTVY    | 89  | >BRAFF-F468CSGSFGTVY    | 352   | 263   |
| >BRAFF-F468CSGSFGTVYK   | 290 | >BRAFF-F468CSGSFGTVYK   | 808   | 518   |
| >BRAFF-F468CSGSFGTVY    | 226 | >BRAFF-F468CSGSFGTVY    | 174   | 52    |
| >BRAFF-F468CSGSFGTVY    | 519 | >BRAFF-F468CSGSFGTVY    | 228   | 291   |
| >BRAFF-F468CSGSFGTVYK   | 438 | >BRAFF-F468CSGSFGTVYK   | 441   | 3     |
| >BRAFF-F468CSGSFGTVYK   | 46  | >BRAFF-F468CSGSFGTVYK   | 58    | 12    |
| >BRAFF-F468CSGSFGTVYK   | 25  | >BRAFF-F468CSGSFGTVYK   | 46    | 21    |
| >BRAFF-F468CSGSFGTVY    | 172 | >BRAFF-F468CSGSFGTVY    | 76    | 96    |
| >BRAFF-F468CSGSFGTVYK   | 212 | >BRAFF-F468CSGSFGTVYK   | 273   | 61    |
| >BRAFF-F468CSGSFGTVY    | 86  | >BRAFF-F468CSGSFGTVY    | 99    | 13    |
| >BRAFF-F468CSGSFGTVY    | 197 | >BRAFF-F468CSGSFGTVY    | 428   | 231   |
| >BRAFF-F468CSGSFGTVY    | 154 | >BRAFF-F468CSGSFGTVY    | 208   | 54    |
| >BRAFF-F468CSGSFGTVY    | 4   | >BRAFF-F468CSGSFGTVY    | 4     | 0     |
| >BRAFF-F468CSGSFGTVYK   | 241 | >BRAFF-F468CSGSFGTVYK   | 404   | 163   |
| >BRAFF-F468CIGSGSFGTVYI | 304 | >BRAFF-F468CIGSGSFGTVYI | 554   | 250   |
| >BRAFF-F468CIGSGSFGTVYI | 214 | >BRAFF-F468CIGSGSFGTVYI | 496   | 282   |
| >BRAFF-F468CIGSGSFGTVY  | 96  | >BRAFF-F468CIGSGSFGTVY  | 401   | 305   |
| >BRAFF-F468CIGSGSFGTVY  | 370 | >BRAFF-F468CIGSGSFGTVY  | 421   | 51    |
| >BRAFF-F468CIGSGSFGTVY  | 146 | >BRAFF-F468CIGSGSFGTVY  | 198   | 52    |
| >BRAFF-F468CIGSGSFGTVY  | 554 | >BRAFF-F468CIGSGSFGTVY  | 494   | 60    |
| >BRAFF-F468CIGSGSFGTVY  | 611 | >BRAFF-F468CIGSGSFGTVY  | 346   | 265   |
| >BRAFF-F468CRIGSGSFGTV  | 163 | >BRAFF-F468CRIGSGSFGTV  | 436   | 273   |

|                        |       |                        |       |       |
|------------------------|-------|------------------------|-------|-------|
| >BRAFF468CRIGSGSFGTV   | 31    | >BRAFF468CRIGSGSCGTV   | 67    | 36    |
| >BRAFF468CRIGSGSFGTV   | 19    | >BRAFF468CRIGSGSCGTV   | 51    | 32    |
| >BRAFF468CRIGSGSFGTV   | 163   | >BRAFF468CRIGSGSCGTV   | 546   | 383   |
| >BRAFF468CRIGSGSFGTV   | 69    | >BRAFF468CRIGSGSCGTV   | 149   | 80    |
| >BRAFF468CRIGSGSFGTV   | 256   | >BRAFF468CRIGSGSCGTV   | 420   | 164   |
| >BRAFF468CRIGSGSFGTV   | 14    | >BRAFF468CRIGSGSCGTV   | 20    | 6     |
| >BRAFF468CRIGSGSFGTV'  | 468   | >BRAFF468CRIGSGSCGTV   | 787   | 319   |
| >BRAFF468CRIGSGSFGTV'  | 215   | >BRAFF468CRIGSGSCGTV   | 854   | 639   |
| >BRAFF468CRIGSGSFGTV'  | 61    | >BRAFF468CRIGSGSCGTV   | 88    | 27    |
| >BRAFF468CRIGSGSFGTV   | 327   | >BRAFF468CRIGSGSCGTV   | 569   | 242   |
| >BRAFF468CRIGSGSFGTV'  | 30    | >BRAFF468CRIGSGSCGTV   | 96    | 66    |
| >BRAFF468CRIGSGSFGTV'  | 50    | >BRAFF468CRIGSGSCGTV   | 44    | 6     |
| >BRAFF468CRIGSGSFGTV'  | 451   | >BRAFF468CRIGSGSCGTV   | 454   | 3     |
| >BRAFF468CRIGSGSFGTV'  | 451   | >BRAFF468CRIGSGSCGTV   | 596   | 145   |
| >BRAFF468CRIGSGSFGTV'  | 77    | >BRAFF468CRIGSGSCGTV   | 106   | 29    |
| >BRAFF468CQRIGSGSF     | 52    | >BRAFF468CQRIGSGSC     | 5911  | 5859  |
| >BRAFF468CQRIGSGSF     | 235   | >BRAFF468CQRIGSGSC     | 6434  | 6199  |
| >BRAFF468CGQRIGSGSF    | 30    | >BRAFF468CGQRIGSGSC    | 4290  | 4260  |
| >BRAFF468CGQRIGSGSF    | 56    | >BRAFF468CGQRIGSGSC    | 10582 | 10526 |
| >BRAFF468CGQRIGSGSF    | 22    | >BRAFF468CGQRIGSGSC    | 14969 | 14947 |
| >BRAFF468CVGQRIGSGSF   | 498   | >BRAFF468CVGQRIGSGSC   | 20854 | 20356 |
| >BRAFF468CVGQRIGSGSF   | 74    | >BRAFF468CVGQRIGSGSC   | 17683 | 17609 |
| >BRAFF468SFGTVYKKGW    | 51    | >BRAFF468S SGTVYKKGW   | 1785  | 1734  |
| >BRAFF468S SFGTVYKKGK  | 2990  | >BRAFF468S SSGTVYKKGK  | 69    | 2921  |
| >BRAFF468S SFGTVYKKGK  | 365   | >BRAFF468S SSGTVYKKGK  | 16095 | 15730 |
| >BRAFF468S SFGTVYKKGK  | 17184 | >BRAFF468S SSGTVYKKGK  | 349   | 16835 |
| >BRAFF468S SFGTVYKKGK  | 19313 | >BRAFF468S SSGTVYKKGK  | 308   | 19005 |
| >BRAFF468S SFGTVYKKGK  | 8115  | >BRAFF468S SSGTVYKKGK  | 123   | 7992  |
| >BRAFF468S TVGQRIGSGS  | 183   | >BRAFF468S TVGQRIGSGS  | 17259 | 17076 |
| >BRAFF468S GSFDTVYK    | 62    | >BRAFF468S GSSDTVYK    | 174   | 112   |
| >BRAFF468S GSFDTVYKKGK | 119   | >BRAFF468S GSSDTVYKKGK | 227   | 108   |
| >BRAFF468S GSFDTVYK    | 6     | >BRAFF468S GSSDTVYK    | 9     | 3     |
| >BRAFF468S GSFDTVYKKGK | 39    | >BRAFF468S GSSDTVYKKGK | 34    | 5     |
| >BRAFF468S GSFDTVYK    | 37    | >BRAFF468S GSSDTVYK    | 200   | 163   |
| >BRAFF468S GSFDTVYKKGK | 338   | >BRAFF468S GSSDTVYKKGK | 1771  | 1433  |
| >BRAFF468S GSFDTVYK    | 89    | >BRAFF468S GSSDTVYK    | 785   | 696   |
| >BRAFF468S GSFDTVYK    | 25    | >BRAFF468S GSSDTVYK    | 258   | 233   |
| >BRAFF468S GSFDTVYKKGK | 9     | >BRAFF468S GSSDTVYKKGK | 14    | 5     |
| >BRAFF468S GSFDTVYKKGK | 40    | >BRAFF468S GSSDTVYKKGK | 88    | 48    |
| >BRAFF468S GSFDTVYKKGK | 29    | >BRAFF468S GSSDTVYKKGK | 35    | 6     |
| >BRAFF468S GSFDTVYKKGK | 90    | >BRAFF468S GSSDTVYKKGK | 444   | 354   |
| >BRAFF468S GSFDTVYKKGK | 103   | >BRAFF468S GSSDTVYKKGK | 282   | 179   |
| >BRAFF468S GSFDTVYK    | 74    | >BRAFF468S GSSDTVYK    | 137   | 63    |

|                       |     |                       |      |     |
|-----------------------|-----|-----------------------|------|-----|
| >BRAFF468SGSFGTVYK GK | 141 | >BRAFF468SGSSGTVYK GK | 400  | 259 |
| >BRAFF468SGSFGTVYK    | 41  | >BRAFF468SGSSGTVYK    | 68   | 27  |
| >BRAFF468SGSFGTVYK    | 331 | >BRAFF468SGSSGTVYK    | 529  | 198 |
| >BRAFF468SGSFGTVY     | 89  | >BRAFF468SGSSGTVY     | 81   | 8   |
| >BRAFF468SGSFGTVYK    | 290 | >BRAFF468SGSSGTVYK    | 445  | 155 |
| >BRAFF468SGSFGTVY     | 226 | >BRAFF468SGSSGTVY     | 150  | 76  |
| >BRAFF468SGSFGTVY     | 963 | >BRAFF468SGSSGTVY     | 470  | 493 |
| >BRAFF468SGSFGTVY     | 519 | >BRAFF468SGSSGTVY     | 390  | 129 |
| >BRAFF468SGSFGTVYK    | 438 | >BRAFF468SGSSGTVYK    | 489  | 51  |
| >BRAFF468SGSFGTVYK    | 46  | >BRAFF468SGSGSSGTVYK  | 101  | 55  |
| >BRAFF468SGSFGTVYK    | 25  | >BRAFF468SGSGSSGTVYK  | 38   | 13  |
| >BRAFF468SGSFGTVY     | 172 | >BRAFF468SGSGSSGTVY   | 244  | 72  |
| >BRAFF468SGSFGTVYK    | 212 | >BRAFF468SGSGSSGTVYK  | 562  | 350 |
| >BRAFF468SGSFGTVY     | 86  | >BRAFF468SGSGSSGTVY   | 55   | 31  |
| >BRAFF468SGSFGTVY     | 197 | >BRAFF468SGSGSSGTVY   | 160  | 37  |
| >BRAFF468SGSFGTVY     | 154 | >BRAFF468SGSGSSGTVY   | 19   | 135 |
| >BRAFF468SGSFGTVY     | 4   | >BRAFF468SGSGSSGTVY   | 6    | 2   |
| >BRAFF468SGSFGTVYK    | 241 | >BRAFF468SGSGSSGTVYK  | 349  | 108 |
| >BRAFF468IGSGSFGTVYI  | 304 | >BRAFF468IGSGSSGTVYI  | 335  | 31  |
| >BRAFF468IGSGSFGTVYI  | 214 | >BRAFF468IGSGSSGTVYI  | 379  | 165 |
| >BRAFF468IGSGSFGTVY   | 96  | >BRAFF468IGSGSSGTVY   | 244  | 148 |
| >BRAFF468IGSGSFGTVY   | 370 | >BRAFF468IGSGSSGTVY   | 270  | 100 |
| >BRAFF468IGSGSFGTVY   | 146 | >BRAFF468IGSGSSGTVY   | 110  | 36  |
| >BRAFF468IGSGSFGTVY   | 675 | >BRAFF468IGSGSSGTVY   | 348  | 327 |
| >BRAFF468IGSGSFGTVY   | 554 | >BRAFF468IGSGSSGTVY   | 87   | 467 |
| >BRAFF468IGSGSFGTVY   | 611 | >BRAFF468IGSGSSGTVY   | 471  | 140 |
| >BRAFF468RIGSGSFGTV   | 163 | >BRAFF468RIGSGSSGTV   | 289  | 126 |
| >BRAFF468RIGSGSFGTV   | 31  | >BRAFF468RIGSGSSGTV   | 66   | 35  |
| >BRAFF468RIGSGSFGTV   | 19  | >BRAFF468RIGSGSSGTV   | 31   | 12  |
| >BRAFF468RIGSGSFGTV   | 163 | >BRAFF468RIGSGSSGTV   | 251  | 88  |
| >BRAFF468RIGSGSFGTV   | 69  | >BRAFF468RIGSGSSGTV   | 104  | 35  |
| >BRAFF468RIGSGSFGTV   | 256 | >BRAFF468RIGSGSSGTV   | 402  | 146 |
| >BRAFF468RIGSGSFGTV   | 14  | >BRAFF468RIGSGSSGTV   | 19   | 5   |
| >BRAFF468RIGSGSFGTV'  | 468 | >BRAFF468RIGSGSSGTV'  | 471  | 3   |
| >BRAFF468RIGSGSFGTV'  | 215 | >BRAFF468RIGSGSSGTV'  | 637  | 422 |
| >BRAFF468RIGSGSFGTV'  | 61  | >BRAFF468RIGSGSSGTV'  | 75   | 14  |
| >BRAFF468RIGSGSFGTV   | 327 | >BRAFF468RIGSGSSGTV   | 1236 | 909 |
| >BRAFF468RIGSGSFGTV'  | 30  | >BRAFF468RIGSGSSGTV'  | 68   | 38  |
| >BRAFF468RIGSGSFGTV'  | 50  | >BRAFF468RIGSGSSGTV'  | 41   | 9   |
| >BRAFF468RIGSGSFGTV'  | 726 | >BRAFF468RIGSGSSGTV'  | 411  | 315 |
| >BRAFF468RIGSGSFGTV'  | 451 | >BRAFF468RIGSGSSGTV'  | 275  | 176 |
| >BRAFF468RIGSGSFGTV'  | 451 | >BRAFF468RIGSGSSGTV'  | 202  | 249 |
| >BRAFF468RIGSGSFGTV'  | 77  | >BRAFF468RIGSGSSGTV'  | 32   | 45  |

|                       |      |                       |       |       |
|-----------------------|------|-----------------------|-------|-------|
| >BRAFF468SQRIGSGSF    | 52   | >BRAFF468SQRIGSGSS    | 7376  | 7324  |
| >BRAFF468SQRIGSGSF    | 235  | >BRAFF468SQRIGSGSS    | 2761  | 2526  |
| >BRAFF468SGQRIGSGSF   | 30   | >BRAFF468SGQRIGSGSS   | 2293  | 2263  |
| >BRAFF468SGQRIGSGSFG  | 1025 | >BRAFF468SGQRIGSGSSG  | 275   | 750   |
| >BRAFF468SGQRIGSGSF   | 56   | >BRAFF468SGQRIGSGSS   | 9660  | 9604  |
| >BRAFF468SGQRIGSGSF   | 22   | >BRAFF468SGQRIGSGSS   | 14292 | 14270 |
| >BRAFF468SVGQRIGSGSF  | 498  | >BRAFF468SVGQRIGSGSS  | 20208 | 19710 |
| >BRAFF468SVGQRIGSGSF  | 74   | >BRAFF468SVGQRIGSGSS  | 17024 | 16950 |
| >BRAFF583FVLHEDLTV    | 9    | >BRAFF583FVLHEDLTV    | 9     | 0     |
| >BRAFF583FVLHEDLTVKI  | 66   | >BRAFF583FVLHEDLTVKI  | 66    | 0     |
| >BRAFF583FVLHEDLTV    | 6    | >BRAFF583FVLHEDLTV    | 6     | 0     |
| >BRAFF583FVLHEDLTVKI  | 14   | >BRAFF583FVLHEDLTVKI  | 14    | 0     |
| >BRAFF583FVLHEDLTV    | 3    | >BRAFF583FVLHEDLTV    | 3     | 0     |
| >BRAFF583FVLHEDLTVKI  | 24   | >BRAFF583FVLHEDLTVKI  | 24    | 0     |
| >BRAFF583FVLHEDLTVKIC | 334  | >BRAFF583FVLHEDLTVKIC | 334   | 0     |
| >BRAFF583FVLHEDLTV    | 7    | >BRAFF583FVLHEDLTV    | 7     | 0     |
| >BRAFF583FVLHEDLTVKI  | 101  | >BRAFF583FVLHEDLTVKI  | 101   | 0     |
| >BRAFF583FVLHEDLTV    | 1    | >BRAFF583FVLHEDLTV    | 1     | 0     |
| >BRAFF583FVLHEDLTVKI  | 2    | >BRAFF583FVLHEDLTVKI  | 2     | 0     |
| >BRAFF583FVLHEDLTV    | 3    | >BRAFF583FVLHEDLTV    | 3     | 0     |
| >BRAFF583FVLHEDLTVKI  | 4    | >BRAFF583FVLHEDLTVKI  | 4     | 0     |
| >BRAFF583FVLHEDLTV    | 4    | >BRAFF583FVLHEDLTV    | 4     | 0     |
| >BRAFF583FVLHEDLTVKI  | 7    | >BRAFF583FVLHEDLTVKI  | 7     | 0     |
| >BRAFF583FVLHEDLTV    | 6    | >BRAFF583FVLHEDLTV    | 6     | 0     |
| >BRAFF583FVLHEDLTVKI  | 13   | >BRAFF583FVLHEDLTVKI  | 13    | 0     |
| >BRAFF583FVLHEDLTV    | 1    | >BRAFF583FVLHEDLTV    | 1     | 0     |
| >BRAFF583FVLHEDLTVKI  | 2    | >BRAFF583FVLHEDLTVKI  | 2     | 0     |
| >BRAFF583FVLHEDLTVKI  | 414  | >BRAFF583FVLHEDLTVKI  | 414   | 0     |
| >BRAFF583FVLHEDLTVKI  | 68   | >BRAFF583FVLHEDLTVKI  | 68    | 0     |
| >BRAFF583FVLHEDLTVKI  | 91   | >BRAFF583FVLHEDLTVKI  | 91    | 0     |
| >BRAFF583FIHRDLKSNIF  | 16   | >BRAFF583FIHRDLKSNIF  | 16    | 0     |
| >BRAFF583FIHRDLKSNIF  | 133  | >BRAFF583FIHRDLKSNIF  | 133   | 0     |
| >BRAFF583FNIFLHEDLTV  | 106  | >BRAFF583FNIFLHEDLTV  | 106   | 0     |
| >BRAFF583FNIFLHEDLTV  | 125  | >BRAFF583FNIFLHEDLTV  | 125   | 0     |
| >BRAFF583FNIFLHEDLTV  | 99   | >BRAFF583FNIFLHEDLTV  | 99    | 0     |
| >BRAFF583FNIFLHEDLTV  | 155  | >BRAFF583FNIFLHEDLTV  | 155   | 0     |
| >BRAFF583FNIFLHEDLTV  | 353  | >BRAFF583FNIFLHEDLTV  | 353   | 0     |
| >BRAFF583FNIFLHEDLTV  | 473  | >BRAFF583FNIFLHEDLTV  | 473   | 0     |
| >BRAFF583FNIFLHEDLTV  | 225  | >BRAFF583FNIFLHEDLTV  | 225   | 0     |
| >BRAFF583FNIFLHEDLTV  | 333  | >BRAFF583FNIFLHEDLTV  | 333   | 0     |
| >BRAFF583FNIFLHEDLTV  | 61   | >BRAFF583FNIFLHEDLTV  | 61    | 0     |
| >BRAFF583FKSNNIFLH    | 330  | >BRAFF583FKSNNIFLH    | 330   | 0     |
| >BRAFF583FKSNNIFLH    | 129  | >BRAFF583FKSNNIFLH    | 129   | 0     |

|                       |      |                       |      |      |
|-----------------------|------|-----------------------|------|------|
| >BRAFF583FKSNNIFLH    | 68   | >BRAFF583FKSNNIFLH    | 68   | 0    |
| >BRAFF583FKSNNIFLHEDI | 30   | >BRAFF583FKSNNIFLHEDI | 30   | 0    |
| >BRAFF583FKSNNIFLHEDI | 370  | >BRAFF583FKSNNIFLHEDI | 370  | 0    |
| >BRAFF583FKSNNIFLH    | 342  | >BRAFF583FKSNNIFLH    | 342  | 0    |
| >BRAFF583FKSNNIFLHEDI | 298  | >BRAFF583FKSNNIFLHEDI | 298  | 0    |
| >BRAFF583FLKSNNIFL    | 52   | >BRAFF583FLKSNNIFL    | 52   | 0    |
| >BRAFF583FLDKSNNIF    | 328  | >BRAFF583FLDKSNNIF    | 328  | 0    |
| >BRAFF583FLDKSNNIF    | 419  | >BRAFF583FLDKSNNIF    | 419  | 0    |
| >BRAFF583FHRDLKSNNIF  | 86   | >BRAFF583FHRDLKSNNIF  | 86   | 0    |
| >BRAFF583FHRDLKSNNIF  | 129  | >BRAFF583FHRDLKSNNIF  | 129  | 0    |
| >BRAFF583FHRDLKSNNIF  | 210  | >BRAFF583FHRDLKSNNIF  | 210  | 0    |
| >BRAFF595L FGLATVKSRW | 98   | >BRAFF595L LGLATVKSRW | 97   | 1    |
| >BRAFF595L FGLATVKSRW | 499  | >BRAFF595L LGLATVKSRW | 141  | 358  |
| >BRAFF595L FGLATVKSRW | 45   | >BRAFF595L LGLATVKSRW | 34   | 11   |
| >BRAFF595L FGLATVKSRW | 215  | >BRAFF595L LGLATVKSRW | 642  | 427  |
| >BRAFF595L DFGLATVKSR | 205  | >BRAFF595L DLGLATVKSR | 1093 | 888  |
| >BRAFF595L DFGLATVKSR | 246  | >BRAFF595L DLGLATVKSR | 1090 | 844  |
| >BRAFF595L HEDLTVKIGD | 858  | >BRAFF595L HEDLTVKIGD | 214  | 644  |
| >BRAFF595L HEDLTVKIGD | 1487 | >BRAFF595L HEDLTVKIGD | 118  | 1369 |
| >BRAFF595L HEDLTVKIGD | 888  | >BRAFF595L HEDLTVKIGD | 182  | 706  |
| >BRAFF595L GDFGLATV   | 393  | >BRAFF595L GDLGLATV   | 1559 | 1166 |
| >BRAFF595L GDFGLATV   | 594  | >BRAFF595L GDLGLATV   | 206  | 388  |
| >BRAFF595L GDFGLATV   | 227  | >BRAFF595L GDLGLATV   | 128  | 99   |
| >BRAFF595L IGDFGLATV  | 253  | >BRAFF595L IGDGLATV   | 267  | 14   |
| >BRAFF595L KIGDFGLATV | 53   | >BRAFF595L KIGDLGLATV | 88   | 35   |
| >BRAFF595L KIGDFGLATV | 34   | >BRAFF595L KIGDLGLATV | 78   | 44   |
| >BRAFF595L KIGDFGLATV | 12   | >BRAFF595L KIGDLGLATV | 18   | 6    |
| >BRAFF595L KIGDFGLATV | 59   | >BRAFF595L KIGDLGLATV | 74   | 15   |
| >BRAFF595L KIGDFGLATV | 4    | >BRAFF595L KIGDLGLATV | 7    | 3    |
| >BRAFF595L KIGDFGLATV | 15   | >BRAFF595L KIGDLGLATV | 18   | 3    |
| >BRAFF595L KIGDFGLATV | 16   | >BRAFF595L KIGDLGLATV | 15   | 1    |
| >BRAFF595L KIGDFGLATV | 30   | >BRAFF595L KIGDLGLATV | 48   | 18   |
| >BRAFF595L KIGDFGLATV | 4    | >BRAFF595L KIGDLGLATV | 4    | 0    |
| >BRAFF595L KIGDFGLATV | 129  | >BRAFF595L KIGDLGLATV | 173  | 44   |
| >BRAFF595L KIGDFGLATV | 57   | >BRAFF595L KIGDLGLATV | 98   | 41   |
| >BRAFF595L KIGDFGLATV | 132  | >BRAFF595L KIGDLGLATV | 304  | 172  |
| >BRAFF595L VKIGDFGLAT | 144  | >BRAFF595L VKIGDLGLAT | 187  | 43   |
| >BRAFF595L LTVKIGDFGL | 354  | >BRAFF595L LTVKIGDLGL | 500  | 146  |
| >BRAFF595L LTVKIGDF   | 154  | >BRAFF595L LTVKIGDL   | 1404 | 1250 |
| >BRAFF595L LTVKIGDFGL | 229  | >BRAFF595L LTVKIGDLGL | 482  | 253  |
| >BRAFF595L LTVKIGDF   | 13   | >BRAFF595L LTVKIGDL   | 146  | 133  |
| >BRAFF595L LTVKIGDFGL | 24   | >BRAFF595L LTVKIGDLGL | 24   | 0    |
| >BRAFF595L LTVKIGDFGL | 424  | >BRAFF595L LTVKIGDLGL | 763  | 339  |



|                       |     |                       |       |       |
|-----------------------|-----|-----------------------|-------|-------|
| >BRAFF595L LTVKIGDF   | 118 | >BRAFF595L LTVKIGDL   | 624   | 506   |
| >BRAFF595L LTVKIGDFGL | 380 | >BRAFF595L LTVKIGDLGL | 407   | 27    |
| >BRAFF595L DLTVKIGDFG | 205 | >BRAFF595L DLTVKIGDLG | 475   | 270   |
| >BRAFF595S FGLATVKSRM | 98  | >BRAFF595S SGLATVKSRM | 275   | 177   |
| >BRAFF595S FGLATVKSRM | 499 | >BRAFF595S SGLATVKSRM | 430   | 69    |
| >BRAFF595S FGLATVKSRM | 45  | >BRAFF595S SGLATVKSRM | 220   | 175   |
| >BRAFF595S FGLATVKSRM | 215 | >BRAFF595S SGLATVKSRM | 2757  | 2542  |
| >BRAFF595S FGLATVKSR  | 756 | >BRAFF595S SGLATVKSR  | 476   | 280   |
| >BRAFF595S DFGLATVKSR | 205 | >BRAFF595S DSGLATVKSR | 2117  | 1912  |
| >BRAFF595S DFGLATVKSR | 246 | >BRAFF595S DSGLATVKSR | 3813  | 3567  |
| >BRAFF595S GDFGLATV   | 393 | >BRAFF595S GDSGLATV   | 5422  | 5029  |
| >BRAFF595S GDFGLATV   | 227 | >BRAFF595S GDSGLATV   | 251   | 24    |
| >BRAFF595S IGDFGLATV  | 253 | >BRAFF595S IGDSGLATV  | 163   | 90    |
| >BRAFF595S IGDFGLATV  | 816 | >BRAFF595S IGDSGLATV  | 413   | 403   |
| >BRAFF595S KIGDFGLATV | 53  | >BRAFF595S KIGDSGLATV | 154   | 101   |
| >BRAFF595S KIGDFGLATV | 34  | >BRAFF595S KIGDSGLATV | 76    | 42    |
| >BRAFF595S KIGDFGLATV | 12  | >BRAFF595S KIGDSGLATV | 22    | 10    |
| >BRAFF595S KIGDFGLATV | 59  | >BRAFF595S KIGDSGLATV | 124   | 65    |
| >BRAFF595S KIGDFGLATV | 4   | >BRAFF595S KIGDSGLATV | 7     | 3     |
| >BRAFF595S KIGDFGLATV | 15  | >BRAFF595S KIGDSGLATV | 14    | 1     |
| >BRAFF595S KIGDFGLATV | 16  | >BRAFF595S KIGDSGLATV | 16    | 0     |
| >BRAFF595S KIGDFGLATV | 30  | >BRAFF595S KIGDSGLATV | 37    | 7     |
| >BRAFF595S KIGDFGLATV | 4   | >BRAFF595S KIGDSGLATV | 3     | 1     |
| >BRAFF595S KIGDFGLATV | 129 | >BRAFF595S KIGDSGLATV | 113   | 16    |
| >BRAFF595S KIGDFGLATV | 57  | >BRAFF595S KIGDSGLATV | 86    | 29    |
| >BRAFF595S KIGDFGLATV | 132 | >BRAFF595S KIGDSGLATV | 630   | 498   |
| >BRAFF595S VKIGDFGLAT | 144 | >BRAFF595S VKIGDSGLAT | 352   | 208   |
| >BRAFF595S LTVKIGDFGL | 354 | >BRAFF595S LTVKIGDSGL | 1234  | 880   |
| >BRAFF595S LTVKIGDF   | 154 | >BRAFF595S LTVKIGDS   | 21384 | 21230 |
| >BRAFF595S LTVKIGDFGL | 229 | >BRAFF595S LTVKIGDSGL | 411   | 182   |
| >BRAFF595S LTVKIGDF   | 13  | >BRAFF595S LTVKIGDS   | 15642 | 15629 |
| >BRAFF595S LTVKIGDFGL | 24  | >BRAFF595S LTVKIGDSGL | 19    | 5     |
| >BRAFF595S LTVKIGDFGL | 424 | >BRAFF595S LTVKIGDSGL | 1120  | 696   |
| >BRAFF595S LTVKIGDF   | 118 | >BRAFF595S LTVKIGDS   | 12543 | 12425 |
| >BRAFF595S LTVKIGDFGL | 380 | >BRAFF595S LTVKIGDSGL | 434   | 54    |
| >BRAFF595S DLTVKIGDFG | 205 | >BRAFF595S DLTVKIGDSG | 383   | 178   |
| >BRAFF610S FEQLSGSI   | 4   | >BRAFF610S SEQLSGSI   | 4     | 0     |
| >BRAFF610S FEQLSGSIL  | 177 | >BRAFF610S SEQLSGSIL  | 352   | 175   |
| >BRAFF610S FEQLSGSILW | 377 | >BRAFF610S SEQLSGSILW | 714   | 337   |
| >BRAFF610S FEQLSGSILW | 129 | >BRAFF610S SEQLSGSILW | 249   | 120   |
| >BRAFF610S FEQLSGSIL  | 436 | >BRAFF610S SEQLSGSIL  | 3102  | 2666  |
| >BRAFF610S FEQLSGSI   | 277 | >BRAFF610S SEQLSGSI   | 737   | 460   |
| >BRAFF610S FEQLSGSIL  | 34  | >BRAFF610S SEQLSGSIL  | 95    | 61    |

|                       |       |                       |       |       |
|-----------------------|-------|-----------------------|-------|-------|
| >BRAFF610SFEQLSGSILW  | 243   | >BRAFF610SSEQLSGSILW  | 682   | 439   |
| >BRAFF610SFEQLSGSI    | 176   | >BRAFF610SSEQLSGSI    | 380   | 204   |
| >BRAFF610SFEQLSGSIL   | 71    | >BRAFF610SSEQLSGSIL   | 157   | 86    |
| >BRAFF610SFEQLSGSILW  | 385   | >BRAFF610SSEQLSGSILW  | 680   | 295   |
| >BRAFF610SFEQLSGSILW  | 72    | >BRAFF610SSEQLSGSILW  | 13    | 59    |
| >BRAFF610SFEQLSGSILW  | 1030  | >BRAFF610SSEQLSGSILW  | 439   | 591   |
| >BRAFF610SFEQLSGSILW  | 288   | >BRAFF610SSEQLSGSILW  | 39    | 249   |
| >BRAFF610SFEQLSGSILW  | 1115  | >BRAFF610SSEQLSGSILW  | 423   | 692   |
| >BRAFF610SFEQLSGSI    | 3870  | >BRAFF610SSEQLSGSI    | 320   | 3550  |
| >BRAFF610SFEQLSGSILW  | 2532  | >BRAFF610SSEQLSGSILW  | 219   | 2313  |
| >BRAFF610SFEQLSGSI    | 36    | >BRAFF610SSEQLSGSI    | 184   | 148   |
| >BRAFF610SFEQLSGSIL   | 81    | >BRAFF610SSEQLSGSIL   | 224   | 143   |
| >BRAFF610SFEQLSGSILW  | 217   | >BRAFF610SSEQLSGSILW  | 1481  | 1264  |
| >BRAFF610SFEQLSGSILW  | 311   | >BRAFF610SSEQLSGSILW  | 5228  | 4917  |
| >BRAFF610SQFEQLSGSI   | 496   | >BRAFF610SQSEQLSGSI   | 9700  | 9204  |
| >BRAFF610SQFEQLSGSIL  | 26033 | >BRAFF610SQSEQLSGSIL  | 134   | 25899 |
| >BRAFF610SQFEQLSGSIL\ | 9792  | >BRAFF610SQSEQLSGSIL\ | 14    | 9778  |
| >BRAFF610SQFEQLSGSIL\ | 9379  | >BRAFF610SQSEQLSGSIL\ | 152   | 9227  |
| >BRAFF610SQFEQLSGSIL\ | 8790  | >BRAFF610SQSEQLSGSIL\ | 482   | 8308  |
| >BRAFF610SQFEQLSGSI   | 7615  | >BRAFF610SQSEQLSGSI   | 41    | 7574  |
| >BRAFF610SQFEQLSGSIL  | 6122  | >BRAFF610SQSEQLSGSIL  | 33    | 6089  |
| >BRAFF610SVKSRWWSGSH  | 9     | >BRAFF610SVKSRWWSGSH  | 7532  | 7523  |
| >BRAFF610SHQFEQLSGSI  | 34    | >BRAFF610SHQSEQLSGSI  | 149   | 115   |
| >BRAFF610SHQFEQLSGSI  | 256   | >BRAFF610SHQSEQLSGSI  | 429   | 173   |
| >BRAFF610SHQFEQLSGSI  | 308   | >BRAFF610SHQSEQLSGSI  | 838   | 530   |
| >BRAFF610SHQFEQLSGSI  | 196   | >BRAFF610SHQSEQLSGSI  | 308   | 112   |
| >BRAFF610SHQFEQLSGS   | 121   | >BRAFF610SHQSEQLSGS   | 572   | 451   |
| >BRAFF610SHQFEQLSGSI  | 89    | >BRAFF610SHQSEQLSGSI  | 311   | 222   |
| >BRAFF610SHQFEQLSGSI  | 412   | >BRAFF610SHQSEQLSGSI  | 4583  | 4171  |
| >BRAFF610SHQFEQLSGSI  | 432   | >BRAFF610SHQSEQLSGSI  | 2089  | 1657  |
| >BRAFF610SHQFEQLSGSI  | 442   | >BRAFF610SHQSEQLSGSI  | 5770  | 5328  |
| >BRAFF610SHQFEQLSGSI  | 185   | >BRAFF610SHQSEQLSGSI  | 503   | 318   |
| >BRAFF610SHQFEQLSGSI  | 183   | >BRAFF610SHQSEQLSGSI  | 519   | 336   |
| >BRAFF610SHQFEQLSGSI  | 157   | >BRAFF610SHQSEQLSGSI  | 912   | 755   |
| >BRAFF610SHQFEQLSGSI  | 70    | >BRAFF610SHQSEQLSGSI  | 573   | 503   |
| >BRAFF610SHQFEQLSGSI  | 8     | >BRAFF610SHQSEQLSGSI  | 54    | 46    |
| >BRAFF610SHQFEQLSGSI  | 195   | >BRAFF610SHQSEQLSGSI  | 509   | 314   |
| >BRAFF610SHQFEQLSGSI  | 16    | >BRAFF610SHQSEQLSGSI  | 24    | 8     |
| >BRAFF610SHQFEQLSGSI  | 388   | >BRAFF610SHQSEQLSGSI  | 1419  | 1031  |
| >BRAFF610SHQFEQLSGSI  | 485   | >BRAFF610SHQSEQLSGSI  | 5961  | 5476  |
| >BRAFF610SHQFEQLSGSI  | 111   | >BRAFF610SHQSEQLSGSI  | 358   | 247   |
| >BRAFF610SHQFEQLSGS   | 1354  | >BRAFF610SHQSEQLSGS   | 395   | 959   |
| >BRAFF610SGSHQFEQL    | 406   | >BRAFF610SGSHQSEQL    | 21277 | 20871 |

|                      |       |                      |       |       |
|----------------------|-------|----------------------|-------|-------|
| >BRAFF610SGSHQFEQL   | 240   | >BRAFF610SGSHQSEQL   | 37    | 203   |
| >BRAFF610SWGSHQFEC   | 796   | >BRAFF610SWGSHQSEQ   | 303   | 493   |
| >BRAFF610SWGSHQFEC   | 865   | >BRAFF610SWGSHQSEQ   | 218   | 647   |
| >BRAFF610RWSGSHQF    | 60    | >BRAFF610RWSGSHQS    | 25107 | 25047 |
| >BRAFF610RWSGSHQF    | 78    | >BRAFF610RWSGSHQS    | 12654 | 12576 |
| >BRAFF610RWSGSHQFE   | 328   | >BRAFF610RWSGSHQSE   | 614   | 286   |
| >BRAFF610RWSGSHQF    | 6     | >BRAFF610RWSGSHQS    | 3501  | 3495  |
| >BRAFF610RWSGSHQFE   | 14    | >BRAFF610RWSGSHQSE   | 24    | 10    |
| >BRAFF610RWSGSHQF    | 144   | >BRAFF610RWSGSHQS    | 463   | 319   |
| >BRAFF610RWSGSHQFE   | 57    | >BRAFF610RWSGSHQSE   | 268   | 211   |
| >BRAFF610RWSGSHQFE   | 116   | >BRAFF610RWSGSHQSE   | 195   | 79    |
| >BRAFF610SRWSGSHQF   | 8     | >BRAFF610SRWSGSHQS   | 3921  | 3913  |
| >BRAFF610SRWSGSHQF   | 37    | >BRAFF610SRWSGSHQS   | 156   | 119   |
| >BRAFF610SRWSGSHQF   | 327   | >BRAFF610SRWSGSHQS   | 609   | 282   |
| >BRAFF610SRWSGSHQF   | 1515  | >BRAFF610SRWSGSHQS   | 438   | 1077  |
| >BRAFF610SRWSGSHQF   | 698   | >BRAFF610SRWSGSHQS   | 455   | 243   |
| >BRAFF610SRWSGSHQF   | 147   | >BRAFF610SRWSGSHQS   | 3002  | 2855  |
| >BRAFF610KSRWSGSHQ   | 44    | >BRAFF610KSRWSGSHQ   | 19    | 25    |
| >BRAFF610KSRWSGSHQ   | 23    | >BRAFF610KSRWSGSHQ   | 48    | 25    |
| >BRAFF610KSRWSGSHQ   | 93    | >BRAFF610KSRWSGSHQ   | 14041 | 13948 |
| >BRAFF610KSRWSGSHQ   | 14    | >BRAFF610KSRWSGSHQ   | 7503  | 7489  |
| >BRAFF610KSRWSGSHQ   | 2     | >BRAFF610KSRWSGSHQ   | 88    | 86    |
| >BRAFF610KSRWSGSHQ   | 186   | >BRAFF610KSRWSGSHQ   | 125   | 61    |
| >BRAFF610KSRWSGSHQ   | 73    | >BRAFF610KSRWSGSHQ   | 8038  | 7965  |
| >BRAFF610KSRWSGSHQ   | 24    | >BRAFF610KSRWSGSHQ   | 13516 | 13492 |
| >BRAFF610KSRWSGSHQ   | 72    | >BRAFF610KSRWSGSHQ   | 11891 | 11819 |
| >BRAFG421'KSPGPQRER  | 822   | >BRAFG421'KSPVPQRER  | 371   | 451   |
| >BRAFG421'LQKSPGPQR  | 62    | >BRAFG421'LQKSPVPQR  | 37    | 25    |
| >BRAFG421'LQKSPGPQRE | 80    | >BRAFG421'LQKSPVPQRE | 54    | 26    |
| >BRAFG421'LQKSPGPQ   | 368   | >BRAFG421'LQKSPVPQ   | 269   | 99    |
| >BRAFG421'LQKSPGPQ   | 921   | >BRAFG421'LQKSPVPQ   | 215   | 706   |
| >BRAFG421'LQKSPGPQR  | 200   | >BRAFG421'LQKSPVPQR  | 236   | 36    |
| >BRAFG421'LQKSPGPQRE | 286   | >BRAFG421'LQKSPVPQRE | 253   | 33    |
| >BRAFG421'ALQKSPGPQF | 438   | >BRAFG421'ALQKSPVPQF | 155   | 283   |
| >BRAFG421'KALQKSPG   | 19579 | >BRAFG421'KALQKSPV   | 172   | 19407 |
| >BRAFG421'KALQKSPG   | 25155 | >BRAFG421'KALQKSPV   | 168   | 24987 |
| >BRAFG421'KALQKSPG   | 24423 | >BRAFG421'KALQKSPV   | 394   | 24029 |
| >BRAFG421'KALQKSPG   | 2885  | >BRAFG421'KALQKSPV   | 476   | 2409  |
| >BRAFG421'KALQKSPGPC | 64    | >BRAFG421'KALQKSPVPC | 46    | 18    |
| >BRAFG421'KALQKSPG   | 7203  | >BRAFG421'KALQKSPV   | 299   | 6904  |
| >BRAFG421'KALQKSPGPC | 158   | >BRAFG421'KALQKSPVPC | 108   | 50    |
| >BRAFG421'VKALQKSPG  | 12222 | >BRAFG421'VKALQKSPV  | 389   | 11833 |
| >BRAFG421'NVKALQKSPC | 24091 | >BRAFG421'NVKALQKSPV | 365   | 23726 |

|                      |       |                      |      |       |
|----------------------|-------|----------------------|------|-------|
| >BRAFG421'NVKALQKSPC | 31233 | >BRAFG421'NVKALQKSP\ | 288  | 30945 |
| >BRAFG464IGSGSFGTVYK | 46    | >BRAFG464IESGSFGTVYK | 178  | 132   |
| >BRAFG464IGSGSFGTVYK | 25    | >BRAFG464IESGSFGTVYK | 98   | 73    |
| >BRAFG464IGSGSFGTVY  | 14994 | >BRAFG464IESGSFGTVY  | 362  | 14632 |
| >BRAFG464IGSGSFGTVY  | 16077 | >BRAFG464IESGSFGTVY  | 392  | 15685 |
| >BRAFG464IGSGSFGTVY  | 172   | >BRAFG464IESGSFGTVY  | 636  | 464   |
| >BRAFG464IGSGSFGTVYK | 212   | >BRAFG464IESGSFGTVYK | 21   | 191   |
| >BRAFG464IGSGSFGTV   | 17323 | >BRAFG464IESGSFGTV   | 211  | 17112 |
| >BRAFG464IGSGSFGTV   | 10225 | >BRAFG464IESGSFGTV   | 84   | 10141 |
| >BRAFG464IGSGSFGTVY  | 86    | >BRAFG464IESGSFGTVY  | 244  | 158   |
| >BRAFG464IGSGSFGTVY  | 197   | >BRAFG464IESGSFGTVY  | 257  | 60    |
| >BRAFG464IGSGSFGTVY  | 154   | >BRAFG464IESGSFGTVY  | 565  | 411   |
| >BRAFG464IGSGSFGTVY  | 4     | >BRAFG464IESGSFGTVY  | 28   | 24    |
| >BRAFG464IGSGSFGTVYK | 241   | >BRAFG464IESGSFGTVYK | 1103 | 862   |
| >BRAFG464IGSGSFGTV   | 24255 | >BRAFG464IESGSFGTV   | 283  | 23972 |
| >BRAFG464IGSGSFGTVYI | 304   | >BRAFG464IESGSFGTVYk | 2681 | 2377  |
| >BRAFG464IGSGSFGTVYI | 214   | >BRAFG464IESGSFGTVYk | 3272 | 3058  |
| >BRAFG464IGSGSFGTVY  | 96    | >BRAFG464IESGSFGTVY  | 165  | 69    |
| >BRAFG464IGSGSFGTVY  | 370   | >BRAFG464IESGSFGTVY  | 579  | 209   |
| >BRAFG464IGSGSFGTVY  | 146   | >BRAFG464IESGSFGTVY  | 125  | 21    |
| >BRAFG464IGSGSFGTVY  | 653   | >BRAFG464IESGSFGTVY  | 123  | 530   |
| >BRAFG464IGSGSFGTVY  | 31753 | >BRAFG464IESGSFGTVY  | 236  | 31517 |
| >BRAFG464IGSGSFGTV   | 20067 | >BRAFG464IESGSFGTV   | 14   | 20053 |
| >BRAFG464IGSGSFGTVY  | 33266 | >BRAFG464IESGSFGTVY  | 428  | 32838 |
| >BRAFG464IGSGSFGT    | 39684 | >BRAFG464IESGSFGT    | 285  | 39399 |
| >BRAFG464IGSGSFGTV   | 40456 | >BRAFG464IESGSFGTV   | 179  | 40277 |
| >BRAFG464IGSGSFGTV   | 32069 | >BRAFG464IESGSFGTV   | 88   | 31981 |
| >BRAFG464RIGSGSFGTV  | 163   | >BRAFG464RIESGSFGTV  | 489  | 326   |
| >BRAFG464RIGSGSFGTV  | 31    | >BRAFG464RIESGSFGTV  | 73   | 42    |
| >BRAFG464RIGSGSFGTV  | 19    | >BRAFG464RIESGSFGTV  | 165  | 146   |
| >BRAFG464RIGSGSFGTV  | 163   | >BRAFG464RIESGSFGTV  | 812  | 649   |
| >BRAFG464RIGSGSFGTV  | 69    | >BRAFG464RIESGSFGTV  | 955  | 886   |
| >BRAFG464RIGSGSFGTV  | 256   | >BRAFG464RIESGSFGTV  | 3026 | 2770  |
| >BRAFG464RIGSGSFGTV  | 14    | >BRAFG464RIESGSFGTV  | 32   | 18    |
| >BRAFG464RIGSGSFGTV' | 468   | >BRAFG464RIESGSFGTV\ | 2537 | 2069  |
| >BRAFG464RIGSGSFGTV' | 215   | >BRAFG464RIESGSFGTV\ | 724  | 509   |
| >BRAFG464RIGSGSFGTV' | 61    | >BRAFG464RIESGSFGTV\ | 81   | 20    |
| >BRAFG464RIGSGSFGTV  | 327   | >BRAFG464RIESGSFGTV  | 529  | 202   |
| >BRAFG464RIGSGSFGTV' | 30    | >BRAFG464RIESGSFGTV\ | 205  | 175   |
| >BRAFG464RIGSGSFGTV' | 50    | >BRAFG464RIESGSFGTV\ | 154  | 104   |
| >BRAFG464RIGSGSFGTV' | 451   | >BRAFG464RIESGSFGTV\ | 996  | 545   |
| >BRAFG464RIGSGSFGTV' | 451   | >BRAFG464RIESGSFGTV\ | 177  | 274   |
| >BRAFG464RIGSGSFGTV' | 77    | >BRAFG464RIESGSFGTV\ | 35   | 42    |

|                      |       |                      |       |       |
|----------------------|-------|----------------------|-------|-------|
| >BRAFG464IRIGSGSFGTV | 933   | >BRAFG464IRIESGSFGTV | 331   | 602   |
| >BRAFG464IQRIGSGSF   | 52    | >BRAFG464IQRIESGSF   | 22    | 30    |
| >BRAFG464IQRIGSGSFGT | 804   | >BRAFG464IQRIESGSFGT | 356   | 448   |
| >BRAFG464IQRIGSGSF   | 235   | >BRAFG464IQRIESGSF   | 382   | 147   |
| >BRAFG464IGQRIGSGSF  | 30    | >BRAFG464IGQRIESGSF  | 38    | 8     |
| >BRAFG464IGQRIGSGSF  | 56    | >BRAFG464IGQRIESGSF  | 628   | 572   |
| >BRAFG464IGQRIGSGSF  | 22    | >BRAFG464IGQRIESGSF  | 27    | 5     |
| >BRAFG464IVGQRIGSGSF | 498   | >BRAFG464IVGQRIESGSF | 1898  | 1400  |
| >BRAFG464IVGQRIGSGSF | 74    | >BRAFG464IVGQRIESGSF | 101   | 27    |
| >BRAFG464ITVGQRIGSGS | 183   | >BRAFG464ITVGQRIESGS | 222   | 39    |
| >BRAFG464IGSGSFGTVYK | 46    | >BRAFG464IRSGSFGTVYK | 19    | 27    |
| >BRAFG464IGSGSFGTVYK | 25    | >BRAFG464IRSGSFGTVYK | 17    | 8     |
| >BRAFG464IGSGSFGTVYK | 1110  | >BRAFG464IRSGSFGTVYK | 23    | 1087  |
| >BRAFG464IGSGSFGTVY  | 172   | >BRAFG464IRSGSFGTVY  | 73    | 99    |
| >BRAFG464IGSGSFGTVYK | 2531  | >BRAFG464IRSGSFGTVYK | 198   | 2333  |
| >BRAFG464IGSGSFGTVYK | 212   | >BRAFG464IRSGSFGTVYK | 143   | 69    |
| >BRAFG464IGSGSFGTVY  | 5454  | >BRAFG464IRSGSFGTVY  | 143   | 5311  |
| >BRAFG464IGSGSFGTVY  | 86    | >BRAFG464IRSGSFGTVY  | 45    | 41    |
| >BRAFG464IGSGSFGTVY  | 197   | >BRAFG464IRSGSFGTVY  | 14    | 183   |
| >BRAFG464IGSGSFGTVY  | 154   | >BRAFG464IRSGSFGTVY  | 8     | 146   |
| >BRAFG464IGSGSFGTVY  | 8433  | >BRAFG464IRSGSFGTVY  | 308   | 8125  |
| >BRAFG464IGSGSFGTVY  | 8316  | >BRAFG464IRSGSFGTVY  | 94    | 8222  |
| >BRAFG464IGSGSFGTV   | 6073  | >BRAFG464IRSGSFGTV   | 177   | 5896  |
| >BRAFG464IGSGSFGTVY  | 4     | >BRAFG464IRSGSFGTVY  | 4     | 0     |
| >BRAFG464IGSGSFGTVYK | 1953  | >BRAFG464IRSGSFGTVYK | 265   | 1688  |
| >BRAFG464IGSGSFGTVYK | 241   | >BRAFG464IRSGSFGTVYK | 584   | 343   |
| >BRAFG464IGSGSFGTVYK | 5213  | >BRAFG464IRSGSFGTVYK | 255   | 4958  |
| >BRAFG464IGSGSFGTV   | 2168  | >BRAFG464IRSGSFGTV   | 214   | 1954  |
| >BRAFG464IGSGSFGTVYI | 304   | >BRAFG464IRSGSFGTVYI | 10774 | 10470 |
| >BRAFG464IGSGSFGTVYI | 214   | >BRAFG464IRSGSFGTVYI | 4962  | 4748  |
| >BRAFG464IGSGSFGTVY  | 96    | >BRAFG464IRSGSFGTVY  | 153   | 57    |
| >BRAFG464IGSGSFGTVY  | 370   | >BRAFG464IRSGSFGTVY  | 836   | 466   |
| >BRAFG464IGSGSFGTVY  | 146   | >BRAFG464IRSGSFGTVY  | 2514  | 2368  |
| >BRAFG464IGSGSFGTVY  | 653   | >BRAFG464IRSGSFGTVY  | 35    | 618   |
| >BRAFG464IGSGSFGTVY  | 27560 | >BRAFG464IRSGSFGTVY  | 119   | 27441 |
| >BRAFG464IGSGSFGTVYI | 24710 | >BRAFG464IRSGSFGTVYI | 383   | 24327 |
| >BRAFG464IRIGSGSFGTV | 163   | >BRAFG464IRIRSGSFGTV | 454   | 291   |
| >BRAFG464IRIGSGSFGTV | 31    | >BRAFG464IRIRSGSFGTV | 37    | 6     |
| >BRAFG464IRIGSGSFGTV | 19    | >BRAFG464IRIRSGSFGTV | 154   | 135   |
| >BRAFG464IRIGSGSFGTV | 163   | >BRAFG464IRIRSGSFGTV | 1906  | 1743  |
| >BRAFG464IRIGSGSFGTV | 69    | >BRAFG464IRIRSGSFGTV | 978   | 909   |
| >BRAFG464IRIGSGSFGTV | 256   | >BRAFG464IRIRSGSFGTV | 3471  | 3215  |
| >BRAFG464IRIGSGSFGTV | 14    | >BRAFG464IRIRSGSFGTV | 25    | 11    |

|                       |       |                       |      |       |
|-----------------------|-------|-----------------------|------|-------|
| >BRAFG464IRIGSGSFGTV' | 468   | >BRAFG464IRIRSGSFGTV' | 168  | 300   |
| >BRAFG464IRIGSGSFGTV' | 215   | >BRAFG464IRIRSGSFGTV' | 410  | 195   |
| >BRAFG464IRIGSGSFG    | 5377  | >BRAFG464IRIRSGSFG    | 11   | 5366  |
| >BRAFG464IRIGSGSFGT   | 11982 | >BRAFG464IRIRSGSFGT   | 44   | 11938 |
| >BRAFG464IRIGSGSFGTV  | 3415  | >BRAFG464IRIRSGSFGTV  | 6    | 3409  |
| >BRAFG464IRIGSGSFGTV' | 9259  | >BRAFG464IRIRSGSFGTV' | 29   | 9230  |
| >BRAFG464IRIGSGSFGTV' | 61    | >BRAFG464IRIRSGSFGTV' | 72   | 11    |
| >BRAFG464IRIGSGSFGTV  | 327   | >BRAFG464IRIRSGSFGTV  | 439  | 112   |
| >BRAFG464IRIGSGSFGTV' | 30    | >BRAFG464IRIRSGSFGTV' | 149  | 119   |
| >BRAFG464IRIGSGSFGTV' | 50    | >BRAFG464IRIRSGSFGTV' | 38   | 12    |
| >BRAFG464IRIGSGSFGTV' | 726   | >BRAFG464IRIRSGSFGTV' | 189  | 537   |
| >BRAFG464IRIGSGSFGTV' | 451   | >BRAFG464IRIRSGSFGTV' | 41   | 410   |
| >BRAFG464IRIGSGSFGTV' | 451   | >BRAFG464IRIRSGSFGTV' | 14   | 437   |
| >BRAFG464IRIGSGSFGTV' | 77    | >BRAFG464IRIRSGSFGTV' | 13   | 64    |
| >BRAFG464IRIGSGSF     | 52    | >BRAFG464IRIRSGSF     | 19   | 33    |
| >BRAFG464IRIGSGSFGT   | 804   | >BRAFG464IRIRSGSFGT'  | 260  | 544   |
| >BRAFG464IRIGSGSF     | 235   | >BRAFG464IRIRSGSF     | 203  | 32    |
| >BRAFG464IRIGSGSFGT   | 521   | >BRAFG464IRIRSGSFGT'  | 495  | 26    |
| >BRAFG464IRIGSGSFGT   | 1501  | >BRAFG464IRIRSGSFGT'  | 473  | 1028  |
| >BRAFG464IGRIGSGSF    | 30    | >BRAFG464IGRIRSGSF    | 34   | 4     |
| >BRAFG464IGRIGSGSF    | 56    | >BRAFG464IGRIRSGSF    | 216  | 160   |
| >BRAFG464IGRIGSGSF    | 22    | >BRAFG464IGRIRSGSF    | 35   | 13    |
| >BRAFG464IVGQRIGSGSF  | 498   | >BRAFG464IVGQRIRSGSF  | 1178 | 680   |
| >BRAFG464IVGQRIGSGSF  | 74    | >BRAFG464IVGQRIRSGSF  | 107  | 33    |
| >BRAFG464ITVGQRIGSGS  | 183   | >BRAFG464ITVGQRIRSGS  | 266  | 83    |
| >BRAFG464ITVGQRIG     | 23336 | >BRAFG464ITVGQRIR     | 247  | 23089 |
| >BRAFG464ITVGQRIG     | 30799 | >BRAFG464ITVGQRIR     | 62   | 30737 |
| >BRAFG464'GSGSFGTV    | 8452  | >BRAFG464'VSGSFGTV    | 247  | 8205  |
| >BRAFG464'GSGSFGTVYK  | 46    | >BRAFG464'VSGSFGTVYK  | 42   | 4     |
| >BRAFG464'GSGSFGTVYK  | 25    | >BRAFG464'VSGSFGTVYK  | 23   | 2     |
| >BRAFG464'GSGSFGTVY   | 172   | >BRAFG464'VSGSFGTVY   | 63   | 109   |
| >BRAFG464'GSGSFGTVYK  | 212   | >BRAFG464'VSGSFGTVYK  | 132  | 80    |
| >BRAFG464'GSGSFGTVY   | 5454  | >BRAFG464'VSGSFGTVY   | 408  | 5046  |
| >BRAFG464'GSGSFGTVY   | 86    | >BRAFG464'VSGSFGTVY   | 70   | 16    |
| >BRAFG464'GSGSFGTVY   | 197   | >BRAFG464'VSGSFGTVY   | 40   | 157   |
| >BRAFG464'GSGSFGTVY   | 154   | >BRAFG464'VSGSFGTVY   | 25   | 129   |
| >BRAFG464'GSGSFGTVY   | 4     | >BRAFG464'VSGSFGTVY   | 6    | 2     |
| >BRAFG464'GSGSFGTVYK  | 241   | >BRAFG464'VSGSFGTVYK  | 860  | 619   |
| >BRAFG464'IGSGSFGTV   | 4459  | >BRAFG464'IVSGSFGTV   | 238  | 4221  |
| >BRAFG464'IGSGSFGTV   | 4618  | >BRAFG464'IVSGSFGTV   | 24   | 4594  |
| >BRAFG464'IGSGSFGT    | 12404 | >BRAFG464'IVSGSFGT    | 470  | 11934 |
| >BRAFG464'IGSGSFGTV   | 1515  | >BRAFG464'IVSGSFGTV   | 30   | 1485  |
| >BRAFG464'IGSGSFGTV   | 6241  | >BRAFG464'IVSGSFGTV   | 141  | 6100  |

|                      |       |                      |     |       |
|----------------------|-------|----------------------|-----|-------|
| >BRAFG464IGSGSFGTV   | 4709  | >BRAFG464IVSGSFGTV   | 9   | 4700  |
| >BRAFG464IGSGSFGTVYI | 304   | >BRAFG464IVSGSFGTVYI | 36  | 268   |
| >BRAFG464IGSGSFGTVY  | 24788 | >BRAFG464IVSGSFGTVY  | 378 | 24410 |
| >BRAFG464IGSGSFGTVYI | 214   | >BRAFG464IVSGSFGTVYI | 10  | 204   |
| >BRAFG464IGSGSFGTVY  | 96    | >BRAFG464IVSGSFGTVY  | 42  | 54    |
| >BRAFG464IGSGSFGTVYI | 1229  | >BRAFG464IVSGSFGTVYI | 56  | 1173  |
| >BRAFG464IGSGSFGTVY  | 370   | >BRAFG464IVSGSFGTVY  | 146 | 224   |
| >BRAFG464IGSGSFGTVYI | 4088  | >BRAFG464IVSGSFGTVYI | 323 | 3765  |
| >BRAFG464IGSGSFGTVYI | 762   | >BRAFG464IVSGSFGTVYI | 18  | 744   |
| >BRAFG464IGSGSFGTV   | 5167  | >BRAFG464IVSGSFGTV   | 56  | 5111  |
| >BRAFG464IGSGSFGTVY  | 146   | >BRAFG464IVSGSFGTVY  | 62  | 84    |
| >BRAFG464IGSGSFGTVY  | 675   | >BRAFG464IVSGSFGTVY  | 246 | 429   |
| >BRAFG464IGSGSFGTVY  | 653   | >BRAFG464IVSGSFGTVY  | 354 | 299   |
| >BRAFG464IGSGSFGTVY  | 554   | >BRAFG464IVSGSFGTVY  | 98  | 456   |
| >BRAFG464IGSGSFGTV   | 1320  | >BRAFG464IVSGSFGTV   | 395 | 925   |
| >BRAFG464IGSGSFGTVY  | 1246  | >BRAFG464IVSGSFGTVY  | 211 | 1035  |
| >BRAFG464RIGSGSFGTV  | 163   | >BRAFG464RIVSGSFGTV  | 133 | 30    |
| >BRAFG464RIGSGSFGTV  | 31    | >BRAFG464RIVSGSFGTV  | 19  | 12    |
| >BRAFG464RIGSGSFGT   | 1267  | >BRAFG464RIVSGSFGT   | 66  | 1201  |
| >BRAFG464RIGSGSFGTV  | 617   | >BRAFG464RIVSGSFGTV  | 135 | 482   |
| >BRAFG464RIGSGSFGTV  | 19    | >BRAFG464RIVSGSFGTV  | 20  | 1     |
| >BRAFG464RIGSGSFGTV  | 163   | >BRAFG464RIVSGSFGTV  | 183 | 20    |
| >BRAFG464RIGSGSFGTV  | 69    | >BRAFG464RIVSGSFGTV  | 117 | 48    |
| >BRAFG464RIGSGSFGTV  | 256   | >BRAFG464RIVSGSFGTV  | 696 | 440   |
| >BRAFG464RIGSGSFGTV  | 14    | >BRAFG464RIVSGSFGTV  | 13  | 1     |
| >BRAFG464RIGSGSFGTV' | 468   | >BRAFG464RIVSGSFGTV' | 543 | 75    |
| >BRAFG464RIGSGSFGTV' | 6717  | >BRAFG464RIVSGSFGTV' | 469 | 6248  |
| >BRAFG464RIGSGSFGTV' | 215   | >BRAFG464RIVSGSFGTV' | 146 | 69    |
| >BRAFG464RIGSGSFGTV' | 61    | >BRAFG464RIVSGSFGTV' | 66  | 5     |
| >BRAFG464RIGSGSFGTV  | 327   | >BRAFG464RIVSGSFGTV  | 53  | 274   |
| >BRAFG464RIGSGSFGTV  | 1260  | >BRAFG464RIVSGSFGTV  | 431 | 829   |
| >BRAFG464RIGSGSFGTV' | 30    | >BRAFG464RIVSGSFGTV' | 76  | 46    |
| >BRAFG464RIGSGSFGTV' | 50    | >BRAFG464RIVSGSFGTV' | 46  | 4     |
| >BRAFG464RIGSGSFGTV' | 726   | >BRAFG464RIVSGSFGTV' | 397 | 329   |
| >BRAFG464RIGSGSFGTV' | 451   | >BRAFG464RIVSGSFGTV' | 93  | 358   |
| >BRAFG464RIGSGSFGTV' | 451   | >BRAFG464RIVSGSFGTV' | 20  | 431   |
| >BRAFG464RIGSGSFGTV' | 2389  | >BRAFG464RIVSGSFGTV' | 477 | 1912  |
| >BRAFG464RIGSGSFGTV' | 77    | >BRAFG464RIVSGSFGTV' | 27  | 50    |
| >BRAFG464RIGSGSFGTV' | 2149  | >BRAFG464RIVSGSFGTV' | 196 | 1953  |
| >BRAFG464QRIGSGSF    | 52    | >BRAFG464QRIVSGSF    | 22  | 30    |
| >BRAFG464QRIGSGSFGT  | 804   | >BRAFG464QRIVSGSFGT  | 331 | 473   |
| >BRAFG464QRIGSGSF    | 235   | >BRAFG464QRIVSGSF    | 277 | 42    |
| >BRAFG464QRIGSGSFGT  | 1501  | >BRAFG464QRIVSGSFGT  | 477 | 1024  |

|                       |      |                       |     |      |
|-----------------------|------|-----------------------|-----|------|
| >BRAFG464'GQRIGSGSF   | 30   | >BRAFG464'GQRIVSGSF   | 34  | 4    |
| >BRAFG464'GQRIGSGSF   | 56   | >BRAFG464'GQRIVSGSF   | 290 | 234  |
| >BRAFG464'GQRIGSGSF   | 22   | >BRAFG464'GQRIVSGSF   | 41  | 19   |
| >BRAFG464'VGQRIGSGSF  | 498  | >BRAFG464'VGQRIVSGSF  | 610 | 112  |
| >BRAFG464'VGQRIGSGSF  | 74   | >BRAFG464'VGQRIVSGSF  | 87  | 13   |
| >BRAFG464'TVGQRIGSGS  | 183  | >BRAFG464'TVGQRIVSGS  | 190 | 7    |
| >BRAFG466,GSFGTVYK    | 62   | >BRAFG466,ASFGTVYK    | 49  | 13   |
| >BRAFG466,GSFGTVYK GK | 119  | >BRAFG466,ASFGTVYK GK | 52  | 67   |
| >BRAFG466,GSFGTVYK    | 6    | >BRAFG466,ASFGTVYK    | 6   | 0    |
| >BRAFG466,GSFGTVYK GK | 39   | >BRAFG466,ASFGTVYK GK | 17  | 22   |
| >BRAFG466,GSFGTVYK    | 37   | >BRAFG466,ASFGTVYK    | 9   | 28   |
| >BRAFG466,GSFGTVYK GK | 338  | >BRAFG466,ASFGTVYK GK | 34  | 304  |
| >BRAFG466,GSFGTVYK    | 89   | >BRAFG466,ASFGTVYK    | 51  | 38   |
| >BRAFG466,GSFGTVYK GK | 1501 | >BRAFG466,ASFGTVYK GK | 483 | 1018 |
| >BRAFG466,GSFGTVYK G  | 1560 | >BRAFG466,ASFGTVYK G  | 397 | 1163 |
| >BRAFG466,GSFGTVYK GK | 1206 | >BRAFG466,ASFGTVYK GK | 441 | 765  |
| >BRAFG466,GSFGTVYK    | 25   | >BRAFG466,ASFGTVYK    | 23  | 2    |
| >BRAFG466,GSFGTVYK GK | 645  | >BRAFG466,ASFGTVYK GK | 243 | 402  |
| >BRAFG466,GSFGTVYK GK | 9    | >BRAFG466,ASFGTVYK GK | 5   | 4    |
| >BRAFG466,GSFGTVYK GK | 40   | >BRAFG466,ASFGTVYK GK | 42  | 2    |
| >BRAFG466,GSFGTVYK GK | 29   | >BRAFG466,ASFGTVYK GK | 23  | 6    |
| >BRAFG466,GSFGTVYK GK | 90   | >BRAFG466,ASFGTVYK GK | 249 | 159  |
| >BRAFG466,GSFGTVYK GK | 103  | >BRAFG466,ASFGTVYK GK | 107 | 4    |
| >BRAFG466,GSFGTVYK    | 74   | >BRAFG466,ASFGTVYK    | 57  | 17   |
| >BRAFG466,GSFGTVYK GK | 141  | >BRAFG466,ASFGTVYK GK | 89  | 52   |
| >BRAFG466,SGSFGTVYK   | 540  | >BRAFG466,SASFGTVYK   | 97  | 443  |
| >BRAFG466,SGSFGTVYK   | 41   | >BRAFG466,SASFGTVYK   | 11  | 30   |
| >BRAFG466,SGSFGTVYK G | 638  | >BRAFG466,SASFGTVYK G | 59  | 579  |
| >BRAFG466,SGSFGTVY    | 910  | >BRAFG466,SASFGTVY    | 241 | 669  |
| >BRAFG466,SGSFGTVYK   | 331  | >BRAFG466,SASFGTVYK   | 40  | 291  |
| >BRAFG466,SGSFGTVYK G | 2582 | >BRAFG466,SASFGTVYK G | 467 | 2115 |
| >BRAFG466,SGSFGTVY    | 89   | >BRAFG466,SASFGTVY    | 81  | 8    |
| >BRAFG466,SGSFGTVYK   | 2906 | >BRAFG466,SASFGTVYK   | 344 | 2562 |
| >BRAFG466,SGSFGTVYK   | 290  | >BRAFG466,SASFGTVYK   | 12  | 278  |
| >BRAFG466,SGSFGTVYK G | 2574 | >BRAFG466,SASFGTVYK G | 101 | 2473 |
| >BRAFG466,SGSFGTVY    | 226  | >BRAFG466,SASFGTVY    | 116 | 110  |
| >BRAFG466,SGSFGTVY    | 2849 | >BRAFG466,SASFGTVY    | 476 | 2373 |
| >BRAFG466,SGSFGTVY    | 2005 | >BRAFG466,SASFGTVY    | 79  | 1926 |
| >BRAFG466,SGSFGTVY    | 519  | >BRAFG466,SASFGTVY    | 58  | 461  |
| >BRAFG466,SGSFGTVYK   | 438  | >BRAFG466,SASFGTVYK   | 182 | 256  |
| >BRAFG466,SGSFGTVY    | 1669 | >BRAFG466,GSASFGTVY   | 432 | 1237 |
| >BRAFG466,SGSFGTVYK   | 46   | >BRAFG466,GSASFGTVYK  | 30  | 16   |
| >BRAFG466,SGSFGTVYK   | 25   | >BRAFG466,GSASFGTVYK  | 11  | 14   |



|                        |      |                        |     |      |
|------------------------|------|------------------------|-----|------|
| >BRAFG466, GSGSFGTVY   | 584  | >BRAFG466, GSASFGTVY   | 160 | 424  |
| >BRAFG466, GSGSFGTVY   | 172  | >BRAFG466, GSASFGTVY   | 51  | 121  |
| >BRAFG466, GSGSFGTVYK  | 212  | >BRAFG466, GSASFGTVYK  | 18  | 194  |
| >BRAFG466, GSGSFGTVY   | 86   | >BRAFG466, GSASFGTVY   | 62  | 24   |
| >BRAFG466, GSGSFGTVY   | 197  | >BRAFG466, GSASFGTVY   | 40  | 157  |
| >BRAFG466, GSGSFGTVY   | 154  | >BRAFG466, GSASFGTVY   | 18  | 136  |
| >BRAFG466, GSGSFGTVY   | 4    | >BRAFG466, GSASFGTVY   | 3   | 1    |
| >BRAFG466, GSGSFGTVYK  | 241  | >BRAFG466, GSASFGTVYK  | 104 | 137  |
| >BRAFG466, IGSFSFGTVYI | 304  | >BRAFG466, IGSFSFGTVYI | 187 | 117  |
| >BRAFG466, IGSFSFGTVYI | 214  | >BRAFG466, IGSFSFGTVYI | 130 | 84   |
| >BRAFG466, IGSFSFGTVY  | 96   | >BRAFG466, IGSFSFGTVY  | 116 | 20   |
| >BRAFG466, IGSFSFGTVY  | 370  | >BRAFG466, IGSFSFGTVY  | 592 | 222  |
| >BRAFG466, IGSFSFGTVY  | 146  | >BRAFG466, IGSFSFGTVY  | 112 | 34   |
| >BRAFG466, IGSFSFGTVY  | 653  | >BRAFG466, IGSFSFGTVY  | 188 | 465  |
| >BRAFG466, IGSFSFGTVY  | 554  | >BRAFG466, IGSFSFGTVY  | 451 | 103  |
| >BRAFG466, IGSFSFGTVY  | 1246 | >BRAFG466, IGSFSFGTVY  | 319 | 927  |
| >BRAFG466, RIGSFSFGTV  | 163  | >BRAFG466, RIGSFSFGTV  | 214 | 51   |
| >BRAFG466, RIGSFSFGTV  | 31   | >BRAFG466, RIGSFSFGTV  | 32  | 1    |
| >BRAFG466, RIGSFSFGTV  | 19   | >BRAFG466, RIGSFSFGTV  | 28  | 9    |
| >BRAFG466, RIGSFSFGTV  | 163  | >BRAFG466, RIGSFSFGTV  | 168 | 5    |
| >BRAFG466, RIGSFSFGTV  | 69   | >BRAFG466, RIGSFSFGTV  | 84  | 15   |
| >BRAFG466, RIGSFSFGTV  | 256  | >BRAFG466, RIGSFSFGTV  | 246 | 10   |
| >BRAFG466, RIGSFSFGTV  | 14   | >BRAFG466, RIGSFSFGTV  | 26  | 12   |
| >BRAFG466, RIGSFSFGTV' | 468  | >BRAFG466, RIGSFSFGTV' | 514 | 46   |
| >BRAFG466, RIGSFSFGTV' | 215  | >BRAFG466, RIGSFSFGTV' | 398 | 183  |
| >BRAFG466, RIGSFSFGTV' | 61   | >BRAFG466, RIGSFSFGTV' | 89  | 28   |
| >BRAFG466, RIGSFSFGTV  | 327  | >BRAFG466, RIGSFSFGTV  | 214 | 113  |
| >BRAFG466, RIGSFSFGTV' | 30   | >BRAFG466, RIGSFSFGTV' | 46  | 16   |
| >BRAFG466, RIGSFSFGTV' | 50   | >BRAFG466, RIGSFSFGTV' | 48  | 2    |
| >BRAFG466, RIGSFSFGTV' | 451  | >BRAFG466, RIGSFSFGTV' | 389 | 62   |
| >BRAFG466, RIGSFSFGTV' | 451  | >BRAFG466, RIGSFSFGTV' | 574 | 123  |
| >BRAFG466, RIGSFSFGTV' | 77   | >BRAFG466, RIGSFSFGTV' | 110 | 33   |
| >BRAFG466, RIGSFSFGTV' | 2149 | >BRAFG466, RIGSFSFGTV' | 472 | 1677 |
| >BRAFG466, QRIGSGSF    | 52   | >BRAFG466, QRIGSGSF    | 23  | 29   |
| >BRAFG466, QRIGSGSF    | 235  | >BRAFG466, QRIGSGSF    | 170 | 65   |
| >BRAFG466, QRIGSGSFGT  | 521  | >BRAFG466, QRIGSGSFGT  | 453 | 68   |
| >BRAFG466, QRIGSGSF    | 2708 | >BRAFG466, QRIGSGSF    | 467 | 2241 |
| >BRAFG466, GQRIGSGSF   | 30   | >BRAFG466, GQRIGSGSF   | 29  | 1    |
| >BRAFG466, GQRIGSGSF   | 56   | >BRAFG466, GQRIGSGSF   | 72  | 16   |
| >BRAFG466, GQRIGSGSF   | 22   | >BRAFG466, GQRIGSGSF   | 6   | 16   |
| >BRAFG466, GQRIGSGSF   | 1109 | >BRAFG466, GQRIGSGSF   | 141 | 968  |
| >BRAFG466, VGQRIGSGSF  | 498  | >BRAFG466, VGQRIGSGSF  | 230 | 268  |
| >BRAFG466, VGQRIGSGSF  | 74   | >BRAFG466, VGQRIGSGSF  | 119 | 45   |

|                      |       |                      |      |       |
|----------------------|-------|----------------------|------|-------|
| >BRAFG466TVGQRIGSGS  | 503   | >BRAFG466TVGQRIGSAS  | 390  | 113   |
| >BRAFG466TVGQRIGSGS  | 183   | >BRAFG466TVGQRIGSAS  | 119  | 64    |
| >BRAFG466GSFGTVYK    | 62    | >BRAFG466ESFGTVYK    | 337  | 275   |
| >BRAFG466GSFGTVYK GK | 119   | >BRAFG466ESFGTVYK GK | 662  | 543   |
| >BRAFG466GSFGTVYK    | 6     | >BRAFG466ESFGTVYK    | 25   | 19    |
| >BRAFG466GSFGTVYK GK | 39    | >BRAFG466ESFGTVYK GK | 165  | 126   |
| >BRAFG466GSFGTVYK    | 37    | >BRAFG466ESFGTVYK    | 1644 | 1607  |
| >BRAFG466GSFGTVYK GK | 338   | >BRAFG466ESFGTVYK GK | 6246 | 5908  |
| >BRAFG466GSFGTVYK    | 89    | >BRAFG466ESFGTVYK    | 1117 | 1028  |
| >BRAFG466GSFGTVYK    | 9970  | >BRAFG466ESFGTVYK    | 432  | 9538  |
| >BRAFG466GSFGTVYK    | 25    | >BRAFG466ESFGTVYK    | 2    | 23    |
| >BRAFG466GSFGTVYK GK | 645   | >BRAFG466ESFGTVYK GK | 31   | 614   |
| >BRAFG466GSFGTVYK GK | 9     | >BRAFG466ESFGTVYK GK | 15   | 6     |
| >BRAFG466GSFGTVYK GK | 40    | >BRAFG466ESFGTVYK GK | 73   | 33    |
| >BRAFG466GSFGTVYK GK | 29    | >BRAFG466ESFGTVYK GK | 69   | 40    |
| >BRAFG466GSFGTVYK GK | 90    | >BRAFG466ESFGTVYK GK | 1804 | 1714  |
| >BRAFG466GSFGTVYK GK | 103   | >BRAFG466ESFGTVYK GK | 160  | 57    |
| >BRAFG466GSFGTVYK    | 74    | >BRAFG466ESFGTVYK    | 195  | 121   |
| >BRAFG466GSFGTVYK GK | 141   | >BRAFG466ESFGTVYK GK | 573  | 432   |
| >BRAFG466GSFGTVYK    | 1983  | >BRAFG466ESFGTVYK    | 410  | 1573  |
| >BRAFG466SGSFGTVY    | 35822 | >BRAFG466SESFGTVY    | 96   | 35726 |
| >BRAFG466SGSFGTVYK   | 41    | >BRAFG466SESFGTVYK   | 591  | 550   |
| >BRAFG466SGSFGTVYK   | 331   | >BRAFG466SESFGTVYK   | 6174 | 5843  |
| >BRAFG466SGSFGTVY    | 89    | >BRAFG466SESFGTVY    | 696  | 607   |
| >BRAFG466SGSFGTVYK   | 290   | >BRAFG466SESFGTVYK   | 679  | 389   |
| >BRAFG466SGSFGTVY    | 226   | >BRAFG466SESFGTVY    | 184  | 42    |
| >BRAFG466SGSFGTVY    | 11933 | >BRAFG466SESFGTVY    | 45   | 11888 |
| >BRAFG466SGSFGTVY    | 36672 | >BRAFG466SESFGTVY    | 346  | 36326 |
| >BRAFG466SGSFGTVYK   | 438   | >BRAFG466SESFGTVYK   | 1136 | 698   |
| >BRAFG466SGSFGTVY    | 1669  | >BRAFG466GSESFGTVY   | 94   | 1575  |
| >BRAFG466SGSFGTVYK   | 46    | >BRAFG466GSESFGTVYK  | 104  | 58    |
| >BRAFG466SGSFGTVYK   | 25    | >BRAFG466GSESFGTVYK  | 30   | 5     |
| >BRAFG466SGSFGTVY    | 172   | >BRAFG466GSESFGTVY   | 182  | 10    |
| >BRAFG466SGSFGTVYK   | 212   | >BRAFG466GSESFGTVYK  | 380  | 168   |
| >BRAFG466SGSFGTVY    | 86    | >BRAFG466GSESFGTVY   | 654  | 568   |
| >BRAFG466SGSFGTVY    | 197   | >BRAFG466GSESFGTVY   | 560  | 363   |
| >BRAFG466SGSFGTVY    | 154   | >BRAFG466GSESFGTVY   | 66   | 88    |
| >BRAFG466SGSFGTVY    | 4     | >BRAFG466GSESFGTVY   | 3    | 1     |
| >BRAFG466SGSFGTVYK   | 241   | >BRAFG466GSESFGTVYK  | 245  | 4     |
| >BRAFG466IGSGSFGTV   | 1515  | >BRAFG466IGSESFGTV   | 467  | 1048  |
| >BRAFG466IGSGSFGTVYI | 304   | >BRAFG466IGSESFGTVYK | 345  | 41    |
| >BRAFG466IGSGSFGTVYI | 214   | >BRAFG466IGSESFGTVYK | 235  | 21    |
| >BRAFG466IGSGSFGTVY  | 96    | >BRAFG466IGSESFGTVY  | 136  | 40    |

|                       |      |                       |      |      |
|-----------------------|------|-----------------------|------|------|
| >BRAFG466IGSGSFGTVY   | 370  | >BRAFG466IGSESFQTVY   | 994  | 624  |
| >BRAFG466IGSGSFGTVY   | 146  | >BRAFG466IGSESFQTVY   | 141  | 5    |
| >BRAFG466IGSGSFGTVY   | 653  | >BRAFG466IGSESFQTVY   | 274  | 379  |
| >BRAFG466IGSGSFGTVY   | 554  | >BRAFG466IGSESFQTVY   | 441  | 113  |
| >BRAFG466IGSGSFGTVY   | 1246 | >BRAFG466IGSESFQTVY   | 281  | 965  |
| >BRAFG466IRIGSGSFGTV  | 163  | >BRAFG466IRIGSESFQTV  | 263  | 100  |
| >BRAFG466IRIGSGSFGTV  | 31   | >BRAFG466IRIGSESFQTV  | 35   | 4    |
| >BRAFG466IRIGSGSFGTV  | 617  | >BRAFG466IRIGSESFQTV  | 476  | 141  |
| >BRAFG466IRIGSGSFGTV  | 19   | >BRAFG466IRIGSESFQTV  | 25   | 6    |
| >BRAFG466IRIGSGSFGTV  | 163  | >BRAFG466IRIGSESFQTV  | 123  | 40   |
| >BRAFG466IRIGSGSFGTV  | 69   | >BRAFG466IRIGSESFQTV  | 111  | 42   |
| >BRAFG466IRIGSGSFGTV  | 256  | >BRAFG466IRIGSESFQTV  | 362  | 106  |
| >BRAFG466IRIGSGSFGTV  | 14   | >BRAFG466IRIGSESFQTV  | 27   | 13   |
| >BRAFG466IRIGSGSFGTV' | 468  | >BRAFG466IRIGSESFQTV\ | 1080 | 612  |
| >BRAFG466IRIGSGSFGTV' | 215  | >BRAFG466IRIGSESFQTV\ | 483  | 268  |
| >BRAFG466IRIGSGSFGTV' | 61   | >BRAFG466IRIGSESFQTV\ | 97   | 36   |
| >BRAFG466IRIGSGSFGTV  | 327  | >BRAFG466IRIGSESFQTV  | 716  | 389  |
| >BRAFG466IRIGSGSFGTV' | 30   | >BRAFG466IRIGSESFQTV\ | 35   | 5    |
| >BRAFG466IRIGSGSFGTV' | 50   | >BRAFG466IRIGSESFQTV\ | 62   | 12   |
| >BRAFG466IRIGSGSFGTV' | 451  | >BRAFG466IRIGSESFQTV\ | 423  | 28   |
| >BRAFG466IRIGSGSFGTV' | 451  | >BRAFG466IRIGSESFQTV\ | 906  | 455  |
| >BRAFG466IRIGSGSFGTV' | 77   | >BRAFG466IRIGSESFQTV\ | 195  | 118  |
| >BRAFG466IQRIGSGSF    | 52   | >BRAFG466IQRIGSESF    | 36   | 16   |
| >BRAFG466IQRIGSGSF    | 235  | >BRAFG466IQRIGSESF    | 428  | 193  |
| >BRAFG466IQRIGSGSF    | 30   | >BRAFG466IQRIGSESF    | 29   | 1    |
| >BRAFG466IQRIGSGSF    | 56   | >BRAFG466IQRIGSESF    | 125  | 69   |
| >BRAFG466IQRIGSGSF    | 22   | >BRAFG466IQRIGSESF    | 8    | 14   |
| >BRAFG466IVGQRIGSGSF  | 498  | >BRAFG466IVGQRIGSESF  | 399  | 99   |
| >BRAFG466IVGQRIGSGSF  | 74   | >BRAFG466IVGQRIGSESF  | 215  | 141  |
| >BRAFG466ITVGQRIGSGS  | 183  | >BRAFG466ITVGQRIGSES  | 152  | 31   |
| >BRAFG466IGSFGTVYK    | 62   | >BRAFG466IRSFQTVYK    | 32   | 30   |
| >BRAFG466IGSFGTVYKKG  | 119  | >BRAFG466IRSFQTVYKKG  | 39   | 80   |
| >BRAFG466IGSFGTVYK    | 6    | >BRAFG466IRSFQTVYK    | 6    | 0    |
| >BRAFG466IGSFGTVYKKG  | 39   | >BRAFG466IRSFQTVYKKG  | 26   | 13   |
| >BRAFG466IGSFGTVYK    | 37   | >BRAFG466IRSFQTVYK    | 5    | 32   |
| >BRAFG466IGSFGTVYKKG  | 338  | >BRAFG466IRSFQTVYKKG  | 8    | 330  |
| >BRAFG466IGSFGTVYK    | 89   | >BRAFG466IRSFQTVYK    | 13   | 76   |
| >BRAFG466IGSFGTVYKKG  | 1501 | >BRAFG466IRSFQTVYKKG  | 133  | 1368 |
| >BRAFG466IGSFGTVYK    | 5939 | >BRAFG466IRSFQTVYK    | 334  | 5605 |
| >BRAFG466IGSFGTVYKG   | 1560 | >BRAFG466IRSFQTVYKG   | 74   | 1486 |
| >BRAFG466IGSFGTVYKKG  | 1206 | >BRAFG466IRSFQTVYKKG  | 104  | 1102 |
| >BRAFG466IGSFGTVYK    | 25   | >BRAFG466IRSFQTVYK    | 31   | 6    |
| >BRAFG466IGSFGTVYKKG  | 645  | >BRAFG466IRSFQTVYKKG  | 346  | 299  |

|                       |       |                        |      |       |
|-----------------------|-------|------------------------|------|-------|
| >BRAFG466IGSFGTVYKGG  | 6058  | >BRAFG466IRSFSGTVYKGG  | 267  | 5791  |
| >BRAFG466IGSFGTVYKGGK | 9     | >BRAFG466IRSFSGTVYKGGK | 4    | 5     |
| >BRAFG466IGSFGTVYKGGK | 40    | >BRAFG466IRSFSGTVYKGGK | 28   | 12    |
| >BRAFG466IGSFGTVYKGGK | 29    | >BRAFG466IRSFSGTVYKGGK | 9    | 20    |
| >BRAFG466IGSFGTVYKGGK | 90    | >BRAFG466IRSFSGTVYKGGK | 69   | 21    |
| >BRAFG466IGSFGTVYKGGK | 103   | >BRAFG466IRSFSGTVYKGGK | 15   | 88    |
| >BRAFG466IGSFGTVYK    | 74    | >BRAFG466IRSFSGTVYK    | 136  | 62    |
| >BRAFG466IGSFGTVYKGGK | 141   | >BRAFG466IRSFSGTVYKGGK | 340  | 199   |
| >BRAFG466IGSFGTVYK    | 1983  | >BRAFG466IRSFSGTVYK    | 67   | 1916  |
| >BRAFG466IGSFGTVYKGGK | 10136 | >BRAFG466IRSFSGTVYKGGK | 490  | 9646  |
| >BRAFG466IGSFGTVYK    | 41    | >BRAFG466IRSFSGTVYK    | 1033 | 992   |
| >BRAFG466IGSFGTVYK    | 331   | >BRAFG466IRSFSGTVYK    | 2111 | 1780  |
| >BRAFG466IGSFGTVY     | 89    | >BRAFG466IRSFSGTVY     | 330  | 241   |
| >BRAFG466IGSFGTVYK    | 290   | >BRAFG466IRSFSGTVYK    | 1077 | 787   |
| >BRAFG466IGSFGTVY     | 226   | >BRAFG466IRSFSGTVY     | 4416 | 4190  |
| >BRAFG466IGSFGTVY     | 2849  | >BRAFG466IRSFSGTVY     | 108  | 2741  |
| >BRAFG466IGSFGTVYK    | 29272 | >BRAFG466IRSFSGTVYK    | 312  | 28960 |
| >BRAFG466IGSFGTVYKGG  | 25758 | >BRAFG466IRSFSGTVYKGG  | 339  | 25419 |
| >BRAFG466IGSFGTVYK    | 438   | >BRAFG466IRSFSGTVYK    | 1658 | 1220  |
| >BRAFG466IQITVGQRIGS  | 38827 | >BRAFG466IQITVGQRIGS   | 300  | 38527 |
| >BRAFG466IGSGSFGTVYK  | 46    | >BRAFG466IGSGSFGTVYK   | 32   | 14    |
| >BRAFG466IGSGSFGTVYK  | 25    | >BRAFG466IGSGSFGTVYK   | 30   | 5     |
| >BRAFG466IGSGSFGTV    | 12360 | >BRAFG466IGSGSFGTV     | 135  | 12225 |
| >BRAFG466IGSGSFGTVYK  | 1110  | >BRAFG466IGSGSFGTVYK   | 5    | 1105  |
| >BRAFG466IGSGSFGTVY   | 172   | >BRAFG466IGSGSFGTVY    | 176  | 4     |
| >BRAFG466IGSGSFGTVYK  | 212   | >BRAFG466IGSGSFGTVYK   | 203  | 9     |
| >BRAFG466IGSGSFGTVY   | 86    | >BRAFG466IGSGSFGTVY    | 49   | 37    |
| >BRAFG466IGSGSFGTVY   | 197   | >BRAFG466IGSGSFGTVY    | 20   | 177   |
| >BRAFG466IGSGSFGTVY   | 154   | >BRAFG466IGSGSFGTVY    | 8    | 146   |
| >BRAFG466IGSGSFGTVY   | 4     | >BRAFG466IGSGSFGTVY    | 2    | 2     |
| >BRAFG466IGSGSFGTVYK  | 241   | >BRAFG466IGSGSFGTVYK   | 277  | 36    |
| >BRAFG466IGSGSFGTVYI  | 304   | >BRAFG466IGSGSFGTVYI   | 235  | 69    |
| >BRAFG466IGSGSFGTVYI  | 214   | >BRAFG466IGSGSFGTVYI   | 188  | 26    |
| >BRAFG466IGSGSFGTVY   | 96    | >BRAFG466IGSGSFGTVY    | 154  | 58    |
| >BRAFG466IGSGSFGTVYI  | 1229  | >BRAFG466IGSGSFGTVYI   | 426  | 803   |
| >BRAFG466IGSGSFGTVY   | 370   | >BRAFG466IGSGSFGTVY    | 485  | 115   |
| >BRAFG466IGSGSFGTVY   | 146   | >BRAFG466IGSGSFGTVY    | 162  | 16    |
| >BRAFG466IGSGSFGTVY   | 653   | >BRAFG466IGSGSFGTVY    | 175  | 478   |
| >BRAFG466IGSGSFGTVY   | 611   | >BRAFG466IGSGSFGTVY    | 406  | 205   |
| >BRAFG466IGSGSFGTVY   | 1246  | >BRAFG466IGSGSFGTVY    | 294  | 952   |
| >BRAFG466IRIGSGSFGTV  | 163   | >BRAFG466IRIGSGSFGTV   | 591  | 428   |
| >BRAFG466IRIGSGSFGTV  | 31    | >BRAFG466IRIGSGSFGTV   | 50   | 19    |
| >BRAFG466IRIGSGSFGTV  | 19    | >BRAFG466IRIGSGSFGTV   | 40   | 21    |

|                       |       |                       |     |       |
|-----------------------|-------|-----------------------|-----|-------|
| >BRAFG466IRIGSGSFGTV  | 163   | >BRAFG466IRIGSRSFGTV  | 256 | 93    |
| >BRAFG466IRIGSGSFGTV  | 69    | >BRAFG466IRIGSRSFGTV  | 194 | 125   |
| >BRAFG466IRIGSGSFGTV  | 256   | >BRAFG466IRIGSRSFGTV  | 811 | 555   |
| >BRAFG466IRIGSGSFGTV  | 14    | >BRAFG466IRIGSRSFGTV  | 32  | 18    |
| >BRAFG466IRIGSGSFGTV' | 468   | >BRAFG466IRIGSRSFGTV\ | 274 | 194   |
| >BRAFG466IRIGSGSFGTV' | 215   | >BRAFG466IRIGSRSFGTV\ | 491 | 276   |
| >BRAFG466IRIGSGSFGTV' | 61    | >BRAFG466IRIGSRSFGTV\ | 136 | 75    |
| >BRAFG466IRIGSGSFGTV  | 327   | >BRAFG466IRIGSRSFGTV  | 754 | 427   |
| >BRAFG466IRIGSGSFGTV' | 30    | >BRAFG466IRIGSRSFGTV\ | 34  | 4     |
| >BRAFG466IRIGSGSFGTV' | 50    | >BRAFG466IRIGSRSFGTV\ | 57  | 7     |
| >BRAFG466IRIGSGSFGTV' | 451   | >BRAFG466IRIGSRSFGTV\ | 502 | 51    |
| >BRAFG466IRIGSGSFGTV' | 451   | >BRAFG466IRIGSRSFGTV\ | 549 | 98    |
| >BRAFG466IRIGSGSFGTV' | 77    | >BRAFG466IRIGSRSFGTV\ | 131 | 54    |
| >BRAFG466IQRIGSGSF    | 52    | >BRAFG466IQRIGSRSF    | 25  | 27    |
| >BRAFG466IQRIGSGSF    | 235   | >BRAFG466IQRIGSRSF    | 167 | 68    |
| >BRAFG466IQRIGSGSFGT  | 521   | >BRAFG466IQRIGSRSFGT' | 390 | 131   |
| >BRAFG466IQRIGSGSF    | 30    | >BRAFG466IQRIGSRSF    | 34  | 4     |
| >BRAFG466IQRIGSGSF    | 56    | >BRAFG466IQRIGSRSF    | 94  | 38    |
| >BRAFG466IQRIGSGSF    | 22    | >BRAFG466IQRIGSRSF    | 6   | 16    |
| >BRAFG466IVGQRIGSGSF  | 498   | >BRAFG466IVGQRIGSRSF  | 704 | 206   |
| >BRAFG466IVGQRIGSGSF  | 74    | >BRAFG466IVGQRIGSRSF  | 269 | 195   |
| >BRAFG466ITVGQRIGSG   | 36588 | >BRAFG466ITVGQRIGSR   | 425 | 36163 |
| >BRAFG466ITVGQRIGSG   | 35239 | >BRAFG466ITVGQRIGSR   | 220 | 35019 |
| >BRAFG466ITVGQRIGSGS  | 183   | >BRAFG466ITVGQRIGSRS  | 235 | 52    |
| >BRAFG466IITVGQRIGSG  | 32234 | >BRAFG466IITVGQRIGSR  | 427 | 31807 |
| >BRAFG466IITVGQRIGSG  | 37767 | >BRAFG466IITVGQRIGSR  | 467 | 37300 |
| >BRAFG466IITVGQRIGSG: | 1366  | >BRAFG466IITVGQRIGSR: | 423 | 943   |
| >BRAFG466'GSFGTVYK    | 62    | >BRAFG466'VSFGTVYK    | 47  | 15    |
| >BRAFG466'GSFGTVYKKGK | 119   | >BRAFG466'VSFGTVYKKGK | 134 | 15    |
| >BRAFG466'GSFGTVYK    | 6     | >BRAFG466'VSFGTVYK    | 6   | 0     |
| >BRAFG466'GSFGTVYKKGK | 39    | >BRAFG466'VSFGTVYKKGK | 39  | 0     |
| >BRAFG466'GSFGTVYK    | 37    | >BRAFG466'VSFGTVYK    | 49  | 12    |
| >BRAFG466'GSFGTVYKKGK | 338   | >BRAFG466'VSFGTVYKKGK | 376 | 38    |
| >BRAFG466'GSFGTVYK    | 89    | >BRAFG466'VSFGTVYK    | 75  | 14    |
| >BRAFG466'GSFGTVYK    | 25    | >BRAFG466'VSFGTVYK    | 14  | 11    |
| >BRAFG466'GSFGTVYKKGK | 645   | >BRAFG466'VSFGTVYKKGK | 480 | 165   |
| >BRAFG466'GSFGTVYKKGK | 9     | >BRAFG466'VSFGTVYKKGK | 6   | 3     |
| >BRAFG466'GSFGTVYKKGK | 40    | >BRAFG466'VSFGTVYKKGK | 33  | 7     |
| >BRAFG466'GSFGTVYKKGK | 29    | >BRAFG466'VSFGTVYKKGK | 13  | 16    |
| >BRAFG466'GSFGTVYKKGK | 90    | >BRAFG466'VSFGTVYKKGK | 147 | 57    |
| >BRAFG466'GSFGTVYKKGK | 103   | >BRAFG466'VSFGTVYKKGK | 31  | 72    |
| >BRAFG466'GSFGTVYK    | 74    | >BRAFG466'VSFGTVYK    | 173 | 99    |
| >BRAFG466'GSFGTVYKKGK | 141   | >BRAFG466'VSFGTVYKKGK | 515 | 374   |

|                      |       |                      |     |       |
|----------------------|-------|----------------------|-----|-------|
| >BRAFG466SGSFGTVYK   | 540   | >BRAFG466SVSFGTVYK   | 39  | 501   |
| >BRAFG466SGSFGTVYKG  | 4658  | >BRAFG466SVSFGTVYKG  | 190 | 4468  |
| >BRAFG466SGSFGTVY    | 9268  | >BRAFG466SVSFGTVY    | 152 | 9116  |
| >BRAFG466SGSFGTVYK   | 41    | >BRAFG466SVSFGTVYK   | 7   | 34    |
| >BRAFG466SGSFGTVYKG  | 638   | >BRAFG466SVSFGTVYKG  | 18  | 620   |
| >BRAFG466SGSFGTVY    | 26603 | >BRAFG466SVSFGTVY    | 469 | 26134 |
| >BRAFG466SGSFGTVY    | 910   | >BRAFG466SVSFGTVY    | 35  | 875   |
| >BRAFG466SGSFGTVYK   | 331   | >BRAFG466SVSFGTVYK   | 15  | 316   |
| >BRAFG466SGSFGTVYKG  | 2582  | >BRAFG466SVSFGTVYKG  | 128 | 2454  |
| >BRAFG466SGSFGTVY    | 89    | >BRAFG466SVSFGTVY    | 44  | 45    |
| >BRAFG466SGSFGTVYK   | 2906  | >BRAFG466SVSFGTVYK   | 108 | 2798  |
| >BRAFG466SGSFGTVYK   | 290   | >BRAFG466SVSFGTVYK   | 9   | 281   |
| >BRAFG466SGSFGTVYKG  | 2574  | >BRAFG466SVSFGTVYKG  | 56  | 2518  |
| >BRAFG466SGSFGTVY    | 2875  | >BRAFG466SVSFGTVY    | 71  | 2804  |
| >BRAFG466SGSFGTVY    | 226   | >BRAFG466SVSFGTVY    | 84  | 142   |
| >BRAFG466SGSFGTVY    | 963   | >BRAFG466SVSFGTVY    | 352 | 611   |
| >BRAFG466SGSFGTVY    | 519   | >BRAFG466SVSFGTVY    | 205 | 314   |
| >BRAFG466SGSFGTVYK   | 438   | >BRAFG466SVSFGTVYK   | 146 | 292   |
| >BRAFG466SGSFGTVYKG  | 1565  | >BRAFG466SVSFGTVYKG  | 421 | 1144  |
| >BRAFG466QITVGQRIGS  | 34571 | >BRAFG466QITVGQRIGS  | 123 | 34448 |
| >BRAFG466GSGSFGTVYK  | 46    | >BRAFG466GSVSFGTVYK  | 35  | 11    |
| >BRAFG466GSGSFGTVYK  | 25    | >BRAFG466GSVSFGTVYK  | 14  | 11    |
| >BRAFG466GSGSFGTVY   | 584   | >BRAFG466GSVSFGTVY   | 336 | 248   |
| >BRAFG466GSGSFGTVY   | 172   | >BRAFG466GSVSFGTVY   | 180 | 8     |
| >BRAFG466GSGSFGTVYK  | 212   | >BRAFG466GSVSFGTVYK  | 29  | 183   |
| >BRAFG466GSGSFGTVY   | 86    | >BRAFG466GSVSFGTVY   | 74  | 12    |
| >BRAFG466GSGSFGTVY   | 197   | >BRAFG466GSVSFGTVY   | 38  | 159   |
| >BRAFG466GSGSFGTVY   | 154   | >BRAFG466GSVSFGTVY   | 12  | 142   |
| >BRAFG466GSGSFGTVY   | 4     | >BRAFG466GSVSFGTVY   | 3   | 1     |
| >BRAFG466GSGSFGTVYK  | 241   | >BRAFG466GSVSFGTVYK  | 138 | 103   |
| >BRAFG466IGSGSFGTVYI | 304   | >BRAFG466IGSVSFGTVYI | 423 | 119   |
| >BRAFG466IGSGSFGTVYI | 214   | >BRAFG466IGSVSFGTVYI | 210 | 4     |
| >BRAFG466IGSGSFGTVY  | 96    | >BRAFG466IGSVSFGTVY  | 120 | 24    |
| >BRAFG466IGSGSFGTVY  | 370   | >BRAFG466IGSVSFGTVY  | 597 | 227   |
| >BRAFG466IGSGSFGTVY  | 146   | >BRAFG466IGSVSFGTVY  | 197 | 51    |
| >BRAFG466IGSGSFGTVY  | 653   | >BRAFG466IGSVSFGTVY  | 264 | 389   |
| >BRAFG466IGSGSFGTVY  | 611   | >BRAFG466IGSVSFGTVY  | 444 | 167   |
| >BRAFG466RIGSGSFGTV  | 163   | >BRAFG466RIGSVSFGTV  | 273 | 110   |
| >BRAFG466RIGSGSFGTV  | 31    | >BRAFG466RIGSVSFGTV  | 34  | 3     |
| >BRAFG466RIGSGSFGTV  | 617   | >BRAFG466RIGSVSFGTV  | 457 | 160   |
| >BRAFG466RIGSGSFGTV  | 19    | >BRAFG466RIGSVSFGTV  | 16  | 3     |
| >BRAFG466RIGSGSFGTV  | 163   | >BRAFG466RIGSVSFGTV  | 158 | 5     |
| >BRAFG466RIGSGSFGTV  | 69    | >BRAFG466RIGSVSFGTV  | 72  | 3     |

|                       |       |                       |      |       |
|-----------------------|-------|-----------------------|------|-------|
| >BRAFG466'RIGSGSFGTV  | 256   | >BRAFG466'RIGSVSFGTV  | 348  | 92    |
| >BRAFG466'RIGSGSFGTV  | 14    | >BRAFG466'RIGSVSFGTV  | 40   | 26    |
| >BRAFG466'RIGSGSFGTV' | 468   | >BRAFG466'RIGSVSFGTV' | 312  | 156   |
| >BRAFG466'RIGSGSFGTV' | 215   | >BRAFG466'RIGSVSFGTV' | 387  | 172   |
| >BRAFG466'RIGSGSFGTV' | 61    | >BRAFG466'RIGSVSFGTV' | 82   | 21    |
| >BRAFG466'RIGSGSFGTV' | 1181  | >BRAFG466'RIGSVSFGTV' | 478  | 703   |
| >BRAFG466'RIGSGSFGTV  | 327   | >BRAFG466'RIGSVSFGTV  | 311  | 16    |
| >BRAFG466'RIGSGSFGTV' | 30    | >BRAFG466'RIGSVSFGTV' | 30   | 0     |
| >BRAFG466'RIGSGSFGTV' | 50    | >BRAFG466'RIGSVSFGTV' | 55   | 5     |
| >BRAFG466'RIGSGSFGTV' | 451   | >BRAFG466'RIGSVSFGTV' | 515  | 64    |
| >BRAFG466'RIGSGSFGTV' | 451   | >BRAFG466'RIGSVSFGTV' | 1765 | 1314  |
| >BRAFG466'RIGSGSFGTV' | 77    | >BRAFG466'RIGSVSFGTV' | 60   | 17    |
| >BRAFG466'QRIGSGSF    | 52    | >BRAFG466'QRIGSVSF    | 14   | 38    |
| >BRAFG466'QRIGSGSF    | 235   | >BRAFG466'QRIGSVSF    | 135  | 100   |
| >BRAFG466'QRIGSGSFGT  | 521   | >BRAFG466'QRIGSVSFGT  | 458  | 63    |
| >BRAFG466'QRIGSGSF    | 2708  | >BRAFG466'QRIGSVSF    | 469  | 2239  |
| >BRAFG466'GQRIGSGSF   | 30    | >BRAFG466'GQRIGSVSF   | 30   | 0     |
| >BRAFG466'GQRIGSGSF   | 56    | >BRAFG466'GQRIGSVSF   | 128  | 72    |
| >BRAFG466'GQRIGSGSF   | 22    | >BRAFG466'GQRIGSVSF   | 3    | 19    |
| >BRAFG466'GQRIGSGSF   | 1109  | >BRAFG466'GQRIGSVSF   | 467  | 642   |
| >BRAFG466'VGQRIGSGSF  | 498   | >BRAFG466'VGQRIGSVSF  | 306  | 192   |
| >BRAFG466'VGQRIGSGSF  | 2129  | >BRAFG466'VGQRIGSVSF  | 361  | 1768  |
| >BRAFG466'VGQRIGSGSF  | 74    | >BRAFG466'VGQRIGSVSF  | 90   | 16    |
| >BRAFG466'TVGQRIGSG   | 22689 | >BRAFG466'TVGQRIGSV   | 253  | 22436 |
| >BRAFG466'TVGQRIGSG   | 33727 | >BRAFG466'TVGQRIGSV   | 99   | 33628 |
| >BRAFG466'TVGQRIGSG   | 21371 | >BRAFG466'TVGQRIGSV   | 380  | 20991 |
| >BRAFG466'TVGQRIGSGS  | 183   | >BRAFG466'TVGQRIGSVS  | 159  | 24    |
| >BRAFG466'ITVGQRIGSG  | 18050 | >BRAFG466'ITVGQRIGSV  | 94   | 17956 |
| >BRAFG466'ITVGQRIGSG  | 17576 | >BRAFG466'ITVGQRIGSV  | 246  | 17330 |
| >BRAFG466'ITVGQRIGSG  | 26010 | >BRAFG466'ITVGQRIGSV  | 345  | 25665 |
| >BRAFG466'ITVGQRIGSG  | 34708 | >BRAFG466'ITVGQRIGSV  | 115  | 34593 |
| >BRAFG466'ITVGQRIGSG  | 28345 | >BRAFG466'ITVGQRIGSV  | 215  | 28130 |
| >BRAFG466'ITVGQRIGSG  | 4734  | >BRAFG466'ITVGQRIGSV  | 134  | 4600  |
| >BRAFG466'ITVGQRIGSG  | 17304 | >BRAFG466'ITVGQRIGSV  | 474  | 16830 |
| >BRAFG466'ITVGQRIGSG: | 1366  | >BRAFG466'ITVGQRIGSV: | 353  | 1013  |
| >BRAFG469,GTVYK GKW   | 13    | >BRAFG469,ATVYK GKW   | 6    | 7     |
| >BRAFG469,GTVYK GKWH  | 1221  | >BRAFG469,ATVYK GKWH  | 186  | 1035  |
| >BRAFG469,GTVYK GKW   | 199   | >BRAFG469,ATVYK GKW   | 232  | 33    |
| >BRAFG469,GTVYK GKW   | 766   | >BRAFG469,ATVYK GKW   | 432  | 334   |
| >BRAFG469,GTVYK GKWH  | 177   | >BRAFG469,ATVYK GKWH  | 524  | 347   |
| >BRAFG469,FGTVYK GK   | 2796  | >BRAFG469,FATVYK GK   | 120  | 2676  |
| >BRAFG469,FGTVYK GKW  | 2909  | >BRAFG469,FATVYK GKW  | 138  | 2771  |
| >BRAFG469,FGTVYK GKW  | 2492  | >BRAFG469,FATVYK GKW  | 67   | 2425  |

|                        |      |                        |     |      |
|------------------------|------|------------------------|-----|------|
| >BRAFG469,FGTVYKGGK    | 820  | >BRAFG469,FATVYKGGK    | 37  | 783  |
| >BRAFG469,FGTVYKGGK    | 2140 | >BRAFG469,FATVYKGGK    | 146 | 1994 |
| >BRAFG469,FGTVYKGGK    | 51   | >BRAFG469,FATVYKGGK    | 16  | 35   |
| >BRAFG469,SFGTVYKGGK   | 365  | >BRAFG469,SFATVYKGGK   | 445 | 80   |
| >BRAFG469,GSFGTVYK     | 62   | >BRAFG469,GSFATVYK     | 50  | 12   |
| >BRAFG469,GSFGTVYKGGK  | 119  | >BRAFG469,GSFATVYKGGK  | 118 | 1    |
| >BRAFG469,GSFGTVYK     | 6    | >BRAFG469,GSFATVYK     | 5   | 1    |
| >BRAFG469,GSFGTVYKGGK  | 39   | >BRAFG469,GSFATVYKGGK  | 31  | 8    |
| >BRAFG469,GSFGTVYK     | 37   | >BRAFG469,GSFATVYK     | 17  | 20   |
| >BRAFG469,GSFGTVYKGGK  | 338  | >BRAFG469,GSFATVYKGGK  | 139 | 199  |
| >BRAFG469,GSFGTVYK     | 89   | >BRAFG469,GSFATVYK     | 50  | 39   |
| >BRAFG469,GSFGTVYK     | 25   | >BRAFG469,GSFATVYK     | 21  | 4    |
| >BRAFG469,GSFGTVYKGGK  | 9    | >BRAFG469,GSFATVYKGGK  | 7   | 2    |
| >BRAFG469,GSFGTVYKGGK  | 40   | >BRAFG469,GSFATVYKGGK  | 43  | 3    |
| >BRAFG469,GSFGTVYKGGK  | 29   | >BRAFG469,GSFATVYKGGK  | 21  | 8    |
| >BRAFG469,GSFGTVYKGGK  | 90   | >BRAFG469,GSFATVYKGGK  | 136 | 46   |
| >BRAFG469,GSFGTVYKGGK  | 103  | >BRAFG469,GSFATVYKGGK  | 169 | 66   |
| >BRAFG469,GSFGTVYK     | 74   | >BRAFG469,GSFATVYK     | 71  | 3    |
| >BRAFG469,GSFGTVYKGGK  | 141  | >BRAFG469,GSFATVYKGGK  | 131 | 10   |
| >BRAFG469,SGSFGTVYK    | 41   | >BRAFG469,SGSFATVYK    | 25  | 16   |
| >BRAFG469,SGSFGTVYKGGK | 638  | >BRAFG469,SGSFATVYKGGK | 473 | 165  |
| >BRAFG469,SGSFGTVYK    | 331  | >BRAFG469,SGSFATVYK    | 96  | 235  |
| >BRAFG469,SGSFGTVY     | 89   | >BRAFG469,SGSFATVY     | 119 | 30   |
| >BRAFG469,SGSFGTVYK    | 290  | >BRAFG469,SGSFATVYK    | 126 | 164  |
| >BRAFG469,SGSFGTVY     | 226  | >BRAFG469,SGSFATVY     | 302 | 76   |
| >BRAFG469,SGSFGTVY     | 519  | >BRAFG469,SGSFATVY     | 359 | 160  |
| >BRAFG469,SGSFGTVYK    | 438  | >BRAFG469,SGSFATVYK    | 486 | 48   |
| >BRAFG469,SGSGFATVYK   | 46   | >BRAFG469,SGSGFATVYK   | 45  | 1    |
| >BRAFG469,SGSGFATVYK   | 25   | >BRAFG469,SGSGFATVYK   | 19  | 6    |
| >BRAFG469,SGSGFATVY    | 584  | >BRAFG469,SGSGFATVY    | 470 | 114  |
| >BRAFG469,SGSGFATVY    | 172  | >BRAFG469,SGSGFATVY    | 162 | 10   |
| >BRAFG469,SGSGFATVYK   | 212  | >BRAFG469,SGSGFATVYK   | 116 | 96   |
| >BRAFG469,SGSGFATVY    | 86   | >BRAFG469,SGSGFATVY    | 174 | 88   |
| >BRAFG469,SGSGFATVY    | 197  | >BRAFG469,SGSGFATVY    | 340 | 143  |
| >BRAFG469,SGSGFATVY    | 154  | >BRAFG469,SGSGFATVY    | 56  | 98   |
| >BRAFG469,SGSGFATVY    | 4    | >BRAFG469,SGSGFATVY    | 4   | 0    |
| >BRAFG469,SGSGFATVYK   | 241  | >BRAFG469,SGSGFATVYK   | 220 | 21   |
| >BRAFG469,IGSGFATV     | 1515 | >BRAFG469,IGSGFATV     | 209 | 1306 |
| >BRAFG469,IGSGFATV     | 4709 | >BRAFG469,IGSGFATV     | 363 | 4346 |
| >BRAFG469,IGSGFATVYI   | 304  | >BRAFG469,IGSGFATVYI   | 290 | 14   |
| >BRAFG469,IGSGFATVYI   | 214  | >BRAFG469,IGSGFATVYI   | 132 | 82   |
| >BRAFG469,IGSGFATVY    | 96   | >BRAFG469,IGSGFATVY    | 73  | 23   |
| >BRAFG469,IGSGFATVY    | 370  | >BRAFG469,IGSGFATVY    | 433 | 63   |



|                       |       |                       |      |       |
|-----------------------|-------|-----------------------|------|-------|
| >BRAFG469IGSGSFGTVYI  | 762   | >BRAFG469IGSGSFATVYI  | 442  | 320   |
| >BRAFG469IGSGSFGTVY   | 146   | >BRAFG469IGSGSFATVY   | 177  | 31    |
| >BRAFG469IGSGSFGTVY   | 554   | >BRAFG469IGSGSFATVY   | 177  | 377   |
| >BRAFG469RIGSGSFGTV   | 749   | >BRAFG469RIGSGSFATV   | 219  | 530   |
| >BRAFG469RIGSGSFGTV   | 163   | >BRAFG469RIGSGSFATV   | 61   | 102   |
| >BRAFG469RIGSGSFGTV   | 31    | >BRAFG469RIGSGSFATV   | 24   | 7     |
| >BRAFG469RIGSGSFGTV   | 617   | >BRAFG469RIGSGSFATV   | 252  | 365   |
| >BRAFG469RIGSGSFGTV   | 19    | >BRAFG469RIGSGSFATV   | 9    | 10    |
| >BRAFG469RIGSGSFGTV   | 163   | >BRAFG469RIGSGSFATV   | 29   | 134   |
| >BRAFG469RIGSGSFGTV   | 69    | >BRAFG469RIGSGSFATV   | 25   | 44    |
| >BRAFG469RIGSGSFGTV   | 256   | >BRAFG469RIGSGSFATV   | 26   | 230   |
| >BRAFG469RIGSGSFGTV   | 14    | >BRAFG469RIGSGSFATV   | 5    | 9     |
| >BRAFG469RIGSGSFGTV'  | 468   | >BRAFG469RIGSGSFATV'  | 341  | 127   |
| >BRAFG469RIGSGSFGTV'  | 215   | >BRAFG469RIGSGSFATV'  | 176  | 39    |
| >BRAFG469RIGSGSFGTV'  | 61    | >BRAFG469RIGSGSFATV'  | 54   | 7     |
| >BRAFG469RIGSGSFGTV   | 1589  | >BRAFG469RIGSGSFATV   | 367  | 1222  |
| >BRAFG469RIGSGSFGTV'  | 1181  | >BRAFG469RIGSGSFATV'  | 400  | 781   |
| >BRAFG469RIGSGSFGTV   | 327   | >BRAFG469RIGSGSFATV   | 198  | 129   |
| >BRAFG469RIGSGSFGTV'  | 30    | >BRAFG469RIGSGSFATV'  | 26   | 4     |
| >BRAFG469RIGSGSFGTV'  | 50    | >BRAFG469RIGSGSFATV'  | 55   | 5     |
| >BRAFG469RIGSGSFGTV'  | 451   | >BRAFG469RIGSGSFATV'  | 471  | 20    |
| >BRAFG469RIGSGSFGTV'  | 451   | >BRAFG469RIGSGSFATV'  | 358  | 93    |
| >BRAFG469RIGSGSFGTV'  | 77    | >BRAFG469RIGSGSFATV'  | 70   | 7     |
| >BRAFG469QRIGSGSFGT   | 804   | >BRAFG469QRIGSGSFAT   | 327  | 477   |
| >BRAFG469QRIGSGSFGT   | 521   | >BRAFG469QRIGSGSFAT   | 442  | 79    |
| >BRAFG469QRIGSGSFGT   | 1877  | >BRAFG469QRIGSGSFAT   | 479  | 1398  |
| >BRAFG469GQRIGSGSFG   | 1973  | >BRAFG469GQRIGSGSFA   | 183  | 1790  |
| >BRAFG469IGTVYK GKW   | 15142 | >BRAFG469IGTVYK GKW   | 192  | 14950 |
| >BRAFG469IGTVYK GKWH  | 11850 | >BRAFG469IGTVYK GKWH  | 43   | 11807 |
| >BRAFG469IGTVYK GKW   | 17232 | >BRAFG469IGTVYK GKW   | 493  | 16739 |
| >BRAFG469IGTVYK GKW   | 13    | >BRAFG469IGTVYK GKW   | 23   | 10    |
| >BRAFG469IGTVYK GKW   | 199   | >BRAFG469IGTVYK GKW   | 689  | 490   |
| >BRAFG469IGTVYK GKWH  | 177   | >BRAFG469IGTVYK GKWH  | 3318 | 3141  |
| >BRAFG469IFGTVYK GKW  | 26158 | >BRAFG469IFGTVYK GKW  | 283  | 25875 |
| >BRAFG469IFGTVYK GKW  | 32818 | >BRAFG469IFGTVYK GKW  | 326  | 32492 |
| >BRAFG469IFGTVYK GKW  | 51    | >BRAFG469IFGTVYK GKW  | 55   | 4     |
| >BRAFG469ISFGTVYK GKV | 365   | >BRAFG469ISFGTVYK GKV | 1673 | 1308  |
| >BRAFG469IGSFGTVYK    | 62    | >BRAFG469IGSFETVYK    | 73   | 11    |
| >BRAFG469IGSFGTVYK GK | 119   | >BRAFG469IGSFETVYK GK | 463  | 344   |
| >BRAFG469IGSFGTVYK    | 6     | >BRAFG469IGSFETVYK    | 6    | 0     |
| >BRAFG469IGSFGTVYK GK | 39    | >BRAFG469IGSFETVYK GK | 58   | 19    |
| >BRAFG469IGSFGTVYK    | 37    | >BRAFG469IGSFETVYK    | 51   | 14    |
| >BRAFG469IGSFGTVYK GK | 338   | >BRAFG469IGSFETVYK GK | 380  | 42    |

|                       |      |                       |     |      |
|-----------------------|------|-----------------------|-----|------|
| >BRAFG469IGSFGTVYK    | 89   | >BRAFG469IGSFETVYK    | 111 | 22   |
| >BRAFG469IGSFGTVYK    | 25   | >BRAFG469IGSFETVYK    | 25  | 0    |
| >BRAFG469IGSFGTVYKKGK | 9    | >BRAFG469IGSFETVYKKGK | 8   | 1    |
| >BRAFG469IGSFGTVYKKGK | 40   | >BRAFG469IGSFETVYKKGK | 51  | 11   |
| >BRAFG469IGSFGTVYKKGK | 29   | >BRAFG469IGSFETVYKKGK | 30  | 1    |
| >BRAFG469IGSFGTVYKKGK | 90   | >BRAFG469IGSFETVYKKGK | 270 | 180  |
| >BRAFG469IGSFGTVYKKGK | 103  | >BRAFG469IGSFETVYKKGK | 257 | 154  |
| >BRAFG469IGSFGTVYK    | 74   | >BRAFG469IGSFETVYK    | 61  | 13   |
| >BRAFG469IGSFGTVYKKGK | 141  | >BRAFG469IGSFETVYKKGK | 107 | 34   |
| >BRAFG469IGSGSFGTVYK  | 41   | >BRAFG469IGSGSFETVYK  | 40  | 1    |
| >BRAFG469IGSGSFGTVYK  | 331  | >BRAFG469IGSGSFETVYK  | 954 | 623  |
| >BRAFG469IGSGSFGTVY   | 89   | >BRAFG469IGSGSFETVY   | 134 | 45   |
| >BRAFG469IGSGSFGTVYK  | 290  | >BRAFG469IGSGSFETVYK  | 313 | 23   |
| >BRAFG469IGSGSFGTVY   | 226  | >BRAFG469IGSGSFETVY   | 866 | 640  |
| >BRAFG469IGSGSFGTVYK  | 438  | >BRAFG469IGSGSFETVYK  | 399 | 39   |
| >BRAFG469IGSGSFGTVYK  | 46   | >BRAFG469IGSGSFETVYK  | 100 | 54   |
| >BRAFG469IGSGSFGTVYK  | 25   | >BRAFG469IGSGSFETVYK  | 21  | 4    |
| >BRAFG469IGSGSFGTVY   | 172  | >BRAFG469IGSGSFETVY   | 140 | 32   |
| >BRAFG469IGSGSFGTVYK  | 212  | >BRAFG469IGSGSFETVYK  | 105 | 107  |
| >BRAFG469IGSGSFGTVY   | 86   | >BRAFG469IGSGSFETVY   | 532 | 446  |
| >BRAFG469IGSGSFGTVY   | 197  | >BRAFG469IGSGSFETVY   | 749 | 552  |
| >BRAFG469IGSGSFGTVY   | 154  | >BRAFG469IGSGSFETVY   | 516 | 362  |
| >BRAFG469IGSGSFGTVY   | 4    | >BRAFG469IGSGSFETVY   | 10  | 6    |
| >BRAFG469IGSGSFGTVYK  | 241  | >BRAFG469IGSGSFETVYK  | 253 | 12   |
| >BRAFG469IGSGSFGTV    | 1515 | >BRAFG469IGSGSFETV    | 360 | 1155 |
| >BRAFG469IGSGSFGTVYI  | 304  | >BRAFG469IGSGSFETVYI  | 892 | 588  |
| >BRAFG469IGSGSFGTVYI  | 214  | >BRAFG469IGSGSFETVYI  | 208 | 6    |
| >BRAFG469IGSGSFGTVY   | 96   | >BRAFG469IGSGSFETVY   | 131 | 35   |
| >BRAFG469IGSGSFGTVY   | 370  | >BRAFG469IGSGSFETVY   | 729 | 359  |
| >BRAFG469IGSGSFGTVY   | 146  | >BRAFG469IGSGSFETVY   | 344 | 198  |
| >BRAFG469IRIGSGSFGTV  | 749  | >BRAFG469IRIGSGSFETV  | 308 | 441  |
| >BRAFG469IRIGSGSFGTV  | 163  | >BRAFG469IRIGSGSFETV  | 58  | 105  |
| >BRAFG469IRIGSGSFGTV  | 31   | >BRAFG469IRIGSGSFETV  | 53  | 22   |
| >BRAFG469IRIGSGSFGTV  | 617  | >BRAFG469IRIGSGSFETV  | 316 | 301  |
| >BRAFG469IRIGSGSFGTV  | 19   | >BRAFG469IRIGSGSFETV  | 10  | 9    |
| >BRAFG469IRIGSGSFGTV  | 163  | >BRAFG469IRIGSGSFETV  | 78  | 85   |
| >BRAFG469IRIGSGSFGTV  | 69   | >BRAFG469IRIGSGSFETV  | 28  | 41   |
| >BRAFG469IRIGSGSFGTV  | 256  | >BRAFG469IRIGSGSFETV  | 44  | 212  |
| >BRAFG469IRIGSGSFGTV  | 14   | >BRAFG469IRIGSGSFETV  | 7   | 7    |
| >BRAFG469IRIGSGSFGTV' | 468  | >BRAFG469IRIGSGSFETV\ | 831 | 363  |
| >BRAFG469IRIGSGSFGTV' | 215  | >BRAFG469IRIGSGSFETV\ | 341 | 126  |
| >BRAFG469IRIGSGSFGTV' | 61   | >BRAFG469IRIGSGSFETV\ | 52  | 9    |
| >BRAFG469IRIGSGSFGTV  | 1589 | >BRAFG469IRIGSGSFETV  | 327 | 1262 |

|                       |       |                       |      |       |
|-----------------------|-------|-----------------------|------|-------|
| >BRAFG469IRIGSGSFGTV  | 327   | >BRAFG469IRIGSGSFETV  | 557  | 230   |
| >BRAFG469IRIGSGSFGTV' | 30    | >BRAFG469IRIGSGSFETV\ | 44   | 14    |
| >BRAFG469IRIGSGSFGTV' | 50    | >BRAFG469IRIGSGSFETV\ | 80   | 30    |
| >BRAFG469IRIGSGSFGTV' | 451   | >BRAFG469IRIGSGSFETV\ | 695  | 244   |
| >BRAFG469IRIGSGSFGTV' | 451   | >BRAFG469IRIGSGSFETV\ | 816  | 365   |
| >BRAFG469IRIGSGSFGTV' | 77    | >BRAFG469IRIGSGSFETV\ | 134  | 57    |
| >BRAFG469IQRIGSGSFGT  | 804   | >BRAFG469IQRIGSGSFET' | 411  | 393   |
| >BRAFG469IGTVYK GKW   | 13    | >BRAFG469IRTVYK GKW   | 6    | 7     |
| >BRAFG469IGTVYK GKWH  | 1221  | >BRAFG469IRTVYK GKWH  | 20   | 1201  |
| >BRAFG469IGTVYK GKW   | 199   | >BRAFG469IRTVYK GKW   | 47   | 152   |
| >BRAFG469IGTVYK GKW   | 766   | >BRAFG469IRTVYK GKW   | 19   | 747   |
| >BRAFG469IGTVYK GKWH  | 177   | >BRAFG469IRTVYK GKWH  | 134  | 43    |
| >BRAFG469IFGTVYK GK   | 20998 | >BRAFG469IFRTVYK GK   | 38   | 20960 |
| >BRAFG469IFGTVYK GKW  | 51    | >BRAFG469IFRTVYK GKW  | 8    | 43    |
| >BRAFG469IVGQRIGSGSF  | 23423 | >BRAFG469IVGQRIGSGSF  | 319  | 23104 |
| >BRAFG469ISFGTVYK GKV | 365   | >BRAFG469ISFRTVYK GKV | 1630 | 1265  |
| >BRAFG469ISFGTVYK GK  | 4323  | >BRAFG469ISFRTVYK GK  | 7    | 4316  |
| >BRAFG469ISFGTVYK     | 62    | >BRAFG469ISFRTVYK     | 52   | 10    |
| >BRAFG469ISFGTVYK GK  | 119   | >BRAFG469ISFRTVYK GK  | 223  | 104   |
| >BRAFG469ISFGTVYK     | 6     | >BRAFG469ISFRTVYK     | 6    | 0     |
| >BRAFG469ISFGTVYK GK  | 39    | >BRAFG469ISFRTVYK GK  | 67   | 28    |
| >BRAFG469ISFGTVYK     | 37    | >BRAFG469ISFRTVYK     | 14   | 23    |
| >BRAFG469ISFGTVYK GK  | 338   | >BRAFG469ISFRTVYK GK  | 90   | 248   |
| >BRAFG469ISFGTVYK     | 89    | >BRAFG469ISFRTVYK     | 34   | 55    |
| >BRAFG469ISFGTVYK     | 25    | >BRAFG469ISFRTVYK     | 34   | 9     |
| >BRAFG469ISFGTVYK GK  | 9     | >BRAFG469ISFRTVYK GK  | 13   | 4     |
| >BRAFG469ISFGTVYK GK  | 40    | >BRAFG469ISFRTVYK GK  | 42   | 2     |
| >BRAFG469ISFGTVYK GK  | 29    | >BRAFG469ISFRTVYK GK  | 23   | 6     |
| >BRAFG469ISFGTVYK GK  | 90    | >BRAFG469ISFRTVYK GK  | 96   | 6     |
| >BRAFG469ISFGTVYK GK  | 103   | >BRAFG469ISFRTVYK GK  | 215  | 112   |
| >BRAFG469ISFGTVYK     | 74    | >BRAFG469ISFRTVYK     | 64   | 10    |
| >BRAFG469ISFGTVYK GK  | 141   | >BRAFG469ISFRTVYK GK  | 116  | 25    |
| >BRAFG469ISGSFGTVYK   | 540   | >BRAFG469ISGSFRTVYK   | 214  | 326   |
| >BRAFG469ISGSFGTVYK   | 41    | >BRAFG469ISGSFRTVYK   | 27   | 14    |
| >BRAFG469ISGSFGTVYK G | 638   | >BRAFG469ISGSFRTVYK G | 480  | 158   |
| >BRAFG469ISGSFGTVYK   | 331   | >BRAFG469ISGSFRTVYK   | 172  | 159   |
| >BRAFG469ISGSFGTVY    | 89    | >BRAFG469ISGSFRTVY    | 149  | 60    |
| >BRAFG469ISGSFGTVYK   | 290   | >BRAFG469ISGSFRTVYK   | 332  | 42    |
| >BRAFG469ISGSFGTVY    | 226   | >BRAFG469ISGSFRTVY    | 487  | 261   |
| >BRAFG469ISGSFGTVYK   | 438   | >BRAFG469ISGSFRTVYK   | 289  | 149   |
| >BRAFG469ISGSFGTVYK   | 46    | >BRAFG469ISGSFRTVYK   | 40   | 6     |
| >BRAFG469ISGSFGTVYK   | 25    | >BRAFG469ISGSFRTVYK   | 20   | 5     |
| >BRAFG469ISGSFGTVY    | 172   | >BRAFG469ISGSFRTVY    | 82   | 90    |

|                       |       |                       |      |       |
|-----------------------|-------|-----------------------|------|-------|
| >BRAFG469IGSGSFGTVYK  | 212   | >BRAFG469IGSGSFRTVYK  | 138  | 74    |
| >BRAFG469IGSGSFGTVY   | 86    | >BRAFG469IGSGSFRTVY   | 190  | 104   |
| >BRAFG469IGSGSFGTVY   | 197   | >BRAFG469IGSGSFRTVY   | 381  | 184   |
| >BRAFG469IGSGSFGTVY   | 154   | >BRAFG469IGSGSFRTVY   | 774  | 620   |
| >BRAFG469IGSGSFGTVY   | 4     | >BRAFG469IGSGSFRTVY   | 7    | 3     |
| >BRAFG469IGSGSFGTVYK  | 241   | >BRAFG469IGSGSFRTVYK  | 240  | 1     |
| >BRAFG469IGSGSFGTVYI  | 304   | >BRAFG469IGSGSFRTVYI  | 298  | 6     |
| >BRAFG469IGSGSFGTVYI  | 214   | >BRAFG469IGSGSFRTVYI  | 208  | 6     |
| >BRAFG469IGSGSFGTVY   | 96    | >BRAFG469IGSGSFRTVY   | 107  | 11    |
| >BRAFG469IGSGSFGTVY   | 370   | >BRAFG469IGSGSFRTVY   | 685  | 315   |
| >BRAFG469IGSGSFGTVY   | 146   | >BRAFG469IGSGSFRTVY   | 250  | 104   |
| >BRAFG469IRIGSGSFGTV  | 163   | >BRAFG469IRIGSGSFRTV  | 229  | 66    |
| >BRAFG469IRIGSGSFGTV  | 31    | >BRAFG469IRIGSGSFRTV  | 55   | 24    |
| >BRAFG469IRIGSGSFGTV  | 19    | >BRAFG469IRIGSGSFRTV  | 21   | 2     |
| >BRAFG469IRIGSGSFGTV  | 163   | >BRAFG469IRIGSGSFRTV  | 243  | 80    |
| >BRAFG469IRIGSGSFGTV  | 69    | >BRAFG469IRIGSGSFRTV  | 109  | 40    |
| >BRAFG469IRIGSGSFGTV  | 256   | >BRAFG469IRIGSGSFRTV  | 314  | 58    |
| >BRAFG469IRIGSGSFGTV  | 14    | >BRAFG469IRIGSGSFRTV  | 18   | 4     |
| >BRAFG469IRIGSGSFG    | 18085 | >BRAFG469IRIGSGSFR    | 185  | 17900 |
| >BRAFG469IRIGSGSFGTV' | 468   | >BRAFG469IRIGSGSFRTV' | 333  | 135   |
| >BRAFG469IRIGSGSFG    | 24239 | >BRAFG469IRIGSGSFR    | 230  | 24009 |
| >BRAFG469IRIGSGSFGTV' | 215   | >BRAFG469IRIGSGSFRTV' | 302  | 87    |
| >BRAFG469IRIGSGSFGTV' | 61    | >BRAFG469IRIGSGSFRTV' | 39   | 22    |
| >BRAFG469IRIGSGSFG    | 14405 | >BRAFG469IRIGSGSFR    | 15   | 14390 |
| >BRAFG469IRIGSGSFG    | 40706 | >BRAFG469IRIGSGSFR    | 490  | 40216 |
| >BRAFG469IRIGSGSFGTV  | 327   | >BRAFG469IRIGSGSFRTV  | 1677 | 1350  |
| >BRAFG469IRIGSGSFGTV' | 30    | >BRAFG469IRIGSGSFRTV' | 54   | 24    |
| >BRAFG469IRIGSGSFGTV' | 50    | >BRAFG469IRIGSGSFRTV' | 63   | 13    |
| >BRAFG469IRIGSGSFGTV' | 451   | >BRAFG469IRIGSGSFRTV' | 634  | 183   |
| >BRAFG469IRIGSGSFGTV' | 451   | >BRAFG469IRIGSGSFRTV' | 843  | 392   |
| >BRAFG469IRIGSGSFGTV' | 77    | >BRAFG469IRIGSGSFRTV' | 88   | 11    |
| >BRAFG469IRIGSGSFG    | 31628 | >BRAFG469IRIGSGSFR    | 124  | 31504 |
| >BRAFG469IRIGSGSFGT   | 804   | >BRAFG469IRIGSGSFRT   | 385  | 419   |
| >BRAFG469IRIGSGSFG    | 7915  | >BRAFG469IRIGSGSFR    | 348  | 7567  |
| >BRAFG469IRIGSGSFGT   | 521   | >BRAFG469IRIGSGSFRT   | 428  | 93    |
| >BRAFG469IGQRIGSGSFG  | 27325 | >BRAFG469IGQRIGSGSFR  | 116  | 27209 |
| >BRAFG469!GTVYK GKW   | 13    | >BRAFG469!STVYK GKW   | 10   | 3     |
| >BRAFG469!GTVYK GKW   | 199   | >BRAFG469!STVYK GKW   | 160  | 39    |
| >BRAFG469!GTVYK GKW   | 766   | >BRAFG469!STVYK GKW   | 460  | 306   |
| >BRAFG469!GTVYK GKWH  | 177   | >BRAFG469!STVYK GKWH  | 188  | 11    |
| >BRAFG469!FGTVYK GK   | 2796  | >BRAFG469!FSTVYK GK   | 159  | 2637  |
| >BRAFG469!FGTVYK GKW  | 2909  | >BRAFG469!FSTVYK GKW  | 18   | 2891  |
| >BRAFG469!FGTVYK GKW  | 5581  | >BRAFG469!FSTVYK GKW  | 322  | 5259  |

|                       |      |                       |     |      |
|-----------------------|------|-----------------------|-----|------|
| >BRAFG469!FGTVYKGKW   | 820  | >BRAFG469!FSTVYKGKW   | 22  | 798  |
| >BRAFG469!FGTVYKGKW   | 51   | >BRAFG469!FSTVYKGKW   | 24  | 27   |
| >BRAFG469!SFGTVYKGKV  | 365  | >BRAFG469!SFSTVYKGKM  | 435 | 70   |
| >BRAFG469!GSFGTVYK    | 62   | >BRAFG469!GSFSTVYK    | 52  | 10   |
| >BRAFG469!GSFGTVYKGK  | 119  | >BRAFG469!GSFSTVYKGK  | 130 | 11   |
| >BRAFG469!GSFGTVYK    | 6    | >BRAFG469!GSFSTVYK    | 6   | 0    |
| >BRAFG469!GSFGTVYKGK  | 39   | >BRAFG469!GSFSTVYKGK  | 28  | 11   |
| >BRAFG469!GSFGTVYK    | 37   | >BRAFG469!GSFSTVYK    | 26  | 11   |
| >BRAFG469!GSFGTVYKGK  | 338  | >BRAFG469!GSFSTVYKGK  | 244 | 94   |
| >BRAFG469!GSFGTVYK    | 89   | >BRAFG469!GSFSTVYK    | 34  | 55   |
| >BRAFG469!GSFGTVYK    | 25   | >BRAFG469!GSFSTVYK    | 15  | 10   |
| >BRAFG469!GSFGTVYKGK  | 9    | >BRAFG469!GSFSTVYKGK  | 8   | 1    |
| >BRAFG469!GSFGTVYKGK  | 40   | >BRAFG469!GSFSTVYKGK  | 55  | 15   |
| >BRAFG469!GSFGTVYKGK  | 29   | >BRAFG469!GSFSTVYKGK  | 30  | 1    |
| >BRAFG469!GSFGTVYKGK  | 90   | >BRAFG469!GSFSTVYKGK  | 38  | 52   |
| >BRAFG469!GSFGTVYKGK  | 103  | >BRAFG469!GSFSTVYKGK  | 267 | 164  |
| >BRAFG469!GSFGTVYK    | 74   | >BRAFG469!GSFSTVYK    | 54  | 20   |
| >BRAFG469!GSFGTVYKGK  | 141  | >BRAFG469!GSFSTVYKGK  | 91  | 50   |
| >BRAFG469!SGSFGTVYK   | 540  | >BRAFG469!SGSFSTVYK   | 284 | 256  |
| >BRAFG469!SGSFGTVYK   | 41   | >BRAFG469!SGSFSTVYK   | 18  | 23   |
| >BRAFG469!SGSFGTVYKG  | 638  | >BRAFG469!SGSFSTVYKG  | 336 | 302  |
| >BRAFG469!SGSFGTVYK   | 331  | >BRAFG469!SGSFSTVYK   | 129 | 202  |
| >BRAFG469!SGSFGTVY    | 89   | >BRAFG469!SGSFSTVY    | 124 | 35   |
| >BRAFG469!SGSFGTVYK   | 290  | >BRAFG469!SGSFSTVYK   | 102 | 188  |
| >BRAFG469!SGSFGTVY    | 226  | >BRAFG469!SGSFSTVY    | 165 | 61   |
| >BRAFG469!SGSFGTVY    | 519  | >BRAFG469!SGSFSTVY    | 359 | 160  |
| >BRAFG469!SGSFGTVYK   | 438  | >BRAFG469!SGSFSTVYK   | 282 | 156  |
| >BRAFG469!GSGSFGTVYK  | 46   | >BRAFG469!GSGSFSTVYK  | 36  | 10   |
| >BRAFG469!GSGSFGTVYK  | 25   | >BRAFG469!GSGSFSTVYK  | 15  | 10   |
| >BRAFG469!GSGSFGTVYK  | 1110 | >BRAFG469!GSGSFSTVYK  | 489 | 621  |
| >BRAFG469!GSGSFGTVY   | 172  | >BRAFG469!GSGSFSTVY   | 125 | 47   |
| >BRAFG469!GSGSFGTVYK  | 212  | >BRAFG469!GSGSFSTVYK  | 72  | 140  |
| >BRAFG469!GSGSFGTVY   | 86   | >BRAFG469!GSGSFSTVY   | 59  | 27   |
| >BRAFG469!GSGSFGTVY   | 197  | >BRAFG469!GSGSFSTVY   | 212 | 15   |
| >BRAFG469!GSGSFGTVY   | 154  | >BRAFG469!GSGSFSTVY   | 65  | 89   |
| >BRAFG469!GSGSFGTVY   | 4    | >BRAFG469!GSGSFSTVY   | 5   | 1    |
| >BRAFG469!GSGSFGTVYK  | 241  | >BRAFG469!GSGSFSTVYK  | 173 | 68   |
| >BRAFG469!IGSGSFGTV   | 1515 | >BRAFG469!IGSGSFSTV   | 446 | 1069 |
| >BRAFG469!IGSGSFGTVYI | 304  | >BRAFG469!IGSGSFSTVYK | 207 | 97   |
| >BRAFG469!IGSGSFGTVYI | 214  | >BRAFG469!IGSGSFSTVYK | 105 | 109  |
| >BRAFG469!IGSGSFGTVY  | 96   | >BRAFG469!IGSGSFSTVY  | 83  | 13   |
| >BRAFG469!IGSGSFGTVY  | 370  | >BRAFG469!IGSGSFSTVY  | 435 | 65   |
| >BRAFG469!IGSGSFGTVYI | 762  | >BRAFG469!IGSGSFSTVYK | 409 | 353  |

|                       |      |                       |     |      |
|-----------------------|------|-----------------------|-----|------|
| >BRAFG469!IGSGSFGTVY  | 146  | >BRAFG469!IGSGSFSTVY  | 104 | 42   |
| >BRAFG469!IGSGSFGTVY  | 653  | >BRAFG469!IGSGSFSTVY  | 329 | 324  |
| >BRAFG469!IGSGSFGTVY  | 554  | >BRAFG469!IGSGSFSTVY  | 229 | 325  |
| >BRAFG469!IGSGSFGTV   | 1320 | >BRAFG469!IGSGSFSTV   | 92  | 1228 |
| >BRAFG469!IGSGSFGTVY  | 611  | >BRAFG469!IGSGSFSTVY  | 215 | 396  |
| >BRAFG469!RIGSGSFGTV  | 749  | >BRAFG469!RIGSGSFSTV  | 341 | 408  |
| >BRAFG469!RIGSGSFGTV  | 163  | >BRAFG469!RIGSGSFSTV  | 55  | 108  |
| >BRAFG469!RIGSGSFGTV  | 31   | >BRAFG469!RIGSGSFSTV  | 22  | 9    |
| >BRAFG469!RIGSGSFGTV  | 617  | >BRAFG469!RIGSGSFSTV  | 250 | 367  |
| >BRAFG469!RIGSGSFGTV  | 19   | >BRAFG469!RIGSGSFSTV  | 12  | 7    |
| >BRAFG469!RIGSGSFGTV  | 163  | >BRAFG469!RIGSGSFSTV  | 57  | 106  |
| >BRAFG469!RIGSGSFGTV  | 69   | >BRAFG469!RIGSGSFSTV  | 29  | 40   |
| >BRAFG469!RIGSGSFGTV  | 256  | >BRAFG469!RIGSGSFSTV  | 67  | 189  |
| >BRAFG469!RIGSGSFGTV  | 14   | >BRAFG469!RIGSGSFSTV  | 5   | 9    |
| >BRAFG469!RIGSGSFGTV' | 468  | >BRAFG469!RIGSGSFSTV\ | 250 | 218  |
| >BRAFG469!RIGSGSFGTV' | 215  | >BRAFG469!RIGSGSFSTV\ | 207 | 8    |
| >BRAFG469!RIGSGSFGTV' | 61   | >BRAFG469!RIGSGSFSTV\ | 46  | 15   |
| >BRAFG469!RIGSGSFGTV' | 1181 | >BRAFG469!RIGSGSFSTV\ | 354 | 827  |
| >BRAFG469!RIGSGSFGTV  | 327  | >BRAFG469!RIGSGSFSTV  | 307 | 20   |
| >BRAFG469!RIGSGSFGTV' | 30   | >BRAFG469!RIGSGSFSTV\ | 25  | 5    |
| >BRAFG469!RIGSGSFGTV' | 50   | >BRAFG469!RIGSGSFSTV\ | 40  | 10   |
| >BRAFG469!RIGSGSFGTV' | 451  | >BRAFG469!RIGSGSFSTV\ | 363 | 88   |
| >BRAFG469!RIGSGSFGTV' | 451  | >BRAFG469!RIGSGSFSTV\ | 307 | 144  |
| >BRAFG469!RIGSGSFGTV' | 77   | >BRAFG469!RIGSGSFSTV\ | 67  | 10   |
| >BRAFG469!QRIGSGSFGT  | 804  | >BRAFG469!QRIGSGSFST\ | 171 | 633  |
| >BRAFG469!GTVYK GKW   | 13   | >BRAFG469!VTVYK GKW   | 8   | 5    |
| >BRAFG469!GTVYK GKWH  | 1221 | >BRAFG469!VTVYK GKWH  | 195 | 1026 |
| >BRAFG469!GTVYK GKW   | 199  | >BRAFG469!VTVYK GKW   | 88  | 111  |
| >BRAFG469!GTVYK GKW   | 766  | >BRAFG469!VTVYK GKW   | 85  | 681  |
| >BRAFG469!GTVYK GKWH  | 177  | >BRAFG469!VTVYK GKWH  | 312 | 135  |
| >BRAFG469!FGTVYK GK   | 2796 | >BRAFG469!FVTVYK GK   | 69  | 2727 |
| >BRAFG469!FGTVYK GKW  | 820  | >BRAFG469!FVTVYK GKW  | 199 | 621  |
| >BRAFG469!FGTVYK GKW  | 51   | >BRAFG469!FVTVYK GKW  | 85  | 34   |
| >BRAFG469!SFGTVYK GKV | 365  | >BRAFG469!SFVTVYK GKV | 681 | 316  |
| >BRAFG469!GSFGTVYK    | 62   | >BRAFG469!GSFVTVYK    | 76  | 14   |
| >BRAFG469!GSFGTVYK GK | 119  | >BRAFG469!GSFVTVYK GK | 315 | 196  |
| >BRAFG469!GSFGTVYK    | 6    | >BRAFG469!GSFVTVYK    | 6   | 0    |
| >BRAFG469!GSFGTVYK GK | 39   | >BRAFG469!GSFVTVYK GK | 50  | 11   |
| >BRAFG469!GSFGTVYK    | 37   | >BRAFG469!GSFVTVYK    | 27  | 10   |
| >BRAFG469!GSFGTVYK GK | 338  | >BRAFG469!GSFVTVYK GK | 207 | 131  |
| >BRAFG469!GSFGTVYK    | 89   | >BRAFG469!GSFVTVYK    | 41  | 48   |
| >BRAFG469!GSFGTVYK    | 25   | >BRAFG469!GSFVTVYK    | 25  | 0    |
| >BRAFG469!GSFGTVYK GK | 9    | >BRAFG469!GSFVTVYK GK | 7   | 2    |

|                       |       |                      |     |       |
|-----------------------|-------|----------------------|-----|-------|
| >BRAFG469'GSFGTVYK GK | 40    | >BRAFG469'GSFVTYK GK | 46  | 6     |
| >BRAFG469'GSFGTVYK GK | 29    | >BRAFG469'GSFVTYK GK | 26  | 3     |
| >BRAFG469'GSFGTVYK GK | 90    | >BRAFG469'GSFVTYK GK | 134 | 44    |
| >BRAFG469'GSFGTVYK GK | 103   | >BRAFG469'GSFVTYK GK | 188 | 85    |
| >BRAFG469'GSFGTVYK    | 74    | >BRAFG469'GSFVTYK    | 61  | 13    |
| >BRAFG469'GSFGTVYK GK | 141   | >BRAFG469'GSFVTYK GK | 101 | 40    |
| >BRAFG469'GSFGTVYK    | 540   | >BRAFG469'GSFVTYK    | 263 | 277   |
| >BRAFG469'GSFGTVYK    | 41    | >BRAFG469'GSFVTYK    | 16  | 25    |
| >BRAFG469'GSFGTVYK G  | 638   | >BRAFG469'GSFVTYK G  | 277 | 361   |
| >BRAFG469'GSFGTVYK    | 331   | >BRAFG469'GSFVTYK    | 393 | 62    |
| >BRAFG469'GSFGTVY     | 89    | >BRAFG469'GSFVTY     | 119 | 30    |
| >BRAFG469'GSFGTVYK    | 290   | >BRAFG469'GSFVTYK    | 47  | 243   |
| >BRAFG469'GSFGTVY     | 226   | >BRAFG469'GSFVTY     | 297 | 71    |
| >BRAFG469'GSFGTVYK    | 438   | >BRAFG469'GSFVTYK    | 474 | 36    |
| >BRAFG469'GSFGTVYK    | 46    | >BRAFG469'GSFVTYK    | 39  | 7     |
| >BRAFG469'GSFGTVYK    | 25    | >BRAFG469'GSFVTYK    | 13  | 12    |
| >BRAFG469'GSFGTVY     | 172   | >BRAFG469'GSFVTY     | 202 | 30    |
| >BRAFG469'GSFGTVYK    | 212   | >BRAFG469'GSFVTYK    | 63  | 149   |
| >BRAFG469'GSFGTVY     | 86    | >BRAFG469'GSFVTY     | 83  | 3     |
| >BRAFG469'GSFGTVY     | 197   | >BRAFG469'GSFVTY     | 208 | 11    |
| >BRAFG469'GSFGTVY     | 154   | >BRAFG469'GSFVTY     | 89  | 65    |
| >BRAFG469'GSFGTVY     | 4     | >BRAFG469'GSFVTY     | 7   | 3     |
| >BRAFG469'GSFGTVYK    | 241   | >BRAFG469'GSFVTYK    | 170 | 71    |
| >BRAFG469'IGSGSFGTV   | 1515  | >BRAFG469'IGSGSFTV   | 273 | 1242  |
| >BRAFG469'IGSGSFGTVI  | 304   | >BRAFG469'IGSGSFTVYI | 222 | 82    |
| >BRAFG469'IGSGSFGTVYI | 214   | >BRAFG469'IGSGSFTVYI | 86  | 128   |
| >BRAFG469'IGSGSFGTVY  | 96    | >BRAFG469'IGSGSFTVY  | 121 | 25    |
| >BRAFG469'IGSGSFGTVY  | 370   | >BRAFG469'IGSGSFTVY  | 518 | 148   |
| >BRAFG469'IGSGSFGTVYI | 762   | >BRAFG469'IGSGSFTVYI | 325 | 437   |
| >BRAFG469'IGSGSFGTVY  | 146   | >BRAFG469'IGSGSFTVY  | 137 | 9     |
| >BRAFG469'IGSGSFGTVY  | 653   | >BRAFG469'IGSGSFTVY  | 317 | 336   |
| >BRAFG469'IGSGSFGTVY  | 554   | >BRAFG469'IGSGSFTVY  | 392 | 162   |
| >BRAFG469'RIGSGSFGTV  | 749   | >BRAFG469'RIGSGSFTV  | 244 | 505   |
| >BRAFG469'RIGSGSFG    | 18927 | >BRAFG469'RIGSGSFV   | 206 | 18721 |
| >BRAFG469'RIGSGSFGTV  | 163   | >BRAFG469'RIGSGSFTV  | 94  | 69    |
| >BRAFG469'RIGSGSFG    | 16932 | >BRAFG469'RIGSGSFV   | 44  | 16888 |
| >BRAFG469'RIGSGSFGTV  | 31    | >BRAFG469'RIGSGSFTV  | 44  | 13    |
| >BRAFG469'RIGSGSFG    | 19800 | >BRAFG469'RIGSGSFV   | 61  | 19739 |
| >BRAFG469'RIGSGSFGTV  | 617   | >BRAFG469'RIGSGSFTV  | 218 | 399   |
| >BRAFG469'RIGSGSFG    | 16764 | >BRAFG469'RIGSGSFV   | 14  | 16750 |
| >BRAFG469'RIGSGSFGTV  | 19    | >BRAFG469'RIGSGSFTV  | 11  | 8     |
| >BRAFG469'RIGSGSFG    | 20517 | >BRAFG469'RIGSGSFV   | 152 | 20365 |
| >BRAFG469'RIGSGSFGTV  | 163   | >BRAFG469'RIGSGSFTV  | 45  | 118   |

|                      |       |                      |       |       |
|----------------------|-------|----------------------|-------|-------|
| >BRAFG469RIGSGSFG    | 19736 | >BRAFG469RIGSGSFV    | 20    | 19716 |
| >BRAFG469RIGSGSFGTV  | 69    | >BRAFG469RIGSGSFVTV  | 19    | 50    |
| >BRAFG469RIGSGSFG    | 23689 | >BRAFG469RIGSGSFV    | 102   | 23587 |
| >BRAFG469RIGSGSFGTV  | 256   | >BRAFG469RIGSGSFVTV  | 54    | 202   |
| >BRAFG469RIGSGSFG    | 28118 | >BRAFG469RIGSGSFV    | 14    | 28104 |
| >BRAFG469RIGSGSFGTV  | 14    | >BRAFG469RIGSGSFVTV  | 6     | 8     |
| >BRAFG469RIGSGSFGTV' | 468   | >BRAFG469RIGSGSFVTV' | 353   | 115   |
| >BRAFG469RIGSGSFGTV' | 215   | >BRAFG469RIGSGSFVTV' | 292   | 77    |
| >BRAFG469RIGSGSFGTV' | 61    | >BRAFG469RIGSGSFVTV' | 62    | 1     |
| >BRAFG469RIGSGSFGTV  | 1589  | >BRAFG469RIGSGSFVTV  | 147   | 1442  |
| >BRAFG469RIGSGSFGTV' | 1181  | >BRAFG469RIGSGSFVTV' | 423   | 758   |
| >BRAFG469RIGSGSFGTV  | 327   | >BRAFG469RIGSGSFVTV  | 398   | 71    |
| >BRAFG469RIGSGSFGTV' | 30    | >BRAFG469RIGSGSFVTV' | 31    | 1     |
| >BRAFG469RIGSGSFGTV' | 50    | >BRAFG469RIGSGSFVTV' | 45    | 5     |
| >BRAFG469RIGSGSFGTV' | 451   | >BRAFG469RIGSGSFVTV' | 386   | 65    |
| >BRAFG469RIGSGSFGTV' | 451   | >BRAFG469RIGSGSFVTV' | 464   | 13    |
| >BRAFG469RIGSGSFGTV' | 77    | >BRAFG469RIGSGSFVTV' | 89    | 12    |
| >BRAFG469QRIGSGSFG   | 9025  | >BRAFG469QRIGSGSFV   | 396   | 8629  |
| >BRAFG469QRIGSGSFGT  | 804   | >BRAFG469QRIGSGSFVT  | 194   | 610   |
| >BRAFG469QRIGSGSFGT  | 521   | >BRAFG469QRIGSGSFVT  | 364   | 157   |
| >BRAFG469QRIGSGSFGT  | 1877  | >BRAFG469QRIGSGSFVT  | 380   | 1497  |
| >BRAFG469GQRIGSGSFG  | 1973  | >BRAFG469GQRIGSGSFV  | 337   | 1636  |
| >BRAFG593IGDFGLATVKS | 4813  | >BRAFG593IDDFGLATVKS | 374   | 4439  |
| >BRAFG593IGDFGLATV   | 393   | >BRAFG593IDDFGLATV   | 11944 | 11551 |
| >BRAFG593IGDFGLATV   | 227   | >BRAFG593IDDFGLATV   | 753   | 526   |
| >BRAFG593IGDFGLATV   | 253   | >BRAFG593IDDFGLATV   | 1970  | 1717  |
| >BRAFG593FLHEDLTVKIC | 334   | >BRAFG593FLHEDLTVKIC | 2355  | 2021  |
| >BRAFG593KIGDFGLATV  | 53    | >BRAFG593KIDDFGLATV  | 40    | 13    |
| >BRAFG593KIGDFGLATV  | 34    | >BRAFG593KIDDFGLATV  | 44    | 10    |
| >BRAFG593KIGDFGLATV  | 12    | >BRAFG593KIDDFGLATV  | 15    | 3     |
| >BRAFG593KIGDFGLA    | 554   | >BRAFG593KIDDFGLA    | 72    | 482   |
| >BRAFG593KIGDFGLAT   | 2273  | >BRAFG593KIDDFGLAT   | 264   | 2009  |
| >BRAFG593KIGDFGLATV  | 59    | >BRAFG593KIDDFGLATV  | 42    | 17    |
| >BRAFG593KIGDFGLA    | 900   | >BRAFG593KIDDFGLA    | 307   | 593   |
| >BRAFG593KIGDFGLAT   | 1206  | >BRAFG593KIDDFGLAT   | 367   | 839   |
| >BRAFG593KIGDFGLATV  | 4     | >BRAFG593KIDDFGLATV  | 3     | 1     |
| >BRAFG593KIGDFGLATV  | 15    | >BRAFG593KIDDFGLATV  | 8     | 7     |
| >BRAFG593KIGDFGLATV  | 16    | >BRAFG593KIDDFGLATV  | 9     | 7     |
| >BRAFG593KIGDFGLATV  | 30    | >BRAFG593KIDDFGLATV  | 20    | 10    |
| >BRAFG593KIGDFGLATV  | 4     | >BRAFG593KIDDFGLATV  | 4     | 0     |
| >BRAFG593KIGDFGLATV  | 129   | >BRAFG593KIDDFGLATV  | 221   | 92    |
| >BRAFG593KIGDFGLATV  | 57    | >BRAFG593KIDDFGLATV  | 59    | 2     |
| >BRAFG593KIGDFGLATV  | 814   | >BRAFG593KIDDFGLATV  | 167   | 647   |



|                       |      |                       |       |       |
|-----------------------|------|-----------------------|-------|-------|
| >BRAF-G593IKIGDFGLATV | 132  | >BRAF-G593IKIDDFGLATV | 846   | 714   |
| >BRAF-G593IVKIGDFGLAT | 144  | >BRAF-G593IVKIDDFGLAT | 72    | 72    |
| >BRAF-G593IVKIGDFGLAT | 785  | >BRAF-G593IVKIDDFGLAT | 352   | 433   |
| >BRAF-G593IVKIGDFGLAT | 835  | >BRAF-G593IVKIDDFGLAT | 459   | 376   |
| >BRAF-G593LTVKIGDFGL  | 354  | >BRAF-G593LTVKIDDFGL  | 274   | 80    |
| >BRAF-G593LTVKIGDF    | 154  | >BRAF-G593LTVKIDDF    | 129   | 25    |
| >BRAF-G593LTVKIGDFGL  | 229  | >BRAF-G593LTVKIDDFGL  | 116   | 113   |
| >BRAF-G593LTVKIGDF    | 13   | >BRAF-G593LTVKIDDF    | 24    | 11    |
| >BRAF-G593LTVKIGDFGL  | 24   | >BRAF-G593LTVKIDDFGL  | 42    | 18    |
| >BRAF-G593LTVKIGDFGL  | 424  | >BRAF-G593LTVKIDDFGL  | 1052  | 628   |
| >BRAF-G593LTVKIGDF    | 118  | >BRAF-G593LTVKIDDF    | 320   | 202   |
| >BRAF-G593LTVKIGDFGL  | 380  | >BRAF-G593LTVKIDDFGL  | 732   | 352   |
| >BRAF-G593DLTVKIGDFG  | 205  | >BRAF-G593DLTVKIDDFG  | 232   | 27    |
| >BRAF-G596IGLATVKSR   | 9740 | >BRAF-G596DLATVKSR    | 135   | 9605  |
| >BRAF-G596IGLATVKSR   | 658  | >BRAF-G596DLATVKSR    | 41    | 617   |
| >BRAF-G596IGLATVKSRW  | 242  | >BRAF-G596DLATVKSRW   | 7596  | 7354  |
| >BRAF-G596FGLATVKSRM  | 98   | >BRAF-G596FDLATVKSRM  | 2752  | 2654  |
| >BRAF-G596FGLATVKSRM  | 499  | >BRAF-G596FDLATVKSRM  | 10675 | 10176 |
| >BRAF-G596FGLATVKSRM  | 45   | >BRAF-G596FDLATVKSRM  | 5503  | 5458  |
| >BRAF-G596FGLATVKSRM  | 215  | >BRAF-G596FDLATVKSRM  | 292   | 77    |
| >BRAF-G596DFGLATVKSR  | 205  | >BRAF-G596DFDLATVKSR  | 299   | 94    |
| >BRAF-G596DFGLATVKSR  | 246  | >BRAF-G596DFDLATVKSR  | 1520  | 1274  |
| >BRAF-G596GDFGLATV    | 393  | >BRAF-G596IGDFDLATV   | 506   | 113   |
| >BRAF-G596GDFGLATV    | 594  | >BRAF-G596IGDFDLATV   | 303   | 291   |
| >BRAF-G596GDFGLATV    | 227  | >BRAF-G596IGDFDLATV   | 106   | 121   |
| >BRAF-G596IGDFGLATV   | 253  | >BRAF-G596IGDFDLATV   | 412   | 159   |
| >BRAF-G596IKIGDFGLATV | 53   | >BRAF-G596IKIGDFDLATV | 37    | 16    |
| >BRAF-G596IKIGDFGLA   | 1135 | >BRAF-G596IKIGDFDLA   | 419   | 716   |
| >BRAF-G596IKIGDFGLATV | 34   | >BRAF-G596IKIGDFDLATV | 35    | 1     |
| >BRAF-G596IKIGDFGLATV | 12   | >BRAF-G596IKIGDFDLATV | 20    | 8     |
| >BRAF-G596IKIGDFGLA   | 554  | >BRAF-G596IKIGDFDLA   | 243   | 311   |
| >BRAF-G596IKIGDFGLATV | 59   | >BRAF-G596IKIGDFDLATV | 53    | 6     |
| >BRAF-G596IKIGDFGLATV | 4    | >BRAF-G596IKIGDFDLATV | 7     | 3     |
| >BRAF-G596IKIGDFGLATV | 15   | >BRAF-G596IKIGDFDLATV | 14    | 1     |
| >BRAF-G596IKIGDFGLATV | 16   | >BRAF-G596IKIGDFDLATV | 20    | 4     |
| >BRAF-G596IKIGDFGLATV | 30   | >BRAF-G596IKIGDFDLATV | 42    | 12    |
| >BRAF-G596IKIGDFGLATV | 4    | >BRAF-G596IKIGDFDLATV | 4     | 0     |
| >BRAF-G596IKIGDFGLATV | 129  | >BRAF-G596IKIGDFDLATV | 263   | 134   |
| >BRAF-G596IKIGDFGLATV | 57   | >BRAF-G596IKIGDFDLATV | 74    | 17    |
| >BRAF-G596IKIGDFGLATV | 509  | >BRAF-G596IKIGDFDLATV | 491   | 18    |
| >BRAF-G596IKIGDFGLATV | 132  | >BRAF-G596IKIGDFDLATV | 89    | 43    |
| >BRAF-G596IVKIGDFGLAT | 144  | >BRAF-G596IVKIGDFDLAT | 111   | 33    |
| >BRAF-G596LTVKIGDFGL  | 354  | >BRAF-G596LTVKIGDFDL  | 1897  | 1543  |

|                       |       |                       |       |       |
|-----------------------|-------|-----------------------|-------|-------|
| >BRAFG596ILTVKIGDFGL/ | 986   | >BRAFG596ILTVKIGDFDL/ | 408   | 578   |
| >BRAFG596ILTVKIGDFGL/ | 229   | >BRAFG596ILTVKIGDFDL/ | 194   | 35    |
| >BRAFG596ILTVKIGDFGL  | 24    | >BRAFG596ILTVKIGDFDL  | 82    | 58    |
| >BRAFG596ILTVKIGDFGL  | 424   | >BRAFG596ILTVKIGDFDL  | 745   | 321   |
| >BRAFG596ILTVKIGDFGL/ | 380   | >BRAFG596ILTVKIGDFDL/ | 611   | 231   |
| >BRAFG596DLTVKIGDFG   | 205   | >BRAFG596DLTVKIGDFD   | 506   | 301   |
| >BRAFG596GLATVKSR     | 2178  | >BRAFG596RLATVKSR     | 255   | 1923  |
| >BRAFG596GLATVKSR     | 697   | >BRAFG596RLATVKSR     | 49    | 648   |
| >BRAFG596GLATVKSRW    | 3071  | >BRAFG596RLATVKSRW    | 251   | 2820  |
| >BRAFG596GLATVKSRW    | 1001  | >BRAFG596RLATVKSRW    | 22    | 979   |
| >BRAFG596GLATVKSRW    | 242   | >BRAFG596RLATVKSRW    | 180   | 62    |
| >BRAFG596GLATVKSR     | 4920  | >BRAFG596RLATVKSR     | 134   | 4786  |
| >BRAFG596FGLATVKSR    | 3076  | >BRAFG596FRLATVKSR    | 128   | 2948  |
| >BRAFG596FGLATVKSRM   | 7821  | >BRAFG596FRLATVKSRM   | 353   | 7468  |
| >BRAFG596FGLATVKSRM   | 98    | >BRAFG596FRLATVKSRM   | 3590  | 3492  |
| >BRAFG596FGLATVKS     | 23135 | >BRAFG596FRLATVKS     | 358   | 22777 |
| >BRAFG596FGLATVKSR    | 18828 | >BRAFG596FRLATVKSR    | 44    | 18784 |
| >BRAFG596FGLATVKSRM   | 499   | >BRAFG596FRLATVKSRM   | 14283 | 13784 |
| >BRAFG596FGLATVKSRM   | 45    | >BRAFG596FRLATVKSRM   | 6677  | 6632  |
| >BRAFG596FGLATVKSRM   | 215   | >BRAFG596FRLATVKSRM   | 367   | 152   |
| >BRAFG596FGLATVKSRM   | 5878  | >BRAFG596FRLATVKSRM   | 157   | 5721  |
| >BRAFG596EDLTVKIGDFI  | 37657 | >BRAFG596EDLTVKIGDFI  | 192   | 37465 |
| >BRAFG596DFGLATVKSR   | 1561  | >BRAFG596DFRLATVKSR   | 303   | 1258  |
| >BRAFG596DFGLATVK     | 1319  | >BRAFG596DFRLATVK     | 141   | 1178  |
| >BRAFG596DFGLATVKSR   | 205   | >BRAFG596DFRLATVKSR   | 80    | 125   |
| >BRAFG596DFGLATVKSR   | 246   | >BRAFG596DFRLATVKSR   | 675   | 429   |
| >BRAFG596GDFGLATV     | 393   | >BRAFG596IGDFRLATV    | 578   | 185   |
| >BRAFG596GDFGLATV     | 594   | >BRAFG596IGDFRLATV    | 346   | 248   |
| >BRAFG596GDFGLATV     | 227   | >BRAFG596IGDFRLATV    | 156   | 71    |
| >BRAFG596IGDFGLATV    | 253   | >BRAFG596IGDFRLATV    | 451   | 198   |
| >BRAFG596KIGDFGLATV   | 53    | >BRAFG596KIGDFRLATV   | 57    | 4     |
| >BRAFG596KIGDFGLATV   | 34    | >BRAFG596KIGDFRLATV   | 52    | 18    |
| >BRAFG596KIGDFGLATV   | 12    | >BRAFG596KIGDFRLATV   | 19    | 7     |
| >BRAFG596KIGDFGLATV   | 59    | >BRAFG596KIGDFRLATV   | 64    | 5     |
| >BRAFG596KIGDFGLATV   | 4     | >BRAFG596KIGDFRLATV   | 11    | 7     |
| >BRAFG596KIGDFGLATV   | 15    | >BRAFG596KIGDFRLATV   | 50    | 35    |
| >BRAFG596KIGDFGLATV   | 16    | >BRAFG596KIGDFRLATV   | 54    | 38    |
| >BRAFG596KIGDFGLATV   | 30    | >BRAFG596KIGDFRLATV   | 144   | 114   |
| >BRAFG596KIGDFGLATV   | 4     | >BRAFG596KIGDFRLATV   | 4     | 0     |
| >BRAFG596KIGDFGLATV   | 129   | >BRAFG596KIGDFRLATVI  | 99    | 30    |
| >BRAFG596KIGDFGLATV   | 57    | >BRAFG596KIGDFRLATVI  | 49    | 8     |
| >BRAFG596KIGDFGLATV   | 563   | >BRAFG596KIGDFRLATVI  | 210   | 353   |
| >BRAFG596KIGDFGLATV   | 509   | >BRAFG596KIGDFRLATV   | 381   | 128   |

|                      |       |                       |      |       |
|----------------------|-------|-----------------------|------|-------|
| >BRAFG596IKIGDFGLATV | 132   | >BRAFG596IKIGDFRLATVI | 115  | 17    |
| >BRAFG596IVKIGDFGLAT | 144   | >BRAFG596IVKIGDFRLATV | 228  | 84    |
| >BRAFG596ITVKIGDFG   | 18497 | >BRAFG596ITVKIGDFR    | 27   | 18470 |
| >BRAFG596ITVKIGDFG   | 29815 | >BRAFG596ITVKIGDFR    | 76   | 29739 |
| >BRAFG596ITVKIGDFG   | 23246 | >BRAFG596ITVKIGDFR    | 10   | 23236 |
| >BRAFG596LTVKIGDFGL  | 354   | >BRAFG596LTVKIGDFRL   | 1351 | 997   |
| >BRAFG596LTVKIGDFG   | 21440 | >BRAFG596LTVKIGDFR    | 66   | 21374 |
| >BRAFG596LTVKIGDFG   | 35330 | >BRAFG596LTVKIGDFR    | 436  | 34894 |
| >BRAFG596LTVKIGDFG   | 12412 | >BRAFG596LTVKIGDFR    | 4    | 12408 |
| >BRAFG596LTVKIGDFGL  | 229   | >BRAFG596LTVKIGDFRL   | 636  | 407   |
| >BRAFG596LTVKIGDFGL  | 24    | >BRAFG596LTVKIGDFRL   | 22   | 2     |
| >BRAFG596LTVKIGDFGL  | 424   | >BRAFG596LTVKIGDFRL   | 366  | 58    |
| >BRAFG596LTVKIGDFGL  | 380   | >BRAFG596LTVKIGDFRL   | 649  | 269   |
| >BRAFG596DLTVKIGDFG  | 205   | >BRAFG596DLTVKIGDFR   | 183  | 22    |
| >BRAFG596DLTVKIGDFG  | 23048 | >BRAFG596DLTVKIGDFR   | 83   | 22965 |
| >BRAFG596DLTVKIGDFG  | 34308 | >BRAFG596DLTVKIGDFR   | 79   | 34229 |
| >BRAFG596GLATVKSR    | 697   | >BRAFG596GLATVKSR     | 377  | 320   |
| >BRAFG596GLATVKSR    | 658   | >BRAFG596GLATVKSR     | 105  | 553   |
| >BRAFG596GLATVKSRW   | 242   | >BRAFG596GLATVKSRW    | 252  | 10    |
| >BRAFG596FGLATVKSR   | 3171  | >BRAFG596FSLATVKSR    | 199  | 2972  |
| >BRAFG596FGLATVKSR   | 3076  | >BRAFG596FSLATVKSR    | 281  | 2795  |
| >BRAFG596FGLATVKSRW  | 98    | >BRAFG596FSLATVKSRW   | 5    | 93    |
| >BRAFG596FGLATVKSRW  | 499   | >BRAFG596FSLATVKSRW   | 46   | 453   |
| >BRAFG596FGLATVKSRW  | 45    | >BRAFG596FSLATVKSRW   | 10   | 35    |
| >BRAFG596FGLATVKSRW  | 215   | >BRAFG596FSLATVKSRW   | 94   | 121   |
| >BRAFG596DFGLATVKSR  | 1561  | >BRAFG596DFSLATVKSR   | 312  | 1249  |
| >BRAFG596DFGLATVKSR  | 205   | >BRAFG596DFSLATVKSR   | 81   | 124   |
| >BRAFG596DFGLATVK    | 2741  | >BRAFG596DFSLATVK     | 457  | 2284  |
| >BRAFG596DFGLATVKSR  | 246   | >BRAFG596DFSLATVKSR   | 469  | 223   |
| >BRAFG596GDFGLATV    | 393   | >BRAFG596GDFSLATV     | 562  | 169   |
| >BRAFG596GDFGLATV    | 594   | >BRAFG596GDFSLATV     | 266  | 328   |
| >BRAFG596GDFGLATV    | 227   | >BRAFG596GDFSLATV     | 95   | 132   |
| >BRAFG596IGDFGLATV   | 253   | >BRAFG596IGDFSLATV    | 438  | 185   |
| >BRAFG596KIGDFGLATV  | 53    | >BRAFG596KIGDFSLATV   | 38   | 15    |
| >BRAFG596KIGDFGLA    | 1135  | >BRAFG596KIGDFSLA     | 281  | 854   |
| >BRAFG596KIGDFGLATV  | 34    | >BRAFG596KIGDFSLATV   | 26   | 8     |
| >BRAFG596KIGDFGLA    | 701   | >BRAFG596KIGDFSLA     | 250  | 451   |
| >BRAFG596KIGDFGLATV  | 12    | >BRAFG596KIGDFSLATV   | 12   | 0     |
| >BRAFG596KIGDFGLA    | 554   | >BRAFG596KIGDFSLA     | 165  | 389   |
| >BRAFG596KIGDFGLATV  | 59    | >BRAFG596KIGDFSLATV   | 49   | 10    |
| >BRAFG596KIGDFGLATV  | 4     | >BRAFG596KIGDFSLATV   | 5    | 1     |
| >BRAFG596KIGDFGLATV  | 15    | >BRAFG596KIGDFSLATV   | 10   | 5     |
| >BRAFG596KIGDFGLATV  | 16    | >BRAFG596KIGDFSLATV   | 17   | 1     |

|                       |       |                       |     |       |
|-----------------------|-------|-----------------------|-----|-------|
| >BRAFG596!KIGDFGLATV  | 30    | >BRAFG596!KIGDFSLATV  | 14  | 16    |
| >BRAFG596!KIGDFGLA    | 1379  | >BRAFG596!KIGDFSLA    | 345 | 1034  |
| >BRAFG596!KIGDFGLATV  | 4     | >BRAFG596!KIGDFSLATV  | 4   | 0     |
| >BRAFG596!KIGDFGLATV  | 129   | >BRAFG596!KIGDFSLATV† | 93  | 36    |
| >BRAFG596!KIGDFGLATV  | 57    | >BRAFG596!KIGDFSLATV† | 46  | 11    |
| >BRAFG596!KIGDFGLATV  | 563   | >BRAFG596!KIGDFSLATV† | 268 | 295   |
| >BRAFG596!KIGDFGLATV  | 509   | >BRAFG596!KIGDFSLATV  | 256 | 253   |
| >BRAFG596!KIGDFGLATV  | 814   | >BRAFG596!KIGDFSLATV  | 444 | 370   |
| >BRAFG596!KIGDFGLATV  | 132   | >BRAFG596!KIGDFSLATV† | 98  | 34    |
| >BRAFG596!VKIGDFGLAT  | 144   | >BRAFG596!VKIGDFSLAT\ | 116 | 28    |
| >BRAFG596!VKIGDFGL    | 1129  | >BRAFG596!VKIGDFSL    | 176 | 953   |
| >BRAFG596!VKIGDFGLAT  | 835   | >BRAFG596!VKIGDFSLAT\ | 201 | 634   |
| >BRAFG596!LTVKIGDFGL  | 537   | >BRAFG596!LTVKIGDFSL  | 299 | 238   |
| >BRAFG596!LTVKIGDFGL  | 354   | >BRAFG596!LTVKIGDFSL  | 382 | 28    |
| >BRAFG596!LTVKIGDFGL/ | 986   | >BRAFG596!LTVKIGDFSLA | 445 | 541   |
| >BRAFG596!LTVKIGDFGL/ | 229   | >BRAFG596!LTVKIGDFSLA | 183 | 46    |
| >BRAFG596!LTVKIGDFGL  | 24    | >BRAFG596!LTVKIGDFSL  | 27  | 3     |
| >BRAFG596!LTVKIGDFGL  | 424   | >BRAFG596!LTVKIGDFSL  | 188 | 236   |
| >BRAFG596!LTVKIGDFGL  | 949   | >BRAFG596!LTVKIGDFSL  | 364 | 585   |
| >BRAFG596!LTVKIGDFGL/ | 380   | >BRAFG596!LTVKIGDFSLA | 87  | 293   |
| >BRAFG596!DLTVKIGDFG  | 205   | >BRAFG596!DLTVKIGDFSI | 167 | 38    |
| >BRAFG606!GSHQFEQL    | 406   | >BRAFG606!ESHQFEQL    | 864 | 458   |
| >BRAFG606!GSHQFEQL    | 19262 | >BRAFG606!ESHQFEQL    | 466 | 18796 |
| >BRAFG606!GSHQFEQL    | 240   | >BRAFG606!ESHQFEQL    | 579 | 339   |
| >BRAFG606!SGSHQFEQL   | 23777 | >BRAFG606!SESHQFEQL   | 123 | 23654 |
| >BRAFG606!SGSHQFEQL   | 21952 | >BRAFG606!SESHQFEQL   | 86  | 21866 |
| >BRAFG606!SGSHQFEQL   | 38791 | >BRAFG606!SESHQFEQL   | 142 | 38649 |
| >BRAFG606!SGSHQFEQL   | 26917 | >BRAFG606!SESHQFEQL   | 38  | 26879 |
| >BRAFG606!WSGSHQFEQ   | 796   | >BRAFG606!WSESHQFEQ   | 375 | 421   |
| >BRAFG606!RWSGSHQF    | 60    | >BRAFG606!RWSESHQF    | 57  | 3     |
| >BRAFG606!RWSGSHQF    | 78    | >BRAFG606!RWSESHQF    | 81  | 3     |
| >BRAFG606!RWSGSHQFE   | 328   | >BRAFG606!RWSESHQFE†  | 402 | 74    |
| >BRAFG606!RWSGSHQF    | 6     | >BRAFG606!RWSESHQF    | 6   | 0     |
| >BRAFG606!RWSGSHQFE   | 14    | >BRAFG606!RWSESHQFE†  | 18  | 4     |
| >BRAFG606!RWSGSHQF    | 664   | >BRAFG606!RWSESHQF    | 287 | 377   |
| >BRAFG606!RWSGSHQF    | 144   | >BRAFG606!RWSESHQF    | 139 | 5     |
| >BRAFG606!RWSGSHQFE   | 57    | >BRAFG606!RWSESHQFE   | 60  | 3     |
| >BRAFG606!RWSGSHQFE   | 116   | >BRAFG606!RWSESHQFE†  | 98  | 18    |
| >BRAFG606!SRWSGSHQF   | 8     | >BRAFG606!SRWSESHQF   | 9   | 1     |
| >BRAFG606!SRWSGSHQF   | 37    | >BRAFG606!SRWSESHQF   | 61  | 24    |
| >BRAFG606!SRWSGSHQF   | 327   | >BRAFG606!SRWSESHQFI  | 537 | 210   |
| >BRAFG606!SRWSGSHQF   | 147   | >BRAFG606!SRWSESHQF   | 655 | 508   |
| >BRAFG606!KSRWSGSH    | 55    | >BRAFG606!KSRWSESH    | 330 | 275   |

|                     |       |                     |      |       |
|---------------------|-------|---------------------|------|-------|
| >BRAFG606IKSRWSGSHQ | 24    | >BRAFG606IKSRWSESHQ | 56   | 32    |
| >BRAFG606IKSRWSGSHQ | 44    | >BRAFG606IKSRWSESHQ | 117  | 73    |
| >BRAFG606IKSRWSGSHQ | 23    | >BRAFG606IKSRWSESHQ | 39   | 16    |
| >BRAFG606IKSRWSGSHQ | 93    | >BRAFG606IKSRWSESHQ | 319  | 226   |
| >BRAFG606IKSRWSGSHQ | 14    | >BRAFG606IKSRWSESHQ | 21   | 7     |
| >BRAFG606IKSRWSGSH  | 31    | >BRAFG606IKSRWSESH  | 56   | 25    |
| >BRAFG606IKSRWSGSHQ | 51    | >BRAFG606IKSRWSESHQ | 169  | 118   |
| >BRAFG606IKSRWSGSHQ | 2     | >BRAFG606IKSRWSESHQ | 3    | 1     |
| >BRAFG606IKSRWSGSHQ | 186   | >BRAFG606IKSRWSESHQ | 309  | 123   |
| >BRAFG606IKSRWSGSHQ | 73    | >BRAFG606IKSRWSESHQ | 56   | 17    |
| >BRAFG606IKSRWSGSHQ | 24    | >BRAFG606IKSRWSESHQ | 20   | 4     |
| >BRAFG606IKSRWSGSH  | 333   | >BRAFG606IKSRWSESH  | 1074 | 741   |
| >BRAFG606IKSRWSGSHQ | 193   | >BRAFG606IKSRWSESHQ | 790  | 597   |
| >BRAFG606IKSRWSGSHQ | 72    | >BRAFG606IKSRWSESHQ | 86   | 14    |
| >BRAFG606IKSRWSGSH  | 1530  | >BRAFG606IKSRWSESH  | 323  | 1207  |
| >BRAFG606IKSRWSGSH  | 9     | >BRAFG606IKSRWSESH  | 6    | 3     |
| >BRAFG606IATVKSRWSG | 451   | >BRAFG606IATVKSRWSE | 551  | 100   |
| >BRAFG606IGSHQFEQL  | 406   | >BRAFG606ILSHQFEQL  | 45   | 361   |
| >BRAFG606IGSHQFEQL  | 240   | >BRAFG606ILSHQFEQL  | 60   | 180   |
| >BRAFG606IGSHQFEQL  | 1171  | >BRAFG606ILSHQFEQL  | 191  | 980   |
| >BRAFG606ISGSHQFEQL | 22071 | >BRAFG606ISLSHQFEQL | 284  | 21787 |
| >BRAFG606ISGSHQFEQ  | 19940 | >BRAFG606ISLSHQFEQ  | 282  | 19658 |
| >BRAFG606ISGSHQFEQL | 2843  | >BRAFG606ISLSHQFEQL | 6    | 2837  |
| >BRAFG606ISGSHQFEQL | 17348 | >BRAFG606ISLSHQFEQL | 51   | 17297 |
| >BRAFG606ISGSHQFEQL | 8085  | >BRAFG606ISLSHQFEQL | 231  | 7854  |
| >BRAFG606ISGSHQFEQL | 20462 | >BRAFG606ISLSHQFEQL | 59   | 20403 |
| >BRAFG606ISGSHQFEQL | 24638 | >BRAFG606ISLSHQFEQL | 237  | 24401 |
| >BRAFG606ISGSHQFEQL | 17910 | >BRAFG606ISLSHQFEQL | 46   | 17864 |
| >BRAFG606ISGSHQFEQ  | 32914 | >BRAFG606ISLSHQFEQ  | 103  | 32811 |
| >BRAFG606ISGSHQFEQL | 24038 | >BRAFG606ISLSHQFEQL | 6    | 24032 |
| >BRAFG606IGLATVKSRW | 18216 | >BRAFG606IGLATVKSRW | 133  | 18083 |
| >BRAFG606IGLATVKSRW | 2495  | >BRAFG606IGLATVKSRW | 10   | 2485  |
| >BRAFG606IGLATVKSRW | 8648  | >BRAFG606IGLATVKSRW | 58   | 8590  |
| >BRAFG606IGLATVKSRW | 13402 | >BRAFG606IGLATVKSRW | 359  | 13043 |
| >BRAFG606IGLATVKSRW | 6064  | >BRAFG606IGLATVKSRW | 36   | 6028  |
| >BRAFG606IGLATVKSRW | 8228  | >BRAFG606IGLATVKSRW | 51   | 8177  |
| >BRAFG606IGLATVKSRW | 5897  | >BRAFG606IGLATVKSRW | 20   | 5877  |
| >BRAFG606IGLATVKSRW | 22497 | >BRAFG606IGLATVKSRW | 437  | 22060 |
| >BRAFG606IGLATVKSRW | 3476  | >BRAFG606IGLATVKSRW | 4    | 3472  |
| >BRAFG606IWSGSHQFEQ | 2715  | >BRAFG606IWSLSHQFEQ | 363  | 2352  |
| >BRAFG606IWSGSHQFEQ | 3081  | >BRAFG606IWSLSHQFEQ | 313  | 2768  |
| >BRAFG606IWSGSHQFEQ | 796   | >BRAFG606IWSLSHQFEQ | 71   | 725   |
| >BRAFG606IWSGSHQF   | 60    | >BRAFG606IWSLSHQF   | 109  | 49    |

|                      |       |                       |     |       |
|----------------------|-------|-----------------------|-----|-------|
| >BRAFG606IRWSGSHQF   | 78    | >BRAFG606IRWSLSHQF    | 79  | 1     |
| >BRAFG606IRWSGSHQFE  | 328   | >BRAFG606IRWSLSHQFE   | 388 | 60    |
| >BRAFG606IRWSGSHQF   | 6     | >BRAFG606IRWSLSHQF    | 10  | 4     |
| >BRAFG606IRWSGSHQFE  | 14    | >BRAFG606IRWSLSHQFE   | 32  | 18    |
| >BRAFG606IRWSGSHQF   | 144   | >BRAFG606IRWSLSHQF    | 135 | 9     |
| >BRAFG606IRWSGSHQFE  | 57    | >BRAFG606IRWSLSHQFE   | 75  | 18    |
| >BRAFG606IRWSGSHQFE  | 116   | >BRAFG606IRWSLSHQFE   | 110 | 6     |
| >BRAFG606ISRWSGSHQF  | 8     | >BRAFG606ISRWSLSHQF   | 13  | 5     |
| >BRAFG606ISRWSGSHQ   | 528   | >BRAFG606ISRWSLSHQ    | 259 | 269   |
| >BRAFG606ISRWSGSHQF  | 37    | >BRAFG606ISRWSLSHQF   | 22  | 15    |
| >BRAFG606ISRWSGSHQF  | 538   | >BRAFG606ISRWSLSHQFE  | 200 | 338   |
| >BRAFG606ISRWSGSHQF  | 327   | >BRAFG606ISRWSLSHQFE  | 167 | 160   |
| >BRAFG606ISRWSGSHQF  | 503   | >BRAFG606ISRWSLSHQF   | 243 | 260   |
| >BRAFG606ISRWSGSHQF  | 147   | >BRAFG606ISRWSLSHQF   | 81  | 66    |
| >BRAFG606IKRWSGSH    | 55    | >BRAFG606IKRWSLSH     | 25  | 30    |
| >BRAFG606IKRWSGSHQ   | 24    | >BRAFG606IKRWSLSHQ    | 15  | 9     |
| >BRAFG606IKRWSGSHQ   | 44    | >BRAFG606IKRWSLSHQI   | 38  | 6     |
| >BRAFG606IKRWSGSHQ   | 23    | >BRAFG606IKRWSLSHQI   | 17  | 6     |
| >BRAFG606IKRWSGSHQ   | 518   | >BRAFG606IKRWSLSHQI   | 269 | 249   |
| >BRAFG606IKRWSGSHQ   | 93    | >BRAFG606IKRWSLSHQI   | 136 | 43    |
| >BRAFG606IKRWSGSHQ   | 14    | >BRAFG606IKRWSLSHQI   | 23  | 9     |
| >BRAFG606IKRWSGSH    | 31    | >BRAFG606IKRWSLSH     | 14  | 17    |
| >BRAFG606IKRWSGSHQ   | 51    | >BRAFG606IKRWSLSHQ    | 59  | 8     |
| >BRAFG606IKRWSGSHQ   | 2     | >BRAFG606IKRWSLSHQI   | 2   | 0     |
| >BRAFG606IKRWSGSHQ   | 186   | >BRAFG606IKRWSLSHQI   | 214 | 28    |
| >BRAFG606IKRWSGSHQ   | 73    | >BRAFG606IKRWSLSHQI   | 58  | 15    |
| >BRAFG606IKRWSGSHQ   | 24    | >BRAFG606IKRWSLSHQI   | 18  | 6     |
| >BRAFG606IKRWSGSH    | 333   | >BRAFG606IKRWSLSH     | 276 | 57    |
| >BRAFG606IKRWSGSHQ   | 193   | >BRAFG606IKRWSLSHQ    | 256 | 63    |
| >BRAFG606IKRWSGSHQ   | 72    | >BRAFG606IKRWSLSHQI   | 81  | 9     |
| >BRAFG606IVKSRWSGSH  | 1530  | >BRAFG606IVKSRWSLSH   | 162 | 1368  |
| >BRAFG606IVKSRWSGSH  | 9     | >BRAFG606IVKSRWSLSHC  | 7   | 2     |
| >BRAFG606ITVKSRSWG   | 1158  | >BRAFG606ITVKSRSWSL   | 246 | 912   |
| >BRAFG606ITVKSRSWGS  | 1526  | >BRAFG606ITVKSRSWSLS  | 453 | 1073  |
| >BRAFG606ITVKSRSWG   | 1738  | >BRAFG606ITVKSRSWSL   | 58  | 1680  |
| >BRAFG606IATVKSRSWG  | 15233 | >BRAFG606IATVKSRSWSL  | 198 | 15035 |
| >BRAFG606IATVKSRSWG  | 20259 | >BRAFG606IATVKSRSWSL  | 499 | 19760 |
| >BRAFG606IATVKSRSWG  | 12363 | >BRAFG606IATVKSRSWSL  | 409 | 11954 |
| >BRAFG606IATVKSRSWG  | 6351  | >BRAFG606IATVKSRSWSL  | 8   | 6343  |
| >BRAFG606IATVKSRSWG: | 660   | >BRAFG606IATVKSRSWSLS | 210 | 450   |
| >BRAFG606IATVKSRSWG  | 9109  | >BRAFG606IATVKSRSWSL  | 99  | 9010  |
| >BRAFG606IATVKSRSWG: | 451   | >BRAFG606IATVKSRSWSLS | 627 | 176   |
| >BRAFG606LATVKSRSWSC | 16271 | >BRAFG606LATVKSRSWSL  | 218 | 16053 |

|                      |       |                      |     |       |
|----------------------|-------|----------------------|-----|-------|
| >BRAFG606IGSHQFEQL   | 406   | >BRAFG606IRSHQFEQL   | 41  | 365   |
| >BRAFG606IGSHQFEQL   | 8401  | >BRAFG606IRSHQFEQL   | 488 | 7913  |
| >BRAFG606IGSHQFEQLSC | 6226  | >BRAFG606IRSHQFEQLSC | 187 | 6039  |
| >BRAFG606IGSHQFEQL   | 5602  | >BRAFG606IRSHQFEQL   | 274 | 5328  |
| >BRAFG606IGSHQFEQL   | 240   | >BRAFG606IRSHQFEQL   | 10  | 230   |
| >BRAFG606IGSHQFEQL   | 7447  | >BRAFG606IRSHQFEQL   | 402 | 7045  |
| >BRAFG606IGSHQFEQL   | 11790 | >BRAFG606IRSHQFEQL   | 345 | 11445 |
| >BRAFG606IGSHQFEQL   | 10517 | >BRAFG606IRSHQFEQL   | 388 | 10129 |
| >BRAFG606IGSHQFEQL   | 22002 | >BRAFG606IRSHQFEQL   | 428 | 21574 |
| >BRAFG606IGSHQFEQL   | 1171  | >BRAFG606IRSHQFEQL   | 90  | 1081  |
| >BRAFG606ISGSHQFEQL  | 10482 | >BRAFG606ISRSHQFEQL  | 402 | 10080 |
| >BRAFG606ISGSHQFEQL  | 26934 | >BRAFG606ISRSHQFEQL  | 254 | 26680 |
| >BRAFG606IGLATVKSRW! | 20349 | >BRAFG606IGLATVKSRW! | 87  | 20262 |
| >BRAFG606IGLATVKSRW! | 39318 | >BRAFG606IGLATVKSRW! | 213 | 39105 |
| >BRAFG606IWSGSHQFEQ  | 3081  | >BRAFG606IWSRSHQFEQ  | 226 | 2855  |
| >BRAFG606IWSGSHQFEQ  | 796   | >BRAFG606IWSRSHQFEQ  | 39  | 757   |
| >BRAFG606IWSGSHQFEQ  | 865   | >BRAFG606IWSRSHQFEQ  | 270 | 595   |
| >BRAFG606IWSGSHQF    | 60    | >BRAFG606IWSRSHQF    | 53  | 7     |
| >BRAFG606IWSGSHQF    | 78    | >BRAFG606IWSRSHQF    | 47  | 31    |
| >BRAFG606IWSGSHQFE   | 328   | >BRAFG606IWSRSHQFE   | 207 | 121   |
| >BRAFG606IWSGSHQF    | 6     | >BRAFG606IWSRSHQF    | 6   | 0     |
| >BRAFG606IWSGSHQFE   | 14    | >BRAFG606IWSRSHQFE   | 15  | 1     |
| >BRAFG606IWSGSHQF    | 664   | >BRAFG606IWSRSHQF    | 175 | 489   |
| >BRAFG606IWSGSHQF    | 144   | >BRAFG606IWSRSHQF    | 167 | 23    |
| >BRAFG606IWSGSHQFE   | 57    | >BRAFG606IWSRSHQFE   | 77  | 20    |
| >BRAFG606IWSGSHQFE   | 116   | >BRAFG606IWSRSHQFE   | 117 | 1     |
| >BRAFG606ISRWSGSHQF  | 8     | >BRAFG606ISRWSRSHQF  | 11  | 3     |
| >BRAFG606ISRWSGSHQ   | 528   | >BRAFG606ISRWSRSHQ   | 309 | 219   |
| >BRAFG606ISRWSGSHQF  | 37    | >BRAFG606ISRWSRSHQF  | 28  | 9     |
| >BRAFG606ISRWSGSHQF  | 538   | >BRAFG606ISRWSRSHQF  | 298 | 240   |
| >BRAFG606ISRWSGSHQF  | 327   | >BRAFG606ISRWSRSHQF  | 228 | 99    |
| >BRAFG606ISRWSGSHQF  | 503   | >BRAFG606ISRWSRSHQF  | 413 | 90    |
| >BRAFG606ISRWSGSHQF  | 147   | >BRAFG606ISRWSRSHQF  | 81  | 66    |
| >BRAFG606IKSRWSGSH   | 55    | >BRAFG606IKSRWSRSH   | 26  | 29    |
| >BRAFG606IKSRWSGSHQ  | 24    | >BRAFG606IKSRWSRSHQ  | 9   | 15    |
| >BRAFG606IKSRWSGSHQ  | 44    | >BRAFG606IKSRWSRSHQ  | 20  | 24    |
| >BRAFG606IKSRWSGSHQ  | 23    | >BRAFG606IKSRWSRSHQ  | 10  | 13    |
| >BRAFG606IKSRWSGSHQ  | 518   | >BRAFG606IKSRWSRSHQ  | 380 | 138   |
| >BRAFG606IKSRWSGSHQ  | 93    | >BRAFG606IKSRWSRSHQ  | 183 | 90    |
| >BRAFG606IKSRWSGSHQ  | 14    | >BRAFG606IKSRWSRSHQ  | 20  | 6     |
| >BRAFG606IKSRWSGSH   | 31    | >BRAFG606IKSRWSRSH   | 48  | 17    |
| >BRAFG606IKSRWSGSHQ  | 51    | >BRAFG606IKSRWSRSHQ  | 205 | 154   |
| >BRAFG606IKSRWSGSHQ  | 2     | >BRAFG606IKSRWSRSHQ  | 2   | 0     |

|                      |       |                      |      |       |
|----------------------|-------|----------------------|------|-------|
| >BRAFG606IKSRWSGSHQ  | 186   | >BRAFG606IKSRWSRSHQ  | 413  | 227   |
| >BRAFG606IKSRWSGSHQ  | 73    | >BRAFG606IKSRWSRSHQ  | 59   | 14    |
| >BRAFG606IKSRWSGSHQ  | 24    | >BRAFG606IKSRWSRSHQ  | 27   | 3     |
| >BRAFG606IKSRWSGSH   | 333   | >BRAFG606IKSRWSRSH   | 252  | 81    |
| >BRAFG606IKSRWSGSHQ  | 193   | >BRAFG606IKSRWSRSHQ  | 449  | 256   |
| >BRAFG606IKSRWSGSHQ  | 72    | >BRAFG606IKSRWSRSHQ  | 89   | 17    |
| >BRAFG606IVKSRWSGSH  | 1530  | >BRAFG606IVKSRWSRSH  | 337  | 1193  |
| >BRAFG606IVKSRWSGSH  | 9     | >BRAFG606IVKSRWSRSH  | 7    | 2     |
| >BRAFG606ITVKSRWSG   | 1158  | >BRAFG606ITVKSRWSR   | 403  | 755   |
| >BRAFG606ITVKSRWSG   | 13668 | >BRAFG606ITVKSRWSR   | 11   | 13657 |
| >BRAFG606ITVKSRWSG   | 16588 | >BRAFG606ITVKSRWSR   | 19   | 16569 |
| >BRAFG606ITVKSRWSG   | 26621 | >BRAFG606ITVKSRWSR   | 20   | 26601 |
| >BRAFG606IATVKSRWSG  | 18818 | >BRAFG606IATVKSRWSR  | 78   | 18740 |
| >BRAFG606IATVKSRWSG  | 17806 | >BRAFG606IATVKSRWSR  | 18   | 17788 |
| >BRAFG606IATVKSRWSG  | 35033 | >BRAFG606IATVKSRWSR  | 227  | 34806 |
| >BRAFG606IATVKSRWSG  | 30359 | >BRAFG606IATVKSRWSR  | 22   | 30337 |
| >BRAFG606IATVKSRWSG  | 451   | >BRAFG606IATVKSRWSR  | 810  | 359   |
| >BRAFG606IATVKSRWSG  | 8540  | >BRAFG606IATVKSRWSR  | 185  | 8355  |
| >BRAFG606LATVKSRWSC  | 19510 | >BRAFG606LATVKSRWSF  | 41   | 19469 |
| >BRAFG606LATVKSRWSC  | 37052 | >BRAFG606LATVKSRWSF  | 181  | 36871 |
| >BRAFG615IGSILWMAPE  | 412   | >BRAFG615IRSILWMAPE  | 192  | 220   |
| >BRAFG615IGSILWMAPE  | 2008  | >BRAFG615IRSILWMAPE  | 80   | 1928  |
| >BRAFG615IGSILWMAPE  | 1723  | >BRAFG615IRSILWMAPE  | 402  | 1321  |
| >BRAFG615IGSILWMAPE  | 770   | >BRAFG615IRSILWMAPE  | 212  | 558   |
| >BRAFG615IGSILWMAPE  | 4123  | >BRAFG615IRSILWMAPE  | 74   | 4049  |
| >BRAFG615IGSILWMAPE  | 295   | >BRAFG615IRSILWMAPE  | 11   | 284   |
| >BRAFG615IGSILWMAPE  | 336   | >BRAFG615IRSILWMAPE  | 14   | 322   |
| >BRAFG615IGSILWMAPE  | 2195  | >BRAFG615IRSILWMAPE  | 38   | 2157  |
| >BRAFG615IGSILWMAPE  | 1137  | >BRAFG615IRSILWMAPE  | 137  | 1000  |
| >BRAFG615IGSILWMAPE  | 257   | >BRAFG615IRSILWMAPE  | 26   | 231   |
| >BRAFG615ISGSILWMAPI | 28911 | >BRAFG615ISRSILWMAPE | 468  | 28443 |
| >BRAFG615ISGSILWMAPI | 27382 | >BRAFG615ISRSILWMAPE | 133  | 27249 |
| >BRAFG615ISGSHQFEQLS | 17545 | >BRAFG615ISGSHQFEQLS | 493  | 17052 |
| >BRAFG615ISGSILWMA   | 395   | >BRAFG615ILRSILWMA   | 1891 | 1496  |
| >BRAFG615ISGSILWM    | 13902 | >BRAFG615ILRSILWM    | 135  | 13767 |
| >BRAFG615ISGSILWMA   | 14615 | >BRAFG615ILRSILWMA   | 119  | 14496 |
| >BRAFG615ISGSILWMAF  | 15257 | >BRAFG615ILRSILWMAF  | 329  | 14928 |
| >BRAFG615ISGSILWM    | 140   | >BRAFG615ILRSILWM    | 11   | 129   |
| >BRAFG615ISGSILWM    | 630   | >BRAFG615ILRSILWM    | 431  | 199   |
| >BRAFG615ISGSILWMA   | 4765  | >BRAFG615ILRSILWMA   | 377  | 4388  |
| >BRAFG615IQLSGSILWM  | 71    | >BRAFG615IQLRSILWM   | 220  | 149   |
| >BRAFG615IQLSGSILWM  | 51    | >BRAFG615IQLRSILWM   | 212  | 161   |
| >BRAFG615IQLSGSILWM  | 31    | >BRAFG615IQLRSILWM   | 78   | 47    |



|                       |      |                       |      |      |
|-----------------------|------|-----------------------|------|------|
| >BRAF-G615IQLSGSILWM  | 231  | >BRAF-G615IQLRSILWM   | 554  | 323  |
| >BRAF-G615IQLSGSILWM/ | 89   | >BRAF-G615IQLRSILWM/  | 144  | 55   |
| >BRAF-G615IQLSGSILWM/ | 156  | >BRAF-G615IQLRSILWM/  | 508  | 352  |
| >BRAF-G615IQLSGSILWM  | 335  | >BRAF-G615IQLRSILWM   | 964  | 629  |
| >BRAF-G615IQLSGSILWM/ | 27   | >BRAF-G615IQLRSILWM/  | 73   | 46   |
| >BRAF-G615IQLSGSILWM/ | 413  | >BRAF-G615IQLRSILWM/  | 411  | 2    |
| >BRAF-G615IQLSGSILWM/ | 82   | >BRAF-G615IQLRSILWM/  | 227  | 145  |
| >BRAF-G615IQLSGSILWM/ | 102  | >BRAF-G615IQLRSILWM/  | 550  | 448  |
| >BRAF-G615IQLSGSILWM  | 17   | >BRAF-G615IQLRSILWM   | 100  | 83   |
| >BRAF-G615IQLSGSILWM/ | 5    | >BRAF-G615IQLRSILWM/  | 11   | 6    |
| >BRAF-G615IQLSGSILW   | 207  | >BRAF-G615IQLRSILW    | 143  | 64   |
| >BRAF-G615IQLSGSILWN  | 53   | >BRAF-G615IQLRSILWN   | 89   | 36   |
| >BRAF-G615IQLSGSILWN  | 307  | >BRAF-G615IQLRSILWN   | 686  | 379  |
| >BRAF-G615IQLSGSILWN  | 355  | >BRAF-G615IQLRSILWN   | 438  | 83   |
| >BRAF-G615IQLSGSILWN  | 399  | >BRAF-G615IQLRSILWN   | 1162 | 763  |
| >BRAF-G615IQLSGSIL    | 51   | >BRAF-G615IQLRSIL     | 77   | 26   |
| >BRAF-G615IQLSGSILWN  | 277  | >BRAF-G615IQLRSILWN   | 267  | 10   |
| >BRAF-G615IQLSGSIL    | 28   | >BRAF-G615IQLRSIL     | 43   | 15   |
| >BRAF-G615IQLSGSILW   | 460  | >BRAF-G615IQLRSILW    | 631  | 171  |
| >BRAF-G615IQLSGSILW   | 245  | >BRAF-G615IQLRSILW    | 405  | 160  |
| >BRAF-G615IFEQLSGSI   | 4    | >BRAF-G615IFEQLRSI    | 4    | 0    |
| >BRAF-G615IFEQLSGSIL  | 177  | >BRAF-G615IFEQLRSIL   | 41   | 136  |
| >BRAF-G615IFEQLSGSILW | 377  | >BRAF-G615IFEQLRSILW  | 110  | 267  |
| >BRAF-G615IFEQLSGSILW | 129  | >BRAF-G615IFEQLRSILWI | 47   | 82   |
| >BRAF-G615IFEQLSGSIL  | 436  | >BRAF-G615IFEQLRSIL   | 290  | 146  |
| >BRAF-G615IFEQLSGSI   | 277  | >BRAF-G615IFEQLRSI    | 656  | 379  |
| >BRAF-G615IFEQLSGSIL  | 34   | >BRAF-G615IFEQLRSIL   | 74   | 40   |
| >BRAF-G615IFEQLSGSILW | 243  | >BRAF-G615IFEQLRSILWI | 475  | 232  |
| >BRAF-G615IFEQLSGSI   | 176  | >BRAF-G615IFEQLRSI    | 104  | 72   |
| >BRAF-G615IFEQLSGSIL  | 71   | >BRAF-G615IFEQLRSIL   | 57   | 14   |
| >BRAF-G615IFEQLSGSILW | 1002 | >BRAF-G615IFEQLRSILW  | 482  | 520  |
| >BRAF-G615IFEQLSGSILW | 385  | >BRAF-G615IFEQLRSILWI | 350  | 35   |
| >BRAF-G615IFEQLSGSILW | 72   | >BRAF-G615IFEQLRSILW  | 70   | 2    |
| >BRAF-G615IFEQLSGSILW | 288  | >BRAF-G615IFEQLRSILW  | 216  | 72   |
| >BRAF-G615IFEQLSGSI   | 36   | >BRAF-G615IFEQLRSI    | 23   | 13   |
| >BRAF-G615IFEQLSGSIL  | 81   | >BRAF-G615IFEQLRSIL   | 37   | 44   |
| >BRAF-G615IFEQLSGSILW | 217  | >BRAF-G615IFEQLRSILW  | 770  | 553  |
| >BRAF-G615IFEQLSGSILW | 508  | >BRAF-G615IFEQLRSILWI | 309  | 199  |
| >BRAF-G615IFEQLSGSILW | 311  | >BRAF-G615IFEQLRSILW  | 404  | 93   |
| >BRAF-G615IQFEQLSGSI  | 496  | >BRAF-G615IQFEQLRSI   | 2218 | 1722 |
| >BRAF-G615IQFEQLSGSIL | 509  | >BRAF-G615IQFEQLRSIL  | 426  | 83   |
| >BRAF-G615IQFEQLSGSI  | 34   | >BRAF-G615IQFEQLRSI   | 40   | 6    |
| >BRAF-G615IQFEQLSGSI  | 256  | >BRAF-G615IQFEQLRSII  | 372  | 116  |

|                        |       |                         |      |       |
|------------------------|-------|-------------------------|------|-------|
| >BRAF-G615I HQFEQLSGSI | 308   | >BRAF-G615I HQFEQLSRSI  | 552  | 244   |
| >BRAF-G615I HQFEQLSGSI | 196   | >BRAF-G615I HQFEQLSRSII | 380  | 184   |
| >BRAF-G615I HQFEQLSGS  | 121   | >BRAF-G615I HQFEQLSRS   | 637  | 516   |
| >BRAF-G615I HQFEQLSGSI | 89    | >BRAF-G615I HQFEQLSRSII | 157  | 68    |
| >BRAF-G615I HQFEQLSGSI | 412   | >BRAF-G615I HQFEQLSRSI  | 500  | 88    |
| >BRAF-G615I HQFEQLSGSI | 432   | >BRAF-G615I HQFEQLSRSII | 1324 | 892   |
| >BRAF-G615I HQFEQLSG   | 19147 | >BRAF-G615I HQFEQLSR    | 50   | 19097 |
| >BRAF-G615I HQFEQLSGSI | 442   | >BRAF-G615I HQFEQLSRSI  | 144  | 298   |
| >BRAF-G615I HQFEQLSG   | 35201 | >BRAF-G615I HQFEQLSR    | 400  | 34801 |
| >BRAF-G615I HQFEQLSG   | 38990 | >BRAF-G615I HQFEQLSR    | 287  | 38703 |
| >BRAF-G615I HQFEQLSGSI | 185   | >BRAF-G615I HQFEQLSRSI  | 232  | 47    |
| >BRAF-G615I HQFEQLSGSI | 183   | >BRAF-G615I HQFEQLSRSII | 325  | 142   |
| >BRAF-G615I HQFEQLSGSI | 157   | >BRAF-G615I HQFEQLSRSII | 451  | 294   |
| >BRAF-G615I HQFEQLSG   | 2303  | >BRAF-G615I HQFEQLSR    | 104  | 2199  |
| >BRAF-G615I HQFEQLSGSI | 70    | >BRAF-G615I HQFEQLSRSI  | 25   | 45    |
| >BRAF-G615I HQFEQLSGSI | 8     | >BRAF-G615I HQFEQLSRSII | 10   | 2     |
| >BRAF-G615I HQFEQLSG   | 8218  | >BRAF-G615I HQFEQLSR    | 384  | 7834  |
| >BRAF-G615I HQFEQLSGSI | 195   | >BRAF-G615I HQFEQLSRSI  | 219  | 24    |
| >BRAF-G615I HQFEQLSGSI | 16    | >BRAF-G615I HQFEQLSRSII | 15   | 1     |
| >BRAF-G615I HQFEQLSGSI | 388   | >BRAF-G615I HQFEQLSRSII | 793  | 405   |
| >BRAF-G615I HQFEQLSGSI | 485   | >BRAF-G615I HQFEQLSRSII | 448  | 37    |
| >BRAF-G615I HQFEQLSGSI | 111   | >BRAF-G615I HQFEQLSRSII | 145  | 34    |
| >BRAF-G615I HQFEQLSGSI | 616   | >BRAF-G615I HQFEQLSRSII | 406  | 210   |
| >BRAF-G615I HQFEQLSGSI | 585   | >BRAF-G615I HQFEQLSRSII | 374  | 211   |
| >BRAF-G615I HQFEQLSG   | 28281 | >BRAF-G615I HQFEQLSR    | 53   | 28228 |
| >BRAF-H608I HQFEQLSGSI | 34    | >BRAF-H608I LQFEQLSGSI  | 37   | 3     |
| >BRAF-H608I HQFEQLSGSI | 583   | >BRAF-H608I LQFEQLSGSI  | 249  | 334   |
| >BRAF-H608I HQFEQLSGSI | 256   | >BRAF-H608I LQFEQLSGSIL | 133  | 123   |
| >BRAF-H608I HQFEQLSGSI | 308   | >BRAF-H608I LQFEQLSGSI  | 108  | 200   |
| >BRAF-H608I HQFEQLSGSI | 196   | >BRAF-H608I LQFEQLSGSIL | 76   | 120   |
| >BRAF-H608I HQFEQLSG   | 1128  | >BRAF-H608I LQFEQLSG    | 448  | 680   |
| >BRAF-H608I HQFEQLSGS  | 121   | >BRAF-H608I LQFEQLSGS   | 54   | 67    |
| >BRAF-H608I HQFEQLSGSI | 1020  | >BRAF-H608I LQFEQLSGSI  | 221  | 799   |
| >BRAF-H608I HQFEQLSGSI | 89    | >BRAF-H608I LQFEQLSGSIL | 40   | 49    |
| >BRAF-H608I HQFEQLSGSI | 412   | >BRAF-H608I LQFEQLSGSI  | 95   | 317   |
| >BRAF-H608I HQFEQLSGSI | 1477  | >BRAF-H608I LQFEQLSGSIL | 433  | 1044  |
| >BRAF-H608I HQFEQLSGSI | 502   | >BRAF-H608I LQFEQLSGSI  | 454  | 48    |
| >BRAF-H608I HQFEQLSGSI | 432   | >BRAF-H608I LQFEQLSGSIL | 386  | 46    |
| >BRAF-H608I HQFEQLSGSI | 442   | >BRAF-H608I LQFEQLSGSI  | 2089 | 1647  |
| >BRAF-H608I HQFEQLSG   | 625   | >BRAF-H608I LQFEQLSG    | 221  | 404   |
| >BRAF-H608I HQFEQLSGSI | 185   | >BRAF-H608I LQFEQLSGSI  | 84   | 101   |
| >BRAF-H608I HQFEQLSGSI | 183   | >BRAF-H608I LQFEQLSGSIL | 80   | 103   |
| >BRAF-H608I HQFEQLSGSI | 157   | >BRAF-H608I LQFEQLSGSIL | 517  | 360   |

|                       |       |                        |      |       |
|-----------------------|-------|------------------------|------|-------|
| >BRAH-H608IHQFEQLSGSI | 70    | >BRAH-H608ILQFEQLSGSI  | 38   | 32    |
| >BRAH-H608IHQFEQLSGSI | 8     | >BRAH-H608ILQFEQLSGSIL | 6    | 2     |
| >BRAH-H608IHQFEQLSGSI | 195   | >BRAH-H608ILQFEQLSGSI  | 3165 | 2970  |
| >BRAH-H608IHQFEQLSGSI | 16    | >BRAH-H608ILQFEQLSGSIL | 141  | 125   |
| >BRAH-H608IHQFEQLSGSI | 388   | >BRAH-H608ILQFEQLSGSIL | 1210 | 822   |
| >BRAH-H608IHQFEQLSGSI | 485   | >BRAH-H608ILQFEQLSGSIL | 1975 | 1490  |
| >BRAH-H608IHQFEQLSGSI | 111   | >BRAH-H608ILQFEQLSGSIL | 145  | 34    |
| >BRAH-H608ISHQFEQLSGS | 25649 | >BRAH-H608ISLQFEQLSGS  | 316  | 25333 |
| >BRAH-H608ISHQFEQLSGS | 19437 | >BRAH-H608ISLQFEQLSGS  | 121  | 19316 |
| >BRAH-H608ISHQFEQLSGS | 24921 | >BRAH-H608ISLQFEQLSGS  | 153  | 24768 |
| >BRAH-H608ISHQFEQLSGS | 23132 | >BRAH-H608ISLQFEQLSGS  | 188  | 22944 |
| >BRAH-H608ISHQFEQLSGS | 34286 | >BRAH-H608ISLQFEQLSGS  | 123  | 34163 |
| >BRAH-H608IATVKSRWSG: | 1265  | >BRAH-H608IATVKSRWSG:  | 201  | 1064  |
| >BRAH-H608IATVKSRWSG: | 660   | >BRAH-H608IATVKSRWSG:  | 10   | 650   |
| >BRAH-H608IATVKSRWSG: | 17062 | >BRAH-H608IATVKSRWSG:  | 353  | 16709 |
| >BRAH-H608IATVKSRWSG: | 451   | >BRAH-H608IATVKSRWSG:  | 218  | 233   |
| >BRAH-H608IATVKSRWSG: | 38074 | >BRAH-H608IATVKSRWSG:  | 475  | 37599 |
| >BRAH-H608IGSHQFEQL   | 406   | >BRAH-H608IGSLQFEQL    | 101  | 305   |
| >BRAH-H608IGSHQFEQL   | 240   | >BRAH-H608IGSLQFEQL    | 124  | 116   |
| >BRAH-H608IRWSGSHQF   | 60    | >BRAH-H608IRWSGSLQF    | 117  | 57    |
| >BRAH-H608IRWSGSHQF   | 78    | >BRAH-H608IRWSGSLQF    | 93   | 15    |
| >BRAH-H608IRWSGSHQFE  | 328   | >BRAH-H608IRWSGSLQFE   | 436  | 108   |
| >BRAH-H608IRWSGSHQF   | 6     | >BRAH-H608IRWSGSLQF    | 6    | 0     |
| >BRAH-H608IRWSGSHQFE  | 14    | >BRAH-H608IRWSGSLQFE   | 14   | 0     |
| >BRAH-H608IRWSGSHQF   | 144   | >BRAH-H608IRWSGSLQF    | 196  | 52    |
| >BRAH-H608IRWSGSHQFE  | 57    | >BRAH-H608IRWSGSLQFE   | 49   | 8     |
| >BRAH-H608IRWSGSHQFE  | 116   | >BRAH-H608IRWSGSLQFE   | 98   | 18    |
| >BRAH-H608ISRWSGSHQF  | 993   | >BRAH-H608ISRWSGSLQF   | 357  | 636   |
| >BRAH-H608ISRWSGSHQF  | 8     | >BRAH-H608ISRWSGSLQF   | 6    | 2     |
| >BRAH-H608ISRWSGSHQ   | 528   | >BRAH-H608ISRWSGSLQ    | 413  | 115   |
| >BRAH-H608ISRWSGSHQF  | 37    | >BRAH-H608ISRWSGSLQF   | 33   | 4     |
| >BRAH-H608ISRWSGSHQF  | 327   | >BRAH-H608ISRWSGSLQFE  | 266  | 61    |
| >BRAH-H608ISRWSGSHQF  | 538   | >BRAH-H608ISRWSGSLQFE  | 423  | 115   |
| >BRAH-H608ISRWSGSHQF  | 503   | >BRAH-H608ISRWSGSLQF   | 127  | 376   |
| >BRAH-H608ISRWSGSHQF  | 147   | >BRAH-H608ISRWSGSLQF   | 71   | 76    |
| >BRAH-H608IKSRWSGSH   | 55    | >BRAH-H608IKSRWSGSL    | 8    | 47    |
| >BRAH-H608IKSRWSGSHQ  | 24    | >BRAH-H608IKSRWSGSLQ   | 25   | 1     |
| >BRAH-H608IKSRWSGSHQ  | 44    | >BRAH-H608IKSRWSGSLQI  | 30   | 14    |
| >BRAH-H608IKSRWSGSHQ  | 23    | >BRAH-H608IKSRWSGSLQI  | 37   | 14    |
| >BRAH-H608IKSRWSGSHQ  | 518   | >BRAH-H608IKSRWSGSLQI  | 367  | 151   |
| >BRAH-H608IKSRWSGSH   | 10135 | >BRAH-H608IKSRWSGSL    | 121  | 10014 |
| >BRAH-H608IKSRWSGSHQ  | 93    | >BRAH-H608IKSRWSGSLQI  | 84   | 9     |
| >BRAH-H608IKSRWSGSH   | 2478  | >BRAH-H608IKSRWSGSL    | 412  | 2066  |

|                        |       |                        |      |       |
|------------------------|-------|------------------------|------|-------|
| >BRAF-H608IKSRWSGSHQ   | 14    | >BRAF-H608IKSRWSGSLQI  | 12   | 2     |
| >BRAF-H608IKSRWSGSH    | 31    | >BRAF-H608IKSRWSGSL    | 3    | 28    |
| >BRAF-H608IKSRWSGSHQ   | 51    | >BRAF-H608IKSRWSGSLQ   | 84   | 33    |
| >BRAF-H608IKSRWSGSHQ   | 2     | >BRAF-H608IKSRWSGSLQI  | 2    | 0     |
| >BRAF-H608IKSRWSGSHQ   | 186   | >BRAF-H608IKSRWSGSLQI  | 237  | 51    |
| >BRAF-H608IKSRWSGSHQ   | 73    | >BRAF-H608IKSRWSGSLQI  | 123  | 50    |
| >BRAF-H608IKSRWSGSHQ   | 24    | >BRAF-H608IKSRWSGSLQI  | 26   | 2     |
| >BRAF-H608IKSRWSGSH    | 333   | >BRAF-H608IKSRWSGSL    | 45   | 288   |
| >BRAF-H608IKSRWSGSHQ   | 193   | >BRAF-H608IKSRWSGSLQ   | 23   | 170   |
| >BRAF-H608IKSRWSGSHQ   | 72    | >BRAF-H608IKSRWSGSLQI  | 24   | 48    |
| >BRAF-H608IKSRWSGSH    | 31239 | >BRAF-H608IKSRWSGSL    | 103  | 31136 |
| >BRAF-H608IVKSRWSGSH   | 1530  | >BRAF-H608IVKSRWSGSL   | 168  | 1362  |
| >BRAF-H608IVKSRWSGSH   | 9     | >BRAF-H608IVKSRWSGSLC  | 7    | 2     |
| >BRAF-H608ITVKSRSWGSII | 2741  | >BRAF-H608ITVKSRSWGSII | 203  | 2538  |
| >BRAF-H608IHQFEQLSGSI  | 34    | >BRAF-H608IRQFEQLSGSI  | 140  | 106   |
| >BRAF-H608IHQFEQLSGSI  | 583   | >BRAF-H608IRQFEQLSGSI  | 434  | 149   |
| >BRAF-H608IHQFEQLSGSI  | 256   | >BRAF-H608IRQFEQLSGSII | 349  | 93    |
| >BRAF-H608IHQFEQLSGSI  | 308   | >BRAF-H608IRQFEQLSGSI  | 143  | 165   |
| >BRAF-H608IHQFEQLSGSI  | 196   | >BRAF-H608IRQFEQLSGSII | 96   | 100   |
| >BRAF-H608IHQFEQLSG    | 1128  | >BRAF-H608IRQFEQLSG    | 415  | 713   |
| >BRAF-H608IHQFEQLSGS   | 121   | >BRAF-H608IRQFEQLSGS   | 41   | 80    |
| >BRAF-H608IHQFEQLSGSI  | 1020  | >BRAF-H608IRQFEQLSGSI  | 430  | 590   |
| >BRAF-H608IHQFEQLSGSI  | 89    | >BRAF-H608IRQFEQLSGSII | 31   | 58    |
| >BRAF-H608IHQFEQLSGSI  | 412   | >BRAF-H608IRQFEQLSGSI  | 88   | 324   |
| >BRAF-H608IHQFEQLSGSI  | 1477  | >BRAF-H608IRQFEQLSGSII | 405  | 1072  |
| >BRAF-H608IHQFEQLSGSI  | 502   | >BRAF-H608IRQFEQLSGSI  | 430  | 72    |
| >BRAF-H608IHQFEQLSGSI  | 432   | >BRAF-H608IRQFEQLSGSII | 375  | 57    |
| >BRAF-H608IHQFEQLSGSI  | 442   | >BRAF-H608IRQFEQLSGSI  | 56   | 386   |
| >BRAF-H608IHQFEQLSG    | 625   | >BRAF-H608IRQFEQLSG    | 207  | 418   |
| >BRAF-H608IHQFEQLSGSI  | 185   | >BRAF-H608IRQFEQLSGSI  | 77   | 108   |
| >BRAF-H608IHQFEQLSGSI  | 183   | >BRAF-H608IRQFEQLSGSII | 72   | 111   |
| >BRAF-H608IHQFEQLSGSI  | 157   | >BRAF-H608IRQFEQLSGSII | 1247 | 1090  |
| >BRAF-H608IHQFEQLSGSI  | 70    | >BRAF-H608IRQFEQLSGSI  | 17   | 53    |
| >BRAF-H608IHQFEQLSGSI  | 8     | >BRAF-H608IRQFEQLSGSII | 3    | 5     |
| >BRAF-H608IHQFEQLSGSI  | 805   | >BRAF-H608IRQFEQLSGSI  | 285  | 520   |
| >BRAF-H608IHQFEQLSGSI  | 1276  | >BRAF-H608IRQFEQLSGSII | 153  | 1123  |
| >BRAF-H608IHQFEQLSGSI  | 195   | >BRAF-H608IRQFEQLSGSI  | 2392 | 2197  |
| >BRAF-H608IHQFEQLSGSI  | 16    | >BRAF-H608IRQFEQLSGSII | 121  | 105   |
| >BRAF-H608IHQFEQLSGSI  | 388   | >BRAF-H608IRQFEQLSGSII | 140  | 248   |
| >BRAF-H608IHQFEQLSGSI  | 485   | >BRAF-H608IRQFEQLSGSII | 431  | 54    |
| >BRAF-H608IHQFEQLSGSI  | 1167  | >BRAF-H608IRQFEQLSGSI  | 138  | 1029  |
| >BRAF-H608IHQFEQLSGSI  | 111   | >BRAF-H608IRQFEQLSGSII | 44   | 67    |
| >BRAF-H608IHQFEQLSGSI  | 616   | >BRAF-H608IRQFEQLSGSII | 383  | 233   |

|                       |       |                        |      |       |
|-----------------------|-------|------------------------|------|-------|
| >BRAH-H608IHQFEQLSGSI | 9181  | >BRAH-H608IRQFEQLSGSII | 353  | 8828  |
| >BRAH-H608IHQFEQLSGSI | 585   | >BRAH-H608IRQFEQLSGSII | 48   | 537   |
| >BRAH-H608ISHQFEQLSGS | 21311 | >BRAH-H608ISRQFEQLSGS  | 211  | 21100 |
| >BRAH-H608IATVKSRWSG: | 3708  | >BRAH-H608IATVKSRWSG:  | 297  | 3411  |
| >BRAH-H608IATVKSRWSG: | 8966  | >BRAH-H608IATVKSRWSG:  | 73   | 8893  |
| >BRAH-H608IATVKSRWSG: | 13719 | >BRAH-H608IATVKSRWSG:  | 58   | 13661 |
| >BRAH-H608IATVKSRWSG: | 451   | >BRAH-H608IATVKSRWSG:  | 4773 | 4322  |
| >BRAH-H608IATVKSRWSG: | 1202  | >BRAH-H608IATVKSRWSG:  | 214  | 988   |
| >BRAH-H608IGSHQFEQL   | 406   | >BRAH-H608IGSRQFEQL    | 714  | 308   |
| >BRAH-H608IGSHQFEQL   | 240   | >BRAH-H608IGSRQFEQL    | 56   | 184   |
| >BRAH-H608IWSGSHQFEQ  | 865   | >BRAH-H608IWSGSRQFEQ   | 459  | 406   |
| >BRAH-H608IRWSGSHQF   | 60    | >BRAH-H608IRWSGSRQF    | 390  | 330   |
| >BRAH-H608IRWSGSHQF   | 78    | >BRAH-H608IRWSGSRQF    | 297  | 219   |
| >BRAH-H608IRWSGSHQFE  | 328   | >BRAH-H608IRWSGSRQFEI  | 674  | 346   |
| >BRAH-H608IRWSGSHQF   | 6     | >BRAH-H608IRWSGSRQF    | 9    | 3     |
| >BRAH-H608IRWSGSHQFE  | 14    | >BRAH-H608IRWSGSRQFEI  | 17   | 3     |
| >BRAH-H608IRWSGSHQF   | 144   | >BRAH-H608IRWSGSRQF    | 203  | 59    |
| >BRAH-H608IRWSGSHQFE  | 57    | >BRAH-H608IRWSGSRQFE   | 52   | 5     |
| >BRAH-H608IRWSGSHQFE  | 116   | >BRAH-H608IRWSGSRQFEI  | 101  | 15    |
| >BRAH-H608ISRWSGSHQF  | 8     | >BRAH-H608ISRWSGSRQF   | 12   | 4     |
| >BRAH-H608ISRWSGSHQF  | 37    | >BRAH-H608ISRWSGSRQF   | 59   | 22    |
| >BRAH-H608ISRWSGSHQF  | 327   | >BRAH-H608ISRWSGSRQFI  | 361  | 34    |
| >BRAH-H608ISRWSGSHQ   | 725   | >BRAH-H608ISRWSGSRQ    | 499  | 226   |
| >BRAH-H608ISRWSGSHQF  | 538   | >BRAH-H608ISRWSGSRQFI  | 466  | 72    |
| >BRAH-H608ISRWSGSHQF  | 503   | >BRAH-H608ISRWSGSRQF   | 407  | 96    |
| >BRAH-H608ISRWSGSHQF  | 147   | >BRAH-H608ISRWSGSRQF   | 124  | 23    |
| >BRAH-H608IKSRWSGSH   | 1471  | >BRAH-H608IKSRWSGSR    | 490  | 981   |
| >BRAH-H608IKSRWSGSH   | 55    | >BRAH-H608IKSRWSGSR    | 10   | 45    |
| >BRAH-H608IKSRWSGSHQ  | 24    | >BRAH-H608IKSRWSGSRQ   | 64   | 40    |
| >BRAH-H608IKSRWSGSHQ  | 44    | >BRAH-H608IKSRWSGSRQ   | 60   | 16    |
| >BRAH-H608IKSRWSGSHQ  | 23    | >BRAH-H608IKSRWSGSRQ   | 31   | 8     |
| >BRAH-H608IKSRWSGSH   | 3085  | >BRAH-H608IKSRWSGSR    | 17   | 3068  |
| >BRAH-H608IKSRWSGSHQ  | 93    | >BRAH-H608IKSRWSGSRQ   | 140  | 47    |
| >BRAH-H608IKSRWSGSHQ  | 14    | >BRAH-H608IKSRWSGSRQ   | 18   | 4     |
| >BRAH-H608IKSRWSGSH   | 31    | >BRAH-H608IKSRWSGSR    | 430  | 399   |
| >BRAH-H608IKSRWSGSHQ  | 51    | >BRAH-H608IKSRWSGSRQ   | 26   | 25    |
| >BRAH-H608IKSRWSGSHQ  | 2     | >BRAH-H608IKSRWSGSRQ   | 2    | 0     |
| >BRAH-H608IKSRWSGSHQ  | 186   | >BRAH-H608IKSRWSGSRQ   | 324  | 138   |
| >BRAH-H608IKSRWSGSHQ  | 73    | >BRAH-H608IKSRWSGSRQ   | 97   | 24    |
| >BRAH-H608IKSRWSGSHQ  | 24    | >BRAH-H608IKSRWSGSRQ   | 182  | 158   |
| >BRAH-H608IKSRWSGSH   | 333   | >BRAH-H608IKSRWSGSR    | 1097 | 764   |
| >BRAH-H608IKSRWSGSHQ  | 193   | >BRAH-H608IKSRWSGSRQ   | 38   | 155   |
| >BRAH-H608IKSRWSGSHQ  | 72    | >BRAH-H608IKSRWSGSRQ   | 42   | 30    |

|                         |       |                         |       |       |
|-------------------------|-------|-------------------------|-------|-------|
| >BRAFF-H608IVKSRWSGSH   | 9     | >BRAFF-H608IVKSRWSGSR   | 9     | 0     |
| >BRAFF-H608ITVKSRRWSGSI | 2741  | >BRAFF-H608ITVKSRRWSGSI | 329   | 2412  |
| >BRAFF-H608ITVKSRRWSGSI | 13706 | >BRAFF-H608ITVKSRRWSGSI | 139   | 13567 |
| >BRAFF-H608ITVKSRRWSGSI | 16327 | >BRAFF-H608ITVKSRRWSGSI | 475   | 15852 |
| >BRAFF-H608ITVKSRRWSGSI | 23751 | >BRAFF-H608ITVKSRRWSGSI | 337   | 23414 |
| >BRAFF-I326TSSPSAPASDSI | 317   | >BRAFF-I326TSSPSAPASDS  | 7029  | 6712  |
| >BRAFF-I326TSSPSAPASDSI | 8     | >BRAFF-I326TSSPSAPASDS  | 574   | 566   |
| >BRAFF-I326TSSPSAPASDSI | 23    | >BRAFF-I326TSSPSAPASDS  | 13764 | 13741 |
| >BRAFF-I326TDSIGPQIL    | 77    | >BRAFF-I326TDSTGPQIL    | 1644  | 1567  |
| >BRAFF-I326TSDSIGPQI    | 360   | >BRAFF-I326TSDSTGPQI    | 416   | 56    |
| >BRAFF-I326TASDSIGPQI   | 493   | >BRAFF-I326TASDSTGPQI   | 88    | 405   |
| >BRAFF-I326TASDSIGPQIL  | 301   | >BRAFF-I326TASDSTGPQIL  | 142   | 159   |
| >BRAFF-I326TASDSIGPQI   | 49    | >BRAFF-I326TASDSTGPQI   | 44    | 5     |
| >BRAFF-I326TAPASDSIGPQ  | 314   | >BRAFF-I326TAPASDSTGPC  | 394   | 80    |
| >BRAFF-I326TAPASDSIGPQ  | 105   | >BRAFF-I326TAPASDSTGPC  | 76    | 29    |
| >BRAFF-I326TSAPASDSI    | 319   | >BRAFF-I326TSAPASDST    | 7631  | 7312  |
| >BRAFF-I326TSAPASDSI    | 107   | >BRAFF-I326TSAPASDST    | 30547 | 30440 |
| >BRAFF-I326TSPASASDSI   | 54    | >BRAFF-I326TSPASASDST   | 28531 | 28477 |
| >BRAFF-I326TSPSAPASDSI  | 118   | >BRAFF-I326TSPSAPASDST  | 14427 | 14309 |
| >BRAFF-I326TSPSAPASDSI  | 232   | >BRAFF-I326TSPSAPASDST  | 3079  | 2847  |
| >BRAFF-I463SIGSGSFGTVYI | 304   | >BRAFF-I463SIGSGSFGTVY  | 612   | 308   |
| >BRAFF-I463SIGSGSFGTVYI | 214   | >BRAFF-I463SIGSGSFGTVY  | 70    | 144   |
| >BRAFF-I463SIGSGSFGTVY  | 96    | >BRAFF-I463SIGSGSFGTVY  | 133   | 37    |
| >BRAFF-I463SIGSGSFGTVY  | 370   | >BRAFF-I463SIGSGSFGTVY  | 551   | 181   |
| >BRAFF-I463SIGSGSFGTVY  | 146   | >BRAFF-I463SIGSGSFGTVY  | 129   | 17    |
| >BRAFF-I463SIGSGSFGTVY  | 675   | >BRAFF-I463SIGSGSFGTVY  | 377   | 298   |
| >BRAFF-I463SIGSGSFGTVY  | 611   | >BRAFF-I463SIGSGSFGTVY  | 105   | 506   |
| >BRAFF-I463SIGSGSFGTVYI | 1138  | >BRAFF-I463SIGSGSFGTVY  | 348   | 790   |
| >BRAFF-I463RIGSGSFGTV   | 163   | >BRAFF-I463RSGSGSFGTV   | 2361  | 2198  |
| >BRAFF-I463RIGSGSFGTV   | 31    | >BRAFF-I463RSGSGSFGTV   | 1003  | 972   |
| >BRAFF-I463RIGSGSFGTV   | 19    | >BRAFF-I463RSGSGSFGTV   | 1997  | 1978  |
| >BRAFF-I463RIGSGSFGTV   | 163   | >BRAFF-I463RSGSGSFGTV   | 8548  | 8385  |
| >BRAFF-I463RIGSGSFGTV   | 69    | >BRAFF-I463RSGSGSFGTV   | 4882  | 4813  |
| >BRAFF-I463RIGSGSFGTV   | 256   | >BRAFF-I463RSGSGSFGTV   | 13162 | 12906 |
| >BRAFF-I463RIGSGSFGTV   | 14    | >BRAFF-I463RSGSGSFGTV   | 8741  | 8727  |
| >BRAFF-I463RIGSGSFGTV'  | 468   | >BRAFF-I463RSGSGSFGTV   | 1492  | 1024  |
| >BRAFF-I463RIGSGSFGTV'  | 215   | >BRAFF-I463RSGSGSFGTV   | 548   | 333   |
| >BRAFF-I463RIGSGSFGTV'  | 61    | >BRAFF-I463RSGSGSFGTV   | 34    | 27    |
| >BRAFF-I463RIGSGSFGTV   | 327   | >BRAFF-I463RSGSGSFGTV   | 279   | 48    |
| >BRAFF-I463RIGSGSFGTV'  | 30    | >BRAFF-I463RSGSGSFGTV   | 92    | 62    |
| >BRAFF-I463RIGSGSFGTV'  | 50    | >BRAFF-I463RSGSGSFGTV   | 44    | 6     |
| >BRAFF-I463RIGSGSFGTV'  | 451   | >BRAFF-I463RSGSGSFGTV   | 57    | 394   |
| >BRAFF-I463RIGSGSFGTV   | 13356 | >BRAFF-I463RSGSGSFGTV   | 225   | 13131 |

|                        |      |                         |       |       |
|------------------------|------|-------------------------|-------|-------|
| >BRAFI463S RIGSGSFGTV' | 451  | >BRAFI463S RSGSGSFGTV   | 5     | 446   |
| >BRAFI463S RIGSGSFGTV' | 2389 | >BRAFI463S RSGSGSFGTV   | 54    | 2335  |
| >BRAFI463S RIGSGSFGTV  | 5474 | >BRAFI463S RSGSGSFGTV   | 278   | 5196  |
| >BRAFI463S RIGSGSFGTV' | 77   | >BRAFI463S RSGSGSFGTV   | 9     | 68    |
| >BRAFI463S QRIGSGSF    | 52   | >BRAFI463S QRSRSGSF     | 78    | 26    |
| >BRAFI463S QRIGSGSF    | 235  | >BRAFI463S QRSRSGSF     | 587   | 352   |
| >BRAFI463S GQRIGSGSF   | 30   | >BRAFI463S GQRSRSGSF    | 22    | 8     |
| >BRAFI463S GQRIGSGSF   | 56   | >BRAFI463S GQRSRSGSF    | 29    | 27    |
| >BRAFI463S GQRIGSGSF   | 22   | >BRAFI463S GQRSRSGSF    | 6     | 16    |
| >BRAFI463S GQRIGSGSF   | 1085 | >BRAFI463S GQRSRSGSF    | 224   | 861   |
| >BRAFI463S VGQRIGSGSF  | 498  | >BRAFI463S VGQRSRSGSGSI | 188   | 310   |
| >BRAFI463S VGQRIGSGSF  | 1466 | >BRAFI463S VGQRSRSGSGSI | 427   | 1039  |
| >BRAFI463S VGQRIGSGSF  | 74   | >BRAFI463S VGQRSRSGSGSI | 69    | 5     |
| >BRAFI463S TVGQRIGSGS  | 183  | >BRAFI463S TVGQRSRSGSG! | 100   | 83    |
| >BRAFI463S GQITVGQRI   | 414  | >BRAFI463S GQITVGQRS    | 11062 | 10648 |
| >BRAFI582M IFLHEDLTV   | 932  | >BRAFI582M MFLHEDLTV    | 499   | 433   |
| >BRAFI582M IFLHEDLTVKI | 68   | >BRAFI582M MFLHEDLTVK   | 47    | 21    |
| >BRAFI582M IFLHEDLTVKI | 91   | >BRAFI582M MFLHEDLTVK   | 21    | 70    |
| >BRAFI582M NIFLHEDLTV  | 106  | >BRAFI582M NMFLHEDLT    | 18    | 88    |
| >BRAFI582M NIFLHEDL    | 629  | >BRAFI582M NMFLHEDL     | 75    | 554   |
| >BRAFI582M NIFLHEDLTV  | 125  | >BRAFI582M NMFLHEDLT    | 26    | 99    |
| >BRAFI582M NIFLHEDLTV  | 99   | >BRAFI582M NMFLHEDLT    | 28    | 71    |
| >BRAFI582M NIFLHEDLTV  | 155  | >BRAFI582M NMFLHEDLT    | 93    | 62    |
| >BRAFI582M NIFLHEDL    | 6684 | >BRAFI582M NMFLHEDL     | 241   | 6443  |
| >BRAFI582M NIFLHEDLTV  | 353  | >BRAFI582M NMFLHEDLT    | 11    | 342   |
| >BRAFI582M NIFLHEDLTV  | 756  | >BRAFI582M NMFLHEDLT    | 14    | 742   |
| >BRAFI582M NIFLHEDLTV  | 473  | >BRAFI582M NMFLHEDLT    | 18    | 455   |
| >BRAFI582M NIFLHEDLTV  | 5875 | >BRAFI582M NMFLHEDLT    | 198   | 5677  |
| >BRAFI582M NIFLHEDL    | 7653 | >BRAFI582M NMFLHEDL     | 319   | 7334  |
| >BRAFI582M NIFLHEDLTV  | 225  | >BRAFI582M NMFLHEDLT    | 24    | 201   |
| >BRAFI582M NIFLHEDLTV  | 1040 | >BRAFI582M NMFLHEDLT    | 312   | 728   |
| >BRAFI582M NIFLHEDLTV  | 333  | >BRAFI582M NMFLHEDLT    | 252   | 81    |
| >BRAFI582M NIFLHEDLTV  | 61   | >BRAFI582M NMFLHEDLT    | 180   | 119   |
| >BRAFI582M IHRDLKSNNI  | 409  | >BRAFI582M IHRDLKSNNI   | 5322  | 4913  |
| >BRAFI582M NNIFLHEDLT  | 764  | >BRAFI582M NNMFLHEDL    | 456   | 308   |
| >BRAFI582M KSNNIFLH    | 330  | >BRAFI582M KSNNMFLH     | 362   | 32    |
| >BRAFI582M KSNNIFLH    | 129  | >BRAFI582M KSNNMFLH     | 97    | 32    |
| >BRAFI582M KSNNIFLH    | 68   | >BRAFI582M KSNNMFLH     | 77    | 9     |
| >BRAFI582M KSNNIFLHEDI | 30   | >BRAFI582M KSNNMFLHEI   | 46    | 16    |
| >BRAFI582M KSNNIFLHEDI | 370  | >BRAFI582M KSNNMFLHEI   | 173   | 197   |
| >BRAFI582M KSNNIFLH    | 342  | >BRAFI582M KSNNMFLH     | 451   | 109   |
| >BRAFI582M KSNNIFLHEDI | 298  | >BRAFI582M KSNNMFLHEI   | 339   | 41    |
| >BRAFI582M LKSNNIFL    | 52   | >BRAFI582M LKSNNMFL     | 37    | 15    |

|                      |       |                      |      |       |
|----------------------|-------|----------------------|------|-------|
| >BRAFI582MDLKSNNIFL  | 567   | >BRAFI582MDLKSNNMFL  | 368  | 199   |
| >BRAFI582MDLKSNNIF   | 328   | >BRAFI582MDLKSNNMF   | 325  | 3     |
| >BRAFI582MDLKSNNIF   | 419   | >BRAFI582MDLKSNNMF   | 484  | 65    |
| >BRAFI582MRDLKSNNIF  | 31    | >BRAFI582MRDLKSNNMF  | 41   | 10    |
| >BRAFI582MRDLKSNNIF  | 605   | >BRAFI582MRDLKSNNMF  | 497  | 108   |
| >BRAFI582MRDLKSNNI   | 2319  | >BRAFI582MRDLKSNNM   | 379  | 1940  |
| >BRAFI582MRDLKSNNIF  | 215   | >BRAFI582MRDLKSNNMF  | 101  | 114   |
| >BRAFI582MRDLKSNNI   | 41    | >BRAFI582MRDLKSNNM   | 699  | 658   |
| >BRAFI582MRDLKSNNIFL | 716   | >BRAFI582MRDLKSNNMF  | 149  | 567   |
| >BRAFI582MRDLKSNNI   | 89    | >BRAFI582MRDLKSNNM   | 3074 | 2985  |
| >BRAFI582MRDLKSNNIFL | 519   | >BRAFI582MRDLKSNNMF  | 327  | 192   |
| >BRAFI582MRDLKSNNIF  | 86    | >BRAFI582MRDLKSNNM   | 106  | 20    |
| >BRAFI582MRDLKSNNIF  | 129   | >BRAFI582MRDLKSNNM   | 154  | 25    |
| >BRAFI582MRDLKSNNIF  | 210   | >BRAFI582MRDLKSNNM   | 292  | 82    |
| >BRAFI582MRDLKSNNI   | 1179  | >BRAFI582MRDLKSNNM   | 424  | 755   |
| >BRAFI582MRDLKSNNIF  | 16    | >BRAFI582MRDLKSNNM   | 19   | 3     |
| >BRAFI582MRDLKSNNIF  | 133   | >BRAFI582MRDLKSNNM   | 79   | 54    |
| >BRAFI592MIGDFGLATV  | 253   | >BRAFI592MIGDFGLATV  | 67   | 186   |
| >BRAFI592MIGDFGLATV  | 816   | >BRAFI592MIGDFGLATV  | 344  | 472   |
| >BRAFI592MKIGDFGLA   | 2562  | >BRAFI592MKIGDFGLA   | 194  | 2368  |
| >BRAFI592MKIGDFGLATV | 53    | >BRAFI592MKIGDFGLATV | 12   | 41    |
| >BRAFI592MKIGDFGLA   | 1135  | >BRAFI592MKIGDFGLA   | 96   | 1039  |
| >BRAFI592MKIGDFGLATV | 34    | >BRAFI592MKIGDFGLATV | 9    | 25    |
| >BRAFI592MKIGDFGLA   | 701   | >BRAFI592MKIGDFGLA   | 44   | 657   |
| >BRAFI592MKIGDFGLATV | 12    | >BRAFI592MKIGDFGLATV | 6    | 6     |
| >BRAFI592MKIGDFGLA   | 554   | >BRAFI592MKIGDFGLA   | 176  | 378   |
| >BRAFI592MKIGDFGLATV | 59    | >BRAFI592MKIGDFGLATV | 39   | 20    |
| >BRAFI592MKIGDFGLA   | 900   | >BRAFI592MKIGDFGLA   | 24   | 876   |
| >BRAFI592MKIGDFGLAT  | 1206  | >BRAFI592MKIGDFGLAT  | 26   | 1180  |
| >BRAFI592MKIGDFGLATV | 4     | >BRAFI592MKIGDFGLATV | 2    | 2     |
| >BRAFI592MKIGDFGLA   | 7285  | >BRAFI592MKIGDFGLA   | 148  | 7137  |
| >BRAFI592MKIGDFGLAT  | 10920 | >BRAFI592MKIGDFGLAT  | 371  | 10549 |
| >BRAFI592MKIGDFGLATV | 15    | >BRAFI592MKIGDFGLATV | 2    | 13    |
| >BRAFI592MKIGDFGLA   | 4116  | >BRAFI592MKIGDFGLA   | 110  | 4006  |
| >BRAFI592MKIGDFGLATV | 16    | >BRAFI592MKIGDFGLATV | 5    | 11    |
| >BRAFI592MKIGDFGLATV | 30    | >BRAFI592MKIGDFGLATV | 3    | 27    |
| >BRAFI592MKIGDFGLA   | 1379  | >BRAFI592MKIGDFGLA   | 42   | 1337  |
| >BRAFI592MKIGDFGLAT  | 5602  | >BRAFI592MKIGDFGLAT  | 203  | 5399  |
| >BRAFI592MKIGDFGLATV | 4     | >BRAFI592MKIGDFGLATV | 2    | 2     |
| >BRAFI592MKIGDFGLATV | 129   | >BRAFI592MKIGDFGLATV | 57   | 72    |
| >BRAFI592MKIGDFGLATV | 57    | >BRAFI592MKIGDFGLATV | 54   | 3     |
| >BRAFI592MKIGDFGLATV | 1971  | >BRAFI592MKIGDFGLATV | 306  | 1665  |
| >BRAFI592MKIGDFGLATV | 509   | >BRAFI592MKIGDFGLATV | 225  | 284   |



|                        |       |                        |      |       |
|------------------------|-------|------------------------|------|-------|
| >BRAFI592M KIGDFGLATV  | 132   | >BRAFI592M KMGDFGLAT   | 77   | 55    |
| >BRAFI592M IFLHEDLTVKI | 68    | >BRAFI592M IFLHEDLTVKM | 1227 | 1159  |
| >BRAFI592M IFLHEDLTVKI | 91    | >BRAFI592M IFLHEDLTVKM | 1165 | 1074  |
| >BRAFI592M VKIGDFGLAT  | 144   | >BRAFI592M VKMGDFGLA   | 77   | 67    |
| >BRAFI592M VKIGDFGLAT  | 785   | >BRAFI592M VKMGDFGLA   | 435  | 350   |
| >BRAFI592M VKIGDFGLAT  | 835   | >BRAFI592M VKMGDFGLA   | 459  | 376   |
| >BRAFI592M LTVKIGDFGL  | 354   | >BRAFI592M LTVKMGDFG   | 458  | 104   |
| >BRAFI592M LTVKIGDF    | 154   | >BRAFI592M LTVKMGDF    | 79   | 75    |
| >BRAFI592M LTVKIGDFGL  | 229   | >BRAFI592M LTVKMGDFG   | 802  | 573   |
| >BRAFI592M LTVKIGDF    | 13    | >BRAFI592M LTVKMGDF    | 7    | 6     |
| >BRAFI592M LTVKIGDFGL  | 24    | >BRAFI592M LTVKMGDFG   | 12   | 12    |
| >BRAFI592M LTVKIGDFGL  | 424   | >BRAFI592M LTVKMGDFG   | 431  | 7     |
| >BRAFI592M LTVKIGDF    | 118   | >BRAFI592M LTVKMGDF    | 146  | 28    |
| >BRAFI592M LTVKIGDFGL  | 949   | >BRAFI592M LTVKMGDFG   | 364  | 585   |
| >BRAFI592M LTVKIGDFGL  | 380   | >BRAFI592M LTVKMGDFG   | 462  | 82    |
| >BRAFI592M DLTVKIGDFG  | 205   | >BRAFI592M DLTVKMGDF   | 384  | 179   |
| >BRAFI592M HEDLTVKI    | 12    | >BRAFI592M HEDLTVKM    | 45   | 33    |
| >BRAFI592M HEDLTVKI    | 114   | >BRAFI592M HEDLTVKM    | 172  | 58    |
| >BRAFI592M HEDLTVKI    | 157   | >BRAFI592M HEDLTVKM    | 1990 | 1833  |
| >BRAFI592M FLHEDLTVKI  | 66    | >BRAFI592M FLHEDLTVKM  | 140  | 74    |
| >BRAFI592M FLHEDLTVKI  | 14    | >BRAFI592M FLHEDLTVKM  | 23   | 9     |
| >BRAFI592M FLHEDLTVKI  | 24    | >BRAFI592M FLHEDLTVKM  | 113  | 89    |
| >BRAFI592M FLHEDLTVKIC | 334   | >BRAFI592M FLHEDLTVKM  | 277  | 57    |
| >BRAFI592M FLHEDLTVKI  | 101   | >BRAFI592M FLHEDLTVKM  | 338  | 237   |
| >BRAFI592M FLHEDLTVKI  | 2     | >BRAFI592M FLHEDLTVKM  | 5    | 3     |
| >BRAFI592M FLHEDLTVKIC | 706   | >BRAFI592M FLHEDLTVKM  | 145  | 561   |
| >BRAFI592M FLHEDLTVKI  | 4     | >BRAFI592M FLHEDLTVKM  | 11   | 7     |
| >BRAFI592M FLHEDLTVKI  | 7     | >BRAFI592M FLHEDLTVKM  | 23   | 16    |
| >BRAFI592M FLHEDLTVKI  | 13    | >BRAFI592M FLHEDLTVKM  | 48   | 35    |
| >BRAFI592M FLHEDLTVKI  | 2     | >BRAFI592M FLHEDLTVKM  | 3    | 1     |
| >BRAFI592M FLHEDLTVKI  | 12508 | >BRAFI592M FLHEDLTVKM  | 421  | 12087 |
| >BRAFI592M FLHEDLTVKI  | 414   | >BRAFI592M FLHEDLTVKM  | 2910 | 2496  |
| >BRAFI592V IGDFGLATV   | 253   | >BRAFI592V VGDFGLATV   | 331  | 78    |
| >BRAFI592V KIGDFGLATV  | 53    | >BRAFI592V KVGDFGLATV  | 121  | 68    |
| >BRAFI592V KIGDFGLATV  | 34    | >BRAFI592V KVGDFGLATV  | 57   | 23    |
| >BRAFI592V KIGDFGLATV  | 12    | >BRAFI592V KVGDFGLATV  | 17   | 5     |
| >BRAFI592V KIGDFGLA    | 554   | >BRAFI592V KVGDFGLA    | 481  | 73    |
| >BRAFI592V KIGDFGLATV  | 59    | >BRAFI592V KVGDFGLATV  | 62   | 3     |
| >BRAFI592V KIGDFGLATV  | 4     | >BRAFI592V KVGDFGLATV  | 9    | 5     |
| >BRAFI592V KIGDFGLATV  | 15    | >BRAFI592V KVGDFGLATV  | 25   | 10    |
| >BRAFI592V KIGDFGLATV  | 16    | >BRAFI592V KVGDFGLATV  | 35   | 19    |
| >BRAFI592V KIGDFGLATV  | 30    | >BRAFI592V KVGDFGLATV  | 75   | 45    |
| >BRAFI592V KIGDFGLATV  | 4     | >BRAFI592V KVGDFGLATV  | 6    | 2     |

|                       |     |                       |      |      |
|-----------------------|-----|-----------------------|------|------|
| >BRAFI592VKIGDFGLATV  | 129 | >BRAFI592VKVGDFGLATV  | 149  | 20   |
| >BRAFI592VKIGDFGLATV  | 57  | >BRAFI592VKVGDFGLATV  | 36   | 21   |
| >BRAFI592VKIGDFGLATV  | 563 | >BRAFI592VKVGDFGLATV  | 178  | 385  |
| >BRAFI592VKIGDFGLATV  | 509 | >BRAFI592VKVGDFGLATV  | 410  | 99   |
| >BRAFI592VKIGDFGLATV  | 814 | >BRAFI592VKVGDFGLATV  | 421  | 393  |
| >BRAFI592VKIGDFGLATV  | 132 | >BRAFI592VKVGDFGLATV  | 332  | 200  |
| >BRAFI592VIFLHEDLTVKI | 68  | >BRAFI592VIFLHEDLTVKV | 1374 | 1306 |
| >BRAFI592VIFLHEDLTVKI | 91  | >BRAFI592VIFLHEDLTVKV | 2858 | 2767 |
| >BRAFI592VKIGDFGLATV  | 144 | >BRAFI592VKVGDFGLATV  | 225  | 81   |
| >BRAFI592LTVKIGDFGL   | 354 | >BRAFI592LTVKVGDFGL   | 512  | 158  |
| >BRAFI592LTVKIGDF     | 154 | >BRAFI592LTVKVGDF     | 165  | 11   |
| >BRAFI592LTVKIGDFGL   | 229 | >BRAFI592LTVKVGDFGL   | 345  | 116  |
| >BRAFI592LTVKIGDF     | 13  | >BRAFI592LTVKVGDF     | 14   | 1    |
| >BRAFI592LTVKIGDFGL   | 24  | >BRAFI592LTVKVGDFGL   | 35   | 11   |
| >BRAFI592LTVKIGDFGL   | 424 | >BRAFI592LTVKVGDFGL   | 490  | 66   |
| >BRAFI592LTVKIGDF     | 118 | >BRAFI592LTVKVGDF     | 169  | 51   |
| >BRAFI592LTVKIGDFGL   | 380 | >BRAFI592LTVKVGDFGL   | 425  | 45   |
| >BRAFI592DLTVKIGDFG   | 205 | >BRAFI592DLTVKVGDFG   | 295  | 90   |
| >BRAFI592HEDLTVKI     | 12  | >BRAFI592HEDLTVKV     | 28   | 16   |
| >BRAFI592HEDLTVKI     | 114 | >BRAFI592HEDLTVKV     | 251  | 137  |
| >BRAFI592HEDLTVKI     | 157 | >BRAFI592HEDLTVKV     | 1480 | 1323 |
| >BRAFI592FLHEDLTVKI   | 66  | >BRAFI592FLHEDLTVKV   | 25   | 41   |
| >BRAFI592FLHEDLTVKI   | 14  | >BRAFI592FLHEDLTVKV   | 10   | 4    |
| >BRAFI592FLHEDLTVKI   | 24  | >BRAFI592FLHEDLTVKV   | 12   | 12   |
| >BRAFI592FLHEDLTVKIC  | 334 | >BRAFI592FLHEDLTVKV   | 386  | 52   |
| >BRAFI592FLHEDLTVKI   | 101 | >BRAFI592FLHEDLTVKV   | 43   | 58   |
| >BRAFI592FLHEDLTVKI   | 2   | >BRAFI592FLHEDLTVKV   | 1    | 1    |
| >BRAFI592FLHEDLTVKIC  | 706 | >BRAFI592FLHEDLTVKV   | 300  | 406  |
| >BRAFI592FLHEDLTVKI   | 4   | >BRAFI592FLHEDLTVKV   | 3    | 1    |
| >BRAFI592FLHEDLTVKI   | 7   | >BRAFI592FLHEDLTVKV   | 4    | 3    |
| >BRAFI592FLHEDLTVKI   | 13  | >BRAFI592FLHEDLTVKV   | 3    | 10   |
| >BRAFI592FLHEDLTVKI   | 2   | >BRAFI592FLHEDLTVKV   | 1    | 1    |
| >BRAFI592FLHEDLTVKI   | 937 | >BRAFI592FLHEDLTVKV   | 215  | 722  |
| >BRAFI592FLHEDLTVKI   | 414 | >BRAFI592FLHEDLTVKV   | 1651 | 1237 |
| >BRAFI617TILWMAPEV    | 9   | >BRAFI617TTLWMAPEV    | 10   | 1    |
| >BRAFI617TILWMAPEVI   | 60  | >BRAFI617TTLWMAPEVI   | 121  | 61   |
| >BRAFI617TILWMAPEVIR  | 80  | >BRAFI617TTLWMAPEVIR  | 149  | 69   |
| >BRAFI617TILWMAPEV    | 51  | >BRAFI617TTLWMAPEV    | 92   | 41   |
| >BRAFI617TILWMAPEV    | 32  | >BRAFI617TTLWMAPEV    | 58   | 26   |
| >BRAFI617TILWMAPEVI   | 456 | >BRAFI617TTLWMAPEVI   | 910  | 454  |
| >BRAFI617TILWMAPEV    | 54  | >BRAFI617TTLWMAPEV    | 97   | 43   |
| >BRAFI617TILWMAPEV    | 2   | >BRAFI617TTLWMAPEV    | 2    | 0    |
| >BRAFI617TILWMAPEVI   | 5   | >BRAFI617TTLWMAPEVI   | 10   | 5    |

|                       |      |                       |      |      |
|-----------------------|------|-----------------------|------|------|
| >BRAFI617T ILWMAPEVIR | 9    | >BRAFI617T TLWMAPEVII | 29   | 20   |
| >BRAFI617T ILWMAPEV   | 9    | >BRAFI617T TLWMAPEV   | 15   | 6    |
| >BRAFI617T ILWMAPEVI  | 88   | >BRAFI617T TLWMAPEVI  | 171  | 83   |
| >BRAFI617T ILWMAPEV   | 4    | >BRAFI617T TLWMAPEV   | 4    | 0    |
| >BRAFI617T ILWMAPEVI  | 19   | >BRAFI617T TLWMAPEVI  | 42   | 23   |
| >BRAFI617T ILWMAPEVIR | 81   | >BRAFI617T TLWMAPEVII | 198  | 117  |
| >BRAFI617T ILWMAPEV   | 2    | >BRAFI617T TLWMAPEV   | 3    | 1    |
| >BRAFI617T ILWMAPEVI  | 12   | >BRAFI617T TLWMAPEVI  | 39   | 27   |
| >BRAFI617T ILWMAPEVIR | 34   | >BRAFI617T TLWMAPEVII | 131  | 97   |
| >BRAFI617T ILWMAPEV   | 3    | >BRAFI617T TLWMAPEV   | 4    | 1    |
| >BRAFI617T ILWMAPEVI  | 47   | >BRAFI617T TLWMAPEVI  | 82   | 35   |
| >BRAFI617T ILWMAPEVIR | 30   | >BRAFI617T TLWMAPEVII | 66   | 36   |
| >BRAFI617T ILWMAPEVI  | 231  | >BRAFI617T TLWMAPEVI  | 263  | 32   |
| >BRAFI617T ILWMAPEVIR | 1509 | >BRAFI617T TLWMAPEVII | 436  | 1073 |
| >BRAFI617T ILWMAPEV   | 377  | >BRAFI617T TLWMAPEV   | 41   | 336  |
| >BRAFI617T ILWMAPEVI  | 241  | >BRAFI617T TLWMAPEVI  | 1678 | 1437 |
| >BRAFI617T ILWMAPEVIR | 266  | >BRAFI617T TLWMAPEVII | 1728 | 1462 |
| >BRAFI617T ILWMAPEVIR | 86   | >BRAFI617T TLWMAPEVII | 127  | 41   |
| >BRAFI617T SILWMAPEV  | 20   | >BRAFI617T STLWMAPEV  | 66   | 46   |
| >BRAFI617T SILWMAPEVI | 368  | >BRAFI617T STLWMAPEV  | 1133 | 765  |
| >BRAFI617T SILWMAPEV  | 176  | >BRAFI617T STLWMAPEV  | 1308 | 1132 |
| >BRAFI617T SILWMAPEVI | 378  | >BRAFI617T STLWMAPEV  | 837  | 459  |
| >BRAFI617T SILWMAPEV  | 10   | >BRAFI617T STLWMAPEV  | 16   | 6    |
| >BRAFI617T SILWMAPEVI | 367  | >BRAFI617T STLWMAPEV  | 427  | 60   |
| >BRAFI617T SILWMAPEV  | 3    | >BRAFI617T STLWMAPEV  | 7    | 4    |
| >BRAFI617T SILWMAPEVI | 28   | >BRAFI617T STLWMAPEV  | 112  | 84   |
| >BRAFI617T SILWMAPEV  | 155  | >BRAFI617T STLWMAPEV  | 529  | 374  |
| >BRAFI617T SILWMAPEV  | 5    | >BRAFI617T STLWMAPEV  | 7    | 2    |
| >BRAFI617T SILWMAPEVI | 67   | >BRAFI617T STLWMAPEV  | 350  | 283  |
| >BRAFI617T SILWMAPEV  | 15   | >BRAFI617T STLWMAPEV  | 425  | 410  |
| >BRAFI617T SILWMAPEV  | 3    | >BRAFI617T STLWMAPEV  | 9    | 6    |
| >BRAFI617T SILWMAPEVI | 314  | >BRAFI617T STLWMAPEV  | 6554 | 6240 |
| >BRAFI617T SILWMAPEVI | 157  | >BRAFI617T STLWMAPEV  | 52   | 105  |
| >BRAFI617T SILWMAPEVI | 167  | >BRAFI617T STLWMAPEV  | 52   | 115  |
| >BRAFI617T SILWMAPEVI | 52   | >BRAFI617T STLWMAPEV  | 22   | 30   |
| >BRAFI617T SILWMAPEVI | 90   | >BRAFI617T STLWMAPEV  | 20   | 70   |
| >BRAFI617T SILWMAPEV  | 5    | >BRAFI617T STLWMAPEV  | 3    | 2    |
| >BRAFI617T SILWMAPEVI | 175  | >BRAFI617T STLWMAPEV  | 51   | 124  |
| >BRAFI617T SILWMAPEV  | 7798 | >BRAFI617T STLWMAPEV  | 119  | 7679 |
| >BRAFI617T SILWMAPEVI | 8889 | >BRAFI617T STLWMAPEV  | 116  | 8773 |
| >BRAFI617T SILWMAPEV  | 8478 | >BRAFI617T STLWMAPEV  | 237  | 8241 |
| >BRAFI617T SILWMAPEVI | 2407 | >BRAFI617T STLWMAPEV  | 59   | 2348 |
| >BRAFI617T SILWMAPEVI | 5184 | >BRAFI617T STLWMAPEV  | 274  | 4910 |

|                        |      |                        |      |      |
|------------------------|------|------------------------|------|------|
| >BRAF-I617T SILWMAPEVI | 84   | >BRAF-I617T STLWMAPEV  | 268  | 184  |
| >BRAF-I617T SILWMAPEVI | 6993 | >BRAF-I617T STLWMAPEV  | 116  | 6877 |
| >BRAF-I617T GSILWMAPE' | 412  | >BRAF-I617T GSTLWMAPE  | 2578 | 2166 |
| >BRAF-I617T GSILWMAPE' | 295  | >BRAF-I617T GSTLWMAPE  | 1134 | 839  |
| >BRAF-I617T GSILWMAPE' | 336  | >BRAF-I617T GSTLWMAPE  | 1060 | 724  |
| >BRAF-I617T GSILWMAPE' | 1137 | >BRAF-I617T GSTLWMAPE  | 476  | 661  |
| >BRAF-I617T GSILWMAPE' | 755  | >BRAF-I617T GSTLWMAPE  | 472  | 283  |
| >BRAF-I617T GSILWMAPE' | 257  | >BRAF-I617T GSTLWMAPE  | 207  | 50   |
| >BRAF-I617T LSGSILWMA  | 395  | >BRAF-I617T LSGSTLWMA  | 3118 | 2723 |
| >BRAF-I617T LSGSILWM   | 140  | >BRAF-I617T LSGSTLWM   | 69   | 71   |
| >BRAF-I617T LSGSILWM   | 614  | >BRAF-I617T LSGSTLWM   | 311  | 303  |
| >BRAF-I617T LSGSILWM   | 630  | >BRAF-I617T LSGSTLWM   | 403  | 227  |
| >BRAF-I617T QLSGSILWM, | 71   | >BRAF-I617T QLSGSTLWM  | 86   | 15   |
| >BRAF-I617T QLSGSILWM  | 51   | >BRAF-I617T QLSGSTLWM  | 49   | 2    |
| >BRAF-I617T QLSGSILWM, | 31   | >BRAF-I617T QLSGSTLWM  | 37   | 6    |
| >BRAF-I617T QLSGSILWM  | 231  | >BRAF-I617T QLSGSTLWM  | 425  | 194  |
| >BRAF-I617T QLSGSILWM, | 89   | >BRAF-I617T QLSGSTLWM  | 81   | 8    |
| >BRAF-I617T QLSGSILWM, | 156  | >BRAF-I617T QLSGSTLWM  | 131  | 25   |
| >BRAF-I617T QLSGSILWM  | 335  | >BRAF-I617T QLSGSTLWM  | 1442 | 1107 |
| >BRAF-I617T QLSGSILWM, | 27   | >BRAF-I617T QLSGSTLWM  | 58   | 31   |
| >BRAF-I617T QLSGSILWM, | 413  | >BRAF-I617T QLSGSTLWM  | 374  | 39   |
| >BRAF-I617T QLSGSILWM, | 82   | >BRAF-I617T QLSGSTLWM  | 111  | 29   |
| >BRAF-I617T QLSGSILWM, | 102  | >BRAF-I617T QLSGSTLWM  | 129  | 27   |
| >BRAF-I617T QLSGSILWM  | 17   | >BRAF-I617T QLSGSTLWM  | 39   | 22   |
| >BRAF-I617T QLSGSILWM, | 5    | >BRAF-I617T QLSGSTLWM  | 6    | 1    |
| >BRAF-I617T QLSGSILW   | 583  | >BRAF-I617T QLSGSTLW   | 464  | 119  |
| >BRAF-I617T QLSGSILW   | 207  | >BRAF-I617T QLSGSTLW   | 185  | 22   |
| >BRAF-I617T EQLSGSIL   | 1227 | >BRAF-I617T EQLSGSTL   | 441  | 786  |
| >BRAF-I617T EQLSGSILWN | 53   | >BRAF-I617T EQLSGSTLWN | 49   | 4    |
| >BRAF-I617T EQLSGSILWN | 307  | >BRAF-I617T EQLSGSTLWN | 677  | 370  |
| >BRAF-I617T EQLSGSILWN | 355  | >BRAF-I617T EQLSGSTLWN | 230  | 125  |
| >BRAF-I617T EQLSGSILWN | 399  | >BRAF-I617T EQLSGSTLWN | 502  | 103  |
| >BRAF-I617T EQLSGSIL   | 51   | >BRAF-I617T EQLSGSTL   | 28   | 23   |
| >BRAF-I617T EQLSGSILWN | 277  | >BRAF-I617T EQLSGSTLWN | 214  | 63   |
| >BRAF-I617T EQLSGSIL   | 28   | >BRAF-I617T EQLSGSTL   | 32   | 4    |
| >BRAF-I617T EQLSGSILW  | 460  | >BRAF-I617T EQLSGSTLW  | 944  | 484  |
| >BRAF-I617T EQLSGSILW  | 245  | >BRAF-I617T EQLSGSTLW  | 535  | 290  |
| >BRAF-I617T FEQLSGSI   | 4    | >BRAF-I617T FEQLSGST   | 36   | 32   |
| >BRAF-I617T FEQLSGSIL  | 177  | >BRAF-I617T FEQLSGSTL  | 171  | 6    |
| >BRAF-I617T FEQLSGSILW | 377  | >BRAF-I617T FEQLSGSTLW | 249  | 128  |
| >BRAF-I617T FEQLSGSILW | 129  | >BRAF-I617T FEQLSGSTLW | 66   | 63   |
| >BRAF-I617T FEQLSGSIL  | 566  | >BRAF-I617T FEQLSGSTL  | 385  | 181  |
| >BRAF-I617T FEQLSGSIL  | 1076 | >BRAF-I617T FEQLSGSTL  | 369  | 707  |

|                        |      |                        |       |       |
|------------------------|------|------------------------|-------|-------|
| >BRAF-I617T FEQLSGSIL  | 436  | >BRAF-I617T FEQLSGSTL  | 365   | 71    |
| >BRAF-I617T FEQLSGSI   | 277  | >BRAF-I617T FEQLSGST   | 10371 | 10094 |
| >BRAF-I617T FEQLSGSIL  | 34   | >BRAF-I617T FEQLSGSTL  | 32    | 2     |
| >BRAF-I617T FEQLSGSILW | 243  | >BRAF-I617T FEQLSGSTLW | 225   | 18    |
| >BRAF-I617T FEQLSGSI   | 176  | >BRAF-I617T FEQLSGST   | 416   | 240   |
| >BRAF-I617T FEQLSGSIL  | 71   | >BRAF-I617T FEQLSGSTL  | 81    | 10    |
| >BRAF-I617T FEQLSGSILW | 385  | >BRAF-I617T FEQLSGSTLW | 505   | 120   |
| >BRAF-I617T FEQLSGSILW | 72   | >BRAF-I617T FEQLSGSTLW | 54    | 18    |
| >BRAF-I617T FEQLSGSILW | 288  | >BRAF-I617T FEQLSGSTLW | 233   | 55    |
| >BRAF-I617T FEQLSGSI   | 36   | >BRAF-I617T FEQLSGST   | 16723 | 16687 |
| >BRAF-I617T FEQLSGSIL  | 81   | >BRAF-I617T FEQLSGSTL  | 107   | 26    |
| >BRAF-I617T FEQLSGSILW | 217  | >BRAF-I617T FEQLSGSTLW | 193   | 24    |
| >BRAF-I617T FEQLSGSILW | 311  | >BRAF-I617T FEQLSGSTLW | 468   | 157   |
| >BRAF-I617T QFEQLSGSI  | 496  | >BRAF-I617T QFEQLSGST  | 21717 | 21221 |
| >BRAF-I617T QFEQLSGSIL | 6401 | >BRAF-I617T QFEQLSGSTL | 303   | 6098  |
| >BRAF-I617T QFEQLSGSIL | 509  | >BRAF-I617T QFEQLSGSTL | 467   | 42    |
| >BRAF-I617T HQFEQLSGSI | 34   | >BRAF-I617T HQFEQLSGST | 12117 | 12083 |
| >BRAF-I617T HQFEQLSGSI | 256  | >BRAF-I617T HQFEQLSGST | 147   | 109   |
| >BRAF-I617T HQFEQLSGSI | 308  | >BRAF-I617T HQFEQLSGST | 1344  | 1036  |
| >BRAF-I617T HQFEQLSGSI | 196  | >BRAF-I617T HQFEQLSGST | 104   | 92    |
| >BRAF-I617T HQFEQLSGSI | 89   | >BRAF-I617T HQFEQLSGST | 24    | 65    |
| >BRAF-I617T HQFEQLSGSI | 412  | >BRAF-I617T HQFEQLSGST | 5567  | 5155  |
| >BRAF-I617T HQFEQLSGSI | 1477 | >BRAF-I617T HQFEQLSGST | 252   | 1225  |
| >BRAF-I617T HQFEQLSGSI | 432  | >BRAF-I617T HQFEQLSGST | 99    | 333   |
| >BRAF-I617T HQFEQLSGSI | 442  | >BRAF-I617T HQFEQLSGST | 16539 | 16097 |
| >BRAF-I617T HQFEQLSGSI | 185  | >BRAF-I617T HQFEQLSGST | 2071  | 1886  |
| >BRAF-I617T HQFEQLSGSI | 183  | >BRAF-I617T HQFEQLSGST | 94    | 89    |
| >BRAF-I617T HQFEQLSGSI | 157  | >BRAF-I617T HQFEQLSGST | 129   | 28    |
| >BRAF-I617T HQFEQLSGSI | 70   | >BRAF-I617T HQFEQLSGST | 2429  | 2359  |
| >BRAF-I617T HQFEQLSGSI | 8    | >BRAF-I617T HQFEQLSGST | 7     | 1     |
| >BRAF-I617T HQFEQLSGSI | 195  | >BRAF-I617T HQFEQLSGST | 5953  | 5758  |
| >BRAF-I617T HQFEQLSGSI | 16   | >BRAF-I617T HQFEQLSGST | 14    | 2     |
| >BRAF-I617T HQFEQLSGSI | 388  | >BRAF-I617T HQFEQLSGST | 328   | 60    |
| >BRAF-I617T HQFEQLSGSI | 485  | >BRAF-I617T HQFEQLSGST | 563   | 78    |
| >BRAF-I617T HQFEQLSGSI | 111  | >BRAF-I617T HQFEQLSGST | 112   | 1     |
| >BRAF-I617T HQFEQLSGSI | 585  | >BRAF-I617T HQFEQLSGST | 494   | 91    |
| >BRAF-K439C SSSSEDRNRN | 103  | >BRAF-K439C SSSSEDRNRN | 24149 | 24046 |
| >BRAF-K439C SSSSEDRNRN | 436  | >BRAF-K439C SSSSEDRNRN | 7865  | 7429  |
| >BRAF-K439C RMKTLGRR   | 285  | >BRAF-K439C RMQTLGRR   | 7224  | 6939  |
| >BRAF-K439C RMKTLGRR   | 7    | >BRAF-K439C RMQTLGRR   | 11    | 4     |
| >BRAF-K439C RMKTLGRR   | 72   | >BRAF-K439C RMQTLGRR   | 96    | 24    |
| >BRAF-K439C NRMKTLGR   | 108  | >BRAF-K439C NRMQTLGR   | 117   | 9     |
| >BRAF-K439C NRMKTLGRR  | 104  | >BRAF-K439C NRMQTLGRR  | 128   | 24    |

|                        |      |                        |       |       |
|------------------------|------|------------------------|-------|-------|
| >BRAFF-K439(NRMKTLGR   | 355  | >BRAFF-K439(NRMQTLGR   | 305   | 50    |
| >BRAFF-K439(RNRMKTLG   | 656  | >BRAFF-K439(RNRMQTLG   | 330   | 326   |
| >BRAFF-K439(RNRMKTLGR  | 70   | >BRAFF-K439(RNRMQTLGR  | 37    | 33    |
| >BRAFF-K439(RNRMKTLGR  | 146  | >BRAFF-K439(RNRMQTLGR  | 120   | 26    |
| >BRAFF-K439(RNRMKTLGR  | 254  | >BRAFF-K439(RNRMQTLGR  | 437   | 183   |
| >BRAFF-K439(RNRMKTLGR  | 331  | >BRAFF-K439(RNRMQTLGR  | 522   | 191   |
| >BRAFF-K439(RNRMKTLGR  | 139  | >BRAFF-K439(RNRMQTLGR  | 114   | 25    |
| >BRAFF-K439(EDRNRMKTL  | 259  | >BRAFF-K439(EDRNRMQTL  | 274   | 15    |
| >BRAFF-K439(SEDNRNMK   | 305  | >BRAFF-K439(SEDNRNMQ   | 272   | 33    |
| >BRAFF-K439(SEDNRNMKT  | 206  | >BRAFF-K439(SEDNRNMQT  | 698   | 492   |
| >BRAFF-K439(SEDNRNMKT  | 196  | >BRAFF-K439(SEDNRNMQT  | 137   | 59    |
| >BRAFF-K439(SEDNRNMKT  | 192  | >BRAFF-K439(SEDNRNMQT  | 57    | 135   |
| >BRAFF-K439(SSEDNRNMK  | 478  | >BRAFF-K439(SSEDNRNMQ  | 26668 | 26190 |
| >BRAFF-K439(SSEDNRNMK' | 36   | >BRAFF-K439(SSEDNRNMQ  | 39    | 3     |
| >BRAFF-K439(SSEDNRNMK' | 311  | >BRAFF-K439(SSEDNRNMQ  | 271   | 40    |
| >BRAFF-K439(SSSEDNRNMI | 38   | >BRAFF-K439(SSSEDNRNMI | 30717 | 30679 |
| >BRAFF-K439(SSSEDNRNRN | 103  | >BRAFF-K439(SSSEDNRNRN | 25393 | 25290 |
| >BRAFF-K439(SSSEDNRNRN | 436  | >BRAFF-K439(SSSEDNRNRN | 13616 | 13180 |
| >BRAFF-K439(RMKTLGRR   | 285  | >BRAFF-K439(RMTTLGRR   | 7840  | 7555  |
| >BRAFF-K439(RMKTLGRR   | 7    | >BRAFF-K439(RMTTLGRR   | 15    | 8     |
| >BRAFF-K439(RMKTLGRR   | 72   | >BRAFF-K439(RMTTLGRR   | 70    | 2     |
| >BRAFF-K439(NRMKTLGR   | 108  | >BRAFF-K439(NRM TTLGR  | 126   | 18    |
| >BRAFF-K439(NRMKTLGRR  | 104  | >BRAFF-K439(NRM TTLGRR | 155   | 51    |
| >BRAFF-K439(NRMKTLGR   | 355  | >BRAFF-K439(NRM TTLGR  | 359   | 4     |
| >BRAFF-K439(RNRMKTLG   | 656  | >BRAFF-K439(RNRM TTLG  | 204   | 452   |
| >BRAFF-K439(RNRMKTLGR  | 70   | >BRAFF-K439(RNRM TTLGR | 25    | 45    |
| >BRAFF-K439(RNRMKTLGR  | 146  | >BRAFF-K439(RNRM TTLGR | 69    | 77    |
| >BRAFF-K439(RNRMKTLGR  | 254  | >BRAFF-K439(RNRM TTLGR | 414   | 160   |
| >BRAFF-K439(RNRMKTLGR  | 331  | >BRAFF-K439(RNRM TTLGR | 397   | 66    |
| >BRAFF-K439(RNRMKTLGR  | 139  | >BRAFF-K439(RNRM TTLGR | 115   | 24    |
| >BRAFF-K439(DRNRMKTL   | 1739 | >BRAFF-K439(DRNRM TTL  | 331   | 1408  |
| >BRAFF-K439(EDRNRMKTL  | 259  | >BRAFF-K439(EDRNRM TTL | 400   | 141   |
| >BRAFF-K439(SEDNRNMK   | 305  | >BRAFF-K439(SEDNRNMT   | 165   | 140   |
| >BRAFF-K439(SEDNRNMKT  | 206  | >BRAFF-K439(SEDNRNMTT  | 705   | 499   |
| >BRAFF-K439(SEDNRNMKT  | 196  | >BRAFF-K439(SEDNRNMTT  | 101   | 95    |
| >BRAFF-K439(SEDNRNMKT  | 1196 | >BRAFF-K439(SEDNRNMTT  | 474   | 722   |
| >BRAFF-K439(SEDNRNMKT  | 1273 | >BRAFF-K439(SEDNRNMTT  | 432   | 841   |
| >BRAFF-K439(SEDNRNMKT  | 192  | >BRAFF-K439(SEDNRNMTT  | 174   | 18    |
| >BRAFF-K439(SSEDNRNMK  | 478  | >BRAFF-K439(SSEDNRNMT  | 27591 | 27113 |
| >BRAFF-K439(SSEDNRNMK' | 36   | >BRAFF-K439(SSEDNRNMT  | 34    | 2     |
| >BRAFF-K439(SSEDNRNMK' | 311  | >BRAFF-K439(SSEDNRNMT  | 99    | 212   |
| >BRAFF-K439(SSEDNRNMK' | 567  | >BRAFF-K439(SSEDNRNMT  | 471   | 96    |
| >BRAFF-K439(SSSEDNRNMI | 38   | >BRAFF-K439(SSSEDNRNMI | 33153 | 33115 |

|                       |       |                       |     |       |
|-----------------------|-------|-----------------------|-----|-------|
| >BRAFF-K475IKWHGDVAVI | 981   | >BRAFF-K475IMWHGDVAV  | 385 | 596   |
| >BRAFF-K475IKWHGDVAVI | 59    | >BRAFF-K475IMWHGDVAV  | 26  | 33    |
| >BRAFF-K475IKWHGDVAVI | 41    | >BRAFF-K475IMWHGDVAV  | 171 | 130   |
| >BRAFF-K475IKWHGDVAVI | 38    | >BRAFF-K475IMWHGDVAV  | 158 | 120   |
| >BRAFF-K475IKWHGDVAV  | 65    | >BRAFF-K475IMWHGDVAV  | 83  | 18    |
| >BRAFF-K475IKWHGDVAVI | 124   | >BRAFF-K475IMWHGDVAV  | 156 | 32    |
| >BRAFF-K475IGKWHGDVA  | 22743 | >BRAFF-K475IGMWHGDVA  | 296 | 22447 |
| >BRAFF-K475IGKWHGDVA\ | 15489 | >BRAFF-K475IGMWHGDVA  | 13  | 15476 |
| >BRAFF-K475IGKWHGDVA\ | 22525 | >BRAFF-K475IGMWHGDVA  | 125 | 22400 |
| >BRAFF-K475IGKWHGDVA\ | 18100 | >BRAFF-K475IGMWHGDVA  | 71  | 18029 |
| >BRAFF-K475IGKWHGDVA\ | 17965 | >BRAFF-K475IGMWHGDVA  | 57  | 17908 |
| >BRAFF-K475IGKWHGDVA\ | 4673  | >BRAFF-K475IGMWHGDVA  | 21  | 4652  |
| >BRAFF-K475IGKWHGDVA  | 20156 | >BRAFF-K475IGMWHGDVA  | 27  | 20129 |
| >BRAFF-K475IGKWHGDVA\ | 3298  | >BRAFF-K475IGMWHGDVA  | 2   | 3296  |
| >BRAFF-K475IGKWHGDVA\ | 17991 | >BRAFF-K475IGMWHGDVA  | 28  | 17963 |
| >BRAFF-K475IGKWHGDVA  | 16773 | >BRAFF-K475IGMWHGDVA  | 33  | 16740 |
| >BRAFF-K475IGKWHGDVA\ | 2648  | >BRAFF-K475IGMWHGDVA  | 2   | 2646  |
| >BRAFF-K475IGKWHGDVA\ | 18714 | >BRAFF-K475IGMWHGDVA  | 41  | 18673 |
| >BRAFF-K475IGKWHGDVA  | 16377 | >BRAFF-K475IGMWHGDVA  | 25  | 16352 |
| >BRAFF-K475IGKWHGDVA\ | 1333  | >BRAFF-K475IGMWHGDVA  | 4   | 1329  |
| >BRAFF-K475IGKWHGDVA\ | 14822 | >BRAFF-K475IGMWHGDVA  | 27  | 14795 |
| >BRAFF-K475IGKWHGDVA\ | 17336 | >BRAFF-K475IGMWHGDVA  | 19  | 17317 |
| >BRAFF-K475IGKWHGDVA  | 33316 | >BRAFF-K475IGMWHGDVA  | 122 | 33194 |
| >BRAFF-K475IGKWHGDVA\ | 8460  | >BRAFF-K475IGMWHGDVA  | 3   | 8457  |
| >BRAFF-K475IGKWHGDVA\ | 33633 | >BRAFF-K475IGMWHGDVA  | 113 | 33520 |
| >BRAFF-K475IGKWHGDVA\ | 14460 | >BRAFF-K475IGMWHGDVA  | 416 | 14044 |
| >BRAFF-K475IGKWHGDVA\ | 48    | >BRAFF-K475IGMWHGDVA  | 132 | 84    |
| >BRAFF-K475IGKWHGDVA\ | 45    | >BRAFF-K475IGMWHGDVA  | 116 | 71    |
| >BRAFF-K475IGKWHGDVA\ | 611   | >BRAFF-K475IGMWHGDVA  | 264 | 347   |
| >BRAFF-K475IGKWHGDVA\ | 858   | >BRAFF-K475IGMWHGDVA  | 371 | 487   |
| >BRAFF-K475IKGKWHGDV/ | 4734  | >BRAFF-K475IKGMWHGDV  | 215 | 4519  |
| >BRAFF-K475IKGKWHGDV/ | 51    | >BRAFF-K475IKGMWHGDV  | 947 | 896   |
| >BRAFF-K475IYKGMWHGD\ | 236   | >BRAFF-K475IYKGMWHGD  | 245 | 9     |
| >BRAFF-K475ITVYKGMWHG | 418   | >BRAFF-K475ITVYKGMWHG | 78  | 340   |
| >BRAFF-K475ITVYKGMWHG | 901   | >BRAFF-K475ITVYKGMWHG | 323 | 578   |
| >BRAFF-K475ITVYKGMWHG | 239   | >BRAFF-K475ITVYKGMWHG | 159 | 80    |
| >BRAFF-K475ITVYKGMWHG | 266   | >BRAFF-K475ITVYKGMWHG | 212 | 54    |
| >BRAFF-K475ITVYKGMWHG | 62    | >BRAFF-K475ITVYKGMWHG | 50  | 12    |
| >BRAFF-K475ITVYKGMWH  | 2254  | >BRAFF-K475ITVYKGMWH  | 278 | 1976  |
| >BRAFF-K475ITVYKGMWHG | 109   | >BRAFF-K475ITVYKGMWHG | 54  | 55    |
| >BRAFF-K475ITVYKGMWHG | 40    | >BRAFF-K475ITVYKGMWHG | 23  | 17    |
| >BRAFF-K475IGTVYKGMW  | 13    | >BRAFF-K475IGTVYKGMW  | 18  | 5     |
| >BRAFF-K475IGTVYKGMW  | 199   | >BRAFF-K475IGTVYKGMW  | 251 | 52    |

|                          |       |                          |       |       |
|--------------------------|-------|--------------------------|-------|-------|
| >BRAFF-K475I GTVYK GKWH  | 177   | >BRAFF-K475I GTVYK GMWI  | 83    | 94    |
| >BRAFF-K475I FGTVYK GKW  | 51    | >BRAFF-K475I FGTVYK GMW  | 62    | 11    |
| >BRAFF-K475I SFGTVYK GKV | 365   | >BRAFF-K475I SFGTVYK GM' | 200   | 165   |
| >BRAFF-K475I GSFGTVYK GK | 119   | >BRAFF-K475I GSFGTVYK GM | 25881 | 25762 |
| >BRAFF-K475I GSFGTVYK GK | 39    | >BRAFF-K475I GSFGTVYK GM | 33541 | 33502 |
| >BRAFF-K475I GSFGTVYK GK | 338   | >BRAFF-K475I GSFGTVYK GM | 8116  | 7778  |
| >BRAFF-K475I GSFGTVYK GK | 11786 | >BRAFF-K475I GSFGTVYK GM | 23    | 11763 |
| >BRAFF-K475I GSFGTVYK GK | 9     | >BRAFF-K475I GSFGTVYK GM | 11    | 2     |
| >BRAFF-K475I GSFGTVYK GK | 40    | >BRAFF-K475I GSFGTVYK GM | 43    | 3     |
| >BRAFF-K475I GSFGTVYK GK | 29    | >BRAFF-K475I GSFGTVYK GM | 38    | 9     |
| >BRAFF-K475I GSFGTVYK GK | 25966 | >BRAFF-K475I GSFGTVYK GM | 327   | 25639 |
| >BRAFF-K475I GSFGTVYK GK | 90    | >BRAFF-K475I GSFGTVYK GM | 31    | 59    |
| >BRAFF-K475I GSFGTVYK GK | 103   | >BRAFF-K475I GSFGTVYK GM | 114   | 11    |
| >BRAFF-K475I GSFGTVYK GK | 141   | >BRAFF-K475I GSFGTVYK GM | 2738  | 2597  |
| >BRAFF-K591F KIGDFGLATV  | 53    | >BRAFF-K591F RIGDFGLATV  | 61    | 8     |
| >BRAFF-K591F KIGDFGLATV  | 34    | >BRAFF-K591F RIGDFGLATV  | 46    | 12    |
| >BRAFF-K591F KIGDFGLATV  | 12    | >BRAFF-K591F RIGDFGLATV  | 13    | 1     |
| >BRAFF-K591F KIGDFGLATV  | 59    | >BRAFF-K591F RIGDFGLATV  | 74    | 15    |
| >BRAFF-K591F KIGDFGLATV  | 4     | >BRAFF-K591F RIGDFGLATV  | 4     | 0     |
| >BRAFF-K591F KIGDFGLATV  | 15    | >BRAFF-K591F RIGDFGLATV  | 23    | 8     |
| >BRAFF-K591F KIGDFGLATV  | 16    | >BRAFF-K591F RIGDFGLATV  | 25    | 9     |
| >BRAFF-K591F KIGDFGLATV  | 30    | >BRAFF-K591F RIGDFGLATV  | 45    | 15    |
| >BRAFF-K591F KIGDFGLATV  | 4     | >BRAFF-K591F RIGDFGLATV  | 4     | 0     |
| >BRAFF-K591F KIGDFGLATV  | 129   | >BRAFF-K591F RIGDFGLATV  | 126   | 3     |
| >BRAFF-K591F KIGDFGLATV  | 57    | >BRAFF-K591F RIGDFGLATV  | 48    | 9     |
| >BRAFF-K591F KIGDFGLATV  | 132   | >BRAFF-K591F RIGDFGLATV  | 192   | 60    |
| >BRAFF-K591F VKIGDFGLAT  | 144   | >BRAFF-K591F VRIGDFGLAT  | 856   | 712   |
| >BRAFF-K591F VKIGDFGL    | 10441 | >BRAFF-K591F VRIGDFGL    | 240   | 10201 |
| >BRAFF-K591F NIFLHEDLTVI | 333   | >BRAFF-K591F NIFLHEDLTVI | 6326  | 5993  |
| >BRAFF-K591F NIFLHEDLTVI | 4207  | >BRAFF-K591F NIFLHEDLTVI | 188   | 4019  |
| >BRAFF-K591F NIFLHEDLTVI | 61    | >BRAFF-K591F NIFLHEDLTVI | 25    | 36    |
| >BRAFF-K591F NIFLHEDLTVI | 5028  | >BRAFF-K591F NIFLHEDLTVI | 210   | 4818  |
| >BRAFF-K591F TVKIGDFGLA  | 1518  | >BRAFF-K591F TVRIGDFGLA  | 246   | 1272  |
| >BRAFF-K591F TVKIGDFGL   | 1338  | >BRAFF-K591F TVRIGDFGL   | 133   | 1205  |
| >BRAFF-K591F LTVKIGDFGL  | 354   | >BRAFF-K591F LTVRIGDFGL  | 300   | 54    |
| >BRAFF-K591F LTVKIGDF    | 154   | >BRAFF-K591F LTVRIGDF    | 96    | 58    |
| >BRAFF-K591F LTVKIGDFGL  | 229   | >BRAFF-K591F LTVRIGDFGL  | 218   | 11    |
| >BRAFF-K591F LTVKIGDF    | 13    | >BRAFF-K591F LTVRIGDF    | 16    | 3     |
| >BRAFF-K591F LTVKIGDFGL  | 24    | >BRAFF-K591F LTVRIGDFGL  | 32    | 8     |
| >BRAFF-K591F LTVKIGDFGL  | 424   | >BRAFF-K591F LTVRIGDFGL  | 709   | 285   |
| >BRAFF-K591F LTVKIGDF    | 118   | >BRAFF-K591F LTVRIGDF    | 342   | 224   |
| >BRAFF-K591F LTVKIGDFGL  | 949   | >BRAFF-K591F LTVRIGDFGL  | 285   | 664   |
| >BRAFF-K591F LTVKIGDFGL  | 380   | >BRAFF-K591F LTVRIGDFGL  | 516   | 136   |



|                      |       |                       |       |       |
|----------------------|-------|-----------------------|-------|-------|
| >BRAFK591FLTLVKIGDFG | 205   | >BRAFK591FLTLVTRIGDFG | 178   | 27    |
| >BRAFK591FHEDLTVKI   | 12    | >BRAFK591FHEDLTVRI    | 10    | 2     |
| >BRAFK591FHEDLTVKI   | 114   | >BRAFK591FHEDLTVRI    | 157   | 43    |
| >BRAFK591FHEDLTVKI   | 157   | >BRAFK591FHEDLTVRI    | 144   | 13    |
| >BRAFK591FLHEDLTVKI  | 66    | >BRAFK591FLHEDLTVRI   | 54    | 12    |
| >BRAFK591FLHEDLTVKI  | 14    | >BRAFK591FLHEDLTVRI   | 15    | 1     |
| >BRAFK591FLHEDLTVK   | 332   | >BRAFK591FLHEDLTVR    | 807   | 475   |
| >BRAFK591FLHEDLTVKI  | 24    | >BRAFK591FLHEDLTVRI   | 31    | 7     |
| >BRAFK591FLHEDLTVKIC | 334   | >BRAFK591FLHEDLTVRIC  | 275   | 59    |
| >BRAFK591FLHEDLTVKI  | 101   | >BRAFK591FLHEDLTVRI   | 112   | 11    |
| >BRAFK591FLHEDLTVK   | 368   | >BRAFK591FLHEDLTVR    | 951   | 583   |
| >BRAFK591FLHEDLTVKI  | 2     | >BRAFK591FLHEDLTVRI   | 2     | 0     |
| >BRAFK591FLHEDLTVKI  | 4     | >BRAFK591FLHEDLTVRI   | 4     | 0     |
| >BRAFK591FLHEDLTVKI  | 7     | >BRAFK591FLHEDLTVRI   | 8     | 1     |
| >BRAFK591FLHEDLTVKI  | 13    | >BRAFK591FLHEDLTVRI   | 14    | 1     |
| >BRAFK591FLHEDLTVK   | 39    | >BRAFK591FLHEDLTVR    | 259   | 220   |
| >BRAFK591FLHEDLTVKI  | 2     | >BRAFK591FLHEDLTVRI   | 2     | 0     |
| >BRAFK591FLHEDLTVK   | 957   | >BRAFK591FLHEDLTVR    | 290   | 667   |
| >BRAFK591FLHEDLTVKI  | 414   | >BRAFK591FLHEDLTVRI   | 729   | 315   |
| >BRAFK591IFLHEDLTVKI | 68    | >BRAFK591IFLHEDLTVRI  | 59    | 9     |
| >BRAFK591IFLHEDLTVKI | 91    | >BRAFK591IFLHEDLTVRI  | 161   | 70    |
| >BRAFK591IFLHEDLTVK  | 993   | >BRAFK591IFLHEDLTVR   | 69    | 924   |
| >BRAFK601EKSRWSGSHQ  | 8600  | >BRAFK601EKSRWSGSHQ   | 124   | 8476  |
| >BRAFK601EKSRWSGSH   | 55    | >BRAFK601EKSRWSGSH    | 12480 | 12425 |
| >BRAFK601EKSRWSGSHQ  | 24    | >BRAFK601EKSRWSGSHQ   | 6800  | 6776  |
| >BRAFK601EKSRWSGSHQ  | 44    | >BRAFK601EKSRWSGSHQ   | 12466 | 12422 |
| >BRAFK601EKSRWSGSHQ  | 23    | >BRAFK601EKSRWSGSHQ   | 7049  | 7026  |
| >BRAFK601EKSRWSGSHQ  | 93    | >BRAFK601EKSRWSGSHQ   | 429   | 336   |
| >BRAFK601EKSRWSGSHQ  | 14    | >BRAFK601EKSRWSGSHQ   | 127   | 113   |
| >BRAFK601EKSRWSGSH   | 31    | >BRAFK601EKSRWSGSH    | 896   | 865   |
| >BRAFK601EKSRWSGSHQ  | 51    | >BRAFK601EKSRWSGSHQ   | 1263  | 1212  |
| >BRAFK601EKSRWSGSHQ  | 2     | >BRAFK601EKSRWSGSHQ   | 3     | 1     |
| >BRAFK601EKSRWSGSHQ  | 186   | >BRAFK601EKSRWSGSHQ   | 2668  | 2482  |
| >BRAFK601EKSRWSGSHQ  | 73    | >BRAFK601EKSRWSGSHQ   | 3429  | 3356  |
| >BRAFK601EKSRWSGSHQ  | 24    | >BRAFK601EKSRWSGSHQ   | 5105  | 5081  |
| >BRAFK601EKSRWSGSH   | 333   | >BRAFK601EKSRWSGSH    | 1467  | 1134  |
| >BRAFK601EKSRWSGSHQ  | 193   | >BRAFK601EKSRWSGSHQ   | 2032  | 1839  |
| >BRAFK601EKSRWSGSHQ  | 72    | >BRAFK601EKSRWSGSHQ   | 568   | 496   |
| >BRAFK601EKSRWSGSH   | 15179 | >BRAFK601EKSRWSGSH    | 459   | 14720 |
| >BRAFK601EKSRWSGSH   | 4512  | >BRAFK601EKSRWSGSH    | 450   | 4062  |
| >BRAFK601EKSRWSGSH   | 9     | >BRAFK601EKSRWSGSH    | 263   | 254   |
| >BRAFK601EKSRWSGSH   | 13311 | >BRAFK601EKSRWSGSH    | 147   | 13164 |
| >BRAFK601EKSRWSGSH   | 16862 | >BRAFK601EKSRWSGSH    | 432   | 16430 |

|                         |       |                         |       |       |
|-------------------------|-------|-------------------------|-------|-------|
| >BRAFF-K601E VKSRWSGSH  | 22553 | >BRAFF-K601E VESRWSGSH  | 265   | 22288 |
| >BRAFF-K601E KIGDFGLATV | 129   | >BRAFF-K601E KIGDFGLATV | 18256 | 18127 |
| >BRAFF-K601E KIGDFGLATV | 57    | >BRAFF-K601E KIGDFGLATV | 22152 | 22095 |
| >BRAFF-K601E KIGDFGLATV | 132   | >BRAFF-K601E KIGDFGLATV | 11462 | 11330 |
| >BRAFF-K601E ATVKSRWSG: | 660   | >BRAFF-K601E ATVESRWSG: | 303   | 357   |
| >BRAFF-K601E ATVKSRWSG: | 451   | >BRAFF-K601E ATVESRWSG: | 1467  | 1016  |
| >BRAFF-K601E LATVKSRW   | 36    | >BRAFF-K601E LATVESRW   | 34    | 2     |
| >BRAFF-K601E LATVKSRW   | 86    | >BRAFF-K601E LATVESRW   | 38    | 48    |
| >BRAFF-K601E LATVKSRW   | 73    | >BRAFF-K601E LATVESRW   | 60    | 13    |
| >BRAFF-K601E LATVKSRW   | 22    | >BRAFF-K601E LATVESRW   | 17    | 5     |
| >BRAFF-K601E LATVKSRW   | 172   | >BRAFF-K601E LATVESRW   | 108   | 64    |
| >BRAFF-K601E LATVKSRW   | 130   | >BRAFF-K601E LATVESRW   | 38    | 92    |
| >BRAFF-K601E GLATVKSR   | 658   | >BRAFF-K601E GLATVESR   | 230   | 428   |
| >BRAFF-K601E GLATVKSRW  | 242   | >BRAFF-K601E GLATVESRW  | 445   | 203   |
| >BRAFF-K601E FGLATVKSRM | 98    | >BRAFF-K601E FGLATVESRM | 110   | 12    |
| >BRAFF-K601E FGLATVKSRM | 499   | >BRAFF-K601E FGLATVESRM | 402   | 97    |
| >BRAFF-K601E FGLATVKSRM | 45    | >BRAFF-K601E FGLATVESRM | 22    | 23    |
| >BRAFF-K601E FGLATVKSRM | 215   | >BRAFF-K601E FGLATVESRM | 128   | 87    |
| >BRAFF-K601E DFGLATVKSR | 205   | >BRAFF-K601E DFGLATVESR | 115   | 90    |
| >BRAFF-K601E DFGLATVKSR | 246   | >BRAFF-K601E DFGLATVESR | 453   | 207   |
| >BRAFF-K601I KSRWSGSH   | 55    | >BRAFF-K601I ISRWSGSH   | 1638  | 1583  |
| >BRAFF-K601I KSRWSGSHQ  | 24    | >BRAFF-K601I ISRWSGSHQ  | 444   | 420   |
| >BRAFF-K601I KSRWSGSHQ  | 44    | >BRAFF-K601I ISRWSGSHQF | 1464  | 1420  |
| >BRAFF-K601I KSRWSGSHQ  | 23    | >BRAFF-K601I ISRWSGSHQF | 374   | 351   |
| >BRAFF-K601I KSRWSGSHQ  | 93    | >BRAFF-K601I ISRWSGSHQF | 87    | 6     |
| >BRAFF-K601I KSRWSGSHQ  | 14    | >BRAFF-K601I ISRWSGSHQF | 13    | 1     |
| >BRAFF-K601I KSRWSGSH   | 31    | >BRAFF-K601I ISRWSGSH   | 46    | 15    |
| >BRAFF-K601I KSRWSGSHQ  | 51    | >BRAFF-K601I ISRWSGSHQ  | 88    | 37    |
| >BRAFF-K601I KSRWSGSHQ  | 2     | >BRAFF-K601I ISRWSGSHQF | 2     | 0     |
| >BRAFF-K601I KSRWSGSHQ  | 186   | >BRAFF-K601I ISRWSGSHQF | 244   | 58    |
| >BRAFF-K601I KSRWSGSHQ  | 73    | >BRAFF-K601I ISRWSGSHQF | 103   | 30    |
| >BRAFF-K601I KSRWSGSHQ  | 24    | >BRAFF-K601I ISRWSGSHQF | 82    | 58    |
| >BRAFF-K601I KSRWSGSH   | 333   | >BRAFF-K601I ISRWSGSH   | 407   | 74    |
| >BRAFF-K601I KSRWSGSHQ  | 193   | >BRAFF-K601I ISRWSGSHQ  | 115   | 78    |
| >BRAFF-K601I KSRWSGSHQ  | 72    | >BRAFF-K601I ISRWSGSHQF | 114   | 42    |
| >BRAFF-K601I VKSRWSGSH  | 4512  | >BRAFF-K601I VISRWSGSHC | 132   | 4380  |
| >BRAFF-K601I VKSRWSGSH  | 9     | >BRAFF-K601I VISRWSGSHC | 537   | 528   |
| >BRAFF-K601I VKSRWSGSH  | 9834  | >BRAFF-K601I VISRWSGSHC | 330   | 9504  |
| >BRAFF-K601I VKSRWSGSH  | 10111 | >BRAFF-K601I VISRWSGSHC | 168   | 9943  |
| >BRAFF-K601I VKSRWSGSH  | 1427  | >BRAFF-K601I VISRWSGSHC | 297   | 1130  |
| >BRAFF-K601I KIGDFGLATV | 17775 | >BRAFF-K601I KIGDFGLATV | 184   | 17591 |
| >BRAFF-K601I KIGDFGLATV | 129   | >BRAFF-K601I KIGDFGLATV | 19335 | 19206 |
| >BRAFF-K601I KIGDFGLATV | 57    | >BRAFF-K601I KIGDFGLATV | 21765 | 21708 |

|                         |       |                         |       |       |
|-------------------------|-------|-------------------------|-------|-------|
| >BRAFF-K601I KIGDFGLATV | 5785  | >BRAFF-K601I KIGDFGLATV | 54    | 5731  |
| >BRAFF-K601I KIGDFGLATV | 132   | >BRAFF-K601I KIGDFGLATV | 15762 | 15630 |
| >BRAFF-K601I TVKSRWSGSI | 10656 | >BRAFF-K601I TVISRWSGSH | 360   | 10296 |
| >BRAFF-K601I TVKSRWSGSI | 11638 | >BRAFF-K601I TVISRWSGSH | 346   | 11292 |
| >BRAFF-K601I ATVKSRWSG: | 660   | >BRAFF-K601I ATVISRWSGS | 181   | 479   |
| >BRAFF-K601I ATVKSRWSG: | 451   | >BRAFF-K601I ATVISRWSGS | 877   | 426   |
| >BRAFF-K601I LATVKSRW   | 36    | >BRAFF-K601I LATVISRW   | 30    | 6     |
| >BRAFF-K601I LATVKSRW   | 86    | >BRAFF-K601I LATVISRW   | 48    | 38    |
| >BRAFF-K601I LATVKSRW   | 73    | >BRAFF-K601I LATVISRW   | 56    | 17    |
| >BRAFF-K601I LATVKSRW   | 22    | >BRAFF-K601I LATVISRW   | 14    | 8     |
| >BRAFF-K601I LATVKSRW   | 172   | >BRAFF-K601I LATVISRW   | 37    | 135   |
| >BRAFF-K601I LATVKSRW   | 130   | >BRAFF-K601I LATVISRW   | 42    | 88    |
| >BRAFF-K601I GLATVKSR   | 2178  | >BRAFF-K601I GLATVISR   | 395   | 1783  |
| >BRAFF-K601I GLATVKSR   | 697   | >BRAFF-K601I GLATVISR   | 388   | 309   |
| >BRAFF-K601I GLATVKSR   | 658   | >BRAFF-K601I GLATVISR   | 184   | 474   |
| >BRAFF-K601I GLATVKSRW  | 1001  | >BRAFF-K601I GLATVISRW  | 325   | 676   |
| >BRAFF-K601I GLATVKSRW  | 242   | >BRAFF-K601I GLATVISRW  | 333   | 91    |
| >BRAFF-K601I FGLATVKSRM | 98    | >BRAFF-K601I FGLATVISRW | 60    | 38    |
| >BRAFF-K601I FGLATVKSRM | 499   | >BRAFF-K601I FGLATVISRW | 530   | 31    |
| >BRAFF-K601I FGLATVKSRM | 45    | >BRAFF-K601I FGLATVISRW | 20    | 25    |
| >BRAFF-K601I FGLATVKSRM | 215   | >BRAFF-K601I FGLATVISRW | 54    | 161   |
| >BRAFF-K601I FGLATVKSR  | 756   | >BRAFF-K601I FGLATVISR  | 422   | 334   |
| >BRAFF-K601I DFGLATVKSR | 205   | >BRAFF-K601I DFGLATVISR | 55    | 150   |
| >BRAFF-K601I DFGLATVKSR | 246   | >BRAFF-K601I DFGLATVISR | 130   | 116   |
| >BRAFF-K601I GDFGLATVK  | 3037  | >BRAFF-K601I GDFGLATVI  | 82    | 2955  |
| >BRAFF-K601I GDFGLATVK  | 3033  | >BRAFF-K601I GDFGLATVI  | 172   | 2861  |
| >BRAFF-K601I GDFGLATVK  | 19256 | >BRAFF-K601I GDFGLATVI  | 105   | 19151 |
| >BRAFF-K601I GDFGLATVK  | 19717 | >BRAFF-K601I GDFGLATVI  | 73    | 19644 |
| >BRAFF-K601I KSRWSGSH   | 55    | >BRAFF-K601I KSRWSGSH   | 55    | 0     |
| >BRAFF-K601I KSRWSGSHQ  | 44    | >BRAFF-K601I KSRWSGSHQ  | 44    | 0     |
| >BRAFF-K601I KSRWSGSHQ  | 23    | >BRAFF-K601I KSRWSGSHQ  | 23    | 0     |
| >BRAFF-K601I KSRWSGSHQ  | 93    | >BRAFF-K601I KSRWSGSHQ  | 93    | 0     |
| >BRAFF-K601I KSRWSGSHQ  | 14    | >BRAFF-K601I KSRWSGSHQ  | 14    | 0     |
| >BRAFF-K601I KSRWSGSH   | 31    | >BRAFF-K601I KSRWSGSH   | 31    | 0     |
| >BRAFF-K601I KSRWSGSHQ  | 2     | >BRAFF-K601I KSRWSGSHQ  | 2     | 0     |
| >BRAFF-K601I KSRWSGSHQ  | 186   | >BRAFF-K601I KSRWSGSHQ  | 186   | 0     |
| >BRAFF-K601I KSRWSGSHQ  | 73    | >BRAFF-K601I KSRWSGSHQ  | 73    | 0     |
| >BRAFF-K601I KSRWSGSHQ  | 24    | >BRAFF-K601I KSRWSGSHQ  | 24    | 0     |
| >BRAFF-K601I KSRWSGSH   | 333   | >BRAFF-K601I KSRWSGSH   | 333   | 0     |
| >BRAFF-K601I KSRWSGSHQ  | 72    | >BRAFF-K601I KSRWSGSHQ  | 72    | 0     |
| >BRAFF-K601I VKSRWSGSH  | 9     | >BRAFF-K601I VKSRWSGSH  | 9     | 0     |
| >BRAFF-K601I KIGDFGLATV | 129   | >BRAFF-K601I KIGDFGLATV | 129   | 0     |
| >BRAFF-K601I KIGDFGLATV | 57    | >BRAFF-K601I KIGDFGLATV | 57    | 0     |

|                         |       |                         |       |       |
|-------------------------|-------|-------------------------|-------|-------|
| >BRAFF-K601F KIGDFGLATV | 132   | >BRAFF-K601F KIGDFGLATV | 132   | 0     |
| >BRAFF-K601F ATVKSRWSG! | 451   | >BRAFF-K601F ATVKSRWSG! | 451   | 0     |
| >BRAFF-K601F LATVKSRW   | 36    | >BRAFF-K601F LATVKSRW   | 36    | 0     |
| >BRAFF-K601F LATVKSRW   | 86    | >BRAFF-K601F LATVKSRW   | 86    | 0     |
| >BRAFF-K601F LATVKSRW   | 73    | >BRAFF-K601F LATVKSRW   | 73    | 0     |
| >BRAFF-K601F LATVKSRW   | 22    | >BRAFF-K601F LATVKSRW   | 22    | 0     |
| >BRAFF-K601F LATVKSRW   | 172   | >BRAFF-K601F LATVKSRW   | 172   | 0     |
| >BRAFF-K601F LATVKSRW   | 130   | >BRAFF-K601F LATVKSRW   | 130   | 0     |
| >BRAFF-K601F FGLATVKSRM | 98    | >BRAFF-K601F FGLATVKSRM | 98    | 0     |
| >BRAFF-K601F FGLATVKSRM | 499   | >BRAFF-K601F FGLATVKSRM | 499   | 0     |
| >BRAFF-K601F FGLATVKSRM | 45    | >BRAFF-K601F FGLATVKSRM | 45    | 0     |
| >BRAFF-K601F FGLATVKSRM | 215   | >BRAFF-K601F FGLATVKSRM | 215   | 0     |
| >BRAFF-K601F DFGLATVKSR | 205   | >BRAFF-K601F DFGLATVKSR | 205   | 0     |
| >BRAFF-K601F DFGLATVKSR | 246   | >BRAFF-K601F DFGLATVKSR | 246   | 0     |
| >BRAFF-K601L KSRWSGSH   | 55    | >BRAFF-K601L LSRWSGSH   | 1713  | 1658  |
| >BRAFF-K601L KSRWSGSHQ  | 24    | >BRAFF-K601L LSRWSGSHQ  | 437   | 413   |
| >BRAFF-K601L KSRWSGSHQ  | 44    | >BRAFF-K601L LSRWSGSHQ  | 1463  | 1419  |
| >BRAFF-K601L KSRWSGSHQ  | 23    | >BRAFF-K601L LSRWSGSHQ  | 388   | 365   |
| >BRAFF-K601L KSRWSGSHQ  | 93    | >BRAFF-K601L LSRWSGSHQ  | 50    | 43    |
| >BRAFF-K601L KSRWSGSHQ  | 14    | >BRAFF-K601L LSRWSGSHQ  | 16    | 2     |
| >BRAFF-K601L KSRWSGSH   | 31    | >BRAFF-K601L LSRWSGSH   | 99    | 68    |
| >BRAFF-K601L KSRWSGSHQ  | 51    | >BRAFF-K601L LSRWSGSHQ  | 162   | 111   |
| >BRAFF-K601L KSRWSGSHQ  | 2     | >BRAFF-K601L LSRWSGSHQ  | 2     | 0     |
| >BRAFF-K601L KSRWSGSHQ  | 186   | >BRAFF-K601L LSRWSGSHQ  | 447   | 261   |
| >BRAFF-K601L KSRWSGSHQ  | 73    | >BRAFF-K601L LSRWSGSHQ  | 206   | 133   |
| >BRAFF-K601L KSRWSGSHQ  | 24    | >BRAFF-K601L LSRWSGSHQ  | 99    | 75    |
| >BRAFF-K601L KSRWSGSH   | 333   | >BRAFF-K601L LSRWSGSH   | 291   | 42    |
| >BRAFF-K601L KSRWSGSHQ  | 193   | >BRAFF-K601L LSRWSGSHQ  | 160   | 33    |
| >BRAFF-K601L KSRWSGSHQ  | 72    | >BRAFF-K601L LSRWSGSHQ  | 33    | 39    |
| >BRAFF-K601L VKSRWSGSH  | 26226 | >BRAFF-K601L VLSRWSGSH  | 476   | 25750 |
| >BRAFF-K601L VKSRWSGSH  | 33180 | >BRAFF-K601L VLSRWSGSH  | 71    | 33109 |
| >BRAFF-K601L VKSRWSGSH  | 33609 | >BRAFF-K601L VLSRWSGSH  | 117   | 33492 |
| >BRAFF-K601L VKSRWSGSH  | 2486  | >BRAFF-K601L VLSRWSGSH  | 373   | 2113  |
| >BRAFF-K601L VKSRWSGSH  | 4512  | >BRAFF-K601L VLSRWSGSH  | 73    | 4439  |
| >BRAFF-K601L VKSRWSGSH  | 9011  | >BRAFF-K601L VLSRWSGSH  | 416   | 8595  |
| >BRAFF-K601L VKSRWSGSH  | 9     | >BRAFF-K601L VLSRWSGSH  | 144   | 135   |
| >BRAFF-K601L VKSRWSGSH  | 1427  | >BRAFF-K601L VLSRWSGSH  | 451   | 976   |
| >BRAFF-K601L KIGDFGLATV | 23086 | >BRAFF-K601L KIGDFGLATV | 298   | 22788 |
| >BRAFF-K601L KIGDFGLATV | 17775 | >BRAFF-K601L KIGDFGLATV | 215   | 17560 |
| >BRAFF-K601L KIGDFGLATV | 20029 | >BRAFF-K601L KIGDFGLATV | 169   | 19860 |
| >BRAFF-K601L KIGDFGLATV | 129   | >BRAFF-K601L KIGDFGLATV | 18518 | 18389 |
| >BRAFF-K601L KIGDFGLATV | 57    | >BRAFF-K601L KIGDFGLATV | 20909 | 20852 |
| >BRAFF-K601L KIGDFGLATV | 5785  | >BRAFF-K601L KIGDFGLATV | 133   | 5652  |

|                         |      |                         |       |       |
|-------------------------|------|-------------------------|-------|-------|
| >BRAFF-K601L KIGDFGLATV | 132  | >BRAFF-K601L KIGDFGLATV | 10109 | 9977  |
| >BRAFF-K601L ATVKSRWSG: | 660  | >BRAFF-K601L ATVLSRWSG: | 433   | 227   |
| >BRAFF-K601L ATVKSRWSG: | 451  | >BRAFF-K601L ATVLSRWSG: | 831   | 380   |
| >BRAFF-K601L LATVKSRW   | 36   | >BRAFF-K601L LATVLSRW   | 28    | 8     |
| >BRAFF-K601L LATVKSRW   | 86   | >BRAFF-K601L LATVLSRW   | 52    | 34    |
| >BRAFF-K601L LATVKSRW   | 73   | >BRAFF-K601L LATVLSRW   | 59    | 14    |
| >BRAFF-K601L LATVKSRW   | 22   | >BRAFF-K601L LATVLSRW   | 15    | 7     |
| >BRAFF-K601L LATVKSRW   | 172  | >BRAFF-K601L LATVLSRW   | 62    | 110   |
| >BRAFF-K601L LATVKSRW   | 130  | >BRAFF-K601L LATVLSRW   | 63    | 67    |
| >BRAFF-K601L GLATVKSR   | 2178 | >BRAFF-K601L GLATVLSR   | 370   | 1808  |
| >BRAFF-K601L GLATVKSR   | 658  | >BRAFF-K601L GLATVLSR   | 349   | 309   |
| >BRAFF-K601L GLATVKSRW  | 1001 | >BRAFF-K601L GLATVLSRW  | 444   | 557   |
| >BRAFF-K601L GLATVKSRW  | 242  | >BRAFF-K601L GLATVLSRW  | 162   | 80    |
| >BRAFF-K601L FGLATVKSRM | 98   | >BRAFF-K601L FGLATVLSRM | 47    | 51    |
| >BRAFF-K601L FGLATVKSRM | 499  | >BRAFF-K601L FGLATVLSRM | 515   | 16    |
| >BRAFF-K601L FGLATVKSRM | 45   | >BRAFF-K601L FGLATVLSRM | 19    | 26    |
| >BRAFF-K601L FGLATVKSRM | 215  | >BRAFF-K601L FGLATVLSRM | 91    | 124   |
| >BRAFF-K601L FGLATVKSR  | 756  | >BRAFF-K601L FGLATVLSR  | 338   | 418   |
| >BRAFF-K601L DFGLATVKSR | 205  | >BRAFF-K601L DFGLATVLSR | 61    | 144   |
| >BRAFF-K601L DFGLATVKSR | 246  | >BRAFF-K601L DFGLATVLSR | 101   | 145   |
| >BRAFF-K601L GDFGLATVK  | 3037 | >BRAFF-K601L GDFGLATVL  | 41    | 2996  |
| >BRAFF-K601L GDFGLATVK  | 3033 | >BRAFF-K601L GDFGLATVL  | 80    | 2953  |
| >BRAFF-K601L KSRWSGSH   | 55   | >BRAFF-K601L NSRWSGSH   | 8108  | 8053  |
| >BRAFF-K601L KSRWSGSHQ  | 24   | >BRAFF-K601L NSRWSGSHC  | 3329  | 3305  |
| >BRAFF-K601L KSRWSGSHQ  | 44   | >BRAFF-K601L NSRWSGSHC  | 8206  | 8162  |
| >BRAFF-K601L KSRWSGSHQ  | 23   | >BRAFF-K601L NSRWSGSHC  | 3345  | 3322  |
| >BRAFF-K601L KSRWSGSHQ  | 93   | >BRAFF-K601L NSRWSGSHC  | 265   | 172   |
| >BRAFF-K601L KSRWSGSHQ  | 14   | >BRAFF-K601L NSRWSGSHC  | 124   | 110   |
| >BRAFF-K601L KSRWSGSH   | 31   | >BRAFF-K601L NSRWSGSH   | 1938  | 1907  |
| >BRAFF-K601L KSRWSGSHQ  | 51   | >BRAFF-K601L NSRWSGSHC  | 2547  | 2496  |
| >BRAFF-K601L KSRWSGSHQ  | 2    | >BRAFF-K601L NSRWSGSHC  | 4     | 2     |
| >BRAFF-K601L KSRWSGSHQ  | 186  | >BRAFF-K601L NSRWSGSHC  | 5124  | 4938  |
| >BRAFF-K601L KSRWSGSHQ  | 73   | >BRAFF-K601L NSRWSGSHC  | 2783  | 2710  |
| >BRAFF-K601L KSRWSGSHQ  | 24   | >BRAFF-K601L NSRWSGSHC  | 4599  | 4575  |
| >BRAFF-K601L KSRWSGSH   | 333  | >BRAFF-K601L NSRWSGSH   | 971   | 638   |
| >BRAFF-K601L KSRWSGSHQ  | 193  | >BRAFF-K601L NSRWSGSHC  | 1553  | 1360  |
| >BRAFF-K601L KSRWSGSHQ  | 72   | >BRAFF-K601L NSRWSGSHC  | 305   | 233   |
| >BRAFF-K601L VKSRWSGSH  | 9    | >BRAFF-K601L VNSRWSGSH  | 642   | 633   |
| >BRAFF-K601L VKSRWSGSH  | 1427 | >BRAFF-K601L VNSRWSGSH  | 368   | 1059  |
| >BRAFF-K601L KIGDFGLATV | 129  | >BRAFF-K601L KIGDFGLATV | 18054 | 17925 |
| >BRAFF-K601L KIGDFGLATV | 57   | >BRAFF-K601L KIGDFGLATV | 20470 | 20413 |
| >BRAFF-K601L KIGDFGLATV | 132  | >BRAFF-K601L KIGDFGLATV | 7806  | 7674  |
| >BRAFF-K601L ATVKSRWSG: | 451  | >BRAFF-K601L ATVNSRWSG  | 326   | 125   |

|                        |       |                        |       |       |
|------------------------|-------|------------------------|-------|-------|
| >BRAFF-K601^LATVKSRW   | 36    | >BRAFF-K601^LATVNSRW   | 22    | 14    |
| >BRAFF-K601^LATVKSRW   | 86    | >BRAFF-K601^LATVNSRW   | 58    | 28    |
| >BRAFF-K601^LATVKSRW   | 73    | >BRAFF-K601^LATVNSRW   | 70    | 3     |
| >BRAFF-K601^LATVKSRW   | 22    | >BRAFF-K601^LATVNSRW   | 16    | 6     |
| >BRAFF-K601^LATVKSRW   | 172   | >BRAFF-K601^LATVNSRW   | 72    | 100   |
| >BRAFF-K601^LATVKSRW   | 130   | >BRAFF-K601^LATVNSRW   | 64    | 66    |
| >BRAFF-K601^GLATVKSR   | 658   | >BRAFF-K601^GLATVNSR   | 203   | 455   |
| >BRAFF-K601^GLATVKSRW  | 242   | >BRAFF-K601^GLATVNSRW  | 162   | 80    |
| >BRAFF-K601^FGLATVKSRW | 98    | >BRAFF-K601^FGLATVNSRV | 116   | 18    |
| >BRAFF-K601^FGLATVKSRW | 499   | >BRAFF-K601^FGLATVNSRV | 674   | 175   |
| >BRAFF-K601^FGLATVKSRW | 45    | >BRAFF-K601^FGLATVNSRV | 25    | 20    |
| >BRAFF-K601^FGLATVKSRW | 215   | >BRAFF-K601^FGLATVNSRV | 111   | 104   |
| >BRAFF-K601^DFGLATVKSR | 205   | >BRAFF-K601^DFGLATVNSF | 134   | 71    |
| >BRAFF-K601^DFGLATVKSR | 246   | >BRAFF-K601^DFGLATVNSF | 300   | 54    |
| >BRAFF-K601^KSRWSGSH   | 55    | >BRAFF-K601^QSRWSGSH   | 2471  | 2416  |
| >BRAFF-K601^KSRWSGSHQ  | 24    | >BRAFF-K601^QSRWSGSHC  | 661   | 637   |
| >BRAFF-K601^KSRWSGSHQ  | 44    | >BRAFF-K601^QSRWSGSHC  | 2119  | 2075  |
| >BRAFF-K601^KSRWSGSHQ  | 23    | >BRAFF-K601^QSRWSGSHC  | 570   | 547   |
| >BRAFF-K601^KSRWSGSHQ  | 93    | >BRAFF-K601^QSRWSGSHC  | 148   | 55    |
| >BRAFF-K601^KSRWSGSHQ  | 14    | >BRAFF-K601^QSRWSGSHC  | 34    | 20    |
| >BRAFF-K601^KSRWSGSH   | 31    | >BRAFF-K601^QSRWSGSH   | 226   | 195   |
| >BRAFF-K601^KSRWSGSHQ  | 51    | >BRAFF-K601^QSRWSGSHC  | 328   | 277   |
| >BRAFF-K601^KSRWSGSHQ  | 2     | >BRAFF-K601^QSRWSGSHC  | 2     | 0     |
| >BRAFF-K601^KSRWSGSHQ  | 186   | >BRAFF-K601^QSRWSGSHC  | 935   | 749   |
| >BRAFF-K601^KSRWSGSHQ  | 73    | >BRAFF-K601^QSRWSGSHC  | 1487  | 1414  |
| >BRAFF-K601^KSRWSGSHQ  | 24    | >BRAFF-K601^QSRWSGSHC  | 674   | 650   |
| >BRAFF-K601^KSRWSGSH   | 333   | >BRAFF-K601^QSRWSGSH   | 583   | 250   |
| >BRAFF-K601^KSRWSGSHQ  | 193   | >BRAFF-K601^QSRWSGSHC  | 507   | 314   |
| >BRAFF-K601^KSRWSGSHQ  | 72    | >BRAFF-K601^QSRWSGSHC  | 82    | 10    |
| >BRAFF-K601^VKSRRWSGSH | 2486  | >BRAFF-K601^VQSRWSGSH  | 475   | 2011  |
| >BRAFF-K601^VKSRRWSGSH | 18095 | >BRAFF-K601^VQSRWSGSH  | 282   | 17813 |
| >BRAFF-K601^VKSRRWSGSH | 19908 | >BRAFF-K601^VQSRWSGSH  | 463   | 19445 |
| >BRAFF-K601^VKSRRWSGSH | 4512  | >BRAFF-K601^VQSRWSGSH  | 46    | 4466  |
| >BRAFF-K601^VKSRRWSGSH | 9     | >BRAFF-K601^VQSRWSGSH  | 10    | 1     |
| >BRAFF-K601^KIGDFGLATV | 129   | >BRAFF-K601^KIGDFGLATV | 17151 | 17022 |
| >BRAFF-K601^KIGDFGLATV | 57    | >BRAFF-K601^KIGDFGLATV | 20710 | 20653 |
| >BRAFF-K601^KIGDFGLATV | 132   | >BRAFF-K601^KIGDFGLATV | 1319  | 1187  |
| >BRAFF-K601^ATVKSRWSG: | 660   | >BRAFF-K601^ATVQSRWSG  | 254   | 406   |
| >BRAFF-K601^ATVKSRWSG: | 451   | >BRAFF-K601^ATVQSRWSG  | 483   | 32    |
| >BRAFF-K601^LATVKSRW   | 36    | >BRAFF-K601^LATVQSRW   | 26    | 10    |
| >BRAFF-K601^LATVKSRW   | 86    | >BRAFF-K601^LATVQSRW   | 43    | 43    |
| >BRAFF-K601^LATVKSRW   | 73    | >BRAFF-K601^LATVQSRW   | 55    | 18    |
| >BRAFF-K601^LATVKSRW   | 22    | >BRAFF-K601^LATVQSRW   | 15    | 7     |

|                      |      |                      |       |       |
|----------------------|------|----------------------|-------|-------|
| >BRAFK601(LATVKSRW   | 172  | >BRAFK601(LATVQSRW   | 104   | 68    |
| >BRAFK601(LATVKSRW   | 130  | >BRAFK601(LATVQSRW   | 61    | 69    |
| >BRAFK601(GLATVKSR   | 658  | >BRAFK601(GLATVQSR   | 412   | 246   |
| >BRAFK601(GLATVKSRW  | 1001 | >BRAFK601(GLATVQSRW  | 80    | 921   |
| >BRAFK601(GLATVKSRW  | 242  | >BRAFK601(GLATVQSRW  | 286   | 44    |
| >BRAFK601(FGLATVKSRW | 98   | >BRAFK601(FGLATVQSRV | 67    | 31    |
| >BRAFK601(FGLATVKSRW | 499  | >BRAFK601(FGLATVQSRV | 372   | 127   |
| >BRAFK601(FGLATVKSRW | 45   | >BRAFK601(FGLATVQSRV | 15    | 30    |
| >BRAFK601(FGLATVKSRW | 215  | >BRAFK601(FGLATVQSRV | 162   | 53    |
| >BRAFK601(DFGLATVKSR | 205  | >BRAFK601(DFGLATVQSF | 175   | 30    |
| >BRAFK601(DFGLATVKSR | 246  | >BRAFK601(DFGLATVQSF | 334   | 88    |
| >BRAFL485FLNVTAPTPQC | 5499 | >BRAFL485FNVTAPTPQC  | 236   | 5263  |
| >BRAFL485FMLNVTAPT   | 124  | >BRAFL485MFNVTAPT    | 6380  | 6256  |
| >BRAFL485FMLNVTAPT   | 36   | >BRAFL485MFNVTAPT    | 12690 | 12654 |
| >BRAFL485FMLNVTAPT   | 185  | >BRAFL485MFNVTAPT    | 20244 | 20059 |
| >BRAFL485FMLNVTAPT   | 57   | >BRAFL485MFNVTAPT    | 28141 | 28084 |
| >BRAFL485FMLNVTAPTPC | 216  | >BRAFL485MFNVTAPTPC  | 30504 | 30288 |
| >BRAFL485FMLNVTAPTPC | 36   | >BRAFL485MFNVTAPTPC  | 23879 | 23843 |
| >BRAFL485FKWHGDVAVF  | 6882 | >BRAFL485FKWHGDVAVF  | 483   | 6399  |
| >BRAFL485FKWHGDVAVF  | 1886 | >BRAFL485FKWHGDVAVF  | 233   | 1653  |
| >BRAFL485FKWHGDVAVF  | 59   | >BRAFL485FKWHGDVAVF  | 9     | 50    |
| >BRAFL485FKWHGDVAVF  | 124  | >BRAFL485FKWHGDVAVF  | 168   | 44    |
| >BRAFL485FKMLNVTAPT  | 30   | >BRAFL485FKMFNVTAPT  | 21    | 9     |
| >BRAFL485FKMLNVTAPT  | 360  | >BRAFL485FKMFNVTAPT  | 36    | 324   |
| >BRAFL485FKMLNVTAPTI | 2383 | >BRAFL485FKMFNVTAPTI | 232   | 2151  |
| >BRAFL485FKMLNVTAPT  | 47   | >BRAFL485FKMFNVTAPT  | 10    | 37    |
| >BRAFL485FKMLNVTAPTI | 2154 | >BRAFL485FKMFNVTAPTI | 248   | 1906  |
| >BRAFL485FKMLNVTAPT  | 25   | >BRAFL485FKMFNVTAPT  | 39    | 14    |
| >BRAFL485FKMLNVTAP   | 321  | >BRAFL485FKMFNVTAP   | 170   | 151   |
| >BRAFL485FKMLNVTAPT  | 6    | >BRAFL485FKMFNVTAPT  | 5     | 1     |
| >BRAFL485FKMLNVTAPTI | 225  | >BRAFL485FKMFNVTAPTI | 127   | 98    |
| >BRAFL485FKMLNVTAPTI | 92   | >BRAFL485FKMFNVTAPTI | 53    | 39    |
| >BRAFL485FKMLNVTAPT  | 12   | >BRAFL485FKMFNVTAPT  | 18    | 6     |
| >BRAFL485FKMLNVTAPTI | 488  | >BRAFL485FKMFNVTAPTI | 704   | 216   |
| >BRAFL485FKMLNVTAPT  | 25   | >BRAFL485FKMFNVTAPT  | 25    | 0     |
| >BRAFL485FKMLNVTAPTI | 200  | >BRAFL485FKMFNVTAPTI | 188   | 12    |
| >BRAFL485FKMLNVTAPT  | 80   | >BRAFL485FKMFNVTAPT  | 748   | 668   |
| >BRAFL485FKMLNVTAPT  | 271  | >BRAFL485FKMFNVTAPT  | 99    | 172   |
| >BRAFL485FKMLNVTAPTI | 1005 | >BRAFL485FKMFNVTAPTI | 425   | 580   |
| >BRAFL485FKMLNVTAP   | 150  | >BRAFL485FKMFNVTAP   | 35    | 115   |
| >BRAFL485FKMLNVTAPT  | 30   | >BRAFL485FKMFNVTAPT  | 10    | 20    |
| >BRAFL485FKMLNVTAPTI | 122  | >BRAFL485FKMFNVTAPTI | 36    | 86    |
| >BRAFL485FKMLNVTAPTI | 109  | >BRAFL485FKMFNVTAPTI | 28    | 81    |

|                      |      |                      |       |       |
|----------------------|------|----------------------|-------|-------|
| >BRAFL485FKMLNVTAPT  | 3550 | >BRAFL485FKMFNVTAPT  | 391   | 3159  |
| >BRAFL485FKMLNVTAPTI | 2374 | >BRAFL485FKMFNVTAPTI | 300   | 2074  |
| >BRAFL485FKMLNVTAP   | 537  | >BRAFL485FKMFNVTAP   | 144   | 393   |
| >BRAFL485FKMLNVTAPT  | 957  | >BRAFL485FKMFNVTAPT  | 233   | 724   |
| >BRAFL485FKMLNVTAPTI | 941  | >BRAFL485FKMFNVTAPTI | 269   | 672   |
| >BRAFL485FKMLNVTAPTI | 359  | >BRAFL485FKMFNVTAPTI | 85    | 274   |
| >BRAFL485FKMLNVTAPTI | 977  | >BRAFL485FKMFNVTAPTI | 461   | 516   |
| >BRAFL485FKMLNVTATA  | 279  | >BRAFL485FKMFNVTATA  | 142   | 137   |
| >BRAFL485FKMLNVTAP   | 466  | >BRAFL485FKMFNVTAP   | 261   | 205   |
| >BRAFL485FVKMLNVTATA | 23   | >BRAFL485FVKMFNVTATA | 11    | 12    |
| >BRAFL485FVKMLNVTATA | 126  | >BRAFL485FVKMFNVTATA | 67    | 59    |
| >BRAFL485FVAVKMLNV   | 317  | >BRAFL485FVAVKMFNV   | 67    | 250   |
| >BRAFL485FVAVKMLNV   | 880  | >BRAFL485FVAVKMFNV   | 452   | 428   |
| >BRAFL485FVAVKMLNV   | 2342 | >BRAFL485FVAVKMFNV   | 326   | 2016  |
| >BRAFL485FDVAVKMLNV  | 41   | >BRAFL485FDVAVKMFNV  | 10    | 31    |
| >BRAFL485FDVAVKMLNV  | 145  | >BRAFL485FDVAVKMFNV  | 50    | 95    |
| >BRAFL485FDVAVKMLNV  | 55   | >BRAFL485FDVAVKMFNV  | 11    | 44    |
| >BRAFL485FGDVAVKMLN  | 246  | >BRAFL485FGDVAVKMFN  | 136   | 110   |
| >BRAFL485FVHGDVAVKI  | 5466 | >BRAFL485FVHGDVAVKI  | 400   | 5066  |
| >BRAFL485FVHGDVAVKI  | 395  | >BRAFL485FVHGDVAVKI  | 5352  | 4957  |
| >BRAFL584FLHEDLTVKI  | 3135 | >BRAFL584FFHEDLTVKI  | 205   | 2930  |
| >BRAFL584FLHEDLTV    | 9    | >BRAFL584FFHEDLTV    | 1068  | 1059  |
| >BRAFL584FLHEDLTVKI  | 66   | >BRAFL584FFHEDLTVKI  | 9619  | 9553  |
| >BRAFL584FLHEDLTV    | 6    | >BRAFL584FFHEDLTV    | 208   | 202   |
| >BRAFL584FLHEDLTVKI  | 14   | >BRAFL584FFHEDLTVKI  | 2409  | 2395  |
| >BRAFL584FLHEDLTV    | 3    | >BRAFL584FFHEDLTV    | 823   | 820   |
| >BRAFL584FLHEDLTVK   | 332  | >BRAFL584FFHEDLTVK   | 19971 | 19639 |
| >BRAFL584FLHEDLTVKI  | 24   | >BRAFL584FFHEDLTVKI  | 4911  | 4887  |
| >BRAFL584FLHEDLTVKIC | 334  | >BRAFL584FFHEDLTVKIC | 20945 | 20611 |
| >BRAFL584FLHEDLTV    | 7    | >BRAFL584FFHEDLTV    | 179   | 172   |
| >BRAFL584FLHEDLTVKI  | 101  | >BRAFL584FFHEDLTVKI  | 4110  | 4009  |
| >BRAFL584FLHEDLTV    | 1    | >BRAFL584FFHEDLTV    | 61    | 60    |
| >BRAFL584FLHEDLTVK   | 368  | >BRAFL584FFHEDLTVK   | 21682 | 21314 |
| >BRAFL584FLHEDLTVKI  | 2    | >BRAFL584FFHEDLTVKI  | 881   | 879   |
| >BRAFL584FLHEDLTV    | 3    | >BRAFL584FFHEDLTV    | 397   | 394   |
| >BRAFL584FLHEDLTVKI  | 4    | >BRAFL584FFHEDLTVKI  | 5260  | 5256  |
| >BRAFL584FLHEDLTV    | 4    | >BRAFL584FFHEDLTV    | 215   | 211   |
| >BRAFL584FLHEDLTVKI  | 7    | >BRAFL584FFHEDLTVKI  | 4179  | 4172  |
| >BRAFL584FLHEDLTV    | 6    | >BRAFL584FFHEDLTV    | 4725  | 4719  |
| >BRAFL584FLHEDLTVKI  | 13   | >BRAFL584FFHEDLTVKI  | 13162 | 13149 |
| >BRAFL584FLHEDLTV    | 1    | >BRAFL584FFHEDLTV    | 23    | 22    |
| >BRAFL584FLHEDLTVK   | 39   | >BRAFL584FFHEDLTVK   | 22257 | 22218 |
| >BRAFL584FLHEDLTVKI  | 2    | >BRAFL584FFHEDLTVKI  | 2228  | 2226  |



|                      |      |                      |       |       |
|----------------------|------|----------------------|-------|-------|
| >BRAFL584FLHEDLTVKI  | 8095 | >BRAFL584FFHEDLTVKI  | 35    | 8060  |
| >BRAFL584FLHEDLTVKI  | 414  | >BRAFL584FFHEDLTVKI  | 1834  | 1420  |
| >BRAFL584HRDLKSNIF   | 129  | >BRAFL584HRDLKSNIF   | 2968  | 2839  |
| >BRAFL584HRDLKSNIF   | 210  | >BRAFL584HRDLKSNIF   | 627   | 417   |
| >BRAFL584IFLHEDLTVKI | 68   | >BRAFL584IFFHEDLTVKI | 70    | 2     |
| >BRAFL584IFLHEDLTVKI | 91   | >BRAFL584IFFHEDLTVKI | 136   | 45    |
| >BRAFL584IFLHEDLTVKI | 1969 | >BRAFL584IFFHEDLTVKI | 402   | 1567  |
| >BRAFL584IFLHEDLTVK  | 993  | >BRAFL584IFFHEDLTVK  | 386   | 607   |
| >BRAFL584NIFLHEDLTV  | 106  | >BRAFL584NIFFHEDLTV  | 127   | 21    |
| >BRAFL584NIFLHEDL    | 629  | >BRAFL584NIFFHEDL    | 313   | 316   |
| >BRAFL584NIFLHEDLTV  | 125  | >BRAFL584NIFFHEDLTV  | 143   | 18    |
| >BRAFL584NIFLHEDLTV  | 99   | >BRAFL584NIFFHEDLTV  | 142   | 43    |
| >BRAFL584NIFLHEDLTV  | 155  | >BRAFL584NIFFHEDLTV  | 222   | 67    |
| >BRAFL584NIFLHEDLTV  | 353  | >BRAFL584NIFFHEDLTV  | 145   | 208   |
| >BRAFL584NIFLHEDLTV  | 756  | >BRAFL584NIFFHEDLTV  | 475   | 281   |
| >BRAFL584NIFLHEDLTV  | 473  | >BRAFL584NIFFHEDLTV  | 408   | 65    |
| >BRAFL584NIFLHEDLTV  | 225  | >BRAFL584NIFFHEDLTV  | 206   | 19    |
| >BRAFL584NIFLHEDLTVI | 333  | >BRAFL584NIFFHEDLTVI | 199   | 134   |
| >BRAFL584NIFLHEDLTVI | 61   | >BRAFL584NIFFHEDLTVI | 22    | 39    |
| >BRAFL584NIFLHEDL    | 1424 | >BRAFL584NIFFHEDL    | 356   | 1068  |
| >BRAFL584KSNIFLH     | 330  | >BRAFL584KSNIFFH     | 246   | 84    |
| >BRAFL584KSNIFLH     | 129  | >BRAFL584KSNIFFH     | 61    | 68    |
| >BRAFL584KSNIFLH     | 1025 | >BRAFL584KSNIFFH     | 455   | 570   |
| >BRAFL584KSNIFLH     | 68   | >BRAFL584KSNIFFH     | 27    | 41    |
| >BRAFL584KSNIFLHE    | 962  | >BRAFL584KSNIFFHE    | 63    | 899   |
| >BRAFL584KSNIFLHEDI  | 30   | >BRAFL584KSNIFFHEDI  | 23    | 7     |
| >BRAFL584KSNIFLHEDI  | 370  | >BRAFL584KSNIFFHEDI  | 371   | 1     |
| >BRAFL584KSNIFLH     | 342  | >BRAFL584KSNIFFH     | 347   | 5     |
| >BRAFL584KSNIFLHEDI  | 298  | >BRAFL584KSNIFFHEDI  | 280   | 18    |
| >BRAFL584LKSNNIFL    | 52   | >BRAFL584LKSNNIFF    | 5     | 47    |
| >BRAFL584RDLKSNIFL   | 2447 | >BRAFL584RDLKSNIFF   | 85    | 2362  |
| >BRAFL588FLTVKIGDFGL | 354  | >BRAFL588FTVKIGDFGL  | 13152 | 12798 |
| >BRAFL588FLTVKIGDF   | 154  | >BRAFL588FTVKIGDF    | 139   | 15    |
| >BRAFL588FLTVKIGDFGL | 229  | >BRAFL588FTVKIGDFGL  | 4166  | 3937  |
| >BRAFL588FLTVKIGDF   | 13   | >BRAFL588FTVKIGDF    | 2596  | 2583  |
| >BRAFL588FLTVKIGDFGL | 24   | >BRAFL588FTVKIGDFGL  | 2146  | 2122  |
| >BRAFL588FLTVKIGDFGL | 424  | >BRAFL588FTVKIGDFGL  | 5036  | 4612  |
| >BRAFL588FLTVKIGDF   | 118  | >BRAFL588FTVKIGDF    | 1295  | 1177  |
| >BRAFL588FLTVKIGDFGL | 380  | >BRAFL588FTVKIGDFGL  | 10458 | 10078 |
| >BRAFL588FLDTVKIGDFG | 205  | >BRAFL588FDPTVKIGDFG | 36255 | 36050 |
| >BRAFL588FKSNIFLHEDI | 30   | >BRAFL588FKSNIFLHEDI | 2510  | 2480  |
| >BRAFL588FKSNIFLHEDI | 370  | >BRAFL588FKSNIFLHEDI | 23546 | 23176 |
| >BRAFL588FKSNIFLHEDI | 298  | >BRAFL588FKSNIFLHEDI | 15308 | 15010 |

|                         |      |                         |      |      |
|-------------------------|------|-------------------------|------|------|
| >BRAF-L588F HEDLTVKI    | 12   | >BRAF-L588F HEDPTVKI    | 309  | 297  |
| >BRAF-L588F HEDLTVKI    | 114  | >BRAF-L588F HEDPTVKI    | 125  | 11   |
| >BRAF-L588F HEDLTVKI    | 157  | >BRAF-L588F HEDPTVKI    | 286  | 129  |
| >BRAF-L588F FLHEDLTV    | 9    | >BRAF-L588F FLHEDPTV    | 8    | 1    |
| >BRAF-L588F FLHEDLTVKI  | 66   | >BRAF-L588F FLHEDPTVKI  | 84   | 18   |
| >BRAF-L588F FLHEDLTV    | 6    | >BRAF-L588F FLHEDPTV    | 6    | 0    |
| >BRAF-L588F FLHEDLTVKI  | 14   | >BRAF-L588F FLHEDPTVKI  | 13   | 1    |
| >BRAF-L588F FLHEDLTV    | 3    | >BRAF-L588F FLHEDPTV    | 3    | 0    |
| >BRAF-L588F FLHEDLTVK   | 332  | >BRAF-L588F FLHEDPTVK   | 1176 | 844  |
| >BRAF-L588F FLHEDLTVKI  | 24   | >BRAF-L588F FLHEDPTVKI  | 27   | 3    |
| >BRAF-L588F FLHEDLTVKIC | 334  | >BRAF-L588F FLHEDPTVKIC | 502  | 168  |
| >BRAF-L588F FLHEDLTV    | 7    | >BRAF-L588F FLHEDPTV    | 10   | 3    |
| >BRAF-L588F FLHEDLTVKI  | 101  | >BRAF-L588F FLHEDPTVKI  | 228  | 127  |
| >BRAF-L588F FLHEDLTV    | 1    | >BRAF-L588F FLHEDPTV    | 1    | 0    |
| >BRAF-L588F FLHEDLTVK   | 368  | >BRAF-L588F FLHEDPTVK   | 382  | 14   |
| >BRAF-L588F FLHEDLTVKI  | 2    | >BRAF-L588F FLHEDPTVKI  | 2    | 0    |
| >BRAF-L588F FLHEDLTV    | 3    | >BRAF-L588F FLHEDPTV    | 3    | 0    |
| >BRAF-L588F FLHEDLTVKI  | 4    | >BRAF-L588F FLHEDPTVKI  | 5    | 1    |
| >BRAF-L588F FLHEDLTV    | 4    | >BRAF-L588F FLHEDPTV    | 4    | 0    |
| >BRAF-L588F FLHEDLTVKI  | 7    | >BRAF-L588F FLHEDPTVKI  | 8    | 1    |
| >BRAF-L588F FLHEDLTV    | 6    | >BRAF-L588F FLHEDPTV    | 4    | 2    |
| >BRAF-L588F FLHEDLTVKI  | 13   | >BRAF-L588F FLHEDPTVKI  | 17   | 4    |
| >BRAF-L588F FLHEDLTV    | 1    | >BRAF-L588F FLHEDPTV    | 1    | 0    |
| >BRAF-L588F FLHEDLTVK   | 39   | >BRAF-L588F FLHEDPTVK   | 137  | 98   |
| >BRAF-L588F FLHEDLTVKI  | 2    | >BRAF-L588F FLHEDPTVKI  | 3    | 1    |
| >BRAF-L588F FLHEDLTV    | 561  | >BRAF-L588F FLHEDPTV    | 394  | 167  |
| >BRAF-L588F FLHEDLTVKI  | 414  | >BRAF-L588F FLHEDPTVKI  | 1340 | 926  |
| >BRAF-L588F IFLHEDLTV   | 2082 | >BRAF-L588F IFLHEDPTV   | 455  | 1627 |
| >BRAF-L588F IFLHEDLTVKI | 68   | >BRAF-L588F IFLHEDPTVKI | 109  | 41   |
| >BRAF-L588F IFLHEDLTVKI | 91   | >BRAF-L588F IFLHEDPTVKI | 148  | 57   |
| >BRAF-L588F NIFLHEDLTV  | 106  | >BRAF-L588F NIFLHEDPTV  | 154  | 48   |
| >BRAF-L588F NIFLHEDLTV  | 125  | >BRAF-L588F NIFLHEDPTV  | 279  | 154  |
| >BRAF-L588F NIFLHEDLTV  | 99   | >BRAF-L588F NIFLHEDPTV  | 270  | 171  |
| >BRAF-L588F NIFLHEDLTV  | 155  | >BRAF-L588F NIFLHEDPTV  | 186  | 31   |
| >BRAF-L588F NIFLHEDLTV  | 353  | >BRAF-L588F NIFLHEDPTV  | 181  | 172  |
| >BRAF-L588F NIFLHEDLTV  | 756  | >BRAF-L588F NIFLHEDPTV  | 420  | 336  |
| >BRAF-L588F NIFLHEDLTV  | 473  | >BRAF-L588F NIFLHEDPTV  | 168  | 305  |
| >BRAF-L588F NIFLHEDLTV  | 225  | >BRAF-L588F NIFLHEDPTV  | 131  | 94   |
| >BRAF-L588F NIFLHEDLTVI | 333  | >BRAF-L588F NIFLHEDPTVI | 330  | 3    |
| >BRAF-L588F NIFLHEDLTVI | 61   | >BRAF-L588F NIFLHEDPTVI | 85   | 24   |
| >BRAF-L588F NIFLHEDLTV  | 1441 | >BRAF-L588F NIFLHEDPTV  | 434  | 1007 |
| >BRAF-L588F LTVKIGDFGL  | 354  | >BRAF-L588F RTVKIGDFGL  | 654  | 300  |
| >BRAF-L588F LTVKIGDF    | 154  | >BRAF-L588F RTVKIGDF    | 150  | 4    |

|                       |       |                       |       |       |
|-----------------------|-------|-----------------------|-------|-------|
| >BRAFL588FLTVKIGDF    | 5637  | >BRAFL588FRTVKIGDF    | 168   | 5469  |
| >BRAFL588FLTVKIGDFGL  | 8042  | >BRAFL588FRTVKIGDFGL  | 320   | 7722  |
| >BRAFL588FLTVKIGDFGL/ | 229   | >BRAFL588FRTVKIGDFGL  | 1181  | 952   |
| >BRAFL588FLTVKIGDF    | 636   | >BRAFL588FRTVKIGDF    | 375   | 261   |
| >BRAFL588FLTVKIGDF    | 13    | >BRAFL588FRTVKIGDF    | 5     | 8     |
| >BRAFL588FLTVKIGDFGL  | 24    | >BRAFL588FRTVKIGDFGL  | 6     | 18    |
| >BRAFL588FLTVKIGDF    | 1948  | >BRAFL588FRTVKIGDF    | 432   | 1516  |
| >BRAFL588FLTVKIGDF    | 2073  | >BRAFL588FRTVKIGDF    | 473   | 1600  |
| >BRAFL588FLTVKIGDFGL  | 1718  | >BRAFL588FRTVKIGDFGL  | 390   | 1328  |
| >BRAFL588FLTVKIGDFGL  | 424   | >BRAFL588FRTVKIGDFGL  | 650   | 226   |
| >BRAFL588FLTVKIGDF    | 118   | >BRAFL588FRTVKIGDF    | 21    | 97    |
| >BRAFL588FLTVKIGDFGL/ | 380   | >BRAFL588FRTVKIGDFGL  | 264   | 116   |
| >BRAFL588FLTVKIGDFG   | 205   | >BRAFL588FRTVKIGDFG   | 34318 | 34113 |
| >BRAFL588FKSNNIFLHEDI | 17074 | >BRAFL588FKSNNIFLHEDI | 354   | 16720 |
| >BRAFL588FKSNNIFLHEDI | 3632  | >BRAFL588FKSNNIFLHEDI | 11    | 3621  |
| >BRAFL588FKSNNIFLHEDI | 30    | >BRAFL588FKSNNIFLHEDI | 1927  | 1897  |
| >BRAFL588FKSNNIFLHEDI | 35542 | >BRAFL588FKSNNIFLHEDI | 473   | 35069 |
| >BRAFL588FKSNNIFLHEDI | 370   | >BRAFL588FKSNNIFLHEDI | 18018 | 17648 |
| >BRAFL588FKSNNIFLHEDI | 298   | >BRAFL588FKSNNIFLHEDI | 16356 | 16058 |
| >BRAFL588FKSNNIFLHEDI | 28492 | >BRAFL588FKSNNIFLHEDI | 288   | 28204 |
| >BRAFL588FHEDLTVKI    | 12    | >BRAFL588FHEDRTVKI    | 92    | 80    |
| >BRAFL588FHEDLTVKI    | 114   | >BRAFL588FHEDRTVKI    | 155   | 41    |
| >BRAFL588FHEDLTVKI    | 157   | >BRAFL588FHEDRTVKI    | 788   | 631   |
| >BRAFL588FLHEDLTV     | 9     | >BRAFL588FLHEDRTV     | 29    | 20    |
| >BRAFL588FLHEDLTVKI   | 66    | >BRAFL588FLHEDRTVKI   | 186   | 120   |
| >BRAFL588FLHEDLTV     | 6     | >BRAFL588FLHEDRTV     | 15    | 9     |
| >BRAFL588FLHEDLTVKI   | 14    | >BRAFL588FLHEDRTVKI   | 28    | 14    |
| >BRAFL588FLHEDLTV     | 3     | >BRAFL588FLHEDRTV     | 4     | 1     |
| >BRAFL588FLHEDLTVK    | 332   | >BRAFL588FLHEDRTVK    | 5892  | 5560  |
| >BRAFL588FLHEDLTVKI   | 24    | >BRAFL588FLHEDRTVKI   | 41    | 17    |
| >BRAFL588FLHEDLTVKIC  | 334   | >BRAFL588FLHEDRTVKIC  | 1553  | 1219  |
| >BRAFL588FLHEDLTV     | 7     | >BRAFL588FLHEDRTV     | 33    | 26    |
| >BRAFL588FLHEDLTVKI   | 101   | >BRAFL588FLHEDRTVKI   | 302   | 201   |
| >BRAFL588FLHEDLTV     | 1     | >BRAFL588FLHEDRTV     | 2     | 1     |
| >BRAFL588FLHEDLTVK    | 368   | >BRAFL588FLHEDRTVK    | 4383  | 4015  |
| >BRAFL588FLHEDLTVKI   | 2     | >BRAFL588FLHEDRTVKI   | 5     | 3     |
| >BRAFL588FLHEDLTV     | 3     | >BRAFL588FLHEDRTV     | 5     | 2     |
| >BRAFL588FLHEDLTVKI   | 4     | >BRAFL588FLHEDRTVKI   | 14    | 10    |
| >BRAFL588FLHEDLTV     | 4     | >BRAFL588FLHEDRTV     | 7     | 3     |
| >BRAFL588FLHEDLTVKI   | 7     | >BRAFL588FLHEDRTVKI   | 19    | 12    |
| >BRAFL588FLHEDLTV     | 6     | >BRAFL588FLHEDRTV     | 34    | 28    |
| >BRAFL588FLHEDLTVKI   | 13    | >BRAFL588FLHEDRTVKI   | 126   | 113   |
| >BRAFL588FLHEDLTV     | 1     | >BRAFL588FLHEDRTV     | 2     | 1     |

|                       |       |                       |      |       |
|-----------------------|-------|-----------------------|------|-------|
| >BRAFL588FVLHEDLTVK   | 39    | >BRAFL588FVLHEDRTVK   | 104  | 65    |
| >BRAFL588FVLHEDLTVKI  | 2     | >BRAFL588FVLHEDRTVKI  | 2    | 0     |
| >BRAFL588FVLHEDLTVK   | 957   | >BRAFL588FVLHEDRTVK   | 394  | 563   |
| >BRAFL588FVLHEDLTVKI  | 414   | >BRAFL588FVLHEDRTVKI  | 471  | 57    |
| >BRAFL588FVFLHEDLTVKI | 68    | >BRAFL588FVFLHEDRTVKI | 130  | 62    |
| >BRAFL588FVFLHEDLTVKI | 91    | >BRAFL588FVFLHEDRTVKI | 203  | 112   |
| >BRAFL588FNIFLHEDLTV  | 106   | >BRAFL588FNIFLHEDRTV  | 1151 | 1045  |
| >BRAFL588FNIFLHEDLTV  | 125   | >BRAFL588FNIFLHEDRTV  | 497  | 372   |
| >BRAFL588FNIFLHEDLTV  | 99    | >BRAFL588FNIFLHEDRTV  | 243  | 144   |
| >BRAFL588FNIFLHEDLTV  | 155   | >BRAFL588FNIFLHEDRTV  | 962  | 807   |
| >BRAFL588FNIFLHEDLTV  | 353   | >BRAFL588FNIFLHEDRTV  | 612  | 259   |
| >BRAFL588FNIFLHEDLTV  | 473   | >BRAFL588FNIFLHEDRTV  | 2549 | 2076  |
| >BRAFL588FNIFLHEDLTV  | 225   | >BRAFL588FNIFLHEDRTV  | 905  | 680   |
| >BRAFL588FNIFLHEDLTVI | 333   | >BRAFL588FNIFLHEDRTVI | 438  | 105   |
| >BRAFL588FNIFLHEDL    | 20865 | >BRAFL588FNIFLHEDR    | 197  | 20668 |
| >BRAFL588FNIFLHEDL    | 17075 | >BRAFL588FNIFLHEDR    | 21   | 17054 |
| >BRAFL588FNIFLHEDLTVI | 61    | >BRAFL588FNIFLHEDRTVI | 53   | 8     |
| >BRAFL588FNIFLHEDL    | 33330 | >BRAFL588FNIFLHEDR    | 179  | 33151 |
| >BRAFL588FNNIFLHEDL   | 25832 | >BRAFL588FNNIFLHEDR   | 95   | 25737 |
| >BRAFL597CLATVKSRW    | 36    | >BRAFL597CQATVKSRW    | 91   | 55    |
| >BRAFL597CLATVKSRW    | 86    | >BRAFL597CQATVKSRW    | 784  | 698   |
| >BRAFL597CLATVKSRW    | 73    | >BRAFL597CQATVKSRW    | 295  | 222   |
| >BRAFL597CLATVKSRW    | 22    | >BRAFL597CQATVKSRW    | 87   | 65    |
| >BRAFL597CLATVKSRW    | 172   | >BRAFL597CQATVKSRW    | 976  | 804   |
| >BRAFL597CLATVKSRW    | 130   | >BRAFL597CQATVKSRW    | 3254 | 3124  |
| >BRAFL597CGLATVKSRW   | 242   | >BRAFL597CGQATVKSRW   | 1556 | 1314  |
| >BRAFL597CDLTVKIGDFG  | 205   | >BRAFL597CDLTVKIGDFG  | 7776 | 7571  |
| >BRAFL597CFGLATVKSRM  | 98    | >BRAFL597CFGQATVKSRM  | 386  | 288   |
| >BRAFL597CFGLATVKSRM  | 499   | >BRAFL597CFGQATVKSRM  | 1440 | 941   |
| >BRAFL597CFGLATVKSRM  | 45    | >BRAFL597CFGQATVKSRM  | 108  | 63    |
| >BRAFL597CFGLATVKSRM  | 215   | >BRAFL597CFGQATVKSRM  | 774  | 559   |
| >BRAFL597CDFGLATVKSR  | 205   | >BRAFL597CDFGQATVKSR  | 672  | 467   |
| >BRAFL597CDFGLATVKSR  | 246   | >BRAFL597CDFGQATVKSR  | 135  | 111   |
| >BRAFL597CGDFGLATV    | 393   | >BRAFL597CGDFGQATV    | 1047 | 654   |
| >BRAFL597CGDFGLATV    | 227   | >BRAFL597CGDFGQATV    | 131  | 96    |
| >BRAFL597CIGDFGLATV   | 253   | >BRAFL597CIGDFGQATV   | 3138 | 2885  |
| >BRAFL597CKIGDFGLATV  | 53    | >BRAFL597CKIGDFGQATV  | 473  | 420   |
| >BRAFL597CKIGDFGLATV  | 34    | >BRAFL597CKIGDFGQATV  | 114  | 80    |
| >BRAFL597CKIGDFGLATV  | 12    | >BRAFL597CKIGDFGQATV  | 67   | 55    |
| >BRAFL597CKIGDFGLATV  | 59    | >BRAFL597CKIGDFGQATV  | 648  | 589   |
| >BRAFL597CKIGDFGLA    | 900   | >BRAFL597CKIGDFGQA    | 490  | 410   |
| >BRAFL597CKIGDFGLATV  | 4     | >BRAFL597CKIGDFGQATV  | 6    | 2     |
| >BRAFL597CKIGDFGLATV  | 15    | >BRAFL597CKIGDFGQATV  | 21   | 6     |

|                      |       |                      |       |       |
|----------------------|-------|----------------------|-------|-------|
| >BRAFL597CKIGDFGLATV | 16    | >BRAFL597CKIGDFGQATV | 20    | 4     |
| >BRAFL597CKIGDFGLATV | 30    | >BRAFL597CKIGDFGQATV | 31    | 1     |
| >BRAFL597CKIGDFGLATV | 4     | >BRAFL597CKIGDFGQATV | 4     | 0     |
| >BRAFL597CKIGDFGLATV | 129   | >BRAFL597CKIGDFGQATV | 212   | 83    |
| >BRAFL597CKIGDFGLATV | 57    | >BRAFL597CKIGDFGQATV | 115   | 58    |
| >BRAFL597CKIGDFGLATV | 132   | >BRAFL597CKIGDFGQATV | 233   | 101   |
| >BRAFL597CVKIGDFGLAT | 144   | >BRAFL597CVKIGDFGQAT | 711   | 567   |
| >BRAFL597CLTVKIGDFGL | 354   | >BRAFL597CLTVKIGDFGQ | 18181 | 17827 |
| >BRAFL597CLTVKIGDFGL | 229   | >BRAFL597CLTVKIGDFGQ | 419   | 190   |
| >BRAFL597CLTVKIGDFGL | 24    | >BRAFL597CLTVKIGDFGQ | 4136  | 4112  |
| >BRAFL597CLTVKIGDFGL | 424   | >BRAFL597CLTVKIGDFGQ | 13261 | 12837 |
| >BRAFL597CLTVKIGDFGL | 380   | >BRAFL597CLTVKIGDFGQ | 694   | 314   |
| >BRAFL597FLATVKSRW   | 36    | >BRAFL597FRATVKSRW   | 15    | 21    |
| >BRAFL597FLATVKSRW   | 86    | >BRAFL597FRATVKSRW   | 2345  | 2259  |
| >BRAFL597FLATVKSRW   | 73    | >BRAFL597FRATVKSRW   | 46    | 27    |
| >BRAFL597FLATVKSRW   | 22    | >BRAFL597FRATVKSRW   | 12    | 10    |
| >BRAFL597FLATVKSRW   | 172   | >BRAFL597FRATVKSRW   | 2114  | 1942  |
| >BRAFL597FLATVKSRW   | 130   | >BRAFL597FRATVKSRW   | 163   | 33    |
| >BRAFL597FGLATVKSR   | 19569 | >BRAFL597FGRATVKSR   | 253   | 19316 |
| >BRAFL597FGLATVKSRW  | 242   | >BRAFL597FGRATVKSRW  | 809   | 567   |
| >BRAFL597FDLTVKIGDFG | 205   | >BRAFL597FDLTVKIGDFG | 24944 | 24739 |
| >BRAFL597FDLTVKIGDFG | 11254 | >BRAFL597FDLTVKIGDFG | 32    | 11222 |
| >BRAFL597FDLTVKIGDFG | 27571 | >BRAFL597FDLTVKIGDFG | 108   | 27463 |
| >BRAFL597FGLATVKSRM  | 98    | >BRAFL597FGRATVKSRV  | 68    | 30    |
| >BRAFL597FGLATVKSRM  | 499   | >BRAFL597FGRATVKSRV  | 346   | 153   |
| >BRAFL597FGLATVKSRM  | 45    | >BRAFL597FGRATVKSRV  | 864   | 819   |
| >BRAFL597FGLATVKSRM  | 215   | >BRAFL597FGRATVKSRV  | 2161  | 1946  |
| >BRAFL597FDFGLATVKSR | 205   | >BRAFL597DFGRATVKSF  | 287   | 82    |
| >BRAFL597FDFGLATVKSR | 246   | >BRAFL597DFGRATVKSF  | 364   | 118   |
| >BRAFL597FGDFGLATV   | 393   | >BRAFL597FGDFGRATV   | 1820  | 1427  |
| >BRAFL597FGDFGLATV   | 227   | >BRAFL597FGDFGRATV   | 371   | 144   |
| >BRAFL597FIGDFGLATV  | 253   | >BRAFL597FIGDFGRATV  | 4547  | 4294  |
| >BRAFL597FKIGDFGLATV | 53    | >BRAFL597FKIGDFGRATV | 410   | 357   |
| >BRAFL597FKIGDFGLATV | 34    | >BRAFL597FKIGDFGRATV | 108   | 74    |
| >BRAFL597FKIGDFGLATV | 12    | >BRAFL597FKIGDFGRATV | 39    | 27    |
| >BRAFL597FKIGDFGLATV | 59    | >BRAFL597FKIGDFGRATV | 404   | 345   |
| >BRAFL597FKIGDFGLATV | 4     | >BRAFL597FKIGDFGRATV | 16    | 12    |
| >BRAFL597FKIGDFGLATV | 15    | >BRAFL597FKIGDFGRATV | 96    | 81    |
| >BRAFL597FKIGDFGLATV | 16    | >BRAFL597FKIGDFGRATV | 101   | 85    |
| >BRAFL597FKIGDFGLATV | 30    | >BRAFL597FKIGDFGRATV | 438   | 408   |
| >BRAFL597FKIGDFGLATV | 4     | >BRAFL597FKIGDFGRATV | 8     | 4     |
| >BRAFL597FKIGDFGLATV | 129   | >BRAFL597FKIGDFGRATV | 160   | 31    |
| >BRAFL597FKIGDFGLATV | 57    | >BRAFL597FKIGDFGRATV | 125   | 68    |

|                       |       |                       |       |       |
|-----------------------|-------|-----------------------|-------|-------|
| >BRAFL597FKIGDFGLATV  | 132   | >BRAFL597FKIGDFGRATV  | 303   | 171   |
| >BRAFL597FVKIGDFGLAT  | 144   | >BRAFL597FVKIGDFGRAT  | 1033  | 889   |
| >BRAFL597FTVKIGDFGL   | 11402 | >BRAFL597FTVKIGDFGR   | 32    | 11370 |
| >BRAFL597FTVKIGDFGL   | 18873 | >BRAFL597FTVKIGDFGR   | 87    | 18786 |
| >BRAFL597FTVKIGDFGL   | 16025 | >BRAFL597FTVKIGDFGR   | 15    | 16010 |
| >BRAFL597FLTVKIGDFGL  | 354   | >BRAFL597FLTVKIGDFGR  | 14641 | 14287 |
| >BRAFL597FLTVKIGDFGL  | 14341 | >BRAFL597FLTVKIGDFGR  | 123   | 14218 |
| >BRAFL597FLTVKIGDFGL  | 22003 | >BRAFL597FLTVKIGDFGR  | 28    | 21975 |
| >BRAFL597FLTVKIGDFGL  | 229   | >BRAFL597FLTVKIGDFGR  | 329   | 100   |
| >BRAFL597FLTVKIGDFGL  | 24    | >BRAFL597FLTVKIGDFGR  | 7349  | 7325  |
| >BRAFL597FLTVKIGDFGL  | 424   | >BRAFL597FLTVKIGDFGR  | 18827 | 18403 |
| >BRAFL597FLTVKIGDFGL  | 380   | >BRAFL597FLTVKIGDFGR  | 650   | 270   |
| >BRAFL597SLATVKSRW    | 36    | >BRAFL597SSATVKSRW    | 77    | 41    |
| >BRAFL597SLATVKSRW    | 86    | >BRAFL597SSATVKSRW    | 972   | 886   |
| >BRAFL597SLATVKSRW    | 73    | >BRAFL597SSATVKSRW    | 157   | 84    |
| >BRAFL597SLATVKSRW    | 22    | >BRAFL597SSATVKSRW    | 94    | 72    |
| >BRAFL597SLATVKSRW    | 172   | >BRAFL597SSATVKSRW    | 1100  | 928   |
| >BRAFL597SLATVKSRW    | 130   | >BRAFL597SSATVKSRW    | 4561  | 4431  |
| >BRAFL597SLATVKSR     | 697   | >BRAFL597SGSATVKSR    | 445   | 252   |
| >BRAFL597SLATVKSR     | 658   | >BRAFL597SGSATVKSR    | 159   | 499   |
| >BRAFL597SLATVKSRW    | 4492  | >BRAFL597SGSATVKSRW   | 41    | 4451  |
| >BRAFL597SLATVKSRW    | 3071  | >BRAFL597SGSATVKSRW   | 102   | 2969  |
| >BRAFL597SLATVKSRW    | 1001  | >BRAFL597SGSATVKSRW   | 18    | 983   |
| >BRAFL597SLATVKSRW    | 242   | >BRAFL597SGSATVKSRW   | 10    | 232   |
| >BRAFL597SLTVKIGDFG   | 205   | >BRAFL597SLTVKIGDFG   | 18337 | 18132 |
| >BRAFL597SLFGLATVKSRW | 98    | >BRAFL597SLFGSATVKSRW | 232   | 134   |
| >BRAFL597SLFGLATVKSRW | 499   | >BRAFL597SLFGSATVKSRW | 908   | 409   |
| >BRAFL597SLFGLATVKSRW | 45    | >BRAFL597SLFGSATVKSRW | 43    | 2     |
| >BRAFL597SLFGLATVKSRW | 215   | >BRAFL597SLFGSATVKSRW | 457   | 242   |
| >BRAFL597SLDFGLATVKSR | 205   | >BRAFL597SLDFGSATVKSR | 346   | 141   |
| >BRAFL597SLDFGLATVKSR | 246   | >BRAFL597SLDFGSATVKSR | 238   | 8     |
| >BRAFL597SLGDFGLATV   | 393   | >BRAFL597SLGDFGSATV   | 957   | 564   |
| >BRAFL597SLGDFGLATV   | 227   | >BRAFL597SLGDFGSATV   | 145   | 82    |
| >BRAFL597SLIGDFGLATV  | 253   | >BRAFL597SLIGDFGSATV  | 1132  | 879   |
| >BRAFL597SLKIGDFGLATV | 53    | >BRAFL597SLKIGDFGSATV | 208   | 155   |
| >BRAFL597SLKIGDFGLATV | 34    | >BRAFL597SLKIGDFGSATV | 66    | 32    |
| >BRAFL597SLKIGDFGLA   | 701   | >BRAFL597SLKIGDFGSA   | 377   | 324   |
| >BRAFL597SLKIGDFGLATV | 12    | >BRAFL597SLKIGDFGSA   | 23    | 11    |
| >BRAFL597SLKIGDFGLA   | 554   | >BRAFL597SLKIGDFGSA   | 370   | 184   |
| >BRAFL597SLKIGDFGLATV | 59    | >BRAFL597SLKIGDFGSA   | 185   | 126   |
| >BRAFL597SLKIGDFGLATV | 4     | >BRAFL597SLKIGDFGSA   | 5     | 1     |
| >BRAFL597SLKIGDFGLATV | 15    | >BRAFL597SLKIGDFGSA   | 15    | 0     |
| >BRAFL597SLKIGDFGLATV | 16    | >BRAFL597SLKIGDFGSA   | 21    | 5     |

|                      |      |                      |       |       |
|----------------------|------|----------------------|-------|-------|
| >BRAFL597SKIGDFGLATV | 30   | >BRAFL597SKIGDFGSATV | 32    | 2     |
| >BRAFL597SKIGDFGLATV | 4    | >BRAFL597SKIGDFGSATV | 4     | 0     |
| >BRAFL597SKIGDFGLATV | 129  | >BRAFL597SKIGDFGSATV | 111   | 18    |
| >BRAFL597SKIGDFGLATV | 57   | >BRAFL597SKIGDFGSATV | 61    | 4     |
| >BRAFL597SKIGDFGLATV | 509  | >BRAFL597SKIGDFGSATV | 441   | 68    |
| >BRAFL597SKIGDFGLATV | 132  | >BRAFL597SKIGDFGSATV | 334   | 202   |
| >BRAFL597SVKIGDFGLAT | 144  | >BRAFL597SVKIGDFGSAT | 322   | 178   |
| >BRAFL597SVKIGDFGLAT | 835  | >BRAFL597SVKIGDFGSAT | 417   | 418   |
| >BRAFL597SLTVKIGDFGL | 354  | >BRAFL597SLTVKIGDFGS | 9923  | 9569  |
| >BRAFL597SLTVKIGDFGL | 229  | >BRAFL597SLTVKIGDFGS | 295   | 66    |
| >BRAFL597SLTVKIGDFGL | 24   | >BRAFL597SLTVKIGDFGS | 5350  | 5326  |
| >BRAFL597SLTVKIGDFGL | 424  | >BRAFL597SLTVKIGDFGS | 12972 | 12548 |
| >BRAFL597SLTVKIGDFGL | 380  | >BRAFL597SLTVKIGDFGS | 786   | 406   |
| >BRAFL597LATVKSRW    | 36   | >BRAFL597LATVKSRW    | 40    | 4     |
| >BRAFL597LATVKSRW    | 86   | >BRAFL597LATVKSRW    | 379   | 293   |
| >BRAFL597LATVKSRW    | 73   | >BRAFL597LATVKSRW    | 92    | 19    |
| >BRAFL597LATVKSRW    | 22   | >BRAFL597LATVKSRW    | 26    | 4     |
| >BRAFL597LATVKSRW    | 172  | >BRAFL597LATVKSRW    | 734   | 562   |
| >BRAFL597LATVKSRW    | 130  | >BRAFL597LATVKSRW    | 624   | 494   |
| >BRAFL597GLATVKSR    | 697  | >BRAFL597GLATVKSR    | 417   | 280   |
| >BRAFL597GLATVKSR    | 658  | >BRAFL597GLATVKSR    | 97    | 561   |
| >BRAFL597GLATVKSRW   | 1001 | >BRAFL597GLATVKSRW   | 182   | 819   |
| >BRAFL597GLATVKSRW   | 242  | >BRAFL597GLATVKSRW   | 36    | 206   |
| >BRAFL597DLTVKIGDFG  | 3196 | >BRAFL597DLTVKIGDFG  | 308   | 2888  |
| >BRAFL597DLTVKIGDFG  | 2678 | >BRAFL597DLTVKIGDFG  | 395   | 2283  |
| >BRAFL597DLTVKIGDFG  | 765  | >BRAFL597DLTVKIGDFG  | 51    | 714   |
| >BRAFL597DLTVKIGDFG  | 1666 | >BRAFL597DLTVKIGDFG  | 106   | 1560  |
| >BRAFL597DLTVKIGDFG  | 205  | >BRAFL597DLTVKIGDFG  | 17    | 188   |
| >BRAFL597FGLATVKSRM  | 98   | >BRAFL597FGLATVKSRM  | 74    | 24    |
| >BRAFL597FGLATVKSRM  | 499  | >BRAFL597FGLATVKSRM  | 579   | 80    |
| >BRAFL597FGLATVKSRM  | 45   | >BRAFL597FGLATVKSRM  | 42    | 3     |
| >BRAFL597FGLATVKSRM  | 215  | >BRAFL597FGLATVKSRM  | 337   | 122   |
| >BRAFL597DFGLATVKSR  | 205  | >BRAFL597DFGLATVKSR  | 430   | 225   |
| >BRAFL597DFGLATVKSR  | 246  | >BRAFL597DFGLATVKSR  | 466   | 220   |
| >BRAFL597GDFGLATV    | 393  | >BRAFL597GDFGVATV    | 935   | 542   |
| >BRAFL597GDFGLATV    | 227  | >BRAFL597GDFGVATV    | 230   | 3     |
| >BRAFL597IGDFGLATV   | 253  | >BRAFL597IGDFGVATV   | 694   | 441   |
| >BRAFL597IGDFGLATV   | 816  | >BRAFL597IGDFGVATV   | 464   | 352   |
| >BRAFL597KIGDFGLATV  | 53   | >BRAFL597KIGDFGVATV  | 128   | 75    |
| >BRAFL597KIGDFGLATV  | 34   | >BRAFL597KIGDFGVATV  | 60    | 26    |
| >BRAFL597KIGDFGLATV  | 12   | >BRAFL597KIGDFGVATV  | 18    | 6     |
| >BRAFL597KIGDFGLATV  | 59   | >BRAFL597KIGDFGVATV  | 156   | 97    |
| >BRAFL597KIGDFGLATV  | 4    | >BRAFL597KIGDFGVATV  | 4     | 0     |

|                      |      |                      |       |       |
|----------------------|------|----------------------|-------|-------|
| >BRAFL597VKIGDFGLATV | 15   | >BRAFL597VKIGDFGVATV | 12    | 3     |
| >BRAFL597VKIGDFGLATV | 16   | >BRAFL597VKIGDFGVATV | 13    | 3     |
| >BRAFL597VKIGDFGLATV | 30   | >BRAFL597VKIGDFGVATV | 20    | 10    |
| >BRAFL597VKIGDFGLATV | 4    | >BRAFL597VKIGDFGVATV | 3     | 1     |
| >BRAFL597VKIGDFGLATV | 129  | >BRAFL597VKIGDFGVATV | 133   | 4     |
| >BRAFL597VKIGDFGLATV | 57   | >BRAFL597VKIGDFGVATV | 58    | 1     |
| >BRAFL597VKIGDFGLATV | 509  | >BRAFL597VKIGDFGVATV | 218   | 291   |
| >BRAFL597VKIGDFGLATV | 132  | >BRAFL597VKIGDFGVATV | 207   | 75    |
| >BRAFL597VKIGDFGL    | 1539 | >BRAFL597VKIGDFGV    | 284   | 1255  |
| >BRAFL597VKIGDFGLAT  | 144  | >BRAFL597VKIGDFGVAT  | 301   | 157   |
| >BRAFL597VKIGDFGLAT  | 835  | >BRAFL597VKIGDFGVAT  | 451   | 384   |
| >BRAFL597TVKIGDFGL   | 1923 | >BRAFL597TVKIGDFGV   | 259   | 1664  |
| >BRAFL597TVKIGDFGL   | 4498 | >BRAFL597TVKIGDFGV   | 136   | 4362  |
| >BRAFL597TVKIGDFGL   | 653  | >BRAFL597TVKIGDFGV   | 68    | 585   |
| >BRAFL597LTVKIGDFGL  | 354  | >BRAFL597LTVKIGDFGV  | 92    | 262   |
| >BRAFL597LTVKIGDFGL  | 2667 | >BRAFL597LTVKIGDFGV  | 155   | 2512  |
| >BRAFL597LTVKIGDFGL  | 4299 | >BRAFL597LTVKIGDFGV  | 192   | 4107  |
| >BRAFL597LTVKIGDFGL  | 6154 | >BRAFL597LTVKIGDFGV  | 274   | 5880  |
| >BRAFL597LTVKIGDFGL  | 229  | >BRAFL597LTVKIGDFGV  | 589   | 360   |
| >BRAFL597LTVKIGDFGL  | 1233 | >BRAFL597LTVKIGDFGV  | 108   | 1125  |
| >BRAFL597LTVKIGDFGL  | 24   | >BRAFL597LTVKIGDFGV  | 537   | 513   |
| >BRAFL597LTVKIGDFGL  | 424  | >BRAFL597LTVKIGDFGV  | 2135  | 1711  |
| >BRAFL597LTVKIGDFGL  | 380  | >BRAFL597LTVKIGDFGV  | 530   | 150   |
| >BRAFL618SLWMAPEVI   | 499  | >BRAFL618SLWMAPEVI   | 589   | 90    |
| >BRAFL618SLWMAPEVI   | 71   | >BRAFL618SLWMAPEVI   | 118   | 47    |
| >BRAFL618SLWMAPEVIR  | 569  | >BRAFL618SLWMAPEVIR  | 409   | 160   |
| >BRAFL618SLWMAPEVIR  | 45   | >BRAFL618SLWMAPEVIR  | 24    | 21    |
| >BRAFL618SLWMAPEVI   | 172  | >BRAFL618SLWMAPEVI   | 117   | 55    |
| >BRAFL618SLWMAPEVIR  | 1656 | >BRAFL618SLWMAPEVIR  | 467   | 1189  |
| >BRAFL618SLWMAPEVIR  | 438  | >BRAFL618SLWMAPEVIR  | 310   | 128   |
| >BRAFL618SILWMAPEV   | 1052 | >BRAFL618SILWMAPEV   | 172   | 880   |
| >BRAFL618SILWMAPEVIR | 1975 | >BRAFL618SILWMAPEVIR | 393   | 1582  |
| >BRAFL618SILWMAPEV   | 9    | >BRAFL618SILWMAPEV   | 367   | 358   |
| >BRAFL618SILWMAPEVI  | 60   | >BRAFL618SILWMAPEVI  | 9251  | 9191  |
| >BRAFL618SILWMAPEVIR | 80   | >BRAFL618SILWMAPEVIR | 7076  | 6996  |
| >BRAFL618SILWMAPEV   | 51   | >BRAFL618SILWMAPEV   | 4691  | 4640  |
| >BRAFL618SILWMAPEV   | 32   | >BRAFL618SILWMAPEV   | 8320  | 8288  |
| >BRAFL618SILWMAPEVI  | 456  | >BRAFL618SILWMAPEVI  | 17757 | 17301 |
| >BRAFL618SILWMAPEV   | 54   | >BRAFL618SILWMAPEV   | 686   | 632   |
| >BRAFL618SILWMAPEV   | 2    | >BRAFL618SILWMAPEV   | 196   | 194   |
| >BRAFL618SILWMAPEVI  | 5    | >BRAFL618SILWMAPEVI  | 4000  | 3995  |
| >BRAFL618SILWMAPEVIR | 9    | >BRAFL618SILWMAPEVIR | 8005  | 7996  |
| >BRAFL618SILWMAPEV   | 9    | >BRAFL618SILWMAPEV   | 12161 | 12152 |



|                      |       |                      |       |       |
|----------------------|-------|----------------------|-------|-------|
| >BRAFL618SILWMAPEVI  | 88    | >BRAFL618SISWMAPEVI  | 22726 | 22638 |
| >BRAFL618SILWMAPEV   | 4     | >BRAFL618SISWMAPEV   | 656   | 652   |
| >BRAFL618SILWMAPEVI  | 19    | >BRAFL618SISWMAPEVI  | 17460 | 17441 |
| >BRAFL618SILWMAPEVIR | 81    | >BRAFL618SISWMAPEVIR | 19838 | 19757 |
| >BRAFL618SILWMAPEV   | 2     | >BRAFL618SISWMAPEV   | 6023  | 6021  |
| >BRAFL618SILWMAPEVI  | 12    | >BRAFL618SISWMAPEVI  | 18216 | 18204 |
| >BRAFL618SILWMAPEVIR | 34    | >BRAFL618SISWMAPEVIR | 20749 | 20715 |
| >BRAFL618SILWMAPEV   | 3     | >BRAFL618SISWMAPEV   | 1220  | 1217  |
| >BRAFL618SILWMAPEVI  | 47    | >BRAFL618SISWMAPEVI  | 31736 | 31689 |
| >BRAFL618SILWMAPEVIR | 30    | >BRAFL618SISWMAPEVIR | 31489 | 31459 |
| >BRAFL618SILWMAPEVI  | 231   | >BRAFL618SISWMAPEVI  | 366   | 135   |
| >BRAFL618SILWMAPEVIR | 1509  | >BRAFL618SISWMAPEVIR | 269   | 1240  |
| >BRAFL618SILWMAPEV   | 377   | >BRAFL618SISWMAPEV   | 874   | 497   |
| >BRAFL618SILWMAPEV   | 535   | >BRAFL618SISWMAPEV   | 371   | 164   |
| >BRAFL618SILWMAPEVI  | 241   | >BRAFL618SISWMAPEVI  | 171   | 70    |
| >BRAFL618SILWMAPEVIR | 266   | >BRAFL618SISWMAPEVIR | 192   | 74    |
| >BRAFL618SILWMAPEV   | 11822 | >BRAFL618SISWMAPEV   | 55    | 11767 |
| >BRAFL618SILWMAPEVI  | 11418 | >BRAFL618SISWMAPEVI  | 46    | 11372 |
| >BRAFL618SILWMAPEVIR | 784   | >BRAFL618SISWMAPEVIR | 5     | 779   |
| >BRAFL618SILWMAPEVIR | 1069  | >BRAFL618SISWMAPEVIR | 475   | 594   |
| >BRAFL618SILWMAPEVIR | 10256 | >BRAFL618SISWMAPEVIR | 217   | 10039 |
| >BRAFL618SILWMAPEVI  | 11142 | >BRAFL618SISWMAPEVI  | 94    | 11048 |
| >BRAFL618SILWMAPEVIR | 11386 | >BRAFL618SISWMAPEVIR | 156   | 11230 |
| >BRAFL618SILWMAPEVIR | 3037  | >BRAFL618SISWMAPEVIR | 127   | 2910  |
| >BRAFL618SILWMAPEVIR | 86    | >BRAFL618SISWMAPEVIR | 227   | 141   |
| >BRAFL618SILWMAPEVI  | 903   | >BRAFL618SISWMAPEVI  | 16    | 887   |
| >BRAFL618SILWMAPEVIR | 13314 | >BRAFL618SISWMAPEVIR | 493   | 12821 |
| >BRAFL618SHQFEQLSGSI | 256   | >BRAFL618SHQFEQLSGSI | 9817  | 9561  |
| >BRAFL618SHQFEQLSGSI | 196   | >BRAFL618SHQFEQLSGSI | 4170  | 3974  |
| >BRAFL618SHQFEQLSGSI | 89    | >BRAFL618SHQFEQLSGSI | 1157  | 1068  |
| >BRAFL618SHQFEQLSGSI | 432   | >BRAFL618SHQFEQLSGSI | 11835 | 11403 |
| >BRAFL618SHQFEQLSGSI | 183   | >BRAFL618SHQFEQLSGSI | 4124  | 3941  |
| >BRAFL618SHQFEQLSGSI | 157   | >BRAFL618SHQFEQLSGSI | 2202  | 2045  |
| >BRAFL618SHQFEQLSGSI | 8     | >BRAFL618SHQFEQLSGSI | 338   | 330   |
| >BRAFL618SHQFEQLSGSI | 16    | >BRAFL618SHQFEQLSGSI | 7441  | 7425  |
| >BRAFL618SHQFEQLSGSI | 388   | >BRAFL618SHQFEQLSGSI | 17102 | 16714 |
| >BRAFL618SHQFEQLSGSI | 485   | >BRAFL618SHQFEQLSGSI | 7281  | 6796  |
| >BRAFL618SHQFEQLSGSI | 111   | >BRAFL618SHQFEQLSGSI | 10170 | 10059 |
| >BRAFL618SILWMAPEV   | 20    | >BRAFL618SISWMAPEV   | 76    | 56    |
| >BRAFL618SILWMAPEVI  | 368   | >BRAFL618SISWMAPEVI  | 1931  | 1563  |
| >BRAFL618SILWMAPEV   | 943   | >BRAFL618SISWMAPEV   | 179   | 764   |
| >BRAFL618SILWMAPEV   | 176   | >BRAFL618SISWMAPEV   | 38    | 138   |
| >BRAFL618SILWMAPEVI  | 378   | >BRAFL618SISWMAPEVI  | 337   | 41    |

|                      |      |                      |      |      |
|----------------------|------|----------------------|------|------|
| >BRAFL618SILWMAPEV   | 10   | >BRAFL618SISWMAPEV   | 33   | 23   |
| >BRAFL618SILWMAPEVI  | 367  | >BRAFL618SISWMAPEVI  | 2016 | 1649 |
| >BRAFL618SILWMAPEV   | 3    | >BRAFL618SISWMAPEV   | 12   | 9    |
| >BRAFL618SILWMAPEVI  | 28   | >BRAFL618SISWMAPEVI  | 286  | 258  |
| >BRAFL618SILWMAPEV   | 155  | >BRAFL618SISWMAPEV   | 871  | 716  |
| >BRAFL618SILWMAPEV   | 5    | >BRAFL618SISWMAPEV   | 8    | 3    |
| >BRAFL618SILWMAPEVI  | 67   | >BRAFL618SISWMAPEVI  | 448  | 381  |
| >BRAFL618SILWMAPEV   | 15   | >BRAFL618SISWMAPEV   | 88   | 73   |
| >BRAFL618SILWMAPEV   | 3    | >BRAFL618SISWMAPEV   | 3    | 0    |
| >BRAFL618SILWMAPEVI  | 314  | >BRAFL618SISWMAPEVI  | 475  | 161  |
| >BRAFL618SILWMAPEVI  | 157  | >BRAFL618SISWMAPEVI  | 144  | 13   |
| >BRAFL618SILWMAPEVI  | 167  | >BRAFL618SISWMAPEVI  | 414  | 247  |
| >BRAFL618SILWMAPEVI  | 52   | >BRAFL618SISWMAPEVI  | 176  | 124  |
| >BRAFL618SILWMAPEVI  | 90   | >BRAFL618SISWMAPEVI  | 27   | 63   |
| >BRAFL618SILWMAPEV   | 5    | >BRAFL618SISWMAPEV   | 25   | 20   |
| >BRAFL618SILWMAPEVI  | 175  | >BRAFL618SISWMAPEVI  | 1630 | 1455 |
| >BRAFL618SILWMAPEVI  | 2407 | >BRAFL618SISWMAPEVI  | 367  | 2040 |
| >BRAFL618SILWMAPEVI  | 84   | >BRAFL618SISWMAPEVI  | 165  | 81   |
| >BRAFL618SGSILWMAPE' | 412  | >BRAFL618SGSISWMAPE' | 619  | 207  |
| >BRAFL618SGSILWMAPE' | 1669 | >BRAFL618SGSISWMAPE' | 494  | 1175 |
| >BRAFL618SGSILWMAPE' | 770  | >BRAFL618SGSISWMAPE' | 287  | 483  |
| >BRAFL618SGSILWMAPE' | 295  | >BRAFL618SGSISWMAPE' | 411  | 116  |
| >BRAFL618SGSILWMAPE' | 336  | >BRAFL618SGSISWMAPE' | 436  | 100  |
| >BRAFL618SGSILWMAPE' | 755  | >BRAFL618SGSISWMAPE' | 197  | 558  |
| >BRAFL618SGSILWMAPE' | 257  | >BRAFL618SGSISWMAPE' | 77   | 180  |
| >BRAFL618LSGSILWMA   | 395  | >BRAFL618LSGSISWMA   | 711  | 316  |
| >BRAFL618LSGSILWM    | 140  | >BRAFL618LSGSISWM    | 105  | 35   |
| >BRAFL618LSGSILWM    | 849  | >BRAFL618LSGSISWM    | 464  | 385  |
| >BRAFL618QLSGSILWM,  | 71   | >BRAFL618QLSGSISWM,  | 241  | 170  |
| >BRAFL618QLSGSILWM   | 51   | >BRAFL618QLSGSISWM   | 22   | 29   |
| >BRAFL618QLSGSILWM,  | 31   | >BRAFL618QLSGSISWM,  | 59   | 28   |
| >BRAFL618QLSGSILWM   | 231  | >BRAFL618QLSGSISWM   | 66   | 165  |
| >BRAFL618QLSGSILWM,  | 89   | >BRAFL618QLSGSISWM,  | 218  | 129  |
| >BRAFL618QLSGSILWM,  | 156  | >BRAFL618QLSGSISWM,  | 518  | 362  |
| >BRAFL618QLSGSILWM   | 335  | >BRAFL618QLSGSISWM   | 282  | 53   |
| >BRAFL618QLSGSILWM,  | 27   | >BRAFL618QLSGSISWM,  | 36   | 9    |
| >BRAFL618QLSGSILWM,  | 413  | >BRAFL618QLSGSISWM,  | 430  | 17   |
| >BRAFL618QLSGSILWM,  | 82   | >BRAFL618QLSGSISWM,  | 98   | 16   |
| >BRAFL618QLSGSILWM,  | 102  | >BRAFL618QLSGSISWM,  | 85   | 17   |
| >BRAFL618QLSGSILWM   | 17   | >BRAFL618QLSGSISWM   | 11   | 6    |
| >BRAFL618QLSGSILWM,  | 5    | >BRAFL618QLSGSISWM,  | 5    | 0    |
| >BRAFL618QLSGSILWM   | 804  | >BRAFL618QLSGSISWM   | 232  | 572  |
| >BRAFL618QLSGSILW    | 583  | >BRAFL618QLSGSISW    | 369  | 214  |

|                       |      |                       |       |       |
|-----------------------|------|-----------------------|-------|-------|
| >BRAFL618S QLSGSILW   | 207  | >BRAFL618S QLSGSISW   | 340   | 133   |
| >BRAFL618S QLSGSILWM  | 2296 | >BRAFL618S QLSGSISWM  | 105   | 2191  |
| >BRAFL618S EQLSGSILWN | 53   | >BRAFL618S EQLSGSISWN | 79    | 26    |
| >BRAFL618S EQLSGSILWN | 307  | >BRAFL618S EQLSGSISWN | 92    | 215   |
| >BRAFL618S EQLSGSILWN | 355  | >BRAFL618S EQLSGSISWN | 256   | 99    |
| >BRAFL618S EQLSGSILWN | 399  | >BRAFL618S EQLSGSISWN | 362   | 37    |
| >BRAFL618S EQLSGSIL   | 51   | >BRAFL618S EQLSGSIS   | 2786  | 2735  |
| >BRAFL618S EQLSGSILW  | 1483 | >BRAFL618S EQLSGSISW  | 183   | 1300  |
| >BRAFL618S EQLSGSILWN | 277  | >BRAFL618S EQLSGSISWN | 131   | 146   |
| >BRAFL618S EQLSGSIL   | 28   | >BRAFL618S EQLSGSIS   | 12991 | 12963 |
| >BRAFL618S EQLSGSILW  | 460  | >BRAFL618S EQLSGSISW  | 630   | 170   |
| >BRAFL618S EQLSGSILW  | 245  | >BRAFL618S EQLSGSISW  | 215   | 30    |
| >BRAFL618S FEQLSGSIL  | 177  | >BRAFL618S FEQLSGSIS  | 9701  | 9524  |
| >BRAFL618S FEQLSGSILW | 377  | >BRAFL618S FEQLSGSISW | 646   | 269   |
| >BRAFL618S FEQLSGSILW | 129  | >BRAFL618S FEQLSGSISW | 102   | 27    |
| >BRAFL618S FEQLSGSILW | 896  | >BRAFL618S FEQLSGSISW | 417   | 479   |
| >BRAFL618S FEQLSGSIL  | 436  | >BRAFL618S FEQLSGSIS  | 21442 | 21006 |
| >BRAFL618S FEQLSGSIL  | 34   | >BRAFL618S FEQLSGSIS  | 13821 | 13787 |
| >BRAFL618S FEQLSGSILW | 243  | >BRAFL618S FEQLSGSISW | 400   | 157   |
| >BRAFL618S FEQLSGSIL  | 71   | >BRAFL618S FEQLSGSIS  | 1533  | 1462  |
| >BRAFL618S FEQLSGSILW | 385  | >BRAFL618S FEQLSGSISW | 571   | 186   |
| >BRAFL618S FEQLSGSILW | 72   | >BRAFL618S FEQLSGSISW | 88    | 16    |
| >BRAFL618S FEQLSGSILW | 288  | >BRAFL618S FEQLSGSISW | 656   | 368   |
| >BRAFL618S FEQLSGSILW | 1709 | >BRAFL618S FEQLSGSISW | 289   | 1420  |
| >BRAFL618S FEQLSGSIL  | 81   | >BRAFL618S FEQLSGSIS  | 4943  | 4862  |
| >BRAFL618S FEQLSGSILW | 217  | >BRAFL618S FEQLSGSISW | 215   | 2     |
| >BRAFL618S FEQLSGSILW | 508  | >BRAFL618S FEQLSGSISW | 328   | 180   |
| >BRAFL618S FEQLSGSILW | 311  | >BRAFL618S FEQLSGSISW | 281   | 30    |
| >BRAFL618V LWMAPEVI   | 499  | >BRAFL618V WWMAPEVI   | 726   | 227   |
| >BRAFL618V LWMAPEVI   | 71   | >BRAFL618V WWMAPEVI   | 39    | 32    |
| >BRAFL618V LWMAPEVIRI | 841  | >BRAFL618V WWMAPEVII  | 478   | 363   |
| >BRAFL618V LWMAPEVIR  | 45   | >BRAFL618V WWMAPEVII  | 22    | 23    |
| >BRAFL618V LWMAPEVI   | 172  | >BRAFL618V WWMAPEVI   | 541   | 369   |
| >BRAFL618V LWMAPEVIRI | 438  | >BRAFL618V WWMAPEVII  | 1239  | 801   |
| >BRAFL618V ILWMAPEVIR | 1975 | >BRAFL618V IWWMAPEVI  | 273   | 1702  |
| >BRAFL618V ILWMAPEV   | 9    | >BRAFL618V IWWMAPEV   | 2741  | 2732  |
| >BRAFL618V ILWMAPEVI  | 60   | >BRAFL618V IWWMAPEVI  | 15882 | 15822 |
| >BRAFL618V ILWMAPEVIR | 80   | >BRAFL618V IWWMAPEVI  | 12343 | 12263 |
| >BRAFL618V ILWMAPEV   | 51   | >BRAFL618V IWWMAPEV   | 5069  | 5018  |
| >BRAFL618V ILWMAPEV   | 32   | >BRAFL618V IWWMAPEV   | 16845 | 16813 |
| >BRAFL618V ILWMAPEVI  | 456  | >BRAFL618V IWWMAPEVI  | 22496 | 22040 |
| >BRAFL618V ILWMAPEV   | 54   | >BRAFL618V IWWMAPEV   | 1110  | 1056  |
| >BRAFL618V ILWMAPEV   | 2    | >BRAFL618V IWWMAPEV   | 546   | 544   |

|                      |       |                       |       |       |
|----------------------|-------|-----------------------|-------|-------|
| >BRAFL618VILWMAPEVI  | 5     | >BRAFL618VIWWMAPEVI   | 7232  | 7227  |
| >BRAFL618VILWMAPEVIR | 9     | >BRAFL618VIWWMAPEVI   | 11647 | 11638 |
| >BRAFL618VILWMAPEV   | 9     | >BRAFL618VIWWMAPEV    | 13999 | 13990 |
| >BRAFL618VILWMAPEVI  | 88    | >BRAFL618VIWWMAPEVI   | 22848 | 22760 |
| >BRAFL618VILWMAPEV   | 4     | >BRAFL618VIWWMAPEV    | 833   | 829   |
| >BRAFL618VILWMAPEVI  | 19    | >BRAFL618VIWWMAPEVI   | 19011 | 18992 |
| >BRAFL618VILWMAPEVIR | 81    | >BRAFL618VIWWMAPEVI   | 21096 | 21015 |
| >BRAFL618VILWMAPEV   | 2     | >BRAFL618VIWWMAPEV    | 11225 | 11223 |
| >BRAFL618VILWMAPEVI  | 12    | >BRAFL618VIWWMAPEVI   | 21138 | 21126 |
| >BRAFL618VILWMAPEVIR | 34    | >BRAFL618VIWWMAPEVI   | 22582 | 22548 |
| >BRAFL618VILWMAPEV   | 3     | >BRAFL618VIWWMAPEV    | 1432  | 1429  |
| >BRAFL618VILWMAPEVI  | 47    | >BRAFL618VIWWMAPEVI   | 31267 | 31220 |
| >BRAFL618VILWMAPEVIR | 30    | >BRAFL618VIWWMAPEVI   | 31307 | 31277 |
| >BRAFL618VILWMAPEVI  | 1382  | >BRAFL618VIWWMAPEVI   | 69    | 1313  |
| >BRAFL618VILWMAPEVI  | 3636  | >BRAFL618VIWWMAPEVI   | 151   | 3485  |
| >BRAFL618VILWMAPEVI  | 231   | >BRAFL618VIWWMAPEVI   | 10261 | 10030 |
| >BRAFL618VILWMAPEV   | 377   | >BRAFL618VIWWMAPEV    | 10745 | 10368 |
| >BRAFL618VILWMAPEVI  | 241   | >BRAFL618VIWWMAPEVI   | 2056  | 1815  |
| >BRAFL618VILWMAPEVIR | 266   | >BRAFL618VIWWMAPEVI   | 2112  | 1846  |
| >BRAFL618VILWMAPEVIR | 86    | >BRAFL618VIWWMAPEVI   | 14    | 72    |
| >BRAFL618VILWMAPEV   | 24731 | >BRAFL618VIWWMAPEV    | 131   | 24600 |
| >BRAFL618VILWMAPEVI  | 23008 | >BRAFL618VIWWMAPEVI   | 104   | 22904 |
| >BRAFL618VILWMAPEVIR | 28559 | >BRAFL618VIWWMAPEVI   | 149   | 28410 |
| >BRAFL618VHQFEQLSGSI | 256   | >BRAFL618VHQFEQLSGSI' | 18497 | 18241 |
| >BRAFL618VHQFEQLSGSI | 196   | >BRAFL618VHQFEQLSGSI' | 12809 | 12613 |
| >BRAFL618VHQFEQLSGSI | 89    | >BRAFL618VHQFEQLSGSI' | 5138  | 5049  |
| >BRAFL618VHQFEQLSGSI | 432   | >BRAFL618VHQFEQLSGSI' | 15685 | 15253 |
| >BRAFL618VHQFEQLSGSI | 183   | >BRAFL618VHQFEQLSGSI' | 287   | 104   |
| >BRAFL618VHQFEQLSGSI | 157   | >BRAFL618VHQFEQLSGSI' | 180   | 23    |
| >BRAFL618VHQFEQLSGSI | 8     | >BRAFL618VHQFEQLSGSI' | 27    | 19    |
| >BRAFL618VHQFEQLSGSI | 4700  | >BRAFL618VHQFEQLSGSI' | 209   | 4491  |
| >BRAFL618VHQFEQLSGSI | 16    | >BRAFL618VHQFEQLSGSI' | 2026  | 2010  |
| >BRAFL618VHQFEQLSGSI | 388   | >BRAFL618VHQFEQLSGSI' | 12540 | 12152 |
| >BRAFL618VHQFEQLSGSI | 485   | >BRAFL618VHQFEQLSGSI' | 9355  | 8870  |
| >BRAFL618VHQFEQLSGSI | 111   | >BRAFL618VHQFEQLSGSI' | 5382  | 5271  |
| >BRAFL618VHQFEQLSGSI | 9050  | >BRAFL618VHQFEQLSGSI' | 29    | 9021  |
| >BRAFL618VSILWMAPEV  | 20    | >BRAFL618VSIWWMAPEV   | 10    | 10    |
| >BRAFL618VSILWMAPEVI | 368   | >BRAFL618VSIWWMAPEV   | 920   | 552   |
| >BRAFL618VSILWMAPEV  | 176   | >BRAFL618VSIWWMAPEV   | 214   | 38    |
| >BRAFL618VSILWMAPEVI | 378   | >BRAFL618VSIWWMAPEV   | 405   | 27    |
| >BRAFL618VSILWMAPEV  | 10    | >BRAFL618VSIWWMAPEV   | 18    | 8     |
| >BRAFL618VSILWMAPEVI | 367   | >BRAFL618VSIWWMAPEV   | 937   | 570   |
| >BRAFL618VSILWMAPEV  | 3     | >BRAFL618VSIWWMAPEV   | 2     | 1     |

|                      |      |                       |      |      |
|----------------------|------|-----------------------|------|------|
| >BRAFL618VSILWMAPEVI | 28   | >BRAFL618VSIWWMAPEV   | 12   | 16   |
| >BRAFL618VSILWMAPEV  | 155  | >BRAFL618VSIWWMAPEV   | 165  | 10   |
| >BRAFL618VSILWMAPEV  | 5    | >BRAFL618VSIWWMAPEV   | 4    | 1    |
| >BRAFL618VSILWMAPEVI | 67   | >BRAFL618VSIWWMAPEV   | 32   | 35   |
| >BRAFL618VSILWMAPEV  | 15   | >BRAFL618VSIWWMAPEV   | 11   | 4    |
| >BRAFL618VSILWMAPEVI | 1105 | >BRAFL618VSIWWMAPEV   | 485  | 620  |
| >BRAFL618VSILWMAPEV  | 3    | >BRAFL618VSIWWMAPEV   | 2    | 1    |
| >BRAFL618VSILWMAPEVI | 314  | >BRAFL618VSIWWMAPEV   | 108  | 206  |
| >BRAFL618VSILWMAPEVI | 157  | >BRAFL618VSIWWMAPEV   | 181  | 24   |
| >BRAFL618VSILWMAPEVI | 167  | >BRAFL618VSIWWMAPEV   | 41   | 126  |
| >BRAFL618VSILWMAPEVI | 52   | >BRAFL618VSIWWMAPEV   | 28   | 24   |
| >BRAFL618VSILWMAPEVI | 90   | >BRAFL618VSIWWMAPEV   | 77   | 13   |
| >BRAFL618VSILWMAPEV  | 5    | >BRAFL618VSIWWMAPEV   | 5    | 0    |
| >BRAFL618VSILWMAPEVI | 175  | >BRAFL618VSIWWMAPEV   | 137  | 38   |
| >BRAFL618VSILWMAPEVI | 84   | >BRAFL618VSIWWMAPEV   | 39   | 45   |
| >BRAFL618VGSILWMAPEV | 412  | >BRAFL618VGSIWWMAPI   | 444  | 32   |
| >BRAFL618VGSILWMAPEV | 1669 | >BRAFL618VGSIWWMAPI   | 128  | 1541 |
| >BRAFL618VGSILWMAPEV | 2812 | >BRAFL618VGSIWWMAPI   | 414  | 2398 |
| >BRAFL618VGSILWMAPEV | 3900 | >BRAFL618VGSIWWMAPI   | 400  | 3500 |
| >BRAFL618VGSILWMAPEV | 770  | >BRAFL618VGSIWWMAPI   | 109  | 661  |
| >BRAFL618VGSILWMAPEV | 295  | >BRAFL618VGSIWWMAPI   | 187  | 108  |
| >BRAFL618VGSILWMAPEV | 336  | >BRAFL618VGSIWWMAPI   | 229  | 107  |
| >BRAFL618VGSILWMAPEV | 755  | >BRAFL618VGSIWWMAPI   | 480  | 275  |
| >BRAFL618VGSILWMAPEV | 257  | >BRAFL618VGSIWWMAPI   | 75   | 182  |
| >BRAFL618VSGSILWMAPI | 765  | >BRAFL618VSGSIWWMAPI  | 282  | 483  |
| >BRAFL618VLSGSILWMA  | 395  | >BRAFL618VLSGSIWWMAPI | 2666 | 2271 |
| >BRAFL618VLSGSILWM   | 140  | >BRAFL618VLSGSIWWM    | 259  | 119  |
| >BRAFL618VLSGSILWM   | 614  | >BRAFL618VLSGSIWWM    | 420  | 194  |
| >BRAFL618VQLSGSILWM  | 512  | >BRAFL618VQLSGSIWWN   | 47   | 465  |
| >BRAFL618VQLSGSILWM, | 71   | >BRAFL618VQLSGSIWWN   | 306  | 235  |
| >BRAFL618VQLSGSILWM  | 51   | >BRAFL618VQLSGSIWWN   | 6    | 45   |
| >BRAFL618VQLSGSILWM, | 31   | >BRAFL618VQLSGSIWWN   | 78   | 47   |
| >BRAFL618VQLSGSILWM  | 231  | >BRAFL618VQLSGSIWWN   | 171  | 60   |
| >BRAFL618VQLSGSILWM, | 89   | >BRAFL618VQLSGSIWWN   | 300  | 211  |
| >BRAFL618VQLSGSILWM  | 1383 | >BRAFL618VQLSGSIWWN   | 80   | 1303 |
| >BRAFL618VQLSGSILWM, | 156  | >BRAFL618VQLSGSIWWN   | 815  | 659  |
| >BRAFL618VQLSGSILWM  | 335  | >BRAFL618VQLSGSIWWN   | 22   | 313  |
| >BRAFL618VQLSGSILWM, | 27   | >BRAFL618VQLSGSIWWN   | 14   | 13   |
| >BRAFL618VQLSGSILWM  | 8097 | >BRAFL618VQLSGSIWWN   | 376  | 7721 |
| >BRAFL618VQLSGSILWM, | 413  | >BRAFL618VQLSGSIWWN   | 446  | 33   |
| >BRAFL618VQLSGSILWM  | 1968 | >BRAFL618VQLSGSIWWN   | 140  | 1828 |
| >BRAFL618VQLSGSILWM, | 82   | >BRAFL618VQLSGSIWWN   | 36   | 46   |
| >BRAFL618VQLSGSILWM  | 840  | >BRAFL618VQLSGSIWWN   | 29   | 811  |

|                      |      |                     |       |       |
|----------------------|------|---------------------|-------|-------|
| >BRAFL618VQLSGSILWM  | 102  | >BRAFL618VQLSGSIWWN | 61    | 41    |
| >BRAFL618VQLSGSILWM  | 17   | >BRAFL618VQLSGSIWWN | 4     | 13    |
| >BRAFL618VQLSGSILWM  | 5    | >BRAFL618VQLSGSIWWN | 5     | 0     |
| >BRAFL618VQLSGSILWM  | 804  | >BRAFL618VQLSGSIWWN | 386   | 418   |
| >BRAFL618VQLSGSILW   | 583  | >BRAFL618VQLSGSIWW  | 427   | 156   |
| >BRAFL618VQLSGSILW   | 207  | >BRAFL618VQLSGSIWW  | 806   | 599   |
| >BRAFL618VEQLSGSILWN | 1002 | >BRAFL618VEQLSGSIWW | 472   | 530   |
| >BRAFL618VEQLSGSILWN | 53   | >BRAFL618VEQLSGSIWW | 54    | 1     |
| >BRAFL618VEQLSGSILWN | 307  | >BRAFL618VEQLSGSIWW | 121   | 186   |
| >BRAFL618VEQLSGSILWN | 355  | >BRAFL618VEQLSGSIWW | 291   | 64    |
| >BRAFL618VEQLSGSILWN | 399  | >BRAFL618VEQLSGSIWW | 616   | 217   |
| >BRAFL618VEQLSGSIL   | 51   | >BRAFL618VEQLSGSIW  | 251   | 200   |
| >BRAFL618VEQLSGSILWN | 277  | >BRAFL618VEQLSGSIWW | 469   | 192   |
| >BRAFL618VEQLSGSIL   | 28   | >BRAFL618VEQLSGSIW  | 6303  | 6275  |
| >BRAFL618VEQLSGSILWN | 562  | >BRAFL618VEQLSGSIWW | 348   | 214   |
| >BRAFL618VEQLSGSILW  | 460  | >BRAFL618VEQLSGSIWW | 326   | 134   |
| >BRAFL618VEQLSGSILWN | 872  | >BRAFL618VEQLSGSIWW | 381   | 491   |
| >BRAFL618VEQLSGSILW  | 245  | >BRAFL618VEQLSGSIWW | 708   | 463   |
| >BRAFL618VEQLSGSIL   | 177  | >BRAFL618VEQLSGSIW  | 781   | 604   |
| >BRAFL618VEQLSGSILW  | 377  | >BRAFL618VEQLSGSIWW | 601   | 224   |
| >BRAFL618VEQLSGSILW  | 129  | >BRAFL618VEQLSGSIWW | 225   | 96    |
| >BRAFL618VEQLSGSILW  | 567  | >BRAFL618VEQLSGSIWW | 180   | 387   |
| >BRAFL618VEQLSGSIL   | 436  | >BRAFL618VEQLSGSIW  | 17299 | 16863 |
| >BRAFL618VEQLSGSIL   | 34   | >BRAFL618VEQLSGSIW  | 8623  | 8589  |
| >BRAFL618VEQLSGSILW  | 243  | >BRAFL618VEQLSGSIWW | 220   | 23    |
| >BRAFL618VEQLSGSIL   | 71   | >BRAFL618VEQLSGSIW  | 2103  | 2032  |
| >BRAFL618VEQLSGSILW  | 385  | >BRAFL618VEQLSGSIWW | 348   | 37    |
| >BRAFL618VEQLSGSIL   | 4062 | >BRAFL618VEQLSGSIW  | 124   | 3938  |
| >BRAFL618VEQLSGSILW  | 72   | >BRAFL618VEQLSGSIWW | 101   | 29    |
| >BRAFL618VEQLSGSIL   | 4017 | >BRAFL618VEQLSGSIW  | 151   | 3866  |
| >BRAFL618VEQLSGSILW  | 288  | >BRAFL618VEQLSGSIWW | 322   | 34    |
| >BRAFL618VEQLSGSIL   | 81   | >BRAFL618VEQLSGSIW  | 731   | 650   |
| >BRAFL618VEQLSGSILW  | 217  | >BRAFL618VEQLSGSIWW | 177   | 40    |
| >BRAFL618VEQLSGSILW  | 508  | >BRAFL618VEQLSGSIWW | 300   | 208   |
| >BRAFL618VEQLSGSILW  | 311  | >BRAFL618VEQLSGSIWW | 769   | 458   |
| >BRAFN581IIFLHEDL    | 5602 | >BRAFN581IIFLHEDL   | 46    | 5556  |
| >BRAFN581IIFLHEDLTV  | 106  | >BRAFN581IIFLHEDLTV | 50    | 56    |
| >BRAFN581IIFLHEDL    | 629  | >BRAFN581IIFLHEDL   | 330   | 299   |
| >BRAFN581IIFLHEDLTV  | 125  | >BRAFN581IIFLHEDLTV | 70    | 55    |
| >BRAFN581IIFLHEDLTV  | 99   | >BRAFN581IIFLHEDLTV | 69    | 30    |
| >BRAFN581IIFLHEDLTV  | 155  | >BRAFN581IIFLHEDLTV | 93    | 62    |
| >BRAFN581IIFLHEDLTV  | 353  | >BRAFN581IIFLHEDLTV | 42    | 311   |
| >BRAFN581IIFLHEDLTV  | 756  | >BRAFN581IIFLHEDLTV | 451   | 305   |

|                       |       |                       |     |       |
|-----------------------|-------|-----------------------|-----|-------|
| >BRAFN581NIFLHEDLTV   | 473   | >BRAFN581IIFLHEDLTV   | 99  | 374   |
| >BRAFN581NIFLHEDLTV   | 225   | >BRAFN581IIFLHEDLTV   | 37  | 188   |
| >BRAFN581NIFLHEDLTVI  | 1040  | >BRAFN581IIFLHEDLTVK  | 104 | 936   |
| >BRAFN581NIFLHEDLTVI  | 333   | >BRAFN581IIFLHEDLTVK  | 67  | 266   |
| >BRAFN581NIFLHEDLTVI  | 61    | >BRAFN581IIFLHEDLTVK  | 121 | 60    |
| >BRAFN581NNIFLHEDLTV  | 12233 | >BRAFN581NIIFLHEDLTV  | 290 | 11943 |
| >BRAFN581NNIFLHEDLTV  | 12297 | >BRAFN581NIIFLHEDLTV  | 230 | 12067 |
| >BRAFN581NNIFLHEDLTV  | 3736  | >BRAFN581NIIFLHEDLTV  | 206 | 3530  |
| >BRAFN581NNIFLHEDLTV  | 764   | >BRAFN581NIIFLHEDLTV  | 61  | 703   |
| >BRAFN581NNIFLHEDLTV  | 8430  | >BRAFN581NIIFLHEDLTV  | 317 | 8113  |
| >BRAFN581SIIHRDLKSNNI | 20168 | >BRAFN581SIIHRDLKSNNI | 373 | 19795 |
| >BRAFN581KSNNIIFLH    | 330   | >BRAFN581KSNNIIFLH    | 586 | 256   |
| >BRAFN581KSNNIIFLH    | 129   | >BRAFN581KSNNIIFLH    | 245 | 116   |
| >BRAFN581KSNNIIFLH    | 68    | >BRAFN581KSNNIIFLH    | 63  | 5     |
| >BRAFN581KSNNIIFLHEDI | 30    | >BRAFN581KSNNIIFLHEDL | 141 | 111   |
| >BRAFN581KSNNIIFLHEDI | 370   | >BRAFN581KSNNIIFLHEDL | 100 | 270   |
| >BRAFN581KSNNIIFLH    | 342   | >BRAFN581KSNNIIFLH    | 298 | 44    |
| >BRAFN581KSNNIIFLHEDI | 298   | >BRAFN581KSNNIIFLHEDL | 271 | 27    |
| >BRAFN581LKSNNIIFL    | 2317  | >BRAFN581LKSNNIIFL    | 440 | 1877  |
| >BRAFN581LKSNNIIFL    | 52    | >BRAFN581LKSNNIIFL    | 81  | 29    |
| >BRAFN581DLKSNNIIFL   | 567   | >BRAFN581DLKSNNIIFL   | 100 | 467   |
| >BRAFN581DLKSNNIIF    | 328   | >BRAFN581DLKSNNIIF    | 720 | 392   |
| >BRAFN581DLKSNNIIF    | 419   | >BRAFN581DLKSNNIIF    | 418 | 1     |
| >BRAFN581RDLKSNNIIF   | 31    | >BRAFN581RDLKSNNIIF   | 29  | 2     |
| >BRAFN581RDLKSNNIIF   | 215   | >BRAFN581RDLKSNNIIF   | 807 | 592   |
| >BRAFN581RDLKSNNII    | 41    | >BRAFN581RDLKSNNII    | 20  | 21    |
| >BRAFN581RDLKSNNIIFL  | 716   | >BRAFN581RDLKSNNIIFL  | 236 | 480   |
| >BRAFN581RDLKSNNII    | 89    | >BRAFN581RDLKSNNII    | 58  | 31    |
| >BRAFN581RDLKSNNIIFL  | 519   | >BRAFN581RDLKSNNIIFL  | 411 | 108   |
| >BRAFN581HRDLKSNNIIF  | 86    | >BRAFN581HRDLKSNNIIF  | 54  | 32    |
| >BRAFN581HRDLKSNNIIF  | 129   | >BRAFN581HRDLKSNNIIFL | 108 | 21    |
| >BRAFN581HRDLKSNNIIF  | 210   | >BRAFN581HRDLKSNNIIFL | 120 | 90    |
| >BRAFN581IHRDLKSNNIIF | 16    | >BRAFN581IHRDLKSNNIIF | 15  | 1     |
| >BRAFN581IHRDLKSNNIIF | 133   | >BRAFN581IHRDLKSNNIIF | 272 | 139   |
| >BRAFN581IIHRDLKSNNII | 409   | >BRAFN581IIHRDLKSNNII | 719 | 310   |
| >BRAFN581NIFLHEDL     | 5602  | >BRAFN581SIFLHEDL     | 197 | 5405  |
| >BRAFN581NIFLHEDLTV   | 106   | >BRAFN581SIFLHEDLTV   | 48  | 58    |
| >BRAFN581NIFLHEDL     | 629   | >BRAFN581SIFLHEDL     | 267 | 362   |
| >BRAFN581NIFLHEDLTV   | 125   | >BRAFN581SIFLHEDLTV   | 55  | 70    |
| >BRAFN581NIFLHEDLTV   | 99    | >BRAFN581SIFLHEDLTV   | 50  | 49    |
| >BRAFN581NIFLHEDLTV   | 155   | >BRAFN581SIFLHEDLTV   | 73  | 82    |
| >BRAFN581NIFLHEDLTV   | 353   | >BRAFN581SIFLHEDLTV   | 38  | 315   |
| >BRAFN581NIFLHEDLTV   | 756   | >BRAFN581SIFLHEDLTV   | 272 | 484   |

|                        |      |                        |     |      |
|------------------------|------|------------------------|-----|------|
| >BRAFN581!NIFLHEDLTV   | 473  | >BRAFN581!SIFLHEDLTV   | 24  | 449  |
| >BRAFN581!NIFLHEDLTV   | 225  | >BRAFN581!SIFLHEDLTV   | 28  | 197  |
| >BRAFN581!NIFLHEDLTVK  | 1040 | >BRAFN581!SIFLHEDLTVK  | 169 | 871  |
| >BRAFN581!NIFLHEDLTVK  | 333  | >BRAFN581!SIFLHEDLTVK  | 23  | 310  |
| >BRAFN581!NIFLHEDL     | 4498 | >BRAFN581!SIFLHEDL     | 445 | 4053 |
| >BRAFN581!NIFLHEDLTVK  | 61   | >BRAFN581!SIFLHEDLTVK  | 116 | 55   |
| >BRAFN581!NNIFLHEDL    | 3736 | >BRAFN581!NSIFLHEDL    | 296 | 3440 |
| >BRAFN581!NNIFLHEDLV   | 764  | >BRAFN581!NSIFLHEDLV   | 69  | 695  |
| >BRAFN581!KSNNIFLH     | 330  | >BRAFN581!KSNSIFLH     | 269 | 61   |
| >BRAFN581!KSNNIFLH     | 129  | >BRAFN581!KSNSIFLH     | 117 | 12   |
| >BRAFN581!KSNNIFLH     | 68   | >BRAFN581!KSNSIFLH     | 57  | 11   |
| >BRAFN581!KSNNIFLHEDL  | 30   | >BRAFN581!KSNSIFLHEDL  | 55  | 25   |
| >BRAFN581!KSNNIFLHEDLV | 370  | >BRAFN581!KSNSIFLHEDLV | 320 | 50   |
| >BRAFN581!KSNNIFLH     | 342  | >BRAFN581!KSNSIFLH     | 152 | 190  |
| >BRAFN581!KSNNIFLHEDL  | 298  | >BRAFN581!KSNSIFLHEDL  | 155 | 143  |
| >BRAFN581!KSNNIFLHEDLV | 617  | >BRAFN581!KSNSIFLHEDLV | 432 | 185  |
| >BRAFN581!LKSNNIFL     | 52   | >BRAFN581!LKSNSIFL     | 22  | 30   |
| >BRAFN581!LKSNNIFLH    | 1161 | >BRAFN581!LKSNSIFLH    | 358 | 803  |
| >BRAFN581!DLKSNNIFL    | 567  | >BRAFN581!DLKSNSIFL    | 375 | 192  |
| >BRAFN581!DLKSNNIF     | 328  | >BRAFN581!DLKSNSIF     | 158 | 170  |
| >BRAFN581!DLKSNNIF     | 419  | >BRAFN581!DLKSNSIF     | 243 | 176  |
| >BRAFN581!RDLKSNNIF    | 31   | >BRAFN581!RDLKSNSIF    | 14  | 17   |
| >BRAFN581!RDLKSNNI     | 1077 | >BRAFN581!RDLKSNSI     | 414 | 663  |
| >BRAFN581!RDLKSNNIF    | 215  | >BRAFN581!RDLKSNSIF    | 15  | 200  |
| >BRAFN581!RDLKSNNI     | 41   | >BRAFN581!RDLKSNSI     | 26  | 15   |
| >BRAFN581!RDLKSNNI     | 89   | >BRAFN581!RDLKSNSI     | 92  | 3    |
| >BRAFN581!RDLKSNNIFL   | 519  | >BRAFN581!RDLKSNSIFL   | 405 | 114  |
| >BRAFN581!HRDLKSNNIF   | 86   | >BRAFN581!HRDLKSNSIF   | 63  | 23   |
| >BRAFN581!HRDLKSNNIF   | 129  | >BRAFN581!HRDLKSNSIFL  | 76  | 53   |
| >BRAFN581!HRDLKSNNIF   | 210  | >BRAFN581!HRDLKSNSIFL  | 236 | 26   |
| >BRAFN581!IHRDLKSNNIF  | 16   | >BRAFN581!IHRDLKSNSIF  | 11  | 5    |
| >BRAFN581!IHRDLKSNNIF  | 133  | >BRAFN581!IHRDLKSNSIF  | 29  | 104  |
| >BRAFN581!IIHRDLKSNNI  | 409  | >BRAFN581!IIHRDLKSNSI  | 243 | 166  |
| >BRAFN581!IIHRDLKSNNI  | 712  | >BRAFN581!IIHRDLKSNSI  | 485 | 227  |
| >BRAFN581'NIFLHEDLTV   | 106  | >BRAFN581'YIFLHEDLTV   | 13  | 93   |
| >BRAFN581'NIFLHEDL     | 629  | >BRAFN581'YIFLHEDL     | 65  | 564  |
| >BRAFN581'NIFLHEDLTV   | 125  | >BRAFN581'YIFLHEDLTV   | 24  | 101  |
| >BRAFN581'NIFLHEDLTV   | 99   | >BRAFN581'YIFLHEDLTV   | 23  | 76   |
| >BRAFN581'NIFLHEDL     | 6101 | >BRAFN581'YIFLHEDL     | 365 | 5736 |
| >BRAFN581'NIFLHEDLTV   | 155  | >BRAFN581'YIFLHEDLTV   | 32  | 123  |
| >BRAFN581'NIFLHEDL     | 6684 | >BRAFN581'YIFLHEDL     | 146 | 6538 |
| >BRAFN581'NIFLHEDLTV   | 353  | >BRAFN581'YIFLHEDLTV   | 7   | 346  |
| >BRAFN581'NIFLHEDLTV   | 756  | >BRAFN581'YIFLHEDLTV   | 28  | 728  |



|                         |       |                         |     |       |
|-------------------------|-------|-------------------------|-----|-------|
| >BRAFN581'NIFLHEDLTV    | 473   | >BRAFN581'YIFLHEDLTV    | 12  | 461   |
| >BRAFN581'NIFLHEDLTV    | 5875  | >BRAFN581'YIFLHEDLTV    | 238 | 5637  |
| >BRAFN581'NIFLHEDL      | 7653  | >BRAFN581'YIFLHEDL      | 76  | 7577  |
| >BRAFN581'NIFLHEDLTV    | 225   | >BRAFN581'YIFLHEDLTV    | 7   | 218   |
| >BRAFN581'NIFLHEDLTVK   | 1040  | >BRAFN581'YIFLHEDLTVK   | 362 | 678   |
| >BRAFN581'NIFLHEDLTVK   | 333   | >BRAFN581'YIFLHEDLTVK   | 103 | 230   |
| >BRAFN581'NIFLHEDLTVK   | 61    | >BRAFN581'YIFLHEDLTVK   | 29  | 32    |
| >BRAFN581'NNIFLHEDL     | 25713 | >BRAFN581'NYIFLHEDL     | 226 | 25487 |
| >BRAFN581'NNIFLHEDL     | 18182 | >BRAFN581'NYIFLHEDL     | 72  | 18110 |
| >BRAFN581'NNIFLHEDLTV   | 24412 | >BRAFN581'NYIFLHEDLTV   | 330 | 24082 |
| >BRAFN581'NNIFLHEDL     | 25446 | >BRAFN581'NYIFLHEDL     | 391 | 25055 |
| >BRAFN581'NNIFLHEDL     | 24410 | >BRAFN581'NYIFLHEDL     | 33  | 24377 |
| >BRAFN581'NNIFLHEDLTV   | 24993 | >BRAFN581'NYIFLHEDLTV   | 410 | 24583 |
| >BRAFN581'NNIFLHEDL     | 7175  | >BRAFN581'NYIFLHEDL     | 246 | 6929  |
| >BRAFN581'NNIFLHEDLTV   | 10154 | >BRAFN581'NYIFLHEDLTV   | 274 | 9880  |
| >BRAFN581'SIIHRDLKSNN   | 24773 | >BRAFN581'SIIHRDLKSNNY  | 89  | 24684 |
| >BRAFN581'SIIHRDLKSNN   | 17978 | >BRAFN581'SIIHRDLKSNNY  | 67  | 17911 |
| >BRAFN581'SIIHRDLKSNN   | 25111 | >BRAFN581'SIIHRDLKSNNY  | 179 | 24932 |
| >BRAFN581'SIIHRDLKSNN   | 23773 | >BRAFN581'SIIHRDLKSNNY  | 74  | 23699 |
| >BRAFN581'SIIHRDLKSNN   | 18193 | >BRAFN581'SIIHRDLKSNNY  | 294 | 17899 |
| >BRAFN581'SIIHRDLKSNN   | 23406 | >BRAFN581'SIIHRDLKSNNY  | 461 | 22945 |
| >BRAFN581'SIIHRDLKSNN   | 18830 | >BRAFN581'SIIHRDLKSNNY  | 466 | 18364 |
| >BRAFN581'SNNIFLHEDLTV  | 8995  | >BRAFN581'SNYIFLHEDLTV  | 318 | 8677  |
| >BRAFN581'KSNNIFLH      | 330   | >BRAFN581'KSNYIFLH      | 454 | 124   |
| >BRAFN581'KSNNIFLH      | 129   | >BRAFN581'KSNYIFLH      | 161 | 32    |
| >BRAFN581'KSNNIFLH      | 68    | >BRAFN581'KSNYIFLH      | 53  | 15    |
| >BRAFN581'KSNNIFLHEDLTV | 30    | >BRAFN581'KSNYIFLHEDLTV | 23  | 7     |
| >BRAFN581'KSNNIFLHEDLTV | 370   | >BRAFN581'KSNYIFLHEDLTV | 265 | 105   |
| >BRAFN581'KSNNIFLH      | 342   | >BRAFN581'KSNYIFLH      | 254 | 88    |
| >BRAFN581'KSNNIFLHEDLTV | 298   | >BRAFN581'KSNYIFLHEDLTV | 230 | 68    |
| >BRAFN581'LKSNNIFL      | 52    | >BRAFN581'LKSNYIFL      | 33  | 19    |
| >BRAFN581'DLKSNNIFL     | 567   | >BRAFN581'DLKSNNYIFL    | 297 | 270   |
| >BRAFN581'DLKSNNIF      | 328   | >BRAFN581'DLKSNNYIF     | 710 | 382   |
| >BRAFN581'DLKSNNIF      | 419   | >BRAFN581'DLKSNNYIF     | 342 | 77    |
| >BRAFN581'RDLSNNIF      | 31    | >BRAFN581'RDLSNNYIF     | 39  | 8     |
| >BRAFN581'RDLSNNIF      | 605   | >BRAFN581'RDLSNNYIF     | 247 | 358   |
| >BRAFN581'RDLSNNIF      | 215   | >BRAFN581'RDLSNNYIF     | 763 | 548   |
| >BRAFN581'RDLSNNI       | 41    | >BRAFN581'RDLSNNYI      | 21  | 20    |
| >BRAFN581'RDLSNNI       | 89    | >BRAFN581'RDLSNNYI      | 74  | 15    |
| >BRAFN581'RDLSNNIFL     | 519   | >BRAFN581'RDLSNNYIFL    | 248 | 271   |
| >BRAFN581'HRDLKSNNIF    | 86    | >BRAFN581'HRDLKSNNYIF   | 50  | 36    |
| >BRAFN581'HRDLKSNNIF    | 129   | >BRAFN581'HRDLKSNNYIFI  | 155 | 26    |
| >BRAFN581'HRDLKSNNIF    | 210   | >BRAFN581'HRDLKSNNYIFI  | 133 | 77    |

|                       |       |                        |       |       |
|-----------------------|-------|------------------------|-------|-------|
| >BRAFN581'IHRDLKSNN   | 16279 | >BRAFN581'IHRDLKSNY    | 88    | 16191 |
| >BRAFN581'IHRDLKSNNIF | 16    | >BRAFN581'IHRDLKSNIYIF | 15    | 1     |
| >BRAFN581'IHRDLKSNN   | 6725  | >BRAFN581'IHRDLKSNY    | 61    | 6664  |
| >BRAFN581'IHRDLKSNNIF | 133   | >BRAFN581'IHRDLKSNIYIF | 265   | 132   |
| >BRAFN581'IIHRDLKSNNI | 409   | >BRAFN581'IIHRDLKSNIYI | 222   | 187   |
| >BRAFN581'IIHRDLKSNNI | 3362  | >BRAFN581'IIHRDLKSNIYI | 413   | 2949  |
| >BRAFN581'IIHRDLKSNN  | 27542 | >BRAFN581'IIHRDLKSNY   | 253   | 27289 |
| >BRAFN581'IIHRDLKSNNI | 712   | >BRAFN581'IIHRDLKSNIYI | 248   | 464   |
| >BRAFP4531IPDGQITV    | 350   | >BRAFP4531ITDGQITV     | 36353 | 36003 |
| >BRAFP4531IPDGQITV    | 9359  | >BRAFP4531ITDGQITV     | 88    | 9271  |
| >BRAFP4531IPDGQITV    | 2637  | >BRAFP4531ITDGQITV     | 15    | 2622  |
| >BRAFP4531IPDGQITV    | 9809  | >BRAFP4531ITDGQITV     | 66    | 9743  |
| >BRAFP4531IPDGQITV    | 7048  | >BRAFP4531ITDGQITV     | 33    | 7015  |
| >BRAFP4531IPDGQITVVGQ | 8489  | >BRAFP4531ITDGQITVVGQ  | 248   | 8241  |
| >BRAFP4531IPDGQITV    | 5369  | >BRAFP4531ITDGQITV     | 496   | 4873  |
| >BRAFP4531IPDGQITV    | 24718 | >BRAFP4531ITDGQITV     | 285   | 24433 |
| >BRAFP4531EIPDGQITV   | 491   | >BRAFP4531EITDGQITV    | 387   | 104   |
| >BRAFP4531EIPDGQITV   | 72    | >BRAFP4531EITDGQITV    | 124   | 52    |
| >BRAFP4531EIPDGQITV   | 74    | >BRAFP4531EITDGQITV    | 39    | 35    |
| >BRAFP4531EIPDGQITV   | 141   | >BRAFP4531EITDGQITV    | 76    | 65    |
| >BRAFP4531EIPDGQITV   | 6     | >BRAFP4531EITDGQITV    | 4     | 2     |
| >BRAFP4531EIPDGQITV   | 22    | >BRAFP4531EITDGQITV    | 22    | 0     |
| >BRAFP4531EIPDGQITV   | 37    | >BRAFP4531EITDGQITV    | 14    | 23    |
| >BRAFP4531WEIPDGQI    | 297   | >BRAFP4531WEITDGQI     | 84    | 213   |
| >BRAFP4531WEIPDGQI    | 65    | >BRAFP4531WEITDGQI     | 38    | 27    |
| >BRAFP4531WEIPDGQI    | 21    | >BRAFP4531WEITDGQI     | 24    | 3     |
| >BRAFP4531WEIPDGQIT   | 632   | >BRAFP4531WEITDGQIT    | 97    | 535   |
| >BRAFP4531WEIPDGQITV  | 18    | >BRAFP4531WEITDGQITV   | 13    | 5     |
| >BRAFP4531DDWEIPDGQ   | 962   | >BRAFP4531DDWEITDGQ    | 134   | 828   |
| >BRAFP4531DDWEIPDGQ   | 363   | >BRAFP4531DDWEITDGQ    | 143   | 220   |
| >BRAFP4531SDDWEIPDGQ  | 287   | >BRAFP4531SDDWEITDGQ   | 245   | 42    |
| >BRAFP4531SDDWEIPDGQ  | 213   | >BRAFP4531SDDWEITDGQ   | 112   | 101   |
| >BRAFQ201'IQDGEKKPIG' | 5757  | >BRAFQ201'IIHDGEKKPIG' | 346   | 5411  |
| >BRAFQ201'IPECCAVYRIC | 3601  | >BRAFQ201'IPECCAVYRIH  | 443   | 3158  |
| >BRAFQ201'RIQDGEKK    | 151   | >BRAFQ201'RIHDGEKK     | 262   | 111   |
| >BRAFQ201'RIQDGEKK    | 1763  | >BRAFQ201'RIHDGEKK     | 43    | 1720  |
| >BRAFQ201'RIQDGEKKPI  | 3728  | >BRAFQ201'RIHDGEKKPI   | 129   | 3599  |
| >BRAFQ201'YRIQDGEKKP  | 238   | >BRAFQ201'YRIHDGEKKP   | 82    | 156   |
| >BRAFQ201'YRIQDGEK    | 140   | >BRAFQ201'YRIHDGEK     | 155   | 15    |
| >BRAFQ201'YRIQDGEKK   | 90    | >BRAFQ201'YRIHDGEKK    | 96    | 6     |
| >BRAFQ201'YRIQDGEKKP  | 124   | >BRAFQ201'YRIHDGEKKP   | 160   | 36    |
| >BRAFQ201'YRIQDGEKKP  | 465   | >BRAFQ201'YRIHDGEKKP   | 728   | 263   |
| >BRAFQ201'VYRIQDGEK   | 27    | >BRAFQ201'VYRIHDGEK    | 34    | 7     |

|                         |       |                         |       |       |
|-------------------------|-------|-------------------------|-------|-------|
| >BRAFF-Q201 VYRIQDGEKK  | 200   | >BRAFF-Q201 VYRIHDGEKK  | 190   | 10    |
| >BRAFF-Q201 AVYRIQDGEK  | 240   | >BRAFF-Q201 AVYRIHDGEK  | 155   | 85    |
| >BRAFF-Q201 AVYRIQDGEK  | 122   | >BRAFF-Q201 AVYRIHDGEK  | 108   | 14    |
| >BRAFF-Q201 AVYRIQDGEK  | 135   | >BRAFF-Q201 AVYRIHDGEK  | 150   | 15    |
| >BRAFF-Q201 AVYRIQDGEK  | 46    | >BRAFF-Q201 AVYRIHDGEK  | 40    | 6     |
| >BRAFF-Q201 AVYRIQDGEK  | 127   | >BRAFF-Q201 AVYRIHDGEK  | 73    | 54    |
| >BRAFF-Q201 AVYRIQDGEK  | 862   | >BRAFF-Q201 AVYRIHDGEK  | 375   | 487   |
| >BRAFF-Q201 AVYRIQDGEK  | 204   | >BRAFF-Q201 AVYRIHDGEK  | 155   | 49    |
| >BRAFF-Q201 CAVYRIQDGE  | 212   | >BRAFF-Q201 CAVYRIHDGE  | 112   | 100   |
| >BRAFF-Q609 QFEQLSGSI   | 496   | >BRAFF-Q609 RFEQLSGSI   | 844   | 348   |
| >BRAFF-Q609 QFEQLSGSI   | 1368  | >BRAFF-Q609 RFEQLSGSI   | 114   | 1254  |
| >BRAFF-Q609 QFEQLSGSIL  | 3216  | >BRAFF-Q609 RFEQLSGSIL  | 425   | 2791  |
| >BRAFF-Q609 QFEQLSGSILV | 1798  | >BRAFF-Q609 RFEQLSGSILV | 202   | 1596  |
| >BRAFF-Q609 QFEQLSGSI   | 796   | >BRAFF-Q609 RFEQLSGSI   | 338   | 458   |
| >BRAFF-Q609 QFEQLSGSIL  | 509   | >BRAFF-Q609 RFEQLSGSIL  | 259   | 250   |
| >BRAFF-Q609 HQFEQLSGSI  | 34    | >BRAFF-Q609 HRFEQLSGSI  | 92    | 58    |
| >BRAFF-Q609 HQFEQLSGSI  | 256   | >BRAFF-Q609 HRFEQLSGSIL | 7844  | 7588  |
| >BRAFF-Q609 HQFEQLSGSI  | 308   | >BRAFF-Q609 HRFEQLSGSI  | 9315  | 9007  |
| >BRAFF-Q609 HQFEQLSGSI  | 196   | >BRAFF-Q609 HRFEQLSGSIL | 14841 | 14645 |
| >BRAFF-Q609 HQFEQLSGS   | 121   | >BRAFF-Q609 HRFEQLSGS   | 19633 | 19512 |
| >BRAFF-Q609 HQFEQLSGSI  | 89    | >BRAFF-Q609 HRFEQLSGSIL | 12481 | 12392 |
| >BRAFF-Q609 HQFEQLSGSI  | 412   | >BRAFF-Q609 HRFEQLSGSI  | 11179 | 10767 |
| >BRAFF-Q609 HQFEQLSGSI  | 432   | >BRAFF-Q609 HRFEQLSGSIL | 16822 | 16390 |
| >BRAFF-Q609 HQFEQLSGSI  | 442   | >BRAFF-Q609 HRFEQLSGSI  | 8115  | 7673  |
| >BRAFF-Q609 HQFEQLSGSI  | 185   | >BRAFF-Q609 HRFEQLSGSI  | 19627 | 19442 |
| >BRAFF-Q609 HQFEQLSGSI  | 183   | >BRAFF-Q609 HRFEQLSGSIL | 19132 | 18949 |
| >BRAFF-Q609 HQFEQLSGSI  | 157   | >BRAFF-Q609 HRFEQLSGSIL | 4978  | 4821  |
| >BRAFF-Q609 HQFEQLSGSI  | 70    | >BRAFF-Q609 HRFEQLSGSI  | 469   | 399   |
| >BRAFF-Q609 HQFEQLSGSI  | 8     | >BRAFF-Q609 HRFEQLSGSIL | 51    | 43    |
| >BRAFF-Q609 HQFEQLSGS   | 3825  | >BRAFF-Q609 HRFEQLSGS   | 130   | 3695  |
| >BRAFF-Q609 HQFEQLSGSI  | 805   | >BRAFF-Q609 HRFEQLSGSI  | 20    | 785   |
| >BRAFF-Q609 HQFEQLSGSI  | 1276  | >BRAFF-Q609 HRFEQLSGSIL | 42    | 1234  |
| >BRAFF-Q609 HQFEQLSGSI  | 195   | >BRAFF-Q609 HRFEQLSGSI  | 234   | 39    |
| >BRAFF-Q609 HQFEQLSGSI  | 16    | >BRAFF-Q609 HRFEQLSGSIL | 18    | 2     |
| >BRAFF-Q609 HQFEQLSGSI  | 388   | >BRAFF-Q609 HRFEQLSGSIL | 14212 | 13824 |
| >BRAFF-Q609 HQFEQLSGSI  | 485   | >BRAFF-Q609 HRFEQLSGSIL | 5771  | 5286  |
| >BRAFF-Q609 HQFEQLSGSI  | 111   | >BRAFF-Q609 HRFEQLSGSIL | 4041  | 3930  |
| >BRAFF-Q609 HQFEQLSG    | 5150  | >BRAFF-Q609 HRFEQLSG    | 354   | 4796  |
| >BRAFF-Q609 HQFEQLSGSI  | 10500 | >BRAFF-Q609 HRFEQLSGSI  | 322   | 10178 |
| >BRAFF-Q609 HQFEQLSGSI  | 585   | >BRAFF-Q609 HRFEQLSGSIL | 34    | 551   |
| >BRAFF-Q609 TVKSRWSGSI  | 1021  | >BRAFF-Q609 TVKSRWSGSI  | 459   | 562   |
| >BRAFF-Q609 TVKSRWSGSI  | 4458  | >BRAFF-Q609 TVKSRWSGSI  | 12    | 4446  |
| >BRAFF-Q609 TVKSRWSGSI  | 9636  | >BRAFF-Q609 TVKSRWSGSI  | 46    | 9590  |

|                      |       |                      |      |       |
|----------------------|-------|----------------------|------|-------|
| >BRAf-Q609 TVKSRWSGS | 3503  | >BRAf-Q609 TVKSRWSGS | 26   | 3477  |
| >BRAf-Q609 GSHQFEQL  | 406   | >BRAf-Q609 GSHRFEQL  | 213  | 193   |
| >BRAf-Q609 GSHQFEQL  | 240   | >BRAf-Q609 GSHRFEQL  | 899  | 659   |
| >BRAf-Q609 SGSHQFEQL | 5458  | >BRAf-Q609 SGSHRFEQL | 270  | 5188  |
| >BRAf-Q609 RWSGSHQF  | 60    | >BRAf-Q609 RWSGSHRF  | 83   | 23    |
| >BRAf-Q609 RWSGSHQF  | 78    | >BRAf-Q609 RWSGSHRF  | 100  | 22    |
| >BRAf-Q609 RWSGSHQFE | 328   | >BRAf-Q609 RWSGSHRFE | 362  | 34    |
| >BRAf-Q609 RWSGSHQF  | 6     | >BRAf-Q609 RWSGSHRF  | 9    | 3     |
| >BRAf-Q609 RWSGSHQFE | 14    | >BRAf-Q609 RWSGSHRFE | 23   | 9     |
| >BRAf-Q609 RWSGSHQF  | 144   | >BRAf-Q609 RWSGSHRF  | 151  | 7     |
| >BRAf-Q609 RWSGSHQFE | 57    | >BRAf-Q609 RWSGSHRFE | 57   | 0     |
| >BRAf-Q609 RWSGSHQFE | 116   | >BRAf-Q609 RWSGSHRFE | 109  | 7     |
| >BRAf-Q609 SRWSGSHQ  | 1045  | >BRAf-Q609 SRWSGSHR  | 401  | 644   |
| >BRAf-Q609 SRWSGSHQF | 8     | >BRAf-Q609 SRWSGSHRF | 17   | 9     |
| >BRAf-Q609 SRWSGSHQ  | 528   | >BRAf-Q609 SRWSGSHR  | 51   | 477   |
| >BRAf-Q609 SRWSGSHQF | 37    | >BRAf-Q609 SRWSGSHRF | 40   | 3     |
| >BRAf-Q609 SRWSGSHQF | 327   | >BRAf-Q609 SRWSGSHRF | 317  | 10    |
| >BRAf-Q609 SRWSGSHQF | 538   | >BRAf-Q609 SRWSGSHRF | 412  | 126   |
| >BRAf-Q609 SRWSGSHQF | 503   | >BRAf-Q609 SRWSGSHRF | 379  | 124   |
| >BRAf-Q609 SRWSGSHQF | 147   | >BRAf-Q609 SRWSGSHRF | 80   | 67    |
| >BRAf-Q609 SRWSGSHQ  | 22380 | >BRAf-Q609 SRWSGSHR  | 311  | 22069 |
| >BRAf-Q609 KSRWSGSHQ | 14310 | >BRAf-Q609 KSRWSGSHR | 319  | 13991 |
| >BRAf-Q609 KSRWSGSHQ | 24    | >BRAf-Q609 KSRWSGSHR | 10   | 14    |
| >BRAf-Q609 KSRWSGSHQ | 44    | >BRAf-Q609 KSRWSGSHR | 61   | 17    |
| >BRAf-Q609 KSRWSGSHQ | 23    | >BRAf-Q609 KSRWSGSHR | 26   | 3     |
| >BRAf-Q609 KSRWSGSHQ | 2874  | >BRAf-Q609 KSRWSGSHR | 9    | 2865  |
| >BRAf-Q609 KSRWSGSHQ | 93    | >BRAf-Q609 KSRWSGSHR | 127  | 34    |
| >BRAf-Q609 KSRWSGSHQ | 14    | >BRAf-Q609 KSRWSGSHR | 23   | 9     |
| >BRAf-Q609 KSRWSGSHQ | 51    | >BRAf-Q609 KSRWSGSHR | 139  | 88    |
| >BRAf-Q609 KSRWSGSHQ | 2     | >BRAf-Q609 KSRWSGSHR | 2    | 0     |
| >BRAf-Q609 KSRWSGSHQ | 186   | >BRAf-Q609 KSRWSGSHR | 279  | 93    |
| >BRAf-Q609 KSRWSGSHQ | 73    | >BRAf-Q609 KSRWSGSHR | 85   | 12    |
| >BRAf-Q609 KSRWSGSHQ | 24    | >BRAf-Q609 KSRWSGSHR | 35   | 11    |
| >BRAf-Q609 KSRWSGSHQ | 193   | >BRAf-Q609 KSRWSGSHR | 465  | 272   |
| >BRAf-Q609 KSRWSGSHQ | 72    | >BRAf-Q609 KSRWSGSHR | 100  | 28    |
| >BRAf-Q609 VKSRWSGSH | 23062 | >BRAf-Q609 VKSRWSGSH | 451  | 22611 |
| >BRAf-Q609 VKSRWSGSH | 1640  | >BRAf-Q609 VKSRWSGSH | 415  | 1225  |
| >BRAf-Q609 VKSRWSGSH | 9     | >BRAf-Q609 VKSRWSGSH | 14   | 5     |
| >BRAf-Q612 QLSGSILWM | 71    | >BRAf-Q612 ELSGSILWM | 268  | 197   |
| >BRAf-Q612 QLSGSILWM | 51    | >BRAf-Q612 ELSGSILWM | 365  | 314   |
| >BRAf-Q612 QLSGSILWM | 31    | >BRAf-Q612 ELSGSILWM | 89   | 58    |
| >BRAf-Q612 QLSGSILWM | 231   | >BRAf-Q612 ELSGSILWM | 2206 | 1975  |
| >BRAf-Q612 QLSGSILWM | 89    | >BRAf-Q612 ELSGSILWM | 201  | 112   |

|                        |       |                        |      |       |
|------------------------|-------|------------------------|------|-------|
| >BRAFF-Q612 QLSGSILWM/ | 156   | >BRAFF-Q612 ELSGSILWMA | 406  | 250   |
| >BRAFF-Q612 QLSGSILWM  | 335   | >BRAFF-Q612 ELSGSILWM  | 546  | 211   |
| >BRAFF-Q612 QLSGSILWM/ | 27    | >BRAFF-Q612 ELSGSILWMA | 47   | 20    |
| >BRAFF-Q612 QLSGSILWM/ | 413   | >BRAFF-Q612 ELSGSILWMA | 1265 | 852   |
| >BRAFF-Q612 QLSGSILWM/ | 82    | >BRAFF-Q612 ELSGSILWMA | 86   | 4     |
| >BRAFF-Q612 QLSGSILWM  | 840   | >BRAFF-Q612 ELSGSILWM  | 419  | 421   |
| >BRAFF-Q612 QLSGSILWM/ | 102   | >BRAFF-Q612 ELSGSILWMA | 63   | 39    |
| >BRAFF-Q612 QLSGSILWM  | 17    | >BRAFF-Q612 ELSGSILWM  | 42   | 25    |
| >BRAFF-Q612 QLSGSILWM/ | 5     | >BRAFF-Q612 ELSGSILWMA | 8    | 3     |
| >BRAFF-Q612 QLSGSILWM  | 10215 | >BRAFF-Q612 ELSGSILWM  | 287  | 9928  |
| >BRAFF-Q612 QLSGSILWM  | 804   | >BRAFF-Q612 ELSGSILWM  | 94   | 710   |
| >BRAFF-Q612 QLSGSILWM/ | 2214  | >BRAFF-Q612 ELSGSILWMA | 426  | 1788  |
| >BRAFF-Q612 QLSGSILWM/ | 2297  | >BRAFF-Q612 ELSGSILWMA | 334  | 1963  |
| >BRAFF-Q612 QLSGSILW   | 207   | >BRAFF-Q612 ELSGSILW   | 1702 | 1495  |
| >BRAFF-Q612 EQLSGSIL   | 2807  | >BRAFF-Q612 EELSGSIL   | 13   | 2794  |
| >BRAFF-Q612 EQLSGSILWM | 12549 | >BRAFF-Q612 EELSGSILWM | 413  | 12136 |
| >BRAFF-Q612 EQLSGSILWM | 53    | >BRAFF-Q612 EELSGSILWM | 6449 | 6396  |
| >BRAFF-Q612 EQLSGSILWM | 307   | >BRAFF-Q612 EELSGSILWM | 1538 | 1231  |
| >BRAFF-Q612 EQLSGSILWM | 355   | >BRAFF-Q612 EELSGSILWM | 762  | 407   |
| >BRAFF-Q612 EQLSGSILWM | 399   | >BRAFF-Q612 EELSGSILWM | 1678 | 1279  |
| >BRAFF-Q612 EQLSGSIL   | 51    | >BRAFF-Q612 EELSGSIL   | 2425 | 2374  |
| >BRAFF-Q612 EQLSGSILWM | 277   | >BRAFF-Q612 EELSGSILWM | 5660 | 5383  |
| >BRAFF-Q612 EQLSGSIL   | 28    | >BRAFF-Q612 EELSGSIL   | 261  | 233   |
| >BRAFF-Q612 EQLSGSIL   | 3045  | >BRAFF-Q612 EELSGSIL   | 39   | 3006  |
| >BRAFF-Q612 EQLSGSIL   | 16452 | >BRAFF-Q612 EELSGSIL   | 299  | 16153 |
| >BRAFF-Q612 EQLSGSILWM | 15394 | >BRAFF-Q612 EELSGSILWM | 394  | 15000 |
| >BRAFF-Q612 EQLSGSILW  | 4441  | >BRAFF-Q612 EELSGSILW  | 65   | 4376  |
| >BRAFF-Q612 EQLSGSIL   | 14204 | >BRAFF-Q612 EELSGSIL   | 251  | 13953 |
| >BRAFF-Q612 EQLSGSILW  | 460   | >BRAFF-Q612 EELSGSILW  | 13   | 447   |
| >BRAFF-Q612 EQLSGSILWM | 14167 | >BRAFF-Q612 EELSGSILWM | 371  | 13796 |
| >BRAFF-Q612 EQLSGSILWM | 872   | >BRAFF-Q612 EELSGSILWM | 7    | 865   |
| >BRAFF-Q612 EQLSGSILWM | 19610 | >BRAFF-Q612 EELSGSILWM | 183  | 19427 |
| >BRAFF-Q612 EQLSGSILW  | 245   | >BRAFF-Q612 EELSGSILW  | 192  | 53    |
| >BRAFF-Q612 SRWSGSHQF  | 327   | >BRAFF-Q612 SRWSGSHQF  | 927  | 600   |
| >BRAFF-Q612 SRWSGSHQF  | 538   | >BRAFF-Q612 SRWSGSHQF  | 381  | 157   |
| >BRAFF-Q612 FEQLSGSI   | 4     | >BRAFF-Q612 FEELSGSI   | 4    | 0     |
| >BRAFF-Q612 FEQLSGSIL  | 177   | >BRAFF-Q612 FEELSGSIL  | 119  | 58    |
| >BRAFF-Q612 FEQLSGSILW | 377   | >BRAFF-Q612 FEELSGSILW | 267  | 110   |
| >BRAFF-Q612 FEQLSGSILW | 129   | >BRAFF-Q612 FEELSGSILW | 93   | 36    |
| >BRAFF-Q612 FEQLSGSIL  | 436   | >BRAFF-Q612 FEELSGSIL  | 222  | 214   |
| >BRAFF-Q612 FEQLSGSI   | 277   | >BRAFF-Q612 FEELSGSI   | 63   | 214   |
| >BRAFF-Q612 FEQLSGSIL  | 34    | >BRAFF-Q612 FEELSGSIL  | 13   | 21    |
| >BRAFF-Q612 FEQLSGSILW | 243   | >BRAFF-Q612 FEELSGSILW | 63   | 180   |

|                        |      |                         |      |      |
|------------------------|------|-------------------------|------|------|
| >BRAFF-Q612 FEQLSGSI   | 176  | >BRAFF-Q612 FEELSGSI    | 640  | 464  |
| >BRAFF-Q612 FEQLSGSIL  | 71   | >BRAFF-Q612 FEELSGSIL   | 277  | 206  |
| >BRAFF-Q612 FEQLSGSILW | 385  | >BRAFF-Q612 FEELSGSILW  | 1617 | 1232 |
| >BRAFF-Q612 FEQLSGSILW | 72   | >BRAFF-Q612 FEELSGSILW  | 105  | 33   |
| >BRAFF-Q612 FEQLSGSILW | 288  | >BRAFF-Q612 FEELSGSILW  | 433  | 145  |
| >BRAFF-Q612 FEQLSGSI   | 36   | >BRAFF-Q612 FEELSGSI    | 64   | 28   |
| >BRAFF-Q612 FEQLSGSIL  | 81   | >BRAFF-Q612 FEELSGSIL   | 149  | 68   |
| >BRAFF-Q612 FEQLSGSILW | 217  | >BRAFF-Q612 FEELSGSILW  | 327  | 110  |
| >BRAFF-Q612 FEQLSGSILW | 311  | >BRAFF-Q612 FEELSGSILW  | 111  | 200  |
| >BRAFF-Q612 QFEQLSGSI  | 496  | >BRAFF-Q612 QFEELSGSI   | 1165 | 669  |
| >BRAFF-Q612 HQFEQLSGSI | 34   | >BRAFF-Q612 HQFEELSGSI  | 70   | 36   |
| >BRAFF-Q612 HQFEQLSGSI | 583  | >BRAFF-Q612 HQFEELSGSI  | 277  | 306  |
| >BRAFF-Q612 HQFEQLSGSI | 256  | >BRAFF-Q612 HQFEELSGSIL | 235  | 21   |
| >BRAFF-Q612 HQFEQLSGSI | 308  | >BRAFF-Q612 HQFEELSGSI  | 242  | 66   |
| >BRAFF-Q612 HQFEQLSGSI | 196  | >BRAFF-Q612 HQFEELSGSIL | 211  | 15   |
| >BRAFF-Q612 HQFEQLSGS  | 121  | >BRAFF-Q612 HQFEELSGS   | 113  | 8    |
| >BRAFF-Q612 HQFEQLSGSI | 89   | >BRAFF-Q612 HQFEELSGSIL | 83   | 6    |
| >BRAFF-Q612 HQFEQLSGSI | 412  | >BRAFF-Q612 HQFEELSGSI  | 323  | 89   |
| >BRAFF-Q612 HQFEQLSGSI | 502  | >BRAFF-Q612 HQFEELSGSI  | 373  | 129  |
| >BRAFF-Q612 HQFEQLSGSI | 432  | >BRAFF-Q612 HQFEELSGSIL | 453  | 21   |
| >BRAFF-Q612 HQFEQLSGSI | 442  | >BRAFF-Q612 HQFEELSGSI  | 565  | 123  |
| >BRAFF-Q612 HQFEQLSGSI | 185  | >BRAFF-Q612 HQFEELSGSI  | 259  | 74   |
| >BRAFF-Q612 HQFEQLSGSI | 183  | >BRAFF-Q612 HQFEELSGSIL | 234  | 51   |
| >BRAFF-Q612 HQFEQLSGSI | 157  | >BRAFF-Q612 HQFEELSGSIL | 283  | 126  |
| >BRAFF-Q612 HQFEQLSGSI | 70   | >BRAFF-Q612 HQFEELSGSI  | 66   | 4    |
| >BRAFF-Q612 HQFEQLSGSI | 8    | >BRAFF-Q612 HQFEELSGSIL | 8    | 0    |
| >BRAFF-Q612 HQFEQLSGSI | 195  | >BRAFF-Q612 HQFEELSGSI  | 166  | 29   |
| >BRAFF-Q612 HQFEQLSGSI | 16   | >BRAFF-Q612 HQFEELSGSIL | 15   | 1    |
| >BRAFF-Q612 HQFEQLSGSI | 388  | >BRAFF-Q612 HQFEELSGSIL | 387  | 1    |
| >BRAFF-Q612 HQFEQLSGSI | 485  | >BRAFF-Q612 HQFEELSGSIL | 774  | 289  |
| >BRAFF-Q612 HQFEQLSGSI | 111  | >BRAFF-Q612 HQFEELSGSIL | 162  | 51   |
| >BRAFF-Q612 GSHQFEQL   | 406  | >BRAFF-Q612 GSHQFEEL    | 1458 | 1052 |
| >BRAFF-Q612 GSHQFEQL   | 240  | >BRAFF-Q612 GSHQFEEL    | 662  | 422  |
| >BRAFF-Q612 RWSGSHQFE  | 328  | >BRAFF-Q612 RWSGSHQFE   | 455  | 127  |
| >BRAFF-Q612 RWSGSHQFE  | 14   | >BRAFF-Q612 RWSGSHQFE   | 11   | 3    |
| >BRAFF-Q612 RWSGSHQFE  | 116  | >BRAFF-Q612 RWSGSHQFE   | 99   | 17   |
| >BRAFF-Q636 QSDVYAFGIV | 1417 | >BRAFF-Q636 ESDVYAFGIV  | 157  | 1260 |
| >BRAFF-Q636 QSDVYAFGI  | 74   | >BRAFF-Q636 ESDVYAFGI   | 12   | 62   |
| >BRAFF-Q636 QSDVYAFGIV | 277  | >BRAFF-Q636 ESDVYAFGIV  | 42   | 235  |
| >BRAFF-Q636 QSDVYAFGIV | 2211 | >BRAFF-Q636 ESDVYAFGIV  | 345  | 1866 |
| >BRAFF-Q636 QSDVYAFGI  | 48   | >BRAFF-Q636 ESDVYAFGI   | 214  | 166  |
| >BRAFF-Q636 QSDVYAFGIV | 77   | >BRAFF-Q636 ESDVYAFGIV  | 309  | 232  |
| >BRAFF-Q636 QSDVYAFGIV | 392  | >BRAFF-Q636 ESDVYAFGIV  | 326  | 66   |

|                        |       |                         |      |       |
|------------------------|-------|-------------------------|------|-------|
| >BRAFF-Q636 QSDVYAFGI  | 242   | >BRAFF-Q636 ESDVYAFGI   | 790  | 548   |
| >BRAFF-Q636 FQSDVYAF   | 21928 | >BRAFF-Q636 FESDVYAF    | 277  | 21651 |
| >BRAFF-Q636 FQSDVYAFGI | 177   | >BRAFF-Q636 FESDVYAFGI  | 8    | 169   |
| >BRAFF-Q636 FQSDVYAFGI | 1148  | >BRAFF-Q636 FESDVYAFGI\ | 29   | 1119  |
| >BRAFF-Q636 FQSDVYAFGI | 131   | >BRAFF-Q636 FESDVYAFGI  | 6362 | 6231  |
| >BRAFF-Q636 FQSDVYAFGI | 52    | >BRAFF-Q636 FESDVYAFGI\ | 7737 | 7685  |
| >BRAFF-Q636 FQSDVYAF   | 61    | >BRAFF-Q636 FESDVYAF    | 3375 | 3314  |
| >BRAFF-Q636 FQSDVYAFG  | 69    | >BRAFF-Q636 FESDVYAFG   | 2740 | 2671  |
| >BRAFF-Q636 FQSDVYAFGI | 18    | >BRAFF-Q636 FESDVYAFGI  | 803  | 785   |
| >BRAFF-Q636 FQSDVYAFGI | 11    | >BRAFF-Q636 FESDVYAFGI\ | 420  | 409   |
| >BRAFF-Q636 FQSDVYAFGI | 183   | >BRAFF-Q636 FESDVYAFGI  | 7729 | 7546  |
| >BRAFF-Q636 FQSDVYAFGI | 5     | >BRAFF-Q636 FESDVYAFGI\ | 348  | 343   |
| >BRAFF-Q636 FQSDVYAF   | 8     | >BRAFF-Q636 FESDVYAF    | 949  | 941   |
| >BRAFF-Q636 FQSDVYAFG  | 32    | >BRAFF-Q636 FESDVYAFG   | 4349 | 4317  |
| >BRAFF-Q636 FQSDVYAFGI | 44    | >BRAFF-Q636 FESDVYAFGI  | 893  | 849   |
| >BRAFF-Q636 FQSDVYAFGI | 4     | >BRAFF-Q636 FESDVYAFGI\ | 103  | 99    |
| >BRAFF-Q636 FQSDVYAFGI | 21    | >BRAFF-Q636 FESDVYAFGI  | 765  | 744   |
| >BRAFF-Q636 FQSDVYAFGI | 65    | >BRAFF-Q636 FESDVYAFGI\ | 1377 | 1312  |
| >BRAFF-Q636 FQSDVYAFGI | 27    | >BRAFF-Q636 FESDVYAFGI  | 4261 | 4234  |
| >BRAFF-Q636 FQSDVYAFGI | 77    | >BRAFF-Q636 FESDVYAFGI\ | 6061 | 5984  |
| >BRAFF-Q636 FQSDVYAFGI | 95    | >BRAFF-Q636 FESDVYAFGI  | 3212 | 3117  |
| >BRAFF-Q636 FQSDVYAFGI | 82    | >BRAFF-Q636 FESDVYAFGI\ | 1706 | 1624  |
| >BRAFF-Q636 FQSDVYAFGI | 141   | >BRAFF-Q636 FESDVYAFGI  | 7829 | 7688  |
| >BRAFF-Q636 FQSDVYAFGI | 98    | >BRAFF-Q636 FESDVYAFGI\ | 1147 | 1049  |
| >BRAFF-Q636 FQSDVYAFGI | 373   | >BRAFF-Q636 FESDVYAFGI  | 3531 | 3158  |
| >BRAFF-Q636 FQSDVYAFGI | 384   | >BRAFF-Q636 FESDVYAFGI\ | 1150 | 766   |
| >BRAFF-Q636 FQSDVYAF   | 35    | >BRAFF-Q636 FESDVYAF    | 215  | 180   |
| >BRAFF-Q636 FQSDVYAF   | 285   | >BRAFF-Q636 FESDVYAF    | 4206 | 3921  |
| >BRAFF-Q636 FQSDVYAF   | 3     | >BRAFF-Q636 FESDVYAF    | 35   | 32    |
| >BRAFF-Q636 FQSDVYAFGI | 249   | >BRAFF-Q636 FESDVYAFGI  | 5171 | 4922  |
| >BRAFF-Q636 FQSDVYAFGI | 271   | >BRAFF-Q636 FESDVYAFGI\ | 5671 | 5400  |
| >BRAFF-Q636 FQSDVYAF   | 199   | >BRAFF-Q636 FESDVYAF    | 8    | 191   |
| >BRAFF-Q636 FQSDVYAF   | 128   | >BRAFF-Q636 FESDVYAF    | 273  | 145   |
| >BRAFF-Q636 FQSDVYAF   | 54    | >BRAFF-Q636 FESDVYAF    | 744  | 690   |
| >BRAFF-Q636 FQSDVYAFGI | 115   | >BRAFF-Q636 FESDVYAFGI  | 1603 | 1488  |
| >BRAFF-Q636 FQSDVYAFGI | 403   | >BRAFF-Q636 FESDVYAFGI\ | 4346 | 3943  |
| >BRAFF-Q636 FQSDVYAF   | 2692  | >BRAFF-Q636 FESDVYAF    | 30   | 2662  |
| >BRAFF-Q636 FQSDVYAFGI | 1823  | >BRAFF-Q636 FESDVYAFGI\ | 17   | 1806  |
| >BRAFF-Q636 FQSDVYAF   | 6923  | >BRAFF-Q636 FESDVYAF    | 165  | 6758  |
| >BRAFF-Q636 FQSDVYAFGI | 17942 | >BRAFF-Q636 FESDVYAFGI  | 87   | 17855 |
| >BRAFF-Q636 FQSDVYAF   | 9633  | >BRAFF-Q636 FESDVYAF    | 147  | 9486  |
| >BRAFF-Q636 FQSDVYAF   | 8344  | >BRAFF-Q636 FESDVYAF    | 152  | 8192  |
| >BRAFF-Q636 FQSDVYAFGI | 262   | >BRAFF-Q636 FESDVYAFGI  | 5    | 257   |

|                        |      |                        |      |      |
|------------------------|------|------------------------|------|------|
| >BRAFF-Q636 FQSDVYAFGI | 2826 | >BRAFF-Q636 FESDVYAFGI | 15   | 2811 |
| >BRAFF-Q636 RMQDKNPYS  | 226  | >BRAFF-Q636 RMQDKNPYS  | 7641 | 7415 |
| >BRAFF-Q636 SFQSDVYAF  | 55   | >BRAFF-Q636 SFESDVYAF  | 270  | 215  |
| >BRAFF-Q636 SFQSDVYAF  | 8    | >BRAFF-Q636 SFESDVYAF  | 31   | 23   |
| >BRAFF-Q636 SFQSDVYAFG | 94   | >BRAFF-Q636 SFESDVYAFG | 993  | 899  |
| >BRAFF-Q636 SFQSDVYAF  | 396  | >BRAFF-Q636 SFESDVYAF  | 460  | 64   |
| >BRAFF-Q636 SFQSDVYA   | 448  | >BRAFF-Q636 SFESDVYA   | 765  | 317  |
| >BRAFF-Q636 YSFQSDVYAF | 1169 | >BRAFF-Q636 YSFESDVYAF | 448  | 721  |
| >BRAFF-Q636 YSFQSDVY   | 175  | >BRAFF-Q636 YSFESDVY   | 107  | 68   |
| >BRAFF-Q636 YSFQSDVYA  | 2158 | >BRAFF-Q636 YSFESDVYA  | 181  | 1977 |
| >BRAFF-Q636 YSFQSDVYA  | 1164 | >BRAFF-Q636 YSFESDVYA  | 302  | 862  |
| >BRAFF-Q636 YSFQSDVYA  | 309  | >BRAFF-Q636 YSFESDVYA  | 35   | 274  |
| >BRAFF-Q636 YSFQSDVYA  | 1139 | >BRAFF-Q636 YSFESDVYA  | 173  | 966  |
| >BRAFF-Q636 YSFQSDVYAF | 188  | >BRAFF-Q636 YSFESDVYAF | 225  | 37   |
| >BRAFF-Q636 YSFQSDVYAF | 382  | >BRAFF-Q636 YSFESDVYAF | 414  | 32   |
| >BRAFF-Q636 YSFQSDVYAF | 253  | >BRAFF-Q636 YSFESDVYAF | 499  | 246  |
| >BRAFF-Q636 YSFQSDVY   | 588  | >BRAFF-Q636 YSFESDVY   | 462  | 126  |
| >BRAFF-Q636 YSFQSDVYAF | 337  | >BRAFF-Q636 YSFESDVYAF | 293  | 44   |
| >BRAFF-Q636 YSFQSDVY   | 81   | >BRAFF-Q636 YSFESDVY   | 101  | 20   |
| >BRAFF-Q636 YSFQSDVYAF | 65   | >BRAFF-Q636 YSFESDVYAF | 83   | 18   |
| >BRAFF-Q636 YSFQSDVY   | 138  | >BRAFF-Q636 YSFESDVY   | 209  | 71   |
| >BRAFF-Q636 YSFQSDVYAF | 55   | >BRAFF-Q636 YSFESDVYAF | 51   | 4    |
| >BRAFF-Q636 YSFQSDVY   | 145  | >BRAFF-Q636 YSFESDVY   | 130  | 15   |
| >BRAFF-Q636 YSFQSDVYA  | 84   | >BRAFF-Q636 YSFESDVYA  | 24   | 60   |
| >BRAFF-Q636 YSFQSDVY   | 31   | >BRAFF-Q636 YSFESDVY   | 37   | 6    |
| >BRAFF-Q636 YSFQSDVYAF | 24   | >BRAFF-Q636 YSFESDVYAF | 28   | 4    |
| >BRAFF-Q636 YSFQSDVY   | 78   | >BRAFF-Q636 YSFESDVY   | 95   | 17   |
| >BRAFF-Q636 YSFQSDVYAF | 271  | >BRAFF-Q636 YSFESDVYAF | 247  | 24   |
| >BRAFF-Q636 YSFQSDVY   | 10   | >BRAFF-Q636 YSFESDVY   | 13   | 3    |
| >BRAFF-Q636 YSFQSDVYA  | 321  | >BRAFF-Q636 YSFESDVYA  | 340  | 19   |
| >BRAFF-Q636 YSFQSDVYAF | 2    | >BRAFF-Q636 YSFESDVYAF | 3    | 1    |
| >BRAFF-Q636 YSFQSDVY   | 3    | >BRAFF-Q636 YSFESDVY   | 4    | 1    |
| >BRAFF-Q636 YSFQSDVYA  | 295  | >BRAFF-Q636 YSFESDVYA  | 355  | 60   |
| >BRAFF-Q636 YSFQSDVYAF | 4    | >BRAFF-Q636 YSFESDVYAF | 4    | 0    |
| >BRAFF-Q636 YSFQSDVY   | 16   | >BRAFF-Q636 YSFESDVY   | 15   | 1    |
| >BRAFF-Q636 YSFQSDVY   | 311  | >BRAFF-Q636 YSFESDVY   | 222  | 89   |
| >BRAFF-Q636 YSFQSDVYAF | 116  | >BRAFF-Q636 YSFESDVYAF | 86   | 30   |
| >BRAFF-Q636 YSFQSDVYAF | 308  | >BRAFF-Q636 YSFESDVYAF | 335  | 27   |
| >BRAFF-Q636 YSFQSDVY   | 89   | >BRAFF-Q636 YSFESDVY   | 110  | 21   |
| >BRAFF-Q636 YSFQSDVYAF | 33   | >BRAFF-Q636 YSFESDVYAF | 37   | 4    |
| >BRAFF-Q636 YSFQSDVYAF | 349  | >BRAFF-Q636 YSFESDVYAF | 304  | 45   |
| >BRAFF-Q636 YSFQSDVY   | 47   | >BRAFF-Q636 YSFESDVY   | 152  | 105  |
| >BRAFF-Q636 YSFQSDVYAF | 585  | >BRAFF-Q636 YSFESDVYAF | 337  | 248  |



|                        |       |                        |       |       |
|------------------------|-------|------------------------|-------|-------|
| >BRAFF-Q636 YSFQSDVY   | 137   | >BRAFF-Q636 YSFESDVY   | 110   | 27    |
| >BRAFF-Q636 YSFQSDVYAF | 64    | >BRAFF-Q636 YSFESDVYAF | 43    | 21    |
| >BRAFF-Q636 PYSFQSDVYA | 267   | >BRAFF-Q636 PYSFESDVYA | 146   | 121   |
| >BRAFF-Q636 PYSFQSDVYA | 400   | >BRAFF-Q636 PYSFESDVYA | 306   | 94    |
| >BRAFF-Q636 PYSFQSDVYA | 25    | >BRAFF-Q636 PYSFESDVYA | 28    | 3     |
| >BRAFF-Q636 PYSFQSDVY  | 409   | >BRAFF-Q636 PYSFESDVY  | 804   | 395   |
| >BRAFF-Q636 PYSFQSDVY  | 380   | >BRAFF-Q636 PYSFESDVY  | 390   | 10    |
| >BRAFF-Q636 PYSFQSDVY  | 646   | >BRAFF-Q636 PYSFESDVY  | 465   | 181   |
| >BRAFF-Q636 NPYSFQSDV  | 44    | >BRAFF-Q636 NPYSFESDV  | 138   | 94    |
| >BRAFF-Q636 NPYSFQSDVY | 148   | >BRAFF-Q636 NPYSFESDVY | 240   | 92    |
| >BRAFF-Q636 NPYSFQSDVY | 228   | >BRAFF-Q636 NPYSFESDVY | 255   | 27    |
| >BRAFF-Q636 NPYSFQSDVY | 97    | >BRAFF-Q636 NPYSFESDVY | 77    | 20    |
| >BRAFF-Q636 NPYSFQSDVY | 10    | >BRAFF-Q636 NPYSFESDVY | 23    | 13    |
| >BRAFF-Q636 NPYSFQSDVY | 110   | >BRAFF-Q636 NPYSFESDVY | 104   | 6     |
| >BRAFF-Q636 MQDKNPYSF  | 854   | >BRAFF-Q636 MQDKNPYSF  | 444   | 410   |
| >BRAFF-R443 RRDSSDDWE  | 71    | >BRAFF-R443 TRDSSDDWE  | 4244  | 4173  |
| >BRAFF-R443 RRDSSDDWE  | 319   | >BRAFF-R443 TRDSSDDWE  | 12182 | 11863 |
| >BRAFF-R443 RRDSSDDWE  | 229   | >BRAFF-R443 TRDSSDDWE  | 6467  | 6238  |
| >BRAFF-R443 RRDSSDDW   | 44    | >BRAFF-R443 TRDSSDDW   | 1804  | 1760  |
| >BRAFF-R443 GRRDSSDDW  | 11574 | >BRAFF-R443 GTRDSSDDW  | 403   | 11171 |
| >BRAFF-R443 GRRDSSDDW  | 8015  | >BRAFF-R443 GTRDSSDDW  | 9     | 8006  |
| >BRAFF-R443 GRRDSSDDW  | 24166 | >BRAFF-R443 GTRDSSDDW  | 87    | 24079 |
| >BRAFF-R443 GRRDSSDDW  | 20242 | >BRAFF-R443 GTRDSSDDW  | 148   | 20094 |
| >BRAFF-R443 GRRDSSDDW  | 16306 | >BRAFF-R443 GTRDSSDDW  | 294   | 16012 |
| >BRAFF-R443 GRRDSSDDW  | 104   | >BRAFF-R443 GTRDSSDDW  | 5952  | 5848  |
| >BRAFF-R443 GRRDSSDDW  | 12261 | >BRAFF-R443 GTRDSSDDW  | 497   | 11764 |
| >BRAFF-R443 LGRDSSDDV  | 318   | >BRAFF-R443 LGTRDSSDDV | 947   | 629   |
| >BRAFF-R443 LGRDSSDDV  | 5746  | >BRAFF-R443 LGTRDSSDDV | 345   | 5401  |
| >BRAFF-R443 RMKTLGRR   | 285   | >BRAFF-R443 RMKTLGTR   | 161   | 124   |
| >BRAFF-R443 RMKTLGRR   | 7     | >BRAFF-R443 RMKTLGTR   | 6     | 1     |
| >BRAFF-R443 RMKTLGRR   | 72    | >BRAFF-R443 RMKTLGTR   | 70    | 2     |
| >BRAFF-R443 NRMKTLGR   | 108   | >BRAFF-R443 NRMKTLGT   | 1434  | 1326  |
| >BRAFF-R443 NRMKTLGRR  | 104   | >BRAFF-R443 NRMKTLGTR  | 113   | 9     |
| >BRAFF-R443 NRMKTLGR   | 355   | >BRAFF-R443 NRMKTLGT   | 33248 | 32893 |
| >BRAFF-R443 RNRMKTGR   | 70    | >BRAFF-R443 RNRMKTGT   | 490   | 420   |
| >BRAFF-R443 RNRMKTGR   | 146   | >BRAFF-R443 RNRMKTGT   | 63    | 83    |
| >BRAFF-R443 RNRMKTGR   | 254   | >BRAFF-R443 RNRMKTGT   | 22091 | 21837 |
| >BRAFF-R443 RNRMKTGR   | 331   | >BRAFF-R443 RNRMKTGT   | 335   | 4     |
| >BRAFF-R443 RNRMKTGR   | 139   | >BRAFF-R443 RNRMKTGT   | 27705 | 27566 |
| >BRAFF-R444 (RDSSDDWEI | 31    | >BRAFF-R444 (QDSSDDWEI | 40    | 9     |
| >BRAFF-R444 (RRDSSDDWE | 16597 | >BRAFF-R444 (RQDSSDDWE | 359   | 16238 |
| >BRAFF-R444 (RRDSSDDWE | 71    | >BRAFF-R444 (RQDSSDDWE | 5704  | 5633  |
| >BRAFF-R444 (RRDSSDDWE | 1246  | >BRAFF-R444 (RQDSSDDWE | 231   | 1015  |

|                       |       |                       |       |       |
|-----------------------|-------|-----------------------|-------|-------|
| >BRAFR444(RRDSDDWE    | 319   | >BRAFR444(RQDSSDDWE   | 8047  | 7728  |
| >BRAFR444(RRDSDDWE    | 229   | >BRAFR444(RQDSSDDWE   | 6643  | 6414  |
| >BRAFR444(RRDSDDW     | 44    | >BRAFR444(RQDSSDDW    | 232   | 188   |
| >BRAFR444(GRRDSSDDW   | 104   | >BRAFR444(GRQDSSDDW   | 207   | 103   |
| >BRAFR444(LGRRDSSDD\  | 318   | >BRAFR444(LGRQDSSDD\  | 494   | 176   |
| >BRAFR444(RMKT LGRR   | 285   | >BRAFR444(RMKT LGRRQ  | 746   | 461   |
| >BRAFR444(RMKT LGRR   | 7     | >BRAFR444(RMKT LGRRQ  | 2849  | 2842  |
| >BRAFR444(RMKT LGRR   | 72    | >BRAFR444(RMKT LGRRQ  | 13355 | 13283 |
| >BRAFR444(NRMKT LGRR  | 104   | >BRAFR444(NRMKT LGRRQ | 1753  | 1649  |
| >BRAFR444(RNRMKT LGRR | 146   | >BRAFR444(RNRMKT LGRR | 439   | 293   |
| >BRAFR444(RNRMKT LGRR | 331   | >BRAFR444(RNRMKT LGRR | 25035 | 24704 |
| >BRAFR444\RDSSDDWEI   | 31    | >BRAFR444\WDSSDDWEI   | 31    | 0     |
| >BRAFR444\RRDSSDDWE   | 18296 | >BRAFR444\RDSSDDWI    | 71    | 18225 |
| >BRAFR444\RRDSSDDWE   | 71    | >BRAFR444\RDSSDDWI    | 6860  | 6789  |
| >BRAFR444\RRDSSDDWE   | 319   | >BRAFR444\RDSSDDWI    | 9243  | 8924  |
| >BRAFR444\RRDSSDDWE   | 229   | >BRAFR444\RDSSDDWI    | 9743  | 9514  |
| >BRAFR444\RRDSSDDW    | 44    | >BRAFR444\RDSSDDW     | 2549  | 2505  |
| >BRAFR444\RRDSSDDW    | 34459 | >BRAFR444\RDSSDDW     | 322   | 34137 |
| >BRAFR444\RRDSSDDWE   | 26356 | >BRAFR444\RDSSDDWI    | 351   | 26005 |
| >BRAFR444\GRRDSSDDW   | 2728  | >BRAFR444\GRDSSDDV    | 137   | 2591  |
| >BRAFR444\GRRDSSDDW   | 104   | >BRAFR444\GRDSSDDV    | 40    | 64    |
| >BRAFR444\LGRRDSSDD\  | 318   | >BRAFR444\LRDSSDD     | 1098  | 780   |
| >BRAFR444\RMKT LGRR   | 285   | >BRAFR444\RMKT LGRRW  | 5164  | 4879  |
| >BRAFR444\RMKT LGRR   | 7     | >BRAFR444\RMKT LGRRW  | 6980  | 6973  |
| >BRAFR444\RMKT LGRR   | 22869 | >BRAFR444\RMKT LGRRW  | 119   | 22750 |
| >BRAFR444\RMKT LGRR   | 23888 | >BRAFR444\RMKT LGRRW  | 125   | 23763 |
| >BRAFR444\RMKT LGRR   | 22792 | >BRAFR444\RMKT LGRRW  | 156   | 22636 |
| >BRAFR444\RMKT LGRR   | 72    | >BRAFR444\RMKT LGRRW  | 29220 | 29148 |
| >BRAFR444\NRMKT LGRR  | 104   | >BRAFR444\NRMKT LGRRW | 1257  | 1153  |
| >BRAFR444\RNRMKT LGRR | 146   | >BRAFR444\RNRMKT LGRR | 3250  | 3104  |
| >BRAFR444\RNRMKT LGRR | 331   | >BRAFR444\RNRMKT LGRR | 30363 | 30032 |
| >BRAFR444\RNRMKT LGRR | 19776 | >BRAFR444\RNRMKT LGRR | 210   | 19566 |
| >BRAFR462IRIGSGSFGTV  | 749   | >BRAFR462IIGSGSFGTV   | 438   | 311   |
| >BRAFR462IRIGSGSFGTV  | 163   | >BRAFR462IIGSGSFGTV   | 112   | 51    |
| >BRAFR462IRIGSGSFGTV  | 31    | >BRAFR462IIGSGSFGTV   | 25    | 6     |
| >BRAFR462IRIGSGSFGTV  | 617   | >BRAFR462IIGSGSFGTV   | 426   | 191   |
| >BRAFR462IRIGSGSFGTV  | 19    | >BRAFR462IIGSGSFGTV   | 19    | 0     |
| >BRAFR462IRIGSGSFGTV  | 163   | >BRAFR462IIGSGSFGTV   | 200   | 37    |
| >BRAFR462IRIGSGSFGTV  | 69    | >BRAFR462IIGSGSFGTV   | 84    | 15    |
| >BRAFR462IRIGSGSFGTV  | 256   | >BRAFR462IIGSGSFGTV   | 101   | 155   |
| >BRAFR462IRIGSGSFGTV  | 14    | >BRAFR462IIGSGSFGTV   | 7     | 7     |
| >BRAFR462IRIGSGSFGTV' | 468   | >BRAFR462IIGSGSFGTVY  | 1554  | 1086  |
| >BRAFR462IRIGSGSFGTV' | 215   | >BRAFR462IIGSGSFGTVY  | 67    | 148   |

|                       |       |                      |       |       |
|-----------------------|-------|----------------------|-------|-------|
| >BRAFR462IRIGSGSFGTV' | 61    | >BRAFR462IIGSGSFGTVY | 51    | 10    |
| >BRAFR462IRIGSGSFGTV  | 327   | >BRAFR462IIGSGSFGTV  | 456   | 129   |
| >BRAFR462IRIGSGSFGTV' | 30    | >BRAFR462IIGSGSFGTVY | 95    | 65    |
| >BRAFR462IRIGSGSFGTV' | 50    | >BRAFR462IIGSGSFGTVY | 69    | 19    |
| >BRAFR462IRIGSGSFGTV' | 726   | >BRAFR462IIGSGSFGTVY | 251   | 475   |
| >BRAFR462IRIGSGSFGTV' | 451   | >BRAFR462IIGSGSFGTVY | 557   | 106   |
| >BRAFR462IRIGSGSFGTV' | 451   | >BRAFR462IIGSGSFGTVY | 1771  | 1320  |
| >BRAFR462IRIGSGSFGTV' | 77    | >BRAFR462IIGSGSFGTVY | 83    | 6     |
| >BRAFR462IQRIGSGSFGT  | 10333 | >BRAFR462IQRIGSGSFGT | 36    | 10297 |
| >BRAFR462IQRIGSGSFGT  | 6033  | >BRAFR462IQRIGSGSFGT | 49    | 5984  |
| >BRAFR462IQRIGSGSFGT  | 14733 | >BRAFR462IQRIGSGSFGT | 164   | 14569 |
| >BRAFR462IQRIGSGSFGT  | 13618 | >BRAFR462IQRIGSGSFGT | 22    | 13596 |
| >BRAFR462IQRIGSGSF    | 17666 | >BRAFR462IQRIGSGSF   | 385   | 17281 |
| >BRAFR462IQRIGSGSF    | 5253  | >BRAFR462IQRIGSGSF   | 29    | 5224  |
| >BRAFR462IQRIGSGSFGT  | 6883  | >BRAFR462IQRIGSGSFGT | 52    | 6831  |
| >BRAFR462IQRIGSGSFGT  | 15733 | >BRAFR462IQRIGSGSFGT | 215   | 15518 |
| >BRAFR462IQRIGSGSF    | 5599  | >BRAFR462IQRIGSGSF   | 67    | 5532  |
| >BRAFR462IQRIGSGSF    | 1234  | >BRAFR462IQRIGSGSF   | 122   | 1112  |
| >BRAFR462IQRIGSGSF    | 52    | >BRAFR462IQRIGSGSF   | 414   | 362   |
| >BRAFR462IQRIGSGSF    | 14133 | >BRAFR462IQRIGSGSF   | 165   | 13968 |
| >BRAFR462IQRIGSGSF    | 235   | >BRAFR462IQRIGSGSF   | 19767 | 19532 |
| >BRAFR462IPDGQITVGQ   | 37027 | >BRAFR462IPDGQITVGQ  | 473   | 36554 |
| >BRAFR462IPDGQITVGQ   | 15505 | >BRAFR462IPDGQITVGQ  | 324   | 15181 |
| >BRAFR462IQRIGSGSFG   | 4736  | >BRAFR462IQRIGSGSFG  | 157   | 4579  |
| >BRAFR462IQRIGSGSF    | 30    | >BRAFR462IQRIGSGSF   | 31    | 1     |
| >BRAFR462IQRIGSGSF    | 56    | >BRAFR462IQRIGSGSF   | 131   | 75    |
| >BRAFR462IQRIGSGSF    | 22    | >BRAFR462IQRIGSGSF   | 40    | 18    |
| >BRAFR462IVGQRIGSGSF  | 498   | >BRAFR462IVGQRIGSGSF | 775   | 277   |
| >BRAFR462IVGQRIGSGSF  | 74    | >BRAFR462IVGQRIGSGSF | 54    | 20    |
| >BRAFR462ITVGQRIGSGS  | 503   | >BRAFR462ITVGQRIGSGS | 337   | 166   |
| >BRAFR462ITVGQRIGSGS  | 183   | >BRAFR462ITVGQRIGSGS | 224   | 41    |
| >BRAFR462IGQITVGQR    | 18732 | >BRAFR462IGQITVGQR   | 421   | 18311 |
| >BRAFR462IGQITVGQR    | 21424 | >BRAFR462IGQITVGQR   | 224   | 21200 |
| >BRAFR462IGQITVGQRI   | 414   | >BRAFR462IGQITVGQRI  | 399   | 15    |
| >BRAFR462IGQITVGQR    | 422   | >BRAFR462IGQITVGQR   | 20024 | 19602 |
| >BRAFR462IGQITVGQRI   | 579   | >BRAFR462IGQITVGQRI  | 115   | 464   |
| >BRAFR462IGQITVGQR    | 35532 | >BRAFR462IGQITVGQR   | 68    | 35464 |
| >BRAFR462IPDGQITVGQI  | 26652 | >BRAFR462IPDGQITVGQI | 189   | 26463 |
| >BRAFR682(RSNCPKAMK   | 77    | >BRAFR682(RSNCPKAMK  | 785   | 708   |
| >BRAFR682(RSNCPKAMK   | 43    | >BRAFR682(RSNCPKAMK  | 182   | 139   |
| >BRAFR682(RSNCPKAMK   | 178   | >BRAFR682(RSNCPKAMK  | 466   | 288   |
| >BRAFR682(RSNCPKAMK   | 17    | >BRAFR682(RSNCPKAMK  | 932   | 915   |
| >BRAFR682(RSNCPKAMK   | 40    | >BRAFR682(RSNCPKAMK  | 1078  | 1038  |

|                       |       |                       |       |       |
|-----------------------|-------|-----------------------|-------|-------|
| >BRAFR682(RSNCPKAMK   | 13    | >BRAFR682(QSNCPKAMK   | 66    | 53    |
| >BRAFR682(RSNCPKAMK   | 1869  | >BRAFR682(QSNCPKAMK   | 331   | 1538  |
| >BRAFR682(RSNCPKAMK   | 531   | >BRAFR682(QSNCPKAMK   | 207   | 324   |
| >BRAFR682(RSNCPKAM    | 59    | >BRAFR682(QSNCPKAM    | 383   | 324   |
| >BRAFR682(RSNCPKAM    | 11    | >BRAFR682(QSNCPKAM    | 207   | 196   |
| >BRAFR682(RSNCPKAMK   | 6     | >BRAFR682(QSNCPKAMK   | 60    | 54    |
| >BRAFR682(RSNCPKAM    | 44    | >BRAFR682(QSNCPKAM    | 574   | 530   |
| >BRAFR682(RSNCPKAMK   | 109   | >BRAFR682(QSNCPKAMK   | 527   | 418   |
| >BRAFR682(RSNCPKAMK   | 374   | >BRAFR682(QSNCPKAMK   | 1988  | 1614  |
| >BRAFR682(VRSNCPKAM   | 3048  | >BRAFR682(VQSNCPKAM   | 248   | 2800  |
| >BRAFR682(VRSNCPKAM   | 7785  | >BRAFR682(VQSNCPKAM   | 268   | 7517  |
| >BRAFR682(VRSNCPKAM   | 14380 | >BRAFR682(VQSNCPKAM   | 441   | 13939 |
| >BRAFR682(VRSNCPKAM   | 19524 | >BRAFR682(VQSNCPKAM   | 299   | 19225 |
| >BRAFR682(VRSNCPKAM   | 80    | >BRAFR682(VQSNCPKAM   | 10    | 70    |
| >BRAFR682(VRSNCPKAM   | 1025  | >BRAFR682(VQSNCPKAM   | 406   | 619   |
| >BRAFR682(GYLSPDLSKVI | 408   | >BRAFR682(GYLSPDLSKVI | 18410 | 18002 |
| >BRAFR682(GYLSPDLSKVI | 90    | >BRAFR682(GYLSPDLSKVI | 11296 | 11206 |
| >BRAFR682(KVRSNCPK    | 63    | >BRAFR682(KVQSNCPK    | 188   | 125   |
| >BRAFR682(KVRSNCPKA   | 55    | >BRAFR682(KVQSNCPKA   | 157   | 102   |
| >BRAFR682(KVRSNCPK    | 288   | >BRAFR682(KVQSNCPK    | 33    | 255   |
| >BRAFR682(KVRSNCPKA   | 597   | >BRAFR682(KVQSNCPKA   | 52    | 545   |
| >BRAFR682(KVRSNCPK    | 3     | >BRAFR682(KVQSNCPK    | 9     | 6     |
| >BRAFR682(KVRSNCPKA   | 5     | >BRAFR682(KVQSNCPKA   | 504   | 499   |
| >BRAFR682(KVRSNCPKA   | 9     | >BRAFR682(KVQSNCPKA   | 1978  | 1969  |
| >BRAFR682(KVRSNCPKA   | 3     | >BRAFR682(KVQSNCPKA   | 26    | 23    |
| >BRAFR682(KVRSNCPK    | 48    | >BRAFR682(KVQSNCPK    | 89    | 41    |
| >BRAFR682(KVRSNCPKA   | 78    | >BRAFR682(KVQSNCPKA   | 137   | 59    |
| >BRAFR682(KVRSNCPKA   | 193   | >BRAFR682(KVQSNCPKA   | 1127  | 934   |
| >BRAFR682(KVRSNCPKA   | 162   | >BRAFR682(KVQSNCPKA   | 1918  | 1756  |
| >BRAFR682(KVRSNCPKA   | 178   | >BRAFR682(KVQSNCPKA   | 139   | 39    |
| >BRAFR682(SKVRSNCPK   | 124   | >BRAFR682(SKVQSNCPK   | 252   | 128   |
| >BRAFR682(SKVRSNCPKA  | 9     | >BRAFR682(SKVQSNCPKA  | 12    | 3     |
| >BRAFR682(SKVRSNCPKA  | 1421  | >BRAFR682(SKVQSNCPKA  | 460   | 961   |
| >BRAFR682(LSKVRSNCPK  | 287   | >BRAFR682(LSKVQSNCPK  | 688   | 401   |
| >BRAFR682(LSKVRSNCPK  | 288   | >BRAFR682(LSKVQSNCPK  | 342   | 54    |
| >BRAFR682(LSKVRSNCPK  | 5     | >BRAFR682(LSKVQSNCPK  | 5     | 0     |
| >BRAFR682(LSKVRSNCPK  | 102   | >BRAFR682(LSKVQSNCPK  | 101   | 1     |
| >BRAFR682(LSKVRSNCPK  | 252   | >BRAFR682(LSKVQSNCPK  | 698   | 446   |
| >BRAFR682(DLSKVRSNCP  | 194   | >BRAFR682(DLSKVQSNCF  | 360   | 166   |
| >BRAFR682(DLSKVRSNCP  | 68    | >BRAFR682(DLSKVQSNCF  | 81    | 13    |
| >BRAFR682(LSPDLSKVR   | 1782  | >BRAFR682(LSPDLSKVQ   | 477   | 1305  |
| >BRAFR682(YLSPDLSKVR  | 237   | >BRAFR682(YLSPDLSKVQ  | 179   | 58    |
| >BRAFR682(YLSPDLSKVR  | 441   | >BRAFR682(YLSPDLSKVQ  | 319   | 122   |

|                        |       |                        |      |       |
|------------------------|-------|------------------------|------|-------|
| >BRAF-R682(YLSPDLSKVR  | 874   | >BRAF-R682(YLSPDLSKVQ  | 16   | 858   |
| >BRAF-R682(YLSPDLSKVR  | 21    | >BRAF-R682(YLSPDLSKVQ  | 17   | 4     |
| >BRAF-S467L SFGTVYKGV  | 365   | >BRAF-S467L LFGTVYKGV  | 274  | 91    |
| >BRAF-S467L SFGTVYKGV  | 3885  | >BRAF-S467L LFGTVYKGV  | 313  | 3572  |
| >BRAF-S467L GSFQTVYK   | 9789  | >BRAF-S467L GLFQTVYK   | 274  | 9515  |
| >BRAF-S467L GSFQTVYK   | 19747 | >BRAF-S467L GLFQTVYK   | 111  | 19636 |
| >BRAF-S467L GSFQTVYK   | 16223 | >BRAF-S467L GLFQTVYK   | 62   | 16161 |
| >BRAF-S467L GSFQTVYK   | 23133 | >BRAF-S467L GLFQTVYK   | 430  | 22703 |
| >BRAF-S467L GSFQTVYK   | 33885 | >BRAF-S467L GLFQTVYK   | 89   | 33796 |
| >BRAF-S467L GSFQTVYK   | 62    | >BRAF-S467L GLFQTVYK   | 32   | 30    |
| >BRAF-S467L GSFQTVYK   | 119   | >BRAF-S467L GLFQTVYK   | 42   | 77    |
| >BRAF-S467L GSFQTVYK   | 6     | >BRAF-S467L GLFQTVYK   | 10   | 4     |
| >BRAF-S467L GSFQTVYK   | 39    | >BRAF-S467L GLFQTVYK   | 129  | 90    |
| >BRAF-S467L GSFQTVYK   | 37    | >BRAF-S467L GLFQTVYK   | 273  | 236   |
| >BRAF-S467L GSFQTVYK   | 338   | >BRAF-S467L GLFQTVYK   | 2140 | 1802  |
| >BRAF-S467L GSFQTVYK   | 89    | >BRAF-S467L GLFQTVYK   | 211  | 122   |
| >BRAF-S467L GSFQTVYK   | 25    | >BRAF-S467L GLFQTVYK   | 117  | 92    |
| >BRAF-S467L GSFQTVYK   | 9     | >BRAF-S467L GLFQTVYK   | 360  | 351   |
| >BRAF-S467L GSFQTVYK   | 40    | >BRAF-S467L GLFQTVYK   | 641  | 601   |
| >BRAF-S467L GSFQTVYK   | 29    | >BRAF-S467L GLFQTVYK   | 778  | 749   |
| >BRAF-S467L GSFQTVYK   | 90    | >BRAF-S467L GLFQTVYK   | 2150 | 2060  |
| >BRAF-S467L GSFQTVYK   | 103   | >BRAF-S467L GLFQTVYK   | 445  | 342   |
| >BRAF-S467L GSFQTVYK   | 74    | >BRAF-S467L GLFQTVYK   | 751  | 677   |
| >BRAF-S467L GSFQTVYK   | 141   | >BRAF-S467L GLFQTVYK   | 1812 | 1671  |
| >BRAF-S467L GSFQTVYK   | 1983  | >BRAF-S467L GLFQTVYK   | 459  | 1524  |
| >BRAF-S467L ITVGQRIGSG | 9965  | >BRAF-S467L ITVGQRIGSG | 420  | 9545  |
| >BRAF-S467L ITVGQRIGSG | 13718 | >BRAF-S467L ITVGQRIGSG | 422  | 13296 |
| >BRAF-S467L ITVGQRIGSG | 4138  | >BRAF-S467L ITVGQRIGSG | 394  | 3744  |
| >BRAF-S467L ITVGQRIGSG | 1871  | >BRAF-S467L ITVGQRIGSG | 6    | 1865  |
| >BRAF-S467L ITVGQRIGSG | 1366  | >BRAF-S467L ITVGQRIGSG | 94   | 1272  |
| >BRAF-S467L SGSFQTVYK  | 41    | >BRAF-S467L SGLFQTVYK  | 36   | 5     |
| >BRAF-S467L SGSFQTVYK  | 331   | >BRAF-S467L SGLFQTVYK  | 112  | 219   |
| >BRAF-S467L SGSFQTVY   | 89    | >BRAF-S467L SGLFQTVY   | 239  | 150   |
| >BRAF-S467L SGSFQTVYK  | 290   | >BRAF-S467L SGLFQTVYK  | 1196 | 906   |
| >BRAF-S467L SGSFQTVY   | 226   | >BRAF-S467L SGLFQTVY   | 581  | 355   |
| >BRAF-S467L SGSFQTVY   | 963   | >BRAF-S467L SGLFQTVY   | 480  | 483   |
| >BRAF-S467L SGSFQTVYK  | 438   | >BRAF-S467L SGLFQTVYK  | 280  | 158   |
| >BRAF-S467L GSGSFQTVYK | 46    | >BRAF-S467L GSGLFQTVYK | 61   | 15    |
| >BRAF-S467L GSGSFQTVYK | 25    | >BRAF-S467L GSGLFQTVYK | 29   | 4     |
| >BRAF-S467L GSGSFQTVY  | 172   | >BRAF-S467L GSGLFQTVY  | 989  | 817   |
| >BRAF-S467L GSGSFQTVYK | 212   | >BRAF-S467L GSGLFQTVYK | 412  | 200   |
| >BRAF-S467L GSGSFQTVY  | 86    | >BRAF-S467L GSGLFQTVY  | 267  | 181   |
| >BRAF-S467L GSGSFQTVY  | 197   | >BRAF-S467L GSGLFQTVY  | 1725 | 1528  |

|                        |       |                        |      |       |
|------------------------|-------|------------------------|------|-------|
| >BRAFS467L GSGSFGTVY   | 154   | >BRAFS467L GSGLFGTVY   | 109  | 45    |
| >BRAFS467L GSGSFGTVY   | 4     | >BRAFS467L GSGLFGTVY   | 12   | 8     |
| >BRAFS467L GSGSFGTVYK  | 241   | >BRAFS467L GSGLFGTVYK  | 368  | 127   |
| >BRAFS467L IGSGSFGTVYI | 304   | >BRAFS467L IGSGLFGTVYI | 486  | 182   |
| >BRAFS467L IGSGSFGTVYI | 214   | >BRAFS467L IGSGLFGTVYI | 215  | 1     |
| >BRAFS467L IGSGSFGTVY  | 96    | >BRAFS467L IGSGLFGTVY  | 151  | 55    |
| >BRAFS467L IGSGSFGTVY  | 370   | >BRAFS467L IGSGLFGTVY  | 780  | 410   |
| >BRAFS467L IGSGSFGTVY  | 146   | >BRAFS467L IGSGLFGTVY  | 256  | 110   |
| >BRAFS467L RIGSGSFGTV  | 749   | >BRAFS467L RIGSGLFGTV  | 350  | 399   |
| >BRAFS467L RIGSGSFGTV  | 163   | >BRAFS467L RIGSGLFGTV  | 128  | 35    |
| >BRAFS467L RIGSGSFGTV  | 31    | >BRAFS467L RIGSGLFGTV  | 34   | 3     |
| >BRAFS467L RIGSGSFGT   | 1267  | >BRAFS467L RIGSGLFGT   | 239  | 1028  |
| >BRAFS467L RIGSGSFGTV  | 617   | >BRAFS467L RIGSGLFGTV  | 211  | 406   |
| >BRAFS467L RIGSGSFGTV  | 19    | >BRAFS467L RIGSGLFGTV  | 13   | 6     |
| >BRAFS467L RIGSGSFGTV  | 163   | >BRAFS467L RIGSGLFGTV  | 145  | 18    |
| >BRAFS467L RIGSGSFGTV  | 69    | >BRAFS467L RIGSGLFGTV  | 55   | 14    |
| >BRAFS467L RIGSGSFGTV  | 256   | >BRAFS467L RIGSGLFGTV  | 256  | 0     |
| >BRAFS467L RIGSGSFGTV  | 14    | >BRAFS467L RIGSGLFGTV  | 14   | 0     |
| >BRAFS467L RIGSGSFGTV' | 468   | >BRAFS467L RIGSGLFGTV' | 787  | 319   |
| >BRAFS467L RIGSGSFGTV' | 215   | >BRAFS467L RIGSGLFGTV' | 233  | 18    |
| >BRAFS467L RIGSGSFGTV' | 61    | >BRAFS467L RIGSGLFGTV' | 76   | 15    |
| >BRAFS467L RIGSGSFGTV  | 327   | >BRAFS467L RIGSGLFGTV  | 495  | 168   |
| >BRAFS467L RIGSGSFGTV' | 30    | >BRAFS467L RIGSGLFGTV' | 37   | 7     |
| >BRAFS467L RIGSGSFGTV' | 50    | >BRAFS467L RIGSGLFGTV' | 77   | 27    |
| >BRAFS467L RIGSGSFGTV' | 451   | >BRAFS467L RIGSGLFGTV' | 862  | 411   |
| >BRAFS467L RIGSGSFGTV' | 451   | >BRAFS467L RIGSGLFGTV' | 769  | 318   |
| >BRAFS467L RIGSGSFGTV' | 77    | >BRAFS467L RIGSGLFGTV' | 109  | 32    |
| >BRAFS467L QRIGSGSF    | 52    | >BRAFS467L QRIGSGLF    | 168  | 116   |
| >BRAFS467L QRIGSGSF    | 235   | >BRAFS467L QRIGSGLF    | 174  | 61    |
| >BRAFS467L QRIGSGSFGT  | 521   | >BRAFS467L QRIGSGLFGT  | 269  | 252   |
| >BRAFS467L GQRIGSGS    | 6830  | >BRAFS467L GQRIGSGL    | 299  | 6531  |
| >BRAFS467L GQRIGSGSF   | 30    | >BRAFS467L GQRIGSGLF   | 59   | 29    |
| >BRAFS467L GQRIGSGSF   | 56    | >BRAFS467L GQRIGSGLF   | 125  | 69    |
| >BRAFS467L GQRIGSGS    | 10495 | >BRAFS467L GQRIGSGL    | 484  | 10011 |
| >BRAFS467L GQRIGSGSF   | 22    | >BRAFS467L GQRIGSGLF   | 227  | 205   |
| >BRAFS467L GQRIGSGSF   | 1085  | >BRAFS467L GQRIGSGLF   | 440  | 645   |
| >BRAFS467L VGQRIGSGSF  | 498   | >BRAFS467L VGQRIGSGLF  | 3228 | 2730  |
| >BRAFS467L VGQRIGSGS   | 8470  | >BRAFS467L VGQRIGSGL   | 491  | 7979  |
| >BRAFS467L VGQRIGSGSF  | 74    | >BRAFS467L VGQRIGSGLF  | 84   | 10    |
| >BRAFS467L TVGQRIGSGS  | 183   | >BRAFS467L TVGQRIGSGL  | 1313 | 1130  |
| >BRAFS602S SRWSGSHQF   | 327   | >BRAFS602S SRWSGSHQF   | 327  | 0     |
| >BRAFS602S KSRWSGSH    | 55    | >BRAFS602S KSRWSGSH    | 55   | 0     |
| >BRAFS602S KSRWSGSHQ   | 44    | >BRAFS602S KSRWSGSHQ   | 44   | 0     |

|                     |       |                     |     |       |
|---------------------|-------|---------------------|-----|-------|
| >BRAFS602SKSRWSGSHQ | 23    | >BRAFS602SKSRWSGSHQ | 23  | 0     |
| >BRAFS602SKSRWSGSHQ | 93    | >BRAFS602SKSRWSGSHQ | 93  | 0     |
| >BRAFS602SKSRWSGSHQ | 14    | >BRAFS602SKSRWSGSHQ | 14  | 0     |
| >BRAFS602SKSRWSGSH  | 31    | >BRAFS602SKSRWSGSH  | 31  | 0     |
| >BRAFS602SKSRWSGSHQ | 2     | >BRAFS602SKSRWSGSHQ | 2   | 0     |
| >BRAFS602SKSRWSGSHQ | 186   | >BRAFS602SKSRWSGSHQ | 186 | 0     |
| >BRAFS602SKSRWSGSHQ | 73    | >BRAFS602SKSRWSGSHQ | 73  | 0     |
| >BRAFS602SKSRWSGSHQ | 24    | >BRAFS602SKSRWSGSHQ | 24  | 0     |
| >BRAFS602SKSRWSGSH  | 333   | >BRAFS602SKSRWSGSH  | 333 | 0     |
| >BRAFS602SKSRWSGSHQ | 72    | >BRAFS602SKSRWSGSHQ | 72  | 0     |
| >BRAFS602VKSRWSGSH  | 9     | >BRAFS602VKSRWSGSH  | 9   | 0     |
| >BRAFS602ATVKSRWSG  | 451   | >BRAFS602ATVKSRWSG  | 451 | 0     |
| >BRAFS602LATVKSRW   | 36    | >BRAFS602LATVKSRW   | 36  | 0     |
| >BRAFS602LATVKSRW   | 86    | >BRAFS602LATVKSRW   | 86  | 0     |
| >BRAFS602LATVKSRW   | 73    | >BRAFS602LATVKSRW   | 73  | 0     |
| >BRAFS602LATVKSRW   | 22    | >BRAFS602LATVKSRW   | 22  | 0     |
| >BRAFS602LATVKSRW   | 172   | >BRAFS602LATVKSRW   | 172 | 0     |
| >BRAFS602LATVKSRW   | 130   | >BRAFS602LATVKSRW   | 130 | 0     |
| >BRAFS602FGLATVKSRW | 98    | >BRAFS602FGLATVKSRW | 98  | 0     |
| >BRAFS602FGLATVKSRW | 499   | >BRAFS602FGLATVKSRW | 499 | 0     |
| >BRAFS602FGLATVKSRW | 45    | >BRAFS602FGLATVKSRW | 45  | 0     |
| >BRAFS602FGLATVKSRW | 215   | >BRAFS602FGLATVKSRW | 215 | 0     |
| >BRAFS602DFGLATVKSR | 205   | >BRAFS602DFGLATVKSR | 205 | 0     |
| >BRAFS602DFGLATVKSR | 246   | >BRAFS602DFGLATVKSR | 246 | 0     |
| >BRAFS602YSRWSGSHQF | 1471  | >BRAFS602YRWSGSHQF  | 165 | 1306  |
| >BRAFS602YSRWSGSHQF | 993   | >BRAFS602YRWSGSHQF  | 125 | 868   |
| >BRAFS602YSRWSGSHQF | 640   | >BRAFS602YRWSGSHQF  | 144 | 496   |
| >BRAFS602YSRWSGSHQ  | 1045  | >BRAFS602YRWSGSHQ   | 319 | 726   |
| >BRAFS602YSRWSGSHQF | 8     | >BRAFS602YRWSGSHQF  | 3   | 5     |
| >BRAFS602YSRWSGSHQ  | 528   | >BRAFS602YRWSGSHQ   | 192 | 336   |
| >BRAFS602YSRWSGSHQF | 37    | >BRAFS602YRWSGSHQF  | 26  | 11    |
| >BRAFS602YSRWSGSHQF | 327   | >BRAFS602YRWSGSHQF  | 131 | 196   |
| >BRAFS602YSRWSGSHQF | 4147  | >BRAFS602YRWSGSHQF  | 384 | 3763  |
| >BRAFS602YSRWSGSHQF | 792   | >BRAFS602YRWSGSHQF  | 104 | 688   |
| >BRAFS602YSRWSGSHQ  | 725   | >BRAFS602YRWSGSHQ   | 383 | 342   |
| >BRAFS602YSRWSGSHQF | 698   | >BRAFS602YRWSGSHQF  | 467 | 231   |
| >BRAFS602YSRWSGSHQF | 538   | >BRAFS602YRWSGSHQF  | 288 | 250   |
| >BRAFS602YSRWSGSHQF | 888   | >BRAFS602YRWSGSHQF  | 389 | 499   |
| >BRAFS602YSRWSGSHQF | 147   | >BRAFS602YRWSGSHQF  | 357 | 210   |
| >BRAFS602YKSRWSGSHQ | 12248 | >BRAFS602YKSRWSGSHQ | 201 | 12047 |
| >BRAFS602YKSRWSGSHQ | 18082 | >BRAFS602YKSRWSGSHQ | 165 | 17917 |
| >BRAFS602YKSRWSGSHQ | 7726  | >BRAFS602YKSRWSGSHQ | 6   | 7720  |
| >BRAFS602YKSRWSGSH  | 55    | >BRAFS602YKSRWSGSH  | 57  | 2     |

|                      |       |                      |       |       |
|----------------------|-------|----------------------|-------|-------|
| >BRAFS602YKSRWSGSHQ  | 24    | >BRAFS602YKYRWSGSHQ  | 25    | 1     |
| >BRAFS602YKSRWSGSHQ  | 44    | >BRAFS602YKYRWSGSHQ  | 46    | 2     |
| >BRAFS602YKSRWSGSHQ  | 23    | >BRAFS602YKYRWSGSHQ  | 23    | 0     |
| >BRAFS602YKSRWSGSHQ  | 93    | >BRAFS602YKYRWSGSHQ  | 3978  | 3885  |
| >BRAFS602YKSRWSGSHQ  | 14    | >BRAFS602YKYRWSGSHQ  | 145   | 131   |
| >BRAFS602YKSRWSGSH   | 31    | >BRAFS602YKYRWSGSH   | 17570 | 17539 |
| >BRAFS602YKSRWSGSHQ  | 51    | >BRAFS602YKYRWSGSHQ  | 19518 | 19467 |
| >BRAFS602YKSRWSGSHQ  | 2     | >BRAFS602YKYRWSGSHQ  | 424   | 422   |
| >BRAFS602YKSRWSGSHQ  | 186   | >BRAFS602YKYRWSGSHQ  | 21453 | 21267 |
| >BRAFS602YKSRWSGSHQ  | 73    | >BRAFS602YKYRWSGSHQ  | 17378 | 17305 |
| >BRAFS602YKSRWSGSHQ  | 24    | >BRAFS602YKYRWSGSHQ  | 10505 | 10481 |
| >BRAFS602YKSRWSGSH   | 333   | >BRAFS602YKYRWSGSH   | 18458 | 18125 |
| >BRAFS602YKSRWSGSHQ  | 193   | >BRAFS602YKYRWSGSHQ  | 5227  | 5034  |
| >BRAFS602YKSRWSGSHQ  | 72    | >BRAFS602YKYRWSGSHQ  | 8126  | 8054  |
| >BRAFS602YKSRWSGSH   | 22798 | >BRAFS602YKYRWSGSH   | 154   | 22644 |
| >BRAFS602YKSRWSGSHQ  | 26669 | >BRAFS602YKYRWSGSHQ  | 284   | 26385 |
| >BRAFS602YKSRWSGSHQ  | 17395 | >BRAFS602YKYRWSGSHQ  | 76    | 17319 |
| >BRAFS602YIGDFGLATVK | 22353 | >BRAFS602YIGDFGLATVK | 302   | 22051 |
| >BRAFS602YVKSRSWSGSH | 2486  | >BRAFS602YVKYRWSGSH  | 344   | 2142  |
| >BRAFS602YVKSRSWSGSH | 1530  | >BRAFS602YVKYRWSGSH  | 226   | 1304  |
| >BRAFS602YVKSRSWSGSH | 1640  | >BRAFS602YVKYRWSGSH  | 284   | 1356  |
| >BRAFS602YVKSRSWSGSH | 9     | >BRAFS602YVKYRWSGSH  | 3     | 6     |
| >BRAFS602YATVKSRWSG  | 451   | >BRAFS602YATVKYRWSG  | 427   | 24    |
| >BRAFS602YLATVKSRW   | 36    | >BRAFS602YLATVKYRW   | 91    | 55    |
| >BRAFS602YLATVKSRW   | 86    | >BRAFS602YLATVKYRW   | 52    | 34    |
| >BRAFS602YLATVKSRW   | 73    | >BRAFS602YLATVKYRW   | 53    | 20    |
| >BRAFS602YLATVKSRW   | 22    | >BRAFS602YLATVKYRW   | 18    | 4     |
| >BRAFS602YLATVKSRW   | 172   | >BRAFS602YLATVKYRW   | 88    | 84    |
| >BRAFS602YLATVKSRW   | 130   | >BRAFS602YLATVKYRW   | 119   | 11    |
| >BRAFS602YGLATVKSR   | 697   | >BRAFS602YGLATVKYR   | 62    | 635   |
| >BRAFS602YGLATVKSR   | 658   | >BRAFS602YGLATVKYR   | 197   | 461   |
| >BRAFS602YGLATVKSRW  | 1001  | >BRAFS602YGLATVKYRW  | 421   | 580   |
| >BRAFS602YGLATVKSRW  | 242   | >BRAFS602YGLATVKYRW  | 6216  | 5974  |
| >BRAFS602YGLATVKSR   | 4920  | >BRAFS602YGLATVKYR   | 363   | 4557  |
| >BRAFS602YFGLATVK    | 23909 | >BRAFS602YFGLATVKY   | 285   | 23624 |
| >BRAFS602YFGLATVK    | 26284 | >BRAFS602YFGLATVKY   | 256   | 26028 |
| >BRAFS602YFGLATVK    | 19218 | >BRAFS602YFGLATVKY   | 319   | 18899 |
| >BRAFS602YFGLATVK    | 23737 | >BRAFS602YFGLATVKY   | 336   | 23401 |
| >BRAFS602YFGLATVKSRM | 98    | >BRAFS602YFGLATVKYRM | 164   | 66    |
| >BRAFS602YFGLATVK    | 15999 | >BRAFS602YFGLATVKY   | 185   | 15814 |
| >BRAFS602YFGLATVKSRM | 499   | >BRAFS602YFGLATVKYRM | 196   | 303   |
| >BRAFS602YFGLATVKSRM | 45    | >BRAFS602YFGLATVKYRM | 27    | 18    |
| >BRAFS602YFGLATVKSRM | 215   | >BRAFS602YFGLATVKYRM | 213   | 2     |



|                      |       |                      |     |       |
|----------------------|-------|----------------------|-----|-------|
| >BRAFS602YFGLATVKSR  | 756   | >BRAFS602YFGLATVKYR  | 63  | 693   |
| >BRAFS602YDFGLATVKS  | 22409 | >BRAFS602YDFGLATVKY  | 184 | 22225 |
| >BRAFS602YDFGLATVKSR | 1561  | >BRAFS602YDFGLATVKYR | 338 | 1223  |
| >BRAFS602YDFGLATVKSR | 205   | >BRAFS602YDFGLATVKYR | 53  | 152   |
| >BRAFS602YDFGLATVKSR | 2715  | >BRAFS602YDFGLATVKYR | 495 | 2220  |
| >BRAFS602YDFGLATVKSR | 246   | >BRAFS602YDFGLATVKYR | 30  | 216   |
| >BRAFS602YGDFGLATVKS | 30587 | >BRAFS602YGDFGLATVKY | 426 | 30161 |
| >BRAFS605FSGSHQFEQL  | 2843  | >BRAFS605FSGSHQFEQL  | 110 | 2733  |
| >BRAFS605FWSGSHQFEQ  | 4735  | >BRAFS605FWSGSHQFEQ  | 14  | 4721  |
| >BRAFS605FGLATVKSRM  | 21555 | >BRAFS605FGLATVKSRM  | 325 | 21230 |
| >BRAFS605FGLATVKSRM  | 23857 | >BRAFS605FGLATVKSRM  | 150 | 23707 |
| >BRAFS605FRWSGSHQF   | 60    | >BRAFS605FRWFGSHQF   | 19  | 41    |
| >BRAFS605FRWSGSHQFE  | 1167  | >BRAFS605FRWFGSHQFE  | 152 | 1015  |
| >BRAFS605FRWSGSHQF   | 78    | >BRAFS605FRWFGSHQF   | 87  | 9     |
| >BRAFS605FRWSGSHQFE  | 328   | >BRAFS605FRWFGSHQFE  | 358 | 30    |
| >BRAFS605FRWSGSHQF   | 6     | >BRAFS605FRWFGSHQF   | 5   | 1     |
| >BRAFS605FRWSGSHQFE  | 14    | >BRAFS605FRWFGSHQFE  | 9   | 5     |
| >BRAFS605FRWSGSHQF   | 3885  | >BRAFS605FRWFGSHQF   | 327 | 3558  |
| >BRAFS605FRWSGSHQF   | 664   | >BRAFS605FRWFGSHQF   | 75  | 589   |
| >BRAFS605FRWSGSHQFE  | 2543  | >BRAFS605FRWFGSHQFE  | 297 | 2246  |
| >BRAFS605FRWSGSHQFE  | 613   | >BRAFS605FRWFGSHQFE  | 146 | 467   |
| >BRAFS605FRWSGSHQF   | 144   | >BRAFS605FRWFGSHQF   | 56  | 88    |
| >BRAFS605FRWSGSHQFE  | 57    | >BRAFS605FRWFGSHQFE  | 26  | 31    |
| >BRAFS605FRWSGSHQFE  | 116   | >BRAFS605FRWFGSHQFE  | 51  | 65    |
| >BRAFS605FSRWGSHQF   | 8     | >BRAFS605FSRWFGSHQF  | 35  | 27    |
| >BRAFS605FSRWGSHQF   | 37    | >BRAFS605FSRWFGSHQF  | 72  | 35    |
| >BRAFS605FSRWGSHQF   | 327   | >BRAFS605FSRWFGSHQF  | 563 | 236   |
| >BRAFS605FSRWGSHQF   | 698   | >BRAFS605FSRWFGSHQF  | 439 | 259   |
| >BRAFS605FSRWGSHQF   | 538   | >BRAFS605FSRWFGSHQF  | 353 | 185   |
| >BRAFS605FSRWGSHQF   | 503   | >BRAFS605FSRWFGSHQF  | 387 | 116   |
| >BRAFS605FSRWGSHQF   | 147   | >BRAFS605FSRWFGSHQF  | 54  | 93    |
| >BRAFS605FKSRWSGSH   | 55    | >BRAFS605FKSRWFGSH   | 77  | 22    |
| >BRAFS605FKSRWSGSHQ  | 24    | >BRAFS605FKSRWFGSHQ  | 27  | 3     |
| >BRAFS605FKSRWSGSHQ  | 44    | >BRAFS605FKSRWFGSHQ  | 47  | 3     |
| >BRAFS605FKSRWSGSHQ  | 23    | >BRAFS605FKSRWFGSHQ  | 25  | 2     |
| >BRAFS605FKSRWSGSHQ  | 518   | >BRAFS605FKSRWFGSHQ  | 112 | 406   |
| >BRAFS605FKSRWSGSHQ  | 93    | >BRAFS605FKSRWFGSHQ  | 160 | 67    |
| >BRAFS605FKSRWSGSHQ  | 14    | >BRAFS605FKSRWFGSHQ  | 25  | 11    |
| >BRAFS605FKSRWSGSH   | 31    | >BRAFS605FKSRWFGSH   | 149 | 118   |
| >BRAFS605FKSRWSGSHQ  | 51    | >BRAFS605FKSRWFGSHQ  | 292 | 241   |
| >BRAFS605FKSRWSGSHQ  | 2     | >BRAFS605FKSRWFGSHQ  | 2   | 0     |
| >BRAFS605FKSRWSGSHQ  | 186   | >BRAFS605FKSRWFGSHQ  | 565 | 379   |
| >BRAFS605FKSRWSGSHQ  | 73    | >BRAFS605FKSRWFGSHQ  | 58  | 15    |

|                     |       |                     |     |       |
|---------------------|-------|---------------------|-----|-------|
| >BRAFS605FKSRWSGSHQ | 24    | >BRAFS605FKSRWFGSHQ | 28  | 4     |
| >BRAFS605FKSRWSGSH  | 333   | >BRAFS605FKSRWFGSH  | 411 | 78    |
| >BRAFS605FKSRWSGSHQ | 193   | >BRAFS605FKSRWFGSHQ | 117 | 76    |
| >BRAFS605FKSRWSGSHQ | 72    | >BRAFS605FKSRWFGSHQ | 45  | 27    |
| >BRAFS605FKSRWSGSH  | 9     | >BRAFS605FKSRWFGSH  | 10  | 1     |
| >BRAFS605FTVKSRWSG  | 1158  | >BRAFS605FTVKSRWFG  | 368 | 790   |
| >BRAFS605FATVKSRWS  | 8991  | >BRAFS605FATVKSRWF  | 18  | 8973  |
| >BRAFS605FATVKSRWSG | 1265  | >BRAFS605FATVKSRWFG | 428 | 837   |
| >BRAFS605FATVKSRWS  | 19382 | >BRAFS605FATVKSRWF  | 311 | 19071 |
| >BRAFS605FATVKSRWS  | 4084  | >BRAFS605FATVKSRWF  | 4   | 4080  |
| >BRAFS605FATVKSRWS  | 27464 | >BRAFS605FATVKSRWF  | 247 | 27217 |
| >BRAFS605FATVKSRWS  | 17681 | >BRAFS605FATVKSRWF  | 365 | 17316 |
| >BRAFS605FATVKSRWSG | 451   | >BRAFS605FATVKSRWFG | 396 | 55    |
| >BRAFS605FATVKSRWSG | 1202  | >BRAFS605FATVKSRWFG | 413 | 789   |
| >BRAFS605FLATVKSRWS | 14852 | >BRAFS605FLATVKSRWF | 22  | 14830 |
| >BRAFS605CRWSGSHQF  | 60    | >BRAFS605CRWGGSHQF  | 30  | 30    |
| >BRAFS605CRWSGSHQF  | 78    | >BRAFS605CRWGGSHQF  | 65  | 13    |
| >BRAFS605CRWSGSHQFE | 328   | >BRAFS605CRWGGSHQFE | 281 | 47    |
| >BRAFS605CRWSGSHQF  | 6     | >BRAFS605CRWGGSHQF  | 5   | 1     |
| >BRAFS605CRWSGSHQFE | 14    | >BRAFS605CRWGGSHQFE | 13  | 1     |
| >BRAFS605CRWSGSHQFE | 613   | >BRAFS605CRWGGSHQFE | 365 | 248   |
| >BRAFS605CRWSGSHQF  | 144   | >BRAFS605CRWGGSHQF  | 339 | 195   |
| >BRAFS605CRWSGSHQFE | 57    | >BRAFS605CRWGGSHQFE | 120 | 63    |
| >BRAFS605CRWSGSHQFE | 116   | >BRAFS605CRWGGSHQFE | 257 | 141   |
| >BRAFS605CSRWSGSHQF | 640   | >BRAFS605CSRWGGSHQF | 416 | 224   |
| >BRAFS605CSRWSGSHQF | 8     | >BRAFS605CSRWGGSHQF | 74  | 66    |
| >BRAFS605CSRWSGSHQ  | 528   | >BRAFS605CSRWGGSHQ  | 407 | 121   |
| >BRAFS605CSRWSGSHQF | 37    | >BRAFS605CSRWGGSHQF | 33  | 4     |
| >BRAFS605CSRWSGSHQF | 327   | >BRAFS605CSRWGGSHQF | 269 | 58    |
| >BRAFS605CSRWSGSHQF | 538   | >BRAFS605CSRWGGSHQF | 424 | 114   |
| >BRAFS605CSRWSGSHQF | 147   | >BRAFS605CSRWGGSHQF | 263 | 116   |
| >BRAFS605CKSRWSGSH  | 55    | >BRAFS605CKSRWGGSH  | 163 | 108   |
| >BRAFS605CKSRWSGSHQ | 24    | >BRAFS605CKSRWGGSHC | 49  | 25    |
| >BRAFS605CKSRWSGSHQ | 44    | >BRAFS605CKSRWGGSHC | 84  | 40    |
| >BRAFS605CKSRWSGSHQ | 23    | >BRAFS605CKSRWGGSHC | 38  | 15    |
| >BRAFS605CKSRWSGSHQ | 518   | >BRAFS605CKSRWGGSHC | 346 | 172   |
| >BRAFS605CKSRWSGSHQ | 93    | >BRAFS605CKSRWGGSHC | 116 | 23    |
| >BRAFS605CKSRWSGSHQ | 14    | >BRAFS605CKSRWGGSHC | 38  | 24    |
| >BRAFS605CKSRWSGSH  | 31    | >BRAFS605CKSRWGGSH  | 58  | 27    |
| >BRAFS605CKSRWSGSHQ | 51    | >BRAFS605CKSRWGGSHC | 119 | 68    |
| >BRAFS605CKSRWSGSHQ | 2     | >BRAFS605CKSRWGGSHC | 2   | 0     |
| >BRAFS605CKSRWSGSHQ | 186   | >BRAFS605CKSRWGGSHC | 333 | 147   |
| >BRAFS605CKSRWSGSHQ | 73    | >BRAFS605CKSRWGGSHC | 139 | 66    |

|                         |       |                        |      |       |
|-------------------------|-------|------------------------|------|-------|
| >BRAFF-S605C KSRWSGSHQ  | 24    | >BRAFF-S605C KSRWGGSHC | 33   | 9     |
| >BRAFF-S605C KSRWSGSH   | 333   | >BRAFF-S605C KSRWGGSH  | 343  | 10    |
| >BRAFF-S605C KSRWSGSHQ  | 193   | >BRAFF-S605C KSRWGGSHC | 194  | 1     |
| >BRAFF-S605C KSRWSGSHQ  | 72    | >BRAFF-S605C KSRWGGSHC | 89   | 17    |
| >BRAFF-S605C VKSRWSGSH  | 9     | >BRAFF-S605C VKSRWGGSH | 12   | 3     |
| >BRAFF-S605C ATVKSRWSG: | 451   | >BRAFF-S605C ATVKSRWGG | 457  | 6     |
| >BRAFF-S605M RWSGSHQF   | 60    | >BRAFF-S605M RWNGSHQF  | 64   | 4     |
| >BRAFF-S605M RWSGSHQF   | 78    | >BRAFF-S605M RWNGSHQF  | 150  | 72    |
| >BRAFF-S605M RWSGSHQFE  | 328   | >BRAFF-S605M RWNGSHQFE | 688  | 360   |
| >BRAFF-S605M RWSGSHQF   | 6     | >BRAFF-S605M RWNGSHQF  | 9    | 3     |
| >BRAFF-S605M RWSGSHQFE  | 14    | >BRAFF-S605M RWNGSHQFE | 33   | 19    |
| >BRAFF-S605M RWSGSHQF   | 144   | >BRAFF-S605M RWNGSHQF  | 280  | 136   |
| >BRAFF-S605M RWSGSHQFE  | 57    | >BRAFF-S605M RWNGSHQFE | 100  | 43    |
| >BRAFF-S605M RWSGSHQFE  | 116   | >BRAFF-S605M RWNGSHQFE | 212  | 96    |
| >BRAFF-S605M SRWSGSHQF  | 8     | >BRAFF-S605M SRWNGSHQF | 10   | 2     |
| >BRAFF-S605M SRWSGSHQ   | 528   | >BRAFF-S605M SRWNGSHQ  | 475  | 53    |
| >BRAFF-S605M SRWSGSHQF  | 37    | >BRAFF-S605M SRWNGSHQF | 38   | 1     |
| >BRAFF-S605M SRWSGSHQF  | 538   | >BRAFF-S605M SRWNGSHQF | 489  | 49    |
| >BRAFF-S605M SRWSGSHQF  | 327   | >BRAFF-S605M SRWNGSHQF | 300  | 27    |
| >BRAFF-S605M SRWSGSHQF  | 538   | >BRAFF-S605M SRWNGSHQF | 474  | 64    |
| >BRAFF-S605M SRWSGSHQF  | 147   | >BRAFF-S605M SRWNGSHQF | 87   | 60    |
| >BRAFF-S605M KSRWSGSH   | 55    | >BRAFF-S605M KSRWNGSH  | 93   | 38    |
| >BRAFF-S605M KSRWSGSHQ  | 24    | >BRAFF-S605M KSRWNGSHC | 36   | 12    |
| >BRAFF-S605M KSRWSGSHQ  | 44    | >BRAFF-S605M KSRWNGSHC | 60   | 16    |
| >BRAFF-S605M KSRWSGSHQ  | 23    | >BRAFF-S605M KSRWNGSHC | 31   | 8     |
| >BRAFF-S605M KSRWSGSHQ  | 518   | >BRAFF-S605M KSRWNGSHC | 268  | 250   |
| >BRAFF-S605M KSRWSGSHQ  | 93    | >BRAFF-S605M KSRWNGSHC | 149  | 56    |
| >BRAFF-S605M KSRWSGSHQ  | 14    | >BRAFF-S605M KSRWNGSHC | 24   | 10    |
| >BRAFF-S605M KSRWSGSH   | 31    | >BRAFF-S605M KSRWNGSH  | 102  | 71    |
| >BRAFF-S605M KSRWSGSHQ  | 51    | >BRAFF-S605M KSRWNGSHC | 190  | 139   |
| >BRAFF-S605M KSRWSGSHQ  | 2     | >BRAFF-S605M KSRWNGSHC | 2    | 0     |
| >BRAFF-S605M KSRWSGSHQ  | 186   | >BRAFF-S605M KSRWNGSHC | 446  | 260   |
| >BRAFF-S605M KSRWSGSHQ  | 73    | >BRAFF-S605M KSRWNGSHC | 99   | 26    |
| >BRAFF-S605M KSRWSGSHQ  | 24    | >BRAFF-S605M KSRWNGSHC | 34   | 10    |
| >BRAFF-S605M KSRWSGSH   | 333   | >BRAFF-S605M KSRWNGSH  | 1006 | 673   |
| >BRAFF-S605M KSRWSGSHQ  | 193   | >BRAFF-S605M KSRWNGSHC | 768  | 575   |
| >BRAFF-S605M KSRWSGSHQ  | 72    | >BRAFF-S605M KSRWNGSHC | 70   | 2     |
| >BRAFF-S605M VKSRWSGSH  | 9     | >BRAFF-S605M VKSRWNGSH | 12   | 3     |
| >BRAFF-S605M ATVKSRWSG: | 451   | >BRAFF-S605M ATVKSRWNG | 562  | 111   |
| >BRAFF-S605F WSGSHQFEC  | 22059 | >BRAFF-S605F WRGSHQFEC | 115  | 21944 |
| >BRAFF-S605F WSGSHQFEC  | 23582 | >BRAFF-S605F WRGSHQFEC | 323  | 23259 |
| >BRAFF-S605F RWSGSHQF   | 60    | >BRAFF-S605F RWRGSHQF  | 42   | 18    |
| >BRAFF-S605F RWSGSHQF   | 78    | >BRAFF-S605F RWRGSHQF  | 133  | 55    |

|                          |       |                          |     |       |
|--------------------------|-------|--------------------------|-----|-------|
| >BRAFF-S605F RWSGSHQFE   | 328   | >BRAFF-S605F RWRGSHQFE   | 622 | 294   |
| >BRAFF-S605F RWSGSHQF    | 6     | >BRAFF-S605F RWRGSHQF    | 10  | 4     |
| >BRAFF-S605F RWSGSHQFE   | 14    | >BRAFF-S605F RWRGSHQFE   | 45  | 31    |
| >BRAFF-S605F RWSGSHQF    | 10095 | >BRAFF-S605F RWRGSHQF    | 218 | 9877  |
| >BRAFF-S605F RWSGSHQFE   | 4529  | >BRAFF-S605F RWRGSHQFE   | 34  | 4495  |
| >BRAFF-S605F RWSGSHQFE   | 4497  | >BRAFF-S605F RWRGSHQFE   | 51  | 4446  |
| >BRAFF-S605F RWSGSHQFE   | 4100  | >BRAFF-S605F RWRGSHQFE   | 75  | 4025  |
| >BRAFF-S605F RWSGSHQF    | 664   | >BRAFF-S605F RWRGSHQF    | 252 | 412   |
| >BRAFF-S605F RWSGSHQF    | 144   | >BRAFF-S605F RWRGSHQF    | 192 | 48    |
| >BRAFF-S605F RWSGSHQFE   | 57    | >BRAFF-S605F RWRGSHQFE   | 70  | 13    |
| >BRAFF-S605F RWSGSHQFE   | 116   | >BRAFF-S605F RWRGSHQFE   | 154 | 38    |
| >BRAFF-S605F SRWSGSHQF   | 8     | >BRAFF-S605F SRWRGSHQF   | 12  | 4     |
| >BRAFF-S605F SRWSGSHQ    | 528   | >BRAFF-S605F SRWRGSHQ    | 382 | 146   |
| >BRAFF-S605F SRWSGSHQF   | 37    | >BRAFF-S605F SRWRGSHQF   | 38  | 1     |
| >BRAFF-S605F SRWSGSHQF   | 327   | >BRAFF-S605F SRWRGSHQF   | 273 | 54    |
| >BRAFF-S605F SRWSGSHQF   | 538   | >BRAFF-S605F SRWRGSHQF   | 432 | 106   |
| >BRAFF-S605F SRWSGSHQF   | 503   | >BRAFF-S605F SRWRGSHQF   | 251 | 252   |
| >BRAFF-S605F SRWSGSHQF   | 1409  | >BRAFF-S605F SRWRGSHQF   | 434 | 975   |
| >BRAFF-S605F SRWSGSHQF   | 147   | >BRAFF-S605F SRWRGSHQF   | 70  | 77    |
| >BRAFF-S605F KSRWSGSH    | 55    | >BRAFF-S605F KSRWRGSH    | 59  | 4     |
| >BRAFF-S605F KSRWSGSHQ   | 24    | >BRAFF-S605F KSRWRGSHQ   | 28  | 4     |
| >BRAFF-S605F KSRWSGSHQ   | 44    | >BRAFF-S605F KSRWRGSHQ   | 46  | 2     |
| >BRAFF-S605F KSRWSGSHQ   | 23    | >BRAFF-S605F KSRWRGSHQ   | 26  | 3     |
| >BRAFF-S605F KSRWSGSHQ   | 518   | >BRAFF-S605F KSRWRGSHQ   | 351 | 167   |
| >BRAFF-S605F KSRWSGSHQ   | 93    | >BRAFF-S605F KSRWRGSHQ   | 172 | 79    |
| >BRAFF-S605F KSRWSGSHQ   | 14    | >BRAFF-S605F KSRWRGSHQ   | 37  | 23    |
| >BRAFF-S605F KSRWSGSH    | 31    | >BRAFF-S605F KSRWRGSH    | 137 | 106   |
| >BRAFF-S605F KSRWSGSHQ   | 51    | >BRAFF-S605F KSRWRGSHQ   | 189 | 138   |
| >BRAFF-S605F KSRWSGSHQ   | 2     | >BRAFF-S605F KSRWRGSHQ   | 2   | 0     |
| >BRAFF-S605F KSRWSGSHQ   | 186   | >BRAFF-S605F KSRWRGSHQ   | 433 | 247   |
| >BRAFF-S605F KSRWSGSHQ   | 73    | >BRAFF-S605F KSRWRGSHQ   | 98  | 25    |
| >BRAFF-S605F KSRWSGSHQ   | 24    | >BRAFF-S605F KSRWRGSHQ   | 59  | 35    |
| >BRAFF-S605F KSRWSGSH    | 333   | >BRAFF-S605F KSRWRGSH    | 925 | 592   |
| >BRAFF-S605F KSRWSGSHQ   | 193   | >BRAFF-S605F KSRWRGSHQ   | 409 | 216   |
| >BRAFF-S605F KSRWSGSHQ   | 72    | >BRAFF-S605F KSRWRGSHQ   | 63  | 9     |
| >BRAFF-S605F VKSRWSGSH   | 9     | >BRAFF-S605F VKSRWRGSH   | 13  | 4     |
| >BRAFF-S605F ATVKSRRWS   | 17386 | >BRAFF-S605F ATVKSRRWR   | 54  | 17332 |
| >BRAFF-S605F ATVKSRRWS   | 24811 | >BRAFF-S605F ATVKSRRWR   | 59  | 24752 |
| >BRAFF-S605F ATVKSRRWSG: | 451   | >BRAFF-S605F ATVKSRRWRG  | 585 | 134   |
| >BRAFF-S605F ATVKSRRWS   | 2567  | >BRAFF-S605F ATVKSRRWR   | 113 | 2454  |
| >BRAFF-S605F LATVKSRRWS  | 21110 | >BRAFF-S605F LATVKSRRWR  | 380 | 20730 |
| >BRAFF-S605F LATVKSRRWS  | 34467 | >BRAFF-S605F LATVKSRRWR  | 334 | 34133 |
| >BRAFF-S605F GLATVKSRRW: | 27328 | >BRAFF-S605F GLATVKSRRWI | 182 | 27146 |

|                         |       |                         |       |       |
|-------------------------|-------|-------------------------|-------|-------|
| >BRAFF-S607F GSHQFEQL   | 406   | >BRAFF-S607F GPHQFEQL   | 6982  | 6576  |
| >BRAFF-S607F GSHQFEQL   | 240   | >BRAFF-S607F GPHQFEQL   | 24006 | 23766 |
| >BRAFF-S607F SGSHQFEQL  | 20244 | >BRAFF-S607F SGPHQFEQL  | 227   | 20017 |
| >BRAFF-S607F WSGSHQFEC  | 796   | >BRAFF-S607F WSGPHQFEC  | 190   | 606   |
| >BRAFF-S607F RWSGSHQF   | 60    | >BRAFF-S607F RWSGPHQF   | 111   | 51    |
| >BRAFF-S607F RWSGSHQF   | 78    | >BRAFF-S607F RWSGPHQF   | 89    | 11    |
| >BRAFF-S607F RWSGSHQFE  | 328   | >BRAFF-S607F RWSGPHQFE  | 461   | 133   |
| >BRAFF-S607F RWSGSHQF   | 6     | >BRAFF-S607F RWSGPHQF   | 6     | 0     |
| >BRAFF-S607F RWSGSHQFE  | 14    | >BRAFF-S607F RWSGPHQFE  | 15    | 1     |
| >BRAFF-S607F RWSGSHQF   | 144   | >BRAFF-S607F RWSGPHQF   | 168   | 24    |
| >BRAFF-S607F RWSGSHQFE  | 57    | >BRAFF-S607F RWSGPHQFE  | 122   | 65    |
| >BRAFF-S607F RWSGSHQFE  | 116   | >BRAFF-S607F RWSGPHQFE  | 188   | 72    |
| >BRAFF-S607F SRWSGSHQF  | 8     | >BRAFF-S607F SRWSGPHQF  | 12    | 4     |
| >BRAFF-S607F SRWSGSHQF  | 37    | >BRAFF-S607F SRWSGPHQF  | 30    | 7     |
| >BRAFF-S607F SRWSGSHQF  | 538   | >BRAFF-S607F SRWSGPHQF  | 478   | 60    |
| >BRAFF-S607F SRWSGSHQF  | 327   | >BRAFF-S607F SRWSGPHQF  | 346   | 19    |
| >BRAFF-S607F SRWSGSHQF  | 503   | >BRAFF-S607F SRWSGPHQF  | 309   | 194   |
| >BRAFF-S607F SRWSGSHQF  | 147   | >BRAFF-S607F SRWSGPHQF  | 49    | 98    |
| >BRAFF-S607F KSRWSGSH   | 55    | >BRAFF-S607F KSRWSGPH   | 26    | 29    |
| >BRAFF-S607F KSRWSGSHQ  | 24    | >BRAFF-S607F KSRWSGPHQ  | 9     | 15    |
| >BRAFF-S607F KSRWSGSHQ  | 44    | >BRAFF-S607F KSRWSGPHQ  | 41    | 3     |
| >BRAFF-S607F KSRWSGSHQ  | 23    | >BRAFF-S607F KSRWSGPHQ  | 19    | 4     |
| >BRAFF-S607F KSRWSGSHQ  | 518   | >BRAFF-S607F KSRWSGPHQ  | 498   | 20    |
| >BRAFF-S607F KSRWSGSHQ  | 93    | >BRAFF-S607F KSRWSGPHQ  | 342   | 249   |
| >BRAFF-S607F KSRWSGSHQ  | 14    | >BRAFF-S607F KSRWSGPHQ  | 18    | 4     |
| >BRAFF-S607F KSRWSGSH   | 31    | >BRAFF-S607F KSRWSGPH   | 22    | 9     |
| >BRAFF-S607F KSRWSGSHQ  | 51    | >BRAFF-S607F KSRWSGPHQ  | 78    | 27    |
| >BRAFF-S607F KSRWSGSHQ  | 2     | >BRAFF-S607F KSRWSGPHQ  | 2     | 0     |
| >BRAFF-S607F KSRWSGSHQ  | 186   | >BRAFF-S607F KSRWSGPHQ  | 320   | 134   |
| >BRAFF-S607F KSRWSGSHQ  | 73    | >BRAFF-S607F KSRWSGPHQ  | 69    | 4     |
| >BRAFF-S607F KSRWSGSHQ  | 24    | >BRAFF-S607F KSRWSGPHQ  | 20    | 4     |
| >BRAFF-S607F KSRWSGSH   | 333   | >BRAFF-S607F KSRWSGPH   | 861   | 528   |
| >BRAFF-S607F KSRWSGSHQ  | 193   | >BRAFF-S607F KSRWSGPHQ  | 5356  | 5163  |
| >BRAFF-S607F KSRWSGSHQ  | 72    | >BRAFF-S607F KSRWSGPHQ  | 61    | 11    |
| >BRAFF-S607F VKSRWSGSH  | 9     | >BRAFF-S607F VKSRWSGPH  | 9     | 0     |
| >BRAFF-S607F TVKSRWSGSI | 1021  | >BRAFF-S607F TVKSRWSGPI | 442   | 579   |
| >BRAFF-S607F ATVKSRWSG  | 451   | >BRAFF-S607F ATVKSRWSG  | 1656  | 1205  |
| >BRAFF-S614F LSGSILWM   | 29578 | >BRAFF-S614F LPGSILWM   | 93    | 29485 |
| >BRAFF-S614F LSGSILWMA  | 395   | >BRAFF-S614F LPGSILWMA  | 11559 | 11164 |
| >BRAFF-S614F LSGSILWM   | 23175 | >BRAFF-S614F LPGSILWM   | 388   | 22787 |
| >BRAFF-S614F LSGSILWM   | 140   | >BRAFF-S614F LPGSILWM   | 21017 | 20877 |
| >BRAFF-S614F LSGSILWM   | 9034  | >BRAFF-S614F LPGSILWM   | 146   | 8888  |
| >BRAFF-S614F LSGSILWM   | 14314 | >BRAFF-S614F LPGSILWM   | 127   | 14187 |

|                      |       |                      |      |       |
|----------------------|-------|----------------------|------|-------|
| >BRAFS614FLSGSILWMA  | 13347 | >BRAFS614FLPGSILWMA  | 19   | 13328 |
| >BRAFS614FQLSGSILWM, | 71    | >BRAFS614FQLPGSILWM, | 173  | 102   |
| >BRAFS614FQLSGSILWM  | 51    | >BRAFS614FQLPGSILWM  | 460  | 409   |
| >BRAFS614FQLSGSILWM, | 31    | >BRAFS614FQLPGSILWM, | 83   | 52    |
| >BRAFS614FQLSGSILWM  | 231   | >BRAFS614FQLPGSILWM  | 805  | 574   |
| >BRAFS614FQLSGSILWM, | 89    | >BRAFS614FQLPGSILWM, | 233  | 144   |
| >BRAFS614FQLSGSILWM, | 156   | >BRAFS614FQLPGSILWM, | 137  | 19    |
| >BRAFS614FQLSGSILWM  | 335   | >BRAFS614FQLPGSILWM  | 281  | 54    |
| >BRAFS614FQLSGSILWM, | 27    | >BRAFS614FQLPGSILWM, | 25   | 2     |
| >BRAFS614FQLSGSILWM, | 413   | >BRAFS614FQLPGSILWM, | 1133 | 720   |
| >BRAFS614FQLSGSILWM, | 82    | >BRAFS614FQLPGSILWM, | 86   | 4     |
| >BRAFS614FQLSGSILWM, | 102   | >BRAFS614FQLPGSILWM, | 599  | 497   |
| >BRAFS614FQLSGSILWM  | 17    | >BRAFS614FQLPGSILWM  | 31   | 14    |
| >BRAFS614FQLSGSILWM, | 5     | >BRAFS614FQLPGSILWM, | 7    | 2     |
| >BRAFS614FQLSGSILWM  | 804   | >BRAFS614FQLPGSILWM  | 445  | 359   |
| >BRAFS614FQLSGSILW   | 207   | >BRAFS614FQLPGSILW   | 7082 | 6875  |
| >BRAFS614FQLSGSILWM  | 1941  | >BRAFS614FQLPGSILWM  | 9    | 1932  |
| >BRAFS614FEQLSGSILWN | 53    | >BRAFS614FEQLPGSILWN | 31   | 22    |
| >BRAFS614FEQLSGSILWN | 307   | >BRAFS614FEQLPGSILWN | 704  | 397   |
| >BRAFS614FEQLSGSILWN | 355   | >BRAFS614FEQLPGSILWN | 824  | 469   |
| >BRAFS614FEQLSGSILWN | 399   | >BRAFS614FEQLPGSILWN | 433  | 34    |
| >BRAFS614FEQLSGSIL   | 51    | >BRAFS614FEQLPGSIL   | 106  | 55    |
| >BRAFS614FEQLSGSILWN | 277   | >BRAFS614FEQLPGSILWN | 507  | 230   |
| >BRAFS614FEQLSGSILW  | 2383  | >BRAFS614FEQLPGSILW  | 497  | 1886  |
| >BRAFS614FEQLSGSIL   | 28    | >BRAFS614FEQLPGSIL   | 49   | 21    |
| >BRAFS614FEQLSGSILW  | 460   | >BRAFS614FEQLPGSILW  | 661  | 201   |
| >BRAFS614FEQLSGSILW  | 245   | >BRAFS614FEQLPGSILW  | 407  | 162   |
| >BRAFS614FEQLSGSI    | 4     | >BRAFS614FEQLPGSI    | 5    | 1     |
| >BRAFS614FEQLSGSIL   | 177   | >BRAFS614FEQLPGSIL   | 2594 | 2417  |
| >BRAFS614FEQLSGSILW  | 377   | >BRAFS614FEQLPGSILW  | 2200 | 1823  |
| >BRAFS614FEQLSGSILW  | 129   | >BRAFS614FEQLPGSILW  | 808  | 679   |
| >BRAFS614FEQLSGSIL   | 436   | >BRAFS614FEQLPGSIL   | 1327 | 891   |
| >BRAFS614FEQLSGSI    | 277   | >BRAFS614FEQLPGSI    | 562  | 285   |
| >BRAFS614FEQLSGSIL   | 34    | >BRAFS614FEQLPGSIL   | 65   | 31    |
| >BRAFS614FEQLSGSILW  | 243   | >BRAFS614FEQLPGSILW  | 359  | 116   |
| >BRAFS614FEQLSGSI    | 176   | >BRAFS614FEQLPGSI    | 498  | 322   |
| >BRAFS614FEQLSGSIL   | 71    | >BRAFS614FEQLPGSIL   | 342  | 271   |
| >BRAFS614FEQLSGSILW  | 385   | >BRAFS614FEQLPGSILW  | 994  | 609   |
| >BRAFS614FEQLSGSILW  | 72    | >BRAFS614FEQLPGSILW  | 69   | 3     |
| >BRAFS614FEQLSGSILW  | 288   | >BRAFS614FEQLPGSILW  | 322  | 34    |
| >BRAFS614FEQLSGSI    | 36    | >BRAFS614FEQLPGSI    | 62   | 26    |
| >BRAFS614FEQLSGSIL   | 81    | >BRAFS614FEQLPGSIL   | 118  | 37    |
| >BRAFS614FEQLSGSILW  | 217   | >BRAFS614FEQLPGSILW  | 367  | 150   |

|                       |     |                       |      |     |
|-----------------------|-----|-----------------------|------|-----|
| >BRAFS614F FEQLSGSILW | 311 | >BRAFS614F FEQLPGSILW | 545  | 234 |
| >BRAFS614F QFEQLSGSI  | 496 | >BRAFS614F QFEQLPGSI  | 1048 | 552 |
| >BRAFS614F QFEQLSGSIL | 509 | >BRAFS614F QFEQLPGSIL | 208  | 301 |
| >BRAFS614F HQFEQLSGSI | 34  | >BRAFS614F HQFEQLPGSI | 103  | 69  |
| >BRAFS614F HQFEQLSGSI | 256 | >BRAFS614F HQFEQLPGSI | 423  | 167 |
| >BRAFS614F HQFEQLSGSI | 308 | >BRAFS614F HQFEQLPGSI | 158  | 150 |
| >BRAFS614F HQFEQLSGSI | 196 | >BRAFS614F HQFEQLPGSI | 498  | 302 |
| >BRAFS614F HQFEQLSGS  | 121 | >BRAFS614F HQFEQLPGS  | 60   | 61  |
| >BRAFS614F HQFEQLSGSI | 89  | >BRAFS614F HQFEQLPGSI | 77   | 12  |
| >BRAFS614F HQFEQLSGSI | 412 | >BRAFS614F HQFEQLPGSI | 215  | 197 |
| >BRAFS614F HQFEQLSGSI | 432 | >BRAFS614F HQFEQLPGSI | 484  | 52  |
| >BRAFS614F HQFEQLSGSI | 442 | >BRAFS614F HQFEQLPGSI | 396  | 46  |
| >BRAFS614F HQFEQLSG   | 625 | >BRAFS614F HQFEQLPG   | 439  | 186 |
| >BRAFS614F HQFEQLSGSI | 185 | >BRAFS614F HQFEQLPGSI | 655  | 470 |
| >BRAFS614F HQFEQLSGSI | 183 | >BRAFS614F HQFEQLPGSI | 312  | 129 |
| >BRAFS614F HQFEQLSGSI | 157 | >BRAFS614F HQFEQLPGSI | 286  | 129 |
| >BRAFS614F HQFEQLSGSI | 70  | >BRAFS614F HQFEQLPGSI | 113  | 43  |
| >BRAFS614F HQFEQLSGSI | 8   | >BRAFS614F HQFEQLPGSI | 13   | 5   |
| >BRAFS614F HQFEQLSGSI | 805 | >BRAFS614F HQFEQLPGSI | 221  | 584 |
| >BRAFS614F HQFEQLSGSI | 195 | >BRAFS614F HQFEQLPGSI | 221  | 26  |
| >BRAFS614F HQFEQLSGSI | 16  | >BRAFS614F HQFEQLPGSI | 21   | 5   |
| >BRAFS614F HQFEQLSGSI | 388 | >BRAFS614F HQFEQLPGSI | 389  | 1   |
| >BRAFS614F HQFEQLSGSI | 485 | >BRAFS614F HQFEQLPGSI | 631  | 146 |
| >BRAFS614F HQFEQLSGSI | 111 | >BRAFS614F HQFEQLPGSI | 98   | 13  |
| >BRAFS614S LSGSILWM   | 140 | >BRAFS614S LSGSILWM   | 140  | 0   |
| >BRAFS614S QLSGSILW   | 207 | >BRAFS614S QLSGSILW   | 207  | 0   |
| >BRAFS614S EQLSGSILWM | 53  | >BRAFS614S EQLSGSILWM | 53   | 0   |
| >BRAFS614S EQLSGSILWM | 399 | >BRAFS614S EQLSGSILWM | 399  | 0   |
| >BRAFS614S EQLSGSIL   | 51  | >BRAFS614S EQLSGSIL   | 51   | 0   |
| >BRAFS614S EQLSGSIL   | 28  | >BRAFS614S EQLSGSIL   | 28   | 0   |
| >BRAFS614S FEQLSGSI   | 4   | >BRAFS614S FEQLSGSI   | 4    | 0   |
| >BRAFS614S FEQLSGSILW | 129 | >BRAFS614S FEQLSGSILW | 129  | 0   |
| >BRAFS614S FEQLSGSI   | 277 | >BRAFS614S FEQLSGSI   | 277  | 0   |
| >BRAFS614S FEQLSGSILW | 243 | >BRAFS614S FEQLSGSILW | 243  | 0   |
| >BRAFS614S FEQLSGSI   | 176 | >BRAFS614S FEQLSGSI   | 176  | 0   |
| >BRAFS614S FEQLSGSILW | 385 | >BRAFS614S FEQLSGSILW | 385  | 0   |
| >BRAFS614S FEQLSGSI   | 36  | >BRAFS614S FEQLSGSI   | 36   | 0   |
| >BRAFS614S HQFEQLSGSI | 256 | >BRAFS614S HQFEQLSGSI | 256  | 0   |
| >BRAFS614S HQFEQLSGSI | 196 | >BRAFS614S HQFEQLSGSI | 196  | 0   |
| >BRAFS614S HQFEQLSGSI | 89  | >BRAFS614S HQFEQLSGSI | 89   | 0   |
| >BRAFS614S HQFEQLSGSI | 432 | >BRAFS614S HQFEQLSGSI | 432  | 0   |
| >BRAFS614S HQFEQLSGSI | 183 | >BRAFS614S HQFEQLSGSI | 183  | 0   |
| >BRAFS614S HQFEQLSGSI | 157 | >BRAFS614S HQFEQLSGSI | 157  | 0   |

|                      |       |                      |       |       |
|----------------------|-------|----------------------|-------|-------|
| >BRAFS614SHQFEQLSGSI | 8     | >BRAFS614SHQFEQLSGSI | 8     | 0     |
| >BRAFS614SHQFEQLSGSI | 16    | >BRAFS614SHQFEQLSGSI | 16    | 0     |
| >BRAFS614SHQFEQLSGSI | 388   | >BRAFS614SHQFEQLSGSI | 388   | 0     |
| >BRAFS614SHQFEQLSGSI | 485   | >BRAFS614SHQFEQLSGSI | 485   | 0     |
| >BRAFS614SHQFEQLSGSI | 111   | >BRAFS614SHQFEQLSGSI | 111   | 0     |
| >BRAFS616FSILWMAPEV  | 20    | >BRAFS616FILWMAPEV   | 7     | 13    |
| >BRAFS616FSILWMAPEVI | 368   | >BRAFS616FILWMAPEVI  | 55    | 313   |
| >BRAFS616FSILWMAPEV  | 943   | >BRAFS616FILWMAPEV   | 35    | 908   |
| >BRAFS616FSILWMAPEVI | 856   | >BRAFS616FILWMAPEVI  | 190   | 666   |
| >BRAFS616FSILWMAPEV  | 176   | >BRAFS616FILWMAPEV   | 17    | 159   |
| >BRAFS616FSILWMAPEVI | 378   | >BRAFS616FILWMAPEVI  | 134   | 244   |
| >BRAFS616FSILWMAPEV  | 10    | >BRAFS616FILWMAPEV   | 3     | 7     |
| >BRAFS616FSILWMAPEVI | 367   | >BRAFS616FILWMAPEVI  | 71    | 296   |
| >BRAFS616FSILWMAPEV  | 3     | >BRAFS616FILWMAPEV   | 2     | 1     |
| >BRAFS616FSILWMAPEVI | 28    | >BRAFS616FILWMAPEVI  | 6     | 22    |
| >BRAFS616FSILWMAPEV  | 155   | >BRAFS616FILWMAPEV   | 20    | 135   |
| >BRAFS616FSILWMAPEVI | 2725  | >BRAFS616FILWMAPEVI  | 276   | 2449  |
| >BRAFS616FSILWMAPEV  | 5     | >BRAFS616FILWMAPEV   | 4     | 1     |
| >BRAFS616FSILWMAPEVI | 67    | >BRAFS616FILWMAPEVI  | 28    | 39    |
| >BRAFS616FSILWMAPEV  | 15    | >BRAFS616FILWMAPEV   | 2     | 13    |
| >BRAFS616FSILWMAPEVI | 1105  | >BRAFS616FILWMAPEVI  | 30    | 1075  |
| >BRAFS616FSILWMAPEV  | 3     | >BRAFS616FILWMAPEV   | 2     | 1     |
| >BRAFS616FSILWMAPEVI | 314   | >BRAFS616FILWMAPEVI  | 32    | 282   |
| >BRAFS616FSILWMAPEVI | 157   | >BRAFS616FILWMAPEVI  | 2290  | 2133  |
| >BRAFS616FSILWMAPEVI | 167   | >BRAFS616FILWMAPEVI  | 1635  | 1468  |
| >BRAFS616FSILWMAPEVI | 52    | >BRAFS616FILWMAPEVI  | 491   | 439   |
| >BRAFS616FSILWMAPEVI | 90    | >BRAFS616FILWMAPEVI  | 37    | 53    |
| >BRAFS616FSILWMAPEV  | 5     | >BRAFS616FILWMAPEV   | 4     | 1     |
| >BRAFS616FSILWMAPEVI | 175   | >BRAFS616FILWMAPEVI  | 63    | 112   |
| >BRAFS616FSILWMAPEVI | 84    | >BRAFS616FILWMAPEVI  | 134   | 50    |
| >BRAFS616FGSILWMAPE' | 412   | >BRAFS616FGFILWMAPE' | 2050  | 1638  |
| >BRAFS616FGSILWMAPE' | 3900  | >BRAFS616FGFILWMAPE' | 416   | 3484  |
| >BRAFS616FGSILWMAPE' | 8442  | >BRAFS616FGFILWMAPE' | 177   | 8265  |
| >BRAFS616FGSILWMAPE' | 295   | >BRAFS616FGFILWMAPE' | 26672 | 26377 |
| >BRAFS616FGSILWMAPE' | 336   | >BRAFS616FGFILWMAPE' | 26693 | 26357 |
| >BRAFS616FGSILWMAPE' | 257   | >BRAFS616FGFILWMAPE' | 13695 | 13438 |
| >BRAFS616FGSHQFEQLSC | 22292 | >BRAFS616FGSHQFEQLSC | 234   | 22058 |
| >BRAFS616FGSHQFEQLSC | 14148 | >BRAFS616FGSHQFEQLSC | 8     | 14140 |
| >BRAFS616FGSHQFEQLSC | 5656  | >BRAFS616FGSHQFEQLSC | 34    | 5622  |
| >BRAFS616FGSILWMAPI  | 1623  | >BRAFS616SGFILWMAPI  | 285   | 1338  |
| >BRAFS616FGSILWMAPI  | 3362  | >BRAFS616SGFILWMAPI  | 379   | 2983  |
| >BRAFS616FGSILWMAPI  | 765   | >BRAFS616SGFILWMAPI  | 87    | 678   |
| >BRAFS616FLSGSILWMA  | 395   | >BRAFS616LSGFILWMA   | 489   | 94    |



|                      |      |                      |     |      |
|----------------------|------|----------------------|-----|------|
| >BRAFS616FLSGSILWM   | 140  | >BRAFS616FLSGFILWM   | 123 | 17   |
| >BRAFS616FLSGSILWM   | 512  | >BRAFS616FLSGFILWM   | 111 | 401  |
| >BRAFS616FLSGSILWM/  | 71   | >BRAFS616FLSGFILWM/  | 40  | 31   |
| >BRAFS616FLSGSILWM   | 51   | >BRAFS616FLSGFILWM   | 31  | 20   |
| >BRAFS616FLSGSILWM/  | 31   | >BRAFS616FLSGFILWM/  | 20  | 11   |
| >BRAFS616FLSGSILWM   | 231  | >BRAFS616FLSGFILWM   | 218 | 13   |
| >BRAFS616FLSGSILWM/  | 89   | >BRAFS616FLSGFILWM/  | 60  | 29   |
| >BRAFS616FLSGSILWM/  | 156  | >BRAFS616FLSGFILWM/  | 97  | 59   |
| >BRAFS616FLSGSILWM   | 335  | >BRAFS616FLSGFILWM   | 78  | 257  |
| >BRAFS616FLSGSILWM/  | 27   | >BRAFS616FLSGFILWM/  | 14  | 13   |
| >BRAFS616FLSGSILWM/  | 413  | >BRAFS616FLSGFILWM/  | 396 | 17   |
| >BRAFS616FLSGSILWM/  | 82   | >BRAFS616FLSGFILWM/  | 82  | 0    |
| >BRAFS616FLSGSILWM/  | 102  | >BRAFS616FLSGFILWM/  | 93  | 9    |
| >BRAFS616FLSGSILWM   | 17   | >BRAFS616FLSGFILWM   | 16  | 1    |
| >BRAFS616FLSGSILWM/  | 5    | >BRAFS616FLSGFILWM/  | 5   | 0    |
| >BRAFS616FLSGSILW    | 207  | >BRAFS616FLSGFILW    | 295 | 88   |
| >BRAFS616FEQLSGSIL   | 1227 | >BRAFS616FEQLSGFIL   | 124 | 1103 |
| >BRAFS616FEQLSGSILWN | 1002 | >BRAFS616FEQLSGFILWN | 353 | 649  |
| >BRAFS616FEQLSGSILWN | 53   | >BRAFS616FEQLSGFILWN | 21  | 32   |
| >BRAFS616FEQLSGSILWN | 307  | >BRAFS616FEQLSGFILWN | 153 | 154  |
| >BRAFS616FEQLSGSILW  | 2697 | >BRAFS616FEQLSGFILW  | 280 | 2417 |
| >BRAFS616FEQLSGSILWN | 355  | >BRAFS616FEQLSGFILWN | 114 | 241  |
| >BRAFS616FEQLSGSILWN | 399  | >BRAFS616FEQLSGFILWN | 344 | 55   |
| >BRAFS616FEQLSGSIL   | 51   | >BRAFS616FEQLSGFIL   | 124 | 73   |
| >BRAFS616FEQLSGSILWN | 277  | >BRAFS616FEQLSGFILWN | 268 | 9    |
| >BRAFS616FEQLSGSIL   | 28   | >BRAFS616FEQLSGFIL   | 26  | 2    |
| >BRAFS616FEQLSGSILW  | 460  | >BRAFS616FEQLSGFILW  | 238 | 222  |
| >BRAFS616FEQLSGSILWN | 872  | >BRAFS616FEQLSGFILWN | 352 | 520  |
| >BRAFS616FEQLSGSILW  | 245  | >BRAFS616FEQLSGFILW  | 49  | 196  |
| >BRAFS616FEQLSGSI    | 4    | >BRAFS616FEQLSGFI    | 3   | 1    |
| >BRAFS616FEQLSGSIL   | 177  | >BRAFS616FEQLSGFIL   | 225 | 48   |
| >BRAFS616FEQLSGSILW  | 377  | >BRAFS616FEQLSGFILW  | 492 | 115  |
| >BRAFS616FEQLSGSILW  | 129  | >BRAFS616FEQLSGFILW  | 113 | 16   |
| >BRAFS616FEQLSGSIL   | 1076 | >BRAFS616FEQLSGFIL   | 338 | 738  |
| >BRAFS616FEQLSGSILW  | 896  | >BRAFS616FEQLSGFILW  | 327 | 569  |
| >BRAFS616FEQLSGSILW  | 567  | >BRAFS616FEQLSGFILW  | 234 | 333  |
| >BRAFS616FEQLSGSIL   | 436  | >BRAFS616FEQLSGFIL   | 216 | 220  |
| >BRAFS616FEQLSGSI    | 277  | >BRAFS616FEQLSGFI    | 209 | 68   |
| >BRAFS616FEQLSGSIL   | 34   | >BRAFS616FEQLSGFIL   | 12  | 22   |
| >BRAFS616FEQLSGSILW  | 243  | >BRAFS616FEQLSGFILW  | 138 | 105  |
| >BRAFS616FEQLSGSI    | 176  | >BRAFS616FEQLSGFI    | 249 | 73   |
| >BRAFS616FEQLSGSIL   | 71   | >BRAFS616FEQLSGFIL   | 36  | 35   |
| >BRAFS616FEQLSGSILW  | 385  | >BRAFS616FEQLSGFILW  | 267 | 118  |

|                      |       |                       |      |       |
|----------------------|-------|-----------------------|------|-------|
| >BRAFS616FFEQLSGSILW | 72    | >BRAFS616FFEQLSGFILW  | 31   | 41    |
| >BRAFS616FFEQLSGSILW | 288   | >BRAFS616FFEQLSGFILW  | 114  | 174   |
| >BRAFS616FFEQLSGSI   | 36    | >BRAFS616FFEQLSGFI    | 12   | 24    |
| >BRAFS616FFEQLSGSIL  | 81    | >BRAFS616FFEQLSGFIL   | 28   | 53    |
| >BRAFS616FFEQLSGSILW | 217   | >BRAFS616FFEQLSGFILW  | 119  | 98    |
| >BRAFS616FFEQLSGSILW | 508   | >BRAFS616FFEQLSGFILW  | 251  | 257   |
| >BRAFS616FFEQLSGSILW | 311   | >BRAFS616FFEQLSGFILW  | 124  | 187   |
| >BRAFS616FQFEQLSGSI  | 496   | >BRAFS616FQFEQLSGFI   | 1898 | 1402  |
| >BRAFS616FQFEQLSGSI  | 2241  | >BRAFS616FQFEQLSGFI   | 397  | 1844  |
| >BRAFS616FQFEQLSGS   | 20383 | >BRAFS616FQFEQLSGF    | 104  | 20279 |
| >BRAFS616FQFEQLSGSI  | 796   | >BRAFS616FQFEQLSGFI   | 264  | 532   |
| >BRAFS616FQFEQLSGSIL | 509   | >BRAFS616FQFEQLSGFIL  | 490  | 19    |
| >BRAFS616FHQFEQLSGSI | 34    | >BRAFS616FHQFEQLSGFI  | 12   | 22    |
| >BRAFS616FHQFEQLSGSI | 1618  | >BRAFS616FHQFEQLSGFIL | 277  | 1341  |
| >BRAFS616FHQFEQLSGSI | 583   | >BRAFS616FHQFEQLSGFI  | 383  | 200   |
| >BRAFS616FHQFEQLSGSI | 256   | >BRAFS616FHQFEQLSGFIL | 112  | 144   |
| >BRAFS616FHQFEQLSGSI | 308   | >BRAFS616FHQFEQLSGFI  | 471  | 163   |
| >BRAFS616FHQFEQLSGSI | 196   | >BRAFS616FHQFEQLSGFIL | 444  | 248   |
| >BRAFS616FHQFEQLSGS  | 121   | >BRAFS616FHQFEQLSGF   | 22   | 99    |
| >BRAFS616FHQFEQLSGSI | 89    | >BRAFS616FHQFEQLSGFIL | 20   | 69    |
| >BRAFS616FHQFEQLSGSI | 412   | >BRAFS616FHQFEQLSGFI  | 216  | 196   |
| >BRAFS616FHQFEQLSGSI | 502   | >BRAFS616FHQFEQLSGFI  | 288  | 214   |
| >BRAFS616FHQFEQLSGSI | 432   | >BRAFS616FHQFEQLSGFIL | 128  | 304   |
| >BRAFS616FHQFEQLSGSI | 442   | >BRAFS616FHQFEQLSGFI  | 3246 | 2804  |
| >BRAFS616FHQFEQLSGS  | 5512  | >BRAFS616FHQFEQLSGF   | 35   | 5477  |
| >BRAFS616FHQFEQLSGSI | 185   | >BRAFS616FHQFEQLSGFI  | 615  | 430   |
| >BRAFS616FHQFEQLSGSI | 183   | >BRAFS616FHQFEQLSGFIL | 367  | 184   |
| >BRAFS616FHQFEQLSGS  | 5153  | >BRAFS616FHQFEQLSGF   | 34   | 5119  |
| >BRAFS616FHQFEQLSGSI | 157   | >BRAFS616FHQFEQLSGFIL | 431  | 274   |
| >BRAFS616FHQFEQLSGS  | 2037  | >BRAFS616FHQFEQLSGF   | 3    | 2034  |
| >BRAFS616FHQFEQLSGSI | 70    | >BRAFS616FHQFEQLSGFI  | 212  | 142   |
| >BRAFS616FHQFEQLSGSI | 8     | >BRAFS616FHQFEQLSGFIL | 15   | 7     |
| >BRAFS616FHQFEQLSGS  | 23247 | >BRAFS616FHQFEQLSGF   | 255  | 22992 |
| >BRAFS616FHQFEQLSGS  | 3825  | >BRAFS616FHQFEQLSGF   | 486  | 3339  |
| >BRAFS616FHQFEQLSGSI | 805   | >BRAFS616FHQFEQLSGFI  | 360  | 445   |
| >BRAFS616FHQFEQLSGSI | 195   | >BRAFS616FHQFEQLSGFIL | 983  | 788   |
| >BRAFS616FHQFEQLSGSI | 16    | >BRAFS616FHQFEQLSGFIL | 13   | 3     |
| >BRAFS616FHQFEQLSGSI | 388   | >BRAFS616FHQFEQLSGFIL | 159  | 229   |
| >BRAFS616FHQFEQLSGSI | 485   | >BRAFS616FHQFEQLSGFIL | 316  | 169   |
| >BRAFS616FHQFEQLSGSI | 111   | >BRAFS616FHQFEQLSGFIL | 122  | 11    |
| >BRAFS616FHQFEQLSGSI | 616   | >BRAFS616FHQFEQLSGFIL | 426  | 190   |
| >BRAFS616FSHQFEQLSGS | 2282  | >BRAFS616FSHQFEQLSGF  | 351  | 1931  |
| >BRAFS616FSHQFEQLSGS | 22746 | >BRAFS616FSHQFEQLSGF  | 458  | 22288 |

|                       |      |                       |       |       |
|-----------------------|------|-----------------------|-------|-------|
| >BRAFS616FSILWMAPEV   | 20   | >BRAFS616FPILWMAPEV   | 1791  | 1771  |
| >BRAFS616FSILWMAPEVI  | 368  | >BRAFS616FPILWMAPEVI  | 10366 | 9998  |
| >BRAFS616FSILWMAPEV   | 176  | >BRAFS616FPILWMAPEV   | 5080  | 4904  |
| >BRAFS616FSILWMAPEVI  | 378  | >BRAFS616FPILWMAPEVI  | 5976  | 5598  |
| >BRAFS616FSILWMAPEV   | 10   | >BRAFS616FPILWMAPEV   | 632   | 622   |
| >BRAFS616FSILWMAPEVI  | 367  | >BRAFS616FPILWMAPEVI  | 12893 | 12526 |
| >BRAFS616FSILWMAPEV   | 3    | >BRAFS616FPILWMAPEV   | 33    | 30    |
| >BRAFS616FSILWMAPEVI  | 28   | >BRAFS616FPILWMAPEVI  | 875   | 847   |
| >BRAFS616FSILWMAPEV   | 155  | >BRAFS616FPILWMAPEV   | 4632  | 4477  |
| >BRAFS616FSILWMAPEV   | 5    | >BRAFS616FPILWMAPEV   | 17    | 12    |
| >BRAFS616FSILWMAPEVI  | 67   | >BRAFS616FPILWMAPEVI  | 3403  | 3336  |
| >BRAFS616FSILWMAPEV   | 15   | >BRAFS616FPILWMAPEV   | 41    | 26    |
| >BRAFS616FSILWMAPEV   | 3    | >BRAFS616FPILWMAPEV   | 14    | 11    |
| >BRAFS616FSILWMAPEVI  | 314  | >BRAFS616FPILWMAPEVI  | 5513  | 5199  |
| >BRAFS616FSILWMAPEVI  | 157  | >BRAFS616FPILWMAPEVI  | 10083 | 9926  |
| >BRAFS616FSILWMAPEVI  | 167  | >BRAFS616FPILWMAPEVI  | 4663  | 4496  |
| >BRAFS616FSILWMAPEVI  | 52   | >BRAFS616FPILWMAPEVI  | 788   | 736   |
| >BRAFS616FSILWMAPEVI  | 90   | >BRAFS616FPILWMAPEVI  | 3194  | 3104  |
| >BRAFS616FSILWMAPEV   | 5    | >BRAFS616FPILWMAPEV   | 60    | 55    |
| >BRAFS616FSILWMAPEVI  | 175  | >BRAFS616FPILWMAPEVI  | 3562  | 3387  |
| >BRAFS616FSILWMAPEVI  | 84   | >BRAFS616FPILWMAPEVI  | 176   | 92    |
| >BRAFS616F GSILWMAPE' | 412  | >BRAFS616F GPILWMAPE' | 3283  | 2871  |
| >BRAFS616F GSILWMAPE' | 295  | >BRAFS616F GPILWMAPE' | 22498 | 22203 |
| >BRAFS616F GSILWMAPE' | 336  | >BRAFS616F GPILWMAPE' | 22336 | 22000 |
| >BRAFS616F GSILWMAPE' | 257  | >BRAFS616F GPILWMAPE' | 6475  | 6218  |
| >BRAFS616F LSGSILWMA  | 395  | >BRAFS616F LSGPILWMA  | 475   | 80    |
| >BRAFS616F LSGSILWMA  | 1267 | >BRAFS616F LSGPILWMA  | 467   | 800   |
| >BRAFS616F LSGSILWM   | 140  | >BRAFS616F LSGPILWM   | 39    | 101   |
| >BRAFS616F LSGSILWM   | 614  | >BRAFS616F LSGPILWM   | 399   | 215   |
| >BRAFS616F LSGSILWM   | 2111 | >BRAFS616F LSGPILWM   | 422   | 1689  |
| >BRAFS616F LSGSILWM   | 849  | >BRAFS616F LSGPILWM   | 290   | 559   |
| >BRAFS616F QLSGSILWM, | 71   | >BRAFS616F QLSGPILWM, | 167   | 96    |
| >BRAFS616F QLSGSILWM  | 51   | >BRAFS616F QLSGPILWM  | 194   | 143   |
| >BRAFS616F QLSGSILWM, | 31   | >BRAFS616F QLSGPILWM, | 47    | 16    |
| >BRAFS616F QLSGSILWM  | 231  | >BRAFS616F QLSGPILWM  | 991   | 760   |
| >BRAFS616F QLSGSILWM, | 89   | >BRAFS616F QLSGPILWM, | 94    | 5     |
| >BRAFS616F QLSGSILWM, | 156  | >BRAFS616F QLSGPILWM, | 171   | 15    |
| >BRAFS616F QLSGSILWM  | 335  | >BRAFS616F QLSGPILWM  | 127   | 208   |
| >BRAFS616F QLSGSILWM, | 27   | >BRAFS616F QLSGPILWM, | 15    | 12    |
| >BRAFS616F QLSGSILWM, | 413  | >BRAFS616F QLSGPILWM, | 535   | 122   |
| >BRAFS616F QLSGSILWM, | 82   | >BRAFS616F QLSGPILWM, | 97    | 15    |
| >BRAFS616F QLSGSILWM, | 102  | >BRAFS616F QLSGPILWM, | 135   | 33    |
| >BRAFS616F QLSGSILWM  | 17   | >BRAFS616F QLSGPILWM  | 31    | 14    |

|                      |     |                      |      |      |
|----------------------|-----|----------------------|------|------|
| >BRAFS616FQLSGSILWML | 5   | >BRAFS616FQLSGPILWML | 5    | 0    |
| >BRAFS616FQLSGSILWM  | 804 | >BRAFS616FQLSGPILWM  | 413  | 391  |
| >BRAFS616FQLSGSILW   | 207 | >BRAFS616FQLSGPILW   | 355  | 148  |
| >BRAFS616FEQLSGSILWM | 53  | >BRAFS616FEQLSGPILWM | 123  | 70   |
| >BRAFS616FEQLSGSILWN | 307 | >BRAFS616FEQLSGPILWN | 197  | 110  |
| >BRAFS616FEQLSGSILWN | 355 | >BRAFS616FEQLSGPILWN | 180  | 175  |
| >BRAFS616FEQLSGSILWN | 399 | >BRAFS616FEQLSGPILWN | 530  | 131  |
| >BRAFS616FEQLSGSIL   | 51  | >BRAFS616FEQLSGPIL   | 110  | 59   |
| >BRAFS616FEQLSGSILWN | 277 | >BRAFS616FEQLSGPILWN | 396  | 119  |
| >BRAFS616FEQLSGSIL   | 28  | >BRAFS616FEQLSGPIL   | 32   | 4    |
| >BRAFS616FEQLSGSILW  | 460 | >BRAFS616FEQLSGPILW  | 530  | 70   |
| >BRAFS616FEQLSGSIL   | 537 | >BRAFS616FEQLSGPIL   | 446  | 91   |
| >BRAFS616FEQLSGSILW  | 245 | >BRAFS616FEQLSGPILW  | 2374 | 2129 |
| >BRAFS616FEQLSGSI    | 4   | >BRAFS616FEQLSGPI    | 5    | 1    |
| >BRAFS616FEQLSGSIL   | 177 | >BRAFS616FEQLSGPIL   | 483  | 306  |
| >BRAFS616FEQLSGSILW  | 377 | >BRAFS616FEQLSGPILW  | 1287 | 910  |
| >BRAFS616FEQLSGSILW  | 129 | >BRAFS616FEQLSGPILW  | 455  | 326  |
| >BRAFS616FEQLSGSIL   | 436 | >BRAFS616FEQLSGPIL   | 560  | 124  |
| >BRAFS616FEQLSGSI    | 277 | >BRAFS616FEQLSGPI    | 165  | 112  |
| >BRAFS616FEQLSGSIL   | 34  | >BRAFS616FEQLSGPIL   | 26   | 8    |
| >BRAFS616FEQLSGSILW  | 243 | >BRAFS616FEQLSGPILW  | 257  | 14   |
| >BRAFS616FEQLSGSI    | 176 | >BRAFS616FEQLSGPI    | 105  | 71   |
| >BRAFS616FEQLSGSIL   | 71  | >BRAFS616FEQLSGPIL   | 42   | 29   |
| >BRAFS616FEQLSGSILW  | 385 | >BRAFS616FEQLSGPILW  | 519  | 134  |
| >BRAFS616FEQLSGSILW  | 72  | >BRAFS616FEQLSGPILW  | 96   | 24   |
| >BRAFS616FEQLSGSILW  | 288 | >BRAFS616FEQLSGPILW  | 263  | 25   |
| >BRAFS616FEQLSGSI    | 36  | >BRAFS616FEQLSGPI    | 11   | 25   |
| >BRAFS616FEQLSGSIL   | 81  | >BRAFS616FEQLSGPIL   | 44   | 37   |
| >BRAFS616FEQLSGSILW  | 217 | >BRAFS616FEQLSGPILW  | 81   | 136  |
| >BRAFS616FEQLSGSILW  | 311 | >BRAFS616FEQLSGPILW  | 1233 | 922  |
| >BRAFS616QFEQLSGSI   | 496 | >BRAFS616QFEQLSGPI   | 710  | 214  |
| >BRAFS616QFEQLSGSIL  | 509 | >BRAFS616QFEQLSGPIL  | 282  | 227  |
| >BRAFS616HQFEQLSGSI  | 34  | >BRAFS616HQFEQLSGPI  | 47   | 13   |
| >BRAFS616HQFEQLSGSI  | 583 | >BRAFS616HQFEQLSGPI  | 476  | 107  |
| >BRAFS616HQFEQLSGSI  | 256 | >BRAFS616HQFEQLSGPI  | 419  | 163  |
| >BRAFS616HQFEQLSGSI  | 308 | >BRAFS616HQFEQLSGPI  | 428  | 120  |
| >BRAFS616HQFEQLSGSI  | 196 | >BRAFS616HQFEQLSGPI  | 564  | 368  |
| >BRAFS616HQFEQLSGS   | 121 | >BRAFS616HQFEQLSGP   | 438  | 317  |
| >BRAFS616HQFEQLSGSI  | 89  | >BRAFS616HQFEQLSGPI  | 43   | 46   |
| >BRAFS616HQFEQLSGSI  | 412 | >BRAFS616HQFEQLSGPI  | 379  | 33   |
| >BRAFS616HQFEQLSGSI  | 502 | >BRAFS616HQFEQLSGPI  | 291  | 211  |
| >BRAFS616HQFEQLSGSI  | 432 | >BRAFS616HQFEQLSGPI  | 368  | 64   |
| >BRAFS616HQFEQLSGSI  | 442 | >BRAFS616HQFEQLSGPI  | 382  | 60   |

|                       |       |                       |      |       |
|-----------------------|-------|-----------------------|------|-------|
| >BRAFS616FHQFEQLSGSI  | 185   | >BRAFS616FHQFEQLSGPI  | 121  | 64    |
| >BRAFS616FHQFEQLSGSI  | 183   | >BRAFS616FHQFEQLSGPI  | 291  | 108   |
| >BRAFS616FHQFEQLSGSI  | 667   | >BRAFS616FHQFEQLSGPI  | 329  | 338   |
| >BRAFS616FHQFEQLSGSI  | 157   | >BRAFS616FHQFEQLSGPI  | 567  | 410   |
| >BRAFS616FHQFEQLSGSI  | 70    | >BRAFS616FHQFEQLSGPI  | 62   | 8     |
| >BRAFS616FHQFEQLSGSI  | 8     | >BRAFS616FHQFEQLSGPI  | 12   | 4     |
| >BRAFS616FHQFEQLSGSI  | 195   | >BRAFS616FHQFEQLSGPI  | 133  | 62    |
| >BRAFS616FHQFEQLSGSI  | 16    | >BRAFS616FHQFEQLSGPI  | 18   | 2     |
| >BRAFS616FHQFEQLSGSI  | 388   | >BRAFS616FHQFEQLSGPI  | 283  | 105   |
| >BRAFS616FHQFEQLSGSI  | 485   | >BRAFS616FHQFEQLSGPI  | 335  | 150   |
| >BRAFS616FHQFEQLSGSI  | 111   | >BRAFS616FHQFEQLSGPI  | 109  | 2     |
| >BRAFT310IETALTSGS    | 92    | >BRAFT310IEIALTSGS    | 702  | 610   |
| >BRAFT310IETALTSGSS   | 288   | >BRAFT310IEIALTSGSS   | 2200 | 1912  |
| >BRAFT310IETALTSGSSPS | 53    | >BRAFT310IEIALTSGSSPS | 420  | 367   |
| >BRAFT310IIPQEEASLAET | 12643 | >BRAFT310IIPQEEASLAEI | 411  | 12232 |
| >BRAFT310IIPQEEASLAET | 5803  | >BRAFT310IIPQEEASLAEI | 191  | 5612  |
| >BRAFT310IAETALTSGS   | 353   | >BRAFT310IAEIALTSGS   | 204  | 149   |
| >BRAFT310IAETALTSGSSI | 817   | >BRAFT310IAEIALTSGSSP | 406  | 411   |
| >BRAFT310IAETALTSGS   | 1098  | >BRAFT310IAEIALTSGS   | 384  | 714   |
| >BRAFT310IAETALTSG    | 450   | >BRAFT310IAEIALTSG    | 269  | 181   |
| >BRAFT310IAETALTSGS   | 183   | >BRAFT310IAEIALTSGS   | 90   | 93    |
| >BRAFT310IAETALTSGSS  | 207   | >BRAFT310IAEIALTSGSS  | 88   | 119   |
| >BRAFT310IAETALTSGS   | 337   | >BRAFT310IAEIALTSGS   | 70   | 267   |
| >BRAFT310IAETALTSGSSI | 1584  | >BRAFT310IAEIALTSGSSP | 397  | 1187  |
| >BRAFT310ISLAETALT    | 253   | >BRAFT310ISLAEIALT    | 95   | 158   |
| >BRAFT310ISLAETALT    | 55    | >BRAFT310ISLAEIALT    | 12   | 43    |
| >BRAFT310ISLAETALTS   | 2136  | >BRAFT310ISLAEIALTS   | 224  | 1912  |
| >BRAFT310ISLAETALTSG  | 289   | >BRAFT310ISLAEIALTSGS | 56   | 233   |
| >BRAFT310ISLAETALT    | 40    | >BRAFT310ISLAEIALT    | 24   | 16    |
| >BRAFT310ISLAETALTS   | 595   | >BRAFT310ISLAEIALTS   | 295  | 300   |
| >BRAFT310ISLAETALTSG  | 127   | >BRAFT310ISLAEIALTSGS | 79   | 48    |
| >BRAFT310ISLAETALT    | 686   | >BRAFT310ISLAEIALT    | 314  | 372   |
| >BRAFT310ISLAETALT    | 92    | >BRAFT310ISLAEIALT    | 52   | 40    |
| >BRAFT310ISLAETALTS   | 212   | >BRAFT310ISLAEIALTS   | 229  | 17    |
| >BRAFT310ISLAETALTSG  | 305   | >BRAFT310ISLAEIALTSGS | 318  | 13    |
| >BRAFT310ISLAETALT    | 59    | >BRAFT310ISLAEIALT    | 50   | 9     |
| >BRAFT310ISLAETALTS   | 204   | >BRAFT310ISLAEIALTS   | 231  | 27    |
| >BRAFT310ISLAETALTSG  | 370   | >BRAFT310ISLAEIALTSGS | 407  | 37    |
| >BRAFT310ISLAETALT    | 17    | >BRAFT310ISLAEIALT    | 15   | 2     |
| >BRAFT310ISLAETALTS   | 157   | >BRAFT310ISLAEIALTS   | 144  | 13    |
| >BRAFT310ISLAETALTSG  | 209   | >BRAFT310ISLAEIALTSGS | 201  | 8     |
| >BRAFT310IASLAETAL    | 446   | >BRAFT310IASLAEIAL    | 879  | 433   |
| >BRAFT310IASLAETAL    | 213   | >BRAFT310IASLAEIAL    | 376  | 163   |

|                         |       |                          |      |       |
|-------------------------|-------|--------------------------|------|-------|
| >BRAFF-T310I ASLAETAL   | 20    | >BRAFF-T310I ASLAEIAL    | 23   | 3     |
| >BRAFF-T310I EASLAETA   | 450   | >BRAFF-T310I EASLAEIA    | 1110 | 660   |
| >BRAFF-T310I EASLAETAL  | 85    | >BRAFF-T310I EASLAEIAL   | 54   | 31    |
| >BRAFF-T310I EEASLAET   | 9661  | >BRAFF-T310I EEASLAEI    | 479  | 9182  |
| >BRAFF-T310I EEASLAETAL | 358   | >BRAFF-T310I EEASLAEIAL  | 539  | 181   |
| >BRAFF-T310I EEASLAETAL | 267   | >BRAFF-T310I EEASLAEIAL  | 117  | 150   |
| >BRAFF-T310I EEASLAET   | 10982 | >BRAFF-T310I EEASLAEI    | 302  | 10680 |
| >BRAFF-T310I EEASLAETAL | 160   | >BRAFF-T310I EEASLAEIAL  | 232  | 72    |
| >BRAFF-T310I EEASLAETAL | 345   | >BRAFF-T310I EEASLAEIAL  | 491  | 146   |
| >BRAFF-T310I EEASLAET   | 1904  | >BRAFF-T310I EEASLAEI    | 392  | 1512  |
| >BRAFF-T310I EEASLAETAL | 301   | >BRAFF-T310I EEASLAEIAL  | 412  | 111   |
| >BRAFF-T310I EEASLAET   | 47    | >BRAFF-T310I EEASLAEI    | 83   | 36    |
| >BRAFF-T310I EEASLAETA  | 15    | >BRAFF-T310I EEASLAEIA   | 13   | 2     |
| >BRAFF-T310I EEASLAETAL | 394   | >BRAFF-T310I EEASLAEIAL  | 361  | 33    |
| >BRAFF-T310I EEASLAETAL | 91    | >BRAFF-T310I EEASLAEIALT | 72   | 19    |
| >BRAFF-T310I EEASLAET   | 22034 | >BRAFF-T310I EEASLAEI    | 339  | 21695 |
| >BRAFF-T310I EEASLAETAL | 476   | >BRAFF-T310I EEASLAEIAL  | 560  | 84    |
| >BRAFF-T310I QEEASLAET  | 4798  | >BRAFF-T310I QEEASLAEI   | 14   | 4784  |
| >BRAFF-T310I QEEASLAETA | 823   | >BRAFF-T310I QEEASLAEIAL | 350  | 473   |
| >BRAFF-T310I QEEASLAET  | 9197  | >BRAFF-T310I QEEASLAEI   | 76   | 9121  |
| >BRAFF-T310I QEEASLAETA | 15    | >BRAFF-T310I QEEASLAEIAL | 9    | 6     |
| >BRAFF-T310I QEEASLAETA | 435   | >BRAFF-T310I QEEASLAEIA  | 1098 | 663   |
| >BRAFF-T310I QEEASLAET  | 73    | >BRAFF-T310I QEEASLAEI   | 192  | 119   |
| >BRAFF-T310I QEEASLAETA | 20    | >BRAFF-T310I QEEASLAEIA  | 40   | 20    |
| >BRAFF-T310I QEEASLAETA | 539   | >BRAFF-T310I QEEASLAEIAL | 306  | 233   |
| >BRAFF-T310I QEEASLAET  | 1458  | >BRAFF-T310I QEEASLAEI   | 15   | 1443  |
| >BRAFF-T310I QEEASLAETA | 337   | >BRAFF-T310I QEEASLAEIAL | 324  | 13    |
| >BRAFF-T440F RMKTLGRR   | 554   | >BRAFF-T440F RMKPLGRR    | 491  | 63    |
| >BRAFF-T440F RMKTLGRR   | 285   | >BRAFF-T440F RMKPLGRR    | 263  | 22    |
| >BRAFF-T440F RMKTLGRRD  | 689   | >BRAFF-T440F RMKPLGRRD   | 479  | 210   |
| >BRAFF-T440F RMKTLGRR   | 7     | >BRAFF-T440F RMKPLGRR    | 8    | 1     |
| >BRAFF-T440F RMKTLGRR   | 72    | >BRAFF-T440F RMKPLGRR    | 101  | 29    |
| >BRAFF-T440F NRMKTLGR   | 108   | >BRAFF-T440F NRMKPLGR    | 190  | 82    |
| >BRAFF-T440F NRMKTLGRR  | 104   | >BRAFF-T440F NRMKPLGRR   | 313  | 209   |
| >BRAFF-T440F NRMKTLGR   | 355   | >BRAFF-T440F NRMKPLGR    | 607  | 252   |
| >BRAFF-T440F RNRMKTLG   | 656   | >BRAFF-T440F RNRMKPLG    | 155  | 501   |
| >BRAFF-T440F RNRMKTLGR  | 70    | >BRAFF-T440F RNRMKPLGR   | 111  | 41    |
| >BRAFF-T440F RNRMKTLGR  | 146   | >BRAFF-T440F RNRMKPLGR   | 330  | 184   |
| >BRAFF-T440F RNRMKTLGR  | 254   | >BRAFF-T440F RNRMKPLGR   | 765  | 511   |
| >BRAFF-T440F RNRMKTLGR  | 331   | >BRAFF-T440F RNRMKPLGR   | 1390 | 1059  |
| >BRAFF-T440F RNRMKTLGR  | 139   | >BRAFF-T440F RNRMKPLGR   | 228  | 89    |
| >BRAFF-T440F EDNRMKTL   | 259   | >BRAFF-T440F EDNRMKPL    | 196  | 63    |
| >BRAFF-T440F SEDNRMKT   | 206   | >BRAFF-T440F SEDNRMKP    | 150  | 56    |

|                          |      |                          |      |      |
|--------------------------|------|--------------------------|------|------|
| >BRAFF-T440F SEDRNRMKT   | 196  | >BRAFF-T440F SEDRNRMKP   | 203  | 7    |
| >BRAFF-T440F SEDRNRMKT   | 192  | >BRAFF-T440F SEDRNRMKP   | 229  | 37   |
| >BRAFF-T440F SSEDNRNMK'  | 36   | >BRAFF-T440F SSEDNRNMK   | 51   | 15   |
| >BRAFF-T440F SSEDNRNMK'  | 311  | >BRAFF-T440F SSEDNRNMK   | 2023 | 1712 |
| >BRAFF-T529/ TQWCEGSSL   | 213  | >BRAFF-T529/ AQWCEGSSL   | 87   | 126  |
| >BRAFF-T529/ TQWCEGSSL   | 1812 | >BRAFF-T529/ AQWCEGSSL   | 477  | 1335 |
| >BRAFF-T529/ TQWCEGSSL   | 871  | >BRAFF-T529/ AQWCEGSSL   | 267  | 604  |
| >BRAFF-T529/ TQWCEGSSL'  | 481  | >BRAFF-T529/ AQWCEGSSL'  | 436  | 45   |
| >BRAFF-T529/ TQWCEGSSL'  | 59   | >BRAFF-T529/ AQWCEGSSL'  | 48   | 11   |
| >BRAFF-T529/ TQWCEGSSL   | 293  | >BRAFF-T529/ AQWCEGSSL   | 117  | 176  |
| >BRAFF-T529/ TQWCEGSSL'  | 74   | >BRAFF-T529/ AQWCEGSSL'  | 53   | 21   |
| >BRAFF-T529/ TQWCEGSSL'  | 53   | >BRAFF-T529/ AQWCEGSSL'  | 85   | 32   |
| >BRAFF-T529/ TQWCEGSSL   | 8    | >BRAFF-T529/ AQWCEGSSL   | 3    | 5    |
| >BRAFF-T529/ TQWCEGSSL'  | 8    | >BRAFF-T529/ AQWCEGSSL'  | 5    | 3    |
| >BRAFF-T529/ TQWCEGSSL'  | 87   | >BRAFF-T529/ AQWCEGSSL'  | 31   | 56   |
| >BRAFF-T529/ TQWCEGSSL   | 308  | >BRAFF-T529/ AQWCEGSSL   | 1230 | 922  |
| >BRAFF-T529/ TQWCEGSSL   | 563  | >BRAFF-T529/ AQWCEGSSL   | 415  | 148  |
| >BRAFF-T529/ VTQWCEGSS   | 187  | >BRAFF-T529/ VAQWCEGSS   | 6970 | 6783 |
| >BRAFF-T529/ VTQWCEGSS   | 268  | >BRAFF-T529/ VAQWCEGSS   | 2361 | 2093 |
| >BRAFF-T529/ VTQWCEGSS   | 53   | >BRAFF-T529/ VAQWCEGSS   | 300  | 247  |
| >BRAFF-T529/ VTQWCEGSS   | 8    | >BRAFF-T529/ VAQWCEGSS   | 14   | 6    |
| >BRAFF-T529/ VTQWCEGSS   | 307  | >BRAFF-T529/ VAQWCEGSS   | 2585 | 2278 |
| >BRAFF-T529/ VTQWCEGSS   | 37   | >BRAFF-T529/ VAQWCEGSS   | 441  | 404  |
| >BRAFF-T529/ VTQWCEGSS   | 12   | >BRAFF-T529/ VAQWCEGSS   | 105  | 93   |
| >BRAFF-T529/ VTQWCEGSS   | 1578 | >BRAFF-T529/ VAQWCEGSS   | 92   | 1486 |
| >BRAFF-T529/ VTQWCEGSS   | 79   | >BRAFF-T529/ VAQWCEGSS   | 4695 | 4616 |
| >BRAFF-T529/ VTQWCEGSS   | 4    | >BRAFF-T529/ VAQWCEGSS   | 22   | 18   |
| >BRAFF-T529/ VTQWCEGSS   | 274  | >BRAFF-T529/ VAQWCEGSS   | 784  | 510  |
| >BRAFF-T529/ VTQWCEGSS   | 60   | >BRAFF-T529/ VAQWCEGSS   | 250  | 190  |
| >BRAFF-T529/ IVTQWCEGS'  | 1579 | >BRAFF-T529/ IVAQWCEGS'  | 139  | 1440 |
| >BRAFF-T529/ IVTQWCEGS'  | 1609 | >BRAFF-T529/ IVAQWCEGS'  | 227  | 1382 |
| >BRAFF-T529/ IVTQWCEGS'  | 515  | >BRAFF-T529/ IVAQWCEGS'  | 203  | 312  |
| >BRAFF-T529/ IVTQWCEGS'  | 148  | >BRAFF-T529/ IVAQWCEGS'  | 132  | 16   |
| >BRAFF-T529/ IVTQWCEGS'  | 74   | >BRAFF-T529/ IVAQWCEGS'  | 73   | 1    |
| >BRAFF-T529/ QLAIVTQWC   | 398  | >BRAFF-T529/ QLAIVAQWC   | 722  | 324  |
| >BRAFF-T529/ QLAIVTQWC   | 119  | >BRAFF-T529/ QLAIVAQWC   | 246  | 127  |
| >BRAFF-T529/ QLAIVTQW    | 690  | >BRAFF-T529/ QLAIVAQW    | 352  | 338  |
| >BRAFF-T529/ QLAIVTQW    | 83   | >BRAFF-T529/ QLAIVAQW    | 72   | 11   |
| >BRAFF-T529/ PQLAIVTQW   | 662  | >BRAFF-T529/ PQLAIVAQW   | 340  | 322  |
| >BRAFF-T529/ KPQLAIVTQW  | 488  | >BRAFF-T529/ KPQLAIVAQV  | 657  | 169  |
| >BRAFF-T529/ KPQLAIVTQW  | 16   | >BRAFF-T529/ KPQLAIVAQV  | 14   | 2    |
| >BRAFF-T529/ STKPQLAIVT  | 355  | >BRAFF-T529/ STKPQLAIVA  | 17   | 338  |
| >BRAFF-T529/ STKPQLAIVTC | 88   | >BRAFF-T529/ STKPQLAIVAI | 88   | 0    |

|                          |       |                          |       |       |
|--------------------------|-------|--------------------------|-------|-------|
| >BRAFF-T589I TVKIGDFGL   | 1338  | >BRAFF-T589I IVKIGDFGL   | 148   | 1190  |
| >BRAFF-T589I LTVKIGDFGL  | 537   | >BRAFF-T589I LIVKIGDFGL  | 263   | 274   |
| >BRAFF-T589I LTVKIGDFGL/ | 2158  | >BRAFF-T589I LIVKIGDFGLA | 484   | 1674  |
| >BRAFF-T589I LTVKIGDFGL  | 354   | >BRAFF-T589I LIVKIGDFGL  | 320   | 34    |
| >BRAFF-T589I LTVKIGDFGL/ | 986   | >BRAFF-T589I LIVKIGDFGLA | 338   | 648   |
| >BRAFF-T589I LTVKIGDFGL  | 6154  | >BRAFF-T589I LIVKIGDFGL  | 214   | 5940  |
| >BRAFF-T589I LTVKIGDF    | 154   | >BRAFF-T589I LIVKIGDF    | 1229  | 1075  |
| >BRAFF-T589I LTVKIGDFGL/ | 229   | >BRAFF-T589I LIVKIGDFGLA | 1510  | 1281  |
| >BRAFF-T589I LTVKIGDF    | 13    | >BRAFF-T589I LIVKIGDF    | 3964  | 3951  |
| >BRAFF-T589I LTVKIGDFGL  | 24    | >BRAFF-T589I LIVKIGDFGL  | 4116  | 4092  |
| >BRAFF-T589I LTVKIGDFGL  | 424   | >BRAFF-T589I LIVKIGDFGL  | 15480 | 15056 |
| >BRAFF-T589I LTVKIGDF    | 118   | >BRAFF-T589I LIVKIGDF    | 3210  | 3092  |
| >BRAFF-T589I LTVKIGDFGL/ | 380   | >BRAFF-T589I LIVKIGDFGLA | 8842  | 8462  |
| >BRAFF-T589I SNNIFLHEDLI | 19260 | >BRAFF-T589I SNNIFLHEDLI | 218   | 19042 |
| >BRAFF-T589I DLTVKIGDFG  | 205   | >BRAFF-T589I DLIVKIGDFGL | 260   | 55    |
| >BRAFF-T589I DLTVKIGDF   | 6031  | >BRAFF-T589I DLIVKIGDF   | 300   | 5731  |
| >BRAFF-T589I HEDLTVKI    | 12    | >BRAFF-T589I HEDLIVKI    | 15    | 3     |
| >BRAFF-T589I HEDLTVKI    | 114   | >BRAFF-T589I HEDLIVKI    | 99    | 15    |
| >BRAFF-T589I HEDLTVKI    | 157   | >BRAFF-T589I HEDLIVKI    | 33    | 124   |
| >BRAFF-T589I HEDLTVKIGD  | 888   | >BRAFF-T589I HEDLIVKIGDF | 445   | 443   |
| >BRAFF-T589I FLHEDLTV    | 9     | >BRAFF-T589I FLHEDLIV    | 12    | 3     |
| >BRAFF-T589I FLHEDLTVKI  | 66    | >BRAFF-T589I FLHEDLIVKI  | 39    | 27    |
| >BRAFF-T589I FLHEDLTV    | 6     | >BRAFF-T589I FLHEDLIV    | 7     | 1     |
| >BRAFF-T589I FLHEDLTVKI  | 14    | >BRAFF-T589I FLHEDLIVKI  | 15    | 1     |
| >BRAFF-T589I FLHEDLTV    | 3     | >BRAFF-T589I FLHEDLIV    | 3     | 0     |
| >BRAFF-T589I FLHEDLTVK   | 332   | >BRAFF-T589I FLHEDLIVK   | 1987  | 1655  |
| >BRAFF-T589I FLHEDLTVKI  | 24    | >BRAFF-T589I FLHEDLIVKI  | 24    | 0     |
| >BRAFF-T589I FLHEDLTVKIG | 334   | >BRAFF-T589I FLHEDLIVKIG | 496   | 162   |
| >BRAFF-T589I FLHEDLTV    | 7     | >BRAFF-T589I FLHEDLIV    | 8     | 1     |
| >BRAFF-T589I FLHEDLTVKI  | 101   | >BRAFF-T589I FLHEDLIVKI  | 72    | 29    |
| >BRAFF-T589I FLHEDLTV    | 1     | >BRAFF-T589I FLHEDLIV    | 2     | 1     |
| >BRAFF-T589I FLHEDLTVK   | 368   | >BRAFF-T589I FLHEDLIVK   | 165   | 203   |
| >BRAFF-T589I FLHEDLTVKI  | 2     | >BRAFF-T589I FLHEDLIVKI  | 2     | 0     |
| >BRAFF-T589I FLHEDLTV    | 3     | >BRAFF-T589I FLHEDLIV    | 3     | 0     |
| >BRAFF-T589I FLHEDLTVKI  | 4     | >BRAFF-T589I FLHEDLIVKI  | 4     | 0     |
| >BRAFF-T589I FLHEDLTV    | 4     | >BRAFF-T589I FLHEDLIV    | 5     | 1     |
| >BRAFF-T589I FLHEDLTVKI  | 7     | >BRAFF-T589I FLHEDLIVKI  | 6     | 1     |
| >BRAFF-T589I FLHEDLTV    | 6     | >BRAFF-T589I FLHEDLIV    | 12    | 6     |
| >BRAFF-T589I FLHEDLTVKI  | 13    | >BRAFF-T589I FLHEDLIVKI  | 11    | 2     |
| >BRAFF-T589I FLHEDLTV    | 1     | >BRAFF-T589I FLHEDLIV    | 2     | 1     |
| >BRAFF-T589I FLHEDLTVK   | 39    | >BRAFF-T589I FLHEDLIVK   | 51    | 12    |
| >BRAFF-T589I FLHEDLTVKI  | 2     | >BRAFF-T589I FLHEDLIVKI  | 2     | 0     |
| >BRAFF-T589I FLHEDLTVKI  | 414   | >BRAFF-T589I FLHEDLIVKI  | 259   | 155   |



|                          |       |                          |      |       |
|--------------------------|-------|--------------------------|------|-------|
| >BRAFF-T589I IFLHEDLT    | 16706 | >BRAFF-T589I IFLHEDLI    | 171  | 16535 |
| >BRAFF-T589I IFLHEDLTVKI | 68    | >BRAFF-T589I IFLHEDLIVKI | 84   | 16    |
| >BRAFF-T589I IFLHEDLT    | 11990 | >BRAFF-T589I IFLHEDLI    | 404  | 11586 |
| >BRAFF-T589I IFLHEDLTVKI | 91    | >BRAFF-T589I IFLHEDLIVKI | 120  | 29    |
| >BRAFF-T589I NIFLHEDLTV  | 106   | >BRAFF-T589I NIFLHEDLIV  | 384  | 278   |
| >BRAFF-T589I NIFLHEDLT   | 5462  | >BRAFF-T589I NIFLHEDLI   | 397  | 5065  |
| >BRAFF-T589I NIFLHEDLTV  | 125   | >BRAFF-T589I NIFLHEDLIV  | 339  | 214   |
| >BRAFF-T589I NIFLHEDLTV  | 99    | >BRAFF-T589I NIFLHEDLIV  | 285  | 186   |
| >BRAFF-T589I NIFLHEDLTV  | 155   | >BRAFF-T589I NIFLHEDLIV  | 351  | 196   |
| >BRAFF-T589I NIFLHEDLTV  | 353   | >BRAFF-T589I NIFLHEDLIV  | 2313 | 1960  |
| >BRAFF-T589I NIFLHEDLTV  | 473   | >BRAFF-T589I NIFLHEDLIV  | 1658 | 1185  |
| >BRAFF-T589I NIFLHEDLTV  | 225   | >BRAFF-T589I NIFLHEDLIV  | 741  | 516   |
| >BRAFF-T589I NIFLHEDLTVI | 333   | >BRAFF-T589I NIFLHEDLIVK | 146  | 187   |
| >BRAFF-T589I NIFLHEDLTVI | 61    | >BRAFF-T589I NIFLHEDLIVK | 58   | 3     |
| >BRAFF-T599I ATVKSRRWSG  | 451   | >BRAFF-T599I AIVKSRRWSGS | 9695 | 9244  |
| >BRAFF-T599I TVKIGDFGLA  | 5285  | >BRAFF-T599I TVKIGDFGLA  | 479  | 4806  |
| >BRAFF-T599I LATVKSRRW   | 36    | >BRAFF-T599I LAIVKSRRW   | 9    | 27    |
| >BRAFF-T599I LATVKSRRW   | 86    | >BRAFF-T599I LAIVKSRRW   | 64   | 22    |
| >BRAFF-T599I LATVKSRRW   | 73    | >BRAFF-T599I LAIVKSRRW   | 48   | 25    |
| >BRAFF-T599I LATVKSRRW   | 22    | >BRAFF-T599I LAIVKSRRW   | 16   | 6     |
| >BRAFF-T599I LATVKSRRW   | 172   | >BRAFF-T599I LAIVKSRRW   | 95   | 77    |
| >BRAFF-T599I LATVKSRRW   | 130   | >BRAFF-T599I LAIVKSRRW   | 497  | 367   |
| >BRAFF-T599I GLATVKSRR   | 697   | >BRAFF-T599I GLAIVKSRR   | 476  | 221   |
| >BRAFF-T599I GLATVKSRRW  | 242   | >BRAFF-T599I GLAIVKSRRW  | 473  | 231   |
| >BRAFF-T599I FGLATVKSRRM | 98    | >BRAFF-T599I FGLAIVKSRRW | 236  | 138   |
| >BRAFF-T599I FGLATVKSRRM | 499   | >BRAFF-T599I FGLAIVKSRRW | 478  | 21    |
| >BRAFF-T599I FGLATVKSRRM | 45    | >BRAFF-T599I FGLAIVKSRRW | 66   | 21    |
| >BRAFF-T599I FGLATVKSRRM | 215   | >BRAFF-T599I FGLAIVKSRRW | 174  | 41    |
| >BRAFF-T599I FGLATVKSRR  | 756   | >BRAFF-T599I FGLAIVKSRR  | 453  | 303   |
| >BRAFF-T599I DFGLATVKSRR | 205   | >BRAFF-T599I DFGLAIVKSRR | 89   | 116   |
| >BRAFF-T599I DFGLATVKSRR | 246   | >BRAFF-T599I DFGLAIVKSRR | 243  | 3     |
| >BRAFF-T599I GDFGLATV    | 393   | >BRAFF-T599I GDFGLAIV    | 459  | 66    |
| >BRAFF-T599I GDFGLATV    | 227   | >BRAFF-T599I GDFGLAIV    | 259  | 32    |
| >BRAFF-T599I IGDFGLATV   | 253   | >BRAFF-T599I IGDFGLAIV   | 1850 | 1597  |
| >BRAFF-T599I KIGDFGLAT   | 6866  | >BRAFF-T599I KIGDFGLAIV  | 451  | 6415  |
| >BRAFF-T599I KIGDFGLATV  | 53    | >BRAFF-T599I KIGDFGLAIV  | 163  | 110   |
| >BRAFF-T599I KIGDFGLATV  | 34    | >BRAFF-T599I KIGDFGLAIV  | 96   | 62    |
| >BRAFF-T599I KIGDFGLATV  | 12    | >BRAFF-T599I KIGDFGLAIV  | 24   | 12    |
| >BRAFF-T599I KIGDFGLAT   | 2273  | >BRAFF-T599I KIGDFGLAIV  | 123  | 2150  |
| >BRAFF-T599I KIGDFGLATV  | 59    | >BRAFF-T599I KIGDFGLAIV  | 118  | 59    |
| >BRAFF-T599I KIGDFGLAT   | 1206  | >BRAFF-T599I KIGDFGLAIV  | 44   | 1162  |
| >BRAFF-T599I KIGDFGLATV  | 4     | >BRAFF-T599I KIGDFGLAIV  | 16   | 12    |
| >BRAFF-T599I KIGDFGLATV  | 15    | >BRAFF-T599I KIGDFGLAIV  | 37   | 22    |

|                         |      |                          |     |      |
|-------------------------|------|--------------------------|-----|------|
| >BRAFF-T599I KIGDFGLATV | 16   | >BRAFF-T599I KIGDFGLAIV  | 37  | 21   |
| >BRAFF-T599I KIGDFGLATV | 30   | >BRAFF-T599I KIGDFGLAIV  | 96  | 66   |
| >BRAFF-T599I KIGDFGLATV | 4    | >BRAFF-T599I KIGDFGLAIV  | 7   | 3    |
| >BRAFF-T599I KIGDFGLATV | 129  | >BRAFF-T599I KIGDFGLAIVk | 112 | 17   |
| >BRAFF-T599I KIGDFGLATV | 57   | >BRAFF-T599I KIGDFGLAIVk | 30  | 27   |
| >BRAFF-T599I KIGDFGLATV | 563  | >BRAFF-T599I KIGDFGLAIVk | 107 | 456  |
| >BRAFF-T599I KIGDFGLAT  | 4470 | >BRAFF-T599I KIGDFGLAI   | 39  | 4431 |
| >BRAFF-T599I KIGDFGLATV | 132  | >BRAFF-T599I KIGDFGLAIVk | 68  | 64   |
| >BRAFF-T599I VKIGDFGLAT | 144  | >BRAFF-T599I VKIGDFGLAI  | 642 | 498  |
| >BRAFF-T599I VKIGDFGLAT | 2739 | >BRAFF-T599I VKIGDFGLAI  | 142 | 2597 |
| >BRAFF-T599IATVKSRWSG:  | 451  | >BRAFF-T599IATVKSRWSG:   | 451 | 0    |
| >BRAFF-T599I LATVKSRW   | 36   | >BRAFF-T599I LATVKSRW    | 36  | 0    |
| >BRAFF-T599I LATVKSRW   | 86   | >BRAFF-T599I LATVKSRW    | 86  | 0    |
| >BRAFF-T599I LATVKSRW   | 73   | >BRAFF-T599I LATVKSRW    | 73  | 0    |
| >BRAFF-T599I LATVKSRW   | 22   | >BRAFF-T599I LATVKSRW    | 22  | 0    |
| >BRAFF-T599I LATVKSRW   | 172  | >BRAFF-T599I LATVKSRW    | 172 | 0    |
| >BRAFF-T599I LATVKSRW   | 130  | >BRAFF-T599I LATVKSRW    | 130 | 0    |
| >BRAFF-T599I FGLATVKSRW | 98   | >BRAFF-T599I FGLATVKSRW  | 98  | 0    |
| >BRAFF-T599I FGLATVKSRW | 499  | >BRAFF-T599I FGLATVKSRW  | 499 | 0    |
| >BRAFF-T599I FGLATVKSRW | 45   | >BRAFF-T599I FGLATVKSRW  | 45  | 0    |
| >BRAFF-T599I FGLATVKSRW | 215  | >BRAFF-T599I FGLATVKSRW  | 215 | 0    |
| >BRAFF-T599I DFGLATVKSR | 205  | >BRAFF-T599I DFGLATVKSR  | 205 | 0    |
| >BRAFF-T599I DFGLATVKSR | 246  | >BRAFF-T599I DFGLATVKSR  | 246 | 0    |
| >BRAFF-T599I GDFGLATV   | 393  | >BRAFF-T599I GDFGLATV    | 393 | 0    |
| >BRAFF-T599I GDFGLATV   | 227  | >BRAFF-T599I GDFGLATV    | 227 | 0    |
| >BRAFF-T599I KIGDFGLATV | 53   | >BRAFF-T599I KIGDFGLATV  | 53  | 0    |
| >BRAFF-T599I KIGDFGLATV | 34   | >BRAFF-T599I KIGDFGLATV  | 34  | 0    |
| >BRAFF-T599I KIGDFGLATV | 12   | >BRAFF-T599I KIGDFGLATV  | 12  | 0    |
| >BRAFF-T599I KIGDFGLATV | 59   | >BRAFF-T599I KIGDFGLATV  | 59  | 0    |
| >BRAFF-T599I KIGDFGLATV | 4    | >BRAFF-T599I KIGDFGLATV  | 4   | 0    |
| >BRAFF-T599I KIGDFGLATV | 15   | >BRAFF-T599I KIGDFGLATV  | 15  | 0    |
| >BRAFF-T599I KIGDFGLATV | 16   | >BRAFF-T599I KIGDFGLATV  | 16  | 0    |
| >BRAFF-T599I KIGDFGLATV | 30   | >BRAFF-T599I KIGDFGLATV  | 30  | 0    |
| >BRAFF-T599I KIGDFGLATV | 4    | >BRAFF-T599I KIGDFGLATV  | 4   | 0    |
| >BRAFF-T599I KIGDFGLATV | 129  | >BRAFF-T599I KIGDFGLATV  | 129 | 0    |
| >BRAFF-T599I KIGDFGLATV | 57   | >BRAFF-T599I KIGDFGLATV  | 57  | 0    |
| >BRAFF-T599I KIGDFGLATV | 132  | >BRAFF-T599I KIGDFGLATV  | 132 | 0    |
| >BRAFF-T599I VKIGDFGLAT | 144  | >BRAFF-T599I VKIGDFGLAT  | 144 | 0    |
| >BRAFF-V459I VGQRIGSGSF | 498  | >BRAFF-V459I LGQRIGSGSF  | 164 | 334  |
| >BRAFF-V459I VGQRIGSGSF | 74   | >BRAFF-V459I LGQRIGSGSF  | 36  | 38   |
| >BRAFF-V459I TVGQRIGSGS | 183  | >BRAFF-V459I TLGQRIGSGS  | 74  | 109  |
| >BRAFF-V459I TVGQRIGSGS | 1442 | >BRAFF-V459I TLGQRIGSGS  | 208 | 1234 |
| >BRAFF-V459I GQITVGQRI  | 414  | >BRAFF-V459I GQITLGQRI   | 860 | 446  |

|                          |      |                          |       |       |
|--------------------------|------|--------------------------|-------|-------|
| >BRAFF-V459I GQITVGQR    | 422  | >BRAFF-V459I GQITLGQR    | 366   | 56    |
| >BRAFF-V459I GQITVGQRI   | 513  | >BRAFF-V459I GQITLGQRI   | 413   | 100   |
| >BRAFF-V459I IPDGQITV    | 350  | >BRAFF-V459I IPDGQITL    | 65    | 285   |
| >BRAFF-V459I IPDGQITV    | 1997 | >BRAFF-V459I IPDGQITL    | 264   | 1733  |
| >BRAFF-V459I IPDGQITV    | 2172 | >BRAFF-V459I IPDGQITL    | 243   | 1929  |
| >BRAFF-V459I IPDGQITV    | 5793 | >BRAFF-V459I IPDGQITL    | 497   | 5296  |
| >BRAFF-V459I IPDGQITV    | 553  | >BRAFF-V459I IPDGQITL    | 171   | 382   |
| >BRAFF-V459I EIPDGQITV   | 491  | >BRAFF-V459I EIPDGQITL   | 3962  | 3471  |
| >BRAFF-V459I EIPDGQITV   | 72   | >BRAFF-V459I EIPDGQITL   | 1170  | 1098  |
| >BRAFF-V459I EIPDGQITV   | 74   | >BRAFF-V459I EIPDGQITL   | 1785  | 1711  |
| >BRAFF-V459I EIPDGQITV   | 141  | >BRAFF-V459I EIPDGQITL   | 2624  | 2483  |
| >BRAFF-V459I EIPDGQITV   | 6    | >BRAFF-V459I EIPDGQITL   | 73    | 67    |
| >BRAFF-V459I EIPDGQITV   | 1140 | >BRAFF-V459I EIPDGQITL   | 359   | 781   |
| >BRAFF-V459I EIPDGQITV   | 22   | >BRAFF-V459I EIPDGQITL   | 117   | 95    |
| >BRAFF-V459I EIPDGQITV   | 37   | >BRAFF-V459I EIPDGQITL   | 681   | 644   |
| >BRAFF-V459I WEIPDGQITV  | 1067 | >BRAFF-V459I WEIPDGQITL  | 79    | 988   |
| >BRAFF-V459I WEIPDGQITV  | 1311 | >BRAFF-V459I WEIPDGQITL  | 340   | 971   |
| >BRAFF-V459I WEIPDGQITV  | 611  | >BRAFF-V459I WEIPDGQITL  | 287   | 324   |
| >BRAFF-V459I WEIPDGQITV  | 18   | >BRAFF-V459I WEIPDGQITL  | 15    | 3     |
| >BRAFF-V471F VYK GKWHGC  | 2071 | >BRAFF-V471F FYK GKWHGC  | 325   | 1746  |
| >BRAFF-V471F VYK GKWHGC  | 2379 | >BRAFF-V471F FYK GKWHGC  | 498   | 1881  |
| >BRAFF-V471F TVYK GKWHG  | 418  | >BRAFF-V471F TFYK GKWHG  | 10991 | 10573 |
| >BRAFF-V471F TVYK GKWHG  | 239  | >BRAFF-V471F TFYK GKWHG  | 2893  | 2654  |
| >BRAFF-V471F TVYK GKWHG  | 266  | >BRAFF-V471F TFYK GKWHG  | 2343  | 2077  |
| >BRAFF-V471F TVYK GKWHG  | 62   | >BRAFF-V471F TFYK GKWHG  | 1799  | 1737  |
| >BRAFF-V471F TVYK GKWHG  | 109  | >BRAFF-V471F TFYK GKWHG  | 12082 | 11973 |
| >BRAFF-V471F TVYK GKWHG  | 40   | >BRAFF-V471F TFYK GKWHG  | 5065  | 5025  |
| >BRAFF-V471F QRIGSGSFGT  | 804  | >BRAFF-V471F QRIGSGSFGT  | 39    | 765   |
| >BRAFF-V471F QRIGSGSFGT  | 521  | >BRAFF-V471F QRIGSGSFGT  | 196   | 325   |
| >BRAFF-V471F QRIGSGSFGT  | 1501 | >BRAFF-V471F QRIGSGSFGT  | 416   | 1085  |
| >BRAFF-V471F GTVYK GKW   | 13   | >BRAFF-V471F GTFYK GKW   | 15    | 2     |
| >BRAFF-V471F GTVYK GKW   | 199  | >BRAFF-V471F GTFYK GKW   | 78    | 121   |
| >BRAFF-V471F GTVYK GKW   | 766  | >BRAFF-V471F GTFYK GKW   | 483   | 283   |
| >BRAFF-V471F GTVYK GKWH  | 177  | >BRAFF-V471F GTFYK GKWH  | 37    | 140   |
| >BRAFF-V471F FGTVYK GKW  | 51   | >BRAFF-V471F FGTFYK GKW  | 89    | 38    |
| >BRAFF-V471F SFGTVYK GKV | 365  | >BRAFF-V471F SFGTFYK GKV | 431   | 66    |
| >BRAFF-V471F SFGTVYK GK  | 1179 | >BRAFF-V471F SFGTFYK GK  | 92    | 1087  |
| >BRAFF-V471F GSFGTVYK    | 62   | >BRAFF-V471F GSFGTFYK    | 47    | 15    |
| >BRAFF-V471F GSFGTVYK GK | 119  | >BRAFF-V471F GSFGTFYK GK | 139   | 20    |
| >BRAFF-V471F GSFGTVYK    | 6    | >BRAFF-V471F GSFGTFYK    | 5     | 1     |
| >BRAFF-V471F GSFGTVYK GK | 39   | >BRAFF-V471F GSFGTFYK GK | 44    | 5     |
| >BRAFF-V471F GSFGTVYK    | 37   | >BRAFF-V471F GSFGTFYK    | 32    | 5     |
| >BRAFF-V471F GSFGTVYK GK | 338  | >BRAFF-V471F GSFGTFYK GK | 196   | 142   |

|                           |       |                           |     |       |
|---------------------------|-------|---------------------------|-----|-------|
| >BRAFF-V471F GSFSGTVYK    | 89    | >BRAFF-V471F GSFSGTFYK    | 23  | 66    |
| >BRAFF-V471F GSFSGTVYK    | 25    | >BRAFF-V471F GSFSGTFYK    | 17  | 8     |
| >BRAFF-V471F GSFSGTVYKGG  | 9     | >BRAFF-V471F GSFSGTFYKGG  | 12  | 3     |
| >BRAFF-V471F GSFSGTVYKGG  | 40    | >BRAFF-V471F GSFSGTFYKGG  | 47  | 7     |
| >BRAFF-V471F GSFSGTVYKGG  | 29    | >BRAFF-V471F GSFSGTFYKGG  | 40  | 11    |
| >BRAFF-V471F GSFSGTVYKGG  | 90    | >BRAFF-V471F GSFSGTFYKGG  | 49  | 41    |
| >BRAFF-V471F GSFSGTVYKGG  | 103   | >BRAFF-V471F GSFSGTFYKGG  | 70  | 33    |
| >BRAFF-V471F GSFSGTVYK    | 74    | >BRAFF-V471F GSFSGTFYK    | 52  | 22    |
| >BRAFF-V471F GSFSGTVYKGG  | 141   | >BRAFF-V471F GSFSGTFYKGG  | 71  | 70    |
| >BRAFF-V471F GSGFSGTVYK   | 540   | >BRAFF-V471F GSGFSGTFYK   | 293 | 247   |
| >BRAFF-V471F GSGFSGTVYK   | 41    | >BRAFF-V471F GSGFSGTFYK   | 14  | 27    |
| >BRAFF-V471F GSGFSGTVYKGG | 638   | >BRAFF-V471F GSGFSGTFYKGG | 318 | 320   |
| >BRAFF-V471F GSGFSGTVY    | 910   | >BRAFF-V471F GSGFSGTFY    | 132 | 778   |
| >BRAFF-V471F GSGFSGTVYK   | 331   | >BRAFF-V471F GSGFSGTFYK   | 288 | 43    |
| >BRAFF-V471F GSGFSGTVY    | 89    | >BRAFF-V471F GSGFSGTFY    | 36  | 53    |
| >BRAFF-V471F GSGFSGTVYK   | 2906  | >BRAFF-V471F GSGFSGTFYK   | 475 | 2431  |
| >BRAFF-V471F GSGFSGTVYK   | 290   | >BRAFF-V471F GSGFSGTFYK   | 136 | 154   |
| >BRAFF-V471F GSGFSGTVY    | 2875  | >BRAFF-V471F GSGFSGTFY    | 399 | 2476  |
| >BRAFF-V471F GSGFSGTVY    | 226   | >BRAFF-V471F GSGFSGTFY    | 919 | 693   |
| >BRAFF-V471F GSGFSGTVYK   | 438   | >BRAFF-V471F GSGFSGTFYK   | 202 | 236   |
| >BRAFF-V471F GSGSFGTVYK   | 46    | >BRAFF-V471F GSGSFGTFYK   | 54  | 8     |
| >BRAFF-V471F GSGSFGTVY    | 4344  | >BRAFF-V471F GSGSFGTFY    | 427 | 3917  |
| >BRAFF-V471F GSGSFGTVYK   | 25    | >BRAFF-V471F GSGSFGTFYK   | 17  | 8     |
| >BRAFF-V471F GSGSFGTVY    | 584   | >BRAFF-V471F GSGSFGTFY    | 77  | 507   |
| >BRAFF-V471F GSGSFGTVY    | 172   | >BRAFF-V471F GSGSFGTFY    | 72  | 100   |
| >BRAFF-V471F GSGSFGTVYK   | 212   | >BRAFF-V471F GSGSFGTFYK   | 156 | 56    |
| >BRAFF-V471F GSGSFGTV     | 10604 | >BRAFF-V471F GSGSFGTF     | 259 | 10345 |
| >BRAFF-V471F GSGSFGTVY    | 86    | >BRAFF-V471F GSGSFGTFY    | 434 | 348   |
| >BRAFF-V471F GSGSFGTV     | 8202  | >BRAFF-V471F GSGSFGTF     | 417 | 7785  |
| >BRAFF-V471F GSGSFGTVY    | 197   | >BRAFF-V471F GSGSFGTFY    | 480 | 283   |
| >BRAFF-V471F GSGSFGTV     | 13346 | >BRAFF-V471F GSGSFGTF     | 60  | 13286 |
| >BRAFF-V471F GSGSFGTVY    | 154   | >BRAFF-V471F GSGSFGTFY    | 218 | 64    |
| >BRAFF-V471F GSGSFGTV     | 6073  | >BRAFF-V471F GSGSFGTF     | 315 | 5758  |
| >BRAFF-V471F GSGSFGTVY    | 4     | >BRAFF-V471F GSGSFGTFY    | 5   | 1     |
| >BRAFF-V471F GSGSFGTVYK   | 1953  | >BRAFF-V471F GSGSFGTFYK   | 498 | 1455  |
| >BRAFF-V471F GSGSFGTVYK   | 241   | >BRAFF-V471F GSGSFGTFYK   | 159 | 82    |
| >BRAFF-V471F IGSGSFGTVYI  | 304   | >BRAFF-V471F IGSGSFGTFYI  | 221 | 83    |
| >BRAFF-V471F IGSGSFGTVYI  | 214   | >BRAFF-V471F IGSGSFGTFYI  | 84  | 130   |
| >BRAFF-V471F IGSGSFGTVY   | 96    | >BRAFF-V471F IGSGSFGTFY   | 37  | 59    |
| >BRAFF-V471F IGSGSFGTVY   | 370   | >BRAFF-V471F IGSGSFGTFY   | 87  | 283   |
| >BRAFF-V471F IGSGSFGTVYI  | 762   | >BRAFF-V471F IGSGSFGTFYI  | 443 | 319   |
| >BRAFF-V471F IGSGSFGTV    | 11441 | >BRAFF-V471F IGSGSFGTF    | 290 | 11151 |
| >BRAFF-V471F IGSGSFGTVY   | 146   | >BRAFF-V471F IGSGSFGTFY   | 474 | 328   |

|                          |       |                          |       |       |
|--------------------------|-------|--------------------------|-------|-------|
| >BRAFF-V471F IGSGSFGTV   | 14509 | >BRAFF-V471F IGSGSFGTF   | 291   | 14218 |
| >BRAFF-V471F IGSGSFGTV   | 1320  | >BRAFF-V471F IGSGSFGTF   | 67    | 1253  |
| >BRAFF-V471F IGSGSFGTVY  | 611   | >BRAFF-V471F IGSGSFGTFY  | 243   | 368   |
| >BRAFF-V471F RIGSGSFGTV  | 163   | >BRAFF-V471F RIGSGSFGTF  | 13254 | 13091 |
| >BRAFF-V471F RIGSGSFGTV  | 31    | >BRAFF-V471F RIGSGSFGTF  | 12565 | 12534 |
| >BRAFF-V471F RIGSGSFGTV  | 19    | >BRAFF-V471F RIGSGSFGTF  | 11185 | 11166 |
| >BRAFF-V471F RIGSGSFGTV  | 163   | >BRAFF-V471F RIGSGSFGTF  | 17115 | 16952 |
| >BRAFF-V471F RIGSGSFGTV  | 69    | >BRAFF-V471F RIGSGSFGTF  | 19996 | 19927 |
| >BRAFF-V471F RIGSGSFGTV  | 256   | >BRAFF-V471F RIGSGSFGTF  | 19683 | 19427 |
| >BRAFF-V471F RIGSGSFGTV  | 14    | >BRAFF-V471F RIGSGSFGTF  | 22219 | 22205 |
| >BRAFF-V471F RIGSGSFGTV' | 468   | >BRAFF-V471F RIGSGSFGTF\ | 110   | 358   |
| >BRAFF-V471F RIGSGSFGTV' | 1581  | >BRAFF-V471F RIGSGSFGTF\ | 231   | 1350  |
| >BRAFF-V471F RIGSGSFGTV  | 15056 | >BRAFF-V471F RIGSGSFGTF  | 220   | 14836 |
| >BRAFF-V471F RIGSGSFGTV' | 215   | >BRAFF-V471F RIGSGSFGTF\ | 46    | 169   |
| >BRAFF-V471F RIGSGSFGTV' | 61    | >BRAFF-V471F RIGSGSFGTF\ | 31    | 30    |
| >BRAFF-V471F RIGSGSFGTV  | 1589  | >BRAFF-V471F RIGSGSFGTF  | 106   | 1483  |
| >BRAFF-V471F RIGSGSFGTV  | 327   | >BRAFF-V471F RIGSGSFGTF  | 26726 | 26399 |
| >BRAFF-V471F RIGSGSFGTV' | 30    | >BRAFF-V471F RIGSGSFGTF\ | 8     | 22    |
| >BRAFF-V471F RIGSGSFGTV  | 2196  | >BRAFF-V471F RIGSGSFGTF  | 45    | 2151  |
| >BRAFF-V471F RIGSGSFGTV' | 50    | >BRAFF-V471F RIGSGSFGTF\ | 92    | 42    |
| >BRAFF-V471F RIGSGSFGTV  | 9676  | >BRAFF-V471F RIGSGSFGTF  | 473   | 9203  |
| >BRAFF-V471F RIGSGSFGTV' | 451   | >BRAFF-V471F RIGSGSFGTF\ | 810   | 359   |
| >BRAFF-V471F RIGSGSFGTV  | 13356 | >BRAFF-V471F RIGSGSFGTF  | 215   | 13141 |
| >BRAFF-V471F RIGSGSFGTV' | 451   | >BRAFF-V471F RIGSGSFGTF\ | 566   | 115   |
| >BRAFF-V471F RIGSGSFGTV  | 5474  | >BRAFF-V471F RIGSGSFGTF  | 276   | 5198  |
| >BRAFF-V471F RIGSGSFGTV' | 77    | >BRAFF-V471F RIGSGSFGTF\ | 102   | 25    |
| >BRAFF-V590I VKIGDFGLAT  | 144   | >BRAFF-V590I IKIGDFGLATV | 122   | 22    |
| >BRAFF-V590I VKIGDFGL    | 1129  | >BRAFF-V590I IKIGDFGL    | 485   | 644   |
| >BRAFF-V590I VKIGDFGLAT  | 835   | >BRAFF-V590I IKIGDFGLATV | 366   | 469   |
| >BRAFF-V590I LTVKIGDFGL  | 537   | >BRAFF-V590I LTIKIGDFGL  | 274   | 263   |
| >BRAFF-V590I LTVKIGDFGL  | 354   | >BRAFF-V590I LTIKIGDFGL  | 219   | 135   |
| >BRAFF-V590I LTVKIGDF    | 154   | >BRAFF-V590I LTIKIGDF    | 66    | 88    |
| >BRAFF-V590I LTVKIGDFGL/ | 229   | >BRAFF-V590I LTIKIGDFGLA | 135   | 94    |
| >BRAFF-V590I LTVKIGDF    | 899   | >BRAFF-V590I LTIKIGDF    | 384   | 515   |
| >BRAFF-V590I LTVKIGDF    | 13    | >BRAFF-V590I LTIKIGDF    | 14    | 1     |
| >BRAFF-V590I LTVKIGDFGL  | 24    | >BRAFF-V590I LTIKIGDFGL  | 25    | 1     |
| >BRAFF-V590I LTVKIGDFGL  | 424   | >BRAFF-V590I LTIKIGDFGL  | 842   | 418   |
| >BRAFF-V590I LTVKIGDF    | 118   | >BRAFF-V590I LTIKIGDF    | 176   | 58    |
| >BRAFF-V590I LTVKIGDFGL/ | 380   | >BRAFF-V590I LTIKIGDFGLA | 589   | 209   |
| >BRAFF-V590I DLTVKIGDFG  | 205   | >BRAFF-V590I DLTIKIGDFGL | 149   | 56    |
| >BRAFF-V590I HEDLTVKI    | 12    | >BRAFF-V590I HEDLTIKI    | 12    | 0     |
| >BRAFF-V590I HEDLTVKI    | 114   | >BRAFF-V590I HEDLTIKI    | 90    | 24    |
| >BRAFF-V590I HEDLTVKI    | 157   | >BRAFF-V590I HEDLTIKI    | 422   | 265   |

|                           |      |                           |       |       |
|---------------------------|------|---------------------------|-------|-------|
| >BRAFF-V590I FLHEDLTV     | 9    | >BRAFF-V590I FLHEDLTI     | 16    | 7     |
| >BRAFF-V590I FLHEDLTVKI   | 66   | >BRAFF-V590I FLHEDLTIKI   | 35    | 31    |
| >BRAFF-V590I FLHEDLTV     | 6    | >BRAFF-V590I FLHEDLTI     | 16    | 10    |
| >BRAFF-V590I FLHEDLTVKI   | 14   | >BRAFF-V590I FLHEDLTIKI   | 11    | 3     |
| >BRAFF-V590I FLHEDLTV     | 3    | >BRAFF-V590I FLHEDLTI     | 6     | 3     |
| >BRAFF-V590I FLHEDLTVK    | 332  | >BRAFF-V590I FLHEDLTIK    | 258   | 74    |
| >BRAFF-V590I FLHEDLTVKI   | 24   | >BRAFF-V590I FLHEDLTIKI   | 22    | 2     |
| >BRAFF-V590I FLHEDLTVKIC  | 334  | >BRAFF-V590I FLHEDLTIKIG  | 356   | 22    |
| >BRAFF-V590I FLHEDLTV     | 7    | >BRAFF-V590I FLHEDLTI     | 29    | 22    |
| >BRAFF-V590I FLHEDLTVKI   | 101  | >BRAFF-V590I FLHEDLTIKI   | 68    | 33    |
| >BRAFF-V590I FLHEDLTV     | 1    | >BRAFF-V590I FLHEDLTI     | 3     | 2     |
| >BRAFF-V590I FLHEDLTVK    | 368  | >BRAFF-V590I FLHEDLTIK    | 1279  | 911   |
| >BRAFF-V590I FLHEDLTVKI   | 2    | >BRAFF-V590I FLHEDLTIKI   | 2     | 0     |
| >BRAFF-V590I FLHEDLTV     | 3    | >BRAFF-V590I FLHEDLTI     | 4     | 1     |
| >BRAFF-V590I FLHEDLTVKI   | 4    | >BRAFF-V590I FLHEDLTIKI   | 4     | 0     |
| >BRAFF-V590I FLHEDLTV     | 4    | >BRAFF-V590I FLHEDLTI     | 8     | 4     |
| >BRAFF-V590I FLHEDLTVKI   | 7    | >BRAFF-V590I FLHEDLTIKI   | 7     | 0     |
| >BRAFF-V590I FLHEDLTV     | 6    | >BRAFF-V590I FLHEDLTI     | 53    | 47    |
| >BRAFF-V590I FLHEDLTVKI   | 13   | >BRAFF-V590I FLHEDLTIKI   | 16    | 3     |
| >BRAFF-V590I FLHEDLTV     | 1    | >BRAFF-V590I FLHEDLTI     | 3     | 2     |
| >BRAFF-V590I FLHEDLTVK    | 39   | >BRAFF-V590I FLHEDLTIK    | 63    | 24    |
| >BRAFF-V590I FLHEDLTVKI   | 2    | >BRAFF-V590I FLHEDLTIKI   | 2     | 0     |
| >BRAFF-V590I FLHEDLTVKI   | 414  | >BRAFF-V590I FLHEDLTIKI   | 420   | 6     |
| >BRAFF-V590I IFLHEDLTV    | 932  | >BRAFF-V590I IFLHEDLTI    | 57    | 875   |
| >BRAFF-V590I IFLHEDLTVKI  | 68   | >BRAFF-V590I IFLHEDLTIKI  | 115   | 47    |
| >BRAFF-V590I IFLHEDLTV    | 3123 | >BRAFF-V590I IFLHEDLTI    | 241   | 2882  |
| >BRAFF-V590I IFLHEDLTV    | 3970 | >BRAFF-V590I IFLHEDLTI    | 126   | 3844  |
| >BRAFF-V590I IFLHEDLTVKI  | 91   | >BRAFF-V590I IFLHEDLTIKI  | 132   | 41    |
| >BRAFF-V590I NIFLHEDLTV   | 106  | >BRAFF-V590I NIFLHEDLTI   | 532   | 426   |
| >BRAFF-V590I NIFLHEDLTV   | 125  | >BRAFF-V590I NIFLHEDLTI   | 226   | 101   |
| >BRAFF-V590I NIFLHEDLTV   | 99   | >BRAFF-V590I NIFLHEDLTI   | 347   | 248   |
| >BRAFF-V590I NIFLHEDLTV   | 155  | >BRAFF-V590I NIFLHEDLTI   | 601   | 446   |
| >BRAFF-V590I NIFLHEDLTV   | 353  | >BRAFF-V590I NIFLHEDLTI   | 4047  | 3694  |
| >BRAFF-V590I NIFLHEDLTV   | 473  | >BRAFF-V590I NIFLHEDLTI   | 8844  | 8371  |
| >BRAFF-V590I NIFLHEDLTV   | 225  | >BRAFF-V590I NIFLHEDLTI   | 13777 | 13552 |
| >BRAFF-V590I NIFLHEDLTVK  | 333  | >BRAFF-V590I NIFLHEDLTIK  | 344   | 11    |
| >BRAFF-V590I NIFLHEDLTVKI | 61   | >BRAFF-V590I NIFLHEDLTIKI | 63    | 2     |
| >BRAFF-V600/VKSRWVSGSH    | 9    | >BRAFF-V600/VKSRWVSGSH    | 7     | 2     |
| >BRAFF-V600/VKIGDFGLAT    | 144  | >BRAFF-V600/VKIGDFGLAT    | 1498  | 1354  |
| >BRAFF-V600/ATVKSRWVSG    | 451  | >BRAFF-V600/ATAKSRWVSG    | 376   | 75    |
| >BRAFF-V600/LATVKSRW      | 36   | >BRAFF-V600/LATAKSRW      | 26    | 10    |
| >BRAFF-V600/LATVKSRW      | 86   | >BRAFF-V600/LATAKSRW      | 106   | 20    |
| >BRAFF-V600/LATVKSRW      | 73   | >BRAFF-V600/LATAKSRW      | 66    | 7     |

|                         |     |                         |       |       |
|-------------------------|-----|-------------------------|-------|-------|
| >BRAFF-V600/LATVKSRW    | 22  | >BRAFF-V600/LATAKSRW    | 19    | 3     |
| >BRAFF-V600/LATVKSRW    | 172 | >BRAFF-V600/LATAKSRW    | 263   | 91    |
| >BRAFF-V600/LATVKSRW    | 130 | >BRAFF-V600/LATAKSRW    | 115   | 15    |
| >BRAFF-V600/GLATVKSRW   | 242 | >BRAFF-V600/GLATAKSRW   | 804   | 562   |
| >BRAFF-V600/FGLATVKSRW  | 98  | >BRAFF-V600/FGLATAKSRW  | 60    | 38    |
| >BRAFF-V600/FGLATVKSRW  | 499 | >BRAFF-V600/FGLATAKSRW  | 421   | 78    |
| >BRAFF-V600/FGLATVKSRW  | 45  | >BRAFF-V600/FGLATAKSRW  | 92    | 47    |
| >BRAFF-V600/FGLATVKSRW  | 215 | >BRAFF-V600/FGLATAKSRW  | 419   | 204   |
| >BRAFF-V600/DFGLATVKSR  | 205 | >BRAFF-V600/DFGLATAKSR  | 183   | 22    |
| >BRAFF-V600/DFGLATVKSR  | 246 | >BRAFF-V600/DFGLATAKSR  | 368   | 122   |
| >BRAFF-V600/GDFGLATV    | 393 | >BRAFF-V600/GDFGLATA    | 492   | 99    |
| >BRAFF-V600/GDFGLATV    | 227 | >BRAFF-V600/GDFGLATA    | 7198  | 6971  |
| >BRAFF-V600/IGDFGLATV   | 253 | >BRAFF-V600/IGDFGLATA   | 2371  | 2118  |
| >BRAFF-V600/KIGDFGLATV  | 53  | >BRAFF-V600/KIGDFGLATA  | 605   | 552   |
| >BRAFF-V600/KIGDFGLATV  | 34  | >BRAFF-V600/KIGDFGLATA  | 182   | 148   |
| >BRAFF-V600/KIGDFGLATV  | 12  | >BRAFF-V600/KIGDFGLATA  | 43    | 31    |
| >BRAFF-V600/KIGDFGLATV  | 59  | >BRAFF-V600/KIGDFGLATA  | 239   | 180   |
| >BRAFF-V600/KIGDFGLATV  | 4   | >BRAFF-V600/KIGDFGLATA  | 97    | 93    |
| >BRAFF-V600/KIGDFGLATV  | 15  | >BRAFF-V600/KIGDFGLATA  | 425   | 410   |
| >BRAFF-V600/KIGDFGLATV  | 16  | >BRAFF-V600/KIGDFGLATA  | 952   | 936   |
| >BRAFF-V600/KIGDFGLATV  | 30  | >BRAFF-V600/KIGDFGLATA  | 2737  | 2707  |
| >BRAFF-V600/KIGDFGLATV  | 4   | >BRAFF-V600/KIGDFGLATA  | 141   | 137   |
| >BRAFF-V600/KIGDFGLATV  | 129 | >BRAFF-V600/KIGDFGLATA  | 108   | 21    |
| >BRAFF-V600/KIGDFGLATV  | 57  | >BRAFF-V600/KIGDFGLATA  | 43    | 14    |
| >BRAFF-V600/KIGDFGLATV  | 563 | >BRAFF-V600/KIGDFGLATA  | 362   | 201   |
| >BRAFF-V600/KIGDFGLATV  | 132 | >BRAFF-V600/KIGDFGLATA  | 131   | 1     |
| >BRAFF-V600I VKSRWSGSH  | 9   | >BRAFF-V600I DKSRWSGSH  | 157   | 148   |
| >BRAFF-V600I VKIGDFGLAT | 144 | >BRAFF-V600I VKIGDFGLAT | 25183 | 25039 |
| >BRAFF-V600I ATVKSRWSG: | 451 | >BRAFF-V600I ATDKSRWSG  | 1227  | 776   |
| >BRAFF-V600I LATVKSRW   | 36  | >BRAFF-V600I LATDKSRW   | 36    | 0     |
| >BRAFF-V600I LATVKSRW   | 86  | >BRAFF-V600I LATDKSRW   | 75    | 11    |
| >BRAFF-V600I LATVKSRW   | 73  | >BRAFF-V600I LATDKSRW   | 123   | 50    |
| >BRAFF-V600I LATVKSRW   | 22  | >BRAFF-V600I LATDKSRW   | 36    | 14    |
| >BRAFF-V600I LATVKSRW   | 172 | >BRAFF-V600I LATDKSRW   | 138   | 34    |
| >BRAFF-V600I LATVKSRW   | 130 | >BRAFF-V600I LATDKSRW   | 99    | 31    |
| >BRAFF-V600I GLATVKSRW  | 242 | >BRAFF-V600I GLATDKSRW  | 1283  | 1041  |
| >BRAFF-V600I FGLATVKSRW | 98  | >BRAFF-V600I FGLATDKSRW | 155   | 57    |
| >BRAFF-V600I FGLATVKSRW | 499 | >BRAFF-V600I FGLATDKSRW | 627   | 128   |
| >BRAFF-V600I FGLATVKSRW | 45  | >BRAFF-V600I FGLATDKSRW | 114   | 69    |
| >BRAFF-V600I FGLATVKSRW | 215 | >BRAFF-V600I FGLATDKSRW | 276   | 61    |
| >BRAFF-V600I DFGLATVKSR | 205 | >BRAFF-V600I DFGLATDKSR | 351   | 146   |
| >BRAFF-V600I DFGLATVKSR | 246 | >BRAFF-V600I DFGLATDKSR | 605   | 359   |
| >BRAFF-V600I GDFGLATV   | 393 | >BRAFF-V600I GDFGLATD   | 11663 | 11270 |

|                          |     |                          |       |       |
|--------------------------|-----|--------------------------|-------|-------|
| >BRAFF-V600I GDFGLATV    | 227 | >BRAFF-V600I GDFGLATD    | 26627 | 26400 |
| >BRAFF-V600I IGDFGLATV   | 253 | >BRAFF-V600I IGDFGLATD   | 23484 | 23231 |
| >BRAFF-V600I KIGDFGLATV  | 53  | >BRAFF-V600I KIGDFGLATD  | 19419 | 19366 |
| >BRAFF-V600I KIGDFGLATV  | 34  | >BRAFF-V600I KIGDFGLATD  | 12462 | 12428 |
| >BRAFF-V600I KIGDFGLATV  | 12  | >BRAFF-V600I KIGDFGLATD  | 9150  | 9138  |
| >BRAFF-V600I KIGDFGLATV  | 59  | >BRAFF-V600I KIGDFGLATD  | 15907 | 15848 |
| >BRAFF-V600I KIGDFGLATV  | 4   | >BRAFF-V600I KIGDFGLATD  | 14276 | 14272 |
| >BRAFF-V600I KIGDFGLATV  | 15  | >BRAFF-V600I KIGDFGLATD  | 17111 | 17096 |
| >BRAFF-V600I KIGDFGLATV  | 16  | >BRAFF-V600I KIGDFGLATD  | 22591 | 22575 |
| >BRAFF-V600I KIGDFGLATV  | 30  | >BRAFF-V600I KIGDFGLATD  | 24560 | 24530 |
| >BRAFF-V600I KIGDFGLATV  | 4   | >BRAFF-V600I KIGDFGLATD  | 22665 | 22661 |
| >BRAFF-V600I KIGDFGLATV  | 129 | >BRAFF-V600I KIGDFGLATD  | 193   | 64    |
| >BRAFF-V600I KIGDFGLATV  | 57  | >BRAFF-V600I KIGDFGLATD  | 106   | 49    |
| >BRAFF-V600I KIGDFGLATV  | 132 | >BRAFF-V600I KIGDFGLATD  | 268   | 136   |
| >BRAFF-V600I VKSRWVSGSHI | 9   | >BRAFF-V600I EKSRWVSGSHI | 38    | 29    |
| >BRAFF-V600I VKIGDFGLAT  | 144 | >BRAFF-V600I VKIGDFGLAT  | 21389 | 21245 |
| >BRAFF-V600I ATVKSRWVSGI | 451 | >BRAFF-V600I ATEKSRWVSGI | 565   | 114   |
| >BRAFF-V600I LATVKSRW    | 36  | >BRAFF-V600I LATEKSRW    | 21    | 15    |
| >BRAFF-V600I LATVKSRW    | 86  | >BRAFF-V600I LATEKSRW    | 61    | 25    |
| >BRAFF-V600I LATVKSRW    | 73  | >BRAFF-V600I LATEKSRW    | 83    | 10    |
| >BRAFF-V600I LATVKSRW    | 22  | >BRAFF-V600I LATEKSRW    | 29    | 7     |
| >BRAFF-V600I LATVKSRW    | 172 | >BRAFF-V600I LATEKSRW    | 147   | 25    |
| >BRAFF-V600I LATVKSRW    | 130 | >BRAFF-V600I LATEKSRW    | 141   | 11    |
| >BRAFF-V600I GLATVKSRW   | 242 | >BRAFF-V600I GLATEKSRW   | 1920  | 1678  |
| >BRAFF-V600I FGLATVKSRM  | 98  | >BRAFF-V600I FGLATEKSRM  | 143   | 45    |
| >BRAFF-V600I FGLATVKSRM  | 499 | >BRAFF-V600I FGLATEKSRM  | 566   | 67    |
| >BRAFF-V600I FGLATVKSRM  | 45  | >BRAFF-V600I FGLATEKSRM  | 138   | 93    |
| >BRAFF-V600I FGLATVKSRM  | 215 | >BRAFF-V600I FGLATEKSRM  | 527   | 312   |
| >BRAFF-V600I DFGLATVKSR  | 205 | >BRAFF-V600I DFGLATEKSR  | 311   | 106   |
| >BRAFF-V600I DFGLATVKSR  | 246 | >BRAFF-V600I DFGLATEKSR  | 688   | 442   |
| >BRAFF-V600I GDFGLATV    | 393 | >BRAFF-V600I GDFGLATE    | 9605  | 9212  |
| >BRAFF-V600I GDFGLATV    | 227 | >BRAFF-V600I GDFGLATE    | 26274 | 26047 |
| >BRAFF-V600I IGDFGLATV   | 253 | >BRAFF-V600I IGDFGLATE   | 20693 | 20440 |
| >BRAFF-V600I KIGDFGLATV  | 53  | >BRAFF-V600I KIGDFGLATE  | 16104 | 16051 |
| >BRAFF-V600I KIGDFGLATV  | 34  | >BRAFF-V600I KIGDFGLATE  | 10966 | 10932 |
| >BRAFF-V600I KIGDFGLATV  | 12  | >BRAFF-V600I KIGDFGLATE  | 8846  | 8834  |
| >BRAFF-V600I KIGDFGLATV  | 59  | >BRAFF-V600I KIGDFGLATE  | 15614 | 15555 |
| >BRAFF-V600I KIGDFGLATV  | 4   | >BRAFF-V600I KIGDFGLATE  | 15090 | 15086 |
| >BRAFF-V600I KIGDFGLATV  | 15  | >BRAFF-V600I KIGDFGLATE  | 15489 | 15474 |
| >BRAFF-V600I KIGDFGLATV  | 16  | >BRAFF-V600I KIGDFGLATE  | 22163 | 22147 |
| >BRAFF-V600I KIGDFGLATV  | 30  | >BRAFF-V600I KIGDFGLATE  | 23611 | 23581 |
| >BRAFF-V600I KIGDFGLATV  | 4   | >BRAFF-V600I KIGDFGLATE  | 17166 | 17162 |
| >BRAFF-V600I KIGDFGLATV  | 129 | >BRAFF-V600I KIGDFGLATEI | 137   | 8     |



|                         |      |                          |       |       |
|-------------------------|------|--------------------------|-------|-------|
| >BRAFF-V600f KIGDFGLATV | 57   | >BRAFF-V600f KIGDFGLATEI | 40    | 17    |
| >BRAFF-V600f KIGDFGLATV | 132  | >BRAFF-V600f KIGDFGLATEI | 220   | 88    |
| >BRAFF-V600f VKSRWSGSH  | 9    | >BRAFF-V600f GKSRWSGSH   | 25    | 16    |
| >BRAFF-V600f VKIGDFGLAT | 144  | >BRAFF-V600f VKIGDFGLATI | 16261 | 16117 |
| >BRAFF-V600f ATVKSRWSG: | 451  | >BRAFF-V600f ATGKSRWSG   | 1481  | 1030  |
| >BRAFF-V600f LATVKSRW   | 36   | >BRAFF-V600f LATGKSRW    | 34    | 2     |
| >BRAFF-V600f LATVKSRW   | 86   | >BRAFF-V600f LATGKSRW    | 97    | 11    |
| >BRAFF-V600f LATVKSRW   | 73   | >BRAFF-V600f LATGKSRW    | 70    | 3     |
| >BRAFF-V600f LATVKSRW   | 22   | >BRAFF-V600f LATGKSRW    | 27    | 5     |
| >BRAFF-V600f LATVKSRW   | 172  | >BRAFF-V600f LATGKSRW    | 216   | 44    |
| >BRAFF-V600f LATVKSRW   | 130  | >BRAFF-V600f LATGKSRW    | 73    | 57    |
| >BRAFF-V600f GLATVKSRW  | 242  | >BRAFF-V600f GLATGKSRW   | 475   | 233   |
| >BRAFF-V600f FGLATVKSRV | 98   | >BRAFF-V600f FGLATGKSRV  | 71    | 27    |
| >BRAFF-V600f FGLATVKSRV | 499  | >BRAFF-V600f FGLATGKSRV  | 879   | 380   |
| >BRAFF-V600f FGLATVKSRV | 45   | >BRAFF-V600f FGLATGKSRV  | 167   | 122   |
| >BRAFF-V600f FGLATVKSRV | 215  | >BRAFF-V600f FGLATGKSRV  | 591   | 376   |
| >BRAFF-V600f DFGLATVKSR | 205  | >BRAFF-V600f DFGLATGKSR  | 183   | 22    |
| >BRAFF-V600f DFGLATVKSR | 246  | >BRAFF-V600f DFGLATGKSR  | 779   | 533   |
| >BRAFF-V600f GDFGLATV   | 393  | >BRAFF-V600f GDFGLATG    | 15285 | 14892 |
| >BRAFF-V600f GDFGLATV   | 227  | >BRAFF-V600f GDFGLATG    | 27434 | 27207 |
| >BRAFF-V600f IGDFGLATV  | 253  | >BRAFF-V600f IGDFGLATG   | 16468 | 16215 |
| >BRAFF-V600f KIGDFGLATV | 53   | >BRAFF-V600f KIGDFGLATG  | 12035 | 11982 |
| >BRAFF-V600f KIGDFGLATV | 34   | >BRAFF-V600f KIGDFGLATG  | 7385  | 7351  |
| >BRAFF-V600f KIGDFGLATV | 12   | >BRAFF-V600f KIGDFGLATG  | 6102  | 6090  |
| >BRAFF-V600f KIGDFGLATV | 59   | >BRAFF-V600f KIGDFGLATG  | 11560 | 11501 |
| >BRAFF-V600f KIGDFGLATV | 4    | >BRAFF-V600f KIGDFGLATG  | 5539  | 5535  |
| >BRAFF-V600f KIGDFGLATV | 15   | >BRAFF-V600f KIGDFGLATG  | 10034 | 10019 |
| >BRAFF-V600f KIGDFGLATV | 16   | >BRAFF-V600f KIGDFGLATG  | 18547 | 18531 |
| >BRAFF-V600f KIGDFGLATV | 30   | >BRAFF-V600f KIGDFGLATG  | 21611 | 21581 |
| >BRAFF-V600f KIGDFGLATV | 4    | >BRAFF-V600f KIGDFGLATG  | 16083 | 16079 |
| >BRAFF-V600f KIGDFGLATV | 129  | >BRAFF-V600f KIGDFGLATG  | 125   | 4     |
| >BRAFF-V600f KIGDFGLATV | 57   | >BRAFF-V600f KIGDFGLATG  | 57    | 0     |
| >BRAFF-V600f KIGDFGLATV | 132  | >BRAFF-V600f KIGDFGLATG  | 112   | 20    |
| >BRAFF-V600f VKSRWSGSH  | 9    | >BRAFF-V600f KKSRSWSGSH  | 6     | 3     |
| >BRAFF-V600f VKIGDFGLAT | 144  | >BRAFF-V600f VKIGDFGLAT  | 22343 | 22199 |
| >BRAFF-V600f ATVKSRWS   | 7850 | >BRAFF-V600f ATKKSRSWS   | 165   | 7685  |
| >BRAFF-V600f ATVKSRWSG  | 3991 | >BRAFF-V600f ATKKSRSWSG  | 41    | 3950  |
| >BRAFF-V600f ATVKSRWSG: | 5329 | >BRAFF-V600f ATKKSRSWSG: | 74    | 5255  |
| >BRAFF-V600f ATVKSRWSG: | 7709 | >BRAFF-V600f ATKKSRSWSG: | 175   | 7534  |
| >BRAFF-V600f ATVKSRWSG: | 451  | >BRAFF-V600f ATKKSRSWSG: | 370   | 81    |
| >BRAFF-V600f LATVKSRW   | 36   | >BRAFF-V600f LATKKSRSW   | 40    | 4     |
| >BRAFF-V600f LATVKSRW   | 86   | >BRAFF-V600f LATKKSRSW   | 107   | 21    |
| >BRAFF-V600f LATVKSRW   | 73   | >BRAFF-V600f LATKKSRSW   | 86    | 13    |

|                         |       |                         |       |       |
|-------------------------|-------|-------------------------|-------|-------|
| >BRAFF-V600I LATVKSRW   | 22    | >BRAFF-V600I LATKKSrw   | 40    | 18    |
| >BRAFF-V600I LATVKSRW   | 172   | >BRAFF-V600I LATKKSrw   | 237   | 65    |
| >BRAFF-V600I LATVKSRW   | 130   | >BRAFF-V600I LATKKSrw   | 180   | 50    |
| >BRAFF-V600I GLATVKSRW  | 242   | >BRAFF-V600I GLATKKSrw  | 1703  | 1461  |
| >BRAFF-V600I FGLATVKSRW | 98    | >BRAFF-V600I FGLATKKSrw | 146   | 48    |
| >BRAFF-V600I FGLATVKSRW | 499   | >BRAFF-V600I FGLATKKSrw | 941   | 442   |
| >BRAFF-V600I FGLATVKSRW | 45    | >BRAFF-V600I FGLATKKSrw | 268   | 223   |
| >BRAFF-V600I FGLATVKSRW | 215   | >BRAFF-V600I FGLATKKSrw | 918   | 703   |
| >BRAFF-V600I DFGLATVKSR | 205   | >BRAFF-V600I DFGLATKKSr | 129   | 76    |
| >BRAFF-V600I DFGLATVKSR | 246   | >BRAFF-V600I DFGLATKKSr | 407   | 161   |
| >BRAFF-V600I GDFGLATV   | 393   | >BRAFF-V600I GDFGLATK   | 8401  | 8008  |
| >BRAFF-V600I GDFGLATV   | 227   | >BRAFF-V600I GDFGLATK   | 22932 | 22705 |
| >BRAFF-V600I IGDFGLATV  | 253   | >BRAFF-V600I IGDFGLATK  | 22462 | 22209 |
| >BRAFF-V600I KIGDFGLATV | 53    | >BRAFF-V600I KIGDFGLATK | 15809 | 15756 |
| >BRAFF-V600I KIGDFGLATV | 34    | >BRAFF-V600I KIGDFGLATK | 9883  | 9849  |
| >BRAFF-V600I KIGDFGLATV | 12    | >BRAFF-V600I KIGDFGLATK | 6095  | 6083  |
| >BRAFF-V600I KIGDFGLATV | 59    | >BRAFF-V600I KIGDFGLATK | 13371 | 13312 |
| >BRAFF-V600I KIGDFGLATV | 4     | >BRAFF-V600I KIGDFGLATK | 10165 | 10161 |
| >BRAFF-V600I KIGDFGLATV | 15    | >BRAFF-V600I KIGDFGLATK | 16818 | 16803 |
| >BRAFF-V600I KIGDFGLATV | 16    | >BRAFF-V600I KIGDFGLATK | 19745 | 19729 |
| >BRAFF-V600I KIGDFGLATV | 30    | >BRAFF-V600I KIGDFGLATK | 22668 | 22638 |
| >BRAFF-V600I KIGDFGLATV | 4     | >BRAFF-V600I KIGDFGLATK | 9544  | 9540  |
| >BRAFF-V600I KIGDFGLATV | 11190 | >BRAFF-V600I KIGDFGLATK | 20    | 11170 |
| >BRAFF-V600I KIGDFGLATV | 129   | >BRAFF-V600I KIGDFGLATK | 88    | 41    |
| >BRAFF-V600I KIGDFGLATV | 34840 | >BRAFF-V600I KIGDFGLATK | 120   | 34720 |
| >BRAFF-V600I KIGDFGLATV | 57    | >BRAFF-V600I KIGDFGLATK | 45    | 12    |
| >BRAFF-V600I KIGDFGLATV | 2808  | >BRAFF-V600I KIGDFGLATK | 58    | 2750  |
| >BRAFF-V600I KIGDFGLATV | 8105  | >BRAFF-V600I KIGDFGLATK | 281   | 7824  |
| >BRAFF-V600I KIGDFGLATV | 25426 | >BRAFF-V600I KIGDFGLATK | 143   | 25283 |
| >BRAFF-V600I KIGDFGLATV | 20071 | >BRAFF-V600I KIGDFGLATK | 216   | 19855 |
| >BRAFF-V600I KIGDFGLATV | 132   | >BRAFF-V600I KIGDFGLATK | 126   | 6     |
| >BRAFF-V600I VKSRWWSGSH | 9     | >BRAFF-V600I LKSRWWSGSH | 7     | 2     |
| >BRAFF-V600I TVKSRWSG   | 1738  | >BRAFF-V600I TLKSRWSG   | 269   | 1469  |
| >BRAFF-V600I VKIGDFGLAT | 144   | >BRAFF-V600I VKIGDFGLAT | 1054  | 910   |
| >BRAFF-V600I VKIGDFGLAT | 835   | >BRAFF-V600I VKIGDFGLAT | 393   | 442   |
| >BRAFF-V600I ATVKSRWSG: | 451   | >BRAFF-V600I ATLKSRWSG: | 343   | 108   |
| >BRAFF-V600I LATVKSRW   | 36    | >BRAFF-V600I LATLKSRW   | 39    | 3     |
| >BRAFF-V600I LATVKSRW   | 86    | >BRAFF-V600I LATLKSRW   | 108   | 22    |
| >BRAFF-V600I LATVKSRW   | 73    | >BRAFF-V600I LATLKSRW   | 113   | 40    |
| >BRAFF-V600I LATVKSRW   | 22    | >BRAFF-V600I LATLKSRW   | 40    | 18    |
| >BRAFF-V600I LATVKSRW   | 172   | >BRAFF-V600I LATLKSRW   | 370   | 198   |
| >BRAFF-V600I LATVKSRW   | 130   | >BRAFF-V600I LATLKSRW   | 243   | 113   |
| >BRAFF-V600I GLATVKSRW  | 242   | >BRAFF-V600I GLATLKSRW  | 222   | 20    |

|                         |      |                          |      |      |
|-------------------------|------|--------------------------|------|------|
| >BRAFF-V600I FGLATVKSRW | 98   | >BRAFF-V600I FGLATLKSRW  | 96   | 2    |
| >BRAFF-V600I FGLATVKSRW | 499  | >BRAFF-V600I FGLATLKSRW  | 647  | 148  |
| >BRAFF-V600I FGLATVKSRW | 45   | >BRAFF-V600I FGLATLKSRW  | 84   | 39   |
| >BRAFF-V600I FGLATVKSRW | 215  | >BRAFF-V600I FGLATLKSRW  | 396  | 181  |
| >BRAFF-V600I DFGLATVKSR | 205  | >BRAFF-V600I DFGLATLKSR  | 107  | 98   |
| >BRAFF-V600I DFGLATVKSR | 246  | >BRAFF-V600I DFGLATLKSR  | 295  | 49   |
| >BRAFF-V600I GDFGLATV   | 393  | >BRAFF-V600I GDFGLATL    | 122  | 271  |
| >BRAFF-V600I GDFGLATV   | 227  | >BRAFF-V600I GDFGLATL    | 1275 | 1048 |
| >BRAFF-V600I IGDFGLATV  | 253  | >BRAFF-V600I IGDFGLATL   | 1522 | 1269 |
| >BRAFF-V600I KIGDFGLATV | 53   | >BRAFF-V600I KIGDFGLATL  | 231  | 178  |
| >BRAFF-V600I KIGDFGLATV | 34   | >BRAFF-V600I KIGDFGLATL  | 34   | 0    |
| >BRAFF-V600I KIGDFGLATV | 12   | >BRAFF-V600I KIGDFGLATL  | 35   | 23   |
| >BRAFF-V600I KIGDFGLATV | 59   | >BRAFF-V600I KIGDFGLATL  | 209  | 150  |
| >BRAFF-V600I KIGDFGLATV | 4    | >BRAFF-V600I KIGDFGLATL  | 29   | 25   |
| >BRAFF-V600I KIGDFGLATV | 15   | >BRAFF-V600I KIGDFGLATL  | 90   | 75   |
| >BRAFF-V600I KIGDFGLATV | 16   | >BRAFF-V600I KIGDFGLATL  | 236  | 220  |
| >BRAFF-V600I KIGDFGLATV | 30   | >BRAFF-V600I KIGDFGLATL  | 507  | 477  |
| >BRAFF-V600I KIGDFGLATV | 4    | >BRAFF-V600I KIGDFGLATL  | 26   | 22   |
| >BRAFF-V600I KIGDFGLATV | 129  | >BRAFF-V600I KIGDFGLATLI | 71   | 58   |
| >BRAFF-V600I KIGDFGLATV | 57   | >BRAFF-V600I KIGDFGLATLI | 26   | 31   |
| >BRAFF-V600I KIGDFGLATV | 563  | >BRAFF-V600I KIGDFGLATLI | 314  | 249  |
| >BRAFF-V600I KIGDFGLATV | 509  | >BRAFF-V600I KIGDFGLATL  | 72   | 437  |
| >BRAFF-V600I KIGDFGLATV | 132  | >BRAFF-V600I KIGDFGLATLI | 108  | 24   |
| >BRAFF-V600I VKSRWSGSH  | 9    | >BRAFF-V600I MKSRWSGSH   | 5    | 4    |
| >BRAFF-V600I TVKSRWSG   | 1738 | >BRAFF-V600I TMKSRWSG    | 281  | 1457 |
| >BRAFF-V600I VKIGDFGLAT | 144  | >BRAFF-V600I VKIGDFGLAT  | 3659 | 3515 |
| >BRAFF-V600I VKIGDFGLAT | 835  | >BRAFF-V600I VKIGDFGLAT  | 216  | 619  |
| >BRAFF-V600I ATVKSRWSG: | 3708 | >BRAFF-V600I ATMKSRWSC   | 207  | 3501 |
| >BRAFF-V600I ATVKSRWSG: | 451  | >BRAFF-V600I ATMKSRWSC   | 279  | 172  |
| >BRAFF-V600I LATVKSRW   | 36   | >BRAFF-V600I LATMKSRW    | 29   | 7    |
| >BRAFF-V600I LATVKSRW   | 86   | >BRAFF-V600I LATMKSRW    | 82   | 4    |
| >BRAFF-V600I LATVKSRW   | 73   | >BRAFF-V600I LATMKSRW    | 118  | 45   |
| >BRAFF-V600I LATVKSRW   | 22   | >BRAFF-V600I LATMKSRW    | 30   | 8    |
| >BRAFF-V600I LATVKSRW   | 172  | >BRAFF-V600I LATMKSRW    | 138  | 34   |
| >BRAFF-V600I LATVKSRW   | 130  | >BRAFF-V600I LATMKSRW    | 142  | 12   |
| >BRAFF-V600I GLATVKSRW  | 242  | >BRAFF-V600I GLATMKSRW   | 292  | 50   |
| >BRAFF-V600I FGLATVKSRW | 98   | >BRAFF-V600I FGLATMKSR\  | 59   | 39   |
| >BRAFF-V600I FGLATVKSRW | 499  | >BRAFF-V600I FGLATMKSR\  | 740  | 241  |
| >BRAFF-V600I FGLATVKSRW | 45   | >BRAFF-V600I FGLATMKSR\  | 115  | 70   |
| >BRAFF-V600I FGLATVKSRW | 215  | >BRAFF-V600I FGLATMKSR\  | 343  | 128  |
| >BRAFF-V600I DFGLATVKSR | 205  | >BRAFF-V600I DFGLATMKSI  | 201  | 4    |
| >BRAFF-V600I DFGLATVKSR | 246  | >BRAFF-V600I DFGLATMKSI  | 286  | 40   |
| >BRAFF-V600I GDFGLATV   | 393  | >BRAFF-V600I GDFGLATM    | 298  | 95   |

|                         |      |                         |       |       |
|-------------------------|------|-------------------------|-------|-------|
| >BRAFF-V600f GDFGLATV   | 227  | >BRAFF-V600f GDFGLATM   | 3304  | 3077  |
| >BRAFF-V600f IGDFGLATV  | 253  | >BRAFF-V600f IGDFGLATM  | 4213  | 3960  |
| >BRAFF-V600f IGDFGLATV  | 4384 | >BRAFF-V600f IGDFGLATM  | 210   | 4174  |
| >BRAFF-V600f KIGDFGLATV | 53   | >BRAFF-V600f KIGDFGLATM | 912   | 859   |
| >BRAFF-V600f KIGDFGLATV | 34   | >BRAFF-V600f KIGDFGLATM | 142   | 108   |
| >BRAFF-V600f KIGDFGLATV | 12   | >BRAFF-V600f KIGDFGLATM | 139   | 127   |
| >BRAFF-V600f KIGDFGLATV | 59   | >BRAFF-V600f KIGDFGLATM | 734   | 675   |
| >BRAFF-V600f KIGDFGLATV | 4    | >BRAFF-V600f KIGDFGLATM | 212   | 208   |
| >BRAFF-V600f KIGDFGLATV | 15   | >BRAFF-V600f KIGDFGLATM | 901   | 886   |
| >BRAFF-V600f KIGDFGLATV | 16   | >BRAFF-V600f KIGDFGLATM | 3485  | 3469  |
| >BRAFF-V600f KIGDFGLATV | 30   | >BRAFF-V600f KIGDFGLATM | 2668  | 2638  |
| >BRAFF-V600f KIGDFGLATV | 4    | >BRAFF-V600f KIGDFGLATM | 818   | 814   |
| >BRAFF-V600f KIGDFGLATV | 129  | >BRAFF-V600f KIGDFGLATM | 100   | 29    |
| >BRAFF-V600f KIGDFGLATV | 57   | >BRAFF-V600f KIGDFGLATM | 35    | 22    |
| >BRAFF-V600f KIGDFGLATV | 509  | >BRAFF-V600f KIGDFGLATM | 354   | 155   |
| >BRAFF-V600f KIGDFGLATV | 5712 | >BRAFF-V600f KIGDFGLATM | 449   | 5263  |
| >BRAFF-V600f KIGDFGLATV | 8804 | >BRAFF-V600f KIGDFGLATM | 330   | 8474  |
| >BRAFF-V600f KIGDFGLATV | 132  | >BRAFF-V600f KIGDFGLATM | 185   | 53    |
| >BRAFF-V600f VKSRWSGSH  | 1530 | >BRAFF-V600f RKSRWSGSH  | 360   | 1170  |
| >BRAFF-V600f VKSRWSGSH  | 1640 | >BRAFF-V600f RKSRWSGSH  | 419   | 1221  |
| >BRAFF-V600f VKSRWSGSH  | 9    | >BRAFF-V600f RKSRWSGSH  | 4     | 5     |
| >BRAFF-V600f VKIGDFGLAT | 144  | >BRAFF-V600f VKIGDFGLAT | 24240 | 24096 |
| >BRAFF-V600f ATVKSRWS   | 7850 | >BRAFF-V600f ATRKSRWS   | 28    | 7822  |
| >BRAFF-V600f ATVKSRWSG  | 3991 | >BRAFF-V600f ATRKSRWSG  | 11    | 3980  |
| >BRAFF-V600f ATVKSRWSG: | 5329 | >BRAFF-V600f ATRKSRWSG: | 17    | 5312  |
| >BRAFF-V600f ATVKSRWSG: | 7709 | >BRAFF-V600f ATRKSRWSG: | 30    | 7679  |
| >BRAFF-V600f ATVKSRWSG: | 660  | >BRAFF-V600f ATRKSRWSG: | 362   | 298   |
| >BRAFF-V600f ATVKSRWSG: | 451  | >BRAFF-V600f ATRKSRWSG: | 119   | 332   |
| >BRAFF-V600f LATVKSRW   | 36   | >BRAFF-V600f LATRCSRW   | 59    | 23    |
| >BRAFF-V600f LATVKSRW   | 86   | >BRAFF-V600f LATRCSRW   | 186   | 100   |
| >BRAFF-V600f LATVKSRW   | 73   | >BRAFF-V600f LATRCSRW   | 69    | 4     |
| >BRAFF-V600f LATVKSRW   | 22   | >BRAFF-V600f LATRCSRW   | 23    | 1     |
| >BRAFF-V600f LATVKSRW   | 172  | >BRAFF-V600f LATRCSRW   | 204   | 32    |
| >BRAFF-V600f LATVKSRW   | 130  | >BRAFF-V600f LATRCSRW   | 182   | 52    |
| >BRAFF-V600f GLATVKSR   | 697  | >BRAFF-V600f GLATRCSR   | 312   | 385   |
| >BRAFF-V600f GLATVKSRW  | 242  | >BRAFF-V600f GLATRCSRW  | 998   | 756   |
| >BRAFF-V600f FGLATVKSRM | 98   | >BRAFF-V600f FGLATRCSRW | 147   | 49    |
| >BRAFF-V600f FGLATVKSRM | 499  | >BRAFF-V600f FGLATRCSRW | 710   | 211   |
| >BRAFF-V600f FGLATVKSRM | 45   | >BRAFF-V600f FGLATRCSRW | 232   | 187   |
| >BRAFF-V600f FGLATVKSRM | 215  | >BRAFF-V600f FGLATRCSRW | 725   | 510   |
| >BRAFF-V600f DFGLATVKSR | 1561 | >BRAFF-V600f DFGLATRCSR | 385   | 1176  |
| >BRAFF-V600f DFGLATVKSR | 205  | >BRAFF-V600f DFGLATRCSR | 105   | 100   |
| >BRAFF-V600f DFGLATVKSR | 246  | >BRAFF-V600f DFGLATRCSR | 454   | 208   |

|                         |       |                         |       |       |
|-------------------------|-------|-------------------------|-------|-------|
| >BRAFF-V600f GDFGLATV   | 393   | >BRAFF-V600f GDFGLATR   | 9525  | 9132  |
| >BRAFF-V600f GDFGLATV   | 227   | >BRAFF-V600f GDFGLATR   | 26666 | 26439 |
| >BRAFF-V600f IGDFGLATV  | 253   | >BRAFF-V600f IGDFGLATR  | 23385 | 23132 |
| >BRAFF-V600f KIGDFGLATV | 53    | >BRAFF-V600f KIGDFGLATR | 14392 | 14339 |
| >BRAFF-V600f KIGDFGLATV | 34    | >BRAFF-V600f KIGDFGLATR | 7593  | 7559  |
| >BRAFF-V600f KIGDFGLATV | 12    | >BRAFF-V600f KIGDFGLATR | 4858  | 4846  |
| >BRAFF-V600f KIGDFGLATV | 59    | >BRAFF-V600f KIGDFGLATR | 11203 | 11144 |
| >BRAFF-V600f KIGDFGLATV | 4     | >BRAFF-V600f KIGDFGLATR | 14134 | 14130 |
| >BRAFF-V600f KIGDFGLATV | 15    | >BRAFF-V600f KIGDFGLATR | 18393 | 18378 |
| >BRAFF-V600f KIGDFGLATV | 16    | >BRAFF-V600f KIGDFGLATR | 22093 | 22077 |
| >BRAFF-V600f KIGDFGLATV | 30    | >BRAFF-V600f KIGDFGLATR | 23799 | 23769 |
| >BRAFF-V600f KIGDFGLATV | 4     | >BRAFF-V600f KIGDFGLATR | 15446 | 15442 |
| >BRAFF-V600f KIGDFGLATV | 11190 | >BRAFF-V600f KIGDFGLATR | 240   | 10950 |
| >BRAFF-V600f KIGDFGLATV | 129   | >BRAFF-V600f KIGDFGLATR | 88    | 41    |
| >BRAFF-V600f KIGDFGLATV | 57    | >BRAFF-V600f KIGDFGLATR | 48    | 9     |
| >BRAFF-V600f KIGDFGLATV | 8105  | >BRAFF-V600f KIGDFGLATR | 18    | 8087  |
| >BRAFF-V600f KIGDFGLATV | 25426 | >BRAFF-V600f KIGDFGLATR | 75    | 25351 |
| >BRAFF-V600f KIGDFGLATV | 20071 | >BRAFF-V600f KIGDFGLATR | 31    | 20040 |
| >BRAFF-V600f KIGDFGLATV | 132   | >BRAFF-V600f KIGDFGLATR | 122   | 10    |
| >BRAFF-W604 RWSGSHQF    | 60    | >BRAFF-W604 RSGSGSHQF   | 3879  | 3819  |
| >BRAFF-W604 RWSGSHQF    | 78    | >BRAFF-W604 RSGSGSHQF   | 4389  | 4311  |
| >BRAFF-W604 RWSGSHQFE   | 328   | >BRAFF-W604 RSGSGSHQFEC | 15181 | 14853 |
| >BRAFF-W604 RWSGSHQF    | 6     | >BRAFF-W604 RSGSGSHQF   | 4422  | 4416  |
| >BRAFF-W604 RWSGSHQFE   | 14    | >BRAFF-W604 RSGSGSHQFEC | 10330 | 10316 |
| >BRAFF-W604 RWSGSHQF    | 3681  | >BRAFF-W604 RSGSGSHQF   | 366   | 3315  |
| >BRAFF-W604 RWSGSHQF    | 4120  | >BRAFF-W604 RSGSGSHQF   | 16    | 4104  |
| >BRAFF-W604 RWSGSHQF    | 2273  | >BRAFF-W604 RSGSGSHQF   | 61    | 2212  |
| >BRAFF-W604 RWSGSHQF    | 144   | >BRAFF-W604 RSGSGSHQF   | 27613 | 27469 |
| >BRAFF-W604 RWSGSHQFE   | 57    | >BRAFF-W604 RSGSGSHQFE  | 20493 | 20436 |
| >BRAFF-W604 RWSGSHQFE   | 116   | >BRAFF-W604 RSGSGSHQFEC | 19462 | 19346 |
| >BRAFF-W604 SRWSGSHQF   | 8     | >BRAFF-W604 SRGSGSHQF   | 215   | 207   |
| >BRAFF-W604 SRWSGSHQF   | 37    | >BRAFF-W604 SRGSGSHQF   | 1449  | 1412  |
| >BRAFF-W604 SRWSGSHQF   | 327   | >BRAFF-W604 SRGSGSHQFE  | 8929  | 8602  |
| >BRAFF-W604 SRWSGSHQF   | 147   | >BRAFF-W604 SRGSGSHQF   | 2334  | 2187  |
| >BRAFF-W604 KSRWSGSH    | 55    | >BRAFF-W604 KSRGSGSH    | 34    | 21    |
| >BRAFF-W604 KSRWSGSHQ   | 24    | >BRAFF-W604 KSRGSGSHQ   | 16    | 8     |
| >BRAFF-W604 KSRWSGSHQ   | 44    | >BRAFF-W604 KSRGSGSHQf  | 28    | 16    |
| >BRAFF-W604 KSRWSGSHQ   | 23    | >BRAFF-W604 KSRGSGSHQf  | 18    | 5     |
| >BRAFF-W604 KSRWSGSHQ   | 93    | >BRAFF-W604 KSRGSGSHQf  | 67    | 26    |
| >BRAFF-W604 KSRWSGSHQ   | 14    | >BRAFF-W604 KSRGSGSHQf  | 14    | 0     |
| >BRAFF-W604 KSRWSGSH    | 31    | >BRAFF-W604 KSRGSGSH    | 22    | 9     |
| >BRAFF-W604 KSRWSGSHQ   | 51    | >BRAFF-W604 KSRGSGSHQ   | 48    | 3     |
| >BRAFF-W604 KSRWSGSHQ   | 2     | >BRAFF-W604 KSRGSGSHQf  | 2     | 0     |

|                      |       |                      |       |       |
|----------------------|-------|----------------------|-------|-------|
| >BRAFW604KSRWSGSHQ   | 186   | >BRAFW604KSRGSGSHQF  | 205   | 19    |
| >BRAFW604KSRWSGSHQ   | 73    | >BRAFW604KSRGSGSHQF  | 45    | 28    |
| >BRAFW604KSRWSGSHQ   | 24    | >BRAFW604KSRGSGSHQF  | 31    | 7     |
| >BRAFW604KSRWSGSH    | 333   | >BRAFW604KSRGSGSH    | 2741  | 2408  |
| >BRAFW604KSRWSGSHQ   | 193   | >BRAFW604KSRGSGSHQ   | 181   | 12    |
| >BRAFW604KSRWSGSHQ   | 72    | >BRAFW604KSRGSGSHQF  | 144   | 72    |
| >BRAFW604VKSRSWSGSH  | 9     | >BRAFW604VKSRSWSGSHC | 8     | 1     |
| >BRAFW604ATVKSRWSGSH | 451   | >BRAFW604ATVKSRGSGSH | 286   | 165   |
| >BRAFW604LATVKSRW    | 36    | >BRAFW604LATVKSRG    | 15849 | 15813 |
| >BRAFW604LATVKSRW    | 86    | >BRAFW604LATVKSRG    | 31903 | 31817 |
| >BRAFW604LATVKSRW    | 73    | >BRAFW604LATVKSRG    | 23886 | 23813 |
| >BRAFW604LATVKSRW    | 22    | >BRAFW604LATVKSRG    | 20810 | 20788 |
| >BRAFW604LATVKSRW    | 172   | >BRAFW604LATVKSRG    | 30173 | 30001 |
| >BRAFW604LATVKSRW    | 130   | >BRAFW604LATVKSRG    | 30398 | 30268 |
| >BRAFW604GLATVKSRW   | 242   | >BRAFW604GLATVKSRG   | 6926  | 6684  |
| >BRAFW604FGLATVKSRW  | 98    | >BRAFW604FGLATVKSRG  | 24110 | 24012 |
| >BRAFW604FGLATVKSRW  | 499   | >BRAFW604FGLATVKSRG  | 25329 | 24830 |
| >BRAFW604FGLATVKSRW  | 45    | >BRAFW604FGLATVKSRG  | 21699 | 21654 |
| >BRAFW604FGLATVKSRW  | 215   | >BRAFW604FGLATVKSRG  | 30413 | 30198 |
| >BRAFW604WSGSHQFEC   | 9196  | >BRAFW604SSGSHQFEQ   | 318   | 8878  |
| >BRAFW604RWSGSHQF    | 60    | >BRAFW604RSSGSHQF    | 2021  | 1961  |
| >BRAFW604RWSGSHQF    | 78    | >BRAFW604RSSGSHQF    | 1349  | 1271  |
| >BRAFW604RWSGSHQFE   | 328   | >BRAFW604RSSGSHQFEQ  | 6627  | 6299  |
| >BRAFW604RWSGSHQF    | 6     | >BRAFW604RSSGSHQF    | 684   | 678   |
| >BRAFW604RWSGSHQFE   | 14    | >BRAFW604RSSGSHQFEQ  | 4271  | 4257  |
| >BRAFW604RWSGSHQF    | 3885  | >BRAFW604RSSGSHQF    | 107   | 3778  |
| >BRAFW604RWSGSHQF    | 3681  | >BRAFW604RSSGSHQF    | 101   | 3580  |
| >BRAFW604RWSGSHQF    | 664   | >BRAFW604RSSGSHQF    | 32    | 632   |
| >BRAFW604RWSGSHQF    | 4120  | >BRAFW604RSSGSHQF    | 2     | 4118  |
| >BRAFW604RWSGSHQFE   | 25526 | >BRAFW604RSSGSHQFEQ  | 431   | 25095 |
| >BRAFW604RWSGSHQFE   | 16741 | >BRAFW604RSSGSHQFEQ  | 6     | 16735 |
| >BRAFW604RWSGSHQF    | 17187 | >BRAFW604RSSGSHQF    | 52    | 17135 |
| >BRAFW604RWSGSHQFE   | 22309 | >BRAFW604RSSGSHQFEQ  | 292   | 22017 |
| >BRAFW604RWSGSHQF    | 2273  | >BRAFW604RSSGSHQF    | 10    | 2263  |
| >BRAFW604RWSGSHQFE   | 17105 | >BRAFW604RSSGSHQFEQ  | 48    | 17057 |
| >BRAFW604RWSGSHQFE   | 13329 | >BRAFW604RSSGSHQFEQ  | 293   | 13036 |
| >BRAFW604RWSGSHQF    | 5945  | >BRAFW604RSSGSHQF    | 18    | 5927  |
| >BRAFW604RWSGSHQFE   | 7577  | >BRAFW604RSSGSHQFEQ  | 138   | 7439  |
| >BRAFW604RWSGSHQF    | 144   | >BRAFW604RSSGSHQF    | 28762 | 28618 |
| >BRAFW604RWSGSHQFE   | 57    | >BRAFW604RSSGSHQFE   | 21777 | 21720 |
| >BRAFW604RWSGSHQFE   | 116   | >BRAFW604RSSGSHQFEQ  | 20962 | 20846 |
| >BRAFW604RWSGSHQFE   | 18322 | >BRAFW604RSSGSHQFEQ  | 253   | 18069 |
| >BRAFW604SRWSGSHQF   | 8     | >BRAFW604SRSSGSHQF   | 33    | 25    |

|                     |      |                     |       |       |
|---------------------|------|---------------------|-------|-------|
| >BRAFW604SRWSGSHQF  | 37   | >BRAFW604SRSSGSHQF  | 621   | 584   |
| >BRAFW604SRWSGSHQF  | 327  | >BRAFW604SRSSGSHQFE | 5317  | 4990  |
| >BRAFW604SRWSGSHQF  | 792  | >BRAFW604SRSSGSHQF  | 302   | 490   |
| >BRAFW604SRWSGSHQF  | 147  | >BRAFW604SRSSGSHQF  | 1180  | 1033  |
| >BRAFW604KSRWSGSH   | 55   | >BRAFW604KSRSSGSH   | 23    | 32    |
| >BRAFW604KSRWSGSHQ  | 24   | >BRAFW604KSRSSGSHQ  | 13    | 11    |
| >BRAFW604KSRWSGSHQ  | 44   | >BRAFW604KSRSSGSHQF | 22    | 22    |
| >BRAFW604KSRWSGSHQ  | 23   | >BRAFW604KSRSSGSHQF | 14    | 9     |
| >BRAFW604KSRWSGSHQ  | 93   | >BRAFW604KSRSSGSHQF | 47    | 46    |
| >BRAFW604KSRWSGSHQ  | 1847 | >BRAFW604KSRSSGSHQ  | 370   | 1477  |
| >BRAFW604KSRWSGSHQ  | 14   | >BRAFW604KSRSSGSHQF | 5     | 9     |
| >BRAFW604KSRWSGSH   | 31   | >BRAFW604KSRSSGSH   | 31    | 0     |
| >BRAFW604KSRWSGSHQ  | 51   | >BRAFW604KSRSSGSHQ  | 98    | 47    |
| >BRAFW604KSRWSGSHQ  | 2    | >BRAFW604KSRSSGSHQF | 2     | 0     |
| >BRAFW604KSRWSGSHQ  | 186  | >BRAFW604KSRSSGSHQF | 305   | 119   |
| >BRAFW604KSRWSGSHQ  | 73   | >BRAFW604KSRSSGSHQF | 57    | 16    |
| >BRAFW604KSRWSGSHQ  | 24   | >BRAFW604KSRSSGSHQF | 32    | 8     |
| >BRAFW604KSRWSGSH   | 333  | >BRAFW604KSRSSGSH   | 2074  | 1741  |
| >BRAFW604KSRWSGSHQ  | 193  | >BRAFW604KSRSSGSHQ  | 70    | 123   |
| >BRAFW604KSRWSGSHQ  | 72   | >BRAFW604KSRSSGSHQF | 123   | 51    |
| >BRAFW604VKSRWSGSH  | 1530 | >BRAFW604VKSRSSGSH  | 374   | 1156  |
| >BRAFW604VKSRWSGSH  | 1640 | >BRAFW604VKSRSSGSHC | 498   | 1142  |
| >BRAFW604VKSRWSGSH  | 9    | >BRAFW604VKSRSSGSHC | 5     | 4     |
| >BRAFW604ATVKSRWSG  | 660  | >BRAFW604ATVKSRSSGS | 203   | 457   |
| >BRAFW604ATVKSRWSG  | 451  | >BRAFW604ATVKSRSSGS | 140   | 311   |
| >BRAFW604LATVKSRW   | 36   | >BRAFW604LATVKRS    | 13258 | 13222 |
| >BRAFW604LATVKSRW   | 86   | >BRAFW604LATVKRS    | 31801 | 31715 |
| >BRAFW604LATVKSRW   | 73   | >BRAFW604LATVKRS    | 23714 | 23641 |
| >BRAFW604LATVKSRW   | 22   | >BRAFW604LATVKRS    | 21755 | 21733 |
| >BRAFW604LATVKSRW   | 172  | >BRAFW604LATVKRS    | 31655 | 31483 |
| >BRAFW604LATVKSRW   | 130  | >BRAFW604LATVKRS    | 30408 | 30278 |
| >BRAFW604GLATVKSRW  | 242  | >BRAFW604GLATVKRS   | 3850  | 3608  |
| >BRAFW604FGLATVKSRM | 98   | >BRAFW604FGLATVKRS  | 23085 | 22987 |
| >BRAFW604FGLATVKSRM | 499  | >BRAFW604FGLATVKRS  | 25142 | 24643 |
| >BRAFW604FGLATVKSRM | 45   | >BRAFW604FGLATVKRS  | 22239 | 22194 |
| >BRAFW604FGLATVKSRM | 215  | >BRAFW604FGLATVKRS  | 31209 | 30994 |
| >BRAFW619WMAPEVIRM  | 79   | >BRAFW619RMAPEVIRM  | 110   | 31    |
| >BRAFW619WMAPEVIRM  | 22   | >BRAFW619RMAPEVIRM  | 51    | 29    |
| >BRAFW619WMAPEVIRM  | 61   | >BRAFW619RMAPEVIRM  | 81    | 20    |
| >BRAFW619WMAPEVIRM  | 139  | >BRAFW619RMAPEVIRM  | 361   | 222   |
| >BRAFW619WMAPEVIRM  | 18   | >BRAFW619RMAPEVIRM  | 25    | 7     |
| >BRAFW619WMAPEVIRM  | 325  | >BRAFW619RMAPEVIRM  | 386   | 61    |
| >BRAFW619WMAPEVIRM  | 98   | >BRAFW619RMAPEVIRM  | 189   | 91    |

|                      |       |                      |       |       |
|----------------------|-------|----------------------|-------|-------|
| >BRAFW619WMAPEVIRM   | 23    | >BRAFW619RMAPEVIRM   | 117   | 94    |
| >BRAFW619WMAPEVIRM   | 10    | >BRAFW619RMAPEVIRM   | 32    | 22    |
| >BRAFW619WMAPEVIRM   | 117   | >BRAFW619RMAPEVIRM   | 715   | 598   |
| >BRAFW619WMAPEVIR    | 2776  | >BRAFW619RMAPEVIR    | 24    | 2752  |
| >BRAFW619WMAPEVIR    | 199   | >BRAFW619RMAPEVIR    | 1086  | 887   |
| >BRAFW619WMAPEVIRM   | 163   | >BRAFW619RMAPEVIRM   | 107   | 56    |
| >BRAFW619WMAPEVIR    | 637   | >BRAFW619RMAPEVIR    | 341   | 296   |
| >BRAFW619WMAPEVIRM   | 128   | >BRAFW619RMAPEVIRM   | 90    | 38    |
| >BRAFW619WMAPEVIRM   | 481   | >BRAFW619RMAPEVIRM   | 53    | 428   |
| >BRAFW619WMAPEVIRM   | 219   | >BRAFW619RMAPEVIRM   | 4185  | 3966  |
| >BRAFW619WMAPEVIRM   | 2670  | >BRAFW619RMAPEVIRM   | 83    | 2587  |
| >BRAFW619WMAPEVIR    | 104   | >BRAFW619RMAPEVIR    | 51    | 53    |
| >BRAFW619LWMAPEVI    | 499   | >BRAFW619LRMAPEVI    | 16073 | 15574 |
| >BRAFW619LWMAPEVI    | 71    | >BRAFW619LRMAPEVI    | 19760 | 19689 |
| >BRAFW619LWMAPEVI    | 4323  | >BRAFW619LRMAPEVI    | 158   | 4165  |
| >BRAFW619LWMAPEVIRI  | 4101  | >BRAFW619LRMAPEVIRM  | 153   | 3948  |
| >BRAFW619LWMAPEVI    | 17626 | >BRAFW619LRMAPEVI    | 208   | 17418 |
| >BRAFW619LWMAPEVIR   | 16992 | >BRAFW619LRMAPEVIR   | 377   | 16615 |
| >BRAFW619LWMAPEVIRI  | 15522 | >BRAFW619LRMAPEVIRM  | 188   | 15334 |
| >BRAFW619LWMAPEVI    | 18552 | >BRAFW619LRMAPEVI    | 486   | 18066 |
| >BRAFW619LWMAPEVIRI  | 17003 | >BRAFW619LRMAPEVIRM  | 454   | 16549 |
| >BRAFW619LWMAPEVIR   | 45    | >BRAFW619LRMAPEVIR   | 1184  | 1139  |
| >BRAFW619LWMAPEVI    | 172   | >BRAFW619LRMAPEVI    | 33274 | 33102 |
| >BRAFW619LWMAPEVIRI  | 438   | >BRAFW619LRMAPEVIRM  | 35720 | 35282 |
| >BRAFW619QFEQLSGSILV | 17519 | >BRAFW619QFEQLSGSILF | 75    | 17444 |
| >BRAFW619ILWMAPEV    | 9     | >BRAFW619ILRMAPEV    | 480   | 471   |
| >BRAFW619ILWMAPEVI   | 60    | >BRAFW619ILRMAPEVI   | 7999  | 7939  |
| >BRAFW619ILWMAPEVIR  | 80    | >BRAFW619ILRMAPEVIRI | 7480  | 7400  |
| >BRAFW619ILWMAPEV    | 51    | >BRAFW619ILRMAPEV    | 371   | 320   |
| >BRAFW619ILWMAPEV    | 32    | >BRAFW619ILRMAPEV    | 18    | 14    |
| >BRAFW619ILWMAPEVI   | 456   | >BRAFW619ILRMAPEVI   | 216   | 240   |
| >BRAFW619ILWMAPEV    | 54    | >BRAFW619ILRMAPEV    | 762   | 708   |
| >BRAFW619ILWMAPEV    | 2     | >BRAFW619ILRMAPEV    | 12    | 10    |
| >BRAFW619ILWMAPEVI   | 5     | >BRAFW619ILRMAPEVI   | 221   | 216   |
| >BRAFW619ILWMAPEVIR  | 9     | >BRAFW619ILRMAPEVIRI | 889   | 880   |
| >BRAFW619ILWMAPEV    | 9     | >BRAFW619ILRMAPEV    | 225   | 216   |
| >BRAFW619ILWMAPEVI   | 88    | >BRAFW619ILRMAPEVI   | 4771  | 4683  |
| >BRAFW619ILWMAPEV    | 4     | >BRAFW619ILRMAPEV    | 24    | 20    |
| >BRAFW619ILWMAPEVI   | 19    | >BRAFW619ILRMAPEVI   | 5498  | 5479  |
| >BRAFW619ILWMAPEVIR  | 81    | >BRAFW619ILRMAPEVIRI | 9150  | 9069  |
| >BRAFW619ILWMAPEV    | 2     | >BRAFW619ILRMAPEV    | 100   | 98    |
| >BRAFW619ILWMAPEVI   | 12    | >BRAFW619ILRMAPEVI   | 5676  | 5664  |
| >BRAFW619ILWMAPEVIR  | 34    | >BRAFW619ILRMAPEVIRI | 9491  | 9457  |



|                     |       |                      |      |       |
|---------------------|-------|----------------------|------|-------|
| >BRAFW619ILWMAPEV   | 3     | >BRAFW619ILRMAPEV    | 4    | 1     |
| >BRAFW619ILWMAPEVI  | 47    | >BRAFW619ILRMAPEVI   | 170  | 123   |
| >BRAFW619ILWMAPEVIR | 30    | >BRAFW619ILRMAPEVIRI | 187  | 157   |
| >BRAFW619ILWMAPEV   | 11243 | >BRAFW619ILRMAPEV    | 199  | 11044 |
| >BRAFW619ILWMAPEVI  | 231   | >BRAFW619ILRMAPEVI   | 5584 | 5353  |
| >BRAFW619ILWMAPEV   | 377   | >BRAFW619ILRMAPEV    | 7320 | 6943  |
| >BRAFW619ILWMAPEVIR | 1492  | >BRAFW619ILRMAPEVIRI | 371  | 1121  |
| >BRAFW619ILWMAPEVI  | 241   | >BRAFW619ILRMAPEVI   | 271  | 30    |
| >BRAFW619ILWMAPEVIR | 266   | >BRAFW619ILRMAPEVIRI | 406  | 140   |
| >BRAFW619ILWMAPEVIR | 86    | >BRAFW619ILRMAPEVIR  | 924  | 838   |
| >BRAFW619SILWMAPEV  | 20    | >BRAFW619SILRMAPEV   | 76   | 56    |
| >BRAFW619SILWMAPEVI | 368   | >BRAFW619SILRMAPEVI  | 1360 | 992   |
| >BRAFW619SILWMAPEV  | 176   | >BRAFW619SILRMAPEV   | 510  | 334   |
| >BRAFW619SILWMAPEVI | 378   | >BRAFW619SILRMAPEVI  | 318  | 60    |
| >BRAFW619SILWMAPEV  | 10    | >BRAFW619SILRMAPEV   | 19   | 9     |
| >BRAFW619SILWMAPEVI | 367   | >BRAFW619SILRMAPEVI  | 930  | 563   |
| >BRAFW619SILWMAPEV  | 3     | >BRAFW619SILRMAPEV   | 13   | 10    |
| >BRAFW619SILWMAPEVI | 28    | >BRAFW619SILRMAPEVI  | 175  | 147   |
| >BRAFW619SILWMAPEV  | 155   | >BRAFW619SILRMAPEV   | 152  | 3     |
| >BRAFW619SILWMAPEV  | 5     | >BRAFW619SILRMAPEV   | 7    | 2     |
| >BRAFW619SILWMAPEVI | 67    | >BRAFW619SILRMAPEVI  | 340  | 273   |
| >BRAFW619SILWMAPEV  | 15    | >BRAFW619SILRMAPEV   | 80   | 65    |
| >BRAFW619SILWMAPEV  | 3     | >BRAFW619SILRMAPEV   | 5    | 2     |
| >BRAFW619SILWMAPEVI | 314   | >BRAFW619SILRMAPEVI  | 932  | 618   |
| >BRAFW619SILWMAPEVI | 157   | >BRAFW619SILRMAPEVIF | 345  | 188   |
| >BRAFW619SILWMAPEVI | 167   | >BRAFW619SILRMAPEVIF | 176  | 9     |
| >BRAFW619SILWMAPEVI | 52    | >BRAFW619SILRMAPEVI  | 144  | 92    |
| >BRAFW619SILWMAPEVI | 90    | >BRAFW619SILRMAPEVIF | 281  | 191   |
| >BRAFW619SILWMAPEV  | 5     | >BRAFW619SILRMAPEV   | 17   | 12    |
| >BRAFW619SILWMAPEVI | 175   | >BRAFW619SILRMAPEVI  | 1171 | 996   |
| >BRAFW619SILWMAPEVI | 84    | >BRAFW619SILRMAPEVIF | 273  | 189   |
| >BRAFW619GSILWMAPEV | 412   | >BRAFW619GSILRMAPEV  | 3557 | 3145  |
| >BRAFW619GSILWMAPEV | 295   | >BRAFW619GSILRMAPEV  | 294  | 1     |
| >BRAFW619GSILWMAPEV | 336   | >BRAFW619GSILRMAPEV  | 294  | 42    |
| >BRAFW619GSILWMAPEV | 257   | >BRAFW619GSILRMAPEV  | 268  | 11    |
| >BRAFW619LSGSILWMA  | 395   | >BRAFW619LSGSILRMA   | 4367 | 3972  |
| >BRAFW619LSGSILWM   | 140   | >BRAFW619LSGSILRM    | 115  | 25    |
| >BRAFW619LSGSILWM   | 630   | >BRAFW619LSGSILRM    | 140  | 490   |
| >BRAFW619QLSGSILWM, | 71    | >BRAFW619QLSGSILRMA  | 1777 | 1706  |
| >BRAFW619QLSGSILWM  | 51    | >BRAFW619QLSGSILRM   | 127  | 76    |
| >BRAFW619QLSGSILWM, | 31    | >BRAFW619QLSGSILRMA  | 146  | 115   |
| >BRAFW619QLSGSILWM  | 231   | >BRAFW619QLSGSILRM   | 671  | 440   |
| >BRAFW619QLSGSILWM, | 89    | >BRAFW619QLSGSILRMA  | 89   | 0     |

|                       |       |                       |       |       |
|-----------------------|-------|-----------------------|-------|-------|
| >BRAFW619QLSGSILWM,   | 156   | >BRAFW619QLSGSILRMA   | 1992  | 1836  |
| >BRAFW619QLSGSILWM    | 335   | >BRAFW619QLSGSILRM    | 371   | 36    |
| >BRAFW619QLSGSILWM,   | 27    | >BRAFW619QLSGSILRMA   | 317   | 290   |
| >BRAFW619QLSGSILWM,   | 413   | >BRAFW619QLSGSILRMA   | 7844  | 7431  |
| >BRAFW619QLSGSILWM,   | 82    | >BRAFW619QLSGSILRMA   | 2421  | 2339  |
| >BRAFW619QLSGSILWM,   | 102   | >BRAFW619QLSGSILRMA   | 2901  | 2799  |
| >BRAFW619QLSGSILWM    | 17    | >BRAFW619QLSGSILRM    | 22    | 5     |
| >BRAFW619QLSGSILWM,   | 5     | >BRAFW619QLSGSILRMA   | 62    | 57    |
| >BRAFW619QLSGSILW     | 17633 | >BRAFW619QLSGSILR     | 311   | 17322 |
| >BRAFW619QLSGSILW     | 27284 | >BRAFW619QLSGSILR     | 100   | 27184 |
| >BRAFW619QLSGSILW     | 207   | >BRAFW619QLSGSILR     | 22237 | 22030 |
| >BRAFW619QLSGSILW     | 30426 | >BRAFW619QLSGSILR     | 171   | 30255 |
| >BRAFW619EQLSGSILWN   | 53    | >BRAFW619EQLSGSILRM   | 935   | 882   |
| >BRAFW619EQLSGSILWN   | 307   | >BRAFW619EQLSGSILRM   | 976   | 669   |
| >BRAFW619EQLSGSILWN   | 355   | >BRAFW619EQLSGSILRM   | 1199  | 844   |
| >BRAFW619EQLSGSILW    | 34102 | >BRAFW619EQLSGSILR    | 480   | 33622 |
| >BRAFW619EQLSGSILW    | 33622 | >BRAFW619EQLSGSILR    | 236   | 33386 |
| >BRAFW619EQLSGSILWN   | 399   | >BRAFW619EQLSGSILRM   | 2326  | 1927  |
| >BRAFW619EQLSGSILWN   | 277   | >BRAFW619EQLSGSILRM   | 221   | 56    |
| >BRAFW619EQLSGSILWN   | 562   | >BRAFW619EQLSGSILRM   | 316   | 246   |
| >BRAFW619EQLSGSILW    | 460   | >BRAFW619EQLSGSILR    | 23756 | 23296 |
| >BRAFW619EQLSGSILW    | 245   | >BRAFW619EQLSGSILR    | 33263 | 33018 |
| >BRAFW619EQLSGSILW    | 33750 | >BRAFW619EQLSGSILR    | 229   | 33521 |
| >BRAFW619FEQLSGSILW   | 377   | >BRAFW619FEQLSGSILR   | 12508 | 12131 |
| >BRAFW619FEQLSGSILW   | 129   | >BRAFW619FEQLSGSILRM  | 573   | 444   |
| >BRAFW619FEQLSGSILW   | 243   | >BRAFW619FEQLSGSILRM  | 642   | 399   |
| >BRAFW619FEQLSGSILW   | 385   | >BRAFW619FEQLSGSILRM  | 218   | 167   |
| >BRAFW619FEQLSGSILW   | 72    | >BRAFW619FEQLSGSILR   | 19193 | 19121 |
| >BRAFW619FEQLSGSILW   | 288   | >BRAFW619FEQLSGSILR   | 25562 | 25274 |
| >BRAFW619FEQLSGSILW   | 217   | >BRAFW619FEQLSGSILR   | 9994  | 9777  |
| >BRAFW619FEQLSGSILW   | 508   | >BRAFW619FEQLSGSILRM  | 113   | 395   |
| >BRAFW619FEQLSGSILW   | 311   | >BRAFW619FEQLSGSILR   | 33503 | 33192 |
| >BRAFW472SYKKGKWHGD\  | 236   | >BRAFW472SYKKGKWHGD\  | 1133  | 897   |
| >BRAFW472SRIGSGSFGTV' | 468   | >BRAFW472SRIGSGSFGTV' | 17810 | 17342 |
| >BRAFW472SRIGSGSFGTV' | 215   | >BRAFW472SRIGSGSFGTV' | 21839 | 21624 |
| >BRAFW472SRIGSGSFGTV' | 61    | >BRAFW472SRIGSGSFGTV' | 14347 | 14286 |
| >BRAFW472SRIGSGSFGTV' | 30    | >BRAFW472SRIGSGSFGTV' | 22334 | 22304 |
| >BRAFW472SRIGSGSFGTV' | 50    | >BRAFW472SRIGSGSFGTV' | 7101  | 7051  |
| >BRAFW472SRIGSGSFGTV' | 451   | >BRAFW472SRIGSGSFGTV' | 14972 | 14521 |
| >BRAFW472SRIGSGSFGTV' | 451   | >BRAFW472SRIGSGSFGTV' | 22220 | 21769 |
| >BRAFW472SRIGSGSFGTV' | 77    | >BRAFW472SRIGSGSFGTV' | 9875  | 9798  |
| >BRAFW472STVYKKGKWHG  | 418   | >BRAFW472STVYKKGKWHG  | 1779  | 1361  |
| >BRAFW472STVYKKGKWHG  | 239   | >BRAFW472STVYKKGKWHG  | 3640  | 3401  |

|                           |      |                           |       |       |
|---------------------------|------|---------------------------|-------|-------|
| >BRAFF-Y472S TVYK GKWHG   | 266  | >BRAFF-Y472S TVSKGKWHG    | 1902  | 1636  |
| >BRAFF-Y472S TVYK GKWHG   | 62   | >BRAFF-Y472S TVSKGKWHG    | 223   | 161   |
| >BRAFF-Y472S TVYK GKWHG   | 109  | >BRAFF-Y472S TVSKGKWHG    | 126   | 17    |
| >BRAFF-Y472S TVYK GKWHG   | 40   | >BRAFF-Y472S TVSKGKWHG    | 422   | 382   |
| >BRAFF-Y472S GTVYK GKW    | 13   | >BRAFF-Y472S GTVSKGKW     | 7     | 6     |
| >BRAFF-Y472S GTVYK GKW    | 199  | >BRAFF-Y472S GTVSKGKW     | 173   | 26    |
| >BRAFF-Y472S GTVYK GKWH   | 177  | >BRAFF-Y472S GTVSKGKWH    | 101   | 76    |
| >BRAFF-Y472S FGTVYK GKW   | 51   | >BRAFF-Y472S FGTVSKGKW    | 124   | 73    |
| >BRAFF-Y472S SFGTVYK GKV  | 365  | >BRAFF-Y472S SFGTVSKGKV   | 1217  | 852   |
| >BRAFF-Y472S GSF GTVYK    | 62   | >BRAFF-Y472S GSF GTVSK    | 86    | 24    |
| >BRAFF-Y472S GSF GTVYK GK | 119  | >BRAFF-Y472S GSF GTVSK GK | 135   | 16    |
| >BRAFF-Y472S GSF GTVYK    | 6    | >BRAFF-Y472S GSF GTVSK    | 9     | 3     |
| >BRAFF-Y472S GSF GTVYK GK | 39   | >BRAFF-Y472S GSF GTVSK GK | 63    | 24    |
| >BRAFF-Y472S GSF GTVYK    | 37   | >BRAFF-Y472S GSF GTVSK    | 64    | 27    |
| >BRAFF-Y472S GSF GTVYK GK | 338  | >BRAFF-Y472S GSF GTVSK GK | 333   | 5     |
| >BRAFF-Y472S GSF GTVYK    | 89   | >BRAFF-Y472S GSF GTVSK    | 1353  | 1264  |
| >BRAFF-Y472S GSF GTVYK    | 25   | >BRAFF-Y472S GSF GTVSK    | 80    | 55    |
| >BRAFF-Y472S GSF GTVYK GK | 645  | >BRAFF-Y472S GSF GTVSK GK | 498   | 147   |
| >BRAFF-Y472S GSF GTVYK GK | 9    | >BRAFF-Y472S GSF GTVSK GK | 6     | 3     |
| >BRAFF-Y472S GSF GTVYK GK | 40   | >BRAFF-Y472S GSF GTVSK GK | 39    | 1     |
| >BRAFF-Y472S GSF GTVYK GK | 29   | >BRAFF-Y472S GSF GTVSK GK | 28    | 1     |
| >BRAFF-Y472S GSF GTVYK G  | 4946 | >BRAFF-Y472S GSF GTVSK G  | 156   | 4790  |
| >BRAFF-Y472S GSF GTVYK GK | 90   | >BRAFF-Y472S GSF GTVSK GK | 36    | 54    |
| >BRAFF-Y472S GSF GTVYK GK | 103  | >BRAFF-Y472S GSF GTVSK GK | 143   | 40    |
| >BRAFF-Y472S GSF GTVYK    | 74   | >BRAFF-Y472S GSF GTVSK    | 109   | 35    |
| >BRAFF-Y472S GSF GTVYK GK | 141  | >BRAFF-Y472S GSF GTVSK GK | 294   | 153   |
| >BRAFF-Y472S SGSF GTVYK   | 41   | >BRAFF-Y472S SGSF GTVSK   | 195   | 154   |
| >BRAFF-Y472S SGSF GTVYK   | 331  | >BRAFF-Y472S SGSF GTVSK   | 791   | 460   |
| >BRAFF-Y472S SGSF GTVY    | 89   | >BRAFF-Y472S SGSF GTVS    | 23060 | 22971 |
| >BRAFF-Y472S SGSF GTVYK   | 290  | >BRAFF-Y472S SGSF GTVSK   | 1204  | 914   |
| >BRAFF-Y472S SGSF GTVY    | 226  | >BRAFF-Y472S SGSF GTVS    | 18546 | 18320 |
| >BRAFF-Y472S SGSF GTVYK   | 438  | >BRAFF-Y472S SGSF GTVSK   | 761   | 323   |
| >BRAFF-Y472S SGSF GTVYK   | 46   | >BRAFF-Y472S SGSF GTVSK   | 115   | 69    |
| >BRAFF-Y472S SGSF GTVYK   | 25   | >BRAFF-Y472S SGSF GTVSK   | 66    | 41    |
| >BRAFF-Y472S SGSF GTVY    | 172  | >BRAFF-Y472S SGSF GTVS    | 23556 | 23384 |
| >BRAFF-Y472S SGSF GTVYK   | 212  | >BRAFF-Y472S SGSF GTVSK   | 1886  | 1674  |
| >BRAFF-Y472S SGSF GTVY    | 86   | >BRAFF-Y472S SGSF GTVS    | 13786 | 13700 |
| >BRAFF-Y472S SGSF GTVY    | 197  | >BRAFF-Y472S SGSF GTVS    | 14568 | 14371 |
| >BRAFF-Y472S SGSF GTVY    | 154  | >BRAFF-Y472S SGSF GTVS    | 23735 | 23581 |
| >BRAFF-Y472S SGSF GTVY    | 4    | >BRAFF-Y472S SGSF GTVS    | 674   | 670   |
| >BRAFF-Y472S SGSF GTVYK   | 241  | >BRAFF-Y472S SGSF GTVSK   | 367   | 126   |
| >BRAFF-Y472S IGSGSF GTVYI | 304  | >BRAFF-Y472S IGSGSF GTVSI | 886   | 582   |
| >BRAFF-Y472S IGSGSF GTVYI | 214  | >BRAFF-Y472S IGSGSF GTVSI | 1115  | 901   |

|                         |       |                        |       |       |
|-------------------------|-------|------------------------|-------|-------|
| >BRAF-Y472S IGSFSFGTVY  | 96    | >BRAF-Y472S IGSFSFGTVS | 25020 | 24924 |
| >BRAF-Y472S IGSFSFGTVY  | 370   | >BRAF-Y472S IGSFSFGTVS | 29550 | 29180 |
| >BRAF-Y472S IGSFSFGTVY  | 146   | >BRAF-Y472S IGSFSFGTVS | 16883 | 16737 |
| >BRCA1-C47I CMLKLLNQ    | 6316  | >BRCA1-C47I WMLKLLNQ   | 456   | 5860  |
| >BRCA1-C47I CMLKLLNQK   | 149   | >BRCA1-C47I WMLKLLNQK  | 951   | 802   |
| >BRCA1-C47I CMLKLLNQKI  | 177   | >BRCA1-C47I WMLKLLNQK  | 232   | 55    |
| >BRCA1-C47I CMLKLLNQK   | 86    | >BRCA1-C47I WMLKLLNQK  | 909   | 823   |
| >BRCA1-C47I CMLKLLNQKI  | 215   | >BRCA1-C47I WMLKLLNQK  | 448   | 233   |
| >BRCA1-C47I CMLKLLNQKI  | 2465  | >BRCA1-C47I WMLKLLNQK  | 215   | 2250  |
| >BRCA1-C47I FCMLKLLNQK  | 13713 | >BRCA1-C47I FWMLKLLNQ  | 410   | 13303 |
| >BRCA1-C47I FCMLKLLNQK  | 11071 | >BRCA1-C47I FWMLKLLNQ  | 222   | 10849 |
| >BRCA1-C47I KFCMLKLLNC  | 65    | >BRCA1-C47I KFWMLKLLN  | 101   | 36    |
| >BRCA1-C47I KFCMLKLLNC  | 49    | >BRCA1-C47I KFWMLKLLN  | 17    | 32    |
| >BRCA1-C47I KFCMLKLLN   | 2846  | >BRCA1-C47I KFWMLKLLN  | 225   | 2621  |
| >BRCA1-C47I KFCMLKLLNC  | 489   | >BRCA1-C47I KFWMLKLLN  | 94    | 395   |
| >BRCA1-C47I KFCMLKLLNC  | 166   | >BRCA1-C47I KFWMLKLLN  | 39    | 127   |
| >BRCA1-C47I KFCMLKLL    | 189   | >BRCA1-C47I KFWMLKLL   | 52    | 137   |
| >BRCA1-C47I KFCMLKLLN   | 1061  | >BRCA1-C47I KFWMLKLLN  | 412   | 649   |
| >BRCA1-C47I KFCMLKLLNC  | 1253  | >BRCA1-C47I KFWMLKLLN  | 441   | 812   |
| >BRCA1-C47I CKFCMLKL    | 48    | >BRCA1-C47I CKFWMLKL   | 276   | 228   |
| >BRCA1-C47I CKFCMLKLL   | 96    | >BRCA1-C47I CKFWMLKLL  | 769   | 673   |
| >BRCA1-C47I CKFCMLKLL   | 1666  | >BRCA1-C47I CKFWMLKLL  | 187   | 1479  |
| >BRCA1-C47I FCKFCMLK    | 1227  | >BRCA1-C47I FCKFWMLK   | 355   | 872   |
| >BRCA1-C47I IFCKFCML    | 115   | >BRCA1-C47I IFCKFWML   | 354   | 239   |
| >BRCA1-C47I IFCKFCMLK   | 380   | >BRCA1-C47I IFCKFWMLK  | 313   | 67    |
| >BRCA1-C47I IFCKFCMLK   | 70    | >BRCA1-C47I IFCKFWMLK  | 55    | 15    |
| >BRCA1-C47I IFCKFCML    | 1128  | >BRCA1-C47I IFCKFWML   | 251   | 877   |
| >BRCA1-C47I IFCKFCML    | 1241  | >BRCA1-C47I IFCKFWML   | 182   | 1059  |
| >BRCA1-C47I IFCKFCMLKLI | 987   | >BRCA1-C47I IFCKFWMLKL | 464   | 523   |
| >BRCA1-C47I IFCKFCML    | 173   | >BRCA1-C47I IFCKFWML   | 51    | 122   |
| >BRCA1-C47I IFCKFCMLKL  | 300   | >BRCA1-C47I IFCKFWMLKL | 264   | 36    |
| >BRCA1-C47I IFCKFCMLK   | 332   | >BRCA1-C47I IFCKFWMLK  | 24    | 308   |
| >BRCA1-C47I IFCKFCMLK   | 394   | >BRCA1-C47I IFCKFWMLK  | 78    | 316   |
| >BRCA1-C47I IFCKFCMLK   | 151   | >BRCA1-C47I IFCKFWMLK  | 125   | 26    |
| >BRCA1-C47I IFCKFCMLK   | 195   | >BRCA1-C47I IFCKFWMLK  | 516   | 321   |
| >BRCA1-C47I IFCKFCMLK   | 1689  | >BRCA1-C47I IFCKFWMLK  | 422   | 1267  |
| >BRCA1-C47I IFCKFCMLK   | 69    | >BRCA1-C47I IFCKFWMLK  | 40    | 29    |
| >BRCA1-C47I IFCKFCMLKL  | 327   | >BRCA1-C47I IFCKFWMLKL | 134   | 193   |
| >BRCA1-C47I IFCKFCMLKLI | 483   | >BRCA1-C47I IFCKFWMLKL | 543   | 60    |
| >BRCA1-C47I HIFCKFCML   | 154   | >BRCA1-C47I HIFCKFWML  | 990   | 836   |
| >BRCA1-C47I HIFCKFCML   | 574   | >BRCA1-C47I HIFCKFWML  | 34    | 540   |
| >BRCA1-C47I HIFCKFCMLK  | 455   | >BRCA1-C47I HIFCKFWMLK | 131   | 324   |
| >BRCA1-C47I HIFCKFCM    | 1415  | >BRCA1-C47I HIFCKFWM   | 427   | 988   |

|                        |       |                       |       |       |
|------------------------|-------|-----------------------|-------|-------|
| >BRCA1-C47\HIFCKFCML   | 158   | >BRCA1-C47\HIFCKFWML  | 22    | 136   |
| >BRCA1-C47\HIFCKFCMLK  | 172   | >BRCA1-C47\HIFCKFWMLI | 94    | 78    |
| >BRCA1-C47\HIFCKFCML   | 330   | >BRCA1-C47\HIFCKFWML  | 191   | 139   |
| >BRCA1-C47\HIFCKFCMLK  | 341   | >BRCA1-C47\HIFCKFWMLI | 261   | 80    |
| >BRCA1-C47\HIFCKFCM    | 1248  | >BRCA1-C47\HIFCKFWM   | 339   | 909   |
| >BRCA1-C47\HIFCKFCML   | 134   | >BRCA1-C47\HIFCKFWML  | 11    | 123   |
| >BRCA1-C47\HIFCKFCMLK  | 350   | >BRCA1-C47\HIFCKFWMLI | 132   | 218   |
| >BRCA1-C47\HIFCKFCML   | 86    | >BRCA1-C47\HIFCKFWML  | 16    | 70    |
| >BRCA1-C47\HIFCKFCMLK  | 652   | >BRCA1-C47\HIFCKFWMLI | 109   | 543   |
| >BRCA1-C47\HIFCKFCML   | 610   | >BRCA1-C47\HIFCKFWML  | 73    | 537   |
| >BRCA1-C47\HIFCKFCML   | 937   | >BRCA1-C47\HIFCKFWML  | 257   | 680   |
| >BRCA1-C47\HIFCKFCML   | 490   | >BRCA1-C47\HIFCKFWML  | 102   | 388   |
| >BRCA1-C47\HIFCKFCMLK  | 1212  | >BRCA1-C47\HIFCKFWMLI | 334   | 878   |
| >BRCA1-C47\HIFCKFCMLK  | 22    | >BRCA1-C47\HIFCKFWMLI | 36    | 14    |
| >BRCA1-C47\HIFCKFCMLK  | 19    | >BRCA1-C47\HIFCKFWMLI | 23    | 4     |
| >BRCA1-C47\HIFCKFCM    | 945   | >BRCA1-C47\HIFCKFWM   | 451   | 494   |
| >BRCA1-C47\HIFCKFCMLK  | 12    | >BRCA1-C47\HIFCKFWMLI | 10    | 2     |
| >BRCA1-C47\HIFCKFCMLK  | 181   | >BRCA1-C47\HIFCKFWMLI | 132   | 49    |
| >BRCA1-C47\HIFCKFCMLK  | 586   | >BRCA1-C47\HIFCKFWMLI | 311   | 275   |
| >BRCA1-C47\HIFCKFCMLK  | 16    | >BRCA1-C47\HIFCKFWMLI | 16    | 0     |
| >BRCA1-C47\HIFCKFCM    | 697   | >BRCA1-C47\HIFCKFWM   | 271   | 426   |
| >BRCA1-C47\HIFCKFCML   | 59    | >BRCA1-C47\HIFCKFWML  | 14    | 45    |
| >BRCA1-C47\HIFCKFCMLK  | 76    | >BRCA1-C47\HIFCKFWMLI | 49    | 27    |
| >BRCA1-C47\HIFCKFCM    | 2257  | >BRCA1-C47\HIFCKFWM   | 480   | 1777  |
| >BRCA1-C47\HIFCKFCML   | 201   | >BRCA1-C47\HIFCKFWML  | 34    | 167   |
| >BRCA1-C47\HIFCKFCMLK  | 598   | >BRCA1-C47\HIFCKFWMLI | 101   | 497   |
| >BRCA1-C47\HIFCKFCML   | 30    | >BRCA1-C47\HIFCKFWML  | 27    | 3     |
| >BRCA1-C47\HIFCKFCMLK  | 376   | >BRCA1-C47\HIFCKFWMLI | 358   | 18    |
| >BRCA1-C47\HIFCKFCMLK  | 339   | >BRCA1-C47\HIFCKFWMLI | 459   | 120   |
| >BRCA1-C47\HIFCKFCMLK  | 782   | >BRCA1-C47\HIFCKFWMLI | 285   | 497   |
| >BRCA1-C47\HIFCKFCMLK  | 29    | >BRCA1-C47\HIFCKFWMLI | 20    | 9     |
| >BRCA1-C47\DHIFCKFCML  | 207   | >BRCA1-C47\DHIFCKFWM  | 231   | 24    |
| >BRCA1-C47\CDHIFCKFC   | 6312  | >BRCA1-C47\CDHIFCKFW  | 404   | 5908  |
| >BRCA1-C47\CDHIFCKFCM  | 575   | >BRCA1-C47\CDHIFCKFWI | 269   | 306   |
| >BRCA1-C47\CDHIFCKFCM  | 233   | >BRCA1-C47\CDHIFCKFWI | 108   | 125   |
| >BRCA1-C47\KCDHIFCKFCI | 2390  | >BRCA1-C47\KCDHIFCKFW | 397   | 1993  |
| >BRCA1-G10\GPKLNAML    | 572   | >BRCA1-G10\WPKLNAML   | 167   | 405   |
| >BRCA1-G10\GPKLNAML    | 3146  | >BRCA1-G10\WPKLNAML   | 382   | 2764  |
| >BRCA1-G10\GPKLNAMLR   | 2096  | >BRCA1-G10\WPKLNAMLF  | 395   | 1701  |
| >BRCA1-G10\RGPKLNAML   | 343   | >BRCA1-G10\RWPKLNAML  | 16686 | 16343 |
| >BRCA1-G10\RGPKLNAML   | 11384 | >BRCA1-G10\RWPKLNAML  | 140   | 11244 |
| >BRCA1-G10\RGPKLNAMLI  | 12425 | >BRCA1-G10\RWPKLNAML  | 175   | 12250 |
| >BRCA1-G10\RGPKLNAM    | 17100 | >BRCA1-G10\RWPKLNAM   | 80    | 17020 |

|                        |       |                       |      |       |
|------------------------|-------|-----------------------|------|-------|
| >BRCA1-G10' RGPKNAML   | 11635 | >BRCA1-G10' RWPKNAML  | 8    | 11627 |
| >BRCA1-G10' RGPKNAML   | 11986 | >BRCA1-G10' RWPKNAML  | 12   | 11974 |
| >BRCA1-G10' RGPKNAML   | 418   | >BRCA1-G10' RWPKNAML  | 74   | 344   |
| >BRCA1-G10' RGPKNAML   | 21    | >BRCA1-G10' RWPKNAML  | 65   | 44    |
| >BRCA1-G10' RGPKNAML   | 47    | >BRCA1-G10' RWPKNAML  | 185  | 138   |
| >BRCA1-G10' RGPKNAML   | 39    | >BRCA1-G10' RWPKNAML  | 10   | 29    |
| >BRCA1-G10' RGPKNAM    | 31834 | >BRCA1-G10' RWPKNAM   | 67   | 31767 |
| >BRCA1-G10' RGPKNAML   | 33929 | >BRCA1-G10' RWPKNAML  | 165  | 33764 |
| >BRCA1-G10' RGPKNAML   | 34952 | >BRCA1-G10' RWPKNAML  | 246  | 34706 |
| >BRCA1-G10' NRGPKLNAM  | 6045  | >BRCA1-G10' NRWPKLNAM | 319  | 5726  |
| >BRCA1-G10' NRGPKLNAM  | 1614  | >BRCA1-G10' NRWPKLNAM | 150  | 1464  |
| >BRCA1-G10' NRGPKLNAM  | 5694  | >BRCA1-G10' NRWPKLNAM | 171  | 5523  |
| >BRCA1-G10' NRGPKLNA   | 3890  | >BRCA1-G10' NRWPKLNA  | 136  | 3754  |
| >BRCA1-G10' NRGPKLNAM  | 2392  | >BRCA1-G10' NRWPKLNAM | 300  | 2092  |
| >BRCA1-G10' NRGPKLNAM  | 2582  | >BRCA1-G10' NRWPKLNAM | 87   | 2495  |
| >BRCA1-G10' NRGPKLNAM  | 668   | >BRCA1-G10' NRWPKLNAM | 180  | 488   |
| >BRCA1-G10' NRGPKLNAM  | 5762  | >BRCA1-G10' NRWPKLNAM | 292  | 5470  |
| >BRCA1-G10' NRGPKLNAM  | 897   | >BRCA1-G10' NRWPKLNAM | 122  | 775   |
| >BRCA1-G10' RNRGPKLNA  | 62    | >BRCA1-G10' RNRWPKLNA | 111  | 49    |
| >BRCA1-G10' RNRGPKLNAI | 145   | >BRCA1-G10' RNRWPKLNA | 248  | 103   |
| >BRCA1-G10' RNRGPKLNAI | 177   | >BRCA1-G10' RNRWPKLNA | 299  | 122   |
| >BRCA1-G10' RNRGPKLNAI | 190   | >BRCA1-G10' RNRWPKLNA | 202  | 12    |
| >BRCA1-G10' RNRGPKLNAI | 449   | >BRCA1-G10' RNRWPKLNA | 193  | 256   |
| >BRCA1-G10' RNRGPKLNAI | 2363  | >BRCA1-G10' RNRWPKLNA | 488  | 1875  |
| >BRCA1-G10' GRNRGPKL   | 282   | >BRCA1-G10' GRNRWPKL  | 105  | 177   |
| >BRCA1-G10' GRNRGPKLN, | 736   | >BRCA1-G10' GRNRWPKLN | 202  | 534   |
| >BRCA1-G10' GRNRGPKLN, | 439   | >BRCA1-G10' GRNRWPKLN | 182  | 257   |
| >BRCA1-G10' GRNRGPKL   | 342   | >BRCA1-G10' GRNRWPKL  | 1003 | 661   |
| >BRCA1-G10' GRNRGPKLN, | 228   | >BRCA1-G10' GRNRWPKLN | 232  | 4     |
| >BRCA1-G10' LGRNRGPK   | 10    | >BRCA1-G10' LGRNRWPK  | 8    | 2     |
| >BRCA1-G10' LGRNRGPKL  | 942   | >BRCA1-G10' LGRNRWPKL | 123  | 819   |
| >BRCA1-G10' LGRNRGPKL  | 354   | >BRCA1-G10' LGRNRWPKL | 150  | 204   |
| >BRCA1-G10' LGRNRGPKL  | 1042  | >BRCA1-G10' LGRNRWPKL | 376  | 666   |
| >BRCA1-G10' ELGRNRGPKL | 1596  | >BRCA1-G10' ELGRNRWPK | 491  | 1105  |
| >BRCA1-G10' ELGRNRGPKL | 1702  | >BRCA1-G10' ELGRNRWPK | 489  | 1213  |
| >BRCA1-G10' ELGRNRGPKL | 115   | >BRCA1-G10' ELGRNRWPK | 31   | 84    |
| >BRCA1-G10' ELGRNRGPK  | 954   | >BRCA1-G10' ELGRNRWPK | 407  | 547   |
| >BRCA1-G10' AELGRNRGPI | 53    | >BRCA1-G10' AELGRNRWP | 49   | 4     |
| >BRCA1-G10' AELGRNRGPI | 139   | >BRCA1-G10' AELGRNRWP | 106  | 33    |
| >BRCA1-G10' AELGRNRG   | 9535  | >BRCA1-G10' AELGRNRW  | 152  | 9383  |
| >BRCA1-G10' AELGRNRG   | 5345  | >BRCA1-G10' AELGRNRW  | 32   | 5313  |
| >BRCA1-G10' AELGRNRGPI | 249   | >BRCA1-G10' AELGRNRWP | 145  | 104   |
| >BRCA1-G10' AELGRNRGPI | 554   | >BRCA1-G10' AELGRNRWP | 221  | 333   |

|                          |      |                         |      |      |
|--------------------------|------|-------------------------|------|------|
| >BRCA1-G10: AELGRNRGPI   | 37   | >BRCA1-G10: AELGRNRWP   | 30   | 7    |
| >BRCA1-G77: GTQESISLLEV  | 233  | >BRCA1-G77: CTQESISLLEV | 551  | 318  |
| >BRCA1-G77: GTQESISLL    | 447  | >BRCA1-G77: CTQESISLL   | 944  | 497  |
| >BRCA1-G77: GTQESISLL    | 361  | >BRCA1-G77: CTQESISLL   | 689  | 328  |
| >BRCA1-G77: GTQESISLLEV  | 107  | >BRCA1-G77: CTQESISLLEV | 240  | 133  |
| >BRCA1-G77: GTQESISLLEV  | 97   | >BRCA1-G77: CTQESISLLEV | 209  | 112  |
| >BRCA1-G77: GTQESISLLEV  | 49   | >BRCA1-G77: CTQESISLLEV | 221  | 172  |
| >BRCA1-G77: GTQESISLLEV  | 82   | >BRCA1-G77: CTQESISLLEV | 875  | 793  |
| >BRCA1-G77: GTQESISLLEV  | 174  | >BRCA1-G77: CTQESISLLEV | 2951 | 2777 |
| >BRCA1-G77: GTQESISLLEV  | 47   | >BRCA1-G77: CTQESISLLEV | 307  | 260  |
| >BRCA1-G77: GTQESISLL    | 8562 | >BRCA1-G77: CTQESISLL   | 320  | 8242 |
| >BRCA1-G77: GTQESISLLEV  | 3734 | >BRCA1-G77: CTQESISLLEV | 184  | 3550 |
| >BRCA1-G77: GTQESISL     | 31   | >BRCA1-G77: CTQESISL    | 89   | 58   |
| >BRCA1-G77: GTQESISLL    | 18   | >BRCA1-G77: CTQESISLL   | 47   | 29   |
| >BRCA1-G77: GTQESISLLEV  | 311  | >BRCA1-G77: CTQESISLLEV | 928  | 617  |
| >BRCA1-G77: GTQESISLL    | 59   | >BRCA1-G77: CTQESISLL   | 32   | 27   |
| >BRCA1-G77: GTQESISLL    | 15   | >BRCA1-G77: CTQESISLL   | 173  | 158  |
| >BRCA1-G77: GTQESISL     | 551  | >BRCA1-G77: CTQESISL    | 46   | 505  |
| >BRCA1-G77: GTQESISLL    | 617  | >BRCA1-G77: CTQESISLL   | 34   | 583  |
| >BRCA1-G77: YGTQESISLL   | 190  | >BRCA1-G77: YCTQESISLL  | 793  | 603  |
| >BRCA1-G77: DYGQTQESI    | 202  | >BRCA1-G77: DYCTQESI    | 22   | 180  |
| >BRCA1-G77: DYGQTQESISLL | 823  | >BRCA1-G77: DYCTQESISLL | 87   | 736  |
| >BRCA1-G77: TDYGTQESI    | 176  | >BRCA1-G77: TDYCTQESI   | 129  | 47   |
| >BRCA1-G77: TDYGTQESISI  | 445  | >BRCA1-G77: TDYCTQESISL | 1342 | 897  |
| >BRCA1-G77: TDYGTQESISI  | 439  | >BRCA1-G77: TDYCTQESISL | 1026 | 587  |
| >BRCA1-G77: TDYGTQESI    | 1023 | >BRCA1-G77: TDYCTQESI   | 339  | 684  |
| >BRCA1-G77: TDYGTQESI    | 29   | >BRCA1-G77: TDYCTQESI   | 25   | 4    |
| >BRCA1-G77: GTDYGQTQESI  | 190  | >BRCA1-G77: GTDYCTQESI  | 294  | 104  |
| >BRCA1-G77: SLVPGTDYGT   | 357  | >BRCA1-G77: SLVPGTDYCT  | 742  | 385  |
| >BRCA1-G77: SLVPGTDYG    | 412  | >BRCA1-G77: SLVPGTDYC   | 649  | 237  |
| >BRCA1-G77: SLVPGTDYGT   | 107  | >BRCA1-G77: SLVPGTDYCT  | 208  | 101  |
| >BRCA1-G77: SLVPGTDYG    | 1774 | >BRCA1-G77: SLVPGTDYC   | 233  | 1541 |
| >BRCA1-G77: SLVPGTDYGT   | 255  | >BRCA1-G77: SLVPGTDYCT  | 576  | 321  |
| >BRCA1-G77: SLVPGTDYG    | 914  | >BRCA1-G77: SLVPGTDYC   | 31   | 883  |
| >BRCA1-G77: SLVPGTDYGT   | 130  | >BRCA1-G77: SLVPGTDYCT  | 659  | 529  |
| >BRCA1-G77: SLVPGTDYG    | 5872 | >BRCA1-G77: SLVPGTDYC   | 194  | 5678 |
| >BRCA1-G77: SLVPGTDYGT   | 289  | >BRCA1-G77: SLVPGTDYCT  | 744  | 455  |
| >BRCA1-G77: SLVPGTDYG    | 1704 | >BRCA1-G77: SLVPGTDYC   | 150  | 1554 |
| >BRCA1-G77: SLVPGTDYGT   | 143  | >BRCA1-G77: SLVPGTDYCT  | 165  | 22   |
| >BRCA1-G77: SLVPGTDYGT   | 2088 | >BRCA1-G77: SLVPGTDYCT  | 363  | 1725 |
| >BRCA1-G77: SLVPGTDYG    | 2729 | >BRCA1-G77: SLVPGTDYC   | 17   | 2712 |
| >BRCA1-G77: SLVPGTDYGT   | 33   | >BRCA1-G77: SLVPGTDYCT  | 120  | 87   |
| >BRCA1-G77: SLVPGTDYGT   | 141  | >BRCA1-G77: SLVPGTDYCT  | 17   | 124  |

|                         |      |                         |       |       |
|-------------------------|------|-------------------------|-------|-------|
| >BRCA1-L30F LIKEPVST    | 1101 | >BRCA1-L30F FIKEPVST    | 82    | 1019  |
| >BRCA1-L30F LIKEPVSTKC  | 1992 | >BRCA1-L30F FIKEPVSTKC  | 419   | 1573  |
| >BRCA1-L30F LIKEPVSTK   | 169  | >BRCA1-L30F FIKEPVSTK   | 517   | 348   |
| >BRCA1-L30F LIKEPVSTK   | 50   | >BRCA1-L30F FIKEPVSTK   | 1461  | 1411  |
| >BRCA1-L30F LIKEPVSTK   | 521  | >BRCA1-L30F FIKEPVSTK   | 106   | 415   |
| >BRCA1-L30F ELIKEPVSTK  | 448  | >BRCA1-L30F EFIKEPVSTK  | 4528  | 4080  |
| >BRCA1-L30F ELIKEPVSTK  | 271  | >BRCA1-L30F EFIKEPVSTK  | 164   | 107   |
| >BRCA1-L30F KILECPICLEL | 15   | >BRCA1-L30F KILECPICLEF | 2000  | 1985  |
| >BRCA1-L30F KILECPICLEL | 210  | >BRCA1-L30F KILECPICLEF | 6202  | 5992  |
| >BRCA1-L30F KILECPICLEL | 24   | >BRCA1-L30F KILECPICLEF | 186   | 162   |
| >BRCA1-L30F KILECPICLEL | 42   | >BRCA1-L30F KILECPICLEF | 3130  | 3088  |
| >BRCA1-L30F KILECPICLEL | 154  | >BRCA1-L30F KILECPICLEF | 12774 | 12620 |
| >BRCA1-L30F KILECPICLEL | 59   | >BRCA1-L30F KILECPICLEF | 11036 | 10977 |
| >BRCA1-L30F KILECPICLEL | 84   | >BRCA1-L30F KILECPICLEF | 13636 | 13552 |
| >BRCA1-L30F KILECPICLEL | 103  | >BRCA1-L30F KILECPICLEF | 17277 | 17174 |
| >BRCA1-L30F KILECPICLEL | 5592 | >BRCA1-L30F KILECPICLEF | 328   | 5264  |
| >BRCA1-L30F KILECPICLEL | 178  | >BRCA1-L30F KILECPICLEF | 38    | 140   |
| >BRCA1-L30F KILECPICLEL | 1735 | >BRCA1-L30F KILECPICLEF | 92    | 1643  |
| >BRCA1-L30F KILECPICLEL | 1476 | >BRCA1-L30F KILECPICLEF | 132   | 1344  |
| >BRCA1-L30F KILECPICLEL | 2959 | >BRCA1-L30F KILECPICLEF | 128   | 2831  |
| >BRCA1-L30F LELIKEPV    | 957  | >BRCA1-L30F LEFIKEPV    | 418   | 539   |
| >BRCA1-L30F LELIKEPV    | 556  | >BRCA1-L30F LEFIKEPV    | 182   | 374   |
| >BRCA1-L30F LELIKEPV    | 217  | >BRCA1-L30F LEFIKEPV    | 104   | 113   |
| >BRCA1-L30F LELIKEPV    | 101  | >BRCA1-L30F LEFIKEPV    | 210   | 109   |
| >BRCA1-L30F CLELIKEPV   | 459  | >BRCA1-L30F CLEFIKEPV   | 199   | 260   |
| >BRCA1-L30F CLELIKEPV   | 923  | >BRCA1-L30F CLEFIKEPV   | 309   | 614   |
| >BRCA1-L30F CLELIKEPV   | 61   | >BRCA1-L30F CLEFIKEPV   | 44    | 17    |
| >BRCA1-L30F CLELIKEPV   | 2161 | >BRCA1-L30F CLEFIKEPV   | 468   | 1693  |
| >BRCA1-L30F ICLELIKEPV  | 1036 | >BRCA1-L30F ICLEFIKEPV  | 494   | 542   |
| >BRCA1-L30F ICLELIKEPV  | 59   | >BRCA1-L30F ICLEFIKEPV  | 29    | 30    |
| >BRCA1-L30F ICLELIKEPV  | 711  | >BRCA1-L30F ICLEFIKEPV  | 286   | 425   |
| >BRCA1-L30F CPICLELI    | 2788 | >BRCA1-L30F CPICLEFI    | 243   | 2545  |
| >BRCA1-L30F CPICLELI    | 362  | >BRCA1-L30F CPICLEFI    | 705   | 343   |
| >BRCA1-L30F CPICLELI    | 57   | >BRCA1-L30F CPICLEFI    | 83    | 26    |
| >BRCA1-L30F CPICLELI    | 232  | >BRCA1-L30F CPICLEFI    | 480   | 248   |
| >BRCA1-L30F CPICLELIK   | 2447 | >BRCA1-L30F CPICLEFIK   | 426   | 2021  |
| >BRCA1-L30F ECPILELI    | 353  | >BRCA1-L30F ECPILEFI    | 126   | 227   |
| >BRCA1-L30F LECPILEL    | 69   | >BRCA1-L30F LECPILEF    | 229   | 160   |
| >BRCA1-L30F LECPILELI   | 8    | >BRCA1-L30F LECPILEFI   | 6     | 2     |
| >BRCA1-L30F LECPILEL    | 7214 | >BRCA1-L30F LECPILEF    | 386   | 6828  |
| >BRCA1-L30F LECPILEL    | 4023 | >BRCA1-L30F LECPILEF    | 261   | 3762  |
| >BRCA1-L30F LECPILEL    | 111  | >BRCA1-L30F LECPILEF    | 15    | 96    |
| >BRCA1-L30F LECPILEL    | 51   | >BRCA1-L30F LECPILEF    | 382   | 331   |



|                        |      |                        |       |       |
|------------------------|------|------------------------|-------|-------|
| >BRCA1-L30FLECPICLEL   | 189  | >BRCA1-L30FLECPICLEF   | 522   | 333   |
| >BRCA1-L30FLECPICLEL   | 948  | >BRCA1-L30FLECPICLEF   | 130   | 818   |
| >BRCA1-L30FLECPICLELI  | 99   | >BRCA1-L30FLECPICLEFI  | 58    | 41    |
| >BRCA1-L30FILECPICLEL  | 281  | >BRCA1-L30FILECPICLEF  | 6985  | 6704  |
| >BRCA1-L30FILECPICLELI | 515  | >BRCA1-L30FILECPICLEFI | 273   | 242   |
| >BRCA1-L30FILECPICLEL  | 211  | >BRCA1-L30FILECPICLEF  | 14197 | 13986 |
| >BRCA1-L30FILECPICLELI | 106  | >BRCA1-L30FILECPICLEFI | 54    | 52    |
| >BRCA1-L30FILECPICLEL  | 347  | >BRCA1-L30FILECPICLEF  | 15218 | 14871 |
| >BRCA1-L30FILECPICLELI | 714  | >BRCA1-L30FILECPICLEFI | 311   | 403   |
| >BRCA1-L30FILECPICLEL  | 62   | >BRCA1-L30FILECPICLEF  | 3675  | 3613  |
| >BRCA1-L30FILECPICLELI | 48   | >BRCA1-L30FILECPICLEFI | 22    | 26    |
| >BRCA1-L30FILECPICLEL  | 248  | >BRCA1-L30FILECPICLEF  | 11654 | 11406 |
| >BRCA1-L30FILECPICLELI | 130  | >BRCA1-L30FILECPICLEFI | 45    | 85    |
| >BRCA1-L30FILECPICLEL  | 14   | >BRCA1-L30FILECPICLEF  | 6335  | 6321  |
| >BRCA1-L30FILECPICLELI | 88   | >BRCA1-L30FILECPICLEFI | 75    | 13    |
| >BRCA1-L30FILECPICLEL  | 4926 | >BRCA1-L30FILECPICLEF  | 291   | 4635  |
| >BRCA1-L75εLQTERSVES   | 599  | >BRCA1-L75εFQTERSVES   | 43    | 556   |
| >BRCA1-L75εLQTERSVESS  | 1378 | >BRCA1-L75εFQTERSVESS  | 108   | 1270  |
| >BRCA1-L75εVLQTERSV    | 496  | >BRCA1-L75εVFQTERSV    | 17789 | 17293 |
| >BRCA1-L75εVLQTERSV    | 156  | >BRCA1-L75εVFQTERSV    | 14729 | 14573 |
| >BRCA1-L75εVLQTERSV    | 30   | >BRCA1-L75εVFQTERSV    | 12722 | 12692 |
| >BRCA1-L75εVLQTERSV    | 48   | >BRCA1-L75εVFQTERSV    | 17666 | 17618 |
| >BRCA1-L75εVLQTERSV    | 172  | >BRCA1-L75εVFQTERSV    | 18500 | 18328 |
| >BRCA1-L75εVLQTERSV    | 268  | >BRCA1-L75εVFQTERSV    | 19664 | 19396 |
| >BRCA1-L75εVLQTERSV    | 4    | >BRCA1-L75εVFQTERSV    | 5507  | 5503  |
| >BRCA1-L75εKDLMLSGER\  | 177  | >BRCA1-L75εKDLMLSGER\  | 377   | 200   |
| >BRCA1-L75εRVLQTERSV   | 82   | >BRCA1-L75εRVFQTERSV   | 47    | 35    |
| >BRCA1-L75εRVLQTERSV   | 498  | >BRCA1-L75εRVFQTERSV   | 502   | 4     |
| >BRCA1-L75εRVLQTERSV   | 307  | >BRCA1-L75εRVFQTERSV   | 126   | 181   |
| >BRCA1-L75εRVLQTERSV   | 557  | >BRCA1-L75εRVFQTERSV   | 267   | 290   |
| >BRCA1-L75εRVLQTERSV   | 551  | >BRCA1-L75εRVFQTERSV   | 118   | 433   |
| >BRCA1-L75εERVLQTER    | 641  | >BRCA1-L75εERVFQTER    | 142   | 499   |
| >BRCA1-L75εGERVLQTERS  | 674  | >BRCA1-L75εGERVFQTERS  | 489   | 185   |
| >BRCA1-L75εGERVLQTERS  | 58   | >BRCA1-L75εGERVFQTERS  | 57    | 1     |
| >BRCA1-L75εGERVLQTERS  | 370  | >BRCA1-L75εGERVFQTERS  | 154   | 216   |
| >BRCA1-L75εGERVLQTER   | 711  | >BRCA1-L75εGERVFQTER   | 491   | 220   |
| >BRCA1-L75εGERVLQTERS  | 31   | >BRCA1-L75εGERVFQTERS  | 29    | 2     |
| >BRCA1-L75εLSGERVLQTE  | 245  | >BRCA1-L75εLSGERVFQTE  | 76    | 169   |
| >BRCA1-L75εLSGERVLQTE  | 557  | >BRCA1-L75εLSGERVFQTE  | 222   | 335   |
| >BRCA1-L75εMLSGERVLQ   | 659  | >BRCA1-L75εMLSGERVFQ   | 336   | 323   |
| >BRCA1-L75εMLSGERVL    | 17   | >BRCA1-L75εMLSGERVF    | 1231  | 1214  |
| >BRCA1-L75εMLSGERVLQ   | 169  | >BRCA1-L75εMLSGERVFQ   | 70    | 99    |
| >BRCA1-L75εMLSGERVLQ   | 264  | >BRCA1-L75εMLSGERVFQ   | 173   | 91    |

|                       |      |                       |       |       |
|-----------------------|------|-----------------------|-------|-------|
| >BRCA1-L75εMLSGERVL   | 193  | >BRCA1-L75εMLSGERVF   | 9409  | 9216  |
| >BRCA1-L75εMLSGERVLO` | 157  | >BRCA1-L75εMLSGERVFO` | 422   | 265   |
| >BRCA1-L75εMLSGERVL   | 119  | >BRCA1-L75εMLSGERVF   | 6780  | 6661  |
| >BRCA1-L75εMLSGERVLO` | 414  | >BRCA1-L75εMLSGERVFO` | 124   | 290   |
| >BRCA1-L75εMLSGERVLO` | 1485 | >BRCA1-L75εMLSGERVFO` | 377   | 1108  |
| >BRCA1-L75εMLSGERVLO` | 2167 | >BRCA1-L75εMLSGERVFO` | 349   | 1818  |
| >BRCA1-L75εMLSGERVL   | 5    | >BRCA1-L75εMLSGERVF   | 2526  | 2521  |
| >BRCA1-L75εMLSGERVLO  | 26   | >BRCA1-L75εMLSGERVFO  | 21    | 5     |
| >BRCA1-L75εMLSGERVLO` | 9    | >BRCA1-L75εMLSGERVFO` | 6     | 3     |
| >BRCA1-L75εMLSGERVL   | 2907 | >BRCA1-L75εMLSGERVF   | 127   | 2780  |
| >BRCA1-L75εMLSGERVL   | 2901 | >BRCA1-L75εMLSGERVF   | 133   | 2768  |
| >BRCA1-L75εMLSGERVL   | 5159 | >BRCA1-L75εMLSGERVF   | 443   | 4716  |
| >BRCA1-L75εLMLSGERVLC | 731  | >BRCA1-L75εLMLSGERVFC | 239   | 492   |
| >BRCA1-L75εLMLSGERVLC | 1528 | >BRCA1-L75εLMLSGERVFC | 384   | 1144  |
| >BRCA1-L75εLMLSGERVL  | 16   | >BRCA1-L75εLMLSGERVF  | 1836  | 1820  |
| >BRCA1-L75εLMLSGERVLC | 47   | >BRCA1-L75εLMLSGERVFC | 22    | 25    |
| >BRCA1-L75εLMLSGERVL  | 105  | >BRCA1-L75εLMLSGERVF  | 13746 | 13641 |
| >BRCA1-L75εLMLSGERVL  | 114  | >BRCA1-L75εLMLSGERVF  | 12465 | 12351 |
| >BRCA1-L75εLMLSGERVLC | 252  | >BRCA1-L75εLMLSGERVFC | 93    | 159   |
| >BRCA1-L75εLMLSGERVL  | 205  | >BRCA1-L75εLMLSGERVF  | 12258 | 12053 |
| >BRCA1-L75εLMLSGERVLC | 381  | >BRCA1-L75εLMLSGERVFC | 73    | 308   |
| >BRCA1-L75εLMLSGERVL  | 19   | >BRCA1-L75εLMLSGERVF  | 11300 | 11281 |
| >BRCA1-L75εLMLSGERVLC | 224  | >BRCA1-L75εLMLSGERVFC | 180   | 44    |
| >BRCA1-L75εLMLSGERVLC | 56   | >BRCA1-L75εLMLSGERVFC | 32    | 24    |
| >BRCA1-L75εLMLSGERVL  | 5519 | >BRCA1-L75εLMLSGERVF  | 340   | 5179  |
| >BRCA1-L75εLMLSGERVL  | 903  | >BRCA1-L75εLMLSGERVF  | 60    | 843   |
| >BRCA1-L75εLMLSGERVL  | 1580 | >BRCA1-L75εLMLSGERVF  | 120   | 1460  |
| >BRCA1-L75εLMLSGERVL  | 54   | >BRCA1-L75εLMLSGERVF  | 4     | 50    |
| >BRCA1-L75εDLMLSGERVI | 4417 | >BRCA1-L75εDLMLSGERVI | 345   | 4072  |
| >BRCA1-S114MGSSHASQV  | 442  | >BRCA1-S114MGSGHASQ\  | 338   | 104   |
| >BRCA1-S114MGSSHASQV  | 2434 | >BRCA1-S114MGSGHASQ\  | 459   | 1975  |
| >BRCA1-S114MGSSHASQV  | 421  | >BRCA1-S114MGSGHASQ\  | 1139  | 718   |
| >BRCA1-S114PMGSSHASQ  | 24   | >BRCA1-S114PMGSGHASC  | 16    | 8     |
| >BRCA1-S114PMGSSHASQ  | 93   | >BRCA1-S114PMGSGHASC  | 57    | 36    |
| >BRCA1-S114PMGSSHASQ  | 41   | >BRCA1-S114PMGSGHASC  | 32    | 9     |
| >BRCA1-S114PMGSSHASQ  | 8    | >BRCA1-S114PMGSGHASC  | 5     | 3     |
| >BRCA1-S114QPMGSSHAS  | 99   | >BRCA1-S114QPMGSGHAS  | 191   | 92    |
| >BRCA1-S114QPMGSSHAS  | 945  | >BRCA1-S114QPMGSGHAS  | 413   | 532   |
| >BRCA1-S114QPMGSSHAS  | 533  | >BRCA1-S114QPMGSGHAS  | 222   | 311   |
| >BRCA1-S114QPMGSSHAS  | 38   | >BRCA1-S114QPMGSGHAS  | 29    | 9     |
| >BRCA1-S114QPMGSSHAS  | 100  | >BRCA1-S114QPMGSGHAS  | 353   | 253   |
| >BRCA1-S114QPMGSSHAS  | 259  | >BRCA1-S114QPMGSGHAS  | 465   | 206   |
| >BRCA1-S114QPMGSSHA   | 217  | >BRCA1-S114QPMGSGHA   | 181   | 36    |

|                        |       |                        |       |       |
|------------------------|-------|------------------------|-------|-------|
| >BRCA1-S114QPMGSSHAS   | 660   | >BRCA1-S114QPMGSGHAS   | 445   | 215   |
| >BRCA1-S114QPMGSSHAS   | 513   | >BRCA1-S114QPMGSGHAS   | 353   | 160   |
| >BRCA1-S114LEQPMGSSH   | 435   | >BRCA1-S114LEQPMGSGH   | 417   | 18    |
| >BRCA1-S114LEQPMGSSH   | 393   | >BRCA1-S114LEQPMGSGH   | 389   | 4     |
| >BRCA1-S114SPEHLKDEVS  | 392   | >BRCA1-S114TPEHLKDEVS  | 2180  | 1788  |
| >BRCA1-S114SPEHLKDEVS  | 399   | >BRCA1-S114TPEHLKDEVS  | 184   | 215   |
| >BRCA1-S114NSPEHLKDEV  | 797   | >BRCA1-S114NTPEHLKDEV  | 93    | 704   |
| >BRCA1-S114NSPEHLKDEV  | 3330  | >BRCA1-S114NTPEHLKDEV  | 254   | 3076  |
| >BRCA1-S114ENNSPEHLK   | 109   | >BRCA1-S114ENNTPEHLK   | 195   | 86    |
| >BRCA1-S114KENNSPEHL   | 385   | >BRCA1-S114KENNTPEHL   | 712   | 327   |
| >BRCA1-S114KENNSPEHL   | 58    | >BRCA1-S114KENNTPEHL   | 68    | 10    |
| >BRCA1-S114KENNSPEHL   | 233   | >BRCA1-S114KENNTPEHL   | 311   | 78    |
| >BRCA1-S114KENNSPEHL   | 120   | >BRCA1-S114KENNTPEHL   | 191   | 71    |
| >BRCA1-S114KKENNSPEHL  | 219   | >BRCA1-S114KKENNTPEHL  | 315   | 96    |
| >BRCA1-S114AKKENNSPEH  | 241   | >BRCA1-S114AKKENNTPEH  | 279   | 38    |
| >BRCA1-S114AKKENNSPEH  | 30    | >BRCA1-S114AKKENNTPEH  | 37    | 7     |
| >BRCA2-D30:DECYNLLA    | 164   | >BRCA2-D30:EECYNLLA    | 58    | 106   |
| >BRCA2-D30:DECYNLLAI   | 53    | >BRCA2-D30:EECYNLLAI   | 39    | 14    |
| >BRCA2-D30:DECYNLLA    | 338   | >BRCA2-D30:EECYNLLA    | 8582  | 8244  |
| >BRCA2-D30:DECYNLLAI   | 16    | >BRCA2-D30:EECYNLLAI   | 753   | 737   |
| >BRCA2-D30:DECYNLLAIKF | 5     | >BRCA2-D30:EECYNLLAIKF | 53    | 48    |
| >BRCA2-D30:DECYNLLAI   | 313   | >BRCA2-D30:EECYNLLAI   | 58    | 255   |
| >BRCA2-D30:DECYNLLAIKF | 1632  | >BRCA2-D30:EECYNLLAIKF | 337   | 1295  |
| >BRCA2-D30:DECYNLLAI   | 3450  | >BRCA2-D30:EECYNLLAI   | 497   | 2953  |
| >BRCA2-D30:DECYNLLAIKF | 194   | >BRCA2-D30:EECYNLLAIKF | 60    | 134   |
| >BRCA2-D30:DECYNLLA    | 1393  | >BRCA2-D30:EECYNLLA    | 24    | 1369  |
| >BRCA2-D30:DECYNLLAI   | 7123  | >BRCA2-D30:EECYNLLAI   | 139   | 6984  |
| >BRCA2-D30:DECYNLLAI   | 824   | >BRCA2-D30:EECYNLLAI   | 218   | 606   |
| >BRCA2-D30:SDECYNLL    | 590   | >BRCA2-D30:SEECYNLL    | 14    | 576   |
| >BRCA2-D30:SDECYNLLAI  | 1124  | >BRCA2-D30:SEECYNLLAI  | 48    | 1076  |
| >BRCA2-D30:SDECYNLL    | 13814 | >BRCA2-D30:SEECYNLL    | 32    | 13782 |
| >BRCA2-D30:SDECYNLLAI  | 8891  | >BRCA2-D30:SEECYNLLAI  | 348   | 8543  |
| >BRCA2-D30:SDECYNLLA   | 5208  | >BRCA2-D30:SEECYNLLA   | 20    | 5188  |
| >BRCA2-D30:SDECYNLLAI  | 854   | >BRCA2-D30:SEECYNLLAI  | 21    | 833   |
| >BRCA2-D30:SDECYNLL    | 414   | >BRCA2-D30:SEECYNLL    | 13313 | 12899 |
| >BRCA2-D30:SDECYNLLAI  | 63    | >BRCA2-D30:SEECYNLLAI  | 3248  | 3185  |
| >BRCA2-D30:LSDECYNLL   | 386   | >BRCA2-D30:LSEECYNLL   | 841   | 455   |
| >BRCA2-D30:LSDECYNLL   | 238   | >BRCA2-D30:LSEECYNLL   | 557   | 319   |
| >BRCA2-D30:LSDECYNL    | 345   | >BRCA2-D30:LSEECYNL    | 446   | 101   |
| >BRCA2-D30:LSDECYNLL   | 51    | >BRCA2-D30:LSEECYNLL   | 32    | 19    |
| >BRCA2-D30:LSDECYNLL   | 513   | >BRCA2-D30:LSEECYNLL   | 193   | 320   |
| >BRCA2-D30:LSDECYNLLAI | 60    | >BRCA2-D30:LSEECYNLLAI | 43    | 17    |
| >BRCA2-D30:YLSEECYNL   | 7     | >BRCA2-D30:YLSEECYNL   | 7     | 0     |

|                        |     |                        |     |     |
|------------------------|-----|------------------------|-----|-----|
| >BRCA2-D30:YLSDECYNLL  | 15  | >BRCA2-D30:YLSEECYNLL  | 18  | 3   |
| >BRCA2-D30:YLSDECYNLL/ | 9   | >BRCA2-D30:YLSEECYNLLA | 9   | 0   |
| >BRCA2-D30:YLSDECYN    | 170 | >BRCA2-D30:YLSEECYN    | 213 | 43  |
| >BRCA2-D30:YLSDECYNL   | 2   | >BRCA2-D30:YLSEECYNL   | 2   | 0   |
| >BRCA2-D30:YLSDECYNLL  | 7   | >BRCA2-D30:YLSEECYNLL  | 9   | 2   |
| >BRCA2-D30:YLSDECYNLL/ | 4   | >BRCA2-D30:YLSEECYNLLA | 4   | 0   |
| >BRCA2-D30:YLSDECYNL   | 5   | >BRCA2-D30:YLSEECYNL   | 6   | 1   |
| >BRCA2-D30:YLSDECYNLL  | 29  | >BRCA2-D30:YLSEECYNLL  | 33  | 4   |
| >BRCA2-D30:YLSDECYNLL/ | 5   | >BRCA2-D30:YLSEECYNLLA | 5   | 0   |
| >BRCA2-D30:YLSDECYNL   | 30  | >BRCA2-D30:YLSEECYNL   | 27  | 3   |
| >BRCA2-D30:YLSDECYNLL  | 69  | >BRCA2-D30:YLSEECYNLL  | 83  | 14  |
| >BRCA2-D30:YLSDECYNLL/ | 27  | >BRCA2-D30:YLSEECYNLLA | 28  | 1   |
| >BRCA2-D30:YLSDECYN    | 239 | >BRCA2-D30:YLSEECYN    | 169 | 70  |
| >BRCA2-D30:YLSDECYNL   | 6   | >BRCA2-D30:YLSEECYNL   | 5   | 1   |
| >BRCA2-D30:YLSDECYNLL  | 9   | >BRCA2-D30:YLSEECYNLL  | 7   | 2   |
| >BRCA2-D30:YLSDECYNLL/ | 15  | >BRCA2-D30:YLSEECYNLLA | 11  | 4   |
| >BRCA2-D30:YLSDECYNL   | 4   | >BRCA2-D30:YLSEECYNL   | 3   | 1   |
| >BRCA2-D30:YLSDECYNLL  | 5   | >BRCA2-D30:YLSEECYNLL  | 5   | 0   |
| >BRCA2-D30:YLSDECYNLL/ | 23  | >BRCA2-D30:YLSEECYNLLA | 22  | 1   |
| >BRCA2-D30:YLSDECYNL   | 8   | >BRCA2-D30:YLSEECYNL   | 7   | 1   |
| >BRCA2-D30:YLSDECYNLL  | 11  | >BRCA2-D30:YLSEECYNLL  | 9   | 2   |
| >BRCA2-D30:YLSDECYNLL/ | 23  | >BRCA2-D30:YLSEECYNLLA | 19  | 4   |
| >BRCA2-D30:YLSDECYNL   | 3   | >BRCA2-D30:YLSEECYNL   | 3   | 0   |
| >BRCA2-D30:YLSDECYNLL  | 6   | >BRCA2-D30:YLSEECYNLL  | 7   | 1   |
| >BRCA2-D30:YLSDECYNLL/ | 23  | >BRCA2-D30:YLSEECYNLLA | 31  | 8   |
| >BRCA2-D30:YLSDECYN    | 46  | >BRCA2-D30:YLSEECYN    | 130 | 84  |
| >BRCA2-D30:YLSDECYNL   | 2   | >BRCA2-D30:YLSEECYNL   | 2   | 0   |
| >BRCA2-D30:YLSDECYNLL  | 2   | >BRCA2-D30:YLSEECYNLL  | 2   | 0   |
| >BRCA2-D30:YLSDECYNLL/ | 3   | >BRCA2-D30:YLSEECYNLLA | 3   | 0   |
| >BRCA2-D30:YLSDECYNLL  | 498 | >BRCA2-D30:YLSEECYNLL  | 629 | 131 |
| >BRCA2-D30:VYLSDECYNLI | 309 | >BRCA2-D30:VYLSEECYNLI | 168 | 141 |
| >BRCA2-D30:VYLSDECYNL  | 92  | >BRCA2-D30:VYLSEECYNL  | 184 | 92  |
| >BRCA2-D30:VYLSDECYNLI | 146 | >BRCA2-D30:VYLSEECYNLI | 95  | 51  |
| >BRCA2-D30:VYLSDECYNL  | 234 | >BRCA2-D30:VYLSEECYNL  | 348 | 114 |
| >BRCA2-D30:VYLSDECYNLI | 179 | >BRCA2-D30:VYLSEECYNLI | 119 | 60  |
| >BRCA2-D30:VYLSDECYNL  | 16  | >BRCA2-D30:VYLSEECYNL  | 10  | 6   |
| >BRCA2-D30:VYLSDECYNLI | 13  | >BRCA2-D30:VYLSEECYNLI | 10  | 3   |
| >BRCA2-D30:VYLSDECY    | 163 | >BRCA2-D30:VYLSEECY    | 325 | 162 |
| >BRCA2-D30:VYLSDECY    | 243 | >BRCA2-D30:VYLSEECY    | 365 | 122 |
| >BRCA2-D30:FVYLSDECYN  | 542 | >BRCA2-D30:FVYLSEECYNI | 353 | 189 |
| >BRCA2-D30:FVYLSDECYN  | 79  | >BRCA2-D30:FVYLSEECYNI | 80  | 1   |
| >BRCA2-D30:FVYLSDECYN  | 17  | >BRCA2-D30:FVYLSEECYNI | 19  | 2   |
| >BRCA2-D30:FVYLSDECYN  | 141 | >BRCA2-D30:FVYLSEECYNI | 161 | 20  |

|                       |       |                        |       |       |
|-----------------------|-------|------------------------|-------|-------|
| >BRCA2-D30!FVYLSDECYN | 44    | >BRCA2-D30!FVYLSEECYNI | 57    | 13    |
| >BRCA2-D30!FVYLSDECYN | 234   | >BRCA2-D30!FVYLSEECYNI | 181   | 53    |
| >BRCA2-D30!FVYLSDECYN | 268   | >BRCA2-D30!FVYLSEECYNI | 331   | 63    |
| >BRCA2-D30!FVYLSDECYN | 241   | >BRCA2-D30!FVYLSEECYNI | 234   | 7     |
| >BRCA2-D30!FVYLSDECYN | 521   | >BRCA2-D30!FVYLSEECYNI | 450   | 71    |
| >BRCA2-D30!FVYLSDECYN | 100   | >BRCA2-D30!FVYLSEECYNI | 88    | 12    |
| >BRCA2-D30!FVYLSDECY  | 120   | >BRCA2-D30!FVYLSEECY   | 124   | 4     |
| >BRCA2-D30!FVYLSDECY  | 33    | >BRCA2-D30!FVYLSEECY   | 81    | 48    |
| >BRCA2-D30!FVYLSDECY  | 200   | >BRCA2-D30!FVYLSEECY   | 218   | 18    |
| >BRCA2-D30!FVYLSDECYN | 71    | >BRCA2-D30!FVYLSEECYNI | 145   | 74    |
| >BRCA2-D30!FVYLSDECY  | 130   | >BRCA2-D30!FVYLSEECY   | 438   | 308   |
| >BRCA2-D30!FVYLSDECY  | 95    | >BRCA2-D30!FVYLSEECY   | 332   | 237   |
| >BRCA2-D30!FVYLSDECY  | 421   | >BRCA2-D30!FVYLSEECY   | 226   | 195   |
| >BRCA2-D30!FVYLSDECY  | 177   | >BRCA2-D30!FVYLSEECY   | 505   | 328   |
| >BRCA2-D30!FVYLSDECYN | 465   | >BRCA2-D30!FVYLSEECYNI | 760   | 295   |
| >BRCA2-D30!FVYLSDECY  | 35    | >BRCA2-D30!FVYLSEECY   | 92    | 57    |
| >BRCA2-D30!PFVYLSDECY | 254   | >BRCA2-D30!PFVYLSEECY  | 395   | 141   |
| >BRCA2-D30!APFVYLSDEC | 288   | >BRCA2-D30!APFVYLSEEC  | 181   | 107   |
| >BRCA2-D30!APFVYLSDEC | 85    | >BRCA2-D30!APFVYLSEEC  | 90    | 5     |
| >BRCA2-D30!APFVYLSDEC | 369   | >BRCA2-D30!APFVYLSEEC  | 486   | 117   |
| >BRCA2-D30!APFVYLSDEC | 179   | >BRCA2-D30!APFVYLSEEC  | 177   | 2     |
| >BRCA2-D30!APFVYLSDEC | 187   | >BRCA2-D30!APFVYLSEEC  | 287   | 100   |
| >BRCA2-D30!GLAPFVYLS  | 1038  | >BRCA2-D30!GLAPFVYLSEI | 160   | 878   |
| >BRCA2-E11!EVPENQMTI  | 142   | >BRCA2-E11!DVPENQMTI   | 570   | 428   |
| >BRCA2-E11!EVPENQMTIL | 168   | >BRCA2-E11!DVPENQMTII  | 672   | 504   |
| >BRCA2-E11!EVPENQMTIL | 64    | >BRCA2-E11!DVPENQMTII  | 387   | 323   |
| >BRCA2-E11!EVPENQMTIL | 12    | >BRCA2-E11!DVPENQMTII  | 47    | 35    |
| >BRCA2-E11!EVPENQMTI  | 17    | >BRCA2-E11!DVPENQMTI   | 63    | 46    |
| >BRCA2-E11!EVPENQMTI  | 58    | >BRCA2-E11!DVPENQMTI   | 470   | 412   |
| >BRCA2-E11!FEVPENQMT  | 123   | >BRCA2-E11!FDVPENQMT   | 3326  | 3203  |
| >BRCA2-E11!FEVPENQMT  | 166   | >BRCA2-E11!FDVPENQMT   | 2461  | 2295  |
| >BRCA2-E11!FEVPENQMT  | 32    | >BRCA2-E11!FDVPENQMT   | 12263 | 12231 |
| >BRCA2-E11!FEVPENQMT  | 149   | >BRCA2-E11!FDVPENQMT   | 19798 | 19649 |
| >BRCA2-E11!FEVPENQMT  | 103   | >BRCA2-E11!FDVPENQMT   | 1377  | 1274  |
| >BRCA2-E11!FEVPENQM   | 387   | >BRCA2-E11!FDVPENQM    | 2849  | 2462  |
| >BRCA2-E11!FEVPENQMT  | 8     | >BRCA2-E11!FDVPENQMT   | 240   | 232   |
| >BRCA2-E11!FEVPENQMT  | 74    | >BRCA2-E11!FDVPENQMT   | 3073  | 2999  |
| >BRCA2-E11!FEVPENQMT  | 1292  | >BRCA2-E11!FDVPENQMT   | 39    | 1253  |
| >BRCA2-E11!FEVPENQMT  | 10628 | >BRCA2-E11!FDVPENQMT   | 454   | 10174 |
| >BRCA2-E11!STFEVPENQM | 180   | >BRCA2-E11!STFDVPENQM  | 274   | 94    |
| >BRCA2-E11!STFEVPENQM | 238   | >BRCA2-E11!STFDVPENQM  | 364   | 126   |
| >BRCA2-E11!STFEVPENQM | 269   | >BRCA2-E11!STFDVPENQM  | 1025  | 756   |
| >BRCA2-E11!STFEVPENQM | 273   | >BRCA2-E11!STFDVPENQM  | 368   | 95    |

|                        |      |                        |      |      |
|------------------------|------|------------------------|------|------|
| >BRCA2-E114STFEVPENQ   | 205  | >BRCA2-E114STFDVPENQ   | 201  | 4    |
| >BRCA2-E114STFEVPENQM  | 427  | >BRCA2-E114STFDVPENQM  | 359  | 68   |
| >BRCA2-E114STFEVPENQN  | 110  | >BRCA2-E114STFDVPENQN  | 175  | 65   |
| >BRCA2-E114STFEVPENQNM | 31   | >BRCA2-E114STFDVPENQNM | 24   | 7    |
| >BRCA2-E114STFEVPENQNM | 39   | >BRCA2-E114STFDVPENQNM | 36   | 3    |
| >BRCA2-E114STFEVPENQNM | 615  | >BRCA2-E114STFDVPENQNM | 240  | 375  |
| >BRCA2-E114KSTFEVPENQ  | 23   | >BRCA2-E114KSTFDVPENC  | 32   | 9    |
| >BRCA2-E114KSTFEVPENQ  | 99   | >BRCA2-E114KSTFDVPENC  | 108  | 9    |
| >BRCA2-E114KSTFEVPENQ  | 90   | >BRCA2-E114KSTFDVPENC  | 68   | 22   |
| >BRCA2-E114LQKSTFEV    | 246  | >BRCA2-E114LQKSTFDV    | 2236 | 1990 |
| >BRCA2-E114LQKSTFEV    | 36   | >BRCA2-E114LQKSTFDV    | 119  | 83   |
| >BRCA2-E114LQKSTFEV    | 11   | >BRCA2-E114LQKSTFDV    | 89   | 78   |
| >BRCA2-E114LQKSTFEV    | 350  | >BRCA2-E114LQKSTFDV    | 1961 | 1611 |
| >BRCA2-E114LQKSTFEV    | 190  | >BRCA2-E114LQKSTFDV    | 566  | 376  |
| >BRCA2-E114LQKSTFEVP   | 192  | >BRCA2-E114LQKSTFDVP   | 502  | 310  |
| >BRCA2-E114LQKSTFEVPE  | 635  | >BRCA2-E114LQKSTFDVPE  | 489  | 146  |
| >BRCA2-E114LQKSTFEV    | 26   | >BRCA2-E114LQKSTFDV    | 57   | 31   |
| >BRCA2-E114LQKSTFEVP   | 164  | >BRCA2-E114LQKSTFDVP   | 508  | 344  |
| >BRCA2-E114LQKSTFEVPE  | 311  | >BRCA2-E114LQKSTFDVPE  | 770  | 459  |
| >BRCA2-E114ILQKSTFEV   | 10   | >BRCA2-E114ILQKSTFDV   | 31   | 21   |
| >BRCA2-E114ILQKSTFEV   | 7    | >BRCA2-E114ILQKSTFDV   | 31   | 24   |
| >BRCA2-E114ILQKSTFEV   | 14   | >BRCA2-E114ILQKSTFDV   | 34   | 20   |
| >BRCA2-E114ILQKSTFEV   | 19   | >BRCA2-E114ILQKSTFDV   | 117  | 98   |
| >BRCA2-E114ILQKSTFEV   | 3    | >BRCA2-E114ILQKSTFDV   | 14   | 11   |
| >BRCA2-E114ILQKSTFEV   | 3    | >BRCA2-E114ILQKSTFDV   | 5    | 2    |
| >BRCA2-E114ILQKSTFEV   | 7    | >BRCA2-E114ILQKSTFDV   | 12   | 5    |
| >BRCA2-E114ILQKSTFEV   | 3    | >BRCA2-E114ILQKSTFDV   | 6    | 3    |
| >BRCA2-E114ILQKSTFEV   | 2    | >BRCA2-E114ILQKSTFDV   | 2    | 0    |
| >BRCA2-E114YILQKSTFEV  | 18   | >BRCA2-E114YILQKSTFDV  | 39   | 21   |
| >BRCA2-E114YILQKSTFEV  | 56   | >BRCA2-E114YILQKSTFDV  | 127  | 71   |
| >BRCA2-E114YILQKSTFEV  | 28   | >BRCA2-E114YILQKSTFDV  | 49   | 21   |
| >BRCA2-E114YILQKSTFEV  | 27   | >BRCA2-E114YILQKSTFDV  | 47   | 20   |
| >BRCA2-E114YILQKSTFEV  | 2    | >BRCA2-E114YILQKSTFDV  | 5    | 3    |
| >BRCA2-E114YILQKSTFEV  | 5    | >BRCA2-E114YILQKSTFDV  | 10   | 5    |
| >BRCA2-E114YILQKSTFEV  | 5    | >BRCA2-E114YILQKSTFDV  | 6    | 1    |
| >BRCA2-E114YILQKSTFEV  | 2    | >BRCA2-E114YILQKSTFDV  | 4    | 2    |
| >BRCA2-E114YILQKSTFEV  | 2    | >BRCA2-E114YILQKSTFDV  | 2    | 0    |
| >BRCA2-E114YILQKSTFEV  | 9    | >BRCA2-E114YILQKSTFDV  | 26   | 17   |
| >BRCA2-E114SYILQKSTFEV | 47   | >BRCA2-E114SYILQKSTFDV | 74   | 27   |
| >BRCA2-E114SYILQKSTFEV | 61   | >BRCA2-E114SYILQKSTFDV | 220  | 159  |
| >BRCA2-E114SYILQKSTFEV | 417  | >BRCA2-E114SYILQKSTFDV | 714  | 297  |
| >BRCA2-E187EVDPMDSW    | 1156 | >BRCA2-E187KVDPMDSW    | 78   | 1078 |
| >BRCA2-E187EVDPMDSW    | 4130 | >BRCA2-E187KVDPMDSW    | 131  | 3999 |

|                         |       |                         |       |       |
|-------------------------|-------|-------------------------|-------|-------|
| >BRCA2-E18;EVDPMDSW     | 1033  | >BRCA2-E18;KVDPDMSW     | 14    | 1019  |
| >BRCA2-E18;AEVDPMDSV    | 6042  | >BRCA2-E18;AKVDPMDSV    | 127   | 5915  |
| >BRCA2-E18;AEVDPMDSV    | 42    | >BRCA2-E18;AKVDPMDSV    | 2800  | 2758  |
| >BRCA2-E18;AEVDPMDSV    | 26    | >BRCA2-E18;AKVDPMDSV    | 2493  | 2467  |
| >BRCA2-E18;AEVDPMDSV    | 199   | >BRCA2-E18;AKVDPMDSV    | 23440 | 23241 |
| >BRCA2-E18;AEVDPMDSV    | 219   | >BRCA2-E18;AKVDPMDSV    | 27389 | 27170 |
| >BRCA2-E18;AEVDPMDSV    | 436   | >BRCA2-E18;AKVDPMDSV    | 530   | 94    |
| >BRCA2-E18;GAEVDPMDS    | 420   | >BRCA2-E18;GAKVDPMDS    | 232   | 188   |
| >BRCA2-E18;GAEVDPMDS    | 558   | >BRCA2-E18;GAKVDPMDS    | 100   | 458   |
| >BRCA2-E18;GAEVDPMDS    | 1216  | >BRCA2-E18;GAKVDPMDS    | 439   | 777   |
| >BRCA2-E18;GAEVDPMDS    | 410   | >BRCA2-E18;GAKVDPMDS    | 2965  | 2555  |
| >BRCA2-E18;LGAEVDPDM    | 447   | >BRCA2-E18;LGAKVDPDM    | 1131  | 684   |
| >BRCA2-E18;LGAEVDPDM    | 261   | >BRCA2-E18;LGAKVDPDM    | 971   | 710   |
| >BRCA2-E18;LGAEVDPDM    | 313   | >BRCA2-E18;LGAKVDPDM    | 275   | 38    |
| >BRCA2-E18;LGAEVDPDM    | 19    | >BRCA2-E18;LGAKVDPDM    | 22    | 3     |
| >BRCA2-E18;LGAEVDPDM    | 225   | >BRCA2-E18;LGAKVDPDM    | 352   | 127   |
| >BRCA2-E18;LGAEVDPDM    | 131   | >BRCA2-E18;LGAKVDPDM    | 135   | 4     |
| >BRCA2-E18;SLGAEVDPDM   | 394   | >BRCA2-E18;SLGAKVDPDM   | 583   | 189   |
| >BRCA2-E18;SLGAEVDPDM   | 79    | >BRCA2-E18;SLGAKVDPDM   | 116   | 37    |
| >BRCA2-E18;SLGAEVDPDM   | 288   | >BRCA2-E18;SLGAKVDPDM   | 415   | 127   |
| >BRCA2-E18;ESLGAEVDPC   | 111   | >BRCA2-E18;ESLGAEVDPC   | 196   | 85    |
| >BRCA2-E18;SESLGAEV     | 12    | >BRCA2-E18;SESLGAKV     | 9     | 3     |
| >BRCA2-E18;SESLGAEV     | 314   | >BRCA2-E18;SESLGAKV     | 576   | 262   |
| >BRCA2-E18;SESLGAEV     | 58    | >BRCA2-E18;SESLGAKV     | 136   | 78    |
| >BRCA2-E18;SESLGAEV     | 434   | >BRCA2-E18;SESLGAKV     | 1567  | 1133  |
| >BRCA2-E18;ISESLGAEV    | 132   | >BRCA2-E18;ISESLGAKV    | 85    | 47    |
| >BRCA2-E18;HISESLGAEV   | 223   | >BRCA2-E18;HISESLGAKV   | 286   | 63    |
| >BRCA2-E18;HISESLGAEV   | 146   | >BRCA2-E18;HISESLGAKV   | 245   | 99    |
| >BRCA2-E18;HISESLGAEV   | 244   | >BRCA2-E18;HISESLGAKV   | 589   | 345   |
| >BRCA2-E18;HISESLGAEV   | 34    | >BRCA2-E18;HISESLGAKV   | 72    | 38    |
| >BRCA2-E18;HISESLGAEV   | 88    | >BRCA2-E18;HISESLGAKV   | 211   | 123   |
| >BRCA2-E18;HISESLGAEV   | 105   | >BRCA2-E18;HISESLGAKV   | 184   | 79    |
| >BRCA2-E18;HISESLGAEV   | 350   | >BRCA2-E18;HISESLGAKV   | 482   | 132   |
| >BRCA2-E18;HISESLGAEV   | 7     | >BRCA2-E18;HISESLGAKV   | 11    | 4     |
| >BRCA2-E18;HISESLGAE    | 19912 | >BRCA2-E18;HISESLGAK    | 70    | 19842 |
| >BRCA2-E18;HISESLGAE    | 26012 | >BRCA2-E18;HISESLGAK    | 227   | 25785 |
| >BRCA2-E18;HISESLGAE    | 14856 | >BRCA2-E18;HISESLGAK    | 106   | 14750 |
| >BRCA2-E18;HISESLGAE    | 17703 | >BRCA2-E18;HISESLGAK    | 124   | 17579 |
| >BRCA2-E18;HISESLGAEV   | 135   | >BRCA2-E18;HISESLGAKV   | 299   | 164   |
| >BRCA2-E18;HISESLGAEV   | 39    | >BRCA2-E18;HISESLGAKV   | 55    | 16    |
| >BRCA2-E18;KHISESLGAEV  | 282   | >BRCA2-E18;KHISESLGAKV  | 670   | 388   |
| >BRCA2-E20(I)EDSTKQVFSK | 439   | >BRCA2-E20(I)QDSTKQVFSK | 380   | 59    |
| >BRCA2-E20(I)EDSTKQV    | 258   | >BRCA2-E20(I)QDSTKQV    | 17893 | 17635 |

|                        |       |                        |      |       |
|------------------------|-------|------------------------|------|-------|
| >BRCA2-E20(IEDSTKQV    | 14608 | >BRCA2-E20(IQDSTKQV    | 245  | 14363 |
| >BRCA2-E20(IEDSTKQV    | 6049  | >BRCA2-E20(IQDSTKQV    | 169  | 5880  |
| >BRCA2-E20(IEDSTKQVFS  | 11044 | >BRCA2-E20(IQDSTKQVFS  | 259  | 10785 |
| >BRCA2-E20(IEDSTKQVF   | 8058  | >BRCA2-E20(IQDSTKQVF   | 235  | 7823  |
| >BRCA2-E20(IEDSTKQVF   | 328   | >BRCA2-E20(IQDSTKQVF   | 16   | 312   |
| >BRCA2-E20(IEDSTKQVF   | 94    | >BRCA2-E20(IQDSTKQVF   | 5330 | 5236  |
| >BRCA2-E20(IEDSTKQVF   | 253   | >BRCA2-E20(IQDSTKQVF   | 8250 | 7997  |
| >BRCA2-E20(EIEDSTKQV   | 5762  | >BRCA2-E20(EIQDSTKQV   | 302  | 5460  |
| >BRCA2-E20(EIEDSTKQV   | 52    | >BRCA2-E20(EIQDSTKQV   | 19   | 33    |
| >BRCA2-E20(EIEDSTKQVF  | 2876  | >BRCA2-E20(EIQDSTKQVF  | 373  | 2503  |
| >BRCA2-E20(EIEDSTKQV   | 1204  | >BRCA2-E20(EIQDSTKQV   | 346  | 858   |
| >BRCA2-E20(EIEDSTKQV   | 91    | >BRCA2-E20(EIQDSTKQV   | 46   | 45    |
| >BRCA2-E20(SEIEDSTKQV  | 51    | >BRCA2-E20(SEIQDSTKQV  | 46   | 5     |
| >BRCA2-E20(SEIEDSTKQVF | 278   | >BRCA2-E20(SEIQDSTKQV  | 179  | 99    |
| >BRCA2-E20(SEIEDSTKQVF | 87    | >BRCA2-E20(SEIQDSTKQV  | 86   | 1     |
| >BRCA2-E20(SEIEDSTKQVF | 42    | >BRCA2-E20(SEIQDSTKQV  | 126  | 84    |
| >BRCA2-E20(SEIEDSTKQVF | 179   | >BRCA2-E20(SEIQDSTKQV  | 272  | 93    |
| >BRCA2-E20(SEIEDSTKQV  | 358   | >BRCA2-E20(SEIQDSTKQV  | 231  | 127   |
| >BRCA2-E20(SEIEDSTKQVF | 209   | >BRCA2-E20(SEIQDSTKQV  | 159  | 50    |
| >BRCA2-E20(SEIEDSTKQVF | 80    | >BRCA2-E20(SEIQDSTKQV  | 74   | 6     |
| >BRCA2-E20(SEIEDSTKQV  | 55    | >BRCA2-E20(SEIQDSTKQV  | 96   | 41    |
| >BRCA2-E20(SEIEDSTKQVF | 341   | >BRCA2-E20(SEIQDSTKQV  | 416  | 75    |
| >BRCA2-E20(FSEIEDSTK   | 169   | >BRCA2-E20(FSEIQDSTK   | 192  | 23    |
| >BRCA2-E20(FSEIEDSTKQ\ | 506   | >BRCA2-E20(FSEIQDSTKQ\ | 324  | 182   |
| >BRCA2-E20(QVFSEIEDSTK | 858   | >BRCA2-E20(QVFSEIQDSTK | 432  | 426   |
| >BRCA2-E20(QVFSEIEDSTK | 110   | >BRCA2-E20(QVFSEIQDSTK | 100  | 10    |
| >BRCA2-E20(QVFSEIEDSTK | 1607  | >BRCA2-E20(QVFSEIQDSTK | 454  | 1153  |
| >BRCA2-E20(QVFSEIEDSTK | 15    | >BRCA2-E20(QVFSEIQDSTK | 19   | 4     |
| >BRCA2-H24 HFHRVEQCVI  | 196   | >BRCA2-H24 NFHRVEQCVI  | 409  | 213   |
| >BRCA2-H24 HFHRVEQCVI  | 292   | >BRCA2-H24 NFHRVEQCVI  | 148  | 144   |
| >BRCA2-H24 HFHRVEQCVI  | 72    | >BRCA2-H24 NFHRVEQCVI  | 232  | 160   |
| >BRCA2-H24 SHFHRVEQC\  | 1679  | >BRCA2-H24 SNFHRVEQC\  | 416  | 1263  |
| >BRCA2-H24 SHFHRVEQC\  | 448   | >BRCA2-H24 SNFHRVEQC\  | 2249 | 1801  |
| >BRCA2-H24 SHFHRVEQC\  | 298   | >BRCA2-H24 SNFHRVEQC\  | 331  | 33    |
| >BRCA2-H24 KSHFHRVE    | 391   | >BRCA2-H24 KSNFHRVE    | 3487 | 3096  |
| >BRCA2-H24 KSHFHRVEQ   | 28    | >BRCA2-H24 KSNFHRVEQ   | 375  | 347   |
| >BRCA2-H24 KSHFHRVEQ(  | 39    | >BRCA2-H24 KSNFHRVEQ(  | 469  | 430   |
| >BRCA2-H24 TKSHFHRV    | 476   | >BRCA2-H24 TKNFHRV     | 751  | 275   |
| >BRCA2-H24 KTKSHFHRV   | 28    | >BRCA2-H24 KTKSNFHRV   | 146  | 118   |
| >BRCA2-H24 KTKSHFHRV   | 189   | >BRCA2-H24 KTKSNFHRV   | 411  | 222   |
| >BRCA2-H24 KTKSHFHRV   | 809   | >BRCA2-H24 KTKSNFHRV   | 492  | 317   |
| >BRCA2-H24 KTKSHFHRV   | 214   | >BRCA2-H24 KTKSNFHRV   | 100  | 114   |
| >BRCA2-H24 KTKSHFHR    | 363   | >BRCA2-H24 KTKSNFHR    | 922  | 559   |



|                         |      |                         |      |      |
|-------------------------|------|-------------------------|------|------|
| >BRCA2-H24 KTKSHFHR     | 299  | >BRCA2-H24 KTKSNFHR     | 425  | 126  |
| >BRCA2-H24 KTKSHFHR     | 8    | >BRCA2-H24 KTKSNFHR     | 9    | 1    |
| >BRCA2-H24 KTKSHFHRV    | 9    | >BRCA2-H24 KTKSNFHRV    | 9    | 0    |
| >BRCA2-H24 KTKSHFHRVE   | 137  | >BRCA2-H24 KTKSNFHRVE   | 152  | 15   |
| >BRCA2-H24 KTKSHFHRVE   | 22   | >BRCA2-H24 KTKSNFHRVE   | 21   | 1    |
| >BRCA2-H24 KTKSHFHRV    | 1090 | >BRCA2-H24 KTKSNFHRV    | 361  | 729  |
| >BRCA2-H24 KTKSHFHR     | 4    | >BRCA2-H24 KTKSNFHR     | 5    | 1    |
| >BRCA2-H24 KTKSHFHRV    | 69   | >BRCA2-H24 KTKSNFHRV    | 151  | 82   |
| >BRCA2-H24 KTKSHFHRVE   | 140  | >BRCA2-H24 KTKSNFHRVE   | 267  | 127  |
| >BRCA2-H24 KTKSHFHR     | 151  | >BRCA2-H24 KTKSNFHR     | 354  | 203  |
| >BRCA2-H24 KTKSHFHR     | 83   | >BRCA2-H24 KTKSNFHR     | 62   | 21   |
| >BRCA2-H24 KTKSHFHRV    | 330  | >BRCA2-H24 KTKSNFHRV    | 4752 | 4422 |
| >BRCA2-H24 KTKSHFHRV    | 111  | >BRCA2-H24 KTKSNFHRV    | 286  | 175  |
| >BRCA2-H24 KTKSHFHRV    | 354  | >BRCA2-H24 KTKSNFHRV    | 288  | 66   |
| >BRCA2-H24 KTKSHFHR     | 126  | >BRCA2-H24 KTKSNFHR     | 217  | 91   |
| >BRCA2-H24 KTKSHFHRV    | 433  | >BRCA2-H24 KTKSNFHRV    | 832  | 399  |
| >BRCA2-H24 KTKSHFHR     | 30   | >BRCA2-H24 KTKSNFHR     | 27   | 3    |
| >BRCA2-H24 FKTKSHFHRV   | 112  | >BRCA2-H24 FKTKSNFHRV   | 121  | 9    |
| >BRCA2-H24 FKTKSHFHR    | 90   | >BRCA2-H24 FKTKSNFHR    | 95   | 5    |
| >BRCA2-H24 FKTKSHFHR    | 185  | >BRCA2-H24 FKTKSNFHR    | 274  | 89   |
| >BRCA2-H24 FKTKSHFHRV   | 105  | >BRCA2-H24 FKTKSNFHRV   | 127  | 22   |
| >BRCA2-H24 FKTKSHFHR    | 438  | >BRCA2-H24 FKTKSNFHR    | 496  | 58   |
| >BRCA2-H24 PFKTKSHFHR   | 37   | >BRCA2-H24 PFKTKSNFHR   | 88   | 51   |
| >BRCA2-H24 PFKTKSHFHR   | 412  | >BRCA2-H24 PFKTKSNFHR   | 1463 | 1051 |
| >BRCA2-H24 PFKTKSHFHR   | 42   | >BRCA2-H24 PFKTKSNFHR   | 73   | 31   |
| >BRCA2-H24 PPFKTKSHF    | 19   | >BRCA2-H24 PPFKTKSNF    | 6    | 13   |
| >BRCA2-H24 PPFKTKSHF    | 231  | >BRCA2-H24 PPFKTKSNF    | 186  | 45   |
| >BRCA2-H24 PPFKTKSHF    | 608  | >BRCA2-H24 PPFKTKSNF    | 289  | 319  |
| >BRCA2-H24 PPFKTKSHFH   | 182  | >BRCA2-H24 PPFKTKSNFH   | 206  | 24   |
| >BRCA2-H24 VPPFKTKSHF   | 158  | >BRCA2-H24 VPPFKTKSNF   | 125  | 33   |
| >BRCA2-H24 VPPFKTKSHF   | 447  | >BRCA2-H24 VPPFKTKSNF   | 155  | 292  |
| >BRCA2-H24 VPPFKTKSHF   | 72   | >BRCA2-H24 VPPFKTKSNF   | 103  | 31   |
| >BRCA2-H24 FVPPFKTKSH   | 100  | >BRCA2-H24 FVPPFKTKSN   | 125  | 25   |
| >BRCA2-H24 FVPPFKTKSH   | 520  | >BRCA2-H24 FVPPFKTKSN   | 394  | 126  |
| >BRCA2-H24 FVPPFKTKSH   | 123  | >BRCA2-H24 FVPPFKTKSN   | 116  | 7    |
| >BRCA2-H24 FVPPFKTKSH   | 564  | >BRCA2-H24 FVPPFKTKSN   | 436  | 128  |
| >BRCA2-I101 IKLSEHNI    | 23   | >BRCA2-I101 SKLSEHNI    | 65   | 42   |
| >BRCA2-I101 IKLSEHNIK   | 103  | >BRCA2-I101 SKLSEHNIK   | 265  | 162  |
| >BRCA2-I101 IKLSEHNIKK  | 274  | >BRCA2-I101 SKLSEHNIKK  | 797  | 523  |
| >BRCA2-I101 EIKLSEHNIKK | 54   | >BRCA2-I101 ESKLSEHNIKK | 59   | 5    |
| >BRCA2-I101 GSFRTASNKE  | 191  | >BRCA2-I101 GSFRTASNKE  | 5822 | 5631 |
| >BRCA2-I101 GSFRTASNKE  | 57   | >BRCA2-I101 GSFRTASNKE  | 6170 | 6113 |
| >BRCA2-I101 GSFRTASNKE  | 67   | >BRCA2-I101 GSFRTASNKE  | 791  | 724  |

|                         |      |                         |       |       |
|-------------------------|------|-------------------------|-------|-------|
| >BRCA2-I101 GSFRTASNKE  | 32   | >BRCA2-I101 GSFRTASNKE  | 23263 | 23231 |
| >BRCA2-I101 KEIKLSEHNI  | 81   | >BRCA2-I101 KESKLSEHNI  | 53    | 28    |
| >BRCA2-I101 KEIKLSEHNI  | 86   | >BRCA2-I101 KESKLSEHNI  | 104   | 18    |
| >BRCA2-I101 KEIKLSEHNI  | 8    | >BRCA2-I101 KESKLSEHNI  | 16    | 8     |
| >BRCA2-I101 ASNKEIKL    | 187  | >BRCA2-I101 ASNKESKL    | 81    | 106   |
| >BRCA2-I101 TASNKEIK    | 303  | >BRCA2-I101 TASNKESK    | 241   | 62    |
| >BRCA2-I101 TASNKEIK    | 129  | >BRCA2-I101 TASNKESK    | 72    | 57    |
| >BRCA2-I101 RTASNKEIK   | 655  | >BRCA2-I101 RTASNKESK   | 321   | 334   |
| >BRCA2-I101 RTASNKEIK   | 88   | >BRCA2-I101 RTASNKESK   | 58    | 30    |
| >BRCA2-I101 RTASNKEIK   | 324  | >BRCA2-I101 RTASNKESK   | 158   | 166   |
| >BRCA2-I101 RTASNKEIK   | 250  | >BRCA2-I101 RTASNKESK   | 198   | 52    |
| >BRCA2-I101 RTASNKEI    | 131  | >BRCA2-I101 RTASNKES    | 14554 | 14423 |
| >BRCA2-I101 RTASNKEIKL  | 431  | >BRCA2-I101 RTASNKESKL  | 846   | 415   |
| >BRCA2-I101 RTASNKEIK   | 85   | >BRCA2-I101 RTASNKESK   | 58    | 27    |
| >BRCA2-I101 RTASNKEI    | 27   | >BRCA2-I101 RTASNKES    | 2880  | 2853  |
| >BRCA2-I101 RTASNKEIKL  | 14   | >BRCA2-I101 RTASNKESKL  | 8     | 6     |
| >BRCA2-I101 RTASNKEI    | 154  | >BRCA2-I101 RTASNKES    | 2657  | 2503  |
| >BRCA2-I101 RTASNKEIKL  | 55   | >BRCA2-I101 RTASNKESKL  | 72    | 17    |
| >BRCA2-I101 RTASNKEIK   | 389  | >BRCA2-I101 RTASNKESK   | 440   | 51    |
| >BRCA2-I101 RTASNKEI    | 30   | >BRCA2-I101 RTASNKES    | 16060 | 16030 |
| >BRCA2-I101 FRTASNKEI   | 101  | >BRCA2-I101 FRTASNKES   | 3111  | 3010  |
| >BRCA2-I101 FRTASNKEIKL | 328  | >BRCA2-I101 FRTASNKESK  | 207   | 121   |
| >BRCA2-I101 FRTASNKEI   | 384  | >BRCA2-I101 FRTASNKES   | 3590  | 3206  |
| >BRCA2-I101 FRTASNKEIKL | 136  | >BRCA2-I101 FRTASNKESK  | 172   | 36    |
| >BRCA2-I101 FRTASNKEIKL | 342  | >BRCA2-I101 FRTASNKESK  | 463   | 121   |
| >BRCA2-I101 SFRTASNKEI  | 17   | >BRCA2-I101 SFRTASNKES  | 181   | 164   |
| >BRCA2-I101 SFRTASNKEIK | 12   | >BRCA2-I101 SFRTASNKESK | 8     | 4     |
| >BRCA2-I310 IKFWIDLNED  | 184  | >BRCA2-I310 MKFWIDLNEI  | 135   | 49    |
| >BRCA2-I310 IKFWIDLNED  | 2634 | >BRCA2-I310 MKFWIDLNEI  | 148   | 2486  |
| >BRCA2-I310 AIKFWIDL    | 3521 | >BRCA2-I310 AMKFWIDL    | 450   | 3071  |
| >BRCA2-I310 AIKFWIDL    | 776  | >BRCA2-I310 AMKFWIDL    | 79    | 697   |
| >BRCA2-I310 AIKFWIDL    | 4508 | >BRCA2-I310 AMKFWIDL    | 166   | 4342  |
| >BRCA2-I310 AIKFWIDL    | 569  | >BRCA2-I310 AMKFWIDL    | 22    | 547   |
| >BRCA2-I310 LSDECYNLLAI | 611  | >BRCA2-I310 LSDECYNLLAI | 274   | 337   |
| >BRCA2-I310 LSDECYNLLAI | 710  | >BRCA2-I310 LSDECYNLLAI | 92    | 618   |
| >BRCA2-I310 LSDECYNLLAI | 8558 | >BRCA2-I310 LSDECYNLLAI | 285   | 8273  |
| >BRCA2-I310 LSDECYNLLAI | 60   | >BRCA2-I310 LSDECYNLLAI | 2071  | 2011  |
| >BRCA2-I310 LAIKFWIDL   | 40   | >BRCA2-I310 LAMKFWIDL   | 39    | 1     |
| >BRCA2-I310 LAIKFWIDL   | 710  | >BRCA2-I310 LAMKFWIDL   | 438   | 272   |
| >BRCA2-I310 LLAIKFWI    | 49   | >BRCA2-I310 LLAMKFWI    | 40    | 9     |
| >BRCA2-I310 LLAIKFWI    | 10   | >BRCA2-I310 LLAMKFWI    | 13    | 3     |
| >BRCA2-I310 LLAIKFWIDL  | 148  | >BRCA2-I310 LLAMKFWIDI  | 117   | 31    |
| >BRCA2-I310 LLAIKFWI    | 24   | >BRCA2-I310 LLAMKFWI    | 17    | 7     |

|                         |      |                        |      |      |
|-------------------------|------|------------------------|------|------|
| >BRCA2-I310 LLAIKFWIDL  | 461  | >BRCA2-I310 LLAMKFWIDI | 411  | 50   |
| >BRCA2-I310 LLAIKFWI    | 97   | >BRCA2-I310 LLAMKFWI   | 83   | 14   |
| >BRCA2-I310 LLAIKFWI    | 13   | >BRCA2-I310 LLAMKFWI   | 15   | 2    |
| >BRCA2-I310 LLAIKFWIDL  | 73   | >BRCA2-I310 LLAMKFWIDI | 70   | 3    |
| >BRCA2-I310 LLAIKFWI    | 199  | >BRCA2-I310 LLAMKFWI   | 154  | 45   |
| >BRCA2-I310 LLAIKFWIDL  | 389  | >BRCA2-I310 LLAMKFWIDI | 282  | 107  |
| >BRCA2-I310 LLAIKFWI    | 19   | >BRCA2-I310 LLAMKFWI   | 21   | 2    |
| >BRCA2-I310 LLAIKFWIDL  | 34   | >BRCA2-I310 LLAMKFWIDI | 36   | 2    |
| >BRCA2-I310 LLAIKFWI    | 92   | >BRCA2-I310 LLAMKFWI   | 63   | 29   |
| >BRCA2-I310 LLAIKFWIDL  | 638  | >BRCA2-I310 LLAMKFWIDI | 393  | 245  |
| >BRCA2-I310 LLAIKFWI    | 4    | >BRCA2-I310 LLAMKFWI   | 4    | 0    |
| >BRCA2-I310 LLAIKFWIDL  | 7    | >BRCA2-I310 LLAMKFWIDI | 6    | 1    |
| >BRCA2-I310 LLAIKFWIDL  | 387  | >BRCA2-I310 LLAMKFWIDI | 478  | 91   |
| >BRCA2-I310 NLLAIKFWI   | 30   | >BRCA2-I310 NLLAMKFWI  | 39   | 9    |
| >BRCA2-I310 NLLAIKFWIDI | 136  | >BRCA2-I310 NLLAMKFWII | 193  | 57   |
| >BRCA2-I310 NLLAIKFWI   | 47   | >BRCA2-I310 NLLAMKFWI  | 185  | 138  |
| >BRCA2-I310 NLLAIKFWIDI | 200  | >BRCA2-I310 NLLAMKFWII | 443  | 243  |
| >BRCA2-I310 NLLAIKFWI   | 76   | >BRCA2-I310 NLLAMKFWI  | 118  | 42   |
| >BRCA2-I310 NLLAIKFWIDI | 321  | >BRCA2-I310 NLLAMKFWII | 502  | 181  |
| >BRCA2-I310 NLLAIKFWI   | 10   | >BRCA2-I310 NLLAMKFWI  | 23   | 13   |
| >BRCA2-I310 NLLAIKFWIDI | 61   | >BRCA2-I310 NLLAMKFWII | 126  | 65   |
| >BRCA2-I310 NLLAIKFWI   | 58   | >BRCA2-I310 NLLAMKFWI  | 90   | 32   |
| >BRCA2-I310 NLLAIKFWIDI | 297  | >BRCA2-I310 NLLAMKFWII | 404  | 107  |
| >BRCA2-I310 NLLAIKFWI   | 26   | >BRCA2-I310 NLLAMKFWI  | 39   | 13   |
| >BRCA2-I310 NLLAIKFWIDI | 52   | >BRCA2-I310 NLLAMKFWII | 76   | 24   |
| >BRCA2-I310 NLLAIKFWI   | 19   | >BRCA2-I310 NLLAMKFWI  | 54   | 35   |
| >BRCA2-I310 NLLAIKFWIDI | 142  | >BRCA2-I310 NLLAMKFWII | 327  | 185  |
| >BRCA2-I310 NLLAIKFWI   | 28   | >BRCA2-I310 NLLAMKFWI  | 23   | 5    |
| >BRCA2-I310 NLLAIKFWIDI | 51   | >BRCA2-I310 NLLAMKFWII | 46   | 5    |
| >BRCA2-I310 NLLAIKFWI   | 470  | >BRCA2-I310 NLLAMKFWI  | 3363 | 2893 |
| >BRCA2-I310 NLLAIKFWI   | 70   | >BRCA2-I310 NLLAMKFWI  | 176  | 106  |
| >BRCA2-I310 YNLLAIKFW   | 292  | >BRCA2-I310 YNLLAMKFW  | 211  | 81   |
| >BRCA2-I310 YNLLAIKFWI  | 81   | >BRCA2-I310 YNLLAMKFW  | 81   | 0    |
| >BRCA2-I310 YNLLAIKFWI  | 442  | >BRCA2-I310 YNLLAMKFW  | 472  | 30   |
| >BRCA2-I310 YNLLAIKF    | 211  | >BRCA2-I310 YNLLAMKF   | 133  | 78   |
| >BRCA2-I310 YNLLAIKFW   | 1199 | >BRCA2-I310 YNLLAMKFW  | 461  | 738  |
| >BRCA2-I310 CYNLLAIKFW  | 152  | >BRCA2-I310 CYNLLAMKFW | 67   | 85   |
| >BRCA2-I310 CYNLLAIKF   | 1028 | >BRCA2-I310 CYNLLAMKF  | 351  | 677  |
| >BRCA2-I310 CYNLLAIKFW  | 297  | >BRCA2-I310 CYNLLAMKFW | 247  | 50   |
| >BRCA2-I310 CYNLLAIKF   | 683  | >BRCA2-I310 CYNLLAMKF  | 369  | 314  |
| >BRCA2-I310 CYNLLAIKFW  | 468  | >BRCA2-I310 CYNLLAMKFW | 296  | 172  |
| >BRCA2-I310 CYNLLAIKFW  | 537  | >BRCA2-I310 CYNLLAMKFW | 475  | 62   |
| >BRCA2-I310 CYNLLAIKF   | 8    | >BRCA2-I310 CYNLLAMKF  | 6    | 2    |

|                         |      |                         |       |       |
|-------------------------|------|-------------------------|-------|-------|
| >BRCA2-I310 CYNLLAIKFW  | 17   | >BRCA2-I310 CYNLLAMKFL  | 15    | 2     |
| >BRCA2-I310 CYNLLAIKFW  | 14   | >BRCA2-I310 CYNLLAMKFL  | 12    | 2     |
| >BRCA2-I310 ECYNLLAI    | 3461 | >BRCA2-I310 ECYNLLAM    | 52    | 3409  |
| >BRCA2-I310 ECYNLLAIKF  | 410  | >BRCA2-I310 ECYNLLAMKF  | 586   | 176   |
| >BRCA2-I310 ECYNLLAIKFL | 1221 | >BRCA2-I310 ECYNLLAMKF  | 490   | 731   |
| >BRCA2-I310 ECYNLLAI    | 6479 | >BRCA2-I310 ECYNLLAM    | 239   | 6240  |
| >BRCA2-I310 ECYNLLAIK   | 338  | >BRCA2-I310 ECYNLLAMK   | 113   | 225   |
| >BRCA2-I310 ECYNLLAI    | 152  | >BRCA2-I310 ECYNLLAM    | 425   | 273   |
| >BRCA2-I310 DECYNLLAI   | 53   | >BRCA2-I310 DECYNLLAM   | 841   | 788   |
| >BRCA2-I310 DECYNLLAI   | 16   | >BRCA2-I310 DECYNLLAM   | 6     | 10    |
| >BRCA2-I310 DECYNLLAIKF | 5    | >BRCA2-I310 DECYNLLAMI  | 5     | 0     |
| >BRCA2-I310 DECYNLLAI   | 313  | >BRCA2-I310 DECYNLLAM   | 593   | 280   |
| >BRCA2-I310 DECYNLLAIKF | 194  | >BRCA2-I310 DECYNLLAMI  | 224   | 30    |
| >BRCA2-I310 SDECYNLLAI  | 63   | >BRCA2-I310 SDECYNLLAM  | 1756  | 1693  |
| >BRCA2-K16: KVHENVEKET  | 339  | >BRCA2-K16: EVHENVEKET  | 3284  | 2945  |
| >BRCA2-K16: KVHENVEK    | 163  | >BRCA2-K16: EVHENVEK    | 5875  | 5712  |
| >BRCA2-K16: KVHENVEK    | 59   | >BRCA2-K16: EVHENVEK    | 1101  | 1042  |
| >BRCA2-K16: KVHENVEK    | 6    | >BRCA2-K16: EVHENVEK    | 2939  | 2933  |
| >BRCA2-K16: KVHENVEKET  | 269  | >BRCA2-K16: EVHENVEKET  | 15434 | 15165 |
| >BRCA2-K16: KVHENVEK    | 399  | >BRCA2-K16: EVHENVEK    | 13542 | 13143 |
| >BRCA2-K16: KVHENVEK    | 663  | >BRCA2-K16: EVHENVEK    | 7     | 656   |
| >BRCA2-K16: KVHENVEKET  | 9085 | >BRCA2-K16: EVHENVEKET  | 83    | 9002  |
| >BRCA2-K16: VKVHENVEK   | 263  | >BRCA2-K16: VEVHENVEK   | 5492  | 5229  |
| >BRCA2-K16: KTSKSIFLKVK | 75   | >BRCA2-K16: KTSKSIFLKVE | 16548 | 16473 |
| >BRCA2-K16: KTSKSIFLKVK | 21   | >BRCA2-K16: KTSKSIFLKVE | 12767 | 12746 |
| >BRCA2-K16: KTSKSIFLKVK | 10   | >BRCA2-K16: KTSKSIFLKVE | 5187  | 5177  |
| >BRCA2-K16: KTSKSIFLKVK | 125  | >BRCA2-K16: KTSKSIFLKVE | 5537  | 5412  |
| >BRCA2-K16: KTSKSIFLKVK | 214  | >BRCA2-K16: KTSKSIFLKVE | 6524  | 6310  |
| >BRCA2-K16: KVKVHENV    | 482  | >BRCA2-K16: KVEVHENV    | 5538  | 5056  |
| >BRCA2-K16: KVKVHENV    | 316  | >BRCA2-K16: KVEVHENV    | 997   | 681   |
| >BRCA2-K16: KVKVHENV    | 195  | >BRCA2-K16: KVEVHENV    | 266   | 71    |
| >BRCA2-K16: KVKVHENV    | 36   | >BRCA2-K16: KVEVHENV    | 5038  | 5002  |
| >BRCA2-K16: KVKVHENV    | 4    | >BRCA2-K16: KVEVHENV    | 147   | 143   |
| >BRCA2-K16: LKVKVHENV   | 5674 | >BRCA2-K16: LKVEVHENV   | 483   | 5191  |
| >BRCA2-K16: LKVKVHENV   | 196  | >BRCA2-K16: LKVEVHENV   | 290   | 94    |
| >BRCA2-K16: LKVKVHENV   | 340  | >BRCA2-K16: LKVEVHENV   | 496   | 156   |
| >BRCA2-K16: FLKVKVHENV  | 226  | >BRCA2-K16: FLKVEVHENV  | 65    | 161   |
| >BRCA2-K16: FLKVKVHENV  | 45   | >BRCA2-K16: FLKVEVHENV  | 25    | 20    |
| >BRCA2-K16: FLKVKVHENV  | 22   | >BRCA2-K16: FLKVEVHENV  | 20    | 2     |
| >BRCA2-K16: FLKVKVHENV  | 483  | >BRCA2-K16: FLKVEVHENV  | 230   | 253   |
| >BRCA2-K16: FLKVKVHENV  | 6    | >BRCA2-K16: FLKVEVHENV  | 6     | 0     |
| >BRCA2-K16: FLKVKVHENV  | 20   | >BRCA2-K16: FLKVEVHENV  | 15    | 5     |
| >BRCA2-K16: FLKVKVHENV  | 28   | >BRCA2-K16: FLKVEVHENV  | 22    | 6     |

|                         |      |                         |       |       |
|-------------------------|------|-------------------------|-------|-------|
| >BRCA2-K16: FLKVKVHENV  | 60   | >BRCA2-K16: FLKVEVHENV  | 37    | 23    |
| >BRCA2-K16: FLKVKVHENV  | 2    | >BRCA2-K16: FLKVEVHENV  | 2     | 0     |
| >BRCA2-K16: IFLKVKVHENV | 506  | >BRCA2-K16: IFLKVEVHENV | 321   | 185   |
| >BRCA2-K16: IFLKVKVHENV | 804  | >BRCA2-K16: IFLKVEVHENV | 388   | 416   |
| >BRCA2-K16: SIFLKVKV    | 414  | >BRCA2-K16: SIFLKVEV    | 66    | 348   |
| >BRCA2-K16: SIFLKVKV    | 220  | >BRCA2-K16: SIFLKVEV    | 55    | 165   |
| >BRCA2-K16: SIFLKVKV    | 136  | >BRCA2-K16: SIFLKVEV    | 74    | 62    |
| >BRCA2-K16: SIFLKVKV    | 422  | >BRCA2-K16: SIFLKVEV    | 134   | 288   |
| >BRCA2-K16: SIFLKVKV    | 24   | >BRCA2-K16: SIFLKVEV    | 10    | 14    |
| >BRCA2-K16: SIFLKVKV    | 1061 | >BRCA2-K16: SIFLKVEV    | 380   | 681   |
| >BRCA2-K16: SIFLKVKV    | 23   | >BRCA2-K16: SIFLKVEV    | 13    | 10    |
| >BRCA2-K16: SIFLKVKV    | 14   | >BRCA2-K16: SIFLKVEV    | 9     | 5     |
| >BRCA2-K16: SIFLKVKV    | 159  | >BRCA2-K16: SIFLKVEV    | 40    | 119   |
| >BRCA2-K16: SIFLKVKV    | 1053 | >BRCA2-K16: SIFLKVEV    | 492   | 561   |
| >BRCA2-K16: KSIFLKVK    | 34   | >BRCA2-K16: KSIFLKVE    | 23742 | 23708 |
| >BRCA2-K16: KSIFLKVK    | 36   | >BRCA2-K16: KSIFLKVE    | 11785 | 11749 |
| >BRCA2-K16: KSIFLKVK    | 165  | >BRCA2-K16: KSIFLKVE    | 8164  | 7999  |
| >BRCA2-K16: KSIFLKVKV   | 291  | >BRCA2-K16: KSIFLKVEV   | 346   | 55    |
| >BRCA2-K16: KSIFLKVKV   | 1214 | >BRCA2-K16: KSIFLKVEV   | 344   | 870   |
| >BRCA2-K16: KSIFLKVK    | 493  | >BRCA2-K16: KSIFLKVE    | 16170 | 15677 |
| >BRCA2-K16: SKSIFLKVKV  | 842  | >BRCA2-K16: SKSIFLKVEV  | 395   | 447   |
| >BRCA2-K16: TSKSIFLKVK  | 121  | >BRCA2-K16: TSKSIFLKVE  | 33783 | 33662 |
| >BRCA2-K16: TSKSIFLKVK  | 23   | >BRCA2-K16: TSKSIFLKVE  | 9650  | 9627  |
| >BRCA2-K16: TSKSIFLKVKV | 214  | >BRCA2-K16: TSKSIFLKVEV | 80    | 134   |
| >BRCA2-P92(PIFKNSTMV    | 8045 | >BRCA2-P92(SIFKNSTMV    | 79    | 7966  |
| >BRCA2-P92(PIFKNSTMV    | 1386 | >BRCA2-P92(SIFKNSTMV    | 37    | 1349  |
| >BRCA2-P92(PIFKNSTMVL   | 2372 | >BRCA2-P92(SIFKNSTMVL   | 124   | 2248  |
| >BRCA2-P92(PIFKNSTMV    | 1371 | >BRCA2-P92(SIFKNSTMV    | 19    | 1352  |
| >BRCA2-P92(PIFKNSTMVL   | 1733 | >BRCA2-P92(SIFKNSTMVL   | 55    | 1678  |
| >BRCA2-P92(PIFKNSTMV    | 5846 | >BRCA2-P92(SIFKNSTMV    | 56    | 5790  |
| >BRCA2-P92(PIFKNSTM     | 7189 | >BRCA2-P92(SIFKNSTM     | 479   | 6710  |
| >BRCA2-P92(PIFKNSTMV    | 125  | >BRCA2-P92(SIFKNSTMV    | 7     | 118   |
| >BRCA2-P92(PIFKNSTMVL   | 2593 | >BRCA2-P92(SIFKNSTMVL   | 106   | 2487  |
| >BRCA2-P92(PIFKNSTMV    | 6462 | >BRCA2-P92(SIFKNSTMV    | 133   | 6329  |
| >BRCA2-P92(PIFKNSTMV    | 196  | >BRCA2-P92(SIFKNSTMV    | 9     | 187   |
| >BRCA2-P92(PIFKNSTMVL   | 5362 | >BRCA2-P92(SIFKNSTMVL   | 111   | 5251  |
| >BRCA2-P92(PIFKNSTMV    | 72   | >BRCA2-P92(SIFKNSTMV    | 8     | 64    |
| >BRCA2-P92(PIFKNSTMVL   | 1649 | >BRCA2-P92(SIFKNSTMVL   | 62    | 1587  |
| >BRCA2-P92(PIFKNSTMVL   | 2187 | >BRCA2-P92(SIFKNSTMVL   | 99    | 2088  |
| >BRCA2-P92(PIFKNSTMVL   | 4196 | >BRCA2-P92(SIFKNSTMVL   | 30    | 4166  |
| >BRCA2-P92(PIFKNSTMVL   | 3380 | >BRCA2-P92(SIFKNSTMVL   | 176   | 3204  |
| >BRCA2-P92(PIFKNSTMVL   | 44   | >BRCA2-P92(SIFKNSTMVL   | 20    | 24    |
| >BRCA2-P92(PIFKNSTMVL   | 618  | >BRCA2-P92(SIFKNSTMVL   | 92    | 526   |

|                       |       |                       |       |       |
|-----------------------|-------|-----------------------|-------|-------|
| >BRCA2-P92(PIFKNSTM   | 4106  | >BRCA2-P92(SIFKNSTM   | 352   | 3754  |
| >BRCA2-P92(PIFKNSTMVL | 1107  | >BRCA2-P92(SIFKNSTMVL | 77    | 1030  |
| >BRCA2-P92(PIFKNSTMVL | 5375  | >BRCA2-P92(SIFKNSTMVL | 116   | 5259  |
| >BRCA2-P92(PIFKNSTMV  | 3405  | >BRCA2-P92(SIFKNSTMV  | 52    | 3353  |
| >BRCA2-P92(PIFKNSTMV  | 1172  | >BRCA2-P92(SIFKNSTMV  | 28    | 1144  |
| >BRCA2-P92(PIFKNSTMVL | 559   | >BRCA2-P92(SIFKNSTMVL | 19    | 540   |
| >BRCA2-P92(PIFKNSTM   | 6350  | >BRCA2-P92(SIFKNSTM   | 168   | 6182  |
| >BRCA2-P92(PIFKNSTMVL | 8177  | >BRCA2-P92(SIFKNSTMVL | 304   | 7873  |
| >BRCA2-P92(PIFKNSTMVL | 3205  | >BRCA2-P92(SIFKNSTMVL | 128   | 3077  |
| >BRCA2-P92(PIFKNSTM   | 4454  | >BRCA2-P92(SIFKNSTM   | 355   | 4099  |
| >BRCA2-P92(PIFKNSTMVL | 1725  | >BRCA2-P92(SIFKNSTMVL | 161   | 1564  |
| >BRCA2-P92(PIFKNSTM   | 1465  | >BRCA2-P92(SIFKNSTM   | 305   | 1160  |
| >BRCA2-P92(PIFKNSTMVL | 1090  | >BRCA2-P92(SIFKNSTMVL | 166   | 924   |
| >BRCA2-P92(PIFKNSTMVL | 823   | >BRCA2-P92(SIFKNSTMVL | 149   | 674   |
| >BRCA2-P92(PIFKNSTMVL | 10603 | >BRCA2-P92(SIFKNSTMVL | 244   | 10359 |
| >BRCA2-P92(PIFKNSTMVL | 9127  | >BRCA2-P92(SIFKNSTMVL | 322   | 8805  |
| >BRCA2-P92(PIFKNSTMVL | 2767  | >BRCA2-P92(SIFKNSTMVL | 34    | 2733  |
| >BRCA2-P92(PIFKNSTMVL | 3961  | >BRCA2-P92(SIFKNSTMVL | 378   | 3583  |
| >BRCA2-P92(PIFKNSTMVL | 651   | >BRCA2-P92(SIFKNSTMVL | 366   | 285   |
| >BRCA2-P92(EPIFKNSTM  | 191   | >BRCA2-P92(ESIFKNSTM  | 11    | 180   |
| >BRCA2-P92(EPIFKNSTMV | 2756  | >BRCA2-P92(ESIFKNSTMV | 75    | 2681  |
| >BRCA2-P92(EPIFKNSTM  | 2319  | >BRCA2-P92(ESIFKNSTM  | 80    | 2239  |
| >BRCA2-P92(EPIFKNSTMV | 7284  | >BRCA2-P92(ESIFKNSTMV | 117   | 7167  |
| >BRCA2-P92(EPIFKNSTMV | 1794  | >BRCA2-P92(ESIFKNSTMV | 37    | 1757  |
| >BRCA2-P92(EPIFKNSTMV | 149   | >BRCA2-P92(ESIFKNSTMV | 70    | 79    |
| >BRCA2-P92(EPIFKNSTM  | 480   | >BRCA2-P92(ESIFKNSTM  | 22414 | 21934 |
| >BRCA2-P92(EPIFKNSTMV | 204   | >BRCA2-P92(ESIFKNSTMV | 22355 | 22151 |
| >BRCA2-P92(EPIFKNSTM  | 270   | >BRCA2-P92(ESIFKNSTM  | 3708  | 3438  |
| >BRCA2-P92(EPIFKNSTMV | 240   | >BRCA2-P92(ESIFKNSTMV | 2757  | 2517  |
| >BRCA2-P92(EPIFKNSTM  | 16574 | >BRCA2-P92(ESIFKNSTM  | 14    | 16560 |
| >BRCA2-P92(EPIFKNSTMV | 21655 | >BRCA2-P92(ESIFKNSTMV | 75    | 21580 |
| >BRCA2-P92(EPIFKNSTM  | 29    | >BRCA2-P92(ESIFKNSTM  | 1748  | 1719  |
| >BRCA2-P92(EPIFKNSTMV | 243   | >BRCA2-P92(ESIFKNSTMV | 6880  | 6637  |
| >BRCA2-P92(EPIFKNSTMV | 183   | >BRCA2-P92(ESIFKNSTMV | 2246  | 2063  |
| >BRCA2-P92(EPIFKNSTM  | 436   | >BRCA2-P92(ESIFKNSTM  | 20779 | 20343 |
| >BRCA2-P92(EPIFKNSTM  | 1454  | >BRCA2-P92(ESIFKNSTM  | 30    | 1424  |
| >BRCA2-P92(HETDLTCVNE | 993   | >BRCA2-P92(HETDLTCVNE | 248   | 745   |
| >BRCA2-P92(NEPIFKNST  | 490   | >BRCA2-P92(NESIFKNST  | 532   | 42    |
| >BRCA2-P92(NEPIFKNSTM | 172   | >BRCA2-P92(NESIFKNSTM | 196   | 24    |
| >BRCA2-P92(NEPIFKNSTM | 21    | >BRCA2-P92(NESIFKNSTM | 20    | 1     |
| >BRCA2-P92(NEPIFKNSTM | 3808  | >BRCA2-P92(NESIFKNSTM | 450   | 3358  |
| >BRCA2-P92(NEPIFKNSTM | 646   | >BRCA2-P92(NESIFKNSTM | 270   | 376   |
| >BRCA2-P92(NEPIFKNSTM | 448   | >BRCA2-P92(NESIFKNSTM | 211   | 237   |

|                        |      |                        |       |       |
|------------------------|------|------------------------|-------|-------|
| >BRCA2-P92(NEPIFKNST   | 8660 | >BRCA2-P92(NESIFKNST   | 276   | 8384  |
| >BRCA2-P92(NEPIFKNSTM  | 8050 | >BRCA2-P92(NESIFKNSTM  | 233   | 7817  |
| >BRCA2-P92(NEPIFKNSTM  | 288  | >BRCA2-P92(NESIFKNSTM  | 202   | 86    |
| >BRCA2-P92(VNEPIFKNSTI | 80   | >BRCA2-P92(VNESIFKNSTI | 43    | 37    |
| >BRCA2-P92(CVNEPIFK    | 73   | >BRCA2-P92(CVNESIFK    | 63    | 10    |
| >BRCA2-P92(CVNEPIFK    | 11   | >BRCA2-P92(CVNESIFK    | 10    | 1     |
| >BRCA2-P92(CVNEPIFK    | 119  | >BRCA2-P92(CVNESIFK    | 44    | 75    |
| >BRCA2-P92(CVNEPIFK    | 635  | >BRCA2-P92(CVNESIFK    | 462   | 173   |
| >BRCA2-P92(CVNEPIFK    | 55   | >BRCA2-P92(CVNESIFK    | 31    | 24    |
| >BRCA2-P92(LTCVNEPIFK  | 139  | >BRCA2-P92(LTCVNESIFK  | 74    | 65    |
| >BRCA2-P92(LTCVNEPIFK  | 12   | >BRCA2-P92(LTCVNESIFK  | 11    | 1     |
| >BRCA2-P92(LTCVNEPIFK  | 41   | >BRCA2-P92(LTCVNESIFK  | 53    | 12    |
| >BRCA2-P92(LTCVNEPIFK  | 48   | >BRCA2-P92(LTCVNESIFK  | 28    | 20    |
| >BRCA2-P92(LTCVNEPIF   | 443  | >BRCA2-P92(LTCVNESIF   | 169   | 274   |
| >BRCA2-P92(LTCVNEPI    | 358  | >BRCA2-P92(LTCVNESI    | 416   | 58    |
| >BRCA2-P92(LTCVNEPIF   | 14   | >BRCA2-P92(LTCVNESIF   | 10    | 4     |
| >BRCA2-P92(LTCVNEPIF   | 215  | >BRCA2-P92(LTCVNESIF   | 558   | 343   |
| >BRCA2-P92(LTCVNEPIF   | 551  | >BRCA2-P92(LTCVNESIF   | 15    | 536   |
| >BRCA2-P92(LTCVNEPIFK  | 420  | >BRCA2-P92(LTCVNESIFK  | 595   | 175   |
| >BRCA2-P92(LTCVNEPI    | 41   | >BRCA2-P92(LTCVNESI    | 29    | 12    |
| >BRCA2-P92(DLTCVNEPIF  | 221  | >BRCA2-P92(DLTCVNESIFK | 223   | 2     |
| >BRCA2-P92(DLTCVNEPIF  | 48   | >BRCA2-P92(DLTCVNESIFK | 32    | 16    |
| >BRCA2-P92(DLTCVNEPI   | 27   | >BRCA2-P92(DLTCVNESI   | 110   | 83    |
| >BRCA2-P92(TDLTCVNEPI  | 230  | >BRCA2-P92(TDLTCVNESI  | 150   | 80    |
| >BRCA2-P92(TDLTCVNEPI  | 529  | >BRCA2-P92(TDLTCVNESI  | 373   | 156   |
| >BRCA2-P92(TDLTCVNEPI  | 95   | >BRCA2-P92(TDLTCVNESI  | 100   | 5     |
| >BRCA2-P92(ETDLTCVNEP  | 58   | >BRCA2-P92(ETDLTCVNES  | 172   | 114   |
| >BRCA2-P92(ETDLTCVNEP  | 14   | >BRCA2-P92(ETDLTCVNES  | 30    | 16    |
| >BRCA2-R18IRPTFFEIFKTR | 83   | >BRCA2-R18IRPTFFEIFKTH | 18353 | 18270 |
| >BRCA2-R18IKTRCNKAD    | 138  | >BRCA2-R18IKTHCNKAD    | 993   | 855   |
| >BRCA2-R18IKTRCNKADL   | 10   | >BRCA2-R18IKTHCNKADL   | 60    | 50    |
| >BRCA2-R18IKTRCNKADLC  | 47   | >BRCA2-R18IKTHCNKADLC  | 402   | 355   |
| >BRCA2-R18IKTRCNKADLC  | 46   | >BRCA2-R18IKTHCNKADLC  | 417   | 371   |
| >BRCA2-R18IKTRCNKADL   | 11   | >BRCA2-R18IKTHCNKADL   | 31    | 20    |
| >BRCA2-R18IFKTRCNKADL  | 129  | >BRCA2-R18IFKTHCNKADL  | 69    | 60    |
| >BRCA2-R18IFKTRCNK     | 19   | >BRCA2-R18IFKTHCNK     | 20    | 1     |
| >BRCA2-R18IFKTRCNK     | 75   | >BRCA2-R18IFKTHCNK     | 84    | 9     |
| >BRCA2-R18IFKTRCNK     | 272  | >BRCA2-R18IFKTHCNK     | 700   | 428   |
| >BRCA2-R18EIFKTRCNK    | 286  | >BRCA2-R18EIFKTHCNK    | 395   | 109   |
| >BRCA2-R18EIFKTRCNK    | 195  | >BRCA2-R18EIFKTHCNK    | 179   | 16    |
| >BRCA2-R18EIFKTRCNK    | 383  | >BRCA2-R18EIFKTHCNK    | 434   | 51    |
| >BRCA2-R18EIFKTRCNK    | 5    | >BRCA2-R18EIFKTHCNK    | 4     | 1     |
| >BRCA2-R18EIFKTRCNK    | 198  | >BRCA2-R18EIFKTHCNK    | 123   | 75    |

|                        |       |                        |       |       |
|------------------------|-------|------------------------|-------|-------|
| >BRCA2-R18IFEIFKTRCNK/ | 677   | >BRCA2-R18IFEIFKTHCNK/ | 337   | 340   |
| >BRCA2-R18IFEIFKTRCNK/ | 445   | >BRCA2-R18IFEIFKTHCNK/ | 303   | 142   |
| >BRCA2-R18IFFEIFKTR    | 330   | >BRCA2-R18IFFEIFKTH    | 13301 | 12971 |
| >BRCA2-R18IFFEIFKTR    | 269   | >BRCA2-R18IFFEIFKTH    | 22573 | 22304 |
| >BRCA2-R18IFFEIFKTR    | 357   | >BRCA2-R18IFFEIFKTH    | 23233 | 22876 |
| >BRCA2-R18IFFEIFKTRCNK | 462   | >BRCA2-R18IFFEIFKTHCNK | 496   | 34    |
| >BRCA2-R18IFFEIFKTR    | 54    | >BRCA2-R18IFFEIFKTH    | 23731 | 23677 |
| >BRCA2-R18ITFFEIFKTR   | 17    | >BRCA2-R18ITFFEIFKTH   | 2474  | 2457  |
| >BRCA2-R18ITFFEIFKTR   | 14    | >BRCA2-R18ITFFEIFKTH   | 4622  | 4608  |
| >BRCA2-R18ITFFEIFKTR   | 18    | >BRCA2-R18ITFFEIFKTH   | 4261  | 4243  |
| >BRCA2-R18ITFFEIFKTR   | 20    | >BRCA2-R18ITFFEIFKTH   | 3278  | 3258  |
| >BRCA2-R18IPTFFEIFKTR  | 322   | >BRCA2-R18IPTFFEIFKTH  | 17819 | 17497 |
| >BRCA2-R18IPTFFEIFKTR  | 82    | >BRCA2-R18IPTFFEIFKTH  | 15010 | 14928 |
| >BRCA2-R18IPTFFEIFKTR  | 286   | >BRCA2-R18IPTFFEIFKTH  | 1507  | 1221  |
| >BRCA2-R18IPTFFEIFKTR  | 192   | >BRCA2-R18IPTFFEIFKTH  | 25578 | 25386 |
| >BRCA2-R26`RDDTAAKTL   | 525   | >BRCA2-R26`SDDTAAKTL   | 425   | 100   |
| >BRCA2-R26`RDDTAAKTLV  | 109   | >BRCA2-R26`SDDTAAKTLV  | 88    | 21    |
| >BRCA2-R26`RDDTAAKTLV  | 488   | >BRCA2-R26`SDDTAAKTLV  | 409   | 79    |
| >BRCA2-R26`ERDDTAAK    | 6167  | >BRCA2-R26`ESDDTAAK    | 88    | 6079  |
| >BRCA2-R26`ERDDTAAKTL  | 13819 | >BRCA2-R26`ESDDTAAKTL  | 282   | 13537 |
| >BRCA2-R26`ERDDTAAKTL  | 13006 | >BRCA2-R26`ESDDTAAKTL  | 242   | 12764 |
| >BRCA2-R26`ERDDTAAKTL  | 3781  | >BRCA2-R26`ESDDTAAKTL  | 18    | 3763  |
| >BRCA2-R26`ERDDTAAKTL  | 24960 | >BRCA2-R26`ESDDTAAKTL  | 42    | 24918 |
| >BRCA2-R26`ERDDTAAKTL  | 66    | >BRCA2-R26`ESDDTAAKTL  | 1524  | 1458  |
| >BRCA2-R26`RRSAIKKIMEI | 85    | >BRCA2-R26`RRSAIKKIMEI | 563   | 478   |
| >BRCA2-R26`RRSAIKKIMEI | 230   | >BRCA2-R26`RRSAIKKIMEI | 272   | 42    |
| >BRCA2-R26`RRSAIKKIMEI | 323   | >BRCA2-R26`RRSAIKKIMEI | 871   | 548   |
| >BRCA2-R26`RRSAIKKIMEI | 130   | >BRCA2-R26`RRSAIKKIMEI | 28527 | 28397 |
| >BRCA2-R26`MERDDTAAK   | 259   | >BRCA2-R26`MESDDTAAK   | 161   | 98    |
| >BRCA2-R26`MERDDTAAK   | 311   | >BRCA2-R26`MESDDTAAK   | 12963 | 12652 |
| >BRCA2-R26`MERDDTAAK   | 494   | >BRCA2-R26`MESDDTAAK   | 1336  | 842   |
| >BRCA2-R26`MERDDTAAK   | 85    | >BRCA2-R26`MESDDTAAK   | 103   | 18    |
| >BRCA2-R26`MERDDTAAK   | 2971  | >BRCA2-R26`MESDDTAAK   | 186   | 2785  |
| >BRCA2-R26`MERDDTAAK   | 134   | >BRCA2-R26`MESDDTAAK   | 13    | 121   |
| >BRCA2-R26`MERDDTAAK   | 552   | >BRCA2-R26`MESDDTAAK   | 259   | 293   |
| >BRCA2-R26`MERDDTAA    | 30    | >BRCA2-R26`MESDDTAA    | 17    | 13    |
| >BRCA2-R26`MERDDTAAK   | 50    | >BRCA2-R26`MESDDTAAK   | 74    | 24    |
| >BRCA2-R26`IMERDDTA    | 270   | >BRCA2-R26`IMESDDTA    | 246   | 24    |
| >BRCA2-R26`IMERDDTAA   | 310   | >BRCA2-R26`IMESDDTAA   | 299   | 11    |
| >BRCA2-R26`KIMERDDTA   | 426   | >BRCA2-R26`KIMESDDTA   | 335   | 91    |
| >BRCA2-R26`KIMERDDTA/  | 1024  | >BRCA2-R26`KIMESDDTA/  | 372   | 652   |
| >BRCA2-R26`KIMERDDTA   | 671   | >BRCA2-R26`KIMESDDTA   | 370   | 301   |
| >BRCA2-R26`KIMERDDTA/  | 328   | >BRCA2-R26`KIMESDDTA/  | 125   | 203   |



|                       |      |                       |       |       |
|-----------------------|------|-----------------------|-------|-------|
| >BRCA2-R26:KIMERDDTA  | 421  | >BRCA2-R26:KIMESDDTA  | 311   | 110   |
| >BRCA2-R26:KIMERDDTA/ | 412  | >BRCA2-R26:KIMESDDTA/ | 220   | 192   |
| >BRCA2-R26:KIMERDDTA  | 81   | >BRCA2-R26:KIMESDDTA  | 43    | 38    |
| >BRCA2-R26:KIMERDDTA/ | 449  | >BRCA2-R26:KIMESDDTA/ | 180   | 269   |
| >BRCA2-R26:KIMERDDTA  | 837  | >BRCA2-R26:KIMESDDTA  | 467   | 370   |
| >BRCA2-R26:KIMERDDTA  | 183  | >BRCA2-R26:KIMESDDTA  | 98    | 85    |
| >BRCA2-R26:KIMERDDTA/ | 488  | >BRCA2-R26:KIMESDDTA/ | 301   | 187   |
| >BRCA2-R26:KIMERDDTA/ | 92   | >BRCA2-R26:KIMESDDTA/ | 101   | 9     |
| >BRCA2-R26:KIMERDDTA/ | 31   | >BRCA2-R26:KIMESDDTA/ | 21    | 10    |
| >BRCA2-R26:KIMERDDTA/ | 67   | >BRCA2-R26:KIMESDDTA/ | 58    | 9     |
| >BRCA2-R26:KIMERDDTA/ | 324  | >BRCA2-R26:KIMESDDTA/ | 553   | 229   |
| >BRCA2-R26:KKIMERDDTA | 260  | >BRCA2-R26:KKIMESDDTA | 191   | 69    |
| >BRCA2-R26:AIKKIMER   | 457  | >BRCA2-R26:AIKKIMES   | 1127  | 670   |
| >BRCA2-R26:AIKKIMER   | 18   | >BRCA2-R26:AIKKIMES   | 12925 | 12907 |
| >BRCA2-R26:AIKKIMER   | 299  | >BRCA2-R26:AIKKIMES   | 32810 | 32511 |
| >BRCA2-R26:SAIKKIMER  | 298  | >BRCA2-R26:SAIKKIMES  | 20272 | 19974 |
| >BRCA2-R26:SAIKKIMER  | 48   | >BRCA2-R26:SAIKKIMES  | 18332 | 18284 |
| >BRCA2-R26:SAIKKIMER  | 21   | >BRCA2-R26:SAIKKIMES  | 12553 | 12532 |
| >BRCA2-R26:SAIKKIMER  | 368  | >BRCA2-R26:SAIKKIMES  | 7185  | 6817  |
| >BRCA2-R26:RSAIKKIMER | 315  | >BRCA2-R26:RSAIKKIMES | 29584 | 29269 |
| >BRCA2-R26:RSAIKKIMER | 18   | >BRCA2-R26:RSAIKKIMES | 14048 | 14030 |
| >BRCA2-R26:RSAIKKIMER | 337  | >BRCA2-R26:RSAIKKIMES | 30978 | 30641 |
| >BRCA2-R26:RSAIKKIMER | 360  | >BRCA2-R26:RSAIKKIMES | 11412 | 11052 |
| >BRCA2-R26:RSAIKKIMER | 334  | >BRCA2-R26:RSAIKKIMES | 34187 | 33853 |
| >BRCA2-R27:RWYTKLGF   | 205  | >BRCA2-R27:HWYTKLGF   | 372   | 167   |
| >BRCA2-R27:RWYTKLGFF  | 243  | >BRCA2-R27:HWYTKLGFF  | 411   | 168   |
| >BRCA2-R27:RWYTKLGF   | 330  | >BRCA2-R27:HWYTKLGF   | 1436  | 1106  |
| >BRCA2-R27:RWYTKLGFF  | 131  | >BRCA2-R27:HWYTKLGFF  | 521   | 390   |
| >BRCA2-R27:RWYTKLGF   | 19   | >BRCA2-R27:HWYTKLGF   | 44    | 25    |
| >BRCA2-R27:RWYTKLGFF  | 14   | >BRCA2-R27:HWYTKLGFF  | 27    | 13    |
| >BRCA2-R27:RWYTKLGF   | 315  | >BRCA2-R27:HWYTKLGF   | 953   | 638   |
| >BRCA2-R27:RWYTKLGF   | 70   | >BRCA2-R27:HWYTKLGF   | 156   | 86    |
| >BRCA2-R27:RWYTKLGFF  | 18   | >BRCA2-R27:HWYTKLGFF  | 32    | 14    |
| >BRCA2-R27:RWYTKLGFFF | 442  | >BRCA2-R27:HWYTKLGFFF | 1977  | 1535  |
| >BRCA2-R27:RWYTKLGFFF | 184  | >BRCA2-R27:HWYTKLGFFF | 400   | 216   |
| >BRCA2-R27:ARWYTKLGF  | 1766 | >BRCA2-R27:AHWYTKLGF  | 481   | 1285  |
| >BRCA2-R27:ARWYTKLGF  | 10   | >BRCA2-R27:AHWYTKLGF  | 17    | 7     |
| >BRCA2-R27:ARWYTKLGF  | 53   | >BRCA2-R27:AHWYTKLGF  | 70    | 17    |
| >BRCA2-R27:ARWYTKLGF  | 22   | >BRCA2-R27:AHWYTKLGF  | 10189 | 10167 |
| >BRCA2-R27:ARWYTKLGF  | 33   | >BRCA2-R27:AHWYTKLGF  | 1652  | 1619  |
| >BRCA2-R27:ARWYTKLGF  | 176  | >BRCA2-R27:AHWYTKLGF  | 20087 | 19911 |
| >BRCA2-R27:ARWYTKLG   | 304  | >BRCA2-R27:AHWYTKLG   | 7285  | 6981  |
| >BRCA2-R27:ARWYTKLGF  | 334  | >BRCA2-R27:AHWYTKLGF  | 9491  | 9157  |

|                        |      |                        |       |       |
|------------------------|------|------------------------|-------|-------|
| >BRCA2-R27:ARWYTKLG    | 455  | >BRCA2-R27:AHWYTKLG    | 16465 | 16010 |
| >BRCA2-R27:ARWYTKLGF   | 53   | >BRCA2-R27:AHWYTKLGF   | 3578  | 3525  |
| >BRCA2-R27:ARWYTKLGF   | 333  | >BRCA2-R27:AHWYTKLGF   | 19360 | 19027 |
| >BRCA2-R27:ARWYTKLGF   | 9    | >BRCA2-R27:AHWYTKLGF   | 4354  | 4345  |
| >BRCA2-R27:ARWYTKLGF   | 229  | >BRCA2-R27:AHWYTKLGF   | 20578 | 20349 |
| >BRCA2-R27:KISANSTRPAI | 226  | >BRCA2-R27:KISANSTRPAI | 605   | 379   |
| >BRCA2-R27:KISANSTRPAI | 264  | >BRCA2-R27:KISANSTRPAI | 2036  | 1772  |
| >BRCA2-R27:KISANSTRPAI | 18   | >BRCA2-R27:KISANSTRPAI | 4642  | 4624  |
| >BRCA2-R27:KISANSTRPAI | 38   | >BRCA2-R27:KISANSTRPAI | 18116 | 18078 |
| >BRCA2-R27:PARWYTKLGI  | 464  | >BRCA2-R27:PAHWYTKLGI  | 1375  | 911   |
| >BRCA2-R27:RPARWYTKL   | 15   | >BRCA2-R27:RPAHWYTKL   | 14    | 1     |
| >BRCA2-R27:RPARWYTKL   | 20   | >BRCA2-R27:RPAHWYTKL   | 19    | 1     |
| >BRCA2-R27:RPARWYTKL   | 181  | >BRCA2-R27:RPAHWYTKL   | 99    | 82    |
| >BRCA2-R27:RPARWYTKL   | 246  | >BRCA2-R27:RPAHWYTKL   | 92    | 154   |
| >BRCA2-R27:RPARWYTKL   | 770  | >BRCA2-R27:RPAHWYTKL   | 327   | 443   |
| >BRCA2-R27:RPARWYTKL   | 784  | >BRCA2-R27:RPAHWYTKL   | 455   | 329   |
| >BRCA2-R27:TRPARWYTK   | 399  | >BRCA2-R27:TRPAHWYTK   | 649   | 250   |
| >BRCA2-R27:TRPARWYTKI  | 112  | >BRCA2-R27:TRPAHWYTKI  | 188   | 76    |
| >BRCA2-R27:TRPARWYTKI  | 302  | >BRCA2-R27:TRPAHWYTKI  | 775   | 473   |
| >BRCA2-R27:TRPARWYTKI  | 170  | >BRCA2-R27:TRPAHWYTKI  | 532   | 362   |
| >BRCA2-R27:STRPARWYTI  | 52   | >BRCA2-R27:STRPAHWYTI  | 77    | 25    |
| >BRCA2-R27:STRPARWYTI  | 11   | >BRCA2-R27:STRPAHWYTI  | 15    | 4     |
| >BRCA2-R27:STRPARWY    | 69   | >BRCA2-R27:STRPAHWY    | 26    | 43    |
| >BRCA2-R27:STRPARWY    | 387  | >BRCA2-R27:STRPAHWY    | 265   | 122   |
| >BRCA2-R27:STRPARWY    | 645  | >BRCA2-R27:STRPAHWY    | 86    | 559   |
| >BRCA2-R27:STRPARWY    | 25   | >BRCA2-R27:STRPAHWY    | 21    | 4     |
| >BRCA2-R27:STRPARWYT   | 10   | >BRCA2-R27:STRPAHWYT   | 9     | 1     |
| >BRCA2-R27:STRPARWYTI  | 3    | >BRCA2-R27:STRPAHWYTI  | 3     | 0     |
| >BRCA2-R27:STRPARWYTI  | 14   | >BRCA2-R27:STRPAHWYTI  | 15    | 1     |
| >BRCA2-R27:STRPARWY    | 171  | >BRCA2-R27:STRPAHWY    | 45    | 126   |
| >BRCA2-R27:STRPARWYTI  | 172  | >BRCA2-R27:STRPAHWYTI  | 455   | 283   |
| >BRCA2-R27:STRPARWYTI  | 91   | >BRCA2-R27:STRPAHWYTI  | 109   | 18    |
| >BRCA2-R27:STRPARWY    | 2008 | >BRCA2-R27:STRPAHWY    | 324   | 1684  |
| >BRCA2-R27:STRPARWY    | 4    | >BRCA2-R27:STRPAHWY    | 3     | 1     |
| >BRCA2-R27:STRPARWYT   | 2125 | >BRCA2-R27:STRPAHWYT   | 392   | 1733  |
| >BRCA2-R27:STRPARWYTI  | 9    | >BRCA2-R27:STRPAHWYTI  | 5     | 4     |
| >BRCA2-R27:STRPARWY    | 147  | >BRCA2-R27:STRPAHWY    | 112   | 35    |
| >BRCA2-R27:STRPARWYT   | 2030 | >BRCA2-R27:STRPAHWYT   | 433   | 1597  |
| >BRCA2-R27:STRPARWYTI  | 271  | >BRCA2-R27:STRPAHWYTI  | 129   | 142   |
| >BRCA2-R27:STRPARWYTI  | 30   | >BRCA2-R27:STRPAHWYTI  | 21    | 9     |
| >BRCA2-R27:STRPARWY    | 805  | >BRCA2-R27:STRPAHWY    | 246   | 559   |
| >BRCA2-R27:STRPARWYTI  | 140  | >BRCA2-R27:STRPAHWYTI  | 81    | 59    |
| >BRCA2-R27:STRPARWYTI  | 177  | >BRCA2-R27:STRPAHWYTI  | 153   | 24    |

|                         |      |                         |       |       |
|-------------------------|------|-------------------------|-------|-------|
| >BRCA2-R27:NSTRPARWY    | 622  | >BRCA2-R27:NSTRPAHWY    | 241   | 381   |
| >BRCA2-R27:NSTRPARWY    | 171  | >BRCA2-R27:NSTRPAHWY    | 69    | 102   |
| >BRCA2-R27:NSTRPARWY    | 4030 | >BRCA2-R27:NSTRPAHWY    | 353   | 3677  |
| >BRCA2-R27:NSTRPARWY    | 172  | >BRCA2-R27:NSTRPAHWY    | 76    | 96    |
| >BRCA2-R27:NSTRPARWY    | 728  | >BRCA2-R27:NSTRPAHWY    | 475   | 253   |
| >BRCA2-R27:NSTRPARW     | 52   | >BRCA2-R27:NSTRPAHW     | 65    | 13    |
| >BRCA2-R27:NSTRPARWY    | 202  | >BRCA2-R27:NSTRPAHWY    | 72    | 130   |
| >BRCA2-R27:NSTRPARW     | 86   | >BRCA2-R27:NSTRPAHW     | 78    | 8     |
| >BRCA2-R27:NSTRPARW     | 58   | >BRCA2-R27:NSTRPAHW     | 21    | 37    |
| >BRCA2-R27:NSTRPARWY    | 58   | >BRCA2-R27:NSTRPAHWY    | 52    | 6     |
| >BRCA2-R27:NSTRPARWY    | 3753 | >BRCA2-R27:NSTRPAHWY    | 384   | 3369  |
| >BRCA2-R27:SANSTRPARV   | 125  | >BRCA2-R27:SANSTRPAHV   | 22    | 103   |
| >BRCA2-R27:SANSTRPAR    | 16   | >BRCA2-R27:SANSTRPAH    | 4251  | 4235  |
| >BRCA2-R27:SANSTRPAR    | 35   | >BRCA2-R27:SANSTRPAH    | 11301 | 11266 |
| >BRCA2-R27:SANSTRPARV   | 38   | >BRCA2-R27:SANSTRPAHV   | 63    | 25    |
| >BRCA2-R27:SANSTRPARV   | 139  | >BRCA2-R27:SANSTRPAHV   | 91    | 48    |
| >BRCA2-R27:SANSTRPARV   | 110  | >BRCA2-R27:SANSTRPAHV   | 103   | 7     |
| >BRCA2-R27:SANSTRPARV   | 22   | >BRCA2-R27:SANSTRPAHV   | 17    | 5     |
| >BRCA2-R27:SANSTRPARV   | 80   | >BRCA2-R27:SANSTRPAHV   | 75    | 5     |
| >BRCA2-R27:ISANSTRPAR   | 137  | >BRCA2-R27:ISANSTRPAH   | 14243 | 14106 |
| >BRCA2-R27:ISANSTRPAR   | 103  | >BRCA2-R27:ISANSTRPAH   | 19103 | 19000 |
| >BRCA2-R27:ISANSTRPAR   | 491  | >BRCA2-R27:ISANSTRPAH   | 461   | 30    |
| >BRCA2-R27:ISANSTRPAR'  | 4    | >BRCA2-R27:ISANSTRPAH'  | 4     | 0     |
| >BRCA2-R27:ISANSTRPAR'  | 37   | >BRCA2-R27:ISANSTRPAH'  | 38    | 1     |
| >BRCA2-R27:ISANSTRPAR'  | 11   | >BRCA2-R27:ISANSTRPAH'  | 10    | 1     |
| >BRCA2-R27:ISANSTRPAR'  | 482  | >BRCA2-R27:ISANSTRPAH'  | 2091  | 1609  |
| >BRCA2-R27:ISANSTRPAR'  | 275  | >BRCA2-R27:ISANSTRPAH'  | 324   | 49    |
| >BRCA2-R28:FRNEREEEEK   | 372  | >BRCA2-R28:FCNEREEEEK   | 24850 | 24478 |
| >BRCA2-R28:EKTSSGLYIFR  | 39   | >BRCA2-R28:EKTSSGLYIFC  | 33163 | 33124 |
| >BRCA2-R28:EKTSSGLYIFR  | 459  | >BRCA2-R28:EKTSSGLYIFC  | 36430 | 35971 |
| >BRCA2-R28:IFRNEREEEEK  | 186  | >BRCA2-R28:IFCNEREEEEK  | 8783  | 8597  |
| >BRCA2-R28:YIFRNEREEEEK | 212  | >BRCA2-R28:YIFCNEREEEEK | 234   | 22    |
| >BRCA2-R28:YIFRNEREEEEK | 19   | >BRCA2-R28:YIFCNEREEEEK | 15    | 4     |
| >BRCA2-R28:LYIFRNER     | 37   | >BRCA2-R28:LYIFCNER     | 118   | 81    |
| >BRCA2-R28:LYIFRNER     | 31   | >BRCA2-R28:LYIFCNER     | 56    | 25    |
| >BRCA2-R28:LYIFRNER     | 183  | >BRCA2-R28:LYIFCNER     | 177   | 6     |
| >BRCA2-R28:LYIFRNER     | 93   | >BRCA2-R28:LYIFCNER     | 60    | 33    |
| >BRCA2-R28:GLYIFRNER    | 443  | >BRCA2-R28:GLYIFCNER    | 664   | 221   |
| >BRCA2-R28:GLYIFRNER    | 19   | >BRCA2-R28:GLYIFCNER    | 95    | 76    |
| >BRCA2-R28:GLYIFRNER    | 225  | >BRCA2-R28:GLYIFCNER    | 239   | 14    |
| >BRCA2-R28:GLYIFRNER    | 370  | >BRCA2-R28:GLYIFCNER    | 791   | 421   |
| >BRCA2-R28:SGLYIFRNER   | 66   | >BRCA2-R28:SGLYIFCNER   | 164   | 98    |
| >BRCA2-R28:SGLYIFRNER   | 358  | >BRCA2-R28:SGLYIFCNER   | 271   | 87    |

|                        |      |                        |       |       |
|------------------------|------|------------------------|-------|-------|
| >BRCA2-R28:SSGLYIFR    | 35   | >BRCA2-R28:SSGLYIFC    | 19733 | 19698 |
| >BRCA2-R28:SSGLYIFRNER | 257  | >BRCA2-R28:SSGLYIFCNER | 290   | 33    |
| >BRCA2-R28:SSGLYIFR    | 17   | >BRCA2-R28:SSGLYIFC    | 16976 | 16959 |
| >BRCA2-R28:SSGLYIFRNER | 35   | >BRCA2-R28:SSGLYIFCNER | 96    | 61    |
| >BRCA2-R28:SSGLYIFR    | 336  | >BRCA2-R28:SSGLYIFC    | 36735 | 36399 |
| >BRCA2-R28:SSGLYIFR    | 68   | >BRCA2-R28:SSGLYIFC    | 36964 | 36896 |
| >BRCA2-R28:SSGLYIFRNER | 95   | >BRCA2-R28:SSGLYIFCNER | 111   | 16    |
| >BRCA2-R28:SSGLYIFR    | 232  | >BRCA2-R28:SSGLYIFC    | 12824 | 12592 |
| >BRCA2-R28:SSGLYIFRNER | 493  | >BRCA2-R28:SSGLYIFCNER | 302   | 191   |
| >BRCA2-R28:SSGLYIFR    | 186  | >BRCA2-R28:SSGLYIFC    | 35358 | 35172 |
| >BRCA2-R28:TSSGLYIFR   | 15   | >BRCA2-R28:TSSGLYIFC   | 15079 | 15064 |
| >BRCA2-R28:TSSGLYIFR   | 15   | >BRCA2-R28:TSSGLYIFC   | 17797 | 17782 |
| >BRCA2-R28:TSSGLYIFR   | 45   | >BRCA2-R28:TSSGLYIFC   | 30321 | 30276 |
| >BRCA2-R28:TSSGLYIFR   | 5    | >BRCA2-R28:TSSGLYIFC   | 22230 | 22225 |
| >BRCA2-R28:TSSGLYIFR   | 364  | >BRCA2-R28:TSSGLYIFC   | 18430 | 18066 |
| >BRCA2-R28:TSSGLYIFR   | 151  | >BRCA2-R28:TSSGLYIFC   | 35885 | 35734 |
| >BRCA2-R28:KTSSGLYIFR  | 71   | >BRCA2-R28:KTSSGLYIFC  | 9885  | 9814  |
| >BRCA2-R28:KTSSGLYIFR  | 14   | >BRCA2-R28:KTSSGLYIFC  | 22253 | 22239 |
| >BRCA2-R28:KTSSGLYIFR  | 60   | >BRCA2-R28:KTSSGLYIFC  | 782   | 722   |
| >BRCA2-R28:KTSSGLYIFR  | 7    | >BRCA2-R28:KTSSGLYIFC  | 8909  | 8902  |
| >BRCA2-R28:KTSSGLYIFR  | 282  | >BRCA2-R28:KTSSGLYIFC  | 24049 | 23767 |
| >BRCA2-R28:KTSSGLYIFR  | 17   | >BRCA2-R28:KTSSGLYIFC  | 27613 | 27596 |
| >BRCA2-R28:KTSSGLYIFR  | 3887 | >BRCA2-R28:KTSSGLYIFC  | 445   | 3442  |
| >BRCA2-R28:KTSSGLYIFR  | 243  | >BRCA2-R28:KTSSGLYIFC  | 32632 | 32389 |
| >BRCA2-R28:KTSSGLYIFR  | 251  | >BRCA2-R28:KTSSGLYIFC  | 14751 | 14500 |
| >BRCA2-R28:KTSSGLYIFR  | 51   | >BRCA2-R28:KTSSGLYIFC  | 30309 | 30258 |
| >BRCA2-T13:TDLLFTDQH   | 61   | >BRCA2-T13:MDLLFTDQH   | 61    | 0     |
| >BRCA2-T13:TDLLFTDQH   | 292  | >BRCA2-T13:MDLLFTDQH   | 89    | 203   |
| >BRCA2-T13:TDLLFTDQH   | 224  | >BRCA2-T13:MDLLFTDQH   | 1124  | 900   |
| >BRCA2-T13:TDLLFTDQH   | 23   | >BRCA2-T13:MDLLFTDQH   | 29    | 6     |
| >BRCA2-T13:DETDLLFT    | 371  | >BRCA2-T13:DEMDLLFT    | 99    | 272   |
| >BRCA2-T13:DETDLLFTD   | 19   | >BRCA2-T13:DEMDLLFTD   | 9     | 10    |
| >BRCA2-T13:DETDLLFTDQ  | 132  | >BRCA2-T13:DEMDLLFTDQ  | 42    | 90    |
| >BRCA2-T13:HKDETDLLF   | 444  | >BRCA2-T13:HKDEM DLLF  | 1416  | 972   |
| >BRCA2-T13:HKDETDLL    | 86   | >BRCA2-T13:HKDEM DLL   | 203   | 117   |
| >BRCA2-T13:IHKDETDLLF  | 180  | >BRCA2-T13:IHKDEM DLLF | 372   | 192   |
| >BRCA2-T13:DTVCIHKDET  | 5854 | >BRCA2-T13:DTVCIHKDEN  | 19    | 5835  |
| >BRCA2-T33:STGEKQFISV  | 223  | >BRCA2-T33:SRGEKQFISV  | 8299  | 8076  |
| >BRCA2-T33:STGEKQFISV  | 167  | >BRCA2-T33:SRGEKQFISV  | 4847  | 4680  |
| >BRCA2-T33:STGEKQFI    | 359  | >BRCA2-T33:SRGEKQFI    | 12900 | 12541 |
| >BRCA2-T33:STGEKQFISV  | 33   | >BRCA2-T33:SRGEKQFISV  | 4139  | 4106  |
| >BRCA2-T33:STGEKQFISV  | 175  | >BRCA2-T33:SRGEKQFISV  | 8569  | 8394  |
| >BRCA2-T33:STGEKQFISV  | 43   | >BRCA2-T33:SRGEKQFISV  | 4984  | 4941  |

|                        |       |                         |       |       |
|------------------------|-------|-------------------------|-------|-------|
| >BRCA2-T33!STGEKQFISV  | 68    | >BRCA2-T33!SRGEKQFISV   | 3862  | 3794  |
| >BRCA2-T33!STGEKQFISV  | 99    | >BRCA2-T33!SRGEKQFISV   | 17910 | 17811 |
| >BRCA2-T33!STGEKQFISV  | 38    | >BRCA2-T33!SRGEKQFISV   | 13716 | 13678 |
| >BRCA2-T33!STGEKQFISV  | 271   | >BRCA2-T33!SRGEKQFISV   | 21798 | 21527 |
| >BRCA2-T33!STGEKQFI    | 52    | >BRCA2-T33!SRGEKQFI     | 4939  | 4887  |
| >BRCA2-T33!GSTGEKQFI   | 9796  | >BRCA2-T33!GSRGEKQFI    | 104   | 9692  |
| >BRCA2-T33!GSTGEKQFIS' | 8506  | >BRCA2-T33!GSRGEKQFIS'  | 89    | 8417  |
| >BRCA2-T33!GSTGEKQF    | 23    | >BRCA2-T33!GSRGEKQF     | 8     | 15    |
| >BRCA2-T33!LSGSTGEK    | 421   | >BRCA2-T33!LSGSRGEK     | 672   | 251   |
| >BRCA2-T33!LSGSTGEKQF  | 144   | >BRCA2-T33!LSGSRGEKQF   | 419   | 275   |
| >BRCA2-T33!LSGSTGEKQF  | 17    | >BRCA2-T33!LSGSRGEKQF   | 20    | 3     |
| >BRCA2-T33!LSGSTGEKQF  | 283   | >BRCA2-T33!LSGSRGEKQF   | 1224  | 941   |
| >BRCA2-T33!LSGSTGEKQF  | 243   | >BRCA2-T33!LSGSRGEKQF   | 143   | 100   |
| >BRCA2-T33!LSGSTGEKQF  | 31    | >BRCA2-T33!LSGSRGEKQF   | 35    | 4     |
| >BRCA2-T33!LLSGSTGEKQ  | 68    | >BRCA2-T33!LLSGSRGEKQ   | 119   | 51    |
| >BRCA2-T33!LLSGSTGEK   | 60    | >BRCA2-T33!LLSGSRGEK    | 82    | 22    |
| >BRCA2-T33!LLSGSTGEK   | 342   | >BRCA2-T33!LLSGSRGEK    | 765   | 423   |
| >BRCA2-T33!LLSGSTGEK   | 495   | >BRCA2-T33!LLSGSRGEK    | 597   | 102   |
| >BRCA2-T33!LLSGSTGEKQ  | 179   | >BRCA2-T33!LLSGSRGEKQ   | 232   | 53    |
| >BRCA2-T33!LLSGSTGEKQ  | 347   | >BRCA2-T33!LLSGSRGEKQ   | 619   | 272   |
| >BRCA2-T33!LLSGSTGEKQ  | 282   | >BRCA2-T33!LLSGSRGEKQ   | 304   | 22    |
| >BRCA2-T33!LLSGSTGEKQ  | 330   | >BRCA2-T33!LLSGSRGEKQ   | 713   | 383   |
| >BRCA2-T33!ALLSGSTGEK' | 88    | >BRCA2-T33!ALLSGSRGEK'  | 263   | 175   |
| >BRCA2-T33!ALLSGSTGEK  | 17    | >BRCA2-T33!ALLSGSRGEK   | 30    | 13    |
| >BRCA2-T33!ALLSGSTGEK  | 44    | >BRCA2-T33!ALLSGSRGEK   | 105   | 61    |
| >BRCA2-T33!ALLSGSTGEK  | 349   | >BRCA2-T33!ALLSGSRGEK   | 171   | 178   |
| >BRCA2-T33!QALLSGSTGE  | 382   | >BRCA2-T33!QALLSGSRGE   | 530   | 148   |
| >BRCA2-T33!QALLSGST    | 36372 | >BRCA2-T33!QALLSGSR     | 450   | 35922 |
| >BRCA2-T33!NTQALLSGST  | 32711 | >BRCA2-T33!NTQALLSGSR   | 54    | 32657 |
| >BRCA2-T63(LFANADSGLL  | 328   | >BRCA2-T63(LIFANADSGLLI | 247   | 81    |
| >BRCA2-T63(LTFANADSGL  | 80    | >BRCA2-T63(LIFANADSGL   | 41    | 39    |
| >BRCA2-T63(LTFANADSGL  | 120   | >BRCA2-T63(LIFANADSGLI  | 46    | 74    |
| >BRCA2-T63(LTFANADSGL  | 198   | >BRCA2-T63(LIFANADSGL   | 83    | 115   |
| >BRCA2-T63(LTFANADSGL  | 1062  | >BRCA2-T63(LIFANADSGLI  | 148   | 914   |
| >BRCA2-T63(LTFANADSGL  | 449   | >BRCA2-T63(LIFANADSGL   | 407   | 42    |
| >BRCA2-T63(LTFANADSGL  | 1128  | >BRCA2-T63(LIFANADSGLI  | 314   | 814   |
| >BRCA2-T63(LTFANADSGL  | 352   | >BRCA2-T63(LIFANADSGL   | 67    | 285   |
| >BRCA2-T63(LTFANADSGL  | 748   | >BRCA2-T63(LIFANADSGLI  | 147   | 601   |
| >BRCA2-T63(LTFANADSGL  | 1594  | >BRCA2-T63(LIFANADSGL   | 313   | 1281  |
| >BRCA2-T63(LTFANADSGL  | 1392  | >BRCA2-T63(LIFANADSGL   | 33    | 1359  |
| >BRCA2-T63(LTFANADSGL  | 3874  | >BRCA2-T63(LIFANADSGLI  | 106   | 3768  |
| >BRCA2-T63(LTFANADSGL  | 188   | >BRCA2-T63(LIFANADSGL   | 1552  | 1364  |
| >BRCA2-T63(LTFANADSGL  | 39    | >BRCA2-T63(LIFANADSGLI  | 421   | 382   |

|                       |       |                        |       |       |
|-----------------------|-------|------------------------|-------|-------|
| >BRCA2-T63(LTFANADSGL | 5     | >BRCA2-T63(LIFANADSGL  | 620   | 615   |
| >BRCA2-T63(LTFANADSGL | 9     | >BRCA2-T63(LIFANADSGLI | 4593  | 4584  |
| >BRCA2-T63(LTFANADSGL | 116   | >BRCA2-T63(LIFANADSGLI | 8891  | 8775  |
| >BRCA2-T63(LTFANADSGL | 184   | >BRCA2-T63(LIFANADSGL  | 8776  | 8592  |
| >BRCA2-T63(LTFANADSGL | 25    | >BRCA2-T63(LIFANADSGLI | 1176  | 1151  |
| >BRCA2-T63(LTFANADSGL | 319   | >BRCA2-T63(LIFANADSGL  | 12084 | 11765 |
| >BRCA2-T63(LTFANADSGL | 47    | >BRCA2-T63(LIFANADSGLI | 4977  | 4930  |
| >BRCA2-T63(FEANAFEAPL | 844   | >BRCA2-T63(FEANAFEAPL  | 7     | 837   |
| >BRCA2-T63(FEANAFEAPL | 1084  | >BRCA2-T63(FEANAFEAPL  | 96    | 988   |
| >BRCA2-T63(FEANAFEAPL | 1439  | >BRCA2-T63(FEANAFEAPL  | 27    | 1412  |
| >BRCA2-T63(FEANAFEAPL | 636   | >BRCA2-T63(FEANAFEAPL  | 277   | 359   |
| >BRCA2-T63(FEANAFEAPL | 90    | >BRCA2-T63(FEANAFEAPL  | 5     | 85    |
| >BRCA2-T63(PLTFANADSC | 1047  | >BRCA2-T63(PLIFANADSG  | 421   | 626   |
| >BRCA2-T63(PLTFANADSC | 174   | >BRCA2-T63(PLIFANADSG  | 252   | 78    |
| >BRCA2-T63(APLTFANA   | 262   | >BRCA2-T63(APLIFANA    | 150   | 112   |
| >BRCA2-T63(EAPLTFANA  | 94    | >BRCA2-T63(EAPLIFANA   | 10    | 84    |
| >BRCA2-T63(FEAPLTFANA | 465   | >BRCA2-T63(FEAPLIFANA  | 719   | 254   |
| >BRCA2-T63(FEAPLTFA   | 126   | >BRCA2-T63(FEAPLIFA    | 240   | 114   |
| >BRCA2-T63(FEAPLTFA   | 52    | >BRCA2-T63(FEAPLIFA    | 39    | 13    |
| >BRCA2-T63(FEAPLTFAN  | 385   | >BRCA2-T63(FEAPLIFAN   | 191   | 194   |
| >BRCA2-T63(FEAPLTFANA | 603   | >BRCA2-T63(FEAPLIFANA  | 453   | 150   |
| >BRCA2-T63(FEAPLTFA   | 414   | >BRCA2-T63(FEAPLIFA    | 283   | 131   |
| >BRCA2-T63(FEAPLTFANA | 447   | >BRCA2-T63(FEAPLIFANA  | 324   | 123   |
| >BRCA2-T63(FEAPLTFA   | 129   | >BRCA2-T63(FEAPLIFA    | 55    | 74    |
| >BRCA2-T63(FEAPLTFANA | 292   | >BRCA2-T63(FEAPLIFANA  | 149   | 143   |
| >BRCA2-T63(AFEAPLTF   | 82    | >BRCA2-T63(AFEAPLIF    | 216   | 134   |
| >BRCA2-T63(NAFEAPLTFA | 888   | >BRCA2-T63(NAFEAPLIFA  | 314   | 574   |
| >BRCA2-T63(NAFEAPLTFA | 362   | >BRCA2-T63(NAFEAPLIFA  | 363   | 1     |
| >BRCA2-T63(NAFEAPLTFA | 260   | >BRCA2-T63(NAFEAPLIFA  | 416   | 156   |
| >BRCA2-T63(NAFEAPLT   | 4385  | >BRCA2-T63(NAFEAPLI    | 392   | 3993  |
| >BRCA2-T63(NAFEAPLTFA | 592   | >BRCA2-T63(NAFEAPLIFA  | 319   | 273   |
| >BRCA2-T63(NAFEAPLTF  | 448   | >BRCA2-T63(NAFEAPLIF   | 4257  | 3809  |
| >BRCA2-T63(NAFEAPLT   | 4902  | >BRCA2-T63(NAFEAPLI    | 180   | 4722  |
| >BRCA2-T63(NAFEAPLTFA | 145   | >BRCA2-T63(NAFEAPLIFA  | 76    | 69    |
| >BRCA2-T63(NAFEAPLT   | 978   | >BRCA2-T63(NAFEAPLI    | 31    | 947   |
| >BRCA2-T63(NAFEAPLTFA | 78    | >BRCA2-T63(NAFEAPLIFA  | 64    | 14    |
| >BRCA2-T63(NAFEAPLTF  | 467   | >BRCA2-T63(NAFEAPLIF   | 1619  | 1152  |
| >BRCA2-T63(NAFEAPLTF  | 24    | >BRCA2-T63(NAFEAPLIF   | 39    | 15    |
| >BRCA2-T63(NAFEAPLTF  | 11    | >BRCA2-T63(NAFEAPLIF   | 116   | 105   |
| >BRCA2-T63(NAFEAPLTF  | 416   | >BRCA2-T63(NAFEAPLIF   | 1444  | 1028  |
| >BRCA2-T63(NAFEAPLTF  | 14    | >BRCA2-T63(NAFEAPLIF   | 29    | 15    |
| >BRCA2-T63(NAFEAPLTF  | 354   | >BRCA2-T63(NAFEAPLIF   | 490   | 136   |
| >BRCA2-T63(NAFEAPLT   | 30278 | >BRCA2-T63(NAFEAPLI    | 90    | 30188 |

|                       |       |                        |       |       |
|-----------------------|-------|------------------------|-------|-------|
| >BRCA2-T63(ANAFEAPLTF | 345   | >BRCA2-T63(ANAFEAPLIF  | 411   | 66    |
| >BRCA2-T63(ANAFEAPLTF | 267   | >BRCA2-T63(ANAFEAPLIF  | 246   | 21    |
| >BRCA2-T63(EANAFEAPLT | 754   | >BRCA2-T63(EANAFEAPLI  | 110   | 644   |
| >BRCA2-T63(EANAFEAPLT | 1805  | >BRCA2-T63(EANAFEAPLI  | 48    | 1757  |
| >BRCA2-T63(EANAFEAPLT | 172   | >BRCA2-T63(EANAFEAPLIF | 208   | 36    |
| >BRCA2-T63(EANAFEAPLT | 73    | >BRCA2-T63(EANAFEAPLIF | 698   | 625   |
| >BRCA2-T63(EANAFEAPLT | 19    | >BRCA2-T63(EANAFEAPLIF | 44    | 25    |
| >BRCA2-T63(EANAFEAPLT | 328   | >BRCA2-T63(EANAFEAPLIF | 403   | 75    |
| >BRCA2-T63(EANAFEAPLT | 30829 | >BRCA2-T63(EANAFEAPLI  | 366   | 30463 |
| >BRCA2-V19;QVSDASLQN, | 731   | >BRCA2-V19;QISDASLQNA  | 384   | 347   |
| >BRCA2-V19;QVSDASLQN, | 26    | >BRCA2-V19;QISDASLQNA  | 70    | 44    |
| >BRCA2-V19;QVSDASLQN, | 434   | >BRCA2-V19;QISDASLQNA  | 879   | 445   |
| >BRCA2-V19;QVSDASLQN, | 598   | >BRCA2-V19;QISDASLQNA  | 243   | 355   |
| >BRCA2-V19;FSTASGKSVQ | 437   | >BRCA2-V19;FSTASGKSVQ  | 17087 | 16650 |
| >BRCA2-V19;FSTASGKSVQ | 161   | >BRCA2-V19;FSTASGKSVQ  | 771   | 610   |
| >BRCA2-V19;FSTASGKSVQ | 113   | >BRCA2-V19;FSTASGKSVQ  | 22    | 91    |
| >BRCA2-V19;FSTASGKSVQ | 474   | >BRCA2-V19;FSTASGKSVQ  | 294   | 180   |
| >BRCA2-V19;FSTASGKSVQ | 2501  | >BRCA2-V19;FSTASGKSVQ  | 36    | 2465  |
| >BRCA2-V19;VQVSDASLQI | 391   | >BRCA2-V19;VQISDASLQN  | 186   | 205   |
| >BRCA2-V19;VQVSDASL   | 39    | >BRCA2-V19;VQISDASL    | 26    | 13    |
| >BRCA2-V19;VQVSDASLQI | 99    | >BRCA2-V19;VQISDASLQN  | 64    | 35    |
| >BRCA2-V19;VQVSDASL   | 290   | >BRCA2-V19;VQISDASL    | 140   | 150   |
| >BRCA2-V19;VQVSDASL   | 31    | >BRCA2-V19;VQISDASL    | 22    | 9     |
| >BRCA2-V19;VQVSDASLQI | 236   | >BRCA2-V19;VQISDASLQN  | 160   | 76    |
| >BRCA2-V19;VQVSDASL   | 156   | >BRCA2-V19;VQISDASL    | 104   | 52    |
| >BRCA2-V19;SVQVSDASL  | 567   | >BRCA2-V19;SVQISDASL   | 268   | 299   |
| >BRCA2-V19;KSVQVSDASL | 161   | >BRCA2-V19;KSVQISDASL  | 115   | 46    |
| >BRCA2-V19;KSVQVSDASL | 7     | >BRCA2-V19;KSVQISDASL  | 6     | 1     |
| >BRCA2-V19;KSVQVSDASL | 23    | >BRCA2-V19;KSVQISDASL  | 44    | 21    |
| >BRCA2-V19;KSVQVSDASL | 231   | >BRCA2-V19;KSVQISDASL( | 209   | 22    |
| >BRCA2-V19;KSVQVSDASL | 259   | >BRCA2-V19;KSVQISDASL  | 250   | 9     |
| >BRCA2-V19;GKSVQVSDA( | 188   | >BRCA2-V19;GKSVQISDAS  | 246   | 58    |
| >BRCA2-V19;ASGKSVQV   | 1804  | >BRCA2-V19;ASGKSVQI    | 251   | 1553  |
| >BRCA2-V19;ASGKSVQV   | 5446  | >BRCA2-V19;ASGKSVQI    | 76    | 5370  |
| >BRCA2-V19;TASGKSVQV  | 138   | >BRCA2-V19;TASGKSVQI   | 11907 | 11769 |
| >BRCA2-V19;TASGKSVQV  | 45    | >BRCA2-V19;TASGKSVQI   | 246   | 201   |
| >BRCA2-V19;TASGKSVQV  | 2233  | >BRCA2-V19;TASGKSVQI   | 479   | 1754  |
| >BRCA2-V19;STASGKSVQV | 496   | >BRCA2-V19;STASGKSVQI  | 1165  | 669   |
| >BRCA2-V19;STASGKSVQV | 153   | >BRCA2-V19;STASGKSVQI  | 1862  | 1709  |
| >BRCA2-V19;STASGKSVQV | 88    | >BRCA2-V19;STASGKSVQI  | 1849  | 1761  |
| >BRCA2-V19;STASGKSVQV | 36    | >BRCA2-V19;STASGKSVQI  | 4694  | 4658  |
| >BRCA2-V19;STASGKSVQV | 3279  | >BRCA2-V19;STASGKSVQI  | 389   | 2890  |
| >BRCA2-V19;STASGKSVQV | 42    | >BRCA2-V19;STASGKSVQI  | 82    | 40    |

|                        |       |                        |      |       |
|------------------------|-------|------------------------|------|-------|
| >BRCA2-V19!STASGKSVQV  | 29    | >BRCA2-V19!STASGKSVQI  | 189  | 160   |
| >BRCA2-V19!STASGKSVQV  | 533   | >BRCA2-V19!STASGKSVQI  | 87   | 446   |
| >BRCA2-V19!STASGKSVQV  | 86    | >BRCA2-V19!STASGKSVQI  | 105  | 19    |
| >BRCA2-V19!STASGKSVQV  | 316   | >BRCA2-V19!STASGKSVQI! | 354  | 38    |
| >BRCA2-V19!STASGKSVQV  | 16154 | >BRCA2-V19!STASGKSVQI  | 330  | 15824 |
| >BRCA2-V35!FVSEVEPN    | 2991  | >BRCA2-V35!FLSEVEPN    | 75   | 2916  |
| >BRCA2-V35!FVSEVEPN    | 2248  | >BRCA2-V35!FLSEVEPN    | 107  | 2141  |
| >BRCA2-V35!FVSEVEPN    | 9439  | >BRCA2-V35!FLSEVEPN    | 486  | 8953  |
| >BRCA2-V35!FVSEVEPN    | 1196  | >BRCA2-V35!FLSEVEPN    | 106  | 1090  |
| >BRCA2-V35!FVSEVEPN    | 7333  | >BRCA2-V35!FLSEVEPN    | 141  | 7192  |
| >BRCA2-V35!FVSEVEPN    | 5302  | >BRCA2-V35!FLSEVEPN    | 131  | 5171  |
| >BRCA2-V35!FVSEVEPN    | 5031  | >BRCA2-V35!FLSEVEPN    | 125  | 4906  |
| >BRCA2-V35!FVSEVEPN    | 5177  | >BRCA2-V35!FLSEVEPN    | 34   | 5143  |
| >BRCA2-V35!YSFVSEVEP   | 381   | >BRCA2-V35!YSFLSEVEP   | 851  | 470   |
| >BRCA2-V35!KYSFVSEV    | 87    | >BRCA2-V35!KYSFLSEV    | 94   | 7     |
| >BRCA2-V35!KYSFVSEV    | 173   | >BRCA2-V35!KYSFLSEV    | 154  | 19    |
| >BRCA2-V35!KYSFVSEV    | 86    | >BRCA2-V35!KYSFLSEV    | 113  | 27    |
| >BRCA2-V35!KYSFVSEV    | 587   | >BRCA2-V35!KYSFLSEV    | 414  | 173   |
| >BRCA2-V35!KYSFVSEV    | 155   | >BRCA2-V35!KYSFLSEV    | 113  | 42    |
| >BRCA2-V35!EKYSFVSEV   | 651   | >BRCA2-V35!EKYSFLSEV   | 470  | 181   |
| >BRCA2-V35!EKYSFVSEV   | 189   | >BRCA2-V35!EKYSFLSEV   | 356  | 167   |
| >BRCA2-V35!EKYSFVSEV   | 271   | >BRCA2-V35!EKYSFLSEV   | 219  | 52    |
| >BRCA2-V35!EKYSFVSEV   | 12    | >BRCA2-V35!EKYSFLSEV   | 22   | 10    |
| >BRCA2-V35!EKYSFVSEVEF | 257   | >BRCA2-V35!EKYSFLSEVEP | 435  | 178   |
| >BRCA2-V35!KEKYSFVS    | 337   | >BRCA2-V35!KEKYSFVS    | 115  | 222   |
| >BRCA2-V35!KEKYSFVSEV  | 198   | >BRCA2-V35!KEKYSFLSEV  | 148  | 50    |
| >BRCA2-V35!KEKYSFVSEV  | 83    | >BRCA2-V35!KEKYSFLSEV  | 165  | 82    |
| >BRCA2-V35!KEKYSFVS    | 394   | >BRCA2-V35!KEKYSFVS    | 741  | 347   |
| >BRCA2-V35!KEKYSFVSE   | 894   | >BRCA2-V35!KEKYSFVSE   | 454  | 440   |
| >BRCA2-V35!KEKYSFVSEV  | 107   | >BRCA2-V35!KEKYSFLSEV  | 103  | 4     |
| >BRCA2-V35!KEKYSFVS    | 80    | >BRCA2-V35!KEKYSFVS    | 226  | 146   |
| >BRCA2-V35!KEKYSFVSEV  | 416   | >BRCA2-V35!KEKYSFLSEV  | 531  | 115   |
| >BRCA2-V35!KEKYSFVSEV  | 46    | >BRCA2-V35!KEKYSFLSEV  | 66   | 20    |
| >BRCA2-V35!VKEKYSFVSEV | 424   | >BRCA2-V35!VKEKYSFLSEV | 792  | 368   |
| >BRCA2-V35!QVKEKYSFV   | 17    | >BRCA2-V35!QVKEKYSFV   | 169  | 152   |
| >BRCA2-V35!QVKEKYSFV   | 453   | >BRCA2-V35!QVKEKYSFV   | 3147 | 2694  |
| >BRCA2-V35!QVKEKYSFV   | 281   | >BRCA2-V35!QVKEKYSFV   | 3978 | 3697  |
| >BRCA2-V35!QVKEKYSFV   | 43    | >BRCA2-V35!QVKEKYSFV   | 69   | 26    |
| >BRCA2-V35!QVKEKYSFV   | 72    | >BRCA2-V35!QVKEKYSFV   | 751  | 679   |
| >BRCA2-V35!QVKEKYSFV   | 694   | >BRCA2-V35!QVKEKYSFV   | 174  | 520   |
| >BRCA2-V35!NQVKEKYSFV  | 394   | >BRCA2-V35!NQVKEKYSFV  | 2176 | 1782  |
| >BRCA2-V35!NQVKEKYSFV  | 3722  | >BRCA2-V35!NQVKEKYSFV  | 222  | 3500  |
| >BRD3-A161!APKGKGRKP/  | 57    | >BRD3-A161!APKGKGRKP/  | 146  | 89    |



|                       |       |                       |       |       |
|-----------------------|-------|-----------------------|-------|-------|
| >BRD3-A161`KPAAGAQSA  | 25    | >BRD3-A161`KPATGAQSA  | 27    | 2     |
| >BRD3-A161`KPAAGAQA   | 196   | >BRD3-A161`KPATGAQA   | 335   | 139   |
| >BRD3-A161`RKAAGAQS   | 464   | >BRD3-A161`RKPATGAQS  | 262   | 202   |
| >BRD3-A161`KGRKPAAG   | 203   | >BRD3-A161`KGRKPATG   | 280   | 77    |
| >BRD3-A161`KGRKPAAGA  | 45    | >BRD3-A161`KGRKPATGA  | 349   | 304   |
| >BRD3-A161`KGRKPAAGA  | 331   | >BRD3-A161`KGRKPATGA  | 345   | 14    |
| >BRD3-A161`KGRKPAAGA  | 232   | >BRD3-A161`KGRKPATGA  | 399   | 167   |
| >BRD3-A161`KGKGRKPAA  | 40    | >BRD3-A161`KGKGRKPAT  | 1273  | 1233  |
| >BRD3-A161`KGKGRKPA   | 200   | >BRD3-A161`KGKGRKPAT  | 670   | 470   |
| >BRD3-T36N`KTNQLQYMC  | 196   | >BRD3-T36N`KNNQLQYMC  | 5354  | 5158  |
| >BRD3-T36N`KTNQLQYMC  | 237   | >BRD3-T36N`KNNQLQYMC  | 12336 | 12099 |
| >BRD3-T36N`KTNQLQYMC  | 87    | >BRD3-T36N`KNNQLQYMC  | 6944  | 6857  |
| >BRD3-T36N`KTNQLQYMC  | 261   | >BRD3-T36N`KNNQLQYMC  | 10068 | 9807  |
| >BRD3-T36N`KTNQLQYM   | 217   | >BRD3-T36N`KNNQLQYM   | 6342  | 6125  |
| >BRD3-T36N`KTNQLQYMC  | 474   | >BRD3-T36N`KNNQLQYMC  | 9197  | 8723  |
| >BRD3-T36N`KTNQLQYMC  | 367   | >BRD3-T36N`KNNQLQYMC  | 4413  | 4046  |
| >BRD3-T36N`KTNQLQYMC  | 489   | >BRD3-T36N`KNNQLQYMC  | 12974 | 12485 |
| >BRD3-T36N`KTNQLQYMC  | 248   | >BRD3-T36N`KNNQLQYMC  | 8291  | 8043  |
| >BRD3-T36N`KTNQLQYMC  | 346   | >BRD3-T36N`KNNQLQYMC  | 14798 | 14452 |
| >BRD3-T36N`KTNQLQYM   | 11    | >BRD3-T36N`KNNQLQYM   | 16708 | 16697 |
| >BRD3-T36N`KTNQLQYMC  | 111   | >BRD3-T36N`KNNQLQYMC  | 23468 | 23357 |
| >BRD3-T36N`KTNQLQYM   | 154   | >BRD3-T36N`KNNQLQYM   | 13811 | 13657 |
| >BRD3-T36N`KTNQLQYM   | 23    | >BRD3-T36N`KNNQLQYM   | 1239  | 1216  |
| >BRD3-T36N`RKTNQLQY   | 329   | >BRD3-T36N`RKNNQLQY   | 257   | 72    |
| >BRD3-T36N`RKTNQLQY   | 13    | >BRD3-T36N`RKNNQLQY   | 6     | 7     |
| >BRD3-T36N`RKTNQLQYM  | 20    | >BRD3-T36N`RKNNQLQYM  | 10    | 10    |
| >BRD3-T36N`GRKTNQLQY  | 384   | >BRD3-T36N`GRKNNQLQY  | 305   | 79    |
| >BRD3-T36N`GRKTNQLQY  | 412   | >BRD3-T36N`GRKNNQLQY  | 288   | 124   |
| >BRD3-T36N`GRKTNQLQY  | 87    | >BRD3-T36N`GRKNNQLQY  | 80    | 7     |
| >BRD3-T36N`GRKTNQLQY  | 475   | >BRD3-T36N`GRKNNQLQY  | 515   | 40    |
| >BRD3-T36N`GRKTNQLQY  | 177   | >BRD3-T36N`GRKNNQLQY  | 187   | 10    |
| >BRD3-T36N`KPGRKTNQL  | 88    | >BRD3-T36N`KPGRKNNQL  | 260   | 172   |
| >BRD3-T36N`KPGRKTNQL  | 25    | >BRD3-T36N`KPGRKNNQL  | 39    | 14    |
| >BRD3-T36N`KPGRKTNQL  | 436   | >BRD3-T36N`KPGRKNNQL  | 1047  | 611   |
| >BRD3-T36N`KPGRKTNQL  | 245   | >BRD3-T36N`KPGRKNNQL  | 358   | 113   |
| >BRD4-C125`CIQDFNTM   | 6697  | >BRD4-C125`YIQDFNTM   | 167   | 6530  |
| >BRD4-C125`CIQDFNTMFT | 5330  | >BRD4-C125`YIQDFNTMFT | 188   | 5142  |
| >BRD4-C125`CIQDFNTM   | 3116  | >BRD4-C125`YIQDFNTM   | 163   | 2953  |
| >BRD4-C125`CIQDFNTMFT | 1147  | >BRD4-C125`YIQDFNTMFT | 98    | 1049  |
| >BRD4-C125`CIQDFNTMFT | 1177  | >BRD4-C125`YIQDFNTMFT | 92    | 1085  |
| >BRD4-C125`CIQDFNTM   | 4359  | >BRD4-C125`YIQDFNTM   | 65    | 4294  |
| >BRD4-C125`CIQDFNTMF  | 12319 | >BRD4-C125`YIQDFNTMF  | 434   | 11885 |
| >BRD4-C125`CIQDFNTMFT | 3031  | >BRD4-C125`YIQDFNTMFT | 153   | 2878  |

|                        |       |                        |     |       |
|------------------------|-------|------------------------|-----|-------|
| >BRD4-C125' CIQDFNTM   | 8146  | >BRD4-C125' YIQDFNTM   | 166 | 7980  |
| >BRD4-C125' CIQDFNTMFT | 9412  | >BRD4-C125' YIQDFNTMFT | 238 | 9174  |
| >BRD4-C125' CIQDFNTM   | 8489  | >BRD4-C125' YIQDFNTM   | 222 | 8267  |
| >BRD4-C125' CIQDFNTM   | 6686  | >BRD4-C125' YIQDFNTM   | 77  | 6609  |
| >BRD4-C125' CIQDFNTMFT | 7313  | >BRD4-C125' YIQDFNTMFT | 75  | 7238  |
| >BRD4-C125' CIQDFNTM   | 4466  | >BRD4-C125' YIQDFNTM   | 242 | 4224  |
| >BRD4-C125' CIQDFNTMF  | 1915  | >BRD4-C125' YIQDFNTMF  | 85  | 1830  |
| >BRD4-C125' CIQDFNTMF  | 2044  | >BRD4-C125' YIQDFNTMF  | 96  | 1948  |
| >BRD4-C125' CIQDFNTMF  | 485   | >BRD4-C125' YIQDFNTMF  | 51  | 434   |
| >BRD4-C125' CIQDFNTM   | 3805  | >BRD4-C125' YIQDFNTM   | 347 | 3458  |
| >BRD4-C125' CIQDFNTM   | 3571  | >BRD4-C125' YIQDFNTM   | 418 | 3153  |
| >BRD4-C125' CIQDFNTMF  | 466   | >BRD4-C125' YIQDFNTMF  | 19  | 447   |
| >BRD4-C125' ECIQDFNTM  | 28347 | >BRD4-C125' EYIQDFNTM  | 184 | 28163 |
| >BRD4-C125' ECIQDFNTMF | 3120  | >BRD4-C125' EYIQDFNTMF | 35  | 3085  |
| >BRD4-C125' ECIQDFNTM  | 21191 | >BRD4-C125' EYIQDFNTM  | 305 | 20886 |
| >BRD4-C125' ECIQDFNTMF | 6504  | >BRD4-C125' EYIQDFNTMF | 57  | 6447  |
| >BRD4-C125' ECIQDFNTM  | 22830 | >BRD4-C125' EYIQDFNTM  | 65  | 22765 |
| >BRD4-C125' ECIQDFNTMF | 8626  | >BRD4-C125' EYIQDFNTMF | 11  | 8615  |
| >BRD4-C125' ECIQDFNTM  | 351   | >BRD4-C125' EYIQDFNTM  | 50  | 301   |
| >BRD4-C125' ECIQDFNTMF | 760   | >BRD4-C125' EYIQDFNTMF | 92  | 668   |
| >BRD4-C125' ECIQDFNTMF | 2344  | >BRD4-C125' EYIQDFNTMF | 319 | 2025  |
| >BRD4-C125' ECIQDFNTM  | 4     | >BRD4-C125' EYIQDFNTM  | 4   | 0     |
| >BRD4-C125' ECIQDFNTMF | 20    | >BRD4-C125' EYIQDFNTMF | 22  | 2     |
| >BRD4-C125' ECIQDFNTM  | 4     | >BRD4-C125' EYIQDFNTM  | 4   | 0     |
| >BRD4-C125' ECIQDFNTMF | 188   | >BRD4-C125' EYIQDFNTMF | 211 | 23    |
| >BRD4-C125' ECIQDFNTMF | 3162  | >BRD4-C125' EYIQDFNTMF | 184 | 2978  |
| >BRD4-C125' ECIQDFNTM  | 6625  | >BRD4-C125' EYIQDFNTM  | 202 | 6423  |
| >BRD4-C125' QECIQDFNTM | 1204  | >BRD4-C125' QEYIQDFNTM | 96  | 1108  |
| >BRD4-C125' QECIQDFNTM | 2998  | >BRD4-C125' QEYIQDFNTM | 248 | 2750  |
| >BRD4-C125' QECIQDFNTM | 977   | >BRD4-C125' QEYIQDFNTM | 86  | 891   |
| >BRD4-C125' QECIQDFNTM | 113   | >BRD4-C125' QEYIQDFNTM | 48  | 65    |
| >BRD4-C125' QECIQDFNTM | 820   | >BRD4-C125' QEYIQDFNTM | 391 | 429   |
| >BRD4-C125' QECIQDFNTM | 1020  | >BRD4-C125' QEYIQDFNTM | 272 | 748   |
| >BRD4-C125' QECIQDFNTM | 1270  | >BRD4-C125' QEYIQDFNTM | 149 | 1121  |
| >BRD4-C125' QECIQDFNTM | 758   | >BRD4-C125' QEYIQDFNTM | 247 | 511   |
| >BRD4-C125' QECIQDFNTM | 1287  | >BRD4-C125' QEYIQDFNTM | 383 | 904   |
| >BRD4-C125' QECIQDFNTM | 1164  | >BRD4-C125' QEYIQDFNTM | 173 | 991   |
| >BRD4-C125' QECIQDFNTM | 191   | >BRD4-C125' QEYIQDFNTM | 123 | 68    |
| >BRD4-C125' QECIQDFNT  | 796   | >BRD4-C125' QEYIQDFNT  | 442 | 354   |
| >BRD4-C125' QECIQDFNTM | 1505  | >BRD4-C125' QEYIQDFNTM | 150 | 1355  |
| >BRD4-C125' AQECIQDFNT | 430   | >BRD4-C125' AQEYIQDFNT | 692 | 262   |
| >BRD4-C125' AQECIQDF   | 67    | >BRD4-C125' AQEYIQDF   | 58  | 9     |
| >BRD4-C125' NAQECIQDF  | 489   | >BRD4-C125' NAQEYIQDF  | 647 | 158   |

|                       |       |                       |      |       |
|-----------------------|-------|-----------------------|------|-------|
| >BRD4-C125'WNAQECIQD  | 329   | >BRD4-C125'WNAQEYIQD  | 193  | 136   |
| >BRD4-C125'YWNAQECI   | 1916  | >BRD4-C125'YWNAQEYI   | 294  | 1622  |
| >BRD4-C125'YWNAQECIQ  | 415   | >BRD4-C125'YWNAQEYIQ  | 235  | 180   |
| >BRD4-C125'YWNAQECI   | 1407  | >BRD4-C125'YWNAQEYI   | 82   | 1325  |
| >BRD4-C125'YWNAQECIQ  | 21    | >BRD4-C125'YWNAQEYIQ  | 15   | 6     |
| >BRD4-C125'YWNAQECIQ  | 380   | >BRD4-C125'YWNAQEYIQ  | 334  | 46    |
| >BRD4-C125'YWNAQECI   | 1016  | >BRD4-C125'YWNAQEYI   | 320  | 696   |
| >BRD4-C125'YYWNAQECI  | 243   | >BRD4-C125'YYWNAQEYI  | 34   | 209   |
| >BRD4-C125'YYWNAQECI  | 1269  | >BRD4-C125'YYWNAQEYI  | 34   | 1235  |
| >BRD4-C125'YYWNAQECI  | 378   | >BRD4-C125'YYWNAQEYI  | 100  | 278   |
| >BRD4-C125'YYWNAQECI  | 2086  | >BRD4-C125'YYWNAQEYI  | 308  | 1778  |
| >BRD4-C125'YYWNAQEC   | 4898  | >BRD4-C125'YYWNAQEY   | 382  | 4516  |
| >BRD4-C125'YYWNAQECI  | 31    | >BRD4-C125'YYWNAQEYI  | 24   | 7     |
| >BRD4-C125'YYWNAQECI  | 94    | >BRD4-C125'YYWNAQEYI  | 103  | 9     |
| >BRD4-C125'YYWNAQEC   | 118   | >BRD4-C125'YYWNAQEY   | 29   | 89    |
| >BRD4-C125'YYWNAQECI  | 14    | >BRD4-C125'YYWNAQEYI  | 4    | 10    |
| >BRD4-C125'YYWNAQECIK | 1019  | >BRD4-C125'YYWNAQEYIK | 300  | 719   |
| >BRD4-C125'YYWNAQEC   | 10419 | >BRD4-C125'YYWNAQEY   | 9    | 10410 |
| >BRD4-C125'YYWNAQEC   | 17721 | >BRD4-C125'YYWNAQEY   | 238  | 17483 |
| >BRD4-C125'YYWNAQEC   | 25249 | >BRD4-C125'YYWNAQEY   | 112  | 25137 |
| >BRD4-C125'YYWNAQEC   | 23275 | >BRD4-C125'YYWNAQEY   | 230  | 23045 |
| >BRD4-C125'YYWNAQEC   | 10493 | >BRD4-C125'YYWNAQEY   | 121  | 10372 |
| >BRD4-C125'YYWNAQEC   | 14282 | >BRD4-C125'YYWNAQEY   | 82   | 14200 |
| >BRD4-C125'YYWNAQECIK | 1093  | >BRD4-C125'YYWNAQEYIK | 404  | 689   |
| >BRD4-C125'NYYWNAQEC  | 229   | >BRD4-C125'NYYWNAQEY  | 35   | 194   |
| >BRD4-C125'NYYWNAQEC  | 314   | >BRD4-C125'NYYWNAQEY  | 338  | 24    |
| >BRD4-C125'NYYWNAQEC  | 676   | >BRD4-C125'NYYWNAQEY  | 147  | 529   |
| >BRD4-C125'NYYWNAQEC  | 59    | >BRD4-C125'NYYWNAQEY  | 8    | 51    |
| >BRD4-C125'NYYWNAQEC  | 18146 | >BRD4-C125'NYYWNAQEY  | 34   | 18112 |
| >BRD4-C125'NYYWNAQEC  | 28147 | >BRD4-C125'NYYWNAQEY  | 420  | 27727 |
| >BRD4-C125'NYYWNAQEC  | 16546 | >BRD4-C125'NYYWNAQEY  | 375  | 16171 |
| >BRD4-C125'NYYWNAQEC  | 36911 | >BRD4-C125'NYYWNAQEY  | 288  | 36623 |
| >BRD4-C125'NYYWNAQEC  | 911   | >BRD4-C125'NYYWNAQEY  | 411  | 500   |
| >BRD4-C125'NYYWNAQEC  | 385   | >BRD4-C125'NYYWNAQEY  | 1593 | 1208  |
| >BRD4-C125'NYYWNAQEC  | 162   | >BRD4-C125'NYYWNAQEY  | 44   | 118   |
| >BRD4-C125'NNYYWNAQI  | 106   | >BRD4-C125'NNYYWNAQI  | 151  | 45    |
| >BRD4-C125'NNYYWNAQI  | 30219 | >BRD4-C125'NNYYWNAQI  | 131  | 30088 |
| >BRD4-C125'NNYYWNAQI  | 966   | >BRD4-C125'NNYYWNAQI  | 105  | 861   |
| >BRD4-C125'NNYYWNAQI  | 27695 | >BRD4-C125'NNYYWNAQI  | 460  | 27235 |
| >BRD4-C125'NNYYWNAQI  | 20444 | >BRD4-C125'NNYYWNAQI  | 470  | 19974 |
| >BRD4-C125'NNYYWNAQI  | 672   | >BRD4-C125'NNYYWNAQI  | 446  | 226   |
| >BRD4_ENST CIQDFNTM   | 6697  | >BRD4_ENST YIQDFNTM   | 167  | 6530  |
| >BRD4_ENST CIQDFNTMFT | 5330  | >BRD4_ENST YIQDFNTMFT | 188  | 5142  |

|                       |       |                       |     |       |
|-----------------------|-------|-----------------------|-----|-------|
| >BRD4_ENST CIQDFNTM   | 3116  | >BRD4_ENST YIQDFNTM   | 163 | 2953  |
| >BRD4_ENST CIQDFNTMF1 | 1147  | >BRD4_ENST YIQDFNTMF1 | 98  | 1049  |
| >BRD4_ENST CIQDFNTMF1 | 1177  | >BRD4_ENST YIQDFNTMF1 | 92  | 1085  |
| >BRD4_ENST CIQDFNTM   | 4359  | >BRD4_ENST YIQDFNTM   | 65  | 4294  |
| >BRD4_ENST CIQDFNTMF  | 12319 | >BRD4_ENST YIQDFNTMF  | 434 | 11885 |
| >BRD4_ENST CIQDFNTMF1 | 3031  | >BRD4_ENST YIQDFNTMF1 | 153 | 2878  |
| >BRD4_ENST CIQDFNTM   | 8146  | >BRD4_ENST YIQDFNTM   | 166 | 7980  |
| >BRD4_ENST CIQDFNTMF1 | 9412  | >BRD4_ENST YIQDFNTMF1 | 238 | 9174  |
| >BRD4_ENST CIQDFNTM   | 8489  | >BRD4_ENST YIQDFNTM   | 222 | 8267  |
| >BRD4_ENST CIQDFNTM   | 6686  | >BRD4_ENST YIQDFNTM   | 77  | 6609  |
| >BRD4_ENST CIQDFNTMF1 | 7313  | >BRD4_ENST YIQDFNTMF1 | 75  | 7238  |
| >BRD4_ENST CIQDFNTM   | 4466  | >BRD4_ENST YIQDFNTM   | 242 | 4224  |
| >BRD4_ENST CIQDFNTMF  | 1915  | >BRD4_ENST YIQDFNTMF  | 85  | 1830  |
| >BRD4_ENST CIQDFNTMF  | 2044  | >BRD4_ENST YIQDFNTMF  | 96  | 1948  |
| >BRD4_ENST CIQDFNTMF  | 485   | >BRD4_ENST YIQDFNTMF  | 51  | 434   |
| >BRD4_ENST CIQDFNTM   | 3805  | >BRD4_ENST YIQDFNTM   | 347 | 3458  |
| >BRD4_ENST CIQDFNTM   | 3571  | >BRD4_ENST YIQDFNTM   | 418 | 3153  |
| >BRD4_ENST CIQDFNTMF  | 466   | >BRD4_ENST YIQDFNTMF  | 19  | 447   |
| >BRD4_ENST ECIQDFNTM  | 28347 | >BRD4_ENST EYIQDFNTM  | 184 | 28163 |
| >BRD4_ENST ECIQDFNTMF | 3120  | >BRD4_ENST EYIQDFNTMF | 35  | 3085  |
| >BRD4_ENST ECIQDFNTM  | 21191 | >BRD4_ENST EYIQDFNTM  | 305 | 20886 |
| >BRD4_ENST ECIQDFNTMF | 6504  | >BRD4_ENST EYIQDFNTMF | 57  | 6447  |
| >BRD4_ENST ECIQDFNTM  | 22830 | >BRD4_ENST EYIQDFNTM  | 65  | 22765 |
| >BRD4_ENST ECIQDFNTMF | 8626  | >BRD4_ENST EYIQDFNTMF | 11  | 8615  |
| >BRD4_ENST ECIQDFNTM  | 351   | >BRD4_ENST EYIQDFNTM  | 50  | 301   |
| >BRD4_ENST ECIQDFNTMF | 760   | >BRD4_ENST EYIQDFNTMF | 92  | 668   |
| >BRD4_ENST ECIQDFNTMF | 2344  | >BRD4_ENST EYIQDFNTMF | 319 | 2025  |
| >BRD4_ENST ECIQDFNTM  | 4     | >BRD4_ENST EYIQDFNTM  | 4   | 0     |
| >BRD4_ENST ECIQDFNTMF | 20    | >BRD4_ENST EYIQDFNTMF | 22  | 2     |
| >BRD4_ENST ECIQDFNTM  | 4     | >BRD4_ENST EYIQDFNTM  | 4   | 0     |
| >BRD4_ENST ECIQDFNTMF | 188   | >BRD4_ENST EYIQDFNTMF | 211 | 23    |
| >BRD4_ENST ECIQDFNTMF | 3162  | >BRD4_ENST EYIQDFNTMF | 184 | 2978  |
| >BRD4_ENST ECIQDFNTM  | 6625  | >BRD4_ENST EYIQDFNTM  | 202 | 6423  |
| >BRD4_ENST QECIQDFNTM | 1204  | >BRD4_ENST QEYIQDFNTM | 96  | 1108  |
| >BRD4_ENST QECIQDFNTM | 2998  | >BRD4_ENST QEYIQDFNTM | 248 | 2750  |
| >BRD4_ENST QECIQDFNTM | 977   | >BRD4_ENST QEYIQDFNTM | 86  | 891   |
| >BRD4_ENST QECIQDFNTM | 113   | >BRD4_ENST QEYIQDFNTM | 48  | 65    |
| >BRD4_ENST QECIQDFNTM | 820   | >BRD4_ENST QEYIQDFNTM | 391 | 429   |
| >BRD4_ENST QECIQDFNTM | 1020  | >BRD4_ENST QEYIQDFNTM | 272 | 748   |
| >BRD4_ENST QECIQDFNTM | 1270  | >BRD4_ENST QEYIQDFNTM | 149 | 1121  |
| >BRD4_ENST QECIQDFNTM | 758   | >BRD4_ENST QEYIQDFNTM | 247 | 511   |
| >BRD4_ENST QECIQDFNTM | 1287  | >BRD4_ENST QEYIQDFNTM | 383 | 904   |
| >BRD4_ENST QECIQDFNTM | 1164  | >BRD4_ENST QEYIQDFNTM | 173 | 991   |

|                       |       |                       |      |       |
|-----------------------|-------|-----------------------|------|-------|
| >BRD4_ENST QECIQDFNTM | 191   | >BRD4_ENST QEYIQDFNTM | 123  | 68    |
| >BRD4_ENST QECIQDFNT  | 796   | >BRD4_ENST QEYIQDFNT  | 442  | 354   |
| >BRD4_ENST QECIQDFNTM | 1505  | >BRD4_ENST QEYIQDFNTM | 150  | 1355  |
| >BRD4_ENST AQECIQDFNT | 430   | >BRD4_ENST AQEYIQDFNT | 692  | 262   |
| >BRD4_ENST AQECIQDF   | 67    | >BRD4_ENST AQEYIQDF   | 58   | 9     |
| >BRD4_ENST NAQECIQDF  | 489   | >BRD4_ENST NAQEYIQDF  | 647  | 158   |
| >BRD4_ENST WNAQECIQD  | 329   | >BRD4_ENST WNAQEYIQD  | 193  | 136   |
| >BRD4_ENST YWNAQECI   | 1916  | >BRD4_ENST YWNAQEYI   | 294  | 1622  |
| >BRD4_ENST YWNAQECIQ  | 415   | >BRD4_ENST YWNAQEYIQ  | 235  | 180   |
| >BRD4_ENST YWNAQECI   | 1407  | >BRD4_ENST YWNAQEYI   | 82   | 1325  |
| >BRD4_ENST YWNAQECIQ  | 21    | >BRD4_ENST YWNAQEYIQ  | 15   | 6     |
| >BRD4_ENST YWNAQECIQ  | 380   | >BRD4_ENST YWNAQEYIQ  | 334  | 46    |
| >BRD4_ENST YWNAQECI   | 1016  | >BRD4_ENST YWNAQEYI   | 320  | 696   |
| >BRD4_ENST YYWNAQECI  | 243   | >BRD4_ENST YYWNAQEYI  | 34   | 209   |
| >BRD4_ENST YYWNAQECI  | 1269  | >BRD4_ENST YYWNAQEYI  | 34   | 1235  |
| >BRD4_ENST YYWNAQECI  | 378   | >BRD4_ENST YYWNAQEYI  | 100  | 278   |
| >BRD4_ENST YYWNAQECI  | 2086  | >BRD4_ENST YYWNAQEYI  | 308  | 1778  |
| >BRD4_ENST YYWNAQEC   | 4898  | >BRD4_ENST YYWNAQEY   | 382  | 4516  |
| >BRD4_ENST YYWNAQECI  | 31    | >BRD4_ENST YYWNAQEYI  | 24   | 7     |
| >BRD4_ENST YYWNAQECI  | 94    | >BRD4_ENST YYWNAQEYI  | 103  | 9     |
| >BRD4_ENST YYWNAQEC   | 118   | >BRD4_ENST YYWNAQEY   | 29   | 89    |
| >BRD4_ENST YYWNAQECI  | 14    | >BRD4_ENST YYWNAQEYI  | 4    | 10    |
| >BRD4_ENST YYWNAQECIK | 1019  | >BRD4_ENST YYWNAQEYIK | 300  | 719   |
| >BRD4_ENST YYWNAQEC   | 10419 | >BRD4_ENST YYWNAQEY   | 9    | 10410 |
| >BRD4_ENST YYWNAQEC   | 17721 | >BRD4_ENST YYWNAQEY   | 238  | 17483 |
| >BRD4_ENST YYWNAQEC   | 25249 | >BRD4_ENST YYWNAQEY   | 112  | 25137 |
| >BRD4_ENST YYWNAQEC   | 23275 | >BRD4_ENST YYWNAQEY   | 230  | 23045 |
| >BRD4_ENST YYWNAQEC   | 10493 | >BRD4_ENST YYWNAQEY   | 121  | 10372 |
| >BRD4_ENST YYWNAQEC   | 14282 | >BRD4_ENST YYWNAQEY   | 82   | 14200 |
| >BRD4_ENST YYWNAQECIK | 1093  | >BRD4_ENST YYWNAQEYIK | 404  | 689   |
| >BRD4_ENST NYYWNAQEC  | 229   | >BRD4_ENST NYYWNAQEY  | 35   | 194   |
| >BRD4_ENST NYYWNAQEC  | 314   | >BRD4_ENST NYYWNAQEY  | 338  | 24    |
| >BRD4_ENST NYYWNAQEC  | 676   | >BRD4_ENST NYYWNAQEY  | 147  | 529   |
| >BRD4_ENST NYYWNAQEC  | 59    | >BRD4_ENST NYYWNAQEY  | 8    | 51    |
| >BRD4_ENST NYYWNAQEC  | 18146 | >BRD4_ENST NYYWNAQEY  | 34   | 18112 |
| >BRD4_ENST NYYWNAQEC  | 28147 | >BRD4_ENST NYYWNAQEY  | 420  | 27727 |
| >BRD4_ENST NYYWNAQEC  | 16546 | >BRD4_ENST NYYWNAQEY  | 375  | 16171 |
| >BRD4_ENST NYYWNAQEC  | 36911 | >BRD4_ENST NYYWNAQEY  | 288  | 36623 |
| >BRD4_ENST NYYWNAQEC  | 911   | >BRD4_ENST NYYWNAQEY  | 411  | 500   |
| >BRD4_ENST NYYWNAQEC  | 385   | >BRD4_ENST NYYWNAQEY  | 1593 | 1208  |
| >BRD4_ENST NYYWNAQEC  | 162   | >BRD4_ENST NYYWNAQEY  | 44   | 118   |
| >BRD4_ENST NNYYWNAQI  | 106   | >BRD4_ENST NNYYWNAQI  | 151  | 45    |
| >BRD4_ENST NNYYWNAQI  | 30219 | >BRD4_ENST NNYYWNAQI  | 131  | 30088 |

|                        |       |                         |       |       |
|------------------------|-------|-------------------------|-------|-------|
| >BRD4_ENST NNYWNAQI    | 966   | >BRD4_ENST NNYWNAQI     | 105   | 861   |
| >BRD4_ENST NNYWNAQI    | 27695 | >BRD4_ENST NNYWNAQI     | 460   | 27235 |
| >BRD4_ENST NNYWNAQI    | 20444 | >BRD4_ENST NNYWNAQI     | 470   | 19974 |
| >BRD4_ENST NNYWNAQI    | 672   | >BRD4_ENST NNYWNAQI     | 446   | 226   |
| >BRIP1-T650 TIGSGPKGR  | 600   | >BRIP1-T650 IIGSGPKGR   | 398   | 202   |
| >BRIP1-T650 GTIGSGPK   | 463   | >BRIP1-T650 GIIGSGPK    | 324   | 139   |
| >BRIP1-T650 GTIGSGPK   | 15    | >BRIP1-T650 GIIGSGPK    | 29    | 14    |
| >BRIP1-T650 GTIGSGPK   | 179   | >BRIP1-T650 GIIGSGPK    | 1039  | 860   |
| >BRIP1-T650 GTIGSGPK   | 284   | >BRIP1-T650 GIIGSGPK    | 1581  | 1297  |
| >BRIP1-T650 GTIGSGPKGR | 427   | >BRIP1-T650 GIIGSGPKGR  | 1454  | 1027  |
| >BRIP1-T650 GTIGSGPK   | 241   | >BRIP1-T650 GIIGSGPK    | 4892  | 4651  |
| >BRIP1-T650 GTIGSGPKGR | 438   | >BRIP1-T650 GIIGSGPKGR  | 7477  | 7039  |
| >BRIP1-T650 IIKNSQVWVC | 4370  | >BRIP1-T650 IIKNSQVWVC  | 382   | 3988  |
| >BRIP1-T650 IIKNSQVWVC | 4800  | >BRIP1-T650 IIKNSQVWVC  | 343   | 4457  |
| >BRIP1-T650 WVTIGSGPI  | 254   | >BRIP1-T650 WVGIIIGSGPK | 293   | 39    |
| >BRIP1-T650 VWVTIGSGI  | 453   | >BRIP1-T650 VWVGIIGSGF  | 332   | 121   |
| >BRIP1-T650 VWVTIGS    | 417   | >BRIP1-T650 VWVGIIGS    | 352   | 65    |
| >BRIP1-T650 VWVTIGSG   | 97    | >BRIP1-T650 VWVGIIGSG   | 107   | 10    |
| >BRIP1-T650 VWVTIGSGI  | 240   | >BRIP1-T650 VWVGIIGSGF  | 262   | 22    |
| >BRIP1-T650 SQVWVGTI   | 197   | >BRIP1-T650 SQVWVGII    | 126   | 71    |
| >BRIP1-T650 SQVWVGTI   | 231   | >BRIP1-T650 SQVWVGII    | 580   | 349   |
| >BRIP1-T650 SQVWVGTI   | 30    | >BRIP1-T650 SQVWVGII    | 51    | 21    |
| >BRIP1-T650 SQVWVGTI   | 125   | >BRIP1-T650 SQVWVGII    | 683   | 558   |
| >BRIP1-T650 SQVWVGTI   | 481   | >BRIP1-T650 SQVWVGII    | 383   | 98    |
| >BRIP1-T650 NSQVWVGT   | 33375 | >BRIP1-T650 NSQVWVGI    | 197   | 33178 |
| >BRIP1-T650 NSQVWVGTI  | 43    | >BRIP1-T650 NSQVWVGII   | 80    | 37    |
| >BRIP1-T650 KNSQVWVGT  | 35101 | >BRIP1-T650 KNSQVWVGI   | 373   | 34728 |
| >BRIP1-T650 IKNSQVWVG  | 1935  | >BRIP1-T650 IKNSQVWVG   | 76    | 1859  |
| >BRIP1-T650 IKNSQVWVG  | 85    | >BRIP1-T650 IKNSQVWVG   | 98    | 13    |
| >BUB1B-R93 RTVQILEGQK  | 190   | >BUB1B-R93 WTVQILEGQI   | 1065  | 875   |
| >BUB1B-R93 RTVQILEGQ   | 600   | >BUB1B-R93 WTVQILEGQ    | 354   | 246   |
| >BUB1B-R93 RTVQILEGQK  | 437   | >BUB1B-R93 WTVQILEGQI   | 14417 | 13980 |
| >BUB1B-R93 RTVQILEGQK  | 73    | >BUB1B-R93 WTVQILEGQI   | 7226  | 7153  |
| >BUB1B-R93 RTVQILEGQK  | 2048  | >BUB1B-R93 WTVQILEGQI   | 176   | 1872  |
| >BUB1B-R93 RTVQILEGQK  | 5102  | >BUB1B-R93 WTVQILEGQI   | 356   | 4746  |
| >BUB1B-R93 RTVQILEGQK  | 12    | >BUB1B-R93 WTVQILEGQI   | 119   | 107   |
| >BUB1B-R93 RTVQILEGQK  | 384   | >BUB1B-R93 WTVQILEGQI   | 5776  | 5392  |
| >BUB1B-R93 RTVQILEGQK  | 166   | >BUB1B-R93 WTVQILEGQI   | 108   | 58    |
| >BUB1B-R93 RTVQILEGQK  | 17    | >BUB1B-R93 WTVQILEGQI   | 102   | 85    |
| >BUB1B-R93 FRTVQILEGQ  | 45    | >BUB1B-R93 FWTVQILEGC   | 12566 | 12521 |
| >BUB1B-R93 QLDVFTLSGF  | 310   | >BUB1B-R93 QLDVFTLSGF   | 34337 | 34027 |
| >BUB1B-R93 QLDVFTLSGF  | 252   | >BUB1B-R93 QLDVFTLSGF   | 22033 | 21781 |
| >BUB1B-R93 SGFRTVQIL   | 497   | >BUB1B-R93 SGFRTVQIL    | 2478  | 1981  |

|                        |      |                       |      |      |
|------------------------|------|-----------------------|------|------|
| >BUB1B-R93 SGFRTVQIL   | 534  | >BUB1B-R93 SGFWTVQIL  | 496  | 38   |
| >BUB1B-R93 SGFRTVQI    | 71   | >BUB1B-R93 SGFWTVQI   | 46   | 25   |
| >BUB1B-R93 LSGFRTVQI   | 323  | >BUB1B-R93 LSGFWTVQI  | 172  | 151  |
| >BUB1B-R93 LSGFRTVQI   | 374  | >BUB1B-R93 LSGFWTVQI  | 446  | 72   |
| >BUB1B-R93 LSGFRTVQIL  | 364  | >BUB1B-R93 LSGFWTVQIL | 326  | 38   |
| >BUB1B-R93 LSGFRTVQIL  | 494  | >BUB1B-R93 LSGFWTVQIL | 1028 | 534  |
| >BUB1B-R93 LSGFRTVQI   | 27   | >BUB1B-R93 LSGFWTVQI  | 23   | 4    |
| >BUB1B-R93 LSGFRTVQIL  | 182  | >BUB1B-R93 LSGFWTVQIL | 451  | 269  |
| >BUB1B-R93 TLSGFRTV    | 234  | >BUB1B-R93 TLSGFWTV   | 13   | 221  |
| >BUB1B-R93 TLSGFRTVQI  | 574  | >BUB1B-R93 TLSGFWTVQI | 198  | 376  |
| >BUB1B-R93 TLSGFRTVQIL | 1259 | >BUB1B-R93 TLSGFWTVQI | 289  | 970  |
| >BUB1B-R93 TLSGFRTV    | 27   | >BUB1B-R93 TLSGFWTV   | 5    | 22   |
| >BUB1B-R93 TLSGFRTVQI  | 62   | >BUB1B-R93 TLSGFWTVQI | 43   | 19   |
| >BUB1B-R93 TLSGFRTVQIL | 21   | >BUB1B-R93 TLSGFWTVQI | 14   | 7    |
| >BUB1B-R93 TLSGFRTV    | 12   | >BUB1B-R93 TLSGFWTV   | 8    | 4    |
| >BUB1B-R93 TLSGFRTVQI  | 47   | >BUB1B-R93 TLSGFWTVQI | 50   | 3    |
| >BUB1B-R93 TLSGFRTVQIL | 98   | >BUB1B-R93 TLSGFWTVQI | 50   | 48   |
| >BUB1B-R93 TLSGFRTV    | 357  | >BUB1B-R93 TLSGFWTV   | 17   | 340  |
| >BUB1B-R93 TLSGFRTVQI  | 1028 | >BUB1B-R93 TLSGFWTVQI | 441  | 587  |
| >BUB1B-R93 TLSGFRTV    | 11   | >BUB1B-R93 TLSGFWTV   | 2    | 9    |
| >BUB1B-R93 TLSGFRTVQI  | 160  | >BUB1B-R93 TLSGFWTVQI | 17   | 143  |
| >BUB1B-R93 TLSGFRTVQIL | 334  | >BUB1B-R93 TLSGFWTVQI | 64   | 270  |
| >BUB1B-R93 TLSGFRTV    | 114  | >BUB1B-R93 TLSGFWTV   | 12   | 102  |
| >BUB1B-R93 TLSGFRTVQI  | 1965 | >BUB1B-R93 TLSGFWTVQI | 486  | 1479 |
| >BUB1B-R93 TLSGFRTV    | 28   | >BUB1B-R93 TLSGFWTV   | 5    | 23   |
| >BUB1B-R93 TLSGFRTVQI  | 453  | >BUB1B-R93 TLSGFWTVQI | 45   | 408  |
| >BUB1B-R93 TLSGFRTVQIL | 404  | >BUB1B-R93 TLSGFWTVQI | 62   | 342  |
| >BUB1B-R93 TLSGFRTV    | 49   | >BUB1B-R93 TLSGFWTV   | 4    | 45   |
| >BUB1B-R93 TLSGFRTVQI  | 433  | >BUB1B-R93 TLSGFWTVQI | 40   | 393  |
| >BUB1B-R93 TLSGFRTVQIL | 616  | >BUB1B-R93 TLSGFWTVQI | 130  | 486  |
| >BUB1B-R93 TLSGFRTV    | 2    | >BUB1B-R93 TLSGFWTV   | 2    | 0    |
| >BUB1B-R93 TLSGFRTVQ   | 281  | >BUB1B-R93 TLSGFWTVQ  | 332  | 51   |
| >BUB1B-R93 TLSGFRTVQI  | 9    | >BUB1B-R93 TLSGFWTVQI | 7    | 2    |
| >BUB1B-R93 TLSGFRTVQIL | 5    | >BUB1B-R93 TLSGFWTVQI | 5    | 0    |
| >BUB1B-R93 TLSGFRTVQI  | 97   | >BUB1B-R93 TLSGFWTVQI | 171  | 74   |
| >BUB1B-R93 TLSGFRTV    | 269  | >BUB1B-R93 TLSGFWTV   | 53   | 216  |
| >BUB1B-R93 TLSGFRTV    | 1206 | >BUB1B-R93 TLSGFWTV   | 97   | 1109 |
| >BUB1B-R93 TLSGFRTVQI  | 1619 | >BUB1B-R93 TLSGFWTVQI | 437  | 1182 |
| >BUB1B-R93 TLSGFRTVQIL | 453  | >BUB1B-R93 TLSGFWTVQI | 309  | 144  |
| >BUB1B-R93 FTLSGFRT    | 1623 | >BUB1B-R93 FTLSGFWT   | 287  | 1336 |
| >BUB1B-R93 FTLSGFRTV   | 69   | >BUB1B-R93 FTLSGFWTV  | 7    | 62   |
| >BUB1B-R93 FTLSGFRTVQ  | 177  | >BUB1B-R93 FTLSGFWTVQ | 27   | 150  |
| >BUB1B-R93 FTLSGFRTV   | 438  | >BUB1B-R93 FTLSGFWTV  | 13   | 425  |

|                       |      |                       |       |       |
|-----------------------|------|-----------------------|-------|-------|
| >BUB1B-R93 FTLSGFRTVQ | 325  | >BUB1B-R93 FTLSGFWTV  | 76    | 249   |
| >BUB1B-R93 FTLSGFRTV  | 63   | >BUB1B-R93 FTLSGFWTV  | 24    | 39    |
| >BUB1B-R93 FTLSGFRTVQ | 343  | >BUB1B-R93 FTLSGFWTV  | 220   | 123   |
| >BUB1B-R93 FTLSGFRT   | 116  | >BUB1B-R93 FTLSGFWT   | 22    | 94    |
| >BUB1B-R93 FTLSGFRTV  | 4    | >BUB1B-R93 FTLSGFWTV  | 2     | 2     |
| >BUB1B-R93 FTLSGFRTVQ | 21   | >BUB1B-R93 FTLSGFWTV  | 10    | 11    |
| >BUB1B-R93 FTLSGFRT   | 634  | >BUB1B-R93 FTLSGFWT   | 252   | 382   |
| >BUB1B-R93 FTLSGFRTV  | 5    | >BUB1B-R93 FTLSGFWTV  | 1     | 4     |
| >BUB1B-R93 FTLSGFRTVQ | 40   | >BUB1B-R93 FTLSGFWTV  | 7     | 33    |
| >BUB1B-R93 FTLSGFRTV  | 61   | >BUB1B-R93 FTLSGFWTV  | 3     | 58    |
| >BUB1B-R93 FTLSGFRTVQ | 984  | >BUB1B-R93 FTLSGFWTV  | 84    | 900   |
| >BUB1B-R93 FTLSGFRTV  | 25   | >BUB1B-R93 FTLSGFWTV  | 4     | 21    |
| >BUB1B-R93 FTLSGFRTVQ | 294  | >BUB1B-R93 FTLSGFWTV  | 26    | 268   |
| >BUB1B-R93 FTLSGFRTV  | 415  | >BUB1B-R93 FTLSGFWTV  | 3     | 412   |
| >BUB1B-R93 FTLSGFRTVQ | 999  | >BUB1B-R93 FTLSGFWTV  | 54    | 945   |
| >BUB1B-R93 FTLSGFRTV  | 16   | >BUB1B-R93 FTLSGFWTV  | 2     | 14    |
| >BUB1B-R93 FTLSGFRTVQ | 737  | >BUB1B-R93 FTLSGFWTV  | 57    | 680   |
| >BUB1B-R93 FTLSGFRTVQ | 2471 | >BUB1B-R93 FTLSGFWTV  | 244   | 2227  |
| >BUB1B-R93 FTLSGFRTV  | 7660 | >BUB1B-R93 FTLSGFWTV  | 405   | 7255  |
| >BUB1B-R93 FTLSGFRTVQ | 324  | >BUB1B-R93 FTLSGFWTV  | 80    | 244   |
| >BUB1B-R93 FTLSGFRTVQ | 211  | >BUB1B-R93 FTLSGFWTV  | 128   | 83    |
| >BUB1B-R93 FTLSGFRTV  | 85   | >BUB1B-R93 FTLSGFWTV  | 9     | 76    |
| >BUB1B-R93 FTLSGFRTVQ | 117  | >BUB1B-R93 FTLSGFWTV  | 25    | 92    |
| >BUB1B-R93 FTLSGFRT   | 315  | >BUB1B-R93 FTLSGFWT   | 142   | 173   |
| >BUB1B-R93 FTLSGFRTV  | 13   | >BUB1B-R93 FTLSGFWTV  | 3     | 10    |
| >BUB1B-R93 FTLSGFRTVQ | 16   | >BUB1B-R93 FTLSGFWTV  | 5     | 11    |
| >BUB1B-R93 FTLSGFRTV  | 586  | >BUB1B-R93 FTLSGFWTV  | 474   | 112   |
| >BUB1B-R93 FTLSGFRTV  | 500  | >BUB1B-R93 FTLSGFWTV  | 474   | 26    |
| >BUB1B-R93 FTLSGFRTVQ | 58   | >BUB1B-R93 FTLSGFWTV  | 62    | 4     |
| >BUB1B-R93 FTLSGFRTVQ | 2832 | >BUB1B-R93 FTLSGFWTV  | 356   | 2476  |
| >BUB1B-R93 FTLSGFRTV  | 955  | >BUB1B-R93 FTLSGFWTV  | 282   | 673   |
| >BUB1B-R93 FTLSGFRTV  | 35   | >BUB1B-R93 FTLSGFWTV  | 118   | 83    |
| >BUB1B-R93 FTLSGFRTVQ | 119  | >BUB1B-R93 FTLSGFWTV  | 132   | 13    |
| >BUB1B-R93 FTLSGFRTV  | 494  | >BUB1B-R93 FTLSGFWTV  | 655   | 161   |
| >BUB1B-R93 FTLSGFRTVQ | 14   | >BUB1B-R93 FTLSGFWTV  | 13    | 1     |
| >BUB1B-R93 VFTLSGFRTV | 6491 | >BUB1B-R93 VFTLSGFWTV | 448   | 6043  |
| >BUB1B-R93 VFTLSGFRTV | 2199 | >BUB1B-R93 VFTLSGFWTV | 89    | 2110  |
| >BUB1B-R93 VFTLSGFR   | 47   | >BUB1B-R93 VFTLSGFW   | 17226 | 17179 |
| >BUB1B-R93 VFTLSGFR   | 54   | >BUB1B-R93 VFTLSGFW   | 26147 | 26093 |
| >BUB1B-R93 VFTLSGFR   | 332  | >BUB1B-R93 VFTLSGFW   | 34357 | 34025 |
| >BUB1B-R93 VFTLSGFR   | 210  | >BUB1B-R93 VFTLSGFW   | 30178 | 29968 |
| >BUB1B-R93 VFTLSGFRTV | 4075 | >BUB1B-R93 VFTLSGFWTV | 369   | 3706  |
| >BUB1B-R93 DVFTLSGFRT | 2447 | >BUB1B-R93 DVFTLSGFW  | 120   | 2327  |



|                         |       |                         |       |       |
|-------------------------|-------|-------------------------|-------|-------|
| >BUB1B-R93 DVFTLSGFRT   | 1631  | >BUB1B-R93 DVFTLSGFWT   | 123   | 1508  |
| >BUB1B-R93 DVFTLSGFRT   | 2083  | >BUB1B-R93 DVFTLSGFWT   | 120   | 1963  |
| >BUB1B-R93 DVFTLSGFRT   | 2797  | >BUB1B-R93 DVFTLSGFWT   | 124   | 2673  |
| >BUB1B-R93 DVFTLSGFR    | 216   | >BUB1B-R93 DVFTLSGFW    | 20885 | 20669 |
| >BUB1B-R93 DVFTLSGFR    | 9     | >BUB1B-R93 DVFTLSGFW    | 7400  | 7391  |
| >BUB1B-R93 DVFTLSGFR    | 2     | >BUB1B-R93 DVFTLSGFW    | 1601  | 1599  |
| >BUB1B-R93 DVFTLSGFRT   | 14    | >BUB1B-R93 DVFTLSGFWT   | 6     | 8     |
| >BUB1B-R93 DVFTLSGFRT   | 37    | >BUB1B-R93 DVFTLSGFWT   | 8     | 29    |
| >BUB1B-R93 DVFTLSGFR    | 157   | >BUB1B-R93 DVFTLSGFW    | 29698 | 29541 |
| >BUB1B-R93 LDVFTLSGFR   | 21129 | >BUB1B-R93 LDVFTLSGFW   | 179   | 20950 |
| >C15orf55-P: RPPAPEAPKE | 206   | >C15orf55-P: RSPAPEAPKE | 24601 | 24395 |
| >C15orf55-P: RPPAPEAPK  | 14827 | >C15orf55-P: RSPAPEAPK  | 440   | 14387 |
| >C15orf55-P: RPPAPEAPK  | 14039 | >C15orf55-P: RSPAPEAPK  | 92    | 13947 |
| >C15orf55-P: RPPAPEAPK  | 14187 | >C15orf55-P: RSPAPEAPK  | 69    | 14118 |
| >C15orf55-P: RPPAPEAPKE | 17949 | >C15orf55-P: RSPAPEAPKE | 455   | 17494 |
| >C15orf55-P: RPPAPEAPKE | 380   | >C15orf55-P: RSPAPEAPKE | 22237 | 21857 |
| >C15orf55-P: RPPAPEAPKE | 22501 | >C15orf55-P: RSPAPEAPKE | 248   | 22253 |
| >C15orf55-P: RPPAPEAPKE | 3086  | >C15orf55-P: RSPAPEAPKE | 38    | 3048  |
| >C15orf55-P: RPPAPEAPKE | 1647  | >C15orf55-P: RSPAPEAPKE | 39    | 1608  |
| >C15orf55-P: AQRPPAPEA  | 461   | >C15orf55-P: AQRSPAPEA  | 1265  | 804   |
| >C15orf55-P: AQRPPAPEAF | 529   | >C15orf55-P: AQRSPAPEAF | 457   | 72    |
| >C15orf55-P: AQRPPAPEA  | 46    | >C15orf55-P: AQRSPAPEA  | 88    | 42    |
| >C15orf55-P: AQRPPAPEAF | 6     | >C15orf55-P: AQRSPAPEAF | 7     | 1     |
| >C15orf55-P: AQRPPAPEA  | 181   | >C15orf55-P: AQRSPAPEA  | 87    | 94    |
| >C15orf55-P: AQRPPAPEAF | 487   | >C15orf55-P: AQRSPAPEAF | 245   | 242   |
| >C15orf55-P: AQRPPAPEAF | 136   | >C15orf55-P: AQRSPAPEAF | 86    | 50    |
| >C15orf55-P: KAQRPPAPEA | 293   | >C15orf55-P: KAQRSPAPEA | 125   | 168   |
| >C15orf55-P: RKAQRPPA   | 316   | >C15orf55-P: RKAQRSPA   | 161   | 155   |
| >C15orf55-P: RKAQRPPAPE | 341   | >C15orf55-P: RKAQRSPAPE | 273   | 68    |
| >C15orf55-P: RKAQRPPA   | 284   | >C15orf55-P: RKAQRSPA   | 584   | 300   |
| >C15orf55-P: QRKAQRPPA  | 268   | >C15orf55-P: QRKAQRSPA  | 1320  | 1052  |
| >C15orf55-P: RQRKAQRP   | 454   | >C15orf55-P: RQRKAQRS   | 145   | 309   |
| >C15orf55-P: RQRKAQRPP  | 40    | >C15orf55-P: RQRKAQRSP  | 75    | 35    |
| >C15orf55-P: RQRKAQRPP, | 4     | >C15orf55-P: RQRKAQRSP, | 5     | 1     |
| >C15orf55-P: RQRKAQRPP, | 51    | >C15orf55-P: RQRKAQRSP, | 41    | 10    |
| >C15orf55-P: RQRKAQRPP, | 109   | >C15orf55-P: RQRKAQRSP, | 89    | 20    |
| >C15orf55-P: RQRKAQRPP  | 269   | >C15orf55-P: RQRKAQRSP  | 280   | 11    |
| >C15orf55-P: RQRKAQRPP, | 53    | >C15orf55-P: RQRKAQRSP, | 29    | 24    |
| >C15orf55-P: RQRKAQRPP, | 188   | >C15orf55-P: RQRKAQRSP, | 168   | 20    |
| >C15orf55-P: RRQRKAQRP  | 827   | >C15orf55-P: RRQRKAQRS  | 354   | 473   |
| >C15orf55-P: RRQRKAQRP  | 141   | >C15orf55-P: RRQRKAQRSI | 121   | 20    |
| >C15orf55-P: RRQRKAQRP  | 239   | >C15orf55-P: RRQRKAQRS  | 145   | 94    |
| >C15orf55-P: RRQRKAQRP  | 98    | >C15orf55-P: RRQRKAQRSI | 97    | 1     |

|                         |       |                         |       |       |
|-------------------------|-------|-------------------------|-------|-------|
| >C15orf55-P: RRQRKAQRP  | 93    | >C15orf55-P: RRQRKAQRSI | 95    | 2     |
| >C15orf55-P: RRQRKAQRP  | 522   | >C15orf55-P: RRQRKAQRSI | 477   | 45    |
| >C15orf55-P: RRQRKAQRP  | 348   | >C15orf55-P: RRQRKAQRSI | 291   | 57    |
| >C15orf55-P: RRRQRKAQR  | 307   | >C15orf55-P: RRRQRKAQR  | 111   | 196   |
| >C15orf55-P: RRRQRKAQR  | 97    | >C15orf55-P: RRRQRKAQR  | 45    | 52    |
| >C15orf55-P: RRRQRKAQR  | 236   | >C15orf55-P: RRRQRKAQR  | 302   | 66    |
| >C15orf55-P: RRRQRKAQR  | 181   | >C15orf55-P: RRRQRKAQR  | 46    | 135   |
| >C15orf55-P: PGVWLSSEM  | 1290  | >C15orf55-P: TGVWLSSEM  | 114   | 1176  |
| >C15orf55-P: PGVWLSSEM  | 2238  | >C15orf55-P: TGVWLSSEM  | 56    | 2182  |
| >C15orf55-P: SPGVWLSSEM | 13849 | >C15orf55-P: STGVWLSSEM | 200   | 13649 |
| >C15orf55-P: SPGVWLSSEM | 5498  | >C15orf55-P: STGVWLSSEM | 350   | 5148  |
| >C15orf55-P: SPGVWLSSEM | 188   | >C15orf55-P: STGVWLSSEM | 22399 | 22211 |
| >C15orf55-P: SPGVWLSSEM | 12441 | >C15orf55-P: STGVWLSSEM | 79    | 12362 |
| >C15orf55-P: SPGVWLSSEM | 1864  | >C15orf55-P: STGVWLSSEM | 20    | 1844  |
| >C15orf55-P: LSPGVWLSSE | 338   | >C15orf55-P: LSTGVWLSSE | 19    | 319   |
| >C15orf55-P: LSPGVWLSSE | 1135  | >C15orf55-P: LSTGVWLSSE | 227   | 908   |
| >C15orf55-P: LSPGVWLSSE | 7234  | >C15orf55-P: LSTGVWLSSE | 95    | 7139  |
| >C15orf55-P: LSPGVWLSSE | 7     | >C15orf55-P: LSTGVWLSSE | 329   | 322   |
| >C15orf55-P: LSPGVWLSSE | 82    | >C15orf55-P: LSTGVWLSSE | 9     | 73    |
| >C15orf55-P: CLSPGVWL   | 234   | >C15orf55-P: CLSTGVWL   | 274   | 40    |
| >C15orf55-P: CLSPGVWL   | 24    | >C15orf55-P: CLSTGVWL   | 28    | 4     |
| >C15orf55-P: CLSPGVWLS  | 217   | >C15orf55-P: CLSTGVWLS  | 539   | 322   |
| >C15orf55-P: CLSPGVWL   | 75    | >C15orf55-P: CLSTGVWL   | 100   | 25    |
| >C15orf55-P: CLSPGVWL   | 467   | >C15orf55-P: CLSTGVWL   | 1162  | 695   |
| >C15orf55-P: CLSPGVWL   | 66    | >C15orf55-P: CLSTGVWL   | 169   | 103   |
| >C15orf55-P: CLSPGVWL   | 289   | >C15orf55-P: CLSTGVWL   | 405   | 116   |
| >C15orf55-P: CLSPGVWL   | 147   | >C15orf55-P: CLSTGVWL   | 250   | 103   |
| >C15orf55-P: CLSPGVWL   | 100   | >C15orf55-P: CLSTGVWL   | 155   | 55    |
| >C15orf55-P: CLSPGVWL   | 6     | >C15orf55-P: CLSTGVWL   | 10    | 4     |
| >C15orf55-P: CLSPGVWLS  | 61    | >C15orf55-P: CLSTGVWLS  | 591   | 530   |
| >C15orf55-P: VCLSPGVWL  | 219   | >C15orf55-P: VCLSTGVWL  | 244   | 25    |
| >C15orf55-P: DVCLSPGVW  | 448   | >C15orf55-P: DVCLSTGVW  | 407   | 41    |
| >C15orf55-P: DVCLSPGV   | 615   | >C15orf55-P: DVCLSTGV   | 85    | 530   |
| >C15orf55-P: DVCLSPGV   | 208   | >C15orf55-P: DVCLSTGV   | 361   | 153   |
| >C15orf55-P: DDVCLSPGV  | 436   | >C15orf55-P: DDVCLSTGV  | 2309  | 1873  |
| >C15orf55-P: GERDDVCLSF | 360   | >C15orf55-P: GERDDVCLST | 299   | 61    |
| >CARD11-A4: DFGDASPR    | 42    | >CARD11-A4: DFGDDSPR    | 49    | 7     |
| >CARD11-A4: DFGDASPR    | 222   | >CARD11-A4: DFGDDSPR    | 344   | 122   |
| >CARD11-A4: ISQDFGDASP  | 392   | >CARD11-A4: ISQDFGDDSP  | 920   | 528   |
| >CARD11-A4: ISQDFGDASP  | 154   | >CARD11-A4: ISQDFGDDSP  | 221   | 67    |
| >CARD11-A4: ISQDFGDASP  | 138   | >CARD11-A4: ISQDFGDDSP  | 189   | 51    |
| >CARD11-C7: CIRGERQSV   | 35    | >CARD11-C7: GIRGERQSV   | 10    | 25    |
| >CARD11-C7: CIRGERQSV   | 2360  | >CARD11-C7: GIRGERQSV   | 393   | 1967  |

|                        |       |                        |      |       |
|------------------------|-------|------------------------|------|-------|
| >CARD11-C7: CIRGERQSV  | 284   | >CARD11-C7: GIRGERQSV  | 243  | 41    |
| >CARD11-C7: CIRGERQSV  | 123   | >CARD11-C7: GIRGERQSV  | 112  | 11    |
| >CARD11-C7: CIRGERQSV  | 709   | >CARD11-C7: GIRGERQSV  | 356  | 353   |
| >CARD11-C7: EGCIRGER   | 416   | >CARD11-C7: EGGIRGER   | 1319 | 903   |
| >CARD11-C7: LLEGIRGER  | 168   | >CARD11-C7: LLEGGIRGER | 87   | 81    |
| >CARD11-C7: LLEGIRGER  | 78    | >CARD11-C7: LLEGGIRGER | 311  | 233   |
| >CARD11-C7: LLEGCIRG   | 383   | >CARD11-C7: LLEGGIRG   | 85   | 298   |
| >CARD11-C7: LLEGCIRG   | 372   | >CARD11-C7: LLEGGIRG   | 444  | 72    |
| >CARD11-C7: LLEGCIRGER | 276   | >CARD11-C7: LLEGGIRGEF | 285  | 9     |
| >CARD11-C7: LLEGCIRGER | 203   | >CARD11-C7: LLEGGIRGEF | 389  | 186   |
| >CARD11-C7: LLLLEGCI   | 116   | >CARD11-C7: LLLLEGGI   | 37   | 79    |
| >CARD11-C7: LLLLEGCI   | 172   | >CARD11-C7: LLLLEGGI   | 137  | 35    |
| >CARD11-C7: LLLLEGCI   | 81    | >CARD11-C7: LLLLEGGI   | 149  | 68    |
| >CARD11-C7: LLLLEGCI   | 356   | >CARD11-C7: LLLLEGGI   | 488  | 132   |
| >CARD11-C7: LLLLEGCI   | 178   | >CARD11-C7: LLLLEGGI   | 93   | 85    |
| >CARD11-C7: LLLLEGCI   | 445   | >CARD11-C7: LLLLEGGI   | 1620 | 1175  |
| >CARD11-C7: QLLLLEGCI  | 191   | >CARD11-C7: QLLLLEGGI  | 1048 | 857   |
| >CARD11-C7: QLLLLEGCI  | 220   | >CARD11-C7: QLLLLEGGI  | 466  | 246   |
| >CARD11-C7: HQLLLEGGI  | 85    | >CARD11-C7: HQLLLEGGI  | 128  | 43    |
| >CARD11-C7: HQLLLEGGI  | 252   | >CARD11-C7: HQLLLEGGI  | 2049 | 1797  |
| >CARD11-C7: HQLLLEGGI  | 139   | >CARD11-C7: HQLLLEGGI  | 290  | 151   |
| >CARD11-C7: HQLLLEGGI  | 341   | >CARD11-C7: HQLLLEGGI  | 668  | 327   |
| >CARD11-C7: HQLLLEGGI  | 71    | >CARD11-C7: HQLLLEGGI  | 185  | 114   |
| >CARD11-N1 YNDELVKV    | 17544 | >CARD11-N1 YSDELVKV    | 364  | 17180 |
| >CARD11-N1 YNDELVKV    | 4603  | >CARD11-N1 YSDELVKV    | 200  | 4403  |
| >CARD11-N1 YNDELVKV    | 1766  | >CARD11-N1 YSDELVKV    | 100  | 1666  |
| >CARD11-N1 YNDELVKV    | 193   | >CARD11-N1 YSDELVKV    | 34   | 159   |
| >CARD11-N1 YNDELVKV    | 542   | >CARD11-N1 YSDELVKV    | 113  | 429   |
| >CARD11-N1 YNDELVKV    | 1171  | >CARD11-N1 YSDELVKV    | 57   | 1114  |
| >CARD11-N1 SYNDELVKV   | 704   | >CARD11-N1 SYSDELVKV   | 353  | 351   |
| >CARD11-N1 SYNDELVKV   | 47    | >CARD11-N1 SYSDELVKV   | 33   | 14    |
| >CARD11-N1 SYNDELVK    | 454   | >CARD11-N1 SYSDELVK    | 536  | 82    |
| >CARD11-N1 SYNDELVKV   | 766   | >CARD11-N1 SYSDELVKV   | 198  | 568   |
| >CARD11-N1 SYNDELVKVK  | 578   | >CARD11-N1 SYSDELVKVK  | 464  | 114   |
| >CARD11-N1 SYNDELVKV   | 94    | >CARD11-N1 SYSDELVKV   | 95   | 1     |
| >CARD11-N1 DSYNDELVK   | 124   | >CARD11-N1 DSYSDELVK   | 83   | 41    |
| >CARD11-N1 DSYNDELVKV  | 144   | >CARD11-N1 DSYSDELVKV  | 101  | 43    |
| >CARD11-N1 DSYNDELV    | 278   | >CARD11-N1 DSYSDELV    | 225  | 53    |
| >CARD11-N1 DSYNDELVKV  | 380   | >CARD11-N1 DSYSDELVKV  | 351  | 29    |
| >CARD11-N1 DSYNDELVKV  | 685   | >CARD11-N1 DSYSDELVKV  | 480  | 205   |
| >CARD11-N1 RDSYNDELV   | 142   | >CARD11-N1 RDSYSDELV   | 103  | 39    |
| >CARD11-N1 RDSYNDELVK  | 443   | >CARD11-N1 RDSYSDELVK  | 342  | 101   |
| >CARD11-N1 ERDSYNDEL   | 145   | >CARD11-N1 ERDSYSDEL   | 98   | 47    |

|                         |       |                         |     |       |
|-------------------------|-------|-------------------------|-----|-------|
| >CARD11-N1 EERDSYNDEL   | 1099  | >CARD11-N1 EERDSYSDEL   | 482 | 617   |
| >CARD11-N1 EERDSYNDEL   | 481   | >CARD11-N1 EERDSYSDEL\  | 443 | 38    |
| >CARD11-N1 EERDSYNDEL   | 489   | >CARD11-N1 EERDSYSDEL   | 365 | 124   |
| >CARD11-N1 EERDSYNDEL   | 243   | >CARD11-N1 EERDSYSDEL\  | 187 | 56    |
| >CARD11-N1 EERDSYNDEL   | 366   | >CARD11-N1 EERDSYSDEL\  | 286 | 80    |
| >CARD11-N1 KEERDSYNDE   | 884   | >CARD11-N1 KEERDSYSDE   | 327 | 557   |
| >CARD11-N1 KEERDSYNDE   | 19    | >CARD11-N1 KEERDSYSDE   | 20  | 1     |
| >CARD11-N1 KEERDSYNDE   | 316   | >CARD11-N1 KEERDSYSDE   | 281 | 35    |
| >CARD11-N1 KEERDSYNDE   | 430   | >CARD11-N1 KEERDSYSDE   | 272 | 158   |
| >CARS-G626\ LGVRFEDHEC  | 1057  | >CARS-G626\ LVVRFEDHEC  | 328 | 729   |
| >CARS-G626\ LGVRFEDHEC  | 29845 | >CARS-G626\ LVVRFEDHEC  | 458 | 29387 |
| >CARS-G626\ ALRDNILPELC | 21049 | >CARS-G626\ ALRDNILPELV | 128 | 20921 |
| >CARS-G626\ ALRDNILPELC | 3653  | >CARS-G626\ ALRDNILPELV | 37  | 3616  |
| >CARS-G626\ ALRDNILPELC | 4979  | >CARS-G626\ ALRDNILPELV | 6   | 4973  |
| >CARS-G626\ ALRDNILPELC | 21965 | >CARS-G626\ ALRDNILPELV | 233 | 21732 |
| >CARS-G626\ ALRDNILPELC | 4299  | >CARS-G626\ ALRDNILPELV | 4   | 4295  |
| >CARS-G626\ ALRDNILPELC | 17791 | >CARS-G626\ ALRDNILPELV | 23  | 17768 |
| >CARS-G626\ ALRDNILPELC | 15786 | >CARS-G626\ ALRDNILPELV | 19  | 15767 |
| >CARS-G626\ ALRDNILPELC | 23720 | >CARS-G626\ ALRDNILPELV | 72  | 23648 |
| >CARS-G626\ ALRDNILPELC | 1898  | >CARS-G626\ ALRDNILPELV | 2   | 1896  |
| >CARS-G626\ ALRDNILPELC | 1389  | >CARS-G626\ ALRDNILPELV | 284 | 1105  |
| >CARS-G626\ LPELVVRF    | 55    | >CARS-G626\ LPELVVRF    | 52  | 3     |
| >CARS-G626\ LPELVVRF    | 94    | >CARS-G626\ LPELVVRF    | 65  | 29    |
| >CARS-G626\ LPELVVRF    | 1707  | >CARS-G626\ LPELVVRF    | 403 | 1304  |
| >CARS-G626\ LPELVVRF    | 38    | >CARS-G626\ LPELVVRF    | 21  | 17    |
| >CARS-G626\ ILPELVVRF   | 423   | >CARS-G626\ ILPELVVRF   | 89  | 334   |
| >CARS-G626\ ILPELVVRF   | 729   | >CARS-G626\ ILPELVVRF   | 164 | 565   |
| >CARS-G626\ ILPELVVRF   | 187   | >CARS-G626\ ILPELVVRF   | 61  | 126   |
| >CARS-G626\ ILPELVVR    | 764   | >CARS-G626\ ILPELVVR    | 178 | 586   |
| >CARS-G626\ NILPELVV    | 413   | >CARS-G626\ NILPELVV    | 928 | 515   |
| >CARS-G626\ NILPELVV    | 42    | >CARS-G626\ NILPELVV    | 94  | 52    |
| >CARS-G626\ NILPELVV    | 45    | >CARS-G626\ NILPELVV    | 84  | 39    |
| >CARS-G626\ NILPELVV    | 232   | >CARS-G626\ NILPELVV    | 257 | 25    |
| >CARS-G626\ NILPELVV    | 106   | >CARS-G626\ NILPELVV    | 146 | 40    |
| >CARS-G626\ NILPELVV    | 101   | >CARS-G626\ NILPELVV    | 155 | 54    |
| >CARS-G626\ NILPELVV    | 40    | >CARS-G626\ NILPELVV    | 55  | 15    |
| >CARS-G626\ NILPELVVR   | 856   | >CARS-G626\ NILPELVVR   | 362 | 494   |
| >CARS-G626\ NILPELVV    | 25    | >CARS-G626\ NILPELVV    | 140 | 115   |
| >CARS-G626\ NILPELVVR   | 461   | >CARS-G626\ NILPELVVR   | 132 | 329   |
| >CARS-G626\ RDNILPELV   | 18046 | >CARS-G626\ RDNILPELV   | 424 | 17622 |
| >CARS-G626\ RDNILPELV   | 19558 | >CARS-G626\ RDNILPELV   | 58  | 19500 |
| >CARS-G626\ RDNILPELVV  | 192   | >CARS-G626\ RDNILPELVV  | 118 | 74    |
| >CARS-V268I VYFDTAKF    | 26    | >CARS-V268I LYFDTAKF    | 32  | 6     |

|                        |       |                        |      |       |
|------------------------|-------|------------------------|------|-------|
| >CARS-V268I VYFDTAKF   | 266   | >CARS-V268I LYFDTAKF   | 329  | 63    |
| >CARS-V268I VYFDTAKF   | 9     | >CARS-V268I LYFDTAKF   | 6    | 3     |
| >CARS-V268I VYFDTAKF   | 498   | >CARS-V268I LYFDTAKF   | 348  | 150   |
| >CARS-V268I VYFDTAKFA  | 1161  | >CARS-V268I LYFDTAKFA  | 460  | 701   |
| >CARS-V268I VYFDTAKF   | 177   | >CARS-V268I LYFDTAKF   | 108  | 69    |
| >CARS-V268I VYFDTAKFA  | 84    | >CARS-V268I LYFDTAKFA  | 68   | 16    |
| >CARS-V268I SVYFDTAKFA | 1181  | >CARS-V268I SLYFDTAKFA | 95   | 1086  |
| >CARS-V268I SVYFDTAKF  | 5028  | >CARS-V268I SLYFDTAKF  | 407  | 4621  |
| >CARS-V268I SVYFDTAKFA | 831   | >CARS-V268I SLYFDTAKFA | 118  | 713   |
| >CARS-V268I SVYFDTAKF  | 11692 | >CARS-V268I SLYFDTAKF  | 366  | 11326 |
| >CARS-V268I SVYFDTAKFA | 847   | >CARS-V268I SLYFDTAKFA | 11   | 836   |
| >CARS-V268I SVYFDTAKFA | 8557  | >CARS-V268I SLYFDTAKFA | 209  | 8348  |
| >CARS-V268I SVYFDTAKFA | 4681  | >CARS-V268I SLYFDTAKFA | 72   | 4609  |
| >CARS-V268I SVYFDTAKFA | 1110  | >CARS-V268I SLYFDTAKFA | 17   | 1093  |
| >CARS-V268I SVYFDTAKFA | 9511  | >CARS-V268I SLYFDTAKFA | 422  | 9089  |
| >CARS-V268I SVYFDTAKFA | 2343  | >CARS-V268I SLYFDTAKFA | 16   | 2327  |
| >CARS-V268I SVYFDTAK   | 57    | >CARS-V268I SLYFDTAK   | 35   | 22    |
| >CARS-V268I SVYFDTAK   | 11    | >CARS-V268I SLYFDTAK   | 23   | 12    |
| >CARS-V268I SVYFDTAKF  | 20    | >CARS-V268I SLYFDTAKF  | 1060 | 1040  |
| >CARS-V268I SVYFDTAKF  | 316   | >CARS-V268I SLYFDTAKF  | 364  | 48    |
| >CARS-V268I SVYFDTAK   | 300   | >CARS-V268I SLYFDTAK   | 2492 | 2192  |
| >CARS-V268I SVYFDTAKF  | 34    | >CARS-V268I SLYFDTAKF  | 32   | 2     |
| >CARS-V268I SVYFDTAK   | 14    | >CARS-V268I SLYFDTAK   | 104  | 90    |
| >CARS-V268I SVYFDTAKFA | 137   | >CARS-V268I SLYFDTAKFA | 908  | 771   |
| >CARS-V268I SVYFDTAKF  | 372   | >CARS-V268I SLYFDTAKF  | 125  | 247   |
| >CARS-V268I SVYFDTAKF  | 669   | >CARS-V268I SLYFDTAKF  | 91   | 578   |
| >CARS-V268I SVYFDTAKF  | 562   | >CARS-V268I SLYFDTAKF  | 88   | 474   |
| >CARS-V268I SVYFDTAKF  | 48    | >CARS-V268I SLYFDTAKF  | 288  | 240   |
| >CARS-V268I SVYFDTAKF  | 408   | >CARS-V268I SLYFDTAKF  | 1984 | 1576  |
| >CARS-V268I SVYFDTAKF  | 154   | >CARS-V268I SLYFDTAKF  | 986  | 832   |
| >CARS-V268I SVYFDTAK   | 376   | >CARS-V268I SLYFDTAK   | 2445 | 2069  |
| >CARS-V268I GSVYFDTAK  | 106   | >CARS-V268I GSLYFDTAK  | 41   | 65    |
| >CARS-V268I GSVYFDTAKF | 410   | >CARS-V268I GSLYFDTAKF | 116  | 294   |
| >CARS-V268I GSVYFDTAK  | 183   | >CARS-V268I GSLYFDTAK  | 842  | 659   |
| >CARS-V268I GSVYFDTAKF | 175   | >CARS-V268I GSLYFDTAKF | 115  | 60    |
| >CARS-V268I GSVYFDTAKF | 7     | >CARS-V268I GSLYFDTAKF | 8    | 1     |
| >CARS-V268I GSVYFDTAKF | 36    | >CARS-V268I GSLYFDTAKF | 37   | 1     |
| >CARS-V268I GSVYFDTAK  | 270   | >CARS-V268I GSLYFDTAK  | 154  | 116   |
| >CARS-V268I VSNGSVYF   | 152   | >CARS-V268I VSNGSLYF   | 162  | 10    |
| >CARS-V268I VSNGSVYF   | 45    | >CARS-V268I VSNGSLYF   | 87   | 42    |
| >CARS-V268I VSNGSVYF   | 4     | >CARS-V268I VSNGSLYF   | 4    | 0     |
| >CARS-V268I VSNGSVYF   | 221   | >CARS-V268I VSNGSLYF   | 213  | 8     |
| >CARS-V268I VSNGSVYF   | 16    | >CARS-V268I VSNGSLYF   | 14   | 2     |

|                         |       |                         |     |      |
|-------------------------|-------|-------------------------|-----|------|
| >CARS-V268I YVSNNGSVY   | 595   | >CARS-V268I YVSNNGSLY   | 106 | 489  |
| >CARS-V268I YVSNNGSVYF  | 66    | >CARS-V268I YVSNNGSLYF  | 87  | 21   |
| >CARS-V268I YVSNNGSVYFD | 437   | >CARS-V268I YVSNNGSLYFD | 572 | 135  |
| >CARS-V268I YVSNNGSVYF  | 79    | >CARS-V268I YVSNNGSLYF  | 101 | 22   |
| >CARS-V268I YVSNNGSVY   | 316   | >CARS-V268I YVSNNGSLY   | 528 | 212  |
| >CARS-V268I YVSNNGSVY   | 115   | >CARS-V268I YVSNNGSLY   | 58  | 57   |
| >CARS-V268I YVSNNGSVYF  | 303   | >CARS-V268I YVSNNGSLYF  | 133 | 170  |
| >CARS-V268I YVSNNGSVY   | 169   | >CARS-V268I YVSNNGSLY   | 442 | 273  |
| >CARS-V268I YVSNNGSVY   | 18    | >CARS-V268I YVSNNGSLY   | 7   | 11   |
| >CARS-V268I YVSNNGSVYF  | 68    | >CARS-V268I YVSNNGSLYF  | 13  | 55   |
| >CARS-V268I YVSNNGSVY   | 61    | >CARS-V268I YVSNNGSLY   | 62  | 1    |
| >CARS-V268I YVSNNGSVY   | 472   | >CARS-V268I YVSNNGSLY   | 201 | 271  |
| >CARS-V268I YVSNNGSVY   | 97    | >CARS-V268I YVSNNGSLY   | 12  | 85   |
| >CARS-V268I YVSNNGSVYF  | 10267 | >CARS-V268I YVSNNGSLYF  | 452 | 9815 |
| >CARS-V268I YVSNNGSVY   | 42    | >CARS-V268I YVSNNGSLY   | 77  | 35   |
| >CARS-V268I YVSNNGSVYF  | 45    | >CARS-V268I YVSNNGSLYF  | 32  | 13   |
| >CARS-V268I YVSNNGSVY   | 29    | >CARS-V268I YVSNNGSLY   | 42  | 13   |
| >CARS-V268I YVSNNGSVYF  | 121   | >CARS-V268I YVSNNGSLYF  | 105 | 16   |
| >CARS-V268I YVSNNGSVY   | 137   | >CARS-V268I YVSNNGSLY   | 462 | 325  |
| >CARS-V268I YVSNNGSVYF  | 33    | >CARS-V268I YVSNNGSLYF  | 56  | 23   |
| >CARS-V268I YVSNNGSVY   | 61    | >CARS-V268I YVSNNGSLY   | 71  | 10   |
| >CARS-V268I YVSNNGSVYF  | 33    | >CARS-V268I YVSNNGSLYF  | 15  | 18   |
| >CARS-V268I YVSNNGSVY   | 22    | >CARS-V268I YVSNNGSLY   | 45  | 23   |
| >CARS-V268I YVSNNGSVYF  | 70    | >CARS-V268I YVSNNGSLYF  | 63  | 7    |
| >CARS-V268I YVSNNGSVYF  | 959   | >CARS-V268I YVSNNGSLYF  | 119 | 840  |
| >CARS-V268I YVSNNGSVY   | 206   | >CARS-V268I YVSNNGSLY   | 208 | 2    |
| >CARS-V268I YVSNNGSVYF  | 33    | >CARS-V268I YVSNNGSLYF  | 20  | 13   |
| >CARS-V268I YVSNNGSVY   | 74    | >CARS-V268I YVSNNGSLY   | 564 | 490  |
| >CARS-V268I YVSNNGSVY   | 995   | >CARS-V268I YVSNNGSLY   | 289 | 706  |
| >CARS-V268I GYVSNNGSV   | 67    | >CARS-V268I GYVSNNGSL   | 18  | 49   |
| >CARS-V268I GYVSNNGSVYF | 53    | >CARS-V268I GYVSNNGSLYF | 35  | 18   |
| >CARS-V268I GYVSNNGSVYF | 91    | >CARS-V268I GYVSNNGSLYF | 66  | 25   |
| >CARS-V268I GYVSNNGSV   | 1295  | >CARS-V268I GYVSNNGSL   | 54  | 1241 |
| >CARS-V268I GYVSNNGSVYF | 7     | >CARS-V268I GYVSNNGSLYF | 7   | 0    |
| >CARS-V268I GYVSNNGSVY  | 53    | >CARS-V268I GYVSNNGSLY  | 14  | 39   |
| >CARS-V268I GYVSNNGSVYF | 61    | >CARS-V268I GYVSNNGSLYF | 35  | 26   |
| >CARS-V268I GYVSNNGSVY  | 74    | >CARS-V268I GYVSNNGSLY  | 85  | 11   |
| >CARS-V268I GYVSNNGSVY  | 353   | >CARS-V268I GYVSNNGSLY  | 620 | 267  |
| >CARS-V268I GYVSNNGSVYF | 353   | >CARS-V268I GYVSNNGSLYF | 631 | 278  |
| >CARS-V268I GYVSNNGSVY  | 39    | >CARS-V268I GYVSNNGSLY  | 28  | 11   |
| >CARS-V268I GYVSNNGSVY  | 410   | >CARS-V268I GYVSNNGSLY  | 177 | 233  |
| >CARS-V268I YGYVSNNGSVY | 181   | >CARS-V268I YGYVSNNGSLY | 113 | 68   |
| >CARS-V268I YGYVSNNGSVY | 2300  | >CARS-V268I YGYVSNNGSLY | 437 | 1863 |

|                                     |      |                                     |      |      |
|-------------------------------------|------|-------------------------------------|------|------|
| >CARS-V268I YGYVSN <del>GSV</del>   | 187  | >CARS-V268I YGYVSN <del>GS</del> LY | 65   | 122  |
| >CARS-V268I YGYVSN <del>GSV</del>   | 56   | >CARS-V268I YGYVSN <del>GS</del> LY | 156  | 100  |
| >CARS-V268I YGYVSN <del>GSV</del>   | 92   | >CARS-V268I YGYVSN <del>GS</del> LY | 71   | 21   |
| >CARS-V268I YGYVSN <del>GS</del> V  | 777  | >CARS-V268I YGYVSN <del>GS</del> L  | 444  | 333  |
| >CARS-V268I YGYVSN <del>GSV</del>   | 16   | >CARS-V268I YGYVSN <del>GS</del> LY | 24   | 8    |
| >CARS-V268I YGYVSN <del>GSV</del>   | 71   | >CARS-V268I YGYVSN <del>GS</del> LY | 60   | 11   |
| >CARS-V268I YGYVSN <del>GSV</del>   | 40   | >CARS-V268I YGYVSN <del>GS</del> LY | 93   | 53   |
| >CARS-V268I YGYVSN <del>GSV</del>   | 21   | >CARS-V268I YGYVSN <del>GS</del> LY | 28   | 7    |
| >CARS-V268I YGYVSN <del>GS</del> V  | 4280 | >CARS-V268I YGYVSN <del>GS</del> L  | 109  | 4171 |
| >CARS-V268I YGYVSN <del>GSV</del>   | 13   | >CARS-V268I YGYVSN <del>GS</del> LY | 17   | 4    |
| >CARS-V268I YGYVSN <del>GSV</del>   | 11   | >CARS-V268I YGYVSN <del>GS</del> LY | 8    | 3    |
| >CARS-V268I YGYVSN <del>GSV</del>   | 250  | >CARS-V268I YGYVSN <del>GS</del> LY | 231  | 19   |
| >CARS-V268I YGYVSN <del>GSV</del>   | 388  | >CARS-V268I YGYVSN <del>GS</del> LY | 3817 | 3429 |
| >CARS-V268I YGYVSN <del>GSV</del>   | 995  | >CARS-V268I YGYVSN <del>GS</del> LY | 299  | 696  |
| >CARS-V268I YGYVSN <del>GSV</del>   | 73   | >CARS-V268I YGYVSN <del>GS</del> LY | 57   | 16   |
| >CARS-V268I YGYVSN <del>GSV</del>   | 144  | >CARS-V268I YGYVSN <del>GS</del> LY | 95   | 49   |
| >CARS-V268I YGYVSN <del>GSV</del>   | 250  | >CARS-V268I YGYVSN <del>GS</del> LY | 1871 | 1621 |
| >CARS-V268I GYGYVSN <del>GS</del>   | 360  | >CARS-V268I GYGYVSN <del>GS</del> L | 84   | 276  |
| >CARS-V268I GYGYVSN <del>GS</del>   | 1019 | >CARS-V268I GYGYVSN <del>GS</del> L | 33   | 986  |
| >CARS-V268I GYGYVSN <del>GS</del>   | 88   | >CARS-V268I GYGYVSN <del>GS</del> L | 24   | 64   |
| >CARS-V268I GYGYVSN <del>GS</del>   | 69   | >CARS-V268I GYGYVSN <del>GS</del> L | 76   | 7    |
| >CARS-V268I GYGYVSN <del>GS</del>   | 2308 | >CARS-V268I GYGYVSN <del>GS</del> L | 448  | 1860 |
| >CARS-V268I GYGYVSN <del>GS</del>   | 200  | >CARS-V268I GYGYVSN <del>GS</del> L | 144  | 56   |
| >CARS-V268I GYGYVSN <del>GS</del>   | 331  | >CARS-V268I GYGYVSN <del>GS</del> L | 167  | 164  |
| >CBFA2T3-A <sup>!</sup> AKRQASEDAI  | 33   | >CBFA2T3-A <sup>!</sup> VKRQASEDAI  | 54   | 21   |
| >CBFA2T3-A <sup>!</sup> EAKRQASEDAI | 4940 | >CBFA2T3-A <sup>!</sup> EVKRQASEDAI | 141  | 4799 |
| >CBFA2T3-A <sup>!</sup> RAKMERALAI  | 11   | >CBFA2T3-A <sup>!</sup> RAKMERALAI  | 15   | 4    |
| >CBFA2T3-A <sup>!</sup> AEAKRQAS    | 60   | >CBFA2T3-A <sup>!</sup> AEVKRQAS    | 107  | 47   |
| >CBFA2T3-A <sup>!</sup> AEAKRQASEI  | 17   | >CBFA2T3-A <sup>!</sup> AEVKRQASEI  | 24   | 7    |
| >CBFA2T3-A <sup>!</sup> AEAKRQASEI  | 369  | >CBFA2T3-A <sup>!</sup> AEVKRQASEI  | 290  | 79   |
| >CBFA2T3-A <sup>!</sup> ALAEAKRQA   | 631  | >CBFA2T3-A <sup>!</sup> ALAEVKRQA   | 342  | 289  |
| >CBFA2T3-A <sup>!</sup> ALAEAKRQA   | 81   | >CBFA2T3-A <sup>!</sup> ALAEVKRQA   | 66   | 15   |
| >CBFA2T3-A <sup>!</sup> ALAEAKRQA   | 98   | >CBFA2T3-A <sup>!</sup> ALAEVKRQA   | 18   | 80   |
| >CBFA2T3-A <sup>!</sup> ALAEAKRQA   | 137  | >CBFA2T3-A <sup>!</sup> ALAEVKRQA   | 66   | 71   |
| >CBFA2T3-A <sup>!</sup> ALAEAKRQ    | 130  | >CBFA2T3-A <sup>!</sup> ALAEVKRQ    | 98   | 32   |
| >CBFA2T3-A <sup>!</sup> ALAEAKRQA   | 13   | >CBFA2T3-A <sup>!</sup> ALAEVKRQA   | 15   | 2    |
| >CBFA2T3-A <sup>!</sup> RALAEAKR    | 57   | >CBFA2T3-A <sup>!</sup> RALAEVKR    | 43   | 14   |
| >CBFA2T3-A <sup>!</sup> RALAEAKR    | 110  | >CBFA2T3-A <sup>!</sup> RALAEVKR    | 82   | 28   |
| >CBFA2T3-A <sup>!</sup> ERALAEAKR   | 340  | >CBFA2T3-A <sup>!</sup> ERALAEVKR   | 301  | 39   |
| >CBFA2T3-A <sup>!</sup> MERALAEA    | 4791 | >CBFA2T3-A <sup>!</sup> MERALAEV    | 393  | 4398 |
| >CBFA2T3-A <sup>!</sup> MERALAEA    | 780  | >CBFA2T3-A <sup>!</sup> MERALAEV    | 310  | 470  |
| >CBFA2T3-A <sup>!</sup> MERALAEA    | 134  | >CBFA2T3-A <sup>!</sup> MERALAEV    | 113  | 21   |
| >CBFA2T3-A <sup>!</sup> MERALAEA    | 14   | >CBFA2T3-A <sup>!</sup> MERALAEV    | 43   | 29   |

|                                     |       |                                     |       |       |
|-------------------------------------|-------|-------------------------------------|-------|-------|
| >CBFA2T3-A <sup>!</sup> MERALAEAK   | 470   | >CBFA2T3-A <sup>!</sup> MERALAEVK   | 752   | 282   |
| >CBFA2T3-A <sup>!</sup> MERALAEA    | 5738  | >CBFA2T3-A <sup>!</sup> MERALAEV    | 201   | 5537  |
| >CBFA2T3-A <sup>!</sup> KMERALAEA   | 370   | >CBFA2T3-A <sup>!</sup> KMERALAEV   | 33    | 337   |
| >CBFA2T3-A <sup>!</sup> KMERALAEA   | 130   | >CBFA2T3-A <sup>!</sup> KMERALAEV   | 17    | 113   |
| >CBFA2T3-A <sup>!</sup> KMERALAEA   | 86    | >CBFA2T3-A <sup>!</sup> KMERALAEV   | 14    | 72    |
| >CBFA2T3-A <sup>!</sup> KMERALAEA   | 198   | >CBFA2T3-A <sup>!</sup> KMERALAEV   | 13    | 185   |
| >CBFA2T3-A <sup>!</sup> KMERALAEA   | 228   | >CBFA2T3-A <sup>!</sup> KMERALAEV   | 6     | 222   |
| >CBFA2T3-A <sup>!</sup> KMERALAEA   | 129   | >CBFA2T3-A <sup>!</sup> KMERALAEV   | 5     | 124   |
| >CBFA2T3-A <sup>!</sup> KMERALAEA   | 1115  | >CBFA2T3-A <sup>!</sup> KMERALAEV   | 24    | 1091  |
| >CBFA2T3-A <sup>!</sup> KMERALAEA   | 5629  | >CBFA2T3-A <sup>!</sup> KMERALAEV   | 39    | 5590  |
| >CBFA2T3-A <sup>!</sup> KMERALAEA   | 40    | >CBFA2T3-A <sup>!</sup> KMERALAEV   | 3     | 37    |
| >CBFA2T3-A <sup>!</sup> KMERALAEAI  | 423   | >CBFA2T3-A <sup>!</sup> KMERALAEVI  | 583   | 160   |
| >CBFA2T3-A <sup>!</sup> KMERALAEAI  | 300   | >CBFA2T3-A <sup>!</sup> KMERALAEVI  | 414   | 114   |
| >CBFA2T3-A <sup>!</sup> KMERALAEAI  | 17    | >CBFA2T3-A <sup>!</sup> KMERALAEVI  | 20    | 3     |
| >CBFA2T3-A <sup>!</sup> KMERALAEAI  | 281   | >CBFA2T3-A <sup>!</sup> KMERALAEVI  | 744   | 463   |
| >CBFA2T3-A <sup>!</sup> KMERALAEAI  | 135   | >CBFA2T3-A <sup>!</sup> KMERALAEVI  | 82    | 53    |
| >CBFA2T3-A <sup>!</sup> AKMERALAE/  | 379   | >CBFA2T3-A <sup>!</sup> AKMERALAE\  | 69    | 310   |
| >CBFA2T3-A <sup>!</sup> AKMERALAE/  | 296   | >CBFA2T3-A <sup>!</sup> AKMERALAE\  | 470   | 174   |
| >CBFA2T3-E <sup>!</sup> ELITTERA    | 13206 | >CBFA2T3-E <sup>!</sup> KLITTERA    | 316   | 12890 |
| >CBFA2T3-E <sup>!</sup> ELITTERA    | 2756  | >CBFA2T3-E <sup>!</sup> KLITTERA    | 197   | 2559  |
| >CBFA2T3-E <sup>!</sup> ELITTERAKM  | 1936  | >CBFA2T3-E <sup>!</sup> KLITTERAKM  | 234   | 1702  |
| >CBFA2T3-E <sup>!</sup> ELITTERA    | 3883  | >CBFA2T3-E <sup>!</sup> KLITTERA    | 107   | 3776  |
| >CBFA2T3-E <sup>!</sup> ELITTERA    | 1811  | >CBFA2T3-E <sup>!</sup> KLITTERA    | 114   | 1697  |
| >CBFA2T3-E <sup>!</sup> ELITTERA    | 5810  | >CBFA2T3-E <sup>!</sup> KLITTERA    | 205   | 5605  |
| >CBFA2T3-E <sup>!</sup> ELITTERA    | 533   | >CBFA2T3-E <sup>!</sup> KLITTERA    | 92    | 441   |
| >CBFA2T3-E <sup>!</sup> ELITTERAK   | 9131  | >CBFA2T3-E <sup>!</sup> KLITTERAK   | 169   | 8962  |
| >CBFA2T3-E <sup>!</sup> ELITTERAKM  | 42    | >CBFA2T3-E <sup>!</sup> KLITTERAKM  | 3804  | 3762  |
| >CBFA2T3-E <sup>!</sup> ELITTERAK   | 15476 | >CBFA2T3-E <sup>!</sup> KLITTERAK   | 149   | 15327 |
| >CBFA2T3-E <sup>!</sup> ELITTERAK   | 168   | >CBFA2T3-E <sup>!</sup> KLITTERAK   | 12885 | 12717 |
| >CBFA2T3-E <sup>!</sup> ELITTERAKM  | 4047  | >CBFA2T3-E <sup>!</sup> KLITTERAKM  | 468   | 3579  |
| >CBFA2T3-E <sup>!</sup> HELITTERAKM | 99    | >CBFA2T3-E <sup>!</sup> HKLITTERAKM | 8229  | 8130  |
| >CBFA2T3-E <sup>!</sup> HELITTER    | 10456 | >CBFA2T3-E <sup>!</sup> HKLITTER    | 426   | 10030 |
| >CBFA2T3-E <sup>!</sup> HELITTERAKM | 4762  | >CBFA2T3-E <sup>!</sup> HKLITTERAKM | 91    | 4671  |
| >CBFA2T3-E <sup>!</sup> HELITTERAKM | 346   | >CBFA2T3-E <sup>!</sup> HKLITTERAKM | 19378 | 19032 |
| >CBFA2T3-E <sup>!</sup> HELITTERAKM | 449   | >CBFA2T3-E <sup>!</sup> HKLITTERAKM | 20667 | 20218 |
| >CBFA2T3-E <sup>!</sup> HELITTERA   | 94    | >CBFA2T3-E <sup>!</sup> HKLITTERA   | 27095 | 27001 |
| >CBFA2T3-E <sup>!</sup> HELITTERA   | 147   | >CBFA2T3-E <sup>!</sup> HKLITTERA   | 22440 | 22293 |
| >CBFA2T3-E <sup>!</sup> HELITTERAKM | 23    | >CBFA2T3-E <sup>!</sup> HKLITTERAKM | 10800 | 10777 |
| >CBFA2T3-E <sup>!</sup> HELITTER    | 121   | >CBFA2T3-E <sup>!</sup> HKLITTER    | 163   | 42    |
| >CBFA2T3-E <sup>!</sup> AVSDAERKA†  | 24075 | >CBFA2T3-E <sup>!</sup> AVSDAERKA†  | 74    | 24001 |
| >CBFA2T3-E <sup>!</sup> AVSDAERKA†  | 12480 | >CBFA2T3-E <sup>!</sup> AVSDAERKA†  | 66    | 12414 |
| >CBFA2T3-E <sup>!</sup> KAHELITT    | 1043  | >CBFA2T3-E <sup>!</sup> KAHKLITT    | 477   | 566   |
| >CBFA2T3-E <sup>!</sup> KAHELITTER  | 889   | >CBFA2T3-E <sup>!</sup> KAHKLITTER  | 476   | 413   |



|                         |       |                         |      |       |
|-------------------------|-------|-------------------------|------|-------|
| >CBFA2T3-E5 KAHELITTERA | 426   | >CBFA2T3-E5 KAHKLITTERA | 216  | 210   |
| >CBFA2T3-E5 KAHELITTER  | 93    | >CBFA2T3-E5 KAHKLITTER  | 36   | 57    |
| >CBFA2T3-E5 KAHELITTER  | 215   | >CBFA2T3-E5 KAHKLITTER  | 387  | 172   |
| >CBFA2T3-E5 KAHELITTER  | 100   | >CBFA2T3-E5 KAHKLITTER  | 71   | 29    |
| >CBFA2T3-E5 RKAHELITTEF | 114   | >CBFA2T3-E5 RKAHKLITTEF | 223  | 109   |
| >CBFA2T3-E5 RKAHELITTEF | 336   | >CBFA2T3-E5 RKAHKLITTEF | 407  | 71    |
| >CBFA2T3-E5 AERKAHEL    | 108   | >CBFA2T3-E5 AERKAHKL    | 76   | 32    |
| >CBFA2T3-E5 AERKAHELI   | 102   | >CBFA2T3-E5 AERKAHKLI   | 23   | 79    |
| >CBFA2T3-E5 AERKAHEL    | 112   | >CBFA2T3-E5 AERKAHKL    | 206  | 94    |
| >CBFA2T3-E5 AERKAHELI   | 171   | >CBFA2T3-E5 AERKAHKLI   | 1415 | 1244  |
| >CBFA2T3-E5 AERKAHEL    | 32    | >CBFA2T3-E5 AERKAHKL    | 93   | 61    |
| >CBFA2T3-E5 AERKAHELI   | 109   | >CBFA2T3-E5 AERKAHKLI   | 146  | 37    |
| >CBFA2T3-E5 AERKAHELIT  | 125   | >CBFA2T3-E5 AERKAHKLIT  | 144  | 19    |
| >CBFA2T3-E5 AERKAHEL    | 233   | >CBFA2T3-E5 AERKAHKL    | 610  | 377   |
| >CBFA2T3-E5 AERKAHELI   | 162   | >CBFA2T3-E5 AERKAHKLI   | 306  | 144   |
| >CBFA2T3-E5 AERKAHELIT  | 300   | >CBFA2T3-E5 AERKAHKLIT  | 343  | 43    |
| >CBFA2T3-E5 AERKAHELIT  | 44    | >CBFA2T3-E5 AERKAHKLIT  | 52   | 8     |
| >CBFA2T3-E5 AERKAHEL    | 79    | >CBFA2T3-E5 AERKAHKL    | 252  | 173   |
| >CBFA2T3-E5 AERKAHELI   | 10    | >CBFA2T3-E5 AERKAHKLI   | 19   | 9     |
| >CBFA2T3-E5 AERKAHELIT  | 121   | >CBFA2T3-E5 AERKAHKLIT  | 206  | 85    |
| >CBFA2T3-E5 DAERKAHE    | 24325 | >CBFA2T3-E5 DAERKAHK    | 451  | 23874 |
| >CBFA2T3-E5 SDAERKAHEL  | 81    | >CBFA2T3-E5 SDAERKAHKL  | 38   | 43    |
| >CBFA2T3-E5 SDAERKAHEL  | 57    | >CBFA2T3-E5 SDAERKAHKL  | 114  | 57    |
| >CBFA2T3-E5 VSDAERKAHE  | 121   | >CBFA2T3-E5 VSDAERKAHK  | 104  | 17    |
| >CBFA2T3-R5 DRDPLHPEHL  | 7500  | >CBFA2T3-R5 DHDPLHPEHI  | 460  | 7040  |
| >CBFA2T3-R5 KENGSDRDPI  | 247   | >CBFA2T3-R5 KENGSDHDPI  | 232  | 15    |
| >CBFA2T3-R5 KENGSDRDPI  | 438   | >CBFA2T3-R5 KENGSDHDPI  | 978  | 540   |
| >CBFA2T3-R5 TKENGSDRDI  | 267   | >CBFA2T3-R5 TKENGSDHDI  | 275  | 8     |
| >CBFA2T3-R5 RTKENGSDR   | 155   | >CBFA2T3-R5 RTKENGSDH   | 1363 | 1208  |
| >CBFA2T3-R5 RTKENGSDR   | 52    | >CBFA2T3-R5 RTKENGSDH   | 6559 | 6507  |
| >CBFA2T3-R5 RTKENGSDR   | 4267  | >CBFA2T3-R5 RTKENGSDH   | 202  | 4065  |
| >CBFA2T3-R5 RTKENGSDR   | 5815  | >CBFA2T3-R5 RTKENGSDH   | 403  | 5412  |
| >CBFB-P100A PMILNGVCV   | 1379  | >CBFB-P100A AMILNGVCV   | 19   | 1360  |
| >CBFB-P100A PMILNGVCVI  | 2458  | >CBFB-P100A AMILNGVCVI  | 488  | 1970  |
| >CBFB-P100A PMILNGVCV   | 8014  | >CBFB-P100A AMILNGVCV   | 145  | 7869  |
| >CBFB-P100A PMILNGVCV   | 2427  | >CBFB-P100A AMILNGVCV   | 110  | 2317  |
| >CBFB-P100A PMILNGVCVI  | 3497  | >CBFB-P100A AMILNGVCVI  | 315  | 3182  |
| >CBFB-P100A PMILNGVCV   | 2905  | >CBFB-P100A AMILNGVCV   | 118  | 2787  |
| >CBFB-P100A PMILNGVCVI  | 1046  | >CBFB-P100A AMILNGVCVI  | 66   | 980   |
| >CBFB-P100A PMILNGVCV   | 4614  | >CBFB-P100A AMILNGVCV   | 123  | 4491  |
| >CBFB-P100A PMILNGVCV   | 174   | >CBFB-P100A AMILNGVCV   | 10   | 164   |
| >CBFB-P100A PMILNGVCVI  | 266   | >CBFB-P100A AMILNGVCVI  | 19   | 247   |
| >CBFB-P100A PMILNGVCV   | 118   | >CBFB-P100A AMILNGVCV   | 4    | 114   |

|                         |       |                         |       |       |
|-------------------------|-------|-------------------------|-------|-------|
| >CBFB-P100/ PMILNGVCVI  | 535   | >CBFB-P100/ AMILNGVCVI  | 16    | 519   |
| >CBFB-P100/ PMILNGVCV   | 117   | >CBFB-P100/ AMILNGVCV   | 12    | 105   |
| >CBFB-P100/ PMILNGVCVI  | 1234  | >CBFB-P100/ AMILNGVCVI  | 92    | 1142  |
| >CBFB-P100/ PMILNGVCV   | 394   | >CBFB-P100/ AMILNGVCV   | 65    | 329   |
| >CBFB-P100/ PMILNGVCVI  | 1881  | >CBFB-P100/ AMILNGVCVI  | 414   | 1467  |
| >CBFB-P100/ PMILNGVCV   | 55    | >CBFB-P100/ AMILNGVCV   | 10    | 45    |
| >CBFB-P100/ PMILNGVCVI  | 688   | >CBFB-P100/ AMILNGVCVI  | 33    | 655   |
| >CBFB-P100/ PMILNGVCVI  | 5096  | >CBFB-P100/ AMILNGVCVI  | 431   | 4665  |
| >CBFB-P100/ PMILNGVCVI  | 4490  | >CBFB-P100/ AMILNGVCVI  | 184   | 4306  |
| >CBFB-P100/ PMILNGVCV   | 2441  | >CBFB-P100/ AMILNGVCV   | 127   | 2314  |
| >CBFB-P100/ PMILNGVCVI  | 1214  | >CBFB-P100/ AMILNGVCVI  | 84    | 1130  |
| >CBFB-P100/ PMILNGVCVI  | 3643  | >CBFB-P100/ AMILNGVCVI  | 349   | 3294  |
| >CBFB-P100/ PMILNGVCVI  | 8142  | >CBFB-P100/ AMILNGVCVI  | 255   | 7887  |
| >CBFB-P100/ PMILNGVCVI  | 6034  | >CBFB-P100/ AMILNGVCVI  | 243   | 5791  |
| >CBFB-P100/ APMILNGV    | 6605  | >CBFB-P100/ AAMILNGV    | 131   | 6474  |
| >CBFB-P100/ APMILNGV    | 7363  | >CBFB-P100/ AAMILNGV    | 172   | 7191  |
| >CBFB-P100/ APMILNGV    | 2972  | >CBFB-P100/ AAMILNGV    | 44    | 2928  |
| >CBFB-P100/ APMILNGVC\  | 4281  | >CBFB-P100/ AAMILNGVC\  | 253   | 4028  |
| >CBFB-P100/ APMILNGV    | 18010 | >CBFB-P100/ AAMILNGV    | 446   | 17564 |
| >CBFB-P100/ APMILNGV    | 5214  | >CBFB-P100/ AAMILNGV    | 148   | 5066  |
| >CBFB-P100/ APMILNGVC\  | 7989  | >CBFB-P100/ AAMILNGVC\  | 340   | 7649  |
| >CBFB-P100/ APMILNGV    | 899   | >CBFB-P100/ AAMILNGV    | 270   | 629   |
| >CBFB-P100/ APMILNGV    | 179   | >CBFB-P100/ AAMILNGV    | 16120 | 15941 |
| >CBFB-P100/ APMILNGVC\  | 75    | >CBFB-P100/ AAMILNGVC\  | 8967  | 8892  |
| >CBFB-P100/ APMILNGVC\  | 57    | >CBFB-P100/ AAMILNGVC\  | 9419  | 9362  |
| >CBFB-P100/ APMILNGVC\  | 15011 | >CBFB-P100/ AAMILNGVC\  | 224   | 14787 |
| >CBFB-P100/ APMILNGVC\  | 163   | >CBFB-P100/ AAMILNGVC\  | 2645  | 2482  |
| >CBFB-P100/ APMILNGVC\  | 198   | >CBFB-P100/ AAMILNGVC\  | 12190 | 11992 |
| >CBFB-P100/ APMILNGVC\  | 1947  | >CBFB-P100/ AAMILNGVC\  | 202   | 1745  |
| >CBFB-P100/ REAGKVYLKA  | 3246  | >CBFB-P100/ REAGKVYLKA  | 181   | 3065  |
| >CBFB-P100/ REAGKVYLKA  | 1451  | >CBFB-P100/ REAGKVYLKA  | 11    | 1440  |
| >CBFB-P100/ KAPMILNGV   | 2921  | >CBFB-P100/ KAAMILNGV   | 479   | 2442  |
| >CBFB-P100/ KAPMILNGV   | 447   | >CBFB-P100/ KAAMILNGV   | 26    | 421   |
| >CBFB-P100/ KAPMILNGVC\ | 2689  | >CBFB-P100/ KAAMILNGVC\ | 306   | 2383  |
| >CBFB-P100/ KAPMILNGV   | 171   | >CBFB-P100/ KAAMILNGV   | 32    | 139   |
| >CBFB-P100/ KAPMILNGV   | 32    | >CBFB-P100/ KAAMILNGV   | 15    | 17    |
| >CBFB-P100/ KAPMILNGVC\ | 538   | >CBFB-P100/ KAAMILNGVC\ | 219   | 319   |
| >CBFB-P100/ KAPMILNGV   | 1230  | >CBFB-P100/ KAAMILNGV   | 465   | 765   |
| >CBFB-P100/ KAPMILNGV   | 434   | >CBFB-P100/ KAAMILNGV   | 97    | 337   |
| >CBFB-P100/ KAPMILNGV   | 27    | >CBFB-P100/ KAAMILNGV   | 4584  | 4557  |
| >CBFB-P100/ KAPMILNGVC\ | 485   | >CBFB-P100/ KAAMILNGVC\ | 15212 | 14727 |
| >CBFB-P100/ KAPMILNGVC\ | 132   | >CBFB-P100/ KAAMILNGVC\ | 8388  | 8256  |
| >CBFB-P100/ LKAPMILNGV  | 475   | >CBFB-P100/ LKAAMILNGV  | 1287  | 812   |

|                       |      |                       |     |      |
|-----------------------|------|-----------------------|-----|------|
| >CBFB-P100/LKAPMILNGV | 524  | >CBFB-P100/LKAAMILNGV | 498 | 26   |
| >CBFB-P100/YLKAPMIL   | 180  | >CBFB-P100/YLKAAMIL   | 169 | 11   |
| >CBFB-P100/YLKAPMILNG | 29   | >CBFB-P100/YLKAAMILNG | 20  | 9    |
| >CBFB-P100/YLKAPMIL   | 45   | >CBFB-P100/YLKAAMIL   | 18  | 27   |
| >CBFB-P100/YLKAPMILNG | 6    | >CBFB-P100/YLKAAMILNG | 3   | 3    |
| >CBFB-P100/YLKAPMIL   | 6    | >CBFB-P100/YLKAAMIL   | 5   | 1    |
| >CBFB-P100/YLKAPMILNG | 2    | >CBFB-P100/YLKAAMILNG | 2   | 0    |
| >CBFB-P100/YLKAPMIL   | 1310 | >CBFB-P100/YLKAAMIL   | 310 | 1000 |
| >CBFB-P100/YLKAPMILNG | 13   | >CBFB-P100/YLKAAMILNG | 8   | 5    |
| >CBFB-P100/YLKAPMIL   | 70   | >CBFB-P100/YLKAAMIL   | 223 | 153  |
| >CBFB-P100/YLKAPMILNG | 3    | >CBFB-P100/YLKAAMILNG | 4   | 1    |
| >CBFB-P100/YLKAPMIL   | 52   | >CBFB-P100/YLKAAMIL   | 44  | 8    |
| >CBFB-P100/YLKAPMILNG | 5    | >CBFB-P100/YLKAAMILNG | 5   | 0    |
| >CBFB-P100/YLKAPMIL   | 475  | >CBFB-P100/YLKAAMIL   | 279 | 196  |
| >CBFB-P100/YLKAPMILNG | 18   | >CBFB-P100/YLKAAMILNG | 13  | 5    |
| >CBFB-P100/YLKAPMILNG | 31   | >CBFB-P100/YLKAAMILNG | 18  | 13   |
| >CBFB-P100/YLKAPMIL   | 5    | >CBFB-P100/YLKAAMIL   | 4   | 1    |
| >CBFB-P100/YLKAPMILNG | 2    | >CBFB-P100/YLKAAMILNG | 2   | 0    |
| >CBFB-P100/YLKAPMILNG | 377  | >CBFB-P100/YLKAAMILNG | 560 | 183  |
| >CBFB-P100/YLKAPMILNG | 252  | >CBFB-P100/YLKAAMILNG | 383 | 131  |
| >CBFB-P100/YLKAPMIL   | 391  | >CBFB-P100/YLKAAMIL   | 184 | 207  |
| >CBFB-P100/YLKAPMIL   | 801  | >CBFB-P100/YLKAAMIL   | 340 | 461  |
| >CBFB-P100/YLKAPMIL   | 346  | >CBFB-P100/YLKAAMIL   | 560 | 214  |
| >CBFB-P100/YLKAPMIL   | 156  | >CBFB-P100/YLKAAMIL   | 187 | 31   |
| >CBFB-P100/VYLKAPMI   | 1257 | >CBFB-P100/VYLKAAMI   | 423 | 834  |
| >CBFB-P100/VYLKAPMI   | 703  | >CBFB-P100/VYLKAAMI   | 194 | 509  |
| >CBFB-P100/VYLKAPMI   | 67   | >CBFB-P100/VYLKAAMI   | 97  | 30   |
| >CBFB-P100/VYLKAPMIL  | 39   | >CBFB-P100/VYLKAAMIL  | 132 | 93   |
| >CBFB-P100/VYLKAPMI   | 71   | >CBFB-P100/VYLKAAMI   | 92  | 21   |
| >CBFB-P100/VYLKAPMIL  | 94   | >CBFB-P100/VYLKAAMIL  | 208 | 114  |
| >CBFB-P100/VYLKAPMI   | 6    | >CBFB-P100/VYLKAAMI   | 6   | 0    |
| >CBFB-P100/VYLKAPMIL  | 6    | >CBFB-P100/VYLKAAMIL  | 5   | 1    |
| >CBFB-P100/KVYLKAPM   | 304  | >CBFB-P100/KVYLKAAM   | 897 | 593  |
| >CBFB-P100/KVYLKAPMI  | 142  | >CBFB-P100/KVYLKAAMI  | 161 | 19   |
| >CBFB-P100/KVYLKAPMIL | 239  | >CBFB-P100/KVYLKAAMIL | 326 | 87   |
| >CBFB-P100/KVYLKAPMI  | 687  | >CBFB-P100/KVYLKAAMI  | 125 | 562  |
| >CBFB-P100/KVYLKAPMIL | 230  | >CBFB-P100/KVYLKAAMIL | 679 | 449  |
| >CBFB-P100/KVYLKAPMI  | 228  | >CBFB-P100/KVYLKAAMI  | 480 | 252  |
| >CBFB-P100/KVYLKAPM   | 158  | >CBFB-P100/KVYLKAAM   | 506 | 348  |
| >CBFB-P100/KVYLKAPMI  | 105  | >CBFB-P100/KVYLKAAMI  | 231 | 126  |
| >CBFB-P100/KVYLKAPMIL | 101  | >CBFB-P100/KVYLKAAMIL | 173 | 72   |
| >CBFB-P100/KVYLKAPM   | 237  | >CBFB-P100/KVYLKAAM   | 177 | 60   |
| >CBFB-P100/KVYLKAPMI  | 66   | >CBFB-P100/KVYLKAAMI  | 35  | 31   |

|                         |      |                         |      |      |
|-------------------------|------|-------------------------|------|------|
| >CBFB-P100/ KVVYLKAPMIL | 82   | >CBFB-P100/ KVVYLKAAMIL | 67   | 15   |
| >CBFB-P100/ KVVYLKAPM   | 16   | >CBFB-P100/ KVVYLKAAM   | 23   | 7    |
| >CBFB-P100/ KVVYLKAPMI  | 56   | >CBFB-P100/ KVVYLKAAMI  | 25   | 31   |
| >CBFB-P100/ KVVYLKAPMIL | 100  | >CBFB-P100/ KVVYLKAAMIL | 43   | 57   |
| >CBFB-P100/ KVVYLKAPMIL | 190  | >CBFB-P100/ KVVYLKAAMIL | 852  | 662  |
| >CBFB-P100/ KVVYLKAPMI  | 146  | >CBFB-P100/ KVVYLKAAMI  | 114  | 32   |
| >CBFB-P100/ GKVVYLKAPM  | 139  | >CBFB-P100/ GKVVYLKAAM  | 124  | 15   |
| >CBFB-P100/ GKVVYLKAPMI | 116  | >CBFB-P100/ GKVVYLKAAM  | 138  | 22   |
| >CBFB-P100/ GKVVYLKAPMI | 337  | >CBFB-P100/ GKVVYLKAAM  | 406  | 69   |
| >CBFB-P100/ EAGKVVYLKAP | 281  | >CBFB-P100/ EAGKVVYLKAA | 799  | 518  |
| >CBFB-P100/ EAGKVVYLKAP | 456  | >CBFB-P100/ EAGKVVYLKAA | 358  | 98   |
| >CBL-A848T- ASAATASPQL  | 2395 | >CBL-A848T- TSAATASPQL  | 172  | 2223 |
| >CBL-A848T- ASAATASPQL  | 483  | >CBL-A848T- TSAATASPQL  | 1842 | 1359 |
| >CBL-A848T- ASAATASPQL  | 5    | >CBL-A848T- TSAATASPQL  | 10   | 5    |
| >CBL-A848T- ASAATASPQL  | 552  | >CBL-A848T- TSAATASPQL  | 165  | 387  |
| >CBL-A848T- ASAATASPQL  | 397  | >CBL-A848T- TSAATASPQL  | 314  | 83   |
| >CBL-A848T- ASAATASPQL  | 66   | >CBL-A848T- TSAATASPQL  | 53   | 13   |
| >CBL-A848T- ASAATASPQL  | 345  | >CBL-A848T- TSAATASPQL  | 485  | 140  |
| >CBL-A848T- AASAATASPC  | 325  | >CBL-A848T- ATSAATASPC  | 110  | 215  |
| >CBL-A848T- AASAATASPC  | 854  | >CBL-A848T- ATSAATASPC  | 121  | 733  |
| >CBL-A848T- AASAATASPC  | 2137 | >CBL-A848T- ATSAATASPC  | 434  | 1703 |
| >CBL-A848T- AASAATASPC  | 28   | >CBL-A848T- ATSAATASPC  | 6    | 22   |
| >CBL-A848T- AASAATASPC  | 330  | >CBL-A848T- ATSAATASPC  | 26   | 304  |
| >CBL-A848T- AASAATASPC  | 1472 | >CBL-A848T- ATSAATASPC  | 247  | 1225 |
| >CBL-A848T- GPAASAAT    | 185  | >CBL-A848T- GPATSAAT    | 307  | 122  |
| >CBL-A848T- GPAASAATA   | 193  | >CBL-A848T- GPATSAATA   | 387  | 194  |
| >CBL-A848T- GPAASAATA   | 383  | >CBL-A848T- GPATSAATA   | 651  | 268  |
| >CBL-A848T- CQQGSGPAA   | 417  | >CBL-A848T- CQQGSGPAT   | 2622 | 2205 |
| >CBL-C381R- CKICAENDK   | 2419 | >CBL-C381R- RKICAENDK   | 265  | 2154 |
| >CBL-C381R- CKICAENDKD  | 735  | >CBL-C381R- RKICAENDKD  | 53   | 682  |
| >CBL-C381R- QLCKICAEND  | 8818 | >CBL-C381R- QLRKICAEND  | 96   | 8722 |
| >CBL-C381R- FQLCKICA    | 131  | >CBL-C381R- FQLRKICA    | 541  | 410  |
| >CBL-C381R- FQLCKICA    | 17   | >CBL-C381R- FQLRKICA    | 29   | 12   |
| >CBL-C381R- FQLCKICAE   | 300  | >CBL-C381R- FQLRKICAE   | 615  | 315  |
| >CBL-C381R- FQLCKICA    | 490  | >CBL-C381R- FQLRKICA    | 754  | 264  |
| >CBL-C381R- FQLCKICA    | 190  | >CBL-C381R- FQLRKICA    | 971  | 781  |
| >CBL-C381R- FQLCKICA    | 487  | >CBL-C381R- FQLRKICA    | 851  | 364  |
| >CBL-C381R- STFQLCKI    | 444  | >CBL-C381R- STFQLRKI    | 724  | 280  |
| >CBL-C381R- STFQLCKI    | 318  | >CBL-C381R- STFQLRKI    | 1508 | 1190 |
| >CBL-C381R- STFQLCKI    | 41   | >CBL-C381R- STFQLRKI    | 43   | 2    |
| >CBL-C381R- STFQLCKI    | 144  | >CBL-C381R- STFQLRKI    | 229  | 85   |
| >CBL-C381R- STFQLCKICA  | 306  | >CBL-C381R- STFQLRKICA  | 459  | 153  |
| >CBL-C381R- STFQLCKI    | 330  | >CBL-C381R- STFQLRKI    | 1043 | 713  |

|                         |       |                         |      |       |
|-------------------------|-------|-------------------------|------|-------|
| >CBL-C381R- STFQLCKI    | 31    | >CBL-C381R- STFQLRKI    | 70   | 39    |
| >CBL-C381R- STFQLCKIC   | 195   | >CBL-C381R- STFQLRKIC   | 479  | 284   |
| >CBL-C381R- STFQLCKI    | 14    | >CBL-C381R- STFQLRKI    | 12   | 2     |
| >CBL-C381R- GSTFQLCK    | 35    | >CBL-C381R- GSTFQLRK    | 42   | 7     |
| >CBL-C381R- GSTFQLCKI   | 434   | >CBL-C381R- GSTFQLRKI   | 1360 | 926   |
| >CBL-C381R- GSTFQLCK    | 195   | >CBL-C381R- GSTFQLRK    | 161  | 34    |
| >CBL-C381R- GSTFQLCKI   | 759   | >CBL-C381R- GSTFQLRKI   | 305  | 454   |
| >CBL-C381R- MGSTFQLCK   | 732   | >CBL-C381R- MGSTFQLRK   | 258  | 474   |
| >CBL-C381R- MGSTFQLCK   | 78    | >CBL-C381R- MGSTFQLRK   | 79   | 1     |
| >CBL-C381R- MGSTFQLCK   | 839   | >CBL-C381R- MGSTFQLRK   | 442  | 397   |
| >CBL-C381R- MGSTFQLC    | 22464 | >CBL-C381R- MGSTFQLR    | 110  | 22354 |
| >CBL-C381R- MGSTFQLC    | 36413 | >CBL-C381R- MGSTFQLR    | 48   | 36365 |
| >CBL-C381R- MGSTFQLCK   | 283   | >CBL-C381R- MGSTFQLRK   | 489  | 206   |
| >CBL-C381R- MGSTFQLC    | 30278 | >CBL-C381R- MGSTFQLR    | 104  | 30174 |
| >CBL-C381R- EMGSTFQLCI  | 89    | >CBL-C381R- EMGSTFQLRI  | 364  | 275   |
| >CBL-C381R- EMGSTFQLCI  | 493   | >CBL-C381R- EMGSTFQLRI  | 2449 | 1956  |
| >CBL-C381R- EMGSTFQLCI  | 245   | >CBL-C381R- EMGSTFQLRI  | 2302 | 2057  |
| >CBL-C381R- EMGSTFQLCI  | 166   | >CBL-C381R- EMGSTFQLRI  | 1117 | 951   |
| >CBL-C381R- EMGSTFQLCI  | 174   | >CBL-C381R- EMGSTFQLRI  | 1936 | 1762  |
| >CBL-C381R- EMGSTFQLCI  | 354   | >CBL-C381R- EMGSTFQLRI  | 379  | 25    |
| >CBL-C381R- EMGSTFQLCI  | 412   | >CBL-C381R- EMGSTFQLRI  | 409  | 3     |
| >CBL-C381R- EMGSTFQLC   | 21254 | >CBL-C381R- EMGSTFQLR   | 127  | 21127 |
| >CBL-C381R- EMGSTFQLC   | 30227 | >CBL-C381R- EMGSTFQLR   | 73   | 30154 |
| >CBL-C381R- EMGSTFQLC   | 33169 | >CBL-C381R- EMGSTFQLR   | 33   | 33136 |
| >CBL-C381R- EMGSTFQLCI  | 360   | >CBL-C381R- EMGSTFQLRI  | 1294 | 934   |
| >CBL-C381R- EMGSTFQLC   | 32552 | >CBL-C381R- EMGSTFQLR   | 58   | 32494 |
| >CBL-C381R- CEMGSTFQLCI | 29812 | >CBL-C381R- CEMGSTFQLRI | 300  | 29512 |
| >CBL-C381R- CEMGSTFQLCI | 140   | >CBL-C381R- CEMGSTFQLRI | 390  | 250   |
| >CBL-C381R- CEMGSTFQLCI | 35865 | >CBL-C381R- CEMGSTFQLRI | 126  | 35739 |
| >CBL-C381Y- CKICAENDK   | 2419  | >CBL-C381Y- YKICAENDK   | 364  | 2055  |
| >CBL-C381Y- CKICAENDKD  | 735   | >CBL-C381Y- YKICAENDKD  | 61   | 674   |
| >CBL-C381Y- LCKICAENDK  | 2586  | >CBL-C381Y- LYKICAENDK  | 300  | 2286  |
| >CBL-C381Y- YCEMGSTFQI  | 19701 | >CBL-C381Y- YCEMGSTFQI  | 118  | 19583 |
| >CBL-C381Y- YCEMGSTFQI  | 23399 | >CBL-C381Y- YCEMGSTFQI  | 231  | 23168 |
| >CBL-C381Y- YCEMGSTFQI  | 25229 | >CBL-C381Y- YCEMGSTFQI  | 200  | 25029 |
| >CBL-C381Y- YCEMGSTFQI  | 5599  | >CBL-C381Y- YCEMGSTFQI  | 18   | 5581  |
| >CBL-C381Y- QLCKICAEND  | 1673  | >CBL-C381Y- QLYKICAEND  | 86   | 1587  |
| >CBL-C381Y- QLCKICAEND  | 1091  | >CBL-C381Y- QLYKICAEND  | 247  | 844   |
| >CBL-C381Y- FQLCKICA    | 131   | >CBL-C381Y- FQLYKICA    | 148  | 17    |
| >CBL-C381Y- FQLCKICA    | 17    | >CBL-C381Y- FQLYKICA    | 22   | 5     |
| >CBL-C381Y- FQLCKICAE   | 300   | >CBL-C381Y- FQLYKICAE   | 566  | 266   |
| >CBL-C381Y- FQLCKICA    | 490   | >CBL-C381Y- FQLYKICA    | 1242 | 752   |
| >CBL-C381Y- FQLCKICA    | 190   | >CBL-C381Y- FQLYKICA    | 919  | 729   |

|                        |       |                        |      |       |
|------------------------|-------|------------------------|------|-------|
| >CBL-C381Y- FQLCKICA   | 487   | >CBL-C381Y- FQLYKICA   | 433  | 54    |
| >CBL-C381Y- STFQLCKI   | 444   | >CBL-C381Y- STFQLYKI   | 406  | 38    |
| >CBL-C381Y- STFQLCKI   | 1386  | >CBL-C381Y- STFQLYKI   | 366  | 1020  |
| >CBL-C381Y- STFQLCKI   | 318   | >CBL-C381Y- STFQLYKI   | 138  | 180   |
| >CBL-C381Y- STFQLCKI   | 41    | >CBL-C381Y- STFQLYKI   | 19   | 22    |
| >CBL-C381Y- STFQLCKI   | 144   | >CBL-C381Y- STFQLYKI   | 26   | 118   |
| >CBL-C381Y- STFQLCKICA | 306   | >CBL-C381Y- STFQLYKICA | 164  | 142   |
| >CBL-C381Y- STFQLCKI   | 330   | >CBL-C381Y- STFQLYKI   | 131  | 199   |
| >CBL-C381Y- STFQLCKI   | 31    | >CBL-C381Y- STFQLYKI   | 45   | 14    |
| >CBL-C381Y- STFQLCKIC  | 195   | >CBL-C381Y- STFQLYKIC  | 461  | 266   |
| >CBL-C381Y- STFQLCKI   | 947   | >CBL-C381Y- STFQLYKI   | 315  | 632   |
| >CBL-C381Y- STFQLCKI   | 14    | >CBL-C381Y- STFQLYKI   | 11   | 3     |
| >CBL-C381Y- GSTFQLCK   | 1541  | >CBL-C381Y- GSTFQLYK   | 276  | 1265  |
| >CBL-C381Y- GSTFQLCK   | 35    | >CBL-C381Y- GSTFQLYK   | 10   | 25    |
| >CBL-C381Y- GSTFQLCK   | 1311  | >CBL-C381Y- GSTFQLYK   | 184  | 1127  |
| >CBL-C381Y- GSTFQLCK   | 1184  | >CBL-C381Y- GSTFQLYK   | 373  | 811   |
| >CBL-C381Y- GSTFQLCKI  | 434   | >CBL-C381Y- GSTFQLYKI  | 1129 | 695   |
| >CBL-C381Y- GSTFQLCK   | 195   | >CBL-C381Y- GSTFQLYK   | 130  | 65    |
| >CBL-C381Y- GSTFQLCKI  | 759   | >CBL-C381Y- GSTFQLYKI  | 444  | 315   |
| >CBL-C381Y- MGSTFQLCK  | 732   | >CBL-C381Y- MGSTFQLYK  | 92   | 640   |
| >CBL-C381Y- MGSTFQLCK  | 78    | >CBL-C381Y- MGSTFQLYK  | 18   | 60    |
| >CBL-C381Y- MGSTFQLC   | 21169 | >CBL-C381Y- MGSTFQLY   | 55   | 21114 |
| >CBL-C381Y- MGSTFQLCK  | 839   | >CBL-C381Y- MGSTFQLYK  | 51   | 788   |
| >CBL-C381Y- MGSTFQLC   | 27320 | >CBL-C381Y- MGSTFQLY   | 103  | 27217 |
| >CBL-C381Y- MGSTFQLCK  | 283   | >CBL-C381Y- MGSTFQLYK  | 81   | 202   |
| >CBL-C381Y- MGSTFQLC   | 14152 | >CBL-C381Y- MGSTFQLY   | 108  | 14044 |
| >CBL-C381Y- MGSTFQLCK  | 1349  | >CBL-C381Y- MGSTFQLYK  | 114  | 1235  |
| >CBL-C381Y- EMGSTFQLCI | 89    | >CBL-C381Y- EMGSTFQLYK | 72   | 17    |
| >CBL-C381Y- EMGSTFQLCI | 493   | >CBL-C381Y- EMGSTFQLYK | 145  | 348   |
| >CBL-C381Y- EMGSTFQLCI | 245   | >CBL-C381Y- EMGSTFQLYK | 330  | 85    |
| >CBL-C381Y- EMGSTFQLCI | 166   | >CBL-C381Y- EMGSTFQLYK | 83   | 83    |
| >CBL-C381Y- EMGSTFQLCI | 174   | >CBL-C381Y- EMGSTFQLYK | 464  | 290   |
| >CBL-C381Y- EMGSTFQLCI | 354   | >CBL-C381Y- EMGSTFQLYK | 79   | 275   |
| >CBL-C381Y- EMGSTFQLCI | 412   | >CBL-C381Y- EMGSTFQLYK | 78   | 334   |
| >CBL-C381Y- EMGSTFQLC  | 30672 | >CBL-C381Y- EMGSTFQLY  | 298  | 30374 |
| >CBL-C381Y- EMGSTFQLC  | 18794 | >CBL-C381Y- EMGSTFQLY  | 25   | 18769 |
| >CBL-C381Y- EMGSTFQLC  | 25953 | >CBL-C381Y- EMGSTFQLY  | 238  | 25715 |
| >CBL-C381Y- EMGSTFQLCI | 1526  | >CBL-C381Y- EMGSTFQLYK | 130  | 1396  |
| >CBL-C381Y- EMGSTFQLCI | 360   | >CBL-C381Y- EMGSTFQLYK | 222  | 138   |
| >CBL-C381Y- EMGSTFQLC  | 25955 | >CBL-C381Y- EMGSTFQLY  | 109  | 25846 |
| >CBL-C381Y- EMGSTFQLC  | 16015 | >CBL-C381Y- EMGSTFQLY  | 99   | 15916 |
| >CBL-C381Y- EMGSTFQLC  | 29322 | >CBL-C381Y- EMGSTFQLY  | 482  | 28840 |
| >CBL-C381Y- EMGSTFQLC  | 10221 | >CBL-C381Y- EMGSTFQLY  | 104  | 10117 |

|                        |       |                        |      |       |
|------------------------|-------|------------------------|------|-------|
| >CBL-C381Y- EMGSTFQLCI | 1183  | >CBL-C381Y- EMGSTFQLYH | 100  | 1083  |
| >CBL-C381Y- CEMGSTFQLC | 1548  | >CBL-C381Y- CEMGSTFQLY | 320  | 1228  |
| >CBL-C381Y- CEMGSTFQLC | 26288 | >CBL-C381Y- CEMGSTFQLY | 142  | 26146 |
| >CBL-C381Y- CEMGSTFQLC | 17198 | >CBL-C381Y- CEMGSTFQLY | 482  | 16716 |
| >CBL-C381Y- CEMGSTFQLC | 13147 | >CBL-C381Y- CEMGSTFQLY | 139  | 13008 |
| >CBL-C381Y- CEMGSTFQLC | 14654 | >CBL-C381Y- CEMGSTFQLY | 148  | 14506 |
| >CBL-C381Y- CEMGSTFQLC | 140   | >CBL-C381Y- CEMGSTFQLY | 249  | 109   |
| >CBL-C381Y- CEMGSTFQLC | 5461  | >CBL-C381Y- CEMGSTFQLY | 465  | 4996  |
| >CBL-C384R- MGSTFQLCKI | 41544 | >CBL-C384R- MGSTFQLCKI | 226  | 41318 |
| >CBL-C384R- MGSTFQLCKI | 31863 | >CBL-C384R- MGSTFQLCKI | 174  | 31689 |
| >CBL-C384R- KICAENDK   | 915   | >CBL-C384R- KIRAENDK   | 324  | 591   |
| >CBL-C384R- KICAENDK   | 232   | >CBL-C384R- KIRAENDK   | 4038 | 3806  |
| >CBL-C384R- KICAENDKDV | 227   | >CBL-C384R- KIRAENDKDV | 4052 | 3825  |
| >CBL-C384R- KICAENDK   | 499   | >CBL-C384R- KIRAENDK   | 5    | 494   |
| >CBL-C384R- KICAENDKDV | 9150  | >CBL-C384R- KIRAENDKDV | 204  | 8946  |
| >CBL-C384R- KICAENDKDV | 1771  | >CBL-C384R- KIRAENDKDV | 10   | 1761  |
| >CBL-C384R- FQLCKICA   | 131   | >CBL-C384R- FQLCKIRA   | 195  | 64    |
| >CBL-C384R- FQLCKICA   | 17    | >CBL-C384R- FQLCKIRA   | 19   | 2     |
| >CBL-C384R- FQLCKICAE  | 300   | >CBL-C384R- FQLCKIRAE  | 1816 | 1516  |
| >CBL-C384R- FQLCKICA   | 490   | >CBL-C384R- FQLCKIRA   | 262  | 228   |
| >CBL-C384R- FQLCKICA   | 190   | >CBL-C384R- FQLCKIRA   | 559  | 369   |
| >CBL-C384R- FQLCKICA   | 487   | >CBL-C384R- FQLCKIRA   | 1303 | 816   |
| >CBL-C384R- TFQLCKIC   | 20809 | >CBL-C384R- TFQLCKIR   | 100  | 20709 |
| >CBL-C384R- TFQLCKIC   | 34593 | >CBL-C384R- TFQLCKIR   | 296  | 34297 |
| >CBL-C384R- TFQLCKIC   | 34645 | >CBL-C384R- TFQLCKIR   | 81   | 34564 |
| >CBL-C384R- STFQLCKIC  | 21211 | >CBL-C384R- STFQLCKIR  | 143  | 21068 |
| >CBL-C384R- STFQLCKIC  | 24426 | >CBL-C384R- STFQLCKIR  | 18   | 24408 |
| >CBL-C384R- STFQLCKICA | 306   | >CBL-C384R- STFQLCKIRA | 286  | 20    |
| >CBL-C384R- STFQLCKIC  | 195   | >CBL-C384R- STFQLCKIR  | 125  | 70    |
| >CBL-C384R- STFQLCKIC  | 6948  | >CBL-C384R- STFQLCKIR  | 75   | 6873  |
| >CBL-C384R- STFQLCKIC  | 33971 | >CBL-C384R- STFQLCKIR  | 115  | 33856 |
| >CBL-C384Y- ICAENDKDVK | 18594 | >CBL-C384Y- IYAENDKDVK | 164  | 18430 |
| >CBL-C384Y- ICAENDKDVK | 18159 | >CBL-C384Y- IYAENDKDVK | 361  | 17798 |
| >CBL-C384Y- ICAENDKDVK | 23592 | >CBL-C384Y- IYAENDKDVK | 66   | 23526 |
| >CBL-C384Y- MGSTFQLCKI | 31239 | >CBL-C384Y- MGSTFQLCKI | 178  | 31061 |
| >CBL-C384Y- MGSTFQLCKI | 17203 | >CBL-C384Y- MGSTFQLCKI | 120  | 17083 |
| >CBL-C384Y- MGSTFQLCKI | 18282 | >CBL-C384Y- MGSTFQLCKI | 220  | 18062 |
| >CBL-C384Y- KICAENDKDV | 1782  | >CBL-C384Y- KIYAENDKDV | 310  | 1472  |
| >CBL-C384Y- KICAENDKDV | 1280  | >CBL-C384Y- KIYAENDKDV | 101  | 1179  |
| >CBL-C384Y- KICAENDKDV | 4431  | >CBL-C384Y- KIYAENDKDV | 111  | 4320  |
| >CBL-C384Y- KICAENDKDV | 591   | >CBL-C384Y- KIYAENDKDV | 63   | 528   |
| >CBL-C384Y- KICAENDK   | 915   | >CBL-C384Y- KIYAENDK   | 52   | 863   |
| >CBL-C384Y- KICAENDKDV | 2488  | >CBL-C384Y- KIYAENDKDV | 90   | 2398  |

|                         |       |                         |     |       |
|-------------------------|-------|-------------------------|-----|-------|
| >CBL-C384Y- KICAENDK    | 232   | >CBL-C384Y- KIYAENDK    | 65  | 167   |
| >CBL-C384Y- KICAENDKDV  | 227   | >CBL-C384Y- KIYAENDKDV  | 69  | 158   |
| >CBL-C384Y- KICAENDK    | 499   | >CBL-C384Y- KIYAENDK    | 172 | 327   |
| >CBL-C384Y- KICAENDKDV  | 1419  | >CBL-C384Y- KIYAENDKDV  | 475 | 944   |
| >CBL-C384Y- FQLCKICA    | 131   | >CBL-C384Y- FQLCKIYA    | 30  | 101   |
| >CBL-C384Y- FQLCKICA    | 2166  | >CBL-C384Y- FQLCKIYA    | 252 | 1914  |
| >CBL-C384Y- FQLCKICA    | 1099  | >CBL-C384Y- FQLCKIYA    | 222 | 877   |
| >CBL-C384Y- FQLCKICA    | 17    | >CBL-C384Y- FQLCKIYA    | 5   | 12    |
| >CBL-C384Y- FQLCKICAE   | 300   | >CBL-C384Y- FQLCKIYAE   | 197 | 103   |
| >CBL-C384Y- FQLCKICA    | 490   | >CBL-C384Y- FQLCKIYA    | 35  | 455   |
| >CBL-C384Y- FQLCKICA    | 190   | >CBL-C384Y- FQLCKIYA    | 41  | 149   |
| >CBL-C384Y- FQLCKICA    | 948   | >CBL-C384Y- FQLCKIYA    | 382 | 566   |
| >CBL-C384Y- FQLCKICA    | 487   | >CBL-C384Y- FQLCKIYA    | 434 | 53    |
| >CBL-C384Y- TFQLCKIC    | 24182 | >CBL-C384Y- TFQLCKIY    | 389 | 23793 |
| >CBL-C384Y- STFQLCKICA  | 2371  | >CBL-C384Y- STFQLCKIYA  | 287 | 2084  |
| >CBL-C384Y- STFQLCKICA  | 2941  | >CBL-C384Y- STFQLCKIYA  | 471 | 2470  |
| >CBL-C384Y- STFQLCKICA  | 2174  | >CBL-C384Y- STFQLCKIYA  | 387 | 1787  |
| >CBL-C384Y- STFQLCKICA  | 775   | >CBL-C384Y- STFQLCKIYA  | 174 | 601   |
| >CBL-C384Y- STFQLCKIC   | 22297 | >CBL-C384Y- STFQLCKIY   | 102 | 22195 |
| >CBL-C384Y- STFQLCKIC   | 25229 | >CBL-C384Y- STFQLCKIY   | 88  | 25141 |
| >CBL-C384Y- STFQLCKIC   | 24426 | >CBL-C384Y- STFQLCKIY   | 329 | 24097 |
| >CBL-C384Y- STFQLCKICA  | 306   | >CBL-C384Y- STFQLCKIYA  | 65  | 241   |
| >CBL-C384Y- STFQLCKIC   | 19055 | >CBL-C384Y- STFQLCKIY   | 265 | 18790 |
| >CBL-C384Y- STFQLCKIC   | 10151 | >CBL-C384Y- STFQLCKIY   | 183 | 9968  |
| >CBL-C384Y- STFQLCKIC   | 12131 | >CBL-C384Y- STFQLCKIY   | 8   | 12123 |
| >CBL-C384Y- STFQLCKIC   | 195   | >CBL-C384Y- STFQLCKIY   | 2   | 193   |
| >CBL-C384Y- STFQLCKICA  | 2593  | >CBL-C384Y- STFQLCKIYA  | 469 | 2124  |
| >CBL-C384Y- STFQLCKIC   | 6948  | >CBL-C384Y- STFQLCKIY   | 379 | 6569  |
| >CBL-C384Y- STFQLCKICAE | 1617  | >CBL-C384Y- STFQLCKIYAE | 496 | 1121  |
| >CBL-C384Y- GSTFQLCKIC  | 19113 | >CBL-C384Y- GSTFQLCKIY  | 89  | 19024 |
| >CBL-C384Y- GSTFQLCKIC  | 19362 | >CBL-C384Y- GSTFQLCKIY  | 81  | 19281 |
| >CBL-C396G- IEPGCHLM    | 36    | >CBL-C396G- IEPGGHLM    | 74  | 38    |
| >CBL-C396G- IEPGCHLM    | 544   | >CBL-C396G- IEPGGHLM    | 382 | 162   |
| >CBL-C396G- KIEPCGHLM   | 184   | >CBL-C396G- KIEPGGHLM   | 327 | 143   |
| >CBL-C396G- VKIEPCGHL   | 436   | >CBL-C396G- VKIEPGGHL   | 241 | 195   |
| >CBL-C396G- VKIEPCGHLM  | 127   | >CBL-C396G- VKIEPGGHLM  | 89  | 38    |
| >CBL-C396R- IEPGCHLM    | 36    | >CBL-C396R- IEPRGHLM    | 55  | 19    |
| >CBL-C396R- IEPGCHLM    | 544   | >CBL-C396R- IEPRGHLM    | 158 | 386   |
| >CBL-C396R- KIEPCGHLM   | 184   | >CBL-C396R- KIEPRGHLM   | 686 | 502   |
| >CBL-C396R- VKIEPCGHL   | 436   | >CBL-C396R- VKIEPRGHL   | 560 | 124   |
| >CBL-C396R- VKIEPCGHLM  | 127   | >CBL-C396R- VKIEPRGHLM  | 140 | 13    |
| >CBL-C396R- KDVKIEPC    | 31269 | >CBL-C396R- KDVKIEPR    | 107 | 31162 |
| >CBL-C396Y- PCGHLMCTS(  | 25067 | >CBL-C396Y- PYGHLMCTS(  | 432 | 24635 |



|                       |      |                       |     |      |
|-----------------------|------|-----------------------|-----|------|
| >CBL-C396Y-IEPCGHLM   | 36   | >CBL-C396Y-IEPYGHLM   | 17  | 19   |
| >CBL-C396Y-IEPCGHLM   | 544  | >CBL-C396Y-IEPYGHLM   | 106 | 438  |
| >CBL-C396Y-KIEPCGHLM  | 184  | >CBL-C396Y-KIEPYGHLM  | 372 | 188  |
| >CBL-C396Y-VKIEPCGHL  | 436  | >CBL-C396Y-VKIEPYGHL  | 246 | 190  |
| >CBL-C396Y-VKIEPCGHLM | 127  | >CBL-C396Y-VKIEPYGHLM | 65  | 62   |
| >CBL-C401S-CTSCLTSW   | 2524 | >CBL-C401S-STSCLTSW   | 201 | 2323 |
| >CBL-C401S-CTSCLTSWQ  | 644  | >CBL-C401S-STSCLTSWQ  | 280 | 364  |
| >CBL-C401S-CTSCLTSW   | 27   | >CBL-C401S-STSCLTSW   | 13  | 14   |
| >CBL-C401S-CTSCLTSW   | 196  | >CBL-C401S-STSCLTSW   | 159 | 37   |
| >CBL-C401S-CTSCLTSW   | 20   | >CBL-C401S-STSCLTSW   | 33  | 13   |
| >CBL-C401S-CTSCLTSWQ  | 202  | >CBL-C401S-STSCLTSWQ  | 16  | 186  |
| >CBL-C401S-MCTSCLTSW  | 931  | >CBL-C401S-MSTSCLTSW  | 6   | 925  |
| >CBL-C401S-MCTSCLTSW  | 176  | >CBL-C401S-MSTSCLTSW  | 60  | 116  |
| >CBL-C401S-MCTSCLTSW  | 2801 | >CBL-C401S-MSTSCLTSW  | 44  | 2757 |
| >CBL-C401S-MCTSCLTSW  | 259  | >CBL-C401S-MSTSCLTSW  | 9   | 250  |
| >CBL-C401S-MCTSCLTSW  | 110  | >CBL-C401S-MSTSCLTSW  | 18  | 92   |
| >CBL-C401S-MCTSCLTSW  | 520  | >CBL-C401S-MSTSCLTSW  | 332 | 188  |
| >CBL-C401S-MCTSCLTSW  | 238  | >CBL-C401S-MSTSCLTSW  | 25  | 213  |
| >CBL-C401S-LMCTSCLT   | 2109 | >CBL-C401S-LMSTSCLT   | 291 | 1818 |
| >CBL-C401S-LMCTSCLT   | 1461 | >CBL-C401S-LMSTSCLT   | 242 | 1219 |
| >CBL-C401S-LMCTSCLT   | 230  | >CBL-C401S-LMSTSCLT   | 92  | 138  |
| >CBL-C401S-LMCTSCLTSM | 432  | >CBL-C401S-LMSTSCLTSM | 166 | 266  |
| >CBL-C401S-LMCTSCLTSM | 128  | >CBL-C401S-LMSTSCLTSM | 120 | 8    |
| >CBL-C401S-LMCTSCLTSM | 167  | >CBL-C401S-LMSTSCLTSM | 55  | 112  |
| >CBL-C401S-LMCTSCLTSM | 82   | >CBL-C401S-LMSTSCLTSM | 75  | 7    |
| >CBL-C401S-LMCTSCLTSM | 1440 | >CBL-C401S-LMSTSCLTSM | 375 | 1065 |
| >CBL-C401S-LMCTSCLTSM | 61   | >CBL-C401S-LMSTSCLTSM | 19  | 42   |
| >CBL-C401S-LMCTSCLTSM | 135  | >CBL-C401S-LMSTSCLTSM | 134 | 1    |
| >CBL-C401S-HLMCTSCL   | 36   | >CBL-C401S-HLMSTSCLT  | 43  | 7    |
| >CBL-C401S-HLMCTSCLT  | 450  | >CBL-C401S-HLMSTSCLT  | 411 | 39   |
| >CBL-C401S-HLMCTSCL   | 8    | >CBL-C401S-HLMSTSCLT  | 7   | 1    |
| >CBL-C401S-HLMCTSCLT  | 160  | >CBL-C401S-HLMSTSCLT  | 82  | 78   |
| >CBL-C401S-HLMCTSCLTS | 1133 | >CBL-C401S-HLMSTSCLT  | 465 | 668  |
| >CBL-C401S-HLMCTSCL   | 38   | >CBL-C401S-HLMSTSCLT  | 36  | 2    |
| >CBL-C401S-HLMCTSCLT  | 176  | >CBL-C401S-HLMSTSCLT  | 186 | 10   |
| >CBL-C401S-HLMCTSCLTS | 860  | >CBL-C401S-HLMSTSCLT  | 371 | 489  |
| >CBL-C401S-HLMCTSCL   | 413  | >CBL-C401S-HLMSTSCLT  | 695 | 282  |
| >CBL-C401S-HLMCTSCL   | 81   | >CBL-C401S-HLMSTSCLT  | 73  | 8    |
| >CBL-C401S-HLMCTSCLT  | 338  | >CBL-C401S-HLMSTSCLT  | 377 | 39   |
| >CBL-C401S-HLMCTSCL   | 5    | >CBL-C401S-HLMSTSCLT  | 8   | 3    |
| >CBL-C401S-HLMCTSCLT  | 64   | >CBL-C401S-HLMSTSCLT  | 336 | 272  |
| >CBL-C401S-HLMCTSCL   | 122  | >CBL-C401S-HLMSTSCLT  | 58  | 64   |
| >CBL-C401S-HLMCTSCL   | 8    | >CBL-C401S-HLMSTSCLT  | 5   | 3    |

|                         |       |                         |      |       |
|-------------------------|-------|-------------------------|------|-------|
| >CBL-C401S-1 HLMCTSCLT  | 550   | >CBL-C401S-1 HLMSTSCLT  | 256  | 294   |
| >CBL-C401S-1 HLMCTSCL   | 32    | >CBL-C401S-1 HLMSTSCL   | 10   | 22    |
| >CBL-C401S-1 HLMCTSCLT  | 460   | >CBL-C401S-1 HLMSTSCLT  | 54   | 406   |
| >CBL-C401S-1 HLMCTSCLTS | 123   | >CBL-C401S-1 HLMSTSCLTS | 127  | 4     |
| >CBL-C401S-1 HLMCTSCL   | 130   | >CBL-C401S-1 HLMSTSCL   | 216  | 86    |
| >CBL-C401S-1 HLMCTSCL   | 501   | >CBL-C401S-1 HLMSTSCL   | 430  | 71    |
| >CBL-C401S-1 HLMCTSCLTS | 228   | >CBL-C401S-1 HLMSTSCLTS | 234  | 6     |
| >CBL-C401S-1 HLMCTSCL   | 966   | >CBL-C401S-1 HLMSTSCL   | 432  | 534   |
| >CBL-C401S-1 HLMCTSCL   | 153   | >CBL-C401S-1 HLMSTSCL   | 92   | 61    |
| >CBL-C401S-1 HLMCTSCLTS | 267   | >CBL-C401S-1 HLMSTSCLTS | 247  | 20    |
| >CBL-C401S-1 HLMCTSCLTS | 129   | >CBL-C401S-1 HLMSTSCLTS | 65   | 64    |
| >CBL-C401S-1 HLMCTSCL   | 75    | >CBL-C401S-1 HLMSTSCL   | 24   | 51    |
| >CBL-C401S-1 HLMCTSCLTS | 640   | >CBL-C401S-1 HLMSTSCLTS | 262  | 378   |
| >CBL-C401S-1 HLMCTSCLTS | 85    | >CBL-C401S-1 HLMSTSCLTS | 43   | 42    |
| >CBL-C401S-1 GHLMCTSCL  | 876   | >CBL-C401S-1 GHLMSTSCL  | 375  | 501   |
| >CBL-C401S-1 GHLMCTSCL  | 134   | >CBL-C401S-1 GHLMSTSCL  | 125  | 9     |
| >CBL-C404R- CLTSWQES    | 1911  | >CBL-C404R- RLTSWQES    | 396  | 1515  |
| >CBL-C404R- CLTSWQESEC  | 584   | >CBL-C404R- RLTSWQESEC  | 116  | 468   |
| >CBL-C404R- EPCGHLMCT!  | 36746 | >CBL-C404R- EPCGHLMCT!  | 269  | 36477 |
| >CBL-C404R- EPCGHLMCT!  | 40302 | >CBL-C404R- EPCGHLMCT!  | 249  | 40053 |
| >CBL-C404R- TSCLTSWQES  | 11765 | >CBL-C404R- TSRLTSWQES  | 188  | 11577 |
| >CBL-C404R- CTSCLTSW    | 27    | >CBL-C404R- CTSRLTSW    | 24   | 3     |
| >CBL-C404R- CTSCLTSW    | 196   | >CBL-C404R- CTSRLTSW    | 69   | 127   |
| >CBL-C404R- CTSCLTSW    | 20    | >CBL-C404R- CTSRLTSW    | 15   | 5     |
| >CBL-C404R- CTSCLTSWQ   | 202   | >CBL-C404R- CTSRLTSWQ   | 370  | 168   |
| >CBL-C404R- MCTSCLTSW   | 931   | >CBL-C404R- MCTSRLTSW   | 396  | 535   |
| >CBL-C404R- MCTSCLTSW   | 176   | >CBL-C404R- MCTSRLTSW   | 1364 | 1188  |
| >CBL-C404R- MCTSCLTSW   | 259   | >CBL-C404R- MCTSRLTSW   | 632  | 373   |
| >CBL-C404R- MCTSCLTSW   | 110   | >CBL-C404R- MCTSRLTSW   | 482  | 372   |
| >CBL-C404R- MCTSCLTSW   | 238   | >CBL-C404R- MCTSRLTSW   | 1623 | 1385  |
| >CBL-C404R- LMCTSCLT    | 230   | >CBL-C404R- LMCTSRLT    | 2226 | 1996  |
| >CBL-C404R- LMCTSCLTSW  | 432   | >CBL-C404R- LMCTSRLTSW  | 292  | 140   |
| >CBL-C404R- LMCTSCLTSW  | 128   | >CBL-C404R- LMCTSRLTSW  | 170  | 42    |
| >CBL-C404R- LMCTSCLTSW  | 167   | >CBL-C404R- LMCTSRLTSW  | 171  | 4     |
| >CBL-C404R- LMCTSCLTSW  | 82    | >CBL-C404R- LMCTSRLTSW  | 66   | 16    |
| >CBL-C404R- LMCTSCLTSW  | 61    | >CBL-C404R- LMCTSRLTSW  | 77   | 16    |
| >CBL-C404R- LMCTSCLTSW  | 135   | >CBL-C404R- LMCTSRLTSW  | 185  | 50    |
| >CBL-C404R- HLMCTSCL    | 36    | >CBL-C404R- HLMCTSRL    | 56   | 20    |
| >CBL-C404R- HLMCTSCLT   | 450   | >CBL-C404R- HLMCTSRLT   | 4640 | 4190  |
| >CBL-C404R- HLMCTSCL    | 8     | >CBL-C404R- HLMCTSRL    | 10   | 2     |
| >CBL-C404R- HLMCTSCLT   | 160   | >CBL-C404R- HLMCTSRLT   | 1010 | 850   |
| >CBL-C404R- HLMCTSCL    | 38    | >CBL-C404R- HLMCTSRL    | 16   | 22    |
| >CBL-C404R- HLMCTSCLT   | 176   | >CBL-C404R- HLMCTSRLT   | 336  | 160   |

|                         |      |                         |      |      |
|-------------------------|------|-------------------------|------|------|
| >CBL-C404R- HLMCTSCL    | 413  | >CBL-C404R- HLMCTSRL    | 709  | 296  |
| >CBL-C404R- HLMCTSCL    | 81   | >CBL-C404R- HLMCTSRL    | 34   | 47   |
| >CBL-C404R- HLMCTSCLT   | 338  | >CBL-C404R- HLMCTSRLT   | 2239 | 1901 |
| >CBL-C404R- HLMCTSCL    | 5    | >CBL-C404R- HLMCTSRL    | 7    | 2    |
| >CBL-C404R- HLMCTSCLT   | 64   | >CBL-C404R- HLMCTSRLT   | 761  | 697  |
| >CBL-C404R- HLMCTSCL    | 122  | >CBL-C404R- HLMCTSRL    | 408  | 286  |
| >CBL-C404R- HLMCTSCL    | 8    | >CBL-C404R- HLMCTSRL    | 19   | 11   |
| >CBL-C404R- HLMCTSCL    | 32   | >CBL-C404R- HLMCTSRL    | 17   | 15   |
| >CBL-C404R- HLMCTSCLT   | 460  | >CBL-C404R- HLMCTSRLT   | 8322 | 7862 |
| >CBL-C404R- HLMCTSCLTS  | 123  | >CBL-C404R- HLMCTSRLTS  | 98   | 25   |
| >CBL-C404R- HLMCTSCL    | 823  | >CBL-C404R- HLMCTSRL    | 462  | 361  |
| >CBL-C404R- HLMCTSCL    | 130  | >CBL-C404R- HLMCTSRL    | 391  | 261  |
| >CBL-C404R- HLMCTSCLTS  | 228  | >CBL-C404R- HLMCTSRLTS  | 378  | 150  |
| >CBL-C404R- HLMCTSCL    | 153  | >CBL-C404R- HLMCTSRL    | 462  | 309  |
| >CBL-C404R- HLMCTSCLTS  | 267  | >CBL-C404R- HLMCTSRLTS  | 442  | 175  |
| >CBL-C404R- HLMCTSCLTS  | 129  | >CBL-C404R- HLMCTSRLTS  | 115  | 14   |
| >CBL-C404R- HLMCTSCL    | 75   | >CBL-C404R- HLMCTSRL    | 386  | 311  |
| >CBL-C404R- HLMCTSCLTS  | 85   | >CBL-C404R- HLMCTSRLTS  | 323  | 238  |
| >CBL-C404R- GHLMCTSCL   | 134  | >CBL-C404R- GHLMCTSRL   | 840  | 706  |
| >CBL-C404S-1 CLTSWQES   | 1911 | >CBL-C404S-1 SLTSWQES   | 114  | 1797 |
| >CBL-C404S-1 CLTSWQESEC | 584  | >CBL-C404S-1 SLTSWQESEC | 38   | 546  |
| >CBL-C404S-1 CTSCLTSWQ  | 644  | >CBL-C404S-1 CTSSLTSWQ  | 358  | 286  |
| >CBL-C404S-1 CTSCLTSW   | 27   | >CBL-C404S-1 CTSSLTSW   | 14   | 13   |
| >CBL-C404S-1 CTSCLTSW   | 196  | >CBL-C404S-1 CTSSLTSW   | 90   | 106  |
| >CBL-C404S-1 CTSCLTSW   | 20   | >CBL-C404S-1 CTSSLTSW   | 14   | 6    |
| >CBL-C404S-1 CTSCLTSWQ  | 202  | >CBL-C404S-1 CTSSLTSWQ  | 106  | 96   |
| >CBL-C404S-1 MCTSCLTSW  | 931  | >CBL-C404S-1 MCTSSLTSW  | 121  | 810  |
| >CBL-C404S-1 MCTSCLTSW  | 176  | >CBL-C404S-1 MCTSSLTSW  | 584  | 408  |
| >CBL-C404S-1 MCTSCLTSW  | 259  | >CBL-C404S-1 MCTSSLTSW  | 147  | 112  |
| >CBL-C404S-1 MCTSCLTSW  | 110  | >CBL-C404S-1 MCTSSLTSW  | 250  | 140  |
| >CBL-C404S-1 MCTSCLTSW  | 238  | >CBL-C404S-1 MCTSSLTSW  | 228  | 10   |
| >CBL-C404S-1 LMCTSCLT   | 1461 | >CBL-C404S-1 LMCTSSLT   | 485  | 976  |
| >CBL-C404S-1 LMCTSCLT   | 230  | >CBL-C404S-1 LMCTSSLT   | 436  | 206  |
| >CBL-C404S-1 LMCTSCLTSM | 432  | >CBL-C404S-1 LMCTSSLTSM | 257  | 175  |
| >CBL-C404S-1 LMCTSCLTSM | 128  | >CBL-C404S-1 LMCTSSLTSM | 74   | 54   |
| >CBL-C404S-1 LMCTSCLTSM | 167  | >CBL-C404S-1 LMCTSSLTSM | 78   | 89   |
| >CBL-C404S-1 LMCTSCLTSM | 82   | >CBL-C404S-1 LMCTSSLTSM | 21   | 61   |
| >CBL-C404S-1 LMCTSCLTSM | 61   | >CBL-C404S-1 LMCTSSLTSM | 34   | 27   |
| >CBL-C404S-1 LMCTSCLTSM | 135  | >CBL-C404S-1 LMCTSSLTSM | 157  | 22   |
| >CBL-C404S-1 HLMCTSCL   | 36   | >CBL-C404S-1 HLMCTSSL   | 26   | 10   |
| >CBL-C404S-1 HLMCTSCLT  | 450  | >CBL-C404S-1 HLMCTSSLT  | 960  | 510  |
| >CBL-C404S-1 HLMCTSCL   | 8    | >CBL-C404S-1 HLMCTSSL   | 6    | 2    |
| >CBL-C404S-1 HLMCTSCLT  | 160  | >CBL-C404S-1 HLMCTSSLT  | 105  | 55   |

|                         |       |                         |      |       |
|-------------------------|-------|-------------------------|------|-------|
| >CBL-C404S-1 HLMCTSCL   | 38    | >CBL-C404S-1 HLMCTSSL   | 7    | 31    |
| >CBL-C404S-1 HLMCTSCLT  | 176   | >CBL-C404S-1 HLMCTSSLT  | 36   | 140   |
| >CBL-C404S-1 HLMCTSCL   | 413   | >CBL-C404S-1 HLMCTSSL   | 133  | 280   |
| >CBL-C404S-1 HLMCTSCL   | 81    | >CBL-C404S-1 HLMCTSSL   | 26   | 55    |
| >CBL-C404S-1 HLMCTSCLT  | 338   | >CBL-C404S-1 HLMCTSSLT  | 973  | 635   |
| >CBL-C404S-1 HLMCTSCL   | 5     | >CBL-C404S-1 HLMCTSSL   | 4    | 1     |
| >CBL-C404S-1 HLMCTSCLT  | 64    | >CBL-C404S-1 HLMCTSSLT  | 108  | 44    |
| >CBL-C404S-1 HLMCTSCLTS | 742   | >CBL-C404S-1 HLMCTSSLTS | 363  | 379   |
| >CBL-C404S-1 HLMCTSCL   | 122   | >CBL-C404S-1 HLMCTSSL   | 187  | 65    |
| >CBL-C404S-1 HLMCTSCL   | 8     | >CBL-C404S-1 HLMCTSSL   | 9    | 1     |
| >CBL-C404S-1 HLMCTSCL   | 32    | >CBL-C404S-1 HLMCTSSL   | 10   | 22    |
| >CBL-C404S-1 HLMCTSCLT  | 460   | >CBL-C404S-1 HLMCTSSLT  | 1458 | 998   |
| >CBL-C404S-1 HLMCTSCL   | 1811  | >CBL-C404S-1 HLMCTSSL   | 188  | 1623  |
| >CBL-C404S-1 HLMCTSCLTS | 123   | >CBL-C404S-1 HLMCTSSLTS | 142  | 19    |
| >CBL-C404S-1 HLMCTSCL   | 823   | >CBL-C404S-1 HLMCTSSL   | 340  | 483   |
| >CBL-C404S-1 HLMCTSCL   | 1659  | >CBL-C404S-1 HLMCTSSL   | 322  | 1337  |
| >CBL-C404S-1 HLMCTSCL   | 130   | >CBL-C404S-1 HLMCTSSL   | 96   | 34    |
| >CBL-C404S-1 HLMCTSCL   | 501   | >CBL-C404S-1 HLMCTSSL   | 134  | 367   |
| >CBL-C404S-1 HLMCTSCLTS | 228   | >CBL-C404S-1 HLMCTSSLTS | 182  | 46    |
| >CBL-C404S-1 HLMCTSCL   | 966   | >CBL-C404S-1 HLMCTSSL   | 295  | 671   |
| >CBL-C404S-1 HLMCTSCLTS | 1462  | >CBL-C404S-1 HLMCTSSLTS | 447  | 1015  |
| >CBL-C404S-1 HLMCTSCL   | 153   | >CBL-C404S-1 HLMCTSSL   | 52   | 101   |
| >CBL-C404S-1 HLMCTSCLTS | 267   | >CBL-C404S-1 HLMCTSSLTS | 143  | 124   |
| >CBL-C404S-1 HLMCTSCLTS | 129   | >CBL-C404S-1 HLMCTSSLTS | 58   | 71    |
| >CBL-C404S-1 HLMCTSCL   | 75    | >CBL-C404S-1 HLMCTSSL   | 50   | 25    |
| >CBL-C404S-1 HLMCTSCLTS | 85    | >CBL-C404S-1 HLMCTSSLTS | 88   | 3     |
| >CBL-C404S-1 GHLMCTSCL  | 876   | >CBL-C404S-1 GHLMCTSSL  | 281  | 595   |
| >CBL-C404S-1 GHLMCTSCL  | 134   | >CBL-C404S-1 GHLMCTSSL  | 83   | 51    |
| >CBL-C404Y-1 CLTSWQES   | 7391  | >CBL-C404Y-1 YLTSWQES   | 410  | 6981  |
| >CBL-C404Y-1 CLTSWQESEC | 5449  | >CBL-C404Y-1 YLTSWQESEC | 272  | 5177  |
| >CBL-C404Y-1 CLTSWQES   | 5437  | >CBL-C404Y-1 YLTSWQES   | 88   | 5349  |
| >CBL-C404Y-1 CLTSWQESEC | 9995  | >CBL-C404Y-1 YLTSWQESEC | 341  | 9654  |
| >CBL-C404Y-1 CLTSWQESEC | 6767  | >CBL-C404Y-1 YLTSWQESEC | 141  | 6626  |
| >CBL-C404Y-1 CLTSWQES   | 12471 | >CBL-C404Y-1 YLTSWQES   | 300  | 12171 |
| >CBL-C404Y-1 CLTSWQESEC | 10919 | >CBL-C404Y-1 YLTSWQESEC | 204  | 10715 |
| >CBL-C404Y-1 CLTSWQES   | 1911  | >CBL-C404Y-1 YLTSWQES   | 13   | 1898  |
| >CBL-C404Y-1 CLTSWQESE  | 8835  | >CBL-C404Y-1 YLTSWQESE  | 52   | 8783  |
| >CBL-C404Y-1 CLTSWQESEC | 8522  | >CBL-C404Y-1 YLTSWQESEC | 50   | 8472  |
| >CBL-C404Y-1 CLTSWQESEC | 584   | >CBL-C404Y-1 YLTSWQESEC | 7    | 577   |
| >CBL-C404Y-1 SCLTSWQES  | 31940 | >CBL-C404Y-1 SYLTSWQES  | 422  | 31518 |
| >CBL-C404Y-1 EPCGHLMCT! | 20893 | >CBL-C404Y-1 EPCGHLMCT! | 114  | 20779 |
| >CBL-C404Y-1 EPCGHLMCT! | 5531  | >CBL-C404Y-1 EPCGHLMCT! | 25   | 5506  |
| >CBL-C404Y-1 CTSCLTSWQ  | 644   | >CBL-C404Y-1 CTSYLTSWQ  | 268  | 376   |

|                         |      |                          |      |      |
|-------------------------|------|--------------------------|------|------|
| >CBL-C404Y- CTSCLT SW   | 27   | >CBL-C404Y- CTSYLTSW     | 17   | 10   |
| >CBL-C404Y- CTSCLT SW   | 196  | >CBL-C404Y- CTSYLTSW     | 102  | 94   |
| >CBL-C404Y- CTSCLT SW   | 20   | >CBL-C404Y- CTSYLTSW     | 15   | 5    |
| >CBL-C404Y- CTSCLT SWQ  | 202  | >CBL-C404Y- CTSYLTSWQ    | 173  | 29   |
| >CBL-C404Y- MCTSCLT SW  | 931  | >CBL-C404Y- MCTSYLTSW    | 454  | 477  |
| >CBL-C404Y- MCTSCLT SW  | 176  | >CBL-C404Y- MCTSYLTSW    | 605  | 429  |
| >CBL-C404Y- MCTSCLT SW  | 259  | >CBL-C404Y- MCTSYLTSW    | 205  | 54   |
| >CBL-C404Y- MCTSCLT SW  | 110  | >CBL-C404Y- MCTSYLTSW    | 225  | 115  |
| >CBL-C404Y- MCTSCLT SW  | 520  | >CBL-C404Y- MCTSYLTSW    | 452  | 68   |
| >CBL-C404Y- MCTSCLT SW  | 238  | >CBL-C404Y- MCTSYLTSW    | 75   | 163  |
| >CBL-C404Y- LMCTSCLT    | 2109 | >CBL-C404Y- LMCTS YLT    | 490  | 1619 |
| >CBL-C404Y- LMCTSCLT    | 906  | >CBL-C404Y- LMCTS YLT    | 445  | 461  |
| >CBL-C404Y- LMCTSCLT    | 230  | >CBL-C404Y- LMCTS YLT    | 410  | 180  |
| >CBL-C404Y- LMCTSCLT SW | 432  | >CBL-C404Y- LMCTS YLT SW | 349  | 83   |
| >CBL-C404Y- LMCTSCLT SW | 128  | >CBL-C404Y- LMCTS YLT SW | 123  | 5    |
| >CBL-C404Y- LMCTSCLT SW | 167  | >CBL-C404Y- LMCTS YLT SW | 89   | 78   |
| >CBL-C404Y- LMCTSCLT SW | 82   | >CBL-C404Y- LMCTS YLT SW | 53   | 29   |
| >CBL-C404Y- LMCTSCLT SW | 61   | >CBL-C404Y- LMCTS YLT SW | 39   | 22   |
| >CBL-C404Y- LMCTSCLT SW | 135  | >CBL-C404Y- LMCTS YLT SW | 115  | 20   |
| >CBL-C404Y- HLMCTSCL    | 36   | >CBL-C404Y- HLMCTS YL    | 11   | 25   |
| >CBL-C404Y- HLMCTSCLT   | 450  | >CBL-C404Y- HLMCTS YLT   | 42   | 408  |
| >CBL-C404Y- HLMCTSCL    | 8    | >CBL-C404Y- HLMCTS YL    | 3    | 5    |
| >CBL-C404Y- HLMCTSCLT   | 160  | >CBL-C404Y- HLMCTS YLT   | 20   | 140  |
| >CBL-C404Y- HLMCTSCL    | 38   | >CBL-C404Y- HLMCTS YL    | 8    | 30   |
| >CBL-C404Y- HLMCTSCLT   | 176  | >CBL-C404Y- HLMCTS YLT   | 139  | 37   |
| >CBL-C404Y- HLMCTSCL    | 413  | >CBL-C404Y- HLMCTS YL    | 52   | 361  |
| >CBL-C404Y- HLMCTSCL    | 81   | >CBL-C404Y- HLMCTS YL    | 6    | 75   |
| >CBL-C404Y- HLMCTSCLT   | 338  | >CBL-C404Y- HLMCTS YLT   | 237  | 101  |
| >CBL-C404Y- HLMCTSCL    | 5    | >CBL-C404Y- HLMCTS YL    | 3    | 2    |
| >CBL-C404Y- HLMCTSCLT   | 64   | >CBL-C404Y- HLMCTS YLT   | 19   | 45   |
| >CBL-C404Y- HLMCTSCLTS  | 742  | >CBL-C404Y- HLMCTS YLTS  | 290  | 452  |
| >CBL-C404Y- HLMCTSCL    | 122  | >CBL-C404Y- HLMCTS YL    | 56   | 66   |
| >CBL-C404Y- HLMCTSCL    | 8    | >CBL-C404Y- HLMCTS YL    | 3    | 5    |
| >CBL-C404Y- HLMCTSCLT   | 550  | >CBL-C404Y- HLMCTS YLT   | 204  | 346  |
| >CBL-C404Y- HLMCTSCL    | 32   | >CBL-C404Y- HLMCTS YL    | 9    | 23   |
| >CBL-C404Y- HLMCTSCLT   | 460  | >CBL-C404Y- HLMCTS YLT   | 1638 | 1178 |
| >CBL-C404Y- HLMCTSCLTS  | 123  | >CBL-C404Y- HLMCTS YLTS  | 51   | 72   |
| >CBL-C404Y- HLMCTSCL    | 823  | >CBL-C404Y- HLMCTS YL    | 70   | 753  |
| >CBL-C404Y- HLMCTSCL    | 1659 | >CBL-C404Y- HLMCTS YL    | 102  | 1557 |
| >CBL-C404Y- HLMCTSCL    | 130  | >CBL-C404Y- HLMCTS YL    | 411  | 281  |
| >CBL-C404Y- HLMCTSCL    | 501  | >CBL-C404Y- HLMCTS YL    | 413  | 88   |
| >CBL-C404Y- HLMCTSCLTS  | 228  | >CBL-C404Y- HLMCTS YLTS  | 258  | 30   |
| >CBL-C404Y- HLMCTSCL    | 153  | >CBL-C404Y- HLMCTS YL    | 156  | 3    |

|                        |       |                        |      |       |
|------------------------|-------|------------------------|------|-------|
| >CBL-C404Y- HLMCTSCLTS | 267   | >CBL-C404Y- HLMCTSCLTS | 238  | 29    |
| >CBL-C404Y- HLMCTSCLTS | 129   | >CBL-C404Y- HLMCTSCLTS | 113  | 16    |
| >CBL-C404Y- HLMCTSCL   | 75    | >CBL-C404Y- HLMCTSCL   | 282  | 207   |
| >CBL-C404Y- HLMCTSCLTS | 85    | >CBL-C404Y- HLMCTSCLTS | 71   | 14    |
| >CBL-C404Y- GHLMCTSC   | 11075 | >CBL-C404Y- GHLMCTSC   | 110  | 10965 |
| >CBL-C404Y- GHLMCTSCL  | 134   | >CBL-C404Y- GHLMCTSCL  | 998  | 864   |
| >CBL-C416Y- CPFCRCEI   | 442   | >CBL-C416Y- YPFCRCEI   | 68   | 374   |
| >CBL-C416Y- CPFCRCEI   | 3240  | >CBL-C416Y- YPFCRCEI   | 184  | 3056  |
| >CBL-C416Y- CPFCRCEI   | 1039  | >CBL-C416Y- YPFCRCEI   | 178  | 861   |
| >CBL-C416Y- CPFCRCEI   | 2002  | >CBL-C416Y- YPFCRCEI   | 218  | 1784  |
| >CBL-C416Y- CPFCRCEI   | 509   | >CBL-C416Y- YPFCRCEI   | 327  | 182   |
| >CBL-C416Y- CPFCRCEI   | 417   | >CBL-C416Y- YPFCRCEI   | 384  | 33    |
| >CBL-C416Y- CPFCRCEIKG | 4716  | >CBL-C416Y- YPFCRCEIKG | 458  | 4258  |
| >CBL-C416Y- CPFCRCEI   | 267   | >CBL-C416Y- YPFCRCEI   | 1259 | 992   |
| >CBL-C416Y- GCPFCRCEI  | 22084 | >CBL-C416Y- GYPFCRCEI  | 401  | 21683 |
| >CBL-C416Y- GCPFCRCEI  | 16537 | >CBL-C416Y- GYPFCRCEI  | 15   | 16522 |
| >CBL-C416Y- TSWQESEGO  | 33228 | >CBL-C416Y- TSWQESEGO  | 466  | 32762 |
| >CBL-C416Y- TSWQESEGO  | 25995 | >CBL-C416Y- TSWQESEGO  | 177  | 25818 |
| >CBL-C416Y- TSWQESEGO  | 27158 | >CBL-C416Y- TSWQESEGO  | 162  | 26996 |
| >CBL-C416Y- TSWQESEGO  | 20298 | >CBL-C416Y- TSWQESEGO  | 490  | 19808 |
| >CBL-C416Y- TSWQESEGO  | 14202 | >CBL-C416Y- TSWQESEGO  | 325  | 13877 |
| >CBL-C416Y- TSWQESEGO  | 8175  | >CBL-C416Y- TSWQESEGO  | 9    | 8166  |
| >CBL-C416Y- TSWQESEGO  | 17301 | >CBL-C416Y- TSWQESEGO  | 144  | 17157 |
| >CBL-C416Y- TSWQESEGO  | 17853 | >CBL-C416Y- TSWQESEGO  | 425  | 17428 |
| >CBL-C416Y- QGCPFCRC   | 8844  | >CBL-C416Y- QGYPCRC    | 229  | 8615  |
| >CBL-C416Y- QGCPFCRCEI | 3031  | >CBL-C416Y- QGYPCRC    | 232  | 2799  |
| >CBL-C416Y- GQGCPFCR   | 173   | >CBL-C416Y- GQGYPCRC   | 103  | 70    |
| >CBL-C416Y- EGQGCPFCR  | 508   | >CBL-C416Y- EGQGYPCRC  | 256  | 252   |
| >CBL-C416Y- EGQGCPFCR  | 239   | >CBL-C416Y- EGQGYPCRC  | 1128 | 889   |
| >CBL-C416Y- SEGQGCPF   | 150   | >CBL-C416Y- SEGQGYPC   | 259  | 109   |
| >CBL-C416Y- SEGQGCPF   | 290   | >CBL-C416Y- SEGQGYPC   | 40   | 250   |
| >CBL-C416Y- SEGQGCPF   | 201   | >CBL-C416Y- SEGQGYPC   | 131  | 70    |
| >CBL-C416Y- SEGQGCPF   | 313   | >CBL-C416Y- SEGQGYPC   | 132  | 181   |
| >CBL-C416Y- SEGQGCPF   | 1276  | >CBL-C416Y- SEGQGYPC   | 275  | 1001  |
| >CBL-C416Y- SEGQGCPFC  | 62    | >CBL-C416Y- SEGQGYPC   | 35   | 27    |
| >CBL-C416Y- SEGQGCPFC  | 296   | >CBL-C416Y- SEGQGYPC   | 217  | 79    |
| >CBL-C416Y- ESEGQGCPF  | 2129  | >CBL-C416Y- ESEGQGYPC  | 460  | 1669  |
| >CBL-C416Y- ESEGQGCPFC | 522   | >CBL-C416Y- ESEGQGYPC  | 356  | 166   |
| >CBL-C416Y- ESEGQGCPFC | 59    | >CBL-C416Y- ESEGQGYPC  | 40   | 19    |
| >CBL-C416Y- ESEGQGCPF  | 32    | >CBL-C416Y- ESEGQGYPC  | 49   | 17    |
| >CBL-C416Y- ESEGQGCPF  | 616   | >CBL-C416Y- ESEGQGYPC  | 144  | 472   |
| >CBL-C416Y- QESEGQGC   | 170   | >CBL-C416Y- QESEGQGY   | 218  | 48    |
| >CBL-C416Y- QESEGQGCPI | 374   | >CBL-C416Y- QESEGQGYPI | 618  | 244   |

|                        |       |                        |      |       |
|------------------------|-------|------------------------|------|-------|
| >CBL-C416Y-QESEGQGCPI  | 271   | >CBL-C416Y-QESEGQGYPI  | 386  | 115   |
| >CBL-C416Y-QESEGQGC    | 8828  | >CBL-C416Y-QESEGQGY    | 64   | 8764  |
| >CBL-C416Y-QESEGQGCPI  | 2198  | >CBL-C416Y-QESEGQGYPI  | 228  | 1970  |
| >CBL-C416Y-QESEGQGC    | 6683  | >CBL-C416Y-QESEGQGY    | 378  | 6305  |
| >CBL-C416Y-QESEGQGCPI  | 3573  | >CBL-C416Y-QESEGQGYPI  | 398  | 3175  |
| >CBL-C416Y-QESEGQGC    | 10509 | >CBL-C416Y-QESEGQGY    | 291  | 10218 |
| >CBL-C416Y-QESEGQGCPI  | 187   | >CBL-C416Y-QESEGQGYPI  | 150  | 37    |
| >CBL-C416Y-WQESEGQGC   | 18114 | >CBL-C416Y-WQESEGQGY   | 165  | 17949 |
| >CBL-C416Y-WQESEGQGC   | 61    | >CBL-C416Y-WQESEGQGY   | 83   | 22    |
| >CBL-C416Y-WQESEGQGC   | 14868 | >CBL-C416Y-WQESEGQGY   | 60   | 14808 |
| >CBL-C416Y-WQESEGQGC   | 93    | >CBL-C416Y-WQESEGQGY   | 93   | 0     |
| >CBL-C416Y-WQESEGQGC   | 9222  | >CBL-C416Y-WQESEGQGY   | 93   | 9129  |
| >CBL-C416Y-WQESEGQGC   | 12    | >CBL-C416Y-WQESEGQGY   | 13   | 1     |
| >CBL-C416Y-WQESEGQGC   | 2466  | >CBL-C416Y-WQESEGQGY   | 447  | 2019  |
| >CBL-C416Y-WQESEGQGC   | 517   | >CBL-C416Y-WQESEGQGY   | 208  | 309   |
| >CBL-C416Y-WQESEGQGC   | 1051  | >CBL-C416Y-WQESEGQGY   | 343  | 708   |
| >CBL-C416Y-SWQESEGQGC  | 32708 | >CBL-C416Y-SWQESEGQGC  | 474  | 32234 |
| >CBL-C416Y-SWQESEGQGC  | 27770 | >CBL-C416Y-SWQESEGQGC  | 218  | 27552 |
| >CBL-C416Y-SWQESEGQGC  | 26232 | >CBL-C416Y-SWQESEGQGC  | 376  | 25856 |
| >CBL-C416Y-SWQESEGQGC  | 585   | >CBL-C416Y-SWQESEGQGC  | 205  | 380   |
| >CBL-C419R-CRCEIKGTEPI | 4240  | >CBL-C419R-RRCEIKGTEPI | 262  | 3978  |
| >CBL-C419R-CRCEIKGT    | 8425  | >CBL-C419R-RRCEIKGT    | 157  | 8268  |
| >CBL-C419R-CRCEIKGTEPI | 12775 | >CBL-C419R-RRCEIKGTEPI | 164  | 12611 |
| >CBL-C419R-CRCEIKGT    | 1844  | >CBL-C419R-RRCEIKGT    | 477  | 1367  |
| >CBL-C419R-CRCEIKGTEPI | 1829  | >CBL-C419R-RRCEIKGTEPI | 97   | 1732  |
| >CBL-C419R-CRCEIKGTEPI | 393   | >CBL-C419R-RRCEIKGTEPI | 490  | 97    |
| >CBL-C419R-QESEGQGCPI  | 187   | >CBL-C419R-QESEGQGCPI  | 1566 | 1379  |
| >CBL-C419R-PFCRCEIK    | 12314 | >CBL-C419R-PFRRCEIK    | 346  | 11968 |
| >CBL-C419R-CPFCRCEI    | 442   | >CBL-C419R-CPFRRCEI    | 437  | 5     |
| >CBL-C419R-CPFCRCEI    | 1039  | >CBL-C419R-CPFRRCEI    | 419  | 620   |
| >CBL-C419R-CPFCRCEI    | 417   | >CBL-C419R-CPFRRCEI    | 760  | 343   |
| >CBL-C419R-CPFCRCEI    | 267   | >CBL-C419R-CPFRRCEI    | 316  | 49    |
| >CBL-C419R-GQGCPFCR    | 173   | >CBL-C419R-GQGCPFRR    | 166  | 7     |
| >CBL-C419R-EGQGCPFC    | 40826 | >CBL-C419R-EGQGCPFR    | 260  | 40566 |
| >CBL-C419R-EGQGCPFC    | 35503 | >CBL-C419R-EGQGCPFR    | 303  | 35200 |
| >CBL-C419R-EGQGCPFCR   | 239   | >CBL-C419R-EGQGCPFRR   | 136  | 103   |
| >CBL-C419R-SEGQGCPCF   | 62    | >CBL-C419R-SEGQGCPCFR  | 534  | 472   |
| >CBL-C419R-SEGQGCPCFF  | 296   | >CBL-C419R-SEGQGCPCFRF | 135  | 161   |
| >CBL-C419R-SEGQGCPCFF  | 689   | >CBL-C419R-SEGQGCPCFRF | 421  | 268   |
| >CBL-C419R-ESEGQGCPCF  | 38417 | >CBL-C419R-ESEGQGCPCFF | 323  | 38094 |
| >CBL-C419R-ESEGQGCPCF  | 59    | >CBL-C419R-ESEGQGCPCFF | 58   | 1     |
| >CBL-E366K-EQYELYCEM   | 229   | >CBL-E366K-KQYELYCEM   | 49   | 180   |
| >CBL-E366K-EQYELYCEM   | 9781  | >CBL-E366K-KQYELYCEM   | 82   | 9699  |

|                        |      |                       |       |       |
|------------------------|------|-----------------------|-------|-------|
| >CBL-E366K- EQYELYCEM  | 5061 | >CBL-E366K- KQYELYCEM | 394   | 4667  |
| >CBL-E366K- EQYELYCEM  | 355  | >CBL-E366K- KQYELYCEM | 10    | 345   |
| >CBL-E366K- EQYELYCEM  | 4196 | >CBL-E366K- KQYELYCEM | 137   | 4059  |
| >CBL-E366K- EQYELYCEM  | 639  | >CBL-E366K- KQYELYCEM | 46    | 593   |
| >CBL-E366K- EQYELYCEM  | 3405 | >CBL-E366K- KQYELYCEM | 168   | 3237  |
| >CBL-E366K- EQYELYCEM  | 300  | >CBL-E366K- KQYELYCEM | 10731 | 10431 |
| >CBL-E366K- EQYELYCEM  | 122  | >CBL-E366K- KQYELYCEM | 47    | 75    |
| >CBL-E366K- EQYELYCEM  | 70   | >CBL-E366K- KQYELYCEM | 9     | 61    |
| >CBL-E366K- EQYELYCEM  | 1819 | >CBL-E366K- KQYELYCEM | 250   | 1569  |
| >CBL-E366K- QEQYELYCEM | 119  | >CBL-E366K- KQYELYCEM | 8888  | 8769  |
| >CBL-E366K- QEQYELYCEM | 2988 | >CBL-E366K- KQYELYCEM | 91    | 2897  |
| >CBL-E366K- QEQYELYCEM | 257  | >CBL-E366K- KQYELYCEM | 27213 | 26956 |
| >CBL-E366K- QEQYELYCEM | 280  | >CBL-E366K- KQYELYCEM | 12513 | 12233 |
| >CBL-E366K- QEQYELYCEM | 249  | >CBL-E366K- KQYELYCEM | 17057 | 16808 |
| >CBL-E366K- QEQYELYC   | 487  | >CBL-E366K- KQYELYC   | 29594 | 29107 |
| >CBL-E366K- QEQYELYCEM | 295  | >CBL-E366K- KQYELYCEM | 15317 | 15022 |
| >CBL-E366K- TQEQYELY   | 1191 | >CBL-E366K- KQYELY    | 75    | 1116  |
| >CBL-E366K- TQEQYELYCE | 2351 | >CBL-E366K- KQYELYCE  | 87    | 2264  |
| >CBL-E366K- TQEQYELY   | 1514 | >CBL-E366K- KQYELY    | 89    | 1425  |
| >CBL-E366K- TQEQYELYCE | 1901 | >CBL-E366K- KQYELYCE  | 172   | 1729  |
| >CBL-E366K- VTQEQYELY  | 37   | >CBL-E366K- KQYELY    | 73    | 36    |
| >CBL-E366K- VTQEQYEL   | 478  | >CBL-E366K- KQYELY    | 3915  | 3437  |
| >CBL-E366K- VTQEQYELY  | 452  | >CBL-E366K- KQYELY    | 636   | 184   |
| >CBL-E366K- VTQEQYELY  | 57   | >CBL-E366K- KQYELY    | 117   | 60    |
| >CBL-E366K- VTQEQYELY  | 363  | >CBL-E366K- KQYELY    | 367   | 4     |
| >CBL-E366K- VTQEQYELY  | 132  | >CBL-E366K- KQYELY    | 41    | 91    |
| >CBL-E366K- VTQEQYEL   | 77   | >CBL-E366K- KQYELY    | 130   | 53    |
| >CBL-E366K- VTQEQYELY  | 28   | >CBL-E366K- KQYELY    | 72    | 44    |
| >CBL-E366K- VTQEQYELY  | 63   | >CBL-E366K- KQYELY    | 18    | 45    |
| >CBL-E366K- KVTQEQYEL  | 155  | >CBL-E366K- KQYELY    | 331   | 176   |
| >CBL-E366K- KVTQEQYEL  | 230  | >CBL-E366K- KQYELY    | 170   | 60    |
| >CBL-E366K- KVTQEQYELY | 17   | >CBL-E366K- KQYELY    | 14    | 3     |
| >CBL-E366K- KVTQEQYEL  | 315  | >CBL-E366K- KQYELY    | 844   | 529   |
| >CBL-E366K- KVTQEQYELY | 94   | >CBL-E366K- KQYELY    | 154   | 60    |
| >CBL-E366K- IKVTQEQY   | 13   | >CBL-E366K- KQYELY    | 9     | 4     |
| >CBL-E366K- IKVTQEQYEL | 36   | >CBL-E366K- KQYELY    | 57    | 21    |
| >CBL-E366K- IKVTQEQYEL | 13   | >CBL-E366K- KQYELY    | 13    | 0     |
| >CBL-E366K- HIKVTQEQY  | 1320 | >CBL-E366K- KQYELY    | 186   | 1134  |
| >CBL-E366K- HIKVTQEQYE | 424  | >CBL-E366K- KQYELY    | 146   | 278   |
| >CBL-E366K- HIKVTQEQYE | 1556 | >CBL-E366K- KQYELY    | 360   | 1196  |
| >CBL-E366K- HIKVTQEQY  | 303  | >CBL-E366K- KQYELY    | 818   | 515   |
| >CBL-E366K- HIKVTQEQY  | 509  | >CBL-E366K- KQYELY    | 377   | 132   |
| >CBL-E366K- HIKVTQEQY  | 1105 | >CBL-E366K- KQYELY    | 329   | 776   |



|                          |      |                          |       |       |
|--------------------------|------|--------------------------|-------|-------|
| >CBL-E366K-l HIKVTQEYQ   | 198  | >CBL-E366K-l HIKVTQKQY   | 219   | 21    |
| >CBL-F418L-l WQESEGQGC   | 1574 | >CBL-F418L-r WQESEGQGC   | 347   | 1227  |
| >CBL-F418L-l WQESEGQGC   | 61   | >CBL-F418L-r WQESEGQGC   | 586   | 525   |
| >CBL-F418L-l WQESEGQGC   | 93   | >CBL-F418L-r WQESEGQGC   | 1193  | 1100  |
| >CBL-F418L-l WQESEGQGC   | 12   | >CBL-F418L-r WQESEGQGC   | 194   | 182   |
| >CBL-F418L-l WQESEGQGC   | 1051 | >CBL-F418L-r WQESEGQGC   | 43    | 1008  |
| >CBL-F418L-l CPFCRCEI    | 442  | >CBL-F418L-r CPLCRCEI    | 1627  | 1185  |
| >CBL-F418L-l CPFCRCEI    | 509  | >CBL-F418L-r CPLCRCEI    | 483   | 26    |
| >CBL-F418L-l CPFCRCEI    | 645  | >CBL-F418L-r CPLCRCEI    | 489   | 156   |
| >CBL-F418L-l CPFCRCEI    | 417  | >CBL-F418L-r CPLCRCEI    | 585   | 168   |
| >CBL-F418L-l CPFCRCEI    | 267  | >CBL-F418L-r CPLCRCEI    | 1093  | 826   |
| >CBL-F418L-l GQGCPFCR    | 173  | >CBL-F418L-r GQGCPCLR    | 1782  | 1609  |
| >CBL-F418L-l EGQGCPCFR   | 239  | >CBL-F418L-r EGQGCPLCR   | 197   | 42    |
| >CBL-F418L-l SEGQGCPCF   | 1314 | >CBL-F418L-r SEGQGCPL    | 246   | 1068  |
| >CBL-F418L-l SEGQGCPCF   | 150  | >CBL-F418L-r SEGQGCPL    | 3262  | 3112  |
| >CBL-F418L-l SEGQGCPCF   | 290  | >CBL-F418L-r SEGQGCPL    | 3451  | 3161  |
| >CBL-F418L-l SEGQGCPCF   | 1547 | >CBL-F418L-r SEGQGCPL    | 263   | 1284  |
| >CBL-F418L-l SEGQGCPCF   | 201  | >CBL-F418L-r SEGQGCPL    | 62    | 139   |
| >CBL-F418L-l SEGQGCPCF   | 313  | >CBL-F418L-r SEGQGCPL    | 2047  | 1734  |
| >CBL-F418L-l SEGQGCPCFC  | 62   | >CBL-F418L-r SEGQGCPLC   | 163   | 101   |
| >CBL-F418L-l SEGQGCPCFC  | 296  | >CBL-F418L-r SEGQGCPLCF  | 773   | 477   |
| >CBL-F418L-l ESEGQGCPCFC | 59   | >CBL-F418L-r ESEGQGCPLC  | 209   | 150   |
| >CBL-F418L-l ESEGQGCPCF  | 32   | >CBL-F418L-r ESEGQGCPL   | 266   | 234   |
| >CBL-F418L-l QESEGQGCPC  | 1419 | >CBL-F418L-r QESEGQGCPC  | 435   | 984   |
| >CBL-F418L-l QESEGQGCPC  | 374  | >CBL-F418L-r QESEGQGCPC  | 5258  | 4884  |
| >CBL-F418L-l QESEGQGCPC  | 271  | >CBL-F418L-r QESEGQGCPC  | 3337  | 3066  |
| >CBL-F418L-l QESEGQGCPC  | 187  | >CBL-F418L-r QESEGQGCPC  | 417   | 230   |
| >CBL-F418S-l WQESEGQGC   | 61   | >CBL-F418S-r WQESEGQGC   | 7868  | 7807  |
| >CBL-F418S-l WQESEGQGC   | 93   | >CBL-F418S-r WQESEGQGC   | 10720 | 10627 |
| >CBL-F418S-l WQESEGQGC   | 12   | >CBL-F418S-r WQESEGQGC   | 5046  | 5034  |
| >CBL-F418S-l CPFCRCEI    | 442  | >CBL-F418S-r CPSCRCEI    | 8428  | 7986  |
| >CBL-F418S-l CPFCRCEI    | 645  | >CBL-F418S-r CPSCRCEI    | 393   | 252   |
| >CBL-F418S-l CPFCRCEI    | 417  | >CBL-F418S-r CPSCRCEI    | 2275  | 1858  |
| >CBL-F418S-l CPFCRCEI    | 267  | >CBL-F418S-r CPSCRCEI    | 1624  | 1357  |
| >CBL-F418S-l GQGCPFCR    | 173  | >CBL-F418S-r GQGCPSCR    | 1450  | 1277  |
| >CBL-F418S-l EGQGCPCFR   | 239  | >CBL-F418S-r EGQGCPCSCR  | 2052  | 1813  |
| >CBL-F418S-l SEGQGCPCF   | 150  | >CBL-F418S-r SEGQGCPCS   | 15480 | 15330 |
| >CBL-F418S-l SEGQGCPCF   | 290  | >CBL-F418S-r SEGQGCPCS   | 13712 | 13422 |
| >CBL-F418S-l SEGQGCPCF   | 201  | >CBL-F418S-r SEGQGCPCS   | 1209  | 1008  |
| >CBL-F418S-l SEGQGCPCF   | 313  | >CBL-F418S-r SEGQGCPCS   | 9026  | 8713  |
| >CBL-F418S-l SEGQGCPCF   | 1276 | >CBL-F418S-r SEGQGCPCS   | 390   | 886   |
| >CBL-F418S-l SEGQGCPCFC  | 62   | >CBL-F418S-r SEGQGCPCSC  | 72    | 10    |
| >CBL-F418S-l SEGQGCPCFC  | 296  | >CBL-F418S-r SEGQGCPCSCF | 703   | 407   |

|                        |       |                        |       |       |
|------------------------|-------|------------------------|-------|-------|
| >CBL-F418S-\ESEGQGCPC  | 59    | >CBL-F418S-†ESEGQGCPC  | 85    | 26    |
| >CBL-F418S-\ESEGQGCPC  | 32    | >CBL-F418S-†ESEGQGCPC  | 17569 | 17537 |
| >CBL-F418S-\QESEGQGCPC | 374   | >CBL-F418S-†QESEGQGCPC | 17352 | 16978 |
| >CBL-F418S-\QESEGQGCPC | 271   | >CBL-F418S-†QESEGQGCPC | 20772 | 20501 |
| >CBL-F418S-\QESEGQGCPC | 187   | >CBL-F418S-†QESEGQGCPC | 222   | 35    |
| >CBL-G375P-GSTFQLCK    | 35    | >CBL-G375P-PSTFQLCK    | 1344  | 1309  |
| >CBL-G375P-GSTFQLCKI   | 434   | >CBL-G375P-PSTFQLCKI   | 9208  | 8774  |
| >CBL-G375P-GSTFQLCK    | 195   | >CBL-G375P-PSTFQLCK    | 2940  | 2745  |
| >CBL-G375P-MGSTFQLCK   | 78    | >CBL-G375P-MPSTFQLCK   | 1216  | 1138  |
| >CBL-G375P-MGSTFQLCK   | 283   | >CBL-G375P-MPSTFQLCK   | 280   | 3     |
| >CBL-G375P-MGSTFQLCKI  | 23142 | >CBL-G375P-MPSTFQLCKI  | 418   | 22724 |
| >CBL-G375P-MGSTFQLCKI  | 24960 | >CBL-G375P-MPSTFQLCKI  | 48    | 24912 |
| >CBL-G375P-EMGSTFQL    | 283   | >CBL-G375P-EMPSTFQL    | 267   | 16    |
| >CBL-G375P-EMGSTFQL    | 40    | >CBL-G375P-EMPSTFQL    | 59    | 19    |
| >CBL-G375P-EMGSTFQLCI  | 89    | >CBL-G375P-EMPSTFQLCK  | 129   | 40    |
| >CBL-G375P-EMGSTFQL    | 211   | >CBL-G375P-EMPSTFQL    | 1068  | 857   |
| >CBL-G375P-EMGSTFQLCI  | 493   | >CBL-G375P-EMPSTFQLCK  | 2058  | 1565  |
| >CBL-G375P-EMGSTFQL    | 75    | >CBL-G375P-EMPSTFQL    | 115   | 40    |
| >CBL-G375P-EMGSTFQLCI  | 245   | >CBL-G375P-EMPSTFQLCK  | 408   | 163   |
| >CBL-G375P-EMGSTFQL    | 13    | >CBL-G375P-EMPSTFQL    | 48    | 35    |
| >CBL-G375P-EMGSTFQLCI  | 166   | >CBL-G375P-EMPSTFQLCK  | 769   | 603   |
| >CBL-G375P-EMGSTFQL    | 18    | >CBL-G375P-EMPSTFQL    | 22    | 4     |
| >CBL-G375P-EMGSTFQLCI  | 174   | >CBL-G375P-EMPSTFQLCK  | 195   | 21    |
| >CBL-G375P-EMGSTFQLCI  | 354   | >CBL-G375P-EMPSTFQLCK  | 507   | 153   |
| >CBL-G375P-EMGSTFQLCI  | 412   | >CBL-G375P-EMPSTFQLCK  | 186   | 226   |
| >CBL-G375P-EMGSTFQLCI  | 1526  | >CBL-G375P-EMPSTFQLCK  | 294   | 1232  |
| >CBL-G375P-EMGSTFQL    | 85    | >CBL-G375P-EMPSTFQL    | 271   | 186   |
| >CBL-G375P-EMGSTFQLCI  | 360   | >CBL-G375P-EMPSTFQLCK  | 1135  | 775   |
| >CBL-G375P-EMGSTFQLC   | 26108 | >CBL-G375P-EMPSTFQLC   | 370   | 25738 |
| >CBL-G375P-CEMGSTFQL   | 357   | >CBL-G375P-CEMPSTFQL   | 116   | 241   |
| >CBL-G375P-CEMGSTFQL   | 195   | >CBL-G375P-CEMPSTFQL   | 368   | 173   |
| >CBL-G375P-CEMGSTFQL   | 137   | >CBL-G375P-CEMPSTFQL   | 292   | 155   |
| >CBL-G375P-CEMGSTFQL   | 21    | >CBL-G375P-CEMPSTFQL   | 94    | 73    |
| >CBL-G375P-CEMGSTFQL   | 61    | >CBL-G375P-CEMPSTFQL   | 127   | 66    |
| >CBL-G375P-CEMGSTFQL   | 256   | >CBL-G375P-CEMPSTFQL   | 202   | 54    |
| >CBL-G375P-CEMGSTFQL   | 163   | >CBL-G375P-CEMPSTFQL   | 265   | 102   |
| >CBL-G375P-CEMGSTFQ    | 316   | >CBL-G375P-CEMPSTFQ    | 789   | 473   |
| >CBL-G375P-CEMGSTFQL   | 109   | >CBL-G375P-CEMPSTFQL   | 330   | 221   |
| >CBL-G375P-CEMGSTFQLC  | 140   | >CBL-G375P-CEMPSTFQLC  | 340   | 200   |
| >CBL-G375P-CEMGSTFQL   | 12    | >CBL-G375P-CEMPSTFQL   | 9     | 3     |
| >CBL-G375P-YCEMGSTF    | 304   | >CBL-G375P-YCEMPSTF    | 549   | 245   |
| >CBL-G375P-LYCEMGSTF   | 29    | >CBL-G375P-LYCEMPSTF   | 36    | 7     |
| >CBL-G375P-LYCEMGSTFC  | 46    | >CBL-G375P-LYCEMPSTFC  | 44    | 2     |

|                        |      |                        |     |      |
|------------------------|------|------------------------|-----|------|
| >CBL-G375P- LYCEMGSTF  | 119  | >CBL-G375P- LYCEMPSTF  | 31  | 88   |
| >CBL-G375P- LYCEMGSTFC | 404  | >CBL-G375P- LYCEMPSTFC | 142 | 262  |
| >CBL-G375P- LYCEMGSTF  | 94   | >CBL-G375P- LYCEMPSTF  | 35  | 59   |
| >CBL-G375P- LYCEMGSTFC | 343  | >CBL-G375P- LYCEMPSTFC | 180 | 163  |
| >CBL-G375P- LYCEMGSTF  | 6    | >CBL-G375P- LYCEMPSTF  | 7   | 1    |
| >CBL-G375P- LYCEMGSTFC | 7    | >CBL-G375P- LYCEMPSTFC | 8   | 1    |
| >CBL-G375P- LYCEMGSTF  | 359  | >CBL-G375P- LYCEMPSTF  | 538 | 179  |
| >CBL-G375P- LYCEMGSTF  | 124  | >CBL-G375P- LYCEMPSTF  | 499 | 375  |
| >CBL-G375P- ELYCEMGST  | 2018 | >CBL-G375P- ELYCEMPST  | 433 | 1585 |
| >CBL-G375P- ELYCEMGSTF | 202  | >CBL-G375P- ELYCEMPSTF | 309 | 107  |
| >CBL-G375P- ELYCEMGSTF | 71   | >CBL-G375P- ELYCEMPSTF | 51  | 20   |
| >CBL-G375P- ELYCEMGSTF | 414  | >CBL-G375P- ELYCEMPSTF | 550 | 136  |
| >CBL-G375P- ELYCEMGSTF | 734  | >CBL-G375P- ELYCEMPSTF | 187 | 547  |
| >CBL-G375P- ELYCEMGST  | 1704 | >CBL-G375P- ELYCEMPST  | 226 | 1478 |
| >CBL-G375P- ELYCEMGSTF | 87   | >CBL-G375P- ELYCEMPSTF | 155 | 68   |
| >CBL-G375P- ELYCEMGSTF | 104  | >CBL-G375P- ELYCEMPSTF | 313 | 209  |
| >CBL-G375P- ELYCEMGSTF | 45   | >CBL-G375P- ELYCEMPSTF | 28  | 17   |
| >CBL-G375P- ELYCEMGSTF | 342  | >CBL-G375P- ELYCEMPSTF | 279 | 63   |
| >CBL-G375P- YELYCEMGST | 471  | >CBL-G375P- YELYCEMPST | 492 | 21   |
| >CBL-G375P- YELYCEMGST | 920  | >CBL-G375P- YELYCEMPST | 362 | 558  |
| >CBL-G375P- YELYCEMGST | 7    | >CBL-G375P- YELYCEMPST | 6   | 1    |
| >CBL-G375P- YELYCEMGST | 2115 | >CBL-G375P- YELYCEMPST | 411 | 1704 |
| >CBL-G375P- YELYCEMGST | 8    | >CBL-G375P- YELYCEMPST | 9   | 1    |
| >CBL-G375P- YELYCEMGST | 504  | >CBL-G375P- YELYCEMPST | 357 | 147  |
| >CBL-G375P- YELYCEMGST | 49   | >CBL-G375P- YELYCEMPST | 84  | 35   |
| >CBL-G375P- YELYCEMGST | 1752 | >CBL-G375P- YELYCEMPST | 280 | 1472 |
| >CBL-G375P- YELYCEMGST | 158  | >CBL-G375P- YELYCEMPST | 122 | 36   |
| >CBL-G375P- YELYCEMGST | 139  | >CBL-G375P- YELYCEMPST | 145 | 6    |
| >CBL-G375P- YELYCEMGST | 112  | >CBL-G375P- YELYCEMPST | 138 | 26   |
| >CBL-G375P- YELYCEMGST | 59   | >CBL-G375P- YELYCEMPST | 103 | 44   |
| >CBL-G375P- YELYCEMGST | 120  | >CBL-G375P- YELYCEMPST | 92  | 28   |
| >CBL-G375P- YELYCEMGST | 22   | >CBL-G375P- YELYCEMPST | 18  | 4    |
| >CBL-G375S- GSTFQLCK   | 35   | >CBL-G375S- SSTFQLCK   | 18  | 17   |
| >CBL-G375S- GSTFQLCK   | 1311 | >CBL-G375S- SSTFQLCK   | 221 | 1090 |
| >CBL-G375S- GSTFQLCK   | 1184 | >CBL-G375S- SSTFQLCK   | 153 | 1031 |
| >CBL-G375S- GSTFQLCKI  | 434  | >CBL-G375S- SSTFQLCKI  | 227 | 207  |
| >CBL-G375S- GSTFQLCK   | 195  | >CBL-G375S- SSTFQLCK   | 138 | 57   |
| >CBL-G375S- GSTFQLCKI  | 759  | >CBL-G375S- SSTFQLCKI  | 166 | 593  |
| >CBL-G375S- MGSTFQLCK  | 732  | >CBL-G375S- MSSTFQLCK  | 66  | 666  |
| >CBL-G375S- MGSTFQLCK  | 78   | >CBL-G375S- MSSTFQLCK  | 10  | 68   |
| >CBL-G375S- MGSTFQLCK  | 839  | >CBL-G375S- MSSTFQLCK  | 33  | 806  |
| >CBL-G375S- MGSTFQLCK  | 283  | >CBL-G375S- MSSTFQLCK  | 16  | 267  |
| >CBL-G375S- MGSTFQLCKI | 7599 | >CBL-G375S- MSSTFQLCKI | 133 | 7466 |

|                        |       |                        |     |       |
|------------------------|-------|------------------------|-----|-------|
| >CBL-G375S- MGSTFQLCKI | 12248 | >CBL-G375S- MSSTFQLCKI | 112 | 12136 |
| >CBL-G375S- MGSTFQLCKI | 2858  | >CBL-G375S- MSSTFQLCKI | 61  | 2797  |
| >CBL-G375S- MGSTFQLCKI | 3254  | >CBL-G375S- MSSTFQLCKI | 180 | 3074  |
| >CBL-G375S- MGSTFQLCK  | 1386  | >CBL-G375S- MSSTFQLCK  | 173 | 1213  |
| >CBL-G375S- MGSTFQLCKI | 2151  | >CBL-G375S- MSSTFQLCKI | 35  | 2116  |
| >CBL-G375S- QEQYELYCEN | 934   | >CBL-G375S- QEQYELYCEN | 280 | 654   |
| >CBL-G375S- EMGSTFQL   | 283   | >CBL-G375S- EMSSTFQL   | 31  | 252   |
| >CBL-G375S- EMGSTFQLCI | 2986  | >CBL-G375S- EMSSTFQLCK | 404 | 2582  |
| >CBL-G375S- EMGSTFQL   | 40    | >CBL-G375S- EMSSTFQL   | 67  | 27    |
| >CBL-G375S- EMGSTFQLCI | 89    | >CBL-G375S- EMSSTFQLCK | 147 | 58    |
| >CBL-G375S- EMGSTFQL   | 211   | >CBL-G375S- EMSSTFQL   | 339 | 128   |
| >CBL-G375S- EMGSTFQLCI | 493   | >CBL-G375S- EMSSTFQLCK | 767 | 274   |
| >CBL-G375S- EMGSTFQL   | 75    | >CBL-G375S- EMSSTFQL   | 98  | 23    |
| >CBL-G375S- EMGSTFQLCI | 245   | >CBL-G375S- EMSSTFQLCK | 305 | 60    |
| >CBL-G375S- EMGSTFQL   | 13    | >CBL-G375S- EMSSTFQL   | 12  | 1     |
| >CBL-G375S- EMGSTFQLCI | 166   | >CBL-G375S- EMSSTFQLCK | 140 | 26    |
| >CBL-G375S- EMGSTFQL   | 18    | >CBL-G375S- EMSSTFQL   | 12  | 6     |
| >CBL-G375S- EMGSTFQLCI | 174   | >CBL-G375S- EMSSTFQLCK | 106 | 68    |
| >CBL-G375S- EMGSTFQLCI | 354   | >CBL-G375S- EMSSTFQLCK | 133 | 221   |
| >CBL-G375S- EMGSTFQLCI | 412   | >CBL-G375S- EMSSTFQLCK | 61  | 351   |
| >CBL-G375S- EMGSTFQLCI | 1526  | >CBL-G375S- EMSSTFQLCK | 192 | 1334  |
| >CBL-G375S- EMGSTFQL   | 85    | >CBL-G375S- EMSSTFQL   | 69  | 16    |
| >CBL-G375S- EMGSTFQLCI | 360   | >CBL-G375S- EMSSTFQLCK | 302 | 58    |
| >CBL-G375S- EMGSTFQL   | 1901  | >CBL-G375S- EMSSTFQL   | 413 | 1488  |
| >CBL-G375S- EMGSTFQL   | 3976  | >CBL-G375S- EMSSTFQL   | 243 | 3733  |
| >CBL-G375S- CEMGSTFQL  | 357   | >CBL-G375S- CEMSSTFQL  | 219 | 138   |
| >CBL-G375S- CEMGSTFQL  | 195   | >CBL-G375S- CEMSSTFQL  | 493 | 298   |
| >CBL-G375S- CEMGSTFQL  | 137   | >CBL-G375S- CEMSSTFQL  | 146 | 9     |
| >CBL-G375S- CEMGSTFQL  | 21    | >CBL-G375S- CEMSSTFQL  | 47  | 26    |
| >CBL-G375S- CEMGSTFQL  | 61    | >CBL-G375S- CEMSSTFQL  | 95  | 34    |
| >CBL-G375S- CEMGSTFQ   | 1176  | >CBL-G375S- CEMSSTFQ   | 380 | 796   |
| >CBL-G375S- CEMGSTFQL  | 256   | >CBL-G375S- CEMSSTFQL  | 104 | 152   |
| >CBL-G375S- CEMGSTFQLC | 667   | >CBL-G375S- CEMSSTFQLC | 283 | 384   |
| >CBL-G375S- CEMGSTFQL  | 163   | >CBL-G375S- CEMSSTFQL  | 157 | 6     |
| >CBL-G375S- CEMGSTFQ   | 316   | >CBL-G375S- CEMSSTFQ   | 504 | 188   |
| >CBL-G375S- CEMGSTFQL  | 109   | >CBL-G375S- CEMSSTFQL  | 209 | 100   |
| >CBL-G375S- CEMGSTFQLC | 140   | >CBL-G375S- CEMSSTFQLC | 246 | 106   |
| >CBL-G375S- CEMGSTFQL  | 12    | >CBL-G375S- CEMSSTFQL  | 6   | 6     |
| >CBL-G375S- YCEMGSTF   | 949   | >CBL-G375S- YCEMSSTF   | 436 | 513   |
| >CBL-G375S- YCEMGSTF   | 1052  | >CBL-G375S- YCEMSSTF   | 488 | 564   |
| >CBL-G375S- YCEMGSTF   | 304   | >CBL-G375S- YCEMSSTF   | 221 | 83    |
| >CBL-G375S- LYCEMGSTF  | 29    | >CBL-G375S- LYCEMSSTF  | 20  | 9     |
| >CBL-G375S- LYCEMGSTFC | 46    | >CBL-G375S- LYCEMSSTFQ | 36  | 10    |

|                        |       |                        |     |       |
|------------------------|-------|------------------------|-----|-------|
| >CBL-G375S- LYCEMGSTF  | 119   | >CBL-G375S- LYCEMSSTF  | 68  | 51    |
| >CBL-G375S- LYCEMGSTFC | 404   | >CBL-G375S- LYCEMSSTFQ | 253 | 151   |
| >CBL-G375S- LYCEMGSTF  | 94    | >CBL-G375S- LYCEMSSTF  | 50  | 44    |
| >CBL-G375S- LYCEMGSTFC | 343   | >CBL-G375S- LYCEMSSTFQ | 234 | 109   |
| >CBL-G375S- LYCEMGSTF  | 6     | >CBL-G375S- LYCEMSSTF  | 5   | 1     |
| >CBL-G375S- LYCEMGSTFC | 7     | >CBL-G375S- LYCEMSSTFQ | 7   | 0     |
| >CBL-G375S- LYCEMGSTF  | 359   | >CBL-G375S- LYCEMSSTF  | 422 | 63    |
| >CBL-G375S- LYCEMGSTF  | 124   | >CBL-G375S- LYCEMSSTF  | 163 | 39    |
| >CBL-G375S- ELYCEMGST  | 714   | >CBL-G375S- ELYCEMSST  | 252 | 462   |
| >CBL-G375S- ELYCEMGSTF | 202   | >CBL-G375S- ELYCEMSSTF | 275 | 73    |
| >CBL-G375S- ELYCEMGSTF | 71    | >CBL-G375S- ELYCEMSSTF | 70  | 1     |
| >CBL-G375S- ELYCEMGSTF | 414   | >CBL-G375S- ELYCEMSSTF | 572 | 158   |
| >CBL-G375S- ELYCEMGSTF | 734   | >CBL-G375S- ELYCEMSSTF | 194 | 540   |
| >CBL-G375S- ELYCEMGSTF | 623   | >CBL-G375S- ELYCEMSSTF | 318 | 305   |
| >CBL-G375S- ELYCEMGSTF | 87    | >CBL-G375S- ELYCEMSSTF | 59  | 28    |
| >CBL-G375S- ELYCEMGSTF | 104   | >CBL-G375S- ELYCEMSSTF | 98  | 6     |
| >CBL-G375S- ELYCEMGSTF | 45    | >CBL-G375S- ELYCEMSSTF | 20  | 25    |
| >CBL-G375S- ELYCEMGSTF | 342   | >CBL-G375S- ELYCEMSSTF | 132 | 210   |
| >CBL-G375S- YELYCEMGST | 471   | >CBL-G375S- YELYCEMSST | 192 | 279   |
| >CBL-G375S- YELYCEMGST | 514   | >CBL-G375S- YELYCEMSST | 335 | 179   |
| >CBL-G375S- YELYCEMGST | 7     | >CBL-G375S- YELYCEMSST | 6   | 1     |
| >CBL-G375S- YELYCEMGST | 8     | >CBL-G375S- YELYCEMSST | 7   | 1     |
| >CBL-G375S- YELYCEMGST | 504   | >CBL-G375S- YELYCEMSST | 250 | 254   |
| >CBL-G375S- YELYCEMGST | 49    | >CBL-G375S- YELYCEMSST | 60  | 11    |
| >CBL-G375S- YELYCEMGST | 1752  | >CBL-G375S- YELYCEMSST | 414 | 1338  |
| >CBL-G375S- YELYCEMGST | 158   | >CBL-G375S- YELYCEMSST | 127 | 31    |
| >CBL-G375S- YELYCEMGST | 139   | >CBL-G375S- YELYCEMSST | 131 | 8     |
| >CBL-G375S- YELYCEMGST | 112   | >CBL-G375S- YELYCEMSST | 124 | 12    |
| >CBL-G375S- YELYCEMGST | 59    | >CBL-G375S- YELYCEMSST | 51  | 8     |
| >CBL-G375S- YELYCEMGST | 120   | >CBL-G375S- YELYCEMSST | 81  | 39    |
| >CBL-G375S- YELYCEMGST | 22    | >CBL-G375S- YELYCEMSST | 16  | 6     |
| >CBL-G415V- QGCPFCRCEI | 6440  | >CBL-G415V- QVCPFCRCEI | 186 | 6254  |
| >CBL-G415V- QGCPFCRCEI | 7142  | >CBL-G415V- QVCPFCRCEI | 182 | 6960  |
| >CBL-G415V- QGCPFCRCEI | 1123  | >CBL-G415V- QVCPFCRCEI | 114 | 1009  |
| >CBL-G415V- LTSWQESEGC | 25702 | >CBL-G415V- LTSWQESEGC | 269 | 25433 |
| >CBL-G415V- LTSWQESEGC | 34973 | >CBL-G415V- LTSWQESEGC | 58  | 34915 |
| >CBL-G415V- LTSWQESEGC | 6526  | >CBL-G415V- LTSWQESEGC | 389 | 6137  |
| >CBL-G415V- GQGCPFCRCI | 1019  | >CBL-G415V- GQVCPFCRCI | 88  | 931   |
| >CBL-G415V- GQGCPFCR   | 173   | >CBL-G415V- GQVCPFCR   | 98  | 75    |
| >CBL-G415V- GQGCPFCRCI | 852   | >CBL-G415V- GQVCPFCRCI | 159 | 693   |
| >CBL-G415V- EGQGCPFCR  | 239   | >CBL-G415V- EGQVCPFCR  | 783 | 544   |
| >CBL-G415V- SEGQGCPF   | 150   | >CBL-G415V- SEGQVCPF   | 194 | 44    |
| >CBL-G415V- SEGQGCPF   | 290   | >CBL-G415V- SEGQVCPF   | 220 | 70    |

|                        |       |                         |     |       |
|------------------------|-------|-------------------------|-----|-------|
| >CBL-G415V- SEGQGCPF   | 201   | >CBL-G415V- SEGQVCPF    | 200 | 1     |
| >CBL-G415V- SEGQGCPF   | 313   | >CBL-G415V- SEGQVCPF    | 174 | 139   |
| >CBL-G415V- SEGQGCPFC  | 62    | >CBL-G415V- SEGQVCPFC   | 88  | 26    |
| >CBL-G415V- SEGQGCPFCF | 296   | >CBL-G415V- SEGQVCPFCF  | 385 | 89    |
| >CBL-G415V- ESEGQGCPF  | 2129  | >CBL-G415V- ESEGQVCPF   | 147 | 1982  |
| >CBL-G415V- ESEGQGCPFC | 522   | >CBL-G415V- ESEGQVCPFC  | 319 | 203   |
| >CBL-G415V- ESEGQGCPFC | 59    | >CBL-G415V- ESEGQVCPFC  | 34  | 25    |
| >CBL-G415V- ESEGQGCPF  | 32    | >CBL-G415V- ESEGQVCPF   | 32  | 0     |
| >CBL-G415V- QESEGQGC   | 170   | >CBL-G415V- QESEGQVC    | 55  | 115   |
| >CBL-G415V- QESEGQGCP  | 374   | >CBL-G415V- QESEGQVCP   | 328 | 46    |
| >CBL-G415V- QESEGQGCP  | 271   | >CBL-G415V- QESEGQVCP   | 132 | 139   |
| >CBL-G415V- QESEGQGC   | 727   | >CBL-G415V- QESEGQVC    | 251 | 476   |
| >CBL-G415V- QESEGQGCP  | 187   | >CBL-G415V- QESEGQVCP   | 125 | 62    |
| >CBL-G415V- WQESEGQGC  | 61    | >CBL-G415V- WQESEGQVC   | 49  | 12    |
| >CBL-G415V- WQESEGQGC  | 93    | >CBL-G415V- WQESEGQVC   | 208 | 115   |
| >CBL-G415V- WQESEGQGC  | 12    | >CBL-G415V- WQESEGQVC   | 11  | 1     |
| >CBL-G415V- WQESEGQGC  | 517   | >CBL-G415V- WQESEGQVC   | 475 | 42    |
| >CBL-G415V- WQESEGQGC  | 1051  | >CBL-G415V- WQESEGQVC   | 441 | 610   |
| >CBL-G415V- SWQESEGQC  | 746   | >CBL-G415V- SWQESEGQV   | 281 | 465   |
| >CBL-G415V- TSWQESEGG  | 30425 | >CBL-G415V- TSWQESEGG   | 484 | 29941 |
| >CBL-G415V- TSWQESEGG  | 16784 | >CBL-G415V- TSWQESEGG   | 235 | 16549 |
| >CBL-H398Y- HLMCTSCL   | 36    | >CBL-H398Y- YLMCTSCL    | 8   | 28    |
| >CBL-H398Y- HLMCTSCLT  | 450   | >CBL-H398Y- YLMCTSCLT   | 16  | 434   |
| >CBL-H398Y- HLMCTSCLTS | 690   | >CBL-H398Y- YLMCTSCLTS  | 71  | 619   |
| >CBL-H398Y- HLMCTSCL   | 8     | >CBL-H398Y- YLMCTSCL    | 3   | 5     |
| >CBL-H398Y- HLMCTSCLT  | 160   | >CBL-H398Y- YLMCTSCLT   | 17  | 143   |
| >CBL-H398Y- HLMCTSCLTS | 1133  | >CBL-H398Y- YLMCTSCLTS  | 142 | 991   |
| >CBL-H398Y- HLMCTSCLTS | 1173  | >CBL-H398Y- YLMCTSCLTS' | 157 | 1016  |
| >CBL-H398Y- HLMCTSCL   | 38    | >CBL-H398Y- YLMCTSCL    | 5   | 33    |
| >CBL-H398Y- HLMCTSCLT  | 176   | >CBL-H398Y- YLMCTSCLT   | 11  | 165   |
| >CBL-H398Y- HLMCTSCLTS | 860   | >CBL-H398Y- YLMCTSCLTS  | 106 | 754   |
| >CBL-H398Y- HLMCTSCLTS | 2888  | >CBL-H398Y- YLMCTSCLTS' | 219 | 2669  |
| >CBL-H398Y- HLMCTSCL   | 413   | >CBL-H398Y- YLMCTSCL    | 20  | 393   |
| >CBL-H398Y- HLMCTSCLT  | 1100  | >CBL-H398Y- YLMCTSCLT   | 48  | 1052  |
| >CBL-H398Y- HLMCTSCLTS | 3658  | >CBL-H398Y- YLMCTSCLTS  | 200 | 3458  |
| >CBL-H398Y- HLMCTSCL   | 81    | >CBL-H398Y- YLMCTSCL    | 4   | 77    |
| >CBL-H398Y- HLMCTSCLT  | 338   | >CBL-H398Y- YLMCTSCLT   | 9   | 329   |
| >CBL-H398Y- HLMCTSCLTS | 3073  | >CBL-H398Y- YLMCTSCLTS  | 99  | 2974  |
| >CBL-H398Y- HLMCTSCL   | 5     | >CBL-H398Y- YLMCTSCL    | 3   | 2     |
| >CBL-H398Y- HLMCTSCLT  | 64    | >CBL-H398Y- YLMCTSCLT   | 8   | 56    |
| >CBL-H398Y- HLMCTSCLTS | 742   | >CBL-H398Y- YLMCTSCLTS  | 76  | 666   |
| >CBL-H398Y- HLMCTSCLTS | 3846  | >CBL-H398Y- YLMCTSCLTS' | 445 | 3401  |
| >CBL-H398Y- HLMCTSCL   | 122   | >CBL-H398Y- YLMCTSCL    | 11  | 111   |

|                        |       |                         |      |       |
|------------------------|-------|-------------------------|------|-------|
| >CBL-H398Y- HLMCTSCLT  | 1152  | >CBL-H398Y- YLMCTSCLT   | 62   | 1090  |
| >CBL-H398Y- HLMCTSCL   | 8     | >CBL-H398Y- YLMCTSCL    | 2    | 6     |
| >CBL-H398Y- HLMCTSCLT  | 550   | >CBL-H398Y- YLMCTSCLT   | 12   | 538   |
| >CBL-H398Y- HLMCTSCL   | 32    | >CBL-H398Y- YLMCTSCL    | 3    | 29    |
| >CBL-H398Y- HLMCTSCLT  | 460   | >CBL-H398Y- YLMCTSCLT   | 8    | 452   |
| >CBL-H398Y- HLMCTSCLTS | 5424  | >CBL-H398Y- YLMCTSCLTS  | 145  | 5279  |
| >CBL-H398Y- HLMCTSCLTS | 123   | >CBL-H398Y- YLMCTSCLTS' | 367  | 244   |
| >CBL-H398Y- HLMCTSCL   | 130   | >CBL-H398Y- YLMCTSCL    | 45   | 85    |
| >CBL-H398Y- HLMCTSCL   | 501   | >CBL-H398Y- YLMCTSCL    | 136  | 365   |
| >CBL-H398Y- HLMCTSCLTS | 228   | >CBL-H398Y- YLMCTSCLTS' | 85   | 143   |
| >CBL-H398Y- HLMCTSCL   | 966   | >CBL-H398Y- YLMCTSCL    | 380  | 586   |
| >CBL-H398Y- HLMCTSCL   | 153   | >CBL-H398Y- YLMCTSCL    | 44   | 109   |
| >CBL-H398Y- HLMCTSCLTS | 267   | >CBL-H398Y- YLMCTSCLTS' | 64   | 203   |
| >CBL-H398Y- HLMCTSCLTS | 129   | >CBL-H398Y- YLMCTSCLTS' | 40   | 89    |
| >CBL-H398Y- HLMCTSCL   | 75    | >CBL-H398Y- YLMCTSCL    | 64   | 11    |
| >CBL-H398Y- HLMCTSCLTS | 85    | >CBL-H398Y- YLMCTSCLTS' | 68   | 17    |
| >CBL-H398Y- HLMCTSCLTS | 3254  | >CBL-H398Y- YLMCTSCLTS' | 439  | 2815  |
| >CBL-H398Y- GHLMCTSCL  | 17073 | >CBL-H398Y- GYLMCTSCL   | 276  | 16797 |
| >CBL-H398Y- GHLMCTSCL  | 12763 | >CBL-H398Y- GYLMCTSCL   | 117  | 12646 |
| >CBL-H398Y- GHLMCTSCL  | 17879 | >CBL-H398Y- GYLMCTSCL   | 78   | 17801 |
| >CBL-H398Y- GHLMCTSCL  | 134   | >CBL-H398Y- GYLMCTSCL   | 7439 | 7305  |
| >CBL-H398Y- IEPCGHLM   | 36    | >CBL-H398Y- IEPCGYLM    | 81   | 45    |
| >CBL-H398Y- KIEPCGHL   | 2127  | >CBL-H398Y- KIEPCGYL    | 449  | 1678  |
| >CBL-H398Y- KIEPCGHLM  | 184   | >CBL-H398Y- KIEPCGYLM   | 177  | 7     |
| >CBL-H398Y- VKIEPCGH   | 1830  | >CBL-H398Y- VKIEPCGY    | 31   | 1799  |
| >CBL-H398Y- VKIEPCGHL  | 436   | >CBL-H398Y- VKIEPCGYL   | 424  | 12    |
| >CBL-H398Y- VKIEPCGHLM | 127   | >CBL-H398Y- VKIEPCGYLM  | 104  | 23    |
| >CBL-H94Y-ᵐ HLRRTILSR  | 6395  | >CBL-H94Y-ᵐ YLRTILSR    | 262  | 6133  |
| >CBL-H94Y-ᵐ HLRRTILSR  | 153   | >CBL-H94Y-ᵐ YLRTILSR    | 753  | 600   |
| >CBL-H94Y-ᵐ HLRRTILSR  | 151   | >CBL-H94Y-ᵐ YLRTILSR    | 627  | 476   |
| >CBL-H94Y-ᵐ HLRRTILSR  | 389   | >CBL-H94Y-ᵐ YLRTILSR    | 385  | 4     |
| >CBL-H94Y-ᵐ HLRRTILSR  | 153   | >CBL-H94Y-ᵐ YLRTILSR    | 62   | 91    |
| >CBL-H94Y-ᵐ HLRRTILSR  | 180   | >CBL-H94Y-ᵐ YLRTILSR    | 24   | 156   |
| >CBL-H94Y-ᵐ HLRRTILSR  | 42    | >CBL-H94Y-ᵐ YLRTILSR    | 1015 | 973   |
| >CBL-H94Y-ᵐ HLRRTILSR  | 278   | >CBL-H94Y-ᵐ YLRTILSR    | 4247 | 3969  |
| >CBL-H94Y-ᵐ HLRRTILSR  | 246   | >CBL-H94Y-ᵐ YLRTILSR    | 3782 | 3536  |
| >CBL-H94Y-ᵐ HLRRTILSR  | 64    | >CBL-H94Y-ᵐ YLRTILSR    | 108  | 44    |
| >CBL-H94Y-ᵐ HLRRTILSR  | 34    | >CBL-H94Y-ᵐ YLRTILSR    | 161  | 127   |
| >CBL-H94Y-ᵐ HLRRTILSR  | 42    | >CBL-H94Y-ᵐ YLRTILSR    | 83   | 41    |
| >CBL-H94Y-ᵐ HLRRTILSR  | 398   | >CBL-H94Y-ᵐ YLRTILSR    | 293  | 105   |
| >CBL-H94Y-ᵐ HLRRTILSR  | 44    | >CBL-H94Y-ᵐ YLRTILSR    | 24   | 20    |
| >CBL-H94Y-ᵐ HLRRTILSR  | 211   | >CBL-H94Y-ᵐ YLRTILSR    | 90   | 121   |
| >CBL-H94Y-ᵐ HLRRTILSR  | 137   | >CBL-H94Y-ᵐ YLRTILSR    | 60   | 77    |

|                         |       |                         |      |       |
|-------------------------|-------|-------------------------|------|-------|
| >CBL-H94Y-m HLRRTILSR   | 433   | >CBL-H94Y-n YLRRTILSR   | 74   | 359   |
| >CBL-H94Y-m HLRRTILSR   | 303   | >CBL-H94Y-n YLRRTILSR   | 108  | 195   |
| >CBL-H94Y-m HLRRTILSR   | 13    | >CBL-H94Y-n YLRRTILSR   | 4    | 9     |
| >CBL-H94Y-m HLRRTILSR   | 135   | >CBL-H94Y-n YLRRTILSR   | 210  | 75    |
| >CBL-H94Y-m HLRRTILSR   | 83    | >CBL-H94Y-n YLRRTILSR   | 337  | 254   |
| >CBL-H94Y-m QHLRTILSR   | 22998 | >CBL-H94Y-n QYLRTILSR   | 408  | 22590 |
| >CBL-H94Y-m QHLRTILSR   | 18560 | >CBL-H94Y-n QYLRTILSR   | 162  | 18398 |
| >CBL-H94Y-m QHLRTILSR   | 4344  | >CBL-H94Y-n QYLRTILSR   | 220  | 4124  |
| >CBL-H94Y-m QHLRTILSR   | 1758  | >CBL-H94Y-n QYLRTILSR   | 58   | 1700  |
| >CBL-H94Y-m QHLRTILSR   | 822   | >CBL-H94Y-n QYLRTILSR   | 32   | 790   |
| >CBL-H94Y-m QHLRTILSR   | 7058  | >CBL-H94Y-n QYLRTILSR   | 131  | 6927  |
| >CBL-H94Y-m QHLRTILSR   | 15843 | >CBL-H94Y-n QYLRTILSR   | 227  | 15616 |
| >CBL-H94Y-m QHLRTILSR   | 543   | >CBL-H94Y-n QYLRTILSR   | 65   | 478   |
| >CBL-H94Y-m QHLRTILSR   | 154   | >CBL-H94Y-n QYLRTILSR   | 1569 | 1415  |
| >CBL-H94Y-m QHLRTILSR   | 424   | >CBL-H94Y-n QYLRTILSR   | 25   | 399   |
| >CBL-H94Y-m ILDLLPDTYQF | 15678 | >CBL-H94Y-n ILDLLPDTYQY | 77   | 15601 |
| >CBL-H94Y-m ILDLLPDTYQF | 5392  | >CBL-H94Y-n ILDLLPDTYQY | 128  | 5264  |
| >CBL-H94Y-m ILDLLPDTYQF | 16166 | >CBL-H94Y-n ILDLLPDTYQY | 497  | 15669 |
| >CBL-H94Y-m ILDLLPDTYQF | 14435 | >CBL-H94Y-n ILDLLPDTYQY | 109  | 14326 |
| >CBL-H94Y-m ILDLLPDTYQF | 19923 | >CBL-H94Y-n ILDLLPDTYQY | 328  | 19595 |
| >CBL-H94Y-m YQHLRTIL    | 3017  | >CBL-H94Y-n YQYLRTIL    | 332  | 2685  |
| >CBL-H94Y-m YQHLRTIL    | 1469  | >CBL-H94Y-n YQYLRTIL    | 268  | 1201  |
| >CBL-H94Y-m YQHLRTIL    | 595   | >CBL-H94Y-n YQYLRTIL    | 89   | 506   |
| >CBL-H94Y-m YQHLRTIL    | 132   | >CBL-H94Y-n YQYLRTIL    | 18   | 114   |
| >CBL-H94Y-m YQHLRTILS   | 2280  | >CBL-H94Y-n YQYLRTILS   | 222  | 2058  |
| >CBL-H94Y-m YQHLRTILSR  | 2097  | >CBL-H94Y-n YQYLRTILSR  | 388  | 1709  |
| >CBL-H94Y-m YQHLRTILSR  | 2564  | >CBL-H94Y-n YQYLRTILSR  | 349  | 2215  |
| >CBL-H94Y-m YQHLRTILSR  | 160   | >CBL-H94Y-n YQYLRTILSR  | 37   | 123   |
| >CBL-H94Y-m YQHLRTILSR  | 366   | >CBL-H94Y-n YQYLRTILSR  | 53   | 313   |
| >CBL-H94Y-m YQHLRTILSR  | 543   | >CBL-H94Y-n YQYLRTILSR  | 142  | 401   |
| >CBL-H94Y-m YQHLRTILSR  | 2212  | >CBL-H94Y-n YQYLRTILSR  | 330  | 1882  |
| >CBL-H94Y-m YQHLRTILSR  | 164   | >CBL-H94Y-n YQYLRTILSR  | 120  | 44    |
| >CBL-H94Y-m YQHLRTILSR  | 367   | >CBL-H94Y-n YQYLRTILSR  | 585  | 218   |
| >CBL-H94Y-m YQHLRTILSR  | 666   | >CBL-H94Y-n YQYLRTILSR  | 275  | 391   |
| >CBL-H94Y-m YQHLRTILSR  | 71    | >CBL-H94Y-n YQYLRTILSR  | 51   | 20    |
| >CBL-H94Y-m YQHLRTILSR  | 111   | >CBL-H94Y-n YQYLRTILSR  | 48   | 63    |
| >CBL-H94Y-m YQHLRTILSR  | 33    | >CBL-H94Y-n YQYLRTILSR  | 11   | 22    |
| >CBL-H94Y-m YQHLRTILSR  | 199   | >CBL-H94Y-n YQYLRTILSR  | 49   | 150   |
| >CBL-H94Y-m YQHLRTILSR  | 21    | >CBL-H94Y-n YQYLRTILSR  | 8    | 13    |
| >CBL-H94Y-m YQHLRTILSR  | 1875  | >CBL-H94Y-n YQYLRTILSR  | 240  | 1635  |
| >CBL-H94Y-m YQHLRTILSR  | 33    | >CBL-H94Y-n YQYLRTILSR  | 20   | 13    |
| >CBL-H94Y-m YQHLRTILSR  | 301   | >CBL-H94Y-n YQYLRTILSR  | 93   | 208   |
| >CBL-H94Y-m YQHLRTILSR  | 602   | >CBL-H94Y-n YQYLRTILSR  | 177  | 425   |



|                         |      |                         |     |      |
|-------------------------|------|-------------------------|-----|------|
| >CBL-H94Y-m YQHLRTILSR  | 143  | >CBL-H94Y-n YQYLRTILSR  | 81  | 62   |
| >CBL-H94Y-m TYQHLRTI    | 8    | >CBL-H94Y-n TYQYLRTI    | 6   | 2    |
| >CBL-H94Y-m TYQHLRTIL   | 8    | >CBL-H94Y-n TYQYLRTIL   | 5   | 3    |
| >CBL-H94Y-m TYQHLRTI    | 76   | >CBL-H94Y-n TYQYLRTI    | 60  | 16   |
| >CBL-H94Y-m TYQHLRTIL   | 417  | >CBL-H94Y-n TYQYLRTIL   | 366 | 51   |
| >CBL-H94Y-m TYQHLRTI    | 102  | >CBL-H94Y-n TYQYLRTI    | 113 | 11   |
| >CBL-H94Y-m TYQHLRTI    | 14   | >CBL-H94Y-n TYQYLRTI    | 17  | 3    |
| >CBL-H94Y-m TYQHLRTIL   | 42   | >CBL-H94Y-n TYQYLRTIL   | 70  | 28   |
| >CBL-H94Y-m TYQHLRTILSF | 40   | >CBL-H94Y-n TYQYLRTILSR | 31  | 9    |
| >CBL-H94Y-m TYQHLRTILSF | 56   | >CBL-H94Y-n TYQYLRTILSR | 41  | 15   |
| >CBL-H94Y-m TYQHLRTILSF | 1033 | >CBL-H94Y-n TYQYLRTILSR | 433 | 600  |
| >CBL-H94Y-m TYQHLRTILSF | 53   | >CBL-H94Y-n TYQYLRTILSR | 71  | 18   |
| >CBL-H94Y-m TYQHLRTIL   | 1012 | >CBL-H94Y-n TYQYLRTIL   | 461 | 551  |
| >CBL-H94Y-m DTYQHLRTI   | 694  | >CBL-H94Y-n DTYQYLRTI   | 134 | 560  |
| >CBL-H94Y-m DTYQHLRTI   | 211  | >CBL-H94Y-n DTYQYLRTI   | 364 | 153  |
| >CBL-H94Y-m DTYQHLRTI   | 37   | >CBL-H94Y-n DTYQYLRTI   | 133 | 96   |
| >CBL-H94Y-m DTYQHLRTIL  | 107  | >CBL-H94Y-n DTYQYLRTIL  | 187 | 80   |
| >CBL-H94Y-m DTYQHLRTI   | 876  | >CBL-H94Y-n DTYQYLRTI   | 212 | 664  |
| >CBL-H94Y-m DTYQHLRTIL  | 957  | >CBL-H94Y-n DTYQYLRTIL  | 391 | 566  |
| >CBL-H94Y-m DTYQHLRTI   | 298  | >CBL-H94Y-n DTYQYLRTI   | 383 | 85   |
| >CBL-H94Y-m DTYQHLRTIL  | 1393 | >CBL-H94Y-n DTYQYLRTIL  | 488 | 905  |
| >CBL-H94Y-m DTYQHLRTI   | 107  | >CBL-H94Y-n DTYQYLRTI   | 51  | 56   |
| >CBL-H94Y-m DTYQHLRTIL  | 513  | >CBL-H94Y-n DTYQYLRTIL  | 275 | 238  |
| >CBL-H94Y-m DTYQHLRTI   | 300  | >CBL-H94Y-n DTYQYLRTI   | 162 | 138  |
| >CBL-H94Y-m DTYQHLRTIL  | 509  | >CBL-H94Y-n DTYQYLRTIL  | 378 | 131  |
| >CBL-H94Y-m DTYQHLRTI   | 77   | >CBL-H94Y-n DTYQYLRTI   | 82  | 5    |
| >CBL-H94Y-m DTYQHLRTIL  | 202  | >CBL-H94Y-n DTYQYLRTIL  | 339 | 137  |
| >CBL-H94Y-m PDYQHLRTI   | 200  | >CBL-H94Y-n PDYQYLRTI   | 88  | 112  |
| >CBL-H94Y-m LPDYQHL     | 141  | >CBL-H94Y-n LPDYQYL     | 27  | 114  |
| >CBL-H94Y-m LPDYQHLRT   | 280  | >CBL-H94Y-n LPDYQYLRT   | 323 | 43   |
| >CBL-H94Y-m LPDYQHL     | 234  | >CBL-H94Y-n LPDYQYL     | 129 | 105  |
| >CBL-H94Y-m LPDYQHLRT   | 88   | >CBL-H94Y-n LPDYQYLRT   | 57  | 31   |
| >CBL-H94Y-m LLPDYQHL    | 248  | >CBL-H94Y-n LLPDYQYL    | 33  | 215  |
| >CBL-H94Y-m LLPDYQHL    | 23   | >CBL-H94Y-n LLPDYQYL    | 7   | 16   |
| >CBL-H94Y-m LLPDYQHL    | 30   | >CBL-H94Y-n LLPDYQYL    | 14  | 16   |
| >CBL-H94Y-m LLPDYQHRLR  | 1033 | >CBL-H94Y-n LLPDYQYLR   | 438 | 595  |
| >CBL-H94Y-m LLPDYQHL    | 53   | >CBL-H94Y-n LLPDYQYL    | 27  | 26   |
| >CBL-H94Y-m LLPDYQHL    | 8    | >CBL-H94Y-n LLPDYQYL    | 2   | 6    |
| >CBL-H94Y-m LLPDYQHRLR  | 258  | >CBL-H94Y-n LLPDYQYLR   | 175 | 83   |
| >CBL-H94Y-m LLPDYQHL    | 20   | >CBL-H94Y-n LLPDYQYL    | 8   | 12   |
| >CBL-H94Y-m LLPDYQHL    | 11   | >CBL-H94Y-n LLPDYQYL    | 8   | 3    |
| >CBL-H94Y-m LLPDYQHL    | 64   | >CBL-H94Y-n LLPDYQYL    | 5   | 59   |
| >CBL-H94Y-m LLPDYQH     | 1433 | >CBL-H94Y-n LLPDYQY     | 96  | 1337 |

|                         |       |                         |     |       |
|-------------------------|-------|-------------------------|-----|-------|
| >CBL-H94Y-m LLPDTYQHL   | 2     | >CBL-H94Y-n LLPDTYQYL   | 2   | 0     |
| >CBL-H94Y-m LLPDTYQHLR  | 198   | >CBL-H94Y-n LLPDTYQYLR  | 653 | 455   |
| >CBL-H94Y-m LLPDTYQHLR  | 15    | >CBL-H94Y-n LLPDTYQYLR  | 13  | 2     |
| >CBL-H94Y-m LLPDTYQH    | 5911  | >CBL-H94Y-n LLPDTYQY    | 41  | 5870  |
| >CBL-H94Y-m LLPDTYQHLR  | 191   | >CBL-H94Y-n LLPDTYQYLR  | 122 | 69    |
| >CBL-H94Y-m LLPDTYQHLR  | 675   | >CBL-H94Y-n LLPDTYQYLR  | 400 | 275   |
| >CBL-H94Y-m LLPDTYQHLR  | 267   | >CBL-H94Y-n LLPDTYQYLR  | 81  | 186   |
| >CBL-H94Y-m LLPDTYQH    | 11530 | >CBL-H94Y-n LLPDTYQY    | 194 | 11336 |
| >CBL-H94Y-m LLPDTYQHL   | 37    | >CBL-H94Y-n LLPDTYQYL   | 7   | 30    |
| >CBL-H94Y-m LLPDTYQHLR  | 340   | >CBL-H94Y-n LLPDTYQYLR  | 219 | 121   |
| >CBL-H94Y-m LLPDTYQHLR  | 240   | >CBL-H94Y-n LLPDTYQYLR  | 113 | 127   |
| >CBL-H94Y-m DLLPDTYQHL  | 1416  | >CBL-H94Y-n DLLPDTYQYL  | 162 | 1254  |
| >CBL-H94Y-m DLLPDTYQHL  | 688   | >CBL-H94Y-n DLLPDTYQYL  | 115 | 573   |
| >CBL-H94Y-m DLLPDTYQHL  | 1831  | >CBL-H94Y-n DLLPDTYQYL  | 411 | 1420  |
| >CBL-H94Y-m DLLPDTYQHL  | 106   | >CBL-H94Y-n DLLPDTYQYL  | 17  | 89    |
| >CBL-H94Y-m DLLPDTYQHL  | 109   | >CBL-H94Y-n DLLPDTYQYL  | 36  | 73    |
| >CBL-H94Y-m DLLPDTYQHL  | 36    | >CBL-H94Y-n DLLPDTYQYL  | 25  | 11    |
| >CBL-H94Y-m DLLPDTYQHL  | 31    | >CBL-H94Y-n DLLPDTYQYL  | 6   | 25    |
| >CBL-H94Y-m DLLPDTYQHL  | 21    | >CBL-H94Y-n DLLPDTYQYL  | 13  | 8     |
| >CBL-H94Y-m DLLPDTYQH   | 13164 | >CBL-H94Y-n DLLPDTYQY   | 337 | 12827 |
| >CBL-H94Y-m DLLPDTYQH   | 1979  | >CBL-H94Y-n DLLPDTYQY   | 15  | 1964  |
| >CBL-H94Y-m DLLPDTYQH   | 19771 | >CBL-H94Y-n DLLPDTYQY   | 376 | 19395 |
| >CBL-H94Y-m DLLPDTYQHL  | 641   | >CBL-H94Y-n DLLPDTYQYL  | 374 | 267   |
| >CBL-H94Y-m DLLPDTYQHL  | 31    | >CBL-H94Y-n DLLPDTYQYL  | 20  | 11    |
| >CBL-H94Y-m DLLPDTYQHL  | 113   | >CBL-H94Y-n DLLPDTYQYL  | 118 | 5     |
| >CBL-H94Y-m DLLPDTYQHL  | 252   | >CBL-H94Y-n DLLPDTYQYL  | 70  | 182   |
| >CBL-H94Y-m DLLPDTYQH   | 6491  | >CBL-H94Y-n DLLPDTYQY   | 454 | 6037  |
| >CBL-H94Y-m DLLPDTYQHL  | 161   | >CBL-H94Y-n DLLPDTYQYL  | 92  | 69    |
| >CBL-H94Y-m LDLLPDTYQH  | 26172 | >CBL-H94Y-n LDLLPDTYQY  | 395 | 25777 |
| >CBL-K287R- KPGSYIFRL   | 377   | >CBL-K287R- RPGSYIFRL   | 97  | 280   |
| >CBL-K287R- KPGSYIFR    | 115   | >CBL-K287R- RPGSYIFR    | 102 | 13    |
| >CBL-K287R- KPGSYIFRL   | 224   | >CBL-K287R- RPGSYIFRL   | 81  | 143   |
| >CBL-K287R- KPGSYIFR    | 42    | >CBL-K287R- RPGSYIFR    | 71  | 29    |
| >CBL-K287R- HKPGSYIF    | 21    | >CBL-K287R- HRPGSYIF    | 270 | 249   |
| >CBL-K287R- HKPGSYIFRL  | 6475  | >CBL-K287R- HRPGSYIFRL  | 70  | 6405  |
| >CBL-K287R- HKPGSYIFRL  | 916   | >CBL-K287R- HRPGSYIFRL  | 300 | 616   |
| >CBL-K287R- HKPGSYIFRL  | 13439 | >CBL-K287R- HRPGSYIFRL  | 447 | 12992 |
| >CBL-K287R- HKPGSYIFR   | 84    | >CBL-K287R- HRPGSYIFR   | 65  | 19    |
| >CBL-K287R- IHKPGSYIFR  | 242   | >CBL-K287R- IHRPGSYIFR  | 204 | 38    |
| >CBL-K287R- IHKPGSYI    | 357   | >CBL-K287R- IHRPGSYI    | 172 | 185   |
| >CBL-K287R- IHKPGSYIF   | 9     | >CBL-K287R- IHRPGSYIF   | 5   | 4     |
| >CBL-K287R- IHKPGSYIFRL | 929   | >CBL-K287R- IHRPGSYIFRL | 466 | 463   |
| >CBL-K287R- IHKPGSYIF   | 1419  | >CBL-K287R- IHRPGSYIF   | 439 | 980   |

|                         |      |                         |     |     |
|-------------------------|------|-------------------------|-----|-----|
| >CBL-K287R- IHKPGSYIF   | 435  | >CBL-K287R- IHRPGSYIF   | 156 | 279 |
| >CBL-K287R- IHKPGSYIFR  | 237  | >CBL-K287R- IHRPGSYIFR  | 370 | 133 |
| >CBL-K287R- FIHKPGSYI   | 299  | >CBL-K287R- FIHRPGSYI   | 524 | 225 |
| >CBL-K287R- FIHKPGSYI   | 33   | >CBL-K287R- FIHRPGSYI   | 32  | 1   |
| >CBL-K287R- FIHKPGSYI   | 305  | >CBL-K287R- FIHRPGSYI   | 364 | 59  |
| >CBL-K287R- FIHKPGSYI   | 9    | >CBL-K287R- FIHRPGSYI   | 7   | 2   |
| >CBL-K287R- FIHKPGSYI   | 454  | >CBL-K287R- FIHRPGSYI   | 788 | 334 |
| >CBL-K287R- FIHKPGSYI   | 211  | >CBL-K287R- FIHRPGSYI   | 93  | 118 |
| >CBL-K287R- FIHKPGSYIFR | 492  | >CBL-K287R- FIHRPGSYIFR | 310 | 182 |
| >CBL-K287R- FIHKPGSY    | 243  | >CBL-K287R- FIHRPGSY    | 552 | 309 |
| >CBL-K287R- FIHKPGSY    | 379  | >CBL-K287R- FIHRPGSY    | 231 | 148 |
| >CBL-K287R- FIHKPGSY    | 266  | >CBL-K287R- FIHRPGSY    | 353 | 87  |
| >CBL-K287R- FIHKPGSY    | 73   | >CBL-K287R- FIHRPGSY    | 64  | 9   |
| >CBL-K287R- FIHKPGSY    | 411  | >CBL-K287R- FIHRPGSY    | 582 | 171 |
| >CBL-K287R- FIHKPGSYIFR | 129  | >CBL-K287R- FIHRPGSYIFR | 84  | 45  |
| >CBL-K287R- FIHKPGSYIFR | 159  | >CBL-K287R- FIHRPGSYIFR | 131 | 28  |
| >CBL-K287R- FIHKPGSYIFR | 13   | >CBL-K287R- FIHRPGSYIFR | 13  | 0   |
| >CBL-K287R- FIHKPGSYI   | 210  | >CBL-K287R- FIHRPGSYI   | 199 | 11  |
| >CBL-K287R- FIHKPGSY    | 429  | >CBL-K287R- FIHRPGSY    | 637 | 208 |
| >CBL-K287R- FIHKPGSY    | 101  | >CBL-K287R- FIHRPGSY    | 106 | 5   |
| >CBL-K287R- FIHKPGSYIF  | 89   | >CBL-K287R- FIHRPGSYIF  | 104 | 15  |
| >CBL-K287R- FIHKPGSY    | 34   | >CBL-K287R- FIHRPGSY    | 33  | 1   |
| >CBL-K287R- FIHKPGSYI   | 437  | >CBL-K287R- FIHRPGSYI   | 588 | 151 |
| >CBL-K287R- FIHKPGSYIF  | 38   | >CBL-K287R- FIHRPGSYIF  | 45  | 7   |
| >CBL-K287R- FIHKPGSY    | 252  | >CBL-K287R- FIHRPGSY    | 227 | 25  |
| >CBL-K287R- FIHKPGSYIF  | 20   | >CBL-K287R- FIHRPGSYIF  | 19  | 1   |
| >CBL-K287R- FIHKPGSYI   | 321  | >CBL-K287R- FIHRPGSYI   | 396 | 75  |
| >CBL-K287R- FIHKPGSYIFR | 118  | >CBL-K287R- FIHRPGSYIFR | 249 | 131 |
| >CBL-K287R- FIHKPGSYI   | 446  | >CBL-K287R- FIHRPGSYI   | 407 | 39  |
| >CBL-K287R- KFIHKPGSYI  | 1105 | >CBL-K287R- KFIHRPGSYI  | 338 | 767 |
| >CBL-K287R- KFIHKPGSYIF | 31   | >CBL-K287R- KFIHRPGSYIF | 32  | 1   |
| >CBL-K287R- KFIHKPGSYIF | 93   | >CBL-K287R- KFIHRPGSYIF | 68  | 25  |
| >CBL-K287R- KFIHKPGSYIF | 35   | >CBL-K287R- KFIHRPGSYIF | 33  | 2   |
| >CBL-K287R- KFIHKPGSY   | 30   | >CBL-K287R- KFIHRPGSY   | 29  | 1   |
| >CBL-K287R- KFIHKPGSYIF | 295  | >CBL-K287R- KFIHRPGSYIF | 285 | 10  |
| >CBL-K287R- KFIHKPGSYI  | 593  | >CBL-K287R- KFIHRPGSYI  | 318 | 275 |
| >CBL-K287R- KFIHKPGSY   | 45   | >CBL-K287R- KFIHRPGSY   | 62  | 17  |
| >CBL-K287R- KFIHKPGSYIF | 292  | >CBL-K287R- KFIHRPGSYIF | 250 | 42  |
| >CBL-K287R- KFIHKPGSY   | 69   | >CBL-K287R- KFIHRPGSY   | 53  | 16  |
| >CBL-K287R- KFIHKPGSYIF | 551  | >CBL-K287R- KFIHRPGSYIF | 361 | 190 |
| >CBL-K287R- KFIHKPGSYI  | 118  | >CBL-K287R- KFIHRPGSYI  | 167 | 49  |
| >CBL-K287R- QKFIHKPGSY  | 114  | >CBL-K287R- QKFIHRPGSY  | 119 | 5   |
| >CBL-K287R- QKFIHKPGSY  | 16   | >CBL-K287R- QKFIHRPGSY  | 10  | 6   |

|                        |       |                        |       |       |
|------------------------|-------|------------------------|-------|-------|
| >CBL-K287R-QKFIHKPGSY  | 30    | >CBL-K287R-QKFIHRPGSY  | 19    | 11    |
| >CBL-K287R-LQKFIHKPGS' | 81    | >CBL-K287R-LQKFIHRPGS' | 72    | 9     |
| >CBL-K287R-LQKFIHKPG   | 345   | >CBL-K287R-LQKFIHRPG   | 235   | 110   |
| >CBL-K287R-LQKFIHKPGS' | 46    | >CBL-K287R-LQKFIHRPGS' | 42    | 4     |
| >CBL-K287R-LQKFIHKPGS' | 557   | >CBL-K287R-LQKFIHRPGS' | 423   | 134   |
| >CBL-K287R-LQKFIHKPGS' | 26    | >CBL-K287R-LQKFIHRPGS' | 25    | 1     |
| >CBL-K287R-RLQKFIHK    | 40    | >CBL-K287R-RLQKFIHR    | 276   | 236   |
| >CBL-K287R-RLQKFIHK    | 25    | >CBL-K287R-RLQKFIHR    | 683   | 658   |
| >CBL-K287R-RLQKFIHK    | 23    | >CBL-K287R-RLQKFIHR    | 2342  | 2319  |
| >CBL-K287R-RLQKFIHK    | 32    | >CBL-K287R-RLQKFIHR    | 8     | 24    |
| >CBL-K287R-RLQKFIHK    | 82    | >CBL-K287R-RLQKFIHR    | 19    | 63    |
| >CBL-K287R-ARLQKFIHK   | 40    | >CBL-K287R-ARLQKFIHR   | 59    | 19    |
| >CBL-K287R-ARLQKFIHK   | 67    | >CBL-K287R-ARLQKFIHR   | 341   | 274   |
| >CBL-K287R-ARLQKFIHK   | 359   | >CBL-K287R-ARLQKFIHR   | 647   | 288   |
| >CBL-K287R-ARLQKFIHK   | 2880  | >CBL-K287R-ARLQKFIHR   | 106   | 2774  |
| >CBL-K287R-KARLQKFIHK  | 140   | >CBL-K287R-KARLQKFIHR  | 2216  | 2076  |
| >CBL-K287R-KARLQKFIHK  | 270   | >CBL-K287R-KARLQKFIHR  | 3212  | 2942  |
| >CBL-K287R-KARLQKFIHK  | 3     | >CBL-K287R-KARLQKFIHR  | 9     | 6     |
| >CBL-K287R-KARLQKFIHK  | 184   | >CBL-K287R-KARLQKFIHR  | 184   | 0     |
| >CBL-K287R-KARLQKFIHK  | 123   | >CBL-K287R-KARLQKFIHR  | 10    | 113   |
| >CBL-K287R-KARLQKFIHK  | 943   | >CBL-K287R-KARLQKFIHR  | 49    | 894   |
| >CBL-K382E-KICAENDK    | 232   | >CBL-K382E-EICAENDK    | 3782  | 3550  |
| >CBL-K382E-KICAENDKDV  | 227   | >CBL-K382E-EICAENDKDV  | 3725  | 3498  |
| >CBL-K382E-KICAENDK    | 499   | >CBL-K382E-EICAENDK    | 15662 | 15163 |
| >CBL-K382E-KICAENDK    | 7238  | >CBL-K382E-EICAENDK    | 66    | 7172  |
| >CBL-K382E-KICAENDKDV  | 7017  | >CBL-K382E-EICAENDKDV  | 68    | 6949  |
| >CBL-K382E-CKICAENDKD  | 25086 | >CBL-K382E-CEICAENDKD  | 332   | 24754 |
| >CBL-K382E-CEMGSTFQLC  | 140   | >CBL-K382E-CEMGSTFQLC  | 192   | 52    |
| >CBL-K382E-FQLCKICA    | 131   | >CBL-K382E-FQLCEICA    | 80    | 51    |
| >CBL-K382E-FQLCKICA    | 17    | >CBL-K382E-FQLCEICA    | 12    | 5     |
| >CBL-K382E-FQLCKICAE   | 300   | >CBL-K382E-FQLCEICAE   | 171   | 129   |
| >CBL-K382E-FQLCKICA    | 490   | >CBL-K382E-FQLCEICA    | 492   | 2     |
| >CBL-K382E-FQLCKICA    | 190   | >CBL-K382E-FQLCEICA    | 125   | 65    |
| >CBL-K382E-FQLCKICA    | 487   | >CBL-K382E-FQLCEICA    | 257   | 230   |
| >CBL-K382E-STFQLCKI    | 444   | >CBL-K382E-STFQLCEI    | 545   | 101   |
| >CBL-K382E-STFQLCKI    | 1386  | >CBL-K382E-STFQLCEI    | 323   | 1063  |
| >CBL-K382E-STFQLCKI    | 1461  | >CBL-K382E-STFQLCEI    | 263   | 1198  |
| >CBL-K382E-STFQLCKI    | 318   | >CBL-K382E-STFQLCEI    | 106   | 212   |
| >CBL-K382E-STFQLCKI    | 682   | >CBL-K382E-STFQLCEI    | 277   | 405   |
| >CBL-K382E-STFQLCKI    | 41    | >CBL-K382E-STFQLCEI    | 31    | 10    |
| >CBL-K382E-STFQLCKI    | 144   | >CBL-K382E-STFQLCEI    | 32    | 112   |
| >CBL-K382E-STFQLCKICA  | 306   | >CBL-K382E-STFQLCEICA  | 131   | 175   |
| >CBL-K382E-STFQLCKI    | 330   | >CBL-K382E-STFQLCEI    | 154   | 176   |

|                         |     |                         |       |       |
|-------------------------|-----|-------------------------|-------|-------|
| >CBL-K382E-1 STFQLCKI   | 31  | >CBL-K382E-1 STFQLCEI   | 46    | 15    |
| >CBL-K382E-1 STFQLCKIC  | 195 | >CBL-K382E-1 STFQLCEIC  | 114   | 81    |
| >CBL-K382E-1 STFQLCKI   | 14  | >CBL-K382E-1 STFQLCEI   | 17    | 3     |
| >CBL-K382E-1 GSTFQLCK   | 35  | >CBL-K382E-1 GSTFQLCE   | 21440 | 21405 |
| >CBL-K382E-1 GSTFQLCKI  | 434 | >CBL-K382E-1 GSTFQLCEI  | 594   | 160   |
| >CBL-K382E-1 GSTFQLCK   | 195 | >CBL-K382E-1 GSTFQLCE   | 7680  | 7485  |
| >CBL-K382E-1 MGSTFQLCK  | 78  | >CBL-K382E-1 MGSTFQLCE  | 21086 | 21008 |
| >CBL-K382E-1 MGSTFQLCK  | 283 | >CBL-K382E-1 MGSTFQLCE  | 22539 | 22256 |
| >CBL-K382E-1 EMGSTFQLCI | 89  | >CBL-K382E-1 EMGSTFQLCI | 41    | 48    |
| >CBL-K382E-1 EMGSTFQLCI | 493 | >CBL-K382E-1 EMGSTFQLCI | 217   | 276   |
| >CBL-K382E-1 EMGSTFQLCI | 245 | >CBL-K382E-1 EMGSTFQLCI | 132   | 113   |
| >CBL-K382E-1 EMGSTFQLCI | 166 | >CBL-K382E-1 EMGSTFQLCI | 110   | 56    |
| >CBL-K382E-1 EMGSTFQLCI | 174 | >CBL-K382E-1 EMGSTFQLCI | 76    | 98    |
| >CBL-K382E-1 EMGSTFQLCI | 354 | >CBL-K382E-1 EMGSTFQLCI | 26096 | 25742 |
| >CBL-K382E-1 EMGSTFQLCI | 412 | >CBL-K382E-1 EMGSTFQLCI | 34616 | 34204 |
| >CBL-K382E-1 EMGSTFQLCI | 360 | >CBL-K382E-1 EMGSTFQLCI | 220   | 140   |
| >CBL-L380P-1 LYCEMGSTFC | 46  | >CBL-L380P-1 LYCEMGSTFC | 14763 | 14717 |
| >CBL-L380P-1 LYCEMGSTFC | 404 | >CBL-L380P-1 LYCEMGSTFC | 19357 | 18953 |
| >CBL-L380P-1 LYCEMGSTFC | 343 | >CBL-L380P-1 LYCEMGSTFC | 8442  | 8099  |
| >CBL-L380P-1 LYCEMGSTFC | 7   | >CBL-L380P-1 LYCEMGSTFC | 1523  | 1516  |
| >CBL-L380P-1 FQLCKICA   | 131 | >CBL-L380P-1 FQPCKICA   | 1439  | 1308  |
| >CBL-L380P-1 FQLCKICA   | 17  | >CBL-L380P-1 FQPCKICA   | 77    | 60    |
| >CBL-L380P-1 FQLCKICAE  | 300 | >CBL-L380P-1 FQPCKICAE  | 1519  | 1219  |
| >CBL-L380P-1 FQLCKICA   | 490 | >CBL-L380P-1 FQPCKICA   | 2280  | 1790  |
| >CBL-L380P-1 FQLCKICA   | 190 | >CBL-L380P-1 FQPCKICA   | 2877  | 2687  |
| >CBL-L380P-1 FQLCKICA   | 487 | >CBL-L380P-1 FQPCKICA   | 3459  | 2972  |
| >CBL-L380P-1 STFQLCKI   | 444 | >CBL-L380P-1 STFQPCKI   | 1384  | 940   |
| >CBL-L380P-1 STFQLCKI   | 318 | >CBL-L380P-1 STFQPCKI   | 208   | 110   |
| >CBL-L380P-1 STFQLCKI   | 41  | >CBL-L380P-1 STFQPCKI   | 45    | 4     |
| >CBL-L380P-1 STFQLCKI   | 144 | >CBL-L380P-1 STFQPCKI   | 109   | 35    |
| >CBL-L380P-1 STFQLCKICA | 306 | >CBL-L380P-1 STFQPCKICA | 203   | 103   |
| >CBL-L380P-1 STFQLCKI   | 330 | >CBL-L380P-1 STFQPCKI   | 218   | 112   |
| >CBL-L380P-1 STFQLCKI   | 31  | >CBL-L380P-1 STFQPCKI   | 21    | 10    |
| >CBL-L380P-1 STFQLCKIC  | 195 | >CBL-L380P-1 STFQPCKIC  | 220   | 25    |
| >CBL-L380P-1 STFQLCKI   | 14  | >CBL-L380P-1 STFQPCKI   | 12    | 2     |
| >CBL-L380P-1 GSTFQLCK   | 35  | >CBL-L380P-1 GSTFQPCK   | 53    | 18    |
| >CBL-L380P-1 GSTFQLCKI  | 434 | >CBL-L380P-1 GSTFQPCKI  | 542   | 108   |
| >CBL-L380P-1 GSTFQLCK   | 195 | >CBL-L380P-1 GSTFQPCK   | 221   | 26    |
| >CBL-L380P-1 MGSTFQLCK  | 78  | >CBL-L380P-1 MGSTFQPCK  | 194   | 116   |
| >CBL-L380P-1 MGSTFQLCK  | 283 | >CBL-L380P-1 MGSTFQPCK  | 187   | 96    |
| >CBL-L380P-1 EMGSTFQL   | 283 | >CBL-L380P-1 EMGSTFQP   | 17389 | 17106 |
| >CBL-L380P-1 EMGSTFQL   | 40  | >CBL-L380P-1 EMGSTFQP   | 13179 | 13139 |
| >CBL-L380P-1 EMGSTFQLCI | 89  | >CBL-L380P-1 EMGSTFQPCI | 73    | 16    |

|                          |       |                          |       |       |
|--------------------------|-------|--------------------------|-------|-------|
| >CBL-L380P-1 EMGSTFQL    | 211   | >CBL-L380P-1 EMGSTFQP    | 18982 | 18771 |
| >CBL-L380P-1 EMGSTFQLCI  | 493   | >CBL-L380P-1 EMGSTFQPCI  | 581   | 88    |
| >CBL-L380P-1 EMGSTFQL    | 75    | >CBL-L380P-1 EMGSTFQP    | 17354 | 17279 |
| >CBL-L380P-1 EMGSTFQLCI  | 245   | >CBL-L380P-1 EMGSTFQPCI  | 284   | 39    |
| >CBL-L380P-1 EMGSTFQL    | 13    | >CBL-L380P-1 EMGSTFQP    | 16438 | 16425 |
| >CBL-L380P-1 EMGSTFQLCI  | 166   | >CBL-L380P-1 EMGSTFQPCI  | 205   | 39    |
| >CBL-L380P-1 EMGSTFQL    | 18    | >CBL-L380P-1 EMGSTFQP    | 20177 | 20159 |
| >CBL-L380P-1 EMGSTFQLCI  | 174   | >CBL-L380P-1 EMGSTFQPCI  | 365   | 191   |
| >CBL-L380P-1 EMGSTFQLCI  | 354   | >CBL-L380P-1 EMGSTFQPCI  | 2007  | 1653  |
| >CBL-L380P-1 EMGSTFQLCI  | 412   | >CBL-L380P-1 EMGSTFQPCI  | 1428  | 1016  |
| >CBL-L380P-1 EMGSTFQL    | 85    | >CBL-L380P-1 EMGSTFQP    | 10976 | 10891 |
| >CBL-L380P-1 EMGSTFQLCI  | 360   | >CBL-L380P-1 EMGSTFQPCI  | 342   | 18    |
| >CBL-L380P-1 CEMGSTFQL   | 357   | >CBL-L380P-1 CEMGSTFQP   | 17392 | 17035 |
| >CBL-L380P-1 CEMGSTFQL   | 195   | >CBL-L380P-1 CEMGSTFQP   | 6082  | 5887  |
| >CBL-L380P-1 CEMGSTFQL   | 137   | >CBL-L380P-1 CEMGSTFQP   | 19606 | 19469 |
| >CBL-L380P-1 CEMGSTFQL   | 21    | >CBL-L380P-1 CEMGSTFQP   | 3055  | 3034  |
| >CBL-L380P-1 CEMGSTFQL   | 61    | >CBL-L380P-1 CEMGSTFQP   | 2082  | 2021  |
| >CBL-L380P-1 CEMGSTFQL   | 256   | >CBL-L380P-1 CEMGSTFQP   | 3105  | 2849  |
| >CBL-L380P-1 CEMGSTFQL   | 163   | >CBL-L380P-1 CEMGSTFQP   | 4125  | 3962  |
| >CBL-L380P-1 CEMGSTFQL   | 109   | >CBL-L380P-1 CEMGSTFQP   | 732   | 623   |
| >CBL-L380P-1 CEMGSTFQLCI | 140   | >CBL-L380P-1 CEMGSTFQPCI | 90    | 50    |
| >CBL-L380P-1 CEMGSTFQL   | 12    | >CBL-L380P-1 CEMGSTFQP   | 373   | 361   |
| >CBL-N454D- EGAPSPNY     | 434   | >CBL-N454D- EGAPSPDY     | 418   | 16    |
| >CBL-N454D- AEGAPSPNY    | 65    | >CBL-N454D- AEGAPSPDY    | 67    | 2     |
| >CBL-N454D- AEGAPSPNY    | 194   | >CBL-N454D- AEGAPSPDY    | 176   | 18    |
| >CBL-N454D- AEGAPSPN     | 300   | >CBL-N454D- AEGAPSPD     | 684   | 384   |
| >CBL-N454D- AEGAPSPNY    | 181   | >CBL-N454D- AEGAPSPDY    | 158   | 23    |
| >CBL-N454D- GAEGAPSPN    | 104   | >CBL-N454D- GAEGAPSPD    | 502   | 398   |
| >CBL-N454D- QGAEGAPSPI   | 159   | >CBL-N454D- QGAEGAPSPI   | 154   | 5     |
| >CBL-N454D- QGAEGAPSPI   | 476   | >CBL-N454D- QGAEGAPSPI   | 1914  | 1438  |
| >CBL-N454D- QGAEGAPSPI   | 290   | >CBL-N454D- QGAEGAPSPI   | 292   | 2     |
| >CBL-P417A- CPFRCRCEI    | 442   | >CBL-P417A- CAFRCRCEI    | 25923 | 25481 |
| >CBL-P417A- CPFRCRCEIK   | 14629 | >CBL-P417A- CAFRCRCEIK   | 300   | 14329 |
| >CBL-P417A- CPFRCRCEIK   | 1862  | >CBL-P417A- CAFRCRCEIK   | 61    | 1801  |
| >CBL-P417A- CPFRCRCEI    | 6252  | >CBL-P417A- CAFRCRCEI    | 175   | 6077  |
| >CBL-P417A- CPFRCRCEI    | 417   | >CBL-P417A- CAFRCRCEI    | 14128 | 13711 |
| >CBL-P417A- CPFRCRCEI    | 267   | >CBL-P417A- CAFRCRCEI    | 36    | 231   |
| >CBL-P417A- SWQESEGQC    | 585   | >CBL-P417A- SWQESEGQC    | 299   | 286   |
| >CBL-P417A- GQGCPFCR     | 173   | >CBL-P417A- GQGCAFCR     | 222   | 49    |
| >CBL-P417A- EGQGCPFCR    | 508   | >CBL-P417A- EGQGCAFCR    | 187   | 321   |
| >CBL-P417A- EGQGCPFCR    | 239   | >CBL-P417A- EGQGCAFCR    | 281   | 42    |
| >CBL-P417A- SEGQGCPF     | 150   | >CBL-P417A- SEGQGCAF     | 178   | 28    |
| >CBL-P417A- SEGQGCPF     | 290   | >CBL-P417A- SEGQGCAF     | 281   | 9     |

|                         |       |                         |       |       |
|-------------------------|-------|-------------------------|-------|-------|
| >CBL-P417A- SEGQGCPF    | 201   | >CBL-P417A- SEGQGCAF    | 474   | 273   |
| >CBL-P417A- SEGQGCPF    | 1079  | >CBL-P417A- SEGQGCAF    | 468   | 611   |
| >CBL-P417A- SEGQGCPF    | 313   | >CBL-P417A- SEGQGCAF    | 236   | 77    |
| >CBL-P417A- SEGQGCPFC   | 62    | >CBL-P417A- SEGQGCAFC   | 90    | 28    |
| >CBL-P417A- SEGQGCPFCF  | 296   | >CBL-P417A- SEGQGCAFCF  | 325   | 29    |
| >CBL-P417A- ESEGQGCPFC  | 59    | >CBL-P417A- ESEGQGCAFC  | 40    | 19    |
| >CBL-P417A- ESEGQGCPF   | 32    | >CBL-P417A- ESEGQGCAF   | 77    | 45    |
| >CBL-P417A- QESEGQGCP   | 374   | >CBL-P417A- QESEGQGCA   | 566   | 192   |
| >CBL-P417A- QESEGQGCP   | 271   | >CBL-P417A- QESEGQGCA   | 253   | 18    |
| >CBL-P417A- QESEGQGCP   | 3655  | >CBL-P417A- QESEGQGCA   | 22    | 3633  |
| >CBL-P417A- QESEGQGCP   | 187   | >CBL-P417A- QESEGQGCA   | 254   | 67    |
| >CBL-P417A- WQESEGQGC   | 61    | >CBL-P417A- WQESEGQGC   | 75    | 14    |
| >CBL-P417A- WQESEGQGC   | 93    | >CBL-P417A- WQESEGQGC   | 97    | 4     |
| >CBL-P417A- WQESEGQGC   | 12    | >CBL-P417A- WQESEGQGC   | 11    | 1     |
| >CBL-P417A- WQESEGQGC   | 517   | >CBL-P417A- WQESEGQGC   | 460   | 57    |
| >CBL-P417L-1 CPFCRCEI   | 442   | >CBL-P417L-1 CLFCRCEI   | 31049 | 30607 |
| >CBL-P417L-1 CPFCRCEI   | 22640 | >CBL-P417L-1 CLFCRCEI   | 95    | 22545 |
| >CBL-P417L-1 CPFCRCEI   | 25953 | >CBL-P417L-1 CLFCRCEI   | 126   | 25827 |
| >CBL-P417L-1 CPFCRCEI   | 18791 | >CBL-P417L-1 CLFCRCEI   | 143   | 18648 |
| >CBL-P417L-1 CPFCRCEI   | 25268 | >CBL-P417L-1 CLFCRCEI   | 51    | 25217 |
| >CBL-P417L-1 CPFCRCEI   | 22429 | >CBL-P417L-1 CLFCRCEI   | 158   | 22271 |
| >CBL-P417L-1 CPFCRCEI   | 35734 | >CBL-P417L-1 CLFCRCEI   | 97    | 35637 |
| >CBL-P417L-1 CPFCRCEIK  | 14994 | >CBL-P417L-1 CLFCRCEIK  | 225   | 14769 |
| >CBL-P417L-1 CPFCRCEIK  | 14629 | >CBL-P417L-1 CLFCRCEIK  | 386   | 14243 |
| >CBL-P417L-1 CPFCRCEIK  | 1862  | >CBL-P417L-1 CLFCRCEIK  | 269   | 1593  |
| >CBL-P417L-1 CPFCRCEI   | 417   | >CBL-P417L-1 CLFCRCEI   | 29099 | 28682 |
| >CBL-P417L-1 CPFCRCEI   | 267   | >CBL-P417L-1 CLFCRCEI   | 452   | 185   |
| >CBL-P417L-1 SWQESEGQGC | 585   | >CBL-P417L-1 SWQESEGQGC | 188   | 397   |
| >CBL-P417L-1 GQGCPFCR   | 173   | >CBL-P417L-1 GQGCLFCR   | 69    | 104   |
| >CBL-P417L-1 EGQGCPFCR  | 508   | >CBL-P417L-1 EGQGCLFCR  | 318   | 190   |
| >CBL-P417L-1 EGQGCPFCR  | 239   | >CBL-P417L-1 EGQGCLFCR  | 573   | 334   |
| >CBL-P417L-1 SEGQGCPF   | 1314  | >CBL-P417L-1 SEGQGCLF   | 83    | 1231  |
| >CBL-P417L-1 SEGQGCPF   | 150   | >CBL-P417L-1 SEGQGCLF   | 1121  | 971   |
| >CBL-P417L-1 SEGQGCPF   | 290   | >CBL-P417L-1 SEGQGCLF   | 1468  | 1178  |
| >CBL-P417L-1 SEGQGCPF   | 201   | >CBL-P417L-1 SEGQGCLF   | 828   | 627   |
| >CBL-P417L-1 SEGQGCPF   | 313   | >CBL-P417L-1 SEGQGCLF   | 163   | 150   |
| >CBL-P417L-1 SEGQGCPFC  | 62    | >CBL-P417L-1 SEGQGCLFC  | 92    | 30    |
| >CBL-P417L-1 SEGQGCPFCF | 296   | >CBL-P417L-1 SEGQGCLFCR | 322   | 26    |
| >CBL-P417L-1 ESEGQGCPFC | 522   | >CBL-P417L-1 ESEGQGCLFC | 351   | 171   |
| >CBL-P417L-1 ESEGQGCPFC | 59    | >CBL-P417L-1 ESEGQGCLFC | 41    | 18    |
| >CBL-P417L-1 ESEGQGCPF  | 32    | >CBL-P417L-1 ESEGQGCLF  | 85    | 53    |
| >CBL-P417L-1 QESEGQGCP  | 20111 | >CBL-P417L-1 QESEGQGCL  | 464   | 19647 |
| >CBL-P417L-1 QESEGQGCP  | 374   | >CBL-P417L-1 QESEGQGCLF | 3270  | 2896  |

|                          |       |                          |       |       |
|--------------------------|-------|--------------------------|-------|-------|
| >CBL-P417L-1 QESEGQGCPI  | 271   | >CBL-P417L-1 QESEGQGCPI  | 1035  | 764   |
| >CBL-P417L-1 QESEGQGCP   | 10099 | >CBL-P417L-1 QESEGQGCL   | 90    | 10009 |
| >CBL-P417L-1 QESEGQGCPI  | 187   | >CBL-P417L-1 QESEGQGCPI  | 281   | 94    |
| >CBL-P417L-1 QESEGQGCP   | 11143 | >CBL-P417L-1 QESEGQGCL   | 238   | 10905 |
| >CBL-P417L-1 WQESEGQGC   | 61    | >CBL-P417L-1 WQESEGQGC   | 214   | 153   |
| >CBL-P417L-1 WQESEGQGC   | 93    | >CBL-P417L-1 WQESEGQGC   | 292   | 199   |
| >CBL-P417L-1 WQESEGQGC   | 12    | >CBL-P417L-1 WQESEGQGC   | 39    | 27    |
| >CBL-P417L-1 WQESEGQGC   | 19746 | >CBL-P417L-1 WQESEGQGC   | 106   | 19640 |
| >CBL-P417S-1 CPFRCRCEI   | 442   | >CBL-P417S-1 CSFRCRCEI   | 24605 | 24163 |
| >CBL-P417S-1 CPFRCRCEIK  | 14629 | >CBL-P417S-1 CSFRCRCEIK  | 87    | 14542 |
| >CBL-P417S-1 CPFRCRCEIK  | 1862  | >CBL-P417S-1 CSFRCRCEIK  | 70    | 1792  |
| >CBL-P417S-1 CPFRCRCEI   | 6252  | >CBL-P417S-1 CSFRCRCEI   | 220   | 6032  |
| >CBL-P417S-1 CPFRCRCEI   | 417   | >CBL-P417S-1 CSFRCRCEI   | 27464 | 27047 |
| >CBL-P417S-1 CPFRCRCEIK  | 5169  | >CBL-P417S-1 CSFRCRCEIK  | 243   | 4926  |
| >CBL-P417S-1 CPFRCRCEI   | 267   | >CBL-P417S-1 CSFRCRCEI   | 13    | 254   |
| >CBL-P417S-1 GQGCPFCR    | 173   | >CBL-P417S-1 GQGCSFCR    | 111   | 62    |
| >CBL-P417S-1 GQGCPFCR    | 852   | >CBL-P417S-1 GQGCSFCR    | 473   | 379   |
| >CBL-P417S-1 EGQGCPCFR   | 508   | >CBL-P417S-1 EGQGCPCFR   | 218   | 290   |
| >CBL-P417S-1 EGQGCPCFR   | 239   | >CBL-P417S-1 EGQGCPCFR   | 293   | 54    |
| >CBL-P417S-1 SEGQGCPCF   | 150   | >CBL-P417S-1 SEGQGCPCF   | 183   | 33    |
| >CBL-P417S-1 SEGQGCPCF   | 290   | >CBL-P417S-1 SEGQGCPCF   | 485   | 195   |
| >CBL-P417S-1 SEGQGCPCF   | 201   | >CBL-P417S-1 SEGQGCPCF   | 393   | 192   |
| >CBL-P417S-1 SEGQGCPCF   | 313   | >CBL-P417S-1 SEGQGCPCF   | 249   | 64    |
| >CBL-P417S-1 SEGQGCPCFC  | 62    | >CBL-P417S-1 SEGQGCPCFC  | 182   | 120   |
| >CBL-P417S-1 SEGQGCPCFC  | 296   | >CBL-P417S-1 SEGQGCPCFC  | 326   | 30    |
| >CBL-P417S-1 ESEGQGCPCF  | 59    | >CBL-P417S-1 ESEGQGCPCF  | 40    | 19    |
| >CBL-P417S-1 ESEGQGCPCF  | 32    | >CBL-P417S-1 ESEGQGCPCF  | 32    | 0     |
| >CBL-P417S-1 QESEGQGCPI  | 374   | >CBL-P417S-1 QESEGQGCPI  | 595   | 221   |
| >CBL-P417S-1 QESEGQGCPI  | 271   | >CBL-P417S-1 QESEGQGCPI  | 286   | 15    |
| >CBL-P417S-1 QESEGQGCP   | 3655  | >CBL-P417S-1 QESEGQGCS   | 385   | 3270  |
| >CBL-P417S-1 QESEGQGCPI  | 187   | >CBL-P417S-1 QESEGQGCPI  | 400   | 213   |
| >CBL-P417S-1 WQESEGQGC   | 61    | >CBL-P417S-1 WQESEGQGC   | 73    | 12    |
| >CBL-P417S-1 WQESEGQGC   | 93    | >CBL-P417S-1 WQESEGQGC   | 154   | 61    |
| >CBL-P417S-1 WQESEGQGC   | 12    | >CBL-P417S-1 WQESEGQGC   | 13    | 1     |
| >CBL-P428L-1 PIVVDPFDPR  | 2445  | >CBL-P428L-1 LIVVDPFDPR  | 134   | 2311  |
| >CBL-P428L-1 PIVVDPFDPR  | 816   | >CBL-P428L-1 LIVVDPFDPR  | 391   | 425   |
| >CBL-P428L-1 EPIVVDPF    | 110   | >CBL-P428L-1 ELIVVDPF    | 32    | 78    |
| >CBL-P428L-1 EPIVVDPFDPI | 407   | >CBL-P428L-1 ELIVVDPFDPI | 38    | 369   |
| >CBL-P428L-1 EPIVVDPFDPI | 59    | >CBL-P428L-1 ELIVVDPFDPI | 11    | 48    |
| >CBL-P428L-1 EPIVVDPF    | 13580 | >CBL-P428L-1 ELIVVDPF    | 206   | 13374 |
| >CBL-P428L-1 EPIVVDPF    | 11    | >CBL-P428L-1 ELIVVDPF    | 422   | 411   |
| >CBL-P428L-1 EPIVVDPF    | 152   | >CBL-P428L-1 ELIVVDPF    | 27037 | 26885 |
| >CBL-P428L-1 EPIVVDPF    | 93    | >CBL-P428L-1 ELIVVDPF    | 5265  | 5172  |



|                          |       |                          |       |       |
|--------------------------|-------|--------------------------|-------|-------|
| >CBL-P428L-1 EPIVVDPF    | 39    | >CBL-P428L-1 ELIVVDPF    | 17323 | 17284 |
| >CBL-P428L-1 TEPIVVDPF   | 166   | >CBL-P428L-1 TELIVVDPF   | 52    | 114   |
| >CBL-P428L-1 TEPIVVDPF   | 234   | >CBL-P428L-1 TELIVVDPF   | 15    | 219   |
| >CBL-P428L-1 TEPIVVDPF   | 6266  | >CBL-P428L-1 TELIVVDPF   | 340   | 5926  |
| >CBL-P428L-1 TEPIVVDPF   | 864   | >CBL-P428L-1 TELIVVDPF   | 56    | 808   |
| >CBL-P428L-1 TEPIVVDPF   | 2294  | >CBL-P428L-1 TELIVVDPF   | 272   | 2022  |
| >CBL-P428L-1 TEPIVVDPF   | 1974  | >CBL-P428L-1 TELIVVDPF   | 137   | 1837  |
| >CBL-P428L-1 TEPIVVDPF   | 262   | >CBL-P428L-1 TELIVVDPF   | 50    | 212   |
| >CBL-P428L-1 GTEPIVVDPF  | 184   | >CBL-P428L-1 GTELIVVDPF  | 184   | 0     |
| >CBL-P428L-1 GTEPIVVDPF  | 22    | >CBL-P428L-1 GTELIVVDPF  | 103   | 81    |
| >CBL-P428L-1 KGTEPIVDP   | 807   | >CBL-P428L-1 KGTELIVDP   | 337   | 470   |
| >CBL-P428L-1 IKGTEPIV    | 252   | >CBL-P428L-1 IKGTELIV    | 551   | 299   |
| >CBL-P428L-1 EIKGTEPIV   | 597   | >CBL-P428L-1 EIKGTELIV   | 377   | 220   |
| >CBL-P428L-1 EIKGTEPIV   | 218   | >CBL-P428L-1 EIKGTELIV   | 804   | 586   |
| >CBL-P428L-1 EIKGTEPIV   | 416   | >CBL-P428L-1 EIKGTELIV   | 403   | 13    |
| >CBL-P428L-1 EIKGTEPI    | 310   | >CBL-P428L-1 EIKGTELI    | 805   | 495   |
| >CBL-P428L-1 CEIKGTEPI   | 124   | >CBL-P428L-1 CEIKGTELI   | 31    | 93    |
| >CBL-P428L-1 CEIKGTEP    | 7841  | >CBL-P428L-1 CEIKGTEL    | 472   | 7369  |
| >CBL-P428L-1 CEIKGTEP    | 6385  | >CBL-P428L-1 CEIKGTEL    | 52    | 6333  |
| >CBL-P428L-1 CEIKGTEPI   | 32    | >CBL-P428L-1 CEIKGTELI   | 51    | 19    |
| >CBL-P428L-1 CEIKGTEPIV  | 190   | >CBL-P428L-1 CEIKGTELIV  | 134   | 56    |
| >CBL-P428L-1 CEIKGTEP    | 3798  | >CBL-P428L-1 CEIKGTEL    | 101   | 3697  |
| >CBL-P428L-1 CEIKGTEPI   | 147   | >CBL-P428L-1 CEIKGTELI   | 697   | 550   |
| >CBL-P428L-1 CEIKGTEPIV  | 385   | >CBL-P428L-1 CEIKGTELIV  | 291   | 94    |
| >CBL-P428L-1 CEIKGTEPI   | 328   | >CBL-P428L-1 CEIKGTELI   | 1526  | 1198  |
| >CBL-P428L-1 CEIKGTEPIV  | 141   | >CBL-P428L-1 CEIKGTELIV  | 132   | 9     |
| >CBL-P428L-1 CEIKGTEP    | 16508 | >CBL-P428L-1 CEIKGTEL    | 496   | 16012 |
| >CBL-P428L-1 CEIKGTEPI   | 5     | >CBL-P428L-1 CEIKGTELI   | 4     | 1     |
| >CBL-P428L-1 CEIKGTEPIV  | 16    | >CBL-P428L-1 CEIKGTELIV  | 9     | 7     |
| >CBL-P428L-1 CRCEIKGTEP  | 14420 | >CBL-P428L-1 CRCEIKGTEL  | 199   | 14221 |
| >CBL-P428L-1 CRCEIKGTEP  | 14907 | >CBL-P428L-1 CRCEIKGTEL  | 324   | 14583 |
| >CBL-P428L-1 CRCEIKGTEPI | 393   | >CBL-P428L-1 CRCEIKGTELI | 350   | 43    |
| >CBL-Q249E- QPWSSLLR     | 2759  | >CBL-Q249E- EPWSSLLR     | 351   | 2408  |
| >CBL-Q249E- QPWSSLLR     | 2225  | >CBL-Q249E- EPWSSLLR     | 198   | 2027  |
| >CBL-Q249E- QPWSSLLRN\   | 12    | >CBL-Q249E- EPWSSLLRN\   | 10    | 2     |
| >CBL-Q249E- QPWSSLLR     | 108   | >CBL-Q249E- EPWSSLLR     | 119   | 11    |
| >CBL-Q249E- FQPWSSLL     | 7330  | >CBL-Q249E- FEPWSSLL     | 30    | 7300  |
| >CBL-Q249E- FQPWSSLLRN   | 10581 | >CBL-Q249E- FEPWSSLLRN   | 421   | 10160 |
| >CBL-Q249E- FQPWSSLL     | 122   | >CBL-Q249E- FEPWSSLL     | 17832 | 17710 |
| >CBL-Q249E- FQPWSSLL     | 60    | >CBL-Q249E- FEPWSSLL     | 4572  | 4512  |
| >CBL-Q249E- FQPWSSLL     | 53    | >CBL-Q249E- FEPWSSLL     | 7412  | 7359  |
| >CBL-Q249E- FQPWSSLL     | 6     | >CBL-Q249E- FEPWSSLL     | 1183  | 1177  |
| >CBL-Q249E- FQPWSSLL     | 170   | >CBL-Q249E- FEPWSSLL     | 5295  | 5125  |

|                         |      |                         |      |      |
|-------------------------|------|-------------------------|------|------|
| >CBL-Q249E- FQPWSSLLR   | 479  | >CBL-Q249E- FEPWSSLLR   | 963  | 484  |
| >CBL-Q249E- FQPWSSLL    | 320  | >CBL-Q249E- FEPWSSLL    | 7181 | 6861 |
| >CBL-Q249E- FQPWSSLL    | 79   | >CBL-Q249E- FEPWSSLL    | 880  | 801  |
| >CBL-Q249E- FQPWSSLL    | 4659 | >CBL-Q249E- FEPWSSLL    | 152  | 4507 |
| >CBL-Q249E- FQPWSSLLRN  | 8526 | >CBL-Q249E- FEPWSSLLRN  | 216  | 8310 |
| >CBL-Q249E- FQPWSSLLRN  | 8031 | >CBL-Q249E- FEPWSSLLRN  | 285  | 7746 |
| >CBL-Q249E- FQPWSSLL    | 149  | >CBL-Q249E- FEPWSSLL    | 3198 | 3049 |
| >CBL-Q249E- FQPWSSLL    | 103  | >CBL-Q249E- FEPWSSLL    | 1522 | 1419 |
| >CBL-Q249E- FQPWSSLLR   | 82   | >CBL-Q249E- FEPWSSLLR   | 177  | 95   |
| >CBL-Q249E- FEFDIFTRLFQ | 366  | >CBL-Q249E- FEFDIFTRLFE | 1100 | 734  |
| >CBL-Q249E- FEFDIFTRLFQ | 119  | >CBL-Q249E- FEFDIFTRLFE | 491  | 372  |
| >CBL-Q249E- FEFDIFTRLFQ | 173  | >CBL-Q249E- FEFDIFTRLFE | 255  | 82   |
| >CBL-Q249E- FEFDIFTRLFQ | 332  | >CBL-Q249E- FEFDIFTRLFE | 905  | 573  |
| >CBL-Q249E- FEFDIFTRLFQ | 495  | >CBL-Q249E- FEFDIFTRLFE | 543  | 48   |
| >CBL-Q249E- LFQPWSSL    | 343  | >CBL-Q249E- LFEPWSSL    | 1687 | 1344 |
| >CBL-Q249E- LFQPWSSLL   | 95   | >CBL-Q249E- LFEPWSSLL   | 450  | 355  |
| >CBL-Q249E- LFQPWSSLL   | 150  | >CBL-Q249E- LFEPWSSLL   | 611  | 461  |
| >CBL-Q249E- LFQPWSSL    | 47   | >CBL-Q249E- LFEPWSSL    | 501  | 454  |
| >CBL-Q249E- LFQPWSSLL   | 37   | >CBL-Q249E- LFEPWSSLL   | 391  | 354  |
| >CBL-Q249E- LFQPWSSLLR  | 13   | >CBL-Q249E- LFEPWSSLLR  | 69   | 56   |
| >CBL-Q249E- LFQPWSSLLR  | 44   | >CBL-Q249E- LFEPWSSLLR  | 102  | 58   |
| >CBL-Q249E- LFQPWSSLLR  | 158  | >CBL-Q249E- LFEPWSSLLR  | 301  | 143  |
| >CBL-Q249E- LFQPWSSLL   | 96   | >CBL-Q249E- LFEPWSSLL   | 110  | 14   |
| >CBL-Q249E- LFQPWSSLLR  | 79   | >CBL-Q249E- LFEPWSSLLR  | 105  | 26   |
| >CBL-Q249E- LFQPWSSLLR  | 183  | >CBL-Q249E- LFEPWSSLLR  | 164  | 19   |
| >CBL-Q249E- LFQPWSSL    | 158  | >CBL-Q249E- LFEPWSSL    | 257  | 99   |
| >CBL-Q249E- LFQPWSSLL   | 101  | >CBL-Q249E- LFEPWSSLL   | 161  | 60   |
| >CBL-Q249E- RLFQPWSS    | 1462 | >CBL-Q249E- RLFEPWSS    | 297  | 1165 |
| >CBL-Q249E- RLFQPWSSL   | 85   | >CBL-Q249E- RLFEPWSSL   | 19   | 66   |
| >CBL-Q249E- RLFQPWSSLL  | 168  | >CBL-Q249E- RLFEPWSSLL  | 86   | 82   |
| >CBL-Q249E- RLFQPWSSL   | 62   | >CBL-Q249E- RLFEPWSSL   | 17   | 45   |
| >CBL-Q249E- RLFQPWSSLL  | 22   | >CBL-Q249E- RLFEPWSSLL  | 13   | 9    |
| >CBL-Q249E- RLFQPWSSL   | 30   | >CBL-Q249E- RLFEPWSSL   | 8    | 22   |
| >CBL-Q249E- RLFQPWSSLL  | 36   | >CBL-Q249E- RLFEPWSSLL  | 30   | 6    |
| >CBL-Q249E- RLFQPWSS    | 1187 | >CBL-Q249E- RLFEPWSS    | 197  | 990  |
| >CBL-Q249E- RLFQPWSSL   | 134  | >CBL-Q249E- RLFEPWSSL   | 16   | 118  |
| >CBL-Q249E- RLFQPWSSLL  | 622  | >CBL-Q249E- RLFEPWSSLL  | 277  | 345  |
| >CBL-Q249E- RLFQPWSS    | 32   | >CBL-Q249E- RLFEPWSS    | 9    | 23   |
| >CBL-Q249E- RLFQPWSSL   | 3    | >CBL-Q249E- RLFEPWSSL   | 2    | 1    |
| >CBL-Q249E- RLFQPWSSLL  | 3    | >CBL-Q249E- RLFEPWSSLL  | 2    | 1    |
| >CBL-Q249E- RLFQPWSSL   | 156  | >CBL-Q249E- RLFEPWSSL   | 13   | 143  |
| >CBL-Q249E- RLFQPWSSLL  | 75   | >CBL-Q249E- RLFEPWSSLL  | 12   | 63   |
| >CBL-Q249E- RLFQPWSS    | 1025 | >CBL-Q249E- RLFEPWSS    | 416  | 609  |

|                        |     |                         |     |     |
|------------------------|-----|-------------------------|-----|-----|
| >CBL-Q249E- RLFQPWSSL  | 27  | >CBL-Q249E- RLFEPWSSL   | 10  | 17  |
| >CBL-Q249E- RLFQPWSSLL | 18  | >CBL-Q249E- RLFEPWSSLL  | 8   | 10  |
| >CBL-Q249E- RLFQPWSSL  | 700 | >CBL-Q249E- RLFEPWSSL   | 84  | 616 |
| >CBL-Q249E- RLFQPWSSLL | 331 | >CBL-Q249E- RLFEPWSSLL  | 52  | 279 |
| >CBL-Q249E- RLFQPWSS   | 240 | >CBL-Q249E- RLFEPWSS    | 123 | 117 |
| >CBL-Q249E- RLFQPWSSL  | 9   | >CBL-Q249E- RLFEPWSSL   | 6   | 3   |
| >CBL-Q249E- RLFQPWSSLL | 7   | >CBL-Q249E- RLFEPWSSLL  | 5   | 2   |
| >CBL-Q249E- RLFQPWSSLL | 33  | >CBL-Q249E- RLFEPWSSLLI | 30  | 3   |
| >CBL-Q249E- RLFQPWSSLL | 77  | >CBL-Q249E- RLFEPWSSLLI | 50  | 27  |
| >CBL-Q249E- RLFQPWSSL  | 927 | >CBL-Q249E- RLFEPWSSL   | 477 | 450 |
| >CBL-Q249E- RLFQPWSSLL | 730 | >CBL-Q249E- RLFEPWSSLLI | 427 | 303 |
| >CBL-Q249E- RLFQPWSSLL | 21  | >CBL-Q249E- RLFEPWSSLLI | 16  | 5   |
| >CBL-Q249E- RLFQPWSSL  | 157 | >CBL-Q249E- RLFEPWSSL   | 135 | 22  |
| >CBL-Q249E- RLFQPWSSLL | 159 | >CBL-Q249E- RLFEPWSSLL  | 140 | 19  |
| >CBL-Q249E- RLFQPWSSLL | 259 | >CBL-Q249E- RLFEPWSSLLI | 181 | 78  |
| >CBL-Q249E- RLFQPWSSL  | 119 | >CBL-Q249E- RLFEPWSSL   | 305 | 186 |
| >CBL-Q249E- RLFQPWSSL  | 72  | >CBL-Q249E- RLFEPWSSL   | 101 | 29  |
| >CBL-Q249E- RLFQPWSSLL | 166 | >CBL-Q249E- RLFEPWSSLL  | 244 | 78  |
| >CBL-Q249E- RLFQPWSSL  | 101 | >CBL-Q249E- RLFEPWSSL   | 88  | 13  |
| >CBL-Q249E- RLFQPWSSLL | 504 | >CBL-Q249E- RLFEPWSSLL  | 450 | 54  |
| >CBL-Q249E- RLFQPWSSL  | 25  | >CBL-Q249E- RLFEPWSSL   | 18  | 7   |
| >CBL-Q249E- RLFQPWSSLL | 71  | >CBL-Q249E- RLFEPWSSLL  | 62  | 9   |
| >CBL-Q249E- RLFQPWSSL  | 29  | >CBL-Q249E- RLFEPWSSL   | 29  | 0   |
| >CBL-Q249E- RLFQPWSSLL | 48  | >CBL-Q249E- RLFEPWSSLL  | 49  | 1   |
| >CBL-Q249E- RLFQPWSSL  | 606 | >CBL-Q249E- RLFEPWSSL   | 256 | 350 |
| >CBL-Q249E- RLFQPWSSLL | 542 | >CBL-Q249E- RLFEPWSSLL  | 272 | 270 |
| >CBL-Q249E- RLFQPWSSL  | 16  | >CBL-Q249E- RLFEPWSSL   | 59  | 43  |
| >CBL-Q249E- RLFQPWSSL  | 338 | >CBL-Q249E- RLFEPWSSL   | 859 | 521 |
| >CBL-Q249E- RLFQPWSSLL | 26  | >CBL-Q249E- RLFEPWSSLLI | 37  | 11  |
| >CBL-Q249E- RLFQPWSSL  | 234 | >CBL-Q249E- RLFEPWSSL   | 291 | 57  |
| >CBL-Q249E- TRLFQPWSSL | 145 | >CBL-Q249E- TRLFEPWSSL  | 251 | 106 |
| >CBL-Q249E- TRLFQPWSSL | 276 | >CBL-Q249E- TRLFEPWSSL  | 492 | 216 |
| >CBL-Q249E- TRLFQPWSSL | 65  | >CBL-Q249E- TRLFEPWSSL  | 57  | 8   |
| >CBL-Q249E- TRLFQPWSSL | 61  | >CBL-Q249E- TRLFEPWSSL  | 56  | 5   |
| >CBL-Q249E- TRLFQPWSSL | 266 | >CBL-Q249E- TRLFEPWSSL  | 468 | 202 |
| >CBL-Q249E- TRLFQPWSSL | 469 | >CBL-Q249E- TRLFEPWSSL  | 839 | 370 |
| >CBL-Q249E- TRLFQPWSSL | 56  | >CBL-Q249E- TRLFEPWSSL  | 86  | 30  |
| >CBL-Q249E- FTRLFQPWSS | 313 | >CBL-Q249E- FTRLFEPWSS  | 594 | 281 |
| >CBL-Q249E- FTRLFQPWSS | 391 | >CBL-Q249E- FTRLFEPWSS  | 520 | 129 |
| >CBL-Q249E- FTRLFQPWSS | 368 | >CBL-Q249E- FTRLFEPWSS  | 425 | 57  |
| >CBL-Q249E- FTRLFQPW   | 5   | >CBL-Q249E- FTRLFEPW    | 7   | 2   |
| >CBL-Q249E- FTRLFQPWSS | 8   | >CBL-Q249E- FTRLFEPWSS  | 10  | 2   |
| >CBL-Q249E- FTRLFQPW   | 45  | >CBL-Q249E- FTRLFEPW    | 49  | 4   |

|                          |       |                          |       |       |
|--------------------------|-------|--------------------------|-------|-------|
| >CBL-Q249E- FTRLFQPW     | 170   | >CBL-Q249E- FTRLFEPW     | 195   | 25    |
| >CBL-Q249E- FTRLFQPWSS   | 387   | >CBL-Q249E- FTRLFEPWSS   | 613   | 226   |
| >CBL-Q249E- FTRLFQPWSS   | 324   | >CBL-Q249E- FTRLFEPWSS   | 285   | 39    |
| >CBL-Q249E- FTRLFQPWSS   | 11    | >CBL-Q249E- FTRLFEPWSS   | 14    | 3     |
| >CBL-Q249E- FTRLFQPW     | 754   | >CBL-Q249E- FTRLFEPW     | 407   | 347   |
| >CBL-Q249E- FTRLFQPWSS   | 134   | >CBL-Q249E- FTRLFEPWSS   | 252   | 118   |
| >CBL-Q249E- IFTRLFQPW    | 474   | >CBL-Q249E- IFTRLFEPW    | 511   | 37    |
| >CBL-Q249E- IFTRLFQPW    | 164   | >CBL-Q249E- IFTRLFEPW    | 252   | 88    |
| >CBL-Q249E- IFTRLFQPW    | 360   | >CBL-Q249E- IFTRLFEPW    | 437   | 77    |
| >CBL-Q249E- IFTRLFQPW    | 331   | >CBL-Q249E- IFTRLFEPW    | 203   | 128   |
| >CBL-Q249E- DIFTRLFQ     | 287   | >CBL-Q249E- DIFTRLFE     | 1567  | 1280  |
| >CBL-Q249E- FDIFTRLFQPW  | 358   | >CBL-Q249E- FDIFTRLFEPV  | 212   | 146   |
| >CBL-R420G- CRCEIKGTEPI  | 393   | >CBL-R420G- CGCEIKGTEPI  | 72    | 321   |
| >CBL-R420G- ESEGQGPCFC   | 59    | >CBL-R420G- ESEGQGPCFC   | 32331 | 32272 |
| >CBL-R420G- CPFCRCEI     | 442   | >CBL-R420G- CPFCGCEI     | 374   | 68    |
| >CBL-R420G- CPFCRCEI     | 509   | >CBL-R420G- CPFCGCEI     | 348   | 161   |
| >CBL-R420G- CPFCRCEI     | 645   | >CBL-R420G- CPFCGCEI     | 307   | 338   |
| >CBL-R420G- CPFCRCEI     | 417   | >CBL-R420G- CPFCGCEI     | 269   | 148   |
| >CBL-R420G- CPFCRCEI     | 267   | >CBL-R420G- CPFCGCEI     | 191   | 76    |
| >CBL-R420G- GQGCPFCRCI   | 1019  | >CBL-R420G- GQGCPFCGCI   | 492   | 527   |
| >CBL-R420G- GQGCPFCRCI   | 1497  | >CBL-R420G- GQGCPFCGCI   | 477   | 1020  |
| >CBL-R420G- GQGCPFCR     | 173   | >CBL-R420G- GQGCPFCG     | 20469 | 20296 |
| >CBL-R420G- EGQGCPFCR    | 239   | >CBL-R420G- EGQGCPFCG    | 35545 | 35306 |
| >CBL-R420G- SEGQGPCFCF   | 1116  | >CBL-R420G- SEGQGPCFCC   | 313   | 803   |
| >CBL-R420G- SEGQGPCFCF   | 296   | >CBL-R420G- SEGQGPCFCC   | 277   | 19    |
| >CBL-R420L-1 CRCEIKGTEPI | 18188 | >CBL-R420L-1 CLCEIKGTEPI | 230   | 17958 |
| >CBL-R420L-1 CRCEIKGTEPI | 18453 | >CBL-R420L-1 CLCEIKGTEPI | 161   | 18292 |
| >CBL-R420L-1 CRCEIKGTEPI | 22648 | >CBL-R420L-1 CLCEIKGTEPI | 49    | 22599 |
| >CBL-R420L-1 CRCEIKGTEPI | 34341 | >CBL-R420L-1 CLCEIKGTEPI | 292   | 34049 |
| >CBL-R420L-1 CRCEIKGTEPI | 393   | >CBL-R420L-1 CLCEIKGTEPI | 338   | 55    |
| >CBL-R420L-1 ESEGQGPCFC  | 59    | >CBL-R420L-1 ESEGQGPCFC  | 25447 | 25388 |
| >CBL-R420L-1 CPFCRCEI    | 442   | >CBL-R420L-1 CPFCLCEI    | 651   | 209   |
| >CBL-R420L-1 CPFCRCEI    | 509   | >CBL-R420L-1 CPFCLCEI    | 218   | 291   |
| >CBL-R420L-1 CPFCRCEI    | 645   | >CBL-R420L-1 CPFCLCEI    | 264   | 381   |
| >CBL-R420L-1 CPFCRCEI    | 417   | >CBL-R420L-1 CPFCLCEI    | 186   | 231   |
| >CBL-R420L-1 CPFCRCEI    | 267   | >CBL-R420L-1 CPFCLCEI    | 302   | 35    |
| >CBL-R420L-1 GQGCPFCRCI  | 1019  | >CBL-R420L-1 GQGCPFCLCE  | 145   | 874   |
| >CBL-R420L-1 GQGCPFCR    | 18816 | >CBL-R420L-1 GQGCPFCL    | 338   | 18478 |
| >CBL-R420L-1 GQGCPFCRCI  | 1497  | >CBL-R420L-1 GQGCPFCLCE  | 317   | 1180  |
| >CBL-R420L-1 GQGCPFCR    | 173   | >CBL-R420L-1 GQGCPFCL    | 16192 | 16019 |
| >CBL-R420L-1 EGQGCPFCR   | 239   | >CBL-R420L-1 EGQGCPFCL   | 32562 | 32323 |
| >CBL-R420L-1 SEGQGPCFCF  | 15353 | >CBL-R420L-1 SEGQGPCFCL  | 388   | 14965 |
| >CBL-R420L-1 SEGQGPCFCF  | 3721  | >CBL-R420L-1 SEGQGPCFCL  | 421   | 3300  |

|                         |       |                         |       |       |
|-------------------------|-------|-------------------------|-------|-------|
| >CBL-R420L-1 SEGQGCPFCF | 296   | >CBL-R420L-1 SEGQGCPFCF | 409   | 113   |
| >CBL-R420P- CRCEIKGTEPI | 393   | >CBL-R420P- CPCEIKGTEPI | 163   | 230   |
| >CBL-R420P- ESEGQGCPFC  | 59    | >CBL-R420P- ESEGQGCPFC  | 30971 | 30912 |
| >CBL-R420P- CPFRCRCEI   | 442   | >CBL-R420P- CPFRCRCEI   | 882   | 440   |
| >CBL-R420P- CPFRCRCEI   | 509   | >CBL-R420P- CPFRCRCEI   | 176   | 333   |
| >CBL-R420P- CPFRCRCEI   | 645   | >CBL-R420P- CPFRCRCEI   | 403   | 242   |
| >CBL-R420P- CPFRCRCEI   | 417   | >CBL-R420P- CPFRCRCEI   | 219   | 198   |
| >CBL-R420P- CPFRCRCEI   | 267   | >CBL-R420P- CPFRCRCEI   | 159   | 108   |
| >CBL-R420P- GQGCPFCRCI  | 1497  | >CBL-R420P- GQGCPFCRCI  | 385   | 1112  |
| >CBL-R420P- GQGCPFCR    | 173   | >CBL-R420P- GQGCPFCR    | 21165 | 20992 |
| >CBL-R420P- GQGCPFCRCI  | 852   | >CBL-R420P- GQGCPFCRCI  | 499   | 353   |
| >CBL-R420P- EGQGCPFCR   | 239   | >CBL-R420P- EGQGCPFCR   | 35336 | 35097 |
| >CBL-R420P- SEGQGCPFCF  | 296   | >CBL-R420P- SEGQGCPFCF  | 156   | 140   |
| >CBL-R420Q- CRCEIKGTEPI | 17099 | >CBL-R420Q- CQCEIKGTEPI | 209   | 16890 |
| >CBL-R420Q- CRCEIKGTEPI | 393   | >CBL-R420Q- CQCEIKGTEPI | 236   | 157   |
| >CBL-R420Q- ESEGQGCPFC  | 59    | >CBL-R420Q- ESEGQGCPFC  | 10259 | 10200 |
| >CBL-R420Q- CPFRCRCEI   | 442   | >CBL-R420Q- CPFRCRCEI   | 522   | 80    |
| >CBL-R420Q- CPFRCRCEI   | 509   | >CBL-R420Q- CPFRCRCEI   | 218   | 291   |
| >CBL-R420Q- CPFRCRCEI   | 645   | >CBL-R420Q- CPFRCRCEI   | 264   | 381   |
| >CBL-R420Q- CPFRCRCEI   | 417   | >CBL-R420Q- CPFRCRCEI   | 461   | 44    |
| >CBL-R420Q- CPFRCRCEI   | 267   | >CBL-R420Q- CPFRCRCEI   | 318   | 51    |
| >CBL-R420Q- GQGCPFCR    | 173   | >CBL-R420Q- GQGCPFCR    | 16238 | 16065 |
| >CBL-R420Q- EGQGCPFCR   | 239   | >CBL-R420Q- EGQGCPFCR   | 22714 | 22475 |
| >CBL-R420Q- SEGQGCPFCF  | 296   | >CBL-R420Q- SEGQGCPFCF  | 579   | 283   |
| >CBL-R499L-1 RLDLLPQRV  | 138   | >CBL-R499L-1 LLDLLPQRV  | 102   | 36    |
| >CBL-R499L-1 RLDLLPQRVC | 249   | >CBL-R499L-1 LLDLLPQRVC | 181   | 68    |
| >CBL-R499L-1 RLDLLPQRV  | 490   | >CBL-R499L-1 LLDLLPQRV  | 331   | 159   |
| >CBL-R499L-1 RLDLLPQRVC | 468   | >CBL-R499L-1 LLDLLPQRVC | 264   | 204   |
| >CBL-R499L-1 RLDLLPQRV  | 367   | >CBL-R499L-1 LLDLLPQRV  | 423   | 56    |
| >CBL-R499L-1 RLDLLPQRV  | 3     | >CBL-R499L-1 LLDLLPQRV  | 3     | 0     |
| >CBL-R499L-1 RLDLLPQRVC | 19    | >CBL-R499L-1 LLDLLPQRVC | 19    | 0     |
| >CBL-R499L-1 RLDLLPQRV  | 20    | >CBL-R499L-1 LLDLLPQRV  | 17    | 3     |
| >CBL-R499L-1 RLDLLPQRVC | 34    | >CBL-R499L-1 LLDLLPQRVC | 28    | 6     |
| >CBL-R499L-1 RLDLLPQRV  | 8     | >CBL-R499L-1 LLDLLPQRV  | 8     | 0     |
| >CBL-R499L-1 RLDLLPQRVC | 10    | >CBL-R499L-1 LLDLLPQRVC | 9     | 1     |
| >CBL-R499L-1 RLDLLPQRV  | 18    | >CBL-R499L-1 LLDLLPQRV  | 8     | 10    |
| >CBL-R499L-1 RLDLLPQRVC | 56    | >CBL-R499L-1 LLDLLPQRVC | 25    | 31    |
| >CBL-R499L-1 RLDLLPQRV  | 9     | >CBL-R499L-1 LLDLLPQRV  | 4     | 5     |
| >CBL-R499L-1 RLDLLPQRVC | 15    | >CBL-R499L-1 LLDLLPQRVC | 8     | 7     |
| >CBL-R499L-1 RLDLLPQR   | 252   | >CBL-R499L-1 LLDLLPQR   | 1977  | 1725  |
| >CBL-R499L-1 RLDLLPQR   | 364   | >CBL-R499L-1 LLDLLPQR   | 3343  | 2979  |
| >CBL-R499L-1 PRLDLLPQRV | 21622 | >CBL-R499L-1 PLLDLLPQRV | 412   | 21210 |
| >CBL-R499L-1 PRLDLLPQRV | 6988  | >CBL-R499L-1 PLLDLLPQRV | 3     | 6985  |

|                          |       |                          |      |       |
|--------------------------|-------|--------------------------|------|-------|
| >CBL-R499L-1 PRLDLLPQRV  | 20641 | >CBL-R499L-1 PLLDLLPQRV  | 80   | 20561 |
| >CBL-R499L-1 PRLDLLPQRV  | 10215 | >CBL-R499L-1 PLLDLLPQRV  | 7    | 10208 |
| >CBL-R499L-1 PRLDLLPQRV  | 14273 | >CBL-R499L-1 PLLDLLPQRV  | 4    | 14269 |
| >CBL-R499L-1 PRLDLLPQRV  | 8487  | >CBL-R499L-1 PLLDLLPQRV  | 3    | 8484  |
| >CBL-R499L-1 PQASLPPVPP  | 1381  | >CBL-R499L-1 PQASLPPVPP  | 176  | 1205  |
| >CBL-R499L-1 VPPRLDLL    | 322   | >CBL-R499L-1 VPPLDLL     | 1568 | 1246  |
| >CBL-R499L-1 VPPRLDLL    | 227   | >CBL-R499L-1 VPPLDLL     | 1293 | 1066  |
| >CBL-R499L-1 VPPRLDLL    | 214   | >CBL-R499L-1 VPPLDLL     | 167  | 47    |
| >CBL-R499L-1 PVPPRLDLL   | 148   | >CBL-R499L-1 PVPPLLDLL   | 36   | 112   |
| >CBL-R499L-1 PPVPPRLDL   | 43    | >CBL-R499L-1 PPVPPLDL    | 167  | 124   |
| >CBL-R499L-1 PPVPPRLDL   | 134   | >CBL-R499L-1 PPVPPLDL    | 1520 | 1386  |
| >CBL-R499L-1 LPPVPPRL    | 454   | >CBL-R499L-1 LPPVPPLL    | 442  | 12    |
| >CBL-R499L-1 LPPVPPRLDL  | 214   | >CBL-R499L-1 LPPVPPLDL   | 183  | 31    |
| >CBL-R499L-1 LPPVPPRLDL  | 194   | >CBL-R499L-1 LPPVPPLDL   | 424  | 230   |
| >CBL-R499L-1 LPPVPPRL    | 610   | >CBL-R499L-1 LPPVPPLL    | 319  | 291   |
| >CBL-R499L-1 LPPVPPRLDI  | 345   | >CBL-R499L-1 LPPVPPLLDL  | 244  | 101   |
| >CBL-R499L-1 LPPVPPRL    | 68    | >CBL-R499L-1 LPPVPPLL    | 11   | 57    |
| >CBL-R499L-1 LPPVPPRLDL  | 562   | >CBL-R499L-1 LPPVPPLDL   | 178  | 384   |
| >CBL-R499L-1 LPPVPPRLDI  | 32    | >CBL-R499L-1 LPPVPPLLDL  | 19   | 13    |
| >CBL-R499L-1 SLPPVPPR    | 18780 | >CBL-R499L-1 SLPPVPPL    | 28   | 18752 |
| >CBL-R499L-1 SLPPVPPRL   | 58    | >CBL-R499L-1 SLPPVPPLL   | 30   | 28    |
| >CBL-R499L-1 SLPPVPPRLDI | 960   | >CBL-R499L-1 SLPPVPPLDL  | 210  | 750   |
| >CBL-R499L-1 SLPPVPPR    | 15121 | >CBL-R499L-1 SLPPVPPL    | 44   | 15077 |
| >CBL-R499L-1 SLPPVPPRL   | 130   | >CBL-R499L-1 SLPPVPPLL   | 37   | 93    |
| >CBL-R499L-1 SLPPVPPRLDI | 1063  | >CBL-R499L-1 SLPPVPPLLDL | 284  | 779   |
| >CBL-R499L-1 SLPPVPPR    | 13063 | >CBL-R499L-1 SLPPVPPL    | 25   | 13038 |
| >CBL-R499L-1 SLPPVPPRL   | 104   | >CBL-R499L-1 SLPPVPPLL   | 49   | 55    |
| >CBL-R499L-1 SLPPVPPRLDI | 720   | >CBL-R499L-1 SLPPVPPLLDL | 127  | 593   |
| >CBL-R499L-1 SLPPVPPR    | 16344 | >CBL-R499L-1 SLPPVPPL    | 70   | 16274 |
| >CBL-R499L-1 SLPPVPPRL   | 1053  | >CBL-R499L-1 SLPPVPPLL   | 287  | 766   |
| >CBL-R499L-1 SLPPVPPRLDI | 2889  | >CBL-R499L-1 SLPPVPPLLDL | 464  | 2425  |
| >CBL-R499L-1 SLPPVPPR    | 2830  | >CBL-R499L-1 SLPPVPPL    | 4    | 2826  |
| >CBL-R499L-1 SLPPVPPRL   | 4     | >CBL-R499L-1 SLPPVPPLL   | 4    | 0     |
| >CBL-R499L-1 SLPPVPPRLDI | 95    | >CBL-R499L-1 SLPPVPPLLDL | 20   | 75    |
| >CBL-R499L-1 SLPPVPPR    | 23086 | >CBL-R499L-1 SLPPVPPL    | 51   | 23035 |
| >CBL-R499L-1 SLPPVPPRL   | 289   | >CBL-R499L-1 SLPPVPPLL   | 233  | 56    |
| >CBL-R499L-1 SLPPVPPR    | 4512  | >CBL-R499L-1 SLPPVPPL    | 7    | 4505  |
| >CBL-R499L-1 SLPPVPPRL   | 7     | >CBL-R499L-1 SLPPVPPLL   | 6    | 1     |
| >CBL-R499L-1 SLPPVPPRLDI | 63    | >CBL-R499L-1 SLPPVPPLLDL | 20   | 43    |
| >CBL-R499L-1 SLPPVPPR    | 24501 | >CBL-R499L-1 SLPPVPPL    | 248  | 24253 |
| >CBL-R499L-1 SLPPVPPRL   | 167   | >CBL-R499L-1 SLPPVPPLL   | 354  | 187   |
| >CBL-R499L-1 SLPPVPPR    | 2540  | >CBL-R499L-1 SLPPVPPL    | 5    | 2535  |
| >CBL-R499L-1 SLPPVPPRL   | 6     | >CBL-R499L-1 SLPPVPPLL   | 8    | 2     |

|                          |       |                          |       |       |
|--------------------------|-------|--------------------------|-------|-------|
| >CBL-R499L-1SLPPVPPRLDI  | 12    | >CBL-R499L-1SLPPVPPLLDI  | 8     | 4     |
| >CBL-R499L-1SLPPVPPRL    | 77    | >CBL-R499L-1SLPPVPPLL    | 8     | 69    |
| >CBL-R499L-1SLPPVPPRLDI  | 144   | >CBL-R499L-1SLPPVPPLLDI  | 43    | 101   |
| >CBL-R499L-1SLPPVPPR     | 260   | >CBL-R499L-1SLPPVPPPL    | 32452 | 32192 |
| >CBL-R499L-1ASLPPVPPR    | 21710 | >CBL-R499L-1ASLPPVPPPL   | 264   | 21446 |
| >CBL-R499L-1ASLPPVPPR    | 40    | >CBL-R499L-1ASLPPVPPPL   | 13907 | 13867 |
| >CBL-R499L-1ASLPPVPPR    | 12794 | >CBL-R499L-1ASLPPVPPPL   | 263   | 12531 |
| >CBL-R499L-1ASLPPVPPR    | 304   | >CBL-R499L-1ASLPPVPPPL   | 188   | 116   |
| >CBL-R499L-1ASLPPVPPRL   | 895   | >CBL-R499L-1ASLPPVPPLL   | 357   | 538   |
| >CBL-R499L-1ASLPPVPPR    | 39    | >CBL-R499L-1ASLPPVPPPL   | 11077 | 11038 |
| >CBL-R499L-1ASLPPVPPR    | 13484 | >CBL-R499L-1ASLPPVPPPL   | 204   | 13280 |
| >CBL-R499L-1ASLPPVPPR    | 625   | >CBL-R499L-1ASLPPVPPPL   | 96    | 529   |
| >CBL-R499L-1ASLPPVPPR    | 709   | >CBL-R499L-1ASLPPVPPPL   | 5     | 704   |
| >CBL-R499L-1ASLPPVPPRL   | 7     | >CBL-R499L-1ASLPPVPPLL   | 14    | 7     |
| >CBL-R499L-1ASLPPVPPRL   | 952   | >CBL-R499L-1ASLPPVPPLL   | 496   | 456   |
| >CBL-R499L-1ASLPPVPPR    | 17911 | >CBL-R499L-1ASLPPVPPPL   | 243   | 17668 |
| >CBL-R499L-1ASLPPVPPRL   | 912   | >CBL-R499L-1ASLPPVPPLL   | 152   | 760   |
| >CBL-R499L-1ASLPPVPPR    | 122   | >CBL-R499L-1ASLPPVPPPL   | 2124  | 2002  |
| >CBL-R499L-1ASLPPVPPR    | 32100 | >CBL-R499L-1ASLPPVPPPL   | 189   | 31911 |
| >CBL-R499L-1QASLPPVPPR   | 53    | >CBL-R499L-1QASLPPVPPPL  | 32171 | 32118 |
| >CBL-R499L-1QASLPPVPPR   | 16981 | >CBL-R499L-1QASLPPVPPPL  | 285   | 16696 |
| >CBL-R499L-1QASLPPVPPR   | 16836 | >CBL-R499L-1QASLPPVPPPL  | 193   | 16643 |
| >CBL-R499L-1QASLPPVPPR   | 407   | >CBL-R499L-1QASLPPVPPPL  | 1459  | 1052  |
| >CBL-R830K- RRINSERK     | 1575  | >CBL-R830K- RKINSERK     | 247   | 1328  |
| >CBL-R830K- RRINSERKA    | 1021  | >CBL-R830K- RKINSERKA    | 138   | 883   |
| >CBL-R830K- RRINSERKAG   | 1674  | >CBL-R830K- RKINSERKAG   | 466   | 1208  |
| >CBL-R830K- RRINSERK     | 50    | >CBL-R830K- RKINSERK     | 1760  | 1710  |
| >CBL-R830K- RRINSERKA    | 232   | >CBL-R830K- RKINSERKA    | 8657  | 8425  |
| >CBL-R830K- RRINSERKAG   | 322   | >CBL-R830K- RKINSERKAG   | 14659 | 14337 |
| >CBL-R830K- RRINSERKAG   | 288   | >CBL-R830K- RKINSERKAG   | 6996  | 6708  |
| >CBL-R830K- RRINSERK     | 253   | >CBL-R830K- RKINSERK     | 5020  | 4767  |
| >CBL-R830K- RRINSERKAG   | 494   | >CBL-R830K- RKINSERKAG   | 10321 | 9827  |
| >CBL-R830K- FRRINSER     | 462   | >CBL-R830K- FPRKINSER    | 522   | 60    |
| >CBL-R830K- FRRINSER     | 423   | >CBL-R830K- FPRKINSER    | 387   | 36    |
| >CBL-R830K- FRRINSE      | 376   | >CBL-R830K- FPRKINSE     | 503   | 127   |
| >CBL-R830K- FRRINSERK/   | 71    | >CBL-R830K- FPRKINSERK/  | 78    | 7     |
| >CBL-R830K- FRRINSE      | 178   | >CBL-R830K- FPRKINSE     | 210   | 32    |
| >CBL-R830K- FRRINSERK/   | 12    | >CBL-R830K- FPRKINSERK/  | 12    | 0     |
| >CBL-R830K- KPFP RRINSEF | 69    | >CBL-R830K- KPFP RRINSEF | 92    | 23    |
| >CBL-R830K- KPFP RRINSEF | 59    | >CBL-R830K- KPFP RRINSEF | 50    | 9     |
| >CBL-R830K- RPPKPFPRRI   | 1077  | >CBL-R830K- RPPKPFPRKI   | 128   | 949   |
| >CBL-R830K- RPPKPFPRRI   | 292   | >CBL-R830K- RPPKPFPRKI   | 249   | 43    |
| >CBL-R830K- RPPKPFPRR    | 87    | >CBL-R830K- RPPKPFPRK    | 1709  | 1622  |

|                         |       |                         |       |       |
|-------------------------|-------|-------------------------|-------|-------|
| >CBL-S376F-1 STFQLCKI   | 444   | >CBL-S376F-1 FTFQLCKI   | 1052  | 608   |
| >CBL-S376F-1 STFQLCKI   | 3486  | >CBL-S376F-1 FTFQLCKI   | 263   | 3223  |
| >CBL-S376F-1 STFQLCKICA | 2371  | >CBL-S376F-1 FTFQLCKICA | 488   | 1883  |
| >CBL-S376F-1 STFQLCKI   | 1386  | >CBL-S376F-1 FTFQLCKI   | 76    | 1310  |
| >CBL-S376F-1 STFQLCKI   | 2321  | >CBL-S376F-1 FTFQLCKI   | 208   | 2113  |
| >CBL-S376F-1 STFQLCKI   | 1461  | >CBL-S376F-1 FTFQLCKI   | 86    | 1375  |
| >CBL-S376F-1 STFQLCKICA | 775   | >CBL-S376F-1 FTFQLCKICA | 178   | 597   |
| >CBL-S376F-1 STFQLCKI   | 318   | >CBL-S376F-1 FTFQLCKI   | 50    | 268   |
| >CBL-S376F-1 STFQLCKI   | 682   | >CBL-S376F-1 FTFQLCKI   | 274   | 408   |
| >CBL-S376F-1 STFQLCKI   | 41    | >CBL-S376F-1 FTFQLCKI   | 354   | 313   |
| >CBL-S376F-1 STFQLCKI   | 144   | >CBL-S376F-1 FTFQLCKI   | 49    | 95    |
| >CBL-S376F-1 STFQLCKICA | 306   | >CBL-S376F-1 FTFQLCKICA | 270   | 36    |
| >CBL-S376F-1 STFQLCKI   | 330   | >CBL-S376F-1 FTFQLCKI   | 111   | 219   |
| >CBL-S376F-1 STFQLCKI   | 31    | >CBL-S376F-1 FTFQLCKI   | 34    | 3     |
| >CBL-S376F-1 STFQLCKIC  | 195   | >CBL-S376F-1 FTFQLCKIC  | 300   | 105   |
| >CBL-S376F-1 STFQLCKI   | 14    | >CBL-S376F-1 FTFQLCKI   | 13    | 1     |
| >CBL-S376F-1 GSTFQLCK   | 35    | >CBL-S376F-1 GFTFQLCK   | 863   | 828   |
| >CBL-S376F-1 GSTFQLCKI  | 434   | >CBL-S376F-1 GFTFQLCKI  | 27248 | 26814 |
| >CBL-S376F-1 GSTFQLCK   | 195   | >CBL-S376F-1 GFTFQLCK   | 2053  | 1858  |
| >CBL-S376F-1 EQYELYCEMC | 12779 | >CBL-S376F-1 EQYELYCEMC | 102   | 12677 |
| >CBL-S376F-1 EQYELYCEMC | 4744  | >CBL-S376F-1 EQYELYCEMC | 10    | 4734  |
| >CBL-S376F-1 MGSTFQLC   | 7250  | >CBL-S376F-1 MGFTFQLC   | 53    | 7197  |
| >CBL-S376F-1 MGSTFQLCK  | 732   | >CBL-S376F-1 MGFTFQLCK  | 145   | 587   |
| >CBL-S376F-1 MGSTFQLCK  | 78    | >CBL-S376F-1 MGFTFQLCK  | 26    | 52    |
| >CBL-S376F-1 MGSTFQLCK  | 839   | >CBL-S376F-1 MGFTFQLCK  | 134   | 705   |
| >CBL-S376F-1 MGSTFQLCK  | 283   | >CBL-S376F-1 MGFTFQLCK  | 46    | 237   |
| >CBL-S376F-1 MGSTFQLCK  | 1386  | >CBL-S376F-1 MGFTFQLCK  | 430   | 956   |
| >CBL-S376F-1 MGSTFQLCK  | 1349  | >CBL-S376F-1 MGFTFQLCK  | 347   | 1002  |
| >CBL-S376F-1 EMGSTFQL   | 283   | >CBL-S376F-1 EMGFTFQL   | 421   | 138   |
| >CBL-S376F-1 EMGSTFQL   | 40    | >CBL-S376F-1 EMGFTFQL   | 57    | 17    |
| >CBL-S376F-1 EMGSTFQLCI | 89    | >CBL-S376F-1 EMGFTFQLCI | 158   | 69    |
| >CBL-S376F-1 EMGSTFQL   | 211   | >CBL-S376F-1 EMGFTFQL   | 287   | 76    |
| >CBL-S376F-1 EMGSTFQLCI | 493   | >CBL-S376F-1 EMGFTFQLCI | 617   | 124   |
| >CBL-S376F-1 EMGSTFQL   | 75    | >CBL-S376F-1 EMGFTFQL   | 148   | 73    |
| >CBL-S376F-1 EMGSTFQLCI | 245   | >CBL-S376F-1 EMGFTFQLCI | 590   | 345   |
| >CBL-S376F-1 EMGSTFQL   | 13    | >CBL-S376F-1 EMGFTFQL   | 19    | 6     |
| >CBL-S376F-1 EMGSTFQLCI | 166   | >CBL-S376F-1 EMGFTFQLCI | 244   | 78    |
| >CBL-S376F-1 EMGSTFQL   | 18    | >CBL-S376F-1 EMGFTFQL   | 46    | 28    |
| >CBL-S376F-1 EMGSTFQLCI | 174   | >CBL-S376F-1 EMGFTFQLCI | 601   | 427   |
| >CBL-S376F-1 EMGSTFQLCI | 354   | >CBL-S376F-1 EMGFTFQLCI | 132   | 222   |
| >CBL-S376F-1 EMGSTFQLCI | 412   | >CBL-S376F-1 EMGFTFQLCI | 226   | 186   |
| >CBL-S376F-1 EMGSTFQL   | 85    | >CBL-S376F-1 EMGFTFQL   | 84    | 1     |
| >CBL-S376F-1 EMGSTFQLCI | 360   | >CBL-S376F-1 EMGFTFQLCI | 500   | 140   |



|                         |       |                         |      |       |
|-------------------------|-------|-------------------------|------|-------|
| >CBL-S376F-\ CEMGSTFQL  | 357   | >CBL-S376F-† CEMGFTFQL  | 203  | 154   |
| >CBL-S376F-\ CEMGSTFQL  | 1482  | >CBL-S376F-† CEMGFTFQL  | 352  | 1130  |
| >CBL-S376F-\ CEMGSTFQ   | 1619  | >CBL-S376F-† CEMGFTFQ   | 373  | 1246  |
| >CBL-S376F-\ CEMGSTFQL  | 195   | >CBL-S376F-† CEMGFTFQL  | 36   | 159   |
| >CBL-S376F-\ CEMGSTFQL  | 137   | >CBL-S376F-† CEMGFTFQL  | 174  | 37    |
| >CBL-S376F-\ CEMGSTFQL  | 21    | >CBL-S376F-† CEMGFTFQL  | 18   | 3     |
| >CBL-S376F-\ CEMGSTFQL  | 61    | >CBL-S376F-† CEMGFTFQL  | 25   | 36    |
| >CBL-S376F-\ CEMGSTFQL  | 256   | >CBL-S376F-† CEMGFTFQL  | 324  | 68    |
| >CBL-S376F-\ CEMGSTFQ   | 672   | >CBL-S376F-† CEMGFTFQ   | 385  | 287   |
| >CBL-S376F-\ CEMGSTFQL  | 163   | >CBL-S376F-† CEMGFTFQL  | 115  | 48    |
| >CBL-S376F-\ CEMGSTFQ   | 316   | >CBL-S376F-† CEMGFTFQ   | 105  | 211   |
| >CBL-S376F-\ CEMGSTFQL  | 109   | >CBL-S376F-† CEMGFTFQL  | 46   | 63    |
| >CBL-S376F-\ CEMGSTFQL  | 140   | >CBL-S376F-† CEMGFTFQL  | 79   | 61    |
| >CBL-S376F-\ CEMGSTFQL  | 12    | >CBL-S376F-† CEMGFTFQL  | 9    | 3     |
| >CBL-S376F-\ YCEMGSTF   | 304   | >CBL-S376F-† YCEMGFTF   | 362  | 58    |
| >CBL-S376F-\ LYCEMGSTF  | 29    | >CBL-S376F-† LYCEMGFTF  | 1356 | 1327  |
| >CBL-S376F-\ LYCEMGSTFC | 46    | >CBL-S376F-† LYCEMGFTFC | 306  | 260   |
| >CBL-S376F-\ LYCEMGSTF  | 119   | >CBL-S376F-† LYCEMGFTF  | 45   | 74    |
| >CBL-S376F-\ LYCEMGSTFC | 404   | >CBL-S376F-† LYCEMGFTFC | 321  | 83    |
| >CBL-S376F-\ LYCEMGSTF  | 94    | >CBL-S376F-† LYCEMGFTF  | 34   | 60    |
| >CBL-S376F-\ LYCEMGSTFC | 343   | >CBL-S376F-† LYCEMGFTFC | 197  | 146   |
| >CBL-S376F-\ LYCEMGSTF  | 6     | >CBL-S376F-† LYCEMGFTF  | 5    | 1     |
| >CBL-S376F-\ LYCEMGSTFC | 7     | >CBL-S376F-† LYCEMGFTFC | 6    | 1     |
| >CBL-S376F-\ LYCEMGSTF  | 359   | >CBL-S376F-† LYCEMGFTF  | 1185 | 826   |
| >CBL-S376F-\ LYCEMGSTF  | 124   | >CBL-S376F-† LYCEMGFTF  | 3171 | 3047  |
| >CBL-S376F-\ ELYCEMGSTF | 202   | >CBL-S376F-† ELYCEMGFTF | 261  | 59    |
| >CBL-S376F-\ ELYCEMG    | 15636 | >CBL-S376F-† ELYCEMGF   | 262  | 15374 |
| >CBL-S376F-\ ELYCEMGSTF | 71    | >CBL-S376F-† ELYCEMGFTF | 144  | 73    |
| >CBL-S376F-\ ELYCEMGSTF | 414   | >CBL-S376F-† ELYCEMGFTF | 889  | 475   |
| >CBL-S376F-\ ELYCEMGSTF | 734   | >CBL-S376F-† ELYCEMGFTF | 260  | 474   |
| >CBL-S376F-\ ELYCEMGSTF | 623   | >CBL-S376F-† ELYCEMGFTF | 361  | 262   |
| >CBL-S376F-\ ELYCEMGSTF | 87    | >CBL-S376F-† ELYCEMGFTF | 195  | 108   |
| >CBL-S376F-\ ELYCEMGSTF | 104   | >CBL-S376F-† ELYCEMGFTF | 320  | 216   |
| >CBL-S376F-\ ELYCEMG    | 16222 | >CBL-S376F-† ELYCEMGF   | 155  | 16067 |
| >CBL-S376F-\ ELYCEMGSTF | 45    | >CBL-S376F-† ELYCEMGFTF | 113  | 68    |
| >CBL-S376F-\ ELYCEMGSTF | 342   | >CBL-S376F-† ELYCEMGFTF | 445  | 103   |
| >CBL-S376F-\ YELYCEMGST | 1405  | >CBL-S376F-† YELYCEMGFT | 261  | 1144  |
| >CBL-S376F-\ YELYCEMGST | 471   | >CBL-S376F-† YELYCEMGFT | 588  | 117   |
| >CBL-S376F-\ YELYCEMGST | 920   | >CBL-S376F-† YELYCEMGFT | 326  | 594   |
| >CBL-S376F-\ YELYCEMG   | 10940 | >CBL-S376F-† YELYCEMGF  | 13   | 10927 |
| >CBL-S376F-\ YELYCEMGST | 7     | >CBL-S376F-† YELYCEMGFT | 12   | 5     |
| >CBL-S376F-\ YELYCEMG   | 2115  | >CBL-S376F-† YELYCEMGF  | 23   | 2092  |
| >CBL-S376F-\ YELYCEMGST | 8     | >CBL-S376F-† YELYCEMGFT | 6    | 2     |

|                         |       |                         |      |       |
|-------------------------|-------|-------------------------|------|-------|
| >CBL-S376F-1 YELYCEMGST | 504   | >CBL-S376F-1 YELYCEMGFT | 366  | 138   |
| >CBL-S376F-1 YELYCEMG   | 6513  | >CBL-S376F-1 YELYCEMGF  | 49   | 6464  |
| >CBL-S376F-1 YELYCEMGST | 49    | >CBL-S376F-1 YELYCEMGFT | 24   | 25    |
| >CBL-S376F-1 YELYCEMG   | 1752  | >CBL-S376F-1 YELYCEMGF  | 203  | 1549  |
| >CBL-S376F-1 YELYCEMGST | 158   | >CBL-S376F-1 YELYCEMGFT | 200  | 42    |
| >CBL-S376F-1 YELYCEMGST | 139   | >CBL-S376F-1 YELYCEMGFT | 88   | 51    |
| >CBL-S376F-1 YELYCEMG   | 7208  | >CBL-S376F-1 YELYCEMGF  | 167  | 7041  |
| >CBL-S376F-1 YELYCEMGST | 112   | >CBL-S376F-1 YELYCEMGFT | 68   | 44    |
| >CBL-S376F-1 YELYCEMGST | 59    | >CBL-S376F-1 YELYCEMGFT | 545  | 486   |
| >CBL-S376F-1 YELYCEMG   | 1127  | >CBL-S376F-1 YELYCEMGF  | 33   | 1094  |
| >CBL-S376F-1 YELYCEMGST | 120   | >CBL-S376F-1 YELYCEMGFT | 87   | 33    |
| >CBL-S376F-1 YELYCEMGST | 22    | >CBL-S376F-1 YELYCEMGFT | 20   | 2     |
| >CBL-S376F-1 QEYLYCEMG! | 30673 | >CBL-S376F-1 QEYLYCEMGI | 165  | 30508 |
| >CBL-S376F-1 QEYLYCEMG! | 28286 | >CBL-S376F-1 QEYLYCEMGI | 165  | 28121 |
| >CBL-S376F-1 QEYLYCEMG! | 12074 | >CBL-S376F-1 QEYLYCEMGI | 21   | 12053 |
| >CBL-S376F-1 QEYLYCEMG! | 17635 | >CBL-S376F-1 QEYLYCEMGI | 178  | 17457 |
| >CBL-S80N-1 SPPYILDLL   | 632   | >CBL-S80N-1 NPPYILDLL   | 446  | 186   |
| >CBL-S80N-1 SPPYILD     | 32    | >CBL-S80N-1 NPPYILD     | 365  | 333   |
| >CBL-S80N-1 SPPYILDLL   | 21    | >CBL-S80N-1 NPPYILDLL   | 380  | 359   |
| >CBL-S80N-1 NSPPYILDLL  | 310   | >CBL-S80N-1 NNPPYILDLL  | 3501 | 3191  |
| >CBL-S80N-1 NSPPYILD    | 5     | >CBL-S80N-1 NNPPYILD    | 741  | 736   |
| >CBL-S80N-1 NSPPYILDLL  | 4     | >CBL-S80N-1 NNPPYILDLL  | 181  | 177   |
| >CBL-S80N-1 LKNSPPYI    | 31    | >CBL-S80N-1 LKNNPPYI    | 49   | 18    |
| >CBL-S80N-1 LKNSPPYIL   | 11    | >CBL-S80N-1 LKNNPPYIL   | 14   | 3     |
| >CBL-S80N-1 LKNSPPYILD  | 18    | >CBL-S80N-1 LKNNPPYILD  | 23   | 5     |
| >CBL-S80N-1 LKNSPPYIL   | 363   | >CBL-S80N-1 LKNNPPYIL   | 931  | 568   |
| >CBL-S80N-1 LKNSPPYIL   | 715   | >CBL-S80N-1 LKNNPPYIL   | 423  | 292   |
| >CBL-S80N-1 ALKNSPPYI   | 216   | >CBL-S80N-1 ALKNNPPYI   | 315  | 99    |
| >CBL-S80N-1 ALKNSPPYI   | 394   | >CBL-S80N-1 ALKNNPPYI   | 630  | 236   |
| >CBL-S80N-1 ALKNSPPYIL  | 25    | >CBL-S80N-1 ALKNNPPYIL  | 38   | 13    |
| >CBL-S80N-1 ALKNSPPYI   | 12    | >CBL-S80N-1 ALKNNPPYI   | 18   | 6     |
| >CBL-S80N-1 ALKNSPPYIL  | 127   | >CBL-S80N-1 ALKNNPPYIL  | 135  | 8     |
| >CBL-S80N-1 ALKNSPPYI   | 13    | >CBL-S80N-1 ALKNNPPYI   | 7    | 6     |
| >CBL-S80N-1 ALKNSPPYIL  | 169   | >CBL-S80N-1 ALKNNPPYIL  | 92   | 77    |
| >CBL-S80N-1 ALKNSPPYI   | 39    | >CBL-S80N-1 ALKNNPPYI   | 13   | 26    |
| >CBL-S80N-1 ALKNSPPYIL  | 81    | >CBL-S80N-1 ALKNNPPYIL  | 32   | 49    |
| >CBL-S80N-1 ALKNSPPYI   | 80    | >CBL-S80N-1 ALKNNPPYI   | 106  | 26    |
| >CBL-S80N-1 ALKNSPPYI   | 326   | >CBL-S80N-1 ALKNNPPYI   | 208  | 118   |
| >CBL-S80N-1 ALKNSPPYI   | 15    | >CBL-S80N-1 ALKNNPPYI   | 12   | 3     |
| >CBL-S80N-1 ALKNSPPYIL  | 25    | >CBL-S80N-1 ALKNNPPYIL  | 22   | 3     |
| >CBL-S80N-1 ALKNSPPY    | 585   | >CBL-S80N-1 ALKNNPPY    | 440  | 145   |
| >CBL-S80N-1 ALKNSPPY    | 79    | >CBL-S80N-1 ALKNNPPY    | 135  | 56    |
| >CBL-S80N-1 ALKNSPPYI   | 12    | >CBL-S80N-1 ALKNNPPYI   | 15   | 3     |

|                              |     |                              |      |      |
|------------------------------|-----|------------------------------|------|------|
| >CBL-S80N- $\nu$ ALKNSPPYIL  | 418 | >CBL-S80N- $\pi$ ALKNNPPYIL  | 565  | 147  |
| >CBL-S80N- $\nu$ ALKNSPPY    | 75  | >CBL-S80N- $\pi$ ALKNNPPY    | 56   | 19   |
| >CBL-S80N- $\nu$ ALKNSPPY    | 37  | >CBL-S80N- $\pi$ ALKNNPPY    | 51   | 14   |
| >CBL-S80N- $\nu$ ALKNSPPY    | 100 | >CBL-S80N- $\pi$ ALKNNPPY    | 136  | 36   |
| >CBL-S80N- $\nu$ ALKNSPPY    | 20  | >CBL-S80N- $\pi$ ALKNNPPY    | 42   | 22   |
| >CBL-S80N- $\nu$ ALKNSPPYI   | 281 | >CBL-S80N- $\pi$ ALKNNPPYI   | 740  | 459  |
| >CBL-S80N- $\nu$ ALKNSPPYIL  | 154 | >CBL-S80N- $\pi$ ALKNNPPYIL  | 389  | 235  |
| >CBL-S80N- $\nu$ ALKNSPPY    | 425 | >CBL-S80N- $\pi$ ALKNNPPY    | 1862 | 1437 |
| >CBL-S80N- $\nu$ LALKNSPPYI  | 31  | >CBL-S80N- $\pi$ LALKNNPPYI  | 24   | 7    |
| >CBL-S80N- $\nu$ LALKNSPPYIL | 53  | >CBL-S80N- $\pi$ LALKNNPPYIL | 124  | 71   |
| >CBL-S80N- $\nu$ LALKNSPPYI  | 302 | >CBL-S80N- $\pi$ LALKNNPPYI  | 510  | 208  |
| >CBL-S80N- $\nu$ LALKNSPPYI  | 271 | >CBL-S80N- $\pi$ LALKNNPPYI  | 412  | 141  |
| >CBL-S80N- $\nu$ LALKNSPPYI  | 128 | >CBL-S80N- $\pi$ LALKNNPPYI  | 134  | 6    |
| >CBL-S80N- $\nu$ LALKNSPPY   | 254 | >CBL-S80N- $\pi$ LALKNNPPY   | 501  | 247  |
| >CBL-S80N- $\nu$ LALKNSPPYI  | 198 | >CBL-S80N- $\pi$ LALKNNPPYI  | 331  | 133  |
| >CBL-S80N- $\nu$ LALKNSPPY   | 228 | >CBL-S80N- $\pi$ LALKNNPPY   | 164  | 64   |
| >CBL-S80N- $\nu$ LALKNSPPYI  | 88  | >CBL-S80N- $\pi$ LALKNNPPYI  | 101  | 13   |
| >CBL-S80N- $\nu$ LALKNSPPY   | 62  | >CBL-S80N- $\pi$ LALKNNPPY   | 112  | 50   |
| >CBL-S80N- $\nu$ LALKNSPPY   | 24  | >CBL-S80N- $\pi$ LALKNNPPY   | 36   | 12   |
| >CBL-S80N- $\nu$ LALKNSPPYI  | 492 | >CBL-S80N- $\pi$ LALKNNPPYI  | 800  | 308  |
| >CBL-S80N- $\nu$ LALKNSPPYIL | 315 | >CBL-S80N- $\pi$ LALKNNPPYIL | 407  | 92   |
| >CBL-S80N- $\nu$ LALKNSPPY   | 7   | >CBL-S80N- $\pi$ LALKNNPPY   | 14   | 7    |
| >CBL-S80N- $\nu$ LALKNSPPYI  | 402 | >CBL-S80N- $\pi$ LALKNNPPYI  | 1301 | 899  |
| >CBL-S80N- $\nu$ LALKNSPPYIL | 417 | >CBL-S80N- $\pi$ LALKNNPPYIL | 815  | 398  |
| >CBL-S80N- $\nu$ LALKNSPPY   | 11  | >CBL-S80N- $\pi$ LALKNNPPY   | 17   | 6    |
| >CBL-S80N- $\nu$ LALKNSPPYI  | 255 | >CBL-S80N- $\pi$ LALKNNPPYI  | 452  | 197  |
| >CBL-S80N- $\nu$ KLALKNSPPYI | 31  | >CBL-S80N- $\pi$ KLALKNNPPY  | 32   | 1    |
| >CBL-S80N- $\nu$ KLALKNSPPYI | 16  | >CBL-S80N- $\pi$ KLALKNNPPY  | 16   | 0    |
| >CBL-S80N- $\nu$ KLALKNSPPYI | 15  | >CBL-S80N- $\pi$ KLALKNNPPY  | 21   | 6    |
| >CBL-S80N- $\nu$ KLALKNSPPYI | 206 | >CBL-S80N- $\pi$ KLALKNNPPY  | 218  | 12   |
| >CBL-S80N- $\nu$ KLALKNSPPYI | 16  | >CBL-S80N- $\pi$ KLALKNNPPY  | 20   | 4    |
| >CBL-S80N- $\nu$ KLALKNSPPYI | 32  | >CBL-S80N- $\pi$ KLALKNNPPY  | 27   | 5    |
| >CBL-S80N- $\nu$ KLALKNSPPYI | 24  | >CBL-S80N- $\pi$ KLALKNNPPY  | 29   | 5    |
| >CBL-S80N- $\nu$ KLALKNSPPYI | 37  | >CBL-S80N- $\pi$ KLALKNNPPY  | 41   | 4    |
| >CBL-S80N- $\nu$ KLALKNSPPYI | 46  | >CBL-S80N- $\pi$ KLALKNNPPY  | 64   | 18   |
| >CBL-S80N- $\nu$ KLALKNSPPY  | 201 | >CBL-S80N- $\pi$ KLALKNNPPY  | 406  | 205  |
| >CBL-S80N- $\nu$ KLALKNSPPYI | 494 | >CBL-S80N- $\pi$ KLALKNNPPY  | 553  | 59   |
| >CBL-S80N- $\nu$ KLALKNSPPY  | 404 | >CBL-S80N- $\pi$ KLALKNNPPY  | 250  | 154  |
| >CBL-S80N- $\nu$ KLALKNSPPYI | 828 | >CBL-S80N- $\pi$ KLALKNNPPY  | 464  | 364  |
| >CBL-S80N- $\nu$ KLALKNSPPY  | 283 | >CBL-S80N- $\pi$ KLALKNNPPY  | 579  | 296  |
| >CBL-S80N- $\nu$ KLALKNSPPY  | 66  | >CBL-S80N- $\pi$ KLALKNNPPY  | 102  | 36   |
| >CBL-S80N- $\nu$ KLALKNSPPY  | 358 | >CBL-S80N- $\pi$ KLALKNNPPY  | 524  | 166  |
| >CBL-S80N- $\nu$ KLALKNSPPY  | 174 | >CBL-S80N- $\pi$ KLALKNNPPY  | 272  | 98   |

|                         |       |                          |       |       |
|-------------------------|-------|--------------------------|-------|-------|
| >CBL-S80N-v KLALKNSPPY  | 167   | >CBL-S80N-r KLALKNNPPY   | 676   | 509   |
| >CBL-S80N-v KLALKNSPPY  | 391   | >CBL-S80N-r KLALKNNPPY   | 1084  | 693   |
| >CBL-S80N-v PKLALKNSPP' | 57    | >CBL-S80N-r PKLALKNNPP   | 77    | 20    |
| >CBL-V391I-v VKIEPCGHL  | 436   | >CBL-V391I-r IKIEPCGHL   | 195   | 241   |
| >CBL-V391I-v VKIEPCGHLM | 127   | >CBL-V391I-r IKIEPCGHLM  | 53    | 74    |
| >CBL-V391I-v AENDKDVKI  | 535   | >CBL-V391I-r AENDKDIKI   | 330   | 205   |
| >CBL-V391I-v AENDKDVKI  | 651   | >CBL-V391I-r AENDKDIKI   | 482   | 169   |
| >CBL-V391I-v AENDKDVKI  | 33    | >CBL-V391I-r AENDKDIKI   | 35    | 2     |
| >CBL-V391I-v CAENDKDV   | 14459 | >CBL-V391I-r CAENDKDI    | 425   | 14034 |
| >CBL-V391I-v KICAENDKDV | 227   | >CBL-V391I-r KICAENDKDIH | 228   | 1     |
| >CBL-W408C WQESEGQGC    | 61    | >CBL-W408C CQESEGQGC     | 221   | 160   |
| >CBL-W408C WQESEGQGC    | 93    | >CBL-W408C CQESEGQGC     | 905   | 812   |
| >CBL-W408C WQESEGQGC    | 12    | >CBL-W408C CQESEGQGC     | 34    | 22    |
| >CBL-W408C SWQESEGQ     | 487   | >CBL-W408C SCQESEGQ      | 37780 | 37293 |
| >CBL-W408C HLMCTSCLTS   | 1173  | >CBL-W408C HLMCTSCLTS    | 423   | 750   |
| >CBL-W408C HLMCTSCLTS   | 2888  | >CBL-W408C HLMCTSCLTS    | 187   | 2701  |
| >CBL-W408C HLMCTSCLTS   | 11336 | >CBL-W408C HLMCTSCLTS    | 224   | 11112 |
| >CBL-W408C HLMCTSCLTS   | 3846  | >CBL-W408C HLMCTSCLTS    | 46    | 3800  |
| >CBL-W408C HLMCTSCLTS   | 15677 | >CBL-W408C HLMCTSCLTS    | 284   | 15393 |
| >CBL-W408C HLMCTSCLTS   | 12334 | >CBL-W408C HLMCTSCLTS    | 149   | 12185 |
| >CBL-W408C HLMCTSCLTS   | 123   | >CBL-W408C HLMCTSCLTS    | 3719  | 3596  |
| >CBL-W408C HLMCTSCLTS   | 228   | >CBL-W408C HLMCTSCLTS    | 4915  | 4687  |
| >CBL-W408C HLMCTSCLTS   | 267   | >CBL-W408C HLMCTSCLTS    | 2214  | 1947  |
| >CBL-W408C HLMCTSCLTS   | 129   | >CBL-W408C HLMCTSCLTS    | 21722 | 21593 |
| >CBL-W408C HLMCTSCLTS   | 85    | >CBL-W408C HLMCTSCLTS    | 21123 | 21038 |
| >CBL-W408C CTSCLTSW     | 27    | >CBL-W408C CTSCLTSC      | 17376 | 17349 |
| >CBL-W408C CTSCLTSW     | 196   | >CBL-W408C CTSCLTSC      | 23943 | 23747 |
| >CBL-W408C CTSCLTSW     | 20    | >CBL-W408C CTSCLTSC      | 18361 | 18341 |
| >CBL-W408C CTSCLTSWQ    | 202   | >CBL-W408C CTSCLTSCQ     | 2266  | 2064  |
| >CBL-W408C MCTSCLTSW    | 176   | >CBL-W408C MCTSCLTSC     | 23690 | 23514 |
| >CBL-W408C MCTSCLTSW    | 259   | >CBL-W408C MCTSCLTSC     | 21798 | 21539 |
| >CBL-W408C MCTSCLTSW    | 110   | >CBL-W408C MCTSCLTSC     | 3344  | 3234  |
| >CBL-W408C MCTSCLTSW    | 238   | >CBL-W408C MCTSCLTSC     | 34176 | 33938 |
| >CBL-W408C LMCTSCLTSM   | 13691 | >CBL-W408C LMCTSCLTSC    | 97    | 13594 |
| >CBL-W408C LMCTSCLTSM   | 432   | >CBL-W408C LMCTSCLTSC    | 2294  | 1862  |
| >CBL-W408C LMCTSCLTSM   | 128   | >CBL-W408C LMCTSCLTSC    | 3476  | 3348  |
| >CBL-W408C LMCTSCLTSM   | 167   | >CBL-W408C LMCTSCLTSC    | 1501  | 1334  |
| >CBL-W408C LMCTSCLTSM   | 82    | >CBL-W408C LMCTSCLTSC    | 21178 | 21096 |
| >CBL-W408C LMCTSCLTSM   | 61    | >CBL-W408C LMCTSCLTSC    | 20875 | 20814 |
| >CBL-W408C LMCTSCLTSM   | 135   | >CBL-W408C LMCTSCLTSC    | 23627 | 23492 |
| >CBL-W408R WQESEGQGC    | 61    | >CBL-W408R RQESEGQGC     | 48    | 13    |
| >CBL-W408R WQESEGQGC    | 93    | >CBL-W408R RQESEGQGC     | 698   | 605   |
| >CBL-W408R WQESEGQGC    | 12    | >CBL-W408R RQESEGQGC     | 6     | 6     |

|                        |       |                        |       |       |
|------------------------|-------|------------------------|-------|-------|
| >CBL-W408R SWQESEGO    | 487   | >CBL-W408R SRQESEGO    | 35570 | 35083 |
| >CBL-W408R HLMCTSCLTS  | 15202 | >CBL-W408R HLMCTSCLTS  | 157   | 15045 |
| >CBL-W408R HLMCTSCLTS  | 14302 | >CBL-W408R HLMCTSCLTS  | 40    | 14262 |
| >CBL-W408R HLMCTSCLTS  | 123   | >CBL-W408R HLMCTSCLTS  | 5843  | 5720  |
| >CBL-W408R HLMCTSCLTS  | 19338 | >CBL-W408R HLMCTSCLTS  | 44    | 19294 |
| >CBL-W408R HLMCTSCLTS  | 22429 | >CBL-W408R HLMCTSCLTS  | 57    | 22372 |
| >CBL-W408R HLMCTSCLTS  | 228   | >CBL-W408R HLMCTSCLTS  | 7403  | 7175  |
| >CBL-W408R HLMCTSCLTS  | 267   | >CBL-W408R HLMCTSCLTS  | 669   | 402   |
| >CBL-W408R HLMCTSCLTS  | 129   | >CBL-W408R HLMCTSCLTS  | 22209 | 22080 |
| >CBL-W408R HLMCTSCLTS  | 85    | >CBL-W408R HLMCTSCLTS  | 22620 | 22535 |
| >CBL-W408R HLMCTSCLTS  | 18008 | >CBL-W408R HLMCTSCLTS  | 43    | 17965 |
| >CBL-W408R CTSCCLTSW   | 15699 | >CBL-W408R CTSCCLTSR   | 136   | 15563 |
| >CBL-W408R CTSCCLTSW   | 28368 | >CBL-W408R CTSCCLTSR   | 177   | 28191 |
| >CBL-W408R CTSCCLTSW   | 13392 | >CBL-W408R CTSCCLTSR   | 21    | 13371 |
| >CBL-W408R CTSCCLTSW   | 27    | >CBL-W408R CTSCCLTSR   | 17961 | 17934 |
| >CBL-W408R CTSCCLTSW   | 196   | >CBL-W408R CTSCCLTSR   | 24182 | 23986 |
| >CBL-W408R CTSCCLTSW   | 20    | >CBL-W408R CTSCCLTSR   | 22091 | 22071 |
| >CBL-W408R CTSCCLTSWQ  | 202   | >CBL-W408R CTSCCLTSRQ  | 326   | 124   |
| >CBL-W408R MCTSCLTSW   | 20738 | >CBL-W408R MCTSCLTSR   | 102   | 20636 |
| >CBL-W408R MCTSCLTSW   | 27376 | >CBL-W408R MCTSCLTSR   | 362   | 27014 |
| >CBL-W408R MCTSCLTSW   | 176   | >CBL-W408R MCTSCLTSR   | 25905 | 25729 |
| >CBL-W408R MCTSCLTSW   | 259   | >CBL-W408R MCTSCLTSR   | 22508 | 22249 |
| >CBL-W408R MCTSCLTSW   | 110   | >CBL-W408R MCTSCLTSR   | 2723  | 2613  |
| >CBL-W408R MCTSCLTSW   | 238   | >CBL-W408R MCTSCLTSR   | 30517 | 30279 |
| >CBL-W408R MCTSCLTSW   | 30589 | >CBL-W408R MCTSCLTSR   | 184   | 30405 |
| >CBL-W408R LMCTSCLTSM  | 432   | >CBL-W408R LMCTSCLTSR  | 685   | 253   |
| >CBL-W408R LMCTSCLTSM  | 14620 | >CBL-W408R LMCTSCLTSR  | 21    | 14599 |
| >CBL-W408R LMCTSCLTSM  | 23695 | >CBL-W408R LMCTSCLTSR  | 155   | 23540 |
| >CBL-W408R LMCTSCLTSM  | 128   | >CBL-W408R LMCTSCLTSR  | 5543  | 5415  |
| >CBL-W408R LMCTSCLTSM  | 167   | >CBL-W408R LMCTSCLTSR  | 367   | 200   |
| >CBL-W408R LMCTSCLTSM  | 82    | >CBL-W408R LMCTSCLTSR  | 22421 | 22339 |
| >CBL-W408R LMCTSCLTSM  | 61    | >CBL-W408R LMCTSCLTSR  | 22312 | 22251 |
| >CBL-W408R LMCTSCLTSM  | 135   | >CBL-W408R LMCTSCLTSR  | 20842 | 20707 |
| >CBL-W408R LMCTSCLTSM  | 28539 | >CBL-W408R LMCTSCLTSR  | 153   | 28386 |
| >CBL-W408R LMCTSCLTSM  | 29823 | >CBL-W408R LMCTSCLTSR  | 212   | 29611 |
| >CBL-Y371C- YCEMGSTF   | 304   | >CBL-Y371C- LCCEMGSTF  | 3339  | 3035  |
| >CBL-Y371C- LYCEMGSTF  | 29    | >CBL-Y371C- LCCEMGSTF  | 26320 | 26291 |
| >CBL-Y371C- LYCEMGSTFC | 46    | >CBL-Y371C- LCCEMGSTFC | 21468 | 21422 |
| >CBL-Y371C- LYCEMGSTF  | 119   | >CBL-Y371C- LCCEMGSTF  | 11522 | 11403 |
| >CBL-Y371C- LYCEMGSTFC | 404   | >CBL-Y371C- LCCEMGSTFC | 20812 | 20408 |
| >CBL-Y371C- LYCEMGSTF  | 94    | >CBL-Y371C- LCCEMGSTF  | 7892  | 7798  |
| >CBL-Y371C- LYCEMGSTFC | 343   | >CBL-Y371C- LCCEMGSTFC | 18478 | 18135 |
| >CBL-Y371C- LYCEMGSTF  | 6     | >CBL-Y371C- LCCEMGSTF  | 9375  | 9369  |

|                                                  |      |                                                  |       |       |
|--------------------------------------------------|------|--------------------------------------------------|-------|-------|
| >CBL-Y371C- <sup>1</sup> LYCEMGSTFC              | 7    | >CBL-Y371C- <sup>1</sup> LCCEMGSTFC              | 14055 | 14048 |
| >CBL-Y371C- <sup>1</sup> LYCEMGSTF               | 359  | >CBL-Y371C- <sup>1</sup> LCCEMGSTF               | 294   | 65    |
| >CBL-Y371C- <sup>1</sup> LYCEMGSTF               | 124  | >CBL-Y371C- <sup>1</sup> LCCEMGSTF               | 20    | 104   |
| >CBL-Y371C- <sup>1</sup> IKVTQEQYEL <sup>1</sup> | 13   | >CBL-Y371C- <sup>1</sup> IKVTQEQYEL <sup>1</sup> | 3263  | 3250  |
| >CBL-Y371C- <sup>1</sup> ELYCEMGSTF              | 202  | >CBL-Y371C- <sup>1</sup> ELCCEMGSTF              | 464   | 262   |
| >CBL-Y371C- <sup>1</sup> ELYCEMGSTF              | 71   | >CBL-Y371C- <sup>1</sup> ELCCEMGSTF              | 67    | 4     |
| >CBL-Y371C- <sup>1</sup> ELYCEMGSTF              | 414  | >CBL-Y371C- <sup>1</sup> ELCCEMGSTF              | 438   | 24    |
| >CBL-Y371C- <sup>1</sup> ELYCEMGSTF              | 87   | >CBL-Y371C- <sup>1</sup> ELCCEMGSTF              | 232   | 145   |
| >CBL-Y371C- <sup>1</sup> ELYCEMGSTF              | 104  | >CBL-Y371C- <sup>1</sup> ELCCEMGSTF              | 998   | 894   |
| >CBL-Y371C- <sup>1</sup> ELYCEMGSTF              | 45   | >CBL-Y371C- <sup>1</sup> ELCCEMGSTF              | 490   | 445   |
| >CBL-Y371C- <sup>1</sup> ELYCEMGSTF              | 342  | >CBL-Y371C- <sup>1</sup> ELCCEMGSTF              | 3130  | 2788  |
| >CBL-Y371C- <sup>1</sup> YELYCEMGST              | 471  | >CBL-Y371C- <sup>1</sup> YELCCEMGST              | 1584  | 1113  |
| >CBL-Y371C- <sup>1</sup> YELYCEMGST              | 7    | >CBL-Y371C- <sup>1</sup> YELCCEMGST              | 7     | 0     |
| >CBL-Y371C- <sup>1</sup> YELYCEMGST              | 8    | >CBL-Y371C- <sup>1</sup> YELCCEMGST              | 8     | 0     |
| >CBL-Y371C- <sup>1</sup> YELYCEMGST              | 504  | >CBL-Y371C- <sup>1</sup> YELCCEMGST              | 257   | 247   |
| >CBL-Y371C- <sup>1</sup> YELYCEMGST              | 49   | >CBL-Y371C- <sup>1</sup> YELCCEMGST              | 79    | 30    |
| >CBL-Y371C- <sup>1</sup> YELYCEMGST              | 158  | >CBL-Y371C- <sup>1</sup> YELCCEMGST              | 929   | 771   |
| >CBL-Y371C- <sup>1</sup> YELYCEMGST              | 139  | >CBL-Y371C- <sup>1</sup> YELCCEMGST              | 259   | 120   |
| >CBL-Y371C- <sup>1</sup> YELYCEMGST              | 1025 | >CBL-Y371C- <sup>1</sup> YELCCEMGST              | 394   | 631   |
| >CBL-Y371C- <sup>1</sup> YELYCEMGST              | 112  | >CBL-Y371C- <sup>1</sup> YELCCEMGST              | 91    | 21    |
| >CBL-Y371C- <sup>1</sup> YELYCEMGST              | 59   | >CBL-Y371C- <sup>1</sup> YELCCEMGST              | 67    | 8     |
| >CBL-Y371C- <sup>1</sup> YELYCEMGST              | 120  | >CBL-Y371C- <sup>1</sup> YELCCEMGST              | 168   | 48    |
| >CBL-Y371C- <sup>1</sup> YELYCEMGST              | 22   | >CBL-Y371C- <sup>1</sup> YELCCEMGST              | 34    | 12    |
| >CBL-Y371C- <sup>1</sup> EQYELYCEM               | 229  | >CBL-Y371C- <sup>1</sup> EQYELCCEM               | 2862  | 2633  |
| >CBL-Y371C- <sup>1</sup> EQYELYCEM               | 558  | >CBL-Y371C- <sup>1</sup> EQYELCCEM               | 161   | 397   |
| >CBL-Y371C- <sup>1</sup> EQYELYCEM               | 355  | >CBL-Y371C- <sup>1</sup> EQYELCCEM               | 476   | 121   |
| >CBL-Y371C- <sup>1</sup> EQYELYCEM               | 300  | >CBL-Y371C- <sup>1</sup> EQYELCCEM               | 1039  | 739   |
| >CBL-Y371C- <sup>1</sup> EQYELYCEM               | 122  | >CBL-Y371C- <sup>1</sup> EQYELCCEM               | 102   | 20    |
| >CBL-Y371C- <sup>1</sup> EQYELYCEM               | 70   | >CBL-Y371C- <sup>1</sup> EQYELCCEM               | 120   | 50    |
| >CBL-Y371C- <sup>1</sup> QEYELYC                 | 556  | >CBL-Y371C- <sup>1</sup> QEYELCC                 | 306   | 250   |
| >CBL-Y371C- <sup>1</sup> QEYELYCEN               | 119  | >CBL-Y371C- <sup>1</sup> QEYELCCEN               | 73    | 46    |
| >CBL-Y371C- <sup>1</sup> QEYELYCEN               | 257  | >CBL-Y371C- <sup>1</sup> QEYELCCEN               | 609   | 352   |
| >CBL-Y371C- <sup>1</sup> QEYELYCEN               | 280  | >CBL-Y371C- <sup>1</sup> QEYELCCEN               | 667   | 387   |
| >CBL-Y371C- <sup>1</sup> QEYELYCEN               | 249  | >CBL-Y371C- <sup>1</sup> QEYELCCEN               | 557   | 308   |
| >CBL-Y371C- <sup>1</sup> QEYELYC                 | 487  | >CBL-Y371C- <sup>1</sup> QEYELCC                 | 415   | 72    |
| >CBL-Y371C- <sup>1</sup> QEYELYCEN               | 295  | >CBL-Y371C- <sup>1</sup> QEYELCCEN               | 1166  | 871   |
| >CBL-Y371C- <sup>1</sup> QEYELYCEN               | 562  | >CBL-Y371C- <sup>1</sup> QEYELCCEN               | 267   | 295   |
| >CBL-Y371C- <sup>1</sup> VTQEQYELY               | 37   | >CBL-Y371C- <sup>1</sup> VTQEQYELC               | 18038 | 18001 |
| >CBL-Y371C- <sup>1</sup> VTQEQYELY               | 452  | >CBL-Y371C- <sup>1</sup> VTQEQYELC               | 23676 | 23224 |
| >CBL-Y371C- <sup>1</sup> VTQEQYELY               | 57   | >CBL-Y371C- <sup>1</sup> VTQEQYELC               | 23207 | 23150 |
| >CBL-Y371C- <sup>1</sup> VTQEQYELY               | 363  | >CBL-Y371C- <sup>1</sup> VTQEQYELC               | 27608 | 27245 |
| >CBL-Y371C- <sup>1</sup> VTQEQYELY               | 132  | >CBL-Y371C- <sup>1</sup> VTQEQYELC               | 25172 | 25040 |
| >CBL-Y371C- <sup>1</sup> VTQEQYELY               | 28   | >CBL-Y371C- <sup>1</sup> VTQEQYELC               | 19926 | 19898 |

|                       |      |                        |       |       |
|-----------------------|------|------------------------|-------|-------|
| >CBL-Y371C-VTQEQYELY  | 63   | >CBL-Y371C-VTQEQYELC   | 14435 | 14372 |
| >CBL-Y371C-KVTQEQYELY | 17   | >CBL-Y371C-KVTQEQYELC  | 24356 | 24339 |
| >CBL-Y371C-KVTQEQYELY | 94   | >CBL-Y371C-KVTQEQYELC  | 7039  | 6945  |
| >CBL-Y371D-YCEMGSTF   | 304  | >CBL-Y371D-DCEMGSTF    | 2107  | 1803  |
| >CBL-Y371D-LYCEMGSTF  | 29   | >CBL-Y371D-LDCEMGSTF   | 28147 | 28118 |
| >CBL-Y371D-LYCEMGSTFC | 46   | >CBL-Y371D-LDCEMGSTFC  | 23712 | 23666 |
| >CBL-Y371D-LYCEMGSTF  | 119  | >CBL-Y371D-LDCEMGSTF   | 15562 | 15443 |
| >CBL-Y371D-LYCEMGSTFC | 404  | >CBL-Y371D-LDCEMGSTFC  | 23891 | 23487 |
| >CBL-Y371D-LYCEMGSTF  | 94   | >CBL-Y371D-LDCEMGSTF   | 15826 | 15732 |
| >CBL-Y371D-LYCEMGSTFC | 343  | >CBL-Y371D-LDCEMGSTFC  | 25604 | 25261 |
| >CBL-Y371D-LYCEMGSTF  | 6    | >CBL-Y371D-LDCEMGSTF   | 20250 | 20244 |
| >CBL-Y371D-LYCEMGSTFC | 7    | >CBL-Y371D-LDCEMGSTFC  | 23489 | 23482 |
| >CBL-Y371D-LYCEMGSTF  | 359  | >CBL-Y371D-LDCEMGSTF   | 770   | 411   |
| >CBL-Y371D-LYCEMGSTF  | 3529 | >CBL-Y371D-LDCEMGSTF   | 423   | 3106  |
| >CBL-Y371D-LYCEMGSTF  | 124  | >CBL-Y371D-LDCEMGSTF   | 94    | 30    |
| >CBL-Y371D-IKVTQEQYEL | 13   | >CBL-Y371D-IKVTQEQYELI | 11514 | 11501 |
| >CBL-Y371D-ELYCEMGSTF | 202  | >CBL-Y371D-ELDCEMGSTF  | 390   | 188   |
| >CBL-Y371D-ELYCEMGSTF | 71   | >CBL-Y371D-ELDCEMGSTF  | 5213  | 5142  |
| >CBL-Y371D-ELYCEMGSTF | 414  | >CBL-Y371D-ELDCEMGSTF  | 5170  | 4756  |
| >CBL-Y371D-ELYCEMGSTF | 87   | >CBL-Y371D-ELDCEMGSTF  | 4745  | 4658  |
| >CBL-Y371D-ELYCEMGSTF | 104  | >CBL-Y371D-ELDCEMGSTF  | 1766  | 1662  |
| >CBL-Y371D-ELYCEMGSTF | 45   | >CBL-Y371D-ELDCEMGSTF  | 2892  | 2847  |
| >CBL-Y371D-ELYCEMGSTF | 342  | >CBL-Y371D-ELDCEMGSTF  | 6740  | 6398  |
| >CBL-Y371D-YELYCEMGST | 471  | >CBL-Y371D-YELDCEMGST  | 1323  | 852   |
| >CBL-Y371D-YELYCEMGST | 7    | >CBL-Y371D-YELDCEMGST  | 13    | 6     |
| >CBL-Y371D-YELYCEMGST | 8    | >CBL-Y371D-YELDCEMGST  | 7     | 1     |
| >CBL-Y371D-YELYCEMGST | 504  | >CBL-Y371D-YELDCEMGST  | 327   | 177   |
| >CBL-Y371D-YELYCEMGST | 49   | >CBL-Y371D-YELDCEMGST  | 61    | 12    |
| >CBL-Y371D-YELYCEMGST | 158  | >CBL-Y371D-YELDCEMGST  | 526   | 368   |
| >CBL-Y371D-YELYCEMGST | 139  | >CBL-Y371D-YELDCEMGST  | 130   | 9     |
| >CBL-Y371D-YELYCEMGST | 112  | >CBL-Y371D-YELDCEMGST  | 102   | 10    |
| >CBL-Y371D-YELYCEMGST | 59   | >CBL-Y371D-YELDCEMGST  | 79    | 20    |
| >CBL-Y371D-YELYCEMGST | 120  | >CBL-Y371D-YELDCEMGST  | 779   | 659   |
| >CBL-Y371D-YELYCEMGST | 22   | >CBL-Y371D-YELDCEMGST  | 18    | 4     |
| >CBL-Y371D-EQYELYCEM  | 229  | >CBL-Y371D-EQYELDCEM   | 6540  | 6311  |
| >CBL-Y371D-EQYELYCEM  | 355  | >CBL-Y371D-EQYELDCEM   | 1084  | 729   |
| >CBL-Y371D-EQYELYCEM  | 300  | >CBL-Y371D-EQYELDCEM   | 4029  | 3729  |
| >CBL-Y371D-EQYELYCEM  | 122  | >CBL-Y371D-EQYELDCEM   | 127   | 5     |
| >CBL-Y371D-EQYELYCEM  | 70   | >CBL-Y371D-EQYELDCEM   | 385   | 315   |
| >CBL-Y371D-EQYELYCEM  | 976  | >CBL-Y371D-EQYELDCEM   | 237   | 739   |
| >CBL-Y371D-QEQYELYCEN | 119  | >CBL-Y371D-QEQYELDCEN  | 280   | 161   |
| >CBL-Y371D-QEQYELYCEN | 257  | >CBL-Y371D-QEQYELDCEN  | 689   | 432   |
| >CBL-Y371D-QEQYELYCEN | 280  | >CBL-Y371D-QEQYELDCEN  | 623   | 343   |

|                        |      |                         |       |       |
|------------------------|------|-------------------------|-------|-------|
| >CBL-Y371D- QEQYELYCEN | 249  | >CBL-Y371D- QEQYELDCEN  | 484   | 235   |
| >CBL-Y371D- QEQYELYC   | 487  | >CBL-Y371D- QEQYELDC    | 1319  | 832   |
| >CBL-Y371D- QEQYELYCEN | 295  | >CBL-Y371D- QEQYELDCEN  | 596   | 301   |
| >CBL-Y371D- VTQEQYELY  | 37   | >CBL-Y371D- VTQEQYELD   | 20147 | 20110 |
| >CBL-Y371D- VTQEQYELY  | 452  | >CBL-Y371D- VTQEQYELD   | 23825 | 23373 |
| >CBL-Y371D- VTQEQYELY  | 57   | >CBL-Y371D- VTQEQYELD   | 24476 | 24419 |
| >CBL-Y371D- VTQEQYELY  | 363  | >CBL-Y371D- VTQEQYELD   | 28981 | 28618 |
| >CBL-Y371D- VTQEQYELY  | 132  | >CBL-Y371D- VTQEQYELD   | 25068 | 24936 |
| >CBL-Y371D- VTQEQYELY  | 28   | >CBL-Y371D- VTQEQYELD   | 23467 | 23439 |
| >CBL-Y371D- VTQEQYELY  | 63   | >CBL-Y371D- VTQEQYELD   | 19605 | 19542 |
| >CBL-Y371D- KVTQEQYELY | 17   | >CBL-Y371D- KVTQEQYELC  | 24014 | 23997 |
| >CBL-Y371D- KVTQEQYELY | 94   | >CBL-Y371D- KVTQEQYELC  | 16589 | 16495 |
| >CBL-Y371H- YCEMGSTF   | 304  | >CBL-Y371H- HCEMGSTF    | 623   | 319   |
| >CBL-Y371H- LYCEMGSTF  | 29   | >CBL-Y371H- LHCEMGSTF   | 11294 | 11265 |
| >CBL-Y371H- LYCEMGSTFC | 46   | >CBL-Y371H- LHCEMGSTFC  | 7247  | 7201  |
| >CBL-Y371H- LYCEMGSTF  | 119  | >CBL-Y371H- LHCEMGSTF   | 4318  | 4199  |
| >CBL-Y371H- LYCEMGSTFC | 404  | >CBL-Y371H- LHCEMGSTFC  | 10694 | 10290 |
| >CBL-Y371H- LYCEMGSTF  | 94   | >CBL-Y371H- LHCEMGSTF   | 3432  | 3338  |
| >CBL-Y371H- LYCEMGSTFC | 343  | >CBL-Y371H- LHCEMGSTFC  | 10320 | 9977  |
| >CBL-Y371H- LYCEMGSTF  | 6    | >CBL-Y371H- LHCEMGSTF   | 3216  | 3210  |
| >CBL-Y371H- LYCEMGSTFC | 7    | >CBL-Y371H- LHCEMGSTFC  | 7263  | 7256  |
| >CBL-Y371H- LYCEMGSTF  | 359  | >CBL-Y371H- LHCEMGSTF   | 34    | 325   |
| >CBL-Y371H- LYCEMGSTFC | 5929 | >CBL-Y371H- LHCEMGSTFC  | 89    | 5840  |
| >CBL-Y371H- LYCEMGSTF  | 124  | >CBL-Y371H- LHCEMGSTF   | 276   | 152   |
| >CBL-Y371H- IKVTQEQYEL | 13   | >CBL-Y371H- IKVTQEQYELI | 821   | 808   |
| >CBL-Y371H- ELYCEMGSTF | 202  | >CBL-Y371H- ELHCEMGSTF  | 439   | 237   |
| >CBL-Y371H- ELYCEMGSTF | 71   | >CBL-Y371H- ELHCEMGSTF  | 115   | 44    |
| >CBL-Y371H- ELYCEMGSTF | 414  | >CBL-Y371H- ELHCEMGSTF  | 266   | 148   |
| >CBL-Y371H- ELYCEMGSTF | 87   | >CBL-Y371H- ELHCEMGSTF  | 187   | 100   |
| >CBL-Y371H- ELYCEMGSTF | 104  | >CBL-Y371H- ELHCEMGSTF  | 295   | 191   |
| >CBL-Y371H- ELYCEMGSTF | 45   | >CBL-Y371H- ELHCEMGSTF  | 157   | 112   |
| >CBL-Y371H- ELYCEMGSTF | 342  | >CBL-Y371H- ELHCEMGSTF  | 2429  | 2087  |
| >CBL-Y371H- YELYCEMGST | 471  | >CBL-Y371H- YELHCEMGST  | 550   | 79    |
| >CBL-Y371H- YELYCEMGST | 7    | >CBL-Y371H- YELHCEMGST  | 7     | 0     |
| >CBL-Y371H- YELYCEMGST | 8    | >CBL-Y371H- YELHCEMGST  | 13    | 5     |
| >CBL-Y371H- YELYCEMGST | 504  | >CBL-Y371H- YELHCEMGST  | 377   | 127   |
| >CBL-Y371H- YELYCEMGST | 49   | >CBL-Y371H- YELHCEMGST  | 78    | 29    |
| >CBL-Y371H- YELYCEMGST | 158  | >CBL-Y371H- YELHCEMGST  | 349   | 191   |
| >CBL-Y371H- YELYCEMGST | 139  | >CBL-Y371H- YELHCEMGST  | 120   | 19    |
| >CBL-Y371H- YELYCEMGST | 112  | >CBL-Y371H- YELHCEMGST  | 84    | 28    |
| >CBL-Y371H- YELYCEMGST | 59   | >CBL-Y371H- YELHCEMGST  | 81    | 22    |
| >CBL-Y371H- YELYCEMGST | 120  | >CBL-Y371H- YELHCEMGST  | 469   | 349   |
| >CBL-Y371H- YELYCEMGST | 22   | >CBL-Y371H- YELHCEMGST  | 27    | 5     |



|                        |      |                         |       |       |
|------------------------|------|-------------------------|-------|-------|
| >CBL-Y371H- EQYELYCEM  | 229  | >CBL-Y371H- EQYELHCEM   | 1637  | 1408  |
| >CBL-Y371H- EQYELYCEM  | 355  | >CBL-Y371H- EQYELHCEM   | 1068  | 713   |
| >CBL-Y371H- EQYELYCEM  | 300  | >CBL-Y371H- EQYELHCEM   | 448   | 148   |
| >CBL-Y371H- EQYELYCEM  | 122  | >CBL-Y371H- EQYELHCEM   | 89    | 33    |
| >CBL-Y371H- EQYELYCEM  | 70   | >CBL-Y371H- EQYELHCEM   | 88    | 18    |
| >CBL-Y371H- QEYELYCEM  | 119  | >CBL-Y371H- QEYELHCEM   | 201   | 82    |
| >CBL-Y371H- QEYELYCEM  | 257  | >CBL-Y371H- QEYELHCEM   | 466   | 209   |
| >CBL-Y371H- QEYELYCEM  | 280  | >CBL-Y371H- QEYELHCEM   | 512   | 232   |
| >CBL-Y371H- QEYELYCEM  | 249  | >CBL-Y371H- QEYELHCEM   | 478   | 229   |
| >CBL-Y371H- QEYELYC    | 487  | >CBL-Y371H- QEYELHC     | 990   | 503   |
| >CBL-Y371H- QEYELYCEM  | 295  | >CBL-Y371H- QEYELHCEM   | 623   | 328   |
| >CBL-Y371H- VTQEYELY   | 37   | >CBL-Y371H- VTQEYELH    | 13922 | 13885 |
| >CBL-Y371H- VTQEYELY   | 452  | >CBL-Y371H- VTQEYELH    | 3897  | 3445  |
| >CBL-Y371H- VTQEYELY   | 57   | >CBL-Y371H- VTQEYELH    | 9446  | 9389  |
| >CBL-Y371H- VTQEYELY   | 363  | >CBL-Y371H- VTQEYELH    | 14918 | 14555 |
| >CBL-Y371H- VTQEYELY   | 132  | >CBL-Y371H- VTQEYELH    | 15644 | 15512 |
| >CBL-Y371H- VTQEYELY   | 28   | >CBL-Y371H- VTQEYELH    | 11996 | 11968 |
| >CBL-Y371H- VTQEYELY   | 63   | >CBL-Y371H- VTQEYELH    | 1877  | 1814  |
| >CBL-Y371H- KVTQEYELY  | 17   | >CBL-Y371H- KVTQEYELH   | 11013 | 10996 |
| >CBL-Y371H- KVTQEYELY  | 94   | >CBL-Y371H- KVTQEYELH   | 6605  | 6511  |
| >CBLB-D759E DLSIYLKGDV | 580  | >CBLB-D759E ELSIYLKGDV  | 337   | 243   |
| >CBLB-D759E DLSIYLKGDV | 148  | >CBLB-D759E ELSIYLKGDV  | 38    | 110   |
| >CBLB-D759E PDLIYLKGDV | 7707 | >CBLB-D759E PELIYLKGDV  | 409   | 7298  |
| >CBLB-D759E PDLIYLKGDV | 104  | >CBLB-D759E PELIYLKGDV  | 5724  | 5620  |
| >CBLB-D759E IPDLIYL    | 33   | >CBLB-D759E IPELSIYL    | 34    | 1     |
| >CBLB-D759E IPDLIYL    | 467  | >CBLB-D759E IPELSIYL    | 364   | 103   |
| >CBLB-D759E IPDLIYL    | 237  | >CBLB-D759E IPELSIYL    | 245   | 8     |
| >CBLB-D759E NIPDLIYL   | 269  | >CBLB-D759E NIPELSIYL   | 277   | 8     |
| >CBLB-D759E NIPDLIYL   | 46   | >CBLB-D759E NIPELSIYL   | 73    | 27    |
| >CBLB-D759E NIPDLIYL   | 56   | >CBLB-D759E NIPELSIYL   | 48    | 8     |
| >CBLB-D759E NIPDLIYL   | 135  | >CBLB-D759E NIPELSIYL   | 90    | 45    |
| >CBLB-D759E NIPDLIYL   | 449  | >CBLB-D759E NIPELSIYL   | 285   | 164   |
| >CBLB-D759E NIPDLIYL   | 384  | >CBLB-D759E NIPELSIYL   | 949   | 565   |
| >CBLB-D759E NIPDLIYLK  | 235  | >CBLB-D759E NIPELSIYLK  | 602   | 367   |
| >CBLB-D759E NIPDLIYLK  | 42   | >CBLB-D759E NIPELSIYLK  | 64    | 22    |
| >CBLB-D759E NIPDLIYLK  | 10   | >CBLB-D759E NIPELSIYLK  | 13    | 3     |
| >CBLB-D759E NIPDLIYL   | 37   | >CBLB-D759E NIPELSIYL   | 51    | 14    |
| >CBLB-D759E NIPDLIYL   | 226  | >CBLB-D759E NIPELSIYL   | 96    | 130   |
| >CBLB-D759E NIPDLIYL   | 125  | >CBLB-D759E NIPELSIYL   | 136   | 11    |
| >CBLB-D759E NIPDLIYLK  | 439  | >CBLB-D759E NIPELSIYLK  | 883   | 444   |
| >CBLB-D759E SNIPDLIYL  | 363  | >CBLB-D759E SNIPELSIYL  | 516   | 153   |
| >CBLB-D759E SNIPDLIYL  | 186  | >CBLB-D759E SNIPELSIYL  | 251   | 65    |
| >CBLB-D759E SNIPDLIYLK | 241  | >CBLB-D759E SNIPELSIYLK | 217   | 24    |

|                         |      |                         |     |      |
|-------------------------|------|-------------------------|-----|------|
| >CBLB-D759E SNIPDLSIY   | 37   | >CBLB-D759E SNIPELSIY   | 76  | 39   |
| >CBLB-D759E SNIPDLSIY   | 451  | >CBLB-D759E SNIPELSIY   | 669 | 218  |
| >CBLB-D759E SNIPDLSIY   | 109  | >CBLB-D759E SNIPELSIY   | 185 | 76   |
| >CBLB-D759E SNIPDLSIY   | 28   | >CBLB-D759E SNIPELSIY   | 39  | 11   |
| >CBLB-D759E SNIPDLSIYLK | 433  | >CBLB-D759E SNIPELSIYLK | 487 | 54   |
| >CBLB-D759E SNIPDLSI    | 94   | >CBLB-D759E SNIPELSI    | 152 | 58   |
| >CBLB-D759E KSNIPDLSIY  | 266  | >CBLB-D759E KSNIPELSIY  | 317 | 51   |
| >CBLB-D759E KSNIPDLSI   | 433  | >CBLB-D759E KSNIPELSI   | 462 | 29   |
| >CBLB-D759E KSNIPDLSIYL | 136  | >CBLB-D759E KSNIPELSIYL | 145 | 9    |
| >CBLB-D759E KSNIPDLSIY  | 38   | >CBLB-D759E KSNIPELSIY  | 44  | 6    |
| >CBLB-D759E KSNIPDLSI   | 82   | >CBLB-D759E KSNIPELSI   | 106 | 24   |
| >CBLB-D759E KSNIPDLSIY  | 442  | >CBLB-D759E KSNIPELSIY  | 853 | 411  |
| >CBLB-D759E KSNIPDLSIY  | 155  | >CBLB-D759E KSNIPELSIY  | 118 | 37   |
| >CBLB-D759E KSNIPDLSI   | 8    | >CBLB-D759E KSNIPELSI   | 13  | 5    |
| >CBLB-D759E KSNIPDLSIY  | 5    | >CBLB-D759E KSNIPELSIY  | 4   | 1    |
| >CBLB-D759E KSNIPDLSIYL | 6    | >CBLB-D759E KSNIPELSIYL | 8   | 2    |
| >CBLB-D759E KSNIPDLSIY  | 324  | >CBLB-D759E KSNIPELSIY  | 311 | 13   |
| >CBLB-D759E KSNIPDLSI   | 23   | >CBLB-D759E KSNIPELSI   | 30  | 7    |
| >CBLB-D759E KSNIPDLSIY  | 26   | >CBLB-D759E KSNIPELSIY  | 28  | 2    |
| >CBLB-D759E KSNIPDLSIYL | 32   | >CBLB-D759E KSNIPELSIYL | 39  | 7    |
| >CBLB-D759E KSNIPDLSIYL | 211  | >CBLB-D759E KSNIPELSIYL | 253 | 42   |
| >CBLB-D759E KSNIPDLSIY  | 75   | >CBLB-D759E KSNIPELSIY  | 60  | 15   |
| >CBLB-D759E KSNIPDLSI   | 18   | >CBLB-D759E KSNIPELSI   | 47  | 29   |
| >CBLB-D759E KSNIPDLSIY  | 56   | >CBLB-D759E KSNIPELSIY  | 77  | 21   |
| >CBLB-D759E KSNIPDLSI   | 73   | >CBLB-D759E KSNIPELSI   | 47  | 26   |
| >CBLB-D759E KSNIPDLSIY  | 88   | >CBLB-D759E KSNIPELSIY  | 49  | 39   |
| >CBLB-D759E KSNIPDLSI   | 8    | >CBLB-D759E KSNIPELSI   | 5   | 3    |
| >CBLB-D759E KSNIPDLSIY  | 97   | >CBLB-D759E KSNIPELSIY  | 97  | 0    |
| >CBLB-D759E KSNIPDLSI   | 228  | >CBLB-D759E KSNIPELSI   | 137 | 91   |
| >CBLB-D759E KSNIPDLSIY  | 265  | >CBLB-D759E KSNIPELSIY  | 161 | 104  |
| >CBLB-D759E KSNIPDLSI   | 324  | >CBLB-D759E KSNIPELSI   | 213 | 111  |
| >CBLB-D759E KSNIPDLSIY  | 258  | >CBLB-D759E KSNIPELSIY  | 282 | 24   |
| >CBLB-D759E KSNIPDLSI   | 1550 | >CBLB-D759E KSNIPELSI   | 412 | 1138 |
| >CBLB-D759E KSNIPDLSIY  | 637  | >CBLB-D759E KSNIPELSIY  | 272 | 365  |
| >CBLB-D759E KSNIPDLSI   | 738  | >CBLB-D759E KSNIPELSI   | 458 | 280  |
| >CBLB-D759E KSNIPDLSIY  | 8    | >CBLB-D759E KSNIPELSIY  | 14  | 6    |
| >CBLB-D759E KSNIPDLSI   | 322  | >CBLB-D759E KSNIPELSI   | 970 | 648  |
| >CBLB-D759E KSNIPDLSIY  | 1075 | >CBLB-D759E KSNIPELSIY  | 185 | 890  |
| >CBLB-D759E KSNIPDLSI   | 163  | >CBLB-D759E KSNIPELSI   | 318 | 155  |
| >CBLB-D759E KSNIPDLSIY  | 1287 | >CBLB-D759E KSNIPELSIY  | 280 | 1007 |
| >CBLB-D759E KSNIPDLSI   | 49   | >CBLB-D759E KSNIPELSI   | 158 | 109  |
| >CBLB-D759E KSNIPDLSIY  | 1082 | >CBLB-D759E KSNIPELSIY  | 485 | 597  |
| >CBLB-D759E KSNIPDLSI   | 39   | >CBLB-D759E KSNIPELSI   | 74  | 35   |

|                       |     |                       |      |      |
|-----------------------|-----|-----------------------|------|------|
| >CBLB-G244(PWGSILRNW  | 205 | >CBLB-G244(PWCSILRNW  | 348  | 143  |
| >CBLB-G244(PWGSILRNW  | 79  | >CBLB-G244(PWCSILRNW  | 100  | 21   |
| >CBLB-G244(QPWGSILRN\ | 654 | >CBLB-G244(QPWCSILRN\ | 248  | 406  |
| >CBLB-G244(QPWGSILRN\ | 11  | >CBLB-G244(QPWCSILRN\ | 11   | 0    |
| >CBLB-G244(QPWGSILR   | 77  | >CBLB-G244(QPWCSILR   | 43   | 34   |
| >CBLB-G244(FQPWGSIL   | 732 | >CBLB-G244(FQPWCSIL   | 204  | 528  |
| >CBLB-G244(FQPWGSIL   | 623 | >CBLB-G244(FQPWCSIL   | 166  | 457  |
| >CBLB-G244(FQPWGSIL   | 153 | >CBLB-G244(FQPWCSIL   | 152  | 1    |
| >CBLB-G244(FQPWGSIL   | 11  | >CBLB-G244(FQPWCSIL   | 12   | 1    |
| >CBLB-G244(FQPWGSIL   | 325 | >CBLB-G244(FQPWCSIL   | 1020 | 695  |
| >CBLB-G244(FQPWGSIL   | 336 | >CBLB-G244(FQPWCSIL   | 269  | 67   |
| >CBLB-G244(FQPWGSIL   | 44  | >CBLB-G244(FQPWCSIL   | 93   | 49   |
| >CBLB-G244(FQPWGSIL   | 166 | >CBLB-G244(FQPWCSIL   | 304  | 138  |
| >CBLB-G244(FQPWGSIL   | 480 | >CBLB-G244(FQPWCSIL   | 2207 | 1727 |
| >CBLB-G244(FQPWGSILR  | 184 | >CBLB-G244(FQPWCSILR  | 32   | 152  |
| >CBLB-G244(LFQPWGSIL  | 383 | >CBLB-G244(LFQPWCSIL  | 220  | 163  |
| >CBLB-G244(LFQPWGSIL  | 308 | >CBLB-G244(LFQPWCSIL  | 53   | 255  |
| >CBLB-G244(LFQPWGSIL  | 595 | >CBLB-G244(LFQPWCSIL  | 428  | 167  |
| >CBLB-G244(LFQPWGSIL  | 60  | >CBLB-G244(LFQPWCSIL  | 83   | 23   |
| >CBLB-G244(LFQPWGSIL  | 84  | >CBLB-G244(LFQPWCSIL  | 72   | 12   |
| >CBLB-G244(LFQPWGSILR | 23  | >CBLB-G244(LFQPWCSILR | 10   | 13   |
| >CBLB-G244(LFQPWGSILR | 104 | >CBLB-G244(LFQPWCSILR | 50   | 54   |
| >CBLB-G244(LFQPWGSILR | 278 | >CBLB-G244(LFQPWCSILR | 371  | 93   |
| >CBLB-G244(LFQPWGSIL  | 150 | >CBLB-G244(LFQPWCSIL  | 130  | 20   |
| >CBLB-G244(LFQPWGSILR | 150 | >CBLB-G244(LFQPWCSILR | 73   | 77   |
| >CBLB-G244(LFQPWGSILR | 376 | >CBLB-G244(LFQPWCSILR | 153  | 223  |
| >CBLB-G244(LFQPWGSIL  | 234 | >CBLB-G244(LFQPWCSIL  | 195  | 39   |
| >CBLB-G244(LFQPWGSIL  | 202 | >CBLB-G244(LFQPWCSIL  | 57   | 145  |
| >CBLB-G244(LFQPWGSIL  | 496 | >CBLB-G244(LFQPWCSIL  | 1019 | 523  |
| >CBLB-G244(RLFQPWGSIL | 511 | >CBLB-G244(RLFQPWCSIL | 65   | 446  |
| >CBLB-G244(RLFQPWGSIL | 885 | >CBLB-G244(RLFQPWCSIL | 330  | 555  |
| >CBLB-G244(RLFQPWGSIL | 919 | >CBLB-G244(RLFQPWCSIL | 311  | 608  |
| >CBLB-G244(RLFQPWGSIL | 88  | >CBLB-G244(RLFQPWCSIL | 85   | 3    |
| >CBLB-G244(RLFQPWGSIL | 46  | >CBLB-G244(RLFQPWCSIL | 72   | 26   |
| >CBLB-G244(RLFQPWGSIL | 118 | >CBLB-G244(RLFQPWCSIL | 55   | 63   |
| >CBLB-G244(RLFQPWGSIL | 440 | >CBLB-G244(RLFQPWCSIL | 64   | 376  |
| >CBLB-G244(RLFQPWGS   | 33  | >CBLB-G244(RLFQPWCS   | 80   | 47   |
| >CBLB-G244(RLFQPWGSIL | 4   | >CBLB-G244(RLFQPWCSIL | 2    | 2    |
| >CBLB-G244(RLFQPWGSIL | 6   | >CBLB-G244(RLFQPWCSIL | 7    | 1    |
| >CBLB-G244(RLFQPWGSIL | 968 | >CBLB-G244(RLFQPWCSIL | 91   | 877  |
| >CBLB-G244(RLFQPWGSIL | 169 | >CBLB-G244(RLFQPWCSIL | 128  | 41   |
| >CBLB-G244(RLFQPWGSIL | 116 | >CBLB-G244(RLFQPWCSIL | 11   | 105  |
| >CBLB-G244(RLFQPWGSIL | 44  | >CBLB-G244(RLFQPWCSIL | 25   | 19   |

|                       |      |                       |      |      |
|-----------------------|------|-----------------------|------|------|
| >CBLB-G244(RLFQPWGS   | 402  | >CBLB-G244(RLFQPWCS   | 521  | 119  |
| >CBLB-G244(RLFQPWGS   | 76   | >CBLB-G244(RLFQPWCSI  | 11   | 65   |
| >CBLB-G244(RLFQPWGSIL | 14   | >CBLB-G244(RLFQPWCSIL | 9    | 5    |
| >CBLB-G244(RLFQPWGSIL | 39   | >CBLB-G244(RLFQPWCSIL | 43   | 4    |
| >CBLB-G244(RLFQPWGSIL | 172  | >CBLB-G244(RLFQPWCSIL | 119  | 53   |
| >CBLB-G244(RLFQPWGS   | 448  | >CBLB-G244(RLFQPWCSI  | 127  | 321  |
| >CBLB-G244(RLFQPWGSIL | 19   | >CBLB-G244(RLFQPWCSIL | 16   | 3    |
| >CBLB-G244(RLFQPWGS   | 152  | >CBLB-G244(RLFQPWCSI  | 31   | 121  |
| >CBLB-G244(RLFQPWGSIL | 393  | >CBLB-G244(RLFQPWCSIL | 182  | 211  |
| >CBLB-G244(RLFQPWGSIL | 365  | >CBLB-G244(RLFQPWCSIL | 258  | 107  |
| >CBLB-G244(RLFQPWGS   | 317  | >CBLB-G244(RLFQPWCSI  | 123  | 194  |
| >CBLB-G244(RLFQPWGSIL | 189  | >CBLB-G244(RLFQPWCSIL | 178  | 11   |
| >CBLB-G244(RLFQPWGS   | 399  | >CBLB-G244(RLFQPWCSI  | 947  | 548  |
| >CBLB-G244(RLFQPWGSIL | 298  | >CBLB-G244(RLFQPWCSIL | 991  | 693  |
| >CBLB-G244(RLFQPWGS   | 689  | >CBLB-G244(RLFQPWCSI  | 133  | 556  |
| >CBLB-G244(RLFQPWGSIL | 61   | >CBLB-G244(RLFQPWCSIL | 47   | 14   |
| >CBLB-G244(RLFQPWGS   | 628  | >CBLB-G244(RLFQPWCSI  | 193  | 435  |
| >CBLB-G244(RLFQPWGSIL | 137  | >CBLB-G244(RLFQPWCSIL | 187  | 50   |
| >CBLB-G244(RLFQPWGSIL | 31   | >CBLB-G244(RLFQPWCSIL | 18   | 13   |
| >CBLB-G244(RLFQPWGS   | 35   | >CBLB-G244(RLFQPWCSI  | 105  | 70   |
| >CBLB-G244(TRLFQPWGS  | 354  | >CBLB-G244(TRLFQPWCSI | 1083 | 729  |
| >CBLB-G244(TRLFQPWGS  | 59   | >CBLB-G244(TRLFQPWCSI | 78   | 19   |
| >CBLB-G244(TRLFQPWGS  | 369  | >CBLB-G244(TRLFQPWCSI | 407  | 38   |
| >CBLB-G244(TRLFQPWGS  | 109  | >CBLB-G244(TRLFQPWCSI | 107  | 2    |
| >CBLB-G244(FTRLFQPWG  | 135  | >CBLB-G244(FTRLFQPWC  | 60   | 75   |
| >CBLB-G244(FTRLFQPWG  | 50   | >CBLB-G244(FTRLFQPWC  | 31   | 19   |
| >CBLB-G244(FTRLFQPWG  | 64   | >CBLB-G244(FTRLFQPWC  | 192  | 128  |
| >CBLB-G244(FTRLFQPWG  | 18   | >CBLB-G244(FTRLFQPWC  | 33   | 15   |
| >CBLB-I619M ITASSNVGR | 639  | >CBLB-I619M MTASSNVG  | 195  | 444  |
| >CBLB-I619M ITASSNVN  | 2803 | >CBLB-I619M MTASSNVN  | 283  | 2520 |
| >CBLB-I619M ITASSNVGR | 20   | >CBLB-I619M MTASSNVG  | 6    | 14   |
| >CBLB-I619M ITASSNVGR | 791  | >CBLB-I619M MTASSNVG  | 69   | 722  |
| >CBLB-I619M ITASSNVNG | 6326 | >CBLB-I619M MTASSNVG  | 179  | 6147 |
| >CBLB-I619M ITASSNVGR | 36   | >CBLB-I619M MTASSNVG  | 44   | 8    |
| >CBLB-I619M GITASSNV  | 2324 | >CBLB-I619M GMTASSNV  | 122  | 2202 |
| >CBLB-I619M GITASSNV  | 144  | >CBLB-I619M GMTASSNV  | 12   | 132  |
| >CBLB-I619M GITASSNV  | 34   | >CBLB-I619M GMTASSNV  | 5    | 29   |
| >CBLB-I619M GITASSNV  | 542  | >CBLB-I619M GMTASSNV  | 161  | 381  |
| >CBLB-I619M GITASSNV  | 420  | >CBLB-I619M GMTASSNV  | 10   | 410  |
| >CBLB-I619M GITASSNV  | 366  | >CBLB-I619M GMTASSNV  | 5    | 361  |
| >CBLB-I619M GITASSNV  | 60   | >CBLB-I619M GMTASSNV  | 7    | 53   |
| >CBLB-I619M GITASSNV  | 2728 | >CBLB-I619M GMTASSNV  | 33   | 2695 |
| >CBLB-I619M GITASSNV  | 11   | >CBLB-I619M GMTASSNV  | 3    | 8    |

|                         |       |                         |       |       |
|-------------------------|-------|-------------------------|-------|-------|
| >CBLB-I619M GITASSNVNG  | 1809  | >CBLB-I619M GMTASSNVN   | 324   | 1485  |
| >CBLB-I619M GITASSNVNG  | 222   | >CBLB-I619M GMTASSNVN   | 570   | 348   |
| >CBLB-I619M LLGEGSPKPG  | 193   | >CBLB-I619M LLGEGSPKPG  | 856   | 663   |
| >CBLB-I619M LLGEGSPKPG  | 181   | >CBLB-I619M LLGEGSPKPG  | 2336  | 2155  |
| >CBLB-I619M LLGEGSPKPG  | 131   | >CBLB-I619M LLGEGSPKPG  | 619   | 488   |
| >CBLB-I619M LLGEGSPKPG  | 4     | >CBLB-I619M LLGEGSPKPG  | 18    | 14    |
| >CBLB-I619M LLGEGSPKPG  | 20    | >CBLB-I619M LLGEGSPKPG  | 134   | 114   |
| >CBLB-I619M LLGEGSPKPG  | 10    | >CBLB-I619M LLGEGSPKPG  | 45    | 35    |
| >CBLB-I619M LLGEGSPKPG  | 9     | >CBLB-I619M LLGEGSPKPG  | 27    | 18    |
| >CBLB-I619M LLGEGSPKPG  | 4     | >CBLB-I619M LLGEGSPKPG  | 9     | 5     |
| >CBLB-I619M KPGITASSNV  | 465   | >CBLB-I619M KPGMTASSN'  | 200   | 265   |
| >CBLB-I619M SPKPGITA    | 791   | >CBLB-I619M SPKPGMTA    | 335   | 456   |
| >CBLB-I619M GEGSPKPGI   | 356   | >CBLB-I619M GEGSPKPGM   | 673   | 317   |
| >CBLB-I619M GEGSPKPGIT, | 59    | >CBLB-I619M GEGSPKPGM   | 88    | 29    |
| >CBLB-I619M GEGSPKPGI   | 32    | >CBLB-I619M GEGSPKPGM   | 377   | 345   |
| >CBLB-P509S PRLDLIQK    | 610   | >CBLB-P509S SRLDLIQK    | 69    | 541   |
| >CBLB-P509S PRLDLIQKGI  | 1709  | >CBLB-P509S SRLDLIQKGI  | 68    | 1641  |
| >CBLB-P509S PPRDLIQK    | 13821 | >CBLB-P509S PSRLDLIQK   | 45    | 13776 |
| >CBLB-P509S IPHLSLPPVPP | 88    | >CBLB-P509S IPHLSLPPVPS | 48    | 40    |
| >CBLB-P509S VPPRLDLI    | 237   | >CBLB-P509S VPSRLDLI    | 12548 | 12311 |
| >CBLB-P509S VPPRLDLI    | 434   | >CBLB-P509S VPSRLDLI    | 271   | 163   |
| >CBLB-P509S VPPRLDLI    | 1973  | >CBLB-P509S VPSRLDLI    | 256   | 1717  |
| >CBLB-P509S PPVPPRLDL   | 43    | >CBLB-P509S PPVPSRLDL   | 9     | 34    |
| >CBLB-P509S PPVPPRLDL   | 134   | >CBLB-P509S PPVPSRLDL   | 202   | 68    |
| >CBLB-P509S LPPVPPRL    | 454   | >CBLB-P509S LPPVPSRL    | 1327  | 873   |
| >CBLB-P509S LPPVPPRLDL  | 214   | >CBLB-P509S LPPVPSRLDL  | 143   | 71    |
| >CBLB-P509S LPPVPPRL    | 1569  | >CBLB-P509S LPPVPSRL    | 339   | 1230  |
| >CBLB-P509S LPPVPPRLDL  | 194   | >CBLB-P509S LPPVPSRLDL  | 223   | 29    |
| >CBLB-P509S LPPVPPRLDLI | 66    | >CBLB-P509S LPPVPSRLDLI | 68    | 2     |
| >CBLB-P509S LPPVPPRLDLI | 150   | >CBLB-P509S LPPVPSRLDLI | 137   | 13    |
| >CBLB-P509S LPPVPPRL    | 68    | >CBLB-P509S LPPVPSRL    | 56    | 12    |
| >CBLB-P509S LPPVPPRLDL  | 562   | >CBLB-P509S LPPVPSRLDL  | 310   | 252   |
| >CBLB-P509S LPPVPPRLDLI | 131   | >CBLB-P509S LPPVPSRLDLI | 59    | 72    |
| >CBLB-P509S SLPPVPPRL   | 58    | >CBLB-P509S SLPPVPSRL   | 323   | 265   |
| >CBLB-P509S SLPPVPPRL   | 130   | >CBLB-P509S SLPPVPSRL   | 67    | 63    |
| >CBLB-P509S SLPPVPPRL   | 104   | >CBLB-P509S SLPPVPSRL   | 21    | 83    |
| >CBLB-P509S SLPPVPPRLDI | 720   | >CBLB-P509S SLPPVPSRLDI | 306   | 414   |
| >CBLB-P509S SLPPVPPRL   | 4     | >CBLB-P509S SLPPVPSRL   | 5     | 1     |
| >CBLB-P509S SLPPVPPRLDI | 95    | >CBLB-P509S SLPPVPSRLDI | 141   | 46    |
| >CBLB-P509S SLPPVPPRL   | 289   | >CBLB-P509S SLPPVPSRL   | 279   | 10    |
| >CBLB-P509S SLPPVPPRL   | 7     | >CBLB-P509S SLPPVPSRL   | 25    | 18    |
| >CBLB-P509S SLPPVPPRLDI | 63    | >CBLB-P509S SLPPVPSRLDI | 92    | 29    |
| >CBLB-P509S SLPPVPPRL   | 167   | >CBLB-P509S SLPPVPSRL   | 665   | 498   |

|                         |       |                         |       |       |
|-------------------------|-------|-------------------------|-------|-------|
| >CBLB-P509S SLPPVPPRL   | 6     | >CBLB-P509S SLPPVPSRL   | 5     | 1     |
| >CBLB-P509S SLPPVPPRLDI | 12    | >CBLB-P509S SLPPVPSRLDI | 11    | 1     |
| >CBLB-P509S SLPPVPPRL   | 77    | >CBLB-P509S SLPPVPSRL   | 135   | 58    |
| >CBLB-P509S SLPPVPPRLDI | 144   | >CBLB-P509S SLPPVPSRLDI | 196   | 52    |
| >CBLB-P509S SLPPVPPR    | 260   | >CBLB-P509S SLPPVPSR    | 961   | 701   |
| >CBLB-P509S LSLPPVPPR   | 235   | >CBLB-P509S LSLPPVPSR   | 900   | 665   |
| >CBLB-P509S LSLPPVPPR   | 39    | >CBLB-P509S LSLPPVPSR   | 133   | 94    |
| >CBLB-P509S LSLPPVPPRL  | 756   | >CBLB-P509S LSLPPVPSRL  | 438   | 318   |
| >CBLB-P509S LSLPPVPPRL  | 7     | >CBLB-P509S LSLPPVPSRL  | 5     | 2     |
| >CBLB-P509S LSLPPVPPRL  | 95    | >CBLB-P509S LSLPPVPSRL  | 133   | 38    |
| >CBLB-P509S LSLPPVPPRL  | 767   | >CBLB-P509S LSLPPVPSRL  | 238   | 529   |
| >CBLB-P509S LSLPPVPPRL  | 736   | >CBLB-P509S LSLPPVPSRL  | 149   | 587   |
| >CBLB-P509S HLSLPPVPPRI | 152   | >CBLB-P509S HLSLPPVPSRI | 93    | 59    |
| >CBLB-P509S HLSLPPVPPRI | 544   | >CBLB-P509S HLSLPPVPSRI | 184   | 360   |
| >CBLB-P509S HLSLPPVPPRI | 63    | >CBLB-P509S HLSLPPVPSRI | 98    | 35    |
| >CBLB-P509S HLSLPPVPPRI | 475   | >CBLB-P509S HLSLPPVPSRI | 529   | 54    |
| >CBLB-P509S HLSLPPVPPRI | 207   | >CBLB-P509S HLSLPPVPSRI | 709   | 502   |
| >CBLB-P509S HLSLPPVPPRI | 373   | >CBLB-P509S HLSLPPVPSRI | 923   | 550   |
| >CBLB-P509S HLSLPPVPPRI | 23    | >CBLB-P509S HLSLPPVPSRI | 29    | 6     |
| >CBLB-P509S HLSLPPVPPR  | 481   | >CBLB-P509S HLSLPPVPSR  | 944   | 463   |
| >CBLB-P509S HLSLPPVPPR  | 108   | >CBLB-P509S HLSLPPVPSR  | 290   | 182   |
| >CBLB-P509S HLSLPPVPPR  | 181   | >CBLB-P509S HLSLPPVPSR  | 185   | 4     |
| >CBLB-P509S HLSLPPVPPR  | 71    | >CBLB-P509S HLSLPPVPSR  | 216   | 145   |
| >CBLC-P444L PRKPRNAQPI  | 736   | >CBLC-P444L LRKPRNAQPI  | 87    | 649   |
| >CBLC-P444L PPRKPRNAQI  | 5828  | >CBLC-P444L PLRKPRNAQI  | 16    | 5812  |
| >CBLC-P444L PPRKPRNA    | 313   | >CBLC-P444L PLRKPRNA    | 21172 | 20859 |
| >CBLC-P444L PPRKPRNAQ   | 54    | >CBLC-P444L PLRKPRNAQ   | 14474 | 14420 |
| >CBLC-P444L PPLPPRPDLPI | 19160 | >CBLC-P444L PPLPPRPDLPI | 147   | 19013 |
| >CBLC-P444L LPPRKPRNA   | 476   | >CBLC-P444L LPLRKPRNA   | 90    | 386   |
| >CBLC-P444L DLPPRKPR    | 128   | >CBLC-P444L DLPLRKPR    | 72    | 56    |
| >CBLC-P444L PRPDLPKPR   | 1029  | >CBLC-P444L PRPDLPKPR   | 370   | 659   |
| >CBLC-P444L PPRPDLP     | 13442 | >CBLC-P444L PPRPDLP     | 61    | 13381 |
| >CBLC-P444L LPPRPDLPP   | 16406 | >CBLC-P444L LPPRPDLPL   | 29    | 16377 |
| >CBLC-P444L LPPRPDLPP   | 5527  | >CBLC-P444L LPPRPDLPL   | 157   | 5370  |
| >CBLC-P444L PLPPRPDLPP  | 23976 | >CBLC-P444L PLPPRPDLPL  | 178   | 23798 |
| >CCDC6-A22IAEKRILQEKL   | 1572  | >CCDC6-A22ISEKRILQEKL   | 225   | 1347  |
| >CCDC6-A22IAEKRILQEKL   | 479   | >CCDC6-A22ISEKRILQEKL   | 651   | 172   |
| >CCDC6-A22IAEKRILQEK    | 310   | >CCDC6-A22ISEKRILQEK    | 1116  | 806   |
| >CCDC6-A22IAEKRILQEKL   | 56    | >CCDC6-A22ISEKRILQEKL   | 388   | 332   |
| >CCDC6-A22IRLWKRMDKL    | 111   | >CCDC6-A22IRLWKRMDKL    | 4632  | 4521  |
| >CCDC6-A22IRLWKRMDKL    | 31    | >CCDC6-A22IRLWKRMDKL    | 1587  | 1556  |
| >CCDC6-A22IRLWKRMDKL    | 43    | >CCDC6-A22IRLWKRMDKL    | 4688  | 4645  |
| >CCDC6-A22IRLWKRMDKL    | 49    | >CCDC6-A22IRLWKRMDKL    | 3417  | 3368  |

|                        |       |                        |       |       |
|------------------------|-------|------------------------|-------|-------|
| >CCDC6-A22 LEAEKRIL    | 115   | >CCDC6-A22 LESEKRIL    | 122   | 7     |
| >CCDC6-A22 LEAEKRIL    | 340   | >CCDC6-A22 LESEKRIL    | 336   | 4     |
| >CCDC6-A22 LEAEKRIL    | 129   | >CCDC6-A22 LESEKRIL    | 85    | 44    |
| >CCDC6-A22 MDKLEAEKRI  | 236   | >CCDC6-A22 MDKLESEKRI  | 306   | 70    |
| >CCDC6-A22 RMDKLEAEKI  | 37    | >CCDC6-A22 RMDKLESEKF  | 41    | 4     |
| >CCDC6-A22 RMDKLEAEKI  | 422   | >CCDC6-A22 RMDKLESEKF  | 554   | 132   |
| >CCDC6-A22 RMDKLEAEKI  | 164   | >CCDC6-A22 RMDKLESEKF  | 208   | 44    |
| >CCDC6-A22 RMDKLEAEK   | 206   | >CCDC6-A22 RMDKLESEK   | 152   | 54    |
| >CCDC6-A22 RMDKLEAEK   | 118   | >CCDC6-A22 RMDKLESEK   | 97    | 21    |
| >CCDC6-A22 RMDKLEAEKI  | 196   | >CCDC6-A22 RMDKLESEKF  | 193   | 3     |
| >CCDC6-A22 RMDKLEAEKI  | 122   | >CCDC6-A22 RMDKLESEKF  | 159   | 37    |
| >CCDC6-A22 KRMDKLEA    | 375   | >CCDC6-A22 KRMDKLES    | 667   | 292   |
| >CCDC6-A22 KRMDKLEAEI  | 98    | >CCDC6-A22 KRMDKLESEK  | 88    | 10    |
| >CCDC6-A22 KRMDKLEAEI  | 70    | >CCDC6-A22 KRMDKLESEK  | 84    | 14    |
| >CCDC6-A22 KRMDKLEA    | 223   | >CCDC6-A22 KRMDKLES    | 666   | 443   |
| >CCDC6-A22 KRMDKLEAEI  | 463   | >CCDC6-A22 KRMDKLESEK  | 628   | 165   |
| >CCDC6-A22 KRMDKLEAEI  | 157   | >CCDC6-A22 KRMDKLESEK  | 149   | 8     |
| >CCDC6-A22 WKRMDKLEA   | 430   | >CCDC6-A22 WKRMDKLES   | 2503  | 2073  |
| >CCDC6-A22 WKRMDKLEA   | 690   | >CCDC6-A22 WKRMDKLES   | 354   | 336   |
| >CCDC6-L217 LWKRMDKL   | 366   | >CCDC6-L217 PWKRMDKL   | 1459  | 1093  |
| >CCDC6-L217 RLWKRMDKL  | 90    | >CCDC6-L217 RPWKRMDKL  | 23000 | 22910 |
| >CCDC6-L217 RLWKRMDKL  | 111   | >CCDC6-L217 RPWKRMDKL  | 22484 | 22373 |
| >CCDC6-L217 RLWKRMDKL  | 90    | >CCDC6-L217 RPWKRMDKL  | 31431 | 31341 |
| >CCDC6-L217 RLWKRMDKL  | 18    | >CCDC6-L217 RPWKRMDKL  | 24513 | 24495 |
| >CCDC6-L217 RLWKRMDKL  | 31    | >CCDC6-L217 RPWKRMDKL  | 24451 | 24420 |
| >CCDC6-L217 RLWKRMDKL  | 142   | >CCDC6-L217 RPWKRMDKL  | 25281 | 25139 |
| >CCDC6-L217 RLWKRMDKL  | 25    | >CCDC6-L217 RPWKRMDKL  | 23229 | 23204 |
| >CCDC6-L217 RLWKRMDKL  | 43    | >CCDC6-L217 RPWKRMDKL  | 24142 | 24099 |
| >CCDC6-L217 RLWKRMDKL  | 44    | >CCDC6-L217 RPWKRMDKL  | 35693 | 35649 |
| >CCDC6-L217 RLWKRMDKL  | 49    | >CCDC6-L217 RPWKRMDKL  | 35869 | 35820 |
| >CCDC6-L217 RLWKRMDK   | 35    | >CCDC6-L217 RPWKRMDK   | 6103  | 6068  |
| >CCDC6-L217 RLWKRMDK   | 108   | >CCDC6-L217 RPWKRMDK   | 10519 | 10411 |
| >CCDC6-L217 RLWKRMDK   | 165   | >CCDC6-L217 RPWKRMDK   | 10910 | 10745 |
| >CCDC6-L217 RLWKRMDK   | 78    | >CCDC6-L217 RPWKRMDK   | 5931  | 5853  |
| >CCDC6-L217 RLWKRMDKL  | 178   | >CCDC6-L217 RPWKRMDKL  | 13179 | 13001 |
| >CCDC6-L217 RLWKRMDKL  | 6751  | >CCDC6-L217 RPWKRMDKL  | 20    | 6731  |
| >CCDC6-L217 RLWKRMDKL  | 14385 | >CCDC6-L217 RPWKRMDKL  | 41    | 14344 |
| >CCDC6-L217 RLWKRMDKL  | 31723 | >CCDC6-L217 RPWKRMDKL  | 390   | 31333 |
| >CCDC6-L217 RLWKRMDK   | 224   | >CCDC6-L217 RPWKRMDK   | 678   | 454   |
| >CCDC6-L217 EQEQEALVNI | 192   | >CCDC6-L217 EQEQEALVNI | 20190 | 19998 |
| >CCDC6-L217 NRLWKRMDI  | 319   | >CCDC6-L217 NRPWKRMDI  | 3109  | 2790  |
| >CCDC6-L217 VNRLWKRMI  | 429   | >CCDC6-L217 VNRPWKRMI  | 211   | 218   |
| >CCDC6-L217 LVNRLWKRMI | 388   | >CCDC6-L217 LVNRPWKRMI | 1588  | 1200  |

|                       |      |                       |       |       |
|-----------------------|------|-----------------------|-------|-------|
| >CCDC6-L217LVNRLWKRM  | 180  | >CCDC6-L217LVNRPWKRM  | 126   | 54    |
| >CCDC6-L217LVNRLWKRM  | 96   | >CCDC6-L217LVNRPWKRM  | 81    | 15    |
| >CCDC6-L217LVNRLWKRM  | 61   | >CCDC6-L217LVNRPWKRM  | 69    | 8     |
| >CCDC6-L217LVNRLWKR   | 17   | >CCDC6-L217LVNRPWKR   | 26    | 9     |
| >CCDC6-L217LVNRLWKR   | 242  | >CCDC6-L217LVNRPWKR   | 385   | 143   |
| >CCDC6-L217LVNRLWKR   | 225  | >CCDC6-L217LVNRPWKR   | 350   | 125   |
| >CCDC6-L217LVNRLWKRM  | 253  | >CCDC6-L217LVNRPWKRM  | 270   | 17    |
| >CCDC6-L217ALVNRLWKRI | 196  | >CCDC6-L217ALVNRPWKR  | 154   | 42    |
| >CCDC6-L217ALVNRLWK   | 598  | >CCDC6-L217ALVNRPWK   | 444   | 154   |
| >CCDC6-L217ALVNRLWKRI | 98   | >CCDC6-L217ALVNRPWKR  | 142   | 44    |
| >CCDC6-L217ALVNRLWK   | 63   | >CCDC6-L217ALVNRPWK   | 85    | 22    |
| >CCDC6-L217ALVNRLWK   | 76   | >CCDC6-L217ALVNRPWK   | 143   | 67    |
| >CCDC6-L217ALVNRLWKR  | 23   | >CCDC6-L217ALVNRPWKR  | 49    | 26    |
| >CCDC6-L217ALVNRLWKR  | 894  | >CCDC6-L217ALVNRPWKR  | 384   | 510   |
| >CCDC6-L217EALVNRLWKI | 162  | >CCDC6-L217EALVNRPWK  | 301   | 139   |
| >CCDC6-L217EALVNRLWKI | 293  | >CCDC6-L217EALVNRPWK  | 1151  | 858   |
| >CCDC6-L217EALVNRLWK  | 45   | >CCDC6-L217EALVNRPWK  | 33    | 12    |
| >CCDC6-L217EALVNRLWKI | 39   | >CCDC6-L217EALVNRPWK  | 80    | 41    |
| >CCDC6-L217EALVNRLW   | 240  | >CCDC6-L217EALVNRPW   | 133   | 107   |
| >CCDC6-L217EALVNRLW   | 328  | >CCDC6-L217EALVNRPW   | 714   | 386   |
| >CCDC6-L217EALVNRLW   | 161  | >CCDC6-L217EALVNRPW   | 200   | 39    |
| >CCDC6-L217EALVNRLW   | 378  | >CCDC6-L217EALVNRPW   | 1310  | 932   |
| >CCDC6-L217EALVNRLW   | 148  | >CCDC6-L217EALVNRPW   | 194   | 46    |
| >CCDC6-L217EALVNRLWKI | 500  | >CCDC6-L217EALVNRPWK  | 497   | 3     |
| >CCDC6-L217QEALVNRL   | 17   | >CCDC6-L217QEALVNRP   | 463   | 446   |
| >CCDC6-L217QEALVNRLW  | 95   | >CCDC6-L217QEALVNRPW  | 231   | 136   |
| >CCDC6-L217QEALVNRLW  | 1283 | >CCDC6-L217QEALVNRPW  | 149   | 1134  |
| >CCDC6-L217QEALVNRL   | 267  | >CCDC6-L217QEALVNRP   | 15287 | 15020 |
| >CCDC6-L217QEALVNRLW  | 75   | >CCDC6-L217QEALVNRPW  | 93    | 18    |
| >CCDC6-L217QEALVNRLW  | 50   | >CCDC6-L217QEALVNRPW  | 84    | 34    |
| >CCDC6-L217QEALVNRLW  | 839  | >CCDC6-L217QEALVNRPW  | 434   | 405   |
| >CCDC6-L217EQEALVNRL  | 154  | >CCDC6-L217EQEALVNRP  | 18286 | 18132 |
| >CCDC6-L217EQEALVNRLV | 120  | >CCDC6-L217EQEALVNRPV | 166   | 46    |
| >CCDC6-L217QEQEALVNRI | 415  | >CCDC6-L217QEQEALVNRI | 16678 | 16263 |
| >CCDC6-L217QEQEALVNRI | 318  | >CCDC6-L217QEQEALVNRI | 759   | 441   |
| >CCDC6-L217QEQEALVNRI | 300  | >CCDC6-L217QEQEALVNRI | 53    | 247   |
| >CCDC6-L217QEQEALVNRI | 404  | >CCDC6-L217QEQEALVNRI | 11826 | 11422 |
| >CCDC6-L217QEQEALVNRI | 81   | >CCDC6-L217QEQEALVNRI | 95    | 14    |
| >CCDC6-L217QEQEALVNRI | 28   | >CCDC6-L217QEQEALVNRI | 45    | 17    |
| >CCDC6-L217QEQEALVNRI | 218  | >CCDC6-L217QEQEALVNRI | 24130 | 23912 |
| >CCDC6-L217QEQEALVNRI | 376  | >CCDC6-L217QEQEALVNRI | 559   | 183   |
| >CCDC6-P44;PPPPPPPM   | 358  | >CCDC6-P44;SPPPPPPM   | 84    | 274   |
| >CCDC6-P44;PPPPPPPM   | 2340 | >CCDC6-P44;SPPPPPPM   | 97    | 2243  |



|                                   |      |                                   |       |       |
|-----------------------------------|------|-----------------------------------|-------|-------|
| >CCDC6-P44;PPPPPPPM               | 1338 | >CCDC6-P44;SPPPPPPM               | 276   | 1062  |
| >CCDC6-P44;PPPPPPPM               | 425  | >CCDC6-P44;SPPPPPPM               | 58    | 367   |
| >CCDC6-P44;PPPPPPPPM              | 450  | >CCDC6-P44;PSPPPPPPM              | 33058 | 32608 |
| >CCDC6-P44;PPPPPPPPM              | 1664 | >CCDC6-P44;PSPPPPPPM              | 16    | 1648  |
| >CCDC6-P44;PPPPPPPPM              | 450  | >CCDC6-P44;PPSPPPPPPM             | 2627  | 2177  |
| >CCDC6-P44;QPPPPPPPPP             | 1163 | >CCDC6-P44;QPPSPPPPPP             | 318   | 845   |
| >CCDC6-P44;QPPPPPPPPP             | 353  | >CCDC6-P44;QPPSPPPPPP             | 369   | 16    |
| >CCDC6-P44;QPPPPPPPPP             | 171  | >CCDC6-P44;QPPSPPPPPP             | 153   | 18    |
| >CCDC6-P44;QPPPPPPPPP             | 247  | >CCDC6-P44;QPPSPPPPPP             | 324   | 77    |
| >CCNB1IP1- <del>N</del> NRQYQKLQG | 952  | >CCNB1IP1- <del>N</del> KRQYQKLQG | 100   | 852   |
| >CCNB1IP1- <del>N</del> NRQYQKLQG | 1284 | >CCNB1IP1- <del>N</del> KRQYQKLQG | 164   | 1120  |
| >CCNB1IP1- <del>N</del> NRQYQKLQG | 152  | >CCNB1IP1- <del>N</del> KRQYQKLQG | 25    | 127   |
| >CCNB1IP1- <del>N</del> NRQYQKLQG | 982  | >CCNB1IP1- <del>N</del> KRQYQKLQG | 210   | 772   |
| >CCNB1IP1- <del>N</del> NRQYQKLQ  | 7111 | >CCNB1IP1- <del>N</del> KRQYQKLQ  | 145   | 6966  |
| >CCNB1IP1- <del>N</del> NRQYQKLQG | 3815 | >CCNB1IP1- <del>N</del> KRQYQKLQG | 186   | 3629  |
| >CCNB1IP1- <del>N</del> NRQYQKLQG | 82   | >CCNB1IP1- <del>N</del> KRQYQKLQG | 15    | 67    |
| >CCNB1IP1- <del>N</del> NRQYQKLQG | 677  | >CCNB1IP1- <del>N</del> KRQYQKLQG | 64    | 613   |
| >CCNB1IP1- <del>N</del> NRQYQKLQG | 44   | >CCNB1IP1- <del>N</del> KRQYQKLQG | 15    | 29    |
| >CCNB1IP1- <del>N</del> NRQYQKLQG | 600  | >CCNB1IP1- <del>N</del> KRQYQKLQG | 175   | 425   |
| >CCNB1IP1- <del>N</del> RNRQYQKL  | 140  | >CCNB1IP1- <del>N</del> RKRQYQKL  | 3095  | 2955  |
| >CCNB1IP1- <del>N</del> RNRQYQKL  | 306  | >CCNB1IP1- <del>N</del> RKRQYQKL  | 969   | 663   |
| >CCNB1IP1- <del>N</del> RNRQYQKL  | 1052 | >CCNB1IP1- <del>N</del> RKRQYQKL  | 15    | 1037  |
| >CCNB1IP1- <del>N</del> RNRQYQKLQ | 2061 | >CCNB1IP1- <del>N</del> RKRQYQKLQ | 37    | 2024  |
| >CCNB1IP1- <del>N</del> RNRQYQKL  | 538  | >CCNB1IP1- <del>N</del> RKRQYQKL  | 144   | 394   |
| >CCNB1IP1- <del>N</del> RNRQYQKLQ | 521  | >CCNB1IP1- <del>N</del> RKRQYQKLQ | 193   | 328   |
| >CCNB1IP1- <del>N</del> RNRQYQKL  | 1363 | >CCNB1IP1- <del>N</del> RKRQYQKL  | 420   | 943   |
| >CCNB1IP1- <del>N</del> RNRQYQKLQ | 354  | >CCNB1IP1- <del>N</del> RKRQYQKLQ | 67    | 287   |
| >CCNB1IP1- <del>N</del> ERNRQYQKL | 7149 | >CCNB1IP1- <del>N</del> ERKRQYQKL | 359   | 6790  |
| >CCNB1IP1- <del>N</del> MERNRQYQK | 124  | >CCNB1IP1- <del>N</del> MERKRQYQK | 104   | 20    |
| >CCNB1IP1- <del>N</del> MERNRQYQK | 377  | >CCNB1IP1- <del>N</del> MERKRQYQK | 221   | 156   |
| >CCNB1IP1- <del>N</del> MERNRQYQK | 43   | >CCNB1IP1- <del>N</del> MERKRQYQK | 72    | 29    |
| >CCNB1IP1- <del>N</del> LMERNRQYQ | 439  | >CCNB1IP1- <del>N</del> LMERKRQYQ | 854   | 415   |
| >CCNB1IP1- <del>N</del> LMERNRQYQ | 136  | >CCNB1IP1- <del>N</del> LMERKRQYQ | 310   | 174   |
| >CCNB1IP1- <del>N</del> LMERNRQYQ | 8    | >CCNB1IP1- <del>N</del> LMERKRQYQ | 13    | 5     |
| >CCNB1IP1- <del>N</del> LMERNRQY  | 439  | >CCNB1IP1- <del>N</del> LMERKRQY  | 957   | 518   |
| >CCNB1IP1- <del>N</del> LMERNRQY  | 430  | >CCNB1IP1- <del>N</del> LMERKRQY  | 844   | 414   |
| >CCNB1IP1- <del>N</del> LMERNRQYQ | 886  | >CCNB1IP1- <del>N</del> LMERKRQYQ | 145   | 741   |
| >CCNB1IP1- <del>N</del> LMERNRQY  | 397  | >CCNB1IP1- <del>N</del> LMERKRQY  | 851   | 454   |
| >CCNB1IP1- <del>N</del> LMERNRQY  | 375  | >CCNB1IP1- <del>N</del> LMERKRQY  | 1301  | 926   |
| >CCNB1IP1- <del>N</del> KLMERNRQY | 463  | >CCNB1IP1- <del>N</del> KLMERKRQY | 747   | 284   |
| >CCNB1IP1- <del>N</del> KLMERNRQ  | 386  | >CCNB1IP1- <del>N</del> KLMERKRQ  | 675   | 289   |
| >CCNB1IP1- <del>N</del> KLMERNRQY | 121  | >CCNB1IP1- <del>N</del> KLMERKRQY | 152   | 31    |
| >CCNB1IP1- <del>N</del> KLMERNRQY | 95   | >CCNB1IP1- <del>N</del> KLMERKRQY | 102   | 7     |

|                        |       |                        |       |       |
|------------------------|-------|------------------------|-------|-------|
| >CCNB1IP1-N KLMERNRQY  | 32    | >CCNB1IP1-N KLMERKRQY  | 33    | 1     |
| >CCNB1IP1-N KLMERNRQY  | 27    | >CCNB1IP1-N KLMERKRQY  | 35    | 8     |
| >CCNB1IP1-N KLMERNRQY  | 52    | >CCNB1IP1-N KLMERKRQY  | 86    | 34    |
| >CCNB1IP1-N KLMERNRQY  | 71    | >CCNB1IP1-N KLMERKRQY  | 44    | 27    |
| >CCNB1IP1-N KLMERNRQY  | 226   | >CCNB1IP1-N KLMERKRQY  | 1426  | 1200  |
| >CCNB1IP1-N KLMERNRQY  | 474   | >CCNB1IP1-N KLMERKRQY  | 1130  | 656   |
| >CCNB1IP1-N KLMERNRQY  | 169   | >CCNB1IP1-N KLMERKRQY  | 393   | 224   |
| >CCNB1IP1-N KLMERNRQY  | 130   | >CCNB1IP1-N KLMERKRQY  | 386   | 256   |
| >CCNB1IP1-N KLMERNRQY  | 312   | >CCNB1IP1-N KLMERKRQY  | 1111  | 799   |
| >CCNB1IP1-N KLMERNRQY  | 60    | >CCNB1IP1-N KLMERKRQY  | 155   | 95    |
| >CCNB1IP1-N EKLERNRQY  | 148   | >CCNB1IP1-N EKLERNRQY  | 265   | 117   |
| >CCNB1IP1-N SEKLMERNRQ | 918   | >CCNB1IP1-N SEKLMERNRQ | 418   | 500   |
| >CCNB1IP1-N SEKLMERNRQ | 221   | >CCNB1IP1-N SEKLMERNRQ | 375   | 154   |
| >CCNB1IP1-N ISEKLMERNR | 426   | >CCNB1IP1-N ISEKLMERNR | 635   | 209   |
| >CCNB1IP1-N DISEKLMERN | 50    | >CCNB1IP1-N DISEKLMERN | 94    | 44    |
| >CCNB1IP1-N DISEKLMERN | 33750 | >CCNB1IP1-N DISEKLMERN | 429   | 33321 |
| >CCNB1IP1-N DISEKLMERN | 73    | >CCNB1IP1-N DISEKLMERN | 86    | 13    |
| >CCND2-R26 YRQDQRDGS   | 33020 | >CCND2-R26 YLQDQRDGS   | 70    | 32950 |
| >CCND2-R26 YRQDQRDGS   | 34553 | >CCND2-R26 YLQDQRDGS   | 229   | 34324 |
| >CCND2-R26 YRQDQRDGS   | 30750 | >CCND2-R26 YLQDQRDGS   | 61    | 30689 |
| >CCND2-R26 YRQDQRDGS   | 294   | >CCND2-R26 YLQDQRDGS   | 30811 | 30517 |
| >CCND2-R26 YRQDQRDGS   | 465   | >CCND2-R26 YLQDQRDGS   | 27686 | 27221 |
| >CCND2-R26 AVLLNSLQQY  | 22572 | >CCND2-R26 AVLLNSLQQY  | 100   | 22472 |
| >CCND2-R26 AVLLNSLQQY  | 23704 | >CCND2-R26 AVLLNSLQQY  | 234   | 23470 |
| >CCND2-R26 AVLLNSLQQY  | 21327 | >CCND2-R26 AVLLNSLQQY  | 216   | 21111 |
| >CCND2-R26 AVLLNSLQQY  | 22161 | >CCND2-R26 AVLLNSLQQY  | 464   | 21697 |
| >CCND2-R26 AVLLNSLQQY  | 24882 | >CCND2-R26 AVLLNSLQQY  | 253   | 24629 |
| >CCND2-R26 AVLLNSLQQY  | 29375 | >CCND2-R26 AVLLNSLQQY  | 202   | 29173 |
| >CCND2-R26 AVLLNSLQQY  | 134   | >CCND2-R26 AVLLNSLQQY  | 12737 | 12603 |
| >CCND2-R26 AVLLNSLQQY  | 608   | >CCND2-R26 AVLLNSLQQY  | 375   | 233   |
| >CCND2-R26 AVLLNSLQQY  | 35    | >CCND2-R26 AVLLNSLQQY  | 7574  | 7539  |
| >CCND2-R26 AVLLNSLQQY  | 375   | >CCND2-R26 AVLLNSLQQY  | 36265 | 35890 |
| >CCND2-R26 AVLLNSLQQY  | 206   | >CCND2-R26 AVLLNSLQQY  | 33209 | 33003 |
| >CCND2-R26 QYRQDQRDC   | 41    | >CCND2-R26 QYLQDQRDC   | 3691  | 3650  |
| >CCND2-R26 QQYRQDQR    | 300   | >CCND2-R26 QQYLQDQR    | 639   | 339   |
| >CCND2-R26 QQYRQDQR    | 439   | >CCND2-R26 QQYLQDQR    | 257   | 182   |
| >CCND2-R26 LQQYRQDQR   | 211   | >CCND2-R26 LQQYLQDQR   | 369   | 158   |
| >CCND2-R26 SLQQYRQDQ   | 267   | >CCND2-R26 SLQQYLQDQ   | 87    | 180   |
| >CCND2-R26 SLQQYRQDQ   | 400   | >CCND2-R26 SLQQYLQDQ   | 769   | 369   |
| >CCND2-R26 SLQQYRQDQ   | 475   | >CCND2-R26 SLQQYLQDQ   | 1263  | 788   |
| >CCND2-R26 NSLQQYRQD   | 238   | >CCND2-R26 NSLQQYLQD   | 149   | 89    |
| >CCND2-R26 LNSLQQYR    | 488   | >CCND2-R26 LNSLQQYL    | 33808 | 33320 |
| >CCND2-R26 LLNSLQQYR   | 20690 | >CCND2-R26 LLNSLQQYL   | 42    | 20648 |

|                        |       |                        |       |       |
|------------------------|-------|------------------------|-------|-------|
| >CCND2-R26 LLNSLQQYR   | 2060  | >CCND2-R26 LLNSLQQYL   | 3     | 2057  |
| >CCND2-R26 LLNSLQQYR   | 14876 | >CCND2-R26 LLNSLQQYL   | 22    | 14854 |
| >CCND2-R26 LLNSLQQYR   | 3754  | >CCND2-R26 LLNSLQQYL   | 5     | 3749  |
| >CCND2-R26 LLNSLQQYR   | 19251 | >CCND2-R26 LLNSLQQYL   | 20    | 19231 |
| >CCND2-R26 LLNSLQQYR   | 14310 | >CCND2-R26 LLNSLQQYL   | 15    | 14295 |
| >CCND2-R26 LLNSLQQYR   | 19201 | >CCND2-R26 LLNSLQQYL   | 6     | 19195 |
| >CCND2-R26 LLNSLQQYR   | 2495  | >CCND2-R26 LLNSLQQYL   | 3     | 2492  |
| >CCND2-R26 LLNSLQQYRC  | 52    | >CCND2-R26 LLNSLQQYLQ  | 87    | 35    |
| >CCND2-R26 LLNSLQQYR   | 411   | >CCND2-R26 LLNSLQQYL   | 15746 | 15335 |
| >CCND2-R26 LLNSLQQYR   | 11    | >CCND2-R26 LLNSLQQYL   | 2770  | 2759  |
| >CCND2-R26 LLNSLQQYR   | 189   | >CCND2-R26 LLNSLQQYL   | 24065 | 23876 |
| >CCND2-R26 LLNSLQQYR   | 220   | >CCND2-R26 LLNSLQQYL   | 29292 | 29072 |
| >CCND2-R26 LLNSLQQYR   | 194   | >CCND2-R26 LLNSLQQYL   | 32563 | 32369 |
| >CCND2-R26 VLLNSLQQYR  | 4562  | >CCND2-R26 VLLNSLQQYL  | 45    | 4517  |
| >CCND2-R26 VLLNSLQQYR  | 4389  | >CCND2-R26 VLLNSLQQYL  | 30    | 4359  |
| >CCND2-R26 VLLNSLQQYR  | 9861  | >CCND2-R26 VLLNSLQQYL  | 252   | 9609  |
| >CCND2-R26 VLLNSLQQYR  | 701   | >CCND2-R26 VLLNSLQQYL  | 2     | 699   |
| >CCND2-R26 VLLNSLQQYR  | 297   | >CCND2-R26 VLLNSLQQYL  | 435   | 138   |
| >CCND2-R26 VLLNSLQQYR  | 9418  | >CCND2-R26 VLLNSLQQYL  | 4     | 9414  |
| >CCND2-R26 VLLNSLQQYR  | 5900  | >CCND2-R26 VLLNSLQQYL  | 6     | 5894  |
| >CCND2-R26 VLLNSLQQYR  | 11573 | >CCND2-R26 VLLNSLQQYL  | 3     | 11570 |
| >CCND2-R26 VLLNSLQQYR  | 1203  | >CCND2-R26 VLLNSLQQYL  | 2     | 1201  |
| >CCND2-R26 VLLNSLQQYR  | 29    | >CCND2-R26 VLLNSLQQYL  | 45    | 16    |
| >CCND2-R26 VLLNSLQQYR  | 60    | >CCND2-R26 VLLNSLQQYL  | 10178 | 10118 |
| >CCND2-R26 VLLNSLQQYR  | 2460  | >CCND2-R26 VLLNSLQQYL  | 296   | 2164  |
| >CCND2-R26 VLLNSLQQYR  | 347   | >CCND2-R26 VLLNSLQQYL  | 30911 | 30564 |
| >CCND2-R26 VLLNSLQQYR  | 289   | >CCND2-R26 VLLNSLQQYL  | 31475 | 31186 |
| >CD79A-T16: TLLLFRKR   | 74    | >CD79A-T16: MLLLFRKR   | 21    | 53    |
| >CD79A-T16: TLLLFRKR   | 162   | >CD79A-T16: MLLLFRKR   | 66    | 96    |
| >CD79A-T16: TLLLFRKR   | 526   | >CD79A-T16: MLLLFRKR   | 195   | 331   |
| >CD79A-T16: TLLLFRKRW  | 1304  | >CD79A-T16: MLLLFRKRW  | 140   | 1164  |
| >CD79A-T16: TLLLFRKRW  | 196   | >CD79A-T16: MLLLFRKRW  | 107   | 89    |
| >CD79A-T16: TLLLFRKR   | 91    | >CD79A-T16: MLLLFRKR   | 60    | 31    |
| >CD79A-T16: GTLLLFRK   | 300   | >CD79A-T16: GMLLLFRK   | 83    | 217   |
| >CD79A-T16: GTLLLFRK   | 11    | >CD79A-T16: GMLLLFRK   | 16    | 5     |
| >CD79A-T16: GTLLLFRK   | 464   | >CD79A-T16: GMLLLFRK   | 3058  | 2594  |
| >CD79A-T16: GTLLLFRK   | 170   | >CD79A-T16: GMLLLFRK   | 126   | 44    |
| >CD79A-T16: GTLLLFRKR  | 56    | >CD79A-T16: GMLLLFRKR  | 39    | 17    |
| >CD79A-T16: GTLLLFRKRW | 11    | >CD79A-T16: GMLLLFRKRW | 753   | 742   |
| >CD79A-T16: GTLLLFRKRW | 58    | >CD79A-T16: GMLLLFRKRW | 548   | 490   |
| >CD79A-T16: GTLLLFRK   | 60    | >CD79A-T16: GMLLLFRK   | 361   | 301   |
| >CD79A-T16: GTLLLFRKR  | 78    | >CD79A-T16: GMLLLFRKR  | 879   | 801   |
| >CD79A-T16: GTLLLFRKR  | 985   | >CD79A-T16: GMLLLFRKR  | 138   | 847   |

|                        |       |                        |      |       |
|------------------------|-------|------------------------|------|-------|
| >CD79A-T16:ILLFCAVVPGT | 196   | >CD79A-T16:ILLFCAVVPGT | 58   | 138   |
| >CD79A-T16:ILLFCAVVPGT | 258   | >CD79A-T16:ILLFCAVVPGT | 152  | 106   |
| >CD79A-T16:ILLFCAVVPGT | 71    | >CD79A-T16:ILLFCAVVPGT | 27   | 44    |
| >CD79A-T16:ILLFCAVVPGT | 939   | >CD79A-T16:ILLFCAVVPGT | 141  | 798   |
| >CD79A-T16:ILLFCAVVPGT | 167   | >CD79A-T16:ILLFCAVVPGT | 82   | 85    |
| >CD79A-T16:ILLFCAVVPGT | 67    | >CD79A-T16:ILLFCAVVPGT | 13   | 54    |
| >CD79A-T16:ILLFCAVVPGT | 96    | >CD79A-T16:ILLFCAVVPGT | 61   | 35    |
| >CD79A-T16:ILLFCAVVPGT | 13217 | >CD79A-T16:ILLFCAVVPGT | 475  | 12742 |
| >CD79A-T16:PGTLLLFR    | 465   | >CD79A-T16:PGMLLLFR    | 228  | 237   |
| >CD79A-T16:VPGTLLLF    | 394   | >CD79A-T16:VPGMLLLF    | 2711 | 2317  |
| >CD79A-T16:VPGTLLLF    | 450   | >CD79A-T16:VPGMLLLF    | 423  | 27    |
| >CD79A-T16:VPGTLLLF    | 142   | >CD79A-T16:VPGMLLLF    | 168  | 26    |
| >CD79A-T16:VPGTLLLFR   | 170   | >CD79A-T16:VPGMLLLFR   | 263  | 93    |
| >CD79A-T16:VVPGTLLLF   | 1314  | >CD79A-T16:VVPGMLLLF   | 423  | 891   |
| >CD79A-T16:VVPGTLLL    | 279   | >CD79A-T16:VVPGMLLL    | 284  | 5     |
| >CD79A-T16:VVPGTLLL    | 120   | >CD79A-T16:VVPGMLLL    | 141  | 21    |
| >CD79A-T16:VVPGTLLLFR  | 546   | >CD79A-T16:VVPGMLLLFF  | 475  | 71    |
| >CD79A-T16:VVPGTLLLFR  | 347   | >CD79A-T16:VVPGMLLLFF  | 293  | 54    |
| >CD79A-T16:VVPGTLLLFR  | 60    | >CD79A-T16:VVPGMLLLFF  | 50   | 10    |
| >CD79A-T16:VVPGTLLLFR  | 39    | >CD79A-T16:VVPGMLLLFF  | 29   | 10    |
| >CD79A-T16:VVPGTLLLF   | 351   | >CD79A-T16:VVPGMLLLF   | 283  | 68    |
| >CD79A-T16:VVPGTLLLF   | 301   | >CD79A-T16:VVPGMLLLF   | 358  | 57    |
| >CD79A-T16:VVPGTLLLF   | 225   | >CD79A-T16:VVPGMLLLF   | 122  | 103   |
| >CD79A-T16:VVPGTLLLFR  | 86    | >CD79A-T16:VVPGMLLLFF  | 41   | 45    |
| >CD79A-T16:VVPGTLLLFR  | 121   | >CD79A-T16:VVPGMLLLFF  | 75   | 46    |
| >CD79A-T16:VVPGTLLLFR  | 24    | >CD79A-T16:VVPGMLLLFF  | 18   | 6     |
| >CD79A-T16:VVPGTLLL    | 4     | >CD79A-T16:VVPGMLLL    | 11   | 7     |
| >CD79A-T16:VVPGTLLLF   | 5     | >CD79A-T16:VVPGMLLLF   | 6    | 1     |
| >CD79A-T16:VVPGTLLLFR  | 284   | >CD79A-T16:VVPGMLLLFF  | 341  | 57    |
| >CD79A-T16:AVVPGTLL    | 407   | >CD79A-T16:AVVPGMLL    | 616  | 209   |
| >CD79A-T16:AVVPGTLL    | 311   | >CD79A-T16:AVVPGMLLL   | 339  | 28    |
| >CD79A-T16:AVVPGTLL    | 450   | >CD79A-T16:AVVPGMLL    | 503  | 53    |
| >CD79A-T16:AVVPGTLL    | 383   | >CD79A-T16:AVVPGMLLL   | 283  | 100   |
| >CD79A-T16:AVVPGTLL    | 53    | >CD79A-T16:AVVPGMLL    | 46   | 7     |
| >CD79A-T16:AVVPGTLL    | 17    | >CD79A-T16:AVVPGMLLL   | 13   | 4     |
| >CD79A-T16:AVVPGTLL    | 97    | >CD79A-T16:AVVPGMLL    | 114  | 17    |
| >CD79A-T16:AVVPGTLL    | 42    | >CD79A-T16:AVVPGMLLL   | 108  | 66    |
| >CD79A-T16:AVVPGTLLLFI | 489   | >CD79A-T16:AVVPGMLLLF  | 567  | 78    |
| >CD79A-T16:AVVPGTLLLFI | 22    | >CD79A-T16:AVVPGMLLLF  | 20   | 2     |
| >CD79A-T16:AVVPGTLL    | 1204  | >CD79A-T16:AVVPGMLL    | 472  | 732   |
| >CD79A-T16:AVVPGTLL    | 1191  | >CD79A-T16:AVVPGMLLL   | 76   | 1115  |
| >CD79A-T16:AVVPGTLLLF  | 61    | >CD79A-T16:AVVPGMLLLF  | 19   | 42    |
| >CD79A-T16:AVVPGTLLLFI | 47    | >CD79A-T16:AVVPGMLLLF  | 36   | 11    |

|                          |      |                         |      |      |
|--------------------------|------|-------------------------|------|------|
| >CD79A-T16: AVVPGTLLLLF  | 68   | >CD79A-T16: AVVPGMLLLL  | 80   | 12   |
| >CD79A-T16: AVVPGTLLLLF  | 242  | >CD79A-T16: AVVPGMLLLLF | 336  | 94   |
| >CD79A-T16: AVVPGTLL     | 138  | >CD79A-T16: AVVPGMLL    | 110  | 28   |
| >CD79A-T16: AVVPGTLLL    | 57   | >CD79A-T16: AVVPGMLLL   | 23   | 34   |
| >CD79A-T16: AVVPGTLLLLF  | 10   | >CD79A-T16: AVVPGMLLLLF | 10   | 0    |
| >CD79A-T16: AVVPGTLLLLF  | 186  | >CD79A-T16: AVVPGMLLLLF | 489  | 303  |
| >CD79A-T16: AVVPGTLL     | 71   | >CD79A-T16: AVVPGMLL    | 36   | 35   |
| >CD79A-T16: AVVPGTLLL    | 1465 | >CD79A-T16: AVVPGMLLL   | 496  | 969  |
| >CD79A-T16: AVVPGTLLLLF  | 983  | >CD79A-T16: AVVPGMLLLLF | 426  | 557  |
| >CD79A-T16: AVVPGTLLLLFI | 298  | >CD79A-T16: AVVPGMLLLLF | 205  | 93   |
| >CD79A-T16: AVVPGTLLLLFI | 473  | >CD79A-T16: AVVPGMLLLLF | 748  | 275  |
| >CD79A-T16: AVVPGTLLLLF  | 460  | >CD79A-T16: AVVPGMLLLLF | 198  | 262  |
| >CD79A-T16: CAVVPGTLLL   | 275  | >CD79A-T16: CAVVPGMLLI  | 388  | 113  |
| >CD79A-T16: CAVVPGTLLL   | 404  | >CD79A-T16: CAVVPGMLLI  | 210  | 194  |
| >CD79A-T16: CAVVPGTLLL   | 34   | >CD79A-T16: CAVVPGMLLI  | 46   | 12   |
| >CD79A-T16: CAVVPGTLLL   | 172  | >CD79A-T16: CAVVPGMLLI  | 134  | 38   |
| >CD79A-T16: CAVVPGTLLL   | 588  | >CD79A-T16: CAVVPGMLLI  | 448  | 140  |
| >CD79A-T16: CAVVPGTL     | 373  | >CD79A-T16: CAVVPGML    | 887  | 514  |
| >CD79A-T16: FCAVVPGTLL   | 624  | >CD79A-T16: FCAVVPGML   | 326  | 298  |
| >CD79A-T16: FCAVVPGTLL   | 177  | >CD79A-T16: FCAVVPGML   | 187  | 10   |
| >CD79A-T16: LFCAVVPGTL   | 199  | >CD79A-T16: LFCAVVPGMI  | 1694 | 1495 |
| >CD79A-T16: LFCAVVPGTL   | 119  | >CD79A-T16: LFCAVVPGMI  | 100  | 19   |
| >CD79A-T16: LFCAVVPGTL   | 591  | >CD79A-T16: LFCAVVPGMI  | 110  | 481  |
| >CD79A-T16: LLFCAVVPGT   | 165  | >CD79A-T16: LLFCAVVPGM  | 76   | 89   |
| >CD79A-T16: LLFCAVVPGT   | 44   | >CD79A-T16: LLFCAVVPGM  | 41   | 3    |
| >CD79A-T16: LLFCAVVPGT   | 127  | >CD79A-T16: LLFCAVVPGM  | 41   | 86   |
| >CD79A-T16: LLFCAVVPGT   | 60   | >CD79A-T16: LLFCAVVPGM  | 30   | 30   |
| >CD79A-T16: LLFCAVVPGT   | 124  | >CD79A-T16: LLFCAVVPGM  | 203  | 79   |
| >CD79A-T16: LLFCAVVPGT   | 17   | >CD79A-T16: LLFCAVVPGM  | 19   | 2    |
| >CD79A-T16: LLFCAVVPGT   | 292  | >CD79A-T16: LLFCAVVPGM  | 238  | 54   |
| >CD79A-T16: LLFCAVVPGT   | 7    | >CD79A-T16: LLFCAVVPGM  | 4    | 3    |
| >CD79A-T16: LLFCAVVPGT   | 3    | >CD79A-T16: LLFCAVVPGM  | 3    | 0    |
| >CD79A-T16: LLFCAVVPGT   | 146  | >CD79A-T16: LLFCAVVPGM  | 33   | 113  |
| >CD79A-T16: LLFCAVVPGT   | 12   | >CD79A-T16: LLFCAVVPGM  | 36   | 24   |
| >CD79A-T16: LLFCAVVPGT   | 40   | >CD79A-T16: LLFCAVVPGM  | 20   | 20   |
| >CD79A-T16: LLFCAVVPGT   | 16   | >CD79A-T16: LLFCAVVPGM  | 21   | 5    |
| >CD79A-T16: LLFCAVVPGT   | 257  | >CD79A-T16: LLFCAVVPGM  | 27   | 230  |
| >CD79A-T16: LLFCAVVPGT   | 102  | >CD79A-T16: LLFCAVVPGM  | 188  | 86   |
| >CD79A-T16: LLFCAVVPGT   | 23   | >CD79A-T16: LLFCAVVPGM  | 15   | 8    |
| >CD79A-T16: LLFCAVVPGT   | 9    | >CD79A-T16: LLFCAVVPGM  | 15   | 6    |
| >CD79A-T16: LLFCAVVPGT   | 254  | >CD79A-T16: LLFCAVVPGM  | 1680 | 1426 |
| >CD79A-T16: LLFCAVVPGT   | 4375 | >CD79A-T16: LLFCAVVPGM  | 350  | 4025 |
| >CD79A-T16: LLFCAVVPGT   | 2546 | >CD79A-T16: LLFCAVVPGM  | 45   | 2501 |

|                        |       |                        |       |       |
|------------------------|-------|------------------------|-------|-------|
| >CD79A-T16: LLFCAVVPGT | 213   | >CD79A-T16: LLFCAVVPGN | 419   | 206   |
| >CD79A-T16: LLFCAVVPGT | 3738  | >CD79A-T16: LLFCAVVPGN | 59    | 3679  |
| >CD79A-T16: LLFCAVVPGT | 150   | >CD79A-T16: LLFCAVVPGN | 229   | 79    |
| >CDC73-A2S- MADVLSVLR  | 107   | >CDC73-A2S- MSDVLSVLR  | 12    | 95    |
| >CDC73-A2S- MADVLSVLR  | 1073  | >CDC73-A2S- MSDVLSVLR  | 261   | 812   |
| >CDC73-A2S- MADVLSVLR  | 82    | >CDC73-A2S- MSDVLSVLR  | 49    | 33    |
| >CDC73-A2S- MADVLSVLR  | 403   | >CDC73-A2S- MSDVLSVLR  | 666   | 263   |
| >CDC73-A2S- MADVLSVLR  | 17    | >CDC73-A2S- MSDVLSVLR  | 22    | 5     |
| >CDC73-A2S- MADVLSVL   | 356   | >CDC73-A2S- MSDVLSVL   | 32    | 324   |
| >CDC73-A2S- MADVLSVLR  | 63    | >CDC73-A2S- MSDVLSVLR  | 12    | 51    |
| >CDC73-A2S- MADVLSVL   | 375   | >CDC73-A2S- MSDVLSVL   | 3512  | 3137  |
| >CDC73-A2S- MADVLSVLR  | 57    | >CDC73-A2S- MSDVLSVLR  | 534   | 477   |
| >CDC73-A2S- MADVLSVL   | 316   | >CDC73-A2S- MSDVLSVL   | 371   | 55    |
| >CDC73-A2S- MADVLSVL   | 1245  | >CDC73-A2S- MSDVLSVL   | 371   | 874   |
| >CDC73-A2S- MADVLSVLR  | 483   | >CDC73-A2S- MSDVLSVLR  | 154   | 329   |
| >CDC73-A2S- MADVLSVL   | 4009  | >CDC73-A2S- MSDVLSVL   | 191   | 3818  |
| >CDC73-A2S- MADVLSVLR  | 704   | >CDC73-A2S- MSDVLSVLR  | 105   | 599   |
| >CDC73-L95F LLGYLNGEA  | 358   | >CDC73-L95F LPGYLNGEA  | 26516 | 26158 |
| >CDC73-L95F LLGYLNGEA  | 471   | >CDC73-L95F LPGYLNGEA  | 20803 | 20332 |
| >CDC73-L95F LLGYLNGEA  | 25636 | >CDC73-L95F LPGYLNGEA  | 123   | 25513 |
| >CDC73-L95F VVRRPDRKDI | 481   | >CDC73-L95F VVRRPDRKDI | 14911 | 14430 |
| >CDC73-L95F DLLGYLNGEA | 331   | >CDC73-L95F DLPGYLNGEA | 2300  | 1969  |
| >CDC73-L95F DLLGYLNGEA | 476   | >CDC73-L95F DLPGYLNGEA | 1051  | 575   |
| >CDC73-L95F RPDRKDLG   | 306   | >CDC73-L95F RPDRKDLPGY | 312   | 6     |
| >CDC73-L95F RPDRKDLG   | 151   | >CDC73-L95F RPDRKDLPGY | 1447  | 1296  |
| >CDC73-L95F RPDRKDLL   | 69    | >CDC73-L95F RPDRKDLP   | 21294 | 21225 |
| >CDC73-L95F RPDRKDLG   | 44    | >CDC73-L95F RPDRKDLPGY | 45    | 1     |
| >CDC73-L95F RRPDRKDLLG | 450   | >CDC73-L95F RRPDRKDLPC | 822   | 372   |
| >CDC73-L95F RRPDRKDLL  | 58    | >CDC73-L95F RRPDRKDLP  | 1702  | 1644  |
| >CDC73-L95F RRPDRKDLLG | 152   | >CDC73-L95F RRPDRKDLPC | 237   | 85    |
| >CDC73-L95F RRPDRKDLLG | 336   | >CDC73-L95F RRPDRKDLPC | 565   | 229   |
| >CDC73-L95F RRPDRKDLL  | 25    | >CDC73-L95F RRPDRKDLP  | 2013  | 1988  |
| >CDC73-L95F RRPDRKDLLG | 347   | >CDC73-L95F RRPDRKDLPC | 683   | 336   |
| >CDC73-L95F RRPDRKDLLG | 170   | >CDC73-L95F RRPDRKDLPC | 292   | 122   |
| >CDC73-L95F VRRPDRKDLL | 254   | >CDC73-L95F VRRPDRKDLF | 12527 | 12273 |
| >CDC73-Q29 RYDQERFK    | 183   | >CDC73-Q29 RYDEERFK    | 400   | 217   |
| >CDC73-Q29 RYDQERFKG   | 107   | >CDC73-Q29 RYDEERFKG   | 200   | 93    |
| >CDC73-Q29 NRYDQERF    | 279   | >CDC73-Q29 NRYDEERF    | 310   | 31    |
| >CDC73-Q29 NRYDQERFK   | 287   | >CDC73-Q29 NRYDEERFK   | 497   | 210   |
| >CDC73-Q29 NRYDQERFK   | 161   | >CDC73-Q29 NRYDEERFK   | 180   | 19    |
| >CDC73-Q29 YNRYDQERFK  | 364   | >CDC73-Q29 YNRYDEERFK  | 1181  | 817   |
| >CDC73-Q29 YNRYDQERF   | 150   | >CDC73-Q29 YNRYDEERF   | 203   | 53    |
| >CDC73-Q29 YNRYDQERF   | 162   | >CDC73-Q29 YNRYDEERF   | 259   | 97    |

|                                     |      |                                     |       |       |
|-------------------------------------|------|-------------------------------------|-------|-------|
| >CDC73-Q29 AYNRYDQERI               | 522  | >CDC73-Q29 AYNRYDEERF               | 444   | 78    |
| >CDC73-Q29 AYNRYDQERI               | 338  | >CDC73-Q29 AYNRYDEERF               | 207   | 131   |
| >CDC73-Q29 AYNRYDQERI               | 12   | >CDC73-Q29 AYNRYDEERF               | 14    | 2     |
| >CDC73-Q29 AYNRYDQERI               | 20   | >CDC73-Q29 AYNRYDEERF               | 83    | 63    |
| >CDC73-Q29 AYNRYDQER                | 23   | >CDC73-Q29 AYNRYDEER                | 28    | 5     |
| >CDC73-Q29 AYNRYDQERI               | 223  | >CDC73-Q29 AYNRYDEERF               | 431   | 208   |
| >CDC73-Q29 AAYNRYDQEI               | 84   | >CDC73-Q29 AAYNRYDEEF               | 89    | 5     |
| >CDC73-Q29 AAYNRYDQEI               | 120  | >CDC73-Q29 AAYNRYDEEF               | 128   | 8     |
| >CDC73-Q29 AAYNRYDQEI               | 103  | >CDC73-Q29 AAYNRYDEEF               | 45    | 58    |
| >CDC73-Q29 AAYNRYDQEI               | 52   | >CDC73-Q29 AAYNRYDEEF               | 60    | 8     |
| >CDC73-Q29 AAYNRYDQEI               | 13   | >CDC73-Q29 AAYNRYDEEF               | 17    | 4     |
| >CDC73-Q29 AAYNRYDQEI               | 418  | >CDC73-Q29 AAYNRYDEEF               | 589   | 171   |
| >CDC73-Q29 AAYNRYDQEI               | 805  | >CDC73-Q29 AAYNRYDEEF               | 499   | 306   |
| >CDC73-Q29 PAAYNRYDQI               | 341  | >CDC73-Q29 PAAYNRYDEE               | 168   | 173   |
| >CDC73-T36 <sup>ϵ</sup> TSLITMLNAK  | 170  | >CDC73-T36 <sup>ϵ</sup> NSLITMLNAK  | 322   | 152   |
| >CDC73-T36 <sup>ϵ</sup> TSLITMLNAK  | 25   | >CDC73-T36 <sup>ϵ</sup> NSLITMLNAK  | 67    | 42    |
| >CDC73-T36 <sup>ϵ</sup> TSLITMLNAK  | 82   | >CDC73-T36 <sup>ϵ</sup> NSLITMLNAK  | 899   | 817   |
| >CDC73-T36 <sup>ϵ</sup> TSLITMLNAK  | 83   | >CDC73-T36 <sup>ϵ</sup> NSLITMLNAK  | 63    | 20    |
| >CDC73-T36 <sup>ϵ</sup> TSLITMLNAK  | 189  | >CDC73-T36 <sup>ϵ</sup> NSLITMLNAK  | 492   | 303   |
| >CDC73-T36 <sup>ϵ</sup> TTSLITML    | 205  | >CDC73-T36 <sup>ϵ</sup> TNSLITML    | 3196  | 2991  |
| >CDC73-T36 <sup>ϵ</sup> TTSLITMLNA  | 488  | >CDC73-T36 <sup>ϵ</sup> TNSLITMLNA  | 5950  | 5462  |
| >CDC73-T36 <sup>ϵ</sup> TTSLITMLNAI | 225  | >CDC73-T36 <sup>ϵ</sup> TNSLITMLNA  | 8768  | 8543  |
| >CDC73-T36 <sup>ϵ</sup> TTSLITMLNAI | 10   | >CDC73-T36 <sup>ϵ</sup> TNSLITMLNA  | 644   | 634   |
| >CDC73-T36 <sup>ϵ</sup> TTSLITMLNAI | 180  | >CDC73-T36 <sup>ϵ</sup> TNSLITMLNA  | 6798  | 6618  |
| >CDC73-T36 <sup>ϵ</sup> TTSLITMLN   | 339  | >CDC73-T36 <sup>ϵ</sup> TNSLITMLN   | 12459 | 12120 |
| >CDC73-T36 <sup>ϵ</sup> TTSLITMLNAI | 6    | >CDC73-T36 <sup>ϵ</sup> TNSLITMLNA  | 267   | 261   |
| >CDC73-T36 <sup>ϵ</sup> TTSLITML    | 13   | >CDC73-T36 <sup>ϵ</sup> TNSLITML    | 1418  | 1405  |
| >CDC73-T36 <sup>ϵ</sup> TTSLITMLNA  | 190  | >CDC73-T36 <sup>ϵ</sup> TNSLITMLNA  | 6024  | 5834  |
| >CDC73-T36 <sup>ϵ</sup> TTSLITML    | 435  | >CDC73-T36 <sup>ϵ</sup> TNSLITML    | 14755 | 14320 |
| >CDC73-T36 <sup>ϵ</sup> TTSLITML    | 160  | >CDC73-T36 <sup>ϵ</sup> TNSLITML    | 23250 | 23090 |
| >CDC73-T36 <sup>ϵ</sup> TTSLITML    | 277  | >CDC73-T36 <sup>ϵ</sup> TNSLITML    | 26615 | 26338 |
| >CDC73-T36 <sup>ϵ</sup> TTSLITML    | 119  | >CDC73-T36 <sup>ϵ</sup> TNSLITML    | 2223  | 2104  |
| >CDC73-T36 <sup>ϵ</sup> TPIIIIPAATT | 458  | >CDC73-T36 <sup>ϵ</sup> TPIIIIPAATN | 2120  | 1662  |
| >CDC73-T36 <sup>ϵ</sup> TPIIIIPAATT | 294  | >CDC73-T36 <sup>ϵ</sup> TPIIIIPAATN | 1320  | 1026  |
| >CDC73-T36 <sup>ϵ</sup> ATTSLITML   | 140  | >CDC73-T36 <sup>ϵ</sup> ATNSLITML   | 42    | 98    |
| >CDC73-T36 <sup>ϵ</sup> ATTSLITML   | 893  | >CDC73-T36 <sup>ϵ</sup> ATNSLITML   | 115   | 778   |
| >CDC73-T36 <sup>ϵ</sup> ATTSLITMLN, | 1391 | >CDC73-T36 <sup>ϵ</sup> ATNSLITMLN  | 274   | 1117  |
| >CDC73-T36 <sup>ϵ</sup> ATTSLITML   | 1462 | >CDC73-T36 <sup>ϵ</sup> ATNSLITML   | 394   | 1068  |
| >CDC73-T36 <sup>ϵ</sup> ATTSLITM    | 30   | >CDC73-T36 <sup>ϵ</sup> ATNSLITM    | 76    | 46    |
| >CDC73-T36 <sup>ϵ</sup> ATTSLITMLN, | 1342 | >CDC73-T36 <sup>ϵ</sup> ATNSLITMLN  | 414   | 928   |
| >CDC73-T36 <sup>ϵ</sup> ATTSLITM    | 996  | >CDC73-T36 <sup>ϵ</sup> ATNSLITM    | 284   | 712   |
| >CDC73-T36 <sup>ϵ</sup> ATTSLITML   | 1046 | >CDC73-T36 <sup>ϵ</sup> ATNSLITML   | 245   | 801   |
| >CDC73-T36 <sup>ϵ</sup> ATTSLITM    | 12   | >CDC73-T36 <sup>ϵ</sup> ATNSLITM    | 13    | 1     |

|                         |     |                        |      |      |
|-------------------------|-----|------------------------|------|------|
| >CDC73-T369ATTSLITML    | 28  | >CDC73-T369ATNSLITML   | 33   | 5    |
| >CDC73-T369ATTSLITML    | 12  | >CDC73-T369ATNSLITML   | 64   | 52   |
| >CDC73-T369ATTSLITM     | 88  | >CDC73-T369ATNSLITM    | 631  | 543  |
| >CDC73-T369ATTSLITML    | 7   | >CDC73-T369ATNSLITML   | 11   | 4    |
| >CDC73-T369AATTSLITM    | 262 | >CDC73-T369AATNSLITM   | 1547 | 1285 |
| >CDC73-T369AATTSLITM    | 532 | >CDC73-T369AATNSLITM   | 387  | 145  |
| >CDC73-T369AATTSLITM    | 19  | >CDC73-T369AATNSLITM   | 19   | 0    |
| >CDC73-T369AATTSLITML   | 121 | >CDC73-T369AATNSLITML  | 115  | 6    |
| >CDC73-T369AATTSLITM    | 262 | >CDC73-T369AATNSLITM   | 307  | 45   |
| >CDC73-T369AATTSLITM    | 243 | >CDC73-T369AATNSLITM   | 533  | 290  |
| >CDC73-T369AATTSLITML   | 146 | >CDC73-T369AATNSLITML  | 258  | 112  |
| >CDC73-T369AATTSLITM    | 492 | >CDC73-T369AATNSLITM   | 217  | 275  |
| >CDC73-T369IPAATTS LI   | 515 | >CDC73-T369IPAATNSLI   | 297  | 218  |
| >CDC73-T369IPAATTS LI   | 261 | >CDC73-T369IPAATNSLI   | 1974 | 1713 |
| >CDC73-T369IPAATTS L    | 50  | >CDC73-T369IPAATNSL    | 87   | 37   |
| >CDC73-T369IPAATTS LITM | 35  | >CDC73-T369IPAATNSLITM | 35   | 0    |
| >CDC73-T369IPAATTS L    | 14  | >CDC73-T369IPAATNSL    | 16   | 2    |
| >CDC73-T369IPAATTS LI   | 46  | >CDC73-T369IPAATNSLI   | 82   | 36   |
| >CDC73-T369IPAATTS LITM | 20  | >CDC73-T369IPAATNSLITM | 23   | 3    |
| >CDC73-T369IPAATTS L    | 47  | >CDC73-T369IPAATNSL    | 98   | 51   |
| >CDC73-T369IPAATTS LITM | 10  | >CDC73-T369IPAATNSLITM | 12   | 2    |
| >CDC73-T369IPAATTS L    | 155 | >CDC73-T369IPAATNSL    | 114  | 41   |
| >CDC73-T369IPAATTS LITM | 486 | >CDC73-T369IPAATNSLITM | 674  | 188  |
| >CDC73-T369IPAATTS LI   | 89  | >CDC73-T369IPAATNSLI   | 164  | 75   |
| >CDC73-T369IPAATTS L    | 279 | >CDC73-T369IPAATNSL    | 453  | 174  |
| >CDC73-T369IPAATTS LI   | 78  | >CDC73-T369IPAATNSLI   | 61   | 17   |
| >CDC73-T369IPAATTS LITM | 115 | >CDC73-T369IPAATNSLITM | 108  | 7    |
| >CDC73-T369IPAATTS LI   | 200 | >CDC73-T369IPAATNSLI   | 271  | 71   |
| >CDC73-T369IPAATTS LI   | 396 | >CDC73-T369IPAATNSLI   | 202  | 194  |
| >CDC73-T369IPAATTS LITM | 264 | >CDC73-T369IPAATNSLITM | 174  | 90   |
| >CDC73-T369IPAATTS L    | 124 | >CDC73-T369IPAATNSL    | 139  | 15   |
| >CDC73-T369IPAATTS LITM | 74  | >CDC73-T369IPAATNSLITM | 101  | 27   |
| >CDC73-T369IPAATTS LI   | 337 | >CDC73-T369IPAATNSLI   | 537  | 200  |
| >CDC73-T369IIPAATTS L   | 38  | >CDC73-T369IIPAATNSL   | 30   | 8    |
| >CDC73-T369IIPAATTS LI  | 179 | >CDC73-T369IIPAATNSLI  | 228  | 49   |
| >CDC73-T369IIPAATTS L   | 32  | >CDC73-T369IIPAATNSL   | 105  | 73   |
| >CDC73-T369IIPAATTS LI  | 98  | >CDC73-T369IIPAATNSLI  | 249  | 151  |
| >CDC73-T369IIPAATTS L   | 76  | >CDC73-T369IIPAATNSL   | 143  | 67   |
| >CDC73-T369IIPAATTS L   | 60  | >CDC73-T369IIPAATNSL   | 238  | 178  |
| >CDC73-T369IIPAATTS L   | 411 | >CDC73-T369IIPAATNSL   | 957  | 546  |
| >CDC73-T369IIPAATTS L   | 538 | >CDC73-T369IIPAATNSL   | 322  | 216  |
| >CDC73-T369IIPAATTS LI  | 153 | >CDC73-T369IIPAATNSLI  | 193  | 40   |
| >CDC73-T369IIPAATTS L   | 36  | >CDC73-T369IIPAATNSL   | 19   | 17   |



|                        |      |                        |       |       |
|------------------------|------|------------------------|-------|-------|
| >CDC73-T369IIPAATTSLI  | 20   | >CDC73-T369IIPAATNSLI  | 22    | 2     |
| >CDC73-T369IIPAATTSLI  | 92   | >CDC73-T369IIPAATNSLI  | 81    | 11    |
| >CDC73-T369IIPAATTSL   | 94   | >CDC73-T369IIIPAATNSL  | 119   | 25    |
| >CDC73-T369IIPAATTSLI  | 120  | >CDC73-T369IIIPAATNSLI | 163   | 43    |
| >CDC73-T369IIPAATTSL   | 79   | >CDC73-T369IIIPAATNSL  | 130   | 51    |
| >CDC73-T369IIIPAATTSLI | 18   | >CDC73-T369IIIPAATNSLI | 38    | 20    |
| >CDC73-T369IIPAATT     | 381  | >CDC73-T369IIIPAATN    | 12341 | 11960 |
| >CDC73-T369IIPAATTSL   | 198  | >CDC73-T369IIIPAATNSL  | 287   | 89    |
| >CDC73-T369IIPAATTSLI  | 28   | >CDC73-T369IIIPAATNSLI | 55    | 27    |
| >CDC73-T369IIPAATTSL   | 25   | >CDC73-T369IIIPAATNSL  | 65    | 40    |
| >CDC73-T369IIPAATTSLI  | 243  | >CDC73-T369IIIPAATNSLI | 510   | 267   |
| >CDC73-T369IIPAATTSLI  | 333  | >CDC73-T369IIIPAATNSLI | 412   | 79    |
| >CDC73-T369IIPAATTSL   | 342  | >CDC73-T369IIIPAATNSL  | 650   | 308   |
| >CDC73-T369IIPAATTSL   | 112  | >CDC73-T369IIIPAATNSL  | 425   | 313   |
| >CDC73-T369IIPAATTSLI  | 430  | >CDC73-T369IIIPAATNSLI | 418   | 12    |
| >CDC73-T369IIPAATTSLI  | 468  | >CDC73-T369IIIPAATNSLI | 765   | 297   |
| >CDC73-T369IIIPAATTSL  | 228  | >CDC73-T369IIIPAATNSL  | 204   | 24    |
| >CDC73-T369IIIPAATTSL  | 152  | >CDC73-T369IIIPAATNSL  | 295   | 143   |
| >CDC73-T369IIIPAATTSL  | 134  | >CDC73-T369IIIPAATNSL  | 178   | 44    |
| >CDC73-T369IIIPAATTSL  | 471  | >CDC73-T369IIIPAATNSL  | 674   | 203   |
| >CDC73-T369IIIPAATTSL  | 121  | >CDC73-T369IIIPAATNSL  | 269   | 148   |
| >CDC73-T369IIIPAATTSL  | 183  | >CDC73-T369IIIPAATNSL  | 647   | 464   |
| >CDH1-A286'ATDADDDVN   | 12   | >CDH1-A286'TTDADDDVN   | 12    | 0     |
| >CDH1-A286'ATDADDDVN   | 160  | >CDH1-A286'TTDADDDVN   | 241   | 81    |
| >CDH1-A286'ATDADDDV    | 6385 | >CDH1-A286'TTDADDDV    | 443   | 5942  |
| >CDH1-A286'ATDADDDVN   | 68   | >CDH1-A286'TTDADDDVN   | 351   | 283   |
| >CDH1-A286'ATDADDDVN   | 1657 | >CDH1-A286'TTDADDDVN   | 432   | 1225  |
| >CDH1-A286'ATDADDDVN   | 182  | >CDH1-A286'TTDADDDVN   | 244   | 62    |
| >CDH1-A286'ATDADDDVN   | 458  | >CDH1-A286'TTDADDDVN   | 512   | 54    |
| >CDH1-A286'TATDADDDV   | 121  | >CDH1-A286'TTTDADDDV   | 21    | 100   |
| >CDH1-A286'TATDADDDV   | 3705 | >CDH1-A286'TTTDADDDVI  | 496   | 3209  |
| >CDH1-A286'LPGTSVMEV   | 52   | >CDH1-A286'LPGTSVMEV   | 909   | 857   |
| >CDH1-A286'EVTATDADDI  | 22   | >CDH1-A286'EVTTTDADDI  | 33    | 11    |
| >CDH1-A286'MEVTATDA    | 29   | >CDH1-A286'MEVTTTDA    | 28    | 1     |
| >CDH1-A286'MEVTATDAD   | 249  | >CDH1-A286'MEVTTTDAD   | 412   | 163   |
| >CDH1-A286'VMEVTATDA   | 607  | >CDH1-A286'VMEVTTTDA   | 288   | 319   |
| >CDH1-A286'SVMEVTATD,  | 873  | >CDH1-A286'SVMEVTTTD/  | 457   | 416   |
| >CDH1-A286'SVMEVTAT    | 147  | >CDH1-A286'SVMEVTTT    | 172   | 25    |
| >CDH1-A286'SVMEVTATD,  | 256  | >CDH1-A286'SVMEVTTTD/  | 84    | 172   |
| >CDH1-A286'SVMEVTAT    | 43   | >CDH1-A286'SVMEVTTT    | 79    | 36    |
| >CDH1-A286'SVMEVTATD,  | 617  | >CDH1-A286'SVMEVTTTD/  | 254   | 363   |
| >CDH1-A286'SVMEVTATD   | 581  | >CDH1-A286'SVMEVTTTD   | 336   | 245   |
| >CDH1-A286'SVMEVTAT    | 201  | >CDH1-A286'SVMEVTTT    | 437   | 236   |

|                        |       |                        |       |       |
|------------------------|-------|------------------------|-------|-------|
| >CDH1-A286`SVMEVTATD,  | 308   | >CDH1-A286`SVMEVTTTD/  | 393   | 85    |
| >CDH1-A286`SVMEVTAT    | 438   | >CDH1-A286`SVMEVTTT    | 703   | 265   |
| >CDH1-A286`SVMEVTATD,  | 233   | >CDH1-A286`SVMEVTTTD/  | 255   | 22    |
| >CDH1-A298 AAIAYTIL    | 87    | >CDH1-A298 DAIAYTIL    | 2364  | 2277  |
| >CDH1-A298 AAIAYTIL    | 477   | >CDH1-A298 DAIAYTIL    | 9402  | 8925  |
| >CDH1-A298 AAIAYTIL    | 335   | >CDH1-A298 DAIAYTIL    | 12274 | 11939 |
| >CDH1-A298 AAIAYTIL    | 3564  | >CDH1-A298 DAIAYTIL    | 445   | 3119  |
| >CDH1-A298 AAIAYTIL    | 252   | >CDH1-A298 DAIAYTIL    | 7349  | 7097  |
| >CDH1-A298 AAIAYTIL    | 189   | >CDH1-A298 DAIAYTIL    | 8055  | 7866  |
| >CDH1-A298 NAAIAYTI    | 28    | >CDH1-A298 NDAIAYTI    | 2104  | 2076  |
| >CDH1-A298 NAAIAYTIL   | 318   | >CDH1-A298 NDAIAYTIL   | 10963 | 10645 |
| >CDH1-A298 NAAIAYTI    | 167   | >CDH1-A298 NDAIAYTI    | 10065 | 9898  |
| >CDH1-A298 NAAIAYTI    | 6988  | >CDH1-A298 NDAIAYTI    | 291   | 6697  |
| >CDH1-A298 NAAIAYTI    | 174   | >CDH1-A298 NDAIAYTI    | 2975  | 2801  |
| >CDH1-A298 NAAIAYTI    | 21338 | >CDH1-A298 NDAIAYTI    | 41    | 21297 |
| >CDH1-A298 DADDDVNTY   | 476   | >CDH1-A298 DADDDVNTY   | 16088 | 15612 |
| >CDH1-A298 YNAAIAYTI   | 340   | >CDH1-A298 YNDAIAYTI   | 1742  | 1402  |
| >CDH1-A298 YNAAIAYTI   | 84    | >CDH1-A298 YNDAIAYTI   | 829   | 745   |
| >CDH1-A298 YNAAIAYTI   | 327   | >CDH1-A298 YNDAIAYTI   | 828   | 501   |
| >CDH1-A298 YNAAIAYTI   | 19    | >CDH1-A298 YNDAIAYTI   | 2823  | 2804  |
| >CDH1-A298 YNAAIAYTI   | 168   | >CDH1-A298 YNDAIAYTI   | 161   | 7     |
| >CDH1-A298 YNAAIAYTIL  | 87    | >CDH1-A298 YNDAIAYTIL  | 87    | 0     |
| >CDH1-A298 YNAAIAYTI   | 306   | >CDH1-A298 YNDAIAYTI   | 1641  | 1335  |
| >CDH1-A298 TYNAAIAYTI  | 4     | >CDH1-A298 TYNDAIAYTI  | 57    | 53    |
| >CDH1-A298 TYNAAIAYTIL | 15    | >CDH1-A298 TYNDAIAYTIL | 465   | 450   |
| >CDH1-A298 TYNAAIAYTI  | 132   | >CDH1-A298 TYNDAIAYTI  | 147   | 15    |
| >CDH1-A298 TYNAAIAYTI  | 112   | >CDH1-A298 TYNDAIAYTI  | 130   | 18    |
| >CDH1-A298 TYNAAIAYTI  | 14    | >CDH1-A298 TYNDAIAYTI  | 27    | 13    |
| >CDH1-A298 TYNAAIAYTIL | 32    | >CDH1-A298 TYNDAIAYTIL | 71    | 39    |
| >CDH1-A298 TYNAAIAY    | 92    | >CDH1-A298 TYNDAIAY    | 69    | 23    |
| >CDH1-A298 TYNAAIAY    | 163   | >CDH1-A298 TYNDAIAY    | 127   | 36    |
| >CDH1-A298 TYNAAIAYTI  | 308   | >CDH1-A298 TYNDAIAYTI  | 424   | 116   |
| >CDH1-A298 TYNAAIAY    | 482   | >CDH1-A298 TYNDAIAY    | 1446  | 964   |
| >CDH1-A298 TYNAAIAY    | 489   | >CDH1-A298 TYNDAIAY    | 507   | 18    |
| >CDH1-A298 TYNAAIAY    | 187   | >CDH1-A298 TYNDAIAY    | 769   | 582   |
| >CDH1-A298 NTYNAAIAYT  | 210   | >CDH1-A298 NTYNDAIAYT  | 700   | 490   |
| >CDH1-A298 NTYNAAIAYT  | 284   | >CDH1-A298 NTYNDAIAYT  | 244   | 40    |
| >CDH1-A298 NTYNAAIAYT  | 107   | >CDH1-A298 NTYNDAIAYT  | 117   | 10    |
| >CDH1-A298 NTYNAAIAYT  | 593   | >CDH1-A298 NTYNDAIAYT  | 362   | 231   |
| >CDH1-A298 NTYNAAIAYT  | 220   | >CDH1-A298 NTYNDAIAYT  | 306   | 86    |
| >CDH1-A298 NTYNAAIAYT  | 291   | >CDH1-A298 NTYNDAIAYT  | 266   | 25    |
| >CDH1-A298 NTYNAAIAYT  | 509   | >CDH1-A298 NTYNDAIAYT  | 324   | 185   |
| >CDH1-A298 NTYNAAIAY   | 283   | >CDH1-A298 NTYNDAIAY   | 694   | 411   |

|                       |      |                       |      |      |
|-----------------------|------|-----------------------|------|------|
| >CDH1-A298 NTYNAAIAY  | 34   | >CDH1-A298 NTYNDAIAY  | 56   | 22   |
| >CDH1-A298 NTYNAAIAY  | 63   | >CDH1-A298 NTYNDAIAY  | 29   | 34   |
| >CDH1-A298 NTYNAAIAY  | 63   | >CDH1-A298 NTYNDAIAY  | 61   | 2    |
| >CDH1-A298 NTYNAAIAY  | 50   | >CDH1-A298 NTYNDAIAY  | 47   | 3    |
| >CDH1-A298 NTYNAAIAY  | 399  | >CDH1-A298 NTYNDAIAY  | 258  | 141  |
| >CDH1-A298 NTYNAAIAY  | 449  | >CDH1-A298 NTYNDAIAY  | 582  | 133  |
| >CDH1-A298 NTYNAAIAYT | 16   | >CDH1-A298 NTYNDAIAYT | 17   | 1    |
| >CDH1-A298 NTYNAAIAY  | 39   | >CDH1-A298 NTYNDAIAY  | 75   | 36   |
| >CDH1-A298 NTYNAAIA   | 130  | >CDH1-A298 NTYNDAIA   | 298  | 168  |
| >CDH1-A298 NTYNAAIAYT | 20   | >CDH1-A298 NTYNDAIAYT | 32   | 12   |
| >CDH1-A298 NTYNAAIAYT | 12   | >CDH1-A298 NTYNDAIAYT | 25   | 13   |
| >CDH1-A298 NTYNAAIA   | 160  | >CDH1-A298 NTYNDAIA   | 995  | 835  |
| >CDH1-A298 NTYNAAIAYT | 68   | >CDH1-A298 NTYNDAIAYT | 113  | 45   |
| >CDH1-A298 NTYNAAIAYT | 8    | >CDH1-A298 NTYNDAIAYT | 12   | 4    |
| >CDH1-A298 NTYNAAIAY  | 158  | >CDH1-A298 NTYNDAIAY  | 361  | 203  |
| >CDH1-A298 NTYNAAIAY  | 185  | >CDH1-A298 NTYNDAIAY  | 325  | 140  |
| >CDH1-A298 NTYNAAIAY  | 102  | >CDH1-A298 NTYNDAIAY  | 173  | 71   |
| >CDH1-A298 NTYNAAIAY  | 10   | >CDH1-A298 NTYNDAIAY  | 29   | 19   |
| >CDH1-A298 NTYNAAIAYT | 102  | >CDH1-A298 NTYNDAIAYT | 290  | 188  |
| >CDH1-A298 NTYNAAIAY  | 373  | >CDH1-A298 NTYNDAIAY  | 1648 | 1275 |
| >CDH1-A298 NTYNAAIAY  | 26   | >CDH1-A298 NTYNDAIAY  | 36   | 10   |
| >CDH1-A298 NTYNAAIAY  | 70   | >CDH1-A298 NTYNDAIAY  | 132  | 62   |
| >CDH1-A298 NTYNAAIAYT | 305  | >CDH1-A298 NTYNDAIAYT | 431  | 126  |
| >CDH1-A298 NTYNAAIAY  | 64   | >CDH1-A298 NTYNDAIAY  | 510  | 446  |
| >CDH1-A298 NTYNAAIAYT | 16   | >CDH1-A298 NTYNDAIAYT | 20   | 4    |
| >CDH1-A298 DVNTYNAAIA | 130  | >CDH1-A298 DVNTYNDAIA | 359  | 229  |
| >CDH1-A298 DVNTYNAAIA | 20   | >CDH1-A298 DVNTYNDAIA | 17   | 3    |
| >CDH1-A298 DVNTYNAAIA | 231  | >CDH1-A298 DVNTYNDAIA | 334  | 103  |
| >CDH1-A298 DVNTYNAAIA | 313  | >CDH1-A298 DVNTYNDAIA | 474  | 161  |
| >CDH1-A298 DVNTYNAAIA | 349  | >CDH1-A298 DVNTYNDAIA | 494  | 145  |
| >CDH1-A298 DVNTYNAA   | 175  | >CDH1-A298 DVNTYNDA   | 1331 | 1156 |
| >CDH1-A298 DVNTYNAAI  | 31   | >CDH1-A298 DVNTYNDAI  | 83   | 52   |
| >CDH1-A298 DVNTYNAAI  | 79   | >CDH1-A298 DVNTYNDAI  | 533  | 454  |
| >CDH1-A298 DVNTYNAAIA | 29   | >CDH1-A298 DVNTYNDAIA | 31   | 2    |
| >CDH1-A298 DDVNTYNAA  | 312  | >CDH1-A298 DDVNTYNDA  | 260  | 52   |
| >CDH1-A298 DDDVNTYNA  | 1243 | >CDH1-A298 DDDVNTYND  | 339  | 904  |
| >CDH1-A298 DDDVNTYNA  | 149  | >CDH1-A298 DDDVNTYND  | 118  | 31   |
| >CDH1-A347 QAADLQGEG  | 754  | >CDH1-A347' QVADLQGEG | 291  | 463  |
| >CDH1-A347 VQAADLQGE  | 126  | >CDH1-A347' VQVADLQGE | 700  | 574  |
| >CDH1-A347 VQAADLQGE  | 415  | >CDH1-A347' VQVADLQGE | 914  | 499  |
| >CDH1-A347 VQAADLQGE  | 36   | >CDH1-A347' VQVADLQGE | 26   | 10   |
| >CDH1-A347 VQAADLQGE  | 429  | >CDH1-A347' VQVADLQGE | 347  | 82   |
| >CDH1-A347 TLVVQAADL  | 484  | >CDH1-A347' TLVVQVADL | 176  | 308  |

|                        |       |                        |      |       |
|------------------------|-------|------------------------|------|-------|
| >CDH1-A347 TLVVQAADL   | 840   | >CDH1-A347 TLVVQVADL   | 115  | 725   |
| >CDH1-A347 TLVVQAADL   | 1350  | >CDH1-A347 TLVVQVADL   | 474  | 876   |
| >CDH1-A347 TLVVQAADL   | 78    | >CDH1-A347 TLVVQVADL   | 35   | 43    |
| >CDH1-A347 YTLVVQAA    | 55    | >CDH1-A347 YTLVVQVA    | 273  | 218   |
| >CDH1-A347 YTLVVQAADI  | 751   | >CDH1-A347 YTLVVQVADI  | 361  | 390   |
| >CDH1-A347 YTLVVQAA    | 62    | >CDH1-A347 YTLVVQVA    | 133  | 71    |
| >CDH1-A347 YTLVVQAADI  | 435   | >CDH1-A347 YTLVVQVADI  | 213  | 222   |
| >CDH1-A347 YTLVVQAA    | 351   | >CDH1-A347 YTLVVQVA    | 292  | 59    |
| >CDH1-A347 YTLVVQAADI  | 714   | >CDH1-A347 YTLVVQVADI  | 287  | 427   |
| >CDH1-A347 YTLVVQAADI  | 557   | >CDH1-A347 YTLVVQVADI  | 413  | 144   |
| >CDH1-A347 YTLVVQAA    | 377   | >CDH1-A347 YTLVVQVA    | 786  | 409   |
| >CDH1-A347 YTLVVQAA    | 111   | >CDH1-A347 YTLVVQVA    | 504  | 393   |
| >CDH1-A347 YTLVVQAADI  | 157   | >CDH1-A347 YTLVVQVADI  | 235  | 78    |
| >CDH1-A347 YTLVVQAADI  | 12    | >CDH1-A347 YTLVVQVADI  | 20   | 8     |
| >CDH1-A347 YTLVVQAADI  | 307   | >CDH1-A347 YTLVVQVADI  | 486  | 179   |
| >CDH1-A347 YTLVVQAADI  | 239   | >CDH1-A347 YTLVVQVADI  | 246  | 7     |
| >CDH1-A347 TYTLVVQA    | 7403  | >CDH1-A347 TYTLVVQV    | 210  | 7193  |
| >CDH1-A347 TYTLVVQAAC  | 157   | >CDH1-A347 TYTLVVQVAC  | 159  | 2     |
| >CDH1-A347 TYTLVVQA    | 1628  | >CDH1-A347 TYTLVVQV    | 167  | 1461  |
| >CDH1-A347 TYTLVVQAAC  | 36    | >CDH1-A347 TYTLVVQVAC  | 26   | 10    |
| >CDH1-A347 PTYTLVVQA   | 5140  | >CDH1-A347 PTYTLVVQV   | 93   | 5047  |
| >CDH1-A347 PTYTLVVQA   | 9026  | >CDH1-A347 PTYTLVVQV   | 229  | 8797  |
| >CDH1-A347 PTYTLVVQA   | 3386  | >CDH1-A347 PTYTLVVQV   | 291  | 3095  |
| >CDH1-A347 PTYTLVVQA   | 5166  | >CDH1-A347 PTYTLVVQV   | 169  | 4997  |
| >CDH1-A347 FPTYTLVVQA  | 25017 | >CDH1-A347 FPTYTLVVQV  | 432  | 24585 |
| >CDH1-A347 FPTYTLVVQA  | 4635  | >CDH1-A347 FPTYTLVVQV  | 425  | 4210  |
| >CDH1-A347 FPTYTLVVQA  | 204   | >CDH1-A347 FPTYTLVVQV  | 579  | 375   |
| >CDH1-A347 FPTYTLVVQA  | 227   | >CDH1-A347 FPTYTLVVQV  | 265  | 38    |
| >CDH1-A347 FPTYTLVVQA  | 89    | >CDH1-A347 FPTYTLVVQV  | 265  | 176   |
| >CDH1-A347 FPTYTLVVQA  | 611   | >CDH1-A347 FPTYTLVVQV  | 189  | 422   |
| >CDH1-A347 FPTYTLVVQA  | 5     | >CDH1-A347 FPTYTLVVQV  | 6    | 1     |
| >CDH1-A347 FPTYTLVVQA  | 4     | >CDH1-A347 FPTYTLVVQV  | 5    | 1     |
| >CDH1-A347 FPTYTLVVQA  | 353   | >CDH1-A347 FPTYTLVVQV  | 105  | 248   |
| >CDH1-A592 APIPEPRTIF  | 479   | >CDH1-A592 TPIPEPRTIF  | 598  | 119   |
| >CDH1-A592 APIPEPRTIFF | 45    | >CDH1-A592 TPIPEPRTIFF | 52   | 7     |
| >CDH1-A592 APIPEPRTIF  | 165   | >CDH1-A592 TPIPEPRTIF  | 144  | 21    |
| >CDH1-A592 APIPEPRTIF  | 99    | >CDH1-A592 TPIPEPRTIF  | 564  | 465   |
| >CDH1-A592 APIPEPRTIFF | 273   | >CDH1-A592 TPIPEPRTIFF | 1387 | 1114  |
| >CDH1-A592 APIPEPRTIF  | 559   | >CDH1-A592 TPIPEPRTIF  | 247  | 312   |
| >CDH1-A592 APIPEPRTIFF | 129   | >CDH1-A592 TPIPEPRTIFF | 51   | 78    |
| >CDH1-A592 APIPEPRTI   | 543   | >CDH1-A592 TPIPEPRTI   | 327  | 216   |
| >CDH1-A592 APIPEPRTIFF | 425   | >CDH1-A592 TPIPEPRTIFF | 230  | 195   |
| >CDH1-A592 APIPEPRTIF  | 239   | >CDH1-A592 TPIPEPRTIF  | 746  | 507   |

|                         |      |                         |      |      |
|-------------------------|------|-------------------------|------|------|
| >CDH1-A592' APIPEPRTIFF | 368  | >CDH1-A592' TPIPEPRTIFF | 1240 | 872  |
| >CDH1-A592' APIPEPRTIFF | 264  | >CDH1-A592' TPIPEPRTIFF | 177  | 87   |
| >CDH1-A592' NAPIPEPR    | 293  | >CDH1-A592' NTPIPEPR    | 84   | 209  |
| >CDH1-A592' NAPIPEPRTI  | 2200 | >CDH1-A592' NTPIPEPRTI  | 120  | 2080 |
| >CDH1-A592' NAPIPEPRTIF | 315  | >CDH1-A592' NTPIPEPRTIF | 19   | 296  |
| >CDH1-A592' LLILSDVNDN, | 76   | >CDH1-A592' LLILSDVNDN` | 460  | 384  |
| >CDH1-A592' LLILSDVNDN, | 164  | >CDH1-A592' LLILSDVNDN` | 1700 | 1536 |
| >CDH1-A592' LLILSDVNDN, | 391  | >CDH1-A592' LLILSDVNDN` | 4059 | 3668 |
| >CDH1-A592' LLILSDVNDN, | 131  | >CDH1-A592' LLILSDVNDN` | 984  | 853  |
| >CDH1-A592' DNAPIPEPR   | 98   | >CDH1-A592' DNTPIPEPR   | 224  | 126  |
| >CDH1-A592' DVNDNAPI    | 44   | >CDH1-A592' DVNDNTPI    | 40   | 4    |
| >CDH1-A592' DVNDNAPI    | 25   | >CDH1-A592' DVNDNTPI    | 41   | 16   |
| >CDH1-A592' SDVNDNAPI   | 229  | >CDH1-A592' SDVNDNTPI   | 376  | 147  |
| >CDH1-A592' LSDVNDNAPI  | 410  | >CDH1-A592' LSDVNDNTPI  | 688  | 278  |
| >CDH1-A592' LSDVNDNAPI  | 121  | >CDH1-A592' LSDVNDNTPI  | 116  | 5    |
| >CDH1-A592' ILSDVNDNA   | 163  | >CDH1-A592' ILSDVNDNT   | 1405 | 1242 |
| >CDH1-A592' ILSDVNDNAP  | 23   | >CDH1-A592' ILSDVNDNTP  | 26   | 3    |
| >CDH1-A592' ILSDVNDNA   | 6    | >CDH1-A592' ILSDVNDNT   | 25   | 19   |
| >CDH1-A592' ILSDVNDNAP  | 5    | >CDH1-A592' ILSDVNDNTP  | 5    | 0    |
| >CDH1-A592' ILSDVNDNA   | 27   | >CDH1-A592' ILSDVNDNT   | 434  | 407  |
| >CDH1-A592' ILSDVNDNAP  | 8    | >CDH1-A592' ILSDVNDNTP  | 7    | 1    |
| >CDH1-A592' ILSDVNDNA   | 338  | >CDH1-A592' ILSDVNDNT   | 2848 | 2510 |
| >CDH1-A592' ILSDVNDNAP  | 51   | >CDH1-A592' ILSDVNDNTP  | 52   | 1    |
| >CDH1-A592' ILSDVNDNA   | 37   | >CDH1-A592' ILSDVNDNT   | 269  | 232  |
| >CDH1-A592' ILSDVNDNAP  | 9    | >CDH1-A592' ILSDVNDNTP  | 12   | 3    |
| >CDH1-A592' ILSDVNDNA   | 351  | >CDH1-A592' ILSDVNDNT   | 4492 | 4141 |
| >CDH1-A592' ILSDVNDNAP  | 11   | >CDH1-A592' ILSDVNDNTP  | 25   | 14   |
| >CDH1-A592' ILSDVNDNA   | 64   | >CDH1-A592' ILSDVNDNT   | 744  | 680  |
| >CDH1-A592' ILSDVNDNAP  | 44   | >CDH1-A592' ILSDVNDNTP  | 44   | 0    |
| >CDH1-A592' ILSDVNDNA   | 83   | >CDH1-A592' ILSDVNDNT   | 606  | 523  |
| >CDH1-A592' ILSDVNDNAP  | 14   | >CDH1-A592' ILSDVNDNTP  | 34   | 20   |
| >CDH1-A592' ILSDVNDNA   | 19   | >CDH1-A592' ILSDVNDNT   | 195  | 176  |
| >CDH1-A592' ILSDVNDNAP  | 9    | >CDH1-A592' ILSDVNDNTP  | 10   | 1    |
| >CDH1-A592' ILSDVNDNAP  | 419  | >CDH1-A592' ILSDVNDNTP  | 718  | 299  |
| >CDH1-A592' LILSDVNDNA  | 288  | >CDH1-A592' LILSDVNDNT  | 950  | 662  |
| >CDH1-A592' LILSDVNDNA  | 156  | >CDH1-A592' LILSDVNDNT  | 555  | 399  |
| >CDH1-A617' ADLPPNTSPF  | 46   | >CDH1-A617' TDLPPNTSPF  | 205  | 159  |
| >CDH1-A617' DADLPPNTSF  | 3356 | >CDH1-A617' DTDLPPNTSP  | 357  | 2999 |
| >CDH1-A617' DADLPPNTSF  | 132  | >CDH1-A617' DTDLPPNTSP  | 1299 | 1167 |
| >CDH1-A617' QVINIIDADL  | 161  | >CDH1-A617' QVINIIDTDL  | 557  | 396  |
| >CDH1-A617' QVINIIDADL  | 398  | >CDH1-A617' QVINIIDTDL  | 246  | 152  |
| >CDH1-A617' QVINIIDA    | 140  | >CDH1-A617' QVINIIDT    | 1539 | 1399 |
| >CDH1-A617' KPQVINIIDA  | 77   | >CDH1-A617' KPQVINIIDT  | 3158 | 3081 |

|                        |      |                        |      |      |
|------------------------|------|------------------------|------|------|
| >CDH1-A634' ASANWTIQY  | 30   | >CDH1-A634' VSANWTIQY  | 28   | 2    |
| >CDH1-A634' ASANWTIQY  | 473  | >CDH1-A634' VSANWTIQY  | 490  | 17   |
| >CDH1-A634' ASANWTIQY  | 37   | >CDH1-A634' VSANWTIQY  | 101  | 64   |
| >CDH1-A634' ASANWTIQY  | 82   | >CDH1-A634' VSANWTIQY  | 301  | 219  |
| >CDH1-A634' ASANWTIQY  | 25   | >CDH1-A634' VSANWTIQY  | 19   | 6    |
| >CDH1-A634' ASANWTIQY  | 49   | >CDH1-A634' VSANWTIQY  | 37   | 12   |
| >CDH1-A634' ASANWTIQY  | 261  | >CDH1-A634' VSANWTIQY  | 1195 | 934  |
| >CDH1-A634' ASANWTIQY  | 403  | >CDH1-A634' VSANWTIQY  | 121  | 282  |
| >CDH1-A634' ASANWTIQY  | 115  | >CDH1-A634' VSANWTIQY  | 155  | 40   |
| >CDH1-A634' ASANWTIQY  | 182  | >CDH1-A634' VSANWTIQY  | 268  | 86   |
| >CDH1-A634' ASANWTIQY  | 6    | >CDH1-A634' VSANWTIQY  | 7    | 1    |
| >CDH1-A634' ASANWTIQY  | 540  | >CDH1-A634' VSANWTIQY  | 190  | 350  |
| >CDH1-A634' ASANWTIQY  | 199  | >CDH1-A634' VSANWTIQY  | 38   | 161  |
| >CDH1-A634' ASANWTIQY  | 53   | >CDH1-A634' VSANWTIQY  | 37   | 16   |
| >CDH1-A634' ASANWTIQ   | 374  | >CDH1-A634' VSANWTIQ   | 4607 | 4233 |
| >CDH1-A634' ASANWTIQY  | 178  | >CDH1-A634' VSANWTIQY  | 884  | 706  |
| >CDH1-A634' GASANWTIQ  | 789  | >CDH1-A634' GVSANWTIQ  | 369  | 420  |
| >CDH1-A634' GASANWTI   | 2128 | >CDH1-A634' GVSANWTI   | 438  | 1690 |
| >CDH1-A634' GASANWTI   | 3730 | >CDH1-A634' GVSANWTI   | 494  | 3236 |
| >CDH1-A634' GASANWTI   | 602  | >CDH1-A634' GVSANWTI   | 122  | 480  |
| >CDH1-A634' GASANWTI   | 2973 | >CDH1-A634' GVSANWTI   | 299  | 2674 |
| >CDH1-A634' GASANWTIQ  | 757  | >CDH1-A634' GVSANWTIQ  | 298  | 459  |
| >CDH1-A634' GASANWTIQ  | 153  | >CDH1-A634' GVSANWTIQ  | 101  | 52   |
| >CDH1-A634' GASANWTIQ  | 532  | >CDH1-A634' GVSANWTIQ  | 330  | 202  |
| >CDH1-A634' GASANWTIQ  | 70   | >CDH1-A634' GVSANWTIQ  | 583  | 513  |
| >CDH1-A634' GASANWTIQ  | 247  | >CDH1-A634' GVSANWTIQ  | 162  | 85   |
| >CDH1-A634' GASANWTI   | 414  | >CDH1-A634' GVSANWTI   | 2377 | 1963 |
| >CDH1-A634' SPFTAELTHG | 673  | >CDH1-A634' SPFTAELTHG | 16   | 657  |
| >CDH1-A634' SPFTAELTHG | 1599 | >CDH1-A634' SPFTAELTHG | 169  | 1430 |
| >CDH1-A634' SPFTAELTHG | 287  | >CDH1-A634' SPFTAELTHG | 1666 | 1379 |
| >CDH1-A634' HGASANWTI  | 273  | >CDH1-A634' HGVSANWTI  | 331  | 58   |
| >CDH1-A634' HGASANWTI  | 128  | >CDH1-A634' HGVSANWTI  | 463  | 335  |
| >CDH1-A634' HGASANWTI  | 265  | >CDH1-A634' HGVSANWTI  | 1202 | 937  |
| >CDH1-A634' HGASANWTI  | 1048 | >CDH1-A634' HGVSANWTI  | 270  | 778  |
| >CDH1-A634' HGASANWTI  | 44   | >CDH1-A634' HGVSANWTI  | 51   | 7    |
| >CDH1-A634' HGASANWTI  | 100  | >CDH1-A634' HGVSANWTI  | 160  | 60   |
| >CDH1-A634' HGASANWTI  | 426  | >CDH1-A634' HGVSANWTI  | 1928 | 1502 |
| >CDH1-A634' HGASANWTI  | 298  | >CDH1-A634' HGVSANWTI  | 894  | 596  |
| >CDH1-A634' THGASANWT  | 274  | >CDH1-A634' THGVSANWT  | 1162 | 888  |
| >CDH1-A634' THGASANWT  | 233  | >CDH1-A634' THGVSANWT  | 751  | 518  |
| >CDH1-A634' LTHGASANW  | 566  | >CDH1-A634' LTHGVSANW  | 432  | 134  |
| >CDH1-A634' LTHGASANW  | 371  | >CDH1-A634' LTHGVSANW  | 423  | 52   |
| >CDH1-A634' LTHGASANW  | 139  | >CDH1-A634' LTHGVSANW  | 46   | 93   |

|                        |      |                        |     |      |
|------------------------|------|------------------------|-----|------|
| >CDH1-A634' LTHGASANW  | 430  | >CDH1-A634' LTHGVSANW  | 528 | 98   |
| >CDH1-A634' LTHGASANW  | 46   | >CDH1-A634' LTHGVSANW  | 105 | 59   |
| >CDH1-A634' LTHGASANW  | 1948 | >CDH1-A634' LTHGVSANW  | 460 | 1488 |
| >CDH1-A634' LTHGASANW  | 137  | >CDH1-A634' LTHGVSANW  | 64  | 73   |
| >CDH1-A634' LTHGASANW  | 56   | >CDH1-A634' LTHGVSANW  | 35  | 21   |
| >CDH1-A634' LTHGASANW  | 3    | >CDH1-A634' LTHGVSANW  | 4   | 1    |
| >CDH1-A634' LTHGASANW  | 19   | >CDH1-A634' LTHGVSANW  | 40  | 21   |
| >CDH1-A634' LTHGASANW  | 39   | >CDH1-A634' LTHGVSANW  | 41  | 2    |
| >CDH1-A634' LTHGASANW  | 20   | >CDH1-A634' LTHGVSANW  | 13  | 7    |
| >CDH1-A634' LTHGASANW  | 533  | >CDH1-A634' LTHGVSANW  | 210 | 323  |
| >CDH1-A634' LTHGASANW  | 94   | >CDH1-A634' LTHGVSANW  | 138 | 44   |
| >CDH1-A634' LTHGASANW  | 1061 | >CDH1-A634' LTHGVSANW  | 330 | 731  |
| >CDH1-A634' LTHGASANW  | 751  | >CDH1-A634' LTHGVSANW  | 386 | 365  |
| >CDH1-A634' LTHGASANW  | 394  | >CDH1-A634' LTHGVSANW  | 238 | 156  |
| >CDH1-A634' LTHGASANW  | 133  | >CDH1-A634' LTHGVSANW  | 140 | 7    |
| >CDH1-A634' LTHGASANW  | 35   | >CDH1-A634' LTHGVSANW  | 30  | 5    |
| >CDH1-A634' ELTHGASA   | 111  | >CDH1-A634' ELTHGVSA   | 87  | 24   |
| >CDH1-A634' AELTHGASA  | 312  | >CDH1-A634' AELTHGVSA  | 122 | 190  |
| >CDH1-A634' AELTHGASAN | 52   | >CDH1-A634' AELTHGVSAN | 51  | 1    |
| >CDH1-A634' AELTHGASAN | 12   | >CDH1-A634' AELTHGVSAN | 12  | 0    |
| >CDH1-A634' AELTHGAS   | 64   | >CDH1-A634' AELTHGVS   | 88  | 24   |
| >CDH1-A634' AELTHGASA  | 9    | >CDH1-A634' AELTHGVSA  | 8   | 1    |
| >CDH1-A634' AELTHGASA  | 71   | >CDH1-A634' AELTHGVSA  | 57  | 14   |
| >CDH1-A634' AELTHGASAN | 45   | >CDH1-A634' AELTHGVSAN | 37  | 8    |
| >CDH1-A634' AELTHGASAN | 503  | >CDH1-A634' AELTHGVSAN | 343 | 160  |
| >CDH1-A634' TAEALTHGA  | 5259 | >CDH1-A634' TAEALTHGV  | 298 | 4961 |
| >CDH1-A634' FTAELTHGA  | 29   | >CDH1-A634' FTAELTHGV  | 9   | 20   |
| >CDH1-A634' FTAELTHGAS | 96   | >CDH1-A634' FTAELTHGVS | 102 | 6    |
| >CDH1-A634' FTAELTHGA  | 4    | >CDH1-A634' FTAELTHGV  | 2   | 2    |
| >CDH1-A634' FTAELTHGAS | 8    | >CDH1-A634' FTAELTHGVS | 12  | 4    |
| >CDH1-A634' FTAELTHGA  | 8    | >CDH1-A634' FTAELTHGV  | 3   | 5    |
| >CDH1-A634' FTAELTHGAS | 8    | >CDH1-A634' FTAELTHGVS | 15  | 7    |
| >CDH1-A634' FTAELTHGA  | 7    | >CDH1-A634' FTAELTHGV  | 4   | 3    |
| >CDH1-A634' FTAELTHGAS | 11   | >CDH1-A634' FTAELTHGVS | 11  | 0    |
| >CDH1-A634' FTAELTHGA  | 24   | >CDH1-A634' FTAELTHGV  | 2   | 22   |
| >CDH1-A634' FTAELTHGAS | 93   | >CDH1-A634' FTAELTHGVS | 107 | 14   |
| >CDH1-A634' FTAELTHGA  | 83   | >CDH1-A634' FTAELTHGV  | 4   | 79   |
| >CDH1-A634' FTAELTHGA  | 46   | >CDH1-A634' FTAELTHGV  | 6   | 40   |
| >CDH1-A634' FTAELTHGAS | 442  | >CDH1-A634' FTAELTHGVS | 312 | 130  |
| >CDH1-A634' FTAELTHGA  | 293  | >CDH1-A634' FTAELTHGV  | 5   | 288  |
| >CDH1-A634' FTAELTHGA  | 49   | >CDH1-A634' FTAELTHGV  | 2   | 47   |
| >CDH1-A634' FTAELTHGAS | 231  | >CDH1-A634' FTAELTHGVS | 294 | 63   |
| >CDH1-A634' FTAELTHGA  | 2828 | >CDH1-A634' FTAELTHGV  | 109 | 2719 |

|                         |      |                         |      |      |
|-------------------------|------|-------------------------|------|------|
| >CDH1-A634' FTAELTHGA   | 5    | >CDH1-A634' FTAELTHGV   | 4    | 1    |
| >CDH1-A634' FTAELTHGAS  | 10   | >CDH1-A634' FTAELTHGVS  | 11   | 1    |
| >CDH1-A634' FTAELTHGA   | 4    | >CDH1-A634' FTAELTHGV   | 2    | 2    |
| >CDH1-A634' FTAELTHGAS  | 20   | >CDH1-A634' FTAELTHGVS  | 28   | 8    |
| >CDH1-A634' FTAELTHGA   | 2638 | >CDH1-A634' FTAELTHGV   | 89   | 2549 |
| >CDH1-A692' AAGVCRKAQ   | 1625 | >CDH1-A692' AVGVCRKAQ   | 110  | 1515 |
| >CDH1-A692' EVSVCDCEGA  | 77   | >CDH1-A692' EVSVCDCEGA  | 12   | 65   |
| >CDH1-A692' GAAGVCRK    | 252  | >CDH1-A692' GAVGVCRK    | 540  | 288  |
| >CDH1-A692' GAAGVCRK    | 232  | >CDH1-A692' GAVGVCRK    | 566  | 334  |
| >CDH1-A692' EGAAGVCR    | 62   | >CDH1-A692' EGAVGVCR    | 66   | 4    |
| >CDH1-A692' EGAAGVCRK   | 361  | >CDH1-A692' EGAVGVCRK   | 514  | 153  |
| >CDH1-A692' CEGAAGVCR   | 48   | >CDH1-A692' CEGAVGVCR   | 48   | 0    |
| >CDH1-A692' CDCEGAAGV   | 115  | >CDH1-A692' CDCEGAVGV   | 126  | 11   |
| >CDH1-A692' VCDCEGAAG   | 298  | >CDH1-A692' VCDCEGAVG   | 396  | 98   |
| >CDH1-A692' SVCDCEGAAC  | 138  | >CDH1-A692' SVCDCEGAVC  | 348  | 210  |
| >CDH1-A692' SVCDCEGAA   | 3761 | >CDH1-A692' SVCDCEGAV   | 463  | 3298 |
| >CDH1-A692' SVCDCEGAAC  | 48   | >CDH1-A692' SVCDCEGAVC  | 45   | 3    |
| >CDH1-A692' SVCDCEGAA   | 7698 | >CDH1-A692' SVCDCEGAV   | 333  | 7365 |
| >CDH1-A692' SVCDCEGAAC  | 58   | >CDH1-A692' SVCDCEGAVC  | 66   | 8    |
| >CDH1-A692' SVCDCEGAAC  | 265  | >CDH1-A692' SVCDCEGAVC  | 188  | 77   |
| >CDH1-A692' SVCDCEGAA   | 7086 | >CDH1-A692' SVCDCEGAV   | 67   | 7019 |
| >CDH1-A692' SVCDCEGAAC  | 10   | >CDH1-A692' SVCDCEGAVC  | 11   | 1    |
| >CDH1-A692' SVCDCEGAA   | 3474 | >CDH1-A692' SVCDCEGAV   | 206  | 3268 |
| >CDH1-A692' SVCDCEGAAC  | 51   | >CDH1-A692' SVCDCEGAVC  | 57   | 6    |
| >CDH1-A692' SVCDCEGAAC  | 349  | >CDH1-A692' SVCDCEGAVC  | 451  | 102  |
| >CDH1-A709' AILGILGGI   | 405  | >CDH1-A709' TILGILGGI   | 823  | 418  |
| >CDH1-A709' AILGILGGI   | 71   | >CDH1-A709' TILGILGGI   | 124  | 53   |
| >CDH1-A709' AILGILGGI   | 34   | >CDH1-A709' TILGILGGI   | 80   | 46   |
| >CDH1-A709' AILGILGGIL  | 443  | >CDH1-A709' TILGILGGIL  | 358  | 85   |
| >CDH1-A709' AILGILGGILA | 114  | >CDH1-A709' TILGILGGILA | 260  | 146  |
| >CDH1-A709' AILGILGGI   | 24   | >CDH1-A709' TILGILGGI   | 109  | 85   |
| >CDH1-A709' AILGILGGIL  | 414  | >CDH1-A709' TILGILGGIL  | 1555 | 1141 |
| >CDH1-A709' AILGILGGILA | 232  | >CDH1-A709' TILGILGGILA | 1001 | 769  |
| >CDH1-A709' AILGILGGI   | 366  | >CDH1-A709' TILGILGGI   | 1498 | 1132 |
| >CDH1-A709' AILGILGGI   | 357  | >CDH1-A709' TILGILGGI   | 705  | 348  |
| >CDH1-A709' AILGILGGI   | 223  | >CDH1-A709' TILGILGGI   | 1221 | 998  |
| >CDH1-A709' AILGILGGIL  | 356  | >CDH1-A709' TILGILGGIL  | 1659 | 1303 |
| >CDH1-A709' AILGILGGILA | 209  | >CDH1-A709' TILGILGGILA | 1238 | 1029 |
| >CDH1-A709' AILGILGGI   | 2955 | >CDH1-A709' TILGILGGI   | 75   | 2880 |
| >CDH1-A709' AILGILGGI   | 763  | >CDH1-A709' TILGILGGI   | 51   | 712  |
| >CDH1-A709' PAILGILGGI  | 9285 | >CDH1-A709' PTILGILGGI  | 382  | 8903 |
| >CDH1-A709' QPVEAGLQIP  | 84   | >CDH1-A709' QPVEAGLQIP  | 75   | 9    |
| >CDH1-A709' QPVEAGLQIP  | 34   | >CDH1-A709' QPVEAGLQIP  | 755  | 721  |



|                         |     |                         |      |      |
|-------------------------|-----|-------------------------|------|------|
| >CDH1-A709' IPAILGIL    | 29  | >CDH1-A709' IPTILGIL    | 79   | 50   |
| >CDH1-A709' IPAILGILGGI | 201 | >CDH1-A709' IPTILGILGGI | 1330 | 1129 |
| >CDH1-A709' IPAILGIL    | 525 | >CDH1-A709' IPTILGIL    | 382  | 143  |
| >CDH1-A709' IPAILGILGGI | 541 | >CDH1-A709' IPTILGILGGI | 409  | 132  |
| >CDH1-A709' IPAILGILG   | 133 | >CDH1-A709' IPTILGILG   | 147  | 14   |
| >CDH1-A709' IPAILGILGGI | 314 | >CDH1-A709' IPTILGILGGI | 398  | 84   |
| >CDH1-A709' QIPAILGI    | 302 | >CDH1-A709' QIPTILGI    | 507  | 205  |
| >CDH1-A709' QIPAILGI    | 190 | >CDH1-A709' QIPTILGI    | 485  | 295  |
| >CDH1-A709' QIPAILGI    | 75  | >CDH1-A709' QIPTILGI    | 173  | 98   |
| >CDH1-A709' QIPAILGIL   | 346 | >CDH1-A709' QIPTILGIL   | 632  | 286  |
| >CDH1-A709' QIPAILGIL   | 187 | >CDH1-A709' QIPTILGIL   | 268  | 81   |
| >CDH1-A709' LQIPAILGI   | 124 | >CDH1-A709' LQIPTILGI   | 181  | 57   |
| >CDH1-A709' LQIPAILGI   | 319 | >CDH1-A709' LQIPTILGI   | 578  | 259  |
| >CDH1-A709' LQIPAILGIL  | 364 | >CDH1-A709' LQIPTILGIL  | 464  | 100  |
| >CDH1-A709' LQIPAILGI   | 41  | >CDH1-A709' LQIPTILGI   | 43   | 2    |
| >CDH1-A709' LQIPAILGIL  | 267 | >CDH1-A709' LQIPTILGIL  | 224  | 43   |
| >CDH1-A709' LQIPAILGI   | 4   | >CDH1-A709' LQIPTILGI   | 4    | 0    |
| >CDH1-A709' LQIPAILGIL  | 188 | >CDH1-A709' LQIPTILGIL  | 132  | 56   |
| >CDH1-A709' LQIPAILGI   | 327 | >CDH1-A709' LQIPTILGI   | 172  | 155  |
| >CDH1-A709' LQIPAILGI   | 479 | >CDH1-A709' LQIPTILGI   | 274  | 205  |
| >CDH1-A709' LQIPAILGI   | 85  | >CDH1-A709' LQIPTILGI   | 104  | 19   |
| >CDH1-A709' LQIPAILGIL  | 121 | >CDH1-A709' LQIPTILGIL  | 173  | 52   |
| >CDH1-A709' LQIPAILGI   | 88  | >CDH1-A709' LQIPTILGI   | 47   | 41   |
| >CDH1-A709' LQIPAILGIL  | 147 | >CDH1-A709' LQIPTILGIL  | 95   | 52   |
| >CDH1-A709' LQIPAILGIL  | 488 | >CDH1-A709' LQIPTILGIL  | 315  | 173  |
| >CDH1-A709' GLQIPAIL    | 557 | >CDH1-A709' GLQIPTIL    | 331  | 226  |
| >CDH1-A709' GLQIPAILGI  | 244 | >CDH1-A709' GLQIPTILGI  | 212  | 32   |
| >CDH1-A709' GLQIPAILGIL | 768 | >CDH1-A709' GLQIPTILGIL | 467  | 301  |
| >CDH1-A709' GLQIPAILGI  | 127 | >CDH1-A709' GLQIPTILGI  | 88   | 39   |
| >CDH1-A709' GLQIPAIL    | 163 | >CDH1-A709' GLQIPTIL    | 241  | 78   |
| >CDH1-A709' GLQIPAILGI  | 30  | >CDH1-A709' GLQIPTILGI  | 19   | 11   |
| >CDH1-A709' GLQIPAILGIL | 414 | >CDH1-A709' GLQIPTILGIL | 379  | 35   |
| >CDH1-A709' GLQIPAIL    | 63  | >CDH1-A709' GLQIPTIL    | 105  | 42   |
| >CDH1-A709' GLQIPAILGI  | 56  | >CDH1-A709' GLQIPTILGI  | 30   | 26   |
| >CDH1-A709' GLQIPAILGIL | 226 | >CDH1-A709' GLQIPTILGIL | 148  | 78   |
| >CDH1-A709' GLQIPAIL    | 520 | >CDH1-A709' GLQIPTIL    | 436  | 84   |
| >CDH1-A709' GLQIPAILGI  | 151 | >CDH1-A709' GLQIPTILGI  | 113  | 38   |
| >CDH1-A709' GLQIPAIL    | 33  | >CDH1-A709' GLQIPTIL    | 32   | 1    |
| >CDH1-A709' GLQIPAILGI  | 36  | >CDH1-A709' GLQIPTILGI  | 26   | 10   |
| >CDH1-A709' GLQIPAILGIL | 91  | >CDH1-A709' GLQIPTILGIL | 83   | 8    |
| >CDH1-A709' AGLQIPAI    | 963 | >CDH1-A709' AGLQIPTI    | 476  | 487  |
| >CDH1-A709' EAGLQIPAI   | 249 | >CDH1-A709' EAGLQIPTI   | 326  | 77   |
| >CDH1-A709' VEAGLQIPAI  | 49  | >CDH1-A709' VEAGLQIPTI  | 43   | 6    |

|                         |       |                         |      |       |
|-------------------------|-------|-------------------------|------|-------|
| >CDH1-A709' VEAGLQIPA   | 493   | >CDH1-A709' VEAGLQIPT   | 1110 | 617   |
| >CDH1-A709' VEAGLQIPAIL | 417   | >CDH1-A709' VEAGLQIPTIL | 447  | 30    |
| >CDH1-A709' VEAGLQIPAIL | 442   | >CDH1-A709' VEAGLQIPTIL | 950  | 508   |
| >CDH1-A709' VEAGLQIPAIL | 19    | >CDH1-A709' VEAGLQIPTIL | 20   | 1     |
| >CDH1-A709' VEAGLQIPA   | 150   | >CDH1-A709' VEAGLQIPT   | 180  | 30    |
| >CDH1-A709' VEAGLQIPAI  | 270   | >CDH1-A709' VEAGLQIPTI  | 204  | 66    |
| >CDH1-A709' VEAGLQIPAIL | 591   | >CDH1-A709' VEAGLQIPTIL | 228  | 363   |
| >CDH1-A709' VEAGLQIPA   | 13    | >CDH1-A709' VEAGLQIPT   | 78   | 65    |
| >CDH1-A709' VEAGLQIPAI  | 9     | >CDH1-A709' VEAGLQIPTI  | 9    | 0     |
| >CDH1-A709' VEAGLQIPAIL | 105   | >CDH1-A709' VEAGLQIPTIL | 99   | 6     |
| >CDH1-D254 DQNDNKPEF    | 15714 | >CDH1-D254 YQNDNKPEF    | 103  | 15611 |
| >CDH1-D254 DQNDNKPEF    | 18220 | >CDH1-D254 YQNDNKPEF    | 424  | 17796 |
| >CDH1-D254 DQNDNKPEF    | 3001  | >CDH1-D254 YQNDNKPEF    | 57   | 2944  |
| >CDH1-D254 DQNDNKPEF    | 253   | >CDH1-D254 YQNDNKPEF    | 6    | 247   |
| >CDH1-D254 DQNDNKPEF    | 309   | >CDH1-D254 YQNDNKPEF    | 1160 | 851   |
| >CDH1-D254 TDQNDNKPE    | 18937 | >CDH1-D254 TYQNDNKPEI   | 123  | 18814 |
| >CDH1-D254 TDQNDNKPE    | 20669 | >CDH1-D254 TYQNDNKPEI   | 91   | 20578 |
| >CDH1-D254 TDQNDNKPE    | 19442 | >CDH1-D254 TYQNDNKPEI   | 8    | 19434 |
| >CDH1-D254 DPMEILITVTI  | 34274 | >CDH1-D254 DPMEILITVTY  | 450  | 33824 |
| >CDH1-D254 DPMEILITVTI  | 3080  | >CDH1-D254 DPMEILITVTY  | 24   | 3056  |
| >CDH1-D254 DPMEILITVTI  | 1363  | >CDH1-D254 DPMEILITVTY  | 8    | 1355  |
| >CDH1-D254 DPMEILITVTI  | 16294 | >CDH1-D254 DPMEILITVTY  | 76   | 16218 |
| >CDH1-D254 DPMEILITVTI  | 17357 | >CDH1-D254 DPMEILITVTY  | 12   | 17345 |
| >CDH1-D254 DPMEILITVTI  | 10938 | >CDH1-D254 DPMEILITVTY  | 38   | 10900 |
| >CDH1-D254 VTDQNDNKP    | 8651  | >CDH1-D254 VTYQNDNKP    | 145  | 8506  |
| >CDH1-D254 VTDQNDNK     | 10219 | >CDH1-D254 VTYQNDNK     | 266  | 9953  |
| >CDH1-D254 VTDQNDNK     | 276   | >CDH1-D254 VTYQNDNK     | 39   | 237   |
| >CDH1-D254 VTDQNDNKP    | 10118 | >CDH1-D254 VTYQNDNKP    | 494  | 9624  |
| >CDH1-D254 VTDQNDNKP    | 16386 | >CDH1-D254 VTYQNDNKP    | 343  | 16043 |
| >CDH1-D254 VTDQNDNK     | 1413  | >CDH1-D254 VTYQNDNK     | 53   | 1360  |
| >CDH1-D254 VTDQNDNKP    | 12244 | >CDH1-D254 VTYQNDNKP    | 464  | 11780 |
| >CDH1-D254 VTDQNDNKP    | 6635  | >CDH1-D254 VTYQNDNKP    | 89   | 6546  |
| >CDH1-D254 VTDQNDNKP    | 16    | >CDH1-D254 VTYQNDNKP    | 4    | 12    |
| >CDH1-D254 VTDQNDNKP    | 957   | >CDH1-D254 VTYQNDNKP    | 114  | 843   |
| >CDH1-D254 VTDQNDNKP    | 980   | >CDH1-D254 VTYQNDNKP    | 108  | 872   |
| >CDH1-D254 TVTDQNDNK    | 80    | >CDH1-D254 TVTYQNDNK    | 95   | 15    |
| >CDH1-D254 TVTDQNDNK    | 39    | >CDH1-D254 TVTYQNDNK    | 14   | 25    |
| >CDH1-D254 ITVTDQNDNI   | 2329  | >CDH1-D254 ITVTYQNDNK   | 346  | 1983  |
| >CDH1-D254 ITVTDQNDNI   | 143   | >CDH1-D254 ITVTYQNDNK   | 73   | 70    |
| >CDH1-D254 ITVTDQNDNI   | 421   | >CDH1-D254 ITVTYQNDNK   | 122  | 299   |
| >CDH1-D254 LITVTDQNDN   | 265   | >CDH1-D254 LITVTYQNDN   | 304  | 39    |
| >CDH1-D254 ILITVTDQ     | 1313  | >CDH1-D254 ILITVTYQ     | 111  | 1202  |
| >CDH1-D254 ILITVTDQ     | 7323  | >CDH1-D254 ILITVTYQ     | 351  | 6972  |

|                        |       |                         |      |       |
|------------------------|-------|-------------------------|------|-------|
| >CDH1-D254 ILITVTDQ    | 837   | >CDH1-D254 ILITVTYQ     | 121  | 716   |
| >CDH1-D254 EILITVTD    | 20141 | >CDH1-D254 EILITVTY     | 284  | 19857 |
| >CDH1-D254 EILITVTD    | 30406 | >CDH1-D254 EILITVTY     | 80   | 30326 |
| >CDH1-D254 EILITVTD    | 35384 | >CDH1-D254 EILITVTY     | 261  | 35123 |
| >CDH1-D254 EILITVTD    | 24481 | >CDH1-D254 EILITVTY     | 265  | 24216 |
| >CDH1-D254 MEILITVTD   | 13168 | >CDH1-D254 MEILITVTY    | 484  | 12684 |
| >CDH1-D254 MEILITVTD   | 24400 | >CDH1-D254 MEILITVTY    | 133  | 24267 |
| >CDH1-D254 MEILITVTD   | 6236  | >CDH1-D254 MEILITVTY    | 293  | 5943  |
| >CDH1-D254 MEILITVTD   | 19634 | >CDH1-D254 MEILITVTY    | 477  | 19157 |
| >CDH1-D254 MEILITVTD   | 22688 | >CDH1-D254 MEILITVTY    | 134  | 22554 |
| >CDH1-D254 MEILITVTD   | 205   | >CDH1-D254 MEILITVTY    | 5    | 200   |
| >CDH1-D254 MEILITVTDQI | 2746  | >CDH1-D254 MEILITVTYQI  | 487  | 2259  |
| >CDH1-D254 MEILITVTD   | 19970 | >CDH1-D254 MEILITVTY    | 49   | 19921 |
| >CDH1-D254 MEILITVTD   | 3808  | >CDH1-D254 MEILITVTY    | 163  | 3645  |
| >CDH1-D254 MEILITVTD   | 484   | >CDH1-D254 MEILITVTY    | 25   | 459   |
| >CDH1-D254 MEILITVTD   | 1269  | >CDH1-D254 MEILITVTY    | 321  | 948   |
| >CDH1-D254 MEILITVTD   | 142   | >CDH1-D254 MEILITVTY    | 149  | 7     |
| >CDH1-D254 MEILITVTDQI | 102   | >CDH1-D254 MEILITVTYQI  | 138  | 36    |
| >CDH1-D254 MEILITVTD   | 32622 | >CDH1-D254 MEILITVTY    | 185  | 32437 |
| >CDH1-D254 PMEILITVTD  | 31243 | >CDH1-D254 PMEILITVTY   | 166  | 31077 |
| >CDH1-D257 DNKPEFTQEV  | 7610  | >CDH1-D257 GNKPEFTQEV   | 417  | 7193  |
| >CDH1-D257 DQNDNKPEF   | 253   | >CDH1-D257 DQNGNKPEF    | 546  | 293   |
| >CDH1-D257 DQNDNKPEF   | 309   | >CDH1-D257 DQNGNKPEF    | 260  | 49    |
| >CDH1-D257 VTDQNDNK    | 276   | >CDH1-D257 VTDQNGNK     | 229  | 47    |
| >CDH1-D257 VTDQNDNKP   | 16    | >CDH1-D257 VTDQNGNKP    | 13   | 3     |
| >CDH1-D257 VTDQNDNKP   | 980   | >CDH1-D257 VTDQNGNKP    | 423  | 557   |
| >CDH1-D257 TVTDQNDNK   | 80    | >CDH1-D257 TVTDQNGNK    | 91   | 11    |
| >CDH1-D257 TVTDQNDNK   | 39    | >CDH1-D257 TVTDQNGNK    | 64   | 25    |
| >CDH1-D257 ITVTDQNDNI  | 143   | >CDH1-D257 ITVTDQNGNI   | 199  | 56    |
| >CDH1-D257 ITVTDQNDNI  | 421   | >CDH1-D257 ITVTDQNGNI   | 1159 | 738   |
| >CDH1-D257 LITVTDQNDN  | 265   | >CDH1-D257 LITVTDQNGN   | 357  | 92    |
| >CDH1-D308 SQDPELPDK   | 705   | >CDH1-D308 SQNPPELPDK   | 151  | 554   |
| >CDH1-D308 SQDPELPDKI  | 3211  | >CDH1-D308 SQNPPELPDKI  | 175  | 3036  |
| >CDH1-D308 LSQDPELPDK  | 160   | >CDH1-D308 LSQNPPELPDK  | 143  | 17    |
| >CDH1-D308 ILSQDPEL    | 117   | >CDH1-D308 ILSQNPPEL    | 104  | 13    |
| >CDH1-D308 ILSQDPEL    | 14    | >CDH1-D308 ILSQNPPEL    | 12   | 2     |
| >CDH1-D308 ILSQDPEL    | 190   | >CDH1-D308 ILSQNPPEL    | 125  | 65    |
| >CDH1-D308 ILSQDPEL    | 28    | >CDH1-D308 ILSQNPPEL    | 15   | 13    |
| >CDH1-D308 ILSQDPEL    | 181   | >CDH1-D308 ILSQNPPEL    | 96   | 85    |
| >CDH1-D308 ILSQDPEL    | 30    | >CDH1-D308 ILSQNPPEL    | 40   | 10    |
| >CDH1-D308 ILSQDPEL    | 55    | >CDH1-D308 ILSQNPPEL    | 23   | 32    |
| >CDH1-D308 ILSQDPEL    | 6     | >CDH1-D308 ILSQNPPEL    | 4    | 2     |
| >CDH1-D308 ILSQDPELPDI | 529   | >CDH1-D308 ILSQNPPELPDI | 278  | 251   |

|                        |       |                        |       |       |
|------------------------|-------|------------------------|-------|-------|
| >CDH1-D308 TILSQDPEL   | 718   | >CDH1-D308 TILSQNPEL   | 251   | 467   |
| >CDH1-D308 TILSQDPEL   | 829   | >CDH1-D308 TILSQNPEL   | 479   | 350   |
| >CDH1-D308 TILSQDPEL   | 771   | >CDH1-D308 TILSQNPEL   | 419   | 352   |
| >CDH1-D308 TILSQDPEL   | 216   | >CDH1-D308 TILSQNPEL   | 341   | 125   |
| >CDH1-D308 TILSQDPEL   | 191   | >CDH1-D308 TILSQNPEL   | 143   | 48    |
| >CDH1-D308 TILSQDPEL   | 797   | >CDH1-D308 TILSQNPEL   | 51    | 746   |
| >CDH1-D308 YTILSQDPEL  | 426   | >CDH1-D308 YTILSQNPEL  | 358   | 68    |
| >CDH1-D308 YTILSQDPEL  | 213   | >CDH1-D308 YTILSQNPEL  | 254   | 41    |
| >CDH1-D308 YTILSQDPEL  | 82    | >CDH1-D308 YTILSQNPEL  | 72    | 10    |
| >CDH1-D308 YTILSQDPEL  | 29    | >CDH1-D308 YTILSQNPEL  | 26    | 3     |
| >CDH1-D308 YTILSQDPEL  | 1476  | >CDH1-D308 YTILSQNPEL  | 485   | 991   |
| >CDH1-D308 YTILSQDPEL  | 457   | >CDH1-D308 YTILSQNPEL  | 94    | 363   |
| >CDH1-D308 YTILSQDPEL  | 7     | >CDH1-D308 YTILSQNPEL  | 7     | 0     |
| >CDH1-D308 YTILSQDPEL  | 849   | >CDH1-D308 YTILSQNPEL  | 266   | 583   |
| >CDH1-D308 YTILSQDPEL  | 209   | >CDH1-D308 YTILSQNPEL  | 75    | 134   |
| >CDH1-D308 YTILSQDPEL  | 929   | >CDH1-D308 YTILSQNPEL  | 303   | 626   |
| >CDH1-D308 AYTILSQDPEL | 937   | >CDH1-D308 AYTILSQNPEL | 374   | 563   |
| >CDH1-D308 AYTILSQDPEL | 18    | >CDH1-D308 AYTILSQNPEL | 15    | 3     |
| >CDH1-D308 IAYTILSQD   | 2157  | >CDH1-D308 IAYTILSQN   | 369   | 1788  |
| >CDH1-D334 DRESFPTY    | 1958  | >CDH1-D334 HRESFPTY    | 269   | 1689  |
| >CDH1-D334 DRESFPTYTL  | 968   | >CDH1-D334 HRESFPTYTL  | 22    | 946   |
| >CDH1-D334 DRESFPTYTL  | 303   | >CDH1-D334 HRESFPTYTL  | 23    | 280   |
| >CDH1-D334 DRESFPTYTL\ | 3293  | >CDH1-D334 HRESFPTYTL\ | 284   | 3009  |
| >CDH1-D334 LDRESFPTY   | 262   | >CDH1-D334 LHRESFPTY   | 779   | 517   |
| >CDH1-D334 LDRESFPTY   | 204   | >CDH1-D334 LHRESFPTY   | 7     | 197   |
| >CDH1-D334 LDRESFPTYTL | 2194  | >CDH1-D334 LHRESFPTYTL | 67    | 2127  |
| >CDH1-D334 LDRESFPTY   | 429   | >CDH1-D334 LHRESFPTY   | 2032  | 1603  |
| >CDH1-D334 LDRESFPTYTL | 16840 | >CDH1-D334 LHRESFPTYTL | 430   | 16410 |
| >CDH1-D334 LDRESFPTY   | 29504 | >CDH1-D334 LHRESFPTY   | 397   | 29107 |
| >CDH1-D334 LDRESFPTYTL | 361   | >CDH1-D334 LHRESFPTYTL | 21710 | 21349 |
| >CDH1-D334 GVISVVTGLI  | 10326 | >CDH1-D334 GVISVVTGLI  | 281   | 10045 |
| >CDH1-D334 GLDRESFPTY  | 3022  | >CDH1-D334 GLHRESFPTY  | 302   | 2720  |
| >CDH1-D334 GLDRESFPT   | 226   | >CDH1-D334 GLHRESFPT   | 452   | 226   |
| >CDH1-D334 GLDRESFPTY  | 66    | >CDH1-D334 GLHRESFPTY  | 120   | 54    |
| >CDH1-D334 GLDRESFPT   | 80    | >CDH1-D334 GLHRESFPT   | 436   | 356   |
| >CDH1-D334 GLDRESFPTY  | 319   | >CDH1-D334 GLHRESFPTY  | 1273  | 954   |
| >CDH1-D334 GLDRESFPT   | 141   | >CDH1-D334 GLHRESFPT   | 1105  | 964   |
| >CDH1-D334 GLDRESFPTY  | 185   | >CDH1-D334 GLHRESFPTY  | 1057  | 872   |
| >CDH1-D334 GLDRESFPT   | 352   | >CDH1-D334 GLHRESFPT   | 196   | 156   |
| >CDH1-D334 GLDRESFPTY  | 229   | >CDH1-D334 GLHRESFPTY  | 127   | 102   |
| >CDH1-D334 GLDRESFPTY  | 1024  | >CDH1-D334 GLHRESFPTY  | 71    | 953   |
| >CDH1-D334 GLDRESFPTY  | 2374  | >CDH1-D334 GLHRESFPTY  | 374   | 2000  |
| >CDH1-D334 GLDRESFPTY  | 5421  | >CDH1-D334 GLHRESFPTY  | 228   | 5193  |

|                        |      |                        |     |      |
|------------------------|------|------------------------|-----|------|
| >CDH1-D334 TGLDRESFPT' | 354  | >CDH1-D334 TGLHRESFPT' | 236 | 118  |
| >CDH1-D334 TGLDRESFPT' | 466  | >CDH1-D334 TGLHRESFPT' | 532 | 66   |
| >CDH1-D334 TGLDRESFPT' | 495  | >CDH1-D334 TGLHRESFPT' | 468 | 27   |
| >CDH1-D334 TTGLDRESF   | 864  | >CDH1-D334 TTGLHRESF   | 439 | 425  |
| >CDH1-D334 VTTGLDRESF  | 860  | >CDH1-D334 VTTGLHRESF  | 496 | 364  |
| >CDH1-D334 VTTGLDRESF  | 374  | >CDH1-D334 VTTGLHRESF  | 178 | 196  |
| >CDH1-D334 VTTGLDRESF  | 32   | >CDH1-D334 VTTGLHRESF  | 19  | 13   |
| >CDH1-D334 VTTGLDRESF  | 484  | >CDH1-D334 VTTGLHRESF  | 528 | 44   |
| >CDH1-D334 VTTGLDRESF  | 379  | >CDH1-D334 VTTGLHRESF  | 402 | 23   |
| >CDH1-D334 VTTGLDRESF  | 652  | >CDH1-D334 VTTGLHRESF  | 75  | 577  |
| >CDH1-D334 VTTGLDRESF  | 42   | >CDH1-D334 VTTGLHRESF  | 32  | 10   |
| >CDH1-D334 VVTTGLDRES  | 221  | >CDH1-D334 VVTTGLHRES  | 180 | 41   |
| >CDH1-D334 VVTTGLDR    | 3460 | >CDH1-D334 VVTTGLHR    | 230 | 3230 |
| >CDH1-D334 VVTTGLDR    | 679  | >CDH1-D334 VVTTGLHR    | 331 | 348  |
| >CDH1-D334 VVTTGLDRES  | 289  | >CDH1-D334 VVTTGLHRES  | 346 | 57   |
| >CDH1-D334 SVVTTGLDR   | 372  | >CDH1-D334 SVVTTGLHR   | 181 | 191  |
| >CDH1-D334 SVVTTGLDR   | 3982 | >CDH1-D334 SVVTTGLHR   | 201 | 3781 |
| >CDH1-D334 SVVTTGLDR   | 234  | >CDH1-D334 SVVTTGLHR   | 96  | 138  |
| >CDH1-D334 SVVTTGLDR   | 1040 | >CDH1-D334 SVVTTGLHR   | 122 | 918  |
| >CDH1-D334 ISVVTTGLDR  | 384  | >CDH1-D334 ISVVTTGLHR  | 145 | 239  |
| >CDH1-D334 ISVVTTGLDR  | 738  | >CDH1-D334 ISVVTTGLHR  | 293 | 445  |
| >CDH1-D334 ISVVTTGLDR  | 101  | >CDH1-D334 ISVVTTGLHR  | 67  | 34   |
| >CDH1-D334 ISVVTTGLD   | 8536 | >CDH1-D334 ISVVTTGLH   | 182 | 8354 |
| >CDH1-D334 VISVVTTGLDI | 1931 | >CDH1-D334 VISVVTTGLHI | 250 | 1681 |
| >CDH1-D334 VISVVTTGLDI | 336  | >CDH1-D334 VISVVTTGLHI | 209 | 127  |
| >CDH1-D334 VISVVTTGLDI | 2145 | >CDH1-D334 VISVVTTGLHI | 459 | 1686 |
| >CDH1-D370 DTNDNPPIF   | 74   | >CDH1-D370 DTNANPPIF   | 112 | 38   |
| >CDH1-D370 DTNDNPPI    | 118  | >CDH1-D370 DTNANPPI    | 88  | 30   |
| >CDH1-D370 DTNDNPPI    | 15   | >CDH1-D370 DTNANPPI    | 17  | 2    |
| >CDH1-D370 TDTNDNPPI   | 2373 | >CDH1-D370 TDTNANPPI   | 404 | 1969 |
| >CDH1-D370 TDTNDNPPI   | 240  | >CDH1-D370 TDTNANPPI   | 197 | 43   |
| >CDH1-D370 VTDNDNPPI   | 190  | >CDH1-D370 VTDNANPPI   | 179 | 11   |
| >CDH1-D370 VTDNDNPPI   | 1038 | >CDH1-D370 VTDNANPPI   | 178 | 860  |
| >CDH1-D370 VTDNDNPPI   | 678  | >CDH1-D370 VTDNANPPI   | 183 | 495  |
| >CDH1-D370 VTDNDNPPI   | 33   | >CDH1-D370 VTDNANPPI   | 20  | 13   |
| >CDH1-D370 VTDNDNPPI   | 387  | >CDH1-D370 VTDNANPPI   | 349 | 38   |
| >CDH1-D370 VTDNDNPPI   | 1338 | >CDH1-D370 VTDNANPPI   | 487 | 851  |
| >CDH1-D370 VTDNDNPPI   | 753  | >CDH1-D370 VTDNANPPI   | 358 | 395  |
| >CDH1-D370 VTDNDNPPI   | 246  | >CDH1-D370 VTDNANPPI   | 201 | 45   |
| >CDH1-D370 TVTDTNDNPI  | 233  | >CDH1-D370 TVTDTNANPI  | 140 | 93   |
| >CDH1-D370 TVTDTNDNPI  | 46   | >CDH1-D370 TVTDTNANPI  | 26  | 20   |
| >CDH1-D370 TVTDTNDNPI  | 48   | >CDH1-D370 TVTDTNANPI  | 20  | 28   |
| >CDH1-D370 DNPPIFNPT   | 1036 | >CDH1-D370 HNPPIFNPT   | 408 | 628  |

|                        |       |                        |     |       |
|------------------------|-------|------------------------|-----|-------|
| >CDH1-D370 TNDNPPIF    | 5113  | >CDH1-D370 TNHNPPIF    | 285 | 4828  |
| >CDH1-D370 DTNDNPPIF   | 74    | >CDH1-D370 DTNHNPPIF   | 112 | 38    |
| >CDH1-D370 DTNDNPPI    | 118   | >CDH1-D370 DTNHNPPI    | 125 | 7     |
| >CDH1-D370 DTNDNPPI    | 15    | >CDH1-D370 DTNHNPPI    | 36  | 21    |
| >CDH1-D370 TDTNDNPPI   | 240   | >CDH1-D370 TDTNHNPPI   | 199 | 41    |
| >CDH1-D370 VTDTNDNPPI  | 190   | >CDH1-D370 VTDTNHNPPI  | 180 | 10    |
| >CDH1-D370 VTDTNDNPPI  | 1038  | >CDH1-D370 VTDTNHNPPI  | 254 | 784   |
| >CDH1-D370 VTDTNDNPPI  | 678   | >CDH1-D370 VTDTNHNPPI  | 285 | 393   |
| >CDH1-D370 VTDTNDNPPI  | 33    | >CDH1-D370 VTDTNHNPPI  | 26  | 7     |
| >CDH1-D370 VTDTNDNPPI  | 387   | >CDH1-D370 VTDTNHNPPI  | 403 | 16    |
| >CDH1-D370 VTDTNDNPPI  | 3451  | >CDH1-D370 VTDTNHNPPI  | 460 | 2991  |
| >CDH1-D370 VTDTNDNPPI  | 1338  | >CDH1-D370 VTDTNHNPPI  | 420 | 918   |
| >CDH1-D370 VTDTNDNPPI  | 753   | >CDH1-D370 VTDTNHNPPI  | 364 | 389   |
| >CDH1-D370 VTDTNDNPPI  | 246   | >CDH1-D370 VTDTNHNPPI  | 101 | 145   |
| >CDH1-D370 TVTDTNDNPI  | 233   | >CDH1-D370 TVTDTNHNPI  | 140 | 93    |
| >CDH1-D370 TVTDTNDNPI  | 46    | >CDH1-D370 TVTDTNHNPI  | 37  | 9     |
| >CDH1-D370 TVTDTNDNPI  | 48    | >CDH1-D370 TVTDTNHNPI  | 16  | 32    |
| >CDH1-D400 DADAPNTPA   | 19121 | >CDH1-D400 YADAPNTPA   | 110 | 19011 |
| >CDH1-D400 DADAPNTPA   | 123   | >CDH1-D400 YADAPNTPA   | 66  | 57    |
| >CDH1-D400 DADAPNTPA'  | 2876  | >CDH1-D400 YADAPNTPA\  | 31  | 2845  |
| >CDH1-D400 DADAPNTPA'  | 2103  | >CDH1-D400 YADAPNTPA\  | 25  | 2078  |
| >CDH1-D400 DADAPNTPA'  | 746   | >CDH1-D400 YADAPNTPA\  | 161 | 585   |
| >CDH1-D400 TDADAPNTP/  | 22100 | >CDH1-D400 TYADAPNTP/  | 139 | 21961 |
| >CDH1-D400 TDADAPNTP/  | 23556 | >CDH1-D400 TYADAPNTP/  | 317 | 23239 |
| >CDH1-D400 TDADAPNTP/  | 24187 | >CDH1-D400 TYADAPNTP/  | 42  | 24145 |
| >CDH1-D400 NVVITTLKVT\ | 36650 | >CDH1-D400 NVVITTLKVT\ | 453 | 36197 |
| >CDH1-D400 NVVITTLKVT\ | 22624 | >CDH1-D400 NVVITTLKVT\ | 151 | 22473 |
| >CDH1-D400 NVVITTLKVT\ | 25165 | >CDH1-D400 NVVITTLKVT\ | 352 | 24813 |
| >CDH1-D400 NVVITTLKVT\ | 20952 | >CDH1-D400 NVVITTLKVT\ | 152 | 20800 |
| >CDH1-D400 NVVITTLKVT\ | 32523 | >CDH1-D400 NVVITTLKVT\ | 156 | 32367 |
| >CDH1-D400 VTDADAPNTF  | 8665  | >CDH1-D400 VTYADAPNTF  | 335 | 8330  |
| >CDH1-D400 VTDADAPNTF  | 800   | >CDH1-D400 VTYADAPNTF  | 198 | 602   |
| >CDH1-D400 VTDADAPNTF  | 5479  | >CDH1-D400 VTYADAPNTF  | 365 | 5114  |
| >CDH1-D400 VTDADAPNTF  | 965   | >CDH1-D400 VTYADAPNTF  | 282 | 683   |
| >CDH1-D400 VTDADAPNT   | 5693  | >CDH1-D400 VTYADAPNT   | 376 | 5317  |
| >CDH1-D400 VTDADAPNTF  | 6398  | >CDH1-D400 VTYADAPNTF  | 463 | 5935  |
| >CDH1-D400 LKVTDADA    | 2014  | >CDH1-D400 LKVTYADA    | 449 | 1565  |
| >CDH1-D400 TLKVTDADA   | 2136  | >CDH1-D400 TLKVTYADA   | 175 | 1961  |
| >CDH1-D400 TTLKVTDA    | 7334  | >CDH1-D400 TTLKVTYA    | 401 | 6933  |
| >CDH1-D400 TTLKVTDA    | 778   | >CDH1-D400 TTLKVTYA    | 36  | 742   |
| >CDH1-D400 TTLKVTDA    | 1376  | >CDH1-D400 TTLKVTYA    | 76  | 1300  |
| >CDH1-D400 TTLKVTDADA  | 1514  | >CDH1-D400 TTLKVTYADA  | 246 | 1268  |
| >CDH1-D400 ITTLKVTD    | 26541 | >CDH1-D400 ITTLKVTY    | 283 | 26258 |

|                        |       |                        |       |       |
|------------------------|-------|------------------------|-------|-------|
| >CDH1-D400 ITTLKVTD    | 32213 | >CDH1-D400 ITTLKVTY    | 357   | 31856 |
| >CDH1-D400 ITTLKVTD    | 9666  | >CDH1-D400 ITTLKVTY    | 5     | 9661  |
| >CDH1-D400 ITTLKVTD    | 26503 | >CDH1-D400 ITTLKVTY    | 361   | 26142 |
| >CDH1-D400 VITTLKVTD   | 31678 | >CDH1-D400 VITTLKVTY   | 193   | 31485 |
| >CDH1-D400 VITTLKVTD   | 28457 | >CDH1-D400 VITTLKVTY   | 496   | 27961 |
| >CDH1-D400 VITTLKVTD   | 37688 | >CDH1-D400 VITTLKVTY   | 416   | 37272 |
| >CDH1-D400 VVITTLKVTD/ | 399   | >CDH1-D400 VVITTLKVTYA | 76    | 323   |
| >CDH1-D400 VVITTLKVTD/ | 2220  | >CDH1-D400 VVITTLKVTYA | 150   | 2070  |
| >CDH1-D400 VVITTLKVTD  | 13847 | >CDH1-D400 VVITTLKVTY  | 25    | 13822 |
| >CDH1-D400 VVITTLKVTD  | 33491 | >CDH1-D400 VVITTLKVTY  | 382   | 33109 |
| >CDH1-D400 VVITTLKVTD  | 20550 | >CDH1-D400 VVITTLKVTY  | 410   | 20140 |
| >CDH1-D400 VVITTLKVTD  | 26741 | >CDH1-D400 VVITTLKVTY  | 467   | 26274 |
| >CDH1-D400 VVITTLKVTD  | 22331 | >CDH1-D400 VVITTLKVTY  | 106   | 22225 |
| >CDH1-D400 VVITTLKVTD  | 36113 | >CDH1-D400 VVITTLKVTY  | 253   | 35860 |
| >CDH1-D402 DAPNTPAWE   | 935   | >CDH1-D402 NAPNTPAWE   | 401   | 534   |
| >CDH1-D402 DAPNTPAWE   | 77    | >CDH1-D402 NAPNTPAWE   | 40    | 37    |
| >CDH1-D402 ADAPNTPAW   | 415   | >CDH1-D402 ANAPNTPAW   | 9733  | 9318  |
| >CDH1-D402 DADAPNTPA   | 1226  | >CDH1-D402 DANAPNTPA   | 59    | 1167  |
| >CDH1-D402 DADAPNTPA   | 123   | >CDH1-D402 DANAPNTPA   | 287   | 164   |
| >CDH1-D402 DADAPNTPA'  | 746   | >CDH1-D402 DANAPNTPA'  | 362   | 384   |
| >CDH1-D402 TTLKVTDADA  | 1514  | >CDH1-D402 TTLKVTDANA  | 319   | 1195  |
| >CDH1-D479 DVNEAPIFV   | 7868  | >CDH1-D479 GVNEAPIFV   | 59    | 7809  |
| >CDH1-D479 DVNEAPIFV   | 5647  | >CDH1-D479 GVNEAPIFV   | 125   | 5522  |
| >CDH1-D479 DVNEAPIFV   | 1933  | >CDH1-D479 GVNEAPIFV   | 20    | 1913  |
| >CDH1-D479 DVNEAPIFV   | 2163  | >CDH1-D479 GVNEAPIFV   | 37    | 2126  |
| >CDH1-D479 DVNEAPIFV   | 126   | >CDH1-D479 GVNEAPIFV   | 8     | 118   |
| >CDH1-D479 DVNEAPIFV   | 1817  | >CDH1-D479 GVNEAPIFV   | 19    | 1798  |
| >CDH1-D479 DVNEAPIFV   | 97    | >CDH1-D479 GVNEAPIFV   | 9     | 88    |
| >CDH1-D479 DVNEAPIFV   | 54    | >CDH1-D479 GVNEAPIFV   | 26    | 28    |
| >CDH1-D479 DVNEAPIFV   | 447   | >CDH1-D479 GVNEAPIFV   | 32    | 415   |
| >CDH1-D479 DVNEAPIF    | 215   | >CDH1-D479 GVNEAPIF    | 7270  | 7055  |
| >CDH1-D479 DVNEAPIFV   | 6467  | >CDH1-D479 GVNEAPIFV   | 423   | 6044  |
| >CDH1-D479 DVNEAPIFV   | 14    | >CDH1-D479 GVNEAPIFV   | 345   | 331   |
| >CDH1-D479 DVNEAPIFV   | 6     | >CDH1-D479 GVNEAPIFV   | 167   | 161   |
| >CDH1-D479 DVNEAPIF    | 381   | >CDH1-D479 GVNEAPIF    | 2613  | 2232  |
| >CDH1-D479 LDVNEAPIF   | 581   | >CDH1-D479 LGVNEAPIF   | 294   | 287   |
| >CDH1-D479 LDVNEAPI    | 90    | >CDH1-D479 LGVNEAPI    | 8291  | 8201  |
| >CDH1-D479 LDVNEAPI    | 124   | >CDH1-D479 LGVNEAPI    | 11708 | 11584 |
| >CDH1-D479 LDVNEAPIFV  | 164   | >CDH1-D479 LGVNEAPIFV  | 13518 | 13354 |
| >CDH1-D479 STATVTVDVL  | 1245  | >CDH1-D479 STATVTVDVL  | 348   | 897   |
| >CDH1-D479 VLDVNEAPI   | 1430  | >CDH1-D479 VLGVNEAPI   | 135   | 1295  |
| >CDH1-D479 VLDVNEAPI   | 468   | >CDH1-D479 VLGVNEAPI   | 2193  | 1725  |
| >CDH1-D479 VLDVNEAPIF' | 32    | >CDH1-D479 VLGVNEAPIF' | 111   | 79    |

|                        |      |                        |     |      |
|------------------------|------|------------------------|-----|------|
| >CDH1-D479 VLDVNEAPIF' | 59   | >CDH1-D479 VLGVNEAPIF' | 78  | 19   |
| >CDH1-D479 VLDVNEAPIF' | 296  | >CDH1-D479 VLGVNEAPIF' | 157 | 139  |
| >CDH1-D479 VLDVNEAPIF' | 96   | >CDH1-D479 VLGVNEAPIF' | 490 | 394  |
| >CDH1-D479 VLDVNEAPI   | 17   | >CDH1-D479 VLGVNEAPI   | 36  | 19   |
| >CDH1-D479 VLDVNEAPIF' | 2    | >CDH1-D479 VLGVNEAPIF' | 3   | 1    |
| >CDH1-D479 VLDVNEAPI   | 10   | >CDH1-D479 VLGVNEAPI   | 17  | 7    |
| >CDH1-D479 VLDVNEAPIF' | 4    | >CDH1-D479 VLGVNEAPIF' | 5   | 1    |
| >CDH1-D479 VLDVNEAPI   | 77   | >CDH1-D479 VLGVNEAPI   | 241 | 164  |
| >CDH1-D479 VLDVNEAPIF' | 4    | >CDH1-D479 VLGVNEAPIF' | 6   | 2    |
| >CDH1-D479 VLDVNEAPI   | 79   | >CDH1-D479 VLGVNEAPI   | 122 | 43   |
| >CDH1-D479 VLDVNEAPIF' | 3    | >CDH1-D479 VLGVNEAPIF' | 3   | 0    |
| >CDH1-D479 VLDVNEAPI   | 32   | >CDH1-D479 VLGVNEAPI   | 23  | 9    |
| >CDH1-D479 VLDVNEAPIF' | 5    | >CDH1-D479 VLGVNEAPIF' | 4   | 1    |
| >CDH1-D479 DVLDVNEAPI  | 147  | >CDH1-D479 DVLGVNEAPI  | 73  | 74   |
| >CDH1-D479 DVLDVNEA    | 137  | >CDH1-D479 DVLGVNEA    | 180 | 43   |
| >CDH1-D479 DVLDVNEA    | 131  | >CDH1-D479 DVLGVNEA    | 412 | 281  |
| >CDH1-D479 DVLDVNEAPI  | 19   | >CDH1-D479 DVLGVNEAPI  | 45  | 26   |
| >CDH1-D479 VDVLVNEAI   | 728  | >CDH1-D479 VDVLGVNEAI  | 296 | 432  |
| >CDH1-D479 VDVLVNEAI   | 78   | >CDH1-D479 VDVLGVNEAI  | 132 | 54   |
| >CDH1-D479 VTVDVLDV    | 1455 | >CDH1-D479 VTVDVLGV    | 414 | 1041 |
| >CDH1-D479 VTVDVLDV    | 197  | >CDH1-D479 VTVDVLGV    | 49  | 148  |
| >CDH1-D479 VTVDVLDVNI  | 415  | >CDH1-D479 VTVDVLGVNI  | 239 | 176  |
| >CDH1-D479 VTVDVLDV    | 107  | >CDH1-D479 VTVDVLGV    | 13  | 94   |
| >CDH1-D479 VTVDVLDVNI  | 97   | >CDH1-D479 VTVDVLGVNI  | 126 | 29   |
| >CDH1-D479 VTVDVLDV    | 76   | >CDH1-D479 VTVDVLGV    | 11  | 65   |
| >CDH1-D479 VTVDVLDV    | 1631 | >CDH1-D479 VTVDVLGV    | 397 | 1234 |
| >CDH1-D479 VTVDVLDV    | 215  | >CDH1-D479 VTVDVLGV    | 79  | 136  |
| >CDH1-D479 VTVDVLDV    | 70   | >CDH1-D479 VTVDVLGV    | 29  | 41   |
| >CDH1-D479 VTVDVLDV    | 249  | >CDH1-D479 VTVDVLGV    | 49  | 200  |
| >CDH1-D479 VTVDVLDVNI  | 165  | >CDH1-D479 VTVDVLGVNI  | 156 | 9    |
| >CDH1-D479 VTVDVLDV    | 858  | >CDH1-D479 VTVDVLGV    | 68  | 790  |
| >CDH1-D479 VTVDVLDV    | 918  | >CDH1-D479 VTVDVLGV    | 169 | 749  |
| >CDH1-D479 TVTVDVLDV   | 1544 | >CDH1-D479 TVTVDVLGV   | 344 | 1200 |
| >CDH1-D479 TVTVDVLDV   | 1502 | >CDH1-D479 TVTVDVLGV   | 78  | 1424 |
| >CDH1-D479 TVTVDVLDV   | 1824 | >CDH1-D479 TVTVDVLGV   | 374 | 1450 |
| >CDH1-D479 TVTVDVLDV   | 248  | >CDH1-D479 TVTVDVLGV   | 53  | 195  |
| >CDH1-D479 TVTVDVLDV   | 856  | >CDH1-D479 TVTVDVLGV   | 76  | 780  |
| >CDH1-D479 TVTVDVLDV   | 2014 | >CDH1-D479 TVTVDVLGV   | 140 | 1874 |
| >CDH1-D479 ATVTVDVLD\  | 494  | >CDH1-D479 ATVTVDVLG\  | 149 | 345  |
| >CDH1-D479 ATVTVDVLD\  | 397  | >CDH1-D479 ATVTVDVLG\  | 93  | 304  |
| >CDH1-D479 ATVTVDVLD\  | 1717 | >CDH1-D479 ATVTVDVLG\  | 188 | 1529 |
| >CDH1-D479 ATVTVDVLD\  | 1024 | >CDH1-D479 ATVTVDVLG\  | 272 | 752  |
| >CDH1-D479 ATVTVDVLD\  | 1356 | >CDH1-D479 ATVTVDVLG\  | 476 | 880  |



|                        |       |                        |       |       |
|------------------------|-------|------------------------|-------|-------|
| >CDH1-D479 ATVTVDVLD\  | 1051  | >CDH1-D479 ATVTVDVLD\  | 349   | 702   |
| >CDH1-D479 ATVTVDVLD\  | 2558  | >CDH1-D479 ATVTVDVLD\  | 496   | 2062  |
| >CDH1-D479 TATVTVDVLC  | 1488  | >CDH1-D479 TATVTVDVLC  | 255   | 1233  |
| >CDH1-D479 TATVTVDVLC  | 3469  | >CDH1-D479 TATVTVDVLC  | 431   | 3038  |
| >CDH1-E463(EVSLTTSTAT\ | 672   | >CDH1-E463(QVSLTTSTAT' | 89    | 583   |
| >CDH1-E463(EVSLTTSTAT\ | 2049  | >CDH1-E463(QVSLTTSTAT' | 275   | 1774  |
| >CDH1-E463(EVSLTTSTAT\ | 109   | >CDH1-E463(QVSLTTSTAT' | 217   | 108   |
| >CDH1-E463(EVSLTTSTAT\ | 258   | >CDH1-E463(QVSLTTSTAT' | 101   | 157   |
| >CDH1-E463(EVSLTTSTA   | 78    | >CDH1-E463(QVSLTTSTA   | 730   | 652   |
| >CDH1-E463(EVSLTTSTAT\ | 8     | >CDH1-E463(QVSLTTSTAT' | 23    | 15    |
| >CDH1-E463(EVSLTTSTAT\ | 11    | >CDH1-E463(QVSLTTSTAT' | 92    | 81    |
| >CDH1-E463(FEVSLTTST   | 5215  | >CDH1-E463(FQVSLTTST   | 75    | 5140  |
| >CDH1-E463(FEVSLTTSTA  | 2731  | >CDH1-E463(FQVSLTTSTA  | 55    | 2676  |
| >CDH1-E463(FEVSLTTSTAT | 7845  | >CDH1-E463(FQVSLTTSTA' | 180   | 7665  |
| >CDH1-E463(FEVSLTTST   | 8004  | >CDH1-E463(FQVSLTTST   | 54    | 7950  |
| >CDH1-E463(FEVSLTTSTA  | 1717  | >CDH1-E463(FQVSLTTSTA  | 27    | 1690  |
| >CDH1-E463(FEVSLTTSTAT | 10178 | >CDH1-E463(FQVSLTTSTA' | 100   | 10078 |
| >CDH1-E463(FEVSLTTS    | 5445  | >CDH1-E463(FQVSLTTS    | 31    | 5414  |
| >CDH1-E463(FEVSLTTST   | 2625  | >CDH1-E463(FQVSLTTST   | 9     | 2616  |
| >CDH1-E463(FEVSLTTSTA  | 1111  | >CDH1-E463(FQVSLTTSTA  | 38    | 1073  |
| >CDH1-E463(FEVSLTTSTAT | 2531  | >CDH1-E463(FQVSLTTSTA' | 9     | 2522  |
| >CDH1-E463(FEVSLTTSTA  | 6793  | >CDH1-E463(FQVSLTTSTA  | 206   | 6587  |
| >CDH1-E463(FEVSLTTS    | 9913  | >CDH1-E463(FQVSLTTS    | 365   | 9548  |
| >CDH1-E463(FEVSLTTST   | 5438  | >CDH1-E463(FQVSLTTST   | 169   | 5269  |
| >CDH1-E463(FEVSLTTSTA  | 1618  | >CDH1-E463(FQVSLTTSTA  | 35    | 1583  |
| >CDH1-E463(FEVSLTTSTAT | 3220  | >CDH1-E463(FQVSLTTSTA' | 86    | 3134  |
| >CDH1-E463(FEVSLTTSTAT | 4875  | >CDH1-E463(FQVSLTTSTA' | 447   | 4428  |
| >CDH1-E463(FEVSLTTST   | 91    | >CDH1-E463(FQVSLTTST   | 5977  | 5886  |
| >CDH1-E463(FEVSLTTSTA  | 178   | >CDH1-E463(FQVSLTTSTA  | 24005 | 23827 |
| >CDH1-E463(FEVSLTTSTAT | 145   | >CDH1-E463(FQVSLTTSTA' | 7771  | 7626  |
| >CDH1-E463(FEVSLTTST   | 39    | >CDH1-E463(FQVSLTTST   | 9933  | 9894  |
| >CDH1-E463(FEVSLTTSTA  | 109   | >CDH1-E463(FQVSLTTSTA  | 18540 | 18431 |
| >CDH1-E463(FEVSLTTSTAT | 107   | >CDH1-E463(FQVSLTTSTA' | 14410 | 14303 |
| >CDH1-E463(HVAVTNVVPI  | 762   | >CDH1-E463(HVAVTNVVPI  | 141   | 621   |
| >CDH1-E463(VPFVSLTT    | 59    | >CDH1-E463(VPFQVSLTT   | 58    | 1     |
| >CDH1-E463(VPFVSLTTST  | 105   | >CDH1-E463(VPFQVSLTTS' | 106   | 1     |
| >CDH1-E463(VPFVSLTTS   | 751   | >CDH1-E463(VPFQVSLTTS  | 261   | 490   |
| >CDH1-E463(VVPFEVSL    | 1068  | >CDH1-E463(VVPFQVSL    | 440   | 628   |
| >CDH1-E463(VVPFEVSL    | 249   | >CDH1-E463(VVPFQVSL    | 48    | 201   |
| >CDH1-E463(NVVPFEVSL   | 335   | >CDH1-E463(NVVPFQVSL   | 104   | 231   |
| >CDH1-E463(NVVPFEVSL   | 216   | >CDH1-E463(NVVPFQVSL   | 106   | 110   |
| >CDH1-E463(NVVPFEVSL   | 48    | >CDH1-E463(NVVPFQVSL   | 21    | 27    |
| >CDH1-E463(NVVPFEVSL   | 685   | >CDH1-E463(NVVPFQVSL   | 107   | 578   |

|                        |     |                        |     |     |
|------------------------|-----|------------------------|-----|-----|
| >CDH1-E463(TNVVPFEV    | 66  | >CDH1-E463(TNVVPFQV    | 184 | 118 |
| >CDH1-E463(VTNVVPFEV   | 260 | >CDH1-E463(VTNVVPFQV   | 917 | 657 |
| >CDH1-E463(VTNVVPFEV   | 460 | >CDH1-E463(VTNVVPFQV   | 854 | 394 |
| >CDH1-E463(VTNVVPFEV   | 465 | >CDH1-E463(VTNVVPFQV   | 572 | 107 |
| >CDH1-E463(VTNVVPFEV   | 300 | >CDH1-E463(VTNVVPFQV   | 661 | 361 |
| >CDH1-E463(VTNVVPFEV   | 9   | >CDH1-E463(VTNVVPFQV   | 10  | 1   |
| >CDH1-E463(VTNVVPFEVS  | 608 | >CDH1-E463(VTNVVPFQV:  | 484 | 124 |
| >CDH1-E463(VTNVVPFEV   | 30  | >CDH1-E463(VTNVVPFQV   | 39  | 9   |
| >CDH1-E463(VTNVVPFEV   | 298 | >CDH1-E463(VTNVVPFQV   | 145 | 153 |
| >CDH1-E463(VTNVVPFEV   | 278 | >CDH1-E463(VTNVVPFQV   | 244 | 34  |
| >CDH1-E463(VTNVVPFEVS  | 163 | >CDH1-E463(VTNVVPFQV:  | 112 | 51  |
| >CDH1-E463(VTNVVPFEV   | 28  | >CDH1-E463(VTNVVPFQV   | 55  | 27  |
| >CDH1-E463(VTNVVPFEVS  | 595 | >CDH1-E463(VTNVVPFQV:  | 329 | 266 |
| >CDH1-E463(VTNVVPFEV   | 141 | >CDH1-E463(VTNVVPFQV   | 85  | 56  |
| >CDH1-E463(VTNVVPFEVS  | 59  | >CDH1-E463(VTNVVPFQV:  | 49  | 10  |
| >CDH1-E463(VTNVVPFEV   | 727 | >CDH1-E463(VTNVVPFQV   | 209 | 518 |
| >CDH1-E463(VTNVVPFEVS  | 232 | >CDH1-E463(VTNVVPFQV:  | 75  | 157 |
| >CDH1-E463(VTNVVPFEVS  | 530 | >CDH1-E463(VTNVVPFQV:  | 258 | 272 |
| >CDH1-E463(AVTNVVPFEV  | 320 | >CDH1-E463(AVTNVVPFQ)  | 824 | 504 |
| >CDH1-E463(AVTNVVPFEV  | 211 | >CDH1-E463(AVTNVVPFQ)  | 355 | 144 |
| >CDH1-E463(AVTNVVPFEV  | 193 | >CDH1-E463(AVTNVVPFQ)  | 425 | 232 |
| >CDH1-E463(AVTNVVPFEV  | 172 | >CDH1-E463(AVTNVVPFQ)  | 287 | 115 |
| >CDH1-E463(AVTNVVPFEV  | 7   | >CDH1-E463(AVTNVVPFQ)  | 7   | 0   |
| >CDH1-E463(AVTNVVPFEV  | 126 | >CDH1-E463(AVTNVVPFQ)  | 311 | 185 |
| >CDH1-E463(AVTNVVPFEV  | 9   | >CDH1-E463(AVTNVVPFQ)  | 10  | 1   |
| >CDH1-E463(AVTNVVPFEV  | 81  | >CDH1-E463(AVTNVVPFQ)  | 38  | 43  |
| >CDH1-E463(AVTNVVPFEV  | 5   | >CDH1-E463(AVTNVVPFQ)  | 5   | 0   |
| >CDH1-E463(AVTNVVPFEV  | 303 | >CDH1-E463(AVTNVVPFQ)  | 200 | 103 |
| >CDH1-E463(VAVTNVVPFE  | 95  | >CDH1-E463(VAVTNVVPFC  | 175 | 80  |
| >CDH1-E463(VAVTNVVPFE  | 70  | >CDH1-E463(VAVTNVVPFC  | 160 | 90  |
| >CDH1-E463(VAVTNVVPFE  | 56  | >CDH1-E463(VAVTNVVPFC  | 62  | 6   |
| >CDH1-E463(VAVTNVVPFE  | 113 | >CDH1-E463(VAVTNVVPFC  | 104 | 9   |
| >CDH1-E463(VAVTNVVPFE  | 98  | >CDH1-E463(VAVTNVVPFC  | 213 | 115 |
| >CDH1-E463(VAVTNVVPFE  | 617 | >CDH1-E463(VAVTNVVPFC  | 460 | 157 |
| >CDH1-G571 GSPVATGTG   | 30  | >CDH1-G571 SSPVATGTGT  | 9   | 21  |
| >CDH1-G571 GSPVATGTG   | 437 | >CDH1-G571 SSPVATGTGT  | 93  | 344 |
| >CDH1-G571 YTALIIATDNC | 379 | >CDH1-G571 YTALIIATDNS | 59  | 320 |
| >CDH1-G571 ATDNGSPV    | 74  | >CDH1-G571 ATDNSSPV    | 73  | 1   |
| >CDH1-G571 ATDNGSPV    | 32  | >CDH1-G571 ATDNSSPV    | 41  | 9   |
| >CDH1-G571 ATDNGSPV    | 185 | >CDH1-G571 ATDNSSPV    | 130 | 55  |
| >CDH1-G571 ATDNGSPV    | 80  | >CDH1-G571 ATDNSSPV    | 87  | 7   |
| >CDH1-G571 ATDNGSPV    | 161 | >CDH1-G571 ATDNSSPV    | 205 | 44  |
| >CDH1-G571 ATDNGSPV    | 71  | >CDH1-G571 ATDNSSPV    | 46  | 25  |

|                        |      |                        |      |      |
|------------------------|------|------------------------|------|------|
| >CDH1-G571 ATDNGSPV    | 465  | >CDH1-G571 ATDNSSPV    | 187  | 278  |
| >CDH1-G571 IATDNGSPV   | 263  | >CDH1-G571 IATDNSSPV   | 109  | 154  |
| >CDH1-G571 IATDNGSPV   | 329  | >CDH1-G571 IATDNSSPV   | 116  | 213  |
| >CDH1-G571 IATDNGSPV   | 241  | >CDH1-G571 IATDNSSPV   | 221  | 20   |
| >CDH1-G571 IATDNGSPV   | 19   | >CDH1-G571 IATDNSSPV   | 14   | 5    |
| >CDH1-G571 IATDNGSPV   | 313  | >CDH1-G571 IATDNSSPV   | 44   | 269  |
| >CDH1-G571 IATDNGSPV   | 1507 | >CDH1-G571 IATDNSSPV   | 367  | 1140 |
| >CDH1-G571 IATDNGSPV   | 898  | >CDH1-G571 IATDNSSPV   | 439  | 459  |
| >CDH1-G571 IIATDNGSPV  | 69   | >CDH1-G571 IIATDNSSPV  | 44   | 25   |
| >CDH1-G571 IIATDNGSPV  | 79   | >CDH1-G571 IIATDNSSPV  | 39   | 40   |
| >CDH1-G571 IIATDNGSPV/ | 639  | >CDH1-G571 IIATDNSSPV/ | 434  | 205  |
| >CDH1-G571 IIATDNGSPV  | 162  | >CDH1-G571 IIATDNSSPV  | 167  | 5    |
| >CDH1-G571 IIATDNGSPV  | 110  | >CDH1-G571 IIATDNSSPV  | 78   | 32   |
| >CDH1-G571 IIATDNGSPV  | 373  | >CDH1-G571 IIATDNSSPV  | 141  | 232  |
| >CDH1-G571 IIATDNGSPV  | 411  | >CDH1-G571 IIATDNSSPV  | 211  | 200  |
| >CDH1-G571 IIATDNGSPV  | 345  | >CDH1-G571 IIATDNSSPV  | 57   | 288  |
| >CDH1-G571 IIATDNGSPV  | 16   | >CDH1-G571 IIATDNSSPV  | 8    | 8    |
| >CDH1-G571 IIATDNGSPV  | 159  | >CDH1-G571 IIATDNSSPV  | 182  | 23   |
| >CDH1-G571 IIATDNGSPV  | 872  | >CDH1-G571 IIATDNSSPV  | 399  | 473  |
| >CDH1-G571 LIIATDNGSPV | 250  | >CDH1-G571 LIIATDNSSPV | 105  | 145  |
| >CDH1-G571 LIIATDNGSPV | 77   | >CDH1-G571 LIIATDNSSPV | 35   | 42   |
| >CDH1-G571 LIIATDNGSPV | 9    | >CDH1-G571 LIIATDNSSPV | 7    | 2    |
| >CDH1-G571 LIIATDNGSPV | 17   | >CDH1-G571 LIIATDNSSPV | 13   | 4    |
| >CDH1-G571 LIIATDNGSPV | 29   | >CDH1-G571 LIIATDNSSPV | 30   | 1    |
| >CDH1-G571 LIIATDNGSPV | 29   | >CDH1-G571 LIIATDNSSPV | 22   | 7    |
| >CDH1-G571 LIIATDNGSPV | 179  | >CDH1-G571 LIIATDNSSPV | 151  | 28   |
| >CDH1-G571 LIIATDNGSPV | 8    | >CDH1-G571 LIIATDNSSPV | 7    | 1    |
| >CDH1-G571 LIIATDNGSPV | 70   | >CDH1-G571 LIIATDNSSPV | 39   | 31   |
| >CDH1-G571 LIIATDNGSPV | 381  | >CDH1-G571 LIIATDNSSPV | 208  | 173  |
| >CDH1-G571 LIIATDNGSPV | 331  | >CDH1-G571 LIIATDNSSPV | 222  | 109  |
| >CDH1-G62D GRQRTAYF    | 154  | >CDH1-G62D DRQRTAYF    | 773  | 619  |
| >CDH1-G62D GRQRTAYF    | 165  | >CDH1-G62D DRQRTAYF    | 1662 | 1497 |
| >CDH1-G62D GRQRTAYFSL  | 78   | >CDH1-G62D DRQRTAYFSL  | 1087 | 1009 |
| >CDH1-G62D GRQRTAYFSL  | 455  | >CDH1-G62D DRQRTAYFSL  | 843  | 388  |
| >CDH1-G62D GRQRTAYFSL  | 80   | >CDH1-G62D DRQRTAYFSL  | 402  | 322  |
| >CDH1-G62D GRQRTAYFSL  | 79   | >CDH1-G62D DRQRTAYFSL  | 426  | 347  |
| >CDH1-G62D GRQRTAYFSL  | 423  | >CDH1-G62D DRQRTAYFSL  | 6900 | 6477 |
| >CDH1-G62D TGRQRTAYFS  | 279  | >CDH1-G62D TDRQRTAYFS  | 677  | 398  |
| >CDH1-G62D TGRQRTAY    | 342  | >CDH1-G62D TDRQRTAY    | 3176 | 2834 |
| >CDH1-G62D TGRQRTAYF   | 114  | >CDH1-G62D TDRQRTAYF   | 9342 | 9228 |
| >CDH1-G62D CTGRQRTAY   | 171  | >CDH1-G62D CTDRQRTAY   | 7    | 164  |
| >CDH1-G62D CTGRQRTAYF  | 2119 | >CDH1-G62D CTDRQRTAYF  | 368  | 1751 |
| >CDH1-G62D CTGRQRTAYF  | 271  | >CDH1-G62D CTDRQRTAYF  | 2000 | 1729 |

|                      |       |                      |      |       |
|----------------------|-------|----------------------|------|-------|
| >CDH1-G62DCTGRQRTAY  | 460   | >CDH1-G62DCTDRQRTAY  | 6858 | 6398  |
| >CDH1-G62DCTGRQRTAYF | 371   | >CDH1-G62DCTDRQRTAYF | 7350 | 6979  |
| >CDH1-G62DCTGRQRTAY  | 429   | >CDH1-G62DCTDRQRTAY  | 596  | 167   |
| >CDH1-G62DCTGRQRTAYF | 219   | >CDH1-G62DCTDRQRTAYF | 115  | 104   |
| >CDH1-G62DCTGRQRTAYF | 466   | >CDH1-G62DCTDRQRTAYF | 340  | 126   |
| >CDH1-G62DCTGRQRTAYF | 49    | >CDH1-G62DCTDRQRTAYF | 65   | 16    |
| >CDH1-G62DCTGRQRTAY  | 659   | >CDH1-G62DCTDRQRTAY  | 158  | 501   |
| >CDH1-G62DFEDCTGRQR1 | 234   | >CDH1-G62DFEDCTDRQR1 | 541  | 307   |
| >CDH1-G62DNFEDCTGRQI | 480   | >CDH1-G62DNFEDCTDRQI | 1154 | 674   |
| >CDH1-G62DNFEDCTGR   | 186   | >CDH1-G62DNFEDCTDR   | 302  | 116   |
| >CDH1-G62DNFEDCTGRQI | 337   | >CDH1-G62DNFEDCTDRQI | 573  | 236   |
| >CDH1-G62DNFEDCTGR   | 451   | >CDH1-G62DNFEDCTDR   | 789  | 338   |
| >CDH1-G62DNFEDCTGR   | 74    | >CDH1-G62DNFEDCTDR   | 153  | 79    |
| >CDH1-G62DNFEDCTGRQI | 176   | >CDH1-G62DNFEDCTDRQI | 120  | 56    |
| >CDH1-G62DRVNFEDCTGF | 156   | >CDH1-G62DRVNFEDCTDF | 351  | 195   |
| >CDH1-G62DRVNFEDCTGF | 199   | >CDH1-G62DRVNFEDCTDF | 400  | 201   |
| >CDH1-G62DRVNFEDCTGF | 344   | >CDH1-G62DRVNFEDCTDF | 775  | 431   |
| >CDH1-H121HHRPPPHQ   | 421   | >CDH1-H121RHRPPPHQ   | 4022 | 3601  |
| >CDH1-H121HHRPPPHQ   | 313   | >CDH1-H121RHRPPPHQ   | 2706 | 2393  |
| >CDH1-H121HHRPPPHQ   | 362   | >CDH1-H121RHRPPPHQ   | 2918 | 2556  |
| >CDH1-H121GHRPPPH    | 12713 | >CDH1-H121GRHRPPPH   | 172  | 12541 |
| >CDH1-H121STKVTLNTVG | 969   | >CDH1-H121STKVTLNTVG | 86   | 883   |
| >CDH1-H121STKVTLNTVG | 4253  | >CDH1-H121STKVTLNTVG | 17   | 4236  |
| >CDH1-H121STKVTLNTVG | 8058  | >CDH1-H121STKVTLNTVG | 21   | 8037  |
| >CDH1-H121NTVGHHR    | 38    | >CDH1-H121NTVGRHR    | 39   | 1     |
| >CDH1-H121NTVGHHR    | 58    | >CDH1-H121NTVGRHR    | 27   | 31    |
| >CDH1-H121NTVGHHR    | 6     | >CDH1-H121NTVGRHR    | 7    | 1     |
| >CDH1-H121NTVGHHR    | 377   | >CDH1-H121NTVGRHR    | 899  | 522   |
| >CDH1-H121NTVGHHR    | 137   | >CDH1-H121NTVGRHR    | 173  | 36    |
| >CDH1-H121LNTVGHHR   | 179   | >CDH1-H121LNTVGRHR   | 214  | 35    |
| >CDH1-H121LNTVGHHR   | 461   | >CDH1-H121LNTVGRHR   | 546  | 85    |
| >CDH1-H121TLNTVGHHR  | 64    | >CDH1-H121TLNTVGRHR  | 37   | 27    |
| >CDH1-H121TLNTVGHHR  | 179   | >CDH1-H121TLNTVGRHR  | 334  | 155   |
| >CDH1-H121TLNTVGHHR  | 261   | >CDH1-H121TLNTVGRHR  | 578  | 317   |
| >CDH1-H121VTLNTVGH   | 3645  | >CDH1-H121VTLNTVGR   | 218  | 3427  |
| >CDH1-H121VTLNTVGHHR | 406   | >CDH1-H121VTLNTVGRHR | 406  | 0     |
| >CDH1-H121VTLNTVGH   | 9411  | >CDH1-H121VTLNTVGR   | 73   | 9338  |
| >CDH1-H121VTLNTVGHHR | 15    | >CDH1-H121VTLNTVGRHR | 18   | 3     |
| >CDH1-H121VTLNTVGHHR | 125   | >CDH1-H121VTLNTVGRHR | 142  | 17    |
| >CDH1-H121VTLNTVGH   | 15850 | >CDH1-H121VTLNTVGR   | 110  | 15740 |
| >CDH1-H121VTLNTVGHHR | 144   | >CDH1-H121VTLNTVGRHR | 152  | 8     |
| >CDH1-H121VTLNTVGH   | 449   | >CDH1-H121VTLNTVGR   | 6460 | 6011  |
| >CDH1-H121VTLNTVGH   | 879   | >CDH1-H121VTLNTVGRH  | 354  | 525   |

|                       |       |                       |      |       |
|-----------------------|-------|-----------------------|------|-------|
| >CDH1-H121 VTLNTVGHH  | 326   | >CDH1-H121 VTLNTVGRH  | 49   | 277   |
| >CDH1-H121 VTLNTVGHHI | 265   | >CDH1-H121 VTLNTVGRHI | 418  | 153   |
| >CDH1-H121 KVTLNTVGH  | 7449  | >CDH1-H121 KVTLNTVGR  | 61   | 7388  |
| >CDH1-H121 KVTLNTVGH  | 17776 | >CDH1-H121 KVTLNTVGR  | 140  | 17636 |
| >CDH1-H121 KVTLNTVGH  | 11449 | >CDH1-H121 KVTLNTVGR  | 33   | 11416 |
| >CDH1-H121 TKVTLNTVGH | 28136 | >CDH1-H121 TKVTLNTVGR | 243  | 27893 |
| >CDH1-H123 HRPPPHQAS  | 5481  | >CDH1-H123 YRPPPHQAS  | 312  | 5169  |
| >CDH1-H123 HHRPPPHQ   | 2684  | >CDH1-H123 HYRPPPHQ   | 17   | 2667  |
| >CDH1-H123 HHRPPPHQA  | 1078  | >CDH1-H123 HYRPPPHQA  | 9    | 1069  |
| >CDH1-H123 HHRPPPHQA  | 3207  | >CDH1-H123 HYRPPPHQA  | 20   | 3187  |
| >CDH1-H123 HHRPPPHQA  | 417   | >CDH1-H123 HYRPPPHQA  | 6    | 411   |
| >CDH1-H123 HHRPPPHQA  | 238   | >CDH1-H123 HYRPPPHQA  | 6436 | 6198  |
| >CDH1-H123 KVTLNTVGH  | 15125 | >CDH1-H123 KVTLNTVGH  | 341  | 14784 |
| >CDH1-H123 KVTLNTVGH  | 9348  | >CDH1-H123 KVTLNTVGH  | 79   | 9269  |
| >CDH1-H123 KVTLNTVGH  | 4672  | >CDH1-H123 KVTLNTVGH  | 37   | 4635  |
| >CDH1-H123 KVTLNTVGH  | 7096  | >CDH1-H123 KVTLNTVGH  | 19   | 7077  |
| >CDH1-H123 KVTLNTVGH  | 15692 | >CDH1-H123 KVTLNTVGH  | 248  | 15444 |
| >CDH1-H123 KVTLNTVGH  | 7234  | >CDH1-H123 KVTLNTVGH  | 187  | 7047  |
| >CDH1-H123 HHRPPPH    | 547   | >CDH1-H123 HHYRPPPH   | 279  | 268   |
| >CDH1-H123 HHRPPPHQ   | 421   | >CDH1-H123 HHYRPPPHQ  | 237  | 184   |
| >CDH1-H123 HHRPPPHQ   | 313   | >CDH1-H123 HHYRPPPHQ  | 167  | 146   |
| >CDH1-H123 HHRPPPHQ   | 362   | >CDH1-H123 HHYRPPPHQ  | 177  | 185   |
| >CDH1-H123 NTVGHHHR   | 38    | >CDH1-H123 NTVGHHYR   | 16   | 22    |
| >CDH1-H123 NTVGHHHR   | 58    | >CDH1-H123 NTVGHHYR   | 37   | 21    |
| >CDH1-H123 NTVGHHHR   | 6     | >CDH1-H123 NTVGHHYR   | 3    | 3     |
| >CDH1-H123 NTVGHHHR   | 377   | >CDH1-H123 NTVGHHYR   | 344  | 33    |
| >CDH1-H123 NTVGHHHR   | 137   | >CDH1-H123 NTVGHHYR   | 43   | 94    |
| >CDH1-H123 LNTVGHHH   | 13072 | >CDH1-H123 LNTVGHHY   | 199  | 12873 |
| >CDH1-H123 LNTVGHHH   | 17297 | >CDH1-H123 LNTVGHHY   | 208  | 17089 |
| >CDH1-H123 LNTVGHHHR  | 179   | >CDH1-H123 LNTVGHHYR  | 48   | 131   |
| >CDH1-H123 LNTVGHHHR  | 461   | >CDH1-H123 LNTVGHHYR  | 125  | 336   |
| >CDH1-H123 TLNTVGHHH  | 1727  | >CDH1-H123 TLNTVGHHY  | 355  | 1372  |
| >CDH1-H123 TLNTVGHHHI | 1177  | >CDH1-H123 TLNTVGHHYI | 366  | 811   |
| >CDH1-H123 TLNTVGHHH  | 6552  | >CDH1-H123 TLNTVGHHY  | 44   | 6508  |
| >CDH1-H123 TLNTVGHHH  | 3168  | >CDH1-H123 TLNTVGHHY  | 19   | 3149  |
| >CDH1-H123 TLNTVGHHHI | 64    | >CDH1-H123 TLNTVGHHYI | 23   | 41    |
| >CDH1-H123 TLNTVGHHHI | 896   | >CDH1-H123 TLNTVGHHYI | 116  | 780   |
| >CDH1-H123 TLNTVGHHHI | 1197  | >CDH1-H123 TLNTVGHHYI | 144  | 1053  |
| >CDH1-H123 TLNTVGHHH  | 5867  | >CDH1-H123 TLNTVGHHY  | 18   | 5849  |
| >CDH1-H123 TLNTVGHHH  | 7660  | >CDH1-H123 TLNTVGHHY  | 100  | 7560  |
| >CDH1-H123 TLNTVGHHH  | 9860  | >CDH1-H123 TLNTVGHHY  | 182  | 9678  |
| >CDH1-H123 TLNTVGHHH  | 17856 | >CDH1-H123 TLNTVGHHY  | 253  | 17603 |
| >CDH1-H123 TLNTVGHHHI | 179   | >CDH1-H123 TLNTVGHHYI | 131  | 48    |

|                        |       |                        |      |       |
|------------------------|-------|------------------------|------|-------|
| >CDH1-H123 TLNTVGHHHI  | 261   | >CDH1-H123 TLNTVGHHYF  | 95   | 166   |
| >CDH1-H123 VTLNTVGHHI  | 11332 | >CDH1-H123 VTLNTVGHH`  | 126  | 11206 |
| >CDH1-H123 VTLNTVGHHI  | 9621  | >CDH1-H123 VTLNTVGHH`  | 442  | 9179  |
| >CDH1-H123 VTLNTVGHHI  | 8035  | >CDH1-H123 VTLNTVGHH`  | 159  | 7876  |
| >CDH1-H123 VTLNTVGHHI  | 406   | >CDH1-H123 VTLNTVGHH`  | 57   | 349   |
| >CDH1-H123 VTLNTVGHHI  | 4596  | >CDH1-H123 VTLNTVGHH`  | 72   | 4524  |
| >CDH1-H123 VTLNTVGHHI  | 13098 | >CDH1-H123 VTLNTVGHH`  | 428  | 12670 |
| >CDH1-H123 VTLNTVGHHI  | 18890 | >CDH1-H123 VTLNTVGHH`  | 287  | 18603 |
| >CDH1-H123 VTLNTVGHHI  | 9731  | >CDH1-H123 VTLNTVGHH`  | 36   | 9695  |
| >CDH1-H123 VTLNTVGHHI  | 15    | >CDH1-H123 VTLNTVGHH`  | 9    | 6     |
| >CDH1-H123 VTLNTVGHHI  | 125   | >CDH1-H123 VTLNTVGHH`  | 90   | 35    |
| >CDH1-H123 VTLNTVGHHI  | 144   | >CDH1-H123 VTLNTVGHH`  | 40   | 104   |
| >CDH1-H123 VTLNTVGHHI  | 7546  | >CDH1-H123 VTLNTVGHH`  | 14   | 7532  |
| >CDH1-H123 VTLNTVGHHI  | 9562  | >CDH1-H123 VTLNTVGHH`  | 193  | 9369  |
| >CDH1-H123 VTLNTVGHHI  | 8977  | >CDH1-H123 VTLNTVGHH`  | 268  | 8709  |
| >CDH1-H123 VTLNTVGHHI  | 1291  | >CDH1-H123 VTLNTVGHH`  | 7    | 1284  |
| >CDH1-H123 VTLNTVGHHI  | 5821  | >CDH1-H123 VTLNTVGHH`  | 87   | 5734  |
| >CDH1-H123 VTLNTVGHHI  | 265   | >CDH1-H123 VTLNTVGHH`  | 226  | 39    |
| >CDH1-H123 VTLNTVGHHI  | 545   | >CDH1-H123 VTLNTVGHH`  | 205  | 340   |
| >CDH1-H233 HAVSSNGNA   | 324   | >CDH1-H233 QAVSSNGNA   | 360  | 36    |
| >CDH1-H233 HAVSSNGNA`  | 113   | >CDH1-H233 QAVSSNGNA   | 179  | 66    |
| >CDH1-H233 HAVSSNGNA   | 401   | >CDH1-H233 QAVSSNGNA   | 473  | 72    |
| >CDH1-H233 SHAUSSNGN,  | 4957  | >CDH1-H233 SQAVSSNGN,  | 101  | 4856  |
| >CDH1-H233 SHAUSSNGN,  | 13901 | >CDH1-H233 SQAVSSNGN,  | 68   | 13833 |
| >CDH1-H233 SHAUSSNGN,  | 12172 | >CDH1-H233 SQAVSSNGN,  | 14   | 12158 |
| >CDH1-H233 SHAUSSNGN,  | 15282 | >CDH1-H233 SQAVSSNGN,  | 249  | 15033 |
| >CDH1-H233 SHAUSSNGN,  | 20258 | >CDH1-H233 SQAVSSNGN,  | 249  | 20009 |
| >CDH1-H233 SHAUSSNGN,  | 411   | >CDH1-H233 SQAVSSNGN,  | 25   | 386   |
| >CDH1-H233 SHAUSSNGN,  | 390   | >CDH1-H233 SQAVSSNGN,  | 8930 | 8540  |
| >CDH1-H233 SHAUSSNGN,  | 116   | >CDH1-H233 SQAVSSNGN,  | 236  | 120   |
| >CDH1-H233 FSHAVSSNGN` | 147   | >CDH1-H233 FSQAVSSNGN` | 825  | 678   |
| >CDH1-H233 TLFHAVSS    | 485   | >CDH1-H233 TLFSQAVSS   | 2312 | 1827  |
| >CDH1-H233 YTLFSHAV    | 40    | >CDH1-H233 YTLFSQAV    | 50   | 10    |
| >CDH1-H233 YTLFSHAV    | 91    | >CDH1-H233 YTLFSQAV    | 146  | 55    |
| >CDH1-H233 YTLFSHAV    | 50    | >CDH1-H233 YTLFSQAV    | 73   | 23    |
| >CDH1-H233 YTLFSHAV    | 10    | >CDH1-H233 YTLFSQAV    | 13   | 3     |
| >CDH1-H233 YTLFSHAV    | 4     | >CDH1-H233 YTLFSQAV    | 5    | 1     |
| >CDH1-H233 YTLFSHAV    | 11    | >CDH1-H233 YTLFSQAV    | 12   | 1     |
| >CDH1-H233 YTLFSHAV    | 22    | >CDH1-H233 YTLFSQAV    | 23   | 1     |
| >CDH1-H233 YTLFSHAV    | 26    | >CDH1-H233 YTLFSQAV    | 28   | 2     |
| >CDH1-H233 YTLFSHAV    | 10    | >CDH1-H233 YTLFSQAV    | 16   | 6     |
| >CDH1-H233 YTLFSHAV    | 16    | >CDH1-H233 YTLFSQAV    | 32   | 16    |
| >CDH1-H233 YTLFSHAV    | 4     | >CDH1-H233 YTLFSQAV    | 6    | 2     |

|                        |      |                        |       |       |
|------------------------|------|------------------------|-------|-------|
| >CDH1-H233 YTLFSHAV    | 378  | >CDH1-H233 YTLFSQAV    | 263   | 115   |
| >CDH1-H233 YTLFSHAV    | 31   | >CDH1-H233 YTLFSQAV    | 40    | 9     |
| >CDH1-H233 YTLFSHAVS   | 199  | >CDH1-H233 YTLFSQAVS   | 575   | 376   |
| >CDH1-H233 YTLFSHAVSS  | 329  | >CDH1-H233 YTLFSQAVSS  | 538   | 209   |
| >CDH1-H233 YTLFSHAVSSI | 338  | >CDH1-H233 YTLFSQAVSSI | 593   | 255   |
| >CDH1-H233 YTLFSHAV    | 92   | >CDH1-H233 YTLFSQAV    | 1491  | 1399  |
| >CDH1-H233 YTLFSHAVS   | 139  | >CDH1-H233 YTLFSQAVS   | 389   | 250   |
| >CDH1-H233 YTLFSHAVSSI | 74   | >CDH1-H233 YTLFSQAVSSI | 111   | 37    |
| >CDH1-H233 TYTLFSHAV   | 480  | >CDH1-H233 TYTLFSQAV   | 837   | 357   |
| >CDH1-H233 TYTLFSHAV   | 482  | >CDH1-H233 TYTLFSQAV   | 2095  | 1613  |
| >CDH1-H233 TYTLFSHAV   | 406  | >CDH1-H233 TYTLFSQAV   | 1074  | 668   |
| >CDH1-H233 ATYTLFSHA   | 190  | >CDH1-H233 ATYTLFSQA   | 450   | 260   |
| >CDH1-H233 ATYTLFSHAV  | 107  | >CDH1-H233 ATYTLFSQAV  | 223   | 116   |
| >CDH1-H233 ATYTLFSHA   | 120  | >CDH1-H233 ATYTLFSQA   | 97    | 23    |
| >CDH1-H233 ATYTLFSHAV  | 34   | >CDH1-H233 ATYTLFSQAV  | 54    | 20    |
| >CDH1-H233 ATYTLFSHA   | 79   | >CDH1-H233 ATYTLFSQA   | 283   | 204   |
| >CDH1-H233 ATYTLFSHAV  | 50   | >CDH1-H233 ATYTLFSQAV  | 87    | 37    |
| >CDH1-H233 ATYTLFSHAV  | 11   | >CDH1-H233 ATYTLFSQAV  | 14    | 3     |
| >CDH1-H233 ATYTLFSHAV  | 88   | >CDH1-H233 ATYTLFSQAV  | 372   | 284   |
| >CDH1-H233 ATYTLFSHAV  | 50   | >CDH1-H233 ATYTLFSQAV  | 104   | 54    |
| >CDH1-H233 ATYTLFSHAV  | 20   | >CDH1-H233 ATYTLFSQAV  | 39    | 19    |
| >CDH1-H233 ATYTLFSH    | 319  | >CDH1-H233 ATYTLFSQ    | 10372 | 10053 |
| >CDH1-H233 ATYTLFSH    | 44   | >CDH1-H233 ATYTLFSQ    | 2368  | 2324  |
| >CDH1-H233 ATYTLFSHA   | 327  | >CDH1-H233 ATYTLFSQA   | 846   | 519   |
| >CDH1-H233 ATYTLFSHAV  | 403  | >CDH1-H233 ATYTLFSQAV  | 427   | 24    |
| >CDH1-H233 ATYTLFSHAV  | 160  | >CDH1-H233 ATYTLFSQAV  | 191   | 31    |
| >CDH1-H233 ATYTLFSHA   | 190  | >CDH1-H233 ATYTLFSQA   | 429   | 239   |
| >CDH1-H233 ATYTLFSHAV  | 21   | >CDH1-H233 ATYTLFSQAV  | 28    | 7     |
| >CDH1-H233 ATYTLFSHAV  | 15   | >CDH1-H233 ATYTLFSQAV  | 32    | 17    |
| >CDH1-H233 ATYTLFSHAV  | 198  | >CDH1-H233 ATYTLFSQAV  | 117   | 81    |
| >CDH1-H233 ATYTLFSH    | 223  | >CDH1-H233 ATYTLFSQ    | 1341  | 1118  |
| >CDH1-H233 ATYTLFSHAV  | 211  | >CDH1-H233 ATYTLFSQAV  | 150   | 61    |
| >CDH1-H233 ATYTLFSHAV  | 151  | >CDH1-H233 ATYTLFSQAV  | 431   | 280   |
| >CDH1-H233 ATYTLFSHA   | 149  | >CDH1-H233 ATYTLFSQA   | 30    | 119   |
| >CDH1-H233 ATYTLFSHAV  | 1415 | >CDH1-H233 ATYTLFSQAV  | 419   | 996   |
| >CDH1-H233 ATYTLFSHAV  | 298  | >CDH1-H233 ATYTLFSQAV  | 365   | 67    |
| >CDH1-H233 ATYTLFSH    | 140  | >CDH1-H233 ATYTLFSQ    | 253   | 113   |
| >CDH1-H233 ATYTLFSHA   | 444  | >CDH1-H233 ATYTLFSQA   | 468   | 24    |
| >CDH1-H233 ATYTLFSHAV  | 306  | >CDH1-H233 ATYTLFSQAV  | 1252  | 946   |
| >CDH1-H233 IATYTLFSHAV | 367  | >CDH1-H233 IATYTLFSQAV | 770   | 403   |
| >CDH1-H233 IATYTLFSHAV | 40   | >CDH1-H233 IATYTLFSQAV | 86    | 46    |
| >CDH1-H233 IATYTLFSHAV | 235  | >CDH1-H233 IATYTLFSQAV | 648   | 413   |
| >CDH1-H233 IATYTLFSHAV | 131  | >CDH1-H233 IATYTLFSQAV | 386   | 255   |

|                        |       |                        |       |       |
|------------------------|-------|------------------------|-------|-------|
| >CDH1-H233 IATYTLFSHAV | 309   | >CDH1-H233 IATYTLFSQAV | 1179  | 870   |
| >CDH1-H233 IATYTLFSHAV | 849   | >CDH1-H233 IATYTLFSQAV | 469   | 380   |
| >CDH1-H233 IATYTLFSHAV | 437   | >CDH1-H233 IATYTLFSQAV | 1346  | 909   |
| >CDH1-H233 RIATYTLFSHA | 170   | >CDH1-H233 RIATYTLFSQA | 134   | 36    |
| >CDH1-H233 RIATYTLFSHA | 26    | >CDH1-H233 RIATYTLFSQA | 22    | 4     |
| >CDH1-H233 RIATYTLFSHA | 50    | >CDH1-H233 RIATYTLFSQA | 139   | 89    |
| >CDH1-H233 RIATYTLFSHA | 340   | >CDH1-H233 RIATYTLFSQA | 731   | 391   |
| >CDH1-H92Y HNPQIHFLVY  | 610   | >CDH1-H92Y YNPQIHFLVY  | 269   | 341   |
| >CDH1-H92Y HNPQIHFLV   | 59    | >CDH1-H92Y YNPQIHFLV   | 83    | 24    |
| >CDH1-H92Y HNPQIHFLVY  | 480   | >CDH1-H92Y YNPQIHFLVY, | 790   | 310   |
| >CDH1-H92Y HNPQIHFLVY  | 815   | >CDH1-H92Y YNPQIHFLVY  | 369   | 446   |
| >CDH1-H92Y HNPQIHFLVY  | 1671  | >CDH1-H92Y YNPQIHFLVY  | 491   | 1180  |
| >CDH1-H92Y HNPQIHFL    | 316   | >CDH1-H92Y YNPQIHFL    | 82    | 234   |
| >CDH1-H92Y HNPQIHFLV   | 201   | >CDH1-H92Y YNPQIHFLV   | 11    | 190   |
| >CDH1-H92Y FHNPQIHFL   | 7081  | >CDH1-H92Y FYNPQIHFL   | 43    | 7038  |
| >CDH1-H92Y FHNPQIHFL   | 276   | >CDH1-H92Y FYNPQIHFL   | 1310  | 1034  |
| >CDH1-H92Y FHNPQIHFL   | 33    | >CDH1-H92Y FYNPQIHFL   | 7     | 26    |
| >CDH1-H92Y FHNPQIHFL   | 898   | >CDH1-H92Y FYNPQIHFL   | 82    | 816   |
| >CDH1-H92Y FHNPQIHFL   | 1438  | >CDH1-H92Y FYNPQIHFL   | 181   | 1257  |
| >CDH1-H92Y FHNPQIHFLV  | 353   | >CDH1-H92Y FYNPQIHFLV  | 37    | 316   |
| >CDH1-H92Y FHNPQIHFL   | 4554  | >CDH1-H92Y FYNPQIHFL   | 357   | 4197  |
| >CDH1-H92Y FHNPQIHFLV  | 719   | >CDH1-H92Y FYNPQIHFLV  | 58    | 661   |
| >CDH1-H92Y FHNPQIHFL   | 726   | >CDH1-H92Y FYNPQIHFL   | 18    | 708   |
| >CDH1-H92Y FHNPQIHFLV  | 105   | >CDH1-H92Y FYNPQIHFLV  | 7     | 98    |
| >CDH1-H92Y FHNPQIHFL   | 2899  | >CDH1-H92Y FYNPQIHFL   | 95    | 2804  |
| >CDH1-H92Y FHNPQIHFL   | 12036 | >CDH1-H92Y FYNPQIHFL   | 213   | 11823 |
| >CDH1-H92Y FHNPQIHFL   | 576   | >CDH1-H92Y FYNPQIHFL   | 6     | 570   |
| >CDH1-H92Y FHNPQIHFL   | 1915  | >CDH1-H92Y FYNPQIHFL   | 6     | 1909  |
| >CDH1-H92Y FHNPQIHFLV  | 16251 | >CDH1-H92Y FYNPQIHFLV  | 57    | 16194 |
| >CDH1-H92Y FHNPQIHFLV  | 15807 | >CDH1-H92Y FYNPQIHFLV' | 72    | 15735 |
| >CDH1-H92Y FHNPQIHFL   | 4139  | >CDH1-H92Y FYNPQIHFL   | 446   | 3693  |
| >CDH1-H92Y FHNPQIHFLV  | 36    | >CDH1-H92Y FYNPQIHFLV' | 10    | 26    |
| >CDH1-H92Y FHNPQIHFLV  | 581   | >CDH1-H92Y FYNPQIHFLV' | 174   | 407   |
| >CDH1-H92Y FHNPQIHFLV  | 286   | >CDH1-H92Y FYNPQIHFLV' | 36    | 250   |
| >CDH1-H92Y FHNPQIHFL   | 20    | >CDH1-H92Y FYNPQIHFL   | 242   | 222   |
| >CDH1-H92Y FHNPQIHFLV  | 38    | >CDH1-H92Y FYNPQIHFLV' | 530   | 492   |
| >CDH1-H92Y FHNPQIHFL   | 330   | >CDH1-H92Y FYNPQIHFL   | 6655  | 6325  |
| >CDH1-H92Y FHNPQIHFL   | 30    | >CDH1-H92Y FYNPQIHFL   | 2369  | 2339  |
| >CDH1-H92Y FHNPQIHFLV  | 231   | >CDH1-H92Y FYNPQIHFLV  | 11807 | 11576 |
| >CDH1-H92Y FHNPQIHFLV  | 3278  | >CDH1-H92Y FYNPQIHFLV' | 178   | 3100  |
| >CDH1-H92Y FHNPQIHFLV  | 5007  | >CDH1-H92Y FYNPQIHFLV  | 143   | 4864  |
| >CDH1-H92Y FHNPQIHFL   | 6860  | >CDH1-H92Y FYNPQIHFL   | 173   | 6687  |
| >CDH1-H92Y VITVKRPLRFI | 15540 | >CDH1-H92Y VITVKRPLRFY | 392   | 15148 |



|                        |       |                        |      |       |
|------------------------|-------|------------------------|------|-------|
| >CDH1-H92Y VITVKRPLRFI | 9458  | >CDH1-H92Y VITVKRPLRFY | 73   | 9385  |
| >CDH1-H92Y VITVKRPLRFI | 18219 | >CDH1-H92Y VITVKRPLRFY | 359  | 17860 |
| >CDH1-H92Y RFHNPQIHFL  | 1820  | >CDH1-H92Y RFYNPQIHFL  | 189  | 1631  |
| >CDH1-H92Y RFHNPQIHFL  | 470   | >CDH1-H92Y RFYNPQIHFL' | 42   | 428   |
| >CDH1-H92Y RFHNPQIHFL  | 3287  | >CDH1-H92Y RFYNPQIHFL' | 153  | 3134  |
| >CDH1-H92Y RFHNPQIHFL  | 1219  | >CDH1-H92Y RFYNPQIHFL' | 231  | 988   |
| >CDH1-H92Y RFHNPQIHF   | 624   | >CDH1-H92Y RFYNPQIHF   | 64   | 560   |
| >CDH1-H92Y RFHNPQIHFL  | 1453  | >CDH1-H92Y RFYNPQIHFL  | 265  | 1188  |
| >CDH1-H92Y RFHNPQIHF   | 7     | >CDH1-H92Y RFYNPQIHF   | 8    | 1     |
| >CDH1-H92Y RFHNPQIHFL  | 14    | >CDH1-H92Y RFYNPQIHFL  | 15   | 1     |
| >CDH1-H92Y RFHNPQIHF   | 313   | >CDH1-H92Y RFYNPQIHF   | 3880 | 3567  |
| >CDH1-H92Y RFHNPQIHFL  | 15    | >CDH1-H92Y RFYNPQIHFL  | 147  | 132   |
| >CDH1-H92Y RFHNPQIHFL  | 18    | >CDH1-H92Y RFYNPQIHFL' | 228  | 210   |
| >CDH1-H92Y RFHNPQIHFL  | 295   | >CDH1-H92Y RFYNPQIHFL' | 138  | 157   |
| >CDH1-H92Y RFHNPQIHF   | 3003  | >CDH1-H92Y RFYNPQIHF   | 387  | 2616  |
| >CDH1-H92Y RFHNPQIHF   | 886   | >CDH1-H92Y RFYNPQIHF   | 349  | 537   |
| >CDH1-H92Y RFHNPQIHF   | 162   | >CDH1-H92Y RFYNPQIHF   | 40   | 122   |
| >CDH1-H92Y RFHNPQIHF   | 4041  | >CDH1-H92Y RFYNPQIHF   | 413  | 3628  |
| >CDH1-H92Y RFHNPQIHFL  | 560   | >CDH1-H92Y RFYNPQIHFL  | 238  | 322   |
| >CDH1-H92Y RFHNPQIHFL  | 54    | >CDH1-H92Y RFYNPQIHFL  | 21   | 33    |
| >CDH1-H92Y RFHNPQIHFL  | 831   | >CDH1-H92Y RFYNPQIHFL' | 400  | 431   |
| >CDH1-H92Y LRFHNPQI    | 50    | >CDH1-H92Y LRFYNPQI    | 71   | 21    |
| >CDH1-H92Y LRFHNPQIH   | 46    | >CDH1-H92Y LRFYNPQIH   | 58   | 12    |
| >CDH1-H92Y LRFHNPQIHF  | 4     | >CDH1-H92Y LRFYNPQIHF  | 4    | 0     |
| >CDH1-H92Y LRFHNPQIHF  | 36    | >CDH1-H92Y LRFYNPQIHFI | 51   | 15    |
| >CDH1-H92Y LRFHNPQI    | 118   | >CDH1-H92Y LRFYNPQI    | 100  | 18    |
| >CDH1-H92Y LRFHNPQIHF  | 72    | >CDH1-H92Y LRFYNPQIHF  | 53   | 19    |
| >CDH1-H92Y LRFHNPQIHF  | 50    | >CDH1-H92Y LRFYNPQIHFI | 51   | 1     |
| >CDH1-H92Y LRFHNPQIHF  | 225   | >CDH1-H92Y LRFYNPQIHFI | 289  | 64    |
| >CDH1-H92Y LRFHNPQI    | 608   | >CDH1-H92Y LRFYNPQI    | 454  | 154   |
| >CDH1-H92Y LRFHNPQI    | 613   | >CDH1-H92Y LRFYNPQI    | 488  | 125   |
| >CDH1-H92Y LRFHNPQIHF  | 496   | >CDH1-H92Y LRFYNPQIHFI | 396  | 100   |
| >CDH1-H92Y LRFHNPQIHF  | 29    | >CDH1-H92Y LRFYNPQIHFI | 29   | 0     |
| >CDH1-H92Y LRFHNPQI    | 549   | >CDH1-H92Y LRFYNPQI    | 471  | 78    |
| >CDH1-H92Y PLRFHNPQI   | 222   | >CDH1-H92Y PLRFYNPQI   | 249  | 27    |
| >CDH1-H92Y PLRFHNPQIH  | 478   | >CDH1-H92Y PLRFYNPQIH  | 316  | 162   |
| >CDH1-H92Y RPLRFHNPQI  | 452   | >CDH1-H92Y RPLRFYNPQI  | 321  | 131   |
| >CDH1-H92Y RPLRFHNPQI  | 444   | >CDH1-H92Y RPLRFYNPQI  | 450  | 6     |
| >CDH1-H92Y KRPLRFHNP   | 353   | >CDH1-H92Y KRPLRFYNPQ  | 412  | 59    |
| >CDH1-H92Y KRPLRFHNP   | 242   | >CDH1-H92Y KRPLRFYNPQ  | 214  | 28    |
| >CDH1-H92Y KRPLRFHNP   | 66    | >CDH1-H92Y KRPLRFYNPQ  | 77   | 11    |
| >CDH1-H92Y VKRPLRFH    | 20344 | >CDH1-H92Y VKRPLRFY    | 371  | 19973 |
| >CDH1-H92Y VKRPLRFH    | 1167  | >CDH1-H92Y VKRPLRFY    | 18   | 1149  |

|                         |       |                        |      |       |
|-------------------------|-------|------------------------|------|-------|
| >CDH1-H92Y TVKRPLRFH    | 12969 | >CDH1-H92Y TVKRPLRFY   | 499  | 12470 |
| >CDH1-H92Y TVKRPLRFH    | 287   | >CDH1-H92Y TVKRPLRFY   | 5    | 282   |
| >CDH1-H92Y TVKRPLRFH    | 1455  | >CDH1-H92Y TVKRPLRFY   | 145  | 1310  |
| >CDH1-H92Y TVKRPLRFH    | 19409 | >CDH1-H92Y TVKRPLRFY   | 271  | 19138 |
| >CDH1-H92Y TVKRPLRFH    | 4403  | >CDH1-H92Y TVKRPLRFY   | 196  | 4207  |
| >CDH1-H92Y ITVKRPLRFH   | 20910 | >CDH1-H92Y ITVKRPLRFY  | 393  | 20517 |
| >CDH1-H92Y ITVKRPLRFH   | 6133  | >CDH1-H92Y ITVKRPLRFY  | 190  | 5943  |
| >CDH1-H92Y ITVKRPLRFH   | 863   | >CDH1-H92Y ITVKRPLRFY  | 27   | 836   |
| >CDH1-H92Y ITVKRPLRFH   | 2616  | >CDH1-H92Y ITVKRPLRFY  | 54   | 2562  |
| >CDH1-H92Y ITVKRPLRFH   | 16924 | >CDH1-H92Y ITVKRPLRFY  | 167  | 16757 |
| >CDH1-H92Y ITVKRPLRFH   | 12875 | >CDH1-H92Y ITVKRPLRFY  | 45   | 12830 |
| >CDH1-H92Y ITVKRPLRFH   | 4955  | >CDH1-H92Y ITVKRPLRFY  | 23   | 4932  |
| >CDH1-H92Y ITVKRPLRFH   | 498   | >CDH1-H92Y ITVKRPLRFY  | 5    | 493   |
| >CDH1-H92Y ITVKRPLRFH   | 8393  | >CDH1-H92Y ITVKRPLRFY  | 161  | 8232  |
| >CDH1-H92Y ITVKRPLRFH   | 8747  | >CDH1-H92Y ITVKRPLRFY  | 82   | 8665  |
| >CDH1-I300M IAYTILSQ    | 1861  | >CDH1-I300M MAYTILSQ   | 195  | 1666  |
| >CDH1-I300M AIAYTILS    | 3522  | >CDH1-I300M AMAYTILS   | 367  | 3155  |
| >CDH1-I300M AIAYTILSQ   | 7074  | >CDH1-I300M AMAYTILSQ  | 199  | 6875  |
| >CDH1-I300M AIAYTILSQ   | 3600  | >CDH1-I300M AMAYTILSQ  | 280  | 3320  |
| >CDH1-I300M AIAYTILSQ   | 5103  | >CDH1-I300M AMAYTILSQ  | 366  | 4737  |
| >CDH1-I300M DDDVNTYNA   | 149   | >CDH1-I300M DDDVNTYNA  | 4209 | 4060  |
| >CDH1-I300M AAIAYTIL    | 87    | >CDH1-I300M AAMAYTIL   | 195  | 108   |
| >CDH1-I300M AAIAYTIL    | 477   | >CDH1-I300M AAMAYTIL   | 95   | 382   |
| >CDH1-I300M AAIAYTIL    | 335   | >CDH1-I300M AAMAYTIL   | 161  | 174   |
| >CDH1-I300M AAIAYTIL    | 252   | >CDH1-I300M AAMAYTIL   | 147  | 105   |
| >CDH1-I300M AAIAYTIL    | 189   | >CDH1-I300M AAMAYTIL   | 183  | 6     |
| >CDH1-I300M AAIAYTIL    | 518   | >CDH1-I300M AAMAYTIL   | 176  | 342   |
| >CDH1-I300M NAAIAYTI    | 28    | >CDH1-I300M NAAMAYTI   | 32   | 4     |
| >CDH1-I300M NAAIAYTIL   | 318   | >CDH1-I300M NAAMAYTIL  | 341  | 23    |
| >CDH1-I300M NAAIAYTI    | 167   | >CDH1-I300M NAAMAYTI   | 339  | 172   |
| >CDH1-I300M NAAIAYTI    | 174   | >CDH1-I300M NAAMAYTI   | 246  | 72    |
| >CDH1-I300M YNAAIAYTI   | 340   | >CDH1-I300M YNAAMAYTI  | 422  | 82    |
| >CDH1-I300M YNAAIAYTI   | 84    | >CDH1-I300M YNAAMAYTI  | 495  | 411   |
| >CDH1-I300M YNAAIAYTI   | 327   | >CDH1-I300M YNAAMAYTI  | 742  | 415   |
| >CDH1-I300M YNAAIAYTI   | 19    | >CDH1-I300M YNAAMAYTI  | 145  | 126   |
| >CDH1-I300M YNAAIAYTI   | 168   | >CDH1-I300M YNAAMAYTI  | 172  | 4     |
| >CDH1-I300M YNAAIAYTIL  | 87    | >CDH1-I300M YNAAMAYTIL | 79   | 8     |
| >CDH1-I300M YNAAIAYTI   | 306   | >CDH1-I300M YNAAMAYTI  | 551  | 245   |
| >CDH1-I300M YNAAIAYTI   | 612   | >CDH1-I300M YNAAMAYTI  | 334  | 278   |
| >CDH1-I300M TYNAAIAYTI  | 4     | >CDH1-I300M TYNAAMAYT  | 4    | 0     |
| >CDH1-I300M TYNAAIAYTIL | 15    | >CDH1-I300M TYNAAMAYT  | 17   | 2     |
| >CDH1-I300M TYNAAIAYTI  | 132   | >CDH1-I300M TYNAAMAYT  | 95   | 37    |
| >CDH1-I300M TYNAAIAYTI  | 112   | >CDH1-I300M TYNAAMAYT  | 93   | 19    |

|                         |     |                       |      |     |
|-------------------------|-----|-----------------------|------|-----|
| >CDH1-I300M TYNAAIAYTI  | 14  | >CDH1-I300M TYNAAMAYT | 19   | 5   |
| >CDH1-I300M TYNAAIAYTIL | 32  | >CDH1-I300M TYNAAMAYT | 41   | 9   |
| >CDH1-I300M TYNAAIAY    | 92  | >CDH1-I300M TYNAAMAY  | 47   | 45  |
| >CDH1-I300M TYNAAIAY    | 163 | >CDH1-I300M TYNAAMAY  | 111  | 52  |
| >CDH1-I300M TYNAAIAYTI  | 308 | >CDH1-I300M TYNAAMAYT | 421  | 113 |
| >CDH1-I300M TYNAAIAY    | 482 | >CDH1-I300M TYNAAMAY  | 87   | 395 |
| >CDH1-I300M TYNAAIAY    | 489 | >CDH1-I300M TYNAAMAY  | 1044 | 555 |
| >CDH1-I300M TYNAAIAY    | 187 | >CDH1-I300M TYNAAMAY  | 179  | 8   |
| >CDH1-I300M NTYNAAIAYT  | 210 | >CDH1-I300M NTYNAAMAY | 195  | 15  |
| >CDH1-I300M NTYNAAIAY   | 538 | >CDH1-I300M NTYNAAMAY | 311  | 227 |
| >CDH1-I300M NTYNAAIAYT  | 284 | >CDH1-I300M NTYNAAMAY | 398  | 114 |
| >CDH1-I300M NTYNAAIAYT  | 107 | >CDH1-I300M NTYNAAMAY | 163  | 56  |
| >CDH1-I300M NTYNAAIAYT  | 630 | >CDH1-I300M NTYNAAMAY | 495  | 135 |
| >CDH1-I300M NTYNAAIAYT  | 220 | >CDH1-I300M NTYNAAMAY | 285  | 65  |
| >CDH1-I300M NTYNAAIAYT  | 291 | >CDH1-I300M NTYNAAMAY | 503  | 212 |
| >CDH1-I300M NTYNAAIAY   | 596 | >CDH1-I300M NTYNAAMAY | 327  | 269 |
| >CDH1-I300M NTYNAAIAY   | 283 | >CDH1-I300M NTYNAAMAY | 138  | 145 |
| >CDH1-I300M NTYNAAIAY   | 34  | >CDH1-I300M NTYNAAMAY | 19   | 15  |
| >CDH1-I300M NTYNAAIAY   | 63  | >CDH1-I300M NTYNAAMAY | 142  | 79  |
| >CDH1-I300M NTYNAAIAY   | 63  | >CDH1-I300M NTYNAAMAY | 186  | 123 |
| >CDH1-I300M NTYNAAIAY   | 50  | >CDH1-I300M NTYNAAMAY | 29   | 21  |
| >CDH1-I300M NTYNAAIAY   | 399 | >CDH1-I300M NTYNAAMAY | 276  | 123 |
| >CDH1-I300M NTYNAAIAY   | 449 | >CDH1-I300M NTYNAAMAY | 544  | 95  |
| >CDH1-I300M NTYNAAIAYT  | 16  | >CDH1-I300M NTYNAAMAY | 15   | 1   |
| >CDH1-I300M NTYNAAIAY   | 39  | >CDH1-I300M NTYNAAMAY | 23   | 16  |
| >CDH1-I300M NTYNAAIA    | 130 | >CDH1-I300M NTYNAAMA  | 38   | 92  |
| >CDH1-I300M NTYNAAIAYT  | 20  | >CDH1-I300M NTYNAAMAY | 18   | 2   |
| >CDH1-I300M NTYNAAIAYT  | 12  | >CDH1-I300M NTYNAAMAY | 11   | 1   |
| >CDH1-I300M NTYNAAIA    | 160 | >CDH1-I300M NTYNAAMA  | 27   | 133 |
| >CDH1-I300M NTYNAAIAYT  | 68  | >CDH1-I300M NTYNAAMAY | 45   | 23  |
| >CDH1-I300M NTYNAAIAYT  | 8   | >CDH1-I300M NTYNAAMAY | 10   | 2   |
| >CDH1-I300M NTYNAAIAY   | 883 | >CDH1-I300M NTYNAAMAY | 110  | 773 |
| >CDH1-I300M NTYNAAIAY   | 158 | >CDH1-I300M NTYNAAMAY | 99   | 59  |
| >CDH1-I300M NTYNAAIAY   | 185 | >CDH1-I300M NTYNAAMAY | 128  | 57  |
| >CDH1-I300M NTYNAAIAY   | 102 | >CDH1-I300M NTYNAAMAY | 40   | 62  |
| >CDH1-I300M NTYNAAIAY   | 10  | >CDH1-I300M NTYNAAMAY | 10   | 0   |
| >CDH1-I300M NTYNAAIAYT  | 102 | >CDH1-I300M NTYNAAMAY | 65   | 37  |
| >CDH1-I300M NTYNAAIAY   | 373 | >CDH1-I300M NTYNAAMAY | 368  | 5   |
| >CDH1-I300M NTYNAAIAY   | 26  | >CDH1-I300M NTYNAAMAY | 58   | 32  |
| >CDH1-I300M NTYNAAIAY   | 70  | >CDH1-I300M NTYNAAMAY | 28   | 42  |
| >CDH1-I300M NTYNAAIAYT  | 305 | >CDH1-I300M NTYNAAMAY | 247  | 58  |
| >CDH1-I300M NTYNAAIAY   | 64  | >CDH1-I300M NTYNAAMAY | 98   | 34  |
| >CDH1-I300M NTYNAAIAYT  | 16  | >CDH1-I300M NTYNAAMAY | 21   | 5   |

|                         |      |                         |      |      |
|-------------------------|------|-------------------------|------|------|
| >CDH1-I300M VNTYNAAIAY  | 705  | >CDH1-I300M VNTYNAAMA   | 411  | 294  |
| >CDH1-I300M VNTYNAAIAY  | 694  | >CDH1-I300M VNTYNAAMA   | 421  | 273  |
| >CDH1-I300M DVNTYNAAI   | 7234 | >CDH1-I300M DVNTYNAAM   | 262  | 6972 |
| >CDH1-I300M DVNTYNAAI   | 130  | >CDH1-I300M DVNTYNAAM   | 73   | 57   |
| >CDH1-I300M DVNTYNAAI   | 2701 | >CDH1-I300M DVNTYNAAM   | 27   | 2674 |
| >CDH1-I300M DVNTYNAAI   | 20   | >CDH1-I300M DVNTYNAAM   | 32   | 12   |
| >CDH1-I300M DVNTYNAAI   | 7488 | >CDH1-I300M DVNTYNAAM   | 245  | 7243 |
| >CDH1-I300M DVNTYNAAI   | 231  | >CDH1-I300M DVNTYNAAM   | 465  | 234  |
| >CDH1-I300M DVNTYNAAI   | 313  | >CDH1-I300M DVNTYNAAM   | 201  | 112  |
| >CDH1-I300M DVNTYNAAI   | 349  | >CDH1-I300M DVNTYNAAM   | 274  | 75   |
| >CDH1-I300M DVNTYNAAI   | 571  | >CDH1-I300M DVNTYNAAM   | 381  | 190  |
| >CDH1-I300M DVNTYNAAI   | 31   | >CDH1-I300M DVNTYNAAM   | 700  | 669  |
| >CDH1-I300M DVNTYNAAI   | 79   | >CDH1-I300M DVNTYNAAM   | 217  | 138  |
| >CDH1-I300M DVNTYNAAI   | 2780 | >CDH1-I300M DVNTYNAAM   | 420  | 2360 |
| >CDH1-I300M DVNTYNAAI   | 3098 | >CDH1-I300M DVNTYNAAM   | 73   | 3025 |
| >CDH1-I300M DVNTYNAAI   | 29   | >CDH1-I300M DVNTYNAAM   | 50   | 21   |
| >CDH1-I300M DDVNTYNAAI  | 312  | >CDH1-I300M DDVNTYNAAI  | 6705 | 6393 |
| >CDH1-I600M IFFCERNPK   | 528  | >CDH1-I600M MFFCERNPK   | 179  | 349  |
| >CDH1-I600M IFFCERNPK   | 59   | >CDH1-I600M MFFCERNPK   | 12   | 47   |
| >CDH1-I600M IFFCERNPK   | 356  | >CDH1-I600M MFFCERNPK   | 73   | 283  |
| >CDH1-I600M IFFCERNPK   | 243  | >CDH1-I600M MFFCERNPK   | 112  | 131  |
| >CDH1-I600M IFFCERNPK   | 406  | >CDH1-I600M MFFCERNPK   | 48   | 358  |
| >CDH1-I600M IFFCERNPK   | 87   | >CDH1-I600M MFFCERNPK   | 55   | 32   |
| >CDH1-I600M IFFCERNPKPK | 679  | >CDH1-I600M MFFCERNPKPK | 448  | 231  |
| >CDH1-I600M TIFFCERNPK  | 68   | >CDH1-I600M TMFFCERNPK  | 42   | 26   |
| >CDH1-I600M TIFFCERNPK  | 37   | >CDH1-I600M TMFFCERNPK  | 40   | 3    |
| >CDH1-I600M TIFFCERNPK  | 296  | >CDH1-I600M TMFFCERNPK  | 415  | 119  |
| >CDH1-I600M TIFFCERNPK  | 143  | >CDH1-I600M TMFFCERNPK  | 83   | 60   |
| >CDH1-I600M TIFFCERNPK  | 11   | >CDH1-I600M TMFFCERNPK  | 19   | 8    |
| >CDH1-I600M TIFFCERNPK  | 363  | >CDH1-I600M TMFFCERNPK  | 228  | 135  |
| >CDH1-I600M RTIFFCER    | 2926 | >CDH1-I600M RTMFFCER    | 423  | 2503 |
| >CDH1-I600M RTIFFCERNPK | 224  | >CDH1-I600M RTMFFCERNPK | 58   | 166  |
| >CDH1-I600M RTIFFCER    | 27   | >CDH1-I600M RTMFFCER    | 12   | 15   |
| >CDH1-I600M RTIFFCERNPK | 11   | >CDH1-I600M RTMFFCERNPK | 7    | 4    |
| >CDH1-I600M RTIFFCER    | 735  | >CDH1-I600M RTMFFCER    | 264  | 471  |
| >CDH1-I600M RTIFFCERNPK | 15   | >CDH1-I600M RTMFFCERNPK | 10   | 5    |
| >CDH1-I600M RTIFFCER    | 8    | >CDH1-I600M RTMFFCER    | 7    | 1    |
| >CDH1-I600M RTIFFCERNPK | 47   | >CDH1-I600M RTMFFCERNPK | 31   | 16   |
| >CDH1-I600M RTIFFCER    | 1411 | >CDH1-I600M RTMFFCER    | 385  | 1026 |
| >CDH1-I600M RTIFFCERNPK | 765  | >CDH1-I600M RTMFFCERNPK | 233  | 532  |
| >CDH1-I600M RTIFFCER    | 157  | >CDH1-I600M RTMFFCER    | 94   | 63   |
| >CDH1-I600M RTIFFCER    | 8    | >CDH1-I600M RTMFFCER    | 9    | 1    |
| >CDH1-I600M RTIFFCERNPK | 32   | >CDH1-I600M RTMFFCERNPK | 39   | 7    |

|                         |      |                        |       |       |
|-------------------------|------|------------------------|-------|-------|
| >CDH1-I600M RTIFFCERN   | 474  | >CDH1-I600M RTMFFCERN  | 185   | 289   |
| >CDH1-I600M RTIFFCER    | 159  | >CDH1-I600M RTMFFCER   | 111   | 48    |
| >CDH1-I600M RTIFFCERNPK | 376  | >CDH1-I600M RTMFFCERNF | 264   | 112   |
| >CDH1-I600M RTIFFCER    | 54   | >CDH1-I600M RTMFFCER   | 44    | 10    |
| >CDH1-I600M PRTIFFCER   | 147  | >CDH1-I600M PRTMFFCER  | 146   | 1     |
| >CDH1-I600M EPRTIFFCER  | 248  | >CDH1-I600M EPRTMFFCER | 233   | 15    |
| >CDH1-I600M EPRTIFFCER  | 204  | >CDH1-I600M EPRTMFFCER | 289   | 85    |
| >CDH1-I600M IPEPRTIFF   | 19   | >CDH1-I600M IPEPRTMFF  | 58    | 39    |
| >CDH1-I600M IPEPRTIF    | 46   | >CDH1-I600M IPEPRTMF   | 54    | 8     |
| >CDH1-I600M IPEPRTIFF   | 163  | >CDH1-I600M IPEPRTMFF  | 105   | 58    |
| >CDH1-I600M IPEPRTIF    | 69   | >CDH1-I600M IPEPRTMF   | 119   | 50    |
| >CDH1-I600M IPEPRTIFF   | 71   | >CDH1-I600M IPEPRTMFF  | 192   | 121   |
| >CDH1-I600M IPEPRTIF    | 395  | >CDH1-I600M IPEPRTMF   | 405   | 10    |
| >CDH1-I600M IPEPRTIFF   | 391  | >CDH1-I600M IPEPRTMFF  | 438   | 47    |
| >CDH1-I600M IPEPRTIF    | 87   | >CDH1-I600M IPEPRTMF   | 52    | 35    |
| >CDH1-I600M IPEPRTIFF   | 30   | >CDH1-I600M IPEPRTMFF  | 34    | 4     |
| >CDH1-I600M APIPEPRTIF  | 479  | >CDH1-I600M APIPEPRTMF | 389   | 90    |
| >CDH1-I600M APIPEPRTIFF | 45   | >CDH1-I600M APIPEPRTMF | 76    | 31    |
| >CDH1-I600M APIPEPRTI   | 1053 | >CDH1-I600M APIPEPRTM  | 120   | 933   |
| >CDH1-I600M APIPEPRTIF  | 165  | >CDH1-I600M APIPEPRTMF | 540   | 375   |
| >CDH1-I600M APIPEPRTIFF | 583  | >CDH1-I600M APIPEPRTMF | 483   | 100   |
| >CDH1-I600M APIPEPRTIF  | 99   | >CDH1-I600M APIPEPRTMF | 144   | 45    |
| >CDH1-I600M APIPEPRTIFF | 273  | >CDH1-I600M APIPEPRTMF | 150   | 123   |
| >CDH1-I600M APIPEPRTI   | 4476 | >CDH1-I600M APIPEPRTM  | 108   | 4368  |
| >CDH1-I600M APIPEPRTIFF | 129  | >CDH1-I600M APIPEPRTMF | 233   | 104   |
| >CDH1-I600M APIPEPRTIFF | 425  | >CDH1-I600M APIPEPRTMF | 490   | 65    |
| >CDH1-I600M APIPEPRTIF  | 239  | >CDH1-I600M APIPEPRTMF | 257   | 18    |
| >CDH1-I600M APIPEPRTIFF | 368  | >CDH1-I600M APIPEPRTMF | 460   | 92    |
| >CDH1-I600M APIPEPRTIFF | 264  | >CDH1-I600M APIPEPRTMF | 271   | 7     |
| >CDH1-I600M NAPIPEPRTIF | 315  | >CDH1-I600M NAPIPEPRTM | 323   | 8     |
| >CDH1-L581F LLLILSDV    | 75   | >CDH1-L581F PLLILSDV   | 4583  | 4508  |
| >CDH1-L581F LLLILSDV    | 170  | >CDH1-L581F PLLILSDV   | 1459  | 1289  |
| >CDH1-L581F LLLILSDV    | 54   | >CDH1-L581F PLLILSDV   | 1477  | 1423  |
| >CDH1-L581F LLLILSDV    | 61   | >CDH1-L581F PLLILSDV   | 3699  | 3638  |
| >CDH1-L581F LLLILSDV    | 4    | >CDH1-L581F PLLILSDV   | 40    | 36    |
| >CDH1-L581F LLLILSDV    | 10   | >CDH1-L581F PLLILSDV   | 642   | 632   |
| >CDH1-L581F LLLILSDV    | 6    | >CDH1-L581F PLLILSDV   | 17    | 11    |
| >CDH1-L581F LLLILSDV    | 8    | >CDH1-L581F PLLILSDV   | 70    | 62    |
| >CDH1-L581F LLLILSDV    | 3    | >CDH1-L581F PLLILSDV   | 15    | 12    |
| >CDH1-L581F TLLLILSDV   | 88   | >CDH1-L581F TPLLILSDV  | 20824 | 20736 |
| >CDH1-L581F TLLLILSDV   | 249  | >CDH1-L581F TPLLILSDV  | 17995 | 17746 |
| >CDH1-L581F TLLLILSDV   | 29   | >CDH1-L581F TPLLILSDV  | 14225 | 14196 |
| >CDH1-L581F TLLLILSDV   | 77   | >CDH1-L581F TPLLILSDV  | 14381 | 14304 |

|                       |       |                       |       |       |
|-----------------------|-------|-----------------------|-------|-------|
| >CDH1-L581FTLLLILSDV  | 19    | >CDH1-L581FTPLLILSDV  | 22951 | 22932 |
| >CDH1-L581FTLLLILSDV  | 21    | >CDH1-L581FTPLLILSDV  | 19875 | 19854 |
| >CDH1-L581FTLLLILSDV  | 10    | >CDH1-L581FTPLLILSDV  | 19815 | 19805 |
| >CDH1-L581FTLLLILSDV  | 6     | >CDH1-L581FTPLLILSDV  | 21191 | 21185 |
| >CDH1-L581FTLLLILSDV  | 4     | >CDH1-L581FTPLLILSDV  | 26284 | 26280 |
| >CDH1-L581FGSPVATGTGT | 30    | >CDH1-L581FGSPVATGTGT | 8684  | 8654  |
| >CDH1-L581FGSPVATGTGT | 437   | >CDH1-L581FGSPVATGTGT | 25188 | 24751 |
| >CDH1-L581FGTLLLILSDV | 418   | >CDH1-L581FGTPLLILSDV | 3377  | 2959  |
| >CDH1-L581FGTLLLILSDV | 149   | >CDH1-L581FGTPLLILSDV | 351   | 202   |
| >CDH1-L581FGTLLLILSDV | 179   | >CDH1-L581FGTPLLILSDV | 485   | 306   |
| >CDH1-L581FGTLLLILSDV | 179   | >CDH1-L581FGTPLLILSDV | 1916  | 1737  |
| >CDH1-L581FGTLLLILSDV | 11065 | >CDH1-L581FGTPLLILSDV | 25    | 11040 |
| >CDH1-L581FGTLLLILSDV | 348   | >CDH1-L581FGTPLLILSDV | 348   | 0     |
| >CDH1-L581FGTGTTTTL   | 380   | >CDH1-L581FGTGTTTTL   | 193   | 187   |
| >CDH1-L581FGTGTTTTL   | 101   | >CDH1-L581FGTGTTTTL   | 102   | 1     |
| >CDH1-L581FGTGTTTTL   | 171   | >CDH1-L581FGTGTTTTL   | 85    | 86    |
| >CDH1-L581FATGTGTLLL  | 314   | >CDH1-L581FATGTGTPLL  | 545   | 231   |
| >CDH1-L581FATGTGTLLL  | 295   | >CDH1-L581FATGTGTPLL  | 457   | 162   |
| >CDH1-L581FATGTGTLLL  | 395   | >CDH1-L581FATGTGTPLL  | 378   | 17    |
| >CDH1-L581FATGTGTLL   | 168   | >CDH1-L581FATGTGTPL   | 56    | 112   |
| >CDH1-L581FATGTGTLL   | 83    | >CDH1-L581FATGTGTPL   | 157   | 74    |
| >CDH1-L581FATGTGTLLLL | 158   | >CDH1-L581FATGTGTPLL  | 145   | 13    |
| >CDH1-L581FATGTGTLL   | 388   | >CDH1-L581FATGTGTPL   | 3336  | 2948  |
| >CDH1-L581FATGTGTLL   | 130   | >CDH1-L581FATGTGTPL   | 96    | 34    |
| >CDH1-L581FATGTGTLLL  | 343   | >CDH1-L581FATGTGTPLL  | 614   | 271   |
| >CDH1-L581FATGTGTLLLL | 272   | >CDH1-L581FATGTGTPLL  | 205   | 67    |
| >CDH1-L581FATGTGTLLL  | 795   | >CDH1-L581FATGTGTPLL  | 263   | 532   |
| >CDH1-L581FATGTGTLLL  | 85    | >CDH1-L581FATGTGTPLL  | 57    | 28    |
| >CDH1-L581FVATGTGTLL  | 5356  | >CDH1-L581FVATGTGTPL  | 142   | 5214  |
| >CDH1-L581FVATGTGTLL  | 90    | >CDH1-L581FVATGTGTP   | 19988 | 19898 |
| >CDH1-L581FVATGTGTLL  | 213   | >CDH1-L581FVATGTGTPL  | 43    | 170   |
| >CDH1-L581FVATGTGTLLL | 178   | >CDH1-L581FVATGTGTPLL | 197   | 19    |
| >CDH1-L581FVATGTGTLLL | 377   | >CDH1-L581FVATGTGTPLL | 324   | 53    |
| >CDH1-L581FVATGTGTLL  | 56    | >CDH1-L581FVATGTGTPL  | 270   | 214   |
| >CDH1-L581FVATGTGTLL  | 56    | >CDH1-L581FVATGTGTPLL | 57    | 1     |
| >CDH1-L581FVATGTGTLLL | 139   | >CDH1-L581FVATGTGTPLL | 306   | 167   |
| >CDH1-L581FVATGTGTLL  | 109   | >CDH1-L581FVATGTGTPL  | 1411  | 1302  |
| >CDH1-L581FVATGTGTLLL | 487   | >CDH1-L581FVATGTGTPLL | 489   | 2     |
| >CDH1-L581FSPVATGTGTL | 306   | >CDH1-L581FSPVATGTGTP | 12672 | 12366 |
| >CDH1-L581FSPVATGTGTL | 62    | >CDH1-L581FSPVATGTGTP | 36701 | 36639 |
| >CDH1-L581FSPVATGTGTL | 131   | >CDH1-L581FSPVATGTGTP | 233   | 102   |
| >CDH1-L581FSPVATGTGTL | 48    | >CDH1-L581FSPVATGTGTP | 4591  | 4543  |
| >CDH1-L581FSPVATGTGTL | 30    | >CDH1-L581FSPVATGTGTP | 9     | 21    |

|                        |      |                        |       |       |
|------------------------|------|------------------------|-------|-------|
| >CDH1-L581\SPVATGTGTL  | 1122 | >CDH1-L581\SPVATGTGTF  | 114   | 1008  |
| >CDH1-L581\SPVATGTGTL  | 79   | >CDH1-L581\SPVATGTGTF  | 17786 | 17707 |
| >CDH1-L581\SPVATGTGTL  | 126  | >CDH1-L581\SPVATGTGTF  | 41    | 85    |
| >CDH1-L581\SPVATGTGTL  | 451  | >CDH1-L581\SPVATGTGTF  | 17796 | 17345 |
| >CDH1-L581\SPVATGTGTL  | 3093 | >CDH1-L581\SPVATGTGTF  | 348   | 2745  |
| >CDH1-L711\IVGILGGILA  | 373  | >CDH1-L711\IVGILGGILA  | 3791  | 3418  |
| >CDH1-L711\IVGILGGILAL | 340  | >CDH1-L711\IVGILGGILAL | 3227  | 2887  |
| >CDH1-L711\IVGILGGI    | 220  | >CDH1-L711\IVGILGGI    | 1725  | 1505  |
| >CDH1-L711\IVGILGGILA  | 425  | >CDH1-L711\IVGILGGILA  | 2886  | 2461  |
| >CDH1-L711\IVGILGGI    | 29   | >CDH1-L711\IVGILGGI    | 2821  | 2792  |
| >CDH1-L711\IVGILGGILA  | 357  | >CDH1-L711\IVGILGGILA  | 10022 | 9665  |
| >CDH1-L711\IVGILGGILAL | 26   | >CDH1-L711\IVGILGGILAL | 1422  | 1396  |
| >CDH1-L711\IVGILGGILAL | 320  | >CDH1-L711\IVGILGGILAL | 9931  | 9611  |
| >CDH1-L711\IVGILGGI    | 280  | >CDH1-L711\IVGILGGI    | 10006 | 9726  |
| >CDH1-L711\IVGILGGILAL | 118  | >CDH1-L711\IVGILGGILAL | 6155  | 6037  |
| >CDH1-L711\IVGILGGI    | 113  | >CDH1-L711\IVGILGGI    | 10964 | 10851 |
| >CDH1-L711\IVGILGGIL   | 321  | >CDH1-L711\IVGILGGIL   | 16005 | 15684 |
| >CDH1-L711\IVGILGGILA  | 163  | >CDH1-L711\IVGILGGILA  | 13961 | 13798 |
| >CDH1-L711\IVGILGGILAL | 22   | >CDH1-L711\IVGILGGILAL | 1741  | 1719  |
| >CDH1-L711\VEAGLQIPAI\ | 873  | >CDH1-L711\VEAGLQIPAI\ | 341   | 532   |
| >CDH1-L711\VEAGLQIPAI\ | 417  | >CDH1-L711\VEAGLQIPAI\ | 1628  | 1211  |
| >CDH1-L711\VEAGLQIPAI\ | 442  | >CDH1-L711\VEAGLQIPAI\ | 6935  | 6493  |
| >CDH1-L711\VEAGLQIPAI\ | 19   | >CDH1-L711\VEAGLQIPAI\ | 134   | 115   |
| >CDH1-L711\VEAGLQIPAI\ | 2051 | >CDH1-L711\VEAGLQIPAI\ | 244   | 1807  |
| >CDH1-L711\VEAGLQIPAI\ | 105  | >CDH1-L711\VEAGLQIPAI\ | 41    | 64    |
| >CDH1-L711\AIVGILGGI   | 405  | >CDH1-L711\AIVGILGGI   | 148   | 257   |
| >CDH1-L711\AIVGILGGILA | 1071 | >CDH1-L711\AIVGILGGILA | 488   | 583   |
| >CDH1-L711\AIVGILGGI   | 71   | >CDH1-L711\AIVGILGGI   | 21    | 50    |
| >CDH1-L711\AIVGILGGILA | 616  | >CDH1-L711\AIVGILGGILA | 219   | 397   |
| >CDH1-L711\AIVGILGGI   | 34   | >CDH1-L711\AIVGILGGI   | 42    | 8     |
| >CDH1-L711\AIVGILGGIL  | 443  | >CDH1-L711\AIVGILGGIL  | 1047  | 604   |
| >CDH1-L711\AIVGILGGILA | 114  | >CDH1-L711\AIVGILGGILA | 177   | 63    |
| >CDH1-L711\AIVGILGGI   | 24   | >CDH1-L711\AIVGILGGI   | 186   | 162   |
| >CDH1-L711\AIVGILGGIL  | 414  | >CDH1-L711\AIVGILGGIL  | 2384  | 1970  |
| >CDH1-L711\AIVGILGGILA | 232  | >CDH1-L711\AIVGILGGILA | 1636  | 1404  |
| >CDH1-L711\AIVGILGGI   | 366  | >CDH1-L711\AIVGILGGI   | 4054  | 3688  |
| >CDH1-L711\AIVGILGGI   | 357  | >CDH1-L711\AIVGILGGI   | 8124  | 7767  |
| >CDH1-L711\AIVGILGGI   | 223  | >CDH1-L711\AIVGILGGI   | 506   | 283   |
| >CDH1-L711\AIVGILGGIL  | 356  | >CDH1-L711\AIVGILGGIL  | 705   | 349   |
| >CDH1-L711\AIVGILGGILA | 209  | >CDH1-L711\AIVGILGGILA | 442   | 233   |
| >CDH1-L711\AIVGILGGI   | 1474 | >CDH1-L711\AIVGILGGI   | 198   | 1276  |
| >CDH1-L711\AIVGILGGIL  | 1921 | >CDH1-L711\AIVGILGGIL  | 353   | 1568  |
| >CDH1-L711\AIVGILGGI   | 2955 | >CDH1-L711\AIVGILGGI   | 405   | 2550  |

|                        |      |                        |     |      |
|------------------------|------|------------------------|-----|------|
| >CDH1-L711\IPAILGIL    | 29   | >CDH1-L711\IPAIVGIL    | 30  | 1    |
| >CDH1-L711\IPAILGILGGI | 201  | >CDH1-L711\IPAIVGILGGI | 162 | 39   |
| >CDH1-L711\IPAILGILGGI | 511  | >CDH1-L711\IPAIVGILGGI | 422 | 89   |
| >CDH1-L711\IPAILGILG   | 133  | >CDH1-L711\IPAIVGILG   | 93  | 40   |
| >CDH1-L711\IPAILGILGGI | 314  | >CDH1-L711\IPAIVGILGGI | 266 | 48   |
| >CDH1-L711\QIPAILGI    | 302  | >CDH1-L711\QIPAIVGI    | 335 | 33   |
| >CDH1-L711\QIPAILGIL   | 510  | >CDH1-L711\QIPAIVGIL   | 493 | 17   |
| >CDH1-L711\QIPAILGI    | 190  | >CDH1-L711\QIPAIVGI    | 299 | 109  |
| >CDH1-L711\QIPAILGI    | 1039 | >CDH1-L711\QIPAIVGI    | 341 | 698  |
| >CDH1-L711\QIPAILGI    | 75   | >CDH1-L711\QIPAIVGI    | 20  | 55   |
| >CDH1-L711\QIPAILGIL   | 346  | >CDH1-L711\QIPAIVGIL   | 203 | 143  |
| >CDH1-L711\QIPAILGIL   | 187  | >CDH1-L711\QIPAIVGIL   | 180 | 7    |
| >CDH1-L711\LQIPAILGI   | 124  | >CDH1-L711\LQIPAIVGI   | 127 | 3    |
| >CDH1-L711\LQIPAILGI   | 319  | >CDH1-L711\LQIPAIVGI   | 142 | 177  |
| >CDH1-L711\LQIPAILGIL  | 364  | >CDH1-L711\LQIPAIVGIL  | 623 | 259  |
| >CDH1-L711\LQIPAILGI   | 41   | >CDH1-L711\LQIPAIVGI   | 44  | 3    |
| >CDH1-L711\LQIPAILGIL  | 267  | >CDH1-L711\LQIPAIVGIL  | 524 | 257  |
| >CDH1-L711\LQIPAILGI   | 4    | >CDH1-L711\LQIPAIVGI   | 4   | 0    |
| >CDH1-L711\LQIPAILGIL  | 188  | >CDH1-L711\LQIPAIVGIL  | 558 | 370  |
| >CDH1-L711\LQIPAILGILG | 541  | >CDH1-L711\LQIPAIVGILG | 440 | 101  |
| >CDH1-L711\LQIPAILGI   | 327  | >CDH1-L711\LQIPAIVGI   | 224 | 103  |
| >CDH1-L711\LQIPAILGI   | 479  | >CDH1-L711\LQIPAIVGI   | 218 | 261  |
| >CDH1-L711\LQIPAILG    | 987  | >CDH1-L711\LQIPAIVG    | 202 | 785  |
| >CDH1-L711\LQIPAILGI   | 85   | >CDH1-L711\LQIPAIVGI   | 93  | 8    |
| >CDH1-L711\LQIPAILGIL  | 121  | >CDH1-L711\LQIPAIVGIL  | 90  | 31   |
| >CDH1-L711\LQIPAILGI   | 88   | >CDH1-L711\LQIPAIVGI   | 55  | 33   |
| >CDH1-L711\LQIPAILGIL  | 147  | >CDH1-L711\LQIPAIVGIL  | 85  | 62   |
| >CDH1-L711\LQIPAILGIL  | 488  | >CDH1-L711\LQIPAIVGIL  | 195 | 293  |
| >CDH1-L711\GLQIPAIL    | 1277 | >CDH1-L711\GLQIPAIV    | 355 | 922  |
| >CDH1-L711\GLQIPAILGI  | 244  | >CDH1-L711\GLQIPAIVGI  | 438 | 194  |
| >CDH1-L711\GLQIPAIL    | 812  | >CDH1-L711\GLQIPAIV    | 89  | 723  |
| >CDH1-L711\GLQIPAILGI  | 127  | >CDH1-L711\GLQIPAIVGI  | 244 | 117  |
| >CDH1-L711\GLQIPAIL    | 163  | >CDH1-L711\GLQIPAIV    | 12  | 151  |
| >CDH1-L711\GLQIPAILGI  | 30   | >CDH1-L711\GLQIPAIVGI  | 25  | 5    |
| >CDH1-L711\GLQIPAILGIL | 414  | >CDH1-L711\GLQIPAIVGIL | 304 | 110  |
| >CDH1-L711\GLQIPAIL    | 63   | >CDH1-L711\GLQIPAIV    | 10  | 53   |
| >CDH1-L711\GLQIPAILGI  | 56   | >CDH1-L711\GLQIPAIVGI  | 32  | 24   |
| >CDH1-L711\GLQIPAILGIL | 226  | >CDH1-L711\GLQIPAIVGIL | 234 | 8    |
| >CDH1-L711\GLQIPAIL    | 520  | >CDH1-L711\GLQIPAIV    | 33  | 487  |
| >CDH1-L711\GLQIPAILGI  | 151  | >CDH1-L711\GLQIPAIVGI  | 133 | 18   |
| >CDH1-L711\GLQIPAIL    | 3966 | >CDH1-L711\GLQIPAIV    | 273 | 3693 |
| >CDH1-L711\GLQIPAIL    | 33   | >CDH1-L711\GLQIPAIV    | 9   | 24   |
| >CDH1-L711\GLQIPAILGI  | 36   | >CDH1-L711\GLQIPAIVGI  | 32  | 4    |



|                        |      |                        |      |      |
|------------------------|------|------------------------|------|------|
| >CDH1-L711\GLQIPAILGIL | 91   | >CDH1-L711\GLQIPAIVGIL | 97   | 6    |
| >CDH1-L711\EAGLQIPAIL  | 2171 | >CDH1-L711\EAGLQIPAIV  | 184  | 1987 |
| >CDH1-M282MEVTATDA     | 29   | >CDH1-M282IEVTATDA     | 1034 | 1005 |
| >CDH1-M282MEVTATDAD    | 249  | >CDH1-M282IEVTATDAD    | 486  | 237  |
| >CDH1-M282MEGALPGTS\   | 693  | >CDH1-M282MEGALPGTS\   | 37   | 656  |
| >CDH1-M282MEGALPGTS\   | 484  | >CDH1-M282MEGALPGTS\   | 272  | 212  |
| >CDH1-M282MEGALPGTS\   | 282  | >CDH1-M282MEGALPGTS\   | 238  | 44   |
| >CDH1-M282MEGALPGTS\   | 449  | >CDH1-M282MEGALPGTS\   | 142  | 307  |
| >CDH1-M282MEGALPGTS\   | 165  | >CDH1-M282MEGALPGTS\   | 17   | 148  |
| >CDH1-M282SVMEVTAT     | 147  | >CDH1-M282SVIEVTAT     | 367  | 220  |
| >CDH1-M282SVMEVTATD,   | 256  | >CDH1-M282SVIEVTATDA   | 918  | 662  |
| >CDH1-M282SVMEVTAT     | 43   | >CDH1-M282SVIEVTAT     | 83   | 40   |
| >CDH1-M282SVMEVTAT     | 201  | >CDH1-M282SVIEVTAT     | 345  | 144  |
| >CDH1-M282SVMEVTATD,   | 308  | >CDH1-M282SVIEVTATDA   | 443  | 135  |
| >CDH1-M282SVMEVTAT     | 438  | >CDH1-M282SVIEVTAT     | 1370 | 932  |
| >CDH1-M282SVMEVTATD,   | 233  | >CDH1-M282SVIEVTATDA   | 762  | 529  |
| >CDH1-M282LPGTSVMEV    | 120  | >CDH1-M282LPGTSVIEV    | 41   | 79   |
| >CDH1-M282LPGTSVMEV    | 562  | >CDH1-M282LPGTSVIEV    | 315  | 247  |
| >CDH1-M282LPGTSVMEV\   | 52   | >CDH1-M282LPGTSVIEV\   | 43   | 9    |
| >CDH1-M282ALPGTSVME\   | 65   | >CDH1-M282ALPGTSVIEV   | 97   | 32   |
| >CDH1-M282ALPGTSVME    | 643  | >CDH1-M282ALPGTSVI     | 188  | 455  |
| >CDH1-M282ALPGTSVME\   | 29   | >CDH1-M282ALPGTSVIEV   | 55   | 26   |
| >CDH1-M282ALPGTSVME    | 623  | >CDH1-M282ALPGTSVI     | 36   | 587  |
| >CDH1-M282ALPGTSVME\   | 15   | >CDH1-M282ALPGTSVIEV   | 28   | 13   |
| >CDH1-M282ALPGTSVME\   | 66   | >CDH1-M282ALPGTSVIEV   | 89   | 23   |
| >CDH1-M282ALPGTSVME    | 161  | >CDH1-M282ALPGTSVI     | 20   | 141  |
| >CDH1-M282ALPGTSVME\   | 2    | >CDH1-M282ALPGTSVIEV   | 3    | 1    |
| >CDH1-M282ALPGTSVME\   | 282  | >CDH1-M282ALPGTSVIEV\  | 167  | 115  |
| >CDH1-M282ALPGTSVME    | 2046 | >CDH1-M282ALPGTSVI     | 138  | 1908 |
| >CDH1-M282ALPGTSVME\   | 10   | >CDH1-M282ALPGTSVIEV   | 9    | 1    |
| >CDH1-M282ALPGTSVME    | 481  | >CDH1-M282ALPGTSVI     | 46   | 435  |
| >CDH1-M282ALPGTSVME\   | 5    | >CDH1-M282ALPGTSVIEV   | 5    | 0    |
| >CDH1-M282ALPGTSVME    | 2020 | >CDH1-M282ALPGTSVI     | 472  | 1548 |
| >CDH1-M282ALPGTSVME\   | 7    | >CDH1-M282ALPGTSVIEV   | 8    | 1    |
| >CDH1-M282ALPGTSVME    | 25   | >CDH1-M282ALPGTSVI     | 7    | 18   |
| >CDH1-M282ALPGTSVME\   | 2    | >CDH1-M282ALPGTSVIEV   | 2    | 0    |
| >CDH1-M282ALPGTSVME\   | 107  | >CDH1-M282ALPGTSVIEV\  | 57   | 50   |
| >CDH1-M282ALPGTSVME    | 2819 | >CDH1-M282ALPGTSVI     | 237  | 2582 |
| >CDH1-M282ALPGTSVME    | 390  | >CDH1-M282ALPGTSVI     | 4701 | 4311 |
| >CDH1-M282GALPGTSVME   | 675  | >CDH1-M282GALPGTSVIE\  | 494  | 181  |
| >CDH1-M282GALPGTSVME   | 400  | >CDH1-M282GALPGTSVIE\  | 947  | 547  |
| >CDH1-M282GALPGTSVME   | 68   | >CDH1-M282GALPGTSVIE\  | 61   | 7    |
| >CDH1-M282GALPGTSVME   | 68   | >CDH1-M282GALPGTSVIE\  | 52   | 16   |

|                      |      |                       |      |      |
|----------------------|------|-----------------------|------|------|
| >CDH1-M282GALPGTSVM  | 360  | >CDH1-M282GALPGTSVIE\ | 325  | 35   |
| >CDH1-M282GALPGTSVM  | 55   | >CDH1-M282GALPGTSVIE\ | 45   | 10   |
| >CDH1-M282GALPGTSVM  | 20   | >CDH1-M282GALPGTSVIE\ | 28   | 8    |
| >CDH1-M282GALPGTSVM  | 19   | >CDH1-M282GALPGTSVI   | 116  | 97   |
| >CDH1-M282GALPGTSVM  | 322  | >CDH1-M282GALPGTSVI   | 8039 | 7717 |
| >CDH1-M282GALPGTSVM  | 10   | >CDH1-M282GALPGTSVI   | 108  | 98   |
| >CDH1-M282GALPGTSVM  | 360  | >CDH1-M282GALPGTSVI   | 17   | 343  |
| >CDH1-M316MFTINRNTG\ | 459  | >CDH1-M316VFTINRNTGV  | 1223 | 764  |
| >CDH1-M316MFTINRNTG\ | 63   | >CDH1-M316VFTINRNTGV  | 287  | 224  |
| >CDH1-M316MFTINRNTG  | 399  | >CDH1-M316VFTINRNTG   | 2040 | 1641 |
| >CDH1-M316MFTINRNTG\ | 391  | >CDH1-M316VFTINRNTGV  | 2124 | 1733 |
| >CDH1-M316NMFTINRNTG | 39   | >CDH1-M316NVFTINRNTG  | 755  | 716  |
| >CDH1-M316NMFTINRNTG | 7    | >CDH1-M316NVFTINRNTG  | 93   | 86   |
| >CDH1-M316NMFTINRNTG | 7    | >CDH1-M316NVFTINRNTG  | 81   | 74   |
| >CDH1-M316NMFTINRNTG | 71   | >CDH1-M316NVFTINRNTG  | 141  | 70   |
| >CDH1-M316NMFTINRNTG | 6    | >CDH1-M316NVFTINRNTG  | 553  | 547  |
| >CDH1-M316NMFTINRNTG | 16   | >CDH1-M316NVFTINRNTG  | 2276 | 2260 |
| >CDH1-M316NMFTINRNTG | 20   | >CDH1-M316NVFTINRNTG  | 1456 | 1436 |
| >CDH1-M316NMFTINRNTG | 19   | >CDH1-M316NVFTINRNTG  | 1900 | 1881 |
| >CDH1-M316NMFTINRNTG | 9    | >CDH1-M316NVFTINRNTG  | 385  | 376  |
| >CDH1-M316NMFTINRNT  | 5594 | >CDH1-M316NVFTINRNT   | 210  | 5384 |
| >CDH1-M316NMFTINRNTG | 53   | >CDH1-M316NVFTINRNTG  | 6    | 47   |
| >CDH1-M316NMFTINRNTG | 119  | >CDH1-M316NVFTINRNTG  | 30   | 89   |
| >CDH1-M316SQDPELPDKM | 1143 | >CDH1-M316SQDPELPDKM  | 117  | 1026 |
| >CDH1-M316SQDPELPDKM | 9946 | >CDH1-M316SQDPELPDKM  | 249  | 9697 |
| >CDH1-M316KNMFTINR   | 45   | >CDH1-M316KNVFTINR    | 164  | 119  |
| >CDH1-M316KNMFTINR   | 44   | >CDH1-M316KNVFTINR    | 49   | 5    |
| >CDH1-M316DKNMFTINR  | 474  | >CDH1-M316DKNVFTINR   | 775  | 301  |
| >CDH1-M316DKNMFTINR  | 196  | >CDH1-M316DKNVFTINR   | 282  | 86   |
| >CDH1-M316DKNMFTINR  | 419  | >CDH1-M316DKNVFTINR   | 963  | 544  |
| >CDH1-M316PDKNMFTI   | 86   | >CDH1-M316PDKNVFTI    | 111  | 25   |
| >CDH1-M316LPDKNMFTI  | 41   | >CDH1-M316LPDKNVFTI   | 18   | 23   |
| >CDH1-M316LPDKNMFTI  | 210  | >CDH1-M316LPDKNVFTI   | 157  | 53   |
| >CDH1-M316LPDKNMFTI  | 22   | >CDH1-M316LPDKNVFTI   | 14   | 8    |
| >CDH1-M316LPDKNMFTI  | 123  | >CDH1-M316LPDKNVFTI   | 373  | 250  |
| >CDH1-M316LPDKNMFTI  | 621  | >CDH1-M316LPDKNVFTI   | 153  | 468  |
| >CDH1-M316ELPDKNMFTI | 303  | >CDH1-M316ELPDKNVFTI  | 360  | 57   |
| >CDH1-M316ELPDKNMFTI | 43   | >CDH1-M316ELPDKNVFTI  | 22   | 21   |
| >CDH1-M316ELPDKNMFTI | 86   | >CDH1-M316ELPDKNVFTI  | 58   | 28   |
| >CDH1-M316ELPDKNMFTI | 172  | >CDH1-M316ELPDKNVFTI  | 89   | 83   |
| >CDH1-M316ELPDKNMFTI | 112  | >CDH1-M316ELPDKNVFTI  | 35   | 77   |
| >CDH1-M316ELPDKNMFT  | 434  | >CDH1-M316ELPDKNVFT   | 490  | 56   |
| >CDH1-M316ELPDKNMFTI | 24   | >CDH1-M316ELPDKNVFTI  | 17   | 7    |

|                       |      |                       |     |      |
|-----------------------|------|-----------------------|-----|------|
| >CDH1-M31€ELPDKNMFTI  | 1237 | >CDH1-M31€ELPDKNVFTI  | 476 | 761  |
| >CDH1-M31€ELPDKNMFTI  | 259  | >CDH1-M31€ELPDKNVFTI  | 356 | 97   |
| >CDH1-M31€ELPDKNMFTI  | 308  | >CDH1-M31€ELPDKNVFTI  | 487 | 179  |
| >CDH1-M31€PELPDKNMF   | 118  | >CDH1-M31€PELPDKNVFT  | 129 | 11   |
| >CDH1-M31€PELPDKNMF   | 257  | >CDH1-M31€PELPDKNVFT  | 224 | 33   |
| >CDH1-M31€PELPDKNMF   | 453  | >CDH1-M31€PELPDKNVFT  | 490 | 37   |
| >CDH1-N315 NMFTINRNTC | 39   | >CDH1-N315 SMFTINRNTC | 13  | 26   |
| >CDH1-N315 NMFTINRNT  | 785  | >CDH1-N315 SMFTINRNT  | 386 | 399  |
| >CDH1-N315 NMFTINRNTC | 7    | >CDH1-N315 SMFTINRNTC | 5   | 2    |
| >CDH1-N315 NMFTINRNTC | 7    | >CDH1-N315 SMFTINRNTC | 5   | 2    |
| >CDH1-N315 NMFTINRNTC | 71   | >CDH1-N315 SMFTINRNTC | 37  | 34   |
| >CDH1-N315 NMFTINRNT  | 3474 | >CDH1-N315 SMFTINRNT  | 465 | 3009 |
| >CDH1-N315 NMFTINRNTC | 6    | >CDH1-N315 SMFTINRNTC | 2   | 4    |
| >CDH1-N315 NMFTINRNTC | 16   | >CDH1-N315 SMFTINRNTC | 8   | 8    |
| >CDH1-N315 NMFTINRNTC | 20   | >CDH1-N315 SMFTINRNTC | 6   | 14   |
| >CDH1-N315 NMFTINRNTC | 19   | >CDH1-N315 SMFTINRNTC | 34  | 15   |
| >CDH1-N315 NMFTINRNTC | 9    | >CDH1-N315 SMFTINRNTC | 3   | 6    |
| >CDH1-N315 NMFTINRNTC | 1624 | >CDH1-N315 SMFTINRNTC | 221 | 1403 |
| >CDH1-N315 NMFTINRNTC | 53   | >CDH1-N315 SMFTINRNTC | 139 | 86   |
| >CDH1-N315 NMFTINRNTC | 119  | >CDH1-N315 SMFTINRNTC | 257 | 138  |
| >CDH1-N315 NMFTINRNTC | 526  | >CDH1-N315 SMFTINRNTC | 134 | 392  |
| >CDH1-N315 KNMFTINR   | 8826 | >CDH1-N315 KSMFTINR   | 182 | 8644 |
| >CDH1-N315 KNMFTINR   | 1793 | >CDH1-N315 KSMFTINR   | 15  | 1778 |
| >CDH1-N315 KNMFTINR   | 2875 | >CDH1-N315 KSMFTINR   | 100 | 2775 |
| >CDH1-N315 KNMFTINRN  | 5837 | >CDH1-N315 KSMFTINRNT | 289 | 5548 |
| >CDH1-N315 KNMFTINR   | 45   | >CDH1-N315 KSMFTINR   | 9   | 36   |
| >CDH1-N315 KNMFTINR   | 1123 | >CDH1-N315 KSMFTINR   | 83  | 1040 |
| >CDH1-N315 KNMFTINR   | 2440 | >CDH1-N315 KSMFTINR   | 174 | 2266 |
| >CDH1-N315 KNMFTINR   | 44   | >CDH1-N315 KSMFTINR   | 51  | 7    |
| >CDH1-N315 DKNMFTINR  | 474  | >CDH1-N315 DKSMFTINR  | 585 | 111  |
| >CDH1-N315 DKNMFTINR  | 196  | >CDH1-N315 DKSMFTINR  | 105 | 91   |
| >CDH1-N315 DKNMFTINR  | 419  | >CDH1-N315 DKSMFTINR  | 311 | 108  |
| >CDH1-N315 PDKNMFTI   | 86   | >CDH1-N315 PDKSMFTI   | 60  | 26   |
| >CDH1-N315 LPDKNMFTI  | 41   | >CDH1-N315 LPDKSMFTI  | 75  | 34   |
| >CDH1-N315 LPDKNMFTI  | 616  | >CDH1-N315 LPDKSMFTI  | 446 | 170  |
| >CDH1-N315 LPDKNMFTI  | 210  | >CDH1-N315 LPDKSMFTI  | 124 | 86   |
| >CDH1-N315 LPDKNMFTI  | 22   | >CDH1-N315 LPDKSMFTI  | 20  | 2    |
| >CDH1-N315 LPDKNMFTI  | 123  | >CDH1-N315 LPDKSMFTI  | 323 | 200  |
| >CDH1-N315 ELPDKNMFTI | 303  | >CDH1-N315 ELPDKSMFTI | 235 | 68   |
| >CDH1-N315 ELPDKNMFTI | 43   | >CDH1-N315 ELPDKSMFTI | 41  | 2    |
| >CDH1-N315 ELPDKNMFTI | 86   | >CDH1-N315 ELPDKSMFTI | 77  | 9    |
| >CDH1-N315 ELPDKNMFTI | 172  | >CDH1-N315 ELPDKSMFTI | 90  | 82   |
| >CDH1-N315 ELPDKNMFTI | 112  | >CDH1-N315 ELPDKSMFTI | 77  | 35   |

|                       |      |                       |      |      |
|-----------------------|------|-----------------------|------|------|
| >CDH1-N315 ELPDKNMFT  | 434  | >CDH1-N315 ELPDKSMFT  | 274  | 160  |
| >CDH1-N315 ELPDKNMFTI | 24   | >CDH1-N315 ELPDKSMFTI | 21   | 3    |
| >CDH1-N315 ELPDKNMFTI | 259  | >CDH1-N315 ELPDKSMFTI | 204  | 55   |
| >CDH1-N315 ELPDKNMFTI | 308  | >CDH1-N315 ELPDKSMFTI | 270  | 38   |
| >CDH1-N315 PELPDKNMF  | 118  | >CDH1-N315 PELPDKSMFT | 103  | 15   |
| >CDH1-N315 PELPDKNMF  | 257  | >CDH1-N315 PELPDKSMFT | 226  | 31   |
| >CDH1-N315 PELPDKNMF  | 453  | >CDH1-N315 PELPDKSMFT | 393  | 60   |
| >CDH1-N315 DPELPDKNM  | 1142 | >CDH1-N315 DPELPDKSM  | 317  | 825  |
| >CDH1-N369 DTNDNPPIF  | 74   | >CDH1-N369 DTDDNPPIF  | 2761 | 2687 |
| >CDH1-N369 DTNDNPPI   | 118  | >CDH1-N369 DTDDNPPI   | 1866 | 1748 |
| >CDH1-N369 DTNDNPPI   | 15   | >CDH1-N369 DTDDNPPI   | 8    | 7    |
| >CDH1-N369 TDTNDNPPI  | 240  | >CDH1-N369 TDTDDNPPI  | 158  | 82   |
| >CDH1-N369 VTDTNDNPPI | 190  | >CDH1-N369 VTDTDDNPPI | 360  | 170  |
| >CDH1-N369 VTDTNDNPPI | 33   | >CDH1-N369 VTDTDDNPPI | 110  | 77   |
| >CDH1-N369 VTDTNDNPPI | 387  | >CDH1-N369 VTDTDDNPPI | 583  | 196  |
| >CDH1-N369 VTDTNDNPPI | 246  | >CDH1-N369 VTDTDDNPPI | 383  | 137  |
| >CDH1-N369 TVTDTNDNPI | 233  | >CDH1-N369 TVTDTDDNPI | 250  | 17   |
| >CDH1-N369 TVTDTNDNPI | 46   | >CDH1-N369 TVTDTDDNPI | 46   | 0    |
| >CDH1-N369 TVTDTNDNPI | 48   | >CDH1-N369 TVTDTDDNPI | 144  | 96   |
| >CDH1-N428 NPVNNDGIL  | 188  | >CDH1-N428 DPVNNDGIL  | 7148 | 6960 |
| >CDH1-N428 NPVNNDGIL  | 328  | >CDH1-N428 DPVNNDGIL  | 603  | 275  |
| >CDH1-N428 NPVNNDGI   | 460  | >CDH1-N428 DPVNNDGI   | 3172 | 2712 |
| >CDH1-N428 TNPVNNDGI  | 7690 | >CDH1-N428 TDPVNNDGI  | 169  | 7521 |
| >CDH1-N428 TTNPVNNDG  | 234  | >CDH1-N428 TTDPVNNDG  | 646  | 412  |
| >CDH1-N428 TTNPVNNDG  | 58   | >CDH1-N428 TTDPVNNDG  | 1034 | 976  |
| >CDH1-N428 TTNPVNNDG  | 225  | >CDH1-N428 TTDPVNNDG  | 104  | 121  |
| >CDH1-N428 TTNPVNNDG  | 362  | >CDH1-N428 TTDPVNNDG  | 764  | 402  |
| >CDH1-N428 VTTNPVNND  | 205  | >CDH1-N428 VTTPVNND   | 77   | 128  |
| >CDH1-N428 VTTNPVNND  | 591  | >CDH1-N428 VTTPVNND   | 208  | 383  |
| >CDH1-N428 VTTNPVNND  | 344  | >CDH1-N428 VTTPVNND   | 166  | 178  |
| >CDH1-N428 VTTNPVNND  | 243  | >CDH1-N428 VTTPVNND   | 266  | 23   |
| >CDH1-N428 FVVTTNPV   | 39   | >CDH1-N428 FVVTTDPV   | 70   | 31   |
| >CDH1-N428 FVVTTNPV   | 17   | >CDH1-N428 FVVTTDPV   | 29   | 12   |
| >CDH1-N428 FVVTTNPV   | 9    | >CDH1-N428 FVVTTDPV   | 16   | 7    |
| >CDH1-N428 FVVTTNPV   | 4    | >CDH1-N428 FVVTTDPV   | 4    | 0    |
| >CDH1-N428 FVVTTNPV   | 35   | >CDH1-N428 FVVTTDPV   | 36   | 1    |
| >CDH1-N428 FVVTTNPV   | 25   | >CDH1-N428 FVVTTDPV   | 24   | 1    |
| >CDH1-N428 FVVTTNPV   | 73   | >CDH1-N428 FVVTTDPV   | 44   | 29   |
| >CDH1-N428 FVVTTNPV   | 449  | >CDH1-N428 FVVTTDPV   | 603  | 154  |
| >CDH1-N428 FVVTTNPV   | 7    | >CDH1-N428 FVVTTDPV   | 11   | 4    |
| >CDH1-N428 FVVTTNPV   | 13   | >CDH1-N428 FVVTTDPV   | 17   | 4    |
| >CDH1-N428 FVVTTNPV   | 9    | >CDH1-N428 FVVTTDPV   | 27   | 18   |
| >CDH1-N428 FVVTTNPV   | 222  | >CDH1-N428 FVVTTDPV   | 436  | 214  |

|                        |       |                        |       |       |
|------------------------|-------|------------------------|-------|-------|
| >CDH1-N428 QFVVTTNPV   | 464   | >CDH1-N428 QFVVTTDPV   | 328   | 136   |
| >CDH1-N428 GQFVVTTNP\  | 123   | >CDH1-N428 GQFVVTTDP\  | 125   | 2     |
| >CDH1-N428 GQFVVTTNP\  | 70    | >CDH1-N428 GQFVVTTDP\  | 116   | 46    |
| >CDH1-N428 GQFVVTTNP\  | 140   | >CDH1-N428 GQFVVTTDP\  | 132   | 8     |
| >CDH1-N428 GQFVVTTNP\  | 88    | >CDH1-N428 GQFVVTTDP\  | 88    | 0     |
| >CDH1-N428 GQFVVTTNP\  | 35    | >CDH1-N428 GQFVVTTDP\  | 42    | 7     |
| >CDH1-N428 GQFVVTTNP\  | 36    | >CDH1-N428 GQFVVTTDP\  | 33    | 3     |
| >CDH1-N428 GQFVVTTNP\  | 266   | >CDH1-N428 GQFVVTTDP\  | 450   | 184   |
| >CDH1-N428 GQFVVTTNP\  | 34    | >CDH1-N428 GQFVVTTDP\  | 106   | 72    |
| >CDH1-P245\ PMEILITV   | 4833  | >CDH1-P245\ LMEILITV   | 101   | 4732  |
| >CDH1-P245\ PMEILITV   | 2075  | >CDH1-P245\ LMEILITV   | 151   | 1924  |
| >CDH1-P245\ PMEILITV   | 2203  | >CDH1-P245\ LMEILITV   | 109   | 2094  |
| >CDH1-P245\ PMEILITV   | 3882  | >CDH1-P245\ LMEILITV   | 134   | 3748  |
| >CDH1-P245\ PMEILITV   | 51    | >CDH1-P245\ LMEILITV   | 4     | 47    |
| >CDH1-P245\ PMEILITV   | 389   | >CDH1-P245\ LMEILITV   | 11    | 378   |
| >CDH1-P245\ PMEILITV   | 185   | >CDH1-P245\ LMEILITV   | 19    | 166   |
| >CDH1-P245\ PMEILITV   | 1974  | >CDH1-P245\ LMEILITV   | 148   | 1826  |
| >CDH1-P245\ PMEILITV   | 15    | >CDH1-P245\ LMEILITV   | 2     | 13    |
| >CDH1-P245\ DPMEILITV  | 16703 | >CDH1-P245\ DLMEILITV  | 27    | 16676 |
| >CDH1-P245\ DPMEILITVT | 22447 | >CDH1-P245\ DLMEILITVT | 467   | 21980 |
| >CDH1-P245\ DPMEILITV  | 13116 | >CDH1-P245\ DLMEILITV  | 49    | 13067 |
| >CDH1-P245\ DPMEILITVT | 21417 | >CDH1-P245\ DLMEILITVT | 474   | 20943 |
| >CDH1-P245\ DPMEILITV  | 10802 | >CDH1-P245\ DLMEILITV  | 35    | 10767 |
| >CDH1-P245\ DPMEILITVT | 19533 | >CDH1-P245\ DLMEILITVT | 202   | 19331 |
| >CDH1-P245\ DPMEILITV  | 5304  | >CDH1-P245\ DLMEILITV  | 17    | 5287  |
| >CDH1-P245\ DPMEILITV  | 8896  | >CDH1-P245\ DLMEILITV  | 2     | 8894  |
| >CDH1-P245\ DPMEILITV  | 12689 | >CDH1-P245\ DLMEILITV  | 4     | 12685 |
| >CDH1-P245\ DPMEILITV  | 14359 | >CDH1-P245\ DLMEILITV  | 9     | 14350 |
| >CDH1-P245\ DPMEILITV  | 6809  | >CDH1-P245\ DLMEILITV  | 2     | 6807  |
| >CDH1-P245\ DPMEILITVT | 18559 | >CDH1-P245\ DLMEILITVT | 335   | 18224 |
| >CDH1-P245\ DPMEILITV  | 16770 | >CDH1-P245\ DLMEILITV  | 3     | 16767 |
| >CDH1-P245\ DPMEILITV  | 184   | >CDH1-P245\ DLMEILITV  | 36    | 148   |
| >CDH1-P245\ DPMEILITV  | 12    | >CDH1-P245\ DLMEILITV  | 6     | 6     |
| >CDH1-P245\ DPMEILITV  | 455   | >CDH1-P245\ DLMEILITV  | 15060 | 14605 |
| >CDH1-P245\ DPMEILITV  | 293   | >CDH1-P245\ DLMEILITV  | 22607 | 22314 |
| >CDH1-P245\ DPMEILITV  | 104   | >CDH1-P245\ DLMEILITV  | 28556 | 28452 |
| >CDH1-P245\ VSSNGNAVEI | 20583 | >CDH1-P245\ VSSNGNAVEI | 134   | 20449 |
| >CDH1-P245\ EDPMEILI   | 2340  | >CDH1-P245\ EDLMEILI   | 227   | 2113  |
| >CDH1-P245\ EDPMEILI   | 1056  | >CDH1-P245\ EDLMEILI   | 464   | 592   |
| >CDH1-P245\ EDPMEILI   | 259   | >CDH1-P245\ EDLMEILI   | 39    | 220   |
| >CDH1-P245\ EDPMEILITV | 805   | >CDH1-P245\ EDLMEILITV | 91    | 714   |
| >CDH1-P245\ VEDPMEIL   | 2291  | >CDH1-P245\ VEDLMEIL   | 78    | 2213  |
| >CDH1-P245\ VEDPMEILI  | 38    | >CDH1-P245\ VEDLMEILI  | 18    | 20    |

|                        |       |                        |      |       |
|------------------------|-------|------------------------|------|-------|
| >CDH1-P245 VEDPMEILITV | 507   | >CDH1-P245 VEDLMEILITV | 301  | 206   |
| >CDH1-P245 VEDPMEIL    | 44    | >CDH1-P245 VEDLMEIL    | 45   | 1     |
| >CDH1-P245 VEDPMEILI   | 340   | >CDH1-P245 VEDLMEILI   | 338  | 2     |
| >CDH1-P245 VEDPMEILITV | 182   | >CDH1-P245 VEDLMEILITV | 190  | 8     |
| >CDH1-P245 VEDPMEILI   | 52    | >CDH1-P245 VEDLMEILI   | 21   | 31    |
| >CDH1-P245 VEDPMEILITV | 104   | >CDH1-P245 VEDLMEILITV | 47   | 57    |
| >CDH1-P245 AVEDPMEIL   | 2558  | >CDH1-P245 AVEDLMEIL   | 437  | 2121  |
| >CDH1-P245 AVEDPMEI    | 1269  | >CDH1-P245 AVEDLMEI    | 196  | 1073  |
| >CDH1-P245 NAVEDPMEI   | 2421  | >CDH1-P245 NAVEDLMEI   | 77   | 2344  |
| >CDH1-P245 NAVEDPMEIL  | 1140  | >CDH1-P245 NAVEDLMEIL  | 484  | 656   |
| >CDH1-P245 NAVEDPMEI   | 96    | >CDH1-P245 NAVEDLMEI   | 72   | 24    |
| >CDH1-P245 NAVEDPMEIL  | 327   | >CDH1-P245 NAVEDLMEIL  | 345  | 18    |
| >CDH1-P245 NAVEDPMEI   | 86    | >CDH1-P245 NAVEDLMEI   | 45   | 41    |
| >CDH1-P245 NAVEDPMEIL  | 430   | >CDH1-P245 NAVEDLMEIL  | 402  | 28    |
| >CDH1-P245 NAVEDPMEI   | 501   | >CDH1-P245 NAVEDLMEI   | 401  | 100   |
| >CDH1-P245 NAVEDPMEIL  | 413   | >CDH1-P245 NAVEDLMEI   | 748  | 335   |
| >CDH1-P245 NAVEDPMEI   | 337   | >CDH1-P245 NAVEDLMEIL  | 440  | 103   |
| >CDH1-P245 NGNAVEDPM   | 246   | >CDH1-P245 NGNAVEDLM   | 3221 | 2975  |
| >CDH1-P245 SSNGNAVEDI  | 137   | >CDH1-P245 SSNGNAVEDI  | 601  | 464   |
| >CDH1-P245 SSNGNAVEDI  | 22210 | >CDH1-P245 SSNGNAVEDI  | 282  | 21928 |
| >CDH1-P245 SSNGNAVEDI  | 186   | >CDH1-P245 SSNGNAVEDI  | 427  | 241   |
| >CDH1-P245 SSNGNAVEDI  | 452   | >CDH1-P245 SSNGNAVEDI  | 3511 | 3059  |
| >CDH1-P245 SSNGNAVEDI  | 1116  | >CDH1-P245 SSNGNAVEDI  | 122  | 994   |
| >CDH1-P260 PEFTQEVF    | 9625  | >CDH1-P260 LEFTQEVF    | 288  | 9337  |
| >CDH1-P260 PEFTQEVF    | 200   | >CDH1-P260 LEFTQEVF    | 12   | 188   |
| >CDH1-P260 PEFTQEVF    | 398   | >CDH1-P260 LEFTQEVF    | 25   | 373   |
| >CDH1-P260 PEFTQEVF    | 1970  | >CDH1-P260 LEFTQEVF    | 106  | 1864  |
| >CDH1-P260 PEFTQEVF    | 3790  | >CDH1-P260 LEFTQEVF    | 331  | 3459  |
| >CDH1-P260 PEFTQEVF    | 992   | >CDH1-P260 LEFTQEVF    | 234  | 758   |
| >CDH1-P260 KPEFTQEV    | 22869 | >CDH1-P260 KLEFTQEV    | 192  | 22677 |
| >CDH1-P260 KPEFTQEV    | 24725 | >CDH1-P260 KLEFTQEV    | 31   | 24694 |
| >CDH1-P260 KPEFTQEV    | 21179 | >CDH1-P260 KLEFTQEV    | 100  | 21079 |
| >CDH1-P260 KPEFTQEV    | 16980 | >CDH1-P260 KLEFTQEV    | 395  | 16585 |
| >CDH1-P260 KPEFTQEV    | 19070 | >CDH1-P260 KLEFTQEV    | 10   | 19060 |
| >CDH1-P260 KPEFTQEV    | 20163 | >CDH1-P260 KLEFTQEV    | 15   | 20148 |
| >CDH1-P260 KPEFTQEV    | 22283 | >CDH1-P260 KLEFTQEV    | 31   | 22252 |
| >CDH1-P260 KPEFTQEV    | 23929 | >CDH1-P260 KLEFTQEV    | 95   | 23834 |
| >CDH1-P260 KPEFTQEV    | 23471 | >CDH1-P260 KLEFTQEV    | 4    | 23467 |
| >CDH1-P260 KPEFTQEVFK  | 6107  | >CDH1-P260 KLEFTQEVFK  | 39   | 6068  |
| >CDH1-P260 KPEFTQEVFK  | 7660  | >CDH1-P260 KLEFTQEVFK  | 142  | 7518  |
| >CDH1-P260 KPEFTQEVFK  | 10159 | >CDH1-P260 KLEFTQEVFK  | 165  | 9994  |
| >CDH1-P260 KPEFTQEVF   | 11274 | >CDH1-P260 KLEFTQEVF   | 70   | 11204 |
| >CDH1-P260 KPEFTQEVFK  | 9059  | >CDH1-P260 KLEFTQEVFK  | 187  | 8872  |

|                        |       |                        |      |       |
|------------------------|-------|------------------------|------|-------|
| >CDH1-P260!ITVTDQNDNF  | 19220 | >CDH1-P260!ITVTDQNDNF  | 378  | 18842 |
| >CDH1-P260!ITVTDQNDNF  | 18365 | >CDH1-P260!ITVTDQNDNF  | 92   | 18273 |
| >CDH1-P260!ITVTDQNDNF  | 15419 | >CDH1-P260!ITVTDQNDNF  | 496  | 14923 |
| >CDH1-P260!NKPEFTQEV   | 1005  | >CDH1-P260!NKLEFTQEV   | 360  | 645   |
| >CDH1-P260!NKPEFTQEV   | 2462  | >CDH1-P260!NKLEFTQEV   | 318  | 2144  |
| >CDH1-P260!NKPEFTQEV   | 4642  | >CDH1-P260!NKLEFTQEV   | 124  | 4518  |
| >CDH1-P260!NKPEFTQEV   | 1202  | >CDH1-P260!NKLEFTQEV   | 118  | 1084  |
| >CDH1-P260!NKPEFTQEVF  | 54    | >CDH1-P260!NKLEFTQEVF  | 7    | 47    |
| >CDH1-P260!DQNDNKPEF   | 253   | >CDH1-P260!DQNDNKLEF   | 241  | 12    |
| >CDH1-P260!DQNDNKPEF   | 309   | >CDH1-P260!DQNDNKLEF   | 204  | 105   |
| >CDH1-P260!VTDQNDNKP   | 1049  | >CDH1-P260!VTDQNDNKL   | 126  | 923   |
| >CDH1-P260!VTDQNDNKP   | 21201 | >CDH1-P260!VTDQNDNKL   | 217  | 20984 |
| >CDH1-P260!VTDQNDNKP   | 16    | >CDH1-P260!VTDQNDNKL   | 10   | 6     |
| >CDH1-P309!PELPDKNM    | 7768  | >CDH1-P309!SELPDKNM    | 311  | 7457  |
| >CDH1-P309!PELPDKNMF   | 3757  | >CDH1-P309!SELPDKNMF   | 350  | 3407  |
| >CDH1-P309!PELPDKNMF   | 118   | >CDH1-P309!SELPDKNMF   | 12   | 106   |
| >CDH1-P309!PELPDKNMF   | 2566  | >CDH1-P309!SELPDKNMF   | 394  | 2172  |
| >CDH1-P309!PELPDKNMF   | 1941  | >CDH1-P309!SELPDKNMF   | 483  | 1458  |
| >CDH1-P309!PELPDKNMF   | 1468  | >CDH1-P309!SELPDKNMF   | 125  | 1343  |
| >CDH1-P309!PELPDKNMF   | 2795  | >CDH1-P309!SELPDKNMF   | 348  | 2447  |
| >CDH1-P309!PELPDKNMF   | 11916 | >CDH1-P309!SELPDKNMF   | 495  | 11421 |
| >CDH1-P309!PELPDKNMF   | 257   | >CDH1-P309!SELPDKNMF   | 32   | 225   |
| >CDH1-P309!PELPDKNMF   | 453   | >CDH1-P309!SELPDKNMF   | 499  | 46    |
| >CDH1-P309!LSQDPELPDK  | 160   | >CDH1-P309!LSQDSELPDK  | 166  | 6     |
| >CDH1-P309!ILSQDPEL    | 117   | >CDH1-P309!ILSQDSEL    | 351  | 234   |
| >CDH1-P309!ILSQDPEL    | 14    | >CDH1-P309!ILSQDSEL    | 7    | 7     |
| >CDH1-P309!ILSQDPEL    | 190   | >CDH1-P309!ILSQDSEL    | 83   | 107   |
| >CDH1-P309!ILSQDPEL    | 28    | >CDH1-P309!ILSQDSEL    | 57   | 29    |
| >CDH1-P309!ILSQDPEL    | 181   | >CDH1-P309!ILSQDSEL    | 147  | 34    |
| >CDH1-P309!ILSQDPEL    | 30    | >CDH1-P309!ILSQDSEL    | 77   | 47    |
| >CDH1-P309!ILSQDPEL    | 55    | >CDH1-P309!ILSQDSEL    | 130  | 75    |
| >CDH1-P309!ILSQDPEL    | 6     | >CDH1-P309!ILSQDSEL    | 5    | 1     |
| >CDH1-P309!ILSQDPELPDK | 529   | >CDH1-P309!ILSQDSELPDK | 410  | 119   |
| >CDH1-P309!TILSQDPEL   | 216   | >CDH1-P309!TILSQDSEL   | 1601 | 1385  |
| >CDH1-P309!TILSQDPEL   | 191   | >CDH1-P309!TILSQDSEL   | 583  | 392   |
| >CDH1-P309!YTILSQDPEL  | 426   | >CDH1-P309!YTILSQDSEL  | 1105 | 679   |
| >CDH1-P309!YTILSQDPEL  | 213   | >CDH1-P309!YTILSQDSEL  | 134  | 79    |
| >CDH1-P309!YTILSQDPEL  | 1330  | >CDH1-P309!YTILSQDSEL  | 492  | 838   |
| >CDH1-P309!YTILSQDPEL  | 82    | >CDH1-P309!YTILSQDSEL  | 141  | 59    |
| >CDH1-P309!YTILSQDPEL  | 29    | >CDH1-P309!YTILSQDSEL  | 30   | 1     |
| >CDH1-P309!YTILSQDPEL  | 457   | >CDH1-P309!YTILSQDSEL  | 1753 | 1296  |
| >CDH1-P309!YTILSQDPEL  | 7     | >CDH1-P309!YTILSQDSEL  | 6    | 1     |
| >CDH1-P309!YTILSQDPEL  | 209   | >CDH1-P309!YTILSQDSEL  | 88   | 121   |

|                        |       |                        |       |       |
|------------------------|-------|------------------------|-------|-------|
| >CDH1-P309:YTILSQDPEL  | 929   | >CDH1-P309:YTILSQDSEL  | 175   | 754   |
| >CDH1-P309:AYTILSQDPEL | 937   | >CDH1-P309:AYTILSQDSEL | 33    | 904   |
| >CDH1-P309:AYTILSQDPEL | 18    | >CDH1-P309:AYTILSQDSEL | 17    | 1     |
| >CDH1-P30T·PGFDAESY    | 1471  | >CDH1-P30T·TGFDAESY    | 370   | 1101  |
| >CDH1-P30T·PGFDAESY    | 4861  | >CDH1-P30T·TGFDAESY    | 445   | 4416  |
| >CDH1-P30T·PGFDAESYTF  | 837   | >CDH1-P30T·TGFDAESYTF  | 330   | 507   |
| >CDH1-P30T·PGFDAESYTF  | 6789  | >CDH1-P30T·TGFDAESYTF  | 185   | 6604  |
| >CDH1-P30T·PGFDAESY    | 3344  | >CDH1-P30T·TGFDAESY    | 273   | 3071  |
| >CDH1-P30T·HPGFDAESY   | 22331 | >CDH1-P30T·HTGFDAESY   | 448   | 21883 |
| >CDH1-P30T·HPGFDAESY   | 14755 | >CDH1-P30T·HTGFDAESY   | 388   | 14367 |
| >CDH1-P30T·HPGFDAESY   | 8227  | >CDH1-P30T·HTGFDAESY   | 81    | 8146  |
| >CDH1-P30T·HPGFDAESY   | 3689  | >CDH1-P30T·HTGFDAESY   | 91    | 3598  |
| >CDH1-P30T·HPGFDAESY   | 3106  | >CDH1-P30T·HTGFDAESY   | 139   | 2967  |
| >CDH1-P30T·HPGFDAESYT  | 4725  | >CDH1-P30T·HTGFDAESYT  | 18    | 4707  |
| >CDH1-P30T·HPGFDAESY   | 3217  | >CDH1-P30T·HTGFDAESY   | 101   | 3116  |
| >CDH1-P30T·HPGFDAESY   | 8291  | >CDH1-P30T·HTGFDAESY   | 370   | 7921  |
| >CDH1-P30T·HPGFDAESYT  | 10407 | >CDH1-P30T·HTGFDAESYT  | 420   | 9987  |
| >CDH1-P30T·HPGFDAESY   | 20198 | >CDH1-P30T·HTGFDAESY   | 120   | 20078 |
| >CDH1-P30T·HPGFDAESYT  | 15553 | >CDH1-P30T·HTGFDAESYT  | 22    | 15531 |
| >CDH1-P30T·HPGFDAESY   | 19    | >CDH1-P30T·HTGFDAESY   | 2529  | 2510  |
| >CDH1-P30T·HPGFDAESYT  | 13    | >CDH1-P30T·HTGFDAESYT  | 643   | 630   |
| >CDH1-P30T·HPGFDAESY   | 112   | >CDH1-P30T·HTGFDAESY   | 16493 | 16381 |
| >CDH1-P30T·HPGFDAESYT  | 60    | >CDH1-P30T·HTGFDAESYT  | 10109 | 10049 |
| >CDH1-P30T·HPGFDAESY   | 6020  | >CDH1-P30T·HTGFDAESY   | 118   | 5902  |
| >CDH1-P30T·HPGFDAESYT  | 8136  | >CDH1-P30T·HTGFDAESYT  | 212   | 7924  |
| >CDH1-P30T·HPGFDAESYT  | 145   | >CDH1-P30T·HTGFDAESYT  | 2897  | 2752  |
| >CDH1-P30T·HPGFDAESY   | 2228  | >CDH1-P30T·HTGFDAESY   | 219   | 2009  |
| >CDH1-P30T·WLCQEPEPCI  | 4218  | >CDH1-P30T·WLCQEPEPCI  | 264   | 3954  |
| >CDH1-P30T·WLCQEPEPCI  | 7252  | >CDH1-P30T·WLCQEPEPCI  | 253   | 6999  |
| >CDH1-P30T·EPCHPGFDA   | 194   | >CDH1-P30T·EPCHTGFDA   | 287   | 93    |
| >CDH1-P30T·EPEPCHPGF   | 39    | >CDH1-P30T·EPEPCHTGF   | 29    | 10    |
| >CDH1-P30T·QEPEPCHPGF  | 311   | >CDH1-P30T·QEPEPCHTGF  | 182   | 129   |
| >CDH1-P30T·QEPEPCHPGF  | 431   | >CDH1-P30T·QEPEPCHTGF  | 220   | 211   |
| >CDH1-P30T·CQEPEPCHPG  | 251   | >CDH1-P30T·CQEPEPCHTGF | 174   | 77    |
| >CDH1-P740:PLLPPEDDT   | 8015  | >CDH1-P740:SLLPPEDDT   | 339   | 7676  |
| >CDH1-P740:EPLLPPEDDTI | 2186  | >CDH1-P740:ESLLPPEDDTI | 91    | 2095  |
| >CDH1-P740:FLRRRAVVKE  | 879   | >CDH1-P740:FLRRRAVVKE  | 458   | 421   |
| >CDH1-P740:RAVVKEPLL   | 287   | >CDH1-P740:RAVVKESLL   | 432   | 145   |
| >CDH1-P740:RAVVKEPL    | 32    | >CDH1-P740:RAVVKESL    | 34    | 2     |
| >CDH1-P740:RAVVKEPLL   | 25    | >CDH1-P740:RAVVKESLL   | 17    | 8     |
| >CDH1-P740:RAVVKEPLL   | 7742  | >CDH1-P740:RAVVKESLL   | 332   | 7410  |
| >CDH1-P740:RRAVVKEP    | 986   | >CDH1-P740:RRAVVKES    | 413   | 573   |
| >CDH1-P740:RRAVVKEPL   | 28    | >CDH1-P740:RRAVVKESL   | 39    | 11    |



|                         |      |                         |      |      |
|-------------------------|------|-------------------------|------|------|
| >CDH1-P740: RRAVVKEPLL  | 17   | >CDH1-P740: RRAVVKESLL  | 19   | 2    |
| >CDH1-P740: RRAVVKEPL   | 493  | >CDH1-P740: RRAVVKESL   | 918  | 425  |
| >CDH1-P740: RRAVVKEP    | 137  | >CDH1-P740: RRAVVKES    | 262  | 125  |
| >CDH1-P740: RRAVVKEPL   | 27   | >CDH1-P740: RRAVVKESL   | 31   | 4    |
| >CDH1-P740: RRAVVKEPLL  | 44   | >CDH1-P740: RRAVVKESLL  | 52   | 8    |
| >CDH1-P740: RRAVVKEPLL  | 146  | >CDH1-P740: RRAVVKESLL  | 186  | 40   |
| >CDH1-P740: RRAVVKEPL   | 23   | >CDH1-P740: RRAVVKESL   | 23   | 0    |
| >CDH1-P740: RRAVVKEPLL  | 53   | >CDH1-P740: RRAVVKESLL  | 56   | 3    |
| >CDH1-P740: RRAVVKEPLL  | 465  | >CDH1-P740: RRAVVKESLL  | 652  | 187  |
| >CDH1-P740: RRRRAVVKEPL | 248  | >CDH1-P740: RRRRAVVKESL | 746  | 498  |
| >CDH1-P740: RRRRAVVKEPL | 91   | >CDH1-P740: RRRRAVVKESL | 106  | 15   |
| >CDH1-P740: RRRRAVVKEPL | 246  | >CDH1-P740: RRRRAVVKESL | 141  | 105  |
| >CDH1-P740: RRRRAVVKEPL | 14   | >CDH1-P740: RRRRAVVKESL | 13   | 1    |
| >CDH1-P740: RRRRAVVKEPL | 72   | >CDH1-P740: RRRRAVVKESL | 67   | 5    |
| >CDH1-P740: RRRRAVVKEP  | 135  | >CDH1-P740: RRRRAVVKES  | 98   | 37   |
| >CDH1-P740: RRRRAVVKEPL | 17   | >CDH1-P740: RRRRAVVKESL | 17   | 0    |
| >CDH1-P740: RRRRAVVKEPL | 15   | >CDH1-P740: RRRRAVVKESL | 15   | 0    |
| >CDH1-P740: RRRRAVVKEPL | 27   | >CDH1-P740: RRRRAVVKESL | 26   | 1    |
| >CDH1-P740: RRRRAVVKEPL | 9    | >CDH1-P740: RRRRAVVKESL | 9    | 0    |
| >CDH1-P740: LRRRAVVKEP  | 136  | >CDH1-P740: LRRRAVVKES  | 149  | 13   |
| >CDH1-P740: LRRRAVVKEP  | 231  | >CDH1-P740: LRRRAVVKES  | 315  | 84   |
| >CDH1-P740: LRRRAVVKEP  | 337  | >CDH1-P740: LRRRAVVKES  | 471  | 134  |
| >CDH1-P740: LRRRAVVKEP  | 158  | >CDH1-P740: LRRRAVVKES  | 140  | 18   |
| >CDH1-R598: RTIFFCERNPI | 224  | >CDH1-R598: QTIFFCERNPI | 2999 | 2775 |
| >CDH1-R598: RTIFFCER    | 27   | >CDH1-R598: QTIFFCER    | 120  | 93   |
| >CDH1-R598: RTIFFCERNPI | 11   | >CDH1-R598: QTIFFCERNPI | 22   | 11   |
| >CDH1-R598: RTIFFCERNPI | 15   | >CDH1-R598: QTIFFCERNPI | 204  | 189  |
| >CDH1-R598: RTIFFCER    | 8    | >CDH1-R598: QTIFFCER    | 40   | 32   |
| >CDH1-R598: RTIFFCERNPI | 47   | >CDH1-R598: QTIFFCERNPI | 1167 | 1120 |
| >CDH1-R598: RTIFFCER    | 157  | >CDH1-R598: QTIFFCER    | 67   | 90   |
| >CDH1-R598: RTIFFCER    | 8    | >CDH1-R598: QTIFFCER    | 3    | 5    |
| >CDH1-R598: RTIFFCERNPI | 32   | >CDH1-R598: QTIFFCERNPI | 8    | 24   |
| >CDH1-R598: RTIFFCERN   | 474  | >CDH1-R598: QTIFFCERN   | 2012 | 1538 |
| >CDH1-R598: RTIFFCER    | 159  | >CDH1-R598: QTIFFCER    | 92   | 67   |
| >CDH1-R598: RTIFFCERNPI | 376  | >CDH1-R598: QTIFFCERNPI | 211  | 165  |
| >CDH1-R598: RTIFFCER    | 54   | >CDH1-R598: QTIFFCER    | 154  | 100  |
| >CDH1-R598: PRTIFFCER   | 8330 | >CDH1-R598: PQTIFFCER   | 395  | 7935 |
| >CDH1-R598: PRTIFFCER   | 147  | >CDH1-R598: PQTIFFCER   | 75   | 72   |
| >CDH1-R598: EPRTIFFCER  | 248  | >CDH1-R598: EPQTIFFCER  | 366  | 118  |
| >CDH1-R598: EPRTIFFCER  | 204  | >CDH1-R598: EPQTIFFCER  | 150  | 54   |
| >CDH1-R598: PEPRTIFFCER | 545  | >CDH1-R598: PEPQTIFFCER | 200  | 345  |
| >CDH1-R598: IPEPRTIFF   | 19   | >CDH1-R598: IPEPQTIFF   | 15   | 4    |
| >CDH1-R598: IPEPRTIF    | 46   | >CDH1-R598: IPEPQTIF    | 403  | 357  |

|                        |     |                        |       |       |
|------------------------|-----|------------------------|-------|-------|
| >CDH1-R598\IPEPRTIFF   | 163 | >CDH1-R598\IPEPQTIFF   | 1541  | 1378  |
| >CDH1-R598\IPEPRTIF    | 69  | >CDH1-R598\IPEPQTIF    | 28    | 41    |
| >CDH1-R598\IPEPRTIFF   | 71  | >CDH1-R598\IPEPQTIFF   | 22    | 49    |
| >CDH1-R598\IPEPRTIF    | 395 | >CDH1-R598\IPEPQTIF    | 120   | 275   |
| >CDH1-R598\IPEPRTIFF   | 391 | >CDH1-R598\IPEPQTIFF   | 83    | 308   |
| >CDH1-R598\IPEPRTIF    | 990 | >CDH1-R598\IPEPQTIF    | 318   | 672   |
| >CDH1-R598\IPEPRTIFF   | 908 | >CDH1-R598\IPEPQTIFF   | 194   | 714   |
| >CDH1-R598\IPEPRTIF    | 87  | >CDH1-R598\IPEPQTIF    | 62    | 25    |
| >CDH1-R598\IPEPRTIFF   | 30  | >CDH1-R598\IPEPQTIFF   | 20    | 10    |
| >CDH1-R598\APIPEPRTIF  | 479 | >CDH1-R598\APIPEPQTIF  | 252   | 227   |
| >CDH1-R598\APIPEPRTIFF | 45  | >CDH1-R598\APIPEPQTIFF | 18    | 27    |
| >CDH1-R598\APIPEPRTIF  | 165 | >CDH1-R598\APIPEPQTIF  | 464   | 299   |
| >CDH1-R598\APIPEPRTIF  | 99  | >CDH1-R598\APIPEPQTIF  | 69    | 30    |
| >CDH1-R598\APIPEPRTIFF | 273 | >CDH1-R598\APIPEPQTIFF | 173   | 100   |
| >CDH1-R598\APIPEPRTIF  | 559 | >CDH1-R598\APIPEPQTIF  | 68    | 491   |
| >CDH1-R598\APIPEPRTIFF | 129 | >CDH1-R598\APIPEPQTIFF | 65    | 64    |
| >CDH1-R598\APIPEPRTI   | 543 | >CDH1-R598\APIPEPQTI   | 289   | 254   |
| >CDH1-R598\APIPEPRTIFF | 425 | >CDH1-R598\APIPEPQTIFF | 215   | 210   |
| >CDH1-R598\APIPEPRTIF  | 239 | >CDH1-R598\APIPEPQTIF  | 254   | 15    |
| >CDH1-R598\APIPEPRTIFF | 368 | >CDH1-R598\APIPEPQTIFF | 304   | 64    |
| >CDH1-R598\APIPEPRTIFF | 264 | >CDH1-R598\APIPEPQTIFF | 231   | 33    |
| >CDH1-R598\NAPIPEPR    | 293 | >CDH1-R598\NAPIPEPQ    | 15551 | 15258 |
| >CDH1-R598\NAPIPEPRTIF | 315 | >CDH1-R598\NAPIPEPQTIF | 312   | 3     |
| >CDH1-R598\DNAPIPEPR   | 98  | >CDH1-R598\DNAPIPEPQ   | 11876 | 11778 |
| >CDH1-R774\RGLDARPEV   | 415 | >CDH1-R774\KGLDARPEV   | 282   | 133   |
| >CDH1-R774\RGLDARPEV   | 556 | >CDH1-R774\KGLDARPEV   | 231   | 325   |
| >CDH1-R774\RGLDARPEV   | 428 | >CDH1-R774\KGLDARPEV   | 421   | 7     |
| >CDH1-R774\RGLDARPEV   | 204 | >CDH1-R774\KGLDARPEV   | 233   | 29    |
| >CDH1-R774\RGLDARPEVT  | 124 | >CDH1-R774\KGLDARPEVT  | 139   | 15    |
| >CDH1-R774\RGLDARPEVT  | 101 | >CDH1-R774\KGLDARPEVT  | 56    | 45    |
| >CDH1-R774\HRGLDARPEV  | 497 | >CDH1-R774\HKGLDARPEV  | 18133 | 17636 |
| >CDH1-R774\QLHRGLDA    | 246 | >CDH1-R774\QLHKGLDA    | 495   | 249   |
| >CDH1-R774\SQLHRGLDAF  | 196 | >CDH1-R774\SQLHKGLDAF  | 356   | 160   |
| >CDH1-R774\SQLHRGLDA   | 466 | >CDH1-R774\SQLHKGLDA   | 1017  | 551   |
| >CDH1-R774\LSQLHRGLDA  | 117 | >CDH1-R774\LSQLHKGLDA  | 160   | 43    |
| >CDH1-R774\LSQLHRGL    | 124 | >CDH1-R774\LSQLHKGL    | 88    | 36    |
| >CDH1-R774\DFDLSQLHR   | 44  | >CDH1-R774\DFDLSQLHK   | 1234  | 1190  |
| >CDH1-R774\QDFDLSQLHF  | 120 | >CDH1-R774\QDFDLSQLHK  | 3113  | 2993  |
| >CDH1-S559I\STYTALIIA  | 462 | >CDH1-S559I\NTYTALIIA  | 718   | 256   |
| >CDH1-S559I\STYTALIIAT | 227 | >CDH1-S559I\NTYTALIIAT | 502   | 275   |
| >CDH1-S559I\STYTALII   | 395 | >CDH1-S559I\NTYTALII   | 1200  | 805   |
| >CDH1-S559I\STYTALIIA  | 273 | >CDH1-S559I\NTYTALIIA  | 854   | 581   |
| >CDH1-S559I\STYTALIIAT | 142 | >CDH1-S559I\NTYTALIIAT | 343   | 201   |

|                         |     |                         |      |      |
|-------------------------|-----|-------------------------|------|------|
| >CDH1-S559I STYTALII    | 268 | >CDH1-S559I NTYTALII    | 5913 | 5645 |
| >CDH1-S559I STYTALIIA   | 86  | >CDH1-S559I NTYTALIIA   | 3806 | 3720 |
| >CDH1-S559I STYTALII    | 86  | >CDH1-S559I NTYTALII    | 857  | 771  |
| >CDH1-S559I STYTALII    | 450 | >CDH1-S559I NTYTALII    | 185  | 265  |
| >CDH1-S559I STYTALIIA   | 503 | >CDH1-S559I NTYTALIIA   | 205  | 298  |
| >CDH1-S559I STYTALIIAT  | 124 | >CDH1-S559I NTYTALIIAT  | 85   | 39   |
| >CDH1-S559I STYTALII    | 161 | >CDH1-S559I NTYTALII    | 63   | 98   |
| >CDH1-S559I STYTALIIA   | 772 | >CDH1-S559I NTYTALIIA   | 294  | 478  |
| >CDH1-S559I STYTALIIAT  | 951 | >CDH1-S559I NTYTALIIAT  | 417  | 534  |
| >CDH1-S559I STYTALII    | 36  | >CDH1-S559I NTYTALII    | 486  | 450  |
| >CDH1-S559I STYTALII    | 214 | >CDH1-S559I NTYTALII    | 660  | 446  |
| >CDH1-S559I STYTALII    | 9   | >CDH1-S559I NTYTALII    | 22   | 13   |
| >CDH1-S559I NSTYTALI    | 143 | >CDH1-S559I NNTYTALI    | 1624 | 1481 |
| >CDH1-S559I NSTYTALI    | 187 | >CDH1-S559I NNTYTALI    | 4469 | 4282 |
| >CDH1-S559I NSTYTALI    | 68  | >CDH1-S559I NNTYTALI    | 2260 | 2192 |
| >CDH1-S559I NSTYTALII   | 99  | >CDH1-S559I NNTYTALII   | 2911 | 2812 |
| >CDH1-S559I KNSTYTAL    | 116 | >CDH1-S559I KNNTYTAL    | 350  | 234  |
| >CDH1-S559I KNSTYTALI   | 372 | >CDH1-S559I KNNTYTALI   | 266  | 106  |
| >CDH1-S559I KNSTYTAL    | 356 | >CDH1-S559I KNNTYTAL    | 432  | 76   |
| >CDH1-S559I KNSTYTALI   | 269 | >CDH1-S559I KNNTYTALI   | 440  | 171  |
| >CDH1-S559I KNSTYTALI   | 482 | >CDH1-S559I KNNTYTALI   | 523  | 41   |
| >CDH1-S559I VKNSTYTALI  | 434 | >CDH1-S559I VKNNTYTALI  | 358  | 76   |
| >CDH1-S559I VKNSTYTA    | 137 | >CDH1-S559I VKNNTYTA    | 240  | 103  |
| >CDH1-S559I VKNSTYTAL   | 5   | >CDH1-S559I VKNNTYTAL   | 7    | 2    |
| >CDH1-S559I VKNSTYTALI  | 47  | >CDH1-S559I VKNNTYTALI  | 68   | 21   |
| >CDH1-S559I VKNSTYTALII | 14  | >CDH1-S559I VKNNTYTALII | 19   | 5    |
| >CDH1-S559I VKNSTYTAL   | 225 | >CDH1-S559I VKNNTYTAL   | 597  | 372  |
| >CDH1-S559I HVKNSTYTAL  | 166 | >CDH1-S559I HVKNNTYTAI  | 246  | 80   |
| >CDH1-S559I HVKNSTYTY   | 100 | >CDH1-S559I HVKNNTYT    | 184  | 84   |
| >CDH1-S559I HVKNSTYTA   | 8   | >CDH1-S559I HVKNNTYTA   | 10   | 2    |
| >CDH1-S559I HVKNSTYTAL  | 18  | >CDH1-S559I HVKNNTYTAI  | 23   | 5    |
| >CDH1-S559I HVKNSTYTAL  | 6   | >CDH1-S559I HVKNNTYTAI  | 7    | 1    |
| >CDH1-S559I HVKNSTYTAL  | 923 | >CDH1-S559I HVKNNTYTAI  | 453  | 470  |
| >CDH1-S559I HVKNSTYTAL  | 682 | >CDH1-S559I HVKNNTYTAI  | 389  | 293  |
| >CDH1-S559I HVKNSTYTA   | 258 | >CDH1-S559I HVKNNTYTA   | 262  | 4    |
| >CDH1-S559I HVKNSTYTAL  | 74  | >CDH1-S559I HVKNNTYTAI  | 75   | 1    |
| >CDH1-S559I HVKNSTYTAL  | 352 | >CDH1-S559I HVKNNTYTAI  | 785  | 433  |
| >CDH1-S559I EHVKNSTY    | 908 | >CDH1-S559I EHVKNNTY    | 327  | 581  |
| >CDH1-S559I EHVKNSTY    | 353 | >CDH1-S559I EHVKNNTY    | 640  | 287  |
| >CDH1-S559I EHVKNSTYTA  | 382 | >CDH1-S559I EHVKNNTYT/  | 463  | 81   |
| >CDH1-S559I EHVKNSTYTA  | 270 | >CDH1-S559I EHVKNNTYT/  | 233  | 37   |
| >CDH1-S559I EHVKNSTYTA  | 29  | >CDH1-S559I EHVKNNTYT/  | 39   | 10   |
| >CDH1-S559I FEHVKNSTY   | 420 | >CDH1-S559I FEHVKNNTY   | 1114 | 694  |

|                        |     |                        |       |       |
|------------------------|-----|------------------------|-------|-------|
| >CDH1-S559IFEHVKNSTY   | 109 | >CDH1-S559IFEHVKNNTY   | 315   | 206   |
| >CDH1-S559IFEHVKNSTY   | 121 | >CDH1-S559IFEHVKNNTY   | 262   | 141   |
| >CDH1-S559IFEHVKNSTY   | 126 | >CDH1-S559IFEHVKNNTY   | 194   | 68    |
| >CDH1-S559IFEHVKNST    | 145 | >CDH1-S559IFEHVKNNT    | 348   | 203   |
| >CDH1-S559IFEHVKNSTYT  | 351 | >CDH1-S559IFEHVKNNTYT  | 488   | 137   |
| >CDH1-S559IFEHVKNSTYT  | 102 | >CDH1-S559IFEHVKNNTYT  | 101   | 1     |
| >CDH1-S559IFEHVKNSTYT  | 74  | >CDH1-S559IFEHVKNNTYT  | 85    | 11    |
| >CDH1-S559IDFEHVKNSTY  | 300 | >CDH1-S559IDFEHVKNNT`  | 522   | 222   |
| >CDH1-S559IDFEHVKNST   | 557 | >CDH1-S559IDFEHVKNNT`  | 276   | 281   |
| >CDH1-S838(GSGSEAASSL  | 351 | >CDH1-S838(GGSEAASSL   | 327   | 24    |
| >CDH1-S838(GSGSEAAASL  | 170 | >CDH1-S838(GGGSEAAASL  | 15811 | 15641 |
| >CDH1-S838(YEGSGSEAAAS | 285 | >CDH1-S838(YEGGGSEAAAS | 124   | 161   |
| >CDH1-S838(YEGSGSEAAAS | 214 | >CDH1-S838(YEGGGSEAAAS | 199   | 15    |
| >CDH1-S838(YEGSGSEAAAS | 29  | >CDH1-S838(YEGGGSEAAAS | 16    | 13    |
| >CDH1-S838(YEGSGSEAAAS | 703 | >CDH1-S838(YEGGGSEAAAS | 467   | 236   |
| >CDH1-S838(YEGSGSEAA   | 187 | >CDH1-S838(YEGGGSEAA   | 134   | 53    |
| >CDH1-S838(YEGSGSEAA   | 83  | >CDH1-S838(YEGGGSEAA   | 53    | 30    |
| >CDH1-S838(YEGSGSEAA   | 424 | >CDH1-S838(YEGGGSEAA   | 1735  | 1311  |
| >CDH1-S838(YEGSGSEAAAS | 39  | >CDH1-S838(YEGGGSEAAAS | 145   | 106   |
| >CDH1-S838(FDYEGSGSEAA | 466 | >CDH1-S838(FDYEGGGSEAA | 719   | 253   |
| >CDH1-S846`SSLNSSESDK  | 426 | >CDH1-S846`TSLNSSESDK  | 817   | 391   |
| >CDH1-S846`SSLNSSESDK  | 30  | >CDH1-S846`TSLNSSESDK  | 55    | 25    |
| >CDH1-S846`SSLNSSESDK  | 370 | >CDH1-S846`TSLNSSESDK  | 1634  | 1264  |
| >CDH1-S846`SSLNSSESDK  | 620 | >CDH1-S846`TSLNSSESDK  | 344   | 276   |
| >CDH1-S846`SSLNSSESDK  | 140 | >CDH1-S846`TSLNSSESDK  | 408   | 268   |
| >CDH1-S846`LSSLNSSESDK | 321 | >CDH1-S846`LTSLNSSESDK | 119   | 202   |
| >CDH1-S846`LSSLNSSESDK | 316 | >CDH1-S846`LTSLNSSESDK | 51    | 265   |
| >CDH1-S846`SLSSLNSS    | 128 | >CDH1-S846`SLTSLNSS    | 703   | 575   |
| >CDH1-S846`SLSSLNSS    | 498 | >CDH1-S846`SLTSLNSS    | 2102  | 1604  |
| >CDH1-S846`EAASLSSLN   | 463 | >CDH1-S846`EAASLTSLN   | 271   | 192   |
| >CDH1-S846`EAASLSSL    | 23  | >CDH1-S846`EAASLTSL    | 19    | 4     |
| >CDH1-S846`EAASLSSLNS  | 291 | >CDH1-S846`EAASLTSLNS  | 208   | 83    |
| >CDH1-S846`EAASLSSL    | 69  | >CDH1-S846`EAASLTSL    | 54    | 15    |
| >CDH1-S846`SEAASLSSL   | 78  | >CDH1-S846`SEAASLTSL   | 75    | 3     |
| >CDH1-S846`SEAASLSSL   | 48  | >CDH1-S846`SEAASLTSL   | 71    | 23    |
| >CDH1-S846`SEAASLSSL   | 468 | >CDH1-S846`SEAASLTSL   | 525   | 57    |
| >CDH1-S846`SEAASLSSL   | 205 | >CDH1-S846`SEAASLTSL   | 406   | 201   |
| >CDH1-S846`SEAASLSSL   | 33  | >CDH1-S846`SEAASLTSL   | 29    | 4     |
| >CDH1-S846`SEAASLSSL   | 47  | >CDH1-S846`SEAASLTSL   | 38    | 9     |
| >CDH1-S846`SEAASLSSL   | 376 | >CDH1-S846`SEAASLTSL   | 491   | 115   |
| >CDH1-S846`SEAASLSS    | 148 | >CDH1-S846`SEAASLTS    | 118   | 30    |
| >CDH1-S846`SEAASLSSL   | 280 | >CDH1-S846`SEAASLTSL   | 208   | 72    |
| >CDH1-S846`SEAASLSSLN  | 371 | >CDH1-S846`SEAASLTSLN  | 453   | 82    |

|                         |       |                         |      |       |
|-------------------------|-------|-------------------------|------|-------|
| >CDH1-S846` SEAASLSSLNS | 226   | >CDH1-S846` SEAASLTLNSL | 226  | 0     |
| >CDH1-S846` SEAASLSSL   | 15    | >CDH1-S846` SEAASLTL    | 15   | 0     |
| >CDH1-S846` GSEAASLSSL  | 28    | >CDH1-S846` GSEAASLTL   | 42   | 14    |
| >CDH1-S846` GSEAASLSSL  | 441   | >CDH1-S846` GSEAASLTL   | 532  | 91    |
| >CDH1-S846` GSEAASLSSL  | 108   | >CDH1-S846` GSEAASLTL   | 206  | 98    |
| >CDH1-S846` SGSEAASLSSI | 351   | >CDH1-S846` SGSEAASLTSI | 1181 | 830   |
| >CDH1-S851I SESDKDQDY   | 1925  | >CDH1-S851I LESDKDQDY   | 434  | 1491  |
| >CDH1-S851I SESDKDQDYI  | 499   | >CDH1-S851I LESDKDQDYI  | 125  | 374   |
| >CDH1-S851I SESDKDQDY   | 99    | >CDH1-S851I LESDKDQDY   | 157  | 58    |
| >CDH1-S851I SESDKDQDYI  | 125   | >CDH1-S851I LESDKDQDYI  | 213  | 88    |
| >CDH1-S851I SESDKDQDY   | 153   | >CDH1-S851I LESDKDQDY   | 320  | 167   |
| >CDH1-S851I SESDKDQDYI  | 139   | >CDH1-S851I LESDKDQDYI  | 288  | 149   |
| >CDH1-S851I SSESDKDQDY  | 23    | >CDH1-S851I SLESDKDQDY  | 80   | 57    |
| >CDH1-S851I SSESDKDQDY  | 194   | >CDH1-S851I SLESDKDQDY  | 432  | 238   |
| >CDH1-S851I SSESDKDQDY  | 8869  | >CDH1-S851I SLESDKDQDY  | 371  | 8498  |
| >CDH1-S851I EAASLSSLNSL | 291   | >CDH1-S851I EAASLSSLNSL | 16   | 275   |
| >CDH1-S851I EAASLSSLNSL | 7205  | >CDH1-S851I EAASLSSLNSL | 56   | 7149  |
| >CDH1-S851I NSSESDKDQI  | 148   | >CDH1-S851I NSLESDKDQI  | 66   | 82    |
| >CDH1-S851I NSSESDKDQI  | 443   | >CDH1-S851I NSLESDKDQI  | 722  | 279   |
| >CDH1-S851I SLNSSESDK   | 102   | >CDH1-S851I SLNSLESDK   | 177  | 75    |
| >CDH1-S851I SLNSSESDK   | 105   | >CDH1-S851I SLNSLESDK   | 139  | 34    |
| >CDH1-S851I SSLNSSESDK  | 426   | >CDH1-S851I SSLNSLESDK  | 518  | 92    |
| >CDH1-S851I SSLNSSESDK  | 30    | >CDH1-S851I SSLNSLESDK  | 26   | 4     |
| >CDH1-S851I SSLNSSESDK  | 370   | >CDH1-S851I SSLNSLESDK  | 826  | 456   |
| >CDH1-S851I SSLNSSESDK  | 140   | >CDH1-S851I SSLNSLESDK  | 141  | 1     |
| >CDH1-S851I LSSLNSSESDK | 321   | >CDH1-S851I LSSLNSLESDK | 246  | 75    |
| >CDH1-S851I LSSLNSSESDK | 316   | >CDH1-S851I LSSLNSLESDK | 588  | 272   |
| >CDH1-S851I SLSSLNSS    | 7871  | >CDH1-S851I SLSSLNSL    | 57   | 7814  |
| >CDH1-S851I SLSSLNSS    | 128   | >CDH1-S851I SLSSLNSL    | 3    | 125   |
| >CDH1-S851I SLSSLNSS    | 498   | >CDH1-S851I SLSSLNSL    | 12   | 486   |
| >CDH1-S851I SLSSLNSS    | 6642  | >CDH1-S851I SLSSLNSL    | 462  | 6180  |
| >CDH1-S851I SLSSLNSS    | 4756  | >CDH1-S851I SLSSLNSL    | 39   | 4717  |
| >CDH1-S851I SLSSLNSS    | 10471 | >CDH1-S851I SLSSLNSL    | 55   | 10416 |
| >CDH1-S851I SLSSLNSS    | 7837  | >CDH1-S851I SLSSLNSL    | 32   | 7805  |
| >CDH1-S851I SLSSLNSS    | 19342 | >CDH1-S851I SLSSLNSL    | 301  | 19041 |
| >CDH1-S851I SLSSLNSS    | 1668  | >CDH1-S851I SLSSLNSL    | 4    | 1664  |
| >CDH1-S851I ASLSSLNSS   | 14099 | >CDH1-S851I ASLSSLNSL   | 283  | 13816 |
| >CDH1-S851I ASLSSLNSS   | 2129  | >CDH1-S851I ASLSSLNSL   | 38   | 2091  |
| >CDH1-S851I ASLSSLNSS   | 5491  | >CDH1-S851I ASLSSLNSL   | 20   | 5471  |
| >CDH1-S851I ASLSSLNSS   | 2494  | >CDH1-S851I ASLSSLNSL   | 80   | 2414  |
| >CDH1-S851I AASLSSLNSS  | 11151 | >CDH1-S851I AASLSSLNSL  | 340  | 10811 |
| >CDH1-S851I AASLSSLNSS  | 9513  | >CDH1-S851I AASLSSLNSL  | 482  | 9031  |
| >CDH1-S851I AASLSSLNSS  | 10023 | >CDH1-S851I AASLSSLNSL  | 421  | 9602  |

|                        |       |                         |       |       |
|------------------------|-------|-------------------------|-------|-------|
| >CDH1-S851IAASLSSLNSS  | 8363  | >CDH1-S851IAASLSSLNSL   | 67    | 8296  |
| >CDH1-T193IITGQGADTPF  | 248   | >CDH1-T193IIPGQGADTPF   | 10982 | 10734 |
| >CDH1-T193IITGQGADTPF  | 98    | >CDH1-T193IIPGQGADTPF   | 11671 | 11573 |
| >CDH1-T193IITGQGADTPF  | 164   | >CDH1-T193IIPGQGADTPF   | 12508 | 12344 |
| >CDH1-T193IITGQGADTPF  | 138   | >CDH1-T193IIPGQGADTPF   | 12663 | 12525 |
| >CDH1-T193IITGQGADTPF  | 70    | >CDH1-T193IIPGQGADTPF   | 1364  | 1294  |
| >CDH1-T193IITGQGADTPF  | 18329 | >CDH1-T193IIPGQGADTPF   | 75    | 18254 |
| >CDH1-T193IITGQGADTPF  | 18569 | >CDH1-T193IIPGQGADTPF   | 491   | 18078 |
| >CDH1-T193IITGQGADTPF  | 27209 | >CDH1-T193IIPGQGADTPF   | 438   | 26771 |
| >CDH1-T193IYSITGQGA    | 1004  | >CDH1-T193IYSIPGQGA     | 356   | 648   |
| >CDH1-T193IYSITGQGA    | 2374  | >CDH1-T193IYSIPGQGA     | 414   | 1960  |
| >CDH1-T193IKVFYSITGQG  | 145   | >CDH1-T193IKVFYSIPGQG   | 314   | 169   |
| >CDH1-T193IKVFYSITGQG  | 120   | >CDH1-T193IKVFYSIPGQG   | 122   | 2     |
| >CDH1-T193IKVFYSITG    | 137   | >CDH1-T193IKVFYSIPG     | 37    | 100   |
| >CDH1-T193IKVFYSITGQ   | 1467  | >CDH1-T193IKVFYSIPGQ    | 127   | 1340  |
| >CDH1-T193IKVFYSITGQG  | 886   | >CDH1-T193IKVFYSIPGQG   | 445   | 441   |
| >CDH1-T193IKVFYSITGQG  | 63    | >CDH1-T193IKVFYSIPGQG   | 53    | 10    |
| >CDH1-T193IKVFYSITG    | 87    | >CDH1-T193IKVFYSIPG     | 218   | 131   |
| >CDH1-T193IKEGKVFYSITG | 632   | >CDH1-T193IKEGKVFYSIPG  | 414   | 218   |
| >CDH1-T295ITYNAAIAYTI  | 4     | >CDH1-T295IINYNAAIAYTI  | 8     | 4     |
| >CDH1-T295ITYNAAIAYTIL | 15    | >CDH1-T295IINYNAAIAYTIL | 42    | 27    |
| >CDH1-T295ITYNAAIAYTI  | 132   | >CDH1-T295IINYNAAIAYTI  | 192   | 60    |
| >CDH1-T295ITYNAAIAYTI  | 112   | >CDH1-T295IINYNAAIAYTI  | 137   | 25    |
| >CDH1-T295ITYNAAIAYTIL | 898   | >CDH1-T295IINYNAAIAYTIL | 484   | 414   |
| >CDH1-T295ITYNAAIAYTI  | 14    | >CDH1-T295IINYNAAIAYTI  | 18    | 4     |
| >CDH1-T295ITYNAAIAYTIL | 32    | >CDH1-T295IINYNAAIAYTIL | 50    | 18    |
| >CDH1-T295ITYNAAIAY    | 92    | >CDH1-T295IINYNAAIAY    | 82    | 10    |
| >CDH1-T295ITYNAAIAY    | 163   | >CDH1-T295IINYNAAIAY    | 71    | 92    |
| >CDH1-T295ITYNAAIAYTI  | 308   | >CDH1-T295IINYNAAIAYTI  | 214   | 94    |
| >CDH1-T295ITYNAAIAY    | 482   | >CDH1-T295IINYNAAIAY    | 411   | 71    |
| >CDH1-T295ITYNAAIAY    | 489   | >CDH1-T295IINYNAAIAY    | 399   | 90    |
| >CDH1-T295ITYNAAIAY    | 556   | >CDH1-T295IINYNAAIAY    | 247   | 309   |
| >CDH1-T295ITYNAAIAY    | 187   | >CDH1-T295IINYNAAIAY    | 273   | 86    |
| >CDH1-T295INTYNAAIAYT  | 210   | >CDH1-T295INIYNAAIAYTI  | 992   | 782   |
| >CDH1-T295INTYNAAIAYT  | 1202  | >CDH1-T295INIYNAAIAYT   | 401   | 801   |
| >CDH1-T295INTYNAAIAYT  | 2139  | >CDH1-T295INIYNAAIAYTI  | 439   | 1700  |
| >CDH1-T295INTYNAAIAYT  | 284   | >CDH1-T295INIYNAAIAYT   | 136   | 148   |
| >CDH1-T295INTYNAAIAYT  | 776   | >CDH1-T295INIYNAAIAYTI  | 315   | 461   |
| >CDH1-T295INTYNAAIA    | 1129  | >CDH1-T295INIYNAAIA     | 173   | 956   |
| >CDH1-T295INTYNAAIAYT  | 107   | >CDH1-T295INIYNAAIAYT   | 56    | 51    |
| >CDH1-T295INTYNAAIAYT  | 630   | >CDH1-T295INIYNAAIAYTI  | 89    | 541   |
| >CDH1-T295INTYNAAIAYT  | 220   | >CDH1-T295INIYNAAIAYTI  | 129   | 91    |
| >CDH1-T295INTYNAAIAYT  | 1592  | >CDH1-T295INIYNAAIAYT   | 412   | 1180  |

|                       |      |                        |       |       |
|-----------------------|------|------------------------|-------|-------|
| >CDH1-T295 NTYNAAIAYT | 291  | >CDH1-T295 NIYNAAIAYTI | 61    | 230   |
| >CDH1-T295 NTYNAAIAYT | 509  | >CDH1-T295 NIYNAAIAYTI | 91    | 418   |
| >CDH1-T295 NTYNAAIAYT | 2987 | >CDH1-T295 NIYNAAIAYTI | 499   | 2488  |
| >CDH1-T295 NTYNAAIAY  | 596  | >CDH1-T295 NIYNAAIAY   | 418   | 178   |
| >CDH1-T295 NTYNAAIAY  | 283  | >CDH1-T295 NIYNAAIAY   | 1164  | 881   |
| >CDH1-T295 NTYNAAIAY  | 34   | >CDH1-T295 NIYNAAIAY   | 283   | 249   |
| >CDH1-T295 NTYNAAIAY  | 63   | >CDH1-T295 NIYNAAIAY   | 580   | 517   |
| >CDH1-T295 NTYNAAIAY  | 63   | >CDH1-T295 NIYNAAIAY   | 895   | 832   |
| >CDH1-T295 NTYNAAIAY  | 50   | >CDH1-T295 NIYNAAIAY   | 78    | 28    |
| >CDH1-T295 NTYNAAIAY  | 399  | >CDH1-T295 NIYNAAIAY   | 892   | 493   |
| >CDH1-T295 NTYNAAIAY  | 449  | >CDH1-T295 NIYNAAIAY   | 1452  | 1003  |
| >CDH1-T295 NTYNAAIAYT | 16   | >CDH1-T295 NIYNAAIAYTI | 26    | 10    |
| >CDH1-T295 NTYNAAIAY  | 39   | >CDH1-T295 NIYNAAIAY   | 329   | 290   |
| >CDH1-T295 NTYNAAIA   | 130  | >CDH1-T295 NIYNAAIA    | 1200  | 1070  |
| >CDH1-T295 NTYNAAIAYT | 20   | >CDH1-T295 NIYNAAIAYT  | 93    | 73    |
| >CDH1-T295 NTYNAAIAYT | 12   | >CDH1-T295 NIYNAAIAYTI | 54    | 42    |
| >CDH1-T295 NTYNAAIA   | 160  | >CDH1-T295 NIYNAAIA    | 792   | 632   |
| >CDH1-T295 NTYNAAIAYT | 68   | >CDH1-T295 NIYNAAIAYT  | 313   | 245   |
| >CDH1-T295 NTYNAAIAYT | 8    | >CDH1-T295 NIYNAAIAYTI | 19    | 11    |
| >CDH1-T295 NTYNAAIAY  | 158  | >CDH1-T295 NIYNAAIAY   | 143   | 15    |
| >CDH1-T295 NTYNAAIAY  | 185  | >CDH1-T295 NIYNAAIAY   | 69    | 116   |
| >CDH1-T295 NTYNAAIAY  | 102  | >CDH1-T295 NIYNAAIAY   | 287   | 185   |
| >CDH1-T295 NTYNAAIAY  | 10   | >CDH1-T295 NIYNAAIAY   | 1792  | 1782  |
| >CDH1-T295 NTYNAAIAYT | 102  | >CDH1-T295 NIYNAAIAYTI | 14442 | 14340 |
| >CDH1-T295 NTYNAAIAY  | 373  | >CDH1-T295 NIYNAAIAY   | 1654  | 1281  |
| >CDH1-T295 NTYNAAIAY  | 26   | >CDH1-T295 NIYNAAIAY   | 24    | 2     |
| >CDH1-T295 NTYNAAIAY  | 70   | >CDH1-T295 NIYNAAIAY   | 2999  | 2929  |
| >CDH1-T295 NTYNAAIAYT | 305  | >CDH1-T295 NIYNAAIAYTI | 8097  | 7792  |
| >CDH1-T295 NTYNAAIAY  | 64   | >CDH1-T295 NIYNAAIAY   | 30    | 34    |
| >CDH1-T295 NTYNAAIAYT | 16   | >CDH1-T295 NIYNAAIAYTI | 1282  | 1266  |
| >CDH1-T295 TATDADDDV  | 3705 | >CDH1-T295 TATDADDDV   | 113   | 3592  |
| >CDH1-T295 VNTYNAAI   | 4032 | >CDH1-T295 VNIYNAAI    | 409   | 3623  |
| >CDH1-T295 VNTYNAAIAY | 705  | >CDH1-T295 VNIYNAAIAY  | 393   | 312   |
| >CDH1-T295 VNTYNAAIAY | 694  | >CDH1-T295 VNIYNAAIAY  | 178   | 516   |
| >CDH1-T295 DVNTYNAAIA | 130  | >CDH1-T295 DVNIYNAAIA  | 236   | 106   |
| >CDH1-T295 DVNTYNAAIA | 20   | >CDH1-T295 DVNIYNAAIA  | 105   | 85    |
| >CDH1-T295 DVNTYNAAIA | 231  | >CDH1-T295 DVNIYNAAIA  | 855   | 624   |
| >CDH1-T295 DVNTYNAAIA | 313  | >CDH1-T295 DVNIYNAAIA  | 311   | 2     |
| >CDH1-T295 DVNTYNAAIA | 349  | >CDH1-T295 DVNIYNAAIA  | 350   | 1     |
| >CDH1-T295 DVNTYNAA   | 175  | >CDH1-T295 DVNIYNAA    | 222   | 47    |
| >CDH1-T295 DVNTYNAAI  | 31   | >CDH1-T295 DVNIYNAAI   | 74    | 43    |
| >CDH1-T295 DVNTYNAAI  | 79   | >CDH1-T295 DVNIYNAAI   | 73    | 6     |
| >CDH1-T295 DVNTYNAAIA | 29   | >CDH1-T295 DVNIYNAAIA  | 34    | 5     |

|                       |       |                        |      |       |
|-----------------------|-------|------------------------|------|-------|
| >CDH1-T295 DDVNTYNAA  | 312   | >CDH1-T295 DDVNIYNAAI  | 725  | 413   |
| >CDH1-T295 DDDVENTYNA | 149   | >CDH1-T295 DDDVNIYNAAI | 149  | 0     |
| >CDH1-T295 DADDDVNTY  | 388   | >CDH1-T295 DADDDVNIY   | 382  | 6     |
| >CDH1-T295 DADDDVNTY  | 476   | >CDH1-T295 DADDDVNIYI  | 847  | 371   |
| >CDH1-T295 DADDDVNTY  | 52    | >CDH1-T295 DADDDVNIY   | 190  | 138   |
| >CDH1-T295 TDADDDVNT  | 13209 | >CDH1-T295 TDADDDVNI   | 253  | 12956 |
| >CDH1-T295 TDADDDVNT  | 8309  | >CDH1-T295 TDADDDVNI   | 95   | 8214  |
| >CDH1-T295 ATDADDDVN  | 12    | >CDH1-T295 ATDADDDVN   | 12   | 0     |
| >CDH1-T295 ATDADDDVN  | 160   | >CDH1-T295 ATDADDDVN   | 188  | 28    |
| >CDH1-T295 ATDADDDVN  | 68    | >CDH1-T295 ATDADDDVN   | 327  | 259   |
| >CDH1-T295 ATDADDDVN  | 182   | >CDH1-T295 ATDADDDVN   | 253  | 71    |
| >CDH1-T295 ATDADDDVN  | 458   | >CDH1-T295 ATDADDDVN   | 618  | 160   |
| >CDH1-T330 TTGLDRESF  | 1662  | >CDH1-T330 ITGLDRESF   | 256  | 1406  |
| >CDH1-T330 TTGLDRESF  | 794   | >CDH1-T330 ITGLDRESF   | 225  | 569   |
| >CDH1-T330 VTTGLDRESF | 374   | >CDH1-T330 VITGLDRESF  | 1099 | 725   |
| >CDH1-T330 VTTGLDRESF | 32    | >CDH1-T330 VITGLDRESF  | 5574 | 5542  |
| >CDH1-T330 VTTGLDRESF | 484   | >CDH1-T330 VITGLDRESF  | 9338 | 8854  |
| >CDH1-T330 VTTGLDRESF | 379   | >CDH1-T330 VITGLDRESF  | 4861 | 4482  |
| >CDH1-T330 VTTGLDRESF | 42    | >CDH1-T330 VITGLDRESF  | 1154 | 1112  |
| >CDH1-T330 NRNTGVISVV | 2341  | >CDH1-T330 NRNTGVISVV  | 56   | 2285  |
| >CDH1-T330 VVTTGLDRES | 221   | >CDH1-T330 VVITGLDRESI | 14   | 207   |
| >CDH1-T330 VVTTGLDR   | 679   | >CDH1-T330 VVITGLDR    | 387  | 292   |
| >CDH1-T330 VVTTGLDRES | 4198  | >CDH1-T330 VVITGLDRESI | 310  | 3888  |
| >CDH1-T330 VVTTGLDRES | 289   | >CDH1-T330 VVITGLDRESI | 525  | 236   |
| >CDH1-T330 SVVTTGLDR  | 372   | >CDH1-T330 SVVITGLDR   | 621  | 249   |
| >CDH1-T330 SVVTTGLDR  | 234   | >CDH1-T330 SVVITGLDR   | 253  | 19    |
| >CDH1-T330 ISVTTGL    | 163   | >CDH1-T330 ISVITGL     | 162  | 1     |
| >CDH1-T330 ISVTTGLDR  | 384   | >CDH1-T330 ISVITGLDR   | 477  | 93    |
| >CDH1-T330 ISVTTGLDR  | 738   | >CDH1-T330 ISVITGLDR   | 393  | 345   |
| >CDH1-T330 ISVTTGLDR  | 101   | >CDH1-T330 ISVITGLDR   | 58   | 43    |
| >CDH1-T330 ISVTTGL    | 8     | >CDH1-T330 ISVITGL     | 11   | 3     |
| >CDH1-T330 ISVTTGL    | 382   | >CDH1-T330 ISVITGL     | 853  | 471   |
| >CDH1-T330 VISVTTGL   | 39    | >CDH1-T330 VISVITGL    | 53   | 14    |
| >CDH1-T330 VISVTTGL   | 130   | >CDH1-T330 VISVITGL    | 94   | 36    |
| >CDH1-T330 VISVTTGL   | 280   | >CDH1-T330 VISVITGL    | 177  | 103   |
| >CDH1-T330 VISVTTGL   | 1017  | >CDH1-T330 VISVITGL    | 170  | 847   |
| >CDH1-T330 VISVTTGL   | 673   | >CDH1-T330 VISVITGL    | 276  | 397   |
| >CDH1-T330 VISVTTGL   | 181   | >CDH1-T330 VISVITGL    | 56   | 125   |
| >CDH1-T330 VISVTTGLDI | 336   | >CDH1-T330 VISVITGLDR  | 390  | 54    |
| >CDH1-T330 GVISVTTGL  | 103   | >CDH1-T330 GVISVITGL   | 104  | 1     |
| >CDH1-T330 GVISVTTGL  | 153   | >CDH1-T330 GVISVITGL   | 160  | 7     |
| >CDH1-T330 GVISVTTGL  | 680   | >CDH1-T330 GVISVITGL   | 330  | 350   |
| >CDH1-T330 GVISVTTGL  | 475   | >CDH1-T330 GVISVITGL   | 151  | 324   |



|                         |       |                         |      |       |
|-------------------------|-------|-------------------------|------|-------|
| >CDH1-T330 NTGVISVVT    | 14668 | >CDH1-T330 NTGVISVVI    | 362  | 14306 |
| >CDH1-T330 NTGVISVVT    | 2188  | >CDH1-T330 NTGVISVVI    | 67   | 2121  |
| >CDH1-T330 NTGVISVVT    | 33253 | >CDH1-T330 NTGVISVVI    | 79   | 33174 |
| >CDH1-T340, TYTLVVQAAE  | 157   | >CDH1-T340, AYTLVVQAAE  | 319  | 162   |
| >CDH1-T340, TYTLVVQAAE  | 36    | >CDH1-T340, AYTLVVQAAE  | 28   | 8     |
| >CDH1-T340, TTGLDRESFP  | 3108  | >CDH1-T340, TTGLDRESFP, | 208  | 2900  |
| >CDH1-T340, FPTYTLVV    | 875   | >CDH1-T340, FPAYTLVV    | 192  | 683   |
| >CDH1-T340, FPTYTLVV    | 88    | >CDH1-T340, FPAYTLVV    | 33   | 55    |
| >CDH1-T340, FPTYTLVVQA  | 204   | >CDH1-T340, FPAYTLVVQA  | 46   | 158   |
| >CDH1-T340, FPTYTLVV    | 185   | >CDH1-T340, FPAYTLVV    | 106  | 79    |
| >CDH1-T340, FPTYTLVVQ   | 463   | >CDH1-T340, FPAYTLVVQ   | 214  | 249   |
| >CDH1-T340, FPTYTLVVQA  | 227   | >CDH1-T340, FPAYTLVVQA  | 225  | 2     |
| >CDH1-T340, FPTYTLVVQA  | 89    | >CDH1-T340, FPAYTLVVQA  | 45   | 44    |
| >CDH1-T340, FPTYTLVV    | 775   | >CDH1-T340, FPAYTLVV    | 151  | 624   |
| >CDH1-T340, FPTYTLVV    | 171   | >CDH1-T340, FPAYTLVV    | 114  | 57    |
| >CDH1-T340, FPTYTLVV    | 96    | >CDH1-T340, FPAYTLVV    | 120  | 24    |
| >CDH1-T340, FPTYTLVV    | 9     | >CDH1-T340, FPAYTLVV    | 7    | 2     |
| >CDH1-T340, FPTYTLVVQ   | 17    | >CDH1-T340, FPAYTLVVQ   | 15   | 2     |
| >CDH1-T340, FPTYTLVVQA  | 5     | >CDH1-T340, FPAYTLVVQA  | 5    | 0     |
| >CDH1-T340, FPTYTLVVQA  | 4     | >CDH1-T340, FPAYTLVVQA  | 4    | 0     |
| >CDH1-T340, FPTYTLVVQA  | 1538  | >CDH1-T340, FPAYTLVVQA  | 360  | 1178  |
| >CDH1-T340, FPTYTLVV    | 268   | >CDH1-T340, FPAYTLVV    | 198  | 70    |
| >CDH1-T340, FPTYTLVVQA  | 353   | >CDH1-T340, FPAYTLVVQA  | 265  | 88    |
| >CDH1-T340, SFPTYTLV    | 1261  | >CDH1-T340, SFPAYTLV    | 426  | 835   |
| >CDH1-T340, SFPTYTLVV   | 841   | >CDH1-T340, SFPAYTLVV   | 476  | 365   |
| >CDH1-T340, SFPTYTLVV   | 416   | >CDH1-T340, SFPAYTLVV   | 257  | 159   |
| >CDH1-T340, SFPTYTLV    | 404   | >CDH1-T340, SFPAYTLV    | 541  | 137   |
| >CDH1-T340, SFPTYTLVV   | 416   | >CDH1-T340, SFPAYTLVV   | 505  | 89    |
| >CDH1-T340, ESFPTYTLV   | 304   | >CDH1-T340, ESFPAYTLV   | 252  | 52    |
| >CDH1-T340, ESFPTYTL    | 138   | >CDH1-T340, ESFPAYTL    | 262  | 124   |
| >CDH1-T340, ESFPTYTLVVC | 188   | >CDH1-T340, ESFPAYTLVVC | 190  | 2     |
| >CDH1-T340, ESFPTYTL    | 13    | >CDH1-T340, ESFPAYTL    | 10   | 3     |
| >CDH1-T340, ESFPTYTLV   | 6     | >CDH1-T340, ESFPAYTLV   | 5    | 1     |
| >CDH1-T340, ESFPTYTLVV  | 71    | >CDH1-T340, ESFPAYTLVV  | 51   | 20    |
| >CDH1-T340, ESFPTYTL    | 85    | >CDH1-T340, ESFPAYTL    | 90   | 5     |
| >CDH1-T340, ESFPTYTLV   | 17    | >CDH1-T340, ESFPAYTLV   | 16   | 1     |
| >CDH1-T340, ESFPTYTLVV  | 29    | >CDH1-T340, ESFPAYTLVV  | 23   | 6     |
| >CDH1-T340, ESFPTYTL    | 259   | >CDH1-T340, ESFPAYTL    | 439  | 180   |
| >CDH1-T340, ESFPTYTLV   | 490   | >CDH1-T340, ESFPAYTLV   | 1006 | 516   |
| >CDH1-T340, ESFPTYTLVV  | 229   | >CDH1-T340, ESFPAYTLVV  | 390  | 161   |
| >CDH1-T340, ESFPTYTL    | 16    | >CDH1-T340, ESFPAYTL    | 13   | 3     |
| >CDH1-T340, ESFPTYTLVV  | 352   | >CDH1-T340, ESFPAYTLVV  | 410  | 58    |
| >CDH1-T340, ESFPTYTLV   | 137   | >CDH1-T340, ESFPAYTLV   | 344  | 207   |

|                        |      |                        |      |      |
|------------------------|------|------------------------|------|------|
| >CDH1-T340,ESFPTYTL    | 89   | >CDH1-T340,ESFPAYTL    | 100  | 11   |
| >CDH1-T340,ESFPTYTLV   | 339  | >CDH1-T340,ESFPAYTLV   | 370  | 31   |
| >CDH1-T340,RESFPTYTL   | 42   | >CDH1-T340,RESFPAYTL   | 113  | 71   |
| >CDH1-T340,RESFPTYTL   | 7    | >CDH1-T340,RESFPAYTL   | 5    | 2    |
| >CDH1-T340,RESFPTYTLV\ | 24   | >CDH1-T340,RESFPAYTLV\ | 18   | 6    |
| >CDH1-T340,RESFPTYTL   | 122  | >CDH1-T340,RESFPAYTL   | 247  | 125  |
| >CDH1-T340,RESFPTYTLV  | 74   | >CDH1-T340,RESFPAYTLV  | 65   | 9    |
| >CDH1-T340,RESFPTYTLV\ | 162  | >CDH1-T340,RESFPAYTLV\ | 207  | 45   |
| >CDH1-T340,RESFPTYTLV  | 773  | >CDH1-T340,RESFPAYTLV  | 462  | 311  |
| >CDH1-T340,RESFPTYTLV  | 541  | >CDH1-T340,RESFPAYTLV  | 399  | 142  |
| >CDH1-T340,RESFPTYT    | 187  | >CDH1-T340,RESFPAYT    | 146  | 41   |
| >CDH1-T340,RESFPTYTLV  | 144  | >CDH1-T340,RESFPAYTLV  | 82   | 62   |
| >CDH1-T340,RESFPTYTLV\ | 78   | >CDH1-T340,RESFPAYTLV\ | 65   | 13   |
| >CDH1-T340,RESFPTYTL   | 232  | >CDH1-T340,RESFPAYTL   | 242  | 10   |
| >CDH1-T340,RESFPTYTL   | 18   | >CDH1-T340,RESFPAYTL   | 66   | 48   |
| >CDH1-T340,RESFPTYTLV  | 17   | >CDH1-T340,RESFPAYTLV  | 25   | 8    |
| >CDH1-T340,RESFPTYTLV\ | 14   | >CDH1-T340,RESFPAYTLV\ | 28   | 14   |
| >CDH1-T340,DRESFPTYTL  | 303  | >CDH1-T340,DRESFPAYTL  | 197  | 106  |
| >CDH1-T340,LDRESFPTY   | 262  | >CDH1-T340,LDRESFPAY   | 175  | 87   |
| >CDH1-T340,LDRESFPTY   | 204  | >CDH1-T340,LDRESFPAY   | 106  | 98   |
| >CDH1-T340,LDRESFPTY   | 429  | >CDH1-T340,LDRESFPAY   | 298  | 131  |
| >CDH1-T340,LDRESFPTY   | 941  | >CDH1-T340,LDRESFPAY   | 382  | 559  |
| >CDH1-T340,LDRESFPTYTL | 361  | >CDH1-T340,LDRESFPAYTI | 321  | 40   |
| >CDH1-T340,GLDRESFPT   | 560  | >CDH1-T340,GLDRESFPA   | 62   | 498  |
| >CDH1-T340,GLDRESFPTY  | 718  | >CDH1-T340,GLDRESFPAY  | 493  | 225  |
| >CDH1-T340,GLDRESFPT   | 1352 | >CDH1-T340,GLDRESFPA   | 164  | 1188 |
| >CDH1-T340,GLDRESFPT   | 692  | >CDH1-T340,GLDRESFPA   | 77   | 615  |
| >CDH1-T340,GLDRESFPT   | 226  | >CDH1-T340,GLDRESFPA   | 30   | 196  |
| >CDH1-T340,GLDRESFPTY  | 66   | >CDH1-T340,GLDRESFPAY  | 39   | 27   |
| >CDH1-T340,GLDRESFPT   | 80   | >CDH1-T340,GLDRESFPA   | 9    | 71   |
| >CDH1-T340,GLDRESFPTY  | 319  | >CDH1-T340,GLDRESFPAY  | 92   | 227  |
| >CDH1-T340,GLDRESFPT   | 141  | >CDH1-T340,GLDRESFPA   | 14   | 127  |
| >CDH1-T340,GLDRESFPTY  | 185  | >CDH1-T340,GLDRESFPAY  | 180  | 5    |
| >CDH1-T340,GLDRESFPT   | 352  | >CDH1-T340,GLDRESFPA   | 37   | 315  |
| >CDH1-T340,GLDRESFPTY  | 229  | >CDH1-T340,GLDRESFPAY  | 177  | 52   |
| >CDH1-T340,TGLDRESFPT  | 354  | >CDH1-T340,TGLDRESFPA  | 341  | 13   |
| >CDH1-T340,TGLDRESFPT  | 466  | >CDH1-T340,TGLDRESFPA  | 238  | 228  |
| >CDH1-T340,TGLDRESFPT  | 495  | >CDH1-T340,TGLDRESFPA  | 1794 | 1299 |
| >CDH1-T340ITYTLVVQAAE  | 157  | >CDH1-T340IMYTLVVQAA   | 1005 | 848  |
| >CDH1-T340ITYTLVVQA    | 1628 | >CDH1-T340IMYTLVVQA    | 489  | 1139 |
| >CDH1-T340ITYTLVVQAAE  | 36   | >CDH1-T340IMYTLVVQAA   | 15   | 21   |
| >CDH1-T340ITYTLVVQA    | 2900 | >CDH1-T340IMYTLVVQA    | 455  | 2445 |
| >CDH1-T340ITYTLVVQAA   | 1437 | >CDH1-T340IMYTLVVQAA   | 235  | 1202 |

|                       |       |                       |      |       |
|-----------------------|-------|-----------------------|------|-------|
| >CDH1-T340IPTYTLVVQA  | 4397  | >CDH1-T340IPMYTLVVQA  | 176  | 4221  |
| >CDH1-T340IPTYTLVVQA  | 5140  | >CDH1-T340IPMYTLVVQA  | 28   | 5112  |
| >CDH1-T340IPTYTLVVQAA | 3827  | >CDH1-T340IPMYTLVVQA  | 20   | 3807  |
| >CDH1-T340IPTYTLVVQA  | 9026  | >CDH1-T340IPMYTLVVQA  | 69   | 8957  |
| >CDH1-T340IPTYTLVVQAA | 12315 | >CDH1-T340IPMYTLVVQA  | 134  | 12181 |
| >CDH1-T340IPTYTLVVQA  | 19856 | >CDH1-T340IPMYTLVVQA  | 69   | 19787 |
| >CDH1-T340IPTYTLVVQAA | 23080 | >CDH1-T340IPMYTLVVQA  | 190  | 22890 |
| >CDH1-T340IFPTYTLVV   | 3518  | >CDH1-T340IFPMYTLVV   | 321  | 3197  |
| >CDH1-T340IFPTYTLVV   | 875   | >CDH1-T340IFPMYTLVV   | 109  | 766   |
| >CDH1-T340IFPTYTLVV   | 88    | >CDH1-T340IFPMYTLVV   | 19   | 69    |
| >CDH1-T340IFPTYTLVVQA | 204   | >CDH1-T340IFPMYTLVVQ  | 32   | 172   |
| >CDH1-T340IFPTYTLVV   | 3033  | >CDH1-T340IFPMYTLVV   | 264  | 2769  |
| >CDH1-T340IFPTYTLVVQA | 4194  | >CDH1-T340IFPMYTLVVQ  | 378  | 3816  |
| >CDH1-T340IFPTYTLVV   | 185   | >CDH1-T340IFPMYTLVV   | 114  | 71    |
| >CDH1-T340IFPTYTLVVQ  | 463   | >CDH1-T340IFPMYTLVVQ  | 252  | 211   |
| >CDH1-T340IFPTYTLVVQA | 227   | >CDH1-T340IFPMYTLVVQ  | 83   | 144   |
| >CDH1-T340IFPTYTLVVQA | 89    | >CDH1-T340IFPMYTLVVQ  | 50   | 39    |
| >CDH1-T340IFPTYTLVV   | 775   | >CDH1-T340IFPMYTLVV   | 43   | 732   |
| >CDH1-T340IFPTYTLVV   | 171   | >CDH1-T340IFPMYTLVV   | 89   | 82    |
| >CDH1-T340IFPTYTLVV   | 96    | >CDH1-T340IFPMYTLVV   | 58   | 38    |
| >CDH1-T340IFPTYTLVVQA | 611   | >CDH1-T340IFPMYTLVVQ  | 326  | 285   |
| >CDH1-T340IFPTYTLVV   | 9     | >CDH1-T340IFPMYTLVV   | 6    | 3     |
| >CDH1-T340IFPTYTLVVQ  | 17    | >CDH1-T340IFPMYTLVVQ  | 9    | 8     |
| >CDH1-T340IFPTYTLVVQA | 5     | >CDH1-T340IFPMYTLVVQ  | 4    | 1     |
| >CDH1-T340IFPTYTLVVQA | 4     | >CDH1-T340IFPMYTLVVQ  | 4    | 0     |
| >CDH1-T340IFPTYTLVV   | 268   | >CDH1-T340IFPMYTLVV   | 159  | 109   |
| >CDH1-T340IFPTYTLVVQA | 353   | >CDH1-T340IFPMYTLVVQ  | 208  | 145   |
| >CDH1-T340ISFPTYTLV   | 533   | >CDH1-T340ISFPMYTLV   | 436  | 97    |
| >CDH1-T340ISFPTYTLVV  | 416   | >CDH1-T340ISFPMYTLVV  | 252  | 164   |
| >CDH1-T340ISFPTYTLV   | 404   | >CDH1-T340ISFPMYTLV   | 519  | 115   |
| >CDH1-T340ISFPTYTLVV  | 416   | >CDH1-T340ISFPMYTLVV  | 548  | 132   |
| >CDH1-T340IESFPTYTLV  | 304   | >CDH1-T340IESFPMYTLV  | 105  | 199   |
| >CDH1-T340IESFPTYTL   | 138   | >CDH1-T340IESFPMYTL   | 165  | 27    |
| >CDH1-T340IESFPTYTLVV | 188   | >CDH1-T340IESFPMYTLVV | 167  | 21    |
| >CDH1-T340IESFPTYTL   | 13    | >CDH1-T340IESFPMYTL   | 11   | 2     |
| >CDH1-T340IESFPTYTLV  | 6     | >CDH1-T340IESFPMYTLV  | 6    | 0     |
| >CDH1-T340IESFPTYTLVV | 71    | >CDH1-T340IESFPMYTLVV | 42   | 29    |
| >CDH1-T340IESFPTYTL   | 85    | >CDH1-T340IESFPMYTL   | 157  | 72    |
| >CDH1-T340IESFPTYTLV  | 17    | >CDH1-T340IESFPMYTLV  | 44   | 27    |
| >CDH1-T340IESFPTYTLVV | 29    | >CDH1-T340IESFPMYTLVV | 60   | 31    |
| >CDH1-T340IESFPTYTL   | 259   | >CDH1-T340IESFPMYTL   | 830  | 571   |
| >CDH1-T340IESFPTYTLV  | 490   | >CDH1-T340IESFPMYTLV  | 1875 | 1385  |
| >CDH1-T340IESFPTYTLVV | 229   | >CDH1-T340IESFPMYTLVV | 637  | 408   |

|                        |       |                        |      |       |
|------------------------|-------|------------------------|------|-------|
| >CDH1-T340IESFPTYTL    | 16    | >CDH1-T340IESFPMYTL    | 11   | 5     |
| >CDH1-T340IESFPTYTLVV  | 352   | >CDH1-T340IESFPMYTLVV  | 379  | 27    |
| >CDH1-T340IESFPTYTLV   | 137   | >CDH1-T340IESFPMYTLV   | 134  | 3     |
| >CDH1-T340IESFPTYTL    | 89    | >CDH1-T340IESFPMYTL    | 156  | 67    |
| >CDH1-T340IESFPTYTLV   | 339   | >CDH1-T340IESFPMYTLV   | 608  | 269   |
| >CDH1-T340IRESFPTYTL   | 42    | >CDH1-T340IRESFPMYTL   | 280  | 238   |
| >CDH1-T340IRESFPTYTL   | 7     | >CDH1-T340IRESFPMYTL   | 7    | 0     |
| >CDH1-T340IRESFPTYTLV\ | 24    | >CDH1-T340IRESFPMYTLV  | 23   | 1     |
| >CDH1-T340IRESFPTYTL   | 122   | >CDH1-T340IRESFPMYTL   | 64   | 58    |
| >CDH1-T340IRESFPTYTLV  | 74    | >CDH1-T340IRESFPMYTLV  | 57   | 17    |
| >CDH1-T340IRESFPTYTLV\ | 162   | >CDH1-T340IRESFPMYTLV  | 106  | 56    |
| >CDH1-T340IRESFPTYTLV  | 773   | >CDH1-T340IRESFPMYTLV  | 486  | 287   |
| >CDH1-T340IRESFPTYTLV  | 541   | >CDH1-T340IRESFPMYTLV  | 342  | 199   |
| >CDH1-T340IRESFPTYT    | 187   | >CDH1-T340IRESFPMYT    | 144  | 43    |
| >CDH1-T340IRESFPTYTLV  | 144   | >CDH1-T340IRESFPMYTLV  | 84   | 60    |
| >CDH1-T340IRESFPTYTLV\ | 78    | >CDH1-T340IRESFPMYTLV  | 63   | 15    |
| >CDH1-T340IRESFPTYTL   | 232   | >CDH1-T340IRESFPMYTL   | 309  | 77    |
| >CDH1-T340IRESFPTYTL   | 18    | >CDH1-T340IRESFPMYTL   | 28   | 10    |
| >CDH1-T340IRESFPTYTLV  | 17    | >CDH1-T340IRESFPMYTLV  | 17   | 0     |
| >CDH1-T340IRESFPTYTLV\ | 14    | >CDH1-T340IRESFPMYTLV  | 21   | 7     |
| >CDH1-T340IDRESFPTYTL  | 303   | >CDH1-T340IDRESFPMYTL  | 294  | 9     |
| >CDH1-T340ILDRESFPTY   | 262   | >CDH1-T340ILDRESFPMY   | 637  | 375   |
| >CDH1-T340ILDRESFPTY   | 204   | >CDH1-T340ILDRESFPMY   | 344  | 140   |
| >CDH1-T340ILDRESFPTY   | 429   | >CDH1-T340ILDRESFPMY   | 1639 | 1210  |
| >CDH1-T340ILDRESFPTYTL | 556   | >CDH1-T340ILDRESFPMYT  | 463  | 93    |
| >CDH1-T340ILDRESFPTY   | 614   | >CDH1-T340ILDRESFPMY   | 439  | 175   |
| >CDH1-T340ILDRESFPT    | 13167 | >CDH1-T340ILDRESFPM    | 312  | 12855 |
| >CDH1-T340ILDRESFPTYTL | 361   | >CDH1-T340ILDRESFPMYT  | 442  | 81    |
| >CDH1-T340IGLDRESFPT   | 560   | >CDH1-T340IGLDRESFPM   | 109  | 451   |
| >CDH1-T340IGLDRESFPT   | 1352  | >CDH1-T340IGLDRESFPM   | 298  | 1054  |
| >CDH1-T340IGLDRESFPT   | 692   | >CDH1-T340IGLDRESFPM   | 288  | 404   |
| >CDH1-T340IGLDRESFPT   | 226   | >CDH1-T340IGLDRESFPM   | 70   | 156   |
| >CDH1-T340IGLDRESFPTY\ | 66    | >CDH1-T340IGLDRESFPM\  | 50   | 16    |
| >CDH1-T340IGLDRESFPT   | 80    | >CDH1-T340IGLDRESFPM   | 12   | 68    |
| >CDH1-T340IGLDRESFPTY\ | 319   | >CDH1-T340IGLDRESFPM\  | 149  | 170   |
| >CDH1-T340IGLDRESFPT   | 141   | >CDH1-T340IGLDRESFPM   | 45   | 96    |
| >CDH1-T340IGLDRESFPTY\ | 185   | >CDH1-T340IGLDRESFPM\  | 140  | 45    |
| >CDH1-T340IGLDRESFPT   | 352   | >CDH1-T340IGLDRESFPM   | 239  | 113   |
| >CDH1-T340IGLDRESFPTY\ | 229   | >CDH1-T340IGLDRESFPM\  | 192  | 37    |
| >CDH1-T340ITGLDRESFPT\ | 354   | >CDH1-T340ITGLDRESFPM\ | 379  | 25    |
| >CDH1-T340ITGLDRESFPT\ | 466   | >CDH1-T340ITGLDRESFPM\ | 1940 | 1474  |
| >CDH1-T340ITGLDRESFPT\ | 495   | >CDH1-T340ITGLDRESFPM\ | 389  | 106   |
| >CDH1-T357IITATAVITV   | 310   | >CDH1-T357IITATAVITV   | 115  | 195   |

|                        |      |                        |       |       |
|------------------------|------|------------------------|-------|-------|
| >CDH1-T357 TTATAVITV   | 361  | >CDH1-T357 ITATAVITV   | 136   | 225   |
| >CDH1-T357 TTATAVITV   | 70   | >CDH1-T357 ITATAVITV   | 49    | 21    |
| >CDH1-T357 TTATAVITV   | 60   | >CDH1-T357 ITATAVITV   | 34    | 26    |
| >CDH1-T357 TTATAVITV   | 201  | >CDH1-T357 ITATAVITV   | 41    | 160   |
| >CDH1-T357 TTATAVITV   | 103  | >CDH1-T357 ITATAVITV   | 51    | 52    |
| >CDH1-T357 TTATAVITV   | 1133 | >CDH1-T357 ITATAVITV   | 174   | 959   |
| >CDH1-T357 TTATAVITV   | 236  | >CDH1-T357 ITATAVITV   | 50    | 186   |
| >CDH1-T357 TTATAVIT    | 355  | >CDH1-T357 ITATAVIT    | 3260  | 2905  |
| >CDH1-T357 TTATAVITV   | 5    | >CDH1-T357 ITATAVITV   | 17    | 12    |
| >CDH1-T357 TTATAVITVT  | 240  | >CDH1-T357 ITATAVITVT  | 958   | 718   |
| >CDH1-T357 TTATAVITV   | 9    | >CDH1-T357 ITATAVITV   | 112   | 103   |
| >CDH1-T357 TTATAVITV   | 938  | >CDH1-T357 ITATAVITV   | 138   | 800   |
| >CDH1-T357 TTATAVITV   | 52   | >CDH1-T357 ITATAVITV   | 36    | 16    |
| >CDH1-T357 TTATAVITV   | 1466 | >CDH1-T357 ITATAVITV   | 350   | 1116  |
| >CDH1-T357 STTATAVITV  | 619  | >CDH1-T357 SITATAVITV  | 226   | 393   |
| >CDH1-T357 STTATAVITV  | 393  | >CDH1-T357 SITATAVITV  | 177   | 216   |
| >CDH1-T357 STTATAVITV  | 83   | >CDH1-T357 SITATAVITV  | 42    | 41    |
| >CDH1-T357 STTATAVITV  | 103  | >CDH1-T357 SITATAVITV  | 99    | 4     |
| >CDH1-T357 STTATAVITV  | 81   | >CDH1-T357 SITATAVITV  | 22    | 59    |
| >CDH1-T357 STTATAVITV  | 430  | >CDH1-T357 SITATAVITV  | 75    | 355   |
| >CDH1-T357 STTATAVITV  | 34   | >CDH1-T357 SITATAVITV  | 12    | 22    |
| >CDH1-T357 STTATAVITV  | 6551 | >CDH1-T357 SITATAVITV  | 489   | 6062  |
| >CDH1-T357 STTATAVI    | 8584 | >CDH1-T357 SITATAVI    | 495   | 8089  |
| >CDH1-T357 STTATAVITV  | 54   | >CDH1-T357 SITATAVITV  | 4     | 50    |
| >CDH1-T357 STTATAVI    | 215  | >CDH1-T357 SITATAVI    | 730   | 515   |
| >CDH1-T357 STTATAVITV  | 466  | >CDH1-T357 SITATAVITV  | 1161  | 695   |
| >CDH1-T357 STTATAVI    | 59   | >CDH1-T357 SITATAVI    | 551   | 492   |
| >CDH1-T357 STTATAVITV  | 17   | >CDH1-T357 SITATAVITV  | 65    | 48    |
| >CDH1-T357 STTATAVITV  | 33   | >CDH1-T357 SITATAVITV  | 142   | 109   |
| >CDH1-T357 STTATAVI    | 85   | >CDH1-T357 SITATAVI    | 10062 | 9977  |
| >CDH1-T357 STTATAVITV  | 242  | >CDH1-T357 SITATAVITV  | 15979 | 15737 |
| >CDH1-T357 STTATAVITV  | 38   | >CDH1-T357 SITATAVITV  | 4367  | 4329  |
| >CDH1-T357 STTATAVI    | 90   | >CDH1-T357 SITATAVI    | 2636  | 2546  |
| >CDH1-T357 STTATAVITV  | 62   | >CDH1-T357 SITATAVITV  | 2015  | 1953  |
| >CDH1-T357 STTATAVITVT | 451  | >CDH1-T357 SITATAVITVT | 10232 | 9781  |
| >CDH1-T357 STTATAVI    | 20   | >CDH1-T357 SITATAVI    | 1401  | 1381  |
| >CDH1-T357 LSTTATAV    | 1190 | >CDH1-T357 LSITATAV    | 167   | 1023  |
| >CDH1-T357 LSTTATAVITV | 785  | >CDH1-T357 LSITATAVITV | 114   | 671   |
| >CDH1-T357 LSTTATAV    | 284  | >CDH1-T357 LSITATAV    | 108   | 176   |
| >CDH1-T357 LSTTATAVI   | 681  | >CDH1-T357 LSITATAVI   | 224   | 457   |
| >CDH1-T357 LSTTATAVITV | 222  | >CDH1-T357 LSITATAVITV | 83    | 139   |
| >CDH1-T357 LSTTATAVI   | 6203 | >CDH1-T357 LSITATAVI   | 402   | 5801  |
| >CDH1-T357 LSTTATAV    | 939  | >CDH1-T357 LSITATAV    | 209   | 730   |

|                        |      |                        |      |      |
|------------------------|------|------------------------|------|------|
| >CDH1-T357 LSTTATAVI   | 1038 | >CDH1-T357 LSITATAVI   | 262  | 776  |
| >CDH1-T357 LSTTATAVITV | 1438 | >CDH1-T357 LSITATAVITV | 371  | 1067 |
| >CDH1-T357 LSTTATAV    | 1156 | >CDH1-T357 LSITATAV    | 369  | 787  |
| >CDH1-T357 LSTTATAVI   | 168  | >CDH1-T357 LSITATAVI   | 41   | 127  |
| >CDH1-T357 LSTTATAVITV | 696  | >CDH1-T357 LSITATAVITV | 183  | 513  |
| >CDH1-T357 LSTTATAVI   | 107  | >CDH1-T357 LSITATAVI   | 55   | 52   |
| >CDH1-T357 LSTTATAVI   | 28   | >CDH1-T357 LSITATAVI   | 282  | 254  |
| >CDH1-T357 LSTTATAVITV | 62   | >CDH1-T357 LSITATAVITV | 532  | 470  |
| >CDH1-T357 LSTTATAV    | 466  | >CDH1-T357 LSITATAV    | 2733 | 2267 |
| >CDH1-T357 LSTTATAVI   | 16   | >CDH1-T357 LSITATAVI   | 16   | 0    |
| >CDH1-T357 GLSTTATAV   | 207  | >CDH1-T357 GLSITATAV   | 537  | 330  |
| >CDH1-T357 GLSTTATA    | 117  | >CDH1-T357 GLSITATA    | 122  | 5    |
| >CDH1-T357 GLSTTATAV   | 10   | >CDH1-T357 GLSITATAV   | 16   | 6    |
| >CDH1-T357 GLSTTATAVI  | 52   | >CDH1-T357 GLSITATAVI  | 93   | 41   |
| >CDH1-T357 GLSTTATA    | 19   | >CDH1-T357 GLSITATA    | 28   | 9    |
| >CDH1-T357 GLSTTATAV   | 5    | >CDH1-T357 GLSITATAV   | 8    | 3    |
| >CDH1-T357 GLSTTATAVI  | 57   | >CDH1-T357 GLSITATAVI  | 79   | 22   |
| >CDH1-T357 GLSTTATAV   | 143  | >CDH1-T357 GLSITATAV   | 318  | 175  |
| >CDH1-T357 GLSTTATA    | 221  | >CDH1-T357 GLSITATA    | 157  | 64   |
| >CDH1-T357 GLSTTATAV   | 12   | >CDH1-T357 GLSITATAV   | 10   | 2    |
| >CDH1-T357 GLSTTATAVI  | 206  | >CDH1-T357 GLSITATAVI  | 147  | 59   |
| >CDH1-T357 GLSTTATA    | 42   | >CDH1-T357 GLSITATA    | 106  | 64   |
| >CDH1-T357 GLSTTATAV   | 6    | >CDH1-T357 GLSITATAV   | 11   | 5    |
| >CDH1-T357 GLSTTATAVI  | 19   | >CDH1-T357 GLSITATAVI  | 47   | 28   |
| >CDH1-T357 GLSTTATA    | 99   | >CDH1-T357 GLSITATA    | 85   | 14   |
| >CDH1-T357 GLSTTATAV   | 12   | >CDH1-T357 GLSITATAV   | 9    | 3    |
| >CDH1-T357 GLSTTATAVI  | 139  | >CDH1-T357 GLSITATAVI  | 108  | 31   |
| >CDH1-T357 GLSTTATAV   | 37   | >CDH1-T357 GLSITATAV   | 121  | 84   |
| >CDH1-T357 GLSTTATAVI  | 452  | >CDH1-T357 GLSITATAVI  | 1044 | 592  |
| >CDH1-T357 GLSTTATA    | 15   | >CDH1-T357 GLSITATA    | 17   | 2    |
| >CDH1-T357 GLSTTATAV   | 3    | >CDH1-T357 GLSITATAV   | 3    | 0    |
| >CDH1-T357 GLSTTATAVI  | 47   | >CDH1-T357 GLSITATAVI  | 48   | 1    |
| >CDH1-T357 EGLSTTATAV  | 44   | >CDH1-T357 EGLSITATAV  | 39   | 5    |
| >CDH1-T357 GEGLSITATA  | 197  | >CDH1-T357 GEGLSITATA  | 489  | 292  |
| >CDH1-T357 GEGLSITATA  | 288  | >CDH1-T357 GEGLSITATA  | 355  | 67   |
| >CDH1-T357 GEGLSITATA  | 473  | >CDH1-T357 GEGLSITATA  | 301  | 172  |
| >CDH1-T357 GEGLSITATA  | 180  | >CDH1-T357 GEGLSITATA  | 85   | 95   |
| >CDH1-T357 GEGLSITATA  | 221  | >CDH1-T357 GEGLSITATA  | 145  | 76   |
| >CDH1-T357 GEGLSITATA  | 43   | >CDH1-T357 GEGLSITATA  | 25   | 18   |
| >CDH1-T357 GEGLSITATA  | 70   | >CDH1-T357 GEGLSITATA  | 47   | 23   |
| >CDH1-T357 GEGLSITATA  | 1073 | >CDH1-T357 GEGLSITATA  | 429  | 644  |
| >CDH1-T357 GEGLSITATA  | 63   | >CDH1-T357 GEGLSITATA  | 58   | 5    |
| >CDH1-T357 GEGLSITATA  | 238  | >CDH1-T357 GEGLSITATA  | 227  | 11   |

|                        |       |                        |      |       |
|------------------------|-------|------------------------|------|-------|
| >CDH1-T357IGEGLSTTATA  | 20    | >CDH1-T357IGEGLSITATA\ | 20   | 0     |
| >CDH1-T357ILQGEGLST    | 4484  | >CDH1-T357ILQGEGLSI    | 482  | 4002  |
| >CDH1-T357ILQGEGLST    | 379   | >CDH1-T357ILQGEGLSI    | 33   | 346   |
| >CDH1-T357ILQGEGLSTT   | 68    | >CDH1-T357ILQGEGLSIT   | 488  | 420   |
| >CDH1-T357ILQGEGLSTTA  | 662   | >CDH1-T357ILQGEGLSITA  | 333  | 329   |
| >CDH1-T357ILQGEGLSTTA  | 167   | >CDH1-T357ILQGEGLSITA\ | 149  | 18    |
| >CDH1-T357ILQGEGLST    | 6959  | >CDH1-T357ILQGEGLSI    | 494  | 6465  |
| >CDH1-T357ILQGEGLST    | 2557  | >CDH1-T357ILQGEGLSI    | 201  | 2356  |
| >CDH1-T357ILQGEGLSTTA  | 212   | >CDH1-T357ILQGEGLSITA  | 389  | 177   |
| >CDH1-T357ILQGEGLST    | 8066  | >CDH1-T357ILQGEGLSI    | 400  | 7666  |
| >CDH1-T357IDLQGEGLSTT  | 315   | >CDH1-T357IDLQGEGLSIT\ | 378  | 63    |
| >CDH1-T357IADLQGEGLST  | 22368 | >CDH1-T357IADLQGEGLSI  | 425  | 21943 |
| >CDH1-T357IADLQGEGLST  | 7375  | >CDH1-T357IADLQGEGLSI  | 87   | 7288  |
| >CDH1-T522ITYRIWRDTAN  | 66    | >CDH1-T522IYRIWRDTAN   | 45   | 21    |
| >CDH1-T522ITYRIWRDTAN  | 524   | >CDH1-T522IYRIWRDTAN   | 276  | 248   |
| >CDH1-T522ITYRIWRDTAN  | 101   | >CDH1-T522IYRIWRDTAN   | 173  | 72    |
| >CDH1-T522ITYRIWRDTA   | 491   | >CDH1-T522IYRIWRDTA    | 232  | 259   |
| >CDH1-T522ITYRIWRDTA   | 116   | >CDH1-T522IYRIWRDTA    | 115  | 1     |
| >CDH1-T522ITYRIWRDTA   | 1333  | >CDH1-T522IYRIWRDTA    | 349  | 984   |
| >CDH1-T522ITYRIWRDTA   | 397   | >CDH1-T522IYRIWRDTA    | 2554 | 2157  |
| >CDH1-T522I EPDTFMEQKI | 8625  | >CDH1-T522I EPDTFMEQKI | 313  | 8312  |
| >CDH1-T522IKITYRIWRDT\ | 1484  | >CDH1-T522IKIYRIWRDTA  | 362  | 1122  |
| >CDH1-T522IKITYRIWRDT\ | 572   | >CDH1-T522IKIYRIWRDTA  | 173  | 399   |
| >CDH1-T522IKITYRIWR    | 821   | >CDH1-T522IKIYRIWR     | 226  | 595   |
| >CDH1-T522IKITYRIWR    | 9     | >CDH1-T522IKIYRIWR     | 8    | 1     |
| >CDH1-T522IKITYRIWR    | 530   | >CDH1-T522IKIYRIWR     | 484  | 46    |
| >CDH1-T522IKITYRIWR    | 134   | >CDH1-T522IKIYRIWR     | 93   | 41    |
| >CDH1-T522IKITYRIWR    | 38    | >CDH1-T522IKIYRIWR     | 33   | 5     |
| >CDH1-T522IQKITYRIWR   | 352   | >CDH1-T522IQKIYRIWR    | 503  | 151   |
| >CDH1-T522IQKITYRIW    | 99    | >CDH1-T522IQKIYRIW     | 342  | 243   |
| >CDH1-T522IQKITYRIWR   | 321   | >CDH1-T522IQKIYRIWR    | 417  | 96    |
| >CDH1-T522IEQKITYRIWR  | 59    | >CDH1-T522IEQKIYRIWR   | 30   | 29    |
| >CDH1-T522IEQKITYRIWR  | 282   | >CDH1-T522IEQKIYRIWR   | 145  | 137   |
| >CDH1-T522IEQKITYRIWR  | 259   | >CDH1-T522IEQKIYRIWR   | 150  | 109   |
| >CDH1-T522IEQKITYRIWR  | 371   | >CDH1-T522IEQKIYRIWR   | 268  | 103   |
| >CDH1-T522IMEQKITYRI   | 10    | >CDH1-T522IMEQKIYRI    | 19   | 9     |
| >CDH1-T522IMEQKITYRIW  | 318   | >CDH1-T522IMEQKIYRIW   | 596  | 278   |
| >CDH1-T522IMEQKITYR    | 77    | >CDH1-T522IMEQKIYR     | 88   | 11    |
| >CDH1-T522IMEQKITYRIW  | 178   | >CDH1-T522IMEQKIYRIW   | 149  | 29    |
| >CDH1-T522IMEQKITYR    | 161   | >CDH1-T522IMEQKIYR     | 186  | 25    |
| >CDH1-T522IMEQKITYRIW  | 175   | >CDH1-T522IMEQKIYRIW   | 198  | 23    |
| >CDH1-T522IMEQKITYRI   | 276   | >CDH1-T522IMEQKIYRI    | 330  | 54    |
| >CDH1-T522IMEQKITYRI   | 194   | >CDH1-T522IMEQKIYRI    | 175  | 19    |

|                       |     |                       |     |     |
|-----------------------|-----|-----------------------|-----|-----|
| >CDH1-T522 MEQKITYRIM | 24  | >CDH1-T522 MEQKIYRIW  | 16  | 8   |
| >CDH1-T522 MEQKITYRI  | 516 | >CDH1-T522 MEQKIYRI   | 322 | 194 |
| >CDH1-T522 MEQKITYRIM | 62  | >CDH1-T522 MEQKIYRIW  | 39  | 23  |
| >CDH1-T522 MEQKITYRI  | 92  | >CDH1-T522 MEQKIYRI   | 54  | 38  |
| >CDH1-T522 MEQKITYRIM | 694 | >CDH1-T522 MEQKIYRIW  | 308 | 386 |
| >CDH1-T522 MEQKITYRIM | 443 | >CDH1-T522 MEQKIYRIW  | 339 | 104 |
| >CDH1-T522 MEQKITYRI  | 6   | >CDH1-T522 MEQKIYRI   | 5   | 1   |
| >CDH1-T522 MEQKITYRIM | 340 | >CDH1-T522 MEQKIYRIW  | 365 | 25  |
| >CDH1-T522 MEQKITYRIM | 204 | >CDH1-T522 MEQKIYRIW  | 170 | 34  |
| >CDH1-T522 MEQKITYR   | 64  | >CDH1-T522 MEQKIYR    | 54  | 10  |
| >CDH1-T522 MEQKITYRIM | 89  | >CDH1-T522 MEQKIYRIW  | 118 | 29  |
| >CDH1-T522 FMEQKITY   | 182 | >CDH1-T522 FMEQKIY    | 129 | 53  |
| >CDH1-T522 FMEQKITYRI | 117 | >CDH1-T522 FMEQKIYRI  | 61  | 56  |
| >CDH1-T522 FMEQKITYRI | 44  | >CDH1-T522 FMEQKIYRI  | 41  | 3   |
| >CDH1-T522 FMEQKITYRI | 146 | >CDH1-T522 FMEQKIYRI  | 127 | 19  |
| >CDH1-T522 FMEQKITYRI | 292 | >CDH1-T522 FMEQKIYRI  | 168 | 124 |
| >CDH1-T522 FMEQKITYRI | 6   | >CDH1-T522 FMEQKIYRI  | 3   | 3   |
| >CDH1-T522 FMEQKITYRI | 11  | >CDH1-T522 FMEQKIYRI  | 9   | 2   |
| >CDH1-T522 FMEQKITYRI | 95  | >CDH1-T522 FMEQKIYRI  | 61  | 34  |
| >CDH1-T522 FMEQKITYRI | 69  | >CDH1-T522 FMEQKIYRI  | 58  | 11  |
| >CDH1-T522 FMEQKITYRI | 5   | >CDH1-T522 FMEQKIYRI  | 4   | 1   |
| >CDH1-T522 FMEQKITY   | 96  | >CDH1-T522 FMEQKIY    | 125 | 29  |
| >CDH1-T522 FMEQKITYR  | 52  | >CDH1-T522 FMEQKIYR   | 97  | 45  |
| >CDH1-T522 FMEQKITYR  | 95  | >CDH1-T522 FMEQKIYR   | 104 | 9   |
| >CDH1-T522 FMEQKITYR  | 67  | >CDH1-T522 FMEQKIYR   | 69  | 2   |
| >CDH1-T522 FMEQKITY   | 232 | >CDH1-T522 FMEQKIY    | 607 | 375 |
| >CDH1-T522 FMEQKITY   | 77  | >CDH1-T522 FMEQKIY    | 102 | 25  |
| >CDH1-T522 FMEQKITY   | 429 | >CDH1-T522 FMEQKIY    | 640 | 211 |
| >CDH1-T522 FMEQKITYRI | 356 | >CDH1-T522 FMEQKIYRIV | 643 | 287 |
| >CDH1-T522 FMEQKITY   | 168 | >CDH1-T522 FMEQKIY    | 492 | 324 |
| >CDH1-T522 FMEQKITYRI | 252 | >CDH1-T522 FMEQKIYRI  | 168 | 84  |
| >CDH1-T522 FMEQKITYRI | 53  | >CDH1-T522 FMEQKIYRIV | 38  | 15  |
| >CDH1-T522 FMEQKITY   | 478 | >CDH1-T522 FMEQKIY    | 708 | 230 |
| >CDH1-T522 FMEQKITYR  | 43  | >CDH1-T522 FMEQKIYR   | 25  | 18  |
| >CDH1-T522 TFMEQKITYR | 932 | >CDH1-T522 TFMEQKIYR  | 493 | 439 |
| >CDH1-T522 TFMEQKITYR | 163 | >CDH1-T522 TFMEQKIYRI | 210 | 47  |
| >CDH1-T522 TFMEQKITYR | 341 | >CDH1-T522 TFMEQKIYRI | 449 | 108 |
| >CDH1-T522 TFMEQKITYR | 105 | >CDH1-T522 TFMEQKIYRI | 153 | 48  |
| >CDH1-T522 TFMEQKITY  | 102 | >CDH1-T522 TFMEQKIY   | 195 | 93  |
| >CDH1-T522 TFMEQKITYR | 21  | >CDH1-T522 TFMEQKIYR  | 15  | 6   |
| >CDH1-T522 TFMEQKITYR | 67  | >CDH1-T522 TFMEQKIYR  | 43  | 24  |
| >CDH1-T522 TFMEQKITYR | 39  | >CDH1-T522 TFMEQKIYR  | 30  | 9   |
| >CDH1-T522 TFMEQKITY  | 364 | >CDH1-T522 TFMEQKIY   | 488 | 124 |



|                        |       |                        |      |       |
|------------------------|-------|------------------------|------|-------|
| >CDH1-T522 TFMEQKITY   | 206   | >CDH1-T522 TFMEQKIYY   | 846  | 640   |
| >CDH1-T522 TFMEQKITYR  | 250   | >CDH1-T522 TFMEQKIYYR  | 172  | 78    |
| >CDH1-T522 TFMEQKITYR  | 21    | >CDH1-T522 TFMEQKIYYR  | 19   | 2     |
| >CDH1-T522 DTFMEQKITY  | 631   | >CDH1-T522 DTFMEQKIYY  | 253  | 378   |
| >CDH1-T522 DTFMEQKITY  | 130   | >CDH1-T522 DTFMEQKIYY  | 853  | 723   |
| >CDH1-T522 DTFMEQKITY  | 375   | >CDH1-T522 DTFMEQKIYY  | 546  | 171   |
| >CDH1-T522 DTFMEQKITY  | 144   | >CDH1-T522 DTFMEQKIYY  | 470  | 326   |
| >CDH1-T522 DTFMEQKITY  | 200   | >CDH1-T522 DTFMEQKIYY  | 154  | 46    |
| >CDH1-T522 DTFMEQKITY  | 539   | >CDH1-T522 DTFMEQKIYY  | 387  | 152   |
| >CDH1-T522 DTFMEQKITY  | 121   | >CDH1-T522 DTFMEQKIYYI | 160  | 39    |
| >CDH1-T522 DTFMEQKITY  | 11    | >CDH1-T522 DTFMEQKIYYI | 11   | 0     |
| >CDH1-T522 DTFMEQKITY  | 346   | >CDH1-T522 DTFMEQKIYY  | 639  | 293   |
| >CDH1-T522 DTFMEQKITY  | 3     | >CDH1-T522 DTFMEQKIYYI | 3    | 0     |
| >CDH1-T522 DTFMEQKITY  | 66    | >CDH1-T522 DTFMEQKIYY  | 386  | 320   |
| >CDH1-T522 DTFMEQKITY  | 259   | >CDH1-T522 DTFMEQKIYY  | 240  | 19    |
| >CDH1-T522 DTFMEQKITY  | 347   | >CDH1-T522 DTFMEQKIYYI | 255  | 92    |
| >CDH1-T522 DTFMEQKITY  | 182   | >CDH1-T522 DTFMEQKIYYI | 111  | 71    |
| >CDH1-T522 DTFMEQKIT   | 32386 | >CDH1-T522 DTFMEQKII   | 296  | 32090 |
| >CDH1-T522 PDTFMEQKIT  | 7841  | >CDH1-T522 PDTFMEQKII  | 122  | 7719  |
| >CDH1-V365 VTDTNDNPPI  | 190   | >CDH1-V365 LTDTNDNPPI  | 79   | 111   |
| >CDH1-V365 VTDTNDNPPI  | 1587  | >CDH1-V365 LTDTNDNPPI  | 470  | 1117  |
| >CDH1-V365 VTDTNDNPPI  | 1038  | >CDH1-V365 LTDTNDNPPI  | 393  | 645   |
| >CDH1-V365 VTDTNDNPPI  | 33    | >CDH1-V365 LTDTNDNPPI  | 31   | 2     |
| >CDH1-V365 VTDTNDNPPI  | 387   | >CDH1-V365 LTDTNDNPPI  | 204  | 183   |
| >CDH1-V365 VTDTNDNPPI  | 246   | >CDH1-V365 LTDTNDNPPI  | 144  | 102   |
| >CDH1-V365 TVTDTNDNPI  | 2530  | >CDH1-V365 TLDTNDNPF   | 93   | 2437  |
| >CDH1-V365 TVTDTNDNPI  | 3731  | >CDH1-V365 TLDTNDNPF   | 106  | 3625  |
| >CDH1-V365 TVTDTNDNPI  | 3391  | >CDH1-V365 TLDTNDNPF   | 120  | 3271  |
| >CDH1-V365 TVTDTNDNPI  | 233   | >CDH1-V365 TLDTNDNPF   | 138  | 95    |
| >CDH1-V365 TVTDTNDNPI  | 4229  | >CDH1-V365 TLDTNDNPF   | 67   | 4162  |
| >CDH1-V365 TVTDTNDNPI  | 4837  | >CDH1-V365 TLDTNDNPF   | 36   | 4801  |
| >CDH1-V365 TVTDTNDNPI  | 3841  | >CDH1-V365 TLDTNDNPF   | 34   | 3807  |
| >CDH1-V365 TVTDTNDNPI  | 10176 | >CDH1-V365 TLDTNDNPF   | 206  | 9970  |
| >CDH1-V365 TVTDTNDNPI  | 2022  | >CDH1-V365 TLDTNDNPF   | 12   | 2010  |
| >CDH1-V365 TVTDTNDNPI  | 46    | >CDH1-V365 TLDTNDNPF   | 1450 | 1404  |
| >CDH1-V365 TVTDTNDNPI  | 48    | >CDH1-V365 TLDTNDNPF   | 223  | 175   |
| >CDH1-V365 LSTTATAVITV | 222   | >CDH1-V365 LSTTATAVITL | 2135 | 1913  |
| >CDH1-V365 LSTTATAVITV | 696   | >CDH1-V365 LSTTATAVITL | 18   | 678   |
| >CDH1-V365 LSTTATAVITV | 3123  | >CDH1-V365 LSTTATAVITL | 178  | 2945  |
| >CDH1-V365 LSTTATAVITV | 62    | >CDH1-V365 LSTTATAVITL | 13   | 49    |
| >CDH1-V365 LSTTATAVITV | 1202  | >CDH1-V365 LSTTATAVITL | 396  | 806   |
| >CDH1-V365 LSTTATAVITV | 885   | >CDH1-V365 LSTTATAVITL | 193  | 692   |
| >CDH1-V365 ATAVITVTD   | 266   | >CDH1-V365 ATAVITLTD   | 779  | 513   |

|                        |      |                        |      |      |
|------------------------|------|------------------------|------|------|
| >CDH1-V365 TATAVITV    | 115  | >CDH1-V365 TATAVITL    | 949  | 834  |
| >CDH1-V365 TATAVITV    | 409  | >CDH1-V365 TATAVITL    | 5431 | 5022 |
| >CDH1-V365 TATAVITV    | 187  | >CDH1-V365 TATAVITL    | 5533 | 5346 |
| >CDH1-V365 TATAVITV    | 14   | >CDH1-V365 TATAVITL    | 92   | 78   |
| >CDH1-V365 TATAVITVT   | 1134 | >CDH1-V365 TATAVITLT   | 313  | 821  |
| >CDH1-V365 TATAVITV    | 168  | >CDH1-V365 TATAVITL    | 1876 | 1708 |
| >CDH1-V365 TTATAVITV   | 310  | >CDH1-V365 TTATAVITL   | 1722 | 1412 |
| >CDH1-V365 TTATAVITV   | 361  | >CDH1-V365 TTATAVITL   | 506  | 145  |
| >CDH1-V365 TTATAVITV   | 70   | >CDH1-V365 TTATAVITL   | 905  | 835  |
| >CDH1-V365 TTATAVITV   | 60   | >CDH1-V365 TTATAVITL   | 572  | 512  |
| >CDH1-V365 TTATAVITV   | 201  | >CDH1-V365 TTATAVITL   | 3340 | 3139 |
| >CDH1-V365 TTATAVITV   | 103  | >CDH1-V365 TTATAVITL   | 3331 | 3228 |
| >CDH1-V365 TTATAVITV   | 236  | >CDH1-V365 TTATAVITL   | 6180 | 5944 |
| >CDH1-V365 TTATAVITV   | 887  | >CDH1-V365 TTATAVITL   | 45   | 842  |
| >CDH1-V365 TTATAVITV   | 1233 | >CDH1-V365 TTATAVITL   | 274  | 959  |
| >CDH1-V365 TTATAVITV   | 5    | >CDH1-V365 TTATAVITL   | 10   | 5    |
| >CDH1-V365 TTATAVITVT  | 240  | >CDH1-V365 TTATAVITLT  | 141  | 99   |
| >CDH1-V365 TTATAVITV   | 9    | >CDH1-V365 TTATAVITL   | 74   | 65   |
| >CDH1-V365 TTATAVITV   | 938  | >CDH1-V365 TTATAVITL   | 20   | 918  |
| >CDH1-V365 TTATAVITV   | 5321 | >CDH1-V365 TTATAVITL   | 288  | 5033 |
| >CDH1-V365 TTATAVITV   | 52   | >CDH1-V365 TTATAVITL   | 11   | 41   |
| >CDH1-V365 TTATAVITV   | 1466 | >CDH1-V365 TTATAVITL   | 453  | 1013 |
| >CDH1-V365 TTATAVITV   | 1805 | >CDH1-V365 TTATAVITL   | 427  | 1378 |
| >CDH1-V365 STTATAVITV  | 393  | >CDH1-V365 STTATAVITL  | 438  | 45   |
| >CDH1-V365 STTATAVITV  | 83   | >CDH1-V365 STTATAVITL  | 461  | 378  |
| >CDH1-V365 STTATAVITV  | 103  | >CDH1-V365 STTATAVITL  | 458  | 355  |
| >CDH1-V365 STTATAVITV  | 81   | >CDH1-V365 STTATAVITL  | 1334 | 1253 |
| >CDH1-V365 STTATAVITV  | 430  | >CDH1-V365 STTATAVITL  | 4336 | 3906 |
| >CDH1-V365 STTATAVITV  | 34   | >CDH1-V365 STTATAVITL  | 836  | 802  |
| >CDH1-V365 STTATAVITV  | 54   | >CDH1-V365 STTATAVITL  | 1753 | 1699 |
| >CDH1-V365 STTATAVITV  | 466  | >CDH1-V365 STTATAVITL  | 122  | 344  |
| >CDH1-V365 STTATAVITV  | 17   | >CDH1-V365 STTATAVITL  | 54   | 37   |
| >CDH1-V365 STTATAVITV  | 33   | >CDH1-V365 STTATAVITL  | 490  | 457  |
| >CDH1-V365 STTATAVITV  | 242  | >CDH1-V365 STTATAVITL  | 10   | 232  |
| >CDH1-V365 STTATAVITV  | 38   | >CDH1-V365 STTATAVITL  | 10   | 28   |
| >CDH1-V365 STTATAVITV1 | 1689 | >CDH1-V365 STTATAVITLT | 460  | 1229 |
| >CDH1-V365 STTATAVITV  | 62   | >CDH1-V365 STTATAVITL  | 45   | 17   |
| >CDH1-V365 STTATAVITV1 | 451  | >CDH1-V365 STTATAVITLT | 323  | 128  |
| >CDH1-V456 VTNVVPFEV   | 260  | >CDH1-V456 MTNVVPFEV   | 42   | 218  |
| >CDH1-V456 VTNVVPFEV   | 460  | >CDH1-V456 MTNVVPFEV   | 44   | 416  |
| >CDH1-V456 VTNVVPFEVS  | 1255 | >CDH1-V456 MTNVVPFEV   | 146  | 1109 |
| >CDH1-V456 VTNVVPFEV   | 465  | >CDH1-V456 MTNVVPFEV   | 96   | 369  |
| >CDH1-V456 VTNVVPFEV   | 300  | >CDH1-V456 MTNVVPFEV   | 73   | 227  |

|                       |       |                       |      |       |
|-----------------------|-------|-----------------------|------|-------|
| >CDH1-V456 VTNVVPFEV  | 9     | >CDH1-V456 MTNVVPFEV  | 6    | 3     |
| >CDH1-V456 VTNVVPFEVS | 608   | >CDH1-V456 MTNVVPFEV  | 299  | 309   |
| >CDH1-V456 VTNVVPFEV  | 620   | >CDH1-V456 MTNVVPFEV  | 339  | 281   |
| >CDH1-V456 VTNVVPFEV  | 30    | >CDH1-V456 MTNVVPFEV  | 29   | 1     |
| >CDH1-V456 VTNVVPFEV  | 298   | >CDH1-V456 MTNVVPFEV  | 229  | 69    |
| >CDH1-V456 VTNVVPFEV  | 278   | >CDH1-V456 MTNVVPFEV  | 115  | 163   |
| >CDH1-V456 VTNVVPFEVS | 163   | >CDH1-V456 MTNVVPFEV  | 57   | 106   |
| >CDH1-V456 VTNVVPFE   | 8430  | >CDH1-V456 MTNVVPFE   | 234  | 8196  |
| >CDH1-V456 VTNVVPFEV  | 28    | >CDH1-V456 MTNVVPFEV  | 4    | 24    |
| >CDH1-V456 VTNVVPFEVS | 595   | >CDH1-V456 MTNVVPFEV  | 13   | 582   |
| >CDH1-V456 VTNVVPFEV  | 141   | >CDH1-V456 MTNVVPFEV  | 9    | 132   |
| >CDH1-V456 VTNVVPFEVS | 5250  | >CDH1-V456 MTNVVPFEV  | 338  | 4912  |
| >CDH1-V456 VTNVVPFEVS | 59    | >CDH1-V456 MTNVVPFEV  | 32   | 27    |
| >CDH1-V456 VTNVVPFEV  | 727   | >CDH1-V456 MTNVVPFEV  | 134  | 593   |
| >CDH1-V456 VTNVVPFEVS | 232   | >CDH1-V456 MTNVVPFEV  | 61   | 171   |
| >CDH1-V456 VTNVVPFEVS | 1201  | >CDH1-V456 MTNVVPFEV  | 254  | 947   |
| >CDH1-V456 AVTNVVPFEV | 320   | >CDH1-V456 AMTNVVPFE  | 21   | 299   |
| >CDH1-V456 AVTNVVPFEV | 211   | >CDH1-V456 AMTNVVPFE  | 20   | 191   |
| >CDH1-V456 AVTNVVPFEV | 193   | >CDH1-V456 AMTNVVPFE  | 30   | 163   |
| >CDH1-V456 AVTNVVPFEV | 172   | >CDH1-V456 AMTNVVPFE  | 92   | 80    |
| >CDH1-V456 AVTNVVPF   | 11736 | >CDH1-V456 AMTNVVPF   | 242  | 11494 |
| >CDH1-V456 AVTNVVPFEV | 7     | >CDH1-V456 AMTNVVPFE  | 1    | 6     |
| >CDH1-V456 AVTNVVPFEV | 126   | >CDH1-V456 AMTNVVPFE  | 3    | 123   |
| >CDH1-V456 AVTNVVPFEV | 9     | >CDH1-V456 AMTNVVPFE  | 4    | 5     |
| >CDH1-V456 AVTNVVPFEV | 81    | >CDH1-V456 AMTNVVPFE  | 3    | 78    |
| >CDH1-V456 AVTNVVPFEV | 5     | >CDH1-V456 AMTNVVPFE  | 2    | 3     |
| >CDH1-V456 AVTNVVPF   | 115   | >CDH1-V456 AMTNVVPF   | 2731 | 2616  |
| >CDH1-V456 AVTNVVPF   | 47    | >CDH1-V456 AMTNVVPF   | 37   | 10    |
| >CDH1-V456 AVTNVVPFEV | 303   | >CDH1-V456 AMTNVVPFE  | 1241 | 938   |
| >CDH1-V456 AVTNVVPF   | 359   | >CDH1-V456 AMTNVVPF   | 48   | 311   |
| >CDH1-V456 AVTNVVPF   | 4746  | >CDH1-V456 AMTNVVPF   | 470  | 4276  |
| >CDH1-V456 AVTNVVPF   | 181   | >CDH1-V456 AMTNVVPF   | 7    | 174   |
| >CDH1-V456 AVTNVVPF   | 384   | >CDH1-V456 AMTNVVPF   | 2146 | 1762  |
| >CDH1-V456 AKQQYILHVA | 73    | >CDH1-V456 AKQQYILHVA | 20   | 53    |
| >CDH1-V456 VAVTNVVPF  | 15    | >CDH1-V456 VAMTNVVPF  | 11   | 4     |
| >CDH1-V456 VAVTNVVPFE | 95    | >CDH1-V456 VAMTNVVPF  | 64   | 31    |
| >CDH1-V456 VAVTNVVPF  | 264   | >CDH1-V456 VAMTNVVPF  | 164  | 100   |
| >CDH1-V456 VAVTNVVPFE | 894   | >CDH1-V456 VAMTNVVPF  | 38   | 856   |
| >CDH1-V456 VAVTNVVPFE | 1125  | >CDH1-V456 VAMTNVVPF  | 169  | 956   |
| >CDH1-V456 VAVTNVVPFE | 673   | >CDH1-V456 VAMTNVVPF  | 170  | 503   |
| >CDH1-V456 VAVTNVVPFE | 70    | >CDH1-V456 VAMTNVVPF  | 25   | 45    |
| >CDH1-V456 VAVTNVVPFE | 56    | >CDH1-V456 VAMTNVVPF  | 22   | 34    |
| >CDH1-V456 VAVTNVVPFE | 1216  | >CDH1-V456 VAMTNVVPF  | 122  | 1094  |

|                       |      |                      |     |      |
|-----------------------|------|----------------------|-----|------|
| >CDH1-V456 VAVTNVVPFE | 659  | >CDH1-V456 VAMTNVVPF | 250 | 409  |
| >CDH1-V456 VAVTNVVPFE | 2208 | >CDH1-V456 VAMTNVVPF | 24  | 2184 |
| >CDH1-V456 VAVTNVVPFE | 113  | >CDH1-V456 VAMTNVVPF | 46  | 67   |
| >CDH1-V456 VAVTNVVPF  | 272  | >CDH1-V456 VAMTNVVPF | 830 | 558  |
| >CDH1-V456 VAVTNVVPF  | 1575 | >CDH1-V456 VAMTNVVPF | 192 | 1383 |
| >CDH1-V456 VAVTNVVPFE | 98   | >CDH1-V456 VAMTNVVPF | 35  | 63   |
| >CDH1-V456 VAVTNVVPFE | 617  | >CDH1-V456 VAMTNVVPF | 148 | 469  |
| >CDH1-V456 VAVTNVVPF  | 149  | >CDH1-V456 VAMTNVVPF | 75  | 74   |
| >CDH1-V456 VAVTNVVPF  | 8    | >CDH1-V456 VAMTNVVPF | 5   | 3    |
| >CDH1-V456 VAVTNVVPF  | 9    | >CDH1-V456 VAMTNVVPF | 8   | 1    |
| >CDH1-V456 VAVTNVVPF  | 33   | >CDH1-V456 VAMTNVVPF | 32  | 1    |
| >CDH1-V456 VAVTNVVPF  | 350  | >CDH1-V456 VAMTNVVPF | 111 | 239  |
| >CDH1-V456 VAVTNVVPF  | 323  | >CDH1-V456 VAMTNVVPF | 121 | 202  |
| >CDH1-V456 HVAVTNVV   | 240  | >CDH1-V456 HVAMTNVV  | 270 | 30   |
| >CDH1-V456 HVAVTNVV   | 392  | >CDH1-V456 HVAMTNVV  | 213 | 179  |
| >CDH1-V456 HVAVTNVV   | 311  | >CDH1-V456 HVAMTNVV  | 329 | 18   |
| >CDH1-V456 HVAVTNVV   | 213  | >CDH1-V456 HVAMTNVV  | 86  | 127  |
| >CDH1-V456 HVAVTNVVPF | 202  | >CDH1-V456 HVAMTNVVF | 129 | 73   |
| >CDH1-V456 HVAVTNVVPF | 63   | >CDH1-V456 HVAMTNVVF | 46  | 17   |
| >CDH1-V456 HVAVTNVVPF | 762  | >CDH1-V456 HVAMTNVVF | 477 | 285  |
| >CDH1-V456 HVAVTNVV   | 12   | >CDH1-V456 HVAMTNVV  | 12  | 0    |
| >CDH1-V456 HVAVTNVV   | 77   | >CDH1-V456 HVAMTNVV  | 132 | 55   |
| >CDH1-V456 HVAVTNVVPF | 75   | >CDH1-V456 HVAMTNVVF | 52  | 23   |
| >CDH1-V456 HVAVTNVVPF | 338  | >CDH1-V456 HVAMTNVVF | 445 | 107  |
| >CDH1-V456 HVAVTNVVPF | 44   | >CDH1-V456 HVAMTNVVF | 30  | 14   |
| >CDH1-V456 HVAVTNVVPF | 127  | >CDH1-V456 HVAMTNVVF | 99  | 28   |
| >CDH1-V456 HVAVTNVVPF | 65   | >CDH1-V456 HVAMTNVVF | 85  | 20   |
| >CDH1-V456 LHVAVTNVVI | 9    | >CDH1-V456 LHVAMTNVV | 10  | 1    |
| >CDH1-V456 LHVAVTNVVI | 563  | >CDH1-V456 LHVAMTNVV | 458 | 105  |
| >CDH1-V456 LHVAVTNVV  | 65   | >CDH1-V456 LHVAMTNVV | 89  | 24   |
| >CDH1-V456 LHVAVTNVVI | 139  | >CDH1-V456 LHVAMTNVV | 160 | 21   |
| >CDH1-V456 LHVAVTNVVI | 206  | >CDH1-V456 LHVAMTNVV | 225 | 19   |
| >CDH1-V456 ILHVAVTNV  | 72   | >CDH1-V456 ILHVAMTNV | 112 | 40   |
| >CDH1-V456 ILHVAVTNVV | 387  | >CDH1-V456 ILHVAMTNV | 432 | 45   |
| >CDH1-V456 ILHVAVTNV  | 11   | >CDH1-V456 ILHVAMTNV | 10  | 1    |
| >CDH1-V456 ILHVAVTNVV | 117  | >CDH1-V456 ILHVAMTNV | 114 | 3    |
| >CDH1-V456 ILHVAVTNV  | 4    | >CDH1-V456 ILHVAMTNV | 5   | 1    |
| >CDH1-V456 ILHVAVTNVV | 45   | >CDH1-V456 ILHVAMTNV | 44  | 1    |
| >CDH1-V456 ILHVAVTNV  | 222  | >CDH1-V456 ILHVAMTNV | 118 | 104  |
| >CDH1-V456 ILHVAVTNV  | 6    | >CDH1-V456 ILHVAMTNV | 19  | 13   |
| >CDH1-V456 ILHVAVTNVV | 6    | >CDH1-V456 ILHVAMTNV | 17  | 11   |
| >CDH1-V456 ILHVAVTNV  | 41   | >CDH1-V456 ILHVAMTNV | 93  | 52   |
| >CDH1-V456 ILHVAVTNVV | 19   | >CDH1-V456 ILHVAMTNV | 36  | 17   |

|                       |      |                       |      |      |
|-----------------------|------|-----------------------|------|------|
| >CDH1-V456 ILHVAVTNV  | 9    | >CDH1-V456 ILHVAMTNV  | 20   | 11   |
| >CDH1-V456 ILHVAVTNVV | 16   | >CDH1-V456 ILHVAMTNV\ | 33   | 17   |
| >CDH1-V456 ILHVAVTNV  | 7    | >CDH1-V456 ILHVAMTNV  | 215  | 208  |
| >CDH1-V456 ILHVAVTNVV | 18   | >CDH1-V456 ILHVAMTNV\ | 100  | 82   |
| >CDH1-V456 ILHVAVTNV  | 2    | >CDH1-V456 ILHVAMTNV  | 3    | 1    |
| >CDH1-V456 ILHVAVTNVV | 4    | >CDH1-V456 ILHVAMTNV\ | 4    | 0    |
| >CDH1-V456 ILHVAVTNV  | 405  | >CDH1-V456 ILHVAMTNV  | 976  | 571  |
| >CDH1-V456 YILHVAVT   | 873  | >CDH1-V456 YILHVAMT   | 418  | 455  |
| >CDH1-V456 YILHVAVTNV | 37   | >CDH1-V456 YILHVAMTN\ | 33   | 4    |
| >CDH1-V456 YILHVAVTNV | 28   | >CDH1-V456 YILHVAMTN\ | 31   | 3    |
| >CDH1-V456 YILHVAVTNV | 227  | >CDH1-V456 YILHVAMTN\ | 197  | 30   |
| >CDH1-V456 YILHVAVTNV | 77   | >CDH1-V456 YILHVAMTN\ | 101  | 24   |
| >CDH1-V456 YILHVAVTNV | 34   | >CDH1-V456 YILHVAMTN\ | 35   | 1    |
| >CDH1-V456 YILHVAVTNV | 23   | >CDH1-V456 YILHVAMTN\ | 18   | 5    |
| >CDH1-V456 YILHVAVT   | 169  | >CDH1-V456 YILHVAMT   | 111  | 58   |
| >CDH1-V456 YILHVAVTNV | 38   | >CDH1-V456 YILHVAMTN\ | 36   | 2    |
| >CDH1-V456 YILHVAVTNV | 7    | >CDH1-V456 YILHVAMTN\ | 9    | 2    |
| >CDH1-V456 YILHVAVT   | 127  | >CDH1-V456 YILHVAMT   | 58   | 69   |
| >CDH1-V456 YILHVAVTNV | 3    | >CDH1-V456 YILHVAMTN\ | 4    | 1    |
| >CDH1-V456 YILHVAVTNV | 3    | >CDH1-V456 YILHVAMTN\ | 4    | 1    |
| >CDH1-V456 YILHVAVTNV | 10   | >CDH1-V456 YILHVAMTN\ | 14   | 4    |
| >CDH1-V456 YILHVAVTNV | 6    | >CDH1-V456 YILHVAMTN\ | 8    | 2    |
| >CDH1-V456 YILHVAVTNV | 5    | >CDH1-V456 YILHVAMTN\ | 7    | 2    |
| >CDH1-V456 YILHVAVTNV | 8    | >CDH1-V456 YILHVAMTN\ | 10   | 2    |
| >CDH1-V456 YILHVAVTNV | 5    | >CDH1-V456 YILHVAMTN\ | 10   | 5    |
| >CDH1-V456 YILHVAVTNV | 7    | >CDH1-V456 YILHVAMTN\ | 6    | 1    |
| >CDH1-V456 YILHVAVTNV | 3    | >CDH1-V456 YILHVAMTN\ | 3    | 0    |
| >CDH1-V456 YILHVAVTNV | 4    | >CDH1-V456 YILHVAMTN\ | 4    | 0    |
| >CDH1-V456 YILHVAVTNV | 98   | >CDH1-V456 YILHVAMTN\ | 123  | 25   |
| >CDH1-V456 YILHVAVTNV | 10   | >CDH1-V456 YILHVAMTN\ | 7    | 3    |
| >CDH1-V456 YILHVAVTNV | 23   | >CDH1-V456 YILHVAMTN\ | 24   | 1    |
| >CDH1-V456 QYILHVAV   | 392  | >CDH1-V456 QYILHVAM   | 154  | 238  |
| >CDH1-V456 QYILHVAV   | 5633 | >CDH1-V456 QYILHVAM   | 97   | 5536 |
| >CDH1-V456 QYILHVAV   | 335  | >CDH1-V456 QYILHVAM   | 485  | 150  |
| >CDH1-V456 QQYILHVAV  | 850  | >CDH1-V456 QQYILHVAM  | 158  | 692  |
| >CDH1-V456 QQYILHVAV  | 324  | >CDH1-V456 QQYILHVAM  | 7117 | 6793 |
| >CDH1-V456 QQYILHVAV  | 21   | >CDH1-V456 QQYILHVAM  | 412  | 391  |
| >CDH1-V456 QQYILHVAV  | 81   | >CDH1-V456 QQYILHVAM  | 4691 | 4610 |
| >CDH1-V456 QQYILHVAV  | 551  | >CDH1-V456 QQYILHVAM  | 462  | 89   |
| >CDH1-V456 QQYILHVAV  | 402  | >CDH1-V456 QQYILHVAM  | 56   | 346  |
| >CDH1-V456 QQYILHVAV  | 19   | >CDH1-V456 QQYILHVAM  | 6    | 13   |
| >CDH1-V456 QQYILHVAV  | 434  | >CDH1-V456 QQYILHVAM  | 114  | 320  |
| >CDH1-V456 QQYILHVAV  | 210  | >CDH1-V456 QQYILHVAM  | 93   | 117  |

|                        |       |                        |       |       |
|------------------------|-------|------------------------|-------|-------|
| >CDH1-V456 KQQYILHVAV  | 172   | >CDH1-V456 KQQYILHVAN  | 2173  | 2001  |
| >CDH1-V456 KQQYILHVAV  | 335   | >CDH1-V456 KQQYILHVAN  | 10169 | 9834  |
| >CDH1-V456 KQQYILHVAV  | 69    | >CDH1-V456 KQQYILHVAN  | 4180  | 4111  |
| >CDH1-V456 KQQYILHVAV  | 85    | >CDH1-V456 KQQYILHVAN  | 65    | 20    |
| >CDH1-V456 KQQYILHVAV  | 446   | >CDH1-V456 KQQYILHVAN  | 55    | 391   |
| >CDH1-V456 KQQYILHVAV  | 62    | >CDH1-V456 KQQYILHVAN  | 17    | 45    |
| >CDH1-V456 KQQYILHVAV  | 981   | >CDH1-V456 KQQYILHVAN  | 364   | 617   |
| >CDH1-V473 VTVDVLDV    | 197   | >CDH1-V473 DTVDVLDV    | 5431  | 5234  |
| >CDH1-V473 VTVDVLDVNI  | 415   | >CDH1-V473 DTVDVLDVNI  | 8273  | 7858  |
| >CDH1-V473 VTVDVLDV    | 107   | >CDH1-V473 DTVDVLDV    | 3704  | 3597  |
| >CDH1-V473 VTVDVLDVNI  | 97    | >CDH1-V473 DTVDVLDVNI  | 6645  | 6548  |
| >CDH1-V473 VTVDVLDV    | 76    | >CDH1-V473 DTVDVLDV    | 3482  | 3406  |
| >CDH1-V473 VTVDVLDV    | 215   | >CDH1-V473 DTVDVLDV    | 4252  | 4037  |
| >CDH1-V473 VTVDVLDV    | 70    | >CDH1-V473 DTVDVLDV    | 4523  | 4453  |
| >CDH1-V473 VTVDVLDV    | 3773  | >CDH1-V473 DTVDVLDV    | 400   | 3373  |
| >CDH1-V473 VTVDVLDVNI  | 3883  | >CDH1-V473 DTVDVLDVNI  | 297   | 3586  |
| >CDH1-V473 VTVDVLDV    | 249   | >CDH1-V473 DTVDVLDV    | 45    | 204   |
| >CDH1-V473 VTVDVLDVNI  | 165   | >CDH1-V473 DTVDVLDVNI  | 23    | 142   |
| >CDH1-V473 VTVDVLDV    | 858   | >CDH1-V473 DTVDVLDV    | 47    | 811   |
| >CDH1-V473 VTVDVLDVNI  | 4517  | >CDH1-V473 DTVDVLDVNI  | 430   | 4087  |
| >CDH1-V473 TVTVDVLDV   | 248   | >CDH1-V473 TDTVDVLDV   | 25349 | 25101 |
| >CDH1-V473 TVTVDVLDV   | 14227 | >CDH1-V473 TDTVDVLDV   | 50    | 14177 |
| >CDH1-V473 EVSLTTSTAT\ | 109   | >CDH1-V473 EVSLTTSTATE | 26100 | 25991 |
| >CDH1-V473 EVSLTTSTAT\ | 258   | >CDH1-V473 EVSLTTSTATE | 37350 | 37092 |
| >CDH1-V473 EVSLTTSTAT\ | 8     | >CDH1-V473 EVSLTTSTATE | 7404  | 7396  |
| >CDH1-V473 EVSLTTSTAT\ | 11    | >CDH1-V473 EVSLTTSTATE | 16199 | 16188 |
| >CDH1-V473 ATVTVDVLD\  | 494   | >CDH1-V473 ATDTVDVLD\  | 1716  | 1222  |
| >CDH1-V473 ATVTVDVLD\  | 397   | >CDH1-V473 ATDTVDVLD\  | 1230  | 833   |
| >CDH1-V473 ATVTVDVLD\  | 1024  | >CDH1-V473 ATDTVDVLD\  | 191   | 833   |
| >CDH1-V473 ATVTVDVL    | 72    | >CDH1-V473 ATDTVDVL    | 14984 | 14912 |
| >CDH1-V473 ATVTVDVL    | 113   | >CDH1-V473 ATDTVDVL    | 729   | 616   |
| >CDH1-V473 TATVTVDV    | 2901  | >CDH1-V473 TATDTVDV    | 165   | 2736  |
| >CDH1-V473 TATVTVDVLC  | 4280  | >CDH1-V473 TATDTVDVLC  | 308   | 3972  |
| >CDH1-V473 TATVTVDV    | 211   | >CDH1-V473 TATDTVDV    | 116   | 95    |
| >CDH1-V473 TATVTVDVL   | 841   | >CDH1-V473 TATDTVDVL   | 398   | 443   |
| >CDH1-V473 STATVTVDV   | 436   | >CDH1-V473 STATDTVDV   | 1290  | 854   |
| >CDH1-V473 STATVTVDVL  | 583   | >CDH1-V473 STATDTVDVL  | 417   | 166   |
| >CDH1-V473 STATVTVDV   | 314   | >CDH1-V473 STATDTVDV   | 598   | 284   |
| >CDH1-V473 STATVTVDV   | 47    | >CDH1-V473 STATDTVDV   | 232   | 185   |
| >CDH1-V473 STATVTVDV   | 422   | >CDH1-V473 STATDTVDV   | 296   | 126   |
| >CDH1-V473 STATVTVDVL  | 213   | >CDH1-V473 STATDTVDVL  | 60    | 153   |
| >CDH1-V473 STATVTVDV   | 217   | >CDH1-V473 STATDTVDV   | 1055  | 838   |
| >CDH1-V473 STATVTVDVL  | 230   | >CDH1-V473 STATDTVDVL  | 728   | 498   |

|                       |     |                       |       |       |
|-----------------------|-----|-----------------------|-------|-------|
| >CDH1-V473 STATVTVDV  | 7   | >CDH1-V473 STATDTVDV  | 33    | 26    |
| >CDH1-V473 STATVTVDVL | 66  | >CDH1-V473 STATDTVDVL | 100   | 34    |
| >CDH1-V473 STATVTVDV  | 70  | >CDH1-V473 STATDTVDV  | 158   | 88    |
| >CDH1-V473 STATVTVDVL | 620 | >CDH1-V473 STATDTVDVL | 490   | 130   |
| >CDH1-V473 STATVTVDVL | 64  | >CDH1-V473 STATDTVDVL | 189   | 125   |
| >CDH1-V473 TSTATVTV   | 26  | >CDH1-V473 TSTATDTV   | 43    | 17    |
| >CDH1-V473 TSTATVTVDV | 77  | >CDH1-V473 TSTATDTVDV | 357   | 280   |
| >CDH1-V473 TSTATVTV   | 491 | >CDH1-V473 TSTATDTV   | 2315  | 1824  |
| >CDH1-V473 TSTATVTVDV | 266 | >CDH1-V473 TSTATDTVDV | 364   | 98    |
| >CDH1-V473 TSTATVTVDV | 384 | >CDH1-V473 TSTATDTVDV | 553   | 169   |
| >CDH1-V473 TSTATVTVDV | 89  | >CDH1-V473 TSTATDTVDV | 194   | 105   |
| >CDH1-V473 TSTATVTV   | 70  | >CDH1-V473 TSTATDTV   | 194   | 124   |
| >CDH1-V473 TTSTATVTV  | 479 | >CDH1-V473 TTSTATDTV  | 375   | 104   |
| >CDH1-V473 TTSTATVTV  | 221 | >CDH1-V473 TTSTATDTV  | 453   | 232   |
| >CDH1-V473 TTSTATVTV  | 207 | >CDH1-V473 TTSTATDTV  | 529   | 322   |
| >CDH1-V473 TTSTATVTV  | 366 | >CDH1-V473 TTSTATDTV  | 2773  | 2407  |
| >CDH1-V473 TTSTATVTV  | 220 | >CDH1-V473 TTSTATDTV  | 1630  | 1410  |
| >CDH1-V473 TTSTATVTV  | 5   | >CDH1-V473 TTSTATDTV  | 6     | 1     |
| >CDH1-V473 TTSTATVTVD | 9   | >CDH1-V473 TTSTATDTVD | 17    | 8     |
| >CDH1-V473 TTSTATVTV  | 21  | >CDH1-V473 TTSTATDTV  | 52    | 31    |
| >CDH1-V473 TTSTATVTVD | 122 | >CDH1-V473 TTSTATDTVD | 213   | 91    |
| >CDH1-V473 TTSTATVTV  | 166 | >CDH1-V473 TTSTATDTV  | 549   | 383   |
| >CDH1-V473 LTTSTATV   | 463 | >CDH1-V473 LTTSTATD   | 25239 | 24776 |
| >CDH1-V473 LTTSTATVTV | 242 | >CDH1-V473 LTTSTATDTV | 267   | 25    |
| >CDH1-V473 LTTSTATV   | 161 | >CDH1-V473 LTTSTATD   | 24475 | 24314 |
| >CDH1-V473 LTTSTATVTV | 84  | >CDH1-V473 LTTSTATDTV | 161   | 77    |
| >CDH1-V473 LTTSTATV   | 148 | >CDH1-V473 LTTSTATD   | 26795 | 26647 |
| >CDH1-V473 LTTSTATVTV | 149 | >CDH1-V473 LTTSTATDTV | 201   | 52    |
| >CDH1-V473 LTTSTATV   | 168 | >CDH1-V473 LTTSTATD   | 28940 | 28772 |
| >CDH1-V473 LTTSTATVTV | 280 | >CDH1-V473 LTTSTATDTV | 627   | 347   |
| >CDH1-V473 LTTSTATV   | 343 | >CDH1-V473 LTTSTATD   | 27142 | 26799 |
| >CDH1-V473 LTTSTATVTV | 227 | >CDH1-V473 LTTSTATDTV | 386   | 159   |
| >CDH1-V473 LTTSTATV   | 19  | >CDH1-V473 LTTSTATD   | 34650 | 34631 |
| >CDH1-V473 LTTSTATVTV | 28  | >CDH1-V473 LTTSTATDTV | 116   | 88    |
| >CDH1-V473 LTTSTATV   | 60  | >CDH1-V473 LTTSTATD   | 16270 | 16210 |
| >CDH1-V473 LTTSTATVTV | 47  | >CDH1-V473 LTTSTATDTV | 40    | 7     |
| >CDH1-V473 LTTSTATV   | 128 | >CDH1-V473 LTTSTATD   | 20208 | 20080 |
| >CDH1-V473 LTTSTATVTV | 157 | >CDH1-V473 LTTSTATDTV | 361   | 204   |
| >CDH1-V473 LTTSTATV   | 107 | >CDH1-V473 LTTSTATD   | 6505  | 6398  |
| >CDH1-V473 LTTSTATVTV | 264 | >CDH1-V473 LTTSTATDTV | 900   | 636   |
| >CDH1-V473 LTTSTATVTV | 35  | >CDH1-V473 LTTSTATDTV | 70    | 35    |
| >CDH1-V473 LTTSTATV   | 239 | >CDH1-V473 LTTSTATD   | 8583  | 8344  |
| >CDH1-V473 LTTSTATVT  | 35  | >CDH1-V473 LTTSTATDT  | 542   | 507   |

|                         |      |                         |       |       |
|-------------------------|------|-------------------------|-------|-------|
| >CDH1-V473 LTTSTATVTV   | 35   | >CDH1-V473 LTTSTATDTV   | 189   | 154   |
| >CDH1-V473 SLTTSTATV    | 38   | >CDH1-V473 SLTTSTATD    | 21488 | 21450 |
| >CDH1-V473 SLTTSTATVTV  | 31   | >CDH1-V473 SLTTSTATDTV  | 71    | 40    |
| >CDH1-V473 SLTTSTATV    | 18   | >CDH1-V473 SLTTSTATD    | 10247 | 10229 |
| >CDH1-V473 SLTTSTATVTV  | 17   | >CDH1-V473 SLTTSTATDTV  | 16    | 1     |
| >CDH1-V473 SLTTSTATV    | 7    | >CDH1-V473 SLTTSTATD    | 10828 | 10821 |
| >CDH1-V473 SLTTSTATVTV  | 10   | >CDH1-V473 SLTTSTATDTV  | 12    | 2     |
| >CDH1-V473 SLTTSTATV    | 155  | >CDH1-V473 SLTTSTATD    | 19454 | 19299 |
| >CDH1-V473 SLTTSTATVTV  | 122  | >CDH1-V473 SLTTSTATDTV  | 150   | 28    |
| >CDH1-V473 SLTTSTATV    | 5    | >CDH1-V473 SLTTSTATD    | 15195 | 15190 |
| >CDH1-V473 SLTTSTATVTV  | 5    | >CDH1-V473 SLTTSTATDTV  | 7     | 2     |
| >CDH1-V473 SLTTSTATV    | 4    | >CDH1-V473 SLTTSTATD    | 13485 | 13481 |
| >CDH1-V473 SLTTSTATVTV  | 4    | >CDH1-V473 SLTTSTATDTV  | 5     | 1     |
| >CDH1-V473 SLTTSTATV    | 6    | >CDH1-V473 SLTTSTATD    | 15134 | 15128 |
| >CDH1-V473 SLTTSTATVTV  | 5    | >CDH1-V473 SLTTSTATDTV  | 7     | 2     |
| >CDH1-V473 SLTTSTATV    | 10   | >CDH1-V473 SLTTSTATD    | 24070 | 24060 |
| >CDH1-V473 SLTTSTATVTV  | 11   | >CDH1-V473 SLTTSTATDTV  | 17    | 6     |
| >CDH1-V473 SLTTSTATV    | 2    | >CDH1-V473 SLTTSTATD    | 5797  | 5795  |
| >CDH1-V473 SLTTSTATVT   | 113  | >CDH1-V473 SLTTSTATDT   | 160   | 47    |
| >CDH1-V473 SLTTSTATVTV  | 2    | >CDH1-V473 SLTTSTATDTV  | 2     | 0     |
| >CDH1-V473 SLTTSTATV    | 321  | >CDH1-V473 SLTTSTATD    | 19417 | 19096 |
| >CDH1-V473 SLTTSTATVTV  | 300  | >CDH1-V473 SLTTSTATDTV  | 473   | 173   |
| >CDH1-V473 SLTTSTATV    | 387  | >CDH1-V473 SLTTSTATD    | 23054 | 22667 |
| >CDH1-V473 SLTTSTATVTV  | 418  | >CDH1-V473 SLTTSTATDTV  | 942   | 524   |
| >CDH1-V473 VSLTTSTATV   | 417  | >CDH1-V473 VSLTTSTATD   | 28373 | 27956 |
| >CDH1-V473 VSLTTSTATV   | 193  | >CDH1-V473 VSLTTSTATD   | 16040 | 15847 |
| >CDH1-V473 VSLTTSTATV   | 41   | >CDH1-V473 VSLTTSTATD   | 3927  | 3886  |
| >CDH1-V473 VSLTTSTATVTV | 495  | >CDH1-V473 VSLTTSTATDTV | 3786  | 3291  |
| >CDH11-A48 AAPYEGFIC    | 235  | >CDH11-A48 SAPYEGFIC    | 118   | 117   |
| >CDH11-A48 AAPYEGFI     | 196  | >CDH11-A48 SAPYEGFI     | 106   | 90    |
| >CDH11-A48 FAAPYEGFI    | 138  | >CDH11-A48 FSAPYEGFI    | 82    | 56    |
| >CDH11-A48 FAAPYEGFI    | 30   | >CDH11-A48 FSAPYEGFI    | 43    | 13    |
| >CDH11-A48 FAAPYEGFI    | 297  | >CDH11-A48 FSAPYEGFI    | 1869  | 1572  |
| >CDH11-A48 FAAPYEGF     | 202  | >CDH11-A48 FSAPYEGF     | 998   | 796   |
| >CDH11-A48 FAAPYEGFI    | 42   | >CDH11-A48 FSAPYEGFI    | 210   | 168   |
| >CDH11-A48 FAAPYEGFI    | 31   | >CDH11-A48 FSAPYEGFI    | 35    | 4     |
| >CDH11-A48 FAAPYEGF     | 391  | >CDH11-A48 FSAPYEGF     | 212   | 179   |
| >CDH11-A48 FAAPYEGF     | 66   | >CDH11-A48 FSAPYEGF     | 43    | 23    |
| >CDH11-A48 FAAPYEGF     | 16   | >CDH11-A48 FSAPYEGF     | 5     | 11    |
| >CDH11-A48 FAAPYEGFI    | 1364 | >CDH11-A48 FSAPYEGFI    | 169   | 1195  |
| >CDH11-A48 FAAPYEGF     | 39   | >CDH11-A48 FSAPYEGF     | 344   | 305   |
| >CDH11-A48 FAAPYEGF     | 81   | >CDH11-A48 FSAPYEGF     | 38    | 43    |
| >CDH11-A48 FAAPYEGFI    | 1111 | >CDH11-A48 FSAPYEGFI    | 294   | 817   |



|                        |      |                        |     |      |
|------------------------|------|------------------------|-----|------|
| >CDH11-A48 FAAPYEGFI   | 1346 | >CDH11-A48 FSAPYEGFI   | 388 | 958  |
| >CDH11-A48 FAAPYEGFI   | 2165 | >CDH11-A48 FSAPYEGFI   | 489 | 1676 |
| >CDH11-A48 FAAPYEGF    | 339  | >CDH11-A48 FSAPYEGF    | 900 | 561  |
| >CDH11-A48 FAAPYEGFI   | 104  | >CDH11-A48 FSAPYEGFI   | 254 | 150  |
| >CDH11-A48 FAAPYEGFI   | 27   | >CDH11-A48 FSAPYEGFI   | 11  | 16   |
| >CDH11-A48 KFAAPYEGF   | 12   | >CDH11-A48 KFSAPYEGF   | 13  | 1    |
| >CDH11-A48 KFAAPYEGFI  | 139  | >CDH11-A48 KFSAPYEGFI  | 132 | 7    |
| >CDH11-A48 KFAAPYEGF   | 346  | >CDH11-A48 KFSAPYEGF   | 265 | 81   |
| >CDH11-A48 KFAAPYEGFI  | 207  | >CDH11-A48 KFSAPYEGFI  | 336 | 129  |
| >CDH11-A48 PKFAAPYEGF  | 9    | >CDH11-A48 PKFSAPYEGF  | 7   | 2    |
| >CDH11-A48 PKFAAPYEGF  | 796  | >CDH11-A48 PKFSAPYEGFI | 408 | 388  |
| >CDH11-A48 APKFAAPYEG  | 222  | >CDH11-A48 APKFSAPYEG  | 991 | 769  |
| >CDH11-A48 APKFAAPY    | 1080 | >CDH11-A48 APKFSAPY    | 429 | 651  |
| >CDH11-A48 APKFAAPYEG  | 1076 | >CDH11-A48 APKFSAPYEG  | 471 | 605  |
| >CDH11-A48 APKFAAPY    | 68   | >CDH11-A48 APKFSAPY    | 75  | 7    |
| >CDH11-A48 APKFAAPY    | 95   | >CDH11-A48 APKFSAPY    | 77  | 18   |
| >CDH11-A48 NAPKFAAPY   | 1498 | >CDH11-A48 NAPKFSAPY   | 347 | 1151 |
| >CDH11-A48 NAPKFAAPY   | 1018 | >CDH11-A48 NAPKFSAPY   | 453 | 565  |
| >CDH11-A48 NAPKFAAPY   | 50   | >CDH11-A48 NAPKFSAPY   | 32  | 18   |
| >CDH11-A48 NAPKFAAPY   | 2986 | >CDH11-A48 NAPKFSAPY   | 473 | 2513 |
| >CDH11-A48 DVNDNAPKF   | 220  | >CDH11-A48 DVNDNAPKF   | 211 | 9    |
| >CDH11-A48 DVNDNAPKF   | 86   | >CDH11-A48 DVNDNAPKF   | 101 | 15   |
| >CDH11-E64IKKEPLIVF    | 26   | >CDH11-E64IKKDPLIVF    | 48  | 22   |
| >CDH11-E64IQKKEPLIV    | 252  | >CDH11-E64IQKKDPLIV    | 351 | 99   |
| >CDH11-E64IQKKEPLIV    | 5    | >CDH11-E64IQKKDPLIVF   | 6   | 1    |
| >CDH11-E64IRQKKEPLIV   | 517  | >CDH11-E64IRQKKDPLIV   | 428 | 89   |
| >CDH11-E64IRQKKEPLI    | 76   | >CDH11-E64IRQKKDPLI    | 109 | 33   |
| >CDH11-E64IRQKKEPLIV   | 157  | >CDH11-E64IRQKKDPLIV   | 305 | 148  |
| >CDH11-E64IRQKKEPLIVF  | 33   | >CDH11-E64IRQKKDPLIVF  | 32  | 1    |
| >CDH11-E64IRQKKEPLI    | 99   | >CDH11-E64IRQKKDPLI    | 130 | 31   |
| >CDH11-E64IRQKKEPLIV   | 18   | >CDH11-E64IRQKKDPLIV   | 21  | 3    |
| >CDH11-E64IRQKKEPLIVF  | 2    | >CDH11-E64IRQKKDPLIVF  | 2   | 0    |
| >CDH11-E64IRQKKEPLI    | 449  | >CDH11-E64IRQKKDPLI    | 616 | 167  |
| >CDH11-E64IRQKKEPLI    | 1055 | >CDH11-E64IRQKKDPLI    | 421 | 634  |
| >CDH11-E64IRQKKEPLIV   | 809  | >CDH11-E64IRQKKDPLIV   | 431 | 378  |
| >CDH11-E64IRRQKKEPLIVI | 37   | >CDH11-E64IRRQKKDPLIV  | 49  | 12   |
| >CDH11-E64IRRQKKEPL    | 68   | >CDH11-E64IRRQKKDPL    | 89  | 21   |
| >CDH11-E64IRRQKKEPLI   | 118  | >CDH11-E64IRRQKKDPLI   | 114 | 4    |
| >CDH11-E64IRRQKKEPLIV  | 26   | >CDH11-E64IRRQKKDPLIV  | 31  | 5    |
| >CDH11-E64IRRQKKEPLIVI | 103  | >CDH11-E64IRRQKKDPLIV  | 104 | 1    |
| >CDH11-E64IRRQKKEPL    | 7    | >CDH11-E64IRRQKKDPL    | 9   | 2    |
| >CDH11-E64IRRQKKEPLI   | 24   | >CDH11-E64IRRQKKDPLI   | 28  | 4    |
| >CDH11-E64IRRQKKEPLIV  | 16   | >CDH11-E64IRRQKKDPLIV  | 15  | 1    |

|                         |      |                        |       |       |
|-------------------------|------|------------------------|-------|-------|
| >CDH11-E64 RRQKKEPLIV   | 29   | >CDH11-E64 RRQKKDPLIV  | 31    | 2     |
| >CDH11-E64 RRQKKEPL     | 29   | >CDH11-E64 RRQKKDPL    | 50    | 21    |
| >CDH11-E64 RRQKKEPLI    | 33   | >CDH11-E64 RRQKKDPLI   | 41    | 8     |
| >CDH11-E64 RRQKKEPLIV   | 20   | >CDH11-E64 RRQKKDPLIV  | 22    | 2     |
| >CDH11-E64 RRQKKEPLIV   | 25   | >CDH11-E64 RRQKKDPLIV  | 28    | 3     |
| >CDH11-E64 LRRQKKEPL    | 113  | >CDH11-E64 LRRQKKDPL   | 234   | 121   |
| >CDH11-E64 LRRQKKEPLI   | 254  | >CDH11-E64 LRRQKKDPLI  | 203   | 51    |
| >CDH11-E64 LRRQKKEPLI   | 271  | >CDH11-E64 LRRQKKDPLI  | 263   | 8     |
| >CDH11-E64 TLRRQKKEPL   | 150  | >CDH11-E64 TLRRQKKDPL  | 346   | 196   |
| >CDH11-E64 TLRRQKKEPLI  | 212  | >CDH11-E64 TLRRQKKDPL  | 307   | 95    |
| >CDH11-E64 TLRRQKKEPLI  | 153  | >CDH11-E64 TLRRQKKDPL  | 184   | 31    |
| >CDH11-E64 VTLRRQKKEP   | 100  | >CDH11-E64 VTLRRQKKDF  | 112   | 12    |
| >CDH11-E64 VTLRRQKKEP   | 47   | >CDH11-E64 VTLRRQKKDF  | 90    | 43    |
| >CDH11-I103 IDDKSGNI    | 129  | >CDH11-I103 VDDKSGNI   | 119   | 10    |
| >CDH11-I103 VIDDKSGNI   | 317  | >CDH11-I103 VVDDKSGNI  | 1082  | 765   |
| >CDH11-I103 SGEGAGTIFV  | 366  | >CDH11-I103 SGEGAGTIFV | 16266 | 15900 |
| >CDH11-I103 FVIDDKSGNI  | 233  | >CDH11-I103 FVVDDKSGNI | 461   | 228   |
| >CDH11-I103 FVIDDKSGNI  | 86   | >CDH11-I103 FVVDDKSGNI | 163   | 77    |
| >CDH11-I103 FVIDDKSGNI  | 92   | >CDH11-I103 FVVDDKSGNI | 141   | 49    |
| >CDH11-I103 FVIDDKSGNI  | 316  | >CDH11-I103 FVVDDKSGNI | 501   | 185   |
| >CDH11-I103 FVIDDKSGNI  | 280  | >CDH11-I103 FVVDDKSGNI | 1050  | 770   |
| >CDH11-I103 FVIDDKSGNI  | 143  | >CDH11-I103 FVVDDKSGNI | 190   | 47    |
| >CDH11-I103 FVIDDKSGNI  | 183  | >CDH11-I103 FVVDDKSGNI | 205   | 22    |
| >CDH11-I103 FVIDDKSGNI  | 110  | >CDH11-I103 FVVDDKSGNI | 152   | 42    |
| >CDH11-I103 TIFVIDDK    | 52   | >CDH11-I103 TIFVVDDK   | 46    | 6     |
| >CDH11-I103 TIFVIDDK    | 15   | >CDH11-I103 TIFVVDDK   | 15    | 0     |
| >CDH11-I103 GTIFVIDDK   | 22   | >CDH11-I103 GTIFVVDDK  | 24    | 2     |
| >CDH11-I103 GTIFVIDDK   | 31   | >CDH11-I103 GTIFVVDDK  | 31    | 0     |
| >CDH11-I103 GTIFVIDDK   | 153  | >CDH11-I103 GTIFVVDDK  | 189   | 36    |
| >CDH11-I103 GAGTIFVIDDI | 349  | >CDH11-I103 GAGTIFVVDE | 403   | 54    |
| >CDH11-I103 GAGTIFVI    | 432  | >CDH11-I103 GAGTIFVV   | 4729  | 4297  |
| >CDH11-I103 GAGTIFVI    | 477  | >CDH11-I103 GAGTIFVV   | 13383 | 12906 |
| >CDH11-I103 EGAGTIFVI   | 137  | >CDH11-I103 EGAGTIFVV  | 32    | 105   |
| >CDH11-I103 EGAGTIFVI   | 1367 | >CDH11-I103 EGAGTIFVV  | 280   | 1087  |
| >CDH11-I103 GEGAGTIFVI  | 136  | >CDH11-I103 GEGAGTIFVV | 1457  | 1321  |
| >CDH11-I103 GEGAGTIFVI  | 275  | >CDH11-I103 GEGAGTIFVV | 400   | 125   |
| >CDH11-I103 GEGAGTIFVI  | 19   | >CDH11-I103 GEGAGTIFVV | 168   | 149   |
| >CDH11-I103 GEGAGTIFVI  | 498  | >CDH11-I103 GEGAGTIFVV | 663   | 165   |
| >CDH11-P38 PPMFLAPSYI   | 67   | >CDH11-P38 HPMFLAPSYI  | 66    | 1     |
| >CDH11-P38 PPMFLAPSY    | 1454 | >CDH11-P38 HPMFLAPSY   | 345   | 1109  |
| >CDH11-P38 PPMFLAPSYI   | 4073 | >CDH11-P38 HPMFLAPSYI  | 236   | 3837  |
| >CDH11-P38 PPMFLAPSYI   | 1066 | >CDH11-P38 HPMFLAPSYI  | 131   | 935   |
| >CDH11-P38 PPMFLAPSY    | 4282 | >CDH11-P38 HPMFLAPSY   | 448   | 3834  |

|                        |       |                        |       |       |
|------------------------|-------|------------------------|-------|-------|
| >CDH11-P38:PPMFLAPS    | 6394  | >CDH11-P38:HPMFLAPS    | 136   | 6258  |
| >CDH11-P38:PPMFLAPSY   | 51    | >CDH11-P38:HPMFLAPSY   | 9     | 42    |
| >CDH11-P38:PPMFLAPSYII | 1164  | >CDH11-P38:HPMFLAPSYII | 40    | 1124  |
| >CDH11-P38:PPMFLAPSY   | 103   | >CDH11-P38:HPMFLAPSY   | 41    | 62    |
| >CDH11-P38:PPMFLAPSYI  | 3867  | >CDH11-P38:HPMFLAPSYI  | 454   | 3413  |
| >CDH11-P38:PPMFLAPS    | 1918  | >CDH11-P38:HPMFLAPS    | 176   | 1742  |
| >CDH11-P38:PPMFLAPSYI  | 3238  | >CDH11-P38:HPMFLAPSYI  | 57    | 3181  |
| >CDH11-P38:PPMFLAPSY   | 1388  | >CDH11-P38:HPMFLAPSY   | 33    | 1355  |
| >CDH11-P38:EPPMFLAPSY  | 1880  | >CDH11-P38:EHPMFLAPSY  | 329   | 1551  |
| >CDH11-P38:EPPMFLAPSY  | 217   | >CDH11-P38:EHPMFLAPSY  | 1439  | 1222  |
| >CDH11-P38:EPPMFLAPSY  | 337   | >CDH11-P38:EHPMFLAPSY  | 3473  | 3136  |
| >CDH11-P38:DEPPMFLA    | 2373  | >CDH11-P38:DEHPMFLA    | 207   | 2166  |
| >CDH11-P38:DEPPMFLAP   | 1233  | >CDH11-P38:DEHPMFLAP   | 117   | 1116  |
| >CDH11-P38:DEPPMFLAP   | 8     | >CDH11-P38:DEHPMFLAP   | 4     | 4     |
| >CDH11-P38:DEPPMFLAP   | 1011  | >CDH11-P38:DEHPMFLAP   | 123   | 888   |
| >CDH11-P38:DEPPMFLA    | 9405  | >CDH11-P38:DEHPMFLA    | 106   | 9299  |
| >CDH11-P38:ADEPPMFL    | 322   | >CDH11-P38:ADEHPMFL    | 349   | 27    |
| >CDH11-P38:ADEPPMFLA   | 438   | >CDH11-P38:ADEHPMFLA   | 604   | 166   |
| >CDH11-P38:DADEPPMFL   | 15    | >CDH11-P38:DADEHPMFL   | 31    | 16    |
| >CDH11-P38:DADEPPMFL   | 32    | >CDH11-P38:DADEHPMFL   | 66    | 34    |
| >CDH11-P38:VEDADEPPM   | 156   | >CDH11-P38:VEDADEHPM   | 99    | 57    |
| >CDH11-P38:VEDADEPPM   | 38    | >CDH11-P38:VEDADEHPM   | 31    | 7     |
| >CDH11-P38:SVEDADEPPM  | 731   | >CDH11-P38:SVEDADEHPM  | 408   | 323   |
| >CDH11-P38:ISVEDADEPPI | 438   | >CDH11-P38:ISVEDADEHP  | 366   | 72    |
| >CDH11-P38:ISVEDADEPPI | 76    | >CDH11-P38:ISVEDADEHP  | 72    | 4     |
| >CDH11-P38:ISVEDADEPPI | 11    | >CDH11-P38:ISVEDADEHP  | 12    | 1     |
| >CDH11-P38:ISVEDADEPPI | 83    | >CDH11-P38:ISVEDADEHP  | 91    | 8     |
| >CDH11-P38:ISVEDADEPPI | 821   | >CDH11-P38:ISVEDADEHP  | 336   | 485   |
| >CDH11-P47:PVAIRVLDV   | 2728  | >CDH11-P47:RVAIRVLDV   | 72    | 2656  |
| >CDH11-P47:PVAIRVLDV   | 11780 | >CDH11-P47:RVAIRVLDV   | 329   | 11451 |
| >CDH11-P47:PVAIRVLDV   | 3788  | >CDH11-P47:RVAIRVLDV   | 475   | 3313  |
| >CDH11-P47:PVAIRVLDV   | 1408  | >CDH11-P47:RVAIRVLDV   | 121   | 1287  |
| >CDH11-P47:VPVAIRVL    | 106   | >CDH11-P47:VRVAIRVL    | 27366 | 27260 |
| >CDH11-P47:VPVAIRVLDV  | 39    | >CDH11-P47:VRVAIRVLDV  | 20689 | 20650 |
| >CDH11-P47:VPVAIRVL    | 33    | >CDH11-P47:VRVAIRVL    | 20245 | 20212 |
| >CDH11-P47:VPVAIRVL    | 6412  | >CDH11-P47:VRVAIRVL    | 496   | 5916  |
| >CDH11-P47:VPVAIRVL    | 24914 | >CDH11-P47:VRVAIRVL    | 192   | 24722 |
| >CDH11-P47:VPVAIRVL    | 446   | >CDH11-P47:VRVAIRVL    | 24089 | 23643 |
| >CDH11-P47:VPVAIRVL    | 417   | >CDH11-P47:VRVAIRVL    | 168   | 249   |
| >CDH11-P47:VPVAIRVLDV  | 227   | >CDH11-P47:VRVAIRVLDV  | 29058 | 28831 |
| >CDH11-P47:VPVAIRVL    | 189   | >CDH11-P47:VRVAIRVL    | 26596 | 26407 |
| >CDH11-P47:VPVAIRVLDV  | 31113 | >CDH11-P47:VRVAIRVLDV  | 375   | 30738 |
| >CDH11-P47:KVPVAIRV    | 100   | >CDH11-P47:KVRVAIRV    | 977   | 877   |

|                        |       |                        |       |       |
|------------------------|-------|------------------------|-------|-------|
| >CDH11-P47:KVPVAIRVLD' | 461   | >CDH11-P47:KVRVAIRVLD' | 2671  | 2210  |
| >CDH11-P47:KVPVAIRV    | 261   | >CDH11-P47:KVRVAIRV    | 1468  | 1207  |
| >CDH11-P47:KVPVAIRV    | 428   | >CDH11-P47:KVRVAIRV    | 3842  | 3414  |
| >CDH11-P47:KVPVAIRV    | 146   | >CDH11-P47:KVRVAIRV    | 266   | 120   |
| >CDH11-P47:KVPVAIRVLD' | 460   | >CDH11-P47:KVRVAIRVLD' | 973   | 513   |
| >CDH11-P47:KVPVAIRV    | 2497  | >CDH11-P47:KVRVAIRV    | 5     | 2492  |
| >CDH11-P47:KVPVAIRVL   | 3103  | >CDH11-P47:KVRVAIRVL   | 5     | 3098  |
| >CDH11-P47:KVPVAIRVLD  | 5942  | >CDH11-P47:KVRVAIRVLD  | 57    | 5885  |
| >CDH11-P47:KVPVAIRVLD' | 3470  | >CDH11-P47:KVRVAIRVLD' | 5     | 3465  |
| >CDH11-P47:KVPVAIRVL   | 3758  | >CDH11-P47:KVRVAIRVL   | 29    | 3729  |
| >CDH11-P47:KVPVAIRVL   | 11059 | >CDH11-P47:KVRVAIRVL   | 204   | 10855 |
| >CDH11-P47:KVPVAIRV    | 63    | >CDH11-P47:KVRVAIRV    | 20302 | 20239 |
| >CDH11-P47:KVPVAIRVL   | 24    | >CDH11-P47:KVRVAIRVL   | 9834  | 9810  |
| >CDH11-P47:AKVPVAIR    | 463   | >CDH11-P47:AKVRVAIR    | 532   | 69    |
| >CDH11-P47:AKVPVAIRVL  | 80    | >CDH11-P47:AKVRVAIRVL  | 62    | 18    |
| >CDH11-P47:AKVPVAIRVL  | 222   | >CDH11-P47:AKVRVAIRVL  | 537   | 315   |
| >CDH11-P47:EAKVPVAIR   | 784   | >CDH11-P47:EAKVRVAIR   | 166   | 618   |
| >CDH11-P47:EAKVPVAIR   | 89    | >CDH11-P47:EAKVRVAIR   | 30    | 59    |
| >CDH11-P47:EAKVPVAIR   | 26    | >CDH11-P47:EAKVRVAIR   | 22    | 4     |
| >CDH11-P47:EAKVPVAI    | 423   | >CDH11-P47:EAKVRVAI    | 998   | 575   |
| >CDH11-P47:EAKVPVAIRV  | 115   | >CDH11-P47:EAKVRVAIRV  | 313   | 198   |
| >CDH11-P47:EAKVPVAIRV  | 260   | >CDH11-P47:EAKVRVAIRV  | 1278  | 1018  |
| >CDH11-P47:EAKVPVAI    | 4187  | >CDH11-P47:EAKVRVAI    | 96    | 4091  |
| >CDH11-P47:EAKVPVAIRV  | 3008  | >CDH11-P47:EAKVRVAIRV  | 105   | 2903  |
| >CDH11-P47:QEAKVPVA    | 539   | >CDH11-P47:QEAKVRVA    | 74    | 465   |
| >CDH11-P47:QEAKVPVAI   | 42    | >CDH11-P47:QEAKVRVAI   | 12    | 30    |
| >CDH11-P47:QEAKVPVAIR  | 171   | >CDH11-P47:QEAKVRVAIR  | 68    | 103   |
| >CDH11-P47:QEAKVPVAI   | 44    | >CDH11-P47:QEAKVRVAI   | 32    | 12    |
| >CDH11-P47:QEAKVPVAIR  | 351   | >CDH11-P47:QEAKVRVAIR  | 269   | 82    |
| >CDH11-P47:QEAKVPVA    | 16    | >CDH11-P47:QEAKVRVA    | 22    | 6     |
| >CDH11-P47:QEAKVPVAI   | 196   | >CDH11-P47:QEAKVRVAI   | 134   | 62    |
| >CDH11-P47:QEAKVPVAIR  | 86    | >CDH11-P47:QEAKVRVAIR  | 74    | 12    |
| >CDH11-P47:QEAKVPVAI   | 14    | >CDH11-P47:QEAKVRVAI   | 16    | 2     |
| >CDH11-P47:QEAKVPVAIR  | 37    | >CDH11-P47:QEAKVRVAIR  | 34    | 3     |
| >CDH11-P47:HQEAKVPV    | 112   | >CDH11-P47:HQEAKVRV    | 1280  | 1168  |
| >CDH11-P47:HQEAKVPVAI  | 195   | >CDH11-P47:HQEAKVRVAI  | 153   | 42    |
| >CDH11-P47:HQEAKVPV    | 165   | >CDH11-P47:HQEAKVRV    | 2302  | 2137  |
| >CDH11-P47:HQEAKVPVAI  | 47    | >CDH11-P47:HQEAKVRVAI  | 98    | 51    |
| >CDH11-P47:HQEAKVPVAI  | 336   | >CDH11-P47:HQEAKVRVAI  | 362   | 26    |
| >CDH11-P47:RHQEAKVPV,  | 430   | >CDH11-P47:RHQEAKVRV,  | 621   | 191   |
| >CDH11-P47:RHQEAKVPV,  | 182   | >CDH11-P47:RHQEAKVRV,  | 338   | 156   |
| >CDH11-P47:RHQEAKVP    | 35471 | >CDH11-P47:RHQEAKVR    | 446   | 35025 |
| >CDH11-P47:NRHQEAKVP'  | 215   | >CDH11-P47:NRHQEAKVR'  | 2051  | 1836  |

|                        |       |                        |       |       |
|------------------------|-------|------------------------|-------|-------|
| >CDH11-P47:NRHQEAKVP'  | 463   | >CDH11-P47:NRHQEAKVR'  | 1128  | 665   |
| >CDH11-P47:HNRHQEAKV   | 71    | >CDH11-P47:HNRHQEAKV   | 422   | 351   |
| >CDH11-P68:PDGINGFI    | 6565  | >CDH11-P68:SDGINGFI    | 146   | 6419  |
| >CDH11-P68:PDGINGFI    | 88    | >CDH11-P68:SDGINGFI    | 85    | 3     |
| >CDH11-P68:NPDGINGFIP  | 1517  | >CDH11-P68:NSDGINGFIP  | 257   | 1260  |
| >CDH11-P68:NPDGINGFIP  | 1754  | >CDH11-P68:NSDGINGFIP  | 107   | 1647  |
| >CDH11-P68:NPDGINGFI   | 6357  | >CDH11-P68:NSDGINGFI   | 173   | 6184  |
| >CDH11-P68:NPDGINGF    | 100   | >CDH11-P68:NSDGINGF    | 3751  | 3651  |
| >CDH11-P68:NPDGINGF    | 14220 | >CDH11-P68:NSDGINGF    | 241   | 13979 |
| >CDH11-P68:NPDGINGFI   | 5849  | >CDH11-P68:NSDGINGFI   | 372   | 5477  |
| >CDH11-P68:EAFDIATLQN  | 3712  | >CDH11-P68:EAFDIATLQN  | 191   | 3521  |
| >CDH11-P68:LQNPDGINGFI | 447   | >CDH11-P68:LQNSDGINGFI | 638   | 191   |
| >CDH11-P68:LQNPDGINGFI | 387   | >CDH11-P68:LQNSDGINGFI | 370   | 17    |
| >CDH11-P68:LQNPDGINGFI | 417   | >CDH11-P68:LQNSDGINGFI | 398   | 19    |
| >CDH11-P68:LQNPDGINGFI | 91    | >CDH11-P68:LQNSDGINGFI | 205   | 114   |
| >CDH11-P68:LQNPDGINGFI | 38    | >CDH11-P68:LQNSDGINGFI | 37    | 1     |
| >CDH11-P68:LQNPDGINGFI | 7     | >CDH11-P68:LQNSDGINGFI | 5     | 2     |
| >CDH11-P68:LQNPDGINGFI | 502   | >CDH11-P68:LQNSDGINGFI | 287   | 215   |
| >CDH11-P68:TLQNPDGI    | 94    | >CDH11-P68:TLQNSDGI    | 252   | 158   |
| >CDH11-P68:TLQNPDGI    | 71    | >CDH11-P68:TLQNSDGI    | 43    | 28    |
| >CDH11-P68:TLQNPDGI    | 385   | >CDH11-P68:TLQNSDGI    | 235   | 150   |
| >CDH11-P68:TLQNPDGING  | 336   | >CDH11-P68:TLQNSDGING  | 174   | 162   |
| >CDH11-P68:TLQNPDGING  | 43    | >CDH11-P68:TLQNSDGING  | 51    | 8     |
| >CDH11-P68:ATLQNPDGI   | 54    | >CDH11-P68:ATLQNSDGI   | 53    | 1     |
| >CDH11-P68:ATLQNPDGI   | 121   | >CDH11-P68:ATLQNSDGI   | 331   | 210   |
| >CDH11-P68:ATLQNPDGI   | 160   | >CDH11-P68:ATLQNSDGI   | 111   | 49    |
| >CDH11-P68:ATLQNPDGI   | 818   | >CDH11-P68:ATLQNSDGI   | 365   | 453   |
| >CDH11-P68:ATLQNPDGI   | 158   | >CDH11-P68:ATLQNSDGI   | 56    | 102   |
| >CDH11-P68:ATLQNPDGI   | 129   | >CDH11-P68:ATLQNSDGI   | 119   | 10    |
| >CDH11-P68:DIATLQNPDC  | 54    | >CDH11-P68:DIATLQNSDG  | 48    | 6     |
| >CDH11-P68:DIATLQNPDC  | 546   | >CDH11-P68:DIATLQNSDG  | 463   | 83    |
| >CDH11-P71:IPAPNSVDV   | 11663 | >CDH11-P71:ISAPNSVDV   | 463   | 11200 |
| >CDH11-P71:IPAPNSVDVDI | 1890  | >CDH11-P71:ISAPNSVDVDI | 137   | 1753  |
| >CDH11-P71:IRPAPNSVDV  | 105   | >CDH11-P71:IRSAPNSVDV  | 26591 | 26486 |
| >CDH11-P71:IRPAPNSVDV  | 24    | >CDH11-P71:IRSAPNSVDV  | 9717  | 9693  |
| >CDH11-P71:IRPAPNSVDV  | 2800  | >CDH11-P71:IRSAPNSVDV  | 374   | 2426  |
| >CDH11-P71:IRPAPNSVDV  | 19646 | >CDH11-P71:IRSAPNSVDV  | 64    | 19582 |
| >CDH11-P71:IYQYMPRPGLI | 242   | >CDH11-P71:IYQYMPRPGLI | 321   | 79    |
| >CDH11-P71:ILRPAPNSV   | 1374  | >CDH11-P71:ILRSAPNSV   | 249   | 1125  |
| >CDH11-P71:ILRPAPNSVDV | 1261  | >CDH11-P71:ILRSAPNSVDV | 234   | 1027  |
| >CDH11-P71:ILRPAPNSV   | 81    | >CDH11-P71:ILRSAPNSV   | 69    | 12    |
| >CDH11-P71:ILRPAPNSV   | 5     | >CDH11-P71:ILRSAPNSV   | 5     | 0     |
| >CDH11-P71:ILRPAPNSVC  | 23    | >CDH11-P71:ILRSAPNSVC  | 22    | 1     |

|                       |       |                        |      |       |
|-----------------------|-------|------------------------|------|-------|
| >CDH11-P71 GLRPAPNSV  | 26    | >CDH11-P71 GLRSAPNSV   | 27   | 1     |
| >CDH11-P71 GLRPAPNSVE | 96    | >CDH11-P71 GLRSAPNSVE  | 108  | 12    |
| >CDH11-P71 GLRPAPNSV  | 24    | >CDH11-P71 GLRSAPNSV   | 38   | 14    |
| >CDH11-P71 GLRPAPNSVE | 55    | >CDH11-P71 GLRSAPNSVE  | 71   | 16    |
| >CDH11-P71 GLRPAPNSV  | 35    | >CDH11-P71 GLRSAPNSV   | 48   | 13    |
| >CDH11-P71 GLRPAPNSVE | 39    | >CDH11-P71 GLRSAPNSVE  | 51   | 12    |
| >CDH11-P71 GLRPAPNSV  | 4     | >CDH11-P71 GLRSAPNSV   | 7    | 3     |
| >CDH11-P71 GLRPAPNSVE | 5     | >CDH11-P71 GLRSAPNSVE  | 6    | 1     |
| >CDH11-P71 GLRPAPNSV  | 65    | >CDH11-P71 GLRSAPNSV   | 118  | 53    |
| >CDH11-P71 GLRPAPNSVE | 440   | >CDH11-P71 GLRSAPNSVE  | 731  | 291   |
| >CDH11-P71 RPGLRPAPNS | 34    | >CDH11-P71 RPGLRSAPNS  | 22   | 12    |
| >CDH11-P71 MPRPGLRP   | 947   | >CDH11-P71 MPRPGLRS    | 300  | 647   |
| >CDH11-P71 MPRPGLRPA  | 10    | >CDH11-P71 MPRPGLRSA   | 12   | 2     |
| >CDH11-P71 MPRPGLRPA  | 239   | >CDH11-P71 MPRPGLRSA   | 129  | 110   |
| >CDH11-P71 MPRPGLRPA  | 285   | >CDH11-P71 MPRPGLRSA   | 1482 | 1197  |
| >CDH11-P71 MPRPGLRP   | 722   | >CDH11-P71 MPRPGLRS    | 389  | 333   |
| >CDH11-P71 MPRPGLRPA  | 6     | >CDH11-P71 MPRPGLRSA   | 9    | 3     |
| >CDH11-P71 MPRPGLRPA  | 84    | >CDH11-P71 MPRPGLRSA   | 107  | 23    |
| >CDH11-P71 YMPRPGLRP/ | 284   | >CDH11-P71 YMPRPGLRS/  | 370  | 86    |
| >CDH11-P71 YMPRPGLRP/ | 30    | >CDH11-P71 YMPRPGLRS/  | 23   | 7     |
| >CDH11-P71 YMPRPGLRP/ | 138   | >CDH11-P71 YMPRPGLRS/  | 217  | 79    |
| >CDH11-P71 YMPRPGLRP  | 1913  | >CDH11-P71 YMPRPGLRS   | 309  | 1604  |
| >CDH11-P71 YMPRPGLRP/ | 9     | >CDH11-P71 YMPRPGLRS/  | 9    | 0     |
| >CDH11-P71 YMPRPGLRP/ | 166   | >CDH11-P71 YMPRPGLRS/  | 267  | 101   |
| >CDH11-P71 YMPRPGLRP/ | 117   | >CDH11-P71 YMPRPGLRS/  | 148  | 31    |
| >CDH11-P71 YMPRPGLRP/ | 15    | >CDH11-P71 YMPRPGLRS/  | 10   | 5     |
| >CDH11-P71 QYMPRPGLR  | 308   | >CDH11-P71 QYMPRPGLR   | 249  | 59    |
| >CDH11-R22 REAKEEYHV  | 623   | >CDH11-R22 WEAKEEYHV'  | 135  | 488   |
| >CDH11-R22 REAKEEYHV  | 238   | >CDH11-R22 WEAKEEYHV'  | 59   | 179   |
| >CDH11-R22 REAKEEYHV  | 6484  | >CDH11-R22 WEAKEEYHV'  | 260  | 6224  |
| >CDH11-R22 REAKEEYHV  | 37    | >CDH11-R22 WEAKEEYHV'  | 53   | 16    |
| >CDH11-R22 REAKEEYHV  | 72    | >CDH11-R22 WEAKEEYHV'  | 174  | 102   |
| >CDH11-R22 REAKEEYHV  | 232   | >CDH11-R22 WEAKEEYHV'  | 225  | 7     |
| >CDH11-R22 REAKEEYHV  | 270   | >CDH11-R22 WEAKEEYHV'  | 4096 | 3826  |
| >CDH11-R22 REAKEEYHV  | 437   | >CDH11-R22 WEAKEEYHV'  | 3452 | 3015  |
| >CDH11-R22 REAKEEYHV  | 165   | >CDH11-R22 WEAKEEYHV'  | 1920 | 1755  |
| >CDH11-R22 REAKEEYHV  | 35    | >CDH11-R22 WEAKEEYHV'  | 38   | 3     |
| >CDH11-R22 REAKEEYHV  | 74    | >CDH11-R22 WEAKEEYHV'  | 42   | 32    |
| >CDH11-R22 REAKEEYHV  | 12    | >CDH11-R22 WEAKEEYHV'  | 10   | 2     |
| >CDH11-R22 DREAKEEYHV | 28503 | >CDH11-R22 DWEAKEEYH'  | 460  | 28043 |
| >CDH11-R22 IIRTALPNMD | 162   | >CDH11-R22 IIRTALPNMD' | 3433 | 3271  |
| >CDH11-R22 IIRTALPNMD | 22843 | >CDH11-R22 IIRTALPNMD' | 237  | 22606 |
| >CDH11-R22 IIRTALPNMD | 24524 | >CDH11-R22 IIRTALPNMD' | 237  | 24287 |

|                       |       |                       |       |       |
|-----------------------|-------|-----------------------|-------|-------|
| >CDH11-R22 MDREAKEY   | 599   | >CDH11-R22 MDWEAKEY   | 141   | 458   |
| >CDH11-R22 MDREAKEY   | 1833  | >CDH11-R22 MDWEAKEY   | 78    | 1755  |
| >CDH11-R22 MDREAKEYI  | 287   | >CDH11-R22 MDWEAKEY   | 117   | 170   |
| >CDH11-R22 LPNMDREA   | 795   | >CDH11-R22 LPNMDWEA   | 204   | 591   |
| >CDH11-R22 LPNMDREA   | 3459  | >CDH11-R22 LPNMDWEA   | 492   | 2967  |
| >CDH11-R22 LPNMDREA   | 84    | >CDH11-R22 LPNMDWEA   | 53    | 31    |
| >CDH11-R22 ALPNMDREA  | 6977  | >CDH11-R22 ALPNMDWEA  | 74    | 6903  |
| >CDH11-R22 ALPNMDREA  | 6167  | >CDH11-R22 ALPNMDWEA  | 169   | 5998  |
| >CDH11-R22 ALPNMDREA  | 1177  | >CDH11-R22 ALPNMDWEA  | 296   | 881   |
| >CDH11-R22 ALPNMDREA  | 11338 | >CDH11-R22 ALPNMDWEA  | 73    | 11265 |
| >CDH11-R22 ALPNMDREA  | 1366  | >CDH11-R22 ALPNMDWEA  | 32    | 1334  |
| >CDH11-R22 ALPNMDREA  | 6389  | >CDH11-R22 ALPNMDWEA  | 46    | 6343  |
| >CDH11-R22 ALPNMDREA  | 1084  | >CDH11-R22 ALPNMDWEA  | 13    | 1071  |
| >CDH11-R22 ALPNMDREA  | 96    | >CDH11-R22 ALPNMDWEA  | 4     | 92    |
| >CDH11-R22 ALPNMDREA  | 256   | >CDH11-R22 ALPNMDWEA  | 108   | 148   |
| >CDH11-R22 TALPNMDRE  | 3453  | >CDH11-R22 TALPNMDWEA | 259   | 3194  |
| >CDH11-R22 TALPNMDRE  | 111   | >CDH11-R22 TALPNMDWEA | 117   | 6     |
| >CDH11-R22 TALPNMDR   | 99    | >CDH11-R22 TALPNMDW   | 28336 | 28237 |
| >CDH11-R22 TALPNMDRE  | 307   | >CDH11-R22 TALPNMDWEA | 360   | 53    |
| >CDH11-R22 TALPNMDR   | 20003 | >CDH11-R22 TALPNMDW   | 16    | 19987 |
| >CDH11-R22 TALPNMDR   | 35640 | >CDH11-R22 TALPNMDW   | 494   | 35146 |
| >CDH11-R22 TALPNMDR   | 21752 | >CDH11-R22 TALPNMDW   | 47    | 21705 |
| >CDH11-R22 TALPNMDR   | 21839 | >CDH11-R22 TALPNMDW   | 49    | 21790 |
| >CDH11-R22 TALPNMDR   | 31715 | >CDH11-R22 TALPNMDW   | 99    | 31616 |
| >CDH11-R22 TALPNMDRE  | 918   | >CDH11-R22 TALPNMDWEA | 187   | 731   |
| >CDH11-R22 RTALPNMDR  | 142   | >CDH11-R22 RTALPNMDW  | 22284 | 22142 |
| >CDH11-R22 RTALPNMDR  | 191   | >CDH11-R22 RTALPNMDW  | 20835 | 20644 |
| >CDH11-R22 RTALPNMDR  | 9149  | >CDH11-R22 RTALPNMDW  | 103   | 9046  |
| >CDH11-R22 RTALPNMDR  | 94    | >CDH11-R22 RTALPNMDW  | 28044 | 27950 |
| >CDH11-R22 RTALPNMDR  | 1825  | >CDH11-R22 RTALPNMDW  | 222   | 1603  |
| >CDH11-R22 RTALPNMDR  | 9383  | >CDH11-R22 RTALPNMDW  | 6     | 9377  |
| >CDH11-R22 RTALPNMDR  | 22003 | >CDH11-R22 RTALPNMDW  | 46    | 21957 |
| >CDH11-R22 RTALPNMDR  | 20411 | >CDH11-R22 RTALPNMDW  | 13    | 20398 |
| >CDH11-R22 RTALPNMDR  | 7508  | >CDH11-R22 RTALPNMDW  | 468   | 7040  |
| >CDH11-R22 RTALPNMDR  | 322   | >CDH11-R22 RTALPNMDW  | 34838 | 34516 |
| >CDH11-R22 IRTALPNMDF | 257   | >CDH11-R22 IRTALPNMDW | 1510  | 1253  |
| >CDH11-R22 IRTALPNMDF | 17043 | >CDH11-R22 IRTALPNMDW | 75    | 16968 |
| >CDK6-P199I PVDLWSVGC | 10800 | >CDK6-P199I LVDLWSVGC | 441   | 10359 |
| >CDK6-P199I TPVDLWSV  | 14601 | >CDK6-P199I TLVDLWSV  | 12    | 14589 |
| >CDK6-P199I TPVDLWSV  | 14281 | >CDK6-P199I TLVDLWSV  | 6     | 14275 |
| >CDK6-P199I TPVDLWSVG | 31329 | >CDK6-P199I TLVDLWSVG | 183   | 31146 |
| >CDK6-P199I TPVDLWSV  | 12705 | >CDK6-P199I TLVDLWSV  | 5     | 12700 |
| >CDK6-P199I TPVDLWSVG | 20304 | >CDK6-P199I TLVDLWSVG | 46    | 20258 |

|                         |       |                         |       |       |
|-------------------------|-------|-------------------------|-------|-------|
| >CDK6-P199I TPVDLWSV    | 493   | >CDK6-P199I TLVDLWSV    | 4     | 489   |
| >CDK6-P199I TPVDLWSVG   | 17347 | >CDK6-P199I TLVDLWSVG   | 415   | 16932 |
| >CDK6-P199I TPVDLWSV    | 5339  | >CDK6-P199I TLVDLWSV    | 2     | 5337  |
| >CDK6-P199I TPVDLWSVG   | 24212 | >CDK6-P199I TLVDLWSVG   | 135   | 24077 |
| >CDK6-P199I TPVDLWSVG   | 24637 | >CDK6-P199I TLVDLWSVG   | 83    | 24554 |
| >CDK6-P199I TPVDLWSV    | 11770 | >CDK6-P199I TLVDLWSV    | 5     | 11765 |
| >CDK6-P199I TPVDLWSVG   | 25139 | >CDK6-P199I TLVDLWSVG   | 337   | 24802 |
| >CDK6-P199I TPVDLWSV    | 11677 | >CDK6-P199I TLVDLWSV    | 5     | 11672 |
| >CDK6-P199I TPVDLWSVG   | 25418 | >CDK6-P199I TLVDLWSVG   | 112   | 25306 |
| >CDK6-P199I TPVDLWSV    | 17276 | >CDK6-P199I TLVDLWSV    | 7     | 17269 |
| >CDK6-P199I TPVDLWSV    | 4912  | >CDK6-P199I TLVDLWSV    | 2     | 4910  |
| >CDK6-P199I TPVDLWSVG   | 33593 | >CDK6-P199I TLVDLWSVG   | 52    | 33541 |
| >CDK6-P199I TPVDLWSVG   | 33746 | >CDK6-P199I TLVDLWSVG   | 86    | 33660 |
| >CDK6-P199I TPVDLWSV    | 370   | >CDK6-P199I TLVDLWSV    | 66    | 304   |
| >CDK6-P199I TPVDLWSV    | 122   | >CDK6-P199I TLVDLWSV    | 41    | 81    |
| >CDK6-P199I TPVDLWSVG   | 344   | >CDK6-P199I TLVDLWSVG   | 19149 | 18805 |
| >CDK6-P199I TPVDLWSV    | 334   | >CDK6-P199I TLVDLWSV    | 28296 | 27962 |
| >CDK6-P199I TPVDLWSVG   | 250   | >CDK6-P199I TLVDLWSVG   | 23656 | 23406 |
| >CDK6-P199I TPVDLWSV    | 302   | >CDK6-P199I TLVDLWSV    | 30524 | 30222 |
| >CDK6-P199I EVLLQSSYATI | 14667 | >CDK6-P199I EVLLQSSYATI | 146   | 14521 |
| >CDK6-P199I EVLLQSSYATI | 15318 | >CDK6-P199I EVLLQSSYATI | 211   | 15107 |
| >CDK6-P199I EVLLQSSYATI | 6882  | >CDK6-P199I EVLLQSSYATI | 18    | 6864  |
| >CDK6-P199I ATPVDLWSV   | 234   | >CDK6-P199I ATLVDLWSV   | 23    | 211   |
| >CDK6-P199I ATPVDLWSV   | 378   | >CDK6-P199I ATLVDLWSV   | 213   | 165   |
| >CDK6-P199I ATPVDLWSV   | 242   | >CDK6-P199I ATLVDLWSV   | 456   | 214   |
| >CDK6-P199I ATPVDLWSV   | 7     | >CDK6-P199I ATLVDLWSV   | 4     | 3     |
| >CDK6-P199I ATPVDLWSV   | 35    | >CDK6-P199I ATLVDLWSV   | 6     | 29    |
| >CDK6-P199I ATPVDLWSV   | 101   | >CDK6-P199I ATLVDLWSV   | 8     | 93    |
| >CDK6-P199I ATPVDLWSV   | 74    | >CDK6-P199I ATLVDLWSV   | 10    | 64    |
| >CDK6-P199I ATPVDLWSV   | 1191  | >CDK6-P199I ATLVDLWSV   | 19    | 1172  |
| >CDK6-P199I ATPVDLWSV   | 13    | >CDK6-P199I ATLVDLWSV   | 7     | 6     |
| >CDK6-P199I ATPVDLWSV   | 191   | >CDK6-P199I ATLVDLWSV   | 842   | 651   |
| >CDK6-P199I ATPVDLWSV   | 799   | >CDK6-P199I ATLVDLWSV   | 15    | 784   |
| >CDK6-P199I ATPVDLWSV   | 13    | >CDK6-P199I ATLVDLWSV   | 6821  | 6808  |
| >CDK6-P199I ATPVDLWSV   | 174   | >CDK6-P199I ATLVDLWSV   | 16660 | 16486 |
| >CDK6-P199I YATPVDLWS   | 49    | >CDK6-P199I YATLVDLWS   | 50    | 1     |
| >CDK6-P199I YATPVDLWS   | 169   | >CDK6-P199I YATLVDLWS   | 178   | 9     |
| >CDK6-P199I YATPVDLWS   | 105   | >CDK6-P199I YATLVDLWS   | 159   | 54    |
| >CDK6-P199I YATPVDLWS   | 20    | >CDK6-P199I YATLVDLWS   | 25    | 5     |
| >CDK6-P199I YATPVDLWS   | 20    | >CDK6-P199I YATLVDLWS   | 69    | 49    |
| >CDK6-P199I YATPVDLWS   | 82    | >CDK6-P199I YATLVDLWS   | 196   | 114   |
| >CDK6-P199I YATPVDLWS   | 20    | >CDK6-P199I YATLVDLWS   | 48    | 28    |
| >CDK6-P199I YATPVDLWS   | 234   | >CDK6-P199I YATLVDLWS   | 298   | 64    |



|                         |      |                         |      |     |
|-------------------------|------|-------------------------|------|-----|
| >CDK6-P199I YATPVDLWS\  | 4    | >CDK6-P199I YATLVDLWS\  | 15   | 11  |
| >CDK6-P199I YATPVDLWS\  | 248  | >CDK6-P199I YATLVDLWS\  | 340  | 92  |
| >CDK6-P199I YATPVDLWS\  | 141  | >CDK6-P199I YATLVDLWS\  | 343  | 202 |
| >CDK6-P199I YATPVDLW    | 18   | >CDK6-P199I YATLVDLW    | 131  | 113 |
| >CDK6-P199I YATPVDLW    | 91   | >CDK6-P199I YATLVDLW    | 73   | 18  |
| >CDK6-P199I YATPVDLW    | 54   | >CDK6-P199I YATLVDLW    | 143  | 89  |
| >CDK6-P199I YATPVDLW    | 10   | >CDK6-P199I YATLVDLW    | 12   | 2   |
| >CDK6-P199I YATPVDLWS\  | 461  | >CDK6-P199I YATLVDLWS\  | 1225 | 764 |
| >CDK6-P199I YATPVDLW    | 43   | >CDK6-P199I YATLVDLW    | 59   | 16  |
| >CDK6-P199I YATPVDLW    | 29   | >CDK6-P199I YATLVDLW    | 64   | 35  |
| >CDK6-P199I SYATPVDL    | 61   | >CDK6-P199I SYATLVDL    | 8    | 53  |
| >CDK6-P199I SYATPVDLW\  | 52   | >CDK6-P199I SYATLVDLWS  | 10   | 42  |
| >CDK6-P199I SYATPVDLW\  | 256  | >CDK6-P199I SYATLVDLWS  | 59   | 197 |
| >CDK6-P199I SYATPVDLW\  | 133  | >CDK6-P199I SYATLVDLWS  | 90   | 43  |
| >CDK6-P199I SYATPVDLW\  | 289  | >CDK6-P199I SYATLVDLWS  | 439  | 150 |
| >CDK6-P199I SYATPVDLW\  | 170  | >CDK6-P199I SYATLVDLWS  | 90   | 80  |
| >CDK6-P199I SYATPVDLW\  | 84   | >CDK6-P199I SYATLVDLWS  | 93   | 9   |
| >CDK6-P199I SYATPVDL    | 700  | >CDK6-P199I SYATLVDL    | 486  | 214 |
| >CDK6-P199I SYATPVDLW   | 219  | >CDK6-P199I SYATLVDLW   | 86   | 133 |
| >CDK6-P199I SYATPVDL    | 32   | >CDK6-P199I SYATLVDL    | 14   | 18  |
| >CDK6-P199I SYATPVDLW   | 29   | >CDK6-P199I SYATLVDLW   | 14   | 15  |
| >CDK6-P199I SYATPVDLW\  | 114  | >CDK6-P199I SYATLVDLWS  | 71   | 43  |
| >CDK6-P199I SYATPVDLW\  | 358  | >CDK6-P199I SYATLVDLWS  | 502  | 144 |
| >CDK6-P199I SYATPVDL    | 446  | >CDK6-P199I SYATLVDL    | 273  | 173 |
| >CDK6-P199I SYATPVDLW\  | 143  | >CDK6-P199I SYATLVDLWS  | 153  | 10  |
| >CDK6-P199I SYATPVDL    | 583  | >CDK6-P199I SYATLVDL    | 447  | 136 |
| >CDK6-P199I SYATPVDLW   | 639  | >CDK6-P199I SYATLVDLW   | 341  | 298 |
| >CDK6-P199I SYATPVDLW\  | 324  | >CDK6-P199I SYATLVDLWS  | 537  | 213 |
| >CDK6-P199I SYATPVDLW\  | 159  | >CDK6-P199I SYATLVDLWS  | 103  | 56  |
| >CDK6-P199I SSSYATPVDL  | 697  | >CDK6-P199I SSSYATLVDL  | 158  | 539 |
| >CDK6-P199I SSSYATPVDL  | 104  | >CDK6-P199I SSSYATLVDL  | 252  | 148 |
| >CDK6-P199I SSSYATPVDLW | 364  | >CDK6-P199I SSSYATLVDLW | 380  | 16  |
| >CDK6-P199I SSSYATPVDL  | 54   | >CDK6-P199I SSSYATLVDL  | 110  | 56  |
| >CDK6-P199I SSSYATPVDL  | 14   | >CDK6-P199I SSSYATLVDL  | 13   | 1   |
| >CDK6-P199I SSSYATPVDLW | 5    | >CDK6-P199I SSSYATLVDLW | 7    | 2   |
| >CDK6-P199I SSSYATPVDLW | 40   | >CDK6-P199I SSSYATLVDLW | 42   | 2   |
| >CDK6-P199I SSSYATPVDLW | 12   | >CDK6-P199I SSSYATLVDLW | 13   | 1   |
| >CDK6-P199I SSSYATPVDLW | 1048 | >CDK6-P199I SSSYATLVDLW | 316  | 732 |
| >CDK6-P199I SSSYATPVDLW | 287  | >CDK6-P199I SSSYATLVDLW | 178  | 109 |
| >CDK6-P199I SSSYATPVDL  | 398  | >CDK6-P199I SSSYATLVDL  | 230  | 168 |
| >CDK6-P199I QSSYATPV    | 25   | >CDK6-P199I QSSYATLV    | 44   | 19  |
| >CDK6-P199I QSSYATPV    | 190  | >CDK6-P199I QSSYATLV    | 1085 | 895 |
| >CDK6-P199I QSSYATPVDL  | 244  | >CDK6-P199I QSSYATLVDL  | 165  | 79  |

|                        |       |                        |      |       |
|------------------------|-------|------------------------|------|-------|
| >CDK6-P199I QSSYATPVDL | 34    | >CDK6-P199I QSSYATLVDL | 43   | 9     |
| >CDK6-P199I QSSYATPVDL | 131   | >CDK6-P199I QSSYATLVDL | 115  | 16    |
| >CDK6-P199I QSSYATPVDL | 14    | >CDK6-P199I QSSYATLVDL | 12   | 2     |
| >CDK6-P199I QSSYATPVDL | 48    | >CDK6-P199I QSSYATLVDL | 92   | 44    |
| >CDK6-P199I QSSYATPVDL | 538   | >CDK6-P199I QSSYATLVDL | 423  | 115   |
| >CDK6-P199I LQSSYATP   | 23018 | >CDK6-P199I LQSSYATL   | 398  | 22620 |
| >CDK6-P199I LQSSYATPV  | 47    | >CDK6-P199I LQSSYATLV  | 53   | 6     |
| >CDK6-P199I LQSSYATP   | 7989  | >CDK6-P199I LQSSYATL   | 32   | 7957  |
| >CDK6-P199I LQSSYATPV  | 15    | >CDK6-P199I LQSSYATLV  | 12   | 3     |
| >CDK6-P199I LQSSYATPVD | 324   | >CDK6-P199I LQSSYATLVD | 128  | 196   |
| >CDK6-P199I LQSSYATP   | 12197 | >CDK6-P199I LQSSYATL   | 101  | 12096 |
| >CDK6-P199I LQSSYATPV  | 6     | >CDK6-P199I LQSSYATLV  | 9    | 3     |
| >CDK6-P199I LQSSYATPVD | 870   | >CDK6-P199I LQSSYATLVD | 487  | 383   |
| >CDK6-P199I LQSSYATP   | 4348  | >CDK6-P199I LQSSYATL   | 31   | 4317  |
| >CDK6-P199I LQSSYATPV  | 7     | >CDK6-P199I LQSSYATLV  | 9    | 2     |
| >CDK6-P199I LQSSYATPVD | 700   | >CDK6-P199I LQSSYATLVD | 160  | 540   |
| >CDK6-P199I LQSSYATPV  | 199   | >CDK6-P199I LQSSYATLV  | 384  | 185   |
| >CDK6-P199I LQSSYATPV  | 227   | >CDK6-P199I LQSSYATLV  | 215  | 12    |
| >CDK6-P199I LQSSYATP   | 1734  | >CDK6-P199I LQSSYATL   | 91   | 1643  |
| >CDK6-P199I LQSSYATPV  | 84    | >CDK6-P199I LQSSYATLV  | 1005 | 921   |
| >CDK6-P199I LQSSYATPVD | 448   | >CDK6-P199I LQSSYATLVD | 358  | 90    |
| >CDK6-P199I LQSSYATP   | 375   | >CDK6-P199I LQSSYATL   | 11   | 364   |
| >CDK6-P199I LQSSYATPV  | 9     | >CDK6-P199I LQSSYATLV  | 31   | 22    |
| >CDK6-P199I LQSSYATPVD | 11    | >CDK6-P199I LQSSYATLVD | 17   | 6     |
| >CDK6-P199I LQSSYATP   | 18271 | >CDK6-P199I LQSSYATL   | 46   | 18225 |
| >CDK6-P199I LQSSYATPV  | 242   | >CDK6-P199I LQSSYATLV  | 1431 | 1189  |
| >CDK6-P199I LQSSYATPVD | 91    | >CDK6-P199I LQSSYATLVD | 267  | 176   |
| >CDK6-P199I LQSSYATP   | 18092 | >CDK6-P199I LQSSYATL   | 427  | 17665 |
| >CDK6-P199I LQSSYATPVD | 484   | >CDK6-P199I LQSSYATLVD | 713  | 229   |
| >CDK6-P199I LLQSSYATP  | 20075 | >CDK6-P199I LLQSSYATL  | 95   | 19980 |
| >CDK6-P199I LLQSSYATPV | 144   | >CDK6-P199I LLQSSYATLV | 245  | 101   |
| >CDK6-P199I LLQSSYATP  | 3846  | >CDK6-P199I LLQSSYATL  | 28   | 3818  |
| >CDK6-P199I LLQSSYATPV | 13    | >CDK6-P199I LLQSSYATLV | 14   | 1     |
| >CDK6-P199I LLQSSYATP  | 5470  | >CDK6-P199I LLQSSYATL  | 23   | 5447  |
| >CDK6-P199I LLQSSYATPV | 25    | >CDK6-P199I LLQSSYATLV | 31   | 6     |
| >CDK6-P199I LLQSSYATPV | 295   | >CDK6-P199I LLQSSYATLV | 569  | 274   |
| >CDK6-P199I LLQSSYATP  | 8064  | >CDK6-P199I LLQSSYATL  | 14   | 8050  |
| >CDK6-P199I LLQSSYATPV | 4     | >CDK6-P199I LLQSSYATLV | 5    | 1     |
| >CDK6-P199I LLQSSYATP  | 8419  | >CDK6-P199I LLQSSYATL  | 8    | 8411  |
| >CDK6-P199I LLQSSYATPV | 5     | >CDK6-P199I LLQSSYATLV | 10   | 5     |
| >CDK6-P199I LLQSSYATP  | 18313 | >CDK6-P199I LLQSSYATL  | 169  | 18144 |
| >CDK6-P199I LLQSSYATPV | 17    | >CDK6-P199I LLQSSYATLV | 19   | 2     |
| >CDK6-P199I LLQSSYATP  | 21260 | >CDK6-P199I LLQSSYATL  | 35   | 21225 |

|                                     |       |                                     |       |       |
|-------------------------------------|-------|-------------------------------------|-------|-------|
| >CDK6-P199I LLQSSYATPV              | 10    | >CDK6-P199I LLQSSYATLV              | 12    | 2     |
| >CDK6-P199I LLQSSYATP               | 3120  | >CDK6-P199I LLQSSYATL               | 2     | 3118  |
| >CDK6-P199I LLQSSYATPV              | 2     | >CDK6-P199I LLQSSYATLV              | 2     | 0     |
| >CDK6-P199I LLQSSYATP               | 3524  | >CDK6-P199I LLQSSYATL               | 147   | 3377  |
| >CDK6-P199I LLQSSYATPV              | 258   | >CDK6-P199I LLQSSYATLV              | 2572  | 2314  |
| >CDK6-P199I LLQSSYATP               | 3512  | >CDK6-P199I LLQSSYATL               | 118   | 3394  |
| >CDK6-P199I LLQSSYATPV              | 168   | >CDK6-P199I LLQSSYATLV              | 867   | 699   |
| >CDK6-P199I VLLQSSYATP              | 5591  | >CDK6-P199I VLLQSSYATL              | 96    | 5495  |
| >CDK6-P199I VLLQSSYATP <sup>A</sup> | 12    | >CDK6-P199I VLLQSSYATL <sup>A</sup> | 13    | 1     |
| >CDK6-P199I VLLQSSYATP              | 6694  | >CDK6-P199I VLLQSSYATL              | 48    | 6646  |
| >CDK6-P199I VLLQSSYATP <sup>A</sup> | 17    | >CDK6-P199I VLLQSSYATL <sup>A</sup> | 15    | 2     |
| >CDK6-P199I VLLQSSYATP              | 5148  | >CDK6-P199I VLLQSSYATL              | 60    | 5088  |
| >CDK6-P199I VLLQSSYATP <sup>A</sup> | 9     | >CDK6-P199I VLLQSSYATL <sup>A</sup> | 15    | 6     |
| >CDK6-P199I VLLQSSYATP <sup>A</sup> | 8     | >CDK6-P199I VLLQSSYATL <sup>A</sup> | 12    | 4     |
| >CDK6-P199I VLLQSSYATP              | 1084  | >CDK6-P199I VLLQSSYATL              | 3     | 1081  |
| >CDK6-P199I VLLQSSYATP <sup>A</sup> | 2     | >CDK6-P199I VLLQSSYATL <sup>A</sup> | 2     | 0     |
| >CDK6-P199I VLLQSSYATP              | 3807  | >CDK6-P199I VLLQSSYATL              | 5     | 3802  |
| >CDK6-P199I VLLQSSYATP <sup>A</sup> | 4     | >CDK6-P199I VLLQSSYATL <sup>A</sup> | 6     | 2     |
| >CDK6-P199I VLLQSSYATP              | 6061  | >CDK6-P199I VLLQSSYATL              | 8     | 6053  |
| >CDK6-P199I VLLQSSYATP <sup>A</sup> | 5     | >CDK6-P199I VLLQSSYATL <sup>A</sup> | 5     | 0     |
| >CDK6-P199I VLLQSSYATP              | 11543 | >CDK6-P199I VLLQSSYATL              | 5     | 11538 |
| >CDK6-P199I VLLQSSYATP <sup>A</sup> | 3     | >CDK6-P199I VLLQSSYATL <sup>A</sup> | 3     | 0     |
| >CDK6-P199I VLLQSSYATP              | 2323  | >CDK6-P199I VLLQSSYATL              | 3     | 2320  |
| >CDK6-P199I VLLQSSYATP <sup>A</sup> | 2     | >CDK6-P199I VLLQSSYATL <sup>A</sup> | 2     | 0     |
| >CDK6-P199I VLLQSSYATP <sup>A</sup> | 96    | >CDK6-P199I VLLQSSYATL <sup>A</sup> | 452   | 356   |
| >CDK6-P199I VLLQSSYATP              | 4076  | >CDK6-P199I VLLQSSYATL              | 124   | 3952  |
| >CDK6-P199I VLLQSSYATP <sup>A</sup> | 199   | >CDK6-P199I VLLQSSYATL <sup>A</sup> | 909   | 710   |
| >CDK6-P199I VLLQSSYATP              | 19643 | >CDK6-P199I VLLQSSYATL              | 191   | 19452 |
| >CDKN2A-A1 AGARLDVRD,               | 289   | >CDKN2A-A1 PGARLDVRD,               | 6458  | 6169  |
| >CDKN2A-A1 RAGARLDV                 | 22726 | >CDKN2A-A1 RPGARLDV                 | 176   | 22550 |
| >CDKN2A-A1 RAGARLDVR                | 90    | >CDKN2A-A1 RPGARLDVR                | 5703  | 5613  |
| >CDKN2A-A1 RAGARLDV                 | 6865  | >CDKN2A-A1 RPGARLDV                 | 50    | 6815  |
| >CDKN2A-A1 RAGARLDVRI               | 15523 | >CDKN2A-A1 RPGARLDVRI               | 378   | 15145 |
| >CDKN2A-A1 FLDTLVVLHR,              | 12    | >CDKN2A-A1 FLDTLVVLHR               | 6060  | 6048  |
| >CDKN2A-A1 FLDTLVVLHR,              | 7     | >CDKN2A-A1 FLDTLVVLHR               | 213   | 206   |
| >CDKN2A-A1 FLDTLVVLHR,              | 24    | >CDKN2A-A1 FLDTLVVLHR               | 6707  | 6683  |
| >CDKN2A-A1 FLDTLVVLHR,              | 68    | >CDKN2A-A1 FLDTLVVLHR               | 4765  | 4697  |
| >CDKN2A-A1 FLDTLVVLHR,              | 3     | >CDKN2A-A1 FLDTLVVLHR               | 265   | 262   |
| >CDKN2A-A1 FLDTLVVLHR,              | 9     | >CDKN2A-A1 FLDTLVVLHR               | 3729  | 3720  |
| >CDKN2A-A1 FLDTLVVLHR,              | 8     | >CDKN2A-A1 FLDTLVVLHR               | 1935  | 1927  |
| >CDKN2A-A1 FLDTLVVLHR,              | 19    | >CDKN2A-A1 FLDTLVVLHR               | 12874 | 12855 |
| >CDKN2A-A1 FLDTLVVLHR,              | 3     | >CDKN2A-A1 FLDTLVVLHR               | 745   | 742   |
| >CDKN2A-A1 HRAGARLDV                | 197   | >CDKN2A-A1 HRPGARLDV                | 1791  | 1594  |

|                        |     |                        |       |       |
|------------------------|-----|------------------------|-------|-------|
| >CDKN2A-A1 HRAGARLDVI  | 101 | >CDKN2A-A1 HRPGARLDVI  | 491   | 390   |
| >CDKN2A-A1 VLHRAGARL   | 371 | >CDKN2A-A1 VLHRPGARL   | 1760  | 1389  |
| >CDKN2A-A1 VLHRAGARL   | 156 | >CDKN2A-A1 VLHRPGARL   | 444   | 288   |
| >CDKN2A-A1 VLHRAGARLC  | 77  | >CDKN2A-A1 VLHRPGARLC  | 158   | 81    |
| >CDKN2A-A1 VLHRAGARL   | 21  | >CDKN2A-A1 VLHRPGARL   | 9     | 12    |
| >CDKN2A-A1 VLHRAGARLC  | 36  | >CDKN2A-A1 VLHRPGARLC  | 21    | 15    |
| >CDKN2A-A1 VLHRAGARL   | 269 | >CDKN2A-A1 VLHRPGARL   | 391   | 122   |
| >CDKN2A-A1 VLHRAGARLC  | 346 | >CDKN2A-A1 VLHRPGARLC  | 388   | 42    |
| >CDKN2A-A1 VLHRAGARL   | 358 | >CDKN2A-A1 VLHRPGARL   | 727   | 369   |
| >CDKN2A-A1 VLHRAGARLC  | 33  | >CDKN2A-A1 VLHRPGARLC  | 61    | 28    |
| >CDKN2A-A1 VLHRAGARL   | 6   | >CDKN2A-A1 VLHRPGARL   | 7     | 1     |
| >CDKN2A-A1 VLHRAGARLC  | 3   | >CDKN2A-A1 VLHRPGARLC  | 4     | 1     |
| >CDKN2A-A1 VLHRAGAR    | 299 | >CDKN2A-A1 VLHRPGAR    | 212   | 87    |
| >CDKN2A-A1 VVLHRAGA    | 471 | >CDKN2A-A1 VVLHRPGA    | 668   | 197   |
| >CDKN2A-A1 VVLHRAGAR   | 225 | >CDKN2A-A1 VVLHRPGAR   | 127   | 98    |
| >CDKN2A-A1 VVLHRAGAR   | 576 | >CDKN2A-A1 VVLHRPGAR   | 255   | 321   |
| >CDKN2A-A1 VVLHRAGARI  | 129 | >CDKN2A-A1 VVLHRPGARI  | 228   | 99    |
| >CDKN2A-A1 LVVLHRAGAF  | 250 | >CDKN2A-A1 LVVLHRPGAF  | 363   | 113   |
| >CDKN2A-A1 LVVLHRAGAF  | 127 | >CDKN2A-A1 LVVLHRPGAF  | 139   | 12    |
| >CDKN2A-A1 LVVLHRAGAF  | 287 | >CDKN2A-A1 LVVLHRPGAF  | 521   | 234   |
| >CDKN2A-A1 LVVLHRAGAF  | 435 | >CDKN2A-A1 LVVLHRPGAF  | 510   | 75    |
| >CDKN2A-A1 TLVVLHRA    | 433 | >CDKN2A-A1 TLVVLHRP    | 6478  | 6045  |
| >CDKN2A-A1 TLVVLHRA    | 247 | >CDKN2A-A1 TLVVLHRP    | 14737 | 14490 |
| >CDKN2A-A1 TLVVLHRAGA  | 240 | >CDKN2A-A1 TLVVLHRPGA  | 623   | 383   |
| >CDKN2A-A1 TLVVLHRA    | 426 | >CDKN2A-A1 TLVVLHRP    | 14432 | 14006 |
| >CDKN2A-A1 TLVVLHRA    | 59  | >CDKN2A-A1 TLVVLHRP    | 13391 | 13332 |
| >CDKN2A-A1 TLVVLHRAGA  | 465 | >CDKN2A-A1 TLVVLHRPGA  | 369   | 96    |
| >CDKN2A-A1 TLVVLHRAGA  | 209 | >CDKN2A-A1 TLVVLHRPGA  | 147   | 62    |
| >CDKN2A-A1 TLVVLHRAGA  | 534 | >CDKN2A-A1 TLVVLHRPGA  | 343   | 191   |
| >CDKN2A-A1 TLVVLHRAGA  | 185 | >CDKN2A-A1 TLVVLHRPGA  | 303   | 118   |
| >CDKN2A-A1 DTLVVLHRA   | 178 | >CDKN2A-A1 DTLVVLHRP   | 13055 | 12877 |
| >CDKN2A-A1 DTLVVLHRAC  | 197 | >CDKN2A-A1 DTLVVLHRPC  | 1289  | 1092  |
| >CDKN2A-A1 DTLVVLHRA   | 46  | >CDKN2A-A1 DTLVVLHRP   | 5146  | 5100  |
| >CDKN2A-A1 DTLVVLHRAC  | 65  | >CDKN2A-A1 DTLVVLHRPC  | 39    | 26    |
| >CDKN2A-A1 AGARLDVRD,  | 289 | >CDKN2A-A1 SGARLDVRD/  | 320   | 31    |
| >CDKN2A-A1 RAGARLDVR   | 90  | >CDKN2A-A1 RSGARLDVR   | 60    | 30    |
| >CDKN2A-A1 FLDTLVVLHR, | 12  | >CDKN2A-A1 FLDTLVVLHR! | 183   | 171   |
| >CDKN2A-A1 FLDTLVVLHR, | 7   | >CDKN2A-A1 FLDTLVVLHR! | 75    | 68    |
| >CDKN2A-A1 FLDTLVVLHR, | 24  | >CDKN2A-A1 FLDTLVVLHR! | 1461  | 1437  |
| >CDKN2A-A1 FLDTLVVLHR, | 68  | >CDKN2A-A1 FLDTLVVLHR! | 1354  | 1286  |
| >CDKN2A-A1 FLDTLVVLHR, | 3   | >CDKN2A-A1 FLDTLVVLHR! | 37    | 34    |
| >CDKN2A-A1 FLDTLVVLHR, | 9   | >CDKN2A-A1 FLDTLVVLHR! | 894   | 885   |
| >CDKN2A-A1 FLDTLVVLHR, | 8   | >CDKN2A-A1 FLDTLVVLHR! | 306   | 298   |

|                        |      |                        |      |      |
|------------------------|------|------------------------|------|------|
| >CDKN2A-A1 FLDTLVVLHR, | 19   | >CDKN2A-A1 FLDTLVVLHR' | 3214 | 3195 |
| >CDKN2A-A1 FLDTLVVLHR, | 3    | >CDKN2A-A1 FLDTLVVLHR' | 55   | 52   |
| >CDKN2A-A1 HRAGARLDV   | 197  | >CDKN2A-A1 HRSGARLDV   | 385  | 188  |
| >CDKN2A-A1 HRAGARLDV'  | 101  | >CDKN2A-A1 HRSGARLDV'  | 169  | 68   |
| >CDKN2A-A1 VLHRAGARL   | 371  | >CDKN2A-A1 VLHRSGARL   | 479  | 108  |
| >CDKN2A-A1 VLHRAGARL   | 156  | >CDKN2A-A1 VLHRSGARL   | 134  | 22   |
| >CDKN2A-A1 VLHRAGARL'  | 77   | >CDKN2A-A1 VLHRSGARL'  | 73   | 4    |
| >CDKN2A-A1 VLHRAGARL   | 21   | >CDKN2A-A1 VLHRSGARL   | 19   | 2    |
| >CDKN2A-A1 VLHRAGARL'  | 36   | >CDKN2A-A1 VLHRSGARL'  | 34   | 2    |
| >CDKN2A-A1 VLHRAGARL   | 269  | >CDKN2A-A1 VLHRSGARL   | 223  | 46   |
| >CDKN2A-A1 VLHRAGARL'  | 346  | >CDKN2A-A1 VLHRSGARL'  | 319  | 27   |
| >CDKN2A-A1 VLHRAGARL   | 358  | >CDKN2A-A1 VLHRSGARL   | 599  | 241  |
| >CDKN2A-A1 VLHRAGARL'  | 33   | >CDKN2A-A1 VLHRSGARL'  | 42   | 9    |
| >CDKN2A-A1 VLHRAGARL   | 6    | >CDKN2A-A1 VLHRSGARL   | 5    | 1    |
| >CDKN2A-A1 VLHRAGARL'  | 3    | >CDKN2A-A1 VLHRSGARL'  | 3    | 0    |
| >CDKN2A-A1 VLHRAGAR    | 862  | >CDKN2A-A1 VLHRSGAR    | 437  | 425  |
| >CDKN2A-A1 VLHRAGAR    | 299  | >CDKN2A-A1 VLHRSGAR    | 147  | 152  |
| >CDKN2A-A1 VVLHRAGA    | 471  | >CDKN2A-A1 VVLHRSGA    | 809  | 338  |
| >CDKN2A-A1 VVLHRAGAR   | 225  | >CDKN2A-A1 VVLHRSGAR   | 104  | 121  |
| >CDKN2A-A1 VVLHRAGAR   | 576  | >CDKN2A-A1 VVLHRSGAR   | 267  | 309  |
| >CDKN2A-A1 VVLHRAGARI  | 129  | >CDKN2A-A1 VVLHRSGARL  | 92   | 37   |
| >CDKN2A-A1 LVVLHRAGAF  | 250  | >CDKN2A-A1 LVVLHRSGAR  | 289  | 39   |
| >CDKN2A-A1 LVVLHRAGAF  | 127  | >CDKN2A-A1 LVVLHRSGAR  | 138  | 11   |
| >CDKN2A-A1 LVVLHRAGAF  | 287  | >CDKN2A-A1 LVVLHRSGAR  | 217  | 70   |
| >CDKN2A-A1 LVVLHRAGAF  | 435  | >CDKN2A-A1 LVVLHRSGAR  | 297  | 138  |
| >CDKN2A-A1 TLVVLHRA    | 433  | >CDKN2A-A1 TLVVLHRS    | 4147 | 3714 |
| >CDKN2A-A1 TLVVLHRA    | 247  | >CDKN2A-A1 TLVVLHRS    | 6147 | 5900 |
| >CDKN2A-A1 TLVVLHRAGA  | 240  | >CDKN2A-A1 TLVVLHRSGA  | 213  | 27   |
| >CDKN2A-A1 TLVVLHRA    | 426  | >CDKN2A-A1 TLVVLHRS    | 6788 | 6362 |
| >CDKN2A-A1 TLVVLHRA    | 59   | >CDKN2A-A1 TLVVLHRS    | 3888 | 3829 |
| >CDKN2A-A1 TLVVLHRAGA  | 465  | >CDKN2A-A1 TLVVLHRSGA  | 572  | 107  |
| >CDKN2A-A1 TLVVLHRAGA  | 209  | >CDKN2A-A1 TLVVLHRSGA  | 156  | 53   |
| >CDKN2A-A1 TLVVLHRAGA  | 534  | >CDKN2A-A1 TLVVLHRSGA  | 378  | 156  |
| >CDKN2A-A1 TLVVLHRAGA  | 185  | >CDKN2A-A1 TLVVLHRSGA  | 208  | 23   |
| >CDKN2A-A1 DTLVVLHRA   | 178  | >CDKN2A-A1 DTLVVLHRS   | 2993 | 2815 |
| >CDKN2A-A1 DTLVVLHRAC  | 197  | >CDKN2A-A1 DTLVVLHRSG  | 348  | 151  |
| >CDKN2A-A1 DTLVVLHRA   | 46   | >CDKN2A-A1 DTLVVLHRS   | 2751 | 2705 |
| >CDKN2A-A1 DTLVVLHRAC  | 65   | >CDKN2A-A1 DTLVVLHRSG  | 139  | 74   |
| >CDKN2A-A1 AGARLDVRD,  | 289  | >CDKN2A-A1 VGARLDVRD,  | 77   | 212  |
| >CDKN2A-A1 RAGARLDV    | 3118 | >CDKN2A-A1 RVGARLDV    | 236  | 2882 |
| >CDKN2A-A1 RAGARLDVR   | 90   | >CDKN2A-A1 RVGARLDVR   | 52   | 38   |
| >CDKN2A-A1 RAGARLDVR   | 670  | >CDKN2A-A1 RVGARLDVR   | 290  | 380  |
| >CDKN2A-A1 FLDTLVVLHR, | 12   | >CDKN2A-A1 FLDTLVVLHR' | 7    | 5    |

|                        |      |                        |      |      |
|------------------------|------|------------------------|------|------|
| >CDKN2A-A1 FLDTLVVLHR, | 7    | >CDKN2A-A1 FLDTLVVLHR' | 3    | 4    |
| >CDKN2A-A1 FLDTLVVLHR, | 24   | >CDKN2A-A1 FLDTLVVLHR' | 7    | 17   |
| >CDKN2A-A1 FLDTLVVLHR, | 68   | >CDKN2A-A1 FLDTLVVLHR' | 9    | 59   |
| >CDKN2A-A1 FLDTLVVLHR, | 3    | >CDKN2A-A1 FLDTLVVLHR' | 1    | 2    |
| >CDKN2A-A1 FLDTLVVLHR, | 9    | >CDKN2A-A1 FLDTLVVLHR' | 2    | 7    |
| >CDKN2A-A1 FLDTLVVLHR, | 8    | >CDKN2A-A1 FLDTLVVLHR' | 4    | 4    |
| >CDKN2A-A1 FLDTLVVLHR, | 19   | >CDKN2A-A1 FLDTLVVLHR' | 2    | 17   |
| >CDKN2A-A1 FLDTLVVLHR, | 3    | >CDKN2A-A1 FLDTLVVLHR' | 1    | 2    |
| >CDKN2A-A1 FLDTLVVLHR, | 1864 | >CDKN2A-A1 FLDTLVVLHR' | 62   | 1802 |
| >CDKN2A-A1 HRAGARLDV   | 197  | >CDKN2A-A1 HRVGARLDV   | 255  | 58   |
| >CDKN2A-A1 HRAGARLDVI  | 101  | >CDKN2A-A1 HRVGARLDVI  | 54   | 47   |
| >CDKN2A-A1 HRAGARLDVI  | 633  | >CDKN2A-A1 HRVGARLDVI  | 476  | 157  |
| >CDKN2A-A1 VLHRAGARL   | 371  | >CDKN2A-A1 VLHRVGARL   | 331  | 40   |
| >CDKN2A-A1 VLHRAGARL   | 156  | >CDKN2A-A1 VLHRVGARL   | 134  | 22   |
| >CDKN2A-A1 VLHRAGARLI  | 77   | >CDKN2A-A1 VLHRVGARLI  | 69   | 8    |
| >CDKN2A-A1 VLHRAGARL   | 21   | >CDKN2A-A1 VLHRVGARL   | 6    | 15   |
| >CDKN2A-A1 VLHRAGARLI  | 36   | >CDKN2A-A1 VLHRVGARLI  | 16   | 20   |
| >CDKN2A-A1 VLHRAGARL   | 269  | >CDKN2A-A1 VLHRVGARL   | 173  | 96   |
| >CDKN2A-A1 VLHRAGARLI  | 346  | >CDKN2A-A1 VLHRVGARLI  | 280  | 66   |
| >CDKN2A-A1 VLHRAGARL   | 358  | >CDKN2A-A1 VLHRVGARL   | 149  | 209  |
| >CDKN2A-A1 VLHRAGARLI  | 33   | >CDKN2A-A1 VLHRVGARLI  | 25   | 8    |
| >CDKN2A-A1 VLHRAGARL   | 6    | >CDKN2A-A1 VLHRVGARL   | 5    | 1    |
| >CDKN2A-A1 VLHRAGARLI  | 3    | >CDKN2A-A1 VLHRVGARLI  | 3    | 0    |
| >CDKN2A-A1 VLHRAGAR    | 862  | >CDKN2A-A1 VLHRVGAR    | 492  | 370  |
| >CDKN2A-A1 VLHRAGAR    | 299  | >CDKN2A-A1 VLHRVGAR    | 89   | 210  |
| >CDKN2A-A1 VVLHRAGA    | 471  | >CDKN2A-A1 VVLHRVGA    | 356  | 115  |
| >CDKN2A-A1 VVLHRAGARI  | 1337 | >CDKN2A-A1 VVLHRVGARI  | 315  | 1022 |
| >CDKN2A-A1 VVLHRAGAR   | 225  | >CDKN2A-A1 VVLHRVGAR   | 71   | 154  |
| >CDKN2A-A1 VVLHRAGAR   | 576  | >CDKN2A-A1 VVLHRVGAR   | 247  | 329  |
| >CDKN2A-A1 VVLHRAGARI  | 129  | >CDKN2A-A1 VVLHRVGARI  | 324  | 195  |
| >CDKN2A-A1 LVVLHRAGAF  | 250  | >CDKN2A-A1 LVVLHRVGAF  | 371  | 121  |
| >CDKN2A-A1 LVVLHRAGAF  | 127  | >CDKN2A-A1 LVVLHRVGAF  | 119  | 8    |
| >CDKN2A-A1 LVVLHRAGAF  | 287  | >CDKN2A-A1 LVVLHRVGAF  | 432  | 145  |
| >CDKN2A-A1 LVVLHRAGAF  | 435  | >CDKN2A-A1 LVVLHRVGAF  | 1089 | 654  |
| >CDKN2A-A1 TLVVLHRA    | 1920 | >CDKN2A-A1 TLVVLHRV    | 237  | 1683 |
| >CDKN2A-A1 TLVVLHRA    | 433  | >CDKN2A-A1 TLVVLHRV    | 63   | 370  |
| >CDKN2A-A1 TLVVLHRA    | 247  | >CDKN2A-A1 TLVVLHRV    | 51   | 196  |
| >CDKN2A-A1 TLVVLHRAGA  | 240  | >CDKN2A-A1 TLVVLHRVGA  | 561  | 321  |
| >CDKN2A-A1 TLVVLHRA    | 1727 | >CDKN2A-A1 TLVVLHRV    | 201  | 1526 |
| >CDKN2A-A1 TLVVLHRA    | 426  | >CDKN2A-A1 TLVVLHRV    | 12   | 414  |
| >CDKN2A-A1 TLVVLHRA    | 2067 | >CDKN2A-A1 TLVVLHRV    | 79   | 1988 |
| >CDKN2A-A1 TLVVLHRA    | 1412 | >CDKN2A-A1 TLVVLHRV    | 33   | 1379 |
| >CDKN2A-A1 TLVVLHRA    | 5377 | >CDKN2A-A1 TLVVLHRV    | 119  | 5258 |

|                       |       |                       |       |       |
|-----------------------|-------|-----------------------|-------|-------|
| >CDKN2A-A1 TLVVLHRA   | 59    | >CDKN2A-A1 TLVVLHRV   | 4     | 55    |
| >CDKN2A-A1 TLVVLHRAGA | 465   | >CDKN2A-A1 TLVVLHRVGA | 560   | 95    |
| >CDKN2A-A1 TLVVLHRAGA | 209   | >CDKN2A-A1 TLVVLHRVGA | 131   | 78    |
| >CDKN2A-A1 TLVVLHRAGA | 534   | >CDKN2A-A1 TLVVLHRVGA | 384   | 150   |
| >CDKN2A-A1 TLVVLHRAGA | 185   | >CDKN2A-A1 TLVVLHRVGA | 190   | 5     |
| >CDKN2A-A1 TLVVLHRA   | 1691  | >CDKN2A-A1 TLVVLHRV   | 193   | 1498  |
| >CDKN2A-A1 TLVVLHRA   | 4848  | >CDKN2A-A1 TLVVLHRV   | 256   | 4592  |
| >CDKN2A-A1 DTLVVLHRA  | 8622  | >CDKN2A-A1 DTLVVLHRV  | 217   | 8405  |
| >CDKN2A-A1 DTLVVLHRA  | 12396 | >CDKN2A-A1 DTLVVLHRV  | 443   | 11953 |
| >CDKN2A-A1 DTLVVLHRA  | 7377  | >CDKN2A-A1 DTLVVLHRV  | 462   | 6915  |
| >CDKN2A-A1 DTLVVLHRA  | 178   | >CDKN2A-A1 DTLVVLHRV  | 18    | 160   |
| >CDKN2A-A1 DTLVVLHRAC | 197   | >CDKN2A-A1 DTLVVLHRVC | 228   | 31    |
| >CDKN2A-A1 DTLVVLHRA  | 46    | >CDKN2A-A1 DTLVVLHRV  | 5     | 41    |
| >CDKN2A-A1 DTLVVLHRAC | 65    | >CDKN2A-A1 DTLVVLHRVC | 98    | 33    |
| >CDKN2A-A1 LDTLVVLHRA | 5404  | >CDKN2A-A1 LDTLVVLHRV | 170   | 5234  |
| >CDKN2A-A1 ARLDVRDAW  | 89    | >CDKN2A-A1 ERLDVRDAW  | 629   | 540   |
| >CDKN2A-A1 ARLDVRDAW  | 117   | >CDKN2A-A1 ERLDVRDAW  | 190   | 73    |
| >CDKN2A-A1 ARLDVRDAW  | 1595  | >CDKN2A-A1 ERLDVRDAW  | 409   | 1186  |
| >CDKN2A-A1 GARLDVRDA  | 35619 | >CDKN2A-A1 GERLDVRDA  | 279   | 35340 |
| >CDKN2A-A1 GARLDVRDA  | 457   | >CDKN2A-A1 GERLDVRDA  | 19278 | 18821 |
| >CDKN2A-A1 DTLVVLHRAC | 197   | >CDKN2A-A1 DTLVVLHRAC | 19183 | 18986 |
| >CDKN2A-A1 DTLVVLHRAC | 65    | >CDKN2A-A1 DTLVVLHRAC | 7722  | 7657  |
| >CDKN2A-A1 AGARLDVRD  | 289   | >CDKN2A-A1 AGERLDVRD  | 7586  | 7297  |
| >CDKN2A-A1 RAGARLDVR  | 90    | >CDKN2A-A1 RAGERLDVR  | 232   | 142   |
| >CDKN2A-A1 HRAGARLDV  | 197   | >CDKN2A-A1 HRAGERLDV  | 580   | 383   |
| >CDKN2A-A1 HRAGARLDV  | 101   | >CDKN2A-A1 HRAGERLDV  | 144   | 43    |
| >CDKN2A-A1 VLHRAGARL  | 371   | >CDKN2A-A1 VLHRAGERL  | 341   | 30    |
| >CDKN2A-A1 VLHRAGARL  | 156   | >CDKN2A-A1 VLHRAGERL  | 922   | 766   |
| >CDKN2A-A1 VLHRAGARL  | 77    | >CDKN2A-A1 VLHRAGERL  | 160   | 83    |
| >CDKN2A-A1 VLHRAGARL  | 21    | >CDKN2A-A1 VLHRAGERL  | 25    | 4     |
| >CDKN2A-A1 VLHRAGARL  | 36    | >CDKN2A-A1 VLHRAGERL  | 41    | 5     |
| >CDKN2A-A1 VLHRAGARL  | 269   | >CDKN2A-A1 VLHRAGERL  | 1222  | 953   |
| >CDKN2A-A1 VLHRAGARL  | 346   | >CDKN2A-A1 VLHRAGERL  | 565   | 219   |
| >CDKN2A-A1 VLHRAGARL  | 358   | >CDKN2A-A1 VLHRAGERL  | 480   | 122   |
| >CDKN2A-A1 VLHRAGARL  | 33    | >CDKN2A-A1 VLHRAGERL  | 50    | 17    |
| >CDKN2A-A1 VLHRAGARL  | 6     | >CDKN2A-A1 VLHRAGERL  | 13    | 7     |
| >CDKN2A-A1 VLHRAGARL  | 3     | >CDKN2A-A1 VLHRAGERL  | 4     | 1     |
| >CDKN2A-A1 VLHRAGAR   | 299   | >CDKN2A-A1 VLHRAGER   | 629   | 330   |
| >CDKN2A-A1 VVLHRAGA   | 471   | >CDKN2A-A1 VVLHRAGE   | 19905 | 19434 |
| >CDKN2A-A1 VVLHRAGAR  | 225   | >CDKN2A-A1 VVLHRAGER  | 374   | 149   |
| >CDKN2A-A1 VVLHRAGARI | 129   | >CDKN2A-A1 VVLHRAGERL | 562   | 433   |
| >CDKN2A-A1 LVVLHRAGAF | 250   | >CDKN2A-A1 LVVLHRAGER | 574   | 324   |
| >CDKN2A-A1 LVVLHRAGAF | 127   | >CDKN2A-A1 LVVLHRAGER | 161   | 34    |

|                       |      |                       |       |       |
|-----------------------|------|-----------------------|-------|-------|
| >CDKN2A-A1 LVVLHRAGAF | 287  | >CDKN2A-A1 LVVLHRAGER | 222   | 65    |
| >CDKN2A-A1 LVVLHRAGAF | 435  | >CDKN2A-A1 LVVLHRAGER | 1814  | 1379  |
| >CDKN2A-A1 TLVVLHRAGA | 240  | >CDKN2A-A1 TLVVLHRAGE | 13597 | 13357 |
| >CDKN2A-A1 TLVVLHRAGA | 465  | >CDKN2A-A1 TLVVLHRAGE | 23919 | 23454 |
| >CDKN2A-A1 TLVVLHRAGA | 209  | >CDKN2A-A1 TLVVLHRAGE | 279   | 70    |
| >CDKN2A-A1 TLVVLHRAGA | 185  | >CDKN2A-A1 TLVVLHRAGE | 140   | 45    |
| >CDKN2A-A1 ARLDVRDAW  | 89   | >CDKN2A-A1 PRLDVRDAW  | 1161  | 1072  |
| >CDKN2A-A1 ARLDVRDAW  | 117  | >CDKN2A-A1 PRLDVRDAW  | 283   | 166   |
| >CDKN2A-A1 GARLDVRDA  | 457  | >CDKN2A-A1 GPRLDVRDA  | 17245 | 16788 |
| >CDKN2A-A1 GARLDVRDA  | 2771 | >CDKN2A-A1 GPRLDVRDA  | 78    | 2693  |
| >CDKN2A-A1 DTLVVLHRAC | 197  | >CDKN2A-A1 DTLVVLHRAC | 13013 | 12816 |
| >CDKN2A-A1 DTLVVLHRAC | 65   | >CDKN2A-A1 DTLVVLHRAC | 4785  | 4720  |
| >CDKN2A-A1 AGARLDVRD  | 289  | >CDKN2A-A1 AGPRLDVRD  | 9772  | 9483  |
| >CDKN2A-A1 RAGARLDVR  | 90   | >CDKN2A-A1 RAGPRLDVR  | 77    | 13    |
| >CDKN2A-A1 HRAGARLDV  | 197  | >CDKN2A-A1 HRAGPRLDV  | 501   | 304   |
| >CDKN2A-A1 HRAGARLDV  | 101  | >CDKN2A-A1 HRAGPRLDV  | 140   | 39    |
| >CDKN2A-A1 VLHRAGARL  | 371  | >CDKN2A-A1 VLHRAGPRL  | 1597  | 1226  |
| >CDKN2A-A1 VLHRAGARL  | 156  | >CDKN2A-A1 VLHRAGPRL  | 652   | 496   |
| >CDKN2A-A1 VLHRAGARL  | 77   | >CDKN2A-A1 VLHRAGPRL  | 174   | 97    |
| >CDKN2A-A1 VLHRAGARL  | 21   | >CDKN2A-A1 VLHRAGPRL  | 19    | 2     |
| >CDKN2A-A1 VLHRAGARL  | 36   | >CDKN2A-A1 VLHRAGPRL  | 24    | 12    |
| >CDKN2A-A1 VLHRAGARL  | 269  | >CDKN2A-A1 VLHRAGPRL  | 631   | 362   |
| >CDKN2A-A1 VLHRAGARL  | 346  | >CDKN2A-A1 VLHRAGPRL  | 505   | 159   |
| >CDKN2A-A1 VLHRAGARL  | 358  | >CDKN2A-A1 VLHRAGPRL  | 53    | 305   |
| >CDKN2A-A1 VLHRAGARL  | 33   | >CDKN2A-A1 VLHRAGPRL  | 35    | 2     |
| >CDKN2A-A1 VLHRAGARL  | 6    | >CDKN2A-A1 VLHRAGPRL  | 8     | 2     |
| >CDKN2A-A1 VLHRAGARL  | 3    | >CDKN2A-A1 VLHRAGPRL  | 4     | 1     |
| >CDKN2A-A1 VLHRAGAR   | 299  | >CDKN2A-A1 VLHRAGPR   | 226   | 73    |
| >CDKN2A-A1 VVLHRAGA   | 471  | >CDKN2A-A1 VVLHRAGP   | 15350 | 14879 |
| >CDKN2A-A1 VVLHRAGAR  | 225  | >CDKN2A-A1 VVLHRAGPR  | 130   | 95    |
| >CDKN2A-A1 VVLHRAGAR  | 576  | >CDKN2A-A1 VVLHRAGPR  | 493   | 83    |
| >CDKN2A-A1 VVLHRAGARI | 129  | >CDKN2A-A1 VVLHRAGPRI | 205   | 76    |
| >CDKN2A-A1 VVLHRAGAR  | 1786 | >CDKN2A-A1 VVLHRAGPR  | 468   | 1318  |
| >CDKN2A-A1 LVVLHRAGAF | 250  | >CDKN2A-A1 LVVLHRAGPF | 291   | 41    |
| >CDKN2A-A1 LVVLHRAGAF | 127  | >CDKN2A-A1 LVVLHRAGPF | 95    | 32    |
| >CDKN2A-A1 LVVLHRAGAF | 287  | >CDKN2A-A1 LVVLHRAGPF | 193   | 94    |
| >CDKN2A-A1 LVVLHRAGAF | 435  | >CDKN2A-A1 LVVLHRAGPF | 786   | 351   |
| >CDKN2A-A1 TLVVLHRAGA | 240  | >CDKN2A-A1 TLVVLHRAGP | 11055 | 10815 |
| >CDKN2A-A1 TLVVLHRAGA | 465  | >CDKN2A-A1 TLVVLHRAGP | 25133 | 24668 |
| >CDKN2A-A1 TLVVLHRAGA | 209  | >CDKN2A-A1 TLVVLHRAGP | 124   | 85    |
| >CDKN2A-A1 TLVVLHRAGA | 534  | >CDKN2A-A1 TLVVLHRAGP | 386   | 148   |
| >CDKN2A-A1 TLVVLHRAGA | 185  | >CDKN2A-A1 TLVVLHRAGP | 186   | 1     |
| >CDKN2A-A1 TLVVLHRAGA | 1170 | >CDKN2A-A1 TLVVLHRAGP | 397   | 773   |



|                       |      |                       |      |      |
|-----------------------|------|-----------------------|------|------|
| >CDKN2A-A1 ARLDVRDAW  | 89   | >CDKN2A-A1 TRLDVRDAW  | 223  | 134  |
| >CDKN2A-A1 ARLDVRDAW  | 117  | >CDKN2A-A1 TRLDVRDAW  | 181  | 64   |
| >CDKN2A-A1 ARLDVRDAW  | 1595 | >CDKN2A-A1 TRLDVRDAW  | 468  | 1127 |
| >CDKN2A-A1 GARLDVRDA' | 604  | >CDKN2A-A1 GTRLDVRDA\ | 80   | 524  |
| >CDKN2A-A1 GARLDVRDA' | 457  | >CDKN2A-A1 GTRLDVRDA\ | 266  | 191  |
| >CDKN2A-A1 DTLVVLHRAC | 197  | >CDKN2A-A1 DTLVVLHRAC | 2605 | 2408 |
| >CDKN2A-A1 DTLVVLHRAC | 65   | >CDKN2A-A1 DTLVVLHRAC | 407  | 342  |
| >CDKN2A-A1 AGARLDVRD, | 289  | >CDKN2A-A1 AGTRLDVRD/ | 485  | 196  |
| >CDKN2A-A1 RAGARLDVR  | 90   | >CDKN2A-A1 RAGTRLDVR  | 135  | 45   |
| >CDKN2A-A1 HRAGARLDV  | 197  | >CDKN2A-A1 HRAGTRLDV  | 215  | 18   |
| >CDKN2A-A1 HRAGARLDV\ | 101  | >CDKN2A-A1 HRAGTRLDV\ | 131  | 30   |
| >CDKN2A-A1 HRAGARLDV  | 813  | >CDKN2A-A1 HRAGTRLDV  | 321  | 492  |
| >CDKN2A-A1 VLHRAGARL  | 371  | >CDKN2A-A1 VLHRAGTRL  | 353  | 18   |
| >CDKN2A-A1 VLHRAGARL  | 156  | >CDKN2A-A1 VLHRAGTRL  | 119  | 37   |
| >CDKN2A-A1 VLHRAGARL\ | 77   | >CDKN2A-A1 VLHRAGTRL\ | 75   | 2    |
| >CDKN2A-A1 VLHRAGARL  | 21   | >CDKN2A-A1 VLHRAGTRL  | 47   | 26   |
| >CDKN2A-A1 VLHRAGARL\ | 36   | >CDKN2A-A1 VLHRAGTRL\ | 33   | 3    |
| >CDKN2A-A1 VLHRAGARL  | 269  | >CDKN2A-A1 VLHRAGTRL  | 1492 | 1223 |
| >CDKN2A-A1 VLHRAGARL\ | 346  | >CDKN2A-A1 VLHRAGTRL\ | 492  | 146  |
| >CDKN2A-A1 VLHRAGARL  | 358  | >CDKN2A-A1 VLHRAGTRL  | 375  | 17   |
| >CDKN2A-A1 VLHRAGARL\ | 33   | >CDKN2A-A1 VLHRAGTRL\ | 33   | 0    |
| >CDKN2A-A1 VLHRAGARL  | 6    | >CDKN2A-A1 VLHRAGTRL  | 7    | 1    |
| >CDKN2A-A1 VLHRAGARL\ | 3    | >CDKN2A-A1 VLHRAGTRL\ | 3    | 0    |
| >CDKN2A-A1 VLHRAGAR   | 299  | >CDKN2A-A1 VLHRAGTR   | 478  | 179  |
| >CDKN2A-A1 VVLHRAGA   | 471  | >CDKN2A-A1 VVLHRAGT   | 3526 | 3055 |
| >CDKN2A-A1 VVLHRAGAR  | 225  | >CDKN2A-A1 VVLHRAGTR  | 386  | 161  |
| >CDKN2A-A1 VVLHRAGARI | 129  | >CDKN2A-A1 VVLHRAGTRL | 194  | 65   |
| >CDKN2A-A1 LVVLHRAGAF | 250  | >CDKN2A-A1 LVVLHRAGTR | 331  | 81   |
| >CDKN2A-A1 LVVLHRAGAF | 127  | >CDKN2A-A1 LVVLHRAGTR | 153  | 26   |
| >CDKN2A-A1 LVVLHRAGAF | 287  | >CDKN2A-A1 LVVLHRAGTR | 180  | 107  |
| >CDKN2A-A1 LVVLHRAGAF | 435  | >CDKN2A-A1 LVVLHRAGTR | 828  | 393  |
| >CDKN2A-A1 TLVVLHRAGA | 240  | >CDKN2A-A1 TLVVLHRAGT | 629  | 389  |
| >CDKN2A-A1 TLVVLHRAGA | 465  | >CDKN2A-A1 TLVVLHRAGT | 3780 | 3315 |
| >CDKN2A-A1 TLVVLHRAGA | 209  | >CDKN2A-A1 TLVVLHRAGT | 284  | 75   |
| >CDKN2A-A1 TLVVLHRAGA | 185  | >CDKN2A-A1 TLVVLHRAGT | 152  | 33   |
| >CDKN2A-A1 ARLDVRDAW  | 89   | >CDKN2A-A1 VRLDVRDAW  | 192  | 103  |
| >CDKN2A-A1 ARLDVRDAW  | 117  | >CDKN2A-A1 VRLDVRDAW  | 29   | 88   |
| >CDKN2A-A1 GARLDVRDA' | 457  | >CDKN2A-A1 GVRLDVRDA' | 3799 | 3342 |
| >CDKN2A-A1 DTLVVLHRAC | 197  | >CDKN2A-A1 DTLVVLHRAC | 19   | 178  |
| >CDKN2A-A1 DTLVVLHRAC | 65   | >CDKN2A-A1 DTLVVLHRAC | 6    | 59   |
| >CDKN2A-A1 AGARLDVRD, | 289  | >CDKN2A-A1 AGVRLDVRD, | 457  | 168  |
| >CDKN2A-A1 RAGARLDVR  | 90   | >CDKN2A-A1 RAGVRLDVR  | 84   | 6    |
| >CDKN2A-A1 HRAGARLDV  | 197  | >CDKN2A-A1 HRAGVRLDV  | 187  | 10   |

|                       |      |                       |      |      |
|-----------------------|------|-----------------------|------|------|
| >CDKN2A-A1 HRAGARLDVI | 101  | >CDKN2A-A1 HRAGVRLDVI | 103  | 2    |
| >CDKN2A-A1 VLHRAGARL  | 371  | >CDKN2A-A1 VLHRAGVRL  | 489  | 118  |
| >CDKN2A-A1 VLHRAGARL  | 156  | >CDKN2A-A1 VLHRAGVRL  | 692  | 536  |
| >CDKN2A-A1 VLHRAGARL  | 77   | >CDKN2A-A1 VLHRAGVRL  | 102  | 25   |
| >CDKN2A-A1 VLHRAGARL  | 21   | >CDKN2A-A1 VLHRAGVRL  | 25   | 4    |
| >CDKN2A-A1 VLHRAGARL  | 36   | >CDKN2A-A1 VLHRAGVRL  | 21   | 15   |
| >CDKN2A-A1 VLHRAGARL  | 269  | >CDKN2A-A1 VLHRAGVRL  | 460  | 191  |
| >CDKN2A-A1 VLHRAGARL  | 346  | >CDKN2A-A1 VLHRAGVRL  | 358  | 12   |
| >CDKN2A-A1 VLHRAGARL  | 358  | >CDKN2A-A1 VLHRAGVRL  | 194  | 164  |
| >CDKN2A-A1 VLHRAGARL  | 33   | >CDKN2A-A1 VLHRAGVRL  | 25   | 8    |
| >CDKN2A-A1 VLHRAGARL  | 6    | >CDKN2A-A1 VLHRAGVRL  | 7    | 1    |
| >CDKN2A-A1 VLHRAGARL  | 3    | >CDKN2A-A1 VLHRAGVRL  | 3    | 0    |
| >CDKN2A-A1 VLHRAGAR   | 299  | >CDKN2A-A1 VLHRAGVR   | 610  | 311  |
| >CDKN2A-A1 VVLHRAGA   | 1786 | >CDKN2A-A1 VVLHRAGV   | 194  | 1592 |
| >CDKN2A-A1 VVLHRAGA   | 471  | >CDKN2A-A1 VVLHRAGV   | 49   | 422  |
| >CDKN2A-A1 VVLHRAGA   | 4344 | >CDKN2A-A1 VVLHRAGV   | 76   | 4268 |
| >CDKN2A-A1 VVLHRAGA   | 8009 | >CDKN2A-A1 VVLHRAGV   | 358  | 7651 |
| >CDKN2A-A1 VVLHRAGA   | 6976 | >CDKN2A-A1 VVLHRAGV   | 314  | 6662 |
| >CDKN2A-A1 VVLHRAGA   | 4071 | >CDKN2A-A1 VVLHRAGV   | 25   | 4046 |
| >CDKN2A-A1 VVLHRAGAR  | 225  | >CDKN2A-A1 VVLHRAGVR  | 569  | 344  |
| >CDKN2A-A1 VVLHRAGA   | 6603 | >CDKN2A-A1 VVLHRAGV   | 343  | 6260 |
| >CDKN2A-A1 VVLHRAGARI | 129  | >CDKN2A-A1 VVLHRAGVRI | 322  | 193  |
| >CDKN2A-A1 LVVLHRAGA  | 2226 | >CDKN2A-A1 LVVLHRAGV  | 445  | 1781 |
| >CDKN2A-A1 LVVLHRAGAF | 250  | >CDKN2A-A1 LVVLHRAGVF | 293  | 43   |
| >CDKN2A-A1 LVVLHRAGA  | 585  | >CDKN2A-A1 LVVLHRAGV  | 76   | 509  |
| >CDKN2A-A1 LVVLHRAGA  | 762  | >CDKN2A-A1 LVVLHRAGV  | 93   | 669  |
| >CDKN2A-A1 LVVLHRAGA  | 6957 | >CDKN2A-A1 LVVLHRAGV  | 49   | 6908 |
| >CDKN2A-A1 LVVLHRAGAF | 127  | >CDKN2A-A1 LVVLHRAGVF | 308  | 181  |
| >CDKN2A-A1 LVVLHRAGAF | 287  | >CDKN2A-A1 LVVLHRAGVF | 535  | 248  |
| >CDKN2A-A1 LVVLHRAGA  | 620  | >CDKN2A-A1 LVVLHRAGV  | 46   | 574  |
| >CDKN2A-A1 LVVLHRAGA  | 7161 | >CDKN2A-A1 LVVLHRAGV  | 383  | 6778 |
| >CDKN2A-A1 LVVLHRAGAF | 435  | >CDKN2A-A1 LVVLHRAGVF | 1032 | 597  |
| >CDKN2A-A1 TLVVLHRAGA | 3807 | >CDKN2A-A1 TLVVLHRAGV | 372  | 3435 |
| >CDKN2A-A1 TLVVLHRAGA | 1043 | >CDKN2A-A1 TLVVLHRAGV | 179  | 864  |
| >CDKN2A-A1 TLVVLHRAGA | 240  | >CDKN2A-A1 TLVVLHRAGV | 42   | 198  |
| >CDKN2A-A1 TLVVLHRAGA | 1737 | >CDKN2A-A1 TLVVLHRAGV | 308  | 1429 |
| >CDKN2A-A1 TLVVLHRAGA | 2943 | >CDKN2A-A1 TLVVLHRAGV | 59   | 2884 |
| >CDKN2A-A1 TLVVLHRAGA | 6630 | >CDKN2A-A1 TLVVLHRAGV | 327  | 6303 |
| >CDKN2A-A1 TLVVLHRAGA | 6598 | >CDKN2A-A1 TLVVLHRAGV | 240  | 6358 |
| >CDKN2A-A1 TLVVLHRAGA | 465  | >CDKN2A-A1 TLVVLHRAGV | 8    | 457  |
| >CDKN2A-A1 TLVVLHRAGA | 209  | >CDKN2A-A1 TLVVLHRAGV | 360  | 151  |
| >CDKN2A-A1 TLVVLHRAGA | 185  | >CDKN2A-A1 TLVVLHRAGV | 215  | 30   |
| >CDKN2A-A1 TLVVLHRAGA | 5764 | >CDKN2A-A1 TLVVLHRAGV | 338  | 5426 |

|                       |      |                       |      |      |
|-----------------------|------|-----------------------|------|------|
| >CDKN2A-A1 AWGRLPVDL  | 474  | >CDKN2A-A1 TWGRLPVDL  | 667  | 193  |
| >CDKN2A-A1 AWGRLPVDL  | 403  | >CDKN2A-A1 TWGRLPVDL  | 404  | 1    |
| >CDKN2A-A1 AWGRLPVDL  | 156  | >CDKN2A-A1 TWGRLPVDL  | 232  | 76   |
| >CDKN2A-A1 DAWGRLPVD  | 6141 | >CDKN2A-A1 DTWGRLPVD  | 474  | 5667 |
| >CDKN2A-A1 DAWGRLPV   | 260  | >CDKN2A-A1 DTWGRLPV   | 39   | 221  |
| >CDKN2A-A1 DAWGRLPVD  | 3245 | >CDKN2A-A1 DTWGRLPVD  | 491  | 2754 |
| >CDKN2A-A1 DAWGRLPV   | 24   | >CDKN2A-A1 DTWGRLPV   | 7    | 17   |
| >CDKN2A-A1 DAWGRLPVD  | 2165 | >CDKN2A-A1 DTWGRLPVD  | 371  | 1794 |
| >CDKN2A-A1 VRDAWGRLP  | 489  | >CDKN2A-A1 VRDTWGRLP  | 837  | 348  |
| >CDKN2A-A1 DVRDAWGRI  | 456  | >CDKN2A-A1 DVRDTWGRI  | 705  | 249  |
| >CDKN2A-A1 DVRDAWGRI  | 277  | >CDKN2A-A1 DVRDTWGRI  | 280  | 3    |
| >CDKN2A-A1 DVRDAWGR   | 17   | >CDKN2A-A1 DVRDTWGR   | 13   | 4    |
| >CDKN2A-A1 DVRDAWGR   | 62   | >CDKN2A-A1 DVRDTWGR   | 55   | 7    |
| >CDKN2A-A1 DVRDAWGRI  | 208  | >CDKN2A-A1 DVRDTWGRI  | 511  | 303  |
| >CDKN2A-A1 DVRDAWGRI  | 198  | >CDKN2A-A1 DVRDTWGRI  | 226  | 28   |
| >CDKN2A-A1 LDVRDAWGF  | 477  | >CDKN2A-A1 LDVRDTWGR  | 499  | 22   |
| >CDKN2A-A1 RLDVRDAWC  | 122  | >CDKN2A-A1 RLDVRDTWG  | 140  | 18   |
| >CDKN2A-A1 RLDVRDAWC  | 227  | >CDKN2A-A1 RLDVRDTWG  | 209  | 18   |
| >CDKN2A-A1 RLDVRDAWC  | 91   | >CDKN2A-A1 RLDVRDTWG  | 95   | 4    |
| >CDKN2A-A1 RLDVRDAWC  | 120  | >CDKN2A-A1 RLDVRDTWG  | 110  | 10   |
| >CDKN2A-A1 RLDVRDAW   | 874  | >CDKN2A-A1 RLDVRDTW   | 389  | 485  |
| >CDKN2A-A1 RLDVRDAW   | 274  | >CDKN2A-A1 RLDVRDTW   | 70   | 204  |
| >CDKN2A-A1 RLDVRDAWC  | 92   | >CDKN2A-A1 RLDVRDTWG  | 91   | 1    |
| >CDKN2A-A1 RLDVRDAWC  | 293  | >CDKN2A-A1 RLDVRDTWG  | 218  | 75   |
| >CDKN2A-A1 ARLDVRDAW  | 89   | >CDKN2A-A1 ARLDVRDTW  | 112  | 23   |
| >CDKN2A-A1 ARLDVRDAW  | 117  | >CDKN2A-A1 ARLDVRDTW  | 61   | 56   |
| >CDKN2A-A1 GARLDVRDA' | 604  | >CDKN2A-A1 GARLDVRDT\ | 234  | 370  |
| >CDKN2A-A1 GARLDVRDA' | 457  | >CDKN2A-A1 GARLDVRDT\ | 91   | 366  |
| >CDKN2A-A1 AGARLDVRD, | 289  | >CDKN2A-A1 AGARLDVRD` | 76   | 213  |
| >CDKN2A-A1 AWGRLPVDL  | 474  | >CDKN2A-A1 VWGRLPVDL  | 774  | 300  |
| >CDKN2A-A1 AWGRLPVDL  | 403  | >CDKN2A-A1 VWGRLPVDL  | 421  | 18   |
| >CDKN2A-A1 AWGRLPVDL  | 156  | >CDKN2A-A1 VWGRLPVDL  | 284  | 128  |
| >CDKN2A-A1 DAWGRLPV   | 2679 | >CDKN2A-A1 DVWGRLPV   | 328  | 2351 |
| >CDKN2A-A1 DAWGRLPV   | 1569 | >CDKN2A-A1 DVWGRLPV   | 97   | 1472 |
| >CDKN2A-A1 DAWGRLPV   | 260  | >CDKN2A-A1 DVWGRLPV   | 61   | 199  |
| >CDKN2A-A1 DAWGRLPV   | 24   | >CDKN2A-A1 DVWGRLPV   | 12   | 12   |
| >CDKN2A-A1 RDAWGRLPV  | 1191 | >CDKN2A-A1 RDVWGRLPV  | 446  | 745  |
| >CDKN2A-A1 VRDAWGRLP  | 489  | >CDKN2A-A1 VRDVWGRLP  | 1533 | 1044 |
| >CDKN2A-A1 DVRDAWGRI  | 456  | >CDKN2A-A1 DVRDVWGRI  | 194  | 262  |
| >CDKN2A-A1 DVRDAWGRI  | 277  | >CDKN2A-A1 DVRDVWGRI  | 627  | 350  |
| >CDKN2A-A1 DVRDAWGR   | 17   | >CDKN2A-A1 DVRDVWGR   | 9    | 8    |
| >CDKN2A-A1 DVRDAWGR   | 62   | >CDKN2A-A1 DVRDVWGR   | 41   | 21   |
| >CDKN2A-A1 DVRDAWGRI  | 208  | >CDKN2A-A1 DVRDVWGRI  | 103  | 105  |

|                       |      |                       |      |      |
|-----------------------|------|-----------------------|------|------|
| >CDKN2A-A1 DVRDAWGRI  | 198  | >CDKN2A-A1 DVRDVWGRI  | 266  | 68   |
| >CDKN2A-A1 LDVRDAWGF  | 477  | >CDKN2A-A1 LDVRDVWGF  | 962  | 485  |
| >CDKN2A-A1 RLDVRDAWC  | 122  | >CDKN2A-A1 RLDVRDVWC  | 84   | 38   |
| >CDKN2A-A1 RLDVRDAWC  | 227  | >CDKN2A-A1 RLDVRDVWC  | 144  | 83   |
| >CDKN2A-A1 RLDVRDAWC  | 91   | >CDKN2A-A1 RLDVRDVWC  | 103  | 12   |
| >CDKN2A-A1 RLDVRDAWC  | 120  | >CDKN2A-A1 RLDVRDVWC  | 108  | 12   |
| >CDKN2A-A1 RLDVRDAW   | 274  | >CDKN2A-A1 RLDVRDVW   | 74   | 200  |
| >CDKN2A-A1 RLDVRDAWC  | 92   | >CDKN2A-A1 RLDVRDVWC  | 78   | 14   |
| >CDKN2A-A1 RLDVRDAWC  | 293  | >CDKN2A-A1 RLDVRDVWC  | 260  | 33   |
| >CDKN2A-A1 ARLDVRDAW  | 89   | >CDKN2A-A1 ARLDVRDVW  | 90   | 1    |
| >CDKN2A-A1 ARLDVRDAW  | 117  | >CDKN2A-A1 ARLDVRDVW  | 68   | 49   |
| >CDKN2A-A1 GARLDVRDA' | 457  | >CDKN2A-A1 GARLDVRDV' | 142  | 315  |
| >CDKN2A-A1 AGARLDVRD, | 289  | >CDKN2A-A1 AGARLDVRD' | 81   | 208  |
| >CDKN2A-A1 AEELGHRDV  | 408  | >CDKN2A-A1 VEELGHRDV  | 1559 | 1151 |
| >CDKN2A-A1 AEELGHRDV  | 29   | >CDKN2A-A1 VEELGHRDV  | 1040 | 1011 |
| >CDKN2A-A1 AEELGHRDV/ | 39   | >CDKN2A-A1 VEELGHRDV/ | 498  | 459  |
| >CDKN2A-A1 AEELGHRDV  | 336  | >CDKN2A-A1 VEELGHRDV  | 1110 | 774  |
| >CDKN2A-A1 LAEELGHRDV | 1178 | >CDKN2A-A1 LVEELGHRDV | 126  | 1052 |
| >CDKN2A-A1 LAEELGHR   | 532  | >CDKN2A-A1 LVEELGHR   | 469  | 63   |
| >CDKN2A-A1 DAWGRLPVD  | 3245 | >CDKN2A-A1 DAWGRLPVD  | 340  | 2905 |
| >CDKN2A-A1 DAWGRLPVD  | 2165 | >CDKN2A-A1 DAWGRLPVD  | 67   | 2098 |
| >CDKN2A-A1 DLAEELGHRC | 265  | >CDKN2A-A1 DLVEELGHRC | 331  | 66   |
| >CDKN2A-A1 DLAEELGHRC | 185  | >CDKN2A-A1 DLVEELGHRC | 658  | 473  |
| >CDKN2A-A1 DLAEELGHRC | 418  | >CDKN2A-A1 DLVEELGHRC | 2131 | 1713 |
| >CDKN2A-A1 DLAEELGHRC | 27   | >CDKN2A-A1 DLVEELGHRC | 57   | 30   |
| >CDKN2A-A1 DLAEELGHR  | 124  | >CDKN2A-A1 DLVEELGHR  | 119  | 5    |
| >CDKN2A-A1 DLAEELGHR  | 182  | >CDKN2A-A1 DLVEELGHR  | 299  | 117  |
| >CDKN2A-A1 LPVDLAEEL  | 414  | >CDKN2A-A1 LPVDLVEEL  | 910  | 496  |
| >CDKN2A-A1 LPVDLAEEL  | 42   | >CDKN2A-A1 LPVDLVEEL  | 47   | 5    |
| >CDKN2A-A1 LPVDLAEELG | 86   | >CDKN2A-A1 LPVDLVEELG | 107  | 21   |
| >CDKN2A-A1 LPVDLAEEL  | 407  | >CDKN2A-A1 LPVDLVEEL  | 257  | 150  |
| >CDKN2A-A1 LPVDLAEEL  | 52   | >CDKN2A-A1 LPVDLVEEL  | 47   | 5    |
| >CDKN2A-A1 LPVDLAEEL  | 1738 | >CDKN2A-A1 LPVDLVEEL  | 396  | 1342 |
| >CDKN2A-A1 LPVDLAEEL  | 86   | >CDKN2A-A1 LPVDLVEEL  | 31   | 55   |
| >CDKN2A-A1 RLPVDLAEEL | 99   | >CDKN2A-A1 RLPVDLVEEL | 78   | 21   |
| >CDKN2A-A1 RLPVDLAEEL | 950  | >CDKN2A-A1 RLPVDLVEEL | 415  | 535  |
| >CDKN2A-A1 RLPVDLAEEL | 1079 | >CDKN2A-A1 RLPVDLVEEL | 458  | 621  |
| >CDKN2A-A1 RLPVDLAEEL | 38   | >CDKN2A-A1 RLPVDLVEEL | 20   | 18   |
| >CDKN2A-A1 RLPVDLAEEL | 165  | >CDKN2A-A1 RLPVDLVEEL | 112  | 53   |
| >CDKN2A-A1 RLPVDLAEEL | 125  | >CDKN2A-A1 RLPVDLVEEL | 59   | 66   |
| >CDKN2A-A1 RLPVDLAEEL | 391  | >CDKN2A-A1 RLPVDLVEEL | 249  | 142  |
| >CDKN2A-A1 RLPVDLAEEL | 15   | >CDKN2A-A1 RLPVDLVEEL | 12   | 3    |
| >CDKN2A-A1 RLPVDLAEEL | 1004 | >CDKN2A-A1 RLPVDLVEEL | 469  | 535  |

|                        |      |                        |      |      |
|------------------------|------|------------------------|------|------|
| >CDKN2A-A1 GRLPVDLAEF  | 202  | >CDKN2A-A1 GRLPVDLVEE  | 207  | 5    |
| >CDKN2A-A1 GRLPVDLAEF  | 194  | >CDKN2A-A1 GRLPVDLVEE  | 156  | 38   |
| >CDKN2A-A1 GRLPVDLAEF  | 29   | >CDKN2A-A1 GRLPVDLVEE  | 23   | 6    |
| >CDKN2A-A1 AWGRLPVDL   | 156  | >CDKN2A-A1 AWGRLPVDL   | 72   | 84   |
| >CDKN2A-A1 ARYLRAAA    | 195  | >CDKN2A-A1 SRYLRAAA    | 284  | 89   |
| >CDKN2A-A1 ARYLRAAAGC  | 321  | >CDKN2A-A1 SRYLRAAAGC  | 517  | 196  |
| >CDKN2A-A1 ARYLRAAA    | 428  | >CDKN2A-A1 SRYLRAAA    | 375  | 53   |
| >CDKN2A-A1 VARYLRAA    | 137  | >CDKN2A-A1 VSRYLRAA    | 50   | 87   |
| >CDKN2A-A1 VARYLRAAA   | 38   | >CDKN2A-A1 VSRYLRAAA   | 17   | 21   |
| >CDKN2A-A1 VARYLRAAAGC | 843  | >CDKN2A-A1 VSRYLRAAAGC | 312  | 531  |
| >CDKN2A-A1 VARYLRAAAGC | 1190 | >CDKN2A-A1 VSRYLRAAAGC | 476  | 714  |
| >CDKN2A-A1 VARYLRAAA   | 284  | >CDKN2A-A1 VSRYLRAAA   | 4667 | 4383 |
| >CDKN2A-A1 DVARYLRAAA  | 376  | >CDKN2A-A1 DVSRYLRAAA  | 466  | 90   |
| >CDKN2A-A1 RDVARYLR    | 243  | >CDKN2A-A1 RDVSRYL     | 178  | 65   |
| >CDKN2A-A1 RDVARYLR    | 79   | >CDKN2A-A1 RDVSRYL     | 118  | 39   |
| >CDKN2A-A1 HRDVARYLR   | 203  | >CDKN2A-A1 HRDVSRYL    | 425  | 222  |
| >CDKN2A-A1 HRDVARYLRA  | 122  | >CDKN2A-A1 HRDVSRYLRA  | 123  | 1    |
| >CDKN2A-A1 HRDVARYL    | 175  | >CDKN2A-A1 HRDVSRYL    | 167  | 8    |
| >CDKN2A-A1 HRDVARYLR   | 370  | >CDKN2A-A1 HRDVSRYL    | 405  | 35   |
| >CDKN2A-A1 GHRDVARYLF  | 282  | >CDKN2A-A1 GHRDVSRYLF  | 158  | 124  |
| >CDKN2A-A1 LGHRDVARY   | 415  | >CDKN2A-A1 LGHRDVSRY   | 509  | 94   |
| >CDKN2A-A1 LGHRDVARYL  | 152  | >CDKN2A-A1 LGHRDVSRYL  | 173  | 21   |
| >CDKN2A-A1 LGHRDVARY   | 409  | >CDKN2A-A1 LGHRDVSRY   | 441  | 32   |
| >CDKN2A-A1 LGHRDVARY   | 1736 | >CDKN2A-A1 LGHRDVSRY   | 100  | 1636 |
| >CDKN2A-A1 ELGHRDVAR)  | 382  | >CDKN2A-A1 ELGHRDVSRY  | 330  | 52   |
| >CDKN2A-A1 ELGHRDVAR)  | 477  | >CDKN2A-A1 ELGHRDVSRY  | 372  | 105  |
| >CDKN2A-A1 ELGHRDVAR)  | 274  | >CDKN2A-A1 ELGHRDVSRY  | 332  | 58   |
| >CDKN2A-A1 ELGHRDVAR)  | 413  | >CDKN2A-A1 ELGHRDVSRY  | 624  | 211  |
| >CDKN2A-A1 ELGHRDVAR   | 85   | >CDKN2A-A1 ELGHRDVSR   | 105  | 20   |
| >CDKN2A-A1 ELGHRDVAR   | 153  | >CDKN2A-A1 ELGHRDVSR   | 162  | 9    |
| >CDKN2A-A1 ELGHRDVAR   | 188  | >CDKN2A-A1 ELGHRDVSR   | 179  | 9    |
| >CDKN2A-A1 EELGHRDVAF  | 86   | >CDKN2A-A1 EELGHRDVSR  | 95   | 9    |
| >CDKN2A-A1 EELGHRDVAF  | 177  | >CDKN2A-A1 EELGHRDVSR  | 231  | 54   |
| >CDKN2A-A1 EELGHRDVAF  | 121  | >CDKN2A-A1 EELGHRDVSR  | 122  | 1    |
| >CDKN2A-A1 EELGHRDVA   | 10   | >CDKN2A-A1 EELGHRDVS   | 170  | 160  |
| >CDKN2A-A1 EELGHRDVAF  | 471  | >CDKN2A-A1 EELGHRDVSR  | 516  | 45   |
| >CDKN2A-A1 AEELGHRDVAF | 39   | >CDKN2A-A1 AEELGHRDVS  | 318  | 279  |
| >CDKN2A-A1 ARYLRAAA    | 195  | >CDKN2A-A1 VRYLRAAA    | 614  | 419  |
| >CDKN2A-A1 ARYLRAAAGC  | 321  | >CDKN2A-A1 VRYLRAAAGC  | 996  | 675  |
| >CDKN2A-A1 ARYLRAAA    | 428  | >CDKN2A-A1 VRYLRAAA    | 333  | 95   |
| >CDKN2A-A1 VARYLRAA    | 137  | >CDKN2A-A1 VVRYLRAA    | 39   | 98   |
| >CDKN2A-A1 VARYLRAAA   | 38   | >CDKN2A-A1 VVRYLRAAA   | 14   | 24   |
| >CDKN2A-A1 VARYLRAAAGC | 843  | >CDKN2A-A1 VVRYLRAAAGC | 242  | 601  |

|                       |       |                       |      |       |
|-----------------------|-------|-----------------------|------|-------|
| >CDKN2A-A1 VARYLRAAAC | 1190  | >CDKN2A-A1 VVRYLRAAAC | 378  | 812   |
| >CDKN2A-A1 VARYLRAAA  | 284   | >CDKN2A-A1 VVRYLRAAA  | 197  | 87    |
| >CDKN2A-A1 DVARYLRAA  | 1041  | >CDKN2A-A1 DVVRYLRAA  | 172  | 869   |
| >CDKN2A-A1 DVARYLRAA/ | 1865  | >CDKN2A-A1 DVVRYLRAA/ | 416  | 1449  |
| >CDKN2A-A1 DVARYLRAA/ | 376   | >CDKN2A-A1 DVVRYLRAA/ | 388  | 12    |
| >CDKN2A-A1 RDVARYLR   | 243   | >CDKN2A-A1 RDVVRYLR   | 189  | 54    |
| >CDKN2A-A1 RDVARYLR   | 79    | >CDKN2A-A1 RDVVRYLR   | 212  | 133   |
| >CDKN2A-A1 HRDVARYLR  | 203   | >CDKN2A-A1 HRDVVRYLR  | 194  | 9     |
| >CDKN2A-A1 HRDVARYLR/ | 122   | >CDKN2A-A1 HRDVVRYLR/ | 119  | 3     |
| >CDKN2A-A1 HRDVARYL   | 175   | >CDKN2A-A1 HRDVVRYL   | 213  | 38    |
| >CDKN2A-A1 HRDVARYLR  | 370   | >CDKN2A-A1 HRDVVRYLR  | 521  | 151   |
| >CDKN2A-A1 GHRDVARYL/ | 282   | >CDKN2A-A1 GHRDVVRYL/ | 170  | 112   |
| >CDKN2A-A1 LGHRDVARY  | 415   | >CDKN2A-A1 LGHRDVVRY  | 2111 | 1696  |
| >CDKN2A-A1 LGHRDVARYL | 152   | >CDKN2A-A1 LGHRDVVRYL | 129  | 23    |
| >CDKN2A-A1 LGHRDVARY  | 409   | >CDKN2A-A1 LGHRDVVRY  | 724  | 315   |
| >CDKN2A-A1 ELGHRDVA   | 10476 | >CDKN2A-A1 ELGHRDVV   | 490  | 9986  |
| >CDKN2A-A1 ELGHRDVAR\ | 382   | >CDKN2A-A1 ELGHRDVVR\ | 200  | 182   |
| >CDKN2A-A1 ELGHRDVA   | 10455 | >CDKN2A-A1 ELGHRDVV   | 284  | 10171 |
| >CDKN2A-A1 ELGHRDVA   | 3620  | >CDKN2A-A1 ELGHRDVV   | 42   | 3578  |
| >CDKN2A-A1 ELGHRDVAR\ | 477   | >CDKN2A-A1 ELGHRDVVR\ | 317  | 160   |
| >CDKN2A-A1 ELGHRDVAR\ | 274   | >CDKN2A-A1 ELGHRDVVR\ | 709  | 435   |
| >CDKN2A-A1 ELGHRDVAR\ | 413   | >CDKN2A-A1 ELGHRDVVR\ | 1634 | 1221  |
| >CDKN2A-A1 ELGHRDVAR  | 85    | >CDKN2A-A1 ELGHRDVVR  | 176  | 91    |
| >CDKN2A-A1 ELGHRDVAR  | 153   | >CDKN2A-A1 ELGHRDVVR  | 192  | 39    |
| >CDKN2A-A1 ELGHRDVAR  | 188   | >CDKN2A-A1 ELGHRDVVR  | 189  | 1     |
| >CDKN2A-A1 EELGHRDVA  | 8836  | >CDKN2A-A1 EELGHRDVV  | 238  | 8598  |
| >CDKN2A-A1 EELGHRDVAF | 86    | >CDKN2A-A1 EELGHRDVVF | 228  | 142   |
| >CDKN2A-A1 EELGHRDVAF | 177   | >CDKN2A-A1 EELGHRDVVF | 168  | 9     |
| >CDKN2A-A1 EELGHRDVA  | 6913  | >CDKN2A-A1 EELGHRDVV  | 403  | 6510  |
| >CDKN2A-A1 EELGHRDVAF | 121   | >CDKN2A-A1 EELGHRDVVF | 105  | 16    |
| >CDKN2A-A1 EELGHRDVA  | 10    | >CDKN2A-A1 EELGHRDVV  | 29   | 19    |
| >CDKN2A-A1 EELGHRDVA  | 6064  | >CDKN2A-A1 EELGHRDVV  | 207  | 5857  |
| >CDKN2A-A1 EELGHRDVAF | 471   | >CDKN2A-A1 EELGHRDVVF | 392  | 79    |
| >CDKN2A-A1 AEELGHRDV/ | 39    | >CDKN2A-A1 AEELGHRDV\ | 120  | 81    |
| >CDKN2A-A1 AEELGHRDV/ | 5611  | >CDKN2A-A1 AEELGHRDV\ | 460  | 5151  |
| >CDKN2A-A1 RAAAGGTR   | 82    | >CDKN2A-A1 RPAAGGTR   | 4989 | 4907  |
| >CDKN2A-A1 RAAAGGTR   | 423   | >CDKN2A-A1 RPAAGGTR   | 7417 | 6994  |
| >CDKN2A-A1 RAAAGGTR   | 15830 | >CDKN2A-A1 RPAAGGTR   | 280  | 15550 |
| >CDKN2A-A1 RAAAGGTRG  | 9344  | >CDKN2A-A1 RPAAGGTRG  | 114  | 9230  |
| >CDKN2A-A1 LRAAAGGTR  | 199   | >CDKN2A-A1 LRPAAGGTR  | 1872 | 1673  |
| >CDKN2A-A1 YLRAAAGGT  | 48    | >CDKN2A-A1 YLRPAAGGT  | 61   | 13    |
| >CDKN2A-A1 YLRAAAGGT  | 128   | >CDKN2A-A1 YLRPAAGGT  | 41   | 87    |
| >CDKN2A-A1 YLRAAAGGTF | 231   | >CDKN2A-A1 YLRPAAGGTF | 251  | 20    |

|                       |      |                        |      |      |
|-----------------------|------|------------------------|------|------|
| >CDKN2A-A1 RYLRAAAG   | 414  | >CDKN2A-A1 RYLRLPAAG   | 858  | 444  |
| >CDKN2A-A1 RYLRAAAGG  | 436  | >CDKN2A-A1 RYLRLPAAGG  | 886  | 450  |
| >CDKN2A-A1 RYLRAAAGG† | 218  | >CDKN2A-A1 RYLRLPAAGG† | 326  | 108  |
| >CDKN2A-A1 RYLRAAAGG† | 128  | >CDKN2A-A1 RYLRLPAAGG† | 200  | 72   |
| >CDKN2A-A1 RYLRAAAG   | 239  | >CDKN2A-A1 RYLRLPAAG   | 533  | 294  |
| >CDKN2A-A1 RYLRAAAGG  | 315  | >CDKN2A-A1 RYLRLPAAGG  | 1630 | 1315 |
| >CDKN2A-A1 RYLRAAAGG† | 96   | >CDKN2A-A1 RYLRLPAAGG† | 294  | 198  |
| >CDKN2A-A1 RYLRAAAGG† | 24   | >CDKN2A-A1 RYLRLPAAGG† | 20   | 4    |
| >CDKN2A-A1 RYLRAAAGG† | 33   | >CDKN2A-A1 RYLRLPAAGG† | 35   | 2    |
| >CDKN2A-A1 ARYLRAAA   | 195  | >CDKN2A-A1 ARYLRLPAA   | 295  | 100  |
| >CDKN2A-A1 ARYLRAAAGC | 321  | >CDKN2A-A1 ARYLRLPAAGC | 458  | 137  |
| >CDKN2A-A1 ARYLRAAA   | 428  | >CDKN2A-A1 ARYLRLPAA   | 362  | 66   |
| >CDKN2A-A1 VARYLRAA   | 137  | >CDKN2A-A1 VARYLRPA    | 49   | 88   |
| >CDKN2A-A1 VARYLRAAA  | 38   | >CDKN2A-A1 VARYLRPAA   | 20   | 18   |
| >CDKN2A-A1 VARYLRAAA  | 284  | >CDKN2A-A1 VARYLRPAA   | 752  | 468  |
| >CDKN2A-A1 DVARYLRAA  | 1129 | >CDKN2A-A1 DVARYLRPA   | 237  | 892  |
| >CDKN2A-A1 DVARYLRAA† | 376  | >CDKN2A-A1 DVARYLRPA†  | 1360 | 984  |
| >CDKN2A-A1 DVARYLRAA† | 877  | >CDKN2A-A1 DVARYLRPA†  | 453  | 424  |
| >CDKN2A-A1 RDVARYLRAA | 1219 | >CDKN2A-A1 RDVARYLRPA  | 439  | 780  |
| >CDKN2A-A1 HRDVARYLR† | 122  | >CDKN2A-A1 HRDVARYLRF  | 1922 | 1800 |
| >CDKN2A-A1 RAAAGGTR   | 82   | >CDKN2A-A1 RVAAGGTR    | 46   | 36   |
| >CDKN2A-A1 RAAAGGTR   | 423  | >CDKN2A-A1 RVAAGGTR    | 289  | 134  |
| >CDKN2A-A1 LRAAAGGTR  | 199  | >CDKN2A-A1 LRVAAGGTR   | 252  | 53   |
| >CDKN2A-A1 YLRAAAGGT  | 48   | >CDKN2A-A1 YLRVAAGGT   | 292  | 244  |
| >CDKN2A-A1 YLRAAAGGT  | 128  | >CDKN2A-A1 YLRVAAGGT   | 632  | 504  |
| >CDKN2A-A1 YLRAAAGGTF | 231  | >CDKN2A-A1 YLRVAAGGTF  | 551  | 320  |
| >CDKN2A-A1 RYLRAAAG   | 414  | >CDKN2A-A1 RYLRLVAAG   | 340  | 74   |
| >CDKN2A-A1 RYLRAAAGG  | 436  | >CDKN2A-A1 RYLRLVAAGG  | 403  | 33   |
| >CDKN2A-A1 RYLRAAAGG† | 218  | >CDKN2A-A1 RYLRLVAAGG† | 203  | 15   |
| >CDKN2A-A1 RYLRAAAGG† | 128  | >CDKN2A-A1 RYLRLVAAGG† | 109  | 19   |
| >CDKN2A-A1 RYLRAAAG   | 239  | >CDKN2A-A1 RYLRLVAAG   | 497  | 258  |
| >CDKN2A-A1 RYLRAAAGG  | 315  | >CDKN2A-A1 RYLRLVAAGG  | 1264 | 949  |
| >CDKN2A-A1 RYLRAAAGG† | 96   | >CDKN2A-A1 RYLRLVAAGG† | 250  | 154  |
| >CDKN2A-A1 RYLRAAAGG† | 24   | >CDKN2A-A1 RYLRLVAAGG† | 16   | 8    |
| >CDKN2A-A1 RYLRAAAGG† | 33   | >CDKN2A-A1 RYLRLVAAGG† | 39   | 6    |
| >CDKN2A-A1 ARYLRAAA   | 195  | >CDKN2A-A1 ARYLRLVAA   | 176  | 19   |
| >CDKN2A-A1 ARYLRAAAGC | 321  | >CDKN2A-A1 ARYLRLVAAGC | 349  | 28   |
| >CDKN2A-A1 ARYLRAAA   | 428  | >CDKN2A-A1 ARYLRLVAA   | 471  | 43   |
| >CDKN2A-A1 ARYLRAAAG  | 638  | >CDKN2A-A1 ARYLRLVAAG  | 380  | 258  |
| >CDKN2A-A1 VARYLRAA   | 137  | >CDKN2A-A1 VARYLRVA    | 228  | 91   |
| >CDKN2A-A1 VARYLRAAA  | 38   | >CDKN2A-A1 VARYLRVAA   | 63   | 25   |
| >CDKN2A-A1 VARYLRAAA  | 284  | >CDKN2A-A1 VARYLRVAA   | 345  | 61   |
| >CDKN2A-A1 DVARYLRA   | 514  | >CDKN2A-A1 DVARYLRV    | 37   | 477  |

|                       |      |                       |     |      |
|-----------------------|------|-----------------------|-----|------|
| >CDKN2A-A1 DVARYLRAA/ | 376  | >CDKN2A-A1 DVARYLRVA/ | 622 | 246  |
| >CDKN2A-A1 DVARYLRA   | 1927 | >CDKN2A-A1 DVARYLRV   | 52  | 1875 |
| >CDKN2A-A1 RDVARYLRA  | 5033 | >CDKN2A-A1 RDVARYLRV  | 139 | 4894 |
| >CDKN2A-A1 HRDVARYLR/ | 122  | >CDKN2A-A1 HRDVARYLR\ | 91  | 31   |
| >CDKN2A-A1 RDVARYLRA/ | 8209 | >CDKN2A-A1 RDVARYLRA\ | 386 | 7823 |
| >CDKN2A-A1 RAAAGGTR   | 82   | >CDKN2A-A1 RAAVGGTR   | 60  | 22   |
| >CDKN2A-A1 RAAAGGTR   | 423  | >CDKN2A-A1 RAAVGGTR   | 541 | 118  |
| >CDKN2A-A1 LRAAAGGTR  | 199  | >CDKN2A-A1 LRAAVGGTR  | 220 | 21   |
| >CDKN2A-A1 YLRAAAGGT  | 48   | >CDKN2A-A1 YLRAAVGGT  | 9   | 39   |
| >CDKN2A-A1 YLRAAAGGT  | 1645 | >CDKN2A-A1 YLRAAVGGT  | 282 | 1363 |
| >CDKN2A-A1 YLRAAAGGT  | 128  | >CDKN2A-A1 YLRAAVGGT  | 45  | 83   |
| >CDKN2A-A1 YLRAAAGGTF | 891  | >CDKN2A-A1 YLRAAVGGTF | 400 | 491  |
| >CDKN2A-A1 YLRAAAGGTF | 231  | >CDKN2A-A1 YLRAAVGGTF | 605 | 374  |
| >CDKN2A-A1 RYLRAAAG   | 414  | >CDKN2A-A1 RYLRAAVG   | 305 | 109  |
| >CDKN2A-A1 RYLRAAAGG  | 436  | >CDKN2A-A1 RYLRAAVGG  | 271 | 165  |
| >CDKN2A-A1 RYLRAAAGG† | 218  | >CDKN2A-A1 RYLRAAVGG† | 125 | 93   |
| >CDKN2A-A1 RYLRAAAGG† | 128  | >CDKN2A-A1 RYLRAAVGG† | 95  | 33   |
| >CDKN2A-A1 RYLRAAAG   | 239  | >CDKN2A-A1 RYLRAAVG   | 421 | 182  |
| >CDKN2A-A1 RYLRAAAGG  | 315  | >CDKN2A-A1 RYLRAAVGG  | 561 | 246  |
| >CDKN2A-A1 RYLRAAAGG† | 96   | >CDKN2A-A1 RYLRAAVGG† | 186 | 90   |
| >CDKN2A-A1 RYLRAAAGG† | 24   | >CDKN2A-A1 RYLRAAVGG† | 21  | 3    |
| >CDKN2A-A1 RYLRAAAGG† | 33   | >CDKN2A-A1 RYLRAAVGG† | 34  | 1    |
| >CDKN2A-A1 ARYLRAAA   | 1662 | >CDKN2A-A1 ARYLRAAV   | 365 | 1297 |
| >CDKN2A-A1 ARYLRAAA   | 195  | >CDKN2A-A1 ARYLRAAV   | 71  | 124  |
| >CDKN2A-A1 ARYLRAAAGC | 321  | >CDKN2A-A1 ARYLRAAVGC | 351 | 30   |
| >CDKN2A-A1 ARYLRAAA   | 428  | >CDKN2A-A1 ARYLRAAV   | 879 | 451  |
| >CDKN2A-A1 VARYLRAAA  | 38   | >CDKN2A-A1 VARYLRAAV  | 69  | 31   |
| >CDKN2A-A1 VARYLRAAA  | 284  | >CDKN2A-A1 VARYLRAAV  | 67  | 217  |
| >CDKN2A-A1 VARYLRAAA  | 943  | >CDKN2A-A1 VARYLRAAV  | 475 | 468  |
| >CDKN2A-A1 DVARYLRAA/ | 1865 | >CDKN2A-A1 DVARYLRAA\ | 442 | 1423 |
| >CDKN2A-A1 DVARYLRAA/ | 376  | >CDKN2A-A1 DVARYLRAA\ | 53  | 323  |
| >CDKN2A-A1 DVARYLRAA/ | 877  | >CDKN2A-A1 DVARYLRAA\ | 24  | 853  |
| >CDKN2A-A1 HARIDAAEG  | 1117 | >CDKN2A-A1 HTRIDAAEG  | 171 | 946  |
| >CDKN2A-A1 HARIDAAEGF | 330  | >CDKN2A-A1 HTRIDAAEGP | 63  | 267  |
| >CDKN2A-A1 RGSNHARI   | 251  | >CDKN2A-A1 RGSNHTRI   | 232 | 19   |
| >CDKN2A-A1 GTRGSNHA   | 16   | >CDKN2A-A1 GTRGSNHT   | 335 | 319  |
| >CDKN2A-A1 GTRGSNHAR  | 51   | >CDKN2A-A1 GTRGSNHTR  | 52  | 1    |
| >CDKN2A-A1 GTRGSNHAR  | 15   | >CDKN2A-A1 GTRGSNHTRI | 40  | 25   |
| >CDKN2A-A1 GTRGSNHAR  | 28   | >CDKN2A-A1 GTRGSNHTR  | 36  | 8    |
| >CDKN2A-A1 GTRGSNHAR  | 412  | >CDKN2A-A1 GTRGSNHTR  | 519 | 107  |
| >CDKN2A-A1 GTRGSNHAR  | 205  | >CDKN2A-A1 GTRGSNHTR  | 169 | 36   |
| >CDKN2A-A1 GTRGSNHAR  | 10   | >CDKN2A-A1 GTRGSNHTRI | 12  | 2    |
| >CDKN2A-A1 GTRGSNHAR  | 2527 | >CDKN2A-A1 GTRGSNHTR  | 455 | 2072 |



|                       |      |                       |      |      |
|-----------------------|------|-----------------------|------|------|
| >CDKN2A-A1 GTRGSNHAR  | 470  | >CDKN2A-A1 GTRGSNHTR  | 460  | 10   |
| >CDKN2A-A1 DAAEGPSDI  | 1183 | >CDKN2A-A1 DTAEGPSDI  | 129  | 1054 |
| >CDKN2A-A1 DAAEGPSDI  | 715  | >CDKN2A-A1 DTAEGPSDI  | 114  | 601  |
| >CDKN2A-A1 IDAAEGPSDI | 267  | >CDKN2A-A1 IDTAEGPSDI | 182  | 85   |
| >CDKN2A-A1 HARIDAAEG  | 1117 | >CDKN2A-A1 HARIDTAEG  | 416  | 701  |
| >CDKN2A-A1 HARIDAAEGF | 330  | >CDKN2A-A1 HARIDTAEGP | 209  | 121  |
| >CDKN2A-A1 AAEGPSDI   | 855  | >CDKN2A-A1 ATEGPSDI   | 193  | 662  |
| >CDKN2A-A1 IDAAEGPSDI | 267  | >CDKN2A-A1 IDATEGPSDI | 349  | 82   |
| >CDKN2A-A1 HARIDAAEGF | 330  | >CDKN2A-A1 HARIDATEGP | 579  | 249  |
| >CDKN2A-A1 ATAAARGR   | 366  | >CDKN2A-A1 TTAAARGR   | 517  | 151  |
| >CDKN2A-A1 ATAAARGR   | 32   | >CDKN2A-A1 TTAAARGR   | 5    | 27   |
| >CDKN2A-A1 ATAAARGRV  | 13   | >CDKN2A-A1 TTAAARGRV  | 5    | 8    |
| >CDKN2A-A1 ATAAARGRV  | 745  | >CDKN2A-A1 TTAAARGRV  | 40   | 705  |
| >CDKN2A-A1 LATAAARGR  | 105  | >CDKN2A-A1 LTAAARGR   | 32   | 73   |
| >CDKN2A-A1 LATAAARGR\ | 107  | >CDKN2A-A1 LTAAARGRV  | 24   | 83   |
| >CDKN2A-A1 LATAAARGR\ | 3014 | >CDKN2A-A1 LTAAARGRV  | 299  | 2715 |
| >CDKN2A-A1 LATAAARGR\ | 3951 | >CDKN2A-A1 LTAAARGRV  | 66   | 3885 |
| >CDKN2A-A1 SSMEPSADW  | 205  | >CDKN2A-A1 SSMEPSADW  | 1297 | 1092 |
| >CDKN2A-A1 SSMEPSADW  | 56   | >CDKN2A-A1 SSMEPSADW  | 870  | 814  |
| >CDKN2A-A1 SSMEPSADW  | 363  | >CDKN2A-A1 SSMEPSADW  | 1649 | 1286 |
| >CDKN2A-A1 WLATAAARG  | 336  | >CDKN2A-A1 WLTTAAARG  | 1133 | 797  |
| >CDKN2A-A1 WLATAAARG  | 22   | >CDKN2A-A1 WLTTAAARG  | 132  | 110  |
| >CDKN2A-A1 WLATAAARG  | 8    | >CDKN2A-A1 WLTTAAARG  | 38   | 30   |
| >CDKN2A-A1 WLATAAARG  | 125  | >CDKN2A-A1 WLTTAAARG  | 355  | 230  |
| >CDKN2A-A1 WLATAAARG  | 25   | >CDKN2A-A1 WLTTAAARG  | 59   | 34   |
| >CDKN2A-A1 WLATAAARG  | 244  | >CDKN2A-A1 WLTTAAARG  | 340  | 96   |
| >CDKN2A-A1 WLATAAARG  | 27   | >CDKN2A-A1 WLTTAAARG  | 53   | 26   |
| >CDKN2A-A1 WLATAAARG  | 23   | >CDKN2A-A1 WLTTAAARG  | 90   | 67   |
| >CDKN2A-A1 WLATAAARG  | 3    | >CDKN2A-A1 WLTTAAARG  | 3    | 0    |
| >CDKN2A-A1 WLATAAAR   | 68   | >CDKN2A-A1 WLTTAAAR   | 152  | 84   |
| >CDKN2A-A1 WLATAAARG  | 37   | >CDKN2A-A1 WLTTAAARG  | 183  | 146  |
| >CDKN2A-A1 WLATAAARG  | 350  | >CDKN2A-A1 WLTTAAARG  | 1363 | 1013 |
| >CDKN2A-A1 WLATAAARG  | 58   | >CDKN2A-A1 WLTTAAARG  | 58   | 0    |
| >CDKN2A-A1 WLATAAAR   | 328  | >CDKN2A-A1 WLTTAAAR   | 376  | 48   |
| >CDKN2A-A1 DWLATAAAR  | 119  | >CDKN2A-A1 DWLTTAAAR  | 161  | 42   |
| >CDKN2A-A1 DWLATAAAR  | 23   | >CDKN2A-A1 DWLTTAAAR  | 21   | 2    |
| >CDKN2A-A1 DWLATAAAR  | 30   | >CDKN2A-A1 DWLTTAAAR  | 29   | 1    |
| >CDKN2A-A1 DWLATAAAA  | 205  | >CDKN2A-A1 DWLTTAAA   | 176  | 29   |
| >CDKN2A-A1 DWLATAAAR  | 450  | >CDKN2A-A1 DWLTTAAAR  | 450  | 0    |
| >CDKN2A-A1 ADWLATAAAA | 943  | >CDKN2A-A1 ADWLTTAAA  | 430  | 513  |
| >CDKN2A-A1 SADWLATAA  | 619  | >CDKN2A-A1 SADWLTTAA  | 444  | 175  |
| >CDKN2A-A1 SADWLATAA  | 830  | >CDKN2A-A1 SADWLTTAA, | 455  | 375  |
| >CDKN2A-A1 SADWLATAA  | 83   | >CDKN2A-A1 SADWLTTAA, | 74   | 9    |

|                       |       |                       |       |       |
|-----------------------|-------|-----------------------|-------|-------|
| >CDKN2A-A1 SADWLATAA  | 491   | >CDKN2A-A1 SADWLTTAA  | 322   | 169   |
| >CDKN2A-A1 SADWLATAA  | 283   | >CDKN2A-A1 SADWLTTAA  | 243   | 40    |
| >CDKN2A-A1 EPSADWLAT  | 30    | >CDKN2A-A1 EPSADWLTT  | 63    | 33    |
| >CDKN2A-A1 EPSADWLAT/ | 31    | >CDKN2A-A1 EPSADWLTT/ | 28    | 3     |
| >CDKN2A-A1 EPSADWLAT/ | 270   | >CDKN2A-A1 EPSADWLTT/ | 287   | 17    |
| >CDKN2A-A1 MEPSADWLA  | 596   | >CDKN2A-A1 MEPSADWLT  | 499   | 97    |
| >CDKN2A-A1 SMEPSADWL  | 188   | >CDKN2A-A1 SMEPSADWL  | 882   | 694   |
| >CDKN2A-A1 SMEPSADWL  | 218   | >CDKN2A-A1 SMEPSADWL  | 800   | 582   |
| >CDKN2A-A1 SMEPSADWL  | 464   | >CDKN2A-A1 SMEPSADWL  | 1880  | 1416  |
| >CDKN2A-A1 SMEPSADWL  | 265   | >CDKN2A-A1 SMEPSADWL  | 1598  | 1333  |
| >CDKN2A-A1 SMEPSADWL  | 257   | >CDKN2A-A1 SMEPSADWL  | 3157  | 2900  |
| >CDKN2A-A1 SMEPSADWL  | 149   | >CDKN2A-A1 SMEPSADWL  | 1604  | 1455  |
| >CDKN2A-A1 SMEPSADWL  | 24    | >CDKN2A-A1 SMEPSADWL  | 142   | 118   |
| >CDKN2A-A1 SMEPSADWL  | 901   | >CDKN2A-A1 SMEPSADWL  | 349   | 552   |
| >CDKN2A-A2 AARGRVEEV  | 50    | >CDKN2A-A2 EARGRVEEV  | 2694  | 2644  |
| >CDKN2A-A2 AARGRVEEVF | 269   | >CDKN2A-A2 EARGRVEEVF | 10632 | 10363 |
| >CDKN2A-A2 AARGRVEEVF | 265   | >CDKN2A-A2 EARGRVEEVF | 1632  | 1367  |
| >CDKN2A-A2 AARGRVEEVF | 2065  | >CDKN2A-A2 EARGRVEEVF | 223   | 1842  |
| >CDKN2A-A2 AARGRVEEV  | 8453  | >CDKN2A-A2 EARGRVEEV  | 239   | 8214  |
| >CDKN2A-A2 AAARGRVEE\ | 25805 | >CDKN2A-A2 AEARGRVEE\ | 177   | 25628 |
| >CDKN2A-A2 AAARGRVEE\ | 33    | >CDKN2A-A2 AEARGRVEE\ | 1833  | 1800  |
| >CDKN2A-A2 AAARGRVEE\ | 434   | >CDKN2A-A2 AEARGRVEE\ | 9323  | 8889  |
| >CDKN2A-A2 AAARGRVEE\ | 127   | >CDKN2A-A2 AEARGRVEE\ | 6847  | 6720  |
| >CDKN2A-A2 AAARGRVEE\ | 34188 | >CDKN2A-A2 AEARGRVEE\ | 338   | 33850 |
| >CDKN2A-A2 AAARGRVE   | 35278 | >CDKN2A-A2 AEARGRVE   | 372   | 34906 |
| >CDKN2A-A2 AAARGRVEE  | 31939 | >CDKN2A-A2 AEARGRVEE  | 272   | 31667 |
| >CDKN2A-A2 AAARGRVEE\ | 24299 | >CDKN2A-A2 AEARGRVEE\ | 187   | 24112 |
| >CDKN2A-A2 AAARGRVEE\ | 35835 | >CDKN2A-A2 AEARGRVEE\ | 415   | 35420 |
| >CDKN2A-A2 AAARGRVEE\ | 34282 | >CDKN2A-A2 AEARGRVEE\ | 232   | 34050 |
| >CDKN2A-A2 EPSADWLAT/ | 31    | >CDKN2A-A2 EPSADWLAT/ | 88    | 57    |
| >CDKN2A-A2 EPSADWLAT/ | 270   | >CDKN2A-A2 EPSADWLAT/ | 8509  | 8239  |
| >CDKN2A-A2 TAAARGRV   | 36    | >CDKN2A-A2 TAEARGRV   | 2496  | 2460  |
| >CDKN2A-A2 TAAARGRVEE | 34    | >CDKN2A-A2 TAEARGRVEE | 1357  | 1323  |
| >CDKN2A-A2 ATAAARGRV  | 589   | >CDKN2A-A2 ATAEARGRV  | 386   | 203   |
| >CDKN2A-A2 ATAAARGRV  | 561   | >CDKN2A-A2 ATAEARGRV  | 176   | 385   |
| >CDKN2A-A2 ATAAARGR   | 366   | >CDKN2A-A2 ATAEARGR   | 913   | 547   |
| >CDKN2A-A2 ATAAARGR   | 32    | >CDKN2A-A2 ATAEARGR   | 38    | 6     |
| >CDKN2A-A2 ATAAARGRV  | 13    | >CDKN2A-A2 ATAEARGRV  | 15    | 2     |
| >CDKN2A-A2 ATAAARGRV  | 745   | >CDKN2A-A2 ATAEARGRV  | 151   | 594   |
| >CDKN2A-A2 ATAAARGR   | 623   | >CDKN2A-A2 ATAEARGR   | 403   | 220   |
| >CDKN2A-A2 LATAAARGR  | 105   | >CDKN2A-A2 LATAEARGR  | 286   | 181   |
| >CDKN2A-A2 LATAAARGR\ | 107   | >CDKN2A-A2 LATAEARGR\ | 352   | 245   |
| >CDKN2A-A2 WLATAAARG  | 336   | >CDKN2A-A2 WLATAEARG  | 302   | 34    |

|                       |       |                       |       |       |
|-----------------------|-------|-----------------------|-------|-------|
| >CDKN2A-A2 WLATAAARG  | 22    | >CDKN2A-A2 WLATAEARG  | 25    | 3     |
| >CDKN2A-A2 WLATAAARG  | 8     | >CDKN2A-A2 WLATAEARG  | 12    | 4     |
| >CDKN2A-A2 WLATAAARG  | 125   | >CDKN2A-A2 WLATAEARG  | 206   | 81    |
| >CDKN2A-A2 WLATAAARG  | 25    | >CDKN2A-A2 WLATAEARG  | 24    | 1     |
| >CDKN2A-A2 WLATAAARG  | 244   | >CDKN2A-A2 WLATAEARG  | 250   | 6     |
| >CDKN2A-A2 WLATAAARG  | 27    | >CDKN2A-A2 WLATAEARG  | 23    | 4     |
| >CDKN2A-A2 WLATAAARG  | 23    | >CDKN2A-A2 WLATAEARG  | 22    | 1     |
| >CDKN2A-A2 WLATAAARG  | 3     | >CDKN2A-A2 WLATAEARG  | 3     | 0     |
| >CDKN2A-A2 WLATAAAR   | 68    | >CDKN2A-A2 WLATAEAR   | 114   | 46    |
| >CDKN2A-A2 WLATAAARG  | 37    | >CDKN2A-A2 WLATAEARG  | 65    | 28    |
| >CDKN2A-A2 WLATAAARG  | 350   | >CDKN2A-A2 WLATAEARG  | 946   | 596   |
| >CDKN2A-A2 WLATAAARG  | 58    | >CDKN2A-A2 WLATAEARG  | 223   | 165   |
| >CDKN2A-A2 WLATAAAR   | 328   | >CDKN2A-A2 WLATAEAR   | 710   | 382   |
| >CDKN2A-A2 DWLATAAAR  | 119   | >CDKN2A-A2 DWLATAEAR  | 629   | 510   |
| >CDKN2A-A2 DWLATAAAR  | 23    | >CDKN2A-A2 DWLATAEAR  | 33    | 10    |
| >CDKN2A-A2 DWLATAAAR  | 30    | >CDKN2A-A2 DWLATAEAR  | 31    | 1     |
| >CDKN2A-A2 DWLATAAA   | 205   | >CDKN2A-A2 DWLATAEA   | 438   | 233   |
| >CDKN2A-A2 DWLATAAAR  | 450   | >CDKN2A-A2 DWLATAEAR  | 336   | 114   |
| >CDKN2A-A2 SADWLATAA  | 83    | >CDKN2A-A2 SADWLATAE  | 104   | 21    |
| >CDKN2A-A2 SADWLATAA  | 491   | >CDKN2A-A2 SADWLATAE  | 16795 | 16304 |
| >CDKN2A-A2 SADWLATAA  | 283   | >CDKN2A-A2 SADWLATAE  | 374   | 91    |
| >CDKN2A-A2 AARGRVEEV  | 50    | >CDKN2A-A2 PARGRVEEV  | 3568  | 3518  |
| >CDKN2A-A2 AARGRVEEVF | 269   | >CDKN2A-A2 PARGRVEEVF | 5144  | 4875  |
| >CDKN2A-A2 AARGRVEEVF | 265   | >CDKN2A-A2 PARGRVEEVF | 3394  | 3129  |
| >CDKN2A-A2 AAARGRVEE\ | 33    | >CDKN2A-A2 APARGRVEE\ | 6664  | 6631  |
| >CDKN2A-A2 AAARGRVEE\ | 434   | >CDKN2A-A2 APARGRVEE\ | 8930  | 8496  |
| >CDKN2A-A2 AAARGRVEE\ | 127   | >CDKN2A-A2 APARGRVEE\ | 3591  | 3464  |
| >CDKN2A-A2 AAARGRVE   | 13653 | >CDKN2A-A2 APARGRVE   | 175   | 13478 |
| >CDKN2A-A2 AAARGRVEE  | 14448 | >CDKN2A-A2 APARGRVEE  | 253   | 14195 |
| >CDKN2A-A2 EPSADWLAT/ | 31    | >CDKN2A-A2 EPSADWLAT/ | 285   | 254   |
| >CDKN2A-A2 EPSADWLAT/ | 270   | >CDKN2A-A2 EPSADWLAT/ | 5007  | 4737  |
| >CDKN2A-A2 TAAARGRV   | 36    | >CDKN2A-A2 TAPARGRV   | 119   | 83    |
| >CDKN2A-A2 TAAARGRVEE | 34    | >CDKN2A-A2 TAPARGRVEE | 94    | 60    |
| >CDKN2A-A2 ATAAARGRV  | 561   | >CDKN2A-A2 ATAPARGRV  | 196   | 365   |
| >CDKN2A-A2 ATAAARGR   | 366   | >CDKN2A-A2 ATAPARGR   | 310   | 56    |
| >CDKN2A-A2 ATAAARGR   | 32    | >CDKN2A-A2 ATAPARGR   | 53    | 21    |
| >CDKN2A-A2 ATAAARGRV  | 13    | >CDKN2A-A2 ATAPARGRV  | 15    | 2     |
| >CDKN2A-A2 ATAAARGRV  | 1736  | >CDKN2A-A2 ATAPARGRV  | 348   | 1388  |
| >CDKN2A-A2 ATAAARGR   | 623   | >CDKN2A-A2 ATAPARGR   | 246   | 377   |
| >CDKN2A-A2 ATAAARGRV  | 1901  | >CDKN2A-A2 ATAPARGRV  | 481   | 1420  |
| >CDKN2A-A2 LATAAARGR  | 105   | >CDKN2A-A2 LATAPARGR  | 221   | 116   |
| >CDKN2A-A2 LATAAARGR\ | 107   | >CDKN2A-A2 LATAPARGR\ | 138   | 31    |
| >CDKN2A-A2 WLATAAARG  | 336   | >CDKN2A-A2 WLATAPARG  | 246   | 90    |

|                       |      |                       |       |       |
|-----------------------|------|-----------------------|-------|-------|
| >CDKN2A-A2 WLATAAARG  | 22   | >CDKN2A-A2 WLATAPARG  | 25    | 3     |
| >CDKN2A-A2 WLATAAARG  | 8    | >CDKN2A-A2 WLATAPARG  | 7     | 1     |
| >CDKN2A-A2 WLATAAARG  | 125  | >CDKN2A-A2 WLATAPARG  | 257   | 132   |
| >CDKN2A-A2 WLATAAARG  | 25   | >CDKN2A-A2 WLATAPARG  | 20    | 5     |
| >CDKN2A-A2 WLATAAARG  | 244  | >CDKN2A-A2 WLATAPARG  | 234   | 10    |
| >CDKN2A-A2 WLATAAARG  | 27   | >CDKN2A-A2 WLATAPARG  | 25    | 2     |
| >CDKN2A-A2 WLATAAARG  | 23   | >CDKN2A-A2 WLATAPARG  | 22    | 1     |
| >CDKN2A-A2 WLATAAARG  | 3    | >CDKN2A-A2 WLATAPARG  | 3     | 0     |
| >CDKN2A-A2 WLATAAAR   | 68   | >CDKN2A-A2 WLATAPAR   | 165   | 97    |
| >CDKN2A-A2 WLATAAARG  | 37   | >CDKN2A-A2 WLATAPARG  | 38    | 1     |
| >CDKN2A-A2 WLATAAARG  | 350  | >CDKN2A-A2 WLATAPARG  | 520   | 170   |
| >CDKN2A-A2 WLATAAARG  | 58   | >CDKN2A-A2 WLATAPARG  | 64    | 6     |
| >CDKN2A-A2 WLATAAAR   | 328  | >CDKN2A-A2 WLATAPAR   | 394   | 66    |
| >CDKN2A-A2 DWLATAAAR  | 119  | >CDKN2A-A2 DWLATAPAR  | 517   | 398   |
| >CDKN2A-A2 DWLATAAAR  | 23   | >CDKN2A-A2 DWLATAPAR  | 33    | 10    |
| >CDKN2A-A2 DWLATAAAR  | 30   | >CDKN2A-A2 DWLATAPAR  | 34    | 4     |
| >CDKN2A-A2 DWLATAAA   | 205  | >CDKN2A-A2 DWLATAPA   | 324   | 119   |
| >CDKN2A-A2 DWLATAAAR  | 450  | >CDKN2A-A2 DWLATAPAR  | 377   | 73    |
| >CDKN2A-A2 SADWLATAA  | 83   | >CDKN2A-A2 SADWLATAP  | 158   | 75    |
| >CDKN2A-A2 SADWLATAA  | 491  | >CDKN2A-A2 SADWLATAP  | 14623 | 14132 |
| >CDKN2A-A2 SADWLATAA  | 283  | >CDKN2A-A2 SADWLATAP  | 111   | 172   |
| >CDKN2A-A2 AARGRVEEV  | 50   | >CDKN2A-A2 SARGRVEEV  | 73    | 23    |
| >CDKN2A-A2 AARGRVEEVF | 269  | >CDKN2A-A2 SARGRVEEVF | 451   | 182   |
| >CDKN2A-A2 AARGRVEEVF | 265  | >CDKN2A-A2 SARGRVEEVF | 218   | 47    |
| >CDKN2A-A2 AAARGRVEE\ | 33   | >CDKN2A-A2 ASARGRVEEV | 1316  | 1283  |
| >CDKN2A-A2 AAARGRVEE\ | 434  | >CDKN2A-A2 ASARGRVEEV | 237   | 197   |
| >CDKN2A-A2 AAARGRVEE\ | 127  | >CDKN2A-A2 ASARGRVEEV | 156   | 29    |
| >CDKN2A-A2 EPSADWLAT/ | 31   | >CDKN2A-A2 EPSADWLAT/ | 39    | 8     |
| >CDKN2A-A2 EPSADWLAT/ | 270  | >CDKN2A-A2 EPSADWLAT/ | 4734  | 4464  |
| >CDKN2A-A2 TAAARGRV   | 36   | >CDKN2A-A2 TASARGRV   | 124   | 88    |
| >CDKN2A-A2 TAAARGRVEE | 34   | >CDKN2A-A2 TASARGRVEE | 94    | 60    |
| >CDKN2A-A2 ATAAARGR   | 366  | >CDKN2A-A2 ATASARGR   | 260   | 106   |
| >CDKN2A-A2 ATAAARGR   | 32   | >CDKN2A-A2 ATASARGR   | 23    | 9     |
| >CDKN2A-A2 ATAAARGRV  | 13   | >CDKN2A-A2 ATASARGRV  | 18    | 5     |
| >CDKN2A-A2 ATAAARGRV  | 1073 | >CDKN2A-A2 ATASARGRV  | 193   | 880   |
| >CDKN2A-A2 ATAAARGR   | 623  | >CDKN2A-A2 ATASARGR   | 282   | 341   |
| >CDKN2A-A2 LATAAARGR  | 105  | >CDKN2A-A2 LATASARGR  | 82    | 23    |
| >CDKN2A-A2 LATAAARGR\ | 107  | >CDKN2A-A2 LATASARGRV | 121   | 14    |
| >CDKN2A-A2 WLATAAARG  | 336  | >CDKN2A-A2 WLATASARG  | 241   | 95    |
| >CDKN2A-A2 WLATAAARG  | 22   | >CDKN2A-A2 WLATASARG  | 18    | 4     |
| >CDKN2A-A2 WLATAAARG  | 8    | >CDKN2A-A2 WLATASARG  | 7     | 1     |
| >CDKN2A-A2 WLATAAARG  | 125  | >CDKN2A-A2 WLATASARG  | 140   | 15    |
| >CDKN2A-A2 WLATAAARG  | 25   | >CDKN2A-A2 WLATASARG  | 23    | 2     |

|                       |      |                       |       |       |
|-----------------------|------|-----------------------|-------|-------|
| >CDKN2A-A2 WLATAAARG  | 244  | >CDKN2A-A2 WLATASARG  | 181   | 63    |
| >CDKN2A-A2 WLATAAARG  | 27   | >CDKN2A-A2 WLATASARG  | 24    | 3     |
| >CDKN2A-A2 WLATAAARG  | 23   | >CDKN2A-A2 WLATASARG  | 20    | 3     |
| >CDKN2A-A2 WLATAAARG  | 3    | >CDKN2A-A2 WLATASARG  | 3     | 0     |
| >CDKN2A-A2 WLATAAAR   | 68   | >CDKN2A-A2 WLATASAR   | 86    | 18    |
| >CDKN2A-A2 WLATAAARG  | 838  | >CDKN2A-A2 WLATASARG  | 408   | 430   |
| >CDKN2A-A2 WLATAAARG  | 37   | >CDKN2A-A2 WLATASARG  | 33    | 4     |
| >CDKN2A-A2 WLATAAARG  | 350  | >CDKN2A-A2 WLATASARG  | 363   | 13    |
| >CDKN2A-A2 WLATAAARG  | 58   | >CDKN2A-A2 WLATASARG  | 76    | 18    |
| >CDKN2A-A2 WLATAAAR   | 328  | >CDKN2A-A2 WLATASAR   | 583   | 255   |
| >CDKN2A-A2 DWLATAAAR  | 119  | >CDKN2A-A2 DWLATASAR  | 193   | 74    |
| >CDKN2A-A2 DWLATAAAR  | 23   | >CDKN2A-A2 DWLATASAR  | 36    | 13    |
| >CDKN2A-A2 DWLATAAAR  | 30   | >CDKN2A-A2 DWLATASAR  | 35    | 5     |
| >CDKN2A-A2 DWLATAAA   | 205  | >CDKN2A-A2 DWLATASA   | 247   | 42    |
| >CDKN2A-A2 DWLATAAAR  | 450  | >CDKN2A-A2 DWLATASAR  | 315   | 135   |
| >CDKN2A-A2 SADWLATAA  | 83   | >CDKN2A-A2 SADWLATAS  | 82    | 1     |
| >CDKN2A-A2 SADWLATAA  | 491  | >CDKN2A-A2 SADWLATAS  | 10860 | 10369 |
| >CDKN2A-A2 SADWLATAA  | 283  | >CDKN2A-A2 SADWLATAS  | 322   | 39    |
| >CDKN2A-A2 AARGRVEEV  | 50   | >CDKN2A-A2 TARGRVEEV  | 476   | 426   |
| >CDKN2A-A2 AARGRVEEVF | 269  | >CDKN2A-A2 TARGRVEEVF | 1795  | 1526  |
| >CDKN2A-A2 AARGRVEEVF | 265  | >CDKN2A-A2 TARGRVEEVF | 438   | 173   |
| >CDKN2A-A2 AARGRVEEVF | 2065 | >CDKN2A-A2 TARGRVEEVF | 274   | 1791  |
| >CDKN2A-A2 AAARGRVEE\ | 786  | >CDKN2A-A2 ATARGRVEE\ | 222   | 564   |
| >CDKN2A-A2 AAARGRVEE\ | 1310 | >CDKN2A-A2 ATARGRVEE\ | 298   | 1012  |
| >CDKN2A-A2 AAARGRVEE\ | 33   | >CDKN2A-A2 ATARGRVEE\ | 24    | 9     |
| >CDKN2A-A2 AAARGRVEE\ | 434  | >CDKN2A-A2 ATARGRVEE\ | 119   | 315   |
| >CDKN2A-A2 AAARGRVEE\ | 127  | >CDKN2A-A2 ATARGRVEE\ | 30    | 97    |
| >CDKN2A-A2 AAARGRVEE\ | 1092 | >CDKN2A-A2 ATARGRVEE\ | 104   | 988   |
| >CDKN2A-A2 EPSADWLAT/ | 31   | >CDKN2A-A2 EPSADWLAT/ | 30    | 1     |
| >CDKN2A-A2 EPSADWLAT/ | 270  | >CDKN2A-A2 EPSADWLAT/ | 4223  | 3953  |
| >CDKN2A-A2 TAAARGRV   | 36   | >CDKN2A-A2 TATARGRV   | 154   | 118   |
| >CDKN2A-A2 TAAARGRVEE | 34   | >CDKN2A-A2 TATARGRVEE | 115   | 81    |
| >CDKN2A-A2 ATAAARGR   | 366  | >CDKN2A-A2 ATATARGR   | 463   | 97    |
| >CDKN2A-A2 ATAAARGR   | 32   | >CDKN2A-A2 ATATARGR   | 35    | 3     |
| >CDKN2A-A2 ATAAARGRV  | 13   | >CDKN2A-A2 ATATARGRV  | 17    | 4     |
| >CDKN2A-A2 LATAAARGR  | 105  | >CDKN2A-A2 LATATARGR  | 108   | 3     |
| >CDKN2A-A2 LATAAARGR\ | 107  | >CDKN2A-A2 LATATARGRV | 166   | 59    |
| >CDKN2A-A2 WLATAAARG  | 336  | >CDKN2A-A2 WLATATARG  | 226   | 110   |
| >CDKN2A-A2 WLATAAARG  | 1220 | >CDKN2A-A2 WLATATARG  | 336   | 884   |
| >CDKN2A-A2 WLATAAARG  | 22   | >CDKN2A-A2 WLATATARG  | 18    | 4     |
| >CDKN2A-A2 WLATAAARG  | 8    | >CDKN2A-A2 WLATATARG  | 7     | 1     |
| >CDKN2A-A2 WLATAAARG  | 125  | >CDKN2A-A2 WLATATARG  | 134   | 9     |
| >CDKN2A-A2 WLATAAARG  | 25   | >CDKN2A-A2 WLATATARG  | 26    | 1     |

|                       |       |                       |       |       |
|-----------------------|-------|-----------------------|-------|-------|
| >CDKN2A-A2 WLATAAARG  | 244   | >CDKN2A-A2 WLATATARG  | 186   | 58    |
| >CDKN2A-A2 WLATAAARG  | 27    | >CDKN2A-A2 WLATATARG  | 28    | 1     |
| >CDKN2A-A2 WLATAAARG  | 23    | >CDKN2A-A2 WLATATARG  | 21    | 2     |
| >CDKN2A-A2 WLATAAARG  | 3     | >CDKN2A-A2 WLATATARG  | 3     | 0     |
| >CDKN2A-A2 WLATAAAR   | 68    | >CDKN2A-A2 WLATATAR   | 80    | 12    |
| >CDKN2A-A2 WLATAAARG  | 37    | >CDKN2A-A2 WLATATARG  | 27    | 10    |
| >CDKN2A-A2 WLATAAARG  | 350   | >CDKN2A-A2 WLATATARG  | 352   | 2     |
| >CDKN2A-A2 WLATAAARG  | 58    | >CDKN2A-A2 WLATATARG  | 127   | 69    |
| >CDKN2A-A2 WLATAAAR   | 328   | >CDKN2A-A2 WLATATAR   | 253   | 75    |
| >CDKN2A-A2 WLATAAARG  | 572   | >CDKN2A-A2 WLATATARG  | 335   | 237   |
| >CDKN2A-A2 DWLATAAAR  | 119   | >CDKN2A-A2 DWLATATAR  | 187   | 68    |
| >CDKN2A-A2 DWLATAAAR  | 23    | >CDKN2A-A2 DWLATATAR  | 22    | 1     |
| >CDKN2A-A2 DWLATAAAR  | 30    | >CDKN2A-A2 DWLATATAR  | 28    | 2     |
| >CDKN2A-A2 DWLATAAA   | 205   | >CDKN2A-A2 DWLATATA   | 282   | 77    |
| >CDKN2A-A2 DWLATAAAR  | 450   | >CDKN2A-A2 DWLATATAR  | 325   | 125   |
| >CDKN2A-A2 ADWLATAAA  | 943   | >CDKN2A-A2 ADWLATATA  | 474   | 469   |
| >CDKN2A-A2 SADWLATAA  | 83    | >CDKN2A-A2 SADWLATAT, | 113   | 30    |
| >CDKN2A-A2 SADWLATAA  | 491   | >CDKN2A-A2 SADWLATAT  | 3382  | 2891  |
| >CDKN2A-A2 SADWLATAA  | 283   | >CDKN2A-A2 SADWLATAT, | 414   | 131   |
| >CDKN2A-A2 ARGRVEEV   | 260   | >CDKN2A-A2 DRGRVEEV   | 3752  | 3492  |
| >CDKN2A-A2 AARGRVEEV  | 50    | >CDKN2A-A2 ADRGRVEEV  | 12085 | 12035 |
| >CDKN2A-A2 AARGRVEEV  | 269   | >CDKN2A-A2 ADRGRVEEV  | 9415  | 9146  |
| >CDKN2A-A2 AARGRVEEV  | 265   | >CDKN2A-A2 ADRGRVEEV  | 4508  | 4243  |
| >CDKN2A-A2 AARGRVEEV  | 16588 | >CDKN2A-A2 ADRGRVEEV  | 303   | 16285 |
| >CDKN2A-A2 AARGRVEEV  | 31255 | >CDKN2A-A2 ADRGRVEEV  | 197   | 31058 |
| >CDKN2A-A2 AAARGRVEE\ | 786   | >CDKN2A-A2 AADRGRVEE\ | 335   | 451   |
| >CDKN2A-A2 AAARGRVEE\ | 33    | >CDKN2A-A2 AADRGRVEE\ | 106   | 73    |
| >CDKN2A-A2 AAARGRVEE\ | 434   | >CDKN2A-A2 AADRGRVEE\ | 2362  | 1928  |
| >CDKN2A-A2 AAARGRVEE\ | 127   | >CDKN2A-A2 AADRGRVEE\ | 2190  | 2063  |
| >CDKN2A-A2 TAAARGRVEI | 559   | >CDKN2A-A2 TAADRGRVEI | 411   | 148   |
| >CDKN2A-A2 TAAARGRVEI | 573   | >CDKN2A-A2 TAADRGRVEI | 384   | 189   |
| >CDKN2A-A2 TAAARGRVEI | 741   | >CDKN2A-A2 TAADRGRVEI | 366   | 375   |
| >CDKN2A-A2 TAAARGRVEI | 881   | >CDKN2A-A2 TAADRGRVEI | 147   | 734   |
| >CDKN2A-A2 TAAARGRV   | 36    | >CDKN2A-A2 TAADRGRV   | 44    | 8     |
| >CDKN2A-A2 TAAARGRVEI | 34    | >CDKN2A-A2 TAADRGRVEI | 34    | 0     |
| >CDKN2A-A2 ATAAARGR   | 366   | >CDKN2A-A2 ATAADRGR   | 616   | 250   |
| >CDKN2A-A2 ATAAARGR   | 32    | >CDKN2A-A2 ATAADRGR   | 60    | 28    |
| >CDKN2A-A2 ATAAARGRV  | 13    | >CDKN2A-A2 ATAADRGRV  | 33    | 20    |
| >CDKN2A-A2 LATAAARGR  | 105   | >CDKN2A-A2 LATAADRGR  | 164   | 59    |
| >CDKN2A-A2 LATAAARGR\ | 107   | >CDKN2A-A2 LATAADRGR\ | 181   | 74    |
| >CDKN2A-A2 WLATAAARG  | 336   | >CDKN2A-A2 WLATAADRG  | 645   | 309   |
| >CDKN2A-A2 WLATAAARG  | 22    | >CDKN2A-A2 WLATAADRG  | 29    | 7     |
| >CDKN2A-A2 WLATAAARG  | 8     | >CDKN2A-A2 WLATAADRG  | 12    | 4     |

|                       |      |                       |       |       |
|-----------------------|------|-----------------------|-------|-------|
| >CDKN2A-A2 WLATAAARG  | 125  | >CDKN2A-A2 WLATAADRG  | 185   | 60    |
| >CDKN2A-A2 WLATAAARG  | 25   | >CDKN2A-A2 WLATAADRG  | 29    | 4     |
| >CDKN2A-A2 WLATAAARG  | 244  | >CDKN2A-A2 WLATAADRG  | 273   | 29    |
| >CDKN2A-A2 WLATAAARG  | 27   | >CDKN2A-A2 WLATAADRG  | 33    | 6     |
| >CDKN2A-A2 WLATAAARG  | 23   | >CDKN2A-A2 WLATAADRG  | 29    | 6     |
| >CDKN2A-A2 WLATAAARG  | 3    | >CDKN2A-A2 WLATAADRG  | 3     | 0     |
| >CDKN2A-A2 WLATAAARG  | 68   | >CDKN2A-A2 WLATAADR   | 139   | 71    |
| >CDKN2A-A2 WLATAAARG  | 37   | >CDKN2A-A2 WLATAADRG  | 72    | 35    |
| >CDKN2A-A2 WLATAAARG  | 350  | >CDKN2A-A2 WLATAADRG  | 725   | 375   |
| >CDKN2A-A2 WLATAAARG  | 58   | >CDKN2A-A2 WLATAADRG  | 101   | 43    |
| >CDKN2A-A2 WLATAAARG  | 328  | >CDKN2A-A2 WLATAADR   | 729   | 401   |
| >CDKN2A-A2 DWLATAAARG | 119  | >CDKN2A-A2 DWLATAADR  | 446   | 327   |
| >CDKN2A-A2 DWLATAAARG | 23   | >CDKN2A-A2 DWLATAADR  | 34    | 11    |
| >CDKN2A-A2 DWLATAAARG | 30   | >CDKN2A-A2 DWLATAADR  | 33    | 3     |
| >CDKN2A-A2 DWLATAAARG | 205  | >CDKN2A-A2 DWLATAADR  | 821   | 616   |
| >CDKN2A-A2 DWLATAAARG | 450  | >CDKN2A-A2 DWLATAADR  | 1472  | 1022  |
| >CDKN2A-A2 SADWLATAA  | 83   | >CDKN2A-A2 SADWLATAA  | 164   | 81    |
| >CDKN2A-A2 SADWLATAA  | 283  | >CDKN2A-A2 SADWLATAA  | 15668 | 15385 |
| >CDKN2A-A3 ALLEAGAL   | 92   | >CDKN2A-A3 PLLEAGAL   | 4913  | 4821  |
| >CDKN2A-A3 ALLEAGALPN | 22   | >CDKN2A-A3 PLLEAGALPN | 1491  | 1469  |
| >CDKN2A-A3 ALLEAGAL   | 67   | >CDKN2A-A3 PLLEAGAL   | 1315  | 1248  |
| >CDKN2A-A3 ALLEAGALPN | 87   | >CDKN2A-A3 PLLEAGALPN | 2798  | 2711  |
| >CDKN2A-A3 ALLEAGAL   | 61   | >CDKN2A-A3 PLLEAGAL   | 3701  | 3640  |
| >CDKN2A-A3 ALLEAGALPN | 26   | >CDKN2A-A3 PLLEAGALPN | 1816  | 1790  |
| >CDKN2A-A3 ALLEAGAL   | 40   | >CDKN2A-A3 PLLEAGAL   | 3648  | 3608  |
| >CDKN2A-A3 ALLEAGALPN | 13   | >CDKN2A-A3 PLLEAGALPN | 928   | 915   |
| >CDKN2A-A3 ALLEAGAL   | 4    | >CDKN2A-A3 PLLEAGAL   | 43    | 39    |
| >CDKN2A-A3 ALLEAGALPN | 5    | >CDKN2A-A3 PLLEAGALPN | 69    | 64    |
| >CDKN2A-A3 ALLEAGAL   | 8    | >CDKN2A-A3 PLLEAGAL   | 422   | 414   |
| >CDKN2A-A3 ALLEAGALPN | 19   | >CDKN2A-A3 PLLEAGALPN | 779   | 760   |
| >CDKN2A-A3 ALLEAGAL   | 16   | >CDKN2A-A3 PLLEAGAL   | 166   | 150   |
| >CDKN2A-A3 ALLEAGALPN | 6    | >CDKN2A-A3 PLLEAGALPN | 28    | 22    |
| >CDKN2A-A3 ALLEAGAL   | 29   | >CDKN2A-A3 PLLEAGAL   | 172   | 143   |
| >CDKN2A-A3 ALLEAGALPN | 15   | >CDKN2A-A3 PLLEAGALPN | 57    | 42    |
| >CDKN2A-A3 ALLEAGAL   | 5    | >CDKN2A-A3 PLLEAGAL   | 108   | 103   |
| >CDKN2A-A3 ALLEAGALPN | 4    | >CDKN2A-A3 PLLEAGALPN | 44    | 40    |
| >CDKN2A-A3 RALLEAGAL  | 1101 | >CDKN2A-A3 RPLLEAGAL  | 14    | 1087  |
| >CDKN2A-A3 RALLEAGAL  | 18   | >CDKN2A-A3 RPLLEAGAL  | 13909 | 13891 |
| >CDKN2A-A3 RALLEAGAL  | 5239 | >CDKN2A-A3 RPLLEAGAL  | 444   | 4795  |
| >CDKN2A-A3 AARGRVEEVF | 269  | >CDKN2A-A3 AARGRVEEVF | 4395  | 4126  |
| >CDKN2A-A3 VRALLEAGAL | 145  | >CDKN2A-A3 VRPLLEAGAL | 785   | 640   |
| >CDKN2A-A3 VRALLEAGAL | 289  | >CDKN2A-A3 VRPLLEAGAL | 383   | 94    |
| >CDKN2A-A3 EVRALLEAGA | 51   | >CDKN2A-A3 EVRPLLEAGA | 69    | 18    |

|                       |      |                       |      |      |
|-----------------------|------|-----------------------|------|------|
| >CDKN2A-A3 EVRALLEAGA | 293  | >CDKN2A-A3 EVRPLLEAGA | 1080 | 787  |
| >CDKN2A-A3 EVRALLEAGA | 497  | >CDKN2A-A3 EVRPLLEAGA | 3810 | 3313 |
| >CDKN2A-A3 EEVRALLE   | 108  | >CDKN2A-A3 EEVRPLLE   | 751  | 643  |
| >CDKN2A-A3 EEVRALLEA  | 326  | >CDKN2A-A3 EEVRPLLEA  | 1053 | 727  |
| >CDKN2A-A3 EEVRALLEA  | 454  | >CDKN2A-A3 EEVRPLLEA  | 1382 | 928  |
| >CDKN2A-A3 EEVRALLEA  | 14   | >CDKN2A-A3 EEVRPLLEA  | 21   | 7    |
| >CDKN2A-A3 EEVRALLEAG | 18   | >CDKN2A-A3 EEVRPLLEAG | 23   | 5    |
| >CDKN2A-A3 VEEVRALL   | 176  | >CDKN2A-A3 VEEVRPLL   | 968  | 792  |
| >CDKN2A-A3 VEEVRALL   | 143  | >CDKN2A-A3 VEEVRPLL   | 253  | 110  |
| >CDKN2A-A3 VEEVRALLEA | 173  | >CDKN2A-A3 VEEVRPLLEA | 202  | 29   |
| >CDKN2A-A3 RVEEVRAL   | 281  | >CDKN2A-A3 RVEEVRPL   | 351  | 70   |
| >CDKN2A-A3 RVEEVRAL   | 165  | >CDKN2A-A3 RVEEVRPL   | 309  | 144  |
| >CDKN2A-A3 RVEEVRALL  | 800  | >CDKN2A-A3 RVEEVRPLL  | 480  | 320  |
| >CDKN2A-A3 GRVEEVRA   | 383  | >CDKN2A-A3 GRVEEVRA   | 192  | 191  |
| >CDKN2A-A3 GRVEEVRA   | 45   | >CDKN2A-A3 GRVEEVRA   | 30   | 15   |
| >CDKN2A-A3 GRVEEVRA   | 189  | >CDKN2A-A3 GRVEEVRA   | 396  | 207  |
| >CDKN2A-A3 GRVEEVRA   | 338  | >CDKN2A-A3 GRVEEVRA   | 579  | 241  |
| >CDKN2A-A3 GRVEEVRA   | 430  | >CDKN2A-A3 GRVEEVRA   | 525  | 95   |
| >CDKN2A-A3 GRVEEVRA   | 92   | >CDKN2A-A3 GRVEEVRA   | 132  | 40   |
| >CDKN2A-A3 GRVEEVRA   | 186  | >CDKN2A-A3 GRVEEVRA   | 229  | 43   |
| >CDKN2A-A3 RGRVEEVRA  | 447  | >CDKN2A-A3 RGRVEEVRA  | 5701 | 5254 |
| >CDKN2A-A3 RGRVEEVRA  | 436  | >CDKN2A-A3 RGRVEEVRA  | 163  | 273  |
| >CDKN2A-A3 RGRVEEVRA  | 98   | >CDKN2A-A3 RGRVEEVRA  | 68   | 30   |
| >CDKN2A-A3 RGRVEEVRA  | 848  | >CDKN2A-A3 RGRVEEVRA  | 412  | 436  |
| >CDKN2A-A3 ARGRVEEVRA | 260  | >CDKN2A-A3 ARGRVEEVRA | 397  | 137  |
| >CDKN2A-A3 ALLEAGAL   | 1936 | >CDKN2A-A3 VLLEAGAL   | 432  | 1504 |
| >CDKN2A-A3 ALLEAGAL   | 92   | >CDKN2A-A3 VLLEAGAL   | 118  | 26   |
| >CDKN2A-A3 ALLEAGALPN | 22   | >CDKN2A-A3 VLLEAGALPN | 26   | 4    |
| >CDKN2A-A3 ALLEAGAL   | 67   | >CDKN2A-A3 VLLEAGAL   | 141  | 74   |
| >CDKN2A-A3 ALLEAGALPN | 87   | >CDKN2A-A3 VLLEAGALPN | 189  | 102  |
| >CDKN2A-A3 ALLEAGAL   | 61   | >CDKN2A-A3 VLLEAGAL   | 90   | 29   |
| >CDKN2A-A3 ALLEAGALPN | 26   | >CDKN2A-A3 VLLEAGALPN | 34   | 8    |
| >CDKN2A-A3 ALLEAGAL   | 40   | >CDKN2A-A3 VLLEAGAL   | 51   | 11   |
| >CDKN2A-A3 ALLEAGALPN | 13   | >CDKN2A-A3 VLLEAGALPN | 15   | 2    |
| >CDKN2A-A3 ALLEAGAL   | 4    | >CDKN2A-A3 VLLEAGAL   | 4    | 0    |
| >CDKN2A-A3 ALLEAGALPN | 5    | >CDKN2A-A3 VLLEAGALPN | 4    | 1    |
| >CDKN2A-A3 ALLEAGAL   | 8    | >CDKN2A-A3 VLLEAGAL   | 8    | 0    |
| >CDKN2A-A3 ALLEAGALPN | 19   | >CDKN2A-A3 VLLEAGALPN | 19   | 0    |
| >CDKN2A-A3 ALLEAGAL   | 16   | >CDKN2A-A3 VLLEAGAL   | 17   | 1    |
| >CDKN2A-A3 ALLEAGALPN | 6    | >CDKN2A-A3 VLLEAGALPN | 6    | 0    |
| >CDKN2A-A3 ALLEAGAL   | 29   | >CDKN2A-A3 VLLEAGAL   | 14   | 15   |
| >CDKN2A-A3 ALLEAGALPN | 15   | >CDKN2A-A3 VLLEAGALPN | 8    | 7    |
| >CDKN2A-A3 ALLEAGAL   | 5    | >CDKN2A-A3 VLLEAGAL   | 6    | 1    |



|                        |       |                        |      |       |
|------------------------|-------|------------------------|------|-------|
| >CDKN2A-A3 ALLEAGALPN  | 4     | >CDKN2A-A3 VLLEAGALPN  | 5    | 1     |
| >CDKN2A-A3 RALLEAGAL   | 18    | >CDKN2A-A3 RVLLEAGAL   | 183  | 165   |
| >CDKN2A-A3 AARGRVEEVF  | 11439 | >CDKN2A-A3 AARGRVEEVF  | 122  | 11317 |
| >CDKN2A-A3 AARGRVEEVF  | 269   | >CDKN2A-A3 AARGRVEEVF  | 470  | 201   |
| >CDKN2A-A3 VRALLEAGAL  | 145   | >CDKN2A-A3 VRVLEAGAL   | 78   | 67    |
| >CDKN2A-A3 VRALLEAGAL  | 289   | >CDKN2A-A3 VRVLEAGAL   | 180  | 109   |
| >CDKN2A-A3 EVRALLEAGA  | 51    | >CDKN2A-A3 EVRVLEAGA   | 118  | 67    |
| >CDKN2A-A3 EVRALLEAGA  | 293   | >CDKN2A-A3 EVRVLEAGA   | 1002 | 709   |
| >CDKN2A-A3 EVRALLEAGA  | 497   | >CDKN2A-A3 EVRVLEAGA   | 3607 | 3110  |
| >CDKN2A-A3 EEVRALLE    | 108   | >CDKN2A-A3 EEVRVLE     | 266  | 158   |
| >CDKN2A-A3 EEVRALLEA   | 326   | >CDKN2A-A3 EEVRVLEA    | 397  | 71    |
| >CDKN2A-A3 EEVRALLEA   | 454   | >CDKN2A-A3 EEVRVLEA    | 342  | 112   |
| >CDKN2A-A3 EEVRALLEA   | 14    | >CDKN2A-A3 EEVRVLEA    | 13   | 1     |
| >CDKN2A-A3 EEVRALLEAG  | 18    | >CDKN2A-A3 EEVRVLEAG   | 17   | 1     |
| >CDKN2A-A3 VEEVRALL    | 176   | >CDKN2A-A3 VEEVRVLL    | 270  | 94    |
| >CDKN2A-A3 VEEVRALL    | 143   | >CDKN2A-A3 VEEVRVLL    | 142  | 1     |
| >CDKN2A-A3 VEEVRALLEA  | 173   | >CDKN2A-A3 VEEVRVLEA   | 149  | 24    |
| >CDKN2A-A3 RVEEVRAL    | 281   | >CDKN2A-A3 RVEEVRVL    | 517  | 236   |
| >CDKN2A-A3 RVEEVRALL   | 1683  | >CDKN2A-A3 RVEEVRVLL   | 286  | 1397  |
| >CDKN2A-A3 RVEEVRAL    | 165   | >CDKN2A-A3 RVEEVRVL    | 544  | 379   |
| >CDKN2A-A3 GRVEEVRAL   | 383   | >CDKN2A-A3 GRVEEVRVL   | 439  | 56    |
| >CDKN2A-A3 GRVEEVRALL  | 45    | >CDKN2A-A3 GRVEEVRVLL  | 48   | 3     |
| >CDKN2A-A3 GRVEEVRAL   | 189   | >CDKN2A-A3 GRVEEVRVL   | 259  | 70    |
| >CDKN2A-A3 GRVEEVRALL  | 338   | >CDKN2A-A3 GRVEEVRVLL  | 275  | 63    |
| >CDKN2A-A3 GRVEEVRALL  | 430   | >CDKN2A-A3 GRVEEVRVLL  | 530  | 100   |
| >CDKN2A-A3 GRVEEVRAL   | 92    | >CDKN2A-A3 GRVEEVRVL   | 98   | 6     |
| >CDKN2A-A3 GRVEEVRALL  | 186   | >CDKN2A-A3 GRVEEVRVLL  | 197  | 11    |
| >CDKN2A-A3 RGRVEEVRA   | 447   | >CDKN2A-A3 RGRVEEVRV   | 781  | 334   |
| >CDKN2A-A3 RGRVEEVRAL  | 436   | >CDKN2A-A3 RGRVEEVRVL  | 648  | 212   |
| >CDKN2A-A3 RGRVEEVRAL  | 98    | >CDKN2A-A3 RGRVEEVRVL  | 133  | 35    |
| >CDKN2A-A3 ARGRVEEVR/  | 260   | >CDKN2A-A3 ARGRVEEVR/  | 303  | 43    |
| >CDKN2A-A3 AGALPNAPN/  | 136   | >CDKN2A-A3 VGALPNAPN/  | 83   | 53    |
| >CDKN2A-A3 EAGALPNA    | 470   | >CDKN2A-A3 EVGALPNA    | 159  | 311   |
| >CDKN2A-A3 RVEEVRALLE, | 633   | >CDKN2A-A3 RVEEVRALLE' | 49   | 584   |
| >CDKN2A-A3 RVEEVRALLE, | 6328  | >CDKN2A-A3 RVEEVRALLE' | 200  | 6128  |
| >CDKN2A-A3 RVEEVRALLE, | 5940  | >CDKN2A-A3 RVEEVRALLE' | 46   | 5894  |
| >CDKN2A-A3 LEAGALPN    | 413   | >CDKN2A-A3 LEVGALPN    | 215  | 198   |
| >CDKN2A-A3 LEAGALPNA   | 569   | >CDKN2A-A3 LEVGALPNA   | 283  | 286   |
| >CDKN2A-A3 LEAGALPNAP  | 721   | >CDKN2A-A3 LEVGALPNAP  | 390  | 331   |
| >CDKN2A-A3 LEAGALPNA   | 621   | >CDKN2A-A3 LEVGALPNA   | 299  | 322   |
| >CDKN2A-A3 LEAGALPNA   | 80    | >CDKN2A-A3 LEVGALPNA   | 132  | 52    |
| >CDKN2A-A3 LEAGALPNA   | 312   | >CDKN2A-A3 LEVGALPNA   | 230  | 82    |
| >CDKN2A-A3 LLEAGALPNA  | 371   | >CDKN2A-A3 LLEVGAALPNA | 772  | 401   |

|                       |      |                       |     |      |
|-----------------------|------|-----------------------|-----|------|
| >CDKN2A-A3 LLEAGALPNA | 241  | >CDKN2A-A3 LLEVGALPNA | 711 | 470  |
| >CDKN2A-A3 LLEAGALPNA | 249  | >CDKN2A-A3 LLEVGALPNA | 543 | 294  |
| >CDKN2A-A3 LLEAGALPNA | 10   | >CDKN2A-A3 LLEVGALPNA | 21  | 11   |
| >CDKN2A-A3 ALLEAGAL   | 92   | >CDKN2A-A3 ALLEVGAL   | 39  | 53   |
| >CDKN2A-A3 ALLEAGALPN | 22   | >CDKN2A-A3 ALLEVGALPN | 20  | 2    |
| >CDKN2A-A3 ALLEAGAL   | 67   | >CDKN2A-A3 ALLEVGAL   | 52  | 15   |
| >CDKN2A-A3 ALLEAGALPN | 87   | >CDKN2A-A3 ALLEVGALPN | 79  | 8    |
| >CDKN2A-A3 ALLEAGAL   | 61   | >CDKN2A-A3 ALLEVGAL   | 31  | 30   |
| >CDKN2A-A3 ALLEAGALPN | 26   | >CDKN2A-A3 ALLEVGALPN | 27  | 1    |
| >CDKN2A-A3 ALLEAGAL   | 40   | >CDKN2A-A3 ALLEVGAL   | 34  | 6    |
| >CDKN2A-A3 ALLEAGALPN | 13   | >CDKN2A-A3 ALLEVGALPN | 14  | 1    |
| >CDKN2A-A3 ALLEAGAL   | 4    | >CDKN2A-A3 ALLEVGAL   | 2   | 2    |
| >CDKN2A-A3 ALLEAGALP  | 1042 | >CDKN2A-A3 ALLEVGALP  | 162 | 880  |
| >CDKN2A-A3 ALLEAGALPN | 761  | >CDKN2A-A3 ALLEVGALPN | 250 | 511  |
| >CDKN2A-A3 ALLEAGALPN | 5    | >CDKN2A-A3 ALLEVGALPN | 3   | 2    |
| >CDKN2A-A3 ALLEAGAL   | 8    | >CDKN2A-A3 ALLEVGAL   | 6   | 2    |
| >CDKN2A-A3 ALLEAGALPN | 19   | >CDKN2A-A3 ALLEVGALPN | 18  | 1    |
| >CDKN2A-A3 ALLEAGAL   | 16   | >CDKN2A-A3 ALLEVGAL   | 10  | 6    |
| >CDKN2A-A3 ALLEAGALPN | 6    | >CDKN2A-A3 ALLEVGALPN | 6   | 0    |
| >CDKN2A-A3 ALLEAGAL   | 29   | >CDKN2A-A3 ALLEVGAL   | 18  | 11   |
| >CDKN2A-A3 ALLEAGALPN | 15   | >CDKN2A-A3 ALLEVGALPN | 18  | 3    |
| >CDKN2A-A3 ALLEAGAL   | 5    | >CDKN2A-A3 ALLEVGAL   | 4   | 1    |
| >CDKN2A-A3 ALLEAGALPN | 4    | >CDKN2A-A3 ALLEVGALPN | 4   | 0    |
| >CDKN2A-A3 RALLEAGAL  | 18   | >CDKN2A-A3 RALLEVGAL  | 29  | 11   |
| >CDKN2A-A3 VRALLEAGAL | 145  | >CDKN2A-A3 VRALLEVGAL | 123 | 22   |
| >CDKN2A-A3 VRALLEAGAL | 289  | >CDKN2A-A3 VRALLEVGAL | 265 | 24   |
| >CDKN2A-A3 EVRALLEAGA | 51   | >CDKN2A-A3 EVRALLEVGA | 22  | 29   |
| >CDKN2A-A3 EVRALLEAGA | 293  | >CDKN2A-A3 EVRALLEVGA | 243 | 50   |
| >CDKN2A-A3 EVRALLEA   | 1124 | >CDKN2A-A3 EVRALLEV   | 61  | 1063 |
| >CDKN2A-A3 EVRALLEAGA | 497  | >CDKN2A-A3 EVRALLEVGA | 890 | 393  |
| >CDKN2A-A3 EVRALLEA   | 2474 | >CDKN2A-A3 EVRALLEV   | 83  | 2391 |
| >CDKN2A-A3 EEVRALLEA  | 2522 | >CDKN2A-A3 EEVRALLEV  | 35  | 2487 |
| >CDKN2A-A3 EEVRALLEA  | 326  | >CDKN2A-A3 EEVRALLEV  | 266 | 60   |
| >CDKN2A-A3 EEVRALLEA  | 454  | >CDKN2A-A3 EEVRALLEV  | 193 | 261  |
| >CDKN2A-A3 EEVRALLEA  | 14   | >CDKN2A-A3 EEVRALLEV  | 53  | 39   |
| >CDKN2A-A3 EEVRALLEAG | 18   | >CDKN2A-A3 EEVRALLEVG | 16  | 2    |
| >CDKN2A-A3 EEVRALLEA  | 4152 | >CDKN2A-A3 EEVRALLEV  | 157 | 3995 |
| >CDKN2A-A3 VEEVRALLEA | 2640 | >CDKN2A-A3 VEEVRALLEV | 41  | 2599 |
| >CDKN2A-A3 VEEVRALLEA | 173  | >CDKN2A-A3 VEEVRALLEV | 677 | 504  |
| >CDKN2A-A3 ALPNAPNSY  | 976  | >CDKN2A-A3 TLPNAPNSY  | 230 | 746  |
| >CDKN2A-A3 ALPNAPNSY  | 181  | >CDKN2A-A3 TLPNAPNSY  | 279 | 98   |
| >CDKN2A-A3 ALPNAPNSY  | 3625 | >CDKN2A-A3 TLPNAPNSY  | 324 | 3301 |
| >CDKN2A-A3 ALPNAPNSY  | 281  | >CDKN2A-A3 TLPNAPNSY  | 736 | 455  |

|                       |     |                        |      |      |
|-----------------------|-----|------------------------|------|------|
| >CDKN2A-A3 ALPNAPNSY  | 358 | >CDKN2A-A3 TLPNAPNSY   | 177  | 181  |
| >CDKN2A-A3 ALPNAPNSY  | 305 | >CDKN2A-A3 TLPNAPNSY   | 1389 | 1084 |
| >CDKN2A-A3 ALPNAPNSYC | 904 | >CDKN2A-A3 TLPNAPNSYC  | 247  | 657  |
| >CDKN2A-A3 GALPNAPNS\ | 951 | >CDKN2A-A3 GTLPNAPNSY  | 321  | 630  |
| >CDKN2A-A3 GALPNAPNS\ | 280 | >CDKN2A-A3 GTLPNAPNSY  | 504  | 224  |
| >CDKN2A-A3 GALPNAPNS\ | 19  | >CDKN2A-A3 GTLPNAPNSY  | 7    | 12   |
| >CDKN2A-A3 GALPNAPNS\ | 513 | >CDKN2A-A3 GTLPNAPNSY  | 28   | 485  |
| >CDKN2A-A3 EEVRALLEAG | 18  | >CDKN2A-A3 EEVRALLEAG  | 103  | 85   |
| >CDKN2A-A3 AGALPNAPN: | 136 | >CDKN2A-A3 AGTLPNAPN:  | 309  | 173  |
| >CDKN2A-A3 EAGALPNA   | 470 | >CDKN2A-A3 EAGTLPNA    | 1031 | 561  |
| >CDKN2A-A3 LEAGALPN   | 413 | >CDKN2A-A3 LEAGTLPN    | 645  | 232  |
| >CDKN2A-A3 LEAGALPNA  | 80  | >CDKN2A-A3 LEAGTLPNA   | 59   | 21   |
| >CDKN2A-A3 LEAGALPNA  | 312 | >CDKN2A-A3 LEAGTLPNA   | 555  | 243  |
| >CDKN2A-A3 LLEAGALPNA | 371 | >CDKN2A-A3 LLEAGTLPNA  | 339  | 32   |
| >CDKN2A-A3 LLEAGALPNA | 241 | >CDKN2A-A3 LLEAGTLPNA  | 188  | 53   |
| >CDKN2A-A3 LLEAGALPNA | 249 | >CDKN2A-A3 LLEAGTLPNA  | 153  | 96   |
| >CDKN2A-A3 LLEAGALPNA | 507 | >CDKN2A-A3 LLEAGTLPNA  | 348  | 159  |
| >CDKN2A-A3 LLEAGALPNA | 584 | >CDKN2A-A3 LLEAGTLPNA  | 340  | 244  |
| >CDKN2A-A3 LLEAGALPNA | 575 | >CDKN2A-A3 LLEAGTLPNA  | 415  | 160  |
| >CDKN2A-A3 LLEAGALPNA | 10  | >CDKN2A-A3 LLEAGTLPNA  | 7    | 3    |
| >CDKN2A-A3 ALLEAGAL   | 92  | >CDKN2A-A3 ALLEAGTL    | 89   | 3    |
| >CDKN2A-A3 ALLEAGALPN | 22  | >CDKN2A-A3 ALLEAGTLPN. | 27   | 5    |
| >CDKN2A-A3 ALLEAGAL   | 67  | >CDKN2A-A3 ALLEAGTL    | 146  | 79   |
| >CDKN2A-A3 ALLEAGALPN | 87  | >CDKN2A-A3 ALLEAGTLPN. | 113  | 26   |
| >CDKN2A-A3 ALLEAGAL   | 61  | >CDKN2A-A3 ALLEAGTL    | 70   | 9    |
| >CDKN2A-A3 ALLEAGALPN | 26  | >CDKN2A-A3 ALLEAGTLPN. | 27   | 1    |
| >CDKN2A-A3 ALLEAGAL   | 40  | >CDKN2A-A3 ALLEAGTL    | 64   | 24   |
| >CDKN2A-A3 ALLEAGALPN | 13  | >CDKN2A-A3 ALLEAGTLPN. | 14   | 1    |
| >CDKN2A-A3 ALLEAGAL   | 4   | >CDKN2A-A3 ALLEAGTL    | 4    | 0    |
| >CDKN2A-A3 ALLEAGALPN | 5   | >CDKN2A-A3 ALLEAGTLPN. | 5    | 0    |
| >CDKN2A-A3 ALLEAGAL   | 8   | >CDKN2A-A3 ALLEAGTL    | 9    | 1    |
| >CDKN2A-A3 ALLEAGALPN | 19  | >CDKN2A-A3 ALLEAGTLPN. | 24   | 5    |
| >CDKN2A-A3 ALLEAGAL   | 16  | >CDKN2A-A3 ALLEAGTL    | 10   | 6    |
| >CDKN2A-A3 ALLEAGALPN | 6   | >CDKN2A-A3 ALLEAGTLPN. | 7    | 1    |
| >CDKN2A-A3 ALLEAGAL   | 29  | >CDKN2A-A3 ALLEAGTL    | 19   | 10   |
| >CDKN2A-A3 ALLEAGALPN | 15  | >CDKN2A-A3 ALLEAGTLPN. | 23   | 8    |
| >CDKN2A-A3 ALLEAGAL   | 5   | >CDKN2A-A3 ALLEAGTL    | 4    | 1    |
| >CDKN2A-A3 ALLEAGALPN | 4   | >CDKN2A-A3 ALLEAGTLPN. | 4    | 0    |
| >CDKN2A-A3 RALLEAGAL  | 18  | >CDKN2A-A3 RALLEAGTL   | 8    | 10   |
| >CDKN2A-A3 VRALLEAGAL | 145 | >CDKN2A-A3 VRALLEAGTL  | 129  | 16   |
| >CDKN2A-A3 VRALLEAGAL | 289 | >CDKN2A-A3 VRALLEAGTL  | 243  | 46   |
| >CDKN2A-A3 EVRALLEAGA | 51  | >CDKN2A-A3 EVRALLEAGT  | 104  | 53   |
| >CDKN2A-A3 EVRALLEAGA | 293 | >CDKN2A-A3 EVRALLEAGT  | 337  | 44   |

|                       |     |                       |       |      |
|-----------------------|-----|-----------------------|-------|------|
| >CDKN2A-A3 EVRALLEAGA | 497 | >CDKN2A-A3 EVRALLEAGT | 1689  | 1192 |
| >CDKN2A-A4 APNSYGRRPI | 20  | >CDKN2A-A4 SPNSYGRRPI | 14    | 6    |
| >CDKN2A-A4 NAPNSYGR   | 65  | >CDKN2A-A4 NSPNSYGR   | 78    | 13   |
| >CDKN2A-A4 NAPNSYGRR  | 147 | >CDKN2A-A4 NSPNSYGRR  | 192   | 45   |
| >CDKN2A-A4 NAPNSYGRR1 | 266 | >CDKN2A-A4 NSPNSYGRRF | 301   | 35   |
| >CDKN2A-A4 NAPNSYGRR1 | 789 | >CDKN2A-A4 NSPNSYGRRF | 231   | 558  |
| >CDKN2A-A4 ALLEAGALPN | 22  | >CDKN2A-A4 ALLEAGALPN | 912   | 890  |
| >CDKN2A-A4 ALLEAGALPN | 87  | >CDKN2A-A4 ALLEAGALPN | 1916  | 1829 |
| >CDKN2A-A4 ALLEAGALPN | 26  | >CDKN2A-A4 ALLEAGALPN | 1999  | 1973 |
| >CDKN2A-A4 ALLEAGALPN | 13  | >CDKN2A-A4 ALLEAGALPN | 281   | 268  |
| >CDKN2A-A4 ALLEAGALPN | 5   | >CDKN2A-A4 ALLEAGALPN | 100   | 95   |
| >CDKN2A-A4 ALLEAGALPN | 19  | >CDKN2A-A4 ALLEAGALPN | 1151  | 1132 |
| >CDKN2A-A4 ALLEAGALPN | 6   | >CDKN2A-A4 ALLEAGALPN | 174   | 168  |
| >CDKN2A-A4 ALLEAGALPN | 15  | >CDKN2A-A4 ALLEAGALPN | 1367  | 1352 |
| >CDKN2A-A4 ALLEAGALPN | 4   | >CDKN2A-A4 ALLEAGALPN | 100   | 96   |
| >CDKN2A-A4 PNAPNSYGR  | 320 | >CDKN2A-A4 PNSPNSYGR  | 413   | 93   |
| >CDKN2A-A4 LPNAPNSY   | 967 | >CDKN2A-A4 LPNSPNSY   | 480   | 487  |
| >CDKN2A-A4 LPNAPNSYGF | 472 | >CDKN2A-A4 LPNSPNSYGR | 538   | 66   |
| >CDKN2A-A4 LPNAPNSY   | 527 | >CDKN2A-A4 LPNSPNSY   | 237   | 290  |
| >CDKN2A-A4 LPNAPNSY   | 11  | >CDKN2A-A4 LPNSPNSY   | 11    | 0    |
| >CDKN2A-A4 LPNAPNSY   | 51  | >CDKN2A-A4 LPNSPNSY   | 42    | 9    |
| >CDKN2A-A4 LPNAPNSYG  | 457 | >CDKN2A-A4 LPNSPNSYG  | 688   | 231  |
| >CDKN2A-A4 LPNAPNSY   | 58  | >CDKN2A-A4 LPNSPNSY   | 71    | 13   |
| >CDKN2A-A4 LPNAPNSY   | 820 | >CDKN2A-A4 LPNSPNSY   | 404   | 416  |
| >CDKN2A-A4 ALPNAPNSY  | 976 | >CDKN2A-A4 ALPNSPNSY  | 456   | 520  |
| >CDKN2A-A4 ALPNAPNSY  | 181 | >CDKN2A-A4 ALPNSPNSY  | 193   | 12   |
| >CDKN2A-A4 ALPNAPNSY  | 281 | >CDKN2A-A4 ALPNSPNSY  | 264   | 17   |
| >CDKN2A-A4 ALPNAPNSY  | 358 | >CDKN2A-A4 ALPNSPNSY  | 191   | 167  |
| >CDKN2A-A4 ALPNAPNSY  | 305 | >CDKN2A-A4 ALPNSPNSY  | 63    | 242  |
| >CDKN2A-A4 GALPNAPNS\ | 280 | >CDKN2A-A4 GALPNSPNSY | 135   | 145  |
| >CDKN2A-A4 GALPNAPNS\ | 19  | >CDKN2A-A4 GALPNSPNSY | 12    | 7    |
| >CDKN2A-A4 GALPNAPNS\ | 513 | >CDKN2A-A4 GALPNSPNSY | 484   | 29   |
| >CDKN2A-A4 AGALPNAPN: | 136 | >CDKN2A-A4 AGALPNSPN: | 148   | 12   |
| >CDKN2A-A4 AGALPNAPN: | 939 | >CDKN2A-A4 AGALPNSPN: | 329   | 610  |
| >CDKN2A-A4 EAGALPNA   | 470 | >CDKN2A-A4 EAGALPNS   | 10308 | 9838 |
| >CDKN2A-A4 LEAGALPNA  | 80  | >CDKN2A-A4 LEAGALPNS  | 2620  | 2540 |
| >CDKN2A-A4 LEAGALPNA  | 312 | >CDKN2A-A4 LEAGALPNS  | 1760  | 1448 |
| >CDKN2A-A4 LLEAGALPNA | 371 | >CDKN2A-A4 LLEAGALPNS | 9901  | 9530 |
| >CDKN2A-A4 LLEAGALPNA | 241 | >CDKN2A-A4 LLEAGALPNS | 6734  | 6493 |
| >CDKN2A-A4 LLEAGALPNA | 249 | >CDKN2A-A4 LLEAGALPNS | 7738  | 7489 |
| >CDKN2A-A4 LLEAGALPNA | 10  | >CDKN2A-A4 LLEAGALPNS | 729   | 719  |
| >CDKN2A-A4 APNSYGRRPI | 20  | >CDKN2A-A4 VPNSYGRRPI | 26    | 6    |
| >CDKN2A-A4 NAPNSYGR   | 65  | >CDKN2A-A4 NVPNSYGR   | 46    | 19   |

|                       |       |                       |     |       |
|-----------------------|-------|-----------------------|-----|-------|
| >CDKN2A-A4 NAPNSYGRR  | 147   | >CDKN2A-A4 NVPNSYGRR  | 129 | 18    |
| >CDKN2A-A4 NAPNSYGRR  | 266   | >CDKN2A-A4 NVPNSYGRR  | 62  | 204   |
| >CDKN2A-A4 NAPNSYGR   | 886   | >CDKN2A-A4 NVPNSYGR   | 461 | 425   |
| >CDKN2A-A4 ALLEAGALPN | 22    | >CDKN2A-A4 ALLEAGALPN | 9   | 13    |
| >CDKN2A-A4 ALLEAGALPN | 87    | >CDKN2A-A4 ALLEAGALPN | 13  | 74    |
| >CDKN2A-A4 ALLEAGALPN | 26    | >CDKN2A-A4 ALLEAGALPN | 7   | 19    |
| >CDKN2A-A4 ALLEAGALPN | 13    | >CDKN2A-A4 ALLEAGALPN | 4   | 9     |
| >CDKN2A-A4 ALLEAGALPN | 5     | >CDKN2A-A4 ALLEAGALPN | 1   | 4     |
| >CDKN2A-A4 ALLEAGALPN | 19    | >CDKN2A-A4 ALLEAGALPN | 3   | 16    |
| >CDKN2A-A4 ALLEAGALPN | 6     | >CDKN2A-A4 ALLEAGALPN | 3   | 3     |
| >CDKN2A-A4 ALLEAGALPN | 15    | >CDKN2A-A4 ALLEAGALPN | 2   | 13    |
| >CDKN2A-A4 ALLEAGALPN | 4     | >CDKN2A-A4 ALLEAGALPN | 2   | 2     |
| >CDKN2A-A4 ALLEAGALPN | 1156  | >CDKN2A-A4 ALLEAGALPN | 32  | 1124  |
| >CDKN2A-A4 PNAPNSYGR  | 320   | >CDKN2A-A4 PNVPSYGR   | 218 | 102   |
| >CDKN2A-A4 LPNAPNSYGF | 472   | >CDKN2A-A4 LPNVPSYGF  | 674 | 202   |
| >CDKN2A-A4 LPNAPNSY   | 11    | >CDKN2A-A4 LPNVPSY    | 15  | 4     |
| >CDKN2A-A4 LPNAPNSY   | 51    | >CDKN2A-A4 LPNVPSY    | 49  | 2     |
| >CDKN2A-A4 LPNAPNSYG  | 457   | >CDKN2A-A4 LPNVPSYG   | 407 | 50    |
| >CDKN2A-A4 LPNAPNSY   | 58    | >CDKN2A-A4 LPNVPSY    | 114 | 56    |
| >CDKN2A-A4 LPNAPNSY   | 820   | >CDKN2A-A4 LPNVPSY    | 494 | 326   |
| >CDKN2A-A4 ALPNAPNSY  | 181   | >CDKN2A-A4 ALPNVPNSY  | 151 | 30    |
| >CDKN2A-A4 ALPNAPNSY  | 1138  | >CDKN2A-A4 ALPNVPNSY  | 345 | 793   |
| >CDKN2A-A4 ALPNAPNSY  | 281   | >CDKN2A-A4 ALPNVPNSY  | 528 | 247   |
| >CDKN2A-A4 ALPNAPNSY  | 358   | >CDKN2A-A4 ALPNVPNSY  | 741 | 383   |
| >CDKN2A-A4 ALPNAPNSY  | 305   | >CDKN2A-A4 ALPNVPNSY  | 480 | 175   |
| >CDKN2A-A4 GALPNAPNS\ | 280   | >CDKN2A-A4 GALPNVPNS\ | 281 | 1     |
| >CDKN2A-A4 GALPNAPNS\ | 19    | >CDKN2A-A4 GALPNVPNS\ | 36  | 17    |
| >CDKN2A-A4 AGALPNAPN: | 136   | >CDKN2A-A4 AGALPNVPN: | 221 | 85    |
| >CDKN2A-A4 EAGALPNA   | 3759  | >CDKN2A-A4 EAGALPNV   | 258 | 3501  |
| >CDKN2A-A4 EAGALPNA   | 470   | >CDKN2A-A4 EAGALPNV   | 16  | 454   |
| >CDKN2A-A4 LEAGALPNA  | 6081  | >CDKN2A-A4 LEAGALPNV  | 103 | 5978  |
| >CDKN2A-A4 LEAGALPNA  | 2682  | >CDKN2A-A4 LEAGALPNV  | 374 | 2308  |
| >CDKN2A-A4 LEAGALPNA  | 17970 | >CDKN2A-A4 LEAGALPNV  | 302 | 17668 |
| >CDKN2A-A4 LEAGALPNA  | 569   | >CDKN2A-A4 LEAGALPNV  | 223 | 346   |
| >CDKN2A-A4 LEAGALPNA  | 2894  | >CDKN2A-A4 LEAGALPNV  | 65  | 2829  |
| >CDKN2A-A4 LEAGALPNA  | 621   | >CDKN2A-A4 LEAGALPNV  | 481 | 140   |
| >CDKN2A-A4 LEAGALPNA  | 80    | >CDKN2A-A4 LEAGALPNV  | 372 | 292   |
| >CDKN2A-A4 LEAGALPNA  | 312   | >CDKN2A-A4 LEAGALPNV  | 17  | 295   |
| >CDKN2A-A4 LLEAGALPNA | 371   | >CDKN2A-A4 LLEAGALPNV | 35  | 336   |
| >CDKN2A-A4 LLEAGALPNA | 241   | >CDKN2A-A4 LLEAGALPNV | 44  | 197   |
| >CDKN2A-A4 LLEAGALPNA | 249   | >CDKN2A-A4 LLEAGALPNV | 43  | 206   |
| >CDKN2A-A4 LLEAGALPNA | 507   | >CDKN2A-A4 LLEAGALPNV | 101 | 406   |
| >CDKN2A-A4 LLEAGALPNA | 584   | >CDKN2A-A4 LLEAGALPNV | 10  | 574   |

|                       |       |                       |       |       |
|-----------------------|-------|-----------------------|-------|-------|
| >CDKN2A-A4 LLEAGALPNA | 1191  | >CDKN2A-A4 LLEAGALPNV | 19    | 1172  |
| >CDKN2A-A4 LLEAGALPNA | 575   | >CDKN2A-A4 LLEAGALPNV | 13    | 562   |
| >CDKN2A-A4 LLEAGALPNA | 2887  | >CDKN2A-A4 LLEAGALPNV | 30    | 2857  |
| >CDKN2A-A4 LLEAGALPNA | 10    | >CDKN2A-A4 LLEAGALPNV | 2     | 8     |
| >CDKN2A-A4 EPAAGSSM   | 401   | >CDKN2A-A4 EPSAGSSM   | 315   | 86    |
| >CDKN2A-A4 EPAAGSSM   | 477   | >CDKN2A-A4 EPSAGSSM   | 1868  | 1391  |
| >CDKN2A-A4 EPAAGSSM   | 33    | >CDKN2A-A4 EPSAGSSM   | 60    | 27    |
| >CDKN2A-A4 EPAAGSSM   | 13    | >CDKN2A-A4 EPSAGSSM   | 15    | 2     |
| >CDKN2A-A4 EPAAGSSMEI | 216   | >CDKN2A-A4 EPSAGSSMEF | 290   | 74    |
| >CDKN2A-A4 EPAAGSSM   | 265   | >CDKN2A-A4 EPSAGSSM   | 382   | 117   |
| >CDKN2A-A4 EPAAGSSM   | 547   | >CDKN2A-A4 EPSAGSSM   | 353   | 194   |
| >CDKN2A-A4 MEPAAGSSV  | 367   | >CDKN2A-A4 MEPSAGSSM  | 291   | 76    |
| >CDKN2A-A4 MEPAAGSSV  | 488   | >CDKN2A-A4 MEPSAGSSM  | 203   | 285   |
| >CDKN2A-A4 MEPAAGSSV  | 382   | >CDKN2A-A4 MEPSAGSSM  | 481   | 99    |
| >CDKN2A-A4 MEPAAGSSV  | 469   | >CDKN2A-A4 MEPSAGSSM  | 1456  | 987   |
| >CDKN2A-A4 MEPAAGSSV  | 291   | >CDKN2A-A4 MEPSAGSSM  | 251   | 40    |
| >CDKN2A-A4 EPAAGSSM   | 401   | >CDKN2A-A4 EPTAGSSM   | 143   | 258   |
| >CDKN2A-A4 EPAAGSSM   | 477   | >CDKN2A-A4 EPTAGSSM   | 1950  | 1473  |
| >CDKN2A-A4 EPAAGSSM   | 33    | >CDKN2A-A4 EPTAGSSM   | 99    | 66    |
| >CDKN2A-A4 EPAAGSSM   | 13    | >CDKN2A-A4 EPTAGSSM   | 18    | 5     |
| >CDKN2A-A4 EPAAGSSMEI | 216   | >CDKN2A-A4 EPTAGSSMEF | 440   | 224   |
| >CDKN2A-A4 EPAAGSSM   | 265   | >CDKN2A-A4 EPTAGSSM   | 1491  | 1226  |
| >CDKN2A-A4 EPAAGSSM   | 547   | >CDKN2A-A4 EPTAGSSM   | 409   | 138   |
| >CDKN2A-A4 MEPAAGSSV  | 700   | >CDKN2A-A4 MEPTAGSSM  | 223   | 477   |
| >CDKN2A-A4 MEPAAGSSV  | 367   | >CDKN2A-A4 MEPTAGSSM  | 584   | 217   |
| >CDKN2A-A4 MEPAAGSSV  | 488   | >CDKN2A-A4 MEPTAGSSM  | 393   | 95    |
| >CDKN2A-A4 MEPAAGSSV  | 382   | >CDKN2A-A4 MEPTAGSSM  | 414   | 32    |
| >CDKN2A-A4 MEPAAGSSV  | 469   | >CDKN2A-A4 MEPTAGSSM  | 2063  | 1594  |
| >CDKN2A-A4 MEPAAGSSV  | 291   | >CDKN2A-A4 MEPTAGSSM  | 145   | 146   |
| >CDKN2A-A5 ARVAELLL   | 180   | >CDKN2A-A5 PRVAELLL   | 3283  | 3103  |
| >CDKN2A-A5 ARVAELLLL  | 120   | >CDKN2A-A5 PRVAELLLL  | 2226  | 2106  |
| >CDKN2A-A5 ARVAELLLLH | 215   | >CDKN2A-A5 PRVAELLLLH | 6318  | 6103  |
| >CDKN2A-A5 ARVAELLL   | 222   | >CDKN2A-A5 PRVAELLL   | 5642  | 5420  |
| >CDKN2A-A5 ARVAELLLL  | 229   | >CDKN2A-A5 PRVAELLLL  | 5731  | 5502  |
| >CDKN2A-A5 ARVAELLLL  | 123   | >CDKN2A-A5 PRVAELLLL  | 864   | 741   |
| >CDKN2A-A5 ARVAELLLL  | 23    | >CDKN2A-A5 PRVAELLLL  | 317   | 294   |
| >CDKN2A-A5 SARVAELL   | 380   | >CDKN2A-A5 SPRVAELL   | 14412 | 14032 |
| >CDKN2A-A5 SARVAELLL  | 39    | >CDKN2A-A5 SPRVAELLL  | 11066 | 11027 |
| >CDKN2A-A5 SARVAELLLL | 38    | >CDKN2A-A5 SPRVAELLLL | 10597 | 10559 |
| >CDKN2A-A5 SARVAELL   | 5501  | >CDKN2A-A5 SPRVAELL   | 46    | 5455  |
| >CDKN2A-A5 SARVAELLL  | 3564  | >CDKN2A-A5 SPRVAELLL  | 31    | 3533  |
| >CDKN2A-A5 SARVAELLLL | 21162 | >CDKN2A-A5 SPRVAELLLL | 59    | 21103 |
| >CDKN2A-A5 SARVAELL   | 377   | >CDKN2A-A5 SPRVAELL   | 18431 | 18054 |

|                        |      |                        |       |       |
|------------------------|------|------------------------|-------|-------|
| >CDKN2A-A5 SARVAELL    | 179  | >CDKN2A-A5 SPRVAELL    | 16174 | 15995 |
| >CDKN2A-A5 SARVAELLLL  | 137  | >CDKN2A-A5 SPRVAELLLL  | 15553 | 15416 |
| >CDKN2A-A5 RPIQVMMM    | 23   | >CDKN2A-A5 RPIQVMMM    | 2229  | 2206  |
| >CDKN2A-A5 RPIQVMMM    | 134  | >CDKN2A-A5 RPIQVMMM    | 2909  | 2775  |
| >CDKN2A-A5 GSARVAEL    | 282  | >CDKN2A-A5 GSPRVAEL    | 4023  | 3741  |
| >CDKN2A-A5 GSARVAELL   | 237  | >CDKN2A-A5 GSPRVAELL   | 15696 | 15459 |
| >CDKN2A-A5 GSARVAELLL  | 255  | >CDKN2A-A5 GSPRVAELLL  | 15720 | 15465 |
| >CDKN2A-A5 GSARVAELLLL | 270  | >CDKN2A-A5 GSPRVAELLLL | 15732 | 15462 |
| >CDKN2A-A5 GSARVAEL    | 9108 | >CDKN2A-A5 GSPRVAEL    | 403   | 8705  |
| >CDKN2A-A5 GSARVAELL   | 753  | >CDKN2A-A5 GSPRVAELL   | 7     | 746   |
| >CDKN2A-A5 GSARVAELLL  | 720  | >CDKN2A-A5 GSPRVAELLL  | 8     | 712   |
| >CDKN2A-A5 GSARVAELLLL | 264  | >CDKN2A-A5 GSPRVAELLLL | 4     | 260   |
| >CDKN2A-A5 GSARVAELL   | 24   | >CDKN2A-A5 GSPRVAELL   | 551   | 527   |
| >CDKN2A-A5 GSARVAELLL  | 452  | >CDKN2A-A5 GSPRVAELLL  | 1305  | 853   |
| >CDKN2A-A5 GSARVAELLLL | 66   | >CDKN2A-A5 GSPRVAELLLL | 1238  | 1172  |
| >CDKN2A-A5 MGSARVAEL   | 66   | >CDKN2A-A5 MGSPRVAEL   | 127   | 61    |
| >CDKN2A-A5 MGSARVAEL   | 399  | >CDKN2A-A5 MGSPRVAEL   | 689   | 290   |
| >CDKN2A-A5 MGSARVAEL   | 218  | >CDKN2A-A5 MGSPRVAEL   | 712   | 494   |
| >CDKN2A-A5 MGSARVAEL   | 753  | >CDKN2A-A5 MGSPRVAEL   | 168   | 585   |
| >CDKN2A-A5 MMGSARVA    | 177  | >CDKN2A-A5 MMGSPRVA    | 503   | 326   |
| >CDKN2A-A5 MMGSARVA    | 143  | >CDKN2A-A5 MMGSPRVA    | 258   | 115   |
| >CDKN2A-A5 MMGSARVA    | 24   | >CDKN2A-A5 MMGSPRVA    | 39    | 15    |
| >CDKN2A-A5 MMGSARVA    | 8    | >CDKN2A-A5 MMGSPRVA    | 20    | 12    |
| >CDKN2A-A5 MMGSARVA    | 224  | >CDKN2A-A5 MMGSPRVA    | 343   | 119   |
| >CDKN2A-A5 MMGSARVA    | 52   | >CDKN2A-A5 MMGSPRVA    | 55    | 3     |
| >CDKN2A-A5 MMGSARVA    | 173  | >CDKN2A-A5 MMGSPRVA    | 412   | 239   |
| >CDKN2A-A5 MMGSARVA    | 436  | >CDKN2A-A5 MMGSPRVA    | 878   | 442   |
| >CDKN2A-A5 MMGSARVA    | 187  | >CDKN2A-A5 MMGSPRVA    | 58    | 129   |
| >CDKN2A-A5 MMGSARVA    | 11   | >CDKN2A-A5 MMGSPRVA    | 6     | 5     |
| >CDKN2A-A5 MMGSARVA    | 24   | >CDKN2A-A5 MMGSPRVA    | 12    | 12    |
| >CDKN2A-A5 MMGSARVA    | 42   | >CDKN2A-A5 MMGSPRVA    | 48    | 6     |
| >CDKN2A-A5 MMGSARVA    | 190  | >CDKN2A-A5 MMGSPRVA    | 219   | 29    |
| >CDKN2A-A5 MMGSARVA    | 46   | >CDKN2A-A5 MMGSPRVA    | 85    | 39    |
| >CDKN2A-A5 MMGSARVA    | 81   | >CDKN2A-A5 MMGSPRVA    | 171   | 90    |
| >CDKN2A-A5 MMGSARVA    | 33   | >CDKN2A-A5 MMGSPRVA    | 70    | 37    |
| >CDKN2A-A5 MMGSARVA    | 112  | >CDKN2A-A5 MMGSPRVA    | 247   | 135   |
| >CDKN2A-A5 MMGSARVA    | 95   | >CDKN2A-A5 MMGSPRVA    | 135   | 40    |
| >CDKN2A-A5 MMGSARVA    | 3    | >CDKN2A-A5 MMGSPRVA    | 3     | 0     |
| >CDKN2A-A5 MMGSARVA    | 8    | >CDKN2A-A5 MMGSPRVA    | 9     | 1     |
| >CDKN2A-A5 MMGSARVA    | 163  | >CDKN2A-A5 MMGSPRVA    | 312   | 149   |
| >CDKN2A-A5 MMGSARVA    | 90   | >CDKN2A-A5 MMGSPRVA    | 72    | 18    |
| >CDKN2A-A5 MMGSARVA    | 402  | >CDKN2A-A5 MMGSPRVA    | 319   | 83    |
| >CDKN2A-A5 MMMGSARV    | 11   | >CDKN2A-A5 MMMGSPRV    | 8     | 3     |

|                     |      |                     |      |      |
|---------------------|------|---------------------|------|------|
| >CDKN2A-A5 MMMGSARV | 549  | >CDKN2A-A5 MMMGSPRV | 209  | 340  |
| >CDKN2A-A5 MMMGSARV | 19   | >CDKN2A-A5 MMMGSPRV | 14   | 5    |
| >CDKN2A-A5 MMMGSARV | 3    | >CDKN2A-A5 MMMGSPRV | 4    | 1    |
| >CDKN2A-A5 MMMGSARV | 102  | >CDKN2A-A5 MMMGSPRV | 117  | 15   |
| >CDKN2A-A5 MMMGSARV | 4    | >CDKN2A-A5 MMMGSPRV | 4    | 0    |
| >CDKN2A-A5 MMMGSARV | 2    | >CDKN2A-A5 MMMGSPRV | 3    | 1    |
| >CDKN2A-A5 MMMGSARV | 11   | >CDKN2A-A5 MMMGSPRV | 6    | 5    |
| >CDKN2A-A5 MMMGSARV | 5    | >CDKN2A-A5 MMMGSPRV | 3    | 2    |
| >CDKN2A-A5 MMMGSARV | 8    | >CDKN2A-A5 MMMGSPRV | 11   | 3    |
| >CDKN2A-A5 MMMGSARV | 437  | >CDKN2A-A5 MMMGSPRV | 2472 | 2035 |
| >CDKN2A-A5 MMMGSARV | 27   | >CDKN2A-A5 MMMGSPRV | 58   | 31   |
| >CDKN2A-A5 MMMGSARV | 2    | >CDKN2A-A5 MMMGSPRV | 2    | 0    |
| >CDKN2A-A5 MMMGSARV | 29   | >CDKN2A-A5 MMMGSPRV | 11   | 18   |
| >CDKN2A-A5 MMMGSARV | 3    | >CDKN2A-A5 MMMGSPRV | 3    | 0    |
| >CDKN2A-A5 MMMGSARV | 3    | >CDKN2A-A5 MMMGSPRV | 4    | 1    |
| >CDKN2A-A5 MMMGSARV | 281  | >CDKN2A-A5 MMMGSPRV | 225  | 56   |
| >CDKN2A-A5 MMMGSARV | 9    | >CDKN2A-A5 MMMGSPRV | 8    | 1    |
| >CDKN2A-A5 MMMGSARV | 8    | >CDKN2A-A5 MMMGSPRV | 6    | 2    |
| >CDKN2A-A5 MMMGSARV | 35   | >CDKN2A-A5 MMMGSPRV | 31   | 4    |
| >CDKN2A-A5 MMMGSARV | 2    | >CDKN2A-A5 MMMGSPRV | 2    | 0    |
| >CDKN2A-A5 MMMGSARV | 91   | >CDKN2A-A5 MMMGSPRV | 56   | 35   |
| >CDKN2A-A5 MMMGSARV | 4    | >CDKN2A-A5 MMMGSPRV | 4    | 0    |
| >CDKN2A-A5 MMMGSARV | 2    | >CDKN2A-A5 MMMGSPRV | 2    | 0    |
| >CDKN2A-A5 MMMGSARV | 21   | >CDKN2A-A5 MMMGSPRV | 35   | 14   |
| >CDKN2A-A5 MMMGSARV | 3    | >CDKN2A-A5 MMMGSPRV | 3    | 0    |
| >CDKN2A-A5 MMMGSARV | 179  | >CDKN2A-A5 MMMGSPRV | 184  | 5    |
| >CDKN2A-A5 MMMGSARV | 29   | >CDKN2A-A5 MMMGSPRV | 157  | 128  |
| >CDKN2A-A5 MMMGSARV | 235  | >CDKN2A-A5 MMMGSPRV | 249  | 14   |
| >CDKN2A-A5 MMMGSARV | 51   | >CDKN2A-A5 MMMGSPRV | 49   | 2    |
| >CDKN2A-A5 MMMGSARV | 188  | >CDKN2A-A5 MMMGSPRV | 201  | 13   |
| >CDKN2A-A5 MMMGSARV | 301  | >CDKN2A-A5 MMMGSPRV | 642  | 341  |
| >CDKN2A-A5 MMMGSARV | 191  | >CDKN2A-A5 MMMGSPRV | 409  | 218  |
| >CDKN2A-A5 MMMGSARV | 84   | >CDKN2A-A5 MMMGSPRV | 120  | 36   |
| >CDKN2A-A5 MMMGSARV | 237  | >CDKN2A-A5 MMMGSPRV | 205  | 32   |
| >CDKN2A-A5 MMMGSARV | 342  | >CDKN2A-A5 MMMGSPRV | 243  | 99   |
| >CDKN2A-A5 MMMGSARV | 31   | >CDKN2A-A5 MMMGSPRV | 26   | 5    |
| >CDKN2A-A5 MMMGSARV | 55   | >CDKN2A-A5 MMMGSPRV | 80   | 25   |
| >CDKN2A-A5 MMMGSARV | 465  | >CDKN2A-A5 MMMGSPRV | 832  | 367  |
| >CDKN2A-A5 MMMGSARV | 18   | >CDKN2A-A5 MMMGSPRV | 24   | 6    |
| >CDKN2A-A5 MMMGSARV | 185  | >CDKN2A-A5 MMMGSPRV | 191  | 6    |
| >CDKN2A-A5 VMMMGSAR | 182  | >CDKN2A-A5 VMMMGSAR | 201  | 19   |
| >CDKN2A-A5 VMMMGSAR | 11   | >CDKN2A-A5 VMMMGSAR | 9    | 2    |
| >CDKN2A-A5 VMMMGSAR | 1340 | >CDKN2A-A5 VMMMGSAR | 411  | 929  |



|                     |      |                     |       |       |
|---------------------|------|---------------------|-------|-------|
| >CDKN2A-A5 VMMMGSAR | 9    | >CDKN2A-A5 VMMMGSAR | 27    | 18    |
| >CDKN2A-A5 VMMMGSAR | 425  | >CDKN2A-A5 VMMMGSAR | 285   | 140   |
| >CDKN2A-A5 VMMMGSAR | 3    | >CDKN2A-A5 VMMMGSAR | 4     | 1     |
| >CDKN2A-A5 VMMMGSAR | 226  | >CDKN2A-A5 VMMMGSAR | 74    | 152   |
| >CDKN2A-A5 VMMMGSAR | 19   | >CDKN2A-A5 VMMMGSAR | 10    | 9     |
| >CDKN2A-A5 VMMMGSAR | 2    | >CDKN2A-A5 VMMMGSAR | 2     | 0     |
| >CDKN2A-A5 VMMMGSAR | 55   | >CDKN2A-A5 VMMMGSAR | 30    | 25    |
| >CDKN2A-A5 VMMMGSAR | 3    | >CDKN2A-A5 VMMMGSAR | 5     | 2     |
| >CDKN2A-A5 VMMMGSAR | 239  | >CDKN2A-A5 VMMMGSAR | 271   | 32    |
| >CDKN2A-A5 VMMMGSAR | 7    | >CDKN2A-A5 VMMMGSAR | 5     | 2     |
| >CDKN2A-A5 VMMMGSAR | 625  | >CDKN2A-A5 VMMMGSAR | 353   | 272   |
| >CDKN2A-A5 VMMMGSAR | 2    | >CDKN2A-A5 VMMMGSAR | 2     | 0     |
| >CDKN2A-A5 VMMMGSAR | 95   | >CDKN2A-A5 VMMMGSAR | 81    | 14    |
| >CDKN2A-A5 VMMMGSAR | 2    | >CDKN2A-A5 VMMMGSAR | 2     | 0     |
| >CDKN2A-A5 VMMMGSAR | 54   | >CDKN2A-A5 VMMMGSAR | 66    | 12    |
| >CDKN2A-A5 VMMMGSAR | 212  | >CDKN2A-A5 VMMMGSAR | 187   | 25    |
| >CDKN2A-A5 VMMMGSAR | 168  | >CDKN2A-A5 VMMMGSAR | 65    | 103   |
| >CDKN2A-A5 VMMMGSAR | 20   | >CDKN2A-A5 VMMMGSAR | 18    | 2     |
| >CDKN2A-A5 VMMMGSAR | 120  | >CDKN2A-A5 VMMMGSAR | 113   | 7     |
| >CDKN2A-A5 VMMMGSAR | 462  | >CDKN2A-A5 VMMMGSAR | 531   | 69    |
| >CDKN2A-A5 VMMMGSAR | 175  | >CDKN2A-A5 VMMMGSAR | 333   | 158   |
| >CDKN2A-A5 VMMMGSAR | 183  | >CDKN2A-A5 VMMMGSAR | 335   | 152   |
| >CDKN2A-A5 VMMMGSAR | 146  | >CDKN2A-A5 VMMMGSAR | 155   | 9     |
| >CDKN2A-A5 VMMMGSAR | 420  | >CDKN2A-A5 VMMMGSAR | 495   | 75    |
| >CDKN2A-A5 VMMMGSAR | 1050 | >CDKN2A-A5 VMMMGSAR | 339   | 711   |
| >CDKN2A-A5 QVMMMGSF | 419  | >CDKN2A-A5 QVMMMGSF | 905   | 486   |
| >CDKN2A-A5 QVMMMGSF | 298  | >CDKN2A-A5 QVMMMGSF | 14842 | 14544 |
| >CDKN2A-A5 QVMMMGSF | 61   | >CDKN2A-A5 QVMMMGSF | 186   | 125   |
| >CDKN2A-A5 QVMMMGSF | 313  | >CDKN2A-A5 QVMMMGSF | 164   | 149   |
| >CDKN2A-A5 QVMMMGSF | 248  | >CDKN2A-A5 QVMMMGSF | 220   | 28    |
| >CDKN2A-A5 QVMMMGSF | 41   | >CDKN2A-A5 QVMMMGSF | 39    | 2     |
| >CDKN2A-A5 QVMMMGSF | 114  | >CDKN2A-A5 QVMMMGSF | 49    | 65    |
| >CDKN2A-A5 QVMMMGSF | 55   | >CDKN2A-A5 QVMMMGSF | 32    | 23    |
| >CDKN2A-A5 QVMMMGSF | 218  | >CDKN2A-A5 QVMMMGSF | 149   | 69    |
| >CDKN2A-A5 QVMMMGSF | 20   | >CDKN2A-A5 QVMMMGSF | 23    | 3     |
| >CDKN2A-A5 QVMMMGSF | 167  | >CDKN2A-A5 QVMMMGSF | 14409 | 14242 |
| >CDKN2A-A5 QVMMMGSF | 215  | >CDKN2A-A5 QVMMMGSF | 945   | 730   |
| >CDKN2A-A5 QVMMMGSF | 78   | >CDKN2A-A5 QVMMMGSF | 44    | 34    |
| >CDKN2A-A5 IQVMMMGS | 167  | >CDKN2A-A5 IQVMMMGS | 12422 | 12255 |
| >CDKN2A-A5 IQVMMMGS | 42   | >CDKN2A-A5 IQVMMMGS | 137   | 95    |
| >CDKN2A-A5 IQVMMMGS | 87   | >CDKN2A-A5 IQVMMMGS | 5735  | 5648  |
| >CDKN2A-A5 IQVMMMGS | 16   | >CDKN2A-A5 IQVMMMGS | 13    | 3     |
| >CDKN2A-A5 IQVMMMGS | 120  | >CDKN2A-A5 IQVMMMGS | 97    | 23    |

|                        |      |                        |      |      |
|------------------------|------|------------------------|------|------|
| >CDKN2A-A5 IQVMMMGS    | 240  | >CDKN2A-A5 IQVMMMGS    | 133  | 107  |
| >CDKN2A-A5 IQVMMMGS    | 117  | >CDKN2A-A5 IQVMMMGS    | 82   | 35   |
| >CDKN2A-A5 IQVMMMGS    | 187  | >CDKN2A-A5 IQVMMMGS    | 200  | 13   |
| >CDKN2A-A5 ARVAELL     | 180  | >CDKN2A-A5 VRVAELL     | 549  | 369  |
| >CDKN2A-A5 ARVAELLLL   | 120  | >CDKN2A-A5 VRVAELLLL   | 354  | 234  |
| >CDKN2A-A5 ARVAELLLLH  | 215  | >CDKN2A-A5 VRVAELLLLH  | 527  | 312  |
| >CDKN2A-A5 ARVAELL     | 222  | >CDKN2A-A5 VRVAELL     | 689  | 467  |
| >CDKN2A-A5 ARVAELLLL   | 229  | >CDKN2A-A5 VRVAELLLL   | 717  | 488  |
| >CDKN2A-A5 ARVAELLLL   | 123  | >CDKN2A-A5 VRVAELLLL   | 459  | 336  |
| >CDKN2A-A5 ARVAELLLL   | 23   | >CDKN2A-A5 VRVAELLLL   | 74   | 51   |
| >CDKN2A-A5 SARVAELL    | 380  | >CDKN2A-A5 SVRVAELL    | 113  | 267  |
| >CDKN2A-A5 SARVAELL    | 39   | >CDKN2A-A5 SVRVAELL    | 15   | 24   |
| >CDKN2A-A5 SARVAELLLL  | 38   | >CDKN2A-A5 SVRVAELLLL  | 15   | 23   |
| >CDKN2A-A5 SARVAELLLLH | 558  | >CDKN2A-A5 SVRVAELLLLH | 155  | 403  |
| >CDKN2A-A5 SARVAELL    | 377  | >CDKN2A-A5 SVRVAELL    | 3249 | 2872 |
| >CDKN2A-A5 SARVAELL    | 179  | >CDKN2A-A5 SVRVAELL    | 2247 | 2068 |
| >CDKN2A-A5 SARVAELLLL  | 137  | >CDKN2A-A5 SVRVAELLLL  | 1637 | 1500 |
| >CDKN2A-A5 RPIQVMMM    | 23   | >CDKN2A-A5 RPIQVMMM    | 13   | 10   |
| >CDKN2A-A5 RPIQVMMM    | 134  | >CDKN2A-A5 RPIQVMMM    | 766  | 632  |
| >CDKN2A-A5 GSARVAEL    | 282  | >CDKN2A-A5 GSVRVAEL    | 104  | 178  |
| >CDKN2A-A5 GSARVAELL   | 1361 | >CDKN2A-A5 GSVRVAELL   | 445  | 916  |
| >CDKN2A-A5 GSARVAELLLL | 950  | >CDKN2A-A5 GSVRVAELLLL | 338  | 612  |
| >CDKN2A-A5 GSARVAELL   | 237  | >CDKN2A-A5 GSVRVAELL   | 537  | 300  |
| >CDKN2A-A5 GSARVAELL   | 255  | >CDKN2A-A5 GSVRVAELL   | 527  | 272  |
| >CDKN2A-A5 GSARVAELLLL | 270  | >CDKN2A-A5 GSVRVAELLLL | 551  | 281  |
| >CDKN2A-A5 GSARVAELLLL | 264  | >CDKN2A-A5 GSVRVAELLLL | 769  | 505  |
| >CDKN2A-A5 GSARVAELL   | 24   | >CDKN2A-A5 GSVRVAELL   | 30   | 6    |
| >CDKN2A-A5 GSARVAELL   | 452  | >CDKN2A-A5 GSVRVAELL   | 1353 | 901  |
| >CDKN2A-A5 GSARVAELLLL | 66   | >CDKN2A-A5 GSVRVAELLLL | 79   | 13   |
| >CDKN2A-A5 MGSARVAEL   | 66   | >CDKN2A-A5 MGSVRVAEL   | 352  | 286  |
| >CDKN2A-A5 MGSARVAEL   | 399  | >CDKN2A-A5 MGSVRVAEL   | 1324 | 925  |
| >CDKN2A-A5 MGSARVAEL   | 218  | >CDKN2A-A5 MGSVRVAEL   | 219  | 1    |
| >CDKN2A-A5 MMGSARVAI   | 177  | >CDKN2A-A5 MMGSVRVAI   | 197  | 20   |
| >CDKN2A-A5 MMGSARVAI   | 143  | >CDKN2A-A5 MMGSVRVAI   | 103  | 40   |
| >CDKN2A-A5 MMGSARVA    | 831  | >CDKN2A-A5 MMGSVRVA    | 364  | 467  |
| >CDKN2A-A5 MMGSARVAI   | 24   | >CDKN2A-A5 MMGSVRVAI   | 28   | 4    |
| >CDKN2A-A5 MMGSARVAI   | 8    | >CDKN2A-A5 MMGSVRVAI   | 8    | 0    |
| >CDKN2A-A5 MMGSARVA    | 224  | >CDKN2A-A5 MMGSVRVA    | 84   | 140  |
| >CDKN2A-A5 MMGSARVAI   | 52   | >CDKN2A-A5 MMGSVRVAI   | 53   | 1    |
| >CDKN2A-A5 MMGSARVAI   | 173  | >CDKN2A-A5 MMGSVRVAI   | 166  | 7    |
| >CDKN2A-A5 MMGSARVAI   | 436  | >CDKN2A-A5 MMGSVRVAI   | 450  | 14   |
| >CDKN2A-A5 MMGSARVA    | 187  | >CDKN2A-A5 MMGSVRVA    | 32   | 155  |
| >CDKN2A-A5 MMGSARVAI   | 11   | >CDKN2A-A5 MMGSVRVAI   | 6    | 5    |

|                      |      |                      |     |     |
|----------------------|------|----------------------|-----|-----|
| >CDKN2A-A5 MMGSARVAI | 24   | >CDKN2A-A5 MMGSVRVAI | 9   | 15  |
| >CDKN2A-A5 MMGSARVAI | 42   | >CDKN2A-A5 MMGSVRVAI | 40  | 2   |
| >CDKN2A-A5 MMGSARVAI | 190  | >CDKN2A-A5 MMGSVRVAI | 151 | 39  |
| >CDKN2A-A5 MMGSARVA  | 1208 | >CDKN2A-A5 MMGSVRVA  | 396 | 812 |
| >CDKN2A-A5 MMGSARVAI | 46   | >CDKN2A-A5 MMGSVRVAI | 32  | 14  |
| >CDKN2A-A5 MMGSARVAI | 81   | >CDKN2A-A5 MMGSVRVAI | 46  | 35  |
| >CDKN2A-A5 MMGSARVAI | 33   | >CDKN2A-A5 MMGSVRVAI | 51  | 18  |
| >CDKN2A-A5 MMGSARVAI | 112  | >CDKN2A-A5 MMGSVRVAI | 155 | 43  |
| >CDKN2A-A5 MMGSARVA  | 95   | >CDKN2A-A5 MMGSVRVA  | 64  | 31  |
| >CDKN2A-A5 MMGSARVAI | 3    | >CDKN2A-A5 MMGSVRVAI | 4   | 1   |
| >CDKN2A-A5 MMGSARVAI | 8    | >CDKN2A-A5 MMGSVRVAI | 8   | 0   |
| >CDKN2A-A5 MMGSARVAI | 163  | >CDKN2A-A5 MMGSVRVAI | 283 | 120 |
| >CDKN2A-A5 MMGSARVAI | 90   | >CDKN2A-A5 MMGSVRVAI | 157 | 67  |
| >CDKN2A-A5 MMGSARVAI | 402  | >CDKN2A-A5 MMGSVRVAI | 632 | 230 |
| >CDKN2A-A5 MMMGSARV  | 587  | >CDKN2A-A5 MMMGSVRV  | 438 | 149 |
| >CDKN2A-A5 MMMGSARV  | 11   | >CDKN2A-A5 MMMGSVRV  | 8   | 3   |
| >CDKN2A-A5 MMMGSARV  | 549  | >CDKN2A-A5 MMMGSVRV  | 73  | 476 |
| >CDKN2A-A5 MMMGSARV  | 19   | >CDKN2A-A5 MMMGSVRV  | 11  | 8   |
| >CDKN2A-A5 MMMGSARV  | 3    | >CDKN2A-A5 MMMGSVRV  | 3   | 0   |
| >CDKN2A-A5 MMMGSARV  | 102  | >CDKN2A-A5 MMMGSVRV  | 25  | 77  |
| >CDKN2A-A5 MMMGSARV  | 4    | >CDKN2A-A5 MMMGSVRV  | 3   | 1   |
| >CDKN2A-A5 MMMGSARV  | 2    | >CDKN2A-A5 MMMGSVRV  | 2   | 0   |
| >CDKN2A-A5 MMMGSARV  | 11   | >CDKN2A-A5 MMMGSVRV  | 4   | 7   |
| >CDKN2A-A5 MMMGSARV  | 5    | >CDKN2A-A5 MMMGSVRV  | 3   | 2   |
| >CDKN2A-A5 MMMGSARV  | 8    | >CDKN2A-A5 MMMGSVRV  | 6   | 2   |
| >CDKN2A-A5 MMMGSARV  | 437  | >CDKN2A-A5 MMMGSVRV  | 173 | 264 |
| >CDKN2A-A5 MMMGSARV  | 27   | >CDKN2A-A5 MMMGSVRV  | 24  | 3   |
| >CDKN2A-A5 MMMGSARV  | 2    | >CDKN2A-A5 MMMGSVRV  | 1   | 1   |
| >CDKN2A-A5 MMMGSARV  | 29   | >CDKN2A-A5 MMMGSVRV  | 8   | 21  |
| >CDKN2A-A5 MMMGSARV  | 3    | >CDKN2A-A5 MMMGSVRV  | 2   | 1   |
| >CDKN2A-A5 MMMGSARV  | 3    | >CDKN2A-A5 MMMGSVRV  | 3   | 0   |
| >CDKN2A-A5 MMMGSARV  | 281  | >CDKN2A-A5 MMMGSVRV  | 96  | 185 |
| >CDKN2A-A5 MMMGSARV  | 9    | >CDKN2A-A5 MMMGSVRV  | 7   | 2   |
| >CDKN2A-A5 MMMGSARV  | 8    | >CDKN2A-A5 MMMGSVRV  | 6   | 2   |
| >CDKN2A-A5 MMMGSARV  | 1302 | >CDKN2A-A5 MMMGSVRV  | 390 | 912 |
| >CDKN2A-A5 MMMGSARV  | 35   | >CDKN2A-A5 MMMGSVRV  | 24  | 11  |
| >CDKN2A-A5 MMMGSARV  | 2    | >CDKN2A-A5 MMMGSVRV  | 2   | 0   |
| >CDKN2A-A5 MMMGSARV  | 91   | >CDKN2A-A5 MMMGSVRV  | 19  | 72  |
| >CDKN2A-A5 MMMGSARV  | 4    | >CDKN2A-A5 MMMGSVRV  | 3   | 1   |
| >CDKN2A-A5 MMMGSARV  | 2    | >CDKN2A-A5 MMMGSVRV  | 2   | 0   |
| >CDKN2A-A5 MMMGSARV  | 21   | >CDKN2A-A5 MMMGSVRV  | 9   | 12  |
| >CDKN2A-A5 MMMGSARV  | 3    | >CDKN2A-A5 MMMGSVRV  | 2   | 1   |
| >CDKN2A-A5 MMMGSARV  | 179  | >CDKN2A-A5 MMMGSVRV  | 191 | 12  |

|                      |      |                      |     |      |
|----------------------|------|----------------------|-----|------|
| >CDKN2A-A5 MMMGSARV  | 29   | >CDKN2A-A5 MMMGSVRV  | 27  | 2    |
| >CDKN2A-A5 MMMGSARV  | 235  | >CDKN2A-A5 MMMGSVRV  | 227 | 8    |
| >CDKN2A-A5 MMMGSARV  | 51   | >CDKN2A-A5 MMMGSVRV  | 82  | 31   |
| >CDKN2A-A5 MMMGSARV  | 188  | >CDKN2A-A5 MMMGSVRV  | 142 | 46   |
| >CDKN2A-A5 MMMGSARV  | 301  | >CDKN2A-A5 MMMGSVRV  | 262 | 39   |
| >CDKN2A-A5 MMMGSARV  | 191  | >CDKN2A-A5 MMMGSVRV  | 112 | 79   |
| >CDKN2A-A5 MMMGSARV  | 84   | >CDKN2A-A5 MMMGSVRV  | 71  | 13   |
| >CDKN2A-A5 MMMGSARV  | 237  | >CDKN2A-A5 MMMGSVRV  | 113 | 124  |
| >CDKN2A-A5 MMMGSARV  | 342  | >CDKN2A-A5 MMMGSVRV  | 167 | 175  |
| >CDKN2A-A5 MMMGSARV  | 31   | >CDKN2A-A5 MMMGSVRV  | 25  | 6    |
| >CDKN2A-A5 MMMGSARV  | 55   | >CDKN2A-A5 MMMGSVRV  | 78  | 23   |
| >CDKN2A-A5 MMMGSARV  | 465  | >CDKN2A-A5 MMMGSVRV  | 541 | 76   |
| >CDKN2A-A5 MMMGSARV  | 18   | >CDKN2A-A5 MMMGSVRV  | 27  | 9    |
| >CDKN2A-A5 MMMGSARV  | 185  | >CDKN2A-A5 MMMGSVRV  | 244 | 59   |
| >CDKN2A-A5 VMMMGSAR  | 182  | >CDKN2A-A5 VMMMGSVR  | 279 | 97   |
| >CDKN2A-A5 VMMMGSAR  | 11   | >CDKN2A-A5 VMMMGSVR  | 11  | 0    |
| >CDKN2A-A5 VMMMGSAR  | 9    | >CDKN2A-A5 VMMMGSVR  | 11  | 2    |
| >CDKN2A-A5 VMMMGSAR  | 425  | >CDKN2A-A5 VMMMGSVR  | 325 | 100  |
| >CDKN2A-A5 VMMMGSAR  | 3    | >CDKN2A-A5 VMMMGSVR  | 5   | 2    |
| >CDKN2A-A5 VMMMGSAR  | 226  | >CDKN2A-A5 VMMMGSVR  | 109 | 117  |
| >CDKN2A-A5 VMMMGSAR  | 19   | >CDKN2A-A5 VMMMGSVR  | 21  | 2    |
| >CDKN2A-A5 VMMMGSAR  | 2    | >CDKN2A-A5 VMMMGSVR  | 2   | 0    |
| >CDKN2A-A5 VMMMGSAR  | 55   | >CDKN2A-A5 VMMMGSVR  | 25  | 30   |
| >CDKN2A-A5 VMMMGSAR  | 3    | >CDKN2A-A5 VMMMGSVR  | 4   | 1    |
| >CDKN2A-A5 VMMMGSAR  | 239  | >CDKN2A-A5 VMMMGSVR  | 171 | 68   |
| >CDKN2A-A5 VMMMGSAR  | 7    | >CDKN2A-A5 VMMMGSVR  | 6   | 1    |
| >CDKN2A-A5 VMMMGSAR  | 625  | >CDKN2A-A5 VMMMGSVR  | 272 | 353  |
| >CDKN2A-A5 VMMMGSAR  | 2    | >CDKN2A-A5 VMMMGSVR  | 2   | 0    |
| >CDKN2A-A5 VMMMGSAR  | 95   | >CDKN2A-A5 VMMMGSVR  | 55  | 40   |
| >CDKN2A-A5 VMMMGSAR  | 2    | >CDKN2A-A5 VMMMGSVR  | 2   | 0    |
| >CDKN2A-A5 VMMMGSAR  | 54   | >CDKN2A-A5 VMMMGSVR  | 34  | 20   |
| >CDKN2A-A5 VMMMGSAR  | 212  | >CDKN2A-A5 VMMMGSVR  | 289 | 77   |
| >CDKN2A-A5 VMMMGSAR  | 168  | >CDKN2A-A5 VMMMGSVR  | 235 | 67   |
| >CDKN2A-A5 VMMMGSAR  | 20   | >CDKN2A-A5 VMMMGSVR  | 31  | 11   |
| >CDKN2A-A5 VMMMGSAR  | 120  | >CDKN2A-A5 VMMMGSVR  | 272 | 152  |
| >CDKN2A-A5 VMMMGSAR  | 462  | >CDKN2A-A5 VMMMGSVR  | 502 | 40   |
| >CDKN2A-A5 VMMMGSAR  | 175  | >CDKN2A-A5 VMMMGSVR  | 267 | 92   |
| >CDKN2A-A5 VMMMGSAR  | 183  | >CDKN2A-A5 VMMMGSVR  | 142 | 41   |
| >CDKN2A-A5 VMMMGSAR  | 146  | >CDKN2A-A5 VMMMGSVR  | 192 | 46   |
| >CDKN2A-A5 VMMMGSAR  | 420  | >CDKN2A-A5 VMMMGSVR  | 178 | 242  |
| >CDKN2A-A5 VMMMGSAR  | 721  | >CDKN2A-A5 VMMMGSVR  | 376 | 345  |
| >CDKN2A-A5 QVMMMGSAR | 3290 | >CDKN2A-A5 QVMMMGSVR | 489 | 2801 |
| >CDKN2A-A5 QVMMMGSAR | 419  | >CDKN2A-A5 QVMMMGSVR | 631 | 212  |

|                       |       |                       |       |       |
|-----------------------|-------|-----------------------|-------|-------|
| >CDKN2A-A5 QVMMMGS/   | 298   | >CDKN2A-A5 QVMMMGS\   | 59    | 239   |
| >CDKN2A-A5 QVMMMGS/   | 61    | >CDKN2A-A5 QVMMMGS\   | 144   | 83    |
| >CDKN2A-A5 QVMMMGS/   | 720   | >CDKN2A-A5 QVMMMGS\   | 61    | 659   |
| >CDKN2A-A5 QVMMMGS/   | 313   | >CDKN2A-A5 QVMMMGS\   | 280   | 33    |
| >CDKN2A-A5 QVMMMGS/   | 248   | >CDKN2A-A5 QVMMMGS\   | 476   | 228   |
| >CDKN2A-A5 QVMMMGS/   | 13930 | >CDKN2A-A5 QVMMMGS\   | 248   | 13682 |
| >CDKN2A-A5 QVMMMGS/   | 41    | >CDKN2A-A5 QVMMMGS\   | 53    | 12    |
| >CDKN2A-A5 QVMMMGS/   | 114   | >CDKN2A-A5 QVMMMGS\   | 167   | 53    |
| >CDKN2A-A5 QVMMMGS/   | 55    | >CDKN2A-A5 QVMMMGS\   | 103   | 48    |
| >CDKN2A-A5 QVMMMGS/   | 218   | >CDKN2A-A5 QVMMMGS\   | 610   | 392   |
| >CDKN2A-A5 QVMMMGS/   | 20    | >CDKN2A-A5 QVMMMGS\   | 30    | 10    |
| >CDKN2A-A5 QVMMMGS/   | 167   | >CDKN2A-A5 QVMMMGS\   | 19    | 148   |
| >CDKN2A-A5 QVMMMGS/   | 215   | >CDKN2A-A5 QVMMMGS\   | 428   | 213   |
| >CDKN2A-A5 QVMMMGS/   | 1837  | >CDKN2A-A5 QVMMMGS\   | 78    | 1759  |
| >CDKN2A-A5 QVMMMGS/   | 78    | >CDKN2A-A5 QVMMMGS\   | 148   | 70    |
| >CDKN2A-A5 IQVMMMGS.  | 167   | >CDKN2A-A5 IQVMMMGS'  | 30    | 137   |
| >CDKN2A-A5 IQVMMMGS.  | 42    | >CDKN2A-A5 IQVMMMGS'  | 126   | 84    |
| >CDKN2A-A5 IQVMMMGS.  | 87    | >CDKN2A-A5 IQVMMMGS'  | 14    | 73    |
| >CDKN2A-A5 IQVMMMGS.  | 16    | >CDKN2A-A5 IQVMMMGS'  | 20    | 4     |
| >CDKN2A-A5 IQVMMMGS.  | 120   | >CDKN2A-A5 IQVMMMGS'  | 264   | 144   |
| >CDKN2A-A5 IQVMMMGS.  | 240   | >CDKN2A-A5 IQVMMMGS'  | 715   | 475   |
| >CDKN2A-A5 IQVMMMGS.  | 117   | >CDKN2A-A5 IQVMMMGS'  | 243   | 126   |
| >CDKN2A-A5 IQVMMMGS.  | 187   | >CDKN2A-A5 IQVMMMGS'  | 343   | 156   |
| >CDKN2A-A5 IQVMMMGS.  | 508   | >CDKN2A-A5 IQVMMMGS'  | 293   | 215   |
| >CDKN2A-A5 AGSSMEPSAI | 465   | >CDKN2A-A5 TGSSMEPSAI | 1895  | 1430  |
| >CDKN2A-A5 EPAAGSSM   | 401   | >CDKN2A-A5 EPATGSSM   | 1448  | 1047  |
| >CDKN2A-A5 EPAAGSSM   | 477   | >CDKN2A-A5 EPATGSSM   | 767   | 290   |
| >CDKN2A-A5 EPAAGSSM   | 33    | >CDKN2A-A5 EPATGSSM   | 31    | 2     |
| >CDKN2A-A5 EPAAGSSM   | 13    | >CDKN2A-A5 EPATGSSM   | 16    | 3     |
| >CDKN2A-A5 EPAAGSSMEI | 216   | >CDKN2A-A5 EPATGSSMEF | 273   | 57    |
| >CDKN2A-A5 EPAAGSSM   | 265   | >CDKN2A-A5 EPATGSSM   | 395   | 130   |
| >CDKN2A-A5 EPAAGSSM   | 547   | >CDKN2A-A5 EPATGSSM   | 403   | 144   |
| >CDKN2A-A5 MEPAAGSSM  | 367   | >CDKN2A-A5 MEPATGSSM  | 13969 | 13602 |
| >CDKN2A-A5 MEPAAGSSM  | 488   | >CDKN2A-A5 MEPATGSSM  | 190   | 298   |
| >CDKN2A-A5 MEPAAGSSM  | 382   | >CDKN2A-A5 MEPATGSSM  | 697   | 315   |
| >CDKN2A-A5 MEPAAGSSM  | 469   | >CDKN2A-A5 MEPATGSSM  | 625   | 156   |
| >CDKN2A-A5 MEPAAGSSM  | 291   | >CDKN2A-A5 MEPATGSSM  | 519   | 228   |
| >CDKN2A-A6 AELLLLHGA  | 964   | >CDKN2A-A6 EELLLLHGA  | 264   | 700   |
| >CDKN2A-A6 AELLLLHGA  | 1922  | >CDKN2A-A6 EELLLLHGA  | 370   | 1552  |
| >CDKN2A-A6 AELLLLHGA  | 35    | >CDKN2A-A6 EELLLLHGA  | 292   | 257   |
| >CDKN2A-A6 AELLLLHGA  | 440   | >CDKN2A-A6 EELLLLHGA  | 830   | 390   |
| >CDKN2A-A6 AELLLLHGA  | 7     | >CDKN2A-A6 EELLLLHGA  | 11    | 4     |
| >CDKN2A-A6 AELLLLHGAE | 313   | >CDKN2A-A6 EELLLLHGAE | 1073  | 760   |

|                        |       |                        |       |       |
|------------------------|-------|------------------------|-------|-------|
| >CDKN2A-A6 AELLLLHGA   | 32    | >CDKN2A-A6 EELLLLHGA   | 1650  | 1618  |
| >CDKN2A-A6 VAELLLLHGA  | 19065 | >CDKN2A-A6 VEELLLLHGA  | 121   | 18944 |
| >CDKN2A-A6 RVAELLLL    | 83    | >CDKN2A-A6 RVEELLLL    | 2129  | 2046  |
| >CDKN2A-A6 RVAELLLLHG, | 171   | >CDKN2A-A6 RVEELLLLHG/ | 4037  | 3866  |
| >CDKN2A-A6 RVAELLLL    | 33    | >CDKN2A-A6 RVEELLLL    | 1177  | 1144  |
| >CDKN2A-A6 RVAELLLLHG, | 79    | >CDKN2A-A6 RVEELLLLHG/ | 2417  | 2338  |
| >CDKN2A-A6 RVAELLLL    | 70    | >CDKN2A-A6 RVEELLLL    | 2682  | 2612  |
| >CDKN2A-A6 RVAELLLLHG, | 23    | >CDKN2A-A6 RVEELLLLHG/ | 1189  | 1166  |
| >CDKN2A-A6 RVAELLLL    | 14    | >CDKN2A-A6 RVEELLLL    | 139   | 125   |
| >CDKN2A-A6 RVAELLLLHG, | 12    | >CDKN2A-A6 RVEELLLLHG/ | 90    | 78    |
| >CDKN2A-A6 RVAELLLL    | 392   | >CDKN2A-A6 RVEELLLL    | 3288  | 2896  |
| >CDKN2A-A6 RVAELLLLHG, | 305   | >CDKN2A-A6 RVEELLLLHG/ | 2722  | 2417  |
| >CDKN2A-A6 RVAELLLL    | 393   | >CDKN2A-A6 RVEELLLL    | 1970  | 1577  |
| >CDKN2A-A6 RVAELLLLHG, | 459   | >CDKN2A-A6 RVEELLLLHG/ | 2545  | 2086  |
| >CDKN2A-A6 RVAELLLLH   | 226   | >CDKN2A-A6 RVEELLLLH   | 3366  | 3140  |
| >CDKN2A-A6 RVAELLLLH   | 230   | >CDKN2A-A6 RVEELLLLH   | 2115  | 1885  |
| >CDKN2A-A6 RVAELLLL    | 424   | >CDKN2A-A6 RVEELLLL    | 1080  | 656   |
| >CDKN2A-A6 RVAELLLLHG, | 370   | >CDKN2A-A6 RVEELLLLHG/ | 12502 | 12132 |
| >CDKN2A-A6 RVAELLLLHG, | 428   | >CDKN2A-A6 RVEELLLLHG/ | 4736  | 4308  |
| >CDKN2A-A6 RVAELLLLH   | 65    | >CDKN2A-A6 RVEELLLLH   | 514   | 449   |
| >CDKN2A-A6 RVAELLLL    | 300   | >CDKN2A-A6 RVEELLLL    | 934   | 634   |
| >CDKN2A-A6 RVAELLLL    | 268   | >CDKN2A-A6 RVEELLLL    | 13456 | 13188 |
| >CDKN2A-A6 RVAELLLL    | 364   | >CDKN2A-A6 RVEELLLL    | 721   | 357   |
| >CDKN2A-A6 ARVAELL     | 180   | >CDKN2A-A6 ARVEELL     | 260   | 80    |
| >CDKN2A-A6 ARVAELL     | 120   | >CDKN2A-A6 ARVEELL     | 134   | 14    |
| >CDKN2A-A6 ARVAELLH    | 215   | >CDKN2A-A6 ARVEELLH    | 271   | 56    |
| >CDKN2A-A6 ARVAELL     | 222   | >CDKN2A-A6 ARVEELL     | 314   | 92    |
| >CDKN2A-A6 ARVAELL     | 229   | >CDKN2A-A6 ARVEELL     | 309   | 80    |
| >CDKN2A-A6 ARVAELL     | 123   | >CDKN2A-A6 ARVEELL     | 257   | 134   |
| >CDKN2A-A6 ARVAELL     | 23    | >CDKN2A-A6 ARVEELL     | 31    | 8     |
| >CDKN2A-A6 SARVAELL    | 380   | >CDKN2A-A6 SARVEELL    | 2059  | 1679  |
| >CDKN2A-A6 SARVAELL    | 39    | >CDKN2A-A6 SARVEELL    | 451   | 412   |
| >CDKN2A-A6 SARVAELL    | 38    | >CDKN2A-A6 SARVEELL    | 217   | 179   |
| >CDKN2A-A6 SARVAELL    | 377   | >CDKN2A-A6 SARVEELL    | 1402  | 1025  |
| >CDKN2A-A6 SARVAELL    | 179   | >CDKN2A-A6 SARVEELL    | 431   | 252   |
| >CDKN2A-A6 SARVAELL    | 137   | >CDKN2A-A6 SARVEELL    | 242   | 105   |
| >CDKN2A-A6 GSARVAEL    | 282   | >CDKN2A-A6 GSARVEEL    | 2028  | 1746  |
| >CDKN2A-A6 GSARVAELL   | 237   | >CDKN2A-A6 GSARVEELL   | 324   | 87    |
| >CDKN2A-A6 GSARVAELL   | 255   | >CDKN2A-A6 GSARVEELL   | 398   | 143   |
| >CDKN2A-A6 GSARVAELL   | 270   | >CDKN2A-A6 GSARVEELL   | 379   | 109   |
| >CDKN2A-A6 GSARVAELL   | 264   | >CDKN2A-A6 GSARVEELL   | 904   | 640   |
| >CDKN2A-A6 GSARVAELL   | 24    | >CDKN2A-A6 GSARVEELL   | 90    | 66    |
| >CDKN2A-A6 GSARVAELL   | 452   | >CDKN2A-A6 GSARVEELL   | 757   | 305   |

|                        |     |                        |       |       |
|------------------------|-----|------------------------|-------|-------|
| >CDKN2A-A6 GSARVAELLLI | 66  | >CDKN2A-A6 GSARVEELLLI | 144   | 78    |
| >CDKN2A-A6 MGSARVAEL   | 66  | >CDKN2A-A6 MGSARVEEL   | 79    | 13    |
| >CDKN2A-A6 MGSARVAELI  | 399 | >CDKN2A-A6 MGSARVEELI  | 460   | 61    |
| >CDKN2A-A6 MGSARVAEL   | 218 | >CDKN2A-A6 MGSARVEEL   | 1063  | 845   |
| >CDKN2A-A6 MMGSARVAI   | 177 | >CDKN2A-A6 MMGSARVEE   | 250   | 73    |
| >CDKN2A-A6 MMGSARVAI   | 143 | >CDKN2A-A6 MMGSARVEE   | 132   | 11    |
| >CDKN2A-A6 MMGSARVAI   | 24  | >CDKN2A-A6 MMGSARVEE   | 24    | 0     |
| >CDKN2A-A6 MMGSARVAI   | 8   | >CDKN2A-A6 MMGSARVEE   | 9     | 1     |
| >CDKN2A-A6 MMGSARVA    | 224 | >CDKN2A-A6 MMGSARVE    | 21546 | 21322 |
| >CDKN2A-A6 MMGSARVAI   | 52  | >CDKN2A-A6 MMGSARVEE   | 123   | 71    |
| >CDKN2A-A6 MMGSARVAI   | 173 | >CDKN2A-A6 MMGSARVEE   | 437   | 264   |
| >CDKN2A-A6 MMGSARVAI   | 436 | >CDKN2A-A6 MMGSARVEE   | 1008  | 572   |
| >CDKN2A-A6 MMGSARVA    | 187 | >CDKN2A-A6 MMGSARVE    | 17557 | 17370 |
| >CDKN2A-A6 MMGSARVAI   | 11  | >CDKN2A-A6 MMGSARVEE   | 12    | 1     |
| >CDKN2A-A6 MMGSARVAI   | 24  | >CDKN2A-A6 MMGSARVEE   | 29    | 5     |
| >CDKN2A-A6 MMGSARVAI   | 42  | >CDKN2A-A6 MMGSARVEE   | 89    | 47    |
| >CDKN2A-A6 MMGSARVAI   | 190 | >CDKN2A-A6 MMGSARVEE   | 313   | 123   |
| >CDKN2A-A6 MMGSARVAI   | 46  | >CDKN2A-A6 MMGSARVEE   | 40    | 6     |
| >CDKN2A-A6 MMGSARVAI   | 81  | >CDKN2A-A6 MMGSARVEE   | 67    | 14    |
| >CDKN2A-A6 MMGSARVAI   | 33  | >CDKN2A-A6 MMGSARVEE   | 44    | 11    |
| >CDKN2A-A6 MMGSARVAI   | 112 | >CDKN2A-A6 MMGSARVEE   | 183   | 71    |
| >CDKN2A-A6 MMGSARVA    | 95  | >CDKN2A-A6 MMGSARVE    | 18467 | 18372 |
| >CDKN2A-A6 MMGSARVAI   | 3   | >CDKN2A-A6 MMGSARVEE   | 4     | 1     |
| >CDKN2A-A6 MMGSARVAI   | 8   | >CDKN2A-A6 MMGSARVEE   | 8     | 0     |
| >CDKN2A-A6 MMGSARVAI   | 163 | >CDKN2A-A6 MMGSARVEE   | 303   | 140   |
| >CDKN2A-A6 MMGSARVAI   | 90  | >CDKN2A-A6 MMGSARVEE   | 140   | 50    |
| >CDKN2A-A6 MMGSARVAI   | 402 | >CDKN2A-A6 MMGSARVEE   | 596   | 194   |
| >CDKN2A-A6 MMMGSARV    | 19  | >CDKN2A-A6 MMMGSARV    | 20    | 1     |
| >CDKN2A-A6 MMMGSARV    | 102 | >CDKN2A-A6 MMMGSARV    | 8544  | 8442  |
| >CDKN2A-A6 MMMGSARV    | 4   | >CDKN2A-A6 MMMGSARV    | 3     | 1     |
| >CDKN2A-A6 MMMGSARV    | 11  | >CDKN2A-A6 MMMGSARV    | 11314 | 11303 |
| >CDKN2A-A6 MMMGSARV    | 5   | >CDKN2A-A6 MMMGSARV    | 6     | 1     |
| >CDKN2A-A6 MMMGSARV    | 437 | >CDKN2A-A6 MMMGSARV    | 21403 | 20966 |
| >CDKN2A-A6 MMMGSARV    | 27  | >CDKN2A-A6 MMMGSARV    | 26    | 1     |
| >CDKN2A-A6 MMMGSARV    | 29  | >CDKN2A-A6 MMMGSARV    | 9029  | 9000  |
| >CDKN2A-A6 MMMGSARV    | 3   | >CDKN2A-A6 MMMGSARV    | 4     | 1     |
| >CDKN2A-A6 MMMGSARV    | 281 | >CDKN2A-A6 MMMGSARV    | 18568 | 18287 |
| >CDKN2A-A6 MMMGSARV    | 9   | >CDKN2A-A6 MMMGSARV    | 11    | 2     |
| >CDKN2A-A6 MMMGSARV    | 35  | >CDKN2A-A6 MMMGSARV    | 42    | 7     |
| >CDKN2A-A6 MMMGSARV    | 91  | >CDKN2A-A6 MMMGSARV    | 17155 | 17064 |
| >CDKN2A-A6 MMMGSARV    | 4   | >CDKN2A-A6 MMMGSARV    | 5     | 1     |
| >CDKN2A-A6 MMMGSARV    | 21  | >CDKN2A-A6 MMMGSARV    | 14317 | 14296 |
| >CDKN2A-A6 MMMGSARV    | 3   | >CDKN2A-A6 MMMGSARV    | 3     | 0     |

|                        |      |                        |       |       |
|------------------------|------|------------------------|-------|-------|
| >CDKN2A-A6 MMMGSARV    | 179  | >CDKN2A-A6 MMMGSARV    | 135   | 44    |
| >CDKN2A-A6 MMMGSARV    | 235  | >CDKN2A-A6 MMMGSARV    | 241   | 6     |
| >CDKN2A-A6 MMMGSARV    | 188  | >CDKN2A-A6 MMMGSARV    | 372   | 184   |
| >CDKN2A-A6 MMMGSARV    | 191  | >CDKN2A-A6 MMMGSARV    | 2002  | 1811  |
| >CDKN2A-A6 MMMGSARV    | 84   | >CDKN2A-A6 MMMGSARV    | 111   | 27    |
| >CDKN2A-A6 MMMGSARV    | 342  | >CDKN2A-A6 MMMGSARV    | 4968  | 4626  |
| >CDKN2A-A6 MMMGSARV    | 31   | >CDKN2A-A6 MMMGSARV    | 37    | 6     |
| >CDKN2A-A6 MMMGSARV    | 55   | >CDKN2A-A6 MMMGSARV    | 214   | 159   |
| >CDKN2A-A6 MMMGSARV    | 18   | >CDKN2A-A6 MMMGSARV    | 42    | 24    |
| >CDKN2A-A6 MMMGSARV    | 185  | >CDKN2A-A6 MMMGSARV    | 370   | 185   |
| >CDKN2A-A6 VMMMGSAR    | 425  | >CDKN2A-A6 VMMMGSAR    | 13556 | 13131 |
| >CDKN2A-A6 VMMMGSAR    | 226  | >CDKN2A-A6 VMMMGSAR    | 13104 | 12878 |
| >CDKN2A-A6 VMMMGSAR    | 55   | >CDKN2A-A6 VMMMGSAR    | 11521 | 11466 |
| >CDKN2A-A6 VMMMGSAR    | 239  | >CDKN2A-A6 VMMMGSAR    | 17157 | 16918 |
| >CDKN2A-A6 VMMMGSAR    | 95   | >CDKN2A-A6 VMMMGSAR    | 16674 | 16579 |
| >CDKN2A-A6 VMMMGSAR    | 54   | >CDKN2A-A6 VMMMGSAR    | 12793 | 12739 |
| >CDKN2A-A6 VMMMGSAR    | 183  | >CDKN2A-A6 VMMMGSAR    | 1556  | 1373  |
| >CDKN2A-A6 AELLLLHGA   | 964  | >CDKN2A-A6 VELLLLHGA   | 288   | 676   |
| >CDKN2A-A6 AELLLLHGA   | 1922 | >CDKN2A-A6 VELLLLHGA   | 180   | 1742  |
| >CDKN2A-A6 AELLLLHGA   | 35   | >CDKN2A-A6 VELLLLHGA   | 147   | 112   |
| >CDKN2A-A6 AELLLLHGA   | 440  | >CDKN2A-A6 VELLLLHGA   | 2514  | 2074  |
| >CDKN2A-A6 AELLLLHGA   | 7    | >CDKN2A-A6 VELLLLHGA   | 65    | 58    |
| >CDKN2A-A6 AELLLHGAE   | 313  | >CDKN2A-A6 VELLLHGAE   | 3664  | 3351  |
| >CDKN2A-A6 AELLLLHGA   | 32   | >CDKN2A-A6 VELLLLHGA   | 156   | 124   |
| >CDKN2A-A6 QVMMMGSAR   | 1731 | >CDKN2A-A6 QVMMMGSAR   | 347   | 1384  |
| >CDKN2A-A6 QVMMMGSAR   | 2484 | >CDKN2A-A6 QVMMMGSAR   | 154   | 2330  |
| >CDKN2A-A6 RVAELLLL    | 83   | >CDKN2A-A6 RVVELLLL    | 260   | 177   |
| >CDKN2A-A6 RVAELLLLHG, | 171  | >CDKN2A-A6 RVVELLLLHG, | 574   | 403   |
| >CDKN2A-A6 RVAELLLL    | 33   | >CDKN2A-A6 RVVELLLL    | 276   | 243   |
| >CDKN2A-A6 RVAELLLLHG, | 79   | >CDKN2A-A6 RVVELLLLHG, | 526   | 447   |
| >CDKN2A-A6 RVAELLLL    | 70   | >CDKN2A-A6 RVVELLLL    | 221   | 151   |
| >CDKN2A-A6 RVAELLLLHG, | 23   | >CDKN2A-A6 RVVELLLLHG, | 63    | 40    |
| >CDKN2A-A6 RVAELLLL    | 14   | >CDKN2A-A6 RVVELLLL    | 12    | 2     |
| >CDKN2A-A6 RVAELLLLHG, | 12   | >CDKN2A-A6 RVVELLLLHG, | 11    | 1     |
| >CDKN2A-A6 RVAELLLL    | 392  | >CDKN2A-A6 RVVELLLL    | 528   | 136   |
| >CDKN2A-A6 RVAELLLLHG, | 305  | >CDKN2A-A6 RVVELLLLHG, | 385   | 80    |
| >CDKN2A-A6 RVAELLLL    | 393  | >CDKN2A-A6 RVVELLLL    | 865   | 472   |
| >CDKN2A-A6 RVAELLLLHG, | 459  | >CDKN2A-A6 RVVELLLLHG, | 1068  | 609   |
| >CDKN2A-A6 RVAELLLLH   | 226  | >CDKN2A-A6 RVVELLLLH   | 810   | 584   |
| >CDKN2A-A6 RVAELLLLH   | 230  | >CDKN2A-A6 RVVELLLLH   | 575   | 345   |
| >CDKN2A-A6 RVAELLLL    | 424  | >CDKN2A-A6 RVVELLLL    | 518   | 94    |
| >CDKN2A-A6 RVAELLLLHG, | 370  | >CDKN2A-A6 RVVELLLLHG, | 1459  | 1089  |
| >CDKN2A-A6 RVAELLLLHG, | 428  | >CDKN2A-A6 RVVELLLLHG, | 687   | 259   |



|                        |      |                        |      |      |
|------------------------|------|------------------------|------|------|
| >CDKN2A-A6 RVAELLLLH   | 65   | >CDKN2A-A6 RVVELLLLH   | 121  | 56   |
| >CDKN2A-A6 RVAELLLL    | 300  | >CDKN2A-A6 RVVELLLL    | 91   | 209  |
| >CDKN2A-A6 RVAELLLL    | 268  | >CDKN2A-A6 RVVELLLL    | 562  | 294  |
| >CDKN2A-A6 RVAELLLL    | 364  | >CDKN2A-A6 RVVELLLL    | 722  | 358  |
| >CDKN2A-A6 ARVAELL     | 180  | >CDKN2A-A6 ARVVELL     | 188  | 8    |
| >CDKN2A-A6 ARVAELLLL   | 120  | >CDKN2A-A6 ARVVELLLL   | 125  | 5    |
| >CDKN2A-A6 ARVAELLLLH  | 215  | >CDKN2A-A6 ARVVELLLLH  | 430  | 215  |
| >CDKN2A-A6 ARVAELL     | 222  | >CDKN2A-A6 ARVVELL     | 709  | 487  |
| >CDKN2A-A6 ARVAELLLL   | 229  | >CDKN2A-A6 ARVVELLLL   | 1038 | 809  |
| >CDKN2A-A6 ARVAELL     | 706  | >CDKN2A-A6 ARVVELL     | 381  | 325  |
| >CDKN2A-A6 ARVAELLLL   | 123  | >CDKN2A-A6 ARVVELLLL   | 116  | 7    |
| >CDKN2A-A6 ARVAELLLL   | 23   | >CDKN2A-A6 ARVVELLLL   | 18   | 5    |
| >CDKN2A-A6 SARVAELL    | 380  | >CDKN2A-A6 SARVVELL    | 831  | 451  |
| >CDKN2A-A6 SARVAELL    | 39   | >CDKN2A-A6 SARVVELL    | 164  | 125  |
| >CDKN2A-A6 SARVAELLLL  | 38   | >CDKN2A-A6 SARVVELLLL  | 100  | 62   |
| >CDKN2A-A6 SARVAELL    | 377  | >CDKN2A-A6 SARVVELL    | 1388 | 1011 |
| >CDKN2A-A6 SARVAELL    | 179  | >CDKN2A-A6 SARVVELL    | 1125 | 946  |
| >CDKN2A-A6 SARVAELLLL  | 137  | >CDKN2A-A6 SARVVELLLL  | 496  | 359  |
| >CDKN2A-A6 SARVAELL    | 1155 | >CDKN2A-A6 SARVVELL    | 443  | 712  |
| >CDKN2A-A6 GSARVAELL   | 687  | >CDKN2A-A6 GSARVVELL   | 204  | 483  |
| >CDKN2A-A6 GSARVAEL    | 282  | >CDKN2A-A6 GSARVVEL    | 608  | 326  |
| >CDKN2A-A6 GSARVAELL   | 237  | >CDKN2A-A6 GSARVVELL   | 107  | 130  |
| >CDKN2A-A6 GSARVAELLLL | 255  | >CDKN2A-A6 GSARVVELLLL | 112  | 143  |
| >CDKN2A-A6 GSARVAELLLL | 270  | >CDKN2A-A6 GSARVVELLLL | 215  | 55   |
| >CDKN2A-A6 GSARVAELLLL | 264  | >CDKN2A-A6 GSARVVELLLL | 281  | 17   |
| >CDKN2A-A6 GSARVAELL   | 24   | >CDKN2A-A6 GSARVVELL   | 62   | 38   |
| >CDKN2A-A6 GSARVAELLLL | 452  | >CDKN2A-A6 GSARVVELLLL | 606  | 154  |
| >CDKN2A-A6 GSARVAELLLL | 66   | >CDKN2A-A6 GSARVVELLLL | 105  | 39   |
| >CDKN2A-A6 MGSARVAEL   | 66   | >CDKN2A-A6 MGSARVVEL   | 140  | 74   |
| >CDKN2A-A6 MGSARVAEL   | 399  | >CDKN2A-A6 MGSARVVEL   | 447  | 48   |
| >CDKN2A-A6 MGSARVAEL   | 218  | >CDKN2A-A6 MGSARVVEL   | 387  | 169  |
| >CDKN2A-A6 MMGSARVA    | 2725 | >CDKN2A-A6 MMGSARVV    | 388  | 2337 |
| >CDKN2A-A6 MMGSARVAI   | 177  | >CDKN2A-A6 MMGSARVVI   | 174  | 3    |
| >CDKN2A-A6 MMGSARVAI   | 143  | >CDKN2A-A6 MMGSARVVI   | 84   | 59   |
| >CDKN2A-A6 MMGSARVA    | 831  | >CDKN2A-A6 MMGSARVV    | 68   | 763  |
| >CDKN2A-A6 MMGSARVAI   | 24   | >CDKN2A-A6 MMGSARVVI   | 34   | 10   |
| >CDKN2A-A6 MMGSARVAI   | 8    | >CDKN2A-A6 MMGSARVVI   | 8    | 0    |
| >CDKN2A-A6 MMGSARVA    | 224  | >CDKN2A-A6 MMGSARVV    | 25   | 199  |
| >CDKN2A-A6 MMGSARVAI   | 52   | >CDKN2A-A6 MMGSARVVI   | 96   | 44   |
| >CDKN2A-A6 MMGSARVAI   | 173  | >CDKN2A-A6 MMGSARVVI   | 88   | 85   |
| >CDKN2A-A6 MMGSARVAI   | 436  | >CDKN2A-A6 MMGSARVVI   | 451  | 15   |
| >CDKN2A-A6 MMGSARVA    | 187  | >CDKN2A-A6 MMGSARVV    | 6    | 181  |
| >CDKN2A-A6 MMGSARVAI   | 11   | >CDKN2A-A6 MMGSARVVI   | 14   | 3    |

|                      |      |                      |     |      |
|----------------------|------|----------------------|-----|------|
| >CDKN2A-A6 MMGSARVAI | 24   | >CDKN2A-A6 MMGSARVVI | 19  | 5    |
| >CDKN2A-A6 MMGSARVA  | 1664 | >CDKN2A-A6 MMGSARVV  | 27  | 1637 |
| >CDKN2A-A6 MMGSARVAI | 42   | >CDKN2A-A6 MMGSARVVI | 62  | 20   |
| >CDKN2A-A6 MMGSARVAI | 190  | >CDKN2A-A6 MMGSARVVI | 136 | 54   |
| >CDKN2A-A6 MMGSARVA  | 1208 | >CDKN2A-A6 MMGSARVV  | 23  | 1185 |
| >CDKN2A-A6 MMGSARVAI | 46   | >CDKN2A-A6 MMGSARVVI | 33  | 13   |
| >CDKN2A-A6 MMGSARVAI | 81   | >CDKN2A-A6 MMGSARVVI | 54  | 27   |
| >CDKN2A-A6 MMGSARVA  | 3077 | >CDKN2A-A6 MMGSARVV  | 14  | 3063 |
| >CDKN2A-A6 MMGSARVAI | 33   | >CDKN2A-A6 MMGSARVVI | 50  | 17   |
| >CDKN2A-A6 MMGSARVAI | 112  | >CDKN2A-A6 MMGSARVVI | 61  | 51   |
| >CDKN2A-A6 MMGSARVA  | 95   | >CDKN2A-A6 MMGSARVV  | 3   | 92   |
| >CDKN2A-A6 MMGSARVAI | 3    | >CDKN2A-A6 MMGSARVVI | 4   | 1    |
| >CDKN2A-A6 MMGSARVAI | 8    | >CDKN2A-A6 MMGSARVVI | 6   | 2    |
| >CDKN2A-A6 MMGSARVAI | 163  | >CDKN2A-A6 MMGSARVVI | 220 | 57   |
| >CDKN2A-A6 MMGSARVA  | 1488 | >CDKN2A-A6 MMGSARVV  | 304 | 1184 |
| >CDKN2A-A6 MMGSARVAI | 90   | >CDKN2A-A6 MMGSARVVI | 57  | 33   |
| >CDKN2A-A6 MMGSARVAI | 402  | >CDKN2A-A6 MMGSARVVI | 342 | 60   |
| >CDKN2A-A6 MMMGSARV  | 549  | >CDKN2A-A6 MMMGSARV  | 72  | 477  |
| >CDKN2A-A6 MMMGSARV  | 19   | >CDKN2A-A6 MMMGSARV  | 18  | 1    |
| >CDKN2A-A6 MMMGSARV  | 102  | >CDKN2A-A6 MMMGSARV  | 16  | 86   |
| >CDKN2A-A6 MMMGSARV  | 4    | >CDKN2A-A6 MMMGSARV  | 4   | 0    |
| >CDKN2A-A6 MMMGSARV  | 11   | >CDKN2A-A6 MMMGSARV  | 4   | 7    |
| >CDKN2A-A6 MMMGSARV  | 5    | >CDKN2A-A6 MMMGSARV  | 6   | 1    |
| >CDKN2A-A6 MMMGSARV  | 437  | >CDKN2A-A6 MMMGSARV  | 45  | 392  |
| >CDKN2A-A6 MMMGSARV  | 27   | >CDKN2A-A6 MMMGSARV  | 25  | 2    |
| >CDKN2A-A6 MMMGSARV  | 29   | >CDKN2A-A6 MMMGSARV  | 3   | 26   |
| >CDKN2A-A6 MMMGSARV  | 3    | >CDKN2A-A6 MMMGSARV  | 4   | 1    |
| >CDKN2A-A6 MMMGSARV  | 281  | >CDKN2A-A6 MMMGSARV  | 6   | 275  |
| >CDKN2A-A6 MMMGSARV  | 9    | >CDKN2A-A6 MMMGSARV  | 9   | 0    |
| >CDKN2A-A6 MMMGSARV  | 1302 | >CDKN2A-A6 MMMGSARV  | 25  | 1277 |
| >CDKN2A-A6 MMMGSARV  | 35   | >CDKN2A-A6 MMMGSARV  | 30  | 5    |
| >CDKN2A-A6 MMMGSARV  | 91   | >CDKN2A-A6 MMMGSARV  | 3   | 88   |
| >CDKN2A-A6 MMMGSARV  | 4    | >CDKN2A-A6 MMMGSARV  | 5   | 1    |
| >CDKN2A-A6 MMMGSARV  | 21   | >CDKN2A-A6 MMMGSARV  | 2   | 19   |
| >CDKN2A-A6 MMMGSARV  | 3    | >CDKN2A-A6 MMMGSARV  | 3   | 0    |
| >CDKN2A-A6 MMMGSARV  | 179  | >CDKN2A-A6 MMMGSARV  | 70  | 109  |
| >CDKN2A-A6 MMMGSARV  | 5198 | >CDKN2A-A6 MMMGSARV  | 448 | 4750 |
| >CDKN2A-A6 MMMGSARV  | 235  | >CDKN2A-A6 MMMGSARV  | 263 | 28   |
| >CDKN2A-A6 MMMGSARV  | 188  | >CDKN2A-A6 MMMGSARV  | 243 | 55   |
| >CDKN2A-A6 MMMGSARV  | 191  | >CDKN2A-A6 MMMGSARV  | 165 | 26   |
| >CDKN2A-A6 MMMGSARV  | 84   | >CDKN2A-A6 MMMGSARV  | 99  | 15   |
| >CDKN2A-A6 MMMGSARV  | 3273 | >CDKN2A-A6 MMMGSARV  | 456 | 2817 |
| >CDKN2A-A6 MMMGSARV  | 342  | >CDKN2A-A6 MMMGSARV  | 53  | 289  |

|                       |       |                       |       |       |
|-----------------------|-------|-----------------------|-------|-------|
| >CDKN2A-A6 MMMGSARV   | 31    | >CDKN2A-A6 MMMGSARV   | 20    | 11    |
| >CDKN2A-A6 MMMGSARV   | 55    | >CDKN2A-A6 MMMGSARV   | 130   | 75    |
| >CDKN2A-A6 MMMGSARV   | 3863  | >CDKN2A-A6 MMMGSARV   | 82    | 3781  |
| >CDKN2A-A6 MMMGSARV   | 18    | >CDKN2A-A6 MMMGSARV   | 15    | 3     |
| >CDKN2A-A6 MMMGSARV   | 185   | >CDKN2A-A6 MMMGSARV   | 151   | 34    |
| >CDKN2A-A6 VMMMGSAR   | 1340  | >CDKN2A-A6 VMMMGSAR   | 130   | 1210  |
| >CDKN2A-A6 VMMMGSAR   | 425   | >CDKN2A-A6 VMMMGSAR   | 100   | 325   |
| >CDKN2A-A6 VMMMGSAR   | 226   | >CDKN2A-A6 VMMMGSAR   | 46    | 180   |
| >CDKN2A-A6 VMMMGSAR   | 55    | >CDKN2A-A6 VMMMGSAR   | 3     | 52    |
| >CDKN2A-A6 VMMMGSAR   | 239   | >CDKN2A-A6 VMMMGSAR   | 6     | 233   |
| >CDKN2A-A6 VMMMGSAR   | 625   | >CDKN2A-A6 VMMMGSAR   | 17    | 608   |
| >CDKN2A-A6 VMMMGSAR   | 95    | >CDKN2A-A6 VMMMGSAR   | 3     | 92    |
| >CDKN2A-A6 VMMMGSAR   | 54    | >CDKN2A-A6 VMMMGSAR   | 3     | 51    |
| >CDKN2A-A6 VMMMGSAR   | 183   | >CDKN2A-A6 VMMMGSAR   | 174   | 9     |
| >CDKN2A-A6 VMMMGSAR   | 721   | >CDKN2A-A6 VMMMGSAR   | 124   | 597   |
| >CDKN2A-A6 AEPNCADPA  | 183   | >CDKN2A-A6 EEPNCADPA  | 1294  | 1111  |
| >CDKN2A-A6 AEPNCADPA  | 209   | >CDKN2A-A6 EEPNCADPA  | 1667  | 1458  |
| >CDKN2A-A6 AEPNCADPA  | 480   | >CDKN2A-A6 EEPNCADPA  | 1158  | 678   |
| >CDKN2A-A6 AEPNCADPA  | 230   | >CDKN2A-A6 EEPNCADPA  | 975   | 745   |
| >CDKN2A-A6 AEPNCADPA  | 65    | >CDKN2A-A6 EEPNCADPA  | 2039  | 1974  |
| >CDKN2A-A6 GAEPNCADP  | 17154 | >CDKN2A-A6 GEEPNCADP  | 102   | 17052 |
| >CDKN2A-A6 GAEPNCADP  | 35175 | >CDKN2A-A6 GEEPNCADP  | 389   | 34786 |
| >CDKN2A-A6 RVAELLLLHG | 171   | >CDKN2A-A6 RVAELLLLHG | 19830 | 19659 |
| >CDKN2A-A6 RVAELLLLHG | 79    | >CDKN2A-A6 RVAELLLLHG | 9826  | 9747  |
| >CDKN2A-A6 RVAELLLLHG | 23    | >CDKN2A-A6 RVAELLLLHG | 10936 | 10913 |
| >CDKN2A-A6 RVAELLLLHG | 12    | >CDKN2A-A6 RVAELLLLHG | 3350  | 3338  |
| >CDKN2A-A6 RVAELLLLHG | 305   | >CDKN2A-A6 RVAELLLLHG | 18935 | 18630 |
| >CDKN2A-A6 RVAELLLLHG | 459   | >CDKN2A-A6 RVAELLLLHG | 23085 | 22626 |
| >CDKN2A-A6 RVAELLLLHG | 370   | >CDKN2A-A6 RVAELLLLHG | 21551 | 21181 |
| >CDKN2A-A6 RVAELLLLHG | 428   | >CDKN2A-A6 RVAELLLLHG | 15350 | 14922 |
| >CDKN2A-A6 HGAEPNCAD  | 272   | >CDKN2A-A6 HGEEPNCAD  | 10742 | 10470 |
| >CDKN2A-A6 LLHGAEPNCA | 360   | >CDKN2A-A6 LLHGEEPNCA | 422   | 62    |
| >CDKN2A-A6 LLHGAEPNCA | 290   | >CDKN2A-A6 LLHGEEPNCA | 338   | 48    |
| >CDKN2A-A6 LLHGAEPNC  | 274   | >CDKN2A-A6 LLHGEEPNC  | 347   | 73    |
| >CDKN2A-A6 LLHGAEPNCA | 278   | >CDKN2A-A6 LLHGEEPNCA | 229   | 49    |
| >CDKN2A-A6 LLHGAEPNCA | 242   | >CDKN2A-A6 LLHGEEPNCA | 345   | 103   |
| >CDKN2A-A6 LLHGAEPNC  | 14    | >CDKN2A-A6 LLHGEEPNC  | 18    | 4     |
| >CDKN2A-A6 LLHGAEPNCA | 26    | >CDKN2A-A6 LLHGEEPNCA | 26    | 0     |
| >CDKN2A-A6 LLLHGAEPNC | 560   | >CDKN2A-A6 LLLHGEEPNC | 489   | 71    |
| >CDKN2A-A6 LLLHGAEPNC | 429   | >CDKN2A-A6 LLLHGEEPNC | 809   | 380   |
| >CDKN2A-A6 LLLHGAEPNC | 476   | >CDKN2A-A6 LLLHGEEPNC | 867   | 391   |
| >CDKN2A-A6 LLLHGAEPNC | 121   | >CDKN2A-A6 LLLHGEEPNC | 159   | 38    |
| >CDKN2A-A6 LLLHGAEPNC | 105   | >CDKN2A-A6 LLLHGEEPNC | 99    | 6     |

|                        |     |                        |       |       |
|------------------------|-----|------------------------|-------|-------|
| >CDKN2A-A6 LLLHGAEPNC  | 428 | >CDKN2A-A6 LLLHGEEPNC  | 595   | 167   |
| >CDKN2A-A6 LLLHGAEPNC  | 80  | >CDKN2A-A6 LLLHGEEPNC  | 87    | 7     |
| >CDKN2A-A6 LLLHGAEPNC  | 294 | >CDKN2A-A6 LLLHGEEPNC  | 418   | 124   |
| >CDKN2A-A6 LLLHGAEPNC  | 66  | >CDKN2A-A6 LLLHGEEPNC  | 50    | 16    |
| >CDKN2A-A6 LLLHGAEPNC  | 369 | >CDKN2A-A6 LLLHGEEPNC  | 719   | 350   |
| >CDKN2A-A6 LLLHGAEPNC  | 198 | >CDKN2A-A6 LLLHGEEPNC  | 233   | 35    |
| >CDKN2A-A6 LLLHGAEPNC  | 35  | >CDKN2A-A6 LLLHGEEPNC  | 43    | 8     |
| >CDKN2A-A6 LLLHGAEPNC  | 53  | >CDKN2A-A6 LLLHGEEPNC  | 52    | 1     |
| >CDKN2A-A6 LLLLHGAEPN  | 220 | >CDKN2A-A6 LLLLHGEEPNC | 252   | 32    |
| >CDKN2A-A6 LLLLHGAEPN  | 89  | >CDKN2A-A6 LLLLHGEEPNC | 148   | 59    |
| >CDKN2A-A6 ELLLLHGA    | 214 | >CDKN2A-A6 ELLLLHGE    | 15992 | 15778 |
| >CDKN2A-A6 ELLLLHGA    | 342 | >CDKN2A-A6 ELLLLHGE    | 18370 | 18028 |
| >CDKN2A-A6 ELLLLHGA    | 186 | >CDKN2A-A6 ELLLLHGE    | 19192 | 19006 |
| >CDKN2A-A6 ELLLLHGA    | 195 | >CDKN2A-A6 ELLLLHGE    | 19101 | 18906 |
| >CDKN2A-A6 ELLLLHGA    | 91  | >CDKN2A-A6 ELLLLHGE    | 11196 | 11105 |
| >CDKN2A-A6 AELLLLHGA   | 35  | >CDKN2A-A6 AELLLLHGE   | 888   | 853   |
| >CDKN2A-A6 AELLLLHGA   | 440 | >CDKN2A-A6 AELLLLHGE   | 1068  | 628   |
| >CDKN2A-A6 AELLLLHGA   | 7   | >CDKN2A-A6 AELLLLHGE   | 290   | 283   |
| >CDKN2A-A6 AELLLLHGAE  | 313 | >CDKN2A-A6 AELLLLHGEE  | 459   | 146   |
| >CDKN2A-A6 AELLLLHGA   | 32  | >CDKN2A-A6 AELLLLHGE   | 416   | 384   |
| >CDKN2A-A6 AEPNCADPA   | 183 | >CDKN2A-A6 TEPNCADPA   | 673   | 490   |
| >CDKN2A-A6 AEPNCADPA   | 209 | >CDKN2A-A6 TEPNCADPA   | 675   | 466   |
| >CDKN2A-A6 AEPNCADPA   | 480 | >CDKN2A-A6 TEPNCADPA   | 4086  | 3606  |
| >CDKN2A-A6 AEPNCADPA   | 230 | >CDKN2A-A6 TEPNCADPA   | 2938  | 2708  |
| >CDKN2A-A6 AEPNCADPA   | 65  | >CDKN2A-A6 TEPNCADPA   | 515   | 450   |
| >CDKN2A-A6 RVAELLLLHG, | 171 | >CDKN2A-A6 RVAELLLLHG  | 1500  | 1329  |
| >CDKN2A-A6 RVAELLLLHG, | 79  | >CDKN2A-A6 RVAELLLLHG  | 730   | 651   |
| >CDKN2A-A6 RVAELLLLHG, | 23  | >CDKN2A-A6 RVAELLLLHG  | 273   | 250   |
| >CDKN2A-A6 RVAELLLLHG, | 12  | >CDKN2A-A6 RVAELLLLHG  | 58    | 46    |
| >CDKN2A-A6 RVAELLLLHG, | 305 | >CDKN2A-A6 RVAELLLLHG  | 1980  | 1675  |
| >CDKN2A-A6 RVAELLLLHG, | 459 | >CDKN2A-A6 RVAELLLLHG  | 3850  | 3391  |
| >CDKN2A-A6 RVAELLLLHG, | 370 | >CDKN2A-A6 RVAELLLLHG  | 4627  | 4257  |
| >CDKN2A-A6 RVAELLLLHG, | 428 | >CDKN2A-A6 RVAELLLLHG  | 2530  | 2102  |
| >CDKN2A-A6 HGAEPNCAD   | 272 | >CDKN2A-A6 HGTEPNCAD   | 1723  | 1451  |
| >CDKN2A-A6 LLHGAEPNCA  | 360 | >CDKN2A-A6 LLHGTEPNC   | 461   | 101   |
| >CDKN2A-A6 LLHGAEPNCA  | 290 | >CDKN2A-A6 LLHGTEPNC   | 229   | 61    |
| >CDKN2A-A6 LLHGAEPNC   | 274 | >CDKN2A-A6 LLHGTEPNC   | 118   | 156   |
| >CDKN2A-A6 LLHGAEPNCA  | 278 | >CDKN2A-A6 LLHGTEPNC   | 194   | 84    |
| >CDKN2A-A6 LLHGAEPNCA  | 242 | >CDKN2A-A6 LLHGTEPNC   | 282   | 40    |
| >CDKN2A-A6 LLHGAEPNC   | 14  | >CDKN2A-A6 LLHGTEPNC   | 11    | 3     |
| >CDKN2A-A6 LLHGAEPNCA  | 26  | >CDKN2A-A6 LLHGTEPNC   | 26    | 0     |
| >CDKN2A-A6 LLLHGAEPNC  | 560 | >CDKN2A-A6 LLLHGTEPNC  | 304   | 256   |
| >CDKN2A-A6 LLLHGAEPNC  | 723 | >CDKN2A-A6 LLLHGTEPNC  | 427   | 296   |

|                        |      |                        |      |      |
|------------------------|------|------------------------|------|------|
| >CDKN2A-A6 LLLHGAEPNC  | 429  | >CDKN2A-A6 LLLHGTEPNC  | 268  | 161  |
| >CDKN2A-A6 LLLHGAEPNC  | 476  | >CDKN2A-A6 LLLHGTEPNC  | 461  | 15   |
| >CDKN2A-A6 LLLHGAEPNC  | 121  | >CDKN2A-A6 LLLHGTEPNC  | 75   | 46   |
| >CDKN2A-A6 LLLHGAEPNC  | 105  | >CDKN2A-A6 LLLHGTEPNC  | 103  | 2    |
| >CDKN2A-A6 LLLHGAEPNC  | 428  | >CDKN2A-A6 LLLHGTEPNC  | 249  | 179  |
| >CDKN2A-A6 LLLHGAEPNC  | 80   | >CDKN2A-A6 LLLHGTEPNC  | 54   | 26   |
| >CDKN2A-A6 LLLHGAEPNC  | 294  | >CDKN2A-A6 LLLHGTEPNC  | 229  | 65   |
| >CDKN2A-A6 LLLHGAEPNC  | 66   | >CDKN2A-A6 LLLHGTEPNC  | 59   | 7    |
| >CDKN2A-A6 LLLHGAEPNC  | 369  | >CDKN2A-A6 LLLHGTEPNC  | 212  | 157  |
| >CDKN2A-A6 LLLHGAEPNC  | 198  | >CDKN2A-A6 LLLHGTEPNC  | 115  | 83   |
| >CDKN2A-A6 LLLHGAEPNC  | 35   | >CDKN2A-A6 LLLHGTEPNC  | 26   | 9    |
| >CDKN2A-A6 LLLHGAEPNC  | 53   | >CDKN2A-A6 LLLHGTEPNC  | 46   | 7    |
| >CDKN2A-A6 LLLLHGAEPN  | 220  | >CDKN2A-A6 LLLLHGTEPNC | 231  | 11   |
| >CDKN2A-A6 LLLLHGAEPN  | 89   | >CDKN2A-A6 LLLLHGTEPNC | 95   | 6    |
| >CDKN2A-A6 ELLLLHGA    | 214  | >CDKN2A-A6 ELLLLHGT    | 1335 | 1121 |
| >CDKN2A-A6 ELLLLHGA    | 342  | >CDKN2A-A6 ELLLLHGT    | 3220 | 2878 |
| >CDKN2A-A6 ELLLLHGA    | 186  | >CDKN2A-A6 ELLLLHGT    | 949  | 763  |
| >CDKN2A-A6 ELLLLHGA    | 195  | >CDKN2A-A6 ELLLLHGT    | 1571 | 1376 |
| >CDKN2A-A6 ELLLLHGA    | 91   | >CDKN2A-A6 ELLLLHGT    | 620  | 529  |
| >CDKN2A-A6 AELLLLHGA   | 35   | >CDKN2A-A6 AELLLLHGT   | 45   | 10   |
| >CDKN2A-A6 AELLLLHGA   | 440  | >CDKN2A-A6 AELLLLHGT   | 696  | 256  |
| >CDKN2A-A6 AELLLLHGA   | 7    | >CDKN2A-A6 AELLLLHGT   | 19   | 12   |
| >CDKN2A-A6 AELLLLHGAE  | 313  | >CDKN2A-A6 AELLLLHGTE  | 268  | 45   |
| >CDKN2A-A6 AELLLLHGA   | 32   | >CDKN2A-A6 AELLLLHGT   | 25   | 7    |
| >CDKN2A-A6 AEPNCADPA   | 183  | >CDKN2A-A6 VEPNCADPA   | 745  | 562  |
| >CDKN2A-A6 AEPNCADPA   | 209  | >CDKN2A-A6 VEPNCADPA   | 1257 | 1048 |
| >CDKN2A-A6 AEPNCADPA   | 480  | >CDKN2A-A6 VEPNCADPA   | 8425 | 7945 |
| >CDKN2A-A6 AEPNCADPA   | 230  | >CDKN2A-A6 VEPNCADPA   | 3564 | 3334 |
| >CDKN2A-A6 AEPNCADPA   | 65   | >CDKN2A-A6 VEPNCADPA   | 222  | 157  |
| >CDKN2A-A6 RVAELLLLHG, | 171  | >CDKN2A-A6 RVAELLLLHG' | 21   | 150  |
| >CDKN2A-A6 RVAELLLLHG, | 79   | >CDKN2A-A6 RVAELLLLHG' | 13   | 66   |
| >CDKN2A-A6 RVAELLLLHG, | 23   | >CDKN2A-A6 RVAELLLLHG' | 6    | 17   |
| >CDKN2A-A6 RVAELLLLHG, | 12   | >CDKN2A-A6 RVAELLLLHG' | 4    | 8    |
| >CDKN2A-A6 RVAELLLLHG, | 305  | >CDKN2A-A6 RVAELLLLHG' | 8    | 297  |
| >CDKN2A-A6 RVAELLLLHG, | 1288 | >CDKN2A-A6 RVAELLLLHG' | 25   | 1263 |
| >CDKN2A-A6 RVAELLLLHG, | 587  | >CDKN2A-A6 RVAELLLLHG' | 13   | 574  |
| >CDKN2A-A6 RVAELLLLHG, | 1731 | >CDKN2A-A6 RVAELLLLHG' | 18   | 1713 |
| >CDKN2A-A6 RVAELLLLHG, | 459  | >CDKN2A-A6 RVAELLLLHG' | 5    | 454  |
| >CDKN2A-A6 RVAELLLLHG, | 370  | >CDKN2A-A6 RVAELLLLHG' | 31   | 339  |
| >CDKN2A-A6 RVAELLLLHG, | 428  | >CDKN2A-A6 RVAELLLLHG' | 13   | 415  |
| >CDKN2A-A6 HGAEPNCAD   | 272  | >CDKN2A-A6 HGVEPNCAD   | 1030 | 758  |
| >CDKN2A-A6 LLHGAEPNCA  | 360  | >CDKN2A-A6 LLHGVEPNCA  | 429  | 69   |
| >CDKN2A-A6 LLHGAEPNCA  | 290  | >CDKN2A-A6 LLHGVEPNCA  | 293  | 3    |

|                       |      |                       |       |       |
|-----------------------|------|-----------------------|-------|-------|
| >CDKN2A-A6 LLHGAEPNC  | 274  | >CDKN2A-A6 LLHGVEPNC  | 42    | 232   |
| >CDKN2A-A6 LLHGAEPNCA | 278  | >CDKN2A-A6 LLHGVEPNCA | 105   | 173   |
| >CDKN2A-A6 LLHGAEPNCA | 242  | >CDKN2A-A6 LLHGVEPNCA | 185   | 57    |
| >CDKN2A-A6 LLHGAEPNC  | 14   | >CDKN2A-A6 LLHGVEPNC  | 15    | 1     |
| >CDKN2A-A6 LLHGAEPNCA | 26   | >CDKN2A-A6 LLHGVEPNCA | 31    | 5     |
| >CDKN2A-A6 LLLHGAEPNC | 560  | >CDKN2A-A6 LLLHGVEPNC | 272   | 288   |
| >CDKN2A-A6 LLLHGAEPNC | 723  | >CDKN2A-A6 LLLHGVEPNC | 486   | 237   |
| >CDKN2A-A6 LLLHGAEPNC | 429  | >CDKN2A-A6 LLLHGVEPNC | 235   | 194   |
| >CDKN2A-A6 LLLHGAEPNC | 476  | >CDKN2A-A6 LLLHGVEPNC | 472   | 4     |
| >CDKN2A-A6 LLLHGAEPNC | 121  | >CDKN2A-A6 LLLHGVEPNC | 30    | 91    |
| >CDKN2A-A6 LLLHGAEPNC | 105  | >CDKN2A-A6 LLLHGVEPNC | 65    | 40    |
| >CDKN2A-A6 LLLHGAEPNC | 428  | >CDKN2A-A6 LLLHGVEPNC | 281   | 147   |
| >CDKN2A-A6 LLLHGAEPNC | 80   | >CDKN2A-A6 LLLHGVEPNC | 59    | 21    |
| >CDKN2A-A6 LLLHGAEPNC | 294  | >CDKN2A-A6 LLLHGVEPNC | 139   | 155   |
| >CDKN2A-A6 LLLHGAEPNC | 66   | >CDKN2A-A6 LLLHGVEPNC | 47    | 19    |
| >CDKN2A-A6 LLLHGAEPNC | 369  | >CDKN2A-A6 LLLHGVEPNC | 202   | 167   |
| >CDKN2A-A6 LLLHGAEPNC | 198  | >CDKN2A-A6 LLLHGVEPNC | 107   | 91    |
| >CDKN2A-A6 LLLHGAEPNC | 35   | >CDKN2A-A6 LLLHGVEPNC | 27    | 8     |
| >CDKN2A-A6 LLLHGAEPNC | 53   | >CDKN2A-A6 LLLHGVEPNC | 44    | 9     |
| >CDKN2A-A6 LLLLHGAEPN | 220  | >CDKN2A-A6 LLLLHGVEPN | 131   | 89    |
| >CDKN2A-A6 LLLLHGAEPN | 89   | >CDKN2A-A6 LLLLHGVEPN | 99    | 10    |
| >CDKN2A-A6 ELLLLHGA   | 1334 | >CDKN2A-A6 ELLLLHGV   | 188   | 1146  |
| >CDKN2A-A6 ELLLLHGA   | 214  | >CDKN2A-A6 ELLLLHGV   | 7     | 207   |
| >CDKN2A-A6 ELLLLHGA   | 760  | >CDKN2A-A6 ELLLLHGV   | 46    | 714   |
| >CDKN2A-A6 ELLLLHGA   | 342  | >CDKN2A-A6 ELLLLHGV   | 13    | 329   |
| >CDKN2A-A6 ELLLLHGA   | 186  | >CDKN2A-A6 ELLLLHGV   | 8     | 178   |
| >CDKN2A-A6 ELLLLHGA   | 195  | >CDKN2A-A6 ELLLLHGV   | 6     | 189   |
| >CDKN2A-A6 ELLLLHGA   | 3331 | >CDKN2A-A6 ELLLLHGV   | 351   | 2980  |
| >CDKN2A-A6 ELLLLHGA   | 91   | >CDKN2A-A6 ELLLLHGV   | 7     | 84    |
| >CDKN2A-A6 AELLLLHGA  | 964  | >CDKN2A-A6 AELLLLHGV  | 17    | 947   |
| >CDKN2A-A6 AELLLLHGA  | 1356 | >CDKN2A-A6 AELLLLHGV  | 90    | 1266  |
| >CDKN2A-A6 AELLLLHGA  | 3077 | >CDKN2A-A6 AELLLLHGV  | 70    | 3007  |
| >CDKN2A-A6 AELLLLHGA  | 35   | >CDKN2A-A6 AELLLLHGV  | 31    | 4     |
| >CDKN2A-A6 AELLLLHGA  | 966  | >CDKN2A-A6 AELLLLHGV  | 444   | 522   |
| >CDKN2A-A6 AELLLLHGA  | 440  | >CDKN2A-A6 AELLLLHGV  | 207   | 233   |
| >CDKN2A-A6 AELLLLHGA  | 7    | >CDKN2A-A6 AELLLLHGV  | 17    | 10    |
| >CDKN2A-A6 AELLLLHGAE | 313  | >CDKN2A-A6 AELLLLHGVE | 486   | 173   |
| >CDKN2A-A6 AELLLLHGA  | 32   | >CDKN2A-A6 AELLLLHGV  | 4     | 28    |
| >CDKN2A-A7 ADPATLTRPV | 498  | >CDKN2A-A7 GDPATLTRPV | 1455  | 957   |
| >CDKN2A-A7 CADPATLTR  | 353  | >CDKN2A-A7 CGDPATLTR  | 4075  | 3722  |
| >CDKN2A-A7 LLLHGAEPNC | 429  | >CDKN2A-A7 LLLHGAEPNC | 16454 | 16025 |
| >CDKN2A-A7 LLLHGAEPNC | 476  | >CDKN2A-A7 LLLHGAEPNC | 10730 | 10254 |
| >CDKN2A-A7 LLLHGAEPNC | 105  | >CDKN2A-A7 LLLHGAEPNC | 5842  | 5737  |

|                       |       |                       |       |       |
|-----------------------|-------|-----------------------|-------|-------|
| >CDKN2A-A7 LLLHGAEPNC | 80    | >CDKN2A-A7 LLLHGAEPNC | 6709  | 6629  |
| >CDKN2A-A7 LLLHGAEPNC | 66    | >CDKN2A-A7 LLLHGAEPNC | 8573  | 8507  |
| >CDKN2A-A7 LLLHGAEPNC | 198   | >CDKN2A-A7 LLLHGAEPNC | 16623 | 16425 |
| >CDKN2A-A7 LLLHGAEPNC | 53    | >CDKN2A-A7 LLLHGAEPNC | 14253 | 14200 |
| >CDKN2A-A7 NCADPATLTF | 284   | >CDKN2A-A7 NCGDPATLTF | 4290  | 4006  |
| >CDKN2A-A7 NCADPATL   | 475   | >CDKN2A-A7 NCGDPATL   | 9603  | 9128  |
| >CDKN2A-A7 NCADPATLTF | 233   | >CDKN2A-A7 NCGDPATLTF | 182   | 51    |
| >CDKN2A-A7 EPNCADPATL | 353   | >CDKN2A-A7 EPNCGDPATI | 2491  | 2138  |
| >CDKN2A-A7 EPNCADPA   | 53    | >CDKN2A-A7 EPNCGDPA   | 79    | 26    |
| >CDKN2A-A7 EPNCADPAT  | 16    | >CDKN2A-A7 EPNCGDPAT  | 19    | 3     |
| >CDKN2A-A7 EPNCADPATL | 279   | >CDKN2A-A7 EPNCGDPATI | 358   | 79    |
| >CDKN2A-A7 EPNCADPA   | 43    | >CDKN2A-A7 EPNCGDPA   | 46    | 3     |
| >CDKN2A-A7 EPNCADPAT  | 371   | >CDKN2A-A7 EPNCGDPAT  | 723   | 352   |
| >CDKN2A-A7 AEPNCADPA` | 183   | >CDKN2A-A7 AEPNCGDPA` | 184   | 1     |
| >CDKN2A-A7 AEPNCADPA  | 209   | >CDKN2A-A7 AEPNCGDPA  | 109   | 100   |
| >CDKN2A-A7 AEPNCADPA  | 480   | >CDKN2A-A7 AEPNCGDPA  | 694   | 214   |
| >CDKN2A-A7 AEPNCADPA` | 230   | >CDKN2A-A7 AEPNCGDPA` | 306   | 76    |
| >CDKN2A-A7 AEPNCADPA` | 65    | >CDKN2A-A7 AEPNCGDPA` | 112   | 47    |
| >CDKN2A-A7 HGAEPNCAD  | 272   | >CDKN2A-A7 HGAEPNCGD  | 494   | 222   |
| >CDKN2A-A7 LLHGAEPNCA | 360   | >CDKN2A-A7 LLHGAEPNCC | 12333 | 11973 |
| >CDKN2A-A7 LLHGAEPNCA | 290   | >CDKN2A-A7 LLHGAEPNCC | 15360 | 15070 |
| >CDKN2A-A7 LLHGAEPNCA | 278   | >CDKN2A-A7 LLHGAEPNCC | 9590  | 9312  |
| >CDKN2A-A7 LLHGAEPNCA | 242   | >CDKN2A-A7 LLHGAEPNCC | 11909 | 11667 |
| >CDKN2A-A7 LLHGAEPNCA | 26    | >CDKN2A-A7 LLHGAEPNCC | 6282  | 6256  |
| >CDKN2A-A7 ADPATLTRPV | 498   | >CDKN2A-A7 PDPATLTRPV | 846   | 348   |
| >CDKN2A-A7 CADPATLTR  | 353   | >CDKN2A-A7 CPDPATLTR  | 4853  | 4500  |
| >CDKN2A-A7 CADPATLTRP | 10851 | >CDKN2A-A7 CPDPATLTRP | 101   | 10750 |
| >CDKN2A-A7 CADPATLTRP | 14825 | >CDKN2A-A7 CPDPATLTRP | 292   | 14533 |
| >CDKN2A-A7 LLLHGAEPNC | 429   | >CDKN2A-A7 LLLHGAEPNC | 18972 | 18543 |
| >CDKN2A-A7 LLLHGAEPNC | 476   | >CDKN2A-A7 LLLHGAEPNC | 12279 | 11803 |
| >CDKN2A-A7 LLLHGAEPNC | 105   | >CDKN2A-A7 LLLHGAEPNC | 9550  | 9445  |
| >CDKN2A-A7 LLLHGAEPNC | 80    | >CDKN2A-A7 LLLHGAEPNC | 10751 | 10671 |
| >CDKN2A-A7 LLLHGAEPNC | 66    | >CDKN2A-A7 LLLHGAEPNC | 11944 | 11878 |
| >CDKN2A-A7 LLLHGAEPNC | 198   | >CDKN2A-A7 LLLHGAEPNC | 18987 | 18789 |
| >CDKN2A-A7 LLLHGAEPNC | 53    | >CDKN2A-A7 LLLHGAEPNC | 16685 | 16632 |
| >CDKN2A-A7 NCADPATLTF | 284   | >CDKN2A-A7 NCPDPATLTR | 904   | 620   |
| >CDKN2A-A7 NCADPATL   | 475   | >CDKN2A-A7 NCPDPATL   | 2114  | 1639  |
| >CDKN2A-A7 NCADPATLTF | 233   | >CDKN2A-A7 NCPDPATLTR | 240   | 7     |
| >CDKN2A-A7 EPNCADPATL | 353   | >CDKN2A-A7 EPNCPDPATL | 9187  | 8834  |
| >CDKN2A-A7 EPNCADPA   | 53    | >CDKN2A-A7 EPNCPDPA   | 120   | 67    |
| >CDKN2A-A7 EPNCADPAT  | 16    | >CDKN2A-A7 EPNCPDPAT  | 32    | 16    |
| >CDKN2A-A7 EPNCADPATL | 279   | >CDKN2A-A7 EPNCPDPATL | 576   | 297   |
| >CDKN2A-A7 EPNCADPA   | 43    | >CDKN2A-A7 EPNCPDPA   | 40    | 3     |

|                       |      |                       |       |       |
|-----------------------|------|-----------------------|-------|-------|
| >CDKN2A-A7 EPNCADPAT  | 371  | >CDKN2A-A7 EPNCPDPAT  | 275   | 96    |
| >CDKN2A-A7 AEPNCADPA  | 183  | >CDKN2A-A7 AEPNCPDPA  | 523   | 340   |
| >CDKN2A-A7 AEPNCADPA  | 209  | >CDKN2A-A7 AEPNCPDPA  | 210   | 1     |
| >CDKN2A-A7 AEPNCADPA  | 480  | >CDKN2A-A7 AEPNCPDPA  | 1050  | 570   |
| >CDKN2A-A7 AEPNCADPA  | 230  | >CDKN2A-A7 AEPNCPDPA  | 308   | 78    |
| >CDKN2A-A7 AEPNCADPA  | 65   | >CDKN2A-A7 AEPNCPDPA  | 82    | 17    |
| >CDKN2A-A7 HGAEPNCAD  | 272  | >CDKN2A-A7 HGAEPNCPD  | 237   | 35    |
| >CDKN2A-A7 LLHGAEPNCA | 360  | >CDKN2A-A7 LLHGAEPNCF | 14538 | 14178 |
| >CDKN2A-A7 LLHGAEPNCA | 290  | >CDKN2A-A7 LLHGAEPNCF | 15163 | 14873 |
| >CDKN2A-A7 LLHGAEPNCA | 278  | >CDKN2A-A7 LLHGAEPNCF | 14120 | 13842 |
| >CDKN2A-A7 LLHGAEPNCA | 242  | >CDKN2A-A7 LLHGAEPNCF | 14596 | 14354 |
| >CDKN2A-A7 LLHGAEPNCA | 26   | >CDKN2A-A7 LLHGAEPNCF | 8619  | 8593  |
| >CDKN2A-A7 ADPATLTRPV | 498  | >CDKN2A-A7 SDPATLTRPV | 919   | 421   |
| >CDKN2A-A7 CADPATLTRP | 5641 | >CDKN2A-A7 CSDPATLTRP | 433   | 5208  |
| >CDKN2A-A7 CADPATLTR  | 353  | >CDKN2A-A7 CSDPATLTR  | 521   | 168   |
| >CDKN2A-A7 CADPATLTRP | 1402 | >CDKN2A-A7 CSDPATLTRP | 419   | 983   |
| >CDKN2A-A7 LLLHGAEPNC | 429  | >CDKN2A-A7 LLLHGAEPNC | 10112 | 9683  |
| >CDKN2A-A7 LLLHGAEPNC | 476  | >CDKN2A-A7 LLLHGAEPNC | 5818  | 5342  |
| >CDKN2A-A7 LLLHGAEPNC | 105  | >CDKN2A-A7 LLLHGAEPNC | 3519  | 3414  |
| >CDKN2A-A7 LLLHGAEPNC | 80   | >CDKN2A-A7 LLLHGAEPNC | 5354  | 5274  |
| >CDKN2A-A7 LLLHGAEPNC | 66   | >CDKN2A-A7 LLLHGAEPNC | 5669  | 5603  |
| >CDKN2A-A7 LLLHGAEPNC | 198  | >CDKN2A-A7 LLLHGAEPNC | 9430  | 9232  |
| >CDKN2A-A7 LLLHGAEPNC | 53   | >CDKN2A-A7 LLLHGAEPNC | 5118  | 5065  |
| >CDKN2A-A7 NCADPATLTF | 284  | >CDKN2A-A7 NCSDPATLTR | 544   | 260   |
| >CDKN2A-A7 NCADPATL   | 475  | >CDKN2A-A7 NCSDPATL   | 2179  | 1704  |
| >CDKN2A-A7 NCADPATLTF | 233  | >CDKN2A-A7 NCSDPATLTR | 309   | 76    |
| >CDKN2A-A7 EPNCADPATL | 353  | >CDKN2A-A7 EPNCSDPATL | 2668  | 2315  |
| >CDKN2A-A7 EPNCADPA   | 53   | >CDKN2A-A7 EPNCSDPA   | 63    | 10    |
| >CDKN2A-A7 EPNCADPAT  | 16   | >CDKN2A-A7 EPNCSDPAT  | 24    | 8     |
| >CDKN2A-A7 EPNCADPATL | 279  | >CDKN2A-A7 EPNCSDPATL | 433   | 154   |
| >CDKN2A-A7 EPNCADPA   | 43   | >CDKN2A-A7 EPNCSDPA   | 57    | 14    |
| >CDKN2A-A7 EPNCADPAT  | 371  | >CDKN2A-A7 EPNCSDPAT  | 944   | 573   |
| >CDKN2A-A7 AEPNCADPA  | 183  | >CDKN2A-A7 AEPNCSDPAT | 274   | 91    |
| >CDKN2A-A7 AEPNCADPA  | 209  | >CDKN2A-A7 AEPNCSDPA  | 95    | 114   |
| >CDKN2A-A7 AEPNCADPA  | 507  | >CDKN2A-A7 AEPNCSDPAT | 489   | 18    |
| >CDKN2A-A7 AEPNCADPA  | 480  | >CDKN2A-A7 AEPNCSDPA  | 543   | 63    |
| >CDKN2A-A7 AEPNCADPA  | 230  | >CDKN2A-A7 AEPNCSDPAT | 324   | 94    |
| >CDKN2A-A7 AEPNCADPA  | 609  | >CDKN2A-A7 AEPNCSDPA  | 469   | 140   |
| >CDKN2A-A7 AEPNCADPA  | 65   | >CDKN2A-A7 AEPNCSDPAT | 58    | 7     |
| >CDKN2A-A7 HGAEPNCAD  | 272  | >CDKN2A-A7 HGAEPNCSDI | 202   | 70    |
| >CDKN2A-A7 LLHGAEPNCA | 360  | >CDKN2A-A7 LLHGAEPNCS | 7988  | 7628  |
| >CDKN2A-A7 LLHGAEPNCA | 290  | >CDKN2A-A7 LLHGAEPNCS | 8420  | 8130  |
| >CDKN2A-A7 LLHGAEPNCA | 278  | >CDKN2A-A7 LLHGAEPNCS | 6390  | 6112  |



|                       |      |                       |      |      |
|-----------------------|------|-----------------------|------|------|
| >CDKN2A-A7 LLHGAEPNCA | 242  | >CDKN2A-A7 LLHGAEPNCS | 8820 | 8578 |
| >CDKN2A-A7 LLHGAEPNCA | 26   | >CDKN2A-A7 LLHGAEPNCS | 1685 | 1659 |
| >CDKN2A-A7 ADPATLTRPV | 498  | >CDKN2A-A7 TDPATLTRPV | 687  | 189  |
| >CDKN2A-A7 CADPATLTRP | 5641 | >CDKN2A-A7 CTDPATLTRP | 209  | 5432 |
| >CDKN2A-A7 CADPATLTRP | 712  | >CDKN2A-A7 CTDPATLTRP | 470  | 242  |
| >CDKN2A-A7 CADPATLTR  | 353  | >CDKN2A-A7 CTDPATLTR  | 152  | 201  |
| >CDKN2A-A7 CADPATLTRP | 1765 | >CDKN2A-A7 CTDPATLTRP | 144  | 1621 |
| >CDKN2A-A7 CADPATLTRP | 585  | >CDKN2A-A7 CTDPATLTRP | 91   | 494  |
| >CDKN2A-A7 CADPATLTRP | 1402 | >CDKN2A-A7 CTDPATLTRP | 494  | 908  |
| >CDKN2A-A7 LLLHGAEPNC | 429  | >CDKN2A-A7 LLLHGAEPNC | 3726 | 3297 |
| >CDKN2A-A7 LLLHGAEPNC | 476  | >CDKN2A-A7 LLLHGAEPNC | 2529 | 2053 |
| >CDKN2A-A7 LLLHGAEPNC | 105  | >CDKN2A-A7 LLLHGAEPNC | 794  | 689  |
| >CDKN2A-A7 LLLHGAEPNC | 80   | >CDKN2A-A7 LLLHGAEPNC | 1309 | 1229 |
| >CDKN2A-A7 LLLHGAEPNC | 66   | >CDKN2A-A7 LLLHGAEPNC | 864  | 798  |
| >CDKN2A-A7 LLLHGAEPNC | 198  | >CDKN2A-A7 LLLHGAEPNC | 1395 | 1197 |
| >CDKN2A-A7 LLLHGAEPNC | 53   | >CDKN2A-A7 LLLHGAEPNC | 471  | 418  |
| >CDKN2A-A7 NCADPATLTF | 284  | >CDKN2A-A7 NCTDPATLTR | 898  | 614  |
| >CDKN2A-A7 NCADPATL   | 475  | >CDKN2A-A7 NCTDPATL   | 2656 | 2181 |
| >CDKN2A-A7 NCADPATLTF | 233  | >CDKN2A-A7 NCTDPATLTR | 301  | 68   |
| >CDKN2A-A7 EPNCADPATL | 353  | >CDKN2A-A7 EPNCTDPATL | 5457 | 5104 |
| >CDKN2A-A7 EPNCADPA   | 53   | >CDKN2A-A7 EPNCTDPA   | 64   | 11   |
| >CDKN2A-A7 EPNCADPAT  | 16   | >CDKN2A-A7 EPNCTDPAT  | 26   | 10   |
| >CDKN2A-A7 EPNCADPATL | 279  | >CDKN2A-A7 EPNCTDPATL | 462  | 183  |
| >CDKN2A-A7 EPNCADPA   | 43   | >CDKN2A-A7 EPNCTDPA   | 43   | 0    |
| >CDKN2A-A7 EPNCADPAT  | 371  | >CDKN2A-A7 EPNCTDPAT  | 424  | 53   |
| >CDKN2A-A7 AEPNCADPA  | 183  | >CDKN2A-A7 AEPNCTDPA  | 307  | 124  |
| >CDKN2A-A7 AEPNCADPA  | 209  | >CDKN2A-A7 AEPNCTDPA  | 84   | 125  |
| >CDKN2A-A7 AEPNCADPA  | 480  | >CDKN2A-A7 AEPNCTDPA  | 500  | 20   |
| >CDKN2A-A7 AEPNCADPA  | 230  | >CDKN2A-A7 AEPNCTDPA  | 503  | 273  |
| >CDKN2A-A7 AEPNCADPA  | 609  | >CDKN2A-A7 AEPNCTDPA  | 251  | 358  |
| >CDKN2A-A7 AEPNCADPA  | 65   | >CDKN2A-A7 AEPNCTDPA  | 42   | 23   |
| >CDKN2A-A7 HGAEPNCAD  | 272  | >CDKN2A-A7 HGAEPNCTD  | 160  | 112  |
| >CDKN2A-A7 LLHGAEPNCA | 360  | >CDKN2A-A7 LLHGAEPNCT | 1351 | 991  |
| >CDKN2A-A7 LLHGAEPNCA | 290  | >CDKN2A-A7 LLHGAEPNCT | 763  | 473  |
| >CDKN2A-A7 LLHGAEPNCA | 278  | >CDKN2A-A7 LLHGAEPNCT | 1845 | 1567 |
| >CDKN2A-A7 LLHGAEPNCA | 242  | >CDKN2A-A7 LLHGAEPNCT | 2078 | 1836 |
| >CDKN2A-A7 LLHGAEPNCA | 26   | >CDKN2A-A7 LLHGAEPNCT | 147  | 121  |
| >CDKN2A-A7 ATLTRPVHDA | 5741 | >CDKN2A-A7 TTLTRPVHDA | 341  | 5400 |
| >CDKN2A-A7 HGAEPNCAD  | 272  | >CDKN2A-A7 HGAEPNCAD  | 4026 | 3754 |
| >CDKN2A-A7 DPATLTRPV  | 485  | >CDKN2A-A7 DPTTLTRPV  | 3009 | 2524 |
| >CDKN2A-A7 DPATLTRPV  | 197  | >CDKN2A-A7 DPTTLTRPV  | 954  | 757  |
| >CDKN2A-A7 DPATLTRPV  | 149  | >CDKN2A-A7 DPTTLTRPV  | 1027 | 878  |
| >CDKN2A-A7 ADPATLTRPV | 498  | >CDKN2A-A7 ADPTTLTRPV | 654  | 156  |

|                                   |      |                                   |      |      |
|-----------------------------------|------|-----------------------------------|------|------|
| >CDKN2A-A7 CADPATLTR              | 353  | >CDKN2A-A7 CADPTTLTR              | 356  | 3    |
| >CDKN2A-A7 NCADPATLTF             | 284  | >CDKN2A-A7 NCADPTTLTR             | 352  | 68   |
| >CDKN2A-A7 NCADPATL               | 475  | >CDKN2A-A7 NCADPTTL               | 472  | 3    |
| >CDKN2A-A7 NCADPATLTF             | 233  | >CDKN2A-A7 NCADPTTLTR             | 125  | 108  |
| >CDKN2A-A7 EPNCADPATL             | 353  | >CDKN2A-A7 EPNCADPTTL             | 195  | 158  |
| >CDKN2A-A7 EPNCADPA               | 53   | >CDKN2A-A7 EPNCADPT               | 47   | 6    |
| >CDKN2A-A7 EPNCADPAT              | 16   | >CDKN2A-A7 EPNCADPTT              | 28   | 12   |
| >CDKN2A-A7 EPNCADPATL             | 279  | >CDKN2A-A7 EPNCADPTTL             | 211  | 68   |
| >CDKN2A-A7 EPNCADPA               | 43   | >CDKN2A-A7 EPNCADPT               | 595  | 552  |
| >CDKN2A-A7 EPNCADPAT              | 371  | >CDKN2A-A7 EPNCADPTT              | 1376 | 1005 |
| >CDKN2A-A7 AEPNCADPA <sup>-</sup> | 183  | >CDKN2A-A7 AEPNCADPTI             | 186  | 3    |
| >CDKN2A-A7 AEPNCADPA              | 209  | >CDKN2A-A7 AEPNCADPT              | 274  | 65   |
| >CDKN2A-A7 AEPNCADPA <sup>-</sup> | 507  | >CDKN2A-A7 AEPNCADPTI             | 399  | 108  |
| >CDKN2A-A7 AEPNCADPA <sup>-</sup> | 849  | >CDKN2A-A7 AEPNCADPTI             | 343  | 506  |
| >CDKN2A-A7 AEPNCADPA              | 480  | >CDKN2A-A7 AEPNCADPT              | 2748 | 2268 |
| >CDKN2A-A7 AEPNCADPA <sup>-</sup> | 230  | >CDKN2A-A7 AEPNCADPTI             | 200  | 30   |
| >CDKN2A-A7 AEPNCADPA              | 609  | >CDKN2A-A7 AEPNCADPT              | 461  | 148  |
| >CDKN2A-A7 AEPNCADPA <sup>-</sup> | 65   | >CDKN2A-A7 AEPNCADPTI             | 58   | 7    |
| >CDKN2A-A7 HGAEPNCAD              | 272  | >CDKN2A-A7 HGAEPNCAD              | 28   | 244  |
| >CDKN2A-A7 HGAEPNCAD              | 3099 | >CDKN2A-A7 HGAEPNCAD              | 231  | 2868 |
| >CDKN2A-A7 DPATLTRPV              | 485  | >CDKN2A-A7 DPVTLTRPV              | 1916 | 1431 |
| >CDKN2A-A7 DPATLTRPV              | 197  | >CDKN2A-A7 DPVTLTRPV              | 362  | 165  |
| >CDKN2A-A7 DPATLTRPV              | 149  | >CDKN2A-A7 DPVTLTRPV              | 744  | 595  |
| >CDKN2A-A7 ADPATLTRPV             | 498  | >CDKN2A-A7 ADPVTLTRPV             | 367  | 131  |
| >CDKN2A-A7 CADPATLTR              | 353  | >CDKN2A-A7 CADPVLTR               | 146  | 207  |
| >CDKN2A-A7 NCADPATLTF             | 284  | >CDKN2A-A7 NCADPVLTR              | 168  | 116  |
| >CDKN2A-A7 NCADPATL               | 475  | >CDKN2A-A7 NCADPVL                | 393  | 82   |
| >CDKN2A-A7 NCADPATLTF             | 233  | >CDKN2A-A7 NCADPVLTR              | 232  | 1    |
| >CDKN2A-A7 EPNCADPATL             | 353  | >CDKN2A-A7 EPNCADPVL              | 169  | 184  |
| >CDKN2A-A7 EPNCADPA               | 2059 | >CDKN2A-A7 EPNCADPV               | 152  | 1907 |
| >CDKN2A-A7 EPNCADPA               | 2285 | >CDKN2A-A7 EPNCADPV               | 92   | 2193 |
| >CDKN2A-A7 EPNCADPA               | 53   | >CDKN2A-A7 EPNCADPV               | 96   | 43   |
| >CDKN2A-A7 EPNCADPAT              | 16   | >CDKN2A-A7 EPNCADPVT              | 46   | 30   |
| >CDKN2A-A7 EPNCADPATL             | 279  | >CDKN2A-A7 EPNCADPVL              | 374  | 95   |
| >CDKN2A-A7 EPNCADPA               | 43   | >CDKN2A-A7 EPNCADPV               | 156  | 113  |
| >CDKN2A-A7 EPNCADPAT              | 371  | >CDKN2A-A7 EPNCADPVT              | 1237 | 866  |
| >CDKN2A-A7 AEPNCADPA              | 6350 | >CDKN2A-A7 AEPNCADPV              | 345  | 6005 |
| >CDKN2A-A7 AEPNCADPA <sup>-</sup> | 183  | >CDKN2A-A7 AEPNCADPV <sup>-</sup> | 99   | 84   |
| >CDKN2A-A7 AEPNCADPA              | 209  | >CDKN2A-A7 AEPNCADPV              | 186  | 23   |
| >CDKN2A-A7 AEPNCADPA <sup>-</sup> | 849  | >CDKN2A-A7 AEPNCADPV <sup>-</sup> | 474  | 375  |
| >CDKN2A-A7 AEPNCADPA              | 480  | >CDKN2A-A7 AEPNCADPV              | 2241 | 1761 |
| >CDKN2A-A7 AEPNCADPA <sup>-</sup> | 230  | >CDKN2A-A7 AEPNCADPV <sup>-</sup> | 373  | 143  |
| >CDKN2A-A7 AEPNCADPA              | 609  | >CDKN2A-A7 AEPNCADPV              | 33   | 576  |

|                        |      |                        |      |      |
|------------------------|------|------------------------|------|------|
| >CDKN2A-A7 AEPNCADPA'  | 65   | >CDKN2A-A7 AEPNCADPV'  | 48   | 17   |
| >CDKN2A-A8 AAREGFLDTL  | 408  | >CDKN2A-A8 PAREGFLDTL' | 8345 | 7937 |
| >CDKN2A-A8 AAREGFLDTL  | 252  | >CDKN2A-A8 PAREGFLDTL' | 4999 | 4747 |
| >CDKN2A-A8 AAREGFLDTL  | 342  | >CDKN2A-A8 PAREGFLDTL  | 5103 | 4761 |
| >CDKN2A-A8 AAREGFLDTL  | 203  | >CDKN2A-A8 PAREGFLDTL' | 3696 | 3493 |
| >CDKN2A-A8 AAREGFLDTL  | 53   | >CDKN2A-A8 PAREGFLDTL  | 5445 | 5392 |
| >CDKN2A-A8 HDAAREGFL   | 169  | >CDKN2A-A8 HDPAREGFL   | 994  | 825  |
| >CDKN2A-A8 RPHVHDAAREC | 58   | >CDKN2A-A8 RPHVHDPAREC | 107  | 49   |
| >CDKN2A-A8 RPHVHDAAREC | 287  | >CDKN2A-A8 RPHVHDPAREC | 258  | 29   |
| >CDKN2A-A8 RPHVHDAAREC | 112  | >CDKN2A-A8 RPHVHDPAREC | 136  | 24   |
| >CDKN2A-A8 RPHVHDAAR   | 319  | >CDKN2A-A8 RPHVHDPAR   | 352  | 33   |
| >CDKN2A-A8 LTRPVHDA    | 48   | >CDKN2A-A8 LTRPVHDP    | 2181 | 2133 |
| >CDKN2A-A8 LTRPVHDAA   | 24   | >CDKN2A-A8 LTRPVHDPA   | 12   | 12   |
| >CDKN2A-A8 LTRPVHDAAF  | 56   | >CDKN2A-A8 LTRPVHDPAF  | 31   | 25   |
| >CDKN2A-A8 LTRPVHDAAF  | 107  | >CDKN2A-A8 LTRPVHDPAF  | 467  | 360  |
| >CDKN2A-A8 LTRPVHDAAF  | 47   | >CDKN2A-A8 LTRPVHDPAF  | 187  | 140  |
| >CDKN2A-A8 TLTRPVHDAA  | 280  | >CDKN2A-A8 TLTRPVHDPA  | 292  | 12   |
| >CDKN2A-A8 TLTRPVHDA   | 12   | >CDKN2A-A8 TLTRPVHDP   | 6463 | 6451 |
| >CDKN2A-A8 TLTRPVHDAA  | 88   | >CDKN2A-A8 TLTRPVHDPA  | 73   | 15   |
| >CDKN2A-A8 TLTRPVHDAA  | 159  | >CDKN2A-A8 TLTRPVHDPA  | 383  | 224  |
| >CDKN2A-A8 TLTRPVHDAA  | 411  | >CDKN2A-A8 TLTRPVHDPA  | 1288 | 877  |
| >CDKN2A-A8 TLTRPVHDAA  | 68   | >CDKN2A-A8 TLTRPVHDPA  | 116  | 48   |
| >CDKN2A-A8 ATLTRPVHDA  | 506  | >CDKN2A-A8 ATLTRPVHDP  | 190  | 316  |
| >CDKN2A-A8 AAREGFLDTL  | 408  | >CDKN2A-A8 TAREGFLDTL' | 852  | 444  |
| >CDKN2A-A8 AAREGFLDTL  | 252  | >CDKN2A-A8 TAREGFLDTL' | 1393 | 1141 |
| >CDKN2A-A8 AAREGFLDTL  | 342  | >CDKN2A-A8 TAREGFLDTL  | 2204 | 1862 |
| >CDKN2A-A8 AAREGFLDTL  | 203  | >CDKN2A-A8 TAREGFLDTL' | 1322 | 1119 |
| >CDKN2A-A8 AAREGFLDTL  | 53   | >CDKN2A-A8 TAREGFLDTL  | 231  | 178  |
| >CDKN2A-A8 DAAREGFL    | 3600 | >CDKN2A-A8 DTAREGFL    | 87   | 3513 |
| >CDKN2A-A8 DAAREGFLDT  | 2476 | >CDKN2A-A8 DTAREGFLDT  | 88   | 2388 |
| >CDKN2A-A8 DAAREGFL    | 1811 | >CDKN2A-A8 DTAREGFL    | 176  | 1635 |
| >CDKN2A-A8 DAAREGFLDT  | 1581 | >CDKN2A-A8 DTAREGFLDT  | 206  | 1375 |
| >CDKN2A-A8 DAAREGFLDT  | 1357 | >CDKN2A-A8 DTAREGFLDT  | 270  | 1087 |
| >CDKN2A-A8 HDAAREGFL   | 169  | >CDKN2A-A8 HDTAREGFL   | 124  | 45   |
| >CDKN2A-A8 RPHVHDAAREC | 58   | >CDKN2A-A8 RPHVHDTAREC | 47   | 11   |
| >CDKN2A-A8 RPHVHDAAREC | 287  | >CDKN2A-A8 RPHVHDTAREC | 234  | 53   |
| >CDKN2A-A8 RPHVHDAAREC | 112  | >CDKN2A-A8 RPHVHDTAREC | 86   | 26   |
| >CDKN2A-A8 RPHVHDAAR   | 319  | >CDKN2A-A8 RPHVHTAR    | 234  | 85   |
| >CDKN2A-A8 LTRPVHDA    | 48   | >CDKN2A-A8 LTRPVHDT    | 1606 | 1558 |
| >CDKN2A-A8 LTRPVHDAA   | 24   | >CDKN2A-A8 LTRPVHDTA   | 23   | 1    |
| >CDKN2A-A8 LTRPVHDAAF  | 56   | >CDKN2A-A8 LTRPVHDTAF  | 199  | 143  |
| >CDKN2A-A8 LTRPVHDAAF  | 107  | >CDKN2A-A8 LTRPVHDTAF  | 296  | 189  |
| >CDKN2A-A8 LTRPVHDAAF  | 47   | >CDKN2A-A8 LTRPVHDTAF  | 79   | 32   |

|                         |      |                         |     |      |
|-------------------------|------|-------------------------|-----|------|
| >CDKN2A-A8 LTRPVHDAA    | 583  | >CDKN2A-A8 LTRPVHDTA    | 85  | 498  |
| >CDKN2A-A8 TLTRPVHDAA   | 611  | >CDKN2A-A8 TLTRPVHDTA   | 470 | 141  |
| >CDKN2A-A8 TLTRPVHDAA   | 280  | >CDKN2A-A8 TLTRPVHDTA   | 203 | 77   |
| >CDKN2A-A8 TLTRPVHDAA   | 1048 | >CDKN2A-A8 TLTRPVHDTA   | 406 | 642  |
| >CDKN2A-A8 TLTRPVHDA    | 12   | >CDKN2A-A8 TLTRPVHDT    | 101 | 89   |
| >CDKN2A-A8 TLTRPVHDAA   | 88   | >CDKN2A-A8 TLTRPVHDTA   | 33  | 55   |
| >CDKN2A-A8 TLTRPVHDAA   | 159  | >CDKN2A-A8 TLTRPVHDTA   | 214 | 55   |
| >CDKN2A-A8 TLTRPVHDAA   | 411  | >CDKN2A-A8 TLTRPVHDTA   | 587 | 176  |
| >CDKN2A-A8 TLTRPVHDAA   | 68   | >CDKN2A-A8 TLTRPVHDTA   | 86  | 18   |
| >CDKN2A-A8 ATLTRPVHDA   | 506  | >CDKN2A-A8 ATLTRPVHDT   | 487 | 19   |
| >CDKN2A-A8 AREGFLDTL    | 165  | >CDKN2A-A8 VREGFLDTL    | 600 | 435  |
| >CDKN2A-A8 AREGFLDTL    | 63   | >CDKN2A-A8 VREGFLDTL    | 165 | 102  |
| >CDKN2A-A8 AAREGFLDTL   | 1005 | >CDKN2A-A8 AVREGFLDTL   | 328 | 677  |
| >CDKN2A-A8 AAREGFLDTL   | 620  | >CDKN2A-A8 AVREGFLDTL   | 63  | 557  |
| >CDKN2A-A8 AAREGFLDTL   | 408  | >CDKN2A-A8 AVREGFLDTL   | 108 | 300  |
| >CDKN2A-A8 AAREGFLDTL   | 3175 | >CDKN2A-A8 AVREGFLDTL   | 185 | 2990 |
| >CDKN2A-A8 AAREGFLDTL   | 252  | >CDKN2A-A8 AVREGFLDTL   | 21  | 231  |
| >CDKN2A-A8 AAREGFLDTL   | 342  | >CDKN2A-A8 AVREGFLDTL   | 96  | 246  |
| >CDKN2A-A8 AAREGFLDTL   | 203  | >CDKN2A-A8 AVREGFLDTL   | 64  | 139  |
| >CDKN2A-A8 AAREGFLDTL   | 53   | >CDKN2A-A8 AVREGFLDTL   | 461 | 408  |
| >CDKN2A-A8 ATLTRPVHDA   | 1556 | >CDKN2A-A8 ATLTRPVHDA   | 188 | 1368 |
| >CDKN2A-A8 ATLTRPVHDA   | 2327 | >CDKN2A-A8 ATLTRPVHDA   | 42  | 2285 |
| >CDKN2A-A8 ATLTRPVHDA   | 9300 | >CDKN2A-A8 ATLTRPVHDA   | 334 | 8966 |
| >CDKN2A-A8 ATLTRPVHDA   | 2733 | >CDKN2A-A8 ATLTRPVHDA   | 485 | 2248 |
| >CDKN2A-A8 ATLTRPVHDA   | 6534 | >CDKN2A-A8 ATLTRPVHDA   | 494 | 6040 |
| >CDKN2A-A8 HDAAREGFL    | 169  | >CDKN2A-A8 HDAVREGFL    | 124 | 45   |
| >CDKN2A-A8 RPVHDAAREGFL | 58   | >CDKN2A-A8 RPVHDAVREGFL | 76  | 18   |
| >CDKN2A-A8 RPVHDAAREGFL | 287  | >CDKN2A-A8 RPVHDAVREGFL | 268 | 19   |
| >CDKN2A-A8 RPVHDAAREGFL | 112  | >CDKN2A-A8 RPVHDAVREGFL | 124 | 12   |
| >CDKN2A-A8 RPVHDAAR     | 319  | >CDKN2A-A8 RPVHDAVR     | 221 | 98   |
| >CDKN2A-A8 LTRPVHDAA    | 8131 | >CDKN2A-A8 LTRPVHDAV    | 299 | 7832 |
| >CDKN2A-A8 LTRPVHDAA    | 24   | >CDKN2A-A8 LTRPVHDAV    | 40  | 16   |
| >CDKN2A-A8 LTRPVHDAAF   | 56   | >CDKN2A-A8 LTRPVHDAVF   | 86  | 30   |
| >CDKN2A-A8 LTRPVHDAAF   | 107  | >CDKN2A-A8 LTRPVHDAVF   | 238 | 131  |
| >CDKN2A-A8 LTRPVHDAAF   | 47   | >CDKN2A-A8 LTRPVHDAVF   | 78  | 31   |
| >CDKN2A-A8 LTRPVHDAA    | 2875 | >CDKN2A-A8 LTRPVHDAV    | 267 | 2608 |
| >CDKN2A-A8 LTRPVHDAA    | 583  | >CDKN2A-A8 LTRPVHDAV    | 68  | 515  |
| >CDKN2A-A8 TLTRPVHDAA   | 2478 | >CDKN2A-A8 TLTRPVHDAV   | 387 | 2091 |
| >CDKN2A-A8 TLTRPVHDAA   | 611  | >CDKN2A-A8 TLTRPVHDAV   | 80  | 531  |
| >CDKN2A-A8 TLTRPVHDAA   | 280  | >CDKN2A-A8 TLTRPVHDAV   | 7   | 273  |
| >CDKN2A-A8 TLTRPVHDAA   | 1975 | >CDKN2A-A8 TLTRPVHDAV   | 29  | 1946 |
| >CDKN2A-A8 TLTRPVHDAA   | 1048 | >CDKN2A-A8 TLTRPVHDAV   | 23  | 1025 |
| >CDKN2A-A8 TLTRPVHDAA   | 9226 | >CDKN2A-A8 TLTRPVHDAV   | 156 | 9070 |

|                       |      |                       |      |      |
|-----------------------|------|-----------------------|------|------|
| >CDKN2A-A8 TLTRPVHDAF | 88   | >CDKN2A-A8 TLTRPVHDAV | 4    | 84   |
| >CDKN2A-A8 TLTRPVHDAF | 159  | >CDKN2A-A8 TLTRPVHDAV | 324  | 165  |
| >CDKN2A-A8 TLTRPVHDAF | 411  | >CDKN2A-A8 TLTRPVHDAV | 1099 | 688  |
| >CDKN2A-A8 TLTRPVHDAF | 68   | >CDKN2A-A8 TLTRPVHDAV | 83   | 15   |
| >CDKN2A-A8 TLTRPVHDAF | 993  | >CDKN2A-A8 TLTRPVHDAV | 138  | 855  |
| >CDKN2A-A8 TLTRPVHDAF | 7966 | >CDKN2A-A8 TLTRPVHDAV | 482  | 7484 |
| >CDKN2A-C7 CADPATLTRP | 712  | >CDKN2A-C7 GADPATLTRF | 346  | 366  |
| >CDKN2A-C7 CADPATLTR  | 353  | >CDKN2A-C7 GADPATLTR  | 1553 | 1200 |
| >CDKN2A-C7 NCADPATLTF | 284  | >CDKN2A-C7 NGADPATLTF | 887  | 603  |
| >CDKN2A-C7 NCADPATL   | 475  | >CDKN2A-C7 NGADPATL   | 1031 | 556  |
| >CDKN2A-C7 NCADPATLTF | 233  | >CDKN2A-C7 NGADPATLTF | 433  | 200  |
| >CDKN2A-C7 LLLHGAEPN  | 220  | >CDKN2A-C7 LLLHGAEPN  | 4614 | 4394 |
| >CDKN2A-C7 LLLHGAEPN  | 89   | >CDKN2A-C7 LLLHGAEPN  | 5331 | 5242 |
| >CDKN2A-C7 EPNCADPATL | 353  | >CDKN2A-C7 EPNGADPATI | 269  | 84   |
| >CDKN2A-C7 EPNCADPA   | 53   | >CDKN2A-C7 EPNGADPA   | 88   | 35   |
| >CDKN2A-C7 EPNCADPAT  | 16   | >CDKN2A-C7 EPNGADPAT  | 22   | 6    |
| >CDKN2A-C7 EPNCADPATL | 279  | >CDKN2A-C7 EPNGADPATI | 496  | 217  |
| >CDKN2A-C7 EPNCADPATL | 753  | >CDKN2A-C7 EPNGADPATI | 199  | 554  |
| >CDKN2A-C7 EPNCADPA   | 43   | >CDKN2A-C7 EPNGADPA   | 43   | 0    |
| >CDKN2A-C7 EPNCADPAT  | 371  | >CDKN2A-C7 EPNGADPAT  | 278  | 93   |
| >CDKN2A-C7 AEPNCADPA  | 183  | >CDKN2A-C7 AEPNGADPA  | 123  | 60   |
| >CDKN2A-C7 AEPNCADPA  | 209  | >CDKN2A-C7 AEPNGADPA  | 600  | 391  |
| >CDKN2A-C7 AEPNCADPA  | 480  | >CDKN2A-C7 AEPNGADPA  | 149  | 331  |
| >CDKN2A-C7 AEPNCADPA  | 230  | >CDKN2A-C7 AEPNGADPA  | 406  | 176  |
| >CDKN2A-C7 AEPNCADPA  | 65   | >CDKN2A-C7 AEPNGADPA  | 69   | 4    |
| >CDKN2A-C7 HGAEPNCAD  | 272  | >CDKN2A-C7 HGAEPNGAD  | 349  | 77   |
| >CDKN2A-C7 LLHGAEPNCA | 360  | >CDKN2A-C7 LLHGAEPNGA | 190  | 170  |
| >CDKN2A-C7 LLHGAEPNCA | 290  | >CDKN2A-C7 LLHGAEPNGA | 92   | 198  |
| >CDKN2A-C7 LLHGAEPNC  | 274  | >CDKN2A-C7 LLHGAEPNG  | 5740 | 5466 |
| >CDKN2A-C7 LLHGAEPNCA | 278  | >CDKN2A-C7 LLHGAEPNGA | 51   | 227  |
| >CDKN2A-C7 LLHGAEPNCA | 242  | >CDKN2A-C7 LLHGAEPNGA | 216  | 26   |
| >CDKN2A-C7 LLHGAEPNC  | 14   | >CDKN2A-C7 LLHGAEPNG  | 1152 | 1138 |
| >CDKN2A-C7 LLHGAEPNCA | 26   | >CDKN2A-C7 LLHGAEPNGA | 10   | 16   |
| >CDKN2A-C7 LLLHGAEPNC | 560  | >CDKN2A-C7 LLLHGAEPNG | 393  | 167  |
| >CDKN2A-C7 LLLHGAEPNC | 723  | >CDKN2A-C7 LLLHGAEPNG | 389  | 334  |
| >CDKN2A-C7 LLLHGAEPNC | 429  | >CDKN2A-C7 LLLHGAEPNG | 56   | 373  |
| >CDKN2A-C7 LLLHGAEPNC | 476  | >CDKN2A-C7 LLLHGAEPNG | 92   | 384  |
| >CDKN2A-C7 LLLHGAEPNC | 121  | >CDKN2A-C7 LLLHGAEPNG | 2799 | 2678 |
| >CDKN2A-C7 LLLHGAEPNC | 105  | >CDKN2A-C7 LLLHGAEPNG | 21   | 84   |
| >CDKN2A-C7 LLLHGAEPNC | 428  | >CDKN2A-C7 LLLHGAEPNG | 6392 | 5964 |
| >CDKN2A-C7 LLLHGAEPNC | 80   | >CDKN2A-C7 LLLHGAEPNG | 36   | 44   |
| >CDKN2A-C7 LLLHGAEPNC | 294  | >CDKN2A-C7 LLLHGAEPNG | 3650 | 3356 |
| >CDKN2A-C7 LLLHGAEPNC | 66   | >CDKN2A-C7 LLLHGAEPNG | 55   | 11   |

|                       |       |                       |       |       |
|-----------------------|-------|-----------------------|-------|-------|
| >CDKN2A-C7 LLLHGAEPNC | 369   | >CDKN2A-C7 LLLHGAEPNG | 12624 | 12255 |
| >CDKN2A-C7 LLLHGAEPNC | 198   | >CDKN2A-C7 LLLHGAEPNG | 121   | 77    |
| >CDKN2A-C7 LLLHGAEPNC | 35    | >CDKN2A-C7 LLLHGAEPNG | 3636  | 3601  |
| >CDKN2A-C7 LLLHGAEPNC | 53    | >CDKN2A-C7 LLLHGAEPNG | 19    | 34    |
| >CDKN2A-C7 CADPATLTRP | 712   | >CDKN2A-C7 SADPATLTRP | 142   | 570   |
| >CDKN2A-C7 CADPATLTRP | 3042  | >CDKN2A-C7 SADPATLTRP | 318   | 2724  |
| >CDKN2A-C7 CADPATLTRP | 7783  | >CDKN2A-C7 SADPATLTRP | 394   | 7389  |
| >CDKN2A-C7 CADPATLTR  | 353   | >CDKN2A-C7 SADPATLTR  | 397   | 44    |
| >CDKN2A-C7 CADPATLTRP | 585   | >CDKN2A-C7 SADPATLTRP | 35    | 550   |
| >CDKN2A-C7 NCADPATLTF | 13999 | >CDKN2A-C7 NSADPATLTR | 220   | 13779 |
| >CDKN2A-C7 NCADPATLTF | 284   | >CDKN2A-C7 NSADPATLTR | 6     | 278   |
| >CDKN2A-C7 NCADPATL   | 475   | >CDKN2A-C7 NSADPATL   | 58    | 417   |
| >CDKN2A-C7 NCADPATLT  | 2621  | >CDKN2A-C7 NSADPATLT  | 384   | 2237  |
| >CDKN2A-C7 NCADPATL   | 868   | >CDKN2A-C7 NSADPATL   | 277   | 591   |
| >CDKN2A-C7 NCADPATL   | 17119 | >CDKN2A-C7 NSADPATL   | 86    | 17033 |
| >CDKN2A-C7 NCADPATLTF | 233   | >CDKN2A-C7 NSADPATLTR | 997   | 764   |
| >CDKN2A-C7 LLLLHGAEPN | 220   | >CDKN2A-C7 LLLLHGAEPN | 2508  | 2288  |
| >CDKN2A-C7 LLLLHGAEPN | 89    | >CDKN2A-C7 LLLLHGAEPN | 1355  | 1266  |
| >CDKN2A-C7 EPNCADPATL | 353   | >CDKN2A-C7 EPNSADPATL | 142   | 211   |
| >CDKN2A-C7 EPNCADPA   | 53    | >CDKN2A-C7 EPNSADPA   | 88    | 35    |
| >CDKN2A-C7 EPNCADPAT  | 16    | >CDKN2A-C7 EPNSADPAT  | 21    | 5     |
| >CDKN2A-C7 EPNCADPATL | 279   | >CDKN2A-C7 EPNSADPATL | 439   | 160   |
| >CDKN2A-C7 EPNCADPATL | 753   | >CDKN2A-C7 EPNSADPATL | 210   | 543   |
| >CDKN2A-C7 EPNCADPA   | 43    | >CDKN2A-C7 EPNSADPA   | 57    | 14    |
| >CDKN2A-C7 EPNCADPAT  | 371   | >CDKN2A-C7 EPNSADPAT  | 493   | 122   |
| >CDKN2A-C7 AEPNCADPA  | 183   | >CDKN2A-C7 AEPNSADPA  | 169   | 14    |
| >CDKN2A-C7 AEPNCADPA  | 209   | >CDKN2A-C7 AEPNSADPA  | 483   | 274   |
| >CDKN2A-C7 AEPNCADPA  | 480   | >CDKN2A-C7 AEPNSADPA  | 126   | 354   |
| >CDKN2A-C7 AEPNCADPA  | 230   | >CDKN2A-C7 AEPNSADPA  | 312   | 82    |
| >CDKN2A-C7 AEPNCADPA  | 65    | >CDKN2A-C7 AEPNSADPA  | 75    | 10    |
| >CDKN2A-C7 HGAEPNCAD  | 272   | >CDKN2A-C7 HGAEPNSAD  | 278   | 6     |
| >CDKN2A-C7 LLHGAEPNCA | 360   | >CDKN2A-C7 LLHGAEPNSA | 111   | 249   |
| >CDKN2A-C7 LLHGAEPNCA | 290   | >CDKN2A-C7 LLHGAEPNSA | 68    | 222   |
| >CDKN2A-C7 LLHGAEPNC  | 274   | >CDKN2A-C7 LLHGAEPNS  | 3177  | 2903  |
| >CDKN2A-C7 LLHGAEPNCA | 278   | >CDKN2A-C7 LLHGAEPNSA | 65    | 213   |
| >CDKN2A-C7 LLHGAEPNCA | 242   | >CDKN2A-C7 LLHGAEPNSA | 304   | 62    |
| >CDKN2A-C7 LLHGAEPNC  | 14    | >CDKN2A-C7 LLHGAEPNS  | 201   | 187   |
| >CDKN2A-C7 LLHGAEPNCA | 26    | >CDKN2A-C7 LLHGAEPNSA | 9     | 17    |
| >CDKN2A-C7 LLLHGAEPNC | 560   | >CDKN2A-C7 LLLHGAEPNS | 259   | 301   |
| >CDKN2A-C7 LLLHGAEPNC | 723   | >CDKN2A-C7 LLLHGAEPNS | 321   | 402   |
| >CDKN2A-C7 LLLHGAEPNC | 429   | >CDKN2A-C7 LLLHGAEPNS | 46    | 383   |
| >CDKN2A-C7 LLLHGAEPNC | 476   | >CDKN2A-C7 LLLHGAEPNS | 111   | 365   |
| >CDKN2A-C7 LLLHGAEPNC | 121   | >CDKN2A-C7 LLLHGAEPNS | 1394  | 1273  |

|                       |       |                        |      |       |
|-----------------------|-------|------------------------|------|-------|
| >CDKN2A-C7 LLLHGAEPNC | 105   | >CDKN2A-C7 LLLHGAEPNS  | 28   | 77    |
| >CDKN2A-C7 LLLHGAEPNC | 428   | >CDKN2A-C7 LLLHGAEPNS  | 5035 | 4607  |
| >CDKN2A-C7 LLLHGAEPNC | 80    | >CDKN2A-C7 LLLHGAEPNS  | 49   | 31    |
| >CDKN2A-C7 LLLHGAEPNC | 294   | >CDKN2A-C7 LLLHGAEPNS  | 1780 | 1486  |
| >CDKN2A-C7 LLLHGAEPNC | 66    | >CDKN2A-C7 LLLHGAEPNS  | 73   | 7     |
| >CDKN2A-C7 LLLHGAEPNC | 369   | >CDKN2A-C7 LLLHGAEPNS  | 4880 | 4511  |
| >CDKN2A-C7 LLLHGAEPNC | 198   | >CDKN2A-C7 LLLHGAEPNS  | 213  | 15    |
| >CDKN2A-C7 LLLHGAEPNC | 35    | >CDKN2A-C7 LLLHGAEPNS  | 701  | 666   |
| >CDKN2A-C7 LLLHGAEPNC | 53    | >CDKN2A-C7 LLLHGAEPNS  | 16   | 37    |
| >CDKN2A-C7 CADPATLTRP | 4189  | >CDKN2A-C7 YADPATLTRP  | 281  | 3908  |
| >CDKN2A-C7 CADPATLTRP | 712   | >CDKN2A-C7 YADPATLTRP  | 25   | 687   |
| >CDKN2A-C7 CADPATLTRP | 3042  | >CDKN2A-C7 YADPATLTRP  | 41   | 3001  |
| >CDKN2A-C7 CADPATLTRP | 6743  | >CDKN2A-C7 YADPATLTRP  | 319  | 6424  |
| >CDKN2A-C7 CADPATLTRP | 7783  | >CDKN2A-C7 YADPATLTRP  | 117  | 7666  |
| >CDKN2A-C7 CADPATLTRP | 9246  | >CDKN2A-C7 YADPATLTRP  | 492  | 8754  |
| >CDKN2A-C7 CADPATLTRP | 5096  | >CDKN2A-C7 YADPATLTRP  | 74   | 5022  |
| >CDKN2A-C7 CADPATLTR  | 353   | >CDKN2A-C7 YADPATLTR   | 101  | 252   |
| >CDKN2A-C7 CADPATLTRP | 1765  | >CDKN2A-C7 YADPATLTRP  | 428  | 1337  |
| >CDKN2A-C7 CADPATLTRP | 585   | >CDKN2A-C7 YADPATLTRP  | 15   | 570   |
| >CDKN2A-C7 NCADPATL   | 24083 | >CDKN2A-C7 NYADPATL    | 120  | 23963 |
| >CDKN2A-C7 NCADPATLTF | 1563  | >CDKN2A-C7 NYADPATLTR  | 190  | 1373  |
| >CDKN2A-C7 NCADPATLTF | 284   | >CDKN2A-C7 NYADPATLTR  | 69   | 215   |
| >CDKN2A-C7 NCADPATL   | 475   | >CDKN2A-C7 NYADPATL    | 2377 | 1902  |
| >CDKN2A-C7 NCADPATLTF | 233   | >CDKN2A-C7 NYADPATLTR  | 24   | 209   |
| >CDKN2A-C7 LLLLHGAEPN | 220   | >CDKN2A-C7 LLLLHGAEPN' | 5338 | 5118  |
| >CDKN2A-C7 LLLLHGAEPN | 89    | >CDKN2A-C7 LLLLHGAEPN' | 2276 | 2187  |
| >CDKN2A-C7 LLLLHGAEPN | 22400 | >CDKN2A-C7 LLLLHGAEPN' | 54   | 22346 |
| >CDKN2A-C7 LLLLHGAEPN | 18098 | >CDKN2A-C7 LLLLHGAEPN' | 444  | 17654 |
| >CDKN2A-C7 LLLLHGAEPN | 13886 | >CDKN2A-C7 LLLLHGAEPN' | 248  | 13638 |
| >CDKN2A-C7 PNCADPATLT | 1360  | >CDKN2A-C7 PNYADPATLT  | 421  | 939   |
| >CDKN2A-C7 EPNCADPATL | 353   | >CDKN2A-C7 EPNYADPATL  | 425  | 72    |
| >CDKN2A-C7 EPNCADPA   | 53    | >CDKN2A-C7 EPNYADPA    | 100  | 47    |
| >CDKN2A-C7 EPNCADPAT  | 16    | >CDKN2A-C7 EPNYADPAT   | 25   | 9     |
| >CDKN2A-C7 EPNCADPATL | 279   | >CDKN2A-C7 EPNYADPATL  | 513  | 234   |
| >CDKN2A-C7 EPNCADPA   | 43    | >CDKN2A-C7 EPNYADPA    | 40   | 3     |
| >CDKN2A-C7 EPNCADPAT  | 371   | >CDKN2A-C7 EPNYADPAT   | 343  | 28    |
| >CDKN2A-C7 AEPNCADPA  | 183   | >CDKN2A-C7 AEPNYADPA   | 172  | 11    |
| >CDKN2A-C7 AEPNCADPA  | 209   | >CDKN2A-C7 AEPNYADPA   | 225  | 16    |
| >CDKN2A-C7 AEPNCADPA  | 480   | >CDKN2A-C7 AEPNYADPA   | 82   | 398   |
| >CDKN2A-C7 AEPNCADPA  | 230   | >CDKN2A-C7 AEPNYADPA   | 324  | 94    |
| >CDKN2A-C7 AEPNCADPA  | 609   | >CDKN2A-C7 AEPNYADPA   | 423  | 186   |
| >CDKN2A-C7 AEPNCADPA  | 65    | >CDKN2A-C7 AEPNYADPA   | 43   | 22    |
| >CDKN2A-C7 HGAEPNCA   | 3080  | >CDKN2A-C7 HGAEPNYA    | 282  | 2798  |

|                       |       |                       |      |       |
|-----------------------|-------|-----------------------|------|-------|
| >CDKN2A-C7 HGAEPNCAD  | 272   | >CDKN2A-C7 HGAEPNYAD  | 150  | 122   |
| >CDKN2A-C7 LLHGAEPNCA | 3531  | >CDKN2A-C7 LLHGAEPNYA | 328  | 3203  |
| >CDKN2A-C7 LLHGAEPNCA | 360   | >CDKN2A-C7 LLHGAEPNYA | 42   | 318   |
| >CDKN2A-C7 LLHGAEPNCA | 290   | >CDKN2A-C7 LLHGAEPNYA | 42   | 248   |
| >CDKN2A-C7 LLHGAEPNC  | 274   | >CDKN2A-C7 LLHGAEPNY  | 6561 | 6287  |
| >CDKN2A-C7 LLHGAEPNCA | 278   | >CDKN2A-C7 LLHGAEPNYA | 17   | 261   |
| >CDKN2A-C7 LLHGAEPNCA | 1919  | >CDKN2A-C7 LLHGAEPNYA | 387  | 1532  |
| >CDKN2A-C7 LLHGAEPNCA | 242   | >CDKN2A-C7 LLHGAEPNYA | 85   | 157   |
| >CDKN2A-C7 LLHGAEPNC  | 14    | >CDKN2A-C7 LLHGAEPNY  | 363  | 349   |
| >CDKN2A-C7 LLHGAEPNCA | 26    | >CDKN2A-C7 LLHGAEPNYA | 8    | 18    |
| >CDKN2A-C7 LLHGAEPNC  | 25238 | >CDKN2A-C7 LLHGAEPNY  | 191  | 25047 |
| >CDKN2A-C7 LLHGAEPNC  | 28422 | >CDKN2A-C7 LLHGAEPNY  | 120  | 28302 |
| >CDKN2A-C7 LLHGAEPNC  | 18757 | >CDKN2A-C7 LLHGAEPNY  | 218  | 18539 |
| >CDKN2A-C7 LLLHGAEPNC | 560   | >CDKN2A-C7 LLLHGAEPNY | 76   | 484   |
| >CDKN2A-C7 LLLHGAEPNC | 723   | >CDKN2A-C7 LLLHGAEPNY | 103  | 620   |
| >CDKN2A-C7 LLLHGAEPNC | 429   | >CDKN2A-C7 LLLHGAEPNY | 47   | 382   |
| >CDKN2A-C7 LLLHGAEPNC | 476   | >CDKN2A-C7 LLLHGAEPNY | 53   | 423   |
| >CDKN2A-C7 LLLHGAEPNC | 121   | >CDKN2A-C7 LLLHGAEPNY | 3211 | 3090  |
| >CDKN2A-C7 LLLHGAEPNC | 105   | >CDKN2A-C7 LLLHGAEPNY | 8    | 97    |
| >CDKN2A-C7 LLLHGAEPNC | 428   | >CDKN2A-C7 LLLHGAEPNY | 8852 | 8424  |
| >CDKN2A-C7 LLLHGAEPNC | 80    | >CDKN2A-C7 LLLHGAEPNY | 21   | 59    |
| >CDKN2A-C7 LLLHGAEPNC | 294   | >CDKN2A-C7 LLLHGAEPNY | 4270 | 3976  |
| >CDKN2A-C7 LLLHGAEPNC | 66    | >CDKN2A-C7 LLLHGAEPNY | 26   | 40    |
| >CDKN2A-C7 LLLHGAEPNC | 369   | >CDKN2A-C7 LLLHGAEPNY | 7672 | 7303  |
| >CDKN2A-C7 LLLHGAEPNC | 198   | >CDKN2A-C7 LLLHGAEPNY | 40   | 158   |
| >CDKN2A-C7 LLLHGAEPNC | 35    | >CDKN2A-C7 LLLHGAEPNY | 1389 | 1354  |
| >CDKN2A-C7 LLLHGAEPNC | 53    | >CDKN2A-C7 LLLHGAEPNY | 14   | 39    |
| >CDKN2A-C7 LLLHGAEPNC | 32324 | >CDKN2A-C7 LLLHGAEPNY | 377  | 31947 |
| >CDKN2A-C7 LLLHGAEPNC | 25160 | >CDKN2A-C7 LLLHGAEPNY | 447  | 24713 |
| >CDKN2A-C7 LLLHGAEPNC | 16168 | >CDKN2A-C7 LLLHGAEPNY | 240  | 15928 |
| >CDKN2A-C7 LLLHGAEPNC | 20629 | >CDKN2A-C7 LLLHGAEPNY | 229  | 20400 |
| >CDKN2A-C7 LLLHGAEPNC | 9282  | >CDKN2A-C7 LLLHGAEPNY | 126  | 9156  |
| >CDKN2A-C7 LLLHGAEPNC | 23332 | >CDKN2A-C7 LLLHGAEPNY | 243  | 23089 |
| >CDKN2A-D1 DVRDAWGRI  | 1480  | >CDKN2A-D1 EVRDAWGRL  | 379  | 1101  |
| >CDKN2A-D1 DVRDAWGRI  | 456   | >CDKN2A-D1 EVRDAWGRL  | 66   | 390   |
| >CDKN2A-D1 DVRDAWGRI  | 644   | >CDKN2A-D1 EVRDAWGRL  | 128  | 516   |
| >CDKN2A-D1 DVRDAWGRI  | 277   | >CDKN2A-D1 EVRDAWGRL  | 225  | 52    |
| >CDKN2A-D1 DVRDAWGR   | 17    | >CDKN2A-D1 EVRDAWGR   | 33   | 16    |
| >CDKN2A-D1 DVRDAWGR   | 62    | >CDKN2A-D1 EVRDAWGR   | 16   | 46    |
| >CDKN2A-D1 DVRDAWGRI  | 4223  | >CDKN2A-D1 EVRDAWGRL  | 417  | 3806  |
| >CDKN2A-D1 DVRDAWGRI  | 208   | >CDKN2A-D1 EVRDAWGRL  | 28   | 180   |
| >CDKN2A-D1 DVRDAWGRI  | 198   | >CDKN2A-D1 EVRDAWGRL  | 32   | 166   |
| >CDKN2A-D1 DVRDAWGR   | 1440  | >CDKN2A-D1 EVRDAWGR   | 475  | 965   |



|                       |      |                       |       |       |
|-----------------------|------|-----------------------|-------|-------|
| >CDKN2A-D1 LDVRDAWGF  | 477  | >CDKN2A-D1 LEVRDAWGR  | 12116 | 11639 |
| >CDKN2A-D1 RLDVRDAWC  | 122  | >CDKN2A-D1 RLEVRDAWG  | 2162  | 2040  |
| >CDKN2A-D1 RLDVRDAWC  | 227  | >CDKN2A-D1 RLEVRDAWG  | 4948  | 4721  |
| >CDKN2A-D1 RLDVRDAWC  | 91   | >CDKN2A-D1 RLEVRDAWG  | 150   | 59    |
| >CDKN2A-D1 RLDVRDAWC  | 120  | >CDKN2A-D1 RLEVRDAWG  | 173   | 53    |
| >CDKN2A-D1 RLDVRDAW   | 274  | >CDKN2A-D1 RLEVRDAW   | 4151  | 3877  |
| >CDKN2A-D1 RLDVRDAWC  | 92   | >CDKN2A-D1 RLEVRDAWG  | 100   | 8     |
| >CDKN2A-D1 RLDVRDAWC  | 293  | >CDKN2A-D1 RLEVRDAWG  | 157   | 136   |
| >CDKN2A-D1 ARLDVRDAW  | 89   | >CDKN2A-D1 ARLEVRDAW  | 63    | 26    |
| >CDKN2A-D1 ARLDVRDAW  | 117  | >CDKN2A-D1 ARLEVRDAW  | 217   | 100   |
| >CDKN2A-D1 GARLDVRDA' | 604  | >CDKN2A-D1 GARLEVRDA\ | 415   | 189   |
| >CDKN2A-D1 GARLDVRDA' | 457  | >CDKN2A-D1 GARLEVRDA\ | 362   | 95    |
| >CDKN2A-D1 AGARLDVRD, | 289  | >CDKN2A-D1 AGARLEVRD/ | 328   | 39    |
| >CDKN2A-D1 RAGARLDVR  | 90   | >CDKN2A-D1 RAGARLEVR  | 34    | 56    |
| >CDKN2A-D1 HRAGARLDV  | 197  | >CDKN2A-D1 HRAGARLEV  | 71    | 126   |
| >CDKN2A-D1 HRAGARLDV  | 101  | >CDKN2A-D1 HRAGARLEVF | 73    | 28    |
| >CDKN2A-D1 HRAGARLDV  | 813  | >CDKN2A-D1 HRAGARLEV  | 206   | 607   |
| >CDKN2A-D1 HRAGARLDV  | 1203 | >CDKN2A-D1 HRAGARLEV  | 376   | 827   |
| >CDKN2A-D1 VLHRAGARLL | 2613 | >CDKN2A-D1 VLHRAGARLE | 358   | 2255  |
| >CDKN2A-D1 VLHRAGARLL | 1621 | >CDKN2A-D1 VLHRAGARLE | 266   | 1355  |
| >CDKN2A-D1 VLHRAGARLL | 77   | >CDKN2A-D1 VLHRAGARLE | 31    | 46    |
| >CDKN2A-D1 VLHRAGARLL | 36   | >CDKN2A-D1 VLHRAGARLE | 7     | 29    |
| >CDKN2A-D1 VLHRAGARLL | 346  | >CDKN2A-D1 VLHRAGARLE | 92    | 254   |
| >CDKN2A-D1 VLHRAGARLL | 33   | >CDKN2A-D1 VLHRAGARLE | 14    | 19    |
| >CDKN2A-D1 VLHRAGARLL | 1296 | >CDKN2A-D1 VLHRAGARLE | 342   | 954   |
| >CDKN2A-D1 VLHRAGARLL | 3    | >CDKN2A-D1 VLHRAGARLE | 2     | 1     |
| >CDKN2A-D1 DVRDAWGRI  | 6104 | >CDKN2A-D1 NVRDAWGRI  | 349   | 5755  |
| >CDKN2A-D1 DVRDAWGRI  | 5947 | >CDKN2A-D1 NVRDAWGRI  | 492   | 5455  |
| >CDKN2A-D1 DVRDAWGRI  | 1480 | >CDKN2A-D1 NVRDAWGRI  | 294   | 1186  |
| >CDKN2A-D1 DVRDAWGRI  | 456  | >CDKN2A-D1 NVRDAWGRI  | 2917  | 2461  |
| >CDKN2A-D1 DVRDAWGRI  | 2164 | >CDKN2A-D1 NVRDAWGRI  | 445   | 1719  |
| >CDKN2A-D1 DVRDAWGRI  | 277  | >CDKN2A-D1 NVRDAWGRI  | 40    | 237   |
| >CDKN2A-D1 DVRDAWGR   | 17   | >CDKN2A-D1 NVRDAWGR   | 64    | 47    |
| >CDKN2A-D1 DVRDAWGR   | 62   | >CDKN2A-D1 NVRDAWGR   | 79    | 17    |
| >CDKN2A-D1 DVRDAWGRI  | 208  | >CDKN2A-D1 NVRDAWGRI  | 91    | 117   |
| >CDKN2A-D1 DVRDAWGRI  | 198  | >CDKN2A-D1 NVRDAWGRI  | 170   | 28    |
| >CDKN2A-D1 DVRDAWGRI  | 4619 | >CDKN2A-D1 NVRDAWGRI  | 171   | 4448  |
| >CDKN2A-D1 DVRDAWGRI  | 1968 | >CDKN2A-D1 NVRDAWGRI  | 84    | 1884  |
| >CDKN2A-D1 DVRDAWGR   | 1440 | >CDKN2A-D1 NVRDAWGR   | 479   | 961   |
| >CDKN2A-D1 LDVRDAWGF  | 477  | >CDKN2A-D1 LNVRDAWGF  | 11769 | 11292 |
| >CDKN2A-D1 RLDVRDAWC  | 802  | >CDKN2A-D1 RLNVRDAWC  | 231   | 571   |
| >CDKN2A-D1 RLDVRDAWC  | 3167 | >CDKN2A-D1 RLNVRDAWC  | 176   | 2991  |
| >CDKN2A-D1 RLDVRDAWC  | 122  | >CDKN2A-D1 RLNVRDAWC  | 211   | 89    |

|                       |       |                       |       |       |
|-----------------------|-------|-----------------------|-------|-------|
| >CDKN2A-D1 RLDVRDAWC  | 227   | >CDKN2A-D1 RLNVDAWC   | 623   | 396   |
| >CDKN2A-D1 RLDVRDAWC  | 91    | >CDKN2A-D1 RLNVDAWC   | 63    | 28    |
| >CDKN2A-D1 RLDVRDAWC  | 120   | >CDKN2A-D1 RLNVDAWC   | 28    | 92    |
| >CDKN2A-D1 RLDVRDAW   | 874   | >CDKN2A-D1 RLNVDAW    | 165   | 709   |
| >CDKN2A-D1 RLDVRDAW   | 274   | >CDKN2A-D1 RLNVDAW    | 60    | 214   |
| >CDKN2A-D1 RLDVRDAWC  | 92    | >CDKN2A-D1 RLNVDAWC   | 76    | 16    |
| >CDKN2A-D1 RLDVRDAWC  | 293   | >CDKN2A-D1 RLNVDAWC   | 132   | 161   |
| >CDKN2A-D1 ARLDVRDAW  | 89    | >CDKN2A-D1 ARLNVRDAW  | 51    | 38    |
| >CDKN2A-D1 ARLDVRDAW  | 117   | >CDKN2A-D1 ARLNVRDAW  | 79    | 38    |
| >CDKN2A-D1 GARLDVRDA' | 604   | >CDKN2A-D1 GARLNVRDA' | 301   | 303   |
| >CDKN2A-D1 GARLDVRDA' | 457   | >CDKN2A-D1 GARLNVRDA' | 437   | 20    |
| >CDKN2A-D1 AGARLDVRD, | 289   | >CDKN2A-D1 AGARLNVRD, | 405   | 116   |
| >CDKN2A-D1 RAGARLDVR  | 90    | >CDKN2A-D1 RAGARLNVR  | 28    | 62    |
| >CDKN2A-D1 RAGARLDVR  | 670   | >CDKN2A-D1 RAGARLNVR  | 392   | 278   |
| >CDKN2A-D1 HRAGARLDV  | 197   | >CDKN2A-D1 HRAGARLNV  | 60    | 137   |
| >CDKN2A-D1 HRAGARLDV  | 101   | >CDKN2A-D1 HRAGARLNV  | 60    | 41    |
| >CDKN2A-D1 HRAGARLDV  | 633   | >CDKN2A-D1 HRAGARLNV  | 359   | 274   |
| >CDKN2A-D1 VLHRAGARL  | 1621  | >CDKN2A-D1 VLHRAGARL  | 364   | 1257  |
| >CDKN2A-D1 VLHRAGARL  | 77    | >CDKN2A-D1 VLHRAGARL  | 27    | 50    |
| >CDKN2A-D1 VLHRAGARL  | 36    | >CDKN2A-D1 VLHRAGARL  | 12    | 24    |
| >CDKN2A-D1 VLHRAGARL  | 346   | >CDKN2A-D1 VLHRAGARL  | 132   | 214   |
| >CDKN2A-D1 VLHRAGARL  | 33    | >CDKN2A-D1 VLHRAGARL  | 18    | 15    |
| >CDKN2A-D1 VLHRAGARL  | 1296  | >CDKN2A-D1 VLHRAGARL  | 320   | 976   |
| >CDKN2A-D1 VLHRAGARL  | 3     | >CDKN2A-D1 VLHRAGARL  | 3     | 0     |
| >CDKN2A-D1 VLHRAGARL  | 1719  | >CDKN2A-D1 VLHRAGARL  | 494   | 1225  |
| >CDKN2A-D1 DVRDAWGRI  | 4203  | >CDKN2A-D1 VVRDAWGRI  | 222   | 3981  |
| >CDKN2A-D1 DVRDAWGRI  | 6104  | >CDKN2A-D1 VVRDAWGRI  | 179   | 5925  |
| >CDKN2A-D1 DVRDAWGRI  | 5947  | >CDKN2A-D1 VVRDAWGRI  | 229   | 5718  |
| >CDKN2A-D1 DVRDAWGRI  | 1480  | >CDKN2A-D1 VVRDAWGRI  | 16    | 1464  |
| >CDKN2A-D1 DVRDAWGRI  | 456   | >CDKN2A-D1 VVRDAWGRI  | 16421 | 15965 |
| >CDKN2A-D1 DVRDAWGRI  | 2164  | >CDKN2A-D1 VVRDAWGRI  | 61    | 2103  |
| >CDKN2A-D1 DVRDAWGRI  | 277   | >CDKN2A-D1 VVRDAWGRI  | 12    | 265   |
| >CDKN2A-D1 DVRDAWGR   | 3061  | >CDKN2A-D1 VVRDAWGR   | 218   | 2843  |
| >CDKN2A-D1 DVRDAWGR   | 17    | >CDKN2A-D1 VVRDAWGR   | 273   | 256   |
| >CDKN2A-D1 DVRDAWGR   | 62    | >CDKN2A-D1 VVRDAWGR   | 607   | 545   |
| >CDKN2A-D1 DVRDAWGRI  | 208   | >CDKN2A-D1 VVRDAWGRI  | 2240  | 2032  |
| >CDKN2A-D1 DVRDAWGRI  | 198   | >CDKN2A-D1 VVRDAWGRI  | 2867  | 2669  |
| >CDKN2A-D1 DVRDAWGRI  | 4619  | >CDKN2A-D1 VVRDAWGRI  | 94    | 4525  |
| >CDKN2A-D1 DVRDAWGRI  | 1968  | >CDKN2A-D1 VVRDAWGRI  | 58    | 1910  |
| >CDKN2A-D1 DVRDAWGRI  | 7610  | >CDKN2A-D1 VVRDAWGRI  | 163   | 7447  |
| >CDKN2A-D1 DVRDAWGRI  | 6053  | >CDKN2A-D1 VVRDAWGRI  | 389   | 5664  |
| >CDKN2A-D1 LDVRDAWGF  | 26477 | >CDKN2A-D1 LVVRDAWGR  | 377   | 26100 |
| >CDKN2A-D1 LDVRDAWGF  | 26571 | >CDKN2A-D1 LVVRDAWGR  | 338   | 26233 |

|                       |       |                       |       |       |
|-----------------------|-------|-----------------------|-------|-------|
| >CDKN2A-D1 LDVRDAWGF  | 5090  | >CDKN2A-D1 LVVRDAWGR  | 51    | 5039  |
| >CDKN2A-D1 LDVRDAWGF  | 477   | >CDKN2A-D1 LVVRDAWGR  | 27014 | 26537 |
| >CDKN2A-D1 VVLHRAGARI | 29771 | >CDKN2A-D1 VVLHRAGARI | 144   | 29627 |
| >CDKN2A-D1 VVLHRAGARI | 30049 | >CDKN2A-D1 VVLHRAGARI | 247   | 29802 |
| >CDKN2A-D1 VVLHRAGARI | 36925 | >CDKN2A-D1 VVLHRAGARI | 224   | 36701 |
| >CDKN2A-D1 RLDVRDAWC  | 802   | >CDKN2A-D1 RLVVRDAWG  | 419   | 383   |
| >CDKN2A-D1 RLDVRDAWC  | 3167  | >CDKN2A-D1 RLVVRDAWG  | 387   | 2780  |
| >CDKN2A-D1 RLDVRDAWC  | 122   | >CDKN2A-D1 RLVVRDAWG  | 344   | 222   |
| >CDKN2A-D1 RLDVRDAWC  | 227   | >CDKN2A-D1 RLVVRDAWG  | 1006  | 779   |
| >CDKN2A-D1 RLDVRDAWC  | 91    | >CDKN2A-D1 RLVVRDAWG  | 71    | 20    |
| >CDKN2A-D1 RLDVRDAWC  | 120   | >CDKN2A-D1 RLVVRDAWG  | 43    | 77    |
| >CDKN2A-D1 RLDVRDAW   | 874   | >CDKN2A-D1 RLVVRDAW   | 331   | 543   |
| >CDKN2A-D1 RLDVRDAW   | 2316  | >CDKN2A-D1 RLVVRDAW   | 216   | 2100  |
| >CDKN2A-D1 RLDVRDAWC  | 2610  | >CDKN2A-D1 RLVVRDAWG  | 277   | 2333  |
| >CDKN2A-D1 RLDVRDAW   | 274   | >CDKN2A-D1 RLVVRDAW   | 86    | 188   |
| >CDKN2A-D1 RLDVRDAWC  | 92    | >CDKN2A-D1 RLVVRDAWG  | 84    | 8     |
| >CDKN2A-D1 RLDVRDAWC  | 293   | >CDKN2A-D1 RLVVRDAWG  | 78    | 215   |
| >CDKN2A-D1 ARLDVRDAW  | 89    | >CDKN2A-D1 ARLVVRDAW  | 52    | 37    |
| >CDKN2A-D1 ARLDVRDAW  | 117   | >CDKN2A-D1 ARLVVRDAW  | 127   | 10    |
| >CDKN2A-D1 GARLDVRDA' | 457   | >CDKN2A-D1 GARLVVRDA\ | 286   | 171   |
| >CDKN2A-D1 AGARLDVRD, | 289   | >CDKN2A-D1 AGARLVVRD, | 196   | 93    |
| >CDKN2A-D1 RAGARLDVVR | 90    | >CDKN2A-D1 RAGARLVVR  | 15    | 75    |
| >CDKN2A-D1 RAGARLDVVR | 670   | >CDKN2A-D1 RAGARLVVR  | 127   | 543   |
| >CDKN2A-D1 HRAGARLD   | 2391  | >CDKN2A-D1 HRAGARLV   | 80    | 2311  |
| >CDKN2A-D1 HRAGARLDV  | 197   | >CDKN2A-D1 HRAGARLVV  | 72    | 125   |
| >CDKN2A-D1 HRAGARLDVI | 101   | >CDKN2A-D1 HRAGARLVVI | 54    | 47    |
| >CDKN2A-D1 HRAGARLD   | 16188 | >CDKN2A-D1 HRAGARLV   | 429   | 15759 |
| >CDKN2A-D1 HRAGARLDV  | 813   | >CDKN2A-D1 HRAGARLVV  | 29    | 784   |
| >CDKN2A-D1 HRAGARLDV  | 1203  | >CDKN2A-D1 HRAGARLVV  | 467   | 736   |
| >CDKN2A-D1 HRAGARLDVI | 633   | >CDKN2A-D1 HRAGARLVVI | 132   | 501   |
| >CDKN2A-D1 VLHRAGARLI | 24098 | >CDKN2A-D1 VLHRAGARLV | 163   | 23935 |
| >CDKN2A-D1 VLHRAGARLI | 77    | >CDKN2A-D1 VLHRAGARLV | 52    | 25    |
| >CDKN2A-D1 VLHRAGARLI | 18230 | >CDKN2A-D1 VLHRAGARLV | 7     | 18223 |
| >CDKN2A-D1 VLHRAGARLI | 36    | >CDKN2A-D1 VLHRAGARLV | 11    | 25    |
| >CDKN2A-D1 VLHRAGARLI | 27357 | >CDKN2A-D1 VLHRAGARLV | 88    | 27269 |
| >CDKN2A-D1 VLHRAGARLI | 346   | >CDKN2A-D1 VLHRAGARLV | 104   | 242   |
| >CDKN2A-D1 VLHRAGARLI | 23837 | >CDKN2A-D1 VLHRAGARLV | 37    | 23800 |
| >CDKN2A-D1 VLHRAGARLI | 33    | >CDKN2A-D1 VLHRAGARLV | 24    | 9     |
| >CDKN2A-D1 VLHRAGARLI | 27035 | >CDKN2A-D1 VLHRAGARLV | 438   | 26597 |
| >CDKN2A-D1 VLHRAGARLI | 1296  | >CDKN2A-D1 VLHRAGARLV | 418   | 878   |
| >CDKN2A-D1 VLHRAGARLI | 18275 | >CDKN2A-D1 VLHRAGARLV | 4     | 18271 |
| >CDKN2A-D1 VLHRAGARLI | 3     | >CDKN2A-D1 VLHRAGARLV | 4     | 1     |
| >CDKN2A-D1 DAWGRLPV   | 10292 | >CDKN2A-D1 HAWGRLPV   | 313   | 9979  |

|                       |       |                       |      |      |
|-----------------------|-------|-----------------------|------|------|
| >CDKN2A-D1 DAWGRLPV   | 2857  | >CDKN2A-D1 HAWGRLPV   | 105  | 2752 |
| >CDKN2A-D1 DAWGRLPV   | 2254  | >CDKN2A-D1 HAWGRLPV   | 211  | 2043 |
| >CDKN2A-D1 DAWGRLPV   | 2679  | >CDKN2A-D1 HAWGRLPV   | 416  | 2263 |
| >CDKN2A-D1 DAWGRLPV   | 1569  | >CDKN2A-D1 HAWGRLPV   | 48   | 1521 |
| >CDKN2A-D1 DAWGRLPV   | 260   | >CDKN2A-D1 HAWGRLPV   | 114  | 146  |
| >CDKN2A-D1 DAWGRLPV   | 24    | >CDKN2A-D1 HAWGRLPV   | 26   | 2    |
| >CDKN2A-D1 DAWGRLPVC  | 6860  | >CDKN2A-D1 HAWGRLPVC  | 165  | 6695 |
| >CDKN2A-D1 DAWGRLPVC  | 1724  | >CDKN2A-D1 HAWGRLPVC  | 208  | 1516 |
| >CDKN2A-D1 RDAWGRLPV  | 1704  | >CDKN2A-D1 RHAWGRLPV  | 305  | 1399 |
| >CDKN2A-D1 RDAWGRLPV  | 7146  | >CDKN2A-D1 RHAWGRLPV  | 102  | 7044 |
| >CDKN2A-D1 RDAWGRLPV  | 5323  | >CDKN2A-D1 RHAWGRLPV  | 79   | 5244 |
| >CDKN2A-D1 RDAWGRLPV  | 1306  | >CDKN2A-D1 RHAWGRLPV  | 295  | 1011 |
| >CDKN2A-D1 RDAWGRLPV  | 3527  | >CDKN2A-D1 RHAWGRLPV  | 422  | 3105 |
| >CDKN2A-D1 HRAGARLDVI | 3219  | >CDKN2A-D1 HRAGARLDVI | 145  | 3074 |
| >CDKN2A-D1 VRDAWGRLP  | 4203  | >CDKN2A-D1 VRHAWGRLP  | 461  | 3742 |
| >CDKN2A-D1 VRDAWGRL   | 2153  | >CDKN2A-D1 VRHAWGRL   | 242  | 1911 |
| >CDKN2A-D1 VRDAWGRLP  | 489   | >CDKN2A-D1 VRHAWGRLP  | 828  | 339  |
| >CDKN2A-D1 DVRDAWGRI  | 456   | >CDKN2A-D1 DVRHAWGRI  | 3574 | 3118 |
| >CDKN2A-D1 DVRDAWGRI  | 277   | >CDKN2A-D1 DVRHAWGRI  | 164  | 113  |
| >CDKN2A-D1 DVRDAWGR   | 17    | >CDKN2A-D1 DVRHAWGR   | 16   | 1    |
| >CDKN2A-D1 DVRDAWGR   | 62    | >CDKN2A-D1 DVRHAWGR   | 106  | 44   |
| >CDKN2A-D1 DVRDAWGRI  | 208   | >CDKN2A-D1 DVRHAWGRI  | 273  | 65   |
| >CDKN2A-D1 DVRDAWGRI  | 198   | >CDKN2A-D1 DVRHAWGRI  | 761  | 563  |
| >CDKN2A-D1 LDVRDAWGF  | 477   | >CDKN2A-D1 LDVRHAWGF  | 427  | 50   |
| >CDKN2A-D1 RLDVRDAWC  | 122   | >CDKN2A-D1 RLDVRHAWC  | 74   | 48   |
| >CDKN2A-D1 RLDVRDAWC  | 227   | >CDKN2A-D1 RLDVRHAWC  | 390  | 163  |
| >CDKN2A-D1 RLDVRDAWC  | 91    | >CDKN2A-D1 RLDVRHAWC  | 102  | 11   |
| >CDKN2A-D1 RLDVRDAWC  | 120   | >CDKN2A-D1 RLDVRHAWC  | 56   | 64   |
| >CDKN2A-D1 RLDVRDAW   | 874   | >CDKN2A-D1 RLDVRHAW   | 447  | 427  |
| >CDKN2A-D1 RLDVRDAW   | 274   | >CDKN2A-D1 RLDVRHAW   | 97   | 177  |
| >CDKN2A-D1 RLDVRDAWC  | 92    | >CDKN2A-D1 RLDVRHAWC  | 123  | 31   |
| >CDKN2A-D1 RLDVRDAWC  | 293   | >CDKN2A-D1 RLDVRHAWC  | 239  | 54   |
| >CDKN2A-D1 ARLDVRDA   | 2752  | >CDKN2A-D1 ARLDVRHA   | 464  | 2288 |
| >CDKN2A-D1 ARLDVRDAW  | 89    | >CDKN2A-D1 ARLDVRHAW  | 48   | 41   |
| >CDKN2A-D1 ARLDVRDAW  | 117   | >CDKN2A-D1 ARLDVRHAW  | 1809 | 1692 |
| >CDKN2A-D1 GARLDVRDA' | 604   | >CDKN2A-D1 GARLDVRHA' | 132  | 472  |
| >CDKN2A-D1 GARLDVRDA' | 457   | >CDKN2A-D1 GARLDVRHA' | 129  | 328  |
| >CDKN2A-D1 AGARLDVRD, | 289   | >CDKN2A-D1 AGARLDVRH, | 96   | 193  |
| >CDKN2A-D1 DAWGRLPV   | 10292 | >CDKN2A-D1 NAWGRLPV   | 478  | 9814 |
| >CDKN2A-D1 DAWGRLPV   | 2857  | >CDKN2A-D1 NAWGRLPV   | 127  | 2730 |
| >CDKN2A-D1 DAWGRLPV   | 2254  | >CDKN2A-D1 NAWGRLPV   | 359  | 1895 |
| >CDKN2A-D1 DAWGRLPV   | 1569  | >CDKN2A-D1 NAWGRLPV   | 280  | 1289 |
| >CDKN2A-D1 DAWGRLPV   | 260   | >CDKN2A-D1 NAWGRLPV   | 121  | 139  |

|                       |       |                       |      |       |
|-----------------------|-------|-----------------------|------|-------|
| >CDKN2A-D1 DAWGRLPV   | 24    | >CDKN2A-D1 NAWGRLPV   | 20   | 4     |
| >CDKN2A-D1 RDAWGRLPV  | 1704  | >CDKN2A-D1 RNAWGRLPV  | 327  | 1377  |
| >CDKN2A-D1 RDAWGRLPV  | 1306  | >CDKN2A-D1 RNAWGRLPV  | 364  | 942   |
| >CDKN2A-D1 VRDAWGRL   | 2153  | >CDKN2A-D1 VRNAWGRL   | 300  | 1853  |
| >CDKN2A-D1 VRDAWGRLP  | 489   | >CDKN2A-D1 VRNAWGRLP  | 1323 | 834   |
| >CDKN2A-D1 DVRDAWGRI  | 456   | >CDKN2A-D1 DVRNAWGRI  | 1440 | 984   |
| >CDKN2A-D1 DVRDAWGRI  | 277   | >CDKN2A-D1 DVRNAWGRI  | 211  | 66    |
| >CDKN2A-D1 DVRDAWGRI  | 17    | >CDKN2A-D1 DVRNAWGRI  | 19   | 2     |
| >CDKN2A-D1 DVRDAWGRI  | 62    | >CDKN2A-D1 DVRNAWGRI  | 69   | 7     |
| >CDKN2A-D1 DVRDAWGRI  | 208   | >CDKN2A-D1 DVRNAWGRI  | 554  | 346   |
| >CDKN2A-D1 DVRDAWGRI  | 198   | >CDKN2A-D1 DVRNAWGRI  | 543  | 345   |
| >CDKN2A-D1 LDVRDAWGF  | 477   | >CDKN2A-D1 LDVRNAWGF  | 435  | 42    |
| >CDKN2A-D1 RLDVRDAWC  | 122   | >CDKN2A-D1 RLDVRNAWC  | 91   | 31    |
| >CDKN2A-D1 RLDVRDAWC  | 227   | >CDKN2A-D1 RLDVRNAWC  | 311  | 84    |
| >CDKN2A-D1 RLDVRDAWC  | 91    | >CDKN2A-D1 RLDVRNAWC  | 103  | 12    |
| >CDKN2A-D1 RLDVRDAWC  | 120   | >CDKN2A-D1 RLDVRNAWC  | 49   | 71    |
| >CDKN2A-D1 RLDVRDAW   | 874   | >CDKN2A-D1 RLDVRNAW   | 487  | 387   |
| >CDKN2A-D1 RLDVRDAW   | 274   | >CDKN2A-D1 RLDVRNAW   | 479  | 205   |
| >CDKN2A-D1 RLDVRDAWC  | 92    | >CDKN2A-D1 RLDVRNAWC  | 125  | 33    |
| >CDKN2A-D1 RLDVRDAWC  | 293   | >CDKN2A-D1 RLDVRNAWC  | 216  | 77    |
| >CDKN2A-D1 ARLDVRDAW  | 89    | >CDKN2A-D1 ARLDVRNAW  | 79   | 10    |
| >CDKN2A-D1 ARLDVRDAW  | 117   | >CDKN2A-D1 ARLDVRNAW  | 1296 | 1179  |
| >CDKN2A-D1 GARLDVRDA' | 604   | >CDKN2A-D1 GARLDVRNA' | 401  | 203   |
| >CDKN2A-D1 GARLDVRDA' | 457   | >CDKN2A-D1 GARLDVRNA' | 371  | 86    |
| >CDKN2A-D1 AGARLDVRD, | 289   | >CDKN2A-D1 AGARLDVRN, | 372  | 83    |
| >CDKN2A-D1 DAWGRLPV   | 10292 | >CDKN2A-D1 YAWGRLPV   | 18   | 10274 |
| >CDKN2A-D1 DAWGRLPVD  | 19603 | >CDKN2A-D1 YAWGRLPVD  | 173  | 19430 |
| >CDKN2A-D1 DAWGRLPV   | 11822 | >CDKN2A-D1 YAWGRLPV   | 298  | 11524 |
| >CDKN2A-D1 DAWGRLPV   | 2857  | >CDKN2A-D1 YAWGRLPV   | 11   | 2846  |
| >CDKN2A-D1 DAWGRLPVD  | 14639 | >CDKN2A-D1 YAWGRLPVD  | 73   | 14566 |
| >CDKN2A-D1 DAWGRLPV   | 2254  | >CDKN2A-D1 YAWGRLPV   | 8    | 2246  |
| >CDKN2A-D1 DAWGRLPVD  | 14504 | >CDKN2A-D1 YAWGRLPVD  | 138  | 14366 |
| >CDKN2A-D1 DAWGRLPVD  | 15338 | >CDKN2A-D1 YAWGRLPVD  | 131  | 15207 |
| >CDKN2A-D1 DAWGRLPV   | 13390 | >CDKN2A-D1 YAWGRLPV   | 243  | 13147 |
| >CDKN2A-D1 DAWGRLPV   | 2679  | >CDKN2A-D1 YAWGRLPV   | 21   | 2658  |
| >CDKN2A-D1 DAWGRLPVD  | 12591 | >CDKN2A-D1 YAWGRLPVD  | 371  | 12220 |
| >CDKN2A-D1 DAWGRLPV   | 4368  | >CDKN2A-D1 YAWGRLPV   | 172  | 4196  |
| >CDKN2A-D1 DAWGRLPV   | 1569  | >CDKN2A-D1 YAWGRLPV   | 5    | 1564  |
| >CDKN2A-D1 DAWGRLPVD  | 13647 | >CDKN2A-D1 YAWGRLPVD  | 70   | 13577 |
| >CDKN2A-D1 DAWGRLPVD  | 23427 | >CDKN2A-D1 YAWGRLPVD  | 391  | 23036 |
| >CDKN2A-D1 DAWGRLPV   | 260   | >CDKN2A-D1 YAWGRLPV   | 155  | 105   |
| >CDKN2A-D1 DAWGRLPV   | 24    | >CDKN2A-D1 YAWGRLPV   | 14   | 10    |
| >CDKN2A-D1 DAWGRLPV   | 13569 | >CDKN2A-D1 YAWGRLPV   | 328  | 13241 |

|                       |       |                       |      |       |
|-----------------------|-------|-----------------------|------|-------|
| >CDKN2A-D1 DAWGRLPV   | 13377 | >CDKN2A-D1 YAWGRLPV   | 310  | 13067 |
| >CDKN2A-D1 DAWGRLPVD  | 6860  | >CDKN2A-D1 YAWGRLPVD  | 70   | 6790  |
| >CDKN2A-D1 DAWGRLPV   | 3780  | >CDKN2A-D1 YAWGRLPV   | 395  | 3385  |
| >CDKN2A-D1 DAWGRLPV   | 8075  | >CDKN2A-D1 YAWGRLPV   | 343  | 7732  |
| >CDKN2A-D1 DAWGRLPVD  | 1724  | >CDKN2A-D1 YAWGRLPVD  | 74   | 1650  |
| >CDKN2A-D1 RDAWGRLPV  | 32665 | >CDKN2A-D1 RYAWGRLPV  | 190  | 32475 |
| >CDKN2A-D1 RDAWGRLPV  | 28385 | >CDKN2A-D1 RYAWGRLPV  | 171  | 28214 |
| >CDKN2A-D1 RDAWGRLPV  | 14973 | >CDKN2A-D1 RYAWGRLPV  | 318  | 14655 |
| >CDKN2A-D1 RDAWGRLPV  | 26870 | >CDKN2A-D1 RYAWGRLPV  | 481  | 26389 |
| >CDKN2A-D1 RDAWGRLPV  | 21256 | >CDKN2A-D1 RYAWGRLPV  | 147  | 21109 |
| >CDKN2A-D1 RDAWGRLPV  | 24457 | >CDKN2A-D1 RYAWGRLPV  | 148  | 24309 |
| >CDKN2A-D1 RDAWGRLPV  | 23481 | >CDKN2A-D1 RYAWGRLPV  | 8    | 23473 |
| >CDKN2A-D1 RDAWGRLPV  | 12037 | >CDKN2A-D1 RYAWGRLPV  | 129  | 11908 |
| >CDKN2A-D1 RDAWGRLPV  | 5350  | >CDKN2A-D1 RYAWGRLPV  | 279  | 5071  |
| >CDKN2A-D1 RDAWGRLP   | 28403 | >CDKN2A-D1 RYAWGRLP   | 151  | 28252 |
| >CDKN2A-D1 RDAWGRLPV  | 14644 | >CDKN2A-D1 RYAWGRLPV  | 40   | 14604 |
| >CDKN2A-D1 RDAWGRLPV  | 21486 | >CDKN2A-D1 RYAWGRLPV  | 70   | 21416 |
| >CDKN2A-D1 HRAGARLDVI | 3219  | >CDKN2A-D1 HRAGARLDVI | 66   | 3153  |
| >CDKN2A-D1 HRAGARLDVI | 37049 | >CDKN2A-D1 HRAGARLDVI | 385  | 36664 |
| >CDKN2A-D1 VRDAWGRL   | 4493  | >CDKN2A-D1 VRYAWGRL   | 149  | 4344  |
| >CDKN2A-D1 VRDAWGRLP  | 4203  | >CDKN2A-D1 VRYAWGRLP  | 133  | 4070  |
| >CDKN2A-D1 VRDAWGRL   | 2153  | >CDKN2A-D1 VRYAWGRL   | 84   | 2069  |
| >CDKN2A-D1 VRDAWGRLP  | 1516  | >CDKN2A-D1 VRYAWGRLP  | 110  | 1406  |
| >CDKN2A-D1 VRDAWGRLP  | 489   | >CDKN2A-D1 VRYAWGRLP  | 348  | 141   |
| >CDKN2A-D1 VRDAWGRL   | 2993  | >CDKN2A-D1 VRYAWGRL   | 469  | 2524  |
| >CDKN2A-D1 VRDAWGRLP  | 1175  | >CDKN2A-D1 VRYAWGRLP  | 292  | 883   |
| >CDKN2A-D1 DVRDAWGRL  | 456   | >CDKN2A-D1 DVRYAWGRL  | 2792 | 2336  |
| >CDKN2A-D1 DVRDAWGRL  | 277   | >CDKN2A-D1 DVRYAWGRL  | 187  | 90    |
| >CDKN2A-D1 DVRDAWGR   | 17    | >CDKN2A-D1 DVRYAWGR   | 12   | 5     |
| >CDKN2A-D1 DVRDAWGR   | 62    | >CDKN2A-D1 DVRYAWGR   | 36   | 26    |
| >CDKN2A-D1 DVRDAWGRL  | 208   | >CDKN2A-D1 DVRYAWGRL  | 186  | 22    |
| >CDKN2A-D1 DVRDAWGRL  | 198   | >CDKN2A-D1 DVRYAWGRL  | 648  | 450   |
| >CDKN2A-D1 LDVRDAWGF  | 477   | >CDKN2A-D1 LDVRYAWGR  | 288  | 189   |
| >CDKN2A-D1 RLDVRDAWG  | 122   | >CDKN2A-D1 RLDVRYAWG  | 86   | 36    |
| >CDKN2A-D1 RLDVRDAWG  | 227   | >CDKN2A-D1 RLDVRYAWG  | 295  | 68    |
| >CDKN2A-D1 RLDVRDAWG  | 91    | >CDKN2A-D1 RLDVRYAWG  | 111  | 20    |
| >CDKN2A-D1 RLDVRDAWG  | 120   | >CDKN2A-D1 RLDVRYAWG  | 31   | 89    |
| >CDKN2A-D1 RLDVRDAW   | 874   | >CDKN2A-D1 RLDVRYAW   | 248  | 626   |
| >CDKN2A-D1 RLDVRDAW   | 274   | >CDKN2A-D1 RLDVRYAW   | 118  | 156   |
| >CDKN2A-D1 RLDVRDAWG  | 92    | >CDKN2A-D1 RLDVRYAWG  | 65   | 27    |
| >CDKN2A-D1 RLDVRDAWG  | 293   | >CDKN2A-D1 RLDVRYAWG  | 245  | 48    |
| >CDKN2A-D1 ARLDVRDAW  | 89    | >CDKN2A-D1 ARLDVRYAW  | 41   | 48    |
| >CDKN2A-D1 ARLDVRDAW  | 117   | >CDKN2A-D1 ARLDVRYAW  | 468  | 351   |

|                       |       |                        |      |       |
|-----------------------|-------|------------------------|------|-------|
| >CDKN2A-D1 GARLDVRD   | 20791 | >CDKN2A-D1 GARLDVRY    | 54   | 20737 |
| >CDKN2A-D1 GARLDVRDA' | 604   | >CDKN2A-D1 GARLDVRYA\  | 199  | 405   |
| >CDKN2A-D1 GARLDVRDA' | 457   | >CDKN2A-D1 GARLDVRYA\  | 136  | 321   |
| >CDKN2A-D1 AGARLDVRD, | 289   | >CDKN2A-D1 AGARLDVRY/  | 141  | 148   |
| >CDKN2A-D1 AGARLDVRD  | 37377 | >CDKN2A-D1 AGARLDVRY   | 366  | 37011 |
| >CDKN2A-D1 RAGARLDVRI | 30130 | >CDKN2A-D1 RAGARLDVRY\ | 236  | 29894 |
| >CDKN2A-D1 RAGARLDVRI | 27005 | >CDKN2A-D1 RAGARLDVRY\ | 148  | 26857 |
| >CDKN2A-D1 RAGARLDVRI | 22975 | >CDKN2A-D1 RAGARLDVRY\ | 447  | 22528 |
| >CDKN2A-D1 RAGARLDVRI | 15651 | >CDKN2A-D1 RAGARLDVRY\ | 48   | 15603 |
| >CDKN2A-D1 RAGARLDVRI | 20390 | >CDKN2A-D1 RAGARLDVRY\ | 395  | 19995 |
| >CDKN2A-D1 DLAEELGHRC | 2266  | >CDKN2A-D1 NLAEEELGHRC | 113  | 2153  |
| >CDKN2A-D1 DLAEELGHRC | 582   | >CDKN2A-D1 NLAEEELGHRC | 17   | 565   |
| >CDKN2A-D1 DLAEELGHRC | 265   | >CDKN2A-D1 NLAEEELGHRC | 43   | 222   |
| >CDKN2A-D1 DLAEELGHRC | 1496  | >CDKN2A-D1 NLAEEELGHRC | 120  | 1376  |
| >CDKN2A-D1 DLAEELGHRC | 185   | >CDKN2A-D1 NLAEEELGHRC | 73   | 112   |
| >CDKN2A-D1 DLAEELGHRC | 418   | >CDKN2A-D1 NLAEEELGHRC | 121  | 297   |
| >CDKN2A-D1 DLAEELGHRC | 27    | >CDKN2A-D1 NLAEEELGHRC | 8    | 19    |
| >CDKN2A-D1 DLAEELGHR  | 124   | >CDKN2A-D1 NLAEEELGHR  | 712  | 588   |
| >CDKN2A-D1 DLAEELGHR  | 182   | >CDKN2A-D1 NLAEEELGHR  | 213  | 31    |
| >CDKN2A-D1 LPVDLAEEL  | 1254  | >CDKN2A-D1 LPVNLAEEEL  | 84   | 1170  |
| >CDKN2A-D1 LPVDLAEEL  | 414   | >CDKN2A-D1 LPVNLAEEEL  | 484  | 70    |
| >CDKN2A-D1 LPVDLAEEL  | 42    | >CDKN2A-D1 LPVNLAEEEL  | 60   | 18    |
| >CDKN2A-D1 LPVDLAEELG | 86    | >CDKN2A-D1 LPVNLAEEELG | 128  | 42    |
| >CDKN2A-D1 LPVDLAEEL  | 407   | >CDKN2A-D1 LPVNLAEEEL  | 1072 | 665   |
| >CDKN2A-D1 LPVDLAEEL  | 52    | >CDKN2A-D1 LPVNLAEEEL  | 60   | 8     |
| >CDKN2A-D1 LPVDLAEEL  | 86    | >CDKN2A-D1 LPVNLAEEEL  | 136  | 50    |
| >CDKN2A-D1 RLPVDLAEEL | 99    | >CDKN2A-D1 RLPVNLAEEEL | 204  | 105   |
| >CDKN2A-D1 RLPVDLAEEL | 38    | >CDKN2A-D1 RLPVNLAEEEL | 26   | 12    |
| >CDKN2A-D1 RLPVDLAEEL | 165   | >CDKN2A-D1 RLPVNLAEEEL | 112  | 53    |
| >CDKN2A-D1 RLPVDLAEEL | 125   | >CDKN2A-D1 RLPVNLAEEEL | 164  | 39    |
| >CDKN2A-D1 RLPVDLAEEL | 391   | >CDKN2A-D1 RLPVNLAEEEL | 427  | 36    |
| >CDKN2A-D1 RLPVDLAEEL | 15    | >CDKN2A-D1 RLPVNLAEEEL | 15   | 0     |
| >CDKN2A-D1 RLPVDLAEEL | 1004  | >CDKN2A-D1 RLPVNLAEEEL | 465  | 539   |
| >CDKN2A-D1 RLPVDLAEEL | 693   | >CDKN2A-D1 RLPVNLAEEEL | 410  | 283   |
| >CDKN2A-D1 GRLPVDLAE  | 202   | >CDKN2A-D1 GRLPVNLAEE  | 127  | 75    |
| >CDKN2A-D1 GRLPVDLAE  | 194   | >CDKN2A-D1 GRLPVNLAEE  | 119  | 75    |
| >CDKN2A-D1 GRLPVDLAE  | 29    | >CDKN2A-D1 GRLPVNLAEE  | 17   | 12    |
| >CDKN2A-D1 AWGRLPVDL  | 474   | >CDKN2A-D1 AWGRLPVNL   | 243  | 231   |
| >CDKN2A-D1 AWGRLPVDL  | 403   | >CDKN2A-D1 AWGRLPVNL   | 405  | 2     |
| >CDKN2A-D1 AWGRLPVDL  | 156   | >CDKN2A-D1 AWGRLPVNL   | 77   | 79    |
| >CDKN2A-D1 DAWGRLPVD  | 2258  | >CDKN2A-D1 DAWGRLPVM   | 411  | 1847  |
| >CDKN2A-D1 DLAEELGHRC | 2266  | >CDKN2A-D1 VLAEEELGHRC | 82   | 2184  |
| >CDKN2A-D1 DLAEELGHRC | 582   | >CDKN2A-D1 VLAEEELGHRC | 9    | 573   |

|                       |       |                        |      |       |
|-----------------------|-------|------------------------|------|-------|
| >CDKN2A-D1 DLAEELGHRC | 6103  | >CDKN2A-D1 VLAEEELGHRD | 290  | 5813  |
| >CDKN2A-D1 DLAEELGHRC | 265   | >CDKN2A-D1 VLAEEELGHRD | 7    | 258   |
| >CDKN2A-D1 DLAEELGHRC | 1496  | >CDKN2A-D1 VLAEEELGHRD | 50   | 1446  |
| >CDKN2A-D1 DLAEELGHRC | 185   | >CDKN2A-D1 VLAEEELGHRD | 15   | 170   |
| >CDKN2A-D1 DLAEELGHRC | 418   | >CDKN2A-D1 VLAEEELGHRD | 39   | 379   |
| >CDKN2A-D1 DLAEELGHRC | 27    | >CDKN2A-D1 VLAEEELGHRD | 3    | 24    |
| >CDKN2A-D1 DLAEELGHR  | 124   | >CDKN2A-D1 VLAEEELGHR  | 2685 | 2561  |
| >CDKN2A-D1 DLAEELGHR  | 182   | >CDKN2A-D1 VLAEEELGHR  | 1265 | 1083  |
| >CDKN2A-D1 LPVDLAEEL  | 414   | >CDKN2A-D1 LPVVLAEEEL  | 650  | 236   |
| >CDKN2A-D1 LPVDLAEEL  | 42    | >CDKN2A-D1 LPVVLAEEEL  | 103  | 61    |
| >CDKN2A-D1 LPVDLAEELG | 86    | >CDKN2A-D1 LPVVLAEEELG | 174  | 88    |
| >CDKN2A-D1 LPVDLAEEL  | 407   | >CDKN2A-D1 LPVVLAEEEL  | 572  | 165   |
| >CDKN2A-D1 LPVDLAEEL  | 52    | >CDKN2A-D1 LPVVLAEEEL  | 57   | 5     |
| >CDKN2A-D1 LPVDLAEEL  | 86    | >CDKN2A-D1 LPVVLAEEEL  | 116  | 30    |
| >CDKN2A-D1 RLPVDLAEEL | 99    | >CDKN2A-D1 RLPVVLAEEEL | 152  | 53    |
| >CDKN2A-D1 RLPVDLAEEL | 38    | >CDKN2A-D1 RLPVVLAEEEL | 21   | 17    |
| >CDKN2A-D1 RLPVDLAEEL | 165   | >CDKN2A-D1 RLPVVLAEEEL | 324  | 159   |
| >CDKN2A-D1 RLPVDLAEEL | 125   | >CDKN2A-D1 RLPVVLAEEEL | 62   | 63    |
| >CDKN2A-D1 RLPVDLAEEL | 391   | >CDKN2A-D1 RLPVVLAEEEL | 958  | 567   |
| >CDKN2A-D1 RLPVDLAEEL | 15    | >CDKN2A-D1 RLPVVLAEEEL | 23   | 8     |
| >CDKN2A-D1 RLPVDLAEEL | 1004  | >CDKN2A-D1 RLPVVLAEEEL | 321  | 683   |
| >CDKN2A-D1 RLPVDLAEEL | 693   | >CDKN2A-D1 RLPVVLAEEEL | 231  | 462   |
| >CDKN2A-D1 GRLPVDLA   | 1631  | >CDKN2A-D1 GRLPVVLA    | 451  | 1180  |
| >CDKN2A-D1 GRLPVDLAE  | 202   | >CDKN2A-D1 GRLPVVLAEE  | 96   | 106   |
| >CDKN2A-D1 GRLPVDLAE  | 194   | >CDKN2A-D1 GRLPVVLAEE  | 90   | 104   |
| >CDKN2A-D1 GRLPVDLAE  | 29    | >CDKN2A-D1 GRLPVVLAEE  | 12   | 17    |
| >CDKN2A-D1 AWGRLPVDL  | 474   | >CDKN2A-D1 AWGRLPVVL   | 207  | 267   |
| >CDKN2A-D1 AWGRLPVD   | 1579  | >CDKN2A-D1 AWGRLPVV    | 413  | 1166  |
| >CDKN2A-D1 AWGRLPVDL  | 403   | >CDKN2A-D1 AWGRLPVVL   | 288  | 115   |
| >CDKN2A-D1 AWGRLPVDL  | 156   | >CDKN2A-D1 AWGRLPVVL   | 117  | 39    |
| >CDKN2A-D1 DAWGRLPVC  | 37176 | >CDKN2A-D1 DAWGRLPVV   | 375  | 36801 |
| >CDKN2A-D1 DAWGRLPVC  | 19933 | >CDKN2A-D1 DAWGRLPVV   | 76   | 19857 |
| >CDKN2A-D1 DLAEELGHRC | 9217  | >CDKN2A-D1 YLAEELGHRD  | 70   | 9147  |
| >CDKN2A-D1 DLAEELGHRC | 2266  | >CDKN2A-D1 YLAEELGHRD  | 13   | 2253  |
| >CDKN2A-D1 DLAEELGHRC | 582   | >CDKN2A-D1 YLAEELGHRD  | 3    | 579   |
| >CDKN2A-D1 DLAEELGHRC | 6103  | >CDKN2A-D1 YLAEELGHRD  | 46   | 6057  |
| >CDKN2A-D1 DLAEELGHRC | 18888 | >CDKN2A-D1 YLAEELGHRD  | 406  | 18482 |
| >CDKN2A-D1 DLAEELGHRC | 265   | >CDKN2A-D1 YLAEELGHRD  | 3    | 262   |
| >CDKN2A-D1 DLAEELGHRC | 1496  | >CDKN2A-D1 YLAEELGHRD  | 10   | 1486  |
| >CDKN2A-D1 DLAEELGHRC | 185   | >CDKN2A-D1 YLAEELGHRD  | 7    | 178   |
| >CDKN2A-D1 DLAEELGHRC | 418   | >CDKN2A-D1 YLAEELGHRD  | 8    | 410   |
| >CDKN2A-D1 DLAEELGHRC | 20394 | >CDKN2A-D1 YLAEELGHRD  | 173  | 20221 |
| >CDKN2A-D1 DLAEELGHRC | 27    | >CDKN2A-D1 YLAEELGHRD  | 2    | 25    |



|                       |       |                       |     |       |
|-----------------------|-------|-----------------------|-----|-------|
| >CDKN2A-D1 DLAEELGHR  | 124   | >CDKN2A-D1 YLAEELGHR  | 824 | 700   |
| >CDKN2A-D1 DLAEELGHR  | 182   | >CDKN2A-D1 YLAEELGHR  | 110 | 72    |
| >CDKN2A-D1 VDLAEELGHR | 3305  | >CDKN2A-D1 VYLAEELGHR | 45  | 3260  |
| >CDKN2A-D1 VRDAWGRLP  | 30181 | >CDKN2A-D1 VRDAWGRLP  | 477 | 29704 |
| >CDKN2A-D1 LPVDLAEEL  | 1254  | >CDKN2A-D1 LPVYLAEEL  | 344 | 910   |
| >CDKN2A-D1 LPVDLAEEL  | 414   | >CDKN2A-D1 LPVYLAEEL  | 436 | 22    |
| >CDKN2A-D1 LPVDLAEEL  | 42    | >CDKN2A-D1 LPVYLAEEL  | 56  | 14    |
| >CDKN2A-D1 LPVDLAEELG | 86    | >CDKN2A-D1 LPVYLAEELG | 127 | 41    |
| >CDKN2A-D1 LPVDLAEEL  | 407   | >CDKN2A-D1 LPVYLAEEL  | 603 | 196   |
| >CDKN2A-D1 LPVDLAEEL  | 52    | >CDKN2A-D1 LPVYLAEEL  | 53  | 1     |
| >CDKN2A-D1 LPVDLAEELG | 2239  | >CDKN2A-D1 LPVYLAEELG | 455 | 1784  |
| >CDKN2A-D1 LPVDLAEEL  | 86    | >CDKN2A-D1 LPVYLAEEL  | 109 | 23    |
| >CDKN2A-D1 RLPVDLAEEL | 99    | >CDKN2A-D1 RLPVYLAEEL | 103 | 4     |
| >CDKN2A-D1 RLPVDLAEEL | 38    | >CDKN2A-D1 RLPVYLAEEL | 24  | 14    |
| >CDKN2A-D1 RLPVDLAEEL | 165   | >CDKN2A-D1 RLPVYLAEEL | 226 | 61    |
| >CDKN2A-D1 RLPVDLAEEL | 125   | >CDKN2A-D1 RLPVYLAEEL | 176 | 51    |
| >CDKN2A-D1 RLPVDLAEEL | 391   | >CDKN2A-D1 RLPVYLAEEL | 839 | 448   |
| >CDKN2A-D1 RLPVDLAEEL | 15    | >CDKN2A-D1 RLPVYLAEEL | 19  | 4     |
| >CDKN2A-D1 RLPVDLAEEL | 693   | >CDKN2A-D1 RLPVYLAEEL | 147 | 546   |
| >CDKN2A-D1 GRLPVDLA   | 1631  | >CDKN2A-D1 GRLPVYLA   | 398 | 1233  |
| >CDKN2A-D1 GRLPVDLAE  | 202   | >CDKN2A-D1 GRLPVYLAEE | 115 | 87    |
| >CDKN2A-D1 GRLPVDLAE  | 194   | >CDKN2A-D1 GRLPVYLAEE | 87  | 107   |
| >CDKN2A-D1 GRLPVDLAE  | 29    | >CDKN2A-D1 GRLPVYLAEE | 13  | 16    |
| >CDKN2A-D1 AWGRLPVDL  | 474   | >CDKN2A-D1 AWGRLPVYL  | 85  | 389   |
| >CDKN2A-D1 AWGRLPVD   | 26810 | >CDKN2A-D1 AWGRLPVY   | 297 | 26513 |
| >CDKN2A-D1 AWGRLPVDL  | 403   | >CDKN2A-D1 AWGRLPVYL  | 85  | 318   |
| >CDKN2A-D1 AWGRLPVDL  | 156   | >CDKN2A-D1 AWGRLPVYL  | 41  | 115   |
| >CDKN2A-D1 AWGRLPVDL  | 765   | >CDKN2A-D1 AWGRLPVYL  | 497 | 268   |
| >CDKN2A-D1 DAWGRLPVC  | 28986 | >CDKN2A-D1 DAWGRLPVY  | 90  | 28896 |
| >CDKN2A-D1 DAWGRLPVC  | 2258  | >CDKN2A-D1 DAWGRLPVY  | 176 | 2082  |
| >CDKN2A-D1 DAWGRLPVC  | 20426 | >CDKN2A-D1 DAWGRLPVY  | 75  | 20351 |
| >CDKN2A-D1 DVARYLRAA  | 1041  | >CDKN2A-D1 EVARYLRAA  | 193 | 848   |
| >CDKN2A-D1 DVARYLRAA/ | 1865  | >CDKN2A-D1 EVARYLRAAA | 399 | 1466  |
| >CDKN2A-D1 DVARYLRA   | 514   | >CDKN2A-D1 EVARYLRA   | 52  | 462   |
| >CDKN2A-D1 DVARYLRAA  | 1129  | >CDKN2A-D1 EVARYLRAA  | 92  | 1037  |
| >CDKN2A-D1 DVARYLRAA/ | 376   | >CDKN2A-D1 EVARYLRAAA | 83  | 293   |
| >CDKN2A-D1 DVARYLRA   | 1927  | >CDKN2A-D1 EVARYLRA   | 324 | 1603  |
| >CDKN2A-D1 DVARYLRAA  | 1540  | >CDKN2A-D1 EVARYLRAA  | 256 | 1284  |
| >CDKN2A-D1 DVARYLRAA/ | 877   | >CDKN2A-D1 EVARYLRAAA | 137 | 740   |
| >CDKN2A-D1 RDVARYLR   | 243   | >CDKN2A-D1 REVARYLR   | 86  | 157   |
| >CDKN2A-D1 RDVARYLRA  | 2821  | >CDKN2A-D1 REVARYLRA  | 178 | 2643  |
| >CDKN2A-D1 RDVARYLRA/ | 18394 | >CDKN2A-D1 REVARYLRAA | 154 | 18240 |
| >CDKN2A-D1 RDVARYLRA/ | 1219  | >CDKN2A-D1 REVARYLRAA | 137 | 1082  |

|                       |       |                       |     |       |
|-----------------------|-------|-----------------------|-----|-------|
| >CDKN2A-D1 RDVARYLRA  | 9828  | >CDKN2A-D1 REVARYLRA  | 28  | 9800  |
| >CDKN2A-D1 RDVARYLRA/ | 2040  | >CDKN2A-D1 REVARYLRAA | 87  | 1953  |
| >CDKN2A-D1 RDVARYLRA/ | 5128  | >CDKN2A-D1 REVARYLRAA | 14  | 5114  |
| >CDKN2A-D1 RDVARYLRA  | 12469 | >CDKN2A-D1 REVARYLRA  | 364 | 12105 |
| >CDKN2A-D1 RDVARYLRA/ | 11129 | >CDKN2A-D1 REVARYLRAA | 230 | 10899 |
| >CDKN2A-D1 RDVARYLR   | 79    | >CDKN2A-D1 REVARYLR   | 33  | 46    |
| >CDKN2A-D1 HRDVARYLR  | 203   | >CDKN2A-D1 HREVARYLR  | 318 | 115   |
| >CDKN2A-D1 HRDVARYLR/ | 122   | >CDKN2A-D1 HREVARYLRA | 140 | 18    |
| >CDKN2A-D1 HRDVARYL   | 175   | >CDKN2A-D1 HREVARYL   | 338 | 163   |
| >CDKN2A-D1 HRDVARYL   | 870   | >CDKN2A-D1 HREVARYL   | 264 | 606   |
| >CDKN2A-D1 HRDVARYLR  | 370   | >CDKN2A-D1 HREVARYLR  | 148 | 222   |
| >CDKN2A-D1 GHRDVARYLF | 282   | >CDKN2A-D1 GHREVARYLF | 458 | 176   |
| >CDKN2A-D1 LGHRDVARY  | 415   | >CDKN2A-D1 LGHREVARY  | 679 | 264   |
| >CDKN2A-D1 LGHRDVARYL | 152   | >CDKN2A-D1 LGHREVARYL | 183 | 31    |
| >CDKN2A-D1 LGHRDVARY  | 409   | >CDKN2A-D1 LGHREVARY  | 472 | 63    |
| >CDKN2A-D1 ELGHRDVAR) | 382   | >CDKN2A-D1 ELGHREVARY | 303 | 79    |
| >CDKN2A-D1 ELGHRDVAR) | 477   | >CDKN2A-D1 ELGHREVARY | 496 | 19    |
| >CDKN2A-D1 ELGHRDVAR) | 274   | >CDKN2A-D1 ELGHREVARY | 344 | 70    |
| >CDKN2A-D1 ELGHRDVAR) | 413   | >CDKN2A-D1 ELGHREVARY | 437 | 24    |
| >CDKN2A-D1 ELGHRDVAR  | 85    | >CDKN2A-D1 ELGHREVAR  | 78  | 7     |
| >CDKN2A-D1 ELGHRDVAR  | 153   | >CDKN2A-D1 ELGHREVAR  | 182 | 29    |
| >CDKN2A-D1 ELGHRDVAR  | 188   | >CDKN2A-D1 ELGHREVAR  | 356 | 168   |
| >CDKN2A-D1 EELGHRDV   | 193   | >CDKN2A-D1 EELGHREV   | 336 | 143   |
| >CDKN2A-D1 EELGHRDVA/ | 86    | >CDKN2A-D1 EELGHREVAR | 119 | 33    |
| >CDKN2A-D1 EELGHRDVA/ | 177   | >CDKN2A-D1 EELGHREVAR | 130 | 47    |
| >CDKN2A-D1 EELGHRDV   | 1576  | >CDKN2A-D1 EELGHREV   | 449 | 1127  |
| >CDKN2A-D1 EELGHRDVA/ | 121   | >CDKN2A-D1 EELGHREVAR | 117 | 4     |
| >CDKN2A-D1 EELGHRDV   | 54    | >CDKN2A-D1 EELGHREV   | 30  | 24    |
| >CDKN2A-D1 EELGHRDVA  | 10    | >CDKN2A-D1 EELGHREVA  | 9   | 1     |
| >CDKN2A-D1 EELGHRDVA/ | 471   | >CDKN2A-D1 EELGHREVAR | 649 | 178   |
| >CDKN2A-D1 AEELGHRDV  | 408   | >CDKN2A-D1 AEELGHREV  | 210 | 198   |
| >CDKN2A-D1 AEELGHRDV  | 1462  | >CDKN2A-D1 AEELGHREV  | 444 | 1018  |
| >CDKN2A-D1 AEELGHRDV  | 29    | >CDKN2A-D1 AEELGHREV  | 17  | 12    |
| >CDKN2A-D1 AEELGHRDV/ | 39    | >CDKN2A-D1 AEELGHREVA | 42  | 3     |
| >CDKN2A-D1 AEELGHRDV/ | 846   | >CDKN2A-D1 AEELGHREVA | 497 | 349   |
| >CDKN2A-D1 AEELGHRDV  | 336   | >CDKN2A-D1 AEELGHREV  | 324 | 12    |
| >CDKN2A-D1 LAEELGHRDV | 1178  | >CDKN2A-D1 LAEELGHREV | 379 | 799   |
| >CDKN2A-D1 DLAEELGHRE | 582   | >CDKN2A-D1 DLAEELGHRE | 265 | 317   |
| >CDKN2A-D1 DLAEELGHRE | 265   | >CDKN2A-D1 DLAEELGHRE | 36  | 229   |
| >CDKN2A-D1 DLAEELGHRE | 1496  | >CDKN2A-D1 DLAEELGHRE | 482 | 1014  |
| >CDKN2A-D1 DLAEELGHRE | 185   | >CDKN2A-D1 DLAEELGHRE | 58  | 127   |
| >CDKN2A-D1 DLAEELGHRE | 418   | >CDKN2A-D1 DLAEELGHRE | 71  | 347   |
| >CDKN2A-D1 DLAEELGHRE | 27    | >CDKN2A-D1 DLAEELGHRE | 11  | 16    |

|                       |      |                       |     |      |
|-----------------------|------|-----------------------|-----|------|
| >CDKN2A-D1 DLAEELGHRE | 1031 | >CDKN2A-D1 DLAEELGHRE | 195 | 836  |
| >CDKN2A-D1 DVARYLRAA  | 5383 | >CDKN2A-D1 NVARYLRAA  | 211 | 5172 |
| >CDKN2A-D1 DVARYLRA   | 514  | >CDKN2A-D1 NVARYLRA   | 208 | 306  |
| >CDKN2A-D1 DVARYLRAA  | 1129 | >CDKN2A-D1 NVARYLRAA  | 455 | 674  |
| >CDKN2A-D1 DVARYLRAA/ | 376  | >CDKN2A-D1 NVARYLRAA/ | 185 | 191  |
| >CDKN2A-D1 RDVARYLR   | 243  | >CDKN2A-D1 RNVARYLR   | 25  | 218  |
| >CDKN2A-D1 RDVARYLR   | 79   | >CDKN2A-D1 RNVARYLR   | 32  | 47   |
| >CDKN2A-D1 HRDVARYLR  | 4848 | >CDKN2A-D1 HRNVARYLR  | 260 | 4588 |
| >CDKN2A-D1 HRDVARYL   | 531  | >CDKN2A-D1 HRNVARYL   | 75  | 456  |
| >CDKN2A-D1 HRDVARYLR  | 203  | >CDKN2A-D1 HRNVARYLR  | 37  | 166  |
| >CDKN2A-D1 HRDVARYLR/ | 122  | >CDKN2A-D1 HRNVARYLR/ | 57  | 65   |
| >CDKN2A-D1 HRDVARYLR/ | 1859 | >CDKN2A-D1 HRNVARYLR/ | 307 | 1552 |
| >CDKN2A-D1 HRDVARYL   | 175  | >CDKN2A-D1 HRNVARYL   | 485 | 310  |
| >CDKN2A-D1 HRDVARYL   | 870  | >CDKN2A-D1 HRNVARYL   | 189 | 681  |
| >CDKN2A-D1 HRDVARYLR  | 370  | >CDKN2A-D1 HRNVARYLR  | 120 | 250  |
| >CDKN2A-D1 GHRDVARYLI | 282  | >CDKN2A-D1 GHRNVARYLI | 256 | 26   |
| >CDKN2A-D1 LGHRDVARY  | 415  | >CDKN2A-D1 LGHRNVARY  | 419 | 4    |
| >CDKN2A-D1 LGHRDVAR   | 1027 | >CDKN2A-D1 LGHRNVAR   | 363 | 664  |
| >CDKN2A-D1 LGHRDVARYI | 152  | >CDKN2A-D1 LGHRNVARYI | 74  | 78   |
| >CDKN2A-D1 LGHRDVARYI | 745  | >CDKN2A-D1 LGHRNVARYI | 467 | 278  |
| >CDKN2A-D1 LGHRDVARY  | 409  | >CDKN2A-D1 LGHRNVARY  | 322 | 87   |
| >CDKN2A-D1 LGHRDVARY  | 2036 | >CDKN2A-D1 LGHRNVARY  | 363 | 1673 |
| >CDKN2A-D1 ELGHRDVAR\ | 382  | >CDKN2A-D1 ELGHRNVAR\ | 324 | 58   |
| >CDKN2A-D1 ELGHRDVAR\ | 477  | >CDKN2A-D1 ELGHRNVAR\ | 653 | 176  |
| >CDKN2A-D1 ELGHRDVAR\ | 274  | >CDKN2A-D1 ELGHRNVAR\ | 301 | 27   |
| >CDKN2A-D1 ELGHRDVAR\ | 413  | >CDKN2A-D1 ELGHRNVAR\ | 290 | 123  |
| >CDKN2A-D1 ELGHRDVAR  | 85   | >CDKN2A-D1 ELGHRNVAR  | 58  | 27   |
| >CDKN2A-D1 ELGHRDVAR  | 153  | >CDKN2A-D1 ELGHRNVAR  | 122 | 31   |
| >CDKN2A-D1 ELGHRDVAR  | 188  | >CDKN2A-D1 ELGHRNVAR  | 156 | 32   |
| >CDKN2A-D1 EELGHRDV   | 193  | >CDKN2A-D1 EELGHRNV   | 215 | 22   |
| >CDKN2A-D1 EELGHRDVAF | 86   | >CDKN2A-D1 EELGHRNVAF | 107 | 21   |
| >CDKN2A-D1 EELGHRDVAF | 177  | >CDKN2A-D1 EELGHRNVAF | 107 | 70   |
| >CDKN2A-D1 EELGHRDVAF | 121  | >CDKN2A-D1 EELGHRNVAF | 107 | 14   |
| >CDKN2A-D1 EELGHRDV   | 54   | >CDKN2A-D1 EELGHRNV   | 50  | 4    |
| >CDKN2A-D1 EELGHRDVA  | 10   | >CDKN2A-D1 EELGHRNVA  | 9   | 1    |
| >CDKN2A-D1 EELGHRDVAF | 471  | >CDKN2A-D1 EELGHRNVAF | 350 | 121  |
| >CDKN2A-D1 AEELGHRDV  | 408  | >CDKN2A-D1 AEELGHRNV  | 241 | 167  |
| >CDKN2A-D1 AEELGHRD   | 881  | >CDKN2A-D1 AEELGHRN   | 369 | 512  |
| >CDKN2A-D1 AEELGHRDV  | 29   | >CDKN2A-D1 AEELGHRNV  | 32  | 3    |
| >CDKN2A-D1 AEELGHRDV/ | 39   | >CDKN2A-D1 AEELGHRNV/ | 31  | 8    |
| >CDKN2A-D1 AEELGHRDV  | 336  | >CDKN2A-D1 AEELGHRNV  | 337 | 1    |
| >CDKN2A-D1 DLAEELGHRE | 582  | >CDKN2A-D1 DLAEELGHRN | 222 | 360  |
| >CDKN2A-D1 DLAEELGHRE | 265  | >CDKN2A-D1 DLAEELGHRN | 72  | 193  |

|                       |      |                       |       |       |
|-----------------------|------|-----------------------|-------|-------|
| >CDKN2A-D1 DLAEELGHRC | 185  | >CDKN2A-D1 DLAEELGHRN | 82    | 103   |
| >CDKN2A-D1 DLAEELGHRC | 418  | >CDKN2A-D1 DLAEELGHRN | 69    | 349   |
| >CDKN2A-D1 DLAEELGHRC | 27   | >CDKN2A-D1 DLAEELGHRN | 17    | 10    |
| >CDKN2A-D1 DLAEELGHRC | 1031 | >CDKN2A-D1 DLAEELGHRN | 145   | 886   |
| >CDKN2A-D1 DAAEGPSDI  | 1183 | >CDKN2A-D1 EAAEGPSDI  | 154   | 1029  |
| >CDKN2A-D1 DAAEGPSDI  | 715  | >CDKN2A-D1 EAAEGPSDI  | 118   | 597   |
| >CDKN2A-D1 IDAAEGPSDI | 3312 | >CDKN2A-D1 IEAAEGPSDI | 134   | 3178  |
| >CDKN2A-D1 IDAAEGPSDI | 5111 | >CDKN2A-D1 IEAAEGPSDI | 67    | 5044  |
| >CDKN2A-D1 IDAAEGPSDI | 267  | >CDKN2A-D1 IEAAEGPSDI | 10488 | 10221 |
| >CDKN2A-D1 HARIDAAEGF | 330  | >CDKN2A-D1 HARIEAAEGP | 211   | 119   |
| >CDKN2A-D1 GSNHARIDA  | 1815 | >CDKN2A-D1 GSNHARIEA  | 415   | 1400  |
| >CDKN2A-D1 DWLATAAAR  | 119  | >CDKN2A-D1 EWLATAAAR  | 372   | 253   |
| >CDKN2A-D1 DWLATAAAR  | 23   | >CDKN2A-D1 EWLATAAAR  | 14    | 9     |
| >CDKN2A-D1 DWLATAAAR  | 30   | >CDKN2A-D1 EWLATAAAR  | 18    | 12    |
| >CDKN2A-D1 DWLATAAA   | 205  | >CDKN2A-D1 EWLATAAA   | 118   | 87    |
| >CDKN2A-D1 DWLATAAAR  | 450  | >CDKN2A-D1 EWLATAAAR  | 244   | 206   |
| >CDKN2A-D1 ADWLATAA   | 6265 | >CDKN2A-D1 AEWLATAA   | 182   | 6083  |
| >CDKN2A-D1 ADWLATAA   | 704  | >CDKN2A-D1 AEWLATAA   | 70    | 634   |
| >CDKN2A-D1 ADWLATAAA  | 1243 | >CDKN2A-D1 AEWLATAAA  | 148   | 1095  |
| >CDKN2A-D1 ADWLATAAA  | 6117 | >CDKN2A-D1 AEWLATAAA  | 375   | 5742  |
| >CDKN2A-D1 ADWLATAA   | 1072 | >CDKN2A-D1 AEWLATAA   | 5     | 1067  |
| >CDKN2A-D1 ADWLATAAA  | 734  | >CDKN2A-D1 AEWLATAAA  | 5     | 729   |
| >CDKN2A-D1 ADWLATAAA  | 3959 | >CDKN2A-D1 AEWLATAAA  | 148   | 3811  |
| >CDKN2A-D1 ADWLATAAA  | 3228 | >CDKN2A-D1 AEWLATAAA  | 102   | 3126  |
| >CDKN2A-D1 SADWLATAA  | 830  | >CDKN2A-D1 SAEWLATAA  | 235   | 595   |
| >CDKN2A-D1 SADWLATAA  | 83   | >CDKN2A-D1 SAEWLATAA  | 35    | 48    |
| >CDKN2A-D1 SADWLATAA  | 491  | >CDKN2A-D1 SAEWLATAA  | 4635  | 4144  |
| >CDKN2A-D1 SADWLATAA  | 283  | >CDKN2A-D1 SAEWLATAA  | 3265  | 2982  |
| >CDKN2A-D1 EPSADWLAT  | 30   | >CDKN2A-D1 EPSAEWLAT  | 36    | 6     |
| >CDKN2A-D1 EPSADWLAT  | 31   | >CDKN2A-D1 EPSAEWLAT  | 35    | 4     |
| >CDKN2A-D1 EPSADWLAT  | 270  | >CDKN2A-D1 EPSAEWLAT  | 365   | 95    |
| >CDKN2A-D1 MEPSADWL   | 777  | >CDKN2A-D1 MEPSAEWL   | 355   | 422   |
| >CDKN2A-D1 MEPSADWL   | 182  | >CDKN2A-D1 MEPSAEWL   | 211   | 29    |
| >CDKN2A-D1 MEPSADWLA  | 830  | >CDKN2A-D1 MEPSAEWLA  | 443   | 387   |
| >CDKN2A-D1 MEPSADWLA  | 596  | >CDKN2A-D1 MEPSAEWLA  | 465   | 131   |
| >CDKN2A-D1 MEPSADWLA  | 678  | >CDKN2A-D1 MEPSAEWLA  | 475   | 203   |
| >CDKN2A-D1 SMEPSADWL  | 188  | >CDKN2A-D1 SMEPSAEWL  | 251   | 63    |
| >CDKN2A-D1 SMEPSADWL  | 53   | >CDKN2A-D1 SMEPSAEWL  | 49    | 4     |
| >CDKN2A-D1 SMEPSADWL  | 218  | >CDKN2A-D1 SMEPSAEWL  | 267   | 49    |
| >CDKN2A-D1 SMEPSADWL  | 464  | >CDKN2A-D1 SMEPSAEWL  | 960   | 496   |
| >CDKN2A-D1 SMEPSADWL  | 199  | >CDKN2A-D1 SMEPSAEWL  | 100   | 99    |
| >CDKN2A-D1 SMEPSADWL  | 265  | >CDKN2A-D1 SMEPSAEWL  | 164   | 101   |
| >CDKN2A-D1 SMEPSADWL  | 443  | >CDKN2A-D1 SMEPSAEWL  | 595   | 152   |

|                       |       |                       |      |       |
|-----------------------|-------|-----------------------|------|-------|
| >CDKN2A-D1 SMEPSADWL  | 257   | >CDKN2A-D1 SMEPSAEWL  | 362  | 105   |
| >CDKN2A-D1 SMEPSADWL  | 332   | >CDKN2A-D1 SMEPSAEWL  | 378  | 46    |
| >CDKN2A-D1 SMEPSADWL  | 149   | >CDKN2A-D1 SMEPSAEWL  | 158  | 9     |
| >CDKN2A-D1 SMEPSADWL  | 17    | >CDKN2A-D1 SMEPSAEWL  | 10   | 7     |
| >CDKN2A-D1 SMEPSADWL  | 24    | >CDKN2A-D1 SMEPSAEWL  | 15   | 9     |
| >CDKN2A-D1 SMEPSADW   | 98    | >CDKN2A-D1 SMEPSAEW   | 28   | 70    |
| >CDKN2A-D1 SSMEPSADW  | 205   | >CDKN2A-D1 SSMEPSAEW  | 205  | 0     |
| >CDKN2A-D1 SSMEPSADW  | 418   | >CDKN2A-D1 SSMEPSAEW  | 402  | 16    |
| >CDKN2A-D1 SSMEPSADW  | 615   | >CDKN2A-D1 SSMEPSAEW  | 424  | 191   |
| >CDKN2A-D1 SSMEPSADW  | 286   | >CDKN2A-D1 SSMEPSAEW  | 379  | 93    |
| >CDKN2A-D1 SSMEPSADW  | 56    | >CDKN2A-D1 SSMEPSAEW  | 76   | 20    |
| >CDKN2A-D1 SSMEPSADW  | 295   | >CDKN2A-D1 SSMEPSAEW  | 161  | 134   |
| >CDKN2A-D1 SSMEPSADW  | 363   | >CDKN2A-D1 SSMEPSAEW  | 240  | 123   |
| >CDKN2A-D1 SSMEPSADW  | 4     | >CDKN2A-D1 SSMEPSAEW  | 3    | 1     |
| >CDKN2A-D1 SSMEPSADW  | 11    | >CDKN2A-D1 SSMEPSAEW  | 8    | 3     |
| >CDKN2A-D1 SSMEPSADW  | 56    | >CDKN2A-D1 SSMEPSAEW  | 54   | 2     |
| >CDKN2A-D1 SSMEPSADW  | 27    | >CDKN2A-D1 SSMEPSAEW  | 13   | 14    |
| >CDKN2A-D1 SSMEPSADW  | 192   | >CDKN2A-D1 SSMEPSAEW  | 175  | 17    |
| >CDKN2A-D1 SSMEPSADW  | 396   | >CDKN2A-D1 SSMEPSAEW  | 134  | 262   |
| >CDKN2A-D1 GSSMEPSAD\ | 13    | >CDKN2A-D1 GSSMEPSAE\ | 8    | 5     |
| >CDKN2A-D1 GSSMEPSAD\ | 96    | >CDKN2A-D1 GSSMEPSAE\ | 60   | 36    |
| >CDKN2A-D1 GSSMEPSAD\ | 179   | >CDKN2A-D1 GSSMEPSAE\ | 143  | 36    |
| >CDKN2A-D1 GSSMEPSAD\ | 81    | >CDKN2A-D1 GSSMEPSAE\ | 23   | 58    |
| >CDKN2A-D1 GSSMEPSAD\ | 152   | >CDKN2A-D1 GSSMEPSAE\ | 112  | 40    |
| >CDKN2A-D1 AGSSMEPSAI | 465   | >CDKN2A-D1 AGSSMEPSAI | 162  | 303   |
| >CDKN2A-D1 AGSSMEPSAI | 1284  | >CDKN2A-D1 AGSSMEPSAI | 245  | 1039  |
| >CDKN2A-D1 DWLATAAAR  | 2896  | >CDKN2A-D1 VWLATAAAR  | 282  | 2614  |
| >CDKN2A-D1 DWLATAAAR  | 119   | >CDKN2A-D1 VWLATAAAR  | 1691 | 1572  |
| >CDKN2A-D1 DWLATAAAR  | 23    | >CDKN2A-D1 VWLATAAAR  | 20   | 3     |
| >CDKN2A-D1 DWLATAAAR  | 30    | >CDKN2A-D1 VWLATAAAR  | 31   | 1     |
| >CDKN2A-D1 DWLATAAA   | 205   | >CDKN2A-D1 VWLATAAA   | 89   | 116   |
| >CDKN2A-D1 DWLATAAAR  | 450   | >CDKN2A-D1 VWLATAAAR  | 187  | 263   |
| >CDKN2A-D1 DWLATAAAR  | 911   | >CDKN2A-D1 VWLATAAAR  | 435  | 476   |
| >CDKN2A-D1 ADWLATAA   | 15327 | >CDKN2A-D1 AVWLATAA   | 249  | 15078 |
| >CDKN2A-D1 ADWLATAAA  | 11510 | >CDKN2A-D1 AVWLATAAA  | 230  | 11280 |
| >CDKN2A-D1 ADWLATAAA  | 24990 | >CDKN2A-D1 AVWLATAAA  | 421  | 24569 |
| >CDKN2A-D1 ADWLATAAA  | 13685 | >CDKN2A-D1 AVWLATAAA  | 414  | 13271 |
| >CDKN2A-D1 ADWLATAAA  | 1672  | >CDKN2A-D1 AVWLATAAA  | 34   | 1638  |
| >CDKN2A-D1 ADWLATAAA  | 22887 | >CDKN2A-D1 AVWLATAAA  | 131  | 22756 |
| >CDKN2A-D1 ADWLATAAA  | 2290  | >CDKN2A-D1 AVWLATAAA  | 469  | 1821  |
| >CDKN2A-D1 SADWLATA   | 710   | >CDKN2A-D1 SAVWLATA   | 394  | 316   |
| >CDKN2A-D1 SADWLATAA  | 619   | >CDKN2A-D1 SAVWLATAA  | 316  | 303   |
| >CDKN2A-D1 SADWLATAA  | 1249  | >CDKN2A-D1 SAVWLATAA  | 448  | 801   |

|                       |       |                       |     |       |
|-----------------------|-------|-----------------------|-----|-------|
| >CDKN2A-D1 SADWLATAA  | 830   | >CDKN2A-D1 SAVWLATAA  | 77  | 753   |
| >CDKN2A-D1 SADWLATAA  | 83    | >CDKN2A-D1 SAVWLATAA  | 9   | 74    |
| >CDKN2A-D1 SADWLATAA  | 2672  | >CDKN2A-D1 SAVWLATAA  | 262 | 2410  |
| >CDKN2A-D1 SADWLATAA  | 491   | >CDKN2A-D1 SAVWLATAA  | 637 | 146   |
| >CDKN2A-D1 SADWLATAA  | 283   | >CDKN2A-D1 SAVWLATAA  | 348 | 65    |
| >CDKN2A-D1 SADWLATAA  | 1535  | >CDKN2A-D1 SAVWLATAA  | 378 | 1157  |
| >CDKN2A-D1 SADWLATAA  | 2760  | >CDKN2A-D1 SAVWLATAA  | 453 | 2307  |
| >CDKN2A-D1 EPSADWLAT  | 30    | >CDKN2A-D1 EPSAVWLAT  | 31  | 1     |
| >CDKN2A-D1 EPSADWLAT/ | 31    | >CDKN2A-D1 EPSAVWLAT/ | 32  | 1     |
| >CDKN2A-D1 EPSADWLA   | 754   | >CDKN2A-D1 EPSAVWLA   | 244 | 510   |
| >CDKN2A-D1 EPSADWLAT/ | 685   | >CDKN2A-D1 EPSAVWLAT/ | 215 | 470   |
| >CDKN2A-D1 EPSADWLAT/ | 270   | >CDKN2A-D1 EPSAVWLAT/ | 80  | 190   |
| >CDKN2A-D1 MEPSADWL   | 777   | >CDKN2A-D1 MEPSAVWL   | 141 | 636   |
| >CDKN2A-D1 MEPSADWL   | 182   | >CDKN2A-D1 MEPSAVWL   | 163 | 19    |
| >CDKN2A-D1 MEPSADWLA  | 1109  | >CDKN2A-D1 MEPSAVWLA  | 400 | 709   |
| >CDKN2A-D1 MEPSADWLA  | 830   | >CDKN2A-D1 MEPSAVWLA  | 219 | 611   |
| >CDKN2A-D1 MEPSADWLA  | 596   | >CDKN2A-D1 MEPSAVWLA  | 243 | 353   |
| >CDKN2A-D1 MEPSADWLA  | 678   | >CDKN2A-D1 MEPSAVWLA  | 361 | 317   |
| >CDKN2A-D1 MEPSADWLA  | 1695  | >CDKN2A-D1 MEPSAVWLA  | 170 | 1525  |
| >CDKN2A-D1 MEPSADWLA  | 597   | >CDKN2A-D1 MEPSAVWLA  | 219 | 378   |
| >CDKN2A-D1 SMEPSADWL  | 188   | >CDKN2A-D1 SMEPSAVWL  | 152 | 36    |
| >CDKN2A-D1 SMEPSADWL  | 53    | >CDKN2A-D1 SMEPSAVWL  | 65  | 12    |
| >CDKN2A-D1 SMEPSADWL  | 218   | >CDKN2A-D1 SMEPSAVWL  | 245 | 27    |
| >CDKN2A-D1 SMEPSADWL  | 464   | >CDKN2A-D1 SMEPSAVWL  | 325 | 139   |
| >CDKN2A-D1 SMEPSADWL  | 199   | >CDKN2A-D1 SMEPSAVWL  | 95  | 104   |
| >CDKN2A-D1 SMEPSADWL  | 265   | >CDKN2A-D1 SMEPSAVWL  | 58  | 207   |
| >CDKN2A-D1 SMEPSADWL  | 443   | >CDKN2A-D1 SMEPSAVWL  | 231 | 212   |
| >CDKN2A-D1 SMEPSADWL  | 257   | >CDKN2A-D1 SMEPSAVWL  | 131 | 126   |
| >CDKN2A-D1 SMEPSADWL  | 332   | >CDKN2A-D1 SMEPSAVWL  | 159 | 173   |
| >CDKN2A-D1 SMEPSADWL  | 149   | >CDKN2A-D1 SMEPSAVWL  | 76  | 73    |
| >CDKN2A-D1 SMEPSADWL  | 17    | >CDKN2A-D1 SMEPSAVWL  | 7   | 10    |
| >CDKN2A-D1 SMEPSADWL  | 24    | >CDKN2A-D1 SMEPSAVWL  | 8   | 16    |
| >CDKN2A-D1 SMEPSADW   | 98    | >CDKN2A-D1 SMEPSAVW   | 28  | 70    |
| >CDKN2A-D1 SMEPSADWL  | 3090  | >CDKN2A-D1 SMEPSAVWL  | 379 | 2711  |
| >CDKN2A-D1 SSMEPSADW  | 894   | >CDKN2A-D1 SSMEPSAVW  | 297 | 597   |
| >CDKN2A-D1 SSMEPSAD   | 27079 | >CDKN2A-D1 SSMEPSAV   | 481 | 26598 |
| >CDKN2A-D1 SSMEPSADW  | 1311  | >CDKN2A-D1 SSMEPSAVW  | 473 | 838   |
| >CDKN2A-D1 SSMEPSAD   | 22335 | >CDKN2A-D1 SSMEPSAV   | 324 | 22011 |
| >CDKN2A-D1 SSMEPSAD   | 24623 | >CDKN2A-D1 SSMEPSAV   | 98  | 24525 |
| >CDKN2A-D1 SSMEPSADW  | 205   | >CDKN2A-D1 SSMEPSAVW  | 105 | 100   |
| >CDKN2A-D1 SSMEPSAD   | 25455 | >CDKN2A-D1 SSMEPSAV   | 115 | 25340 |
| >CDKN2A-D1 SSMEPSADW  | 418   | >CDKN2A-D1 SSMEPSAVW  | 668 | 250   |
| >CDKN2A-D1 SSMEPSADW  | 615   | >CDKN2A-D1 SSMEPSAVW  | 312 | 303   |

|                       |       |                        |     |       |
|-----------------------|-------|------------------------|-----|-------|
| >CDKN2A-D1 SSMEPSAD   | 14474 | >CDKN2A-D1 SSMEPSAV    | 24  | 14450 |
| >CDKN2A-D1 SSMEPSADW  | 286   | >CDKN2A-D1 SSMEPSAVW   | 265 | 21    |
| >CDKN2A-D1 SSMEPSADW  | 56    | >CDKN2A-D1 SSMEPSAVW   | 32  | 24    |
| >CDKN2A-D1 SSMEPSAD   | 12783 | >CDKN2A-D1 SSMEPSAV    | 28  | 12755 |
| >CDKN2A-D1 SSMEPSADW  | 295   | >CDKN2A-D1 SSMEPSAVW   | 145 | 150   |
| >CDKN2A-D1 SSMEPSADW  | 363   | >CDKN2A-D1 SSMEPSAVW   | 99  | 264   |
| >CDKN2A-D1 SSMEPSADW  | 3673  | >CDKN2A-D1 SSMEPSAVW   | 299 | 3374  |
| >CDKN2A-D1 SSMEPSAD   | 16629 | >CDKN2A-D1 SSMEPSAV    | 394 | 16235 |
| >CDKN2A-D1 SSMEPSAD   | 9663  | >CDKN2A-D1 SSMEPSAV    | 369 | 9294  |
| >CDKN2A-D1 SSMEPSADW  | 4     | >CDKN2A-D1 SSMEPSAVW   | 3   | 1     |
| >CDKN2A-D1 SSMEPSADW  | 11    | >CDKN2A-D1 SSMEPSAVW   | 6   | 5     |
| >CDKN2A-D1 SSMEPSADW  | 56    | >CDKN2A-D1 SSMEPSAVW   | 48  | 8     |
| >CDKN2A-D1 SSMEPSADW  | 27    | >CDKN2A-D1 SSMEPSAVW   | 10  | 17    |
| >CDKN2A-D1 SSMEPSADW  | 192   | >CDKN2A-D1 SSMEPSAVW   | 70  | 122   |
| >CDKN2A-D1 SSMEPSADW  | 2101  | >CDKN2A-D1 SSMEPSAVW   | 144 | 1957  |
| >CDKN2A-D1 SSMEPSADW  | 396   | >CDKN2A-D1 SSMEPSAVW   | 77  | 319   |
| >CDKN2A-D1 GSSMEPSAD\ | 13    | >CDKN2A-D1 GSSMEPSAV\  | 8   | 5     |
| >CDKN2A-D1 GSSMEPSAD\ | 96    | >CDKN2A-D1 GSSMEPSAV\  | 32  | 64    |
| >CDKN2A-D1 GSSMEPSAD\ | 179   | >CDKN2A-D1 GSSMEPSAV\  | 125 | 54    |
| >CDKN2A-D1 GSSMEPSAD\ | 81    | >CDKN2A-D1 GSSMEPSAV\  | 17  | 64    |
| >CDKN2A-D1 GSSMEPSAD\ | 152   | >CDKN2A-D1 GSSMEPSAV\  | 190 | 38    |
| >CDKN2A-D1 AGSSMEPSAI | 465   | >CDKN2A-D1 AGSSMEPSA\  | 181 | 284   |
| >CDKN2A-D1 AGSSMEPSAI | 1284  | >CDKN2A-D1 AGSSMEPSA\  | 136 | 1148  |
| >CDKN2A-D1 ARIDAAEGPS | 14419 | >CDKN2A-D1 ARIDAAEGPS  | 49  | 14370 |
| >CDKN2A-D1 ARIDAAEGPS | 9736  | >CDKN2A-D1 ARIDAAEGPS  | 353 | 9383  |
| >CDKN2A-D1 AEGPSDIP   | 1619  | >CDKN2A-D1 AEGPSYIP    | 332 | 1287  |
| >CDKN2A-D1 AEGPSDIPD  | 551   | >CDKN2A-D1 AEGPSYIPD   | 72  | 479   |
| >CDKN2A-D1 AAEGPSDI   | 855   | >CDKN2A-D1 AAEGPSYI    | 264 | 591   |
| >CDKN2A-D1 DAAEGPSD   | 21304 | >CDKN2A-D1 DAAEGPSY    | 204 | 21100 |
| >CDKN2A-D1 DAAEGPSD   | 33936 | >CDKN2A-D1 DAAEGPSY    | 245 | 33691 |
| >CDKN2A-D1 DAAEGPSD   | 32950 | >CDKN2A-D1 DAAEGPSY    | 295 | 32655 |
| >CDKN2A-D1 DAAEGPSDI  | 1183  | >CDKN2A-D1 DAAEGPSYI   | 42  | 1141  |
| >CDKN2A-D1 DAAEGPSDI  | 715   | >CDKN2A-D1 DAAEGPSYI   | 32  | 683   |
| >CDKN2A-D1 DAAEGPSD   | 16793 | >CDKN2A-D1 DAAEGPSY    | 47  | 16746 |
| >CDKN2A-D1 IDAAEGPSD  | 33314 | >CDKN2A-D1 IDAAEGPSY   | 426 | 32888 |
| >CDKN2A-D1 IDAAEGPSDI | 267   | >CDKN2A-D1 IDAAEGPSYI  | 254 | 13    |
| >CDKN2A-D1 RIDAAEGPSD | 5188  | >CDKN2A-D1 RIDAAEGPSY\ | 340 | 4848  |
| >CDKN2A-D1 RIDAAEGPSD | 1341  | >CDKN2A-D1 RIDAAEGPSY\ | 52  | 1289  |
| >CDKN2A-D1 RIDAAEGPSD | 3409  | >CDKN2A-D1 RIDAAEGPSY\ | 370 | 3039  |
| >CDKN2A-D1 RIDAAEGPSD | 27742 | >CDKN2A-D1 RIDAAEGPSY  | 342 | 27400 |
| >CDKN2A-D1 RIDAAEGPSD | 26375 | >CDKN2A-D1 RIDAAEGPSY  | 297 | 26078 |
| >CDKN2A-D7 DPATLTRPV  | 485   | >CDKN2A-D7 EPATLTRPV   | 52  | 433   |
| >CDKN2A-D7 DPATLTRPV  | 197   | >CDKN2A-D7 EPATLTRPV   | 65  | 132   |

|                       |       |                       |       |       |
|-----------------------|-------|-----------------------|-------|-------|
| >CDKN2A-D7 DPATLTRPV  | 149   | >CDKN2A-D7 EPATLTRPV  | 65    | 84    |
| >CDKN2A-D7 DPATLTRPV  | 668   | >CDKN2A-D7 EPATLTRPV  | 248   | 420   |
| >CDKN2A-D7 DPATLTRPV  | 1104  | >CDKN2A-D7 EPATLTRPV  | 330   | 774   |
| >CDKN2A-D7 ADPATLTRPV | 5714  | >CDKN2A-D7 AEPATLTRPV | 282   | 5432  |
| >CDKN2A-D7 ADPATLTRPV | 18024 | >CDKN2A-D7 AEPATLTRPV | 154   | 17870 |
| >CDKN2A-D7 ADPATLTRPV | 13227 | >CDKN2A-D7 AEPATLTRPV | 453   | 12774 |
| >CDKN2A-D7 ADPATLTRPV | 1757  | >CDKN2A-D7 AEPATLTRPV | 86    | 1671  |
| >CDKN2A-D7 ADPATLTRPV | 6131  | >CDKN2A-D7 AEPATLTRPV | 135   | 5996  |
| >CDKN2A-D7 ADPATLTRPV | 498   | >CDKN2A-D7 AEPATLTRPV | 14847 | 14349 |
| >CDKN2A-D7 CADPATLTR  | 353   | >CDKN2A-D7 CAEPATLTR  | 173   | 180   |
| >CDKN2A-D7 CADPATLTR  | 941   | >CDKN2A-D7 CAEPATLTR  | 402   | 539   |
| >CDKN2A-D7 NCADPATLTF | 284   | >CDKN2A-D7 NCAEPATLTR | 495   | 211   |
| >CDKN2A-D7 NCADPATL   | 475   | >CDKN2A-D7 NCAEPATL   | 694   | 219   |
| >CDKN2A-D7 NCADPATL   | 868   | >CDKN2A-D7 NCAEPATL   | 492   | 376   |
| >CDKN2A-D7 NCADPATLTF | 233   | >CDKN2A-D7 NCAEPATLTR | 480   | 247   |
| >CDKN2A-D7 EPNCADPATL | 353   | >CDKN2A-D7 EPNCAEPATL | 398   | 45    |
| >CDKN2A-D7 EPNCADPA   | 53    | >CDKN2A-D7 EPNCAEPA   | 112   | 59    |
| >CDKN2A-D7 EPNCADPAT  | 16    | >CDKN2A-D7 EPNCAEPAT  | 25    | 9     |
| >CDKN2A-D7 EPNCADPATL | 958   | >CDKN2A-D7 EPNCAEPATL | 372   | 586   |
| >CDKN2A-D7 EPNCADPATL | 279   | >CDKN2A-D7 EPNCAEPATL | 398   | 119   |
| >CDKN2A-D7 EPNCADPA   | 43    | >CDKN2A-D7 EPNCAEPA   | 90    | 47    |
| >CDKN2A-D7 EPNCADPAT  | 371   | >CDKN2A-D7 EPNCAEPAT  | 297   | 74    |
| >CDKN2A-D7 AEPNCADPA  | 183   | >CDKN2A-D7 AEPNCAEPAT | 255   | 72    |
| >CDKN2A-D7 AEPNCADPA  | 209   | >CDKN2A-D7 AEPNCAEPA  | 277   | 68    |
| >CDKN2A-D7 AEPNCADPA  | 480   | >CDKN2A-D7 AEPNCAEPA  | 474   | 6     |
| >CDKN2A-D7 AEPNCADPA  | 230   | >CDKN2A-D7 AEPNCAEPAT | 291   | 61    |
| >CDKN2A-D7 AEPNCADPA  | 65    | >CDKN2A-D7 AEPNCAEPAT | 57    | 8     |
| >CDKN2A-D7 HGAEPNCAD  | 272   | >CDKN2A-D7 HGAEPNCAEI | 173   | 99    |
| >CDKN2A-D7 DPATLTRPV  | 485   | >CDKN2A-D7 NPATLTRPV  | 204   | 281   |
| >CDKN2A-D7 DPATLTRPV  | 197   | >CDKN2A-D7 NPATLTRPV  | 185   | 12    |
| >CDKN2A-D7 DPATLTRPV  | 149   | >CDKN2A-D7 NPATLTRPV  | 17    | 132   |
| >CDKN2A-D7 DPATLTRPV  | 668   | >CDKN2A-D7 NPATLTRPV  | 379   | 289   |
| >CDKN2A-D7 DPATLTRPV  | 1104  | >CDKN2A-D7 NPATLTRPV  | 202   | 902   |
| >CDKN2A-D7 DPATLTRPV  | 3427  | >CDKN2A-D7 NPATLTRPV  | 498   | 2929  |
| >CDKN2A-D7 ADPATLTRPV | 498   | >CDKN2A-D7 ANPATLTRPV | 15095 | 14597 |
| >CDKN2A-D7 CADPATLTR  | 4860  | >CDKN2A-D7 CANPATLTR  | 386   | 4474  |
| >CDKN2A-D7 CADPATLTR  | 353   | >CDKN2A-D7 CANPATLTR  | 69    | 284   |
| >CDKN2A-D7 CADPATLTRP | 1765  | >CDKN2A-D7 CANPATLTRP | 68    | 1697  |
| >CDKN2A-D7 CADPATLTR  | 941   | >CDKN2A-D7 CANPATLTR  | 354   | 587   |
| >CDKN2A-D7 NCADPATLTF | 284   | >CDKN2A-D7 NCANPATLTF | 376   | 92    |
| >CDKN2A-D7 NCADPATL   | 475   | >CDKN2A-D7 NCANPATL   | 1024  | 549   |
| >CDKN2A-D7 NCADPATLTF | 233   | >CDKN2A-D7 NCANPATLTF | 500   | 267   |
| >CDKN2A-D7 EPNCADPATL | 353   | >CDKN2A-D7 EPNCANPATL | 214   | 139   |



|                       |       |                       |       |       |
|-----------------------|-------|-----------------------|-------|-------|
| >CDKN2A-D7 EPNCADPATL | 949   | >CDKN2A-D7 EPNCANPATL | 237   | 712   |
| >CDKN2A-D7 EPNCADPA   | 53    | >CDKN2A-D7 EPNCANPA   | 89    | 36    |
| >CDKN2A-D7 EPNCADPAT  | 16    | >CDKN2A-D7 EPNCANPAT  | 30    | 14    |
| >CDKN2A-D7 EPNCADPATL | 279   | >CDKN2A-D7 EPNCANPATL | 504   | 225   |
| >CDKN2A-D7 EPNCADPATL | 753   | >CDKN2A-D7 EPNCANPATL | 273   | 480   |
| >CDKN2A-D7 EPNCADPA   | 43    | >CDKN2A-D7 EPNCANPA   | 25    | 18    |
| >CDKN2A-D7 EPNCADPAT  | 371   | >CDKN2A-D7 EPNCANPAT  | 284   | 87    |
| >CDKN2A-D7 AEPNCADPA` | 183   | >CDKN2A-D7 AEPNCANPA` | 259   | 76    |
| >CDKN2A-D7 AEPNCADPA  | 209   | >CDKN2A-D7 AEPNCANPA  | 131   | 78    |
| >CDKN2A-D7 AEPNCADPA` | 507   | >CDKN2A-D7 AEPNCANPA` | 413   | 94    |
| >CDKN2A-D7 AEPNCADPA` | 849   | >CDKN2A-D7 AEPNCANPA` | 489   | 360   |
| >CDKN2A-D7 AEPNCADPA  | 480   | >CDKN2A-D7 AEPNCANPA  | 476   | 4     |
| >CDKN2A-D7 AEPNCADPA` | 230   | >CDKN2A-D7 AEPNCANPA` | 340   | 110   |
| >CDKN2A-D7 AEPNCADPA` | 65    | >CDKN2A-D7 AEPNCANPA` | 60    | 5     |
| >CDKN2A-D7 HGAEPNCAD  | 272   | >CDKN2A-D7 HGAEPNCAN  | 208   | 64    |
| >CDKN2A-D7 DPATLTRPV  | 485   | >CDKN2A-D7 VPATLTRPV  | 4397  | 3912  |
| >CDKN2A-D7 DPATLTRPV  | 197   | >CDKN2A-D7 VPATLTRPV  | 1089  | 892   |
| >CDKN2A-D7 DPATLTRPV  | 149   | >CDKN2A-D7 VPATLTRPV  | 17    | 132   |
| >CDKN2A-D7 DPATLTRPV  | 1104  | >CDKN2A-D7 VPATLTRPV  | 145   | 959   |
| >CDKN2A-D7 ADPATLTRPV | 11743 | >CDKN2A-D7 AVPATLTRPV | 97    | 11646 |
| >CDKN2A-D7 ADPATLTRPV | 11646 | >CDKN2A-D7 AVPATLTRPV | 180   | 11466 |
| >CDKN2A-D7 ADPATLTRPV | 14737 | >CDKN2A-D7 AVPATLTRPV | 180   | 14557 |
| >CDKN2A-D7 ADPATLTRPV | 18488 | >CDKN2A-D7 AVPATLTRPV | 67    | 18421 |
| >CDKN2A-D7 ADPATLTRPV | 18456 | >CDKN2A-D7 AVPATLTRPV | 269   | 18187 |
| >CDKN2A-D7 ADPATLTRPV | 15831 | >CDKN2A-D7 AVPATLTRPV | 372   | 15459 |
| >CDKN2A-D7 ADPATLTRPV | 498   | >CDKN2A-D7 AVPATLTRPV | 27763 | 27265 |
| >CDKN2A-D7 LLHGAEPNCA | 23473 | >CDKN2A-D7 LLHGAEPNCA | 77    | 23396 |
| >CDKN2A-D7 LLHGAEPNCA | 14881 | >CDKN2A-D7 LLHGAEPNCA | 38    | 14843 |
| >CDKN2A-D7 LLHGAEPNCA | 21033 | >CDKN2A-D7 LLHGAEPNCA | 20    | 21013 |
| >CDKN2A-D7 LLHGAEPNCA | 25143 | >CDKN2A-D7 LLHGAEPNCA | 127   | 25016 |
| >CDKN2A-D7 LLHGAEPNCA | 5484  | >CDKN2A-D7 LLHGAEPNCA | 2     | 5482  |
| >CDKN2A-D7 LLHGAEPNCA | 19615 | >CDKN2A-D7 LLHGAEPNCA | 15    | 19600 |
| >CDKN2A-D7 LLHGAEPNCA | 17152 | >CDKN2A-D7 LLHGAEPNCA | 8     | 17144 |
| >CDKN2A-D7 LLHGAEPNCA | 23871 | >CDKN2A-D7 LLHGAEPNCA | 12    | 23859 |
| >CDKN2A-D7 LLHGAEPNCA | 3479  | >CDKN2A-D7 LLHGAEPNCA | 2     | 3477  |
| >CDKN2A-D7 CADPATLTRP | 712   | >CDKN2A-D7 CAVPATLTRP | 373   | 339   |
| >CDKN2A-D7 CADPATLTR  | 353   | >CDKN2A-D7 CAVPATLTR  | 34    | 319   |
| >CDKN2A-D7 CADPATLTRP | 1765  | >CDKN2A-D7 CAVPATLTRP | 40    | 1725  |
| >CDKN2A-D7 CADPATLTR  | 941   | >CDKN2A-D7 CAVPATLTR  | 163   | 778   |
| >CDKN2A-D7 NCADPATLTF | 284   | >CDKN2A-D7 NCAVPATLTR | 364   | 80    |
| >CDKN2A-D7 NCADPATL   | 475   | >CDKN2A-D7 NCAVPATL   | 876   | 401   |
| >CDKN2A-D7 NCADPATLTF | 233   | >CDKN2A-D7 NCAVPATLTR | 758   | 525   |
| >CDKN2A-D7 EPNCADPATL | 353   | >CDKN2A-D7 EPNCAVPATL | 234   | 119   |

|                       |       |                       |       |       |
|-----------------------|-------|-----------------------|-------|-------|
| >CDKN2A-D7 EPNCADPATL | 949   | >CDKN2A-D7 EPNCAVPATL | 205   | 744   |
| >CDKN2A-D7 EPNCADPA   | 53    | >CDKN2A-D7 EPNCAVPA   | 67    | 14    |
| >CDKN2A-D7 EPNCADPAT  | 16    | >CDKN2A-D7 EPNCAVPAT  | 28    | 12    |
| >CDKN2A-D7 EPNCADPATL | 958   | >CDKN2A-D7 EPNCAVPATL | 475   | 483   |
| >CDKN2A-D7 EPNCADPATL | 279   | >CDKN2A-D7 EPNCAVPATL | 496   | 217   |
| >CDKN2A-D7 EPNCADPATL | 753   | >CDKN2A-D7 EPNCAVPATL | 218   | 535   |
| >CDKN2A-D7 EPNCADPA   | 43    | >CDKN2A-D7 EPNCAVPA   | 30    | 13    |
| >CDKN2A-D7 EPNCADPAT  | 371   | >CDKN2A-D7 EPNCAVPAT  | 290   | 81    |
| >CDKN2A-D7 AEPNCADPA  | 183   | >CDKN2A-D7 AEPNCAVPA  | 130   | 53    |
| >CDKN2A-D7 AEPNCADPA  | 209   | >CDKN2A-D7 AEPNCAVPA  | 164   | 45    |
| >CDKN2A-D7 AEPNCADPA  | 507   | >CDKN2A-D7 AEPNCAVPA  | 343   | 164   |
| >CDKN2A-D7 AEPNCADPA  | 480   | >CDKN2A-D7 AEPNCAVPA  | 234   | 246   |
| >CDKN2A-D7 AEPNCADPA  | 230   | >CDKN2A-D7 AEPNCAVPA  | 218   | 12    |
| >CDKN2A-D7 AEPNCADPA  | 609   | >CDKN2A-D7 AEPNCAVPA  | 370   | 239   |
| >CDKN2A-D7 AEPNCADPA  | 65    | >CDKN2A-D7 AEPNCAVPA  | 40    | 25    |
| >CDKN2A-D7 HGAEPNCAD  | 20134 | >CDKN2A-D7 HGAEPNCAV  | 70    | 20064 |
| >CDKN2A-D7 HGAEPNCAD  | 272   | >CDKN2A-D7 HGAEPNCAV  | 174   | 98    |
| >CDKN2A-D7 HGAEPNCAD  | 17718 | >CDKN2A-D7 HGAEPNCAV  | 113   | 17605 |
| >CDKN2A-D7 DPATLTRPV  | 485   | >CDKN2A-D7 YPATLTRPV  | 288   | 197   |
| >CDKN2A-D7 DPATLTRPV  | 197   | >CDKN2A-D7 YPATLTRPV  | 111   | 86    |
| >CDKN2A-D7 DPATLTRPV  | 149   | >CDKN2A-D7 YPATLTRPV  | 11    | 138   |
| >CDKN2A-D7 DPATLTRPV  | 668   | >CDKN2A-D7 YPATLTRPV  | 45    | 623   |
| >CDKN2A-D7 DPATLTRPV  | 8572  | >CDKN2A-D7 YPATLTRPV  | 285   | 8287  |
| >CDKN2A-D7 DPATLTRPV  | 1104  | >CDKN2A-D7 YPATLTRPV  | 20    | 1084  |
| >CDKN2A-D7 DPATLTRPV  | 3427  | >CDKN2A-D7 YPATLTRPV  | 127   | 3300  |
| >CDKN2A-D7 ADPATLTRPV | 18578 | >CDKN2A-D7 AYPATLTRPV | 387   | 18191 |
| >CDKN2A-D7 ADPATLTR   | 25046 | >CDKN2A-D7 AYPATLTR   | 299   | 24747 |
| >CDKN2A-D7 ADPATLTRPV | 24052 | >CDKN2A-D7 AYPATLTRPV | 321   | 23731 |
| >CDKN2A-D7 ADPATLTR   | 16483 | >CDKN2A-D7 AYPATLTR   | 451   | 16032 |
| >CDKN2A-D7 ADPATLTR   | 6460  | >CDKN2A-D7 AYPATLTR   | 53    | 6407  |
| >CDKN2A-D7 ADPATLTRPV | 498   | >CDKN2A-D7 AYPATLTRPV | 27355 | 26857 |
| >CDKN2A-D7 LLHGAEPNCA | 3479  | >CDKN2A-D7 LLHGAEPNCA | 340   | 3139  |
| >CDKN2A-D7 LLHGAEPNCA | 27161 | >CDKN2A-D7 LLHGAEPNCA | 416   | 26745 |
| >CDKN2A-D7 LLHGAEPNCA | 33861 | >CDKN2A-D7 LLHGAEPNCA | 328   | 33533 |
| >CDKN2A-D7 LLHGAEPNCA | 13058 | >CDKN2A-D7 LLHGAEPNCA | 58    | 13000 |
| >CDKN2A-D7 LLHGAEPNCA | 20475 | >CDKN2A-D7 LLHGAEPNCA | 61    | 20414 |
| >CDKN2A-D7 LLHGAEPNCA | 22880 | >CDKN2A-D7 LLHGAEPNCA | 187   | 22693 |
| >CDKN2A-D7 LLHGAEPNCA | 23204 | >CDKN2A-D7 LLHGAEPNCA | 200   | 23004 |
| >CDKN2A-D7 CADPATLTRP | 10559 | >CDKN2A-D7 CAYPATLTRP | 280   | 10279 |
| >CDKN2A-D7 CADPATLTRP | 4483  | >CDKN2A-D7 CAYPATLTRP | 190   | 4293  |
| >CDKN2A-D7 CADPATLTRP | 712   | >CDKN2A-D7 CAYPATLTRP | 264   | 448   |
| >CDKN2A-D7 CADPATLTR  | 5051  | >CDKN2A-D7 CAYPATLTR  | 373   | 4678  |
| >CDKN2A-D7 CADPATLTR  | 4860  | >CDKN2A-D7 CAYPATLTR  | 305   | 4555  |

|                       |       |                        |       |       |
|-----------------------|-------|------------------------|-------|-------|
| >CDKN2A-D7 CADPATLTR  | 353   | >CDKN2A-D7 CAYPATLTR   | 16    | 337   |
| >CDKN2A-D7 CADPATLTRP | 1765  | >CDKN2A-D7 CAYPATLTRP' | 43    | 1722  |
| >CDKN2A-D7 CADPATLTRP | 585   | >CDKN2A-D7 CAYPATLTRP' | 178   | 407   |
| >CDKN2A-D7 CADPATLTR  | 941   | >CDKN2A-D7 CAYPATLTR   | 82    | 859   |
| >CDKN2A-D7 CADPATLTRP | 1402  | >CDKN2A-D7 CAYPATLTRP' | 115   | 1287  |
| >CDKN2A-D7 NCADPATLTF | 284   | >CDKN2A-D7 NCAYPATLTR  | 198   | 86    |
| >CDKN2A-D7 NCADPATL   | 475   | >CDKN2A-D7 NCAYPATL    | 359   | 116   |
| >CDKN2A-D7 NCADPATLTF | 233   | >CDKN2A-D7 NCAYPATLTR  | 515   | 282   |
| >CDKN2A-D7 EPNCADPATL | 353   | >CDKN2A-D7 EPNCAYPATL  | 257   | 96    |
| >CDKN2A-D7 EPNCADPA   | 2059  | >CDKN2A-D7 EPNCAYPA    | 485   | 1574  |
| >CDKN2A-D7 EPNCADPA   | 2285  | >CDKN2A-D7 EPNCAYPA    | 348   | 1937  |
| >CDKN2A-D7 EPNCADPATL | 949   | >CDKN2A-D7 EPNCAYPATL  | 156   | 793   |
| >CDKN2A-D7 EPNCADPA   | 53    | >CDKN2A-D7 EPNCAYPA    | 54    | 1     |
| >CDKN2A-D7 EPNCADPAT  | 16    | >CDKN2A-D7 EPNCAYPAT   | 33    | 17    |
| >CDKN2A-D7 EPNCADPATL | 958   | >CDKN2A-D7 EPNCAYPATL  | 434   | 524   |
| >CDKN2A-D7 EPNCADPATL | 279   | >CDKN2A-D7 EPNCAYPATL  | 509   | 230   |
| >CDKN2A-D7 EPNCADPATL | 753   | >CDKN2A-D7 EPNCAYPATL  | 244   | 509   |
| >CDKN2A-D7 EPNCADPA   | 43    | >CDKN2A-D7 EPNCAYPA    | 16    | 27    |
| >CDKN2A-D7 EPNCADPAT  | 371   | >CDKN2A-D7 EPNCAYPAT   | 81    | 290   |
| >CDKN2A-D7 AEPNCADPA` | 183   | >CDKN2A-D7 AEPNCAYPAT  | 175   | 8     |
| >CDKN2A-D7 AEPNCADPA  | 209   | >CDKN2A-D7 AEPNCAYPA   | 52    | 157   |
| >CDKN2A-D7 AEPNCADPA` | 507   | >CDKN2A-D7 AEPNCAYPAT  | 174   | 333   |
| >CDKN2A-D7 AEPNCADPA` | 849   | >CDKN2A-D7 AEPNCAYPAT  | 274   | 575   |
| >CDKN2A-D7 AEPNCADPA  | 480   | >CDKN2A-D7 AEPNCAYPA   | 120   | 360   |
| >CDKN2A-D7 AEPNCADPA` | 230   | >CDKN2A-D7 AEPNCAYPAT  | 116   | 114   |
| >CDKN2A-D7 AEPNCADPA  | 609   | >CDKN2A-D7 AEPNCAYPA   | 412   | 197   |
| >CDKN2A-D7 AEPNCADPA` | 65    | >CDKN2A-D7 AEPNCAYPAT  | 37    | 28    |
| >CDKN2A-D7 GAEPNCAD   | 25450 | >CDKN2A-D7 GAEPNCAY    | 135   | 25315 |
| >CDKN2A-D7 GAEPNCAD   | 23107 | >CDKN2A-D7 GAEPNCAY    | 317   | 22790 |
| >CDKN2A-D7 HGAEPNCAD  | 272   | >CDKN2A-D7 HGAEPNCAYI  | 88    | 184   |
| >CDKN2A-D7 HGAEPNCAD  | 20083 | >CDKN2A-D7 HGAEPNCAY   | 227   | 19856 |
| >CDKN2A-D7 HGAEPNCAD  | 23631 | >CDKN2A-D7 HGAEPNCAY   | 57    | 23574 |
| >CDKN2A-D7 HGAEPNCAD  | 15596 | >CDKN2A-D7 HGAEPNCAY   | 29    | 15567 |
| >CDKN2A-D7 HGAEPNCAD  | 27728 | >CDKN2A-D7 HGAEPNCAY   | 83    | 27645 |
| >CDKN2A-D7 LHGAEPNCAI | 24843 | >CDKN2A-D7 LHGAEPNCAI  | 236   | 24607 |
| >CDKN2A-D8 HDAAREGFL  | 169   | >CDKN2A-D8 HGAAREGFL   | 17380 | 17211 |
| >CDKN2A-D8 RPVHDAAREG | 1609  | >CDKN2A-D8 RPVHGAAREG  | 298   | 1311  |
| >CDKN2A-D8 RPVHDAAREG | 58    | >CDKN2A-D8 RPVHGAAREG  | 29    | 29    |
| >CDKN2A-D8 RPVHDAAREG | 287   | >CDKN2A-D8 RPVHGAAREG  | 303   | 16    |
| >CDKN2A-D8 RPVHDAAREG | 112   | >CDKN2A-D8 RPVHGAAREG  | 121   | 9     |
| >CDKN2A-D8 RPVHDAAR   | 319   | >CDKN2A-D8 RPVHGAAR    | 507   | 188   |
| >CDKN2A-D8 LTRPVHDA   | 48    | >CDKN2A-D8 LTRPVHGA    | 20    | 28    |
| >CDKN2A-D8 LTRPVHDA   | 24    | >CDKN2A-D8 LTRPVHGAA   | 8     | 16    |

|                        |       |                        |       |       |
|------------------------|-------|------------------------|-------|-------|
| >CDKN2A-D8 LTRPVHDAAF  | 56    | >CDKN2A-D8 LTRPVHGAAF  | 19    | 37    |
| >CDKN2A-D8 LTRPVHDAAF  | 107   | >CDKN2A-D8 LTRPVHGAAF  | 50    | 57    |
| >CDKN2A-D8 LTRPVHDAAF  | 1201  | >CDKN2A-D8 LTRPVHGAAF  | 458   | 743   |
| >CDKN2A-D8 LTRPVHDAAF  | 47    | >CDKN2A-D8 LTRPVHGAAF  | 41    | 6     |
| >CDKN2A-D8 LTRPVHDAAF  | 827   | >CDKN2A-D8 LTRPVHGAAF  | 356   | 471   |
| >CDKN2A-D8 LTRPVHDAA   | 583   | >CDKN2A-D8 LTRPVHGAA   | 244   | 339   |
| >CDKN2A-D8 LTRPVHDAAF  | 583   | >CDKN2A-D8 LTRPVHGAAF  | 322   | 261   |
| >CDKN2A-D8 TLTRPVHDA   | 660   | >CDKN2A-D8 TLTRPVHGA   | 116   | 544   |
| >CDKN2A-D8 TLTRPVHDAF  | 611   | >CDKN2A-D8 TLTRPVHGAA  | 190   | 421   |
| >CDKN2A-D8 TLTRPVHDA   | 722   | >CDKN2A-D8 TLTRPVHGA   | 40    | 682   |
| >CDKN2A-D8 TLTRPVHDAF  | 280   | >CDKN2A-D8 TLTRPVHGAA  | 245   | 35    |
| >CDKN2A-D8 TLTRPVHDA   | 2123  | >CDKN2A-D8 TLTRPVHGA   | 246   | 1877  |
| >CDKN2A-D8 TLTRPVHDA   | 694   | >CDKN2A-D8 TLTRPVHGA   | 176   | 518   |
| >CDKN2A-D8 TLTRPVHDA   | 12    | >CDKN2A-D8 TLTRPVHGA   | 5     | 7     |
| >CDKN2A-D8 TLTRPVHDAF  | 88    | >CDKN2A-D8 TLTRPVHGAA  | 105   | 17    |
| >CDKN2A-D8 TLTRPVHDAF  | 159   | >CDKN2A-D8 TLTRPVHGAA  | 103   | 56    |
| >CDKN2A-D8 TLTRPVHDAF  | 411   | >CDKN2A-D8 TLTRPVHGAA  | 454   | 43    |
| >CDKN2A-D8 TLTRPVHDAF  | 68    | >CDKN2A-D8 TLTRPVHGAA  | 109   | 41    |
| >CDKN2A-D8 TLTRPVHDA   | 4185  | >CDKN2A-D8 TLTRPVHGA   | 480   | 3705  |
| >CDKN2A-D8 ATLTRPVHDA  | 970   | >CDKN2A-D8 ATLTRPVHGAA | 456   | 514   |
| >CDKN2A-D8 ATLTRPVHDA  | 506   | >CDKN2A-D8 ATLTRPVHGAA | 114   | 392   |
| >CDKN2A-D8 HDAAREGFL   | 16748 | >CDKN2A-D8 HHAAREGFL   | 435   | 16313 |
| >CDKN2A-D8 HDAAREGFL   | 12589 | >CDKN2A-D8 HHAAREGFL   | 160   | 12429 |
| >CDKN2A-D8 HDAAREGF    | 28207 | >CDKN2A-D8 HHAAREGF    | 382   | 27825 |
| >CDKN2A-D8 HDAAREGFL   | 169   | >CDKN2A-D8 HHAAREGFL   | 20466 | 20297 |
| >CDKN2A-D8 VHDAAREGFI  | 3491  | >CDKN2A-D8 VHHAAREGFI  | 416   | 3075  |
| >CDKN2A-D8 VHDAAREGF   | 2616  | >CDKN2A-D8 VHHAAREGF   | 147   | 2469  |
| >CDKN2A-D8 RPHVHDAAR   | 2840  | >CDKN2A-D8 RPHVHHAAR   | 377   | 2463  |
| >CDKN2A-D8 RPHVHDAAREG | 58    | >CDKN2A-D8 RPHVHHAAREG | 23    | 35    |
| >CDKN2A-D8 RPHVHDAAREG | 287   | >CDKN2A-D8 RPHVHHAAREG | 206   | 81    |
| >CDKN2A-D8 RPHVHDAAREG | 112   | >CDKN2A-D8 RPHVHHAAREG | 105   | 7     |
| >CDKN2A-D8 RPHVHDAAR   | 319   | >CDKN2A-D8 RPHVHHAAR   | 168   | 151   |
| >CDKN2A-D8 LTRPVHDA    | 48    | >CDKN2A-D8 LTRPVHHA    | 10    | 38    |
| >CDKN2A-D8 LTRPVHDAA   | 24    | >CDKN2A-D8 LTRPVHHAA   | 6     | 18    |
| >CDKN2A-D8 LTRPVHDAAF  | 56    | >CDKN2A-D8 LTRPVHHAAF  | 9     | 47    |
| >CDKN2A-D8 LTRPVHDAAF  | 107   | >CDKN2A-D8 LTRPVHHAAF  | 26    | 81    |
| >CDKN2A-D8 LTRPVHDAAF  | 1201  | >CDKN2A-D8 LTRPVHHAAF  | 219   | 982   |
| >CDKN2A-D8 LTRPVHDAAF  | 47    | >CDKN2A-D8 LTRPVHHAAF  | 88    | 41    |
| >CDKN2A-D8 LTRPVHDAAF  | 827   | >CDKN2A-D8 LTRPVHHAAF  | 390   | 437   |
| >CDKN2A-D8 TLTRPVHDA   | 660   | >CDKN2A-D8 TLTRPVHHA   | 242   | 418   |
| >CDKN2A-D8 TLTRPVHDAF  | 611   | >CDKN2A-D8 TLTRPVHHA   | 270   | 341   |
| >CDKN2A-D8 TLTRPVHDA   | 722   | >CDKN2A-D8 TLTRPVHHA   | 106   | 616   |
| >CDKN2A-D8 TLTRPVHDAF  | 280   | >CDKN2A-D8 TLTRPVHHA   | 67    | 213   |

|                       |       |                       |       |       |
|-----------------------|-------|-----------------------|-------|-------|
| >CDKN2A-D8 TLTRPVHDA  | 2123  | >CDKN2A-D8 TLTRPVHHA  | 415   | 1708  |
| >CDKN2A-D8 TLTRPVHDAF | 1975  | >CDKN2A-D8 TLTRPVHHA  | 494   | 1481  |
| >CDKN2A-D8 TLTRPVHDA  | 694   | >CDKN2A-D8 TLTRPVHHA  | 114   | 580   |
| >CDKN2A-D8 TLTRPVHDAF | 1048  | >CDKN2A-D8 TLTRPVHHA  | 371   | 677   |
| >CDKN2A-D8 TLTRPVHDA  | 12    | >CDKN2A-D8 TLTRPVHHA  | 7     | 5     |
| >CDKN2A-D8 TLTRPVHDAF | 88    | >CDKN2A-D8 TLTRPVHHA  | 8     | 80    |
| >CDKN2A-D8 TLTRPVHDAF | 159   | >CDKN2A-D8 TLTRPVHHA  | 38    | 121   |
| >CDKN2A-D8 TLTRPVHDAF | 411   | >CDKN2A-D8 TLTRPVHHA  | 154   | 257   |
| >CDKN2A-D8 TLTRPVHDAF | 68    | >CDKN2A-D8 TLTRPVHHA  | 57    | 11    |
| >CDKN2A-D8 ATLRPVHDA  | 970   | >CDKN2A-D8 ATLRPVHHA  | 132   | 838   |
| >CDKN2A-D8 ATLRPVHDA  | 506   | >CDKN2A-D8 ATLRPVHHA  | 78    | 428   |
| >CDKN2A-D8 ATLRPVHD   | 1634  | >CDKN2A-D8 ATLRPVHHA  | 164   | 1470  |
| >CDKN2A-D8 HDAAREGFL  | 169   | >CDKN2A-D8 HNAAREGFL  | 8738  | 8569  |
| >CDKN2A-D8 VHDAAREGF  | 2616  | >CDKN2A-D8 VHNAAREGF  | 266   | 2350  |
| >CDKN2A-D8 RPVHDAAREG | 1609  | >CDKN2A-D8 RPVHNAAREG | 325   | 1284  |
| >CDKN2A-D8 RPVHDAAREG | 58    | >CDKN2A-D8 RPVHNAAREG | 33    | 25    |
| >CDKN2A-D8 RPVHDAAREG | 287   | >CDKN2A-D8 RPVHNAAREG | 216   | 71    |
| >CDKN2A-D8 RPVHDAAREG | 112   | >CDKN2A-D8 RPVHNAAREG | 148   | 36    |
| >CDKN2A-D8 RPVHDAAR   | 319   | >CDKN2A-D8 RPVHNAAR   | 160   | 159   |
| >CDKN2A-D8 LTRPVHDA   | 48    | >CDKN2A-D8 LTRPVHNA   | 11    | 37    |
| >CDKN2A-D8 LTRPVHDAF  | 24    | >CDKN2A-D8 LTRPVHNA   | 6     | 18    |
| >CDKN2A-D8 LTRPVHDAAF | 56    | >CDKN2A-D8 LTRPVHNAAF | 12    | 44    |
| >CDKN2A-D8 LTRPVHDAAF | 107   | >CDKN2A-D8 LTRPVHNAAF | 46    | 61    |
| >CDKN2A-D8 LTRPVHDAAF | 47    | >CDKN2A-D8 LTRPVHNAAF | 38    | 9     |
| >CDKN2A-D8 LTRPVHDAF  | 583   | >CDKN2A-D8 LTRPVHNA   | 219   | 364   |
| >CDKN2A-D8 TLTRPVHDA  | 660   | >CDKN2A-D8 TLTRPVHNA  | 161   | 499   |
| >CDKN2A-D8 TLTRPVHDAF | 611   | >CDKN2A-D8 TLTRPVHNA  | 333   | 278   |
| >CDKN2A-D8 TLTRPVHDA  | 722   | >CDKN2A-D8 TLTRPVHNA  | 116   | 606   |
| >CDKN2A-D8 TLTRPVHDAF | 280   | >CDKN2A-D8 TLTRPVHNA  | 282   | 2     |
| >CDKN2A-D8 TLTRPVHDA  | 694   | >CDKN2A-D8 TLTRPVHNA  | 276   | 418   |
| >CDKN2A-D8 TLTRPVHDA  | 12    | >CDKN2A-D8 TLTRPVHNA  | 7     | 5     |
| >CDKN2A-D8 TLTRPVHDAF | 88    | >CDKN2A-D8 TLTRPVHNA  | 48    | 40    |
| >CDKN2A-D8 TLTRPVHDAF | 159   | >CDKN2A-D8 TLTRPVHNA  | 69    | 90    |
| >CDKN2A-D8 TLTRPVHDAF | 411   | >CDKN2A-D8 TLTRPVHNA  | 238   | 173   |
| >CDKN2A-D8 TLTRPVHDAF | 68    | >CDKN2A-D8 TLTRPVHNA  | 56    | 12    |
| >CDKN2A-D8 ATLRPVHDA  | 970   | >CDKN2A-D8 ATLRPVHNA  | 188   | 782   |
| >CDKN2A-D8 ATLRPVHDA  | 506   | >CDKN2A-D8 ATLRPVHNA  | 71    | 435   |
| >CDKN2A-D8 HDAAREGFL  | 10837 | >CDKN2A-D8 HVAAREGFL  | 232   | 10605 |
| >CDKN2A-D8 HDAAREGF   | 27475 | >CDKN2A-D8 HVAAREGF   | 380   | 27095 |
| >CDKN2A-D8 HDAAREGFL  | 12873 | >CDKN2A-D8 HVAAREGFL  | 49    | 12824 |
| >CDKN2A-D8 HDAAREGFL  | 169   | >CDKN2A-D8 HVAAREGFL  | 23176 | 23007 |
| >CDKN2A-D8 VHDAAREGF  | 2616  | >CDKN2A-D8 VHVAAREGF  | 225   | 2391  |
| >CDKN2A-D8 RPVHDAAREG | 58    | >CDKN2A-D8 RPVHVAAREG | 47    | 11    |

|                       |       |                       |     |       |
|-----------------------|-------|-----------------------|-----|-------|
| >CDKN2A-D8 RPVHDAAREC | 287   | >CDKN2A-D8 RPVHVAAREC | 385 | 98    |
| >CDKN2A-D8 RPVHDAAREC | 112   | >CDKN2A-D8 RPVHVAAREC | 117 | 5     |
| >CDKN2A-D8 RPVHDAAR   | 319   | >CDKN2A-D8 RPVHVAAR   | 327 | 8     |
| >CDKN2A-D8 LTRPVHDA   | 48    | >CDKN2A-D8 LTRPVHVA   | 14  | 34    |
| >CDKN2A-D8 LTRPVHDAA  | 24    | >CDKN2A-D8 LTRPVHVAA  | 6   | 18    |
| >CDKN2A-D8 LTRPVHDAAF | 56    | >CDKN2A-D8 LTRPVHVAAF | 14  | 42    |
| >CDKN2A-D8 LTRPVHDAAF | 107   | >CDKN2A-D8 LTRPVHVAAF | 39  | 68    |
| >CDKN2A-D8 LTRPVHDAAF | 47    | >CDKN2A-D8 LTRPVHVAAF | 62  | 15    |
| >CDKN2A-D8 LTRPVHDAAF | 583   | >CDKN2A-D8 LTRPVHVAAF | 400 | 183   |
| >CDKN2A-D8 TLTRPVHD   | 25070 | >CDKN2A-D8 TLTRPVHV   | 283 | 24787 |
| >CDKN2A-D8 TLTRPVHD   | 25222 | >CDKN2A-D8 TLTRPVHV   | 200 | 25022 |
| >CDKN2A-D8 TLTRPVHD   | 22947 | >CDKN2A-D8 TLTRPVHV   | 52  | 22895 |
| >CDKN2A-D8 TLTRPVHDA  | 660   | >CDKN2A-D8 TLTRPVHVA  | 392 | 268   |
| >CDKN2A-D8 TLTRPVHDAF | 611   | >CDKN2A-D8 TLTRPVHVAA | 312 | 299   |
| >CDKN2A-D8 TLTRPVHD   | 29446 | >CDKN2A-D8 TLTRPVHV   | 341 | 29105 |
| >CDKN2A-D8 TLTRPVHD   | 18414 | >CDKN2A-D8 TLTRPVHV   | 10  | 18404 |
| >CDKN2A-D8 TLTRPVHDA  | 722   | >CDKN2A-D8 TLTRPVHVA  | 119 | 603   |
| >CDKN2A-D8 TLTRPVHDAF | 280   | >CDKN2A-D8 TLTRPVHVAA | 128 | 152   |
| >CDKN2A-D8 TLTRPVHD   | 24583 | >CDKN2A-D8 TLTRPVHV   | 20  | 24563 |
| >CDKN2A-D8 TLTRPVHD   | 20401 | >CDKN2A-D8 TLTRPVHV   | 11  | 20390 |
| >CDKN2A-D8 TLTRPVHDA  | 694   | >CDKN2A-D8 TLTRPVHVA  | 473 | 221   |
| >CDKN2A-D8 TLTRPVHD   | 26945 | >CDKN2A-D8 TLTRPVHV   | 103 | 26842 |
| >CDKN2A-D8 TLTRPVHD   | 13472 | >CDKN2A-D8 TLTRPVHV   | 3   | 13469 |
| >CDKN2A-D8 TLTRPVHDA  | 12    | >CDKN2A-D8 TLTRPVHVA  | 12  | 0     |
| >CDKN2A-D8 TLTRPVHDAF | 88    | >CDKN2A-D8 TLTRPVHVAA | 22  | 66    |
| >CDKN2A-D8 TLTRPVHDAF | 159   | >CDKN2A-D8 TLTRPVHVAA | 79  | 80    |
| >CDKN2A-D8 TLTRPVHDAF | 411   | >CDKN2A-D8 TLTRPVHVAA | 341 | 70    |
| >CDKN2A-D8 TLTRPVHDAF | 68    | >CDKN2A-D8 TLTRPVHVAA | 65  | 3     |
| >CDKN2A-D8 TLTRPVHD   | 19244 | >CDKN2A-D8 TLTRPVHV   | 150 | 19094 |
| >CDKN2A-D8 ATLTRPVHD  | 30466 | >CDKN2A-D8 ATLTRPVHV  | 388 | 30078 |
| >CDKN2A-D8 ATLTRPVHD  | 28622 | >CDKN2A-D8 ATLTRPVHV  | 77  | 28545 |
| >CDKN2A-D8 ATLTRPVHD  | 23578 | >CDKN2A-D8 ATLTRPVHV  | 113 | 23465 |
| >CDKN2A-D8 ATLTRPVHD  | 37121 | >CDKN2A-D8 ATLTRPVHV  | 245 | 36876 |
| >CDKN2A-D8 ATLTRPVHD  | 4280  | >CDKN2A-D8 ATLTRPVHV  | 181 | 4099  |
| >CDKN2A-D8 ATLTRPVHDA | 970   | >CDKN2A-D8 ATLTRPVHVA | 275 | 695   |
| >CDKN2A-D8 ATLTRPVHDA | 506   | >CDKN2A-D8 ATLTRPVHVA | 74  | 432   |
| >CDKN2A-D8 DAAREGFL   | 17702 | >CDKN2A-D8 YAAREGFL   | 194 | 17508 |
| >CDKN2A-D8 DAAREGFLDT | 9852  | >CDKN2A-D8 YAAREGFLDT | 61  | 9791  |
| >CDKN2A-D8 DAAREGFL   | 22976 | >CDKN2A-D8 YAAREGFL   | 453 | 22523 |
| >CDKN2A-D8 DAAREGFLDT | 14351 | >CDKN2A-D8 YAAREGFLDT | 63  | 14288 |
| >CDKN2A-D8 DAAREGFLDT | 20255 | >CDKN2A-D8 YAAREGFLDT | 489 | 19766 |
| >CDKN2A-D8 DAAREGFLDT | 20863 | >CDKN2A-D8 YAAREGFLDT | 378 | 20485 |
| >CDKN2A-D8 DAAREGFLDT | 9961  | >CDKN2A-D8 YAAREGFLDT | 419 | 9542  |

|                        |       |                        |       |       |
|------------------------|-------|------------------------|-------|-------|
| >CDKN2A-D8 DAAREGFLDT  | 2929  | >CDKN2A-D8 YAAREGFLDT  | 255   | 2674  |
| >CDKN2A-D8 DAAREGFLDT  | 17162 | >CDKN2A-D8 YAAREGFLDT  | 303   | 16859 |
| >CDKN2A-D8 HDAAREGFL   | 11350 | >CDKN2A-D8 HYAAREGFL   | 14    | 11336 |
| >CDKN2A-D8 HDAAREGF    | 26181 | >CDKN2A-D8 HYAAREGF    | 450   | 25731 |
| >CDKN2A-D8 HDAAREGF    | 20806 | >CDKN2A-D8 HYAAREGF    | 8     | 20798 |
| >CDKN2A-D8 HDAAREGFL   | 25112 | >CDKN2A-D8 HYAAREGFL   | 18    | 25094 |
| >CDKN2A-D8 HDAAREGFL   | 169   | >CDKN2A-D8 HYAAREGFL   | 23160 | 22991 |
| >CDKN2A-D8 DPATLTRPVH  | 11825 | >CDKN2A-D8 DPATLTRPVH  | 77    | 11748 |
| >CDKN2A-D8 VHDAAREGFI  | 3491  | >CDKN2A-D8 VHYAAREGFL  | 396   | 3095  |
| >CDKN2A-D8 VHDAAREGF   | 2616  | >CDKN2A-D8 VHYAAREGF   | 39    | 2577  |
| >CDKN2A-D8 VHDAAREGF   | 6711  | >CDKN2A-D8 VHYAAREGF   | 302   | 6409  |
| >CDKN2A-D8 RPHVHDAAR   | 2840  | >CDKN2A-D8 RPHVHYAAR   | 298   | 2542  |
| >CDKN2A-D8 RPHVHDAAREC | 58    | >CDKN2A-D8 RPHVHYAAREC | 34    | 24    |
| >CDKN2A-D8 RPHVHDAAREC | 287   | >CDKN2A-D8 RPHVHYAAREC | 155   | 132   |
| >CDKN2A-D8 RPHVHDAAREC | 112   | >CDKN2A-D8 RPHVHYAAREC | 123   | 11    |
| >CDKN2A-D8 RPHVHDAAR   | 319   | >CDKN2A-D8 RPHVHYAAR   | 178   | 141   |
| >CDKN2A-D8 LTRPVHDA    | 48    | >CDKN2A-D8 LTRPVHYA    | 7     | 41    |
| >CDKN2A-D8 LTRPVHDA    | 24    | >CDKN2A-D8 LTRPVHYA    | 7     | 17    |
| >CDKN2A-D8 LTRPVHDAAF  | 56    | >CDKN2A-D8 LTRPVHYAAR  | 11    | 45    |
| >CDKN2A-D8 LTRPVHDAAF  | 107   | >CDKN2A-D8 LTRPVHYAAR  | 25    | 82    |
| >CDKN2A-D8 LTRPVHDAAF  | 1201  | >CDKN2A-D8 LTRPVHYAAR  | 261   | 940   |
| >CDKN2A-D8 LTRPVHDAAF  | 47    | >CDKN2A-D8 LTRPVHYAAR  | 47    | 0     |
| >CDKN2A-D8 LTRPVHDAAF  | 827   | >CDKN2A-D8 LTRPVHYAAR  | 342   | 485   |
| >CDKN2A-D8 LTRPVHDAAF  | 583   | >CDKN2A-D8 LTRPVHYAAR  | 457   | 126   |
| >CDKN2A-D8 TLTRPVHDA   | 8584  | >CDKN2A-D8 TLTRPVHYA   | 405   | 8179  |
| >CDKN2A-D8 TLTRPVHDA   | 4176  | >CDKN2A-D8 TLTRPVHYA   | 172   | 4004  |
| >CDKN2A-D8 TLTRPVHDA   | 660   | >CDKN2A-D8 TLTRPVHYA   | 87    | 573   |
| >CDKN2A-D8 TLTRPVHDA   | 611   | >CDKN2A-D8 TLTRPVHYA   | 359   | 252   |
| >CDKN2A-D8 TLTRPVHDA   | 722   | >CDKN2A-D8 TLTRPVHYA   | 10    | 712   |
| >CDKN2A-D8 TLTRPVHDA   | 280   | >CDKN2A-D8 TLTRPVHYA   | 42    | 238   |
| >CDKN2A-D8 TLTRPVHDA   | 2123  | >CDKN2A-D8 TLTRPVHYA   | 129   | 1994  |
| >CDKN2A-D8 TLTRPVHDA   | 1975  | >CDKN2A-D8 TLTRPVHYA   | 250   | 1725  |
| >CDKN2A-D8 TLTRPVHDA   | 694   | >CDKN2A-D8 TLTRPVHYA   | 57    | 637   |
| >CDKN2A-D8 TLTRPVHDA   | 1048  | >CDKN2A-D8 TLTRPVHYA   | 387   | 661   |
| >CDKN2A-D8 TLTRPVHDA   | 6739  | >CDKN2A-D8 TLTRPVHYA   | 158   | 6581  |
| >CDKN2A-D8 TLTRPVHDA   | 12    | >CDKN2A-D8 TLTRPVHYA   | 5     | 7     |
| >CDKN2A-D8 TLTRPVHDA   | 88    | >CDKN2A-D8 TLTRPVHYA   | 22    | 66    |
| >CDKN2A-D8 TLTRPVHD    | 34624 | >CDKN2A-D8 TLTRPVHY    | 435   | 34189 |
| >CDKN2A-D8 TLTRPVHD    | 25827 | >CDKN2A-D8 TLTRPVHY    | 206   | 25621 |
| >CDKN2A-D8 TLTRPVHDA   | 159   | >CDKN2A-D8 TLTRPVHYA   | 33    | 126   |
| >CDKN2A-D8 TLTRPVHDA   | 411   | >CDKN2A-D8 TLTRPVHYA   | 165   | 246   |
| >CDKN2A-D8 TLTRPVHDA   | 68    | >CDKN2A-D8 TLTRPVHYA   | 59    | 9     |
| >CDKN2A-D8 TLTRPVHDA   | 4185  | >CDKN2A-D8 TLTRPVHYA   | 115   | 4070  |

|                        |       |                        |     |       |
|------------------------|-------|------------------------|-----|-------|
| >CDKN2A-D8 TLTRPVHDA   | 993   | >CDKN2A-D8 TLTRPVHYAA  | 497 | 496   |
| >CDKN2A-D8 TLTRPVHD    | 26101 | >CDKN2A-D8 TLTRPVHY    | 103 | 25998 |
| >CDKN2A-D8 TLTRPVHD    | 31023 | >CDKN2A-D8 TLTRPVHY    | 421 | 30602 |
| >CDKN2A-D8 ATLTRPVHDA  | 3311  | >CDKN2A-D8 ATLTRPVHYA  | 418 | 2893  |
| >CDKN2A-D8 ATLTRPVHDA  | 4800  | >CDKN2A-D8 ATLTRPVHYA  | 159 | 4641  |
| >CDKN2A-D8 ATLTRPVHD   | 24481 | >CDKN2A-D8 ATLTRPVHY   | 278 | 24203 |
| >CDKN2A-D8 ATLTRPVHD   | 29193 | >CDKN2A-D8 ATLTRPVHY   | 110 | 29083 |
| >CDKN2A-D8 ATLTRPVHD   | 36757 | >CDKN2A-D8 ATLTRPVHY   | 292 | 36465 |
| >CDKN2A-D8 ATLTRPVHD   | 24073 | >CDKN2A-D8 ATLTRPVHY   | 104 | 23969 |
| >CDKN2A-D8 ATLTRPVHD   | 4280  | >CDKN2A-D8 ATLTRPVHY   | 463 | 3817  |
| >CDKN2A-D8 ATLTRPVHDA  | 970   | >CDKN2A-D8 ATLTRPVHYA  | 64  | 906   |
| >CDKN2A-D8 ATLTRPVHDA  | 506   | >CDKN2A-D8 ATLTRPVHYA  | 97  | 409   |
| >CDKN2A-D8 ATLTRPVHDA  | 5577  | >CDKN2A-D8 ATLTRPVHYA  | 408 | 5169  |
| >CDKN2A-D8 ATLTRPVHD   | 25563 | >CDKN2A-D8 ATLTRPVHY   | 111 | 25452 |
| >CDKN2A-D8 ATLTRPVHD   | 21009 | >CDKN2A-D8 ATLTRPVHY   | 142 | 20867 |
| >CDKN2A-D8 ATLTRPVHD   | 13512 | >CDKN2A-D8 ATLTRPVHY   | 5   | 13507 |
| >CDKN2A-D8 ATLTRPVHD   | 1634  | >CDKN2A-D8 ATLTRPVHY   | 160 | 1474  |
| >CDKN2A-D9 DTLVVLHR    | 277   | >CDKN2A-D9 NTLVVLHR    | 61  | 216   |
| >CDKN2A-D9 DTLVVLHR    | 9     | >CDKN2A-D9 NTLVVLHR    | 25  | 16    |
| >CDKN2A-D9 DTLVVLHR    | 16    | >CDKN2A-D9 NTLVVLHR    | 24  | 8     |
| >CDKN2A-D9 DTLVVLHRA   | 178   | >CDKN2A-D9 NTLVVLHRA   | 77  | 101   |
| >CDKN2A-D9 DTLVVLHRAC  | 197   | >CDKN2A-D9 NTLVVLHRAC  | 87  | 110   |
| >CDKN2A-D9 DTLVVLHRA   | 46    | >CDKN2A-D9 NTLVVLHRA   | 44  | 2     |
| >CDKN2A-D9 DTLVVLHRAC  | 65    | >CDKN2A-D9 NTLVVLHRAC  | 62  | 3     |
| >CDKN2A-D9 LDTLVVLHR   | 1784  | >CDKN2A-D9 LNTLVVLHR   | 411 | 1373  |
| >CDKN2A-D9 FLDTLVVL    | 12    | >CDKN2A-D9 FLNTLVVL    | 16  | 4     |
| >CDKN2A-D9 FLDTLVVLHR, | 12    | >CDKN2A-D9 FLNTLVVLHR, | 17  | 5     |
| >CDKN2A-D9 FLDTLVVL    | 9     | >CDKN2A-D9 FLNTLVVL    | 3   | 6     |
| >CDKN2A-D9 FLDTLVVLH   | 908   | >CDKN2A-D9 FLNTLVVLH   | 252 | 656   |
| >CDKN2A-D9 FLDTLVVLHR, | 7     | >CDKN2A-D9 FLNTLVVLHR, | 3   | 4     |
| >CDKN2A-D9 FLDTLVVL    | 74    | >CDKN2A-D9 FLNTLVVL    | 5   | 69    |
| >CDKN2A-D9 FLDTLVVLHR, | 24    | >CDKN2A-D9 FLNTLVVLHR, | 3   | 21    |
| >CDKN2A-D9 FLDTLVVL    | 37    | >CDKN2A-D9 FLNTLVVL    | 75  | 38    |
| >CDKN2A-D9 FLDTLVVLHR, | 68    | >CDKN2A-D9 FLNTLVVLHR, | 170 | 102   |
| >CDKN2A-D9 FLDTLVVL    | 3     | >CDKN2A-D9 FLNTLVVL    | 4   | 1     |
| >CDKN2A-D9 FLDTLVVLHR, | 3     | >CDKN2A-D9 FLNTLVVLHR, | 4   | 1     |
| >CDKN2A-D9 FLDTLVVL    | 4     | >CDKN2A-D9 FLNTLVVL    | 5   | 1     |
| >CDKN2A-D9 FLDTLVVLHR, | 9     | >CDKN2A-D9 FLNTLVVLHR, | 17  | 8     |
| >CDKN2A-D9 FLDTLVVL    | 7     | >CDKN2A-D9 FLNTLVVL    | 10  | 3     |
| >CDKN2A-D9 FLDTLVVLHR, | 8     | >CDKN2A-D9 FLNTLVVLHR, | 14  | 6     |
| >CDKN2A-D9 FLDTLVVL    | 8     | >CDKN2A-D9 FLNTLVVL    | 10  | 2     |
| >CDKN2A-D9 FLDTLVVLHR, | 19    | >CDKN2A-D9 FLNTLVVLHR, | 23  | 4     |
| >CDKN2A-D9 FLDTLVVL    | 3     | >CDKN2A-D9 FLNTLVVL    | 2   | 1     |



|                       |      |                       |      |      |
|-----------------------|------|-----------------------|------|------|
| >CDKN2A-D9 FLDTLVVLR  | 3    | >CDKN2A-D9 FLNTLVVLR  | 3    | 0    |
| >CDKN2A-D9 FLDTLVVLR  | 586  | >CDKN2A-D9 FLNTLVVLR  | 115  | 471  |
| >CDKN2A-D9 FLDTLVVLR  | 626  | >CDKN2A-D9 FLNTLVVLR  | 225  | 401  |
| >CDKN2A-D9 FLDTLVVLR  | 354  | >CDKN2A-D9 FLNTLVVLR  | 146  | 208  |
| >CDKN2A-D9 FLDTLVV    | 4098 | >CDKN2A-D9 FLNTLVV    | 277  | 3821 |
| >CDKN2A-D9 FLDTLVV    | 52   | >CDKN2A-D9 FLNTLVV    | 147  | 95   |
| >CDKN2A-D9 FLDTLVVLR  | 553  | >CDKN2A-D9 FLNTLVVLR  | 390  | 163  |
| >CDKN2A-D9 FLDTLVVLR  | 272  | >CDKN2A-D9 FLNTLVVLR  | 116  | 156  |
| >CDKN2A-D9 GFLDTLVV   | 313  | >CDKN2A-D9 GFLNTLVV   | 583  | 270  |
| >CDKN2A-D9 GFLDTLVV   | 494  | >CDKN2A-D9 GFLNTLVV   | 811  | 317  |
| >CDKN2A-D9 GFLDTLVV   | 110  | >CDKN2A-D9 GFLNTLVV   | 210  | 100  |
| >CDKN2A-D9 GFLDTLVV   | 221  | >CDKN2A-D9 GFLNTLVV   | 1299 | 1078 |
| >CDKN2A-D9 GFLDTLVV   | 298  | >CDKN2A-D9 GFLNTLVV   | 160  | 138  |
| >CDKN2A-D9 GFLDTLVV   | 75   | >CDKN2A-D9 GFLNTLVV   | 32   | 43   |
| >CDKN2A-D9 GFLDTLVVH  | 38   | >CDKN2A-D9 GFLNTLVVH  | 30   | 8    |
| >CDKN2A-D9 GFLDTLVVH  | 421  | >CDKN2A-D9 GFLNTLVVH  | 541  | 120  |
| >CDKN2A-D9 GFLDTLVVH  | 77   | >CDKN2A-D9 GFLNTLVVH  | 138  | 61   |
| >CDKN2A-D9 EGFLDTLV   | 135  | >CDKN2A-D9 EGFLNTLV   | 68   | 67   |
| >CDKN2A-D9 REGFLDTL   | 13   | >CDKN2A-D9 REGFLNTL   | 18   | 5    |
| >CDKN2A-D9 REGFLDTLV  | 213  | >CDKN2A-D9 REGFLNTLV  | 151  | 62   |
| >CDKN2A-D9 REGFLDTLVV | 14   | >CDKN2A-D9 REGFLNTLVV | 13   | 1    |
| >CDKN2A-D9 REGFLDTL   | 99   | >CDKN2A-D9 REGFLNTL   | 69   | 30   |
| >CDKN2A-D9 REGFLDTLV  | 208  | >CDKN2A-D9 REGFLNTLV  | 117  | 91   |
| >CDKN2A-D9 REGFLDTLVV | 264  | >CDKN2A-D9 REGFLNTLVV | 190  | 74   |
| >CDKN2A-D9 REGFLDTLVV | 63   | >CDKN2A-D9 REGFLNTLVV | 43   | 20   |
| >CDKN2A-D9 REGFLDTLV  | 818  | >CDKN2A-D9 REGFLNTLV  | 355  | 463  |
| >CDKN2A-D9 REGFLDTLV  | 35   | >CDKN2A-D9 REGFLNTLV  | 24   | 11   |
| >CDKN2A-D9 REGFLDTLVV | 89   | >CDKN2A-D9 REGFLNTLVV | 34   | 55   |
| >CDKN2A-D9 REGFLDTLVV | 68   | >CDKN2A-D9 REGFLNTLVV | 54   | 14   |
| >CDKN2A-D9 REGFLDTL   | 957  | >CDKN2A-D9 REGFLNTL   | 386  | 571  |
| >CDKN2A-D9 AREGFLDTL  | 503  | >CDKN2A-D9 AREGFLNTL  | 131  | 372  |
| >CDKN2A-D9 AREGFLDTL  | 165  | >CDKN2A-D9 AREGFLNTL  | 121  | 44   |
| >CDKN2A-D9 AREGFLDTL  | 63   | >CDKN2A-D9 AREGFLNTL  | 21   | 42   |
| >CDKN2A-D9 AREGFLDTLV | 642  | >CDKN2A-D9 AREGFLNTLV | 365  | 277  |
| >CDKN2A-D9 AAREGFLDTL | 620  | >CDKN2A-D9 AAREGFLNTL | 292  | 328  |
| >CDKN2A-D9 AAREGFLDTL | 408  | >CDKN2A-D9 AAREGFLNTL | 253  | 155  |
| >CDKN2A-D9 AAREGFLDTL | 252  | >CDKN2A-D9 AAREGFLNTL | 183  | 69   |
| >CDKN2A-D9 AAREGFLDT  | 1653 | >CDKN2A-D9 AAREGFLNT  | 296  | 1357 |
| >CDKN2A-D9 AAREGFLDTL | 342  | >CDKN2A-D9 AAREGFLNTL | 38   | 304  |
| >CDKN2A-D9 AAREGFLDTL | 203  | >CDKN2A-D9 AAREGFLNTL | 58   | 145  |
| >CDKN2A-D9 AAREGFLDTL | 1509 | >CDKN2A-D9 AAREGFLNTL | 488  | 1021 |
| >CDKN2A-D9 AAREGFLDTL | 53   | >CDKN2A-D9 AAREGFLNTL | 38   | 15   |
| >CDKN2A-E1 EELGHRDV   | 193  | >CDKN2A-E1 QELGHRDV   | 156  | 37   |

|                       |      |                       |       |       |
|-----------------------|------|-----------------------|-------|-------|
| >CDKN2A-E1 EELGHRDVAF | 86   | >CDKN2A-E1 QELGHRDVA  | 1128  | 1042  |
| >CDKN2A-E1 EELGHRDVAF | 177  | >CDKN2A-E1 QELGHRDVA  | 114   | 63    |
| >CDKN2A-E1 EELGHRDVAF | 121  | >CDKN2A-E1 QELGHRDVA  | 260   | 139   |
| >CDKN2A-E1 EELGHRDV   | 54   | >CDKN2A-E1 QELGHRDV   | 131   | 77    |
| >CDKN2A-E1 EELGHRDVA  | 10   | >CDKN2A-E1 QELGHRDVA  | 18    | 8     |
| >CDKN2A-E1 EELGHRDVAF | 471  | >CDKN2A-E1 QELGHRDVA  | 305   | 166   |
| >CDKN2A-E1 AEELGHRDV  | 408  | >CDKN2A-E1 AQELGHRDV  | 11745 | 11337 |
| >CDKN2A-E1 AEELGHRDV  | 29   | >CDKN2A-E1 AQELGHRDV  | 4368  | 4339  |
| >CDKN2A-E1 AEELGHRDV  | 39   | >CDKN2A-E1 AQELGHRDV  | 3109  | 3070  |
| >CDKN2A-E1 AEELGHRDV  | 336  | >CDKN2A-E1 AQELGHRDV  | 18045 | 17709 |
| >CDKN2A-E1 LAEELGHR   | 1077 | >CDKN2A-E1 LAQELGHR   | 200   | 877   |
| >CDKN2A-E1 LAEELGHR   | 1617 | >CDKN2A-E1 LAQELGHR   | 453   | 1164  |
| >CDKN2A-E1 DLAEELGHRC | 265  | >CDKN2A-E1 DLAQELGHRI | 1435  | 1170  |
| >CDKN2A-E1 DLAEELGHRC | 185  | >CDKN2A-E1 DLAQELGHRI | 635   | 450   |
| >CDKN2A-E1 DLAEELGHRC | 418  | >CDKN2A-E1 DLAQELGHRI | 2042  | 1624  |
| >CDKN2A-E1 DLAEELGHRC | 27   | >CDKN2A-E1 DLAQELGHRI | 55    | 28    |
| >CDKN2A-E1 DLAEELGHR  | 124  | >CDKN2A-E1 DLAQELGHR  | 292   | 168   |
| >CDKN2A-E1 DLAEELGHR  | 182  | >CDKN2A-E1 DLAQELGHR  | 280   | 98    |
| >CDKN2A-E1 LPVDLAEEL  | 414  | >CDKN2A-E1 LPVDLAQEL  | 96    | 318   |
| >CDKN2A-E1 LPVDLAEEL  | 42   | >CDKN2A-E1 LPVDLAQEL  | 32    | 10    |
| >CDKN2A-E1 LPVDLAEELG | 86   | >CDKN2A-E1 LPVDLAQELG | 69    | 17    |
| >CDKN2A-E1 LPVDLAEEL  | 407  | >CDKN2A-E1 LPVDLAQEL  | 260   | 147   |
| >CDKN2A-E1 LPVDLAEEL  | 52   | >CDKN2A-E1 LPVDLAQEL  | 113   | 61    |
| >CDKN2A-E1 LPVDLAEEL  | 86   | >CDKN2A-E1 LPVDLAQEL  | 186   | 100   |
| >CDKN2A-E1 RLPVDLAEEL | 99   | >CDKN2A-E1 RLPVDLAQEL | 262   | 163   |
| >CDKN2A-E1 RLPVDLAEEL | 38   | >CDKN2A-E1 RLPVDLAQEL | 41    | 3     |
| >CDKN2A-E1 RLPVDLAEEL | 165  | >CDKN2A-E1 RLPVDLAQEL | 144   | 21    |
| >CDKN2A-E1 RLPVDLAEEL | 125  | >CDKN2A-E1 RLPVDLAQEL | 97    | 28    |
| >CDKN2A-E1 RLPVDLAEEL | 391  | >CDKN2A-E1 RLPVDLAQEL | 422   | 31    |
| >CDKN2A-E1 RLPVDLAEEL | 15   | >CDKN2A-E1 RLPVDLAQEL | 10    | 5     |
| >CDKN2A-E1 GRLPVDLAE  | 202  | >CDKN2A-E1 GRLPVDLAE  | 205   | 3     |
| >CDKN2A-E1 GRLPVDLAE  | 194  | >CDKN2A-E1 GRLPVDLAE  | 184   | 10    |
| >CDKN2A-E1 GRLPVDLAE  | 29   | >CDKN2A-E1 GRLPVDLAE  | 19    | 10    |
| >CDKN2A-E1 ELGHRDVAR  | 1533 | >CDKN2A-E1 ALGHRDVAR  | 101   | 1432  |
| >CDKN2A-E1 ELGHRDVAR  | 382  | >CDKN2A-E1 ALGHRDVAR  | 37    | 345   |
| >CDKN2A-E1 ELGHRDVAR  | 1057 | >CDKN2A-E1 ALGHRDVAR  | 75    | 982   |
| >CDKN2A-E1 ELGHRDVAR  | 1150 | >CDKN2A-E1 ALGHRDVAR  | 109   | 1041  |
| >CDKN2A-E1 ELGHRDVA   | 3620 | >CDKN2A-E1 ALGHRDVA   | 185   | 3435  |
| >CDKN2A-E1 ELGHRDVAR  | 477  | >CDKN2A-E1 ALGHRDVAR  | 21    | 456   |
| >CDKN2A-E1 ELGHRDVAR  | 274  | >CDKN2A-E1 ALGHRDVAR  | 2205  | 1931  |
| >CDKN2A-E1 ELGHRDVAR  | 413  | >CDKN2A-E1 ALGHRDVAR  | 174   | 239   |
| >CDKN2A-E1 ELGHRDVAR  | 3615 | >CDKN2A-E1 ALGHRDVAR  | 168   | 3447  |
| >CDKN2A-E1 ELGHRDVAR  | 85   | >CDKN2A-E1 ALGHRDVAR  | 2360  | 2275  |

|                       |       |                       |       |       |
|-----------------------|-------|-----------------------|-------|-------|
| >CDKN2A-E1 ELGHRDVAR  | 153   | >CDKN2A-E1 ALGHRDVAR  | 5525  | 5372  |
| >CDKN2A-E1 ELGHRDVAR\ | 1728  | >CDKN2A-E1 ALGHRDVAR' | 277   | 1451  |
| >CDKN2A-E1 ELGHRDVAR\ | 608   | >CDKN2A-E1 ALGHRDVAR' | 118   | 490   |
| >CDKN2A-E1 ELGHRDVAR  | 188   | >CDKN2A-E1 ALGHRDVAR  | 786   | 598   |
| >CDKN2A-E1 EELGHRDV   | 193   | >CDKN2A-E1 EALGHRDV   | 30558 | 30365 |
| >CDKN2A-E1 EELGHRDVAF | 86    | >CDKN2A-E1 EALGHRDVAI | 8     | 78    |
| >CDKN2A-E1 EELGHRDVAF | 2936  | >CDKN2A-E1 EALGHRDVAI | 281   | 2655  |
| >CDKN2A-E1 EELGHRDVAF | 6569  | >CDKN2A-E1 EALGHRDVAI | 20    | 6549  |
| >CDKN2A-E1 EELGHRDV   | 11075 | >CDKN2A-E1 EALGHRDV   | 141   | 10934 |
| >CDKN2A-E1 EELGHRDVAF | 21097 | >CDKN2A-E1 EALGHRDVAI | 228   | 20869 |
| >CDKN2A-E1 EELGHRDVAF | 177   | >CDKN2A-E1 EALGHRDVAI | 13649 | 13472 |
| >CDKN2A-E1 EELGHRDVAF | 7045  | >CDKN2A-E1 EALGHRDVAI | 104   | 6941  |
| >CDKN2A-E1 EELGHRDVAF | 121   | >CDKN2A-E1 EALGHRDVAI | 24701 | 24580 |
| >CDKN2A-E1 EELGHRDV   | 54    | >CDKN2A-E1 EALGHRDV   | 28666 | 28612 |
| >CDKN2A-E1 EELGHRDVA  | 10    | >CDKN2A-E1 EALGHRDVA  | 15610 | 15600 |
| >CDKN2A-E1 EELGHRDVAF | 471   | >CDKN2A-E1 EALGHRDVAI | 589   | 118   |
| >CDKN2A-E1 AEELGHRDV  | 408   | >CDKN2A-E1 AEALGHRDV  | 400   | 8     |
| >CDKN2A-E1 AEELGHRD   | 881   | >CDKN2A-E1 AEALGHRD   | 474   | 407   |
| >CDKN2A-E1 AEELGHRDV  | 29    | >CDKN2A-E1 AEALGHRDV  | 17    | 12    |
| >CDKN2A-E1 AEELGHRDV/ | 39    | >CDKN2A-E1 AEALGHRDV/ | 70    | 31    |
| >CDKN2A-E1 AEELGHRDV/ | 846   | >CDKN2A-E1 AEALGHRDV/ | 412   | 434   |
| >CDKN2A-E1 AEELGHRDV  | 336   | >CDKN2A-E1 AEALGHRDV  | 129   | 207   |
| >CDKN2A-E1 LAEELGHR   | 1077  | >CDKN2A-E1 LAEALGHR   | 393   | 684   |
| >CDKN2A-E1 LAEELGHR   | 532   | >CDKN2A-E1 LAEALGHR   | 421   | 111   |
| >CDKN2A-E1 DLAEELGHRE | 582   | >CDKN2A-E1 DLAEALGHRE | 398   | 184   |
| >CDKN2A-E1 DLAEELGHRE | 265   | >CDKN2A-E1 DLAEALGHRE | 226   | 39    |
| >CDKN2A-E1 DLAEELGHRE | 185   | >CDKN2A-E1 DLAEALGHRE | 114   | 71    |
| >CDKN2A-E1 DLAEELGHRE | 418   | >CDKN2A-E1 DLAEALGHRE | 201   | 217   |
| >CDKN2A-E1 DLAEELGHRE | 27    | >CDKN2A-E1 DLAEALGHRE | 22    | 5     |
| >CDKN2A-E1 DLAEELGHR  | 124   | >CDKN2A-E1 DLAEALGHR  | 74    | 50    |
| >CDKN2A-E1 DLAEELGHR  | 182   | >CDKN2A-E1 DLAEALGHR  | 82    | 100   |
| >CDKN2A-E1 DLAEELGHRE | 1031  | >CDKN2A-E1 DLAEALGHRE | 387   | 644   |
| >CDKN2A-E1 LPVDLAEEL  | 414   | >CDKN2A-E1 LPVDLAEAL  | 45    | 369   |
| >CDKN2A-E1 LPVDLAEEL  | 905   | >CDKN2A-E1 LPVDLAEA   | 200   | 705   |
| >CDKN2A-E1 LPVDLAEEL  | 42    | >CDKN2A-E1 LPVDLAEAL  | 17    | 25    |
| >CDKN2A-E1 LPVDLAEELG | 86    | >CDKN2A-E1 LPVDLAEALG | 80    | 6     |
| >CDKN2A-E1 LPVDLAEEL  | 1748  | >CDKN2A-E1 LPVDLAEAL  | 100   | 1648  |
| >CDKN2A-E1 LPVDLAEEL  | 407   | >CDKN2A-E1 LPVDLAEAL  | 555   | 148   |
| >CDKN2A-E1 LPVDLAEEL  | 52    | >CDKN2A-E1 LPVDLAEAL  | 56    | 4     |
| >CDKN2A-E1 LPVDLAEEL  | 1458  | >CDKN2A-E1 LPVDLAEA   | 12    | 1446  |
| >CDKN2A-E1 LPVDLAEEL  | 86    | >CDKN2A-E1 LPVDLAEAL  | 93    | 7     |
| >CDKN2A-E1 RLPVDLAEEL | 22625 | >CDKN2A-E1 RLPVDLAEA  | 414   | 22211 |
| >CDKN2A-E1 RLPVDLAEEL | 13569 | >CDKN2A-E1 RLPVDLAEA  | 194   | 13375 |

|                       |       |                       |       |       |
|-----------------------|-------|-----------------------|-------|-------|
| >CDKN2A-E1 RLPVDLAEEL | 99    | >CDKN2A-E1 RLPVDLAEAL | 73    | 26    |
| >CDKN2A-E1 RLPVDLAE   | 14523 | >CDKN2A-E1 RLPVDLAEA  | 25    | 14498 |
| >CDKN2A-E1 RLPVDLAE   | 13173 | >CDKN2A-E1 RLPVDLAEA  | 136   | 13037 |
| >CDKN2A-E1 RLPVDLAE   | 15991 | >CDKN2A-E1 RLPVDLAEA  | 124   | 15867 |
| >CDKN2A-E1 RLPVDLAEEL | 38    | >CDKN2A-E1 RLPVDLAEAL | 41    | 3     |
| >CDKN2A-E1 RLPVDLAE   | 16786 | >CDKN2A-E1 RLPVDLAEA  | 223   | 16563 |
| >CDKN2A-E1 RLPVDLAEEL | 165   | >CDKN2A-E1 RLPVDLAEAL | 96    | 69    |
| >CDKN2A-E1 RLPVDLAE   | 18934 | >CDKN2A-E1 RLPVDLAEA  | 409   | 18525 |
| >CDKN2A-E1 RLPVDLAEEL | 125   | >CDKN2A-E1 RLPVDLAEAL | 298   | 173   |
| >CDKN2A-E1 RLPVDLAEEL | 391   | >CDKN2A-E1 RLPVDLAEAL | 526   | 135   |
| >CDKN2A-E1 RLPVDLAE   | 9423  | >CDKN2A-E1 RLPVDLAEA  | 25    | 9398  |
| >CDKN2A-E1 RLPVDLAEEL | 15    | >CDKN2A-E1 RLPVDLAEAL | 28    | 13    |
| >CDKN2A-E1 RLPVDLAEEL | 1004  | >CDKN2A-E1 RLPVDLAEAL | 328   | 676   |
| >CDKN2A-E1 RLPVDLAEEL | 693   | >CDKN2A-E1 RLPVDLAEAL | 360   | 333   |
| >CDKN2A-E1 GRLPVDLAE  | 202   | >CDKN2A-E1 GRLPVDLAEA | 159   | 43    |
| >CDKN2A-E1 GRLPVDLAE  | 1465  | >CDKN2A-E1 GRLPVDLAEA | 210   | 1255  |
| >CDKN2A-E1 GRLPVDLAE  | 194   | >CDKN2A-E1 GRLPVDLAEA | 264   | 70    |
| >CDKN2A-E1 GRLPVDLAE  | 29    | >CDKN2A-E1 GRLPVDLAEA | 31    | 2     |
| >CDKN2A-E1 ELGHRDVAR\ | 1533  | >CDKN2A-E1 KLGHRDVAR\ | 97    | 1436  |
| >CDKN2A-E1 ELGHRDVAR\ | 382   | >CDKN2A-E1 KLGHRDVAR\ | 32    | 350   |
| >CDKN2A-E1 ELGHRDVAR\ | 1057  | >CDKN2A-E1 KLGHRDVAR\ | 40    | 1017  |
| >CDKN2A-E1 ELGHRDVAR\ | 1150  | >CDKN2A-E1 KLGHRDVAR\ | 91    | 1059  |
| >CDKN2A-E1 ELGHRDVAR\ | 477   | >CDKN2A-E1 KLGHRDVAR\ | 74    | 403   |
| >CDKN2A-E1 ELGHRDVAR\ | 274   | >CDKN2A-E1 KLGHRDVAR\ | 5849  | 5575  |
| >CDKN2A-E1 ELGHRDVAR\ | 413   | >CDKN2A-E1 KLGHRDVAR\ | 148   | 265   |
| >CDKN2A-E1 ELGHRDVAR  | 3615  | >CDKN2A-E1 KLGHRDVAR  | 28    | 3587  |
| >CDKN2A-E1 ELGHRDVAR  | 85    | >CDKN2A-E1 KLGHRDVAR  | 4615  | 4530  |
| >CDKN2A-E1 ELGHRDVAR  | 153   | >CDKN2A-E1 KLGHRDVAR  | 8398  | 8245  |
| >CDKN2A-E1 ELGHRDVAR\ | 1728  | >CDKN2A-E1 KLGHRDVAR\ | 44    | 1684  |
| >CDKN2A-E1 ELGHRDVAR\ | 608   | >CDKN2A-E1 KLGHRDVAR\ | 141   | 467   |
| >CDKN2A-E1 ELGHRDVAR  | 188   | >CDKN2A-E1 KLGHRDVAR  | 29    | 159   |
| >CDKN2A-E1 EELGHRDV   | 193   | >CDKN2A-E1 EKLGHRDV   | 25569 | 25376 |
| >CDKN2A-E1 EELGHRDVAF | 86    | >CDKN2A-E1 EKLGHRDVAF | 63    | 23    |
| >CDKN2A-E1 EELGHRDVAF | 177   | >CDKN2A-E1 EKLGHRDVAF | 12101 | 11924 |
| >CDKN2A-E1 EELGHRDVAF | 121   | >CDKN2A-E1 EKLGHRDVAF | 15544 | 15423 |
| >CDKN2A-E1 EELGHRDV   | 54    | >CDKN2A-E1 EKLGHRDV   | 23318 | 23264 |
| >CDKN2A-E1 EELGHRDVA  | 10    | >CDKN2A-E1 EKLGHRDVA  | 9788  | 9778  |
| >CDKN2A-E1 EELGHRDVAF | 471   | >CDKN2A-E1 EKLGHRDVAF | 675   | 204   |
| >CDKN2A-E1 AEELGHRDV  | 408   | >CDKN2A-E1 AEKLGHRDV  | 2011  | 1603  |
| >CDKN2A-E1 AEELGHRDV  | 1462  | >CDKN2A-E1 AEKLGHRDV  | 181   | 1281  |
| >CDKN2A-E1 AEELGHRDV  | 29    | >CDKN2A-E1 AEKLGHRDV  | 23    | 6     |
| >CDKN2A-E1 AEELGHRDV/ | 39    | >CDKN2A-E1 AEKLGHRDV/ | 141   | 102   |
| >CDKN2A-E1 AEELGHRDV  | 336   | >CDKN2A-E1 AEKLGHRDV  | 148   | 188   |

|                        |       |                       |       |       |
|------------------------|-------|-----------------------|-------|-------|
| >CDKN2A-E1 LAEELGHR    | 1077  | >CDKN2A-E1 LAEKLGHR   | 421   | 656   |
| >CDKN2A-E1 DLAEELGHRC  | 582   | >CDKN2A-E1 DLAEKLGHRC | 415   | 167   |
| >CDKN2A-E1 DLAEELGHRC  | 265   | >CDKN2A-E1 DLAEKLGHRC | 244   | 21    |
| >CDKN2A-E1 DLAEELGHRC  | 185   | >CDKN2A-E1 DLAEKLGHRC | 212   | 27    |
| >CDKN2A-E1 DLAEELGHRC  | 418   | >CDKN2A-E1 DLAEKLGHRC | 424   | 6     |
| >CDKN2A-E1 DLAEELGHRC  | 27    | >CDKN2A-E1 DLAEKLGHRC | 30    | 3     |
| >CDKN2A-E1 DLAEELGHR   | 124   | >CDKN2A-E1 DLAEKLGHR  | 53    | 71    |
| >CDKN2A-E1 DLAEELGHR   | 182   | >CDKN2A-E1 DLAEKLGHR  | 260   | 78    |
| >CDKN2A-E1 LPVDLAEEL   | 414   | >CDKN2A-E1 LPVDLAEKL  | 1473  | 1059  |
| >CDKN2A-E1 LPVDLAEEL   | 42    | >CDKN2A-E1 LPVDLAEKL  | 232   | 190   |
| >CDKN2A-E1 LPVDLAEELG  | 86    | >CDKN2A-E1 LPVDLAEKLG | 223   | 137   |
| >CDKN2A-E1 LPVDLAEEL   | 407   | >CDKN2A-E1 LPVDLAEKL  | 534   | 127   |
| >CDKN2A-E1 LPVDLAEEL   | 52    | >CDKN2A-E1 LPVDLAEKL  | 75    | 23    |
| >CDKN2A-E1 LPVDLAEEL   | 86    | >CDKN2A-E1 LPVDLAEKL  | 183   | 97    |
| >CDKN2A-E1 RLPVDLAEEL  | 99    | >CDKN2A-E1 RLPVDLAEKL | 132   | 33    |
| >CDKN2A-E1 RLPVDLAEEL  | 38    | >CDKN2A-E1 RLPVDLAEKL | 82    | 44    |
| >CDKN2A-E1 RLPVDLAEEL  | 165   | >CDKN2A-E1 RLPVDLAEKL | 392   | 227   |
| >CDKN2A-E1 RLPVDLAEEL  | 125   | >CDKN2A-E1 RLPVDLAEKL | 207   | 82    |
| >CDKN2A-E1 RLPVDLAEEL  | 391   | >CDKN2A-E1 RLPVDLAEKL | 506   | 115   |
| >CDKN2A-E1 RLPVDLAEEL  | 15    | >CDKN2A-E1 RLPVDLAEKL | 24    | 9     |
| >CDKN2A-E1 RLPVDLAEEL  | 21429 | >CDKN2A-E1 RLPVDLAEK  | 456   | 20973 |
| >CDKN2A-E1 RLPVDLAEEL  | 693   | >CDKN2A-E1 RLPVDLAEKL | 341   | 352   |
| >CDKN2A-E1 RLPVDLAEEL  | 202   | >CDKN2A-E1 RLPVDLAEK  | 105   | 97    |
| >CDKN2A-E1 GRLPVDLAEEL | 194   | >CDKN2A-E1 GRLPVDLAEK | 282   | 88    |
| >CDKN2A-E1 GRLPVDLAEEL | 29    | >CDKN2A-E1 GRLPVDLAEK | 46    | 17    |
| >CDKN2A-E2 EEVRALLE    | 108   | >CDKN2A-E2 DEVRALLE   | 386   | 278   |
| >CDKN2A-E2 EEVRALLEA   | 2305  | >CDKN2A-E2 DEVRALLEA  | 39    | 2266  |
| >CDKN2A-E2 EEVRALLEAG  | 6632  | >CDKN2A-E2 DEVRALLEAG | 213   | 6419  |
| >CDKN2A-E2 EEVRALLEA   | 326   | >CDKN2A-E2 DEVRALLEA  | 2486  | 2160  |
| >CDKN2A-E2 EEVRALLEA   | 454   | >CDKN2A-E2 DEVRALLEA  | 2018  | 1564  |
| >CDKN2A-E2 EEVRALLEA   | 14    | >CDKN2A-E2 DEVRALLEA  | 683   | 669   |
| >CDKN2A-E2 EEVRALLEAG  | 18    | >CDKN2A-E2 DEVRALLEAG | 1104  | 1086  |
| >CDKN2A-E2 VEEVRALL    | 176   | >CDKN2A-E2 VDEVRALL   | 9046  | 8870  |
| >CDKN2A-E2 VEEVRALL    | 143   | >CDKN2A-E2 VDEVRALL   | 18508 | 18365 |
| >CDKN2A-E2 VEEVRALLEA  | 173   | >CDKN2A-E2 VDEVRALLEA | 4461  | 4288  |
| >CDKN2A-E2 VEEVRALL    | 10479 | >CDKN2A-E2 VDEVRALL   | 357   | 10122 |
| >CDKN2A-E2 RVEEVRALL   | 1989  | >CDKN2A-E2 RVDEVRALL  | 257   | 1732  |
| >CDKN2A-E2 RVEEVRALL   | 1231  | >CDKN2A-E2 RVDEVRALL  | 113   | 1118  |
| >CDKN2A-E2 RVEEVRALLE, | 633   | >CDKN2A-E2 RVDEVRALLE | 76    | 557   |
| >CDKN2A-E2 RVEEVRALL   | 3161  | >CDKN2A-E2 RVDEVRALL  | 141   | 3020  |
| >CDKN2A-E2 RVEEVRALL   | 5310  | >CDKN2A-E2 RVDEVRALL  | 273   | 5037  |
| >CDKN2A-E2 RVEEVRALLE, | 6328  | >CDKN2A-E2 RVDEVRALLE | 455   | 5873  |
| >CDKN2A-E2 RVEEVRALL   | 281   | >CDKN2A-E2 RVDEVRALL  | 257   | 24    |

|                        |      |                          |       |       |
|------------------------|------|--------------------------|-------|-------|
| >CDKN2A-E2 RVEEVRAL    | 165  | >CDKN2A-E2 RVDEVRAL      | 218   | 53    |
| >CDKN2A-E2 GRVEEVRAL   | 383  | >CDKN2A-E2 GRVDEVRAL     | 686   | 303   |
| >CDKN2A-E2 GRVEEVRALL  | 45   | >CDKN2A-E2 GRVDEVRA      | 55    | 10    |
| >CDKN2A-E2 GRVEEVRAL   | 189  | >CDKN2A-E2 GRVDEVRAL     | 404   | 215   |
| >CDKN2A-E2 GRVEEVRALL  | 338  | >CDKN2A-E2 GRVDEVRA      | 592   | 254   |
| >CDKN2A-E2 GRVEEVRALL  | 430  | >CDKN2A-E2 GRVDEVRA      | 765   | 335   |
| >CDKN2A-E2 GRVEEVRAL   | 92   | >CDKN2A-E2 GRVDEVRAL     | 106   | 14    |
| >CDKN2A-E2 GRVEEVRALL  | 186  | >CDKN2A-E2 GRVDEVRA      | 357   | 171   |
| >CDKN2A-E2 RGRVVEVRA   | 447  | >CDKN2A-E2 RGRVDEVRA     | 882   | 435   |
| >CDKN2A-E2 RGRVVEVRAL  | 436  | >CDKN2A-E2 RGRVDEVRA     | 658   | 222   |
| >CDKN2A-E2 RGRVVEVRAL  | 98   | >CDKN2A-E2 RGRVDEVRA     | 148   | 50    |
| >CDKN2A-E2 RGRVVEVR    | 668  | >CDKN2A-E2 RGRVDEVRA     | 483   | 185   |
| >CDKN2A-E2 ARGRVVEVRA  | 260  | >CDKN2A-E2 ARGRVDEVRA    | 308   | 48    |
| >CDKN2A-E2 AARGRVVEV   | 50   | >CDKN2A-E2 AARGRVDEVRA   | 207   | 157   |
| >CDKN2A-E2 AARGRVVEV   | 269  | >CDKN2A-E2 AARGRVDEVRA   | 325   | 56    |
| >CDKN2A-E2 AARGRVVEV   | 265  | >CDKN2A-E2 AARGRVDEVRA   | 331   | 66    |
| >CDKN2A-E2 AAARGRVVEV  | 33   | >CDKN2A-E2 AAARGRVDEVRA  | 84    | 51    |
| >CDKN2A-E2 AAARGRVVEV  | 434  | >CDKN2A-E2 AAARGRVDEVRA  | 553   | 119   |
| >CDKN2A-E2 AAARGRVVEV  | 127  | >CDKN2A-E2 AAARGRVDEVRA  | 148   | 21    |
| >CDKN2A-E2 TAAARGRVVEV | 34   | >CDKN2A-E2 TAAARGRVDEVRA | 42    | 8     |
| >CDKN2A-E2 EEVRALLE    | 108  | >CDKN2A-E2 KEVRALLE      | 270   | 162   |
| >CDKN2A-E2 EEVRALLEA   | 326  | >CDKN2A-E2 KEVRALLEA     | 45    | 281   |
| >CDKN2A-E2 EEVRALLEA   | 454  | >CDKN2A-E2 KEVRALLEA     | 1150  | 696   |
| >CDKN2A-E2 EEVRALLEA   | 14   | >CDKN2A-E2 KEVRALLEA     | 32    | 18    |
| >CDKN2A-E2 EEVRALLEAG  | 18   | >CDKN2A-E2 KEVRALLEAG    | 51    | 33    |
| >CDKN2A-E2 EEVRALLEA   | 4152 | >CDKN2A-E2 KEVRALLEA     | 260   | 3892  |
| >CDKN2A-E2 EEVRALLEAG  | 6293 | >CDKN2A-E2 KEVRALLEAG    | 484   | 5809  |
| >CDKN2A-E2 VEEVRALL    | 176  | >CDKN2A-E2 VKEVRALL      | 26967 | 26791 |
| >CDKN2A-E2 VEEVRALL    | 143  | >CDKN2A-E2 VKEVRALL      | 19749 | 19606 |
| >CDKN2A-E2 VEEVRALLEA  | 173  | >CDKN2A-E2 VKEVRALLEA    | 13526 | 13353 |
| >CDKN2A-E2 RVEEVRALLE  | 4403 | >CDKN2A-E2 RVKEVRALLE    | 337   | 4066  |
| >CDKN2A-E2 RVEEVRAL    | 4822 | >CDKN2A-E2 RVKEVRAL      | 19    | 4803  |
| >CDKN2A-E2 RVEEVRALL   | 1319 | >CDKN2A-E2 RVKEVRALL     | 7     | 1312  |
| >CDKN2A-E2 RVEEVRALLE  | 9211 | >CDKN2A-E2 RVKEVRALLE    | 181   | 9030  |
| >CDKN2A-E2 RVEEVRALLE  | 542  | >CDKN2A-E2 RVKEVRALLE    | 6     | 536   |
| >CDKN2A-E2 RVEEVRALL   | 2746 | >CDKN2A-E2 RVKEVRALL     | 198   | 2548  |
| >CDKN2A-E2 RVEEVRAL    | 281  | >CDKN2A-E2 RVKEVRAL      | 378   | 97    |
| >CDKN2A-E2 RVEEVRAL    | 165  | >CDKN2A-E2 RVKEVRAL      | 83    | 82    |
| >CDKN2A-E2 RVEEVRALL   | 806  | >CDKN2A-E2 RVKEVRALL     | 479   | 327   |
| >CDKN2A-E2 GRVEEVRAL   | 383  | >CDKN2A-E2 GRVKEVRAL     | 303   | 80    |
| >CDKN2A-E2 GRVEEVRALL  | 45   | >CDKN2A-E2 GRVKEVRALL    | 66    | 21    |
| >CDKN2A-E2 GRVEEVRAL   | 189  | >CDKN2A-E2 GRVKEVRAL     | 706   | 517   |
| >CDKN2A-E2 GRVEEVRALL  | 338  | >CDKN2A-E2 GRVKEVRALL    | 903   | 565   |

|                       |       |                       |       |       |
|-----------------------|-------|-----------------------|-------|-------|
| >CDKN2A-E2 GRVEEVRALL | 430   | >CDKN2A-E2 GRVKEVRALL | 350   | 80    |
| >CDKN2A-E2 GRVEEVRAL  | 92    | >CDKN2A-E2 GRVKEVRAL  | 78    | 14    |
| >CDKN2A-E2 GRVEEVRALL | 186   | >CDKN2A-E2 GRVKEVRALL | 302   | 116   |
| >CDKN2A-E2 RGRVEEVRA  | 447   | >CDKN2A-E2 RGRVKEVRA  | 137   | 310   |
| >CDKN2A-E2 RGRVEEVRAL | 436   | >CDKN2A-E2 RGRVKEVRAL | 180   | 256   |
| >CDKN2A-E2 RGRVEEVRAL | 98    | >CDKN2A-E2 RGRVKEVRAL | 49    | 49    |
| >CDKN2A-E2 RGRVEEVR   | 668   | >CDKN2A-E2 RGRVKEVR   | 76    | 592   |
| >CDKN2A-E2 ARGRVEEVR/ | 260   | >CDKN2A-E2 ARGRVKEVR/ | 143   | 117   |
| >CDKN2A-E2 AARGRVEEV  | 50    | >CDKN2A-E2 AARGRVKEV  | 222   | 172   |
| >CDKN2A-E2 AARGRVEEV  | 668   | >CDKN2A-E2 AARGRVKEV  | 88    | 580   |
| >CDKN2A-E2 AARGRVEEVf | 269   | >CDKN2A-E2 AARGRVKEVf | 91    | 178   |
| >CDKN2A-E2 AARGRVEEVf | 265   | >CDKN2A-E2 AARGRVKEVf | 87    | 178   |
| >CDKN2A-E2 AAARGRVEE\ | 33    | >CDKN2A-E2 AAARGRVKE\ | 80    | 47    |
| >CDKN2A-E2 AAARGRVE   | 15622 | >CDKN2A-E2 AAARGRVK   | 314   | 15308 |
| >CDKN2A-E2 AAARGRVEE\ | 434   | >CDKN2A-E2 AAARGRVKE\ | 164   | 270   |
| >CDKN2A-E2 AAARGRVEE\ | 127   | >CDKN2A-E2 AAARGRVKE\ | 146   | 19    |
| >CDKN2A-E2 TAAARGRVEf | 34    | >CDKN2A-E2 TAAARGRVKf | 144   | 110   |
| >CDKN2A-E2 ATAAARGRVI | 20828 | >CDKN2A-E2 ATAAARGRVI | 69    | 20759 |
| >CDKN2A-E2 ATAAARGRVI | 31084 | >CDKN2A-E2 ATAAARGRVI | 30    | 31054 |
| >CDKN2A-E2 ATAAARGRVI | 10907 | >CDKN2A-E2 ATAAARGRVI | 35    | 10872 |
| >CDKN2A-E2 ATAAARGRVI | 32064 | >CDKN2A-E2 ATAAARGRVI | 219   | 31845 |
| >CDKN2A-E2 EPAAGSSM   | 401   | >CDKN2A-E2 KPAAGSSM   | 180   | 221   |
| >CDKN2A-E2 EPAAGSSM   | 477   | >CDKN2A-E2 KPAAGSSM   | 8807  | 8330  |
| >CDKN2A-E2 EPAAGSSM   | 33    | >CDKN2A-E2 KPAAGSSM   | 11    | 22    |
| >CDKN2A-E2 EPAAGSSMEI | 8423  | >CDKN2A-E2 KPAAGSSMEI | 367   | 8056  |
| >CDKN2A-E2 EPAAGSSM   | 13    | >CDKN2A-E2 KPAAGSSM   | 47    | 34    |
| >CDKN2A-E2 EPAAGSSMEI | 216   | >CDKN2A-E2 KPAAGSSMEI | 2288  | 2072  |
| >CDKN2A-E2 EPAAGSSM   | 265   | >CDKN2A-E2 KPAAGSSM   | 916   | 651   |
| >CDKN2A-E2 EPAAGSSM   | 1030  | >CDKN2A-E2 KPAAGSSM   | 491   | 539   |
| >CDKN2A-E2 MEPAAGSSV  | 367   | >CDKN2A-E2 MKPAAGSSV  | 463   | 96    |
| >CDKN2A-E2 MEPAAGSSV  | 488   | >CDKN2A-E2 MKPAAGSSV  | 10    | 478   |
| >CDKN2A-E2 MEPAAGSSV  | 382   | >CDKN2A-E2 MKPAAGSSV  | 18575 | 18193 |
| >CDKN2A-E2 MEPAAGSSV  | 469   | >CDKN2A-E2 MKPAAGSSV  | 31497 | 31028 |
| >CDKN2A-E2 MEPAAGSSV  | 291   | >CDKN2A-E2 MKPAAGSSV  | 29510 | 29219 |
| >CDKN2A-E3 EAGALPNA   | 470   | >CDKN2A-E3 DAGALPNA   | 2299  | 1829  |
| >CDKN2A-E3 LEAGALPN   | 413   | >CDKN2A-E3 LDAGALPN   | 18336 | 17923 |
| >CDKN2A-E3 LEAGALPNA  | 80    | >CDKN2A-E3 LDAGALPNA  | 17940 | 17860 |
| >CDKN2A-E3 LEAGALPNA  | 312   | >CDKN2A-E3 LDAGALPNA  | 14390 | 14078 |
| >CDKN2A-E3 LLEAGALPNA | 371   | >CDKN2A-E3 LLDAGALPNA | 103   | 268   |
| >CDKN2A-E3 LLEAGALPNA | 241   | >CDKN2A-E3 LLDAGALPNA | 101   | 140   |
| >CDKN2A-E3 LLEAGALPNA | 249   | >CDKN2A-E3 LLDAGALPNA | 153   | 96    |
| >CDKN2A-E3 LLEAGALPNA | 507   | >CDKN2A-E3 LLDAGALPNA | 169   | 338   |
| >CDKN2A-E3 LLEAGALPNA | 584   | >CDKN2A-E3 LLDAGALPNA | 20    | 564   |

|                       |      |                       |      |      |
|-----------------------|------|-----------------------|------|------|
| >CDKN2A-E3 LLEAGALPNA | 1191 | >CDKN2A-E3 LLDAGALPNA | 96   | 1095 |
| >CDKN2A-E3 LLEAGALPNA | 575  | >CDKN2A-E3 LLDAGALPNA | 14   | 561  |
| >CDKN2A-E3 LLEAGALPNA | 2887 | >CDKN2A-E3 LLDAGALPNA | 78   | 2809 |
| >CDKN2A-E3 LLEAGALPNA | 10   | >CDKN2A-E3 LLDAGALPNA | 7    | 3    |
| >CDKN2A-E3 ALLEAGAL   | 92   | >CDKN2A-E3 ALLDAGAL   | 80   | 12   |
| >CDKN2A-E3 ALLEAGALPN | 22   | >CDKN2A-E3 ALLDAGALPN | 21   | 1    |
| >CDKN2A-E3 ALLEAGAL   | 67   | >CDKN2A-E3 ALLDAGAL   | 55   | 12   |
| >CDKN2A-E3 ALLEAGALPN | 87   | >CDKN2A-E3 ALLDAGALPN | 71   | 16   |
| >CDKN2A-E3 ALLEAGAL   | 61   | >CDKN2A-E3 ALLDAGAL   | 55   | 6    |
| >CDKN2A-E3 ALLEAGALPN | 26   | >CDKN2A-E3 ALLDAGALPN | 23   | 3    |
| >CDKN2A-E3 ALLEAGAL   | 40   | >CDKN2A-E3 ALLDAGAL   | 37   | 3    |
| >CDKN2A-E3 ALLEAGALPN | 13   | >CDKN2A-E3 ALLDAGALPN | 12   | 1    |
| >CDKN2A-E3 ALLEAGAL   | 4    | >CDKN2A-E3 ALLDAGAL   | 5    | 1    |
| >CDKN2A-E3 ALLEAGALPN | 5    | >CDKN2A-E3 ALLDAGALPN | 6    | 1    |
| >CDKN2A-E3 ALLEAGAL   | 8    | >CDKN2A-E3 ALLDAGAL   | 7    | 1    |
| >CDKN2A-E3 ALLEAGALPN | 19   | >CDKN2A-E3 ALLDAGALPN | 18   | 1    |
| >CDKN2A-E3 ALLEAGAL   | 16   | >CDKN2A-E3 ALLDAGAL   | 17   | 1    |
| >CDKN2A-E3 ALLEAGALPN | 6    | >CDKN2A-E3 ALLDAGALPN | 7    | 1    |
| >CDKN2A-E3 ALLEAGAL   | 29   | >CDKN2A-E3 ALLDAGAL   | 20   | 9    |
| >CDKN2A-E3 ALLEAGALPN | 15   | >CDKN2A-E3 ALLDAGALPN | 11   | 4    |
| >CDKN2A-E3 ALLEAGAL   | 5    | >CDKN2A-E3 ALLDAGAL   | 4    | 1    |
| >CDKN2A-E3 ALLEAGALPN | 4    | >CDKN2A-E3 ALLDAGALPN | 3    | 1    |
| >CDKN2A-E3 RALLEAGAL  | 1101 | >CDKN2A-E3 RALLDAGAL  | 312  | 789  |
| >CDKN2A-E3 RALLEAGAL  | 18   | >CDKN2A-E3 RALLDAGAL  | 36   | 18   |
| >CDKN2A-E3 VRALLEAGAL | 145  | >CDKN2A-E3 VRALLDAGAL | 186  | 41   |
| >CDKN2A-E3 VRALLEAGAL | 289  | >CDKN2A-E3 VRALLDAGAL | 355  | 66   |
| >CDKN2A-E3 EVRALLEAGA | 51   | >CDKN2A-E3 EVRALLDAGA | 37   | 14   |
| >CDKN2A-E3 EVRALLEAGA | 293  | >CDKN2A-E3 EVRALLDAGA | 237  | 56   |
| >CDKN2A-E3 EVRALLEAGA | 497  | >CDKN2A-E3 EVRALLDAGA | 1046 | 549  |
| >CDKN2A-E3 EVRALLEAGA | 742  | >CDKN2A-E3 EVRALLDAGA | 427  | 315  |
| >CDKN2A-E3 EEVRALLE   | 108  | >CDKN2A-E3 EEVRALLD   | 196  | 88   |
| >CDKN2A-E3 EEVRALLEA  | 326  | >CDKN2A-E3 EEVRALLDA  | 1399 | 1073 |
| >CDKN2A-E3 EEVRALLE   | 924  | >CDKN2A-E3 EEVRALLD   | 496  | 428  |
| >CDKN2A-E3 EEVRALLEA  | 454  | >CDKN2A-E3 EEVRALLDA  | 420  | 34   |
| >CDKN2A-E3 EEVRALLEA  | 14   | >CDKN2A-E3 EEVRALLDA  | 25   | 11   |
| >CDKN2A-E3 EEVRALLEAG | 18   | >CDKN2A-E3 EEVRALLDAG | 30   | 12   |
| >CDKN2A-E3 VEEVRALLEA | 173  | >CDKN2A-E3 VEEVRALLDA | 301  | 128  |
| >CDKN2A-E6 ELLLLHGA   | 5332 | >CDKN2A-E6 GLLLLHGA   | 359  | 4973 |
| >CDKN2A-E6 ELLLLHGA   | 2842 | >CDKN2A-E6 GLLLLHGA   | 468  | 2374 |
| >CDKN2A-E6 ELLLLHGA   | 2288 | >CDKN2A-E6 GLLLLHGA   | 297  | 1991 |
| >CDKN2A-E6 ELLLLHGA   | 1334 | >CDKN2A-E6 GLLLLHGA   | 364  | 970  |
| >CDKN2A-E6 ELLLLHGA   | 214  | >CDKN2A-E6 GLLLLHGA   | 34   | 180  |
| >CDKN2A-E6 ELLLLHGA   | 760  | >CDKN2A-E6 GLLLLHGA   | 61   | 699  |



|                        |      |                      |       |       |
|------------------------|------|----------------------|-------|-------|
| >CDKN2A-E6 ELLLLHGA    | 342  | >CDKN2A-E6 GLLLLHGA  | 33    | 309   |
| >CDKN2A-E6 ELLLLHGA    | 186  | >CDKN2A-E6 GLLLLHGA  | 404   | 218   |
| >CDKN2A-E6 ELLLLHGA    | 195  | >CDKN2A-E6 GLLLLHGA  | 36    | 159   |
| >CDKN2A-E6 ELLLLHGA    | 91   | >CDKN2A-E6 GLLLLHGA  | 9668  | 9577  |
| >CDKN2A-E6 AELLLLHGA   | 35   | >CDKN2A-E6 AGLLLLHGA | 29327 | 29292 |
| >CDKN2A-E6 AELLLLHGA   | 440  | >CDKN2A-E6 AGLLLLHGA | 39370 | 38930 |
| >CDKN2A-E6 AELLLLHGA   | 7    | >CDKN2A-E6 AGLLLLHGA | 15024 | 15017 |
| >CDKN2A-E6 AELLLHGAE   | 313  | >CDKN2A-E6 AGLLLHGAE | 25672 | 25359 |
| >CDKN2A-E6 AELLLLHGA   | 32   | >CDKN2A-E6 AGLLLLHGA | 29862 | 29830 |
| >CDKN2A-E6 VMMMGSAR    | 1010 | >CDKN2A-E6 VMMMGSAR  | 215   | 795   |
| >CDKN2A-E6 RVAELLLL    | 83   | >CDKN2A-E6 RVAGLLL   | 221   | 138   |
| >CDKN2A-E6 RVAELLLLHG, | 171  | >CDKN2A-E6 RVAGLLLHG | 646   | 475   |
| >CDKN2A-E6 RVAELLLL    | 33   | >CDKN2A-E6 RVAGLLL   | 48    | 15    |
| >CDKN2A-E6 RVAELLLLHG, | 79   | >CDKN2A-E6 RVAGLLLHG | 100   | 21    |
| >CDKN2A-E6 RVAELLLL    | 70   | >CDKN2A-E6 RVAGLLL   | 130   | 60    |
| >CDKN2A-E6 RVAELLLLHG, | 23   | >CDKN2A-E6 RVAGLLLHG | 43    | 20    |
| >CDKN2A-E6 RVAELLLL    | 14   | >CDKN2A-E6 RVAGLLL   | 33    | 19    |
| >CDKN2A-E6 RVAELLLLHG, | 12   | >CDKN2A-E6 RVAGLLLHG | 26    | 14    |
| >CDKN2A-E6 RVAELLLL    | 392  | >CDKN2A-E6 RVAGLLL   | 1000  | 608   |
| >CDKN2A-E6 RVAELLLLHG, | 305  | >CDKN2A-E6 RVAGLLLHG | 891   | 586   |
| >CDKN2A-E6 RVAELLLL    | 393  | >CDKN2A-E6 RVAGLLL   | 252   | 141   |
| >CDKN2A-E6 RVAELLLLHG, | 459  | >CDKN2A-E6 RVAGLLLHG | 395   | 64    |
| >CDKN2A-E6 RVAELLLH    | 226  | >CDKN2A-E6 RVAGLLH   | 205   | 21    |
| >CDKN2A-E6 RVAELLLH    | 230  | >CDKN2A-E6 RVAGLLH   | 220   | 10    |
| >CDKN2A-E6 RVAELLLH    | 877  | >CDKN2A-E6 RVAGLLH   | 274   | 603   |
| >CDKN2A-E6 RVAELLLL    | 424  | >CDKN2A-E6 RVAGLLL   | 191   | 233   |
| >CDKN2A-E6 RVAELLLLHG, | 370  | >CDKN2A-E6 RVAGLLLHG | 436   | 66    |
| >CDKN2A-E6 RVAELLLLHG, | 428  | >CDKN2A-E6 RVAGLLLHG | 2270  | 1842  |
| >CDKN2A-E6 RVAELLLH    | 65   | >CDKN2A-E6 RVAGLLH   | 120   | 55    |
| >CDKN2A-E6 RVAELLLL    | 300  | >CDKN2A-E6 RVAGLLL   | 299   | 1     |
| >CDKN2A-E6 RVAELLLL    | 268  | >CDKN2A-E6 RVAGLLL   | 230   | 38    |
| >CDKN2A-E6 RVAELLLL    | 1902 | >CDKN2A-E6 RVAGLLL   | 352   | 1550  |
| >CDKN2A-E6 RVAELLLH    | 1048 | >CDKN2A-E6 RVAGLLH   | 267   | 781   |
| >CDKN2A-E6 RVAELLLL    | 364  | >CDKN2A-E6 RVAGLLL   | 627   | 263   |
| >CDKN2A-E6 ARVAELL     | 180  | >CDKN2A-E6 ARVAGLL   | 84    | 96    |
| >CDKN2A-E6 ARVAELLLL   | 120  | >CDKN2A-E6 ARVAGLLL  | 61    | 59    |
| >CDKN2A-E6 ARVAELLLH   | 215  | >CDKN2A-E6 ARVAGLLH  | 206   | 9     |
| >CDKN2A-E6 ARVAELL     | 222  | >CDKN2A-E6 ARVAGLL   | 97    | 125   |
| >CDKN2A-E6 ARVAELLLL   | 229  | >CDKN2A-E6 ARVAGLLL  | 70    | 159   |
| >CDKN2A-E6 ARVAELLLL   | 123  | >CDKN2A-E6 ARVAGLLL  | 47    | 76    |
| >CDKN2A-E6 ARVAELLLL   | 23   | >CDKN2A-E6 ARVAGLLL  | 8     | 15    |
| >CDKN2A-E6 SARVAELL    | 380  | >CDKN2A-E6 SARVAGLL  | 68    | 312   |
| >CDKN2A-E6 SARVAELL    | 39   | >CDKN2A-E6 SARVAGLLL | 16    | 23    |

|                        |      |                       |      |      |
|------------------------|------|-----------------------|------|------|
| >CDKN2A-E6 SARVAELLLL  | 38   | >CDKN2A-E6 SARVAGLLLL | 17   | 21   |
| >CDKN2A-E6 SARVAELLLL  | 558  | >CDKN2A-E6 SARVAGLLLL | 315  | 243  |
| >CDKN2A-E6 SARVAELL    | 3564 | >CDKN2A-E6 SARVAGLLL  | 245  | 3319 |
| >CDKN2A-E6 SARVAELL    | 377  | >CDKN2A-E6 SARVAGLL   | 170  | 207  |
| >CDKN2A-E6 SARVAELL    | 179  | >CDKN2A-E6 SARVAGLLL  | 45   | 134  |
| >CDKN2A-E6 SARVAELLLL  | 137  | >CDKN2A-E6 SARVAGLLLL | 43   | 94   |
| >CDKN2A-E6 SARVAELL    | 1155 | >CDKN2A-E6 SARVAGLLL  | 345  | 810  |
| >CDKN2A-E6 GSARVAEL    | 282  | >CDKN2A-E6 GSARVAGL   | 174  | 108  |
| >CDKN2A-E6 GSARVAELLL  | 950  | >CDKN2A-E6 GSARVAGLLL | 488  | 462  |
| >CDKN2A-E6 GSARVAELL   | 237  | >CDKN2A-E6 GSARVAGLL  | 1690 | 1453 |
| >CDKN2A-E6 GSARVAELLL  | 255  | >CDKN2A-E6 GSARVAGLLL | 873  | 618  |
| >CDKN2A-E6 GSARVAELLLL | 270  | >CDKN2A-E6 GSARVAGLLL | 421  | 151  |
| >CDKN2A-E6 GSARVAELL   | 720  | >CDKN2A-E6 GSARVAGLLL | 292  | 428  |
| >CDKN2A-E6 GSARVAELLLL | 264  | >CDKN2A-E6 GSARVAGLLL | 376  | 112  |
| >CDKN2A-E6 GSARVAELL   | 24   | >CDKN2A-E6 GSARVAGLL  | 21   | 3    |
| >CDKN2A-E6 GSARVAELLL  | 452  | >CDKN2A-E6 GSARVAGLLL | 257  | 195  |
| >CDKN2A-E6 GSARVAELLL  | 66   | >CDKN2A-E6 GSARVAGLLL | 39   | 27   |
| >CDKN2A-E6 MGSARVAEL   | 66   | >CDKN2A-E6 MGSARVAGL  | 125  | 59   |
| >CDKN2A-E6 MGSARVAEL   | 399  | >CDKN2A-E6 MGSARVAGL  | 415  | 16   |
| >CDKN2A-E6 MGSARVAEL   | 218  | >CDKN2A-E6 MGSARVAGL  | 435  | 217  |
| >CDKN2A-E6 MMGSARVAI   | 177  | >CDKN2A-E6 MMGSARVAI  | 174  | 3    |
| >CDKN2A-E6 MMGSARVAI   | 143  | >CDKN2A-E6 MMGSARVAI  | 463  | 320  |
| >CDKN2A-E6 MMGSARVAI   | 24   | >CDKN2A-E6 MMGSARVAI  | 23   | 1    |
| >CDKN2A-E6 MMGSARVAI   | 8    | >CDKN2A-E6 MMGSARVAI  | 22   | 14   |
| >CDKN2A-E6 MMGSARVAI   | 52   | >CDKN2A-E6 MMGSARVAI  | 38   | 14   |
| >CDKN2A-E6 MMGSARVAI   | 173  | >CDKN2A-E6 MMGSARVAI  | 101  | 72   |
| >CDKN2A-E6 MMGSARVAI   | 436  | >CDKN2A-E6 MMGSARVAI  | 1419 | 983  |
| >CDKN2A-E6 MMGSARVAI   | 11   | >CDKN2A-E6 MMGSARVAI  | 11   | 0    |
| >CDKN2A-E6 MMGSARVAI   | 24   | >CDKN2A-E6 MMGSARVAI  | 44   | 20   |
| >CDKN2A-E6 MMGSARVAI   | 42   | >CDKN2A-E6 MMGSARVAI  | 31   | 11   |
| >CDKN2A-E6 MMGSARVAI   | 190  | >CDKN2A-E6 MMGSARVAI  | 456  | 266  |
| >CDKN2A-E6 MMGSARVAI   | 46   | >CDKN2A-E6 MMGSARVAI  | 49   | 3    |
| >CDKN2A-E6 MMGSARVAI   | 81   | >CDKN2A-E6 MMGSARVAI  | 194  | 113  |
| >CDKN2A-E6 MMGSARVAI   | 33   | >CDKN2A-E6 MMGSARVAI  | 19   | 14   |
| >CDKN2A-E6 MMGSARVAI   | 112  | >CDKN2A-E6 MMGSARVAI  | 784  | 672  |
| >CDKN2A-E6 MMGSARVAI   | 3    | >CDKN2A-E6 MMGSARVAI  | 3    | 0    |
| >CDKN2A-E6 MMGSARVAI   | 8    | >CDKN2A-E6 MMGSARVAI  | 14   | 6    |
| >CDKN2A-E6 MMGSARVAI   | 163  | >CDKN2A-E6 MMGSARVAI  | 191  | 28   |
| >CDKN2A-E6 MMGSARVAI   | 90   | >CDKN2A-E6 MMGSARVAI  | 221  | 131  |
| >CDKN2A-E6 MMGSARVAI   | 402  | >CDKN2A-E6 MMGSARVAI  | 948  | 546  |
| >CDKN2A-E6 MMMGSARV    | 587  | >CDKN2A-E6 MMMGSARV   | 408  | 179  |
| >CDKN2A-E6 MMMGSARV    | 19   | >CDKN2A-E6 MMMGSARV   | 23   | 4    |
| >CDKN2A-E6 MMMGSARV    | 4    | >CDKN2A-E6 MMMGSARV   | 4    | 0    |

|                       |      |                       |       |       |
|-----------------------|------|-----------------------|-------|-------|
| >CDKN2A-E6 MMMGSARV   | 5    | >CDKN2A-E6 MMMGSARV   | 4     | 1     |
| >CDKN2A-E6 MMMGSARV   | 27   | >CDKN2A-E6 MMMGSARV   | 19    | 8     |
| >CDKN2A-E6 MMMGSARV   | 3    | >CDKN2A-E6 MMMGSARV   | 3     | 0     |
| >CDKN2A-E6 MMMGSARV   | 9    | >CDKN2A-E6 MMMGSARV   | 8     | 1     |
| >CDKN2A-E6 MMMGSARV   | 35   | >CDKN2A-E6 MMMGSARV   | 35    | 0     |
| >CDKN2A-E6 MMMGSARV   | 4    | >CDKN2A-E6 MMMGSARV   | 3     | 1     |
| >CDKN2A-E6 MMMGSARV   | 3    | >CDKN2A-E6 MMMGSARV   | 3     | 0     |
| >CDKN2A-E6 MMMGSARV   | 179  | >CDKN2A-E6 MMMGSARV   | 197   | 18    |
| >CDKN2A-E6 MMMGSARV   | 235  | >CDKN2A-E6 MMMGSARV   | 259   | 24    |
| >CDKN2A-E6 MMMGSARV   | 819  | >CDKN2A-E6 MMMGSARV   | 369   | 450   |
| >CDKN2A-E6 MMMGSARV   | 188  | >CDKN2A-E6 MMMGSARV   | 276   | 88    |
| >CDKN2A-E6 MMMGSARV   | 1250 | >CDKN2A-E6 MMMGSARV   | 230   | 1020  |
| >CDKN2A-E6 MMMGSARV   | 84   | >CDKN2A-E6 MMMGSARV   | 91    | 7     |
| >CDKN2A-E6 MMMGSARV   | 540  | >CDKN2A-E6 MMMGSARV   | 325   | 215   |
| >CDKN2A-E6 MMMGSARV   | 31   | >CDKN2A-E6 MMMGSARV   | 59    | 28    |
| >CDKN2A-E6 MMMGSARV   | 55   | >CDKN2A-E6 MMMGSARV   | 44    | 11    |
| >CDKN2A-E6 MMMGSARV   | 18   | >CDKN2A-E6 MMMGSARV   | 23    | 5     |
| >CDKN2A-E6 MMMGSARV   | 185  | >CDKN2A-E6 MMMGSARV   | 237   | 52    |
| >CDKN2A-E6 EPNCADPATL | 353  | >CDKN2A-E6 KPNCADPATL | 204   | 149   |
| >CDKN2A-E6 EPNCADPA   | 5872 | >CDKN2A-E6 KPNCADPA   | 204   | 5668  |
| >CDKN2A-E6 EPNCADPATL | 1632 | >CDKN2A-E6 KPNCADPATL | 88    | 1544  |
| >CDKN2A-E6 EPNCADPA   | 53   | >CDKN2A-E6 KPNCADPA   | 474   | 421   |
| >CDKN2A-E6 EPNCADPAT  | 16   | >CDKN2A-E6 KPNCADPAT  | 68    | 52    |
| >CDKN2A-E6 EPNCADPATL | 279  | >CDKN2A-E6 KPNCADPATL | 1940  | 1661  |
| >CDKN2A-E6 EPNCADPA   | 43   | >CDKN2A-E6 KPNCADPA   | 75    | 32    |
| >CDKN2A-E6 EPNCADPAT  | 371  | >CDKN2A-E6 KPNCADPAT  | 796   | 425   |
| >CDKN2A-E6 AEPNCADPA` | 5736 | >CDKN2A-E6 AKPNCADPA` | 231   | 5505  |
| >CDKN2A-E6 AEPNCADPA` | 183  | >CDKN2A-E6 AKPNCADPA` | 19867 | 19684 |
| >CDKN2A-E6 AEPNCADPA  | 209  | >CDKN2A-E6 AKPNCADPA  | 28885 | 28676 |
| >CDKN2A-E6 AEPNCADPA  | 480  | >CDKN2A-E6 AKPNCADPA  | 28293 | 27813 |
| >CDKN2A-E6 AEPNCADPA` | 230  | >CDKN2A-E6 AKPNCADPA` | 15530 | 15300 |
| >CDKN2A-E6 AEPNCADPA` | 65   | >CDKN2A-E6 AKPNCADPA` | 16640 | 16575 |
| >CDKN2A-E6 HGAEPNCAD  | 272  | >CDKN2A-E6 HGAKPNCAD  | 802   | 530   |
| >CDKN2A-E6 LLHGAEPNCA | 360  | >CDKN2A-E6 LLHGAKPNC  | 940   | 580   |
| >CDKN2A-E6 LLHGAEPNCA | 290  | >CDKN2A-E6 LLHGAKPNC  | 424   | 134   |
| >CDKN2A-E6 LLHGAEPNC  | 274  | >CDKN2A-E6 LLHGAKPNC  | 337   | 63    |
| >CDKN2A-E6 LLHGAEPNCA | 278  | >CDKN2A-E6 LLHGAKPNC  | 292   | 14    |
| >CDKN2A-E6 LLHGAEPNCA | 242  | >CDKN2A-E6 LLHGAKPNC  | 385   | 143   |
| >CDKN2A-E6 LLHGAEPNC  | 14   | >CDKN2A-E6 LLHGAKPNC  | 14    | 0     |
| >CDKN2A-E6 LLHGAEPNCA | 26   | >CDKN2A-E6 LLHGAKPNC  | 27    | 1     |
| >CDKN2A-E6 LLLHGAEPNC | 429  | >CDKN2A-E6 LLLHGAKPNC | 434   | 5     |
| >CDKN2A-E6 LLLHGAEPNC | 476  | >CDKN2A-E6 LLLHGAKPNC | 1365  | 889   |
| >CDKN2A-E6 LLLHGAEPNC | 121  | >CDKN2A-E6 LLLHGAKPNC | 213   | 92    |

|                       |       |                       |       |       |
|-----------------------|-------|-----------------------|-------|-------|
| >CDKN2A-E6 LLLHGAEPNC | 105   | >CDKN2A-E6 LLLHGAKPNC | 185   | 80    |
| >CDKN2A-E6 LLLHGAEPNC | 428   | >CDKN2A-E6 LLLHGAKPNC | 998   | 570   |
| >CDKN2A-E6 LLLHGAEPNC | 80    | >CDKN2A-E6 LLLHGAKPNC | 147   | 67    |
| >CDKN2A-E6 LLLHGAEPNC | 294   | >CDKN2A-E6 LLLHGAKPNC | 705   | 411   |
| >CDKN2A-E6 LLLHGAEPNC | 66    | >CDKN2A-E6 LLLHGAKPNC | 126   | 60    |
| >CDKN2A-E6 LLLHGAEPNC | 369   | >CDKN2A-E6 LLLHGAKPNC | 772   | 403   |
| >CDKN2A-E6 LLLHGAEPNC | 198   | >CDKN2A-E6 LLLHGAKPNC | 374   | 176   |
| >CDKN2A-E6 LLLHGAEPNC | 35    | >CDKN2A-E6 LLLHGAKPNC | 56    | 21    |
| >CDKN2A-E6 LLLHGAEPNC | 53    | >CDKN2A-E6 LLLHGAKPNC | 76    | 23    |
| >CDKN2A-E6 LLLLHGAEPN | 220   | >CDKN2A-E6 LLLLHGAKPN | 271   | 51    |
| >CDKN2A-E6 LLLLHGAEPN | 89    | >CDKN2A-E6 LLLLHGAKPN | 109   | 20    |
| >CDKN2A-E6 LLLLHGAE   | 19684 | >CDKN2A-E6 LLLLHGAK   | 115   | 19569 |
| >CDKN2A-E6 ELLLLHGAE  | 14403 | >CDKN2A-E6 ELLLLHGAK  | 496   | 13907 |
| >CDKN2A-E6 AELLLLHGAE | 313   | >CDKN2A-E6 AELLLLHGAK | 293   | 20    |
| >CDKN2A-E6 EPNCADPATL | 353   | >CDKN2A-E6 QPNCADPATL | 228   | 125   |
| >CDKN2A-E6 EPNCADPATL | 1632  | >CDKN2A-E6 QPNCADPATL | 173   | 1459  |
| >CDKN2A-E6 EPNCADPA   | 53    | >CDKN2A-E6 QPNCADPA   | 98    | 45    |
| >CDKN2A-E6 EPNCADPAT  | 16    | >CDKN2A-E6 QPNCADPAT  | 23    | 7     |
| >CDKN2A-E6 EPNCADPATL | 958   | >CDKN2A-E6 QPNCADPATL | 395   | 563   |
| >CDKN2A-E6 EPNCADPATL | 279   | >CDKN2A-E6 QPNCADPATL | 507   | 228   |
| >CDKN2A-E6 EPNCADPA   | 43    | >CDKN2A-E6 QPNCADPA   | 54    | 11    |
| >CDKN2A-E6 EPNCADPAT  | 371   | >CDKN2A-E6 QPNCADPAT  | 650   | 279   |
| >CDKN2A-E6 AEPNCADPA  | 6365  | >CDKN2A-E6 AQPNCADPA  | 68    | 6297  |
| >CDKN2A-E6 AEPNCADPA  | 9586  | >CDKN2A-E6 AQPNCADPA  | 82    | 9504  |
| >CDKN2A-E6 AEPNCADPA  | 5736  | >CDKN2A-E6 AQPNCADPA  | 250   | 5486  |
| >CDKN2A-E6 AEPNCADPA  | 183   | >CDKN2A-E6 AQPNCADPA  | 7720  | 7537  |
| >CDKN2A-E6 AEPNCADPA  | 209   | >CDKN2A-E6 AQPNCADPA  | 14081 | 13872 |
| >CDKN2A-E6 AEPNCADPA  | 480   | >CDKN2A-E6 AQPNCADPA  | 17841 | 17361 |
| >CDKN2A-E6 AEPNCADPA  | 230   | >CDKN2A-E6 AQPNCADPA  | 11838 | 11608 |
| >CDKN2A-E6 AEPNCADPA  | 65    | >CDKN2A-E6 AQPNCADPA  | 9188  | 9123  |
| >CDKN2A-E6 HGAEPNCAD  | 272   | >CDKN2A-E6 HGAQPNCAD  | 1007  | 735   |
| >CDKN2A-E6 LLHGAEPNCA | 360   | >CDKN2A-E6 LLHGAQPNC  | 618   | 258   |
| >CDKN2A-E6 LLHGAEPNCA | 290   | >CDKN2A-E6 LLHGAQPNC  | 409   | 119   |
| >CDKN2A-E6 LLHGAEPNC  | 274   | >CDKN2A-E6 LLHGAQPNC  | 171   | 103   |
| >CDKN2A-E6 LLHGAEPNCA | 278   | >CDKN2A-E6 LLHGAQPNC  | 215   | 63    |
| >CDKN2A-E6 LLHGAEPNCA | 242   | >CDKN2A-E6 LLHGAQPNC  | 204   | 38    |
| >CDKN2A-E6 LLHGAEPNC  | 14    | >CDKN2A-E6 LLHGAQPNC  | 9     | 5     |
| >CDKN2A-E6 LLHGAEPNCA | 26    | >CDKN2A-E6 LLHGAQPNC  | 21    | 5     |
| >CDKN2A-E6 LLLHGAEPNC | 429   | >CDKN2A-E6 LLLHGAQPNC | 364   | 65    |
| >CDKN2A-E6 LLLHGAEPNC | 476   | >CDKN2A-E6 LLLHGAQPNC | 570   | 94    |
| >CDKN2A-E6 LLLHGAEPNC | 121   | >CDKN2A-E6 LLLHGAQPNC | 96    | 25    |
| >CDKN2A-E6 LLLHGAEPNC | 105   | >CDKN2A-E6 LLLHGAQPNC | 105   | 0     |
| >CDKN2A-E6 LLLHGAEPNC | 428   | >CDKN2A-E6 LLLHGAQPNC | 286   | 142   |

|                        |       |                       |       |       |
|------------------------|-------|-----------------------|-------|-------|
| >CDKN2A-E6 LLLHGAEPNC  | 80    | >CDKN2A-E6 LLLHGAQPNC | 70    | 10    |
| >CDKN2A-E6 LLLHGAEPNC  | 294   | >CDKN2A-E6 LLLHGAQPNC | 231   | 63    |
| >CDKN2A-E6 LLLHGAEPNC  | 66    | >CDKN2A-E6 LLLHGAQPNC | 56    | 10    |
| >CDKN2A-E6 LLLHGAEPNC  | 369   | >CDKN2A-E6 LLLHGAQPNC | 213   | 156   |
| >CDKN2A-E6 LLLHGAEPNC  | 198   | >CDKN2A-E6 LLLHGAQPNC | 224   | 26    |
| >CDKN2A-E6 LLLHGAEPNC  | 35    | >CDKN2A-E6 LLLHGAQPNC | 19    | 16    |
| >CDKN2A-E6 LLLHGAEPNC  | 53    | >CDKN2A-E6 LLLHGAQPNC | 38    | 15    |
| >CDKN2A-E6 LLLLHGAEPN  | 220   | >CDKN2A-E6 LLLLHGAQPN | 174   | 46    |
| >CDKN2A-E6 LLLLHGAEPN  | 1016  | >CDKN2A-E6 LLLLHGAQPN | 471   | 545   |
| >CDKN2A-E6 LLLLHGAEPN  | 89    | >CDKN2A-E6 LLLLHGAQPN | 68    | 21    |
| >CDKN2A-E6 AELLLLHGAE  | 313   | >CDKN2A-E6 AELLLLHGAE | 365   | 52    |
| >CDKN2A-E6 AELLLLHGAEI | 736   | >CDKN2A-E6 AELLLLHGAE | 328   | 408   |
| >CDKN2A-E6 EPNCADPATI  | 353   | >CDKN2A-E6 VPNCADPATI | 60    | 293   |
| >CDKN2A-E6 EPNCADPATI  | 1632  | >CDKN2A-E6 VPNCADPATI | 191   | 1441  |
| >CDKN2A-E6 EPNCADPA    | 53    | >CDKN2A-E6 VPNCADPA   | 102   | 49    |
| >CDKN2A-E6 EPNCADPAT   | 16    | >CDKN2A-E6 VPNCADPAT  | 21    | 5     |
| >CDKN2A-E6 EPNCADPATI  | 958   | >CDKN2A-E6 VPNCADPATI | 330   | 628   |
| >CDKN2A-E6 EPNCADPATI  | 279   | >CDKN2A-E6 VPNCADPATI | 537   | 258   |
| >CDKN2A-E6 EPNCADPA    | 43    | >CDKN2A-E6 VPNCADPA   | 23    | 20    |
| >CDKN2A-E6 EPNCADPAT   | 371   | >CDKN2A-E6 VPNCADPAT  | 195   | 176   |
| >CDKN2A-E6 AEPNCADPA   | 6365  | >CDKN2A-E6 AVPNCADPA  | 272   | 6093  |
| >CDKN2A-E6 AEPNCADPA`  | 22219 | >CDKN2A-E6 AVPNCADPA` | 471   | 21748 |
| >CDKN2A-E6 AEPNCADPA`  | 8572  | >CDKN2A-E6 AVPNCADPA` | 404   | 8168  |
| >CDKN2A-E6 AEPNCADPA   | 21437 | >CDKN2A-E6 AVPNCADPA  | 495   | 20942 |
| >CDKN2A-E6 AEPNCADPA`  | 183   | >CDKN2A-E6 AVPNCADPA` | 21937 | 21754 |
| >CDKN2A-E6 AEPNCADPA   | 209   | >CDKN2A-E6 AVPNCADPA  | 37757 | 37548 |
| >CDKN2A-E6 AEPNCADPA   | 480   | >CDKN2A-E6 AVPNCADPA  | 37101 | 36621 |
| >CDKN2A-E6 AEPNCADPA`  | 230   | >CDKN2A-E6 AVPNCADPA` | 27619 | 27389 |
| >CDKN2A-E6 AEPNCADPA`  | 13260 | >CDKN2A-E6 AVPNCADPA` | 302   | 12958 |
| >CDKN2A-E6 AEPNCADPA`  | 65    | >CDKN2A-E6 AVPNCADPA` | 28581 | 28516 |
| >CDKN2A-E6 HGAEPNCAD   | 272   | >CDKN2A-E6 HGAVPNCAD  | 838   | 566   |
| >CDKN2A-E6 LLHGAEPNCA/ | 360   | >CDKN2A-E6 LLHGAVPNC/ | 245   | 115   |
| >CDKN2A-E6 LLHGAEPNCA/ | 290   | >CDKN2A-E6 LLHGAVPNC/ | 161   | 129   |
| >CDKN2A-E6 LLHGAEPNC   | 274   | >CDKN2A-E6 LLHGAVPNC  | 29    | 245   |
| >CDKN2A-E6 LLHGAEPNCA/ | 278   | >CDKN2A-E6 LLHGAVPNC/ | 44    | 234   |
| >CDKN2A-E6 LLHGAEPNC   | 1317  | >CDKN2A-E6 LLHGAVPNC  | 324   | 993   |
| >CDKN2A-E6 LLHGAEPNCA/ | 242   | >CDKN2A-E6 LLHGAVPNC/ | 81    | 161   |
| >CDKN2A-E6 LLHGAEPNC   | 3379  | >CDKN2A-E6 LLHGAVPNC  | 319   | 3060  |
| >CDKN2A-E6 LLHGAEPNC   | 14    | >CDKN2A-E6 LLHGAVPNC  | 6     | 8     |
| >CDKN2A-E6 LLHGAEPNCA/ | 26    | >CDKN2A-E6 LLHGAVPNC/ | 18    | 8     |
| >CDKN2A-E6 LLLHGAEPNC  | 560   | >CDKN2A-E6 LLLHGAVPNC | 274   | 286   |
| >CDKN2A-E6 LLLHGAEPNC  | 429   | >CDKN2A-E6 LLLHGAVPNC | 317   | 112   |
| >CDKN2A-E6 LLLHGAEPNC  | 476   | >CDKN2A-E6 LLLHGAVPNC | 347   | 129   |

|                       |       |                       |     |       |
|-----------------------|-------|-----------------------|-----|-------|
| >CDKN2A-E6 LLLHGAEPNC | 121   | >CDKN2A-E6 LLLHGAVPNC | 42  | 79    |
| >CDKN2A-E6 LLLHGAEPNC | 105   | >CDKN2A-E6 LLLHGAVPNC | 54  | 51    |
| >CDKN2A-E6 LLLHGAEPNC | 428   | >CDKN2A-E6 LLLHGAVPNC | 196 | 232   |
| >CDKN2A-E6 LLLHGAEPNC | 80    | >CDKN2A-E6 LLLHGAVPNC | 62  | 18    |
| >CDKN2A-E6 LLLHGAEPNC | 294   | >CDKN2A-E6 LLLHGAVPNC | 134 | 160   |
| >CDKN2A-E6 LLLHGAEPNC | 66    | >CDKN2A-E6 LLLHGAVPNC | 35  | 31    |
| >CDKN2A-E6 LLLHGAEPNC | 369   | >CDKN2A-E6 LLLHGAVPNC | 118 | 251   |
| >CDKN2A-E6 LLLHGAEPNC | 198   | >CDKN2A-E6 LLLHGAVPNC | 141 | 57    |
| >CDKN2A-E6 LLLHGAEPNC | 35    | >CDKN2A-E6 LLLHGAVPNC | 16  | 19    |
| >CDKN2A-E6 LLLHGAEPNC | 53    | >CDKN2A-E6 LLLHGAVPNC | 45  | 8     |
| >CDKN2A-E6 LLLLHGAE   | 23005 | >CDKN2A-E6 LLLLHGAV   | 145 | 22860 |
| >CDKN2A-E6 LLLLHGAE   | 12656 | >CDKN2A-E6 LLLLHGAV   | 147 | 12509 |
| >CDKN2A-E6 LLLLHGAE   | 16164 | >CDKN2A-E6 LLLLHGAV   | 28  | 16136 |
| >CDKN2A-E6 LLLLHGAE   | 13357 | >CDKN2A-E6 LLLLHGAV   | 68  | 13289 |
| >CDKN2A-E6 LLLLHGAE   | 12207 | >CDKN2A-E6 LLLLHGAV   | 3   | 12204 |
| >CDKN2A-E6 LLLLHGAEPN | 220   | >CDKN2A-E6 LLLLHGAVPN | 87  | 133   |
| >CDKN2A-E6 LLLLHGAE   | 18607 | >CDKN2A-E6 LLLLHGAV   | 10  | 18597 |
| >CDKN2A-E6 LLLLHGAE   | 20932 | >CDKN2A-E6 LLLLHGAV   | 17  | 20915 |
| >CDKN2A-E6 LLLLHGAE   | 25336 | >CDKN2A-E6 LLLLHGAV   | 18  | 25318 |
| >CDKN2A-E6 LLLLHGAEPN | 1016  | >CDKN2A-E6 LLLLHGAVPN | 310 | 706   |
| >CDKN2A-E6 LLLLHGAE   | 18027 | >CDKN2A-E6 LLLLHGAV   | 4   | 18023 |
| >CDKN2A-E6 LLLLHGAEPN | 89    | >CDKN2A-E6 LLLLHGAVPN | 70  | 19    |
| >CDKN2A-E6 ELLLHGAE   | 25013 | >CDKN2A-E6 ELLLHGAV   | 25  | 24988 |
| >CDKN2A-E6 ELLLHGAE   | 24002 | >CDKN2A-E6 ELLLHGAV   | 163 | 23839 |
| >CDKN2A-E6 ELLLHGAE   | 26790 | >CDKN2A-E6 ELLLHGAV   | 154 | 26636 |
| >CDKN2A-E6 ELLLHGAE   | 33960 | >CDKN2A-E6 ELLLHGAV   | 56  | 33904 |
| >CDKN2A-E6 ELLLHGAE   | 17458 | >CDKN2A-E6 ELLLHGAV   | 18  | 17440 |
| >CDKN2A-E6 AELLHGAE   | 17082 | >CDKN2A-E6 AELLHGAV   | 80  | 17002 |
| >CDKN2A-E6 AELLHGAE   | 1112  | >CDKN2A-E6 AELLHGAV   | 183 | 929   |
| >CDKN2A-E6 AELLHGAE   | 3642  | >CDKN2A-E6 AELLHGAV   | 109 | 3533  |
| >CDKN2A-E6 AELLHGAE   | 2997  | >CDKN2A-E6 AELLHGAV   | 114 | 2883  |
| >CDKN2A-E6 AELLHGAE   | 313   | >CDKN2A-E6 AELLHGAV   | 56  | 257   |
| >CDKN2A-E6 AELLHGAE   | 9144  | >CDKN2A-E6 AELLHGAV   | 28  | 9116  |
| >CDKN2A-E8 REGFLDTL   | 13    | >CDKN2A-E8 KEGFLDTL   | 34  | 21    |
| >CDKN2A-E8 REGFLDTLV  | 213   | >CDKN2A-E8 KEGFLDTLV  | 868 | 655   |
| >CDKN2A-E8 REGFLDTLVV | 14    | >CDKN2A-E8 KEGFLDTLVV | 37  | 23    |
| >CDKN2A-E8 REGFLDTL   | 99    | >CDKN2A-E8 KEGFLDTL   | 111 | 12    |
| >CDKN2A-E8 REGFLDTLV  | 208   | >CDKN2A-E8 KEGFLDTLV  | 253 | 45    |
| >CDKN2A-E8 REGFLDTLVV | 264   | >CDKN2A-E8 KEGFLDTLVV | 536 | 272   |
| >CDKN2A-E8 REGFLDTLVV | 63    | >CDKN2A-E8 KEGFLDTLVV | 67  | 4     |
| >CDKN2A-E8 REGFLDTLV  | 35    | >CDKN2A-E8 KEGFLDTLV  | 72  | 37    |
| >CDKN2A-E8 REGFLDTLVV | 89    | >CDKN2A-E8 KEGFLDTLVV | 147 | 58    |
| >CDKN2A-E8 REGFLDTLVV | 68    | >CDKN2A-E8 KEGFLDTLVV | 138 | 70    |

|                        |       |                        |       |       |
|------------------------|-------|------------------------|-------|-------|
| >CDKN2A-E8 AREGFLDTL   | 165   | >CDKN2A-E8 AKEGFLDTL   | 5332  | 5167  |
| >CDKN2A-E8 AREGFLDTL   | 63    | >CDKN2A-E8 AKEGFLDTL   | 5640  | 5577  |
| >CDKN2A-E8 TLTRPVHDAF  | 3923  | >CDKN2A-E8 TLTRPVHDAF  | 225   | 3698  |
| >CDKN2A-E8 TLTRPVHDAF  | 4860  | >CDKN2A-E8 TLTRPVHDAF  | 249   | 4611  |
| >CDKN2A-E8 TLTRPVHDAF  | 159   | >CDKN2A-E8 TLTRPVHDAF  | 3644  | 3485  |
| >CDKN2A-E8 TLTRPVHDAF  | 411   | >CDKN2A-E8 TLTRPVHDAF  | 8484  | 8073  |
| >CDKN2A-E8 TLTRPVHDAF  | 68    | >CDKN2A-E8 TLTRPVHDAF  | 240   | 172   |
| >CDKN2A-E8 AAREGFLDTL  | 620   | >CDKN2A-E8 AAKEGFLDTL  | 274   | 346   |
| >CDKN2A-E8 AAREGFLDTL  | 408   | >CDKN2A-E8 AAKEGFLDTL  | 337   | 71    |
| >CDKN2A-E8 AAREGFLDTL  | 252   | >CDKN2A-E8 AAKEGFLDTL  | 362   | 110   |
| >CDKN2A-E8 AAREGFLDTL  | 342   | >CDKN2A-E8 AAKEGFLDTL  | 1900  | 1558  |
| >CDKN2A-E8 AAREGFLDTL  | 203   | >CDKN2A-E8 AAKEGFLDTL  | 1109  | 906   |
| >CDKN2A-E8 AAREGFLDTL  | 53    | >CDKN2A-E8 AAKEGFLDTL  | 398   | 345   |
| >CDKN2A-E8 HDAAREGFL   | 169   | >CDKN2A-E8 HDAAKEGFL   | 213   | 44    |
| >CDKN2A-E8 RPHDAAREGFL | 58    | >CDKN2A-E8 RPHDAAREGFL | 116   | 58    |
| >CDKN2A-E8 RPHDAAREGFL | 287   | >CDKN2A-E8 RPHDAAREGFL | 396   | 109   |
| >CDKN2A-E8 RPHDAAREGFL | 112   | >CDKN2A-E8 RPHDAAREGFL | 140   | 28    |
| >CDKN2A-E8 RPHDAAR     | 319   | >CDKN2A-E8 RPHDAAK     | 6754  | 6435  |
| >CDKN2A-E8 LTRPVHDAAF  | 56    | >CDKN2A-E8 LTRPVHDAAF  | 4     | 52    |
| >CDKN2A-E8 LTRPVHDAAF  | 107   | >CDKN2A-E8 LTRPVHDAAF  | 2232  | 2125  |
| >CDKN2A-E8 LTRPVHDAAF  | 47    | >CDKN2A-E8 LTRPVHDAAF  | 143   | 96    |
| >CDKN2A-E8 EGFLDTLV    | 135   | >CDKN2A-E8 AGFLDTLV    | 6039  | 5904  |
| >CDKN2A-E8 REGFLDTL    | 21791 | >CDKN2A-E8 RAGFLDTL    | 339   | 21452 |
| >CDKN2A-E8 REGFLDTLVV  | 22402 | >CDKN2A-E8 RAGFLDTLVV  | 318   | 22084 |
| >CDKN2A-E8 REGFLDTL    | 13    | >CDKN2A-E8 RAGFLDTL    | 16091 | 16078 |
| >CDKN2A-E8 REGFLDTLV   | 213   | >CDKN2A-E8 RAGFLDTLV   | 20404 | 20191 |
| >CDKN2A-E8 REGFLDTLVV  | 14    | >CDKN2A-E8 RAGFLDTLVV  | 15675 | 15661 |
| >CDKN2A-E8 REGFLDTL    | 99    | >CDKN2A-E8 RAGFLDTL    | 30015 | 29916 |
| >CDKN2A-E8 REGFLDTLV   | 208   | >CDKN2A-E8 RAGFLDTLV   | 34221 | 34013 |
| >CDKN2A-E8 REGFLDTLVV  | 264   | >CDKN2A-E8 RAGFLDTLVV  | 32318 | 32054 |
| >CDKN2A-E8 REGFLDTLVV  | 63    | >CDKN2A-E8 RAGFLDTLVV  | 25212 | 25149 |
| >CDKN2A-E8 REGFLDTLV   | 35    | >CDKN2A-E8 RAGFLDTLV   | 25081 | 25046 |
| >CDKN2A-E8 REGFLDTLVV  | 89    | >CDKN2A-E8 RAGFLDTLVV  | 28632 | 28543 |
| >CDKN2A-E8 REGFLDTLVV  | 68    | >CDKN2A-E8 RAGFLDTLVV  | 22558 | 22490 |
| >CDKN2A-E8 LTRPVHDAAF  | 2496  | >CDKN2A-E8 LTRPVHDAAF  | 32    | 2464  |
| >CDKN2A-E8 LTRPVHDAAF  | 827   | >CDKN2A-E8 LTRPVHDAAF  | 376   | 451   |
| >CDKN2A-E8 LTRPVHDAAF  | 583   | >CDKN2A-E8 LTRPVHDAAF  | 218   | 365   |
| >CDKN2A-E8 AREGFLDTL   | 1353  | >CDKN2A-E8 ARAGFLDTL   | 107   | 1246  |
| >CDKN2A-E8 AREGFLDTLV  | 707   | >CDKN2A-E8 ARAGFLDTLV  | 283   | 424   |
| >CDKN2A-E8 AREGFLDTLV  | 3235  | >CDKN2A-E8 ARAGFLDTLV  | 291   | 2944  |
| >CDKN2A-E8 AREGFLDTL   | 503   | >CDKN2A-E8 ARAGFLDTL   | 252   | 251   |
| >CDKN2A-E8 AREGFLDTL   | 165   | >CDKN2A-E8 ARAGFLDTL   | 131   | 34    |
| >CDKN2A-E8 AREGFLDTLV  | 691   | >CDKN2A-E8 ARAGFLDTLV  | 475   | 216   |

|                       |      |                       |       |       |
|-----------------------|------|-----------------------|-------|-------|
| >CDKN2A-E8 AREGFLDTL  | 63   | >CDKN2A-E8 ARAGFLDTL  | 47    | 16    |
| >CDKN2A-E8 AREGFLDTLV | 642  | >CDKN2A-E8 ARAGFLDTLV | 431   | 211   |
| >CDKN2A-E8 AAREGFLDTL | 408  | >CDKN2A-E8 AARAGFLDTL | 885   | 477   |
| >CDKN2A-E8 AAREGFLDTL | 252  | >CDKN2A-E8 AARAGFLDTL | 662   | 410   |
| >CDKN2A-E8 AAREGFLDTL | 342  | >CDKN2A-E8 AARAGFLDTL | 137   | 205   |
| >CDKN2A-E8 AAREGFLDTL | 203  | >CDKN2A-E8 AARAGFLDTL | 87    | 116   |
| >CDKN2A-E8 AAREGFLDTL | 53   | >CDKN2A-E8 AARAGFLDTL | 39    | 14    |
| >CDKN2A-E8 DAAREGFL   | 1811 | >CDKN2A-E8 DAARAGFL   | 275   | 1536  |
| >CDKN2A-E8 DAAREGFLDT | 1581 | >CDKN2A-E8 DAARAGFLDT | 435   | 1146  |
| >CDKN2A-E8 HDAAREGFL  | 1055 | >CDKN2A-E8 HDAARAGFL  | 114   | 941   |
| >CDKN2A-E8 HDAAREGFL  | 169  | >CDKN2A-E8 HDAARAGFL  | 59    | 110   |
| >CDKN2A-E8 VHDAAREGFL | 1646 | >CDKN2A-E8 VHDAARAGFL | 357   | 1289  |
| >CDKN2A-E8 RPVHDAARE  | 8669 | >CDKN2A-E8 RPVHDAARA  | 265   | 8404  |
| >CDKN2A-E8 RPVHDAARE  | 58   | >CDKN2A-E8 RPVHDAARA  | 28    | 30    |
| >CDKN2A-E8 RPVHDAARE  | 287  | >CDKN2A-E8 RPVHDAARA  | 212   | 75    |
| >CDKN2A-E8 RPVHDAARE  | 112  | >CDKN2A-E8 RPVHDAARA  | 60    | 52    |
| >CDKN2A-E8 EGFLDTLV   | 135  | >CDKN2A-E8 DGFLDTLV   | 974   | 839   |
| >CDKN2A-E8 REGFLDTL   | 13   | >CDKN2A-E8 RDGFLDTL   | 9885  | 9872  |
| >CDKN2A-E8 REGFLDTLV  | 213  | >CDKN2A-E8 RDGFLDTLV  | 17138 | 16925 |
| >CDKN2A-E8 REGFLDTLVV | 14   | >CDKN2A-E8 RDGFLDTLVV | 9119  | 9105  |
| >CDKN2A-E8 REGFLDTL   | 99   | >CDKN2A-E8 RDGFLDTL   | 620   | 521   |
| >CDKN2A-E8 REGFLDTLV  | 208  | >CDKN2A-E8 RDGFLDTLV  | 1619  | 1411  |
| >CDKN2A-E8 REGFLDTLVV | 264  | >CDKN2A-E8 RDGFLDTLVV | 21529 | 21265 |
| >CDKN2A-E8 REGFLDTLVV | 63   | >CDKN2A-E8 RDGFLDTLVV | 507   | 444   |
| >CDKN2A-E8 REGFLDTLV  | 35   | >CDKN2A-E8 RDGFLDTLV  | 3615  | 3580  |
| >CDKN2A-E8 REGFLDTLVV | 89   | >CDKN2A-E8 RDGFLDTLVV | 3666  | 3577  |
| >CDKN2A-E8 REGFLDTLVV | 68   | >CDKN2A-E8 RDGFLDTLVV | 2595  | 2527  |
| >CDKN2A-E8 AREGFLDTL  | 503  | >CDKN2A-E8 ARDGFLDTL  | 284   | 219   |
| >CDKN2A-E8 AREGFLDTL  | 165  | >CDKN2A-E8 ARDGFLDTL  | 408   | 243   |
| >CDKN2A-E8 AREGFLDTL  | 63   | >CDKN2A-E8 ARDGFLDTL  | 227   | 164   |
| >CDKN2A-E8 AAREGFLDTL | 408  | >CDKN2A-E8 AARDGFLDTL | 490   | 82    |
| >CDKN2A-E8 AAREGFLDTL | 252  | >CDKN2A-E8 AARDGFLDTL | 99    | 153   |
| >CDKN2A-E8 AAREGFLDTL | 342  | >CDKN2A-E8 AARDGFLDTL | 279   | 63    |
| >CDKN2A-E8 AAREGFLDTL | 203  | >CDKN2A-E8 AARDGFLDTL | 165   | 38    |
| >CDKN2A-E8 AAREGFLDTL | 53   | >CDKN2A-E8 AARDGFLDTL | 33    | 20    |
| >CDKN2A-E8 HDAAREGFL  | 169  | >CDKN2A-E8 HDAARDGFL  | 193   | 24    |
| >CDKN2A-E8 RPVHDAARE  | 58   | >CDKN2A-E8 RPVHDAARD  | 45    | 13    |
| >CDKN2A-E8 RPVHDAARE  | 287  | >CDKN2A-E8 RPVHDAARD  | 551   | 264   |
| >CDKN2A-E8 RPVHDAARE  | 112  | >CDKN2A-E8 RPVHDAARD  | 62    | 50    |
| >CDKN2A-E8 EGFLDTLV   | 135  | >CDKN2A-E8 GGFLDTLV   | 12230 | 12095 |
| >CDKN2A-E8 REGFLDTL   | 13   | >CDKN2A-E8 RGGFLDTL   | 19592 | 19579 |
| >CDKN2A-E8 REGFLDTLV  | 213  | >CDKN2A-E8 RGGFLDTLV  | 22278 | 22065 |
| >CDKN2A-E8 REGFLDTLVV | 14   | >CDKN2A-E8 RGGFLDTLVV | 19543 | 19529 |



|                       |       |                       |       |       |
|-----------------------|-------|-----------------------|-------|-------|
| >CDKN2A-E8 REGFLDTL   | 99    | >CDKN2A-E8 RGGFLDTL   | 33336 | 33237 |
| >CDKN2A-E8 REGFLDTLV  | 208   | >CDKN2A-E8 RGGFLDTLV  | 36318 | 36110 |
| >CDKN2A-E8 REGFLDTLVV | 264   | >CDKN2A-E8 RGGFLDTLVV | 35023 | 34759 |
| >CDKN2A-E8 REGFLDTLVV | 63    | >CDKN2A-E8 RGGFLDTLVV | 28115 | 28052 |
| >CDKN2A-E8 REGFLDTLV  | 35    | >CDKN2A-E8 RGGFLDTLV  | 30188 | 30153 |
| >CDKN2A-E8 REGFLDTLVV | 89    | >CDKN2A-E8 RGGFLDTLVV | 33003 | 32914 |
| >CDKN2A-E8 REGFLDTLVV | 68    | >CDKN2A-E8 RGGFLDTLVV | 26975 | 26907 |
| >CDKN2A-E8 LTRPVHDAAF | 2496  | >CDKN2A-E8 LTRPVHDAAF | 402   | 2094  |
| >CDKN2A-E8 AREGFLDTL  | 1353  | >CDKN2A-E8 ARGGFLDTL  | 474   | 879   |
| >CDKN2A-E8 AREGFLDTLV | 707   | >CDKN2A-E8 ARGGFLDTLV | 498   | 209   |
| >CDKN2A-E8 AREGFLDTL  | 165   | >CDKN2A-E8 ARGGFLDTL  | 396   | 231   |
| >CDKN2A-E8 AREGFLDTL  | 63    | >CDKN2A-E8 ARGGFLDTL  | 191   | 128   |
| >CDKN2A-E8 AAREGFLDTL | 408   | >CDKN2A-E8 AARGGFLDTL | 1160  | 752   |
| >CDKN2A-E8 AAREGFLDTL | 252   | >CDKN2A-E8 AARGGFLDTL | 210   | 42    |
| >CDKN2A-E8 AAREGFLDTL | 342   | >CDKN2A-E8 AARGGFLDTL | 301   | 41    |
| >CDKN2A-E8 AAREGFLDTL | 203   | >CDKN2A-E8 AARGGFLDTL | 183   | 20    |
| >CDKN2A-E8 AAREGFLDTL | 53    | >CDKN2A-E8 AARGGFLDTL | 41    | 12    |
| >CDKN2A-E8 HDAAREGFL  | 169   | >CDKN2A-E8 HDAAREGFL  | 309   | 140   |
| >CDKN2A-E8 RPVHDAAREG | 58    | >CDKN2A-E8 RPVHDAAREG | 25    | 33    |
| >CDKN2A-E8 RPVHDAAREG | 287   | >CDKN2A-E8 RPVHDAAREG | 765   | 478   |
| >CDKN2A-E8 RPVHDAAREG | 112   | >CDKN2A-E8 RPVHDAAREG | 107   | 5     |
| >CDKN2A-E8 EGFLDTLV   | 135   | >CDKN2A-E8 KGFLDTLV   | 10209 | 10074 |
| >CDKN2A-E8 REGFLDTLVV | 5201  | >CDKN2A-E8 RKGFLDTLVV | 195   | 5006  |
| >CDKN2A-E8 REGFLDTL   | 13    | >CDKN2A-E8 RKGFLDTL   | 12799 | 12786 |
| >CDKN2A-E8 REGFLDTLV  | 213   | >CDKN2A-E8 RKGFLDTLV  | 18787 | 18574 |
| >CDKN2A-E8 REGFLDTLVV | 14    | >CDKN2A-E8 RKGFLDTLVV | 12388 | 12374 |
| >CDKN2A-E8 REGFLDTL   | 99    | >CDKN2A-E8 RKGFLDTL   | 21957 | 21858 |
| >CDKN2A-E8 REGFLDTLV  | 208   | >CDKN2A-E8 RKGFLDTLV  | 28837 | 28629 |
| >CDKN2A-E8 REGFLDTLVV | 264   | >CDKN2A-E8 RKGFLDTLVV | 27066 | 26802 |
| >CDKN2A-E8 REGFLDTLVV | 63    | >CDKN2A-E8 RKGFLDTLVV | 17740 | 17677 |
| >CDKN2A-E8 REGFLDTLV  | 35    | >CDKN2A-E8 RKGFLDTLV  | 17634 | 17599 |
| >CDKN2A-E8 REGFLDTLVV | 89    | >CDKN2A-E8 RKGFLDTLVV | 18232 | 18143 |
| >CDKN2A-E8 REGFLDTLVV | 68    | >CDKN2A-E8 RKGFLDTLVV | 14882 | 14814 |
| >CDKN2A-E8 REGFLDTLVV | 2081  | >CDKN2A-E8 RKGFLDTLVV | 435   | 1646  |
| >CDKN2A-E8 LTRPVHDAAF | 21171 | >CDKN2A-E8 LTRPVHDAAF | 353   | 20818 |
| >CDKN2A-E8 LTRPVHDAAF | 2496  | >CDKN2A-E8 LTRPVHDAAF | 6     | 2490  |
| >CDKN2A-E8 LTRPVHDAAF | 13689 | >CDKN2A-E8 LTRPVHDAAF | 439   | 13250 |
| >CDKN2A-E8 LTRPVHDAAF | 18781 | >CDKN2A-E8 LTRPVHDAAF | 162   | 18619 |
| >CDKN2A-E8 LTRPVHDAAF | 583   | >CDKN2A-E8 LTRPVHDAAF | 459   | 124   |
| >CDKN2A-E8 AREGFLDTL  | 1353  | >CDKN2A-E8 ARKGFLDTL  | 209   | 1144  |
| >CDKN2A-E8 AREGFLDTLV | 707   | >CDKN2A-E8 ARKGFLDTLV | 260   | 447   |
| >CDKN2A-E8 AREGFLDTL  | 165   | >CDKN2A-E8 ARKGFLDTL  | 138   | 27    |
| >CDKN2A-E8 AREGFLDTLV | 691   | >CDKN2A-E8 ARKGFLDTLV | 493   | 198   |

|                       |       |                       |       |       |
|-----------------------|-------|-----------------------|-------|-------|
| >CDKN2A-E8 AREGFLDTL  | 63    | >CDKN2A-E8 ARKGFLDTL  | 102   | 39    |
| >CDKN2A-E8 AAREGFLDTL | 408   | >CDKN2A-E8 AARKGFLDTL | 1881  | 1473  |
| >CDKN2A-E8 AAREGFLDTL | 252   | >CDKN2A-E8 AARKGFLDTL | 1453  | 1201  |
| >CDKN2A-E8 AAREGFLDTL | 342   | >CDKN2A-E8 AARKGFLDTL | 182   | 160   |
| >CDKN2A-E8 AAREGFLDTL | 203   | >CDKN2A-E8 AARKGFLDTL | 111   | 92    |
| >CDKN2A-E8 AAREGFLDTL | 53    | >CDKN2A-E8 AARKGFLDTL | 95    | 42    |
| >CDKN2A-E8 HDAAREGFL  | 1055  | >CDKN2A-E8 HDAARKGFL  | 198   | 857   |
| >CDKN2A-E8 HDAAREGFL  | 169   | >CDKN2A-E8 HDAARKGFL  | 231   | 62    |
| >CDKN2A-E8 PVHDAARE   | 15418 | >CDKN2A-E8 PVHDAARK   | 148   | 15270 |
| >CDKN2A-E8 RPVHDAARE  | 58    | >CDKN2A-E8 RPVHDAARK  | 43    | 15    |
| >CDKN2A-E8 RPVHDAARE  | 287   | >CDKN2A-E8 RPVHDAARK  | 171   | 116   |
| >CDKN2A-E8 RPVHDAARE  | 112   | >CDKN2A-E8 RPVHDAARK  | 174   | 62    |
| >CDKN2A-E8 EGFLDTLV   | 135   | >CDKN2A-E8 VGFLDTLV   | 5087  | 4952  |
| >CDKN2A-E8 REGFLDTL   | 1802  | >CDKN2A-E8 RVGFLDTL   | 48    | 1754  |
| >CDKN2A-E8 REGFLDTLVV | 7419  | >CDKN2A-E8 RVGFLDTLVV | 489   | 6930  |
| >CDKN2A-E8 REGFLDTLVV | 3514  | >CDKN2A-E8 RVGFLDTLVV | 97    | 3417  |
| >CDKN2A-E8 REGFLDTL   | 13    | >CDKN2A-E8 RVGFLDTL   | 19334 | 19321 |
| >CDKN2A-E8 REGFLDTLV  | 213   | >CDKN2A-E8 RVGFLDTLV  | 21953 | 21740 |
| >CDKN2A-E8 REGFLDTLVV | 14    | >CDKN2A-E8 RVGFLDTLVV | 19165 | 19151 |
| >CDKN2A-E8 REGFLDTL   | 99    | >CDKN2A-E8 RVGFLDTL   | 33573 | 33474 |
| >CDKN2A-E8 REGFLDTLV  | 208   | >CDKN2A-E8 RVGFLDTLV  | 36445 | 36237 |
| >CDKN2A-E8 REGFLDTLVV | 264   | >CDKN2A-E8 RVGFLDTLVV | 34342 | 34078 |
| >CDKN2A-E8 REGFLDTLVV | 63    | >CDKN2A-E8 RVGFLDTLVV | 28809 | 28746 |
| >CDKN2A-E8 REGFLDTLV  | 35    | >CDKN2A-E8 RVGFLDTLV  | 25616 | 25581 |
| >CDKN2A-E8 REGFLDTLVV | 89    | >CDKN2A-E8 RVGFLDTLVV | 31095 | 31006 |
| >CDKN2A-E8 REGFLDTLVV | 68    | >CDKN2A-E8 RVGFLDTLVV | 24457 | 24389 |
| >CDKN2A-E8 LTRPVHDAAF | 34531 | >CDKN2A-E8 LTRPVHDAAF | 159   | 34372 |
| >CDKN2A-E8 LTRPVHDAAF | 2496  | >CDKN2A-E8 LTRPVHDAAF | 55    | 2441  |
| >CDKN2A-E8 LTRPVHDAAF | 23856 | >CDKN2A-E8 LTRPVHDAAF | 391   | 23465 |
| >CDKN2A-E8 LTRPVHDAAF | 827   | >CDKN2A-E8 LTRPVHDAAF | 38    | 789   |
| >CDKN2A-E8 LTRPVHDAAF | 583   | >CDKN2A-E8 LTRPVHDAAF | 29    | 554   |
| >CDKN2A-E8 AREGFLDTL  | 1353  | >CDKN2A-E8 ARVGFLDTL  | 122   | 1231  |
| >CDKN2A-E8 AREGFLDTLV | 707   | >CDKN2A-E8 ARVGFLDTLV | 144   | 563   |
| >CDKN2A-E8 AREGFLDTLV | 3235  | >CDKN2A-E8 ARVGFLDTLV | 324   | 2911  |
| >CDKN2A-E8 AREGFLDTL  | 503   | >CDKN2A-E8 ARVGFLDTL  | 287   | 216   |
| >CDKN2A-E8 AREGFLDTL  | 165   | >CDKN2A-E8 ARVGFLDTL  | 196   | 31    |
| >CDKN2A-E8 AREGFLDTL  | 63    | >CDKN2A-E8 ARVGFLDTL  | 87    | 24    |
| >CDKN2A-E8 AAREGFLDTL | 408   | >CDKN2A-E8 AARVGFLDTL | 1869  | 1461  |
| >CDKN2A-E8 AAREGFLDTL | 252   | >CDKN2A-E8 AARVGFLDTL | 1646  | 1394  |
| >CDKN2A-E8 AAREGFLDTL | 342   | >CDKN2A-E8 AARVGFLDTL | 202   | 140   |
| >CDKN2A-E8 AAREGFLDTL | 203   | >CDKN2A-E8 AARVGFLDTL | 123   | 80    |
| >CDKN2A-E8 AAREGFLDTL | 53    | >CDKN2A-E8 AARVGFLDTL | 49    | 4     |
| >CDKN2A-E8 DAAREGFL   | 1811  | >CDKN2A-E8 DAARVGFL   | 102   | 1709  |

|                        |       |                        |      |       |
|------------------------|-------|------------------------|------|-------|
| >CDKN2A-E8 DAAREGFLDT  | 1581  | >CDKN2A-E8 DAARVGFLDT  | 201  | 1380  |
| >CDKN2A-E8 HDAAREGFL   | 1055  | >CDKN2A-E8 HDAARVGFL   | 171  | 884   |
| >CDKN2A-E8 HDAAREGFL   | 169   | >CDKN2A-E8 HDAARVGFL   | 129  | 40    |
| >CDKN2A-E8 VHDAAREGFI  | 1646  | >CDKN2A-E8 VHDAARVGF   | 438  | 1208  |
| >CDKN2A-E8 PVHDAARE    | 32881 | >CDKN2A-E8 PVHDAARV    | 100  | 32781 |
| >CDKN2A-E8 RPVHDAARE   | 8669  | >CDKN2A-E8 RPVHDAARV   | 82   | 8587  |
| >CDKN2A-E8 RPVHDAARE(  | 58    | >CDKN2A-E8 RPVHDAARV(  | 30   | 28    |
| >CDKN2A-E8 RPVHDAARE(  | 287   | >CDKN2A-E8 RPVHDAARV(  | 121  | 166   |
| >CDKN2A-E8 RPVHDAARE(  | 112   | >CDKN2A-E8 RPVHDAARV(  | 59   | 53    |
| >CDKN2A-F9 FLDTLVVL    | 12    | >CDKN2A-F9 LLDTLVVL    | 52   | 40    |
| >CDKN2A-F9 FLDTLVVLHR, | 12    | >CDKN2A-F9 LLDTLVVLHR, | 49   | 37    |
| >CDKN2A-F9 FLDTLVVL    | 9     | >CDKN2A-F9 LLDTLVVL    | 77   | 68    |
| >CDKN2A-F9 FLDTLVVLHR, | 7     | >CDKN2A-F9 LLDTLVVLHR, | 70   | 63    |
| >CDKN2A-F9 FLDTLVVL    | 74    | >CDKN2A-F9 LLDTLVVL    | 755  | 681   |
| >CDKN2A-F9 FLDTLVVLHR, | 24    | >CDKN2A-F9 LLDTLVVLHR, | 236  | 212   |
| >CDKN2A-F9 FLDTLVVL    | 37    | >CDKN2A-F9 LLDTLVVL    | 308  | 271   |
| >CDKN2A-F9 FLDTLVVLHR, | 68    | >CDKN2A-F9 LLDTLVVLHR, | 430  | 362   |
| >CDKN2A-F9 FLDTLVVL    | 3     | >CDKN2A-F9 LLDTLVVL    | 10   | 7     |
| >CDKN2A-F9 FLDTLVVLHR, | 3     | >CDKN2A-F9 LLDTLVVLHR, | 11   | 8     |
| >CDKN2A-F9 FLDTLVVL    | 4     | >CDKN2A-F9 LLDTLVVL    | 12   | 8     |
| >CDKN2A-F9 FLDTLVVLHR, | 9     | >CDKN2A-F9 LLDTLVVLHR, | 61   | 52    |
| >CDKN2A-F9 FLDTLVVL    | 7     | >CDKN2A-F9 LLDTLVVL    | 18   | 11    |
| >CDKN2A-F9 FLDTLVVLHR, | 8     | >CDKN2A-F9 LLDTLVVLHR, | 27   | 19    |
| >CDKN2A-F9 FLDTLVVL    | 8     | >CDKN2A-F9 LLDTLVVL    | 31   | 23    |
| >CDKN2A-F9 FLDTLVVLHR, | 19    | >CDKN2A-F9 LLDTLVVLHR, | 113  | 94    |
| >CDKN2A-F9 FLDTLVVL    | 3     | >CDKN2A-F9 LLDTLVVL    | 6    | 3     |
| >CDKN2A-F9 FLDTLVVLHR, | 3     | >CDKN2A-F9 LLDTLVVLHR, | 6    | 3     |
| >CDKN2A-F9 FLDTLVVLHR  | 586   | >CDKN2A-F9 LLDTLVVLHR  | 367  | 219   |
| >CDKN2A-F9 FLDTLVVLHR  | 354   | >CDKN2A-F9 LLDTLVVLHR  | 1631 | 1277  |
| >CDKN2A-F9 FLDTLVVL    | 52    | >CDKN2A-F9 LLDTLVVL    | 1274 | 1222  |
| >CDKN2A-F9 FLDTLVVLHR  | 553   | >CDKN2A-F9 LLDTLVVLHR  | 489  | 64    |
| >CDKN2A-F9 FLDTLVVLHR  | 272   | >CDKN2A-F9 LLDTLVVLHR  | 350  | 78    |
| >CDKN2A-F9 GFLDTLVV    | 4489  | >CDKN2A-F9 GLLDTLVV    | 11   | 4478  |
| >CDKN2A-F9 GFLDTLVVL   | 9024  | >CDKN2A-F9 GLLDTLVVL   | 15   | 9009  |
| >CDKN2A-F9 GFLDTLVV    | 3190  | >CDKN2A-F9 GLLDTLVV    | 64   | 3126  |
| >CDKN2A-F9 GFLDTLVVL   | 2877  | >CDKN2A-F9 GLLDTLVVL   | 50   | 2827  |
| >CDKN2A-F9 GFLDTLVV    | 8492  | >CDKN2A-F9 GLLDTLVV    | 18   | 8474  |
| >CDKN2A-F9 GFLDTLVVL   | 16327 | >CDKN2A-F9 GLLDTLVVL   | 87   | 16240 |
| >CDKN2A-F9 GFLDTLVV    | 1989  | >CDKN2A-F9 GLLDTLVV    | 10   | 1979  |
| >CDKN2A-F9 GFLDTLVVL   | 4792  | >CDKN2A-F9 GLLDTLVVL   | 15   | 4777  |
| >CDKN2A-F9 GFLDTLVV    | 313   | >CDKN2A-F9 GLLDTLVV    | 2    | 311   |
| >CDKN2A-F9 GFLDTLVVL   | 1991  | >CDKN2A-F9 GLLDTLVVL   | 3    | 1988  |
| >CDKN2A-F9 GFLDTLVV    | 494   | >CDKN2A-F9 GLLDTLVV    | 2    | 492   |

|                       |       |                       |       |       |
|-----------------------|-------|-----------------------|-------|-------|
| >CDKN2A-F9 GFLDTLVVL  | 1686  | >CDKN2A-F9 GLLDTLVVL  | 3     | 1683  |
| >CDKN2A-F9 GFLDTLVV   | 110   | >CDKN2A-F9 GLLDTLVV   | 4     | 106   |
| >CDKN2A-F9 GFLDTLVVL  | 1473  | >CDKN2A-F9 GLLDTLVVL  | 6     | 1467  |
| >CDKN2A-F9 GFLDTLVV   | 2884  | >CDKN2A-F9 GLLDTLVV   | 3     | 2881  |
| >CDKN2A-F9 GFLDTLVVL  | 8499  | >CDKN2A-F9 GLLDTLVVL  | 5     | 8494  |
| >CDKN2A-F9 GFLDTLVV   | 221   | >CDKN2A-F9 GLLDTLVV   | 2     | 219   |
| >CDKN2A-F9 GFLDTLVVL  | 2258  | >CDKN2A-F9 GLLDTLVVL  | 2     | 2256  |
| >CDKN2A-F9 GFLDTLVVL  | 298   | >CDKN2A-F9 GLLDTLVVL  | 9107  | 8809  |
| >CDKN2A-F9 GFLDTLVVL  | 75    | >CDKN2A-F9 GLLDTLVVL  | 12258 | 12183 |
| >CDKN2A-F9 GFLDTLVVLH | 38    | >CDKN2A-F9 GLLDTLVVLH | 140   | 102   |
| >CDKN2A-F9 GFLDTLVVLH | 421   | >CDKN2A-F9 GLLDTLVVLH | 1958  | 1537  |
| >CDKN2A-F9 GFLDTLVVLH | 77    | >CDKN2A-F9 GLLDTLVVLH | 275   | 198   |
| >CDKN2A-F9 RPVHDAARE  | 58    | >CDKN2A-F9 RPVHDAARE  | 23    | 35    |
| >CDKN2A-F9 RPVHDAARE  | 287   | >CDKN2A-F9 RPVHDAARE  | 4920  | 4633  |
| >CDKN2A-F9 RPVHDAARE  | 112   | >CDKN2A-F9 RPVHDAARE  | 1780  | 1668  |
| >CDKN2A-F9 EGFLDTLV   | 135   | >CDKN2A-F9 EGLLDTLV   | 3354  | 3219  |
| >CDKN2A-F9 REGFLDTLV  | 1564  | >CDKN2A-F9 REGLLDTLV  | 478   | 1086  |
| >CDKN2A-F9 REGFLDTL   | 13    | >CDKN2A-F9 REGLLDTL   | 25    | 12    |
| >CDKN2A-F9 REGFLDTLV  | 213   | >CDKN2A-F9 REGLLDTLV  | 641   | 428   |
| >CDKN2A-F9 REGFLDTLVV | 14    | >CDKN2A-F9 REGLLDTLVV | 28    | 14    |
| >CDKN2A-F9 REGFLDTL   | 99    | >CDKN2A-F9 REGLLDTL   | 76    | 23    |
| >CDKN2A-F9 REGFLDTLV  | 208   | >CDKN2A-F9 REGLLDTLV  | 155   | 53    |
| >CDKN2A-F9 REGFLDTLVV | 264   | >CDKN2A-F9 REGLLDTLVV | 338   | 74    |
| >CDKN2A-F9 REGFLDTLVV | 63    | >CDKN2A-F9 REGLLDTLVV | 55    | 8     |
| >CDKN2A-F9 REGFLDTLV  | 35    | >CDKN2A-F9 REGLLDTLV  | 17    | 18    |
| >CDKN2A-F9 REGFLDTLVV | 89    | >CDKN2A-F9 REGLLDTLVV | 111   | 22    |
| >CDKN2A-F9 REGFLDTLVV | 68    | >CDKN2A-F9 REGLLDTLVV | 42    | 26    |
| >CDKN2A-F9 AREGFLDTL  | 165   | >CDKN2A-F9 AREGLLDTL  | 217   | 52    |
| >CDKN2A-F9 AREGFLDTL  | 63    | >CDKN2A-F9 AREGLLDTL  | 69    | 6     |
| >CDKN2A-F9 AAREGFLDTL | 620   | >CDKN2A-F9 AAREGLLDTL | 427   | 193   |
| >CDKN2A-F9 AAREGFLDTL | 408   | >CDKN2A-F9 AAREGLLDTL | 583   | 175   |
| >CDKN2A-F9 AAREGFLDTL | 252   | >CDKN2A-F9 AAREGLLDTL | 205   | 47    |
| >CDKN2A-F9 AAREGFLDTL | 342   | >CDKN2A-F9 AAREGLLDTL | 542   | 200   |
| >CDKN2A-F9 AAREGFLDTL | 203   | >CDKN2A-F9 AAREGLLDTL | 266   | 63    |
| >CDKN2A-F9 AAREGFLDTL | 53    | >CDKN2A-F9 AAREGLLDTL | 35    | 18    |
| >CDKN2A-F9 HDAAREGFL  | 169   | >CDKN2A-F9 HDAAREGFL  | 115   | 54    |
| >CDKN2A-G1 GARLDVRDA  | 604   | >CDKN2A-G1 WARLDVRDA  | 194   | 410   |
| >CDKN2A-G1 GARLDVRDA  | 457   | >CDKN2A-G1 WARLDVRDA  | 245   | 212   |
| >CDKN2A-G1 GARLDVRDA  | 2771  | >CDKN2A-G1 WARLDVRDA  | 415   | 2356  |
| >CDKN2A-G1 AGARLDVRD  | 21955 | >CDKN2A-G1 AWARLDVRD  | 381   | 21574 |
| >CDKN2A-G1 AGARLDVRD  | 289   | >CDKN2A-G1 AWARLDVRD  | 4342  | 4053  |
| >CDKN2A-G1 AGARLDVR   | 6082  | >CDKN2A-G1 AWARLDVR   | 120   | 5962  |
| >CDKN2A-G1 AGARLDVRD  | 34196 | >CDKN2A-G1 AWARLDVRD  | 138   | 34058 |

|                       |       |                      |     |       |
|-----------------------|-------|----------------------|-----|-------|
| >CDKN2A-G1 RAGARLDV   | 3118  | >CDKN2A-G1 RAWARLDV  | 456 | 2662  |
| >CDKN2A-G1 RAGARLDVR  | 90    | >CDKN2A-G1 RAWARLDVR | 11  | 79    |
| >CDKN2A-G1 RAGARLDV   | 5075  | >CDKN2A-G1 RAWARLDV  | 284 | 4791  |
| >CDKN2A-G1 RAGARLDVR  | 670   | >CDKN2A-G1 RAWARLDVR | 108 | 562   |
| >CDKN2A-G1 HRAGARLDV  | 197   | >CDKN2A-G1 HRAWARLDV | 180 | 17    |
| >CDKN2A-G1 HRAGARLDV  | 101   | >CDKN2A-G1 HRAWARLDV | 49  | 52    |
| >CDKN2A-G1 HRAGARLDV  | 1203  | >CDKN2A-G1 HRAWARLDV | 163 | 1040  |
| >CDKN2A-G1 HRAGARLDV  | 633   | >CDKN2A-G1 HRAWARLDV | 303 | 330   |
| >CDKN2A-G1 VLHRAGARL  | 1276  | >CDKN2A-G1 VLHRAWARL | 102 | 1174  |
| >CDKN2A-G1 VLHRAGARL  | 371   | >CDKN2A-G1 VLHRAWARL | 274 | 97    |
| >CDKN2A-G1 VLHRAGARL  | 156   | >CDKN2A-G1 VLHRAWARL | 172 | 16    |
| >CDKN2A-G1 VLHRAGARL  | 77    | >CDKN2A-G1 VLHRAWARL | 75  | 2     |
| >CDKN2A-G1 VLHRAGARL  | 21    | >CDKN2A-G1 VLHRAWARL | 15  | 6     |
| >CDKN2A-G1 VLHRAGARL  | 36    | >CDKN2A-G1 VLHRAWARL | 27  | 9     |
| >CDKN2A-G1 VLHRAGARL  | 269   | >CDKN2A-G1 VLHRAWARL | 645 | 376   |
| >CDKN2A-G1 VLHRAGARL  | 346   | >CDKN2A-G1 VLHRAWARL | 534 | 188   |
| >CDKN2A-G1 VLHRAGARL  | 358   | >CDKN2A-G1 VLHRAWARL | 166 | 192   |
| >CDKN2A-G1 VLHRAGARL  | 33    | >CDKN2A-G1 VLHRAWARL | 26  | 7     |
| >CDKN2A-G1 VLHRAGARL  | 6     | >CDKN2A-G1 VLHRAWARL | 6   | 0     |
| >CDKN2A-G1 VLHRAGARL  | 3     | >CDKN2A-G1 VLHRAWARL | 3   | 0     |
| >CDKN2A-G1 VLHRAGARL  | 2379  | >CDKN2A-G1 VLHRAWARL | 475 | 1904  |
| >CDKN2A-G1 VLHRAGAR   | 299   | >CDKN2A-G1 VLHRAWAR  | 44  | 255   |
| >CDKN2A-G1 VLHRAGAR   | 3139  | >CDKN2A-G1 VLHRAWAR  | 403 | 2736  |
| >CDKN2A-G1 VLHRAGAR   | 2512  | >CDKN2A-G1 VLHRAWAR  | 452 | 2060  |
| >CDKN2A-G1 VVLHRAGA   | 471   | >CDKN2A-G1 VVLHRAWA  | 297 | 174   |
| >CDKN2A-G1 VVLHRAGARI | 1337  | >CDKN2A-G1 VVLHRAWAR | 308 | 1029  |
| >CDKN2A-G1 VVLHRAGARI | 998   | >CDKN2A-G1 VVLHRAWAR | 214 | 784   |
| >CDKN2A-G1 VVLHRAGAR  | 2247  | >CDKN2A-G1 VVLHRAWAR | 276 | 1971  |
| >CDKN2A-G1 VVLHRAGAR  | 225   | >CDKN2A-G1 VVLHRAWAR | 32  | 193   |
| >CDKN2A-G1 VVLHRAGAR  | 576   | >CDKN2A-G1 VVLHRAWAR | 72  | 504   |
| >CDKN2A-G1 VVLHRAGARI | 129   | >CDKN2A-G1 VVLHRAWAR | 125 | 4     |
| >CDKN2A-G1 VVLHRAGAR  | 1786  | >CDKN2A-G1 VVLHRAWAR | 257 | 1529  |
| >CDKN2A-G1 LVVLHRAGAF | 250   | >CDKN2A-G1 LVVLHRAWA | 90  | 160   |
| >CDKN2A-G1 LVVLHRAGAF | 1077  | >CDKN2A-G1 LVVLHRAWA | 491 | 586   |
| >CDKN2A-G1 LVVLHRAGAF | 873   | >CDKN2A-G1 LVVLHRAWA | 360 | 513   |
| >CDKN2A-G1 LVVLHRAGAF | 127   | >CDKN2A-G1 LVVLHRAWA | 16  | 111   |
| >CDKN2A-G1 LVVLHRAGAF | 1985  | >CDKN2A-G1 LVVLHRAWA | 226 | 1759  |
| >CDKN2A-G1 LVVLHRAGAF | 287   | >CDKN2A-G1 LVVLHRAWA | 28  | 259   |
| >CDKN2A-G1 LVVLHRAG   | 23995 | >CDKN2A-G1 LVVLHRAW  | 111 | 23884 |
| >CDKN2A-G1 LVVLHRAGAF | 435   | >CDKN2A-G1 LVVLHRAWA | 497 | 62    |
| >CDKN2A-G1 LVVLHRAG   | 22314 | >CDKN2A-G1 LVVLHRAW  | 382 | 21932 |
| >CDKN2A-G1 LVVLHRAGAF | 5290  | >CDKN2A-G1 LVVLHRAWA | 407 | 4883  |
| >CDKN2A-G1 LVVLHRAGAF | 1867  | >CDKN2A-G1 LVVLHRAWA | 415 | 1452  |

|                        |       |                        |      |       |
|------------------------|-------|------------------------|------|-------|
| >CDKN2A-G1 TLVVLHRAGA  | 240   | >CDKN2A-G1 TLVVLHRAW,  | 498  | 258   |
| >CDKN2A-G1 TLVVLHRAGA  | 465   | >CDKN2A-G1 TLVVLHRAW,  | 281  | 184   |
| >CDKN2A-G1 TLVVLHRAGA  | 209   | >CDKN2A-G1 TLVVLHRAW,  | 55   | 154   |
| >CDKN2A-G1 TLVVLHRAGA  | 534   | >CDKN2A-G1 TLVVLHRAW,  | 139  | 395   |
| >CDKN2A-G1 TLVVLHRAGA  | 185   | >CDKN2A-G1 TLVVLHRAW,  | 104  | 81    |
| >CDKN2A-G1 TLVVLHRAGA  | 1170  | >CDKN2A-G1 TLVVLHRAW,  | 262  | 908   |
| >CDKN2A-G1 DTLVVLHRAC  | 27331 | >CDKN2A-G1 DTLVVLHRAV  | 411  | 26920 |
| >CDKN2A-G1 DTLVVLHRAC  | 197   | >CDKN2A-G1 DTLVVLHRAV  | 449  | 252   |
| >CDKN2A-G1 DTLVVLHRAC  | 65    | >CDKN2A-G1 DTLVVLHRAV  | 202  | 137   |
| >CDKN2A-G1 DTLVVLHRAC  | 26013 | >CDKN2A-G1 DTLVVLHRAV  | 233  | 25780 |
| >CDKN2A-G1 DTLVVLHRAC  | 24936 | >CDKN2A-G1 DTLVVLHRAV  | 184  | 24752 |
| >CDKN2A-G1 DTLVVLHRAC  | 33308 | >CDKN2A-G1 DTLVVLHRAV  | 455  | 32853 |
| >CDKN2A-G1 GRLPVDLAEE  | 202   | >CDKN2A-G1 DRLPVDLAEE  | 3088 | 2886  |
| >CDKN2A-G1 GRLPVDLAEE  | 194   | >CDKN2A-G1 DRLPVDLAEE  | 1848 | 1654  |
| >CDKN2A-G1 GRLPVDLAEE  | 29    | >CDKN2A-G1 DRLPVDLAEE  | 661  | 632   |
| >CDKN2A-G1 AWGRLPVDL   | 474   | >CDKN2A-G1 AWDRLPVDL   | 3414 | 2940  |
| >CDKN2A-G1 AWGRLPVDL   | 403   | >CDKN2A-G1 AWDRLPVDL   | 411  | 8     |
| >CDKN2A-G1 AWGRLPVDL   | 156   | >CDKN2A-G1 AWDRLPVDL   | 156  | 0     |
| >CDKN2A-G1 DAWGRLPV    | 260   | >CDKN2A-G1 DAWDRLPV    | 207  | 53    |
| >CDKN2A-G1 DAWGRLPV    | 24    | >CDKN2A-G1 DAWDRLPV    | 13   | 11    |
| >CDKN2A-G1 VRDAWGRLP   | 489   | >CDKN2A-G1 VRDAWDRLP   | 1071 | 582   |
| >CDKN2A-G1 DVRDAWGRI   | 456   | >CDKN2A-G1 DVRDAWDRI   | 7780 | 7324  |
| >CDKN2A-G1 DVRDAWGRI   | 277   | >CDKN2A-G1 DVRDAWDRI   | 748  | 471   |
| >CDKN2A-G1 DVRDAWGR    | 17    | >CDKN2A-G1 DVRDAWDR    | 22   | 5     |
| >CDKN2A-G1 DVRDAWGR    | 62    | >CDKN2A-G1 DVRDAWDR    | 109  | 47    |
| >CDKN2A-G1 DVRDAWGRI   | 208   | >CDKN2A-G1 DVRDAWDRI   | 221  | 13    |
| >CDKN2A-G1 DVRDAWGRI   | 198   | >CDKN2A-G1 DVRDAWDRI   | 280  | 82    |
| >CDKN2A-G1 LDVRDAWGF   | 477   | >CDKN2A-G1 LDVRDAWDF   | 678  | 201   |
| >CDKN2A-G1 RLDVRDAWC   | 802   | >CDKN2A-G1 RLDVRDAWC   | 282  | 520   |
| >CDKN2A-G1 RLDVRDAWC   | 122   | >CDKN2A-G1 RLDVRDAWC   | 89   | 33    |
| >CDKN2A-G1 RLDVRDAWC   | 805   | >CDKN2A-G1 RLDVRDAWC   | 320  | 485   |
| >CDKN2A-G1 RLDVRDAWC   | 227   | >CDKN2A-G1 RLDVRDAWC   | 100  | 127   |
| >CDKN2A-G1 RLDVRDAWC   | 91    | >CDKN2A-G1 RLDVRDAWC   | 73   | 18    |
| >CDKN2A-G1 RLDVRDAWC   | 120   | >CDKN2A-G1 RLDVRDAWC   | 285  | 165   |
| >CDKN2A-G1 RLDVRDAWC   | 92    | >CDKN2A-G1 RLDVRDAWC   | 179  | 87    |
| >CDKN2A-G1 RLDVRDAWC   | 293   | >CDKN2A-G1 RLDVRDAWC   | 591  | 298   |
| >CDKN2A-G1 ARLDVRDAW   | 89    | >CDKN2A-G1 ARLDVRDAW   | 323  | 234   |
| >CDKN2A-G1 GHRDVARYLI  | 282   | >CDKN2A-G1 DHRDVARYLI  | 450  | 168   |
| >CDKN2A-G1 GHRDVARYLI  | 4089  | >CDKN2A-G1 DHRDVARYLI  | 291  | 3798  |
| >CDKN2A-G1 LGHRDVARYI  | 415   | >CDKN2A-G1 LDHRDVARYI  | 4547 | 4132  |
| >CDKN2A-G1 LGHRDVARYI  | 152   | >CDKN2A-G1 LDHRDVARYI  | 2503 | 2351  |
| >CDKN2A-G1 LGHRDVARYI  | 409   | >CDKN2A-G1 LDHRDVARYI  | 3687 | 3278  |
| >CDKN2A-G1 ELGHRDVARYI | 938   | >CDKN2A-G1 ELDHRDVARYI | 127  | 811   |

|                       |       |                       |      |       |
|-----------------------|-------|-----------------------|------|-------|
| >CDKN2A-G1 ELGHRDVAR\ | 382   | >CDKN2A-G1 ELDHRDVAR\ | 155  | 227   |
| >CDKN2A-G1 ELGHRDVAR\ | 1150  | >CDKN2A-G1 ELDHRDVAR\ | 427  | 723   |
| >CDKN2A-G1 ELGHRDVAR\ | 477   | >CDKN2A-G1 ELDHRDVAR\ | 594  | 117   |
| >CDKN2A-G1 ELGHRDVAR\ | 274   | >CDKN2A-G1 ELDHRDVAR\ | 3078 | 2804  |
| >CDKN2A-G1 ELGHRDVAR\ | 413   | >CDKN2A-G1 ELDHRDVAR\ | 609  | 196   |
| >CDKN2A-G1 ELGHRDVAR  | 85    | >CDKN2A-G1 ELDHRDVAR  | 107  | 22    |
| >CDKN2A-G1 ELGHRDVAR  | 153   | >CDKN2A-G1 ELDHRDVAR  | 175  | 22    |
| >CDKN2A-G1 ELGHRDVAR  | 188   | >CDKN2A-G1 ELDHRDVAR  | 1065 | 877   |
| >CDKN2A-G1 EELGHRDV   | 193   | >CDKN2A-G1 EELDHRDV   | 145  | 48    |
| >CDKN2A-G1 EELGHRDVAF | 86    | >CDKN2A-G1 EELDHRDVAF | 167  | 81    |
| >CDKN2A-G1 EELGHRDVAF | 177   | >CDKN2A-G1 EELDHRDVAF | 211  | 34    |
| >CDKN2A-G1 EELGHRDVAF | 121   | >CDKN2A-G1 EELDHRDVAF | 128  | 7     |
| >CDKN2A-G1 EELGHRDV   | 54    | >CDKN2A-G1 EELDHRDV   | 131  | 77    |
| >CDKN2A-G1 EELGHRDVA  | 10    | >CDKN2A-G1 EELDHRDVA  | 19   | 9     |
| >CDKN2A-G1 EELGHRDVAF | 471   | >CDKN2A-G1 EELDHRDVAF | 392  | 79    |
| >CDKN2A-G1 AEELGHRDV  | 408   | >CDKN2A-G1 AEELDHRDV  | 939  | 531   |
| >CDKN2A-G1 AEELGHRDV  | 29    | >CDKN2A-G1 AEELDHRDV  | 51   | 22    |
| >CDKN2A-G1 AEELGHRDV/ | 39    | >CDKN2A-G1 AEELDHRDV/ | 46   | 7     |
| >CDKN2A-G1 AEELGHRDV  | 336   | >CDKN2A-G1 AEELDHRDV  | 896  | 560   |
| >CDKN2A-G1 LAEELGHR   | 532   | >CDKN2A-G1 LAEELDHR   | 246  | 286   |
| >CDKN2A-G1 DLAEELGHRC | 265   | >CDKN2A-G1 DLAEELDHR  | 264  | 1     |
| >CDKN2A-G1 DLAEELGHRC | 185   | >CDKN2A-G1 DLAEELDHR  | 169  | 16    |
| >CDKN2A-G1 DLAEELGHRC | 418   | >CDKN2A-G1 DLAEELDHR  | 284  | 134   |
| >CDKN2A-G1 DLAEELGHRC | 27    | >CDKN2A-G1 DLAEELDHR  | 36   | 9     |
| >CDKN2A-G1 DLAEELGHR  | 124   | >CDKN2A-G1 DLAEELDHR  | 201  | 77    |
| >CDKN2A-G1 DLAEELGHR  | 182   | >CDKN2A-G1 DLAEELDHR  | 95   | 87    |
| >CDKN2A-G1 LPVDLAEELG | 86    | >CDKN2A-G1 LPVDLAEELD | 103  | 17    |
| >CDKN2A-G1 GHRDVARYLF | 282   | >CDKN2A-G1 SHRDVARYLF | 88   | 194   |
| >CDKN2A-G1 LGHRDVARY  | 8474  | >CDKN2A-G1 LSHRDVARY  | 20   | 8454  |
| >CDKN2A-G1 LGHRDVARY  | 415   | >CDKN2A-G1 LSHRDVARY  | 97   | 318   |
| >CDKN2A-G1 LGHRDVAR   | 1027  | >CDKN2A-G1 LSHRDVAR   | 60   | 967   |
| >CDKN2A-G1 LGHRDVARYL | 152   | >CDKN2A-G1 LSHRDVARYL | 20   | 132   |
| >CDKN2A-G1 LGHRDVAR   | 2888  | >CDKN2A-G1 LSHRDVAR   | 212  | 2676  |
| >CDKN2A-G1 LGHRDVARYL | 745   | >CDKN2A-G1 LSHRDVARYL | 47   | 698   |
| >CDKN2A-G1 LGHRDVARY  | 409   | >CDKN2A-G1 LSHRDVARY  | 122  | 287   |
| >CDKN2A-G1 LGHRDVARY  | 3998  | >CDKN2A-G1 LSHRDVARY  | 403  | 3595  |
| >CDKN2A-G1 LGHRDVARY  | 2036  | >CDKN2A-G1 LSHRDVARY  | 7    | 2029  |
| >CDKN2A-G1 LGHRDVARYL | 12743 | >CDKN2A-G1 LSHRDVARYL | 105  | 12638 |
| >CDKN2A-G1 LGHRDVARY  | 7463  | >CDKN2A-G1 LSHRDVARY  | 237  | 7226  |
| >CDKN2A-G1 LGHRDVARY  | 8401  | >CDKN2A-G1 LSHRDVARY  | 163  | 8238  |
| >CDKN2A-G1 LGHRDVARY  | 1736  | >CDKN2A-G1 LSHRDVARY  | 117  | 1619  |
| >CDKN2A-G1 ELGHRDVAR\ | 938   | >CDKN2A-G1 ELSHRDVARY | 248  | 690   |
| >CDKN2A-G1 ELGHRDVAR\ | 1533  | >CDKN2A-G1 ELSHRDVARY | 213  | 1320  |

|                       |      |                        |     |      |
|-----------------------|------|------------------------|-----|------|
| >CDKN2A-G1 ELGHRDVAR\ | 382  | >CDKN2A-G1 ELSHRDVARY  | 568 | 186  |
| >CDKN2A-G1 ELGHRDVAR\ | 477  | >CDKN2A-G1 ELSHRDVARY  | 326 | 151  |
| >CDKN2A-G1 ELGHRDVAR\ | 1035 | >CDKN2A-G1 ELSHRDVARY  | 434 | 601  |
| >CDKN2A-G1 ELGHRDVAR\ | 274  | >CDKN2A-G1 ELSHRDVARY  | 278 | 4    |
| >CDKN2A-G1 ELGHRDVAR\ | 413  | >CDKN2A-G1 ELSHRDVARY  | 276 | 137  |
| >CDKN2A-G1 ELGHRDVAR  | 85   | >CDKN2A-G1 ELSHRDVAR   | 38  | 47   |
| >CDKN2A-G1 ELGHRDVAR  | 153  | >CDKN2A-G1 ELSHRDVAR   | 25  | 128  |
| >CDKN2A-G1 ELGHRDVAR\ | 3655 | >CDKN2A-G1 ELSHRDVARY  | 479 | 3176 |
| >CDKN2A-G1 ELGHRDVAR\ | 608  | >CDKN2A-G1 ELSHRDVARY  | 378 | 230  |
| >CDKN2A-G1 ELGHRDVAR  | 188  | >CDKN2A-G1 ELSHRDVAR   | 305 | 117  |
| >CDKN2A-G1 EELGHRDV   | 193  | >CDKN2A-G1 EELSHRDV    | 177 | 16   |
| >CDKN2A-G1 EELGHRDVAF | 86   | >CDKN2A-G1 EELSHRDVAR  | 115 | 29   |
| >CDKN2A-G1 EELGHRDVAF | 177  | >CDKN2A-G1 EELSHRDVAR  | 356 | 179  |
| >CDKN2A-G1 EELGHRDVAF | 121  | >CDKN2A-G1 EELSHRDVAR  | 123 | 2    |
| >CDKN2A-G1 EELGHRDV   | 54   | >CDKN2A-G1 EELSHRDV    | 83  | 29   |
| >CDKN2A-G1 EELGHRDVA  | 10   | >CDKN2A-G1 EELSHRDVA   | 15  | 5    |
| >CDKN2A-G1 EELGHRDVAF | 471  | >CDKN2A-G1 EELSHRDVAR  | 587 | 116  |
| >CDKN2A-G1 AEELGHRDV  | 408  | >CDKN2A-G1 AEELSHRDV   | 719 | 311  |
| >CDKN2A-G1 AEELGHRDV  | 29   | >CDKN2A-G1 AEELSHRDV   | 23  | 6    |
| >CDKN2A-G1 AEELGHRDV\ | 39   | >CDKN2A-G1 AEELSHRDVA  | 34  | 5    |
| >CDKN2A-G1 AEELGHRDV  | 336  | >CDKN2A-G1 AEELSHRDV   | 457 | 121  |
| >CDKN2A-G1 LAEELGHR   | 1077 | >CDKN2A-G1 LAEELSHR    | 494 | 583  |
| >CDKN2A-G1 LAEELGHR   | 532  | >CDKN2A-G1 LAEELSHR    | 188 | 344  |
| >CDKN2A-G1 DLAEELGHRC | 582  | >CDKN2A-G1 DLAEELSHRD  | 435 | 147  |
| >CDKN2A-G1 DLAEELGHRC | 265  | >CDKN2A-G1 DLAEELSHRD  | 232 | 33   |
| >CDKN2A-G1 DLAEELGHRC | 185  | >CDKN2A-G1 DLAEELSHRD  | 170 | 15   |
| >CDKN2A-G1 DLAEELGHRC | 418  | >CDKN2A-G1 DLAEELSHRD  | 291 | 127  |
| >CDKN2A-G1 DLAEELGHRC | 27   | >CDKN2A-G1 DLAEELSHRD  | 25  | 2    |
| >CDKN2A-G1 DLAEELGHR  | 124  | >CDKN2A-G1 DLAEELSHR   | 54  | 70   |
| >CDKN2A-G1 DLAEELGHR  | 182  | >CDKN2A-G1 DLAEELSHR   | 50  | 132  |
| >CDKN2A-G1 LPVDLAEELG | 86   | >CDKN2A-G1 LPVDLAEELSH | 49  | 37   |
| >CDKN2A-G1 AGGTRGSNH  | 1291 | >CDKN2A-G1 AAGTRGSNH   | 146 | 1145 |
| >CDKN2A-G1 DVARYLRAA\ | 8202 | >CDKN2A-G1 DVARYLRAA\  | 211 | 7991 |
| >CDKN2A-G1 RAAAGGTR   | 82   | >CDKN2A-G1 RAAAAGTR    | 96  | 14   |
| >CDKN2A-G1 RAAAGGTR   | 423  | >CDKN2A-G1 RAAAAGTR    | 148 | 275  |
| >CDKN2A-G1 LRAAAGGTR  | 199  | >CDKN2A-G1 LRAAAAAGTR  | 140 | 59   |
| >CDKN2A-G1 YLRAAAGGT  | 48   | >CDKN2A-G1 YLRAAAAAGT  | 20  | 28   |
| >CDKN2A-G1 YLRAAAGGT  | 1645 | >CDKN2A-G1 YLRAAAAAGT  | 358 | 1287 |
| >CDKN2A-G1 YLRAAAGGT  | 128  | >CDKN2A-G1 YLRAAAAAGT  | 11  | 117  |
| >CDKN2A-G1 YLRAAAGG   | 920  | >CDKN2A-G1 YLRAAAAAG   | 237 | 683  |
| >CDKN2A-G1 YLRAAAGGTF | 231  | >CDKN2A-G1 YLRAAAAAGTF | 113 | 118  |
| >CDKN2A-G1 RYLRAAAG   | 414  | >CDKN2A-G1 RYLRAAAA    | 199 | 215  |
| >CDKN2A-G1 RYLRAAAGG  | 436  | >CDKN2A-G1 RYLRAAAAAG  | 319 | 117  |



|                       |       |                       |      |       |
|-----------------------|-------|-----------------------|------|-------|
| >CDKN2A-G1 RYLRAAAGG  | 218   | >CDKN2A-G1 RYLRAAAAG  | 218  | 0     |
| >CDKN2A-G1 RYLRAAAGG  | 128   | >CDKN2A-G1 RYLRAAAAG  | 104  | 24    |
| >CDKN2A-G1 RYLRAAAG   | 239   | >CDKN2A-G1 RYLRAAAA   | 19   | 220   |
| >CDKN2A-G1 RYLRAAAGG  | 315   | >CDKN2A-G1 RYLRAAAAG  | 95   | 220   |
| >CDKN2A-G1 RYLRAAAGG  | 96    | >CDKN2A-G1 RYLRAAAAG  | 78   | 18    |
| >CDKN2A-G1 RYLRAAAGG  | 24    | >CDKN2A-G1 RYLRAAAAG  | 27   | 3     |
| >CDKN2A-G1 RYLRAAAGG  | 33    | >CDKN2A-G1 RYLRAAAAG  | 26   | 7     |
| >CDKN2A-G1 RYLRAAAG   | 1304  | >CDKN2A-G1 RYLRAAAA   | 386  | 918   |
| >CDKN2A-G1 ARYLRAAAG  | 1439  | >CDKN2A-G1 ARYLRAAAA  | 192  | 1247  |
| >CDKN2A-G1 ARYLRAAAG  | 321   | >CDKN2A-G1 ARYLRAAAA  | 295  | 26    |
| >CDKN2A-G1 ARYLRAAAG  | 638   | >CDKN2A-G1 ARYLRAAAA  | 305  | 333   |
| >CDKN2A-G1 VARYLRAAAG | 843   | >CDKN2A-G1 VARYLRAAAA | 64   | 779   |
| >CDKN2A-G1 AGGTRGSNH  | 29263 | >CDKN2A-G1 AEGTRGSNH  | 477  | 28786 |
| >CDKN2A-G1 AGGTRGSNH  | 38581 | >CDKN2A-G1 AEGTRGSNH  | 458  | 38123 |
| >CDKN2A-G1 RAAAGGTR   | 82    | >CDKN2A-G1 RAAAEGR    | 218  | 136   |
| >CDKN2A-G1 RAAAGGTR   | 423   | >CDKN2A-G1 RAAAEGR    | 327  | 96    |
| >CDKN2A-G1 LRAAAGGTR  | 199   | >CDKN2A-G1 LRAAAEGTR  | 501  | 302   |
| >CDKN2A-G1 YLRAAAGGT  | 48    | >CDKN2A-G1 YLRAAAEGT  | 98   | 50    |
| >CDKN2A-G1 YLRAAAGGT  | 1645  | >CDKN2A-G1 YLRAAAEGT  | 445  | 1200  |
| >CDKN2A-G1 YLRAAAGGT  | 128   | >CDKN2A-G1 YLRAAAEGT  | 33   | 95    |
| >CDKN2A-G1 YLRAAAGGT  | 231   | >CDKN2A-G1 YLRAAAEGTR | 300  | 69    |
| >CDKN2A-G1 RYLRAAAG   | 414   | >CDKN2A-G1 RYLRAAAE   | 520  | 106   |
| >CDKN2A-G1 RYLRAAAGG  | 436   | >CDKN2A-G1 RYLRAAAEG  | 116  | 320   |
| >CDKN2A-G1 RYLRAAAGG  | 218   | >CDKN2A-G1 RYLRAAAEGT | 151  | 67    |
| >CDKN2A-G1 RYLRAAAGG  | 128   | >CDKN2A-G1 RYLRAAAEGT | 114  | 14    |
| >CDKN2A-G1 RYLRAAAG   | 239   | >CDKN2A-G1 RYLRAAAE   | 1896 | 1657  |
| >CDKN2A-G1 RYLRAAAGG  | 315   | >CDKN2A-G1 RYLRAAAEG  | 174  | 141   |
| >CDKN2A-G1 RYLRAAAGG  | 96    | >CDKN2A-G1 RYLRAAAEGT | 159  | 63    |
| >CDKN2A-G1 RYLRAAAGG  | 24    | >CDKN2A-G1 RYLRAAAEGT | 31   | 7     |
| >CDKN2A-G1 RYLRAAAGG  | 33    | >CDKN2A-G1 RYLRAAAEGT | 33   | 0     |
| >CDKN2A-G1 ARYLRAAAG  | 321   | >CDKN2A-G1 ARYLRAAAEC | 411  | 90    |
| >CDKN2A-G1 GTRGSNHAR  | 9261  | >CDKN2A-G1 DTRGSNHAR  | 252  | 9009  |
| >CDKN2A-G1 GTRGSNHA   | 16    | >CDKN2A-G1 DTRGSNHA   | 585  | 569   |
| >CDKN2A-G1 GTRGSNHAR  | 51    | >CDKN2A-G1 DTRGSNHAR  | 2556 | 2505  |
| >CDKN2A-G1 GTRGSNHAR  | 15    | >CDKN2A-G1 DTRGSNHAR  | 573  | 558   |
| >CDKN2A-G1 GTRGSNHAR  | 28    | >CDKN2A-G1 DTRGSNHAR  | 363  | 335   |
| >CDKN2A-G1 GTRGSNHAR  | 412   | >CDKN2A-G1 DTRGSNHAR  | 10   | 402   |
| >CDKN2A-G1 GTRGSNHAR  | 205   | >CDKN2A-G1 DTRGSNHAR  | 10   | 195   |
| >CDKN2A-G1 GTRGSNHAR  | 1597  | >CDKN2A-G1 DTRGSNHAR  | 406  | 1191  |
| >CDKN2A-G1 GTRGSNHAR  | 10    | >CDKN2A-G1 DTRGSNHAR  | 185  | 175   |
| >CDKN2A-G1 GTRGSNHAR  | 470   | >CDKN2A-G1 DTRGSNHAR  | 4124 | 3654  |
| >CDKN2A-G1 GGTRGSNHA  | 21040 | >CDKN2A-G1 GDTRGSNHA  | 465  | 20575 |
| >CDKN2A-G1 RAAAGGTR   | 82    | >CDKN2A-G1 RAAAGDTR   | 156  | 74    |

|                       |      |                       |      |      |
|-----------------------|------|-----------------------|------|------|
| >CDKN2A-G1 RAAAGGTR   | 423  | >CDKN2A-G1 RAAAGDTR   | 205  | 218  |
| >CDKN2A-G1 LRAAAGGTR  | 199  | >CDKN2A-G1 LRAAAGDTR  | 683  | 484  |
| >CDKN2A-G1 YLRAAAGGT  | 48   | >CDKN2A-G1 YLRAAAGDT  | 365  | 317  |
| >CDKN2A-G1 YLRAAAGGT  | 128  | >CDKN2A-G1 YLRAAAGDT  | 626  | 498  |
| >CDKN2A-G1 YLRAAAGGTF | 1026 | >CDKN2A-G1 YLRAAAGDTF | 266  | 760  |
| >CDKN2A-G1 YLRAAAGGTF | 231  | >CDKN2A-G1 YLRAAAGDTF | 169  | 62   |
| >CDKN2A-G1 RYLRAAAGG  | 436  | >CDKN2A-G1 RYLRAAAGD  | 563  | 127  |
| >CDKN2A-G1 RYLRAAAGG† | 218  | >CDKN2A-G1 RYLRAAAGD† | 223  | 5    |
| >CDKN2A-G1 RYLRAAAGG† | 128  | >CDKN2A-G1 RYLRAAAGD† | 118  | 10   |
| >CDKN2A-G1 RYLRAAAGG  | 315  | >CDKN2A-G1 RYLRAAAGD  | 1769 | 1454 |
| >CDKN2A-G1 RYLRAAAGG† | 96   | >CDKN2A-G1 RYLRAAAGD† | 407  | 311  |
| >CDKN2A-G1 RYLRAAAGG† | 24   | >CDKN2A-G1 RYLRAAAGD† | 39   | 15   |
| >CDKN2A-G1 RYLRAAAGG† | 33   | >CDKN2A-G1 RYLRAAAGD† | 33   | 0    |
| >CDKN2A-G1 ARYLRAAAGC | 321  | >CDKN2A-G1 ARYLRAAAGC | 1401 | 1080 |
| >CDKN2A-G1 GTRGSNHA   | 16   | >CDKN2A-G1 STRGSNHA   | 6    | 10   |
| >CDKN2A-G1 GTRGSNHAR  | 51   | >CDKN2A-G1 STRGSNHAR  | 12   | 39   |
| >CDKN2A-G1 GTRGSNHAR  | 15   | >CDKN2A-G1 STRGSNHARI | 6    | 9    |
| >CDKN2A-G1 GTRGSNHAR  | 28   | >CDKN2A-G1 STRGSNHAR  | 21   | 7    |
| >CDKN2A-G1 GTRGSNHAR  | 412  | >CDKN2A-G1 STRGSNHAR  | 123  | 289  |
| >CDKN2A-G1 GTRGSNHAR  | 205  | >CDKN2A-G1 STRGSNHAR  | 23   | 182  |
| >CDKN2A-G1 GTRGSNHAR  | 1597 | >CDKN2A-G1 STRGSNHARI | 218  | 1379 |
| >CDKN2A-G1 GTRGSNHAR  | 10   | >CDKN2A-G1 STRGSNHARI | 8    | 2    |
| >CDKN2A-G1 GTRGSNHAR  | 1587 | >CDKN2A-G1 STRGSNHARI | 356  | 1231 |
| >CDKN2A-G1 GTRGSNHAR  | 470  | >CDKN2A-G1 STRGSNHAR  | 287  | 183  |
| >CDKN2A-G1 GTRGSNHAR  | 585  | >CDKN2A-G1 STRGSNHARI | 392  | 193  |
| >CDKN2A-G1 GGTRGSNHA  | 4029 | >CDKN2A-G1 GSTRGSNHAI | 316  | 3713 |
| >CDKN2A-G1 GGTRGSNHA  | 3515 | >CDKN2A-G1 GSTRGSNHAI | 293  | 3222 |
| >CDKN2A-G1 GGTRGSNHA  | 3391 | >CDKN2A-G1 GSTRGSNHAI | 204  | 3187 |
| >CDKN2A-G1 RAAAGGTR   | 82   | >CDKN2A-G1 RAAAGSTR   | 40   | 42   |
| >CDKN2A-G1 RAAAGGTR   | 423  | >CDKN2A-G1 RAAAGSTR   | 132  | 291  |
| >CDKN2A-G1 LRAAAGGTR  | 199  | >CDKN2A-G1 LRAAAGSTR  | 225  | 26   |
| >CDKN2A-G1 YLRAAAGG   | 1088 | >CDKN2A-G1 YLRAAAGS   | 240  | 848  |
| >CDKN2A-G1 YLRAAAGGT  | 48   | >CDKN2A-G1 YLRAAAGST  | 37   | 11   |
| >CDKN2A-G1 YLRAAAGG   | 1926 | >CDKN2A-G1 YLRAAAGS   | 252  | 1674 |
| >CDKN2A-G1 YLRAAAGGT  | 128  | >CDKN2A-G1 YLRAAAGST  | 85   | 43   |
| >CDKN2A-G1 YLRAAAGGTF | 1070 | >CDKN2A-G1 YLRAAAGSTR | 485  | 585  |
| >CDKN2A-G1 YLRAAAGGTF | 891  | >CDKN2A-G1 YLRAAAGSTR | 356  | 535  |
| >CDKN2A-G1 YLRAAAGGTF | 1026 | >CDKN2A-G1 YLRAAAGSTR | 95   | 931  |
| >CDKN2A-G1 YLRAAAGGTF | 729  | >CDKN2A-G1 YLRAAAGSTR | 465  | 264  |
| >CDKN2A-G1 YLRAAAGGTF | 231  | >CDKN2A-G1 YLRAAAGSTR | 115  | 116  |
| >CDKN2A-G1 RYLRAAAGG  | 436  | >CDKN2A-G1 RYLRAAAGS  | 424  | 12   |
| >CDKN2A-G1 RYLRAAAGG† | 218  | >CDKN2A-G1 RYLRAAAGST | 118  | 100  |
| >CDKN2A-G1 RYLRAAAGG† | 128  | >CDKN2A-G1 RYLRAAAGST | 139  | 11   |

|                       |       |                       |      |       |
|-----------------------|-------|-----------------------|------|-------|
| >CDKN2A-G1 RYLRAAAGG  | 315   | >CDKN2A-G1 RYLRAAAGS  | 291  | 24    |
| >CDKN2A-G1 RYLRAAAGG† | 1387  | >CDKN2A-G1 RYLRAAAGST | 440  | 947   |
| >CDKN2A-G1 RYLRAAAGG† | 96    | >CDKN2A-G1 RYLRAAAGST | 76   | 20    |
| >CDKN2A-G1 RYLRAAAGG† | 24    | >CDKN2A-G1 RYLRAAAGST | 15   | 9     |
| >CDKN2A-G1 RYLRAAAGG† | 33    | >CDKN2A-G1 RYLRAAAGST | 34   | 1     |
| >CDKN2A-G1 ARYLRAAAGC | 321   | >CDKN2A-G1 ARYLRAAAGS | 359  | 38    |
| >CDKN2A-G1 RGSNHARI   | 251   | >CDKN2A-G1 RDSNHARI   | 1305 | 1054  |
| >CDKN2A-G1 RGSNHARI   | 14898 | >CDKN2A-G1 RDSNHARI   | 174  | 14724 |
| >CDKN2A-G1 GTRGSNHA   | 16    | >CDKN2A-G1 GTRDSNHA   | 18   | 2     |
| >CDKN2A-G1 GTRGSNHAR  | 51    | >CDKN2A-G1 GTRDSNHAR  | 45   | 6     |
| >CDKN2A-G1 GTRGSNHAR  | 15    | >CDKN2A-G1 GTRDSNHAR  | 13   | 2     |
| >CDKN2A-G1 GTRGSNHAR  | 28    | >CDKN2A-G1 GTRDSNHAR  | 21   | 7     |
| >CDKN2A-G1 GTRGSNHAR  | 412   | >CDKN2A-G1 GTRDSNHAR  | 298  | 114   |
| >CDKN2A-G1 GTRGSNHAR  | 205   | >CDKN2A-G1 GTRDSNHAR  | 136  | 69    |
| >CDKN2A-G1 GTRGSNHAR  | 10    | >CDKN2A-G1 GTRDSNHAR  | 10   | 0     |
| >CDKN2A-G1 GTRGSNHAR  | 470   | >CDKN2A-G1 GTRDSNHAR  | 315  | 155   |
| >CDKN2A-G1 AAEGPSDI   | 855   | >CDKN2A-G1 AAEVPSDI   | 432  | 423   |
| >CDKN2A-G1 DAAEGPSDI  | 1183  | >CDKN2A-G1 DAAEVPSDI  | 162  | 1021  |
| >CDKN2A-G1 IDAAEGPSDI | 267   | >CDKN2A-G1 IDAAEVPSDI | 141  | 126   |
| >CDKN2A-G1 RIDAAEGPSD | 2358  | >CDKN2A-G1 RIDAAEVPSD | 461  | 1897  |
| >CDKN2A-G1 HARIDAAEG  | 1117  | >CDKN2A-G1 HARIDAAEV  | 130  | 987   |
| >CDKN2A-G1 HARIDAAEGF | 330   | >CDKN2A-G1 HARIDAAEVP | 223  | 107   |
| >CDKN2A-G1 HARIDAAEG  | 4243  | >CDKN2A-G1 HARIDAAEV  | 170  | 4073  |
| >CDKN2A-G2 GRVEEVRAL  | 383   | >CDKN2A-G2 DRVEEVRAL  | 5630 | 5247  |
| >CDKN2A-G2 GRVEEVRALL | 45    | >CDKN2A-G2 DRVEEVRALL | 574  | 529   |
| >CDKN2A-G2 GRVEEVRAL  | 189   | >CDKN2A-G2 DRVEEVRAL  | 288  | 99    |
| >CDKN2A-G2 GRVEEVRALL | 338   | >CDKN2A-G2 DRVEEVRALL | 491  | 153   |
| >CDKN2A-G2 GRVEEVRALL | 430   | >CDKN2A-G2 DRVEEVRALL | 3070 | 2640  |
| >CDKN2A-G2 GRVEEVRAL  | 92    | >CDKN2A-G2 DRVEEVRAL  | 3031 | 2939  |
| >CDKN2A-G2 GRVEEVRALL | 186   | >CDKN2A-G2 DRVEEVRALL | 1450 | 1264  |
| >CDKN2A-G2 RGRVEEVRA  | 447   | >CDKN2A-G2 RDRVEEVRA  | 5930 | 5483  |
| >CDKN2A-G2 RGRVEEVRAL | 436   | >CDKN2A-G2 RDRVEEVRAL | 5880 | 5444  |
| >CDKN2A-G2 RGRVEEVRAL | 98    | >CDKN2A-G2 RDRVEEVRAL | 1799 | 1701  |
| >CDKN2A-G2 RGRVEEVRAL | 19421 | >CDKN2A-G2 RDRVEEVRAL | 459  | 18962 |
| >CDKN2A-G2 ARGRVEEVR/ | 4686  | >CDKN2A-G2 ARDRVEEVR/ | 290  | 4396  |
| >CDKN2A-G2 ARGRVEEVR/ | 260   | >CDKN2A-G2 ARDRVEEVR/ | 279  | 19    |
| >CDKN2A-G2 AARGRVEEV  | 678   | >CDKN2A-G2 AARDRVEEV  | 209  | 469   |
| >CDKN2A-G2 AARGRVEEV  | 50    | >CDKN2A-G2 AARDRVEEV  | 20   | 30    |
| >CDKN2A-G2 AARGRVEEV† | 269   | >CDKN2A-G2 AARDRVEEV† | 250  | 19    |
| >CDKN2A-G2 AARGRVEEV† | 265   | >CDKN2A-G2 AARDRVEEV† | 560  | 295   |
| >CDKN2A-G2 AAARGRVEE\ | 33    | >CDKN2A-G2 AAARDRVEE\ | 48   | 15    |
| >CDKN2A-G2 AAARGRVEE\ | 434   | >CDKN2A-G2 AAARDRVEE\ | 746  | 312   |
| >CDKN2A-G2 AAARGRVEE\ | 127   | >CDKN2A-G2 AAARDRVEE\ | 140  | 13    |

|                       |       |                       |      |       |
|-----------------------|-------|-----------------------|------|-------|
| >CDKN2A-G2 TAAARGRV   | 36    | >CDKN2A-G2 TAAARDRV   | 19   | 17    |
| >CDKN2A-G2 TAAARGRVEI | 34    | >CDKN2A-G2 TAAARDRVEI | 18   | 16    |
| >CDKN2A-G2 ATAAARGRV  | 1588  | >CDKN2A-G2 ATAAARDRV  | 279  | 1309  |
| >CDKN2A-G2 ATAAARGRV  | 561   | >CDKN2A-G2 ATAAARDRV  | 376  | 185   |
| >CDKN2A-G2 ATAAARGR   | 366   | >CDKN2A-G2 ATAAARDR   | 1096 | 730   |
| >CDKN2A-G2 ATAAARGR   | 32    | >CDKN2A-G2 ATAAARDR   | 59   | 27    |
| >CDKN2A-G2 ATAAARGRV  | 13    | >CDKN2A-G2 ATAAARDRV  | 11   | 2     |
| >CDKN2A-G2 ATAAARGR   | 623   | >CDKN2A-G2 ATAAARDR   | 408  | 215   |
| >CDKN2A-G2 LATAAARGR  | 105   | >CDKN2A-G2 LATAAARDR  | 259  | 154   |
| >CDKN2A-G2 LATAAARGR\ | 107   | >CDKN2A-G2 LATAAARDR\ | 129  | 22    |
| >CDKN2A-G2 WLATAAARG  | 336   | >CDKN2A-G2 WLATAAARD  | 149  | 187   |
| >CDKN2A-G2 WLATAAARG  | 22    | >CDKN2A-G2 WLATAAARD  | 10   | 12    |
| >CDKN2A-G2 WLATAAARG  | 8     | >CDKN2A-G2 WLATAAARD  | 13   | 5     |
| >CDKN2A-G2 WLATAAARG  | 125   | >CDKN2A-G2 WLATAAARD  | 43   | 82    |
| >CDKN2A-G2 WLATAAARG  | 25    | >CDKN2A-G2 WLATAAARD  | 18   | 7     |
| >CDKN2A-G2 WLATAAARG  | 244   | >CDKN2A-G2 WLATAAARD  | 97   | 147   |
| >CDKN2A-G2 WLATAAARG  | 27    | >CDKN2A-G2 WLATAAARD  | 13   | 14    |
| >CDKN2A-G2 WLATAAARG  | 23    | >CDKN2A-G2 WLATAAARD  | 7    | 16    |
| >CDKN2A-G2 WLATAAARG  | 3     | >CDKN2A-G2 WLATAAARD  | 3    | 0     |
| >CDKN2A-G2 WLATAAARG  | 37    | >CDKN2A-G2 WLATAAARD  | 33   | 4     |
| >CDKN2A-G2 WLATAAARG  | 350   | >CDKN2A-G2 WLATAAARD  | 372  | 22    |
| >CDKN2A-G2 WLATAAARG  | 58    | >CDKN2A-G2 WLATAAARD  | 95   | 37    |
| >CDKN2A-G2 DWLATAAAR  | 30    | >CDKN2A-G2 DWLATAAAR  | 50   | 20    |
| >CDKN2A-G3 GALPNAPNS\ | 12143 | >CDKN2A-G3 EALPNAPNSY | 227  | 11916 |
| >CDKN2A-G3 GALPNAPNS\ | 10763 | >CDKN2A-G3 EALPNAPNSY | 305  | 10458 |
| >CDKN2A-G3 GALPNAPNS\ | 280   | >CDKN2A-G3 EALPNAPNSY | 374  | 94    |
| >CDKN2A-G3 GALPNAPNS\ | 19    | >CDKN2A-G3 EALPNAPNSY | 43   | 24    |
| >CDKN2A-G3 AGALPNAPN\ | 136   | >CDKN2A-G3 AEALPNAPNS | 1072 | 936   |
| >CDKN2A-G3 AGALPNAPN\ | 1733  | >CDKN2A-G3 AEALPNAPNS | 280  | 1453  |
| >CDKN2A-G3 AGALPNAPN\ | 18524 | >CDKN2A-G3 AEALPNAPNS | 167  | 18357 |
| >CDKN2A-G3 AGALPNAPN\ | 34595 | >CDKN2A-G3 AEALPNAPNS | 285  | 34310 |
| >CDKN2A-G3 AGALPNAPN  | 37228 | >CDKN2A-G3 AEALPNAPN  | 310  | 36918 |
| >CDKN2A-G3 AGALPNAPN\ | 30446 | >CDKN2A-G3 AEALPNAPNS | 450  | 29996 |
| >CDKN2A-G3 AGALPNAPN\ | 36466 | >CDKN2A-G3 AEALPNAPNS | 351  | 36115 |
| >CDKN2A-G3 EAGALPNA   | 470   | >CDKN2A-G3 EAEALPNA   | 1539 | 1069  |
| >CDKN2A-G3 LEAGALPN   | 413   | >CDKN2A-G3 LEAEALPN   | 308  | 105   |
| >CDKN2A-G3 LEAGALPNA  | 569   | >CDKN2A-G3 LEAEALPNA  | 267  | 302   |
| >CDKN2A-G3 LEAGALPNAP | 721   | >CDKN2A-G3 LEAEALPNAP | 425  | 296   |
| >CDKN2A-G3 LEAGALPNA  | 621   | >CDKN2A-G3 LEAEALPNA  | 404  | 217   |
| >CDKN2A-G3 LEAGALPNA  | 80    | >CDKN2A-G3 LEAEALPNA  | 116  | 36    |
| >CDKN2A-G3 LEAGALPNA  | 312   | >CDKN2A-G3 LEAEALPNA  | 65   | 247   |
| >CDKN2A-G3 LLEAGALPNA | 371   | >CDKN2A-G3 LLEAEALPNA | 290  | 81    |
| >CDKN2A-G3 LLEAGALPNA | 241   | >CDKN2A-G3 LLEAEALPNA | 396  | 155   |

|                       |      |                        |      |      |
|-----------------------|------|------------------------|------|------|
| >CDKN2A-G3 LLEAGALPNA | 249  | >CDKN2A-G3 LLEAEALPNA  | 274  | 25   |
| >CDKN2A-G3 LLEAGALPNA | 507  | >CDKN2A-G3 LLEAEALPNA  | 374  | 133  |
| >CDKN2A-G3 LLEAGALPNA | 10   | >CDKN2A-G3 LLEAEALPNA  | 20   | 10   |
| >CDKN2A-G3 ALLEAGAL   | 92   | >CDKN2A-G3 ALLEAEAL    | 33   | 59   |
| >CDKN2A-G3 ALLEAGALPN | 22   | >CDKN2A-G3 ALLEAEALPN  | 18   | 4    |
| >CDKN2A-G3 ALLEAGAL   | 67   | >CDKN2A-G3 ALLEAEAL    | 20   | 47   |
| >CDKN2A-G3 ALLEAGALPN | 87   | >CDKN2A-G3 ALLEAEALPN  | 84   | 3    |
| >CDKN2A-G3 ALLEAGAL   | 61   | >CDKN2A-G3 ALLEAEAL    | 179  | 118  |
| >CDKN2A-G3 ALLEAGALPN | 26   | >CDKN2A-G3 ALLEAEALPN  | 48   | 22   |
| >CDKN2A-G3 ALLEAGAL   | 40   | >CDKN2A-G3 ALLEAEAL    | 20   | 20   |
| >CDKN2A-G3 ALLEAGALPN | 13   | >CDKN2A-G3 ALLEAEALPN  | 16   | 3    |
| >CDKN2A-G3 ALLEAGAL   | 4    | >CDKN2A-G3 ALLEAEAL    | 3    | 1    |
| >CDKN2A-G3 ALLEAGALPN | 5    | >CDKN2A-G3 ALLEAEALPN  | 6    | 1    |
| >CDKN2A-G3 ALLEAGAL   | 8    | >CDKN2A-G3 ALLEAEAL    | 6    | 2    |
| >CDKN2A-G3 ALLEAGALPN | 19   | >CDKN2A-G3 ALLEAEALPN  | 19   | 0    |
| >CDKN2A-G3 ALLEAGAL   | 16   | >CDKN2A-G3 ALLEAEAL    | 10   | 6    |
| >CDKN2A-G3 ALLEAGALPN | 6    | >CDKN2A-G3 ALLEAEALPN  | 6    | 0    |
| >CDKN2A-G3 ALLEAGAL   | 29   | >CDKN2A-G3 ALLEAEAL    | 7    | 22   |
| >CDKN2A-G3 ALLEAGALPN | 15   | >CDKN2A-G3 ALLEAEALPN  | 12   | 3    |
| >CDKN2A-G3 ALLEAGAL   | 5    | >CDKN2A-G3 ALLEAEAL    | 4    | 1    |
| >CDKN2A-G3 ALLEAGALPN | 4    | >CDKN2A-G3 ALLEAEALPN  | 4    | 0    |
| >CDKN2A-G3 ALLEAGAL   | 2518 | >CDKN2A-G3 ALLEAEAL    | 444  | 2074 |
| >CDKN2A-G3 RALLEAGAL  | 18   | >CDKN2A-G3 RALLEAEAL   | 24   | 6    |
| >CDKN2A-G3 VRALLEAGAL | 145  | >CDKN2A-G3 VRALLEAEAL  | 411  | 266  |
| >CDKN2A-G3 VRALLEAGAL | 515  | >CDKN2A-G3 VRALLEAEAL  | 376  | 139  |
| >CDKN2A-G3 VRALLEAGAL | 289  | >CDKN2A-G3 VRALLEAEAL  | 1005 | 716  |
| >CDKN2A-G3 EVRALLEAGA | 51   | >CDKN2A-G3 EVRALLEAEA  | 59   | 8    |
| >CDKN2A-G3 EVRALLEAGA | 293  | >CDKN2A-G3 EVRALLEAEA  | 453  | 160  |
| >CDKN2A-G3 EVRALLEAGA | 497  | >CDKN2A-G3 EVRALLEAEA  | 564  | 67   |
| >CDKN2A-G3 EVRALLEAGA | 890  | >CDKN2A-G3 EVRALLEAEA  | 444  | 446  |
| >CDKN2A-G3 EEVRALLEAG | 18   | >CDKN2A-G3 EEVRALLEAEA | 15   | 3    |
| >CDKN2A-G3 GALPNAPNS\ | 6262 | >CDKN2A-G3 RALPNAPNSY  | 166  | 6096 |
| >CDKN2A-G3 GALPNAPNS\ | 951  | >CDKN2A-G3 RALPNAPNSY  | 176  | 775  |
| >CDKN2A-G3 GALPNAPNS\ | 1531 | >CDKN2A-G3 RALPNAPNSY  | 340  | 1191 |
| >CDKN2A-G3 GALPNAPNS\ | 280  | >CDKN2A-G3 RALPNAPNSY  | 21   | 259  |
| >CDKN2A-G3 GALPNAPNS  | 8964 | >CDKN2A-G3 RALPNAPNS   | 388  | 8576 |
| >CDKN2A-G3 GALPNAPNS\ | 19   | >CDKN2A-G3 RALPNAPNSY  | 4    | 15   |
| >CDKN2A-G3 GALPNAPNS\ | 1947 | >CDKN2A-G3 RALPNAPNSY  | 125  | 1822 |
| >CDKN2A-G3 GALPNAPNS\ | 3870 | >CDKN2A-G3 RALPNAPNSY  | 42   | 3828 |
| >CDKN2A-G3 GALPNAPNS\ | 513  | >CDKN2A-G3 RALPNAPNSY  | 86   | 427  |
| >CDKN2A-G3 AGALPNAPN\ | 136  | >CDKN2A-G3 ARALPNAPNS  | 528  | 392  |
| >CDKN2A-G3 AGALPNAPN\ | 1733 | >CDKN2A-G3 ARALPNAPNS  | 56   | 1677 |
| >CDKN2A-G3 EAGALPNA   | 470  | >CDKN2A-G3 EARALPNA    | 2837 | 2367 |

|                       |       |                       |      |       |
|-----------------------|-------|-----------------------|------|-------|
| >CDKN2A-G3 LEAGALPN   | 413   | >CDKN2A-G3 LEARALPN   | 1841 | 1428  |
| >CDKN2A-G3 LEAGALPNA  | 80    | >CDKN2A-G3 LEARALPNA  | 129  | 49    |
| >CDKN2A-G3 LEAGALPNA  | 312   | >CDKN2A-G3 LEARALPNA  | 185  | 127   |
| >CDKN2A-G3 LLEAGALPNA | 371   | >CDKN2A-G3 LLEARALPNA | 1328 | 957   |
| >CDKN2A-G3 LLEAGALPNA | 241   | >CDKN2A-G3 LLEARALPNA | 987  | 746   |
| >CDKN2A-G3 LLEAGALPNA | 249   | >CDKN2A-G3 LLEARALPNA | 372  | 123   |
| >CDKN2A-G3 LLEAGALPNA | 10    | >CDKN2A-G3 LLEARALPNA | 21   | 11    |
| >CDKN2A-G3 ALLEAGAL   | 92    | >CDKN2A-G3 ALLEARAL   | 136  | 44    |
| >CDKN2A-G3 ALLEAGALPN | 22    | >CDKN2A-G3 ALLEARALPN | 33   | 11    |
| >CDKN2A-G3 ALLEAGAL   | 67    | >CDKN2A-G3 ALLEARAL   | 109  | 42    |
| >CDKN2A-G3 ALLEAGALPN | 87    | >CDKN2A-G3 ALLEARALPN | 174  | 87    |
| >CDKN2A-G3 ALLEAGAL   | 61    | >CDKN2A-G3 ALLEARAL   | 182  | 121   |
| >CDKN2A-G3 ALLEAGALPN | 26    | >CDKN2A-G3 ALLEARALPN | 51   | 25    |
| >CDKN2A-G3 ALLEAGAL   | 40    | >CDKN2A-G3 ALLEARAL   | 92   | 52    |
| >CDKN2A-G3 ALLEAGALPN | 13    | >CDKN2A-G3 ALLEARALPN | 22   | 9     |
| >CDKN2A-G3 ALLEAGAL   | 4     | >CDKN2A-G3 ALLEARAL   | 7    | 3     |
| >CDKN2A-G3 ALLEAGALPN | 5     | >CDKN2A-G3 ALLEARALPN | 14   | 9     |
| >CDKN2A-G3 ALLEAGAL   | 8     | >CDKN2A-G3 ALLEARAL   | 18   | 10    |
| >CDKN2A-G3 ALLEAGALPN | 19    | >CDKN2A-G3 ALLEARALPN | 62   | 43    |
| >CDKN2A-G3 ALLEAGAL   | 16    | >CDKN2A-G3 ALLEARAL   | 28   | 12    |
| >CDKN2A-G3 ALLEAGALPN | 6     | >CDKN2A-G3 ALLEARALPN | 10   | 4     |
| >CDKN2A-G3 ALLEAGAL   | 29    | >CDKN2A-G3 ALLEARAL   | 47   | 18    |
| >CDKN2A-G3 ALLEAGALPN | 15    | >CDKN2A-G3 ALLEARALPN | 38   | 23    |
| >CDKN2A-G3 ALLEAGAL   | 5     | >CDKN2A-G3 ALLEARAL   | 6    | 1     |
| >CDKN2A-G3 ALLEAGALPN | 4     | >CDKN2A-G3 ALLEARALPN | 5    | 1     |
| >CDKN2A-G3 ALLEAGALPN | 1253  | >CDKN2A-G3 ALLEARALPN | 444  | 809   |
| >CDKN2A-G3 RALLEAGAL  | 18    | >CDKN2A-G3 RALLEARAL  | 17   | 1     |
| >CDKN2A-G3 VRALLEAGAL | 145   | >CDKN2A-G3 VRALLEARAL | 239  | 94    |
| >CDKN2A-G3 VRALLEAGAL | 289   | >CDKN2A-G3 VRALLEARAL | 557  | 268   |
| >CDKN2A-G3 EVRALLEAGA | 51    | >CDKN2A-G3 EVRALLEARA | 111  | 60    |
| >CDKN2A-G3 EVRALLEAGA | 293   | >CDKN2A-G3 EVRALLEARA | 226  | 67    |
| >CDKN2A-G3 EVRALLEAG  | 22828 | >CDKN2A-G3 EVRALLEAR  | 320  | 22508 |
| >CDKN2A-G3 EVRALLEAG  | 25702 | >CDKN2A-G3 EVRALLEAR  | 29   | 25673 |
| >CDKN2A-G3 EVRALLEAG  | 31541 | >CDKN2A-G3 EVRALLEAR  | 25   | 31516 |
| >CDKN2A-G3 EVRALLEAGA | 497   | >CDKN2A-G3 EVRALLEARA | 588  | 91    |
| >CDKN2A-G3 EEVRALLEAG | 18    | >CDKN2A-G3 EEVRALLEAR | 26   | 8     |
| >CDKN2A-G3 GALPNAPNS\ | 951   | >CDKN2A-G3 VALPNAPNSY | 404  | 547   |
| >CDKN2A-G3 GALPNAPNS\ | 280   | >CDKN2A-G3 VALPNAPNSY | 56   | 224   |
| >CDKN2A-G3 GALPNAPNS\ | 19    | >CDKN2A-G3 VALPNAPNSY | 8    | 11    |
| >CDKN2A-G3 GALPNAPNS\ | 3870  | >CDKN2A-G3 VALPNAPNSY | 402  | 3468  |
| >CDKN2A-G3 GALPNAPNS\ | 513   | >CDKN2A-G3 VALPNAPNSY | 351  | 162   |
| >CDKN2A-G3 AGALPNAPN! | 12499 | >CDKN2A-G3 AVALPNAPN! | 450  | 12049 |
| >CDKN2A-G3 AGALPNAPN! | 14089 | >CDKN2A-G3 AVALPNAPN! | 39   | 14050 |

|                        |       |                        |     |       |
|------------------------|-------|------------------------|-----|-------|
| >CDKN2A-G3 AGALPNAPN:  | 4028  | >CDKN2A-G3 AVALPNAPN:  | 164 | 3864  |
| >CDKN2A-G3 AGALPNAPN:  | 136   | >CDKN2A-G3 AVALPNAPN:  | 67  | 69    |
| >CDKN2A-G3 AGALPNAPN:  | 980   | >CDKN2A-G3 AVALPNAPN:  | 263 | 717   |
| >CDKN2A-G3 AGALPNAPN:  | 1737  | >CDKN2A-G3 AVALPNAPN:  | 399 | 1338  |
| >CDKN2A-G3 AGALPNAPN:  | 939   | >CDKN2A-G3 AVALPNAPN:  | 284 | 655   |
| >CDKN2A-G3 VEEVRALLEA' | 15278 | >CDKN2A-G3 VEEVRALLEA' | 109 | 15169 |
| >CDKN2A-G3 VEEVRALLEA' | 16509 | >CDKN2A-G3 VEEVRALLEA' | 355 | 16154 |
| >CDKN2A-G3 VEEVRALLEA' | 9512  | >CDKN2A-G3 VEEVRALLEA' | 71  | 9441  |
| >CDKN2A-G3 EAGALPNA    | 3759  | >CDKN2A-G3 EAVALPNA    | 267 | 3492  |
| >CDKN2A-G3 EAGALPNA    | 470   | >CDKN2A-G3 EAVALPNA    | 133 | 337   |
| >CDKN2A-G3 LEAGALPN    | 413   | >CDKN2A-G3 LEAVALPN    | 785 | 372   |
| >CDKN2A-G3 LEAGALPNA   | 80    | >CDKN2A-G3 LEAVALPNA   | 98  | 18    |
| >CDKN2A-G3 LEAGALPNA   | 312   | >CDKN2A-G3 LEAVALPNA   | 85  | 227   |
| >CDKN2A-G3 LLEAGALPNA  | 371   | >CDKN2A-G3 LLEAVALPNA  | 552 | 181   |
| >CDKN2A-G3 LLEAGALPNA  | 241   | >CDKN2A-G3 LLEAVALPNA  | 440 | 199   |
| >CDKN2A-G3 LLEAGALPNA  | 249   | >CDKN2A-G3 LLEAVALPNA  | 267 | 18    |
| >CDKN2A-G3 LLEAGALPNA  | 507   | >CDKN2A-G3 LLEAVALPNA  | 405 | 102   |
| >CDKN2A-G3 LLEAGALPNA  | 584   | >CDKN2A-G3 LLEAVALPNA  | 350 | 234   |
| >CDKN2A-G3 LLEAGALPNA  | 575   | >CDKN2A-G3 LLEAVALPNA  | 490 | 85    |
| >CDKN2A-G3 LLEAGALPNA  | 10    | >CDKN2A-G3 LLEAVALPNA  | 22  | 12    |
| >CDKN2A-G3 ALLEAGAL    | 92    | >CDKN2A-G3 ALLEAVAL    | 18  | 74    |
| >CDKN2A-G3 ALLEAGALPN  | 22    | >CDKN2A-G3 ALLEAVALPN  | 14  | 8     |
| >CDKN2A-G3 ALLEAGAL    | 67    | >CDKN2A-G3 ALLEAVAL    | 15  | 52    |
| >CDKN2A-G3 ALLEAGALP   | 2318  | >CDKN2A-G3 ALLEAVALP   | 460 | 1858  |
| >CDKN2A-G3 ALLEAGALPN  | 87    | >CDKN2A-G3 ALLEAVALPN  | 45  | 42    |
| >CDKN2A-G3 ALLEAGAL    | 61    | >CDKN2A-G3 ALLEAVAL    | 42  | 19    |
| >CDKN2A-G3 ALLEAGALPN  | 26    | >CDKN2A-G3 ALLEAVALPN  | 15  | 11    |
| >CDKN2A-G3 ALLEAGAL    | 40    | >CDKN2A-G3 ALLEAVAL    | 10  | 30    |
| >CDKN2A-G3 ALLEAGALPN  | 13    | >CDKN2A-G3 ALLEAVALPN  | 11  | 2     |
| >CDKN2A-G3 ALLEAGAL    | 4     | >CDKN2A-G3 ALLEAVAL    | 2   | 2     |
| >CDKN2A-G3 ALLEAGALP   | 1042  | >CDKN2A-G3 ALLEAVALP   | 232 | 810   |
| >CDKN2A-G3 ALLEAGALPN  | 761   | >CDKN2A-G3 ALLEAVALPN  | 231 | 530   |
| >CDKN2A-G3 ALLEAGALPN  | 5     | >CDKN2A-G3 ALLEAVALPN  | 5   | 0     |
| >CDKN2A-G3 ALLEAGAL    | 8     | >CDKN2A-G3 ALLEAVAL    | 4   | 4     |
| >CDKN2A-G3 ALLEAGALPN  | 19    | >CDKN2A-G3 ALLEAVALPN  | 16  | 3     |
| >CDKN2A-G3 ALLEAGAL    | 16    | >CDKN2A-G3 ALLEAVAL    | 7   | 9     |
| >CDKN2A-G3 ALLEAGALPN  | 6     | >CDKN2A-G3 ALLEAVALPN  | 6   | 0     |
| >CDKN2A-G3 ALLEAGAL    | 29    | >CDKN2A-G3 ALLEAVAL    | 5   | 24    |
| >CDKN2A-G3 ALLEAGALPN  | 15    | >CDKN2A-G3 ALLEAVALPN  | 6   | 9     |
| >CDKN2A-G3 ALLEAGAL    | 5     | >CDKN2A-G3 ALLEAVAL    | 3   | 2     |
| >CDKN2A-G3 ALLEAGALPN  | 4     | >CDKN2A-G3 ALLEAVALPN  | 4   | 0     |
| >CDKN2A-G3 ALLEAGAL    | 2518  | >CDKN2A-G3 ALLEAVAL    | 116 | 2402  |
| >CDKN2A-G3 ALLEAGAL    | 1523  | >CDKN2A-G3 ALLEAVAL    | 262 | 1261  |

|                       |       |                       |      |       |
|-----------------------|-------|-----------------------|------|-------|
| >CDKN2A-G3 ALLEAGAL   | 1574  | >CDKN2A-G3 ALLEAVAL   | 216  | 1358  |
| >CDKN2A-G3 RALLEAGAL  | 5708  | >CDKN2A-G3 RALLEAVAL  | 166  | 5542  |
| >CDKN2A-G3 RALLEAGAL  | 5852  | >CDKN2A-G3 RALLEAVAL  | 287  | 5565  |
| >CDKN2A-G3 RALLEAGAL  | 18    | >CDKN2A-G3 RALLEAVAL  | 11   | 7     |
| >CDKN2A-G3 RALLEAGAL  | 2340  | >CDKN2A-G3 RALLEAVAL  | 445  | 1895  |
| >CDKN2A-G3 VRALLEAGAL | 145   | >CDKN2A-G3 VRALLEAVAL | 240  | 95    |
| >CDKN2A-G3 VRALLEAGAL | 515   | >CDKN2A-G3 VRALLEAVAL | 73   | 442   |
| >CDKN2A-G3 VRALLEAGAL | 289   | >CDKN2A-G3 VRALLEAVAL | 489  | 200   |
| >CDKN2A-G3 EVRALLEAG  | 4285  | >CDKN2A-G3 EVRALLEAV  | 197  | 4088  |
| >CDKN2A-G3 EVRALLEAGA | 51    | >CDKN2A-G3 EVRALLEAVA | 122  | 71    |
| >CDKN2A-G3 EVRALLEAGA | 293   | >CDKN2A-G3 EVRALLEAVA | 304  | 11    |
| >CDKN2A-G3 EVRALLEAG  | 10556 | >CDKN2A-G3 EVRALLEAV  | 20   | 10536 |
| >CDKN2A-G3 EVRALLEAGA | 497   | >CDKN2A-G3 EVRALLEAVA | 977  | 480   |
| >CDKN2A-G3 EVRALLEAGA | 890   | >CDKN2A-G3 EVRALLEAVA | 456  | 434   |
| >CDKN2A-G3 EVRALLEAG  | 16803 | >CDKN2A-G3 EVRALLEAV  | 58   | 16745 |
| >CDKN2A-G3 EEVRALLEAG | 17056 | >CDKN2A-G3 EEVRALLEAV | 77   | 16979 |
| >CDKN2A-G3 EEVRALLEAG | 18    | >CDKN2A-G3 EEVRALLEAV | 12   | 6     |
| >CDKN2A-G4 GRRPIQVM   | 317   | >CDKN2A-G4 DRRPIQVM   | 1182 | 865   |
| >CDKN2A-G4 GRRPIQVM   | 485   | >CDKN2A-G4 DRRPIQVM   | 1319 | 834   |
| >CDKN2A-G4 GRRPIQVM   | 365   | >CDKN2A-G4 DRRPIQVM   | 1336 | 971   |
| >CDKN2A-G4 GRRPIQVM   | 314   | >CDKN2A-G4 DRRPIQVM   | 3352 | 3038  |
| >CDKN2A-G4 GRRPIQVM   | 115   | >CDKN2A-G4 DRRPIQVM   | 1368 | 1253  |
| >CDKN2A-G4 GRRPIQVM   | 203   | >CDKN2A-G4 DRRPIQVM   | 3429 | 3226  |
| >CDKN2A-G4 GRRPIQVM   | 250   | >CDKN2A-G4 DRRPIQVM   | 6011 | 5761  |
| >CDKN2A-G4 GRRPIQVM   | 213   | >CDKN2A-G4 DRRPIQVM   | 1757 | 1544  |
| >CDKN2A-G4 GRRPIQVM   | 455   | >CDKN2A-G4 DRRPIQVM   | 2433 | 1978  |
| >CDKN2A-G4 GRRPIQVM   | 34    | >CDKN2A-G4 DRRPIQVM   | 734  | 700   |
| >CDKN2A-G4 GRRPIQVM   | 222   | >CDKN2A-G4 DRRPIQVM   | 1385 | 1163  |
| >CDKN2A-G4 YGRRPIQVM  | 395   | >CDKN2A-G4 YDRRPIQVM  | 4005 | 3610  |
| >CDKN2A-G4 YGRRPIQVM  | 343   | >CDKN2A-G4 YDRRPIQVM  | 3540 | 3197  |
| >CDKN2A-G4 YGRRPIQVM  | 262   | >CDKN2A-G4 YDRRPIQVM  | 516  | 254   |
| >CDKN2A-G4 YGRRPIQVM  | 425   | >CDKN2A-G4 YDRRPIQVM  | 788  | 363   |
| >CDKN2A-G4 YGRRPIQVM  | 44    | >CDKN2A-G4 YDRRPIQVM  | 132  | 88    |
| >CDKN2A-G4 YGRRPIQVM  | 45    | >CDKN2A-G4 YDRRPIQVM  | 249  | 204   |
| >CDKN2A-G4 YGRRPIQVM  | 37    | >CDKN2A-G4 YDRRPIQVM  | 103  | 66    |
| >CDKN2A-G4 SYGRRPIQVM | 136   | >CDKN2A-G4 SYDRRPIQVM | 1105 | 969   |
| >CDKN2A-G4 SYGRRPIQVM | 74    | >CDKN2A-G4 SYDRRPIQVM | 575  | 501   |
| >CDKN2A-G4 NSYGRRPIQV | 264   | >CDKN2A-G4 NSYDRRPIQV | 238  | 26    |
| >CDKN2A-G4 NSYGRRPIQV | 485   | >CDKN2A-G4 NSYDRRPIQV | 794  | 309   |
| >CDKN2A-G4 NSYGRRPI   | 511   | >CDKN2A-G4 NSYDRRPI   | 410  | 101   |
| >CDKN2A-G4 NSYGRRPIQV | 408   | >CDKN2A-G4 NSYDRRPIQV | 128  | 280   |
| >CDKN2A-G4 NSYGRRPIQV | 132   | >CDKN2A-G4 NSYDRRPIQV | 96   | 36    |
| >CDKN2A-G4 NSYGRRPIQV | 495   | >CDKN2A-G4 NSYDRRPIQV | 423  | 72    |



|                       |       |                       |      |       |
|-----------------------|-------|-----------------------|------|-------|
| >CDKN2A-G4 NSYGRRPIQV | 251   | >CDKN2A-G4 NSYDRRPIQV | 310  | 59    |
| >CDKN2A-G4 NSYGRRPI   | 104   | >CDKN2A-G4 NSYDRRPI   | 73   | 31    |
| >CDKN2A-G4 APNSYGRRPI | 20    | >CDKN2A-G4 APNSYDRRPI | 49   | 29    |
| >CDKN2A-G4 NAPNSYGR   | 65    | >CDKN2A-G4 NAPNSYDR   | 101  | 36    |
| >CDKN2A-G4 NAPNSYGRR  | 147   | >CDKN2A-G4 NAPNSYDRR  | 66   | 81    |
| >CDKN2A-G4 NAPNSYGRRR | 266   | >CDKN2A-G4 NAPNSYDRRI | 281  | 15    |
| >CDKN2A-G4 PNAPNSYGR  | 320   | >CDKN2A-G4 PNAPNSYDR  | 1500 | 1180  |
| >CDKN2A-G4 LPNAPNSYGF | 472   | >CDKN2A-G4 LPNAPNSYDF | 751  | 279   |
| >CDKN2A-G4 LPNAPNSYG  | 457   | >CDKN2A-G4 LPNAPNSYD  | 833  | 376   |
| >CDKN2A-G4 GRRPIQVM   | 317   | >CDKN2A-G4 SRRPIQVM   | 114  | 203   |
| >CDKN2A-G4 GRRPIQVMM  | 485   | >CDKN2A-G4 SRRPIQVMM  | 190  | 295   |
| >CDKN2A-G4 GRRPIQVMM  | 365   | >CDKN2A-G4 SRRPIQVMM  | 138  | 227   |
| >CDKN2A-G4 GRRPIQVM   | 314   | >CDKN2A-G4 SRRPIQVM   | 528  | 214   |
| >CDKN2A-G4 GRRPIQVMM  | 115   | >CDKN2A-G4 SRRPIQVMM  | 180  | 65    |
| >CDKN2A-G4 GRRPIQVMM  | 203   | >CDKN2A-G4 SRRPIQVMM  | 350  | 147   |
| >CDKN2A-G4 GRRPIQVMM  | 250   | >CDKN2A-G4 SRRPIQVMM  | 242  | 8     |
| >CDKN2A-G4 GRRPIQVMM  | 213   | >CDKN2A-G4 SRRPIQVMM  | 245  | 32    |
| >CDKN2A-G4 GRRPIQVMM  | 455   | >CDKN2A-G4 SRRPIQVMM  | 630  | 175   |
| >CDKN2A-G4 GRRPIQVMM  | 34    | >CDKN2A-G4 SRRPIQVMM  | 70   | 36    |
| >CDKN2A-G4 GRRPIQVMM  | 222   | >CDKN2A-G4 SRRPIQVMM  | 298  | 76    |
| >CDKN2A-G4 YGRRPIQVM  | 11442 | >CDKN2A-G4 YSRRPIQVM  | 50   | 11392 |
| >CDKN2A-G4 YGRRPIQVMI | 19318 | >CDKN2A-G4 YSRRPIQVMI | 417  | 18901 |
| >CDKN2A-G4 YGRRPIQVMI | 16895 | >CDKN2A-G4 YSRRPIQVMI | 212  | 16683 |
| >CDKN2A-G4 YGRRPIQV   | 1266  | >CDKN2A-G4 YSRRPIQV   | 62   | 1204  |
| >CDKN2A-G4 YGRRPIQVM  | 3226  | >CDKN2A-G4 YSRRPIQVM  | 168  | 3058  |
| >CDKN2A-G4 YGRRPIQVMI | 3083  | >CDKN2A-G4 YSRRPIQVMI | 184  | 2899  |
| >CDKN2A-G4 YGRRPIQVMI | 1516  | >CDKN2A-G4 YSRRPIQVMI | 70   | 1446  |
| >CDKN2A-G4 YGRRPIQVM  | 395   | >CDKN2A-G4 YSRRPIQVM  | 293  | 102   |
| >CDKN2A-G4 YGRRPIQVM  | 343   | >CDKN2A-G4 YSRRPIQVM  | 85   | 258   |
| >CDKN2A-G4 YGRRPIQVMI | 1998  | >CDKN2A-G4 YSRRPIQVMI | 390  | 1608  |
| >CDKN2A-G4 YGRRPIQVMI | 1352  | >CDKN2A-G4 YSRRPIQVMI | 253  | 1099  |
| >CDKN2A-G4 YGRRPIQV   | 5440  | >CDKN2A-G4 YSRRPIQV   | 349  | 5091  |
| >CDKN2A-G4 YGRRPIQVM  | 262   | >CDKN2A-G4 YSRRPIQVM  | 17   | 245   |
| >CDKN2A-G4 YGRRPIQVMI | 597   | >CDKN2A-G4 YSRRPIQVMI | 33   | 564   |
| >CDKN2A-G4 YGRRPIQVMI | 425   | >CDKN2A-G4 YSRRPIQVMI | 27   | 398   |
| >CDKN2A-G4 YGRRPIQV   | 12074 | >CDKN2A-G4 YSRRPIQV   | 95   | 11979 |
| >CDKN2A-G4 YGRRPIQVM  | 1252  | >CDKN2A-G4 YSRRPIQVM  | 10   | 1242  |
| >CDKN2A-G4 YGRRPIQVMI | 1644  | >CDKN2A-G4 YSRRPIQVMI | 9    | 1635  |
| >CDKN2A-G4 YGRRPIQVMI | 890   | >CDKN2A-G4 YSRRPIQVMI | 7    | 883   |
| >CDKN2A-G4 YGRRPIQVM  | 44    | >CDKN2A-G4 YSRRPIQVM  | 6    | 38    |
| >CDKN2A-G4 YGRRPIQVMI | 45    | >CDKN2A-G4 YSRRPIQVMI | 18   | 27    |
| >CDKN2A-G4 YGRRPIQVMI | 37    | >CDKN2A-G4 YSRRPIQVMI | 6    | 31    |
| >CDKN2A-G4 SYGRRPIQVM | 1035  | >CDKN2A-G4 SYSRRPIQVM | 285  | 750   |

|                       |       |                       |     |       |
|-----------------------|-------|-----------------------|-----|-------|
| >CDKN2A-G4SYGRRPIQVM  | 780   | >CDKN2A-G4SYSRRPIQVM  | 228 | 552   |
| >CDKN2A-G4SYGRRPIQVM  | 136   | >CDKN2A-G4SYSRRPIQVM  | 152 | 16    |
| >CDKN2A-G4SYGRRPIQVM  | 74    | >CDKN2A-G4SYSRRPIQVM  | 83  | 9     |
| >CDKN2A-G4NSYGRRPIQV  | 264   | >CDKN2A-G4NSYSRRPIQV  | 169 | 95    |
| >CDKN2A-G4NSYGRRPIQV  | 485   | >CDKN2A-G4NSYSRRPIQV  | 588 | 103   |
| >CDKN2A-G4NSYGRRPIQV  | 408   | >CDKN2A-G4NSYSRRPIQV  | 246 | 162   |
| >CDKN2A-G4NSYGRRPIQV  | 1044  | >CDKN2A-G4NSYSRRPIQV  | 186 | 858   |
| >CDKN2A-G4NSYGRRPIQV  | 132   | >CDKN2A-G4NSYSRRPIQV  | 212 | 80    |
| >CDKN2A-G4NSYGRRPIQV  | 495   | >CDKN2A-G4NSYSRRPIQV  | 388 | 107   |
| >CDKN2A-G4NSYGRRPIQV  | 251   | >CDKN2A-G4NSYSRRPIQV  | 104 | 147   |
| >CDKN2A-G4NSYGRRPI    | 104   | >CDKN2A-G4NSYSRRPI    | 56  | 48    |
| >CDKN2A-G4APNSYGRRI   | 20    | >CDKN2A-G4APNSYSRRPI  | 30  | 10    |
| >CDKN2A-G4APNSYGRRI   | 544   | >CDKN2A-G4APNSYSRRPI  | 182 | 362   |
| >CDKN2A-G4NAPNSYGR    | 65    | >CDKN2A-G4NAPNSYSR    | 45  | 20    |
| >CDKN2A-G4NAPNSYGR    | 147   | >CDKN2A-G4NAPNSYSRR   | 45  | 102   |
| >CDKN2A-G4NAPNSYGRRI  | 266   | >CDKN2A-G4NAPNSYSRRF  | 207 | 59    |
| >CDKN2A-G4PNAPNSYGR   | 320   | >CDKN2A-G4PNAPNSYSR   | 739 | 419   |
| >CDKN2A-G4LPNAPNSYGF  | 472   | >CDKN2A-G4LPNAPNSYSR  | 506 | 34    |
| >CDKN2A-G4LPNAPNSYG   | 457   | >CDKN2A-G4LPNAPNSYS   | 319 | 138   |
| >CDKN2A-G5GSARVAEL    | 6789  | >CDKN2A-G5RSARVAEL    | 270 | 6519  |
| >CDKN2A-G5GSARVAELL   | 5595  | >CDKN2A-G5RSARVAELL   | 226 | 5369  |
| >CDKN2A-G5GSARVAELLLI | 8993  | >CDKN2A-G5RSARVAELLLI | 474 | 8519  |
| >CDKN2A-G5GSARVAEL    | 282   | >CDKN2A-G5RSARVAEL    | 11  | 271   |
| >CDKN2A-G5GSARVAELL   | 3896  | >CDKN2A-G5RSARVAELL   | 68  | 3828  |
| >CDKN2A-G5GSARVAELLL  | 1361  | >CDKN2A-G5RSARVAELLL  | 30  | 1331  |
| >CDKN2A-G5GSARVAELLLI | 950   | >CDKN2A-G5RSARVAELLLI | 22  | 928   |
| >CDKN2A-G5GSARVAELL   | 4125  | >CDKN2A-G5RSARVAELL   | 232 | 3893  |
| >CDKN2A-G5GSARVAELLL  | 5999  | >CDKN2A-G5RSARVAELLL  | 309 | 5690  |
| >CDKN2A-G5GSARVAELLLI | 7032  | >CDKN2A-G5RSARVAELLLI | 389 | 6643  |
| >CDKN2A-G5GSARVAEL    | 1128  | >CDKN2A-G5RSARVAEL    | 31  | 1097  |
| >CDKN2A-G5GSARVAELL   | 237   | >CDKN2A-G5RSARVAELL   | 16  | 221   |
| >CDKN2A-G5GSARVAELLL  | 255   | >CDKN2A-G5RSARVAELLL  | 17  | 238   |
| >CDKN2A-G5GSARVAELLLI | 270   | >CDKN2A-G5RSARVAELLLI | 18  | 252   |
| >CDKN2A-G5GSARVAELL   | 753   | >CDKN2A-G5RSARVAELL   | 163 | 590   |
| >CDKN2A-G5GSARVAELLL  | 720   | >CDKN2A-G5RSARVAELLL  | 177 | 543   |
| >CDKN2A-G5GSARVAELLLI | 264   | >CDKN2A-G5RSARVAELLLI | 69  | 195   |
| >CDKN2A-G5GSARVAEL    | 3633  | >CDKN2A-G5RSARVAEL    | 100 | 3533  |
| >CDKN2A-G5GSARVAELL   | 24    | >CDKN2A-G5RSARVAELL   | 21  | 3     |
| >CDKN2A-G5GSARVAELLL  | 452   | >CDKN2A-G5RSARVAELLL  | 70  | 382   |
| >CDKN2A-G5GSARVAELLLI | 66    | >CDKN2A-G5RSARVAELLLI | 53  | 13    |
| >CDKN2A-G5GSARVAEL    | 19252 | >CDKN2A-G5RSARVAEL    | 242 | 19010 |
| >CDKN2A-G5GSARVAELL   | 7288  | >CDKN2A-G5RSARVAELL   | 456 | 6832  |
| >CDKN2A-G5GSARVAELLLI | 4759  | >CDKN2A-G5RSARVAELLLI | 350 | 4409  |

|                        |       |                        |      |       |
|------------------------|-------|------------------------|------|-------|
| >CDKN2A-G5 GSARVAELLLI | 2018  | >CDKN2A-G5 RSARVAELLLI | 355  | 1663  |
| >CDKN2A-G5 GSARVAEL    | 2067  | >CDKN2A-G5 RSARVAEL    | 122  | 1945  |
| >CDKN2A-G5 GSARVAELL   | 1376  | >CDKN2A-G5 RSARVAELL   | 68   | 1308  |
| >CDKN2A-G5 GSARVAELLLI | 1380  | >CDKN2A-G5 RSARVAELLLI | 79   | 1301  |
| >CDKN2A-G5 MGSARVAEL   | 66    | >CDKN2A-G5 MRSARVAEL   | 790  | 724   |
| >CDKN2A-G5 MGSARVAELI  | 399   | >CDKN2A-G5 MRSARVAELI  | 2912 | 2513  |
| >CDKN2A-G5 MGSARVAEL   | 218   | >CDKN2A-G5 MRSARVAEL   | 178  | 40    |
| >CDKN2A-G5 MGSARVAEL   | 6036  | >CDKN2A-G5 MRSARVAEL   | 223  | 5813  |
| >CDKN2A-G5 MGSARVAEL   | 24186 | >CDKN2A-G5 MRSARVAEL   | 266  | 23920 |
| >CDKN2A-G5 MGSARVAELI  | 24996 | >CDKN2A-G5 MRSARVAELI  | 79   | 24917 |
| >CDKN2A-G5 MGSARVAELI  | 22953 | >CDKN2A-G5 MRSARVAELI  | 167  | 22786 |
| >CDKN2A-G5 MGSARVAEL   | 2748  | >CDKN2A-G5 MRSARVAEL   | 31   | 2717  |
| >CDKN2A-G5 MGSARVAELI  | 4281  | >CDKN2A-G5 MRSARVAELI  | 59   | 4222  |
| >CDKN2A-G5 MGSARVAELI  | 3863  | >CDKN2A-G5 MRSARVAELI  | 52   | 3811  |
| >CDKN2A-G5 MGSARVAELI  | 25867 | >CDKN2A-G5 MRSARVAELI  | 259  | 25608 |
| >CDKN2A-G5 MGSARVAELI  | 24889 | >CDKN2A-G5 MRSARVAELI  | 245  | 24644 |
| >CDKN2A-G5 MGSARVAEL   | 25358 | >CDKN2A-G5 MRSARVAEL   | 34   | 25324 |
| >CDKN2A-G5 MGSARVAELI  | 25705 | >CDKN2A-G5 MRSARVAELI  | 167  | 25538 |
| >CDKN2A-G5 MGSARVAELI  | 18957 | >CDKN2A-G5 MRSARVAELI  | 30   | 18927 |
| >CDKN2A-G5 GRRPIQVMM   | 6939  | >CDKN2A-G5 GRRPIQVMM   | 494  | 6445  |
| >CDKN2A-G5 GRRPIQVMM   | 1077  | >CDKN2A-G5 GRRPIQVMM   | 190  | 887   |
| >CDKN2A-G5 MMGSARVAI   | 177   | >CDKN2A-G5 MMRSARVAE   | 855  | 678   |
| >CDKN2A-G5 MMGSARVAI   | 143   | >CDKN2A-G5 MMRSARVAE   | 1576 | 1433  |
| >CDKN2A-G5 MMGSARVAI   | 24    | >CDKN2A-G5 MMRSARVAE   | 55   | 31    |
| >CDKN2A-G5 MMGSARVAI   | 8     | >CDKN2A-G5 MMRSARVAE   | 24   | 16    |
| >CDKN2A-G5 MMGSARVA    | 224   | >CDKN2A-G5 MMRSARVA    | 69   | 155   |
| >CDKN2A-G5 MMGSARVAI   | 52    | >CDKN2A-G5 MMRSARVAE   | 62   | 10    |
| >CDKN2A-G5 MMGSARVAI   | 173   | >CDKN2A-G5 MMRSARVAE   | 59   | 114   |
| >CDKN2A-G5 MMGSARVAI   | 436   | >CDKN2A-G5 MMRSARVAE   | 1387 | 951   |
| >CDKN2A-G5 MMGSARVA    | 187   | >CDKN2A-G5 MMRSARVA    | 1609 | 1422  |
| >CDKN2A-G5 MMGSARVAI   | 11    | >CDKN2A-G5 MMRSARVAE   | 62   | 51    |
| >CDKN2A-G5 MMGSARVAI   | 24    | >CDKN2A-G5 MMRSARVAE   | 171  | 147   |
| >CDKN2A-G5 MMGSARVAI   | 42    | >CDKN2A-G5 MMRSARVAE   | 517  | 475   |
| >CDKN2A-G5 MMGSARVAI   | 190   | >CDKN2A-G5 MMRSARVAE   | 2737 | 2547  |
| >CDKN2A-G5 MMGSARVAI   | 46    | >CDKN2A-G5 MMRSARVAE   | 860  | 814   |
| >CDKN2A-G5 MMGSARVAI   | 81    | >CDKN2A-G5 MMRSARVAE   | 1750 | 1669  |
| >CDKN2A-G5 MMGSARVAI   | 33    | >CDKN2A-G5 MMRSARVAE   | 1088 | 1055  |
| >CDKN2A-G5 MMGSARVAI   | 112   | >CDKN2A-G5 MMRSARVAE   | 5683 | 5571  |
| >CDKN2A-G5 MMGSARVA    | 95    | >CDKN2A-G5 MMRSARVA    | 212  | 117   |
| >CDKN2A-G5 MMGSARVAI   | 3     | >CDKN2A-G5 MMRSARVAE   | 4    | 1     |
| >CDKN2A-G5 MMGSARVAI   | 8     | >CDKN2A-G5 MMRSARVAE   | 14   | 6     |
| >CDKN2A-G5 MMGSARVA    | 6500  | >CDKN2A-G5 MMRSARVA    | 13   | 6487  |
| >CDKN2A-G5 MMGSARVAI   | 13121 | >CDKN2A-G5 MMRSARVAE   | 177  | 12944 |

|                      |      |                      |      |      |
|----------------------|------|----------------------|------|------|
| >CDKN2A-G5 MMGSARVAI | 6953 | >CDKN2A-G5 MMRSARVAE | 12   | 6941 |
| >CDKN2A-G5 MMGSARVAI | 9614 | >CDKN2A-G5 MMRSARVAE | 78   | 9536 |
| >CDKN2A-G5 MMGSARVA  | 771  | >CDKN2A-G5 MMRSARVA  | 232  | 539  |
| >CDKN2A-G5 MMGSARVAI | 163  | >CDKN2A-G5 MMRSARVAE | 68   | 95   |
| >CDKN2A-G5 MMGSARVAI | 935  | >CDKN2A-G5 MMRSARVAE | 275  | 660  |
| >CDKN2A-G5 MMGSARVA  | 1488 | >CDKN2A-G5 MMRSARVA  | 86   | 1402 |
| >CDKN2A-G5 MMGSARVAI | 3278 | >CDKN2A-G5 MMRSARVAE | 266  | 3012 |
| >CDKN2A-G5 MMGSARVAI | 90   | >CDKN2A-G5 MMRSARVAE | 11   | 79   |
| >CDKN2A-G5 MMGSARVAI | 402  | >CDKN2A-G5 MMRSARVAE | 34   | 368  |
| >CDKN2A-G5 MMGSARVAI | 5641 | >CDKN2A-G5 MMRSARVAE | 282  | 5359 |
| >CDKN2A-G5 MMMGSARV  | 587  | >CDKN2A-G5 MMMRSARV  | 320  | 267  |
| >CDKN2A-G5 MMMGSARV  | 11   | >CDKN2A-G5 MMMRSARV  | 14   | 3    |
| >CDKN2A-G5 MMMGSARV  | 19   | >CDKN2A-G5 MMMRSARV  | 29   | 10   |
| >CDKN2A-G5 MMMGSARV  | 3    | >CDKN2A-G5 MMMRSARV  | 5    | 2    |
| >CDKN2A-G5 MMMGSARV  | 102  | >CDKN2A-G5 MMMRSARV  | 507  | 405  |
| >CDKN2A-G5 MMMGSARV  | 4    | >CDKN2A-G5 MMMRSARV  | 6    | 2    |
| >CDKN2A-G5 MMMGSARV  | 2    | >CDKN2A-G5 MMMRSARV  | 3    | 1    |
| >CDKN2A-G5 MMMGSARV  | 11   | >CDKN2A-G5 MMMRSARV  | 19   | 8    |
| >CDKN2A-G5 MMMGSARV  | 5    | >CDKN2A-G5 MMMRSARV  | 6    | 1    |
| >CDKN2A-G5 MMMGSARV  | 8    | >CDKN2A-G5 MMMRSARV  | 12   | 4    |
| >CDKN2A-G5 MMMGSARV  | 437  | >CDKN2A-G5 MMMRSARV  | 1188 | 751  |
| >CDKN2A-G5 MMMGSARV  | 27   | >CDKN2A-G5 MMMRSARV  | 46   | 19   |
| >CDKN2A-G5 MMMGSARV  | 2    | >CDKN2A-G5 MMMRSARV  | 2    | 0    |
| >CDKN2A-G5 MMMGSARV  | 29   | >CDKN2A-G5 MMMRSARV  | 98   | 69   |
| >CDKN2A-G5 MMMGSARV  | 3    | >CDKN2A-G5 MMMRSARV  | 5    | 2    |
| >CDKN2A-G5 MMMGSARV  | 3    | >CDKN2A-G5 MMMRSARV  | 3    | 0    |
| >CDKN2A-G5 MMMGSARV  | 281  | >CDKN2A-G5 MMMRSARV  | 261  | 20   |
| >CDKN2A-G5 MMMGSARV  | 9    | >CDKN2A-G5 MMMRSARV  | 8    | 1    |
| >CDKN2A-G5 MMMGSARV  | 8    | >CDKN2A-G5 MMMRSARV  | 13   | 5    |
| >CDKN2A-G5 MMMGSARV  | 35   | >CDKN2A-G5 MMMRSARV  | 79   | 44   |
| >CDKN2A-G5 MMMGSARV  | 2    | >CDKN2A-G5 MMMRSARV  | 2    | 0    |
| >CDKN2A-G5 MMMGSARV  | 91   | >CDKN2A-G5 MMMRSARV  | 454  | 363  |
| >CDKN2A-G5 MMMGSARV  | 4    | >CDKN2A-G5 MMMRSARV  | 8    | 4    |
| >CDKN2A-G5 MMMGSARV  | 2    | >CDKN2A-G5 MMMRSARV  | 2    | 0    |
| >CDKN2A-G5 MMMGSARV  | 21   | >CDKN2A-G5 MMMRSARV  | 113  | 92   |
| >CDKN2A-G5 MMMGSARV  | 3    | >CDKN2A-G5 MMMRSARV  | 4    | 1    |
| >CDKN2A-G5 MMMGSARV  | 179  | >CDKN2A-G5 MMMRSARV  | 416  | 237  |
| >CDKN2A-G5 MMMGSARV  | 29   | >CDKN2A-G5 MMMRSARV  | 67   | 38   |
| >CDKN2A-G5 MMMGSARV  | 235  | >CDKN2A-G5 MMMRSARV  | 513  | 278  |
| >CDKN2A-G5 MMMGSARV  | 51   | >CDKN2A-G5 MMMRSARV  | 96   | 45   |
| >CDKN2A-G5 MMMGSARV  | 1816 | >CDKN2A-G5 MMMRSARV  | 146  | 1670 |
| >CDKN2A-G5 MMMGSARV  | 2223 | >CDKN2A-G5 MMMRSARV  | 319  | 1904 |
| >CDKN2A-G5 MMMGSARV  | 188  | >CDKN2A-G5 MMMRSARV  | 40   | 148  |

|                      |      |                      |      |      |
|----------------------|------|----------------------|------|------|
| >CDKN2A-G5 MMMGSARV  | 301  | >CDKN2A-G5 MMMRSARV  | 357  | 56   |
| >CDKN2A-G5 MMMGSARV  | 191  | >CDKN2A-G5 MMMRSARV  | 197  | 6    |
| >CDKN2A-G5 MMMGSARV  | 84   | >CDKN2A-G5 MMMRSARV  | 87   | 3    |
| >CDKN2A-G5 MMMGSARV  | 237  | >CDKN2A-G5 MMMRSARV  | 65   | 172  |
| >CDKN2A-G5 MMMGSARV  | 342  | >CDKN2A-G5 MMMRSARV  | 57   | 285  |
| >CDKN2A-G5 MMMGSARV  | 1291 | >CDKN2A-G5 MMMRSARV  | 353  | 938  |
| >CDKN2A-G5 MMMGSARV  | 31   | >CDKN2A-G5 MMMRSARV  | 12   | 19   |
| >CDKN2A-G5 MMMGSARV  | 55   | >CDKN2A-G5 MMMRSARV  | 175  | 120  |
| >CDKN2A-G5 MMMGSARV  | 465  | >CDKN2A-G5 MMMRSARV  | 2169 | 1704 |
| >CDKN2A-G5 MMMGSARV  | 18   | >CDKN2A-G5 MMMRSARV  | 52   | 34   |
| >CDKN2A-G5 MMMGSARV  | 185  | >CDKN2A-G5 MMMRSARV  | 440  | 255  |
| >CDKN2A-G5 VMMMGSAR  | 182  | >CDKN2A-G5 VMMMR SAR | 23   | 159  |
| >CDKN2A-G5 VMMMGSAR  | 11   | >CDKN2A-G5 VMMMR SAR | 13   | 2    |
| >CDKN2A-G5 VMMMGSAR  | 9    | >CDKN2A-G5 VMMMR SAR | 9    | 0    |
| >CDKN2A-G5 VMMMGSAR  | 425  | >CDKN2A-G5 VMMMR SAR | 1381 | 956  |
| >CDKN2A-G5 VMMMGSAR  | 3    | >CDKN2A-G5 VMMMR SAR | 3    | 0    |
| >CDKN2A-G5 VMMMGSAR  | 226  | >CDKN2A-G5 VMMMR SAR | 322  | 96   |
| >CDKN2A-G5 VMMMGSAR  | 19   | >CDKN2A-G5 VMMMR SAR | 36   | 17   |
| >CDKN2A-G5 VMMMGSAR  | 2    | >CDKN2A-G5 VMMMR SAR | 3    | 1    |
| >CDKN2A-G5 VMMMGSAR  | 55   | >CDKN2A-G5 VMMMR SAR | 130  | 75   |
| >CDKN2A-G5 VMMMGSAR  | 3    | >CDKN2A-G5 VMMMR SAR | 5    | 2    |
| >CDKN2A-G5 VMMMGSAR  | 239  | >CDKN2A-G5 VMMMR SAR | 424  | 185  |
| >CDKN2A-G5 VMMMGSAR  | 7    | >CDKN2A-G5 VMMMR SAR | 13   | 6    |
| >CDKN2A-G5 VMMMGSAR  | 2    | >CDKN2A-G5 VMMMR SAR | 2    | 0    |
| >CDKN2A-G5 VMMMGSAR  | 95   | >CDKN2A-G5 VMMMR SAR | 441  | 346  |
| >CDKN2A-G5 VMMMGSAR  | 2    | >CDKN2A-G5 VMMMR SAR | 2    | 0    |
| >CDKN2A-G5 VMMMGSAR  | 54   | >CDKN2A-G5 VMMMR SAR | 131  | 77   |
| >CDKN2A-G5 VMMMGSAR  | 212  | >CDKN2A-G5 VMMMR SAR | 116  | 96   |
| >CDKN2A-G5 VMMMGSAR  | 168  | >CDKN2A-G5 VMMMR SAR | 116  | 52   |
| >CDKN2A-G5 VMMMGSAR  | 20   | >CDKN2A-G5 VMMMR SAR | 9    | 11   |
| >CDKN2A-G5 VMMMGSAR  | 120  | >CDKN2A-G5 VMMMR SAR | 35   | 85   |
| >CDKN2A-G5 VMMMGSAR  | 462  | >CDKN2A-G5 VMMMR SAR | 249  | 213  |
| >CDKN2A-G5 VMMMGSAR  | 3787 | >CDKN2A-G5 VMMMR SAR | 39   | 3748 |
| >CDKN2A-G5 VMMMGSAR  | 175  | >CDKN2A-G5 VMMMR SAR | 323  | 148  |
| >CDKN2A-G5 VMMMGSAR  | 183  | >CDKN2A-G5 VMMMR SAR | 272  | 89   |
| >CDKN2A-G5 VMMMGSAR  | 146  | >CDKN2A-G5 VMMMR SAR | 227  | 81   |
| >CDKN2A-G5 VMMMGSAR  | 420  | >CDKN2A-G5 VMMMR SAR | 500  | 80   |
| >CDKN2A-G5 VMMMGSAR  | 1050 | >CDKN2A-G5 VMMMR SAR | 459  | 591  |
| >CDKN2A-G5 QVMMMGSAR | 419  | >CDKN2A-G5 QVMMMRSA  | 622  | 203  |
| >CDKN2A-G5 QVMMMGSAR | 298  | >CDKN2A-G5 QVMMMRSA  | 751  | 453  |
| >CDKN2A-G5 QVMMMGSAR | 61   | >CDKN2A-G5 QVMMMRSA  | 119  | 58   |
| >CDKN2A-G5 QVMMMGSAR | 313  | >CDKN2A-G5 QVMMMRSA  | 348  | 35   |
| >CDKN2A-G5 QVMMMGSAR | 248  | >CDKN2A-G5 QVMMMRSA  | 1133 | 885  |

|                       |       |                        |     |       |
|-----------------------|-------|------------------------|-----|-------|
| >CDKN2A-G5 QVMMMGS/   | 41    | >CDKN2A-G5 QVMMMRS/    | 55  | 14    |
| >CDKN2A-G5 QVMMMGS/   | 114   | >CDKN2A-G5 QVMMMRS/    | 100 | 14    |
| >CDKN2A-G5 QVMMMGS/   | 55    | >CDKN2A-G5 QVMMMRS/    | 16  | 39    |
| >CDKN2A-G5 QVMMMGS/   | 218   | >CDKN2A-G5 QVMMMRS/    | 39  | 179   |
| >CDKN2A-G5 QVMMMGS/   | 20    | >CDKN2A-G5 QVMMMRS/    | 8   | 12    |
| >CDKN2A-G5 QVMMMGS/   | 167   | >CDKN2A-G5 QVMMMRS/    | 207 | 40    |
| >CDKN2A-G5 QVMMMGS/   | 215   | >CDKN2A-G5 QVMMMRS/    | 111 | 104   |
| >CDKN2A-G5 QVMMMGS/   | 78    | >CDKN2A-G5 QVMMMRS/    | 151 | 73    |
| >CDKN2A-G5 IQVMMMGS/  | 167   | >CDKN2A-G5 IQVMMMRS/   | 403 | 236   |
| >CDKN2A-G5 IQVMMMGS/  | 42    | >CDKN2A-G5 IQVMMMRS/   | 64  | 22    |
| >CDKN2A-G5 IQVMMMGS/  | 87    | >CDKN2A-G5 IQVMMMRS/   | 179 | 92    |
| >CDKN2A-G5 IQVMMMGS/  | 16    | >CDKN2A-G5 IQVMMMRS/   | 23  | 7     |
| >CDKN2A-G5 IQVMMMGS/  | 120   | >CDKN2A-G5 IQVMMMRS/   | 31  | 89    |
| >CDKN2A-G5 IQVMMMGS/  | 240   | >CDKN2A-G5 IQVMMMRS/   | 202 | 38    |
| >CDKN2A-G5 IQVMMMGS/  | 117   | >CDKN2A-G5 IQVMMMRS/   | 214 | 97    |
| >CDKN2A-G5 IQVMMMGS/  | 187   | >CDKN2A-G5 IQVMMMRS/   | 149 | 38    |
| >CDKN2A-G5 IQVMMMGS/  | 508   | >CDKN2A-G5 IQVMMMRS/   | 326 | 182   |
| >CDKN2A-G5 RPIQVMMM/  | 40421 | >CDKN2A-G5 RPIQVMMM/   | 479 | 39942 |
| >CDKN2A-G5 RPIQVMMM/  | 23    | >CDKN2A-G5 RPIQVMMM/   | 22  | 1     |
| >CDKN2A-G5 RPIQVMMM/  | 288   | >CDKN2A-G5 RPIQVMMM/   | 570 | 282   |
| >CDKN2A-G5 RPIQVMMM/  | 134   | >CDKN2A-G5 RPIQVMMM/   | 198 | 64    |
| >CDKN2A-G5 RPIQVMMM/  | 34512 | >CDKN2A-G5 RPIQVMMM/   | 296 | 34216 |
| >CDKN2A-G5 RRPIQVMMM/ | 29664 | >CDKN2A-G5 RRPIQVMMM/  | 268 | 29396 |
| >CDKN2A-G5 RRPIQVMMM/ | 2331  | >CDKN2A-G5 RRPIQVMMM/  | 111 | 2220  |
| >CDKN2A-G5 RRPIQVMMM/ | 125   | >CDKN2A-G5 RRPIQVMMM/  | 48  | 77    |
| >CDKN2A-G5 RRPIQVMMM/ | 238   | >CDKN2A-G5 RRPIQVMMM/  | 51  | 187   |
| >CDKN2A-G5 RRPIQVMMM/ | 33998 | >CDKN2A-G5 RRPIQVMMM/  | 176 | 33822 |
| >CDKN2A-G6 HGAEPNCA   | 3080  | >CDKN2A-G6 HSAEPNCA    | 198 | 2882  |
| >CDKN2A-G6 HGAEPNCAD  | 272   | >CDKN2A-G6 HSAEPNCAD/  | 25  | 247   |
| >CDKN2A-G6 HGAEPNCAD  | 3099  | >CDKN2A-G6 HSAEPNCAD/  | 389 | 2710  |
| >CDKN2A-G6 LLHGAEPNCA | 360   | >CDKN2A-G6 LLHSAEPNCA  | 213 | 147   |
| >CDKN2A-G6 LLHGAEPNCA | 290   | >CDKN2A-G6 LLHSAEPNCA  | 252 | 38    |
| >CDKN2A-G6 LLHGAEPNC  | 274   | >CDKN2A-G6 LLHSAEPNC   | 571 | 297   |
| >CDKN2A-G6 LLHGAEPNCA | 278   | >CDKN2A-G6 LLHSAEPNCA  | 485 | 207   |
| >CDKN2A-G6 LLHGAEPNCA | 242   | >CDKN2A-G6 LLHSAEPNCA  | 351 | 109   |
| >CDKN2A-G6 LLHGAEPNC  | 14    | >CDKN2A-G6 LLHSAEPNC   | 40  | 26    |
| >CDKN2A-G6 LLHGAEPNCA | 26    | >CDKN2A-G6 LLHSAEPNCA  | 51  | 25    |
| >CDKN2A-G6 LLLHGAEPNC | 723   | >CDKN2A-G6 LLLHSAEPNC/ | 464 | 259   |
| >CDKN2A-G6 LLLHGAEPNC | 429   | >CDKN2A-G6 LLLHSAEPNC/ | 448 | 19    |
| >CDKN2A-G6 LLLHGAEPNC | 476   | >CDKN2A-G6 LLLHSAEPNC/ | 858 | 382   |
| >CDKN2A-G6 LLLHGAEPNC | 121   | >CDKN2A-G6 LLLHSAEPNC  | 171 | 50    |
| >CDKN2A-G6 LLLHGAEPNC | 105   | >CDKN2A-G6 LLLHSAEPNC/ | 145 | 40    |
| >CDKN2A-G6 LLLHGAEPNC | 428   | >CDKN2A-G6 LLLHSAEPNC  | 450 | 22    |

|                        |      |                        |      |      |
|------------------------|------|------------------------|------|------|
| >CDKN2A-G6 LLLHGAEPNC  | 80   | >CDKN2A-G6 LLLHSAEPNC  | 78   | 2    |
| >CDKN2A-G6 LLLHGAEPNC  | 294  | >CDKN2A-G6 LLLHSAEPNC  | 542  | 248  |
| >CDKN2A-G6 LLLHGAEPNC  | 66   | >CDKN2A-G6 LLLHSAEPNC  | 101  | 35   |
| >CDKN2A-G6 LLLHGAEPNC  | 369  | >CDKN2A-G6 LLLHSAEPNC  | 731  | 362  |
| >CDKN2A-G6 LLLHGAEPNC  | 198  | >CDKN2A-G6 LLLHSAEPNC  | 319  | 121  |
| >CDKN2A-G6 LLLHGAEPNC  | 35   | >CDKN2A-G6 LLLHSAEPNC  | 67   | 32   |
| >CDKN2A-G6 LLLHGAEPNC  | 53   | >CDKN2A-G6 LLLHSAEPNC  | 77   | 24   |
| >CDKN2A-G6 LLLLHGAEPN  | 220  | >CDKN2A-G6 LLLLHSAEPNC | 231  | 11   |
| >CDKN2A-G6 LLLLHGAEPN  | 1016 | >CDKN2A-G6 LLLLHSAEPNC | 483  | 533  |
| >CDKN2A-G6 LLLLHGAEPN  | 89   | >CDKN2A-G6 LLLLHSAEPNC | 81   | 8    |
| >CDKN2A-G6 ELLLLHGA    | 214  | >CDKN2A-G6 ELLLLHSA    | 235  | 21   |
| >CDKN2A-G6 ELLLLHGA    | 342  | >CDKN2A-G6 ELLLLHSA    | 381  | 39   |
| >CDKN2A-G6 ELLLLHGA    | 186  | >CDKN2A-G6 ELLLLHSA    | 229  | 43   |
| >CDKN2A-G6 ELLLLHGA    | 195  | >CDKN2A-G6 ELLLLHSA    | 110  | 85   |
| >CDKN2A-G6 ELLLLHGA    | 91   | >CDKN2A-G6 ELLLLHSA    | 155  | 64   |
| >CDKN2A-G6 AELLLLHGA   | 964  | >CDKN2A-G6 AELLLLHSA   | 365  | 599  |
| >CDKN2A-G6 AELLLLHG    | 2437 | >CDKN2A-G6 AELLLLHS    | 239  | 2198 |
| >CDKN2A-G6 AELLLLHGA   | 35   | >CDKN2A-G6 AELLLLHSA   | 17   | 18   |
| >CDKN2A-G6 AELLLLHGA   | 440  | >CDKN2A-G6 AELLLLHSA   | 414  | 26   |
| >CDKN2A-G6 AELLLLHG    | 775  | >CDKN2A-G6 AELLLLHS    | 185  | 590  |
| >CDKN2A-G6 AELLLLHGA   | 7    | >CDKN2A-G6 AELLLLHSA   | 7    | 0    |
| >CDKN2A-G6 AELLLLHGAE  | 313  | >CDKN2A-G6 AELLLLHSAE  | 318  | 5    |
| >CDKN2A-G6 AELLLLHGA   | 32   | >CDKN2A-G6 AELLLLHSA   | 37   | 5    |
| >CDKN2A-G6 AELLLLHGAEI | 736  | >CDKN2A-G6 AELLLLHSAEF | 485  | 251  |
| >CDKN2A-G6 RVAELLLLHG, | 171  | >CDKN2A-G6 RVAELLLLHS/ | 134  | 37   |
| >CDKN2A-G6 RVAELLLLHG, | 79   | >CDKN2A-G6 RVAELLLLHS/ | 64   | 15   |
| >CDKN2A-G6 RVAELLLLHG, | 23   | >CDKN2A-G6 RVAELLLLHS/ | 20   | 3    |
| >CDKN2A-G6 RVAELLLLHG, | 12   | >CDKN2A-G6 RVAELLLLHS/ | 12   | 0    |
| >CDKN2A-G6 RVAELLLLHG, | 305  | >CDKN2A-G6 RVAELLLLHS/ | 390  | 85   |
| >CDKN2A-G6 RVAELLLLHG, | 459  | >CDKN2A-G6 RVAELLLLHS/ | 344  | 115  |
| >CDKN2A-G6 RVAELLLLHG, | 370  | >CDKN2A-G6 RVAELLLLHS/ | 511  | 141  |
| >CDKN2A-G6 RVAELLLLHG, | 428  | >CDKN2A-G6 RVAELLLLHS/ | 737  | 309  |
| >CDKN2A-G6 HGAEPNCAD   | 4353 | >CDKN2A-G6 HVAEPNCAD   | 188  | 4165 |
| >CDKN2A-G6 HGAEPNCA    | 3080 | >CDKN2A-G6 HVAEPNCA    | 39   | 3041 |
| >CDKN2A-G6 HGAEPNCAD   | 272  | >CDKN2A-G6 HVAEPNCAD   | 9    | 263  |
| >CDKN2A-G6 HGAEPNCAD   | 3099 | >CDKN2A-G6 HVAEPNCAD   | 71   | 3028 |
| >CDKN2A-G6 ARVAELLLLH( | 3655 | >CDKN2A-G6 ARVAELLLLH) | 209  | 3446 |
| >CDKN2A-G6 ARVAELLLLH( | 5457 | >CDKN2A-G6 ARVAELLLLH) | 378  | 5079 |
| >CDKN2A-G6 LLHGAEPNCA  | 360  | >CDKN2A-G6 LLHVAEPNCA  | 891  | 531  |
| >CDKN2A-G6 LLHGAEPNCA  | 290  | >CDKN2A-G6 LLHVAEPNCA  | 496  | 206  |
| >CDKN2A-G6 LLHGAEPNC   | 274  | >CDKN2A-G6 LLHVAEPNC   | 2062 | 1788 |
| >CDKN2A-G6 LLHGAEPNCA  | 278  | >CDKN2A-G6 LLHVAEPNCA  | 1439 | 1161 |
| >CDKN2A-G6 LLHGAEPNCA  | 242  | >CDKN2A-G6 LLHVAEPNCA  | 700  | 458  |

|                        |       |                        |     |       |
|------------------------|-------|------------------------|-----|-------|
| >CDKN2A-G6 LLHGAEPNC   | 14    | >CDKN2A-G6 LLHVAEPNC   | 121 | 107   |
| >CDKN2A-G6 LLHGAEPNCA  | 26    | >CDKN2A-G6 LLHVAEPNCA  | 102 | 76    |
| >CDKN2A-G6 LLLHGAEPNC  | 560   | >CDKN2A-G6 LLLHVAEPNC  | 374 | 186   |
| >CDKN2A-G6 LLLHGAEPNC  | 723   | >CDKN2A-G6 LLLHVAEPNC  | 379 | 344   |
| >CDKN2A-G6 LLLHGAEPNC  | 429   | >CDKN2A-G6 LLLHVAEPNC  | 470 | 41    |
| >CDKN2A-G6 LLLHGAEPNC  | 476   | >CDKN2A-G6 LLLHVAEPNC  | 626 | 150   |
| >CDKN2A-G6 LLLHGAEPNC  | 121   | >CDKN2A-G6 LLLHVAEPNC  | 82  | 39    |
| >CDKN2A-G6 LLLHGAEPNC  | 105   | >CDKN2A-G6 LLLHVAEPNC  | 50  | 55    |
| >CDKN2A-G6 LLLHGAEPNC  | 428   | >CDKN2A-G6 LLLHVAEPNC  | 455 | 27    |
| >CDKN2A-G6 LLLHGAEPNC  | 80    | >CDKN2A-G6 LLLHVAEPNC  | 78  | 2     |
| >CDKN2A-G6 LLLHGAEPNC  | 294   | >CDKN2A-G6 LLLHVAEPNC  | 271 | 23    |
| >CDKN2A-G6 LLLHGAEPNC  | 66    | >CDKN2A-G6 LLLHVAEPNC  | 52  | 14    |
| >CDKN2A-G6 LLLHGAEPNC  | 369   | >CDKN2A-G6 LLLHVAEPNC  | 648 | 279   |
| >CDKN2A-G6 LLLHGAEPNC  | 198   | >CDKN2A-G6 LLLHVAEPNC  | 253 | 55    |
| >CDKN2A-G6 LLLHGAEPNC  | 35    | >CDKN2A-G6 LLLHVAEPNC  | 108 | 73    |
| >CDKN2A-G6 LLLHGAEPNC  | 53    | >CDKN2A-G6 LLLHVAEPNC  | 109 | 56    |
| >CDKN2A-G6 LLLLHGAEPN  | 220   | >CDKN2A-G6 LLLLHVAEPNI | 154 | 66    |
| >CDKN2A-G6 LLLLHGAEPN  | 1016  | >CDKN2A-G6 LLLLHVAEPNI | 342 | 674   |
| >CDKN2A-G6 LLLLHGAEPN  | 89    | >CDKN2A-G6 LLLLHVAEPNI | 67  | 22    |
| >CDKN2A-G6 ELLLLHGA    | 214   | >CDKN2A-G6 ELLLLHVA    | 399 | 185   |
| >CDKN2A-G6 ELLLLHGA    | 342   | >CDKN2A-G6 ELLLLHVA    | 462 | 120   |
| >CDKN2A-G6 ELLLLHGA    | 186   | >CDKN2A-G6 ELLLLHVA    | 336 | 150   |
| >CDKN2A-G6 ELLLLHGA    | 195   | >CDKN2A-G6 ELLLLHVA    | 269 | 74    |
| >CDKN2A-G6 ELLLLHGA    | 91    | >CDKN2A-G6 ELLLLHVA    | 547 | 456   |
| >CDKN2A-G6 AELLLLHG    | 5881  | >CDKN2A-G6 AELLLLHV    | 112 | 5769  |
| >CDKN2A-G6 AELLLLHG    | 18012 | >CDKN2A-G6 AELLLLHV    | 269 | 17743 |
| >CDKN2A-G6 AELLLLHG    | 16664 | >CDKN2A-G6 AELLLLHV    | 277 | 16387 |
| >CDKN2A-G6 AELLLLHG    | 2437  | >CDKN2A-G6 AELLLLHV    | 50  | 2387  |
| >CDKN2A-G6 AELLLLHGA   | 35    | >CDKN2A-G6 AELLLLHVA   | 23  | 12    |
| >CDKN2A-G6 AELLLLHG    | 1373  | >CDKN2A-G6 AELLLLHV    | 220 | 1153  |
| >CDKN2A-G6 AELLLLHGA   | 440   | >CDKN2A-G6 AELLLLHVA   | 570 | 130   |
| >CDKN2A-G6 AELLLLHG    | 775   | >CDKN2A-G6 AELLLLHV    | 39  | 736   |
| >CDKN2A-G6 AELLLLHGA   | 7     | >CDKN2A-G6 AELLLLHVA   | 5   | 2     |
| >CDKN2A-G6 AELLLLHGAE  | 313   | >CDKN2A-G6 AELLLLHVAE  | 253 | 60    |
| >CDKN2A-G6 AELLLLHG    | 1644  | >CDKN2A-G6 AELLLLHV    | 8   | 1636  |
| >CDKN2A-G6 AELLLLHGA   | 32    | >CDKN2A-G6 AELLLLHVA   | 63  | 31    |
| >CDKN2A-G6 AELLLLHGAEI | 736   | >CDKN2A-G6 AELLLLHVAEI | 389 | 347   |
| >CDKN2A-G6 RVAELLLLHG  | 7238  | >CDKN2A-G6 RVAELLLLHV  | 120 | 7118  |
| >CDKN2A-G6 RVAELLLLHG, | 171   | >CDKN2A-G6 RVAELLLLHV, | 390 | 219   |
| >CDKN2A-G6 RVAELLLLHG  | 9568  | >CDKN2A-G6 RVAELLLLHV  | 122 | 9446  |
| >CDKN2A-G6 RVAELLLLHG, | 79    | >CDKN2A-G6 RVAELLLLHV, | 199 | 120   |
| >CDKN2A-G6 RVAELLLLHG  | 9487  | >CDKN2A-G6 RVAELLLLHV  | 54  | 9433  |
| >CDKN2A-G6 RVAELLLLHG, | 23    | >CDKN2A-G6 RVAELLLLHV, | 56  | 33    |



|                        |       |                        |      |       |
|------------------------|-------|------------------------|------|-------|
| >CDKN2A-G6 RVAELLLLHG  | 3809  | >CDKN2A-G6 RVAELLLLHV  | 49   | 3760  |
| >CDKN2A-G6 RVAELLLLHG, | 12    | >CDKN2A-G6 RVAELLLLHV, | 31   | 19    |
| >CDKN2A-G6 RVAELLLLHG  | 16445 | >CDKN2A-G6 RVAELLLLHV  | 24   | 16421 |
| >CDKN2A-G6 RVAELLLLHG, | 305   | >CDKN2A-G6 RVAELLLLHV, | 699  | 394   |
| >CDKN2A-G6 RVAELLLLHG  | 19659 | >CDKN2A-G6 RVAELLLLHV  | 142  | 19517 |
| >CDKN2A-G6 RVAELLLLHG  | 17589 | >CDKN2A-G6 RVAELLLLHV  | 17   | 17572 |
| >CDKN2A-G6 RVAELLLLHG  | 25213 | >CDKN2A-G6 RVAELLLLHV  | 287  | 24926 |
| >CDKN2A-G6 RVAELLLLHG  | 28931 | >CDKN2A-G6 RVAELLLLHV  | 15   | 28916 |
| >CDKN2A-G6 RVAELLLLHG, | 459   | >CDKN2A-G6 RVAELLLLHV, | 1072 | 613   |
| >CDKN2A-G6 RVAELLLLHG  | 22475 | >CDKN2A-G6 RVAELLLLHV  | 207  | 22268 |
| >CDKN2A-G6 RVAELLLLHG, | 370   | >CDKN2A-G6 RVAELLLLHV, | 1207 | 837   |
| >CDKN2A-G6 RVAELLLLHG  | 17637 | >CDKN2A-G6 RVAELLLLHV  | 77   | 17560 |
| >CDKN2A-G6 RVAELLLLHG, | 428   | >CDKN2A-G6 RVAELLLLHV, | 2175 | 1747  |
| >CDKN2A-G8 GFLDTLVV    | 313   | >CDKN2A-G8 SFLDTLVV    | 134  | 179   |
| >CDKN2A-G8 GFLDTLVV    | 494   | >CDKN2A-G8 SFLDTLVV    | 725  | 231   |
| >CDKN2A-G8 GFLDTLVV    | 110   | >CDKN2A-G8 SFLDTLVV    | 56   | 54    |
| >CDKN2A-G8 GFLDTLVV    | 221   | >CDKN2A-G8 SFLDTLVV    | 104  | 117   |
| >CDKN2A-G8 GFLDTLVVL   | 298   | >CDKN2A-G8 SFLDTLVVL   | 463  | 165   |
| >CDKN2A-G8 GFLDTLVVL   | 75    | >CDKN2A-G8 SFLDTLVVL   | 37   | 38    |
| >CDKN2A-G8 GFLDTLVVLH  | 38    | >CDKN2A-G8 SFLDTLVVLHI | 18   | 20    |
| >CDKN2A-G8 GFLDTLVVLH  | 421   | >CDKN2A-G8 SFLDTLVVLHI | 110  | 311   |
| >CDKN2A-G8 GFLDTLVVLH  | 77    | >CDKN2A-G8 SFLDTLVVLHI | 25   | 52    |
| >CDKN2A-G8 GFLDTLVV    | 3127  | >CDKN2A-G8 SFLDTLVV    | 347  | 2780  |
| >CDKN2A-G8 GFLDTLVVL   | 1084  | >CDKN2A-G8 SFLDTLVVL   | 138  | 946   |
| >CDKN2A-G8 GFLDTLVV    | 3470  | >CDKN2A-G8 SFLDTLVV    | 451  | 3019  |
| >CDKN2A-G8 GFLDTLVVL   | 1571  | >CDKN2A-G8 SFLDTLVVL   | 174  | 1397  |
| >CDKN2A-G8 EGFLDTLVVLI | 4526  | >CDKN2A-G8 ESFLDTLVVLI | 199  | 4327  |
| >CDKN2A-G8 EGFLDTLV    | 135   | >CDKN2A-G8 ESFLDTLV    | 13   | 122   |
| >CDKN2A-G8 EGFLDTLVV   | 1222  | >CDKN2A-G8 ESFLDTLVV   | 61   | 1161  |
| >CDKN2A-G8 EGFLDTLVVL  | 11072 | >CDKN2A-G8 ESFLDTLVVL  | 319  | 10753 |
| >CDKN2A-G8 EGFLDTLV    | 3302  | >CDKN2A-G8 ESFLDTLV    | 218  | 3084  |
| >CDKN2A-G8 EGFLDTLVV   | 3508  | >CDKN2A-G8 ESFLDTLVV   | 174  | 3334  |
| >CDKN2A-G8 EGFLDTLVVL  | 13387 | >CDKN2A-G8 ESFLDTLVVL  | 120  | 13267 |
| >CDKN2A-G8 REGFLDTL    | 13    | >CDKN2A-G8 RESFLDTL    | 5    | 8     |
| >CDKN2A-G8 REGFLDTLV   | 213   | >CDKN2A-G8 RESFLDTLV   | 30   | 183   |
| >CDKN2A-G8 REGFLDTLVV  | 14    | >CDKN2A-G8 RESFLDTLVVI | 5    | 9     |
| >CDKN2A-G8 REGFLDTL    | 99    | >CDKN2A-G8 RESFLDTL    | 57   | 42    |
| >CDKN2A-G8 REGFLDTLV   | 208   | >CDKN2A-G8 RESFLDTLV   | 126  | 82    |
| >CDKN2A-G8 REGFLDTLVV  | 264   | >CDKN2A-G8 RESFLDTLVV  | 129  | 135   |
| >CDKN2A-G8 REGFLDTLVV  | 63    | >CDKN2A-G8 RESFLDTLVVI | 48   | 15    |
| >CDKN2A-G8 REGFLDTLVV  | 1578  | >CDKN2A-G8 RESFLDTLVVI | 464  | 1114  |
| >CDKN2A-G8 REGFLDTLV   | 35    | >CDKN2A-G8 RESFLDTLV   | 17   | 18    |
| >CDKN2A-G8 REGFLDTLVV  | 89    | >CDKN2A-G8 RESFLDTLVV  | 50   | 39    |

|                        |       |                        |      |       |
|------------------------|-------|------------------------|------|-------|
| >CDKN2A-G8 REGFLDTLVV  | 68    | >CDKN2A-G8 RESFLDTLVVI | 31   | 37    |
| >CDKN2A-G8 AREGFLDTL   | 165   | >CDKN2A-G8 ARESFLDTL   | 103  | 62    |
| >CDKN2A-G8 AREGFLDTLV  | 691   | >CDKN2A-G8 ARESFLDTLV  | 444  | 247   |
| >CDKN2A-G8 AREGFLDTL   | 63    | >CDKN2A-G8 ARESFLDTL   | 36   | 27    |
| >CDKN2A-G8 AREGFLDTLV  | 642   | >CDKN2A-G8 ARESFLDTLV  | 379  | 263   |
| >CDKN2A-G8 AAREGFLDTL  | 408   | >CDKN2A-G8 AARESFLDTL  | 598  | 190   |
| >CDKN2A-G8 AAREGFLDTL  | 252   | >CDKN2A-G8 AARESFLDTL  | 402  | 150   |
| >CDKN2A-G8 AAREGFLDTL  | 342   | >CDKN2A-G8 AARESFLDTL  | 182  | 160   |
| >CDKN2A-G8 AAREGFLDTL  | 203   | >CDKN2A-G8 AARESFLDTL  | 120  | 83    |
| >CDKN2A-G8 AAREGFLDTL  | 1509  | >CDKN2A-G8 AARESFLDTL  | 374  | 1135  |
| >CDKN2A-G8 AAREGFLDTL  | 53    | >CDKN2A-G8 AARESFLDTL  | 33   | 20    |
| >CDKN2A-G8 HDAAREGFL   | 169   | >CDKN2A-G8 HDAARESFL   | 542  | 373   |
| >CDKN2A-G8 VHDAAREGFI  | 1646  | >CDKN2A-G8 VHDAARESFL  | 403  | 1243  |
| >CDKN2A-G8 RPVHDAARE   | 58    | >CDKN2A-G8 RPVHDAARE   | 18   | 40    |
| >CDKN2A-G8 RPVHDAARE   | 287   | >CDKN2A-G8 RPVHDAARE   | 72   | 215   |
| >CDKN2A-G8 RPVHDAARE   | 112   | >CDKN2A-G8 RPVHDAARE   | 59   | 53    |
| >CDKN2A-G8 RPVHDAARE   | 3553  | >CDKN2A-G8 RPVHDAARE   | 216  | 3337  |
| >CDKN2A-G8 RPVHDAARE   | 965   | >CDKN2A-G8 RPVHDAARE   | 271  | 694   |
| >CDKN2A-G8 GFLDTLVV    | 313   | >CDKN2A-G8 VFLDTLVV    | 134  | 179   |
| >CDKN2A-G8 GFLDTLVV    | 494   | >CDKN2A-G8 VFLDTLVV    | 1065 | 571   |
| >CDKN2A-G8 GFLDTLVV    | 110   | >CDKN2A-G8 VFLDTLVV    | 158  | 48    |
| >CDKN2A-G8 GFLDTLVV    | 221   | >CDKN2A-G8 VFLDTLVV    | 75   | 146   |
| >CDKN2A-G8 GFLDTLVVL   | 298   | >CDKN2A-G8 VFLDTLVVL   | 83   | 215   |
| >CDKN2A-G8 GFLDTLVVL   | 75    | >CDKN2A-G8 VFLDTLVVL   | 67   | 8     |
| >CDKN2A-G8 GFLDTLVVLH  | 38    | >CDKN2A-G8 VFLDTLVVLH  | 32   | 6     |
| >CDKN2A-G8 GFLDTLVVLH  | 421   | >CDKN2A-G8 VFLDTLVVLH  | 88   | 333   |
| >CDKN2A-G8 GFLDTLVVLH  | 77    | >CDKN2A-G8 VFLDTLVVLH  | 58   | 19    |
| >CDKN2A-G8 GFLDTLVVL   | 1084  | >CDKN2A-G8 VFLDTLVVL   | 278  | 806   |
| >CDKN2A-G8 EGFLDTLV    | 19927 | >CDKN2A-G8 EVFLDTLV    | 305  | 19622 |
| >CDKN2A-G8 EGFLDTLVVL  | 18548 | >CDKN2A-G8 EVFLDTLVVL  | 421  | 18127 |
| >CDKN2A-G8 EGFLDTLVVLI | 4526  | >CDKN2A-G8 EVFLDTLVVLI | 85   | 4441  |
| >CDKN2A-G8 EGFLDTLV    | 135   | >CDKN2A-G8 EVFLDTLV    | 7    | 128   |
| >CDKN2A-G8 EGFLDTLVV   | 1222  | >CDKN2A-G8 EVFLDTLVV   | 14   | 1208  |
| >CDKN2A-G8 EGFLDTLVVL  | 11072 | >CDKN2A-G8 EVFLDTLVVL  | 221  | 10851 |
| >CDKN2A-G8 EGFLDTLV    | 3302  | >CDKN2A-G8 EVFLDTLV    | 25   | 3277  |
| >CDKN2A-G8 EGFLDTLVV   | 3508  | >CDKN2A-G8 EVFLDTLVV   | 17   | 3491  |
| >CDKN2A-G8 EGFLDTLVVL  | 8046  | >CDKN2A-G8 EVFLDTLVVL  | 147  | 7899  |
| >CDKN2A-G8 REGFLDTL    | 13    | >CDKN2A-G8 REVFLDTL    | 6    | 7     |
| >CDKN2A-G8 REGFLDTLV   | 213   | >CDKN2A-G8 REVFLDTLV   | 29   | 184   |
| >CDKN2A-G8 REGFLDTLVV  | 14    | >CDKN2A-G8 REVFLDTLVV  | 6    | 8     |
| >CDKN2A-G8 REGFLDTL    | 99    | >CDKN2A-G8 REVFLDTL    | 56   | 43    |
| >CDKN2A-G8 REGFLDTLV   | 208   | >CDKN2A-G8 REVFLDTLV   | 95   | 113   |
| >CDKN2A-G8 REGFLDTLVV  | 264   | >CDKN2A-G8 REVFLDTLVV  | 126  | 138   |

|                       |       |                       |      |       |
|-----------------------|-------|-----------------------|------|-------|
| >CDKN2A-G8 REGFLDTLVV | 63    | >CDKN2A-G8 REVFLDTLVV | 35   | 28    |
| >CDKN2A-G8 REGFLDTL   | 1231  | >CDKN2A-G8 REVFLDTL   | 444  | 787   |
| >CDKN2A-G8 REGFLDTL   | 4071  | >CDKN2A-G8 REVFLDTL   | 497  | 3574  |
| >CDKN2A-G8 REGFLDTLVV | 1578  | >CDKN2A-G8 REVFLDTLVV | 235  | 1343  |
| >CDKN2A-G8 REGFLDTL   | 1574  | >CDKN2A-G8 REVFLDTL   | 395  | 1179  |
| >CDKN2A-G8 REGFLDTLV  | 35    | >CDKN2A-G8 REVFLDTLV  | 12   | 23    |
| >CDKN2A-G8 REGFLDTLVV | 89    | >CDKN2A-G8 REVFLDTLVV | 98   | 9     |
| >CDKN2A-G8 REGFLDTLVV | 68    | >CDKN2A-G8 REVFLDTLVV | 17   | 51    |
| >CDKN2A-G8 AREGFLDTL  | 165   | >CDKN2A-G8 AREVFLDTL  | 75   | 90    |
| >CDKN2A-G8 AREGFLDTLV | 691   | >CDKN2A-G8 AREVFLDTLV | 315  | 376   |
| >CDKN2A-G8 AREGFLDTL  | 63    | >CDKN2A-G8 AREVFLDTL  | 17   | 46    |
| >CDKN2A-G8 AREGFLDTLV | 642   | >CDKN2A-G8 AREVFLDTLV | 187  | 455   |
| >CDKN2A-G8 AAREGFLDTL | 408   | >CDKN2A-G8 AAREVFLDTL | 432  | 24    |
| >CDKN2A-G8 AAREGFLDTL | 252   | >CDKN2A-G8 AAREVFLDTL | 603  | 351   |
| >CDKN2A-G8 AAREGFLDTL | 342   | >CDKN2A-G8 AAREVFLDTL | 359  | 17    |
| >CDKN2A-G8 AAREGFLDTL | 203   | >CDKN2A-G8 AAREVFLDTL | 230  | 27    |
| >CDKN2A-G8 AAREGFLDTL | 53    | >CDKN2A-G8 AAREVFLDTL | 232  | 179   |
| >CDKN2A-G8 DAAREGFL   | 1811  | >CDKN2A-G8 DAAREVFL   | 436  | 1375  |
| >CDKN2A-G8 HDAAREGFL  | 169   | >CDKN2A-G8 HDAAREVFL  | 517  | 348   |
| >CDKN2A-G8 VHDAAREGFL | 1646  | >CDKN2A-G8 VHDAAREVFL | 208  | 1438  |
| >CDKN2A-G8 PVHDAAREG  | 35106 | >CDKN2A-G8 PVHDAAREV  | 478  | 34628 |
| >CDKN2A-G8 RPVHDAAREG | 4239  | >CDKN2A-G8 RPVHDAAREV | 67   | 4172  |
| >CDKN2A-G8 RPVHDAAREG | 58    | >CDKN2A-G8 RPVHDAAREV | 24   | 34    |
| >CDKN2A-G8 RPVHDAAREG | 287   | >CDKN2A-G8 RPVHDAAREV | 96   | 191   |
| >CDKN2A-G8 RPVHDAAREG | 112   | >CDKN2A-G8 RPVHDAAREV | 51   | 61    |
| >CDKN2A-G8 RPVHDAAREG | 7860  | >CDKN2A-G8 RPVHDAAREV | 241  | 7619  |
| >CDKN2A-G8 RPVHDAAREG | 3553  | >CDKN2A-G8 RPVHDAAREV | 164  | 3389  |
| >CDKN2A-G8 RPVHDAAREG | 965   | >CDKN2A-G8 RPVHDAAREV | 210  | 755   |
| >CDKN2A-H1 HRDVARYLR  | 203   | >CDKN2A-H1 QRDVARYLR  | 626  | 423   |
| >CDKN2A-H1 HRDVARYLR  | 122   | >CDKN2A-H1 QRDVARYLR  | 1548 | 1426  |
| >CDKN2A-H1 HRDVARYL   | 175   | >CDKN2A-H1 QRDVARYL   | 1322 | 1147  |
| >CDKN2A-H1 HRDVARYLR  | 370   | >CDKN2A-H1 QRDVARYLR  | 1270 | 900   |
| >CDKN2A-H1 GHRDVARY   | 1558  | >CDKN2A-H1 GQRDVARY   | 415  | 1143  |
| >CDKN2A-H1 GHRDVARYL  | 282   | >CDKN2A-H1 GQRDVARYL  | 49   | 233   |
| >CDKN2A-H1 GHRDVARY   | 10668 | >CDKN2A-H1 GQRDVARY   | 63   | 10605 |
| >CDKN2A-H1 GHRDVARY   | 2839  | >CDKN2A-H1 GQRDVARY   | 153  | 2686  |
| >CDKN2A-H1 GHRDVARYL  | 3916  | >CDKN2A-H1 GQRDVARYL  | 395  | 3521  |
| >CDKN2A-H1 LPVDLAEELG | 86    | >CDKN2A-H1 LPVDLAEELG | 620  | 534   |
| >CDKN2A-H1 LGHRDVARY  | 415   | >CDKN2A-H1 LGQRDVARY  | 295  | 120   |
| >CDKN2A-H1 LGHRDVARYL | 152   | >CDKN2A-H1 LGQRDVARYL | 191  | 39    |
| >CDKN2A-H1 LGHRDVARY  | 409   | >CDKN2A-H1 LGQRDVARY  | 440  | 31    |
| >CDKN2A-H1 ELGHRDVARY | 382   | >CDKN2A-H1 ELGQRDVARY | 226  | 156   |
| >CDKN2A-H1 ELGHRDVARY | 477   | >CDKN2A-H1 ELGQRDVARY | 196  | 281   |

|                       |       |                       |      |       |
|-----------------------|-------|-----------------------|------|-------|
| >CDKN2A-H1 ELGHRDVAR\ | 274   | >CDKN2A-H1 ELGQRDVAR\ | 147  | 127   |
| >CDKN2A-H1 ELGHRDVAR\ | 1279  | >CDKN2A-H1 ELGQRDVAR\ | 193  | 1086  |
| >CDKN2A-H1 ELGHRDVAR\ | 413   | >CDKN2A-H1 ELGQRDVAR\ | 614  | 201   |
| >CDKN2A-H1 ELGHRDVAR  | 85    | >CDKN2A-H1 ELGQRDVAR  | 138  | 53    |
| >CDKN2A-H1 ELGHRDVAR  | 153   | >CDKN2A-H1 ELGQRDVAR  | 143  | 10    |
| >CDKN2A-H1 ELGHRDVAR  | 188   | >CDKN2A-H1 ELGQRDVAR  | 91   | 97    |
| >CDKN2A-H1 EELGHRDV   | 193   | >CDKN2A-H1 EELGQRDV   | 241  | 48    |
| >CDKN2A-H1 EELGHRDVAF | 86    | >CDKN2A-H1 EELGQRDVAF | 196  | 110   |
| >CDKN2A-H1 EELGHRDVAF | 177   | >CDKN2A-H1 EELGQRDVAF | 312  | 135   |
| >CDKN2A-H1 EELGHRDVAF | 121   | >CDKN2A-H1 EELGQRDVAF | 169  | 48    |
| >CDKN2A-H1 EELGHRDV   | 54    | >CDKN2A-H1 EELGQRDV   | 123  | 69    |
| >CDKN2A-H1 EELGHRDVA  | 10    | >CDKN2A-H1 EELGQRDVA  | 20   | 10    |
| >CDKN2A-H1 EELGHRDVAF | 471   | >CDKN2A-H1 EELGQRDVAF | 423  | 48    |
| >CDKN2A-H1 AEELGHRDV  | 408   | >CDKN2A-H1 AEELGQRDV  | 1516 | 1108  |
| >CDKN2A-H1 AEELGHRDV  | 29    | >CDKN2A-H1 AEELGQRDV  | 58   | 29    |
| >CDKN2A-H1 AEELGHRDV/ | 39    | >CDKN2A-H1 AEELGQRDV/ | 69   | 30    |
| >CDKN2A-H1 AEELGHRDV  | 336   | >CDKN2A-H1 AEELGQRDV  | 140  | 196   |
| >CDKN2A-H1 DLAEELGHRC | 265   | >CDKN2A-H1 DLAEELGQRC | 311  | 46    |
| >CDKN2A-H1 DLAEELGHRC | 185   | >CDKN2A-H1 DLAEELGQRC | 143  | 42    |
| >CDKN2A-H1 DLAEELGHRC | 418   | >CDKN2A-H1 DLAEELGQRC | 184  | 234   |
| >CDKN2A-H1 DLAEELGHRC | 27    | >CDKN2A-H1 DLAEELGQRC | 23   | 4     |
| >CDKN2A-H1 DLAEELGHR  | 124   | >CDKN2A-H1 DLAEELGQR  | 327  | 203   |
| >CDKN2A-H1 DLAEELGHR  | 182   | >CDKN2A-H1 DLAEELGQR  | 111  | 71    |
| >CDKN2A-H1 HARIDAAEGF | 330   | >CDKN2A-H1 QARIDAAEGF | 3044 | 2714  |
| >CDKN2A-H1 NHARIDAA   | 21230 | >CDKN2A-H1 NQARIDAA   | 147  | 21083 |
| >CDKN2A-H1 RGSNHARI   | 251   | >CDKN2A-H1 RGSNQARI   | 330  | 79    |
| >CDKN2A-H1 GTRGSNHA   | 16    | >CDKN2A-H1 GTRGSNQA   | 25   | 9     |
| >CDKN2A-H1 GTRGSNHAR  | 51    | >CDKN2A-H1 GTRGSNQAR  | 44   | 7     |
| >CDKN2A-H1 GTRGSNHAR  | 15    | >CDKN2A-H1 GTRGSNQAR  | 23   | 8     |
| >CDKN2A-H1 GTRGSNHAR  | 28    | >CDKN2A-H1 GTRGSNQAR  | 100  | 72    |
| >CDKN2A-H1 GTRGSNHAR  | 412   | >CDKN2A-H1 GTRGSNQAR  | 1084 | 672   |
| >CDKN2A-H1 GTRGSNHAR  | 205   | >CDKN2A-H1 GTRGSNQAR  | 1045 | 840   |
| >CDKN2A-H1 GTRGSNHAR  | 10    | >CDKN2A-H1 GTRGSNQAR  | 14   | 4     |
| >CDKN2A-H1 GTRGSNHAR  | 470   | >CDKN2A-H1 GTRGSNQAR  | 6006 | 5536  |
| >CDKN2A-H1 HARIDAAEGP | 330   | >CDKN2A-H1 YARIDAAEGP | 4126 | 3796  |
| >CDKN2A-H1 AAAGGTRGSI | 16043 | >CDKN2A-H1 AAAGGTRGSI | 349  | 15694 |
| >CDKN2A-H1 AAAGGTRGSI | 16748 | >CDKN2A-H1 AAAGGTRGSI | 413  | 16335 |
| >CDKN2A-H1 AAAGGTRGSI | 15152 | >CDKN2A-H1 AAAGGTRGSI | 140  | 15012 |
| >CDKN2A-H1 AAAGGTRGSI | 13107 | >CDKN2A-H1 AAAGGTRGSI | 332  | 12775 |
| >CDKN2A-H1 AAAGGTRGSI | 12210 | >CDKN2A-H1 AAAGGTRGSI | 333  | 11877 |
| >CDKN2A-H1 AAAGGTRGSI | 2965  | >CDKN2A-H1 AAAGGTRGSI | 15   | 2950  |
| >CDKN2A-H1 AAAGGTRGSI | 8400  | >CDKN2A-H1 AAAGGTRGSI | 485  | 7915  |
| >CDKN2A-H1 AAAGGTRGSI | 3444  | >CDKN2A-H1 AAAGGTRGSI | 224  | 3220  |

|                       |       |                        |       |       |
|-----------------------|-------|------------------------|-------|-------|
| >CDKN2A-H1 RGSNHARI   | 5731  | >CDKN2A-H1 RGSNYARI    | 315   | 5416  |
| >CDKN2A-H1 RGSNHARI   | 251   | >CDKN2A-H1 RGSNYARI    | 181   | 70    |
| >CDKN2A-H1 TRGSNHAR   | 575   | >CDKN2A-H1 TRGSNYAR    | 318   | 257   |
| >CDKN2A-H1 GTRGSNHA   | 16    | >CDKN2A-H1 GTRGSNYA    | 11    | 5     |
| >CDKN2A-H1 GTRGSNHAR  | 51    | >CDKN2A-H1 GTRGSNYAR   | 70    | 19    |
| >CDKN2A-H1 GTRGSNHAR  | 15    | >CDKN2A-H1 GTRGSNYARI  | 19    | 4     |
| >CDKN2A-H1 GTRGSNHAR  | 28    | >CDKN2A-H1 GTRGSNYAR   | 19    | 9     |
| >CDKN2A-H1 GTRGSNHAR  | 412   | >CDKN2A-H1 GTRGSNYAR   | 124   | 288   |
| >CDKN2A-H1 GTRGSNHAR  | 205   | >CDKN2A-H1 GTRGSNYAR   | 180   | 25    |
| >CDKN2A-H1 GTRGSNHAR  | 10    | >CDKN2A-H1 GTRGSNYARI  | 17    | 7     |
| >CDKN2A-H1 GTRGSNHAR  | 470   | >CDKN2A-H1 GTRGSNYAR   | 577   | 107   |
| >CDKN2A-H1 GTRGSNHAR  | 585   | >CDKN2A-H1 GTRGSNYARI  | 291   | 294   |
| >CDKN2A-H1 AAGGTRGSN  | 18276 | >CDKN2A-H1 AAGGTRGSN   | 155   | 18121 |
| >CDKN2A-H1 AAGGTRGSN  | 11646 | >CDKN2A-H1 AAGGTRGSN   | 146   | 11500 |
| >CDKN2A-H6 HGAEPNCAD  | 272   | >CDKN2A-H6 PGAEPNCADI  | 14091 | 13819 |
| >CDKN2A-H6 LHGAEPNCA  | 23759 | >CDKN2A-H6 LPGAEPNCA   | 273   | 23486 |
| >CDKN2A-H6 LLHGAEPNCA | 360   | >CDKN2A-H6 LLPGAEPNCA  | 469   | 109   |
| >CDKN2A-H6 LLHGAEPNCA | 290   | >CDKN2A-H6 LLPGAEPNCA  | 490   | 200   |
| >CDKN2A-H6 LLHGAEPNC  | 274   | >CDKN2A-H6 LLPGAEPNC   | 608   | 334   |
| >CDKN2A-H6 LLHGAEPNCA | 278   | >CDKN2A-H6 LLPGAEPNCA  | 575   | 297   |
| >CDKN2A-H6 LLHGAEPNCA | 242   | >CDKN2A-H6 LLPGAEPNCA  | 177   | 65    |
| >CDKN2A-H6 LLHGAEPNC  | 14    | >CDKN2A-H6 LLPGAEPNC   | 16    | 2     |
| >CDKN2A-H6 LLHGAEPNCA | 26    | >CDKN2A-H6 LLPGAEPNCA  | 32    | 6     |
| >CDKN2A-H6 LLLHGAEPNC | 560   | >CDKN2A-H6 LLLPGAEPNC  | 351   | 209   |
| >CDKN2A-H6 LLLHGAEPNC | 723   | >CDKN2A-H6 LLLPGAEPNC  | 410   | 313   |
| >CDKN2A-H6 LLLHGAEPNC | 429   | >CDKN2A-H6 LLLPGAEPNC  | 396   | 33    |
| >CDKN2A-H6 LLLHGAEPNC | 476   | >CDKN2A-H6 LLLPGAEPNC  | 200   | 276   |
| >CDKN2A-H6 LLLHGAEPNC | 121   | >CDKN2A-H6 LLLPGAEPNC  | 52    | 69    |
| >CDKN2A-H6 LLLHGAEPNC | 105   | >CDKN2A-H6 LLLPGAEPNC  | 47    | 58    |
| >CDKN2A-H6 LLLHGAEPNC | 428   | >CDKN2A-H6 LLLPGAEPNC  | 396   | 32    |
| >CDKN2A-H6 LLLHGAEPNC | 80    | >CDKN2A-H6 LLLPGAEPNC  | 63    | 17    |
| >CDKN2A-H6 LLLHGAEPNC | 294   | >CDKN2A-H6 LLLPGAEPNC  | 115   | 179   |
| >CDKN2A-H6 LLLHGAEPNC | 66    | >CDKN2A-H6 LLLPGAEPNC  | 30    | 36    |
| >CDKN2A-H6 LLLHGAEPNC | 369   | >CDKN2A-H6 LLLPGAEPNC  | 123   | 246   |
| >CDKN2A-H6 LLLHGAEPNC | 198   | >CDKN2A-H6 LLLPGAEPNC  | 53    | 145   |
| >CDKN2A-H6 LLLHGAEPNC | 35    | >CDKN2A-H6 LLLPGAEPNC  | 10    | 25    |
| >CDKN2A-H6 LLLHGAEPNC | 53    | >CDKN2A-H6 LLLPGAEPNC  | 18    | 35    |
| >CDKN2A-H6 LLLLHGAEPN | 220   | >CDKN2A-H6 LLLLPGAEPNC | 147   | 73    |
| >CDKN2A-H6 LLLLHGAEPN | 89    | >CDKN2A-H6 LLLLPGAEPNC | 86    | 3     |
| >CDKN2A-H6 ELLLLHGA   | 214   | >CDKN2A-H6 ELLLLPGA    | 223   | 9     |
| >CDKN2A-H6 ELLLLHGA   | 342   | >CDKN2A-H6 ELLLLPGA    | 210   | 132   |
| >CDKN2A-H6 ELLLLHGA   | 186   | >CDKN2A-H6 ELLLLPGA    | 154   | 32    |
| >CDKN2A-H6 ELLLLHGA   | 195   | >CDKN2A-H6 ELLLLPGA    | 425   | 230   |

|                        |       |                        |       |       |
|------------------------|-------|------------------------|-------|-------|
| >CDKN2A-H6 ELLLLHGA    | 91    | >CDKN2A-H6 ELLLLPGA    | 125   | 34    |
| >CDKN2A-H6 AELLLLHG    | 2437  | >CDKN2A-H6 AELLLLPG    | 295   | 2142  |
| >CDKN2A-H6 AELLLLHGA   | 35    | >CDKN2A-H6 AELLLLPGA   | 28    | 7     |
| >CDKN2A-H6 AELLLLHGA   | 440   | >CDKN2A-H6 AELLLLPGA   | 471   | 31    |
| >CDKN2A-H6 AELLLLHG    | 775   | >CDKN2A-H6 AELLLLPG    | 234   | 541   |
| >CDKN2A-H6 AELLLLHGA   | 7     | >CDKN2A-H6 AELLLLPGA   | 7     | 0     |
| >CDKN2A-H6 AELLLHGAE   | 313   | >CDKN2A-H6 AELLLPGAE   | 307   | 6     |
| >CDKN2A-H6 AELLLLHGA   | 32    | >CDKN2A-H6 AELLLLPGA   | 9     | 23    |
| >CDKN2A-H6 AELLLHGAEI  | 736   | >CDKN2A-H6 AELLLPGAEIF | 481   | 255   |
| >CDKN2A-H6 RVAELLLLHG, | 171   | >CDKN2A-H6 RVAELLLLPG/ | 148   | 23    |
| >CDKN2A-H6 RVAELLLLHG, | 79    | >CDKN2A-H6 RVAELLLLPG/ | 293   | 214   |
| >CDKN2A-H6 RVAELLLLHG, | 23    | >CDKN2A-H6 RVAELLLLPG/ | 38    | 15    |
| >CDKN2A-H6 RVAELLLLHG, | 12    | >CDKN2A-H6 RVAELLLLPG/ | 11    | 1     |
| >CDKN2A-H6 RVAELLLLHG, | 305   | >CDKN2A-H6 RVAELLLLPG/ | 445   | 140   |
| >CDKN2A-H6 RVAELLLLHG, | 587   | >CDKN2A-H6 RVAELLLLPG/ | 413   | 174   |
| >CDKN2A-H6 RVAELLLLHG, | 459   | >CDKN2A-H6 RVAELLLLPG/ | 1118  | 659   |
| >CDKN2A-H6 RVAELLLLH   | 226   | >CDKN2A-H6 RVAELLLP    | 11942 | 11716 |
| >CDKN2A-H6 RVAELLLLH   | 230   | >CDKN2A-H6 RVAELLLP    | 12909 | 12679 |
| >CDKN2A-H6 RVAELLLLHG, | 370   | >CDKN2A-H6 RVAELLLLPG/ | 2854  | 2484  |
| >CDKN2A-H6 RVAELLLLHG, | 428   | >CDKN2A-H6 RVAELLLLPG/ | 540   | 112   |
| >CDKN2A-H6 RVAELLLLH   | 65    | >CDKN2A-H6 RVAELLLP    | 8548  | 8483  |
| >CDKN2A-H6 ARVAELLLLH  | 215   | >CDKN2A-H6 ARVAELLLP   | 3214  | 2999  |
| >CDKN2A-H6 HGAEPNCAD   | 272   | >CDKN2A-H6 RGAEPNCAD   | 8074  | 7802  |
| >CDKN2A-H6 SARVAELLLF  | 558   | >CDKN2A-H6 SARVAELLLF  | 48    | 510   |
| >CDKN2A-H6 SARVAELLLF  | 12687 | >CDKN2A-H6 SARVAELLLF  | 167   | 12520 |
| >CDKN2A-H6 SARVAELLLF  | 24431 | >CDKN2A-H6 SARVAELLLF  | 339   | 24092 |
| >CDKN2A-H6 LLHGAEPNCA  | 360   | >CDKN2A-H6 LLRGAEPNCA  | 1111  | 751   |
| >CDKN2A-H6 LLHGAEPNCA  | 290   | >CDKN2A-H6 LLRGAEPNCA  | 555   | 265   |
| >CDKN2A-H6 LLHGAEPNC   | 274   | >CDKN2A-H6 LLRGAEPNC   | 3341  | 3067  |
| >CDKN2A-H6 LLHGAEPNCA  | 278   | >CDKN2A-H6 LLRGAEPNCA  | 3121  | 2843  |
| >CDKN2A-H6 LLHGAEPNCA  | 242   | >CDKN2A-H6 LLRGAEPNCA  | 1840  | 1598  |
| >CDKN2A-H6 LLHGAEPNC   | 14    | >CDKN2A-H6 LLRGAEPNC   | 26    | 12    |
| >CDKN2A-H6 LLHGAEPNCA  | 26    | >CDKN2A-H6 LLRGAEPNCA  | 52    | 26    |
| >CDKN2A-H6 LLLHGAEPNC  | 429   | >CDKN2A-H6 LLLRGAEPNC  | 944   | 515   |
| >CDKN2A-H6 LLLHGAEPNC  | 476   | >CDKN2A-H6 LLLRGAEPNC  | 731   | 255   |
| >CDKN2A-H6 LLLHGAEPNC  | 121   | >CDKN2A-H6 LLLRGAEPNC  | 91    | 30    |
| >CDKN2A-H6 LLLHGAEPNC  | 105   | >CDKN2A-H6 LLLRGAEPNC  | 86    | 19    |
| >CDKN2A-H6 LLLHGAEPNC  | 428   | >CDKN2A-H6 LLLRGAEPNC  | 692   | 264   |
| >CDKN2A-H6 LLLHGAEPNC  | 80    | >CDKN2A-H6 LLLRGAEPNC  | 118   | 38    |
| >CDKN2A-H6 LLLHGAEPNC  | 294   | >CDKN2A-H6 LLLRGAEPNC  | 356   | 62    |
| >CDKN2A-H6 LLLHGAEPNC  | 66    | >CDKN2A-H6 LLLRGAEPNC  | 67    | 1     |
| >CDKN2A-H6 LLLHGAEPNC  | 369   | >CDKN2A-H6 LLLRGAEPNC  | 324   | 45    |
| >CDKN2A-H6 LLLHGAEPNC  | 198   | >CDKN2A-H6 LLLRGAEPNC  | 168   | 30    |

|                        |       |                        |      |       |
|------------------------|-------|------------------------|------|-------|
| >CDKN2A-H6 LLLHGAEPNC  | 35    | >CDKN2A-H6 LLLRGAEPNC  | 20   | 15    |
| >CDKN2A-H6 LLLHGAEPNC  | 53    | >CDKN2A-H6 LLLRGAEPNC  | 33   | 20    |
| >CDKN2A-H6 LLLLHGAEPN  | 220   | >CDKN2A-H6 LLLLRGAEPN  | 391  | 171   |
| >CDKN2A-H6 LLLLHGAEPN  | 89    | >CDKN2A-H6 LLLLRGAEPN  | 84   | 5     |
| >CDKN2A-H6 ELLLLHGA    | 214   | >CDKN2A-H6 ELLLLRGA    | 1728 | 1514  |
| >CDKN2A-H6 ELLLLHGA    | 342   | >CDKN2A-H6 ELLLLRGA    | 3646 | 3304  |
| >CDKN2A-H6 ELLLLHGA    | 186   | >CDKN2A-H6 ELLLLRGA    | 2895 | 2709  |
| >CDKN2A-H6 ELLLLHGA    | 195   | >CDKN2A-H6 ELLLLRGA    | 3283 | 3088  |
| >CDKN2A-H6 ELLLLHGA    | 91    | >CDKN2A-H6 ELLLLRGA    | 1484 | 1393  |
| >CDKN2A-H6 AELLLLHGA   | 35    | >CDKN2A-H6 AELLLLRGA   | 42   | 7     |
| >CDKN2A-H6 AELLLLHGA   | 440   | >CDKN2A-H6 AELLLLRGA   | 628  | 188   |
| >CDKN2A-H6 AELLLLHGA   | 7     | >CDKN2A-H6 AELLLLRGA   | 13   | 6     |
| >CDKN2A-H6 AELLLLHGAE  | 313   | >CDKN2A-H6 AELLLLRGAE  | 411  | 98    |
| >CDKN2A-H6 AELLLLHGA   | 32    | >CDKN2A-H6 AELLLLRGA   | 63   | 31    |
| >CDKN2A-H6 RVAELLLLHG, | 171   | >CDKN2A-H6 RVAELLLLRG/ | 1254 | 1083  |
| >CDKN2A-H6 RVAELLLLHG, | 79    | >CDKN2A-H6 RVAELLLLRG/ | 642  | 563   |
| >CDKN2A-H6 RVAELLLLHG, | 23    | >CDKN2A-H6 RVAELLLLRG/ | 46   | 23    |
| >CDKN2A-H6 RVAELLLLHG, | 12    | >CDKN2A-H6 RVAELLLLRG/ | 41   | 29    |
| >CDKN2A-H6 RVAELLLLHG, | 305   | >CDKN2A-H6 RVAELLLLRG/ | 1231 | 926   |
| >CDKN2A-H6 RVAELLLLHG, | 459   | >CDKN2A-H6 RVAELLLLRG/ | 5079 | 4620  |
| >CDKN2A-H6 RVAELLLLH   | 226   | >CDKN2A-H6 RVAELLLLR   | 124  | 102   |
| >CDKN2A-H6 RVAELLLLH   | 230   | >CDKN2A-H6 RVAELLLLR   | 39   | 191   |
| >CDKN2A-H6 RVAELLLLH   | 1743  | >CDKN2A-H6 RVAELLLLR   | 24   | 1719  |
| >CDKN2A-H6 RVAELLLLH   | 12606 | >CDKN2A-H6 RVAELLLLR   | 64   | 12542 |
| >CDKN2A-H6 RVAELLLLHG, | 370   | >CDKN2A-H6 RVAELLLLRG/ | 3152 | 2782  |
| >CDKN2A-H6 RVAELLLLHG, | 428   | >CDKN2A-H6 RVAELLLLRG/ | 2825 | 2397  |
| >CDKN2A-H6 RVAELLLLH   | 65    | >CDKN2A-H6 RVAELLLLR   | 5978 | 5913  |
| >CDKN2A-H6 RVAELLLLH   | 20752 | >CDKN2A-H6 RVAELLLLR   | 81   | 20671 |
| >CDKN2A-H6 ARVAELLLLH  | 215   | >CDKN2A-H6 ARVAELLLLR  | 47   | 168   |
| >CDKN2A-H6 ARVAELLLLH  | 1636  | >CDKN2A-H6 ARVAELLLLR  | 459  | 1177  |
| >CDKN2A-H6 HGAEPNCAD   | 4353  | >CDKN2A-H6 YGAEPNCADI  | 464  | 3889  |
| >CDKN2A-H6 HGAEPNCAD   | 272   | >CDKN2A-H6 YGAEPNCADI  | 389  | 117   |
| >CDKN2A-H6 SARVAELLLLF | 11248 | >CDKN2A-H6 SARVAELLLLY | 78   | 11170 |
| >CDKN2A-H6 SARVAELLLLF | 558   | >CDKN2A-H6 SARVAELLLLY | 53   | 505   |
| >CDKN2A-H6 SARVAELLLLF | 12888 | >CDKN2A-H6 SARVAELLLLY | 63   | 12825 |
| >CDKN2A-H6 SARVAELLLLF | 4245  | >CDKN2A-H6 SARVAELLLLY | 17   | 4228  |
| >CDKN2A-H6 SARVAELLLLF | 1171  | >CDKN2A-H6 SARVAELLLLY | 78   | 1093  |
| >CDKN2A-H6 LLHGAEPNCA  | 3531  | >CDKN2A-H6 LLYGAEPNCA  | 414  | 3117  |
| >CDKN2A-H6 LLHGAEPNCA  | 360   | >CDKN2A-H6 LLYGAEPNCA  | 51   | 309   |
| >CDKN2A-H6 LLHGAEPNCA  | 290   | >CDKN2A-H6 LLYGAEPNCA  | 55   | 235   |
| >CDKN2A-H6 LLHGAEPNC   | 274   | >CDKN2A-H6 LLYGAEPNC   | 25   | 249   |
| >CDKN2A-H6 LLHGAEPNCA  | 278   | >CDKN2A-H6 LLYGAEPNCA  | 25   | 253   |
| >CDKN2A-H6 LLHGAEPNCA  | 1919  | >CDKN2A-H6 LLYGAEPNCA  | 221  | 1698  |

|                        |       |                        |     |       |
|------------------------|-------|------------------------|-----|-------|
| >CDKN2A-H6 LLHGAEPNC   | 1317  | >CDKN2A-H6 LLYGAEPNC   | 47  | 1270  |
| >CDKN2A-H6 LLHGAEPNCA  | 242   | >CDKN2A-H6 LLYGAEPNCA  | 19  | 223   |
| >CDKN2A-H6 LLHGAEPNCA  | 2478  | >CDKN2A-H6 LLYGAEPNCA  | 344 | 2134  |
| >CDKN2A-H6 LLHGAEPNC   | 14    | >CDKN2A-H6 LLYGAEPNC   | 7   | 7     |
| >CDKN2A-H6 LLHGAEPNCA  | 26    | >CDKN2A-H6 LLYGAEPNCA  | 14  | 12    |
| >CDKN2A-H6 LLLHGAEPNC  | 560   | >CDKN2A-H6 LLLYGAEPNC  | 450 | 110   |
| >CDKN2A-H6 LLLHGAEPNC  | 429   | >CDKN2A-H6 LLLYGAEPNC  | 630 | 201   |
| >CDKN2A-H6 LLLHGAEPNC  | 476   | >CDKN2A-H6 LLLYGAEPNC  | 647 | 171   |
| >CDKN2A-H6 LLLHGAEPNC  | 121   | >CDKN2A-H6 LLLYGAEPNC  | 265 | 144   |
| >CDKN2A-H6 LLLHGAEPNC  | 105   | >CDKN2A-H6 LLLYGAEPNC  | 239 | 134   |
| >CDKN2A-H6 LLLHGAEPNC  | 428   | >CDKN2A-H6 LLLYGAEPNC  | 706 | 278   |
| >CDKN2A-H6 LLLHGAEPNC  | 80    | >CDKN2A-H6 LLLYGAEPNC  | 123 | 43    |
| >CDKN2A-H6 LLLHGAEPNC  | 294   | >CDKN2A-H6 LLLYGAEPNC  | 615 | 321   |
| >CDKN2A-H6 LLLHGAEPNC  | 66    | >CDKN2A-H6 LLLYGAEPNC  | 132 | 66    |
| >CDKN2A-H6 LLLHGAEPNC  | 369   | >CDKN2A-H6 LLLYGAEPNC  | 434 | 65    |
| >CDKN2A-H6 LLLHGAEPNC  | 198   | >CDKN2A-H6 LLLYGAEPNC  | 242 | 44    |
| >CDKN2A-H6 LLLHGAEPNC  | 35    | >CDKN2A-H6 LLLYGAEPNC  | 82  | 47    |
| >CDKN2A-H6 LLLHGAEPNC  | 53    | >CDKN2A-H6 LLLYGAEPNC  | 111 | 58    |
| >CDKN2A-H6 LLLLHGAEPN  | 220   | >CDKN2A-H6 LLLLYGAEPNC | 113 | 107   |
| >CDKN2A-H6 LLLLHGAEPN  | 89    | >CDKN2A-H6 LLLLYGAEPNC | 49  | 40    |
| >CDKN2A-H6 ELLLLHGA    | 214   | >CDKN2A-H6 ELLLLLYGA   | 191 | 23    |
| >CDKN2A-H6 ELLLLHGA    | 760   | >CDKN2A-H6 ELLLLLYGA   | 462 | 298   |
| >CDKN2A-H6 ELLLLHGA    | 342   | >CDKN2A-H6 ELLLLLYGA   | 266 | 76    |
| >CDKN2A-H6 ELLLLHGA    | 186   | >CDKN2A-H6 ELLLLLYGA   | 140 | 46    |
| >CDKN2A-H6 ELLLLHGA    | 195   | >CDKN2A-H6 ELLLLLYGA   | 595 | 400   |
| >CDKN2A-H6 ELLLLHGA    | 91    | >CDKN2A-H6 ELLLLLYGA   | 130 | 39    |
| >CDKN2A-H6 AELLLLHGA   | 35    | >CDKN2A-H6 AELLLLLYGA  | 17  | 18    |
| >CDKN2A-H6 AELLLLHGAE  | 1112  | >CDKN2A-H6 AELLLLLYGAE | 493 | 619   |
| >CDKN2A-H6 AELLLLHGA   | 440   | >CDKN2A-H6 AELLLLLYGA  | 428 | 12    |
| >CDKN2A-H6 AELLLLHG    | 775   | >CDKN2A-H6 AELLLLLYG   | 354 | 421   |
| >CDKN2A-H6 AELLLLHGA   | 7     | >CDKN2A-H6 AELLLLLYGA  | 6   | 1     |
| >CDKN2A-H6 AELLLLHGAE  | 313   | >CDKN2A-H6 AELLLLLYGAE | 153 | 160   |
| >CDKN2A-H6 AELLLLHGA   | 32    | >CDKN2A-H6 AELLLLLYGA  | 20  | 12    |
| >CDKN2A-H6 VAELLLLH    | 14307 | >CDKN2A-H6 VAELLLLY    | 44  | 14263 |
| >CDKN2A-H6 VAELLLLH    | 10686 | >CDKN2A-H6 VAELLLLY    | 119 | 10567 |
| >CDKN2A-H6 VAELLLLH    | 13104 | >CDKN2A-H6 VAELLLLY    | 97  | 13007 |
| >CDKN2A-H6 VAELLLLH    | 13964 | >CDKN2A-H6 VAELLLLY    | 116 | 13848 |
| >CDKN2A-H6 RVAELLLLH   | 17396 | >CDKN2A-H6 RVAELLLLY   | 109 | 17287 |
| >CDKN2A-H6 RVAELLLLHG, | 171   | >CDKN2A-H6 RVAELLLLYG/ | 79  | 92    |
| >CDKN2A-H6 RVAELLLLHG, | 79    | >CDKN2A-H6 RVAELLLLYG/ | 49  | 30    |
| >CDKN2A-H6 RVAELLLLHG, | 23    | >CDKN2A-H6 RVAELLLLYG/ | 31  | 8     |
| >CDKN2A-H6 RVAELLLLHG, | 12    | >CDKN2A-H6 RVAELLLLYG/ | 12  | 0     |
| >CDKN2A-H6 RVAELLLLHG, | 305   | >CDKN2A-H6 RVAELLLLYG/ | 287 | 18    |



|                        |       |                        |      |       |
|------------------------|-------|------------------------|------|-------|
| >CDKN2A-H6 RVAELLLLHG, | 459   | >CDKN2A-H6 RVAELLLLYG/ | 1777 | 1318  |
| >CDKN2A-H6 RVAELLLLH   | 226   | >CDKN2A-H6 RVAELLLLY   | 78   | 148   |
| >CDKN2A-H6 RVAELLLLH   | 230   | >CDKN2A-H6 RVAELLLLY   | 30   | 200   |
| >CDKN2A-H6 RVAELLLLH   | 11224 | >CDKN2A-H6 RVAELLLLY   | 116  | 11108 |
| >CDKN2A-H6 RVAELLLLH   | 877   | >CDKN2A-H6 RVAELLLLY   | 7    | 870   |
| >CDKN2A-H6 RVAELLLLH   | 9090  | >CDKN2A-H6 RVAELLLLY   | 89   | 9001  |
| >CDKN2A-H6 RVAELLLLHG, | 370   | >CDKN2A-H6 RVAELLLLYG/ | 192  | 178   |
| >CDKN2A-H6 RVAELLLLHG, | 428   | >CDKN2A-H6 RVAELLLLYG/ | 830  | 402   |
| >CDKN2A-H6 RVAELLLLH   | 65    | >CDKN2A-H6 RVAELLLLY   | 3    | 62    |
| >CDKN2A-H6 RVAELLLLH   | 10508 | >CDKN2A-H6 RVAELLLLY   | 177  | 10331 |
| >CDKN2A-H6 RVAELLLLH   | 7234  | >CDKN2A-H6 RVAELLLLY   | 29   | 7205  |
| >CDKN2A-H6 RVAELLLLH   | 2562  | >CDKN2A-H6 RVAELLLLY   | 37   | 2525  |
| >CDKN2A-H6 RVAELLLLH   | 1048  | >CDKN2A-H6 RVAELLLLY   | 48   | 1000  |
| >CDKN2A-H6 RVAELLLLH   | 30087 | >CDKN2A-H6 RVAELLLLY   | 288  | 29799 |
| >CDKN2A-H6 RVAELLLLH   | 15511 | >CDKN2A-H6 RVAELLLLY   | 224  | 15287 |
| >CDKN2A-H6 ARVAELLLLH  | 11220 | >CDKN2A-H6 ARVAELLLLY  | 17   | 11203 |
| >CDKN2A-H6 ARVAELLLLH  | 4351  | >CDKN2A-H6 ARVAELLLLY  | 290  | 4061  |
| >CDKN2A-H6 ARVAELLLLH  | 215   | >CDKN2A-H6 ARVAELLLLY  | 21   | 194   |
| >CDKN2A-H8 HDAAREGFL   | 169   | >CDKN2A-H8 NDAAREGFL   | 442  | 273   |
| >CDKN2A-H8 RPVHDAAREC  | 58    | >CDKN2A-H8 RPVNDAAAREC | 101  | 43    |
| >CDKN2A-H8 RPVHDAAREC  | 287   | >CDKN2A-H8 RPVNDAAAREC | 486  | 199   |
| >CDKN2A-H8 RPVHDAAREC  | 112   | >CDKN2A-H8 RPVNDAAAREC | 161  | 49    |
| >CDKN2A-H8 RPVHDAAR    | 319   | >CDKN2A-H8 RPVNDAAAR   | 466  | 147   |
| >CDKN2A-H8 LTRPVHDA    | 48    | >CDKN2A-H8 LTRPVNDA    | 68   | 20    |
| >CDKN2A-H8 LTRPVHDAA   | 24    | >CDKN2A-H8 LTRPVNDAA   | 69   | 45    |
| >CDKN2A-H8 LTRPVHDAAF  | 56    | >CDKN2A-H8 LTRPVNDAAF  | 99   | 43    |
| >CDKN2A-H8 LTRPVHDAAF  | 107   | >CDKN2A-H8 LTRPVNDAAF  | 115  | 8     |
| >CDKN2A-H8 LTRPVHDAAF  | 47    | >CDKN2A-H8 LTRPVNDAAF  | 30   | 17    |
| >CDKN2A-H8 TLTRPVHDAA  | 280   | >CDKN2A-H8 TLTRPVNDAA  | 793  | 513   |
| >CDKN2A-H8 TLTRPVHDA   | 12    | >CDKN2A-H8 TLTRPVNDA   | 176  | 164   |
| >CDKN2A-H8 TLTRPVHDAA  | 88    | >CDKN2A-H8 TLTRPVNDAA  | 275  | 187   |
| >CDKN2A-H8 TLTRPVHDA   | 159   | >CDKN2A-H8 TLTRPVNDAA  | 391  | 232   |
| >CDKN2A-H8 TLTRPVHDAA  | 411   | >CDKN2A-H8 TLTRPVNDAA  | 683  | 272   |
| >CDKN2A-H8 TLTRPVHDA   | 68    | >CDKN2A-H8 TLTRPVNDAA  | 67   | 1     |
| >CDKN2A-H8 HDAAREGFL   | 169   | >CDKN2A-H8 PDAAREGFL   | 161  | 8     |
| >CDKN2A-H8 VHDAAREGF   | 12088 | >CDKN2A-H8 VPDAAREGF   | 8    | 12080 |
| >CDKN2A-H8 VHDAAREGF   | 3491  | >CDKN2A-H8 VPDAAREGF   | 8    | 3483  |
| >CDKN2A-H8 VHDAAREGF   | 22691 | >CDKN2A-H8 VPDAAREGF   | 458  | 22233 |
| >CDKN2A-H8 VHDAAREGF   | 31690 | >CDKN2A-H8 VPDAAREGF   | 448  | 31242 |
| >CDKN2A-H8 VHDAAREGF   | 18920 | >CDKN2A-H8 VPDAAREGF   | 338  | 18582 |
| >CDKN2A-H8 RPVHDAAREC  | 58    | >CDKN2A-H8 RPVPDAAREC  | 74   | 16    |
| >CDKN2A-H8 RPVHDAAREC  | 287   | >CDKN2A-H8 RPVPDAAREC  | 620  | 333   |
| >CDKN2A-H8 RPVHDAAREC  | 112   | >CDKN2A-H8 RPVPDAAREC  | 106  | 6     |

|                       |       |                       |     |       |
|-----------------------|-------|-----------------------|-----|-------|
| >CDKN2A-H8 RPVHDAAR   | 319   | >CDKN2A-H8 RPVPDAAR   | 342 | 23    |
| >CDKN2A-H8 LTRPVHDA   | 48    | >CDKN2A-H8 LTRPVPDA   | 39  | 9     |
| >CDKN2A-H8 LTRPVHDA   | 24    | >CDKN2A-H8 LTRPVPDAA  | 86  | 62    |
| >CDKN2A-H8 LTRPVHDAAF | 56    | >CDKN2A-H8 LTRPVPDAAF | 144 | 88    |
| >CDKN2A-H8 LTRPVHDAAF | 107   | >CDKN2A-H8 LTRPVPDAAF | 314 | 207   |
| >CDKN2A-H8 LTRPVHDAAF | 47    | >CDKN2A-H8 LTRPVPDAAF | 44  | 3     |
| >CDKN2A-H8 TLTRPVHDA  | 611   | >CDKN2A-H8 TLTRPVPDAA | 209 | 402   |
| >CDKN2A-H8 TLTRPVHDA  | 280   | >CDKN2A-H8 TLTRPVPDAA | 230 | 50    |
| >CDKN2A-H8 TLTRPVHDA  | 694   | >CDKN2A-H8 TLTRPVPDA  | 375 | 319   |
| >CDKN2A-H8 TLTRPVHDA  | 12    | >CDKN2A-H8 TLTRPVPDA  | 35  | 23    |
| >CDKN2A-H8 TLTRPVHDA  | 88    | >CDKN2A-H8 TLTRPVPDAA | 160 | 72    |
| >CDKN2A-H8 TLTRPVHDA  | 159   | >CDKN2A-H8 TLTRPVPDAA | 380 | 221   |
| >CDKN2A-H8 TLTRPVHDA  | 411   | >CDKN2A-H8 TLTRPVPDAA | 570 | 159   |
| >CDKN2A-H8 TLTRPVHDA  | 68    | >CDKN2A-H8 TLTRPVPDAA | 79  | 11    |
| >CDKN2A-H8 ATLRPVHDA  | 970   | >CDKN2A-H8 ATLRPVPDA  | 348 | 622   |
| >CDKN2A-H8 HDAAREGFL  | 169   | >CDKN2A-H8 QDAAREGFL  | 287 | 118   |
| >CDKN2A-H8 VHDAAREGF  | 21627 | >CDKN2A-H8 VQDAAREGF  | 403 | 21224 |
| >CDKN2A-H8 VHDAAREGF  | 2616  | >CDKN2A-H8 VQDAAREGF  | 373 | 2243  |
| >CDKN2A-H8 RPVHDAAREC | 58    | >CDKN2A-H8 RPVQDAAREC | 47  | 11    |
| >CDKN2A-H8 RPVHDAAREC | 287   | >CDKN2A-H8 RPVQDAAREC | 849 | 562   |
| >CDKN2A-H8 RPVHDAAREC | 112   | >CDKN2A-H8 RPVQDAAREC | 82  | 30    |
| >CDKN2A-H8 RPVHDAAR   | 319   | >CDKN2A-H8 RPVQDAAR   | 192 | 127   |
| >CDKN2A-H8 LTRPVHDA   | 48    | >CDKN2A-H8 LTRPVQDA   | 76  | 28    |
| >CDKN2A-H8 LTRPVHDA   | 24    | >CDKN2A-H8 LTRPVQDAA  | 88  | 64    |
| >CDKN2A-H8 LTRPVHDAAF | 56    | >CDKN2A-H8 LTRPVQDAAF | 100 | 44    |
| >CDKN2A-H8 LTRPVHDAAF | 107   | >CDKN2A-H8 LTRPVQDAAF | 150 | 43    |
| >CDKN2A-H8 LTRPVHDAAF | 47    | >CDKN2A-H8 LTRPVQDAAF | 48  | 1     |
| >CDKN2A-H8 TLTRPVHDA  | 280   | >CDKN2A-H8 TLTRPVQDA  | 467 | 187   |
| >CDKN2A-H8 TLTRPVHDA  | 12    | >CDKN2A-H8 TLTRPVQDA  | 40  | 28    |
| >CDKN2A-H8 TLTRPVHDA  | 88    | >CDKN2A-H8 TLTRPVQDA  | 107 | 19    |
| >CDKN2A-H8 TLTRPVHDA  | 159   | >CDKN2A-H8 TLTRPVQDA  | 330 | 171   |
| >CDKN2A-H8 TLTRPVHDA  | 411   | >CDKN2A-H8 TLTRPVQDA  | 580 | 169   |
| >CDKN2A-H8 TLTRPVHDA  | 68    | >CDKN2A-H8 TLTRPVQDA  | 116 | 48    |
| >CDKN2A-H8 HDAAREGFL  | 169   | >CDKN2A-H8 RDAAREGFL  | 188 | 19    |
| >CDKN2A-H8 VHDAAREGFI | 10970 | >CDKN2A-H8 VRDAAREGFI | 167 | 10803 |
| >CDKN2A-H8 VHDAAREGFI | 23475 | >CDKN2A-H8 VRDAAREGFI | 468 | 23007 |
| >CDKN2A-H8 VHDAAREGFI | 14942 | >CDKN2A-H8 VRDAAREGFI | 93  | 14849 |
| >CDKN2A-H8 PVHDAAREG  | 1934  | >CDKN2A-H8 PVRDAAREGI | 226 | 1708  |
| >CDKN2A-H8 RPVHDAAREC | 58    | >CDKN2A-H8 RPVRDAAREC | 58  | 0     |
| >CDKN2A-H8 RPVHDAAREC | 287   | >CDKN2A-H8 RPVRDAAREC | 527 | 240   |
| >CDKN2A-H8 RPVHDAAREC | 112   | >CDKN2A-H8 RPVRDAAREC | 278 | 166   |
| >CDKN2A-H8 RPVHDAAR   | 319   | >CDKN2A-H8 RPVRDAAR   | 561 | 242   |
| >CDKN2A-H8 LTRPVHDA   | 48    | >CDKN2A-H8 LTRPVRDA   | 61  | 13    |

|                        |       |                       |      |       |
|------------------------|-------|-----------------------|------|-------|
| >CDKN2A-H8 LTRPVHDAA   | 24    | >CDKN2A-H8 LTRPVRDAA  | 33   | 9     |
| >CDKN2A-H8 LTRPVHDAAF  | 56    | >CDKN2A-H8 LTRPVRDAAF | 62   | 6     |
| >CDKN2A-H8 LTRPVHDAAF  | 107   | >CDKN2A-H8 LTRPVRDAAF | 45   | 62    |
| >CDKN2A-H8 LTRPVHDAAF  | 47    | >CDKN2A-H8 LTRPVRDAAF | 47   | 0     |
| >CDKN2A-H8 TLTRPVHDAA  | 280   | >CDKN2A-H8 TLTRPVRDAA | 1662 | 1382  |
| >CDKN2A-H8 TLTRPVHDA   | 12    | >CDKN2A-H8 TLTRPVRDA  | 704  | 692   |
| >CDKN2A-H8 TLTRPVHDAF  | 88    | >CDKN2A-H8 TLTRPVRDAA | 385  | 297   |
| >CDKN2A-H8 TLTRPVHDAF  | 159   | >CDKN2A-H8 TLTRPVRDAA | 275  | 116   |
| >CDKN2A-H8 TLTRPVHDAF  | 411   | >CDKN2A-H8 TLTRPVRDAA | 368  | 43    |
| >CDKN2A-H8 TLTRPVHDAF  | 68    | >CDKN2A-H8 TLTRPVRDAA | 119  | 51    |
| >CDKN2A-H8 ATLTRPVH    | 2513  | >CDKN2A-H8 ATLTRPVR   | 184  | 2329  |
| >CDKN2A-H8 ATLTRPVH    | 2995  | >CDKN2A-H8 ATLTRPVR   | 422  | 2573  |
| >CDKN2A-H8 ATLTRPVH    | 5599  | >CDKN2A-H8 ATLTRPVR   | 24   | 5575  |
| >CDKN2A-H8 ATLTRPVH    | 27521 | >CDKN2A-H8 ATLTRPVR   | 464  | 27057 |
| >CDKN2A-H8 ATLTRPVH    | 1032  | >CDKN2A-H8 ATLTRPVR   | 173  | 859   |
| >CDKN2A-H8 HDAAREGFL   | 169   | >CDKN2A-H8 YDAAREGFL  | 237  | 68    |
| >CDKN2A-H8 VHDAAREGFI  | 16665 | >CDKN2A-H8 VYDAAREGFL | 497  | 16168 |
| >CDKN2A-H8 VHDAAREGF   | 12964 | >CDKN2A-H8 VYDAAREGF  | 362  | 12602 |
| >CDKN2A-H8 VHDAAREGF   | 12397 | >CDKN2A-H8 VYDAAREGF  | 22   | 12375 |
| >CDKN2A-H8 VHDAAREGFI  | 21245 | >CDKN2A-H8 VYDAAREGFL | 124  | 21121 |
| >CDKN2A-H8 RPHVHDAAREC | 58    | >CDKN2A-H8 RPYVDAAREC | 78   | 20    |
| >CDKN2A-H8 RPHVHDAAREC | 287   | >CDKN2A-H8 RPYVDAAREC | 430  | 143   |
| >CDKN2A-H8 RPHVHDAAREC | 112   | >CDKN2A-H8 RPYVDAAREC | 139  | 27    |
| >CDKN2A-H8 RPHVHDAAR   | 319   | >CDKN2A-H8 RPYVDAAR   | 460  | 141   |
| >CDKN2A-H8 LTRPVHDA    | 48    | >CDKN2A-H8 LTRPVYDA   | 69   | 21    |
| >CDKN2A-H8 LTRPVHDAA   | 24    | >CDKN2A-H8 LTRPVYDAA  | 36   | 12    |
| >CDKN2A-H8 LTRPVHDAAF  | 56    | >CDKN2A-H8 LTRPVYDAAR | 73   | 17    |
| >CDKN2A-H8 LTRPVHDAAF  | 107   | >CDKN2A-H8 LTRPVYDAAR | 50   | 57    |
| >CDKN2A-H8 LTRPVHDAAF  | 1201  | >CDKN2A-H8 LTRPVYDAAR | 357  | 844   |
| >CDKN2A-H8 LTRPVHDAAF  | 47    | >CDKN2A-H8 LTRPVYDAAR | 26   | 21    |
| >CDKN2A-H8 TLTRPVHDAF  | 611   | >CDKN2A-H8 TLTRPVYDAA | 353  | 258   |
| >CDKN2A-H8 TLTRPVHDAF  | 280   | >CDKN2A-H8 TLTRPVYDAA | 262  | 18    |
| >CDKN2A-H8 TLTRPVHDA   | 12    | >CDKN2A-H8 TLTRPVYDA  | 63   | 51    |
| >CDKN2A-H8 TLTRPVHDAF  | 88    | >CDKN2A-H8 TLTRPVYDAA | 135  | 47    |
| >CDKN2A-H8 TLTRPVHDAF  | 159   | >CDKN2A-H8 TLTRPVYDAA | 100  | 59    |
| >CDKN2A-H8 TLTRPVHDAF  | 411   | >CDKN2A-H8 TLTRPVYDAA | 209  | 202   |
| >CDKN2A-H8 TLTRPVHDAF  | 68    | >CDKN2A-H8 TLTRPVYDAA | 50   | 18    |
| >CDKN2A-H8 ATLTRPVH    | 2513  | >CDKN2A-H8 ATLTRPVY   | 250  | 2263  |
| >CDKN2A-H8 ATLTRPVH    | 5787  | >CDKN2A-H8 ATLTRPVY   | 89   | 5698  |
| >CDKN2A-H8 ATLTRPVH    | 13482 | >CDKN2A-H8 ATLTRPVY   | 212  | 13270 |
| >CDKN2A-H8 ATLTRPVH    | 2995  | >CDKN2A-H8 ATLTRPVY   | 393  | 2602  |
| >CDKN2A-H8 ATLTRPVH    | 8296  | >CDKN2A-H8 ATLTRPVY   | 80   | 8216  |
| >CDKN2A-H8 ATLTRPVH    | 5838  | >CDKN2A-H8 ATLTRPVY   | 175  | 5663  |

|                        |       |                        |      |       |
|------------------------|-------|------------------------|------|-------|
| >CDKN2A-H8 ATLTRPVH    | 2101  | >CDKN2A-H8 ATLTRPVY    | 6    | 2095  |
| >CDKN2A-H8 DPATLTRPVH  | 19691 | >CDKN2A-H8 DPATLTRPVY  | 62   | 19629 |
| >CDKN2A-H9 HRAGARLDV   | 197   | >CDKN2A-H9 RRAGARLDV   | 77   | 120   |
| >CDKN2A-H9 HRAGARLDVI  | 101   | >CDKN2A-H9 RRAGARLDVI  | 51   | 50    |
| >CDKN2A-H9 HRAGARLD    | 12295 | >CDKN2A-H9 RRAGARLD    | 480  | 11815 |
| >CDKN2A-H9 HRAGARLDV   | 1850  | >CDKN2A-H9 RRAGARLDV   | 61   | 1789  |
| >CDKN2A-H9 HRAGARLDV   | 1203  | >CDKN2A-H9 RRAGARLDV   | 109  | 1094  |
| >CDKN2A-H9 HRAGARLDVI  | 5836  | >CDKN2A-H9 RRAGARLDVI  | 341  | 5495  |
| >CDKN2A-H9 HRAGARLDVI  | 633   | >CDKN2A-H9 RRAGARLDVI  | 476  | 157   |
| >CDKN2A-H9 LHRAGARL    | 1186  | >CDKN2A-H9 LRRAGARL    | 434  | 752   |
| >CDKN2A-H9 EGFLDTLVVLI | 4526  | >CDKN2A-H9 EGFLDTLVVLI | 20   | 4506  |
| >CDKN2A-H9 EGFLDTLVVLI | 21890 | >CDKN2A-H9 EGFLDTLVVLI | 70   | 21820 |
| >CDKN2A-H9 VLHRAGARL   | 371   | >CDKN2A-H9 VLRRAGARL   | 1267 | 896   |
| >CDKN2A-H9 VLHRAGARL   | 156   | >CDKN2A-H9 VLRRAGARL   | 309  | 153   |
| >CDKN2A-H9 VLHRAGARLI  | 77    | >CDKN2A-H9 VLRRAGARLI  | 146  | 69    |
| >CDKN2A-H9 VLHRAGARL   | 21    | >CDKN2A-H9 VLRRAGARL   | 295  | 274   |
| >CDKN2A-H9 VLHRAGARLI  | 36    | >CDKN2A-H9 VLRRAGARLI  | 391  | 355   |
| >CDKN2A-H9 VLHRAGARL   | 269   | >CDKN2A-H9 VLRRAGARL   | 2259 | 1990  |
| >CDKN2A-H9 VLHRAGARLI  | 346   | >CDKN2A-H9 VLRRAGARLI  | 1672 | 1326  |
| >CDKN2A-H9 VLHRAGARL   | 358   | >CDKN2A-H9 VLRRAGARL   | 2572 | 2214  |
| >CDKN2A-H9 VLHRAGARLI  | 33    | >CDKN2A-H9 VLRRAGARLI  | 298  | 265   |
| >CDKN2A-H9 VLHRAGARL   | 6     | >CDKN2A-H9 VLRRAGARL   | 9    | 3     |
| >CDKN2A-H9 VLHRAGARLI  | 3     | >CDKN2A-H9 VLRRAGARLI  | 4    | 1     |
| >CDKN2A-H9 VLHRAGARL   | 2379  | >CDKN2A-H9 VLRRAGARL   | 352  | 2027  |
| >CDKN2A-H9 VLHRAGARLI  | 1719  | >CDKN2A-H9 VLRRAGARLI  | 252  | 1467  |
| >CDKN2A-H9 VLHRAGAR    | 299   | >CDKN2A-H9 VLRRAGAR    | 183  | 116   |
| >CDKN2A-H9 VLHRAGARL   | 6412  | >CDKN2A-H9 VLRRAGARL   | 312  | 6100  |
| >CDKN2A-H9 VVLHRAGA    | 471   | >CDKN2A-H9 VVLRRAGA    | 797  | 326   |
| >CDKN2A-H9 VVLHRAGARI  | 998   | >CDKN2A-H9 VVLRRAGARI  | 480  | 518   |
| >CDKN2A-H9 VVLHRAGAR   | 225   | >CDKN2A-H9 VVLRRAGAR   | 130  | 95    |
| >CDKN2A-H9 VVLHRAGARI  | 129   | >CDKN2A-H9 VVLRRAGARI  | 544  | 415   |
| >CDKN2A-H9 LVVLHRAGAF  | 250   | >CDKN2A-H9 LVVLRRAGAF  | 210  | 40    |
| >CDKN2A-H9 LVVLHRAGAF  | 127   | >CDKN2A-H9 LVVLRRAGAF  | 115  | 12    |
| >CDKN2A-H9 LVVLHRAGAF  | 287   | >CDKN2A-H9 LVVLRRAGAF  | 752  | 465   |
| >CDKN2A-H9 LVVLHRAGAF  | 435   | >CDKN2A-H9 LVVLRRAGAF  | 344  | 91    |
| >CDKN2A-H9 TLVVLHRA    | 433   | >CDKN2A-H9 TLVVLHRA    | 2944 | 2511  |
| >CDKN2A-H9 TLVVLHRA    | 247   | >CDKN2A-H9 TLVVLHRA    | 613  | 366   |
| >CDKN2A-H9 TLVVLHRAGA  | 240   | >CDKN2A-H9 TLVVLHRRAGA | 242  | 2     |
| >CDKN2A-H9 TLVVLHRA    | 426   | >CDKN2A-H9 TLVVLHRA    | 2661 | 2235  |
| >CDKN2A-H9 TLVVLHRA    | 59    | >CDKN2A-H9 TLVVLHRA    | 924  | 865   |
| >CDKN2A-H9 TLVVLHRAGA  | 465   | >CDKN2A-H9 TLVVLHRRAGA | 533  | 68    |
| >CDKN2A-H9 TLVVLHRAGA  | 209   | >CDKN2A-H9 TLVVLHRRAGA | 213  | 4     |
| >CDKN2A-H9 TLVVLHRAGA  | 534   | >CDKN2A-H9 TLVVLHRRAGA | 498  | 36    |

|                        |       |                        |      |       |
|------------------------|-------|------------------------|------|-------|
| >CDKN2A-H9 TLVVLHRAGA  | 185   | >CDKN2A-H9 TLVVLRRAGA  | 196  | 11    |
| >CDKN2A-H9 DTLVVLHR    | 277   | >CDKN2A-H9 DTLVVLRR    | 867  | 590   |
| >CDKN2A-H9 DTLVVLHR    | 9     | >CDKN2A-H9 DTLVVLRR    | 15   | 6     |
| >CDKN2A-H9 DTLVVLHR    | 16    | >CDKN2A-H9 DTLVVLRR    | 21   | 5     |
| >CDKN2A-H9 DTLVVLHRA   | 178   | >CDKN2A-H9 DTLVVLRRRA  | 3934 | 3756  |
| >CDKN2A-H9 DTLVVLHRAC  | 197   | >CDKN2A-H9 DTLVVLRRAG  | 653  | 456   |
| >CDKN2A-H9 DTLVVLHRA   | 46    | >CDKN2A-H9 DTLVVLRRRA  | 1333 | 1287  |
| >CDKN2A-H9 DTLVVLHRAC  | 65    | >CDKN2A-H9 DTLVVLRRAG  | 357  | 292   |
| >CDKN2A-H9 FLDTLVVLHR, | 12    | >CDKN2A-H9 FLDTLVVLRR, | 41   | 29    |
| >CDKN2A-H9 FLDTLVVLHR, | 7     | >CDKN2A-H9 FLDTLVVLRR, | 41   | 34    |
| >CDKN2A-H9 FLDTLVVLHR, | 24    | >CDKN2A-H9 FLDTLVVLRR, | 51   | 27    |
| >CDKN2A-H9 FLDTLVVLHR, | 68    | >CDKN2A-H9 FLDTLVVLRR, | 290  | 222   |
| >CDKN2A-H9 FLDTLVVLHR, | 3     | >CDKN2A-H9 FLDTLVVLRR, | 7    | 4     |
| >CDKN2A-H9 FLDTLVVLHR, | 9     | >CDKN2A-H9 FLDTLVVLRR, | 66   | 57    |
| >CDKN2A-H9 FLDTLVVLHR, | 8     | >CDKN2A-H9 FLDTLVVLRR, | 30   | 22    |
| >CDKN2A-H9 FLDTLVVLHR, | 19    | >CDKN2A-H9 FLDTLVVLRR, | 301  | 282   |
| >CDKN2A-H9 FLDTLVVLHR, | 3     | >CDKN2A-H9 FLDTLVVLRR, | 10   | 7     |
| >CDKN2A-H9 FLDTLVVLH   | 15274 | >CDKN2A-H9 FLDTLVVLR   | 134  | 15140 |
| >CDKN2A-H9 FLDTLVVLHR  | 354   | >CDKN2A-H9 FLDTLVVLRR  | 387  | 33    |
| >CDKN2A-H9 FLDTLVVLH   | 31469 | >CDKN2A-H9 FLDTLVVLR   | 301  | 31168 |
| >CDKN2A-H9 FLDTLVVLHR  | 272   | >CDKN2A-H9 FLDTLVVLRR  | 590  | 318   |
| >CDKN2A-H9 GFLDTLVVLH  | 10422 | >CDKN2A-H9 GFLDTLVVLR  | 125  | 10297 |
| >CDKN2A-H9 GFLDTLVVLH  | 38    | >CDKN2A-H9 GFLDTLVVLR  | 80   | 42    |
| >CDKN2A-H9 GFLDTLVVLH  | 12222 | >CDKN2A-H9 GFLDTLVVLR  | 331  | 11891 |
| >CDKN2A-H9 GFLDTLVVLH  | 421   | >CDKN2A-H9 GFLDTLVVLR  | 1255 | 834   |
| >CDKN2A-H9 GFLDTLVVLH  | 16647 | >CDKN2A-H9 GFLDTLVVLR  | 477  | 16170 |
| >CDKN2A-H9 GFLDTLVVLH  | 19577 | >CDKN2A-H9 GFLDTLVVLR  | 89   | 19488 |
| >CDKN2A-H9 GFLDTLVVLH  | 77    | >CDKN2A-H9 GFLDTLVVLR  | 151  | 74    |
| >CDKN2A-H9 HRAGARLDV   | 197   | >CDKN2A-H9 YRAGARLDV   | 163  | 34    |
| >CDKN2A-H9 HRAGARLDV   | 101   | >CDKN2A-H9 YRAGARLDV   | 885  | 784   |
| >CDKN2A-H9 HRAGARLDV   | 813   | >CDKN2A-H9 YRAGARLDV   | 481  | 332   |
| >CDKN2A-H9 LHRAGARL    | 22418 | >CDKN2A-H9 LYRAGARL    | 482  | 21936 |
| >CDKN2A-H9 LHRAGARL    | 20730 | >CDKN2A-H9 LYRAGARL    | 69   | 20661 |
| >CDKN2A-H9 LHRAGARL    | 8131  | >CDKN2A-H9 LYRAGARL    | 100  | 8031  |
| >CDKN2A-H9 LHRAGARLD\  | 5317  | >CDKN2A-H9 LYRAGARLDV  | 49   | 5268  |
| >CDKN2A-H9 LHRAGARLD\  | 8579  | >CDKN2A-H9 LYRAGARLDV  | 183  | 8396  |
| >CDKN2A-H9 LHRAGARLD\  | 16361 | >CDKN2A-H9 LYRAGARLDV  | 339  | 16022 |
| >CDKN2A-H9 LHRAGARLD\  | 6633  | >CDKN2A-H9 LYRAGARLDV  | 409  | 6224  |
| >CDKN2A-H9 EGFLDTLVVLI | 6599  | >CDKN2A-H9 EGFLDTLVVL' | 442  | 6157  |
| >CDKN2A-H9 VLHRAGARL   | 1276  | >CDKN2A-H9 VLYRAGARL   | 88   | 1188  |
| >CDKN2A-H9 VLHRAGARL   | 3402  | >CDKN2A-H9 VLYRAGARL   | 335  | 3067  |
| >CDKN2A-H9 VLHRAGARL   | 2613  | >CDKN2A-H9 VLYRAGARLD  | 305  | 2308  |
| >CDKN2A-H9 VLHRAGARL   | 371   | >CDKN2A-H9 VLYRAGARL   | 110  | 261   |

|                       |      |                       |     |      |
|-----------------------|------|-----------------------|-----|------|
| >CDKN2A-H9 VLHRAGARLI | 1621 | >CDKN2A-H9 VLYRAGARLD | 352 | 1269 |
| >CDKN2A-H9 VLHRAGARL  | 156  | >CDKN2A-H9 VLYRAGARL  | 37  | 119  |
| >CDKN2A-H9 VLHRAGARLI | 77   | >CDKN2A-H9 VLYRAGARLD | 21  | 56   |
| >CDKN2A-H9 VLHRAGARLI | 1977 | >CDKN2A-H9 VLYRAGARLD | 325 | 1652 |
| >CDKN2A-H9 VLHRAGARL  | 21   | >CDKN2A-H9 VLYRAGARL  | 5   | 16   |
| >CDKN2A-H9 VLHRAGARLI | 36   | >CDKN2A-H9 VLYRAGARLD | 7   | 29   |
| >CDKN2A-H9 VLHRAGARL  | 269  | >CDKN2A-H9 VLYRAGARL  | 34  | 235  |
| >CDKN2A-H9 VLHRAGARLI | 346  | >CDKN2A-H9 VLYRAGARLD | 69  | 277  |
| >CDKN2A-H9 VLHRAGARL  | 358  | >CDKN2A-H9 VLYRAGARL  | 17  | 341  |
| >CDKN2A-H9 VLHRAGARLI | 33   | >CDKN2A-H9 VLYRAGARLD | 7   | 26   |
| >CDKN2A-H9 VLHRAGARL  | 1854 | >CDKN2A-H9 VLYRAGARL  | 190 | 1664 |
| >CDKN2A-H9 VLHRAGARLI | 1296 | >CDKN2A-H9 VLYRAGARLD | 186 | 1110 |
| >CDKN2A-H9 VLHRAGARL  | 6    | >CDKN2A-H9 VLYRAGARL  | 4   | 2    |
| >CDKN2A-H9 VLHRAGARLI | 3    | >CDKN2A-H9 VLYRAGARLD | 3   | 0    |
| >CDKN2A-H9 VLHRAGAR   | 862  | >CDKN2A-H9 VLYRAGAR   | 80  | 782  |
| >CDKN2A-H9 VLHRAGAR   | 299  | >CDKN2A-H9 VLYRAGAR   | 122 | 177  |
| >CDKN2A-H9 VLHRAGARL  | 1276 | >CDKN2A-H9 VLYRAGARL  | 473 | 803  |
| >CDKN2A-H9 VLHRAGARL  | 3986 | >CDKN2A-H9 VLYRAGARL  | 411 | 3575 |
| >CDKN2A-H9 VVLHRAGA   | 471  | >CDKN2A-H9 VVLYRAGA   | 508 | 37   |
| >CDKN2A-H9 VVLHRAGAR  | 225  | >CDKN2A-H9 VVLYRAGAR  | 127 | 98   |
| >CDKN2A-H9 VVLHRAGAR  | 576  | >CDKN2A-H9 VVLYRAGAR  | 272 | 304  |
| >CDKN2A-H9 VVLHRAGAR  | 1012 | >CDKN2A-H9 VVLYRAGAR  | 326 | 686  |
| >CDKN2A-H9 VVLHRAGARI | 129  | >CDKN2A-H9 VVLYRAGARL | 227 | 98   |
| >CDKN2A-H9 LVVLHRAGAF | 250  | >CDKN2A-H9 LVVLYRAGAR | 183 | 67   |
| >CDKN2A-H9 LVVLHRAGA  | 762  | >CDKN2A-H9 LVVLYRAGA  | 415 | 347  |
| >CDKN2A-H9 LVVLHRAGAF | 127  | >CDKN2A-H9 LVVLYRAGAR | 110 | 17   |
| >CDKN2A-H9 LVVLHRAGAF | 287  | >CDKN2A-H9 LVVLYRAGAR | 287 | 0    |
| >CDKN2A-H9 LVVLHRAGA  | 620  | >CDKN2A-H9 LVVLYRAGA  | 282 | 338  |
| >CDKN2A-H9 LVVLHRAGAF | 435  | >CDKN2A-H9 LVVLYRAGAR | 278 | 157  |
| >CDKN2A-H9 TLVVLHRA   | 433  | >CDKN2A-H9 TLVVLYRA   | 242 | 191  |
| >CDKN2A-H9 TLVVLHRAGA | 1043 | >CDKN2A-H9 TLVVLYRAGA | 423 | 620  |
| >CDKN2A-H9 TLVVLHRA   | 247  | >CDKN2A-H9 TLVVLYRA   | 230 | 17   |
| >CDKN2A-H9 TLVVLHRAGA | 240  | >CDKN2A-H9 TLVVLYRAGA | 172 | 68   |
| >CDKN2A-H9 TLVVLHRA   | 426  | >CDKN2A-H9 TLVVLYRA   | 383 | 43   |
| >CDKN2A-H9 TLVVLHRA   | 59   | >CDKN2A-H9 TLVVLYRA   | 136 | 77   |
| >CDKN2A-H9 TLVVLHRAGA | 465  | >CDKN2A-H9 TLVVLYRAGA | 317 | 148  |
| >CDKN2A-H9 TLVVLHRAGA | 209  | >CDKN2A-H9 TLVVLYRAGA | 208 | 1    |
| >CDKN2A-H9 TLVVLHRAGA | 185  | >CDKN2A-H9 TLVVLYRAGA | 200 | 15   |
| >CDKN2A-H9 DTLVVLHR   | 277  | >CDKN2A-H9 DTLVVLYR   | 82  | 195  |
| >CDKN2A-H9 DTLVVLHR   | 9    | >CDKN2A-H9 DTLVVLYR   | 8   | 1    |
| >CDKN2A-H9 DTLVVLHR   | 16   | >CDKN2A-H9 DTLVVLYR   | 6   | 10   |
| >CDKN2A-H9 DTLVVLHRA  | 178  | >CDKN2A-H9 DTLVVLYRA  | 70  | 108  |
| >CDKN2A-H9 DTLVVLHRAC | 197  | >CDKN2A-H9 DTLVVLYRAG | 106 | 91   |

|                                |       |                               |     |       |
|--------------------------------|-------|-------------------------------|-----|-------|
| >CDKN2A-H9 DTLVVLHRA           | 46    | >CDKN2A-H9 DTLVVLYRA          | 114 | 68    |
| >CDKN2A-H9 DTLVVLHRAC          | 65    | >CDKN2A-H9 DTLVVLYRAG         | 66  | 1     |
| >CDKN2A-H9 DTLVVLHR            | 554   | >CDKN2A-H9 DTLVVLYR           | 484 | 70    |
| >CDKN2A-H9 DTLVVLHR            | 1779  | >CDKN2A-H9 DTLVVLYR           | 489 | 1290  |
| >CDKN2A-H9 FLDTLVVLH           | 2353  | >CDKN2A-H9 FLDTLVVLY          | 11  | 2342  |
| >CDKN2A-H9 FLDTLVVLHR          | 550   | >CDKN2A-H9 FLDTLVVLYR         | 119 | 431   |
| >CDKN2A-H9 FLDTLVVLHR,         | 12    | >CDKN2A-H9 FLDTLVVLYR/        | 10  | 2     |
| >CDKN2A-H9 FLDTLVVLHR          | 1626  | >CDKN2A-H9 FLDTLVVLYR         | 252 | 1374  |
| >CDKN2A-H9 FLDTLVVLHR,         | 7     | >CDKN2A-H9 FLDTLVVLYR/        | 6   | 1     |
| >CDKN2A-H9 FLDTLVVLHR,         | 24    | >CDKN2A-H9 FLDTLVVLYR/        | 33  | 9     |
| >CDKN2A-H9 FLDTLVVLHR,         | 68    | >CDKN2A-H9 FLDTLVVLYR/        | 74  | 6     |
| >CDKN2A-H9 FLDTLVVLH           | 2954  | >CDKN2A-H9 FLDTLVVLY          | 375 | 2579  |
| >CDKN2A-H9 FLDTLVVLHR          | 1433  | >CDKN2A-H9 FLDTLVVLYR         | 218 | 1215  |
| >CDKN2A-H9 FLDTLVVLHR,         | 3     | >CDKN2A-H9 FLDTLVVLYR/        | 3   | 0     |
| >CDKN2A-H9 FLDTLVVLHR,         | 9     | >CDKN2A-H9 FLDTLVVLYR/        | 8   | 1     |
| >CDKN2A-H9 FLDTLVVLHR,         | 8     | >CDKN2A-H9 FLDTLVVLYR/        | 9   | 1     |
| >CDKN2A-H9 FLDTLVVLHR,         | 19    | >CDKN2A-H9 FLDTLVVLYR/        | 21  | 2     |
| >CDKN2A-H9 FLDTLVVLHR,         | 3     | >CDKN2A-H9 FLDTLVVLYR/        | 4   | 1     |
| >CDKN2A-H9 FLDTLVVLH           | 4909  | >CDKN2A-H9 FLDTLVVLY          | 39  | 4870  |
| >CDKN2A-H9 FLDTLVVLHR          | 586   | >CDKN2A-H9 FLDTLVVLYR         | 182 | 404   |
| >CDKN2A-H9 FLDTLVVLHR          | 626   | >CDKN2A-H9 FLDTLVVLYR         | 80  | 546   |
| >CDKN2A-H9 FLDTLVVLHR          | 354   | >CDKN2A-H9 FLDTLVVLYR         | 45  | 309   |
| >CDKN2A-H9 FLDTLVVLH           | 13760 | >CDKN2A-H9 FLDTLVVLY          | 52  | 13708 |
| >CDKN2A-H9 FLDTLVVLH           | 14830 | >CDKN2A-H9 FLDTLVVLY          | 129 | 14701 |
| >CDKN2A-H9 FLDTLVVLHR          | 553   | >CDKN2A-H9 FLDTLVVLYR         | 311 | 242   |
| >CDKN2A-H9 FLDTLVVLHR          | 272   | >CDKN2A-H9 FLDTLVVLYR         | 108 | 164   |
| >CDKN2A-H9 GFLDTLVVLH          | 12934 | >CDKN2A-H9 GFLDTLVVLY         | 80  | 12854 |
| >CDKN2A-H9 GFLDTLVVLH          | 38    | >CDKN2A-H9 GFLDTLVVLYI        | 17  | 21    |
| >CDKN2A-H9 GFLDTLVVLH          | 421   | >CDKN2A-H9 GFLDTLVVLYI        | 242 | 179   |
| >CDKN2A-H9 GFLDTLVVLH          | 77    | >CDKN2A-H9 GFLDTLVVLYI        | 34  | 43    |
| >CDKN2A-I4 $\epsilon$ IQVMMMG, | 1017  | >CDKN2A-I4 $\epsilon$ MQVMMMG | 252 | 765   |
| >CDKN2A-I4 $\epsilon$ IQVMMMG, | 598   | >CDKN2A-I4 $\epsilon$ MQVMMMG | 132 | 466   |
| >CDKN2A-I4 $\epsilon$ IQVMMMG, | 167   | >CDKN2A-I4 $\epsilon$ MQVMMMG | 52  | 115   |
| >CDKN2A-I4 $\epsilon$ IQVMMMG, | 42    | >CDKN2A-I4 $\epsilon$ MQVMMMG | 15  | 27    |
| >CDKN2A-I4 $\epsilon$ IQVMMMG, | 944   | >CDKN2A-I4 $\epsilon$ MQVMMMG | 320 | 624   |
| >CDKN2A-I4 $\epsilon$ IQVMMMG, | 87    | >CDKN2A-I4 $\epsilon$ MQVMMMG | 27  | 60    |
| >CDKN2A-I4 $\epsilon$ IQVMMMG, | 16    | >CDKN2A-I4 $\epsilon$ MQVMMMG | 7   | 9     |
| >CDKN2A-I4 $\epsilon$ IQVMMMG, | 587   | >CDKN2A-I4 $\epsilon$ MQVMMMG | 262 | 325   |
| >CDKN2A-I4 $\epsilon$ IQVMMMG, | 777   | >CDKN2A-I4 $\epsilon$ MQVMMMG | 216 | 561   |
| >CDKN2A-I4 $\epsilon$ IQVMMMG, | 120   | >CDKN2A-I4 $\epsilon$ MQVMMMG | 38  | 82    |
| >CDKN2A-I4 $\epsilon$ IQVMMMG, | 240   | >CDKN2A-I4 $\epsilon$ MQVMMMG | 139 | 101   |
| >CDKN2A-I4 $\epsilon$ IQVMMMG, | 117   | >CDKN2A-I4 $\epsilon$ MQVMMMG | 19  | 98    |
| >CDKN2A-I4 $\epsilon$ IQVMMMG, | 9898  | >CDKN2A-I4 $\epsilon$ MQVMMMG | 458 | 9440  |

|                      |      |                      |      |      |
|----------------------|------|----------------------|------|------|
| >CDKN2A-I49IQVMMMSG. | 691  | >CDKN2A-I49MQVMMMG   | 338  | 353  |
| >CDKN2A-I49IQVMMMSG. | 754  | >CDKN2A-I49MQVMMMG   | 398  | 356  |
| >CDKN2A-I49IQVMMMSG. | 187  | >CDKN2A-I49MQVMMMG   | 148  | 39   |
| >CDKN2A-I49IQVMMMSG. | 508  | >CDKN2A-I49MQVMMMG   | 408  | 100  |
| >CDKN2A-I49PIQVMMMG  | 1725 | >CDKN2A-I49PMQVMMM   | 283  | 1442 |
| >CDKN2A-I49NAPNSYGRR | 266  | >CDKN2A-I49NAPNSYGRR | 3927 | 3661 |
| >CDKN2A-I49RPIQVMMM  | 109  | >CDKN2A-I49RPMQVMM   | 356  | 247  |
| >CDKN2A-I49RPIQVMMM  | 18   | >CDKN2A-I49RPMQVMM   | 8    | 10   |
| >CDKN2A-I49RPIQVMMM  | 1124 | >CDKN2A-I49RPMQVMM   | 271  | 853  |
| >CDKN2A-I49RPIQVMMM  | 23   | >CDKN2A-I49RPMQVMM   | 11   | 12   |
| >CDKN2A-I49RPIQVMMM  | 109  | >CDKN2A-I49RPMQVMM   | 114  | 5    |
| >CDKN2A-I49RPIQVMMM  | 1178 | >CDKN2A-I49RPMQVMM   | 497  | 681  |
| >CDKN2A-I49RPIQVMMM  | 288  | >CDKN2A-I49RPMQVMM   | 125  | 163  |
| >CDKN2A-I49RPIQVMMM  | 134  | >CDKN2A-I49RPMQVMM   | 131  | 3    |
| >CDKN2A-I49RPIQVMMM  | 391  | >CDKN2A-I49RPMQVMM   | 848  | 457  |
| >CDKN2A-I49RRPIQVMM  | 612  | >CDKN2A-I49RRPMQVM   | 315  | 297  |
| >CDKN2A-I49RRPIQVMM  | 439  | >CDKN2A-I49RRPMQVM   | 168  | 271  |
| >CDKN2A-I49RRPIQVMM  | 120  | >CDKN2A-I49RRPMQVM   | 109  | 11   |
| >CDKN2A-I49RRPIQVMM  | 184  | >CDKN2A-I49RRPMQVM   | 161  | 23   |
| >CDKN2A-I49RRPIQVMM  | 131  | >CDKN2A-I49RRPMQVM   | 170  | 39   |
| >CDKN2A-I49RRPIQVMM  | 163  | >CDKN2A-I49RRPMQVM   | 176  | 13   |
| >CDKN2A-I49RRPIQVMM  | 125  | >CDKN2A-I49RRPMQVM   | 176  | 51   |
| >CDKN2A-I49RRPIQVMM  | 319  | >CDKN2A-I49RRPMQVM   | 383  | 64   |
| >CDKN2A-I49RRPIQVMM  | 74   | >CDKN2A-I49RRPMQVM   | 194  | 120  |
| >CDKN2A-I49RRPIQVMM  | 238  | >CDKN2A-I49RRPMQVM   | 302  | 64   |
| >CDKN2A-I49GRRPIQVM  | 317  | >CDKN2A-I49GRRPMQVM  | 400  | 83   |
| >CDKN2A-I49GRRPIQVM  | 485  | >CDKN2A-I49GRRPMQVM  | 540  | 55   |
| >CDKN2A-I49GRRPIQVM  | 365  | >CDKN2A-I49GRRPMQVM  | 322  | 43   |
| >CDKN2A-I49GRRPIQVM  | 314  | >CDKN2A-I49GRRPMQVM  | 566  | 252  |
| >CDKN2A-I49GRRPIQVM  | 115  | >CDKN2A-I49GRRPMQVM  | 149  | 34   |
| >CDKN2A-I49GRRPIQVM  | 203  | >CDKN2A-I49GRRPMQVM  | 187  | 16   |
| >CDKN2A-I49GRRPIQVM  | 250  | >CDKN2A-I49GRRPMQVM  | 360  | 110  |
| >CDKN2A-I49GRRPIQVM  | 213  | >CDKN2A-I49GRRPMQVM  | 166  | 47   |
| >CDKN2A-I49GRRPIQVM  | 455  | >CDKN2A-I49GRRPMQVM  | 477  | 22   |
| >CDKN2A-I49GRRPIQVM  | 34   | >CDKN2A-I49GRRPMQVM  | 22   | 12   |
| >CDKN2A-I49GRRPIQVM  | 222  | >CDKN2A-I49GRRPMQVM  | 253  | 31   |
| >CDKN2A-I49YGRRPIQVM | 395  | >CDKN2A-I49YGRRPMQVM | 112  | 283  |
| >CDKN2A-I49YGRRPIQVM | 343  | >CDKN2A-I49YGRRPMQVM | 452  | 109  |
| >CDKN2A-I49YGRRPIQVM | 262  | >CDKN2A-I49YGRRPMQVM | 346  | 84   |
| >CDKN2A-I49YGRRPIQVM | 425  | >CDKN2A-I49YGRRPMQVM | 422  | 3    |
| >CDKN2A-I49YGRRPIQVM | 1252 | >CDKN2A-I49YGRRPMQVM | 336  | 916  |
| >CDKN2A-I49YGRRPIQVM | 44   | >CDKN2A-I49YGRRPMQVM | 16   | 28   |
| >CDKN2A-I49YGRRPIQVM | 45   | >CDKN2A-I49YGRRPMQVM | 43   | 2    |



|                                   |      |                                   |      |      |
|-----------------------------------|------|-----------------------------------|------|------|
| >CDKN2A-I4 $\epsilon$ YGRRPIQVMI  | 37   | >CDKN2A-I4 $\epsilon$ YGRRPMQV    | 22   | 15   |
| >CDKN2A-I4 $\epsilon$ SYGRRPIQVM  | 780  | >CDKN2A-I4 $\epsilon$ SYGRRPMQV   | 391  | 389  |
| >CDKN2A-I4 $\epsilon$ SYGRRPIQV   | 799  | >CDKN2A-I4 $\epsilon$ SYGRRPMQV   | 427  | 372  |
| >CDKN2A-I4 $\epsilon$ SYGRRPIQVM  | 559  | >CDKN2A-I4 $\epsilon$ SYGRRPMQV   | 472  | 87   |
| >CDKN2A-I4 $\epsilon$ SYGRRPIQV   | 935  | >CDKN2A-I4 $\epsilon$ SYGRRPMQV   | 153  | 782  |
| >CDKN2A-I4 $\epsilon$ SYGRRPIQVM  | 136  | >CDKN2A-I4 $\epsilon$ SYGRRPMQV   | 96   | 40   |
| >CDKN2A-I4 $\epsilon$ SYGRRPIQVM  | 74   | >CDKN2A-I4 $\epsilon$ SYGRRPMQV   | 47   | 27   |
| >CDKN2A-I4 $\epsilon$ NSYGRRPIQV  | 264  | >CDKN2A-I4 $\epsilon$ NSYGRRPMQ   | 203  | 61   |
| >CDKN2A-I4 $\epsilon$ NSYGRRPIQV  | 485  | >CDKN2A-I4 $\epsilon$ NSYGRRPMQ   | 222  | 263  |
| >CDKN2A-I4 $\epsilon$ NSYGRRPIQV  | 408  | >CDKN2A-I4 $\epsilon$ NSYGRRPMQ   | 227  | 181  |
| >CDKN2A-I4 $\epsilon$ NSYGRRPI    | 1095 | >CDKN2A-I4 $\epsilon$ NSYGRRPM    | 113  | 982  |
| >CDKN2A-I4 $\epsilon$ NSYGRRPIQV  | 132  | >CDKN2A-I4 $\epsilon$ NSYGRRPMQ   | 72   | 60   |
| >CDKN2A-I4 $\epsilon$ NSYGRRPIQV  | 495  | >CDKN2A-I4 $\epsilon$ NSYGRRPMQ   | 716  | 221  |
| >CDKN2A-I4 $\epsilon$ NSYGRRPIQV  | 251  | >CDKN2A-I4 $\epsilon$ NSYGRRPMQ   | 134  | 117  |
| >CDKN2A-I4 $\epsilon$ NSYGRRPI    | 104  | >CDKN2A-I4 $\epsilon$ NSYGRRPM    | 2985 | 2881 |
| >CDKN2A-I4 $\epsilon$ APNSYGRRPI  | 20   | >CDKN2A-I4 $\epsilon$ APNSYGRRPM  | 17   | 3    |
| >CDKN2A-I4 $\epsilon$ APNSYGRRPI  | 544  | >CDKN2A-I4 $\epsilon$ APNSYGRRPM  | 214  | 330  |
| >CDKN2A-I4 $\epsilon$ IQVMMMGS    | 167  | >CDKN2A-I4 $\epsilon$ SQVMMMGS    | 162  | 5    |
| >CDKN2A-I4 $\epsilon$ IQVMMMGS    | 42   | >CDKN2A-I4 $\epsilon$ SQVMMMGS    | 39   | 3    |
| >CDKN2A-I4 $\epsilon$ IQVMMMGS    | 87   | >CDKN2A-I4 $\epsilon$ SQVMMMGS    | 93   | 6    |
| >CDKN2A-I4 $\epsilon$ IQVMMMGS    | 16   | >CDKN2A-I4 $\epsilon$ SQVMMMGS    | 13   | 3    |
| >CDKN2A-I4 $\epsilon$ IQVMMMGS    | 1485 | >CDKN2A-I4 $\epsilon$ SQVMMMGS    | 290  | 1195 |
| >CDKN2A-I4 $\epsilon$ IQVMMMGS    | 120  | >CDKN2A-I4 $\epsilon$ SQVMMMGS    | 79   | 41   |
| >CDKN2A-I4 $\epsilon$ IQVMMMGS    | 240  | >CDKN2A-I4 $\epsilon$ SQVMMMGS    | 314  | 74   |
| >CDKN2A-I4 $\epsilon$ IQVMMMGS    | 117  | >CDKN2A-I4 $\epsilon$ SQVMMMGS    | 55   | 62   |
| >CDKN2A-I4 $\epsilon$ IQVMMMGS    | 187  | >CDKN2A-I4 $\epsilon$ SQVMMMGS    | 496  | 309  |
| >CDKN2A-I4 $\epsilon$ NAPNSYGRRPI | 266  | >CDKN2A-I4 $\epsilon$ NAPNSYGRRPM | 6452 | 6186 |
| >CDKN2A-I4 $\epsilon$ RPIQVMMM    | 109  | >CDKN2A-I4 $\epsilon$ RPSQVMMM    | 1863 | 1754 |
| >CDKN2A-I4 $\epsilon$ RPIQVMMM    | 18   | >CDKN2A-I4 $\epsilon$ RPSQVMMM    | 21   | 3    |
| >CDKN2A-I4 $\epsilon$ RPIQVMMM    | 23   | >CDKN2A-I4 $\epsilon$ RPSQVMMM    | 24   | 1    |
| >CDKN2A-I4 $\epsilon$ RPIQVMMM    | 109  | >CDKN2A-I4 $\epsilon$ RPSQVMMM    | 118  | 9    |
| >CDKN2A-I4 $\epsilon$ RPIQVMMM    | 288  | >CDKN2A-I4 $\epsilon$ RPSQVMMM    | 927  | 639  |
| >CDKN2A-I4 $\epsilon$ RPIQVMMM    | 134  | >CDKN2A-I4 $\epsilon$ RPSQVMMM    | 1214 | 1080 |
| >CDKN2A-I4 $\epsilon$ RPIQVMMM    | 391  | >CDKN2A-I4 $\epsilon$ RPSQVMMM    | 472  | 81   |
| >CDKN2A-I4 $\epsilon$ RRPIQVMM    | 612  | >CDKN2A-I4 $\epsilon$ RRPSQVMM    | 134  | 478  |
| >CDKN2A-I4 $\epsilon$ RRPIQVMM    | 439  | >CDKN2A-I4 $\epsilon$ RRPSQVMMI   | 94   | 345  |
| >CDKN2A-I4 $\epsilon$ RRPIQVMM    | 120  | >CDKN2A-I4 $\epsilon$ RRPSQVMM    | 119  | 1    |
| >CDKN2A-I4 $\epsilon$ RRPIQVMM    | 184  | >CDKN2A-I4 $\epsilon$ RRPSQVMMI   | 136  | 48   |
| >CDKN2A-I4 $\epsilon$ RRPIQVMM    | 131  | >CDKN2A-I4 $\epsilon$ RRPSQVMM    | 235  | 104  |
| >CDKN2A-I4 $\epsilon$ RRPIQVMM    | 163  | >CDKN2A-I4 $\epsilon$ RRPSQVMMI   | 170  | 7    |
| >CDKN2A-I4 $\epsilon$ RRPIQVMM    | 125  | >CDKN2A-I4 $\epsilon$ RRPSQVMMI   | 215  | 90   |
| >CDKN2A-I4 $\epsilon$ RRPIQVMM    | 319  | >CDKN2A-I4 $\epsilon$ RRPSQVMM    | 670  | 351  |
| >CDKN2A-I4 $\epsilon$ RRPIQVMM    | 74   | >CDKN2A-I4 $\epsilon$ RRPSQVMMI   | 131  | 57   |

|                                  |       |                                  |       |       |
|----------------------------------|-------|----------------------------------|-------|-------|
| >CDKN2A-I4 $\epsilon$ RRPIQVMM   | 238   | >CDKN2A-I4 $\epsilon$ RRPSQVMMI  | 415   | 177   |
| >CDKN2A-I4 $\epsilon$ GRRPIQVM   | 317   | >CDKN2A-I4 $\epsilon$ GRRPSQVM   | 81    | 236   |
| >CDKN2A-I4 $\epsilon$ GRRPIQVMM  | 485   | >CDKN2A-I4 $\epsilon$ GRRPSQVMM  | 61    | 424   |
| >CDKN2A-I4 $\epsilon$ GRRPIQVMM  | 365   | >CDKN2A-I4 $\epsilon$ GRRPSQVMM  | 68    | 297   |
| >CDKN2A-I4 $\epsilon$ GRRPIQVM   | 314   | >CDKN2A-I4 $\epsilon$ GRRPSQVM   | 987   | 673   |
| >CDKN2A-I4 $\epsilon$ GRRPIQVMM  | 115   | >CDKN2A-I4 $\epsilon$ GRRPSQVMM  | 344   | 229   |
| >CDKN2A-I4 $\epsilon$ GRRPIQVMM  | 203   | >CDKN2A-I4 $\epsilon$ GRRPSQVMM  | 207   | 4     |
| >CDKN2A-I4 $\epsilon$ GRRPIQVMM  | 250   | >CDKN2A-I4 $\epsilon$ GRRPSQVMM  | 637   | 387   |
| >CDKN2A-I4 $\epsilon$ GRRPIQVMM  | 213   | >CDKN2A-I4 $\epsilon$ GRRPSQVMM  | 504   | 291   |
| >CDKN2A-I4 $\epsilon$ GRRPIQVMM  | 455   | >CDKN2A-I4 $\epsilon$ GRRPSQVMM  | 387   | 68    |
| >CDKN2A-I4 $\epsilon$ GRRPIQVMM  | 34    | >CDKN2A-I4 $\epsilon$ GRRPSQVMM  | 101   | 67    |
| >CDKN2A-I4 $\epsilon$ GRRPIQVMM  | 222   | >CDKN2A-I4 $\epsilon$ GRRPSQVMM  | 258   | 36    |
| >CDKN2A-I4 $\epsilon$ YGRRPIQVM  | 395   | >CDKN2A-I4 $\epsilon$ YGRRPSQVM  | 166   | 229   |
| >CDKN2A-I4 $\epsilon$ YGRRPIQVM  | 343   | >CDKN2A-I4 $\epsilon$ YGRRPSQVM  | 150   | 193   |
| >CDKN2A-I4 $\epsilon$ YGRRPIQVM  | 897   | >CDKN2A-I4 $\epsilon$ YGRRPSQVM  | 272   | 625   |
| >CDKN2A-I4 $\epsilon$ YGRRPIQVM  | 262   | >CDKN2A-I4 $\epsilon$ YGRRPSQVM  | 152   | 110   |
| >CDKN2A-I4 $\epsilon$ YGRRPIQVMI | 597   | >CDKN2A-I4 $\epsilon$ YGRRPSQVM  | 213   | 384   |
| >CDKN2A-I4 $\epsilon$ YGRRPIQVMI | 425   | >CDKN2A-I4 $\epsilon$ YGRRPSQVM  | 237   | 188   |
| >CDKN2A-I4 $\epsilon$ YGRRPIQVM  | 44    | >CDKN2A-I4 $\epsilon$ YGRRPSQVM  | 21    | 23    |
| >CDKN2A-I4 $\epsilon$ YGRRPIQVMI | 45    | >CDKN2A-I4 $\epsilon$ YGRRPSQVM  | 56    | 11    |
| >CDKN2A-I4 $\epsilon$ YGRRPIQVMI | 37    | >CDKN2A-I4 $\epsilon$ YGRRPSQVM  | 20    | 17    |
| >CDKN2A-I4 $\epsilon$ SYGRRPIQV  | 4313  | >CDKN2A-I4 $\epsilon$ SYGRRPSQV  | 90    | 4223  |
| >CDKN2A-I4 $\epsilon$ SYGRRPIQVM | 1035  | >CDKN2A-I4 $\epsilon$ SYGRRPSQVM | 402   | 633   |
| >CDKN2A-I4 $\epsilon$ SYGRRPIQVM | 780   | >CDKN2A-I4 $\epsilon$ SYGRRPSQVM | 196   | 584   |
| >CDKN2A-I4 $\epsilon$ SYGRRPIQVM | 136   | >CDKN2A-I4 $\epsilon$ SYGRRPSQVM | 221   | 85    |
| >CDKN2A-I4 $\epsilon$ SYGRRPIQVM | 74    | >CDKN2A-I4 $\epsilon$ SYGRRPSQVM | 94    | 20    |
| >CDKN2A-I4 $\epsilon$ NSYGRRPIQV | 264   | >CDKN2A-I4 $\epsilon$ NSYGRRPSQ\ | 264   | 0     |
| >CDKN2A-I4 $\epsilon$ NSYGRRPIQV | 485   | >CDKN2A-I4 $\epsilon$ NSYGRRPSQ\ | 1681  | 1196  |
| >CDKN2A-I4 $\epsilon$ NSYGRRPIQV | 408   | >CDKN2A-I4 $\epsilon$ NSYGRRPSQ\ | 568   | 160   |
| >CDKN2A-I4 $\epsilon$ NSYGRRPIQV | 132   | >CDKN2A-I4 $\epsilon$ NSYGRRPSQ\ | 90    | 42    |
| >CDKN2A-I4 $\epsilon$ NSYGRRPIQV | 495   | >CDKN2A-I4 $\epsilon$ NSYGRRPSQ\ | 744   | 249   |
| >CDKN2A-I4 $\epsilon$ NSYGRRPIQV | 251   | >CDKN2A-I4 $\epsilon$ NSYGRRPSQ\ | 188   | 63    |
| >CDKN2A-I4 $\epsilon$ NSYGRRPI   | 104   | >CDKN2A-I4 $\epsilon$ NSYGRRPS   | 26409 | 26305 |
| >CDKN2A-I4 $\epsilon$ APNSYGRRPI | 20    | >CDKN2A-I4 $\epsilon$ APNSYGRRPS | 559   | 539   |
| >CDKN2A-I4 $\epsilon$ APNSYGRRPI | 1068  | >CDKN2A-I4 $\epsilon$ APNSYGRRPS | 299   | 769   |
| >CDKN2A-L1:LPVDLAEEL             | 10225 | >CDKN2A-L1:MPVDLAEEL             | 473   | 9752  |
| >CDKN2A-L1:LPVDLAEEL             | 414   | >CDKN2A-L1:MPVDLAEEL             | 170   | 244   |
| >CDKN2A-L1:LPVDLAEEL             | 905   | >CDKN2A-L1:MPVDLAEEL             | 119   | 786   |
| >CDKN2A-L1:LPVDLAEEL             | 42    | >CDKN2A-L1:MPVDLAEEL             | 17    | 25    |
| >CDKN2A-L1:LPVDLAEELG            | 86    | >CDKN2A-L1:MPVDLAEELC            | 24    | 62    |
| >CDKN2A-L1:LPVDLAEEL             | 1748  | >CDKN2A-L1:MPVDLAEEL             | 125   | 1623  |
| >CDKN2A-L1:LPVDLAEEL             | 407   | >CDKN2A-L1:MPVDLAEEL             | 425   | 18    |
| >CDKN2A-L1:LPVDLAEEL             | 52    | >CDKN2A-L1:MPVDLAEEL             | 30    | 22    |

|                       |      |                       |       |       |
|-----------------------|------|-----------------------|-------|-------|
| >CDKN2A-L1 LPVDLAEELG | 2239 | >CDKN2A-L1 MPVDLAEELC | 462   | 1777  |
| >CDKN2A-L1 LPVDLAEEL  | 1738 | >CDKN2A-L1 MPVDLAEEL  | 491   | 1247  |
| >CDKN2A-L1 LPVDLAEEL  | 86   | >CDKN2A-L1 MPVDLAEEL  | 136   | 50    |
| >CDKN2A-L1 RLPVDLAEEL | 99   | >CDKN2A-L1 RMPVDLAEEL | 111   | 12    |
| >CDKN2A-L1 RLPVDLAEEL | 38   | >CDKN2A-L1 RMPVDLAEEL | 24    | 14    |
| >CDKN2A-L1 RLPVDLAEEL | 165  | >CDKN2A-L1 RMPVDLAEEL | 106   | 59    |
| >CDKN2A-L1 RLPVDLAEEL | 125  | >CDKN2A-L1 RMPVDLAEEL | 112   | 13    |
| >CDKN2A-L1 RLPVDLAEEL | 391  | >CDKN2A-L1 RMPVDLAEEL | 276   | 115   |
| >CDKN2A-L1 RLPVDLAEEL | 15   | >CDKN2A-L1 RMPVDLAEEL | 23    | 8     |
| >CDKN2A-L1 RLPVDLAEEL | 1924 | >CDKN2A-L1 RMPVDLAEEL | 353   | 1571  |
| >CDKN2A-L1 RLDVRDAWG  | 122  | >CDKN2A-L1 RLDVRDAWG  | 796   | 674   |
| >CDKN2A-L1 RLDVRDAWG  | 227  | >CDKN2A-L1 RLDVRDAWG  | 2357  | 2130  |
| >CDKN2A-L1 RLDVRDAWG  | 91   | >CDKN2A-L1 RLDVRDAWG  | 1622  | 1531  |
| >CDKN2A-L1 GRLPVDLAE  | 202  | >CDKN2A-L1 GRMPVDLAE  | 82    | 120   |
| >CDKN2A-L1 GRLPVDLAE  | 1465 | >CDKN2A-L1 GRMPVDLAE  | 379   | 1086  |
| >CDKN2A-L1 GRLPVDLAE  | 194  | >CDKN2A-L1 GRMPVDLAE  | 132   | 62    |
| >CDKN2A-L1 GRLPVDLAE  | 29   | >CDKN2A-L1 GRMPVDLAE  | 18    | 11    |
| >CDKN2A-L1 AWGRLPVDL  | 474  | >CDKN2A-L1 AWGRMPVD   | 875   | 401   |
| >CDKN2A-L1 AWGRLPVDL  | 403  | >CDKN2A-L1 AWGRMPVD   | 491   | 88    |
| >CDKN2A-L1 AWGRLPVDL  | 156  | >CDKN2A-L1 AWGRMPVD   | 182   | 26    |
| >CDKN2A-L1 DAWGRLPV   | 260  | >CDKN2A-L1 DAWGRMPV   | 54    | 206   |
| >CDKN2A-L1 DAWGRLPV   | 24   | >CDKN2A-L1 DAWGRMPV   | 14    | 10    |
| >CDKN2A-L1 RDAWGRLPV  | 737  | >CDKN2A-L1 RDAWGRMP   | 373   | 364   |
| >CDKN2A-L1 RDAWGRLPV  | 654  | >CDKN2A-L1 RDAWGRMP   | 420   | 234   |
| >CDKN2A-L1 VRDAWGRLP  | 489  | >CDKN2A-L1 VRDAWGRM   | 404   | 85    |
| >CDKN2A-L1 DVRDAWGRI  | 456  | >CDKN2A-L1 DVRDAWGRI  | 22    | 434   |
| >CDKN2A-L1 DVRDAWGRI  | 644  | >CDKN2A-L1 DVRDAWGRI  | 83    | 561   |
| >CDKN2A-L1 DVRDAWGRI  | 277  | >CDKN2A-L1 DVRDAWGRI  | 183   | 94    |
| >CDKN2A-L1 DVRDAWGRI  | 208  | >CDKN2A-L1 DVRDAWGRI  | 47    | 161   |
| >CDKN2A-L1 DVRDAWGRI  | 198  | >CDKN2A-L1 DVRDAWGRI  | 115   | 83    |
| >CDKN2A-L1 LDVRDAWGF  | 477  | >CDKN2A-L1 LDVRDAWGF  | 1312  | 835   |
| >CDKN2A-L1 LPVDLAEEL  | 414  | >CDKN2A-L1 PPVDLAEEL  | 7514  | 7100  |
| >CDKN2A-L1 LPVDLAEEL  | 42   | >CDKN2A-L1 PPVDLAEEL  | 2095  | 2053  |
| >CDKN2A-L1 LPVDLAEELG | 86   | >CDKN2A-L1 PPVDLAEELG | 2207  | 2121  |
| >CDKN2A-L1 LPVDLAEEL  | 407  | >CDKN2A-L1 PPVDLAEEL  | 7394  | 6987  |
| >CDKN2A-L1 LPVDLAEEL  | 52   | >CDKN2A-L1 PPVDLAEEL  | 463   | 411   |
| >CDKN2A-L1 LPVDLAEEL  | 86   | >CDKN2A-L1 PPVDLAEEL  | 2453  | 2367  |
| >CDKN2A-L1 RLPVDLAEEL | 99   | >CDKN2A-L1 RPPVDLAEEL | 20072 | 19973 |
| >CDKN2A-L1 RLPVDLAEEL | 38   | >CDKN2A-L1 RPPVDLAEEL | 25081 | 25043 |
| >CDKN2A-L1 RLPVDLAEEL | 165  | >CDKN2A-L1 RPPVDLAEEL | 24844 | 24679 |
| >CDKN2A-L1 RLPVDLAEEL | 125  | >CDKN2A-L1 RPPVDLAEEL | 24418 | 24293 |
| >CDKN2A-L1 RLPVDLAEEL | 391  | >CDKN2A-L1 RPPVDLAEEL | 25756 | 25365 |
| >CDKN2A-L1 RLPVDLAEEL | 15   | >CDKN2A-L1 RPPVDLAEEL | 31371 | 31356 |

|                        |       |                        |       |       |
|------------------------|-------|------------------------|-------|-------|
| >CDKN2A-L1: RLPVDLAEEL | 29396 | >CDKN2A-L1: RPPVDLAEEL | 128   | 29268 |
| >CDKN2A-L1: RLDVRDAWG  | 122   | >CDKN2A-L1: RLDVRDAWG  | 14236 | 14114 |
| >CDKN2A-L1: RLDVRDAWG  | 227   | >CDKN2A-L1: RLDVRDAWG  | 17137 | 16910 |
| >CDKN2A-L1: RLDVRDAWG  | 91    | >CDKN2A-L1: RLDVRDAWG  | 22865 | 22774 |
| >CDKN2A-L1: GRLPVDLAE  | 202   | >CDKN2A-L1: GRPPVDLAE  | 3438  | 3236  |
| >CDKN2A-L1: GRLPVDLAE  | 194   | >CDKN2A-L1: GRPPVDLAE  | 447   | 253   |
| >CDKN2A-L1: GRLPVDLAE  | 29    | >CDKN2A-L1: GRPPVDLAE  | 48    | 19    |
| >CDKN2A-L1: AWGRLPVDL  | 474   | >CDKN2A-L1: AWGRPPVDL  | 1115  | 641   |
| >CDKN2A-L1: AWGRLPVDL  | 403   | >CDKN2A-L1: AWGRPPVDL  | 1165  | 762   |
| >CDKN2A-L1: AWGRLPVDL  | 156   | >CDKN2A-L1: AWGRPPVDL  | 105   | 51    |
| >CDKN2A-L1: DAWGRLPV   | 260   | >CDKN2A-L1: DAWGRPPV   | 507   | 247   |
| >CDKN2A-L1: DAWGRLPV   | 24    | >CDKN2A-L1: DAWGRPPV   | 17    | 7     |
| >CDKN2A-L1: RDAWGRLPV  | 737   | >CDKN2A-L1: RDAWGRPPV  | 194   | 543   |
| >CDKN2A-L1: VRDAWGRLP  | 489   | >CDKN2A-L1: VRDAWGRPF  | 528   | 39    |
| >CDKN2A-L1: DVRDAWGRI  | 456   | >CDKN2A-L1: DVRDAWGRI  | 12599 | 12143 |
| >CDKN2A-L1: DVRDAWGRI  | 277   | >CDKN2A-L1: DVRDAWGRI  | 205   | 72    |
| >CDKN2A-L1: DVRDAWGRI  | 208   | >CDKN2A-L1: DVRDAWGRI  | 392   | 184   |
| >CDKN2A-L1: DVRDAWGRI  | 198   | >CDKN2A-L1: DVRDAWGRI  | 80    | 118   |
| >CDKN2A-L1: LDVRDAWGF  | 477   | >CDKN2A-L1: LDVRDAWGF  | 16594 | 16117 |
| >CDKN2A-L1: LRAAAGGTR  | 199   | >CDKN2A-L1: PRAAAGGTR  | 2648  | 2449  |
| >CDKN2A-L1: YLRAAAGGT  | 48    | >CDKN2A-L1: YPRAAAGGT  | 19605 | 19557 |
| >CDKN2A-L1: YLRAAAGGT  | 128   | >CDKN2A-L1: YPRAAAGGT  | 36659 | 36531 |
| >CDKN2A-L1: YLRAAAGGT  | 11121 | >CDKN2A-L1: YPRAAAGGT  | 30    | 11091 |
| >CDKN2A-L1: YLRAAAGGTF | 21462 | >CDKN2A-L1: YPRAAAGGTI | 404   | 21058 |
| >CDKN2A-L1: YLRAAAGGTF | 231   | >CDKN2A-L1: YPRAAAGGTI | 12355 | 12124 |
| >CDKN2A-L1: ELGHRDVAR) | 382   | >CDKN2A-L1: ELGHRDVAR) | 18237 | 17855 |
| >CDKN2A-L1: ELGHRDVAR) | 477   | >CDKN2A-L1: ELGHRDVAR) | 27608 | 27131 |
| >CDKN2A-L1: RYLRAAAG   | 414   | >CDKN2A-L1: RYPRAAAG   | 340   | 74    |
| >CDKN2A-L1: RYLRAAAGG  | 436   | >CDKN2A-L1: RYPRAAAGG  | 405   | 31    |
| >CDKN2A-L1: RYLRAAAGG  | 218   | >CDKN2A-L1: RYPRAAAGG` | 181   | 37    |
| >CDKN2A-L1: RYLRAAAGG  | 128   | >CDKN2A-L1: RYPRAAAGG` | 109   | 19    |
| >CDKN2A-L1: RYLRAAAG   | 239   | >CDKN2A-L1: RYPRAAAG   | 4695  | 4456  |
| >CDKN2A-L1: RYLRAAAGG  | 315   | >CDKN2A-L1: RYPRAAAGG  | 5364  | 5049  |
| >CDKN2A-L1: RYLRAAAGG  | 96    | >CDKN2A-L1: RYPRAAAGG` | 2726  | 2630  |
| >CDKN2A-L1: RYLRAAAGG  | 24    | >CDKN2A-L1: RYPRAAAGG` | 232   | 208   |
| >CDKN2A-L1: RYLRAAAGG  | 33    | >CDKN2A-L1: RYPRAAAGG` | 36    | 3     |
| >CDKN2A-L1: ARYLRAAA   | 195   | >CDKN2A-L1: ARYPRAAA   | 421   | 226   |
| >CDKN2A-L1: ARYLRAAAGC | 321   | >CDKN2A-L1: ARYPRAAAGC | 554   | 233   |
| >CDKN2A-L1: ARYLRAAA   | 428   | >CDKN2A-L1: ARYPRAAA   | 508   | 80    |
| >CDKN2A-L1: ARYLRAAAG  | 638   | >CDKN2A-L1: ARYPRAAAG  | 414   | 224   |
| >CDKN2A-L1: VARYLRAA   | 137   | >CDKN2A-L1: VARYPRAA   | 143   | 6     |
| >CDKN2A-L1: VARYLRAAA  | 38    | >CDKN2A-L1: VARYPRAAA  | 43    | 5     |
| >CDKN2A-L1: VARYLRAA   | 1040  | >CDKN2A-L1: VARYPRAA   | 495   | 545   |

|                         |      |                         |       |       |
|-------------------------|------|-------------------------|-------|-------|
| >CDKN2A-L1: VARYLRAAA   | 284  | >CDKN2A-L1: VARYPRAAA   | 59    | 225   |
| >CDKN2A-L1: DVARYLRAAA/ | 376  | >CDKN2A-L1: DVARYPRAAA/ | 282   | 94    |
| >CDKN2A-L1: RDVARYLR    | 243  | >CDKN2A-L1: RDVARYPR    | 143   | 100   |
| >CDKN2A-L1: RDVARYLR    | 79   | >CDKN2A-L1: RDVARYPR    | 50    | 29    |
| >CDKN2A-L1: HRDVARYLR   | 203  | >CDKN2A-L1: HRDVARYPR   | 166   | 37    |
| >CDKN2A-L1: HRDVARYLR/  | 122  | >CDKN2A-L1: HRDVARYPR/  | 171   | 49    |
| >CDKN2A-L1: HRDVARYL    | 175  | >CDKN2A-L1: HRDVARYP    | 19230 | 19055 |
| >CDKN2A-L1: HRDVARYLR   | 370  | >CDKN2A-L1: HRDVARYPR   | 146   | 224   |
| >CDKN2A-L1: GHRDVARYL/  | 282  | >CDKN2A-L1: GHRDVARYP/  | 262   | 20    |
| >CDKN2A-L1: LGHRDVARYL  | 152  | >CDKN2A-L1: LGHRDVARYP  | 107   | 45    |
| >CDKN2A-L1: LGHRDVARYL  | 881  | >CDKN2A-L1: LGHRDVARYP  | 382   | 499   |
| >CDKN2A-L1: LRAAAGGTR   | 199  | >CDKN2A-L1: QRAAAGGTR   | 235   | 36    |
| >CDKN2A-L1: YLRAAAGGT   | 48   | >CDKN2A-L1: YQRAAAGGT   | 1686  | 1638  |
| >CDKN2A-L1: YLRAAAGGT   | 128  | >CDKN2A-L1: YQRAAAGGT   | 30687 | 30559 |
| >CDKN2A-L1: YLRAAAGG    | 920  | >CDKN2A-L1: YQRAAAGG    | 214   | 706   |
| >CDKN2A-L1: YLRAAAGGTF  | 827  | >CDKN2A-L1: YQRAAAGGT   | 215   | 612   |
| >CDKN2A-L1: YLRAAAGGTF  | 6251 | >CDKN2A-L1: YQRAAAGGT   | 418   | 5833  |
| >CDKN2A-L1: YLRAAAGGTF  | 231  | >CDKN2A-L1: YQRAAAGGT   | 6537  | 6306  |
| >CDKN2A-L1: ELGHRDVAR/  | 382  | >CDKN2A-L1: ELGHRDVAR/  | 12010 | 11628 |
| >CDKN2A-L1: ELGHRDVAR/  | 477  | >CDKN2A-L1: ELGHRDVAR/  | 10192 | 9715  |
| >CDKN2A-L1: RYLRAAAG    | 414  | >CDKN2A-L1: RYQRAAAG    | 678   | 264   |
| >CDKN2A-L1: RYLRAAAGG   | 436  | >CDKN2A-L1: RYQRAAAGG   | 753   | 317   |
| >CDKN2A-L1: RYLRAAAGGT  | 218  | >CDKN2A-L1: RYQRAAAGG   | 358   | 140   |
| >CDKN2A-L1: RYLRAAAGGT  | 128  | >CDKN2A-L1: RYQRAAAGG   | 182   | 54    |
| >CDKN2A-L1: RYLRAAAG    | 239  | >CDKN2A-L1: RYQRAAAG    | 979   | 740   |
| >CDKN2A-L1: RYLRAAAGG   | 315  | >CDKN2A-L1: RYQRAAAGG   | 1205  | 890   |
| >CDKN2A-L1: RYLRAAAGGT  | 96   | >CDKN2A-L1: RYQRAAAGG   | 403   | 307   |
| >CDKN2A-L1: RYLRAAAGGT  | 24   | >CDKN2A-L1: RYQRAAAGG   | 26    | 2     |
| >CDKN2A-L1: RYLRAAAGGT  | 33   | >CDKN2A-L1: RYQRAAAGG   | 72    | 39    |
| >CDKN2A-L1: ARYLRAAAA   | 195  | >CDKN2A-L1: ARYQRAAAA   | 218   | 23    |
| >CDKN2A-L1: ARYLRAAAGC  | 321  | >CDKN2A-L1: ARYQRAAAG   | 333   | 12    |
| >CDKN2A-L1: ARYLRAAAA   | 428  | >CDKN2A-L1: ARYQRAAAA   | 318   | 110   |
| >CDKN2A-L1: VARYLRAA    | 137  | >CDKN2A-L1: VARYQRAA    | 76    | 61    |
| >CDKN2A-L1: VARYLRAAAA  | 38   | >CDKN2A-L1: VARYQRAAAA  | 18    | 20    |
| >CDKN2A-L1: VARYLRAAAA  | 284  | >CDKN2A-L1: VARYQRAAAA  | 324   | 40    |
| >CDKN2A-L1: DVARYLRA    | 514  | >CDKN2A-L1: DVARYQRA    | 345   | 169   |
| >CDKN2A-L1: DVARYLRAAA/ | 376  | >CDKN2A-L1: DVARYQRAA/  | 600   | 224   |
| >CDKN2A-L1: RDVARYLR    | 243  | >CDKN2A-L1: RDVARYQR    | 325   | 82    |
| >CDKN2A-L1: RDVARYLR    | 79   | >CDKN2A-L1: RDVARYQR    | 164   | 85    |
| >CDKN2A-L1: HRDVARYLR   | 203  | >CDKN2A-L1: HRDVARYQR   | 212   | 9     |
| >CDKN2A-L1: HRDVARYLR/  | 122  | >CDKN2A-L1: HRDVARYQR/  | 158   | 36    |
| >CDKN2A-L1: HRDVARYL    | 175  | >CDKN2A-L1: HRDVARYQ    | 15905 | 15730 |
| >CDKN2A-L1: HRDVARYLR   | 370  | >CDKN2A-L1: HRDVARYQR   | 1108  | 738   |

|                       |       |                       |       |       |
|-----------------------|-------|-----------------------|-------|-------|
| >CDKN2A-L1:GHRDVARYL  | 282   | >CDKN2A-L1:GHRDVARYQ  | 565   | 283   |
| >CDKN2A-L1:LGHRDVARYL | 152   | >CDKN2A-L1:LGHRDVARYC | 255   | 103   |
| >CDKN2A-L1:LRAAAGGT   | 2330  | >CDKN2A-L1:RRAAAGGT   | 263   | 2067  |
| >CDKN2A-L1:LRAAAGGTR  | 199   | >CDKN2A-L1:RRAAAGGTR  | 42    | 157   |
| >CDKN2A-L1:LRAAAGGTRC | 5353  | >CDKN2A-L1:RRAAAGGTRC | 155   | 5198  |
| >CDKN2A-L1:LRAAAGGTRC | 2175  | >CDKN2A-L1:RRAAAGGTRC | 230   | 1945  |
| >CDKN2A-L1:LRAAAGGT   | 19776 | >CDKN2A-L1:RRAAAGGT   | 427   | 19349 |
| >CDKN2A-L1:LRAAAGGTR  | 14314 | >CDKN2A-L1:RRAAAGGTR  | 351   | 13963 |
| >CDKN2A-L1:LRAAAGGTRC | 15550 | >CDKN2A-L1:RRAAAGGTRC | 417   | 15133 |
| >CDKN2A-L1:YLRAAAGGT  | 48    | >CDKN2A-L1:YRRAAAGGT  | 18412 | 18364 |
| >CDKN2A-L1:YLRAAAGGT  | 128   | >CDKN2A-L1:YRRAAAGGT  | 34968 | 34840 |
| >CDKN2A-L1:YLRAAAGGTF | 23351 | >CDKN2A-L1:YRRAAAGGTI | 114   | 23237 |
| >CDKN2A-L1:YLRAAAGGTF | 231   | >CDKN2A-L1:YRRAAAGGTI | 7405  | 7174  |
| >CDKN2A-L1:ELGHRDVAR) | 382   | >CDKN2A-L1:ELGHRDVAR) | 21651 | 21269 |
| >CDKN2A-L1:ELGHRDVAR) | 477   | >CDKN2A-L1:ELGHRDVAR) | 25942 | 25465 |
| >CDKN2A-L1:ELGHRDVAR) | 19172 | >CDKN2A-L1:ELGHRDVAR) | 151   | 19021 |
| >CDKN2A-L1:ELGHRDVAR) | 25728 | >CDKN2A-L1:ELGHRDVAR) | 78    | 25650 |
| >CDKN2A-L1:ELGHRDVAR) | 27678 | >CDKN2A-L1:ELGHRDVAR) | 112   | 27566 |
| >CDKN2A-L1:RYLRAAAG   | 414   | >CDKN2A-L1:RYRRAAAG   | 4127  | 3713  |
| >CDKN2A-L1:RYLRAAAGG  | 436   | >CDKN2A-L1:RYRRAAAGG  | 4365  | 3929  |
| >CDKN2A-L1:RYLRAAAGGT | 218   | >CDKN2A-L1:RYRRAAAGG  | 2480  | 2262  |
| >CDKN2A-L1:RYLRAAAGGT | 128   | >CDKN2A-L1:RYRRAAAGG  | 1007  | 879   |
| >CDKN2A-L1:RYLRAAAG   | 239   | >CDKN2A-L1:RYRRAAAG   | 6     | 233   |
| >CDKN2A-L1:RYLRAAAGG  | 315   | >CDKN2A-L1:RYRRAAAGG  | 6     | 309   |
| >CDKN2A-L1:RYLRAAAGGT | 1387  | >CDKN2A-L1:RYRRAAAGG  | 16    | 1371  |
| >CDKN2A-L1:RYLRAAAGGT | 96    | >CDKN2A-L1:RYRRAAAGG  | 5     | 91    |
| >CDKN2A-L1:RYLRAAAGGT | 24    | >CDKN2A-L1:RYRRAAAGG  | 17    | 7     |
| >CDKN2A-L1:RYLRAAAGGT | 33    | >CDKN2A-L1:RYRRAAAGG  | 85    | 52    |
| >CDKN2A-L1:ARYLRAAA   | 195   | >CDKN2A-L1:ARYRRAAA   | 158   | 37    |
| >CDKN2A-L1:ARYLRAAAGC | 321   | >CDKN2A-L1:ARYRRAAAGC | 242   | 79    |
| >CDKN2A-L1:ARYLRAAA   | 428   | >CDKN2A-L1:ARYRRAAA   | 324   | 104   |
| >CDKN2A-L1:ARYLRAAAG  | 638   | >CDKN2A-L1:ARYRRAAAG  | 481   | 157   |
| >CDKN2A-L1:VARYLRAA   | 137   | >CDKN2A-L1:VARYRRAA   | 53    | 84    |
| >CDKN2A-L1:VARYLRAAA  | 38    | >CDKN2A-L1:VARYRRAAA  | 19    | 19    |
| >CDKN2A-L1:VARYLRAAAC | 843   | >CDKN2A-L1:VARYRRAAAC | 371   | 472   |
| >CDKN2A-L1:VARYLRAA   | 1040  | >CDKN2A-L1:VARYRRAA   | 158   | 882   |
| >CDKN2A-L1:VARYLRAAA  | 284   | >CDKN2A-L1:VARYRRAAA  | 62    | 222   |
| >CDKN2A-L1:VARYLRAA   | 2773  | >CDKN2A-L1:VARYRRAA   | 161   | 2612  |
| >CDKN2A-L1:VARYLRAAA  | 943   | >CDKN2A-L1:VARYRRAAA  | 29    | 914   |
| >CDKN2A-L1:DVARYLRAA/ | 376   | >CDKN2A-L1:DVARYRRAA/ | 463   | 87    |
| >CDKN2A-L1:RDVARYLR   | 243   | >CDKN2A-L1:RDVARYRR   | 393   | 150   |
| >CDKN2A-L1:RDVARYLR   | 79    | >CDKN2A-L1:RDVARYRR   | 139   | 60    |
| >CDKN2A-L1:HRDVARYLR  | 203   | >CDKN2A-L1:HRDVARYRR  | 249   | 46    |

|                       |       |                       |       |       |
|-----------------------|-------|-----------------------|-------|-------|
| >CDKN2A-L1:HRDVARYLR/ | 122   | >CDKN2A-L1:HRDVARYRR/ | 336   | 214   |
| >CDKN2A-L1:HRDVARYL   | 175   | >CDKN2A-L1:HRDVARYR   | 16793 | 16618 |
| >CDKN2A-L1:HRDVARYLR  | 370   | >CDKN2A-L1:HRDVARYRR  | 673   | 303   |
| >CDKN2A-L1:GHRDVARYLI | 282   | >CDKN2A-L1:GHRDVARYRI | 380   | 98    |
| >CDKN2A-L1:LGHRDVARYI | 152   | >CDKN2A-L1:LGHRDVARYI | 267   | 115   |
| >CDKN2A-L1:LATAAARGR  | 105   | >CDKN2A-L1:PATAAARGR  | 3110  | 3005  |
| >CDKN2A-L1:LATAAARGR\ | 107   | >CDKN2A-L1:PATAAARGR\ | 2567  | 2460  |
| >CDKN2A-L1:WLATAAARG  | 35478 | >CDKN2A-L1:WPATAAARG  | 479   | 34999 |
| >CDKN2A-L1:WLATAAARG  | 336   | >CDKN2A-L1:WPATAAARG  | 22248 | 21912 |
| >CDKN2A-L1:WLATAAARG  | 22    | >CDKN2A-L1:WPATAAARG  | 20443 | 20421 |
| >CDKN2A-L1:WLATAAARG  | 8     | >CDKN2A-L1:WPATAAARG  | 16139 | 16131 |
| >CDKN2A-L1:WLATAAARG  | 125   | >CDKN2A-L1:WPATAAARG  | 15211 | 15086 |
| >CDKN2A-L1:WLATAAARG  | 25    | >CDKN2A-L1:WPATAAARG  | 20242 | 20217 |
| >CDKN2A-L1:WLATAAARG  | 244   | >CDKN2A-L1:WPATAAARG  | 24235 | 23991 |
| >CDKN2A-L1:WLATAAARG  | 27    | >CDKN2A-L1:WPATAAARG  | 20117 | 20090 |
| >CDKN2A-L1:WLATAAARG  | 23    | >CDKN2A-L1:WPATAAARG  | 21325 | 21302 |
| >CDKN2A-L1:WLATAAARG  | 3     | >CDKN2A-L1:WPATAAARG  | 17960 | 17957 |
| >CDKN2A-L1:WLATAAAR   | 68    | >CDKN2A-L1:WPATAAAR   | 480   | 412   |
| >CDKN2A-L1:WLATAAARG  | 37    | >CDKN2A-L1:WPATAAARG  | 387   | 350   |
| >CDKN2A-L1:WLATAAARG  | 350   | >CDKN2A-L1:WPATAAARG  | 792   | 442   |
| >CDKN2A-L1:WLATAAARG  | 11314 | >CDKN2A-L1:WPATAAARG  | 40    | 11274 |
| >CDKN2A-L1:WLATAAAR   | 9152  | >CDKN2A-L1:WPATAAAR   | 84    | 9068  |
| >CDKN2A-L1:WLATAAARG  | 15165 | >CDKN2A-L1:WPATAAARG  | 336   | 14829 |
| >CDKN2A-L1:WLATAAARG  | 29219 | >CDKN2A-L1:WPATAAARG  | 125   | 29094 |
| >CDKN2A-L1:WLATAAARG  | 58    | >CDKN2A-L1:WPATAAARG  | 3242  | 3184  |
| >CDKN2A-L1:WLATAAAR   | 328   | >CDKN2A-L1:WPATAAAR   | 1062  | 734   |
| >CDKN2A-L1:GSSMEPSAD\ | 96    | >CDKN2A-L1:GSSMEPSAD\ | 20449 | 20353 |
| >CDKN2A-L1:GSSMEPSAD\ | 152   | >CDKN2A-L1:GSSMEPSAD\ | 9733  | 9581  |
| >CDKN2A-L1:DWLATAAAR  | 119   | >CDKN2A-L1:DWPATAAAR  | 961   | 842   |
| >CDKN2A-L1:DWLATAAAR  | 23    | >CDKN2A-L1:DWPATAAAR  | 28    | 5     |
| >CDKN2A-L1:DWLATAAAR  | 30    | >CDKN2A-L1:DWPATAAAR  | 43    | 13    |
| >CDKN2A-L1:DWLATAAA   | 205   | >CDKN2A-L1:DWPATAAA   | 697   | 492   |
| >CDKN2A-L1:DWLATAAAR  | 450   | >CDKN2A-L1:DWPATAAAR  | 1186  | 736   |
| >CDKN2A-L1:SADWLATA   | 614   | >CDKN2A-L1:SADWPATA   | 428   | 186   |
| >CDKN2A-L1:SADWLATAA  | 83    | >CDKN2A-L1:SADWPATAA  | 136   | 53    |
| >CDKN2A-L1:SADWLATA   | 526   | >CDKN2A-L1:SADWPATA   | 322   | 204   |
| >CDKN2A-L1:SADWLATAA  | 491   | >CDKN2A-L1:SADWPATAA  | 159   | 332   |
| >CDKN2A-L1:SADWLATAA  | 283   | >CDKN2A-L1:SADWPATAA  | 113   | 170   |
| >CDKN2A-L1:EPSADWLA   | 737   | >CDKN2A-L1:EPSADWPA   | 77    | 660   |
| >CDKN2A-L1:EPSADWLAT  | 30    | >CDKN2A-L1:EPSADWPAT  | 31    | 1     |
| >CDKN2A-L1:EPSADWLAT/ | 31    | >CDKN2A-L1:EPSADWPAT/ | 43    | 12    |
| >CDKN2A-L1:EPSADWLA   | 754   | >CDKN2A-L1:EPSADWPA   | 268   | 486   |
| >CDKN2A-L1:EPSADWLAT/ | 270   | >CDKN2A-L1:EPSADWPAT/ | 137   | 133   |

|                       |       |                       |       |       |
|-----------------------|-------|-----------------------|-------|-------|
| >CDKN2A-L1 MEPSADWLA  | 2800  | >CDKN2A-L1 MEPSADWPA  | 288   | 2512  |
| >CDKN2A-L1 MEPSADWL   | 182   | >CDKN2A-L1 MEPSADWP   | 10121 | 9939  |
| >CDKN2A-L1 MEPSADWLA  | 3184  | >CDKN2A-L1 MEPSADWPA  | 499   | 2685  |
| >CDKN2A-L1 MEPSADWLA  | 830   | >CDKN2A-L1 MEPSADWPA  | 277   | 553   |
| >CDKN2A-L1 SMEPSADWL  | 188   | >CDKN2A-L1 SMEPSADWF  | 118   | 70    |
| >CDKN2A-L1 SMEPSADWL  | 53    | >CDKN2A-L1 SMEPSADWF  | 10821 | 10768 |
| >CDKN2A-L1 SMEPSADWL  | 218   | >CDKN2A-L1 SMEPSADWF  | 194   | 24    |
| >CDKN2A-L1 SMEPSADWL  | 464   | >CDKN2A-L1 SMEPSADWF  | 247   | 217   |
| >CDKN2A-L1 SMEPSADWL  | 199   | >CDKN2A-L1 SMEPSADWF  | 18266 | 18067 |
| >CDKN2A-L1 SMEPSADWL  | 265   | >CDKN2A-L1 SMEPSADWF  | 130   | 135   |
| >CDKN2A-L1 SMEPSADWL  | 443   | >CDKN2A-L1 SMEPSADWF  | 24204 | 23761 |
| >CDKN2A-L1 SMEPSADWL  | 257   | >CDKN2A-L1 SMEPSADWF  | 73    | 184   |
| >CDKN2A-L1 SMEPSADWL  | 332   | >CDKN2A-L1 SMEPSADWF  | 18615 | 18283 |
| >CDKN2A-L1 SMEPSADWL  | 149   | >CDKN2A-L1 SMEPSADWF  | 115   | 34    |
| >CDKN2A-L1 SMEPSADWL  | 17    | >CDKN2A-L1 SMEPSADWF  | 13185 | 13168 |
| >CDKN2A-L1 SMEPSADWL  | 24    | >CDKN2A-L1 SMEPSADWF  | 22    | 2     |
| >CDKN2A-L1 SMEPSADWL  | 901   | >CDKN2A-L1 SMEPSADWF  | 425   | 476   |
| >CDKN2A-L1 SSMEPSADW  | 205   | >CDKN2A-L1 SSMEPSADW  | 88    | 117   |
| >CDKN2A-L1 SSMEPSADW  | 418   | >CDKN2A-L1 SSMEPSADW  | 24279 | 23861 |
| >CDKN2A-L1 SSMEPSADW  | 286   | >CDKN2A-L1 SSMEPSADW  | 23302 | 23016 |
| >CDKN2A-L1 SSMEPSADW  | 56    | >CDKN2A-L1 SSMEPSADW  | 26    | 30    |
| >CDKN2A-L1 SSMEPSADW  | 295   | >CDKN2A-L1 SSMEPSADW  | 9223  | 8928  |
| >CDKN2A-L1 SSMEPSADW  | 363   | >CDKN2A-L1 SSMEPSADW  | 99    | 264   |
| >CDKN2A-L1 SSMEPSADW  | 11    | >CDKN2A-L1 SSMEPSADW  | 10263 | 10252 |
| >CDKN2A-L1 SSMEPSADW  | 192   | >CDKN2A-L1 SSMEPSADW  | 16561 | 16369 |
| >CDKN2A-L1 SSMEPSADW  | 396   | >CDKN2A-L1 SSMEPSADW  | 14693 | 14297 |
| >CDKN2A-L1 LATAAARGR  | 105   | >CDKN2A-L1 RATAAARGR  | 640   | 535   |
| >CDKN2A-L1 LATAAARGR\ | 107   | >CDKN2A-L1 RATAAARGR\ | 118   | 11    |
| >CDKN2A-L1 WLATAAARG  | 336   | >CDKN2A-L1 WRATAAARC  | 21811 | 21475 |
| >CDKN2A-L1 WLATAAARG  | 22    | >CDKN2A-L1 WRATAAARC  | 14760 | 14738 |
| >CDKN2A-L1 WLATAAARG  | 8     | >CDKN2A-L1 WRATAAARC  | 14018 | 14010 |
| >CDKN2A-L1 WLATAAARG  | 125   | >CDKN2A-L1 WRATAAARC  | 13505 | 13380 |
| >CDKN2A-L1 WLATAAARG  | 25    | >CDKN2A-L1 WRATAAARC  | 17977 | 17952 |
| >CDKN2A-L1 WLATAAARG  | 244   | >CDKN2A-L1 WRATAAARC  | 23095 | 22851 |
| >CDKN2A-L1 WLATAAARG  | 27    | >CDKN2A-L1 WRATAAARC  | 17480 | 17453 |
| >CDKN2A-L1 WLATAAARG  | 23    | >CDKN2A-L1 WRATAAARC  | 19627 | 19604 |
| >CDKN2A-L1 WLATAAARG  | 3     | >CDKN2A-L1 WRATAAARC  | 10048 | 10045 |
| >CDKN2A-L1 WLATAAAR   | 68    | >CDKN2A-L1 WRATAAAR   | 1814  | 1746  |
| >CDKN2A-L1 WLATAAARG  | 37    | >CDKN2A-L1 WRATAAARC  | 1542  | 1505  |
| >CDKN2A-L1 WLATAAARG  | 350   | >CDKN2A-L1 WRATAAARC  | 13890 | 13540 |
| >CDKN2A-L1 WLATAAAR   | 16654 | >CDKN2A-L1 WRATAAAR   | 149   | 16505 |
| >CDKN2A-L1 WLATAAARG  | 27895 | >CDKN2A-L1 WRATAAARC  | 226   | 27669 |
| >CDKN2A-L1 WLATAAARG  | 17859 | >CDKN2A-L1 WRATAAARC  | 204   | 17655 |



|                      |       |                      |       |       |
|----------------------|-------|----------------------|-------|-------|
| >CDKN2A-L1 WLATAAARG | 58    | >CDKN2A-L1 WRATAAARC | 1438  | 1380  |
| >CDKN2A-L1 WLATAAAR  | 328   | >CDKN2A-L1 WRATAAAR  | 1029  | 701   |
| >CDKN2A-L1 GSSMEPSAD | 32745 | >CDKN2A-L1 GSSMEPSAD | 282   | 32463 |
| >CDKN2A-L1 GSSMEPSAD | 96    | >CDKN2A-L1 GSSMEPSAD | 15055 | 14959 |
| >CDKN2A-L1 GSSMEPSAD | 152   | >CDKN2A-L1 GSSMEPSAD | 4788  | 4636  |
| >CDKN2A-L1 GSSMEPSAD | 6507  | >CDKN2A-L1 GSSMEPSAD | 323   | 6184  |
| >CDKN2A-L1 DWLATAAAR | 119   | >CDKN2A-L1 DWRATAAAF | 78    | 41    |
| >CDKN2A-L1 DWLATAAAR | 781   | >CDKN2A-L1 DWRATAAAF | 487   | 294   |
| >CDKN2A-L1 DWLATAAAR | 23    | >CDKN2A-L1 DWRATAAAF | 67    | 44    |
| >CDKN2A-L1 DWLATAAAR | 30    | >CDKN2A-L1 DWRATAAAF | 91    | 61    |
| >CDKN2A-L1 DWLATAAA  | 205   | >CDKN2A-L1 DWRATAAA  | 586   | 381   |
| >CDKN2A-L1 DWLATAAAR | 450   | >CDKN2A-L1 DWRATAAAF | 1002  | 552   |
| >CDKN2A-L1 SADWLATAA | 83    | >CDKN2A-L1 SADWRATAA | 129   | 46    |
| >CDKN2A-L1 SADWLATAA | 491   | >CDKN2A-L1 SADWRATAA | 2552  | 2061  |
| >CDKN2A-L1 SADWLATAA | 283   | >CDKN2A-L1 SADWRATAA | 906   | 623   |
| >CDKN2A-L1 EPSADWLAT | 30    | >CDKN2A-L1 EPSADWRAT | 89    | 59    |
| >CDKN2A-L1 EPSADWLAT | 31    | >CDKN2A-L1 EPSADWRAT | 75    | 44    |
| >CDKN2A-L1 EPSADWLAT | 270   | >CDKN2A-L1 EPSADWRAT | 346   | 76    |
| >CDKN2A-L1 MEPSADWL  | 182   | >CDKN2A-L1 MEPSADWR  | 17229 | 17047 |
| >CDKN2A-L1 SMEPSADWL | 188   | >CDKN2A-L1 SMEPSADWF | 623   | 435   |
| >CDKN2A-L1 SMEPSADWL | 53    | >CDKN2A-L1 SMEPSADWF | 18890 | 18837 |
| >CDKN2A-L1 SMEPSADWL | 218   | >CDKN2A-L1 SMEPSADWF | 624   | 406   |
| >CDKN2A-L1 SMEPSADWL | 464   | >CDKN2A-L1 SMEPSADWF | 1251  | 787   |
| >CDKN2A-L1 SMEPSADWL | 199   | >CDKN2A-L1 SMEPSADWF | 21432 | 21233 |
| >CDKN2A-L1 SMEPSADWL | 265   | >CDKN2A-L1 SMEPSADWF | 174   | 91    |
| >CDKN2A-L1 SMEPSADWL | 443   | >CDKN2A-L1 SMEPSADWF | 26352 | 25909 |
| >CDKN2A-L1 SMEPSADWL | 257   | >CDKN2A-L1 SMEPSADWF | 284   | 27    |
| >CDKN2A-L1 SMEPSADWL | 332   | >CDKN2A-L1 SMEPSADWF | 18621 | 18289 |
| >CDKN2A-L1 SMEPSADWL | 149   | >CDKN2A-L1 SMEPSADWF | 221   | 72    |
| >CDKN2A-L1 SMEPSADWL | 17    | >CDKN2A-L1 SMEPSADWF | 10518 | 10501 |
| >CDKN2A-L1 SMEPSADWL | 24    | >CDKN2A-L1 SMEPSADWF | 16    | 8     |
| >CDKN2A-L1 SMEPSADWL | 30196 | >CDKN2A-L1 SMEPSADWF | 286   | 29910 |
| >CDKN2A-L1 SSMEPSADW | 205   | >CDKN2A-L1 SSMEPSADW | 506   | 301   |
| >CDKN2A-L1 SSMEPSADW | 25257 | >CDKN2A-L1 SSMEPSADW | 57    | 25200 |
| >CDKN2A-L1 SSMEPSADW | 418   | >CDKN2A-L1 SSMEPSADW | 13397 | 12979 |
| >CDKN2A-L1 SSMEPSADW | 11831 | >CDKN2A-L1 SSMEPSADW | 47    | 11784 |
| >CDKN2A-L1 SSMEPSADW | 18025 | >CDKN2A-L1 SSMEPSADW | 8     | 18017 |
| >CDKN2A-L1 SSMEPSADW | 286   | >CDKN2A-L1 SSMEPSADW | 23640 | 23354 |
| >CDKN2A-L1 SSMEPSADW | 56    | >CDKN2A-L1 SSMEPSADW | 81    | 25    |
| >CDKN2A-L1 SSMEPSADW | 295   | >CDKN2A-L1 SSMEPSADW | 11046 | 10751 |
| >CDKN2A-L1 SSMEPSADW | 363   | >CDKN2A-L1 SSMEPSADW | 481   | 118   |
| >CDKN2A-L1 SSMEPSADW | 11    | >CDKN2A-L1 SSMEPSADW | 4898  | 4887  |
| >CDKN2A-L1 SSMEPSADW | 192   | >CDKN2A-L1 SSMEPSADW | 18030 | 17838 |

|                       |       |                       |       |       |
|-----------------------|-------|-----------------------|-------|-------|
| >CDKN2A-L1 SSMEPSADW  | 396   | >CDKN2A-L1 SSMEPSADW  | 9686  | 9290  |
| >CDKN2A-L1 SSMEPSADW  | 5771  | >CDKN2A-L1 SSMEPSADW  | 236   | 5535  |
| >CDKN2A-L3 LLEAGALPNA | 371   | >CDKN2A-L3 PLEAGALPNA | 12647 | 12276 |
| >CDKN2A-L3 LLEAGALPNA | 241   | >CDKN2A-L3 PLEAGALPNA | 7082  | 6841  |
| >CDKN2A-L3 LLEAGALPNA | 249   | >CDKN2A-L3 PLEAGALPNA | 6125  | 5876  |
| >CDKN2A-L3 LLEAGALPNA | 10    | >CDKN2A-L3 PLEAGALPNA | 281   | 271   |
| >CDKN2A-L3 ALLEAGAL   | 23663 | >CDKN2A-L3 APLEAGAL   | 64    | 23599 |
| >CDKN2A-L3 ALLEAGALPN | 33939 | >CDKN2A-L3 APLEAGALPN | 346   | 33593 |
| >CDKN2A-L3 ALLEAGAL   | 92    | >CDKN2A-L3 APLEAGAL   | 22589 | 22497 |
| >CDKN2A-L3 ALLEAGALPN | 22    | >CDKN2A-L3 APLEAGALPN | 21278 | 21256 |
| >CDKN2A-L3 ALLEAGAL   | 67    | >CDKN2A-L3 APLEAGAL   | 26317 | 26250 |
| >CDKN2A-L3 ALLEAGALPN | 87    | >CDKN2A-L3 APLEAGALPN | 30513 | 30426 |
| >CDKN2A-L3 ALLEAGAL   | 61    | >CDKN2A-L3 APLEAGAL   | 22262 | 22201 |
| >CDKN2A-L3 ALLEAGALPN | 26    | >CDKN2A-L3 APLEAGALPN | 19504 | 19478 |
| >CDKN2A-L3 ALLEAGAL   | 40    | >CDKN2A-L3 APLEAGAL   | 9758  | 9718  |
| >CDKN2A-L3 ALLEAGALPN | 13    | >CDKN2A-L3 APLEAGALPN | 7406  | 7393  |
| >CDKN2A-L3 ALLEAGAL   | 4     | >CDKN2A-L3 APLEAGAL   | 12815 | 12811 |
| >CDKN2A-L3 ALLEAGALPN | 5     | >CDKN2A-L3 APLEAGALPN | 14889 | 14884 |
| >CDKN2A-L3 ALLEAGAL   | 8     | >CDKN2A-L3 APLEAGAL   | 19944 | 19936 |
| >CDKN2A-L3 ALLEAGALPN | 19    | >CDKN2A-L3 APLEAGALPN | 20198 | 20179 |
| >CDKN2A-L3 ALLEAGAL   | 16    | >CDKN2A-L3 APLEAGAL   | 19911 | 19895 |
| >CDKN2A-L3 ALLEAGALPN | 6     | >CDKN2A-L3 APLEAGALPN | 13845 | 13839 |
| >CDKN2A-L3 ALLEAGAL   | 29    | >CDKN2A-L3 APLEAGAL   | 22295 | 22266 |
| >CDKN2A-L3 ALLEAGALPN | 15    | >CDKN2A-L3 APLEAGALPN | 17501 | 17486 |
| >CDKN2A-L3 ALLEAGAL   | 5     | >CDKN2A-L3 APLEAGAL   | 28339 | 28334 |
| >CDKN2A-L3 ALLEAGALPN | 4     | >CDKN2A-L3 APLEAGALPN | 26785 | 26781 |
| >CDKN2A-L3 ALLEAGAL   | 4143  | >CDKN2A-L3 APLEAGAL   | 17    | 4126  |
| >CDKN2A-L3 ALLEAGAL   | 9550  | >CDKN2A-L3 APLEAGAL   | 300   | 9250  |
| >CDKN2A-L3 ALLEAGAL   | 1574  | >CDKN2A-L3 APLEAGAL   | 93    | 1481  |
| >CDKN2A-L3 ALLEAGALPN | 30827 | >CDKN2A-L3 APLEAGALPN | 165   | 30662 |
| >CDKN2A-L3 ALLEAGAL   | 14532 | >CDKN2A-L3 APLEAGAL   | 421   | 14111 |
| >CDKN2A-L3 ARGRVEEVR/ | 260   | >CDKN2A-L3 ARGRVEEVR/ | 18230 | 17970 |
| >CDKN2A-L3 RALLEAGAL  | 18    | >CDKN2A-L3 RAPLEAGAL  | 1937  | 1919  |
| >CDKN2A-L3 RALLEAGAL  | 17872 | >CDKN2A-L3 RAPLEAGAL  | 75    | 17797 |
| >CDKN2A-L3 VRALLEAGAL | 145   | >CDKN2A-L3 VRAPLEAGAL | 379   | 234   |
| >CDKN2A-L3 VRALLEAGAL | 515   | >CDKN2A-L3 VRAPLEAGAL | 270   | 245   |
| >CDKN2A-L3 VRALLEAGAL | 289   | >CDKN2A-L3 VRAPLEAGAL | 323   | 34    |
| >CDKN2A-L3 EVRALLEAGA | 51    | >CDKN2A-L3 EVRAPLEAGA | 31    | 20    |
| >CDKN2A-L3 EVRALLEAGA | 293   | >CDKN2A-L3 EVRAPLEAGA | 135   | 158   |
| >CDKN2A-L3 EVRALLEAGA | 497   | >CDKN2A-L3 EVRAPLEAGA | 542   | 45    |
| >CDKN2A-L3 EVRALLEAGA | 742   | >CDKN2A-L3 EVRAPLEAGA | 287   | 455   |
| >CDKN2A-L3 EEVRALLE   | 108   | >CDKN2A-L3 EEVRAPLE   | 558   | 450   |
| >CDKN2A-L3 EEVRALLEA  | 326   | >CDKN2A-L3 EEVRAPLEA  | 888   | 562   |

|                       |       |                       |       |       |
|-----------------------|-------|-----------------------|-------|-------|
| >CDKN2A-L3:EEVRALLEA  | 454   | >CDKN2A-L3:EEVRAPLEA  | 592   | 138   |
| >CDKN2A-L3:EEVRALLEA  | 14    | >CDKN2A-L3:EEVRAPLEA  | 24    | 10    |
| >CDKN2A-L3:EEVRALLEAG | 18    | >CDKN2A-L3:EEVRAPLEAG | 26    | 8     |
| >CDKN2A-L3:VEEVRALL   | 176   | >CDKN2A-L3:VEEVRAPL   | 2185  | 2009  |
| >CDKN2A-L3:VEEVRALL   | 143   | >CDKN2A-L3:VEEVRAPL   | 92    | 51    |
| >CDKN2A-L3:VEEVRALLEA | 173   | >CDKN2A-L3:VEEVRAPLEA | 169   | 4     |
| >CDKN2A-L3:RVEEVRALL  | 1231  | >CDKN2A-L3:RVEEVRAPL  | 370   | 861   |
| >CDKN2A-L3:RVEEVRALLE | 542   | >CDKN2A-L3:RVEEVRAPLE | 426   | 116   |
| >CDKN2A-L3:RVEEVRAL   | 281   | >CDKN2A-L3:RVEEVRAP   | 11163 | 10882 |
| >CDKN2A-L3:RVEEVRALL  | 1683  | >CDKN2A-L3:RVEEVRAPL  | 231   | 1452  |
| >CDKN2A-L3:RVEEVRAL   | 165   | >CDKN2A-L3:RVEEVRAP   | 20876 | 20711 |
| >CDKN2A-L3:RVEEVRALL  | 1681  | >CDKN2A-L3:RVEEVRAPL  | 40    | 1641  |
| >CDKN2A-L3:GRVEEVRAL  | 383   | >CDKN2A-L3:GRVEEVRAP  | 7090  | 6707  |
| >CDKN2A-L3:GRVEEVRALL | 45    | >CDKN2A-L3:GRVEEVRAPL | 70    | 25    |
| >CDKN2A-L3:GRVEEVRAL  | 189   | >CDKN2A-L3:GRVEEVRAP  | 22492 | 22303 |
| >CDKN2A-L3:GRVEEVRALL | 338   | >CDKN2A-L3:GRVEEVRAPL | 92    | 246   |
| >CDKN2A-L3:GRVEEVRALL | 430   | >CDKN2A-L3:GRVEEVRAPL | 922   | 492   |
| >CDKN2A-L3:GRVEEVRAL  | 92    | >CDKN2A-L3:GRVEEVRAP  | 13543 | 13451 |
| >CDKN2A-L3:GRVEEVRALL | 186   | >CDKN2A-L3:GRVEEVRAPL | 416   | 230   |
| >CDKN2A-L3:RGRVEEVRAL | 436   | >CDKN2A-L3:RGRVEEVRAP | 3221  | 2785  |
| >CDKN2A-L3:RGRVEEVRAL | 98    | >CDKN2A-L3:RGRVEEVRAP | 54    | 44    |
| >CDKN2A-L3:RGRVEEVRAL | 1529  | >CDKN2A-L3:RGRVEEVRAP | 434   | 1095  |
| >CDKN2A-L3:LEAGALPN   | 413   | >CDKN2A-L3:REAGALPN   | 3721  | 3308  |
| >CDKN2A-L3:LEAGALPNA  | 2894  | >CDKN2A-L3:REAGALPNA  | 460   | 2434  |
| >CDKN2A-L3:LEAGALPNA  | 621   | >CDKN2A-L3:REAGALPNA  | 191   | 430   |
| >CDKN2A-L3:LEAGALPNA  | 80    | >CDKN2A-L3:REAGALPNA  | 17    | 63    |
| >CDKN2A-L3:LEAGALPNA  | 312   | >CDKN2A-L3:REAGALPNA  | 65    | 247   |
| >CDKN2A-L3:LLEAGALPNA | 371   | >CDKN2A-L3:LREAGALPNA | 26671 | 26300 |
| >CDKN2A-L3:LLEAGALPNA | 241   | >CDKN2A-L3:LREAGALPNA | 23185 | 22944 |
| >CDKN2A-L3:LLEAGALPNA | 249   | >CDKN2A-L3:LREAGALPNA | 22337 | 22088 |
| >CDKN2A-L3:LLEAGALPNA | 10    | >CDKN2A-L3:LREAGALPNA | 26918 | 26908 |
| >CDKN2A-L3:RGRVEEVRAL | 98    | >CDKN2A-L3:RGRVEEVRAP | 138   | 40    |
| >CDKN2A-L3:RGRVEEVRAL | 12048 | >CDKN2A-L3:RGRVEEVRAP | 64    | 11984 |
| >CDKN2A-L3:ALLEAGAL   | 92    | >CDKN2A-L3:ALREAGAL   | 4265  | 4173  |
| >CDKN2A-L3:ALLEAGALPN | 22    | >CDKN2A-L3:ALREAGALPN | 1544  | 1522  |
| >CDKN2A-L3:ALLEAGAL   | 67    | >CDKN2A-L3:ALREAGAL   | 211   | 144   |
| >CDKN2A-L3:ALLEAGALPN | 87    | >CDKN2A-L3:ALREAGALPN | 465   | 378   |
| >CDKN2A-L3:ALLEAGAL   | 61    | >CDKN2A-L3:ALREAGAL   | 32    | 29    |
| >CDKN2A-L3:ALLEAGALPN | 26    | >CDKN2A-L3:ALREAGALPN | 15    | 11    |
| >CDKN2A-L3:ALLEAGAL   | 40    | >CDKN2A-L3:ALREAGAL   | 2475  | 2435  |
| >CDKN2A-L3:ALLEAGALPN | 13    | >CDKN2A-L3:ALREAGALPN | 714   | 701   |
| >CDKN2A-L3:ALLEAGAL   | 4     | >CDKN2A-L3:ALREAGAL   | 93    | 89    |
| >CDKN2A-L3:ALLEAGALPN | 5     | >CDKN2A-L3:ALREAGALPN | 158   | 153   |

|                        |       |                        |       |       |
|------------------------|-------|------------------------|-------|-------|
| >CDKN2A-L3: ALLEAGAL   | 8     | >CDKN2A-L3: ALREAGAL   | 311   | 303   |
| >CDKN2A-L3: ALLEAGALPN | 19    | >CDKN2A-L3: ALREAGALPN | 1053  | 1034  |
| >CDKN2A-L3: ALLEAGAL   | 16    | >CDKN2A-L3: ALREAGAL   | 937   | 921   |
| >CDKN2A-L3: ALLEAGALPN | 6     | >CDKN2A-L3: ALREAGALPN | 150   | 144   |
| >CDKN2A-L3: ALLEAGAL   | 29    | >CDKN2A-L3: ALREAGAL   | 7119  | 7090  |
| >CDKN2A-L3: ALLEAGALPN | 15    | >CDKN2A-L3: ALREAGALPN | 2765  | 2750  |
| >CDKN2A-L3: ALLEAGAL   | 5     | >CDKN2A-L3: ALREAGAL   | 12    | 7     |
| >CDKN2A-L3: ALLEAGALPN | 4     | >CDKN2A-L3: ALREAGALPN | 8     | 4     |
| >CDKN2A-L3: ALLEAGAL   | 8824  | >CDKN2A-L3: ALREAGAL   | 288   | 8536  |
| >CDKN2A-L3: ALLEAGALPN | 1253  | >CDKN2A-L3: ALREAGALPN | 13    | 1240  |
| >CDKN2A-L3: ALLEAGAL   | 4143  | >CDKN2A-L3: ALREAGAL   | 93    | 4050  |
| >CDKN2A-L3: ALLEAGAL   | 2291  | >CDKN2A-L3: ALREAGAL   | 366   | 1925  |
| >CDKN2A-L3: RALLEAGAL  | 18    | >CDKN2A-L3: RALREAGAL  | 42    | 24    |
| >CDKN2A-L3: VRALLEAGAL | 145   | >CDKN2A-L3: VRALREAGAL | 216   | 71    |
| >CDKN2A-L3: VRALLEAGAL | 289   | >CDKN2A-L3: VRALREAGAL | 259   | 30    |
| >CDKN2A-L3: EVRALLEAGA | 51    | >CDKN2A-L3: EVRALREAGA | 232   | 181   |
| >CDKN2A-L3: EVRALLEAGA | 293   | >CDKN2A-L3: EVRALREAGA | 338   | 45    |
| >CDKN2A-L3: EVRALLEAGA | 497   | >CDKN2A-L3: EVRALREAGA | 583   | 86    |
| >CDKN2A-L3: EVRALLEAGA | 742   | >CDKN2A-L3: EVRALREAGA | 214   | 528   |
| >CDKN2A-L3: EEVRALLE   | 108   | >CDKN2A-L3: EEVRALRE   | 1982  | 1874  |
| >CDKN2A-L3: EEVRALLEA  | 326   | >CDKN2A-L3: EEVRALREA  | 1480  | 1154  |
| >CDKN2A-L3: EEVRALLEA  | 454   | >CDKN2A-L3: EEVRALREA  | 854   | 400   |
| >CDKN2A-L3: EEVRALLEA  | 14    | >CDKN2A-L3: EEVRALREA  | 21    | 7     |
| >CDKN2A-L3: EEVRALLEAG | 18    | >CDKN2A-L3: EEVRALREAG | 28    | 10    |
| >CDKN2A-L3: VEEVRALL   | 176   | >CDKN2A-L3: VEEVRALR   | 7197  | 7021  |
| >CDKN2A-L3: VEEVRALL   | 143   | >CDKN2A-L3: VEEVRALR   | 19285 | 19142 |
| >CDKN2A-L3: VEEVRALLEA | 173   | >CDKN2A-L3: VEEVRALREA | 210   | 37    |
| >CDKN2A-L3: RVEEVRALL  | 2746  | >CDKN2A-L3: RVEEVRALR  | 10    | 2736  |
| >CDKN2A-L3: RVEEVRALL  | 22672 | >CDKN2A-L3: RVEEVRALR  | 247   | 22425 |
| >CDKN2A-L3: RVEEVRALL  | 23375 | >CDKN2A-L3: RVEEVRALR  | 28    | 23347 |
| >CDKN2A-L3: GRVEEVALL  | 45    | >CDKN2A-L3: GRVEEVALLR | 104   | 59    |
| >CDKN2A-L3: GRVEEVALL  | 338   | >CDKN2A-L3: GRVEEVALLR | 21106 | 20768 |
| >CDKN2A-L3: GRVEEVALL  | 430   | >CDKN2A-L3: GRVEEVALLR | 3550  | 3120  |
| >CDKN2A-L3: GRVEEVALL  | 186   | >CDKN2A-L3: GRVEEVALLR | 1430  | 1244  |
| >CDKN2A-L6: LLLHGAEPNC | 429   | >CDKN2A-L6: PLLHGAEPNC | 8051  | 7622  |
| >CDKN2A-L6: LLLHGAEPNC | 476   | >CDKN2A-L6: PLLHGAEPNC | 12582 | 12106 |
| >CDKN2A-L6: LLLHGAEPNC | 121   | >CDKN2A-L6: PLLHGAEPNC | 2354  | 2233  |
| >CDKN2A-L6: LLLHGAEPNC | 105   | >CDKN2A-L6: PLLHGAEPNC | 2441  | 2336  |
| >CDKN2A-L6: LLLHGAEPNC | 428   | >CDKN2A-L6: PLLHGAEPNC | 9336  | 8908  |
| >CDKN2A-L6: LLLHGAEPNC | 80    | >CDKN2A-L6: PLLHGAEPNC | 4943  | 4863  |
| >CDKN2A-L6: LLLHGAEPNC | 294   | >CDKN2A-L6: PLLHGAEPNC | 3429  | 3135  |
| >CDKN2A-L6: LLLHGAEPNC | 66    | >CDKN2A-L6: PLLHGAEPNC | 1199  | 1133  |
| >CDKN2A-L6: LLLHGAEPNC | 369   | >CDKN2A-L6: PLLHGAEPNC | 1468  | 1099  |

|                         |       |                        |       |       |
|-------------------------|-------|------------------------|-------|-------|
| >CDKN2A-L6: LLLHGAEPNC  | 198   | >CDKN2A-L6: PLLHGAEPNC | 1420  | 1222  |
| >CDKN2A-L6: LLLHGAEPNC  | 35    | >CDKN2A-L6: PLLHGAEPNC | 1847  | 1812  |
| >CDKN2A-L6: LLLHGAEPNC  | 53    | >CDKN2A-L6: PLLHGAEPNC | 2169  | 2116  |
| >CDKN2A-L6: LLLLHGAEPN  | 220   | >CDKN2A-L6: LPLLHGAEPN | 27958 | 27738 |
| >CDKN2A-L6: LLLLHGAEPN  | 89    | >CDKN2A-L6: LPLLHGAEPN | 36437 | 36348 |
| >CDKN2A-L6: LLLLHGAE    | 29693 | >CDKN2A-L6: LPLLHGAE   | 348   | 29345 |
| >CDKN2A-L6: LLLLHGAEP   | 28730 | >CDKN2A-L6: LPLLHGAEP  | 316   | 28414 |
| >CDKN2A-L6: MMGSARVAI   | 143   | >CDKN2A-L6: MMGSARVAI  | 21476 | 21333 |
| >CDKN2A-L6: MMGSARVAI   | 8     | >CDKN2A-L6: MMGSARVAI  | 2739  | 2731  |
| >CDKN2A-L6: MMGSARVAI   | 173   | >CDKN2A-L6: MMGSARVAI  | 15462 | 15289 |
| >CDKN2A-L6: MMGSARVAI   | 436   | >CDKN2A-L6: MMGSARVAI  | 16886 | 16450 |
| >CDKN2A-L6: MMGSARVAI   | 24    | >CDKN2A-L6: MMGSARVAI  | 8573  | 8549  |
| >CDKN2A-L6: MMGSARVAI   | 190   | >CDKN2A-L6: MMGSARVAI  | 21032 | 20842 |
| >CDKN2A-L6: MMGSARVAI   | 81    | >CDKN2A-L6: MMGSARVAI  | 17828 | 17747 |
| >CDKN2A-L6: MMGSARVAI   | 112   | >CDKN2A-L6: MMGSARVAI  | 22308 | 22196 |
| >CDKN2A-L6: MMGSARVAI   | 8     | >CDKN2A-L6: MMGSARVAI  | 15337 | 15329 |
| >CDKN2A-L6: MMGSARVAI   | 402   | >CDKN2A-L6: MMGSARVAI  | 6945  | 6543  |
| >CDKN2A-L6: ELLLLHGA    | 214   | >CDKN2A-L6: ELPLLHGA   | 1569  | 1355  |
| >CDKN2A-L6: ELLLLHGA    | 342   | >CDKN2A-L6: ELPLLHGA   | 2559  | 2217  |
| >CDKN2A-L6: ELLLLHGA    | 186   | >CDKN2A-L6: ELPLLHGA   | 3551  | 3365  |
| >CDKN2A-L6: ELLLLHGA    | 195   | >CDKN2A-L6: ELPLLHGA   | 382   | 187   |
| >CDKN2A-L6: ELLLLHGA    | 91    | >CDKN2A-L6: ELPLLHGA   | 2668  | 2577  |
| >CDKN2A-L6: AELLLLHGA   | 1356  | >CDKN2A-L6: AELPLLHGA  | 275   | 1081  |
| >CDKN2A-L6: AELLLLHGA   | 35    | >CDKN2A-L6: AELPLLHGA  | 69    | 34    |
| >CDKN2A-L6: AELLLLHGA   | 440   | >CDKN2A-L6: AELPLLHGA  | 310   | 130   |
| >CDKN2A-L6: AELLLLHGA   | 7     | >CDKN2A-L6: AELPLLHGA  | 8     | 1     |
| >CDKN2A-L6: AELLLHGAE   | 313   | >CDKN2A-L6: AELPLHGAE  | 420   | 107   |
| >CDKN2A-L6: AELLLLHGA   | 32    | >CDKN2A-L6: AELPLLHGA  | 58    | 26    |
| >CDKN2A-L6: RVAELLLL    | 83    | >CDKN2A-L6: RVAELPLL   | 87    | 4     |
| >CDKN2A-L6: RVAELLLLHG, | 171   | >CDKN2A-L6: RVAELPLLHG | 273   | 102   |
| >CDKN2A-L6: RVAELLLL    | 33    | >CDKN2A-L6: RVAELPLL   | 56    | 23    |
| >CDKN2A-L6: RVAELLLLHG, | 79    | >CDKN2A-L6: RVAELPLLHG | 156   | 77    |
| >CDKN2A-L6: RVAELLLL    | 70    | >CDKN2A-L6: RVAELPLL   | 127   | 57    |
| >CDKN2A-L6: RVAELLLLHG, | 23    | >CDKN2A-L6: RVAELPLLHG | 30    | 7     |
| >CDKN2A-L6: RVAELLLL    | 14    | >CDKN2A-L6: RVAELPLL   | 33    | 19    |
| >CDKN2A-L6: RVAELLLLHG, | 12    | >CDKN2A-L6: RVAELPLLHG | 32    | 20    |
| >CDKN2A-L6: RVAELLLL    | 392   | >CDKN2A-L6: RVAELPLL   | 232   | 160   |
| >CDKN2A-L6: RVAELLLLHG, | 305   | >CDKN2A-L6: RVAELPLLHG | 216   | 89    |
| >CDKN2A-L6: RVAELLLL    | 569   | >CDKN2A-L6: RVAELPLL   | 275   | 294   |
| >CDKN2A-L6: RVAELLLL    | 393   | >CDKN2A-L6: RVAELPLL   | 305   | 88    |
| >CDKN2A-L6: RVAELLLLHG, | 459   | >CDKN2A-L6: RVAELPLLHG | 509   | 50    |
| >CDKN2A-L6: RVAELLLLH   | 226   | >CDKN2A-L6: RVAELPLLH  | 199   | 27    |
| >CDKN2A-L6: RVAELLLLH   | 230   | >CDKN2A-L6: RVAELPLLH  | 227   | 3     |

|                         |      |                        |       |       |
|-------------------------|------|------------------------|-------|-------|
| >CDKN2A-L6: RVAELLLL    | 424  | >CDKN2A-L6: RVAELPLL   | 559   | 135   |
| >CDKN2A-L6: RVAELLLLHG, | 370  | >CDKN2A-L6: RVAELPLLHG | 328   | 42    |
| >CDKN2A-L6: RVAELLLLHG, | 428  | >CDKN2A-L6: RVAELPLLHG | 465   | 37    |
| >CDKN2A-L6: RVAELLLLH   | 65   | >CDKN2A-L6: RVAELPLLH  | 39    | 26    |
| >CDKN2A-L6: RVAELLLL    | 300  | >CDKN2A-L6: RVAELPLL   | 478   | 178   |
| >CDKN2A-L6: RVAELLLL    | 268  | >CDKN2A-L6: RVAELPLL   | 361   | 93    |
| >CDKN2A-L6: RVAELLLL    | 364  | >CDKN2A-L6: RVAELPLL   | 489   | 125   |
| >CDKN2A-L6: ARVAELL     | 836  | >CDKN2A-L6: ARVAELPL   | 253   | 583   |
| >CDKN2A-L6: ARVAELL     | 180  | >CDKN2A-L6: ARVAELPL   | 174   | 6     |
| >CDKN2A-L6: ARVAELLLL   | 120  | >CDKN2A-L6: ARVAELPLL  | 290   | 170   |
| >CDKN2A-L6: ARVAELLLLH  | 215  | >CDKN2A-L6: ARVAELPLLH | 99    | 116   |
| >CDKN2A-L6: ARVAELL     | 222  | >CDKN2A-L6: ARVAELPL   | 71    | 151   |
| >CDKN2A-L6: ARVAELLLL   | 229  | >CDKN2A-L6: ARVAELPLL  | 336   | 107   |
| >CDKN2A-L6: ARVAELL     | 706  | >CDKN2A-L6: ARVAELPL   | 382   | 324   |
| >CDKN2A-L6: ARVAELLLL   | 123  | >CDKN2A-L6: ARVAELPLL  | 298   | 175   |
| >CDKN2A-L6: ARVAELL     | 881  | >CDKN2A-L6: ARVAELPL   | 285   | 596   |
| >CDKN2A-L6: ARVAELLLL   | 23   | >CDKN2A-L6: ARVAELPLL  | 42    | 19    |
| >CDKN2A-L6: SARVAELL    | 380  | >CDKN2A-L6: SARVAELP   | 2889  | 2509  |
| >CDKN2A-L6: SARVAELL    | 39   | >CDKN2A-L6: SARVAELPL  | 18    | 21    |
| >CDKN2A-L6: SARVAELLLL  | 38   | >CDKN2A-L6: SARVAELPLL | 25    | 13    |
| >CDKN2A-L6: SARVAELLLL  | 558  | >CDKN2A-L6: SARVAELPLL | 445   | 113   |
| >CDKN2A-L6: SARVAELL    | 3564 | >CDKN2A-L6: SARVAELPL  | 80    | 3484  |
| >CDKN2A-L6: SARVAELL    | 377  | >CDKN2A-L6: SARVAELP   | 22199 | 21822 |
| >CDKN2A-L6: SARVAELL    | 179  | >CDKN2A-L6: SARVAELPL  | 38    | 141   |
| >CDKN2A-L6: SARVAELLLL  | 137  | >CDKN2A-L6: SARVAELPLL | 162   | 25    |
| >CDKN2A-L6: GSARVAELL   | 1361 | >CDKN2A-L6: GSARVAELPL | 408   | 953   |
| >CDKN2A-L6: GSARVAELL   | 237  | >CDKN2A-L6: GSARVAELP  | 16705 | 16468 |
| >CDKN2A-L6: GSARVAELLLL | 255  | >CDKN2A-L6: GSARVAELPL | 897   | 642   |
| >CDKN2A-L6: GSARVAELLLL | 270  | >CDKN2A-L6: GSARVAELPL | 470   | 200   |
| >CDKN2A-L6: GSARVAELLLL | 264  | >CDKN2A-L6: GSARVAELPL | 198   | 66    |
| >CDKN2A-L6: GSARVAELL   | 24   | >CDKN2A-L6: GSARVAELP  | 3772  | 3748  |
| >CDKN2A-L6: GSARVAELL   | 452  | >CDKN2A-L6: GSARVAELPL | 1464  | 1012  |
| >CDKN2A-L6: GSARVAELLLL | 66   | >CDKN2A-L6: GSARVAELPL | 90    | 24    |
| >CDKN2A-L6: MGSARVAEL   | 399  | >CDKN2A-L6: MGSARVAEL  | 492   | 93    |
| >CDKN2A-L6: MGSARVAEL   | 1728 | >CDKN2A-L6: MGSARVAEL  | 454   | 1274  |
| >CDKN2A-L6: LLLHGAEPNC  | 429  | >CDKN2A-L6: VLLHGAEPNC | 718   | 289   |
| >CDKN2A-L6: LLLHGAEPNC  | 476  | >CDKN2A-L6: VLLHGAEPNC | 728   | 252   |
| >CDKN2A-L6: LLLHGAEPNC  | 121  | >CDKN2A-L6: VLLHGAEPNC | 100   | 21    |
| >CDKN2A-L6: LLLHGAEPNC  | 105  | >CDKN2A-L6: VLLHGAEPNC | 89    | 16    |
| >CDKN2A-L6: LLLHGAEPNC  | 428  | >CDKN2A-L6: VLLHGAEPNC | 507   | 79    |
| >CDKN2A-L6: LLLHGAEPNC  | 80   | >CDKN2A-L6: VLLHGAEPNC | 97    | 17    |
| >CDKN2A-L6: LLLHGAEPNC  | 294  | >CDKN2A-L6: VLLHGAEPNC | 194   | 100   |
| >CDKN2A-L6: LLLHGAEPNC  | 66   | >CDKN2A-L6: VLLHGAEPNC | 50    | 16    |

|                         |      |                        |      |      |
|-------------------------|------|------------------------|------|------|
| >CDKN2A-L6: LLLHGAEPNC  | 369  | >CDKN2A-L6: VLLHGAEPNC | 300  | 69   |
| >CDKN2A-L6: LLLHGAEPNC  | 198  | >CDKN2A-L6: VLLHGAEPNC | 141  | 57   |
| >CDKN2A-L6: LLLHGAEPNC  | 35   | >CDKN2A-L6: VLLHGAEPNC | 54   | 19   |
| >CDKN2A-L6: LLLHGAEPNC  | 53   | >CDKN2A-L6: VLLHGAEPNC | 80   | 27   |
| >CDKN2A-L6: LLLLHGAEPN  | 220  | >CDKN2A-L6: LVLLHGAEPN | 8200 | 7980 |
| >CDKN2A-L6: LLLLHGAEPN  | 89   | >CDKN2A-L6: LVLLHGAEPN | 9840 | 9751 |
| >CDKN2A-L6: MMGSARVAI   | 143  | >CDKN2A-L6: MMGSARVAI  | 48   | 95   |
| >CDKN2A-L6: MMGSARVAI   | 8    | >CDKN2A-L6: MMGSARVAI  | 7    | 1    |
| >CDKN2A-L6: MMGSARVAI   | 173  | >CDKN2A-L6: MMGSARVAI  | 17   | 156  |
| >CDKN2A-L6: MMGSARVAI   | 436  | >CDKN2A-L6: MMGSARVAI  | 57   | 379  |
| >CDKN2A-L6: MMGSARVAI   | 24   | >CDKN2A-L6: MMGSARVAI  | 4    | 20   |
| >CDKN2A-L6: MMGSARVAI   | 190  | >CDKN2A-L6: MMGSARVAI  | 23   | 167  |
| >CDKN2A-L6: MMGSARVAI   | 81   | >CDKN2A-L6: MMGSARVAI  | 11   | 70   |
| >CDKN2A-L6: MMGSARVAI   | 112  | >CDKN2A-L6: MMGSARVAI  | 8    | 104  |
| >CDKN2A-L6: MMGSARVAI   | 8    | >CDKN2A-L6: MMGSARVAI  | 3    | 5    |
| >CDKN2A-L6: MMGSARVAI   | 1720 | >CDKN2A-L6: MMGSARVAI  | 191  | 1529 |
| >CDKN2A-L6: MMGSARVAI   | 402  | >CDKN2A-L6: MMGSARVAI  | 830  | 428  |
| >CDKN2A-L6: ELLLLHGA    | 214  | >CDKN2A-L6: ELVLLHGA   | 1331 | 1117 |
| >CDKN2A-L6: ELLLLHGA    | 342  | >CDKN2A-L6: ELVLLHGA   | 2835 | 2493 |
| >CDKN2A-L6: ELLLLHGA    | 186  | >CDKN2A-L6: ELVLLHGA   | 2540 | 2354 |
| >CDKN2A-L6: ELLLLHGA    | 195  | >CDKN2A-L6: ELVLLHGA   | 367  | 172  |
| >CDKN2A-L6: ELLLLHGA    | 91   | >CDKN2A-L6: ELVLLHGA   | 411  | 320  |
| >CDKN2A-L6: AELLLLHGA   | 35   | >CDKN2A-L6: AELVLLHGA  | 38   | 3    |
| >CDKN2A-L6: AELLLLHGA   | 440  | >CDKN2A-L6: AELVLLHGA  | 380  | 60   |
| >CDKN2A-L6: AELLLLHGA   | 7    | >CDKN2A-L6: AELVLLHGA  | 6    | 1    |
| >CDKN2A-L6: AELLLHGAE   | 313  | >CDKN2A-L6: AELVLLHGAE | 281  | 32   |
| >CDKN2A-L6: AELLLLHGA   | 32   | >CDKN2A-L6: AELVLLHGA  | 40   | 8    |
| >CDKN2A-L6: RVAELLLL    | 83   | >CDKN2A-L6: RVAELVLL   | 87   | 4    |
| >CDKN2A-L6: RVAELLLLHG, | 171  | >CDKN2A-L6: RVAELVLLHG | 194  | 23   |
| >CDKN2A-L6: RVAELLLL    | 33   | >CDKN2A-L6: RVAELVLL   | 20   | 13   |
| >CDKN2A-L6: RVAELLLLHG, | 79   | >CDKN2A-L6: RVAELVLLHG | 90   | 11   |
| >CDKN2A-L6: RVAELLLL    | 70   | >CDKN2A-L6: RVAELVLL   | 70   | 0    |
| >CDKN2A-L6: RVAELLLLHG, | 23   | >CDKN2A-L6: RVAELVLLHG | 22   | 1    |
| >CDKN2A-L6: RVAELLLL    | 14   | >CDKN2A-L6: RVAELVLL   | 17   | 3    |
| >CDKN2A-L6: RVAELLLLHG, | 12   | >CDKN2A-L6: RVAELVLLHG | 17   | 5    |
| >CDKN2A-L6: RVAELLLL    | 392  | >CDKN2A-L6: RVAELVLL   | 228  | 164  |
| >CDKN2A-L6: RVAELLLLHG, | 305  | >CDKN2A-L6: RVAELVLLHG | 213  | 92   |
| >CDKN2A-L6: RVAELLLL    | 569  | >CDKN2A-L6: RVAELVLL   | 347  | 222  |
| >CDKN2A-L6: RVAELLLLHG, | 587  | >CDKN2A-L6: RVAELVLLHG | 395  | 192  |
| >CDKN2A-L6: RVAELLLL    | 393  | >CDKN2A-L6: RVAELVLL   | 258  | 135  |
| >CDKN2A-L6: RVAELLLLHG, | 459  | >CDKN2A-L6: RVAELVLLHG | 424  | 35   |
| >CDKN2A-L6: RVAELLLLH   | 226  | >CDKN2A-L6: RVAELVLLH  | 194  | 32   |
| >CDKN2A-L6: RVAELLLLH   | 230  | >CDKN2A-L6: RVAELVLLH  | 200  | 30   |

|                         |      |                        |       |       |
|-------------------------|------|------------------------|-------|-------|
| >CDKN2A-L6: RVAELLLL    | 424  | >CDKN2A-L6: RVAELVLL   | 137   | 287   |
| >CDKN2A-L6: RVAELLLL    | 1847 | >CDKN2A-L6: RVAELVLL   | 435   | 1412  |
| >CDKN2A-L6: RVAELLLLHG, | 370  | >CDKN2A-L6: RVAELVLLHG | 252   | 118   |
| >CDKN2A-L6: RVAELLLLHG, | 428  | >CDKN2A-L6: RVAELVLLHG | 448   | 20    |
| >CDKN2A-L6: RVAELLLLH   | 65   | >CDKN2A-L6: RVAELVLLH  | 84    | 19    |
| >CDKN2A-L6: RVAELLLL    | 300  | >CDKN2A-L6: RVAELVLL   | 479   | 179   |
| >CDKN2A-L6: RVAELLLL    | 268  | >CDKN2A-L6: RVAELVLL   | 590   | 322   |
| >CDKN2A-L6: RVAELLLL    | 364  | >CDKN2A-L6: RVAELVLL   | 768   | 404   |
| >CDKN2A-L6: ARVAELL     | 836  | >CDKN2A-L6: ARVAELVL   | 298   | 538   |
| >CDKN2A-L6: ARVAELL     | 180  | >CDKN2A-L6: ARVAELVL   | 313   | 133   |
| >CDKN2A-L6: ARVAELLLL   | 120  | >CDKN2A-L6: ARVAELVLL  | 147   | 27    |
| >CDKN2A-L6: ARVAELLLLH  | 215  | >CDKN2A-L6: ARVAELVLLH | 227   | 12    |
| >CDKN2A-L6: ARVAELL     | 222  | >CDKN2A-L6: ARVAELVL   | 53    | 169   |
| >CDKN2A-L6: ARVAELLLL   | 229  | >CDKN2A-L6: ARVAELVLL  | 142   | 87    |
| >CDKN2A-L6: ARVAELLLL   | 123  | >CDKN2A-L6: ARVAELVLL  | 289   | 166   |
| >CDKN2A-L6: ARVAELLLL   | 23   | >CDKN2A-L6: ARVAELVLL  | 54    | 31    |
| >CDKN2A-L6: SARVAELL    | 380  | >CDKN2A-L6: SARVAELV   | 231   | 149   |
| >CDKN2A-L6: SARVAELL    | 39   | >CDKN2A-L6: SARVAELVL  | 75    | 36    |
| >CDKN2A-L6: SARVAELLLL  | 38   | >CDKN2A-L6: SARVAELVLL | 67    | 29    |
| >CDKN2A-L6: SARVAELL    | 3564 | >CDKN2A-L6: SARVAELVL  | 271   | 3293  |
| >CDKN2A-L6: SARVAELL    | 377  | >CDKN2A-L6: SARVAELV   | 6414  | 6037  |
| >CDKN2A-L6: SARVAELL    | 179  | >CDKN2A-L6: SARVAELVL  | 108   | 71    |
| >CDKN2A-L6: SARVAELLLL  | 137  | >CDKN2A-L6: SARVAELVLL | 248   | 111   |
| >CDKN2A-L6: GSARVAELLLL | 760  | >CDKN2A-L6: GSARVAELVL | 453   | 307   |
| >CDKN2A-L6: GSARVAELL   | 3806 | >CDKN2A-L6: GSARVAELV  | 339   | 3467  |
| >CDKN2A-L6: GSARVAELL   | 237  | >CDKN2A-L6: GSARVAELV  | 5270  | 5033  |
| >CDKN2A-L6: GSARVAELLLL | 255  | >CDKN2A-L6: GSARVAELVL | 224   | 31    |
| >CDKN2A-L6: GSARVAELLLL | 270  | >CDKN2A-L6: GSARVAELVL | 895   | 625   |
| >CDKN2A-L6: GSARVAELLLL | 264  | >CDKN2A-L6: GSARVAELVL | 303   | 39    |
| >CDKN2A-L6: GSARVAELL   | 24   | >CDKN2A-L6: GSARVAELV  | 73    | 49    |
| >CDKN2A-L6: GSARVAELL   | 452  | >CDKN2A-L6: GSARVAELVL | 745   | 293   |
| >CDKN2A-L6: GSARVAELLLL | 66   | >CDKN2A-L6: GSARVAELVL | 101   | 35    |
| >CDKN2A-L6: MGSARVAEL   | 399  | >CDKN2A-L6: MGSARVAEL' | 1466  | 1067  |
| >CDKN2A-L6: LLHGAEPNCA  | 360  | >CDKN2A-L6: PLHGAEPNC/ | 9598  | 9238  |
| >CDKN2A-L6: LLHGAEPNCA  | 290  | >CDKN2A-L6: PLHGAEPNC/ | 6479  | 6189  |
| >CDKN2A-L6: LLHGAEPNC   | 274  | >CDKN2A-L6: PLHGAEPNC  | 4640  | 4366  |
| >CDKN2A-L6: LLHGAEPNCA  | 278  | >CDKN2A-L6: PLHGAEPNC/ | 4859  | 4581  |
| >CDKN2A-L6: LLHGAEPNCA  | 242  | >CDKN2A-L6: PLHGAEPNC/ | 2535  | 2293  |
| >CDKN2A-L6: LLHGAEPNC   | 14   | >CDKN2A-L6: PLHGAEPNC  | 571   | 557   |
| >CDKN2A-L6: LLHGAEPNCA  | 26   | >CDKN2A-L6: PLHGAEPNC/ | 601   | 575   |
| >CDKN2A-L6: LLLHGAEPNC  | 429  | >CDKN2A-L6: LPLHGAEPNC | 21650 | 21221 |
| >CDKN2A-L6: LLLHGAEPNC  | 476  | >CDKN2A-L6: LPLHGAEPNC | 20506 | 20030 |
| >CDKN2A-L6: LLLHGAEPNC  | 121  | >CDKN2A-L6: LPLHGAEPNC | 26747 | 26626 |



|                        |       |                       |       |       |
|------------------------|-------|-----------------------|-------|-------|
| >CDKN2A-L6·LLLHGAEPNC  | 105   | >CDKN2A-L6·LPLHGAEPNC | 27110 | 27005 |
| >CDKN2A-L6·LLLHGAEPNC  | 428   | >CDKN2A-L6·LPLHGAEPNC | 22702 | 22274 |
| >CDKN2A-L6·LLLHGAEPNC  | 80    | >CDKN2A-L6·LPLHGAEPNC | 21202 | 21122 |
| >CDKN2A-L6·LLLHGAEPNC  | 294   | >CDKN2A-L6·LPLHGAEPNC | 24083 | 23789 |
| >CDKN2A-L6·LLLHGAEPNC  | 66    | >CDKN2A-L6·LPLHGAEPNC | 22838 | 22772 |
| >CDKN2A-L6·LLLHGAEPNC  | 369   | >CDKN2A-L6·LPLHGAEPNC | 20939 | 20570 |
| >CDKN2A-L6·LLLHGAEPNC  | 198   | >CDKN2A-L6·LPLHGAEPNC | 21104 | 20906 |
| >CDKN2A-L6·LLLHGAEPNC  | 35    | >CDKN2A-L6·LPLHGAEPNC | 35378 | 35343 |
| >CDKN2A-L6·LLLHGAEPNC  | 53    | >CDKN2A-L6·LPLHGAEPNC | 35632 | 35579 |
| >CDKN2A-L6·LLLHGAEPNC  | 17541 | >CDKN2A-L6·LPLHGAEPNC | 23    | 17518 |
| >CDKN2A-L6·MGSARVAELI  | 399   | >CDKN2A-L6·MGSARVAELI | 18674 | 18275 |
| >CDKN2A-L6·LLLLHGAEPN  | 220   | >CDKN2A-L6·LLPLHGAEPN | 1864  | 1644  |
| >CDKN2A-L6·LLLLHGAEPN  | 89    | >CDKN2A-L6·LLPLHGAEPN | 171   | 82    |
| >CDKN2A-L6·ELLLLHGA    | 1334  | >CDKN2A-L6·ELLPLHGA   | 455   | 879   |
| >CDKN2A-L6·ELLLLHGA    | 214   | >CDKN2A-L6·ELLPLHGA   | 40    | 174   |
| >CDKN2A-L6·ELLLLHGA    | 760   | >CDKN2A-L6·ELLPLHGA   | 361   | 399   |
| >CDKN2A-L6·ELLLLHGA    | 342   | >CDKN2A-L6·ELLPLHGA   | 114   | 228   |
| >CDKN2A-L6·ELLLLHGA    | 186   | >CDKN2A-L6·ELLPLHGA   | 85    | 101   |
| >CDKN2A-L6·ELLLLHGA    | 195   | >CDKN2A-L6·ELLPLHGA   | 29    | 166   |
| >CDKN2A-L6·ELLLLHGA    | 91    | >CDKN2A-L6·ELLPLHGA   | 35    | 56    |
| >CDKN2A-L6·AELLLLHGA   | 35    | >CDKN2A-L6·AELLPLHGA  | 238   | 203   |
| >CDKN2A-L6·AELLLLHGA   | 440   | >CDKN2A-L6·AELLPLHGA  | 1906  | 1466  |
| >CDKN2A-L6·AELLLLHGA   | 7     | >CDKN2A-L6·AELLPLHGA  | 11    | 4     |
| >CDKN2A-L6·AELLLHGAE   | 313   | >CDKN2A-L6·AELLPLHGAE | 395   | 82    |
| >CDKN2A-L6·AELLLLHGA   | 32    | >CDKN2A-L6·AELLPLHGA  | 57    | 25    |
| >CDKN2A-L6·RVAELLLL    | 83    | >CDKN2A-L6·RVAELLPL   | 49    | 34    |
| >CDKN2A-L6·RVAELLLLHG, | 171   | >CDKN2A-L6·RVAELLPLHG | 201   | 30    |
| >CDKN2A-L6·RVAELLLL    | 33    | >CDKN2A-L6·RVAELLPL   | 33    | 0     |
| >CDKN2A-L6·RVAELLLLHG, | 79    | >CDKN2A-L6·RVAELLPLHG | 166   | 87    |
| >CDKN2A-L6·RVAELLLL    | 70    | >CDKN2A-L6·RVAELLPL   | 39    | 31    |
| >CDKN2A-L6·RVAELLLLHG, | 23    | >CDKN2A-L6·RVAELLPLHG | 31    | 8     |
| >CDKN2A-L6·RVAELLLL    | 14    | >CDKN2A-L6·RVAELLPL   | 8     | 6     |
| >CDKN2A-L6·RVAELLLLHG, | 12    | >CDKN2A-L6·RVAELLPLHG | 12    | 0     |
| >CDKN2A-L6·RVAELLLL    | 392   | >CDKN2A-L6·RVAELLPL   | 179   | 213   |
| >CDKN2A-L6·RVAELLLLHG, | 305   | >CDKN2A-L6·RVAELLPLHG | 189   | 116   |
| >CDKN2A-L6·RVAELLLL    | 569   | >CDKN2A-L6·RVAELLPL   | 285   | 284   |
| >CDKN2A-L6·RVAELLLLHG, | 587   | >CDKN2A-L6·RVAELLPLHG | 443   | 144   |
| >CDKN2A-L6·RVAELLLL    | 393   | >CDKN2A-L6·RVAELLPL   | 347   | 46    |
| >CDKN2A-L6·RVAELLLLHG, | 459   | >CDKN2A-L6·RVAELLPLHG | 298   | 161   |
| >CDKN2A-L6·RVAELLLLH   | 226   | >CDKN2A-L6·RVAELLPLH  | 708   | 482   |
| >CDKN2A-L6·RVAELLLLH   | 230   | >CDKN2A-L6·RVAELLPLH  | 950   | 720   |
| >CDKN2A-L6·RVAELLLL    | 424   | >CDKN2A-L6·RVAELLPL   | 104   | 320   |
| >CDKN2A-L6·RVAELLLLHG, | 370   | >CDKN2A-L6·RVAELLPLHG | 356   | 14    |

|                        |       |                        |       |       |
|------------------------|-------|------------------------|-------|-------|
| >CDKN2A-L6·RVAELLLL    | 1360  | >CDKN2A-L6·RVAELLPL    | 261   | 1099  |
| >CDKN2A-L6·RVAELLLLHG, | 428   | >CDKN2A-L6·RVAELLPLHG  | 190   | 238   |
| >CDKN2A-L6·RVAELLLLH   | 65    | >CDKN2A-L6·RVAELLPLH   | 5119  | 5054  |
| >CDKN2A-L6·RVAELLLL    | 1766  | >CDKN2A-L6·RVAELLPL    | 108   | 1658  |
| >CDKN2A-L6·RVAELLLL    | 300   | >CDKN2A-L6·RVAELLPL    | 105   | 195   |
| >CDKN2A-L6·RVAELLLL    | 268   | >CDKN2A-L6·RVAELLPL    | 1162  | 894   |
| >CDKN2A-L6·RVAELLLL    | 364   | >CDKN2A-L6·RVAELLPL    | 128   | 236   |
| >CDKN2A-L6·RVAELLLL    | 860   | >CDKN2A-L6·RVAELLPL    | 294   | 566   |
| >CDKN2A-L6·ARVAELLLL   | 918   | >CDKN2A-L6·ARVAELLPL   | 191   | 727   |
| >CDKN2A-L6·ARVAELL     | 180   | >CDKN2A-L6·ARVAELLP    | 5261  | 5081  |
| >CDKN2A-L6·ARVAELLLL   | 120   | >CDKN2A-L6·ARVAELLPL   | 96    | 24    |
| >CDKN2A-L6·ARVAELLLLH  | 215   | >CDKN2A-L6·ARVAELLPLH  | 297   | 82    |
| >CDKN2A-L6·ARVAELL     | 222   | >CDKN2A-L6·ARVAELLP    | 22334 | 22112 |
| >CDKN2A-L6·ARVAELLLL   | 229   | >CDKN2A-L6·ARVAELLPL   | 47    | 182   |
| >CDKN2A-L6·ARVAELLLL   | 123   | >CDKN2A-L6·ARVAELLPL   | 331   | 208   |
| >CDKN2A-L6·ARVAELLLL   | 23    | >CDKN2A-L6·ARVAELLPL   | 106   | 83    |
| >CDKN2A-L6·SARVAELL    | 39    | >CDKN2A-L6·SARVAELLP   | 631   | 592   |
| >CDKN2A-L6·SARVAELLLL  | 38    | >CDKN2A-L6·SARVAELLPL  | 20    | 18    |
| >CDKN2A-L6·SARVAELLLLH | 558   | >CDKN2A-L6·SARVAELLPLH | 386   | 172   |
| >CDKN2A-L6·SARVAELL    | 179   | >CDKN2A-L6·SARVAELLP   | 18906 | 18727 |
| >CDKN2A-L6·SARVAELLLL  | 137   | >CDKN2A-L6·SARVAELLPL  | 38    | 99    |
| >CDKN2A-L6·GSARVAELLLL | 950   | >CDKN2A-L6·GSARVAELLP  | 256   | 694   |
| >CDKN2A-L6·GSARVAELL   | 255   | >CDKN2A-L6·GSARVAELLP  | 17044 | 16789 |
| >CDKN2A-L6·GSARVAELLLL | 270   | >CDKN2A-L6·GSARVAELLP  | 937   | 667   |
| >CDKN2A-L6·GSARVAELLLL | 264   | >CDKN2A-L6·GSARVAELLP  | 1331  | 1067  |
| >CDKN2A-L6·GSARVAELL   | 452   | >CDKN2A-L6·GSARVAELLP  | 20984 | 20532 |
| >CDKN2A-L6·GSARVAELLLL | 66    | >CDKN2A-L6·GSARVAELLP  | 588   | 522   |
| >CDKN2A-L6·LLHGAEPNC   | 19265 | >CDKN2A-L6·LPHGAEPNC   | 50    | 19215 |
| >CDKN2A-L6·LLHGAEPNCA  | 360   | >CDKN2A-L6·LPHGAEPNC/  | 27637 | 27277 |
| >CDKN2A-L6·LLHGAEPNCA  | 290   | >CDKN2A-L6·LPHGAEPNC/  | 25332 | 25042 |
| >CDKN2A-L6·LLHGAEPNC   | 274   | >CDKN2A-L6·LPHGAEPNC   | 28683 | 28409 |
| >CDKN2A-L6·LLHGAEPNCA  | 278   | >CDKN2A-L6·LPHGAEPNC/  | 28615 | 28337 |
| >CDKN2A-L6·LLHGAEPNCA  | 242   | >CDKN2A-L6·LPHGAEPNC/  | 25456 | 25214 |
| >CDKN2A-L6·LLHGAEPNC   | 14    | >CDKN2A-L6·LPHGAEPNC   | 33302 | 33288 |
| >CDKN2A-L6·LLHGAEPNCA  | 26    | >CDKN2A-L6·LPHGAEPNC/  | 33144 | 33118 |
| >CDKN2A-L6·LLHGAEPNCA  | 23569 | >CDKN2A-L6·LPHGAEPNC/  | 42    | 23527 |
| >CDKN2A-L6·LLHGAEPNCA  | 27173 | >CDKN2A-L6·LPHGAEPNC/  | 237   | 26936 |
| >CDKN2A-L6·GSARVAELLLL | 270   | >CDKN2A-L6·GSARVAELLLL | 17092 | 16822 |
| >CDKN2A-L6·GSARVAELLLL | 264   | >CDKN2A-L6·GSARVAELLLL | 19132 | 18868 |
| >CDKN2A-L6·GSARVAELLLL | 66    | >CDKN2A-L6·GSARVAELLLL | 6197  | 6131  |
| >CDKN2A-L6·LLLHGAEPNC  | 429   | >CDKN2A-L6·LLPHGAEPNC  | 243   | 186   |
| >CDKN2A-L6·LLLHGAEPNC  | 476   | >CDKN2A-L6·LLPHGAEPNC  | 1844  | 1368  |
| >CDKN2A-L6·LLLHGAEPNC  | 121   | >CDKN2A-L6·LLPHGAEPNC  | 979   | 858   |

|                         |      |                        |       |       |
|-------------------------|------|------------------------|-------|-------|
| >CDKN2A-L6: LLLHGAEPNC  | 105  | >CDKN2A-L6: LLPHGAEPNC | 985   | 880   |
| >CDKN2A-L6: LLLHGAEPNC  | 428  | >CDKN2A-L6: LLPHGAEPNC | 5800  | 5372  |
| >CDKN2A-L6: LLLHGAEPNC  | 80   | >CDKN2A-L6: LLPHGAEPNC | 1662  | 1582  |
| >CDKN2A-L6: LLLHGAEPNC  | 294  | >CDKN2A-L6: LLPHGAEPNC | 1883  | 1589  |
| >CDKN2A-L6: LLLHGAEPNC  | 66   | >CDKN2A-L6: LLPHGAEPNC | 660   | 594   |
| >CDKN2A-L6: LLLHGAEPNC  | 369  | >CDKN2A-L6: LLPHGAEPNC | 6551  | 6182  |
| >CDKN2A-L6: LLLHGAEPNC  | 198  | >CDKN2A-L6: LLPHGAEPNC | 6322  | 6124  |
| >CDKN2A-L6: LLLHGAEPNC  | 35   | >CDKN2A-L6: LLPHGAEPNC | 72    | 37    |
| >CDKN2A-L6: LLLHGAEPNC  | 53   | >CDKN2A-L6: LLPHGAEPNC | 96    | 43    |
| >CDKN2A-L6: LLLLHGAEPN  | 220  | >CDKN2A-L6: LLLPHGAEPN | 44    | 176   |
| >CDKN2A-L6: LLLLHGAEPN  | 1113 | >CDKN2A-L6: LLLPHGAEPN | 369   | 744   |
| >CDKN2A-L6: LLLLHGAEPN  | 1173 | >CDKN2A-L6: LLLPHGAEPN | 316   | 857   |
| >CDKN2A-L6: LLLLHGAEPN  | 1016 | >CDKN2A-L6: LLLPHGAEPN | 343   | 673   |
| >CDKN2A-L6: LLLLHGAEPN  | 89   | >CDKN2A-L6: LLLPHGAEPN | 13    | 76    |
| >CDKN2A-L6: ELLLLHGA    | 214  | >CDKN2A-L6: ELLLPHGA   | 139   | 75    |
| >CDKN2A-L6: ELLLLHGA    | 342  | >CDKN2A-L6: ELLLPHGA   | 644   | 302   |
| >CDKN2A-L6: ELLLLHGA    | 186  | >CDKN2A-L6: ELLLPHGA   | 223   | 37    |
| >CDKN2A-L6: ELLLLHGA    | 195  | >CDKN2A-L6: ELLLPHGA   | 281   | 86    |
| >CDKN2A-L6: ELLLLHGA    | 91   | >CDKN2A-L6: ELLLPHGA   | 59    | 32    |
| >CDKN2A-L6: AELLLLHGA   | 35   | >CDKN2A-L6: AELLLPHGA  | 59    | 24    |
| >CDKN2A-L6: AELLLLHGA   | 440  | >CDKN2A-L6: AELLLPHGA  | 511   | 71    |
| >CDKN2A-L6: AELLLLHGA   | 7    | >CDKN2A-L6: AELLLPHGA  | 11    | 4     |
| >CDKN2A-L6: AELLLHGAE   | 313  | >CDKN2A-L6: AELLLPHGAE | 490   | 177   |
| >CDKN2A-L6: AELLLLHGA   | 32   | >CDKN2A-L6: AELLLPHGA  | 135   | 103   |
| >CDKN2A-L6: RVAELLLL    | 83   | >CDKN2A-L6: RVAELLLP   | 19708 | 19625 |
| >CDKN2A-L6: RVAELLLLHG, | 171  | >CDKN2A-L6: RVAELLLPHG | 311   | 140   |
| >CDKN2A-L6: RVAELLLL    | 33   | >CDKN2A-L6: RVAELLLP   | 7660  | 7627  |
| >CDKN2A-L6: RVAELLLLHG, | 79   | >CDKN2A-L6: RVAELLLPHG | 201   | 122   |
| >CDKN2A-L6: RVAELLLL    | 70   | >CDKN2A-L6: RVAELLLP   | 9108  | 9038  |
| >CDKN2A-L6: RVAELLLLHG, | 23   | >CDKN2A-L6: RVAELLLPHG | 36    | 13    |
| >CDKN2A-L6: RVAELLLL    | 14   | >CDKN2A-L6: RVAELLLP   | 3531  | 3517  |
| >CDKN2A-L6: RVAELLLLHG, | 12   | >CDKN2A-L6: RVAELLLPHG | 41    | 29    |
| >CDKN2A-L6: RVAELLLL    | 392  | >CDKN2A-L6: RVAELLLP   | 21251 | 20859 |
| >CDKN2A-L6: RVAELLLLHG, | 305  | >CDKN2A-L6: RVAELLLPHG | 261   | 44    |
| >CDKN2A-L6: RVAELLLL    | 393  | >CDKN2A-L6: RVAELLLP   | 30136 | 29743 |
| >CDKN2A-L6: RVAELLLLHG, | 459  | >CDKN2A-L6: RVAELLLPHG | 966   | 507   |
| >CDKN2A-L6: RVAELLLLH   | 226  | >CDKN2A-L6: RVAELLLPH  | 502   | 276   |
| >CDKN2A-L6: RVAELLLLH   | 230  | >CDKN2A-L6: RVAELLLPH  | 269   | 39    |
| >CDKN2A-L6: RVAELLLL    | 424  | >CDKN2A-L6: RVAELLLP   | 12228 | 11804 |
| >CDKN2A-L6: RVAELLLLHG, | 370  | >CDKN2A-L6: RVAELLLPHG | 356   | 14    |
| >CDKN2A-L6: RVAELLLLHG, | 428  | >CDKN2A-L6: RVAELLLPHG | 424   | 4     |
| >CDKN2A-L6: RVAELLLLH   | 65   | >CDKN2A-L6: RVAELLLPH  | 427   | 362   |
| >CDKN2A-L6: RVAELLLL    | 300  | >CDKN2A-L6: RVAELLLP   | 19324 | 19024 |

|                        |      |                        |       |       |
|------------------------|------|------------------------|-------|-------|
| >CDKN2A-L6:RVAELLLL    | 268  | >CDKN2A-L6:RVAELLLP    | 17719 | 17451 |
| >CDKN2A-L6:RVAELLLL    | 364  | >CDKN2A-L6:RVAELLLP    | 7159  | 6795  |
| >CDKN2A-L6:ARVAELLLL   | 120  | >CDKN2A-L6:ARVAELLLP   | 3723  | 3603  |
| >CDKN2A-L6:ARVAELLLLH  | 215  | >CDKN2A-L6:ARVAELLLPH  | 367   | 152   |
| >CDKN2A-L6:ARVAELLLL   | 229  | >CDKN2A-L6:ARVAELLLP   | 22544 | 22315 |
| >CDKN2A-L6:ARVAELLLL   | 123  | >CDKN2A-L6:ARVAELLLP   | 6600  | 6477  |
| >CDKN2A-L6:ARVAELLLL   | 23   | >CDKN2A-L6:ARVAELLLP   | 9204  | 9181  |
| >CDKN2A-L6:SARVAELLLL  | 38   | >CDKN2A-L6:SARVAELLLP  | 547   | 509   |
| >CDKN2A-L6:SARVAELLLLH | 558  | >CDKN2A-L6:SARVAELLLPH | 249   | 309   |
| >CDKN2A-L6:SARVAELLLL  | 137  | >CDKN2A-L6:SARVAELLLP  | 17910 | 17773 |
| >CDKN2A-L7:LTRPVHDA    | 48   | >CDKN2A-L7:HTRPVHDA    | 10    | 38    |
| >CDKN2A-L7:LTRPVHDAA   | 24   | >CDKN2A-L7:HTRPVHDAA   | 7     | 17    |
| >CDKN2A-L7:LTRPVHDAAF  | 56   | >CDKN2A-L7:HTRPVHDAA   | 10    | 46    |
| >CDKN2A-L7:LTRPVHDAAF  | 2496 | >CDKN2A-L7:HTRPVHDAA   | 364   | 2132  |
| >CDKN2A-L7:LTRPVHDAAF  | 107  | >CDKN2A-L7:HTRPVHDAA   | 121   | 14    |
| >CDKN2A-L7:LTRPVHDAAF  | 47   | >CDKN2A-L7:HTRPVHDAA   | 14    | 33    |
| >CDKN2A-L7:LTRPVHDA    | 2875 | >CDKN2A-L7:HTRPVHDAA   | 366   | 2509  |
| >CDKN2A-L7:TLTRPVHDA   | 280  | >CDKN2A-L7:THTRPVHDA   | 26873 | 26593 |
| >CDKN2A-L7:TLTRPVHDA   | 12   | >CDKN2A-L7:THTRPVHDA   | 28373 | 28361 |
| >CDKN2A-L7:TLTRPVHDA   | 88   | >CDKN2A-L7:THTRPVHDA   | 32735 | 32647 |
| >CDKN2A-L7:TLTRPVHDA   | 159  | >CDKN2A-L7:THTRPVHDA   | 4984  | 4825  |
| >CDKN2A-L7:TLTRPVHDA   | 411  | >CDKN2A-L7:THTRPVHDA   | 9882  | 9471  |
| >CDKN2A-L7:TLTRPVHDA   | 68   | >CDKN2A-L7:THTRPVHDA   | 1100  | 1032  |
| >CDKN2A-L7:AEPNCADPA   | 183  | >CDKN2A-L7:AEPNCADPA   | 15260 | 15077 |
| >CDKN2A-L7:AEPNCADPA   | 65   | >CDKN2A-L7:AEPNCADPA   | 7161  | 7096  |
| >CDKN2A-L7:ATLTRPVH    | 2995 | >CDKN2A-L7:ATHTRPVH    | 352   | 2643  |
| >CDKN2A-L7:ATLTRPVHDA  | 970  | >CDKN2A-L7:ATHTRPVHD   | 76    | 894   |
| >CDKN2A-L7:ATLTRPVHDA  | 506  | >CDKN2A-L7:ATHTRPVHD   | 41    | 465   |
| >CDKN2A-L7:DPATLTRPV   | 485  | >CDKN2A-L7:DPATHTRPV   | 1617  | 1132  |
| >CDKN2A-L7:DPATLTRPV   | 197  | >CDKN2A-L7:DPATHTRPV   | 194   | 3     |
| >CDKN2A-L7:DPATLTRPV   | 149  | >CDKN2A-L7:DPATHTRPV   | 31    | 118   |
| >CDKN2A-L7:DPATLTRPV   | 668  | >CDKN2A-L7:DPATHTRPV   | 404   | 264   |
| >CDKN2A-L7:ADPATLTRPV  | 498  | >CDKN2A-L7:ADPATHTRPV  | 784   | 286   |
| >CDKN2A-L7:CADPATLTR   | 353  | >CDKN2A-L7:CADPATHTR   | 124   | 229   |
| >CDKN2A-L7:CADPATLTRP  | 585  | >CDKN2A-L7:CADPATHTRP  | 325   | 260   |
| >CDKN2A-L7:NCADPATLTF  | 284  | >CDKN2A-L7:NCADPATHTI  | 502   | 218   |
| >CDKN2A-L7:NCADPATL    | 475  | >CDKN2A-L7:NCADPATH    | 22688 | 22213 |
| >CDKN2A-L7:NCADPATLTF  | 233  | >CDKN2A-L7:NCADPATHTI  | 185   | 48    |
| >CDKN2A-L7:EPNCADPATL  | 353  | >CDKN2A-L7:EPNCADPATH  | 34127 | 33774 |
| >CDKN2A-L7:EPNCADPATL  | 279  | >CDKN2A-L7:EPNCADPATH  | 508   | 229   |
| >CDKN2A-L9:FLDTLVVL    | 12   | >CDKN2A-L9:FQDTLVVL    | 50    | 38    |
| >CDKN2A-L9:FLDTLVVLHR  | 12   | >CDKN2A-L9:FQDTLVVLHR  | 52    | 40    |
| >CDKN2A-L9:FLDTLVVL    | 9    | >CDKN2A-L9:FQDTLVVL    | 83    | 74    |

|                        |      |                       |      |      |
|------------------------|------|-----------------------|------|------|
| >CDKN2A-L9:FLDTLVVLHR, | 7    | >CDKN2A-L9:FQDTLVVLHR | 85   | 78   |
| >CDKN2A-L9:FLDTLVVL    | 74   | >CDKN2A-L9:FQDTLVVL   | 1179 | 1105 |
| >CDKN2A-L9:FLDTLVVLHR, | 24   | >CDKN2A-L9:FQDTLVVLHR | 413  | 389  |
| >CDKN2A-L9:FLDTLVVL    | 37   | >CDKN2A-L9:FQDTLVVL   | 9    | 28   |
| >CDKN2A-L9:FLDTLVVLHR, | 68   | >CDKN2A-L9:FQDTLVVLHR | 11   | 57   |
| >CDKN2A-L9:FLDTLVVL    | 3    | >CDKN2A-L9:FQDTLVVL   | 147  | 144  |
| >CDKN2A-L9:FLDTLVVLHR, | 3    | >CDKN2A-L9:FQDTLVVLHR | 152  | 149  |
| >CDKN2A-L9:FLDTLVVL    | 4    | >CDKN2A-L9:FQDTLVVL   | 146  | 142  |
| >CDKN2A-L9:FLDTLVVLHR, | 9    | >CDKN2A-L9:FQDTLVVLHR | 777  | 768  |
| >CDKN2A-L9:FLDTLVVL    | 7    | >CDKN2A-L9:FQDTLVVL   | 455  | 448  |
| >CDKN2A-L9:FLDTLVVLHR, | 8    | >CDKN2A-L9:FQDTLVVLHR | 698  | 690  |
| >CDKN2A-L9:FLDTLVVL    | 8    | >CDKN2A-L9:FQDTLVVL   | 3535 | 3527 |
| >CDKN2A-L9:FLDTLVVLHR, | 19   | >CDKN2A-L9:FQDTLVVLHR | 5645 | 5626 |
| >CDKN2A-L9:FLDTLVVL    | 3    | >CDKN2A-L9:FQDTLVVL   | 4574 | 4571 |
| >CDKN2A-L9:FLDTLVVLHR, | 3    | >CDKN2A-L9:FQDTLVVLHR | 4969 | 4966 |
| >CDKN2A-L9:FLDTLVVLHR  | 354  | >CDKN2A-L9:FQDTLVVLHR | 922  | 568  |
| >CDKN2A-L9:FLDTLVVL    | 4098 | >CDKN2A-L9:FQDTLVVL   | 346  | 3752 |
| >CDKN2A-L9:FLDTLVVL    | 52   | >CDKN2A-L9:FQDTLVVL   | 7    | 45   |
| >CDKN2A-L9:FLDTLVVLHR  | 272  | >CDKN2A-L9:FQDTLVVLHR | 370  | 98   |
| >CDKN2A-L9:GFLDTLVV    | 313  | >CDKN2A-L9:GFQDTLVV   | 2347 | 2034 |
| >CDKN2A-L9:GFLDTLVV    | 494  | >CDKN2A-L9:GFQDTLVV   | 1760 | 1266 |
| >CDKN2A-L9:GFLDTLVV    | 110  | >CDKN2A-L9:GFQDTLVV   | 3192 | 3082 |
| >CDKN2A-L9:GFLDTLVV    | 221  | >CDKN2A-L9:GFQDTLVV   | 497  | 276  |
| >CDKN2A-L9:GFLDTLVVL   | 298  | >CDKN2A-L9:GFQDTLVVL  | 371  | 73   |
| >CDKN2A-L9:GFLDTLVVL   | 75   | >CDKN2A-L9:GFQDTLVVL  | 138  | 63   |
| >CDKN2A-L9:GFLDTLVVLH  | 38   | >CDKN2A-L9:GFQDTLVVLH | 37   | 1    |
| >CDKN2A-L9:GFLDTLVVLH  | 421  | >CDKN2A-L9:GFQDTLVVLH | 617  | 196  |
| >CDKN2A-L9:GFLDTLVVLH  | 77   | >CDKN2A-L9:GFQDTLVVLH | 224  | 147  |
| >CDKN2A-L9:EGFLDTLV    | 135  | >CDKN2A-L9:EGFQDTLV   | 185  | 50   |
| >CDKN2A-L9:REGFLDTL    | 13   | >CDKN2A-L9:REGFQDTL   | 28   | 15   |
| >CDKN2A-L9:REGFLDTLV   | 213  | >CDKN2A-L9:REGFQDTLV  | 658  | 445  |
| >CDKN2A-L9:REGFLDTLVV  | 14   | >CDKN2A-L9:REGFQDTLVV | 26   | 12   |
| >CDKN2A-L9:REGFLDTL    | 99   | >CDKN2A-L9:REGFQDTL   | 187  | 88   |
| >CDKN2A-L9:REGFLDTLV   | 208  | >CDKN2A-L9:REGFQDTLV  | 707  | 499  |
| >CDKN2A-L9:REGFLDTLVV  | 264  | >CDKN2A-L9:REGFQDTLVV | 410  | 146  |
| >CDKN2A-L9:REGFLDTLVV  | 63   | >CDKN2A-L9:REGFQDTLVV | 114  | 51   |
| >CDKN2A-L9:REGFLDTLV   | 35   | >CDKN2A-L9:REGFQDTLV  | 78   | 43   |
| >CDKN2A-L9:REGFLDTLVV  | 89   | >CDKN2A-L9:REGFQDTLVV | 203  | 114  |
| >CDKN2A-L9:REGFLDTLVV  | 68   | >CDKN2A-L9:REGFQDTLVV | 89   | 21   |
| >CDKN2A-L9:AREGFLDTL   | 503  | >CDKN2A-L9:AREGFQDTL  | 270  | 233  |
| >CDKN2A-L9:AREGFLDTL   | 165  | >CDKN2A-L9:AREGFQDTL  | 223  | 58   |
| >CDKN2A-L9:AREGFLDTL   | 63   | >CDKN2A-L9:AREGFQDTL  | 106  | 43   |
| >CDKN2A-L9:AAREGFLDTL  | 408  | >CDKN2A-L9:AAREGFQDTI | 588  | 180  |

|                        |      |                       |       |       |
|------------------------|------|-----------------------|-------|-------|
| >CDKN2A-L9:AAREGFLDTL  | 252  | >CDKN2A-L9:AAREGFQDTI | 148   | 104   |
| >CDKN2A-L9:AAREGFLDTL  | 342  | >CDKN2A-L9:AAREGFQDTI | 402   | 60    |
| >CDKN2A-L9:AAREGFLDTL  | 203  | >CDKN2A-L9:AAREGFQDTI | 186   | 17    |
| >CDKN2A-L9:AAREGFLDTL  | 53   | >CDKN2A-L9:AAREGFQDTI | 104   | 51    |
| >CDKN2A-L9:HDAAREGFL   | 169  | >CDKN2A-L9:HDAAREGFQ  | 10247 | 10078 |
| >CDKN2A-L9:FLDTLVVL    | 12   | >CDKN2A-L9:FVDTLVVL   | 70    | 58    |
| >CDKN2A-L9:FLDTLVVLHR, | 12   | >CDKN2A-L9:FVDTLVVLHR | 68    | 56    |
| >CDKN2A-L9:FLDTLVVL    | 9    | >CDKN2A-L9:FVDTLVVL   | 96    | 87    |
| >CDKN2A-L9:FLDTLVVLHR, | 7    | >CDKN2A-L9:FVDTLVVLHR | 86    | 79    |
| >CDKN2A-L9:FLDTLVVL    | 74   | >CDKN2A-L9:FVDTLVVL   | 1046  | 972   |
| >CDKN2A-L9:FLDTLVVLHR, | 24   | >CDKN2A-L9:FVDTLVVLHR | 379   | 355   |
| >CDKN2A-L9:FLDTLVVL    | 37   | >CDKN2A-L9:FVDTLVVL   | 31    | 6     |
| >CDKN2A-L9:FLDTLVVLHR, | 68   | >CDKN2A-L9:FVDTLVVLHR | 51    | 17    |
| >CDKN2A-L9:FLDTLVVL    | 3    | >CDKN2A-L9:FVDTLVVL   | 83    | 80    |
| >CDKN2A-L9:FLDTLVVLHR, | 3    | >CDKN2A-L9:FVDTLVVLHR | 89    | 86    |
| >CDKN2A-L9:FLDTLVVL    | 4    | >CDKN2A-L9:FVDTLVVL   | 210   | 206   |
| >CDKN2A-L9:FLDTLVVLHR, | 9    | >CDKN2A-L9:FVDTLVVLHR | 1330  | 1321  |
| >CDKN2A-L9:FLDTLVVL    | 7    | >CDKN2A-L9:FVDTLVVL   | 180   | 173   |
| >CDKN2A-L9:FLDTLVVLHR, | 8    | >CDKN2A-L9:FVDTLVVLHR | 274   | 266   |
| >CDKN2A-L9:FLDTLVVL    | 8    | >CDKN2A-L9:FVDTLVVL   | 706   | 698   |
| >CDKN2A-L9:FLDTLVVLHR, | 19   | >CDKN2A-L9:FVDTLVVLHR | 1833  | 1814  |
| >CDKN2A-L9:FLDTLVVL    | 3    | >CDKN2A-L9:FVDTLVVL   | 145   | 142   |
| >CDKN2A-L9:FLDTLVVLHR, | 3    | >CDKN2A-L9:FVDTLVVLHR | 121   | 118   |
| >CDKN2A-L9:FLDTLVVLHR  | 586  | >CDKN2A-L9:FVDTLVVLHR | 383   | 203   |
| >CDKN2A-L9:FLDTLVVLHR  | 626  | >CDKN2A-L9:FVDTLVVLHR | 475   | 151   |
| >CDKN2A-L9:FLDTLVVLHR  | 354  | >CDKN2A-L9:FVDTLVVLHR | 32    | 322   |
| >CDKN2A-L9:FLDTLVVLHR, | 5138 | >CDKN2A-L9:FVDTLVVLHR | 379   | 4759  |
| >CDKN2A-L9:FLDTLVVLHR, | 1864 | >CDKN2A-L9:FVDTLVVLHR | 457   | 1407  |
| >CDKN2A-L9:FLDTLVVL    | 52   | >CDKN2A-L9:FVDTLVVL   | 84    | 32    |
| >CDKN2A-L9:FLDTLVVLHR  | 272  | >CDKN2A-L9:FVDTLVVLHR | 448   | 176   |
| >CDKN2A-L9:GFLDTLVV    | 313  | >CDKN2A-L9:GFVDTLVV   | 1961  | 1648  |
| >CDKN2A-L9:GFLDTLVV    | 494  | >CDKN2A-L9:GFVDTLVV   | 2716  | 2222  |
| >CDKN2A-L9:GFLDTLVV    | 110  | >CDKN2A-L9:GFVDTLVV   | 1672  | 1562  |
| >CDKN2A-L9:GFLDTLVV    | 221  | >CDKN2A-L9:GFVDTLVV   | 482   | 261   |
| >CDKN2A-L9:GFLDTLVVL   | 298  | >CDKN2A-L9:GFVDTLVVL  | 312   | 14    |
| >CDKN2A-L9:GFLDTLVVL   | 75   | >CDKN2A-L9:GFVDTLVVL  | 644   | 569   |
| >CDKN2A-L9:GFLDTLVVLH  | 38   | >CDKN2A-L9:GFVDTLVVLH | 85    | 47    |
| >CDKN2A-L9:GFLDTLVVLH  | 421  | >CDKN2A-L9:GFVDTLVVLH | 1034  | 613   |
| >CDKN2A-L9:GFLDTLVVLH  | 77   | >CDKN2A-L9:GFVDTLVVLH | 101   | 24    |
| >CDKN2A-L9:EGFLDTLV    | 135  | >CDKN2A-L9:EGFVDTLV   | 117   | 18    |
| >CDKN2A-L9:REGFLDTL    | 13   | >CDKN2A-L9:REGFVDTL   | 13    | 0     |
| >CDKN2A-L9:REGFLDTLV   | 213  | >CDKN2A-L9:REGFVDTLV  | 143   | 70    |
| >CDKN2A-L9:REGFLDTLVV  | 14   | >CDKN2A-L9:REGFVDTLVV | 11    | 3     |

|                       |       |                       |       |       |
|-----------------------|-------|-----------------------|-------|-------|
| >CDKN2A-L9 REGFLDTL   | 99    | >CDKN2A-L9 REGFVDTL   | 185   | 86    |
| >CDKN2A-L9 REGFLDTLV  | 208   | >CDKN2A-L9 REGFVDTLV  | 683   | 475   |
| >CDKN2A-L9 REGFLDTLVV | 264   | >CDKN2A-L9 REGFVDTLVV | 355   | 91    |
| >CDKN2A-L9 REGFLDTLVV | 63    | >CDKN2A-L9 REGFVDTLVV | 123   | 60    |
| >CDKN2A-L9 REGFLDTLV  | 35    | >CDKN2A-L9 REGFVDTLV  | 41    | 6     |
| >CDKN2A-L9 REGFLDTLVV | 89    | >CDKN2A-L9 REGFVDTLVV | 114   | 25    |
| >CDKN2A-L9 REGFLDTLVV | 68    | >CDKN2A-L9 REGFVDTLVV | 67    | 1     |
| >CDKN2A-L9 AREGFLDTL  | 503   | >CDKN2A-L9 AREGFVDTL  | 147   | 356   |
| >CDKN2A-L9 AREGFLDTL  | 165   | >CDKN2A-L9 AREGFVDTL  | 166   | 1     |
| >CDKN2A-L9 AREGFLDTL  | 63    | >CDKN2A-L9 AREGFVDTL  | 50    | 13    |
| >CDKN2A-L9 AAREGFLDTL | 408   | >CDKN2A-L9 AAREGFVDTL | 358   | 50    |
| >CDKN2A-L9 AAREGFLDTL | 252   | >CDKN2A-L9 AAREGFVDTL | 206   | 46    |
| >CDKN2A-L9 AAREGFLDTL | 342   | >CDKN2A-L9 AAREGFVDTL | 459   | 117   |
| >CDKN2A-L9 AAREGFLDTL | 203   | >CDKN2A-L9 AAREGFVDTL | 255   | 52    |
| >CDKN2A-L9 AAREGFLDTL | 53    | >CDKN2A-L9 AAREGFVDTL | 53    | 0     |
| >CDKN2A-L9 DAAREGFL   | 1811  | >CDKN2A-L9 DAAREGFV   | 165   | 1646  |
| >CDKN2A-L9 DAAREGFL   | 3810  | >CDKN2A-L9 DAAREGFV   | 482   | 3328  |
| >CDKN2A-L9 HDAAREGFL  | 1055  | >CDKN2A-L9 HDAAREGFV  | 490   | 565   |
| >CDKN2A-L9 HDAAREGFL  | 169   | >CDKN2A-L9 HDAAREGFV  | 46    | 123   |
| >CDKN2A-L9 VLHRAGARL  | 8889  | >CDKN2A-L9 VPHRAGARL  | 8     | 8881  |
| >CDKN2A-L9 VLHRAGARLI | 1337  | >CDKN2A-L9 VPHRAGARLI | 6     | 1331  |
| >CDKN2A-L9 VLHRAGARL  | 371   | >CDKN2A-L9 VPHRAGARL  | 34634 | 34263 |
| >CDKN2A-L9 VLHRAGARL  | 156   | >CDKN2A-L9 VPHRAGARL  | 24032 | 23876 |
| >CDKN2A-L9 VLHRAGARLI | 77    | >CDKN2A-L9 VPHRAGARLI | 22537 | 22460 |
| >CDKN2A-L9 VLHRAGARL  | 21    | >CDKN2A-L9 VPHRAGARL  | 24344 | 24323 |
| >CDKN2A-L9 VLHRAGARLI | 36    | >CDKN2A-L9 VPHRAGARLI | 22498 | 22462 |
| >CDKN2A-L9 VLHRAGARL  | 269   | >CDKN2A-L9 VPHRAGARL  | 26074 | 25805 |
| >CDKN2A-L9 VLHRAGARLI | 346   | >CDKN2A-L9 VPHRAGARLI | 24705 | 24359 |
| >CDKN2A-L9 VLHRAGARL  | 358   | >CDKN2A-L9 VPHRAGARL  | 25962 | 25604 |
| >CDKN2A-L9 VLHRAGARLI | 33    | >CDKN2A-L9 VPHRAGARLI | 22875 | 22842 |
| >CDKN2A-L9 VLHRAGARL  | 6     | >CDKN2A-L9 VPHRAGARL  | 28534 | 28528 |
| >CDKN2A-L9 VLHRAGARLI | 3     | >CDKN2A-L9 VPHRAGARLI | 19586 | 19583 |
| >CDKN2A-L9 VLHRAGAR   | 299   | >CDKN2A-L9 VPHRAGAR   | 8638  | 8339  |
| >CDKN2A-L9 VLHRAGARL  | 6412  | >CDKN2A-L9 VPHRAGARL  | 22    | 6390  |
| >CDKN2A-L9 VLHRAGARLI | 16413 | >CDKN2A-L9 VPHRAGARLI | 41    | 16372 |
| >CDKN2A-L9 REGFLDTLVV | 14    | >CDKN2A-L9 REGFLDTLVV | 2264  | 2250  |
| >CDKN2A-L9 REGFLDTLVV | 63    | >CDKN2A-L9 REGFLDTLVV | 2799  | 2736  |
| >CDKN2A-L9 REGFLDTLVV | 68    | >CDKN2A-L9 REGFLDTLVV | 4136  | 4068  |
| >CDKN2A-L9 VVLHRAGA   | 471   | >CDKN2A-L9 VVPHRAGA   | 2221  | 1750  |
| >CDKN2A-L9 VVLHRAGAR  | 225   | >CDKN2A-L9 VVPHRAGAR  | 3079  | 2854  |
| >CDKN2A-L9 VVLHRAGARI | 129   | >CDKN2A-L9 VVPHRAGARI | 4546  | 4417  |
| >CDKN2A-L9 VVLHRAGARI | 22275 | >CDKN2A-L9 VVPHRAGARI | 302   | 21973 |
| >CDKN2A-L9 LVVLHRAGAF | 250   | >CDKN2A-L9 LVVPHRAGAF | 411   | 161   |

|                         |      |                        |       |       |
|-------------------------|------|------------------------|-------|-------|
| >CDKN2A-L9' LVVLHRAGAF  | 1138 | >CDKN2A-L9' LVVPHRAGAF | 474   | 664   |
| >CDKN2A-L9' LVVLHRAGA   | 585  | >CDKN2A-L9' LVVPHRAGA  | 239   | 346   |
| >CDKN2A-L9' LVVLHRAGA   | 762  | >CDKN2A-L9' LVVPHRAGA  | 221   | 541   |
| >CDKN2A-L9' LVVLHRAGAF  | 927  | >CDKN2A-L9' LVVPHRAGAF | 90    | 837   |
| >CDKN2A-L9' LVVLHRAGAF  | 127  | >CDKN2A-L9' LVVPHRAGAF | 177   | 50    |
| >CDKN2A-L9' LVVLHRAGAF  | 287  | >CDKN2A-L9' LVVPHRAGAF | 217   | 70    |
| >CDKN2A-L9' LVVLHRAGA   | 620  | >CDKN2A-L9' LVVPHRAGA  | 120   | 500   |
| >CDKN2A-L9' LVVLHRAGAF  | 1232 | >CDKN2A-L9' LVVPHRAGAF | 364   | 868   |
| >CDKN2A-L9' LVVLHRAGAF  | 435  | >CDKN2A-L9' LVVPHRAGAF | 65    | 370   |
| >CDKN2A-L9' TLVVLHRA    | 433  | >CDKN2A-L9' TLVVPHRA   | 2059  | 1626  |
| >CDKN2A-L9' TLVVLHRA    | 247  | >CDKN2A-L9' TLVVPHRA   | 639   | 392   |
| >CDKN2A-L9' TLVVLHRAGA  | 240  | >CDKN2A-L9' TLVVPHRAG/ | 309   | 69    |
| >CDKN2A-L9' TLVVLHRA    | 426  | >CDKN2A-L9' TLVVPHRA   | 294   | 132   |
| >CDKN2A-L9' TLVVLHRA    | 59   | >CDKN2A-L9' TLVVPHRA   | 89    | 30    |
| >CDKN2A-L9' TLVVLHRAGA  | 465  | >CDKN2A-L9' TLVVPHRAG/ | 274   | 191   |
| >CDKN2A-L9' TLVVLHRAGA  | 209  | >CDKN2A-L9' TLVVPHRAG/ | 395   | 186   |
| >CDKN2A-L9' TLVVLHRAGA  | 185  | >CDKN2A-L9' TLVVPHRAG/ | 265   | 80    |
| >CDKN2A-L9' DTLVVLHR    | 277  | >CDKN2A-L9' DTLVVPHR   | 302   | 25    |
| >CDKN2A-L9' DTLVVLHR    | 9    | >CDKN2A-L9' DTLVVPHR   | 12    | 3     |
| >CDKN2A-L9' DTLVVLHR    | 16   | >CDKN2A-L9' DTLVVPHR   | 17    | 1     |
| >CDKN2A-L9' DTLVVLHRA   | 178  | >CDKN2A-L9' DTLVVPHRA  | 241   | 63    |
| >CDKN2A-L9' DTLVVLHRAC  | 197  | >CDKN2A-L9' DTLVVPHRAC | 171   | 26    |
| >CDKN2A-L9' DTLVVLHRA   | 46   | >CDKN2A-L9' DTLVVPHRA  | 83    | 37    |
| >CDKN2A-L9' DTLVVLHRAC  | 65   | >CDKN2A-L9' DTLVVPHRAC | 67    | 2     |
| >CDKN2A-L9' FLDTLVVL    | 12   | >CDKN2A-L9' FLDTLVVP   | 9829  | 9817  |
| >CDKN2A-L9' FLDTLVVLHR, | 12   | >CDKN2A-L9' FLDTLVVPHR | 14    | 2     |
| >CDKN2A-L9' FLDTLVVL    | 9    | >CDKN2A-L9' FLDTLVVP   | 650   | 641   |
| >CDKN2A-L9' FLDTLVVLHR, | 7    | >CDKN2A-L9' FLDTLVVPHR | 12    | 5     |
| >CDKN2A-L9' FLDTLVVL    | 74   | >CDKN2A-L9' FLDTLVVP   | 8401  | 8327  |
| >CDKN2A-L9' FLDTLVVLHR, | 24   | >CDKN2A-L9' FLDTLVVPHR | 31    | 7     |
| >CDKN2A-L9' FLDTLVVL    | 37   | >CDKN2A-L9' FLDTLVVP   | 3838  | 3801  |
| >CDKN2A-L9' FLDTLVVLHR, | 68   | >CDKN2A-L9' FLDTLVVPHR | 244   | 176   |
| >CDKN2A-L9' FLDTLVVL    | 3    | >CDKN2A-L9' FLDTLVVP   | 975   | 972   |
| >CDKN2A-L9' FLDTLVVLHR, | 3    | >CDKN2A-L9' FLDTLVVPHR | 3     | 0     |
| >CDKN2A-L9' FLDTLVVL    | 4    | >CDKN2A-L9' FLDTLVVP   | 4676  | 4672  |
| >CDKN2A-L9' FLDTLVVLHR, | 9    | >CDKN2A-L9' FLDTLVVPHR | 11    | 2     |
| >CDKN2A-L9' FLDTLVVL    | 7    | >CDKN2A-L9' FLDTLVVP   | 3351  | 3344  |
| >CDKN2A-L9' FLDTLVVLHR, | 8    | >CDKN2A-L9' FLDTLVVPHR | 8     | 0     |
| >CDKN2A-L9' FLDTLVVL    | 8    | >CDKN2A-L9' FLDTLVVP   | 17750 | 17742 |
| >CDKN2A-L9' FLDTLVVLHR, | 19   | >CDKN2A-L9' FLDTLVVPHR | 24    | 5     |
| >CDKN2A-L9' FLDTLVVL    | 3    | >CDKN2A-L9' FLDTLVVP   | 3454  | 3451  |
| >CDKN2A-L9' FLDTLVVLHR, | 3    | >CDKN2A-L9' FLDTLVVPHR | 3     | 0     |
| >CDKN2A-L9' FLDTLVVLHR  | 354  | >CDKN2A-L9' FLDTLVVPHR | 619   | 265   |



|                        |     |                        |       |       |
|------------------------|-----|------------------------|-------|-------|
| >CDKN2A-L9' FLDTLVVL   | 52  | >CDKN2A-L9' FLDTLVVP   | 13552 | 13500 |
| >CDKN2A-L9' FLDTLVVLR  | 272 | >CDKN2A-L9' FLDTLVVPHR | 565   | 293   |
| >CDKN2A-L9' GFLDTLVVL  | 298 | >CDKN2A-L9' GFLDTLVVP  | 19520 | 19222 |
| >CDKN2A-L9' GFLDTLVVL  | 75  | >CDKN2A-L9' GFLDTLVVP  | 13672 | 13597 |
| >CDKN2A-L9' GFLDTLVVLH | 38  | >CDKN2A-L9' GFLDTLVVPH | 32    | 6     |
| >CDKN2A-L9' GFLDTLVVLH | 421 | >CDKN2A-L9' GFLDTLVVPH | 509   | 88    |
| >CDKN2A-L9' GFLDTLVVLH | 77  | >CDKN2A-L9' GFLDTLVVPH | 197   | 120   |
| >CDKN2A-M! MMMGSARV    | 587 | >CDKN2A-M! IMMGSARVA   | 250   | 337   |
| >CDKN2A-M! MMMGSARV    | 11  | >CDKN2A-M! IMMGSARV    | 17    | 6     |
| >CDKN2A-M! MMMGSARV    | 19  | >CDKN2A-M! IMMGSARVA   | 34    | 15    |
| >CDKN2A-M! MMMGSARV    | 3   | >CDKN2A-M! IMMGSARV    | 5     | 2     |
| >CDKN2A-M! MMMGSARV    | 102 | >CDKN2A-M! IMMGSARVA   | 537   | 435   |
| >CDKN2A-M! MMMGSARV    | 4   | >CDKN2A-M! IMMGSARVA   | 7     | 3     |
| >CDKN2A-M! MMMGSARV    | 2   | >CDKN2A-M! IMMGSARV    | 3     | 1     |
| >CDKN2A-M! MMMGSARV    | 11  | >CDKN2A-M! IMMGSARVA   | 31    | 20    |
| >CDKN2A-M! MMMGSARV    | 5   | >CDKN2A-M! IMMGSARVA   | 8     | 3     |
| >CDKN2A-M! MMMGSARV    | 8   | >CDKN2A-M! IMMGSARV    | 16    | 8     |
| >CDKN2A-M! MMMGSARV    | 437 | >CDKN2A-M! IMMGSARVA   | 1542  | 1105  |
| >CDKN2A-M! MMMGSARV    | 27  | >CDKN2A-M! IMMGSARVA   | 67    | 40    |
| >CDKN2A-M! MMMGSARV    | 2   | >CDKN2A-M! IMMGSARV    | 2     | 0     |
| >CDKN2A-M! MMMGSARV    | 29  | >CDKN2A-M! IMMGSARVA   | 64    | 35    |
| >CDKN2A-M! MMMGSARV    | 3   | >CDKN2A-M! IMMGSARVA   | 5     | 2     |
| >CDKN2A-M! MMMGSARV    | 3   | >CDKN2A-M! IMMGSARV    | 5     | 2     |
| >CDKN2A-M! MMMGSARV    | 281 | >CDKN2A-M! IMMGSARVA   | 924   | 643   |
| >CDKN2A-M! MMMGSARV    | 9   | >CDKN2A-M! IMMGSARVA   | 16    | 7     |
| >CDKN2A-M! MMMGSARV    | 8   | >CDKN2A-M! IMMGSARV    | 10    | 2     |
| >CDKN2A-M! MMMGSARV    | 35  | >CDKN2A-M! IMMGSARVA   | 63    | 28    |
| >CDKN2A-M! MMMGSARV    | 2   | >CDKN2A-M! IMMGSARV    | 2     | 0     |
| >CDKN2A-M! MMMGSARV    | 91  | >CDKN2A-M! IMMGSARVA   | 126   | 35    |
| >CDKN2A-M! MMMGSARV    | 4   | >CDKN2A-M! IMMGSARVA   | 5     | 1     |
| >CDKN2A-M! MMMGSARV    | 2   | >CDKN2A-M! IMMGSARV    | 2     | 0     |
| >CDKN2A-M! MMMGSARV    | 21  | >CDKN2A-M! IMMGSARVA   | 76    | 55    |
| >CDKN2A-M! MMMGSARV    | 3   | >CDKN2A-M! IMMGSARVA   | 4     | 1     |
| >CDKN2A-M! MMMGSARV    | 179 | >CDKN2A-M! IMMGSARVA   | 333   | 154   |
| >CDKN2A-M! MMMGSARV    | 29  | >CDKN2A-M! IMMGSARV    | 997   | 968   |
| >CDKN2A-M! MMMGSARV    | 235 | >CDKN2A-M! IMMGSARVA   | 4542  | 4307  |
| >CDKN2A-M! MMMGSARV    | 51  | >CDKN2A-M! IMMGSARV    | 1076  | 1025  |
| >CDKN2A-M! MMMGSARV    | 188 | >CDKN2A-M! IMMGSARVA   | 1052  | 864   |
| >CDKN2A-M! MMMGSARV    | 301 | >CDKN2A-M! IMMGSARV    | 506   | 205   |
| >CDKN2A-M! MMMGSARV    | 191 | >CDKN2A-M! IMMGSARVA   | 306   | 115   |
| >CDKN2A-M! MMMGSARV    | 84  | >CDKN2A-M! IMMGSARVA   | 124   | 40    |
| >CDKN2A-M! MMMGSARV    | 237 | >CDKN2A-M! IMMGSARV    | 323   | 86    |
| >CDKN2A-M! MMMGSARV    | 342 | >CDKN2A-M! IMMGSARVA   | 433   | 91    |

|                       |      |                       |      |      |
|-----------------------|------|-----------------------|------|------|
| >CDKN2A-M! MMMGSARV   | 31   | >CDKN2A-M! IMMGSARVA  | 38   | 7    |
| >CDKN2A-M! MMMGSARV   | 55   | >CDKN2A-M! IMMGSARVA  | 67   | 12   |
| >CDKN2A-M! MMMGSARV   | 465  | >CDKN2A-M! IMMGSARV   | 6124 | 5659 |
| >CDKN2A-M! MMMGSARV   | 18   | >CDKN2A-M! IMMGSARVA  | 179  | 161  |
| >CDKN2A-M! MMMGSARV   | 185  | >CDKN2A-M! IMMGSARVA  | 972  | 787  |
| >CDKN2A-M! VMMMGSAR   | 182  | >CDKN2A-M! VIMMGSARV  | 564  | 382  |
| >CDKN2A-M! VMMMGSAR   | 11   | >CDKN2A-M! VIMMGSARV  | 42   | 31   |
| >CDKN2A-M! VMMMGSAR   | 9    | >CDKN2A-M! VIMMGSARV  | 60   | 51   |
| >CDKN2A-M! VMMMGSAR   | 425  | >CDKN2A-M! VIMMGSARV  | 2168 | 1743 |
| >CDKN2A-M! VMMMGSAR   | 3    | >CDKN2A-M! VIMMGSARV  | 7    | 4    |
| >CDKN2A-M! VMMMGSAR   | 226  | >CDKN2A-M! VIMMGSARV  | 995  | 769  |
| >CDKN2A-M! VMMMGSAR   | 19   | >CDKN2A-M! VIMMGSARV  | 24   | 5    |
| >CDKN2A-M! VMMMGSAR   | 2    | >CDKN2A-M! VIMMGSARV  | 11   | 9    |
| >CDKN2A-M! VMMMGSAR   | 55   | >CDKN2A-M! VIMMGSARV  | 2560 | 2505 |
| >CDKN2A-M! VMMMGSAR   | 3    | >CDKN2A-M! VIMMGSARV  | 67   | 64   |
| >CDKN2A-M! VMMMGSAR   | 239  | >CDKN2A-M! VIMMGSARV  | 8997 | 8758 |
| >CDKN2A-M! VMMMGSAR   | 7    | >CDKN2A-M! VIMMGSARV  | 61   | 54   |
| >CDKN2A-M! VMMMGSAR   | 2    | >CDKN2A-M! VIMMGSARV  | 4    | 2    |
| >CDKN2A-M! VMMMGSAR   | 95   | >CDKN2A-M! VIMMGSARV  | 2230 | 2135 |
| >CDKN2A-M! VMMMGSAR   | 2    | >CDKN2A-M! VIMMGSARV  | 3    | 1    |
| >CDKN2A-M! VMMMGSAR   | 54   | >CDKN2A-M! VIMMGSARV  | 1569 | 1515 |
| >CDKN2A-M! VMMMGSAR   | 212  | >CDKN2A-M! VIMMGSAR   | 794  | 582  |
| >CDKN2A-M! VMMMGSAR   | 168  | >CDKN2A-M! VIMMGSAR   | 154  | 14   |
| >CDKN2A-M! VMMMGSAR   | 20   | >CDKN2A-M! VIMMGSAR   | 74   | 54   |
| >CDKN2A-M! VMMMGSAR   | 120  | >CDKN2A-M! VIMMGSAR   | 220  | 100  |
| >CDKN2A-M! VMMMGSAR   | 462  | >CDKN2A-M! VIMMGSAR   | 202  | 260  |
| >CDKN2A-M! VMMMGSAR   | 1971 | >CDKN2A-M! VIMMGSARV  | 194  | 1777 |
| >CDKN2A-M! VMMMGSAR   | 175  | >CDKN2A-M! VIMMGSARV  | 1619 | 1444 |
| >CDKN2A-M! VMMMGSAR   | 183  | >CDKN2A-M! VIMMGSARV  | 1687 | 1504 |
| >CDKN2A-M! VMMMGSAR   | 146  | >CDKN2A-M! VIMMGSAR   | 6182 | 6036 |
| >CDKN2A-M! VMMMGSAR   | 420  | >CDKN2A-M! VIMMGSARV  | 9231 | 8811 |
| >CDKN2A-M! NSYGRRPIQV | 264  | >CDKN2A-M! NSYGRRPIQV | 1107 | 843  |
| >CDKN2A-M! NSYGRRPIQV | 485  | >CDKN2A-M! NSYGRRPIQV | 8069 | 7584 |
| >CDKN2A-M! NSYGRRPIQV | 132  | >CDKN2A-M! NSYGRRPIQV | 1180 | 1048 |
| >CDKN2A-M! NSYGRRPIQV | 251  | >CDKN2A-M! NSYGRRPIQV | 2637 | 2386 |
| >CDKN2A-M! NSYGRRPIQV | 1074 | >CDKN2A-M! NSYGRRPIQV | 41   | 1033 |
| >CDKN2A-M! QVMMMGSF   | 419  | >CDKN2A-M! QVIMMGSF   | 1396 | 977  |
| >CDKN2A-M! QVMMMGSF   | 298  | >CDKN2A-M! QVIMMGSF   | 675  | 377  |
| >CDKN2A-M! QVMMMGSF   | 61   | >CDKN2A-M! QVIMMGSF   | 189  | 128  |
| >CDKN2A-M! QVMMMGSF   | 313  | >CDKN2A-M! QVIMMGSF   | 587  | 274  |
| >CDKN2A-M! QVMMMGSF   | 248  | >CDKN2A-M! QVIMMGSF   | 7447 | 7199 |
| >CDKN2A-M! QVMMMGSF   | 41   | >CDKN2A-M! QVIMMGSF   | 78   | 37   |
| >CDKN2A-M! QVMMMGSF   | 114  | >CDKN2A-M! QVIMMGSF   | 492  | 378  |

|                      |     |                       |      |      |
|----------------------|-----|-----------------------|------|------|
| >CDKN2A-M! QVMMMGS/  | 55  | >CDKN2A-M! QVIMMGS/   | 115  | 60   |
| >CDKN2A-M! QVMMMGS/  | 218 | >CDKN2A-M! QVIMMGS/   | 437  | 219  |
| >CDKN2A-M! QVMMMGS/  | 20  | >CDKN2A-M! QVIMMGS/   | 19   | 1    |
| >CDKN2A-M! QVMMMGS/  | 167 | >CDKN2A-M! QVIMMGS/   | 313  | 146  |
| >CDKN2A-M! QVMMMGS/  | 215 | >CDKN2A-M! QVIMMGS/   | 302  | 87   |
| >CDKN2A-M! QVMMMGS/  | 78  | >CDKN2A-M! QVIMMGS/   | 229  | 151  |
| >CDKN2A-M! IQVMMMGS/ | 167 | >CDKN2A-M! IQVIMMGS/  | 278  | 111  |
| >CDKN2A-M! IQVMMMGS/ | 42  | >CDKN2A-M! IQVIMMGS/  | 69   | 27   |
| >CDKN2A-M! IQVMMMGS/ | 87  | >CDKN2A-M! IQVIMMGS/  | 124  | 37   |
| >CDKN2A-M! IQVMMMGS/ | 16  | >CDKN2A-M! IQVIMMGS/  | 19   | 3    |
| >CDKN2A-M! IQVMMMGS/ | 120 | >CDKN2A-M! IQVIMMGS/  | 148  | 28   |
| >CDKN2A-M! IQVMMMGS/ | 240 | >CDKN2A-M! IQVIMMGS/  | 396  | 156  |
| >CDKN2A-M! IQVMMMGS/ | 117 | >CDKN2A-M! IQVIMMGS/  | 121  | 4    |
| >CDKN2A-M! IQVMMMGS/ | 187 | >CDKN2A-M! IQVIMMGS/  | 387  | 200  |
| >CDKN2A-M! RPIQVMMM  | 109 | >CDKN2A-M! RPIQVIMM   | 34   | 75   |
| >CDKN2A-M! RPIQVMMM  | 18  | >CDKN2A-M! RPIQVIMM   | 25   | 7    |
| >CDKN2A-M! RPIQVMMM  | 23  | >CDKN2A-M! RPIQVIMM   | 41   | 18   |
| >CDKN2A-M! RPIQVMMM  | 109 | >CDKN2A-M! RPIQVIMM   | 56   | 53   |
| >CDKN2A-M! RPIQVMMM  | 288 | >CDKN2A-M! RPIQVIMM   | 197  | 91   |
| >CDKN2A-M! RPIQVMMM  | 134 | >CDKN2A-M! RPIQVIMM   | 151  | 17   |
| >CDKN2A-M! RPIQVMMM  | 391 | >CDKN2A-M! RPIQVIMM   | 214  | 177  |
| >CDKN2A-M! RRPIQVMMM | 439 | >CDKN2A-M! RRPIQVIMM  | 970  | 531  |
| >CDKN2A-M! RRPIQVMM  | 120 | >CDKN2A-M! RRPIQVIM   | 183  | 63   |
| >CDKN2A-M! RRPIQVMMM | 184 | >CDKN2A-M! RRPIQVIMM  | 106  | 78   |
| >CDKN2A-M! RRPIQVMM  | 131 | >CDKN2A-M! RRPIQVIM   | 316  | 185  |
| >CDKN2A-M! RRPIQVMMM | 163 | >CDKN2A-M! RRPIQVIMM  | 129  | 34   |
| >CDKN2A-M! RRPIQVMMM | 125 | >CDKN2A-M! RRPIQVIMM  | 117  | 8    |
| >CDKN2A-M! RRPIQVMM  | 319 | >CDKN2A-M! RRPIQVIM   | 529  | 210  |
| >CDKN2A-M! RRPIQVMMM | 74  | >CDKN2A-M! RRPIQVIMM  | 54   | 20   |
| >CDKN2A-M! RRPIQVMMM | 238 | >CDKN2A-M! RRPIQVIMM  | 213  | 25   |
| >CDKN2A-M! GRRPIQVM  | 317 | >CDKN2A-M! GRRPIQVI   | 789  | 472  |
| >CDKN2A-M! GRRPIQVM  | 485 | >CDKN2A-M! GRRPIQVIM  | 392  | 93   |
| >CDKN2A-M! GRRPIQVM  | 365 | >CDKN2A-M! GRRPIQVIMM | 591  | 226  |
| >CDKN2A-M! GRRPIQVM  | 314 | >CDKN2A-M! GRRPIQVI   | 618  | 304  |
| >CDKN2A-M! GRRPIQVM  | 115 | >CDKN2A-M! GRRPIQVIM  | 253  | 138  |
| >CDKN2A-M! GRRPIQVM  | 203 | >CDKN2A-M! GRRPIQVIMM | 145  | 58   |
| >CDKN2A-M! GRRPIQVM  | 250 | >CDKN2A-M! GRRPIQVIM  | 528  | 278  |
| >CDKN2A-M! GRRPIQVM  | 213 | >CDKN2A-M! GRRPIQVIM  | 238  | 25   |
| >CDKN2A-M! GRRPIQVM  | 455 | >CDKN2A-M! GRRPIQVIMM | 582  | 127  |
| >CDKN2A-M! GRRPIQVM  | 34  | >CDKN2A-M! GRRPIQVIM  | 49   | 15   |
| >CDKN2A-M! GRRPIQVM  | 222 | >CDKN2A-M! GRRPIQVIMM | 287  | 65   |
| >CDKN2A-M! YGRRPIQVM | 395 | >CDKN2A-M! YGRRPIQVI  | 3138 | 2743 |
| >CDKN2A-M! YGRRPIQVM | 343 | >CDKN2A-M! YGRRPIQVI  | 4789 | 4446 |

|                       |      |                        |       |       |
|-----------------------|------|------------------------|-------|-------|
| >CDKN2A-M! YGRRPIQVM  | 262  | >CDKN2A-M! YGRRPIQVI   | 784   | 522   |
| >CDKN2A-M! YGRRPIQVMI | 597  | >CDKN2A-M! YGRRPIQVIM  | 391   | 206   |
| >CDKN2A-M! YGRRPIQVMI | 425  | >CDKN2A-M! YGRRPIQVIM  | 820   | 395   |
| >CDKN2A-M! YGRRPIQVM  | 44   | >CDKN2A-M! YGRRPIQVI   | 670   | 626   |
| >CDKN2A-M! YGRRPIQVMI | 45   | >CDKN2A-M! YGRRPIQVIM  | 52    | 7     |
| >CDKN2A-M! YGRRPIQVMI | 37   | >CDKN2A-M! YGRRPIQVIM  | 68    | 31    |
| >CDKN2A-M! SYGRRPIQVN | 1035 | >CDKN2A-M! SYGRRPIQVI  | 135   | 900   |
| >CDKN2A-M! SYGRRPIQVN | 136  | >CDKN2A-M! SYGRRPIQVI  | 16    | 120   |
| >CDKN2A-M! SYGRRPIQVN | 74   | >CDKN2A-M! SYGRRPIQVIN | 306   | 232   |
| >CDKN2A-M! MMMGSARV   | 11   | >CDKN2A-M! KMMGSARV    | 14    | 3     |
| >CDKN2A-M! MMMGSARV   | 19   | >CDKN2A-M! KMMGSARV/   | 26    | 7     |
| >CDKN2A-M! MMMGSARV   | 3    | >CDKN2A-M! KMMGSARV    | 6     | 3     |
| >CDKN2A-M! MMMGSARV   | 102  | >CDKN2A-M! KMMGSARV/   | 593   | 491   |
| >CDKN2A-M! MMMGSARV   | 4    | >CDKN2A-M! KMMGSARV/   | 7     | 3     |
| >CDKN2A-M! MMMGSARV   | 2    | >CDKN2A-M! KMMGSARV    | 3     | 1     |
| >CDKN2A-M! MMMGSARV   | 11   | >CDKN2A-M! KMMGSARV/   | 35    | 24    |
| >CDKN2A-M! MMMGSARV   | 5    | >CDKN2A-M! KMMGSARV/   | 8     | 3     |
| >CDKN2A-M! MMMGSARV   | 8    | >CDKN2A-M! KMMGSARV    | 11    | 3     |
| >CDKN2A-M! MMMGSARV   | 437  | >CDKN2A-M! KMMGSARV/   | 895   | 458   |
| >CDKN2A-M! MMMGSARV   | 27   | >CDKN2A-M! KMMGSARV/   | 36    | 9     |
| >CDKN2A-M! MMMGSARV   | 2    | >CDKN2A-M! KMMGSARV    | 2     | 0     |
| >CDKN2A-M! MMMGSARV   | 29   | >CDKN2A-M! KMMGSARV/   | 60    | 31    |
| >CDKN2A-M! MMMGSARV   | 3    | >CDKN2A-M! KMMGSARV/   | 5     | 2     |
| >CDKN2A-M! MMMGSARV   | 3    | >CDKN2A-M! KMMGSARV    | 3     | 0     |
| >CDKN2A-M! MMMGSARV   | 281  | >CDKN2A-M! KMMGSARV/   | 305   | 24    |
| >CDKN2A-M! MMMGSARV   | 9    | >CDKN2A-M! KMMGSARV/   | 8     | 1     |
| >CDKN2A-M! MMMGSARV   | 8    | >CDKN2A-M! KMMGSARV    | 8     | 0     |
| >CDKN2A-M! MMMGSARV   | 35   | >CDKN2A-M! KMMGSARV/   | 30    | 5     |
| >CDKN2A-M! MMMGSARV   | 2    | >CDKN2A-M! KMMGSARV    | 2     | 0     |
| >CDKN2A-M! MMMGSARV   | 91   | >CDKN2A-M! KMMGSARV/   | 266   | 175   |
| >CDKN2A-M! MMMGSARV   | 4    | >CDKN2A-M! KMMGSARV/   | 8     | 4     |
| >CDKN2A-M! MMMGSARV   | 2    | >CDKN2A-M! KMMGSARV    | 2     | 0     |
| >CDKN2A-M! MMMGSARV   | 21   | >CDKN2A-M! KMMGSARV/   | 215   | 194   |
| >CDKN2A-M! MMMGSARV   | 3    | >CDKN2A-M! KMMGSARV/   | 5     | 2     |
| >CDKN2A-M! MMMGSARV   | 1427 | >CDKN2A-M! KMMGSARV    | 176   | 1251  |
| >CDKN2A-M! MMMGSARV   | 2351 | >CDKN2A-M! KMMGSARV/   | 340   | 2011  |
| >CDKN2A-M! MMMGSARV   | 179  | >CDKN2A-M! KMMGSARV/   | 21    | 158   |
| >CDKN2A-M! MMMGSARV   | 29   | >CDKN2A-M! KMMGSARV    | 4242  | 4213  |
| >CDKN2A-M! MMMGSARV   | 235  | >CDKN2A-M! KMMGSARV/   | 10735 | 10500 |
| >CDKN2A-M! MMMGSARV   | 51   | >CDKN2A-M! KMMGSARV    | 1674  | 1623  |
| >CDKN2A-M! MMMGSARV   | 188  | >CDKN2A-M! KMMGSARV/   | 1384  | 1196  |
| >CDKN2A-M! MMMGSARV   | 301  | >CDKN2A-M! KMMGSARV    | 577   | 276   |
| >CDKN2A-M! MMMGSARV   | 191  | >CDKN2A-M! KMMGSARV/   | 363   | 172   |

|                       |       |                       |       |       |
|-----------------------|-------|-----------------------|-------|-------|
| >CDKN2A-M! MMMGSARV   | 84    | >CDKN2A-M! KMMGSARV/  | 140   | 56    |
| >CDKN2A-M! MMMGSARV   | 237   | >CDKN2A-M! KMMGSARV   | 309   | 72    |
| >CDKN2A-M! MMMGSARV   | 342   | >CDKN2A-M! KMMGSARV/  | 460   | 118   |
| >CDKN2A-M! MMMGSARV   | 31    | >CDKN2A-M! KMMGSARV/  | 42    | 11    |
| >CDKN2A-M! MMMGSARV   | 55    | >CDKN2A-M! KMMGSARV/  | 33    | 22    |
| >CDKN2A-M! MMMGSARV   | 465   | >CDKN2A-M! KMMGSARV   | 6064  | 5599  |
| >CDKN2A-M! MMMGSARV   | 18    | >CDKN2A-M! KMMGSARV/  | 201   | 183   |
| >CDKN2A-M! MMMGSARV   | 185   | >CDKN2A-M! KMMGSARV/  | 240   | 55    |
| >CDKN2A-M! MMMGSARV   | 1431  | >CDKN2A-M! KMMGSARV/  | 400   | 1031  |
| >CDKN2A-M! VMMMGSAR   | 182   | >CDKN2A-M! VKMMGSAR\  | 3066  | 2884  |
| >CDKN2A-M! VMMMGSAR   | 11    | >CDKN2A-M! VKMMGSAR\  | 15670 | 15659 |
| >CDKN2A-M! VMMMGSAR   | 9     | >CDKN2A-M! VKMMGSAR\  | 5560  | 5551  |
| >CDKN2A-M! VMMMGSAR   | 425   | >CDKN2A-M! VKMMGSAR\  | 19916 | 19491 |
| >CDKN2A-M! VMMMGSAR   | 3     | >CDKN2A-M! VKMMGSAR\  | 3709  | 3706  |
| >CDKN2A-M! VMMMGSAR   | 226   | >CDKN2A-M! VKMMGSAR\  | 18698 | 18472 |
| >CDKN2A-M! VMMMGSAR   | 19    | >CDKN2A-M! VKMMGSAR\  | 1592  | 1573  |
| >CDKN2A-M! VMMMGSAR   | 2     | >CDKN2A-M! VKMMGSAR\  | 2269  | 2267  |
| >CDKN2A-M! VMMMGSAR   | 55    | >CDKN2A-M! VKMMGSAR\  | 21765 | 21710 |
| >CDKN2A-M! VMMMGSAR   | 3     | >CDKN2A-M! VKMMGSAR\  | 10800 | 10797 |
| >CDKN2A-M! VMMMGSAR   | 239   | >CDKN2A-M! VKMMGSAR\  | 22028 | 21789 |
| >CDKN2A-M! VMMMGSAR   | 7     | >CDKN2A-M! VKMMGSAR\  | 9648  | 9641  |
| >CDKN2A-M! VMMMGSAR   | 2     | >CDKN2A-M! VKMMGSAR\  | 4070  | 4068  |
| >CDKN2A-M! VMMMGSAR   | 95    | >CDKN2A-M! VKMMGSAR\  | 17672 | 17577 |
| >CDKN2A-M! VMMMGSAR   | 2     | >CDKN2A-M! VKMMGSAR\  | 909   | 907   |
| >CDKN2A-M! VMMMGSAR   | 54    | >CDKN2A-M! VKMMGSAR\  | 29892 | 29838 |
| >CDKN2A-M! VMMMGSAR   | 212   | >CDKN2A-M! VKMMGSAR   | 20432 | 20220 |
| >CDKN2A-M! VMMMGSAR   | 168   | >CDKN2A-M! VKMMGSAR   | 21398 | 21230 |
| >CDKN2A-M! VMMMGSAR   | 20    | >CDKN2A-M! VKMMGSAR   | 6357  | 6337  |
| >CDKN2A-M! VMMMGSAR   | 120   | >CDKN2A-M! VKMMGSAR   | 6485  | 6365  |
| >CDKN2A-M! VMMMGSAR   | 462   | >CDKN2A-M! VKMMGSAR   | 5535  | 5073  |
| >CDKN2A-M! VMMMGSAR   | 175   | >CDKN2A-M! VKMMGSAR\  | 17163 | 16988 |
| >CDKN2A-M! VMMMGSAR   | 183   | >CDKN2A-M! VKMMGSAR\  | 15106 | 14923 |
| >CDKN2A-M! VMMMGSAR   | 146   | >CDKN2A-M! VKMMGSAR   | 69    | 77    |
| >CDKN2A-M! VMMMGSAR   | 420   | >CDKN2A-M! VKMMGSAR\  | 189   | 231   |
| >CDKN2A-M! VMMMGSAR   | 721   | >CDKN2A-M! VKMMGSAR\  | 331   | 390   |
| >CDKN2A-M! NSYGRRPIQV | 264   | >CDKN2A-M! NSYGRRPIQV | 22209 | 21945 |
| >CDKN2A-M! NSYGRRPIQV | 20788 | >CDKN2A-M! NSYGRRPIQV | 214   | 20574 |
| >CDKN2A-M! NSYGRRPIQV | 24031 | >CDKN2A-M! NSYGRRPIQV | 189   | 23842 |
| >CDKN2A-M! NSYGRRPIQV | 485   | >CDKN2A-M! NSYGRRPIQV | 24824 | 24339 |
| >CDKN2A-M! NSYGRRPIQV | 15312 | >CDKN2A-M! NSYGRRPIQV | 138   | 15174 |
| >CDKN2A-M! NSYGRRPIQV | 132   | >CDKN2A-M! NSYGRRPIQV | 19993 | 19861 |
| >CDKN2A-M! NSYGRRPIQV | 251   | >CDKN2A-M! NSYGRRPIQV | 16758 | 16507 |
| >CDKN2A-M! QVMMMGSAR  | 419   | >CDKN2A-M! QVKMMGSA   | 4591  | 4172  |

|                      |      |                      |       |       |
|----------------------|------|----------------------|-------|-------|
| >CDKN2A-M! QVMMMGS/  | 298  | >CDKN2A-M! QVKMMGSA  | 1253  | 955   |
| >CDKN2A-M! QVMMMGS/  | 61   | >CDKN2A-M! QVKMMGSA  | 582   | 521   |
| >CDKN2A-M! QVMMMGS/  | 313  | >CDKN2A-M! QVKMMGSA  | 7704  | 7391  |
| >CDKN2A-M! QVMMMGS/  | 248  | >CDKN2A-M! QVKMMGSA  | 16410 | 16162 |
| >CDKN2A-M! QVMMMGS/  | 41   | >CDKN2A-M! QVKMMGSA  | 349   | 308   |
| >CDKN2A-M! QVMMMGS/  | 114  | >CDKN2A-M! QVKMMGSA  | 3438  | 3324  |
| >CDKN2A-M! QVMMMGS/  | 3780 | >CDKN2A-M! QVKMMGSA  | 197   | 3583  |
| >CDKN2A-M! QVMMMGS/  | 4127 | >CDKN2A-M! QVKMMGSA  | 281   | 3846  |
| >CDKN2A-M! QVMMMGS/  | 4859 | >CDKN2A-M! QVKMMGSA  | 319   | 4540  |
| >CDKN2A-M! QVMMMGS/  | 55   | >CDKN2A-M! QVKMMGSA  | 34    | 21    |
| >CDKN2A-M! QVMMMGS/  | 218  | >CDKN2A-M! QVKMMGSA  | 181   | 37    |
| >CDKN2A-M! QVMMMGS/  | 20   | >CDKN2A-M! QVKMMGSA  | 92    | 72    |
| >CDKN2A-M! QVMMMGS/  | 167  | >CDKN2A-M! QVKMMGSA  | 6532  | 6365  |
| >CDKN2A-M! QVMMMGS/  | 215  | >CDKN2A-M! QVKMMGSA  | 2164  | 1949  |
| >CDKN2A-M! QVMMMGS/  | 78   | >CDKN2A-M! QVKMMGSA  | 3674  | 3596  |
| >CDKN2A-M! IQVMMMGS, | 598  | >CDKN2A-M! IQVKMMGSA | 480   | 118   |
| >CDKN2A-M! IQVMMMGS, | 167  | >CDKN2A-M! IQVKMMGSA | 228   | 61    |
| >CDKN2A-M! IQVMMMGS, | 42   | >CDKN2A-M! IQVKMMGSA | 51    | 9     |
| >CDKN2A-M! IQVMMMGS, | 87   | >CDKN2A-M! IQVKMMGSA | 115   | 28    |
| >CDKN2A-M! IQVMMMGS, | 16   | >CDKN2A-M! IQVKMMGSA | 18    | 2     |
| >CDKN2A-M! IQVMMMGS, | 120  | >CDKN2A-M! IQVKMMGSA | 126   | 6     |
| >CDKN2A-M! IQVMMMGS, | 240  | >CDKN2A-M! IQVKMMGSA | 842   | 602   |
| >CDKN2A-M! IQVMMMGS, | 117  | >CDKN2A-M! IQVKMMGSA | 448   | 331   |
| >CDKN2A-M! IQVMMMGS, | 187  | >CDKN2A-M! IQVKMMGSA | 168   | 19    |
| >CDKN2A-M! IQVMMMGS, | 508  | >CDKN2A-M! IQVKMMGSA | 489   | 19    |
| >CDKN2A-M! RPIQVMMM  | 109  | >CDKN2A-M! RPIQVKMM  | 187   | 78    |
| >CDKN2A-M! RPIQVMMM  | 18   | >CDKN2A-M! RPIQVKMM  | 23    | 5     |
| >CDKN2A-M! RPIQVMMM  | 23   | >CDKN2A-M! RPIQVKMM  | 23    | 0     |
| >CDKN2A-M! RPIQVMMM  | 109  | >CDKN2A-M! RPIQVKMM  | 299   | 190   |
| >CDKN2A-M! RPIQVMMM  | 288  | >CDKN2A-M! RPIQVKMM  | 742   | 454   |
| >CDKN2A-M! RPIQVMMM  | 134  | >CDKN2A-M! RPIQVKMM  | 195   | 61    |
| >CDKN2A-M! RPIQVMMM  | 391  | >CDKN2A-M! RPIQVKMM  | 560   | 169   |
| >CDKN2A-M! RRPIQVMMM | 439  | >CDKN2A-M! RRPIQVKMM | 835   | 396   |
| >CDKN2A-M! RRPIQVMM  | 120  | >CDKN2A-M! RRPIQVKM  | 75    | 45    |
| >CDKN2A-M! RRPIQVMMM | 184  | >CDKN2A-M! RRPIQVKMM | 130   | 54    |
| >CDKN2A-M! RRPIQVMM  | 131  | >CDKN2A-M! RRPIQVKM  | 189   | 58    |
| >CDKN2A-M! RRPIQVMMM | 163  | >CDKN2A-M! RRPIQVKMM | 319   | 156   |
| >CDKN2A-M! RRPIQVMMM | 125  | >CDKN2A-M! RRPIQVKMM | 112   | 13    |
| >CDKN2A-M! RRPIQVMM  | 319  | >CDKN2A-M! RRPIQVKM  | 136   | 183   |
| >CDKN2A-M! RRPIQVMMM | 74   | >CDKN2A-M! RRPIQVKMM | 144   | 70    |
| >CDKN2A-M! RRPIQVMMM | 238  | >CDKN2A-M! RRPIQVKMM | 317   | 79    |
| >CDKN2A-M! GRRPIQVM  | 8888 | >CDKN2A-M! GRRPIQVK  | 395   | 8493  |
| >CDKN2A-M! GRRPIQVM  | 317  | >CDKN2A-M! GRRPIQVK  | 3419  | 3102  |

|                       |      |                       |       |       |
|-----------------------|------|-----------------------|-------|-------|
| >CDKN2A-M! GRRPIQVMV  | 485  | >CDKN2A-M! GRRPIQVKM  | 869   | 384   |
| >CDKN2A-M! GRRPIQVMV  | 365  | >CDKN2A-M! GRRPIQVKMI | 622   | 257   |
| >CDKN2A-M! GRRPIQVM   | 314  | >CDKN2A-M! GRRPIQVK   | 375   | 61    |
| >CDKN2A-M! GRRPIQVMV  | 115  | >CDKN2A-M! GRRPIQVKM  | 71    | 44    |
| >CDKN2A-M! GRRPIQVMV  | 203  | >CDKN2A-M! GRRPIQVKMI | 212   | 9     |
| >CDKN2A-M! GRRPIQVMV  | 250  | >CDKN2A-M! GRRPIQVKM  | 1142  | 892   |
| >CDKN2A-M! GRRPIQVMV  | 213  | >CDKN2A-M! GRRPIQVKM  | 329   | 116   |
| >CDKN2A-M! GRRPIQVMV  | 455  | >CDKN2A-M! GRRPIQVKMI | 1151  | 696   |
| >CDKN2A-M! GRRPIQVMV  | 34   | >CDKN2A-M! GRRPIQVKM  | 69    | 35    |
| >CDKN2A-M! GRRPIQVMV  | 222  | >CDKN2A-M! GRRPIQVKMI | 641   | 419   |
| >CDKN2A-M! YGRRPIQVM  | 3226 | >CDKN2A-M! YGRRPIQVK  | 54    | 3172  |
| >CDKN2A-M! YGRRPIQVM  | 395  | >CDKN2A-M! YGRRPIQVK  | 23045 | 22650 |
| >CDKN2A-M! YGRRPIQVM  | 343  | >CDKN2A-M! YGRRPIQVK  | 18069 | 17726 |
| >CDKN2A-M! YGRRPIQVM  | 262  | >CDKN2A-M! YGRRPIQVK  | 5018  | 4756  |
| >CDKN2A-M! YGRRPIQVMI | 425  | >CDKN2A-M! YGRRPIQVKM | 730   | 305   |
| >CDKN2A-M! YGRRPIQVM  | 44   | >CDKN2A-M! YGRRPIQVK  | 8576  | 8532  |
| >CDKN2A-M! YGRRPIQVMI | 45   | >CDKN2A-M! YGRRPIQVKM | 57    | 12    |
| >CDKN2A-M! YGRRPIQVMI | 37   | >CDKN2A-M! YGRRPIQVKM | 64    | 27    |
| >CDKN2A-M! SYGRRPIQVM | 136  | >CDKN2A-M! SYGRRPIQVK | 1755  | 1619  |
| >CDKN2A-M! SYGRRPIQVM | 74   | >CDKN2A-M! SYGRRPIQVK | 131   | 57    |
| >CDKN2A-M! SYGRRPIQVM | 6900 | >CDKN2A-M! SYGRRPIQVK | 196   | 6704  |
| >CDKN2A-M! MMMGSARV   | 11   | >CDKN2A-M! LMMGSARV   | 17    | 6     |
| >CDKN2A-M! MMMGSARV   | 19   | >CDKN2A-M! LMMGSARV/  | 35    | 16    |
| >CDKN2A-M! MMMGSARV   | 3    | >CDKN2A-M! LMMGSARV   | 5     | 2     |
| >CDKN2A-M! MMMGSARV   | 102  | >CDKN2A-M! LMMGSARV/  | 402   | 300   |
| >CDKN2A-M! MMMGSARV   | 4    | >CDKN2A-M! LMMGSARV/  | 7     | 3     |
| >CDKN2A-M! MMMGSARV   | 2    | >CDKN2A-M! LMMGSARV   | 3     | 1     |
| >CDKN2A-M! MMMGSARV   | 11   | >CDKN2A-M! LMMGSARV/  | 27    | 16    |
| >CDKN2A-M! MMMGSARV   | 5    | >CDKN2A-M! LMMGSARV/  | 8     | 3     |
| >CDKN2A-M! MMMGSARV   | 8    | >CDKN2A-M! LMMGSARV   | 13    | 5     |
| >CDKN2A-M! MMMGSARV   | 437  | >CDKN2A-M! LMMGSARV/  | 1379  | 942   |
| >CDKN2A-M! MMMGSARV   | 27   | >CDKN2A-M! LMMGSARV/  | 57    | 30    |
| >CDKN2A-M! MMMGSARV   | 2    | >CDKN2A-M! LMMGSARV   | 2     | 0     |
| >CDKN2A-M! MMMGSARV   | 29   | >CDKN2A-M! LMMGSARV/  | 61    | 32    |
| >CDKN2A-M! MMMGSARV   | 3    | >CDKN2A-M! LMMGSARV/  | 5     | 2     |
| >CDKN2A-M! MMMGSARV   | 3    | >CDKN2A-M! LMMGSARV   | 4     | 1     |
| >CDKN2A-M! MMMGSARV   | 281  | >CDKN2A-M! LMMGSARV/  | 521   | 240   |
| >CDKN2A-M! MMMGSARV   | 9    | >CDKN2A-M! LMMGSARV/  | 11    | 2     |
| >CDKN2A-M! MMMGSARV   | 8    | >CDKN2A-M! LMMGSARV   | 9     | 1     |
| >CDKN2A-M! MMMGSARV   | 35   | >CDKN2A-M! LMMGSARV/  | 52    | 17    |
| >CDKN2A-M! MMMGSARV   | 2    | >CDKN2A-M! LMMGSARV   | 2     | 0     |
| >CDKN2A-M! MMMGSARV   | 91   | >CDKN2A-M! LMMGSARV/  | 142   | 51    |
| >CDKN2A-M! MMMGSARV   | 4    | >CDKN2A-M! LMMGSARV/  | 5     | 1     |

|                     |     |                      |      |      |
|---------------------|-----|----------------------|------|------|
| >CDKN2A-M! MMMGSARV | 2   | >CDKN2A-M! LMMGSARV  | 2    | 0    |
| >CDKN2A-M! MMMGSARV | 21  | >CDKN2A-M! LMMGSARV/ | 34   | 13   |
| >CDKN2A-M! MMMGSARV | 3   | >CDKN2A-M! LMMGSARV/ | 3    | 0    |
| >CDKN2A-M! MMMGSARV | 179 | >CDKN2A-M! LMMGSARV/ | 943  | 764  |
| >CDKN2A-M! MMMGSARV | 29  | >CDKN2A-M! LMMGSARV  | 696  | 667  |
| >CDKN2A-M! MMMGSARV | 235 | >CDKN2A-M! LMMGSARV/ | 3619 | 3384 |
| >CDKN2A-M! MMMGSARV | 51  | >CDKN2A-M! LMMGSARV  | 458  | 407  |
| >CDKN2A-M! MMMGSARV | 188 | >CDKN2A-M! LMMGSARV/ | 478  | 290  |
| >CDKN2A-M! MMMGSARV | 301 | >CDKN2A-M! LMMGSARV  | 242  | 59   |
| >CDKN2A-M! MMMGSARV | 191 | >CDKN2A-M! LMMGSARV/ | 149  | 42   |
| >CDKN2A-M! MMMGSARV | 84  | >CDKN2A-M! LMMGSARV/ | 73   | 11   |
| >CDKN2A-M! MMMGSARV | 237 | >CDKN2A-M! LMMGSARV  | 419  | 182  |
| >CDKN2A-M! MMMGSARV | 342 | >CDKN2A-M! LMMGSARV/ | 599  | 257  |
| >CDKN2A-M! MMMGSARV | 31  | >CDKN2A-M! LMMGSARV/ | 49   | 18   |
| >CDKN2A-M! MMMGSARV | 55  | >CDKN2A-M! LMMGSARV/ | 129  | 74   |
| >CDKN2A-M! MMMGSARV | 465 | >CDKN2A-M! LMMGSARV  | 4940 | 4475 |
| >CDKN2A-M! MMMGSARV | 18  | >CDKN2A-M! LMMGSARV/ | 126  | 108  |
| >CDKN2A-M! MMMGSARV | 185 | >CDKN2A-M! LMMGSARV/ | 628  | 443  |
| >CDKN2A-M! VMMMGSAR | 182 | >CDKN2A-M! VLMMGSAR\ | 2057 | 1875 |
| >CDKN2A-M! VMMMGSAR | 11  | >CDKN2A-M! VLMMGSAR\ | 12   | 1    |
| >CDKN2A-M! VMMMGSAR | 9   | >CDKN2A-M! VLMMGSAR\ | 9    | 0    |
| >CDKN2A-M! VMMMGSAR | 425 | >CDKN2A-M! VLMMGSAR\ | 383  | 42   |
| >CDKN2A-M! VMMMGSAR | 3   | >CDKN2A-M! VLMMGSAR\ | 3    | 0    |
| >CDKN2A-M! VMMMGSAR | 226 | >CDKN2A-M! VLMMGSAR\ | 240  | 14   |
| >CDKN2A-M! VMMMGSAR | 19  | >CDKN2A-M! VLMMGSAR\ | 28   | 9    |
| >CDKN2A-M! VMMMGSAR | 2   | >CDKN2A-M! VLMMGSAR\ | 2    | 0    |
| >CDKN2A-M! VMMMGSAR | 55  | >CDKN2A-M! VLMMGSAR\ | 96   | 41   |
| >CDKN2A-M! VMMMGSAR | 3   | >CDKN2A-M! VLMMGSAR\ | 4    | 1    |
| >CDKN2A-M! VMMMGSAR | 239 | >CDKN2A-M! VLMMGSAR\ | 374  | 135  |
| >CDKN2A-M! VMMMGSAR | 7   | >CDKN2A-M! VLMMGSAR\ | 6    | 1    |
| >CDKN2A-M! VMMMGSAR | 2   | >CDKN2A-M! VLMMGSAR\ | 2    | 0    |
| >CDKN2A-M! VMMMGSAR | 95  | >CDKN2A-M! VLMMGSAR\ | 130  | 35   |
| >CDKN2A-M! VMMMGSAR | 2   | >CDKN2A-M! VLMMGSAR\ | 2    | 0    |
| >CDKN2A-M! VMMMGSAR | 54  | >CDKN2A-M! VLMMGSAR\ | 31   | 23   |
| >CDKN2A-M! VMMMGSAR | 212 | >CDKN2A-M! VLMMGSAR  | 270  | 58   |
| >CDKN2A-M! VMMMGSAR | 168 | >CDKN2A-M! VLMMGSAR  | 578  | 410  |
| >CDKN2A-M! VMMMGSAR | 20  | >CDKN2A-M! VLMMGSAR  | 77   | 57   |
| >CDKN2A-M! VMMMGSAR | 120 | >CDKN2A-M! VLMMGSAR  | 217  | 97   |
| >CDKN2A-M! VMMMGSAR | 462 | >CDKN2A-M! VLMMGSAR  | 615  | 153  |
| >CDKN2A-M! VMMMGSAR | 175 | >CDKN2A-M! VLMMGSAR  | 585  | 410  |
| >CDKN2A-M! VMMMGSAR | 183 | >CDKN2A-M! VLMMGSAR  | 651  | 468  |
| >CDKN2A-M! VMMMGSAR | 146 | >CDKN2A-M! VLMMGSAR  | 2077 | 1931 |
| >CDKN2A-M! VMMMGSAR | 420 | >CDKN2A-M! VLMMGSAR\ | 3845 | 3425 |



|                       |     |                       |      |      |
|-----------------------|-----|-----------------------|------|------|
| >CDKN2A-M! NSYGRRPIQV | 264 | >CDKN2A-M! NSYGRRPIQV | 325  | 61   |
| >CDKN2A-M! NSYGRRPIQV | 485 | >CDKN2A-M! NSYGRRPIQV | 2820 | 2335 |
| >CDKN2A-M! NSYGRRPIQV | 132 | >CDKN2A-M! NSYGRRPIQV | 210  | 78   |
| >CDKN2A-M! NSYGRRPIQV | 251 | >CDKN2A-M! NSYGRRPIQV | 1507 | 1256 |
| >CDKN2A-M! QVMMMGS/   | 419 | >CDKN2A-M! QVLMMGSAI  | 1609 | 1190 |
| >CDKN2A-M! QVMMMGS/   | 298 | >CDKN2A-M! QVLMMGSA   | 2458 | 2160 |
| >CDKN2A-M! QVMMMGS/   | 61  | >CDKN2A-M! QVLMMGSAI  | 265  | 204  |
| >CDKN2A-M! QVMMMGS/   | 313 | >CDKN2A-M! QVLMMGSAI  | 435  | 122  |
| >CDKN2A-M! QVMMMGS/   | 731 | >CDKN2A-M! QVLMMGSAI  | 320  | 411  |
| >CDKN2A-M! QVMMMGS/   | 248 | >CDKN2A-M! QVLMMGSAI  | 633  | 385  |
| >CDKN2A-M! QVMMMGS/   | 41  | >CDKN2A-M! QVLMMGSAI  | 48   | 7    |
| >CDKN2A-M! QVMMMGS/   | 114 | >CDKN2A-M! QVLMMGSAI  | 625  | 511  |
| >CDKN2A-M! QVMMMGS/   | 55  | >CDKN2A-M! QVLMMGSAI  | 82   | 27   |
| >CDKN2A-M! QVMMMGS/   | 218 | >CDKN2A-M! QVLMMGSAI  | 298  | 80   |
| >CDKN2A-M! QVMMMGS/   | 20  | >CDKN2A-M! QVLMMGSAI  | 117  | 97   |
| >CDKN2A-M! QVMMMGS/   | 167 | >CDKN2A-M! QVLMMGSA   | 3478 | 3311 |
| >CDKN2A-M! QVMMMGS/   | 215 | >CDKN2A-M! QVLMMGSAI  | 2100 | 1885 |
| >CDKN2A-M! QVMMMGS/   | 78  | >CDKN2A-M! QVLMMGSAI  | 77   | 1    |
| >CDKN2A-M! IQVMMMGS,  | 167 | >CDKN2A-M! IQVLMMGSA  | 308  | 141  |
| >CDKN2A-M! IQVMMMGS,  | 42  | >CDKN2A-M! IQVLMMGSA  | 78   | 36   |
| >CDKN2A-M! IQVMMMGS,  | 87  | >CDKN2A-M! IQVLMMGSA  | 121  | 34   |
| >CDKN2A-M! IQVMMMGS,  | 16  | >CDKN2A-M! IQVLMMGSA  | 19   | 3    |
| >CDKN2A-M! IQVMMMGS,  | 120 | >CDKN2A-M! IQVLMMGSA  | 130  | 10   |
| >CDKN2A-M! IQVMMMGS,  | 240 | >CDKN2A-M! IQVLMMGSA  | 403  | 163  |
| >CDKN2A-M! IQVMMMGS,  | 117 | >CDKN2A-M! IQVLMMGSA  | 253  | 136  |
| >CDKN2A-M! IQVMMMGS,  | 187 | >CDKN2A-M! IQVLMMGSA  | 477  | 290  |
| >CDKN2A-M! RPIQVMMM   | 109 | >CDKN2A-M! RPIQVLMM   | 67   | 42   |
| >CDKN2A-M! RPIQVMMM   | 18  | >CDKN2A-M! RPIQVLMM   | 17   | 1    |
| >CDKN2A-M! RPIQVMMM   | 23  | >CDKN2A-M! RPIQVLMMG  | 33   | 10   |
| >CDKN2A-M! RPIQVMMM   | 109 | >CDKN2A-M! RPIQVLMM   | 78   | 31   |
| >CDKN2A-M! RPIQVMMM   | 288 | >CDKN2A-M! RPIQVLMMG  | 255  | 33   |
| >CDKN2A-M! RPIQVMMM   | 134 | >CDKN2A-M! RPIQVLMMG  | 95   | 39   |
| >CDKN2A-M! RPIQVMMM   | 391 | >CDKN2A-M! RPIQVLMM   | 473  | 82   |
| >CDKN2A-M! RRPIQVMMM  | 439 | >CDKN2A-M! RRPIQVLMM  | 746  | 307  |
| >CDKN2A-M! RRPIQVMM   | 120 | >CDKN2A-M! RRPIQVLM   | 84   | 36   |
| >CDKN2A-M! RRPIQVMMM  | 184 | >CDKN2A-M! RRPIQVLMM  | 88   | 96   |
| >CDKN2A-M! RRPIQVMM   | 131 | >CDKN2A-M! RRPIQVLM   | 104  | 27   |
| >CDKN2A-M! RRPIQVMMM  | 163 | >CDKN2A-M! RRPIQVLMM  | 79   | 84   |
| >CDKN2A-M! RRPIQVMMM  | 125 | >CDKN2A-M! RRPIQVLMM  | 91   | 34   |
| >CDKN2A-M! RRPIQVMM   | 319 | >CDKN2A-M! RRPIQVLM   | 270  | 49   |
| >CDKN2A-M! RRPIQVMMM  | 74  | >CDKN2A-M! RRPIQVLMM  | 34   | 40   |
| >CDKN2A-M! RRPIQVMMM  | 238 | >CDKN2A-M! RRPIQVLMM  | 154  | 84   |
| >CDKN2A-M! GRRPIQVM   | 317 | >CDKN2A-M! GRRPIQVL   | 521  | 204  |

|                       |      |                        |      |      |
|-----------------------|------|------------------------|------|------|
| >CDKN2A-M! GRRPIQVMV  | 485  | >CDKN2A-M! GRRPIQVLM   | 931  | 446  |
| >CDKN2A-M! GRRPIQVMV  | 365  | >CDKN2A-M! GRRPIQVLMV  | 621  | 256  |
| >CDKN2A-M! GRRPIQVM   | 314  | >CDKN2A-M! GRRPIQVL    | 481  | 167  |
| >CDKN2A-M! GRRPIQVMV  | 115  | >CDKN2A-M! GRRPIQVLM   | 93   | 22   |
| >CDKN2A-M! GRRPIQVMV  | 203  | >CDKN2A-M! GRRPIQVLMV  | 94   | 109  |
| >CDKN2A-M! GRRPIQVMV  | 250  | >CDKN2A-M! GRRPIQVLM   | 303  | 53   |
| >CDKN2A-M! GRRPIQVMV  | 213  | >CDKN2A-M! GRRPIQVLM   | 125  | 88   |
| >CDKN2A-M! GRRPIQVMV  | 455  | >CDKN2A-M! GRRPIQVLMV  | 296  | 159  |
| >CDKN2A-M! GRRPIQVMV  | 34   | >CDKN2A-M! GRRPIQVLM   | 23   | 11   |
| >CDKN2A-M! GRRPIQVMV  | 222  | >CDKN2A-M! GRRPIQVLMV  | 136  | 86   |
| >CDKN2A-M! YGRRPIQVM  | 395  | >CDKN2A-M! YGRRPIQVL   | 330  | 65   |
| >CDKN2A-M! YGRRPIQVM  | 343  | >CDKN2A-M! YGRRPIQVL   | 1976 | 1633 |
| >CDKN2A-M! YGRRPIQVM  | 262  | >CDKN2A-M! YGRRPIQVL   | 478  | 216  |
| >CDKN2A-M! YGRRPIQVMI | 425  | >CDKN2A-M! YGRRPIQVLM  | 697  | 272  |
| >CDKN2A-M! YGRRPIQVMI | 890  | >CDKN2A-M! YGRRPIQVLM  | 452  | 438  |
| >CDKN2A-M! YGRRPIQVM  | 44   | >CDKN2A-M! YGRRPIQVL   | 312  | 268  |
| >CDKN2A-M! YGRRPIQVMI | 45   | >CDKN2A-M! YGRRPIQVLM  | 49   | 4    |
| >CDKN2A-M! YGRRPIQVMI | 37   | >CDKN2A-M! YGRRPIQVLM  | 50   | 13   |
| >CDKN2A-M! SYGRRPIQVM | 1035 | >CDKN2A-M! SYGRRPIQVL  | 382  | 653  |
| >CDKN2A-M! SYGRRPIQVM | 559  | >CDKN2A-M! SYGRRPIQVLI | 305  | 254  |
| >CDKN2A-M! SYGRRPIQVM | 136  | >CDKN2A-M! SYGRRPIQVL  | 13   | 123  |
| >CDKN2A-M! SYGRRPIQVM | 74   | >CDKN2A-M! SYGRRPIQVLI | 205  | 131  |
| >CDKN2A-M! SYGRRPIQVM | 964  | >CDKN2A-M! SYGRRPIQVL  | 490  | 474  |
| >CDKN2A-M! SYGRRPIQVM | 1788 | >CDKN2A-M! SYGRRPIQVL  | 343  | 1445 |
| >CDKN2A-M! MMGSARVAI  | 177  | >CDKN2A-M! TMGSARVAE   | 853  | 676  |
| >CDKN2A-M! MMGSARVAI  | 143  | >CDKN2A-M! TMGSARVAE   | 1583 | 1440 |
| >CDKN2A-M! MMGSARVAI  | 24   | >CDKN2A-M! TMGSARVAE   | 69   | 45   |
| >CDKN2A-M! MMGSARVAI  | 8    | >CDKN2A-M! TMGSARVAE   | 59   | 51   |
| >CDKN2A-M! MMGSARVA   | 224  | >CDKN2A-M! TMGSARVA    | 2097 | 1873 |
| >CDKN2A-M! MMGSARVAI  | 52   | >CDKN2A-M! TMGSARVAE   | 93   | 41   |
| >CDKN2A-M! MMGSARVAI  | 173  | >CDKN2A-M! TMGSARVAE   | 1475 | 1302 |
| >CDKN2A-M! MMGSARVAI  | 436  | >CDKN2A-M! TMGSARVAE   | 3136 | 2700 |
| >CDKN2A-M! MMGSARVA   | 187  | >CDKN2A-M! TMGSARVA    | 2418 | 2231 |
| >CDKN2A-M! MMGSARVAI  | 11   | >CDKN2A-M! TMGSARVAE   | 80   | 69   |
| >CDKN2A-M! MMGSARVAI  | 24   | >CDKN2A-M! TMGSARVAE   | 231  | 207  |
| >CDKN2A-M! MMGSARVAI  | 42   | >CDKN2A-M! TMGSARVAE   | 217  | 175  |
| >CDKN2A-M! MMGSARVAI  | 190  | >CDKN2A-M! TMGSARVAE   | 1277 | 1087 |
| >CDKN2A-M! MMGSARVAI  | 46   | >CDKN2A-M! TMGSARVAE   | 194  | 148  |
| >CDKN2A-M! MMGSARVAI  | 81   | >CDKN2A-M! TMGSARVAE   | 358  | 277  |
| >CDKN2A-M! MMGSARVAI  | 33   | >CDKN2A-M! TMGSARVAE   | 197  | 164  |
| >CDKN2A-M! MMGSARVAI  | 112  | >CDKN2A-M! TMGSARVAE   | 1035 | 923  |
| >CDKN2A-M! MMGSARVA   | 95   | >CDKN2A-M! TMGSARVA    | 1089 | 994  |
| >CDKN2A-M! MMGSARVAI  | 3    | >CDKN2A-M! TMGSARVAE   | 10   | 7    |

|                     |      |                     |       |       |
|---------------------|------|---------------------|-------|-------|
| >CDKN2A-M!MMGSARVAI | 8    | >CDKN2A-M!TMGSARVAE | 56    | 48    |
| >CDKN2A-M!MMGSARVAI | 163  | >CDKN2A-M!TMGSARVAE | 736   | 573   |
| >CDKN2A-M!MMGSARVAI | 90   | >CDKN2A-M!TMGSARVAE | 941   | 851   |
| >CDKN2A-M!MMGSARVAI | 402  | >CDKN2A-M!TMGSARVAE | 2725  | 2323  |
| >CDKN2A-M!MMMGSARV  | 11   | >CDKN2A-M!MTMGSARV  | 70    | 59    |
| >CDKN2A-M!MMMGSARV  | 19   | >CDKN2A-M!MTMGSARV/ | 148   | 129   |
| >CDKN2A-M!MMMGSARV  | 3    | >CDKN2A-M!MTMGSARV  | 21    | 18    |
| >CDKN2A-M!MMMGSARV  | 102  | >CDKN2A-M!MTMGSARV/ | 3471  | 3369  |
| >CDKN2A-M!MMMGSARV  | 4    | >CDKN2A-M!MTMGSARV/ | 20    | 16    |
| >CDKN2A-M!MMMGSARV  | 2    | >CDKN2A-M!MTMGSARV  | 18    | 16    |
| >CDKN2A-M!MMMGSARV  | 11   | >CDKN2A-M!MTMGSARV/ | 797   | 786   |
| >CDKN2A-M!MMMGSARV  | 5    | >CDKN2A-M!MTMGSARV/ | 72    | 67    |
| >CDKN2A-M!MMMGSARV  | 8    | >CDKN2A-M!MTMGSARV  | 25    | 17    |
| >CDKN2A-M!MMMGSARV  | 437  | >CDKN2A-M!MTMGSARV/ | 1888  | 1451  |
| >CDKN2A-M!MMMGSARV  | 27   | >CDKN2A-M!MTMGSARV/ | 74    | 47    |
| >CDKN2A-M!MMMGSARV  | 2    | >CDKN2A-M!MTMGSARV  | 20    | 18    |
| >CDKN2A-M!MMMGSARV  | 29   | >CDKN2A-M!MTMGSARV/ | 4564  | 4535  |
| >CDKN2A-M!MMMGSARV  | 3    | >CDKN2A-M!MTMGSARV/ | 166   | 163   |
| >CDKN2A-M!MMMGSARV  | 3    | >CDKN2A-M!MTMGSARV  | 367   | 364   |
| >CDKN2A-M!MMMGSARV  | 281  | >CDKN2A-M!MTMGSARV/ | 14414 | 14133 |
| >CDKN2A-M!MMMGSARV  | 9    | >CDKN2A-M!MTMGSARV/ | 1824  | 1815  |
| >CDKN2A-M!MMMGSARV  | 8    | >CDKN2A-M!MTMGSARV  | 567   | 559   |
| >CDKN2A-M!MMMGSARV  | 35   | >CDKN2A-M!MTMGSARV/ | 4855  | 4820  |
| >CDKN2A-M!MMMGSARV  | 2    | >CDKN2A-M!MTMGSARV  | 96    | 94    |
| >CDKN2A-M!MMMGSARV  | 91   | >CDKN2A-M!MTMGSARV/ | 5853  | 5762  |
| >CDKN2A-M!MMMGSARV  | 4    | >CDKN2A-M!MTMGSARV/ | 915   | 911   |
| >CDKN2A-M!MMMGSARV  | 2    | >CDKN2A-M!MTMGSARV  | 11    | 9     |
| >CDKN2A-M!MMMGSARV  | 21   | >CDKN2A-M!MTMGSARV/ | 13895 | 13874 |
| >CDKN2A-M!MMMGSARV  | 3    | >CDKN2A-M!MTMGSARV/ | 215   | 212   |
| >CDKN2A-M!MMMGSARV  | 7545 | >CDKN2A-M!MTMGSARV/ | 243   | 7302  |
| >CDKN2A-M!MMMGSARV  | 179  | >CDKN2A-M!MTMGSARV/ | 105   | 74    |
| >CDKN2A-M!MMMGSARV  | 29   | >CDKN2A-M!MTMGSARV  | 5     | 24    |
| >CDKN2A-M!MMMGSARV  | 5198 | >CDKN2A-M!MTMGSARV/ | 54    | 5144  |
| >CDKN2A-M!MMMGSARV  | 235  | >CDKN2A-M!MTMGSARV/ | 9     | 226   |
| >CDKN2A-M!MMMGSARV  | 51   | >CDKN2A-M!MTMGSARV  | 9     | 42    |
| >CDKN2A-M!MMMGSARV  | 819  | >CDKN2A-M!MTMGSARV/ | 74    | 745   |
| >CDKN2A-M!MMMGSARV  | 188  | >CDKN2A-M!MTMGSARV/ | 1385  | 1197  |
| >CDKN2A-M!MMMGSARV  | 301  | >CDKN2A-M!MTMGSARV  | 3610  | 3309  |
| >CDKN2A-M!MMMGSARV  | 191  | >CDKN2A-M!MTMGSARV/ | 2978  | 2787  |
| >CDKN2A-M!MMMGSARV  | 84   | >CDKN2A-M!MTMGSARV/ | 859   | 775   |
| >CDKN2A-M!MMMGSARV  | 237  | >CDKN2A-M!MTMGSARV  | 3921  | 3684  |
| >CDKN2A-M!MMMGSARV  | 342  | >CDKN2A-M!MTMGSARV/ | 6254  | 5912  |
| >CDKN2A-M!MMMGSARV  | 31   | >CDKN2A-M!MTMGSARV/ | 619   | 588   |

|                       |       |                       |      |       |
|-----------------------|-------|-----------------------|------|-------|
| >CDKN2A-M! MMMGSARV   | 1155  | >CDKN2A-M! MTMGSARV   | 9    | 1146  |
| >CDKN2A-M! MMMGSARV   | 11134 | >CDKN2A-M! MTMGSARV/  | 148  | 10986 |
| >CDKN2A-M! MMMGSARV   | 55    | >CDKN2A-M! MTMGSARV/  | 3    | 52    |
| >CDKN2A-M! MMMGSARV   | 465   | >CDKN2A-M! MTMGSARV   | 6028 | 5563  |
| >CDKN2A-M! MMMGSARV   | 18    | >CDKN2A-M! MTMGSARV/  | 222  | 204   |
| >CDKN2A-M! MMMGSARV   | 185   | >CDKN2A-M! MTMGSARV/  | 4246 | 4061  |
| >CDKN2A-M! MMMGSARV   | 1431  | >CDKN2A-M! MTMGSARV/  | 254  | 1177  |
| >CDKN2A-M! MMMGSARV   | 12762 | >CDKN2A-M! MTMGSARV/  | 319  | 12443 |
| >CDKN2A-M! MMMGSARV   | 6830  | >CDKN2A-M! MTMGSARV/  | 101  | 6729  |
| >CDKN2A-M! MMMGSARV   | 11959 | >CDKN2A-M! MTMGSARV/  | 391  | 11568 |
| >CDKN2A-M! SYGRRPIQVM | 74    | >CDKN2A-M! SYGRRPIQVM | 1183 | 1109  |
| >CDKN2A-M! VMMMGSAR   | 182   | >CDKN2A-M! VMTMGSAR\  | 1085 | 903   |
| >CDKN2A-M! VMMMGSAR   | 11    | >CDKN2A-M! VMTMGSAR\  | 69   | 58    |
| >CDKN2A-M! VMMMGSAR   | 9     | >CDKN2A-M! VMTMGSAR\  | 76   | 67    |
| >CDKN2A-M! VMMMGSAR   | 425   | >CDKN2A-M! VMTMGSAR\  | 3749 | 3324  |
| >CDKN2A-M! VMMMGSAR   | 3     | >CDKN2A-M! VMTMGSAR\  | 8    | 5     |
| >CDKN2A-M! VMMMGSAR   | 226   | >CDKN2A-M! VMTMGSAR\  | 2055 | 1829  |
| >CDKN2A-M! VMMMGSAR   | 19    | >CDKN2A-M! VMTMGSAR\  | 121  | 102   |
| >CDKN2A-M! VMMMGSAR   | 2     | >CDKN2A-M! VMTMGSAR\  | 4    | 2     |
| >CDKN2A-M! VMMMGSAR   | 55    | >CDKN2A-M! VMTMGSAR\  | 402  | 347   |
| >CDKN2A-M! VMMMGSAR   | 3     | >CDKN2A-M! VMTMGSAR\  | 10   | 7     |
| >CDKN2A-M! VMMMGSAR   | 239   | >CDKN2A-M! VMTMGSAR\  | 2410 | 2171  |
| >CDKN2A-M! VMMMGSAR   | 7     | >CDKN2A-M! VMTMGSAR\  | 8    | 1     |
| >CDKN2A-M! VMMMGSAR   | 2     | >CDKN2A-M! VMTMGSAR\  | 5    | 3     |
| >CDKN2A-M! VMMMGSAR   | 95    | >CDKN2A-M! VMTMGSAR\  | 3885 | 3790  |
| >CDKN2A-M! VMMMGSAR   | 2     | >CDKN2A-M! VMTMGSAR\  | 2    | 0     |
| >CDKN2A-M! VMMMGSAR   | 54    | >CDKN2A-M! VMTMGSAR\  | 63   | 9     |
| >CDKN2A-M! VMMMGSAR   | 212   | >CDKN2A-M! VMTMGSAR   | 1963 | 1751  |
| >CDKN2A-M! VMMMGSAR   | 168   | >CDKN2A-M! VMTMGSAR   | 3487 | 3319  |
| >CDKN2A-M! VMMMGSAR   | 20    | >CDKN2A-M! VMTMGSAR   | 56   | 36    |
| >CDKN2A-M! VMMMGSAR   | 120   | >CDKN2A-M! VMTMGSAR   | 222  | 102   |
| >CDKN2A-M! VMMMGSAR   | 462   | >CDKN2A-M! VMTMGSAR   | 531  | 69    |
| >CDKN2A-M! VMMMGSAR   | 175   | >CDKN2A-M! VMTMGSAR\  | 3717 | 3542  |
| >CDKN2A-M! VMMMGSAR   | 183   | >CDKN2A-M! VMTMGSAR\  | 3159 | 2976  |
| >CDKN2A-M! VMMMGSAR   | 146   | >CDKN2A-M! VMTMGSAR   | 1299 | 1153  |
| >CDKN2A-M! VMMMGSAR   | 420   | >CDKN2A-M! VMTMGSAR\  | 2556 | 2136  |
| >CDKN2A-M! QVMMMGS/   | 419   | >CDKN2A-M! QVMTMGS/   | 374  | 45    |
| >CDKN2A-M! QVMMMGS/   | 298   | >CDKN2A-M! QVMTMGS/   | 276  | 22    |
| >CDKN2A-M! QVMMMGS/   | 61    | >CDKN2A-M! QVMTMGS/   | 53   | 8     |
| >CDKN2A-M! QVMMMGS/   | 313   | >CDKN2A-M! QVMTMGS/   | 407  | 94    |
| >CDKN2A-M! QVMMMGS/   | 248   | >CDKN2A-M! QVMTMGS/   | 183  | 65    |
| >CDKN2A-M! QVMMMGS/   | 41    | >CDKN2A-M! QVMTMGS/   | 58   | 17    |
| >CDKN2A-M! QVMMMGS/   | 114   | >CDKN2A-M! QVMTMGS/   | 154  | 40    |

|                       |     |                       |       |       |
|-----------------------|-----|-----------------------|-------|-------|
| >CDKN2A-M! QVMMMGS/   | 55  | >CDKN2A-M! QVMTMGSA   | 88    | 33    |
| >CDKN2A-M! QVMMMGS/   | 218 | >CDKN2A-M! QVMTMGSA   | 689   | 471   |
| >CDKN2A-M! QVMMMGS/   | 20  | >CDKN2A-M! QVMTMGSA   | 18    | 2     |
| >CDKN2A-M! QVMMMGS/   | 167 | >CDKN2A-M! QVMTMGSA   | 90    | 77    |
| >CDKN2A-M! QVMMMGS/   | 215 | >CDKN2A-M! QVMTMGSA   | 148   | 67    |
| >CDKN2A-M! QVMMMGS/   | 78  | >CDKN2A-M! QVMTMGSA   | 55    | 23    |
| >CDKN2A-M! IQVMMMGS.  | 167 | >CDKN2A-M! IQVMTMGSA  | 191   | 24    |
| >CDKN2A-M! IQVMMMGS.  | 42  | >CDKN2A-M! IQVMTMGSA  | 44    | 2     |
| >CDKN2A-M! IQVMMMGS.  | 87  | >CDKN2A-M! IQVMTMGSA  | 69    | 18    |
| >CDKN2A-M! IQVMMMGS.  | 16  | >CDKN2A-M! IQVMTMGSA  | 14    | 2     |
| >CDKN2A-M! IQVMMMGS.  | 587 | >CDKN2A-M! IQVMTMGSA  | 301   | 286   |
| >CDKN2A-M! IQVMMMGS.  | 120 | >CDKN2A-M! IQVMTMGSA  | 270   | 150   |
| >CDKN2A-M! IQVMMMGS.  | 240 | >CDKN2A-M! IQVMTMGSA  | 443   | 203   |
| >CDKN2A-M! IQVMMMGS.  | 117 | >CDKN2A-M! IQVMTMGSA  | 194   | 77    |
| >CDKN2A-M! IQVMMMGS.  | 691 | >CDKN2A-M! IQVMTMGSA  | 474   | 217   |
| >CDKN2A-M! IQVMMMGS.  | 187 | >CDKN2A-M! IQVMTMGSA  | 78    | 109   |
| >CDKN2A-M! IQVMMMGS.  | 508 | >CDKN2A-M! IQVMTMGSA  | 210   | 298   |
| >CDKN2A-M! RPIQVMMM   | 109 | >CDKN2A-M! RPIQVMTM   | 54    | 55    |
| >CDKN2A-M! RPIQVMMM   | 18  | >CDKN2A-M! RPIQVMTM   | 13    | 5     |
| >CDKN2A-M! RPIQVMMM   | 23  | >CDKN2A-M! RPIQVMTMG  | 20    | 3     |
| >CDKN2A-M! RPIQVMMM   | 109 | >CDKN2A-M! RPIQVMTM   | 29    | 80    |
| >CDKN2A-M! RPIQVMMM   | 288 | >CDKN2A-M! RPIQVMTMG  | 406   | 118   |
| >CDKN2A-M! RPIQVMMM   | 134 | >CDKN2A-M! RPIQVMTMG  | 181   | 47    |
| >CDKN2A-M! RPIQVMMM   | 391 | >CDKN2A-M! RPIQVMTM   | 62    | 329   |
| >CDKN2A-M! RRPIQVMMM  | 439 | >CDKN2A-M! RRPIQVMTM  | 266   | 173   |
| >CDKN2A-M! RRPIQVMM   | 120 | >CDKN2A-M! RRPIQVMT   | 1766  | 1646  |
| >CDKN2A-M! RRPIQVMMM  | 184 | >CDKN2A-M! RRPIQVMTM  | 209   | 25    |
| >CDKN2A-M! RRPIQVMM   | 131 | >CDKN2A-M! RRPIQVMT   | 450   | 319   |
| >CDKN2A-M! RRPIQVMMM  | 163 | >CDKN2A-M! RRPIQVMTM  | 121   | 42    |
| >CDKN2A-M! RRPIQVMMM  | 125 | >CDKN2A-M! RRPIQVMTM  | 139   | 14    |
| >CDKN2A-M! RRPIQVMM   | 319 | >CDKN2A-M! RRPIQVMT   | 2554  | 2235  |
| >CDKN2A-M! RRPIQVMMM  | 74  | >CDKN2A-M! RRPIQVMTM  | 80    | 6     |
| >CDKN2A-M! RRPIQVMMM  | 238 | >CDKN2A-M! RRPIQVMTM  | 327   | 89    |
| >CDKN2A-M! GRRPIQVMV  | 485 | >CDKN2A-M! GRRPIQVMT  | 7637  | 7152  |
| >CDKN2A-M! GRRPIQVMV  | 365 | >CDKN2A-M! GRRPIQVMTI | 241   | 124   |
| >CDKN2A-M! GRRPIQVMV  | 115 | >CDKN2A-M! GRRPIQVMT  | 2314  | 2199  |
| >CDKN2A-M! GRRPIQVMV  | 203 | >CDKN2A-M! GRRPIQVMTI | 194   | 9     |
| >CDKN2A-M! GRRPIQVMV  | 250 | >CDKN2A-M! GRRPIQVMT  | 13164 | 12914 |
| >CDKN2A-M! GRRPIQVMV  | 213 | >CDKN2A-M! GRRPIQVMT  | 645   | 432   |
| >CDKN2A-M! GRRPIQVMV  | 455 | >CDKN2A-M! GRRPIQVMTI | 401   | 54    |
| >CDKN2A-M! GRRPIQVMV  | 34  | >CDKN2A-M! GRRPIQVMT  | 960   | 926   |
| >CDKN2A-M! GRRPIQVMV  | 222 | >CDKN2A-M! GRRPIQVMTI | 225   | 3     |
| >CDKN2A-M! YGRRPIQVMI | 425 | >CDKN2A-M! YGRRPIQVM  | 222   | 203   |

|                       |     |                        |       |       |
|-----------------------|-----|------------------------|-------|-------|
| >CDKN2A-M! YGRRPIQVMI | 890 | >CDKN2A-M! YGRRPIQVM   | 269   | 621   |
| >CDKN2A-M! YGRRPIQVMI | 45  | >CDKN2A-M! YGRRPIQVM   | 8534  | 8489  |
| >CDKN2A-M! YGRRPIQVMI | 37  | >CDKN2A-M! YGRRPIQVM   | 46    | 9     |
| >CDKN2A-M! MEPSADWL   | 182 | >CDKN2A-M! IEPSADWL    | 347   | 165   |
| >CDKN2A-M! SMEPSADWL  | 188 | >CDKN2A-M! SIEPSADWLA  | 2443  | 2255  |
| >CDKN2A-M! SMEPSADWL  | 53  | >CDKN2A-M! SIEPSADWL   | 632   | 579   |
| >CDKN2A-M! SMEPSADWL  | 218 | >CDKN2A-M! SIEPSADWLA  | 1701  | 1483  |
| >CDKN2A-M! SMEPSADWL  | 464 | >CDKN2A-M! SIEPSADWLA  | 921   | 457   |
| >CDKN2A-M! SMEPSADWL  | 199 | >CDKN2A-M! SIEPSADWL   | 5442  | 5243  |
| >CDKN2A-M! SMEPSADWL  | 265 | >CDKN2A-M! SIEPSADWLA  | 5892  | 5627  |
| >CDKN2A-M! SMEPSADWL  | 443 | >CDKN2A-M! SIEPSADWL   | 13066 | 12623 |
| >CDKN2A-M! SMEPSADWL  | 257 | >CDKN2A-M! SIEPSADWLA  | 10215 | 9958  |
| >CDKN2A-M! SMEPSADWL  | 332 | >CDKN2A-M! SIEPSADWL   | 8095  | 7763  |
| >CDKN2A-M! SMEPSADWL  | 149 | >CDKN2A-M! SIEPSADWLA  | 4357  | 4208  |
| >CDKN2A-M! SMEPSADWL  | 17  | >CDKN2A-M! SIEPSADWL   | 329   | 312   |
| >CDKN2A-M! SMEPSADWL  | 24  | >CDKN2A-M! SIEPSADWLA  | 411   | 387   |
| >CDKN2A-M! SMEPSADW   | 98  | >CDKN2A-M! SIEPSADW    | 301   | 203   |
| >CDKN2A-M! SSMEPSADW  | 541 | >CDKN2A-M! SSIEPSADWL  | 363   | 178   |
| >CDKN2A-M! SSMEPSADW  | 205 | >CDKN2A-M! SSIEPSADWL  | 380   | 175   |
| >CDKN2A-M! SSMEPSADW  | 418 | >CDKN2A-M! SSIEPSADWL  | 67    | 351   |
| >CDKN2A-M! SSMEPSADW  | 286 | >CDKN2A-M! SSIEPSADWL  | 405   | 119   |
| >CDKN2A-M! SSMEPSADW  | 56  | >CDKN2A-M! SSIEPSADWL  | 97    | 41    |
| >CDKN2A-M! SSMEPSADW  | 295 | >CDKN2A-M! SSIEPSADWL  | 861   | 566   |
| >CDKN2A-M! SSMEPSADW  | 363 | >CDKN2A-M! SSIEPSADWL  | 1127  | 764   |
| >CDKN2A-M! SSMEPSADW  | 4   | >CDKN2A-M! SSIEPSADW   | 4     | 0     |
| >CDKN2A-M! SSMEPSADW  | 11  | >CDKN2A-M! SSIEPSADWL  | 13    | 2     |
| >CDKN2A-M! SSMEPSADW  | 56  | >CDKN2A-M! SSIEPSADW   | 68    | 12    |
| >CDKN2A-M! SSMEPSADW  | 27  | >CDKN2A-M! SSIEPSADW   | 31    | 4     |
| >CDKN2A-M! SSMEPSADW  | 192 | >CDKN2A-M! SSIEPSADWL  | 163   | 29    |
| >CDKN2A-M! SSMEPSADW  | 396 | >CDKN2A-M! SSIEPSADWL  | 621   | 225   |
| >CDKN2A-M! GSSMEPSAD\ | 13  | >CDKN2A-M! GSSIEPSADW  | 10    | 3     |
| >CDKN2A-M! GSSMEPSAD\ | 96  | >CDKN2A-M! GSSIEPSADW  | 60    | 36    |
| >CDKN2A-M! GSSMEPSAD\ | 179 | >CDKN2A-M! GSSIEPSADW  | 129   | 50    |
| >CDKN2A-M! GSSMEPSAD\ | 81  | >CDKN2A-M! GSSIEPSADW  | 110   | 29    |
| >CDKN2A-M! GSSMEPSAD\ | 152 | >CDKN2A-M! GSSIEPSADW  | 259   | 107   |
| >CDKN2A-M! AGSSMEPSAI | 465 | >CDKN2A-M! AGSSIEPSAD\ | 713   | 248   |
| >CDKN2A-M! EPAAGSSM   | 401 | >CDKN2A-M! EPAAGSSI    | 2358  | 1957  |
| >CDKN2A-M! EPAAGSSM   | 477 | >CDKN2A-M! EPAAGSSI    | 256   | 221   |
| >CDKN2A-M! EPAAGSSM   | 33  | >CDKN2A-M! EPAAGSSI    | 111   | 78    |
| >CDKN2A-M! EPAAGSSM   | 13  | >CDKN2A-M! EPAAGSSI    | 434   | 421   |
| >CDKN2A-M! EPAAGSSME  | 901 | >CDKN2A-M! EPAAGSSIE   | 485   | 416   |
| >CDKN2A-M! EPAAGSSMEI | 216 | >CDKN2A-M! EPAAGSSIEP  | 175   | 41    |
| >CDKN2A-M! EPAAGSSM   | 265 | >CDKN2A-M! EPAAGSSI    | 805   | 540   |

|                        |       |                        |      |       |
|------------------------|-------|------------------------|------|-------|
| >CDKN2A-M! EPAAGSSM    | 547   | >CDKN2A-M! EPAAGSSI    | 290  | 257   |
| >CDKN2A-M! MEPAAGSSM   | 700   | >CDKN2A-M! MEPAAGSSI   | 33   | 667   |
| >CDKN2A-M! MEPAAGSSM   | 367   | >CDKN2A-M! MEPAAGSSI   | 1740 | 1373  |
| >CDKN2A-M! MEPAAGSSM   | 488   | >CDKN2A-M! MEPAAGSSI   | 1185 | 697   |
| >CDKN2A-M! MEPAAGSSM   | 382   | >CDKN2A-M! MEPAAGSSI   | 3090 | 2708  |
| >CDKN2A-M! MEPAAGSSM   | 469   | >CDKN2A-M! MEPAAGSSI   | 460  | 9     |
| >CDKN2A-M! MEPAAGSSM   | 291   | >CDKN2A-M! MEPAAGSSI   | 24   | 267   |
| >CDKN2A-N3 NAPNSYGR    | 2987  | >CDKN2A-N3 KAPNSYGR    | 63   | 2924  |
| >CDKN2A-N3 NAPNSYGRR   | 3402  | >CDKN2A-N3 KAPNSYGRR   | 86   | 3316  |
| >CDKN2A-N3 NAPNSYGR    | 65    | >CDKN2A-N3 KAPNSYGR    | 1387 | 1322  |
| >CDKN2A-N3 NAPNSYGRR   | 147   | >CDKN2A-N3 KAPNSYGRR   | 2719 | 2572  |
| >CDKN2A-N3 NAPNSYGRRF  | 266   | >CDKN2A-N3 KAPNSYGRRF  | 9936 | 9670  |
| >CDKN2A-N3 NAPNSYGRRF  | 3065  | >CDKN2A-N3 KAPNSYGRRF  | 288  | 2777  |
| >CDKN2A-N3 NAPNSYGR    | 886   | >CDKN2A-N3 KAPNSYGR    | 109  | 777   |
| >CDKN2A-N3 NAPNSYGRRF  | 789   | >CDKN2A-N3 KAPNSYGRRF  | 146  | 643   |
| >CDKN2A-N3 PNAPNSYGR   | 320   | >CDKN2A-N3 PKAPNSYGR   | 451  | 131   |
| >CDKN2A-N3 RALLEAGALP  | 20126 | >CDKN2A-N3 RALLEAGALP  | 363  | 19763 |
| >CDKN2A-N3 RALLEAGALP  | 21986 | >CDKN2A-N3 RALLEAGALP  | 61   | 21925 |
| >CDKN2A-N3 RALLEAGALP  | 5220  | >CDKN2A-N3 RALLEAGALP  | 18   | 5202  |
| >CDKN2A-N3 LPNAPNSYGF  | 472   | >CDKN2A-N3 LPKAPNSYGR  | 767  | 295   |
| >CDKN2A-N3 LPNAPNSY    | 585   | >CDKN2A-N3 LPKAPNSY    | 312  | 273   |
| >CDKN2A-N3 LPNAPNSY    | 527   | >CDKN2A-N3 LPKAPNSY    | 409  | 118   |
| >CDKN2A-N3 LPNAPNSY    | 11    | >CDKN2A-N3 LPKAPNSY    | 31   | 20    |
| >CDKN2A-N3 LPNAPNSY    | 51    | >CDKN2A-N3 LPKAPNSY    | 661  | 610   |
| >CDKN2A-N3 LPNAPNSYG   | 457   | >CDKN2A-N3 LPKAPNSYG   | 1776 | 1319  |
| >CDKN2A-N3 LPNAPNSY    | 58    | >CDKN2A-N3 LPKAPNSY    | 393  | 335   |
| >CDKN2A-N3 ALPNAPNSY   | 181   | >CDKN2A-N3 ALPKAPNSY   | 339  | 158   |
| >CDKN2A-N3 ALPNAPNSY   | 281   | >CDKN2A-N3 ALPKAPNSY   | 338  | 57    |
| >CDKN2A-N3 ALPNAPNSY   | 358   | >CDKN2A-N3 ALPKAPNSY   | 487  | 129   |
| >CDKN2A-N3 ALPNAPNSY   | 305   | >CDKN2A-N3 ALPKAPNSY   | 369  | 64    |
| >CDKN2A-N3 ALPNAPNSY   | 904   | >CDKN2A-N3 ALPKAPNSY   | 451  | 453   |
| >CDKN2A-N3 GALPNAPNSY  | 280   | >CDKN2A-N3 GALPKAPNSY  | 851  | 571   |
| >CDKN2A-N3 GALPNAPNSY  | 19    | >CDKN2A-N3 GALPKAPNSY  | 19   | 0     |
| >CDKN2A-N3 AGALPNAPNSY | 136   | >CDKN2A-N3 AGALPKAPNSY | 200  | 64    |
| >CDKN2A-N3 EAGALPNA    | 470   | >CDKN2A-N3 EAGALPKA    | 1164 | 694   |
| >CDKN2A-N3 LEAGALPN    | 413   | >CDKN2A-N3 LEAGALPK    | 340  | 73    |
| >CDKN2A-N3 LEAGALPNA   | 569   | >CDKN2A-N3 LEAGALPKA   | 381  | 188   |
| >CDKN2A-N3 LEAGALPNA   | 80    | >CDKN2A-N3 LEAGALPKA   | 99   | 19    |
| >CDKN2A-N3 LEAGALPNA   | 312   | >CDKN2A-N3 LEAGALPKA   | 173  | 139   |
| >CDKN2A-N3 LLEAGALPNA  | 371   | >CDKN2A-N3 LLEAGALPKA  | 895  | 524   |
| >CDKN2A-N3 LLEAGALPNA  | 241   | >CDKN2A-N3 LLEAGALPKA  | 357  | 116   |
| >CDKN2A-N3 LLEAGALPNA  | 249   | >CDKN2A-N3 LLEAGALPKA  | 500  | 251   |
| >CDKN2A-N3 LLEAGALPNA  | 10    | >CDKN2A-N3 LLEAGALPKA  | 9    | 1     |

|                        |       |                        |      |       |
|------------------------|-------|------------------------|------|-------|
| >CDKN2A-N3 LLEAGALPN   | 19300 | >CDKN2A-N3 LLEAGALPK   | 125  | 19175 |
| >CDKN2A-N3 LLEAGALPN   | 25548 | >CDKN2A-N3 LLEAGALPK   | 266  | 25282 |
| >CDKN2A-N3 ALLEAGALPN  | 22    | >CDKN2A-N3 ALLEAGALPK  | 30   | 8     |
| >CDKN2A-N3 ALLEAGALPN  | 87    | >CDKN2A-N3 ALLEAGALPK  | 152  | 65    |
| >CDKN2A-N3 ALLEAGALPN  | 26    | >CDKN2A-N3 ALLEAGALPK  | 43   | 17    |
| >CDKN2A-N3 ALLEAGALPN  | 13    | >CDKN2A-N3 ALLEAGALPK  | 15   | 2     |
| >CDKN2A-N3 ALLEAGALPN  | 5     | >CDKN2A-N3 ALLEAGALPK  | 5    | 0     |
| >CDKN2A-N3 ALLEAGALPN  | 19    | >CDKN2A-N3 ALLEAGALPK  | 26   | 7     |
| >CDKN2A-N3 ALLEAGALPN  | 6     | >CDKN2A-N3 ALLEAGALPK  | 7    | 1     |
| >CDKN2A-N3 ALLEAGALPN  | 15    | >CDKN2A-N3 ALLEAGALPK  | 17   | 2     |
| >CDKN2A-N3 ALLEAGALPN  | 4     | >CDKN2A-N3 ALLEAGALPK  | 4    | 0     |
| >CDKN2A-N3 ALLEAGALPN  | 11768 | >CDKN2A-N3 ALLEAGALPK  | 15   | 11753 |
| >CDKN2A-N3 ALLEAGALPN  | 29216 | >CDKN2A-N3 ALLEAGALPK  | 25   | 29191 |
| >CDKN2A-N3 ALLEAGALPN  | 9329  | >CDKN2A-N3 ALLEAGALPK  | 42   | 9287  |
| >CDKN2A-N4 NSYGRRPIQV  | 264   | >CDKN2A-N4 DSYGRRPIQV  | 487  | 223   |
| >CDKN2A-N4 NSYGRRPIQV  | 485   | >CDKN2A-N4 DSYGRRPIQV  | 98   | 387   |
| >CDKN2A-N4 NSYGRRPIQV  | 408   | >CDKN2A-N4 DSYGRRPIQV  | 468  | 60    |
| >CDKN2A-N4 NSYGRRPIQV  | 132   | >CDKN2A-N4 DSYGRRPIQV  | 384  | 252   |
| >CDKN2A-N4 NSYGRRPIQV  | 495   | >CDKN2A-N4 DSYGRRPIQV  | 470  | 25    |
| >CDKN2A-N4 NSYGRRPIQV  | 251   | >CDKN2A-N4 DSYGRRPIQV  | 1063 | 812   |
| >CDKN2A-N4 NSYGRRPI    | 104   | >CDKN2A-N4 DSYGRRPI    | 528  | 424   |
| >CDKN2A-N4 LEAGALPNAF  | 721   | >CDKN2A-N4 LEAGALPNAF  | 452  | 269   |
| >CDKN2A-N4 APNSYGRRPI  | 20    | >CDKN2A-N4 APDSYGRRPI  | 27   | 7     |
| >CDKN2A-N4 NAPNSYGR    | 65    | >CDKN2A-N4 NAPDSYGR    | 59   | 6     |
| >CDKN2A-N4 NAPNSYGRR   | 147   | >CDKN2A-N4 NAPDSYGRR   | 92   | 55    |
| >CDKN2A-N4 NAPNSYGRR   | 266   | >CDKN2A-N4 NAPDSYGRR   | 118  | 148   |
| >CDKN2A-N4 PNAPNSYGR   | 320   | >CDKN2A-N4 PNAPDSYGR   | 973  | 653   |
| >CDKN2A-N4 LPNAPNSYGF  | 472   | >CDKN2A-N4 LPNAPDSYGF  | 591  | 119   |
| >CDKN2A-N4 LPNAPNSY    | 11    | >CDKN2A-N4 LPNAPDSY    | 9    | 2     |
| >CDKN2A-N4 LPNAPNSY    | 51    | >CDKN2A-N4 LPNAPDSY    | 44   | 7     |
| >CDKN2A-N4 LPNAPNSYG   | 457   | >CDKN2A-N4 LPNAPDSYG   | 744  | 287   |
| >CDKN2A-N4 LPNAPNSY    | 58    | >CDKN2A-N4 LPNAPDSY    | 134  | 76    |
| >CDKN2A-N4 LPNAPNSY    | 820   | >CDKN2A-N4 LPNAPDSY    | 425  | 395   |
| >CDKN2A-N4 ALPNAPNSY   | 181   | >CDKN2A-N4 ALPNAPDSY   | 524  | 343   |
| >CDKN2A-N4 ALPNAPNSY   | 281   | >CDKN2A-N4 ALPNAPDSY   | 573  | 292   |
| >CDKN2A-N4 ALPNAPNSY   | 358   | >CDKN2A-N4 ALPNAPDSY   | 575  | 217   |
| >CDKN2A-N4 ALPNAPNSY   | 305   | >CDKN2A-N4 ALPNAPDSY   | 1459 | 1154  |
| >CDKN2A-N4 GALPNAPNSY  | 280   | >CDKN2A-N4 GALPNAPDSY  | 1145 | 865   |
| >CDKN2A-N4 GALPNAPNSY  | 19    | >CDKN2A-N4 GALPNAPDSY  | 25   | 6     |
| >CDKN2A-N4 AGALPNAPNSY | 136   | >CDKN2A-N4 AGALPNAPDSY | 292  | 156   |
| >CDKN2A-N4 NSYGRRPIQV  | 264   | >CDKN2A-N4 TSYGRRPIQV  | 37   | 227   |
| >CDKN2A-N4 NSYGRRPIQV  | 485   | >CDKN2A-N4 TSYGRRPIQV  | 197  | 288   |
| >CDKN2A-N4 NSYGRRPI    | 1529  | >CDKN2A-N4 TSYGRRPI    | 371  | 1158  |



|                      |      |                      |     |      |
|----------------------|------|----------------------|-----|------|
| >CDKN2A-N4NSYGRRPI   | 511  | >CDKN2A-N4TSYGRRPI   | 356 | 155  |
| >CDKN2A-N4NSYGRRPIQV | 408  | >CDKN2A-N4TSYGRRPIQV | 513 | 105  |
| >CDKN2A-N4NSYGRRPI   | 1095 | >CDKN2A-N4TSYGRRPI   | 90  | 1005 |
| >CDKN2A-N4NSYGRRPIQV | 3183 | >CDKN2A-N4TSYGRRPIQV | 497 | 2686 |
| >CDKN2A-N4NSYGRRPIQV | 132  | >CDKN2A-N4TSYGRRPIQV | 18  | 114  |
| >CDKN2A-N4NSYGRRPIQV | 495  | >CDKN2A-N4TSYGRRPIQV | 143 | 352  |
| >CDKN2A-N4NSYGRRPIQV | 251  | >CDKN2A-N4TSYGRRPIQV | 80  | 171  |
| >CDKN2A-N4NSYGRRPI   | 104  | >CDKN2A-N4TSYGRRPI   | 38  | 66   |
| >CDKN2A-N4LEAGALPNAF | 4469 | >CDKN2A-N4LEAGALPNAF | 391 | 4078 |
| >CDKN2A-N4APNSYGRRPI | 20   | >CDKN2A-N4APTSYGRRPI | 20  | 0    |
| >CDKN2A-N4NAPNSYGR   | 65   | >CDKN2A-N4NAPTSYGR   | 68  | 3    |
| >CDKN2A-N4NAPNSYGRR  | 147  | >CDKN2A-N4NAPTSYGRR  | 167 | 20   |
| >CDKN2A-N4NAPNSYGRR  | 266  | >CDKN2A-N4NAPTSYGRR  | 180 | 86   |
| >CDKN2A-N4NAPNSYGR   | 886  | >CDKN2A-N4NAPTSYGR   | 490 | 396  |
| >CDKN2A-N4PNAPNSYGR  | 320  | >CDKN2A-N4PNAPTSYGR  | 342 | 22   |
| >CDKN2A-N4LPNAPNSYGF | 472  | >CDKN2A-N4LPNAPTSYGR | 475 | 3    |
| >CDKN2A-N4LPNAPNSY   | 527  | >CDKN2A-N4LPNAPTSY   | 374 | 153  |
| >CDKN2A-N4LPNAPNSY   | 11   | >CDKN2A-N4LPNAPTSY   | 9   | 2    |
| >CDKN2A-N4LPNAPNSY   | 51   | >CDKN2A-N4LPNAPTSY   | 33  | 18   |
| >CDKN2A-N4LPNAPNSYG  | 457  | >CDKN2A-N4LPNAPTSYG  | 306 | 151  |
| >CDKN2A-N4LPNAPNSY   | 58   | >CDKN2A-N4LPNAPTSY   | 55  | 3    |
| >CDKN2A-N4LPNAPNSY   | 820  | >CDKN2A-N4LPNAPTSY   | 446 | 374  |
| >CDKN2A-N4ALPNAPNSY  | 181  | >CDKN2A-N4ALPNAPTSY  | 777 | 596  |
| >CDKN2A-N4ALPNAPNSY  | 281  | >CDKN2A-N4ALPNAPTSY  | 167 | 114  |
| >CDKN2A-N4ALPNAPNSY  | 358  | >CDKN2A-N4ALPNAPTSY  | 385 | 27   |
| >CDKN2A-N4ALPNAPNSY  | 305  | >CDKN2A-N4ALPNAPTSY  | 148 | 157  |
| >CDKN2A-N4GALPNAPNS\ | 280  | >CDKN2A-N4GALPNAPTSY | 175 | 105  |
| >CDKN2A-N4GALPNAPNS\ | 19   | >CDKN2A-N4GALPNAPTSY | 8   | 11   |
| >CDKN2A-N4GALPNAPNS\ | 513  | >CDKN2A-N4GALPNAPTSY | 383 | 130  |
| >CDKN2A-N4AGALPNAPN: | 136  | >CDKN2A-N4AGALPNAPTS | 390 | 254  |
| >CDKN2A-N4NSYGRRPIQV | 264  | >CDKN2A-N4YSYGRRPIQV | 52  | 212  |
| >CDKN2A-N4NSYGRRPIQV | 2700 | >CDKN2A-N4YSYGRRPIQV | 431 | 2269 |
| >CDKN2A-N4NSYGRRPIQV | 3699 | >CDKN2A-N4YSYGRRPIQV | 305 | 3394 |
| >CDKN2A-N4NSYGRRPIQV | 2366 | >CDKN2A-N4YSYGRRPIQV | 56  | 2310 |
| >CDKN2A-N4NSYGRRPIQV | 8726 | >CDKN2A-N4YSYGRRPIQV | 277 | 8449 |
| >CDKN2A-N4NSYGRRPIQV | 4684 | >CDKN2A-N4YSYGRRPIQV | 44  | 4640 |
| >CDKN2A-N4NSYGRRPIQV | 485  | >CDKN2A-N4YSYGRRPIQV | 119 | 366  |
| >CDKN2A-N4NSYGRRPI   | 1529 | >CDKN2A-N4YSYGRRPI   | 416 | 1113 |
| >CDKN2A-N4NSYGRRPIQV | 408  | >CDKN2A-N4YSYGRRPIQV | 210 | 198  |
| >CDKN2A-N4NSYGRRPIQV | 1369 | >CDKN2A-N4YSYGRRPIQV | 152 | 1217 |
| >CDKN2A-N4NSYGRRPI   | 4690 | >CDKN2A-N4YSYGRRPI   | 294 | 4396 |
| >CDKN2A-N4NSYGRRPIQV | 1044 | >CDKN2A-N4YSYGRRPIQV | 66  | 978  |
| >CDKN2A-N4NSYGRRPI   | 1095 | >CDKN2A-N4YSYGRRPI   | 16  | 1079 |

|                      |       |                      |     |       |
|----------------------|-------|----------------------|-----|-------|
| >CDKN2A-N4NSYGRRPIQV | 3183  | >CDKN2A-N4YSYGRRPIQV | 55  | 3128  |
| >CDKN2A-N4NSYGRRPIQV | 132   | >CDKN2A-N4YSYGRRPIQV | 7   | 125   |
| >CDKN2A-N4NSYGRRPIQV | 7195  | >CDKN2A-N4YSYGRRPIQV | 297 | 6898  |
| >CDKN2A-N4NSYGRRPIQV | 495   | >CDKN2A-N4YSYGRRPIQV | 44  | 451   |
| >CDKN2A-N4NSYGRRPIQV | 251   | >CDKN2A-N4YSYGRRPIQV | 15  | 236   |
| >CDKN2A-N4NSYGRRPI   | 8809  | >CDKN2A-N4YSYGRRPI   | 436 | 8373  |
| >CDKN2A-N4NSYGRRPI   | 104   | >CDKN2A-N4YSYGRRPI   | 24  | 80    |
| >CDKN2A-N4NSYGRRPIQV | 1074  | >CDKN2A-N4YSYGRRPIQV | 272 | 802   |
| >CDKN2A-N4PNSYGRRPI  | 27297 | >CDKN2A-N4PYSYGRRPI  | 144 | 27153 |
| >CDKN2A-N4LEAGALPNAF | 15163 | >CDKN2A-N4LEAGALPNAF | 107 | 15056 |
| >CDKN2A-N4LEAGALPNAF | 721   | >CDKN2A-N4LEAGALPNAF | 9   | 712   |
| >CDKN2A-N4LEAGALPNAF | 21546 | >CDKN2A-N4LEAGALPNAF | 338 | 21208 |
| >CDKN2A-N4LEAGALPNAF | 11649 | >CDKN2A-N4LEAGALPNAF | 359 | 11290 |
| >CDKN2A-N4APNSYGRRPI | 20    | >CDKN2A-N4APYSYGRRPI | 19  | 1     |
| >CDKN2A-N4APNSYGRRPI | 544   | >CDKN2A-N4APYSYGRRPI | 400 | 144   |
| >CDKN2A-N4NAPNSYGR   | 65    | >CDKN2A-N4NAPYSYGR   | 30  | 35    |
| >CDKN2A-N4NAPNSYGRR  | 147   | >CDKN2A-N4NAPYSYGRR  | 62  | 85    |
| >CDKN2A-N4NAPNSYGRR  | 266   | >CDKN2A-N4NAPYSYGRR  | 98  | 168   |
| >CDKN2A-N4PNAPNSYGR  | 320   | >CDKN2A-N4PNAPYSYGR  | 277 | 43    |
| >CDKN2A-N4LPNAPNSYGF | 838   | >CDKN2A-N4LPNAPYSYGR | 415 | 423   |
| >CDKN2A-N4LPNAPNSYGF | 472   | >CDKN2A-N4LPNAPYSYGR | 312 | 160   |
| >CDKN2A-N4LPNAPNSY   | 527   | >CDKN2A-N4LPNAPYSY   | 450 | 77    |
| >CDKN2A-N4LPNAPNSY   | 11    | >CDKN2A-N4LPNAPYSY   | 9   | 2     |
| >CDKN2A-N4LPNAPNSY   | 51    | >CDKN2A-N4LPNAPYSY   | 28  | 23    |
| >CDKN2A-N4LPNAPNSY   | 776   | >CDKN2A-N4LPNAPYSY   | 353 | 423   |
| >CDKN2A-N4LPNAPNSYG  | 457   | >CDKN2A-N4LPNAPYSYG  | 101 | 356   |
| >CDKN2A-N4LPNAPNSY   | 58    | >CDKN2A-N4LPNAPYSY   | 26  | 32    |
| >CDKN2A-N4LPNAPNSY   | 820   | >CDKN2A-N4LPNAPYSY   | 256 | 564   |
| >CDKN2A-N4ALPNAPNS   | 3999  | >CDKN2A-N4ALPNAPYS   | 378 | 3621  |
| >CDKN2A-N4ALPNAPNSY  | 1621  | >CDKN2A-N4ALPNAPYSY  | 86  | 1535  |
| >CDKN2A-N4ALPNAPNSY  | 181   | >CDKN2A-N4ALPNAPYSY  | 75  | 106   |
| >CDKN2A-N4ALPNAPNSY  | 1138  | >CDKN2A-N4ALPNAPYSY  | 146 | 992   |
| >CDKN2A-N4ALPNAPNSY  | 281   | >CDKN2A-N4ALPNAPYSY  | 225 | 56    |
| >CDKN2A-N4ALPNAPNSY  | 358   | >CDKN2A-N4ALPNAPYSY  | 664 | 306   |
| >CDKN2A-N4ALPNAPNSY  | 305   | >CDKN2A-N4ALPNAPYSY  | 395 | 90    |
| >CDKN2A-N4ALPNAPNSY  | 904   | >CDKN2A-N4ALPNAPYSYG | 480 | 424   |
| >CDKN2A-N4GALPNAPNS  | 3589  | >CDKN2A-N4GALPNAPYSY | 468 | 3121  |
| >CDKN2A-N4GALPNAPN   | 21925 | >CDKN2A-N4GALPNAPY   | 122 | 21803 |
| >CDKN2A-N4GALPNAPNS  | 3202  | >CDKN2A-N4GALPNAPYSY | 430 | 2772  |
| >CDKN2A-N4GALPNAPN   | 30120 | >CDKN2A-N4GALPNAPY   | 369 | 29751 |
| >CDKN2A-N4GALPNAPNS  | 951   | >CDKN2A-N4GALPNAPYSY | 277 | 674   |
| >CDKN2A-N4GALPNAPN   | 20053 | >CDKN2A-N4GALPNAPY   | 381 | 19672 |
| >CDKN2A-N4GALPNAPN   | 24049 | >CDKN2A-N4GALPNAPY   | 470 | 23579 |

|                       |       |                       |      |       |
|-----------------------|-------|-----------------------|------|-------|
| >CDKN2A-N4GALPNAPNS\  | 280   | >CDKN2A-N4GALPNAPYSY  | 352  | 72    |
| >CDKN2A-N4GALPNAPN    | 11119 | >CDKN2A-N4GALPNAPY    | 6    | 11113 |
| >CDKN2A-N4GALPNAPNS\  | 19    | >CDKN2A-N4GALPNAPYSY  | 11   | 8     |
| >CDKN2A-N4GALPNAPN    | 17384 | >CDKN2A-N4GALPNAPY    | 114  | 17270 |
| >CDKN2A-N4AGALPNAPN   | 29455 | >CDKN2A-N4AGALPNAPY   | 319  | 29136 |
| >CDKN2A-N4AGALPNAPN:  | 136   | >CDKN2A-N4AGALPNAPYS  | 80   | 56    |
| >CDKN2A-N4AGALPNAPN   | 18755 | >CDKN2A-N4AGALPNAPY   | 289  | 18466 |
| >CDKN2A-N4AGALPNAPN   | 29341 | >CDKN2A-N4AGALPNAPY   | 440  | 28901 |
| >CDKN2A-N4AGALPNAPN   | 23408 | >CDKN2A-N4AGALPNAPY   | 238  | 23170 |
| >CDKN2A-N4AGALPNAPN   | 21405 | >CDKN2A-N4AGALPNAPY   | 428  | 20977 |
| >CDKN2A-N4EAGALPNAP\  | 27259 | >CDKN2A-N4EAGALPNAPY  | 256  | 27003 |
| >CDKN2A-N4EAGALPNAP\  | 22152 | >CDKN2A-N4EAGALPNAPY  | 48   | 22104 |
| >CDKN2A-N7NCADPATLTF  | 284   | >CDKN2A-N7ICADPATLTR  | 1165 | 881   |
| >CDKN2A-N7NCADPATL    | 475   | >CDKN2A-N7ICADPATL    | 4539 | 4064  |
| >CDKN2A-N7NCADPATLTF  | 233   | >CDKN2A-N7ICADPATLTR  | 152  | 81    |
| >CDKN2A-N7PNCADPATLT  | 1360  | >CDKN2A-N7PICADPATLTF | 243  | 1117  |
| >CDKN2A-N7ELLLLHGAEPI | 17661 | >CDKN2A-N7ELLLLHGAEPI | 191  | 17470 |
| >CDKN2A-N7ELLLLHGAEPI | 21982 | >CDKN2A-N7ELLLLHGAEPI | 471  | 21511 |
| >CDKN2A-N7ELLLLHGAEPI | 12239 | >CDKN2A-N7ELLLLHGAEPI | 32   | 12207 |
| >CDKN2A-N7EPNCADPATL  | 353   | >CDKN2A-N7EPICADPATL  | 104  | 249   |
| >CDKN2A-N7EPNCADPATL  | 949   | >CDKN2A-N7EPICADPATL  | 477  | 472   |
| >CDKN2A-N7EPNCADPA    | 53    | >CDKN2A-N7EPICADPA    | 49   | 4     |
| >CDKN2A-N7EPNCADPAT   | 16    | >CDKN2A-N7EPICADPAT   | 16   | 0     |
| >CDKN2A-N7EPNCADPATL  | 958   | >CDKN2A-N7EPICADPATL  | 257  | 701   |
| >CDKN2A-N7EPNCADPATL  | 279   | >CDKN2A-N7EPICADPATL  | 232  | 47    |
| >CDKN2A-N7EPNCADPATL  | 753   | >CDKN2A-N7EPICADPATL  | 188  | 565   |
| >CDKN2A-N7EPNCADPA    | 43    | >CDKN2A-N7EPICADPA    | 23   | 20    |
| >CDKN2A-N7EPNCADPAT   | 371   | >CDKN2A-N7EPICADPAT   | 175  | 196   |
| >CDKN2A-N7AEPNCADPA   | 183   | >CDKN2A-N7AEPICADPAT  | 402  | 219   |
| >CDKN2A-N7AEPNCADPA   | 209   | >CDKN2A-N7AEPICADPA   | 327  | 118   |
| >CDKN2A-N7AEPNCADPA   | 507   | >CDKN2A-N7AEPICADPAT  | 479  | 28    |
| >CDKN2A-N7AEPNCADPA   | 480   | >CDKN2A-N7AEPICADPA   | 341  | 139   |
| >CDKN2A-N7AEPNCADPA   | 230   | >CDKN2A-N7AEPICADPAT  | 158  | 72    |
| >CDKN2A-N7AEPNCADPA   | 65    | >CDKN2A-N7AEPICADPAT  | 58   | 7     |
| >CDKN2A-N7HGAEPNCAD   | 272   | >CDKN2A-N7HGAEPICADP  | 221  | 51    |
| >CDKN2A-N7LLHGAEPN    | 21869 | >CDKN2A-N7LLHGAEPI    | 281  | 21588 |
| >CDKN2A-N7LLHGAEPN    | 8729  | >CDKN2A-N7LLHGAEPI    | 78   | 8651  |
| >CDKN2A-N7LLHGAEPNCA  | 360   | >CDKN2A-N7LLHGAEPICA  | 233  | 127   |
| >CDKN2A-N7LLHGAEPN    | 17048 | >CDKN2A-N7LLHGAEPI    | 42   | 17006 |
| >CDKN2A-N7LLHGAEPNCA  | 290   | >CDKN2A-N7LLHGAEPICA  | 238  | 52    |
| >CDKN2A-N7LLHGAEPN    | 18982 | >CDKN2A-N7LLHGAEPI    | 391  | 18591 |
| >CDKN2A-N7LLHGAEPN    | 5021  | >CDKN2A-N7LLHGAEPI    | 11   | 5010  |
| >CDKN2A-N7LLHGAEPNC   | 274   | >CDKN2A-N7LLHGAEPIC   | 837  | 563   |

|                      |       |                       |     |       |
|----------------------|-------|-----------------------|-----|-------|
| >CDKN2A-N7LLHGAEPNCA | 278   | >CDKN2A-N7LLHGAEPICA  | 137 | 141   |
| >CDKN2A-N7LLHGAEPN   | 20527 | >CDKN2A-N7LLHGAEPI    | 96  | 20431 |
| >CDKN2A-N7LLHGAEPN   | 15769 | >CDKN2A-N7LLHGAEPI    | 70  | 15699 |
| >CDKN2A-N7LLHGAEPNCA | 242   | >CDKN2A-N7LLHGAEPICA  | 117 | 125   |
| >CDKN2A-N7LLHGAEPN   | 4386  | >CDKN2A-N7LLHGAEPI    | 7   | 4379  |
| >CDKN2A-N7LLHGAEPNC  | 14    | >CDKN2A-N7LLHGAEPIC   | 23  | 9     |
| >CDKN2A-N7LLHGAEPNCA | 26    | >CDKN2A-N7LLHGAEPICA  | 19  | 7     |
| >CDKN2A-N7LLLHGAEPN  | 19394 | >CDKN2A-N7LLLHGAEPI   | 76  | 19318 |
| >CDKN2A-N7LLLHGAEPNC | 560   | >CDKN2A-N7LLLHGAEPICA | 189 | 371   |
| >CDKN2A-N7LLLHGAEPN  | 13655 | >CDKN2A-N7LLLHGAEPI   | 161 | 13494 |
| >CDKN2A-N7LLLHGAEPN  | 17321 | >CDKN2A-N7LLLHGAEPI   | 48  | 17273 |
| >CDKN2A-N7LLLHGAEPNC | 429   | >CDKN2A-N7LLLHGAEPICA | 684 | 255   |
| >CDKN2A-N7LLLHGAEPN  | 5325  | >CDKN2A-N7LLLHGAEPI   | 13  | 5312  |
| >CDKN2A-N7LLLHGAEPNC | 476   | >CDKN2A-N7LLLHGAEPICA | 323 | 153   |
| >CDKN2A-N7LLLHGAEPN  | 3104  | >CDKN2A-N7LLLHGAEPI   | 7   | 3097  |
| >CDKN2A-N7LLLHGAEPNC | 121   | >CDKN2A-N7LLLHGAEPIC  | 291 | 170   |
| >CDKN2A-N7LLLHGAEPNC | 105   | >CDKN2A-N7LLLHGAEPICA | 42  | 63    |
| >CDKN2A-N7LLLHGAEPN  | 9652  | >CDKN2A-N7LLLHGAEPI   | 9   | 9643  |
| >CDKN2A-N7LLLHGAEPNC | 428   | >CDKN2A-N7LLLHGAEPIC  | 592 | 164   |
| >CDKN2A-N7LLLHGAEPNC | 80    | >CDKN2A-N7LLLHGAEPICA | 65  | 15    |
| >CDKN2A-N7LLLHGAEPN  | 12023 | >CDKN2A-N7LLLHGAEPI   | 22  | 12001 |
| >CDKN2A-N7LLLHGAEPNC | 294   | >CDKN2A-N7LLLHGAEPIC  | 647 | 353   |
| >CDKN2A-N7LLLHGAEPNC | 66    | >CDKN2A-N7LLLHGAEPICA | 33  | 33    |
| >CDKN2A-N7LLLHGAEPN  | 16153 | >CDKN2A-N7LLLHGAEPI   | 38  | 16115 |
| >CDKN2A-N7LLLHGAEPNC | 369   | >CDKN2A-N7LLLHGAEPIC  | 637 | 268   |
| >CDKN2A-N7LLLHGAEPNC | 198   | >CDKN2A-N7LLLHGAEPICA | 138 | 60    |
| >CDKN2A-N7LLLHGAEPN  | 10721 | >CDKN2A-N7LLLHGAEPI   | 14  | 10707 |
| >CDKN2A-N7LLLHGAEPNC | 35    | >CDKN2A-N7LLLHGAEPIC  | 56  | 21    |
| >CDKN2A-N7LLLHGAEPNC | 53    | >CDKN2A-N7LLLHGAEPICA | 32  | 21    |
| >CDKN2A-N7LLLHGAEPN  | 21119 | >CDKN2A-N7LLLHGAEPI   | 423 | 20696 |
| >CDKN2A-N7LLLHGAEPN  | 10650 | >CDKN2A-N7LLLHGAEPI   | 453 | 10197 |
| >CDKN2A-N7LLLLHGAEPN | 19365 | >CDKN2A-N7LLLLHGAEPI  | 245 | 19120 |
| >CDKN2A-N7LLLLHGAEPN | 12595 | >CDKN2A-N7LLLLHGAEPI  | 68  | 12527 |
| >CDKN2A-N7LLLLHGAEPN | 13860 | >CDKN2A-N7LLLLHGAEPI  | 101 | 13759 |
| >CDKN2A-N7LLLLHGAEPN | 20079 | >CDKN2A-N7LLLLHGAEPI  | 340 | 19739 |
| >CDKN2A-N7LLLLHGAEPN | 5567  | >CDKN2A-N7LLLLHGAEPI  | 10  | 5557  |
| >CDKN2A-N7LLLLHGAEPN | 220   | >CDKN2A-N7LLLLHGAEPIC | 525 | 305   |
| >CDKN2A-N7LLLLHGAEPN | 12850 | >CDKN2A-N7LLLLHGAEPI  | 18  | 12832 |
| >CDKN2A-N7LLLLHGAEPN | 16429 | >CDKN2A-N7LLLLHGAEPI  | 76  | 16353 |
| >CDKN2A-N7LLLLHGAEPN | 20603 | >CDKN2A-N7LLLLHGAEPI  | 91  | 20512 |
| >CDKN2A-N7LLLLHGAEPN | 14375 | >CDKN2A-N7LLLLHGAEPI  | 37  | 14338 |
| >CDKN2A-N7LLLLHGAEPN | 89    | >CDKN2A-N7LLLLHGAEPIC | 143 | 54    |
| >CDKN2A-N7NCADPATLTF | 2999  | >CDKN2A-N7KCADPATLTR  | 310 | 2689  |

|                      |       |                      |       |       |
|----------------------|-------|----------------------|-------|-------|
| >CDKN2A-N7NCADPATLTF | 284   | >CDKN2A-N7KCADPATLTR | 5961  | 5677  |
| >CDKN2A-N7NCADPATL   | 475   | >CDKN2A-N7KCADPATL   | 11342 | 10867 |
| >CDKN2A-N7NCADPATLTF | 233   | >CDKN2A-N7KCADPATLTR | 35    | 198   |
| >CDKN2A-N7EPNCADPATL | 353   | >CDKN2A-N7EPKCADPATL | 610   | 257   |
| >CDKN2A-N7EPNCADPA   | 53    | >CDKN2A-N7EPKCADPA   | 605   | 552   |
| >CDKN2A-N7EPNCADPAT  | 16    | >CDKN2A-N7EPKCADPAT  | 91    | 75    |
| >CDKN2A-N7EPNCADPATL | 279   | >CDKN2A-N7EPKCADPATL | 2367  | 2088  |
| >CDKN2A-N7EPNCADPA   | 43    | >CDKN2A-N7EPKCADPA   | 168   | 125   |
| >CDKN2A-N7EPNCADPAT  | 371   | >CDKN2A-N7EPKCADPAT  | 2242  | 1871  |
| >CDKN2A-N7AEPNCADPA  | 183   | >CDKN2A-N7AEPKCADPAT | 290   | 107   |
| >CDKN2A-N7AEPNCADPA  | 209   | >CDKN2A-N7AEPKCADPA  | 430   | 221   |
| >CDKN2A-N7AEPNCADPA  | 507   | >CDKN2A-N7AEPKCADPAT | 303   | 204   |
| >CDKN2A-N7AEPNCADPA  | 480   | >CDKN2A-N7AEPKCADPA  | 652   | 172   |
| >CDKN2A-N7AEPNCADPA  | 230   | >CDKN2A-N7AEPKCADPAT | 127   | 103   |
| >CDKN2A-N7AEPNCADPA  | 65    | >CDKN2A-N7AEPKCADPAT | 72    | 7     |
| >CDKN2A-N7HGAEPNCAD  | 272   | >CDKN2A-N7HGAEPKADI  | 535   | 263   |
| >CDKN2A-N7LLHGAEPNCA | 360   | >CDKN2A-N7LLHGAEPKCA | 1623  | 1263  |
| >CDKN2A-N7LLHGAEPNCA | 290   | >CDKN2A-N7LLHGAEPKCA | 468   | 178   |
| >CDKN2A-N7LLHGAEPNC  | 274   | >CDKN2A-N7LLHGAEPKC  | 260   | 14    |
| >CDKN2A-N7LLHGAEPNCA | 278   | >CDKN2A-N7LLHGAEPKCA | 377   | 99    |
| >CDKN2A-N7LLHGAEPNCA | 242   | >CDKN2A-N7LLHGAEPKCA | 532   | 290   |
| >CDKN2A-N7LLHGAEPNC  | 14    | >CDKN2A-N7LLHGAEPKC  | 13    | 1     |
| >CDKN2A-N7LLHGAEPNCA | 26    | >CDKN2A-N7LLHGAEPKCA | 40    | 14    |
| >CDKN2A-N7LLHGAEPN   | 21160 | >CDKN2A-N7LLHGAEPK   | 351   | 20809 |
| >CDKN2A-N7LLHGAEPN   | 14258 | >CDKN2A-N7LLHGAEPK   | 205   | 14053 |
| >CDKN2A-N7LLLHGAEPNC | 429   | >CDKN2A-N7LLLHGAEPKC | 929   | 500   |
| >CDKN2A-N7LLLHGAEPNC | 476   | >CDKN2A-N7LLLHGAEPKC | 1430  | 954   |
| >CDKN2A-N7LLLHGAEPNC | 121   | >CDKN2A-N7LLLHGAEPKC | 114   | 7     |
| >CDKN2A-N7LLLHGAEPNC | 105   | >CDKN2A-N7LLLHGAEPKC | 151   | 46    |
| >CDKN2A-N7LLLHGAEPNC | 428   | >CDKN2A-N7LLLHGAEPKC | 644   | 216   |
| >CDKN2A-N7LLLHGAEPNC | 80    | >CDKN2A-N7LLLHGAEPKC | 285   | 205   |
| >CDKN2A-N7LLLHGAEPNC | 294   | >CDKN2A-N7LLLHGAEPKC | 332   | 38    |
| >CDKN2A-N7LLLHGAEPNC | 66    | >CDKN2A-N7LLLHGAEPKC | 156   | 90    |
| >CDKN2A-N7LLLHGAEPNC | 369   | >CDKN2A-N7LLLHGAEPKC | 494   | 125   |
| >CDKN2A-N7LLLHGAEPNC | 198   | >CDKN2A-N7LLLHGAEPKC | 499   | 301   |
| >CDKN2A-N7LLLHGAEPNC | 35    | >CDKN2A-N7LLLHGAEPKC | 34    | 1     |
| >CDKN2A-N7LLLHGAEPNC | 53    | >CDKN2A-N7LLLHGAEPKC | 87    | 34    |
| >CDKN2A-N7LLLHGAEPN  | 21406 | >CDKN2A-N7LLLHGAEPK  | 256   | 21150 |
| >CDKN2A-N7LLLLHGAEPN | 220   | >CDKN2A-N7LLLLHGAEPK | 207   | 13    |
| >CDKN2A-N7LLLLHGAEPN | 89    | >CDKN2A-N7LLLLHGAEPK | 88    | 1     |
| >CDKN2A-N7LLLLHGAEPN | 17621 | >CDKN2A-N7LLLLHGAEPK | 50    | 17571 |
| >CDKN2A-N7LLLLHGAEPN | 35740 | >CDKN2A-N7LLLLHGAEPK | 198   | 35542 |
| >CDKN2A-P1PVDLAEELGH | 7305  | >CDKN2A-P1HVDLAEELGH | 270   | 7035  |

|                       |       |                        |       |       |
|-----------------------|-------|------------------------|-------|-------|
| >CDKN2A-P1 LPVDLAEEL  | 414   | >CDKN2A-P1 LHVDLAEEL   | 27143 | 26729 |
| >CDKN2A-P1 LPVDLAEEL  | 42    | >CDKN2A-P1 LHVDLAEEL   | 16056 | 16014 |
| >CDKN2A-P1 LPVDLAEELG | 86    | >CDKN2A-P1 LHVDLAEELG  | 15433 | 15347 |
| >CDKN2A-P1 LPVDLAEEL  | 1748  | >CDKN2A-P1 LHVDLAEEL   | 212   | 1536  |
| >CDKN2A-P1 LPVDLAEEL  | 407   | >CDKN2A-P1 LHVDLAEEL   | 14111 | 13704 |
| >CDKN2A-P1 LPVDLAEEL  | 52    | >CDKN2A-P1 LHVDLAEEL   | 11626 | 11574 |
| >CDKN2A-P1 LPVDLAEEL  | 86    | >CDKN2A-P1 LHVDLAEEL   | 19487 | 19401 |
| >CDKN2A-P1 RLPVDLAEEL | 99    | >CDKN2A-P1 RLHVDLAEEL  | 80    | 19    |
| >CDKN2A-P1 RLPVDLAEEL | 38    | >CDKN2A-P1 RLHVDLAEEL  | 20    | 18    |
| >CDKN2A-P1 RLPVDLAEEL | 165   | >CDKN2A-P1 RLHVDLAEEL  | 75    | 90    |
| >CDKN2A-P1 RLPVDLAEEL | 125   | >CDKN2A-P1 RLHVDLAEEL  | 204   | 79    |
| >CDKN2A-P1 RLPVDLAEEL | 391   | >CDKN2A-P1 RLHVDLAEEL  | 781   | 390   |
| >CDKN2A-P1 RLPVDLAEEL | 15    | >CDKN2A-P1 RLHVDLAEEL  | 12    | 3     |
| >CDKN2A-P1 GRPVDLAEEL | 202   | >CDKN2A-P1 GRLHVDLAEEL | 151   | 51    |
| >CDKN2A-P1 GRPVDLAEEL | 194   | >CDKN2A-P1 GRLHVDLAEEL | 167   | 27    |
| >CDKN2A-P1 GRPVDLAEEL | 29    | >CDKN2A-P1 GRLHVDLAEEL | 50    | 21    |
| >CDKN2A-P1 AWGRLPVDL  | 474   | >CDKN2A-P1 AWGRLHVDL   | 156   | 318   |
| >CDKN2A-P1 AWGRLPVDL  | 403   | >CDKN2A-P1 AWGRLHVDL   | 480   | 77    |
| >CDKN2A-P1 AWGRLPVDL  | 156   | >CDKN2A-P1 AWGRLHVDL   | 400   | 244   |
| >CDKN2A-P1 DAWGRLPV   | 260   | >CDKN2A-P1 DAWGRLHV    | 486   | 226   |
| >CDKN2A-P1 DAWGRLPV   | 24    | >CDKN2A-P1 DAWGRLHV    | 85    | 61    |
| >CDKN2A-P1 VRDAWGRLP  | 489   | >CDKN2A-P1 VRDAWGRLP   | 4340  | 3851  |
| >CDKN2A-P1 DVRDAWGRI  | 277   | >CDKN2A-P1 DVRDAWGRI   | 486   | 209   |
| >CDKN2A-P1 DVRDAWGRI  | 208   | >CDKN2A-P1 DVRDAWGRI   | 710   | 502   |
| >CDKN2A-P1 DVRDAWGRI  | 198   | >CDKN2A-P1 DVRDAWGRI   | 770   | 572   |
| >CDKN2A-P1 LPVDLAEEL  | 21384 | >CDKN2A-P1 LLVDLAEEL   | 59    | 21325 |
| >CDKN2A-P1 LPVDLAEEL  | 7457  | >CDKN2A-P1 LLVDLAEEL   | 6     | 7451  |
| >CDKN2A-P1 LPVDLAEEL  | 21293 | >CDKN2A-P1 LLVDLAEEL   | 48    | 21245 |
| >CDKN2A-P1 LPVDLAEEL  | 7849  | >CDKN2A-P1 LLVDLAEEL   | 20    | 7829  |
| >CDKN2A-P1 LPVDLAEEL  | 17301 | >CDKN2A-P1 LLVDLAEEL   | 6     | 17295 |
| >CDKN2A-P1 LPVDLAEEL  | 22896 | >CDKN2A-P1 LLVDLAEEL   | 17    | 22879 |
| >CDKN2A-P1 LPVDLAEEL  | 23132 | >CDKN2A-P1 LLVDLAEEL   | 31    | 23101 |
| >CDKN2A-P1 LPVDLAEEL  | 23296 | >CDKN2A-P1 LLVDLAEEL   | 40    | 23256 |
| >CDKN2A-P1 LPVDLAEEL  | 21813 | >CDKN2A-P1 LLVDLAEEL   | 3     | 21810 |
| >CDKN2A-P1 LPVDLAEEL  | 414   | >CDKN2A-P1 LLVDLAEEL   | 22578 | 22164 |
| >CDKN2A-P1 LPVDLAEEL  | 42    | >CDKN2A-P1 LLVDLAEEL   | 9036  | 8994  |
| >CDKN2A-P1 LPVDLAEELG | 86    | >CDKN2A-P1 LLVDLAEELGI | 6406  | 6320  |
| >CDKN2A-P1 LPVDLAEEL  | 407   | >CDKN2A-P1 LLVDLAEEL   | 22046 | 21639 |
| >CDKN2A-P1 LPVDLAEEL  | 52    | >CDKN2A-P1 LLVDLAEEL   | 19338 | 19286 |
| >CDKN2A-P1 LPVDLAEEL  | 86    | >CDKN2A-P1 LLVDLAEEL   | 20360 | 20274 |
| >CDKN2A-P1 RLPVDLAEEL | 1803  | >CDKN2A-P1 RLLVDLAEEL  | 126   | 1677  |
| >CDKN2A-P1 RLPVDLAEEL | 99    | >CDKN2A-P1 RLLVDLAEEL  | 57    | 42    |
| >CDKN2A-P1 RLPVDLAEEL | 950   | >CDKN2A-P1 RLLVDLAEEL  | 334   | 616   |

|                        |       |                        |       |       |
|------------------------|-------|------------------------|-------|-------|
| >CDKN2A-P1 RLPVDLAEEL  | 1079  | >CDKN2A-P1 RLLVDLAEEL  | 224   | 855   |
| >CDKN2A-P1 RLPVDLAEEL  | 38    | >CDKN2A-P1 RLLVDLAEEL  | 7     | 31    |
| >CDKN2A-P1 RLPVDLAEEL  | 165   | >CDKN2A-P1 RLLVDLAEEL  | 14    | 151   |
| >CDKN2A-P1 RLPVDLAEEL  | 125   | >CDKN2A-P1 RLLVDLAEEL  | 19    | 106   |
| >CDKN2A-P1 RLPVDLAEEL  | 391   | >CDKN2A-P1 RLLVDLAEEL  | 13    | 378   |
| >CDKN2A-P1 RLPVDLAEEL  | 15    | >CDKN2A-P1 RLLVDLAEEL  | 10    | 5     |
| >CDKN2A-P1 RLPVDLAEEL  | 1004  | >CDKN2A-P1 RLLVDLAEEL  | 260   | 744   |
| >CDKN2A-P1 GRLPVDLAEEL | 202   | >CDKN2A-P1 GRLLVDLAEEL | 119   | 83    |
| >CDKN2A-P1 GRLPVDLAEEL | 194   | >CDKN2A-P1 GRLLVDLAEEL | 202   | 8     |
| >CDKN2A-P1 GRLPVDLAEEL | 29    | >CDKN2A-P1 GRLLVDLAEEL | 35    | 6     |
| >CDKN2A-P1 AWGRLPVDL   | 474   | >CDKN2A-P1 AWGRLLVDL   | 130   | 344   |
| >CDKN2A-P1 AWGRLPVDL   | 403   | >CDKN2A-P1 AWGRLLVDL   | 516   | 113   |
| >CDKN2A-P1 AWGRLPVDL   | 156   | >CDKN2A-P1 AWGRLLVDL   | 330   | 174   |
| >CDKN2A-P1 DAWGRLPV    | 260   | >CDKN2A-P1 DAWGRLLV    | 722   | 462   |
| >CDKN2A-P1 DAWGRLPV    | 24    | >CDKN2A-P1 DAWGRLLV    | 98    | 74    |
| >CDKN2A-P1 RDAWGRLP    | 9505  | >CDKN2A-P1 RDAWGRL     | 365   | 9140  |
| >CDKN2A-P1 RDAWGRLP    | 6295  | >CDKN2A-P1 RDAWGRL     | 126   | 6169  |
| >CDKN2A-P1 RDAWGRLPV   | 737   | >CDKN2A-P1 RDAWGRLV    | 424   | 313   |
| >CDKN2A-P1 RDAWGRLPV   | 654   | >CDKN2A-P1 RDAWGRLV    | 261   | 393   |
| >CDKN2A-P1 VRDAWGRLP   | 22795 | >CDKN2A-P1 VRDAWGRL    | 464   | 22331 |
| >CDKN2A-P1 VRDAWGRLP   | 489   | >CDKN2A-P1 VRDAWGRL    | 1963  | 1474  |
| >CDKN2A-P1 VRDAWGRLP   | 19159 | >CDKN2A-P1 VRDAWGRL    | 141   | 19018 |
| >CDKN2A-P1 DVRDAWGRI   | 277   | >CDKN2A-P1 DVRDAWGRI   | 560   | 283   |
| >CDKN2A-P1 DVRDAWGRI   | 208   | >CDKN2A-P1 DVRDAWGRI   | 631   | 423   |
| >CDKN2A-P1 DVRDAWGRI   | 198   | >CDKN2A-P1 DVRDAWGRI   | 815   | 617   |
| >CDKN2A-P1 LPVDLAEEL   | 7457  | >CDKN2A-P1 LSVDLAEEL   | 198   | 7259  |
| >CDKN2A-P1 LPVDLAEEL   | 10225 | >CDKN2A-P1 LSVDLAEEL   | 465   | 9760  |
| >CDKN2A-P1 LPVDLAEEL   | 414   | >CDKN2A-P1 LSVDLAEEL   | 25631 | 25217 |
| >CDKN2A-P1 LPVDLAEEL   | 16840 | >CDKN2A-P1 LSVDLAEEL   | 11    | 16829 |
| >CDKN2A-P1 LPVDLAEELG  | 24017 | >CDKN2A-P1 LSVDLAEELG  | 356   | 23661 |
| >CDKN2A-P1 LPVDLAEEL   | 42    | >CDKN2A-P1 LSVDLAEEL   | 5817  | 5775  |
| >CDKN2A-P1 LPVDLAEELG  | 86    | >CDKN2A-P1 LSVDLAEELG  | 5351  | 5265  |
| >CDKN2A-P1 LPVDLAEEL   | 407   | >CDKN2A-P1 LSVDLAEEL   | 17005 | 16598 |
| >CDKN2A-P1 LPVDLAEEL   | 52    | >CDKN2A-P1 LSVDLAEEL   | 9545  | 9493  |
| >CDKN2A-P1 LPVDLAEEL   | 20870 | >CDKN2A-P1 LSVDLAEEL   | 488   | 20382 |
| >CDKN2A-P1 LPVDLAEEL   | 4658  | >CDKN2A-P1 LSVDLAEEL   | 185   | 4473  |
| >CDKN2A-P1 LPVDLAEEL   | 86    | >CDKN2A-P1 LSVDLAEEL   | 13872 | 13786 |
| >CDKN2A-P1 RLPVDLAEEL  | 99    | >CDKN2A-P1 RLSVDLAEEL  | 32    | 67    |
| >CDKN2A-P1 RLPVDLAEEL  | 950   | >CDKN2A-P1 RLSVDLAEEL  | 330   | 620   |
| >CDKN2A-P1 RLPVDLAEEL  | 38    | >CDKN2A-P1 RLSVDLAEEL  | 42    | 4     |
| >CDKN2A-P1 RLPVDLAEEL  | 165   | >CDKN2A-P1 RLSVDLAEEL  | 60    | 105   |
| >CDKN2A-P1 RLPVDLAEEL  | 125   | >CDKN2A-P1 RLSVDLAEEL  | 103   | 22    |
| >CDKN2A-P1 RLPVDLAEEL  | 391   | >CDKN2A-P1 RLSVDLAEEL  | 74    | 317   |

|                       |       |                       |       |       |
|-----------------------|-------|-----------------------|-------|-------|
| >CDKN2A-P1 RLPVDLAEEL | 15    | >CDKN2A-P1 RLSVDLAEEL | 10    | 5     |
| >CDKN2A-P1 GRLPVDLAE  | 202   | >CDKN2A-P1 GRLSVDLAE  | 112   | 90    |
| >CDKN2A-P1 GRLPVDLAE  | 194   | >CDKN2A-P1 GRLSVDLAE  | 179   | 15    |
| >CDKN2A-P1 GRLPVDLAE  | 29    | >CDKN2A-P1 GRLSVDLAE  | 65    | 36    |
| >CDKN2A-P1 AWGRLPVDL  | 474   | >CDKN2A-P1 AWGRLSVDL  | 159   | 315   |
| >CDKN2A-P1 AWGRLPVDL  | 403   | >CDKN2A-P1 AWGRLSVDL  | 865   | 462   |
| >CDKN2A-P1 AWGRLPVDL  | 156   | >CDKN2A-P1 AWGRLSVDL  | 369   | 213   |
| >CDKN2A-P1 DAWGRLPV   | 260   | >CDKN2A-P1 DAWGRLSV   | 567   | 307   |
| >CDKN2A-P1 DAWGRLPV   | 24    | >CDKN2A-P1 DAWGRLSV   | 88    | 64    |
| >CDKN2A-P1 VRDAWGRLP  | 489   | >CDKN2A-P1 VRDAWGRLS  | 871   | 382   |
| >CDKN2A-P1 DVRDAWGRI  | 277   | >CDKN2A-P1 DVRDAWGRI  | 476   | 199   |
| >CDKN2A-P1 DVRDAWGRI  | 208   | >CDKN2A-P1 DVRDAWGRI  | 717   | 509   |
| >CDKN2A-P1 DVRDAWGRI  | 198   | >CDKN2A-P1 DVRDAWGRI  | 559   | 361   |
| >CDKN2A-P1 PSADWLATA  | 12437 | >CDKN2A-P1 SSADWLATA  | 405   | 12032 |
| >CDKN2A-P1 PSADWLATA  | 6447  | >CDKN2A-P1 SSADWLATA  | 472   | 5975  |
| >CDKN2A-P1 PSADWLATA  | 3538  | >CDKN2A-P1 SSADWLATA  | 185   | 3353  |
| >CDKN2A-P1 PSADWLATA  | 5256  | >CDKN2A-P1 SSADWLATA  | 396   | 4860  |
| >CDKN2A-P1 PSADWLATA  | 4968  | >CDKN2A-P1 SSADWLATA  | 39    | 4929  |
| >CDKN2A-P1 PSADWLATA  | 6905  | >CDKN2A-P1 SSADWLATA  | 128   | 6777  |
| >CDKN2A-P1 PSADWLATA  | 5139  | >CDKN2A-P1 SSADWLATA  | 77    | 5062  |
| >CDKN2A-P1 PSADWLATA  | 11573 | >CDKN2A-P1 SSADWLATA  | 426   | 11147 |
| >CDKN2A-P1 PSADWLATA  | 3364  | >CDKN2A-P1 SSADWLATA  | 41    | 3323  |
| >CDKN2A-P1 PSADWLATA  | 3175  | >CDKN2A-P1 SSADWLATA  | 89    | 3086  |
| >CDKN2A-P1 PSADWLATA  | 5150  | >CDKN2A-P1 SSADWLATA  | 260   | 4890  |
| >CDKN2A-P1 PSADWLATA  | 3689  | >CDKN2A-P1 SSADWLATA  | 153   | 3536  |
| >CDKN2A-P1 EPSADWLA   | 3339  | >CDKN2A-P1 ESSADWLA   | 106   | 3233  |
| >CDKN2A-P1 EPSADWLAT  | 9245  | >CDKN2A-P1 ESSADWLAT  | 199   | 9046  |
| >CDKN2A-P1 EPSADWLAT  | 6054  | >CDKN2A-P1 ESSADWLAT  | 220   | 5834  |
| >CDKN2A-P1 EPSADWLAT  | 30    | >CDKN2A-P1 ESSADWLAT  | 3853  | 3823  |
| >CDKN2A-P1 EPSADWLAT  | 31    | >CDKN2A-P1 ESSADWLAT  | 3900  | 3869  |
| >CDKN2A-P1 EPSADWLAT  | 270   | >CDKN2A-P1 ESSADWLAT  | 26773 | 26503 |
| >CDKN2A-P1 MEPSADWL   | 777   | >CDKN2A-P1 MESSADWL   | 179   | 598   |
| >CDKN2A-P1 MEPSADWLA  | 2800  | >CDKN2A-P1 MESSADWLA  | 291   | 2509  |
| >CDKN2A-P1 MEPSADWLA  | 1973  | >CDKN2A-P1 MESSADWLA  | 226   | 1747  |
| >CDKN2A-P1 MEPSADWL   | 182   | >CDKN2A-P1 MESSADWL   | 9     | 173   |
| >CDKN2A-P1 MEPSADWL   | 911   | >CDKN2A-P1 MESSADWL   | 127   | 784   |
| >CDKN2A-P1 MEPSADWLA  | 1904  | >CDKN2A-P1 MESSADWLA  | 264   | 1640  |
| >CDKN2A-P1 MEPSADWL   | 11005 | >CDKN2A-P1 MESSADWL   | 329   | 10676 |
| >CDKN2A-P1 MEPSADWLA  | 830   | >CDKN2A-P1 MESSADWLA  | 16    | 814   |
| >CDKN2A-P1 MEPSADWLA  | 596   | >CDKN2A-P1 MESSADWLA  | 259   | 337   |
| >CDKN2A-P1 MEPSADWLA  | 678   | >CDKN2A-P1 MESSADWLA  | 18    | 660   |
| >CDKN2A-P1 MEPSADWLA  | 597   | >CDKN2A-P1 MESSADWLA  | 385   | 212   |
| >CDKN2A-P1 SMEPSADWL  | 188   | >CDKN2A-P1 SMEPSADWL  | 227   | 39    |



|                       |       |                       |     |       |
|-----------------------|-------|-----------------------|-----|-------|
| >CDKN2A-P1 SMEPSADWL  | 53    | >CDKN2A-P1 SMESSADWL  | 36  | 17    |
| >CDKN2A-P1 SMEPSADWL  | 218   | >CDKN2A-P1 SMESSADWL  | 87  | 131   |
| >CDKN2A-P1 SMEPSADWL  | 464   | >CDKN2A-P1 SMESSADWL  | 721 | 257   |
| >CDKN2A-P1 SMEPSADWL  | 199   | >CDKN2A-P1 SMESSADWL  | 254 | 55    |
| >CDKN2A-P1 SMEPSADWL  | 265   | >CDKN2A-P1 SMESSADWL  | 319 | 54    |
| >CDKN2A-P1 SMEPSADWL  | 443   | >CDKN2A-P1 SMESSADWL  | 807 | 364   |
| >CDKN2A-P1 SMEPSADWL  | 257   | >CDKN2A-P1 SMESSADWL  | 399 | 142   |
| >CDKN2A-P1 SMEPSADWL  | 332   | >CDKN2A-P1 SMESSADWL  | 501 | 169   |
| >CDKN2A-P1 SMEPSADWL  | 149   | >CDKN2A-P1 SMESSADWL  | 220 | 71    |
| >CDKN2A-P1 SMEPSADWL  | 17    | >CDKN2A-P1 SMESSADWL  | 37  | 20    |
| >CDKN2A-P1 SMEPSADWL  | 24    | >CDKN2A-P1 SMESSADWL  | 50  | 26    |
| >CDKN2A-P1 SMEPSADW   | 98    | >CDKN2A-P1 SMESSADW   | 588 | 490   |
| >CDKN2A-P1 SSMEPSADW  | 205   | >CDKN2A-P1 SSMESSADW  | 162 | 43    |
| >CDKN2A-P1 SSMEPSADW  | 418   | >CDKN2A-P1 SSMESSADW  | 590 | 172   |
| >CDKN2A-P1 SSMEPSADW  | 286   | >CDKN2A-P1 SSMESSADW  | 296 | 10    |
| >CDKN2A-P1 SSMEPSADW  | 56    | >CDKN2A-P1 SSMESSADW  | 109 | 53    |
| >CDKN2A-P1 SSMEPSADW  | 295   | >CDKN2A-P1 SSMESSADW  | 566 | 271   |
| >CDKN2A-P1 SSMEPSADW  | 363   | >CDKN2A-P1 SSMESSADW  | 768 | 405   |
| >CDKN2A-P1 SSMEPSADW  | 4     | >CDKN2A-P1 SSMESSADW  | 3   | 1     |
| >CDKN2A-P1 SSMEPSADW  | 11    | >CDKN2A-P1 SSMESSADW  | 9   | 2     |
| >CDKN2A-P1 SSMEPSADW  | 56    | >CDKN2A-P1 SSMESSADW  | 47  | 9     |
| >CDKN2A-P1 SSMEPSADW  | 27    | >CDKN2A-P1 SSMESSADW  | 16  | 11    |
| >CDKN2A-P1 SSMEPSADW  | 192   | >CDKN2A-P1 SSMESSADW  | 227 | 35    |
| >CDKN2A-P1 SSMEPSADW  | 396   | >CDKN2A-P1 SSMESSADW  | 259 | 137   |
| >CDKN2A-P1 GSSMEPSAD\ | 13    | >CDKN2A-P1 GSSMESSAD\ | 8   | 5     |
| >CDKN2A-P1 GSSMEPSAD\ | 96    | >CDKN2A-P1 GSSMESSAD\ | 79  | 17    |
| >CDKN2A-P1 GSSMEPSAD\ | 179   | >CDKN2A-P1 GSSMESSAD\ | 189 | 10    |
| >CDKN2A-P1 GSSMEPSAD\ | 81    | >CDKN2A-P1 GSSMESSAD\ | 67  | 14    |
| >CDKN2A-P1 GSSMEPSAD\ | 152   | >CDKN2A-P1 GSSMESSAD\ | 85  | 67    |
| >CDKN2A-P1 AGSSMEPSAI | 465   | >CDKN2A-P1 AGSSMESSAI | 323 | 142   |
| >CDKN2A-P1 EPAAGSSMEI | 216   | >CDKN2A-P1 EPAAGSSMEI | 769 | 553   |
| >CDKN2A-P1 NHARIDAAEC | 5225  | >CDKN2A-P1 NHARIDAAEC | 499 | 4726  |
| >CDKN2A-P1 NHARIDAAEC | 21274 | >CDKN2A-P1 NHARIDAAEC | 194 | 21080 |
| >CDKN2A-P1 DAAEGPSDI  | 715   | >CDKN2A-P1 DAAEGLSDI  | 391 | 324   |
| >CDKN2A-P1 IDAAEGPSDI | 267   | >CDKN2A-P1 IDAAEGLSDI | 186 | 81    |
| >CDKN2A-P1 RIDAAEGP   | 15174 | >CDKN2A-P1 RIDAAEGL   | 291 | 14883 |
| >CDKN2A-P1 RIDAAEGP   | 21144 | >CDKN2A-P1 RIDAAEGL   | 324 | 20820 |
| >CDKN2A-P1 ARIDAAEGP  | 4312  | >CDKN2A-P1 ARIDAAEGL  | 157 | 4155  |
| >CDKN2A-P1 ARIDAAEGP  | 24875 | >CDKN2A-P1 ARIDAAEGL  | 322 | 24553 |
| >CDKN2A-P1 ARIDAAEGP  | 11787 | >CDKN2A-P1 ARIDAAEGL  | 149 | 11638 |
| >CDKN2A-P1 HARIDAAEGF | 330   | >CDKN2A-P1 HARIDAAEGL | 701 | 371   |
| >CDKN2A-P1 HARIDAAEGF | 13022 | >CDKN2A-P1 HARIDAAEGL | 14  | 13008 |
| >CDKN2A-P1 AEGPSDIPD  | 551   | >CDKN2A-P1 AEGSSDIPD  | 385 | 166   |

|                       |       |                       |       |       |
|-----------------------|-------|-----------------------|-------|-------|
| >CDKN2A-P1 DAAEGPSDI  | 715   | >CDKN2A-P1 DAAEGSSDI  | 325   | 390   |
| >CDKN2A-P1 IDAAEGPSDI | 267   | >CDKN2A-P1 IDAAEGSSDI | 188   | 79    |
| >CDKN2A-P1 HARIDAAEGF | 330   | >CDKN2A-P1 HARIDAAEGS | 582   | 252   |
| >CDKN2A-P3 PNAPNSYGR  | 3977  | >CDKN2A-P3 LNAPNSYGR  | 179   | 3798  |
| >CDKN2A-P3 PNAPNSYGR  | 320   | >CDKN2A-P3 LNAPNSYGR  | 281   | 39    |
| >CDKN2A-P3 LPNAPNSY   | 20236 | >CDKN2A-P3 LLNAPNSY   | 492   | 19744 |
| >CDKN2A-P3 LPNAPNSYGF | 19080 | >CDKN2A-P3 LLNAPNSYGR | 265   | 18815 |
| >CDKN2A-P3 LPNAPNSY   | 4854  | >CDKN2A-P3 LLNAPNSY   | 216   | 4638  |
| >CDKN2A-P3 LPNAPNSY   | 967   | >CDKN2A-P3 LLNAPNSY   | 49    | 918   |
| >CDKN2A-P3 LPNAPNSYGF | 838   | >CDKN2A-P3 LLNAPNSYGR | 74    | 764   |
| >CDKN2A-P3 LPNAPNSYGF | 2817  | >CDKN2A-P3 LLNAPNSYGR | 64    | 2753  |
| >CDKN2A-P3 LPNAPNSYGF | 472   | >CDKN2A-P3 LLNAPNSYGR | 140   | 332   |
| >CDKN2A-P3 LPNAPNSYGF | 2414  | >CDKN2A-P3 LLNAPNSYGR | 488   | 1926  |
| >CDKN2A-P3 LPNAPNSY   | 3802  | >CDKN2A-P3 LLNAPNSY   | 47    | 3755  |
| >CDKN2A-P3 LPNAPNSY   | 585   | >CDKN2A-P3 LLNAPNSY   | 49    | 536   |
| >CDKN2A-P3 LPNAPNSY   | 527   | >CDKN2A-P3 LLNAPNSY   | 53    | 474   |
| >CDKN2A-P3 LPNAPNSY   | 11    | >CDKN2A-P3 LLNAPNSY   | 661   | 650   |
| >CDKN2A-P3 LPNAPNSY   | 51    | >CDKN2A-P3 LLNAPNSY   | 21453 | 21402 |
| >CDKN2A-P3 LPNAPNSYG  | 457   | >CDKN2A-P3 LLNAPNSYG  | 29721 | 29264 |
| >CDKN2A-P3 LPNAPNSY   | 58    | >CDKN2A-P3 LLNAPNSY   | 2774  | 2716  |
| >CDKN2A-P3 LPNAPNSY   | 6308  | >CDKN2A-P3 LLNAPNSY   | 480   | 5828  |
| >CDKN2A-P3 LPNAPNSYGF | 718   | >CDKN2A-P3 LLNAPNSYGR | 292   | 426   |
| >CDKN2A-P3 VRALLEAGAL | 6887  | >CDKN2A-P3 VRALLEAGAL | 295   | 6592  |
| >CDKN2A-P3 VRALLEAGAL | 14488 | >CDKN2A-P3 VRALLEAGAL | 57    | 14431 |
| >CDKN2A-P3 ALPNAPNSY  | 2008  | >CDKN2A-P3 ALLNAPNSY  | 243   | 1765  |
| >CDKN2A-P3 ALPNAPNSY  | 1621  | >CDKN2A-P3 ALLNAPNSY  | 177   | 1444  |
| >CDKN2A-P3 ALPNAPNSY  | 181   | >CDKN2A-P3 ALLNAPNSY  | 63    | 118   |
| >CDKN2A-P3 ALPNAPNSY  | 1668  | >CDKN2A-P3 ALLNAPNSY  | 135   | 1533  |
| >CDKN2A-P3 ALPNAPNSY  | 1138  | >CDKN2A-P3 ALLNAPNSY  | 321   | 817   |
| >CDKN2A-P3 ALPNAPNSY  | 281   | >CDKN2A-P3 ALLNAPNSY  | 149   | 132   |
| >CDKN2A-P3 ALPNAPNSY  | 358   | >CDKN2A-P3 ALLNAPNSY  | 124   | 234   |
| >CDKN2A-P3 ALPNAPNSY  | 305   | >CDKN2A-P3 ALLNAPNSY  | 18    | 287   |
| >CDKN2A-P3 GALPNAPNSY | 951   | >CDKN2A-P3 GALLNAPNSY | 440   | 511   |
| >CDKN2A-P3 GALPNAPNSY | 280   | >CDKN2A-P3 GALLNAPNSY | 1186  | 906   |
| >CDKN2A-P3 GALPNAPNSY | 19    | >CDKN2A-P3 GALLNAPNSY | 81    | 62    |
| >CDKN2A-P3 GALPNAPNSY | 513   | >CDKN2A-P3 GALLNAPNSY | 190   | 323   |
| >CDKN2A-P3 AGALPNAPNS | 136   | >CDKN2A-P3 AGALLNAPNS | 92    | 44    |
| >CDKN2A-P3 EAGALPNA   | 470   | >CDKN2A-P3 EAGALLNA   | 883   | 413   |
| >CDKN2A-P3 LEAGALPN   | 413   | >CDKN2A-P3 LEAGALLN   | 2254  | 1841  |
| >CDKN2A-P3 LEAGALPNA  | 569   | >CDKN2A-P3 LEAGALLNA  | 423   | 146   |
| >CDKN2A-P3 LEAGALPNAP | 721   | >CDKN2A-P3 LEAGALLNAP | 373   | 348   |
| >CDKN2A-P3 LEAGALPNA  | 80    | >CDKN2A-P3 LEAGALLNA  | 130   | 50    |
| >CDKN2A-P3 LEAGALPNA  | 312   | >CDKN2A-P3 LEAGALLNA  | 1454  | 1142  |

|                       |       |                        |       |       |
|-----------------------|-------|------------------------|-------|-------|
| >CDKN2A-P3 LLEAGALPNA | 371   | >CDKN2A-P3 LLEAGALLNA  | 266   | 105   |
| >CDKN2A-P3 LLEAGALP   | 6705  | >CDKN2A-P3 LLEAGALL    | 46    | 6659  |
| >CDKN2A-P3 LLEAGALPNA | 241   | >CDKN2A-P3 LLEAGALLNA  | 102   | 139   |
| >CDKN2A-P3 LLEAGALP   | 17949 | >CDKN2A-P3 LLEAGALL    | 493   | 17456 |
| >CDKN2A-P3 LLEAGALPNA | 249   | >CDKN2A-P3 LLEAGALLNA  | 103   | 146   |
| >CDKN2A-P3 LLEAGALP   | 19062 | >CDKN2A-P3 LLEAGALL    | 242   | 18820 |
| >CDKN2A-P3 LLEAGALP   | 23406 | >CDKN2A-P3 LLEAGALL    | 338   | 23068 |
| >CDKN2A-P3 LLEAGALP   | 9577  | >CDKN2A-P3 LLEAGALL    | 6     | 9571  |
| >CDKN2A-P3 LLEAGALPNA | 10    | >CDKN2A-P3 LLEAGALLNA  | 13    | 3     |
| >CDKN2A-P3 ALLEAGALP  | 16493 | >CDKN2A-P3 ALLEAGALL   | 18    | 16475 |
| >CDKN2A-P3 ALLEAGALPN | 22    | >CDKN2A-P3 ALLEAGALLN. | 29    | 7     |
| >CDKN2A-P3 ALLEAGALP  | 2318  | >CDKN2A-P3 ALLEAGALL   | 16    | 2302  |
| >CDKN2A-P3 ALLEAGALPN | 87    | >CDKN2A-P3 ALLEAGALLN. | 86    | 1     |
| >CDKN2A-P3 ALLEAGALP  | 6369  | >CDKN2A-P3 ALLEAGALL   | 30    | 6339  |
| >CDKN2A-P3 ALLEAGALPN | 26    | >CDKN2A-P3 ALLEAGALLN. | 30    | 4     |
| >CDKN2A-P3 ALLEAGALP  | 3010  | >CDKN2A-P3 ALLEAGALL   | 14    | 2996  |
| >CDKN2A-P3 ALLEAGALPN | 13    | >CDKN2A-P3 ALLEAGALLN. | 19    | 6     |
| >CDKN2A-P3 ALLEAGALP  | 1042  | >CDKN2A-P3 ALLEAGALL   | 3     | 1039  |
| >CDKN2A-P3 ALLEAGALPN | 5     | >CDKN2A-P3 ALLEAGALLN. | 6     | 1     |
| >CDKN2A-P3 ALLEAGALP  | 5402  | >CDKN2A-P3 ALLEAGALL   | 5     | 5397  |
| >CDKN2A-P3 ALLEAGALPN | 19    | >CDKN2A-P3 ALLEAGALLN. | 25    | 6     |
| >CDKN2A-P3 ALLEAGALP  | 4258  | >CDKN2A-P3 ALLEAGALL   | 6     | 4252  |
| >CDKN2A-P3 ALLEAGALPN | 6     | >CDKN2A-P3 ALLEAGALLN. | 8     | 2     |
| >CDKN2A-P3 ALLEAGALP  | 15339 | >CDKN2A-P3 ALLEAGALL   | 7     | 15332 |
| >CDKN2A-P3 ALLEAGALPN | 15    | >CDKN2A-P3 ALLEAGALLN. | 32    | 17    |
| >CDKN2A-P3 ALLEAGALP  | 2011  | >CDKN2A-P3 ALLEAGALL   | 3     | 2008  |
| >CDKN2A-P3 ALLEAGALPN | 4     | >CDKN2A-P3 ALLEAGALLN. | 5     | 1     |
| >CDKN2A-P3 RALLEAGALP | 12318 | >CDKN2A-P3 RALLEAGALL  | 12    | 12306 |
| >CDKN2A-P4 PIQVMMM    | 1725  | >CDKN2A-P4 LIQVMMM     | 49    | 1676  |
| >CDKN2A-P4 PIQVMMM    | 2016  | >CDKN2A-P4 LIQVMMM     | 389   | 1627  |
| >CDKN2A-P4 PIQVMMM    | 6131  | >CDKN2A-P4 LIQVMMM     | 412   | 5719  |
| >CDKN2A-P4 RPIQVMMM   | 109   | >CDKN2A-P4 RLIQVMMM    | 33325 | 33216 |
| >CDKN2A-P4 RPIQVMMM   | 23139 | >CDKN2A-P4 RLIQVMMM    | 166   | 22973 |
| >CDKN2A-P4 RPIQVMMM   | 23458 | >CDKN2A-P4 RLIQVMMM    | 366   | 23092 |
| >CDKN2A-P4 RPIQVMMM   | 29338 | >CDKN2A-P4 RLIQVMMM    | 228   | 29110 |
| >CDKN2A-P4 RPIQVMMM   | 29935 | >CDKN2A-P4 RLIQVMMM    | 212   | 29723 |
| >CDKN2A-P4 RPIQVMMM   | 19825 | >CDKN2A-P4 RLIQVMMM    | 81    | 19744 |
| >CDKN2A-P4 RPIQVMMM   | 12897 | >CDKN2A-P4 RLIQVMMM    | 7     | 12890 |
| >CDKN2A-P4 RPIQVMMM   | 14055 | >CDKN2A-P4 RLIQVMMM    | 189   | 13866 |
| >CDKN2A-P4 RPIQVMMM   | 22501 | >CDKN2A-P4 RLIQVMMM    | 26    | 22475 |
| >CDKN2A-P4 RPIQVMMM   | 24719 | >CDKN2A-P4 RLIQVMMM    | 65    | 24654 |
| >CDKN2A-P4 RPIQVMMM   | 26690 | >CDKN2A-P4 RLIQVMMM    | 411   | 26279 |
| >CDKN2A-P4 RPIQVMMM   | 35530 | >CDKN2A-P4 RLIQVMMM    | 179   | 35351 |

|                      |       |                      |       |       |
|----------------------|-------|----------------------|-------|-------|
| >CDKN2A-P4 RPIQVMMM  | 35535 | >CDKN2A-P4 RLIQVMMM  | 92    | 35443 |
| >CDKN2A-P4 RPIQVMMM  | 18    | >CDKN2A-P4 RLIQVMMM  | 10101 | 10083 |
| >CDKN2A-P4 RPIQVMMM  | 23    | >CDKN2A-P4 RLIQVMMM  | 8712  | 8689  |
| >CDKN2A-P4 RPIQVMMM  | 11175 | >CDKN2A-P4 RLIQVMMM  | 108   | 11067 |
| >CDKN2A-P4 RPIQVMMM  | 1480  | >CDKN2A-P4 RLIQVMMM  | 212   | 1268  |
| >CDKN2A-P4 RPIQVMMM  | 6835  | >CDKN2A-P4 RLIQVMMM  | 382   | 6453  |
| >CDKN2A-P4 RPIQVMMM  | 109   | >CDKN2A-P4 RLIQVMMM  | 10860 | 10751 |
| >CDKN2A-P4 RPIQVMMM  | 288   | >CDKN2A-P4 RLIQVMMM  | 28354 | 28066 |
| >CDKN2A-P4 RPIQVMMM  | 134   | >CDKN2A-P4 RLIQVMMM  | 27552 | 27418 |
| >CDKN2A-P4 RPIQVMMM  | 391   | >CDKN2A-P4 RLIQVMMM  | 14191 | 13800 |
| >CDKN2A-P4 RRPIQVMM  | 612   | >CDKN2A-P4 RRRIQVMM  | 58    | 554   |
| >CDKN2A-P4 RRPIQVMM  | 439   | >CDKN2A-P4 RRRIQVMM  | 32    | 407   |
| >CDKN2A-P4 RRPIQVMM  | 120   | >CDKN2A-P4 RRRIQVMM  | 15    | 105   |
| >CDKN2A-P4 RRPIQVMM  | 184   | >CDKN2A-P4 RRRIQVMM  | 19    | 165   |
| >CDKN2A-P4 RRPIQVMM  | 2331  | >CDKN2A-P4 RRRIQVMM  | 188   | 2143  |
| >CDKN2A-P4 RRPIQVMM  | 1884  | >CDKN2A-P4 RRRIQVMM  | 122   | 1762  |
| >CDKN2A-P4 RRPIQVMM  | 131   | >CDKN2A-P4 RRRIQVMM  | 39    | 92    |
| >CDKN2A-P4 RRPIQVMM  | 163   | >CDKN2A-P4 RRRIQVMM  | 83    | 80    |
| >CDKN2A-P4 RRPIQVMM  | 125   | >CDKN2A-P4 RRRIQVMM  | 59    | 66    |
| >CDKN2A-P4 RRPIQVMM  | 659   | >CDKN2A-P4 RRRIQVMM  | 245   | 414   |
| >CDKN2A-P4 RRPIQVMM  | 319   | >CDKN2A-P4 RRRIQVMM  | 51    | 268   |
| >CDKN2A-P4 RRPIQVMM  | 74    | >CDKN2A-P4 RRRIQVMM  | 56    | 18    |
| >CDKN2A-P4 RRPIQVMM  | 238   | >CDKN2A-P4 RRRIQVMM  | 92    | 146   |
| >CDKN2A-P4 RRPIQVMM  | 767   | >CDKN2A-P4 RRRIQVMM  | 482   | 285   |
| >CDKN2A-P4 GRRPIQVM  | 317   | >CDKN2A-P4 GRRRIQVM  | 841   | 524   |
| >CDKN2A-P4 GRRPIQVM  | 485   | >CDKN2A-P4 GRRRIQVM  | 1231  | 746   |
| >CDKN2A-P4 GRRPIQVM  | 365   | >CDKN2A-P4 GRRRIQVM  | 913   | 548   |
| >CDKN2A-P4 GRRPIQVM  | 314   | >CDKN2A-P4 GRRRIQVM  | 149   | 165   |
| >CDKN2A-P4 GRRPIQVM  | 115   | >CDKN2A-P4 GRRRIQVM  | 76    | 39    |
| >CDKN2A-P4 GRRPIQVM  | 203   | >CDKN2A-P4 GRRRIQVM  | 91    | 112   |
| >CDKN2A-P4 GRRPIQVM  | 250   | >CDKN2A-P4 GRRRIQVM  | 740   | 490   |
| >CDKN2A-P4 GRRPIQVM  | 213   | >CDKN2A-P4 GRRRIQVM  | 259   | 46    |
| >CDKN2A-P4 GRRPIQVM  | 455   | >CDKN2A-P4 GRRRIQVM  | 263   | 192   |
| >CDKN2A-P4 GRRPIQVM  | 34    | >CDKN2A-P4 GRRRIQVM  | 44    | 10    |
| >CDKN2A-P4 GRRPIQVM  | 222   | >CDKN2A-P4 GRRRIQVM  | 197   | 25    |
| >CDKN2A-P4 YGRRPIQVM | 395   | >CDKN2A-P4 YGRRRIQVM | 2015  | 1620  |
| >CDKN2A-P4 YGRRPIQVM | 3446  | >CDKN2A-P4 YGRRRIQVM | 485   | 2961  |
| >CDKN2A-P4 YGRRPIQVM | 343   | >CDKN2A-P4 YGRRRIQVM | 250   | 93    |
| >CDKN2A-P4 YGRRPIQVM | 262   | >CDKN2A-P4 YGRRRIQVM | 671   | 409   |
| >CDKN2A-P4 YGRRPIQVM | 425   | >CDKN2A-P4 YGRRRIQVM | 772   | 347   |
| >CDKN2A-P4 YGRRPIQVM | 44    | >CDKN2A-P4 YGRRRIQVM | 45    | 1     |
| >CDKN2A-P4 YGRRPIQVM | 45    | >CDKN2A-P4 YGRRRIQVM | 33    | 12    |
| >CDKN2A-P4 YGRRPIQVM | 37    | >CDKN2A-P4 YGRRRIQVM | 37    | 0     |

|                       |       |                       |       |       |
|-----------------------|-------|-----------------------|-------|-------|
| >CDKN2A-P4 SYGRRPIQVM | 1035  | >CDKN2A-P4 SYGRRLIQVM | 211   | 824   |
| >CDKN2A-P4 SYGRRPIQV  | 882   | >CDKN2A-P4 SYGRRLIQV  | 335   | 547   |
| >CDKN2A-P4 SYGRRPIQV  | 935   | >CDKN2A-P4 SYGRRLIQV  | 133   | 802   |
| >CDKN2A-P4 SYGRRPIQVM | 136   | >CDKN2A-P4 SYGRRLIQVM | 40    | 96    |
| >CDKN2A-P4 SYGRRPIQVM | 74    | >CDKN2A-P4 SYGRRLIQVM | 35    | 39    |
| >CDKN2A-P4 SYGRRPIQV  | 1299  | >CDKN2A-P4 SYGRRLIQV  | 265   | 1034  |
| >CDKN2A-P4 NSYGRRPIQV | 264   | >CDKN2A-P4 NSYGRRLIQV | 223   | 41    |
| >CDKN2A-P4 NSYGRRPIQV | 485   | >CDKN2A-P4 NSYGRRLIQV | 1070  | 585   |
| >CDKN2A-P4 NSYGRRPIQV | 977   | >CDKN2A-P4 NSYGRRLIQV | 132   | 845   |
| >CDKN2A-P4 NSYGRRPIQV | 408   | >CDKN2A-P4 NSYGRRLIQV | 393   | 15    |
| >CDKN2A-P4 NSYGRRPIQV | 132   | >CDKN2A-P4 NSYGRRLIQV | 131   | 1     |
| >CDKN2A-P4 NSYGRRPIQV | 495   | >CDKN2A-P4 NSYGRRLIQV | 1439  | 944   |
| >CDKN2A-P4 NSYGRRPIQV | 251   | >CDKN2A-P4 NSYGRRLIQV | 213   | 38    |
| >CDKN2A-P4 NSYGRRPI   | 104   | >CDKN2A-P4 NSYGRRLI   | 58    | 46    |
| >CDKN2A-P4 APNSYGRRP  | 10173 | >CDKN2A-P4 APNSYGRRL  | 16    | 10157 |
| >CDKN2A-P4 APNSYGRRPI | 20    | >CDKN2A-P4 APNSYGRRLI | 69    | 49    |
| >CDKN2A-P4 APNSYGRRP  | 19718 | >CDKN2A-P4 APNSYGRRL  | 316   | 19402 |
| >CDKN2A-P4 NAPNSYGRRI | 266   | >CDKN2A-P4 NAPNSYGRRI | 714   | 448   |
| >CDKN2A-P4 NAPNSYGRRI | 24204 | >CDKN2A-P4 NAPNSYGRRI | 391   | 23813 |
| >CDKN2A-P4 PIQVMMMG   | 8971  | >CDKN2A-P4 RIQVMMMG   | 243   | 8728  |
| >CDKN2A-P4 PIQVMMMG   | 1725  | >CDKN2A-P4 RIQVMMMG   | 11    | 1714  |
| >CDKN2A-P4 RPIQVMMM   | 109   | >CDKN2A-P4 RRIQVMMM   | 29560 | 29451 |
| >CDKN2A-P4 RPIQVMMM   | 18    | >CDKN2A-P4 RRIQVMMM   | 18837 | 18819 |
| >CDKN2A-P4 RPIQVMMM   | 23    | >CDKN2A-P4 RRIQVMMM   | 17183 | 17160 |
| >CDKN2A-P4 RPIQVMMM   | 1480  | >CDKN2A-P4 RRIQVMMM   | 63    | 1417  |
| >CDKN2A-P4 RPIQVMMM   | 12556 | >CDKN2A-P4 RRIQVMMM   | 25    | 12531 |
| >CDKN2A-P4 RPIQVMMM   | 27315 | >CDKN2A-P4 RRIQVMMM   | 345   | 26970 |
| >CDKN2A-P4 RPIQVMMM   | 21620 | >CDKN2A-P4 RRIQVMMM   | 109   | 21511 |
| >CDKN2A-P4 RPIQVMMM   | 109   | >CDKN2A-P4 RRIQVMMM   | 19750 | 19641 |
| >CDKN2A-P4 RPIQVMMM   | 288   | >CDKN2A-P4 RRIQVMMM   | 30602 | 30314 |
| >CDKN2A-P4 RPIQVMMM   | 134   | >CDKN2A-P4 RRIQVMMM   | 28527 | 28393 |
| >CDKN2A-P4 RPIQVMMM   | 391   | >CDKN2A-P4 RRIQVMMM   | 24556 | 24165 |
| >CDKN2A-P4 RPIQVMMM   | 3473  | >CDKN2A-P4 RRIQVMMM   | 16    | 3457  |
| >CDKN2A-P4 RPIQVMMM   | 16273 | >CDKN2A-P4 RRIQVMMM   | 121   | 16152 |
| >CDKN2A-P4 RPIQVMMM   | 15346 | >CDKN2A-P4 RRIQVMMM   | 55    | 15291 |
| >CDKN2A-P4 RPIQVMMM   | 20292 | >CDKN2A-P4 RRIQVMMM   | 214   | 20078 |
| >CDKN2A-P4 RPIQVMMM   | 10907 | >CDKN2A-P4 RRIQVMMM   | 140   | 10767 |
| >CDKN2A-P4 RPIQVMMM   | 21356 | >CDKN2A-P4 RRIQVMMM   | 259   | 21097 |
| >CDKN2A-P4 RPIQVMMM   | 14585 | >CDKN2A-P4 RRIQVMMM   | 44    | 14541 |
| >CDKN2A-P4 RPIQVMMM   | 27043 | >CDKN2A-P4 RRIQVMMM   | 380   | 26663 |
| >CDKN2A-P4 RRPIQVMM   | 16135 | >CDKN2A-P4 RRRIQVMM   | 355   | 15780 |
| >CDKN2A-P4 RRPIQVMM   | 14473 | >CDKN2A-P4 RRRIQVMM   | 91    | 14382 |
| >CDKN2A-P4 RRPIQVMM   | 612   | >CDKN2A-P4 RRRIQVMM   | 40    | 572   |

|                       |      |                       |      |      |
|-----------------------|------|-----------------------|------|------|
| >CDKN2A-P4 RRPIQVMMM  | 439  | >CDKN2A-P4 RRRIQVMMM  | 21   | 418  |
| >CDKN2A-P4 RRPIQVMM   | 120  | >CDKN2A-P4 RRRIQVMM   | 34   | 86   |
| >CDKN2A-P4 RRPIQVMMM  | 184  | >CDKN2A-P4 RRRIQVMMM  | 47   | 137  |
| >CDKN2A-P4 RRPIQVMMM  | 2331 | >CDKN2A-P4 RRRIQVMMM  | 280  | 2051 |
| >CDKN2A-P4 RRPIQVMMM  | 1884 | >CDKN2A-P4 RRRIQVMMM  | 464  | 1420 |
| >CDKN2A-P4 RRPIQVMM   | 131  | >CDKN2A-P4 RRRIQVMM   | 21   | 110  |
| >CDKN2A-P4 RRPIQVMMM  | 163  | >CDKN2A-P4 RRRIQVMMM  | 48   | 115  |
| >CDKN2A-P4 RRPIQVMMM  | 125  | >CDKN2A-P4 RRRIQVMMM  | 43   | 82   |
| >CDKN2A-P4 RRPIQVMMM  | 659  | >CDKN2A-P4 RRRIQVMMM  | 135  | 524  |
| >CDKN2A-P4 RRPIQVMM   | 319  | >CDKN2A-P4 RRRIQVMM   | 54   | 265  |
| >CDKN2A-P4 RRPIQVMMM  | 74   | >CDKN2A-P4 RRRIQVMMM  | 48   | 26   |
| >CDKN2A-P4 RRPIQVMMM  | 238  | >CDKN2A-P4 RRRIQVMMM  | 77   | 161  |
| >CDKN2A-P4 RRPIQVMMM  | 767  | >CDKN2A-P4 RRRIQVMMM  | 473  | 294  |
| >CDKN2A-P4 GRRPIQVM   | 317  | >CDKN2A-P4 GRRRIQVM   | 346  | 29   |
| >CDKN2A-P4 GRRPIQVMV  | 485  | >CDKN2A-P4 GRRRIQVMV  | 423  | 62   |
| >CDKN2A-P4 GRRPIQVMV  | 365  | >CDKN2A-P4 GRRRIQVMV  | 331  | 34   |
| >CDKN2A-P4 GRRPIQVM   | 314  | >CDKN2A-P4 GRRRIQVM   | 128  | 186  |
| >CDKN2A-P4 GRRPIQVMV  | 115  | >CDKN2A-P4 GRRRIQVMV  | 59   | 56   |
| >CDKN2A-P4 GRRPIQVMV  | 203  | >CDKN2A-P4 GRRRIQVMV  | 129  | 74   |
| >CDKN2A-P4 GRRPIQVMV  | 250  | >CDKN2A-P4 GRRRIQVMV  | 347  | 97   |
| >CDKN2A-P4 GRRPIQVMV  | 213  | >CDKN2A-P4 GRRRIQVMV  | 147  | 66   |
| >CDKN2A-P4 GRRPIQVMV  | 455  | >CDKN2A-P4 GRRRIQVMV  | 169  | 286  |
| >CDKN2A-P4 GRRPIQVMV  | 34   | >CDKN2A-P4 GRRRIQVMV  | 55   | 21   |
| >CDKN2A-P4 GRRPIQVMV  | 222  | >CDKN2A-P4 GRRRIQVMV  | 180  | 42   |
| >CDKN2A-P4 YGRRPIQV   | 1266 | >CDKN2A-P4 YGRRRIQV   | 487  | 779  |
| >CDKN2A-P4 YGRRPIQVM  | 395  | >CDKN2A-P4 YGRRRIQVM  | 491  | 96   |
| >CDKN2A-P4 YGRRPIQV   | 5115 | >CDKN2A-P4 YGRRRIQV   | 143  | 4972 |
| >CDKN2A-P4 YGRRPIQVM  | 3446 | >CDKN2A-P4 YGRRRIQVM  | 29   | 3417 |
| >CDKN2A-P4 YGRRPIQVMI | 3116 | >CDKN2A-P4 YGRRRIQVMI | 120  | 2996 |
| >CDKN2A-P4 YGRRPIQVM  | 343  | >CDKN2A-P4 YGRRRIQVM  | 346  | 3    |
| >CDKN2A-P4 YGRRPIQVM  | 262  | >CDKN2A-P4 YGRRRIQVM  | 717  | 455  |
| >CDKN2A-P4 YGRRPIQVMI | 425  | >CDKN2A-P4 YGRRRIQVMI | 780  | 355  |
| >CDKN2A-P4 YGRRPIQVM  | 44   | >CDKN2A-P4 YGRRRIQVM  | 164  | 120  |
| >CDKN2A-P4 YGRRPIQVMI | 45   | >CDKN2A-P4 YGRRRIQVMI | 33   | 12   |
| >CDKN2A-P4 YGRRPIQVMI | 37   | >CDKN2A-P4 YGRRRIQVMI | 81   | 44   |
| >CDKN2A-P4 SYGRRPIQVM | 1035 | >CDKN2A-P4 SYGRRRIQVM | 152  | 883  |
| >CDKN2A-P4 SYGRRPIQVM | 780  | >CDKN2A-P4 SYGRRRIQVM | 385  | 395  |
| >CDKN2A-P4 SYGRRPIQV  | 935  | >CDKN2A-P4 SYGRRRIQV  | 463  | 472  |
| >CDKN2A-P4 SYGRRPIQVM | 136  | >CDKN2A-P4 SYGRRRIQVM | 93   | 43   |
| >CDKN2A-P4 SYGRRPIQVM | 74   | >CDKN2A-P4 SYGRRRIQVM | 53   | 21   |
| >CDKN2A-P4 NSYGRRPIQV | 264  | >CDKN2A-P4 NSYGRRRIQV | 178  | 86   |
| >CDKN2A-P4 NSYGRRPIQV | 485  | >CDKN2A-P4 NSYGRRRIQV | 1228 | 743  |
| >CDKN2A-P4 NSYGRRPIQV | 977  | >CDKN2A-P4 NSYGRRRIQV | 143  | 834  |

|                        |       |                        |       |       |
|------------------------|-------|------------------------|-------|-------|
| >CDKN2A-P4 NSYGRRPIQV  | 408   | >CDKN2A-P4 NSYGRRIQV   | 1428  | 1020  |
| >CDKN2A-P4 NSYGRRIQV   | 132   | >CDKN2A-P4 NSYGRRIQV   | 198   | 66    |
| >CDKN2A-P4 NSYGRRIQV   | 495   | >CDKN2A-P4 NSYGRRIQV   | 2168  | 1673  |
| >CDKN2A-P4 NSYGRRIQV   | 251   | >CDKN2A-P4 NSYGRRIQV   | 379   | 128   |
| >CDKN2A-P4 NSYGRRI     | 104   | >CDKN2A-P4 NSYGRRI     | 98    | 6     |
| >CDKN2A-P4 APNSYGRRI   | 20    | >CDKN2A-P4 APNSYGRRI   | 213   | 193   |
| >CDKN2A-P4 APNSYGRRI   | 1068  | >CDKN2A-P4 APNSYGRRI   | 395   | 673   |
| >CDKN2A-P4 NAPNSYGRRI  | 35249 | >CDKN2A-P4 NAPNSYGRRI  | 232   | 35017 |
| >CDKN2A-P4 NAPNSYGRRI  | 266   | >CDKN2A-P4 NAPNSYGRRI  | 1001  | 735   |
| >CDKN2A-P7 EPNCADPATL  | 353   | >CDKN2A-P7 EANCADPATI  | 25998 | 25645 |
| >CDKN2A-P7 EPNCADPA    | 2059  | >CDKN2A-P7 EANCADPA    | 47    | 2012  |
| >CDKN2A-P7 EPNCADPATL  | 949   | >CDKN2A-P7 EANCADPATI  | 185   | 764   |
| >CDKN2A-P7 EPNCADPA    | 53    | >CDKN2A-P7 EANCADPA    | 466   | 413   |
| >CDKN2A-P7 EPNCADPAT   | 16    | >CDKN2A-P7 EANCADPAT   | 64    | 48    |
| >CDKN2A-P7 EPNCADPATL  | 279   | >CDKN2A-P7 EANCADPATI  | 1772  | 1493  |
| >CDKN2A-P7 EPNCADPA    | 43    | >CDKN2A-P7 EANCADPA    | 3713  | 3670  |
| >CDKN2A-P7 EPNCADPAT   | 371   | >CDKN2A-P7 EANCADPAT   | 21617 | 21246 |
| >CDKN2A-P7 AELLLLHGAEI | 1089  | >CDKN2A-P7 AELLLLHGAEI | 58    | 1031  |
| >CDKN2A-P7 AELLLLHGAEI | 750   | >CDKN2A-P7 AELLLLHGAEI | 8     | 742   |
| >CDKN2A-P7 AELLLLHGAEI | 736   | >CDKN2A-P7 AELLLLHGAEI | 74    | 662   |
| >CDKN2A-P7 AEPNCADPA`  | 5501  | >CDKN2A-P7 AEANCADPA`  | 274   | 5227  |
| >CDKN2A-P7 AEPNCADPA`  | 183   | >CDKN2A-P7 AEANCADPA`  | 13    | 170   |
| >CDKN2A-P7 AEPNCADPA`  | 209   | >CDKN2A-P7 AEANCADPA`  | 70    | 139   |
| >CDKN2A-P7 AEPNCADPA`  | 507   | >CDKN2A-P7 AEANCADPA`  | 355   | 152   |
| >CDKN2A-P7 AEPNCADPA`  | 849   | >CDKN2A-P7 AEANCADPA`  | 305   | 544   |
| >CDKN2A-P7 AEPNCADPA`  | 1804  | >CDKN2A-P7 AEANCADPA`  | 199   | 1605  |
| >CDKN2A-P7 AEPNCADPA`  | 480   | >CDKN2A-P7 AEANCADPA`  | 11    | 469   |
| >CDKN2A-P7 AEPNCADPA`  | 230   | >CDKN2A-P7 AEANCADPA`  | 106   | 124   |
| >CDKN2A-P7 AEPNCADPA`  | 12822 | >CDKN2A-P7 AEANCADPA`  | 357   | 12465 |
| >CDKN2A-P7 AEPNCADPA`  | 609   | >CDKN2A-P7 AEANCADPA`  | 157   | 452   |
| >CDKN2A-P7 AEPNCADPA`  | 65    | >CDKN2A-P7 AEANCADPA`  | 23    | 42    |
| >CDKN2A-P7 HGAEPNCAD   | 272   | >CDKN2A-P7 HGAEANCAD   | 383   | 111   |
| >CDKN2A-P7 LLHGAEPNCA/ | 360   | >CDKN2A-P7 LLHGAEANC/  | 589   | 229   |
| >CDKN2A-P7 LLHGAEPNCA/ | 290   | >CDKN2A-P7 LLHGAEANC/  | 1013  | 723   |
| >CDKN2A-P7 LLHGAEPNC   | 274   | >CDKN2A-P7 LLHGAEANC   | 282   | 8     |
| >CDKN2A-P7 LLHGAEPNCA/ | 278   | >CDKN2A-P7 LLHGAEANC/  | 546   | 268   |
| >CDKN2A-P7 LLHGAEPNCA/ | 242   | >CDKN2A-P7 LLHGAEANC/  | 460   | 218   |
| >CDKN2A-P7 LLHGAEPNC   | 14    | >CDKN2A-P7 LLHGAEANC   | 14    | 0     |
| >CDKN2A-P7 LLHGAEPNCA/ | 26    | >CDKN2A-P7 LLHGAEANC/  | 23    | 3     |
| >CDKN2A-P7 LLLHGAEP    | 19527 | >CDKN2A-P7 LLLHGAEA    | 126   | 19401 |
| >CDKN2A-P7 LLLHGAEP    | 6493  | >CDKN2A-P7 LLLHGAEA    | 268   | 6225  |
| >CDKN2A-P7 LLLHGAEP    | 10850 | >CDKN2A-P7 LLLHGAEA    | 53    | 10797 |
| >CDKN2A-P7 LLLHGAEPNC  | 429   | >CDKN2A-P7 LLLHGAEANC  | 672   | 243   |

|                        |       |                        |       |       |
|------------------------|-------|------------------------|-------|-------|
| >CDKN2A-P7 LLLHGAEP    | 5720  | >CDKN2A-P7 LLLHGAEA    | 68    | 5652  |
| >CDKN2A-P7 LLLHGAEPNC  | 476   | >CDKN2A-P7 LLLHGAEANC  | 211   | 265   |
| >CDKN2A-P7 LLLHGAEP    | 2925  | >CDKN2A-P7 LLLHGAEA    | 13    | 2912  |
| >CDKN2A-P7 LLLHGAEPNC  | 121   | >CDKN2A-P7 LLLHGAEANC  | 118   | 3     |
| >CDKN2A-P7 LLLHGAEPNC  | 105   | >CDKN2A-P7 LLLHGAEANC  | 192   | 87    |
| >CDKN2A-P7 LLLHGAEP    | 7435  | >CDKN2A-P7 LLLHGAEA    | 32    | 7403  |
| >CDKN2A-P7 LLLHGAEPNC  | 428   | >CDKN2A-P7 LLLHGAEANC  | 299   | 129   |
| >CDKN2A-P7 LLLHGAEPNC  | 80    | >CDKN2A-P7 LLLHGAEANC  | 84    | 4     |
| >CDKN2A-P7 LLLHGAEP    | 10341 | >CDKN2A-P7 LLLHGAEA    | 34    | 10307 |
| >CDKN2A-P7 LLLHGAEPNC  | 294   | >CDKN2A-P7 LLLHGAEANC  | 1058  | 764   |
| >CDKN2A-P7 LLLHGAEPNC  | 66    | >CDKN2A-P7 LLLHGAEANC  | 87    | 21    |
| >CDKN2A-P7 LLLHGAEP    | 18868 | >CDKN2A-P7 LLLHGAEA    | 147   | 18721 |
| >CDKN2A-P7 LLLHGAEPNC  | 369   | >CDKN2A-P7 LLLHGAEANC  | 379   | 10    |
| >CDKN2A-P7 LLLHGAEPNC  | 198   | >CDKN2A-P7 LLLHGAEANC  | 223   | 25    |
| >CDKN2A-P7 LLLHGAEP    | 4637  | >CDKN2A-P7 LLLHGAEA    | 7     | 4630  |
| >CDKN2A-P7 LLLHGAEPNC  | 35    | >CDKN2A-P7 LLLHGAEANC  | 41    | 6     |
| >CDKN2A-P7 LLLHGAEPNC  | 53    | >CDKN2A-P7 LLLHGAEANC  | 49    | 4     |
| >CDKN2A-P7 LLLLHGAEP   | 21326 | >CDKN2A-P7 LLLLHGAEA   | 283   | 21043 |
| >CDKN2A-P7 LLLLHGAEP   | 5354  | >CDKN2A-P7 LLLLHGAEA   | 293   | 5061  |
| >CDKN2A-P7 LLLLHGAEP   | 10137 | >CDKN2A-P7 LLLLHGAEA   | 55    | 10082 |
| >CDKN2A-P7 LLLLHGAEP   | 8509  | >CDKN2A-P7 LLLLHGAEA   | 433   | 8076  |
| >CDKN2A-P7 LLLLHGAEP   | 5810  | >CDKN2A-P7 LLLLHGAEA   | 30    | 5780  |
| >CDKN2A-P7 LLLLHGAEPN  | 220   | >CDKN2A-P7 LLLLHGAEAN  | 228   | 8     |
| >CDKN2A-P7 LLLLHGAEP   | 11275 | >CDKN2A-P7 LLLLHGAEA   | 87    | 11188 |
| >CDKN2A-P7 LLLLHGAEP   | 16320 | >CDKN2A-P7 LLLLHGAEA   | 259   | 16061 |
| >CDKN2A-P7 LLLLHGAEP   | 9490  | >CDKN2A-P7 LLLLHGAEA   | 23    | 9467  |
| >CDKN2A-P7 LLLLHGAEPN  | 89    | >CDKN2A-P7 LLLLHGAEAN  | 98    | 9     |
| >CDKN2A-P7 EPNCADPATL  | 353   | >CDKN2A-P7 ELNCADPATL  | 30269 | 29916 |
| >CDKN2A-P7 EPNCADPATL  | 25765 | >CDKN2A-P7 ELNCADPATL  | 346   | 25419 |
| >CDKN2A-P7 EPNCADPATL  | 25090 | >CDKN2A-P7 ELNCADPATL  | 483   | 24607 |
| >CDKN2A-P7 EPNCADPATL  | 27281 | >CDKN2A-P7 ELNCADPATL  | 108   | 27173 |
| >CDKN2A-P7 EPNCADPATL  | 22630 | >CDKN2A-P7 ELNCADPATL  | 51    | 22579 |
| >CDKN2A-P7 EPNCADPATL  | 26322 | >CDKN2A-P7 ELNCADPATL  | 448   | 25874 |
| >CDKN2A-P7 EPNCADPATL  | 20906 | >CDKN2A-P7 ELNCADPATL  | 73    | 20833 |
| >CDKN2A-P7 EPNCADPATL  | 35247 | >CDKN2A-P7 ELNCADPATL  | 126   | 35121 |
| >CDKN2A-P7 EPNCADPA    | 2059  | >CDKN2A-P7 ELNCADPA    | 165   | 1894  |
| >CDKN2A-P7 EPNCADPATL  | 949   | >CDKN2A-P7 ELNCADPATL  | 372   | 577   |
| >CDKN2A-P7 EPNCADPA    | 53    | >CDKN2A-P7 ELNCADPA    | 7066  | 7013  |
| >CDKN2A-P7 EPNCADPAT   | 16    | >CDKN2A-P7 ELNCADPAT   | 1662  | 1646  |
| >CDKN2A-P7 EPNCADPATL  | 279   | >CDKN2A-P7 ELNCADPATL  | 9815  | 9536  |
| >CDKN2A-P7 EPNCADPA    | 43    | >CDKN2A-P7 ELNCADPA    | 17510 | 17467 |
| >CDKN2A-P7 EPNCADPAT   | 371   | >CDKN2A-P7 ELNCADPAT   | 32600 | 32229 |
| >CDKN2A-P7 AELLLLHGAEI | 10492 | >CDKN2A-P7 AELLLLHGAEI | 149   | 10343 |



|                        |       |                        |     |       |
|------------------------|-------|------------------------|-----|-------|
| >CDKN2A-P7 AELLLLHGAEI | 4935  | >CDKN2A-P7 AELLLLHGAEI | 22  | 4913  |
| >CDKN2A-P7 AELLLLHGAEI | 1089  | >CDKN2A-P7 AELLLLHGAEI | 20  | 1069  |
| >CDKN2A-P7 AELLLLHGAEI | 4084  | >CDKN2A-P7 AELLLLHGAEI | 286 | 3798  |
| >CDKN2A-P7 AELLLLHGAEI | 3352  | >CDKN2A-P7 AELLLLHGAEI | 142 | 3210  |
| >CDKN2A-P7 AELLLLHGAEI | 750   | >CDKN2A-P7 AELLLLHGAEI | 150 | 600   |
| >CDKN2A-P7 AELLLLHGAEI | 736   | >CDKN2A-P7 AELLLLHGAEI | 7   | 729   |
| >CDKN2A-P7 AEPNCADPA`  | 5501  | >CDKN2A-P7 AELNCADPAI  | 311 | 5190  |
| >CDKN2A-P7 AEPNCADPA`  | 183   | >CDKN2A-P7 AELNCADPAI  | 12  | 171   |
| >CDKN2A-P7 AEPNCADPA   | 209   | >CDKN2A-P7 AELNCADPA   | 20  | 189   |
| >CDKN2A-P7 AEPNCADPA`  | 507   | >CDKN2A-P7 AELNCADPAI  | 463 | 44    |
| >CDKN2A-P7 AEPNCADPA`  | 849   | >CDKN2A-P7 AELNCADPAI  | 71  | 778   |
| >CDKN2A-P7 AEPNCADPA   | 5187  | >CDKN2A-P7 AELNCADPA   | 447 | 4740  |
| >CDKN2A-P7 AEPNCADPA`  | 1804  | >CDKN2A-P7 AELNCADPAI  | 102 | 1702  |
| >CDKN2A-P7 AEPNCADPA   | 480   | >CDKN2A-P7 AELNCADPA   | 12  | 468   |
| >CDKN2A-P7 AEPNCADPA`  | 230   | >CDKN2A-P7 AELNCADPAI  | 246 | 16    |
| >CDKN2A-P7 AEPNCADPA   | 609   | >CDKN2A-P7 AELNCADPA   | 75  | 534   |
| >CDKN2A-P7 AEPNCADPA`  | 3264  | >CDKN2A-P7 AELNCADPAI  | 218 | 3046  |
| >CDKN2A-P7 AEPNCADPA`  | 65    | >CDKN2A-P7 AELNCADPAI  | 12  | 53    |
| >CDKN2A-P7 HGAEPNCAD   | 272   | >CDKN2A-P7 HGAELNCADI  | 360 | 88    |
| >CDKN2A-P7 LLHGAEPNCA  | 360   | >CDKN2A-P7 LLHGAELNCA  | 154 | 206   |
| >CDKN2A-P7 LLHGAEPNCA  | 290   | >CDKN2A-P7 LLHGAELNCA  | 182 | 108   |
| >CDKN2A-P7 LLHGAEPNC   | 274   | >CDKN2A-P7 LLHGAELNC   | 519 | 245   |
| >CDKN2A-P7 LLHGAEPNCA  | 278   | >CDKN2A-P7 LLHGAELNCA  | 368 | 90    |
| >CDKN2A-P7 LLHGAEPNCA  | 242   | >CDKN2A-P7 LLHGAELNCA  | 316 | 74    |
| >CDKN2A-P7 LLHGAEPNC   | 14    | >CDKN2A-P7 LLHGAELNC   | 24  | 10    |
| >CDKN2A-P7 LLHGAEPNCA  | 26    | >CDKN2A-P7 LLHGAELNCA  | 17  | 9     |
| >CDKN2A-P7 LLLHGAEP    | 19527 | >CDKN2A-P7 LLLHGAEL    | 46  | 19481 |
| >CDKN2A-P7 LLLHGAEPNC  | 560   | >CDKN2A-P7 LLLHGAELNC  | 310 | 250   |
| >CDKN2A-P7 LLLHGAEP    | 6493  | >CDKN2A-P7 LLLHGAEL    | 56  | 6437  |
| >CDKN2A-P7 LLLHGAEPNC  | 723   | >CDKN2A-P7 LLLHGAELNC  | 309 | 414   |
| >CDKN2A-P7 LLLHGAEP    | 10850 | >CDKN2A-P7 LLLHGAEL    | 81  | 10769 |
| >CDKN2A-P7 LLLHGAEPNC  | 429   | >CDKN2A-P7 LLLHGAELNC  | 288 | 141   |
| >CDKN2A-P7 LLLHGAEP    | 5720  | >CDKN2A-P7 LLLHGAEL    | 50  | 5670  |
| >CDKN2A-P7 LLLHGAEPNC  | 476   | >CDKN2A-P7 LLLHGAELNC  | 86  | 390   |
| >CDKN2A-P7 LLLHGAEP    | 2925  | >CDKN2A-P7 LLLHGAEL    | 6   | 2919  |
| >CDKN2A-P7 LLLHGAEPNC  | 121   | >CDKN2A-P7 LLLHGAELNC  | 211 | 90    |
| >CDKN2A-P7 LLLHGAEPNC  | 105   | >CDKN2A-P7 LLLHGAELNC  | 120 | 15    |
| >CDKN2A-P7 LLLHGAEP    | 7435  | >CDKN2A-P7 LLLHGAEL    | 8   | 7427  |
| >CDKN2A-P7 LLLHGAEPNC  | 428   | >CDKN2A-P7 LLLHGAELNC  | 868 | 440   |
| >CDKN2A-P7 LLLHGAEPNC  | 80    | >CDKN2A-P7 LLLHGAELNC  | 64  | 16    |
| >CDKN2A-P7 LLLHGAEP    | 10341 | >CDKN2A-P7 LLLHGAEL    | 15  | 10326 |
| >CDKN2A-P7 LLLHGAEPNC  | 294   | >CDKN2A-P7 LLLHGAELNC  | 891 | 597   |
| >CDKN2A-P7 LLLHGAEPNC  | 66    | >CDKN2A-P7 LLLHGAELNC  | 59  | 7     |

|                       |       |                       |       |       |
|-----------------------|-------|-----------------------|-------|-------|
| >CDKN2A-P7 LLLHGAEP   | 18868 | >CDKN2A-P7 LLLHGAEL   | 18    | 18850 |
| >CDKN2A-P7 LLLHGAEPNC | 369   | >CDKN2A-P7 LLLHGAELNC | 843   | 474   |
| >CDKN2A-P7 LLLHGAEPNC | 198   | >CDKN2A-P7 LLLHGAELNC | 149   | 49    |
| >CDKN2A-P7 LLLHGAEP   | 4637  | >CDKN2A-P7 LLLHGAEL   | 3     | 4634  |
| >CDKN2A-P7 LLLHGAEPNC | 35    | >CDKN2A-P7 LLLHGAELNC | 57    | 22    |
| >CDKN2A-P7 LLLHGAEPNC | 53    | >CDKN2A-P7 LLLHGAELNC | 32    | 21    |
| >CDKN2A-P7 LLLHGAEP   | 8373  | >CDKN2A-P7 LLLHGAEL   | 421   | 7952  |
| >CDKN2A-P7 LLLLHGAEP  | 21326 | >CDKN2A-P7 LLLLHGAEL  | 91    | 21235 |
| >CDKN2A-P7 LLLLHGAEP  | 5354  | >CDKN2A-P7 LLLLHGAEL  | 77    | 5277  |
| >CDKN2A-P7 LLLLHGAEP  | 10137 | >CDKN2A-P7 LLLLHGAEL  | 85    | 10052 |
| >CDKN2A-P7 LLLLHGAEP  | 8509  | >CDKN2A-P7 LLLLHGAEL  | 268   | 8241  |
| >CDKN2A-P7 LLLLHGAEP  | 5810  | >CDKN2A-P7 LLLLHGAEL  | 10    | 5800  |
| >CDKN2A-P7 LLLLHGAEPN | 220   | >CDKN2A-P7 LLLLHGAELN | 345   | 125   |
| >CDKN2A-P7 LLLLHGAEP  | 11275 | >CDKN2A-P7 LLLLHGAEL  | 24    | 11251 |
| >CDKN2A-P7 LLLLHGAEP  | 16320 | >CDKN2A-P7 LLLLHGAEL  | 76    | 16244 |
| >CDKN2A-P7 LLLLHGAEP  | 22936 | >CDKN2A-P7 LLLLHGAEL  | 54    | 22882 |
| >CDKN2A-P7 LLLLHGAEP  | 9490  | >CDKN2A-P7 LLLLHGAEL  | 8     | 9482  |
| >CDKN2A-P7 LLLLHGAEPN | 89    | >CDKN2A-P7 LLLLHGAELN | 157   | 68    |
| >CDKN2A-P7 LLLLHGAEP  | 12196 | >CDKN2A-P7 LLLLHGAEL  | 278   | 11918 |
| >CDKN2A-P7 ELLLHGAEP  | 18461 | >CDKN2A-P7 ELLLHGAEL  | 184   | 18277 |
| >CDKN2A-P7 ELLLHGAEP  | 24226 | >CDKN2A-P7 ELLLHGAEL  | 483   | 23743 |
| >CDKN2A-P7 ELLLHGAEP  | 28767 | >CDKN2A-P7 ELLLHGAEL  | 185   | 28582 |
| >CDKN2A-P7 ELLLHGAEP  | 14949 | >CDKN2A-P7 ELLLHGAEL  | 191   | 14758 |
| >CDKN2A-P7 PNCADPATLT | 1360  | >CDKN2A-P7 SNCADPATLT | 492   | 868   |
| >CDKN2A-P7 EPNCADPATL | 353   | >CDKN2A-P7 ENSCADPATL | 27861 | 27508 |
| >CDKN2A-P7 EPNCADPA   | 2059  | >CDKN2A-P7 ENSCADPA   | 62    | 1997  |
| >CDKN2A-P7 EPNCADPATL | 23212 | >CDKN2A-P7 ENSCADPATL | 243   | 22969 |
| >CDKN2A-P7 EPNCADPA   | 53    | >CDKN2A-P7 ENSCADPA   | 4746  | 4693  |
| >CDKN2A-P7 EPNCADPAT  | 16    | >CDKN2A-P7 ENSCADPAT  | 930   | 914   |
| >CDKN2A-P7 EPNCADPATL | 279   | >CDKN2A-P7 ENSCADPATL | 7709  | 7430  |
| >CDKN2A-P7 EPNCADPA   | 43    | >CDKN2A-P7 ENSCADPA   | 18521 | 18478 |
| >CDKN2A-P7 EPNCADPAT  | 371   | >CDKN2A-P7 ENSCADPAT  | 31581 | 31210 |
| >CDKN2A-P7 EPNCADPATL | 19500 | >CDKN2A-P7 ENSCADPATL | 263   | 19237 |
| >CDKN2A-P7 AELLHGAEL  | 1089  | >CDKN2A-P7 AELLHGAEL  | 269   | 820   |
| >CDKN2A-P7 AELLHGAEL  | 750   | >CDKN2A-P7 AELLHGAEL  | 81    | 669   |
| >CDKN2A-P7 AELLHGAEL  | 736   | >CDKN2A-P7 AELLHGAEL  | 352   | 384   |
| >CDKN2A-P7 AEPNCADPA  | 5501  | >CDKN2A-P7 AESNCADPA  | 431   | 5070  |
| >CDKN2A-P7 AEPNCADPA  | 183   | >CDKN2A-P7 AESNCADPA  | 9     | 174   |
| >CDKN2A-P7 AEPNCADPA  | 209   | >CDKN2A-P7 AESNCADPA  | 40    | 169   |
| >CDKN2A-P7 AEPNCADPA  | 507   | >CDKN2A-P7 AESNCADPA  | 324   | 183   |
| >CDKN2A-P7 AEPNCADPA  | 849   | >CDKN2A-P7 AESNCADPA  | 184   | 665   |
| >CDKN2A-P7 AEPNCADPA  | 1804  | >CDKN2A-P7 AESNCADPA  | 252   | 1552  |
| >CDKN2A-P7 AEPNCADPA  | 480   | >CDKN2A-P7 AESNCADPA  | 13    | 467   |

|                       |       |                       |       |       |
|-----------------------|-------|-----------------------|-------|-------|
| >CDKN2A-P7 AEPNCADPA  | 230   | >CDKN2A-P7 AESNCADPA  | 107   | 123   |
| >CDKN2A-P7 AEPNCADPA  | 12822 | >CDKN2A-P7 AESNCADPA  | 440   | 12382 |
| >CDKN2A-P7 AEPNCADPA  | 609   | >CDKN2A-P7 AESNCADPA  | 347   | 262   |
| >CDKN2A-P7 AEPNCADPA  | 65    | >CDKN2A-P7 AESNCADPA  | 30    | 35    |
| >CDKN2A-P7 HGAEPNCAD  | 272   | >CDKN2A-P7 HGAESNCAD  | 568   | 296   |
| >CDKN2A-P7 LLHGAEPNCA | 360   | >CDKN2A-P7 LLHGAESNCA | 377   | 17    |
| >CDKN2A-P7 LLHGAEPNCA | 290   | >CDKN2A-P7 LLHGAESNCA | 539   | 249   |
| >CDKN2A-P7 LLHGAEPNC  | 274   | >CDKN2A-P7 LLHGAESNC  | 546   | 272   |
| >CDKN2A-P7 LLHGAEPNCA | 278   | >CDKN2A-P7 LLHGAESNCA | 553   | 275   |
| >CDKN2A-P7 LLHGAEPNCA | 242   | >CDKN2A-P7 LLHGAESNCA | 380   | 138   |
| >CDKN2A-P7 LLHGAEPNC  | 14    | >CDKN2A-P7 LLHGAESNC  | 19    | 5     |
| >CDKN2A-P7 LLHGAEPNCA | 26    | >CDKN2A-P7 LLHGAESNCA | 23    | 3     |
| >CDKN2A-P7 LLLHGAEPNC | 723   | >CDKN2A-P7 LLLHGAESNC | 465   | 258   |
| >CDKN2A-P7 LLLHGAEPNC | 429   | >CDKN2A-P7 LLLHGAESNC | 493   | 64    |
| >CDKN2A-P7 LLLHGAEPNC | 476   | >CDKN2A-P7 LLLHGAESNC | 208   | 268   |
| >CDKN2A-P7 LLLHGAEPNC | 121   | >CDKN2A-P7 LLLHGAESNC | 190   | 69    |
| >CDKN2A-P7 LLLHGAEPNC | 105   | >CDKN2A-P7 LLLHGAESNC | 162   | 57    |
| >CDKN2A-P7 LLLHGAEPNC | 428   | >CDKN2A-P7 LLLHGAESNC | 525   | 97    |
| >CDKN2A-P7 LLLHGAEPNC | 80    | >CDKN2A-P7 LLLHGAESNC | 63    | 17    |
| >CDKN2A-P7 LLLHGAEPNC | 294   | >CDKN2A-P7 LLLHGAESNC | 1106  | 812   |
| >CDKN2A-P7 LLLHGAEPNC | 66    | >CDKN2A-P7 LLLHGAESNC | 60    | 6     |
| >CDKN2A-P7 LLLHGAEPNC | 369   | >CDKN2A-P7 LLLHGAESNC | 639   | 270   |
| >CDKN2A-P7 LLLHGAEPNC | 198   | >CDKN2A-P7 LLLHGAESNC | 143   | 55    |
| >CDKN2A-P7 LLLHGAEP   | 4637  | >CDKN2A-P7 LLLHGAES   | 463   | 4174  |
| >CDKN2A-P7 LLLHGAEPNC | 35    | >CDKN2A-P7 LLLHGAESNC | 45    | 10    |
| >CDKN2A-P7 LLLHGAEPNC | 53    | >CDKN2A-P7 LLLHGAESNC | 42    | 11    |
| >CDKN2A-P7 LLLLHGAEPN | 220   | >CDKN2A-P7 LLLLHGAESN | 352   | 132   |
| >CDKN2A-P7 LLLLHGAEPN | 89    | >CDKN2A-P7 LLLLHGAESN | 126   | 37    |
| >CDKN2A-P7 PATLTRPV   | 10266 | >CDKN2A-P7 HATLTRPV   | 141   | 10125 |
| >CDKN2A-P7 DPATLTRPV  | 485   | >CDKN2A-P7 DHATLTRPV  | 4943  | 4458  |
| >CDKN2A-P7 DPATLTRPV  | 197   | >CDKN2A-P7 DHATLTRPV  | 13400 | 13203 |
| >CDKN2A-P7 DPATLTRPV  | 149   | >CDKN2A-P7 DHATLTRPV  | 23956 | 23807 |
| >CDKN2A-P7 ADPATLTRPV | 498   | >CDKN2A-P7 ADHATLTRPV | 180   | 318   |
| >CDKN2A-P7 CADPATLTR  | 353   | >CDKN2A-P7 CADHATLTR  | 509   | 156   |
| >CDKN2A-P7 NCADPATLTF | 284   | >CDKN2A-P7 NCADHATLTF | 287   | 3     |
| >CDKN2A-P7 NCADPATL   | 475   | >CDKN2A-P7 NCADHATL   | 1298  | 823   |
| >CDKN2A-P7 NCADPATLTF | 233   | >CDKN2A-P7 NCADHATLTF | 128   | 105   |
| >CDKN2A-P7 EPNCADPATL | 353   | >CDKN2A-P7 EPNCADHATI | 337   | 16    |
| >CDKN2A-P7 EPNCADPA   | 53    | >CDKN2A-P7 EPNCADHA   | 921   | 868   |
| >CDKN2A-P7 EPNCADPAT  | 16    | >CDKN2A-P7 EPNCADHAT  | 17    | 1     |
| >CDKN2A-P7 EPNCADPATL | 279   | >CDKN2A-P7 EPNCADHATI | 193   | 86    |
| >CDKN2A-P7 EPNCADPA   | 43    | >CDKN2A-P7 EPNCADHA   | 168   | 125   |
| >CDKN2A-P7 EPNCADPAT  | 371   | >CDKN2A-P7 EPNCADHAT  | 532   | 161   |

|                       |       |                       |       |       |
|-----------------------|-------|-----------------------|-------|-------|
| >CDKN2A-P7 AEPNCADPA  | 183   | >CDKN2A-P7 AEPNCADHA  | 96    | 87    |
| >CDKN2A-P7 AEPNCADPA  | 209   | >CDKN2A-P7 AEPNCADHA  | 2773  | 2564  |
| >CDKN2A-P7 AEPNCADPA  | 507   | >CDKN2A-P7 AEPNCADHA  | 215   | 292   |
| >CDKN2A-P7 AEPNCADPA  | 480   | >CDKN2A-P7 AEPNCADHA  | 1414  | 934   |
| >CDKN2A-P7 AEPNCADPA  | 230   | >CDKN2A-P7 AEPNCADHA  | 191   | 39    |
| >CDKN2A-P7 AEPNCADPA  | 65    | >CDKN2A-P7 AEPNCADHA  | 122   | 57    |
| >CDKN2A-P7 HGAEPNCAD  | 272   | >CDKN2A-P7 HGAEPNCAD  | 964   | 692   |
| >CDKN2A-P7 DPATLTRPV  | 20049 | >CDKN2A-P7 DLATLTRPV  | 210   | 19839 |
| >CDKN2A-P7 DPATLTRPV  | 29179 | >CDKN2A-P7 DLATLTRPV  | 313   | 28866 |
| >CDKN2A-P7 DPATLTRPV  | 24925 | >CDKN2A-P7 DLATLTRPV  | 178   | 24747 |
| >CDKN2A-P7 DPATLTRPV  | 23793 | >CDKN2A-P7 DLATLTRPV  | 171   | 23622 |
| >CDKN2A-P7 DPATLTRPV  | 35536 | >CDKN2A-P7 DLATLTRPV  | 78    | 35458 |
| >CDKN2A-P7 DPATLTRPV  | 485   | >CDKN2A-P7 DLATLTRPV  | 47    | 438   |
| >CDKN2A-P7 DPATLTRPV  | 197   | >CDKN2A-P7 DLATLTRPV  | 87    | 110   |
| >CDKN2A-P7 DPATLTRPV  | 149   | >CDKN2A-P7 DLATLTRPV  | 21372 | 21223 |
| >CDKN2A-P7 ADPATLTRPV | 498   | >CDKN2A-P7 ADLATLTRPV | 65    | 433   |
| >CDKN2A-P7 CADPATLTR  | 353   | >CDKN2A-P7 CADLATLTR  | 491   | 138   |
| >CDKN2A-P7 NCADPATL   | 1919  | >CDKN2A-P7 NCADLATL   | 382   | 1537  |
| >CDKN2A-P7 NCADPATLTF | 284   | >CDKN2A-P7 NCADLATLTR | 240   | 44    |
| >CDKN2A-P7 NCADPATL   | 475   | >CDKN2A-P7 NCADLATL   | 546   | 71    |
| >CDKN2A-P7 NCADPATLTF | 233   | >CDKN2A-P7 NCADLATLTR | 101   | 132   |
| >CDKN2A-P7 EPNCADPATL | 353   | >CDKN2A-P7 EPNCADLATL | 603   | 250   |
| >CDKN2A-P7 EPNCADPA   | 53    | >CDKN2A-P7 EPNCADLA   | 465   | 412   |
| >CDKN2A-P7 EPNCADPAT  | 16    | >CDKN2A-P7 EPNCADLAT  | 14    | 2     |
| >CDKN2A-P7 EPNCADPATL | 279   | >CDKN2A-P7 EPNCADLATL | 208   | 71    |
| >CDKN2A-P7 EPNCADPA   | 43    | >CDKN2A-P7 EPNCADLA   | 109   | 66    |
| >CDKN2A-P7 EPNCADPAT  | 371   | >CDKN2A-P7 EPNCADLAT  | 3013  | 2642  |
| >CDKN2A-P7 AEPNCADPA  | 183   | >CDKN2A-P7 AEPNCADLAT | 109   | 74    |
| >CDKN2A-P7 AEPNCADPA  | 209   | >CDKN2A-P7 AEPNCADLA  | 1462  | 1253  |
| >CDKN2A-P7 AEPNCADPA  | 507   | >CDKN2A-P7 AEPNCADLAT | 459   | 48    |
| >CDKN2A-P7 AEPNCADPA  | 480   | >CDKN2A-P7 AEPNCADLA  | 1197  | 717   |
| >CDKN2A-P7 AEPNCADPA  | 230   | >CDKN2A-P7 AEPNCADLAT | 159   | 71    |
| >CDKN2A-P7 AEPNCADPA  | 609   | >CDKN2A-P7 AEPNCADLA  | 449   | 160   |
| >CDKN2A-P7 AEPNCADPA  | 65    | >CDKN2A-P7 AEPNCADLAT | 31    | 34    |
| >CDKN2A-P7 HGAEPNCAD  | 272   | >CDKN2A-P7 HGAEPNCAD  | 843   | 571   |
| >CDKN2A-P7 PATLTRPV   | 10266 | >CDKN2A-P7 SATLTRPV   | 362   | 9904  |
| >CDKN2A-P7 DPATLTRPV  | 485   | >CDKN2A-P7 DSATLTRPV  | 15    | 470   |
| >CDKN2A-P7 DPATLTRPV  | 197   | >CDKN2A-P7 DSATLTRPV  | 136   | 61    |
| >CDKN2A-P7 DPATLTRPV  | 149   | >CDKN2A-P7 DSATLTRPV  | 21682 | 21533 |
| >CDKN2A-P7 ADPATLTRPV | 498   | >CDKN2A-P7 ADSATLTRPV | 111   | 387   |
| >CDKN2A-P7 CADPATLTR  | 353   | >CDKN2A-P7 CADSATLTR  | 237   | 116   |
| >CDKN2A-P7 CADPATLTRP | 585   | >CDKN2A-P7 CADSATLTRP | 445   | 140   |
| >CDKN2A-P7 NCADPATLTF | 284   | >CDKN2A-P7 NCADSATLTR | 456   | 172   |

|                        |       |                       |       |       |
|------------------------|-------|-----------------------|-------|-------|
| >CDKN2A-P7 NCADPATL    | 475   | >CDKN2A-P7 NCADSATL   | 662   | 187   |
| >CDKN2A-P7 NCADPATLTF  | 233   | >CDKN2A-P7 NCADSATLTR | 214   | 19    |
| >CDKN2A-P7 EPNCADPATL  | 353   | >CDKN2A-P7 EPNCADSATL | 636   | 283   |
| >CDKN2A-P7 EPNCADPA    | 53    | >CDKN2A-P7 EPNCADSA   | 141   | 88    |
| >CDKN2A-P7 EPNCADPAT   | 16    | >CDKN2A-P7 EPNCADSAT  | 14    | 2     |
| >CDKN2A-P7 EPNCADPATL  | 279   | >CDKN2A-P7 EPNCADSATL | 220   | 59    |
| >CDKN2A-P7 EPNCADPA    | 43    | >CDKN2A-P7 EPNCADSA   | 127   | 84    |
| >CDKN2A-P7 EPNCADPAT   | 371   | >CDKN2A-P7 EPNCADSAT  | 1564  | 1193  |
| >CDKN2A-P7 AEPNCADPA   | 183   | >CDKN2A-P7 AEPNCADSA  | 111   | 72    |
| >CDKN2A-P7 AEPNCADPA   | 209   | >CDKN2A-P7 AEPNCADSA  | 375   | 166   |
| >CDKN2A-P7 AEPNCADPA   | 507   | >CDKN2A-P7 AEPNCADSA  | 499   | 8     |
| >CDKN2A-P7 AEPNCADPA   | 480   | >CDKN2A-P7 AEPNCADSA  | 802   | 322   |
| >CDKN2A-P7 AEPNCADPA   | 230   | >CDKN2A-P7 AEPNCADSA  | 192   | 38    |
| >CDKN2A-P7 AEPNCADPA   | 65    | >CDKN2A-P7 AEPNCADSA  | 59    | 6     |
| >CDKN2A-P7 HGAEPNCAD   | 272   | >CDKN2A-P7 HGAEPNCAD  | 957   | 685   |
| >CDKN2A-P8 PVHDAAREG   | 1915  | >CDKN2A-P8 HVHDAAREG  | 364   | 1551  |
| >CDKN2A-P8 PVHDAAREG   | 8782  | >CDKN2A-P8 HVHDAAREG  | 395   | 8387  |
| >CDKN2A-P8 PVHDAAREG   | 1934  | >CDKN2A-P8 HVHDAAREG  | 32    | 1902  |
| >CDKN2A-P8 PVHDAAREG   | 12893 | >CDKN2A-P8 HVHDAAREG  | 131   | 12762 |
| >CDKN2A-P8 PVHDAAREG   | 7697  | >CDKN2A-P8 HVHDAAREG  | 329   | 7368  |
| >CDKN2A-P8 PVHDAAREG   | 10305 | >CDKN2A-P8 HVHDAAREG  | 135   | 10170 |
| >CDKN2A-P8 RPHVHDAAREG | 58    | >CDKN2A-P8 RHVHDAAREG | 24832 | 24774 |
| >CDKN2A-P8 RPHVHDAAREG | 287   | >CDKN2A-P8 RHVHDAAREG | 23    | 264   |
| >CDKN2A-P8 RPHVHDAAREG | 112   | >CDKN2A-P8 RHVHDAAREG | 17230 | 17118 |
| >CDKN2A-P8 RPHVHDAAREG | 3941  | >CDKN2A-P8 RHVHDAAREG | 138   | 3803  |
| >CDKN2A-P8 RPHVHDAAR   | 319   | >CDKN2A-P8 RHVHDAAR   | 271   | 48    |
| >CDKN2A-P8 LTRPVHDA    | 48    | >CDKN2A-P8 LTRHVHDA   | 44    | 4     |
| >CDKN2A-P8 LTRPVHDAA   | 24    | >CDKN2A-P8 LTRHVHDAA  | 27    | 3     |
| >CDKN2A-P8 LTRPVHDAAF  | 56    | >CDKN2A-P8 LTRHVHDAAF | 62    | 6     |
| >CDKN2A-P8 LTRPVHDAAF  | 107   | >CDKN2A-P8 LTRHVHDAAF | 96    | 11    |
| >CDKN2A-P8 LTRPVHDAAF  | 47    | >CDKN2A-P8 LTRHVHDAAF | 138   | 91    |
| >CDKN2A-P8 TLTRPVHDA   | 660   | >CDKN2A-P8 TLTRHVHDA  | 69    | 591   |
| >CDKN2A-P8 TLTRPVHDAA  | 280   | >CDKN2A-P8 TLTRHVHDAA | 515   | 235   |
| >CDKN2A-P8 TLTRPVHDA   | 12    | >CDKN2A-P8 TLTRHVHDA  | 12    | 0     |
| >CDKN2A-P8 TLTRPVHDAA  | 88    | >CDKN2A-P8 TLTRHVHDAA | 134   | 46    |
| >CDKN2A-P8 TLTRPVHDAA  | 159   | >CDKN2A-P8 TLTRHVHDAA | 71    | 88    |
| >CDKN2A-P8 TLTRPVHDAA  | 411   | >CDKN2A-P8 TLTRHVHDAA | 479   | 68    |
| >CDKN2A-P8 TLTRPVHDAA  | 68    | >CDKN2A-P8 TLTRHVHDAA | 93    | 25    |
| >CDKN2A-P8 ATLTRPVHDA  | 970   | >CDKN2A-P8 ATLTRHVHDA | 371   | 599   |
| >CDKN2A-P8 ATLTRPVHDA  | 506   | >CDKN2A-P8 ATLTRHVHDA | 273   | 233   |
| >CDKN2A-P8 DPATLTRPV   | 485   | >CDKN2A-P8 DPATLTRHV  | 1959  | 1474  |
| >CDKN2A-P8 DPATLTRPV   | 197   | >CDKN2A-P8 DPATLTRHV  | 853   | 656   |
| >CDKN2A-P8 DPATLTRPV   | 149   | >CDKN2A-P8 DPATLTRHV  | 4331  | 4182  |

|                       |       |                       |       |       |
|-----------------------|-------|-----------------------|-------|-------|
| >CDKN2A-P8 ADPATLTRPV | 498   | >CDKN2A-P8 ADPATLTRHV | 690   | 192   |
| >CDKN2A-P8 PVHDAAREG  | 8635  | >CDKN2A-P8 LVHDAAREGI | 412   | 8223  |
| >CDKN2A-P8 PVHDAAREG  | 1934  | >CDKN2A-P8 LVHDAAREGI | 305   | 1629  |
| >CDKN2A-P8 PVHDAAREG  | 7697  | >CDKN2A-P8 LVHDAAREGI | 122   | 7575  |
| >CDKN2A-P8 PVHDAAREG  | 10305 | >CDKN2A-P8 LVHDAAREGI | 117   | 10188 |
| >CDKN2A-P8 RRVHDAAR   | 2840  | >CDKN2A-P8 RLVHDAAR   | 50    | 2790  |
| >CDKN2A-P8 RRVHDAAREC | 15897 | >CDKN2A-P8 RLVHDAAREC | 158   | 15739 |
| >CDKN2A-P8 RRVHDAAREC | 58    | >CDKN2A-P8 RLVHDAAREC | 20095 | 20037 |
| >CDKN2A-P8 RRVHDAAREC | 8849  | >CDKN2A-P8 RLVHDAAREC | 78    | 8771  |
| >CDKN2A-P8 RRVHDAAREC | 287   | >CDKN2A-P8 RLVHDAAREC | 39    | 248   |
| >CDKN2A-P8 RRVHDAAREC | 2142  | >CDKN2A-P8 RLVHDAAREC | 76    | 2066  |
| >CDKN2A-P8 RRVHDAAREC | 112   | >CDKN2A-P8 RLVHDAAREC | 9879  | 9767  |
| >CDKN2A-P8 RRVHDAAR   | 319   | >CDKN2A-P8 RLVHDAAR   | 112   | 207   |
| >CDKN2A-P8 NCADPATLTF | 14952 | >CDKN2A-P8 NCADPATLTF | 462   | 14490 |
| >CDKN2A-P8 LTRPVHDA   | 48    | >CDKN2A-P8 LTRLVHDA   | 96    | 48    |
| >CDKN2A-P8 LTRPVHDAA  | 24    | >CDKN2A-P8 LTRLVHDAA  | 55    | 31    |
| >CDKN2A-P8 LTRPVHDAAF | 56    | >CDKN2A-P8 LTRLVHDAAF | 126   | 70    |
| >CDKN2A-P8 LTRPVHDAAF | 107   | >CDKN2A-P8 LTRLVHDAAF | 79    | 28    |
| >CDKN2A-P8 LTRPVHDAAF | 47    | >CDKN2A-P8 LTRLVHDAAF | 69    | 22    |
| >CDKN2A-P8 TLTRPVHDA  | 660   | >CDKN2A-P8 TLTRLVHDA  | 245   | 415   |
| >CDKN2A-P8 TLTRPVHDAA | 611   | >CDKN2A-P8 TLTRLVHDAA | 411   | 200   |
| >CDKN2A-P8 TLTRPVHDAA | 280   | >CDKN2A-P8 TLTRLVHDAA | 603   | 323   |
| >CDKN2A-P8 TLTRPVHDA  | 694   | >CDKN2A-P8 TLTRLVHDA  | 199   | 495   |
| >CDKN2A-P8 TLTRPVHDA  | 12    | >CDKN2A-P8 TLTRLVHDA  | 12    | 0     |
| >CDKN2A-P8 TLTRPVHDAA | 88    | >CDKN2A-P8 TLTRLVHDAA | 158   | 70    |
| >CDKN2A-P8 TLTRPVHDAA | 159   | >CDKN2A-P8 TLTRLVHDAA | 83    | 76    |
| >CDKN2A-P8 TLTRPVHDAA | 411   | >CDKN2A-P8 TLTRLVHDAA | 269   | 142   |
| >CDKN2A-P8 TLTRPVHDAA | 68    | >CDKN2A-P8 TLTRLVHDAA | 67    | 1     |
| >CDKN2A-P8 ATLTRPVHDA | 1556  | >CDKN2A-P8 ATLTRLVHDA | 359   | 1197  |
| >CDKN2A-P8 DPATLTRPV  | 485   | >CDKN2A-P8 DPATLTRLV  | 1552  | 1067  |
| >CDKN2A-P8 DPATLTRPV  | 197   | >CDKN2A-P8 DPATLTRLV  | 664   | 467   |
| >CDKN2A-P8 DPATLTRPV  | 149   | >CDKN2A-P8 DPATLTRLV  | 4245  | 4096  |
| >CDKN2A-P8 ADPATLTRPV | 498   | >CDKN2A-P8 ADPATLTRLV | 163   | 335   |
| >CDKN2A-P8 CADPATLTRP | 23620 | >CDKN2A-P8 CADPATLTRL | 378   | 23242 |
| >CDKN2A-P8 PVHDAAREG  | 1915  | >CDKN2A-P8 SVHDAAREGI | 341   | 1574  |
| >CDKN2A-P8 PVHDAAREG  | 1934  | >CDKN2A-P8 SVHDAAREGI | 113   | 1821  |
| >CDKN2A-P8 PVHDAAREG  | 12893 | >CDKN2A-P8 SVHDAAREGI | 409   | 12484 |
| >CDKN2A-P8 PVHDAAREG  | 7697  | >CDKN2A-P8 SVHDAAREGI | 246   | 7451  |
| >CDKN2A-P8 PVHDAAREG  | 10305 | >CDKN2A-P8 SVHDAAREGI | 280   | 10025 |
| >CDKN2A-P8 RRVHDAAREC | 8751  | >CDKN2A-P8 RSVHDAAREC | 465   | 8286  |
| >CDKN2A-P8 RRVHDAAR   | 2840  | >CDKN2A-P8 RSVHDAAR   | 34    | 2806  |
| >CDKN2A-P8 RRVHDAAREC | 15897 | >CDKN2A-P8 RSVHDAAREC | 262   | 15635 |
| >CDKN2A-P8 RRVHDAAR   | 8172  | >CDKN2A-P8 RSVHDAAR   | 491   | 7681  |

|                       |       |                       |       |       |
|-----------------------|-------|-----------------------|-------|-------|
| >CDKN2A-P8 RPVHDAAREC | 58    | >CDKN2A-P8 RSVHDAAREC | 22738 | 22680 |
| >CDKN2A-P8 RPVHDAAREC | 8849  | >CDKN2A-P8 RSVHDAAREC | 158   | 8691  |
| >CDKN2A-P8 RPVHDAAREC | 287   | >CDKN2A-P8 RSVHDAAREC | 29    | 258   |
| >CDKN2A-P8 RPVHDAARE  | 20087 | >CDKN2A-P8 RSVHDAARE  | 226   | 19861 |
| >CDKN2A-P8 RPVHDAAREC | 2142  | >CDKN2A-P8 RSVHDAAREC | 4     | 2138  |
| >CDKN2A-P8 RPVHDAAREC | 112   | >CDKN2A-P8 RSVHDAAREC | 7539  | 7427  |
| >CDKN2A-P8 RPVHDAAREC | 17572 | >CDKN2A-P8 RSVHDAAREC | 128   | 17444 |
| >CDKN2A-P8 RPVHDAAREC | 15705 | >CDKN2A-P8 RSVHDAAREC | 22    | 15683 |
| >CDKN2A-P8 RPVHDAAREC | 3912  | >CDKN2A-P8 RSVHDAAREC | 149   | 3763  |
| >CDKN2A-P8 RPVHDAAR   | 319   | >CDKN2A-P8 RSVHDAAR   | 453   | 134   |
| >CDKN2A-P8 LTRPVHDA   | 48    | >CDKN2A-P8 LTRSVHDA   | 59    | 11    |
| >CDKN2A-P8 LTRPVHDAA  | 24    | >CDKN2A-P8 LTRSVHDAA  | 39    | 15    |
| >CDKN2A-P8 LTRPVHDAAF | 56    | >CDKN2A-P8 LTRSVHDAAF | 94    | 38    |
| >CDKN2A-P8 LTRPVHDAAF | 107   | >CDKN2A-P8 LTRSVHDAAF | 91    | 16    |
| >CDKN2A-P8 LTRPVHDAAF | 47    | >CDKN2A-P8 LTRSVHDAAF | 33    | 14    |
| >CDKN2A-P8 LTRPVHDAA  | 583   | >CDKN2A-P8 LTRSVHDAA  | 221   | 362   |
| >CDKN2A-P8 LTRPVHDAAF | 583   | >CDKN2A-P8 LTRSVHDAAF | 285   | 298   |
| >CDKN2A-P8 TLTRPVHDA  | 660   | >CDKN2A-P8 TLTRSVHDA  | 174   | 486   |
| >CDKN2A-P8 TLTRPVHDAA | 611   | >CDKN2A-P8 TLTRSVHDAA | 498   | 113   |
| >CDKN2A-P8 TLTRPVHDAA | 280   | >CDKN2A-P8 TLTRSVHDAA | 522   | 242   |
| >CDKN2A-P8 TLTRPVHDA  | 694   | >CDKN2A-P8 TLTRSVHDA  | 378   | 316   |
| >CDKN2A-P8 TLTRPVHDA  | 12    | >CDKN2A-P8 TLTRSVHDA  | 8     | 4     |
| >CDKN2A-P8 TLTRPVHDAA | 88    | >CDKN2A-P8 TLTRSVHDAA | 85    | 3     |
| >CDKN2A-P8 TLTRPVHDAA | 159   | >CDKN2A-P8 TLTRSVHDAA | 119   | 40    |
| >CDKN2A-P8 TLTRPVHDAA | 411   | >CDKN2A-P8 TLTRSVHDAA | 498   | 87    |
| >CDKN2A-P8 TLTRPVHDAA | 68    | >CDKN2A-P8 TLTRSVHDAA | 45    | 23    |
| >CDKN2A-P8 ATLTRPVHDA | 970   | >CDKN2A-P8 ATLTRSVHDA | 420   | 550   |
| >CDKN2A-P8 ATLTRPVHDA | 506   | >CDKN2A-P8 ATLTRSVHDA | 378   | 128   |
| >CDKN2A-P8 DPATLTRPV  | 485   | >CDKN2A-P8 DPATLTRSV  | 1812  | 1327  |
| >CDKN2A-P8 DPATLTRPV  | 197   | >CDKN2A-P8 DPATLTRSV  | 574   | 377   |
| >CDKN2A-P8 DPATLTRPV  | 149   | >CDKN2A-P8 DPATLTRSV  | 347   | 198   |
| >CDKN2A-P8 ADPATLTRPV | 498   | >CDKN2A-P8 ADPATLTRSV | 582   | 84    |
| >CDKN2A-Q5 QVMMMGSA   | 873   | >CDKN2A-Q5 RVMMMGSA   | 311   | 562   |
| >CDKN2A-Q5 QVMMMGSA   | 419   | >CDKN2A-Q5 RVMMMGSA   | 290   | 129   |
| >CDKN2A-Q5 QVMMMGSA   | 298   | >CDKN2A-Q5 RVMMMGSA   | 84    | 214   |
| >CDKN2A-Q5 QVMMMGSA   | 61    | >CDKN2A-Q5 RVMMMGSA   | 37    | 24    |
| >CDKN2A-Q5 QVMMMGSA   | 720   | >CDKN2A-Q5 RVMMMGSA   | 231   | 489   |
| >CDKN2A-Q5 QVMMMGSA   | 313   | >CDKN2A-Q5 RVMMMGSA   | 166   | 147   |
| >CDKN2A-Q5 QVMMMGSA   | 731   | >CDKN2A-Q5 RVMMMGSA   | 78    | 653   |
| >CDKN2A-Q5 QVMMMGSA   | 2036  | >CDKN2A-Q5 RVMMMGSA   | 406   | 1630  |
| >CDKN2A-Q5 QVMMMGSA   | 248   | >CDKN2A-Q5 RVMMMGSA   | 108   | 140   |
| >CDKN2A-Q5 QVMMMGSA   | 41    | >CDKN2A-Q5 RVMMMGSA   | 19    | 22    |
| >CDKN2A-Q5 QVMMMGSA   | 2770  | >CDKN2A-Q5 RVMMMGSA   | 189   | 2581  |

|                      |       |                      |       |       |
|----------------------|-------|----------------------|-------|-------|
| >CDKN2A-Q5 QVMMMGS/  | 114   | >CDKN2A-Q5 RVMMMGS/  | 30    | 84    |
| >CDKN2A-Q5 QVMMMGS/  | 3780  | >CDKN2A-Q5 RVMMMGS/  | 80    | 3700  |
| >CDKN2A-Q5 QVMMMGS/  | 4127  | >CDKN2A-Q5 RVMMMGS/  | 117   | 4010  |
| >CDKN2A-Q5 QVMMMGS/  | 4859  | >CDKN2A-Q5 RVMMMGS/  | 125   | 4734  |
| >CDKN2A-Q5 QVMMMGS/  | 55    | >CDKN2A-Q5 RVMMMGS/  | 8     | 47    |
| >CDKN2A-Q5 QVMMMGS/  | 218   | >CDKN2A-Q5 RVMMMGS/  | 801   | 583   |
| >CDKN2A-Q5 QVMMMGS/  | 20    | >CDKN2A-Q5 RVMMMGS/  | 114   | 94    |
| >CDKN2A-Q5 QVMMMGS/  | 167   | >CDKN2A-Q5 RVMMMGS/  | 3236  | 3069  |
| >CDKN2A-Q5 QVMMMGS/  | 215   | >CDKN2A-Q5 RVMMMGS/  | 192   | 23    |
| >CDKN2A-Q5 QVMMMGS/  | 78    | >CDKN2A-Q5 RVMMMGS/  | 974   | 896   |
| >CDKN2A-Q5 QVMMMGS/  | 6298  | >CDKN2A-Q5 RVMMMGS/  | 219   | 6079  |
| >CDKN2A-Q5 QVMMMGS/  | 3983  | >CDKN2A-Q5 RVMMMGS/  | 112   | 3871  |
| >CDKN2A-Q5 QVMMMGS/  | 3451  | >CDKN2A-Q5 RVMMMGS/  | 176   | 3275  |
| >CDKN2A-Q5 IQVMMMGS/ | 167   | >CDKN2A-Q5 IRVMMMGS/ | 10744 | 10577 |
| >CDKN2A-Q5 IQVMMMGS/ | 42    | >CDKN2A-Q5 IRVMMMGS/ | 8792  | 8750  |
| >CDKN2A-Q5 IQVMMMGS/ | 87    | >CDKN2A-Q5 IRVMMMGS/ | 18530 | 18443 |
| >CDKN2A-Q5 IQVMMMGS/ | 16    | >CDKN2A-Q5 IRVMMMGS/ | 11522 | 11506 |
| >CDKN2A-Q5 IQVMMMGS/ | 120   | >CDKN2A-Q5 IRVMMMGS/ | 650   | 530   |
| >CDKN2A-Q5 IQVMMMGS/ | 240   | >CDKN2A-Q5 IRVMMMGS/ | 415   | 175   |
| >CDKN2A-Q5 IQVMMMGS/ | 117   | >CDKN2A-Q5 IRVMMMGS/ | 817   | 700   |
| >CDKN2A-Q5 IQVMMMGS/ | 187   | >CDKN2A-Q5 IRVMMMGS/ | 769   | 582   |
| >CDKN2A-Q5 IQVMMMGS/ | 10453 | >CDKN2A-Q5 IRVMMMGS/ | 134   | 10319 |
| >CDKN2A-Q5 PIQVMMMG  | 12597 | >CDKN2A-Q5 PIRVMMMG/ | 301   | 12296 |
| >CDKN2A-Q5 RPIQVMMM  | 109   | >CDKN2A-Q5 RPIRVMMM  | 94    | 15    |
| >CDKN2A-Q5 RPIQVMMM  | 18    | >CDKN2A-Q5 RPIRVMMM  | 17    | 1     |
| >CDKN2A-Q5 RPIQVMMM/ | 23    | >CDKN2A-Q5 RPIRVMMM/ | 31    | 8     |
| >CDKN2A-Q5 RPIQVMMM  | 109   | >CDKN2A-Q5 RPIRVMMM  | 461   | 352   |
| >CDKN2A-Q5 RPIQVMMM/ | 288   | >CDKN2A-Q5 RPIRVMMM/ | 1104  | 816   |
| >CDKN2A-Q5 RPIQVMMM/ | 134   | >CDKN2A-Q5 RPIRVMMM/ | 96    | 38    |
| >CDKN2A-Q5 RPIQVMMM  | 391   | >CDKN2A-Q5 RPIRVMMM  | 364   | 27    |
| >CDKN2A-Q5 RRPIQVMM  | 439   | >CDKN2A-Q5 RRPVMM    | 594   | 155   |
| >CDKN2A-Q5 RRPIQVMM  | 120   | >CDKN2A-Q5 RRPVMM    | 86    | 34    |
| >CDKN2A-Q5 RRPIQVMM  | 184   | >CDKN2A-Q5 RRPVMM    | 112   | 72    |
| >CDKN2A-Q5 RRPIQVMM  | 131   | >CDKN2A-Q5 RRPVMM    | 60    | 71    |
| >CDKN2A-Q5 RRPIQVMM  | 163   | >CDKN2A-Q5 RRPVMM    | 97    | 66    |
| >CDKN2A-Q5 RRPIQVMM  | 125   | >CDKN2A-Q5 RRPVMM    | 77    | 48    |
| >CDKN2A-Q5 RRPIQVMM  | 659   | >CDKN2A-Q5 RRPVMM    | 430   | 229   |
| >CDKN2A-Q5 RRPIQVMM  | 319   | >CDKN2A-Q5 RRPVMM    | 284   | 35    |
| >CDKN2A-Q5 RRPIQVMM  | 74    | >CDKN2A-Q5 RRPVMM    | 25    | 49    |
| >CDKN2A-Q5 RRPIQVMM  | 238   | >CDKN2A-Q5 RRPVMM    | 166   | 72    |
| >CDKN2A-Q5 RRPIQVMM  | 767   | >CDKN2A-Q5 RRPVMM    | 279   | 488   |
| >CDKN2A-Q5 GRRPIQVM  | 317   | >CDKN2A-Q5 GRRPVMM   | 576   | 259   |
| >CDKN2A-Q5 GRRPIQVM  | 485   | >CDKN2A-Q5 GRRPVMM   | 477   | 8     |



|                       |       |                        |       |       |
|-----------------------|-------|------------------------|-------|-------|
| >CDKN2A-Q5 GRRPIQVMM  | 365   | >CDKN2A-Q5 GRRPIRVMM   | 395   | 30    |
| >CDKN2A-Q5 GRRPIQVM   | 314   | >CDKN2A-Q5 GRRPIRVMM   | 229   | 85    |
| >CDKN2A-Q5 GRRPIQVMM  | 115   | >CDKN2A-Q5 GRRPIRVMM   | 96    | 19    |
| >CDKN2A-Q5 GRRPIQVMM  | 203   | >CDKN2A-Q5 GRRPIRVMM   | 234   | 31    |
| >CDKN2A-Q5 GRRPIQVMM  | 250   | >CDKN2A-Q5 GRRPIRVMM   | 199   | 51    |
| >CDKN2A-Q5 GRRPIQVMM  | 213   | >CDKN2A-Q5 GRRPIRVMM   | 113   | 100   |
| >CDKN2A-Q5 GRRPIQVMM  | 455   | >CDKN2A-Q5 GRRPIRVMM   | 395   | 60    |
| >CDKN2A-Q5 GRRPIQVMM  | 34    | >CDKN2A-Q5 GRRPIRVMM   | 17    | 17    |
| >CDKN2A-Q5 GRRPIQVMM  | 222   | >CDKN2A-Q5 GRRPIRVMM   | 140   | 82    |
| >CDKN2A-Q5 YGRRPIQVM  | 395   | >CDKN2A-Q5 YGRRPIRVMM  | 184   | 211   |
| >CDKN2A-Q5 YGRRPIQVM  | 343   | >CDKN2A-Q5 YGRRPIRVMM  | 787   | 444   |
| >CDKN2A-Q5 YGRRPIQVM  | 262   | >CDKN2A-Q5 YGRRPIRVMM  | 834   | 572   |
| >CDKN2A-Q5 YGRRPIQVMI | 425   | >CDKN2A-Q5 YGRRPIRVMM  | 669   | 244   |
| >CDKN2A-Q5 YGRRPIQVM  | 44    | >CDKN2A-Q5 YGRRPIRVMM  | 56    | 12    |
| >CDKN2A-Q5 YGRRPIQVMI | 45    | >CDKN2A-Q5 YGRRPIRVMM  | 67    | 22    |
| >CDKN2A-Q5 YGRRPIQVMI | 37    | >CDKN2A-Q5 YGRRPIRVMM  | 33    | 4     |
| >CDKN2A-Q5 SYGRRPIQVM | 136   | >CDKN2A-Q5 SYGRRPIRVMM | 465   | 329   |
| >CDKN2A-Q5 SYGRRPIQVM | 74    | >CDKN2A-Q5 SYGRRPIRVMM | 103   | 29    |
| >CDKN2A-Q5 SYGRRPIQ   | 15466 | >CDKN2A-Q5 SYGRRPIRV   | 90    | 15376 |
| >CDKN2A-Q5 SYGRRPIQ   | 7174  | >CDKN2A-Q5 SYGRRPIRV   | 43    | 7131  |
| >CDKN2A-Q5 NSYGRRPIQV | 264   | >CDKN2A-Q5 NSYGRRPIRV  | 435   | 171   |
| >CDKN2A-Q5 NSYGRRPIQV | 485   | >CDKN2A-Q5 NSYGRRPIRV  | 611   | 126   |
| >CDKN2A-Q5 NSYGRRPIQ  | 15310 | >CDKN2A-Q5 NSYGRRPIRV  | 83    | 15227 |
| >CDKN2A-Q5 NSYGRRPIQ  | 17047 | >CDKN2A-Q5 NSYGRRPIRV  | 106   | 16941 |
| >CDKN2A-Q5 NSYGRRPIQ  | 2693  | >CDKN2A-Q5 NSYGRRPIRV  | 32    | 2661  |
| >CDKN2A-Q5 NSYGRRPIQV | 408   | >CDKN2A-Q5 NSYGRRPIRV  | 1156  | 748   |
| >CDKN2A-Q5 NSYGRRPIQV | 132   | >CDKN2A-Q5 NSYGRRPIRV  | 194   | 62    |
| >CDKN2A-Q5 NSYGRRPIQV | 495   | >CDKN2A-Q5 NSYGRRPIRV  | 837   | 342   |
| >CDKN2A-Q5 NSYGRRPIQV | 251   | >CDKN2A-Q5 NSYGRRPIRV  | 301   | 50    |
| >CDKN2A-R1 RLDVRDAWC  | 122   | >CDKN2A-R1 QLDVRDAWC   | 889   | 767   |
| >CDKN2A-R1 RLDVRDAWC  | 227   | >CDKN2A-R1 QLDVRDAWC   | 1468  | 1241  |
| >CDKN2A-R1 RLDVRDAWC  | 91    | >CDKN2A-R1 QLDVRDAWC   | 234   | 143   |
| >CDKN2A-R1 RLDVRDAWC  | 120   | >CDKN2A-R1 QLDVRDAWC   | 969   | 849   |
| >CDKN2A-R1 RLDVRDAW   | 274   | >CDKN2A-R1 QLDVRDAW    | 5421  | 5147  |
| >CDKN2A-R1 RLDVRDAWC  | 92    | >CDKN2A-R1 QLDVRDAWC   | 403   | 311   |
| >CDKN2A-R1 RLDVRDAWC  | 293   | >CDKN2A-R1 QLDVRDAWC   | 922   | 629   |
| >CDKN2A-R1 ARLDVRDA   | 19341 | >CDKN2A-R1 AQLDVRDA    | 248   | 19093 |
| >CDKN2A-R1 ARLDVRDAW  | 11771 | >CDKN2A-R1 AQLDVRDAW   | 187   | 11584 |
| >CDKN2A-R1 ARLDVRDAW  | 89    | >CDKN2A-R1 AQLDVRDAW   | 1515  | 1426  |
| >CDKN2A-R1 ARLDVRDAW  | 1541  | >CDKN2A-R1 AQLDVRDAW   | 435   | 1106  |
| >CDKN2A-R1 ARLDVRDAW  | 117   | >CDKN2A-R1 AQLDVRDAW   | 825   | 708   |
| >CDKN2A-R1 TLVVLHRAGA | 209   | >CDKN2A-R1 TLVVLHRAGA  | 18091 | 17882 |
| >CDKN2A-R1 TLVVLHRAGA | 185   | >CDKN2A-R1 TLVVLHRAGA  | 16993 | 16808 |

|                       |      |                       |       |       |
|-----------------------|------|-----------------------|-------|-------|
| >CDKN2A-R1 GARLDVRDA' | 457  | >CDKN2A-R1 GAQLDVRDA  | 1658  | 1201  |
| >CDKN2A-R1 AGARLDVRD, | 289  | >CDKN2A-R1 AGAQLDVRD  | 465   | 176   |
| >CDKN2A-R1 RAGARLDVR  | 90   | >CDKN2A-R1 RAGAQLDVR  | 238   | 148   |
| >CDKN2A-R1 HRAGARLDV  | 197  | >CDKN2A-R1 HRAGAQLDV  | 239   | 42    |
| >CDKN2A-R1 HRAGARLDVI | 101  | >CDKN2A-R1 HRAGAQLDV  | 88    | 13    |
| >CDKN2A-R1 VLHRAGARL  | 371  | >CDKN2A-R1 VLHRAGAQL  | 230   | 141   |
| >CDKN2A-R1 VLHRAGARL  | 156  | >CDKN2A-R1 VLHRAGAQL  | 96    | 60    |
| >CDKN2A-R1 VLHRAGARLI | 77   | >CDKN2A-R1 VLHRAGAQLI | 46    | 31    |
| >CDKN2A-R1 VLHRAGARL  | 21   | >CDKN2A-R1 VLHRAGAQL  | 17    | 4     |
| >CDKN2A-R1 VLHRAGARLI | 36   | >CDKN2A-R1 VLHRAGAQLI | 14    | 22    |
| >CDKN2A-R1 VLHRAGARL  | 269  | >CDKN2A-R1 VLHRAGAQL  | 246   | 23    |
| >CDKN2A-R1 VLHRAGARLI | 346  | >CDKN2A-R1 VLHRAGAQLI | 101   | 245   |
| >CDKN2A-R1 VLHRAGARL  | 358  | >CDKN2A-R1 VLHRAGAQL  | 153   | 205   |
| >CDKN2A-R1 VLHRAGARLI | 33   | >CDKN2A-R1 VLHRAGAQLI | 16    | 17    |
| >CDKN2A-R1 VLHRAGARLI | 1296 | >CDKN2A-R1 VLHRAGAQLI | 263   | 1033  |
| >CDKN2A-R1 VLHRAGARL  | 6    | >CDKN2A-R1 VLHRAGAQL  | 5     | 1     |
| >CDKN2A-R1 VLHRAGARLI | 3    | >CDKN2A-R1 VLHRAGAQLI | 3     | 0     |
| >CDKN2A-R1 VLHRAGAR   | 299  | >CDKN2A-R1 VLHRAGAQ   | 20348 | 20049 |
| >CDKN2A-R1 VVLHRAGAR  | 225  | >CDKN2A-R1 VVLHRAGAQ  | 21375 | 21150 |
| >CDKN2A-R1 VVLHRAGARI | 129  | >CDKN2A-R1 VVLHRAGAQ  | 89    | 40    |
| >CDKN2A-R1 LVVLHRAGAF | 250  | >CDKN2A-R1 LVVLHRAGAC | 444   | 194   |
| >CDKN2A-R1 LVVLHRAGAF | 127  | >CDKN2A-R1 LVVLHRAGAC | 18467 | 18340 |
| >CDKN2A-R1 LVVLHRAGAF | 287  | >CDKN2A-R1 LVVLHRAGAC | 30067 | 29780 |
| >CDKN2A-R1 LVVLHRAGAF | 435  | >CDKN2A-R1 LVVLHRAGAC | 314   | 121   |
| >CDKN2A-R1 VRDAWGRLP  | 2895 | >CDKN2A-R1 VCDAWGRLP  | 331   | 2564  |
| >CDKN2A-R1 VRDAWGRLP  | 489  | >CDKN2A-R1 VCDAWGRLP  | 15998 | 15509 |
| >CDKN2A-R1 DVRDAWGRI  | 456  | >CDKN2A-R1 DVCDAWGRI  | 637   | 181   |
| >CDKN2A-R1 DVRDAWGRI  | 644  | >CDKN2A-R1 DVCDAWGRI  | 247   | 397   |
| >CDKN2A-R1 DVRDAWGRI  | 277  | >CDKN2A-R1 DVCDAWGRI  | 9825  | 9548  |
| >CDKN2A-R1 DVRDAWGR   | 17   | >CDKN2A-R1 DVCDAWGR   | 21    | 4     |
| >CDKN2A-R1 DVRDAWGR   | 62   | >CDKN2A-R1 DVCDAWGR   | 16    | 46    |
| >CDKN2A-R1 DVRDAWGRI  | 4223 | >CDKN2A-R1 DVCDAWGRI  | 407   | 3816  |
| >CDKN2A-R1 DVRDAWGRI  | 208  | >CDKN2A-R1 DVCDAWGRI  | 30    | 178   |
| >CDKN2A-R1 DVRDAWGRI  | 198  | >CDKN2A-R1 DVCDAWGRI  | 74    | 124   |
| >CDKN2A-R1 LDVRDAWGF  | 477  | >CDKN2A-R1 LDVCDAWGF  | 455   | 22    |
| >CDKN2A-R1 RLDVRDAWC  | 802  | >CDKN2A-R1 RLDVCDAWC  | 382   | 420   |
| >CDKN2A-R1 RLDVRDAWC  | 122  | >CDKN2A-R1 RLDVCDAWC  | 137   | 15    |
| >CDKN2A-R1 RLDVRDAWC  | 805  | >CDKN2A-R1 RLDVCDAWC  | 463   | 342   |
| >CDKN2A-R1 RLDVRDAWC  | 227  | >CDKN2A-R1 RLDVCDAWC  | 184   | 43    |
| >CDKN2A-R1 RLDVRDAWC  | 91   | >CDKN2A-R1 RLDVCDAWC  | 88    | 3     |
| >CDKN2A-R1 RLDVRDAWC  | 120  | >CDKN2A-R1 RLDVCDAWC  | 92    | 28    |
| >CDKN2A-R1 RLDVRDAW   | 274  | >CDKN2A-R1 RLDVCDAW   | 172   | 102   |
| >CDKN2A-R1 RLDVRDAWC  | 92   | >CDKN2A-R1 RLDVCDAWC  | 65    | 27    |

|                       |      |                       |       |       |
|-----------------------|------|-----------------------|-------|-------|
| >CDKN2A-R1 RLDVRDAWC  | 293  | >CDKN2A-R1 RLDVCDAWC  | 104   | 189   |
| >CDKN2A-R1 ARLDVRDAW  | 89   | >CDKN2A-R1 ARLDVCDAW  | 263   | 174   |
| >CDKN2A-R1 ARLDVRDAW  | 117  | >CDKN2A-R1 ARLDVCDAW  | 190   | 73    |
| >CDKN2A-R1 GARLDVRDA' | 604  | >CDKN2A-R1 GARLDVCDA' | 440   | 164   |
| >CDKN2A-R1 GARLDVRDA' | 457  | >CDKN2A-R1 GARLDVCDA' | 922   | 465   |
| >CDKN2A-R1 AGARLDVRD, | 289  | >CDKN2A-R1 AGARLDVCD, | 428   | 139   |
| >CDKN2A-R1 RAGARLDVR  | 90   | >CDKN2A-R1 RAGARLDVC  | 20881 | 20791 |
| >CDKN2A-R1 HRAGARLDV( | 101  | >CDKN2A-R1 HRAGARLDV( | 1466  | 1365  |
| >CDKN2A-R1 RLPVDLAEEL | 99   | >CDKN2A-R1 GLPVDLAEEL | 91    | 8     |
| >CDKN2A-R1 RLPVDLAEEL | 38   | >CDKN2A-R1 GLPVDLAEEL | 81    | 43    |
| >CDKN2A-R1 RLPVDLAEEL | 165  | >CDKN2A-R1 GLPVDLAEEL | 93    | 72    |
| >CDKN2A-R1 RLPVDLAEEL | 125  | >CDKN2A-R1 GLPVDLAEEL | 70    | 55    |
| >CDKN2A-R1 RLPVDLAEEL | 391  | >CDKN2A-R1 GLPVDLAEEL | 883   | 492   |
| >CDKN2A-R1 RLPVDLAEEL | 15   | >CDKN2A-R1 GLPVDLAEEL | 14    | 1     |
| >CDKN2A-R1 GRLPVDLAE  | 202  | >CDKN2A-R1 GGLPVDLAE  | 24643 | 24441 |
| >CDKN2A-R1 GRLPVDLAE  | 194  | >CDKN2A-R1 GGLPVDLAE  | 22057 | 21863 |
| >CDKN2A-R1 GRLPVDLAE  | 29   | >CDKN2A-R1 GGLPVDLAE  | 17420 | 17391 |
| >CDKN2A-R1 ARLDVRDAW  | 89   | >CDKN2A-R1 ARLDVRDAW  | 2490  | 2401  |
| >CDKN2A-R1 AWGRLPVDL  | 474  | >CDKN2A-R1 AWGGLPVDL  | 395   | 79    |
| >CDKN2A-R1 AWGRLPVDL  | 403  | >CDKN2A-R1 AWGGLPVDL  | 371   | 32    |
| >CDKN2A-R1 AWGRLPVDL  | 156  | >CDKN2A-R1 AWGGLPVDL  | 122   | 34    |
| >CDKN2A-R1 DAWGRLPV   | 260  | >CDKN2A-R1 DAWGGLPV   | 370   | 110   |
| >CDKN2A-R1 DAWGRLPV   | 24   | >CDKN2A-R1 DAWGGLPV   | 11    | 13    |
| >CDKN2A-R1 VRDAWGRLP  | 489  | >CDKN2A-R1 VRDAWGGLF  | 625   | 136   |
| >CDKN2A-R1 DVRDAWGRI  | 456  | >CDKN2A-R1 DVRDAWGGI  | 81    | 375   |
| >CDKN2A-R1 DVRDAWGRI  | 277  | >CDKN2A-R1 DVRDAWGGI  | 570   | 293   |
| >CDKN2A-R1 DVRDAWGR   | 17   | >CDKN2A-R1 DVRDAWGG   | 17690 | 17673 |
| >CDKN2A-R1 DVRDAWGR   | 62   | >CDKN2A-R1 DVRDAWGG   | 35018 | 34956 |
| >CDKN2A-R1 DVRDAWGRI  | 208  | >CDKN2A-R1 DVRDAWGGI  | 483   | 275   |
| >CDKN2A-R1 DVRDAWGRI  | 198  | >CDKN2A-R1 DVRDAWGGI  | 135   | 63    |
| >CDKN2A-R1 LDVRDAWGF  | 477  | >CDKN2A-R1 LDVRDAWGC  | 426   | 51    |
| >CDKN2A-R1 RLDVRDAWC  | 1671 | >CDKN2A-R1 RLDVRDAWC  | 472   | 1199  |
| >CDKN2A-R1 RLDVRDAWC  | 122  | >CDKN2A-R1 RLDVRDAWC  | 82    | 40    |
| >CDKN2A-R1 RLDVRDAWC  | 805  | >CDKN2A-R1 RLDVRDAWC  | 234   | 571   |
| >CDKN2A-R1 RLDVRDAWC  | 227  | >CDKN2A-R1 RLDVRDAWC  | 108   | 119   |
| >CDKN2A-R1 RLDVRDAWC  | 91   | >CDKN2A-R1 RLDVRDAWC  | 101   | 10    |
| >CDKN2A-R1 RLDVRDAWC  | 120  | >CDKN2A-R1 RLDVRDAWC  | 31245 | 31125 |
| >CDKN2A-R1 RLDVRDAWC  | 92   | >CDKN2A-R1 RLDVRDAWC  | 24362 | 24270 |
| >CDKN2A-R1 RLDVRDAWC  | 293  | >CDKN2A-R1 RLDVRDAWC  | 35868 | 35575 |
| >CDKN2A-R1 RLPVDLAEEL | 99   | >CDKN2A-R1 PLPVDLAEEL | 2331  | 2232  |
| >CDKN2A-R1 RLPVDLAEEL | 38   | >CDKN2A-R1 PLPVDLAEEL | 998   | 960   |
| >CDKN2A-R1 RLPVDLAEEL | 165  | >CDKN2A-R1 PLPVDLAEEL | 4267  | 4102  |
| >CDKN2A-R1 RLPVDLAEEL | 125  | >CDKN2A-R1 PLPVDLAEEL | 1499  | 1374  |

|                       |       |                       |       |       |
|-----------------------|-------|-----------------------|-------|-------|
| >CDKN2A-R1 RLPVDLAEEL | 391   | >CDKN2A-R1 PLPVDLAEEL | 2265  | 1874  |
| >CDKN2A-R1 RLPVDLAEEL | 15    | >CDKN2A-R1 PLPVDLAEEL | 77    | 62    |
| >CDKN2A-R1 GRLPVDLAE  | 202   | >CDKN2A-R1 GPLPVDLAE  | 25754 | 25552 |
| >CDKN2A-R1 GRLPVDLA   | 31452 | >CDKN2A-R1 GPLPVDLA   | 276   | 31176 |
| >CDKN2A-R1 GRLPVDLAE  | 194   | >CDKN2A-R1 GPLPVDLAE  | 20919 | 20725 |
| >CDKN2A-R1 GRLPVDLAE  | 29    | >CDKN2A-R1 GPLPVDLAE  | 18462 | 18433 |
| >CDKN2A-R1 ARLDVRDAW  | 89    | >CDKN2A-R1 ARLDVRDAW  | 1654  | 1565  |
| >CDKN2A-R1 WGRLPVDL   | 24872 | >CDKN2A-R1 WGRLPVDL   | 226   | 24646 |
| >CDKN2A-R1 AWGRLPVDL  | 474   | >CDKN2A-R1 AWGRLPVDL  | 148   | 326   |
| >CDKN2A-R1 AWGRLPVDL  | 403   | >CDKN2A-R1 AWGRLPVDL  | 245   | 158   |
| >CDKN2A-R1 AWGRLPVDL  | 156   | >CDKN2A-R1 AWGRLPVDL  | 95    | 61    |
| >CDKN2A-R1 AWGRLPVDL  | 765   | >CDKN2A-R1 AWGRLPVDL  | 452   | 313   |
| >CDKN2A-R1 DAWGRLPV   | 2254  | >CDKN2A-R1 DAWGRLPV   | 297   | 1957  |
| >CDKN2A-R1 DAWGRLPV   | 260   | >CDKN2A-R1 DAWGRLPV   | 106   | 154   |
| >CDKN2A-R1 DAWGRLPV   | 24    | >CDKN2A-R1 DAWGRLPV   | 7     | 17    |
| >CDKN2A-R1 DAWGRLPVD  | 2258  | >CDKN2A-R1 DAWGRLPVD  | 404   | 1854  |
| >CDKN2A-R1 DAWGRLPVD  | 2165  | >CDKN2A-R1 DAWGRLPVD  | 385   | 1780  |
| >CDKN2A-R1 VRDAWGRLP  | 1516  | >CDKN2A-R1 VRDAWGRLP  | 364   | 1152  |
| >CDKN2A-R1 VRDAWGRL   | 1239  | >CDKN2A-R1 VRDAWGRL   | 120   | 1119  |
| >CDKN2A-R1 VRDAWGRLP  | 489   | >CDKN2A-R1 VRDAWGRLP  | 239   | 250   |
| >CDKN2A-R1 VRDAWGRLP  | 1175  | >CDKN2A-R1 VRDAWGRLP  | 469   | 706   |
| >CDKN2A-R1 DVRDAWGRI  | 456   | >CDKN2A-R1 DVRDAWGRI  | 273   | 183   |
| >CDKN2A-R1 DVRDAWGRI  | 644   | >CDKN2A-R1 DVRDAWGRI  | 344   | 300   |
| >CDKN2A-R1 DVRDAWGRI  | 2164  | >CDKN2A-R1 DVRDAWGRI  | 401   | 1763  |
| >CDKN2A-R1 DVRDAWGRI  | 277   | >CDKN2A-R1 DVRDAWGRI  | 327   | 50    |
| >CDKN2A-R1 DVRDAWGR   | 17    | >CDKN2A-R1 DVRDAWGR   | 19387 | 19370 |
| >CDKN2A-R1 DVRDAWGR   | 62    | >CDKN2A-R1 DVRDAWGR   | 33766 | 33704 |
| >CDKN2A-R1 DVRDAWGRI  | 208   | >CDKN2A-R1 DVRDAWGRI  | 239   | 31    |
| >CDKN2A-R1 DVRDAWGRI  | 198   | >CDKN2A-R1 DVRDAWGRI  | 93    | 105   |
| >CDKN2A-R1 DVRDAWGRI  | 4619  | >CDKN2A-R1 DVRDAWGRI  | 428   | 4191  |
| >CDKN2A-R1 LDVRDAWGF  | 477   | >CDKN2A-R1 LDVRDAWGF  | 422   | 55    |
| >CDKN2A-R1 RLDVRDAWC  | 802   | >CDKN2A-R1 RLDVRDAWC  | 381   | 421   |
| >CDKN2A-R1 RLDVRDAWC  | 1671  | >CDKN2A-R1 RLDVRDAWC  | 335   | 1336  |
| >CDKN2A-R1 RLDVRDAWC  | 122   | >CDKN2A-R1 RLDVRDAWC  | 95    | 27    |
| >CDKN2A-R1 RLDVRDAWC  | 805   | >CDKN2A-R1 RLDVRDAWC  | 185   | 620   |
| >CDKN2A-R1 RLDVRDAWC  | 227   | >CDKN2A-R1 RLDVRDAWC  | 117   | 110   |
| >CDKN2A-R1 RLDVRDAWC  | 91    | >CDKN2A-R1 RLDVRDAWC  | 144   | 53    |
| >CDKN2A-R1 RLDVRDAWC  | 120   | >CDKN2A-R1 RLDVRDAWC  | 31830 | 31710 |
| >CDKN2A-R1 RLDVRDAWC  | 92    | >CDKN2A-R1 RLDVRDAWC  | 22849 | 22757 |
| >CDKN2A-R1 RLDVRDAWC  | 293   | >CDKN2A-R1 RLDVRDAWC  | 35776 | 35483 |
| >CDKN2A-R1 RLPVDLAEEL | 99    | >CDKN2A-R1 SLPVDLAEEL | 58    | 41    |
| >CDKN2A-R1 RLPVDLAEEL | 38    | >CDKN2A-R1 SLPVDLAEEL | 35    | 3     |
| >CDKN2A-R1 RLPVDLAEEL | 165   | >CDKN2A-R1 SLPVDLAEEL | 150   | 15    |

|                       |       |                       |       |       |
|-----------------------|-------|-----------------------|-------|-------|
| >CDKN2A-R1 RLPVDLAEEL | 125   | >CDKN2A-R1 SLPVDLAEEL | 34    | 91    |
| >CDKN2A-R1 RLPVDLAEEL | 391   | >CDKN2A-R1 SLPVDLAEEL | 484   | 93    |
| >CDKN2A-R1 RLPVDLAEEL | 15    | >CDKN2A-R1 SLPVDLAEEL | 8     | 7     |
| >CDKN2A-R1 GRLPVDLAE  | 25501 | >CDKN2A-R1 GSLPVDLAE  | 66    | 25435 |
| >CDKN2A-R1 GRLPVDLAE  | 202   | >CDKN2A-R1 GSLPVDLAE  | 21257 | 21055 |
| >CDKN2A-R1 GRLPVDLAE  | 8655  | >CDKN2A-R1 GSLPVDLAE  | 214   | 8441  |
| >CDKN2A-R1 GRLPVDLAE  | 194   | >CDKN2A-R1 GSLPVDLAE  | 13624 | 13430 |
| >CDKN2A-R1 GRLPVDLAE  | 29    | >CDKN2A-R1 GSLPVDLAE  | 14524 | 14495 |
| >CDKN2A-R1 ARLDVRDAW  | 89    | >CDKN2A-R1 ARLDVRDAW  | 742   | 653   |
| >CDKN2A-R1 AWGRLPVDL  | 474   | >CDKN2A-R1 AWGSLPVDL  | 386   | 88    |
| >CDKN2A-R1 AWGRLPVDL  | 403   | >CDKN2A-R1 AWGSLPVDL  | 257   | 146   |
| >CDKN2A-R1 AWGRLPVDL  | 156   | >CDKN2A-R1 AWGSLPVDL  | 120   | 36    |
| >CDKN2A-R1 DAWGRLPV   | 260   | >CDKN2A-R1 DAWGSLPV   | 143   | 117   |
| >CDKN2A-R1 DAWGRLPV   | 24    | >CDKN2A-R1 DAWGSLPV   | 9     | 15    |
| >CDKN2A-R1 VRDAWGRL   | 1239  | >CDKN2A-R1 VRDAWGSL   | 210   | 1029  |
| >CDKN2A-R1 VRDAWGRLP  | 489   | >CDKN2A-R1 VRDAWGSLP  | 208   | 281   |
| >CDKN2A-R1 DVRDAWGRI  | 456   | >CDKN2A-R1 DVRDAWGSL  | 243   | 213   |
| >CDKN2A-R1 DVRDAWGRI  | 277   | >CDKN2A-R1 DVRDAWGSL  | 253   | 24    |
| >CDKN2A-R1 DVRDAWGR   | 17    | >CDKN2A-R1 DVRDAWGS   | 12289 | 12272 |
| >CDKN2A-R1 DVRDAWGR   | 62    | >CDKN2A-R1 DVRDAWGS   | 25725 | 25663 |
| >CDKN2A-R1 DVRDAWGRI  | 208   | >CDKN2A-R1 DVRDAWGSL  | 198   | 10    |
| >CDKN2A-R1 DVRDAWGRI  | 198   | >CDKN2A-R1 DVRDAWGSL  | 83    | 115   |
| >CDKN2A-R1 DVRDAWGRI  | 4619  | >CDKN2A-R1 DVRDAWGSL  | 416   | 4203  |
| >CDKN2A-R1 LDVRDAWGF  | 477   | >CDKN2A-R1 LDVRDAWGS  | 488   | 11    |
| >CDKN2A-R1 RLDVRDAWC  | 802   | >CDKN2A-R1 RLDVRDAWC  | 461   | 341   |
| >CDKN2A-R1 RLDVRDAWC  | 122   | >CDKN2A-R1 RLDVRDAWC  | 101   | 21    |
| >CDKN2A-R1 RLDVRDAWC  | 805   | >CDKN2A-R1 RLDVRDAWC  | 310   | 495   |
| >CDKN2A-R1 RLDVRDAWC  | 227   | >CDKN2A-R1 RLDVRDAWC  | 151   | 76    |
| >CDKN2A-R1 RLDVRDAWC  | 91    | >CDKN2A-R1 RLDVRDAWC  | 84    | 7     |
| >CDKN2A-R1 RLDVRDAWC  | 120   | >CDKN2A-R1 RLDVRDAWC  | 26886 | 26766 |
| >CDKN2A-R1 RLDVRDAWC  | 92    | >CDKN2A-R1 RLDVRDAWC  | 15527 | 15435 |
| >CDKN2A-R1 RLDVRDAWC  | 293   | >CDKN2A-R1 RLDVRDAWC  | 32470 | 32177 |
| >CDKN2A-R1 RDVARYLR   | 243   | >CDKN2A-R1 HDVARYLR   | 857   | 614   |
| >CDKN2A-R1 RDVARYLR   | 79    | >CDKN2A-R1 HDVARYLR   | 85    | 6     |
| >CDKN2A-R1 HRDVARYL   | 2620  | >CDKN2A-R1 HHDVARYL   | 145   | 2475  |
| >CDKN2A-R1 HRDVARYLR  | 203   | >CDKN2A-R1 HHDVARYLR  | 16112 | 15909 |
| >CDKN2A-R1 HRDVARYLR/ | 122   | >CDKN2A-R1 HHDVARYLR/ | 10201 | 10079 |
| >CDKN2A-R1 HRDVARYL   | 175   | >CDKN2A-R1 HHDVARYL   | 65    | 110   |
| >CDKN2A-R1 HRDVARYLR  | 370   | >CDKN2A-R1 HHDVARYLR  | 266   | 104   |
| >CDKN2A-R1 GHRDVARYLI | 282   | >CDKN2A-R1 GHHDVARYLI | 712   | 430   |
| >CDKN2A-R1 LGHRDVARY  | 415   | >CDKN2A-R1 LGHHDVARY  | 173   | 242   |
| >CDKN2A-R1 LGHRDVARYI | 152   | >CDKN2A-R1 LGHHDVARYI | 227   | 75    |
| >CDKN2A-R1 LGHRDVARY  | 409   | >CDKN2A-R1 LGHHDVARY  | 246   | 163   |

|                       |       |                       |       |       |
|-----------------------|-------|-----------------------|-------|-------|
| >CDKN2A-R1 LGHRDVARY  | 2036  | >CDKN2A-R1 LGHHDVARY  | 346   | 1690  |
| >CDKN2A-R1 ELGHRDVAR\ | 382   | >CDKN2A-R1 ELGHHDVAR\ | 220   | 162   |
| >CDKN2A-R1 ELGHRDVAR\ | 477   | >CDKN2A-R1 ELGHHDVAR\ | 485   | 8     |
| >CDKN2A-R1 ELGHRDVAR\ | 274   | >CDKN2A-R1 ELGHHDVAR\ | 58    | 216   |
| >CDKN2A-R1 ELGHRDVAR\ | 413   | >CDKN2A-R1 ELGHHDVAR\ | 912   | 499   |
| >CDKN2A-R1 ELGHRDVAR  | 85    | >CDKN2A-R1 ELGHHDVAR  | 284   | 199   |
| >CDKN2A-R1 ELGHRDVAR  | 153   | >CDKN2A-R1 ELGHHDVAR  | 169   | 16    |
| >CDKN2A-R1 ELGHRDVAR\ | 608   | >CDKN2A-R1 ELGHHDVAR\ | 325   | 283   |
| >CDKN2A-R1 ELGHRDVAR  | 188   | >CDKN2A-R1 ELGHHDVAR  | 154   | 34    |
| >CDKN2A-R1 EELGHRDV   | 193   | >CDKN2A-R1 EELGHHDV   | 306   | 113   |
| >CDKN2A-R1 EELGHRDVAI | 86    | >CDKN2A-R1 EELGHHDVAI | 58    | 28    |
| >CDKN2A-R1 EELGHRDVAI | 177   | >CDKN2A-R1 EELGHHDVAI | 147   | 30    |
| >CDKN2A-R1 EELGHRDV   | 1496  | >CDKN2A-R1 EELGHHDV   | 298   | 1198  |
| >CDKN2A-R1 EELGHRDVA  | 744   | >CDKN2A-R1 EELGHHDVA  | 431   | 313   |
| >CDKN2A-R1 EELGHRDVAI | 121   | >CDKN2A-R1 EELGHHDVAI | 89    | 32    |
| >CDKN2A-R1 EELGHRDV   | 54    | >CDKN2A-R1 EELGHHDV   | 19    | 35    |
| >CDKN2A-R1 EELGHRDVA  | 10    | >CDKN2A-R1 EELGHHDVA  | 5     | 5     |
| >CDKN2A-R1 EELGHRDVAI | 471   | >CDKN2A-R1 EELGHHDVAI | 389   | 82    |
| >CDKN2A-R1 AEELGHRDV  | 408   | >CDKN2A-R1 AEELGHHDV  | 45    | 363   |
| >CDKN2A-R1 AEELGHRDV  | 29    | >CDKN2A-R1 AEELGHHDV  | 15    | 14    |
| >CDKN2A-R1 AEELGHRDV/ | 39    | >CDKN2A-R1 AEELGHHDV/ | 31    | 8     |
| >CDKN2A-R1 AEELGHRDV/ | 846   | >CDKN2A-R1 AEELGHHDV/ | 428   | 418   |
| >CDKN2A-R1 AEELGHRDV  | 336   | >CDKN2A-R1 AEELGHHDV  | 163   | 173   |
| >CDKN2A-R1 LAEELGHRDV | 1178  | >CDKN2A-R1 LAEELGHHDV | 79    | 1099  |
| >CDKN2A-R1 DLAEELGHRE | 582   | >CDKN2A-R1 DLAEELGHHE | 297   | 285   |
| >CDKN2A-R1 DLAEELGHRE | 265   | >CDKN2A-R1 DLAEELGHHE | 69    | 196   |
| >CDKN2A-R1 DLAEELGHRE | 1496  | >CDKN2A-R1 DLAEELGHHE | 290   | 1206  |
| >CDKN2A-R1 DLAEELGHRE | 185   | >CDKN2A-R1 DLAEELGHHE | 25    | 160   |
| >CDKN2A-R1 DLAEELGHRE | 418   | >CDKN2A-R1 DLAEELGHHE | 29    | 389   |
| >CDKN2A-R1 DLAEELGHRE | 27    | >CDKN2A-R1 DLAEELGHHE | 6     | 21    |
| >CDKN2A-R1 DLAEELGHR  | 124   | >CDKN2A-R1 DLAEELGHH  | 21946 | 21822 |
| >CDKN2A-R1 DLAEELGHR  | 182   | >CDKN2A-R1 DLAEELGHH  | 16828 | 16646 |
| >CDKN2A-R1 DLAEELGHRE | 1031  | >CDKN2A-R1 DLAEELGHHE | 101   | 930   |
| >CDKN2A-R1 RYLRAAAG   | 414   | >CDKN2A-R1 QYLRAAAG   | 2115  | 1701  |
| >CDKN2A-R1 RYLRAAAGG  | 436   | >CDKN2A-R1 QYLRAAAGG  | 2308  | 1872  |
| >CDKN2A-R1 RYLRAAAGG\ | 218   | >CDKN2A-R1 QYLRAAAGG\ | 1376  | 1158  |
| >CDKN2A-R1 RYLRAAAGG\ | 128   | >CDKN2A-R1 QYLRAAAGG\ | 635   | 507   |
| >CDKN2A-R1 RYLRAAAG   | 239   | >CDKN2A-R1 QYLRAAAG   | 6571  | 6332  |
| >CDKN2A-R1 RYLRAAAGG  | 315   | >CDKN2A-R1 QYLRAAAGG  | 7020  | 6705  |
| >CDKN2A-R1 RYLRAAAGG\ | 96    | >CDKN2A-R1 QYLRAAAGG\ | 3410  | 3314  |
| >CDKN2A-R1 RYLRAAAGG\ | 24    | >CDKN2A-R1 QYLRAAAGG\ | 671   | 647   |
| >CDKN2A-R1 RYLRAAAGG\ | 33    | >CDKN2A-R1 QYLRAAAGG\ | 76    | 43    |
| >CDKN2A-R1 ARYLRAAA   | 14514 | >CDKN2A-R1 AQYLRAAA   | 212   | 14302 |

|                        |       |                        |       |       |
|------------------------|-------|------------------------|-------|-------|
| >CDKN2A-R1 ARYLRAAA    | 16803 | >CDKN2A-R1 AQYLRAAA    | 50    | 16753 |
| >CDKN2A-R1 ARYLRAAA    | 21198 | >CDKN2A-R1 AQYLRAAA    | 422   | 20776 |
| >CDKN2A-R1 ARYLRAAA    | 1662  | >CDKN2A-R1 AQYLRAAA    | 260   | 1402  |
| >CDKN2A-R1 ARYLRAAA    | 195   | >CDKN2A-R1 AQYLRAAA    | 4478  | 4283  |
| >CDKN2A-R1 ARYLRAAAAGC | 321   | >CDKN2A-R1 AQYLRAAAAGC | 7174  | 6853  |
| >CDKN2A-R1 ARYLRAAA    | 6642  | >CDKN2A-R1 AQYLRAAA    | 367   | 6275  |
| >CDKN2A-R1 ARYLRAAA    | 428   | >CDKN2A-R1 AQYLRAAA    | 6425  | 5997  |
| >CDKN2A-R1 AEELGHRDVAF | 846   | >CDKN2A-R1 AEELGHRDVAF | 440   | 406   |
| >CDKN2A-R1 VARYLRAA    | 137   | >CDKN2A-R1 VAQYLRAA    | 10396 | 10259 |
| >CDKN2A-R1 VARYLRAAA   | 38    | >CDKN2A-R1 VAQYLRAAA   | 6607  | 6569  |
| >CDKN2A-R1 VARYLRAAA   | 284   | >CDKN2A-R1 VAQYLRAAA   | 7342  | 7058  |
| >CDKN2A-R1 DVARYLRAAF  | 376   | >CDKN2A-R1 DVAQYLRAAF  | 481   | 105   |
| >CDKN2A-R1 DVARYLRAAF  | 877   | >CDKN2A-R1 DVAQYLRAAF  | 484   | 393   |
| >CDKN2A-R1 RDVARYLR    | 243   | >CDKN2A-R1 RDVAQYLR    | 652   | 409   |
| >CDKN2A-R1 RDVARYLR    | 79    | >CDKN2A-R1 RDVAQYLR    | 79    | 0     |
| >CDKN2A-R1 HRDVARYLR   | 203   | >CDKN2A-R1 HRDVAQYLR   | 223   | 20    |
| >CDKN2A-R1 HRDVARYLRAF | 122   | >CDKN2A-R1 HRDVAQYLRAF | 109   | 13    |
| >CDKN2A-R1 HRDVARYL    | 175   | >CDKN2A-R1 HRDVAQYL    | 86    | 89    |
| >CDKN2A-R1 HRDVARYLR   | 370   | >CDKN2A-R1 HRDVAQYLR   | 720   | 350   |
| >CDKN2A-R1 GHRDVARYLRF | 282   | >CDKN2A-R1 GHRDVAQYLRF | 917   | 635   |
| >CDKN2A-R1 LGHRDVARY   | 415   | >CDKN2A-R1 LGHRDVAQY   | 992   | 577   |
| >CDKN2A-R1 LGHRDVARYL  | 152   | >CDKN2A-R1 LGHRDVAQYL  | 268   | 116   |
| >CDKN2A-R1 LGHRDVARY   | 409   | >CDKN2A-R1 LGHRDVAQY   | 278   | 131   |
| >CDKN2A-R1 ELGHRDVAR)  | 382   | >CDKN2A-R1 ELGHRDVAQ'  | 182   | 200   |
| >CDKN2A-R1 ELGHRDVAR)  | 1057  | >CDKN2A-R1 ELGHRDVAQ'  | 328   | 729   |
| >CDKN2A-R1 ELGHRDVAR)  | 1150  | >CDKN2A-R1 ELGHRDVAQ'  | 292   | 858   |
| >CDKN2A-R1 ELGHRDVAR)  | 1449  | >CDKN2A-R1 ELGHRDVAQ'  | 405   | 1044  |
| >CDKN2A-R1 ELGHRDVAR)  | 477   | >CDKN2A-R1 ELGHRDVAQ'  | 71    | 406   |
| >CDKN2A-R1 ELGHRDVAR)  | 274   | >CDKN2A-R1 ELGHRDVAQ'  | 333   | 59    |
| >CDKN2A-R1 ELGHRDVAR)  | 413   | >CDKN2A-R1 ELGHRDVAQ'  | 379   | 34    |
| >CDKN2A-R1 ELGHRDVAR   | 85    | >CDKN2A-R1 ELGHRDVAQ   | 17909 | 17824 |
| >CDKN2A-R1 ELGHRDVAR   | 153   | >CDKN2A-R1 ELGHRDVAQ   | 15622 | 15469 |
| >CDKN2A-R1 ELGHRDVAR)  | 608   | >CDKN2A-R1 ELGHRDVAQ'  | 432   | 176   |
| >CDKN2A-R1 ELGHRDVAR   | 188   | >CDKN2A-R1 ELGHRDVAQ   | 18444 | 18256 |
| >CDKN2A-R1 EELGHRDVAF  | 86    | >CDKN2A-R1 EELGHRDVAC  | 94    | 8     |
| >CDKN2A-R1 EELGHRDVAF  | 177   | >CDKN2A-R1 EELGHRDVAC  | 75    | 102   |
| >CDKN2A-R1 EELGHRDVAF  | 121   | >CDKN2A-R1 EELGHRDVAC  | 127   | 6     |
| >CDKN2A-R1 EELGHRDVAF  | 471   | >CDKN2A-R1 EELGHRDVAC  | 21310 | 20839 |
| >CDKN2A-R1 RYLRAAAG    | 414   | >CDKN2A-R1 WYLRAAAG    | 739   | 325   |
| >CDKN2A-R1 RYLRAAAGG   | 436   | >CDKN2A-R1 WYLRAAAGG   | 791   | 355   |
| >CDKN2A-R1 RYLRAAAGG   | 218   | >CDKN2A-R1 WYLRAAAGG   | 364   | 146   |
| >CDKN2A-R1 RYLRAAAGG   | 128   | >CDKN2A-R1 WYLRAAAGG   | 179   | 51    |
| >CDKN2A-R1 RYLRAAAG    | 239   | >CDKN2A-R1 WYLRAAAG    | 15063 | 14824 |

|                       |       |                       |       |       |
|-----------------------|-------|-----------------------|-------|-------|
| >CDKN2A-R1 RYLRAAAGG  | 315   | >CDKN2A-R1 WYLRAAAGG  | 15376 | 15061 |
| >CDKN2A-R1 RYLRAAAGG† | 96    | >CDKN2A-R1 WYLRAAAGG  | 13331 | 13235 |
| >CDKN2A-R1 RYLRAAAGG† | 24    | >CDKN2A-R1 WYLRAAAGG  | 2736  | 2712  |
| >CDKN2A-R1 RYLRAAAGG† | 33    | >CDKN2A-R1 WYLRAAAGG  | 79    | 46    |
| >CDKN2A-R1 ARYLRAAA   | 195   | >CDKN2A-R1 AWYLRAAA   | 16965 | 16770 |
| >CDKN2A-R1 ARYLRAAAG† | 321   | >CDKN2A-R1 AWYLRAAAG  | 20330 | 20009 |
| >CDKN2A-R1 ARYLRAAA   | 428   | >CDKN2A-R1 AWYLRAAA   | 23462 | 23034 |
| >CDKN2A-R1 ARYLRAAA   | 32616 | >CDKN2A-R1 AWYLRAAA   | 107   | 32509 |
| >CDKN2A-R1 ARYLRAAAG  | 38018 | >CDKN2A-R1 AWYLRAAAG  | 374   | 37644 |
| >CDKN2A-R1 AEELGHRDV† | 6223  | >CDKN2A-R1 AEELGHRDV† | 76    | 6147  |
| >CDKN2A-R1 AEELGHRDV† | 7918  | >CDKN2A-R1 AEELGHRDV† | 125   | 7793  |
| >CDKN2A-R1 VARYLRAA   | 137   | >CDKN2A-R1 VAWYLRAA   | 11750 | 11613 |
| >CDKN2A-R1 VARYLRAAA  | 38    | >CDKN2A-R1 VAWYLRAAA  | 8049  | 8011  |
| >CDKN2A-R1 VARYLRAAA  | 284   | >CDKN2A-R1 VAWYLRAAA  | 3676  | 3392  |
| >CDKN2A-R1 VARYLRAA   | 4599  | >CDKN2A-R1 VAWYLRAA   | 353   | 4246  |
| >CDKN2A-R1 VARYLRAAA  | 2418  | >CDKN2A-R1 VAWYLRAAA  | 142   | 2276  |
| >CDKN2A-R1 DVARYLRA   | 514   | >CDKN2A-R1 DVAWYLRA   | 200   | 314   |
| >CDKN2A-R1 DVARYLRAA† | 376   | >CDKN2A-R1 DVAWYLRAA  | 167   | 209   |
| >CDKN2A-R1 DVARYLRA   | 1927  | >CDKN2A-R1 DVAWYLRA   | 132   | 1795  |
| >CDKN2A-R1 DVARYLRAA  | 1540  | >CDKN2A-R1 DVAWYLRAA  | 177   | 1363  |
| >CDKN2A-R1 DVARYLRAA† | 877   | >CDKN2A-R1 DVAWYLRAA  | 126   | 751   |
| >CDKN2A-R1 RDVARYLR   | 243   | >CDKN2A-R1 RDVAWYLR   | 215   | 28    |
| >CDKN2A-R1 RDVARYLR   | 79    | >CDKN2A-R1 RDVAWYLR   | 57    | 22    |
| >CDKN2A-R1 HRDVARYL   | 531   | >CDKN2A-R1 HRDVAWYL   | 306   | 225   |
| >CDKN2A-R1 HRDVARYLR  | 203   | >CDKN2A-R1 HRDVAWYLR  | 172   | 31    |
| >CDKN2A-R1 HRDVARYLR† | 122   | >CDKN2A-R1 HRDVAWYLR  | 54    | 68    |
| >CDKN2A-R1 HRDVARYL   | 175   | >CDKN2A-R1 HRDVAWYL   | 38    | 137   |
| >CDKN2A-R1 HRDVARYLR  | 370   | >CDKN2A-R1 HRDVAWYLR  | 174   | 196   |
| >CDKN2A-R1 GHRDVARYL† | 282   | >CDKN2A-R1 GHRDVAWYL  | 642   | 360   |
| >CDKN2A-R1 LGHRDVARY  | 415   | >CDKN2A-R1 LGHRDVAWY  | 687   | 272   |
| >CDKN2A-R1 LGHRDVARYL | 152   | >CDKN2A-R1 LGHRDVAWY  | 158   | 6     |
| >CDKN2A-R1 LGHRDVARY  | 409   | >CDKN2A-R1 LGHRDVAWY  | 1098  | 689   |
| >CDKN2A-R1 LGHRDVAR   | 22761 | >CDKN2A-R1 LGHRDVAW   | 436   | 22325 |
| >CDKN2A-R1 LGHRDVAR   | 31495 | >CDKN2A-R1 LGHRDVAW   | 140   | 31355 |
| >CDKN2A-R1 ELGHRDVAR† | 938   | >CDKN2A-R1 ELGHRDVAW  | 307   | 631   |
| >CDKN2A-R1 ELGHRDVAR† | 1533  | >CDKN2A-R1 ELGHRDVAW  | 179   | 1354  |
| >CDKN2A-R1 ELGHRDVAR† | 382   | >CDKN2A-R1 ELGHRDVAW  | 54    | 328   |
| >CDKN2A-R1 ELGHRDVAR† | 1057  | >CDKN2A-R1 ELGHRDVAW  | 51    | 1006  |
| >CDKN2A-R1 ELGHRDVAR† | 1150  | >CDKN2A-R1 ELGHRDVAW  | 78    | 1072  |
| >CDKN2A-R1 ELGHRDVAR† | 1449  | >CDKN2A-R1 ELGHRDVAW  | 102   | 1347  |
| >CDKN2A-R1 ELGHRDVAR† | 477   | >CDKN2A-R1 ELGHRDVAW  | 30    | 447   |
| >CDKN2A-R1 ELGHRDVAR† | 274   | >CDKN2A-R1 ELGHRDVAW  | 122   | 152   |
| >CDKN2A-R1 ELGHRDVAR† | 1279  | >CDKN2A-R1 ELGHRDVAW  | 405   | 874   |



|                       |       |                       |       |       |
|-----------------------|-------|-----------------------|-------|-------|
| >CDKN2A-R1 ELGHRDVAR\ | 413   | >CDKN2A-R1 ELGHRDVAW  | 558   | 145   |
| >CDKN2A-R1 ELGHRDVAR  | 85    | >CDKN2A-R1 ELGHRDVAW  | 26895 | 26810 |
| >CDKN2A-R1 ELGHRDVAR  | 153   | >CDKN2A-R1 ELGHRDVAW  | 31599 | 31446 |
| >CDKN2A-R1 ELGHRDVAR  | 188   | >CDKN2A-R1 ELGHRDVAW  | 30094 | 29906 |
| >CDKN2A-R1 EELGHRDVA\ | 86    | >CDKN2A-R1 EELGHRDVA\ | 34    | 52    |
| >CDKN2A-R1 EELGHRDVA\ | 177   | >CDKN2A-R1 EELGHRDVA\ | 97    | 80    |
| >CDKN2A-R1 EELGHRDVA\ | 18089 | >CDKN2A-R1 EELGHRDVA\ | 40    | 18049 |
| >CDKN2A-R1 EELGHRDVA\ | 13632 | >CDKN2A-R1 EELGHRDVA\ | 52    | 13580 |
| >CDKN2A-R1 EELGHRDVA\ | 121   | >CDKN2A-R1 EELGHRDVA\ | 65    | 56    |
| >CDKN2A-R1 EELGHRDVA\ | 940   | >CDKN2A-R1 EELGHRDVA\ | 471   | 469   |
| >CDKN2A-R1 EELGHRDVA\ | 30616 | >CDKN2A-R1 EELGHRDVA\ | 155   | 30461 |
| >CDKN2A-R1 EELGHRDVA\ | 471   | >CDKN2A-R1 EELGHRDVA\ | 33857 | 33386 |
| >CDKN2A-R1 RAAAGGTR   | 82    | >CDKN2A-R1 CAAAGGTR   | 1712  | 1630  |
| >CDKN2A-R1 RAAAGGTR   | 423   | >CDKN2A-R1 CAAAGGTR   | 83    | 340   |
| >CDKN2A-R1 LRAAAGGTR  | 199   | >CDKN2A-R1 LCAAAGGTR  | 25886 | 25687 |
| >CDKN2A-R1 LGHRDVARYI | 152   | >CDKN2A-R1 LGHRDVARYI | 22169 | 22017 |
| >CDKN2A-R1 YLRAAAGGT  | 48    | >CDKN2A-R1 YLCAAAGGT  | 81    | 33    |
| >CDKN2A-R1 YLRAAAGGT  | 1645  | >CDKN2A-R1 YLCAAAGGT  | 146   | 1499  |
| >CDKN2A-R1 YLRAAAGGT  | 128   | >CDKN2A-R1 YLCAAAGGT  | 92    | 36    |
| >CDKN2A-R1 YLRAAAGGTF | 1026  | >CDKN2A-R1 YLCAAAGGTF | 396   | 630   |
| >CDKN2A-R1 YLRAAAGGTF | 231   | >CDKN2A-R1 YLCAAAGGTF | 150   | 81    |
| >CDKN2A-R1 RYLRAAAG   | 414   | >CDKN2A-R1 RYLCAAAG   | 566   | 152   |
| >CDKN2A-R1 RYLRAAAGG  | 436   | >CDKN2A-R1 RYLCAAAGG  | 678   | 242   |
| >CDKN2A-R1 RYLRAAAGG\ | 218   | >CDKN2A-R1 RYLCAAAGG\ | 321   | 103   |
| >CDKN2A-R1 RYLRAAAGG\ | 128   | >CDKN2A-R1 RYLCAAAGG\ | 220   | 92    |
| >CDKN2A-R1 RYLRAAAG   | 239   | >CDKN2A-R1 RYLCAAAG   | 834   | 595   |
| >CDKN2A-R1 RYLRAAAGG  | 315   | >CDKN2A-R1 RYLCAAAGG  | 958   | 643   |
| >CDKN2A-R1 RYLRAAAGG\ | 96    | >CDKN2A-R1 RYLCAAAGG\ | 252   | 156   |
| >CDKN2A-R1 RYLRAAAGG\ | 24    | >CDKN2A-R1 RYLCAAAGG\ | 55    | 31    |
| >CDKN2A-R1 RYLRAAAGG\ | 33    | >CDKN2A-R1 RYLCAAAGG\ | 18    | 15    |
| >CDKN2A-R1 ARYLRAAA   | 195   | >CDKN2A-R1 ARYLCAAA   | 1040  | 845   |
| >CDKN2A-R1 ARYLRAAAG\ | 321   | >CDKN2A-R1 ARYLCAAAG\ | 765   | 444   |
| >CDKN2A-R1 ARYLRAAA   | 428   | >CDKN2A-R1 ARYLCAAA   | 620   | 192   |
| >CDKN2A-R1 VARYLRAA   | 137   | >CDKN2A-R1 VARYLCAA   | 227   | 90    |
| >CDKN2A-R1 VARYLRAAA  | 38    | >CDKN2A-R1 VARYLCAAA  | 379   | 341   |
| >CDKN2A-R1 VARYLRAAA  | 284   | >CDKN2A-R1 VARYLCAAA  | 3254  | 2970  |
| >CDKN2A-R1 DVARYLRAA  | 1129  | >CDKN2A-R1 DVARYLCAA  | 206   | 923   |
| >CDKN2A-R1 DVARYLRAA\ | 376   | >CDKN2A-R1 DVARYLCAA\ | 219   | 157   |
| >CDKN2A-R1 DVARYLRAA  | 1540  | >CDKN2A-R1 DVARYLCAA  | 250   | 1290  |
| >CDKN2A-R1 DVARYLRAA\ | 877   | >CDKN2A-R1 DVARYLCAA\ | 418   | 459   |
| >CDKN2A-R1 RDVARYLR   | 243   | >CDKN2A-R1 RDVARYLC   | 22157 | 21914 |
| >CDKN2A-R1 RDVARYLR   | 79    | >CDKN2A-R1 RDVARYLC   | 31193 | 31114 |
| >CDKN2A-R1 HRDVARYLR  | 203   | >CDKN2A-R1 HRDVARYLC  | 4381  | 4178  |

|                       |       |                       |       |       |
|-----------------------|-------|-----------------------|-------|-------|
| >CDKN2A-R1 HRDVARYLR/ | 122   | >CDKN2A-R1 HRDVARYLC/ | 113   | 9     |
| >CDKN2A-R1 HRDVARYLR  | 370   | >CDKN2A-R1 HRDVARYLC  | 36211 | 35841 |
| >CDKN2A-R1 GHRDVARYLI | 282   | >CDKN2A-R1 GHRDVARYLI | 27132 | 26850 |
| >CDKN2A-R1 RAAAGGTR   | 82    | >CDKN2A-R1 HAAAGGTR   | 368   | 286   |
| >CDKN2A-R1 RAAAGGTR   | 423   | >CDKN2A-R1 HAAAGGTR   | 33    | 390   |
| >CDKN2A-R1 LRAAAGGTR  | 199   | >CDKN2A-R1 LHAAAGGTR  | 21697 | 21498 |
| >CDKN2A-R1 LGHRDVARYI | 152   | >CDKN2A-R1 LGHRDVARYI | 12011 | 11859 |
| >CDKN2A-R1 YLRAAAGGT  | 48    | >CDKN2A-R1 YLHAAAGGT  | 26    | 22    |
| >CDKN2A-R1 YLRAAAGG   | 4761  | >CDKN2A-R1 YLHAAAGG   | 439   | 4322  |
| >CDKN2A-R1 YLRAAAGGT  | 1645  | >CDKN2A-R1 YLHAAAGGT  | 98    | 1547  |
| >CDKN2A-R1 YLRAAAGGT  | 128   | >CDKN2A-R1 YLHAAAGGT  | 42    | 86    |
| >CDKN2A-R1 YLRAAAGGTI | 1026  | >CDKN2A-R1 YLHAAAGGTI | 381   | 645   |
| >CDKN2A-R1 YLRAAAGGTI | 231   | >CDKN2A-R1 YLHAAAGGTI | 239   | 8     |
| >CDKN2A-R1 RYLRAAAG   | 414   | >CDKN2A-R1 RYLHAAAG   | 463   | 49    |
| >CDKN2A-R1 RYLRAAAGG  | 436   | >CDKN2A-R1 RYLHAAAGG  | 533   | 97    |
| >CDKN2A-R1 RYLRAAAGGT | 218   | >CDKN2A-R1 RYLHAAAGGT | 279   | 61    |
| >CDKN2A-R1 RYLRAAAGGT | 128   | >CDKN2A-R1 RYLHAAAGGT | 158   | 30    |
| >CDKN2A-R1 RYLRAAAG   | 239   | >CDKN2A-R1 RYLHAAAG   | 459   | 220   |
| >CDKN2A-R1 RYLRAAAGG  | 315   | >CDKN2A-R1 RYLHAAAGG  | 686   | 371   |
| >CDKN2A-R1 RYLRAAAGGT | 96    | >CDKN2A-R1 RYLHAAAGGT | 172   | 76    |
| >CDKN2A-R1 RYLRAAAGGT | 24    | >CDKN2A-R1 RYLHAAAGGT | 36    | 12    |
| >CDKN2A-R1 RYLRAAAGGT | 33    | >CDKN2A-R1 RYLHAAAGGT | 24    | 9     |
| >CDKN2A-R1 ARYLRAAA   | 195   | >CDKN2A-R1 ARYLHAAA   | 432   | 237   |
| >CDKN2A-R1 ARYLRAAAGC | 321   | >CDKN2A-R1 ARYLHAAAGC | 442   | 121   |
| >CDKN2A-R1 ARYLRAAA   | 428   | >CDKN2A-R1 ARYLHAAA   | 733   | 305   |
| >CDKN2A-R1 VARYLRAA   | 137   | >CDKN2A-R1 VARYLHAA   | 104   | 33    |
| >CDKN2A-R1 VARYLRAAA  | 38    | >CDKN2A-R1 VARYLHAAA  | 27    | 11    |
| >CDKN2A-R1 VARYLRAAA  | 284   | >CDKN2A-R1 VARYLHAAA  | 1323  | 1039  |
| >CDKN2A-R1 DVARYLRAA  | 1041  | >CDKN2A-R1 DVARYLHAA  | 240   | 801   |
| >CDKN2A-R1 DVARYLRA   | 514   | >CDKN2A-R1 DVARYLHA   | 193   | 321   |
| >CDKN2A-R1 DVARYLRAA  | 1129  | >CDKN2A-R1 DVARYLHAA  | 39    | 1090  |
| >CDKN2A-R1 DVARYLRAA/ | 376   | >CDKN2A-R1 DVARYLHAA/ | 210   | 166   |
| >CDKN2A-R1 DVARYLRAA  | 1540  | >CDKN2A-R1 DVARYLHAA  | 46    | 1494  |
| >CDKN2A-R1 DVARYLRAA/ | 877   | >CDKN2A-R1 DVARYLHAA/ | 148   | 729   |
| >CDKN2A-R1 RDVARYLR   | 243   | >CDKN2A-R1 RDVARYLH   | 13282 | 13039 |
| >CDKN2A-R1 RDVARYLR   | 79    | >CDKN2A-R1 RDVARYLH   | 20765 | 20686 |
| >CDKN2A-R1 HRDVARYLR  | 203   | >CDKN2A-R1 HRDVARYLH  | 515   | 312   |
| >CDKN2A-R1 HRDVARYLR/ | 122   | >CDKN2A-R1 HRDVARYLH/ | 130   | 8     |
| >CDKN2A-R1 HRDVARYLR  | 370   | >CDKN2A-R1 HRDVARYLH  | 31782 | 31412 |
| >CDKN2A-R1 GHRDVARYLI | 282   | >CDKN2A-R1 GHRDVARYLI | 10035 | 9753  |
| >CDKN2A-R1 RAAAGGTR   | 82    | >CDKN2A-R1 LAAAGGTR   | 942   | 860   |
| >CDKN2A-R1 RAAAGGTR   | 423   | >CDKN2A-R1 LAAAGGTR   | 85    | 338   |
| >CDKN2A-R1 LRAAAGGT   | 27203 | >CDKN2A-R1 LLAAAGGT   | 284   | 26919 |

|                       |       |                       |       |       |
|-----------------------|-------|-----------------------|-------|-------|
| >CDKN2A-R1 LRAAAGGT   | 19672 | >CDKN2A-R1 LLAAAGGT   | 67    | 19605 |
| >CDKN2A-R1 LRAAAGGT   | 36165 | >CDKN2A-R1 LLAAAGGT   | 156   | 36009 |
| >CDKN2A-R1 LRAAAGGTR  | 4923  | >CDKN2A-R1 LLAAAGGTR  | 350   | 4573  |
| >CDKN2A-R1 LRAAAGGTR  | 199   | >CDKN2A-R1 LLAAAGGTR  | 21461 | 21262 |
| >CDKN2A-R1 LGHRDVARYL | 152   | >CDKN2A-R1 LGHRDVARYL | 16259 | 16107 |
| >CDKN2A-R1 YLRAAAGGT  | 48    | >CDKN2A-R1 YLLAAAGGT  | 91    | 43    |
| >CDKN2A-R1 YLRAAAGGT  | 5898  | >CDKN2A-R1 YLLAAAGGT  | 65    | 5833  |
| >CDKN2A-R1 YLRAAAGG   | 4761  | >CDKN2A-R1 YLLAAAGG   | 102   | 4659  |
| >CDKN2A-R1 YLRAAAGGT  | 1645  | >CDKN2A-R1 YLLAAAGGT  | 22    | 1623  |
| >CDKN2A-R1 YLRAAAGGTF | 7725  | >CDKN2A-R1 YLLAAAGGTR | 250   | 7475  |
| >CDKN2A-R1 YLRAAAGGT  | 9700  | >CDKN2A-R1 YLLAAAGGT  | 242   | 9458  |
| >CDKN2A-R1 YLRAAAGGT  | 4869  | >CDKN2A-R1 YLLAAAGGT  | 62    | 4807  |
| >CDKN2A-R1 YLRAAAGGT  | 12853 | >CDKN2A-R1 YLLAAAGGT  | 116   | 12737 |
| >CDKN2A-R1 YLRAAAGG   | 1926  | >CDKN2A-R1 YLLAAAGG   | 365   | 1561  |
| >CDKN2A-R1 YLRAAAGGT  | 128   | >CDKN2A-R1 YLLAAAGGT  | 27    | 101   |
| >CDKN2A-R1 YLRAAAGGTF | 2223  | >CDKN2A-R1 YLLAAAGGTR | 458   | 1765  |
| >CDKN2A-R1 YLRAAAGGTF | 1070  | >CDKN2A-R1 YLLAAAGGTR | 376   | 694   |
| >CDKN2A-R1 YLRAAAGGTF | 1026  | >CDKN2A-R1 YLLAAAGGTR | 423   | 603   |
| >CDKN2A-R1 YLRAAAGGTF | 231   | >CDKN2A-R1 YLLAAAGGTR | 280   | 49    |
| >CDKN2A-R1 RYLRAAAG   | 414   | >CDKN2A-R1 RYLLAAAG   | 641   | 227   |
| >CDKN2A-R1 RYLRAAAGG  | 436   | >CDKN2A-R1 RYLLAAAGG  | 806   | 370   |
| >CDKN2A-R1 RYLRAAAGGT | 218   | >CDKN2A-R1 RYLLAAAGGT | 375   | 157   |
| >CDKN2A-R1 RYLRAAAGGT | 128   | >CDKN2A-R1 RYLLAAAGGT | 280   | 152   |
| >CDKN2A-R1 RYLRAAAG   | 239   | >CDKN2A-R1 RYLLAAAG   | 1030  | 791   |
| >CDKN2A-R1 RYLRAAAGG  | 315   | >CDKN2A-R1 RYLLAAAGG  | 1408  | 1093  |
| >CDKN2A-R1 RYLRAAAGGT | 96    | >CDKN2A-R1 RYLLAAAGGT | 358   | 262   |
| >CDKN2A-R1 RYLRAAAGGT | 24    | >CDKN2A-R1 RYLLAAAGGT | 43    | 19    |
| >CDKN2A-R1 RYLRAAAGGT | 33    | >CDKN2A-R1 RYLLAAAGGT | 22    | 11    |
| >CDKN2A-R1 ARYLRAAA   | 195   | >CDKN2A-R1 ARYLLAAA   | 170   | 25    |
| >CDKN2A-R1 ARYLRAAAGC | 321   | >CDKN2A-R1 ARYLLAAAGC | 239   | 82    |
| >CDKN2A-R1 ARYLRAAA   | 428   | >CDKN2A-R1 ARYLLAAA   | 599   | 171   |
| >CDKN2A-R1 VARYLRAA   | 137   | >CDKN2A-R1 VARYLLAA   | 119   | 18    |
| >CDKN2A-R1 VARYLRAAA  | 38    | >CDKN2A-R1 VARYLLAAA  | 104   | 66    |
| >CDKN2A-R1 VARYLRAAA  | 284   | >CDKN2A-R1 VARYLLAAA  | 2820  | 2536  |
| >CDKN2A-R1 DVARYLRA   | 514   | >CDKN2A-R1 DVARYLLA   | 280   | 234   |
| >CDKN2A-R1 DVARYLRAA  | 1129  | >CDKN2A-R1 DVARYLLAA  | 491   | 638   |
| >CDKN2A-R1 DVARYLRAAA | 376   | >CDKN2A-R1 DVARYLLAAA | 339   | 37    |
| >CDKN2A-R1 DVARYLRAA  | 1540  | >CDKN2A-R1 DVARYLLAA  | 297   | 1243  |
| >CDKN2A-R1 DVARYLRAAA | 877   | >CDKN2A-R1 DVARYLLAAA | 230   | 647   |
| >CDKN2A-R1 RDVARYLR   | 243   | >CDKN2A-R1 RDVARYLL   | 17991 | 17748 |
| >CDKN2A-R1 RDVARYLR   | 15944 | >CDKN2A-R1 RDVARYLL   | 399   | 15545 |
| >CDKN2A-R1 RDVARYLR   | 79    | >CDKN2A-R1 RDVARYLL   | 24139 | 24060 |
| >CDKN2A-R1 RDVARYLR   | 17101 | >CDKN2A-R1 RDVARYLL   | 342   | 16759 |

|                       |       |                       |       |       |
|-----------------------|-------|-----------------------|-------|-------|
| >CDKN2A-R1 HRDVARYLR  | 203   | >CDKN2A-R1 HRDVARYLL  | 147   | 56    |
| >CDKN2A-R1 HRDVARYLR/ | 122   | >CDKN2A-R1 HRDVARYLLA | 114   | 8     |
| >CDKN2A-R1 HRDVARYLR  | 9959  | >CDKN2A-R1 HRDVARYLL  | 23    | 9936  |
| >CDKN2A-R1 HRDVARYLR  | 1777  | >CDKN2A-R1 HRDVARYLL  | 40    | 1737  |
| >CDKN2A-R1 HRDVARYLR  | 370   | >CDKN2A-R1 HRDVARYLL  | 33509 | 33139 |
| >CDKN2A-R1 GHRDVARYLI | 282   | >CDKN2A-R1 GHRDVARYLI | 17331 | 17049 |
| >CDKN2A-R1 RGSNHARI   | 251   | >CDKN2A-R1 IGSNHARI   | 1322  | 1071  |
| >CDKN2A-R1 TRGSNHAR   | 9046  | >CDKN2A-R1 TIGSNHAR   | 85    | 8961  |
| >CDKN2A-R1 TRGSNHAR   | 2709  | >CDKN2A-R1 TIGSNHAR   | 40    | 2669  |
| >CDKN2A-R1 TRGSNHAR   | 575   | >CDKN2A-R1 TIGSNHAR   | 121   | 454   |
| >CDKN2A-R1 RYLRAAAGG  | 17735 | >CDKN2A-R1 RYLRAAAGG  | 9     | 17726 |
| >CDKN2A-R1 RYLRAAAGG  | 6704  | >CDKN2A-R1 RYLRAAAGG  | 185   | 6519  |
| >CDKN2A-R1 RYLRAAAGG  | 2626  | >CDKN2A-R1 RYLRAAAGG  | 61    | 2565  |
| >CDKN2A-R1 RYLRAAAGG  | 128   | >CDKN2A-R1 RYLRAAAGG  | 4     | 124   |
| >CDKN2A-R1 RYLRAAAGG  | 96    | >CDKN2A-R1 RYLRAAAGG  | 25    | 71    |
| >CDKN2A-R1 RYLRAAAGG  | 24    | >CDKN2A-R1 RYLRAAAGG  | 13073 | 13049 |
| >CDKN2A-R1 RYLRAAAGG  | 16618 | >CDKN2A-R1 RYLRAAAGG  | 480   | 16138 |
| >CDKN2A-R1 RYLRAAAGG  | 33    | >CDKN2A-R1 RYLRAAAGG  | 23422 | 23389 |
| >CDKN2A-R1 RYLRAAAGG  | 1507  | >CDKN2A-R1 RYLRAAAGG  | 408   | 1099  |
| >CDKN2A-R1 RYLRAAAGG  | 41506 | >CDKN2A-R1 RYLRAAAGG  | 471   | 41035 |
| >CDKN2A-R1 GTRGSNHAR  | 3722  | >CDKN2A-R1 GTIGSNHAR  | 95    | 3627  |
| >CDKN2A-R1 GTRGSNHA   | 16    | >CDKN2A-R1 GTIGSNHA   | 3860  | 3844  |
| >CDKN2A-R1 GTRGSNHAR  | 51    | >CDKN2A-R1 GTIGSNHAR  | 8864  | 8813  |
| >CDKN2A-R1 GTRGSNHAR  | 15    | >CDKN2A-R1 GTIGSNHARI | 3848  | 3833  |
| >CDKN2A-R1 GTRGSNHAR  | 28    | >CDKN2A-R1 GTIGSNHAR  | 45    | 17    |
| >CDKN2A-R1 GTRGSNHAR  | 412   | >CDKN2A-R1 GTIGSNHAR  | 1181  | 769   |
| >CDKN2A-R1 GTRGSNHAR  | 205   | >CDKN2A-R1 GTIGSNHAR  | 13    | 192   |
| >CDKN2A-R1 GTRGSNHAR  | 1597  | >CDKN2A-R1 GTIGSNHARI | 130   | 1467  |
| >CDKN2A-R1 GTRGSNHAR  | 10    | >CDKN2A-R1 GTIGSNHARI | 16    | 6     |
| >CDKN2A-R1 GTRGSNHAR  | 470   | >CDKN2A-R1 GTIGSNHAR  | 139   | 331   |
| >CDKN2A-R1 GTRGSNHAR  | 585   | >CDKN2A-R1 GTIGSNHARI | 370   | 215   |
| >CDKN2A-R1 RAAAGGTR   | 82    | >CDKN2A-R1 RAAAGGTI   | 19410 | 19328 |
| >CDKN2A-R1 RAAAGGTR   | 423   | >CDKN2A-R1 RAAAGGTI   | 37221 | 36798 |
| >CDKN2A-R1 RAAAGGTR   | 15830 | >CDKN2A-R1 RAAAGGTI   | 174   | 15656 |
| >CDKN2A-R1 RAAAGGTR   | 4639  | >CDKN2A-R1 RAAAGGTI   | 26    | 4613  |
| >CDKN2A-R1 RAAAGGTR   | 18493 | >CDKN2A-R1 RAAAGGTI   | 148   | 18345 |
| >CDKN2A-R1 RAAAGGTR   | 5306  | >CDKN2A-R1 RAAAGGTI   | 408   | 4898  |
| >CDKN2A-R1 RAAAGGTR   | 35297 | >CDKN2A-R1 RAAAGGTI   | 14    | 35283 |
| >CDKN2A-R1 LRAAAGGTR  | 199   | >CDKN2A-R1 LRAAAGGTI  | 251   | 52    |
| >CDKN2A-R1 LRAAAGGTR  | 5213  | >CDKN2A-R1 LRAAAGGTI  | 190   | 5023  |
| >CDKN2A-R1 LRAAAGGTR  | 42139 | >CDKN2A-R1 LRAAAGGTI  | 458   | 41681 |
| >CDKN2A-R1 YLRAAAGGTF | 10834 | >CDKN2A-R1 YLRAAAGGTI | 86    | 10748 |
| >CDKN2A-R1 YLRAAAGGTF | 6411  | >CDKN2A-R1 YLRAAAGGTI | 32    | 6379  |

|                        |       |                        |       |       |
|------------------------|-------|------------------------|-------|-------|
| >CDKN2A-R1 YLRAAAGGTF  | 15973 | >CDKN2A-R1 YLRAAAGGTI  | 30    | 15943 |
| >CDKN2A-R1 YLRAAAGGTF  | 25377 | >CDKN2A-R1 YLRAAAGGTI  | 110   | 25267 |
| >CDKN2A-R1 YLRAAAGGTF  | 20524 | >CDKN2A-R1 YLRAAAGGTI  | 298   | 20226 |
| >CDKN2A-R1 YLRAAAGGTF  | 9188  | >CDKN2A-R1 YLRAAAGGTI  | 10    | 9178  |
| >CDKN2A-R1 YLRAAAGGTF  | 1207  | >CDKN2A-R1 YLRAAAGGTI  | 324   | 883   |
| >CDKN2A-R1 YLRAAAGGTF  | 5798  | >CDKN2A-R1 YLRAAAGGTI  | 215   | 5583  |
| >CDKN2A-R1 YLRAAAGGTF  | 729   | >CDKN2A-R1 YLRAAAGGTI  | 104   | 625   |
| >CDKN2A-R1 YLRAAAGGTF  | 231   | >CDKN2A-R1 YLRAAAGGTI  | 33086 | 32855 |
| >CDKN2A-R1 RGSNHARI    | 251   | >CDKN2A-R1 TGSNHARI    | 2163  | 1912  |
| >CDKN2A-R1 TRGSNHAR    | 25829 | >CDKN2A-R1 TTGSNHAR    | 366   | 25463 |
| >CDKN2A-R1 TRGSNHAR    | 9046  | >CDKN2A-R1 TTGSNHAR    | 34    | 9012  |
| >CDKN2A-R1 TRGSNHAR    | 15195 | >CDKN2A-R1 TTGSNHAR    | 352   | 14843 |
| >CDKN2A-R1 TRGSNHAR    | 2709  | >CDKN2A-R1 TTGSNHAR    | 9     | 2700  |
| >CDKN2A-R1 TRGSNHARI   | 19063 | >CDKN2A-R1 TTGSNHARI   | 146   | 18917 |
| >CDKN2A-R1 TRGSNHARI   | 19814 | >CDKN2A-R1 TTGSNHARI   | 319   | 19495 |
| >CDKN2A-R1 TRGSNHARI   | 26218 | >CDKN2A-R1 TTGSNHARI   | 461   | 25757 |
| >CDKN2A-R1 TRGSNHARI   | 36619 | >CDKN2A-R1 TTGSNHARI   | 441   | 36178 |
| >CDKN2A-R1 TRGSNHAR    | 575   | >CDKN2A-R1 TTGSNHAR    | 486   | 89    |
| >CDKN2A-R1 TRGSNHARI   | 9393  | >CDKN2A-R1 TTGSNHARI   | 177   | 9216  |
| >CDKN2A-R1 RYLRAAAGGTF | 128   | >CDKN2A-R1 RYLRAAAGGTI | 96    | 32    |
| >CDKN2A-R1 RYLRAAAGGTF | 96    | >CDKN2A-R1 RYLRAAAGGTI | 603   | 507   |
| >CDKN2A-R1 RYLRAAAGGTF | 24    | >CDKN2A-R1 RYLRAAAGGTI | 15875 | 15851 |
| >CDKN2A-R1 RYLRAAAGGTF | 33    | >CDKN2A-R1 RYLRAAAGGTI | 17647 | 17614 |
| >CDKN2A-R1 GTRGSNHAR   | 3722  | >CDKN2A-R1 GTTGSNHAR   | 428   | 3294  |
| >CDKN2A-R1 GTRGSNHA    | 16    | >CDKN2A-R1 GTTGSNHA    | 4613  | 4597  |
| >CDKN2A-R1 GTRGSNHAR   | 51    | >CDKN2A-R1 GTTGSNHAR   | 9408  | 9357  |
| >CDKN2A-R1 GTRGSNHAR   | 15    | >CDKN2A-R1 GTTGSNHARI  | 4309  | 4294  |
| >CDKN2A-R1 GTRGSNHAR   | 28    | >CDKN2A-R1 GTTGSNHAR   | 80    | 52    |
| >CDKN2A-R1 GTRGSNHAR   | 412   | >CDKN2A-R1 GTTGSNHAR   | 1242  | 830   |
| >CDKN2A-R1 GTRGSNHAR   | 205   | >CDKN2A-R1 GTTGSNHAR   | 24    | 181   |
| >CDKN2A-R1 GTRGSNHAR   | 1597  | >CDKN2A-R1 GTTGSNHARI  | 252   | 1345  |
| >CDKN2A-R1 GTRGSNHAR   | 10    | >CDKN2A-R1 GTTGSNHARI  | 43    | 33    |
| >CDKN2A-R1 GTRGSNHAR   | 2443  | >CDKN2A-R1 GTTGSNHARI  | 130   | 2313  |
| >CDKN2A-R1 GTRGSNHAR   | 470   | >CDKN2A-R1 GTTGSNHAR   | 298   | 172   |
| >CDKN2A-R1 GTRGSNHAR   | 585   | >CDKN2A-R1 GTTGSNHARI  | 230   | 355   |
| >CDKN2A-R1 RAAAGGTR    | 82    | >CDKN2A-R1 RAAAGGTT    | 20334 | 20252 |
| >CDKN2A-R1 RAAAGGTR    | 423   | >CDKN2A-R1 RAAAGGTT    | 34370 | 33947 |
| >CDKN2A-R1 LRAAAGGTR   | 199   | >CDKN2A-R1 LRAAAGGTT   | 3278  | 3079  |
| >CDKN2A-R1 YLRAAAGGTF  | 6411  | >CDKN2A-R1 YLRAAAGGTI  | 131   | 6280  |
| >CDKN2A-R1 YLRAAAGGTF  | 9188  | >CDKN2A-R1 YLRAAAGGTI  | 95    | 9093  |
| >CDKN2A-R1 YLRAAAGGTF  | 827   | >CDKN2A-R1 YLRAAAGGTI  | 328   | 499   |
| >CDKN2A-R1 YLRAAAGGTF  | 231   | >CDKN2A-R1 YLRAAAGGTI  | 24436 | 24205 |
| >CDKN2A-R2 RGRVEEVRA   | 447   | >CDKN2A-R2 PGRVEEVRA   | 12884 | 12437 |

|                       |       |                       |       |       |
|-----------------------|-------|-----------------------|-------|-------|
| >CDKN2A-R2 RGRVEEVRAI | 436   | >CDKN2A-R2 PGRVEEVRAI | 12317 | 11881 |
| >CDKN2A-R2 RGRVEEVRAI | 98    | >CDKN2A-R2 PGRVEEVRAI | 6392  | 6294  |
| >CDKN2A-R2 ARGRVEEVR/ | 20913 | >CDKN2A-R2 APGRVEEVR/ | 61    | 20852 |
| >CDKN2A-R2 ARGRVEEVR/ | 27742 | >CDKN2A-R2 APGRVEEVR/ | 473   | 27269 |
| >CDKN2A-R2 ARGRVEEVR/ | 260   | >CDKN2A-R2 APGRVEEVR/ | 28752 | 28492 |
| >CDKN2A-R2 SADWLATAA  | 83    | >CDKN2A-R2 SADWLATAA  | 35919 | 35836 |
| >CDKN2A-R2 AARGRVEEV  | 2271  | >CDKN2A-R2 AAPGRVEEV  | 202   | 2069  |
| >CDKN2A-R2 AARGRVEEV  | 1099  | >CDKN2A-R2 AAPGRVEEV  | 141   | 958   |
| >CDKN2A-R2 AARGRVEEV  | 50    | >CDKN2A-R2 AAPGRVEEV  | 30    | 20    |
| >CDKN2A-R2 AARGRVEEVF | 269   | >CDKN2A-R2 AAPGRVEEVF | 15793 | 15524 |
| >CDKN2A-R2 AARGRVEEVF | 265   | >CDKN2A-R2 AAPGRVEEVF | 1328  | 1063  |
| >CDKN2A-R2 AARGRVEEVF | 2065  | >CDKN2A-R2 AAPGRVEEVF | 326   | 1739  |
| >CDKN2A-R2 AARGRVEEV  | 8453  | >CDKN2A-R2 AAPGRVEEV  | 471   | 7982  |
| >CDKN2A-R2 AAARGRVEE\ | 786   | >CDKN2A-R2 AAAPGRVEE\ | 469   | 317   |
| >CDKN2A-R2 AAARGRVEE\ | 33    | >CDKN2A-R2 AAAPGRVEE\ | 14    | 19    |
| >CDKN2A-R2 AAARGRVEE\ | 434   | >CDKN2A-R2 AAAPGRVEE\ | 375   | 59    |
| >CDKN2A-R2 AAARGRVEE\ | 127   | >CDKN2A-R2 AAAPGRVEE\ | 127   | 0     |
| >CDKN2A-R2 TAAARGRV   | 36    | >CDKN2A-R2 TAAAPGRV   | 15    | 21    |
| >CDKN2A-R2 TAAARGRVEI | 34    | >CDKN2A-R2 TAAAPGRVEI | 12    | 22    |
| >CDKN2A-R2 TAAARGRV   | 982   | >CDKN2A-R2 TAAAPGRV   | 120   | 862   |
| >CDKN2A-R2 TAAARGRVEI | 810   | >CDKN2A-R2 TAAAPGRVEI | 140   | 670   |
| >CDKN2A-R2 ATAAARGRV  | 589   | >CDKN2A-R2 ATAAAPGRV  | 53    | 536   |
| >CDKN2A-R2 ATAAARGRV  | 4329  | >CDKN2A-R2 ATAAAPGRV  | 243   | 4086  |
| >CDKN2A-R2 ATAAARGR   | 762   | >CDKN2A-R2 ATAAAPGR   | 301   | 461   |
| >CDKN2A-R2 ATAAARGR   | 366   | >CDKN2A-R2 ATAAAPGR   | 592   | 226   |
| >CDKN2A-R2 ATAAARGR   | 32    | >CDKN2A-R2 ATAAAPGR   | 26    | 6     |
| >CDKN2A-R2 ATAAARGRV  | 13    | >CDKN2A-R2 ATAAAPGRV  | 21    | 8     |
| >CDKN2A-R2 ATAAARGRV  | 745   | >CDKN2A-R2 ATAAAPGRV  | 282   | 463   |
| >CDKN2A-R2 ATAAARGR   | 623   | >CDKN2A-R2 ATAAAPGR   | 239   | 384   |
| >CDKN2A-R2 LATAAARGR\ | 710   | >CDKN2A-R2 LATAAAPGR\ | 286   | 424   |
| >CDKN2A-R2 LATAAARGR  | 105   | >CDKN2A-R2 LATAAAPGR  | 34    | 71    |
| >CDKN2A-R2 LATAAARGR\ | 107   | >CDKN2A-R2 LATAAAPGR\ | 903   | 796   |
| >CDKN2A-R2 WLATAAARG  | 336   | >CDKN2A-R2 WLATAAAPG  | 106   | 230   |
| >CDKN2A-R2 WLATAAARG  | 22    | >CDKN2A-R2 WLATAAAPG  | 12    | 10    |
| >CDKN2A-R2 WLATAAARG  | 8     | >CDKN2A-R2 WLATAAAPG  | 4     | 4     |
| >CDKN2A-R2 WLATAAARG  | 125   | >CDKN2A-R2 WLATAAAPG  | 96    | 29    |
| >CDKN2A-R2 WLATAAARG  | 25    | >CDKN2A-R2 WLATAAAPG  | 7     | 18    |
| >CDKN2A-R2 WLATAAARG  | 244   | >CDKN2A-R2 WLATAAAPG  | 47    | 197   |
| >CDKN2A-R2 WLATAAARG  | 27    | >CDKN2A-R2 WLATAAAPG  | 13    | 14    |
| >CDKN2A-R2 WLATAAARG  | 23    | >CDKN2A-R2 WLATAAAPG  | 5     | 18    |
| >CDKN2A-R2 WLATAAARG  | 3     | >CDKN2A-R2 WLATAAAPG  | 3     | 0     |
| >CDKN2A-R2 WLATAAAR   | 68    | >CDKN2A-R2 WLATAAAP   | 31466 | 31398 |
| >CDKN2A-R2 WLATAAARG  | 838   | >CDKN2A-R2 WLATAAAPG  | 254   | 584   |

|                       |       |                       |       |       |
|-----------------------|-------|-----------------------|-------|-------|
| >CDKN2A-R2 WLATAAARG  | 37    | >CDKN2A-R2 WLATAAARG  | 47    | 10    |
| >CDKN2A-R2 WLATAAARG  | 350   | >CDKN2A-R2 WLATAAARG  | 172   | 178   |
| >CDKN2A-R2 WLATAAARG  | 58    | >CDKN2A-R2 WLATAAARG  | 48    | 10    |
| >CDKN2A-R2 WLATAAARG  | 328   | >CDKN2A-R2 WLATAAARG  | 36154 | 35826 |
| >CDKN2A-R2 WLATAAARG  | 572   | >CDKN2A-R2 WLATAAARG  | 271   | 301   |
| >CDKN2A-R2 DWLATAAARG | 119   | >CDKN2A-R2 DWLATAAARG | 32551 | 32432 |
| >CDKN2A-R2 DWLATAAARG | 23    | >CDKN2A-R2 DWLATAAARG | 27904 | 27881 |
| >CDKN2A-R2 DWLATAAARG | 30    | >CDKN2A-R2 DWLATAAARG | 26    | 4     |
| >CDKN2A-R2 DWLATAAARG | 450   | >CDKN2A-R2 DWLATAAARG | 378   | 72    |
| >CDKN2A-R2 RVEEVRAL   | 281   | >CDKN2A-R2 RVEEVRAL   | 14370 | 14089 |
| >CDKN2A-R2 RVEEVRAL   | 165   | >CDKN2A-R2 RVEEVRAL   | 11569 | 11404 |
| >CDKN2A-R2 GRVEEVRAL  | 22940 | >CDKN2A-R2 GRVEEVRAL  | 94    | 22846 |
| >CDKN2A-R2 GRVEEVRAL  | 383   | >CDKN2A-R2 GRVEEVRAL  | 26055 | 25672 |
| >CDKN2A-R2 GRVEEVRALL | 45    | >CDKN2A-R2 GRVEEVRALL | 23181 | 23136 |
| >CDKN2A-R2 GRVEEVRAL  | 22994 | >CDKN2A-R2 GRVEEVRAL  | 375   | 22619 |
| >CDKN2A-R2 GRVEEVRAL  | 189   | >CDKN2A-R2 GRVEEVRAL  | 647   | 458   |
| >CDKN2A-R2 GRVEEVRALL | 338   | >CDKN2A-R2 GRVEEVRALL | 862   | 524   |
| >CDKN2A-R2 GRVEEVRAL  | 15619 | >CDKN2A-R2 GRVEEVRAL  | 55    | 15564 |
| >CDKN2A-R2 GRVEEVRALL | 430   | >CDKN2A-R2 GRVEEVRALL | 28972 | 28542 |
| >CDKN2A-R2 GRVEEVRAL  | 92    | >CDKN2A-R2 GRVEEVRAL  | 23472 | 23380 |
| >CDKN2A-R2 GRVEEVRALL | 186   | >CDKN2A-R2 GRVEEVRALL | 27629 | 27443 |
| >CDKN2A-R2 DWLATAAARG | 30    | >CDKN2A-R2 DWLATAAARG | 29733 | 29703 |
| >CDKN2A-R2 RGRVVEEVRA | 447   | >CDKN2A-R2 RGRVVEEVRA | 16302 | 15855 |
| >CDKN2A-R2 RGRVVEEVRA | 436   | >CDKN2A-R2 RGRVVEEVRA | 16159 | 15723 |
| >CDKN2A-R2 RGRVVEEVRA | 98    | >CDKN2A-R2 RGRVVEEVRA | 12531 | 12433 |
| >CDKN2A-R2 RGRVVEEVRA | 14722 | >CDKN2A-R2 RGRVVEEVRA | 88    | 14634 |
| >CDKN2A-R2 ARGVVEEVRA | 260   | >CDKN2A-R2 ARGVVEEVRA | 199   | 61    |
| >CDKN2A-R2 AARGVVEEV  | 1099  | >CDKN2A-R2 AARGVVEEV  | 219   | 880   |
| >CDKN2A-R2 AARGVVEEV  | 50    | >CDKN2A-R2 AARGVVEEV  | 62    | 12    |
| >CDKN2A-R2 AARGVVEEV  | 269   | >CDKN2A-R2 AARGVVEEV  | 541   | 272   |
| >CDKN2A-R2 AARGVVEEV  | 265   | >CDKN2A-R2 AARGVVEEV  | 492   | 227   |
| >CDKN2A-R2 AAARGVVEE\ | 786   | >CDKN2A-R2 AAARGVVEE\ | 104   | 682   |
| >CDKN2A-R2 AAARGVVEE\ | 1310  | >CDKN2A-R2 AAARGVVEE\ | 454   | 856   |
| >CDKN2A-R2 AAARGVVEE\ | 33    | >CDKN2A-R2 AAARGVVEE\ | 38    | 5     |
| >CDKN2A-R2 AAARGVVEE\ | 434   | >CDKN2A-R2 AAARGVVEE\ | 1180  | 746   |
| >CDKN2A-R2 AAARGVVEE\ | 127   | >CDKN2A-R2 AAARGVVEE\ | 200   | 73    |
| >CDKN2A-R2 TAAARGVVEE | 741   | >CDKN2A-R2 TAAARGVVEE | 351   | 390   |
| >CDKN2A-R2 TAAARGVVEE | 881   | >CDKN2A-R2 TAAARGVVEE | 346   | 535   |
| >CDKN2A-R2 TAAARGRV   | 36    | >CDKN2A-R2 TAAARGRV   | 19    | 17    |
| >CDKN2A-R2 TAAARGVVEE | 34    | >CDKN2A-R2 TAAARGVVEE | 31    | 3     |
| >CDKN2A-R2 TAAARGRV   | 982   | >CDKN2A-R2 TAAARGRV   | 75    | 907   |
| >CDKN2A-R2 TAAARGVVEE | 810   | >CDKN2A-R2 TAAARGVVEE | 123   | 687   |
| >CDKN2A-R2 ATAAARGRV  | 589   | >CDKN2A-R2 ATAAARGRV  | 100   | 489   |

|                       |       |                       |       |       |
|-----------------------|-------|-----------------------|-------|-------|
| >CDKN2A-R2 ATAAARGRV  | 1020  | >CDKN2A-R2 ATAAARGPV  | 133   | 887   |
| >CDKN2A-R2 ATAAARGR   | 366   | >CDKN2A-R2 ATAAARGP   | 23713 | 23347 |
| >CDKN2A-R2 ATAAARGR   | 32    | >CDKN2A-R2 ATAAARGP   | 31220 | 31188 |
| >CDKN2A-R2 ATAAARGRV  | 13    | >CDKN2A-R2 ATAAARGPV  | 6     | 7     |
| >CDKN2A-R2 ATAAARGRV  | 745   | >CDKN2A-R2 ATAAARGPV  | 67    | 678   |
| >CDKN2A-R2 ATAAARGRV  | 2878  | >CDKN2A-R2 ATAAARGPV  | 257   | 2621  |
| >CDKN2A-R2 LATAAARGR  | 105   | >CDKN2A-R2 LATAAARGP  | 36298 | 36193 |
| >CDKN2A-R2 LATAAARGR\ | 107   | >CDKN2A-R2 LATAAARGP\ | 57    | 50    |
| >CDKN2A-R2 WLATAAARG  | 336   | >CDKN2A-R2 WLATAAARG  | 134   | 202   |
| >CDKN2A-R2 WLATAAARG  | 22    | >CDKN2A-R2 WLATAAARG  | 14    | 8     |
| >CDKN2A-R2 WLATAAARG  | 8     | >CDKN2A-R2 WLATAAARG  | 4     | 4     |
| >CDKN2A-R2 WLATAAARG  | 125   | >CDKN2A-R2 WLATAAARG  | 24    | 101   |
| >CDKN2A-R2 WLATAAARG  | 25    | >CDKN2A-R2 WLATAAARG  | 20    | 5     |
| >CDKN2A-R2 WLATAAARG  | 244   | >CDKN2A-R2 WLATAAARG  | 66    | 178   |
| >CDKN2A-R2 WLATAAARG  | 27    | >CDKN2A-R2 WLATAAARG  | 16    | 11    |
| >CDKN2A-R2 WLATAAARG  | 23    | >CDKN2A-R2 WLATAAARG  | 23    | 0     |
| >CDKN2A-R2 WLATAAARG  | 3     | >CDKN2A-R2 WLATAAARG  | 3     | 0     |
| >CDKN2A-R2 WLATAAARG  | 37    | >CDKN2A-R2 WLATAAARG  | 17    | 20    |
| >CDKN2A-R2 WLATAAARG  | 350   | >CDKN2A-R2 WLATAAARG  | 60    | 290   |
| >CDKN2A-R2 WLATAAARG  | 58    | >CDKN2A-R2 WLATAAARG  | 18349 | 18291 |
| >CDKN2A-R2 RVEEVRAL   | 281   | >CDKN2A-R2 QVEEVRAL   | 2578  | 2297  |
| >CDKN2A-R2 RVEEVRALL  | 3120  | >CDKN2A-R2 QVEEVRALL  | 97    | 3023  |
| >CDKN2A-R2 RVEEVRAL   | 165   | >CDKN2A-R2 QVEEVRAL   | 6057  | 5892  |
| >CDKN2A-R2 GRVEEVRALL | 9935  | >CDKN2A-R2 GQVEEVRALL | 352   | 9583  |
| >CDKN2A-R2 GRVEEVRAL  | 17273 | >CDKN2A-R2 GQVEEVRAL  | 364   | 16909 |
| >CDKN2A-R2 GRVEEVRA   | 21388 | >CDKN2A-R2 GQVEEVRA   | 257   | 21131 |
| >CDKN2A-R2 GRVEEVRAL  | 11494 | >CDKN2A-R2 GQVEEVRAL  | 82    | 11412 |
| >CDKN2A-R2 GRVEEVRAL  | 1247  | >CDKN2A-R2 GQVEEVRAL  | 174   | 1073  |
| >CDKN2A-R2 GRVEEVRAL  | 383   | >CDKN2A-R2 GQVEEVRAL  | 7191  | 6808  |
| >CDKN2A-R2 GRVEEVRALL | 45    | >CDKN2A-R2 GQVEEVRALL | 3341  | 3296  |
| >CDKN2A-R2 GRVEEVRAL  | 189   | >CDKN2A-R2 GQVEEVRAL  | 188   | 1     |
| >CDKN2A-R2 GRVEEVRALL | 338   | >CDKN2A-R2 GQVEEVRALL | 314   | 24    |
| >CDKN2A-R2 GRVEEVRAL  | 8015  | >CDKN2A-R2 GQVEEVRAL  | 220   | 7795  |
| >CDKN2A-R2 GRVEEVRALL | 5396  | >CDKN2A-R2 GQVEEVRALL | 175   | 5221  |
| >CDKN2A-R2 GRVEEVRALL | 430   | >CDKN2A-R2 GQVEEVRALL | 12053 | 11623 |
| >CDKN2A-R2 GRVEEVRAL  | 92    | >CDKN2A-R2 GQVEEVRAL  | 2116  | 2024  |
| >CDKN2A-R2 GRVEEVRALL | 186   | >CDKN2A-R2 GQVEEVRALL | 7244  | 7058  |
| >CDKN2A-R2 DWLATAAAR  | 30    | >CDKN2A-R2 DWLATAAAR  | 6550  | 6520  |
| >CDKN2A-R2 RGRVEEVRA  | 447   | >CDKN2A-R2 RGQVEEVRA  | 12499 | 12052 |
| >CDKN2A-R2 RGRVEEVRAL | 436   | >CDKN2A-R2 RGQVEEVRAL | 12813 | 12377 |
| >CDKN2A-R2 RGRVEEVRAL | 98    | >CDKN2A-R2 RGQVEEVRAL | 7315  | 7217  |
| >CDKN2A-R2 ARGRVEEVR/ | 260   | >CDKN2A-R2 ARGQVEEVR/ | 283   | 23    |
| >CDKN2A-R2 AARGRVEEV  | 50    | >CDKN2A-R2 AARGQVEEV  | 44    | 6     |



|                       |       |                       |       |       |
|-----------------------|-------|-----------------------|-------|-------|
| >CDKN2A-R2 AARGRVEEV  | 269   | >CDKN2A-R2 AARGQVEEV  | 269   | 0     |
| >CDKN2A-R2 AARGRVEEV  | 265   | >CDKN2A-R2 AARGQVEEV  | 762   | 497   |
| >CDKN2A-R2 AAARGRVEE\ | 786   | >CDKN2A-R2 AAARGQVEE' | 300   | 486   |
| >CDKN2A-R2 AAARGRVEE\ | 1310  | >CDKN2A-R2 AAARGQVEE' | 398   | 912   |
| >CDKN2A-R2 AAARGRVEE\ | 33    | >CDKN2A-R2 AAARGQVEE' | 23    | 10    |
| >CDKN2A-R2 AAARGRVEE\ | 434   | >CDKN2A-R2 AAARGQVEE' | 961   | 527   |
| >CDKN2A-R2 AAARGRVEE\ | 127   | >CDKN2A-R2 AAARGQVEE' | 153   | 26    |
| >CDKN2A-R2 TAAARGRVEE | 559   | >CDKN2A-R2 TAAARGQVEE | 354   | 205   |
| >CDKN2A-R2 TAAARGRVEE | 881   | >CDKN2A-R2 TAAARGQVEE | 359   | 522   |
| >CDKN2A-R2 TAAARGRV   | 36    | >CDKN2A-R2 TAAARGQV   | 33    | 3     |
| >CDKN2A-R2 TAAARGRVEE | 34    | >CDKN2A-R2 TAAARGQVEE | 22    | 12    |
| >CDKN2A-R2 TAAARGRV   | 982   | >CDKN2A-R2 TAAARGQV   | 275   | 707   |
| >CDKN2A-R2 TAAARGRVEE | 810   | >CDKN2A-R2 TAAARGQVEE | 399   | 411   |
| >CDKN2A-R2 ATAAARGRV  | 589   | >CDKN2A-R2 ATAAARGQV  | 367   | 222   |
| >CDKN2A-R2 ATAAARGRV  | 561   | >CDKN2A-R2 ATAAARGQV  | 405   | 156   |
| >CDKN2A-R2 ATAAARGR   | 366   | >CDKN2A-R2 ATAAARGQ   | 19939 | 19573 |
| >CDKN2A-R2 ATAAARGR   | 32    | >CDKN2A-R2 ATAAARGQ   | 7687  | 7655  |
| >CDKN2A-R2 ATAAARGRV  | 13    | >CDKN2A-R2 ATAAARGQV  | 15    | 2     |
| >CDKN2A-R2 ATAAARGRV  | 745   | >CDKN2A-R2 ATAAARGQV  | 192   | 553   |
| >CDKN2A-R2 LATAAARGR  | 105   | >CDKN2A-R2 LATAAARGQ  | 15065 | 14960 |
| >CDKN2A-R2 LATAAARGR\ | 107   | >CDKN2A-R2 LATAAARGQ\ | 144   | 37    |
| >CDKN2A-R2 WLATAAARG  | 336   | >CDKN2A-R2 WLATAAARG  | 326   | 10    |
| >CDKN2A-R2 WLATAAARG  | 22    | >CDKN2A-R2 WLATAAARG  | 17    | 5     |
| >CDKN2A-R2 WLATAAARG  | 8     | >CDKN2A-R2 WLATAAARG  | 7     | 1     |
| >CDKN2A-R2 WLATAAARG  | 125   | >CDKN2A-R2 WLATAAARG  | 78    | 47    |
| >CDKN2A-R2 WLATAAARG  | 25    | >CDKN2A-R2 WLATAAARG  | 21    | 4     |
| >CDKN2A-R2 WLATAAARG  | 244   | >CDKN2A-R2 WLATAAARG  | 229   | 15    |
| >CDKN2A-R2 WLATAAARG  | 27    | >CDKN2A-R2 WLATAAARG  | 17    | 10    |
| >CDKN2A-R2 WLATAAARG  | 23    | >CDKN2A-R2 WLATAAARG  | 11    | 12    |
| >CDKN2A-R2 WLATAAARG  | 11218 | >CDKN2A-R2 WLATAAARG  | 457   | 10761 |
| >CDKN2A-R2 WLATAAARG  | 3     | >CDKN2A-R2 WLATAAARG  | 3     | 0     |
| >CDKN2A-R2 WLATAAARG  | 37    | >CDKN2A-R2 WLATAAARG  | 46    | 9     |
| >CDKN2A-R2 WLATAAARG  | 350   | >CDKN2A-R2 WLATAAARG  | 147   | 203   |
| >CDKN2A-R2 WLATAAARG  | 58    | >CDKN2A-R2 WLATAAARG  | 3088  | 3030  |
| >CDKN2A-R2 RALLEAGAL  | 18    | >CDKN2A-R2 QALLEAGAL  | 682   | 664   |
| >CDKN2A-R2 VRALLEAGA  | 22068 | >CDKN2A-R2 VQALLEAGA  | 310   | 21758 |
| >CDKN2A-R2 VRALLEAGAL | 145   | >CDKN2A-R2 VQALLEAGAL | 12296 | 12151 |
| >CDKN2A-R2 VRALLEAGAL | 515   | >CDKN2A-R2 VQALLEAGAL | 384   | 131   |
| >CDKN2A-R2 VRALLEAGAL | 289   | >CDKN2A-R2 VQALLEAGAL | 10372 | 10083 |
| >CDKN2A-R2 AAARGRVEE\ | 434   | >CDKN2A-R2 AAARGRVEE\ | 19165 | 18731 |
| >CDKN2A-R2 AAARGRVEE\ | 127   | >CDKN2A-R2 AAARGRVEE\ | 14568 | 14441 |
| >CDKN2A-R2 EVRALLEAGA | 51    | >CDKN2A-R2 EVQALLEAGA | 76    | 25    |
| >CDKN2A-R2 EVRALLEAGA | 293   | >CDKN2A-R2 EVQALLEAGA | 2941  | 2648  |

|                        |      |                       |       |       |
|------------------------|------|-----------------------|-------|-------|
| >CDKN2A-R2 EVRALLEA    | 1124 | >CDKN2A-R2 EVQALLEA   | 162   | 962   |
| >CDKN2A-R2 EVRALLEAGA  | 497  | >CDKN2A-R2 EVQALLEAGA | 545   | 48    |
| >CDKN2A-R2 EVRALLEAGA  | 890  | >CDKN2A-R2 EVQALLEAGA | 157   | 733   |
| >CDKN2A-R2 EVRALLEAGA  | 1463 | >CDKN2A-R2 EVQALLEAGA | 289   | 1174  |
| >CDKN2A-R2 EEVRALLE    | 108  | >CDKN2A-R2 EEVQALLE   | 75    | 33    |
| >CDKN2A-R2 EEVRALLEA   | 326  | >CDKN2A-R2 EEVQALLEA  | 152   | 174   |
| >CDKN2A-R2 EEVRALLEA   | 454  | >CDKN2A-R2 EEVQALLEA  | 273   | 181   |
| >CDKN2A-R2 EEVRALLEA   | 14   | >CDKN2A-R2 EEVQALLEA  | 10    | 4     |
| >CDKN2A-R2 EEVRALLEAG  | 18   | >CDKN2A-R2 EEVQALLEAG | 14    | 4     |
| >CDKN2A-R2 VEEVRALL    | 176  | >CDKN2A-R2 VEEVQALL   | 57    | 119   |
| >CDKN2A-R2 VEEVRALL    | 143  | >CDKN2A-R2 VEEVQALL   | 98    | 45    |
| >CDKN2A-R2 VEEVRALLEA  | 173  | >CDKN2A-R2 VEEVQALLEA | 178   | 5     |
| >CDKN2A-R2 RVEEVRALL   | 1769 | >CDKN2A-R2 RVEEVQALL  | 349   | 1420  |
| >CDKN2A-R2 RVEEVRAL    | 1989 | >CDKN2A-R2 RVEEVQAL   | 456   | 1533  |
| >CDKN2A-R2 RVEEVRALLE, | 633  | >CDKN2A-R2 RVEEVQALLE | 445   | 188   |
| >CDKN2A-R2 RVEEVRAL    | 281  | >CDKN2A-R2 RVEEVQAL   | 224   | 57    |
| >CDKN2A-R2 RVEEVRAL    | 165  | >CDKN2A-R2 RVEEVQAL   | 876   | 711   |
| >CDKN2A-R2 GRVEEVRAL   | 1247 | >CDKN2A-R2 GRVEEVQAL  | 418   | 829   |
| >CDKN2A-R2 GRVEEVRAL   | 383  | >CDKN2A-R2 GRVEEVQAL  | 593   | 210   |
| >CDKN2A-R2 GRVEEVRALL  | 45   | >CDKN2A-R2 GRVEEVQALL | 33    | 12    |
| >CDKN2A-R2 GRVEEVRAL   | 189  | >CDKN2A-R2 GRVEEVQAL  | 46    | 143   |
| >CDKN2A-R2 GRVEEVRALL  | 338  | >CDKN2A-R2 GRVEEVQALL | 244   | 94    |
| >CDKN2A-R2 GRVEEVRALL  | 430  | >CDKN2A-R2 GRVEEVQALL | 552   | 122   |
| >CDKN2A-R2 GRVEEVRAL   | 92   | >CDKN2A-R2 GRVEEVQAL  | 219   | 127   |
| >CDKN2A-R2 GRVEEVRALL  | 186  | >CDKN2A-R2 GRVEEVQALL | 132   | 54    |
| >CDKN2A-R2 RGRVEEVRA   | 447  | >CDKN2A-R2 RGRVEEVQA  | 330   | 117   |
| >CDKN2A-R2 RGRVEEVRAL  | 436  | >CDKN2A-R2 RGRVEEVQAI | 343   | 93    |
| >CDKN2A-R2 RGRVEEVRAL  | 98   | >CDKN2A-R2 RGRVEEVQAI | 137   | 39    |
| >CDKN2A-R2 RGRVEEVRAL  | 848  | >CDKN2A-R2 RGRVEEVQAI | 470   | 378   |
| >CDKN2A-R2 ARGRVEEVR/  | 260  | >CDKN2A-R2 ARGRVEEVQ/ | 483   | 223   |
| >CDKN2A-R2 AARGRVEEVI  | 269  | >CDKN2A-R2 AARGRVEEVI | 205   | 64    |
| >CDKN2A-R2 AARGRVEEVI  | 265  | >CDKN2A-R2 AARGRVEEVI | 27037 | 26772 |
| >CDKN2A-R5 RVAELLLL    | 83   | >CDKN2A-R5 QVAELLLL   | 372   | 289   |
| >CDKN2A-R5 RVAELLLLHG, | 171  | >CDKN2A-R5 QVAELLLLHG | 849   | 678   |
| >CDKN2A-R5 RVAELLLL    | 33   | >CDKN2A-R5 QVAELLLL   | 47    | 14    |
| >CDKN2A-R5 RVAELLLLHG, | 79   | >CDKN2A-R5 QVAELLLLHG | 99    | 20    |
| >CDKN2A-R5 RVAELLLL    | 70   | >CDKN2A-R5 QVAELLLL   | 273   | 203   |
| >CDKN2A-R5 RVAELLLLHG, | 23   | >CDKN2A-R5 QVAELLLLHG | 76    | 53    |
| >CDKN2A-R5 RVAELLLL    | 14   | >CDKN2A-R5 QVAELLLL   | 36    | 22    |
| >CDKN2A-R5 RVAELLLLHG, | 12   | >CDKN2A-R5 QVAELLLLHG | 25    | 13    |
| >CDKN2A-R5 RVAELLLL    | 392  | >CDKN2A-R5 QVAELLLL   | 2645  | 2253  |
| >CDKN2A-R5 RVAELLLLHG, | 305  | >CDKN2A-R5 QVAELLLLHG | 2288  | 1983  |
| >CDKN2A-R5 RVAELLLL    | 393  | >CDKN2A-R5 QVAELLLL   | 1298  | 905   |

|                        |       |                        |       |       |
|------------------------|-------|------------------------|-------|-------|
| >CDKN2A-R5 RVAELLLLHG, | 459   | >CDKN2A-R5 QVAELLLLHG  | 1393  | 934   |
| >CDKN2A-R5 RVAELLLLH   | 226   | >CDKN2A-R5 QVAELLLLH   | 3038  | 2812  |
| >CDKN2A-R5 RVAELLLLH   | 230   | >CDKN2A-R5 QVAELLLLH   | 1535  | 1305  |
| >CDKN2A-R5 RVAELLLLH   | 877   | >CDKN2A-R5 QVAELLLLH   | 333   | 544   |
| >CDKN2A-R5 RVAELLLL    | 424   | >CDKN2A-R5 QVAELLLL    | 3387  | 2963  |
| >CDKN2A-R5 RVAELLLL    | 1847  | >CDKN2A-R5 QVAELLLL    | 75    | 1772  |
| >CDKN2A-R5 RVAELLLLHG, | 370   | >CDKN2A-R5 QVAELLLLHG  | 19    | 351   |
| >CDKN2A-R5 RVAELLLL    | 1360  | >CDKN2A-R5 QVAELLLL    | 92    | 1268  |
| >CDKN2A-R5 RVAELLLLHG, | 428   | >CDKN2A-R5 QVAELLLLHG  | 37    | 391   |
| >CDKN2A-R5 RVAELLLLH   | 65    | >CDKN2A-R5 QVAELLLLH   | 529   | 464   |
| >CDKN2A-R5 RVAELLLL    | 300   | >CDKN2A-R5 QVAELLLL    | 4369  | 4069  |
| >CDKN2A-R5 RVAELLLL    | 268   | >CDKN2A-R5 QVAELLLL    | 8376  | 8108  |
| >CDKN2A-R5 RVAELLLL    | 364   | >CDKN2A-R5 QVAELLLL    | 17019 | 16655 |
| >CDKN2A-R5 ARVAELLLL   | 20467 | >CDKN2A-R5 AQVAELLLL   | 309   | 20158 |
| >CDKN2A-R5 ARVAELL     | 9565  | >CDKN2A-R5 AQVAELL     | 237   | 9328  |
| >CDKN2A-R5 ARVAELLLL   | 5295  | >CDKN2A-R5 AQVAELLLL   | 73    | 5222  |
| >CDKN2A-R5 ARVAELLLL   | 12807 | >CDKN2A-R5 AQVAELLLL   | 219   | 12588 |
| >CDKN2A-R5 ARVAELL     | 11904 | >CDKN2A-R5 AQVAELL     | 16    | 11888 |
| >CDKN2A-R5 ARVAELLLL   | 7334  | >CDKN2A-R5 AQVAELLLL   | 7     | 7327  |
| >CDKN2A-R5 ARVAELL     | 836   | >CDKN2A-R5 AQVAELL     | 156   | 680   |
| >CDKN2A-R5 ARVAELLLL   | 918   | >CDKN2A-R5 AQVAELLLL   | 200   | 718   |
| >CDKN2A-R5 ARVAELL     | 180   | >CDKN2A-R5 AQVAELL     | 4177  | 3997  |
| >CDKN2A-R5 ARVAELLLL   | 120   | >CDKN2A-R5 AQVAELLLL   | 2987  | 2867  |
| >CDKN2A-R5 ARVAELLLLH  | 215   | >CDKN2A-R5 AQVAELLLLH  | 14248 | 14033 |
| >CDKN2A-R5 ARVAELL     | 222   | >CDKN2A-R5 AQVAELL     | 169   | 53    |
| >CDKN2A-R5 ARVAELLLL   | 229   | >CDKN2A-R5 AQVAELLLL   | 173   | 56    |
| >CDKN2A-R5 ARVAELLLL   | 17269 | >CDKN2A-R5 AQVAELLLL   | 497   | 16772 |
| >CDKN2A-R5 ARVAELL     | 10778 | >CDKN2A-R5 AQVAELL     | 417   | 10361 |
| >CDKN2A-R5 ARVAELLLL   | 12638 | >CDKN2A-R5 AQVAELLLL   | 485   | 12153 |
| >CDKN2A-R5 ARVAELLLL   | 123   | >CDKN2A-R5 AQVAELLLL   | 3188  | 3065  |
| >CDKN2A-R5 ARVAELLLL   | 23    | >CDKN2A-R5 AQVAELLLL   | 518   | 495   |
| >CDKN2A-R5 SARVAELL    | 380   | >CDKN2A-R5 SAQVAELL    | 12406 | 12026 |
| >CDKN2A-R5 SARVAELL    | 39    | >CDKN2A-R5 SAQVAELL    | 7835  | 7796  |
| >CDKN2A-R5 SARVAELLLL  | 38    | >CDKN2A-R5 SAQVAELLLL  | 7248  | 7210  |
| >CDKN2A-R5 SARVAELL    | 377   | >CDKN2A-R5 SAQVAELL    | 3163  | 2786  |
| >CDKN2A-R5 SARVAELL    | 179   | >CDKN2A-R5 SAQVAELL    | 1850  | 1671  |
| >CDKN2A-R5 SARVAELLLL  | 137   | >CDKN2A-R5 SAQVAELLLL  | 1495  | 1358  |
| >CDKN2A-R5 GSARVAEL    | 696   | >CDKN2A-R5 GSAQVAEL    | 423   | 273   |
| >CDKN2A-R5 GSARVAELL   | 687   | >CDKN2A-R5 GSAQVAELL   | 406   | 281   |
| >CDKN2A-R5 GSARVAELLLL | 760   | >CDKN2A-R5 GSAQVAELLLL | 498   | 262   |
| >CDKN2A-R5 GSARVAEL    | 282   | >CDKN2A-R5 GSAQVAEL    | 80    | 202   |
| >CDKN2A-R5 GSARVAELL   | 1361  | >CDKN2A-R5 GSAQVAELL   | 362   | 999   |
| >CDKN2A-R5 GSARVAELLLL | 950   | >CDKN2A-R5 GSAQVAELL   | 257   | 693   |

|                        |      |                       |      |      |
|------------------------|------|-----------------------|------|------|
| >CDKN2A-R5 GSARVAELL   | 237  | >CDKN2A-R5 GSAQVAELL  | 530  | 293  |
| >CDKN2A-R5 GSARVAELLL  | 255  | >CDKN2A-R5 GSAQVAELLL | 471  | 216  |
| >CDKN2A-R5 GSARVAELLLI | 270  | >CDKN2A-R5 GSAQVAELLL | 490  | 220  |
| >CDKN2A-R5 GSARVAELL   | 753  | >CDKN2A-R5 GSAQVAELL  | 266  | 487  |
| >CDKN2A-R5 GSARVAELLL  | 720  | >CDKN2A-R5 GSAQVAELLL | 342  | 378  |
| >CDKN2A-R5 GSARVAELLLI | 264  | >CDKN2A-R5 GSAQVAELLL | 119  | 145  |
| >CDKN2A-R5 GSARVAELL   | 24   | >CDKN2A-R5 GSAQVAELL  | 19   | 5    |
| >CDKN2A-R5 GSARVAELLL  | 452  | >CDKN2A-R5 GSAQVAELLL | 1417 | 965  |
| >CDKN2A-R5 GSARVAELLLI | 66   | >CDKN2A-R5 GSAQVAELLL | 53   | 13   |
| >CDKN2A-R5 MGSARVAEL   | 66   | >CDKN2A-R5 MGSAQVAEL  | 45   | 21   |
| >CDKN2A-R5 MGSARVAELI  | 399  | >CDKN2A-R5 MGSAQVAEL  | 304  | 95   |
| >CDKN2A-R5 MGSARVAEL   | 530  | >CDKN2A-R5 MGSAQVAEL  | 302  | 228  |
| >CDKN2A-R5 MGSARVAEL   | 218  | >CDKN2A-R5 MGSAQVAEL  | 5461 | 5243 |
| >CDKN2A-R5 MMGSARVAI   | 177  | >CDKN2A-R5 MMGSAQVA   | 126  | 51   |
| >CDKN2A-R5 MMGSARVAI   | 143  | >CDKN2A-R5 MMGSAQVA   | 63   | 80   |
| >CDKN2A-R5 MMGSARVA    | 831  | >CDKN2A-R5 MMGSAQVA   | 133  | 698  |
| >CDKN2A-R5 MMGSARVAI   | 24   | >CDKN2A-R5 MMGSAQVA   | 21   | 3    |
| >CDKN2A-R5 MMGSARVAI   | 8    | >CDKN2A-R5 MMGSAQVA   | 5    | 3    |
| >CDKN2A-R5 MMGSARVA    | 224  | >CDKN2A-R5 MMGSAQVA   | 95   | 129  |
| >CDKN2A-R5 MMGSARVAI   | 52   | >CDKN2A-R5 MMGSAQVA   | 59   | 7    |
| >CDKN2A-R5 MMGSARVAI   | 173  | >CDKN2A-R5 MMGSAQVA   | 105  | 68   |
| >CDKN2A-R5 MMGSARVAI   | 436  | >CDKN2A-R5 MMGSAQVA   | 286  | 150  |
| >CDKN2A-R5 MMGSARVA    | 187  | >CDKN2A-R5 MMGSAQVA   | 40   | 147  |
| >CDKN2A-R5 MMGSARVAI   | 11   | >CDKN2A-R5 MMGSAQVA   | 5    | 6    |
| >CDKN2A-R5 MMGSARVAI   | 24   | >CDKN2A-R5 MMGSAQVA   | 9    | 15   |
| >CDKN2A-R5 MMGSARVA    | 1664 | >CDKN2A-R5 MMGSAQVA   | 158  | 1506 |
| >CDKN2A-R5 MMGSARVAI   | 42   | >CDKN2A-R5 MMGSAQVA   | 9    | 33   |
| >CDKN2A-R5 MMGSARVAI   | 190  | >CDKN2A-R5 MMGSAQVA   | 48   | 142  |
| >CDKN2A-R5 MMGSARVA    | 1208 | >CDKN2A-R5 MMGSAQVA   | 110  | 1098 |
| >CDKN2A-R5 MMGSARVAI   | 46   | >CDKN2A-R5 MMGSAQVA   | 16   | 30   |
| >CDKN2A-R5 MMGSARVAI   | 81   | >CDKN2A-R5 MMGSAQVA   | 29   | 52   |
| >CDKN2A-R5 MMGSARVA    | 3077 | >CDKN2A-R5 MMGSAQVA   | 139  | 2938 |
| >CDKN2A-R5 MMGSARVAI   | 33   | >CDKN2A-R5 MMGSAQVA   | 6    | 27   |
| >CDKN2A-R5 MMGSARVAI   | 112  | >CDKN2A-R5 MMGSAQVA   | 15   | 97   |
| >CDKN2A-R5 MMGSARVA    | 95   | >CDKN2A-R5 MMGSAQVA   | 12   | 83   |
| >CDKN2A-R5 MMGSARVAI   | 3    | >CDKN2A-R5 MMGSAQVA   | 3    | 0    |
| >CDKN2A-R5 MMGSARVAI   | 8    | >CDKN2A-R5 MMGSAQVA   | 6    | 2    |
| >CDKN2A-R5 MMGSARVA    | 771  | >CDKN2A-R5 MMGSAQVA   | 462  | 309  |
| >CDKN2A-R5 MMGSARVAI   | 163  | >CDKN2A-R5 MMGSAQVA   | 156  | 7    |
| >CDKN2A-R5 MMGSARVAI   | 90   | >CDKN2A-R5 MMGSAQVA   | 84   | 6    |
| >CDKN2A-R5 MMGSARVAI   | 402  | >CDKN2A-R5 MMGSAQVA   | 442  | 40   |
| >CDKN2A-R5 MMMGSARV    | 11   | >CDKN2A-R5 MMMGSAQV   | 8    | 3    |
| >CDKN2A-R5 MMMGSARV    | 549  | >CDKN2A-R5 MMMGSAQV   | 85   | 464  |

|                     |      |                     |     |      |
|---------------------|------|---------------------|-----|------|
| >CDKN2A-R5 MMMGSARV | 19   | >CDKN2A-R5 MMMGSAQ\ | 12  | 7    |
| >CDKN2A-R5 MMMGSARV | 3    | >CDKN2A-R5 MMMGSAQ\ | 2   | 1    |
| >CDKN2A-R5 MMMGSARV | 102  | >CDKN2A-R5 MMMGSAQ\ | 17  | 85   |
| >CDKN2A-R5 MMMGSARV | 4    | >CDKN2A-R5 MMMGSAQ\ | 2   | 2    |
| >CDKN2A-R5 MMMGSARV | 2    | >CDKN2A-R5 MMMGSAQ\ | 2   | 0    |
| >CDKN2A-R5 MMMGSARV | 11   | >CDKN2A-R5 MMMGSAQ\ | 8   | 3    |
| >CDKN2A-R5 MMMGSARV | 5    | >CDKN2A-R5 MMMGSAQ\ | 4   | 1    |
| >CDKN2A-R5 MMMGSARV | 8    | >CDKN2A-R5 MMMGSAQ\ | 5   | 3    |
| >CDKN2A-R5 MMMGSARV | 437  | >CDKN2A-R5 MMMGSAQ\ | 48  | 389  |
| >CDKN2A-R5 MMMGSARV | 27   | >CDKN2A-R5 MMMGSAQ\ | 13  | 14   |
| >CDKN2A-R5 MMMGSARV | 2    | >CDKN2A-R5 MMMGSAQ\ | 2   | 0    |
| >CDKN2A-R5 MMMGSARV | 29   | >CDKN2A-R5 MMMGSAQ\ | 10  | 19   |
| >CDKN2A-R5 MMMGSARV | 3    | >CDKN2A-R5 MMMGSAQ\ | 3   | 0    |
| >CDKN2A-R5 MMMGSARV | 3    | >CDKN2A-R5 MMMGSAQ\ | 3   | 0    |
| >CDKN2A-R5 MMMGSARV | 281  | >CDKN2A-R5 MMMGSAQ\ | 29  | 252  |
| >CDKN2A-R5 MMMGSARV | 9    | >CDKN2A-R5 MMMGSAQ\ | 5   | 4    |
| >CDKN2A-R5 MMMGSARV | 8    | >CDKN2A-R5 MMMGSAQ\ | 6   | 2    |
| >CDKN2A-R5 MMMGSARV | 1302 | >CDKN2A-R5 MMMGSAQ\ | 86  | 1216 |
| >CDKN2A-R5 MMMGSARV | 35   | >CDKN2A-R5 MMMGSAQ\ | 15  | 20   |
| >CDKN2A-R5 MMMGSARV | 2    | >CDKN2A-R5 MMMGSAQ\ | 2   | 0    |
| >CDKN2A-R5 MMMGSARV | 91   | >CDKN2A-R5 MMMGSAQ\ | 12  | 79   |
| >CDKN2A-R5 MMMGSARV | 4    | >CDKN2A-R5 MMMGSAQ\ | 2   | 2    |
| >CDKN2A-R5 MMMGSARV | 2    | >CDKN2A-R5 MMMGSAQ\ | 1   | 1    |
| >CDKN2A-R5 MMMGSARV | 21   | >CDKN2A-R5 MMMGSAQ\ | 4   | 17   |
| >CDKN2A-R5 MMMGSARV | 3    | >CDKN2A-R5 MMMGSAQ\ | 2   | 1    |
| >CDKN2A-R5 MMMGSARV | 1020 | >CDKN2A-R5 MMMGSAQ\ | 448 | 572  |
| >CDKN2A-R5 MMMGSARV | 179  | >CDKN2A-R5 MMMGSAQ\ | 182 | 3    |
| >CDKN2A-R5 MMMGSARV | 29   | >CDKN2A-R5 MMMGSAQ\ | 30  | 1    |
| >CDKN2A-R5 MMMGSARV | 235  | >CDKN2A-R5 MMMGSAQ\ | 150 | 85   |
| >CDKN2A-R5 MMMGSARV | 51   | >CDKN2A-R5 MMMGSAQ\ | 16  | 35   |
| >CDKN2A-R5 MMMGSARV | 819  | >CDKN2A-R5 MMMGSAQ\ | 364 | 455  |
| >CDKN2A-R5 MMMGSARV | 188  | >CDKN2A-R5 MMMGSAQ\ | 314 | 126  |
| >CDKN2A-R5 MMMGSARV | 301  | >CDKN2A-R5 MMMGSAQ\ | 203 | 98   |
| >CDKN2A-R5 MMMGSARV | 191  | >CDKN2A-R5 MMMGSAQ\ | 113 | 78   |
| >CDKN2A-R5 MMMGSARV | 84   | >CDKN2A-R5 MMMGSAQ\ | 70  | 14   |
| >CDKN2A-R5 MMMGSARV | 540  | >CDKN2A-R5 MMMGSAQ\ | 445 | 95   |
| >CDKN2A-R5 MMMGSARV | 237  | >CDKN2A-R5 MMMGSAQ\ | 106 | 131  |
| >CDKN2A-R5 MMMGSARV | 342  | >CDKN2A-R5 MMMGSAQ\ | 87  | 255  |
| >CDKN2A-R5 MMMGSARV | 31   | >CDKN2A-R5 MMMGSAQ\ | 22  | 9    |
| >CDKN2A-R5 MMMGSARV | 55   | >CDKN2A-R5 MMMGSAQ\ | 46  | 9    |
| >CDKN2A-R5 MMMGSARV | 802  | >CDKN2A-R5 MMMGSAQ\ | 348 | 454  |
| >CDKN2A-R5 MMMGSARV | 465  | >CDKN2A-R5 MMMGSAQ\ | 177 | 288  |
| >CDKN2A-R5 MMMGSARV | 18   | >CDKN2A-R5 MMMGSAQ\ | 13  | 5    |

|                      |      |                      |       |       |
|----------------------|------|----------------------|-------|-------|
| >CDKN2A-R5 MMMGSARV  | 185  | >CDKN2A-R5 MMMGSAQV  | 155   | 30    |
| >CDKN2A-R5 VMMMGSAR  | 182  | >CDKN2A-R5 VMMMGSAC  | 340   | 158   |
| >CDKN2A-R5 VMMMGSAR  | 11   | >CDKN2A-R5 VMMMGSAC  | 11    | 0     |
| >CDKN2A-R5 VMMMGSAR  | 9    | >CDKN2A-R5 VMMMGSAC  | 7     | 2     |
| >CDKN2A-R5 VMMMGSAR  | 425  | >CDKN2A-R5 VMMMGSAC  | 299   | 126   |
| >CDKN2A-R5 VMMMGSAR  | 3    | >CDKN2A-R5 VMMMGSAC  | 3     | 0     |
| >CDKN2A-R5 VMMMGSAR  | 226  | >CDKN2A-R5 VMMMGSAC  | 284   | 58    |
| >CDKN2A-R5 VMMMGSAR  | 19   | >CDKN2A-R5 VMMMGSAC  | 15    | 4     |
| >CDKN2A-R5 VMMMGSAR  | 2    | >CDKN2A-R5 VMMMGSAC  | 2     | 0     |
| >CDKN2A-R5 VMMMGSAR  | 55   | >CDKN2A-R5 VMMMGSAC  | 22    | 33    |
| >CDKN2A-R5 VMMMGSAR  | 3    | >CDKN2A-R5 VMMMGSAC  | 3     | 0     |
| >CDKN2A-R5 VMMMGSAR  | 239  | >CDKN2A-R5 VMMMGSAC  | 48    | 191   |
| >CDKN2A-R5 VMMMGSAR  | 7    | >CDKN2A-R5 VMMMGSAC  | 6     | 1     |
| >CDKN2A-R5 VMMMGSAR  | 625  | >CDKN2A-R5 VMMMGSAC  | 93    | 532   |
| >CDKN2A-R5 VMMMGSAR  | 2    | >CDKN2A-R5 VMMMGSAC  | 1     | 1     |
| >CDKN2A-R5 VMMMGSAR  | 95   | >CDKN2A-R5 VMMMGSAC  | 20    | 75    |
| >CDKN2A-R5 VMMMGSAR  | 8048 | >CDKN2A-R5 VMMMGSAC  | 171   | 7877  |
| >CDKN2A-R5 VMMMGSAR  | 2    | >CDKN2A-R5 VMMMGSAC  | 2     | 0     |
| >CDKN2A-R5 VMMMGSAR  | 54   | >CDKN2A-R5 VMMMGSAC  | 10    | 44    |
| >CDKN2A-R5 VMMMGSAR  | 212  | >CDKN2A-R5 VMMMGSAC  | 12392 | 12180 |
| >CDKN2A-R5 VMMMGSAR  | 168  | >CDKN2A-R5 VMMMGSAC  | 18800 | 18632 |
| >CDKN2A-R5 VMMMGSAR  | 20   | >CDKN2A-R5 VMMMGSAC  | 11646 | 11626 |
| >CDKN2A-R5 VMMMGSAR  | 120  | >CDKN2A-R5 VMMMGSAC  | 15709 | 15589 |
| >CDKN2A-R5 VMMMGSAR  | 462  | >CDKN2A-R5 VMMMGSAC  | 18785 | 18323 |
| >CDKN2A-R5 VMMMGSAR  | 1475 | >CDKN2A-R5 VMMMGSAC  | 389   | 1086  |
| >CDKN2A-R5 VMMMGSAR  | 2128 | >CDKN2A-R5 VMMMGSAC  | 221   | 1907  |
| >CDKN2A-R5 VMMMGSAR  | 175  | >CDKN2A-R5 VMMMGSAC  | 134   | 41    |
| >CDKN2A-R5 VMMMGSAR  | 183  | >CDKN2A-R5 VMMMGSAC  | 116   | 67    |
| >CDKN2A-R5 VMMMGSAR  | 146  | >CDKN2A-R5 VMMMGSAC  | 747   | 601   |
| >CDKN2A-R5 VMMMGSAR  | 420  | >CDKN2A-R5 VMMMGSAC  | 202   | 218   |
| >CDKN2A-R5 VMMMGSAR  | 721  | >CDKN2A-R5 VMMMGSAC  | 270   | 451   |
| >CDKN2A-R5 QVMMMGS/  | 419  | >CDKN2A-R5 QVMMMGS/  | 531   | 112   |
| >CDKN2A-R5 QVMMMGS/  | 61   | >CDKN2A-R5 QVMMMGS/  | 59    | 2     |
| >CDKN2A-R5 QVMMMGS/  | 313  | >CDKN2A-R5 QVMMMGS/  | 197   | 116   |
| >CDKN2A-R5 QVMMMGS/  | 248  | >CDKN2A-R5 QVMMMGS/  | 111   | 137   |
| >CDKN2A-R5 QVMMMGS/  | 41   | >CDKN2A-R5 QVMMMGS/  | 32    | 9     |
| >CDKN2A-R5 QVMMMGS/  | 114  | >CDKN2A-R5 QVMMMGS/  | 14478 | 14364 |
| >CDKN2A-R5 QVMMMGS/  | 55   | >CDKN2A-R5 QVMMMGS/  | 15769 | 15714 |
| >CDKN2A-R5 QVMMMGS/  | 218  | >CDKN2A-R5 QVMMMGS/  | 24293 | 24075 |
| >CDKN2A-R5 QVMMMGS/  | 20   | >CDKN2A-R5 QVMMMGS/  | 2947  | 2927  |
| >CDKN2A-R5 QVMMMGS/  | 215  | >CDKN2A-R5 QVMMMGS/  | 291   | 76    |
| >CDKN2A-R5 QVMMMGS/  | 78   | >CDKN2A-R5 QVMMMGS/  | 37    | 41    |
| >CDKN2A-R5 IQVMMMGS. | 598  | >CDKN2A-R5 IQVMMMGS. | 405   | 193   |

|                       |       |                        |       |       |
|-----------------------|-------|------------------------|-------|-------|
| >CDKN2A-R5 IQVMMMGS,  | 42    | >CDKN2A-R5 IQVMMMGS,   | 30    | 12    |
| >CDKN2A-R5 IQVMMMGS,  | 16    | >CDKN2A-R5 IQVMMMGS,   | 13    | 3     |
| >CDKN2A-R5 IQVMMMGS,  | 587   | >CDKN2A-R5 IQVMMMGS,   | 486   | 101   |
| >CDKN2A-R5 IQVMMMGS,  | 120   | >CDKN2A-R5 IQVMMMGS,   | 18627 | 18507 |
| >CDKN2A-R5 IQVMMMGS,  | 240   | >CDKN2A-R5 IQVMMMGS,   | 19388 | 19148 |
| >CDKN2A-R5 IQVMMMGS,  | 117   | >CDKN2A-R5 IQVMMMGS,   | 25551 | 25434 |
| >CDKN2A-R5 IQVMMMGS,  | 187   | >CDKN2A-R5 IQVMMMGS,   | 782   | 595   |
| >CDKN2A-R5 IQVMMMGS,  | 508   | >CDKN2A-R5 IQVMMMGS,   | 287   | 221   |
| >CDKN2A-R8 RPHVDAAREC | 58    | >CDKN2A-R8 LPVHDAAREC  | 531   | 473   |
| >CDKN2A-R8 RPHVDAAREC | 287   | >CDKN2A-R8 LPVHDAAREC  | 691   | 404   |
| >CDKN2A-R8 RPHVDAAR   | 1321  | >CDKN2A-R8 LPVHDAAR    | 154   | 1167  |
| >CDKN2A-R8 RPHVDAAREC | 112   | >CDKN2A-R8 LPVHDAAREC  | 22    | 90    |
| >CDKN2A-R8 RPHVDAAREC | 1685  | >CDKN2A-R8 LPVHDAAREC  | 94    | 1591  |
| >CDKN2A-R8 RPHVDAAREC | 965   | >CDKN2A-R8 LPVHDAAREC  | 87    | 878   |
| >CDKN2A-R8 RPHVDAAR   | 319   | >CDKN2A-R8 LPVHDAAR    | 2715  | 2396  |
| >CDKN2A-R8 TRPVHDAAR  | 14004 | >CDKN2A-R8 TLPVHDAAR   | 455   | 13549 |
| >CDKN2A-R8 TRPVHDAAR  | 8359  | >CDKN2A-R8 TLPVHDAAR   | 388   | 7971  |
| >CDKN2A-R8 LTRPVHDAA  | 7554  | >CDKN2A-R8 LTLPVHDAA   | 270   | 7284  |
| >CDKN2A-R8 LTRPVHDAA  | 8131  | >CDKN2A-R8 LTLPVHDAA   | 303   | 7828  |
| >CDKN2A-R8 LTRPVHDA   | 48    | >CDKN2A-R8 LTLPVHDA    | 4921  | 4873  |
| >CDKN2A-R8 LTRPVHDAA  | 24    | >CDKN2A-R8 LTLPVHDAA   | 3345  | 3321  |
| >CDKN2A-R8 LTRPVHDAAF | 56    | >CDKN2A-R8 LTLPVHDAAR  | 4571  | 4515  |
| >CDKN2A-R8 LTRPVHDAAF | 107   | >CDKN2A-R8 LTLPVHDAAR  | 109   | 2     |
| >CDKN2A-R8 LTRPVHDAAF | 47    | >CDKN2A-R8 LTLPVHDAAR  | 23    | 24    |
| >CDKN2A-R8 LTRPVHDAA  | 2875  | >CDKN2A-R8 LTLPVHDAA   | 455   | 2420  |
| >CDKN2A-R8 TLTRPVHDAA | 280   | >CDKN2A-R8 TLTPVHDAA   | 739   | 459   |
| >CDKN2A-R8 TLTRPVHDA  | 12    | >CDKN2A-R8 TLTPVHDA    | 40    | 28    |
| >CDKN2A-R8 TLTRPVHDAA | 88    | >CDKN2A-R8 TLTPVHDAA   | 268   | 180   |
| >CDKN2A-R8 TLTRPVHDAA | 159   | >CDKN2A-R8 TLTPVHDAA   | 297   | 138   |
| >CDKN2A-R8 TLTRPVHDAA | 411   | >CDKN2A-R8 TLTPVHDAA   | 247   | 164   |
| >CDKN2A-R8 TLTRPVHDAA | 68    | >CDKN2A-R8 TLTPVHDAA   | 67    | 1     |
| >CDKN2A-R8 DPATLTRPV  | 485   | >CDKN2A-R8 DPATLTLPV   | 207   | 278   |
| >CDKN2A-R8 DPATLTRPV  | 197   | >CDKN2A-R8 DPATLTLPV   | 46    | 151   |
| >CDKN2A-R8 DPATLTRPV  | 149   | >CDKN2A-R8 DPATLTLPV   | 271   | 122   |
| >CDKN2A-R8 DPATLTRPV  | 668   | >CDKN2A-R8 DPATLTLPV   | 142   | 526   |
| >CDKN2A-R8 ADPATLTRPV | 498   | >CDKN2A-R8 ADPATLTLPV  | 160   | 338   |
| >CDKN2A-R8 CADPATLTRP | 712   | >CDKN2A-R8 CADPATLTLP' | 131   | 581   |
| >CDKN2A-R8 CADPATLTR  | 353   | >CDKN2A-R8 CADPATLTL   | 29089 | 28736 |
| >CDKN2A-R8 CADPATLTRP | 585   | >CDKN2A-R8 CADPATLTLP' | 135   | 450   |
| >CDKN2A-R8 CADPATLTR  | 17210 | >CDKN2A-R8 CADPATLTL   | 114   | 17096 |
| >CDKN2A-R8 CADPATLTR  | 10098 | >CDKN2A-R8 CADPATLTL   | 363   | 9735  |
| >CDKN2A-R8 CADPATLTR  | 34314 | >CDKN2A-R8 CADPATLTL   | 72    | 34242 |
| >CDKN2A-R8 NCADPATLTF | 284   | >CDKN2A-R8 NCADPATLTL  | 31330 | 31046 |

|                       |       |                        |       |       |
|-----------------------|-------|------------------------|-------|-------|
| >CDKN2A-R8 NCADPATLTF | 17263 | >CDKN2A-R8 NCADPATLTL  | 439   | 16824 |
| >CDKN2A-R8 NCADPATLTF | 233   | >CDKN2A-R8 NCADPATLTL  | 30866 | 30633 |
| >CDKN2A-R8 RRVHDAARE  | 58    | >CDKN2A-R8 QPVHDAARE   | 2435  | 2377  |
| >CDKN2A-R8 RRVHDAARE  | 287   | >CDKN2A-R8 QPVHDAARE   | 1237  | 950   |
| >CDKN2A-R8 RRVHDAAR   | 1321  | >CDKN2A-R8 QPVHDAAR    | 416   | 905   |
| >CDKN2A-R8 RRVHDAARE  | 112   | >CDKN2A-R8 QPVHDAARE   | 51    | 61    |
| >CDKN2A-R8 RRVHDAARE  | 965   | >CDKN2A-R8 QPVHDAARE   | 473   | 492   |
| >CDKN2A-R8 RRVHDAAR   | 319   | >CDKN2A-R8 QPVHDAAR    | 1375  | 1056  |
| >CDKN2A-R8 TRRVHDAAR  | 14004 | >CDKN2A-R8 TQPVHDAAR   | 345   | 13659 |
| >CDKN2A-R8 LTRRVHDA   | 48    | >CDKN2A-R8 LTQPVHDA    | 8954  | 8906  |
| >CDKN2A-R8 LTRRVHDAA  | 24    | >CDKN2A-R8 LTQPVHDAA   | 7063  | 7039  |
| >CDKN2A-R8 LTRRVHDAAF | 56    | >CDKN2A-R8 LTQPVHDAAI  | 8084  | 8028  |
| >CDKN2A-R8 LTRRVHDAAF | 107   | >CDKN2A-R8 LTQPVHDAAI  | 179   | 72    |
| >CDKN2A-R8 LTRRVHDAAF | 47    | >CDKN2A-R8 LTQPVHDAAI  | 37    | 10    |
| >CDKN2A-R8 TLTRRVHDA  | 722   | >CDKN2A-R8 TLTQPVHDA   | 444   | 278   |
| >CDKN2A-R8 TLTRRVHDAA | 280   | >CDKN2A-R8 TLTQPVHDA/  | 190   | 90    |
| >CDKN2A-R8 TLTRRVHDA  | 694   | >CDKN2A-R8 TLTQPVHDA   | 274   | 420   |
| >CDKN2A-R8 TLTRRVHDA  | 12    | >CDKN2A-R8 TLTQPVHDA   | 9     | 3     |
| >CDKN2A-R8 TLTRRVHDAA | 88    | >CDKN2A-R8 TLTQPVHDA/  | 68    | 20    |
| >CDKN2A-R8 TLTRRVHDAA | 159   | >CDKN2A-R8 TLTQPVHDA/  | 653   | 494   |
| >CDKN2A-R8 TLTRRVHDAA | 411   | >CDKN2A-R8 TLTQPVHDA/  | 545   | 134   |
| >CDKN2A-R8 TLTRRVHDAA | 68    | >CDKN2A-R8 TLTQPVHDA/  | 58    | 10    |
| >CDKN2A-R8 ATLTRRVHDA | 506   | >CDKN2A-R8 ATLTQPVHDA/ | 498   | 8     |
| >CDKN2A-R8 DPATLTRPV  | 485   | >CDKN2A-R8 DPATLTQPV   | 151   | 334   |
| >CDKN2A-R8 DPATLTRPV  | 197   | >CDKN2A-R8 DPATLTQPV   | 66    | 131   |
| >CDKN2A-R8 DPATLTRPV  | 149   | >CDKN2A-R8 DPATLTQPV   | 399   | 250   |
| >CDKN2A-R8 DPATLTRPV  | 668   | >CDKN2A-R8 DPATLTQPV   | 346   | 322   |
| >CDKN2A-R8 ADPATLTRPV | 498   | >CDKN2A-R8 ADPATLTQPV  | 345   | 153   |
| >CDKN2A-R8 CADPATLTRP | 712   | >CDKN2A-R8 CADPATLTQF  | 242   | 470   |
| >CDKN2A-R8 CADPATLTR  | 353   | >CDKN2A-R8 CADPATLTQ   | 15690 | 15337 |
| >CDKN2A-R8 CADPATLTRP | 585   | >CDKN2A-R8 CADPATLTQF  | 176   | 409   |
| >CDKN2A-R8 NCADPATLTF | 284   | >CDKN2A-R8 NCADPATLTC  | 30737 | 30453 |
| >CDKN2A-R8 NCADPATLTF | 233   | >CDKN2A-R8 NCADPATLTC  | 20309 | 20076 |
| >CDKN2A-R8 REGFLDTLV  | 1564  | >CDKN2A-R8 LEGFLDTLV   | 407   | 1157  |
| >CDKN2A-R8 REGFLDTLVV | 1787  | >CDKN2A-R8 LEGFLDTLVV  | 403   | 1384  |
| >CDKN2A-R8 REGFLDTL   | 3753  | >CDKN2A-R8 LEGFLDTL    | 433   | 3320  |
| >CDKN2A-R8 REGFLDTLVV | 2602  | >CDKN2A-R8 LEGFLDTLVVI | 299   | 2303  |
| >CDKN2A-R8 REGFLDTL   | 13    | >CDKN2A-R8 LEGFLDTL    | 53    | 40    |
| >CDKN2A-R8 REGFLDTLV  | 213   | >CDKN2A-R8 LEGFLDTLV   | 1421  | 1208  |
| >CDKN2A-R8 REGFLDTLVV | 14    | >CDKN2A-R8 LEGFLDTLVVI | 53    | 39    |
| >CDKN2A-R8 REGFLDTL   | 99    | >CDKN2A-R8 LEGFLDTL    | 371   | 272   |
| >CDKN2A-R8 REGFLDTLV  | 208   | >CDKN2A-R8 LEGFLDTLV   | 772   | 564   |
| >CDKN2A-R8 REGFLDTLVV | 264   | >CDKN2A-R8 LEGFLDTLVV  | 960   | 696   |



|                       |       |                        |       |       |
|-----------------------|-------|------------------------|-------|-------|
| >CDKN2A-R8 REGFLDTLVV | 63    | >CDKN2A-R8 LEGFLDTLVVI | 229   | 166   |
| >CDKN2A-R8 REGFLDTLV  | 35    | >CDKN2A-R8 LEGFLDTLV   | 222   | 187   |
| >CDKN2A-R8 REGFLDTLVV | 89    | >CDKN2A-R8 LEGFLDTLVV  | 413   | 324   |
| >CDKN2A-R8 REGFLDTLVV | 68    | >CDKN2A-R8 LEGFLDTLVVI | 314   | 246   |
| >CDKN2A-R8 AREGFLDTL  | 23313 | >CDKN2A-R8 ALEGFLDTL   | 304   | 23009 |
| >CDKN2A-R8 AREGFLDTLV | 13068 | >CDKN2A-R8 ALEGFLDTLV  | 61    | 13007 |
| >CDKN2A-R8 AREGFLDTLV | 21612 | >CDKN2A-R8 ALEGFLDTLV  | 206   | 21406 |
| >CDKN2A-R8 AREGFLDTL  | 7196  | >CDKN2A-R8 ALEGFLDTL   | 14    | 7182  |
| >CDKN2A-R8 AREGFLDTLV | 6079  | >CDKN2A-R8 ALEGFLDTLV  | 19    | 6060  |
| >CDKN2A-R8 AREGFLDTLV | 14474 | >CDKN2A-R8 ALEGFLDTLV  | 52    | 14422 |
| >CDKN2A-R8 AREGFLDTLV | 13615 | >CDKN2A-R8 ALEGFLDTLV  | 52    | 13563 |
| >CDKN2A-R8 AREGFLDTLV | 17860 | >CDKN2A-R8 ALEGFLDTLV  | 127   | 17733 |
| >CDKN2A-R8 AREGFLDTLV | 8205  | >CDKN2A-R8 ALEGFLDTLV  | 276   | 7929  |
| >CDKN2A-R8 AREGFLDTLV | 11556 | >CDKN2A-R8 ALEGFLDTLV  | 207   | 11349 |
| >CDKN2A-R8 AREGFLDTL  | 20883 | >CDKN2A-R8 ALEGFLDTL   | 18    | 20865 |
| >CDKN2A-R8 AREGFLDTLV | 15902 | >CDKN2A-R8 ALEGFLDTLV  | 21    | 15881 |
| >CDKN2A-R8 AREGFLDTLV | 14097 | >CDKN2A-R8 ALEGFLDTLV  | 12    | 14085 |
| >CDKN2A-R8 AREGFLDTL  | 23864 | >CDKN2A-R8 ALEGFLDTL   | 30    | 23834 |
| >CDKN2A-R8 AREGFLDTLV | 23147 | >CDKN2A-R8 ALEGFLDTLV  | 65    | 23082 |
| >CDKN2A-R8 AREGFLDTLV | 21543 | >CDKN2A-R8 ALEGFLDTLV  | 16    | 21527 |
| >CDKN2A-R8 AREGFLDTL  | 25422 | >CDKN2A-R8 ALEGFLDTL   | 161   | 25261 |
| >CDKN2A-R8 AREGFLDTLV | 20882 | >CDKN2A-R8 ALEGFLDTLV  | 30    | 20852 |
| >CDKN2A-R8 AREGFLDTLV | 21426 | >CDKN2A-R8 ALEGFLDTLV  | 34    | 21392 |
| >CDKN2A-R8 AREGFLDTLV | 22176 | >CDKN2A-R8 ALEGFLDTLV  | 135   | 22041 |
| >CDKN2A-R8 AREGFLDT   | 33335 | >CDKN2A-R8 ALEGFLDT    | 134   | 33201 |
| >CDKN2A-R8 AREGFLDTL  | 21072 | >CDKN2A-R8 ALEGFLDTL   | 3     | 21069 |
| >CDKN2A-R8 AREGFLDTLV | 9711  | >CDKN2A-R8 ALEGFLDTLV  | 2     | 9709  |
| >CDKN2A-R8 AREGFLDTLV | 9422  | >CDKN2A-R8 ALEGFLDTLV  | 2     | 9420  |
| >CDKN2A-R8 AREGFLDTL  | 13095 | >CDKN2A-R8 ALEGFLDTL   | 139   | 12956 |
| >CDKN2A-R8 AREGFLDTL  | 165   | >CDKN2A-R8 ALEGFLDTL   | 17263 | 17098 |
| >CDKN2A-R8 AREGFLDTL  | 63    | >CDKN2A-R8 ALEGFLDTL   | 16332 | 16269 |
| >CDKN2A-R8 TLTRPVHDA^ | 22265 | >CDKN2A-R8 TLTRPVHDA^  | 157   | 22108 |
| >CDKN2A-R8 TLTRPVHDA^ | 19626 | >CDKN2A-R8 TLTRPVHDA^  | 358   | 19268 |
| >CDKN2A-R8 TLTRPVHDA^ | 18692 | >CDKN2A-R8 TLTRPVHDA^  | 156   | 18536 |
| >CDKN2A-R8 TLTRPVHDA^ | 23707 | >CDKN2A-R8 TLTRPVHDA^  | 145   | 23562 |
| >CDKN2A-R8 TLTRPVHDA^ | 9438  | >CDKN2A-R8 TLTRPVHDA^  | 14    | 9424  |
| >CDKN2A-R8 TLTRPVHDA^ | 159   | >CDKN2A-R8 TLTRPVHDA^  | 16820 | 16661 |
| >CDKN2A-R8 TLTRPVHDA^ | 411   | >CDKN2A-R8 TLTRPVHDA^  | 26632 | 26221 |
| >CDKN2A-R8 TLTRPVHDA^ | 68    | >CDKN2A-R8 TLTRPVHDA^  | 27060 | 26992 |
| >CDKN2A-R8 AAREGFLDTL | 9487  | >CDKN2A-R8 AALEGFLDTL' | 371   | 9116  |
| >CDKN2A-R8 AAREGFLDTL | 1005  | >CDKN2A-R8 AALEGFLDTL  | 187   | 818   |
| >CDKN2A-R8 AAREGFLDTL | 3679  | >CDKN2A-R8 AALEGFLDTL  | 141   | 3538  |
| >CDKN2A-R8 AAREGFLDTL | 408   | >CDKN2A-R8 AALEGFLDTL' | 22    | 386   |

|                       |       |                        |       |       |
|-----------------------|-------|------------------------|-------|-------|
| >CDKN2A-R8 AAREGFLDTL | 5617  | >CDKN2A-R8 AALEGFLDTL  | 156   | 5461  |
| >CDKN2A-R8 AAREGFLDTL | 4023  | >CDKN2A-R8 AALEGFLDTL' | 114   | 3909  |
| >CDKN2A-R8 AAREGFLDTL | 6594  | >CDKN2A-R8 AALEGFLDTL' | 69    | 6525  |
| >CDKN2A-R8 AAREGFLDTL | 252   | >CDKN2A-R8 AALEGFLDTL' | 58    | 194   |
| >CDKN2A-R8 AAREGFLDTL | 342   | >CDKN2A-R8 AALEGFLDTL  | 8951  | 8609  |
| >CDKN2A-R8 AAREGFLDTL | 203   | >CDKN2A-R8 AALEGFLDTL' | 6881  | 6678  |
| >CDKN2A-R8 AAREGFLDTL | 7716  | >CDKN2A-R8 AALEGFLDTL' | 320   | 7396  |
| >CDKN2A-R8 AAREGFLDTL | 53    | >CDKN2A-R8 AALEGFLDTL  | 126   | 73    |
| >CDKN2A-R8 HDAAREGFL  | 169   | >CDKN2A-R8 HDAAREGFL   | 165   | 4     |
| >CDKN2A-R8 PVHDAAREG  | 1915  | >CDKN2A-R8 PVHDAAREGf  | 384   | 1531  |
| >CDKN2A-R8 RPVHDAAR   | 4663  | >CDKN2A-R8 RPVHDAAL    | 10    | 4653  |
| >CDKN2A-R8 RPVHDAAREC | 58    | >CDKN2A-R8 RPVHDAALEC  | 165   | 107   |
| >CDKN2A-R8 RPVHDAAREC | 287   | >CDKN2A-R8 RPVHDAALEC  | 331   | 44    |
| >CDKN2A-R8 RPVHDAAR   | 1321  | >CDKN2A-R8 RPVHDAAL    | 69    | 1252  |
| >CDKN2A-R8 RPVHDAAREC | 112   | >CDKN2A-R8 RPVHDAALEC  | 93    | 19    |
| >CDKN2A-R8 RPVHDAAR   | 16189 | >CDKN2A-R8 RPVHDAAL    | 186   | 16003 |
| >CDKN2A-R8 RPVHDAAR   | 17764 | >CDKN2A-R8 RPVHDAAL    | 491   | 17273 |
| >CDKN2A-R8 RPVHDAAR   | 319   | >CDKN2A-R8 RPVHDAAL    | 32218 | 31899 |
| >CDKN2A-R8 TRPVHDAAR  | 9934  | >CDKN2A-R8 TRPVHDAAL   | 393   | 9541  |
| >CDKN2A-R8 LTRPVHDAAF | 56    | >CDKN2A-R8 LTRPVHDAAL  | 37    | 19    |
| >CDKN2A-R8 LTRPVHDAAF | 107   | >CDKN2A-R8 LTRPVHDAAL  | 17428 | 17321 |
| >CDKN2A-R8 LTRPVHDAAF | 47    | >CDKN2A-R8 LTRPVHDAAL  | 27007 | 26960 |
| >CDKN2A-R8 LTRPVHDAAF | 12008 | >CDKN2A-R8 LTRPVHDAAL  | 336   | 11672 |
| >CDKN2A-R8 LTRPVHDAAF | 2741  | >CDKN2A-R8 LTRPVHDAAL  | 7     | 2734  |
| >CDKN2A-R8 LTRPVHDAAF | 14382 | >CDKN2A-R8 LTRPVHDAAL  | 231   | 14151 |
| >CDKN2A-R8 LTRPVHDAAF | 583   | >CDKN2A-R8 LTRPVHDAAL  | 328   | 255   |
| >CDKN2A-R8 REGFLDTL   | 13    | >CDKN2A-R8 QEGFLDTL    | 81    | 68    |
| >CDKN2A-R8 REGFLDTLV  | 213   | >CDKN2A-R8 QEGFLDTLV   | 2106  | 1893  |
| >CDKN2A-R8 REGFLDTLVV | 14    | >CDKN2A-R8 QEGFLDTLVV  | 84    | 70    |
| >CDKN2A-R8 REGFLDTL   | 99    | >CDKN2A-R8 QEGFLDTL    | 705   | 606   |
| >CDKN2A-R8 REGFLDTLV  | 208   | >CDKN2A-R8 QEGFLDTLV   | 1646  | 1438  |
| >CDKN2A-R8 REGFLDTLVV | 264   | >CDKN2A-R8 QEGFLDTLVV  | 471   | 207   |
| >CDKN2A-R8 REGFLDTLVV | 63    | >CDKN2A-R8 QEGFLDTLVV  | 367   | 304   |
| >CDKN2A-R8 REGFLDTLV  | 35    | >CDKN2A-R8 QEGFLDTLV   | 317   | 282   |
| >CDKN2A-R8 REGFLDTLVV | 89    | >CDKN2A-R8 QEGFLDTLVV  | 707   | 618   |
| >CDKN2A-R8 REGFLDTLVV | 68    | >CDKN2A-R8 QEGFLDTLVV  | 446   | 378   |
| >CDKN2A-R8 AREGFLDTL  | 7196  | >CDKN2A-R8 AQEGFLDTL   | 155   | 7041  |
| >CDKN2A-R8 AREGFLDTLV | 6079  | >CDKN2A-R8 AQEGFLDTLV  | 163   | 5916  |
| >CDKN2A-R8 AREGFLDTL  | 10509 | >CDKN2A-R8 AQEGFLDTL   | 24    | 10485 |
| >CDKN2A-R8 AREGFLDTLV | 8205  | >CDKN2A-R8 AQEGFLDTLV  | 249   | 7956  |
| >CDKN2A-R8 AREGFLDTLV | 11556 | >CDKN2A-R8 AQEGFLDTLV  | 28    | 11528 |
| >CDKN2A-R8 AREGFLDTL  | 503   | >CDKN2A-R8 AQEGFLDTL   | 471   | 32    |
| >CDKN2A-R8 AREGFLDTL  | 10859 | >CDKN2A-R8 AQEGFLDTL   | 99    | 10760 |

|                       |       |                       |       |       |
|-----------------------|-------|-----------------------|-------|-------|
| >CDKN2A-R8 AREGFLDTL  | 165   | >CDKN2A-R8 AQEGFLDTL  | 4161  | 3996  |
| >CDKN2A-R8 AREGFLDTL  | 63    | >CDKN2A-R8 AQEGFLDTL  | 3301  | 3238  |
| >CDKN2A-R8 TLTRPVHDA  | 159   | >CDKN2A-R8 TLTRPVHDA  | 17360 | 17201 |
| >CDKN2A-R8 TLTRPVHDA  | 411   | >CDKN2A-R8 TLTRPVHDA  | 26049 | 25638 |
| >CDKN2A-R8 TLTRPVHDA  | 68    | >CDKN2A-R8 TLTRPVHDA  | 10682 | 10614 |
| >CDKN2A-R8 AAREGFLDTL | 408   | >CDKN2A-R8 AAQEGFLDTL | 122   | 286   |
| >CDKN2A-R8 AAREGFLDTL | 252   | >CDKN2A-R8 AAQEGFLDTL | 124   | 128   |
| >CDKN2A-R8 AAREGFLDTL | 342   | >CDKN2A-R8 AAQEGFLDTL | 12232 | 11890 |
| >CDKN2A-R8 AAREGFLDTL | 203   | >CDKN2A-R8 AAQEGFLDTL | 10230 | 10027 |
| >CDKN2A-R8 AAREGFLDTL | 53    | >CDKN2A-R8 AAQEGFLDTL | 585   | 532   |
| >CDKN2A-R8 HDAAREGFL  | 169   | >CDKN2A-R8 HDAAQEGFL  | 95    | 74    |
| >CDKN2A-R8 RPVHDAARE  | 58    | >CDKN2A-R8 RPVHDAAQE  | 201   | 143   |
| >CDKN2A-R8 RPVHDAARE  | 287   | >CDKN2A-R8 RPVHDAAQE  | 282   | 5     |
| >CDKN2A-R8 RPVHDAAR   | 1321  | >CDKN2A-R8 RPVHDAAQ   | 314   | 1007  |
| >CDKN2A-R8 RPVHDAARE  | 112   | >CDKN2A-R8 RPVHDAAQE  | 76    | 36    |
| >CDKN2A-R8 RPVHDAAR   | 319   | >CDKN2A-R8 RPVHDAAQ   | 22224 | 21905 |
| >CDKN2A-R8 LTRPVHDAAF | 56    | >CDKN2A-R8 LTRPVHDAAC | 166   | 110   |
| >CDKN2A-R8 LTRPVHDAAF | 107   | >CDKN2A-R8 LTRPVHDAAC | 21542 | 21435 |
| >CDKN2A-R8 LTRPVHDAAF | 47    | >CDKN2A-R8 LTRPVHDAAC | 26121 | 26074 |
| >CDKN2A-R8 REGFLDTLV  | 1564  | >CDKN2A-R8 WEGFLDTLV  | 420   | 1144  |
| >CDKN2A-R8 REGFLDTLVV | 1787  | >CDKN2A-R8 WEGFLDTLV  | 424   | 1363  |
| >CDKN2A-R8 REGFLDTL   | 3753  | >CDKN2A-R8 WEGFLDTL   | 83    | 3670  |
| >CDKN2A-R8 REGFLDTLVV | 2602  | >CDKN2A-R8 WEGFLDTLV  | 67    | 2535  |
| >CDKN2A-R8 REGFLDTL   | 13    | >CDKN2A-R8 WEGFLDTL   | 19    | 6     |
| >CDKN2A-R8 REGFLDTLV  | 213   | >CDKN2A-R8 WEGFLDTLV  | 362   | 149   |
| >CDKN2A-R8 REGFLDTLVV | 14    | >CDKN2A-R8 WEGFLDTLV  | 18    | 4     |
| >CDKN2A-R8 REGFLDTL   | 99    | >CDKN2A-R8 WEGFLDTL   | 120   | 21    |
| >CDKN2A-R8 REGFLDTLV  | 208   | >CDKN2A-R8 WEGFLDTLV  | 226   | 18    |
| >CDKN2A-R8 REGFLDTLVV | 264   | >CDKN2A-R8 WEGFLDTLV  | 686   | 422   |
| >CDKN2A-R8 REGFLDTLVV | 63    | >CDKN2A-R8 WEGFLDTLV  | 67    | 4     |
| >CDKN2A-R8 REGFLDTL   | 1574  | >CDKN2A-R8 WEGFLDTL   | 347   | 1227  |
| >CDKN2A-R8 REGFLDTLV  | 35    | >CDKN2A-R8 WEGFLDTLV  | 35    | 0     |
| >CDKN2A-R8 REGFLDTLVV | 89    | >CDKN2A-R8 WEGFLDTLV  | 40    | 49    |
| >CDKN2A-R8 REGFLDTLVV | 68    | >CDKN2A-R8 WEGFLDTLV  | 50    | 18    |
| >CDKN2A-R8 AREGFLDTL  | 18386 | >CDKN2A-R8 AWEGFLDTL  | 178   | 18208 |
| >CDKN2A-R8 AREGFLDTL  | 165   | >CDKN2A-R8 AWEGFLDTL  | 14772 | 14607 |
| >CDKN2A-R8 AREGFLDTL  | 63    | >CDKN2A-R8 AWEGFLDTL  | 20645 | 20582 |
| >CDKN2A-R8 AREGFLDTL  | 3157  | >CDKN2A-R8 AWEGFLDTL  | 318   | 2839  |
| >CDKN2A-R8 AREGFLDTL  | 25264 | >CDKN2A-R8 AWEGFLDTL  | 58    | 25206 |
| >CDKN2A-R8 AREGFLDTLV | 23741 | >CDKN2A-R8 AWEGFLDTLV | 94    | 23647 |
| >CDKN2A-R8 AREGFLDTLV | 34532 | >CDKN2A-R8 AWEGFLDTLV | 284   | 34248 |
| >CDKN2A-R8 TLTRPVHDA  | 159   | >CDKN2A-R8 TLTRPVHDA  | 20019 | 19860 |
| >CDKN2A-R8 TLTRPVHDA  | 411   | >CDKN2A-R8 TLTRPVHDA  | 32156 | 31745 |

|                       |       |                       |       |       |
|-----------------------|-------|-----------------------|-------|-------|
| >CDKN2A-R8 TLTRPVHDA  | 68    | >CDKN2A-R8 TLTRPVHDA  | 26606 | 26538 |
| >CDKN2A-R8 TLTRPVHDA  | 22936 | >CDKN2A-R8 TLTRPVHDA  | 422   | 22514 |
| >CDKN2A-R8 AAREGFLDTL | 9487  | >CDKN2A-R8 AAWEGFLDT  | 72    | 9415  |
| >CDKN2A-R8 AAREGFLDTL | 1005  | >CDKN2A-R8 AAWEGFLDT  | 263   | 742   |
| >CDKN2A-R8 AAREGFLDTL | 3679  | >CDKN2A-R8 AAWEGFLDT  | 292   | 3387  |
| >CDKN2A-R8 AAREGFLDTL | 408   | >CDKN2A-R8 AAWEGFLDT  | 27    | 381   |
| >CDKN2A-R8 AAREGFLDTL | 5617  | >CDKN2A-R8 AAWEGFLDT  | 59    | 5558  |
| >CDKN2A-R8 AAREGFLDTL | 4023  | >CDKN2A-R8 AAWEGFLDT  | 45    | 3978  |
| >CDKN2A-R8 AAREGFLDTL | 15512 | >CDKN2A-R8 AAWEGFLDT  | 218   | 15294 |
| >CDKN2A-R8 AAREGFLDTL | 6594  | >CDKN2A-R8 AAWEGFLDT  | 32    | 6562  |
| >CDKN2A-R8 AAREGFLDTL | 3175  | >CDKN2A-R8 AAWEGFLDT  | 200   | 2975  |
| >CDKN2A-R8 AAREGFLDTL | 252   | >CDKN2A-R8 AAWEGFLDT  | 24    | 228   |
| >CDKN2A-R8 AAREGFLDTL | 342   | >CDKN2A-R8 AAWEGFLDT  | 12639 | 12297 |
| >CDKN2A-R8 AAREGFLDTL | 203   | >CDKN2A-R8 AAWEGFLDT  | 10993 | 10790 |
| >CDKN2A-R8 AAREGFLDTL | 10328 | >CDKN2A-R8 AAWEGFLDT  | 471   | 9857  |
| >CDKN2A-R8 AAREGFLDTL | 7716  | >CDKN2A-R8 AAWEGFLDT  | 256   | 7460  |
| >CDKN2A-R8 AAREGFLDTL | 53    | >CDKN2A-R8 AAWEGFLDT  | 73    | 20    |
| >CDKN2A-R8 DAAREGFL   | 3810  | >CDKN2A-R8 DAAWEGFL   | 353   | 3457  |
| >CDKN2A-R8 DAAREGFLDT | 1357  | >CDKN2A-R8 DAAWEGFLD  | 248   | 1109  |
| >CDKN2A-R8 HDAAREGFL  | 169   | >CDKN2A-R8 HDAAWEGFL  | 253   | 84    |
| >CDKN2A-R8 RPHDAAR    | 4663  | >CDKN2A-R8 RPHDAAW    | 64    | 4599  |
| >CDKN2A-R8 RPHDAAREG  | 58    | >CDKN2A-R8 RPHDAAWE   | 103   | 45    |
| >CDKN2A-R8 RPHDAAREG  | 287   | >CDKN2A-R8 RPHDAAWE   | 381   | 94    |
| >CDKN2A-R8 RPHDAAR    | 1321  | >CDKN2A-R8 RPHDAAW    | 99    | 1222  |
| >CDKN2A-R8 RPHDAAREG  | 112   | >CDKN2A-R8 RPHDAAWE   | 57    | 55    |
| >CDKN2A-R8 RPHDAAR    | 23826 | >CDKN2A-R8 RPHDAAW    | 68    | 23758 |
| >CDKN2A-R8 RPHDAAR    | 14915 | >CDKN2A-R8 RPHDAAW    | 8     | 14907 |
| >CDKN2A-R8 RPHDAAR    | 25646 | >CDKN2A-R8 RPHDAAW    | 40    | 25606 |
| >CDKN2A-R8 RPHDAAR    | 319   | >CDKN2A-R8 RPHDAAW    | 33500 | 33181 |
| >CDKN2A-R8 LTRPVHDAAF | 56    | >CDKN2A-R8 LTRPVHDAAL | 1721  | 1665  |
| >CDKN2A-R8 LTRPVHDAAF | 107   | >CDKN2A-R8 LTRPVHDAAL | 27652 | 27545 |
| >CDKN2A-R8 LTRPVHDAAF | 47    | >CDKN2A-R8 LTRPVHDAAL | 30971 | 30924 |
| >CDKN2A-R8 LTRPVHDAAF | 2741  | >CDKN2A-R8 LTRPVHDAAL | 5     | 2736  |
| >CDKN2A-R8 LTRPVHDAAF | 19750 | >CDKN2A-R8 LTRPVHDAAL | 35    | 19715 |
| >CDKN2A-R8 LTRPVHDAAF | 22419 | >CDKN2A-R8 LTRPVHDAAL | 25    | 22394 |
| >CDKN2A-R8 LTRPVHDAAF | 583   | >CDKN2A-R8 LTRPVHDAAL | 416   | 167   |
| >CDKN2A-R8 LTRPVHDAAF | 27033 | >CDKN2A-R8 LTRPVHDAAL | 240   | 26793 |
| >CDKN2A-R9 RAGARLDVR  | 90    | >CDKN2A-R9 QAGARLDVR  | 3061  | 2971  |
| >CDKN2A-R9 HRAGARLDV  | 2964  | >CDKN2A-R9 HQAGARLDV  | 274   | 2690  |
| >CDKN2A-R9 HRAGARLDV  | 197   | >CDKN2A-R9 HQAGARLDV  | 4383  | 4186  |
| >CDKN2A-R9 HRAGARLDV  | 101   | >CDKN2A-R9 HQAGARLDV  | 9066  | 8965  |
| >CDKN2A-R9 HRAGARLDV  | 633   | >CDKN2A-R9 HQAGARLDV  | 269   | 364   |
| >CDKN2A-R9 GFLDTLVVLH | 38    | >CDKN2A-R9 GFLDTLVVLH | 12647 | 12609 |

|                        |      |                       |       |       |
|------------------------|------|-----------------------|-------|-------|
| >CDKN2A-R9 GFLDTLVVLH  | 421  | >CDKN2A-R9 GFLDTLVVLH | 26281 | 25860 |
| >CDKN2A-R9 GFLDTLVVLH  | 77   | >CDKN2A-R9 GFLDTLVVLH | 8136  | 8059  |
| >CDKN2A-R9 LHRAGARL    | 3010 | >CDKN2A-R9 LHQAGARL   | 417   | 2593  |
| >CDKN2A-R9 VLHRAGARL   | 371  | >CDKN2A-R9 VLHQAGARL  | 235   | 136   |
| >CDKN2A-R9 VLHRAGARL   | 156  | >CDKN2A-R9 VLHQAGARL  | 139   | 17    |
| >CDKN2A-R9 VLHRAGARLI  | 77   | >CDKN2A-R9 VLHQAGARLI | 71    | 6     |
| >CDKN2A-R9 VLHRAGARL   | 21   | >CDKN2A-R9 VLHQAGARL  | 14    | 7     |
| >CDKN2A-R9 VLHRAGARLI  | 36   | >CDKN2A-R9 VLHQAGARLI | 27    | 9     |
| >CDKN2A-R9 VLHRAGARL   | 269  | >CDKN2A-R9 VLHQAGARL  | 371   | 102   |
| >CDKN2A-R9 VLHRAGARLI  | 346  | >CDKN2A-R9 VLHQAGARLI | 453   | 107   |
| >CDKN2A-R9 VLHRAGARL   | 358  | >CDKN2A-R9 VLHQAGARL  | 176   | 182   |
| >CDKN2A-R9 VLHRAGARLI  | 33   | >CDKN2A-R9 VLHQAGARLI | 23    | 10    |
| >CDKN2A-R9 VLHRAGARL   | 6    | >CDKN2A-R9 VLHQAGARL  | 4     | 2     |
| >CDKN2A-R9 VLHRAGARLI  | 3    | >CDKN2A-R9 VLHQAGARLI | 3     | 0     |
| >CDKN2A-R9 VLHRAGAR    | 299  | >CDKN2A-R9 VLHQAGAR   | 1582  | 1283  |
| >CDKN2A-R9 VVLHRAGA    | 471  | >CDKN2A-R9 VVLHQAGA   | 435   | 36    |
| >CDKN2A-R9 VVLHRAGAR   | 225  | >CDKN2A-R9 VVLHQAGAR  | 747   | 522   |
| >CDKN2A-R9 VVLHRAGARI  | 129  | >CDKN2A-R9 VVLHQAGAR  | 98    | 31    |
| >CDKN2A-R9 LVVLHRAGAF  | 250  | >CDKN2A-R9 LVVLHQAGAI | 288   | 38    |
| >CDKN2A-R9 LVVLHRAGA   | 585  | >CDKN2A-R9 LVVLHQAGA  | 245   | 340   |
| >CDKN2A-R9 LVVLHRAGA   | 762  | >CDKN2A-R9 LVVLHQAGA  | 432   | 330   |
| >CDKN2A-R9 LVVLHRAGAF  | 127  | >CDKN2A-R9 LVVLHQAGAI | 421   | 294   |
| >CDKN2A-R9 LVVLHRAGAF  | 287  | >CDKN2A-R9 LVVLHQAGAI | 315   | 28    |
| >CDKN2A-R9 LVVLHRAGAF  | 435  | >CDKN2A-R9 LVVLHQAGAI | 218   | 217   |
| >CDKN2A-R9 TLVVLHRA    | 433  | >CDKN2A-R9 TLVVLHQA   | 235   | 198   |
| >CDKN2A-R9 TLVVLHRA    | 247  | >CDKN2A-R9 TLVVLHQA   | 154   | 93    |
| >CDKN2A-R9 TLVVLHRAGA  | 240  | >CDKN2A-R9 TLVVLHQAG/ | 412   | 172   |
| >CDKN2A-R9 TLVVLHRA    | 426  | >CDKN2A-R9 TLVVLHQA   | 281   | 145   |
| >CDKN2A-R9 TLVVLHRA    | 59   | >CDKN2A-R9 TLVVLHQA   | 27    | 32    |
| >CDKN2A-R9 TLVVLHRAGA  | 465  | >CDKN2A-R9 TLVVLHQAG/ | 118   | 347   |
| >CDKN2A-R9 TLVVLHRAGA  | 209  | >CDKN2A-R9 TLVVLHQAG/ | 279   | 70    |
| >CDKN2A-R9 TLVVLHRAGA  | 185  | >CDKN2A-R9 TLVVLHQAG/ | 164   | 21    |
| >CDKN2A-R9 DTLVVLHR    | 277  | >CDKN2A-R9 DTLVVLHQ   | 16164 | 15887 |
| >CDKN2A-R9 DTLVVLHR    | 9    | >CDKN2A-R9 DTLVVLHQ   | 2615  | 2606  |
| >CDKN2A-R9 DTLVVLHR    | 16   | >CDKN2A-R9 DTLVVLHQ   | 2639  | 2623  |
| >CDKN2A-R9 DTLVVLHRA   | 178  | >CDKN2A-R9 DTLVVLHQA  | 261   | 83    |
| >CDKN2A-R9 DTLVVLHRAC  | 197  | >CDKN2A-R9 DTLVVLHQAC | 255   | 58    |
| >CDKN2A-R9 DTLVVLHRA   | 46   | >CDKN2A-R9 DTLVVLHQA  | 19    | 27    |
| >CDKN2A-R9 DTLVVLHRAC  | 65   | >CDKN2A-R9 DTLVVLHQAC | 43    | 22    |
| >CDKN2A-R9 FLDTLVVLHR, | 12   | >CDKN2A-R9 FLDTLVVLHQ | 12    | 0     |
| >CDKN2A-R9 FLDTLVVLHR, | 7    | >CDKN2A-R9 FLDTLVVLHQ | 6     | 1     |
| >CDKN2A-R9 FLDTLVVLHR, | 24   | >CDKN2A-R9 FLDTLVVLHQ | 17    | 7     |
| >CDKN2A-R9 FLDTLVVLHR, | 68   | >CDKN2A-R9 FLDTLVVLHQ | 53    | 15    |

|                        |       |                       |       |       |
|------------------------|-------|-----------------------|-------|-------|
| >CDKN2A-R9 FLDTLVVLHR  | 1433  | >CDKN2A-R9 FLDTLVVLHQ | 165   | 1268  |
| >CDKN2A-R9 FLDTLVVLHR, | 3     | >CDKN2A-R9 FLDTLVVLHQ | 3     | 0     |
| >CDKN2A-R9 FLDTLVVLHR, | 9     | >CDKN2A-R9 FLDTLVVLHQ | 9     | 0     |
| >CDKN2A-R9 FLDTLVVLHR  | 2977  | >CDKN2A-R9 FLDTLVVLHQ | 63    | 2914  |
| >CDKN2A-R9 FLDTLVVLHR, | 8     | >CDKN2A-R9 FLDTLVVLHQ | 7     | 1     |
| >CDKN2A-R9 FLDTLVVLHR, | 19    | >CDKN2A-R9 FLDTLVVLHQ | 10    | 9     |
| >CDKN2A-R9 FLDTLVVLHR  | 3232  | >CDKN2A-R9 FLDTLVVLHQ | 51    | 3181  |
| >CDKN2A-R9 FLDTLVVLHR, | 3     | >CDKN2A-R9 FLDTLVVLHQ | 3     | 0     |
| >CDKN2A-R9 FLDTLVVLHR  | 354   | >CDKN2A-R9 FLDTLVVLHQ | 31321 | 30967 |
| >CDKN2A-R9 FLDTLVVLHR  | 272   | >CDKN2A-R9 FLDTLVVLHQ | 22785 | 22513 |
| >CDKN2A-R9 RAGARLDVR   | 90    | >CDKN2A-R9 WAGARLDVR  | 6919  | 6829  |
| >CDKN2A-R9 HRAGARLDV   | 197   | >CDKN2A-R9 HWAGARLDV  | 17559 | 17362 |
| >CDKN2A-R9 HRAGARLDV   | 101   | >CDKN2A-R9 HWAGARLDV  | 10428 | 10327 |
| >CDKN2A-R9 HRAGARLDV   | 633   | >CDKN2A-R9 HWAGARLDV  | 18    | 615   |
| >CDKN2A-R9 HRAGARLDV   | 33286 | >CDKN2A-R9 HWAGARLDV  | 462   | 32824 |
| >CDKN2A-R9 GFLDTLVVLH  | 9113  | >CDKN2A-R9 GFLDTLVVLH | 250   | 8863  |
| >CDKN2A-R9 GFLDTLVVLH  | 8438  | >CDKN2A-R9 GFLDTLVVLH | 109   | 8329  |
| >CDKN2A-R9 GFLDTLVVLH  | 38    | >CDKN2A-R9 GFLDTLVVLH | 16125 | 16087 |
| >CDKN2A-R9 GFLDTLVVLH  | 421   | >CDKN2A-R9 GFLDTLVVLH | 33057 | 32636 |
| >CDKN2A-R9 GFLDTLVVLH  | 22205 | >CDKN2A-R9 GFLDTLVVLH | 385   | 21820 |
| >CDKN2A-R9 GFLDTLVVLH  | 77    | >CDKN2A-R9 GFLDTLVVLH | 24273 | 24196 |
| >CDKN2A-R9 LHRAGARL    | 3010  | >CDKN2A-R9 LHWAGARL   | 381   | 2629  |
| >CDKN2A-R9 VLHRAGARL   | 371   | >CDKN2A-R9 VLHWAGARL  | 202   | 169   |
| >CDKN2A-R9 VLHRAGARL   | 156   | >CDKN2A-R9 VLHWAGARL  | 60    | 96    |
| >CDKN2A-R9 VLHRAGARL   | 77    | >CDKN2A-R9 VLHWAGARL  | 40    | 37    |
| >CDKN2A-R9 VLHRAGARL   | 21    | >CDKN2A-R9 VLHWAGARL  | 6     | 15    |
| >CDKN2A-R9 VLHRAGARL   | 36    | >CDKN2A-R9 VLHWAGARL  | 10    | 26    |
| >CDKN2A-R9 VLHRAGARL   | 269   | >CDKN2A-R9 VLHWAGARL  | 321   | 52    |
| >CDKN2A-R9 VLHRAGARL   | 346   | >CDKN2A-R9 VLHWAGARL  | 388   | 42    |
| >CDKN2A-R9 VLHRAGARL   | 358   | >CDKN2A-R9 VLHWAGARL  | 36    | 322   |
| >CDKN2A-R9 VLHRAGARL   | 33    | >CDKN2A-R9 VLHWAGARL  | 14    | 19    |
| >CDKN2A-R9 VLHRAGARL   | 1854  | >CDKN2A-R9 VLHWAGARL  | 271   | 1583  |
| >CDKN2A-R9 VLHRAGARL   | 1296  | >CDKN2A-R9 VLHWAGARL  | 344   | 952   |
| >CDKN2A-R9 VLHRAGARL   | 6     | >CDKN2A-R9 VLHWAGARL  | 3     | 3     |
| >CDKN2A-R9 VLHRAGARL   | 3     | >CDKN2A-R9 VLHWAGARL  | 2     | 1     |
| >CDKN2A-R9 VLHRAGAR    | 299   | >CDKN2A-R9 VLHWAGAR   | 265   | 34    |
| >CDKN2A-R9 VVLHRAGA    | 471   | >CDKN2A-R9 VVLHWAGA   | 57    | 414   |
| >CDKN2A-R9 VVLHRAGA    | 4344  | >CDKN2A-R9 VVLHWAGA   | 228   | 4116  |
| >CDKN2A-R9 VVLHRAGARI  | 1337  | >CDKN2A-R9 VVLHWAGAF  | 83    | 1254  |
| >CDKN2A-R9 VVLHRAGARI  | 998   | >CDKN2A-R9 VVLHWAGAF  | 148   | 850   |
| >CDKN2A-R9 VVLHRAGAR   | 225   | >CDKN2A-R9 VVLHWAGAF  | 203   | 22    |
| >CDKN2A-R9 VVLHRAGAR   | 576   | >CDKN2A-R9 VVLHWAGAF  | 302   | 274   |
| >CDKN2A-R9 VVLHRAGARI  | 129   | >CDKN2A-R9 VVLHWAGAF  | 130   | 1     |

|                       |       |                       |       |       |
|-----------------------|-------|-----------------------|-------|-------|
| >CDKN2A-R9 LVVLHRAGAF | 250   | >CDKN2A-R9 LVVLHWAGA  | 125   | 125   |
| >CDKN2A-R9 LVVLHRAGA  | 585   | >CDKN2A-R9 LVVLHWAGA  | 171   | 414   |
| >CDKN2A-R9 LVVLHRAGA  | 762   | >CDKN2A-R9 LVVLHWAGA  | 53    | 709   |
| >CDKN2A-R9 LVVLHRAGAF | 1077  | >CDKN2A-R9 LVVLHWAGA  | 251   | 826   |
| >CDKN2A-R9 LVVLHRAGAF | 127   | >CDKN2A-R9 LVVLHWAGA  | 140   | 13    |
| >CDKN2A-R9 LVVLHRAGAF | 287   | >CDKN2A-R9 LVVLHWAGA  | 243   | 44    |
| >CDKN2A-R9 LVVLHRAGAF | 435   | >CDKN2A-R9 LVVLHWAGA  | 152   | 283   |
| >CDKN2A-R9 TLVVLHRA   | 433   | >CDKN2A-R9 TLVVLHWA   | 130   | 303   |
| >CDKN2A-R9 TLVVLHRA   | 247   | >CDKN2A-R9 TLVVLHWA   | 106   | 141   |
| >CDKN2A-R9 TLVVLHRAGA | 240   | >CDKN2A-R9 TLVVLHWAG  | 193   | 47    |
| >CDKN2A-R9 TLVVLHRA   | 1727  | >CDKN2A-R9 TLVVLHWA   | 410   | 1317  |
| >CDKN2A-R9 TLVVLHRA   | 426   | >CDKN2A-R9 TLVVLHWA   | 196   | 230   |
| >CDKN2A-R9 TLVVLHRAGA | 2943  | >CDKN2A-R9 TLVVLHWAG  | 273   | 2670  |
| >CDKN2A-R9 TLVVLHRA   | 1412  | >CDKN2A-R9 TLVVLHWA   | 314   | 1098  |
| >CDKN2A-R9 TLVVLHRA   | 59    | >CDKN2A-R9 TLVVLHWA   | 17    | 42    |
| >CDKN2A-R9 TLVVLHRAGA | 465   | >CDKN2A-R9 TLVVLHWAG  | 94    | 371   |
| >CDKN2A-R9 TLVVLHRAGA | 209   | >CDKN2A-R9 TLVVLHWAG  | 135   | 74    |
| >CDKN2A-R9 TLVVLHRAGA | 534   | >CDKN2A-R9 TLVVLHWAG  | 208   | 326   |
| >CDKN2A-R9 TLVVLHRAGA | 185   | >CDKN2A-R9 TLVVLHWAG  | 89    | 96    |
| >CDKN2A-R9 TLVVLHRAGA | 1170  | >CDKN2A-R9 TLVVLHWAG  | 472   | 698   |
| >CDKN2A-R9 DTLVVLHR   | 277   | >CDKN2A-R9 DTLVVLHW   | 18492 | 18215 |
| >CDKN2A-R9 DTLVVLHR   | 9     | >CDKN2A-R9 DTLVVLHW   | 7886  | 7877  |
| >CDKN2A-R9 DTLVVLHR   | 16    | >CDKN2A-R9 DTLVVLHW   | 13936 | 13920 |
| >CDKN2A-R9 DTLVVLHRA  | 178   | >CDKN2A-R9 DTLVVLHWA  | 248   | 70    |
| >CDKN2A-R9 DTLVVLHRAC | 197   | >CDKN2A-R9 DTLVVLHWA  | 216   | 19    |
| >CDKN2A-R9 DTLVVLHRA  | 46    | >CDKN2A-R9 DTLVVLHWA  | 45    | 1     |
| >CDKN2A-R9 DTLVVLHRAC | 65    | >CDKN2A-R9 DTLVVLHWA  | 47    | 18    |
| >CDKN2A-R9 DTLVVLHR   | 21387 | >CDKN2A-R9 DTLVVLHW   | 71    | 21316 |
| >CDKN2A-R9 DTLVVLHR   | 24008 | >CDKN2A-R9 DTLVVLHW   | 118   | 23890 |
| >CDKN2A-R9 DTLVVLHR   | 21756 | >CDKN2A-R9 DTLVVLHW   | 51    | 21705 |
| >CDKN2A-R9 DTLVVLHR   | 33554 | >CDKN2A-R9 DTLVVLHW   | 280   | 33274 |
| >CDKN2A-R9 LDTLVVLHR  | 22737 | >CDKN2A-R9 LDTLVVLHW  | 329   | 22408 |
| >CDKN2A-R9 LDTLVVLHR  | 33730 | >CDKN2A-R9 LDTLVVLHW  | 400   | 33330 |
| >CDKN2A-R9 FLDTLVVLHR | 12    | >CDKN2A-R9 FLDTLVVLHM | 10    | 2     |
| >CDKN2A-R9 FLDTLVVLHR | 7     | >CDKN2A-R9 FLDTLVVLHM | 5     | 2     |
| >CDKN2A-R9 FLDTLVVLHR | 24    | >CDKN2A-R9 FLDTLVVLHM | 14    | 10    |
| >CDKN2A-R9 FLDTLVVLHR | 68    | >CDKN2A-R9 FLDTLVVLHM | 35    | 33    |
| >CDKN2A-R9 FLDTLVVLHR | 3     | >CDKN2A-R9 FLDTLVVLHM | 4     | 1     |
| >CDKN2A-R9 FLDTLVVLHR | 9     | >CDKN2A-R9 FLDTLVVLHM | 13    | 4     |
| >CDKN2A-R9 FLDTLVVLHR | 8     | >CDKN2A-R9 FLDTLVVLHM | 7     | 1     |
| >CDKN2A-R9 FLDTLVVLHR | 19    | >CDKN2A-R9 FLDTLVVLHM | 17    | 2     |
| >CDKN2A-R9 FLDTLVVLHR | 3     | >CDKN2A-R9 FLDTLVVLHM | 3     | 0     |
| >CDKN2A-R9 FLDTLVVLHR | 354   | >CDKN2A-R9 FLDTLVVLHM | 35237 | 34883 |

|                        |       |                        |       |       |
|------------------------|-------|------------------------|-------|-------|
| >CDKN2A-R9 FLDTLVVLHR  | 22201 | >CDKN2A-R9 FLDTLVVLHM  | 40    | 22161 |
| >CDKN2A-R9 FLDTLVVLHR  | 31120 | >CDKN2A-R9 FLDTLVVLHM  | 117   | 31003 |
| >CDKN2A-R9 FLDTLVVLHR  | 272   | >CDKN2A-R9 FLDTLVVLHM  | 32743 | 32471 |
| >CDKN2A-S1. RGSNHARI   | 251   | >CDKN2A-S1. RGCNHARI   | 136   | 115   |
| >CDKN2A-S1. TRGSNHAR   | 575   | >CDKN2A-S1. TRGCNHAR   | 249   | 326   |
| >CDKN2A-S1. GTRGSNHA   | 16    | >CDKN2A-S1. GTRGCNHA   | 77    | 61    |
| >CDKN2A-S1. GTRGSNHAR  | 51    | >CDKN2A-S1. GTRGCNHAR  | 370   | 319   |
| >CDKN2A-S1. GTRGSNHAR  | 15    | >CDKN2A-S1. GTRGCNHAR  | 40    | 25    |
| >CDKN2A-S1. GTRGSNHAR  | 28    | >CDKN2A-S1. GTRGCNHAR  | 20    | 8     |
| >CDKN2A-S1. GTRGSNHAR  | 412   | >CDKN2A-S1. GTRGCNHAR  | 171   | 241   |
| >CDKN2A-S1. GTRGSNHAR  | 205   | >CDKN2A-S1. GTRGCNHAR  | 491   | 286   |
| >CDKN2A-S1. GTRGSNHAR  | 10    | >CDKN2A-S1. GTRGCNHAR  | 30    | 20    |
| >CDKN2A-S1. GTRGSNHAR  | 470   | >CDKN2A-S1. GTRGCNHAR  | 638   | 168   |
| >CDKN2A-S4. SYGRRPIQV  | 799   | >CDKN2A-S4. IYGRRPIQV  | 232   | 567   |
| >CDKN2A-S4. SYGRRPIQVM | 559   | >CDKN2A-S4. IYGRRPIQVM | 179   | 380   |
| >CDKN2A-S4. SYGRRPIQVM | 136   | >CDKN2A-S4. IYGRRPIQVM | 305   | 169   |
| >CDKN2A-S4. SYGRRPIQVM | 74    | >CDKN2A-S4. IYGRRPIQVM | 149   | 75    |
| >CDKN2A-S4. NSYGRRPIQV | 264   | >CDKN2A-S4. NIYGRRPIQV | 498   | 234   |
| >CDKN2A-S4. NSYGRRPI   | 7990  | >CDKN2A-S4. NIYGRRPI   | 402   | 7588  |
| >CDKN2A-S4. NSYGRRPIQV | 2700  | >CDKN2A-S4. NIYGRRPIQV | 108   | 2592  |
| >CDKN2A-S4. NSYGRRPIQV | 2366  | >CDKN2A-S4. NIYGRRPIQV | 48    | 2318  |
| >CDKN2A-S4. NSYGRRPIQV | 8726  | >CDKN2A-S4. NIYGRRPIQV | 138   | 8588  |
| >CDKN2A-S4. NSYGRRPIQV | 4684  | >CDKN2A-S4. NIYGRRPIQV | 16    | 4668  |
| >CDKN2A-S4. NSYGRRPIQV | 485   | >CDKN2A-S4. NIYGRRPIQV | 473   | 12    |
| >CDKN2A-S4. NSYGRRPI   | 511   | >CDKN2A-S4. NIYGRRPI   | 361   | 150   |
| >CDKN2A-S4. NSYGRRPIQV | 408   | >CDKN2A-S4. NIYGRRPIQV | 90    | 318   |
| >CDKN2A-S4. NSYGRRPIQV | 132   | >CDKN2A-S4. NIYGRRPIQV | 10819 | 10687 |
| >CDKN2A-S4. NSYGRRPIQV | 495   | >CDKN2A-S4. NIYGRRPIQV | 7278  | 6783  |
| >CDKN2A-S4. NSYGRRPIQV | 251   | >CDKN2A-S4. NIYGRRPIQV | 3730  | 3479  |
| >CDKN2A-S4. NSYGRRPI   | 104   | >CDKN2A-S4. NIYGRRPI   | 5036  | 4932  |
| >CDKN2A-S4. EAGALPNAPI | 8734  | >CDKN2A-S4. EAGALPNAPI | 63    | 8671  |
| >CDKN2A-S4. APNSYGRRPI | 20    | >CDKN2A-S4. APNIYGRRPI | 33    | 13    |
| >CDKN2A-S4. NAPNSYGR   | 1527  | >CDKN2A-S4. NAPNIYGR   | 490   | 1037  |
| >CDKN2A-S4. NAPNSYGR   | 65    | >CDKN2A-S4. NAPNIYGR   | 31    | 34    |
| >CDKN2A-S4. NAPNSYGRR  | 147   | >CDKN2A-S4. NAPNIYGRR  | 54    | 93    |
| >CDKN2A-S4. NAPNSYGRR  | 266   | >CDKN2A-S4. NAPNIYGRRP | 62    | 204   |
| >CDKN2A-S4. NAPNSYGR   | 886   | >CDKN2A-S4. NAPNIYGR   | 399   | 487   |
| >CDKN2A-S4. PNAPNSYGR  | 320   | >CDKN2A-S4. PNAPNIYGR  | 203   | 117   |
| >CDKN2A-S4. LPNAPNSYGF | 472   | >CDKN2A-S4. LPNAPNIYGR | 830   | 358   |
| >CDKN2A-S4. LPNAPNSY   | 11    | >CDKN2A-S4. LPNAPNIY   | 13    | 2     |
| >CDKN2A-S4. LPNAPNSY   | 51    | >CDKN2A-S4. LPNAPNIY   | 51    | 0     |
| >CDKN2A-S4. LPNAPNSY   | 776   | >CDKN2A-S4. LPNAPNIY   | 462   | 314   |
| >CDKN2A-S4. LPNAPNSYG  | 457   | >CDKN2A-S4. LPNAPNIYG  | 332   | 125   |



|                       |       |                       |       |       |
|-----------------------|-------|-----------------------|-------|-------|
| >CDKN2A-S4.LPNAPNSY   | 58    | >CDKN2A-S4.LPNAPNIY   | 96    | 38    |
| >CDKN2A-S4.LPNAPNSYGF | 718   | >CDKN2A-S4.LPNAPNIYGR | 325   | 393   |
| >CDKN2A-S4.ALPNAPNS   | 16099 | >CDKN2A-S4.ALPNAPNI   | 486   | 15613 |
| >CDKN2A-S4.ALPNAPNS   | 10604 | >CDKN2A-S4.ALPNAPNI   | 498   | 10106 |
| >CDKN2A-S4.ALPNAPNS   | 4856  | >CDKN2A-S4.ALPNAPNI   | 61    | 4795  |
| >CDKN2A-S4.ALPNAPNS   | 3999  | >CDKN2A-S4.ALPNAPNI   | 27    | 3972  |
| >CDKN2A-S4.ALPNAPNS   | 16583 | >CDKN2A-S4.ALPNAPNI   | 156   | 16427 |
| >CDKN2A-S4.ALPNAPNS   | 5280  | >CDKN2A-S4.ALPNAPNI   | 27    | 5253  |
| >CDKN2A-S4.ALPNAPNS   | 18684 | >CDKN2A-S4.ALPNAPNI   | 381   | 18303 |
| >CDKN2A-S4.ALPNAPNS   | 1610  | >CDKN2A-S4.ALPNAPNI   | 18    | 1592  |
| >CDKN2A-S4.ALPNAPNSY  | 181   | >CDKN2A-S4.ALPNAPNIY  | 307   | 126   |
| >CDKN2A-S4.ALPNAPNSY  | 281   | >CDKN2A-S4.ALPNAPNIY  | 1467  | 1186  |
| >CDKN2A-S4.ALPNAPNSY  | 358   | >CDKN2A-S4.ALPNAPNIY  | 480   | 122   |
| >CDKN2A-S4.ALPNAPNSY  | 305   | >CDKN2A-S4.ALPNAPNIY  | 580   | 275   |
| >CDKN2A-S4.GALPNAPNS  | 20931 | >CDKN2A-S4.GALPNAPNI  | 185   | 20746 |
| >CDKN2A-S4.GALPNAPNS\ | 280   | >CDKN2A-S4.GALPNAPNIY | 499   | 219   |
| >CDKN2A-S4.GALPNAPNS  | 8964  | >CDKN2A-S4.GALPNAPNI  | 83    | 8881  |
| >CDKN2A-S4.GALPNAPNS\ | 19    | >CDKN2A-S4.GALPNAPNIY | 60    | 41    |
| >CDKN2A-S4.AGALPNAPN\ | 136   | >CDKN2A-S4.AGALPNAPNI | 219   | 83    |
| >CDKN2A-S4.SYGRRPIQV  | 799   | >CDKN2A-S4.RYGRRPIQV  | 223   | 576   |
| >CDKN2A-S4.SYGRRPIQVM | 559   | >CDKN2A-S4.RYGRRPIQVM | 162   | 397   |
| >CDKN2A-S4.SYGRRPIQV  | 935   | >CDKN2A-S4.RYGRRPIQV  | 146   | 789   |
| >CDKN2A-S4.SYGRRPIQVM | 136   | >CDKN2A-S4.RYGRRPIQVM | 29    | 107   |
| >CDKN2A-S4.SYGRRPIQVM | 74    | >CDKN2A-S4.RYGRRPIQVM | 19    | 55    |
| >CDKN2A-S4.SYGRRPIQV  | 2806  | >CDKN2A-S4.RYGRRPIQV  | 231   | 2575  |
| >CDKN2A-S4.NSYGRRPIQV | 264   | >CDKN2A-S4.NRYGRRPIQV | 3769  | 3505  |
| >CDKN2A-S4.NSYGRRPIQV | 485   | >CDKN2A-S4.NRYGRRPIQV | 14503 | 14018 |
| >CDKN2A-S4.NSYGRRPIQV | 408   | >CDKN2A-S4.NRYGRRPIQV | 12374 | 11966 |
| >CDKN2A-S4.NSYGRRPIQV | 1044  | >CDKN2A-S4.NRYGRRPIQV | 470   | 574   |
| >CDKN2A-S4.NSYGRRPIQV | 132   | >CDKN2A-S4.NRYGRRPIQV | 25973 | 25841 |
| >CDKN2A-S4.NSYGRRPI   | 18500 | >CDKN2A-S4.NRYGRRPI   | 77    | 18423 |
| >CDKN2A-S4.NSYGRRPIQV | 27149 | >CDKN2A-S4.NRYGRRPIQV | 217   | 26932 |
| >CDKN2A-S4.NSYGRRPIQV | 18621 | >CDKN2A-S4.NRYGRRPIQV | 100   | 18521 |
| >CDKN2A-S4.NSYGRRPI   | 10707 | >CDKN2A-S4.NRYGRRPI   | 455   | 10252 |
| >CDKN2A-S4.NSYGRRPIQV | 11143 | >CDKN2A-S4.NRYGRRPIQV | 495   | 10648 |
| >CDKN2A-S4.NSYGRRPIQV | 3359  | >CDKN2A-S4.NRYGRRPIQV | 54    | 3305  |
| >CDKN2A-S4.NSYGRRPI   | 13048 | >CDKN2A-S4.NRYGRRPI   | 216   | 12832 |
| >CDKN2A-S4.NSYGRRPIQ  | 12973 | >CDKN2A-S4.NRYGRRPIQ  | 227   | 12746 |
| >CDKN2A-S4.NSYGRRPIQV | 14063 | >CDKN2A-S4.NRYGRRPIQV | 279   | 13784 |
| >CDKN2A-S4.NSYGRRPIQV | 495   | >CDKN2A-S4.NRYGRRPIQV | 18285 | 17790 |
| >CDKN2A-S4.NSYGRRPIQV | 251   | >CDKN2A-S4.NRYGRRPIQV | 10165 | 9914  |
| >CDKN2A-S4.NSYGRRPI   | 24819 | >CDKN2A-S4.NRYGRRPI   | 464   | 24355 |
| >CDKN2A-S4.NSYGRRPI   | 16069 | >CDKN2A-S4.NRYGRRPI   | 364   | 15705 |

|                       |       |                       |       |       |
|-----------------------|-------|-----------------------|-------|-------|
| >CDKN2A-S4.NSYGRRPIQV | 26629 | >CDKN2A-S4.NRYGRRPIQV | 219   | 26410 |
| >CDKN2A-S4.NSYGRRPI   | 104   | >CDKN2A-S4.NRYGRRPI   | 5701  | 5597  |
| >CDKN2A-S4.EAGALPNAPN | 22355 | >CDKN2A-S4.EAGALPNAPN | 34    | 22321 |
| >CDKN2A-S4.APNSYGRRPI | 20    | >CDKN2A-S4.APNRYGRRPI | 33    | 13    |
| >CDKN2A-S4.APNSYGRRPI | 544   | >CDKN2A-S4.APNRYGRRPI | 450   | 94    |
| >CDKN2A-S4.NAPNSYGR   | 1527  | >CDKN2A-S4.NAPNRYGR   | 291   | 1236  |
| >CDKN2A-S4.NAPNSYGR   | 65    | >CDKN2A-S4.NAPNRYGR   | 101   | 36    |
| >CDKN2A-S4.NAPNSYGRR  | 147   | >CDKN2A-S4.NAPNRYGRR  | 412   | 265   |
| >CDKN2A-S4.NAPNSYGRR  | 266   | >CDKN2A-S4.NAPNRYGRR  | 581   | 315   |
| >CDKN2A-S4.PNAPNSYGR  | 320   | >CDKN2A-S4.PNAPNRYGR  | 331   | 11    |
| >CDKN2A-S4.LPNAPNSYGF | 838   | >CDKN2A-S4.LPNAPNRYGF | 258   | 580   |
| >CDKN2A-S4.LPNAPNSYGF | 472   | >CDKN2A-S4.LPNAPNRYGF | 1092  | 620   |
| >CDKN2A-S4.LPNAPNSY   | 11    | >CDKN2A-S4.LPNAPNRY   | 18    | 7     |
| >CDKN2A-S4.LPNAPNSY   | 51    | >CDKN2A-S4.LPNAPNRY   | 76    | 25    |
| >CDKN2A-S4.LPNAPNSYG  | 457   | >CDKN2A-S4.LPNAPNRYG  | 652   | 195   |
| >CDKN2A-S4.LPNAPNSY   | 58    | >CDKN2A-S4.LPNAPNRY   | 166   | 108   |
| >CDKN2A-S4.ALPNAPNSY  | 181   | >CDKN2A-S4.ALPNAPNRY  | 339   | 158   |
| >CDKN2A-S4.ALPNAPNSY  | 281   | >CDKN2A-S4.ALPNAPNRY  | 1584  | 1303  |
| >CDKN2A-S4.ALPNAPNSY  | 358   | >CDKN2A-S4.ALPNAPNRY  | 1127  | 769   |
| >CDKN2A-S4.ALPNAPNSY  | 305   | >CDKN2A-S4.ALPNAPNRY  | 2801  | 2496  |
| >CDKN2A-S4.GALPNAPNS) | 280   | >CDKN2A-S4.GALPNAPNR) | 2162  | 1882  |
| >CDKN2A-S4.GALPNAPNS) | 19    | >CDKN2A-S4.GALPNAPNR) | 15    | 4     |
| >CDKN2A-S4.GALPNAPNS  | 12770 | >CDKN2A-S4.GALPNAPNR  | 359   | 12411 |
| >CDKN2A-S4.AGALPNAPN  | 136   | >CDKN2A-S4.AGALPNAPN  | 235   | 99    |
| >CDKN2A-S5.SARVAELL   | 380   | >CDKN2A-S5.NARVAELL   | 5678  | 5298  |
| >CDKN2A-S5.SARVAELL   | 39    | >CDKN2A-S5.NARVAELL   | 1805  | 1766  |
| >CDKN2A-S5.SARVAELL   | 38    | >CDKN2A-S5.NARVAELL   | 1553  | 1515  |
| >CDKN2A-S5.SARVAELL   | 377   | >CDKN2A-S5.NARVAELL   | 4658  | 4281  |
| >CDKN2A-S5.SARVAELL   | 179   | >CDKN2A-S5.NARVAELL   | 2666  | 2487  |
| >CDKN2A-S5.SARVAELL   | 137   | >CDKN2A-S5.NARVAELL   | 2179  | 2042  |
| >CDKN2A-S5.GSARVAEL   | 282   | >CDKN2A-S5.GNARVAEL   | 22841 | 22559 |
| >CDKN2A-S5.GSARVAELL  | 237   | >CDKN2A-S5.GNARVAELL  | 17080 | 16843 |
| >CDKN2A-S5.GSARVAELL  | 255   | >CDKN2A-S5.GNARVAELL  | 16954 | 16699 |
| >CDKN2A-S5.GSARVAELL  | 270   | >CDKN2A-S5.GNARVAELL  | 17033 | 16763 |
| >CDKN2A-S5.GSARVAELL  | 264   | >CDKN2A-S5.GNARVAELL  | 14319 | 14055 |
| >CDKN2A-S5.GSARVAELL  | 24    | >CDKN2A-S5.GNARVAELL  | 505   | 481   |
| >CDKN2A-S5.GSARVAELL  | 452   | >CDKN2A-S5.GNARVAELL  | 16658 | 16206 |
| >CDKN2A-S5.GSARVAELL  | 66    | >CDKN2A-S5.GNARVAELL  | 1188  | 1122  |
| >CDKN2A-S5.RRPIQVMM   | 659   | >CDKN2A-S5.RRPIQVMM   | 364   | 295   |
| >CDKN2A-S5.MGSARVAEL  | 66    | >CDKN2A-S5.MGNARVAEL  | 137   | 71    |
| >CDKN2A-S5.MGSARVAEL  | 399   | >CDKN2A-S5.MGNARVAEL  | 753   | 354   |
| >CDKN2A-S5.MGSARVAEL  | 218   | >CDKN2A-S5.MGNARVAEL  | 446   | 228   |
| >CDKN2A-S5.MMGSARVA   | 177   | >CDKN2A-S5.MMGNARVA   | 128   | 49    |

|                      |     |                     |     |     |
|----------------------|-----|---------------------|-----|-----|
| >CDKN2A-S5 MMGSARVAI | 143 | >CDKN2A-S5 MMGNARVA | 180 | 37  |
| >CDKN2A-S5 MMGSARVAI | 24  | >CDKN2A-S5 MMGNARVA | 29  | 5   |
| >CDKN2A-S5 MMGSARVAI | 8   | >CDKN2A-S5 MMGNARVA | 13  | 5   |
| >CDKN2A-S5 MMGSARVA  | 224 | >CDKN2A-S5 MMGNARVA | 336 | 112 |
| >CDKN2A-S5 MMGSARVAI | 52  | >CDKN2A-S5 MMGNARVA | 60  | 8   |
| >CDKN2A-S5 MMGSARVAI | 173 | >CDKN2A-S5 MMGNARVA | 225 | 52  |
| >CDKN2A-S5 MMGSARVAI | 436 | >CDKN2A-S5 MMGNARVA | 335 | 101 |
| >CDKN2A-S5 MMGSARVA  | 187 | >CDKN2A-S5 MMGNARVA | 125 | 62  |
| >CDKN2A-S5 MMGSARVAI | 11  | >CDKN2A-S5 MMGNARVA | 10  | 1   |
| >CDKN2A-S5 MMGSARVAI | 24  | >CDKN2A-S5 MMGNARVA | 19  | 5   |
| >CDKN2A-S5 MMGSARVAI | 42  | >CDKN2A-S5 MMGNARVA | 23  | 19  |
| >CDKN2A-S5 MMGSARVAI | 190 | >CDKN2A-S5 MMGNARVA | 90  | 100 |
| >CDKN2A-S5 MMGSARVAI | 46  | >CDKN2A-S5 MMGNARVA | 31  | 15  |
| >CDKN2A-S5 MMGSARVAI | 81  | >CDKN2A-S5 MMGNARVA | 56  | 25  |
| >CDKN2A-S5 MMGSARVAI | 33  | >CDKN2A-S5 MMGNARVA | 37  | 4   |
| >CDKN2A-S5 MMGSARVAI | 112 | >CDKN2A-S5 MMGNARVA | 122 | 10  |
| >CDKN2A-S5 MMGSARVA  | 95  | >CDKN2A-S5 MMGNARVA | 75  | 20  |
| >CDKN2A-S5 MMGSARVAI | 3   | >CDKN2A-S5 MMGNARVA | 3   | 0   |
| >CDKN2A-S5 MMGSARVAI | 8   | >CDKN2A-S5 MMGNARVA | 7   | 1   |
| >CDKN2A-S5 MMGSARVAI | 163 | >CDKN2A-S5 MMGNARVA | 149 | 14  |
| >CDKN2A-S5 MMGSARVAI | 90  | >CDKN2A-S5 MMGNARVA | 125 | 35  |
| >CDKN2A-S5 MMGSARVAI | 402 | >CDKN2A-S5 MMGNARVA | 546 | 144 |
| >CDKN2A-S5 MMMGSARV  | 587 | >CDKN2A-S5 MMMGNAR\ | 420 | 167 |
| >CDKN2A-S5 MMMGSARV  | 11  | >CDKN2A-S5 MMMGNAR\ | 12  | 1   |
| >CDKN2A-S5 MMMGSARV  | 19  | >CDKN2A-S5 MMMGNAR\ | 22  | 3   |
| >CDKN2A-S5 MMMGSARV  | 3   | >CDKN2A-S5 MMMGNAR\ | 3   | 0   |
| >CDKN2A-S5 MMMGSARV  | 102 | >CDKN2A-S5 MMMGNAR\ | 182 | 80  |
| >CDKN2A-S5 MMMGSARV  | 4   | >CDKN2A-S5 MMMGNAR\ | 4   | 0   |
| >CDKN2A-S5 MMMGSARV  | 2   | >CDKN2A-S5 MMMGNAR\ | 3   | 1   |
| >CDKN2A-S5 MMMGSARV  | 11  | >CDKN2A-S5 MMMGNAR\ | 17  | 6   |
| >CDKN2A-S5 MMMGSARV  | 5   | >CDKN2A-S5 MMMGNAR\ | 6   | 1   |
| >CDKN2A-S5 MMMGSARV  | 8   | >CDKN2A-S5 MMMGNAR\ | 10  | 2   |
| >CDKN2A-S5 MMMGSARV  | 437 | >CDKN2A-S5 MMMGNAR\ | 799 | 362 |
| >CDKN2A-S5 MMMGSARV  | 27  | >CDKN2A-S5 MMMGNAR\ | 35  | 8   |
| >CDKN2A-S5 MMMGSARV  | 2   | >CDKN2A-S5 MMMGNAR\ | 2   | 0   |
| >CDKN2A-S5 MMMGSARV  | 29  | >CDKN2A-S5 MMMGNAR\ | 15  | 14  |
| >CDKN2A-S5 MMMGSARV  | 3   | >CDKN2A-S5 MMMGNAR\ | 3   | 0   |
| >CDKN2A-S5 MMMGSARV  | 3   | >CDKN2A-S5 MMMGNAR\ | 3   | 0   |
| >CDKN2A-S5 MMMGSARV  | 281 | >CDKN2A-S5 MMMGNAR\ | 61  | 220 |
| >CDKN2A-S5 MMMGSARV  | 9   | >CDKN2A-S5 MMMGNAR\ | 5   | 4   |
| >CDKN2A-S5 MMMGSARV  | 8   | >CDKN2A-S5 MMMGNAR\ | 9   | 1   |
| >CDKN2A-S5 MMMGSARV  | 35  | >CDKN2A-S5 MMMGNAR\ | 42  | 7   |
| >CDKN2A-S5 MMMGSARV  | 2   | >CDKN2A-S5 MMMGNAR\ | 2   | 0   |

|                     |     |                     |      |     |
|---------------------|-----|---------------------|------|-----|
| >CDKN2A-S5 MMMGSARV | 91  | >CDKN2A-S5 MMMGNAR\ | 67   | 24  |
| >CDKN2A-S5 MMMGSARV | 4   | >CDKN2A-S5 MMMGNAR\ | 4    | 0   |
| >CDKN2A-S5 MMMGSARV | 2   | >CDKN2A-S5 MMMGNAR\ | 2    | 0   |
| >CDKN2A-S5 MMMGSARV | 21  | >CDKN2A-S5 MMMGNAR\ | 17   | 4   |
| >CDKN2A-S5 MMMGSARV | 3   | >CDKN2A-S5 MMMGNAR\ | 3    | 0   |
| >CDKN2A-S5 MMMGSARV | 179 | >CDKN2A-S5 MMMGNAR\ | 97   | 82  |
| >CDKN2A-S5 MMMGSARV | 29  | >CDKN2A-S5 MMMGNAR\ | 27   | 2   |
| >CDKN2A-S5 MMMGSARV | 235 | >CDKN2A-S5 MMMGNAR\ | 231  | 4   |
| >CDKN2A-S5 MMMGSARV | 51  | >CDKN2A-S5 MMMGNAR\ | 56   | 5   |
| >CDKN2A-S5 MMMGSARV | 188 | >CDKN2A-S5 MMMGNAR\ | 175  | 13  |
| >CDKN2A-S5 MMMGSARV | 301 | >CDKN2A-S5 MMMGNAR\ | 654  | 353 |
| >CDKN2A-S5 MMMGSARV | 191 | >CDKN2A-S5 MMMGNAR\ | 387  | 196 |
| >CDKN2A-S5 MMMGSARV | 84  | >CDKN2A-S5 MMMGNAR\ | 123  | 39  |
| >CDKN2A-S5 MMMGSARV | 237 | >CDKN2A-S5 MMMGNAR\ | 547  | 310 |
| >CDKN2A-S5 MMMGSARV | 342 | >CDKN2A-S5 MMMGNAR\ | 1027 | 685 |
| >CDKN2A-S5 MMMGSARV | 31  | >CDKN2A-S5 MMMGNAR\ | 53   | 22  |
| >CDKN2A-S5 MMMGSARV | 55  | >CDKN2A-S5 MMMGNAR\ | 143  | 88  |
| >CDKN2A-S5 MMMGSARV | 465 | >CDKN2A-S5 MMMGNAR\ | 741  | 276 |
| >CDKN2A-S5 MMMGSARV | 18  | >CDKN2A-S5 MMMGNAR\ | 19   | 1   |
| >CDKN2A-S5 MMMGSARV | 185 | >CDKN2A-S5 MMMGNAR\ | 291  | 106 |
| >CDKN2A-S5 VMMMGSAR | 182 | >CDKN2A-S5 VMMMGNAF | 429  | 247 |
| >CDKN2A-S5 VMMMGSAR | 11  | >CDKN2A-S5 VMMMGNAF | 11   | 0   |
| >CDKN2A-S5 VMMMGSAR | 9   | >CDKN2A-S5 VMMMGNAF | 12   | 3   |
| >CDKN2A-S5 VMMMGSAR | 425 | >CDKN2A-S5 VMMMGNAF | 529  | 104 |
| >CDKN2A-S5 VMMMGSAR | 3   | >CDKN2A-S5 VMMMGNAF | 4    | 1   |
| >CDKN2A-S5 VMMMGSAR | 226 | >CDKN2A-S5 VMMMGNAF | 329  | 103 |
| >CDKN2A-S5 VMMMGSAR | 19  | >CDKN2A-S5 VMMMGNAF | 25   | 6   |
| >CDKN2A-S5 VMMMGSAR | 2   | >CDKN2A-S5 VMMMGNAF | 2    | 0   |
| >CDKN2A-S5 VMMMGSAR | 55  | >CDKN2A-S5 VMMMGNAF | 55   | 0   |
| >CDKN2A-S5 VMMMGSAR | 3   | >CDKN2A-S5 VMMMGNAF | 5    | 2   |
| >CDKN2A-S5 VMMMGSAR | 239 | >CDKN2A-S5 VMMMGNAF | 221  | 18  |
| >CDKN2A-S5 VMMMGSAR | 7   | >CDKN2A-S5 VMMMGNAF | 10   | 3   |
| >CDKN2A-S5 VMMMGSAR | 2   | >CDKN2A-S5 VMMMGNAF | 2    | 0   |
| >CDKN2A-S5 VMMMGSAR | 95  | >CDKN2A-S5 VMMMGNAF | 114  | 19  |
| >CDKN2A-S5 VMMMGSAR | 2   | >CDKN2A-S5 VMMMGNAF | 2    | 0   |
| >CDKN2A-S5 VMMMGSAR | 54  | >CDKN2A-S5 VMMMGNAF | 59   | 5   |
| >CDKN2A-S5 VMMMGSAR | 212 | >CDKN2A-S5 VMMMGNAF | 725  | 513 |
| >CDKN2A-S5 VMMMGSAR | 168 | >CDKN2A-S5 VMMMGNAF | 273  | 105 |
| >CDKN2A-S5 VMMMGSAR | 20  | >CDKN2A-S5 VMMMGNAF | 22   | 2   |
| >CDKN2A-S5 VMMMGSAR | 120 | >CDKN2A-S5 VMMMGNAF | 135  | 15  |
| >CDKN2A-S5 VMMMGSAR | 462 | >CDKN2A-S5 VMMMGNAF | 554  | 92  |
| >CDKN2A-S5 VMMMGSAR | 175 | >CDKN2A-S5 VMMMGNAF | 395  | 220 |
| >CDKN2A-S5 VMMMGSAR | 183 | >CDKN2A-S5 VMMMGNAF | 339  | 156 |

|                       |      |                       |      |      |
|-----------------------|------|-----------------------|------|------|
| >CDKN2A-S5 VMMMGSAR   | 146  | >CDKN2A-S5 VMMMGNAF   | 241  | 95   |
| >CDKN2A-S5 VMMMGSAR   | 420  | >CDKN2A-S5 VMMMGNAF   | 605  | 185  |
| >CDKN2A-S5 QVMMMGS/   | 419  | >CDKN2A-S5 QVMMMGN/   | 391  | 28   |
| >CDKN2A-S5 QVMMMGS/   | 298  | >CDKN2A-S5 QVMMMGN/   | 490  | 192  |
| >CDKN2A-S5 QVMMMGS/   | 61   | >CDKN2A-S5 QVMMMGN/   | 96   | 35   |
| >CDKN2A-S5 QVMMMGS/   | 313  | >CDKN2A-S5 QVMMMGN/   | 335  | 22   |
| >CDKN2A-S5 QVMMMGS/   | 248  | >CDKN2A-S5 QVMMMGN/   | 472  | 224  |
| >CDKN2A-S5 QVMMMGS/   | 41   | >CDKN2A-S5 QVMMMGN/   | 75   | 34   |
| >CDKN2A-S5 QVMMMGS/   | 114  | >CDKN2A-S5 QVMMMGN/   | 190  | 76   |
| >CDKN2A-S5 QVMMMGS/   | 55   | >CDKN2A-S5 QVMMMGN/   | 77   | 22   |
| >CDKN2A-S5 QVMMMGS/   | 218  | >CDKN2A-S5 QVMMMGN/   | 399  | 181  |
| >CDKN2A-S5 QVMMMGS/   | 20   | >CDKN2A-S5 QVMMMGN/   | 30   | 10   |
| >CDKN2A-S5 QVMMMGS/   | 167  | >CDKN2A-S5 QVMMMGN/   | 159  | 8    |
| >CDKN2A-S5 QVMMMGS/   | 215  | >CDKN2A-S5 QVMMMGN/   | 155  | 60   |
| >CDKN2A-S5 QVMMMGS/   | 78   | >CDKN2A-S5 QVMMMGN/   | 87   | 9    |
| >CDKN2A-S5 IQVMMMGS.  | 167  | >CDKN2A-S5 IQVMMMGN   | 292  | 125  |
| >CDKN2A-S5 IQVMMMGS.  | 42   | >CDKN2A-S5 IQVMMMGN   | 79   | 37   |
| >CDKN2A-S5 IQVMMMGS.  | 87   | >CDKN2A-S5 IQVMMMGN   | 523  | 436  |
| >CDKN2A-S5 IQVMMMGS.  | 16   | >CDKN2A-S5 IQVMMMGN   | 26   | 10   |
| >CDKN2A-S5 IQVMMMGS.  | 120  | >CDKN2A-S5 IQVMMMGN   | 135  | 15   |
| >CDKN2A-S5 IQVMMMGS.  | 240  | >CDKN2A-S5 IQVMMMGN   | 441  | 201  |
| >CDKN2A-S5 IQVMMMGS.  | 117  | >CDKN2A-S5 IQVMMMGN   | 224  | 107  |
| >CDKN2A-S5 IQVMMMGS.  | 187  | >CDKN2A-S5 IQVMMMGN   | 348  | 161  |
| >CDKN2A-S5 RPIQVMMMI  | 23   | >CDKN2A-S5 RPIQVMMMI  | 93   | 70   |
| >CDKN2A-S5 RPIQVMMMI  | 288  | >CDKN2A-S5 RPIQVMMMI  | 829  | 541  |
| >CDKN2A-S5 RPIQVMMMI  | 134  | >CDKN2A-S5 RPIQVMMMI  | 296  | 162  |
| >CDKN2A-T1 GTRGSNHA   | 16   | >CDKN2A-T1 GARGSNHA   | 61   | 45   |
| >CDKN2A-T1 GTRGSNHAR  | 51   | >CDKN2A-T1 GARGSNHAR  | 350  | 299  |
| >CDKN2A-T1 GTRGSNHAR  | 15   | >CDKN2A-T1 GARGSNHAR  | 59   | 44   |
| >CDKN2A-T1 GTRGSNHAR  | 28   | >CDKN2A-T1 GARGSNHAR  | 74   | 46   |
| >CDKN2A-T1 GTRGSNHAR  | 412  | >CDKN2A-T1 GARGSNHAR  | 1096 | 684  |
| >CDKN2A-T1 GTRGSNHAR  | 205  | >CDKN2A-T1 GARGSNHAR  | 1124 | 919  |
| >CDKN2A-T1 GTRGSNHAR  | 10   | >CDKN2A-T1 GARGSNHAR  | 72   | 62   |
| >CDKN2A-T1 GTRGSNHAR  | 470  | >CDKN2A-T1 GARGSNHAR  | 4819 | 4349 |
| >CDKN2A-T1 ARYLRAAAGC | 321  | >CDKN2A-T1 ARYLRAAAGC | 153  | 168  |
| >CDKN2A-T1 ARYLRAAAGC | 1070 | >CDKN2A-T1 ARYLRAAAGC | 412  | 658  |
| >CDKN2A-T1 RAAAGGTR   | 82   | >CDKN2A-T1 RAAAGGAR   | 73   | 9    |
| >CDKN2A-T1 RAAAGGTR   | 423  | >CDKN2A-T1 RAAAGGAR   | 598  | 175  |
| >CDKN2A-T1 LRAAAGGTR  | 199  | >CDKN2A-T1 LRAAAGGAR  | 230  | 31   |
| >CDKN2A-T1 YLRAAAGGT  | 48   | >CDKN2A-T1 YLRAAAGGA  | 7    | 41   |
| >CDKN2A-T1 YLRAAAGGT  | 1645 | >CDKN2A-T1 YLRAAAGGA  | 216  | 1429 |
| >CDKN2A-T1 YLRAAAGGT  | 128  | >CDKN2A-T1 YLRAAAGGA  | 13   | 115  |
| >CDKN2A-T1 YLRAAAGGTF | 729  | >CDKN2A-T1 YLRAAAGGAI | 460  | 269  |

|                       |       |                       |       |       |
|-----------------------|-------|-----------------------|-------|-------|
| >CDKN2A-T1 YLRAAAGGTF | 231   | >CDKN2A-T1 YLRAAAGGAI | 151   | 80    |
| >CDKN2A-T1 RYLRAAAGGΓ | 218   | >CDKN2A-T1 RYLRAAAGG/ | 220   | 2     |
| >CDKN2A-T1 RYLRAAAGGΓ | 128   | >CDKN2A-T1 RYLRAAAGG/ | 208   | 80    |
| >CDKN2A-T1 RYLRAAAGGΓ | 1387  | >CDKN2A-T1 RYLRAAAGG/ | 52    | 1335  |
| >CDKN2A-T1 RYLRAAAGGΓ | 96    | >CDKN2A-T1 RYLRAAAGG/ | 98    | 2     |
| >CDKN2A-T1 RYLRAAAGGΓ | 24    | >CDKN2A-T1 RYLRAAAGG/ | 19    | 5     |
| >CDKN2A-T1 RYLRAAAGGΓ | 33    | >CDKN2A-T1 RYLRAAAGG/ | 39    | 6     |
| >CDKN2A-T1 TRGSNHAR   | 575   | >CDKN2A-T1 IRGSNHAR   | 373   | 202   |
| >CDKN2A-T1 GTRGSNHAR  | 10029 | >CDKN2A-T1 GIRGSNHARI | 454   | 9575  |
| >CDKN2A-T1 GTRGSNHA   | 16    | >CDKN2A-T1 GIRGSNHA   | 58    | 42    |
| >CDKN2A-T1 GTRGSNHAR  | 51    | >CDKN2A-T1 GIRGSNHAR  | 309   | 258   |
| >CDKN2A-T1 GTRGSNHAR  | 15    | >CDKN2A-T1 GIRGSNHARI | 56    | 41    |
| >CDKN2A-T1 GTRGSNHAR  | 28    | >CDKN2A-T1 GIRGSNHAR  | 68    | 40    |
| >CDKN2A-T1 GTRGSNHAR  | 412   | >CDKN2A-T1 GIRGSNHAR  | 1062  | 650   |
| >CDKN2A-T1 GTRGSNHAR  | 205   | >CDKN2A-T1 GIRGSNHAR  | 1169  | 964   |
| >CDKN2A-T1 GTRGSNHAR  | 10    | >CDKN2A-T1 GIRGSNHARI | 1992  | 1982  |
| >CDKN2A-T1 GTRGSNHAR  | 470   | >CDKN2A-T1 GIRGSNHAR  | 10958 | 10488 |
| >CDKN2A-T1 ARYLRAAAGC | 19488 | >CDKN2A-T1 ARYLRAAAGC | 266   | 19222 |
| >CDKN2A-T1 ARYLRAAAGC | 321   | >CDKN2A-T1 ARYLRAAAGC | 39    | 282   |
| >CDKN2A-T1 ARYLRAAAGC | 1070  | >CDKN2A-T1 ARYLRAAAGC | 29    | 1041  |
| >CDKN2A-T1 RAAAGGTR   | 82    | >CDKN2A-T1 RAAAGGIR   | 153   | 71    |
| >CDKN2A-T1 RAAAGGTR   | 423   | >CDKN2A-T1 RAAAGGIR   | 692   | 269   |
| >CDKN2A-T1 LRAAAGGT   | 2330  | >CDKN2A-T1 LRAAAGGI   | 187   | 2143  |
| >CDKN2A-T1 LRAAAGGTR  | 199   | >CDKN2A-T1 LRAAAGGIR  | 438   | 239   |
| >CDKN2A-T1 YLRAAAGGT  | 3382  | >CDKN2A-T1 YLRAAAGGI  | 199   | 3183  |
| >CDKN2A-T1 YLRAAAGGT  | 48    | >CDKN2A-T1 YLRAAAGGI  | 6     | 42    |
| >CDKN2A-T1 YLRAAAGGT  | 1645  | >CDKN2A-T1 YLRAAAGGI  | 40    | 1605  |
| >CDKN2A-T1 YLRAAAGGT  | 9700  | >CDKN2A-T1 YLRAAAGGI  | 192   | 9508  |
| >CDKN2A-T1 YLRAAAGGT  | 4869  | >CDKN2A-T1 YLRAAAGGI  | 386   | 4483  |
| >CDKN2A-T1 YLRAAAGGT  | 128   | >CDKN2A-T1 YLRAAAGGI  | 12    | 116   |
| >CDKN2A-T1 YLRAAAGGT  | 1198  | >CDKN2A-T1 YLRAAAGGI  | 211   | 987   |
| >CDKN2A-T1 YLRAAAGGTF | 231   | >CDKN2A-T1 YLRAAAGGIR | 458   | 227   |
| >CDKN2A-T1 RYLRAAAGGΓ | 13953 | >CDKN2A-T1 RYLRAAAGGI | 50    | 13903 |
| >CDKN2A-T1 RYLRAAAGGΓ | 218   | >CDKN2A-T1 RYLRAAAGGI | 5     | 213   |
| >CDKN2A-T1 RYLRAAAGGΓ | 128   | >CDKN2A-T1 RYLRAAAGGI | 292   | 164   |
| >CDKN2A-T1 RYLRAAAGGΓ | 1387  | >CDKN2A-T1 RYLRAAAGGI | 55    | 1332  |
| >CDKN2A-T1 RYLRAAAGGΓ | 96    | >CDKN2A-T1 RYLRAAAGGI | 135   | 39    |
| >CDKN2A-T1 RYLRAAAGGΓ | 24    | >CDKN2A-T1 RYLRAAAGGI | 36    | 12    |
| >CDKN2A-T1 RYLRAAAGGΓ | 33    | >CDKN2A-T1 RYLRAAAGGI | 37    | 4     |
| >CDKN2A-T1 GTRGSNHA   | 16    | >CDKN2A-T1 GPRGSNHA   | 12783 | 12767 |
| >CDKN2A-T1 GTRGSNHAR  | 51    | >CDKN2A-T1 GPRGSNHAR  | 15771 | 15720 |
| >CDKN2A-T1 GTRGSNHAR  | 15    | >CDKN2A-T1 GPRGSNHAR  | 12461 | 12446 |
| >CDKN2A-T1 GTRGSNHAR  | 28    | >CDKN2A-T1 GPRGSNHAR  | 4598  | 4570  |

|                       |       |                       |       |       |
|-----------------------|-------|-----------------------|-------|-------|
| >CDKN2A-T1 GTRGSNHAR  | 412   | >CDKN2A-T1 GPRGSNHAR  | 7337  | 6925  |
| >CDKN2A-T1 GTRGSNHAR  | 205   | >CDKN2A-T1 GPRGSNHAR  | 12862 | 12657 |
| >CDKN2A-T1 GTRGSNHA   | 18146 | >CDKN2A-T1 GPRGSNHA   | 128   | 18018 |
| >CDKN2A-T1 GTRGSNHAR  | 10    | >CDKN2A-T1 GPRGSNHAR  | 11601 | 11591 |
| >CDKN2A-T1 GTRGSNHA   | 29894 | >CDKN2A-T1 GPRGSNHA   | 475   | 29419 |
| >CDKN2A-T1 GTRGSNHAR  | 470   | >CDKN2A-T1 GPRGSNHAR  | 14739 | 14269 |
| >CDKN2A-T1 ARYLRAAAGC | 321   | >CDKN2A-T1 ARYLRAAAGC | 591   | 270   |
| >CDKN2A-T1 GGTRGSNHA  | 12796 | >CDKN2A-T1 GGPRGSNHA  | 258   | 12538 |
| >CDKN2A-T1 RAAAGGTR   | 82    | >CDKN2A-T1 RAAAGGPR   | 47    | 35    |
| >CDKN2A-T1 RAAAGGTR   | 423   | >CDKN2A-T1 RAAAGGPR   | 658   | 235   |
| >CDKN2A-T1 RAAAGGTR   | 1680  | >CDKN2A-T1 RAAAGGPR   | 492   | 1188  |
| >CDKN2A-T1 LRAAAGGTR  | 199   | >CDKN2A-T1 LRAAAGGPR  | 123   | 76    |
| >CDKN2A-T1 YLRAAAGGT  | 48    | >CDKN2A-T1 YLRAAAGGP  | 3217  | 3169  |
| >CDKN2A-T1 YLRAAAGGT  | 128   | >CDKN2A-T1 YLRAAAGGP  | 12710 | 12582 |
| >CDKN2A-T1 YLRAAAGGTF | 729   | >CDKN2A-T1 YLRAAAGGPF | 425   | 304   |
| >CDKN2A-T1 YLRAAAGGTF | 231   | >CDKN2A-T1 YLRAAAGGPF | 312   | 81    |
| >CDKN2A-T1 RYLRAAAGGT | 218   | >CDKN2A-T1 RYLRAAAGGF | 528   | 310   |
| >CDKN2A-T1 RYLRAAAGGT | 128   | >CDKN2A-T1 RYLRAAAGGF | 390   | 262   |
| >CDKN2A-T1 RYLRAAAGGT | 96    | >CDKN2A-T1 RYLRAAAGGF | 44    | 52    |
| >CDKN2A-T1 RYLRAAAGGT | 24    | >CDKN2A-T1 RYLRAAAGGF | 14    | 10    |
| >CDKN2A-T1 RYLRAAAGGT | 33    | >CDKN2A-T1 RYLRAAAGGF | 19    | 14    |
| >CDKN2A-T1 TAAARGRVEE | 559   | >CDKN2A-T1 MAAARGRVE  | 61    | 498   |
| >CDKN2A-T1 TAAARGRV   | 2026  | >CDKN2A-T1 MAAARGRV   | 260   | 1766  |
| >CDKN2A-T1 TAAARGRVEE | 573   | >CDKN2A-T1 MAAARGRVE  | 72    | 501   |
| >CDKN2A-T1 TAAARGRVEE | 741   | >CDKN2A-T1 MAAARGRVE  | 117   | 624   |
| >CDKN2A-T1 TAAARGRVEE | 2006  | >CDKN2A-T1 MAAARGRVE  | 221   | 1785  |
| >CDKN2A-T1 TAAARGRV   | 3626  | >CDKN2A-T1 MAAARGRV   | 303   | 3323  |
| >CDKN2A-T1 TAAARGRVEE | 881   | >CDKN2A-T1 MAAARGRVE  | 92    | 789   |
| >CDKN2A-T1 TAAARGRV   | 36    | >CDKN2A-T1 MAAARGRV   | 16    | 20    |
| >CDKN2A-T1 TAAARGRVEE | 34    | >CDKN2A-T1 MAAARGRVE  | 16    | 18    |
| >CDKN2A-T1 TAAARGRV   | 5580  | >CDKN2A-T1 MAAARGRV   | 491   | 5089  |
| >CDKN2A-T1 ATAAARGRV  | 1588  | >CDKN2A-T1 AMAAARGRV  | 31    | 1557  |
| >CDKN2A-T1 ATAAARGRV  | 589   | >CDKN2A-T1 AMAAARGRV  | 8     | 581   |
| >CDKN2A-T1 ATAAARGRV  | 4329  | >CDKN2A-T1 AMAAARGRV  | 29    | 4300  |
| >CDKN2A-T1 ATAAARGRV  | 6883  | >CDKN2A-T1 AMAAARGRV  | 32    | 6851  |
| >CDKN2A-T1 ATAAARGRV  | 561   | >CDKN2A-T1 AMAAARGRV  | 4     | 557   |
| >CDKN2A-T1 ATAAARGR   | 366   | >CDKN2A-T1 AMAAARGR   | 208   | 158   |
| >CDKN2A-T1 ATAAARGR   | 32    | >CDKN2A-T1 AMAAARGR   | 684   | 652   |
| >CDKN2A-T1 ATAAARGRV  | 13    | >CDKN2A-T1 AMAAARGRV  | 643   | 630   |
| >CDKN2A-T1 SMEPSADWL  | 9046  | >CDKN2A-T1 SMEPSADWL  | 324   | 8722  |
| >CDKN2A-T1 SMEPSADWL  | 11200 | >CDKN2A-T1 SMEPSADWL  | 462   | 10738 |
| >CDKN2A-T1 LATAAARGRV | 2416  | >CDKN2A-T1 LAMAAARGR  | 187   | 2229  |
| >CDKN2A-T1 LATAAARGR  | 105   | >CDKN2A-T1 LAMAAARGR  | 59    | 46    |

|                       |       |                        |     |       |
|-----------------------|-------|------------------------|-----|-------|
| >CDKN2A-T1 LATAAARGRI | 107   | >CDKN2A-T1 LAMAAAARGR  | 36  | 71    |
| >CDKN2A-T1 LATAAARGRI | 3162  | >CDKN2A-T1 LAMAAAARGR  | 297 | 2865  |
| >CDKN2A-T1 WLATAAARG  | 336   | >CDKN2A-T1 WLAMAAAAR   | 425 | 89    |
| >CDKN2A-T1 WLATAAARG  | 22    | >CDKN2A-T1 WLAMAAAAR   | 23  | 1     |
| >CDKN2A-T1 WLATAAARG  | 8     | >CDKN2A-T1 WLAMAAAAR   | 9   | 1     |
| >CDKN2A-T1 WLATAAARG  | 125   | >CDKN2A-T1 WLAMAAAAR   | 128 | 3     |
| >CDKN2A-T1 WLATAAARG  | 25    | >CDKN2A-T1 WLAMAAAAR   | 18  | 7     |
| >CDKN2A-T1 WLATAAARG  | 244   | >CDKN2A-T1 WLAMAAAAR   | 365 | 121   |
| >CDKN2A-T1 WLATAAARG  | 27    | >CDKN2A-T1 WLAMAAAAR   | 22  | 5     |
| >CDKN2A-T1 WLATAAARG  | 23    | >CDKN2A-T1 WLAMAAAAR   | 28  | 5     |
| >CDKN2A-T1 WLATAAARG  | 3     | >CDKN2A-T1 WLAMAAAAR   | 3   | 0     |
| >CDKN2A-T1 WLATAAAR   | 68    | >CDKN2A-T1 WLAMAAAAR   | 64  | 4     |
| >CDKN2A-T1 WLATAAARG  | 838   | >CDKN2A-T1 WLAMAAAAR   | 418 | 420   |
| >CDKN2A-T1 WLATAAARG  | 37    | >CDKN2A-T1 WLAMAAAAR   | 64  | 27    |
| >CDKN2A-T1 WLATAAARG  | 350   | >CDKN2A-T1 WLAMAAAAR   | 441 | 91    |
| >CDKN2A-T1 WLATAAARG  | 58    | >CDKN2A-T1 WLAMAAAAR   | 51  | 7     |
| >CDKN2A-T1 WLATAAAR   | 328   | >CDKN2A-T1 WLAMAAAAR   | 507 | 179   |
| >CDKN2A-T1 DWLATAAAR  | 119   | >CDKN2A-T1 DWLAMAAAAR  | 83  | 36    |
| >CDKN2A-T1 DWLATAAAR  | 23    | >CDKN2A-T1 DWLAMAAAAR  | 24  | 1     |
| >CDKN2A-T1 DWLATAAAR  | 30    | >CDKN2A-T1 DWLAMAAAAR  | 32  | 2     |
| >CDKN2A-T1 DWLATAAA   | 205   | >CDKN2A-T1 DWLAMAAAAR  | 167 | 38    |
| >CDKN2A-T1 DWLATAAAR  | 450   | >CDKN2A-T1 DWLAMAAAAR  | 453 | 3     |
| >CDKN2A-T1 ADWLATAAA  | 734   | >CDKN2A-T1 ADWLAMAAAR  | 454 | 280   |
| >CDKN2A-T1 SADWLATAA  | 83    | >CDKN2A-T1 SADWLAMAAAR | 68  | 15    |
| >CDKN2A-T1 SADWLATA   | 526   | >CDKN2A-T1 SADWLAMAAAR | 209 | 317   |
| >CDKN2A-T1 SADWLATAA  | 491   | >CDKN2A-T1 SADWLAMAAAR | 178 | 313   |
| >CDKN2A-T1 SADWLATAA  | 283   | >CDKN2A-T1 SADWLAMAAAR | 191 | 92    |
| >CDKN2A-T1 PSADWLAT   | 20359 | >CDKN2A-T1 PSADWLAM    | 353 | 20006 |
| >CDKN2A-T1 EPSADWLAT  | 7143  | >CDKN2A-T1 EPSADWLAM   | 109 | 7034  |
| >CDKN2A-T1 EPSADWLAT  | 30    | >CDKN2A-T1 EPSADWLAM   | 7   | 23    |
| >CDKN2A-T1 EPSADWLAT/ | 31    | >CDKN2A-T1 EPSADWLAM   | 43  | 12    |
| >CDKN2A-T1 EPSADWLAT  | 8836  | >CDKN2A-T1 EPSADWLAM   | 139 | 8697  |
| >CDKN2A-T1 EPSADWLAT  | 1424  | >CDKN2A-T1 EPSADWLAM   | 50  | 1374  |
| >CDKN2A-T1 EPSADWLAT/ | 270   | >CDKN2A-T1 EPSADWLAM   | 290 | 20    |
| >CDKN2A-T1 EPSADWLAT  | 8572  | >CDKN2A-T1 EPSADWLAM   | 371 | 8201  |
| >CDKN2A-T1 MEPSADWLA  | 1109  | >CDKN2A-T1 MEPSADWLA   | 367 | 742   |
| >CDKN2A-T1 MEPSADWLA  | 2551  | >CDKN2A-T1 MEPSADWLA   | 313 | 2238  |
| >CDKN2A-T7 TLTRPVHDA  | 660   | >CDKN2A-T7 SLTRPVHDA   | 377 | 283   |
| >CDKN2A-T7 TLTRPVHDA/ | 611   | >CDKN2A-T7 SLTRPVHDA/  | 388 | 223   |
| >CDKN2A-T7 TLTRPVHDA  | 722   | >CDKN2A-T7 SLTRPVHDA   | 116 | 606   |
| >CDKN2A-T7 TLTRPVHDA/ | 280   | >CDKN2A-T7 SLTRPVHDA/  | 47  | 233   |
| >CDKN2A-T7 TLTRPVHDA  | 694   | >CDKN2A-T7 SLTRPVHDA   | 51  | 643   |
| >CDKN2A-T7 TLTRPVHDA/ | 1048  | >CDKN2A-T7 SLTRPVHDA/  | 105 | 943   |



|                       |       |                       |      |       |
|-----------------------|-------|-----------------------|------|-------|
| >CDKN2A-T7 TLTRPVHDA  | 12    | >CDKN2A-T7 SLTRPVHDA  | 5    | 7     |
| >CDKN2A-T7 TLTRPVHDAA | 88    | >CDKN2A-T7 SLTRPVHDAA | 24   | 64    |
| >CDKN2A-T7 TLTRPVHDAA | 159   | >CDKN2A-T7 SLTRPVHDAA | 102  | 57    |
| >CDKN2A-T7 TLTRPVHDAA | 411   | >CDKN2A-T7 SLTRPVHDAA | 1384 | 973   |
| >CDKN2A-T7 TLTRPVHDAA | 68    | >CDKN2A-T7 SLTRPVHDAA | 243  | 175   |
| >CDKN2A-T7 DPATLTRPV  | 485   | >CDKN2A-T7 DPASLTRPV  | 565  | 80    |
| >CDKN2A-T7 DPATLTRPV  | 197   | >CDKN2A-T7 DPASLTRPV  | 117  | 80    |
| >CDKN2A-T7 DPATLTRPV  | 149   | >CDKN2A-T7 DPASLTRPV  | 90   | 59    |
| >CDKN2A-T7 DPATLTRPV  | 668   | >CDKN2A-T7 DPASLTRPV  | 453  | 215   |
| >CDKN2A-T7 ADPATLTRPV | 498   | >CDKN2A-T7 ADPASLTRPV | 546  | 48    |
| >CDKN2A-T7 CADPATLTR  | 353   | >CDKN2A-T7 CADPASLTR  | 615  | 262   |
| >CDKN2A-T7 NCADPATLTF | 284   | >CDKN2A-T7 NCADPASLTR | 235  | 49    |
| >CDKN2A-T7 NCADPATL   | 475   | >CDKN2A-T7 NCADPASL   | 323  | 152   |
| >CDKN2A-T7 NCADPATLTF | 233   | >CDKN2A-T7 NCADPASLTR | 531  | 298   |
| >CDKN2A-T7 EPNCADPATL | 353   | >CDKN2A-T7 EPNCADPASL | 314  | 39    |
| >CDKN2A-T7 EPNCADPAT  | 16    | >CDKN2A-T7 EPNCADPAS  | 19   | 3     |
| >CDKN2A-T7 EPNCADPATL | 279   | >CDKN2A-T7 EPNCADPASL | 316  | 37    |
| >CDKN2A-T7 EPNCADPAT  | 371   | >CDKN2A-T7 EPNCADPAS  | 757  | 386   |
| >CDKN2A-T7 AEPNCADPA  | 183   | >CDKN2A-T7 AEPNCADPAS | 308  | 125   |
| >CDKN2A-T7 AEPNCADPA  | 849   | >CDKN2A-T7 AEPNCADPAS | 355  | 494   |
| >CDKN2A-T7 AEPNCADPA  | 230   | >CDKN2A-T7 AEPNCADPAS | 464  | 234   |
| >CDKN2A-T7 AEPNCADPA  | 65    | >CDKN2A-T7 AEPNCADPAS | 62   | 3     |
| >CDKN2A-T7 LTRPVHDA   | 8636  | >CDKN2A-T7 LIRPVHDA   | 488  | 8148  |
| >CDKN2A-T7 LTRPVHDA   | 48    | >CDKN2A-T7 LIRPVHDA   | 279  | 231   |
| >CDKN2A-T7 LTRPVHDAA  | 24    | >CDKN2A-T7 LIRPVHDAA  | 123  | 99    |
| >CDKN2A-T7 LTRPVHDAAF | 56    | >CDKN2A-T7 LIRPVHDAAR | 323  | 267   |
| >CDKN2A-T7 LTRPVHDAAF | 107   | >CDKN2A-T7 LIRPVHDAAR | 86   | 21    |
| >CDKN2A-T7 LTRPVHDAAF | 47    | >CDKN2A-T7 LIRPVHDAAR | 142  | 95    |
| >CDKN2A-T7 EPNCADPATL | 279   | >CDKN2A-T7 EPNCADPATL | 406  | 127   |
| >CDKN2A-T7 EPNCADPATL | 12659 | >CDKN2A-T7 EPNCADPATL | 477  | 12182 |
| >CDKN2A-T7 EPNCADPATL | 6097  | >CDKN2A-T7 EPNCADPATL | 164  | 5933  |
| >CDKN2A-T7 TLTRPVHDA  | 660   | >CDKN2A-T7 TLIRPVHDA  | 97   | 563   |
| >CDKN2A-T7 TLTRPVHDAA | 611   | >CDKN2A-T7 TLIRPVHDAA | 172  | 439   |
| >CDKN2A-T7 TLTRPVHDA  | 722   | >CDKN2A-T7 TLIRPVHDA  | 201  | 521   |
| >CDKN2A-T7 TLTRPVHDAA | 280   | >CDKN2A-T7 TLIRPVHDAA | 82   | 198   |
| >CDKN2A-T7 TLTRPVHDA  | 2123  | >CDKN2A-T7 TLIRPVHDA  | 409  | 1714  |
| >CDKN2A-T7 TLTRPVHDAA | 1975  | >CDKN2A-T7 TLIRPVHDAA | 436  | 1539  |
| >CDKN2A-T7 TLTRPVHDA  | 12    | >CDKN2A-T7 TLIRPVHDA  | 23   | 11    |
| >CDKN2A-T7 TLTRPVHDAA | 88    | >CDKN2A-T7 TLIRPVHDAA | 139  | 51    |
| >CDKN2A-T7 TLTRPVHDAA | 159   | >CDKN2A-T7 TLIRPVHDAA | 88   | 71    |
| >CDKN2A-T7 TLTRPVHDAA | 411   | >CDKN2A-T7 TLIRPVHDAA | 355  | 56    |
| >CDKN2A-T7 TLTRPVHDAA | 68    | >CDKN2A-T7 TLIRPVHDAA | 57   | 11    |
| >CDKN2A-T7 TLTRPVHDAA | 993   | >CDKN2A-T7 TLIRPVHDAA | 413  | 580   |

|                        |       |                       |      |       |
|------------------------|-------|-----------------------|------|-------|
| >CDKN2A-T7 DPATLTRPV   | 485   | >CDKN2A-T7 DPATLIRPV  | 569  | 84    |
| >CDKN2A-T7 DPATLTRPV   | 197   | >CDKN2A-T7 DPATLIRPV  | 261  | 64    |
| >CDKN2A-T7 DPATLTRPV   | 149   | >CDKN2A-T7 DPATLIRPV  | 1054 | 905   |
| >CDKN2A-T7 ADPATLTRPV  | 498   | >CDKN2A-T7 ADPATLIRPV | 645  | 147   |
| >CDKN2A-T7 CADPATLTR   | 353   | >CDKN2A-T7 CADPATLIR  | 612  | 259   |
| >CDKN2A-T7 CADPATLT    | 21055 | >CDKN2A-T7 CADPATLI   | 20   | 21035 |
| >CDKN2A-T7 NCADPATLTF  | 284   | >CDKN2A-T7 NCADPATLIR | 652  | 368   |
| >CDKN2A-T7 NCADPATLT   | 2621  | >CDKN2A-T7 NCADPATLI  | 110  | 2511  |
| >CDKN2A-T7 NCADPATLT   | 6314  | >CDKN2A-T7 NCADPATLI  | 288  | 6026  |
| >CDKN2A-T7 NCADPATLTF  | 233   | >CDKN2A-T7 NCADPATLIR | 316  | 83    |
| >CDKN2A-T9 TLVVLHRA    | 433   | >CDKN2A-T9 ALVVLHRA   | 199  | 234   |
| >CDKN2A-T9 TLVVLHRA    | 247   | >CDKN2A-T9 ALVVLHRA   | 136  | 111   |
| >CDKN2A-T9 TLVVLHRAGA  | 240   | >CDKN2A-T9 ALVVLHRAGA | 263  | 23    |
| >CDKN2A-T9 TLVVLHRA    | 426   | >CDKN2A-T9 ALVVLHRA   | 107  | 319   |
| >CDKN2A-T9 TLVVLHRA    | 1412  | >CDKN2A-T9 ALVVLHRA   | 454  | 958   |
| >CDKN2A-T9 TLVVLHRA    | 59    | >CDKN2A-T9 ALVVLHRA   | 18   | 41    |
| >CDKN2A-T9 TLVVLHRAGA  | 465   | >CDKN2A-T9 ALVVLHRAGA | 86   | 379   |
| >CDKN2A-T9 TLVVLHRAGA  | 209   | >CDKN2A-T9 ALVVLHRAGA | 158  | 51    |
| >CDKN2A-T9 TLVVLHRAGA  | 185   | >CDKN2A-T9 ALVVLHRAGA | 3323 | 3138  |
| >CDKN2A-T9 DTLVVLHR    | 277   | >CDKN2A-T9 DALVVLHR   | 811  | 534   |
| >CDKN2A-T9 DTLVVLHR    | 9     | >CDKN2A-T9 DALVVLHR   | 16   | 7     |
| >CDKN2A-T9 DTLVVLHR    | 16    | >CDKN2A-T9 DALVVLHR   | 41   | 25    |
| >CDKN2A-T9 DTLVVLHRA   | 178   | >CDKN2A-T9 DALVVLHRA  | 2073 | 1895  |
| >CDKN2A-T9 DTLVVLHRAC  | 197   | >CDKN2A-T9 DALVVLHRAC | 1996 | 1799  |
| >CDKN2A-T9 DTLVVLHRA   | 46    | >CDKN2A-T9 DALVVLHRA  | 308  | 262   |
| >CDKN2A-T9 DTLVVLHRAC  | 65    | >CDKN2A-T9 DALVVLHRAC | 376  | 311   |
| >CDKN2A-T9 FLDTLVVL    | 12    | >CDKN2A-T9 FLDALVVL   | 11   | 1     |
| >CDKN2A-T9 FLDTLVVLHR  | 550   | >CDKN2A-T9 FLDALVVLHR | 443  | 107   |
| >CDKN2A-T9 FLDTLVVLHR, | 12    | >CDKN2A-T9 FLDALVVLHR | 11   | 1     |
| >CDKN2A-T9 FLDTLVVL    | 9     | >CDKN2A-T9 FLDALVVL   | 5    | 4     |
| >CDKN2A-T9 FLDTLVVLH   | 908   | >CDKN2A-T9 FLDALVVLH  | 375  | 533   |
| >CDKN2A-T9 FLDTLVVLHR, | 7     | >CDKN2A-T9 FLDALVVLHR | 5    | 2     |
| >CDKN2A-T9 FLDTLVVL    | 74    | >CDKN2A-T9 FLDALVVL   | 44   | 30    |
| >CDKN2A-T9 FLDTLVVLHR, | 24    | >CDKN2A-T9 FLDALVVLHR | 16   | 8     |
| >CDKN2A-T9 FLDTLVVL    | 37    | >CDKN2A-T9 FLDALVVL   | 19   | 18    |
| >CDKN2A-T9 FLDTLVVLHR, | 68    | >CDKN2A-T9 FLDALVVLHR | 37   | 31    |
| >CDKN2A-T9 FLDTLVVL    | 3     | >CDKN2A-T9 FLDALVVL   | 3    | 0     |
| >CDKN2A-T9 FLDTLVVLHR, | 3     | >CDKN2A-T9 FLDALVVLHR | 2    | 1     |
| >CDKN2A-T9 FLDTLVVL    | 4     | >CDKN2A-T9 FLDALVVL   | 4    | 0     |
| >CDKN2A-T9 FLDTLVVLHR, | 9     | >CDKN2A-T9 FLDALVVLHR | 9    | 0     |
| >CDKN2A-T9 FLDTLVVL    | 7     | >CDKN2A-T9 FLDALVVL   | 5    | 2     |
| >CDKN2A-T9 FLDTLVVLHR, | 8     | >CDKN2A-T9 FLDALVVLHR | 7    | 1     |
| >CDKN2A-T9 FLDTLVVL    | 8     | >CDKN2A-T9 FLDALVVL   | 7    | 1     |

|                        |      |                        |     |      |
|------------------------|------|------------------------|-----|------|
| >CDKN2A-T9 FLDTLVVLR   | 19   | >CDKN2A-T9 FLDALVLR    | 14  | 5    |
| >CDKN2A-T9 FLDTLVV     | 3    | >CDKN2A-T9 FLDALVV     | 2   | 1    |
| >CDKN2A-T9 FLDTLVVLR   | 3    | >CDKN2A-T9 FLDALVLR    | 2   | 1    |
| >CDKN2A-T9 FLDTLVVLR   | 354  | >CDKN2A-T9 FLDALVLR    | 197 | 157  |
| >CDKN2A-T9 FLDTLVV     | 52   | >CDKN2A-T9 FLDALVV     | 38  | 14   |
| >CDKN2A-T9 FLDTLVVLR   | 553  | >CDKN2A-T9 FLDALVLR    | 241 | 312  |
| >CDKN2A-T9 FLDTLVVLR   | 272  | >CDKN2A-T9 FLDALVLR    | 271 | 1    |
| >CDKN2A-T9 GFLDTLVV    | 313  | >CDKN2A-T9 GFLDALVV    | 577 | 264  |
| >CDKN2A-T9 GFLDTLVV    | 494  | >CDKN2A-T9 GFLDALVV    | 983 | 489  |
| >CDKN2A-T9 GFLDTLVV    | 110  | >CDKN2A-T9 GFLDALVV    | 153 | 43   |
| >CDKN2A-T9 GFLDTLVV    | 221  | >CDKN2A-T9 GFLDALVV    | 273 | 52   |
| >CDKN2A-T9 GFLDTLVV    | 298  | >CDKN2A-T9 GFLDALVV    | 336 | 38   |
| >CDKN2A-T9 GFLDTLVV    | 75   | >CDKN2A-T9 GFLDALVV    | 48  | 27   |
| >CDKN2A-T9 GFLDTLVVLR  | 38   | >CDKN2A-T9 GFLDALVLR   | 56  | 18   |
| >CDKN2A-T9 GFLDTLVVLR  | 421  | >CDKN2A-T9 GFLDALVLR   | 467 | 46   |
| >CDKN2A-T9 GFLDTLVVLR  | 77   | >CDKN2A-T9 GFLDALVLR   | 91  | 14   |
| >CDKN2A-T9 EGFLDTLV    | 135  | >CDKN2A-T9 EGFLDALV    | 135 | 0    |
| >CDKN2A-T9 REGFLDTLV   | 13   | >CDKN2A-T9 REGFLDALV   | 12  | 1    |
| >CDKN2A-T9 REGFLDTLV   | 213  | >CDKN2A-T9 REGFLDALV   | 166 | 47   |
| >CDKN2A-T9 REGFLDTLVV  | 14   | >CDKN2A-T9 REGFLDALVV  | 12  | 2    |
| >CDKN2A-T9 REGFLDTLV   | 99   | >CDKN2A-T9 REGFLDALV   | 61  | 38   |
| >CDKN2A-T9 REGFLDTLV   | 208  | >CDKN2A-T9 REGFLDALV   | 929 | 721  |
| >CDKN2A-T9 REGFLDTLVV  | 264  | >CDKN2A-T9 REGFLDALVV  | 336 | 72   |
| >CDKN2A-T9 REGFLDTLVV  | 63   | >CDKN2A-T9 REGFLDALVV  | 91  | 28   |
| >CDKN2A-T9 REGFLDTLV   | 35   | >CDKN2A-T9 REGFLDALV   | 38  | 3    |
| >CDKN2A-T9 REGFLDTLVV  | 89   | >CDKN2A-T9 REGFLDALVV  | 100 | 11   |
| >CDKN2A-T9 REGFLDTLVV  | 68   | >CDKN2A-T9 REGFLDALVV  | 62  | 6    |
| >CDKN2A-T9 AREGFLDTLV  | 503  | >CDKN2A-T9 AREGFLDALV  | 181 | 322  |
| >CDKN2A-T9 AREGFLDTLV  | 165  | >CDKN2A-T9 AREGFLDALV  | 424 | 259  |
| >CDKN2A-T9 AREGFLDTLV  | 63   | >CDKN2A-T9 AREGFLDALV  | 88  | 25   |
| >CDKN2A-T9 AAREGFLDTLV | 408  | >CDKN2A-T9 AAREGFLDALV | 363 | 45   |
| >CDKN2A-T9 AAREGFLDTLV | 252  | >CDKN2A-T9 AAREGFLDALV | 197 | 55   |
| >CDKN2A-T9 AAREGFLDTLV | 1653 | >CDKN2A-T9 AAREGFLDALV | 60  | 1593 |
| >CDKN2A-T9 AAREGFLDTLV | 342  | >CDKN2A-T9 AAREGFLDALV | 364 | 22   |
| >CDKN2A-T9 AAREGFLDTLV | 203  | >CDKN2A-T9 AAREGFLDALV | 56  | 147  |
| >CDKN2A-T9 AAREGFLDTLV | 53   | >CDKN2A-T9 AAREGFLDALV | 170 | 117  |
| >CDKN2A-T9 TLVVLHRA    | 1920 | >CDKN2A-T9 MLVVLHRA    | 343 | 1577 |
| >CDKN2A-T9 TLVVLHRA    | 433  | >CDKN2A-T9 MLVVLHRA    | 66  | 367  |
| >CDKN2A-T9 TLVVLHRAGA  | 1043 | >CDKN2A-T9 MLVVLHRAGA  | 300 | 743  |
| >CDKN2A-T9 TLVVLHRA    | 247  | >CDKN2A-T9 MLVVLHRA    | 54  | 193  |
| >CDKN2A-T9 TLVVLHRAGA  | 240  | >CDKN2A-T9 MLVVLHRAGA  | 137 | 103  |
| >CDKN2A-T9 TLVVLHRA    | 1727 | >CDKN2A-T9 MLVVLHRA    | 379 | 1348 |
| >CDKN2A-T9 TLVVLHRA    | 426  | >CDKN2A-T9 MLVVLHRA    | 44  | 382  |

|                        |       |                       |      |       |
|------------------------|-------|-----------------------|------|-------|
| >CDKN2A-T9 TLVVLHRAGA  | 2943  | >CDKN2A-T9 MLVVLHRAG  | 325  | 2618  |
| >CDKN2A-T9 TLVVLHRA    | 1412  | >CDKN2A-T9 MLVVLHRA   | 416  | 996   |
| >CDKN2A-T9 TLVVLHRA    | 59    | >CDKN2A-T9 MLVVLHRA   | 12   | 47    |
| >CDKN2A-T9 TLVVLHRAGA  | 465   | >CDKN2A-T9 MLVVLHRAG  | 44   | 421   |
| >CDKN2A-T9 TLVVLHRAGA  | 209   | >CDKN2A-T9 MLVVLHRAG  | 50   | 159   |
| >CDKN2A-T9 TLVVLHRAGA  | 534   | >CDKN2A-T9 MLVVLHRAG  | 174  | 360   |
| >CDKN2A-T9 TLVVLHRAGA  | 185   | >CDKN2A-T9 MLVVLHRAG  | 64   | 121   |
| >CDKN2A-T9 DTLVVLHRA   | 8622  | >CDKN2A-T9 DMLVVLHRA  | 62   | 8560  |
| >CDKN2A-T9 DTLVVLHRAC  | 13995 | >CDKN2A-T9 DMLVVLHRA  | 448  | 13547 |
| >CDKN2A-T9 DTLVVLHRA   | 12396 | >CDKN2A-T9 DMLVVLHRA  | 168  | 12228 |
| >CDKN2A-T9 DTLVVLHRA   | 7377  | >CDKN2A-T9 DMLVVLHRA  | 70   | 7307  |
| >CDKN2A-T9 DTLVVLHRAC  | 10220 | >CDKN2A-T9 DMLVVLHRA  | 468  | 9752  |
| >CDKN2A-T9 DTLVVLHRA   | 23163 | >CDKN2A-T9 DMLVVLHRA  | 260  | 22903 |
| >CDKN2A-T9 DTLVVLHR    | 277   | >CDKN2A-T9 DMLVVLHR   | 163  | 114   |
| >CDKN2A-T9 DTLVVLHR    | 9     | >CDKN2A-T9 DMLVVLHR   | 10   | 1     |
| >CDKN2A-T9 DTLVVLHR    | 16    | >CDKN2A-T9 DMLVVLHR   | 142  | 126   |
| >CDKN2A-T9 DTLVVLHRA   | 178   | >CDKN2A-T9 DMLVVLHRA  | 6725 | 6547  |
| >CDKN2A-T9 DTLVVLHRAC  | 197   | >CDKN2A-T9 DMLVVLHRA  | 6637 | 6440  |
| >CDKN2A-T9 DTLVVLHRA   | 46    | >CDKN2A-T9 DMLVVLHRA  | 552  | 506   |
| >CDKN2A-T9 DTLVVLHRAC  | 65    | >CDKN2A-T9 DMLVVLHRA  | 558  | 493   |
| >CDKN2A-T9 DTLVVLHR    | 1779  | >CDKN2A-T9 DMLVVLHR   | 273  | 1506  |
| >CDKN2A-T9 FLDTLVVL    | 12    | >CDKN2A-T9 FLDMLVVL   | 16   | 4     |
| >CDKN2A-T9 FLDTLVVLHR  | 550   | >CDKN2A-T9 FLDMLVVLHF | 393  | 157   |
| >CDKN2A-T9 FLDTLVVLHR, | 12    | >CDKN2A-T9 FLDMLVVLHF | 17   | 5     |
| >CDKN2A-T9 FLDTLVVL    | 9     | >CDKN2A-T9 FLDMLVVL   | 19   | 10    |
| >CDKN2A-T9 FLDTLVVLHR, | 7     | >CDKN2A-T9 FLDMLVVLHF | 16   | 9     |
| >CDKN2A-T9 FLDTLVVL    | 74    | >CDKN2A-T9 FLDMLVVL   | 90   | 16    |
| >CDKN2A-T9 FLDTLVVLHR, | 24    | >CDKN2A-T9 FLDMLVVLHF | 31   | 7     |
| >CDKN2A-T9 FLDTLVVL    | 37    | >CDKN2A-T9 FLDMLVVL   | 65   | 28    |
| >CDKN2A-T9 FLDTLVVLHR, | 68    | >CDKN2A-T9 FLDMLVVLHF | 146  | 78    |
| >CDKN2A-T9 FLDTLVVL    | 3     | >CDKN2A-T9 FLDMLVVL   | 3    | 0     |
| >CDKN2A-T9 FLDTLVVLHR, | 3     | >CDKN2A-T9 FLDMLVVLHF | 3    | 0     |
| >CDKN2A-T9 FLDTLVVL    | 4     | >CDKN2A-T9 FLDMLVVL   | 6    | 2     |
| >CDKN2A-T9 FLDTLVVLHR, | 9     | >CDKN2A-T9 FLDMLVVLHF | 16   | 7     |
| >CDKN2A-T9 FLDTLVVL    | 7     | >CDKN2A-T9 FLDMLVVL   | 6    | 1     |
| >CDKN2A-T9 FLDTLVVLHR, | 8     | >CDKN2A-T9 FLDMLVVLHF | 8    | 0     |
| >CDKN2A-T9 FLDTLVVL    | 8     | >CDKN2A-T9 FLDMLVVL   | 13   | 5     |
| >CDKN2A-T9 FLDTLVVLHR, | 19    | >CDKN2A-T9 FLDMLVVLHF | 31   | 12    |
| >CDKN2A-T9 FLDTLVVL    | 3     | >CDKN2A-T9 FLDMLVVL   | 3    | 0     |
| >CDKN2A-T9 FLDTLVVLHR, | 3     | >CDKN2A-T9 FLDMLVVLHF | 3    | 0     |
| >CDKN2A-T9 FLDTLVVLHR  | 586   | >CDKN2A-T9 FLDMLVVLHF | 434  | 152   |
| >CDKN2A-T9 FLDTLVVLHR  | 626   | >CDKN2A-T9 FLDMLVVLHF | 241  | 385   |
| >CDKN2A-T9 FLDTLVVLHR  | 354   | >CDKN2A-T9 FLDMLVVLHF | 229  | 125   |

|                       |       |                       |       |       |
|-----------------------|-------|-----------------------|-------|-------|
| >CDKN2A-T9 FLDTLVVL   | 52    | >CDKN2A-T9 FLDMLVVL   | 142   | 90    |
| >CDKN2A-T9 FLDTLVVLHR | 553   | >CDKN2A-T9 FLDMLVVLHF | 480   | 73    |
| >CDKN2A-T9 FLDTLVVLHR | 272   | >CDKN2A-T9 FLDMLVVLHF | 386   | 114   |
| >CDKN2A-T9 GFLDTLVV   | 313   | >CDKN2A-T9 GFLDMLVV   | 701   | 388   |
| >CDKN2A-T9 GFLDTLVV   | 494   | >CDKN2A-T9 GFLDMLVV   | 1239  | 745   |
| >CDKN2A-T9 GFLDTLVV   | 110   | >CDKN2A-T9 GFLDMLVV   | 254   | 144   |
| >CDKN2A-T9 GFLDTLVV   | 221   | >CDKN2A-T9 GFLDMLVV   | 240   | 19    |
| >CDKN2A-T9 GFLDTLVVL  | 298   | >CDKN2A-T9 GFLDMLVVL  | 320   | 22    |
| >CDKN2A-T9 GFLDTLVVL  | 75    | >CDKN2A-T9 GFLDMLVVL  | 97    | 22    |
| >CDKN2A-T9 GFLDTLVVLH | 38    | >CDKN2A-T9 GFLDMLVVLH | 31    | 7     |
| >CDKN2A-T9 GFLDTLVVLH | 421   | >CDKN2A-T9 GFLDMLVVLH | 332   | 89    |
| >CDKN2A-T9 GFLDTLVVLH | 77    | >CDKN2A-T9 GFLDMLVVLH | 84    | 7     |
| >CDKN2A-T9 EGFLDTLV   | 135   | >CDKN2A-T9 EGFLDMLV   | 73    | 62    |
| >CDKN2A-T9 REGFLDTL   | 13    | >CDKN2A-T9 REGFLDML   | 16    | 3     |
| >CDKN2A-T9 REGFLDTLV  | 213   | >CDKN2A-T9 REGFLDMLV  | 85    | 128   |
| >CDKN2A-T9 REGFLDTLVV | 14    | >CDKN2A-T9 REGFLDMLV  | 12    | 2     |
| >CDKN2A-T9 REGFLDTL   | 99    | >CDKN2A-T9 REGFLDML   | 61    | 38    |
| >CDKN2A-T9 REGFLDTLV  | 208   | >CDKN2A-T9 REGFLDMLV  | 265   | 57    |
| >CDKN2A-T9 REGFLDTLVV | 264   | >CDKN2A-T9 REGFLDMLV  | 282   | 18    |
| >CDKN2A-T9 REGFLDTLVV | 63    | >CDKN2A-T9 REGFLDMLV  | 46    | 17    |
| >CDKN2A-T9 REGFLDTLV  | 35    | >CDKN2A-T9 REGFLDMLV  | 33    | 2     |
| >CDKN2A-T9 REGFLDTLVV | 89    | >CDKN2A-T9 REGFLDMLV  | 62    | 27    |
| >CDKN2A-T9 REGFLDTLVV | 68    | >CDKN2A-T9 REGFLDMLV  | 47    | 21    |
| >CDKN2A-T9 AREGFLDTL  | 165   | >CDKN2A-T9 AREGFLDML  | 256   | 91    |
| >CDKN2A-T9 AREGFLDTL  | 63    | >CDKN2A-T9 AREGFLDML  | 55    | 8     |
| >CDKN2A-T9 AAREGFLDTL | 408   | >CDKN2A-T9 AAREGFLDM  | 420   | 12    |
| >CDKN2A-T9 AAREGFLDTL | 252   | >CDKN2A-T9 AAREGFLDM  | 205   | 47    |
| >CDKN2A-T9 AAREGFLDT  | 1653  | >CDKN2A-T9 AAREGFLDM  | 193   | 1460  |
| >CDKN2A-T9 AAREGFLDTL | 342   | >CDKN2A-T9 AAREGFLDM  | 600   | 258   |
| >CDKN2A-T9 AAREGFLDTL | 203   | >CDKN2A-T9 AAREGFLDM  | 33    | 170   |
| >CDKN2A-T9 AAREGFLDT  | 13552 | >CDKN2A-T9 AAREGFLDM  | 341   | 13211 |
| >CDKN2A-T9 AAREGFLDT  | 11486 | >CDKN2A-T9 AAREGFLDM  | 45    | 11441 |
| >CDKN2A-T9 AAREGFLDTL | 53    | >CDKN2A-T9 AAREGFLDM  | 144   | 91    |
| >CDKN2A-T9 TLVVLHRA   | 433   | >CDKN2A-T9 RLVVLHRA   | 351   | 82    |
| >CDKN2A-T9 TLVVLHRA   | 247   | >CDKN2A-T9 RLVVLHRA   | 137   | 110   |
| >CDKN2A-T9 TLVVLHRAGA | 240   | >CDKN2A-T9 RLVVLHRAGA | 263   | 23    |
| >CDKN2A-T9 TLVVLHRA   | 426   | >CDKN2A-T9 RLVVLHRA   | 95    | 331   |
| >CDKN2A-T9 TLVVLHRA   | 59    | >CDKN2A-T9 RLVVLHRA   | 52    | 7     |
| >CDKN2A-T9 TLVVLHRAGA | 465   | >CDKN2A-T9 RLVVLHRAGA | 355   | 110   |
| >CDKN2A-T9 TLVVLHRAGA | 209   | >CDKN2A-T9 RLVVLHRAGA | 29    | 180   |
| >CDKN2A-T9 TLVVLHRAGA | 185   | >CDKN2A-T9 RLVVLHRAGA | 3975  | 3790  |
| >CDKN2A-T9 TLVVLHRAGA | 1170  | >CDKN2A-T9 RLVVLHRAGA | 206   | 964   |
| >CDKN2A-T9 DTLVVLHR   | 277   | >CDKN2A-T9 DRLVVLHR   | 14842 | 14565 |

|                       |       |                       |       |       |
|-----------------------|-------|-----------------------|-------|-------|
| >CDKN2A-T9 DTLVVLHR   | 9     | >CDKN2A-T9 DRLVVLHR   | 523   | 514   |
| >CDKN2A-T9 DTLVVLHR   | 16    | >CDKN2A-T9 DRLVVLHR   | 2957  | 2941  |
| >CDKN2A-T9 DTLVVLHRA  | 178   | >CDKN2A-T9 DRLVVLHRA  | 20273 | 20095 |
| >CDKN2A-T9 DTLVVLHRAC | 197   | >CDKN2A-T9 DRLVVLHRAC | 19598 | 19401 |
| >CDKN2A-T9 DTLVVLHRA  | 46    | >CDKN2A-T9 DRLVVLHRA  | 17664 | 17618 |
| >CDKN2A-T9 DTLVVLHRAC | 65    | >CDKN2A-T9 DRLVVLHRAC | 17040 | 16975 |
| >CDKN2A-T9 DTLVVLHR   | 24896 | >CDKN2A-T9 DRLVVLHR   | 480   | 24416 |
| >CDKN2A-T9 FLDTLVVL   | 12    | >CDKN2A-T9 FLDRLVVL   | 17    | 5     |
| >CDKN2A-T9 FLDTLVVLHR | 12    | >CDKN2A-T9 FLDRLVVLHR | 17    | 5     |
| >CDKN2A-T9 FLDTLVVL   | 9     | >CDKN2A-T9 FLDRLVVL   | 12    | 3     |
| >CDKN2A-T9 FLDTLVVLHR | 7     | >CDKN2A-T9 FLDRLVVLHR | 10    | 3     |
| >CDKN2A-T9 FLDTLVVL   | 74    | >CDKN2A-T9 FLDRLVVL   | 94    | 20    |
| >CDKN2A-T9 FLDTLVVLHR | 24    | >CDKN2A-T9 FLDRLVVLHR | 33    | 9     |
| >CDKN2A-T9 FLDTLVVL   | 37    | >CDKN2A-T9 FLDRLVVL   | 43    | 6     |
| >CDKN2A-T9 FLDTLVVLHR | 68    | >CDKN2A-T9 FLDRLVVLHR | 90    | 22    |
| >CDKN2A-T9 FLDTLVVL   | 3     | >CDKN2A-T9 FLDRLVVL   | 3     | 0     |
| >CDKN2A-T9 FLDTLVVLHR | 3     | >CDKN2A-T9 FLDRLVVLHR | 3     | 0     |
| >CDKN2A-T9 FLDTLVVL   | 4     | >CDKN2A-T9 FLDRLVVL   | 4     | 0     |
| >CDKN2A-T9 FLDTLVVLHR | 9     | >CDKN2A-T9 FLDRLVVLHR | 10    | 1     |
| >CDKN2A-T9 FLDTLVVL   | 7     | >CDKN2A-T9 FLDRLVVL   | 7     | 0     |
| >CDKN2A-T9 FLDTLVVLHR | 8     | >CDKN2A-T9 FLDRLVVLHR | 8     | 0     |
| >CDKN2A-T9 FLDTLVVL   | 8     | >CDKN2A-T9 FLDRLVVL   | 13    | 5     |
| >CDKN2A-T9 FLDTLVVLHR | 19    | >CDKN2A-T9 FLDRLVVLHR | 27    | 8     |
| >CDKN2A-T9 FLDTLVVL   | 3     | >CDKN2A-T9 FLDRLVVL   | 3     | 0     |
| >CDKN2A-T9 FLDTLVVLHR | 3     | >CDKN2A-T9 FLDRLVVLHR | 3     | 0     |
| >CDKN2A-T9 FLDTLVVLHR | 626   | >CDKN2A-T9 FLDRLVVLHR | 458   | 168   |
| >CDKN2A-T9 FLDTLVVLHR | 354   | >CDKN2A-T9 FLDRLVVLHR | 1308  | 954   |
| >CDKN2A-T9 FLDTLVVL   | 52    | >CDKN2A-T9 FLDRLVVL   | 225   | 173   |
| >CDKN2A-T9 FLDTLVVLHR | 553   | >CDKN2A-T9 FLDRLVVLHR | 349   | 204   |
| >CDKN2A-T9 FLDTLVVLHR | 272   | >CDKN2A-T9 FLDRLVVLHR | 626   | 354   |
| >CDKN2A-T9 GFLDTLVV   | 313   | >CDKN2A-T9 GFLDRLVV   | 1247  | 934   |
| >CDKN2A-T9 GFLDTLVV   | 494   | >CDKN2A-T9 GFLDRLVV   | 2483  | 1989  |
| >CDKN2A-T9 GFLDTLVV   | 110   | >CDKN2A-T9 GFLDRLVV   | 770   | 660   |
| >CDKN2A-T9 GFLDTLVV   | 221   | >CDKN2A-T9 GFLDRLVV   | 317   | 96    |
| >CDKN2A-T9 GFLDTLVVL  | 298   | >CDKN2A-T9 GFLDRLVVL  | 1181  | 883   |
| >CDKN2A-T9 GFLDTLVVL  | 75    | >CDKN2A-T9 GFLDRLVVL  | 144   | 69    |
| >CDKN2A-T9 GFLDTLVVLH | 38    | >CDKN2A-T9 GFLDRLVVLH | 24    | 14    |
| >CDKN2A-T9 GFLDTLVVLH | 421   | >CDKN2A-T9 GFLDRLVVLH | 154   | 267   |
| >CDKN2A-T9 GFLDTLVVLH | 77    | >CDKN2A-T9 GFLDRLVVLH | 77    | 0     |
| >CDKN2A-T9 EGFLDTLV   | 135   | >CDKN2A-T9 EGFLDRLV   | 580   | 445   |
| >CDKN2A-T9 REGFLDTL   | 13    | >CDKN2A-T9 REGFLDRL   | 44    | 31    |
| >CDKN2A-T9 REGFLDTLV  | 213   | >CDKN2A-T9 REGFLDRLV  | 463   | 250   |
| >CDKN2A-T9 REGFLDTLVV | 14    | >CDKN2A-T9 REGFLDRLVV | 28    | 14    |

|                       |       |                       |       |       |
|-----------------------|-------|-----------------------|-------|-------|
| >CDKN2A-T9 REGFLDTL   | 99    | >CDKN2A-T9 REGFLDRL   | 205   | 106   |
| >CDKN2A-T9 REGFLDTLV  | 208   | >CDKN2A-T9 REGFLDRLV  | 427   | 219   |
| >CDKN2A-T9 REGFLDTLVV | 264   | >CDKN2A-T9 REGFLDRLVV | 296   | 32    |
| >CDKN2A-T9 REGFLDTLVV | 63    | >CDKN2A-T9 REGFLDRLVV | 94    | 31    |
| >CDKN2A-T9 REGFLDTLV  | 35    | >CDKN2A-T9 REGFLDRLV  | 143   | 108   |
| >CDKN2A-T9 REGFLDTLVV | 89    | >CDKN2A-T9 REGFLDRLVV | 174   | 85    |
| >CDKN2A-T9 REGFLDTLVV | 68    | >CDKN2A-T9 REGFLDRLVV | 91    | 23    |
| >CDKN2A-T9 AREGFLDTL  | 165   | >CDKN2A-T9 AREGFLDRL  | 339   | 174   |
| >CDKN2A-T9 AREGFLDTL  | 63    | >CDKN2A-T9 AREGFLDRL  | 103   | 40    |
| >CDKN2A-T9 AAREGFLDTL | 408   | >CDKN2A-T9 AAREGFLDRL | 1242  | 834   |
| >CDKN2A-T9 AAREGFLDTL | 252   | >CDKN2A-T9 AAREGFLDRL | 1080  | 828   |
| >CDKN2A-T9 AAREGFLDT  | 1653  | >CDKN2A-T9 AAREGFLDR  | 333   | 1320  |
| >CDKN2A-T9 AAREGFLDTL | 342   | >CDKN2A-T9 AAREGFLDRL | 687   | 345   |
| >CDKN2A-T9 AAREGFLDTL | 203   | >CDKN2A-T9 AAREGFLDRL | 96    | 107   |
| >CDKN2A-T9 AAREGFLDTL | 53    | >CDKN2A-T9 AAREGFLDRL | 78    | 25    |
| >CDKN2A-T9 AAREGFLDT  | 8163  | >CDKN2A-T9 AAREGFLDR  | 189   | 7974  |
| >CDKN2A-T9 DAAREGFLDT | 37859 | >CDKN2A-T9 DAAREGFLDF | 354   | 37505 |
| >CDKN2A-V1 VRDAWGRLP  | 1516  | >CDKN2A-V1 MRDAWGRLI  | 350   | 1166  |
| >CDKN2A-V1 VRDAWGRL   | 1239  | >CDKN2A-V1 MRDAWGRL   | 124   | 1115  |
| >CDKN2A-V1 VRDAWGRLP  | 489   | >CDKN2A-V1 MRDAWGRLI  | 52    | 437   |
| >CDKN2A-V1 DVRDAWGRI  | 10702 | >CDKN2A-V1 DMRDAWGR   | 409   | 10293 |
| >CDKN2A-V1 DVRDAWGRI  | 1480  | >CDKN2A-V1 DMRDAWGR   | 21    | 1459  |
| >CDKN2A-V1 DVRDAWGRI  | 456   | >CDKN2A-V1 DMRDAWGR   | 9489  | 9033  |
| >CDKN2A-V1 DVRDAWGRI  | 277   | >CDKN2A-V1 DMRDAWGR   | 1110  | 833   |
| >CDKN2A-V1 DVRDAWGR   | 17    | >CDKN2A-V1 DMRDAWGR   | 13    | 4     |
| >CDKN2A-V1 DVRDAWGR   | 62    | >CDKN2A-V1 DMRDAWGR   | 444   | 382   |
| >CDKN2A-V1 DVRDAWGRI  | 208   | >CDKN2A-V1 DMRDAWGR   | 5535  | 5327  |
| >CDKN2A-V1 DVRDAWGRI  | 198   | >CDKN2A-V1 DMRDAWGR   | 681   | 483   |
| >CDKN2A-V1 DVRDAWGR   | 1440  | >CDKN2A-V1 DMRDAWGR   | 371   | 1069  |
| >CDKN2A-V1 VLHRAGARLI | 1337  | >CDKN2A-V1 VLHRAGARLI | 222   | 1115  |
| >CDKN2A-V1 VLHRAGARLI | 77    | >CDKN2A-V1 VLHRAGARLI | 4357  | 4280  |
| >CDKN2A-V1 VLHRAGARLI | 36    | >CDKN2A-V1 VLHRAGARLI | 2825  | 2789  |
| >CDKN2A-V1 VLHRAGARLI | 346   | >CDKN2A-V1 VLHRAGARLI | 10035 | 9689  |
| >CDKN2A-V1 VLHRAGARLI | 33    | >CDKN2A-V1 VLHRAGARLI | 6724  | 6691  |
| >CDKN2A-V1 VLHRAGARLI | 3     | >CDKN2A-V1 VLHRAGARLI | 173   | 170   |
| >CDKN2A-V1 LDVRDAWGF  | 477   | >CDKN2A-V1 LDMRDAWGF  | 445   | 32    |
| >CDKN2A-V1 RLDVRDAWGF | 122   | >CDKN2A-V1 RLDMRDAWGF | 56    | 66    |
| >CDKN2A-V1 RLDVRDAWGF | 227   | >CDKN2A-V1 RLDMRDAWGF | 176   | 51    |
| >CDKN2A-V1 RLDVRDAWGF | 91    | >CDKN2A-V1 RLDMRDAWGF | 59    | 32    |
| >CDKN2A-V1 RLDVRDAWGF | 120   | >CDKN2A-V1 RLDMRDAWGF | 60    | 60    |
| >CDKN2A-V1 RLDVRDAW   | 274   | >CDKN2A-V1 RLDMRDAW   | 632   | 358   |
| >CDKN2A-V1 RLDVRDAWGF | 92    | >CDKN2A-V1 RLDMRDAWGF | 85    | 7     |
| >CDKN2A-V1 RLDVRDAWGF | 293   | >CDKN2A-V1 RLDMRDAWGF | 170   | 123   |

|                       |       |                        |       |       |
|-----------------------|-------|------------------------|-------|-------|
| >CDKN2A-V1 ARLDVRDAW  | 89    | >CDKN2A-V1 ARLDMRDAV   | 87    | 2     |
| >CDKN2A-V1 ARLDVRDAW  | 117   | >CDKN2A-V1 ARLDMRDAV   | 135   | 18    |
| >CDKN2A-V1 GARLDVRDA' | 604   | >CDKN2A-V1 GARLDMRDA   | 300   | 304   |
| >CDKN2A-V1 GARLDVRDA' | 457   | >CDKN2A-V1 GARLDMRDA   | 661   | 204   |
| >CDKN2A-V1 AGARLDVRD, | 289   | >CDKN2A-V1 AGARLDMRC   | 285   | 4     |
| >CDKN2A-V1 RAGARLDVR  | 90    | >CDKN2A-V1 RAGARLDMR   | 82    | 8     |
| >CDKN2A-V1 RAGARLDV   | 7721  | >CDKN2A-V1 RAGARLDM    | 388   | 7333  |
| >CDKN2A-V1 HRAGARLDV  | 197   | >CDKN2A-V1 HRAGARLDM   | 49    | 148   |
| >CDKN2A-V1 HRAGARLDV  | 101   | >CDKN2A-V1 HRAGARLDM   | 97    | 4     |
| >CDKN2A-V1 HRAGARLDV  | 813   | >CDKN2A-V1 HRAGARLDM   | 188   | 625   |
| >CDKN2A-V1 PVDLAEEL   | 21139 | >CDKN2A-V1 PEDLAEEL    | 425   | 20714 |
| >CDKN2A-V1 DVRDAWGRI  | 277   | >CDKN2A-V1 DVRDAWGRI   | 5271  | 4994  |
| >CDKN2A-V1 DVRDAWGRI  | 208   | >CDKN2A-V1 DVRDAWGRI   | 25426 | 25218 |
| >CDKN2A-V1 DVRDAWGRI  | 198   | >CDKN2A-V1 DVRDAWGRI   | 19126 | 18928 |
| >CDKN2A-V1 LPVDLAEEL  | 414   | >CDKN2A-V1 LPEDLAEEL   | 864   | 450   |
| >CDKN2A-V1 LPVDLAEEL  | 42    | >CDKN2A-V1 LPEDLAEEL   | 134   | 92    |
| >CDKN2A-V1 LPVDLAEELG | 86    | >CDKN2A-V1 LPEDLAEELGI | 212   | 126   |
| >CDKN2A-V1 LPVDLAEEL  | 407   | >CDKN2A-V1 LPEDLAEEL   | 1921  | 1514  |
| >CDKN2A-V1 LPVDLAEEL  | 52    | >CDKN2A-V1 LPEDLAEEL   | 109   | 57    |
| >CDKN2A-V1 LPVDLAEEL  | 86    | >CDKN2A-V1 LPEDLAEEL   | 77    | 9     |
| >CDKN2A-V1 RLPVDLAEEL | 99    | >CDKN2A-V1 RLPEDLAEEL  | 40    | 59    |
| >CDKN2A-V1 RLPVDLAEEL | 38    | >CDKN2A-V1 RLPEDLAEEL  | 5     | 33    |
| >CDKN2A-V1 RLPVDLAEEL | 165   | >CDKN2A-V1 RLPEDLAEEL  | 23    | 142   |
| >CDKN2A-V1 RLPVDLAEEL | 125   | >CDKN2A-V1 RLPEDLAEEL  | 19    | 106   |
| >CDKN2A-V1 RLPVDLAEEL | 391   | >CDKN2A-V1 RLPEDLAEEL  | 60    | 331   |
| >CDKN2A-V1 RLPVDLAEEL | 15    | >CDKN2A-V1 RLPEDLAEEL  | 5     | 10    |
| >CDKN2A-V1 RLPVDLAEEL | 1004  | >CDKN2A-V1 RLPEDLAEEL  | 484   | 520   |
| >CDKN2A-V1 RLPVDLAEEL | 693   | >CDKN2A-V1 RLPEDLAEEL  | 468   | 225   |
| >CDKN2A-V1 GRLPVDLAE  | 202   | >CDKN2A-V1 GRLPEDLAE   | 427   | 225   |
| >CDKN2A-V1 GRLPVDLAE  | 194   | >CDKN2A-V1 GRLPEDLAE   | 658   | 464   |
| >CDKN2A-V1 GRLPVDLAE  | 29    | >CDKN2A-V1 GRLPEDLAE   | 92    | 63    |
| >CDKN2A-V1 AWGRLPVDL  | 474   | >CDKN2A-V1 AWGRLPEDL   | 813   | 339   |
| >CDKN2A-V1 AWGRLPVDL  | 403   | >CDKN2A-V1 AWGRLPEDL   | 443   | 40    |
| >CDKN2A-V1 AWGRLPVDL  | 156   | >CDKN2A-V1 AWGRLPEDL   | 253   | 97    |
| >CDKN2A-V1 DAWGRLPV   | 260   | >CDKN2A-V1 DAWGRLPE    | 24834 | 24574 |
| >CDKN2A-V1 DAWGRLPV   | 24    | >CDKN2A-V1 DAWGRLPE    | 15762 | 15738 |
| >CDKN2A-V1 VRDAWGRLP  | 489   | >CDKN2A-V1 VRDAWGRLP   | 14426 | 13937 |
| >CDKN2A-V1 PVDLAEEL   | 17203 | >CDKN2A-V1 PLDLAEEL    | 365   | 16838 |
| >CDKN2A-V1 DVRDAWGRI  | 277   | >CDKN2A-V1 DVRDAWGRI   | 419   | 142   |
| >CDKN2A-V1 DVRDAWGRI  | 208   | >CDKN2A-V1 DVRDAWGRI   | 2608  | 2400  |
| >CDKN2A-V1 DVRDAWGRI  | 198   | >CDKN2A-V1 DVRDAWGRI   | 1893  | 1695  |
| >CDKN2A-V1 DVRDAWGRI  | 1968  | >CDKN2A-V1 DVRDAWGRI   | 281   | 1687  |
| >CDKN2A-V1 LPVDLAEEL  | 414   | >CDKN2A-V1 LPLDLAEEL   | 732   | 318   |



|                        |      |                        |       |       |
|------------------------|------|------------------------|-------|-------|
| >CDKN2A-V1 LPVDLAEEL   | 42   | >CDKN2A-V1 LPLDLAEEL   | 72    | 30    |
| >CDKN2A-V1 LPVDLAEELG  | 86   | >CDKN2A-V1 LPLDLAEELG  | 128   | 42    |
| >CDKN2A-V1 LPVDLAEEL   | 407  | >CDKN2A-V1 LPLDLAEEL   | 282   | 125   |
| >CDKN2A-V1 LPVDLAEEL   | 52   | >CDKN2A-V1 LPLDLAEEL   | 74    | 22    |
| >CDKN2A-V1 LPVDLAEEL   | 86   | >CDKN2A-V1 LPLDLAEEL   | 51    | 35    |
| >CDKN2A-V1 RLPVDLAEEL  | 99   | >CDKN2A-V1 RLPLDLAEEL  | 77    | 22    |
| >CDKN2A-V1 RLPVDLAEEL  | 38   | >CDKN2A-V1 RLPLDLAEEL  | 49    | 11    |
| >CDKN2A-V1 RLPVDLAEEL  | 165  | >CDKN2A-V1 RLPLDLAEEL  | 196   | 31    |
| >CDKN2A-V1 RLPVDLAEEL  | 125  | >CDKN2A-V1 RLPLDLAEEL  | 173   | 48    |
| >CDKN2A-V1 RLPVDLAEEL  | 391  | >CDKN2A-V1 RLPLDLAEEL  | 390   | 1     |
| >CDKN2A-V1 RLPVDLAEEL  | 15   | >CDKN2A-V1 RLPLDLAEEL  | 19    | 4     |
| >CDKN2A-V1 GRLPVDLAEEL | 202  | >CDKN2A-V1 GRLPLDLAEEL | 131   | 71    |
| >CDKN2A-V1 GRLPVDLAEEL | 194  | >CDKN2A-V1 GRLPLDLAEEL | 173   | 21    |
| >CDKN2A-V1 GRLPVDLAEEL | 29   | >CDKN2A-V1 GRLPLDLAEEL | 22    | 7     |
| >CDKN2A-V1 AWGRLPVDL   | 474  | >CDKN2A-V1 AWGRLPLDL   | 630   | 156   |
| >CDKN2A-V1 AWGRLPVDL   | 403  | >CDKN2A-V1 AWGRLPLDL   | 474   | 71    |
| >CDKN2A-V1 AWGRLPVDL   | 156  | >CDKN2A-V1 AWGRLPLDL   | 123   | 33    |
| >CDKN2A-V1 DAWGRLPV    | 260  | >CDKN2A-V1 DAWGRLPL    | 2648  | 2388  |
| >CDKN2A-V1 DAWGRLPV    | 24   | >CDKN2A-V1 DAWGRLPL    | 222   | 198   |
| >CDKN2A-V1 RDAWGRLPV   | 1704 | >CDKN2A-V1 RDAWGRLPL   | 169   | 1535  |
| >CDKN2A-V1 RDAWGRLPV   | 2125 | >CDKN2A-V1 RDAWGRLPL   | 337   | 1788  |
| >CDKN2A-V1 VRDAWGRLP   | 1516 | >CDKN2A-V1 VRDAWGRLP   | 127   | 1389  |
| >CDKN2A-V1 VRDAWGRLP   | 489  | >CDKN2A-V1 VRDAWGRLP   | 45    | 444   |
| >CDKN2A-V1 VRDAWGRLP   | 3130 | >CDKN2A-V1 VRDAWGRLP   | 381   | 2749  |
| >CDKN2A-V1 VRDAWGRLP   | 1175 | >CDKN2A-V1 VRDAWGRLP   | 194   | 981   |
| >CDKN2A-V1 VARYLRAA    | 137  | >CDKN2A-V1 FARYLRAA    | 1296  | 1159  |
| >CDKN2A-V1 VARYLRAAA   | 38   | >CDKN2A-V1 FARYLRAAA   | 334   | 296   |
| >CDKN2A-V1 VARYLRAA    | 1040 | >CDKN2A-V1 FARYLRAA    | 460   | 580   |
| >CDKN2A-V1 VARYLRAAA   | 284  | >CDKN2A-V1 FARYLRAAA   | 114   | 170   |
| >CDKN2A-V1 VARYLRAA    | 2773 | >CDKN2A-V1 FARYLRAA    | 282   | 2491  |
| >CDKN2A-V1 VARYLRAAA   | 943  | >CDKN2A-V1 FARYLRAAA   | 91    | 852   |
| >CDKN2A-V1 VARYLRAA    | 4599 | >CDKN2A-V1 FARYLRAA    | 36    | 4563  |
| >CDKN2A-V1 VARYLRAAA   | 2418 | >CDKN2A-V1 FARYLRAAA   | 22    | 2396  |
| >CDKN2A-V1 DVARYLRAA/  | 376  | >CDKN2A-V1 DFARYLRAAA  | 15074 | 14698 |
| >CDKN2A-V1 DLAEELGHRC  | 265  | >CDKN2A-V1 DLAEELGHRC  | 20315 | 20050 |
| >CDKN2A-V1 DLAEELGHRC  | 185  | >CDKN2A-V1 DLAEELGHRC  | 20336 | 20151 |
| >CDKN2A-V1 DLAEELGHRC  | 418  | >CDKN2A-V1 DLAEELGHRC  | 19213 | 18795 |
| >CDKN2A-V1 DLAEELGHRC  | 27   | >CDKN2A-V1 DLAEELGHRC  | 22762 | 22735 |
| >CDKN2A-V1 RDVARYLR    | 243  | >CDKN2A-V1 RDFARYLR    | 42    | 201   |
| >CDKN2A-V1 RDVARYLRA   | 2821 | >CDKN2A-V1 RDFARYLRA   | 323   | 2498  |
| >CDKN2A-V1 RDVARYLRA/  | 1219 | >CDKN2A-V1 RDFARYLRAA  | 147   | 1072  |
| >CDKN2A-V1 RDVARYLR    | 79   | >CDKN2A-V1 RDFARYLR    | 39    | 40    |
| >CDKN2A-V1 HRDVARYLR   | 203  | >CDKN2A-V1 HRDFARYLR   | 456   | 253   |

|                        |       |                         |      |       |
|------------------------|-------|-------------------------|------|-------|
| >CDKN2A-V1 HRDVARYLRA  | 122   | >CDKN2A-V1 HRDFARYLRA   | 119  | 3     |
| >CDKN2A-V1 HRDVARYL    | 175   | >CDKN2A-V1 HRDFARYL     | 358  | 183   |
| >CDKN2A-V1 HRDVARYLR   | 370   | >CDKN2A-V1 HRDFARYLR    | 174  | 196   |
| >CDKN2A-V1 GHRDVARYLFA | 282   | >CDKN2A-V1 GHRDFARYLFA  | 115  | 167   |
| >CDKN2A-V1 LGHRDVARY   | 415   | >CDKN2A-V1 LGHRDFARY    | 202  | 213   |
| >CDKN2A-V1 LGHRDVAR    | 1027  | >CDKN2A-V1 LGHRDFAR     | 172  | 855   |
| >CDKN2A-V1 LGHRDVARYL  | 152   | >CDKN2A-V1 LGHRDFARYL   | 71   | 81    |
| >CDKN2A-V1 LGHRDVARY   | 409   | >CDKN2A-V1 LGHRDFARY    | 332  | 77    |
| >CDKN2A-V1 LGHRDVARYL  | 881   | >CDKN2A-V1 LGHRDFARYL   | 428  | 453   |
| >CDKN2A-V1 ELGHRDVAR)  | 382   | >CDKN2A-V1 ELGHRDFARY   | 277  | 105   |
| >CDKN2A-V1 ELGHRDVAR)  | 477   | >CDKN2A-V1 ELGHRDFARY   | 312  | 165   |
| >CDKN2A-V1 ELGHRDVAR)  | 274   | >CDKN2A-V1 ELGHRDFARY   | 482  | 208   |
| >CDKN2A-V1 ELGHRDVAR)  | 413   | >CDKN2A-V1 ELGHRDFARY   | 345  | 68    |
| >CDKN2A-V1 ELGHRDVAR   | 85    | >CDKN2A-V1 ELGHRDFAR    | 38   | 47    |
| >CDKN2A-V1 ELGHRDVAR   | 153   | >CDKN2A-V1 ELGHRDFAR    | 71   | 82    |
| >CDKN2A-V1 ELGHRDVAR)  | 1728  | >CDKN2A-V1 ELGHRDFARY   | 490  | 1238  |
| >CDKN2A-V1 ELGHRDVAR   | 188   | >CDKN2A-V1 ELGHRDFAR    | 190  | 2     |
| >CDKN2A-V1 EELGHRDV    | 193   | >CDKN2A-V1 EELGHRDF     | 832  | 639   |
| >CDKN2A-V1 EELGHRDVAFA | 86    | >CDKN2A-V1 EELGHRDFAFA  | 106  | 20    |
| >CDKN2A-V1 EELGHRDV    | 4009  | >CDKN2A-V1 EELGHRDF     | 94   | 3915  |
| >CDKN2A-V1 EELGHRDVAFA | 177   | >CDKN2A-V1 EELGHRDFAFA  | 165  | 12    |
| >CDKN2A-V1 EELGHRDV    | 1043  | >CDKN2A-V1 EELGHRDF     | 65   | 978   |
| >CDKN2A-V1 EELGHRDVAFA | 121   | >CDKN2A-V1 EELGHRDFAFA  | 76   | 45    |
| >CDKN2A-V1 EELGHRDV    | 54    | >CDKN2A-V1 EELGHRDF     | 1016 | 962   |
| >CDKN2A-V1 EELGHRDVA   | 10    | >CDKN2A-V1 EELGHRDFA    | 13   | 3     |
| >CDKN2A-V1 EELGHRDVAFA | 940   | >CDKN2A-V1 EELGHRDFAFA  | 487  | 453   |
| >CDKN2A-V1 EELGHRDVAFA | 471   | >CDKN2A-V1 EELGHRDFAFA  | 418  | 53    |
| >CDKN2A-V1 AEELGHRDV   | 408   | >CDKN2A-V1 AEELGHRDF    | 532  | 124   |
| >CDKN2A-V1 AEELGHRDV   | 29    | >CDKN2A-V1 AEELGHRDF    | 414  | 385   |
| >CDKN2A-V1 AEELGHRDVFA | 39    | >CDKN2A-V1 AEELGHRDFAFA | 34   | 5     |
| >CDKN2A-V1 AEELGHRDVFA | 846   | >CDKN2A-V1 AEELGHRDFAFA | 456  | 390   |
| >CDKN2A-V1 AEELGHRDV   | 336   | >CDKN2A-V1 AEELGHRDF    | 1637 | 1301  |
| >CDKN2A-V1 LAEELGHRDV  | 16517 | >CDKN2A-V1 LAEELGHRDF   | 162  | 16355 |
| >CDKN2A-V1 VARYLRAA    | 137   | >CDKN2A-V1 IARYLRAA     | 48   | 89    |
| >CDKN2A-V1 VARYLRAAA   | 38    | >CDKN2A-V1 IARYLRAAA    | 16   | 22    |
| >CDKN2A-V1 VARYLRAAAAC | 843   | >CDKN2A-V1 IARYLRAAAAG  | 315  | 528   |
| >CDKN2A-V1 VARYLRAAA   | 284   | >CDKN2A-V1 IARYLRAAA    | 168  | 116   |
| >CDKN2A-V1 VARYLRAAA   | 2418  | >CDKN2A-V1 IARYLRAAA    | 374  | 2044  |
| >CDKN2A-V1 DVARYLRAAFA | 376   | >CDKN2A-V1 DIARYLRAAA   | 680  | 304   |
| >CDKN2A-V1 DLAEELGHRC  | 265   | >CDKN2A-V1 DLAEELGHRC   | 2780 | 2515  |
| >CDKN2A-V1 DLAEELGHRC  | 185   | >CDKN2A-V1 DLAEELGHRC   | 3345 | 3160  |
| >CDKN2A-V1 DLAEELGHRC  | 418   | >CDKN2A-V1 DLAEELGHRC   | 5395 | 4977  |
| >CDKN2A-V1 DLAEELGHRC  | 27    | >CDKN2A-V1 DLAEELGHRC   | 2890 | 2863  |

|                       |      |                       |       |       |
|-----------------------|------|-----------------------|-------|-------|
| >CDKN2A-V1 RDVARYLR   | 243  | >CDKN2A-V1 RDIARYLR   | 140   | 103   |
| >CDKN2A-V1 RDVARYLR   | 79   | >CDKN2A-V1 RDIARYLR   | 90    | 11    |
| >CDKN2A-V1 HRDVARYLR  | 203  | >CDKN2A-V1 HRDIARYLR  | 295   | 92    |
| >CDKN2A-V1 HRDVARYLR/ | 122  | >CDKN2A-V1 HRDIARYLRA | 98    | 24    |
| >CDKN2A-V1 HRDVARYL   | 175  | >CDKN2A-V1 HRDIARYL   | 346   | 171   |
| >CDKN2A-V1 HRDVARYLR  | 370  | >CDKN2A-V1 HRDIARYLR  | 166   | 204   |
| >CDKN2A-V1 GHRDVARYLR | 282  | >CDKN2A-V1 GHRDIARYLR | 194   | 88    |
| >CDKN2A-V1 LGHRDVARY  | 415  | >CDKN2A-V1 LGHRDIARY  | 256   | 159   |
| >CDKN2A-V1 LGHRDVARYL | 152  | >CDKN2A-V1 LGHRDIARYL | 111   | 41    |
| >CDKN2A-V1 LGHRDVARY  | 409  | >CDKN2A-V1 LGHRDIARY  | 611   | 202   |
| >CDKN2A-V1 ELGHRDVARY | 382  | >CDKN2A-V1 ELGHRDIARY | 491   | 109   |
| >CDKN2A-V1 ELGHRDVARY | 477  | >CDKN2A-V1 ELGHRDIARY | 466   | 11    |
| >CDKN2A-V1 ELGHRDVARY | 274  | >CDKN2A-V1 ELGHRDIARY | 267   | 7     |
| >CDKN2A-V1 ELGHRDVARY | 413  | >CDKN2A-V1 ELGHRDIARY | 355   | 58    |
| >CDKN2A-V1 ELGHRDVAR  | 85   | >CDKN2A-V1 ELGHRDIAR  | 100   | 15    |
| >CDKN2A-V1 ELGHRDVAR  | 153  | >CDKN2A-V1 ELGHRDIAR  | 192   | 39    |
| >CDKN2A-V1 ELGHRDVAR  | 188  | >CDKN2A-V1 ELGHRDIAR  | 223   | 35    |
| >CDKN2A-V1 EELGHRDV   | 193  | >CDKN2A-V1 EELGHRDI   | 59    | 134   |
| >CDKN2A-V1 EELGHRDVAF | 86   | >CDKN2A-V1 EELGHRDIAR | 98    | 12    |
| >CDKN2A-V1 EELGHRDVAF | 177  | >CDKN2A-V1 EELGHRDIAR | 185   | 8     |
| >CDKN2A-V1 EELGHRDVAF | 121  | >CDKN2A-V1 EELGHRDIAR | 98    | 23    |
| >CDKN2A-V1 EELGHRDV   | 54   | >CDKN2A-V1 EELGHRDI   | 226   | 172   |
| >CDKN2A-V1 EELGHRDVA  | 10   | >CDKN2A-V1 EELGHRDIA  | 16    | 6     |
| >CDKN2A-V1 EELGHRDV   | 4568 | >CDKN2A-V1 EELGHRDI   | 477   | 4091  |
| >CDKN2A-V1 EELGHRDVAF | 471  | >CDKN2A-V1 EELGHRDIAR | 521   | 50    |
| >CDKN2A-V1 AEELGHRDV  | 2114 | >CDKN2A-V1 AEELGHRDI  | 235   | 1879  |
| >CDKN2A-V1 AEELGHRDV  | 408  | >CDKN2A-V1 AEELGHRDI  | 161   | 247   |
| >CDKN2A-V1 AEELGHRDV  | 29   | >CDKN2A-V1 AEELGHRDI  | 96    | 67    |
| >CDKN2A-V1 AEELGHRDV/ | 39   | >CDKN2A-V1 AEELGHRDIA | 48    | 9     |
| >CDKN2A-V1 AEELGHRDV  | 336  | >CDKN2A-V1 AEELGHRDI  | 142   | 194   |
| >CDKN2A-V2 VRALLEAGAL | 145  | >CDKN2A-V2 GRALLEAGAL | 39    | 106   |
| >CDKN2A-V2 VRALLEAGAL | 289  | >CDKN2A-V2 GRALLEAGAL | 365   | 76    |
| >CDKN2A-V2 EVRALLEAGA | 51   | >CDKN2A-V2 EGRALLEAGA | 19426 | 19375 |
| >CDKN2A-V2 EVRALLEAGA | 293  | >CDKN2A-V2 EGRALLEAGA | 6250  | 5957  |
| >CDKN2A-V2 EVRALLEAGA | 497  | >CDKN2A-V2 EGRALLEAGA | 21375 | 20878 |
| >CDKN2A-V2 TAAARGRVEE | 34   | >CDKN2A-V2 TAAARGRVEE | 7813  | 7779  |
| >CDKN2A-V2 EEVRALLE   | 108  | >CDKN2A-V2 EEGRALLE   | 663   | 555   |
| >CDKN2A-V2 EEVRALLEA  | 326  | >CDKN2A-V2 EEGRALLEA  | 696   | 370   |
| >CDKN2A-V2 EEVRALLEA  | 454  | >CDKN2A-V2 EEGRALLEA  | 1145  | 691   |
| >CDKN2A-V2 EEVRALLEA  | 14   | >CDKN2A-V2 EEGRALLEA  | 13    | 1     |
| >CDKN2A-V2 EEVRALLEAG | 18   | >CDKN2A-V2 EEGRALLEAG | 19    | 1     |
| >CDKN2A-V2 VEEVRALL   | 176  | >CDKN2A-V2 VEEGRALL   | 544   | 368   |
| >CDKN2A-V2 VEEVRALL   | 143  | >CDKN2A-V2 VEEGRALL   | 38    | 105   |

|                       |      |                       |       |       |
|-----------------------|------|-----------------------|-------|-------|
| >CDKN2A-V2 VEEVRALLEA | 173  | >CDKN2A-V2 VEEGRALLEA | 310   | 137   |
| >CDKN2A-V2 RVEEVRALLE | 542  | >CDKN2A-V2 RVEEGRALLE | 474   | 68    |
| >CDKN2A-V2 RVEEVRAL   | 281  | >CDKN2A-V2 RVEEGRAL   | 1329  | 1048  |
| >CDKN2A-V2 RVEEVRAL   | 165  | >CDKN2A-V2 RVEEGRAL   | 41    | 124   |
| >CDKN2A-V2 RVEEVRALL  | 1681 | >CDKN2A-V2 RVEEGRALL  | 418   | 1263  |
| >CDKN2A-V2 GRVEEVRAL  | 383  | >CDKN2A-V2 GRVEEGRAL  | 609   | 226   |
| >CDKN2A-V2 GRVEEVRALL | 45   | >CDKN2A-V2 GRVEEGRALL | 58    | 13    |
| >CDKN2A-V2 GRVEEVRAL  | 189  | >CDKN2A-V2 GRVEEGRAL  | 519   | 330   |
| >CDKN2A-V2 GRVEEVRALL | 338  | >CDKN2A-V2 GRVEEGRALL | 475   | 137   |
| >CDKN2A-V2 GRVEEVRALL | 430  | >CDKN2A-V2 GRVEEGRALL | 539   | 109   |
| >CDKN2A-V2 GRVEEVRAL  | 92   | >CDKN2A-V2 GRVEEGRAL  | 288   | 196   |
| >CDKN2A-V2 GRVEEVRALL | 186  | >CDKN2A-V2 GRVEEGRALL | 263   | 77    |
| >CDKN2A-V2 RGRVEEVRA  | 447  | >CDKN2A-V2 RGRVEEGRA  | 872   | 425   |
| >CDKN2A-V2 RGRVEEVRAL | 436  | >CDKN2A-V2 RGRVEEGRAI | 651   | 215   |
| >CDKN2A-V2 RGRVEEVRAL | 98   | >CDKN2A-V2 RGRVEEGRAI | 116   | 18    |
| >CDKN2A-V2 ARGRVEEVR/ | 260  | >CDKN2A-V2 ARGRVEEGR/ | 396   | 136   |
| >CDKN2A-V2 AARGRVEEV  | 50   | >CDKN2A-V2 AARGRVEEG  | 33980 | 33930 |
| >CDKN2A-V2 AARGRVEEVI | 269  | >CDKN2A-V2 AARGRVEEGI | 402   | 133   |
| >CDKN2A-V2 AARGRVEEVI | 265  | >CDKN2A-V2 AARGRVEEGI | 123   | 142   |
| >CDKN2A-V2 AAARGRVEE\ | 33   | >CDKN2A-V2 AAARGRVEEK | 32899 | 32866 |
| >CDKN2A-V2 AAARGRVEE\ | 434  | >CDKN2A-V2 AAARGRVEEK | 607   | 173   |
| >CDKN2A-V2 AAARGRVEE\ | 127  | >CDKN2A-V2 AAARGRVEEK | 106   | 21    |
| >CDKN2A-V2 VRALLEAGAL | 145  | >CDKN2A-V2 MRALLEAGAI | 42    | 103   |
| >CDKN2A-V2 VRALLEAGAL | 515  | >CDKN2A-V2 MRALLEAGAI | 45    | 470   |
| >CDKN2A-V2 VRALLEAGAL | 289  | >CDKN2A-V2 MRALLEAGAI | 238   | 51    |
| >CDKN2A-V2 EVRALLEAGA | 51   | >CDKN2A-V2 EMRALLEAG/ | 1704  | 1653  |
| >CDKN2A-V2 EVRALLEAGA | 293  | >CDKN2A-V2 EMRALLEAG/ | 2698  | 2405  |
| >CDKN2A-V2 EVRALLEAGA | 497  | >CDKN2A-V2 EMRALLEAG/ | 1234  | 737   |
| >CDKN2A-V2 TAAARGRVEI | 34   | >CDKN2A-V2 TAAARGRVEI | 1242  | 1208  |
| >CDKN2A-V2 EEVRALLE   | 108  | >CDKN2A-V2 EEMRALLE   | 99    | 9     |
| >CDKN2A-V2 EEVRALLEA  | 326  | >CDKN2A-V2 EEMRALLEA  | 108   | 218   |
| >CDKN2A-V2 EEVRALLEA  | 454  | >CDKN2A-V2 EEMRALLEA  | 288   | 166   |
| >CDKN2A-V2 EEVRALLEA  | 14   | >CDKN2A-V2 EEMRALLEA  | 7     | 7     |
| >CDKN2A-V2 EEVRALLEAG | 18   | >CDKN2A-V2 EEMRALLEAC | 8     | 10    |
| >CDKN2A-V2 VEEVRALL   | 176  | >CDKN2A-V2 VEEMRALL   | 78    | 98    |
| >CDKN2A-V2 VEEVRALL   | 143  | >CDKN2A-V2 VEEMRALL   | 100   | 43    |
| >CDKN2A-V2 VEEVRALLEA | 173  | >CDKN2A-V2 VEEMRALLEA | 195   | 22    |
| >CDKN2A-V2 RVEEVRALLE | 542  | >CDKN2A-V2 RVEEMRALLE | 419   | 123   |
| >CDKN2A-V2 RVEEVRAL   | 281  | >CDKN2A-V2 RVEEMRAL   | 471   | 190   |
| >CDKN2A-V2 RVEEVRAL   | 165  | >CDKN2A-V2 RVEEMRAL   | 97    | 68    |
| >CDKN2A-V2 RVEEVRALL  | 800  | >CDKN2A-V2 RVEEMRALL  | 362   | 438   |
| >CDKN2A-V2 GRVEEVRAL  | 383  | >CDKN2A-V2 GRVEEMRAL  | 592   | 209   |
| >CDKN2A-V2 GRVEEVRALL | 45   | >CDKN2A-V2 GRVEEMRALI | 59    | 14    |

|                       |      |                       |       |       |
|-----------------------|------|-----------------------|-------|-------|
| >CDKN2A-V2 GRVEEVRAL  | 189  | >CDKN2A-V2 GRVEEMRAL  | 290   | 101   |
| >CDKN2A-V2 GRVEEVRALL | 338  | >CDKN2A-V2 GRVEEMRALI | 468   | 130   |
| >CDKN2A-V2 GRVEEVRALL | 430  | >CDKN2A-V2 GRVEEMRALI | 580   | 150   |
| >CDKN2A-V2 GRVEEVRAL  | 92   | >CDKN2A-V2 GRVEEMRAL  | 193   | 101   |
| >CDKN2A-V2 GRVEEVRALL | 186  | >CDKN2A-V2 GRVEEMRALI | 184   | 2     |
| >CDKN2A-V2 RGRVEEVRA  | 447  | >CDKN2A-V2 RGRVEEMRA  | 114   | 333   |
| >CDKN2A-V2 RGRVEEVRAL | 436  | >CDKN2A-V2 RGRVEEMRA  | 267   | 169   |
| >CDKN2A-V2 RGRVEEVRAL | 98   | >CDKN2A-V2 RGRVEEMRA  | 59    | 39    |
| >CDKN2A-V2 ARGRVEEVR/ | 260  | >CDKN2A-V2 ARGRVEEMR  | 340   | 80    |
| >CDKN2A-V2 AARGRVEEV  | 50   | >CDKN2A-V2 AARGRVEEM  | 18645 | 18595 |
| >CDKN2A-V2 AARGRVEEVF | 269  | >CDKN2A-V2 AARGRVEEM  | 115   | 154   |
| >CDKN2A-V2 AARGRVEEVF | 265  | >CDKN2A-V2 AARGRVEEM  | 105   | 160   |
| >CDKN2A-V2 AARGRVEEV  | 3243 | >CDKN2A-V2 AARGRVEEM  | 396   | 2847  |
| >CDKN2A-V2 AARGRVEEV  | 1803 | >CDKN2A-V2 AARGRVEEM  | 24    | 1779  |
| >CDKN2A-V2 AAARGRVEE\ | 33   | >CDKN2A-V2 AAARGRVEEI | 13872 | 13839 |
| >CDKN2A-V2 AAARGRVEE\ | 434  | >CDKN2A-V2 AAARGRVEEI | 419   | 15    |
| >CDKN2A-V2 AAARGRVEE\ | 127  | >CDKN2A-V2 AAARGRVEEI | 58    | 69    |
| >CDKN2A-V5 VM MMGSAR  | 182  | >CDKN2A-V5 AM MMGSAR  | 677   | 495   |
| >CDKN2A-V5 VM MMGSAR  | 11   | >CDKN2A-V5 AM MMGSAR  | 10    | 1     |
| >CDKN2A-V5 VM MMGSAR  | 9    | >CDKN2A-V5 AM MMGSAR  | 6     | 3     |
| >CDKN2A-V5 VM MMGSAR  | 425  | >CDKN2A-V5 AM MMGSAR  | 190   | 235   |
| >CDKN2A-V5 VM MMGSAR  | 3    | >CDKN2A-V5 AM MMGSAR  | 3     | 0     |
| >CDKN2A-V5 VM MMGSAR  | 226  | >CDKN2A-V5 AM MMGSAR  | 115   | 111   |
| >CDKN2A-V5 VM MMGSAR  | 19   | >CDKN2A-V5 AM MMGSAR  | 14    | 5     |
| >CDKN2A-V5 VM MMGSAR  | 2    | >CDKN2A-V5 AM MMGSAR  | 2     | 0     |
| >CDKN2A-V5 VM MMGSAR  | 55   | >CDKN2A-V5 AM MMGSAR  | 75    | 20    |
| >CDKN2A-V5 VM MMGSAR  | 3    | >CDKN2A-V5 AM MMGSAR  | 4     | 1     |
| >CDKN2A-V5 VM MMGSAR  | 239  | >CDKN2A-V5 AM MMGSAR  | 271   | 32    |
| >CDKN2A-V5 VM MMGSAR  | 7    | >CDKN2A-V5 AM MMGSAR  | 7     | 0     |
| >CDKN2A-V5 VM MMGSAR  | 2    | >CDKN2A-V5 AM MMGSAR  | 2     | 0     |
| >CDKN2A-V5 VM MMGSAR  | 95   | >CDKN2A-V5 AM MMGSAR  | 266   | 171   |
| >CDKN2A-V5 VM MMGSAR  | 2    | >CDKN2A-V5 AM MMGSAR  | 2     | 0     |
| >CDKN2A-V5 VM MMGSAR  | 54   | >CDKN2A-V5 AM MMGSAR  | 45    | 9     |
| >CDKN2A-V5 VM MMGSAR  | 212  | >CDKN2A-V5 AM MMGSAR  | 202   | 10    |
| >CDKN2A-V5 VM MMGSAR  | 168  | >CDKN2A-V5 AM MMGSAR  | 69    | 99    |
| >CDKN2A-V5 VM MMGSAR  | 20   | >CDKN2A-V5 AM MMGSAR  | 18    | 2     |
| >CDKN2A-V5 VM MMGSAR  | 120  | >CDKN2A-V5 AM MMGSAR  | 488   | 368   |
| >CDKN2A-V5 VM MMGSAR  | 462  | >CDKN2A-V5 AM MMGSAR  | 798   | 336   |
| >CDKN2A-V5 VM MMGSAR  | 175  | >CDKN2A-V5 AM MMGSAR  | 127   | 48    |
| >CDKN2A-V5 VM MMGSAR  | 183  | >CDKN2A-V5 AM MMGSAR  | 132   | 51    |
| >CDKN2A-V5 VM MMGSAR  | 146  | >CDKN2A-V5 AM MMGSAR  | 109   | 37    |
| >CDKN2A-V5 VM MMGSAR  | 420  | >CDKN2A-V5 AM MMGSAR  | 255   | 165   |
| >CDKN2A-V5 VM MMGSAR  | 721  | >CDKN2A-V5 AM MMGSAR  | 418   | 303   |

|                      |      |                      |      |      |
|----------------------|------|----------------------|------|------|
| >CDKN2A-V5 QVMMMGS/  | 419  | >CDKN2A-V5 QAMMMGS/  | 1071 | 652  |
| >CDKN2A-V5 QVMMMGS/  | 298  | >CDKN2A-V5 QAMMMGS/  | 1682 | 1384 |
| >CDKN2A-V5 QVMMMGS/  | 61   | >CDKN2A-V5 QAMMMGS/  | 173  | 112  |
| >CDKN2A-V5 QVMMMGS/  | 313  | >CDKN2A-V5 QAMMMGS/  | 711  | 398  |
| >CDKN2A-V5 QVMMMGS/  | 248  | >CDKN2A-V5 QAMMMGS/  | 2243 | 1995 |
| >CDKN2A-V5 QVMMMGS/  | 41   | >CDKN2A-V5 QAMMMGS/  | 775  | 734  |
| >CDKN2A-V5 QVMMMGS/  | 114  | >CDKN2A-V5 QAMMMGS/  | 771  | 657  |
| >CDKN2A-V5 QVMMMGS/  | 55   | >CDKN2A-V5 QAMMMGS/  | 98   | 43   |
| >CDKN2A-V5 QVMMMGS/  | 218  | >CDKN2A-V5 QAMMMGS/  | 500  | 282  |
| >CDKN2A-V5 QVMMMGS/  | 20   | >CDKN2A-V5 QAMMMGS/  | 33   | 13   |
| >CDKN2A-V5 QVMMMGS/  | 167  | >CDKN2A-V5 QAMMMGS/  | 921  | 754  |
| >CDKN2A-V5 QVMMMGS/  | 215  | >CDKN2A-V5 QAMMMGS/  | 466  | 251  |
| >CDKN2A-V5 QVMMMGS/  | 78   | >CDKN2A-V5 QAMMMGS/  | 208  | 130  |
| >CDKN2A-V5 QVMMMGS/  | 3451 | >CDKN2A-V5 QAMMMGS/  | 447  | 3004 |
| >CDKN2A-V5 IQVMMMGS, | 1017 | >CDKN2A-V5 IQAMMMGS, | 345  | 672  |
| >CDKN2A-V5 IQVMMMGS, | 598  | >CDKN2A-V5 IQAMMMGS, | 133  | 465  |
| >CDKN2A-V5 IQVMMMGS, | 167  | >CDKN2A-V5 IQAMMMGS, | 70   | 97   |
| >CDKN2A-V5 IQVMMMGS, | 42   | >CDKN2A-V5 IQAMMMGS, | 18   | 24   |
| >CDKN2A-V5 IQVMMMGS, | 87   | >CDKN2A-V5 IQAMMMGS, | 135  | 48   |
| >CDKN2A-V5 IQVMMMGS, | 16   | >CDKN2A-V5 IQAMMMGS, | 22   | 6    |
| >CDKN2A-V5 IQVMMMGS, | 587  | >CDKN2A-V5 IQAMMMGS, | 473  | 114  |
| >CDKN2A-V5 IQVMMMGS, | 777  | >CDKN2A-V5 IQAMMMGS, | 335  | 442  |
| >CDKN2A-V5 IQVMMMGS, | 120  | >CDKN2A-V5 IQAMMMGS, | 165  | 45   |
| >CDKN2A-V5 IQVMMMGS, | 240  | >CDKN2A-V5 IQAMMMGS, | 304  | 64   |
| >CDKN2A-V5 IQVMMMGS, | 117  | >CDKN2A-V5 IQAMMMGS, | 53   | 64   |
| >CDKN2A-V5 IQVMMMGS, | 691  | >CDKN2A-V5 IQAMMMGS, | 497  | 194  |
| >CDKN2A-V5 IQVMMMGS, | 187  | >CDKN2A-V5 IQAMMMGS, | 205  | 18   |
| >CDKN2A-V5 RPIQVMMM  | 109  | >CDKN2A-V5 RPIQAMMM  | 25   | 84   |
| >CDKN2A-V5 RPIQVMMM  | 18   | >CDKN2A-V5 RPIQAMMM  | 13   | 5    |
| >CDKN2A-V5 RPIQVMMM  | 23   | >CDKN2A-V5 RPIQAMMM  | 16   | 7    |
| >CDKN2A-V5 RPIQVMMM  | 109  | >CDKN2A-V5 RPIQAMMM  | 76   | 33   |
| >CDKN2A-V5 RPIQVMMM  | 288  | >CDKN2A-V5 RPIQAMMM  | 493  | 205  |
| >CDKN2A-V5 RPIQVMMM  | 134  | >CDKN2A-V5 RPIQAMMM  | 153  | 19   |
| >CDKN2A-V5 RPIQVMMM  | 391  | >CDKN2A-V5 RPIQAMMM  | 729  | 338  |
| >CDKN2A-V5 RRPIQVMMM | 439  | >CDKN2A-V5 RRPIQAMMM | 677  | 238  |
| >CDKN2A-V5 RRPIQVMM  | 120  | >CDKN2A-V5 RRPIQAMM  | 141  | 21   |
| >CDKN2A-V5 RRPIQVMMM | 184  | >CDKN2A-V5 RRPIQAMMM | 188  | 4    |
| >CDKN2A-V5 RRPIQVMM  | 131  | >CDKN2A-V5 RRPIQAMM  | 102  | 29   |
| >CDKN2A-V5 RRPIQVMMM | 163  | >CDKN2A-V5 RRPIQAMMM | 136  | 27   |
| >CDKN2A-V5 RRPIQVMMM | 125  | >CDKN2A-V5 RRPIQAMMM | 173  | 48   |
| >CDKN2A-V5 RRPIQVMM  | 319  | >CDKN2A-V5 RRPIQAMM  | 398  | 79   |
| >CDKN2A-V5 RRPIQVMMM | 74   | >CDKN2A-V5 RRPIQAMMM | 114  | 40   |
| >CDKN2A-V5 RRPIQVMMM | 238  | >CDKN2A-V5 RRPIQAMMM | 326  | 88   |

|                       |     |                       |      |      |
|-----------------------|-----|-----------------------|------|------|
| >CDKN2A-V5 GRRPIQVM   | 317 | >CDKN2A-V5 GRRPIQAM   | 242  | 75   |
| >CDKN2A-V5 GRRPIQVMV  | 485 | >CDKN2A-V5 GRRPIQAMM  | 979  | 494  |
| >CDKN2A-V5 GRRPIQVMV  | 365 | >CDKN2A-V5 GRRPIQAMM  | 562  | 197  |
| >CDKN2A-V5 GRRPIQVM   | 314 | >CDKN2A-V5 GRRPIQAM   | 283  | 31   |
| >CDKN2A-V5 GRRPIQVMV  | 115 | >CDKN2A-V5 GRRPIQAMM  | 154  | 39   |
| >CDKN2A-V5 GRRPIQVMV  | 203 | >CDKN2A-V5 GRRPIQAMM  | 224  | 21   |
| >CDKN2A-V5 GRRPIQVMV  | 250 | >CDKN2A-V5 GRRPIQAMM  | 69   | 181  |
| >CDKN2A-V5 GRRPIQVMV  | 213 | >CDKN2A-V5 GRRPIQAMM  | 339  | 126  |
| >CDKN2A-V5 GRRPIQVMV  | 455 | >CDKN2A-V5 GRRPIQAMM  | 565  | 110  |
| >CDKN2A-V5 GRRPIQVMV  | 34  | >CDKN2A-V5 GRRPIQAMM  | 45   | 11   |
| >CDKN2A-V5 GRRPIQVMV  | 222 | >CDKN2A-V5 GRRPIQAMM  | 244  | 22   |
| >CDKN2A-V5 YGRRPIQVM  | 395 | >CDKN2A-V5 YGRRPIQAM  | 88   | 307  |
| >CDKN2A-V5 YGRRPIQVM  | 343 | >CDKN2A-V5 YGRRPIQAM  | 371  | 28   |
| >CDKN2A-V5 YGRRPIQVM  | 897 | >CDKN2A-V5 YGRRPIQAM  | 384  | 513  |
| >CDKN2A-V5 YGRRPIQVM  | 262 | >CDKN2A-V5 YGRRPIQAM  | 136  | 126  |
| >CDKN2A-V5 YGRRPIQVMI | 425 | >CDKN2A-V5 YGRRPIQAMI | 477  | 52   |
| >CDKN2A-V5 YGRRPIQVM  | 44  | >CDKN2A-V5 YGRRPIQAM  | 181  | 137  |
| >CDKN2A-V5 YGRRPIQVMI | 45  | >CDKN2A-V5 YGRRPIQAMI | 54   | 9    |
| >CDKN2A-V5 YGRRPIQVMI | 37  | >CDKN2A-V5 YGRRPIQAMI | 30   | 7    |
| >CDKN2A-V5 SYGRRPIQVM | 136 | >CDKN2A-V5 SYGRRPIQAM | 180  | 44   |
| >CDKN2A-V5 SYGRRPIQVM | 74  | >CDKN2A-V5 SYGRRPIQAM | 132  | 58   |
| >CDKN2A-V5 NSYGRRPIQV | 264 | >CDKN2A-V5 NSYGRRPIQA | 185  | 79   |
| >CDKN2A-V5 NSYGRRPIQV | 485 | >CDKN2A-V5 NSYGRRPIQA | 288  | 197  |
| >CDKN2A-V5 NSYGRRPIQV | 408 | >CDKN2A-V5 NSYGRRPIQA | 6127 | 5719 |
| >CDKN2A-V5 NSYGRRPIQV | 132 | >CDKN2A-V5 NSYGRRPIQA | 111  | 21   |
| >CDKN2A-V5 NSYGRRPIQV | 495 | >CDKN2A-V5 NSYGRRPIQA | 2792 | 2297 |
| >CDKN2A-V5 NSYGRRPIQV | 251 | >CDKN2A-V5 NSYGRRPIQA | 857  | 606  |
| >CDKN2A-V5 VMMSGAR    | 182 | >CDKN2A-V5 IMMSGAR\   | 202  | 20   |
| >CDKN2A-V5 VMMSGAR    | 11  | >CDKN2A-V5 IMMSGAR\   | 10   | 1    |
| >CDKN2A-V5 VMMSGAR    | 9   | >CDKN2A-V5 IMMSGAR\   | 6    | 3    |
| >CDKN2A-V5 VMMSGAR    | 425 | >CDKN2A-V5 IMMSGAR\   | 159  | 266  |
| >CDKN2A-V5 VMMSGAR    | 3   | >CDKN2A-V5 IMMSGAR\   | 3    | 0    |
| >CDKN2A-V5 VMMSGAR    | 226 | >CDKN2A-V5 IMMSGAR\   | 100  | 126  |
| >CDKN2A-V5 VMMSGAR    | 19  | >CDKN2A-V5 IMMSGAR\   | 15   | 4    |
| >CDKN2A-V5 VMMSGAR    | 2   | >CDKN2A-V5 IMMSGAR\   | 2    | 0    |
| >CDKN2A-V5 VMMSGAR    | 55  | >CDKN2A-V5 IMMSGAR\   | 68   | 13   |
| >CDKN2A-V5 VMMSGAR    | 3   | >CDKN2A-V5 IMMSGAR\   | 4    | 1    |
| >CDKN2A-V5 VMMSGAR    | 239 | >CDKN2A-V5 IMMSGAR\   | 334  | 95   |
| >CDKN2A-V5 VMMSGAR    | 7   | >CDKN2A-V5 IMMSGAR\   | 8    | 1    |
| >CDKN2A-V5 VMMSGAR    | 2   | >CDKN2A-V5 IMMSGAR\   | 2    | 0    |
| >CDKN2A-V5 VMMSGAR    | 95  | >CDKN2A-V5 IMMSGAR\   | 102  | 7    |
| >CDKN2A-V5 VMMSGAR    | 2   | >CDKN2A-V5 IMMSGAR\   | 2    | 0    |
| >CDKN2A-V5 VMMSGAR    | 54  | >CDKN2A-V5 IMMSGAR\   | 73   | 19   |

|                      |      |                      |     |      |
|----------------------|------|----------------------|-----|------|
| >CDKN2A-V5 VMMMGSAR  | 212  | >CDKN2A-V5 IMMMGSAR  | 145 | 67   |
| >CDKN2A-V5 VMMMGSAR  | 168  | >CDKN2A-V5 IMMMGSAR  | 197 | 29   |
| >CDKN2A-V5 VMMMGSAR  | 20   | >CDKN2A-V5 IMMMGSAR  | 16  | 4    |
| >CDKN2A-V5 VMMMGSAR  | 120  | >CDKN2A-V5 IMMMGSAR  | 59  | 61   |
| >CDKN2A-V5 VMMMGSAR  | 462  | >CDKN2A-V5 IMMMGSAR  | 134 | 328  |
| >CDKN2A-V5 VMMMGSAR  | 175  | >CDKN2A-V5 IMMMGSAR\ | 148 | 27   |
| >CDKN2A-V5 VMMMGSAR  | 183  | >CDKN2A-V5 IMMMGSAR\ | 150 | 33   |
| >CDKN2A-V5 VMMMGSAR  | 146  | >CDKN2A-V5 IMMMGSAR  | 67  | 79   |
| >CDKN2A-V5 VMMMGSAR  | 420  | >CDKN2A-V5 IMMMGSAR\ | 172 | 248  |
| >CDKN2A-V5 VMMMGSAR  | 721  | >CDKN2A-V5 IMMMGSAR\ | 281 | 440  |
| >CDKN2A-V5 VMMMGSAR  | 1050 | >CDKN2A-V5 IMMMGSAR  | 381 | 669  |
| >CDKN2A-V5 QVMMMGS/  | 873  | >CDKN2A-V5 QIMMMGSA  | 384 | 489  |
| >CDKN2A-V5 QVMMMGS/  | 419  | >CDKN2A-V5 QIMMMGSA  | 295 | 124  |
| >CDKN2A-V5 QVMMMGS/  | 298  | >CDKN2A-V5 QIMMMGSA  | 140 | 158  |
| >CDKN2A-V5 QVMMMGS/  | 61   | >CDKN2A-V5 QIMMMGSA  | 42  | 19   |
| >CDKN2A-V5 QVMMMGS/  | 313  | >CDKN2A-V5 QIMMMGSA  | 289 | 24   |
| >CDKN2A-V5 QVMMMGS/  | 731  | >CDKN2A-V5 QIMMMGSA  | 210 | 521  |
| >CDKN2A-V5 QVMMMGS/  | 248  | >CDKN2A-V5 QIMMMGSA  | 103 | 145  |
| >CDKN2A-V5 QVMMMGS/  | 41   | >CDKN2A-V5 QIMMMGSA  | 16  | 25   |
| >CDKN2A-V5 QVMMMGS/  | 114  | >CDKN2A-V5 QIMMMGSA  | 254 | 140  |
| >CDKN2A-V5 QVMMMGS/  | 55   | >CDKN2A-V5 QIMMMGSA  | 98  | 43   |
| >CDKN2A-V5 QVMMMGS/  | 218  | >CDKN2A-V5 QIMMMGSA  | 354 | 136  |
| >CDKN2A-V5 QVMMMGS/  | 20   | >CDKN2A-V5 QIMMMGSA  | 47  | 27   |
| >CDKN2A-V5 QVMMMGS/  | 167  | >CDKN2A-V5 QIMMMGSA  | 812 | 645  |
| >CDKN2A-V5 QVMMMGS/  | 215  | >CDKN2A-V5 QIMMMGSA  | 530 | 315  |
| >CDKN2A-V5 QVMMMGS/  | 78   | >CDKN2A-V5 QIMMMGSA  | 150 | 72   |
| >CDKN2A-V5 IQVMMMGS. | 1017 | >CDKN2A-V5 IQIMMMGSA | 242 | 775  |
| >CDKN2A-V5 IQVMMMGS. | 598  | >CDKN2A-V5 IQIMMMGSA | 469 | 129  |
| >CDKN2A-V5 IQVMMMGS. | 167  | >CDKN2A-V5 IQIMMMGSA | 93  | 74   |
| >CDKN2A-V5 IQVMMMGS. | 42   | >CDKN2A-V5 IQIMMMGSA | 24  | 18   |
| >CDKN2A-V5 IQVMMMGS. | 87   | >CDKN2A-V5 IQIMMMGSA | 57  | 30   |
| >CDKN2A-V5 IQVMMMGS. | 16   | >CDKN2A-V5 IQIMMMGSA | 11  | 5    |
| >CDKN2A-V5 IQVMMMGS. | 587  | >CDKN2A-V5 IQIMMMGSA | 410 | 177  |
| >CDKN2A-V5 IQVMMMGS. | 1485 | >CDKN2A-V5 IQIMMMGSA | 480 | 1005 |
| >CDKN2A-V5 IQVMMMGS. | 120  | >CDKN2A-V5 IQIMMMGSA | 53  | 67   |
| >CDKN2A-V5 IQVMMMGS. | 240  | >CDKN2A-V5 IQIMMMGSA | 125 | 115  |
| >CDKN2A-V5 IQVMMMGS. | 117  | >CDKN2A-V5 IQIMMMGSA | 62  | 55   |
| >CDKN2A-V5 IQVMMMGS. | 691  | >CDKN2A-V5 IQIMMMGSA | 283 | 408  |
| >CDKN2A-V5 IQVMMMGS. | 754  | >CDKN2A-V5 IQIMMMGSA | 356 | 398  |
| >CDKN2A-V5 IQVMMMGS. | 187  | >CDKN2A-V5 IQIMMMGSA | 131 | 56   |
| >CDKN2A-V5 IQVMMMGS. | 508  | >CDKN2A-V5 IQIMMMGSA | 369 | 139  |
| >CDKN2A-V5 RPIQVMMM  | 109  | >CDKN2A-V5 RPIQIMMM  | 155 | 46   |
| >CDKN2A-V5 RPIQVMMM  | 18   | >CDKN2A-V5 RPIQIMMM  | 22  | 4    |



|                       |     |                       |      |      |
|-----------------------|-----|-----------------------|------|------|
| >CDKN2A-V5 RPIQVMMM   | 23  | >CDKN2A-V5 RPIQIMMMC  | 27   | 4    |
| >CDKN2A-V5 RPIQVMMM   | 109 | >CDKN2A-V5 RPIQIMMM   | 103  | 6    |
| >CDKN2A-V5 RPIQVMMM   | 288 | >CDKN2A-V5 RPIQIMMMC  | 209  | 79   |
| >CDKN2A-V5 RPIQVMMM   | 134 | >CDKN2A-V5 RPIQIMMMC  | 105  | 29   |
| >CDKN2A-V5 RPIQVMMM   | 805 | >CDKN2A-V5 RPIQIMMM   | 487  | 318  |
| >CDKN2A-V5 RPIQVMMM   | 391 | >CDKN2A-V5 RPIQIMMM   | 525  | 134  |
| >CDKN2A-V5 RRPIQVMMM  | 439 | >CDKN2A-V5 RRPIQIMMM  | 581  | 142  |
| >CDKN2A-V5 RRPIQVMM   | 120 | >CDKN2A-V5 RRPIQIMM   | 102  | 18   |
| >CDKN2A-V5 RRPIQVMMM  | 184 | >CDKN2A-V5 RRPIQIMMM  | 108  | 76   |
| >CDKN2A-V5 RRPIQVMM   | 131 | >CDKN2A-V5 RRPIQIMM   | 70   | 61   |
| >CDKN2A-V5 RRPIQVMMM  | 163 | >CDKN2A-V5 RRPIQIMMM  | 97   | 66   |
| >CDKN2A-V5 RRPIQVMMM  | 125 | >CDKN2A-V5 RRPIQIMMM  | 140  | 15   |
| >CDKN2A-V5 RRPIQVMM   | 319 | >CDKN2A-V5 RRPIQIMM   | 231  | 88   |
| >CDKN2A-V5 RRPIQVMMM  | 74  | >CDKN2A-V5 RRPIQIMMM  | 53   | 21   |
| >CDKN2A-V5 RRPIQVMMM  | 238 | >CDKN2A-V5 RRPIQIMMM  | 165  | 73   |
| >CDKN2A-V5 GRRPIQVM   | 317 | >CDKN2A-V5 GRRPIQIM   | 430  | 113  |
| >CDKN2A-V5 GRRPIQVMM  | 485 | >CDKN2A-V5 GRRPIQIMM  | 914  | 429  |
| >CDKN2A-V5 GRRPIQVM   | 365 | >CDKN2A-V5 GRRPIQIMM  | 525  | 160  |
| >CDKN2A-V5 GRRPIQVM   | 314 | >CDKN2A-V5 GRRPIQIM   | 415  | 101  |
| >CDKN2A-V5 GRRPIQVMM  | 115 | >CDKN2A-V5 GRRPIQIMM  | 120  | 5    |
| >CDKN2A-V5 GRRPIQVMM  | 203 | >CDKN2A-V5 GRRPIQIMM  | 187  | 16   |
| >CDKN2A-V5 GRRPIQVMM  | 250 | >CDKN2A-V5 GRRPIQIMM  | 204  | 46   |
| >CDKN2A-V5 GRRPIQVMM  | 213 | >CDKN2A-V5 GRRPIQIMM  | 162  | 51   |
| >CDKN2A-V5 GRRPIQVMM  | 455 | >CDKN2A-V5 GRRPIQIMM  | 443  | 12   |
| >CDKN2A-V5 GRRPIQVMM  | 34  | >CDKN2A-V5 GRRPIQIMM  | 27   | 7    |
| >CDKN2A-V5 GRRPIQVMM  | 222 | >CDKN2A-V5 GRRPIQIMM  | 175  | 47   |
| >CDKN2A-V5 YGRRPIQVM  | 395 | >CDKN2A-V5 YGRRPIQIM  | 1431 | 1036 |
| >CDKN2A-V5 YGRRPIQVM  | 343 | >CDKN2A-V5 YGRRPIQIM  | 2534 | 2191 |
| >CDKN2A-V5 YGRRPIQVM  | 262 | >CDKN2A-V5 YGRRPIQIM  | 349  | 87   |
| >CDKN2A-V5 YGRRPIQVM  | 425 | >CDKN2A-V5 YGRRPIQIM  | 588  | 163  |
| >CDKN2A-V5 YGRRPIQVM  | 44  | >CDKN2A-V5 YGRRPIQIM  | 46   | 2    |
| >CDKN2A-V5 YGRRPIQVM  | 45  | >CDKN2A-V5 YGRRPIQIM  | 40   | 5    |
| >CDKN2A-V5 YGRRPIQVM  | 37  | >CDKN2A-V5 YGRRPIQIM  | 37   | 0    |
| >CDKN2A-V5 SYGRRPIQV  | 799 | >CDKN2A-V5 SYGRRPIQI  | 68   | 731  |
| >CDKN2A-V5 SYGRRPIQV  | 935 | >CDKN2A-V5 SYGRRPIQI  | 29   | 906  |
| >CDKN2A-V5 SYGRRPIQVM | 136 | >CDKN2A-V5 SYGRRPIQIM | 329  | 193  |
| >CDKN2A-V5 SYGRRPIQVM | 74  | >CDKN2A-V5 SYGRRPIQIM | 113  | 39   |
| >CDKN2A-V5 NSYGRRPIQV | 264 | >CDKN2A-V5 NSYGRRPIQI | 178  | 86   |
| >CDKN2A-V5 NSYGRRPIQV | 485 | >CDKN2A-V5 NSYGRRPIQI | 683  | 198  |
| >CDKN2A-V5 NSYGRRPIQV | 408 | >CDKN2A-V5 NSYGRRPIQI | 2181 | 1773 |
| >CDKN2A-V5 NSYGRRPIQV | 132 | >CDKN2A-V5 NSYGRRPIQI | 225  | 93   |
| >CDKN2A-V5 NSYGRRPIQV | 495 | >CDKN2A-V5 NSYGRRPIQI | 654  | 159  |
| >CDKN2A-V5 NSYGRRPIQV | 251 | >CDKN2A-V5 NSYGRRPIQI | 270  | 19   |

|                        |      |                        |       |       |
|------------------------|------|------------------------|-------|-------|
| >CDKN2A-V5 RVAELLLL    | 83   | >CDKN2A-V5 RGAELLLL    | 8847  | 8764  |
| >CDKN2A-V5 RVAELLLLHG, | 171  | >CDKN2A-V5 RGAELLLLHG, | 12215 | 12044 |
| >CDKN2A-V5 RVAELLLL    | 33   | >CDKN2A-V5 RGAELLLL    | 723   | 690   |
| >CDKN2A-V5 RVAELLLLHG, | 79   | >CDKN2A-V5 RGAELLLLHG, | 1839  | 1760  |
| >CDKN2A-V5 RVAELLLL    | 70   | >CDKN2A-V5 RGAELLLL    | 7649  | 7579  |
| >CDKN2A-V5 RVAELLLLHG, | 23   | >CDKN2A-V5 RGAELLLLHG, | 4334  | 4311  |
| >CDKN2A-V5 RVAELLLL    | 14   | >CDKN2A-V5 RGAELLLL    | 1079  | 1065  |
| >CDKN2A-V5 RVAELLLLHG, | 12   | >CDKN2A-V5 RGAELLLLHG, | 532   | 520   |
| >CDKN2A-V5 RVAELLLL    | 392  | >CDKN2A-V5 RGAELLLL    | 9859  | 9467  |
| >CDKN2A-V5 RVAELLLLHG, | 305  | >CDKN2A-V5 RGAELLLLHG, | 8173  | 7868  |
| >CDKN2A-V5 RVAELLLL    | 393  | >CDKN2A-V5 RGAELLLL    | 18345 | 17952 |
| >CDKN2A-V5 RVAELLLLHG, | 459  | >CDKN2A-V5 RGAELLLLHG, | 20587 | 20128 |
| >CDKN2A-V5 RVAELLLLH   | 226  | >CDKN2A-V5 RGAELLLLH   | 8770  | 8544  |
| >CDKN2A-V5 RVAELLLLH   | 230  | >CDKN2A-V5 RGAELLLLH   | 9905  | 9675  |
| >CDKN2A-V5 RVAELLLL    | 424  | >CDKN2A-V5 RGAELLLL    | 16276 | 15852 |
| >CDKN2A-V5 RVAELLLLHG, | 370  | >CDKN2A-V5 RGAELLLLHG, | 12272 | 11902 |
| >CDKN2A-V5 RVAELLLLHG, | 428  | >CDKN2A-V5 RGAELLLLHG, | 10403 | 9975  |
| >CDKN2A-V5 RVAELLLLH   | 65   | >CDKN2A-V5 RGAELLLLH   | 4196  | 4131  |
| >CDKN2A-V5 RVAELLLL    | 300  | >CDKN2A-V5 RGAELLLL    | 1539  | 1239  |
| >CDKN2A-V5 RVAELLLL    | 268  | >CDKN2A-V5 RGAELLLL    | 1164  | 896   |
| >CDKN2A-V5 RVAELLLL    | 364  | >CDKN2A-V5 RGAELLLL    | 788   | 424   |
| >CDKN2A-V5 IQVMMMG,    | 42   | >CDKN2A-V5 IQVMMMG,    | 14759 | 14717 |
| >CDKN2A-V5 IQVMMMG,    | 16   | >CDKN2A-V5 IQVMMMG,    | 5991  | 5975  |
| >CDKN2A-V5 ARVAELL     | 180  | >CDKN2A-V5 ARGAEELL    | 757   | 577   |
| >CDKN2A-V5 ARVAELLLL   | 120  | >CDKN2A-V5 ARGAEELLLL  | 491   | 371   |
| >CDKN2A-V5 ARVAELLLLH  | 215  | >CDKN2A-V5 ARGAEELLLLH | 894   | 679   |
| >CDKN2A-V5 ARVAELL     | 222  | >CDKN2A-V5 ARGAEELL    | 4219  | 3997  |
| >CDKN2A-V5 ARVAELLLL   | 229  | >CDKN2A-V5 ARGAEELLLL  | 4397  | 4168  |
| >CDKN2A-V5 ARVAELLLL   | 123  | >CDKN2A-V5 ARGAEELLLL  | 244   | 121   |
| >CDKN2A-V5 ARVAELLLL   | 23   | >CDKN2A-V5 ARGAEELLLL  | 55    | 32    |
| >CDKN2A-V5 SARVAELL    | 380  | >CDKN2A-V5 SARGAELL    | 548   | 168   |
| >CDKN2A-V5 SARVAELL    | 39   | >CDKN2A-V5 SARGAELL    | 67    | 28    |
| >CDKN2A-V5 SARVAELLLL  | 38   | >CDKN2A-V5 SARGAELLLL  | 58    | 20    |
| >CDKN2A-V5 SARVAELL    | 377  | >CDKN2A-V5 SARGAELL    | 203   | 174   |
| >CDKN2A-V5 SARVAELL    | 179  | >CDKN2A-V5 SARGAELL    | 157   | 22    |
| >CDKN2A-V5 SARVAELLLL  | 137  | >CDKN2A-V5 SARGAELLLL  | 117   | 20    |
| >CDKN2A-V5 GSARVAEL    | 282  | >CDKN2A-V5 GSARGAEL    | 85    | 197   |
| >CDKN2A-V5 GSARVAELLLL | 1361 | >CDKN2A-V5 GSARGAELLLL | 339   | 1022  |
| >CDKN2A-V5 GSARVAELLLI | 950  | >CDKN2A-V5 GSARGAELLLL | 228   | 722   |
| >CDKN2A-V5 GSARVAELL   | 237  | >CDKN2A-V5 GSARGAELL   | 1193  | 956   |
| >CDKN2A-V5 GSARVAELLLL | 255  | >CDKN2A-V5 GSARGAELLLL | 781   | 526   |
| >CDKN2A-V5 GSARVAELLLI | 270  | >CDKN2A-V5 GSARGAELLLL | 764   | 494   |
| >CDKN2A-V5 GSARVAELLLI | 264  | >CDKN2A-V5 GSARGAELLLL | 579   | 315   |

|                        |     |                        |      |      |
|------------------------|-----|------------------------|------|------|
| >CDKN2A-V5 GSARVAELL   | 24  | >CDKN2A-V5 GSARGAELL   | 42   | 18   |
| >CDKN2A-V5 GSARVAELLL  | 452 | >CDKN2A-V5 GSARGAELLL  | 453  | 1    |
| >CDKN2A-V5 GSARVAELLLI | 66  | >CDKN2A-V5 GSARGAELLLI | 95   | 29   |
| >CDKN2A-V5 MGSARVAEL   | 66  | >CDKN2A-V5 MGSARGAEL   | 423  | 357  |
| >CDKN2A-V5 MGSARVAELI  | 399 | >CDKN2A-V5 MGSARGAELI  | 880  | 481  |
| >CDKN2A-V5 MGSARVAEL   | 218 | >CDKN2A-V5 MGSARGAEL   | 900  | 682  |
| >CDKN2A-V5 MMGSARVAI   | 177 | >CDKN2A-V5 MMGSARGAI   | 474  | 297  |
| >CDKN2A-V5 MMGSARVAI   | 143 | >CDKN2A-V5 MMGSARGAI   | 448  | 305  |
| >CDKN2A-V5 MMGSARVAI   | 24  | >CDKN2A-V5 MMGSARGAI   | 44   | 20   |
| >CDKN2A-V5 MMGSARVAI   | 8   | >CDKN2A-V5 MMGSARGAI   | 17   | 9    |
| >CDKN2A-V5 MMGSARVA    | 224 | >CDKN2A-V5 MMGSARGA    | 72   | 152  |
| >CDKN2A-V5 MMGSARVAI   | 52  | >CDKN2A-V5 MMGSARGAI   | 144  | 92   |
| >CDKN2A-V5 MMGSARVAI   | 173 | >CDKN2A-V5 MMGSARGAI   | 137  | 36   |
| >CDKN2A-V5 MMGSARVAI   | 436 | >CDKN2A-V5 MMGSARGAI   | 731  | 295  |
| >CDKN2A-V5 MMGSARVA    | 187 | >CDKN2A-V5 MMGSARGA    | 111  | 76   |
| >CDKN2A-V5 MMGSARVAI   | 11  | >CDKN2A-V5 MMGSARGAI   | 25   | 14   |
| >CDKN2A-V5 MMGSARVAI   | 24  | >CDKN2A-V5 MMGSARGAI   | 46   | 22   |
| >CDKN2A-V5 MMGSARVAI   | 42  | >CDKN2A-V5 MMGSARGAI   | 128  | 86   |
| >CDKN2A-V5 MMGSARVAI   | 190 | >CDKN2A-V5 MMGSARGAI   | 357  | 167  |
| >CDKN2A-V5 MMGSARVAI   | 46  | >CDKN2A-V5 MMGSARGAI   | 175  | 129  |
| >CDKN2A-V5 MMGSARVAI   | 81  | >CDKN2A-V5 MMGSARGAI   | 197  | 116  |
| >CDKN2A-V5 MMGSARVAI   | 33  | >CDKN2A-V5 MMGSARGAI   | 279  | 246  |
| >CDKN2A-V5 MMGSARVAI   | 112 | >CDKN2A-V5 MMGSARGAI   | 228  | 116  |
| >CDKN2A-V5 MMGSARVA    | 95  | >CDKN2A-V5 MMGSARGA    | 58   | 37   |
| >CDKN2A-V5 MMGSARVAI   | 3   | >CDKN2A-V5 MMGSARGAI   | 6    | 3    |
| >CDKN2A-V5 MMGSARVAI   | 8   | >CDKN2A-V5 MMGSARGAI   | 10   | 2    |
| >CDKN2A-V5 MMGSARVAI   | 163 | >CDKN2A-V5 MMGSARGAI   | 190  | 27   |
| >CDKN2A-V5 MMGSARVAI   | 90  | >CDKN2A-V5 MMGSARGAI   | 197  | 107  |
| >CDKN2A-V5 MMGSARVAI   | 402 | >CDKN2A-V5 MMGSARGAI   | 974  | 572  |
| >CDKN2A-V5 MMMGSARV    | 11  | >CDKN2A-V5 MMMGSARC    | 4380 | 4369 |
| >CDKN2A-V5 MMMGSARV    | 549 | >CDKN2A-V5 MMMGSARC    | 241  | 308  |
| >CDKN2A-V5 MMMGSARV    | 19  | >CDKN2A-V5 MMMGSARC    | 20   | 1    |
| >CDKN2A-V5 MMMGSARV    | 3   | >CDKN2A-V5 MMMGSARC    | 243  | 240  |
| >CDKN2A-V5 MMMGSARV    | 102 | >CDKN2A-V5 MMMGSARC    | 31   | 71   |
| >CDKN2A-V5 MMMGSARV    | 4   | >CDKN2A-V5 MMMGSARC    | 4    | 0    |
| >CDKN2A-V5 MMMGSARV    | 2   | >CDKN2A-V5 MMMGSARC    | 541  | 539  |
| >CDKN2A-V5 MMMGSARV    | 11  | >CDKN2A-V5 MMMGSARC    | 5    | 6    |
| >CDKN2A-V5 MMMGSARV    | 5   | >CDKN2A-V5 MMMGSARC    | 6    | 1    |
| >CDKN2A-V5 MMMGSARV    | 8   | >CDKN2A-V5 MMMGSARC    | 4608 | 4600 |
| >CDKN2A-V5 MMMGSARV    | 437 | >CDKN2A-V5 MMMGSARC    | 65   | 372  |
| >CDKN2A-V5 MMMGSARV    | 27  | >CDKN2A-V5 MMMGSARC    | 29   | 2    |
| >CDKN2A-V5 MMMGSARV    | 2   | >CDKN2A-V5 MMMGSARC    | 395  | 393  |
| >CDKN2A-V5 MMMGSARV    | 29  | >CDKN2A-V5 MMMGSARC    | 12   | 17   |

|                     |      |                     |       |       |
|---------------------|------|---------------------|-------|-------|
| >CDKN2A-V5 MMMGSARV | 3    | >CDKN2A-V5 MMMGSARC | 4     | 1     |
| >CDKN2A-V5 MMMGSARV | 3    | >CDKN2A-V5 MMMGSARC | 4323  | 4320  |
| >CDKN2A-V5 MMMGSARV | 281  | >CDKN2A-V5 MMMGSARC | 88    | 193   |
| >CDKN2A-V5 MMMGSARV | 9    | >CDKN2A-V5 MMMGSARC | 8     | 1     |
| >CDKN2A-V5 MMMGSARV | 8    | >CDKN2A-V5 MMMGSARC | 12154 | 12146 |
| >CDKN2A-V5 MMMGSARV | 1302 | >CDKN2A-V5 MMMGSARC | 413   | 889   |
| >CDKN2A-V5 MMMGSARV | 35   | >CDKN2A-V5 MMMGSARC | 44    | 9     |
| >CDKN2A-V5 MMMGSARV | 2    | >CDKN2A-V5 MMMGSARC | 4036  | 4034  |
| >CDKN2A-V5 MMMGSARV | 91   | >CDKN2A-V5 MMMGSARC | 30    | 61    |
| >CDKN2A-V5 MMMGSARV | 4    | >CDKN2A-V5 MMMGSARC | 6     | 2     |
| >CDKN2A-V5 MMMGSARV | 2    | >CDKN2A-V5 MMMGSARC | 766   | 764   |
| >CDKN2A-V5 MMMGSARV | 21   | >CDKN2A-V5 MMMGSARC | 11    | 10    |
| >CDKN2A-V5 MMMGSARV | 3    | >CDKN2A-V5 MMMGSARC | 3     | 0     |
| >CDKN2A-V5 MMMGSARV | 179  | >CDKN2A-V5 MMMGSARC | 432   | 253   |
| >CDKN2A-V5 MMMGSARV | 29   | >CDKN2A-V5 MMMGSARC | 9288  | 9259  |
| >CDKN2A-V5 MMMGSARV | 235  | >CDKN2A-V5 MMMGSARC | 426   | 191   |
| >CDKN2A-V5 MMMGSARV | 51   | >CDKN2A-V5 MMMGSARC | 15650 | 15599 |
| >CDKN2A-V5 MMMGSARV | 188  | >CDKN2A-V5 MMMGSARC | 372   | 184   |
| >CDKN2A-V5 MMMGSARV | 301  | >CDKN2A-V5 MMMGSARC | 534   | 233   |
| >CDKN2A-V5 MMMGSARV | 191  | >CDKN2A-V5 MMMGSARC | 794   | 603   |
| >CDKN2A-V5 MMMGSARV | 84   | >CDKN2A-V5 MMMGSARC | 105   | 21    |
| >CDKN2A-V5 MMMGSARV | 540  | >CDKN2A-V5 MMMGSARC | 217   | 323   |
| >CDKN2A-V5 MMMGSARV | 237  | >CDKN2A-V5 MMMGSARC | 9938  | 9701  |
| >CDKN2A-V5 MMMGSARV | 342  | >CDKN2A-V5 MMMGSARC | 1885  | 1543  |
| >CDKN2A-V5 MMMGSARV | 31   | >CDKN2A-V5 MMMGSARC | 35    | 4     |
| >CDKN2A-V5 MMMGSARV | 55   | >CDKN2A-V5 MMMGSARC | 50    | 5     |
| >CDKN2A-V5 MMMGSARV | 465  | >CDKN2A-V5 MMMGSARC | 12701 | 12236 |
| >CDKN2A-V5 MMMGSARV | 18   | >CDKN2A-V5 MMMGSARC | 34    | 16    |
| >CDKN2A-V5 MMMGSARV | 185  | >CDKN2A-V5 MMMGSARC | 199   | 14    |
| >CDKN2A-V5 VMMMGSAR | 182  | >CDKN2A-V5 VMMMGSAR | 3252  | 3070  |
| >CDKN2A-V5 VMMMGSAR | 11   | >CDKN2A-V5 VMMMGSAR | 11359 | 11348 |
| >CDKN2A-V5 VMMMGSAR | 9    | >CDKN2A-V5 VMMMGSAR | 4230  | 4221  |
| >CDKN2A-V5 VMMMGSAR | 425  | >CDKN2A-V5 VMMMGSAR | 239   | 186   |
| >CDKN2A-V5 VMMMGSAR | 3    | >CDKN2A-V5 VMMMGSAR | 1682  | 1679  |
| >CDKN2A-V5 VMMMGSAR | 226  | >CDKN2A-V5 VMMMGSAR | 108   | 118   |
| >CDKN2A-V5 VMMMGSAR | 19   | >CDKN2A-V5 VMMMGSAR | 7619  | 7600  |
| >CDKN2A-V5 VMMMGSAR | 2    | >CDKN2A-V5 VMMMGSAR | 1076  | 1074  |
| >CDKN2A-V5 VMMMGSAR | 55   | >CDKN2A-V5 VMMMGSAR | 25    | 30    |
| >CDKN2A-V5 VMMMGSAR | 3    | >CDKN2A-V5 VMMMGSAR | 6621  | 6618  |
| >CDKN2A-V5 VMMMGSAR | 239  | >CDKN2A-V5 VMMMGSAR | 106   | 133   |
| >CDKN2A-V5 VMMMGSAR | 7    | >CDKN2A-V5 VMMMGSAR | 11498 | 11491 |
| >CDKN2A-V5 VMMMGSAR | 625  | >CDKN2A-V5 VMMMGSAR | 293   | 332   |
| >CDKN2A-V5 VMMMGSAR | 2    | >CDKN2A-V5 VMMMGSAR | 6393  | 6391  |

|                       |      |                      |       |       |
|-----------------------|------|----------------------|-------|-------|
| >CDKN2A-V5 VMMSGAR    | 95   | >CDKN2A-V5 VMMSGAR   | 39    | 56    |
| >CDKN2A-V5 VMMSGAR    | 2    | >CDKN2A-V5 VMMSGAR   | 1782  | 1780  |
| >CDKN2A-V5 VMMSGAR    | 54   | >CDKN2A-V5 VMMSGAR   | 28    | 26    |
| >CDKN2A-V5 VMMSGAR    | 175  | >CDKN2A-V5 VMMSGAR   | 316   | 141   |
| >CDKN2A-V5 VMMSGAR    | 183  | >CDKN2A-V5 VMMSGAR   | 579   | 396   |
| >CDKN2A-V5 VMMSGAR    | 420  | >CDKN2A-V5 VMMSGAR   | 11979 | 11559 |
| >CDKN2A-V5 QVMMSGAR   | 419  | >CDKN2A-V5 QVMMSGAR  | 18958 | 18539 |
| >CDKN2A-V5 QVMMSGAR   | 61   | >CDKN2A-V5 QVMMSGAR  | 16970 | 16909 |
| >CDKN2A-V5 QVMMSGAR   | 313  | >CDKN2A-V5 QVMMSGAR  | 19784 | 19471 |
| >CDKN2A-V5 QVMMSGAR   | 248  | >CDKN2A-V5 QVMMSGAR  | 24618 | 24370 |
| >CDKN2A-V5 QVMMSGAR   | 41   | >CDKN2A-V5 QVMMSGAR  | 33823 | 33782 |
| >CDKN2A-V5 QVMMSGAR   | 215  | >CDKN2A-V5 QVMMSGAR  | 27952 | 27737 |
| >CDKN2A-V5 QVMMSGAR   | 78   | >CDKN2A-V5 QVMMSGAR  | 16024 | 15946 |
| >CDKN2A-V5 RVAELLL    | 83   | >CDKN2A-V5 RVAELLL   | 11    | 72    |
| >CDKN2A-V5 RVAELLLHG, | 171  | >CDKN2A-V5 RVAELLLHG | 15    | 156   |
| >CDKN2A-V5 RVAELLL    | 33   | >CDKN2A-V5 RVAELLL   | 3     | 30    |
| >CDKN2A-V5 RVAELLLHG, | 79   | >CDKN2A-V5 RVAELLLHG | 6     | 73    |
| >CDKN2A-V5 RVAELLL    | 70   | >CDKN2A-V5 RVAELLL   | 5     | 65    |
| >CDKN2A-V5 RVAELLLHG, | 23   | >CDKN2A-V5 RVAELLLHG | 4     | 19    |
| >CDKN2A-V5 RVAELLL    | 14   | >CDKN2A-V5 RVAELLL   | 9     | 5     |
| >CDKN2A-V5 RVAELLLHG, | 12   | >CDKN2A-V5 RVAELLLHG | 9     | 3     |
| >CDKN2A-V5 RVAELLL    | 392  | >CDKN2A-V5 RVAELLL   | 5     | 387   |
| >CDKN2A-V5 RVAELLLHG, | 305  | >CDKN2A-V5 RVAELLLHG | 5     | 300   |
| >CDKN2A-V5 RVAELLL    | 3146 | >CDKN2A-V5 RVAELLL   | 13    | 3133  |
| >CDKN2A-V5 RVAELLLHG, | 1288 | >CDKN2A-V5 RVAELLLHG | 13    | 1275  |
| >CDKN2A-V5 RVAELLL    | 569  | >CDKN2A-V5 RVAELLL   | 10    | 559   |
| >CDKN2A-V5 RVAELLLHG, | 587  | >CDKN2A-V5 RVAELLLHG | 12    | 575   |
| >CDKN2A-V5 RVAELLL    | 3245 | >CDKN2A-V5 RVAELLL   | 31    | 3214  |
| >CDKN2A-V5 RVAELLLHG, | 1731 | >CDKN2A-V5 RVAELLLHG | 20    | 1711  |
| >CDKN2A-V5 RVAELLL    | 393  | >CDKN2A-V5 RVAELLL   | 5     | 388   |
| >CDKN2A-V5 RVAELLLHG, | 459  | >CDKN2A-V5 RVAELLLHG | 6     | 453   |
| >CDKN2A-V5 RVAELLLH   | 226  | >CDKN2A-V5 RVAELLLH  | 84    | 142   |
| >CDKN2A-V5 RVAELLLH   | 230  | >CDKN2A-V5 RVAELLLH  | 892   | 662   |
| >CDKN2A-V5 RVAELLLH   | 877  | >CDKN2A-V5 RVAELLLH  | 187   | 690   |
| >CDKN2A-V5 RVAELLL    | 424  | >CDKN2A-V5 RVAELLL   | 229   | 195   |
| >CDKN2A-V5 RVAELLLHG, | 370  | >CDKN2A-V5 RVAELLLHG | 6915  | 6545  |
| >CDKN2A-V5 RVAELLLHG, | 428  | >CDKN2A-V5 RVAELLLHG | 1651  | 1223  |
| >CDKN2A-V5 RVAELLLH   | 65   | >CDKN2A-V5 RVAELLLH  | 109   | 44    |
| >CDKN2A-V5 RVAELLL    | 5438 | >CDKN2A-V5 RVAELLL   | 443   | 4995  |
| >CDKN2A-V5 RVAELLLHG  | 4188 | >CDKN2A-V5 RVAELLLHG | 440   | 3748  |
| >CDKN2A-V5 RVAELLL    | 6689 | >CDKN2A-V5 RVAELLL   | 426   | 6263  |
| >CDKN2A-V5 RVAELLL    | 300  | >CDKN2A-V5 RVAELLL   | 580   | 280   |
| >CDKN2A-V5 RVAELLL    | 5056 | >CDKN2A-V5 RVAELLL   | 160   | 4896  |

|                        |      |                       |      |      |
|------------------------|------|-----------------------|------|------|
| >CDKN2A-V5 RVAELLLL    | 268  | >CDKN2A-V5 RMAELLLL   | 177  | 91   |
| >CDKN2A-V5 RVAELLLL    | 364  | >CDKN2A-V5 RMAELLLL   | 195  | 169  |
| >CDKN2A-V5 IQVMMMGSL   | 1356 | >CDKN2A-V5 IQVMMMGSL  | 353  | 1003 |
| >CDKN2A-V5 IQVMMMGSL   | 42   | >CDKN2A-V5 IQVMMMGSL  | 3458 | 3416 |
| >CDKN2A-V5 IQVMMMGSL   | 16   | >CDKN2A-V5 IQVMMMGSL  | 383  | 367  |
| >CDKN2A-V5 IQVMMMGSL   | 754  | >CDKN2A-V5 IQVMMMGSL  | 95   | 659  |
| >CDKN2A-V5 IQVMMMGSL   | 508  | >CDKN2A-V5 IQVMMMGSL  | 124  | 384  |
| >CDKN2A-V5 ARVAELLL    | 836  | >CDKN2A-V5 ARMAELLL   | 385  | 451  |
| >CDKN2A-V5 ARVAELLLL   | 918  | >CDKN2A-V5 ARMAELLLL  | 431  | 487  |
| >CDKN2A-V5 ARVAELLL    | 180  | >CDKN2A-V5 ARMAELLL   | 32   | 148  |
| >CDKN2A-V5 ARVAELLLL   | 120  | >CDKN2A-V5 ARMAELLLL  | 24   | 96   |
| >CDKN2A-V5 ARVAELLLLH  | 215  | >CDKN2A-V5 ARMAELLLLH | 130  | 85   |
| >CDKN2A-V5 ARVAELLL    | 222  | >CDKN2A-V5 ARMAELLL   | 62   | 160  |
| >CDKN2A-V5 ARVAELLLL   | 229  | >CDKN2A-V5 ARMAELLLL  | 65   | 164  |
| >CDKN2A-V5 ARVAELLLL   | 123  | >CDKN2A-V5 ARMAELLLL  | 58   | 65   |
| >CDKN2A-V5 ARVAELLLL   | 23   | >CDKN2A-V5 ARMAELLLL  | 9    | 14   |
| >CDKN2A-V5 SARVAELL    | 380  | >CDKN2A-V5 SARMAELL   | 331  | 49   |
| >CDKN2A-V5 SARVAELLL   | 39   | >CDKN2A-V5 SARMAELLL  | 36   | 3    |
| >CDKN2A-V5 SARVAELLLL  | 38   | >CDKN2A-V5 SARMAELLLL | 36   | 2    |
| >CDKN2A-V5 SARVAELLLLH | 558  | >CDKN2A-V5 SARMAELLLL | 490  | 68   |
| >CDKN2A-V5 SARVAELL    | 377  | >CDKN2A-V5 SARMAELL   | 212  | 165  |
| >CDKN2A-V5 SARVAELLL   | 179  | >CDKN2A-V5 SARMAELLL  | 133  | 46   |
| >CDKN2A-V5 SARVAELLLL  | 137  | >CDKN2A-V5 SARMAELLLL | 108  | 29   |
| >CDKN2A-V5 GSARVAEL    | 282  | >CDKN2A-V5 GSARMAEL   | 78   | 204  |
| >CDKN2A-V5 GSARVAELLLI | 950  | >CDKN2A-V5 GSARMAELLL | 360  | 590  |
| >CDKN2A-V5 GSARVAELL   | 237  | >CDKN2A-V5 GSARMAELL  | 1078 | 841  |
| >CDKN2A-V5 GSARVAELLL  | 255  | >CDKN2A-V5 GSARMAELLL | 751  | 496  |
| >CDKN2A-V5 GSARVAELLLL | 270  | >CDKN2A-V5 GSARMAELLL | 703  | 433  |
| >CDKN2A-V5 GSARVAELLLL | 264  | >CDKN2A-V5 GSARMAELLL | 271  | 7    |
| >CDKN2A-V5 GSARVAELL   | 24   | >CDKN2A-V5 GSARMAELL  | 26   | 2    |
| >CDKN2A-V5 GSARVAELLL  | 452  | >CDKN2A-V5 GSARMAELLL | 191  | 261  |
| >CDKN2A-V5 GSARVAELLLL | 66   | >CDKN2A-V5 GSARMAELLL | 69   | 3    |
| >CDKN2A-V5 MGSARVAEL   | 66   | >CDKN2A-V5 MGSARMAEL  | 71   | 5    |
| >CDKN2A-V5 MGSARVAELI  | 399  | >CDKN2A-V5 MGSARMAEL  | 421  | 22   |
| >CDKN2A-V5 MGSARVAEL   | 530  | >CDKN2A-V5 MGSARMAEL  | 300  | 230  |
| >CDKN2A-V5 MGSARVAEL   | 218  | >CDKN2A-V5 MGSARMAEL  | 447  | 229  |
| >CDKN2A-V5 MGSARVAEL   | 753  | >CDKN2A-V5 MGSARMAEL  | 287  | 466  |
| >CDKN2A-V5 MMGSARVAI   | 177  | >CDKN2A-V5 MMGSARMA   | 190  | 13   |
| >CDKN2A-V5 MMGSARVAI   | 143  | >CDKN2A-V5 MMGSARMA   | 170  | 27   |
| >CDKN2A-V5 MMGSARVA    | 831  | >CDKN2A-V5 MMGSARMA   | 499  | 332  |
| >CDKN2A-V5 MMGSARVAI   | 24   | >CDKN2A-V5 MMGSARMA   | 23   | 1    |
| >CDKN2A-V5 MMGSARVAI   | 8    | >CDKN2A-V5 MMGSARMA   | 10   | 2    |
| >CDKN2A-V5 MMGSARVA    | 224  | >CDKN2A-V5 MMGSARMA   | 106  | 118  |

|                      |     |                     |     |     |
|----------------------|-----|---------------------|-----|-----|
| >CDKN2A-V5 MMGSARVAI | 52  | >CDKN2A-V5 MMGSARMA | 51  | 1   |
| >CDKN2A-V5 MMGSARVAI | 173 | >CDKN2A-V5 MMGSARMA | 114 | 59  |
| >CDKN2A-V5 MMGSARVAI | 436 | >CDKN2A-V5 MMGSARMA | 608 | 172 |
| >CDKN2A-V5 MMGSARVA  | 187 | >CDKN2A-V5 MMGSARMA | 92  | 95  |
| >CDKN2A-V5 MMGSARVAI | 11  | >CDKN2A-V5 MMGSARMA | 18  | 7   |
| >CDKN2A-V5 MMGSARVAI | 24  | >CDKN2A-V5 MMGSARMA | 41  | 17  |
| >CDKN2A-V5 MMGSARVAI | 42  | >CDKN2A-V5 MMGSARMA | 54  | 12  |
| >CDKN2A-V5 MMGSARVAI | 190 | >CDKN2A-V5 MMGSARMA | 234 | 44  |
| >CDKN2A-V5 MMGSARVAI | 46  | >CDKN2A-V5 MMGSARMA | 85  | 39  |
| >CDKN2A-V5 MMGSARVAI | 81  | >CDKN2A-V5 MMGSARMA | 133 | 52  |
| >CDKN2A-V5 MMGSARVAI | 33  | >CDKN2A-V5 MMGSARMA | 89  | 56  |
| >CDKN2A-V5 MMGSARVAI | 112 | >CDKN2A-V5 MMGSARMA | 104 | 8   |
| >CDKN2A-V5 MMGSARVA  | 95  | >CDKN2A-V5 MMGSARMA | 59  | 36  |
| >CDKN2A-V5 MMGSARVAI | 3   | >CDKN2A-V5 MMGSARMA | 3   | 0   |
| >CDKN2A-V5 MMGSARVAI | 8   | >CDKN2A-V5 MMGSARMA | 7   | 1   |
| >CDKN2A-V5 MMGSARVAI | 163 | >CDKN2A-V5 MMGSARMA | 227 | 64  |
| >CDKN2A-V5 MMGSARVAI | 90  | >CDKN2A-V5 MMGSARMA | 133 | 43  |
| >CDKN2A-V5 MMGSARVAI | 402 | >CDKN2A-V5 MMGSARMA | 419 | 17  |
| >CDKN2A-V5 MMMGSARV  | 587 | >CDKN2A-V5 MMMGSARN | 379 | 208 |
| >CDKN2A-V5 MMMGSARV  | 11  | >CDKN2A-V5 MMMGSARN | 38  | 27  |
| >CDKN2A-V5 MMMGSARV  | 549 | >CDKN2A-V5 MMMGSARN | 195 | 354 |
| >CDKN2A-V5 MMMGSARV  | 19  | >CDKN2A-V5 MMMGSARN | 16  | 3   |
| >CDKN2A-V5 MMMGSARV  | 3   | >CDKN2A-V5 MMMGSARN | 13  | 10  |
| >CDKN2A-V5 MMMGSARV  | 102 | >CDKN2A-V5 MMMGSARN | 39  | 63  |
| >CDKN2A-V5 MMMGSARV  | 4   | >CDKN2A-V5 MMMGSARN | 3   | 1   |
| >CDKN2A-V5 MMMGSARV  | 2   | >CDKN2A-V5 MMMGSARN | 18  | 16  |
| >CDKN2A-V5 MMMGSARV  | 11  | >CDKN2A-V5 MMMGSARN | 8   | 3   |
| >CDKN2A-V5 MMMGSARV  | 5   | >CDKN2A-V5 MMMGSARN | 5   | 0   |
| >CDKN2A-V5 MMMGSARV  | 8   | >CDKN2A-V5 MMMGSARN | 149 | 141 |
| >CDKN2A-V5 MMMGSARV  | 437 | >CDKN2A-V5 MMMGSARN | 255 | 182 |
| >CDKN2A-V5 MMMGSARV  | 27  | >CDKN2A-V5 MMMGSARN | 19  | 8   |
| >CDKN2A-V5 MMMGSARV  | 2   | >CDKN2A-V5 MMMGSARN | 13  | 11  |
| >CDKN2A-V5 MMMGSARV  | 29  | >CDKN2A-V5 MMMGSARN | 13  | 16  |
| >CDKN2A-V5 MMMGSARV  | 3   | >CDKN2A-V5 MMMGSARN | 4   | 1   |
| >CDKN2A-V5 MMMGSARV  | 3   | >CDKN2A-V5 MMMGSARN | 57  | 54  |
| >CDKN2A-V5 MMMGSARV  | 281 | >CDKN2A-V5 MMMGSARN | 589 | 308 |
| >CDKN2A-V5 MMMGSARV  | 9   | >CDKN2A-V5 MMMGSARN | 10  | 1   |
| >CDKN2A-V5 MMMGSARV  | 8   | >CDKN2A-V5 MMMGSARN | 637 | 629 |
| >CDKN2A-V5 MMMGSARV  | 35  | >CDKN2A-V5 MMMGSARN | 46  | 11  |
| >CDKN2A-V5 MMMGSARV  | 2   | >CDKN2A-V5 MMMGSARN | 10  | 8   |
| >CDKN2A-V5 MMMGSARV  | 91  | >CDKN2A-V5 MMMGSARN | 79  | 12  |
| >CDKN2A-V5 MMMGSARV  | 4   | >CDKN2A-V5 MMMGSARN | 6   | 2   |
| >CDKN2A-V5 MMMGSARV  | 2   | >CDKN2A-V5 MMMGSARN | 10  | 8   |

|                     |       |                     |      |       |
|---------------------|-------|---------------------|------|-------|
| >CDKN2A-V5 MMMGSARV | 21    | >CDKN2A-V5 MMMGSARN | 15   | 6     |
| >CDKN2A-V5 MMMGSARV | 3     | >CDKN2A-V5 MMMGSARN | 3    | 0     |
| >CDKN2A-V5 MMMGSARV | 179   | >CDKN2A-V5 MMMGSARN | 334  | 155   |
| >CDKN2A-V5 MMMGSARV | 29    | >CDKN2A-V5 MMMGSARN | 1834 | 1805  |
| >CDKN2A-V5 MMMGSARV | 235   | >CDKN2A-V5 MMMGSARN | 144  | 91    |
| >CDKN2A-V5 MMMGSARV | 51    | >CDKN2A-V5 MMMGSARN | 724  | 673   |
| >CDKN2A-V5 MMMGSARV | 819   | >CDKN2A-V5 MMMGSARN | 412  | 407   |
| >CDKN2A-V5 MMMGSARV | 188   | >CDKN2A-V5 MMMGSARN | 280  | 92    |
| >CDKN2A-V5 MMMGSARV | 301   | >CDKN2A-V5 MMMGSARN | 53   | 248   |
| >CDKN2A-V5 MMMGSARV | 191   | >CDKN2A-V5 MMMGSARN | 869  | 678   |
| >CDKN2A-V5 MMMGSARV | 84    | >CDKN2A-V5 MMMGSARN | 127  | 43    |
| >CDKN2A-V5 MMMGSARV | 804   | >CDKN2A-V5 MMMGSARN | 109  | 695   |
| >CDKN2A-V5 MMMGSARV | 237   | >CDKN2A-V5 MMMGSARN | 48   | 189   |
| >CDKN2A-V5 MMMGSARV | 342   | >CDKN2A-V5 MMMGSARN | 745  | 403   |
| >CDKN2A-V5 MMMGSARV | 31    | >CDKN2A-V5 MMMGSARN | 46   | 15    |
| >CDKN2A-V5 MMMGSARV | 1155  | >CDKN2A-V5 MMMGSARN | 26   | 1129  |
| >CDKN2A-V5 MMMGSARV | 55    | >CDKN2A-V5 MMMGSARN | 34   | 21    |
| >CDKN2A-V5 MMMGSARV | 5992  | >CDKN2A-V5 MMMGSARN | 101  | 5891  |
| >CDKN2A-V5 MMMGSARV | 465   | >CDKN2A-V5 MMMGSARN | 121  | 344   |
| >CDKN2A-V5 MMMGSARV | 18    | >CDKN2A-V5 MMMGSARN | 25   | 7     |
| >CDKN2A-V5 MMMGSARV | 185   | >CDKN2A-V5 MMMGSARN | 204  | 19    |
| >CDKN2A-V5 MMMGSARV | 10495 | >CDKN2A-V5 MMMGSARN | 427  | 10068 |
| >CDKN2A-V5 VMMMGSAR | 182   | >CDKN2A-V5 VMMMGSAR | 46   | 136   |
| >CDKN2A-V5 VMMMGSAR | 11    | >CDKN2A-V5 VMMMGSAR | 73   | 62    |
| >CDKN2A-V5 VMMMGSAR | 9     | >CDKN2A-V5 VMMMGSAR | 212  | 203   |
| >CDKN2A-V5 VMMMGSAR | 425   | >CDKN2A-V5 VMMMGSAR | 293  | 132   |
| >CDKN2A-V5 VMMMGSAR | 3     | >CDKN2A-V5 VMMMGSAR | 42   | 39    |
| >CDKN2A-V5 VMMMGSAR | 226   | >CDKN2A-V5 VMMMGSAR | 213  | 13    |
| >CDKN2A-V5 VMMMGSAR | 19    | >CDKN2A-V5 VMMMGSAR | 549  | 530   |
| >CDKN2A-V5 VMMMGSAR | 2     | >CDKN2A-V5 VMMMGSAR | 25   | 23    |
| >CDKN2A-V5 VMMMGSAR | 55    | >CDKN2A-V5 VMMMGSAR | 26   | 29    |
| >CDKN2A-V5 VMMMGSAR | 3     | >CDKN2A-V5 VMMMGSAR | 89   | 86    |
| >CDKN2A-V5 VMMMGSAR | 239   | >CDKN2A-V5 VMMMGSAR | 408  | 169   |
| >CDKN2A-V5 VMMMGSAR | 7     | >CDKN2A-V5 VMMMGSAR | 456  | 449   |
| >CDKN2A-V5 VMMMGSAR | 625   | >CDKN2A-V5 VMMMGSAR | 302  | 323   |
| >CDKN2A-V5 VMMMGSAR | 2     | >CDKN2A-V5 VMMMGSAR | 11   | 9     |
| >CDKN2A-V5 VMMMGSAR | 95    | >CDKN2A-V5 VMMMGSAR | 101  | 6     |
| >CDKN2A-V5 VMMMGSAR | 2     | >CDKN2A-V5 VMMMGSAR | 16   | 14    |
| >CDKN2A-V5 VMMMGSAR | 54    | >CDKN2A-V5 VMMMGSAR | 41   | 13    |
| >CDKN2A-V5 VMMMGSAR | 175   | >CDKN2A-V5 VMMMGSAR | 44   | 131   |
| >CDKN2A-V5 VMMMGSAR | 183   | >CDKN2A-V5 VMMMGSAR | 626  | 443   |
| >CDKN2A-V5 VMMMGSAR | 1289  | >CDKN2A-V5 VMMMGSAR | 183  | 1106  |
| >CDKN2A-V5 VMMMGSAR | 420   | >CDKN2A-V5 VMMMGSAR | 90   | 330   |



|                       |       |                       |       |       |
|-----------------------|-------|-----------------------|-------|-------|
| >CDKN2A-V5 VMMMGSAR   | 1034  | >CDKN2A-V5 VMMMGSAR   | 36    | 998   |
| >CDKN2A-V5 QVMMMGS/   | 419   | >CDKN2A-V5 QVMMMGS/   | 1721  | 1302  |
| >CDKN2A-V5 QVMMMGS/   | 61    | >CDKN2A-V5 QVMMMGS/   | 1697  | 1636  |
| >CDKN2A-V5 QVMMMGS/   | 313   | >CDKN2A-V5 QVMMMGS/   | 4558  | 4245  |
| >CDKN2A-V5 QVMMMGS/   | 248   | >CDKN2A-V5 QVMMMGS/   | 7853  | 7605  |
| >CDKN2A-V5 QVMMMGS/   | 41    | >CDKN2A-V5 QVMMMGS/   | 15166 | 15125 |
| >CDKN2A-V5 QVMMMGS/   | 10143 | >CDKN2A-V5 QVMMMGS/   | 139   | 10004 |
| >CDKN2A-V5 QVMMMGS/   | 215   | >CDKN2A-V5 QVMMMGS/   | 5166  | 4951  |
| >CDKN2A-V5 QVMMMGS/   | 78    | >CDKN2A-V5 QVMMMGS/   | 1228  | 1150  |
| >CDKN2A-V5 QVMMMGS/   | 3344  | >CDKN2A-V5 QVMMMGS/   | 253   | 3091  |
| >CDKN2A-V5 QVMMMGS/   | 3451  | >CDKN2A-V5 QVMMMGS/   | 96    | 3355  |
| >CDKN2A-V5 QVMMMGS/   | 5749  | >CDKN2A-V5 QVMMMGS/   | 143   | 5606  |
| >CDKN2A-V8 PVHDAAREG  | 8635  | >CDKN2A-V8 PLHDAAREGF | 88    | 8547  |
| >CDKN2A-V8 CADPATLTRP | 1402  | >CDKN2A-V8 CADPATLTRP | 291   | 1111  |
| >CDKN2A-V8 RPHDAAREC  | 58    | >CDKN2A-V8 RPLHDAAREC | 89    | 31    |
| >CDKN2A-V8 RPHDAAREC  | 287   | >CDKN2A-V8 RPLHDAAREC | 171   | 116   |
| >CDKN2A-V8 RPHDAAREC  | 112   | >CDKN2A-V8 RPLHDAAREC | 236   | 124   |
| >CDKN2A-V8 RPHDAAR    | 319   | >CDKN2A-V8 RPLHDAAR   | 217   | 102   |
| >CDKN2A-V8 LTRPVHDA   | 48    | >CDKN2A-V8 LTRPLHDA   | 48    | 0     |
| >CDKN2A-V8 LTRPVHDAA  | 24    | >CDKN2A-V8 LTRPLHDAA  | 25    | 1     |
| >CDKN2A-V8 LTRPVHDAAF | 56    | >CDKN2A-V8 LTRPLHDAAR | 64    | 8     |
| >CDKN2A-V8 LTRPVHDAAF | 107   | >CDKN2A-V8 LTRPLHDAAR | 91    | 16    |
| >CDKN2A-V8 LTRPVHDAAF | 47    | >CDKN2A-V8 LTRPLHDAAR | 65    | 18    |
| >CDKN2A-V8 LTRPVHDAAF | 827   | >CDKN2A-V8 LTRPLHDAAR | 457   | 370   |
| >CDKN2A-V8 TLTRPVHDAA | 280   | >CDKN2A-V8 TLTRPLHDAA | 592   | 312   |
| >CDKN2A-V8 TLTRPVHDA  | 12    | >CDKN2A-V8 TLTRPLHDA  | 13    | 1     |
| >CDKN2A-V8 TLTRPVHDAA | 88    | >CDKN2A-V8 TLTRPLHDAA | 91    | 3     |
| >CDKN2A-V8 TLTRPVHDAA | 159   | >CDKN2A-V8 TLTRPLHDAA | 135   | 24    |
| >CDKN2A-V8 TLTRPVHDAA | 411   | >CDKN2A-V8 TLTRPLHDAA | 299   | 112   |
| >CDKN2A-V8 TLTRPVHDAA | 68    | >CDKN2A-V8 TLTRPLHDAA | 86    | 18    |
| >CDKN2A-V8 ATLTRPVHDA | 506   | >CDKN2A-V8 ATLTRPLHDA | 401   | 105   |
| >CDKN2A-V8 ATLTRPVH   | 1032  | >CDKN2A-V8 ATLTRPLH   | 451   | 581   |
| >CDKN2A-V8 DPATLTRPV  | 485   | >CDKN2A-V8 DPATLTRPL  | 4440  | 3955  |
| >CDKN2A-V8 DPATLTRPV  | 197   | >CDKN2A-V8 DPATLTRPL  | 776   | 579   |
| >CDKN2A-V8 DPATLTRPV  | 149   | >CDKN2A-V8 DPATLTRPL  | 33    | 116   |
| >CDKN2A-V8 DPATLTRPV  | 668   | >CDKN2A-V8 DPATLTRPL  | 86    | 582   |
| >CDKN2A-V8 ADPATLTRPV | 498   | >CDKN2A-V8 ADPATLTRPL | 3036  | 2538  |
| >CDKN2A-V8 VHDAAREGF  | 1646  | >CDKN2A-V8 MHDAAREGF  | 101   | 1545  |
| >CDKN2A-V8 VHDAAREGF  | 6711  | >CDKN2A-V8 MHDAAREGF  | 201   | 6510  |
| >CDKN2A-V8 PVHDAAREG  | 11050 | >CDKN2A-V8 PMHDAAREC  | 282   | 10768 |
| >CDKN2A-V8 PVHDAAREG  | 8635  | >CDKN2A-V8 PMHDAAREC  | 173   | 8462  |
| >CDKN2A-V8 PVHDAAREG  | 5614  | >CDKN2A-V8 PMHDAAREC  | 274   | 5340  |
| >CDKN2A-V8 CADPATLTRP | 4605  | >CDKN2A-V8 CADPATLTRP | 51    | 4554  |

|                       |      |                       |       |       |
|-----------------------|------|-----------------------|-------|-------|
| >CDKN2A-V8 RPHDAARE   | 58   | >CDKN2A-V8 RPMHDAARE  | 20    | 38    |
| >CDKN2A-V8 RPHDAARE   | 287  | >CDKN2A-V8 RPMHDAARE  | 94    | 193   |
| >CDKN2A-V8 RPHDAARE   | 112  | >CDKN2A-V8 RPMHDAARE  | 146   | 34    |
| >CDKN2A-V8 RPHDAAR    | 319  | >CDKN2A-V8 RPMHDAAR   | 273   | 46    |
| >CDKN2A-V8 LTRPVHDA   | 48   | >CDKN2A-V8 LTRPMHDA   | 39    | 9     |
| >CDKN2A-V8 LTRPVHDA   | 24   | >CDKN2A-V8 LTRPMHDA   | 19    | 5     |
| >CDKN2A-V8 LTRPVHDAF  | 56   | >CDKN2A-V8 LTRPMHDA   | 45    | 11    |
| >CDKN2A-V8 LTRPVHDAF  | 107  | >CDKN2A-V8 LTRPMHDA   | 71    | 36    |
| >CDKN2A-V8 LTRPVHDAF  | 47   | >CDKN2A-V8 LTRPMHDA   | 62    | 15    |
| >CDKN2A-V8 LTRPVHDAF  | 827  | >CDKN2A-V8 LTRPMHDA   | 350   | 477   |
| >CDKN2A-V8 TLTRPVHDA  | 280  | >CDKN2A-V8 TLTRPMHDA  | 1084  | 804   |
| >CDKN2A-V8 TLTRPVHDA  | 12   | >CDKN2A-V8 TLTRPMHDA  | 27    | 15    |
| >CDKN2A-V8 TLTRPVHDA  | 88   | >CDKN2A-V8 TLTRPMHDA  | 99    | 11    |
| >CDKN2A-V8 TLTRPVHDA  | 159  | >CDKN2A-V8 TLTRPMHDA  | 102   | 57    |
| >CDKN2A-V8 TLTRPVHDA  | 411  | >CDKN2A-V8 TLTRPMHDA  | 264   | 147   |
| >CDKN2A-V8 TLTRPVHDA  | 68   | >CDKN2A-V8 TLTRPMHDA  | 74    | 6     |
| >CDKN2A-V8 ATLTRPVHDA | 506  | >CDKN2A-V8 ATLTRPMHDA | 288   | 218   |
| >CDKN2A-V8 DPATLTRPV  | 485  | >CDKN2A-V8 DPATLTRPM  | 12371 | 11886 |
| >CDKN2A-V8 DPATLTRPV  | 197  | >CDKN2A-V8 DPATLTRPM  | 1186  | 989   |
| >CDKN2A-V8 DPATLTRPV  | 149  | >CDKN2A-V8 DPATLTRPM  | 35    | 114   |
| >CDKN2A-V8 DPATLTRPV  | 668  | >CDKN2A-V8 DPATLTRPM  | 15    | 653   |
| >CDKN2A-V8 ADPATLTRPV | 498  | >CDKN2A-V8 ADPATLTRPM | 6942  | 6444  |
| >CDKN2A-V9 VVLRAGA    | 471  | >CDKN2A-V9 AVLHRAGA   | 338   | 133   |
| >CDKN2A-V9 VVLRAGA    | 3405 | >CDKN2A-V9 AVLHRAGA   | 475   | 2930  |
| >CDKN2A-V9 VVLRAGAR   | 225  | >CDKN2A-V9 AVLHRAGAR  | 123   | 102   |
| >CDKN2A-V9 VVLRAGARI  | 129  | >CDKN2A-V9 AVLHRAGARI | 139   | 10    |
| >CDKN2A-V9 LVVLRAGAF  | 250  | >CDKN2A-V9 LAVLHRAGAF | 262   | 12    |
| >CDKN2A-V9 LVVLRAGAF  | 127  | >CDKN2A-V9 LAVLHRAGAF | 296   | 169   |
| >CDKN2A-V9 LVVLRAGAF  | 287  | >CDKN2A-V9 LAVLHRAGAF | 538   | 251   |
| >CDKN2A-V9 LVVLRAGAF  | 435  | >CDKN2A-V9 LAVLHRAGAF | 33    | 402   |
| >CDKN2A-V9 AAREGFLDTL | 408  | >CDKN2A-V9 AAREGFLDTL | 3144  | 2736  |
| >CDKN2A-V9 AAREGFLDTL | 252  | >CDKN2A-V9 AAREGFLDTL | 12430 | 12178 |
| >CDKN2A-V9 AAREGFLDTL | 203  | >CDKN2A-V9 AAREGFLDTL | 112   | 91    |
| >CDKN2A-V9 TLVVLHRA   | 433  | >CDKN2A-V9 TLAVLHRA   | 63    | 370   |
| >CDKN2A-V9 TLVVLHRA   | 1043 | >CDKN2A-V9 TLAVLHRA   | 454   | 589   |
| >CDKN2A-V9 TLVVLHRA   | 247  | >CDKN2A-V9 TLAVLHRA   | 79    | 168   |
| >CDKN2A-V9 TLVVLHRA   | 240  | >CDKN2A-V9 TLAVLHRA   | 187   | 53    |
| >CDKN2A-V9 TLVVLHRA   | 426  | >CDKN2A-V9 TLAVLHRA   | 350   | 76    |
| >CDKN2A-V9 TLVVLHRA   | 1412 | >CDKN2A-V9 TLAVLHRA   | 413   | 999   |
| >CDKN2A-V9 TLVVLHRA   | 59   | >CDKN2A-V9 TLAVLHRA   | 32    | 27    |
| >CDKN2A-V9 TLVVLHRA   | 465  | >CDKN2A-V9 TLAVLHRA   | 203   | 262   |
| >CDKN2A-V9 TLVVLHRA   | 209  | >CDKN2A-V9 TLAVLHRA   | 206   | 3     |
| >CDKN2A-V9 TLVVLHRA   | 185  | >CDKN2A-V9 TLAVLHRA   | 93    | 92    |

|                        |      |                        |      |      |
|------------------------|------|------------------------|------|------|
| >CDKN2A-V9 DTLVVLHR    | 277  | >CDKN2A-V9 DTLAVLHR    | 336  | 59   |
| >CDKN2A-V9 DTLVVLHR    | 9    | >CDKN2A-V9 DTLAVLHR    | 12   | 3    |
| >CDKN2A-V9 DTLVVLHR    | 16   | >CDKN2A-V9 DTLAVLHR    | 14   | 2    |
| >CDKN2A-V9 DTLVVLHRA   | 178  | >CDKN2A-V9 DTLAVLHRA   | 41   | 137  |
| >CDKN2A-V9 DTLVVLHRAC  | 197  | >CDKN2A-V9 DTLAVLHRAC  | 60   | 137  |
| >CDKN2A-V9 DTLVVLHRA   | 46   | >CDKN2A-V9 DTLAVLHRA   | 20   | 26   |
| >CDKN2A-V9 DTLVVLHRAC  | 65   | >CDKN2A-V9 DTLAVLHRAC  | 33   | 32   |
| >CDKN2A-V9 FLDTLVVL    | 12   | >CDKN2A-V9 FLDTLAVL    | 16   | 4    |
| >CDKN2A-V9 FLDTLVVLHR, | 12   | >CDKN2A-V9 FLDTLAVLHR, | 15   | 3    |
| >CDKN2A-V9 FLDTLVVL    | 9    | >CDKN2A-V9 FLDTLAVL    | 9    | 0    |
| >CDKN2A-V9 FLDTLVVLHR, | 7    | >CDKN2A-V9 FLDTLAVLHR, | 8    | 1    |
| >CDKN2A-V9 FLDTLVVL    | 74   | >CDKN2A-V9 FLDTLAVL    | 52   | 22   |
| >CDKN2A-V9 FLDTLVVLHR, | 24   | >CDKN2A-V9 FLDTLAVLHR, | 37   | 13   |
| >CDKN2A-V9 FLDTLVVL    | 37   | >CDKN2A-V9 FLDTLAVL    | 32   | 5    |
| >CDKN2A-V9 FLDTLVVLHR, | 68   | >CDKN2A-V9 FLDTLAVLHR, | 46   | 22   |
| >CDKN2A-V9 FLDTLVVL    | 3    | >CDKN2A-V9 FLDTLAVL    | 4    | 1    |
| >CDKN2A-V9 FLDTLVVLHR, | 3    | >CDKN2A-V9 FLDTLAVLHR, | 5    | 2    |
| >CDKN2A-V9 FLDTLVVL    | 4    | >CDKN2A-V9 FLDTLAVL    | 4    | 0    |
| >CDKN2A-V9 FLDTLVVLHR, | 9    | >CDKN2A-V9 FLDTLAVLHR, | 11   | 2    |
| >CDKN2A-V9 FLDTLVVL    | 7    | >CDKN2A-V9 FLDTLAVL    | 9    | 2    |
| >CDKN2A-V9 FLDTLVVLHR, | 8    | >CDKN2A-V9 FLDTLAVLHR, | 10   | 2    |
| >CDKN2A-V9 FLDTLVVL    | 8    | >CDKN2A-V9 FLDTLAVL    | 9    | 1    |
| >CDKN2A-V9 FLDTLVVLHR, | 19   | >CDKN2A-V9 FLDTLAVLHR, | 38   | 19   |
| >CDKN2A-V9 FLDTLVVL    | 3    | >CDKN2A-V9 FLDTLAVL    | 3    | 0    |
| >CDKN2A-V9 FLDTLVVLHR, | 3    | >CDKN2A-V9 FLDTLAVLHR, | 3    | 0    |
| >CDKN2A-V9 FLDTLVVLHR  | 354  | >CDKN2A-V9 FLDTLAVLHR  | 561  | 207  |
| >CDKN2A-V9 FLDTLVVL    | 52   | >CDKN2A-V9 FLDTLAVL    | 50   | 2    |
| >CDKN2A-V9 FLDTLVVLHR  | 553  | >CDKN2A-V9 FLDTLAVLHR  | 205  | 348  |
| >CDKN2A-V9 FLDTLVVLHR  | 272  | >CDKN2A-V9 FLDTLAVLHR  | 237  | 35   |
| >CDKN2A-V9 GFLDTLVV    | 313  | >CDKN2A-V9 GFLDTLAV    | 152  | 161  |
| >CDKN2A-V9 GFLDTLVV    | 494  | >CDKN2A-V9 GFLDTLAV    | 224  | 270  |
| >CDKN2A-V9 GFLDTLVV    | 110  | >CDKN2A-V9 GFLDTLAV    | 129  | 19   |
| >CDKN2A-V9 GFLDTLVV    | 221  | >CDKN2A-V9 GFLDTLAV    | 187  | 34   |
| >CDKN2A-V9 GFLDTLVVL   | 298  | >CDKN2A-V9 GFLDTLAVL   | 543  | 245  |
| >CDKN2A-V9 GFLDTLVVL   | 75   | >CDKN2A-V9 GFLDTLAVL   | 229  | 154  |
| >CDKN2A-V9 GFLDTLVVLH  | 38   | >CDKN2A-V9 GFLDTLAVLH  | 53   | 15   |
| >CDKN2A-V9 GFLDTLVVLH  | 421  | >CDKN2A-V9 GFLDTLAVLH  | 593  | 172  |
| >CDKN2A-V9 GFLDTLVVLH  | 77   | >CDKN2A-V9 GFLDTLAVLH  | 85   | 8    |
| >CDKN2A-V9 EGFLDTLV    | 135  | >CDKN2A-V9 EGFLDTLA    | 1863 | 1728 |
| >CDKN2A-V9 EGFLDTLVV   | 1222 | >CDKN2A-V9 EGFLDTLAV   | 412  | 810  |
| >CDKN2A-V9 REGFLDTLV   | 213  | >CDKN2A-V9 REGFLDTLA   | 4927 | 4714 |
| >CDKN2A-V9 REGFLDTLVV  | 14   | >CDKN2A-V9 REGFLDTLAV  | 18   | 4    |
| >CDKN2A-V9 REGFLDTLV   | 208  | >CDKN2A-V9 REGFLDTLA   | 233  | 25   |

|                       |      |                       |      |      |
|-----------------------|------|-----------------------|------|------|
| >CDKN2A-V9 REGFLDTLVV | 264  | >CDKN2A-V9 REGFLDTLAV | 159  | 105  |
| >CDKN2A-V9 REGFLDTLVV | 63   | >CDKN2A-V9 REGFLDTLAV | 124  | 61   |
| >CDKN2A-V9 REGFLDTLV  | 818  | >CDKN2A-V9 REGFLDTLA  | 193  | 625  |
| >CDKN2A-V9 REGFLDTLV  | 35   | >CDKN2A-V9 REGFLDTLA  | 1268 | 1233 |
| >CDKN2A-V9 REGFLDTLVV | 89   | >CDKN2A-V9 REGFLDTLAV | 65   | 24   |
| >CDKN2A-V9 REGFLDTLVV | 68   | >CDKN2A-V9 REGFLDTLAV | 79   | 11   |
| >CDKN2A-V9 VVLHRAGA   | 471  | >CDKN2A-V9 LVLHRAGA   | 311  | 160  |
| >CDKN2A-V9 VVLHRAGAR  | 225  | >CDKN2A-V9 LVLHRAGAR  | 166  | 59   |
| >CDKN2A-V9 VVLHRAGAR  | 576  | >CDKN2A-V9 LVLHRAGAR  | 363  | 213  |
| >CDKN2A-V9 VVLHRAGAR  | 1012 | >CDKN2A-V9 LVLHRAGAR  | 450  | 562  |
| >CDKN2A-V9 VVLHRAGARI | 129  | >CDKN2A-V9 LVLHRAGARL | 151  | 22   |
| >CDKN2A-V9 LVVLHRAGAF | 250  | >CDKN2A-V9 LLVLHRAGAR | 1220 | 970  |
| >CDKN2A-V9 LVVLHRAGA  | 4628 | >CDKN2A-V9 LLVLHRAGA  | 293  | 4335 |
| >CDKN2A-V9 LVVLHRAGAF | 1138 | >CDKN2A-V9 LLVLHRAGAR | 100  | 1038 |
| >CDKN2A-V9 LVVLHRAGA  | 585  | >CDKN2A-V9 LLVLHRAGA  | 36   | 549  |
| >CDKN2A-V9 LVVLHRAGAF | 1567 | >CDKN2A-V9 LLVLHRAGAR | 90   | 1477 |
| >CDKN2A-V9 LVVLHRAGAF | 8643 | >CDKN2A-V9 LLVLHRAGAR | 237  | 8406 |
| >CDKN2A-V9 LVVLHRAGA  | 6957 | >CDKN2A-V9 LLVLHRAGA  | 46   | 6911 |
| >CDKN2A-V9 LVVLHRAGAF | 927  | >CDKN2A-V9 LLVLHRAGAR | 11   | 916  |
| >CDKN2A-V9 LVVLHRAGAF | 127  | >CDKN2A-V9 LLVLHRAGAR | 160  | 33   |
| >CDKN2A-V9 LVVLHRAGAF | 287  | >CDKN2A-V9 LLVLHRAGAR | 2656 | 2369 |
| >CDKN2A-V9 LVVLHRAGAF | 435  | >CDKN2A-V9 LLVLHRAGAR | 2569 | 2134 |
| >CDKN2A-V9 AAREGFLDTL | 408  | >CDKN2A-V9 AAREGFLDTL | 2068 | 1660 |
| >CDKN2A-V9 AAREGFLDTL | 252  | >CDKN2A-V9 AAREGFLDTL | 4894 | 4642 |
| >CDKN2A-V9 AAREGFLDTL | 203  | >CDKN2A-V9 AAREGFLDTL | 322  | 119  |
| >CDKN2A-V9 AAREGFLDTL | 2939 | >CDKN2A-V9 AAREGFLDTL | 85   | 2854 |
| >CDKN2A-V9 TLVVLHRA   | 433  | >CDKN2A-V9 TLLVLHRA   | 956  | 523  |
| >CDKN2A-V9 TLVVLHRA   | 247  | >CDKN2A-V9 TLLVLHRA   | 680  | 433  |
| >CDKN2A-V9 TLVVLHRAGA | 240  | >CDKN2A-V9 TLLVLHRAGA | 180  | 60   |
| >CDKN2A-V9 TLVVLHRA   | 426  | >CDKN2A-V9 TLLVLHRA   | 71   | 355  |
| >CDKN2A-V9 TLVVLHRA   | 1412 | >CDKN2A-V9 TLLVLHRA   | 157  | 1255 |
| >CDKN2A-V9 TLVVLHRA   | 59   | >CDKN2A-V9 TLLVLHRA   | 36   | 23   |
| >CDKN2A-V9 TLVVLHRAGA | 465  | >CDKN2A-V9 TLLVLHRAGA | 235  | 230  |
| >CDKN2A-V9 TLVVLHRAGA | 209  | >CDKN2A-V9 TLLVLHRAGA | 85   | 124  |
| >CDKN2A-V9 TLVVLHRAGA | 534  | >CDKN2A-V9 TLLVLHRAGA | 189  | 345  |
| >CDKN2A-V9 TLVVLHRAGA | 185  | >CDKN2A-V9 TLLVLHRAGA | 765  | 580  |
| >CDKN2A-V9 DTLVVLHR   | 277  | >CDKN2A-V9 DTLLVLHR   | 444  | 167  |
| >CDKN2A-V9 DTLVVLHR   | 9    | >CDKN2A-V9 DTLLVLHR   | 9    | 0    |
| >CDKN2A-V9 DTLVVLHR   | 16   | >CDKN2A-V9 DTLLVLHR   | 23   | 7    |
| >CDKN2A-V9 DTLVVLHRA  | 178  | >CDKN2A-V9 DTLLVLHRA  | 188  | 10   |
| >CDKN2A-V9 DTLVVLHRAC | 197  | >CDKN2A-V9 DTLLVLHRAG | 203  | 6    |
| >CDKN2A-V9 DTLVVLHRA  | 46   | >CDKN2A-V9 DTLLVLHRA  | 65   | 19   |
| >CDKN2A-V9 DTLVVLHRAC | 65   | >CDKN2A-V9 DTLLVLHRAG | 84   | 19   |

|                        |      |                        |      |      |
|------------------------|------|------------------------|------|------|
| >CDKN2A-V9 FLDTLVVL    | 12   | >CDKN2A-V9 FLDTLLVL    | 12   | 0    |
| >CDKN2A-V9 FLDTLVVLHR, | 12   | >CDKN2A-V9 FLDTLLVLHR/ | 12   | 0    |
| >CDKN2A-V9 FLDTLVVL    | 9    | >CDKN2A-V9 FLDTLLVL    | 13   | 4    |
| >CDKN2A-V9 FLDTLVVLHR, | 7    | >CDKN2A-V9 FLDTLLVLHR/ | 6    | 1    |
| >CDKN2A-V9 FLDTLVVL    | 74   | >CDKN2A-V9 FLDTLLVL    | 84   | 10   |
| >CDKN2A-V9 FLDTLVVLHR, | 24   | >CDKN2A-V9 FLDTLLVLHR/ | 26   | 2    |
| >CDKN2A-V9 FLDTLVVL    | 37   | >CDKN2A-V9 FLDTLLVL    | 25   | 12   |
| >CDKN2A-V9 FLDTLVVLHR, | 68   | >CDKN2A-V9 FLDTLLVLHR/ | 39   | 29   |
| >CDKN2A-V9 FLDTLVVL    | 3    | >CDKN2A-V9 FLDTLLVL    | 4    | 1    |
| >CDKN2A-V9 FLDTLVVLHR, | 3    | >CDKN2A-V9 FLDTLLVLHR/ | 4    | 1    |
| >CDKN2A-V9 FLDTLVVL    | 4    | >CDKN2A-V9 FLDTLLVL    | 4    | 0    |
| >CDKN2A-V9 FLDTLVVLHR, | 9    | >CDKN2A-V9 FLDTLLVLHR/ | 8    | 1    |
| >CDKN2A-V9 FLDTLVVL    | 7    | >CDKN2A-V9 FLDTLLVL    | 8    | 1    |
| >CDKN2A-V9 FLDTLVVLHR, | 8    | >CDKN2A-V9 FLDTLLVLHR/ | 9    | 1    |
| >CDKN2A-V9 FLDTLVVL    | 8    | >CDKN2A-V9 FLDTLLVL    | 11   | 3    |
| >CDKN2A-V9 FLDTLVVLHR, | 19   | >CDKN2A-V9 FLDTLLVLHR/ | 27   | 8    |
| >CDKN2A-V9 FLDTLVVL    | 3    | >CDKN2A-V9 FLDTLLVL    | 3    | 0    |
| >CDKN2A-V9 FLDTLVVLHR, | 3    | >CDKN2A-V9 FLDTLLVLHR/ | 3    | 0    |
| >CDKN2A-V9 FLDTLVVLHR  | 354  | >CDKN2A-V9 FLDTLLVLHR  | 744  | 390  |
| >CDKN2A-V9 FLDTLVVL    | 52   | >CDKN2A-V9 FLDTLLVL    | 118  | 66   |
| >CDKN2A-V9 FLDTLVVLHR  | 272  | >CDKN2A-V9 FLDTLLVLHR  | 242  | 30   |
| >CDKN2A-V9 GFLDTLVV    | 313  | >CDKN2A-V9 GFLDTLLV    | 315  | 2    |
| >CDKN2A-V9 GFLDTLVV    | 494  | >CDKN2A-V9 GFLDTLLV    | 815  | 321  |
| >CDKN2A-V9 GFLDTLVV    | 110  | >CDKN2A-V9 GFLDTLLV    | 80   | 30   |
| >CDKN2A-V9 GFLDTLVV    | 221  | >CDKN2A-V9 GFLDTLLV    | 157  | 64   |
| >CDKN2A-V9 GFLDTLVVL   | 298  | >CDKN2A-V9 GFLDTLLVL   | 448  | 150  |
| >CDKN2A-V9 GFLDTLVVL   | 75   | >CDKN2A-V9 GFLDTLLVL   | 109  | 34   |
| >CDKN2A-V9 GFLDTLVV    | 4075 | >CDKN2A-V9 GFLDTLLV    | 494  | 3581 |
| >CDKN2A-V9 GFLDTLVVLH  | 38   | >CDKN2A-V9 GFLDTLLVLHI | 56   | 18   |
| >CDKN2A-V9 GFLDTLVVLH  | 421  | >CDKN2A-V9 GFLDTLLVLHI | 698  | 277  |
| >CDKN2A-V9 GFLDTLVVLH  | 77   | >CDKN2A-V9 GFLDTLLVLHI | 51   | 26   |
| >CDKN2A-V9 GFLDTLVVL   | 1084 | >CDKN2A-V9 GFLDTLLVL   | 362  | 722  |
| >CDKN2A-V9 EGFLDTLV    | 135  | >CDKN2A-V9 EGFLDTLL    | 1412 | 1277 |
| >CDKN2A-V9 EGFLDTLVV   | 1222 | >CDKN2A-V9 EGFLDTLLV   | 326  | 896  |
| >CDKN2A-V9 REGFLDTLV   | 213  | >CDKN2A-V9 REGFLDTLL   | 27   | 186  |
| >CDKN2A-V9 REGFLDTLVV  | 14   | >CDKN2A-V9 REGFLDTLLVI | 17   | 3    |
| >CDKN2A-V9 REGFLDTLV   | 208  | >CDKN2A-V9 REGFLDTLL   | 78   | 130  |
| >CDKN2A-V9 REGFLDTLVV  | 264  | >CDKN2A-V9 REGFLDTLLV  | 231  | 33   |
| >CDKN2A-V9 REGFLDTLVV  | 63   | >CDKN2A-V9 REGFLDTLLVI | 39   | 24   |
| >CDKN2A-V9 REGFLDTLV   | 35   | >CDKN2A-V9 REGFLDTLL   | 76   | 41   |
| >CDKN2A-V9 REGFLDTLVV  | 89   | >CDKN2A-V9 REGFLDTLLV  | 72   | 17   |
| >CDKN2A-V9 REGFLDTLVV  | 68   | >CDKN2A-V9 REGFLDTLLVI | 85   | 17   |
| >CDKN2A-V9 AREGFLDTLV  | 707  | >CDKN2A-V9 AREGFLDTLL  | 65   | 642  |

|                       |       |                       |       |       |
|-----------------------|-------|-----------------------|-------|-------|
| >CDKN2A-V9 AREGFLDTLV | 691   | >CDKN2A-V9 AREGFLDTLL | 440   | 251   |
| >CDKN2A-V9 AREGFLDTLV | 642   | >CDKN2A-V9 AREGFLDTLL | 253   | 389   |
| >CDKN2A-W: AWGRLPVDL  | 474   | >CDKN2A-W: ACGRLPVDL  | 21690 | 21216 |
| >CDKN2A-W: AWGRLPVDL  | 403   | >CDKN2A-W: ACGRLPVDL  | 38843 | 38440 |
| >CDKN2A-W: AWGRLPVDL  | 156   | >CDKN2A-W: ACGRLPVDLA | 29067 | 28911 |
| >CDKN2A-W: AGARLDVRD, | 289   | >CDKN2A-W: AGARLDVRD, | 21782 | 21493 |
| >CDKN2A-W: DAWGRLPV   | 260   | >CDKN2A-W: DACGRLPV   | 870   | 610   |
| >CDKN2A-W: DAWGRLPV   | 24    | >CDKN2A-W: DACGRLPV   | 1140  | 1116  |
| >CDKN2A-W: VRDAWGRLP  | 489   | >CDKN2A-W: VRDACGRLP  | 1251  | 762   |
| >CDKN2A-W: DVRDAWGRI  | 456   | >CDKN2A-W: DVRDACGRL  | 1706  | 1250  |
| >CDKN2A-W: DVRDAWGRI  | 277   | >CDKN2A-W: DVRDACGRLI | 629   | 352   |
| >CDKN2A-W: DVRDAWGR   | 17    | >CDKN2A-W: DVRDACGR   | 39    | 22    |
| >CDKN2A-W: DVRDAWGR   | 62    | >CDKN2A-W: DVRDACGR   | 66    | 4     |
| >CDKN2A-W: DVRDAWGRI  | 208   | >CDKN2A-W: DVRDACGRLI | 292   | 84    |
| >CDKN2A-W: DVRDAWGRI  | 198   | >CDKN2A-W: DVRDACGRLI | 286   | 88    |
| >CDKN2A-W: LDVRDAWGF  | 477   | >CDKN2A-W: LDVRDACGRI | 768   | 291   |
| >CDKN2A-W: RLDVRDAWC  | 122   | >CDKN2A-W: RLDVRDACGI | 372   | 250   |
| >CDKN2A-W: RLDVRDAWC  | 227   | >CDKN2A-W: RLDVRDACGI | 470   | 243   |
| >CDKN2A-W: RLDVRDAWC  | 91    | >CDKN2A-W: RLDVRDACGI | 114   | 23    |
| >CDKN2A-W: RLDVRDAWC  | 120   | >CDKN2A-W: RLDVRDACGI | 233   | 113   |
| >CDKN2A-W: RLDVRDAW   | 274   | >CDKN2A-W: RLDVRDAC   | 22047 | 21773 |
| >CDKN2A-W: RLDVRDAWC  | 92    | >CDKN2A-W: RLDVRDACGI | 193   | 101   |
| >CDKN2A-W: RLDVRDAWC  | 293   | >CDKN2A-W: RLDVRDACGI | 488   | 195   |
| >CDKN2A-W: ARLDVRDAW  | 89    | >CDKN2A-W: ARLDVRDAC  | 179   | 90    |
| >CDKN2A-W: ARLDVRDAW  | 117   | >CDKN2A-W: ARLDVRDAC  | 33818 | 33701 |
| >CDKN2A-W: GARLDVRDA' | 457   | >CDKN2A-W: GARLDVRDA' | 24868 | 24411 |
| >CDKN2A-W: WLATAAARG  | 336   | >CDKN2A-W: LLATAAARGR | 312   | 24    |
| >CDKN2A-W: WLATAAARG  | 22    | >CDKN2A-W: LLATAAARGR | 17    | 5     |
| >CDKN2A-W: WLATAAARG  | 8     | >CDKN2A-W: LLATAAARGR | 8     | 0     |
| >CDKN2A-W: WLATAAARG  | 125   | >CDKN2A-W: LLATAAARGR | 324   | 199   |
| >CDKN2A-W: WLATAAARG  | 25    | >CDKN2A-W: LLATAAARGR | 28    | 3     |
| >CDKN2A-W: WLATAAARG  | 244   | >CDKN2A-W: LLATAAARGR | 241   | 3     |
| >CDKN2A-W: WLATAAARG  | 27    | >CDKN2A-W: LLATAAARGR | 31    | 4     |
| >CDKN2A-W: WLATAAARG  | 23    | >CDKN2A-W: LLATAAARGR | 55    | 32    |
| >CDKN2A-W: WLATAAARG  | 3     | >CDKN2A-W: LLATAAARGR | 3     | 0     |
| >CDKN2A-W: WLATAAAR   | 3575  | >CDKN2A-W: LLATAAAR   | 398   | 3177  |
| >CDKN2A-W: WLATAAARG  | 1804  | >CDKN2A-W: LLATAAARGR | 348   | 1456  |
| >CDKN2A-W: WLATAAAR   | 68    | >CDKN2A-W: LLATAAAR   | 51    | 17    |
| >CDKN2A-W: WLATAAARG  | 37    | >CDKN2A-W: LLATAAARGR | 203   | 166   |
| >CDKN2A-W: WLATAAARG  | 350   | >CDKN2A-W: LLATAAARGR | 1829  | 1479  |
| >CDKN2A-W: WLATAAARG  | 58    | >CDKN2A-W: LLATAAARGR | 914   | 856   |
| >CDKN2A-W: WLATAAAR   | 328   | >CDKN2A-W: LLATAAAR   | 842   | 514   |
| >CDKN2A-W: DWLATAAA   | 25309 | >CDKN2A-W: DLLATAAA   | 333   | 24976 |

|                      |       |                      |       |       |
|----------------------|-------|----------------------|-------|-------|
| >CDKN2A-W:DWLATAAA   | 20647 | >CDKN2A-W:DLLATAAA   | 154   | 20493 |
| >CDKN2A-W:DWLATAAA   | 35499 | >CDKN2A-W:DLLATAAA   | 431   | 35068 |
| >CDKN2A-W:DWLATAAAR  | 119   | >CDKN2A-W:DLLATAAAR  | 37    | 82    |
| >CDKN2A-W:DWLATAAAR  | 781   | >CDKN2A-W:DLLATAAARC | 331   | 450   |
| >CDKN2A-W:DWLATAAAR  | 2629  | >CDKN2A-W:DLLATAAAR  | 113   | 2516  |
| >CDKN2A-W:DWLATAAAR  | 5743  | >CDKN2A-W:DLLATAAARC | 415   | 5328  |
| >CDKN2A-W:DWLATAAA   | 10040 | >CDKN2A-W:DLLATAAA   | 228   | 9812  |
| >CDKN2A-W:DWLATAAAR  | 23    | >CDKN2A-W:DLLATAAAR  | 828   | 805   |
| >CDKN2A-W:DWLATAAAR  | 30    | >CDKN2A-W:DLLATAAARC | 1075  | 1045  |
| >CDKN2A-W:DWLATAAA   | 205   | >CDKN2A-W:DLLATAAA   | 27866 | 27661 |
| >CDKN2A-W:DWLATAAAR  | 450   | >CDKN2A-W:DLLATAAAR  | 31850 | 31400 |
| >CDKN2A-W:AGSSMEPSAI | 465   | >CDKN2A-W:AGSSMEPSAI | 8699  | 8234  |
| >CDKN2A-W:SADWLATAA  | 83    | >CDKN2A-W:SADLLATAAA | 325   | 242   |
| >CDKN2A-W:SADWLATAA  | 491   | >CDKN2A-W:SADLLATAA  | 5330  | 4839  |
| >CDKN2A-W:SADWLATAA  | 283   | >CDKN2A-W:SADLLATAAA | 2695  | 2412  |
| >CDKN2A-W:EPSADWLAT  | 30    | >CDKN2A-W:EPSADLLAT  | 86    | 56    |
| >CDKN2A-W:EPSADWLAT/ | 31    | >CDKN2A-W:EPSADLLATA | 61    | 30    |
| >CDKN2A-W:EPSADWLAT/ | 685   | >CDKN2A-W:EPSADLLATA | 411   | 274   |
| >CDKN2A-W:EPSADWLAT/ | 270   | >CDKN2A-W:EPSADLLATA | 279   | 9     |
| >CDKN2A-W:MEPSADWL   | 777   | >CDKN2A-W:MEPSADLL   | 146   | 631   |
| >CDKN2A-W:MEPSADWL   | 182   | >CDKN2A-W:MEPSADLL   | 160   | 22    |
| >CDKN2A-W:SMEPSADWL  | 188   | >CDKN2A-W:SMEPSADLLA | 537   | 349   |
| >CDKN2A-W:SMEPSADW   | 23108 | >CDKN2A-W:SMEPSADL   | 283   | 22825 |
| >CDKN2A-W:SMEPSADWL  | 53    | >CDKN2A-W:SMEPSADLL  | 39    | 14    |
| >CDKN2A-W:SMEPSADWL  | 218   | >CDKN2A-W:SMEPSADLLA | 259   | 41    |
| >CDKN2A-W:SMEPSADWL  | 464   | >CDKN2A-W:SMEPSADLLA | 959   | 495   |
| >CDKN2A-W:SMEPSADWL  | 199   | >CDKN2A-W:SMEPSADLL  | 402   | 203   |
| >CDKN2A-W:SMEPSADWL  | 265   | >CDKN2A-W:SMEPSADLLA | 1789  | 1524  |
| >CDKN2A-W:SMEPSADW   | 23803 | >CDKN2A-W:SMEPSADL   | 260   | 23543 |
| >CDKN2A-W:SMEPSADWL  | 443   | >CDKN2A-W:SMEPSADLL  | 279   | 164   |
| >CDKN2A-W:SMEPSADWL  | 257   | >CDKN2A-W:SMEPSADLLA | 3160  | 2903  |
| >CDKN2A-W:SMEPSADWL  | 332   | >CDKN2A-W:SMEPSADLL  | 448   | 116   |
| >CDKN2A-W:SMEPSADWL  | 149   | >CDKN2A-W:SMEPSADLLA | 882   | 733   |
| >CDKN2A-W:SMEPSADW   | 12549 | >CDKN2A-W:SMEPSADL   | 18    | 12531 |
| >CDKN2A-W:SMEPSADWL  | 17    | >CDKN2A-W:SMEPSADLL  | 35    | 18    |
| >CDKN2A-W:SMEPSADWL  | 24    | >CDKN2A-W:SMEPSADLLA | 112   | 88    |
| >CDKN2A-W:SMEPSADW   | 98    | >CDKN2A-W:SMEPSADL   | 3784  | 3686  |
| >CDKN2A-W:SSMEPSADW  | 205   | >CDKN2A-W:SSMEPSADLL | 914   | 709   |
| >CDKN2A-W:SSMEPSADW  | 418   | >CDKN2A-W:SSMEPSADLL | 3048  | 2630  |
| >CDKN2A-W:SSMEPSADW  | 21450 | >CDKN2A-W:SSMEPSADL  | 201   | 21249 |
| >CDKN2A-W:SSMEPSADW  | 286   | >CDKN2A-W:SSMEPSADLL | 127   | 159   |
| >CDKN2A-W:SSMEPSADW  | 56    | >CDKN2A-W:SSMEPSADLL | 313   | 257   |
| >CDKN2A-W:SSMEPSADW  | 13263 | >CDKN2A-W:SSMEPSADL  | 156   | 13107 |

|                       |       |                       |       |       |
|-----------------------|-------|-----------------------|-------|-------|
| >CDKN2A-W:SSMEPSADW   | 295   | >CDKN2A-W:SSMEPSADLL  | 258   | 37    |
| >CDKN2A-W:SSMEPSADW   | 363   | >CDKN2A-W:SSMEPSADLL  | 1034  | 671   |
| >CDKN2A-W:SSMEPSADW   | 4     | >CDKN2A-W:SSMEPSADL   | 11    | 7     |
| >CDKN2A-W:SSMEPSADW   | 11    | >CDKN2A-W:SSMEPSADLL  | 24    | 13    |
| >CDKN2A-W:SSMEPSADW   | 56    | >CDKN2A-W:SSMEPSADL   | 13008 | 12952 |
| >CDKN2A-W:SSMEPSADW   | 27    | >CDKN2A-W:SSMEPSADL   | 10267 | 10240 |
| >CDKN2A-W:SSMEPSADW   | 192   | >CDKN2A-W:SSMEPSADLL  | 119   | 73    |
| >CDKN2A-W:SSMEPSADW   | 396   | >CDKN2A-W:SSMEPSADLL  | 1081  | 685   |
| >CDKN2A-W:SSMEPSADW   | 32198 | >CDKN2A-W:SSMEPSADL   | 205   | 31993 |
| >CDKN2A-W:GSSMEPSADL  | 13    | >CDKN2A-W:GSSMEPSADI  | 137   | 124   |
| >CDKN2A-W:GSSMEPSADL  | 96    | >CDKN2A-W:GSSMEPSADI  | 232   | 136   |
| >CDKN2A-W:GSSMEPSADL  | 179   | >CDKN2A-W:GSSMEPSADI  | 20357 | 20178 |
| >CDKN2A-W:GSSMEPSADL  | 81    | >CDKN2A-W:GSSMEPSADI  | 15749 | 15668 |
| >CDKN2A-W:GSSMEPSADL  | 4005  | >CDKN2A-W:GSSMEPSADI  | 336   | 3669  |
| >CDKN2A-W:GSSMEPSADL  | 152   | >CDKN2A-W:GSSMEPSADI  | 115   | 37    |
| >CDKN2A-Y1 YLRAAAGGT  | 48    | >CDKN2A-Y1 CLRAAAGGT  | 1462  | 1414  |
| >CDKN2A-Y1 YLRAAAGGT  | 128   | >CDKN2A-Y1 CLRAAAGGT  | 13282 | 13154 |
| >CDKN2A-Y1 YLRAAAGGTF | 231   | >CDKN2A-Y1 CLRAAAGGTF | 442   | 211   |
| >CDKN2A-Y1 RYLRAAAG   | 414   | >CDKN2A-Y1 RCLRAAAG   | 20726 | 20312 |
| >CDKN2A-Y1 RYLRAAAGG  | 436   | >CDKN2A-Y1 RCLRAAAGG  | 21030 | 20594 |
| >CDKN2A-Y1 RYLRAAAGGT | 218   | >CDKN2A-Y1 RCLRAAAGGT | 21437 | 21219 |
| >CDKN2A-Y1 RYLRAAAGGT | 128   | >CDKN2A-Y1 RCLRAAAGGT | 21152 | 21024 |
| >CDKN2A-Y1 RYLRAAAG   | 239   | >CDKN2A-Y1 RCLRAAAG   | 2725  | 2486  |
| >CDKN2A-Y1 RYLRAAAGG  | 315   | >CDKN2A-Y1 RCLRAAAGG  | 3024  | 2709  |
| >CDKN2A-Y1 RYLRAAAGGT | 96    | >CDKN2A-Y1 RCLRAAAGGT | 1254  | 1158  |
| >CDKN2A-Y1 RYLRAAAGGT | 24    | >CDKN2A-Y1 RCLRAAAGGT | 532   | 508   |
| >CDKN2A-Y1 RYLRAAAGGT | 33    | >CDKN2A-Y1 RCLRAAAGGT | 193   | 160   |
| >CDKN2A-Y1 EELGHRDVAF | 86    | >CDKN2A-Y1 EELGHRDVAF | 24028 | 23942 |
| >CDKN2A-Y1 EELGHRDVAF | 177   | >CDKN2A-Y1 EELGHRDVAF | 13454 | 13277 |
| >CDKN2A-Y1 EELGHRDVAF | 121   | >CDKN2A-Y1 EELGHRDVAF | 4734  | 4613  |
| >CDKN2A-Y1 EELGHRDVAF | 940   | >CDKN2A-Y1 EELGHRDVAF | 446   | 494   |
| >CDKN2A-Y1 ARYLRAAA   | 195   | >CDKN2A-Y1 ARCLRAAA   | 4243  | 4048  |
| >CDKN2A-Y1 ARYLRAAAGC | 321   | >CDKN2A-Y1 ARCLRAAAGC | 5625  | 5304  |
| >CDKN2A-Y1 ARYLRAAA   | 428   | >CDKN2A-Y1 ARCLRAAA   | 5865  | 5437  |
| >CDKN2A-Y1 VARYLRAA   | 137   | >CDKN2A-Y1 VARCLRAA   | 220   | 83    |
| >CDKN2A-Y1 VARYLRAAA  | 38    | >CDKN2A-Y1 VARCLRAAA  | 47    | 9     |
| >CDKN2A-Y1 VARYLRAAA  | 284   | >CDKN2A-Y1 VARCLRAAA  | 434   | 150   |
| >CDKN2A-Y1 DVARYLRAA/ | 376   | >CDKN2A-Y1 DVARCLRAA/ | 794   | 418   |
| >CDKN2A-Y1 RDVARYLR   | 243   | >CDKN2A-Y1 RDVARCLR   | 1246  | 1003  |
| >CDKN2A-Y1 RDVARYLR   | 79    | >CDKN2A-Y1 RDVARCLR   | 156   | 77    |
| >CDKN2A-Y1 HRDVARYLR  | 203   | >CDKN2A-Y1 HRDVARCLR  | 841   | 638   |
| >CDKN2A-Y1 HRDVARYLR/ | 122   | >CDKN2A-Y1 HRDVARCLR/ | 286   | 164   |
| >CDKN2A-Y1 HRDVARYL   | 175   | >CDKN2A-Y1 HRDVARCL   | 61    | 114   |



|                        |      |                       |       |       |
|------------------------|------|-----------------------|-------|-------|
| >CDKN2A-Y1 HRDVARYLR   | 370  | >CDKN2A-Y1 HRDVARCLR  | 1381  | 1011  |
| >CDKN2A-Y1 GHRDVARYLFI | 282  | >CDKN2A-Y1 GHRDVARCLI | 432   | 150   |
| >CDKN2A-Y1 LGHRDVARY   | 415  | >CDKN2A-Y1 LGHRDVARC  | 34162 | 33747 |
| >CDKN2A-Y1 LGHRDVARYI  | 152  | >CDKN2A-Y1 LGHRDVARCI | 487   | 335   |
| >CDKN2A-Y1 LGHRDVARY   | 409  | >CDKN2A-Y1 LGHRDVARC  | 21875 | 21466 |
| >CDKN2A-Y1 ELGHRDVAR)  | 382  | >CDKN2A-Y1 ELGHRDVARC | 3651  | 3269  |
| >CDKN2A-Y1 ELGHRDVAR)  | 477  | >CDKN2A-Y1 ELGHRDVARC | 1814  | 1337  |
| >CDKN2A-Y1 ELGHRDVAR)  | 274  | >CDKN2A-Y1 ELGHRDVARC | 28939 | 28665 |
| >CDKN2A-Y1 ELGHRDVAR)  | 413  | >CDKN2A-Y1 ELGHRDVARC | 31986 | 31573 |
| >CDKN2A-Y1 YLRAAAGGT   | 48   | >CDKN2A-Y1 HLRAAAGGT  | 1221  | 1173  |
| >CDKN2A-Y1 YLRAAAGGT   | 128  | >CDKN2A-Y1 HLRAAAGGT  | 6880  | 6752  |
| >CDKN2A-Y1 YLRAAAGG    | 3023 | >CDKN2A-Y1 HLRAAAGG   | 192   | 2831  |
| >CDKN2A-Y1 YLRAAAGGTF  | 1207 | >CDKN2A-Y1 HLRAAAGGTI | 49    | 1158  |
| >CDKN2A-Y1 YLRAAAGGTF  | 231  | >CDKN2A-Y1 HLRAAAGGTI | 405   | 174   |
| >CDKN2A-Y1 RYLRAAAG    | 414  | >CDKN2A-Y1 RHLRAAAG   | 16918 | 16504 |
| >CDKN2A-Y1 RYLRAAAGG   | 436  | >CDKN2A-Y1 RHLRAAAGG  | 17387 | 16951 |
| >CDKN2A-Y1 RYLRAAAGG   | 218  | >CDKN2A-Y1 RHLRAAAGG  | 17966 | 17748 |
| >CDKN2A-Y1 RYLRAAAGG   | 128  | >CDKN2A-Y1 RHLRAAAGG  | 17034 | 16906 |
| >CDKN2A-Y1 RYLRAAAG    | 239  | >CDKN2A-Y1 RHLRAAAG   | 10852 | 10613 |
| >CDKN2A-Y1 RYLRAAAGG   | 315  | >CDKN2A-Y1 RHLRAAAGG  | 11320 | 11005 |
| >CDKN2A-Y1 RYLRAAAGG   | 96   | >CDKN2A-Y1 RHLRAAAGG  | 8630  | 8534  |
| >CDKN2A-Y1 RYLRAAAGG   | 24   | >CDKN2A-Y1 RHLRAAAGG  | 2256  | 2232  |
| >CDKN2A-Y1 RYLRAAAGG   | 33   | >CDKN2A-Y1 RHLRAAAGG  | 546   | 513   |
| >CDKN2A-Y1 EELGHRDVAF  | 86   | >CDKN2A-Y1 EELGHRDVAF | 7193  | 7107  |
| >CDKN2A-Y1 EELGHRDVAF  | 177  | >CDKN2A-Y1 EELGHRDVAF | 5735  | 5558  |
| >CDKN2A-Y1 EELGHRDVAF  | 121  | >CDKN2A-Y1 EELGHRDVAF | 2207  | 2086  |
| >CDKN2A-Y1 ARYLRAAA    | 195  | >CDKN2A-Y1 ARHLRAAA   | 785   | 590   |
| >CDKN2A-Y1 ARYLRAAAG   | 321  | >CDKN2A-Y1 ARHLRAAAG  | 1189  | 868   |
| >CDKN2A-Y1 ARYLRAAA    | 428  | >CDKN2A-Y1 ARHLRAAA   | 2347  | 1919  |
| >CDKN2A-Y1 VARYLRAA    | 137  | >CDKN2A-Y1 VARHLRAA   | 115   | 22    |
| >CDKN2A-Y1 VARYLRAAA   | 38   | >CDKN2A-Y1 VARHLRAAA  | 35    | 3     |
| >CDKN2A-Y1 VARYLRAAA   | 284  | >CDKN2A-Y1 VARHLRAAA  | 196   | 88    |
| >CDKN2A-Y1 DVARYLRAA   | 1041 | >CDKN2A-Y1 DVARHLRAA  | 313   | 728   |
| >CDKN2A-Y1 DVARYLRAA   | 376  | >CDKN2A-Y1 DVARHLRAA  | 1349  | 973   |
| >CDKN2A-Y1 RDVARYLR    | 243  | >CDKN2A-Y1 RDVARHLR   | 417   | 174   |
| >CDKN2A-Y1 RDVARYLR    | 79   | >CDKN2A-Y1 RDVARHLR   | 134   | 55    |
| >CDKN2A-Y1 HRDVARYL    | 531  | >CDKN2A-Y1 HRDVARHL   | 326   | 205   |
| >CDKN2A-Y1 HRDVARYLR   | 203  | >CDKN2A-Y1 HRDVARHLR  | 237   | 34    |
| >CDKN2A-Y1 HRDVARYLR   | 122  | >CDKN2A-Y1 HRDVARHLR  | 122   | 0     |
| >CDKN2A-Y1 HRDVARYL    | 175  | >CDKN2A-Y1 HRDVARHL   | 206   | 31    |
| >CDKN2A-Y1 HRDVARYLR   | 370  | >CDKN2A-Y1 HRDVARHLR  | 1087  | 717   |
| >CDKN2A-Y1 GHRDVARYLFI | 282  | >CDKN2A-Y1 GHRDVARHLI | 474   | 192   |
| >CDKN2A-Y1 LGHRDVARY   | 415  | >CDKN2A-Y1 LGHRDVARH  | 24359 | 23944 |

|                       |      |                       |       |       |
|-----------------------|------|-----------------------|-------|-------|
| >CDKN2A-Y1 LGHRDVARYI | 152  | >CDKN2A-Y1 LGHRDVARH  | 266   | 114   |
| >CDKN2A-Y1 LGHRDVARY  | 409  | >CDKN2A-Y1 LGHRDVARH  | 16151 | 15742 |
| >CDKN2A-Y1 ELGHRDVARY | 382  | >CDKN2A-Y1 ELGHRDVARH | 2033  | 1651  |
| >CDKN2A-Y1 ELGHRDVARY | 477  | >CDKN2A-Y1 ELGHRDVARH | 936   | 459   |
| >CDKN2A-Y1 ELGHRDVARY | 274  | >CDKN2A-Y1 ELGHRDVARH | 10033 | 9759  |
| >CDKN2A-Y1 ELGHRDVARY | 413  | >CDKN2A-Y1 ELGHRDVARH | 25695 | 25282 |
| >CDKN2A-Y4 YGRRPIQV   | 1266 | >CDKN2A-Y4 SGRRPIQV   | 179   | 1087  |
| >CDKN2A-Y4 YGRRPIQVMI | 1516 | >CDKN2A-Y4 SGRRPIQVMI | 215   | 1301  |
| >CDKN2A-Y4 YGRRPIQVM  | 395  | >CDKN2A-Y4 SGRRPIQVM  | 1344  | 949   |
| >CDKN2A-Y4 YGRRPIQVM  | 343  | >CDKN2A-Y4 SGRRPIQVM  | 1269  | 926   |
| >CDKN2A-Y4 YGRRPIQVM  | 262  | >CDKN2A-Y4 SGRRPIQVM  | 1707  | 1445  |
| >CDKN2A-Y4 YGRRPIQVMI | 425  | >CDKN2A-Y4 SGRRPIQVMI | 2363  | 1938  |
| >CDKN2A-Y4 YGRRPIQVM  | 44   | >CDKN2A-Y4 SGRRPIQVM  | 84    | 40    |
| >CDKN2A-Y4 YGRRPIQVMI | 45   | >CDKN2A-Y4 SGRRPIQVMI | 57    | 12    |
| >CDKN2A-Y4 YGRRPIQVMI | 37   | >CDKN2A-Y4 SGRRPIQVMI | 71    | 34    |
| >CDKN2A-Y4 SYGRRPIQVM | 136  | >CDKN2A-Y4 SSGRRPIQVM | 23001 | 22865 |
| >CDKN2A-Y4 SYGRRPIQVM | 74   | >CDKN2A-Y4 SSGRRPIQVM | 21466 | 21392 |
| >CDKN2A-Y4 SYGRRPIQVM | 5028 | >CDKN2A-Y4 SSGRRPIQVM | 60    | 4968  |
| >CDKN2A-Y4 SYGRRPIQVM | 7625 | >CDKN2A-Y4 SSGRRPIQVM | 244   | 7381  |
| >CDKN2A-Y4 AGALPNAPN  | 136  | >CDKN2A-Y4 AGALPNAPN  | 24863 | 24727 |
| >CDKN2A-Y4 NSYGRRPIQV | 264  | >CDKN2A-Y4 NSSGRRPIQV | 10923 | 10659 |
| >CDKN2A-Y4 NSYGRRPIQV | 485  | >CDKN2A-Y4 NSSGRRPIQV | 2154  | 1669  |
| >CDKN2A-Y4 NSYGRRPIQV | 408  | >CDKN2A-Y4 NSSGRRPIQV | 3153  | 2745  |
| >CDKN2A-Y4 NSYGRRPIQV | 132  | >CDKN2A-Y4 NSSGRRPIQV | 1610  | 1478  |
| >CDKN2A-Y4 NSYGRRPIQV | 495  | >CDKN2A-Y4 NSSGRRPIQV | 276   | 219   |
| >CDKN2A-Y4 NSYGRRPIQV | 251  | >CDKN2A-Y4 NSSGRRPIQV | 489   | 238   |
| >CDKN2A-Y4 NSYGRRPI   | 104  | >CDKN2A-Y4 NSSGRRPI   | 709   | 605   |
| >CDKN2A-Y4 APNSYGRRPI | 20   | >CDKN2A-Y4 APNSSGRRPI | 14    | 6     |
| >CDKN2A-Y4 NAPNSYGR   | 65   | >CDKN2A-Y4 NAPNSSGR   | 80    | 15    |
| >CDKN2A-Y4 NAPNSYGRR  | 147  | >CDKN2A-Y4 NAPNSSGRR  | 167   | 20    |
| >CDKN2A-Y4 NAPNSYGRR  | 266  | >CDKN2A-Y4 NAPNSSGRR  | 348   | 82    |
| >CDKN2A-Y4 PNAPNSYGR  | 320  | >CDKN2A-Y4 PNAPNSSGR  | 7767  | 7447  |
| >CDKN2A-Y4 LPNAPNSYGF | 472  | >CDKN2A-Y4 LPNAPNSSGF | 1188  | 716   |
| >CDKN2A-Y4 LPNAPNSY   | 11   | >CDKN2A-Y4 LPNAPNSS   | 930   | 919   |
| >CDKN2A-Y4 LPNAPNSY   | 51   | >CDKN2A-Y4 LPNAPNSS   | 12778 | 12727 |
| >CDKN2A-Y4 LPNAPNSY   | 776  | >CDKN2A-Y4 LPNAPNSS   | 92    | 684   |
| >CDKN2A-Y4 LPNAPNSYG  | 457  | >CDKN2A-Y4 LPNAPNSSG  | 306   | 151   |
| >CDKN2A-Y4 LPNAPNSY   | 58   | >CDKN2A-Y4 LPNAPNSS   | 12314 | 12256 |
| >CDKN2A-Y4 ALPNAPNSY  | 181  | >CDKN2A-Y4 ALPNAPNSS  | 20874 | 20693 |
| >CDKN2A-Y4 ALPNAPNSY  | 281  | >CDKN2A-Y4 ALPNAPNSS  | 17917 | 17636 |
| >CDKN2A-Y4 ALPNAPNSY  | 358  | >CDKN2A-Y4 ALPNAPNSS  | 26825 | 26467 |
| >CDKN2A-Y4 ALPNAPNSY  | 305  | >CDKN2A-Y4 ALPNAPNSS  | 13619 | 13314 |
| >CDKN2A-Y4 GALPNAPNS  | 280  | >CDKN2A-Y4 GALPNAPNS  | 18192 | 17912 |

|                       |      |                       |       |       |
|-----------------------|------|-----------------------|-------|-------|
| >CDKN2A-Y4 GALPNAPNS\ | 19   | >CDKN2A-Y4 GALPNAPNS\ | 14499 | 14480 |
| >CDKN2C-A4 TALQVMKL   | 325  | >CDKN2C-A4 TGLQVMKL   | 7717  | 7392  |
| >CDKN2C-A4 TALQVMKL   | 361  | >CDKN2C-A4 TGLQVMKL   | 8789  | 8428  |
| >CDKN2C-A4 RTALQVMK   | 66   | >CDKN2C-A4 RTGLQVMK   | 142   | 76    |
| >CDKN2C-A4 RTALQVMK   | 15   | >CDKN2C-A4 RTGLQVMK   | 26    | 11    |
| >CDKN2C-A4 RTALQVMK   | 17   | >CDKN2C-A4 RTGLQVMK   | 33    | 16    |
| >CDKN2C-A4 RTALQVMKL  | 409  | >CDKN2C-A4 RTGLQVMKL  | 1024  | 615   |
| >CDKN2C-A4 RTALQVMK   | 175  | >CDKN2C-A4 RTGLQVMK   | 323   | 148   |
| >CDKN2C-A4 RTALQVMKL  | 109  | >CDKN2C-A4 RTGLQVMKL  | 163   | 54    |
| >CDKN2C-A4 RTALQVMK   | 80   | >CDKN2C-A4 RTGLQVMK   | 1511  | 1431  |
| >CDKN2C-A4 RTALQVMKL  | 6    | >CDKN2C-A4 RTGLQVMKL  | 14    | 8     |
| >CDKN2C-A4 RTALQVMKL  | 131  | >CDKN2C-A4 RTGLQVMKL  | 1521  | 1390  |
| >CDKN2C-A4 RTALQVMKL  | 431  | >CDKN2C-A4 RTGLQVMKL  | 2926  | 2495  |
| >CDKN2C-A4 RTALQVMKL  | 452  | >CDKN2C-A4 RTGLQVMKL  | 2165  | 1713  |
| >CDKN2C-A4 RTALQVMK   | 257  | >CDKN2C-A4 RTGLQVMK   | 857   | 600   |
| >CDKN2C-A4 GRTALQVM   | 78   | >CDKN2C-A4 GRTGLQVM   | 76    | 2     |
| >CDKN2C-A4 GRTALQVMK  | 38   | >CDKN2C-A4 GRTGLQVMK  | 33    | 5     |
| >CDKN2C-A4 GRTALQVMK  | 22   | >CDKN2C-A4 GRTGLQVMK  | 28    | 6     |
| >CDKN2C-A4 GRTALQVMK  | 411  | >CDKN2C-A4 GRTGLQVMK  | 987   | 576   |
| >CDKN2C-A4 GRTALQVMK  | 95   | >CDKN2C-A4 GRTGLQVMK  | 239   | 144   |
| >CDKN2C-A4 GRTALQVMK  | 145  | >CDKN2C-A4 GRTGLQVMK  | 219   | 74    |
| >CDKN2C-A4 FGRTALQVM  | 362  | >CDKN2C-A4 FGRTGLQVM  | 915   | 553   |
| >CDKN2C-A4 FGRTALQVM  | 220  | >CDKN2C-A4 FGRTGLQVM  | 123   | 97    |
| >CDKN2C-A4 AQNGFGRTA  | 390  | >CDKN2C-A4 AQNGFGRTG  | 1371  | 981   |
| >CDKN2C-A4 AQNGFGRTA  | 156  | >CDKN2C-A4 AQNGFGRTG  | 486   | 330   |
| >CDKN2C-A4 AQNGFGRTA  | 37   | >CDKN2C-A4 AQNGFGRTG  | 177   | 140   |
| >CDKN2C-A4 AQNGFGRTA  | 111  | >CDKN2C-A4 AQNGFGRTG  | 1368  | 1257  |
| >CDKN2C-A4 AQNGFGRTA  | 214  | >CDKN2C-A4 AQNGFGRTG  | 9890  | 9676  |
| >CDKN2C-A4 AQNGFGRTA  | 186  | >CDKN2C-A4 AQNGFGRTG  | 960   | 774   |
| >CDKN2C-D6 DLKDRTGFA\ | 2923 | >CDKN2C-D6 NLKDRTGFA\ | 450   | 2473  |
| >CDKN2C-D6 DLKDRTGFA  | 7841 | >CDKN2C-D6 NLKDRTGFA  | 327   | 7514  |
| >CDKN2C-D6 DLKDRTGFA\ | 789  | >CDKN2C-D6 NLKDRTGFA\ | 146   | 643   |
| >CDKN2C-D6 DLKDRTGFA\ | 6312 | >CDKN2C-D6 NLKDRTGFA\ | 376   | 5936  |
| >CDKN2C-D6 DLKDRTGFA  | 597  | >CDKN2C-D6 NLKDRTGFA  | 10    | 587   |
| >CDKN2C-D6 DLKDRTGFA\ | 794  | >CDKN2C-D6 NLKDRTGFA\ | 141   | 653   |
| >CDKN2C-D6 DLKDRTGFA\ | 956  | >CDKN2C-D6 NLKDRTGFA\ | 12    | 944   |
| >CDKN2C-D6 DLKDRTGFA\ | 273  | >CDKN2C-D6 NLKDRTGFA\ | 37    | 236   |
| >CDKN2C-D6 DLKDRTGFA\ | 302  | >CDKN2C-D6 NLKDRTGFA\ | 18    | 284   |
| >CDKN2C-D6 DLKDRTGFA\ | 5466 | >CDKN2C-D6 NLKDRTGFA\ | 443   | 5023  |
| >CDKN2C-D6 DLKDRTGFA\ | 910  | >CDKN2C-D6 NLKDRTGFA\ | 319   | 591   |
| >CDKN2C-D6 DLKDRTGFA\ | 763  | >CDKN2C-D6 NLKDRTGFA\ | 215   | 548   |
| >CDKN2C-D6 DLKDRTGFA  | 1776 | >CDKN2C-D6 NLKDRTGFA  | 367   | 1409  |
| >CDKN2C-D6 DLKDRTGFA\ | 12   | >CDKN2C-D6 NLKDRTGFA\ | 5     | 7     |

|                       |      |                       |      |      |
|-----------------------|------|-----------------------|------|------|
| >CDKN2C-D6 DLKDRTGFAV | 654  | >CDKN2C-D6 NLKDRTGFAV | 156  | 498  |
| >CDKN2C-D6 DLKDRTGF   | 448  | >CDKN2C-D6 NLKDRTGF   | 2413 | 1965 |
| >CDKN2C-D6 DLKDRTGFAV | 387  | >CDKN2C-D6 NLKDRTGFAV | 120  | 267  |
| >CDKN2C-D6 DLKDRTGF   | 3508 | >CDKN2C-D6 NLKDRTGF   | 269  | 3239 |
| >CDKN2C-D6 DLKDRTGF   | 1063 | >CDKN2C-D6 NLKDRTGF   | 229  | 834  |
| >CDKN2C-D6 PDLKDRTGFA | 158  | >CDKN2C-D6 PNLKDRTGFA | 6005 | 5847 |
| >CDKN2C-D6 RRRLLRGANP | 386  | >CDKN2C-D6 RRRLLRGANP | 131  | 255  |
| >CDKN2C-D6 RRRLLRGANP | 382  | >CDKN2C-D6 RRRLLRGANP | 145  | 237  |
| >CDKN2C-D6 RRRLLRGANP | 838  | >CDKN2C-D6 RRRLLRGANP | 219  | 619  |
| >CDKN2C-D6 NPDLDKRTGF | 265  | >CDKN2C-D6 NPNLDKRTGF | 146  | 119  |
| >CDKN2C-D6 RGANPDLK   | 2596 | >CDKN2C-D6 RGANPNLK   | 492  | 2104 |
| >CDKN2C-D6 RGANPDLK   | 859  | >CDKN2C-D6 RGANPNLK   | 468  | 391  |
| >CDKN2C-D6 RGANPDLK   | 3218 | >CDKN2C-D6 RGANPNLK   | 396  | 2822 |
| >CDKN2C-D6 LLRGANPDL  | 1044 | >CDKN2C-D6 LLRGANPNL  | 111  | 933  |
| >CDKN2C-D6 LLRGANPDL  | 1150 | >CDKN2C-D6 LLRGANPNL  | 250  | 900  |
| >CDKN2C-D6 LLRGANPDL  | 1241 | >CDKN2C-D6 LLRGANPNL  | 267  | 974  |
| >CDKN2C-D6 LLRGANPDL  | 761  | >CDKN2C-D6 LLRGANPNL  | 235  | 526  |
| >CDKN2C-D6 LLRGANPDL  | 6    | >CDKN2C-D6 LLRGANPNL  | 4    | 2    |
| >CDKN2C-D6 LLRGANPDLK | 129  | >CDKN2C-D6 LLRGANPNLK | 96   | 33   |
| >CDKN2C-D6 LLRGANPDL  | 358  | >CDKN2C-D6 LLRGANPNL  | 47   | 311  |
| >CDKN2C-D6 LLRGANPDLK | 19   | >CDKN2C-D6 LLRGANPNLK | 6    | 13   |
| >CDKN2C-D6 LLLRGANPDL | 178  | >CDKN2C-D6 LLLRGANPNL | 79   | 99   |
| >CDKN2C-D6 LLLRGANPDL | 142  | >CDKN2C-D6 LLLRGANPNL | 60   | 82   |
| >CDKN2C-D6 LLLRGANPDL | 593  | >CDKN2C-D6 LLLRGANPNL | 225  | 368  |
| >CDKN2C-D6 LLLRGANPDL | 624  | >CDKN2C-D6 LLLRGANPNL | 207  | 417  |
| >CDKN2C-D6 LLLRGANPDL | 41   | >CDKN2C-D6 LLLRGANPNL | 14   | 27   |
| >CDKN2C-D6 LLLRGANPDL | 60   | >CDKN2C-D6 LLLRGANPNL | 21   | 39   |
| >CDKN2C-D6 LLLRGANPDL | 17   | >CDKN2C-D6 LLLRGANPNL | 11   | 6    |
| >CDKN2C-D6 LLLRGANPDL | 50   | >CDKN2C-D6 LLLRGANPNL | 11   | 39   |
| >CDKN2C-D6 LLLRGANPDL | 6    | >CDKN2C-D6 LLLRGANPNL | 4    | 2    |
| >CDKN2C-D6 LLLRGANPDL | 131  | >CDKN2C-D6 LLLRGANPNL | 62   | 69   |
| >CDKN2C-D6 LLLRGANPDL | 216  | >CDKN2C-D6 LLLRGANPNL | 175  | 41   |
| >CDKN2C-D6 LLLRGANPDL | 1220 | >CDKN2C-D6 LLLRGANPNL | 211  | 1009 |
| >CDKN2C-D6 RLLLRGANPD | 617  | >CDKN2C-D6 RLLLRGANPN | 167  | 450  |
| >CDKN2C-D6 RLLLRGANPD | 1264 | >CDKN2C-D6 RLLLRGANPN | 311  | 953  |
| >CDKN2C-D6 RLLLRGANPD | 696  | >CDKN2C-D6 RLLLRGANPN | 348  | 348  |
| >CDKN2C-D6 RLLLRGANPD | 144  | >CDKN2C-D6 RLLLRGANPN | 39   | 105  |
| >CDKN2C-D6 RLLLRGANPD | 257  | >CDKN2C-D6 RLLLRGANPN | 95   | 162  |
| >CDKN2C-D6 RLLLRGANPD | 51   | >CDKN2C-D6 RLLLRGANPN | 31   | 20   |
| >CDKN2C-D6 RLLLRGANPD | 431  | >CDKN2C-D6 RLLLRGANPN | 75   | 356  |
| >CDKN2C-D6 RLLLRGANPD | 38   | >CDKN2C-D6 RLLLRGANPN | 27   | 11   |
| >CDKN2C-D6 RLLLRGANPD | 2082 | >CDKN2C-D6 RLLLRGANPN | 487  | 1595 |
| >CDKN2C-D6 RLLLRGANPD | 1527 | >CDKN2C-D6 RLLLRGANPN | 343  | 1184 |

|                        |      |                        |      |      |
|------------------------|------|------------------------|------|------|
| >CDKN2C-M: MAEPWGNEI   | 327  | >CDKN2C-M: IAEPWGNEL   | 320  | 7    |
| >CDKN2C-M: MAEPWGNEI   | 153  | >CDKN2C-M: IAEPWGNEL   | 2018 | 1865 |
| >CDKN2C-M: MAEPWGNEI   | 357  | >CDKN2C-M: IAEPWGNEL   | 4004 | 3647 |
| >CEBPA-A17{ EEDEAKQLAL | 3380 | >CEBPA-A17{ EEDEAKQLAL | 45   | 3335 |
| >CEBPA-A17{ EEDEAKQLAL | 230  | >CEBPA-A17{ EEDEAKQLAL | 1247 | 1017 |
| >CEBPA-A17{ ALAGLFPY   | 344  | >CEBPA-A17{ ALVGLFPY   | 1514 | 1170 |
| >CEBPA-A17{ ALAGLFPYQ  | 37   | >CEBPA-A17{ ALVGLFPYQ  | 201  | 164  |
| >CEBPA-A17{ ALAGLFPYQP | 382  | >CEBPA-A17{ ALVGLFPYQP | 1332 | 950  |
| >CEBPA-A17{ ALAGLFPYQ  | 310  | >CEBPA-A17{ ALVGLFPYQ  | 309  | 1    |
| >CEBPA-A17{ ALAGLFPYQ  | 159  | >CEBPA-A17{ ALVGLFPYQ  | 198  | 39   |
| >CEBPA-A17{ ALAGLFPYQ  | 44   | >CEBPA-A17{ ALVGLFPYQ  | 211  | 167  |
| >CEBPA-A17{ ALAGLFPY   | 143  | >CEBPA-A17{ ALVGLFPY   | 337  | 194  |
| >CEBPA-A17{ ALAGLFPYQ  | 5    | >CEBPA-A17{ ALVGLFPYQ  | 11   | 6    |
| >CEBPA-A17{ ALAGLFPY   | 254  | >CEBPA-A17{ ALVGLFPY   | 971  | 717  |
| >CEBPA-A17{ ALAGLFPY   | 166  | >CEBPA-A17{ ALVGLFPY   | 409  | 243  |
| >CEBPA-A17{ ALAGLFPY   | 180  | >CEBPA-A17{ ALVGLFPY   | 50   | 130  |
| >CEBPA-A17{ ALAGLFPY   | 14   | >CEBPA-A17{ ALVGLFPY   | 20   | 6    |
| >CEBPA-A17{ ALAGLFPY   | 41   | >CEBPA-A17{ ALVGLFPY   | 155  | 114  |
| >CEBPA-A17{ ALAGLFPY   | 52   | >CEBPA-A17{ ALVGLFPY   | 99   | 47   |
| >CEBPA-A17{ ALAGLFPY   | 45   | >CEBPA-A17{ ALVGLFPY   | 56   | 11   |
| >CEBPA-A17{ ALAGLFPY   | 191  | >CEBPA-A17{ ALVGLFPY   | 339  | 148  |
| >CEBPA-A17{ ALAGLFPY   | 989  | >CEBPA-A17{ ALVGLFPY   | 364  | 625  |
| >CEBPA-A17{ ALAGLFPY   | 437  | >CEBPA-A17{ ALVGLFPY   | 762  | 325  |
| >CEBPA-A17{ ALAGLFPY   | 276  | >CEBPA-A17{ ALVGLFPY   | 1203 | 927  |
| >CEBPA-A17{ LALAGLFPY  | 247  | >CEBPA-A17{ LALVGLFPY  | 904  | 657  |
| >CEBPA-A17{ LALAGLFPY  | 25   | >CEBPA-A17{ LALVGLFPY  | 33   | 8    |
| >CEBPA-A17{ LALAGLFPY  | 125  | >CEBPA-A17{ LALVGLFPY  | 115  | 10   |
| >CEBPA-A17{ LALAGLFPY  | 176  | >CEBPA-A17{ LALVGLFPY  | 745  | 569  |
| >CEBPA-A17{ LALAGLFPY  | 94   | >CEBPA-A17{ LALVGLFPY  | 167  | 73   |
| >CEBPA-A17{ LALAGLFPY  | 456  | >CEBPA-A17{ LALVGLFPY  | 1052 | 596  |
| >CEBPA-A17{ LALAGLFPY  | 181  | >CEBPA-A17{ LALVGLFPY  | 305  | 124  |
| >CEBPA-A17{ LALAGLFPY  | 6    | >CEBPA-A17{ LALVGLFPY  | 6    | 0    |
| >CEBPA-A17{ LALAGLFPY  | 14   | >CEBPA-A17{ LALVGLFPY  | 15   | 1    |
| >CEBPA-A17{ LALAGLFPY  | 404  | >CEBPA-A17{ LALVGLFPY  | 340  | 64   |
| >CEBPA-A17{ LALAGLFPY  | 55   | >CEBPA-A17{ LALVGLFPY  | 94   | 39   |
| >CEBPA-A17{ LALAGLFPY  | 418  | >CEBPA-A17{ LALVGLFPY  | 552  | 134  |
| >CEBPA-A17{ QLALAGLFPY | 295  | >CEBPA-A17{ QLALVGLFPY | 355  | 60   |
| >CEBPA-A17{ QLALAGLFPY | 90   | >CEBPA-A17{ QLALVGLFPY | 51   | 39   |
| >CEBPA-A17{ QLALAGLFPY | 124  | >CEBPA-A17{ QLALVGLFPY | 114  | 10   |
| >CEBPA-A17{ QLALAGLFPY | 47   | >CEBPA-A17{ QLALVGLFPY | 25   | 22   |
| >CEBPA-A17{ QLALAGLFPY | 81   | >CEBPA-A17{ QLALVGLFPY | 114  | 33   |
| >CEBPA-A17{ QLALAGLF   | 404  | >CEBPA-A17{ QLALVGLF   | 711  | 307  |
| >CEBPA-A17{ QLALAGLFPY | 69   | >CEBPA-A17{ QLALVGLFPY | 108  | 39   |

|                       |      |                       |     |      |
|-----------------------|------|-----------------------|-----|------|
| >CEBPA-A17(QLALAGLFPY | 293  | >CEBPA-A17(QLALVGLFPY | 500 | 207  |
| >CEBPA-A17(KQLALAGL   | 139  | >CEBPA-A17(KQLALVGL   | 63  | 76   |
| >CEBPA-A17(KQLALAGL   | 242  | >CEBPA-A17(KQLALVGL   | 268 | 26   |
| >CEBPA-A17(KQLALAGL   | 8    | >CEBPA-A17(KQLALVGL   | 7   | 1    |
| >CEBPA-A17(KQLALAGLF  | 114  | >CEBPA-A17(KQLALVGLF  | 72  | 42   |
| >CEBPA-A17(KQLALAGLFP | 68   | >CEBPA-A17(KQLALVGLFP | 66  | 2    |
| >CEBPA-A17(KQLALAGL   | 249  | >CEBPA-A17(KQLALVGL   | 152 | 97   |
| >CEBPA-A17(KQLALAGL   | 163  | >CEBPA-A17(KQLALVGL   | 166 | 3    |
| >CEBPA-A17(KQLALAGL   | 633  | >CEBPA-A17(KQLALVGL   | 282 | 351  |
| >CEBPA-A17(KQLALAGLFP | 191  | >CEBPA-A17(KQLALVGLFP | 192 | 1    |
| >CEBPA-A17(KQLALAGLFP | 131  | >CEBPA-A17(KQLALVGLFP | 216 | 85   |
| >CEBPA-A17(KQLALAGLFP | 51   | >CEBPA-A17(KQLALVGLFP | 58  | 7    |
| >CEBPA-A17(KQLALAGLFP | 563  | >CEBPA-A17(KQLALVGLFP | 382 | 181  |
| >CEBPA-A17(KQLALAGL   | 483  | >CEBPA-A17(KQLALVGL   | 153 | 330  |
| >CEBPA-A17(KQLALAGLF  | 352  | >CEBPA-A17(KQLALVGLF  | 286 | 66   |
| >CEBPA-A17(KQLALAGLFP | 220  | >CEBPA-A17(KQLALVGLFP | 237 | 17   |
| >CEBPA-A17(KQLALAGLFP | 16   | >CEBPA-A17(KQLALVGLFP | 22  | 6    |
| >CEBPA-A17(KQLALAGLF  | 207  | >CEBPA-A17(KQLALVGLF  | 95  | 112  |
| >CEBPA-A17(KQLALAGLFP | 60   | >CEBPA-A17(KQLALVGLFP | 50  | 10   |
| >CEBPA-A17(KQLALAGLFP | 246  | >CEBPA-A17(KQLALVGLFP | 342 | 96   |
| >CEBPA-A17(KQLALAGL   | 112  | >CEBPA-A17(KQLALVGL   | 57  | 55   |
| >CEBPA-A17(KQLALAGLF  | 18   | >CEBPA-A17(KQLALVGLF  | 14  | 4    |
| >CEBPA-A17(KQLALAGLFP | 10   | >CEBPA-A17(KQLALVGLFP | 8   | 2    |
| >CEBPA-A17(KQLALAGL   | 411  | >CEBPA-A17(KQLALVGL   | 311 | 100  |
| >CEBPA-A17(KQLALAGLF  | 407  | >CEBPA-A17(KQLALVGLF  | 373 | 34   |
| >CEBPA-A17(KQLALAGLFP | 273  | >CEBPA-A17(KQLALVGLFP | 282 | 9    |
| >CEBPA-A17(KQLALAGL   | 114  | >CEBPA-A17(KQLALVGL   | 98  | 16   |
| >CEBPA-A17(KQLALAGLF  | 1072 | >CEBPA-A17(KQLALVGLF  | 459 | 613  |
| >CEBPA-A17(KQLALAGL   | 386  | >CEBPA-A17(KQLALVGL   | 310 | 76   |
| >CEBPA-A17(AKQLALAGLF | 193  | >CEBPA-A17(AKQLALVGLF | 116 | 77   |
| >CEBPA-A17(AKQLALAGL  | 246  | >CEBPA-A17(AKQLALVGL  | 162 | 84   |
| >CEBPA-A17(EAKQLALA   | 4087 | >CEBPA-A17(EAKQLALV   | 283 | 3804 |
| >CEBPA-A17(EAKQLALA   | 6296 | >CEBPA-A17(EAKQLALV   | 253 | 6043 |
| >CEBPA-A17(EAKQLALAGL | 439  | >CEBPA-A17(EAKQLALVGL | 994 | 555  |
| >CEBPA-A17(EAKQLALAGL | 268  | >CEBPA-A17(EAKQLALVGL | 371 | 103  |
| >CEBPA-A17(DEAKQLALA  | 1139 | >CEBPA-A17(DEAKQLALV  | 22  | 1117 |
| >CEBPA-A17(DEAKQLALAC | 115  | >CEBPA-A17(DEAKQLALVC | 155 | 40   |
| >CEBPA-A17(DEAKQLALA  | 772  | >CEBPA-A17(DEAKQLALV  | 310 | 462  |
| >CEBPA-A17(DEAKQLALAC | 43   | >CEBPA-A17(DEAKQLALVC | 41  | 2    |
| >CEBPA-A17(DEAKQLALA  | 5648 | >CEBPA-A17(DEAKQLALV  | 163 | 5485 |
| >CEBPA-A17(DEAKQLALAC | 561  | >CEBPA-A17(DEAKQLALVC | 405 | 156  |
| >CEBPA-A17(EDEAKQLALA | 3580 | >CEBPA-A17(EDEAKQLALV | 113 | 3467 |
| >CEBPA-A19(AHLAAPHLQF | 593  | >CEBPA-A19(LHLAAPHLQF | 257 | 336  |

|                        |       |                        |      |       |
|------------------------|-------|------------------------|------|-------|
| >CEBPA-A19! AHLAAPHLQF | 20    | >CEBPA-A19! LHLAAPHLQF | 22   | 2     |
| >CEBPA-A19! AHLAAPHL   | 64    | >CEBPA-A19! LHLAAPHL   | 137  | 73    |
| >CEBPA-A19! PAHLAAPHL  | 24482 | >CEBPA-A19! PLHLAAPHL  | 114  | 24368 |
| >CEBPA-A19! PAHLAAPHLC | 353   | >CEBPA-A19! PLHLAAPHLC | 6434 | 6081  |
| >CEBPA-A19! PSHPHPHPPF | 121   | >CEBPA-A19! PSHPHPHPPF | 310  | 189   |
| >CEBPA-A19! PPAHLAAPHL | 598   | >CEBPA-A19! PPLHLAAPHL | 126  | 472   |
| >CEBPA-A19! PPAHLAAPH  | 173   | >CEBPA-A19! PPLHLAAPH  | 362  | 189   |
| >CEBPA-A19! PPPAHLAAPH | 58    | >CEBPA-A19! PPPLHLAAPH | 540  | 482   |
| >CEBPA-A19! PPPAHLAAPH | 425   | >CEBPA-A19! PPPLHLAAPH | 803  | 378   |
| >CEBPA-A19! HPPPAHLAA  | 68    | >CEBPA-A19! HPPPLHLAA  | 275  | 207   |
| >CEBPA-A19! HPPPAHLAA  | 147   | >CEBPA-A19! HPPPLHLAA  | 191  | 44    |
| >CEBPA-A19! HPPPAHLAAF | 44    | >CEBPA-A19! HPPPLHLAAP | 54   | 10    |
| >CEBPA-A19! HPPPAHLA   | 88    | >CEBPA-A19! HPPPLHLA   | 70   | 18    |
| >CEBPA-A19! HPPPAHLAA  | 84    | >CEBPA-A19! HPPPLHLAA  | 114  | 30    |
| >CEBPA-A19! HPPPAHLAAF | 476   | >CEBPA-A19! HPPPLHLAAP | 273  | 203   |
| >CEBPA-A19! HPPPAHLA   | 68    | >CEBPA-A19! HPPPLHLA   | 941  | 873   |
| >CEBPA-A19! HPHPPPAHL  | 343   | >CEBPA-A19! HPHPPPLHL  | 154  | 189   |
| >CEBPA-A19! HPHPPPAHL  | 45    | >CEBPA-A19! HPHPPPLHL  | 37   | 8     |
| >CEBPA-A19! HPHPPPAHLA | 50    | >CEBPA-A19! HPHPPPLHLA | 65   | 15    |
| >CEBPA-A19! HPHPPPAH   | 77    | >CEBPA-A19! HPHPPPLH   | 696  | 619   |
| >CEBPA-A19! HPHPPPAHLA | 228   | >CEBPA-A19! HPHPPPLHLA | 247  | 19    |
| >CEBPA-A19! HPHPPPAHL  | 306   | >CEBPA-A19! HPHPPPLHL  | 394  | 88    |
| >CEBPA-A19! HPHPPPAHLA | 44    | >CEBPA-A19! HPHPPPLHLA | 33   | 11    |
| >CEBPA-A19! HPHPPPAHLA | 48    | >CEBPA-A19! HPHPPPLHLA | 70   | 22    |
| >CEBPA-A19! HPHPHPPPAI | 369   | >CEBPA-A19! HPHPHPPPLI | 208  | 161   |
| >CEBPA-A19! HPHPHPPPA  | 50    | >CEBPA-A19! HPHPHPPPL  | 14   | 36    |
| >CEBPA-A19! HPHPHPPPAI | 40    | >CEBPA-A19! HPHPHPPPLI | 35   | 5     |
| >CEBPA-A19! HPHPHPPPA  | 1593  | >CEBPA-A19! HPHPHPPPL  | 194  | 1399  |
| >CEBPA-A19! HPHPHPPPA  | 93    | >CEBPA-A19! HPHPHPPPL  | 36   | 57    |
| >CEBPA-A19! HPHPHPPPA  | 5018  | >CEBPA-A19! HPHPHPPPL  | 16   | 5002  |
| >CEBPA-A19! HPHPHPPPAI | 144   | >CEBPA-A19! HPHPHPPPLI | 168  | 24    |
| >CEBPA-A19! HPHPHPPPA  | 29    | >CEBPA-A19! HPHPHPPPL  | 5794 | 5765  |
| >CEBPA-A19! SHPHPHPPP/ | 20384 | >CEBPA-A19! SHPHPHPPP/ | 399  | 19985 |
| >CEBPA-A29! AVRKSRDK   | 317   | >CEBPA-A29! PVRKSRDK   | 5887 | 5570  |
| >CEBPA-A29! AVRKSRDK   | 4     | >CEBPA-A29! PVRKSRDK   | 18   | 14    |
| >CEBPA-A29! AVRKSRDKA  | 20    | >CEBPA-A29! PVRKSRDKA  | 596  | 576   |
| >CEBPA-A29! AVRKSRDKAK | 4     | >CEBPA-A29! PVRKSRDKAK | 19   | 15    |
| >CEBPA-A29! AVRKSRDKAK | 149   | >CEBPA-A29! PVRKSRDKAK | 2842 | 2693  |
| >CEBPA-A29! NIAVRKSR   | 206   | >CEBPA-A29! NIPVRKSR   | 536  | 330   |
| >CEBPA-A29! NIAVRKSR   | 53    | >CEBPA-A29! NIPVRKSR   | 489  | 436   |
| >CEBPA-A29! NNIAVRKSR  | 135   | >CEBPA-A29! NNIPVRKSR  | 166  | 31    |
| >CEBPA-A29! RNNIAVRK   | 353   | >CEBPA-A29! RNNIPVRK   | 748  | 395   |
| >CEBPA-A29! RNNIAVRKSR | 174   | >CEBPA-A29! RNNIPVRKSR | 170  | 4     |

|                         |      |                         |      |      |
|-------------------------|------|-------------------------|------|------|
| >CEBPA-A29! ERNNIAVR    | 192  | >CEBPA-A29! ERNNIPVR    | 460  | 268  |
| >CEBPA-A29! ERNNIAVRK   | 466  | >CEBPA-A29! ERNNIPVRK   | 1487 | 1021 |
| >CEBPA-A29! ERNNIAVRKS  | 299  | >CEBPA-A29! ERNNIPVRKS  | 548  | 249  |
| >CEBPA-A29! ERNNIAVRK   | 233  | >CEBPA-A29! ERNNIPVRK   | 378  | 145  |
| >CEBPA-A29! RERNNIAV    | 451  | >CEBPA-A29! RERNNIPV    | 154  | 297  |
| >CEBPA-A29! RERNNIAVRK  | 45   | >CEBPA-A29! RERNNIPVRK  | 29   | 16   |
| >CEBPA-A29! RERNNIAVR   | 226  | >CEBPA-A29! RERNNIPVR   | 907  | 681  |
| >CEBPA-A29! RERNNIAV    | 253  | >CEBPA-A29! RERNNIPV    | 288  | 35   |
| >CEBPA-A29! RERNNIAV    | 130  | >CEBPA-A29! RERNNIPV    | 214  | 84   |
| >CEBPA-A29! RERNNIAV    | 31   | >CEBPA-A29! RERNNIPV    | 17   | 14   |
| >CEBPA-A29! RERNNIAVR   | 2008 | >CEBPA-A29! RERNNIPVR   | 420  | 1588 |
| >CEBPA-A29! RERNNIAV    | 113  | >CEBPA-A29! RERNNIPV    | 172  | 59   |
| >CEBPA-A29! RERNNIAV    | 909  | >CEBPA-A29! RERNNIPV    | 373  | 536  |
| >CEBPA-A29! RERNNIAVR   | 571  | >CEBPA-A29! RERNNIPVR   | 172  | 399  |
| >CEBPA-A29! RERNNIAVRK  | 374  | >CEBPA-A29! RERNNIPVRK  | 280  | 94   |
| >CEBPA-A29! RERNNIAV    | 2672 | >CEBPA-A29! RERNNIPV    | 304  | 2368 |
| >CEBPA-A29! RERNNIAVR   | 370  | >CEBPA-A29! RERNNIPVR   | 581  | 211  |
| >CEBPA-A29! RRERNNIAVR  | 55   | >CEBPA-A29! RRERNNIPVR  | 38   | 17   |
| >CEBPA-A29! RRERNNIAVR  | 186  | >CEBPA-A29! RRERNNIPVR  | 226  | 40   |
| >CEBPA-A29! RRERNNIA    | 110  | >CEBPA-A29! RRERNNIP    | 161  | 51   |
| >CEBPA-A29! RRERNNIAV   | 76   | >CEBPA-A29! RRERNNIPV   | 69   | 7    |
| >CEBPA-A29! RRERNNIAVR  | 75   | >CEBPA-A29! RRERNNIPVR  | 77   | 2    |
| >CEBPA-A29! RRERNNIAVR  | 218  | >CEBPA-A29! RRERNNIPVR  | 209  | 9    |
| >CEBPA-A29! RRERNNIAV   | 101  | >CEBPA-A29! RRERNNIPV   | 156  | 55   |
| >CEBPA-A29! RRERNNIAVR  | 82   | >CEBPA-A29! RRERNNIPVR  | 88   | 6    |
| >CEBPA-A29! RRERNNIAVR  | 102  | >CEBPA-A29! RRERNNIPVR  | 93   | 9    |
| >CEBPA-A29! RRERNNIAVR  | 351  | >CEBPA-A29! RRERNNIPVR  | 350  | 1    |
| >CEBPA-A29! VRRERNNIAV  | 312  | >CEBPA-A29! VRRERNNIPV  | 344  | 32   |
| >CEBPA-A29! VRRERNNIAV  | 215  | >CEBPA-A29! VRRERNNIPV  | 288  | 73   |
| >CEBPA-A29! RVRRRERNNIA | 4    | >CEBPA-A29! RVRRRERNNIP | 14   | 10   |
| >CEBPA-A29! RVRRRERNNIA | 3    | >CEBPA-A29! RVRRRERNNIP | 3    | 0    |
| >CEBPA-A29! RVRRRERNNIA | 46   | >CEBPA-A29! RVRRRERNNIP | 64   | 18   |
| >CEBPA-E31€ ELTSDNDRL   | 546  | >CEBPA-E31€ KLTSDNDRL   | 26   | 520  |
| >CEBPA-E31€ ELTSDNDRL   | 2769 | >CEBPA-E31€ KLTSDNDRL   | 204  | 2565 |
| >CEBPA-E31€ ELTSDNDRL   | 6299 | >CEBPA-E31€ KLTSDNDRL   | 224  | 6075 |
| >CEBPA-E31€ ELTSDNDRL   | 2879 | >CEBPA-E31€ KLTSDNDRL   | 175  | 2704 |
| >CEBPA-E31€ ELTSDNDRL   | 136  | >CEBPA-E31€ KLTSDNDRL   | 27   | 109  |
| >CEBPA-E31€ ELTSDNDRLR  | 3232 | >CEBPA-E31€ KLTSDNDRLR  | 143  | 3089 |
| >CEBPA-E31€ ELTSDNDRLR  | 4093 | >CEBPA-E31€ KLTSDNDRLR  | 342  | 3751 |
| >CEBPA-E31€ ELTSDNDRLR  | 5793 | >CEBPA-E31€ KLTSDNDRLR  | 354  | 5439 |
| >CEBPA-E31€ ELTSDNDR    | 31   | >CEBPA-E31€ KLTSDNDR    | 3528 | 3497 |
| >CEBPA-E31€ ELTSDNDRLR  | 285  | >CEBPA-E31€ KLTSDNDRLR  | 6279 | 5994 |
| >CEBPA-E31€ ELTSDNDRLR  | 123  | >CEBPA-E31€ KLTSDNDRLR  | 8647 | 8524 |



|                       |       |                       |       |       |
|-----------------------|-------|-----------------------|-------|-------|
| >CEBPA-E31€ELTSDNDRLR | 6865  | >CEBPA-E31€KLTSDNDRLR | 455   | 6410  |
| >CEBPA-E31€ELTSDNDR   | 3274  | >CEBPA-E31€KLTSDNDR   | 254   | 3020  |
| >CEBPA-E31€ELTSDNDRLR | 2139  | >CEBPA-E31€KLTSDNDRLR | 165   | 1974  |
| >CEBPA-E31€LELTSDNDR  | 8405  | >CEBPA-E31€LKLTSNDNR  | 472   | 7933  |
| >CEBPA-E31€LELTSDNDRL | 4691  | >CEBPA-E31€LKLTSNDNRL | 162   | 4529  |
| >CEBPA-E31€LELTSDNDRL | 215   | >CEBPA-E31€LKLTSNDNRL | 28728 | 28513 |
| >CEBPA-E31€VLELTSDNDR | 270   | >CEBPA-E31€VLKLTSDNDR | 315   | 45    |
| >CEBPA-E31€VLELTSDNDR | 106   | >CEBPA-E31€VLKLTSDNDR | 133   | 27    |
| >CEBPA-E31€KVLELTSDND | 128   | >CEBPA-E31€KVLKLTSDND | 85    | 43    |
| >CEBPA-E31€KVLELTSDND | 93    | >CEBPA-E31€KVLKLTSDND | 59    | 34    |
| >CEBPA-E31€TQQKVLEL   | 198   | >CEBPA-E31€TQQKVLKL   | 1543  | 1345  |
| >CEBPA-E31€ETQQKVLE   | 26516 | >CEBPA-E31€ETQQKVLK   | 371   | 26145 |
| >CEBPA-E31€ETQQKVLEL  | 175   | >CEBPA-E31€ETQQKVLKL  | 288   | 113   |
| >CEBPA-E31€ETQQKVLEL  | 252   | >CEBPA-E31€ETQQKVLKL  | 313   | 61    |
| >CEBPA-E31€ETQQKVLE   | 4632  | >CEBPA-E31€ETQQKVLK   | 19    | 4613  |
| >CEBPA-E31€ETQQKVLEL  | 29    | >CEBPA-E31€ETQQKVLKL  | 28    | 1     |
| >CEBPA-E31€VETQQKVLEL | 174   | >CEBPA-E31€VETQQKVLKL | 590   | 416   |
| >CEBPA-E31€VETQQKVLEL | 1342  | >CEBPA-E31€VETQQKVLKL | 426   | 916   |
| >CEBPA-E31€VETQQKVLEL | 344   | >CEBPA-E31€VETQQKVLKL | 567   | 223   |
| >CEBPA-E31€VETQQKVLEL | 481   | >CEBPA-E31€VETQQKVLKL | 1171  | 690   |
| >CEBPA-G11 AGPGGAVM   | 377   | >CEBPA-G11 AGPDGAVM   | 356   | 21    |
| >CEBPA-G11 APAGPGGA   | 74    | >CEBPA-G11 APAGPDGA   | 397   | 323   |
| >CEBPA-G11 APAGPGGAV  | 8     | >CEBPA-G11 APAGPDGAV  | 11    | 3     |
| >CEBPA-G11 APAGPGGAV  | 17    | >CEBPA-G11 APAGPDGAV  | 37    | 20    |
| >CEBPA-G11 APAGPGGAV  | 335   | >CEBPA-G11 APAGPDGAV  | 985   | 650   |
| >CEBPA-G11 APAGPGGAV  | 452   | >CEBPA-G11 APAGPDGAV  | 1093  | 641   |
| >CEBPA-G11 APAGPGGAV  | 163   | >CEBPA-G11 APAGPDGAV  | 459   | 296   |
| >CEBPA-G11 APAGPGGAV  | 422   | >CEBPA-G11 APAGPDGAV  | 522   | 100   |
| >CEBPA-G11 GAPAGPGGA  | 321   | >CEBPA-G11 GAPAGPDGA  | 935   | 614   |
| >CEBPA-G11 GAPAGPGGA  | 125   | >CEBPA-G11 GAPAGPDGA  | 119   | 6     |
| >CEBPA-G11 YPGAPAGPG  | 353   | >CEBPA-G11 YPGAPAGPD  | 894   | 541   |
| >CEBPA-G11 YPGAPAGPG  | 292   | >CEBPA-G11 YPGAPAGPD  | 191   | 101   |
| >CEBPA-G12 MPGGAHGPF  | 1169  | >CEBPA-G12 MPEGAHGPP  | 471   | 698   |
| >CEBPA-G12 MPGGAHGPF  | 170   | >CEBPA-G12 MPEGAHGPP  | 79    | 91    |
| >CEBPA-G12 MPGGAHGPF  | 330   | >CEBPA-G12 MPEGAHGPP  | 229   | 101   |
| >CEBPA-G12 MPGGAHGPF  | 2375  | >CEBPA-G12 MPEGAHGPP  | 464   | 1911  |
| >CEBPA-G12 MPGGAHGPF  | 170   | >CEBPA-G12 MPEGAHGPP  | 129   | 41    |
| >CEBPA-G12 AVMPGGAHC  | 467   | >CEBPA-G12 AVMPEGAHC  | 1246  | 779   |
| >CEBPA-G17'GLFPYQPPP  | 5470  | >CEBPA-G17'FLFPYQPPP  | 151   | 5319  |
| >CEBPA-G17'GLFPYQPPP  | 2675  | >CEBPA-G17'FLFPYQPPP  | 442   | 2233  |
| >CEBPA-G17'GLFPYQPPPI | 7571  | >CEBPA-G17'FLFPYQPPPI | 387   | 7184  |
| >CEBPA-G17'GLFPYQPP   | 605   | >CEBPA-G17'FLFPYQPP   | 26    | 579   |
| >CEBPA-G17'GLFPYQPPP  | 521   | >CEBPA-G17'FLFPYQPPP  | 21    | 500   |

|                        |      |                         |      |      |
|------------------------|------|-------------------------|------|------|
| >CEBPA-G17' GLFPYQPPPP | 1471 | >CEBPA-G17' FLFPYQPPPI  | 71   | 1400 |
| >CEBPA-G17' GLFPYQPP   | 4703 | >CEBPA-G17' FLFPYQPP    | 271  | 4432 |
| >CEBPA-G17' GLFPYQPPP  | 5650 | >CEBPA-G17' FLFPYQPPP   | 296  | 5354 |
| >CEBPA-G17' GLFPYQPPPI | 5938 | >CEBPA-G17' FLFPYQPPPI  | 363  | 5575 |
| >CEBPA-G17' GLFPYQPP   | 4974 | >CEBPA-G17' FLFPYQPP    | 279  | 4695 |
| >CEBPA-G17' GLFPYQPPP  | 2620 | >CEBPA-G17' FLFPYQPPP   | 76   | 2544 |
| >CEBPA-G17' GLFPYQPPPI | 4999 | >CEBPA-G17' FLFPYQPPPI  | 253  | 4746 |
| >CEBPA-G17' GLFPYQPP   | 1100 | >CEBPA-G17' FLFPYQPP    | 60   | 1040 |
| >CEBPA-G17' GLFPYQPPP  | 738  | >CEBPA-G17' FLFPYQPPP   | 40   | 698  |
| >CEBPA-G17' GLFPYQPPPI | 893  | >CEBPA-G17' FLFPYQPPPI  | 57   | 836  |
| >CEBPA-G17' GLFPYQPPP  | 523  | >CEBPA-G17' FLFPYQPPPI  | 31   | 492  |
| >CEBPA-G17' GLFPYQPPP  | 1907 | >CEBPA-G17' FLFPYQPPP   | 328  | 1579 |
| >CEBPA-G17' GLFPYQPPPI | 2375 | >CEBPA-G17' FLFPYQPPPI  | 457  | 1918 |
| >CEBPA-G17' GLFPYQPPPI | 2153 | >CEBPA-G17' FLFPYQPPPI  | 409  | 1744 |
| >CEBPA-G17' GLFPYQPP   | 1784 | >CEBPA-G17' FLFPYQPP    | 69   | 1715 |
| >CEBPA-G17' GLFPYQPPP  | 639  | >CEBPA-G17' FLFPYQPPP   | 30   | 609  |
| >CEBPA-G17' GLFPYQPPPI | 1436 | >CEBPA-G17' FLFPYQPPPI  | 89   | 1347 |
| >CEBPA-G17' GLFPYQPPPI | 1233 | >CEBPA-G17' FLFPYQPPPI  | 67   | 1166 |
| >CEBPA-G17' GLFPYQPP   | 4379 | >CEBPA-G17' FLFPYQPP    | 499  | 3880 |
| >CEBPA-G17' LAGLFPYQPP | 4444 | >CEBPA-G17' LAFGLFPYQPP | 428  | 4016 |
| >CEBPA-G17' ALAGLFPY   | 344  | >CEBPA-G17' ALAFLFPY    | 623  | 279  |
| >CEBPA-G17' ALAGLFPYQ  | 37   | >CEBPA-G17' ALAFLFPYQ   | 120  | 83   |
| >CEBPA-G17' ALAGLFPYQP | 382  | >CEBPA-G17' ALAFLFPYQP  | 905  | 523  |
| >CEBPA-G17' ALAGLFPYQ  | 310  | >CEBPA-G17' ALAFLFPYQ   | 1077 | 767  |
| >CEBPA-G17' ALAGLFPYQ  | 159  | >CEBPA-G17' ALAFLFPYQ   | 463  | 304  |
| >CEBPA-G17' ALAGLFPYQ  | 44   | >CEBPA-G17' ALAFLFPYQ   | 213  | 169  |
| >CEBPA-G17' ALAGLFPY   | 143  | >CEBPA-G17' ALAFLFPY    | 1238 | 1095 |
| >CEBPA-G17' ALAGLFPYQ  | 5    | >CEBPA-G17' ALAFLFPYQ   | 45   | 40   |
| >CEBPA-G17' ALAGLFPY   | 254  | >CEBPA-G17' ALAFLFPY    | 206  | 48   |
| >CEBPA-G17' ALAGLFPY   | 166  | >CEBPA-G17' ALAFLFPY    | 70   | 96   |
| >CEBPA-G17' ALAGLFPY   | 180  | >CEBPA-G17' ALAFLFPY    | 493  | 313  |
| >CEBPA-G17' ALAGLFPY   | 14   | >CEBPA-G17' ALAFLFPY    | 12   | 2    |
| >CEBPA-G17' ALAGLFPY   | 41   | >CEBPA-G17' ALAFLFPY    | 28   | 13   |
| >CEBPA-G17' ALAGLFPY   | 52   | >CEBPA-G17' ALAFLFPY    | 20   | 32   |
| >CEBPA-G17' ALAGLFPY   | 45   | >CEBPA-G17' ALAFLFPY    | 52   | 7    |
| >CEBPA-G17' ALAGLFPY   | 191  | >CEBPA-G17' ALAFLFPY    | 541  | 350  |
| >CEBPA-G17' ALAGLFPY   | 731  | >CEBPA-G17' ALAFLFPY    | 264  | 467  |
| >CEBPA-G17' ALAGLFPY   | 437  | >CEBPA-G17' ALAFLFPY    | 280  | 157  |
| >CEBPA-G17' ALAGLFPY   | 276  | >CEBPA-G17' ALAFLFPY    | 245  | 31   |
| >CEBPA-G17' LALAGLFPY  | 247  | >CEBPA-G17' LALAFLFPY   | 335  | 88   |
| >CEBPA-G17' LALAGLFPY  | 512  | >CEBPA-G17' LALAFLFPY   | 87   | 425  |
| >CEBPA-G17' LALAGLFPY  | 25   | >CEBPA-G17' LALAFLFPY   | 27   | 2    |
| >CEBPA-G17' LALAGLFPY  | 125  | >CEBPA-G17' LALAFLFPY   | 194  | 69   |

|                        |      |                         |      |      |
|------------------------|------|-------------------------|------|------|
| >CEBPA-G17' LALAGLFPY  | 176  | >CEBPA-G17' LALAFLEPY   | 82   | 94   |
| >CEBPA-G17' LALAGLFPY  | 94   | >CEBPA-G17' LALAFLEPY   | 145  | 51   |
| >CEBPA-G17' LALAGLFPY  | 456  | >CEBPA-G17' LALAFLEPY   | 880  | 424  |
| >CEBPA-G17' LALAGLFPY  | 181  | >CEBPA-G17' LALAFLEPY   | 36   | 145  |
| >CEBPA-G17' LALAGLFPY  | 6    | >CEBPA-G17' LALAFLEPY   | 8    | 2    |
| >CEBPA-G17' LALAGLFPY  | 861  | >CEBPA-G17' LALAFLEPY   | 452  | 409  |
| >CEBPA-G17' LALAGLFPY  | 14   | >CEBPA-G17' LALAFLEPY   | 13   | 1    |
| >CEBPA-G17' LALAGLFPY  | 404  | >CEBPA-G17' LALAFLEPY   | 165  | 239  |
| >CEBPA-G17' LALAGLFPY  | 1261 | >CEBPA-G17' LALAFLEPY   | 115  | 1146 |
| >CEBPA-G17' LALAGLFPY  | 55   | >CEBPA-G17' LALAFLEPY   | 40   | 15   |
| >CEBPA-G17' LALAGLFPY  | 3543 | >CEBPA-G17' LALAFLEPY   | 376  | 3167 |
| >CEBPA-G17' LALAGLFPY  | 418  | >CEBPA-G17' LALAFLEPY   | 305  | 113  |
| >CEBPA-G17' QLALAGLFPY | 1917 | >CEBPA-G17' QLALAFLEPY  | 452  | 1465 |
| >CEBPA-G17' QLALAGLF   | 2639 | >CEBPA-G17' QLALAFLE    | 457  | 2182 |
| >CEBPA-G17' QLALAGLFPY | 295  | >CEBPA-G17' QLALAFLEPY  | 349  | 54   |
| >CEBPA-G17' QLALAGLFPY | 687  | >CEBPA-G17' QLALAFLEPY  | 279  | 408  |
| >CEBPA-G17' QLALAGLF   | 652  | >CEBPA-G17' QLALAFLE    | 144  | 508  |
| >CEBPA-G17' QLALAGLFPY | 90   | >CEBPA-G17' QLALAFLEPY  | 47   | 43   |
| >CEBPA-G17' QLALAGLFPY | 124  | >CEBPA-G17' QLALAFLEPY  | 122  | 2    |
| >CEBPA-G17' QLALAGLFPY | 47   | >CEBPA-G17' QLALAFLEPY  | 25   | 22   |
| >CEBPA-G17' QLALAGLFPY | 81   | >CEBPA-G17' QLALAFLEPY  | 80   | 1    |
| >CEBPA-G17' QLALAGLF   | 404  | >CEBPA-G17' QLALAFLE    | 1555 | 1151 |
| >CEBPA-G17' QLALAGLFPY | 69   | >CEBPA-G17' QLALAFLEPY  | 178  | 109  |
| >CEBPA-G17' QLALAGLFPY | 820  | >CEBPA-G17' QLALAFLEPY  | 416  | 404  |
| >CEBPA-G17' QLALAGLFPY | 293  | >CEBPA-G17' QLALAFLEPY  | 442  | 149  |
| >CEBPA-G17' QLALAGLFPY | 668  | >CEBPA-G17' QLALAFLEPY  | 388  | 280  |
| >CEBPA-G17' KQLALAGL   | 139  | >CEBPA-G17' KQLALAFLE   | 29   | 110  |
| >CEBPA-G17' KQLALAGL   | 242  | >CEBPA-G17' KQLALAFLE   | 45   | 197  |
| >CEBPA-G17' KQLALAGL   | 8    | >CEBPA-G17' KQLALAFLE   | 4    | 4    |
| >CEBPA-G17' KQLALAGLF  | 114  | >CEBPA-G17' KQLALAFLE   | 10   | 104  |
| >CEBPA-G17' KQLALAGLFP | 68   | >CEBPA-G17' KQLALAFLEP\ | 23   | 45   |
| >CEBPA-G17' KQLALAGL   | 249  | >CEBPA-G17' KQLALAFLE   | 107  | 142  |
| >CEBPA-G17' KQLALAGL   | 163  | >CEBPA-G17' KQLALAFLE   | 71   | 92   |
| >CEBPA-G17' KQLALAGL   | 633  | >CEBPA-G17' KQLALAFLE   | 97   | 536  |
| >CEBPA-G17' KQLALAGLFP | 663  | >CEBPA-G17' KQLALAFLEP\ | 440  | 223  |
| >CEBPA-G17' KQLALAGLFP | 191  | >CEBPA-G17' KQLALAFLEP\ | 34   | 157  |
| >CEBPA-G17' KQLALAGLF  | 6605 | >CEBPA-G17' KQLALAFLE   | 389  | 6216 |
| >CEBPA-G17' KQLALAGLF  | 2671 | >CEBPA-G17' KQLALAFLE   | 186  | 2485 |
| >CEBPA-G17' KQLALAGLFP | 131  | >CEBPA-G17' KQLALAFLEP\ | 76   | 55   |
| >CEBPA-G17' KQLALAGLFP | 51   | >CEBPA-G17' KQLALAFLEP\ | 66   | 15   |
| >CEBPA-G17' KQLALAGLFP | 563  | >CEBPA-G17' KQLALAFLEP\ | 144  | 419  |
| >CEBPA-G17' KQLALAGL   | 483  | >CEBPA-G17' KQLALAFLE   | 661  | 178  |
| >CEBPA-G17' KQLALAGLF  | 352  | >CEBPA-G17' KQLALAFLE   | 19   | 333  |

|                        |       |                          |      |       |
|------------------------|-------|--------------------------|------|-------|
| >CEBPA-G17' KQLALAGLFP | 220   | >CEBPA-G17' KQLALAFLLFP\ | 45   | 175   |
| >CEBPA-G17' KQLALAGLFP | 16    | >CEBPA-G17' KQLALAFLLFP\ | 10   | 6     |
| >CEBPA-G17' KQLALAGLF  | 207   | >CEBPA-G17' KQLALAFLLF   | 235  | 28    |
| >CEBPA-G17' KQLALAGLFP | 60    | >CEBPA-G17' KQLALAFLLFP\ | 68   | 8     |
| >CEBPA-G17' KQLALAGLFP | 246   | >CEBPA-G17' KQLALAFLLFP\ | 430  | 184   |
| >CEBPA-G17' KQLALAGL   | 112   | >CEBPA-G17' KQLALAFLL    | 53   | 59    |
| >CEBPA-G17' KQLALAGLF  | 18    | >CEBPA-G17' KQLALAFLLF   | 6    | 12    |
| >CEBPA-G17' KQLALAGLFP | 10    | >CEBPA-G17' KQLALAFLLFP\ | 6    | 4     |
| >CEBPA-G17' KQLALAGL   | 411   | >CEBPA-G17' KQLALAFLL    | 488  | 77    |
| >CEBPA-G17' KQLALAGLF  | 407   | >CEBPA-G17' KQLALAFLLF   | 151  | 256   |
| >CEBPA-G17' KQLALAGLFP | 273   | >CEBPA-G17' KQLALAFLLFP\ | 153  | 120   |
| >CEBPA-G17' KQLALAGL   | 712   | >CEBPA-G17' KQLALAFLL    | 421  | 291   |
| >CEBPA-G17' KQLALAGL   | 114   | >CEBPA-G17' KQLALAFLL    | 159  | 45    |
| >CEBPA-G17' KQLALAGLF  | 1072  | >CEBPA-G17' KQLALAFLLF   | 50   | 1022  |
| >CEBPA-G17' KQLALAGL   | 500   | >CEBPA-G17' KQLALAFLL    | 285  | 215   |
| >CEBPA-G17' KQLALAGLF  | 662   | >CEBPA-G17' KQLALAFLLF   | 350  | 312   |
| >CEBPA-G17' KQLALAGL   | 386   | >CEBPA-G17' KQLALAFLL    | 804  | 418   |
| >CEBPA-G17' AKQLALAG   | 10852 | >CEBPA-G17' AKQLALAF     | 9    | 10843 |
| >CEBPA-G17' AKQLALAGLF | 193   | >CEBPA-G17' AKQLALAFLLF  | 53   | 140   |
| >CEBPA-G17' AKQLALAGLF | 570   | >CEBPA-G17' AKQLALAFLLF  | 362  | 208   |
| >CEBPA-G17' AKQLALAGL  | 246   | >CEBPA-G17' AKQLALAFLL   | 278  | 32    |
| >CEBPA-G17' EAKQLALAG  | 13666 | >CEBPA-G17' EAKQLALAF    | 255  | 13411 |
| >CEBPA-G17' EAKQLALAG  | 27770 | >CEBPA-G17' EAKQLALAF    | 281  | 27489 |
| >CEBPA-G17' EAKQLALAG  | 22774 | >CEBPA-G17' EAKQLALAF    | 69   | 22705 |
| >CEBPA-G17' EAKQLALAGL | 439   | >CEBPA-G17' EAKQLALAFLL  | 1055 | 616   |
| >CEBPA-G17' EAKQLALAGL | 268   | >CEBPA-G17' EAKQLALAFLL  | 96   | 172   |
| >CEBPA-G17' EAKQLALAG  | 8401  | >CEBPA-G17' EAKQLALAF    | 48   | 8353  |
| >CEBPA-G17' EAKQLALAGL | 1067  | >CEBPA-G17' EAKQLALAFLL  | 408  | 659   |
| >CEBPA-G17' DEAKQLALAC | 115   | >CEBPA-G17' DEAKQLALAF   | 16   | 99    |
| >CEBPA-G17' DEAKQLALAC | 2037  | >CEBPA-G17' DEAKQLALAF   | 105  | 1932  |
| >CEBPA-G17' DEAKQLALAC | 43    | >CEBPA-G17' DEAKQLALAF   | 38   | 5     |
| >CEBPA-G17' DEAKQLALAC | 11621 | >CEBPA-G17' DEAKQLALAF   | 474  | 11147 |
| >CEBPA-G17' DEAKQLALAC | 2253  | >CEBPA-G17' DEAKQLALAF   | 97   | 2156  |
| >CEBPA-G34 GIFRQLPESSL | 2336  | >CEBPA-G34 SIFRQLPESSL   | 230  | 2106  |
| >CEBPA-G34 GIFRQLPESSL | 292   | >CEBPA-G34 SIFRQLPESSL   | 193  | 99    |
| >CEBPA-G34 GIFRQLPESSL | 479   | >CEBPA-G34 SIFRQLPESSL   | 328  | 151   |
| >CEBPA-G34 GIFRQLPESSL | 625   | >CEBPA-G34 SIFRQLPESSL   | 363  | 262   |
| >CEBPA-G34 GIFRQLPESSL | 197   | >CEBPA-G34 SIFRQLPESSL   | 84   | 113   |
| >CEBPA-G34 GIFRQLPESSL | 484   | >CEBPA-G34 SIFRQLPESSL   | 201  | 283   |
| >CEBPA-G34 GIFRQLPESSL | 59    | >CEBPA-G34 SIFRQLPESSL   | 33   | 26    |
| >CEBPA-G34 GIFRQLPESSL | 323   | >CEBPA-G34 SIFRQLPESSL   | 338  | 15    |
| >CEBPA-G34 LRGIFRQL    | 527   | >CEBPA-G34 LRSIFRQL      | 195  | 332   |
| >CEBPA-G34 LRGIFRQL    | 316   | >CEBPA-G34 LRSIFRQL      | 703  | 387   |

|                         |       |                        |      |       |
|-------------------------|-------|------------------------|------|-------|
| >CEBPA-G34 LRGIFRQL     | 73    | >CEBPA-G34 LRSIFRQL    | 144  | 71    |
| >CEBPA-G34 TLRGIFRQL    | 322   | >CEBPA-G34 TLRSIFRQL   | 369  | 47    |
| >CEBPA-G34 TLRGIFRQL    | 268   | >CEBPA-G34 TLRSIFRQL   | 160  | 108   |
| >CEBPA-G34 TLRGIFRQ     | 137   | >CEBPA-G34 TLRSIFRQ    | 497  | 360   |
| >CEBPA-G34 TLRGIFRQL    | 16    | >CEBPA-G34 TLRSIFRQL   | 74   | 58    |
| >CEBPA-G34 TLRGIFRQL    | 200   | >CEBPA-G34 TLRSIFRQL   | 65   | 135   |
| >CEBPA-G34 DTLRGIFRQL   | 161   | >CEBPA-G34 DTLRSIFRQL  | 203  | 42    |
| >CEBPA-G34 DTLRGIFR     | 105   | >CEBPA-G34 DTLRSIFR    | 68   | 37    |
| >CEBPA-G34 DTLRGIFR     | 8     | >CEBPA-G34 DTLRSIFR    | 8    | 0     |
| >CEBPA-G34 DTLRGIFR     | 11    | >CEBPA-G34 DTLRSIFR    | 6    | 5     |
| >CEBPA-G34 DTLRGIFRQL   | 52    | >CEBPA-G34 DTLRSIFRQL  | 55   | 3     |
| >CEBPA-G34 DTLRGIFR     | 777   | >CEBPA-G34 DTLRSIFR    | 444  | 333   |
| >CEBPA-G34 ELDTLRGIFR   | 341   | >CEBPA-G34 ELDTLRSIFR  | 354  | 13    |
| >CEBPA-G34 ELDTLRGIFR   | 75    | >CEBPA-G34 ELDTLRSIFR  | 84   | 9     |
| >CEBPA-G34 ELDTLRGIFR   | 66    | >CEBPA-G34 ELDTLRSIFR  | 55   | 11    |
| >CEBPA-G34 ELDTLRGIFR   | 581   | >CEBPA-G34 ELDTLRSIFR  | 389  | 192   |
| >CEBPA-G34 RELDTLRGI    | 19    | >CEBPA-G34 RELDTLRSI   | 9    | 10    |
| >CEBPA-G34 RELDTLRGIFF  | 253   | >CEBPA-G34 RELDTLRSIFR | 203  | 50    |
| >CEBPA-G34 RELDTLRGIFF  | 107   | >CEBPA-G34 RELDTLRSIF  | 14   | 93    |
| >CEBPA-G34 RELDTLRGI    | 32    | >CEBPA-G34 RELDTLRSI   | 31   | 1     |
| >CEBPA-G34 RELDTLRGI    | 172   | >CEBPA-G34 RELDTLRSI   | 38   | 134   |
| >CEBPA-G34 RELDTLRGI    | 577   | >CEBPA-G34 RELDTLRSI   | 425  | 152   |
| >CEBPA-G34 RELDTLRGIFF  | 601   | >CEBPA-G34 RELDTLRSIF  | 456  | 145   |
| >CEBPA-G34 RELDTLRGIFF  | 283   | >CEBPA-G34 RELDTLRSIF  | 163  | 120   |
| >CEBPA-G34 RELDTLRGI    | 4     | >CEBPA-G34 RELDTLRSI   | 4    | 0     |
| >CEBPA-G34 RELDTLRGIFF  | 68    | >CEBPA-G34 RELDTLRSIF  | 50   | 18    |
| >CEBPA-G34 RELDTLRGIFF  | 78    | >CEBPA-G34 RELDTLRSIFR | 63   | 15    |
| >CEBPA-G34 SRELDTLRGIFF | 92    | >CEBPA-G34 SRELDTLRSIF | 50   | 42    |
| >CEBPA-G34 LSRELDTLRGI  | 323   | >CEBPA-G34 LSRELDTLRSI | 105  | 218   |
| >CEBPA-G34 LSRELDTLRGI  | 47    | >CEBPA-G34 LSRELDTLRSI | 47   | 0     |
| >CEBPA-G34 LSRELDTLRGI  | 987   | >CEBPA-G34 LSRELDTLRSI | 307  | 680   |
| >CEBPA-G34 LSRELDTLRGI  | 100   | >CEBPA-G34 LSRELDTLRSI | 34   | 66    |
| >CEBPA-H84 HSRQQEKA     | 99    | >CEBPA-H84 LSRQQEKA    | 1098 | 999   |
| >CEBPA-H84 HSRQQEKAK    | 6     | >CEBPA-H84 LSRQQEKAK   | 18   | 12    |
| >CEBPA-H84 HSRQQEKAK/   | 45    | >CEBPA-H84 LSRQQEKAK/  | 485  | 440   |
| >CEBPA-H84 HSRQQEKAK/   | 28    | >CEBPA-H84 LSRQQEKAK/  | 295  | 267   |
| >CEBPA-H84 QHSRQQEKA    | 26176 | >CEBPA-H84 QLSRQQEKA   | 455  | 25721 |
| >CEBPA-H84 QHSRQQEKA    | 36597 | >CEBPA-H84 QLSRQQEKA   | 172  | 36425 |
| >CEBPA-H84 QHSRQQEKA    | 35654 | >CEBPA-H84 QLSRQQEKA/  | 129  | 35525 |
| >CEBPA-H84 QHSRQQEK     | 18971 | >CEBPA-H84 QLSRQQEK    | 306  | 18665 |
| >CEBPA-H84 FQHSRQQEK    | 133   | >CEBPA-H84 FQLSRQQEK   | 107  | 26    |
| >CEBPA-H84 FQHSRQQEK/   | 528   | >CEBPA-H84 FQLSRQQEK/  | 439  | 89    |
| >CEBPA-H84 FQHSRQQEK/   | 114   | >CEBPA-H84 FQLSRQQEK/  | 93   | 21    |

|                       |       |                        |      |       |
|-----------------------|-------|------------------------|------|-------|
| >CEBPA-H84 LFQHSRQQEI | 432   | >CEBPA-H84 LFQLSRQQEK  | 886  | 454   |
| >CEBPA-H84 DLFQHSRQQI | 201   | >CEBPA-H84 DLFQLSRQQE  | 170  | 31    |
| >CEBPA-H84 LADLFQHSR  | 208   | >CEBPA-H84 LADLFQLSR   | 681  | 473   |
| >CEBPA-H84 FLADLFQH   | 3500  | >CEBPA-H84 FLADLFQL    | 7    | 3493  |
| >CEBPA-H84 FLADLFQHS  | 154   | >CEBPA-H84 FLADLFQLS   | 74   | 80    |
| >CEBPA-H84 FLADLFQHSR | 1782  | >CEBPA-H84 FLADLFQLSR  | 363  | 1419  |
| >CEBPA-H84 FLADLFQH   | 31    | >CEBPA-H84 FLADLFQL    | 1    | 30    |
| >CEBPA-H84 FLADLFQHS  | 5     | >CEBPA-H84 FLADLFQLS   | 3    | 2     |
| >CEBPA-H84 FLADLFQHSR | 280   | >CEBPA-H84 FLADLFQLSR  | 207  | 73    |
| >CEBPA-H84 FLADLFQHSR | 14    | >CEBPA-H84 FLADLFQLSR( | 7    | 7     |
| >CEBPA-H84 FLADLFQH   | 1798  | >CEBPA-H84 FLADLFQL    | 3    | 1795  |
| >CEBPA-H84 FLADLFQHS  | 20    | >CEBPA-H84 FLADLFQLS   | 14   | 6     |
| >CEBPA-H84 FLADLFQHSR | 167   | >CEBPA-H84 FLADLFQLSR( | 48   | 119   |
| >CEBPA-H84 FLADLFQH   | 752   | >CEBPA-H84 FLADLFQL    | 3    | 749   |
| >CEBPA-H84 FLADLFQHS  | 12    | >CEBPA-H84 FLADLFQLS   | 16   | 4     |
| >CEBPA-H84 FLADLFQHSR | 527   | >CEBPA-H84 FLADLFQLSR( | 205  | 322   |
| >CEBPA-H84 FLADLFQH   | 828   | >CEBPA-H84 FLADLFQL    | 2    | 826   |
| >CEBPA-H84 FLADLFQHS  | 87    | >CEBPA-H84 FLADLFQLS   | 93   | 6     |
| >CEBPA-H84 FLADLFQHSR | 185   | >CEBPA-H84 FLADLFQLSR( | 136  | 49    |
| >CEBPA-H84 FLADLFQH   | 6920  | >CEBPA-H84 FLADLFQL    | 3    | 6917  |
| >CEBPA-H84 FLADLFQH   | 3031  | >CEBPA-H84 FLADLFQL    | 4    | 3027  |
| >CEBPA-H84 FLADLFQHS  | 83    | >CEBPA-H84 FLADLFQLS   | 222  | 139   |
| >CEBPA-H84 FLADLFQHSR | 297   | >CEBPA-H84 FLADLFQLSR( | 193  | 104   |
| >CEBPA-H84 FLADLFQH   | 6876  | >CEBPA-H84 FLADLFQL    | 2    | 6874  |
| >CEBPA-H84 FLADLFQH   | 52    | >CEBPA-H84 FLADLFQL    | 1    | 51    |
| >CEBPA-H84 FLADLFQHS  | 8     | >CEBPA-H84 FLADLFQLS   | 6    | 2     |
| >CEBPA-H84 FLADLFQHSR | 16    | >CEBPA-H84 FLADLFQLSR  | 55   | 39    |
| >CEBPA-H84 FLADLFQHSR | 4     | >CEBPA-H84 FLADLFQLSR( | 3    | 1     |
| >CEBPA-H84 FLADLFQH   | 260   | >CEBPA-H84 FLADLFQL    | 2730 | 2470  |
| >CEBPA-H84 FLADLFQHSR | 93    | >CEBPA-H84 FLADLFQLSR  | 210  | 117   |
| >CEBPA-H84 FLADLFQHSR | 255   | >CEBPA-H84 FLADLFQLSR  | 169  | 86    |
| >CEBPA-H84 FLADLFQHSR | 44    | >CEBPA-H84 FLADLFQLSR  | 31   | 13    |
| >CEBPA-H84 FLADLFQH   | 15639 | >CEBPA-H84 FLADLFQL    | 138  | 15501 |
| >CEBPA-H84 FLADLFQH   | 15194 | >CEBPA-H84 FLADLFQL    | 59   | 15135 |
| >CEBPA-H84 FLADLFQHSR | 86    | >CEBPA-H84 FLADLFQLSR  | 104  | 18    |
| >CEBPA-H84 EFLADLFQH  | 13748 | >CEBPA-H84 EFLADLFQL   | 67   | 13681 |
| >CEBPA-H84 EFLADLFQHS | 169   | >CEBPA-H84 EFLADLFQLSF | 576  | 407   |
| >CEBPA-H84 EFLADLFQHS | 16    | >CEBPA-H84 EFLADLFQLSF | 26   | 10    |
| >CEBPA-H84 EFLADLFQHS | 58    | >CEBPA-H84 EFLADLFQLSF | 133  | 75    |
| >CEBPA-H84 EFLADLFQH  | 17995 | >CEBPA-H84 EFLADLFQL   | 242  | 17753 |
| >CEBPA-H84 EFLADLFQHS | 54    | >CEBPA-H84 EFLADLFQLSF | 52   | 2     |
| >CEBPA-H84 EFLADLFQH  | 8030  | >CEBPA-H84 EFLADLFQL   | 164  | 7866  |
| >CEBPA-H84 DEFLADLFQH | 5935  | >CEBPA-H84 DEFLADLFQL  | 60   | 5875  |

|                        |      |                        |      |      |
|------------------------|------|------------------------|------|------|
| >CEBPA-H84 DEFLADLFQH  | 331  | >CEBPA-H84 DEFLADLFQL  | 132  | 199  |
| >CEBPA-H84 DEFLADLFQH  | 53   | >CEBPA-H84 DEFLADLFQL  | 38   | 15   |
| >CEBPA-H84 DEFLADLFQH  | 7250 | >CEBPA-H84 DEFLADLFQL  | 473  | 6777 |
| >CEBPA-H84 DEFLADLFQH  | 1761 | >CEBPA-H84 DEFLADLFQL  | 88   | 1673 |
| >CEBPA-L175 ALAGLFPY   | 344  | >CEBPA-L175 AVAGLFPY   | 6692 | 6348 |
| >CEBPA-L175 ALAGLFPYQ  | 37   | >CEBPA-L175 AVAGLFPYQ  | 1912 | 1875 |
| >CEBPA-L175 ALAGLFPYQP | 382  | >CEBPA-L175 AVAGLFPYQF | 7554 | 7172 |
| >CEBPA-L175 ALAGLFPYQ  | 310  | >CEBPA-L175 AVAGLFPYQ  | 375  | 65   |
| >CEBPA-L175 ALAGLFPYQ  | 159  | >CEBPA-L175 AVAGLFPYQ  | 5882 | 5723 |
| >CEBPA-L175 ALAGLFPYQ  | 44   | >CEBPA-L175 AVAGLFPYQ  | 5289 | 5245 |
| >CEBPA-L175 ALAGLFPY   | 143  | >CEBPA-L175 AVAGLFPY   | 8897 | 8754 |
| >CEBPA-L175 ALAGLFPYQ  | 5    | >CEBPA-L175 AVAGLFPYQ  | 1376 | 1371 |
| >CEBPA-L175 ALAGLFPY   | 254  | >CEBPA-L175 AVAGLFPY   | 746  | 492  |
| >CEBPA-L175 ALAGLFPY   | 166  | >CEBPA-L175 AVAGLFPY   | 29   | 137  |
| >CEBPA-L175 ALAGLFPY   | 180  | >CEBPA-L175 AVAGLFPY   | 9    | 171  |
| >CEBPA-L175 ALAGLFPY   | 14   | >CEBPA-L175 AVAGLFPY   | 11   | 3    |
| >CEBPA-L175 ALAGLFPY   | 41   | >CEBPA-L175 AVAGLFPY   | 40   | 1    |
| >CEBPA-L175 ALAGLFPY   | 52   | >CEBPA-L175 AVAGLFPY   | 48   | 4    |
| >CEBPA-L175 ALAGLFPY   | 45   | >CEBPA-L175 AVAGLFPY   | 76   | 31   |
| >CEBPA-L175 ALAGLFPY   | 191  | >CEBPA-L175 AVAGLFPY   | 1222 | 1031 |
| >CEBPA-L175 ALAGLFPY   | 989  | >CEBPA-L175 AVAGLFPY   | 189  | 800  |
| >CEBPA-L175 ALAGLFPY   | 706  | >CEBPA-L175 AVAGLFPY   | 137  | 569  |
| >CEBPA-L175 ALAGLFPY   | 437  | >CEBPA-L175 AVAGLFPY   | 149  | 288  |
| >CEBPA-L175 ALAGLFPY   | 276  | >CEBPA-L175 AVAGLFPY   | 465  | 189  |
| >CEBPA-L175 REEDEAKQLA | 14   | >CEBPA-L175 REEDEAKQLA | 69   | 55   |
| >CEBPA-L175 REEDEAKQLA | 249  | >CEBPA-L175 REEDEAKQLA | 757  | 508  |
| >CEBPA-L175 REEDEAKQLA | 3524 | >CEBPA-L175 REEDEAKQLA | 354  | 3170 |
| >CEBPA-L175 REEDEAKQLA | 180  | >CEBPA-L175 REEDEAKQLA | 104  | 76   |
| >CEBPA-L175 LAVAGLFPY  | 247  | >CEBPA-L175 LAVAGLFPY  | 338  | 91   |
| >CEBPA-L175 LAVAGLFPY  | 850  | >CEBPA-L175 LAVAGLFPY  | 97   | 753  |
| >CEBPA-L175 LAVAGLFPY  | 25   | >CEBPA-L175 LAVAGLFPY  | 30   | 5    |
| >CEBPA-L175 LAVAGLFPY  | 125  | >CEBPA-L175 LAVAGLFPY  | 146  | 21   |
| >CEBPA-L175 LAVAGLFPY  | 176  | >CEBPA-L175 LAVAGLFPY  | 309  | 133  |
| >CEBPA-L175 LAVAGLFPY  | 94   | >CEBPA-L175 LAVAGLFPY  | 65   | 29   |
| >CEBPA-L175 LAVAGLFPY  | 456  | >CEBPA-L175 LAVAGLFPY  | 817  | 361  |
| >CEBPA-L175 LAVAGLFPY  | 181  | >CEBPA-L175 LAVAGLFPY  | 344  | 163  |
| >CEBPA-L175 LAVAGLFPY  | 6    | >CEBPA-L175 LAVAGLFPY  | 5    | 1    |
| >CEBPA-L175 LAVAGLFPY  | 14   | >CEBPA-L175 LAVAGLFPY  | 14   | 0    |
| >CEBPA-L175 LAVAGLFPY  | 404  | >CEBPA-L175 LAVAGLFPY  | 322  | 82   |
| >CEBPA-L175 LAVAGLFPY  | 55   | >CEBPA-L175 LAVAGLFPY  | 49   | 6    |
| >CEBPA-L175 LAVAGLFPY  | 3543 | >CEBPA-L175 LAVAGLFPY  | 477  | 3066 |
| >CEBPA-L175 LAVAGLFPY  | 418  | >CEBPA-L175 LAVAGLFPY  | 344  | 74   |
| >CEBPA-L175 QLAVAGLFPY | 295  | >CEBPA-L175 QLAVAGLFPY | 438  | 143  |

|                        |      |                        |      |      |
|------------------------|------|------------------------|------|------|
| >CEBPA-L175 QLALAGLFPY | 90   | >CEBPA-L175 QLAVAGLFPY | 104  | 14   |
| >CEBPA-L175 QLALAGLFPY | 124  | >CEBPA-L175 QLAVAGLFPY | 151  | 27   |
| >CEBPA-L175 QLALAGLFPY | 47   | >CEBPA-L175 QLAVAGLFPY | 32   | 15   |
| >CEBPA-L175 QLALAGLF   | 792  | >CEBPA-L175 QLAVAGLF   | 494  | 298  |
| >CEBPA-L175 QLALAGLFPY | 81   | >CEBPA-L175 QLAVAGLFPY | 64   | 17   |
| >CEBPA-L175 QLALAGLF   | 404  | >CEBPA-L175 QLAVAGLF   | 174  | 230  |
| >CEBPA-L175 QLALAGLFPY | 69   | >CEBPA-L175 QLAVAGLFPY | 39   | 30   |
| >CEBPA-L175 QLALAGLFPY | 820  | >CEBPA-L175 QLAVAGLFPY | 404  | 416  |
| >CEBPA-L175 QLALAGLFPY | 293  | >CEBPA-L175 QLAVAGLFPY | 486  | 193  |
| >CEBPA-L175 QLALAGLFPY | 668  | >CEBPA-L175 QLAVAGLFPY | 437  | 231  |
| >CEBPA-L175 KQLALAGL   | 139  | >CEBPA-L175 KQLAVAGL   | 132  | 7    |
| >CEBPA-L175 KQLALAGL   | 242  | >CEBPA-L175 KQLAVAGL   | 283  | 41   |
| >CEBPA-L175 KQLALAGL   | 511  | >CEBPA-L175 KQLAVAGL   | 463  | 48   |
| >CEBPA-L175 KQLALAGL   | 8    | >CEBPA-L175 KQLAVAGL   | 7    | 1    |
| >CEBPA-L175 KQLALAGLF  | 114  | >CEBPA-L175 KQLAVAGLF  | 65   | 49   |
| >CEBPA-L175 KQLALAGLFP | 68   | >CEBPA-L175 KQLAVAGLFP | 51   | 17   |
| >CEBPA-L175 KQLALAGL   | 249  | >CEBPA-L175 KQLAVAGL   | 86   | 163  |
| >CEBPA-L175 KQLALAGL   | 163  | >CEBPA-L175 KQLAVAGL   | 161  | 2    |
| >CEBPA-L175 KQLALAGL   | 633  | >CEBPA-L175 KQLAVAGL   | 285  | 348  |
| >CEBPA-L175 KQLALAGLFP | 663  | >CEBPA-L175 KQLAVAGLFP | 389  | 274  |
| >CEBPA-L175 KQLALAGLFP | 191  | >CEBPA-L175 KQLAVAGLFP | 147  | 44   |
| >CEBPA-L175 KQLALAGLFP | 131  | >CEBPA-L175 KQLAVAGLFP | 189  | 58   |
| >CEBPA-L175 KQLALAGLFP | 51   | >CEBPA-L175 KQLAVAGLFP | 43   | 8    |
| >CEBPA-L175 KQLALAGL   | 483  | >CEBPA-L175 KQLAVAGL   | 291  | 192  |
| >CEBPA-L175 KQLALAGLF  | 352  | >CEBPA-L175 KQLAVAGLF  | 306  | 46   |
| >CEBPA-L175 KQLALAGLFP | 220  | >CEBPA-L175 KQLAVAGLFP | 224  | 4    |
| >CEBPA-L175 KQLALAGLFP | 16   | >CEBPA-L175 KQLAVAGLFP | 19   | 3    |
| >CEBPA-L175 KQLALAGLF  | 207  | >CEBPA-L175 KQLAVAGLF  | 237  | 30   |
| >CEBPA-L175 KQLALAGLFP | 60   | >CEBPA-L175 KQLAVAGLFP | 64   | 4    |
| >CEBPA-L175 KQLALAGLFP | 246  | >CEBPA-L175 KQLAVAGLFP | 195  | 51   |
| >CEBPA-L175 KQLALAGL   | 112  | >CEBPA-L175 KQLAVAGL   | 74   | 38   |
| >CEBPA-L175 KQLALAGLF  | 18   | >CEBPA-L175 KQLAVAGLF  | 16   | 2    |
| >CEBPA-L175 KQLALAGLFP | 10   | >CEBPA-L175 KQLAVAGLFP | 9    | 1    |
| >CEBPA-L175 KQLALAGL   | 411  | >CEBPA-L175 KQLAVAGL   | 572  | 161  |
| >CEBPA-L175 KQLALAGLF  | 407  | >CEBPA-L175 KQLAVAGLF  | 669  | 262  |
| >CEBPA-L175 KQLALAGLFP | 273  | >CEBPA-L175 KQLAVAGLFP | 403  | 130  |
| >CEBPA-L175 KQLALAGL   | 712  | >CEBPA-L175 KQLAVAGL   | 345  | 367  |
| >CEBPA-L175 KQLALAGL   | 114  | >CEBPA-L175 KQLAVAGL   | 111  | 3    |
| >CEBPA-L175 KQLALAGLF  | 1072 | >CEBPA-L175 KQLAVAGLF  | 477  | 595  |
| >CEBPA-L175 KQLALAGL   | 386  | >CEBPA-L175 KQLAVAGL   | 1770 | 1384 |
| >CEBPA-L175 AKQLALAGLF | 193  | >CEBPA-L175 AKQLAVAGLF | 133  | 60   |
| >CEBPA-L175 AKQLALAGL  | 246  | >CEBPA-L175 AKQLAVAGL  | 254  | 8    |
| >CEBPA-L175 EAKQLALAGL | 439  | >CEBPA-L175 EAKQLAVAGL | 544  | 105  |



|                        |       |                        |       |       |
|------------------------|-------|------------------------|-------|-------|
| >CEBPA-L175 EAKQLALAGL | 268   | >CEBPA-L175 EAKQLAVAGI | 574   | 306   |
| >CEBPA-L175 DEAKQLAL   | 275   | >CEBPA-L175 DEAKQLAV   | 288   | 13    |
| >CEBPA-L175 DEAKQLALAC | 115   | >CEBPA-L175 DEAKQLAVAC | 182   | 67    |
| >CEBPA-L175 DEAKQLAL   | 29    | >CEBPA-L175 DEAKQLAV   | 85    | 56    |
| >CEBPA-L175 DEAKQLALA  | 772   | >CEBPA-L175 DEAKQLAVA  | 264   | 508   |
| >CEBPA-L175 DEAKQLALAC | 43    | >CEBPA-L175 DEAKQLAVAC | 42    | 1     |
| >CEBPA-L175 EDEAKQLAL  | 1102  | >CEBPA-L175 EDEAKQLAV  | 176   | 926   |
| >CEBPA-L175 EEDEAKQLAL | 253   | >CEBPA-L175 EEDEAKQLAV | 3901  | 3648  |
| >CEBPA-L175 EEDEAKQLAL | 470   | >CEBPA-L175 EEDEAKQLAV | 1030  | 560   |
| >CEBPA-L175 EEDEAKQLAL | 1125  | >CEBPA-L175 EEDEAKQLAV | 296   | 829   |
| >CEBPA-L175 EEDEAKQLAL | 230   | >CEBPA-L175 EEDEAKQLAV | 92    | 138   |
| >CEBPA-L324 LRKRVEQLSR | 577   | >CEBPA-L324 QRKRVEQLSF | 496   | 81    |
| >CEBPA-L324 RLRKRVEQL  | 250   | >CEBPA-L324 RQRKRVEQL  | 10808 | 10558 |
| >CEBPA-L324 RLRKRVEQL  | 87    | >CEBPA-L324 RQRKRVEQL  | 2533  | 2446  |
| >CEBPA-L324 RLRKRVEQL  | 145   | >CEBPA-L324 RQRKRVEQL  | 10772 | 10627 |
| >CEBPA-L324 RLRKRVEQL  | 29    | >CEBPA-L324 RQRKRVEQL  | 23788 | 23759 |
| >CEBPA-L324 RLRKRVEQLS | 126   | >CEBPA-L324 RQRKRVEQLS | 1442  | 1316  |
| >CEBPA-L324 RLRKRVEQ   | 74    | >CEBPA-L324 RQRKRVEQ   | 139   | 65    |
| >CEBPA-L324 RLRKRVEQL  | 164   | >CEBPA-L324 RQRKRVEQL  | 364   | 200   |
| >CEBPA-L324 RLRKRVEQLS | 149   | >CEBPA-L324 RQRKRVEQLS | 304   | 155   |
| >CEBPA-L324 RLRKRVEQLS | 28    | >CEBPA-L324 RQRKRVEQLS | 48    | 20    |
| >CEBPA-L324 RLRKRVEQLS | 30    | >CEBPA-L324 RQRKRVEQLS | 28    | 2     |
| >CEBPA-L324 RLRKRVEQL  | 29    | >CEBPA-L324 RQRKRVEQL  | 298   | 269   |
| >CEBPA-L324 RLRKRVEQL  | 431   | >CEBPA-L324 RQRKRVEQL  | 113   | 318   |
| >CEBPA-L324 RLRKRVEQ   | 5002  | >CEBPA-L324 RQRKRVEQ   | 374   | 4628  |
| >CEBPA-L324 RLRKRVEQL  | 629   | >CEBPA-L324 RQRKRVEQL  | 24    | 605   |
| >CEBPA-L324 RLRKRVEQLS | 1593  | >CEBPA-L324 RQRKRVEQLS | 56    | 1537  |
| >CEBPA-L324 RLRKRVEQL  | 239   | >CEBPA-L324 RQRKRVEQL  | 2324  | 2085  |
| >CEBPA-L324 RLRKRVEQLS | 8653  | >CEBPA-L324 RQRKRVEQLS | 484   | 8169  |
| >CEBPA-L324 RLRKRVEQL  | 11384 | >CEBPA-L324 RQRKRVEQL  | 185   | 11199 |
| >CEBPA-L324 RLRKRVEQ   | 2547  | >CEBPA-L324 RQRKRVEQ   | 364   | 2183  |
| >CEBPA-L324 RLRKRVEQL  | 1130  | >CEBPA-L324 RQRKRVEQL  | 160   | 970   |
| >CEBPA-L324 RLRKRVEQLS | 3611  | >CEBPA-L324 RQRKRVEQLS | 416   | 3195  |
| >CEBPA-L324 RLRKRVEQL  | 718   | >CEBPA-L324 RQRKRVEQL  | 76    | 642   |
| >CEBPA-L324 RLRKRVEQLS | 177   | >CEBPA-L324 RQRKRVEQLS | 264   | 87    |
| >CEBPA-L324 VLELTSNDNR | 270   | >CEBPA-L324 VLELTSNDNR | 12306 | 12036 |
| >CEBPA-L324 VLELTSNDNR | 106   | >CEBPA-L324 VLELTSNDNR | 6545  | 6439  |
| >CEBPA-L324 NDRLRKRVEC | 524   | >CEBPA-L324 NDRQRKRVEI | 408   | 116   |
| >CEBPA-L324 TSDNDRLRK  | 56    | >CEBPA-L324 TSDNDRQRK  | 513   | 457   |
| >CEBPA-L324 TSDNDRLR   | 294   | >CEBPA-L324 TSDNDRQR   | 420   | 126   |
| >CEBPA-L324 LTSDNDRL   | 308   | >CEBPA-L324 LTSDNDRQ   | 13874 | 13566 |
| >CEBPA-L324 LTSDNDRLRK | 24    | >CEBPA-L324 LTSDNDRQRH | 98    | 74    |
| >CEBPA-L324 LTSDNDRLRK | 470   | >CEBPA-L324 LTSDNDRQRH | 823   | 353   |

|                        |      |                        |       |       |
|------------------------|------|------------------------|-------|-------|
| >CEBPA-L324LTSDNDRLRK  | 438  | >CEBPA-L324LTSDNDRQR   | 624   | 186   |
| >CEBPA-L324LTSDNDRLR   | 22   | >CEBPA-L324LTSDNDRQR   | 33    | 11    |
| >CEBPA-L324LTSDNDRLRK  | 168  | >CEBPA-L324LTSDNDRQR   | 337   | 169   |
| >CEBPA-L324LTSDNDRLRK  | 54   | >CEBPA-L324LTSDNDRQR   | 53    | 1     |
| >CEBPA-L324LTSDNDRL    | 482  | >CEBPA-L324LTSDNDRQ    | 16451 | 15969 |
| >CEBPA-L324LTSDNDRL    | 50   | >CEBPA-L324LTSDNDRQ    | 9597  | 9547  |
| >CEBPA-L324ELTSDNDRL   | 136  | >CEBPA-L324ELTSDNDRQ   | 8394  | 8258  |
| >CEBPA-L324ELTSDNDRLR  | 285  | >CEBPA-L324ELTSDNDRQ   | 1394  | 1109  |
| >CEBPA-L324ELTSDNDRLR  | 123  | >CEBPA-L324ELTSDNDRQ   | 124   | 1     |
| >CEBPA-L324LELTSDNDRL  | 215  | >CEBPA-L324LELTSDNDRQ  | 28160 | 27945 |
| >CEBPA-L335ELDTLRGIFR  | 341  | >CEBPA-L335EQDTLRGIFR  | 574   | 233   |
| >CEBPA-L335ELDTLRGIFR  | 75   | >CEBPA-L335EQDTLRGIFR  | 222   | 147   |
| >CEBPA-L335ELDTLRGIFR  | 66   | >CEBPA-L335EQDTLRGIFR  | 155   | 89    |
| >CEBPA-L335RKRVEQLSRE  | 15   | >CEBPA-L335RKRVEQLSRE  | 561   | 546   |
| >CEBPA-L335RKRVEQLSRE  | 170  | >CEBPA-L335RKRVEQLSRE  | 4743  | 4573  |
| >CEBPA-L335RKRVEQLSRE  | 335  | >CEBPA-L335RKRVEQLSRE  | 10507 | 10172 |
| >CEBPA-L335RELDTLRGI   | 19   | >CEBPA-L335REQDTLRGI   | 40    | 21    |
| >CEBPA-L335RELDTLRGIFF | 253  | >CEBPA-L335REQDTLRGI   | 335   | 82    |
| >CEBPA-L335RELDTLRGI   | 107  | >CEBPA-L335REQDTLRGI   | 409   | 302   |
| >CEBPA-L335RELDTLRGI   | 32   | >CEBPA-L335REQDTLRGI   | 91    | 59    |
| >CEBPA-L335RELDTLRGI   | 172  | >CEBPA-L335REQDTLRGI   | 468   | 296   |
| >CEBPA-L335RELDTLRGI   | 736  | >CEBPA-L335REQDTLRGI   | 436   | 300   |
| >CEBPA-L335RELDTLRGI   | 601  | >CEBPA-L335REQDTLRGI   | 182   | 419   |
| >CEBPA-L335RELDTLRGI   | 283  | >CEBPA-L335REQDTLRGI   | 303   | 20    |
| >CEBPA-L335RELDTLRGI   | 2862 | >CEBPA-L335REQDTLRGI   | 424   | 2438  |
| >CEBPA-L335RELDTLRGI   | 2042 | >CEBPA-L335REQDTLRGI   | 481   | 1561  |
| >CEBPA-L335RELDTLRGI   | 4    | >CEBPA-L335REQDTLRGI   | 8     | 4     |
| >CEBPA-L335RELDTLRGI   | 68   | >CEBPA-L335REQDTLRGI   | 101   | 33    |
| >CEBPA-L335RELDTLRGIFF | 78   | >CEBPA-L335REQDTLRGI   | 200   | 122   |
| >CEBPA-L335SRELDTLRGI  | 770  | >CEBPA-L335SREQDTLRGI  | 424   | 346   |
| >CEBPA-L335SRELDTLRGI  | 92   | >CEBPA-L335SREQDTLRGI  | 109   | 17    |
| >CEBPA-L335LSRELDTLRGI | 323  | >CEBPA-L335LSREQDTLRGI | 180   | 143   |
| >CEBPA-L335LSRELDTLR   | 45   | >CEBPA-L335LSREQDTLR   | 79    | 34    |
| >CEBPA-L335LSRELDTLR   | 128  | >CEBPA-L335LSREQDTLR   | 299   | 171   |
| >CEBPA-L335LSRELDTLR   | 288  | >CEBPA-L335LSREQDTLR   | 515   | 227   |
| >CEBPA-L335LSRELDTL    | 16   | >CEBPA-L335LSREQDTL    | 23    | 7     |
| >CEBPA-L335LSRELDTLRGI | 47   | >CEBPA-L335LSREQDTLRGI | 48    | 1     |
| >CEBPA-L335LSRELDTLRGI | 100  | >CEBPA-L335LSREQDTLRGI | 114   | 14    |
| >CEBPA-L335QLSRELDTL   | 16   | >CEBPA-L335QLSREQDTL   | 46    | 30    |
| >CEBPA-L335QLSRELDTL   | 396  | >CEBPA-L335QLSREQDTL   | 3040  | 2644  |
| >CEBPA-L335QLSRELDTL   | 388  | >CEBPA-L335QLSREQDTL   | 1114  | 726   |
| >CEBPA-L335QLSRELDTL   | 96   | >CEBPA-L335QLSREQDTL   | 547   | 451   |
| >CEBPA-L335QLSRELDTL   | 35   | >CEBPA-L335QLSREQDTL   | 55    | 20    |

|                         |       |                         |       |       |
|-------------------------|-------|-------------------------|-------|-------|
| >CEBPA-L335 QLSRELDTLR  | 1365  | >CEBPA-L335 QLSREQDTLR  | 431   | 934   |
| >CEBPA-L335 EQLSRELDTLI | 242   | >CEBPA-L335 EQLSREQDTL  | 325   | 83    |
| >CEBPA-L335 EQLSRELDTLI | 353   | >CEBPA-L335 EQLSREQDTL  | 516   | 163   |
| >CEBPA-L335 EQLSRELDTLI | 212   | >CEBPA-L335 EQLSREQDTL  | 389   | 177   |
| >CEBPA-L335 VEQLSREL    | 90    | >CEBPA-L335 VEQLSREQ    | 3379  | 3289  |
| >CEBPA-L335 VEQLSRELDT  | 242   | >CEBPA-L335 VEQLSREQDT  | 540   | 298   |
| >CEBPA-L335 VEQLSRELDT  | 142   | >CEBPA-L335 VEQLSREQDT  | 217   | 75    |
| >CEBPA-L335 VEQLSREL    | 194   | >CEBPA-L335 VEQLSREQ    | 6411  | 6217  |
| >CEBPA-L335 VEQLSRELDT  | 425   | >CEBPA-L335 VEQLSREQDT  | 427   | 2     |
| >CEBPA-L335 VEQLSRELDT  | 82    | >CEBPA-L335 VEQLSREQDT  | 235   | 153   |
| >CEBPA-L335 RVEQLSREL   | 400   | >CEBPA-L335 RVEQLSREQ   | 11584 | 11184 |
| >CEBPA-L335 RVEQLSREL   | 385   | >CEBPA-L335 RVEQLSREQ   | 18159 | 17774 |
| >CEBPA-L335 RVEQLSREL   | 446   | >CEBPA-L335 RVEQLSREQ   | 18719 | 18273 |
| >CEBPA-L335 KRVEQLSREL  | 461   | >CEBPA-L335 KRVEQLSREQ  | 7143  | 6682  |
| >CEBPA-L335 KRVEQLSREL  | 33    | >CEBPA-L335 KRVEQLSREQ  | 712   | 679   |
| >CEBPA-L335 KRVEQLSREL  | 127   | >CEBPA-L335 KRVEQLSREQ  | 1476  | 1349  |
| >CEBPA-L335 KRVEQLSREL  | 64    | >CEBPA-L335 KRVEQLSREQ  | 1817  | 1753  |
| >CEBPA-P14F PMSSHLQSP   | 11716 | >CEBPA-P14F RMSSHLQSP   | 451   | 11265 |
| >CEBPA-P14F PMSSHLQSPF  | 10798 | >CEBPA-P14F RMSSHLQSPF  | 195   | 10603 |
| >CEBPA-P14F PMSSHLQSPF  | 5326  | >CEBPA-P14F RMSSHLQSPF  | 88    | 5238  |
| >CEBPA-P14F PMSSHLQSP   | 5943  | >CEBPA-P14F RMSSHLQSP   | 445   | 5498  |
| >CEBPA-P14F PMSSHLQSPF  | 4937  | >CEBPA-P14F RMSSHLQSPF  | 367   | 4570  |
| >CEBPA-P14F PMSSHLQSPF  | 2105  | >CEBPA-P14F RMSSHLQSPF  | 100   | 2005  |
| >CEBPA-P14F RPPMSSHL    | 130   | >CEBPA-P14F RPRMSSHL    | 5115  | 4985  |
| >CEBPA-P14F RPPMSSHL    | 33    | >CEBPA-P14F RPRMSSHL    | 7     | 26    |
| >CEBPA-P14F RPPMSSHLQ   | 4654  | >CEBPA-P14F RPRMSSHLQ   | 38    | 4616  |
| >CEBPA-P14F RPPMSSHLQ   | 5665  | >CEBPA-P14F RPRMSSHLQ   | 58    | 5607  |
| >CEBPA-P14F RPPMSSHL    | 2849  | >CEBPA-P14F RPRMSSHL    | 86    | 2763  |
| >CEBPA-P14F RPPMSSHL    | 4821  | >CEBPA-P14F RPRMSSHL    | 400   | 4421  |
| >CEBPA-P14F PRPPMSSHL   | 132   | >CEBPA-P14F PRPRMSSHL   | 164   | 32    |
| >CEBPA-P14F EPRPPMSSH   | 176   | >CEBPA-P14F EPRPRMSSH   | 131   | 45    |
| >CEBPA-P14F AEPRPPMSSH  | 82    | >CEBPA-P14F AEPRPRMSSH  | 70    | 12    |
| >CEBPA-P14F EAEP RPPM   | 214   | >CEBPA-P14F EAEP RPRM   | 2901  | 2687  |
| >CEBPA-P14F YEAEP RPPM  | 319   | >CEBPA-P14F YEAEP RPRM  | 3239  | 2920  |
| >CEBPA-P14F YEAEP RPPM  | 16    | >CEBPA-P14F YEAEP RPRM  | 323   | 307   |
| >CEBPA-P14F YEAEP RPPM  | 413   | >CEBPA-P14F YEAEP RPRM  | 6389  | 5976  |
| >CEBPA-P14F YEAEP RPPM  | 202   | >CEBPA-P14F YEAEP RPRM  | 3412  | 3210  |
| >CEBPA-P14F YEAEP RPPM  | 50    | >CEBPA-P14F YEAEP RPRM  | 366   | 316   |
| >CEBPA-P14F YEAEP RPPM  | 122   | >CEBPA-P14F YEAEP RPRM  | 881   | 759   |
| >CEBPA-P14F YEAEP RPPM  | 16    | >CEBPA-P14F YEAEP RPRM  | 17    | 1     |
| >CEBPA-P14F FYEAEP RPP  | 30401 | >CEBPA-P14F FYEAEP RPR  | 55    | 30346 |
| >CEBPA-P14F DFYEAEP RPP | 34825 | >CEBPA-P14F DFYEAEP RPR | 302   | 34523 |
| >CEBPA-P14F DFYEAEP RPP | 17017 | >CEBPA-P14F DFYEAEP RPR | 54    | 16963 |

|                        |       |                        |       |       |
|------------------------|-------|------------------------|-------|-------|
| >CEBPA-P14F DFYEAERPP  | 37432 | >CEBPA-P14F DFYEAERPRR | 172   | 37260 |
| >CEBPA-P14F DFYEAERPP  | 190   | >CEBPA-P14F DFYEAERPRR | 1940  | 1750  |
| >CEBPA-P14F DFYEAERPP  | 34314 | >CEBPA-P14F DFYEAERPRR | 230   | 34084 |
| >CEBPA-P18( FPYQPPPP   | 11640 | >CEBPA-P18( FHYQPPPP   | 274   | 11366 |
| >CEBPA-P18( FPYQPPPP   | 8833  | >CEBPA-P18( FHYQPPPP   | 238   | 8595  |
| >CEBPA-P18( FPYQPPPPPP | 8930  | >CEBPA-P18( FHYQPPPPPP | 231   | 8699  |
| >CEBPA-P18( FPYQPPPPPP | 8930  | >CEBPA-P18( FHYQPPPPPP | 231   | 8699  |
| >CEBPA-P18( FPYQPPPP   | 337   | >CEBPA-P18( FHYQPPPP   | 21547 | 21210 |
| >CEBPA-P18( FPYQPPPP   | 247   | >CEBPA-P18( FHYQPPPP   | 20892 | 20645 |
| >CEBPA-P18( FPYQPPPPPP | 269   | >CEBPA-P18( FHYQPPPPPP | 20954 | 20685 |
| >CEBPA-P18( FPYQPPPP   | 14    | >CEBPA-P18( FHYQPPPP   | 3003  | 2989  |
| >CEBPA-P18( FPYQPPPP   | 9     | >CEBPA-P18( FHYQPPPP   | 1720  | 1711  |
| >CEBPA-P18( FPYQPPPPPP | 242   | >CEBPA-P18( FHYQPPPPPP | 25518 | 25276 |
| >CEBPA-P18( FPYQPPPPPP | 9     | >CEBPA-P18( FHYQPPPPPP | 1719  | 1710  |
| >CEBPA-P18( ALAGLFPY   | 344   | >CEBPA-P18( ALAGLFHY   | 476   | 132   |
| >CEBPA-P18( ALAGLFPYQ  | 37    | >CEBPA-P18( ALAGLFHYQ  | 8     | 29    |
| >CEBPA-P18( ALAGLFPYQP | 382   | >CEBPA-P18( ALAGLFHYQF | 121   | 261   |
| >CEBPA-P18( ALAGLFPYQ  | 310   | >CEBPA-P18( ALAGLFHYQ  | 527   | 217   |
| >CEBPA-P18( ALAGLFPYQ  | 159   | >CEBPA-P18( ALAGLFHYQ  | 97    | 62    |
| >CEBPA-P18( ALAGLFPYQ  | 44    | >CEBPA-P18( ALAGLFHYQ  | 73    | 29    |
| >CEBPA-P18( ALAGLFPY   | 143   | >CEBPA-P18( ALAGLFHY   | 96    | 47    |
| >CEBPA-P18( ALAGLFPYQ  | 5     | >CEBPA-P18( ALAGLFHYQ  | 3     | 2     |
| >CEBPA-P18( ALAGLFPY   | 254   | >CEBPA-P18( ALAGLFHY   | 260   | 6     |
| >CEBPA-P18( ALAGLFPY   | 166   | >CEBPA-P18( ALAGLFHY   | 592   | 426   |
| >CEBPA-P18( ALAGLFPY   | 180   | >CEBPA-P18( ALAGLFHY   | 152   | 28    |
| >CEBPA-P18( ALAGLFPY   | 14    | >CEBPA-P18( ALAGLFHY   | 12    | 2     |
| >CEBPA-P18( ALAGLFPY   | 41    | >CEBPA-P18( ALAGLFHY   | 24    | 17    |
| >CEBPA-P18( ALAGLFPY   | 52    | >CEBPA-P18( ALAGLFHY   | 14    | 38    |
| >CEBPA-P18( ALAGLFPY   | 45    | >CEBPA-P18( ALAGLFHY   | 50    | 5     |
| >CEBPA-P18( ALAGLFPY   | 191   | >CEBPA-P18( ALAGLFHY   | 614   | 423   |
| >CEBPA-P18( ALAGLFPY   | 437   | >CEBPA-P18( ALAGLFHY   | 2846  | 2409  |
| >CEBPA-P18( ALAGLFPY   | 276   | >CEBPA-P18( ALAGLFHY   | 157   | 119   |
| >CEBPA-P18( LALAGLFPY  | 247   | >CEBPA-P18( LALAGLFHY  | 429   | 182   |
| >CEBPA-P18( LALAGLFPY  | 25    | >CEBPA-P18( LALAGLFHY  | 18    | 7     |
| >CEBPA-P18( LALAGLFPY  | 125   | >CEBPA-P18( LALAGLFHY  | 66    | 59    |
| >CEBPA-P18( LALAGLFPY  | 176   | >CEBPA-P18( LALAGLFHY  | 52    | 124   |
| >CEBPA-P18( LALAGLFPY  | 94    | >CEBPA-P18( LALAGLFHY  | 117   | 23    |
| >CEBPA-P18( LALAGLFPY  | 456   | >CEBPA-P18( LALAGLFHY  | 2810  | 2354  |
| >CEBPA-P18( LALAGLFPY  | 181   | >CEBPA-P18( LALAGLFHY  | 608   | 427   |
| >CEBPA-P18( LALAGLFPY  | 6     | >CEBPA-P18( LALAGLFHY  | 6     | 0     |
| >CEBPA-P18( LALAGLFPY  | 14    | >CEBPA-P18( LALAGLFHY  | 136   | 122   |
| >CEBPA-P18( LALAGLFPY  | 404   | >CEBPA-P18( LALAGLFHY  | 195   | 209   |
| >CEBPA-P18( LALAGLFPY  | 55    | >CEBPA-P18( LALAGLFHY  | 21    | 34    |

|                       |       |                       |      |      |
|-----------------------|-------|-----------------------|------|------|
| >CEBPA-P18(LALAGLFPY  | 418   | >CEBPA-P18(LALAGLFHY  | 2475 | 2057 |
| >CEBPA-P18(QLALAGLFPY | 1087  | >CEBPA-P18(QLALAGLFHY | 308  | 779  |
| >CEBPA-P18(QLALAGLFPY | 1056  | >CEBPA-P18(QLALAGLFHY | 325  | 731  |
| >CEBPA-P18(QLALAGLFPY | 295   | >CEBPA-P18(QLALAGLFHY | 396  | 101  |
| >CEBPA-P18(QLALAGLFPY | 90    | >CEBPA-P18(QLALAGLFHY | 100  | 10   |
| >CEBPA-P18(QLALAGLFPY | 124   | >CEBPA-P18(QLALAGLFHY | 127  | 3    |
| >CEBPA-P18(QLALAGLFPY | 47    | >CEBPA-P18(QLALAGLFHY | 17   | 30   |
| >CEBPA-P18(QLALAGLFPY | 81    | >CEBPA-P18(QLALAGLFHY | 95   | 14   |
| >CEBPA-P18(QLALAGLFPY | 69    | >CEBPA-P18(QLALAGLFHY | 240  | 171  |
| >CEBPA-P18(QLALAGLFPY | 293   | >CEBPA-P18(QLALAGLFHY | 350  | 57   |
| >CEBPA-P18(KQLALAGLFP | 68    | >CEBPA-P18(KQLALAGLFH | 112  | 44   |
| >CEBPA-P18(KQLALAGLFP | 191   | >CEBPA-P18(KQLALAGLFH | 680  | 489  |
| >CEBPA-P18(KQLALAGLFP | 131   | >CEBPA-P18(KQLALAGLFH | 101  | 30   |
| >CEBPA-P18(KQLALAGLFP | 51    | >CEBPA-P18(KQLALAGLFH | 30   | 21   |
| >CEBPA-P18(KQLALAGLFP | 220   | >CEBPA-P18(KQLALAGLFH | 1864 | 1644 |
| >CEBPA-P18(KQLALAGLFP | 16    | >CEBPA-P18(KQLALAGLFH | 7    | 9    |
| >CEBPA-P18(KQLALAGLFP | 60    | >CEBPA-P18(KQLALAGLFH | 60   | 0    |
| >CEBPA-P18(KQLALAGLFP | 246   | >CEBPA-P18(KQLALAGLFH | 989  | 743  |
| >CEBPA-P18(KQLALAGLFP | 10    | >CEBPA-P18(KQLALAGLFH | 16   | 6    |
| >CEBPA-P18(KQLALAGLFP | 273   | >CEBPA-P18(KQLALAGLFH | 359  | 86   |
| >CEBPA-P18(KQLALAGLFP | 1756  | >CEBPA-P18(KQLALAGLFH | 435  | 1321 |
| >CEBPA-P23(PALGAAGL   | 10115 | >CEBPA-P23(AALGAAGL   | 263  | 9852 |
| >CEBPA-P23(PALGAAGL   | 2717  | >CEBPA-P23(AALGAAGL   | 13   | 2704 |
| >CEBPA-P23(APALGAAGL  | 37    | >CEBPA-P23(AAALGAAGL  | 1142 | 1105 |
| >CEBPA-P23(APALGAAGL  | 7066  | >CEBPA-P23(AAALGAAGL  | 11   | 7055 |
| >CEBPA-P23(APALGAAGL  | 205   | >CEBPA-P23(AAALGAAGL  | 2979 | 2774 |
| >CEBPA-P23(PAPALGAAGI | 65    | >CEBPA-P23(PAAALGAAGI | 6638 | 6573 |
| >CEBPA-P23(HPAPALGAA( | 769   | >CEBPA-P23(HPAAALGAA( | 229  | 540  |
| >CEBPA-P23(HPAPALGAA( | 260   | >CEBPA-P23(HPAAALGAA( | 193  | 67   |
| >CEBPA-P23(HPAPALGA   | 84    | >CEBPA-P23(HPAAALGA   | 92   | 8    |
| >CEBPA-P23(HPAPALGAA  | 13    | >CEBPA-P23(HPAAALGAA  | 15   | 2    |
| >CEBPA-P23(HPAPALGAA( | 16    | >CEBPA-P23(HPAAALGAA( | 21   | 5    |
| >CEBPA-P23(HPAPALGA   | 336   | >CEBPA-P23(HPAAALGA   | 301  | 35   |
| >CEBPA-P23(HPAPALGAA  | 47    | >CEBPA-P23(HPAAALGAA  | 55   | 8    |
| >CEBPA-P23(HPAPALGAA( | 72    | >CEBPA-P23(HPAAALGAA( | 67   | 5    |
| >CEBPA-P23(HPAPALGAA( | 72    | >CEBPA-P23(HPAAALGAA( | 37   | 35   |
| >CEBPA-P23(HPAPALGA   | 162   | >CEBPA-P23(HPAAALGA   | 113  | 49   |
| >CEBPA-P23(HPAPALGAA  | 9     | >CEBPA-P23(HPAAALGAA  | 8    | 1    |
| >CEBPA-P23(HPAPALGAA( | 247   | >CEBPA-P23(HPAAALGAA( | 796  | 549  |
| >CEBPA-P23(HPAPALGAA  | 139   | >CEBPA-P23(HPAAALGAA  | 96   | 43   |
| >CEBPA-P23(SHPAPAL    | 7     | >CEBPA-P23(SHPAAAL    | 17   | 10   |
| >CEBPA-P23(SHPAPAL    | 18    | >CEBPA-P23(SHPAAAL    | 11   | 7    |
| >CEBPA-P23(SHPAPALGA  | 74    | >CEBPA-P23(SHPAAALGA  | 40   | 34   |

|                       |       |                       |       |       |
|-----------------------|-------|-----------------------|-------|-------|
| >CEBPA-P23:SPHPAPAL   | 244   | >CEBPA-P23:SPHPAAAL   | 197   | 47    |
| >CEBPA-P23:SPHPAPAL   | 57    | >CEBPA-P23:SPHPAAAL   | 37    | 20    |
| >CEBPA-P23:SPHPAPALGA | 42    | >CEBPA-P23:SPHPAAALGA | 33    | 9     |
| >CEBPA-P23:SPHPAPALGA | 86    | >CEBPA-P23:SPHPAAALGA | 84    | 2     |
| >CEBPA-P23:PSPHPAPAL  | 205   | >CEBPA-P23:PSPHPAAAL  | 246   | 41    |
| >CEBPA-P23:PSPHPAPAL  | 24    | >CEBPA-P23:PSPHPAAAL  | 12    | 12    |
| >CEBPA-P23:PSPHPAPALG | 1186  | >CEBPA-P23:PSPHPAAALG | 391   | 795   |
| >CEBPA-P23:VPSHPAP    | 12813 | >CEBPA-P23:VPSHPAA    | 185   | 12628 |
| >CEBPA-P23:VPSHPAPA   | 122   | >CEBPA-P23:VPSHPAAA   | 150   | 28    |
| >CEBPA-P23:VPSHPAPAL  | 695   | >CEBPA-P23:VPSHPAAAL  | 222   | 473   |
| >CEBPA-P23:VPSHPAP    | 2568  | >CEBPA-P23:VPSHPAA    | 275   | 2293  |
| >CEBPA-P23:VPSHPAPA   | 147   | >CEBPA-P23:VPSHPAAA   | 114   | 33    |
| >CEBPA-P23:VPSHPAPAL  | 110   | >CEBPA-P23:VPSHPAAAL  | 67    | 43    |
| >CEBPA-P23:VPSHPAP    | 3495  | >CEBPA-P23:VPSHPAA    | 97    | 3398  |
| >CEBPA-P23:VPSHPAPA   | 113   | >CEBPA-P23:VPSHPAAA   | 142   | 29    |
| >CEBPA-P23:PVPSHPAPA  | 114   | >CEBPA-P23:PVPSHPAAA  | 63    | 51    |
| >CEBPA-P23:TPVPSHPAP  | 439   | >CEBPA-P23:TPVPSHPAA  | 520   | 81    |
| >CEBPA-P23:TPVPSHPAP  | 143   | >CEBPA-P23:TPVPSHPAA  | 109   | 34    |
| >CEBPA-P23:TPVPSHPAP  | 5388  | >CEBPA-P23:TPVPSHPAA  | 137   | 5251  |
| >CEBPA-P23:TPVPSHPAP  | 31    | >CEBPA-P23:TPVPSHPAA  | 33    | 2     |
| >CEBPA-P39:PAQPPAPPA  | 6317  | >CEBPA-P39:SAQPPAPPA  | 282   | 6035  |
| >CEBPA-P39:GPAQPPAPP  | 121   | >CEBPA-P39:GSAQPPAPP  | 19260 | 19139 |
| >CEBPA-P39:GPAQPPAPP  | 72    | >CEBPA-P39:GSAQPPAPP  | 19269 | 19197 |
| >CEBPA-P39:FPRGAGPA   | 10    | >CEBPA-P39:FPRGAGSA   | 10    | 0     |
| >CEBPA-P39:FPRGAGPAQ  | 15    | >CEBPA-P39:FPRGAGSAQ  | 9     | 6     |
| >CEBPA-P39:FPRGAGPAQ  | 68    | >CEBPA-P39:FPRGAGSAQ  | 51    | 17    |
| >CEBPA-P39:FPRGAGPA   | 236   | >CEBPA-P39:FPRGAGSA   | 859   | 623   |
| >CEBPA-P39:FPRGAGPAQ  | 77    | >CEBPA-P39:FPRGAGSAQ  | 70    | 7     |
| >CEBPA-P39:FPRGAGPA   | 5     | >CEBPA-P39:FPRGAGSA   | 7     | 2     |
| >CEBPA-P39:FPRGAGPAQ  | 18    | >CEBPA-P39:FPRGAGSAQ  | 25    | 7     |
| >CEBPA-P39:FPRGAGPAQ  | 169   | >CEBPA-P39:FPRGAGSAQ  | 196   | 27    |
| >CEBPA-P39:FPRGAGPAQ  | 25    | >CEBPA-P39:FPRGAGSAQ  | 40    | 15    |
| >CEBPA-R14:RLEPLYERV  | 37    | >CEBPA-R14:TLEPLYERV  | 45    | 8     |
| >CEBPA-R14:RLEPLYERV  | 248   | >CEBPA-R14:TLEPLYERV  | 614   | 366   |
| >CEBPA-R14:RLEPLYERV  | 309   | >CEBPA-R14:TLEPLYERV  | 922   | 613   |
| >CEBPA-R14:RLEPLYERV  | 11    | >CEBPA-R14:TLEPLYERV  | 38    | 27    |
| >CEBPA-R14:RLEPLYERV  | 140   | >CEBPA-R14:TLEPLYERV  | 471   | 331   |
| >CEBPA-R14:RLEPLYERV  | 65    | >CEBPA-R14:TLEPLYERV  | 142   | 77    |
| >CEBPA-R14:RLEPLYERV  | 3     | >CEBPA-R14:TLEPLYERV  | 3     | 0     |
| >CEBPA-R14:RLEPLYERVG | 75    | >CEBPA-R14:TLEPLYERVG | 96    | 21    |
| >CEBPA-R14:RLEPLYER   | 15    | >CEBPA-R14:TLEPLYER   | 79    | 64    |
| >CEBPA-R14:RLEPLYER   | 3909  | >CEBPA-R14:TLEPLYER   | 255   | 3654  |
| >CEBPA-R14:RLEPLYERV  | 9351  | >CEBPA-R14:TLEPLYERV  | 410   | 8941  |

|                        |       |                        |       |       |
|------------------------|-------|------------------------|-------|-------|
| >CEBPA-R14;RLEPLYER    | 81    | >CEBPA-R14;TLEPLYER    | 379   | 298   |
| >CEBPA-R14;GRLEPLYERV  | 7354  | >CEBPA-R14;GTLEPLYERV  | 448   | 6906  |
| >CEBPA-R14;GRLEPLYERV  | 5853  | >CEBPA-R14;GTLEPLYERV  | 180   | 5673  |
| >CEBPA-R14;GRLEPLYERV  | 426   | >CEBPA-R14;GTLEPLYERV  | 6     | 420   |
| >CEBPA-R14;GRLEPLYERV  | 3987  | >CEBPA-R14;GTLEPLYERV  | 60    | 3927  |
| >CEBPA-R14;GRLEPLYERV  | 2873  | >CEBPA-R14;GTLEPLYERV  | 25    | 2848  |
| >CEBPA-R14;GRLEPLYERV  | 4909  | >CEBPA-R14;GTLEPLYERV  | 64    | 4845  |
| >CEBPA-R14;GRLEPLYER   | 19810 | >CEBPA-R14;GTLEPLYER   | 48    | 19762 |
| >CEBPA-R14;GRLEPLYER   | 7466  | >CEBPA-R14;GTLEPLYER   | 22    | 7444  |
| >CEBPA-R14;GRLEPLYER   | 12522 | >CEBPA-R14;GTLEPLYER   | 270   | 12252 |
| >CEBPA-R14;GRLEPLYER   | 16140 | >CEBPA-R14;GTLEPLYER   | 187   | 15953 |
| >CEBPA-R14;GRLEPLYERV  | 15406 | >CEBPA-R14;GTLEPLYERV  | 37    | 15369 |
| >CEBPA-R14;GRLEPLYER   | 192   | >CEBPA-R14;GTLEPLYER   | 19253 | 19061 |
| >CEBPA-R14;GRLEPLYERV  | 200   | >CEBPA-R14;GTLEPLYERV  | 27472 | 27272 |
| >CEBPA-R14;GRLEPLYER   | 5727  | >CEBPA-R14;GTLEPLYER   | 170   | 5557  |
| >CEBPA-R14;YLDGRLEPLY  | 163   | >CEBPA-R14;YLDGTLEPLY  | 115   | 48    |
| >CEBPA-R14;YLDGRLEPL   | 9     | >CEBPA-R14;YLDGTLEPL   | 9     | 0     |
| >CEBPA-R14;YLDGRLEPL   | 3     | >CEBPA-R14;YLDGTLEPL   | 4     | 1     |
| >CEBPA-R14;YLDGRLEPL   | 15    | >CEBPA-R14;YLDGTLEPL   | 17    | 2     |
| >CEBPA-R14;YLDGRLEPL   | 5     | >CEBPA-R14;YLDGTLEPL   | 6     | 1     |
| >CEBPA-R14;YLDGRLEP    | 881   | >CEBPA-R14;YLDGTLEP    | 178   | 703   |
| >CEBPA-R14;YLDGRLEPL   | 2     | >CEBPA-R14;YLDGTLEPL   | 2     | 0     |
| >CEBPA-R14;YLDGRLEPLY  | 327   | >CEBPA-R14;YLDGTLEPLY  | 163   | 164   |
| >CEBPA-R14;YLDGRLEPLYI | 238   | >CEBPA-R14;YLDGTLEPLYE | 114   | 124   |
| >CEBPA-R14;YLDGRLEPL   | 3     | >CEBPA-R14;YLDGTLEPL   | 3     | 0     |
| >CEBPA-R14;YLDGRLEPL   | 7     | >CEBPA-R14;YLDGTLEPL   | 5     | 2     |
| >CEBPA-R14;YLDGRLEPLY  | 807   | >CEBPA-R14;YLDGTLEPLY  | 337   | 470   |
| >CEBPA-R14;YLDGRLEPL   | 6     | >CEBPA-R14;YLDGTLEPL   | 3     | 3     |
| >CEBPA-R14;YLDGRLEP    | 420   | >CEBPA-R14;YLDGTLEP    | 241   | 179   |
| >CEBPA-R14;YLDGRLEPL   | 2     | >CEBPA-R14;YLDGTLEPL   | 2     | 0     |
| >CEBPA-R14;YLDGRLEPLY  | 97    | >CEBPA-R14;YLDGTLEPLY  | 91    | 6     |
| >CEBPA-R14;YLDGRLEPLYI | 570   | >CEBPA-R14;YLDGTLEPLYE | 480   | 90    |
| >CEBPA-R14;YLDGRLEPLY  | 608   | >CEBPA-R14;YLDGTLEPLY  | 173   | 435   |
| >CEBPA-R14;YLDGRLEPLY  | 627   | >CEBPA-R14;YLDGTLEPLY  | 419   | 208   |
| >CEBPA-R14;YLDGRLEPL   | 1434  | >CEBPA-R14;YLDGTLEPL   | 211   | 1223  |
| >CEBPA-R14;YLDGRLEPLY  | 61    | >CEBPA-R14;YLDGTLEPLY  | 73    | 12    |
| >CEBPA-R14;YLDGRLEPLY  | 578   | >CEBPA-R14;YLDGTLEPLY  | 447   | 131   |
| >CEBPA-R14;YLDGRLEPL   | 1237  | >CEBPA-R14;YLDGTLEPL   | 189   | 1048  |
| >CEBPA-R14;GYLDGRLEPL  | 340   | >CEBPA-R14;GYLDGTLEPL  | 378   | 38    |
| >CEBPA-R14;GYLDGRLEPL  | 30    | >CEBPA-R14;GYLDGTLEPL  | 17    | 13    |
| >CEBPA-R14;GYLDGRLEPL  | 11    | >CEBPA-R14;GYLDGTLEPL  | 9     | 2     |
| >CEBPA-R14;GYLDGRLEPL  | 111   | >CEBPA-R14;GYLDGTLEPL  | 117   | 6     |
| >CEBPA-R14;GYLDGRLEPL  | 1125  | >CEBPA-R14;GYLDGTLEPL  | 364   | 761   |

|                       |       |                        |       |       |
|-----------------------|-------|------------------------|-------|-------|
| >CEBPA-R14:GYLDGRLEPL | 403   | >CEBPA-R14:GYLDGTLEPL  | 340   | 63    |
| >CEBPA-R14:GYLDGRLEPL | 833   | >CEBPA-R14:GYLDGTLEPL  | 475   | 358   |
| >CEBPA-R14:AAAGYLDGRI | 1190  | >CEBPA-R14:AAAGYLDGTI  | 443   | 747   |
| >CEBPA-R14:AAAGYLDGR  | 107   | >CEBPA-R14:AAAGYLDGT   | 31558 | 31451 |
| >CEBPA-R14:AAAGYLDGRI | 257   | >CEBPA-R14:AAAGYLDGTI  | 156   | 101   |
| >CEBPA-R14:CAAAGYLDGI | 52    | >CEBPA-R14:CAAAGYLDG   | 30319 | 30267 |
| >CEBPA-R14:CAAAGYLDGI | 313   | >CEBPA-R14:CAAAGYLDG   | 118   | 195   |
| >CEBPA-R28:RERNNIIV   | 451   | >CEBPA-R28:PERNNIIV    | 12337 | 11886 |
| >CEBPA-R28:RERNNIIVRK | 45    | >CEBPA-R28:PERNNIIVRK  | 5799  | 5754  |
| >CEBPA-R28:RERNNIIVR  | 226   | >CEBPA-R28:PERNNIIVR   | 10678 | 10452 |
| >CEBPA-R28:RERNNIIV   | 253   | >CEBPA-R28:PERNNIIV    | 7510  | 7257  |
| >CEBPA-R28:RERNNIIV   | 130   | >CEBPA-R28:PERNNIIV    | 6215  | 6085  |
| >CEBPA-R28:RERNNIIV   | 31    | >CEBPA-R28:PERNNIIV    | 2180  | 2149  |
| >CEBPA-R28:RERNNIIV   | 113   | >CEBPA-R28:PERNNIIV    | 3149  | 3036  |
| >CEBPA-R28:RERNNIIVRK | 374   | >CEBPA-R28:PERNNIIVRK  | 13962 | 13588 |
| >CEBPA-R28:RERNNIIVR  | 370   | >CEBPA-R28:PERNNIIVR   | 3963  | 3593  |
| >CEBPA-R28:RRERNNIA   | 25009 | >CEBPA-R28:RPERNNIA    | 179   | 24830 |
| >CEBPA-R28:RRERNNIIV  | 18648 | >CEBPA-R28:RPERNNIIV   | 19    | 18629 |
| >CEBPA-R28:RRERNNIIVR | 55    | >CEBPA-R28:RPERNNIIVR  | 22299 | 22244 |
| >CEBPA-R28:RRERNNIIVR | 186   | >CEBPA-R28:RPERNNIIVR  | 19066 | 18880 |
| >CEBPA-R28:RRERNNIA   | 110   | >CEBPA-R28:RPERNNIA    | 13425 | 13315 |
| >CEBPA-R28:RRERNNIIV  | 76    | >CEBPA-R28:RPERNNIIV   | 13028 | 12952 |
| >CEBPA-R28:RRERNNIIVR | 75    | >CEBPA-R28:RPERNNIIVR  | 17922 | 17847 |
| >CEBPA-R28:RRERNNIIVR | 218   | >CEBPA-R28:RPERNNIIVR  | 19271 | 19053 |
| >CEBPA-R28:RRERNNIIV  | 101   | >CEBPA-R28:RPERNNIIV   | 11816 | 11715 |
| >CEBPA-R28:RRERNNIIVR | 82    | >CEBPA-R28:RPERNNIIVR  | 22052 | 21970 |
| >CEBPA-R28:RRERNNIIVR | 102   | >CEBPA-R28:RPERNNIIVR  | 13394 | 13292 |
| >CEBPA-R28:RRERNNIIVR | 351   | >CEBPA-R28:RPERNNIIVR  | 393   | 42    |
| >CEBPA-R28:DKNSNEYRVF | 497   | >CEBPA-R28:DKNSNEYRVF  | 39850 | 39353 |
| >CEBPA-R28:VRRERNNIIV | 312   | >CEBPA-R28:VRPERNNIIV  | 3378  | 3066  |
| >CEBPA-R28:VRRERNNI   | 464   | >CEBPA-R28:VRPERNNI    | 6861  | 6397  |
| >CEBPA-R28:VRRERNNIIV | 215   | >CEBPA-R28:VRPERNNIIV  | 1107  | 892   |
| >CEBPA-R28:RVRERNNIA  | 594   | >CEBPA-R28:RVRPERNNIA  | 206   | 388   |
| >CEBPA-R28:RVRERNNN   | 49    | >CEBPA-R28:RVRPERNN    | 83    | 34    |
| >CEBPA-R28:RVRERNNI   | 4     | >CEBPA-R28:RVRPERNNI   | 4     | 0     |
| >CEBPA-R28:RVRERNNIA  | 4     | >CEBPA-R28:RVRPERNNIA  | 4     | 0     |
| >CEBPA-R28:RVRERNNIA  | 3     | >CEBPA-R28:RVRPERNNIA  | 4     | 1     |
| >CEBPA-R28:RVRERNNI   | 473   | >CEBPA-R28:RVRPERNNI   | 309   | 164   |
| >CEBPA-R28:RVRERNNIA  | 46    | >CEBPA-R28:RVRPERNNIA  | 38    | 8     |
| >CEBPA-R28:RVRERNNI   | 1733  | >CEBPA-R28:RVRPERNNI   | 448   | 1285  |
| >CEBPA-R28:YRVRERNNI  | 433   | >CEBPA-R28:YRVRPERNNI  | 240   | 193   |
| >CEBPA-R28:EYRVRERNNI | 407   | >CEBPA-R28:EYRVRPERNNI | 1213  | 806   |
| >CEBPA-R28:EYRVRER    | 159   | >CEBPA-R28:EYRVRPER    | 244   | 85    |



|                        |      |                       |       |       |
|------------------------|------|-----------------------|-------|-------|
| >CEBPA-R28;EYRVRER     | 11   | >CEBPA-R28;EYRVRPER   | 13    | 2     |
| >CEBPA-R28;EYRVRER     | 605  | >CEBPA-R28;EYRVRPER   | 479   | 126   |
| >CEBPA-R28;EYRVRER     | 500  | >CEBPA-R28;EYRVRPER   | 386   | 114   |
| >CEBPA-R28;NEYRVRER    | 387  | >CEBPA-R28;NEYRVRPER  | 1454  | 1067  |
| >CEBPA-R28;NEYRVRER    | 666  | >CEBPA-R28;NEYRVRPER  | 211   | 455   |
| >CEBPA-R28;NEYRVRRE    | 4042 | >CEBPA-R28;NEYRVRPE   | 352   | 3690  |
| >CEBPA-R28;NEYRVRER    | 376  | >CEBPA-R28;NEYRVRPER  | 285   | 91    |
| >CEBPA-R28;NSNEYRVR    | 25   | >CEBPA-R28;NSNEYRVRP  | 18833 | 18808 |
| >CEBPA-R28;NSNEYRVRRE  | 53   | >CEBPA-R28;NSNEYRVRPE | 39    | 14    |
| >CEBPA-R28;NSNEYRVR    | 70   | >CEBPA-R28;NSNEYRVRP  | 27865 | 27795 |
| >CEBPA-R28;NSNEYRVRRE  | 89   | >CEBPA-R28;NSNEYRVRPE | 87    | 2     |
| >CEBPA-R28;NSNEYRVR    | 19   | >CEBPA-R28;NSNEYRVRP  | 24045 | 24026 |
| >CEBPA-R28;NSNEYRVRRE  | 32   | >CEBPA-R28;NSNEYRVRPE | 17    | 15    |
| >CEBPA-R28;KNSNEYRVRF  | 183  | >CEBPA-R28;KNSNEYRVRF | 26843 | 26660 |
| >CEBPA-R28;KNSNEYRVRF  | 150  | >CEBPA-R28;KNSNEYRVRF | 33280 | 33130 |
| >CEBPA-R29;RKS RDKAK   | 344  | >CEBPA-R29;PKSRDKAK   | 7352  | 7008  |
| >CEBPA-R29;AVRKS RDK   | 317  | >CEBPA-R29;AVPKSRDK   | 2316  | 1999  |
| >CEBPA-R29;AVRKS RDK   | 4    | >CEBPA-R29;AVPKSRDK   | 1402  | 1398  |
| >CEBPA-R29;AVRKS RDKA  | 20   | >CEBPA-R29;AVPKSRDKA  | 10097 | 10077 |
| >CEBPA-R29;AVRKS RDKAK | 4    | >CEBPA-R29;AVPKSRDKAK | 1200  | 1196  |
| >CEBPA-R29;AVRKS RDKAK | 149  | >CEBPA-R29;AVPKSRDKAK | 13637 | 13488 |
| >CEBPA-R29;NIAVRKSR    | 206  | >CEBPA-R29;NIAVPKSR   | 959   | 753   |
| >CEBPA-R29;NIAVRKSR    | 53   | >CEBPA-R29;NIAVPKSR   | 91    | 38    |
| >CEBPA-R29;NIAVRKSRDK  | 1215 | >CEBPA-R29;NIAVPKSRDK | 422   | 793   |
| >CEBPA-R29;NIAVRKSRDK  | 1267 | >CEBPA-R29;NIAVPKSRDK | 348   | 919   |
| >CEBPA-R29;NNIAVRKSR   | 135  | >CEBPA-R29;NNIAVPKSR  | 331   | 196   |
| >CEBPA-R29;RNNIAVRK    | 353  | >CEBPA-R29;RNNIAVPK   | 54    | 299   |
| >CEBPA-R29;RNNIAVRKSR  | 174  | >CEBPA-R29;RNNIAVPKSR | 707   | 533   |
| >CEBPA-R29;ERNNIAVR    | 192  | >CEBPA-R29;ERNNIAVP   | 35596 | 35404 |
| >CEBPA-R29;ERNNIAVRK   | 466  | >CEBPA-R29;ERNNIAVPK  | 377   | 89    |
| >CEBPA-R29;ERNNIAVRKS  | 299  | >CEBPA-R29;ERNNIAVPKS | 450   | 151   |
| >CEBPA-R29;ERNNIAVRK   | 233  | >CEBPA-R29;ERNNIAVPK  | 155   | 78    |
| >CEBPA-R29;RERNNIAVRK  | 45   | >CEBPA-R29;RERNNIAVPK | 12    | 33    |
| >CEBPA-R29;RERNNIAVR   | 226  | >CEBPA-R29;RERNNIAVP  | 21761 | 21535 |
| >CEBPA-R29;RERNNIAVRK  | 709  | >CEBPA-R29;RERNNIAVPK | 383   | 326   |
| >CEBPA-R29;RERNNIAVRK  | 374  | >CEBPA-R29;RERNNIAVPK | 89    | 285   |
| >CEBPA-R29;RERNNIAVR   | 370  | >CEBPA-R29;RERNNIAVP  | 34937 | 34567 |
| >CEBPA-R29;RRERNNIAVR  | 55   | >CEBPA-R29;RRERNNIAVP | 2840  | 2785  |
| >CEBPA-R29;RRERNNIAVR  | 186  | >CEBPA-R29;RRERNNIAVP | 151   | 35    |
| >CEBPA-R29;RRERNNIAVR  | 75   | >CEBPA-R29;RRERNNIAVP | 585   | 510   |
| >CEBPA-R29;RRERNNIAVR  | 218  | >CEBPA-R29;RRERNNIAVP | 232   | 14    |
| >CEBPA-R29;RRERNNIAVR  | 82   | >CEBPA-R29;RRERNNIAVP | 1329  | 1247  |
| >CEBPA-R29;RRERNNIAVR  | 102  | >CEBPA-R29;RRERNNIAVP | 137   | 35    |

|                       |       |                       |       |       |
|-----------------------|-------|-----------------------|-------|-------|
| >CEBPA-R29;RRERNNIAVR | 351   | >CEBPA-R29;RRERNNIAVP | 35269 | 34918 |
| >CEBPA-R30(ERNNIAVRKS | 299   | >CEBPA-R30(ERNNIAVRKS | 38823 | 38524 |
| >CEBPA-R30(KSRDKAKQ   | 63    | >CEBPA-R30(KSGDKAKQ   | 11344 | 11281 |
| >CEBPA-R30(KSRDKAKQR  | 28    | >CEBPA-R30(KSGDKAKQR  | 10752 | 10724 |
| >CEBPA-R30(KSRDKAKQR  | 202   | >CEBPA-R30(KSGDKAKQR  | 13547 | 13345 |
| >CEBPA-R30(KSRDKAKQR  | 8     | >CEBPA-R30(KSGDKAKQR  | 3912  | 3904  |
| >CEBPA-R30(KSRDKAKQR  | 45    | >CEBPA-R30(KSGDKAKQR  | 265   | 220   |
| >CEBPA-R30(KSRDKAKQ   | 315   | >CEBPA-R30(KSGDKAKQ   | 5608  | 5293  |
| >CEBPA-R30(KSRDKAKQR  | 161   | >CEBPA-R30(KSGDKAKQR  | 3549  | 3388  |
| >CEBPA-R30(KSRDKAKQR  | 35    | >CEBPA-R30(KSGDKAKQR  | 697   | 662   |
| >CEBPA-R30(KSRDKAKQR  | 480   | >CEBPA-R30(KSGDKAKQR  | 232   | 248   |
| >CEBPA-R30(RKSRDKAK   | 344   | >CEBPA-R30(RKSGDKAK   | 1463  | 1119  |
| >CEBPA-R30(AVRKSRDK   | 317   | >CEBPA-R30(AVRKSGDK   | 262   | 55    |
| >CEBPA-R30(AVRKSRDK   | 4     | >CEBPA-R30(AVRKSGDK   | 5     | 1     |
| >CEBPA-R30(AVRKSRDKA  | 20    | >CEBPA-R30(AVRKSGDKA  | 79    | 59    |
| >CEBPA-R30(AVRKSRDKA  | 4     | >CEBPA-R30(AVRKSGDKA  | 5     | 1     |
| >CEBPA-R30(AVRKSRDKA  | 149   | >CEBPA-R30(AVRKSGDKA  | 365   | 216   |
| >CEBPA-R30(NIAVRKSR   | 206   | >CEBPA-R30(NIAVRKSG   | 33214 | 33008 |
| >CEBPA-R30(NIAVRKSR   | 53    | >CEBPA-R30(NIAVRKSG   | 29517 | 29464 |
| >CEBPA-R30(NNIAVRKSR  | 135   | >CEBPA-R30(NNIAVRKSG  | 36052 | 35917 |
| >CEBPA-R30(RNNIAVRKSR | 174   | >CEBPA-R30(RNNIAVRKSG | 30639 | 30465 |
| >CEBPA-R30(SRDKAKQRN  | 16432 | >CEBPA-R30(SLDKAKQRN  | 11    | 16421 |
| >CEBPA-R30(SRDKAKQRN  | 21906 | >CEBPA-R30(SLDKAKQRN  | 78    | 21828 |
| >CEBPA-R30(SRDKAKQRN  | 14963 | >CEBPA-R30(SLDKAKQRN  | 10    | 14953 |
| >CEBPA-R30(SRDKAKQRN  | 23507 | >CEBPA-R30(SLDKAKQRN  | 276   | 23231 |
| >CEBPA-R30(SRDKAKQRN  | 18920 | >CEBPA-R30(SLDKAKQRN  | 8     | 18912 |
| >CEBPA-R30(ERNNIAVRKS | 299   | >CEBPA-R30(ERNNIAVRKS | 33165 | 32866 |
| >CEBPA-R30(ERNNIAVRKS | 20925 | >CEBPA-R30(ERNNIAVRKS | 498   | 20427 |
| >CEBPA-R30(KSRDKAKQ   | 63    | >CEBPA-R30(KSLDKAKQ   | 4408  | 4345  |
| >CEBPA-R30(KSRDKAKQR  | 28    | >CEBPA-R30(KSLDKAKQR  | 3110  | 3082  |
| >CEBPA-R30(KSRDKAKQR  | 202   | >CEBPA-R30(KSLDKAKQR  | 7275  | 7073  |
| >CEBPA-R30(KSRDKAKQR  | 8     | >CEBPA-R30(KSLDKAKQR  | 437   | 429   |
| >CEBPA-R30(KSRDKAKQR  | 45    | >CEBPA-R30(KSLDKAKQR  | 60    | 15    |
| >CEBPA-R30(KSRDKAKQ   | 315   | >CEBPA-R30(KSLDKAKQ   | 823   | 508   |
| >CEBPA-R30(KSRDKAKQR  | 161   | >CEBPA-R30(KSLDKAKQR  | 427   | 266   |
| >CEBPA-R30(KSRDKAKQR  | 35    | >CEBPA-R30(KSLDKAKQR  | 62    | 27    |
| >CEBPA-R30(KSRDKAKQR  | 480   | >CEBPA-R30(KSLDKAKQR  | 127   | 353   |
| >CEBPA-R30(RKSRDKAK   | 344   | >CEBPA-R30(RKSLDKAK   | 1233  | 889   |
| >CEBPA-R30(AVRKSRDK   | 317   | >CEBPA-R30(AVRKSLDK   | 151   | 166   |
| >CEBPA-R30(AVRKSRDK   | 2293  | >CEBPA-R30(AVRKSLDK   | 492   | 1801  |
| >CEBPA-R30(AVRKSRDK   | 4     | >CEBPA-R30(AVRKSLDK   | 4     | 0     |
| >CEBPA-R30(AVRKSRDKA  | 20    | >CEBPA-R30(AVRKSLDKA  | 48    | 28    |
| >CEBPA-R30(AVRKSRDKA  | 4     | >CEBPA-R30(AVRKSLDKA  | 5     | 1     |

|                        |       |                        |       |       |
|------------------------|-------|------------------------|-------|-------|
| >CEBPA-R30(AVRKSRDKAK  | 149   | >CEBPA-R30(AVRKSLDKAK  | 302   | 153   |
| >CEBPA-R30(NIAVRKSRDK  | 801   | >CEBPA-R30(NIAVRKSLDK  | 193   | 608   |
| >CEBPA-R30(NIAVRKSRDK  | 2710  | >CEBPA-R30(NIAVRKSLDK  | 205   | 2505  |
| >CEBPA-R30(NIAVRKSR    | 206   | >CEBPA-R30(NIAVRKSL    | 23264 | 23058 |
| >CEBPA-R30(NIAVRKSR    | 53    | >CEBPA-R30(NIAVRKSL    | 20368 | 20315 |
| >CEBPA-R30(NIAVRKSRDK  | 1215  | >CEBPA-R30(NIAVRKSLDK  | 231   | 984   |
| >CEBPA-R30(NIAVRKSR    | 10321 | >CEBPA-R30(NIAVRKSL    | 110   | 10211 |
| >CEBPA-R30(NNIAVRKSR   | 135   | >CEBPA-R30(NNIAVRKSL   | 28592 | 28457 |
| >CEBPA-R30(RNNIAVRKSR  | 174   | >CEBPA-R30(RNNIAVRKSL  | 20877 | 20703 |
| >CEBPA-R30(KQRNVETQQ   | 743   | >CEBPA-R30(KQPNVETQQ   | 98    | 645   |
| >CEBPA-R30(KQRNVETQQ   | 1059  | >CEBPA-R30(KQPNVETQQ   | 155   | 904   |
| >CEBPA-R30(KQRNVETQQ   | 1704  | >CEBPA-R30(KQPNVETQQ   | 123   | 1581  |
| >CEBPA-R30(KQRNVETQQ   | 8     | >CEBPA-R30(KQPNVETQQ   | 3959  | 3951  |
| >CEBPA-R30(KQRNVETQQ   | 121   | >CEBPA-R30(KQPNVETQQ   | 13655 | 13534 |
| >CEBPA-R30(KQRNVETQQ   | 281   | >CEBPA-R30(KQPNVETQQ   | 3425  | 3144  |
| >CEBPA-R30(KQRNVETQQ   | 54    | >CEBPA-R30(KQPNVETQQ   | 760   | 706   |
| >CEBPA-R30(KSRDKAKQR   | 28    | >CEBPA-R30(KSRDKAKQP   | 244   | 216   |
| >CEBPA-R30(KSRDKAKQR   | 202   | >CEBPA-R30(KSRDKAKQP   | 45    | 157   |
| >CEBPA-R30(KSRDKAKQR   | 8     | >CEBPA-R30(KSRDKAKQP   | 6     | 2     |
| >CEBPA-R30(KSRDKAKQR   | 45    | >CEBPA-R30(KSRDKAKQP   | 20292 | 20247 |
| >CEBPA-R30(KSRDKAKQR   | 161   | >CEBPA-R30(KSRDKAKQP   | 910   | 749   |
| >CEBPA-R30(KSRDKAKQR   | 35    | >CEBPA-R30(KSRDKAKQP   | 22    | 13    |
| >CEBPA-R30(KSRDKAKQR   | 480   | >CEBPA-R30(KSRDKAKQP   | 32778 | 32298 |
| >CEBPA-R33(LRGIFRQL    | 24261 | >CEBPA-R33(LPGIFRQL    | 102   | 24159 |
| >CEBPA-R33(LRGIFRQL    | 316   | >CEBPA-R33(LPGIFRQL    | 23766 | 23450 |
| >CEBPA-R33(LRGIFRQL    | 73    | >CEBPA-R33(LPGIFRQL    | 6190  | 6117  |
| >CEBPA-R33(EQLSRELDLFI | 242   | >CEBPA-R33(EQLSRELDLFI | 35527 | 35285 |
| >CEBPA-R33(EQLSRELDLFI | 353   | >CEBPA-R33(EQLSRELDLFI | 37618 | 37265 |
| >CEBPA-R33(EQLSRELDLFI | 212   | >CEBPA-R33(EQLSRELDLFI | 34720 | 34508 |
| >CEBPA-R33(TLRGIFRQL   | 322   | >CEBPA-R33(TLPGIFRQL   | 70    | 252   |
| >CEBPA-R33(TLRGIFRQL   | 268   | >CEBPA-R33(TLPGIFRQL   | 221   | 47    |
| >CEBPA-R33(TLRGIFRQL   | 712   | >CEBPA-R33(TLPGIFRQL   | 96    | 616   |
| >CEBPA-R33(TLRGIFRQ    | 137   | >CEBPA-R33(TLPGIFRQ    | 83    | 54    |
| >CEBPA-R33(TLRGIFRQL   | 16    | >CEBPA-R33(TLPGIFRQL   | 10    | 6     |
| >CEBPA-R33(TLRGIFRQL   | 200   | >CEBPA-R33(TLPGIFRQL   | 6369  | 6169  |
| >CEBPA-R33(TLRGIFRQL   | 6962  | >CEBPA-R33(TLPGIFRQL   | 12    | 6950  |
| >CEBPA-R33(DTLRGIFRQL  | 161   | >CEBPA-R33(DTLPGIFRQL  | 342   | 181   |
| >CEBPA-R33(DTLRGIFR    | 105   | >CEBPA-R33(DTLPGIFR    | 162   | 57    |
| >CEBPA-R33(DTLRGIFR    | 8     | >CEBPA-R33(DTLPGIFR    | 10    | 2     |
| >CEBPA-R33(DTLRGIFR    | 11    | >CEBPA-R33(DTLPGIFR    | 11    | 0     |
| >CEBPA-R33(DTLRGIFRQL  | 52    | >CEBPA-R33(DTLPGIFRQL  | 35    | 17    |
| >CEBPA-R33(DTLRGIFRQL  | 1317  | >CEBPA-R33(DTLPGIFRQL  | 158   | 1159  |
| >CEBPA-R33(ELDTLRGI    | 514   | >CEBPA-R33(ELDTLPGI    | 59    | 455   |

|                        |      |                        |       |       |
|------------------------|------|------------------------|-------|-------|
| >CEBPA-R33!ELDTLRGI    | 2586 | >CEBPA-R33!ELDTLPGI    | 356   | 2230  |
| >CEBPA-R33!ELDTLRGI    | 2808 | >CEBPA-R33!ELDTLPGI    | 144   | 2664  |
| >CEBPA-R33!ELDTLRGI    | 2408 | >CEBPA-R33!ELDTLPGI    | 139   | 2269  |
| >CEBPA-R33!ELDTLRGI    | 3133 | >CEBPA-R33!ELDTLPGI    | 489   | 2644  |
| >CEBPA-R33!ELDTLRGIFR  | 341  | >CEBPA-R33!ELDTLPGIFR  | 2339  | 1998  |
| >CEBPA-R33!ELDTLRGIFR  | 75   | >CEBPA-R33!ELDTLPGIFR  | 380   | 305   |
| >CEBPA-R33!ELDTLRGIFR  | 66   | >CEBPA-R33!ELDTLPGIFR  | 56    | 10    |
| >CEBPA-R33!ELDTLRGI    | 602  | >CEBPA-R33!ELDTLPGI    | 54    | 548   |
| >CEBPA-R33!RELDTLRGI   | 19   | >CEBPA-R33!RELDTLPGI   | 29    | 10    |
| >CEBPA-R33!RELDTLRGI   | 1344 | >CEBPA-R33!RELDTLPGI   | 79    | 1265  |
| >CEBPA-R33!RELDTLRGIFF | 253  | >CEBPA-R33!RELDTLPGIFR | 349   | 96    |
| >CEBPA-R33!RELDTLRGIF  | 107  | >CEBPA-R33!RELDTLPGIF  | 93    | 14    |
| >CEBPA-R33!RELDTLRGI   | 32   | >CEBPA-R33!RELDTLPGI   | 16    | 16    |
| >CEBPA-R33!RELDTLRGI   | 172  | >CEBPA-R33!RELDTLPGI   | 70    | 102   |
| >CEBPA-R33!RELDTLRGIF  | 601  | >CEBPA-R33!RELDTLPGIF  | 494   | 107   |
| >CEBPA-R33!RELDTLRGIF  | 283  | >CEBPA-R33!RELDTLPGIF  | 227   | 56    |
| >CEBPA-R33!RELDTLRGI   | 1298 | >CEBPA-R33!RELDTLPGI   | 487   | 811   |
| >CEBPA-R33!RELDTLRGIF  | 2042 | >CEBPA-R33!RELDTLPGIF  | 338   | 1704  |
| >CEBPA-R33!RELDTLRGI   | 4    | >CEBPA-R33!RELDTLPGI   | 2     | 2     |
| >CEBPA-R33!RELDTLRGIF  | 68   | >CEBPA-R33!RELDTLPGIF  | 46    | 22    |
| >CEBPA-R33!RELDTLRGIFF | 78   | >CEBPA-R33!RELDTLPGIFR | 69    | 9     |
| >CEBPA-R33!SRELDTLRGI  | 929  | >CEBPA-R33!SRELDTLPGI  | 492   | 437   |
| >CEBPA-R33!SRELDTLRGIF | 92   | >CEBPA-R33!SRELDTLPGIF | 125   | 33    |
| >CEBPA-R33!LSRELDTLRGI | 323  | >CEBPA-R33!LSRELDTLPGI | 123   | 200   |
| >CEBPA-R33!LSRELDTLR   | 45   | >CEBPA-R33!LSRELDTLP   | 19407 | 19362 |
| >CEBPA-R33!LSRELDTLR   | 128  | >CEBPA-R33!LSRELDTLP   | 30038 | 29910 |
| >CEBPA-R33!LSRELDTLR   | 288  | >CEBPA-R33!LSRELDTLP   | 36871 | 36583 |
| >CEBPA-R33!LSRELDTLRGI | 47   | >CEBPA-R33!LSRELDTLPGI | 30    | 17    |
| >CEBPA-R33!LSRELDTLRGI | 100  | >CEBPA-R33!LSRELDTLPGI | 74    | 26    |
| >CEBPA-S21!SPPHAPSSAA  | 212  | >CEBPA-S21!GPPHAPSSAA  | 99    | 113   |
| >CEBPA-S21!SPPHAPSSAA  | 22   | >CEBPA-S21!GPPHAPSSAA  | 144   | 122   |
| >CEBPA-S21!SPPHAPSSA   | 479  | >CEBPA-S21!GPPHAPSSA   | 2899  | 2420  |
| >CEBPA-S21!SPPHAPSSAA  | 235  | >CEBPA-S21!GPPHAPSSAA  | 3681  | 3446  |
| >CEBPA-S21!SPPHAPSSAA  | 66   | >CEBPA-S21!GPPHAPSSAA  | 263   | 197   |
| >CEBPA-S21!SPPHAPSSAA  | 337  | >CEBPA-S21!GPPHAPSSAA  | 907   | 570   |
| >CEBPA-S21!SPPHAPSSAA  | 46   | >CEBPA-S21!GPPHAPSSAA  | 128   | 82    |
| >CEBPA-S21!SPPHAPSSAA  | 61   | >CEBPA-S21!GPPHAPSSAA  | 2040  | 1979  |
| >CEBPA-S21!QSPPHAPSS   | 265  | >CEBPA-S21!QGPPHAPSS   | 8058  | 7793  |
| >CEBPA-S21!QSPPHAPSSA  | 263  | >CEBPA-S21!QGPPHAPSSA  | 9355  | 9092  |
| >CEBPA-S21!LQSPHAPSS   | 183  | >CEBPA-S21!LQGPPHAPSS  | 1377  | 1194  |
| >CEBPA-S21!LQSPHAPSS   | 187  | >CEBPA-S21!LQGPPHAPSS  | 732   | 545   |
| >CEBPA-S21!LQSPHAPS    | 347  | >CEBPA-S21!LQGPPHAPS   | 560   | 213   |
| >CEBPA-S21!LQSPHAPSS   | 154  | >CEBPA-S21!LQGPPHAPSS  | 214   | 60    |

|                        |       |                        |       |       |
|------------------------|-------|------------------------|-------|-------|
| >CEBPA-S21C LQSPPHAPSS | 70    | >CEBPA-S21C LQGPPHAPSS | 425   | 355   |
| >CEBPA-S21C HLQSPPHA   | 161   | >CEBPA-S21C HLQGPPHA   | 83    | 78    |
| >CEBPA-S21C HLQSPPHA   | 235   | >CEBPA-S21C HLQGPPHA   | 269   | 34    |
| >CEBPA-S21C HLQSPPHA   | 494   | >CEBPA-S21C HLQGPPHA   | 262   | 232   |
| >CEBPA-S21C HLQSPPHA   | 39    | >CEBPA-S21C HLQGPPHA   | 18    | 21    |
| >CEBPA-S21C SSSLQSPPH  | 140   | >CEBPA-S21C SSSLQGPPH  | 527   | 387   |
| >CEBPA-S21C SSSLQSPPHA | 15    | >CEBPA-S21C SSSLQGPPH/ | 29    | 14    |
| >CEBPA-S21C MSSHLQSPPI | 215   | >CEBPA-S21C MSSHLQGPP  | 329   | 114   |
| >CEBPA-S21C MSSHLQSPPI | 332   | >CEBPA-S21C MSSHLQGPP  | 394   | 62    |
| >CEBPA-S21C MSSHLQSPPI | 359   | >CEBPA-S21C MSSHLQGPP  | 842   | 483   |
| >CEBPA-S21F SPPHAPSSAA | 212   | >CEBPA-S21F RPPHAPSSAA | 635   | 423   |
| >CEBPA-S21F SPPHAPSSAA | 22    | >CEBPA-S21F RPPHAPSSAA | 47    | 25    |
| >CEBPA-S21F SPPHAPSSA  | 479   | >CEBPA-S21F RPPHAPSSA  | 83    | 396   |
| >CEBPA-S21F SPPHAPSSAA | 235   | >CEBPA-S21F RPPHAPSSAA | 145   | 90    |
| >CEBPA-S21F SPPHAPSSAA | 66    | >CEBPA-S21F RPPHAPSSAA | 25    | 41    |
| >CEBPA-S21F SPPHAPSSAA | 337   | >CEBPA-S21F RPPHAPSSAA | 58    | 279   |
| >CEBPA-S21F SPPHAPSSAA | 46    | >CEBPA-S21F RPPHAPSSAA | 61    | 15    |
| >CEBPA-S21F SPPHAPSSAA | 61    | >CEBPA-S21F RPPHAPSSAA | 199   | 138   |
| >CEBPA-S21F SPPHAPSSAA | 605   | >CEBPA-S21F RPPHAPSSAA | 459   | 146   |
| >CEBPA-S21F QSPPHAPSS  | 265   | >CEBPA-S21F QRPPHAPSS  | 26240 | 25975 |
| >CEBPA-S21F QSPPHAPSSA | 263   | >CEBPA-S21F QRPPHAPSSA | 29559 | 29296 |
| >CEBPA-S21F LQSPPHAPSS | 183   | >CEBPA-S21F LQRPPHAPSS | 485   | 302   |
| >CEBPA-S21F LQSPPHAPSS | 187   | >CEBPA-S21F LQRPPHAPSS | 1844  | 1657  |
| >CEBPA-S21F LQSPPHAPS  | 11696 | >CEBPA-S21F LQRPPHAPS  | 160   | 11536 |
| >CEBPA-S21F LQSPPHAPSS | 13438 | >CEBPA-S21F LQRPPHAPSS | 385   | 13053 |
| >CEBPA-S21F LQSPPHAPSS | 6811  | >CEBPA-S21F LQRPPHAPSS | 47    | 6764  |
| >CEBPA-S21F LQSPPHAPS  | 347   | >CEBPA-S21F LQRPPHAPS  | 197   | 150   |
| >CEBPA-S21F LQSPPHAPSS | 154   | >CEBPA-S21F LQRPPHAPSS | 95    | 59    |
| >CEBPA-S21F LQSPPHAP   | 932   | >CEBPA-S21F LQRPPHAP   | 431   | 501   |
| >CEBPA-S21F LQSPPHAPS  | 564   | >CEBPA-S21F LQRPPHAPS  | 269   | 295   |
| >CEBPA-S21F LQSPPHAPSS | 851   | >CEBPA-S21F LQRPPHAPSS | 341   | 510   |
| >CEBPA-S21F LQSPPHAPSS | 70    | >CEBPA-S21F LQRPPHAPSS | 33    | 37    |
| >CEBPA-S21F HLQSPPHA   | 161   | >CEBPA-S21F HLQRPPHA   | 292   | 131   |
| >CEBPA-S21F HLQSPPHA   | 235   | >CEBPA-S21F HLQRPPHA   | 325   | 90    |
| >CEBPA-S21F HLQSPPHA   | 494   | >CEBPA-S21F HLQRPPHA   | 1042  | 548   |
| >CEBPA-S21F HLQSPPHA   | 39    | >CEBPA-S21F HLQRPPHA   | 42    | 3     |
| >CEBPA-S21F SSSLQSPPH  | 140   | >CEBPA-S21F SSSLQRPPH  | 112   | 28    |
| >CEBPA-S21F SSSLQSPPHA | 15    | >CEBPA-S21F SSSLQRPPHA | 15    | 0     |
| >CEBPA-S21F MSSHLQSPPI | 215   | >CEBPA-S21F MSSHLQRPPI | 235   | 20    |
| >CEBPA-S21F MSSHLQSPPI | 332   | >CEBPA-S21F MSSHLQRPPI | 833   | 501   |
| >CEBPA-S21F MSSHLQSPPI | 359   | >CEBPA-S21F MSSHLQRPPI | 1953  | 1594  |
| >CEBPA-S21F PMSSHLQS   | 22495 | >CEBPA-S21F PMSSHLQR   | 481   | 22014 |
| >CEBPA-S21F PMSSHLQS   | 34019 | >CEBPA-S21F PMSSHLQR   | 466   | 33553 |

|                         |       |                         |      |       |
|-------------------------|-------|-------------------------|------|-------|
| >CEBPA-S21FRPPMSSHLQI   | 29266 | >CEBPA-S21FRPPMSSHLQI   | 402  | 28864 |
| >CEBPA-S21FRPPMSSHLQI   | 28986 | >CEBPA-S21FRPPMSSHLQI   | 143  | 28843 |
| >CEBPA-V31VLELTSDNDR    | 270   | >CEBPA-V31MLELTSDNDR    | 36   | 234   |
| >CEBPA-V31VLELTSDNDR    | 106   | >CEBPA-V31MLELTSDNDR    | 48   | 58    |
| >CEBPA-V31KVLELTSDND    | 128   | >CEBPA-V31KMLELTSDND    | 40   | 88    |
| >CEBPA-V31KVLELTSDND    | 93    | >CEBPA-V31KMLELTSDND    | 32   | 61    |
| >CEBPA-V31KQRNVETQQ     | 121   | >CEBPA-V31KQRNVETQQ     | 185  | 64    |
| >CEBPA-V31KQRNVETQQ     | 5102  | >CEBPA-V31KQRNVETQQ     | 419  | 4683  |
| >CEBPA-V31KQRNVETQQ     | 54    | >CEBPA-V31KQRNVETQQ     | 13   | 41    |
| >CEBPA-V31TQQKVLEL      | 198   | >CEBPA-V31TQQKMLEL      | 346  | 148   |
| >CEBPA-V31ETQQKVLEL     | 1963  | >CEBPA-V31ETQQKMLEL     | 227  | 1736  |
| >CEBPA-V31ETQQKVLEL     | 1678  | >CEBPA-V31ETQQKMLEL     | 297  | 1381  |
| >CEBPA-V31ETQQKVLEL     | 175   | >CEBPA-V31ETQQKMLEL     | 27   | 148   |
| >CEBPA-V31ETQQKVLEL     | 252   | >CEBPA-V31ETQQKMLEL     | 245  | 7     |
| >CEBPA-V31ETQQKVLEL     | 799   | >CEBPA-V31ETQQKMLEL     | 418  | 381   |
| >CEBPA-V31ETQQKVLEL     | 29    | >CEBPA-V31ETQQKMLEL     | 17   | 12    |
| >CEBPA-V31VETQQKVL      | 63    | >CEBPA-V31VETQQKML      | 65   | 2     |
| >CEBPA-V31VETQQKVLEL    | 174   | >CEBPA-V31VETQQKMLE     | 151  | 23    |
| >CEBPA-V31VETQQKVL      | 320   | >CEBPA-V31VETQQKML      | 324  | 4     |
| >CEBPA-V31VETQQKVL      | 332   | >CEBPA-V31VETQQKML      | 381  | 49    |
| >CEBPA-V31VETQQKVLEL    | 344   | >CEBPA-V31VETQQKMLE     | 304  | 40    |
| >CEBPA-V31VETQQKVLEL    | 481   | >CEBPA-V31VETQQKMLE     | 417  | 64    |
| >CEBPA-V31QRNVETQQK     | 1137  | >CEBPA-V31QRNVETQQK     | 474  | 663   |
| >CEBPA-V31QRNVETQQK     | 811   | >CEBPA-V31QRNVETQQK     | 240  | 571   |
| >CEP110-D6DEKETLLQRL    | 766   | >CEP110-D6NEKETLLQRL    | 252  | 514   |
| >CEP110-D6DEKETLLQ      | 226   | >CEP110-D6NEKETLLQ      | 846  | 620   |
| >CEP110-D6DEKETLLQR     | 99    | >CEP110-D6NEKETLLQR     | 436  | 337   |
| >CEP110-D6DEKETLLQRL    | 2260  | >CEP110-D6NEKETLLQRL    | 154  | 2106  |
| >CEP110-D6RDEKETLLQR    | 467   | >CEP110-D6RNEKETLLQR    | 154  | 313   |
| >CEP110-D6LRDEKETLLQI   | 2729  | >CEP110-D6LRNEKETLLQI   | 439  | 2290  |
| >CEP110-D6KLRDEKETL     | 216   | >CEP110-D6KLRNEKETL     | 1414 | 1198  |
| >CEP110-D6KLRDEKETLL    | 81    | >CEP110-D6KLRNEKETLL    | 92   | 11    |
| >CEP110-D6KLRDEKETL     | 95    | >CEP110-D6KLRNEKETL     | 283  | 188   |
| >CEP110-D6KLRDEKETLL    | 349   | >CEP110-D6KLRNEKETLL    | 805  | 456   |
| >CEP110-D6KLRDEKETL     | 286   | >CEP110-D6KLRNEKETL     | 592  | 306   |
| >CEP110-D6KLRDEKET      | 453   | >CEP110-D6KLRNEKET      | 2997 | 2544  |
| >CEP110-D6KLRDEKETL     | 7     | >CEP110-D6KLRNEKETL     | 30   | 23    |
| >CEP110-D6KLRDEKETLL    | 11    | >CEP110-D6KLRNEKETLL    | 33   | 22    |
| >CEP110-D6KLRDEKETLLC   | 384   | >CEP110-D6KLRNEKETLLC   | 2562 | 2178  |
| >CEP110-D6KLRDEKETLLC   | 286   | >CEP110-D6KLRNEKETLLC   | 220  | 66    |
| >CEP110-D6KLRDEKETL     | 1067  | >CEP110-D6KLRNEKETL     | 255  | 812   |
| >CEP110-D6RKLKLRDEKETL  | 25    | >CEP110-D6RKLKLRNEKETL  | 19   | 6     |
| >CEP110-D6RKLKLRDEKETLI | 40    | >CEP110-D6RKLKLRNEKETLI | 33   | 7     |

|                          |       |                          |       |       |
|--------------------------|-------|--------------------------|-------|-------|
| >CEP110-D64 RKL RDEKETL  | 278   | >CEP110-D64 RKL RNEKETL  | 240   | 38    |
| >CEP110-D64 RKL RDEKETLI | 423   | >CEP110-D64 RKL RNEKETLI | 384   | 39    |
| >CEP110-D64 CRKL RDEKET  | 874   | >CEP110-D64 CRKL RNEKET  | 433   | 441   |
| >CEP110-Q44 QLKKISEA     | 370   | >CEP110-Q44 PLKKISEA     | 4683  | 4313  |
| >CEP110-Q44 QLKKISEA     | 78    | >CEP110-Q44 PLKKISEA     | 1421  | 1343  |
| >CEP110-Q44 QLKKISEA     | 323   | >CEP110-Q44 PLKKISEA     | 1022  | 699   |
| >CEP110-Q44 QLKKISEAGK   | 245   | >CEP110-Q44 PLKKISEAGK   | 1328  | 1083  |
| >CEP110-Q44 IQLKKISEA    | 70    | >CEP110-Q44 IPLKKISEA    | 21110 | 21040 |
| >CEP110-Q44 IQLKKISEA    | 280   | >CEP110-Q44 IPLKKISEA    | 10240 | 9960  |
| >CEP110-Q44 IQLKKISEA    | 27665 | >CEP110-Q44 IPLKKISEA    | 85    | 27580 |
| >CEP110-Q44 EAIQLKKI     | 1174  | >CEP110-Q44 EAIPLKKI     | 197   | 977   |
| >CEP110-Q44 EAIQLKKISEA  | 351   | >CEP110-Q44 EAIPLKKISEA  | 115   | 236   |
| >CEP110-Q44 EEAIQLKKI    | 6     | >CEP110-Q44 EEAIPLKKI    | 25    | 19    |
| >CEP110-Q44 EEAIQLKKI    | 48    | >CEP110-Q44 EEAIPLKKI    | 36    | 12    |
| >CEP110-Q44 LEEAIQLKKI   | 16    | >CEP110-Q44 LEEAIPLKKI   | 43    | 27    |
| >CEP110-Q44 LEEAIQLKKI   | 41    | >CEP110-Q44 LEEAIPLKKI   | 35    | 6     |
| >CEP110-Q44 QLEEEAIQL    | 97    | >CEP110-Q44 QLEEEAIPL    | 69    | 28    |
| >CEP110-Q44 QLEEEAIQL    | 1004  | >CEP110-Q44 QLEEEAIPL    | 153   | 851   |
| >CEP110-Q44 QLEEEAIQL    | 180   | >CEP110-Q44 QLEEEAIPL    | 159   | 21    |
| >CEP110-Q44 QLEEEAIQLKKI | 522   | >CEP110-Q44 QLEEEAIPLKKI | 328   | 194   |
| >CEP110-Q44 QLEEEAIQL    | 452   | >CEP110-Q44 QLEEEAIPL    | 107   | 345   |
| >CEP110-Q44 QLEEEAIQL    | 12    | >CEP110-Q44 QLEEEAIPL    | 22    | 10    |
| >CEP110-Q44 QLEEEAIQLKKI | 177   | >CEP110-Q44 QLEEEAIPLKKI | 191   | 14    |
| >CEP110-Q44 QLEEEAIQLKK  | 382   | >CEP110-Q44 QLEEEAIPLKK  | 298   | 84    |
| >CEP110-Q44 QLEEEAIQLKK  | 524   | >CEP110-Q44 QLEEEAIPLKK  | 304   | 220   |
| >CEP110-Q44 KQLEEEAIQL   | 129   | >CEP110-Q44 KQLEEEAIPL   | 34    | 95    |
| >CEP110-Q44 KQLEEEAIQL   | 16    | >CEP110-Q44 KQLEEEAIPL   | 8     | 8     |
| >CEP110-Q44 KQLEEEAIQL   | 101   | >CEP110-Q44 KQLEEEAIPL   | 91    | 10    |
| >CEP110-Q44 KQLEEEAIQL   | 160   | >CEP110-Q44 KQLEEEAIPL   | 22    | 138   |
| >CEP110-Q44 KQLEEEAIQL   | 291   | >CEP110-Q44 KQLEEEAIPL   | 190   | 101   |
| >CEP110-Q44 KQLEEEAIQLK  | 437   | >CEP110-Q44 KQLEEEAIPLK  | 454   | 17    |
| >CEP110-Q44 KQLEEEAIQLKI | 143   | >CEP110-Q44 KQLEEEAIPLKK | 151   | 8     |
| >CEP110-Q44 KQLEEEAIQLK  | 409   | >CEP110-Q44 KQLEEEAIPLK  | 286   | 123   |
| >CEP110-Q44 KQLEEEAIQLKI | 76    | >CEP110-Q44 KQLEEEAIPLKK | 61    | 15    |
| >CEP110-Q44 KQLEEEAIQLK  | 114   | >CEP110-Q44 KQLEEEAIPLK  | 43    | 71    |
| >CEP110-Q44 KQLEEEAIQLKI | 207   | >CEP110-Q44 KQLEEEAIPLKK | 153   | 54    |
| >CEP110-Q44 KQLEEEAIQL   | 246   | >CEP110-Q44 KQLEEEAIPL   | 75    | 171   |
| >CEP110-Q44 KQLEEEAIQL   | 54    | >CEP110-Q44 KQLEEEAIPL   | 16    | 38    |
| >CEP110-Q44 KQLEEEAIQLKI | 301   | >CEP110-Q44 KQLEEEAIPLKK | 344   | 43    |
| >CEP110-Q44 KQLEEEAIQL   | 96    | >CEP110-Q44 KQLEEEAIPL   | 21    | 75    |
| >CEP110-Q44 KQLEEEAIQL   | 1681  | >CEP110-Q44 KQLEEEAIPL   | 301   | 1380  |
| >CEP110-Q44 KQLEEEAIQL   | 139   | >CEP110-Q44 KQLEEEAIPL   | 74    | 65    |
| >CEP110-Q44 KQLEEEAIQLK  | 446   | >CEP110-Q44 KQLEEEAIPLK  | 338   | 108   |

|                         |       |                         |       |       |
|-------------------------|-------|-------------------------|-------|-------|
| >CEP110-Q4{KQLEEEAIQLKI | 318   | >CEP110-Q4{KQLEEEAIPLKK | 188   | 130   |
| >CEP110-Q4{FKQLEEEAIQL  | 627   | >CEP110-Q4{FKQLEEEAIPL  | 133   | 494   |
| >CEP110-Q4{FKQLEEEAIQL  | 249   | >CEP110-Q4{FKQLEEEAIPL  | 56    | 193   |
| >CHEK2-K37{KILGETSL     | 269   | >CHEK2-K37{EILGETSL     | 12988 | 12719 |
| >CHEK2-K37{KILGETSL     | 184   | >CHEK2-K37{EILGETSL     | 2345  | 2161  |
| >CHEK2-K37{KILGETSL     | 65    | >CHEK2-K37{EILGETSL     | 3843  | 3778  |
| >CHEK2-K37{KILGETSL     | 110   | >CHEK2-K37{EILGETSL     | 1681  | 1571  |
| >CHEK2-K37{KILGETSL     | 164   | >CHEK2-K37{EILGETSL     | 2944  | 2780  |
| >CHEK2-K37{KILGETSL     | 36    | >CHEK2-K37{EILGETSL     | 415   | 379   |
| >CHEK2-K37{KILGETSLMR   | 61    | >CHEK2-K37{EILGETSLMR   | 1144  | 1083  |
| >CHEK2-K37{KILGETSLMR   | 141   | >CHEK2-K37{EILGETSLMR   | 974   | 833   |
| >CHEK2-K37{KILGETSLM    | 15470 | >CHEK2-K37{EILGETSLM    | 68    | 15402 |
| >CHEK2-K37{KILGETSL     | 9980  | >CHEK2-K37{EILGETSL     | 367   | 9613  |
| >CHEK2-K37{KILGETSLM    | 1820  | >CHEK2-K37{EILGETSLM    | 16    | 1804  |
| >CHEK2-K37{KILGETSLM    | 3716  | >CHEK2-K37{EILGETSLM    | 70    | 3646  |
| >CHEK2-K37{KILGETSLMR   | 33    | >CHEK2-K37{EILGETSLMR   | 699   | 666   |
| >CHEK2-K37{KILGETSL     | 25    | >CHEK2-K37{EILGETSL     | 1616  | 1591  |
| >CHEK2-K37{KILGETSLMR   | 2662  | >CHEK2-K37{EILGETSLMR   | 361   | 2301  |
| >CHEK2-K37{KILGETSLMR   | 705   | >CHEK2-K37{EILGETSLMR   | 27    | 678   |
| >CHEK2-K37{KILGETSL     | 10050 | >CHEK2-K37{EILGETSL     | 151   | 9899  |
| >CHEK2-K37{KILGETSLM    | 9434  | >CHEK2-K37{EILGETSLM    | 85    | 9349  |
| >CHEK2-K37{KILGETSLM    | 65    | >CHEK2-K37{EILGETSLM    | 876   | 811   |
| >CHEK2-K37{KILGETSLMR   | 478   | >CHEK2-K37{EILGETSLMR   | 5845  | 5367  |
| >CHEK2-K37{KILGETSLMR   | 21    | >CHEK2-K37{EILGETSLMR   | 94    | 73    |
| >CHEK2-K37{SKILGETS     | 21509 | >CHEK2-K37{SEILGETS     | 110   | 21399 |
| >CHEK2-K37{SKILGETSLM   | 12338 | >CHEK2-K37{SEILGETSLM   | 166   | 12172 |
| >CHEK2-K37{SKILGETSL    | 89    | >CHEK2-K37{SEILGETSL    | 4757  | 4668  |
| >CHEK2-K37{SKILGETSLM   | 169   | >CHEK2-K37{SEILGETSLM   | 6324  | 6155  |
| >CHEK2-K37{SKILGETSL    | 13191 | >CHEK2-K37{SEILGETSL    | 29    | 13162 |
| >CHEK2-K37{SKILGETSL    | 19820 | >CHEK2-K37{SEILGETSL    | 37    | 19783 |
| >CHEK2-K37{SKILGETSLM   | 26833 | >CHEK2-K37{SEILGETSLM   | 294   | 26539 |
| >CHEK2-K37{SKILGETSLM   | 20851 | >CHEK2-K37{SEILGETSLM   | 391   | 20460 |
| >CHEK2-K37{SKILGETSLM   | 359   | >CHEK2-K37{SEILGETSLM   | 448   | 89    |
| >CHEK2-K37{SKILGETSL    | 14619 | >CHEK2-K37{SEILGETSL    | 34    | 14585 |
| >CHEK2-K37{SKILGETSLM   | 17033 | >CHEK2-K37{SEILGETSLM   | 86    | 16947 |
| >CHEK2-K37{LIKITDFGHSK  | 371   | >CHEK2-K37{LIKITDFGHSE  | 26340 | 25969 |
| >CHEK2-K37{LIKITDFGHSK  | 22    | >CHEK2-K37{LIKITDFGHSE  | 9655  | 9633  |
| >CHEK2-K37{LIKITDFGHSK  | 326   | >CHEK2-K37{LIKITDFGHSE  | 22812 | 22486 |
| >CHEK2-K37{HSKILGETSLM  | 227   | >CHEK2-K37{HSEILGETSLM  | 10538 | 10311 |
| >CHEK2-K37{HSKILGETSL   | 18    | >CHEK2-K37{HSEILGETSL   | 42    | 24    |
| >CHEK2-K37{HSKILGETSLM  | 19    | >CHEK2-K37{HSEILGETSLM  | 40    | 21    |
| >CHEK2-K37{HSKILGETSLM  | 15    | >CHEK2-K37{HSEILGETSLM  | 21    | 6     |
| >CHEK2-K37{TDFGHSKI     | 1177  | >CHEK2-K37{TDFGHSEI     | 332   | 845   |



|                         |       |                         |       |       |
|-------------------------|-------|-------------------------|-------|-------|
| >CHEK2-K37: TDFGHSKIL   | 487   | >CHEK2-K37: TDFGHSEIL   | 501   | 14    |
| >CHEK2-K37: TDFGHSKI    | 282   | >CHEK2-K37: TDFGHSEI    | 198   | 84    |
| >CHEK2-K37: TDFGHSKIL   | 1224  | >CHEK2-K37: TDFGHSEIL   | 406   | 818   |
| >CHEK2-K37: ITDFGHSK    | 39    | >CHEK2-K37: ITDFGHSE    | 21650 | 21611 |
| >CHEK2-K37: ITDFGHSK    | 189   | >CHEK2-K37: ITDFGHSE    | 18312 | 18123 |
| >CHEK2-K37: ITDFGHSKI   | 24    | >CHEK2-K37: ITDFGHSEI   | 32    | 8     |
| >CHEK2-K37: ITDFGHSKIL  | 20    | >CHEK2-K37: ITDFGHSEIL  | 44    | 24    |
| >CHEK2-K37: ITDFGHSKI   | 13    | >CHEK2-K37: ITDFGHSEI   | 17    | 4     |
| >CHEK2-K37: ITDFGHSK    | 455   | >CHEK2-K37: ITDFGHSE    | 15889 | 15434 |
| >CHEK2-K37: ITDFGHSKI   | 58    | >CHEK2-K37: ITDFGHSEI   | 149   | 91    |
| >CHEK2-K37: ITDFGHSKIL  | 435   | >CHEK2-K37: ITDFGHSEIL  | 633   | 198   |
| >CHEK2-K37: KITDFGHSKI  | 457   | >CHEK2-K37: KITDFGHSEI  | 294   | 163   |
| >CHEK2-K37: KITDFGHSKIL | 360   | >CHEK2-K37: KITDFGHSEIL | 57    | 303   |
| >CHEK2-K37: KITDFGHSKI  | 212   | >CHEK2-K37: KITDFGHSEI  | 117   | 95    |
| >CHEK2-K37: KITDFGHSKIL | 915   | >CHEK2-K37: KITDFGHSEIL | 202   | 713   |
| >CHEK2-K37: KITDFGHSKI  | 215   | >CHEK2-K37: KITDFGHSEI  | 96    | 119   |
| >CHEK2-K37: KITDFGHSKIL | 1058  | >CHEK2-K37: KITDFGHSEIL | 467   | 591   |
| >CHEK2-K37: KITDFGHSKI  | 119   | >CHEK2-K37: KITDFGHSEI  | 55    | 64    |
| >CHEK2-K37: KITDFGHSKIL | 175   | >CHEK2-K37: KITDFGHSEIL | 70    | 105   |
| >CHEK2-K37: KITDFGHSK   | 197   | >CHEK2-K37: KITDFGHSE   | 20762 | 20565 |
| >CHEK2-K37: KITDFGHSK   | 17    | >CHEK2-K37: KITDFGHSE   | 17179 | 17162 |
| >CHEK2-K37: KITDFGHSK   | 31    | >CHEK2-K37: KITDFGHSE   | 12097 | 12066 |
| >CHEK2-K37: KITDFGHSK   | 295   | >CHEK2-K37: KITDFGHSE   | 13614 | 13319 |
| >CHEK2-K37: KITDFGHSKI  | 303   | >CHEK2-K37: KITDFGHSEI  | 313   | 10    |
| >CHEK2-K37: KITDFGHSKIL | 575   | >CHEK2-K37: KITDFGHSEIL | 236   | 339   |
| >CHEK2-K37: KITDFGHSK   | 102   | >CHEK2-K37: KITDFGHSE   | 12556 | 12454 |
| >CHEK2-K37: IKITDFGHSK  | 157   | >CHEK2-K37: IKITDFGHSE  | 1733  | 1576  |
| >CHEK2-K37: IKITDFGHSKI | 54    | >CHEK2-K37: IKITDFGHSEI | 27    | 27    |
| >CHEK2-P53: PAVCAAVL    | 4998  | >CHEK2-P53: LAVCAAVL    | 64    | 4934  |
| >CHEK2-P53: PAVCAAVL    | 4273  | >CHEK2-P53: LAVCAAVL    | 148   | 4125  |
| >CHEK2-P53: RPAVCAAV    | 20392 | >CHEK2-P53: RLAVCAAV    | 25    | 20367 |
| >CHEK2-P53: RPAVCAAVL   | 23455 | >CHEK2-P53: RLAVCAAVL   | 217   | 23238 |
| >CHEK2-P53: RPAVCAAV    | 17193 | >CHEK2-P53: RLAVCAAV    | 5     | 17188 |
| >CHEK2-P53: RPAVCAAVL   | 22198 | >CHEK2-P53: RLAVCAAVL   | 17    | 22181 |
| >CHEK2-P53: RPAVCAAV    | 13104 | >CHEK2-P53: RLAVCAAV    | 5     | 13099 |
| >CHEK2-P53: RPAVCAAVL   | 21453 | >CHEK2-P53: RLAVCAAVL   | 44    | 21409 |
| >CHEK2-P53: RPAVCAAV    | 7649  | >CHEK2-P53: RLAVCAAV    | 17    | 7632  |
| >CHEK2-P53: RPAVCAAVL   | 21464 | >CHEK2-P53: RLAVCAAVL   | 391   | 21073 |
| >CHEK2-P53: RPAVCAAV    | 16265 | >CHEK2-P53: RLAVCAAV    | 9     | 16256 |
| >CHEK2-P53: RPAVCAAVL   | 28980 | >CHEK2-P53: RLAVCAAVL   | 369   | 28611 |
| >CHEK2-P53: RPAVCAAV    | 18713 | >CHEK2-P53: RLAVCAAV    | 9     | 18704 |
| >CHEK2-P53: RPAVCAAVL   | 22200 | >CHEK2-P53: RLAVCAAVL   | 65    | 22135 |
| >CHEK2-P53: RPAVCAAV    | 19085 | >CHEK2-P53: RLAVCAAV    | 15    | 19070 |

|                       |       |                       |       |       |
|-----------------------|-------|-----------------------|-------|-------|
| >CHEK2-P53(RPAVCAAVL  | 25257 | >CHEK2-P53(RLAVCAAVL  | 267   | 24990 |
| >CHEK2-P53(RPAVCAAV   | 20668 | >CHEK2-P53(RLAVCAAV   | 6     | 20662 |
| >CHEK2-P53(RPAVCAAVL  | 22507 | >CHEK2-P53(RLAVCAAVL  | 51    | 22456 |
| >CHEK2-P53(RPAVCAAV   | 23843 | >CHEK2-P53(RLAVCAAV   | 4     | 23839 |
| >CHEK2-P53(RPAVCAAVL  | 32789 | >CHEK2-P53(RLAVCAAVL  | 26    | 32763 |
| >CHEK2-P53(RPAVCAAV   | 13    | >CHEK2-P53(RLAVCAAV   | 1999  | 1986  |
| >CHEK2-P53(RPAVCAAVL  | 11    | >CHEK2-P53(RLAVCAAVL  | 200   | 189   |
| >CHEK2-P53(RPAVCAAVL  | 14669 | >CHEK2-P53(RLAVCAAVL  | 239   | 14430 |
| >CHEK2-P53(RPAVCAAVL  | 2267  | >CHEK2-P53(RLAVCAAVL  | 433   | 1834  |
| >CHEK2-P53(RPAVCAAVL  | 6219  | >CHEK2-P53(RLAVCAAVL  | 423   | 5796  |
| >CHEK2-P53(RPAVCAAVL  | 351   | >CHEK2-P53(RLAVCAAVL  | 10308 | 9957  |
| >CHEK2-P53(RPAVCAAVL  | 33    | >CHEK2-P53(RLAVCAAVL  | 392   | 359   |
| >CHEK2-P53(RPAVCAAV   | 195   | >CHEK2-P53(RLAVCAAV   | 26189 | 25994 |
| >CHEK2-P53(KRPAVCAAV  | 1620  | >CHEK2-P53(KRLAVCAAV  | 310   | 1310  |
| >CHEK2-P53(KRPAVCAAVL | 1120  | >CHEK2-P53(KRLAVCAAVL | 169   | 951   |
| >CHEK2-P53(KRPAVCAAVL | 191   | >CHEK2-P53(KRLAVCAAVL | 25    | 166   |
| >CHEK2-P53(KRPAVCAAVL | 774   | >CHEK2-P53(KRLAVCAAVL | 45    | 729   |
| >CHEK2-P53(KRPAVCAAV  | 427   | >CHEK2-P53(KRLAVCAAV  | 161   | 266   |
| >CHEK2-P53(KRPAVCAAVL | 68    | >CHEK2-P53(KRLAVCAAVL | 39    | 29    |
| >CHEK2-P53(KRPAVCAAV  | 837   | >CHEK2-P53(KRLAVCAAV  | 350   | 487   |
| >CHEK2-P53(KRPAVCAAVL | 178   | >CHEK2-P53(KRLAVCAAVL | 72    | 106   |
| >CHEK2-P53(TKRPVCAA   | 386   | >CHEK2-P53(TKRLAVCAA  | 965   | 579   |
| >CHEK2-P53(TKRPVCAAV  | 132   | >CHEK2-P53(TKRLAVCAAV | 319   | 187   |
| >CHEK2-P53(TKRPVCAAV  | 74    | >CHEK2-P53(TKRLAVCAAV | 167   | 93    |
| >CHEK2-P53(TKRPVCAAV  | 283   | >CHEK2-P53(TKRLAVCAAV | 564   | 281   |
| >CHEK2-P53(TTKRPVCA   | 517   | >CHEK2-P53(TTKRLAVCA  | 413   | 104   |
| >CHEK2-P53(TTKRPVCAA  | 54    | >CHEK2-P53(TTKRLAVCAA | 53    | 1     |
| >CHEK2-P53(TTKRPVCAA  | 259   | >CHEK2-P53(TTKRLAVCAA | 225   | 34    |
| >CHEK2-P53(TTKRPVCAA  | 23    | >CHEK2-P53(TTKRLAVCAA | 31    | 8     |
| >CHEK2-P53(TTKRPVCAA  | 277   | >CHEK2-P53(TTKRLAVCAA | 498   | 221   |
| >CHEK2-P53(ETTKRPAV   | 31    | >CHEK2-P53(ETTKRLAV   | 19    | 12    |
| >CHEK2-P53(ETTKRPAVCA | 211   | >CHEK2-P53(ETTKRLAVCA | 322   | 111   |
| >CHEK2-P53(ETTKRPAVCA | 87    | >CHEK2-P53(ETTKRLAVCA | 88    | 1     |
| >CHEK2-P53(ETTKRPAV   | 26    | >CHEK2-P53(ETTKRLAV   | 44    | 18    |
| >CHEK2-P53(AETTKRPAV  | 226   | >CHEK2-P53(AETTKRLAV  | 148   | 78    |
| >CHEK2-P53(AETTKRPAV  | 254   | >CHEK2-P53(AETTKRLAV  | 200   | 54    |
| >CHEK2-P53(AETTKRPA   | 16    | >CHEK2-P53(AETTKRLA   | 38    | 22    |
| >CHEK2-P53(AETTKRPAV  | 26    | >CHEK2-P53(AETTKRLAV  | 53    | 27    |
| >CHEK2-P53(AETTKRPAVC | 11    | >CHEK2-P53(AETTKRLAVC | 10    | 1     |
| >CHEK2-P53(AETTKRPAV  | 16    | >CHEK2-P53(AETTKRLAV  | 42    | 26    |
| >CHEK2-P53(EGAETTKRPA | 493   | >CHEK2-P53(EGAETTKRLA | 263   | 230   |
| >CHEK2-P53(EGAETTKRPA | 154   | >CHEK2-P53(EGAETTKRLA | 353   | 199   |
| >CHEK2-P53(AEGAETTKRP | 382   | >CHEK2-P53(AEGAETTKRL | 1678  | 1296  |

|                        |       |                        |       |       |
|------------------------|-------|------------------------|-------|-------|
| >CHEK2-P53(AEGAETTKRP  | 11    | >CHEK2-P53(AEGAETTKRL  | 20    | 9     |
| >CHEK2-P53(AEGAETTKRP  | 16636 | >CHEK2-P53(AEGAETTKRL  | 38    | 16598 |
| >CHEK2-R34(RDLKPENV    | 328   | >CHEK2-R34(HDLKPENV    | 299   | 29    |
| >CHEK2-R34(HRDLKPENV   | 5452  | >CHEK2-R34(HHDLKPENV   | 426   | 5026  |
| >CHEK2-R34(HRDLKPENVL  | 1212  | >CHEK2-R34(HHDLKPENVL  | 75    | 1137  |
| >CHEK2-R34(HRDLKPENVL  | 2234  | >CHEK2-R34(HHDLKPENVL  | 119   | 2115  |
| >CHEK2-R34(HRDLKPENVL  | 54    | >CHEK2-R34(HHDLKPENVL  | 4712  | 4658  |
| >CHEK2-R34(HRDLKPENVL  | 83    | >CHEK2-R34(HHDLKPENVL  | 37    | 46    |
| >CHEK2-R34(HRDLKPENVL  | 151   | >CHEK2-R34(HHDLKPENVL  | 57    | 94    |
| >CHEK2-R34(HRDLKPENVL  | 267   | >CHEK2-R34(HHDLKPENVL  | 21247 | 20980 |
| >CHEK2-R34(HRDLKPENVL  | 242   | >CHEK2-R34(HHDLKPENVL  | 20571 | 20329 |
| >CHEK2-R34(QYLHENGIIHI | 350   | >CHEK2-R34(QYLHENGIIHI | 11292 | 10942 |
| >CHEK2-R34(QYLHENGIIHI | 144   | >CHEK2-R34(QYLHENGIIHI | 22342 | 22198 |
| >CHEK2-R34(QYLHENGIIHI | 17    | >CHEK2-R34(QYLHENGIIHI | 3693  | 3676  |
| >CHEK2-R34(IHRDLKPENV  | 972   | >CHEK2-R34(IHHDLPKENV  | 317   | 655   |
| >CHEK2-R34(IHRDLKPENV  | 3035  | >CHEK2-R34(IHHDLPKENV  | 185   | 2850  |
| >CHEK2-R34(IIHRDLKPENV | 69    | >CHEK2-R34(IIHHDLPKENV | 30    | 39    |
| >CHEK2-R34(IIHRDLKPENV | 71    | >CHEK2-R34(IIHHDLPKENV | 81    | 10    |
| >CHEK2-R34(IIHRDLKPENV | 38    | >CHEK2-R34(IIHHDLPKENV | 70    | 32    |
| >CHEK2-R34(GIIHRDLK    | 47    | >CHEK2-R34(GIIHHDK     | 46    | 1     |
| >CHEK2-R34(HENGIIHRDL  | 358   | >CHEK2-R34(HENGIIHHDL  | 269   | 89    |
| >CHEK2-R34(HENGIIHRDL  | 242   | >CHEK2-R34(HENGIIHHDL  | 90    | 152   |
| >CHEK2-R34(HENGIIHR    | 59    | >CHEK2-R34(HENGIIHH    | 23937 | 23878 |
| >CHEK2-R34(YLHENGIIHR  | 255   | >CHEK2-R34(YLHENGIIHH  | 514   | 259   |
| >CHEK2-R34(YLHENGIIHRI | 88    | >CHEK2-R34(YLHENGIIHHI | 124   | 36    |
| >CHEK2-R34(YLHENGIIHR  | 141   | >CHEK2-R34(YLHENGIIHH  | 426   | 285   |
| >CHEK2-R34(YLHENGIIHRI | 76    | >CHEK2-R34(YLHENGIIHHI | 108   | 32    |
| >CHEK2-R34(YLHENGIIHR  | 211   | >CHEK2-R34(YLHENGIIHH  | 19071 | 18860 |
| >CHEK2-R34(YLHENGIIHR  | 156   | >CHEK2-R34(YLHENGIIHH  | 25926 | 25770 |
| >CHN1-R12T·RPPVWKSYS   | 1572  | >CHN1-R12T·TPPVWKSYS   | 340   | 1232  |
| >CHN1-R12T·RPPVWKSYSL  | 239   | >CHN1-R12T·TPPVWKSYSL  | 57    | 182   |
| >CHN1-R12T·RPPVWKSYSLY | 1982  | >CHN1-R12T·TPPVWKSYSLY | 407   | 1575  |
| >CHN1-R12T·RPPVWKSYSL  | 264   | >CHN1-R12T·TPPVWKSYSL  | 173   | 91    |
| >CHN1-R12T·RPPVWKSYSLY | 198   | >CHN1-R12T·TPPVWKSYSLY | 733   | 535   |
| >CHN1-R12T·RPPVWKSYSL  | 73    | >CHN1-R12T·TPPVWKSYSL  | 3498  | 3425  |
| >CHN1-R12T·RPPVWKSYS   | 663   | >CHN1-R12T·TPPVWKSYS   | 266   | 397   |
| >CHN1-R12T·RPPVWKSYSL  | 318   | >CHN1-R12T·TPPVWKSYSL  | 331   | 13    |
| >CHN1-R12T·YRPPVWKSYSL | 14081 | >CHN1-R12T·YTPPVWKSYSL | 167   | 13914 |
| >CHN1-R12T·YRPPVWKSYSL | 7059  | >CHN1-R12T·YTPPVWKSYSL | 238   | 6821  |
| >CHN1-R12T·YRPPVWKSYSL | 4885  | >CHN1-R12T·YTPPVWKSYSL | 171   | 4714  |
| >CHN1-R12T·YRPPVWKSYSL | 2950  | >CHN1-R12T·YTPPVWKSYSL | 27    | 2923  |
| >CHN1-R12T·YRPPVWKSYSL | 11653 | >CHN1-R12T·YTPPVWKSYSL | 403   | 11250 |
| >CHN1-R12T·YRPPVWKSYSL | 5643  | >CHN1-R12T·YTPPVWKSYSL | 253   | 5390  |

|                        |       |                       |       |       |
|------------------------|-------|-----------------------|-------|-------|
| >CHN1-R12T·YRPPVWKSYL  | 7192  | >CHN1-R12T·YTPPVWKSYL | 353   | 6839  |
| >CHN1-R12T·YRPPVWKS    | 5310  | >CHN1-R12T·YTPPVWKS   | 15    | 5295  |
| >CHN1-R12T·YRPPVWKSYL  | 14547 | >CHN1-R12T·YTPPVWKSYL | 165   | 14382 |
| >CHN1-R12T·YRPPVWKS    | 17793 | >CHN1-R12T·YTPPVWKS   | 86    | 17707 |
| >CHN1-R12T·YRPPVWKSYL  | 15305 | >CHN1-R12T·YTPPVWKSYL | 136   | 15169 |
| >CHN1-R12T·YRPPVWKS    | 25722 | >CHN1-R12T·YTPPVWKS   | 220   | 25502 |
| >CHN1-R12T·YRPPVWKS    | 2974  | >CHN1-R12T·YTPPVWKS   | 64    | 2910  |
| >CHN1-R12T·YRPPVWKSYL  | 96    | >CHN1-R12T·YTPPVWKSYL | 11    | 85    |
| >CHN1-R12T·YRPPVWKSYL  | 2147  | >CHN1-R12T·YTPPVWKSYL | 292   | 1855  |
| >CHN1-R12T·YRPPVWKSYL  | 19400 | >CHN1-R12T·YTPPVWKSYL | 210   | 19190 |
| >CHN1-R12T·YRPPVWKS    | 18432 | >CHN1-R12T·YTPPVWKS   | 349   | 18083 |
| >CHN1-R12T·YRPPVWKSYL  | 23157 | >CHN1-R12T·YTPPVWKSYL | 329   | 22828 |
| >CHN1-R12T·YRPPVWKSYL  | 1669  | >CHN1-R12T·YTPPVWKSYL | 149   | 1520  |
| >CHN1-R12T·YRPPVWKS    | 11495 | >CHN1-R12T·YTPPVWKS   | 259   | 11236 |
| >CHN1-R12T·YRPPVWKS    | 778   | >CHN1-R12T·YTPPVWKS   | 373   | 405   |
| >CHN1-R12T·YRPPVWKS    | 209   | >CHN1-R12T·YTPPVWKS   | 810   | 601   |
| >CHN1-R12T·YRPPVWKS    | 22173 | >CHN1-R12T·YTPPVWKS   | 17    | 22156 |
| >CHN1-R12T·YRPPVWKSYL  | 26226 | >CHN1-R12T·YTPPVWKSYL | 187   | 26039 |
| >CHN1-R12T·YRPPVWKSYL  | 23248 | >CHN1-R12T·YTPPVWKSYL | 23    | 23225 |
| >CHN1-R12T·YRPPVWKSYL  | 371   | >CHN1-R12T·YTPPVWKSYL | 26579 | 26208 |
| >CHN1-R12T·YRPPVWKS    | 26017 | >CHN1-R12T·YTPPVWKS   | 24    | 25993 |
| >CHN1-R12T·YRPPVWKSYL  | 591   | >CHN1-R12T·YTPPVWKSYL | 2     | 589   |
| >CHN1-R12T·YRPPVWKSYL  | 6197  | >CHN1-R12T·YTPPVWKSYL | 4     | 6193  |
| >CHN1-R12T·YRPPVWKS    | 6275  | >CHN1-R12T·YTPPVWKS   | 54    | 6221  |
| >CHN1-R12T·YRPPVWKSYL  | 16861 | >CHN1-R12T·YTPPVWKSYL | 123   | 16738 |
| >CHN1-R12T·YRPPVWKSYL  | 5064  | >CHN1-R12T·YTPPVWKSYL | 41    | 5023  |
| >CHN1-R12T·YRPPVWKSYL  | 380   | >CHN1-R12T·YTPPVWKSYL | 24240 | 23860 |
| >CHN1-R12T·YRPPVWKSYL  | 771   | >CHN1-R12T·YTPPVWKSYL | 130   | 641   |
| >CHN1-R12T·YRPPVWKSYL  | 16256 | >CHN1-R12T·YTPPVWKSYL | 167   | 16089 |
| >CHN1-R12T·ALTLFDTDEYI | 9877  | >CHN1-R12T·ALTLFDTDEY | 223   | 9654  |
| >CHN1-R12T·ALTLFDTDEYI | 123   | >CHN1-R12T·ALTLFDTDEY | 19458 | 19335 |
| >CHN1-R12T·ALTLFDTDEYI | 154   | >CHN1-R12T·ALTLFDTDEY | 34347 | 34193 |
| >CHN1-R12T·ALTLFDTDEYI | 229   | >CHN1-R12T·ALTLFDTDEY | 32881 | 32652 |
| >CHN1-R12T·EYRPPVWKS\  | 114   | >CHN1-R12T·EYTPPVWKS  | 52    | 62    |
| >CHN1-R12T·EYRPPVWKS\  | 406   | >CHN1-R12T·EYTPPVWKS  | 220   | 186   |
| >CHN1-R12T·EYRPPVWKS\  | 218   | >CHN1-R12T·EYTPPVWKS  | 145   | 73    |
| >CHN1-R12T·EYRPPVWKS\  | 895   | >CHN1-R12T·EYTPPVWKS  | 354   | 541   |
| >CHN1-R12T·EYRPPVWK    | 269   | >CHN1-R12T·EYTPPVWK   | 13622 | 13353 |
| >CHN1-R12T·EYRPPVWKS\  | 390   | >CHN1-R12T·EYTPPVWKS  | 305   | 85    |
| >CHN1-R12T·EYRPPVWK    | 199   | >CHN1-R12T·EYTPPVWK   | 489   | 290   |
| >CHN1-R12T·EYRPPVWK    | 1136  | >CHN1-R12T·EYTPPVWK   | 165   | 971   |
| >CHN1-R12T·EYRPPVWK    | 406   | >CHN1-R12T·EYTPPVWK   | 262   | 144   |
| >CHN1-R12T·EYRPPVWKS\  | 473   | >CHN1-R12T·EYTPPVWKS  | 319   | 154   |

|                        |       |                        |       |       |
|------------------------|-------|------------------------|-------|-------|
| >CHN1-R12T·EYRPPVWKS\  | 283   | >CHN1-R12T·EYTPPVWKS\  | 194   | 89    |
| >CHN1-R12T·DEYRPPVWK:  | 431   | >CHN1-R12T·DEYTPPVWK:  | 364   | 67    |
| >CHN1-R12T·DEYRPPVW    | 66    | >CHN1-R12T·DEYTPPVW    | 34    | 32    |
| >CHN1-R12T·DEYRPPVWK:  | 11    | >CHN1-R12T·DEYTPPVWK:  | 8     | 3     |
| >CHN1-R12T·DEYRPPVW    | 184   | >CHN1-R12T·DEYTPPVW    | 135   | 49    |
| >CHN1-R12T·DEYRPPVWK:  | 533   | >CHN1-R12T·DEYTPPVWK:  | 376   | 157   |
| >CHN1-R12T·DEYRPPVW    | 142   | >CHN1-R12T·DEYTPPVW    | 138   | 4     |
| >CHN1-R12T·DEYRPPVWK:  | 142   | >CHN1-R12T·DEYTPPVWK:  | 165   | 23    |
| >CHN1-R12T·TDEYRPPV    | 1162  | >CHN1-R12T·TDEYTPPV    | 295   | 867   |
| >CHN1-R12T·DTDEYRPPV   | 2530  | >CHN1-R12T·DTDEYTPPV   | 470   | 2060  |
| >CHN1-R12T·DTDEYRPPV   | 1771  | >CHN1-R12T·DTDEYTPPV   | 224   | 1547  |
| >CHN1-R12T·DTDEYRPPV   | 706   | >CHN1-R12T·DTDEYTPPV   | 53    | 653   |
| >CHN1-R12T·DTDEYRPPV   | 1389  | >CHN1-R12T·DTDEYTPPV   | 101   | 1288  |
| >CHN1-R12T·DTDEYRPPV   | 8437  | >CHN1-R12T·DTDEYTPPV   | 309   | 8128  |
| >CHN1-R12T·DTDEYRPPVV  | 87    | >CHN1-R12T·DTDEYTPPVV  | 74    | 13    |
| >CHN1-R12T·DTDEYRPPV   | 230   | >CHN1-R12T·DTDEYTPPV   | 131   | 99    |
| >CHN1-R12T·DTDEYRPPV   | 3     | >CHN1-R12T·DTDEYTPPV   | 2     | 1     |
| >CHN1-R12T·DTDEYRPPVV  | 844   | >CHN1-R12T·DTDEYTPPVV  | 411   | 433   |
| >CHN1-R12T·DTDEYRPPVV  | 1593  | >CHN1-R12T·DTDEYTPPVV  | 424   | 1169  |
| >CHN1-R12T·FDTDEYRPPV  | 994   | >CHN1-R12T·FDTDEYTPPV  | 317   | 677   |
| >CHN1-R12T·FDTDEYRPPV  | 839   | >CHN1-R12T·FDTDEYTPPV  | 367   | 472   |
| >CHN1-R12T·FDTDEYRPPV  | 393   | >CHN1-R12T·FDTDEYTPPV  | 355   | 38    |
| >CHN1-R12T·FDTDEYRPPV  | 239   | >CHN1-R12T·FDTDEYTPPV  | 82    | 157   |
| >CHN1-R12T·LFDTDEYR    | 132   | >CHN1-R12T·LFDTDEYT    | 32109 | 31977 |
| >CHN1-R12T·TLFDTDEYR   | 15187 | >CHN1-R12T·TLFDTDEYT   | 176   | 15011 |
| >CHN1-R12T·TLFDTDEYR   | 1699  | >CHN1-R12T·TLFDTDEYT   | 85    | 1614  |
| >CHN1-R12T·TLFDTDEYRPI | 1718  | >CHN1-R12T·TLFDTDEYTPI | 362   | 1356  |
| >CHN1-R12T·TLFDTDEYR   | 9048  | >CHN1-R12T·TLFDTDEYT   | 305   | 8743  |
| >CHN1-R12T·TLFDTDEYR   | 1586  | >CHN1-R12T·TLFDTDEYT   | 19    | 1567  |
| >CHN1-R12T·TLFDTDEYR   | 10856 | >CHN1-R12T·TLFDTDEYT   | 223   | 10633 |
| >CHN1-R12T·TLFDTDEYR   | 7753  | >CHN1-R12T·TLFDTDEYT   | 77    | 7676  |
| >CHN1-R12T·TLFDTDEYR   | 16513 | >CHN1-R12T·TLFDTDEYT   | 484   | 16029 |
| >CHN1-R12T·TLFDTDEYR   | 2562  | >CHN1-R12T·TLFDTDEYT   | 30    | 2532  |
| >CHN1-R12T·TLFDTDEYR   | 344   | >CHN1-R12T·TLFDTDEYT   | 22126 | 21782 |
| >CHN1-R12T·TLFDTDEYR   | 26    | >CHN1-R12T·TLFDTDEYT   | 17596 | 17570 |
| >CHN1-R12T·TLFDTDEYR   | 139   | >CHN1-R12T·TLFDTDEYT   | 24373 | 24234 |
| >CHN1-R12T·TLFDTDEYR   | 5     | >CHN1-R12T·TLFDTDEYT   | 6533  | 6528  |
| >CHN1-R12T·TLFDTDEYR   | 26    | >CHN1-R12T·TLFDTDEYT   | 19809 | 19783 |
| >CHN1-R12T·LTLFDTDEYR  | 5982  | >CHN1-R12T·LTLFDTDEYT  | 322   | 5660  |
| >CHN1-R12T·LTLFDTDEYR  | 78    | >CHN1-R12T·LTLFDTDEYT  | 28485 | 28407 |
| >CHN1-R12T·LTLFDTDEYR  | 71    | >CHN1-R12T·LTLFDTDEYT  | 21234 | 21163 |
| >CHN1-R12T·LTLFDTDEYR  | 340   | >CHN1-R12T·LTLFDTDEYT  | 24215 | 23875 |
| >CHN1-R12T·LTLFDTDEYR  | 8     | >CHN1-R12T·LTLFDTDEYT  | 16684 | 16676 |

|                       |       |                       |       |       |
|-----------------------|-------|-----------------------|-------|-------|
| >CHN1-R12T·LTLFDTDEYR | 385   | >CHN1-R12T·LTLFDTDEYT | 32464 | 32079 |
| >CHN1-R395 RYLMAHLK   | 141   | >CHN1-R395 QYLMAHLK   | 634   | 493   |
| >CHN1-R395 RYLMAHLK   | 305   | >CHN1-R395 QYLMAHLK   | 705   | 400   |
| >CHN1-R395 RYLMAHLK   | 215   | >CHN1-R395 QYLMAHLK   | 1391  | 1176  |
| >CHN1-R395 RYLMAHLKR  | 241   | >CHN1-R395 QYLMAHLKR  | 1217  | 976   |
| >CHN1-R395 RYLMAHLKR\ | 40    | >CHN1-R395 QYLMAHLKR' | 289   | 249   |
| >CHN1-R395 RYLMAHLKR\ | 397   | >CHN1-R395 QYLMAHLKR' | 2350  | 1953  |
| >CHN1-R395 RYLMAHLK   | 5     | >CHN1-R395 QYLMAHLK   | 47    | 42    |
| >CHN1-R395 RYLMAHLKR  | 25    | >CHN1-R395 QYLMAHLKR  | 1520  | 1495  |
| >CHN1-R395 RYLMAHLKR\ | 78    | >CHN1-R395 QYLMAHLKR' | 2651  | 2573  |
| >CHN1-R395 RYLMAHLK   | 44    | >CHN1-R395 QYLMAHLK   | 1194  | 1150  |
| >CHN1-R395 RYLMAHLKR  | 11    | >CHN1-R395 QYLMAHLKR  | 147   | 136   |
| >CHN1-R395 RYLMAHLKR  | 693   | >CHN1-R395 QYLMAHLKR  | 214   | 479   |
| >CHN1-R395 RYLMAHLK   | 24    | >CHN1-R395 QYLMAHLK   | 54    | 30    |
| >CHN1-R395 RYLMAHLKR  | 10    | >CHN1-R395 QYLMAHLKR  | 13    | 3     |
| >CHN1-R395 LRYLMAHL   | 204   | >CHN1-R395 LQYLMAHL   | 36    | 168   |
| >CHN1-R395 LRYLMAHLKF | 355   | >CHN1-R395 LQYLMAHLKF | 150   | 205   |
| >CHN1-R395 LRYLMAHL   | 4382  | >CHN1-R395 LQYLMAHL   | 177   | 4205  |
| >CHN1-R395 LRYLMAHLKF | 6611  | >CHN1-R395 LQYLMAHLKF | 413   | 6198  |
| >CHN1-R395 LRYLMAHL   | 12673 | >CHN1-R395 LQYLMAHL   | 150   | 12523 |
| >CHN1-R395 LRYLMAHLKF | 6741  | >CHN1-R395 LQYLMAHLKF | 32    | 6709  |
| >CHN1-R395 LRYLMAHL   | 12342 | >CHN1-R395 LQYLMAHL   | 23    | 12319 |
| >CHN1-R395 LRYLMAHLKF | 12938 | >CHN1-R395 LQYLMAHLKF | 32    | 12906 |
| >CHN1-R395 LRYLMAHLKF | 6452  | >CHN1-R395 LQYLMAHLKF | 133   | 6319  |
| >CHN1-R395 LRYLMAHLKF | 3503  | >CHN1-R395 LQYLMAHLKF | 235   | 3268  |
| >CHN1-R395 LRYLMAHLK  | 11365 | >CHN1-R395 LQYLMAHLK  | 79    | 11286 |
| >CHN1-R395 LRYLMAHLK  | 3719  | >CHN1-R395 LQYLMAHLK  | 20    | 3699  |
| >CHN1-R395 LRYLMAHLKF | 9899  | >CHN1-R395 LQYLMAHLKF | 362   | 9537  |
| >CHN1-R395 LRYLMAHLK  | 16593 | >CHN1-R395 LQYLMAHLK  | 468   | 16125 |
| >CHN1-R395 LRYLMAHLKF | 83    | >CHN1-R395 LQYLMAHLKF | 24    | 59    |
| >CHN1-R395 LRYLMAHLKF | 124   | >CHN1-R395 LQYLMAHLKF | 113   | 11    |
| >CHN1-R395 LRYLMAHLK  | 1110  | >CHN1-R395 LQYLMAHLK  | 331   | 779   |
| >CHN1-R395 LRYLMAHL   | 15423 | >CHN1-R395 LQYLMAHL   | 93    | 15330 |
| >CHN1-R395 LRYLMAHL   | 441   | >CHN1-R395 LQYLMAHL   | 56    | 385   |
| >CHN1-R395 LRYLMAHLKF | 1382  | >CHN1-R395 LQYLMAHLKF | 338   | 1044  |
| >CHN1-R395 LRYLMAHL   | 53    | >CHN1-R395 LQYLMAHL   | 1624  | 1571  |
| >CHN1-R395 LRYLMAHLK  | 21    | >CHN1-R395 LQYLMAHLK  | 403   | 382   |
| >CHN1-R395 LRYLMAHLKF | 31    | >CHN1-R395 LQYLMAHLKF | 2802  | 2771  |
| >CHN1-R395 LRYLMAHLKF | 121   | >CHN1-R395 LQYLMAHLKF | 3548  | 3427  |
| >CHN1-R395 LRYLMAHL   | 10832 | >CHN1-R395 LQYLMAHL   | 393   | 10439 |
| >CHN1-R395 LRYLMAHL   | 5880  | >CHN1-R395 LQYLMAHL   | 370   | 5510  |
| >CHN1-R395 LRYLMAHL   | 400   | >CHN1-R395 LQYLMAHL   | 7043  | 6643  |
| >CHN1-R395 LRYLMAHL   | 181   | >CHN1-R395 LQYLMAHL   | 2239  | 2058  |

|                        |      |                        |       |       |
|------------------------|------|------------------------|-------|-------|
| >CHN1-R395 LRYLMAHLK   | 20   | >CHN1-R395 LQYLMAHLK   | 733   | 713   |
| >CHN1-R395 LRYLMAHLKF  | 341  | >CHN1-R395 LQYLMAHLKF  | 10248 | 9907  |
| >CHN1-R395 LRYLMAHLKF  | 123  | >CHN1-R395 LQYLMAHLKF  | 5005  | 4882  |
| >CHN1-R395 LRYLMAHLKF  | 231  | >CHN1-R395 LQYLMAHLKF  | 133   | 98    |
| >CHN1-R395 LLPPAHCETLF | 1910 | >CHN1-R395 LLPPAHCETLF | 46    | 1864  |
| >CHN1-R395 LLPPAHCETLF | 359  | >CHN1-R395 LLPPAHCETLF | 21655 | 21296 |
| >CHN1-R395 TLRYLMAHL   | 3130 | >CHN1-R395 TLQYLMAHL   | 121   | 3009  |
| >CHN1-R395 TLRYLMAHL   | 154  | >CHN1-R395 TLQYLMAHL   | 29    | 125   |
| >CHN1-R395 TLRYLMAHL   | 73   | >CHN1-R395 TLQYLMAHL   | 128   | 55    |
| >CHN1-R395 TLRYLMAHL   | 2039 | >CHN1-R395 TLQYLMAHL   | 86    | 1953  |
| >CHN1-R395 TLRYLMAHL   | 223  | >CHN1-R395 TLQYLMAHL   | 96    | 127   |
| >CHN1-R395 TLRYLMAHLK  | 25   | >CHN1-R395 TLQYLMAHLK  | 29    | 4     |
| >CHN1-R395 TLRYLMAHLK  | 499  | >CHN1-R395 TLQYLMAHLK  | 3177  | 2678  |
| >CHN1-R395 TLRYLMAHLK  | 133  | >CHN1-R395 TLQYLMAHLK  | 47    | 86    |
| >CHN1-R395 TLRYLMAHL   | 456  | >CHN1-R395 TLQYLMAHL   | 13202 | 12746 |
| >CHN1-R395 TLRYLMAHLK  | 14   | >CHN1-R395 TLQYLMAHLK  | 4002  | 3988  |
| >CHN1-R395 TLRYLMAHLK  | 344  | >CHN1-R395 TLQYLMAHLK  | 564   | 220   |
| >CHN1-R395 TLRYLMAHLK  | 29   | >CHN1-R395 TLQYLMAHLK  | 47    | 18    |
| >CHN1-R395 TLRYLMAHLK  | 86   | >CHN1-R395 TLQYLMAHLK  | 216   | 130   |
| >CHN1-R395 TLRYLMAHLK  | 206  | >CHN1-R395 TLQYLMAHLK  | 176   | 30    |
| >CHN1-R395 TLRYLMAHLK  | 275  | >CHN1-R395 TLQYLMAHLK  | 155   | 120   |
| >CHN1-R395 TLRYLMAHL   | 403  | >CHN1-R395 TLQYLMAHL   | 3877  | 3474  |
| >CHN1-R395 TLRYLMAHL   | 305  | >CHN1-R395 TLQYLMAHL   | 730   | 425   |
| >CHN1-R395 TLRYLMAHLK  | 277  | >CHN1-R395 TLQYLMAHLK  | 339   | 62    |
| >CHN1-R395 TLRYLMAHLK  | 416  | >CHN1-R395 TLQYLMAHLK  | 383   | 33    |
| >CHN1-R395 ETLRYLMAHL  | 48   | >CHN1-R395 ETLQYLMAHI  | 72    | 24    |
| >CHN1-R395 ETLRYLMAH   | 579  | >CHN1-R395 ETLQYLMAH   | 116   | 463   |
| >CHN1-R395 ETLRYLMAHL  | 625  | >CHN1-R395 ETLQYLMAHI  | 188   | 437   |
| >CHN1-R395 ETLRYLMAH   | 19   | >CHN1-R395 ETLQYLMAH   | 17    | 2     |
| >CHN1-R395 ETLRYLMAHL  | 3    | >CHN1-R395 ETLQYLMAHI  | 3     | 0     |
| >CHN1-R395 ETLRYLMAH   | 446  | >CHN1-R395 ETLQYLMAH   | 61    | 385   |
| >CHN1-R395 ETLRYLMAHL  | 217  | >CHN1-R395 ETLQYLMAHI  | 49    | 168   |
| >CHN1-R395 ETLRYLMAHL  | 311  | >CHN1-R395 ETLQYLMAHI  | 387   | 76    |
| >CHN1-R395 ETLRYLMAHL  | 6    | >CHN1-R395 ETLQYLMAHI  | 5     | 1     |
| >CHN1-R395 ETLRYLMAHL  | 86   | >CHN1-R395 ETLQYLMAHI  | 104   | 18    |
| >CHN1-R395 ETLRYLMA    | 15   | >CHN1-R395 ETLQYLMA    | 10    | 5     |
| >CHN1-R395 ETLRYLMAHL  | 7    | >CHN1-R395 ETLQYLMAHI  | 6     | 1     |
| >CHN1-R395 ETLRYLMAHL  | 787  | >CHN1-R395 ETLQYLMAHI  | 461   | 326   |
| >CHN1-R395 ETLRYLMAHL  | 53   | >CHN1-R395 ETLQYLMAHI  | 21    | 32    |
| >CHN1-R395 ETLRYLMAHL  | 259  | >CHN1-R395 ETLQYLMAHI  | 224   | 35    |
| >CHN1-R395 CETLRYLM    | 254  | >CHN1-R395 CETLQYLM    | 84    | 170   |
| >CHN1-R395 CETLRYLMAH  | 476  | >CHN1-R395 CETLQYLMAH  | 733   | 257   |
| >CHN1-R395 CETLRYLMAH  | 327  | >CHN1-R395 CETLQYLMAH  | 205   | 122   |

|                        |      |                        |      |      |
|------------------------|------|------------------------|------|------|
| >CHN1-R395 CETLRYLM    | 342  | >CHN1-R395 CETLQYLM    | 187  | 155  |
| >CHN1-R395 CETLRYLMA   | 538  | >CHN1-R395 CETLQYLMA   | 210  | 328  |
| >CHN1-R395 CETLRYLMA   | 74   | >CHN1-R395 CETLQYLMA   | 77   | 3    |
| >CHN1-R395 CETLRYLM    | 775  | >CHN1-R395 CETLQYLM    | 460  | 315  |
| >CHN1-R395 CETLRYLMAF  | 214  | >CHN1-R395 CETLQYLMAF  | 193  | 21   |
| >CHN1-R395 AHCETLRY    | 673  | >CHN1-R395 AHCETLQY    | 440  | 233  |
| >CHN1-R395 AHCETLRY    | 296  | >CHN1-R395 AHCETLQY    | 418  | 122  |
| >CHN1-R395 AHCETLRYL   | 2129 | >CHN1-R395 AHCETLQYL   | 470  | 1659 |
| >CHN1-R395 AHCETLRYLM  | 426  | >CHN1-R395 AHCETLQYLM  | 313  | 113  |
| >CHN1-R395 AHCETLRYL   | 907  | >CHN1-R395 AHCETLQYL   | 497  | 410  |
| >CHN1-R395 PAHCETLRY   | 222  | >CHN1-R395 PAHCETLQY   | 135  | 87   |
| >CHN1-R395 PAHCETLRY   | 286  | >CHN1-R395 PAHCETLQY   | 611  | 325  |
| >CHN1-R395 PPAHCETLRY  | 1131 | >CHN1-R395 PPAHCETLQY  | 249  | 882  |
| >CHN1-R395 PPAHCETLRY  | 401  | >CHN1-R395 PPAHCETLQY  | 780  | 379  |
| >CHN1-R395 LPPAHCETLR' | 27   | >CHN1-R395 LPPAHCETLQ  | 25   | 2    |
| >CHN1-R395 LPPAHCETLR' | 282  | >CHN1-R395 LPPAHCETLQ  | 281  | 1    |
| >CHN1-R395 LPPAHCETLR' | 858  | >CHN1-R395 LPPAHCETLQ  | 426  | 432  |
| >CHN1-Y70N YLIREQRQ    | 13   | >CHN1-Y70N NLIREQRQ    | 1604 | 1591 |
| >CHN1-Y70N YLIREQR     | 51   | >CHN1-Y70N NLIREQR     | 105  | 54   |
| >CHN1-Y70N SYLIREQR    | 56   | >CHN1-Y70N SNLIREQR    | 1960 | 1904 |
| >CHN1-Y70N SYLIREQR    | 107  | >CHN1-Y70N SNLIREQR    | 9748 | 9641 |
| >CHN1-Y70N SYLIREQR    | 130  | >CHN1-Y70N SNLIREQR    | 4547 | 4417 |
| >CHN1-Y70N DQLLIVAEGS' | 93   | >CHN1-Y70N DQLLIVAEGSI | 9417 | 9324 |
| >CHN1-Y70N GSYLIREQR   | 65   | >CHN1-Y70N GSNLIREQR   | 222  | 157  |
| >CHN1-Y70N GSYLIREQR   | 144  | >CHN1-Y70N GSNLIREQR   | 1721 | 1577 |
| >CHN1-Y70N EGSYLIRESQF | 42   | >CHN1-Y70N EGSNLIRESQI | 78   | 36   |
| >CHN1-Y70N AEGSYLIR    | 380  | >CHN1-Y70N AEGSNLIR    | 1240 | 860  |
| >CHN1-Y70N AEGSYLIRE   | 192  | >CHN1-Y70N AEGSNLIRE   | 786  | 594  |
| >CHN1-Y70N AEGSYLIRE   | 433  | >CHN1-Y70N AEGSNLIRE   | 442  | 9    |
| >CHN1-Y70N AEGSYLIRESC | 275  | >CHN1-Y70N AEGSNLIRESC | 685  | 410  |
| >CHN1-Y70N IVAEGSYL    | 204  | >CHN1-Y70N IVAEGSNL    | 1523 | 1319 |
| >CHN1-Y70N IVAEGSYLI   | 26   | >CHN1-Y70N IVAEGSNLI   | 359  | 333  |
| >CHN1-Y70N IVAEGSYL    | 13   | >CHN1-Y70N IVAEGSNL    | 61   | 48   |
| >CHN1-Y70N IVAEGSYLI   | 13   | >CHN1-Y70N IVAEGSNLI   | 31   | 18   |
| >CHN1-Y70N IVAEGSYL    | 49   | >CHN1-Y70N IVAEGSNL    | 90   | 41   |
| >CHN1-Y70N IVAEGSYLI   | 35   | >CHN1-Y70N IVAEGSNLI   | 29   | 6    |
| >CHN1-Y70N IVAEGSYL    | 24   | >CHN1-Y70N IVAEGSNL    | 218  | 194  |
| >CHN1-Y70N IVAEGSYLI   | 10   | >CHN1-Y70N IVAEGSNLI   | 21   | 11   |
| >CHN1-Y70N IVAEGSYL    | 58   | >CHN1-Y70N IVAEGSNL    | 816  | 758  |
| >CHN1-Y70N IVAEGSYLI   | 66   | >CHN1-Y70N IVAEGSNLI   | 862  | 796  |
| >CHN1-Y70N IVAEGSYLI   | 212  | >CHN1-Y70N IVAEGSNLI   | 2296 | 2084 |
| >CHN1-Y70N IVAEGSYL    | 241  | >CHN1-Y70N IVAEGSNL    | 1334 | 1093 |
| >CHN1-Y70N IVAEGSYLI   | 194  | >CHN1-Y70N IVAEGSNLI   | 1295 | 1101 |



|                        |     |                        |       |       |
|------------------------|-----|------------------------|-------|-------|
| >CHN1-Y70N IVAEGSYL    | 90  | >CHN1-Y70N IVAEGSNL    | 1125  | 1035  |
| >CHN1-Y70N IVAEGSYLI   | 65  | >CHN1-Y70N IVAEGSNLI   | 1398  | 1333  |
| >CHN1-Y70N IVAEGSYL    | 44  | >CHN1-Y70N IVAEGSNL    | 140   | 96    |
| >CHN1-Y70N IVAEGSYLI   | 203 | >CHN1-Y70N IVAEGSNLI   | 686   | 483   |
| >CHN1-Y70N IVAEGSYLIR  | 228 | >CHN1-Y70N IVAEGSNLIR  | 389   | 161   |
| >CHN1-Y70N IVAEGSYLI   | 367 | >CHN1-Y70N IVAEGSNLI   | 3287  | 2920  |
| >CHN1-Y70N IVAEGSYLIR  | 28  | >CHN1-Y70N IVAEGSNLIR  | 21    | 7     |
| >CHN1-Y70N IVAEGSYL    | 94  | >CHN1-Y70N IVAEGSNL    | 348   | 254   |
| >CHN1-Y70N IVAEGSYLI   | 14  | >CHN1-Y70N IVAEGSNLI   | 34    | 20    |
| >CHN1-Y70N IVAEGSYL    | 415 | >CHN1-Y70N IVAEGSNL    | 1026  | 611   |
| >CHN1-Y70N IVAEGSYLI   | 87  | >CHN1-Y70N IVAEGSNLI   | 227   | 140   |
| >CHN1-Y70N IVAEGSYL    | 507 | >CHN1-Y70N IVAEGSNL    | 424   | 83    |
| >CHN1-Y70N IVAEGSYL    | 247 | >CHN1-Y70N IVAEGSNL    | 3967  | 3720  |
| >CHN1-Y70N IVAEGSYLIR  | 469 | >CHN1-Y70N IVAEGSNLIR  | 1106  | 637   |
| >CHN1-Y70N IVAEGSYLI   | 446 | >CHN1-Y70N IVAEGSNLI   | 545   | 99    |
| >CHN1-Y70N LIVAEGSYL   | 46  | >CHN1-Y70N LIVAEGSNL   | 186   | 140   |
| >CHN1-Y70N LIVAEGSYLI  | 103 | >CHN1-Y70N LIVAEGSNLI  | 394   | 291   |
| >CHN1-Y70N LIVAEGSYL   | 115 | >CHN1-Y70N LIVAEGSNL   | 231   | 116   |
| >CHN1-Y70N LIVAEGSYLI  | 245 | >CHN1-Y70N LIVAEGSNLI  | 218   | 27    |
| >CHN1-Y70N LIVAEGSYL   | 125 | >CHN1-Y70N LIVAEGSNL   | 2081  | 1956  |
| >CHN1-Y70N LIVAEGSYLI  | 141 | >CHN1-Y70N LIVAEGSNLI  | 883   | 742   |
| >CHN1-Y70N LIVAEGSYL   | 183 | >CHN1-Y70N LIVAEGSNL   | 2637  | 2454  |
| >CHN1-Y70N LIVAEGSYLI  | 271 | >CHN1-Y70N LIVAEGSNLI  | 1889  | 1618  |
| >CHN1-Y70N LIVAEGSYL   | 90  | >CHN1-Y70N LIVAEGSNL   | 286   | 196   |
| >CHN1-Y70N LIVAEGSYLI  | 471 | >CHN1-Y70N LIVAEGSNLI  | 1132  | 661   |
| >CHN1-Y70N LIVAEGSY    | 189 | >CHN1-Y70N LIVAEGSN    | 30897 | 30708 |
| >CHN1-Y70N LIVAEGSY    | 204 | >CHN1-Y70N LIVAEGSN    | 22570 | 22366 |
| >CHN1-Y70N LIVAEGSY    | 102 | >CHN1-Y70N LIVAEGSN    | 26123 | 26021 |
| >CHN1-Y70N LIVAEGSYLIR | 245 | >CHN1-Y70N LIVAEGSNLIR | 218   | 27    |
| >CHN1-Y70N LIVAEGSY    | 94  | >CHN1-Y70N LIVAEGSN    | 15249 | 15155 |
| >CHN1-Y70N LIVAEGSY    | 337 | >CHN1-Y70N LIVAEGSN    | 20894 | 20557 |
| >CHN1-Y70N LIVAEGSYLIR | 262 | >CHN1-Y70N LIVAEGSNLIR | 341   | 79    |
| >CHN1-Y70N LLIVAEGSYL  | 118 | >CHN1-Y70N LLIVAEGSNL  | 861   | 743   |
| >CHN1-Y70N LLIVAEGSYLI | 96  | >CHN1-Y70N LLIVAEGSNLI | 338   | 242   |
| >CHN1-Y70N LLIVAEGSYL  | 23  | >CHN1-Y70N LLIVAEGSNL  | 59    | 36    |
| >CHN1-Y70N LLIVAEGSYLI | 32  | >CHN1-Y70N LLIVAEGSNLI | 48    | 16    |
| >CHN1-Y70N LLIVAEGSYL  | 63  | >CHN1-Y70N LLIVAEGSNL  | 129   | 66    |
| >CHN1-Y70N LLIVAEGSYLI | 70  | >CHN1-Y70N LLIVAEGSNLI | 54    | 16    |
| >CHN1-Y70N LLIVAEGSYL  | 117 | >CHN1-Y70N LLIVAEGSNL  | 265   | 148   |
| >CHN1-Y70N LLIVAEGSYLI | 193 | >CHN1-Y70N LLIVAEGSNLI | 260   | 67    |
| >CHN1-Y70N LLIVAEGSYL  | 35  | >CHN1-Y70N LLIVAEGSNL  | 285   | 250   |
| >CHN1-Y70N LLIVAEGSYLI | 62  | >CHN1-Y70N LLIVAEGSNLI | 228   | 166   |
| >CHN1-Y70N LLIVAEGSYL  | 44  | >CHN1-Y70N LLIVAEGSNL  | 203   | 159   |

|                         |      |                         |       |       |
|-------------------------|------|-------------------------|-------|-------|
| >CHN1-Y70N LLIVAEGSYLI  | 39   | >CHN1-Y70N LLIVAEGSNLI  | 116   | 77    |
| >CHN1-Y70N LLIVAEGSYL   | 106  | >CHN1-Y70N LLIVAEGSNL   | 568   | 462   |
| >CHN1-Y70N LLIVAEGSYLI  | 153  | >CHN1-Y70N LLIVAEGSNLI  | 372   | 219   |
| >CHN1-Y70N LLIVAEGSYLI  | 483  | >CHN1-Y70N LLIVAEGSNLI  | 2251  | 1768  |
| >CHN1-Y70N LLIVAEGSYL   | 10   | >CHN1-Y70N LLIVAEGSNL   | 17    | 7     |
| >CHN1-Y70N LLIVAEGSYLI  | 27   | >CHN1-Y70N LLIVAEGSNLI  | 44    | 17    |
| >CHN1-Y70N LLIVAEGSY    | 191  | >CHN1-Y70N LLIVAEGSN    | 23786 | 23595 |
| >CHN1-Y70N LLIVAEGSY    | 32   | >CHN1-Y70N LLIVAEGSN    | 20096 | 20064 |
| >CHN1-Y70N LLIVAEGSY    | 68   | >CHN1-Y70N LLIVAEGSN    | 12386 | 12318 |
| >CHN1-Y70N LLIVAEGSY    | 251  | >CHN1-Y70N LLIVAEGSN    | 23143 | 22892 |
| >CHN1-Y70N LLIVAEGSY    | 493  | >CHN1-Y70N LLIVAEGSN    | 22914 | 22421 |
| >CHN1-Y70N QLLIVAEGSYL  | 109  | >CHN1-Y70N QLLIVAEGSNL  | 263   | 154   |
| >CHN1-Y70N QLLIVAEGSYL  | 231  | >CHN1-Y70N QLLIVAEGSNL  | 1180  | 949   |
| >CHN1-Y70N QLLIVAEGSYL  | 7    | >CHN1-Y70N QLLIVAEGSNL  | 42    | 35    |
| >CHN1-Y70N QLLIVAEGSYL  | 72   | >CHN1-Y70N QLLIVAEGSNL  | 385   | 313   |
| >CHN1-Y70N QLLIVAEGSYL  | 38   | >CHN1-Y70N QLLIVAEGSNL  | 111   | 73    |
| >CHN1-Y70N QLLIVAEGSYL  | 44   | >CHN1-Y70N QLLIVAEGSNL  | 304   | 260   |
| >CHN1-Y70N QLLIVAEGSYL  | 25   | >CHN1-Y70N QLLIVAEGSNL  | 58    | 33    |
| >CHN1-Y70N QLLIVAEGSY   | 96   | >CHN1-Y70N QLLIVAEGSN   | 23829 | 23733 |
| >CHN1-Y70N QLLIVAEGSY   | 407  | >CHN1-Y70N QLLIVAEGSN   | 24914 | 24507 |
| >CHN1-Y70N QLLIVAEGSY   | 183  | >CHN1-Y70N QLLIVAEGSN   | 22635 | 22452 |
| >CIC-A652T-l APSLAYGAPA | 88   | >CIC-A652T-r TPSLAYGAPA | 63    | 25    |
| >CIC-A652T-l APSLAYGAPA | 107  | >CIC-A652T-r TPSLAYGAPA | 755   | 648   |
| >CIC-A652T-l APSLAYGAPA | 783  | >CIC-A652T-r TPSLAYGAPA | 172   | 611   |
| >CIC-A652T-l APSLAYGA   | 888  | >CIC-A652T-r TPSLAYGA   | 379   | 509   |
| >CIC-A652T-l APSLAYGAPA | 92   | >CIC-A652T-r TPSLAYGAPA | 24    | 68    |
| >CIC-A652T-l APSLAYGAPA | 108  | >CIC-A652T-r TPSLAYGAPA | 40    | 68    |
| >CIC-A652T-l PAPSLAYGA  | 5212 | >CIC-A652T-r PTPSLAYGA  | 264   | 4948  |
| >CIC-A652T-l PAPSLAYGAP | 2939 | >CIC-A652T-r PTPSLAYGAP | 128   | 2811  |
| >CIC-A652T-l APAPSLAY   | 100  | >CIC-A652T-r APTPSLAY   | 600   | 500   |
| >CIC-A652T-l APAPSLAY   | 289  | >CIC-A652T-r APTPSLAY   | 698   | 409   |
| >CIC-A652T-l APAPSLAY   | 13   | >CIC-A652T-r APTPSLAY   | 17    | 4     |
| >CIC-A652T-l APAPSLAY   | 353  | >CIC-A652T-r APTPSLAY   | 269   | 84    |
| >CIC-A652T-l APAPSLAYGA | 214  | >CIC-A652T-r APTPSLAYGA | 174   | 40    |
| >CIC-A652T-l APAPSLAY   | 6    | >CIC-A652T-r APTPSLAY   | 10    | 4     |
| >CIC-A652T-l APAPSLAY   | 431  | >CIC-A652T-r APTPSLAY   | 561   | 130   |
| >CIC-A652T-l SAPAPSLAY  | 187  | >CIC-A652T-r SAPTPSLAY  | 223   | 36    |
| >CIC-A652T-l SAPAPSLAYG | 130  | >CIC-A652T-r SAPTPSLAYG | 206   | 76    |
| >CIC-A652T-l SAPAPSLAY  | 496  | >CIC-A652T-r SAPTPSLAY  | 1384  | 888   |
| >CIC-A652T-l SAPAPSLAY  | 133  | >CIC-A652T-r SAPTPSLAY  | 371   | 238   |
| >CIC-A652T-l SAPAPSLAY  | 135  | >CIC-A652T-r SAPTPSLAY  | 448   | 313   |
| >CIC-A652T-l SAPAPSLAY  | 230  | >CIC-A652T-r SAPTPSLAY  | 487   | 257   |
| >CIC-A652T-l SAPAPSLAY  | 65   | >CIC-A652T-r SAPTPSLAY  | 73    | 8     |

|                         |       |                          |       |       |
|-------------------------|-------|--------------------------|-------|-------|
| >CIC-A652T-\ SAPAPSLAY  | 166   | >CIC-A652T-r SAPTPSLAY   | 299   | 133   |
| >CIC-A652T-\ SAPAPSLAYG | 44    | >CIC-A652T-r SAPTPSLAYG  | 65    | 21    |
| >CIC-A652T-\ SAPAPSLAYG | 332   | >CIC-A652T-r SAPTPSLAYG  | 553   | 221   |
| >CIC-A652T-\ PSAPAPSLAY | 138   | >CIC-A652T-r PSAPTPSLAY  | 98    | 40    |
| >CIC-A652T-\ PSAPAPSLAY | 419   | >CIC-A652T-r PSAPTPSLAY  | 235   | 184   |
| >CIC-A652T-\ PSAPAPSLAY | 54    | >CIC-A652T-r PSAPTPSLAY  | 48    | 6     |
| >CIC-A652T-\ PSAPAPSLAY | 234   | >CIC-A652T-r PSAPTPSLAY  | 329   | 95    |
| >CIC-A652T-\ VPSAPAPSL  | 24    | >CIC-A652T-r VPSAPTPSL   | 46    | 22    |
| >CIC-A652T-\ VPSAPAPSLA | 484   | >CIC-A652T-r VPSAPTPSLA' | 484   | 0     |
| >CIC-A652T-\ VPSAPAPSL  | 47    | >CIC-A652T-r VPSAPTPSL   | 31    | 16    |
| >CIC-A652T-\ VPSAPAPSLA | 469   | >CIC-A652T-r VPSAPTPSLA' | 329   | 140   |
| >CIC-A652T-\ VPSAPAPSLA | 281   | >CIC-A652T-r VPSAPTPSLA' | 279   | 2     |
| >CIC-A652T-\ VPSAPAPSLA | 566   | >CIC-A652T-r VPSAPTPSLA' | 494   | 72    |
| >CIC-A652T-\ VPSAPAPS   | 744   | >CIC-A652T-r VPSAPTPS    | 458   | 286   |
| >CIC-A652T-\ VPSAPAPSL  | 457   | >CIC-A652T-r VPSAPTPSL   | 202   | 255   |
| >CIC-A652T-\ VPSAPAPSLA | 10    | >CIC-A652T-r VPSAPTPSLA' | 9     | 1     |
| >CIC-A652T-\ VPSAPAPSL  | 194   | >CIC-A652T-r VPSAPTPSL   | 287   | 93    |
| >CIC-A652T-\ VPSAPAPSLA | 124   | >CIC-A652T-r VPSAPTPSLA' | 118   | 6     |
| >CIC-A652T-\ VPSAPAPSLA | 102   | >CIC-A652T-r VPSAPTPSLA  | 108   | 6     |
| >CIC-A652T-\ VPSAPAPSLA | 16    | >CIC-A652T-r VPSAPTPSLA' | 12    | 4     |
| >CIC-A652T-\ RVPSAPAPSL | 613   | >CIC-A652T-r RVPSAPTPSL  | 290   | 323   |
| >CIC-A652T-\ RVPSAPAPSL | 198   | >CIC-A652T-r RVPSAPTPSL  | 211   | 13    |
| >CIC-A652T-\ RVPSAPAPSL | 333   | >CIC-A652T-r RVPSAPTPSL  | 665   | 332   |
| >CIC-A652T-\ RVPSAPAPSL | 207   | >CIC-A652T-r RVPSAPTPSL  | 95    | 112   |
| >CIC-A652T-\ RVPSAPAPSL | 403   | >CIC-A652T-r RVPSAPTPSL  | 502   | 99    |
| >CIC-A652T-\ RVPSAPAPSL | 16    | >CIC-A652T-r RVPSAPTPSL  | 25    | 9     |
| >CIC-A652T-\ ARVPSAPAPS | 67    | >CIC-A652T-r ARVPSAPTPS  | 65    | 2     |
| >CIC-A652T-\ ARVPSAPAPS | 30    | >CIC-A652T-r ARVPSAPTPS  | 37    | 7     |
| >CIC-A652T-\ ARVPSAPAPS | 75    | >CIC-A652T-r ARVPSAPTPS  | 63    | 12    |
| >CIC-A652T-\ GARVPSAPA  | 16    | >CIC-A652T-r GARVPSAPT   | 437   | 421   |
| >CIC-A652T-\ GARVPSAPAF | 169   | >CIC-A652T-r GARVPSAPTF  | 607   | 438   |
| >CIC-E104K-\ ESPGPGPPH  | 490   | >CIC-E104K-r KSPGPGPPH   | 18354 | 17864 |
| >CIC-E104K-\ ESPGPGPPHF | 55    | >CIC-E104K-r KSPGPGPPHF  | 5219  | 5164  |
| >CIC-E104K-\ ESPGPGPPHF | 99    | >CIC-E104K-r KSPGPGPPHF  | 2391  | 2292  |
| >CIC-E104K-\ ESPGPGPPHF | 5647  | >CIC-E104K-r KSPGPGPPHF  | 113   | 5534  |
| >CIC-E104K-\ ESPGPGPPHF | 42    | >CIC-E104K-r KSPGPGPPHF  | 4751  | 4709  |
| >CIC-E104K-\ ESPGPGPPHF | 216   | >CIC-E104K-r KSPGPGPPHF  | 11460 | 11244 |
| >CIC-E104K-\ ESPGPGPPHF | 2528  | >CIC-E104K-r KSPGPGPPHF  | 64    | 2464  |
| >CIC-E104K-\ ESPGPGPPHF | 10    | >CIC-E104K-r KSPGPGPPHF  | 3     | 7     |
| >CIC-E104K-\ CPESGPGPP  | 262   | >CIC-E104K-r CPKSPGPGPP  | 1237  | 975   |
| >CIC-E104K-\ RPPGATCPE  | 17833 | >CIC-E104K-r RPPGATCPK   | 197   | 17636 |
| >CIC-Q427H- QRAASEDM    | 487   | >CIC-Q427H- HRAASEDM     | 532   | 45    |
| >CIC-Q427H- QRAASEDM    | 3563  | >CIC-Q427H- HRAASEDM     | 436   | 3127  |

|                        |       |                           |       |       |
|------------------------|-------|---------------------------|-------|-------|
| >CIC-Q427H- SQRAASEDM  | 54    | >CIC-Q427H- SHRAASEDM     | 13200 | 13146 |
| >CIC-Q427H- SQRAASEDM  | 265   | >CIC-Q427H- SHRAASEDM     | 8072  | 7807  |
| >CIC-Q427H- SQRAASEDM  | 31    | >CIC-Q427H- SHRAASEDM     | 742   | 711   |
| >CIC-Q427H- RSQRAASEDM | 1275  | >CIC-Q427H- RSHRAASEDM    | 194   | 1081  |
| >CIC-Q427H- RSQRAASE   | 3615  | >CIC-Q427H- RSHRAASE      | 152   | 3463  |
| >CIC-Q427H- RSQRAASED  | 4227  | >CIC-Q427H- RSHRAASED     | 384   | 3843  |
| >CIC-Q427H- RSQRAASEDM | 2123  | >CIC-Q427H- RSHRAASEDM    | 72    | 2051  |
| >CIC-Q427H- RSQRAASEDM | 426   | >CIC-Q427H- RSHRAASEDM    | 122   | 304   |
| >CIC-Q427H- RSQRAASEDM | 27    | >CIC-Q427H- RSHRAASEDM    | 14    | 13    |
| >CIC-Q427H- RSQRAASEDM | 637   | >CIC-Q427H- RSHRAASEDM    | 372   | 265   |
| >CIC-Q427H- RSQRAASEDM | 221   | >CIC-Q427H- RSHRAASEDM    | 410   | 189   |
| >CIC-Q427H- RSQRAASEDM | 23    | >CIC-Q427H- RSHRAASEDM    | 29    | 6     |
| >CIC-Q427H- SRSQRAASED | 1165  | >CIC-Q427H- SRSHRAASED    | 432   | 733   |
| >CIC-Q427H- ASRSQRAA   | 7     | >CIC-Q427H- ASRSHRAA      | 6     | 1     |
| >CIC-Q427H- ASRSQRAAS  | 11    | >CIC-Q427H- ASRSHRAAS     | 14    | 3     |
| >CIC-Q427H- ASRSQRAASE | 143   | >CIC-Q427H- ASRSHRAASE    | 134   | 9     |
| >CIC-Q427H- ASRSQRAASE | 317   | >CIC-Q427H- ASRSHRAASE    | 333   | 16    |
| >CIC-Q427H- RASRSQRA   | 232   | >CIC-Q427H- RASRSHRA      | 143   | 89    |
| >CIC-Q427H- RASRSQRAA  | 102   | >CIC-Q427H- RASRSHRAA     | 32    | 70    |
| >CIC-Q427H- RASRSQRAAS | 593   | >CIC-Q427H- RASRSHRAAS    | 311   | 282   |
| >CIC-Q427H- RASRSQRAA  | 993   | >CIC-Q427H- RASRSHRAA     | 310   | 683   |
| >CIC-Q427H- TRASRSQR   | 376   | >CIC-Q427H- TRASRSHR      | 395   | 19    |
| >CIC-Q427H- TRASRSQR   | 556   | >CIC-Q427H- TRASRSHR      | 391   | 165   |
| >CIC-Q427H- PTRASRSQ   | 168   | >CIC-Q427H- PTRASRSRSH    | 621   | 453   |
| >CIC-Q427H- PTRASRSQR  | 71    | >CIC-Q427H- PTRASRSRSHR   | 33    | 38    |
| >CIC-Q427H- PTRASRSQRA | 25    | >CIC-Q427H- PTRASRSRSHRA  | 24    | 1     |
| >CIC-Q427H- PTRASRSQRA | 17    | >CIC-Q427H- PTRASRSRSHRA  | 11    | 6     |
| >CIC-Q427H- PTRASRSQR  | 273   | >CIC-Q427H- PTRASRSRSHR   | 100   | 173   |
| >CIC-Q427H- PTRASRSQR  | 430   | >CIC-Q427H- PTRASRSRSHR   | 143   | 287   |
| >CIC-Q427H- LPTRASRSQ  | 518   | >CIC-Q427H- LPTRASRSRSH   | 327   | 191   |
| >CIC-Q427H- LPTRASRSQR | 524   | >CIC-Q427H- LPTRASRSRSHR  | 439   | 85    |
| >CIC-Q427H- LPTRASRSQ  | 1516  | >CIC-Q427H- LPTRASRSRSH   | 175   | 1341  |
| >CIC-Q427H- LPTRASRSQR | 57    | >CIC-Q427H- LPTRASRSRSHR  | 21    | 36    |
| >CIC-Q427H- LLPTRASRSQ | 909   | >CIC-Q427H- LLPTRASRSRSHI | 399   | 510   |
| >CIC-W37S-v WHSLVPFL   | 35    | >CIC-W37S-n SHSLVPFL      | 134   | 99    |
| >CIC-W37S-v PWHLVPFL   | 5738  | >CIC-W37S-n PSHSLVPFL     | 494   | 5244  |
| >CIC-W37S-v PWHLVPF    | 388   | >CIC-W37S-n PSHSLVPF      | 12988 | 12600 |
| >CIC-W37S-v PWHLVPF    | 108   | >CIC-W37S-n PSHSLVPF      | 10514 | 10406 |
| >CIC-W37S-v PWHLVPFL   | 378   | >CIC-W37S-n PSHSLVPFL     | 17818 | 17440 |
| >CIC-W37S-v PWHLVPFL   | 3353  | >CIC-W37S-n PSHSLVPFL     | 419   | 2934  |
| >CIC-W37S-v PWHLVPF    | 813   | >CIC-W37S-n PSHSLVPF      | 66    | 747   |
| >CIC-W37S-v PWHLVPF    | 26303 | >CIC-W37S-n PSHSLVPF      | 276   | 26027 |
| >CIC-W37S-v PWHLVPFL   | 12607 | >CIC-W37S-n PSHSLVPFL     | 436   | 12171 |

|                        |      |                        |       |       |
|------------------------|------|------------------------|-------|-------|
| >CIC-W37S-m PWHSLVPFL  | 63   | >CIC-W37S-n PSHSLVPFL  | 30691 | 30628 |
| >CIC-W37S-m VEPRSVAVFP | 262  | >CIC-W37S-n VEPRSVAVFP | 15556 | 15294 |
| >CIC-W37S-m VEPRSVAVFP | 429  | >CIC-W37S-n VEPRSVAVFP | 3622  | 3193  |
| >CIC-W37S-m FPWHSVLPF  | 251  | >CIC-W37S-n FPSHSVLPF  | 1839  | 1588  |
| >CIC-W37S-m FPWHSVLPFL | 15   | >CIC-W37S-n FPSHSVLPFL | 34    | 19    |
| >CIC-W37S-m FPWHSVLPFL | 120  | >CIC-W37S-n FPSHSVLPFL | 997   | 877   |
| >CIC-W37S-m FPWHSVLPF  | 13   | >CIC-W37S-n FPSHSVLPF  | 14    | 1     |
| >CIC-W37S-m FPWHSVLPF  | 289  | >CIC-W37S-n FPSHSVLPF  | 825   | 536   |
| >CIC-W37S-m FPWHSVLPF  | 4    | >CIC-W37S-n FPSHSVLPF  | 9     | 5     |
| >CIC-W37S-m FPWHSVLPFL | 350  | >CIC-W37S-n FPSHSVLPFL | 1241  | 891   |
| >CIC-W37S-m FPWHSVLP   | 130  | >CIC-W37S-n FPSHSVLP   | 826   | 696   |
| >CIC-W37S-m FPWHSVLPF  | 6    | >CIC-W37S-n FPSHSVLPF  | 9     | 3     |
| >CIC-W37S-m FPWHSVLPFL | 53   | >CIC-W37S-n FPSHSVLPFL | 257   | 204   |
| >CIC-W37S-m FPWHSVLPFL | 235  | >CIC-W37S-n FPSHSVLPFL | 95    | 140   |
| >CIC-W37S-m FPWHSVLPF  | 208  | >CIC-W37S-n FPSHSVLPF  | 496   | 288   |
| >CIC-W37S-m FPWHSVLPFL | 312  | >CIC-W37S-n FPSHSVLPFL | 778   | 466   |
| >CIC-W37S-m FPWHSVLPF  | 19   | >CIC-W37S-n FPSHSVLPF  | 45    | 26    |
| >CIC-W37S-m FPWHSVLPFL | 221  | >CIC-W37S-n FPSHSVLPFL | 387   | 166   |
| >CIC-W37S-m FPWHSVLP   | 17   | >CIC-W37S-n FPSHSVLP   | 320   | 303   |
| >CIC-W37S-m FPWHSVLPF  | 10   | >CIC-W37S-n FPSHSVLPF  | 68    | 58    |
| >CIC-W37S-m FPWHSVLPFL | 2053 | >CIC-W37S-n FPSHSVLPFL | 484   | 1569  |
| >CIC-W37S-m FPWHSVLPFL | 4    | >CIC-W37S-n FPSHSVLPFL | 5     | 1     |
| >CIC-W37S-m FPWHSVLPF  | 32   | >CIC-W37S-n FPSHSVLPF  | 18    | 14    |
| >CIC-W37S-m FPWHSVLPF  | 7    | >CIC-W37S-n FPSHSVLPF  | 8     | 1     |
| >CIC-W37S-m FPWHSVLPFL | 53   | >CIC-W37S-n FPSHSVLPFL | 60    | 7     |
| >CIC-W37S-m VFPWHSVLP  | 265  | >CIC-W37S-n VFPSHSVLP  | 1290  | 1025  |
| >CIC-W37S-m VFPWHSVLPF | 181  | >CIC-W37S-n VFPSHSVLPF | 148   | 33    |
| >CIC-W37S-m VFPWHSVLPF | 68   | >CIC-W37S-n VFPSHSVLPF | 67    | 1     |
| >CIC-W37S-m VFPWHSVLPF | 188  | >CIC-W37S-n VFPSHSVLPF | 272   | 84    |
| >CIC-W37S-m VFPWHSVLPF | 15   | >CIC-W37S-n VFPSHSVLPF | 13    | 2     |
| >CIC-W37S-m VFPWHSVLPF | 37   | >CIC-W37S-n VFPSHSVLPF | 34    | 3     |
| >CIC-W37S-m VFPWHSVLPF | 2395 | >CIC-W37S-n VFPSHSVLPF | 483   | 1912  |
| >CIC-W37S-m VFPWHSVLPF | 178  | >CIC-W37S-n VFPSHSVLPF | 116   | 62    |
| >CIC-W37S-m VFPWHSVLPF | 22   | >CIC-W37S-n VFPSHSVLPF | 15    | 7     |
| >CIC-W37S-m VFPWHSVLPF | 498  | >CIC-W37S-n VFPSHSVLPF | 562   | 64    |
| >CIC-W37S-m VFPWHSVLP  | 344  | >CIC-W37S-n VFPSHSVLP  | 2747  | 2403  |
| >CIC-W37S-m VFPWHSVLPF | 132  | >CIC-W37S-n VFPSHSVLPF | 738   | 606   |
| >CIC-W37S-m AVFPWHSVLP | 56   | >CIC-W37S-n AVFPWHSVLP | 575   | 519   |
| >CIC-W37S-m AVFPWHSVLP | 59   | >CIC-W37S-n AVFPWHSVLP | 188   | 129   |
| >CIC-W37S-m AVFPWHSVLP | 101  | >CIC-W37S-n AVFPWHSVLP | 414   | 313   |
| >CIC-W37S-m AVFPWHSVLP | 39   | >CIC-W37S-n AVFPWHSVLP | 452   | 413   |
| >CIC-W37S-m AVFPWHSVLP | 58   | >CIC-W37S-n AVFPWHSVLP | 48    | 10    |
| >CIC-W37S-m AVFPWHSVLP | 35   | >CIC-W37S-n AVFPWHSVLP | 59    | 24    |

|                         |      |                         |      |      |
|-------------------------|------|-------------------------|------|------|
| >CIC-W37S-v AVFPWHS�    | 186  | >CIC-W37S-n AVFP SHSL   | 187  | 1    |
| >CIC-W37S-v AVFPWHS LV  | 9    | >CIC-W37S-n AVFP SHSLV  | 13   | 4    |
| >CIC-W37S-v AVFPWHS L   | 15   | >CIC-W37S-n AVFP SHSL   | 41   | 26   |
| >CIC-W37S-v AVFPWHS LV  | 8    | >CIC-W37S-n AVFP SHSLV  | 23   | 15   |
| >CIC-W37S-v AVFPWHS LVI | 83   | >CIC-W37S-n AVFP SHSLVP | 128  | 45   |
| >CIC-W37S-v AVFPWHS L   | 14   | >CIC-W37S-n AVFP SHSL   | 75   | 61   |
| >CIC-W37S-v AVFPWHS LV  | 4    | >CIC-W37S-n AVFP SHSLV  | 24   | 20   |
| >CIC-W37S-v AVFPWHS LV  | 399  | >CIC-W37S-n AVFP SHSLV  | 1848 | 1449 |
| >CIC-W37S-v AVFPWHS L   | 132  | >CIC-W37S-n AVFP SHSL   | 522  | 390  |
| >CIC-W37S-v AVFPWHS LV  | 18   | >CIC-W37S-n AVFP SHSLV  | 82   | 64   |
| >CIC-W37S-v AVFPWHS L   | 6    | >CIC-W37S-n AVFP SHSL   | 10   | 4    |
| >CIC-W37S-v AVFPWHS LV  | 2    | >CIC-W37S-n AVFP SHSLV  | 5    | 3    |
| >CIC-W37S-v AVFPWHS LVI | 417  | >CIC-W37S-n AVFP SHSLVP | 1336 | 919  |
| >CIC-W37S-v AVFPWHS LVI | 331  | >CIC-W37S-n AVFP SHSLVP | 521  | 190  |
| >CIC-W37S-v AVFPWHS LVI | 163  | >CIC-W37S-n AVFP SHSLVP | 788  | 625  |
| >CIC-W37S-v AVFPWHS L   | 246  | >CIC-W37S-n AVFP SHSL   | 129  | 117  |
| >CIC-W37S-v AVFPWHS LV  | 118  | >CIC-W37S-n AVFP SHSLV  | 31   | 87   |
| >CIC-W37S-v AVFPWHS L   | 146  | >CIC-W37S-n AVFP SHSL   | 127  | 19   |
| >CIC-W37S-v AVFPWHS LVI | 17   | >CIC-W37S-n AVFP SHSLVP | 34   | 17   |
| >CIC-W37S-v AVFPWHS L   | 71   | >CIC-W37S-n AVFP SHSL   | 105  | 34   |
| >CIC-W37S-v AVFPWHS LV  | 15   | >CIC-W37S-n AVFP SHSLV  | 22   | 7    |
| >CIC-W37S-v AVFPWHS L   | 232  | >CIC-W37S-n AVFP SHSL   | 705  | 473  |
| >CIC-W37S-v AVFPWHS LV  | 27   | >CIC-W37S-n AVFP SHSLV  | 518  | 491  |
| >CIC-W37S-v AVFPWHS L   | 608  | >CIC-W37S-n AVFP SHSL   | 345  | 263  |
| >CIC-W37S-v AVFPWHS LVI | 33   | >CIC-W37S-n AVFP SHSLVP | 31   | 2    |
| >CIC-W37S-v AVFPWHS LVI | 811  | >CIC-W37S-n AVFP SHSLVP | 326  | 485  |
| >CIC-W37S-v AVFPWHS L   | 601  | >CIC-W37S-n AVFP SHSL   | 161  | 440  |
| >CIC-W37S-v AVFPWHS LV  | 1552 | >CIC-W37S-n AVFP SHSLV  | 346  | 1206 |
| >CIC-W37S-v AVFPWHS LVI | 8    | >CIC-W37S-n AVFP SHSLVP | 4    | 4    |
| >CIC-W37S-v AVFPWHS L   | 48   | >CIC-W37S-n AVFP SHSL   | 17   | 31   |
| >CIC-W37S-v AVFPWHS LV  | 1512 | >CIC-W37S-n AVFP SHSLV  | 244  | 1268 |
| >CIC-W37S-v AVFPWHS LVI | 6    | >CIC-W37S-n AVFP SHSLVP | 4    | 2    |
| >CIC-W37S-v AVFPWHS LVI | 172  | >CIC-W37S-n AVFP SHSLVP | 200  | 28   |
| >CIC-W37S-v AVFPWHS L   | 1588 | >CIC-W37S-n AVFP SHSL   | 362  | 1226 |
| >CIC-W37S-v AVFPWHS LV  | 8    | >CIC-W37S-n AVFP SHSLV  | 14   | 6    |
| >CIC-W37S-v AVFPWHS LVI | 91   | >CIC-W37S-n AVFP SHSLVP | 129  | 38   |
| >CIC-W37S-v AVFPWHS LVI | 498  | >CIC-W37S-n AVFP SHSLVP | 317  | 181  |
| >CIC-W37S-v AVFPWHS L   | 502  | >CIC-W37S-n AVFP SHSL   | 478  | 24   |
| >CIC-W37S-v VAVFPWHS L  | 313  | >CIC-W37S-n VAVFP SHSL  | 971  | 658  |
| >CIC-W37S-v VAVFPWHS L' | 200  | >CIC-W37S-n VAVFP SHSLV | 652  | 452  |
| >CIC-W37S-v VAVFPWHS L' | 228  | >CIC-W37S-n VAVFP SHSLV | 368  | 140  |
| >CIC-W37S-v VAVFPWHS L  | 376  | >CIC-W37S-n VAVFP SHSL  | 301  | 75   |
| >CIC-W37S-v VAVFPWHS L' | 238  | >CIC-W37S-n VAVFP SHSLV | 82   | 156  |

|                        |      |                          |       |       |
|------------------------|------|--------------------------|-------|-------|
| >CIC-W37S-v VAVFPWHL   | 1062 | >CIC-W37S-n VAVFP SHSL   | 420   | 642   |
| >CIC-W37S-v VAVFPWHL'  | 314  | >CIC-W37S-n VAVFP SHSLV  | 452   | 138   |
| >CIC-W37S-v VAVFPWHL   | 45   | >CIC-W37S-n VAVFP SHSL   | 25    | 20    |
| >CIC-W37S-v VAVFPWHL   | 1028 | >CIC-W37S-n VAVFP SHSL   | 249   | 779   |
| >CIC-W37S-v SVAVFPWHSI | 130  | >CIC-W37S-n SVAVFP SHSL' | 836   | 706   |
| >CIC-W37S-v SVAVFPWHSI | 97   | >CIC-W37S-n SVAVFP SHSL  | 65    | 32    |
| >CIC-W37S-v SVAVFPWHSI | 33   | >CIC-W37S-n SVAVFP SHSL' | 53    | 20    |
| >CIC-W37S-v SVAVFPWHSI | 232  | >CIC-W37S-n SVAVFP SHSL  | 153   | 79    |
| >CIC-W37S-v SVAVFPWHSI | 27   | >CIC-W37S-n SVAVFP SHSL' | 22    | 5     |
| >CIC-W37S-v SVAVFPWHSI | 39   | >CIC-W37S-n SVAVFP SHSL' | 143   | 104   |
| >CIC-W37S-v SVAVFPWHSI | 215  | >CIC-W37S-n SVAVFP SHSL  | 679   | 464   |
| >CIC-W37S-v SVAVFPWHSI | 28   | >CIC-W37S-n SVAVFP SHSL' | 153   | 125   |
| >CIC-W37S-v SVAVFPWHSI | 248  | >CIC-W37S-n SVAVFP SHSL  | 966   | 718   |
| >CIC-W37S-v SVAVFPWHSI | 31   | >CIC-W37S-n SVAVFP SHSL' | 112   | 81    |
| >CIC-W37S-v SVAVFPWHSI | 93   | >CIC-W37S-n SVAVFP SHSL  | 181   | 88    |
| >CIC-W37S-v SVAVFPWHSI | 10   | >CIC-W37S-n SVAVFP SHSL' | 27    | 17    |
| >CIC-W37S-v SVAVFPWHS  | 410  | >CIC-W37S-n SVAVFP SHS   | 1145  | 735   |
| >CIC-W37S-v SVAVFPWHSI | 82   | >CIC-W37S-n SVAVFP SHSL  | 75    | 7     |
| >CIC-W37S-v SVAVFPWHSI | 12   | >CIC-W37S-n SVAVFP SHSL' | 15    | 3     |
| >CIC-W37S-v SVAVFPWHSI | 39   | >CIC-W37S-n SVAVFP SHSL  | 60    | 21    |
| >CIC-W37S-v SVAVFPWHSI | 12   | >CIC-W37S-n SVAVFP SHSL' | 41    | 29    |
| >CIC-W37S-v SVAVFPWHSI | 200  | >CIC-W37S-n SVAVFP SHSL' | 67    | 133   |
| >CIC-W37S-v SVAVFPWH   | 347  | >CIC-W37S-n SVAVFP SH    | 896   | 549   |
| >CIC-W37S-v SVAVFPWHSI | 249  | >CIC-W37S-n SVAVFP SHSL  | 8967  | 8718  |
| >CIC-W37S-v RSVAVFPWH  | 88   | >CIC-W37S-n RSVAVFP SHS  | 157   | 69    |
| >CIC-W37S-v RSVAVFPWH  | 284  | >CIC-W37S-n RSVAVFP SHS  | 299   | 15    |
| >CIC-W37S-v RSVAVFPW   | 44   | >CIC-W37S-n RSVAVFP S    | 5171  | 5127  |
| >CIC-W37S-v RSVAVFPWH  | 388  | >CIC-W37S-n RSVAVFP SHS  | 65    | 323   |
| >CIC-W37S-v RSVAVFPWH  | 893  | >CIC-W37S-n RSVAVFP SHS  | 318   | 575   |
| >CIC-W37S-v RSVAVFPWH  | 278  | >CIC-W37S-n RSVAVFP SHS  | 110   | 168   |
| >CIC-W37S-v RSVAVFPW   | 4    | >CIC-W37S-n RSVAVFP S    | 918   | 914   |
| >CIC-W37S-v RSVAVFPWH  | 488  | >CIC-W37S-n RSVAVFP SH   | 485   | 3     |
| >CIC-W37S-v RSVAVFPWH  | 6    | >CIC-W37S-n RSVAVFP SHS  | 5     | 1     |
| >CIC-W37S-v RSVAVFPW   | 29   | >CIC-W37S-n RSVAVFP S    | 8680  | 8651  |
| >CIC-W37S-v RSVAVFPWH  | 276  | >CIC-W37S-n RSVAVFP SHS  | 476   | 200   |
| >CIC-W37S-v RSVAVFPW   | 7    | >CIC-W37S-n RSVAVFP S    | 3866  | 3859  |
| >CIC-W37S-v RSVAVFPWH  | 889  | >CIC-W37S-n RSVAVFP SH   | 179   | 710   |
| >CIC-W37S-v RSVAVFPWH  | 30   | >CIC-W37S-n RSVAVFP SHS  | 21    | 9     |
| >CIC-W37S-v RSVAVFPWH  | 80   | >CIC-W37S-n RSVAVFP SHS  | 53    | 27    |
| >CIC-W37S-v RSVAVFPW   | 166  | >CIC-W37S-n RSVAVFP S    | 5010  | 4844  |
| >CIC-W37S-v RSVAVFPWH  | 187  | >CIC-W37S-n RSVAVFP SH   | 409   | 222   |
| >CIC-W37S-v RSVAVFPWH  | 160  | >CIC-W37S-n RSVAVFP SHS  | 139   | 21    |
| >CIC-W37S-v RSVAVFPW   | 55   | >CIC-W37S-n RSVAVFP S    | 30242 | 30187 |

|                        |      |                        |       |       |
|------------------------|------|------------------------|-------|-------|
| >CIC-W37S-m RSVAVFPWH  | 127  | >CIC-W37S-n RSVAVFPSHS | 110   | 17    |
| >CIC-W37S-m PRSVAVFPW  | 119  | >CIC-W37S-n PRSVAVFPS  | 32711 | 32592 |
| >CIC-W37S-m EPRSVAVFPV | 1557 | >CIC-W37S-n EPRSVAVFPS | 391   | 1166  |
| >CIC-W37S-m EPRSVAVFPV | 20   | >CIC-W37S-n EPRSVAVFPS | 21556 | 21536 |
| >CLTC-Y1289 YYQDRGYFEE | 224  | >CLTC-Y1289 CYQDRGYFEE | 2857  | 2633  |
| >CLTC-Y1289 YYQDRGYFEE | 452  | >CLTC-Y1289 CYQDRGYFEE | 7947  | 7495  |
| >CLTC-Y1289 YYQDRGYFEE | 180  | >CLTC-Y1289 CYQDRGYFEE | 12487 | 12307 |
| >CLTC-Y1289 YYQDRGYF   | 53   | >CLTC-Y1289 CYQDRGYF   | 95    | 42    |
| >CLTC-Y1289 YYQDRGYFEE | 41   | >CLTC-Y1289 CYQDRGYFEE | 86    | 45    |
| >CLTC-Y1289 YYQDRGYF   | 142  | >CLTC-Y1289 CYQDRGYF   | 412   | 270   |
| >CLTC-Y1289 YYQDRGYFEE | 110  | >CLTC-Y1289 CYQDRGYFEE | 360   | 250   |
| >CLTC-Y1289 YYQDRGYF   | 4    | >CLTC-Y1289 CYQDRGYF   | 5     | 1     |
| >CLTC-Y1289 YYQDRGYFEE | 184  | >CLTC-Y1289 CYQDRGYFEE | 287   | 103   |
| >CLTC-Y1289 YYQDRGYFEE | 5    | >CLTC-Y1289 CYQDRGYFEE | 6     | 1     |
| >CLTC-Y1289 YYQDRGYF   | 220  | >CLTC-Y1289 CYQDRGYF   | 2225  | 2005  |
| >CLTC-Y1289 YYQDRGYFEE | 345  | >CLTC-Y1289 CYQDRGYFEE | 314   | 31    |
| >CLTC-Y1289 NYYQDRGYF  | 148  | >CLTC-Y1289 NCYQDRGYF  | 15271 | 15123 |
| >CLTC-Y1289 NYYQDRGYF  | 8    | >CLTC-Y1289 NCYQDRGYF  | 7654  | 7646  |
| >CLTC-Y1289 NYYQDRGY   | 171  | >CLTC-Y1289 NCYQDRGY   | 3824  | 3653  |
| >CLTC-Y1289 NYYQDRGY   | 380  | >CLTC-Y1289 NCYQDRGY   | 2363  | 1983  |
| >CLTC-Y1289 NYYQDRGY   | 340  | >CLTC-Y1289 NCYQDRGY   | 1455  | 1115  |
| >CLTC-Y1289 HADELEELIN | 54   | >CLTC-Y1289 HADELEELIN | 19865 | 19811 |
| >CLTC-Y1289 HADELEELIN | 282  | >CLTC-Y1289 HADELEELIN | 24165 | 23883 |
| >CLTC-Y1289 HADELEELIN | 63   | >CLTC-Y1289 HADELEELIN | 15443 | 15380 |
| >CLTC-Y1289 HADELEELIN | 374  | >CLTC-Y1289 HADELEELIN | 22383 | 22009 |
| >CLTC-Y1289 INYYQDRGYF | 277  | >CLTC-Y1289 INCYQDRGYF | 2691  | 2414  |
| >CLTC-Y1289 INYYQDRGY  | 389  | >CLTC-Y1289 INCYQDRGY  | 3866  | 3477  |
| >CLTC-Y1289 INYYQDRGYF | 162  | >CLTC-Y1289 INCYQDRGYF | 2283  | 2121  |
| >CLTC-Y1289 LINYYQDRGY | 297  | >CLTC-Y1289 LINCYQDRGY | 317   | 20    |
| >CLTC-Y1289 LINYYQDRGY | 409  | >CLTC-Y1289 LINCYQDRGY | 609   | 200   |
| >CLTC-Y1289 LINYYQDR   | 108  | >CLTC-Y1289 LINCYQDR   | 271   | 163   |
| >CLTC-Y1289 LINYYQDR   | 209  | >CLTC-Y1289 LINCYQDR   | 434   | 225   |
| >CLTC-Y1289 LINYYQDRGY | 207  | >CLTC-Y1289 LINCYQDRGY | 224   | 17    |
| >CLTC-Y1289 LINYYQDRGY | 220  | >CLTC-Y1289 LINCYQDRGY | 224   | 4     |
| >CLTC-Y1289 ELINYYQDRG | 9    | >CLTC-Y1289 ELINCYQDRG | 15    | 6     |
| >CLTC-Y1289 ELINYYQDRG | 19   | >CLTC-Y1289 ELINCYQDRG | 35    | 16    |
| >CLTC-Y1289 ELINYYQDRG | 37   | >CLTC-Y1289 ELINCYQDRG | 99    | 62    |
| >CLTC-Y1289 ELINYYQDR  | 125  | >CLTC-Y1289 ELINCYQDR  | 211   | 86    |
| >CLTC-Y1289 ELINYYQDR  | 36   | >CLTC-Y1289 ELINCYQDR  | 80    | 44    |
| >CLTC-Y1289 ELINYYQDRG | 368  | >CLTC-Y1289 ELINCYQDRG | 499   | 131   |
| >CLTC-Y1289 ELINYYQDRG | 289  | >CLTC-Y1289 ELINCYQDRG | 519   | 230   |
| >CLTC-Y1289 ELINYYQDR  | 1196 | >CLTC-Y1289 ELINCYQDR  | 391   | 805   |
| >CLTC-Y1289 LEELINYY   | 1180 | >CLTC-Y1289 LEELINCY   | 470   | 710   |



|                         |      |                         |       |       |
|-------------------------|------|-------------------------|-------|-------|
| >CLTC-Y1289 LEELINYY    | 66   | >CLTC-Y1289 LEELINCY    | 100   | 34    |
| >CLTC-Y1289 LEELINYY    | 1219 | >CLTC-Y1289 LEELINCY    | 455   | 764   |
| >CLTC-Y1289 LEELINYY    | 410  | >CLTC-Y1289 LEELINCY    | 760   | 350   |
| >CLTC-Y1289 ELEELINYY   | 287  | >CLTC-Y1289 ELEELINCY   | 920   | 633   |
| >CLTC-Y1289 ELEELINYY   | 187  | >CLTC-Y1289 ELEELINCY   | 458   | 271   |
| >CLTC-Y1289 ELEELINYY   | 241  | >CLTC-Y1289 ELEELINCY   | 4733  | 4492  |
| >CLTC-Y1289 ELEELINYY   | 439  | >CLTC-Y1289 ELEELINC    | 33099 | 32660 |
| >CLTC-Y1289 ELEELINYY   | 177  | >CLTC-Y1289 ELEELINCY   | 421   | 244   |
| >CLTC-Y1289 DELEELINYY  | 414  | >CLTC-Y1289 DELEELINCY  | 749   | 335   |
| >CLTC-Y1289 DELEELINYY  | 198  | >CLTC-Y1289 DELEELINC   | 30864 | 30666 |
| >CLTC-Y1289 DELEELINYY  | 499  | >CLTC-Y1289 DELEELINCY  | 296   | 203   |
| >CLTC-Y1289 DELEELINYY  | 4    | >CLTC-Y1289 DELEELINC   | 155   | 151   |
| >CLTC-Y1289 DELEELINYY  | 127  | >CLTC-Y1289 DELEELINCY  | 266   | 139   |
| >CLTC-Y1289 DELEELINYYC | 19   | >CLTC-Y1289 DELEELINCYC | 86    | 67    |
| >CLTC-Y1289 DELEELINYY  | 483  | >CLTC-Y1289 DELEELINC   | 6425  | 5942  |
| >CLTC-Y1289 DELEELINYY  | 123  | >CLTC-Y1289 DELEELINC   | 6870  | 6747  |
| >CLTC-Y1289 DELEELINYY  | 290  | >CLTC-Y1289 DELEELINCY  | 1220  | 930   |
| >CLTCL1-E11 EVVQSASRS   | 433  | >CLTCL1-E11 VVVQSASRS   | 14338 | 13905 |
| >CLTCL1-E11 EVVQSASR    | 249  | >CLTCL1-E11 VVVQSASR    | 2478  | 2229  |
| >CLTCL1-E11 EVVQSASR    | 3    | >CLTCL1-E11 VVVQSASR    | 71    | 68    |
| >CLTCL1-E11 LEVVQSASR   | 6692 | >CLTCL1-E11 LVVVQSASR   | 150   | 6542  |
| >CLTCL1-E11 LEVVQSASR   | 4170 | >CLTCL1-E11 LVVVQSASR   | 49    | 4121  |
| >CLTCL1-E11 YLEVQQSA    | 529  | >CLTCL1-E11 YLVVVQSA    | 86    | 443   |
| >CLTCL1-E11 YLEVQQSA    | 55   | >CLTCL1-E11 YLVVVQSA    | 25    | 30    |
| >CLTCL1-E11 YLEVQQSAS   | 1175 | >CLTCL1-E11 YLVVVQSAS   | 391   | 784   |
| >CLTCL1-E11 YLEVQQSA    | 92   | >CLTCL1-E11 YLVVVQSA    | 9     | 83    |
| >CLTCL1-E11 YLEVQQSAS   | 6155 | >CLTCL1-E11 YLVVVQSAS   | 480   | 5675  |
| >CLTCL1-E11 YLEVQQSA    | 1174 | >CLTCL1-E11 YLVVVQSA    | 94    | 1080  |
| >CLTCL1-E11 YLEVQQSA    | 39   | >CLTCL1-E11 YLVVVQSA    | 7     | 32    |
| >CLTCL1-E11 YLEVQQSAS   | 2972 | >CLTCL1-E11 YLVVVQSAS   | 420   | 2552  |
| >CLTCL1-E11 YLEVQQSA    | 94   | >CLTCL1-E11 YLVVVQSA    | 29    | 65    |
| >CLTCL1-E11 YLEVQQSA    | 126  | >CLTCL1-E11 YLVVVQSA    | 20    | 106   |
| >CLTCL1-E11 YLEVQQSA    | 1457 | >CLTCL1-E11 YLVVVQSA    | 131   | 1326  |
| >CLTCL1-E11 YLEVQQSA    | 5    | >CLTCL1-E11 YLVVVQSA    | 4     | 1     |
| >CLTCL1-E11 YLEVQQSASR  | 834  | >CLTCL1-E11 YLVVVQSASR  | 263   | 571   |
| >CLTCL1-E11 YLEVQQSASR  | 296  | >CLTCL1-E11 YLVVVQSASR  | 22    | 274   |
| >CLTCL1-E11 YLEVQQSASR  | 571  | >CLTCL1-E11 YLVVVQSASR  | 458   | 113   |
| >CLTCL1-E11 SYLEVQQSA   | 212  | >CLTCL1-E11 SYLVVVQSA   | 74    | 138   |
| >CLTCL1-E11 SYLEVQQSAS  | 195  | >CLTCL1-E11 SYLVVVQSAS  | 87    | 108   |
| >CLTCL1-E11 SYLEVQQSA   | 168  | >CLTCL1-E11 SYLVVVQSA   | 3178  | 3010  |
| >CLTCL1-E11 SYLEVQQSA   | 297  | >CLTCL1-E11 SYLVVVQSA   | 4194  | 3897  |
| >CLTCL1-E11 SYLEVQQS    | 346  | >CLTCL1-E11 SYLVVVQS    | 343   | 3     |
| >CLTCL1-E11 SYLEVQQSA   | 186  | >CLTCL1-E11 SYLVVVQSA   | 192   | 6     |

|                        |       |                        |      |       |
|------------------------|-------|------------------------|------|-------|
| >CLTCL1-E11 SYLEVQQSAS | 432   | >CLTCL1-E11 SYLVVVQSAS | 626  | 194   |
| >CLTCL1-E11 SYLEVQQSAS | 46    | >CLTCL1-E11 SYLVVVQSAS | 26   | 20    |
| >CLTCL1-E11 SYLEVQQSAS | 51    | >CLTCL1-E11 SYLVVVQSAS | 66   | 15    |
| >CLTCL1-E11 SYLEVQQSAS | 73    | >CLTCL1-E11 SYLVVVQSAS | 131  | 58    |
| >CLTCL1-E11 SYLEVQSA   | 266   | >CLTCL1-E11 SYLVVVQSA  | 326  | 60    |
| >CLTCL1-E11 SSYLEVVQSA | 1008  | >CLTCL1-E11 SSYLVVVQSA | 383  | 625   |
| >CLTCL1-E11 DDPSSYLE   | 25366 | >CLTCL1-E11 DDPSSYLV   | 449  | 24917 |
| >CLTCL1-E11 GDDPSSYLE  | 8987  | >CLTCL1-E11 GDDPSSYLV  | 26   | 8961  |
| >CLTCL1-E11 GDDPSSYLEV | 66    | >CLTCL1-E11 GDDPSSYLVV | 53   | 13    |
| >CLTCL1-E11 GDDPSSYLEV | 53    | >CLTCL1-E11 GDDPSSYLVV | 70   | 17    |
| >CLTCL1-E11 RGDDPSSYLE | 28096 | >CLTCL1-E11 RGDDPSSYLV | 312  | 27784 |
| >CLTCL1-E11 RGDDPSSYLE | 384   | >CLTCL1-E11 RGDDPSSYLV | 713  | 329   |
| >CLTCL1-V84 LVAEVEKRNR | 5682  | >CLTCL1-V84 LLAEVEKRNR | 267  | 5415  |
| >CLTCL1-V84 LVAEVEKRNR | 186   | >CLTCL1-V84 LLAEVEKRNR | 13   | 173   |
| >CLTCL1-V84 LVAEVEKRNR | 2311  | >CLTCL1-V84 LLAEVEKRNR | 62   | 2249  |
| >CLTCL1-V84 LVAEVEKRNR | 1702  | >CLTCL1-V84 LLAEVEKRNR | 22   | 1680  |
| >CLTCL1-V84 LVAEVEKRNR | 12063 | >CLTCL1-V84 LLAEVEKRNR | 283  | 11780 |
| >CLTCL1-V84 LVAEVEKRNR | 5026  | >CLTCL1-V84 LLAEVEKRNR | 66   | 4960  |
| >CLTCL1-V84 LVAEVEKRNR | 11892 | >CLTCL1-V84 LLAEVEKRNR | 233  | 11659 |
| >CLTCL1-V84 LVAEVEKRNR | 208   | >CLTCL1-V84 LLAEVEKRNR | 4    | 204   |
| >CLTCL1-V84 LVAEVEKRNR | 342   | >CLTCL1-V84 LLAEVEKRNR | 441  | 99    |
| >CLTCL1-V84 LVAEVEKR   | 18    | >CLTCL1-V84 LLAEVEKR   | 92   | 74    |
| >CLTCL1-V84 LVAEVEKRNR | 72    | >CLTCL1-V84 LLAEVEKRNR | 934  | 862   |
| >CLTCL1-V84 LVAEVEKRNR | 174   | >CLTCL1-V84 LLAEVEKRNR | 2462 | 2288  |
| >CLTCL1-V84 ELVAEVEK   | 46    | >CLTCL1-V84 ELLAEVEK   | 198  | 152   |
| >CLTCL1-V84 ELVAEVEKR  | 23    | >CLTCL1-V84 ELLAEVEKR  | 96   | 73    |
| >CLTCL1-V84 ELVAEVEKRN | 71    | >CLTCL1-V84 ELLAEVEKRN | 316  | 245   |
| >CLTCL1-V84 ELVAEVEKR  | 414   | >CLTCL1-V84 ELLAEVEKR  | 247  | 167   |
| >CLTCL1-V84 ELVAEVEKRN | 525   | >CLTCL1-V84 ELLAEVEKRN | 293  | 232   |
| >CLTCL1-V84 DELVAEVE   | 1368  | >CLTCL1-V84 DELLAEVE   | 357  | 1011  |
| >CLTCL1-V84 DELVAEVE   | 376   | >CLTCL1-V84 DELLAEVE   | 249  | 127   |
| >CLTCL1-V84 DELVAEVEK  | 379   | >CLTCL1-V84 DELLAEVEK  | 256  | 123   |
| >CLTCL1-V84 TDELVAEV   | 75    | >CLTCL1-V84 TDELLAEV   | 78   | 3     |
| >CLTCL1-V84 STDELVAEV  | 470   | >CLTCL1-V84 STDELLAEV  | 261  | 209   |
| >CLTCL1-V84 STDELVAEV  | 20    | >CLTCL1-V84 STDELLAEV  | 16   | 4     |
| >CLTCL1-V84 STDELVAEV  | 53    | >CLTCL1-V84 STDELLAEV  | 39   | 14    |
| >CLTCL1-V84 STDELVAEV  | 92    | >CLTCL1-V84 STDELLAEV  | 105  | 13    |
| >CLTCL1-V84 STDELVAEV  | 11    | >CLTCL1-V84 STDELLAEV  | 6    | 5     |
| >CLTCL1-V84 STDELVAEV  | 3     | >CLTCL1-V84 STDELLAEV  | 4    | 1     |
| >CLTCL1-V84 STDELVAEV  | 27    | >CLTCL1-V84 STDELLAEV  | 21   | 6     |
| >CLTCL1-V84 STDELVAEV  | 8     | >CLTCL1-V84 STDELLAEV  | 10   | 2     |
| >CLTCL1-V84 STDELVAEV  | 241   | >CLTCL1-V84 STDELLAEV  | 619  | 378   |
| >CLTCL1-V84 STDELVAEV  | 20    | >CLTCL1-V84 STDELLAEV  | 23   | 3     |

|                         |       |                         |       |       |
|-------------------------|-------|-------------------------|-------|-------|
| >CLTCL1-V84 STDELVAEVE  | 20    | >CLTCL1-V84 STDELLAEVEI | 20    | 0     |
| >CLTCL1-V84 STDELVAEVE  | 135   | >CLTCL1-V84 STDELLAEVEI | 171   | 36    |
| >CLTCL1-V84 STDELVAEV   | 21    | >CLTCL1-V84 STDELLAEV   | 29    | 8     |
| >CLTCL1-V84 STDELVAEV   | 4     | >CLTCL1-V84 STDELLAEV   | 4     | 0     |
| >CLTCL1-V84 STDELVAEVE  | 321   | >CLTCL1-V84 STDELLAEVEI | 386   | 65    |
| >CLTCL1-V84 FSTDELVAEV  | 428   | >CLTCL1-V84 FSTDELLAEV  | 169   | 259   |
| >CLTCL1-V84 FSTDELVAEV  | 402   | >CLTCL1-V84 FSTDELLAEV  | 210   | 192   |
| >CLTCL1-V84 FSTDELVAEV  | 309   | >CLTCL1-V84 FSTDELLAEV  | 148   | 161   |
| >CLTCL1-V84 FSTDELVA    | 971   | >CLTCL1-V84 FSTDELLA    | 441   | 530   |
| >CLTCL1-V84 FSTDELVAEV  | 97    | >CLTCL1-V84 FSTDELLAEV  | 46    | 51    |
| >CLTCL1-V84 FSTDELVAEV  | 82    | >CLTCL1-V84 FSTDELLAEV  | 125   | 43    |
| >CLTCL1-V84 FSTDELVAEV  | 301   | >CLTCL1-V84 FSTDELLAEV  | 470   | 169   |
| >CLTCL1-V84 FSTDELVAEV  | 17    | >CLTCL1-V84 FSTDELLAEV  | 20    | 3     |
| >CLTCL1-V84 FSTDELVAEV  | 156   | >CLTCL1-V84 FSTDELLAEV  | 170   | 14    |
| >CLTCL1-V84 FSTDELVAEV  | 148   | >CLTCL1-V84 FSTDELLAEV  | 146   | 2     |
| >CLTCL1-V84 FSTDELVAEV  | 439   | >CLTCL1-V84 FSTDELLAEV  | 530   | 91    |
| >CLTCL1-V84 FSTDELVAEV  | 838   | >CLTCL1-V84 FSTDELLAEV  | 363   | 475   |
| >CLTCL1-V84 GQFSTDELV   | 178   | >CLTCL1-V84 GQFSTDELL   | 1225  | 1047  |
| >CLTCL1-V84 GQFSTDELV   | 88    | >CLTCL1-V84 GQFSTDELL   | 106   | 18    |
| >CLTCL1-V84 GQFSTDELVA  | 447   | >CLTCL1-V84 GQFSTDELLA  | 151   | 296   |
| >CLTCL1-V84 GQFSTDELV   | 24    | >CLTCL1-V84 GQFSTDELL   | 134   | 110   |
| >CLTCL1-V84 GQFSTDELV   | 116   | >CLTCL1-V84 GQFSTDELL   | 1966  | 1850  |
| >CLTCL1-V84 GQFSTDELV   | 183   | >CLTCL1-V84 GQFSTDELL   | 2210  | 2027  |
| >CLTCL1-V84 GQFSTDELV   | 57    | >CLTCL1-V84 GQFSTDELL   | 1533  | 1476  |
| >CLTCL1-V84 GQFSTDELV   | 237   | >CLTCL1-V84 GQFSTDELL   | 109   | 128   |
| >CLTCL1-V84 GQFSTDELVA  | 333   | >CLTCL1-V84 GQFSTDELLA  | 1184  | 851   |
| >CLTCL1-V84 GQFSTDELV   | 1129  | >CLTCL1-V84 GQFSTDELL   | 90    | 1039  |
| >CLTCL1-V84 GQFSTDELV   | 5527  | >CLTCL1-V84 GQFSTDELL   | 284   | 5243  |
| >COL1A1-G6.GERGEQGPA    | 17294 | >COL1A1-G6.DERGEQGPA    | 402   | 16892 |
| >COL1A1-G6.GERGEQGPA    | 375   | >COL1A1-G6.DERGEQGPA    | 9366  | 8991  |
| >COL1A1-G6.GERGEQGPA    | 151   | >COL1A1-G6.DERGEQGPA    | 2174  | 2023  |
| >COL1A1-L12 LKSLSQQI    | 112   | >COL1A1-L12 FKSLSQQI    | 62    | 50    |
| >COL1A1-L12 LKSLSQQIENI | 133   | >COL1A1-L12 FKSLSQQIENI | 67    | 66    |
| >COL1A1-L12 TLKSLSQQI   | 7709  | >COL1A1-L12 TFKSLSQQI   | 491   | 7218  |
| >COL1A1-L12 TLKSLSQQI   | 210   | >COL1A1-L12 TFKSLSQQI   | 13774 | 13564 |
| >COL1A1-L12 TLKSLSQQI   | 43    | >COL1A1-L12 TFKSLSQQI   | 14846 | 14803 |
| >COL1A1-L12 TLKSLSQQI   | 63    | >COL1A1-L12 TFKSLSQQI   | 24887 | 24824 |
| >COL1A1-L12 TLKSLSQQI   | 15143 | >COL1A1-L12 TFKSLSQQI   | 376   | 14767 |
| >COL1A1-L12 RDRDLEVDTT  | 5005  | >COL1A1-L12 RDRDLEVDTT  | 388   | 4617  |
| >COL1A1-L12 RDRDLEVDTT  | 333   | >COL1A1-L12 RDRDLEVDTT  | 683   | 350   |
| >COL1A1-L12 RDRDLEVDTT  | 1045  | >COL1A1-L12 RDRDLEVDTT  | 207   | 838   |
| >COL1A1-L12 TTLKSLSQQI  | 1142  | >COL1A1-L12 TTFKSLSQQI  | 227   | 915   |
| >COL1A1-L12 TTLKSLSQ    | 5047  | >COL1A1-L12 TTFKSLSQ    | 181   | 4866  |

|                       |      |                       |      |      |
|-----------------------|------|-----------------------|------|------|
| >COL1A1-L12TTLKSLSQQ  | 2010 | >COL1A1-L12TTFKSLSQQ  | 68   | 1942 |
| >COL1A1-L12TTLKSLSQQI | 1478 | >COL1A1-L12TTFKSLSQQI | 164  | 1314 |
| >COL1A1-L12TTLKSLSQQI | 28   | >COL1A1-L12TTFKSLSQQI | 52   | 24   |
| >COL1A1-L12TTLKSLSQQ  | 1144 | >COL1A1-L12TTFKSLSQQ  | 434  | 710  |
| >COL1A1-L12TTLKSLSQQI | 30   | >COL1A1-L12TTFKSLSQQI | 19   | 11   |
| >COL1A1-L12TTLKSLSQQ  | 100  | >COL1A1-L12TTFKSLSQQ  | 21   | 79   |
| >COL1A1-L12DTTLKSLSQQ | 734  | >COL1A1-L12DTTFKSLSQQ | 164  | 570  |
| >COL1A1-L12VDTTLKSL   | 7598 | >COL1A1-L12VDTTFKSL   | 380  | 7218 |
| >COL1A1-L12EVDTTLKSL  | 244  | >COL1A1-L12EVDTTFKSL  | 148  | 96   |
| >COL1A1-L12LEVDTTLKSL | 43   | >COL1A1-L12LEVDTTFKSL | 48   | 5    |
| >COL1A1-L12LEVDTTLKSL | 648  | >COL1A1-L12LEVDTTFKSL | 408  | 240  |
| >COL1A1-L12LEVDTTLKSL | 568  | >COL1A1-L12LEVDTTFKSL | 344  | 224  |
| >COL1A1-L12LEVDTTLKS  | 1754 | >COL1A1-L12LEVDTTFKS  | 498  | 1256 |
| >COL1A1-L12LEVDTTLKSL | 141  | >COL1A1-L12LEVDTTFKSL | 180  | 39   |
| >COL1A1-L12DLEVDTTLK  | 472  | >COL1A1-L12DLEVDTTFK  | 174  | 298  |
| >COL1A1-L12RDLEVDTTL  | 1615 | >COL1A1-L12RDLEVDTTF  | 286  | 1329 |
| >COL1A1-L12RDLEVDTTL  | 225  | >COL1A1-L12RDLEVDTTF  | 570  | 345  |
| >COL1A1-L12RDLEVDTTL  | 455  | >COL1A1-L12RDLEVDTTF  | 2096 | 1641 |
| >COL1A1-P34GPPGFPGAV  | 1938 | >COL1A1-P34GPSGFPGAV  | 341  | 1597 |
| >COL1A1-P34AGPPGFPGA  | 482  | >COL1A1-P34AGPSGFPGA  | 1359 | 877  |
| >COL1A1-P34GPAGPPGF   | 541  | >COL1A1-P34GPAGPSGF   | 110  | 431  |
| >COL1A1-P34GPAGPPGF   | 533  | >COL1A1-P34GPAGPSGF   | 303  | 230  |
| >COL1A1-P34GPAGPPGFPC | 159  | >COL1A1-P34GPAGPSGFPC | 137  | 22   |
| >COL1A1-P34TGPAGPPGF  | 347  | >COL1A1-P34TGPAGPSGF  | 980  | 633  |
| >COL1A1-P34PTGPAGPPGF | 190  | >COL1A1-P34PTGPAGPSGF | 139  | 51   |
| >COL1A1-P34PTGPAGPPGF | 463  | >COL1A1-P34PTGPAGPSGF | 190  | 273  |
| >COL1A1-P34GPTGPAGPPC | 1111 | >COL1A1-P34GPTGPAGPSC | 443  | 668  |
| >COL1A1-P34GPTGPAGPPC | 533  | >COL1A1-P34GPTGPAGPSC | 436  | 97   |
| >COL1A1-P34GPTGPAGPPC | 2489 | >COL1A1-P34GPTGPAGPSC | 266  | 2223 |
| >COL1A1-P77GPAGAPGDK  | 5187 | >COL1A1-P77GSAGAPGDK  | 387  | 4800 |
| >COL1A1-P77GLTGPIGPPG | 3620 | >COL1A1-P77GLTGPIGPPG | 477  | 3143 |
| >COL1A1-P77GPIGPPGPA  | 219  | >COL1A1-P77GPIGPPGSA  | 450  | 231  |
| >COL1A1-P77GPIGPPGPA  | 43   | >COL1A1-P77GPIGPPGSA  | 152  | 109  |
| >COL1A1-P77GPIGPPGPAG | 381  | >COL1A1-P77GPIGPPGSAG | 422  | 41   |
| >CREBBP-A27GADSTPNI   | 1043 | >CREBBP-A27GTDSTPNI   | 278  | 765  |
| >CREBBP-A27LGADSTPNI  | 242  | >CREBBP-A27LGTDSTPNI  | 481  | 239  |
| >CREBBP-A27GLGADSTPNI | 109  | >CREBBP-A27GLGTDSTPNI | 136  | 27   |
| >CREBBP-A27GLGADSTPNI | 165  | >CREBBP-A27GLGTDSTPNI | 258  | 93   |
| >CREBBP-A27GLGADSTPNI | 43   | >CREBBP-A27GLGTDSTPNI | 110  | 67   |
| >CREBBP-A27GLGADSTPNI | 19   | >CREBBP-A27GLGTDSTPNI | 23   | 4    |
| >CREBBP-A27GLGADSTPNI | 16   | >CREBBP-A27GLGTDSTPNI | 28   | 12   |
| >CREBBP-A27GLGADSTPNI | 89   | >CREBBP-A27GLGTDSTPNI | 138  | 49   |
| >CREBBP-A27GLGADSTPNI | 19   | >CREBBP-A27GLGTDSTPNI | 31   | 12   |

|                       |       |                       |       |       |
|-----------------------|-------|-----------------------|-------|-------|
| >CREBBP-A2:QMGQPGLG/  | 172   | >CREBBP-A2:QMGQPGLG/  | 1368  | 1196  |
| >CREBBP-A2:GQMGQPGLC  | 364   | >CREBBP-A2:GQMGQPGLC  | 979   | 615   |
| >CREBBP-A2:GQMGQPGLC  | 302   | >CREBBP-A2:GQMGQPGLC  | 1031  | 729   |
| >CREBBP-F1:FVDSGEMSE! | 125   | >CREBBP-F1:FVDSGEMSE! | 1849  | 1724  |
| >CREBBP-F1:FVDSGEMSE! | 102   | >CREBBP-F1:FVDSGEMSE! | 863   | 761   |
| >CREBBP-F1:FVDSGEMSE! | 302   | >CREBBP-F1:FVDSGEMSE! | 315   | 13    |
| >CREBBP-F1:RFVDSGEM   | 10687 | >CREBBP-F1:RFVDSGEM   | 155   | 10532 |
| >CREBBP-F1:RFVDSGEM   | 11211 | >CREBBP-F1:RFVDSGEM   | 486   | 10725 |
| >CREBBP-F1:RFVDSGEM   | 2526  | >CREBBP-F1:RFVDSGEM   | 287   | 2239  |
| >CREBBP-F1:RFVDSGEM   | 10411 | >CREBBP-F1:RFVDSGEM   | 20    | 10391 |
| >CREBBP-F1:RFVDSGEM   | 1783  | >CREBBP-F1:RFVDSGEM   | 342   | 1441  |
| >CREBBP-F1:VEVKPGMKSI | 170   | >CREBBP-F1:VEVKPGMKSI | 4933  | 4763  |
| >CREBBP-F1:VEVKPGMKSI | 316   | >CREBBP-F1:VEVKPGMKSI | 8071  | 7755  |
| >CREBBP-F1:VEVKPGMKSI | 368   | >CREBBP-F1:VEVKPGMKSI | 4022  | 3654  |
| >CREBBP-F1:VEVKPGMKSI | 181   | >CREBBP-F1:VEVKPGMKSI | 3862  | 3681  |
| >CREBBP-F1:VEVKPGMKSI | 453   | >CREBBP-F1:VEVKPGMKSI | 71    | 382   |
| >CREBBP-F1:SRFVDSGEM  | 355   | >CREBBP-F1:SRFVDSGEM  | 1729  | 1374  |
| >CREBBP-F1:SRFVDSGEM  | 103   | >CREBBP-F1:SRFVDSGEM  | 669   | 566   |
| >CREBBP-F1:KSRFVDSG   | 61    | >CREBBP-F1:KSRFVDSG   | 93    | 32    |
| >CREBBP-F1:KSRFVDSGEM | 16    | >CREBBP-F1:KSRFVDSGEM | 20    | 4     |
| >CREBBP-F1:KSRFVDSGEM | 249   | >CREBBP-F1:KSRFVDSGEM | 304   | 55    |
| >CREBBP-F1:KSRFVDSGEM | 8     | >CREBBP-F1:KSRFVDSGEM | 8     | 0     |
| >CREBBP-F1:KSRFVDSGEM | 22    | >CREBBP-F1:KSRFVDSGEM | 27    | 5     |
| >CREBBP-F1:KSRFVDSGEM | 301   | >CREBBP-F1:KSRFVDSGEM | 540   | 239   |
| >CREBBP-F1:MKSRFVDSGI | 38    | >CREBBP-F1:MKSRFVDSGI | 79    | 41    |
| >CREBBP-F1:KPGMKSRF   | 77    | >CREBBP-F1:KPGMKSRF   | 107   | 30    |
| >CREBBP-F1:KPGMKSRFV  | 79    | >CREBBP-F1:KPGMKSRFV  | 23    | 56    |
| >CREBBP-F1:EVKPGMKSR' | 30737 | >CREBBP-F1:EVKPGMKSR' | 447   | 30290 |
| >CREBBP-F1:EVKPGMKSR' | 250   | >CREBBP-F1:EVKPGMKSR' | 3334  | 3084  |
| >CREBBP-F1:EVKPGMKSR' | 24    | >CREBBP-F1:EVKPGMKSR' | 1355  | 1331  |
| >CREBBP-F1:EVKPGMKSR' | 74    | >CREBBP-F1:EVKPGMKSR' | 430   | 356   |
| >CREBBP-F1:EVKPGMKSR' | 490   | >CREBBP-F1:EVKPGMKSR' | 2457  | 1967  |
| >CREBBP-F1:EVKPGMKSR' | 129   | >CREBBP-F1:EVKPGMKSR' | 11971 | 11842 |
| >CREBBP-I14 ILIGYLEYV | 7     | >CREBBP-I14 ILIGYLEYV | 7     | 0     |
| >CREBBP-I14 ILIGYLEYV | 2     | >CREBBP-I14 ILIGYLEYV | 2     | 0     |
| >CREBBP-I14 ILIGYLEYV | 3     | >CREBBP-I14 ILIGYLEYV | 3     | 0     |
| >CREBBP-I14 ILIGYLEYV | 3     | >CREBBP-I14 ILIGYLEYV | 4     | 1     |
| >CREBBP-I14 ILIGYLEYV | 1     | >CREBBP-I14 ILIGYLEYV | 1     | 0     |
| >CREBBP-I14 ILIGYLEYV | 3     | >CREBBP-I14 ILIGYLEYV | 3     | 0     |
| >CREBBP-I14 ILIGYLEYV | 6     | >CREBBP-I14 ILIGYLEYV | 7     | 1     |
| >CREBBP-I14 ILIGYLEYV | 2     | >CREBBP-I14 ILIGYLEYV | 3     | 1     |
| >CREBBP-I14 ILIGYLEY  | 327   | >CREBBP-I14 ILIGYLEY  | 1140  | 813   |
| >CREBBP-I14 ILIGYLEYV | 1     | >CREBBP-I14 ILIGYLEYV | 2     | 1     |

|                         |      |                         |      |      |
|-------------------------|------|-------------------------|------|------|
| >CREBBP-I14 ILIGYLEYVKK | 482  | >CREBBP-I14 TLIGYLEYVKK | 1826 | 1344 |
| >CREBBP-I14 ILIGYLEYVK  | 67   | >CREBBP-I14 TLIGYLEYVK  | 110  | 43   |
| >CREBBP-I14 ILIGYLEYVKK | 128  | >CREBBP-I14 TLIGYLEYVKK | 243  | 115  |
| >CREBBP-I14 ILIGYLEYVK  | 44   | >CREBBP-I14 TLIGYLEYVK  | 27   | 17   |
| >CREBBP-I14 ILIGYLEYVKK | 81   | >CREBBP-I14 TLIGYLEYVKK | 37   | 44   |
| >CREBBP-I14 ILIGYLEY    | 3828 | >CREBBP-I14 TLIGYLEY    | 172  | 3656 |
| >CREBBP-I14 ILIGYLEY    | 203  | >CREBBP-I14 TLIGYLEY    | 41   | 162  |
| >CREBBP-I14 ILIGYLEYV   | 1611 | >CREBBP-I14 TLIGYLEYV   | 279  | 1332 |
| >CREBBP-I14 ILIGYLEY    | 7    | >CREBBP-I14 TLIGYLEY    | 8    | 1    |
| >CREBBP-I14 ILIGYLEY    | 181  | >CREBBP-I14 TLIGYLEY    | 497  | 316  |
| >CREBBP-I14 ILIGYLEYVK  | 366  | >CREBBP-I14 TLIGYLEYVK  | 85   | 281  |
| >CREBBP-I14 ILIGYLEYVKK | 251  | >CREBBP-I14 TLIGYLEYVKK | 103  | 148  |
| >CREBBP-I14 ILIGYLEYV   | 125  | >CREBBP-I14 TLIGYLEYV   | 16   | 109  |
| >CREBBP-I14 ILIGYLEYV   | 406  | >CREBBP-I14 TLIGYLEYV   | 24   | 382  |
| >CREBBP-I14 ILIGYLEY    | 25   | >CREBBP-I14 TLIGYLEY    | 34   | 9    |
| >CREBBP-I14 ILIGYLEY    | 72   | >CREBBP-I14 TLIGYLEY    | 105  | 33   |
| >CREBBP-I14 ILIGYLEY    | 285  | >CREBBP-I14 TLIGYLEY    | 224  | 61   |
| >CREBBP-I14 ILIGYLEY    | 147  | >CREBBP-I14 TLIGYLEY    | 1047 | 900  |
| >CREBBP-I14 ILIGYLEY    | 181  | >CREBBP-I14 TLIGYLEY    | 1480 | 1299 |
| >CREBBP-I14 EILIGYLEYV  | 68   | >CREBBP-I14 ETLIGYLEYV  | 145  | 77   |
| >CREBBP-I14 EILIGYLEYV  | 124  | >CREBBP-I14 ETLIGYLEYV  | 211  | 87   |
| >CREBBP-I14 EILIGYLEYV  | 111  | >CREBBP-I14 ETLIGYLEYV  | 200  | 89   |
| >CREBBP-I14 EILIGYLEYV  | 69   | >CREBBP-I14 ETLIGYLEYV  | 67   | 2    |
| >CREBBP-I14 EILIGYLEYV  | 11   | >CREBBP-I14 ETLIGYLEYV  | 32   | 21   |
| >CREBBP-I14 EILIGYLEYV  | 33   | >CREBBP-I14 ETLIGYLEYV  | 142  | 109  |
| >CREBBP-I14 EILIGYLEYV  | 20   | >CREBBP-I14 ETLIGYLEYV  | 164  | 144  |
| >CREBBP-I14 EILIGYLEYV  | 23   | >CREBBP-I14 ETLIGYLEYV  | 822  | 799  |
| >CREBBP-I14 EILIGYLEYVK | 533  | >CREBBP-I14 ETLIGYLEYVK | 201  | 332  |
| >CREBBP-I14 EILIGYLEY   | 426  | >CREBBP-I14 ETLIGYLEY   | 68   | 358  |
| >CREBBP-I14 EILIGYLEY   | 251  | >CREBBP-I14 ETLIGYLEY   | 33   | 218  |
| >CREBBP-I14 EILIGYLEY   | 284  | >CREBBP-I14 ETLIGYLEY   | 55   | 229  |
| >CREBBP-I14 EILIGYLEYV  | 1595 | >CREBBP-I14 ETLIGYLEYV  | 387  | 1208 |
| >CREBBP-I14 EILIGYLEY   | 1306 | >CREBBP-I14 ETLIGYLEY   | 116  | 1190 |
| >CREBBP-I14 EILIGYLEY   | 27   | >CREBBP-I14 ETLIGYLEY   | 17   | 10   |
| >CREBBP-I14 EILIGYLEYVK | 112  | >CREBBP-I14 ETLIGYLEYVK | 22   | 90   |
| >CREBBP-I14 EILIGYLEYV  | 84   | >CREBBP-I14 ETLIGYLEYV  | 20   | 64   |
| >CREBBP-I14 EILIGYLEYV  | 4    | >CREBBP-I14 ETLIGYLEYV  | 3    | 1    |
| >CREBBP-I14 EILIGYLEY   | 220  | >CREBBP-I14 ETLIGYLEY   | 118  | 102  |
| >CREBBP-I14 EILIGYLEY   | 1330 | >CREBBP-I14 ETLIGYLEY   | 5    | 1325 |
| >CREBBP-I14 EILIGYLEY   | 342  | >CREBBP-I14 ETLIGYLEY   | 476  | 134  |
| >CREBBP-I14 EILIGYLEY   | 8924 | >CREBBP-I14 ETLIGYLEY   | 411  | 8513 |
| >CREBBP-I14 EILIGYLEYVK | 5036 | >CREBBP-I14 ETLIGYLEYVK | 320  | 4716 |
| >CREBBP-I14 RCLRTAVYHE  | 207  | >CREBBP-I14 RCLRTAVYHE  | 3786 | 3579 |

|                         |     |                         |       |       |
|-------------------------|-----|-------------------------|-------|-------|
| >CREBBP-I14 RCLRTAVYHE  | 184 | >CREBBP-I14 RCLRTAVYHE  | 12011 | 11827 |
| >CREBBP-I14 HEILIGYL    | 8   | >CREBBP-I14 HETLIGYL    | 8     | 0     |
| >CREBBP-I14 HEILIGYLEYV | 38  | >CREBBP-I14 HETLIGYLEYV | 21    | 17    |
| >CREBBP-I14 HEILIGYLEYV | 250 | >CREBBP-I14 HETLIGYLEYV | 1242  | 992   |
| >CREBBP-I14 HEILIGYLEY  | 243 | >CREBBP-I14 HETLIGYLEY  | 423   | 180   |
| >CREBBP-I14 HEILIGYLEY  | 416 | >CREBBP-I14 HETLIGYLEY  | 1473  | 1057  |
| >CREBBP-I14 HEILIGYLEYV | 366 | >CREBBP-I14 HETLIGYLEYV | 1197  | 831   |
| >CREBBP-I14 HEILIGYLEY  | 122 | >CREBBP-I14 HETLIGYLEY  | 154   | 32    |
| >CREBBP-I14 HEILIGYL    | 231 | >CREBBP-I14 HETLIGYL    | 676   | 445   |
| >CREBBP-I14 HEILIGYLEY  | 134 | >CREBBP-I14 HETLIGYLEY  | 171   | 37    |
| >CREBBP-I14 HEILIGYLEYV | 349 | >CREBBP-I14 HETLIGYLEYV | 1112  | 763   |
| >CREBBP-I14 HEILIGYL    | 11  | >CREBBP-I14 HETLIGYL    | 13    | 2     |
| >CREBBP-I14 HEILIGYLEYV | 25  | >CREBBP-I14 HETLIGYLEYV | 31    | 6     |
| >CREBBP-I14 HEILIGYL    | 48  | >CREBBP-I14 HETLIGYL    | 70    | 22    |
| >CREBBP-I14 HEILIGYLEYV | 87  | >CREBBP-I14 HETLIGYLEYV | 160   | 73    |
| >CREBBP-I14 HEILIGYLEY  | 259 | >CREBBP-I14 HETLIGYLEY  | 574   | 315   |
| >CREBBP-I14 HEILIGYL    | 196 | >CREBBP-I14 HETLIGYL    | 632   | 436   |
| >CREBBP-I14 HEILIGYLEY  | 28  | >CREBBP-I14 HETLIGYLEY  | 101   | 73    |
| >CREBBP-I14 HEILIGYLEYV | 272 | >CREBBP-I14 HETLIGYLEYV | 882   | 610   |
| >CREBBP-I14 HEILIGYLEYV | 175 | >CREBBP-I14 HETLIGYLEYV | 263   | 88    |
| >CREBBP-I14 HEILIGYL    | 43  | >CREBBP-I14 HETLIGYL    | 130   | 87    |
| >CREBBP-I14 HEILIGYLEYV | 5   | >CREBBP-I14 HETLIGYLEYV | 13    | 8     |
| >CREBBP-I14 YHEILIGYLEY | 113 | >CREBBP-I14 YHETLIGYLEY | 96    | 17    |
| >CREBBP-I14 YHEILIGYLEY | 309 | >CREBBP-I14 YHETLIGYLEY | 272   | 37    |
| >CREBBP-I14 YHEILIGYL   | 937 | >CREBBP-I14 YHETLIGYL   | 177   | 760   |
| >CREBBP-I14 VYHEILIGYL  | 131 | >CREBBP-I14 VYHETLIGYL  | 91    | 40    |
| >CREBBP-I14 VYHEILIGYL  | 405 | >CREBBP-I14 VYHETLIGYL  | 441   | 36    |
| >CREBBP-I14 VYHEILIGYL  | 8   | >CREBBP-I14 VYHETLIGYL  | 9     | 1     |
| >CREBBP-I14 VYHEILIGY   | 320 | >CREBBP-I14 VYHETLIGY   | 142   | 178   |
| >CREBBP-I14 VYHEILIGY   | 73  | >CREBBP-I14 VYHETLIGY   | 158   | 85    |
| >CREBBP-I14 VYHEILIGY   | 160 | >CREBBP-I14 VYHETLIGY   | 286   | 126   |
| >CREBBP-I14 VYHEILIGY   | 47  | >CREBBP-I14 VYHETLIGY   | 212   | 165   |
| >CREBBP-I14 VYHEILIGYL  | 410 | >CREBBP-I14 VYHETLIGYL  | 313   | 97    |
| >CREBBP-I14 AVYHEILIGYL | 231 | >CREBBP-I14 AVYHETLIGYI | 229   | 2     |
| >CREBBP-I14 AVYHEILI    | 414 | >CREBBP-I14 AVYHETLI    | 964   | 550   |
| >CREBBP-I14 AVYHEILIGYL | 330 | >CREBBP-I14 AVYHETLIGYI | 405   | 75    |
| >CREBBP-I14 AVYHEILI    | 605 | >CREBBP-I14 AVYHETLI    | 327   | 278   |
| >CREBBP-I14 AVYHEILIGYL | 147 | >CREBBP-I14 AVYHETLIGYI | 114   | 33    |
| >CREBBP-I14 AVYHEILI    | 161 | >CREBBP-I14 AVYHETLI    | 67    | 94    |
| >CREBBP-I14 AVYHEILIGYL | 51  | >CREBBP-I14 AVYHETLIGYI | 53    | 2     |
| >CREBBP-I14 AVYHEILI    | 116 | >CREBBP-I14 AVYHETLI    | 160   | 44    |
| >CREBBP-I14 AVYHEILIGYL | 64  | >CREBBP-I14 AVYHETLIGYI | 82    | 18    |
| >CREBBP-I14 AVYHEILI    | 275 | >CREBBP-I14 AVYHETLI    | 906   | 631   |

|                         |      |                         |      |      |
|-------------------------|------|-------------------------|------|------|
| >CREBBP-I14 AVYHEILIGYL | 41   | >CREBBP-I14 AVYHETLIGYI | 88   | 47   |
| >CREBBP-I14 AVYHEILIGYL | 341  | >CREBBP-I14 AVYHETLIGYI | 492  | 151  |
| >CREBBP-I14 AVYHEILIGYL | 166  | >CREBBP-I14 AVYHETLIGYI | 280  | 114  |
| >CREBBP-I14 AVYHEILIGY  | 75   | >CREBBP-I14 AVYHETLIGY  | 66   | 9    |
| >CREBBP-I14 AVYHEILIGY  | 175  | >CREBBP-I14 AVYHETLIGY  | 139  | 36   |
| >CREBBP-I14 AVYHEILIGY  | 14   | >CREBBP-I14 AVYHETLIGY  | 20   | 6    |
| >CREBBP-I14 AVYHEILIGYL | 295  | >CREBBP-I14 AVYHETLIGYI | 322  | 27   |
| >CREBBP-I14 AVYHEILIGY  | 791  | >CREBBP-I14 AVYHETLIGY  | 301  | 490  |
| >CREBBP-I14 AVYHEILIGY  | 199  | >CREBBP-I14 AVYHETLIGY  | 315  | 116  |
| >CREBBP-I14 AVYHEILIGY  | 405  | >CREBBP-I14 AVYHETLIGY  | 288  | 117  |
| >CREBBP-I14 AVYHEILI    | 350  | >CREBBP-I14 AVYHETLI    | 154  | 196  |
| >CREBBP-I14 AVYHEILIGY  | 32   | >CREBBP-I14 AVYHETLIGY  | 27   | 5    |
| >CREBBP-I14 AVYHEILIGY  | 181  | >CREBBP-I14 AVYHETLIGY  | 125  | 56   |
| >CREBBP-I14 AVYHEILIGY  | 417  | >CREBBP-I14 AVYHETLIGY  | 222  | 195  |
| >CREBBP-I14 AVYHEILIGY  | 16   | >CREBBP-I14 AVYHETLIGY  | 12   | 4    |
| >CREBBP-I14 AVYHEILIGYL | 334  | >CREBBP-I14 AVYHETLIGYI | 451  | 117  |
| >CREBBP-I14 AVYHEILIGY  | 297  | >CREBBP-I14 AVYHETLIGY  | 474  | 177  |
| >CREBBP-I14 AVYHEILI    | 288  | >CREBBP-I14 AVYHETLI    | 186  | 102  |
| >CREBBP-I14 TAVYHEILI   | 361  | >CREBBP-I14 TAVYHETLI   | 390  | 29   |
| >CREBBP-I14 TAVYHEILIGY | 213  | >CREBBP-I14 TAVYHETLIGY | 275  | 62   |
| >CREBBP-I14 TAVYHEILIGY | 31   | >CREBBP-I14 TAVYHETLIGY | 36   | 5    |
| >CREBBP-I14 TAVYHEILIGY | 222  | >CREBBP-I14 TAVYHETLIGY | 345  | 123  |
| >CREBBP-I14 TAVYHEILIGY | 474  | >CREBBP-I14 TAVYHETLIGY | 683  | 209  |
| >CREBBP-I14 TAVYHEIL    | 879  | >CREBBP-I14 TAVYHETL    | 396  | 483  |
| >CREBBP-I14 TAVYHEILI   | 457  | >CREBBP-I14 TAVYHETLI   | 347  | 110  |
| >CREBBP-I14 TAVYHEIL    | 3571 | >CREBBP-I14 TAVYHETL    | 472  | 3099 |
| >CREBBP-I14 TAVYHEILIGY | 80   | >CREBBP-I14 TAVYHETLIGY | 46   | 34   |
| >CREBBP-I14 TAVYHEILIGY | 39   | >CREBBP-I14 TAVYHETLIGY | 50   | 11   |
| >CREBBP-I14 RTAVYHEI    | 316  | >CREBBP-I14 RTAVYHET    | 5498 | 5182 |
| >CREBBP-I14 RTAVYHEIL   | 577  | >CREBBP-I14 RTAVYHETL   | 327  | 250  |
| >CREBBP-I14 RTAVYHEI    | 398  | >CREBBP-I14 RTAVYHET    | 4712 | 4314 |
| >CREBBP-I14 RTAVYHEI    | 248  | >CREBBP-I14 RTAVYHET    | 4551 | 4303 |
| >CREBBP-I14 RTAVYHEILI  | 215  | >CREBBP-I14 RTAVYHETLI  | 884  | 669  |
| >CREBBP-I14 RTAVYHEI    | 92   | >CREBBP-I14 RTAVYHET    | 9169 | 9077 |
| >CREBBP-I14 RTAVYHEIL   | 260  | >CREBBP-I14 RTAVYHETL   | 23   | 237  |
| >CREBBP-I14 RTAVYHEILI  | 130  | >CREBBP-I14 RTAVYHETLI  | 93   | 37   |
| >CREBBP-I14 RTAVYHEI    | 115  | >CREBBP-I14 RTAVYHET    | 3262 | 3147 |
| >CREBBP-I14 RTAVYHEILI  | 191  | >CREBBP-I14 RTAVYHETLI  | 413  | 222  |
| >CREBBP-I14 RTAVYHEI    | 17   | >CREBBP-I14 RTAVYHET    | 1076 | 1059 |
| >CREBBP-I14 RTAVYHEIL   | 9    | >CREBBP-I14 RTAVYHETL   | 4    | 5    |
| >CREBBP-I14 RTAVYHEILI  | 30   | >CREBBP-I14 RTAVYHETLI  | 18   | 12   |
| >CREBBP-I14 RTAVYHEIL   | 1153 | >CREBBP-I14 RTAVYHETL   | 308  | 845  |
| >CREBBP-I14 RTAVYHEI    | 33   | >CREBBP-I14 RTAVYHET    | 6079 | 6046 |



|                         |       |                         |       |       |
|-------------------------|-------|-------------------------|-------|-------|
| >CREBBP-I14 RTAVYHEIL   | 70    | >CREBBP-I14 RTAVYHETL   | 58    | 12    |
| >CREBBP-I14 RTAVYHEILI  | 64    | >CREBBP-I14 RTAVYHETLI  | 52    | 12    |
| >CREBBP-I14 RTAVYHEIL   | 31    | >CREBBP-I14 RTAVYHETL   | 42    | 11    |
| >CREBBP-I14 RTAVYHEILI  | 71    | >CREBBP-I14 RTAVYHETLI  | 140   | 69    |
| >CREBBP-I14 RTAVYHEI    | 334   | >CREBBP-I14 RTAVYHET    | 2098  | 1764  |
| >CREBBP-I14 RTAVYHEIL   | 25    | >CREBBP-I14 RTAVYHETL   | 20    | 5     |
| >CREBBP-I14 RTAVYHEILI  | 46    | >CREBBP-I14 RTAVYHETLI  | 65    | 19    |
| >CREBBP-I14 RTAVYHEI    | 436   | >CREBBP-I14 RTAVYHET    | 2541  | 2105  |
| >CREBBP-I14 RTAVYHEI    | 20    | >CREBBP-I14 RTAVYHET    | 22363 | 22343 |
| >CREBBP-I14 RTAVYHEIL   | 87    | >CREBBP-I14 RTAVYHETL   | 52    | 35    |
| >CREBBP-I14 RTAVYHEILI  | 127   | >CREBBP-I14 RTAVYHETLI  | 77    | 50    |
| >CREBBP-I14 LRTAVYHEI   | 415   | >CREBBP-I14 LRTAVYHET   | 21167 | 20752 |
| >CREBBP-I14 LRTAVYHEI   | 138   | >CREBBP-I14 LRTAVYHET   | 1679  | 1541  |
| >CREBBP-I14 LRTAVYHEIL  | 84    | >CREBBP-I14 LRTAVYHETL  | 117   | 33    |
| >CREBBP-I14 LRTAVYHEILI | 193   | >CREBBP-I14 LRTAVYHETLI | 203   | 10    |
| >CREBBP-I14 LRTAVYHEI   | 290   | >CREBBP-I14 LRTAVYHET   | 9613  | 9323  |
| >CREBBP-I14 LRTAVYHEIL  | 207   | >CREBBP-I14 LRTAVYHETL  | 276   | 69    |
| >CREBBP-I14 LRTAVYHEILI | 316   | >CREBBP-I14 LRTAVYHETLI | 471   | 155   |
| >CREBBP-I14 CLRTAVYHEI  | 486   | >CREBBP-I14 CLRTAVYHET  | 3610  | 3124  |
| >CREBBP-I14 CLRTAVYHEI  | 356   | >CREBBP-I14 CLRTAVYHET  | 5948  | 5592  |
| >CREBBP-I14 CLRTAVYHEI  | 70    | >CREBBP-I14 CLRTAVYHET  | 985   | 915   |
| >CREBBP-I14 CLRTAVYHEIL | 272   | >CREBBP-I14 CLRTAVYHET  | 69    | 203   |
| >CREBBP-I14 CLRTAVYHEI  | 186   | >CREBBP-I14 CLRTAVYHET  | 3678  | 3492  |
| >CREBBP-I14 CLRTAVYHEIL | 773   | >CREBBP-I14 CLRTAVYHET  | 455   | 318   |
| >CREBBP-L13 LEDRVNKF    | 2528  | >CREBBP-L13 SEDRVNKF    | 410   | 2118  |
| >CREBBP-L13 LEDRVNKFL   | 12    | >CREBBP-L13 SEDRVNKFL   | 10    | 2     |
| >CREBBP-L13 LEDRVNKFL   | 57    | >CREBBP-L13 SEDRVNKFL   | 105   | 48    |
| >CREBBP-L13 LEDRVNKF    | 899   | >CREBBP-L13 SEDRVNKF    | 445   | 454   |
| >CREBBP-L13 LEDRVNKFL   | 849   | >CREBBP-L13 SEDRVNKFL   | 358   | 491   |
| >CREBBP-L13 HLEDRVNKFL  | 490   | >CREBBP-L13 HSEDRVNKFL  | 15173 | 14683 |
| >CREBBP-L13 HLEDRVNKFL  | 413   | >CREBBP-L13 HSEDRVNKFL  | 22347 | 21934 |
| >CREBBP-L13 HLEDRVNKFL  | 298   | >CREBBP-L13 HSEDRVNKFL  | 22137 | 21839 |
| >CREBBP-L13 HLEDRVNKFL  | 20    | >CREBBP-L13 HSEDRVNKFL  | 23615 | 23595 |
| >CREBBP-L13 HLEDRVNK    | 326   | >CREBBP-L13 HSEDRVNK    | 2756  | 2430  |
| >CREBBP-L13 HLEDRVNK    | 1620  | >CREBBP-L13 HSEDRVNK    | 220   | 1400  |
| >CREBBP-L13 HLEDRVNKFL  | 40    | >CREBBP-L13 HSEDRVNKFL  | 30    | 10    |
| >CREBBP-L13 HLEDRVNKFL  | 102   | >CREBBP-L13 HSEDRVNKFL  | 133   | 31    |
| >CREBBP-L13 HLEDRVNK    | 891   | >CREBBP-L13 HSEDRVNK    | 303   | 588   |
| >CREBBP-L13 HLEDRVNKFL  | 78    | >CREBBP-L13 HSEDRVNKFL  | 32    | 46    |
| >CREBBP-L13 HLEDRVNKF   | 4548  | >CREBBP-L13 HSEDRVNKF   | 12    | 4536  |
| >CREBBP-L13 HLEDRVNKFL  | 14296 | >CREBBP-L13 HSEDRVNKFL  | 181   | 14115 |
| >CREBBP-L13 HLEDRVNKF   | 6538  | >CREBBP-L13 HSEDRVNKF   | 437   | 6101  |
| >CREBBP-L13 HLEDRVNKFL  | 82    | >CREBBP-L13 HSEDRVNKFL  | 285   | 203   |

|                         |       |                         |       |       |
|-------------------------|-------|-------------------------|-------|-------|
| >CREBBP-L13:RLQTTRLGNF  | 383   | >CREBBP-L13:RLQTTRLGNF  | 17854 | 17471 |
| >CREBBP-L13:RLQTTRLGNF  | 177   | >CREBBP-L13:RLQTTRLGNF  | 12284 | 12107 |
| >CREBBP-L13:RLQTTRLGNF  | 59    | >CREBBP-L13:RLQTTRLGNF  | 14101 | 14042 |
| >CREBBP-L13:RLQTTRLGNF  | 139   | >CREBBP-L13:RLQTTRLGNF  | 7413  | 7274  |
| >CREBBP-L13:NHLED RVNKI | 341   | >CREBBP-L13:NHSEDRVNKI  | 636   | 295   |
| >CREBBP-L13:NHLED RVNKI | 114   | >CREBBP-L13:NHSEDRVNKI  | 154   | 40    |
| >CREBBP-L13:RLGNHLEDRA  | 95    | >CREBBP-L13:RLGNHSEDR\  | 135   | 40    |
| >CREBBP-L13:RLGNHLEDRA  | 5     | >CREBBP-L13:RLGNHSEDR\  | 7     | 2     |
| >CREBBP-L13:RLGNHLEDRA  | 15    | >CREBBP-L13:RLGNHSEDR\  | 17    | 2     |
| >CREBBP-L13:RLGNHLEDRA  | 16    | >CREBBP-L13:RLGNHSEDR\  | 17    | 1     |
| >CREBBP-L13:RLGNHLEDRA  | 61    | >CREBBP-L13:RLGNHSEDR\  | 62    | 1     |
| >CREBBP-L13:RLGNHLEDRA  | 5     | >CREBBP-L13:RLGNHSEDR\  | 6     | 1     |
| >CREBBP-L13:RLGNHLEDR   | 164   | >CREBBP-L13:RLGNHSEDR   | 366   | 202   |
| >CREBBP-L13:RLGNHLEDR   | 708   | >CREBBP-L13:RLGNHSEDR   | 398   | 310   |
| >CREBBP-L13:TTRLGNHL    | 87    | >CREBBP-L13:TTRLGNHS    | 422   | 335   |
| >CREBBP-L13:TTRLGNHLED  | 207   | >CREBBP-L13:TTRLGNHSEC  | 346   | 139   |
| >CREBBP-L13:TTRLGNHLED  | 143   | >CREBBP-L13:TTRLGNHSEC  | 198   | 55    |
| >CREBBP-L13:TTRLGNHLED  | 86    | >CREBBP-L13:TTRLGNHSEC  | 86    | 0     |
| >CREBBP-L13:TTRLGNHL    | 43    | >CREBBP-L13:TTRLGNHS    | 10830 | 10787 |
| >CREBBP-L13:TTRLGNHL    | 152   | >CREBBP-L13:TTRLGNHS    | 3236  | 3084  |
| >CREBBP-L13:QTTRLGNHL   | 398   | >CREBBP-L13:QTTRLGNHS   | 7366  | 6968  |
| >CREBBP-L13:QTTRLGNHL   | 313   | >CREBBP-L13:QTTRLGNHS   | 11504 | 11191 |
| >CREBBP-L13:QTTRLGNHL   | 252   | >CREBBP-L13:QTTRLGNHS   | 6531  | 6279  |
| >CREBBP-L13:LQTTRLGNHL  | 387   | >CREBBP-L13:LQTTRLGNHS  | 8021  | 7634  |
| >CREBBP-N8:INPGIGNV     | 12134 | >CREBBP-N8:ITPGIGNV     | 306   | 11828 |
| >CREBBP-N8:INPGIGNV     | 10570 | >CREBBP-N8:ITPGIGNV     | 175   | 10395 |
| >CREBBP-N8:INPGIGNV     | 14697 | >CREBBP-N8:ITPGIGNV     | 325   | 14372 |
| >CREBBP-N8:INPGIGNV     | 3196  | >CREBBP-N8:ITPGIGNV     | 22    | 3174  |
| >CREBBP-N8:INPGIGNVS    | 13654 | >CREBBP-N8:ITPGIGNVS    | 29    | 13625 |
| >CREBBP-N8:INPGIGNVSA   | 19038 | >CREBBP-N8:ITPGIGNVSA   | 95    | 18943 |
| >CREBBP-N8:INPGIGNVSA   | 19226 | >CREBBP-N8:ITPGIGNVSA   | 74    | 19152 |
| >CREBBP-N8:LLRGGSGSSIT  | 12663 | >CREBBP-N8:LLRGGSGSSIT  | 251   | 12412 |
| >CREBBP-N8:LLRGGSGSSIT  | 7401  | >CREBBP-N8:LLRGGSGSSIT  | 83    | 7318  |
| >CREBBP-N8:SINPGIGNV    | 212   | >CREBBP-N8:SITPGIGNV    | 591   | 379   |
| >CREBBP-N8:SINPGIGNV    | 4     | >CREBBP-N8:SITPGIGNV    | 12    | 8     |
| >CREBBP-N8:SINPGIGNVS/  | 64    | >CREBBP-N8:SITPGIGNVSA/ | 404   | 340   |
| >CREBBP-N8:SINPGIGNV    | 100   | >CREBBP-N8:SITPGIGNV    | 69    | 31    |
| >CREBBP-N8:SINPGIGNVS/  | 397   | >CREBBP-N8:SITPGIGNVSA/ | 216   | 181   |
| >CREBBP-N8:SINPGIGNV    | 15    | >CREBBP-N8:SITPGIGNV    | 39    | 24    |
| >CREBBP-N8:SINPGIGNV    | 30    | >CREBBP-N8:SITPGIGNV    | 32    | 2     |
| >CREBBP-N8:SINPGIGNV    | 5     | >CREBBP-N8:SITPGIGNV    | 3     | 2     |
| >CREBBP-N8:SINPGIGNVS/  | 117   | >CREBBP-N8:SITPGIGNVSA/ | 70    | 47    |
| >CREBBP-N8:SINPGIGNV    | 51    | >CREBBP-N8:SITPGIGNV    | 50    | 1     |

|                         |      |                         |      |      |
|-------------------------|------|-------------------------|------|------|
| >CREBBP-N8: SINPGIGNV   | 139  | >CREBBP-N8: SITPGIGNV   | 340  | 201  |
| >CREBBP-N8: SSINPGIGNV  | 276  | >CREBBP-N8: SSITPGIGNV  | 312  | 36   |
| >CREBBP-N8: SSINPGIGNV  | 93   | >CREBBP-N8: SSITPGIGNV  | 104  | 11   |
| >CREBBP-N8: SSINPGIGNV  | 206  | >CREBBP-N8: SSITPGIGNV  | 280  | 74   |
| >CREBBP-N8: SSINPGIGNV  | 420  | >CREBBP-N8: SSITPGIGNV  | 444  | 24   |
| >CREBBP-N8: GSSINPGI    | 466  | >CREBBP-N8: GSSITPGI    | 292  | 174  |
| >CREBBP-N8: GSSINPGI    | 221  | >CREBBP-N8: GSSITPGI    | 94   | 127  |
| >CREBBP-N8: SGSSINPGI   | 639  | >CREBBP-N8: SGSSITPGI   | 356  | 283  |
| >CREBBP-N8: GSGSSINPGI  | 298  | >CREBBP-N8: GSGSSITPGI  | 405  | 107  |
| >CREBBP-P9: QPPSVATPQ   | 1468 | >CREBBP-P9: QPSSVATPQ   | 160  | 1308 |
| >CREBBP-P9: VQPPSVAT    | 419  | >CREBBP-P9: VQPSSVAT    | 1026 | 607  |
| >CREBBP-P9: TPVQPPSV    | 233  | >CREBBP-P9: TPVQPSSV    | 477  | 244  |
| >CREBBP-P9: TPVQPPSV    | 610  | >CREBBP-P9: TPVQPSSV    | 123  | 487  |
| >CREBBP-P9: TPVQPPSVA   | 467  | >CREBBP-P9: TPVQPSSVA   | 98   | 369  |
| >CREBBP-P9: TPVQPPSVA   | 646  | >CREBBP-P9: TPVQPSSVA   | 223  | 423  |
| >CREBBP-P9: TPVQPPSV    | 483  | >CREBBP-P9: TPVQPSSV    | 1008 | 525  |
| >CREBBP-P9: TPVQPPSVA   | 104  | >CREBBP-P9: TPVQPSSVA   | 81   | 23   |
| >CREBBP-P9: QTPVQPPSV   | 498  | >CREBBP-P9: QTPVQPSSV   | 63   | 435  |
| >CREBBP-P9: QTPVQPPSV   | 298  | >CREBBP-P9: QTPVQPSSV   | 1833 | 1535 |
| >CREBBP-P9: QTPVQPPSV   | 277  | >CREBBP-P9: QTPVQPSSV   | 578  | 301  |
| >CRLF2-F232 FILISSLA    | 162  | >CRLF2-F232 CILISSLA    | 6822 | 6660 |
| >CRLF2-F232 FILISSLAI   | 79   | >CRLF2-F232 CILISSLAI   | 3749 | 3670 |
| >CRLF2-F232 FILISSLAIL  | 92   | >CRLF2-F232 CILISSLAIL  | 1936 | 1844 |
| >CRLF2-F232 FILISSLAILL | 48   | >CRLF2-F232 CILISSLAILL | 2020 | 1972 |
| >CRLF2-F232 FILISSLA    | 149  | >CRLF2-F232 CILISSLA    | 4096 | 3947 |
| >CRLF2-F232 FILISSLAI   | 362  | >CRLF2-F232 CILISSLAI   | 5286 | 4924 |
| >CRLF2-F232 FILISSLAIL  | 81   | >CRLF2-F232 CILISSLAIL  | 668  | 587  |
| >CRLF2-F232 FILISSLAILL | 97   | >CRLF2-F232 CILISSLAILL | 2149 | 2052 |
| >CRLF2-F232 FILISSLA    | 80   | >CRLF2-F232 CILISSLA    | 1661 | 1581 |
| >CRLF2-F232 FILISSLAI   | 147  | >CRLF2-F232 CILISSLAI   | 2086 | 1939 |
| >CRLF2-F232 FILISSLAIL  | 57   | >CRLF2-F232 CILISSLAIL  | 492  | 435  |
| >CRLF2-F232 FILISSLA    | 34   | >CRLF2-F232 CILISSLA    | 2814 | 2780 |
| >CRLF2-F232 FILISSLAI   | 18   | >CRLF2-F232 CILISSLAI   | 730  | 712  |
| >CRLF2-F232 FILISSLAIL  | 49   | >CRLF2-F232 CILISSLAIL  | 467  | 418  |
| >CRLF2-F232 FILISSLAILL | 19   | >CRLF2-F232 CILISSLAILL | 1181 | 1162 |
| >CRLF2-F232 FILISSLA    | 104  | >CRLF2-F232 CILISSLA    | 4545 | 4441 |
| >CRLF2-F232 FILISSLAI   | 23   | >CRLF2-F232 CILISSLAI   | 1194 | 1171 |
| >CRLF2-F232 FILISSLAIL  | 52   | >CRLF2-F232 CILISSLAIL  | 2805 | 2753 |
| >CRLF2-F232 FILISSLAILL | 31   | >CRLF2-F232 CILISSLAILL | 1555 | 1524 |
| >CRLF2-F232 FILISSLAI   | 139  | >CRLF2-F232 CILISSLAI   | 5439 | 5300 |
| >CRLF2-F232 FILISSLAIL  | 76   | >CRLF2-F232 CILISSLAIL  | 3251 | 3175 |
| >CRLF2-F232 FILISSLAILL | 300  | >CRLF2-F232 CILISSLAILL | 7233 | 6933 |
| >CRLF2-F232 FILISSLA    | 114  | >CRLF2-F232 CILISSLA    | 9274 | 9160 |

|                         |      |                         |       |       |
|-------------------------|------|-------------------------|-------|-------|
| >CRLF2-F232 FILISSLAI   | 72   | >CRLF2-F232 CILISSLAI   | 6762  | 6690  |
| >CRLF2-F232 FILISSLAIL  | 70   | >CRLF2-F232 CILISSLAIL  | 5618  | 5548  |
| >CRLF2-F232 FILISSLAILL | 31   | >CRLF2-F232 CILISSLAILL | 3648  | 3617  |
| >CRLF2-F232 FILISSLAIL  | 162  | >CRLF2-F232 CILISSLAIL  | 3165  | 3003  |
| >CRLF2-F232 FILISSLAILL | 451  | >CRLF2-F232 CILISSLAILL | 4610  | 4159  |
| >CRLF2-F232 FILISSLA    | 66   | >CRLF2-F232 CILISSLA    | 7276  | 7210  |
| >CRLF2-F232 FILISSLAI   | 148  | >CRLF2-F232 CILISSLAI   | 10002 | 9854  |
| >CRLF2-F232 FILISSLAIL  | 20   | >CRLF2-F232 CILISSLAIL  | 1981  | 1961  |
| >CRLF2-F232 FILISSLAILL | 22   | >CRLF2-F232 CILISSLAILL | 2593  | 2571  |
| >CRLF2-F232 FILISSLAI   | 51   | >CRLF2-F232 CILISSLAI   | 2278  | 2227  |
| >CRLF2-F232 FILISSLAIL  | 298  | >CRLF2-F232 CILISSLAIL  | 7044  | 6746  |
| >CRLF2-F232 FILISSLAILL | 82   | >CRLF2-F232 CILISSLAILL | 3498  | 3416  |
| >CRLF2-F232 FILISSLAI   | 496  | >CRLF2-F232 CILISSLAI   | 3693  | 3197  |
| >CRLF2-F232 FILISSLAI   | 300  | >CRLF2-F232 CILISSLAI   | 1838  | 1538  |
| >CRLF2-F232 FILISSLAIL  | 284  | >CRLF2-F232 CILISSLAIL  | 5772  | 5488  |
| >CRLF2-F232 FILISSLAILL | 206  | >CRLF2-F232 CILISSLAILL | 4420  | 4214  |
| >CRLF2-F232 FILISSLAI   | 2335 | >CRLF2-F232 CILISSLAI   | 448   | 1887  |
| >CRLF2-F232 KFILISSL    | 18   | >CRLF2-F232 KCILISSL    | 3359  | 3341  |
| >CRLF2-F232 KFILISSLAI  | 140  | >CRLF2-F232 KCILISSLAI  | 8288  | 8148  |
| >CRLF2-F232 KFILISSL    | 410  | >CRLF2-F232 KCILISSL    | 975   | 565   |
| >CRLF2-F232 KFILISSLAIL | 272  | >CRLF2-F232 KCILISSLAIL | 16777 | 16505 |
| >CRLF2-F232 KFILISSL    | 192  | >CRLF2-F232 KCILISSL    | 18535 | 18343 |
| >CRLF2-F232 KFILISSLAI  | 340  | >CRLF2-F232 KCILISSLAI  | 19506 | 19166 |
| >CRLF2-F232 KFILISSLAI  | 356  | >CRLF2-F232 KCILISSLAI  | 1421  | 1065  |
| >CRLF2-F232 KFILISSL    | 944  | >CRLF2-F232 KCILISSL    | 463   | 481   |
| >CRLF2-F232 KFILISSLAI  | 168  | >CRLF2-F232 KCILISSLAI  | 82    | 86    |
| >CRLF2-F232 KFILISSLAIL | 2127 | >CRLF2-F232 KCILISSLAIL | 338   | 1789  |
| >CRLF2-F232 KFILISSL    | 156  | >CRLF2-F232 KCILISSL    | 23063 | 22907 |
| >CRLF2-F232 KFILISSLAIL | 431  | >CRLF2-F232 KCILISSLAIL | 27080 | 26649 |
| >CRLF2-F232 PTPPKPKLSKF | 58   | >CRLF2-F232 PTPPKPKLSK  | 1412  | 1354  |
| >CRLF2-F232 SKFILISSL   | 341  | >CRLF2-F232 SKCILISSL   | 267   | 74    |
| >CRLF2-F232 SKFILISSLAI | 281  | >CRLF2-F232 SKCILISSLAI | 1447  | 1166  |
| >CRLF2-F232 SKFILISSL   | 10   | >CRLF2-F232 SKCILISSL   | 183   | 173   |
| >CRLF2-F232 SKFILISSLA  | 403  | >CRLF2-F232 SKCILISSLA  | 4659  | 4256  |
| >CRLF2-F232 SKFILISSLAI | 12   | >CRLF2-F232 SKCILISSLAI | 172   | 160   |
| >CRLF2-F232 SKFILISSL   | 235  | >CRLF2-F232 SKCILISSL   | 965   | 730   |
| >CRLF2-F232 SKFILISSL   | 273  | >CRLF2-F232 SKCILISSL   | 2880  | 2607  |
| >CRLF2-F232 SKFILISSL   | 366  | >CRLF2-F232 SKCILISSL   | 722   | 356   |
| >CRLF2-F232 SKFILISSLAI | 322  | >CRLF2-F232 SKCILISSLAI | 869   | 547   |
| >CRLF2-F232 LSKFILISS   | 392  | >CRLF2-F232 LSKCILISS   | 606   | 214   |
| >CRLF2-F232 LSKFILISSL  | 237  | >CRLF2-F232 LSKCILISSL  | 338   | 101   |
| >CRLF2-F232 LSKFILISSLA | 51   | >CRLF2-F232 LSKCILISSLA | 71    | 20    |
| >CRLF2-F232 LSKFILISSL  | 662  | >CRLF2-F232 LSKCILISSL  | 434   | 228   |

|                         |      |                         |       |       |
|-------------------------|------|-------------------------|-------|-------|
| >CRLF2-F232 LSKFILISL   | 654  | >CRLF2-F232 LSKCILISL   | 213   | 441   |
| >CRLF2-F232 LSKFILISL   | 34   | >CRLF2-F232 LSKCILISL   | 55    | 21    |
| >CRLF2-F232 LSKFILISL   | 148  | >CRLF2-F232 LSKCILISL   | 809   | 661   |
| >CRLF2-F232 LSKFILISLA  | 120  | >CRLF2-F232 LSKCILISLA  | 121   | 1     |
| >CRLF2-F232 LSKFILISL   | 267  | >CRLF2-F232 LSKCILISL   | 184   | 83    |
| >CRLF2-F232 KLSKFILI    | 25   | >CRLF2-F232 KLSKCILI    | 24    | 1     |
| >CRLF2-F232 KLSKFILISL  | 27   | >CRLF2-F232 KLSKCILISL  | 26    | 1     |
| >CRLF2-F232 KLSKFILI    | 9    | >CRLF2-F232 KLSKCILI    | 13    | 4     |
| >CRLF2-F232 KLSKFILISS  | 354  | >CRLF2-F232 KLSKCILISS  | 493   | 139   |
| >CRLF2-F232 KLSKFILISL  | 6    | >CRLF2-F232 KLSKCILISL  | 6     | 0     |
| >CRLF2-F232 KLSKFILI    | 20   | >CRLF2-F232 KLSKCILI    | 26    | 6     |
| >CRLF2-F232 KLSKFILISS  | 480  | >CRLF2-F232 KLSKCILISS  | 935   | 455   |
| >CRLF2-F232 KLSKFILISL  | 10   | >CRLF2-F232 KLSKCILISL  | 10    | 0     |
| >CRLF2-F232 KLSKFILI    | 81   | >CRLF2-F232 KLSKCILI    | 171   | 90    |
| >CRLF2-F232 KLSKFILISL  | 129  | >CRLF2-F232 KLSKCILISL  | 105   | 24    |
| >CRLF2-F232 KLSKFILI    | 22   | >CRLF2-F232 KLSKCILI    | 128   | 106   |
| >CRLF2-F232 KLSKFILISL  | 11   | >CRLF2-F232 KLSKCILISL  | 36    | 25    |
| >CRLF2-F232 KLSKFILI    | 70   | >CRLF2-F232 KLSKCILI    | 127   | 57    |
| >CRLF2-F232 KLSKFILISL  | 32   | >CRLF2-F232 KLSKCILISL  | 26    | 6     |
| >CRLF2-F232 KLSKFILI    | 47   | >CRLF2-F232 KLSKCILI    | 105   | 58    |
| >CRLF2-F232 KLSKFILISL  | 26   | >CRLF2-F232 KLSKCILISL  | 42    | 16    |
| >CRLF2-F232 KLSKFILISL  | 157  | >CRLF2-F232 KLSKCILISL  | 124   | 33    |
| >CRLF2-F232 KLSKFILI    | 36   | >CRLF2-F232 KLSKCILI    | 60    | 24    |
| >CRLF2-F232 KLSKFILISL  | 5    | >CRLF2-F232 KLSKCILISL  | 6     | 1     |
| >CRLF2-F232 KLSKFILI    | 126  | >CRLF2-F232 KLSKCILI    | 547   | 421   |
| >CRLF2-F232 KLSKFILISL  | 122  | >CRLF2-F232 KLSKCILISL  | 573   | 451   |
| >CRLF2-F232 KLSKFILISL  | 171  | >CRLF2-F232 KLSKCILISL  | 246   | 75    |
| >CRLF2-F232 KPKLSKFI    | 151  | >CRLF2-F232 KPKLSKCI    | 220   | 69    |
| >CRLF2-F232 KPKLSKFIL   | 45   | >CRLF2-F232 KPKLSKCIL   | 60    | 15    |
| >CRLF2-F232 KPKLSKFILI  | 371  | >CRLF2-F232 KPKLSKCILI  | 129   | 242   |
| >CRLF2-F232 KPKLSKFIL   | 1605 | >CRLF2-F232 KPKLSKCIL   | 297   | 1308  |
| >CRLF2-F232 PKPKLSKFI   | 181  | >CRLF2-F232 PKPKLSKCI   | 1322  | 1141  |
| >CRLF2-F232 PKPKLSKF    | 329  | >CRLF2-F232 PKPKLSKC    | 22436 | 22107 |
| >CRLF2-F232 PPKPKLSKFIL | 1221 | >CRLF2-F232 PPKPKLSKCIL | 484   | 737   |
| >CRLF2-F232 TPPPKLSKF   | 414  | >CRLF2-F232 TPPPKLSKC   | 15184 | 14770 |
| >CRLF2-F232 TPPPKLSKFI  | 309  | >CRLF2-F232 TPPPKLSKCI  | 363   | 54    |
| >CRLF2-F232 TPPPKLSKF   | 202  | >CRLF2-F232 TPPPKLSKC   | 32029 | 31827 |
| >CRLF2-F232 TPPPKLSKFI  | 82   | >CRLF2-F232 TPPPKLSKCI  | 4417  | 4335  |
| >CRLF2-F232 TPPPKLSKF   | 145  | >CRLF2-F232 TPPPKLSKC   | 2338  | 2193  |
| >CRTC3-N15{NRTNSDSAL    | 427  | >CRTC3-N15{KRTNSDSAL    | 52    | 375   |
| >CRTC3-N15{NRTNSDSAL    | 108  | >CRTC3-N15{KRTNSDSAL    | 1511  | 1403  |
| >CRTC3-N15{NRTNSDSAL    | 3004 | >CRTC3-N15{KRTNSDSAL    | 173   | 2831  |
| >CRTC3-N15{NRTNSDSAL    | 816  | >CRTC3-N15{KRTNSDSAL    | 222   | 594   |

|                        |       |                        |      |       |
|------------------------|-------|------------------------|------|-------|
| >CRTC3-N15\LNRTNSDSA   | 10021 | >CRTC3-N15\LKRTNSDSA   | 174  | 9847  |
| >CRTC3-N15\LNRTNSDSAL  | 449   | >CRTC3-N15\LKRTNSDSAL  | 6    | 443   |
| >CRTC3-N15\LNRTNSDSAL  | 9663  | >CRTC3-N15\LKRTNSDSAL  | 283  | 9380  |
| >CRTC3-N15\ALNRTNSDSA  | 37    | >CRTC3-N15\ALKRTNSDSA  | 250  | 213   |
| >CRTC3-N15\ALNRTNSDSA  | 375   | >CRTC3-N15\ALKRTNSDSA  | 313  | 62    |
| >CRTC3-N15\ALNRTNSDSA  | 42    | >CRTC3-N15\ALKRTNSDSA  | 72   | 30    |
| >CRTC3-N15\ALNRTNSDSA  | 190   | >CRTC3-N15\ALKRTNSDSA  | 3716 | 3526  |
| >CRTC3-N15\ALNRTNSDSA  | 74    | >CRTC3-N15\ALKRTNSDSA  | 1465 | 1391  |
| >CRTC3-N15\ALNRTNSDSA  | 272   | >CRTC3-N15\ALKRTNSDSA  | 2360 | 2088  |
| >CRTC3-N15\ALNRTNSDSA  | 54    | >CRTC3-N15\ALKRTNSDSA  | 606  | 552   |
| >CRTC3-N15\ALNRTNSDSA  | 417   | >CRTC3-N15\ALKRTNSDSA  | 8842 | 8425  |
| >CRTC3-N15\ALNRTNSDSA  | 222   | >CRTC3-N15\ALKRTNSDSA  | 7127 | 6905  |
| >CRTC3-N15\ALNRTNSDSA  | 28    | >CRTC3-N15\ALKRTNSDSA  | 99   | 71    |
| >CRTC3-N15\ALNRTNSDSA  | 8     | >CRTC3-N15\ALKRTNSDSA  | 22   | 14    |
| >CRTC3-N15\ALNRTNSDSA  | 2638  | >CRTC3-N15\ALKRTNSDSA  | 147  | 2491  |
| >CRTC3-N15\ALNRTNSDSA  | 4700  | >CRTC3-N15\ALKRTNSDSA  | 377  | 4323  |
| >CRTC3-N15\ALNRTNSDSA  | 5063  | >CRTC3-N15\ALKRTNSDSA  | 220  | 4843  |
| >CRTC3-N15\ALNRTNSDSA  | 442   | >CRTC3-N15\ALKRTNSDSA  | 243  | 199   |
| >CRTC3-N15\ALNRTNSDSA  | 173   | >CRTC3-N15\ALKRTNSDSA  | 111  | 62    |
| >CRTC3-N15\RLTSALNRT   | 376   | >CRTC3-N15\RLTSALKRT   | 5908 | 5532  |
| >CRTC3-N15\RLTSALNRT   | 298   | >CRTC3-N15\RLTSALKRT   | 1244 | 946   |
| >CRTC3-N15\RLTSALNRT   | 184   | >CRTC3-N15\RLTSALKRT   | 534  | 350   |
| >CRTC3-N15\RLTSALNR    | 221   | >CRTC3-N15\RLTSALKR    | 306  | 85    |
| >CRTC3-N15\RLTSALNR    | 41    | >CRTC3-N15\RLTSALKR    | 69   | 28    |
| >CRTC3-N15\RLTSALNR    | 89    | >CRTC3-N15\RLTSALKR    | 102  | 13    |
| >CRTC3-N15\FRLTSALNR   | 259   | >CRTC3-N15\FRLTSALKR   | 563  | 304   |
| >CRTC3-N15\FRLTSALN    | 1281  | >CRTC3-N15\FRLTSALK    | 36   | 1245  |
| >CRTC3-N15\FRLTSALNR   | 45    | >CRTC3-N15\FRLTSALKR   | 35   | 10    |
| >CRTC3-N15\FRLTSALNR   | 217   | >CRTC3-N15\FRLTSALKR   | 287  | 70    |
| >CRTC3-N15\GFRLTSALN   | 890   | >CRTC3-N15\GFRLTSALK   | 4    | 886   |
| >CRTC3-N15\GFRLTSALNR  | 154   | >CRTC3-N15\GFRLTSALKR  | 339  | 185   |
| >CRTC3-N15\GFRLTSALN   | 15873 | >CRTC3-N15\GFRLTSALK   | 336  | 15537 |
| >CRTC3-N15\GFRLTSALNR  | 60    | >CRTC3-N15\GFRLTSALKR  | 85   | 25    |
| >CRTC3-N15\GFRLTSALNR  | 485   | >CRTC3-N15\GFRLTSALKR  | 473  | 12    |
| >CRTC3-N15\GFRLTSALNR  | 308   | >CRTC3-N15\GFRLTSALKR  | 475  | 167   |
| >CRTC3-N15\GFRLTSALNR  | 468   | >CRTC3-N15\GFRLTSALKR  | 615  | 147   |
| >CRTC3-N15\PGFRLTSALN  | 202   | >CRTC3-N15\PGFRLTSALK  | 253  | 51    |
| >CSF1R-G41\EVSVIWTFIN  | 912   | >CSF1R-G41\EVSVIWTFIN  | 129  | 783   |
| >CSF1R-G41\FINGSGTLL   | 387   | >CSF1R-G41\FINSSGTLL   | 277  | 110   |
| >CSF1R-G41\FINGSGTL    | 18    | >CSF1R-G41\FINSSGTLL   | 16   | 2     |
| >CSF1R-G41\FINGSGTLL   | 5     | >CSF1R-G41\FINSSGTLL   | 4    | 1     |
| >CSF1R-G41\FINGSGTLLCA | 68    | >CSF1R-G41\FINSSGTLLCA | 74   | 6     |
| >CSF1R-G41\FINGSGTL    | 11    | >CSF1R-G41\FINSSGTLL   | 9    | 2     |

|                          |      |                         |     |      |
|--------------------------|------|-------------------------|-----|------|
| >CSF1R-G41E FINGSGTLL    | 8    | >CSF1R-G41E FINSSGTLL   | 7   | 1    |
| >CSF1R-G41E FINGSGTLLCA/ | 33   | >CSF1R-G41E FINSSGTLLCA | 25  | 8    |
| >CSF1R-G41E FINGSGTL     | 157  | >CSF1R-G41E FINSSGTLL   | 221 | 64   |
| >CSF1R-G41E FINGSGTLL    | 81   | >CSF1R-G41E FINSSGTLL   | 87  | 6    |
| >CSF1R-G41E FINGSGTLLCA/ | 189  | >CSF1R-G41E FINSSGTLLCA | 207 | 18   |
| >CSF1R-G41E FINGSGTL     | 38   | >CSF1R-G41E FINSSGTLL   | 71  | 33   |
| >CSF1R-G41E FINGSGTLL    | 103  | >CSF1R-G41E FINSSGTLL   | 195 | 92   |
| >CSF1R-G41E FINGSGTLLCA/ | 352  | >CSF1R-G41E FINSSGTLLCA | 591 | 239  |
| >CSF1R-G41E FINGSGTL     | 272  | >CSF1R-G41E FINSSGTLL   | 516 | 244  |
| >CSF1R-G41E FINGSGTLL    | 280  | >CSF1R-G41E FINSSGTLL   | 525 | 245  |
| >CSF1R-G41E FINGSGTLLCA/ | 342  | >CSF1R-G41E FINSSGTLLCA | 491 | 149  |
| >CSF1R-G41E FINGSGTL     | 9    | >CSF1R-G41E FINSSGTLL   | 25  | 16   |
| >CSF1R-G41E FINGSGTLL    | 6    | >CSF1R-G41E FINSSGTLL   | 18  | 12   |
| >CSF1R-G41E FINGSGTLLC   | 118  | >CSF1R-G41E FINSSGTLLC  | 504 | 386  |
| >CSF1R-G41E FINGSGTLLCA/ | 46   | >CSF1R-G41E FINSSGTLLCA | 178 | 132  |
| >CSF1R-G41E FINGSGTLL    | 2157 | >CSF1R-G41E FINSSGTLL   | 220 | 1937 |
| >CSF1R-G41E FINGSGTLL    | 589  | >CSF1R-G41E FINSSGTLL   | 240 | 349  |
| >CSF1R-G41E TFINGSGTL    | 45   | >CSF1R-G41E TFINSSGTLL  | 22  | 23   |
| >CSF1R-G41E TFINGSGTLL   | 454  | >CSF1R-G41E TFINSSGTLL  | 281 | 173  |
| >CSF1R-G41E TFINGSGTL    | 515  | >CSF1R-G41E TFINSSGTLL  | 359 | 156  |
| >CSF1R-G41E TFINGSGTL    | 160  | >CSF1R-G41E TFINSSGTLL  | 283 | 123  |
| >CSF1R-G41E WTFINGSGTL   | 580  | >CSF1R-G41E WTFINSSGTLL | 425 | 155  |
| >CSF1R-G41E WTFINGSGTL   | 410  | >CSF1R-G41E WTFINSSGTLL | 207 | 203  |
| >CSF1R-G41E WTFINGSGTL   | 165  | >CSF1R-G41E WTFINSSGTLL | 163 | 2    |
| >CSF1R-G41E WTFINGSGTL   | 565  | >CSF1R-G41E WTFINSSGTLL | 387 | 178  |
| >CSF1R-G41E WTFINGSGTL   | 211  | >CSF1R-G41E WTFINSSGTLL | 237 | 26   |
| >CSF1R-G41E WTFINGSGTL   | 494  | >CSF1R-G41E WTFINSSGTLL | 518 | 24   |
| >CSF1R-G41E WTFINGSGT    | 1808 | >CSF1R-G41E WTFINSSGT   | 261 | 1547 |
| >CSF1R-G41E WTFINGSGTL   | 262  | >CSF1R-G41E WTFINSSGTLL | 79  | 183  |
| >CSF1R-G41E WTFINGSGTL   | 67   | >CSF1R-G41E WTFINSSGTLL | 34  | 33   |
| >CSF1R-G41E WTFINGSGTL   | 251  | >CSF1R-G41E WTFINSSGTLL | 137 | 114  |
| >CSF1R-G41E WTFINGSGTL   | 522  | >CSF1R-G41E WTFINSSGTLL | 241 | 281  |
| >CSF1R-G41E WTFINGSGTL   | 277  | >CSF1R-G41E WTFINSSGTLL | 230 | 47   |
| >CSF1R-G41E WTFINGSGT    | 129  | >CSF1R-G41E WTFINSSGT   | 87  | 42   |
| >CSF1R-G41E WTFINGSGTL   | 5    | >CSF1R-G41E WTFINSSGTLL | 4   | 1    |
| >CSF1R-G41E WTFINGSGTL   | 7    | >CSF1R-G41E WTFINSSGTLL | 6   | 1    |
| >CSF1R-G41E WTFINGSGTL   | 302  | >CSF1R-G41E WTFINSSGTLL | 219 | 83   |
| >CSF1R-G41E WTFINGSGT    | 135  | >CSF1R-G41E WTFINSSGT   | 173 | 38   |
| >CSF1R-G41E WTFINGSGTL   | 17   | >CSF1R-G41E WTFINSSGTLL | 17  | 0    |
| >CSF1R-G41E WTFINGSGTL   | 6    | >CSF1R-G41E WTFINSSGTLL | 6   | 0    |
| >CSF1R-G41E WTFINGSGTL   | 153  | >CSF1R-G41E WTFINSSGTLL | 116 | 37   |
| >CSF1R-G41E IWTFINGS     | 465  | >CSF1R-G41E IWTFINSS    | 295 | 170  |
| >CSF1R-G41E IWTFINGSG    | 297  | >CSF1R-G41E IWTFINSSG   | 329 | 32   |

|                          |      |                         |       |       |
|--------------------------|------|-------------------------|-------|-------|
| >CSF1R-G41E IWTFINGSGT   | 150  | >CSF1R-G41E IWTFINSSGTI | 140   | 10    |
| >CSF1R-G41E VIWTFING     | 199  | >CSF1R-G41E VIWTFINS    | 87    | 112   |
| >CSF1R-G41E VIWTFINGSG   | 312  | >CSF1R-G41E VIWTFINSSG  | 309   | 3     |
| >CSF1R-H50E HTHPPDEFLF   | 421  | >CSF1R-H50E QTHPPDEFLF  | 952   | 531   |
| >CSF1R-H50E HTHPPDEF     | 154  | >CSF1R-H50E QTHPPDEF    | 144   | 10    |
| >CSF1R-H50E HTHPPDEFL    | 232  | >CSF1R-H50E QTHPPDEFL   | 236   | 4     |
| >CSF1R-H50E HTHPPDEFL    | 416  | >CSF1R-H50E QTHPPDEFL   | 3762  | 3346  |
| >CSF1R-H50E HTHPPDEFLF   | 203  | >CSF1R-H50E QTHPPDEFLF  | 1657  | 1454  |
| >CSF1R-H50E HTHPPDEFL    | 8    | >CSF1R-H50E QTHPPDEFL   | 11    | 3     |
| >CSF1R-H50E HTHPPDEFLF   | 258  | >CSF1R-H50E QTHPPDEFLF  | 534   | 276   |
| >CSF1R-H50E HTHPPDEF     | 324  | >CSF1R-H50E QTHPPDEF    | 441   | 117   |
| >CSF1R-H50E HTHPPDEF     | 5    | >CSF1R-H50E QTHPPDEF    | 7     | 2     |
| >CSF1R-H50E HTHPPDEFL    | 22   | >CSF1R-H50E QTHPPDEFL   | 46    | 24    |
| >CSF1R-H50E HTHPPDEFLF   | 4    | >CSF1R-H50E QTHPPDEFLF  | 6     | 2     |
| >CSF1R-H50E HTHPPDEF     | 429  | >CSF1R-H50E QTHPPDEF    | 3200  | 2771  |
| >CSF1R-H50E HTHPPDEFLF   | 93   | >CSF1R-H50E QTHPPDEFLF  | 685   | 592   |
| >CSF1R-H50E HTHPPDEFLF   | 103  | >CSF1R-H50E QTHPPDEFLF  | 344   | 241   |
| >CSF1R-H50E HTHPPDEFL    | 657  | >CSF1R-H50E QTHPPDEFL   | 358   | 299   |
| >CSF1R-H50E HTHPPDEFLF   | 228  | >CSF1R-H50E QTHPPDEFLF  | 116   | 112   |
| >CSF1R-H50E HTHPPDEFL    | 73   | >CSF1R-H50E QTHPPDEFL   | 126   | 53    |
| >CSF1R-H50E AHTHPPDEF    | 67   | >CSF1R-H50E AQTHPPDEF   | 8     | 59    |
| >CSF1R-H50E AHTHPPDEFL   | 3848 | >CSF1R-H50E AQTHPPDEFL  | 294   | 3554  |
| >CSF1R-H50E AHTHPPDEFL   | 209  | >CSF1R-H50E AQTHPPDEFL  | 16    | 193   |
| >CSF1R-H50E WAFIPISAGA   | 159  | >CSF1R-H50E WAFIPISAGA  | 1095  | 936   |
| >CSF1R-H50E WAFIPISAGA   | 338  | >CSF1R-H50E WAFIPISAGA  | 1581  | 1243  |
| >CSF1R-H50E GAHTHPPDEI   | 382  | >CSF1R-H50E GAQTHPPDEI  | 1378  | 996   |
| >CSF1R-H50E GAHTHPPDEI   | 473  | >CSF1R-H50E GAQTHPPDEI  | 1512  | 1039  |
| >CSF1R-H50E AGAHTHPPD    | 235  | >CSF1R-H50E AGAQTHPPD   | 588   | 353   |
| >CSF1R-H50E ISAGAHTH     | 160  | >CSF1R-H50E ISAGAQTH    | 219   | 59    |
| >CSF1R-H50E IPISAGAH     | 9380 | >CSF1R-H50E IPISAGAQ    | 464   | 8916  |
| >CSF1R-H50E IPISAGAHT    | 195  | >CSF1R-H50E IPISAGAQT   | 141   | 54    |
| >CSF1R-H50E IPISAGAHT    | 984  | >CSF1R-H50E IPISAGAQT   | 475   | 509   |
| >CSF1R-H50E IPISAGAH     | 37   | >CSF1R-H50E IPISAGAQ    | 228   | 191   |
| >CSF1R-H50E IPISAGAHT    | 143  | >CSF1R-H50E IPISAGAQT   | 52    | 91    |
| >CSF1R-H50E FIPISAGAHT   | 396  | >CSF1R-H50E FIPISAGAQT  | 420   | 24    |
| >CSF1R-L301 LNLSSSEQNL   | 303  | >CSF1R-L301 FNLSSSEQNL  | 155   | 148   |
| >CSF1R-L301 YLNLSSSEQNL  | 337  | >CSF1R-L301 YFNLSSSEQNL | 20652 | 20315 |
| >CSF1R-L301 YLNLSSSEQNLI | 78   | >CSF1R-L301 YFNLSSSEQNL | 16594 | 16516 |
| >CSF1R-L301 YLNLSSSEQ    | 202  | >CSF1R-L301 YFNLSSSEQ   | 11662 | 11460 |
| >CSF1R-L301 YLNLSSSEQNL  | 35   | >CSF1R-L301 YFNLSSSEQNL | 6274  | 6239  |
| >CSF1R-L301 YLNLSSSEQNLI | 5    | >CSF1R-L301 YFNLSSSEQNL | 401   | 396   |
| >CSF1R-L301 YLNLSSSEQNL  | 162  | >CSF1R-L301 YFNLSSSEQNL | 16580 | 16418 |
| >CSF1R-L301 YLNLSSSEQNLI | 8    | >CSF1R-L301 YFNLSSSEQNL | 8273  | 8265  |



|                          |       |                         |       |       |
|--------------------------|-------|-------------------------|-------|-------|
| >CSF1R-L301 YLNLSSSEQNL  | 17    | >CSF1R-L301 YFNLSSEQNL  | 8700  | 8683  |
| >CSF1R-L301 YLNLSSSEQNLI | 24    | >CSF1R-L301 YFNLSSEQNL  | 11346 | 11322 |
| >CSF1R-L301 YLNLSSSEQNL  | 17    | >CSF1R-L301 YFNLSSEQNL  | 14392 | 14375 |
| >CSF1R-L301 YLNLSSSEQNLI | 19    | >CSF1R-L301 YFNLSSEQNL  | 15351 | 15332 |
| >CSF1R-L301 YLNLSSSEQNL  | 18    | >CSF1R-L301 YFNLSSEQNL  | 10929 | 10911 |
| >CSF1R-L301 YLNLSSSEQNLI | 43    | >CSF1R-L301 YFNLSSEQNL  | 14615 | 14572 |
| >CSF1R-L301 YLNLSSSEQNL  | 15    | >CSF1R-L301 YFNLSSEQNL  | 7160  | 7145  |
| >CSF1R-L301 YLNLSSSEQNLI | 32    | >CSF1R-L301 YFNLSSEQNL  | 12070 | 12038 |
| >CSF1R-L301 YLNLSSSEQ    | 26    | >CSF1R-L301 YFNLSSEQ    | 24448 | 24422 |
| >CSF1R-L301 YLNLSSSEQNL  | 3     | >CSF1R-L301 YFNLSSEQNL  | 6034  | 6031  |
| >CSF1R-L301 YLNLSSSEQNLI | 10    | >CSF1R-L301 YFNLSSEQNL  | 17417 | 17407 |
| >CSF1R-L301 YLNLSSSEQNL  | 17689 | >CSF1R-L301 YFNLSSEQNL  | 399   | 17290 |
| >CSF1R-L301 YLNLSSSEQNLI | 16822 | >CSF1R-L301 YFNLSSEQNL  | 408   | 16414 |
| >CSF1R-L301 YLNLSSSEQNL  | 274   | >CSF1R-L301 YFNLSSEQNL  | 3969  | 3695  |
| >CSF1R-L301 MFFRVVESA\   | 18    | >CSF1R-L301 MFFRVVESA\  | 1232  | 1214  |
| >CSF1R-L301 MFFRVVESA\   | 120   | >CSF1R-L301 MFFRVVESA\  | 4887  | 4767  |
| >CSF1R-L301 MFFRVVESA\   | 136   | >CSF1R-L301 MFFRVVESA\  | 21    | 115   |
| >CSF1R-L301 MFFRVVESA\   | 1738  | >CSF1R-L301 MFFRVVESA\  | 311   | 1427  |
| >CSF1R-L301 MFFRVVESA\   | 13    | >CSF1R-L301 MFFRVVESA\  | 5     | 8     |
| >CSF1R-L301 MFFRVVESA\   | 4897  | >CSF1R-L301 MFFRVVESA\  | 115   | 4782  |
| >CSF1R-L301 MFFRVVESA\   | 477   | >CSF1R-L301 MFFRVVESA\  | 3569  | 3092  |
| >CSF1R-L301 MFFRVVESA\   | 329   | >CSF1R-L301 MFFRVVESA\  | 10836 | 10507 |
| >CSF1R-L301 MFFRVVESA\   | 5081  | >CSF1R-L301 MFFRVVESA\  | 195   | 4886  |
| >CSF1R-L301 MFFRVVESA\   | 1473  | >CSF1R-L301 MFFRVVESA\  | 65    | 1408  |
| >CSF1R-L301 MFFRVVESA\   | 1953  | >CSF1R-L301 MFFRVVESA\  | 158   | 1795  |
| >CSF1R-L301 MFFRVVESA\   | 1683  | >CSF1R-L301 MFFRVVESA\  | 258   | 1425  |
| >CSF1R-L301 MFFRVVESA\   | 84    | >CSF1R-L301 MFFRVVESA\  | 299   | 215   |
| >CSF1R-L301 AYLNLSSSEQN  | 1286  | >CSF1R-L301 AYFNLSSEQN  | 332   | 954   |
| >CSF1R-L301 AYLNLSSSEQN  | 17    | >CSF1R-L301 AYFNLSSEQN  | 21    | 4     |
| >CSF1R-L301 AYLNLSSSEQN  | 411   | >CSF1R-L301 AYFNLSSEQN  | 430   | 19    |
| >CSF1R-L301 AYLNLSSSEQ   | 450   | >CSF1R-L301 AYFNLSSEQ   | 681   | 231   |
| >CSF1R-L301 AYLNLSSSEQN  | 7     | >CSF1R-L301 AYFNLSSEQN  | 9     | 2     |
| >CSF1R-L301 AYLNLSSSEQN  | 1605  | >CSF1R-L301 AYFNLSSEQN  | 376   | 1229  |
| >CSF1R-L301 ESAYLNLSSSEC | 176   | >CSF1R-L301 ESAYFNLSSEC | 96    | 80    |
| >CSF1R-L301 ESAYLNLSS    | 231   | >CSF1R-L301 ESAYFNLS    | 108   | 123   |
| >CSF1R-L301 ESAYLNLSS    | 582   | >CSF1R-L301 ESAYFNLS    | 380   | 202   |
| >CSF1R-L301 VESAYLNL     | 508   | >CSF1R-L301 VESAYFNL    | 473   | 35    |
| >CSF1R-L301 VESAYLNL     | 25    | >CSF1R-L301 VESAYFNL    | 13    | 12    |
| >CSF1R-L301 VESAYLNL     | 85    | >CSF1R-L301 VESAYFNL    | 61    | 24    |
| >CSF1R-L301 VESAYLNLSS   | 2007  | >CSF1R-L301 VESAYFNLS   | 389   | 1618  |
| >CSF1R-L301 VVESAYLNL    | 946   | >CSF1R-L301 VVESAYFNL   | 135   | 811   |
| >CSF1R-L301 RVVESAYL     | 361   | >CSF1R-L301 RVVESAYF    | 15675 | 15314 |
| >CSF1R-L301 RVVESAYL     | 62    | >CSF1R-L301 RVVESAYF    | 5226  | 5164  |

|                          |      |                         |       |       |
|--------------------------|------|-------------------------|-------|-------|
| >CSF1R-L301 RVVESAYLNL   | 363  | >CSF1R-L301 RVVESAYFNL  | 241   | 122   |
| >CSF1R-L301 RVVESAYL     | 184  | >CSF1R-L301 RVVESAYF    | 8851  | 8667  |
| >CSF1R-L301 RVVESAYL     | 14   | >CSF1R-L301 RVVESAYF    | 83    | 69    |
| >CSF1R-L301 RVVESAYLNL   | 226  | >CSF1R-L301 RVVESAYFNL  | 165   | 61    |
| >CSF1R-L301 RVVESAYLNL   | 504  | >CSF1R-L301 RVVESAYFNL  | 274   | 230   |
| >CSF1R-L301 RVVESAYL     | 80   | >CSF1R-L301 RVVESAYF    | 5965  | 5885  |
| >CSF1R-L301 RVVESAYLNL   | 1001 | >CSF1R-L301 RVVESAYFNL  | 247   | 754   |
| >CSF1R-L301 RVVESAYL     | 202  | >CSF1R-L301 RVVESAYF    | 13469 | 13267 |
| >CSF1R-L301 RVVESAYLNL   | 1816 | >CSF1R-L301 RVVESAYFNL  | 378   | 1438  |
| >CSF1R-L301 RVVESAYL     | 314  | >CSF1R-L301 RVVESAYF    | 22064 | 21750 |
| >CSF1R-L301 RVVESAYLNL   | 1240 | >CSF1R-L301 RVVESAYFNL  | 479   | 761   |
| >CSF1R-L301 RVVESAYL     | 368  | >CSF1R-L301 RVVESAYF    | 37    | 331   |
| >CSF1R-L301 RVVESAYL     | 381  | >CSF1R-L301 RVVESAYF    | 3499  | 3118  |
| >CSF1R-L301 RVVESAYLNL   | 368  | >CSF1R-L301 RVVESAYFNL  | 432   | 64    |
| >CSF1R-L301 RVVESAYL     | 1078 | >CSF1R-L301 RVVESAYF    | 257   | 821   |
| >CSF1R-L301 RVVESAYLNL   | 484  | >CSF1R-L301 RVVESAYFNL  | 389   | 95    |
| >CSF1R-L301 RVVESAYL     | 467  | >CSF1R-L301 RVVESAYF    | 17410 | 16943 |
| >CSF1R-L301 RVVESAYLNL   | 1066 | >CSF1R-L301 RVVESAYFNL  | 243   | 823   |
| >CSF1R-L301 RVVESAYL     | 433  | >CSF1R-L301 RVVESAYF    | 12231 | 11798 |
| >CSF1R-L301 RVVESAYLNL   | 652  | >CSF1R-L301 RVVESAYFNL  | 135   | 517   |
| >CSF1R-L301 RVVESAYL     | 1781 | >CSF1R-L301 RVVESAYF    | 89    | 1692  |
| >CSF1R-L301 RVVESAYL     | 2015 | >CSF1R-L301 RVVESAYF    | 62    | 1953  |
| >CSF1R-L301 RVVESAYL     | 15   | >CSF1R-L301 RVVESAYF    | 4     | 11    |
| >CSF1R-L301 RVVESAYLNL   | 17   | >CSF1R-L301 RVVESAYFNL  | 19    | 2     |
| >CSF1R-L301 RVVESAYL     | 463  | >CSF1R-L301 RVVESAYF    | 25    | 438   |
| >CSF1R-L301 RVVESAYLNL   | 740  | >CSF1R-L301 RVVESAYFNL  | 449   | 291   |
| >CSF1R-L301 FRVVESAYL    | 182  | >CSF1R-L301 FRVVESAYF   | 11    | 171   |
| >CSF1R-L301 FRVVESAYLN   | 112  | >CSF1R-L301 FRVVESAYFN  | 166   | 54    |
| >CSF1R-L301 FRVVESAYL    | 475  | >CSF1R-L301 FRVVESAYF   | 566   | 91    |
| >CSF1R-L301 FRVVESAYLN   | 141  | >CSF1R-L301 FRVVESAYFN  | 126   | 15    |
| >CSF1R-L301 FRVVESAYL    | 41   | >CSF1R-L301 FRVVESAYF   | 1422  | 1381  |
| >CSF1R-L301 FRVVESAYLN   | 52   | >CSF1R-L301 FRVVESAYFN  | 38    | 14    |
| >CSF1R-L301 FRVVESAYL    | 1334 | >CSF1R-L301 FRVVESAYF   | 124   | 1210  |
| >CSF1R-L301 FFRVVESAYL   | 252  | >CSF1R-L301 FFRVVESAYF  | 21    | 231   |
| >CSF1R-L301 FFRVVESAYL   | 3563 | >CSF1R-L301 FFRVVESAYF  | 214   | 3349  |
| >CSF1R-L301 FFRVVESAYL   | 4450 | >CSF1R-L301 FFRVVESAYF  | 226   | 4224  |
| >CSF1R-L301 FFRVVESAYL   | 5165 | >CSF1R-L301 FFRVVESAYF  | 316   | 4849  |
| >CSF1R-L301 LNLSSSEQNL   | 303  | >CSF1R-L301 SNLSSSEQNL  | 932   | 629   |
| >CSF1R-L301 YLNLSSSEQNL  | 337  | >CSF1R-L301 YSNLSSSEQNL | 16686 | 16349 |
| >CSF1R-L301 YLNLSSSEQNLI | 78   | >CSF1R-L301 YSNLSSSEQNL | 13223 | 13145 |
| >CSF1R-L301 YLNLSSSEQ    | 202  | >CSF1R-L301 YSNLSSSEQ   | 15336 | 15134 |
| >CSF1R-L301 YLNLSSSEQNL  | 35   | >CSF1R-L301 YSNLSSSEQNL | 4164  | 4129  |
| >CSF1R-L301 YLNLSSSEQNLI | 5    | >CSF1R-L301 YSNLSSSEQNL | 864   | 859   |

|                          |       |                          |       |       |
|--------------------------|-------|--------------------------|-------|-------|
| >CSF1R-L301 YLNLSSSEQNL  | 162   | >CSF1R-L301 YSNLSSSEQNL  | 12006 | 11844 |
| >CSF1R-L301 YLNLSSSEQNLI | 8     | >CSF1R-L301 YSNLSSSEQNL  | 5013  | 5005  |
| >CSF1R-L301 YLNLSSSEQNL  | 17    | >CSF1R-L301 YSNLSSSEQNL  | 11455 | 11438 |
| >CSF1R-L301 YLNLSSSEQNLI | 24    | >CSF1R-L301 YSNLSSSEQNL  | 12853 | 12829 |
| >CSF1R-L301 YLNLSSSEQNL  | 17    | >CSF1R-L301 YSNLSSSEQNL  | 17440 | 17423 |
| >CSF1R-L301 YLNLSSSEQNLI | 19    | >CSF1R-L301 YSNLSSSEQNL  | 18758 | 18739 |
| >CSF1R-L301 YLNLSSSEQNL  | 18    | >CSF1R-L301 YSNLSSSEQNL  | 16699 | 16681 |
| >CSF1R-L301 YLNLSSSEQNLI | 43    | >CSF1R-L301 YSNLSSSEQNL  | 19742 | 19699 |
| >CSF1R-L301 YLNLSSSEQNL  | 15    | >CSF1R-L301 YSNLSSSEQNL  | 16385 | 16370 |
| >CSF1R-L301 YLNLSSSEQNLI | 32    | >CSF1R-L301 YSNLSSSEQNL  | 17788 | 17756 |
| >CSF1R-L301 YLNLSSSEQ    | 26    | >CSF1R-L301 YSNLSSSEQ    | 31589 | 31563 |
| >CSF1R-L301 YLNLSSSEQNL  | 3     | >CSF1R-L301 YSNLSSSEQNL  | 17019 | 17016 |
| >CSF1R-L301 YLNLSSSEQNLI | 10    | >CSF1R-L301 YSNLSSSEQNL  | 27329 | 27319 |
| >CSF1R-L301 YLNLSSSEQNL  | 274   | >CSF1R-L301 YSNLSSSEQNL  | 188   | 86    |
| >CSF1R-L301 YLNLSSSEQNL  | 2242  | >CSF1R-L301 YSNLSSSEQNL  | 8     | 2234  |
| >CSF1R-L301 YLNLSSSEQNLI | 12944 | >CSF1R-L301 YSNLSSSEQNL  | 314   | 12630 |
| >CSF1R-L301 YLNLSSSEQNLI | 12964 | >CSF1R-L301 YSNLSSSEQNL  | 261   | 12703 |
| >CSF1R-L301 YLNLSSSEQNLI | 5271  | >CSF1R-L301 YSNLSSSEQNL  | 197   | 5074  |
| >CSF1R-L301 YLNLSSSEQNLI | 5640  | >CSF1R-L301 YSNLSSSEQNL  | 300   | 5340  |
| >CSF1R-L301 YLNLSSSEQNL  | 25754 | >CSF1R-L301 YSNLSSSEQNL  | 464   | 25290 |
| >CSF1R-L301 YLNLSSSEQNLI | 8662  | >CSF1R-L301 YSNLSSSEQNL  | 100   | 8562  |
| >CSF1R-L301 MFFRVVESA\   | 18    | >CSF1R-L301 MFFRVVESA\   | 1708  | 1690  |
| >CSF1R-L301 MFFRVVESA\   | 120   | >CSF1R-L301 MFFRVVESA\   | 5969  | 5849  |
| >CSF1R-L301 MFFRVVESA\   | 136   | >CSF1R-L301 MFFRVVESA\   | 14826 | 14690 |
| >CSF1R-L301 MFFRVVESA\   | 13    | >CSF1R-L301 MFFRVVESA\   | 5010  | 4997  |
| >CSF1R-L301 MFFRVVESA\   | 477   | >CSF1R-L301 MFFRVVESA\   | 1616  | 1139  |
| >CSF1R-L301 MFFRVVESA\   | 329   | >CSF1R-L301 MFFRVVESA\   | 3481  | 3152  |
| >CSF1R-L301 MFFRVVESA\   | 84    | >CSF1R-L301 MFFRVVESA\   | 627   | 543   |
| >CSF1R-L301 AYLNLSSSEQN  | 17    | >CSF1R-L301 AYSNLSSSEQN  | 42    | 25    |
| >CSF1R-L301 AYLNLSSSEQN  | 411   | >CSF1R-L301 AYSNLSSSEQN  | 2958  | 2547  |
| >CSF1R-L301 AYLNLSSSEQ   | 450   | >CSF1R-L301 AYSNLSSSEQ   | 1222  | 772   |
| >CSF1R-L301 AYLNLSSSEQN  | 7     | >CSF1R-L301 AYSNLSSSEQN  | 18    | 11    |
| >CSF1R-L301 ESAYLNLSSSEC | 176   | >CSF1R-L301 ESAYSNLSSSEC | 144   | 32    |
| >CSF1R-L301 ESAYLNLSS    | 231   | >CSF1R-L301 ESAYSNLSS    | 268   | 37    |
| >CSF1R-L301 VESAYLNL     | 508   | >CSF1R-L301 VESAYSNL     | 127   | 381   |
| >CSF1R-L301 VESAYLNL     | 25    | >CSF1R-L301 VESAYSNL     | 37    | 12    |
| >CSF1R-L301 VESAYLNL     | 85    | >CSF1R-L301 VESAYSNL     | 120   | 35    |
| >CSF1R-L301 VVESAYLNL    | 778   | >CSF1R-L301 VVESAYSNL    | 480   | 298   |
| >CSF1R-L301 VVESAYLNL    | 4664  | >CSF1R-L301 VVESAYSNL    | 220   | 4444  |
| >CSF1R-L301 RVVESAYL     | 361   | >CSF1R-L301 RVVESAYS     | 14724 | 14363 |
| >CSF1R-L301 RVVESAYL     | 62    | >CSF1R-L301 RVVESAYS     | 8128  | 8066  |
| >CSF1R-L301 RVVESAYLNL   | 363   | >CSF1R-L301 RVVESAYSNL   | 371   | 8     |
| >CSF1R-L301 RVVESAYL     | 184   | >CSF1R-L301 RVVESAYS     | 6738  | 6554  |

|                        |      |                        |       |       |
|------------------------|------|------------------------|-------|-------|
| >CSF1R-L301 RVVESAYLNL | 574  | >CSF1R-L301 RVVESAYSNL | 438   | 136   |
| >CSF1R-L301 RVVESAYL   | 14   | >CSF1R-L301 RVVESAYS   | 605   | 591   |
| >CSF1R-L301 RVVESAYLNL | 226  | >CSF1R-L301 RVVESAYSNL | 569   | 343   |
| >CSF1R-L301 RVVESAYL   | 80   | >CSF1R-L301 RVVESAYS   | 6984  | 6904  |
| >CSF1R-L301 RVVESAYL   | 202  | >CSF1R-L301 RVVESAYS   | 14714 | 14512 |
| >CSF1R-L301 RVVESAYL   | 314  | >CSF1R-L301 RVVESAYS   | 20927 | 20613 |
| >CSF1R-L301 RVVESAYL   | 368  | >CSF1R-L301 RVVESAYS   | 13040 | 12672 |
| >CSF1R-L301 RVVESAYLNL | 1491 | >CSF1R-L301 RVVESAYSNL | 340   | 1151  |
| >CSF1R-L301 RVVESAYL   | 381  | >CSF1R-L301 RVVESAYS   | 1564  | 1183  |
| >CSF1R-L301 RVVESAYLNL | 368  | >CSF1R-L301 RVVESAYSNL | 721   | 353   |
| >CSF1R-L301 RVVESAYLNL | 484  | >CSF1R-L301 RVVESAYSNL | 829   | 345   |
| >CSF1R-L301 RVVESAYL   | 467  | >CSF1R-L301 RVVESAYS   | 6933  | 6466  |
| >CSF1R-L301 RVVESAYLNL | 1066 | >CSF1R-L301 RVVESAYSNL | 392   | 674   |
| >CSF1R-L301 RVVESAYL   | 433  | >CSF1R-L301 RVVESAYS   | 13151 | 12718 |
| >CSF1R-L301 RVVESAYL   | 15   | >CSF1R-L301 RVVESAYS   | 3196  | 3181  |
| >CSF1R-L301 RVVESAYLNL | 17   | >CSF1R-L301 RVVESAYSNL | 14    | 3     |
| >CSF1R-L301 RVVESAYL   | 463  | >CSF1R-L301 RVVESAYS   | 15730 | 15267 |
| >CSF1R-L301 FRVVESAYL  | 182  | >CSF1R-L301 FRVVESAYS  | 4980  | 4798  |
| >CSF1R-L301 FRVVESAYLN | 112  | >CSF1R-L301 FRVVESAYSN | 70    | 42    |
| >CSF1R-L301 FRVVESAYL  | 475  | >CSF1R-L301 FRVVESAYS  | 5150  | 4675  |
| >CSF1R-L301 FRVVESAYLN | 141  | >CSF1R-L301 FRVVESAYSN | 220   | 79    |
| >CSF1R-L301 FRVVESAYL  | 41   | >CSF1R-L301 FRVVESAYS  | 13678 | 13637 |
| >CSF1R-L301 FRVVESAYLN | 52   | >CSF1R-L301 FRVVESAYSN | 51    | 1     |
| >CSF1R-L301 FFRVVESAYL | 252  | >CSF1R-L301 FFRVVESAYS | 16209 | 15957 |
| >CSF1R-L301 LNLSSQNL   | 303  | >CSF1R-L301 VNLSSQNL   | 543   | 240   |
| >CSF1R-L301 YLNLSSQNL  | 337  | >CSF1R-L301 YVNLSSQNL  | 6895  | 6558  |
| >CSF1R-L301 YLNLSSQNL  | 78   | >CSF1R-L301 YVNLSSQNL  | 2289  | 2211  |
| >CSF1R-L301 YLNLSSQ    | 202  | >CSF1R-L301 YVNLSSQ    | 6031  | 5829  |
| >CSF1R-L301 YLNLSSQNL  | 35   | >CSF1R-L301 YVNLSSQNL  | 540   | 505   |
| >CSF1R-L301 YLNLSSQNL  | 5    | >CSF1R-L301 YVNLSSQNL  | 74    | 69    |
| >CSF1R-L301 YLNLSSQNL  | 162  | >CSF1R-L301 YVNLSSQNL  | 1628  | 1466  |
| >CSF1R-L301 YLNLSSQNL  | 8    | >CSF1R-L301 YVNLSSQNL  | 116   | 108   |
| >CSF1R-L301 YLNLSSQNL  | 638  | >CSF1R-L301 YVNLSSQNL  | 443   | 195   |
| >CSF1R-L301 YLNLSSQNL  | 17   | >CSF1R-L301 YVNLSSQNL  | 1312  | 1295  |
| >CSF1R-L301 YLNLSSQNL  | 24   | >CSF1R-L301 YVNLSSQNL  | 1793  | 1769  |
| >CSF1R-L301 YLNLSSQNL  | 17   | >CSF1R-L301 YVNLSSQNL  | 2514  | 2497  |
| >CSF1R-L301 YLNLSSQNL  | 19   | >CSF1R-L301 YVNLSSQNL  | 3183  | 3164  |
| >CSF1R-L301 YLNLSSQNL  | 18   | >CSF1R-L301 YVNLSSQNL  | 2057  | 2039  |
| >CSF1R-L301 YLNLSSQNL  | 43   | >CSF1R-L301 YVNLSSQNL  | 3738  | 3695  |
| >CSF1R-L301 YLNLSSQNL  | 15   | >CSF1R-L301 YVNLSSQNL  | 443   | 428   |
| >CSF1R-L301 YLNLSSQNL  | 32   | >CSF1R-L301 YVNLSSQNL  | 1508  | 1476  |
| >CSF1R-L301 YLNLSSQ    | 26   | >CSF1R-L301 YVNLSSQ    | 7245  | 7219  |
| >CSF1R-L301 YLNLSSQNL  | 3    | >CSF1R-L301 YVNLSSQNL  | 133   | 130   |

|                          |      |                          |      |      |
|--------------------------|------|--------------------------|------|------|
| >CSF1R-L301 YLNLSSSEQNLI | 10   | >CSF1R-L301 YVNLSSSEQNLI | 1734 | 1724 |
| >CSF1R-L301 YLNLSSSEQNLI | 2896 | >CSF1R-L301 YVNLSSSEQNLI | 103  | 2793 |
| >CSF1R-L301 YLNLSSSEQNL  | 274  | >CSF1R-L301 YVNLSSSEQNL  | 1702 | 1428 |
| >CSF1R-L301 YLNLSSSEQNL  | 2242 | >CSF1R-L301 YVNLSSSEQNL  | 325  | 1917 |
| >CSF1R-L301 MFFRVVESA\   | 1587 | >CSF1R-L301 MFFRVVESA\   | 296  | 1291 |
| >CSF1R-L301 MFFRVVESA\   | 18   | >CSF1R-L301 MFFRVVESA\   | 12   | 6    |
| >CSF1R-L301 MFFRVVESA\   | 987  | >CSF1R-L301 MFFRVVESA\   | 161  | 826  |
| >CSF1R-L301 MFFRVVESA\   | 120  | >CSF1R-L301 MFFRVVESA\   | 14   | 106  |
| >CSF1R-L301 MFFRVVESA\   | 1691 | >CSF1R-L301 MFFRVVESA\   | 93   | 1598 |
| >CSF1R-L301 MFFRVVESA\   | 1327 | >CSF1R-L301 MFFRVVESA\   | 49   | 1278 |
| >CSF1R-L301 MFFRVVESA\   | 136  | >CSF1R-L301 MFFRVVESA\   | 1577 | 1441 |
| >CSF1R-L301 MFFRVVESA\   | 13   | >CSF1R-L301 MFFRVVESA\   | 435  | 422  |
| >CSF1R-L301 MFFRVVESA\   | 477  | >CSF1R-L301 MFFRVVESA\   | 294  | 183  |
| >CSF1R-L301 MFFRVVESA\   | 329  | >CSF1R-L301 MFFRVVESA\   | 46   | 283  |
| >CSF1R-L301 MFFRVVESA\   | 84   | >CSF1R-L301 MFFRVVESA\   | 123  | 39   |
| >CSF1R-L301 AYLNLSSSEQN  | 17   | >CSF1R-L301 AYVNLSSSEQN  | 25   | 8    |
| >CSF1R-L301 AYLNLSSSEQN  | 411  | >CSF1R-L301 AYVNLSSSEQN  | 412  | 1    |
| >CSF1R-L301 AYLNLSSSEQ   | 450  | >CSF1R-L301 AYVNLSSSEQ   | 1942 | 1492 |
| >CSF1R-L301 AYLNLSSSEQN  | 7    | >CSF1R-L301 AYVNLSSSEQN  | 21   | 14   |
| >CSF1R-L301 ESAYLNLSSSEQ | 176  | >CSF1R-L301 ESAYVNLSSSEQ | 89   | 87   |
| >CSF1R-L301 ESAYLNLSS    | 231  | >CSF1R-L301 ESAYVNLSS    | 89   | 142  |
| >CSF1R-L301 ESAYLNLSS    | 582  | >CSF1R-L301 ESAYVNLSS    | 177  | 405  |
| >CSF1R-L301 VESAYLNL     | 508  | >CSF1R-L301 VESAYVNL     | 232  | 276  |
| >CSF1R-L301 VESAYLNL     | 25   | >CSF1R-L301 VESAYVNL     | 28   | 3    |
| >CSF1R-L301 VESAYLNL     | 85   | >CSF1R-L301 VESAYVNL     | 155  | 70   |
| >CSF1R-L301 VVESAYLNL    | 778  | >CSF1R-L301 VVESAYVNL    | 499  | 279  |
| >CSF1R-L301 RVVESAYL     | 361  | >CSF1R-L301 RVVESAYV     | 86   | 275  |
| >CSF1R-L301 RVVESAYL     | 62   | >CSF1R-L301 RVVESAYV     | 47   | 15   |
| >CSF1R-L301 RVVESAYLNL   | 363  | >CSF1R-L301 RVVESAYVNL   | 630  | 267  |
| >CSF1R-L301 RVVESAYL     | 184  | >CSF1R-L301 RVVESAYV     | 16   | 168  |
| >CSF1R-L301 RVVESAYL     | 14   | >CSF1R-L301 RVVESAYV     | 6    | 8    |
| >CSF1R-L301 RVVESAYLNL   | 226  | >CSF1R-L301 RVVESAYVNL   | 482  | 256  |
| >CSF1R-L301 RVVESAYL     | 80   | >CSF1R-L301 RVVESAYV     | 8    | 72   |
| >CSF1R-L301 RVVESAYL     | 202  | >CSF1R-L301 RVVESAYV     | 17   | 185  |
| >CSF1R-L301 RVVESAYL     | 1276 | >CSF1R-L301 RVVESAYV     | 49   | 1227 |
| >CSF1R-L301 RVVESAYL     | 1464 | >CSF1R-L301 RVVESAYV     | 70   | 1394 |
| >CSF1R-L301 RVVESAYL     | 314  | >CSF1R-L301 RVVESAYV     | 13   | 301  |
| >CSF1R-L301 RVVESAYL     | 368  | >CSF1R-L301 RVVESAYV     | 3273 | 2905 |
| >CSF1R-L301 RVVESAYL     | 381  | >CSF1R-L301 RVVESAYV     | 233  | 148  |
| >CSF1R-L301 RVVESAYLNL   | 368  | >CSF1R-L301 RVVESAYVNL   | 684  | 316  |
| >CSF1R-L301 RVVESAYLNL   | 484  | >CSF1R-L301 RVVESAYVNL   | 185  | 299  |
| >CSF1R-L301 RVVESAYL     | 467  | >CSF1R-L301 RVVESAYV     | 49   | 418  |
| >CSF1R-L301 RVVESAYLNL   | 1066 | >CSF1R-L301 RVVESAYVNL   | 416  | 650  |

|                        |       |                        |       |       |
|------------------------|-------|------------------------|-------|-------|
| >CSF1R-L301 RVVESAYL   | 433   | >CSF1R-L301 RVVESAYV   | 33    | 400   |
| >CSF1R-L301 RVVESAYL   | 15    | >CSF1R-L301 RVVESAYV   | 242   | 227   |
| >CSF1R-L301 RVVESAYLNL | 17    | >CSF1R-L301 RVVESAYVNL | 26    | 9     |
| >CSF1R-L301 RVVESAYL   | 463   | >CSF1R-L301 RVVESAYV   | 6769  | 6306  |
| >CSF1R-L301 FRVVESAYL  | 2364  | >CSF1R-L301 FRVVESAYV  | 267   | 2097  |
| >CSF1R-L301 FRVVESAYL  | 182   | >CSF1R-L301 FRVVESAYV  | 365   | 183   |
| >CSF1R-L301 FRVVESAYLN | 112   | >CSF1R-L301 FRVVESAYVN | 80    | 32    |
| >CSF1R-L301 FRVVESAYL  | 475   | >CSF1R-L301 FRVVESAYV  | 1287  | 812   |
| >CSF1R-L301 FRVVESAYLN | 141   | >CSF1R-L301 FRVVESAYVN | 154   | 13    |
| >CSF1R-L301 FRVVESAYL  | 41    | >CSF1R-L301 FRVVESAYV  | 749   | 708   |
| >CSF1R-L301 FRVVESAYLN | 52    | >CSF1R-L301 FRVVESAYVN | 38    | 14    |
| >CSF1R-L301 FFRVVESAYL | 252   | >CSF1R-L301 FFRVVESAYV | 6199  | 5947  |
| >CSF1R-P693 PEGGVDYKNI | 607   | >CSF1R-P693 HEGGVDYKN  | 50    | 557   |
| >CSF1R-P693 PEGGVDYKNI | 1296  | >CSF1R-P693 HEGGVDYKN  | 107   | 1189  |
| >CSF1R-P693 DPEGGVDY   | 89    | >CSF1R-P693 DHEGGVDY   | 9595  | 9506  |
| >CSF1R-P693 GQDPEGGV   | 151   | >CSF1R-P693 GQDHEGGV   | 220   | 69    |
| >CSF1R-P693 GQDPEGGV   | 307   | >CSF1R-P693 GQDHEGGV   | 829   | 522   |
| >CSF1R-P693 GQDPEGGV   | 466   | >CSF1R-P693 GQDHEGGV   | 534   | 68    |
| >CSF1R-P693 GQDPEGGVD  | 330   | >CSF1R-P693 GQDHEGGVL  | 535   | 205   |
| >CSF1R-P693 SLSPGQDPEG | 1075  | >CSF1R-P693 SLSPGQDHEG | 481   | 594   |
| >CSF1R-R10€ RPWNVLAQE  | 380   | >CSF1R-R10€ WPWNVLAQ   | 2194  | 1814  |
| >CSF1R-R10€ RPWNVLAQE  | 570   | >CSF1R-R10€ WPWNVLAQ   | 473   | 97    |
| >CSF1R-R10€ RPWNVLAQE  | 1396  | >CSF1R-R10€ WPWNVLAQ   | 89    | 1307  |
| >CSF1R-R10€ RPWNVLAQE  | 3059  | >CSF1R-R10€ WPWNVLAQ   | 404   | 2655  |
| >CSF1R-R10€ RPWNVLAQ   | 329   | >CSF1R-R10€ WPWNVLAQ   | 2369  | 2040  |
| >CSF1R-R10€ RPWNVLAQE  | 117   | >CSF1R-R10€ WPWNVLAQ   | 3734  | 3617  |
| >CSF1R-R10€ RPWNVLAQE  | 90    | >CSF1R-R10€ WPWNVLAQ   | 753   | 663   |
| >CSF1R-R10€ RPWNVLAQ   | 302   | >CSF1R-R10€ WPWNVLAQ   | 30    | 272   |
| >CSF1R-R10€ RPWNVLAQE  | 6575  | >CSF1R-R10€ WPWNVLAQ   | 265   | 6310  |
| >CSF1R-R10€ RPWNVLAQE  | 1805  | >CSF1R-R10€ WPWNVLAQ   | 82    | 1723  |
| >CSF1R-R10€ RPWNVLAQE  | 2169  | >CSF1R-R10€ WPWNVLAQ   | 459   | 1710  |
| >CSF1R-R10€ RPWNVLAQ   | 2059  | >CSF1R-R10€ WPWNVLAQ   | 92    | 1967  |
| >CSF1R-R10€ RPWNVLAQE  | 1188  | >CSF1R-R10€ WPWNVLAQ   | 60    | 1128  |
| >CSF1R-R10€ RPWNVLAQE  | 668   | >CSF1R-R10€ WPWNVLAQ   | 382   | 286   |
| >CSF1R-R10€ RPWNVLAQE  | 347   | >CSF1R-R10€ WPWNVLAQ   | 18    | 329   |
| >CSF1R-R10€ ARPWNVLAC  | 19325 | >CSF1R-R10€ AWPWNVLAQ  | 240   | 19085 |
| >CSF1R-R10€ ARPWNVLAC  | 245   | >CSF1R-R10€ AWPWNVLAQ  | 28178 | 27933 |
| >CSF1R-R10€ ARPWNVLAC  | 4034  | >CSF1R-R10€ AWPWNVLAQ  | 433   | 3601  |
| >CSF1R-R10€ ARPWNVLA   | 28388 | >CSF1R-R10€ AWPWNVLAQ  | 85    | 28303 |
| >CSF1R-R10€ ARPWNVLAC  | 32145 | >CSF1R-R10€ AWPWNVLAQ  | 89    | 32056 |
| >CSF1R-R10€ ARPWNVLAC  | 30617 | >CSF1R-R10€ AWPWNVLAQ  | 149   | 30468 |
| >CSF1R-R10€ AIHLYVKDPA | 156   | >CSF1R-R10€ AIHLYVKDPA | 21967 | 21811 |
| >CSF1R-R10€ AIHLYVKDPA | 25053 | >CSF1R-R10€ AIHLYVKDPA | 262   | 24791 |

|                        |       |                         |       |       |
|------------------------|-------|-------------------------|-------|-------|
| >CSF1R-R10€ PARPWNVLA  | 313   | >CSF1R-R10€ PAWPWNVL    | 14464 | 14151 |
| >CSF1R-R10€ DPARPWNV   | 890   | >CSF1R-R10€ DPAWPWNV    | 343   | 547   |
| >CSF1R-R10€ DPARPWNV   | 131   | >CSF1R-R10€ DPAWPWNV    | 19    | 112   |
| >CSF1R-R10€ DPARPWNVL  | 97    | >CSF1R-R10€ DPAWPWNV    | 34    | 63    |
| >CSF1R-R10€ DPARPWNVL  | 910   | >CSF1R-R10€ DPAWPWNV    | 266   | 644   |
| >CSF1R-R10€ DPARPWNVL  | 812   | >CSF1R-R10€ DPAWPWNV    | 188   | 624   |
| >CSF1R-R10€ DPARPWNVL  | 1618  | >CSF1R-R10€ DPAWPWNV    | 282   | 1336  |
| >CSF1R-R10€ DPARPWNVL  | 185   | >CSF1R-R10€ DPAWPWNV    | 2827  | 2642  |
| >CSF1R-R10€ KDPARPWNV  | 6154  | >CSF1R-R10€ KDPAPWPN'   | 309   | 5845  |
| >CSF1R-R10€ KDPARPWNV  | 197   | >CSF1R-R10€ KDPAPWPN'   | 302   | 105   |
| >CSF1R-R10€ VKDPARPWN  | 1105  | >CSF1R-R10€ VKDPAPWPI   | 151   | 954   |
| >CSF1R-R10€ VKDPARPWN  | 1402  | >CSF1R-R10€ VKDPAPWPI   | 171   | 1231  |
| >CSF1R-R10€ VKDPARPWN  | 618   | >CSF1R-R10€ VKDPAPWPI   | 446   | 172   |
| >CSF1R-R10€ YVKDPARPW  | 268   | >CSF1R-R10€ YVKDPAWPV   | 39    | 229   |
| >CSF1R-R10€ YVKDPARPW  | 483   | >CSF1R-R10€ YVKDPAWPV   | 155   | 328   |
| >CSF1R-R10€ YVKDPARPW  | 14    | >CSF1R-R10€ YVKDPAWPV   | 10    | 4     |
| >CSF1R-R10€ YVKDPARPW  | 84    | >CSF1R-R10€ YVKDPAWPV   | 18    | 66    |
| >CSF1R-R10€ YVKDPARPW  | 22    | >CSF1R-R10€ YVKDPAWPV   | 4     | 18    |
| >CSF1R-R10€ YVKDPARPW  | 90    | >CSF1R-R10€ YVKDPAWPV   | 10    | 80    |
| >CSF1R-R10€ YVKDPARPW  | 288   | >CSF1R-R10€ YVKDPAWPV   | 33    | 255   |
| >CSF1R-R10€ YVKDPARPW  | 287   | >CSF1R-R10€ YVKDPAWPV   | 16    | 271   |
| >CSF1R-R10€ YVKDPARPW  | 4     | >CSF1R-R10€ YVKDPAWPV   | 2     | 2     |
| >CSF1R-R10€ YVKDPARPW  | 89    | >CSF1R-R10€ YVKDPAWPV   | 21    | 68    |
| >CSF1R-R10€ YVKDPARPW  | 44    | >CSF1R-R10€ YVKDPAWPV   | 7     | 37    |
| >CSF1R-R10€ YVKDPARPW  | 20    | >CSF1R-R10€ YVKDPAWPV   | 24    | 4     |
| >CSF1R-R10€ YVKDPARPW  | 412   | >CSF1R-R10€ YVKDPAWPV   | 130   | 282   |
| >CSF1R-R10€ LYVKDPAW   | 11074 | >CSF1R-R10€ LYVKDPAW    | 244   | 10830 |
| >CSF1R-R10€ LYVKDPAWPV | 413   | >CSF1R-R10€ LYVKDPAWPV' | 102   | 311   |
| >CSF1R-R10€ LYVKDPAWPV | 358   | >CSF1R-R10€ LYVKDPAWPV' | 96    | 262   |
| >CSF1R-R10€ LYVKDPAW   | 4143  | >CSF1R-R10€ LYVKDPAW    | 63    | 4080  |
| >CSF1R-R10€ LYVKDPAWPV | 275   | >CSF1R-R10€ LYVKDPAWPV' | 38    | 237   |
| >CSF1R-R10€ LYVKDPAW   | 82    | >CSF1R-R10€ LYVKDPAW    | 27623 | 27541 |
| >CSF1R-R10€ HLYVKDPAW  | 27    | >CSF1R-R10€ HLYVKDPAW   | 16088 | 16061 |
| >CSF1R-R10€ HLYVKDPAWF | 728   | >CSF1R-R10€ HLYVKDPAW   | 345   | 383   |
| >CSF1R-R10€ HLYVKDPAW  | 164   | >CSF1R-R10€ HLYVKDPAW   | 24396 | 24232 |
| >CSF1R-R10€ HLYVKDPAW  | 214   | >CSF1R-R10€ HLYVKDPAW   | 27279 | 27065 |
| >CSF1R-R10€ HLYVKDPAWF | 334   | >CSF1R-R10€ HLYVKDPAW   | 483   | 149   |
| >CSF1R-R10€ HLYVKDPAW  | 23566 | >CSF1R-R10€ HLYVKDPAW   | 47    | 23519 |
| >CSF1R-R10€ HLYVKDPAWF | 25    | >CSF1R-R10€ HLYVKDPAW   | 28    | 3     |
| >CSF1R-R10€ HLYVKDPAWF | 299   | >CSF1R-R10€ HLYVKDPAW   | 175   | 124   |
| >CSF1R-R10€ HLYVKDPAW  | 22552 | >CSF1R-R10€ HLYVKDPAW   | 414   | 22138 |
| >CSF1R-R10€ HLYVKDPAWF | 1776  | >CSF1R-R10€ HLYVKDPAW   | 127   | 1649  |
| >CSF1R-R10€ HLYVKDPAWF | 3412  | >CSF1R-R10€ HLYVKDPAW   | 362   | 3050  |

|                         |       |                         |       |       |
|-------------------------|-------|-------------------------|-------|-------|
| >CSF1R-R106 HLYVKDPAW   | 243   | >CSF1R-R106 HLYVKDPAW   | 28379 | 28136 |
| >CSF1R-R106 IHLYVKDPAW  | 27221 | >CSF1R-R106 IHLYVKDPAW  | 367   | 26854 |
| >CSF1R-R753 RDLLHFSSQV  | 1497  | >CSF1R-R753 QDLLHFSSQV  | 466   | 1031  |
| >CSF1R-R753 RDLLHFSSQV  | 278   | >CSF1R-R753 QDLLHFSSQV  | 1789  | 1511  |
| >CSF1R-R753 RDLLHFSSQV  | 71    | >CSF1R-R753 QDLLHFSSQV  | 100   | 29    |
| >CSF1R-R753 LRDLLHFSSQ' | 7733  | >CSF1R-R753 LQDLLHFSSQ  | 341   | 7392  |
| >CSF1R-R753 LRDLLHFSSQ' | 11769 | >CSF1R-R753 LQDLLHFSSQ  | 27    | 11742 |
| >CSF1R-R753 LRDLLHFSSQ' | 7097  | >CSF1R-R753 LQDLLHFSSQ  | 118   | 6979  |
| >CSF1R-R753 LRDLLHFSSQ' | 12792 | >CSF1R-R753 LQDLLHFSSQ  | 329   | 12463 |
| >CSF1R-R753 ELRDLLHFS   | 879   | >CSF1R-R753 ELQDLLHFS   | 432   | 447   |
| >CSF1R-R753 ELRDLLHFSSC | 461   | >CSF1R-R753 ELQDLLHFSSC | 235   | 226   |
| >CSF1R-R753 ELRDLLHF    | 94    | >CSF1R-R753 ELQDLLHF    | 159   | 65    |
| >CSF1R-R753 ELRDLLHF    | 115   | >CSF1R-R753 ELQDLLHF    | 214   | 99    |
| >CSF1R-R753 ELRDLLHF    | 487   | >CSF1R-R753 ELQDLLHF    | 2718  | 2231  |
| >CSF1R-R753 LELRDLLHFS  | 360   | >CSF1R-R753 LELQDLLHFS  | 383   | 23    |
| >CSF1R-R753 LELRDLLHF   | 607   | >CSF1R-R753 LELQDLLHF   | 284   | 323   |
| >CSF1R-R753 LELRDLLHF   | 89    | >CSF1R-R753 LELQDLLHF   | 137   | 48    |
| >CSF1R-R753 LELRDLLHF   | 85    | >CSF1R-R753 LELQDLLHF   | 43    | 42    |
| >CSF1R-R753 LELRDLLHFSS | 574   | >CSF1R-R753 LELQDLLHFSS | 341   | 233   |
| >CSF1R-R753 LELRDLLHF   | 673   | >CSF1R-R753 LELQDLLHF   | 469   | 204   |
| >CSF1R-R753 LELRDLLHFSS | 479   | >CSF1R-R753 LELQDLLHFSS | 290   | 189   |
| >CSF1R-R753 LELRDLLHF   | 432   | >CSF1R-R753 LELQDLLHF   | 246   | 186   |
| >CSF1R-R753 LELRDLLHF   | 171   | >CSF1R-R753 LELQDLLHF   | 112   | 59    |
| >CSF1R-R753 LELRDLLHF   | 201   | >CSF1R-R753 LELQDLLHF   | 74    | 127   |
| >CSF1R-R753 RPLELRDL    | 494   | >CSF1R-R753 RPLELQDL    | 103   | 391   |
| >CSF1R-R753 RPLELRDLL   | 589   | >CSF1R-R753 RPLELQDLL   | 488   | 101   |
| >CSF1R-R753 RPLELRDLLHF | 287   | >CSF1R-R753 RPLELQDLLHF | 308   | 21    |
| >CSF1R-R753 RPLELRDL    | 30    | >CSF1R-R753 RPLELQDL    | 151   | 121   |
| >CSF1R-R753 RPLELRDLL   | 47    | >CSF1R-R753 RPLELQDLL   | 644   | 597   |
| >CSF1R-R753 RPLELRDLLHF | 147   | >CSF1R-R753 RPLELQDLLHF | 689   | 542   |
| >CSF1R-R753 RPLELRDLLHF | 384   | >CSF1R-R753 RPLELQDLLHF | 478   | 94    |
| >CSF1R-R753 RPLELRDLLHF | 558   | >CSF1R-R753 RPLELQDLLHF | 282   | 276   |
| >CSF1R-R753 RPLELRDLLHF | 216   | >CSF1R-R753 RPLELQDLLHF | 208   | 8     |
| >CSF1R-R753 GRPLELRDLL  | 566   | >CSF1R-R753 GRPLELQDLL  | 365   | 201   |
| >CSF1R-R753 GRPLELRDL   | 140   | >CSF1R-R753 GRPLELQDL   | 336   | 196   |
| >CSF1R-S638 SHLGQHENIV  | 846   | >CSF1R-S638 NHLGQHENIV  | 388   | 458   |
| >CSF1R-S638 MSHLGQHEN   | 141   | >CSF1R-S638 MNHLGQHEN   | 3893  | 3752  |
| >CSF1R-S638 MSHLGQHEN   | 279   | >CSF1R-S638 MNHLGQHEN   | 6009  | 5730  |
| >CSF1R-S638 MSHLGQHEN   | 256   | >CSF1R-S638 MNHLGQHEN   | 2531  | 2275  |
| >CSF1R-S638 MSHLGQHEN   | 76    | >CSF1R-S638 MNHLGQHEN   | 22082 | 22006 |
| >CSF1R-S638 IMSHLGQHEI  | 22    | >CSF1R-S638 IMNHLGQHE   | 45    | 23    |
| >CSF1R-S638 IMSHLGQHEI  | 45    | >CSF1R-S638 IMNHLGQHE   | 32    | 13    |
| >CSF1R-S638 IMSHLGQHEI  | 53    | >CSF1R-S638 IMNHLGQHE   | 27    | 26    |



|                         |      |                         |      |      |
|-------------------------|------|-------------------------|------|------|
| >CSF1R-S638 IMSHLGQHEI  | 358  | >CSF1R-S638 IMNHLGQHE   | 260  | 98   |
| >CSF1R-S638 IMSHLGQHEI  | 263  | >CSF1R-S638 IMNHLGQHE   | 218  | 45   |
| >CSF1R-S638 IMSHLGQHEI  | 97   | >CSF1R-S638 IMNHLGQHE   | 120  | 23   |
| >CSF1R-S638 IMSHLGQHEI  | 1060 | >CSF1R-S638 IMNHLGQHE   | 482  | 578  |
| >CSF1R-S638 IMSHLGQHEI  | 98   | >CSF1R-S638 IMNHLGQHE   | 110  | 12   |
| >CSF1R-S638 KIMSHLGQH   | 176  | >CSF1R-S638 KIMNHLGQH   | 193  | 17   |
| >CSF1R-S638 ELKIMSHL    | 169  | >CSF1R-S638 ELKIMNHL    | 386  | 217  |
| >CSF1R-S638 ELKIMSHL    | 97   | >CSF1R-S638 ELKIMNHL    | 171  | 74   |
| >CSF1R-S638 SELKIMSHL   | 37   | >CSF1R-S638 SELKIMNHL   | 34   | 3    |
| >CSF1R-S638 SELKIMSHL   | 96   | >CSF1R-S638 SELKIMNHL   | 120  | 24   |
| >CSF1R-S638 SELKIMSHL   | 126  | >CSF1R-S638 SELKIMNHL   | 143  | 17   |
| >CSF1R-S638 SELKIMSHL   | 366  | >CSF1R-S638 SELKIMNHL   | 536  | 170  |
| >CSF1R-S638 SELKIMSHLG  | 717  | >CSF1R-S638 SELKIMNHLG  | 438  | 279  |
| >CSF1R-S638 SELKIMSHL   | 13   | >CSF1R-S638 SELKIMNHL   | 15   | 2    |
| >CSF1R-S638 MSELKIMSHL  | 25   | >CSF1R-S638 MSELKIMNHL  | 141  | 116  |
| >CSF1R-S638 MSELKIMSHL  | 474  | >CSF1R-S638 MSELKIMNHL  | 833  | 359  |
| >CSF1R-S638 LMSELKIMSH  | 71   | >CSF1R-S638 LMSELKIMNHL | 72   | 1    |
| >CSF1R-S638 LMSELKIMSH  | 7    | >CSF1R-S638 LMSELKIMNHL | 6    | 1    |
| >CSF1R-S638 LMSELKIMSH  | 20   | >CSF1R-S638 LMSELKIMNHL | 29   | 9    |
| >CSF1R-S638 LMSELKIMSH  | 75   | >CSF1R-S638 LMSELKIMNHL | 68   | 7    |
| >CSF1R-S638 LMSELKIMS   | 466  | >CSF1R-S638 LMSELKIMNHL | 2044 | 1578 |
| >CSF1R-S638 LMSELKIMSH  | 12   | >CSF1R-S638 LMSELKIMNHL | 19   | 7    |
| >CSF1R-S638 LMSELKIMSH  | 22   | >CSF1R-S638 LMSELKIMNHL | 21   | 1    |
| >CSF1R-S638 LMSELKIMSH  | 20   | >CSF1R-S638 LMSELKIMNHL | 26   | 6    |
| >CSF1R-S638 LMSELKIMSH  | 97   | >CSF1R-S638 LMSELKIMNHL | 156  | 59   |
| >CSF1R-S638 LMSELKIMSH  | 4    | >CSF1R-S638 LMSELKIMNHL | 5    | 1    |
| >CSF1R-S638 LMSELKIMSH  | 210  | >CSF1R-S638 LMSELKIMNHL | 350  | 140  |
| >CSF1R-S638 LMSELKIMSH  | 420  | >CSF1R-S638 LMSELKIMNHL | 672  | 252  |
| >CSF1R-T952 LTCCEQGDI   | 53   | >CSF1R-T952 LICCEQGDI   | 4276 | 4223 |
| >CSF1R-T952 LEEESSSEHLT | 730  | >CSF1R-T952 LEEESSSEHLI | 9    | 721  |
| >CSF1R-T952 LEEESSSEHLT | 4833 | >CSF1R-T952 LEEESSSEHLI | 53   | 4780 |
| >CSF1R-T952 LEEESSSEHLT | 3183 | >CSF1R-T952 LEEESSSEHLI | 29   | 3154 |
| >CSF1R-T952 HLTCCCEQGDI | 828  | >CSF1R-T952 HLICCEQGDI  | 297  | 531  |
| >CSF1R-T952 HLTCCCEQGDI | 1905 | >CSF1R-T952 HLICCEQGDI  | 327  | 1578 |
| >CSF1R-T952 HLTCCCEQGDI | 455  | >CSF1R-T952 HLICCEQGDI  | 120  | 335  |
| >CSF1R-T952 HLTCCCEQGDI | 317  | >CSF1R-T952 HLICCEQGDI  | 67   | 250  |
| >CSF1R-T952 SEHLTCCE    | 373  | >CSF1R-T952 SEHLICCE    | 584  | 211  |
| >CSF1R-T952 SEHLTCCEQ   | 727  | >CSF1R-T952 SEHLICCEQ   | 471  | 256  |
| >CSF1R-T952 SEHLTCCEQ   | 816  | >CSF1R-T952 SEHLICCEQ   | 377  | 439  |
| >CSF1R-T952 SEHLTCCEQG  | 328  | >CSF1R-T952 SEHLICCEQG  | 370  | 42   |
| >CSF1R-T952 ESSSEHLT    | 6374 | >CSF1R-T952 ESSSEHLI    | 265  | 6109 |
| >CSF1R-T952 EESSSEHLT   | 6981 | >CSF1R-T952 EESSSEHLI   | 18   | 6963 |
| >CSF1R-T952 EESSSEHLT   | 8549 | >CSF1R-T952 EESSSEHLI   | 174  | 8375 |

|                         |       |                         |       |       |
|-------------------------|-------|-------------------------|-------|-------|
| >CSF1R-T952 EESSSEHLT   | 37    | >CSF1R-T952 EESSSEHLI   | 81    | 44    |
| >CSF1R-T952 EESSSEHLTCC | 82    | >CSF1R-T952 EESSSEHLICC | 45    | 37    |
| >CSF1R-T952 EESSSEHLT   | 12923 | >CSF1R-T952 EESSSEHLI   | 427   | 12496 |
| >CSF1R-T952 EEESSEHLT   | 4291  | >CSF1R-T952 EEESSEHLI   | 17    | 4274  |
| >CSF1R-T952 EEESSEHLT   | 1052  | >CSF1R-T952 EEESSEHLI   | 265   | 787   |
| >CSF1R-T952 EEESSEHLT   | 2048  | >CSF1R-T952 EEESSEHLI   | 248   | 1800  |
| >CSF1R-T952 EEESSEHLT   | 210   | >CSF1R-T952 EEESSEHLI   | 288   | 78    |
| >CSF1R-T952 EEESSEHLTCC | 409   | >CSF1R-T952 EEESSEHLICC | 419   | 10    |
| >CSF1R-T952 EEESSEHLT   | 8101  | >CSF1R-T952 EEESSEHLI   | 65    | 8036  |
| >CSF1R-V32C VVKPGATV    | 49    | >CSF1R-V32C VGKPGATV    | 8153  | 8104  |
| >CSF1R-V32C VVKPGATV    | 284   | >CSF1R-V32C VGKPGATV    | 6495  | 6211  |
| >CSF1R-V32C VVKPGATV    | 10    | >CSF1R-V32C VGKPGATV    | 3207  | 3197  |
| >CSF1R-V32C VVKPGATVTL  | 118   | >CSF1R-V32C VGKPGATVTL  | 13907 | 13789 |
| >CSF1R-V32C VVKPGATVTL  | 27    | >CSF1R-V32C VGKPGATVTL  | 282   | 255   |
| >CSF1R-V32C VVKPGATVTL  | 206   | >CSF1R-V32C VGKPGATVTL  | 4214  | 4008  |
| >CSF1R-V32C VVKPGATVTL  | 94    | >CSF1R-V32C VGKPGATVTL  | 458   | 364   |
| >CSF1R-V32C VIEPSVPELVV | 287   | >CSF1R-V32C VIEPSVPELVC | 25012 | 24725 |
| >CSF1R-V32C VIEPSVPELVV | 18    | >CSF1R-V32C VIEPSVPELVC | 23167 | 23149 |
| >CSF1R-V32C LVVVKPGATV  | 178   | >CSF1R-V32C LVGKPGATV   | 948   | 770   |
| >CSF1R-V32C LVVVKPGATV  | 78    | >CSF1R-V32C LVGKPGATV   | 951   | 873   |
| >CSF1R-V32C LVVVKPGATVT | 230   | >CSF1R-V32C LVGKPGATVT  | 2136  | 1906  |
| >CSF1R-V32C LVVVKPGATV  | 46    | >CSF1R-V32C LVGKPGATV   | 42    | 4     |
| >CSF1R-V32C LVVVKPGATV  | 467   | >CSF1R-V32C LVGKPGATV   | 395   | 72    |
| >CSF1R-V32C LVVVKPGATV  | 25    | >CSF1R-V32C LVGKPGATV   | 24    | 1     |
| >CSF1R-V32C LVVVKPGATVT | 241   | >CSF1R-V32C LVGKPGATVT  | 262   | 21    |
| >CSF1R-V32C LVVVKPGATV  | 144   | >CSF1R-V32C LVGKPGATV   | 1858  | 1714  |
| >CSF1R-V32C LVVVKPGATV  | 125   | >CSF1R-V32C LVGKPGATV   | 464   | 339   |
| >CSF1R-V32C LVVVKPGATVT | 199   | >CSF1R-V32C LVGKPGATVT  | 3123  | 2924  |
| >CSF1R-V32C LVVVKPGATV  | 298   | >CSF1R-V32C LVGKPGATV   | 1287  | 989   |
| >CSF1R-V32C LVVVKPGATVT | 421   | >CSF1R-V32C LVGKPGATVT  | 1551  | 1130  |
| >CSF1R-V32C ELVVKPGATV  | 903   | >CSF1R-V32C ELVGKPGATV  | 366   | 537   |
| >CSF1R-V32C ELVVKPGATV  | 149   | >CSF1R-V32C ELVGKPGATV  | 94    | 55    |
| >CSF1R-V32C ELVVKPGATV  | 36    | >CSF1R-V32C ELVGKPGATV  | 9     | 27    |
| >CSF1R-V32C ELVVKPGATV  | 138   | >CSF1R-V32C ELVGKPGATV  | 100   | 38    |
| >CSF1R-V32C ELVVKPGATV  | 267   | >CSF1R-V32C ELVGKPGATV  | 94    | 173   |
| >CSF1R-V32C ELVVKPGATV  | 240   | >CSF1R-V32C ELVGKPGATV  | 75    | 165   |
| >CSF1R-V32C ELVVKPGA    | 828   | >CSF1R-V32C ELVGKPGA    | 122   | 706   |
| >CSF1R-V32C ELVVKPGATV  | 26    | >CSF1R-V32C ELVGKPGATV  | 7     | 19    |
| >CSF1R-V32C ELVVKPGATV  | 296   | >CSF1R-V32C ELVGKPGATV  | 195   | 101   |
| >CSF1R-V32C ELVVKPGATV  | 151   | >CSF1R-V32C ELVGKPGATV  | 133   | 18    |
| >CSF1R-V32C PELVVKPGAT  | 497   | >CSF1R-V32C PELVGKPGAT  | 576   | 79    |
| >CSF1R-V32C VPPELVVKPGA | 41    | >CSF1R-V32C VPPELVGKPGA | 88    | 47    |
| >CSF1R-V32C SVPELVVKPG  | 202   | >CSF1R-V32C SVPELVGKPG  | 388   | 186   |

|                         |      |                         |       |       |
|-------------------------|------|-------------------------|-------|-------|
| >CSF1R-V32C SVPELVVKPG  | 471  | >CSF1R-V32C SVPELVGKPG  | 912   | 441   |
| >CSF1R-V32C SVPELVVKPG  | 279  | >CSF1R-V32C SVPELVGKPG  | 629   | 350   |
| >CSF1R-V32C SVPELVVK    | 70   | >CSF1R-V32C SVPELVGK    | 82    | 12    |
| >CSF1R-V32C SVPELVVKPG  | 316  | >CSF1R-V32C SVPELVGKPG  | 760   | 444   |
| >CSF1R-V32C EPSVPELVVK  | 761  | >CSF1R-V32C EPSVPELVGK  | 489   | 272   |
| >CSF1R-Y571 YNEKWEFPR   | 1266 | >CSF1R-Y571 DNEKWEFPR   | 215   | 1051  |
| >CSF1R-Y571 YNEKWEFPR   | 389  | >CSF1R-Y571 DNEKWEFPR   | 514   | 125   |
| >CSF1R-Y571 YNEKWEFPR   | 136  | >CSF1R-Y571 DNEKWEFPR   | 445   | 309   |
| >CSF1R-Y571 PYNEKWEF    | 108  | >CSF1R-Y571 PDNEKWEF    | 15999 | 15891 |
| >CSF1R-Y571 PYNEKWEF    | 433  | >CSF1R-Y571 PDNEKWEF    | 20354 | 19921 |
| >CSF1R-Y571 PYNEKWEF    | 34   | >CSF1R-Y571 PDNEKWEF    | 23159 | 23125 |
| >CSF1R-Y571 PYNEKWEFPI  | 41   | >CSF1R-Y571 PDNEKWEFPI  | 3523  | 3482  |
| >CSF1R-Y571 YTFIDPTQLPY | 28   | >CSF1R-Y571 YTFIDPTQLPI | 19786 | 19758 |
| >CSF1R-Y571 YTFIDPTQLPY | 187  | >CSF1R-Y571 YTFIDPTQLPI | 22650 | 22463 |
| >CSF1R-Y571 YTFIDPTQLPY | 80   | >CSF1R-Y571 YTFIDPTQLPI | 19083 | 19003 |
| >CSF1R-Y571 YTFIDPTQLPY | 346  | >CSF1R-Y571 YTFIDPTQLPI | 21307 | 20961 |
| >CSF1R-Y571 YTFIDPTQLPY | 6    | >CSF1R-Y571 YTFIDPTQLPI | 8473  | 8467  |
| >CSF1R-Y571 YTFIDPTQLPY | 254  | >CSF1R-Y571 YTFIDPTQLPI | 26446 | 26192 |
| >CSF1R-Y571 YTFIDPTQLPY | 75   | >CSF1R-Y571 YTFIDPTQLPI | 10011 | 9936  |
| >CSF1R-Y571 YTFIDPTQLPY | 22   | >CSF1R-Y571 YTFIDPTQLPI | 20213 | 20191 |
| >CSF1R-Y571 YTFIDPTQLPY | 62   | >CSF1R-Y571 YTFIDPTQLPI | 15747 | 15685 |
| >CSF1R-Y571 YTFIDPTQLPY | 209  | >CSF1R-Y571 YTFIDPTQLPI | 29893 | 29684 |
| >CSF1R-Y571 YTFIDPTQLPY | 17   | >CSF1R-Y571 YTFIDPTQLPI | 12530 | 12513 |
| >CSF1R-Y571 YTFIDPTQLPY | 3    | >CSF1R-Y571 YTFIDPTQLPI | 1661  | 1658  |
| >CSF1R-Y571 YTFIDPTQLPY | 41   | >CSF1R-Y571 YTFIDPTQLPI | 16877 | 16836 |
| >CSF1R-Y571 YTFIDPTQLPY | 178  | >CSF1R-Y571 YTFIDPTQLPI | 15448 | 15270 |
| >CSF1R-Y571 YTFIDPTQLPY | 231  | >CSF1R-Y571 YTFIDPTQLPI | 17266 | 17035 |
| >CSF1R-Y571 YTFIDPTQLPY | 17   | >CSF1R-Y571 YTFIDPTQLPI | 6395  | 6378  |
| >CSF1R-Y571 YTFIDPTQLPY | 153  | >CSF1R-Y571 YTFIDPTQLPI | 33100 | 32947 |
| >CSF1R-Y571 YTFIDPTQLPY | 479  | >CSF1R-Y571 YTFIDPTQLPI | 4129  | 3650  |
| >CSF1R-Y571 LPYNEKWEF   | 300  | >CSF1R-Y571 LPDNEKWEF   | 5455  | 5155  |
| >CSF1R-Y571 LPYNEKWEF   | 445  | >CSF1R-Y571 LPDNEKWEF   | 6351  | 5906  |
| >CSF1R-Y571 LPYNEKWEFF  | 438  | >CSF1R-Y571 LPDNEKWEFI  | 4749  | 4311  |
| >CSF1R-Y571 LPYNEKWEF   | 169  | >CSF1R-Y571 LPDNEKWEF   | 9489  | 9320  |
| >CSF1R-Y571 LPYNEKWEF   | 16   | >CSF1R-Y571 LPDNEKWEF   | 44    | 28    |
| >CSF1R-Y571 LPYNEKWEFF  | 465  | >CSF1R-Y571 LPDNEKWEFI  | 2185  | 1720  |
| >CSF1R-Y571 LPYNEKWEF   | 11   | >CSF1R-Y571 LPDNEKWEF   | 13    | 2     |
| >CSF1R-Y571 LPYNEKWEFF  | 268  | >CSF1R-Y571 LPDNEKWEFI  | 2738  | 2470  |
| >CSF1R-Y571 LPYNEKWEF   | 155  | >CSF1R-Y571 LPDNEKWEF   | 1420  | 1265  |
| >CSF1R-Y571 LPYNEKWEF   | 33   | >CSF1R-Y571 LPDNEKWEF   | 141   | 108   |
| >CSF1R-Y571 LPYNEKWEFF  | 172  | >CSF1R-Y571 LPDNEKWEFI  | 1422  | 1250  |
| >CSF1R-Y571 QLPYNEKWEI  | 262  | >CSF1R-Y571 QLDPNEKWE   | 403   | 141   |
| >CSF1R-Y571 TQLPYNEKW   | 50   | >CSF1R-Y571 TQLPDNEKW   | 91    | 41    |

|                        |     |                        |       |       |
|------------------------|-----|------------------------|-------|-------|
| >CSF1R-Y571 TQLPYNEK   | 56  | >CSF1R-Y571 TQLPDNEK   | 285   | 229   |
| >CSF1R-Y571 TQLPYNEKW  | 82  | >CSF1R-Y571 TQLPDNEKW  | 151   | 69    |
| >CSF1R-Y571 TQLPYNEKW  | 161 | >CSF1R-Y571 TQLPDNEKW  | 163   | 2     |
| >CSF1R-Y571 TQLPYNEKW  | 15  | >CSF1R-Y571 TQLPDNEKW  | 18    | 3     |
| >CSF1R-Y571 TQLPYNEKW  | 290 | >CSF1R-Y571 TQLPDNEKW  | 349   | 59    |
| >CSF1R-Y571 TQLPYNEKW  | 119 | >CSF1R-Y571 TQLPDNEKW  | 394   | 275   |
| >CSF1R-Y571 DPTQLPYNEK | 51  | >CSF1R-Y571 DPTQLPDNEK | 71    | 20    |
| >CSF1R-Y571 DPTQLPYNEK | 30  | >CSF1R-Y571 DPTQLPDNEK | 33    | 3     |
| >CSF1R-Y571 FIDPTQLPY  | 9   | >CSF1R-Y571 FIDPTQLPD  | 10215 | 10206 |
| >CSF1R-Y571 FIDPTQLPY  | 21  | >CSF1R-Y571 FIDPTQLPD  | 15357 | 15336 |
| >CSF1R-Y571 FIDPTQLPY  | 39  | >CSF1R-Y571 FIDPTQLPD  | 23937 | 23898 |
| >CSF1R-Y571 FIDPTQLPY  | 208 | >CSF1R-Y571 FIDPTQLPD  | 21611 | 21403 |
| >CSF1R-Y571 FIDPTQLPY  | 285 | >CSF1R-Y571 FIDPTQLPD  | 32113 | 31828 |
| >CSF1R-Y571 FIDPTQLPY  | 111 | >CSF1R-Y571 FIDPTQLPD  | 25362 | 25251 |
| >CSF1R-Y571 FIDPTQLPY  | 81  | >CSF1R-Y571 FIDPTQLPD  | 20367 | 20286 |
| >CSF1R-Y571 FIDPTQLPY  | 423 | >CSF1R-Y571 FIDPTQLPD  | 38169 | 37746 |
| >CSF1R-Y571 FIDPTQLPY  | 62  | >CSF1R-Y571 FIDPTQLPD  | 29351 | 29289 |
| >CSF1R-Y571 TFIDPTQLPY | 225 | >CSF1R-Y571 TFIDPTQLPD | 33005 | 32780 |
| >CSF1R-Y571 TFIDPTQLPY | 411 | >CSF1R-Y571 TFIDPTQLPD | 34950 | 34539 |
| >CSF1R-Y571 TFIDPTQLPY | 47  | >CSF1R-Y571 TFIDPTQLPD | 24863 | 24816 |
| >CSF1R-Y571 TFIDPTQLPY | 314 | >CSF1R-Y571 TFIDPTQLPD | 24962 | 24648 |
| >CSF1R-Y571 TFIDPTQLPY | 151 | >CSF1R-Y571 TFIDPTQLPD | 24351 | 24200 |
| >CSF1R-Y571 TFIDPTQLPY | 423 | >CSF1R-Y571 TFIDPTQLPD | 22335 | 21912 |
| >CSF1R-Y571 TFIDPTQLPY | 166 | >CSF1R-Y571 TFIDPTQLPD | 28747 | 28581 |
| >CSF1R-Y969 IAQPLLQPNN | 232 | >CSF1R-Y969 IAQPLLQPNN | 29126 | 28894 |
| >CSF1R-Y969 IAQPLLQPNN | 480 | >CSF1R-Y969 IAQPLLQPNN | 15138 | 14658 |
| >CSF1R-Y969 IAQPLLQPNN | 20  | >CSF1R-Y969 IAQPLLQPNN | 16229 | 16209 |
| >CSF1R-Y969 IAQPLLQPNN | 490 | >CSF1R-Y969 IAQPLLQPNN | 21451 | 20961 |
| >CSF1R-Y969 LQPNNYQF   | 342 | >CSF1R-Y969 LQPNNCQF   | 2163  | 1821  |
| >CSF1R-Y969 LQPNNYQF   | 432 | >CSF1R-Y969 LQPNNCQF   | 1989  | 1557  |
| >CSF1R-Y969 LQPNNYQF   | 68  | >CSF1R-Y969 LQPNNCQF   | 413   | 345   |
| >CSF1R-Y969 LQPNNYQF   | 104 | >CSF1R-Y969 LQPNNCQF   | 68    | 36    |
| >CSF1R-Y969 LQPNNYQF   | 11  | >CSF1R-Y969 LQPNNCQF   | 17    | 6     |
| >CSF1R-Y969 LLQPNNYQFC | 63  | >CSF1R-Y969 LLQPNNCQFC | 154   | 91    |
| >CSF1R-Y969 LLQPNNYQFC | 59  | >CSF1R-Y969 LLQPNNCQFC | 198   | 139   |
| >CSF1R-Y969 LLQPNNYQFC | 298 | >CSF1R-Y969 LLQPNNCQFC | 409   | 111   |
| >CSF1R-Y969 LLQPNNYQ   | 51  | >CSF1R-Y969 LLQPNNCQ   | 211   | 160   |
| >CSF1R-Y969 LLQPNNYQF  | 368 | >CSF1R-Y969 LLQPNNCQF  | 75    | 293   |
| >CSF1R-Y969 LLQPNNYQFC | 10  | >CSF1R-Y969 LLQPNNCQFC | 9     | 1     |
| >CSF1R-Y969 LLQPNNYQF  | 57  | >CSF1R-Y969 LLQPNNCQF  | 1412  | 1355  |
| >CSF1R-Y969 LLQPNNYQF  | 75  | >CSF1R-Y969 LLQPNNCQF  | 396   | 321   |
| >CSF1R-Y969 LLQPNNYQF  | 395 | >CSF1R-Y969 LLQPNNCQF  | 8181  | 7786  |
| >CSF1R-Y969 LLQPNNYQF  | 382 | >CSF1R-Y969 LLQPNNCQF  | 2911  | 2529  |

|                        |     |                        |       |       |
|------------------------|-----|------------------------|-------|-------|
| >CSF1R-Y969 LLQPNNYQF  | 80  | >CSF1R-Y969 LLQPNNCQF  | 46    | 34    |
| >CSF1R-Y969 LLQPNNYQF  | 276 | >CSF1R-Y969 LLQPNNCQF  | 234   | 42    |
| >CSF1R-Y969 LLQPNNYQF  | 113 | >CSF1R-Y969 LLQPNNCQF  | 161   | 48    |
| >CSF1R-Y969 LLQPNNYQF  | 196 | >CSF1R-Y969 LLQPNNCQF  | 102   | 94    |
| >CSF1R-Y969 PLLQPNNYQF | 283 | >CSF1R-Y969 PLLQPNNCQF | 1069  | 786   |
| >CSF1R-Y969 PLLQPNNY   | 167 | >CSF1R-Y969 PLLQPNNC   | 31560 | 31393 |
| >CSF1R-Y969 PLLQPNNY   | 364 | >CSF1R-Y969 PLLQPNNC   | 24693 | 24329 |
| >CSF1R-Y969 PLLQPNNY   | 426 | >CSF1R-Y969 PLLQPNNC   | 25080 | 24654 |
| >CSF1R-Y969 QPLLQPNNY  | 126 | >CSF1R-Y969 QPLLQPNNC  | 13389 | 13263 |
| >CSF1R-Y969 QPLLQPNNY( | 77  | >CSF1R-Y969 QPLLQPNNC( | 149   | 72    |
| >CSF1R-Y969 QPLLQPNNY  | 171 | >CSF1R-Y969 QPLLQPNNC  | 19767 | 19596 |
| >CSF1R-Y969 QPLLQPNNY( | 214 | >CSF1R-Y969 QPLLQPNNC( | 397   | 183   |
| >CSF1R-Y969 QPLLQPNNY( | 495 | >CSF1R-Y969 QPLLQPNNC( | 587   | 92    |
| >CSF1R-Y969 AQPLLQPNN' | 418 | >CSF1R-Y969 AQPLLQPNN( | 31487 | 31069 |
| >CSF1R-Y969 AQPLLQPNN' | 283 | >CSF1R-Y969 AQPLLQPNN( | 13737 | 13454 |
| >CSF1R-Y969 IAQPLLQPNN | 232 | >CSF1R-Y969 IAQPLLQPNN | 31361 | 31129 |
| >CSF1R-Y969 IAQPLLQPNN | 480 | >CSF1R-Y969 IAQPLLQPNN | 26207 | 25727 |
| >CSF1R-Y969 IAQPLLQPNN | 20  | >CSF1R-Y969 IAQPLLQPNN | 19506 | 19486 |
| >CSF1R-Y969 IAQPLLQPNN | 490 | >CSF1R-Y969 IAQPLLQPNN | 25272 | 24782 |
| >CSF1R-Y969 LQPNNYQF   | 342 | >CSF1R-Y969 LQPNNDQF   | 2783  | 2441  |
| >CSF1R-Y969 LQPNNYQF   | 432 | >CSF1R-Y969 LQPNNDQF   | 3654  | 3222  |
| >CSF1R-Y969 LQPNNYQF   | 68  | >CSF1R-Y969 LQPNNDQF   | 356   | 288   |
| >CSF1R-Y969 LQPNNYQF   | 104 | >CSF1R-Y969 LQPNNDQF   | 160   | 56    |
| >CSF1R-Y969 LQPNNYQF   | 11  | >CSF1R-Y969 LQPNNDQF   | 62    | 51    |
| >CSF1R-Y969 LLQPNNYQF( | 63  | >CSF1R-Y969 LLQPNNDQF( | 223   | 160   |
| >CSF1R-Y969 LLQPNNYQF( | 59  | >CSF1R-Y969 LLQPNNDQF( | 124   | 65    |
| >CSF1R-Y969 LLQPNNYQF( | 298 | >CSF1R-Y969 LLQPNNDQF( | 782   | 484   |
| >CSF1R-Y969 LLQPNNYQ   | 51  | >CSF1R-Y969 LLQPNNDQ   | 349   | 298   |
| >CSF1R-Y969 LLQPNNYQF  | 368 | >CSF1R-Y969 LLQPNNDQF  | 2383  | 2015  |
| >CSF1R-Y969 LLQPNNYQF( | 10  | >CSF1R-Y969 LLQPNNDQF( | 23    | 13    |
| >CSF1R-Y969 LLQPNNYQF  | 57  | >CSF1R-Y969 LLQPNNDQF  | 569   | 512   |
| >CSF1R-Y969 LLQPNNYQF  | 75  | >CSF1R-Y969 LLQPNNDQF  | 151   | 76    |
| >CSF1R-Y969 LLQPNNYQF  | 395 | >CSF1R-Y969 LLQPNNDQF  | 6045  | 5650  |
| >CSF1R-Y969 LLQPNNYQF  | 382 | >CSF1R-Y969 LLQPNNDQF  | 3979  | 3597  |
| >CSF1R-Y969 LLQPNNYQF  | 80  | >CSF1R-Y969 LLQPNNDQF  | 140   | 60    |
| >CSF1R-Y969 LLQPNNYQF  | 276 | >CSF1R-Y969 LLQPNNDQF  | 272   | 4     |
| >CSF1R-Y969 LLQPNNYQF  | 113 | >CSF1R-Y969 LLQPNNDQF  | 695   | 582   |
| >CSF1R-Y969 LLQPNNYQF  | 196 | >CSF1R-Y969 LLQPNNDQF  | 1352  | 1156  |
| >CSF1R-Y969 PLLQPNNYQF | 283 | >CSF1R-Y969 PLLQPNNDQ  | 1022  | 739   |
| >CSF1R-Y969 PLLQPNNY   | 167 | >CSF1R-Y969 PLLQPNND   | 36896 | 36729 |
| >CSF1R-Y969 PLLQPNNY   | 364 | >CSF1R-Y969 PLLQPNND   | 25815 | 25451 |
| >CSF1R-Y969 PLLQPNNY   | 426 | >CSF1R-Y969 PLLQPNND   | 31652 | 31226 |
| >CSF1R-Y969 QPLLQPNNY  | 126 | >CSF1R-Y969 QPLLQPNND  | 17676 | 17550 |

|                        |      |                        |       |       |
|------------------------|------|------------------------|-------|-------|
| >CSF1R-Y969 QPLLQPNNY( | 77   | >CSF1R-Y969 QPLLQPNNDI | 129   | 52    |
| >CSF1R-Y969 QPLLQPNNY  | 171  | >CSF1R-Y969 QPLLQPNNND | 25885 | 25714 |
| >CSF1R-Y969 QPLLQPNNY( | 214  | >CSF1R-Y969 QPLLQPNNDI | 818   | 604   |
| >CSF1R-Y969 QPLLQPNNY( | 495  | >CSF1R-Y969 QPLLQPNNDI | 521   | 26    |
| >CSF1R-Y969 AQPLLQPNN' | 418  | >CSF1R-Y969 AQPLLQPNNI | 31325 | 30907 |
| >CSF1R-Y969 AQPLLQPNN' | 283  | >CSF1R-Y969 AQPLLQPNNI | 21968 | 21685 |
| >CSF1R-Y969 IAQPLLQPNN | 232  | >CSF1R-Y969 IAQPLLQPNN | 12862 | 12630 |
| >CSF1R-Y969 IAQPLLQPNN | 480  | >CSF1R-Y969 IAQPLLQPNN | 111   | 369   |
| >CSF1R-Y969 IAQPLLQPNN | 20   | >CSF1R-Y969 IAQPLLQPNN | 15    | 5     |
| >CSF1R-Y969 IAQPLLQPNN | 490  | >CSF1R-Y969 IAQPLLQPNN | 1093  | 603   |
| >CSF1R-Y969 IAQPLLQPNN | 1274 | >CSF1R-Y969 IAQPLLQPNN | 320   | 954   |
| >CSF1R-Y969 LQPNNYQF   | 1824 | >CSF1R-Y969 LQPNNFQF   | 254   | 1570  |
| >CSF1R-Y969 LQPNNYQFC  | 963  | >CSF1R-Y969 LQPNNFQFC  | 73    | 890   |
| >CSF1R-Y969 LQPNNYQF   | 342  | >CSF1R-Y969 LQPNNFQF   | 366   | 24    |
| >CSF1R-Y969 LQPNNYQF   | 432  | >CSF1R-Y969 LQPNNFQF   | 301   | 131   |
| >CSF1R-Y969 LQPNNYQF   | 68   | >CSF1R-Y969 LQPNNFQF   | 50    | 18    |
| >CSF1R-Y969 LQPNNYQF   | 104  | >CSF1R-Y969 LQPNNFQF   | 84    | 20    |
| >CSF1R-Y969 LQPNNYQF   | 11   | >CSF1R-Y969 LQPNNFQF   | 15    | 4     |
| >CSF1R-Y969 LLQPNNYQFC | 63   | >CSF1R-Y969 LLQPNNFQFC | 57    | 6     |
| >CSF1R-Y969 LLQPNNYQFC | 59   | >CSF1R-Y969 LLQPNNFQFC | 50    | 9     |
| >CSF1R-Y969 LLQPNNYQFC | 298  | >CSF1R-Y969 LLQPNNFQFC | 273   | 25    |
| >CSF1R-Y969 LLQPNNYQ   | 51   | >CSF1R-Y969 LLQPNNFQ   | 67    | 16    |
| >CSF1R-Y969 LLQPNNYQF  | 368  | >CSF1R-Y969 LLQPNNFQF  | 102   | 266   |
| >CSF1R-Y969 LLQPNNYQFC | 10   | >CSF1R-Y969 LLQPNNFQFC | 7     | 3     |
| >CSF1R-Y969 LLQPNNYQF  | 57   | >CSF1R-Y969 LLQPNNFQF  | 64    | 7     |
| >CSF1R-Y969 LLQPNNYQF  | 75   | >CSF1R-Y969 LLQPNNFQF  | 38    | 37    |
| >CSF1R-Y969 LLQPNNYQF  | 395  | >CSF1R-Y969 LLQPNNFQF  | 521   | 126   |
| >CSF1R-Y969 LLQPNNYQF  | 382  | >CSF1R-Y969 LLQPNNFQF  | 1302  | 920   |
| >CSF1R-Y969 LLQPNNYQF  | 80   | >CSF1R-Y969 LLQPNNFQF  | 79    | 1     |
| >CSF1R-Y969 LLQPNNYQF  | 276  | >CSF1R-Y969 LLQPNNFQF  | 235   | 41    |
| >CSF1R-Y969 LLQPNNYQF  | 113  | >CSF1R-Y969 LLQPNNFQF  | 190   | 77    |
| >CSF1R-Y969 LLQPNNYQF  | 196  | >CSF1R-Y969 LLQPNNFQF  | 74    | 122   |
| >CSF1R-Y969 PLLQPNNYQF | 283  | >CSF1R-Y969 PLLQPNNFQF | 347   | 64    |
| >CSF1R-Y969 PLLQPNNY   | 167  | >CSF1R-Y969 PLLQPNNF   | 1987  | 1820  |
| >CSF1R-Y969 PLLQPNNY   | 364  | >CSF1R-Y969 PLLQPNNF   | 8179  | 7815  |
| >CSF1R-Y969 PLLQPNNY   | 426  | >CSF1R-Y969 PLLQPNNF   | 1024  | 598   |
| >CSF1R-Y969 PLLQPNNY   | 1531 | >CSF1R-Y969 PLLQPNNF   | 409   | 1122  |
| >CSF1R-Y969 QPLLQPNNY( | 927  | >CSF1R-Y969 QPLLQPNNFC | 335   | 592   |
| >CSF1R-Y969 QPLLQPNNY  | 126  | >CSF1R-Y969 QPLLQPNNF  | 279   | 153   |
| >CSF1R-Y969 QPLLQPNNY( | 77   | >CSF1R-Y969 QPLLQPNNFC | 89    | 12    |
| >CSF1R-Y969 QPLLQPNNY  | 171  | >CSF1R-Y969 QPLLQPNNF  | 335   | 164   |
| >CSF1R-Y969 QPLLQPNNY( | 214  | >CSF1R-Y969 QPLLQPNNFC | 203   | 11    |
| >CSF1R-Y969 QPLLQPNNY( | 495  | >CSF1R-Y969 QPLLQPNNFC | 307   | 188   |

|                         |     |                         |       |       |
|-------------------------|-----|-------------------------|-------|-------|
| >CSF1R-Y969 AQPLLQPNN'  | 418 | >CSF1R-Y969 AQPLLQPNNI  | 10435 | 10017 |
| >CSF1R-Y969 AQPLLQPNN'  | 283 | >CSF1R-Y969 AQPLLQPNNI  | 77    | 206   |
| >CSF1R-Y969 IAQPLLQPNN  | 232 | >CSF1R-Y969 IAQPLLQPNN  | 15597 | 15365 |
| >CSF1R-Y969 IAQPLLQPNN  | 480 | >CSF1R-Y969 IAQPLLQPNN  | 9973  | 9493  |
| >CSF1R-Y969 IAQPLLQPNN  | 20  | >CSF1R-Y969 IAQPLLQPNN  | 7612  | 7592  |
| >CSF1R-Y969 IAQPLLQPNN  | 490 | >CSF1R-Y969 IAQPLLQPNN  | 8391  | 7901  |
| >CSF1R-Y969 LQPNNYQF    | 342 | >CSF1R-Y969 LQPNNHQF    | 629   | 287   |
| >CSF1R-Y969 LQPNNYQF    | 432 | >CSF1R-Y969 LQPNNHQF    | 723   | 291   |
| >CSF1R-Y969 LQPNNYQF    | 68  | >CSF1R-Y969 LQPNNHQF    | 150   | 82    |
| >CSF1R-Y969 LQPNNYQF    | 104 | >CSF1R-Y969 LQPNNHQF    | 95    | 9     |
| >CSF1R-Y969 LQPNNYQF    | 11  | >CSF1R-Y969 LQPNNHQF    | 15    | 4     |
| >CSF1R-Y969 LLQPNNYQFC  | 63  | >CSF1R-Y969 LLQPNNHQFC  | 61    | 2     |
| >CSF1R-Y969 LLQPNNYQFC  | 59  | >CSF1R-Y969 LLQPNNHQFC  | 105   | 46    |
| >CSF1R-Y969 LLQPNNYQFC  | 298 | >CSF1R-Y969 LLQPNNHQFC  | 420   | 122   |
| >CSF1R-Y969 LLQPNNYQ    | 51  | >CSF1R-Y969 LLQPNNHQ    | 84    | 33    |
| >CSF1R-Y969 LLQPNNYQF   | 368 | >CSF1R-Y969 LLQPNNHQF   | 42    | 326   |
| >CSF1R-Y969 LLQPNNYQFC  | 10  | >CSF1R-Y969 LLQPNNHQFC  | 7     | 3     |
| >CSF1R-Y969 LLQPNNYQF   | 57  | >CSF1R-Y969 LLQPNNHQF   | 59    | 2     |
| >CSF1R-Y969 LLQPNNYQF   | 75  | >CSF1R-Y969 LLQPNNHQF   | 65    | 10    |
| >CSF1R-Y969 LLQPNNYQF   | 395 | >CSF1R-Y969 LLQPNNHQF   | 1146  | 751   |
| >CSF1R-Y969 LLQPNNYQF   | 382 | >CSF1R-Y969 LLQPNNHQF   | 2577  | 2195  |
| >CSF1R-Y969 LLQPNNYQF   | 80  | >CSF1R-Y969 LLQPNNHQF   | 66    | 14    |
| >CSF1R-Y969 LLQPNNYQF   | 276 | >CSF1R-Y969 LLQPNNHQF   | 103   | 173   |
| >CSF1R-Y969 LLQPNNYQF   | 113 | >CSF1R-Y969 LLQPNNHQF   | 159   | 46    |
| >CSF1R-Y969 LLQPNNYQF   | 196 | >CSF1R-Y969 LLQPNNHQF   | 112   | 84    |
| >CSF1R-Y969 PLLQPNNYQF  | 283 | >CSF1R-Y969 PLLQPNNHQF  | 406   | 123   |
| >CSF1R-Y969 PLLQPNNY    | 167 | >CSF1R-Y969 PLLQPNNH    | 10814 | 10647 |
| >CSF1R-Y969 PLLQPNNY    | 364 | >CSF1R-Y969 PLLQPNNH    | 14103 | 13739 |
| >CSF1R-Y969 PLLQPNNY    | 426 | >CSF1R-Y969 PLLQPNNH    | 10590 | 10164 |
| >CSF1R-Y969 PLLQPNNYQF  | 744 | >CSF1R-Y969 PLLQPNNHQF  | 402   | 342   |
| >CSF1R-Y969 QPLLQPNNY(C | 927 | >CSF1R-Y969 QPLLQPNNH(C | 472   | 455   |
| >CSF1R-Y969 QPLLQPNNY   | 126 | >CSF1R-Y969 QPLLQPNNH   | 1913  | 1787  |
| >CSF1R-Y969 QPLLQPNNY(C | 77  | >CSF1R-Y969 QPLLQPNNH(C | 148   | 71    |
| >CSF1R-Y969 QPLLQPNNY   | 171 | >CSF1R-Y969 QPLLQPNNH   | 19024 | 18853 |
| >CSF1R-Y969 QPLLQPNNY(C | 214 | >CSF1R-Y969 QPLLQPNNH(C | 480   | 266   |
| >CSF1R-Y969 QPLLQPNNY(C | 495 | >CSF1R-Y969 QPLLQPNNH(C | 367   | 128   |
| >CSF1R-Y969 AQPLLQPNN'  | 418 | >CSF1R-Y969 AQPLLQPNNI  | 24483 | 24065 |
| >CSF1R-Y969 AQPLLQPNN'  | 283 | >CSF1R-Y969 AQPLLQPNNI  | 6240  | 5957  |
| >CSF1R-Y969 IAQPLLQPNN  | 232 | >CSF1R-Y969 IAQPLLQPNN  | 26328 | 26096 |
| >CSF1R-Y969 IAQPLLQPNN  | 480 | >CSF1R-Y969 IAQPLLQPNN  | 21934 | 21454 |
| >CSF1R-Y969 IAQPLLQPNN  | 20  | >CSF1R-Y969 IAQPLLQPNN  | 16728 | 16708 |
| >CSF1R-Y969 IAQPLLQPNN  | 490 | >CSF1R-Y969 IAQPLLQPNN  | 23114 | 22624 |
| >CSF1R-Y969 LQPNNYQF    | 342 | >CSF1R-Y969 LQPNNNQF    | 2151  | 1809  |

|                         |      |                         |       |       |
|-------------------------|------|-------------------------|-------|-------|
| >CSF1R-Y969 LQPNNYQF    | 432  | >CSF1R-Y969 LQPNNNQF    | 1610  | 1178  |
| >CSF1R-Y969 LQPNNYQF    | 68   | >CSF1R-Y969 LQPNNNQF    | 325   | 257   |
| >CSF1R-Y969 LQPNNYQF    | 104  | >CSF1R-Y969 LQPNNNQF    | 104   | 0     |
| >CSF1R-Y969 LQPNNYQF    | 11   | >CSF1R-Y969 LQPNNNQF    | 14    | 3     |
| >CSF1R-Y969 LLQPNNYQFC  | 63   | >CSF1R-Y969 LLQPNNNQFC  | 180   | 117   |
| >CSF1R-Y969 LLQPNNYQFC  | 59   | >CSF1R-Y969 LLQPNNNQFC  | 116   | 57    |
| >CSF1R-Y969 LLQPNNYQFC  | 298  | >CSF1R-Y969 LLQPNNNQFC  | 582   | 284   |
| >CSF1R-Y969 LLQPNNYQ    | 51   | >CSF1R-Y969 LLQPNNNQ    | 162   | 111   |
| >CSF1R-Y969 LLQPNNYQF   | 368  | >CSF1R-Y969 LLQPNNNQF   | 1256  | 888   |
| >CSF1R-Y969 LLQPNNYQFC  | 10   | >CSF1R-Y969 LLQPNNNQFC  | 15    | 5     |
| >CSF1R-Y969 LLQPNNYQF   | 57   | >CSF1R-Y969 LLQPNNNQF   | 400   | 343   |
| >CSF1R-Y969 LLQPNNYQF   | 75   | >CSF1R-Y969 LLQPNNNQF   | 154   | 79    |
| >CSF1R-Y969 LLQPNNYQF   | 395  | >CSF1R-Y969 LLQPNNNQF   | 4063  | 3668  |
| >CSF1R-Y969 LLQPNNYQF   | 382  | >CSF1R-Y969 LLQPNNNQF   | 3491  | 3109  |
| >CSF1R-Y969 LLQPNNYQF   | 80   | >CSF1R-Y969 LLQPNNNQF   | 74    | 6     |
| >CSF1R-Y969 LLQPNNYQF   | 276  | >CSF1R-Y969 LLQPNNNQF   | 153   | 123   |
| >CSF1R-Y969 LLQPNNYQF   | 113  | >CSF1R-Y969 LLQPNNNQF   | 123   | 10    |
| >CSF1R-Y969 LLQPNNYQF   | 196  | >CSF1R-Y969 LLQPNNNQF   | 810   | 614   |
| >CSF1R-Y969 PLLQPNNYQF  | 283  | >CSF1R-Y969 PLLQPNNNQ   | 632   | 349   |
| >CSF1R-Y969 PLLQPNNY    | 167  | >CSF1R-Y969 PLLQPNNN    | 31957 | 31790 |
| >CSF1R-Y969 PLLQPNNY    | 364  | >CSF1R-Y969 PLLQPNNN    | 23154 | 22790 |
| >CSF1R-Y969 PLLQPNNY    | 426  | >CSF1R-Y969 PLLQPNNN    | 25627 | 25201 |
| >CSF1R-Y969 PLLQPNNYQF  | 744  | >CSF1R-Y969 PLLQPNNNQ   | 474   | 270   |
| >CSF1R-Y969 QPLLQPNNY   | 126  | >CSF1R-Y969 QPLLQPNNN   | 13635 | 13509 |
| >CSF1R-Y969 QPLLQPNNY(C | 77   | >CSF1R-Y969 QPLLQPNNN(C | 153   | 76    |
| >CSF1R-Y969 QPLLQPNNY   | 171  | >CSF1R-Y969 QPLLQPNNN   | 24023 | 23852 |
| >CSF1R-Y969 QPLLQPNNY(C | 214  | >CSF1R-Y969 QPLLQPNNN(C | 1025  | 811   |
| >CSF1R-Y969 QPLLQPNNY(C | 495  | >CSF1R-Y969 QPLLQPNNN(C | 743   | 248   |
| >CSF1R-Y969 AQPLLQPNN'  | 418  | >CSF1R-Y969 AQPLLQPNNI  | 30257 | 29839 |
| >CSF1R-Y969 AQPLLQPNN'  | 283  | >CSF1R-Y969 AQPLLQPNNI  | 16797 | 16514 |
| >CTNNA1-H5 HVLAASVEQ/   | 2932 | >CTNNA1-H5 YVLAASVEQ/   | 387   | 2545  |
| >CTNNA1-H5 HVLAASVEQ/   | 2051 | >CTNNA1-H5 YVLAASVEQ/   | 229   | 1822  |
| >CTNNA1-H5 HVLAASVEQ    | 6296 | >CTNNA1-H5 YVLAASVEQ    | 340   | 5956  |
| >CTNNA1-H5 HVLAASVEQ/   | 2418 | >CTNNA1-H5 YVLAASVEQ/   | 129   | 2289  |
| >CTNNA1-H5 HVLAASVEQ/   | 2174 | >CTNNA1-H5 YVLAASVEQ/   | 73    | 2101  |
| >CTNNA1-H5 HVLAASVEQ/   | 2158 | >CTNNA1-H5 YVLAASVEQ/   | 38    | 2120  |
| >CTNNA1-H5 HVLAASVEQ/   | 2502 | >CTNNA1-H5 YVLAASVEQ/   | 71    | 2431  |
| >CTNNA1-H5 HVLAASVEQ/   | 2886 | >CTNNA1-H5 YVLAASVEQ/   | 37    | 2849  |
| >CTNNA1-H5 HVLAASVEQ/   | 2997 | >CTNNA1-H5 YVLAASVEQ/   | 37    | 2960  |
| >CTNNA1-H5 HVLAASVEQ    | 378  | >CTNNA1-H5 YVLAASVEQ    | 4360  | 3982  |
| >CTNNA1-H5 HVLAASVEQ/   | 320  | >CTNNA1-H5 YVLAASVEQ/   | 3407  | 3087  |
| >CTNNA1-H5 HVLAASVEQ/   | 1528 | >CTNNA1-H5 YVLAASVEQ/   | 319   | 1209  |
| >CTNNA1-H5 HVLAASVEQ/   | 89   | >CTNNA1-H5 YVLAASVEQ/   | 38    | 51    |



|                       |       |                       |       |       |
|-----------------------|-------|-----------------------|-------|-------|
| >CTNNA1-H5 HVLAASVEQ/ | 866   | >CTNNA1-H5 YVLAASVEQA | 434   | 432   |
| >CTNNA1-H5 AHVLAASV   | 17346 | >CTNNA1-H5 AYVLAASV   | 348   | 16998 |
| >CTNNA1-H5 AHVLAASV   | 412   | >CTNNA1-H5 AYVLAASV   | 13330 | 12918 |
| >CTNNA1-H5 NKKRGRSKK/ | 1243  | >CTNNA1-H5 NKKRGRSKK/ | 17    | 1226  |
| >CTNNA1-H5 KAHVLAASV  | 3800  | >CTNNA1-H5 KAYVLAASV  | 204   | 3596  |
| >CTNNA1-H5 KAHVLAASV  | 1811  | >CTNNA1-H5 KAYVLAASV  | 402   | 1409  |
| >CTNNA1-H5 KAHVLAASV  | 596   | >CTNNA1-H5 KAYVLAASV  | 91    | 505   |
| >CTNNA1-H5 KAHVLAASV  | 434   | >CTNNA1-H5 KAYVLAASV  | 36    | 398   |
| >CTNNA1-H5 KAHVLAASV  | 1127  | >CTNNA1-H5 KAYVLAASV  | 93    | 1034  |
| >CTNNA1-H5 KAHVLAASV  | 5263  | >CTNNA1-H5 KAYVLAASV  | 391   | 4872  |
| >CTNNA1-H5 KAHVLAASV  | 1799  | >CTNNA1-H5 KAYVLAASV  | 250   | 1549  |
| >CTNNA1-H5 KAHVLAAS   | 274   | >CTNNA1-H5 KAYVLAAS   | 3342  | 3068  |
| >CTNNA1-H5 KAHVLAASV  | 24    | >CTNNA1-H5 KAYVLAASV  | 377   | 353   |
| >CTNNA1-H5 KAHVLAASVE | 162   | >CTNNA1-H5 KAYVLAASVE | 1919  | 1757  |
| >CTNNA1-H5 KAHVLAASV  | 4932  | >CTNNA1-H5 KAYVLAASV  | 259   | 4673  |
| >CTNNA1-H5 KAHVLAASV  | 1656  | >CTNNA1-H5 KAYVLAASV  | 463   | 1193  |
| >CTNNA1-H5 KAHVLAASV  | 141   | >CTNNA1-H5 KAYVLAASV  | 23    | 118   |
| >CTNNA1-H5 KAHVLAASV  | 5349  | >CTNNA1-H5 KAYVLAASV  | 383   | 4966  |
| >CTNNA1-H5 KAHVLAASV  | 1712  | >CTNNA1-H5 KAYVLAASV  | 424   | 1288  |
| >CTNNA1-H5 KKAHVLAAS  | 154   | >CTNNA1-H5 KKAYVLAAS  | 147   | 7     |
| >CTNNA1-H5 KKAHVLAASV | 55    | >CTNNA1-H5 KKAYVLAASV | 50    | 5     |
| >CTNNA1-H5 SKKAHVLAAS | 360   | >CTNNA1-H5 SKKAYVLAAS | 1694  | 1334  |
| >CTNNA1-H5 SKKAHVLAAS | 136   | >CTNNA1-H5 SKKAYVLAAS | 91    | 45    |
| >CTNNA1-H5 SKKAHVLAAS | 82    | >CTNNA1-H5 SKKAYVLAAS | 66    | 16    |
| >CTNNA1-H5 RSKKAHVLA  | 12    | >CTNNA1-H5 RSKKAYVLA  | 14    | 2     |
| >CTNNA1-H5 RSKKAHVLA  | 4     | >CTNNA1-H5 RSKKAYVLA  | 4     | 0     |
| >CTNNA1-H5 RSKKAHVLA  | 4     | >CTNNA1-H5 RSKKAYVLA  | 4     | 0     |
| >CTNNA1-H5 RSKKAHVLA  | 11    | >CTNNA1-H5 RSKKAYVLA  | 12    | 1     |
| >CTNNA1-H5 RSKKAHVLA  | 249   | >CTNNA1-H5 RSKKAYVLA  | 191   | 58    |
| >CTNNA1-H5 RSKKAHVLA  | 540   | >CTNNA1-H5 RSKKAYVLA  | 401   | 139   |
| >CTNNA1-H5 RSKKAHVLA  | 8     | >CTNNA1-H5 RSKKAYVLA  | 12    | 4     |
| >CTNNA1-H5 RSKKAHVLA  | 375   | >CTNNA1-H5 RSKKAYVLA  | 492   | 117   |
| >CTNNA1-H5 RSKKAHVLA  | 89    | >CTNNA1-H5 RSKKAYVLA  | 125   | 36    |
| >CTNNA1-H5 RSKKAHVLA  | 25    | >CTNNA1-H5 RSKKAYVLA  | 94    | 69    |
| >CTNNA1-H5 RSKKAHVLA  | 577   | >CTNNA1-H5 RSKKAYVLA  | 463   | 114   |
| >CTNNA1-H5 GRSKKAHVLA | 170   | >CTNNA1-H5 GRSKKAHVLA | 211   | 41    |
| >CTNNA1-H5 GRSKKAHVLA | 111   | >CTNNA1-H5 GRSKKAHVLA | 156   | 45    |
| >CTNNA1-H5 GRSKKAHVLA | 312   | >CTNNA1-H5 GRSKKAHVLA | 396   | 84    |
| >CTNNA1-H5 GRSKKAHVLA | 75    | >CTNNA1-H5 GRSKKAHVLA | 151   | 76    |
| >CTNNA1-H5 RGRSKKAHV  | 1895  | >CTNNA1-H5 RGRSKKAHV  | 221   | 1674  |
| >CTNNA1-H5 RGRSKKAHV  | 28    | >CTNNA1-H5 RGRSKKAHV  | 15    | 13    |
| >CTNNA1-H5 RGRSKKAHV  | 96    | >CTNNA1-H5 RGRSKKAHV  | 108   | 12    |
| >CTNNA1-H5 RGRSKKAHV  | 11    | >CTNNA1-H5 RGRSKKAHV  | 11    | 0     |

|                        |       |                        |      |       |
|------------------------|-------|------------------------|------|-------|
| >CTNNA1-H5 RGRSKKAH    | 14298 | >CTNNA1-H5 RGRSKKAY    | 384  | 13914 |
| >CTNNA1-H5 RGRSKKAH    | 8583  | >CTNNA1-H5 RGRSKKAY    | 312  | 8271  |
| >CTNNA1-H5 RGRSKKAH    | 11697 | >CTNNA1-H5 RGRSKKAY    | 101  | 11596 |
| >CTNNA1-H5 RGRSKKAHV   | 307   | >CTNNA1-H5 RGRSKKAYV   | 351  | 44    |
| >CTNNA1-H5 KRGRSKKAH   | 1860  | >CTNNA1-H5 KRGRSKKAY   | 42   | 1818  |
| >CTNNA1-H5 KRGRSKKAH\  | 478   | >CTNNA1-H5 KRGRSKKAYV  | 543  | 65    |
| >CTNNA1-H5 KRGRSKKAH\  | 107   | >CTNNA1-H5 KRGRSKKAYV  | 125  | 18    |
| >CTNNA1-H5 KRGRSKKAH\  | 285   | >CTNNA1-H5 KRGRSKKAYV  | 456  | 171   |
| >CTNNA1-H5 KKRGRSKKA\  | 121   | >CTNNA1-H5 KKRGRSKKAY  | 58   | 63    |
| >CTNNA1-H5 KKRGRSKKA\  | 212   | >CTNNA1-H5 KKRGRSKKAY  | 7    | 205   |
| >CTNNA1-H5 KKRGRSKKA\  | 333   | >CTNNA1-H5 KKRGRSKKAY  | 317  | 16    |
| >CTNNA1-R3 RLESIISGA   | 36    | >CTNNA1-R3 HLESIISGA   | 28   | 8     |
| >CTNNA1-R3 RLESIISGAAL | 25    | >CTNNA1-R3 HLESIISGAAL | 25   | 0     |
| >CTNNA1-R3 RLESIISGA   | 19    | >CTNNA1-R3 HLESIISGA   | 47   | 28    |
| >CTNNA1-R3 RLESIISGAA  | 185   | >CTNNA1-R3 HLESIISGAA  | 412  | 227   |
| >CTNNA1-R3 RLESIISGAAL | 116   | >CTNNA1-R3 HLESIISGAAL | 310  | 194   |
| >CTNNA1-R3 RLESIISGA   | 67    | >CTNNA1-R3 HLESIISGA   | 333  | 266   |
| >CTNNA1-R3 RLESIISGAA  | 349   | >CTNNA1-R3 HLESIISGAA  | 1346 | 997   |
| >CTNNA1-R3 RLESIISGAAL | 48    | >CTNNA1-R3 HLESIISGAAL | 204  | 156   |
| >CTNNA1-R3 RLESIISGA   | 401   | >CTNNA1-R3 HLESIISGA   | 499  | 98    |
| >CTNNA1-R3 RLESIISGAAL | 75    | >CTNNA1-R3 HLESIISGAAL | 94   | 19    |
| >CTNNA1-R3 RLESIISGA   | 21    | >CTNNA1-R3 HLESIISGA   | 19   | 2     |
| >CTNNA1-R3 RLESIISGAA  | 369   | >CTNNA1-R3 HLESIISGAA  | 346  | 23    |
| >CTNNA1-R3 RLESIISGAAL | 18    | >CTNNA1-R3 HLESIISGAAL | 17   | 1     |
| >CTNNA1-R3 RLESIISGAAL | 1811  | >CTNNA1-R3 HLESIISGAAL | 155  | 1656  |
| >CTNNA1-R3 EERLESII    | 7     | >CTNNA1-R3 EEHLESII    | 10   | 3     |
| >CTNNA1-R3 EERLESII    | 965   | >CTNNA1-R3 EEHLESII    | 379  | 586   |
| >CTNNA1-R3 EERLESII    | 966   | >CTNNA1-R3 EEHLESII    | 241  | 725   |
| >CTNNA1-R3 EERLESII    | 742   | >CTNNA1-R3 EEHLESII    | 209  | 533   |
| >CTNNA1-R3 EERLESII    | 52    | >CTNNA1-R3 EEHLESII    | 17   | 35    |
| >CTNNA1-R3 EERLESII    | 14    | >CTNNA1-R3 EEHLESII    | 15   | 1     |
| >CTNNA1-R3 LEERLESI    | 176   | >CTNNA1-R3 LEEHLESI    | 84   | 92    |
| >CTNNA1-R3 LEERLESII   | 278   | >CTNNA1-R3 LEEHLESII   | 138  | 140   |
| >CTNNA1-R3 LEERLESI    | 476   | >CTNNA1-R3 LEEHLESI    | 726  | 250   |
| >CTNNA1-R3 LEERLESII   | 55    | >CTNNA1-R3 LEEHLESII   | 44   | 11    |
| >CTNNA1-R3 SLEERLESI   | 154   | >CTNNA1-R3 SLEEHLESI   | 73   | 81    |
| >CTNNA1-R3 SLEERLESI   | 25    | >CTNNA1-R3 SLEEHLESI   | 10   | 15    |
| >CTNNA1-R3 SLEERLESII  | 409   | >CTNNA1-R3 SLEEHLESII  | 241  | 168   |
| >CTNNA1-R3 SLEERLESI   | 49    | >CTNNA1-R3 SLEEHLESI   | 14   | 35    |
| >CTNNA1-R3 SLEERLESI   | 82    | >CTNNA1-R3 SLEEHLESI   | 41   | 41    |
| >CTNNA1-R3 SLEERLESI   | 15    | >CTNNA1-R3 SLEEHLESI   | 8    | 7     |
| >CTNNA1-R3 SLEERLESII  | 223   | >CTNNA1-R3 SLEEHLESII  | 136  | 87    |
| >CTNNA1-R3 SLEERLESI   | 25    | >CTNNA1-R3 SLEEHLESI   | 16   | 9     |

|                        |      |                        |       |       |
|------------------------|------|------------------------|-------|-------|
| >CTNNA1-R3 SLEERLESII  | 124  | >CTNNA1-R3 SLEEHLESII  | 85    | 39    |
| >CTNNA1-R3 SLEERLESI   | 187  | >CTNNA1-R3 SLEEHLESI   | 224   | 37    |
| >CTNNA1-R3 SLEERLESI   | 8    | >CTNNA1-R3 SLEEHLESI   | 8     | 0     |
| >CTNNA1-R3 SLEERLESII  | 47   | >CTNNA1-R3 SLEEHLESII  | 57    | 10    |
| >CTNNA1-R3 RPSLEERL    | 313  | >CTNNA1-R3 RPSLEEHL    | 414   | 101   |
| >CTNNA1-R3 RPSLEERLESI | 149  | >CTNNA1-R3 RPSLEEHL    | 190   | 41    |
| >CTNNA1-R3 RFRPSLEERL  | 154  | >CTNNA1-R3 RFRPSLEEHL  | 71    | 83    |
| >CTNNA1-R3 RFRPSLEER   | 54   | >CTNNA1-R3 RFRPSLEEHL  | 683   | 629   |
| >CTNNA1-R3 RFRPSLEERL  | 189  | >CTNNA1-R3 RFRPSLEEHL  | 70    | 119   |
| >CTNNA1-R3 RFRPSLEER   | 8    | >CTNNA1-R3 RFRPSLEEHL  | 751   | 743   |
| >CTNNA1-R3 RFRPSLEER   | 317  | >CTNNA1-R3 RFRPSLEEHL  | 26077 | 25760 |
| >CTNNA1-R3 RFRPSLEERL  | 1303 | >CTNNA1-R3 RFRPSLEEHL  | 132   | 1171  |
| >CTNNA1-R3 ERFRPSLEERL | 827  | >CTNNA1-R3 ERFRPSLEEHL | 366   | 461   |
| >CTNNA1-R3 ERFRPSLEERL | 517  | >CTNNA1-R3 ERFRPSLEEHL | 404   | 113   |
| >CTNNB1-A1 AMEPDRKAA   | 346  | >CTNNB1-A1 TMEPDRKAA   | 342   | 4     |
| >CTNNB1-A1 AMEPDRKAA   | 46   | >CTNNB1-A1 TMEPDRKAA   | 168   | 122   |
| >CTNNB1-A1 AMEPDRKAA   | 71   | >CTNNB1-A1 TMEPDRKAA   | 206   | 135   |
| >CTNNB1-A1 AMEPDRKA    | 304  | >CTNNB1-A1 TMEPDRKA    | 1538  | 1234  |
| >CTNNB1-A1 AMEPDRKAA   | 241  | >CTNNB1-A1 TMEPDRKAA   | 1443  | 1202  |
| >CTNNB1-A1 AMEPDRKAA   | 3    | >CTNNB1-A1 TMEPDRKAA   | 7     | 4     |
| >CTNNB1-A1 MAMEPDRK/   | 299  | >CTNNB1-A1 MTMEPDRK/   | 115   | 184   |
| >CTNNB1-A1 MAMEPDRK/   | 258  | >CTNNB1-A1 MTMEPDRK/   | 97    | 161   |
| >CTNNB1-A1 MAMEPDRK/   | 165  | >CTNNB1-A1 MTMEPDRK/   | 57    | 108   |
| >CTNNB1-A1 MAMEPDRK/   | 45   | >CTNNB1-A1 MTMEPDRK/   | 34    | 11    |
| >CTNNB1-A1 MAMEPDRK/   | 35   | >CTNNB1-A1 MTMEPDRK/   | 12    | 23    |
| >CTNNB1-A1 MAMEPDRK/   | 453  | >CTNNB1-A1 MTMEPDRK/   | 85    | 368   |
| >CTNNB1-A1 MAMEPDRK/   | 572  | >CTNNB1-A1 MTMEPDRK/   | 379   | 193   |
| >CTNNB1-A1 MAMEPDRK/   | 76   | >CTNNB1-A1 MTMEPDRK/   | 56    | 20    |
| >CTNNB1-A1 MAMEPDRK    | 1474 | >CTNNB1-A1 MTMEPDRK    | 242   | 1232  |
| >CTNNB1-A1 MAMEPDRK    | 62   | >CTNNB1-A1 MTMEPDRK    | 20    | 42    |
| >CTNNB1-A1 MAMEPDRK    | 45   | >CTNNB1-A1 MTMEPDRK    | 10    | 35    |
| >CTNNB1-A1 MAMEPDRK/   | 108  | >CTNNB1-A1 MTMEPDRK/   | 17    | 91    |
| >CTNNB1-A1 MAMEPDRK/   | 1399 | >CTNNB1-A1 MTMEPDRK/   | 134   | 1265  |
| >CTNNB1-A1 MAMEPDRK/   | 7    | >CTNNB1-A1 MTMEPDRK/   | 4     | 3     |
| >CTNNB1-A1 MAMEPDRK/   | 1948 | >CTNNB1-A1 MTMEPDRK/   | 469   | 1479  |
| >CTNNB1-A1 MAMEPDRK/   | 1291 | >CTNNB1-A1 MTMEPDRK/   | 341   | 950   |
| >CTNNB1-A1 MAMEPDRK/   | 24   | >CTNNB1-A1 MTMEPDRK/   | 10    | 14    |
| >CTNNB1-A1 MAMEPDRK/   | 1133 | >CTNNB1-A1 MTMEPDRK/   | 102   | 1031  |
| >CTNNB1-A1 MAMEPDRK/   | 372  | >CTNNB1-A1 MTMEPDRK/   | 4161  | 3789  |
| >CTNNB1-A1 MAMEPDRK/   | 285  | >CTNNB1-A1 MTMEPDRK/   | 5840  | 5555  |
| >CTNNB1-A1 TQADLMELD   | 164  | >CTNNB1-A1 TQADLMELD   | 1499  | 1335  |
| >CTNNB1-A1 TQADLMELD   | 272  | >CTNNB1-A1 TQADLMELD   | 3354  | 3082  |
| >CTNNB1-A1 TQADLMELD   | 29   | >CTNNB1-A1 TQADLMELD   | 170   | 141   |

|                       |      |                       |      |      |
|-----------------------|------|-----------------------|------|------|
| >CTNNB1-A1 DMAMEPDR   | 291  | >CTNNB1-A1 DMTMEPDR   | 133  | 158  |
| >CTNNB1-A1 DMAMEPDR   | 128  | >CTNNB1-A1 DMTMEPDR   | 245  | 117  |
| >CTNNB1-A1 MELDMAME   | 385  | >CTNNB1-A1 MELDMTMEI  | 116  | 269  |
| >CTNNB1-A1 MELDMAME   | 395  | >CTNNB1-A1 MELDMTMEI  | 197  | 198  |
| >CTNNB1-A1 MELDMAME   | 525  | >CTNNB1-A1 MELDMTMEI  | 373  | 152  |
| >CTNNB1-A1 LMELDMAM   | 399  | >CTNNB1-A1 LMELDMTM   | 890  | 491  |
| >CTNNB1-A1 DLMELDMA   | 477  | >CTNNB1-A1 DLMELDMT   | 2617 | 2140 |
| >CTNNB1-A1 DLMELDMAN  | 516  | >CTNNB1-A1 DLMELDMTN  | 245  | 271  |
| >CTNNB1-A1 DLMELDMA   | 223  | >CTNNB1-A1 DLMELDMT   | 1485 | 1262 |
| >CTNNB1-A1 DLMELDMAN  | 317  | >CTNNB1-A1 DLMELDMTN  | 191  | 126  |
| >CTNNB1-A1 DLMELDMAN  | 317  | >CTNNB1-A1 DLMELDMTN  | 1882 | 1565 |
| >CTNNB1-A1 DLMELDMAN  | 450  | >CTNNB1-A1 DLMELDMTN  | 542  | 92   |
| >CTNNB1-A1 DLMELDMAN  | 442  | >CTNNB1-A1 DLMELDMTN  | 688  | 246  |
| >CTNNB1-A1 DLMELDMAN  | 71   | >CTNNB1-A1 DLMELDMTN  | 163  | 92   |
| >CTNNB1-A1 ADLMELDMA  | 112  | >CTNNB1-A1 ADLMELDMT  | 140  | 28   |
| >CTNNB1-A1 ADLMELDMA  | 493  | >CTNNB1-A1 ADLMELDMT  | 242  | 251  |
| >CTNNB1-A1 QADLMELDN  | 51   | >CTNNB1-A1 QADLMELDN  | 104  | 53   |
| >CTNNB1-A1 ASRHAIMR   | 14   | >CTNNB1-A1 SSRHAIMR   | 20   | 6    |
| >CTNNB1-A1 ASRHAIMRS  | 13   | >CTNNB1-A1 SSRHAIMRS  | 17   | 4    |
| >CTNNB1-A1 ASRHAIMRSF | 46   | >CTNNB1-A1 SSRHAIMRSP | 74   | 28   |
| >CTNNB1-A1 ASRHAIMRSF | 11   | >CTNNB1-A1 SSRHAIMRSP | 13   | 2    |
| >CTNNB1-A1 ASRHAIMR   | 70   | >CTNNB1-A1 SSRHAIMR   | 75   | 5    |
| >CTNNB1-A1 ASRHAIMR   | 1531 | >CTNNB1-A1 SSRHAIMR   | 256  | 1275 |
| >CTNNB1-A1 ASRHAIMR   | 314  | >CTNNB1-A1 SSRHAIMR   | 379  | 65   |
| >CTNNB1-A1 EASRHAIM   | 990  | >CTNNB1-A1 ESSRHAIM   | 91   | 899  |
| >CTNNB1-A1 EASRHAIMR  | 6    | >CTNNB1-A1 ESSRHAIMR  | 7    | 1    |
| >CTNNB1-A1 EASRHAIM   | 159  | >CTNNB1-A1 ESSRHAIM   | 1497 | 1338 |
| >CTNNB1-A1 VMVHQLSKK  | 126  | >CTNNB1-A1 VMVHQLSKK  | 3298 | 3172 |
| >CTNNB1-A1 VMVHQLSKK  | 395  | >CTNNB1-A1 VMVHQLSKK  | 7927 | 7532 |
| >CTNNB1-A1 VMVHQLSKK  | 125  | >CTNNB1-A1 VMVHQLSKK  | 9053 | 8928 |
| >CTNNB1-A1 KEASRHAI   | 264  | >CTNNB1-A1 KESSRHAI   | 290  | 26   |
| >CTNNB1-A1 KEASRHAIMF | 746  | >CTNNB1-A1 KESSRHAIMR | 288  | 458  |
| >CTNNB1-A1 KEASRHAIM  | 464  | >CTNNB1-A1 KESSRHAIM  | 429  | 35   |
| >CTNNB1-A1 KEASRHAI   | 49   | >CTNNB1-A1 KESSRHAI   | 41   | 8    |
| >CTNNB1-A1 KEASRHAIM  | 159  | >CTNNB1-A1 KESSRHAIM  | 134  | 25   |
| >CTNNB1-A1 KEASRHAI   | 478  | >CTNNB1-A1 KESSRHAI   | 251  | 227  |
| >CTNNB1-A1 KEASRHAI   | 154  | >CTNNB1-A1 KESSRHAI   | 189  | 35   |
| >CTNNB1-A1 KEASRHAIM  | 193  | >CTNNB1-A1 KESSRHAIM  | 353  | 160  |
| >CTNNB1-A1 KEASRHAIMF | 122  | >CTNNB1-A1 KESSRHAIMR | 136  | 14   |
| >CTNNB1-A1 KKEASRHAI  | 120  | >CTNNB1-A1 KKESSRHAI  | 65   | 55   |
| >CTNNB1-A1 KKEASRHAIM | 93   | >CTNNB1-A1 KKESSRHAIM | 50   | 43   |
| >CTNNB1-A1 KKEASRHAI  | 474  | >CTNNB1-A1 KKESSRHAI  | 750  | 276  |
| >CTNNB1-A1 KKEASRHAIM | 221  | >CTNNB1-A1 KKESSRHAIM | 322  | 101  |

|                       |      |                        |      |      |
|-----------------------|------|------------------------|------|------|
| >CTNNB1-A1 SKKEASRHA  | 1893 | >CTNNB1-A1 SKKESSRHA   | 462  | 1431 |
| >CTNNB1-A1 SKKEASRHAI | 68   | >CTNNB1-A1 SKKESSRHAI  | 29   | 39   |
| >CTNNB1-A1 SKKEASRHAI | 44   | >CTNNB1-A1 SKKESSRHAI  | 22   | 22   |
| >CTNNB1-A1 LSKKEASRHA | 173  | >CTNNB1-A1 LSKKESSRHA  | 94   | 79   |
| >CTNNB1-A1 LSKKEASRHA | 204  | >CTNNB1-A1 LSKKESSRHAI | 108  | 96   |
| >CTNNB1-A1 LSKKEASR   | 128  | >CTNNB1-A1 LSKKESSR    | 158  | 30   |
| >CTNNB1-A1 LSKKEASR   | 326  | >CTNNB1-A1 LSKKESSR    | 362  | 36   |
| >CTNNB1-A1 LSKKEASRHA | 344  | >CTNNB1-A1 LSKKESSRHAI | 233  | 111  |
| >CTNNB1-A1 LSKKEASRHA | 259  | >CTNNB1-A1 LSKKESSRHAI | 363  | 104  |
| >CTNNB1-A1 LSKKEASRH  | 43   | >CTNNB1-A1 LSKKESSRH   | 53   | 10   |
| >CTNNB1-A1 LSKKEASRHA | 119  | >CTNNB1-A1 LSKKESSRHAI | 115  | 4    |
| >CTNNB1-A1 QLSKKEASR  | 408  | >CTNNB1-A1 QLSKKESSR   | 457  | 49   |
| >CTNNB1-A1 HQLSKKEASR | 213  | >CTNNB1-A1 HQLSKKESSR  | 388  | 175  |
| >CTNNB1-A1 HQLSKKEASR | 194  | >CTNNB1-A1 HQLSKKESSR  | 338  | 144  |
| >CTNNB1-A1 MVHQLSKKE  | 243  | >CTNNB1-A1 MVHQLSKKE   | 2528 | 2285 |
| >CTNNB1-A1 ASRHAIMR   | 14   | >CTNNB1-A1 TSRHAIMR    | 76   | 62   |
| >CTNNB1-A1 ASRHAIMRS  | 13   | >CTNNB1-A1 TSRHAIMRS   | 70   | 57   |
| >CTNNB1-A1 ASRHAIMRSF | 46   | >CTNNB1-A1 TSRHAIMRSP  | 369  | 323  |
| >CTNNB1-A1 ASRHAIMRSF | 11   | >CTNNB1-A1 TSRHAIMRSP  | 45   | 34   |
| >CTNNB1-A1 ASRHAIMR   | 70   | >CTNNB1-A1 TSRHAIMR    | 97   | 27   |
| >CTNNB1-A1 ASRHAIMR   | 2858 | >CTNNB1-A1 TSRHAIMR    | 366  | 2492 |
| >CTNNB1-A1 ASRHAIMR   | 1531 | >CTNNB1-A1 TSRHAIMR    | 88   | 1443 |
| >CTNNB1-A1 ASRHAIMR   | 314  | >CTNNB1-A1 TSRHAIMR    | 1279 | 965  |
| >CTNNB1-A1 EASRHAIM   | 6127 | >CTNNB1-A1 ETSRHAIM    | 198  | 5929 |
| >CTNNB1-A1 EASRHAIM   | 990  | >CTNNB1-A1 ETSRHAIM    | 14   | 976  |
| >CTNNB1-A1 EASRHAIMR  | 513  | >CTNNB1-A1 ETSRHAIMR   | 166  | 347  |
| >CTNNB1-A1 EASRHAIMR  | 6    | >CTNNB1-A1 ETSRHAIMR   | 3    | 3    |
| >CTNNB1-A1 EASRHAIM   | 4333 | >CTNNB1-A1 ETSRHAIM    | 342  | 3991 |
| >CTNNB1-A1 EASRHAIM   | 159  | >CTNNB1-A1 ETSRHAIM    | 2673 | 2514 |
| >CTNNB1-A1 VMVHQLSKK  | 126  | >CTNNB1-A1 VMVHQLSKK   | 899  | 773  |
| >CTNNB1-A1 VMVHQLSKK  | 395  | >CTNNB1-A1 VMVHQLSKK   | 2461 | 2066 |
| >CTNNB1-A1 VMVHQLSKK  | 125  | >CTNNB1-A1 VMVHQLSKK   | 1392 | 1267 |
| >CTNNB1-A1 KEASRHAI   | 264  | >CTNNB1-A1 KETSRHAI    | 259  | 5    |
| >CTNNB1-A1 KEASRHAIM  | 464  | >CTNNB1-A1 KETSRHAIM   | 1017 | 553  |
| >CTNNB1-A1 KEASRHAI   | 49   | >CTNNB1-A1 KETSRHAI    | 43   | 6    |
| >CTNNB1-A1 KEASRHAIM  | 159  | >CTNNB1-A1 KETSRHAIM   | 138  | 21   |
| >CTNNB1-A1 KEASRHAI   | 478  | >CTNNB1-A1 KETSRHAI    | 225  | 253  |
| >CTNNB1-A1 KEASRHAI   | 154  | >CTNNB1-A1 KETSRHAI    | 336  | 182  |
| >CTNNB1-A1 KEASRHAIM  | 193  | >CTNNB1-A1 KETSRHAIM   | 369  | 176  |
| >CTNNB1-A1 KEASRHAIMF | 122  | >CTNNB1-A1 KETSRHAIMR  | 153  | 31   |
| >CTNNB1-A1 KKEASRHAI  | 120  | >CTNNB1-A1 KKETSRHAI   | 110  | 10   |
| >CTNNB1-A1 KKEASRHAIM | 93   | >CTNNB1-A1 KKETSRHAIM  | 87   | 6    |
| >CTNNB1-A1 KKEASRHAI  | 474  | >CTNNB1-A1 KKETSRHAI   | 1088 | 614  |

|                         |      |                          |      |      |
|-------------------------|------|--------------------------|------|------|
| >CTNNB1-A1 KKEASRHAIM   | 221  | >CTNNB1-A1 KKETSRRHAIM   | 229  | 8    |
| >CTNNB1-A1 SKKEASRHAI   | 68   | >CTNNB1-A1 SKKETSRRHAI   | 40   | 28   |
| >CTNNB1-A1 SKKEASRHAI   | 44   | >CTNNB1-A1 SKKETSRRHAI   | 26   | 18   |
| >CTNNB1-A1 LSKKEASRHA   | 173  | >CTNNB1-A1 LSKKETSRRHA   | 106  | 67   |
| >CTNNB1-A1 LSKKEASRHA   | 204  | >CTNNB1-A1 LSKKETSRRHAI  | 133  | 71   |
| >CTNNB1-A1 LSKKEASR     | 128  | >CTNNB1-A1 LSKKETSRR     | 101  | 27   |
| >CTNNB1-A1 LSKKEASR     | 326  | >CTNNB1-A1 LSKKETSRR     | 364  | 38   |
| >CTNNB1-A1 LSKKEASRHA   | 344  | >CTNNB1-A1 LSKKETSRRHAI  | 288  | 56   |
| >CTNNB1-A1 LSKKEASRHA   | 259  | >CTNNB1-A1 LSKKETSRRHAI  | 558  | 299  |
| >CTNNB1-A1 LSKKEASRH    | 43   | >CTNNB1-A1 LSKKETSRRH    | 101  | 58   |
| >CTNNB1-A1 LSKKEASRHA   | 119  | >CTNNB1-A1 LSKKETSRRHAI  | 114  | 5    |
| >CTNNB1-A1 QLSKKEASR    | 408  | >CTNNB1-A1 QLSKKETSRR    | 607  | 199  |
| >CTNNB1-A1 HQLSKKEASR   | 213  | >CTNNB1-A1 HQLSKKETSRR   | 479  | 266  |
| >CTNNB1-A1 HQLSKKEASR   | 194  | >CTNNB1-A1 HQLSKKETSRR   | 195  | 1    |
| >CTNNB1-A1 MVHQLSKKEASR | 243  | >CTNNB1-A1 MVHQLSKKETSRR | 4179 | 3936 |
| >CTNNB1-A2 AAVSHWQQQ    | 61   | >CTNNB1-A2 VAVSHWQQQ     | 203  | 142  |
| >CTNNB1-A2 AAVSHWQQQ    | 459  | >CTNNB1-A2 VAVSHWQQQ     | 236  | 223  |
| >CTNNB1-A2 AAVSHWQQQ    | 540  | >CTNNB1-A2 VAVSHWQQQ     | 321  | 219  |
| >CTNNB1-A2 AAVSHWQQQ    | 144  | >CTNNB1-A2 VAVSHWQQQ     | 199  | 55   |
| >CTNNB1-A2 AAVSHWQQQ    | 58   | >CTNNB1-A2 VAVSHWQQQ     | 80   | 22   |
| >CTNNB1-A2 AAVSHWQQQ    | 10   | >CTNNB1-A2 VAVSHWQQQ     | 11   | 1    |
| >CTNNB1-A2 AAVSHWQQQ    | 91   | >CTNNB1-A2 VAVSHWQQQ     | 37   | 54   |
| >CTNNB1-A2 AAVSHWQQQ    | 2471 | >CTNNB1-A2 VAVSHWQQQ     | 485  | 1986 |
| >CTNNB1-A2 AAVSHWQQQ    | 112  | >CTNNB1-A2 VAVSHWQQQ     | 280  | 168  |
| >CTNNB1-A2 RKAASVSHW    | 55   | >CTNNB1-A2 RKVAVSHW      | 48   | 7    |
| >CTNNB1-A2 RKAASVSHW    | 38   | >CTNNB1-A2 RKVAVSHW      | 58   | 20   |
| >CTNNB1-A2 RKAASVSHW    | 203  | >CTNNB1-A2 RKVAVSHW      | 316  | 113  |
| >CTNNB1-A2 EPDRKAAV     | 323  | >CTNNB1-A2 EPDRKVAV      | 544  | 221  |
| >CTNNB1-A2 EPDRKAAVSH   | 83   | >CTNNB1-A2 EPDRKVAVSH    | 59   | 24   |
| >CTNNB1-A2 EPDRKAAVSH   | 13   | >CTNNB1-A2 EPDRKVAVSH    | 10   | 3    |
| >CTNNB1-A2 MEPDRKAAV    | 112  | >CTNNB1-A2 MEPDRKVAV     | 184  | 72   |
| >CTNNB1-A2 MEPDRKAAV    | 196  | >CTNNB1-A2 MEPDRKVAV     | 136  | 60   |
| >CTNNB1-A2 AMEPDRKAA    | 346  | >CTNNB1-A2 AMEPDRKVA     | 737  | 391  |
| >CTNNB1-A2 AMEPDRKA     | 4669 | >CTNNB1-A2 AMEPDRKV      | 110  | 4559 |
| >CTNNB1-A2 AMEPDRKAA    | 46   | >CTNNB1-A2 AMEPDRKVA     | 58   | 12   |
| >CTNNB1-A2 AMEPDRKA     | 9374 | >CTNNB1-A2 AMEPDRKV      | 484  | 8890 |
| >CTNNB1-A2 AMEPDRKAA    | 71   | >CTNNB1-A2 AMEPDRKVA     | 91   | 20   |
| >CTNNB1-A2 AMEPDRKA     | 9781 | >CTNNB1-A2 AMEPDRKV      | 463  | 9318 |
| >CTNNB1-A2 AMEPDRKAA    | 514  | >CTNNB1-A2 AMEPDRKVA     | 373  | 141  |
| >CTNNB1-A2 AMEPDRKA     | 304  | >CTNNB1-A2 AMEPDRKV      | 7    | 297  |
| >CTNNB1-A2 AMEPDRKAA    | 241  | >CTNNB1-A2 AMEPDRKVA     | 278  | 37   |
| >CTNNB1-A2 AMEPDRKAA    | 3    | >CTNNB1-A2 AMEPDRKVA     | 4    | 1    |
| >CTNNB1-A2 MAMEPDRKA    | 299  | >CTNNB1-A2 MAMEPDRKV     | 347  | 48   |

|                      |       |                      |      |       |
|----------------------|-------|----------------------|------|-------|
| >CTNNB1-A2 MAMEPDRK\ | 258   | >CTNNB1-A2 MAMEPDRK\ | 392  | 134   |
| >CTNNB1-A2 MAMEPDRK\ | 165   | >CTNNB1-A2 MAMEPDRK\ | 441  | 276   |
| >CTNNB1-A2 MAMEPDRK\ | 45    | >CTNNB1-A2 MAMEPDRK\ | 45   | 0     |
| >CTNNB1-A2 MAMEPDRK\ | 5911  | >CTNNB1-A2 MAMEPDRK\ | 118  | 5793  |
| >CTNNB1-A2 MAMEPDRK\ | 35    | >CTNNB1-A2 MAMEPDRK\ | 39   | 4     |
| >CTNNB1-A2 MAMEPDRK\ | 453   | >CTNNB1-A2 MAMEPDRK\ | 595  | 142   |
| >CTNNB1-A2 MAMEPDRK\ | 76    | >CTNNB1-A2 MAMEPDRK\ | 91   | 15    |
| >CTNNB1-A2 MAMEPDRK\ | 108   | >CTNNB1-A2 MAMEPDRK\ | 12   | 96    |
| >CTNNB1-A2 MAMEPDRK\ | 7     | >CTNNB1-A2 MAMEPDRK\ | 8    | 1     |
| >CTNNB1-A2 MAMEPDRK\ | 1948  | >CTNNB1-A2 MAMEPDRK\ | 114  | 1834  |
| >CTNNB1-A2 MAMEPDRK\ | 24    | >CTNNB1-A2 MAMEPDRK\ | 29   | 5     |
| >CTNNB1-A2 MAMEPDRK\ | 372   | >CTNNB1-A2 MAMEPDRK\ | 375  | 3     |
| >CTNNB1-A2 MAMEPDRK\ | 285   | >CTNNB1-A2 MAMEPDRK\ | 195  | 90    |
| >CTNNB1-A2 DMAMEPDRI | 6370  | >CTNNB1-A2 DMAMEPDRI | 220  | 6150  |
| >CTNNB1-A2 DMAMEPDRI | 8184  | >CTNNB1-A2 DMAMEPDRI | 265  | 7919  |
| >CTNNB1-A2 DMAMEPDRI | 11662 | >CTNNB1-A2 DMAMEPDRI | 499  | 11163 |
| >CTNNB1-A2 DMAMEPDRI | 10738 | >CTNNB1-A2 DMAMEPDRI | 151  | 10587 |
| >CTNNB1-A2 AVSHWQQQ\ | 77    | >CTNNB1-A2 TVSHWQQQ\ | 199  | 122   |
| >CTNNB1-A2 AVSHWQQQ\ | 245   | >CTNNB1-A2 TVSHWQQQ\ | 510  | 265   |
| >CTNNB1-A2 AVSHWQQQ\ | 368   | >CTNNB1-A2 TVSHWQQQ\ | 1422 | 1054  |
| >CTNNB1-A2 AVSHWQQQ\ | 40    | >CTNNB1-A2 TVSHWQQQ\ | 264  | 224   |
| >CTNNB1-A2 AVSHWQQQ\ | 1105  | >CTNNB1-A2 TVSHWQQQ\ | 265  | 840   |
| >CTNNB1-A2 AVSHWQQQ\ | 163   | >CTNNB1-A2 TVSHWQQQ\ | 139  | 24    |
| >CTNNB1-A2 AVSHWQQQ\ | 140   | >CTNNB1-A2 TVSHWQQQ\ | 180  | 40    |
| >CTNNB1-A2 AVSHWQQQ\ | 488   | >CTNNB1-A2 TVSHWQQQ\ | 26   | 462   |
| >CTNNB1-A2 AVSHWQQQ\ | 4820  | >CTNNB1-A2 TVSHWQQQ\ | 430  | 4390  |
| >CTNNB1-A2 AVSHWQQQ\ | 333   | >CTNNB1-A2 TVSHWQQQ\ | 240  | 93    |
| >CTNNB1-A2 AVSHWQQQ\ | 121   | >CTNNB1-A2 TVSHWQQQ\ | 235  | 114   |
| >CTNNB1-A2 AVSHWQQQ\ | 396   | >CTNNB1-A2 TVSHWQQQ\ | 1785 | 1389  |
| >CTNNB1-A2 AVSHWQQQ\ | 116   | >CTNNB1-A2 TVSHWQQQ\ | 650  | 534   |
| >CTNNB1-A2 AVSHWQQQ\ | 378   | >CTNNB1-A2 TVSHWQQQ\ | 568  | 190   |
| >CTNNB1-A2 AVSHWQQQ\ | 460   | >CTNNB1-A2 TVSHWQQQ\ | 572  | 112   |
| >CTNNB1-A2 AVSHWQQQ\ | 282   | >CTNNB1-A2 TVSHWQQQ\ | 825  | 543   |
| >CTNNB1-A2 AAVSHWQQ\ | 7559  | >CTNNB1-A2 ATVSHWQQ\ | 262  | 7297  |
| >CTNNB1-A2 AAVSHWQQ\ | 7540  | >CTNNB1-A2 ATVSHWQQ\ | 353  | 7187  |
| >CTNNB1-A2 AAVSHWQQ\ | 12408 | >CTNNB1-A2 ATVSHWQQ\ | 474  | 11934 |
| >CTNNB1-A2 AAVSHWQQ\ | 9979  | >CTNNB1-A2 ATVSHWQQ\ | 217  | 9762  |
| >CTNNB1-A2 AAVSHWQQ\ | 61    | >CTNNB1-A2 ATVSHWQQ\ | 4    | 57    |
| >CTNNB1-A2 AAVSHWQQ\ | 459   | >CTNNB1-A2 ATVSHWQQ\ | 62   | 397   |
| >CTNNB1-A2 AAVSHWQQ\ | 540   | >CTNNB1-A2 ATVSHWQQ\ | 170  | 370   |
| >CTNNB1-A2 AAVSHWQQ\ | 144   | >CTNNB1-A2 ATVSHWQQ\ | 108  | 36    |
| >CTNNB1-A2 AAVSHWQQ\ | 58    | >CTNNB1-A2 ATVSHWQQ\ | 124  | 66    |
| >CTNNB1-A2 AAVSHWQQ\ | 10    | >CTNNB1-A2 ATVSHWQQ\ | 5    | 5     |

|                        |      |                       |      |      |
|------------------------|------|-----------------------|------|------|
| >CTNNB1-A2 AAVSHWQQC   | 91   | >CTNNB1-A2 ATVSHWQQC  | 1783 | 1692 |
| >CTNNB1-A2 AAVSHWQQC   | 1405 | >CTNNB1-A2 ATVSHWQQC  | 67   | 1338 |
| >CTNNB1-A2 AAVSHWQQC   | 112  | >CTNNB1-A2 ATVSHWQQC  | 124  | 12   |
| >CTNNB1-A2 AAVSHWQQ    | 1526 | >CTNNB1-A2 ATVSHWQQ   | 243  | 1283 |
| >CTNNB1-A2 AAVSHWQQC   | 1084 | >CTNNB1-A2 ATVSHWQQC  | 194  | 890  |
| >CTNNB1-A2 RKA AVSHW   | 55   | >CTNNB1-A2 RKATVSHW   | 42   | 13   |
| >CTNNB1-A2 RKA AVSHW   | 38   | >CTNNB1-A2 RKATVSHW   | 63   | 25   |
| >CTNNB1-A2 RKA AVSHW   | 203  | >CTNNB1-A2 RKATVSHW   | 211  | 8    |
| >CTNNB1-A2 EPDRKAAV    | 323  | >CTNNB1-A2 EPDRKATV   | 491  | 168  |
| >CTNNB1-A2 EPDRKAAVSH  | 83   | >CTNNB1-A2 EPDRKATVSH | 71   | 12   |
| >CTNNB1-A2 EPDRKAAVSH  | 13   | >CTNNB1-A2 EPDRKATVSH | 13   | 0    |
| >CTNNB1-A2 MEPDRKAAV   | 112  | >CTNNB1-A2 MEPDRKATV  | 79   | 33   |
| >CTNNB1-A2 MEPDRKAAV   | 1672 | >CTNNB1-A2 MEPDRKATV  | 412  | 1260 |
| >CTNNB1-A2 MEPDRKAAV   | 196  | >CTNNB1-A2 MEPDRKATV  | 203  | 7    |
| >CTNNB1-A2 AMEPDRKAA   | 346  | >CTNNB1-A2 AMEPDRKAT  | 262  | 84   |
| >CTNNB1-A2 AMEPDRKAA   | 46   | >CTNNB1-A2 AMEPDRKAT  | 36   | 10   |
| >CTNNB1-A2 AMEPDRKAA   | 71   | >CTNNB1-A2 AMEPDRKAT  | 48   | 23   |
| >CTNNB1-A2 AMEPDRKAA   | 514  | >CTNNB1-A2 AMEPDRKAT  | 211  | 303  |
| >CTNNB1-A2 AMEPDRKAA   | 241  | >CTNNB1-A2 AMEPDRKAT  | 2495 | 2254 |
| >CTNNB1-A2 AMEPDRKAA   | 3    | >CTNNB1-A2 AMEPDRKAT  | 3    | 0    |
| >CTNNB1-A2 MAMEPDRK/   | 299  | >CTNNB1-A2 MAMEPDRK/  | 262  | 37   |
| >CTNNB1-A2 MAMEPDRK/   | 258  | >CTNNB1-A2 MAMEPDRK/  | 349  | 91   |
| >CTNNB1-A2 MAMEPDRK/   | 165  | >CTNNB1-A2 MAMEPDRK/  | 167  | 2    |
| >CTNNB1-A2 MAMEPDRK/   | 45   | >CTNNB1-A2 MAMEPDRK/  | 40   | 5    |
| >CTNNB1-A2 MAMEPDRK/   | 35   | >CTNNB1-A2 MAMEPDRK/  | 27   | 8    |
| >CTNNB1-A2 MAMEPDRK/   | 453  | >CTNNB1-A2 MAMEPDRK/  | 246  | 207  |
| >CTNNB1-A2 MAMEPDRK/   | 572  | >CTNNB1-A2 MAMEPDRK/  | 411  | 161  |
| >CTNNB1-A2 MAMEPDRK/   | 76   | >CTNNB1-A2 MAMEPDRK/  | 34   | 42   |
| >CTNNB1-A2 MAMEPDRK/   | 7    | >CTNNB1-A2 MAMEPDRK/  | 8    | 1    |
| >CTNNB1-A2 MAMEPDRK/   | 24   | >CTNNB1-A2 MAMEPDRK/  | 27   | 3    |
| >CTNNB1-A2 MAMEPDRK/   | 1133 | >CTNNB1-A2 MAMEPDRK/  | 318  | 815  |
| >CTNNB1-A2 MAMEPDRK/   | 372  | >CTNNB1-A2 MAMEPDRK/  | 708  | 336  |
| >CTNNB1-A2 MAMEPDRK/   | 285  | >CTNNB1-A2 MAMEPDRK/  | 813  | 528  |
| >CTNNB1-A3 ATTTAPSLSGI | 216  | >CTNNB1-A3 GTTTAPSLSG | 344  | 128  |
| >CTNNB1-A3 ATTTAPSLSGI | 36   | >CTNNB1-A3 GTTTAPSLSG | 32   | 4    |
| >CTNNB1-A3 ATTTAPSLSGI | 51   | >CTNNB1-A3 GTTTAPSLSG | 528  | 477  |
| >CTNNB1-A3 ATTTAPSLSGI | 129  | >CTNNB1-A3 GTTTAPSLSG | 186  | 57   |
| >CTNNB1-A3 ATTTAPSL    | 16   | >CTNNB1-A3 GTTTAPSL   | 62   | 46   |
| >CTNNB1-A3 ATTTAPSL    | 362  | >CTNNB1-A3 GTTTAPSL   | 124  | 238  |
| >CTNNB1-A3 ATTTAPSLSGI | 404  | >CTNNB1-A3 GTTTAPSLSG | 750  | 346  |
| >CTNNB1-A3 ATTTAPSL    | 368  | >CTNNB1-A3 GTTTAPSL   | 913  | 545  |
| >CTNNB1-A3 GATTTAPSL   | 272  | >CTNNB1-A3 GGTTTAPSL  | 9414 | 9142 |
| >CTNNB1-A3 GATTTAPSL   | 346  | >CTNNB1-A3 GGTTTAPSL  | 3290 | 2944 |



|                        |      |                        |       |       |
|------------------------|------|------------------------|-------|-------|
| >CTNNB1-A3 SYLDSGIHSGA | 410  | >CTNNB1-A3 SYLDSGIHSGA | 1462  | 1052  |
| >CTNNB1-A3 HSGATTTAPS  | 33   | >CTNNB1-A3 HSGGTTTAPS  | 35    | 2     |
| >CTNNB1-A3 GIHSGATTTA  | 432  | >CTNNB1-A3 GIHSGGTTTA  | 612   | 180   |
| >CTNNB1-A3 GIHSGATTTA  | 276  | >CTNNB1-A3 GIHSGGTTTA  | 205   | 71    |
| >CTNNB1-A3 GIHSGATTTA  | 362  | >CTNNB1-A3 GIHSGGTTTA  | 322   | 40    |
| >CTNNB1-A3 YLDSGIHSGA  | 78   | >CTNNB1-A3 YLDSGIHSGG  | 3852  | 3774  |
| >CTNNB1-A3 YLDSGIHSGA  | 212  | >CTNNB1-A3 YLDSGIHSGG  | 240   | 28    |
| >CTNNB1-A3 YLDSGIHSGA  | 24   | >CTNNB1-A3 YLDSGIHSGG  | 1433  | 1409  |
| >CTNNB1-A3 YLDSGIHSGA  | 284  | >CTNNB1-A3 YLDSGIHSGG  | 375   | 91    |
| >CTNNB1-A3 YLDSGIHSGA  | 32   | >CTNNB1-A3 YLDSGIHSGG  | 4220  | 4188  |
| >CTNNB1-A3 YLDSGIHSGA  | 78   | >CTNNB1-A3 YLDSGIHSGG  | 79    | 1     |
| >CTNNB1-A3 YLDSGIHSGA  | 280  | >CTNNB1-A3 YLDSGIHSGG  | 12024 | 11744 |
| >CTNNB1-A3 YLDSGIHSGA  | 178  | >CTNNB1-A3 YLDSGIHSGG  | 174   | 4     |
| >CTNNB1-A3 YLDSGIHSGA  | 2    | >CTNNB1-A3 YLDSGIHSGG  | 39    | 37    |
| >CTNNB1-A3 YLDSGIHSGA  | 12   | >CTNNB1-A3 YLDSGIHSGG  | 11    | 1     |
| >CTNNB1-A3 YLDSGIHSGA  | 8    | >CTNNB1-A3 YLDSGIHSGG  | 743   | 735   |
| >CTNNB1-A3 YLDSGIHSGA  | 83   | >CTNNB1-A3 YLDSGIHSGG  | 89    | 6     |
| >CTNNB1-A3 YLDSGIHSGA  | 7    | >CTNNB1-A3 YLDSGIHSGG  | 553   | 546   |
| >CTNNB1-A3 YLDSGIHSGA  | 121  | >CTNNB1-A3 YLDSGIHSGG  | 55    | 66    |
| >CTNNB1-A3 YLDSGIHSGA  | 7    | >CTNNB1-A3 YLDSGIHSGG  | 3958  | 3951  |
| >CTNNB1-A3 YLDSGIHSGA  | 255  | >CTNNB1-A3 YLDSGIHSGG  | 128   | 127   |
| >CTNNB1-A3 YLDSGIHSGA  | 2    | >CTNNB1-A3 YLDSGIHSGG  | 98    | 96    |
| >CTNNB1-A3 YLDSGIHSGA  | 36   | >CTNNB1-A3 YLDSGIHSGG  | 21    | 15    |
| >CTNNB1-A3 ATTTAPSLSGI | 216  | >CTNNB1-A3 TTTTAPSLSGI | 286   | 70    |
| >CTNNB1-A3 ATTTAPSLSGI | 36   | >CTNNB1-A3 TTTTAPSLSGI | 30    | 6     |
| >CTNNB1-A3 ATTTAPSLSGI | 51   | >CTNNB1-A3 TTTTAPSLSGI | 469   | 418   |
| >CTNNB1-A3 ATTTAPSLSGI | 129  | >CTNNB1-A3 TTTTAPSLSGI | 9     | 120   |
| >CTNNB1-A3 ATTTAPSL    | 3653 | >CTNNB1-A3 TTTTAPSL    | 196   | 3457  |
| >CTNNB1-A3 ATTTAPSL    | 4093 | >CTNNB1-A3 TTTTAPSL    | 365   | 3728  |
| >CTNNB1-A3 ATTTAPSL    | 16   | >CTNNB1-A3 TTTTAPSL    | 55    | 39    |
| >CTNNB1-A3 ATTTAPSL    | 535  | >CTNNB1-A3 TTTTAPSL    | 450   | 85    |
| >CTNNB1-A3 ATTTAPSL    | 1096 | >CTNNB1-A3 TTTTAPSL    | 354   | 742   |
| >CTNNB1-A3 ATTTAPSL    | 362  | >CTNNB1-A3 TTTTAPSL    | 476   | 114   |
| >CTNNB1-A3 ATTTAPSLSGI | 404  | >CTNNB1-A3 TTTTAPSLSGI | 1531  | 1127  |
| >CTNNB1-A3 ATTTAPSL    | 368  | >CTNNB1-A3 TTTTAPSL    | 697   | 329   |
| >CTNNB1-A3 GATTTAPSL   | 272  | >CTNNB1-A3 GTTTTAPSL   | 22    | 250   |
| >CTNNB1-A3 GATTTAPSL   | 346  | >CTNNB1-A3 GTTTTAPSL   | 35    | 311   |
| >CTNNB1-A3 GATTTAPSL   | 1097 | >CTNNB1-A3 GTTTTAPSL   | 42    | 1055  |
| >CTNNB1-A3 SYLDSGIHSGA | 410  | >CTNNB1-A3 SYLDSGIHSGA | 1472  | 1062  |
| >CTNNB1-A3 HSGATTTAPS  | 33   | >CTNNB1-A3 HSGTTTTAPS  | 68    | 35    |
| >CTNNB1-A3 GIHSGATTTA  | 432  | >CTNNB1-A3 GIHSGTTTTA  | 368   | 64    |
| >CTNNB1-A3 GIHSGATTTA  | 276  | >CTNNB1-A3 GIHSGTTTTA  | 174   | 102   |
| >CTNNB1-A3 GIHSGATTTA  | 362  | >CTNNB1-A3 GIHSGTTTTA  | 236   | 126   |

|                        |       |                        |      |       |
|------------------------|-------|------------------------|------|-------|
| >CTNNB1-A3 YLDSGIHSGA  | 78    | >CTNNB1-A3 YLDSGIHSGT  | 282  | 204   |
| >CTNNB1-A3 YLDSGIHSGA' | 212   | >CTNNB1-A3 YLDSGIHSGT  | 200  | 12    |
| >CTNNB1-A3 YLDSGIHSGA  | 24    | >CTNNB1-A3 YLDSGIHSGT  | 58   | 34    |
| >CTNNB1-A3 YLDSGIHSGA' | 284   | >CTNNB1-A3 YLDSGIHSGT  | 545  | 261   |
| >CTNNB1-A3 YLDSGIHSGA  | 32    | >CTNNB1-A3 YLDSGIHSGT  | 66   | 34    |
| >CTNNB1-A3 YLDSGIHSGA' | 78    | >CTNNB1-A3 YLDSGIHSGT  | 91   | 13    |
| >CTNNB1-A3 YLDSGIHSGA  | 280   | >CTNNB1-A3 YLDSGIHSGT  | 1024 | 744   |
| >CTNNB1-A3 YLDSGIHSGA' | 178   | >CTNNB1-A3 YLDSGIHSGT  | 333  | 155   |
| >CTNNB1-A3 YLDSGIHSGA  | 2     | >CTNNB1-A3 YLDSGIHSGT  | 5    | 3     |
| >CTNNB1-A3 YLDSGIHSGA' | 12    | >CTNNB1-A3 YLDSGIHSGT  | 9    | 3     |
| >CTNNB1-A3 YLDSGIHSGA  | 8     | >CTNNB1-A3 YLDSGIHSGT  | 59   | 51    |
| >CTNNB1-A3 YLDSGIHSGA' | 83    | >CTNNB1-A3 YLDSGIHSGT  | 55   | 28    |
| >CTNNB1-A3 YLDSGIHSGA  | 7     | >CTNNB1-A3 YLDSGIHSGT  | 22   | 15    |
| >CTNNB1-A3 YLDSGIHSGA' | 121   | >CTNNB1-A3 YLDSGIHSGT  | 46   | 75    |
| >CTNNB1-A3 YLDSGIHSGA  | 7     | >CTNNB1-A3 YLDSGIHSGT  | 29   | 22    |
| >CTNNB1-A3 YLDSGIHSGA' | 255   | >CTNNB1-A3 YLDSGIHSGT  | 150  | 105   |
| >CTNNB1-A3 YLDSGIHSGA  | 2     | >CTNNB1-A3 YLDSGIHSGT  | 4    | 2     |
| >CTNNB1-A3 YLDSGIHSGA' | 36    | >CTNNB1-A3 YLDSGIHSGT  | 15   | 21    |
| >CTNNB1-A4 TAPSLSGK    | 164   | >CTNNB1-A4 TAPPSLSGK   | 4777 | 4613  |
| >CTNNB1-A4 TTAPSLSGK   | 86    | >CTNNB1-A4 TTPPSLSGK   | 576  | 490   |
| >CTNNB1-A4 TTAPSLSGK   | 10    | >CTNNB1-A4 TTPPSLSGK   | 33   | 23    |
| >CTNNB1-A4 TTAPSLSGK   | 5     | >CTNNB1-A4 TTPPSLSGK   | 41   | 36    |
| >CTNNB1-A4 TTAPSLSG    | 5083  | >CTNNB1-A4 TTPPSLSG    | 67   | 5016  |
| >CTNNB1-A4 TTAPSLSGK   | 8790  | >CTNNB1-A4 TTPPSLSGK   | 139  | 8651  |
| >CTNNB1-A4 TTAPSLSGKG  | 8523  | >CTNNB1-A4 TTPPSLSGKG  | 136  | 8387  |
| >CTNNB1-A4 TTAPSLSGKG  | 14305 | >CTNNB1-A4 TTPPSLSGKG  | 486  | 13819 |
| >CTNNB1-A4 TTAPSLSGK   | 198   | >CTNNB1-A4 TTPPSLSGK   | 1746 | 1548  |
| >CTNNB1-A4 TTTAPSLSGK  | 59    | >CTNNB1-A4 TTTPPSLSGK  | 52   | 7     |
| >CTNNB1-A4 TTTAPSLSGK  | 15    | >CTNNB1-A4 TTTPPSLSGK  | 17   | 2     |
| >CTNNB1-A4 TTTAPSLSGK  | 439   | >CTNNB1-A4 TTTPPSLSGK  | 453  | 14    |
| >CTNNB1-A4 TTTAPSLSGK  | 8     | >CTNNB1-A4 TTTPPSLSGK  | 13   | 5     |
| >CTNNB1-A4 TTTAPSL     | 338   | >CTNNB1-A4 TTTPPSL     | 314  | 24    |
| >CTNNB1-A4 ATTTAPSLSGI | 216   | >CTNNB1-A4 ATTTPPSLSGI | 149  | 67    |
| >CTNNB1-A4 ATTTAPSLSGI | 36    | >CTNNB1-A4 ATTTPPSLSGI | 29   | 7     |
| >CTNNB1-A4 ATTTAPSLSGI | 51    | >CTNNB1-A4 ATTTPPSLSGI | 154  | 103   |
| >CTNNB1-A4 ATTTAPSLSGI | 129   | >CTNNB1-A4 ATTTPPSLSGI | 192  | 63    |
| >CTNNB1-A4 ATTTAPSL    | 16    | >CTNNB1-A4 ATTTPPSL    | 18   | 2     |
| >CTNNB1-A4 ATTTAPSL    | 362   | >CTNNB1-A4 ATTTPPSL    | 132  | 230   |
| >CTNNB1-A4 ATTTAPSLGI  | 404   | >CTNNB1-A4 ATTTPPSLGI  | 466  | 62    |
| >CTNNB1-A4 ATTTAPSL    | 368   | >CTNNB1-A4 ATTTPPSL    | 372  | 4     |
| >CTNNB1-A4 GATTTAPSL   | 272   | >CTNNB1-A4 GATTTPPSL   | 980  | 708   |
| >CTNNB1-A4 GATTTAPSL   | 346   | >CTNNB1-A4 GATTTPPSL   | 1189 | 843   |
| >CTNNB1-A4 HSGATTTAPS  | 33    | >CTNNB1-A4 HSGATTTPPS  | 53   | 20    |

|                        |      |                        |       |       |
|------------------------|------|------------------------|-------|-------|
| >CTNNB1-A4 GIHSGATTTA  | 432  | >CTNNB1-A4 GIHSGATTTTP | 15214 | 14782 |
| >CTNNB1-A4 GIHSGATTTA  | 276  | >CTNNB1-A4 GIHSGATTTTP | 14942 | 14666 |
| >CTNNB1-A4 GIHSGATTTA  | 362  | >CTNNB1-A4 GIHSGATTTTP | 25726 | 25364 |
| >CTNNB1-A4 TAPSLSGK    | 663  | >CTNNB1-A4 TTPSLSGK    | 74    | 589   |
| >CTNNB1-A4 TAPSLSGK    | 164  | >CTNNB1-A4 TTPSLSGK    | 39    | 125   |
| >CTNNB1-A4 TAPSLSGKG   | 6127 | >CTNNB1-A4 TTPSLSGKG   | 465   | 5662  |
| >CTNNB1-A4 TTAPSLSGK   | 86   | >CTNNB1-A4 TTTPSLSGK   | 246   | 160   |
| >CTNNB1-A4 TTAPSLSGK   | 10   | >CTNNB1-A4 TTTPSLSGK   | 16    | 6     |
| >CTNNB1-A4 TTAPSLSGK   | 5    | >CTNNB1-A4 TTTPSLSGK   | 9     | 4     |
| >CTNNB1-A4 TTAPSLSGK   | 198  | >CTNNB1-A4 TTTPSLSGK   | 575   | 377   |
| >CTNNB1-A4 TTTAPSLSGK  | 59   | >CTNNB1-A4 TTTTPSLSGK  | 62    | 3     |
| >CTNNB1-A4 TTTAPSLSGK  | 15   | >CTNNB1-A4 TTTTPSLSGK  | 17    | 2     |
| >CTNNB1-A4 TTTAPSLSGK  | 439  | >CTNNB1-A4 TTTTPSLSGK  | 630   | 191   |
| >CTNNB1-A4 TTTAPSLSGK  | 8    | >CTNNB1-A4 TTTTPSLSGK  | 12    | 4     |
| >CTNNB1-A4 TTTAPSLSL   | 338  | >CTNNB1-A4 TTTTPSLSL   | 732   | 394   |
| >CTNNB1-A4 ATTTAPSLSGI | 216  | >CTNNB1-A4 ATTTTPSLSGI | 222   | 6     |
| >CTNNB1-A4 ATTTAPSLSGI | 36   | >CTNNB1-A4 ATTTTPSLSGI | 32    | 4     |
| >CTNNB1-A4 ATTTAPSLSGI | 51   | >CTNNB1-A4 ATTTTPSLSGI | 51    | 0     |
| >CTNNB1-A4 ATTTAPSLSGI | 129  | >CTNNB1-A4 ATTTTPSLSGI | 148   | 19    |
| >CTNNB1-A4 ATTTAPSL    | 16   | >CTNNB1-A4 ATTTTPSL    | 17    | 1     |
| >CTNNB1-A4 ATTTAPSL    | 1096 | >CTNNB1-A4 ATTTTPSL    | 483   | 613   |
| >CTNNB1-A4 ATTTAPSLSL  | 362  | >CTNNB1-A4 ATTTTPSLSL  | 154   | 208   |
| >CTNNB1-A4 ATTTAPSLSGI | 404  | >CTNNB1-A4 ATTTTPSLSGI | 310   | 94    |
| >CTNNB1-A4 ATTTAPSL    | 368  | >CTNNB1-A4 ATTTTPSL    | 318   | 50    |
| >CTNNB1-A4 GATTTAPSL   | 272  | >CTNNB1-A4 GATTTTPSL   | 839   | 567   |
| >CTNNB1-A4 GATTTAPSL   | 346  | >CTNNB1-A4 GATTTTPSL   | 347   | 1     |
| >CTNNB1-A4 HSGATTTAPS  | 984  | >CTNNB1-A4 HSGATTTTPS  | 487   | 497   |
| >CTNNB1-A4 HSGATTTAPS  | 33   | >CTNNB1-A4 HSGATTTTPS  | 44    | 11    |
| >CTNNB1-A4 HSGATTTAPS  | 654  | >CTNNB1-A4 HSGATTTTPS  | 401   | 253   |
| >CTNNB1-A4 GIHSGATTTA  | 432  | >CTNNB1-A4 GIHSGATTTT  | 1446  | 1014  |
| >CTNNB1-A4 GIHSGATTTA  | 276  | >CTNNB1-A4 GIHSGATTTT  | 715   | 439   |
| >CTNNB1-A4 GIHSGATTTA  | 362  | >CTNNB1-A4 GIHSGATTTT  | 4206  | 3844  |
| >CTNNB1-A4 TAPSLSGK    | 663  | >CTNNB1-A4 TVPSLSGK    | 97    | 566   |
| >CTNNB1-A4 TAPSLSGK    | 164  | >CTNNB1-A4 TVPSLSGK    | 95    | 69    |
| >CTNNB1-A4 SGIHSGATTT, | 5002 | >CTNNB1-A4 SGIHSGATTT' | 492   | 4510  |
| >CTNNB1-A4 TTAPSLSGK   | 86   | >CTNNB1-A4 TTVPSLSGK   | 245   | 159   |
| >CTNNB1-A4 TTAPSLSGK   | 10   | >CTNNB1-A4 TTVPSLSGK   | 13    | 3     |
| >CTNNB1-A4 TTAPSLSGK   | 5    | >CTNNB1-A4 TTVPSLSGK   | 8     | 3     |
| >CTNNB1-A4 TTAPSLSGK   | 198  | >CTNNB1-A4 TTVPSLSGK   | 384   | 186   |
| >CTNNB1-A4 TTTAPSLSGK  | 59   | >CTNNB1-A4 TTTVPSLSGK  | 100   | 41    |
| >CTNNB1-A4 TTTAPSLSGK  | 15   | >CTNNB1-A4 TTTVPSLSGK  | 22    | 7     |
| >CTNNB1-A4 TTTAPSLSGK  | 439  | >CTNNB1-A4 TTTVPSLSGK  | 632   | 193   |
| >CTNNB1-A4 TTTAPSLSGK  | 8    | >CTNNB1-A4 TTTVPSLSGK  | 14    | 6     |

|                        |      |                        |      |      |
|------------------------|------|------------------------|------|------|
| >CTNNB1-A4 TTTAPSL     | 338  | >CTNNB1-A4 TTTVPSLS    | 846  | 508  |
| >CTNNB1-A4 ATTTAPSLSGI | 216  | >CTNNB1-A4 ATTTVPSLSGI | 137  | 79   |
| >CTNNB1-A4 ATTTAPSLSGI | 36   | >CTNNB1-A4 ATTTVPSLSGI | 24   | 12   |
| >CTNNB1-A4 ATTTAPSL    | 838  | >CTNNB1-A4 ATTTVPSL    | 498  | 340  |
| >CTNNB1-A4 ATTTAPSLSGI | 51   | >CTNNB1-A4 ATTTVPSLSGI | 128  | 77   |
| >CTNNB1-A4 ATTTAPSL    | 1253 | >CTNNB1-A4 ATTTVPSL    | 476  | 777  |
| >CTNNB1-A4 ATTTAPSLSGI | 129  | >CTNNB1-A4 ATTTVPSLSGI | 60   | 69   |
| >CTNNB1-A4 ATTTAPSL    | 16   | >CTNNB1-A4 ATTTVPSL    | 44   | 28   |
| >CTNNB1-A4 ATTTAPSL    | 362  | >CTNNB1-A4 ATTTVPSLS   | 133  | 229  |
| >CTNNB1-A4 ATTTAPSLSGI | 404  | >CTNNB1-A4 ATTTVPSLSGI | 433  | 29   |
| >CTNNB1-A4 ATTTAPSL    | 368  | >CTNNB1-A4 ATTTVPSL    | 495  | 127  |
| >CTNNB1-A4 GATTTAPSL   | 272  | >CTNNB1-A4 GATTTVPSL   | 579  | 307  |
| >CTNNB1-A4 GATTTAPSL   | 346  | >CTNNB1-A4 GATTTVPSL   | 273  | 73   |
| >CTNNB1-A4 HSGATTTA    | 4911 | >CTNNB1-A4 HSGATTTV    | 388  | 4523 |
| >CTNNB1-A4 HSGATTTA    | 7851 | >CTNNB1-A4 HSGATTTV    | 433  | 7418 |
| >CTNNB1-A4 HSGATTTAPS  | 33   | >CTNNB1-A4 HSGATTTVPS  | 43   | 10   |
| >CTNNB1-A4 GIHSGATTTA  | 432  | >CTNNB1-A4 GIHSGATTTV  | 74   | 358  |
| >CTNNB1-A4 GIHSGATTTA  | 276  | >CTNNB1-A4 GIHSGATTTV  | 45   | 231  |
| >CTNNB1-A4 GIHSGATTTA  | 2515 | >CTNNB1-A4 GIHSGATTTV  | 31   | 2484 |
| >CTNNB1-A4 GIHSGATTTA  | 6211 | >CTNNB1-A4 GIHSGATTTV  | 179  | 6032 |
| >CTNNB1-A4 GIHSGATTTA  | 3137 | >CTNNB1-A4 GIHSGATTTV  | 37   | 3100 |
| >CTNNB1-A4 GIHSGATTTA  | 362  | >CTNNB1-A4 GIHSGATTTV  | 5    | 357  |
| >CTNNB1-A5 ADLMELDMA   | 112  | >CTNNB1-A5 VDLMELDMA   | 541  | 429  |
| >CTNNB1-A5 ADLMELDMA   | 493  | >CTNNB1-A5 VDLMELDMA   | 1013 | 520  |
| >CTNNB1-A5 QADLMELDM   | 51   | >CTNNB1-A5 QVDLMELDM   | 191  | 140  |
| >CTNNB1-A5 TQADLMEL    | 123  | >CTNNB1-A5 TQVDLMEL    | 427  | 304  |
| >CTNNB1-A5 TQADLMEL    | 21   | >CTNNB1-A5 TQVDLMEL    | 102  | 81   |
| >CTNNB1-A5 TQADLMELD   | 164  | >CTNNB1-A5 TQVDLMELD   | 792  | 628  |
| >CTNNB1-A5 TQADLMEL    | 131  | >CTNNB1-A5 TQVDLMEL    | 343  | 212  |
| >CTNNB1-A5 TQADLMELD   | 272  | >CTNNB1-A5 TQVDLMELD   | 654  | 382  |
| >CTNNB1-A5 TQADLMEL    | 13   | >CTNNB1-A5 TQVDLMEL    | 10   | 3    |
| >CTNNB1-A5 TQADLMELD   | 29   | >CTNNB1-A5 TQVDLMELD   | 21   | 8    |
| >CTNNB1-A5 TQADLMEL    | 83   | >CTNNB1-A5 TQVDLMEL    | 88   | 5    |
| >CTNNB1-A5 ATQADLMEL   | 465  | >CTNNB1-A5 ATQVDLMEL   | 2320 | 1855 |
| >CTNNB1-A5 ATQADLMEL   | 353  | >CTNNB1-A5 ATQVDLMEL   | 1204 | 851  |
| >CTNNB1-A5 ATQADLMEL   | 436  | >CTNNB1-A5 ATQVDLMEL   | 1274 | 838  |
| >CTNNB1-A5 ATQADLMEL   | 84   | >CTNNB1-A5 ATQVDLMEL   | 127  | 43   |
| >CTNNB1-A5 ATQADLMELI  | 111  | >CTNNB1-A5 ATQVDLMELI  | 136  | 25   |
| >CTNNB1-A5 MATQADLMI   | 466  | >CTNNB1-A5 MATQVDLMI   | 585  | 119  |
| >CTNNB1-A5 MATQADLMI   | 339  | >CTNNB1-A5 MATQVDLMI   | 356  | 17   |
| >CTNNB1-A5 MATQADLM    | 283  | >CTNNB1-A5 MATQVDLM    | 1077 | 794  |
| >CTNNB1-A5 MATQADLMI   | 122  | >CTNNB1-A5 MATQVDLMI   | 438  | 316  |
| >CTNNB1-A5 MATQADLM    | 19   | >CTNNB1-A5 MATQVDLM    | 24   | 5    |

|                        |      |                        |      |      |
|------------------------|------|------------------------|------|------|
| >CTNNB1-A5 MATQADLM    | 491  | >CTNNB1-A5 MATQVDLM    | 315  | 176  |
| >CTNNB1-A5 MATQADLM    | 199  | >CTNNB1-A5 MATQVDLM    | 85   | 114  |
| >CTNNB1-A5 MATQADLMI   | 283  | >CTNNB1-A5 MATQVDLMI   | 135  | 148  |
| >CTNNB1-A5 MATQADLM    | 459  | >CTNNB1-A5 MATQVDLM    | 552  | 93   |
| >CTNNB1-A6 APLTELLHSR  | 1678 | >CTNNB1-A6 TPLTELLHSR  | 389  | 1289 |
| >CTNNB1-A6 TAPLTELLHSF | 76   | >CTNNB1-A6 TPPLTELLHSR | 22   | 54   |
| >CTNNB1-A6 TAPLTEL     | 592  | >CTNNB1-A6 TPPLTELL    | 110  | 482  |
| >CTNNB1-A6 TAPLTEL     | 11   | >CTNNB1-A6 TPPLTELL    | 3    | 8    |
| >CTNNB1-A6 TAPLTELLH   | 4161 | >CTNNB1-A6 TPPLTELLH   | 212  | 3949 |
| >CTNNB1-A6 TAPLTELLHS  | 4086 | >CTNNB1-A6 TPPLTELLHS  | 274  | 3812 |
| >CTNNB1-A6 TAPLTELLHSF | 3952 | >CTNNB1-A6 TPPLTELLHSR | 302  | 3650 |
| >CTNNB1-A6 AEAIEAEGAT  | 13   | >CTNNB1-A6 AEAIEAEGAT  | 48   | 35   |
| >CTNNB1-A6 ATAPLTEL    | 19   | >CTNNB1-A6 ATTPLTEL    | 200  | 181  |
| >CTNNB1-A6 ATAPLTELL   | 8    | >CTNNB1-A6 ATTPLTELL   | 59   | 51   |
| >CTNNB1-A6 ATAPLTEL    | 322  | >CTNNB1-A6 ATTPLTEL    | 2365 | 2043 |
| >CTNNB1-A6 ATAPLTEL    | 123  | >CTNNB1-A6 ATTPLTEL    | 360  | 237  |
| >CTNNB1-A6 ATAPLTELL   | 191  | >CTNNB1-A6 ATTPLTELL   | 551  | 360  |
| >CTNNB1-A6 ATAPLTELL   | 218  | >CTNNB1-A6 ATTPLTELL   | 398  | 180  |
| >CTNNB1-A6 ATAPLTEL    | 36   | >CTNNB1-A6 ATTPLTEL    | 212  | 176  |
| >CTNNB1-A6 ATAPLTELL   | 14   | >CTNNB1-A6 ATTPLTELL   | 53   | 39   |
| >CTNNB1-A6 ATAPLTEL    | 12   | >CTNNB1-A6 ATTPLTEL    | 13   | 1    |
| >CTNNB1-A6 ATAPLTELL   | 35   | >CTNNB1-A6 ATTPLTELL   | 40   | 5    |
| >CTNNB1-A6 ATAPLTELL   | 236  | >CTNNB1-A6 ATTPLTELL   | 593  | 357  |
| >CTNNB1-A6 ATAPLTELL   | 7    | >CTNNB1-A6 ATTPLTELL   | 6    | 1    |
| >CTNNB1-A6 ATAPLTELL   | 40   | >CTNNB1-A6 ATTPLTELL   | 43   | 3    |
| >CTNNB1-A6 ATAPLTELLH  | 291  | >CTNNB1-A6 ATTPLTELLH  | 708  | 417  |
| >CTNNB1-A6 ATAPLTEL    | 141  | >CTNNB1-A6 ATTPLTEL    | 444  | 303  |
| >CTNNB1-A6 ATAPLTELL   | 58   | >CTNNB1-A6 ATTPLTELL   | 149  | 91   |
| >CTNNB1-A6 GATAPLTELL  | 283  | >CTNNB1-A6 GATTPLTELL  | 346  | 63   |
| >CTNNB1-A6 GATAPLTEL   | 550  | >CTNNB1-A6 GATTPLTEL   | 373  | 177  |
| >CTNNB1-A6 EGATAPLTELI | 203  | >CTNNB1-A6 EGATTPLTELI | 427  | 224  |
| >CTNNB1-A6 AEGATAPL    | 25   | >CTNNB1-A6 AEGATTPL    | 39   | 14   |
| >CTNNB1-A6 AEGATAPLTE  | 54   | >CTNNB1-A6 AEGATTPLTE  | 86   | 32   |
| >CTNNB1-A6 AEGATAPL    | 76   | >CTNNB1-A6 AEGATTPL    | 30   | 46   |
| >CTNNB1-A6 AEGATAPLT   | 788  | >CTNNB1-A6 AEGATTPLT   | 411  | 377  |
| >CTNNB1-A6 AEGATAPLTE  | 80   | >CTNNB1-A6 AEGATTPLTE  | 72   | 8    |
| >CTNNB1-A6 AEGATAPLTE  | 316  | >CTNNB1-A6 AEGATTPLTE  | 309  | 7    |
| >CTNNB1-A6 AEGATAPL    | 318  | >CTNNB1-A6 AEGATTPL    | 406  | 88   |
| >CTNNB1-A6 AEGATAPLTE  | 338  | >CTNNB1-A6 AEGATTPLTE  | 411  | 73   |
| >CTNNB1-A6 AEGATAPL    | 55   | >CTNNB1-A6 AEGATTPL    | 70   | 15   |
| >CTNNB1-A6 AEGATAPLT   | 14   | >CTNNB1-A6 AEGATTPLT   | 16   | 2    |
| >CTNNB1-A6 AEGATAPLTE  | 266  | >CTNNB1-A6 AEGATTPLTE  | 470  | 204  |
| >CTNNB1-A6 AEGATAPLTE  | 75   | >CTNNB1-A6 AEGATTPLTE  | 95   | 20   |

|                        |      |                        |      |      |
|------------------------|------|------------------------|------|------|
| >CTNNB1-A6 AEGATAPL    | 392  | >CTNNB1-A6 AEGATTPL    | 418  | 26   |
| >CTNNB1-A6 AEGATAPLT   | 218  | >CTNNB1-A6 AEGATTPLT   | 78   | 140  |
| >CTNNB1-A6 AEGATAPLTE  | 38   | >CTNNB1-A6 AEGATTPLTE  | 22   | 16   |
| >CTNNB1-A6 EAEGATAPL   | 38   | >CTNNB1-A6 EAEGATTPL   | 93   | 55   |
| >CTNNB1-A6 EAEGATAPL   | 65   | >CTNNB1-A6 EAEGATTPL   | 186  | 121  |
| >CTNNB1-A6 EAEGATAPL   | 77   | >CTNNB1-A6 EAEGATTPL   | 75   | 2    |
| >CTNNB1-A6 EAEGATAPL   | 350  | >CTNNB1-A6 EAEGATTPL   | 1133 | 783  |
| >CTNNB1-A6 IEAEGATA    | 270  | >CTNNB1-A6 IEAEGATT    | 358  | 88   |
| >CTNNB1-A6 IEAEGATAPL  | 87   | >CTNNB1-A6 IEAEGATTPL  | 101  | 14   |
| >CTNNB1-A6 IEAEGATA    | 484  | >CTNNB1-A6 IEAEGATT    | 1069 | 585  |
| >CTNNB1-A6 IEAEGATAPL  | 123  | >CTNNB1-A6 IEAEGATTPL  | 315  | 192  |
| >CTNNB1-A6 IEAEGATAPL  | 149  | >CTNNB1-A6 IEAEGATTPL  | 119  | 30   |
| >CTNNB1-A6 IEAEGATA    | 169  | >CTNNB1-A6 IEAEGATT    | 1374 | 1205 |
| >CTNNB1-A6 IEAEGATAPL  | 787  | >CTNNB1-A6 IEAEGATTPL  | 336  | 451  |
| >CTNNB1-A6 IEAEGATAPLT | 116  | >CTNNB1-A6 IEAEGATTPLT | 64   | 52   |
| >CTNNB1-A6 AIEAEGATAP  | 127  | >CTNNB1-A6 AIEAEGATTPI | 146  | 19   |
| >CTNNB1-A6 AIEAEGATAP  | 213  | >CTNNB1-A6 AIEAEGATTPI | 290  | 77   |
| >CTNNB1-A6 EAIEAEGATA  | 110  | >CTNNB1-A6 EAIEAEGATT  | 305  | 195  |
| >CTNNB1-A6 EAIEAEGATA  | 335  | >CTNNB1-A6 EAIEAEGATT  | 2236 | 1901 |
| >CTNNB1-D1 DMAMEPDR    | 6709 | >CTNNB1-D1 NMAMEPDR    | 240  | 6469 |
| >CTNNB1-D1 DMAMEPDR    | 291  | >CTNNB1-D1 NMAMEPDR    | 1982 | 1691 |
| >CTNNB1-D1 DMAMEPDR    | 128  | >CTNNB1-D1 NMAMEPDR    | 156  | 28   |
| >CTNNB1-D1 ELDMAMEPC   | 813  | >CTNNB1-D1 ELNMAMEPC   | 393  | 420  |
| >CTNNB1-D1 ELDMAMEPC   | 1089 | >CTNNB1-D1 ELNMAMEPC   | 198  | 891  |
| >CTNNB1-D1 MELDMAME    | 385  | >CTNNB1-D1 MELNMAME    | 519  | 134  |
| >CTNNB1-D1 MELDMAME    | 395  | >CTNNB1-D1 MELNMAME    | 467  | 72   |
| >CTNNB1-D1 LMELDMAM    | 399  | >CTNNB1-D1 LMELNMAM    | 571  | 172  |
| >CTNNB1-D1 DLMELDMA    | 755  | >CTNNB1-D1 DLMELNMA    | 423  | 332  |
| >CTNNB1-D1 DLMELDMA    | 477  | >CTNNB1-D1 DLMELNMA    | 472  | 5    |
| >CTNNB1-D1 DLMELDMA    | 223  | >CTNNB1-D1 DLMELNMA    | 157  | 66   |
| >CTNNB1-D1 DLMELDMAN   | 317  | >CTNNB1-D1 DLMELNMAN   | 122  | 195  |
| >CTNNB1-D1 DLMELDMAN   | 317  | >CTNNB1-D1 DLMELNMAN   | 283  | 34   |
| >CTNNB1-D1 DLMELDMAN   | 450  | >CTNNB1-D1 DLMELNMAN   | 176  | 274  |
| >CTNNB1-D1 DLMELDMA    | 973  | >CTNNB1-D1 DLMELNMA    | 243  | 730  |
| >CTNNB1-D1 DLMELDMAN   | 442  | >CTNNB1-D1 DLMELNMAN   | 31   | 411  |
| >CTNNB1-D1 DLMELDMAN   | 71   | >CTNNB1-D1 DLMELNMAN   | 213  | 142  |
| >CTNNB1-D1 ADLMELDMA   | 112  | >CTNNB1-D1 ADLMELNMA   | 90   | 22   |
| >CTNNB1-D1 ADLMELDMA   | 493  | >CTNNB1-D1 ADLMELNMA   | 670  | 177  |
| >CTNNB1-D1 QADLMELDN   | 51   | >CTNNB1-D1 QADLMELNN   | 82   | 31   |
| >CTNNB1-D1 TQADLMELD   | 1676 | >CTNNB1-D1 TQADLMELN   | 491  | 1185 |
| >CTNNB1-D1 TQADLMELD   | 164  | >CTNNB1-D1 TQADLMELN   | 128  | 36   |
| >CTNNB1-D1 TQADLMELD   | 272  | >CTNNB1-D1 TQADLMELN   | 134  | 138  |
| >CTNNB1-D1 TQADLMELD   | 29   | >CTNNB1-D1 TQADLMELN   | 29   | 0    |

|                       |       |                       |      |       |
|-----------------------|-------|-----------------------|------|-------|
| >CTNNB1-D1 ATQADLMELI | 506   | >CTNNB1-D1 ATQADLMELI | 227  | 279   |
| >CTNNB1-D1 ATQADLMELI | 111   | >CTNNB1-D1 ATQADLMELI | 32   | 79    |
| >CTNNB1-D1 ATQADLMELI | 733   | >CTNNB1-D1 ATQADLMELI | 378  | 355   |
| >CTNNB1-D1 DRKAAVSHW  | 4007  | >CTNNB1-D1 HRKAAVSHW  | 430  | 3577  |
| >CTNNB1-D1 DRKAAVSH   | 4443  | >CTNNB1-D1 HRKAAVSH   | 265  | 4178  |
| >CTNNB1-D1 DRKAAVSHW  | 9222  | >CTNNB1-D1 HRKAAVSHW  | 200  | 9022  |
| >CTNNB1-D1 DRKAAVSHW  | 13961 | >CTNNB1-D1 HRKAAVSHW  | 373  | 13588 |
| >CTNNB1-D1 PDRKAAVSHI | 9344  | >CTNNB1-D1 PHRKAAVSHI | 306  | 9038  |
| >CTNNB1-D1 EPDRKAAV   | 323   | >CTNNB1-D1 EPHRKAAV   | 3304 | 2981  |
| >CTNNB1-D1 EPDRKAAV   | 880   | >CTNNB1-D1 EPHRKAAV   | 200  | 680   |
| >CTNNB1-D1 EPDRKAAV   | 2199  | >CTNNB1-D1 EPHRKAAV   | 60   | 2139  |
| >CTNNB1-D1 EPDRKAAVSH | 83    | >CTNNB1-D1 EPHRKAAVSH | 114  | 31    |
| >CTNNB1-D1 EPDRKAAVSH | 13    | >CTNNB1-D1 EPHRKAAVSH | 11   | 2     |
| >CTNNB1-D1 MEPDRKAAV  | 112   | >CTNNB1-D1 MEPHRKAAV  | 40   | 72    |
| >CTNNB1-D1 MEPDRKAAV  | 196   | >CTNNB1-D1 MEPHRKAAV  | 314  | 118   |
| >CTNNB1-D1 AMEPDRKAA  | 346   | >CTNNB1-D1 AMEPHRKAA  | 331  | 15    |
| >CTNNB1-D1 AMEPDRKAA  | 46    | >CTNNB1-D1 AMEPHRKAA  | 47   | 1     |
| >CTNNB1-D1 AMEPDRKAA  | 71    | >CTNNB1-D1 AMEPHRKAA  | 132  | 61    |
| >CTNNB1-D1 AMEPDRKA   | 304   | >CTNNB1-D1 AMEPHRKA   | 254  | 50    |
| >CTNNB1-D1 AMEPDRKAA  | 241   | >CTNNB1-D1 AMEPHRKAA  | 319  | 78    |
| >CTNNB1-D1 AMEPDRKAA  | 3     | >CTNNB1-D1 AMEPHRKAA  | 5    | 2     |
| >CTNNB1-D1 MAMEPDRK/  | 299   | >CTNNB1-D1 MAMEPHRK/  | 474  | 175   |
| >CTNNB1-D1 MAMEPDRK/  | 258   | >CTNNB1-D1 MAMEPHRK/  | 286  | 28    |
| >CTNNB1-D1 MAMEPDRK/  | 165   | >CTNNB1-D1 MAMEPHRK/  | 101  | 64    |
| >CTNNB1-D1 MAMEPDRK/  | 45    | >CTNNB1-D1 MAMEPHRK/  | 50   | 5     |
| >CTNNB1-D1 MAMEPDRK/  | 35    | >CTNNB1-D1 MAMEPHRK/  | 29   | 6     |
| >CTNNB1-D1 MAMEPDRK/  | 453   | >CTNNB1-D1 MAMEPHRK/  | 688  | 235   |
| >CTNNB1-D1 MAMEPDRK/  | 76    | >CTNNB1-D1 MAMEPHRK/  | 83   | 7     |
| >CTNNB1-D1 MAMEPDRK   | 1474  | >CTNNB1-D1 MAMEPHRK   | 208  | 1266  |
| >CTNNB1-D1 MAMEPDRK   | 62    | >CTNNB1-D1 MAMEPHRK   | 22   | 40    |
| >CTNNB1-D1 MAMEPDRK   | 2659  | >CTNNB1-D1 MAMEPHRK   | 200  | 2459  |
| >CTNNB1-D1 MAMEPDRK   | 45    | >CTNNB1-D1 MAMEPHRK   | 19   | 26    |
| >CTNNB1-D1 MAMEPDRK/  | 108   | >CTNNB1-D1 MAMEPHRK/  | 129  | 21    |
| >CTNNB1-D1 MAMEPDRK/  | 7     | >CTNNB1-D1 MAMEPHRK/  | 8    | 1     |
| >CTNNB1-D1 MAMEPDRK/  | 1948  | >CTNNB1-D1 MAMEPHRK/  | 233  | 1715  |
| >CTNNB1-D1 MAMEPDRK/  | 1291  | >CTNNB1-D1 MAMEPHRK/  | 416  | 875   |
| >CTNNB1-D1 MAMEPDRK/  | 24    | >CTNNB1-D1 MAMEPHRK/  | 16   | 8     |
| >CTNNB1-D1 MAMEPDRK/  | 667   | >CTNNB1-D1 MAMEPHRK/  | 347  | 320   |
| >CTNNB1-D1 MAMEPDRK/  | 372   | >CTNNB1-D1 MAMEPHRK/  | 735  | 363   |
| >CTNNB1-D1 MAMEPDRK/  | 285   | >CTNNB1-D1 MAMEPHRK/  | 210  | 75    |
| >CTNNB1-D1 DMAMEPDR   | 291   | >CTNNB1-D1 DMAMEPHR   | 63   | 228   |
| >CTNNB1-D1 DMAMEPDR   | 128   | >CTNNB1-D1 DMAMEPHR   | 73   | 55    |
| >CTNNB1-D1 DMAMEPDR   | 564   | >CTNNB1-D1 DMAMEPHRI  | 240  | 324   |

|                        |       |                        |      |       |
|------------------------|-------|------------------------|------|-------|
| >CTNNB1-D1 DMAMEPDR    | 3261  | >CTNNB1-D1 DMAMEPHR    | 481  | 2780  |
| >CTNNB1-D1 MELDMAME    | 395   | >CTNNB1-D1 MELDMAME    | 313  | 82    |
| >CTNNB1-D1 MELDMAME    | 525   | >CTNNB1-D1 MELDMAME    | 168  | 357   |
| >CTNNB1-D3 LDSDGIHSGA  | 11478 | >CTNNB1-D3 LASGIHSGA   | 299  | 11179 |
| >CTNNB1-D3 YLSDGIHS    | 603   | >CTNNB1-D3 YLASGIHS    | 427  | 176   |
| >CTNNB1-D3 YLSDGIHSGA  | 78    | >CTNNB1-D3 YLASGIHSGA  | 66   | 12    |
| >CTNNB1-D3 YLSDGIHSGA  | 212   | >CTNNB1-D3 YLASGIHSGA  | 154  | 58    |
| >CTNNB1-D3 YLSDGIHS    | 1509  | >CTNNB1-D3 YLASGIHS    | 93   | 1416  |
| >CTNNB1-D3 YLSDGIHSG   | 278   | >CTNNB1-D3 YLASGIHSG   | 19   | 259   |
| >CTNNB1-D3 YLSDGIHSGA  | 24    | >CTNNB1-D3 YLASGIHSGA  | 11   | 13    |
| >CTNNB1-D3 YLSDGIHSGA  | 284   | >CTNNB1-D3 YLASGIHSGA  | 21   | 263   |
| >CTNNB1-D3 YLSDGIHS    | 2792  | >CTNNB1-D3 YLASGIHS    | 78   | 2714  |
| >CTNNB1-D3 YLSDGIHSG   | 1353  | >CTNNB1-D3 YLASGIHSG   | 32   | 1321  |
| >CTNNB1-D3 YLSDGIHSGA  | 32    | >CTNNB1-D3 YLASGIHSGA  | 14   | 18    |
| >CTNNB1-D3 YLSDGIHSGA  | 78    | >CTNNB1-D3 YLASGIHSGA  | 5    | 73    |
| >CTNNB1-D3 YLSDGIHS    | 419   | >CTNNB1-D3 YLASGIHS    | 229  | 190   |
| >CTNNB1-D3 YLSDGIHSG   | 570   | >CTNNB1-D3 YLASGIHSG   | 321  | 249   |
| >CTNNB1-D3 YLSDGIHSGA  | 280   | >CTNNB1-D3 YLASGIHSGA  | 197  | 83    |
| >CTNNB1-D3 YLSDGIHSGA  | 178   | >CTNNB1-D3 YLASGIHSGA  | 103  | 75    |
| >CTNNB1-D3 YLSDGIHS    | 47    | >CTNNB1-D3 YLASGIHS    | 108  | 61    |
| >CTNNB1-D3 YLSDGIHSG   | 15    | >CTNNB1-D3 YLASGIHSG   | 27   | 12    |
| >CTNNB1-D3 YLSDGIHSGA  | 2     | >CTNNB1-D3 YLASGIHSGA  | 3    | 1     |
| >CTNNB1-D3 YLSDGIHSGA  | 12    | >CTNNB1-D3 YLASGIHSGA  | 22   | 10    |
| >CTNNB1-D3 YLSDGIHS    | 395   | >CTNNB1-D3 YLASGIHS    | 1081 | 686   |
| >CTNNB1-D3 YLSDGIHSG   | 139   | >CTNNB1-D3 YLASGIHSG   | 324  | 185   |
| >CTNNB1-D3 YLSDGIHSGA  | 8     | >CTNNB1-D3 YLASGIHSGA  | 16   | 8     |
| >CTNNB1-D3 YLSDGIHSGA  | 83    | >CTNNB1-D3 YLASGIHSGA  | 244  | 161   |
| >CTNNB1-D3 YLSDGIHS    | 101   | >CTNNB1-D3 YLASGIHS    | 119  | 18    |
| >CTNNB1-D3 YLSDGIHSG   | 140   | >CTNNB1-D3 YLASGIHSG   | 150  | 10    |
| >CTNNB1-D3 YLSDGIHSGA  | 7     | >CTNNB1-D3 YLASGIHSGA  | 7    | 0     |
| >CTNNB1-D3 YLSDGIHSGA  | 121   | >CTNNB1-D3 YLASGIHSGA  | 145  | 24    |
| >CTNNB1-D3 YLSDGIHSGA  | 7     | >CTNNB1-D3 YLASGIHSGA  | 5    | 2     |
| >CTNNB1-D3 YLSDGIHSGA  | 255   | >CTNNB1-D3 YLASGIHSGA  | 183  | 72    |
| >CTNNB1-D3 YLSDGIHS    | 66    | >CTNNB1-D3 YLASGIHS    | 21   | 45    |
| >CTNNB1-D3 YLSDGIHSG   | 13    | >CTNNB1-D3 YLASGIHSG   | 7    | 6     |
| >CTNNB1-D3 YLSDGIHSGA  | 2     | >CTNNB1-D3 YLASGIHSGA  | 2    | 0     |
| >CTNNB1-D3 YLSDGIHSGA  | 36    | >CTNNB1-D3 YLASGIHSGA  | 15   | 21    |
| >CTNNB1-D3 YLSDGIHSGA  | 1702  | >CTNNB1-D3 YLASGIHSGA  | 161  | 1541  |
| >CTNNB1-D3 YLSDGIHSGA  | 554   | >CTNNB1-D3 YLASGIHSGA  | 470  | 84    |
| >CTNNB1-D3 SYLSDGIHSG/ | 3455  | >CTNNB1-D3 SYLASGIHSG/ | 173  | 3282  |
| >CTNNB1-D3 SYLSDGIHSG/ | 410   | >CTNNB1-D3 SYLASGIHSG/ | 347  | 63    |
| >CTNNB1-D3 QSYLSDGI    | 1029  | >CTNNB1-D3 QSYLASGI    | 485  | 544   |
| >CTNNB1-D3 QSYLSDGI    | 46    | >CTNNB1-D3 QSYLASGI    | 16   | 30    |



|                       |       |                        |      |       |
|-----------------------|-------|------------------------|------|-------|
| >CTNNB1-D3 QSYLDSGI   | 22    | >CTNNB1-D3 QSYLASGI    | 19   | 3     |
| >CTNNB1-D3 QQSYLDSGI  | 2494  | >CTNNB1-D3 QQSYLASGI   | 236  | 2258  |
| >CTNNB1-D3 QQSYLDSGI  | 1017  | >CTNNB1-D3 QQSYLASGI   | 353  | 664   |
| >CTNNB1-D3 QQSYLDSGI  | 417   | >CTNNB1-D3 QQSYLASGI   | 126  | 291   |
| >CTNNB1-D3 QQQSYLDSGI | 1044  | >CTNNB1-D3 QQQSYLASGI  | 482  | 562   |
| >CTNNB1-D3 QQQSYLDSGI | 381   | >CTNNB1-D3 QQQSYLASGI  | 152  | 229   |
| >CTNNB1-D3 WQQQSYLDS  | 638   | >CTNNB1-D3 WQQQSYLAS   | 234  | 404   |
| >CTNNB1-D3 WQQQSYLD   | 20935 | >CTNNB1-D3 WQQQSYLA    | 225  | 20710 |
| >CTNNB1-D3 WQQQSYLDS  | 268   | >CTNNB1-D3 WQQQSYLAS   | 97   | 171   |
| >CTNNB1-D3 WQQQSYLDS  | 760   | >CTNNB1-D3 WQQQSYLAS   | 189  | 571   |
| >CTNNB1-D3 WQQQSYLDS  | 431   | >CTNNB1-D3 WQQQSYLAS   | 315  | 116   |
| >CTNNB1-D3 WQQQSYLDS  | 1891  | >CTNNB1-D3 WQQQSYLAS   | 383  | 1508  |
| >CTNNB1-D3 WQQQSYLDS  | 187   | >CTNNB1-D3 WQQQSYLAS   | 83   | 104   |
| >CTNNB1-D3 WQQQSYLDS  | 742   | >CTNNB1-D3 WQQQSYLAS   | 257  | 485   |
| >CTNNB1-D3 HWQQQSYLLE | 2450  | >CTNNB1-D3 HWQQQSYLLE  | 367  | 2083  |
| >CTNNB1-D3 HWQQQSYLLE | 1246  | >CTNNB1-D3 HWQQQSYLLE  | 423  | 823   |
| >CTNNB1-D3 HWQQQSYLLE | 297   | >CTNNB1-D3 HWQQQSYLLE  | 513  | 216   |
| >CTNNB1-D3 LDSGIHSGA  | 7672  | >CTNNB1-D3 LESGIHSGA   | 432  | 7240  |
| >CTNNB1-D3 LDSGIHSGA  | 13016 | >CTNNB1-D3 LESGIHSGA   | 55   | 12961 |
| >CTNNB1-D3 LDSGIHSGAT | 26508 | >CTNNB1-D3 LESGIHSGAT  | 402  | 26106 |
| >CTNNB1-D3 YLDSGIHSGA | 78    | >CTNNB1-D3 YLESGIHSGA  | 246  | 168   |
| >CTNNB1-D3 YLDSGIHSGA | 212   | >CTNNB1-D3 YLESGIHSGAT | 1761 | 1549  |
| >CTNNB1-D3 YLDSGIHSG  | 278   | >CTNNB1-D3 YLESGIHSG   | 340  | 62    |
| >CTNNB1-D3 YLDSGIHSGA | 24    | >CTNNB1-D3 YLESGIHSGA  | 41   | 17    |
| >CTNNB1-D3 YLDSGIHSGA | 284   | >CTNNB1-D3 YLESGIHSGAT | 409  | 125   |
| >CTNNB1-D3 YLDSGIHSGA | 32    | >CTNNB1-D3 YLESGIHSGA  | 49   | 17    |
| >CTNNB1-D3 YLDSGIHSGA | 78    | >CTNNB1-D3 YLESGIHSGAT | 135  | 57    |
| >CTNNB1-D3 YLDSGIHS   | 419   | >CTNNB1-D3 YLESGIHS    | 3156 | 2737  |
| >CTNNB1-D3 YLDSGIHSGA | 280   | >CTNNB1-D3 YLESGIHSGA  | 880  | 600   |
| >CTNNB1-D3 YLDSGIHSGA | 178   | >CTNNB1-D3 YLESGIHSGAT | 1256 | 1078  |
| >CTNNB1-D3 YLDSGIHS   | 47    | >CTNNB1-D3 YLESGIHS    | 1010 | 963   |
| >CTNNB1-D3 YLDSGIHSG  | 15    | >CTNNB1-D3 YLESGIHSG   | 261  | 246   |
| >CTNNB1-D3 YLDSGIHSGA | 2     | >CTNNB1-D3 YLESGIHSGA  | 11   | 9     |
| >CTNNB1-D3 YLDSGIHSGA | 12    | >CTNNB1-D3 YLESGIHSGAT | 177  | 165   |
| >CTNNB1-D3 YLDSGIHS   | 395   | >CTNNB1-D3 YLESGIHS    | 3119 | 2724  |
| >CTNNB1-D3 YLDSGIHSG  | 139   | >CTNNB1-D3 YLESGIHSG   | 713  | 574   |
| >CTNNB1-D3 YLDSGIHSGA | 8     | >CTNNB1-D3 YLESGIHSGA  | 44   | 36    |
| >CTNNB1-D3 YLDSGIHSGA | 83    | >CTNNB1-D3 YLESGIHSGAT | 776  | 693   |
| >CTNNB1-D3 YLDSGIHS   | 101   | >CTNNB1-D3 YLESGIHS    | 3946 | 3845  |
| >CTNNB1-D3 YLDSGIHSG  | 140   | >CTNNB1-D3 YLESGIHSG   | 3962 | 3822  |
| >CTNNB1-D3 YLDSGIHSGA | 7     | >CTNNB1-D3 YLESGIHSGA  | 82   | 75    |
| >CTNNB1-D3 YLDSGIHSGA | 121   | >CTNNB1-D3 YLESGIHSGAT | 2496 | 2375  |
| >CTNNB1-D3 YLDSGIHSGA | 7     | >CTNNB1-D3 YLESGIHSGA  | 203  | 196   |

|                        |      |                         |      |      |
|------------------------|------|-------------------------|------|------|
| >CTNNB1-D3 YLDSGIHSGA' | 255  | >CTNNB1-D3 YLESGIHSGA'  | 3610 | 3355 |
| >CTNNB1-D3 YLDSGIHS    | 66   | >CTNNB1-D3 YLESGIHS     | 115  | 49   |
| >CTNNB1-D3 YLDSGIHSG   | 13   | >CTNNB1-D3 YLESGIHSG    | 19   | 6    |
| >CTNNB1-D3 YLDSGIHSGA  | 2    | >CTNNB1-D3 YLESGIHSGA   | 3    | 1    |
| >CTNNB1-D3 YLDSGIHSGA' | 36   | >CTNNB1-D3 YLESGIHSGA'  | 53   | 17   |
| >CTNNB1-D3 SYLDSGIHSG/ | 410  | >CTNNB1-D3 SYLESGIHSGA/ | 419  | 9    |
| >CTNNB1-D3 QSYLDSGI    | 46   | >CTNNB1-D3 QSYLESGI     | 35   | 11   |
| >CTNNB1-D3 QSYLDSGI    | 22   | >CTNNB1-D3 QSYLESGI     | 35   | 13   |
| >CTNNB1-D3 QQSYLEDSGI  | 417  | >CTNNB1-D3 QQSYLESGI    | 194  | 223  |
| >CTNNB1-D3 QQQSYLDSGI  | 381  | >CTNNB1-D3 QQQSYLESGI   | 211  | 170  |
| >CTNNB1-D3 WQQQSYLDS   | 268  | >CTNNB1-D3 WQQQSYLES    | 223  | 45   |
| >CTNNB1-D3 WQQQSYLDS   | 760  | >CTNNB1-D3 WQQQSYLES    | 317  | 443  |
| >CTNNB1-D3 WQQQSYLDS   | 431  | >CTNNB1-D3 WQQQSYLES    | 664  | 233  |
| >CTNNB1-D3 WQQQSYLDS   | 187  | >CTNNB1-D3 WQQQSYLES    | 121  | 66   |
| >CTNNB1-D3 HWQQQSYLLE  | 297  | >CTNNB1-D3 HWQQQSYLE    | 424  | 127  |
| >CTNNB1-D3 YLDSGIHSGA  | 78   | >CTNNB1-D3 YLGSGIHSGA   | 108  | 30   |
| >CTNNB1-D3 YLDSGIHSGA' | 212  | >CTNNB1-D3 YLGSGIHSGA'  | 653  | 441  |
| >CTNNB1-D3 YLDSGIHSG   | 278  | >CTNNB1-D3 YLGSGIHSG    | 196  | 82   |
| >CTNNB1-D3 YLDSGIHSGA  | 24   | >CTNNB1-D3 YLGSGIHSGA   | 20   | 4    |
| >CTNNB1-D3 YLDSGIHSGA' | 284  | >CTNNB1-D3 YLGSGIHSGA'  | 243  | 41   |
| >CTNNB1-D3 YLDSGIHSG   | 1353 | >CTNNB1-D3 YLGSGIHSG    | 493  | 860  |
| >CTNNB1-D3 YLDSGIHSGA  | 32   | >CTNNB1-D3 YLGSGIHSGA   | 22   | 10   |
| >CTNNB1-D3 YLDSGIHSGA' | 78   | >CTNNB1-D3 YLGSGIHSGA'  | 31   | 47   |
| >CTNNB1-D3 YLDSGIHS    | 419  | >CTNNB1-D3 YLGSGIHS     | 2535 | 2116 |
| >CTNNB1-D3 YLDSGIHSGA  | 280  | >CTNNB1-D3 YLGSGIHSGA   | 497  | 217  |
| >CTNNB1-D3 YLDSGIHSGA' | 178  | >CTNNB1-D3 YLGSGIHSGA'  | 875  | 697  |
| >CTNNB1-D3 YLDSGIHS    | 47   | >CTNNB1-D3 YLGSGIHS     | 119  | 72   |
| >CTNNB1-D3 YLDSGIHSG   | 15   | >CTNNB1-D3 YLGSGIHSG    | 31   | 16   |
| >CTNNB1-D3 YLDSGIHSGA  | 2    | >CTNNB1-D3 YLGSGIHSGA   | 3    | 1    |
| >CTNNB1-D3 YLDSGIHSGA' | 12   | >CTNNB1-D3 YLGSGIHSGA'  | 24   | 12   |
| >CTNNB1-D3 YLDSGIHS    | 395  | >CTNNB1-D3 YLGSGIHS     | 914  | 519  |
| >CTNNB1-D3 YLDSGIHSG   | 139  | >CTNNB1-D3 YLGSGIHSG    | 272  | 133  |
| >CTNNB1-D3 YLDSGIHSGA  | 8    | >CTNNB1-D3 YLGSGIHSGA   | 14   | 6    |
| >CTNNB1-D3 YLDSGIHSGA' | 83   | >CTNNB1-D3 YLGSGIHSGA'  | 200  | 117  |
| >CTNNB1-D3 YLDSGIHS    | 101  | >CTNNB1-D3 YLGSGIHS     | 305  | 204  |
| >CTNNB1-D3 YLDSGIHSG   | 140  | >CTNNB1-D3 YLGSGIHSG    | 406  | 266  |
| >CTNNB1-D3 YLDSGIHSGA  | 7    | >CTNNB1-D3 YLGSGIHSGA   | 9    | 2    |
| >CTNNB1-D3 YLDSGIHSGA' | 121  | >CTNNB1-D3 YLGSGIHSGA'  | 287  | 166  |
| >CTNNB1-D3 YLDSGIHSGA  | 7    | >CTNNB1-D3 YLGSGIHSGA   | 7    | 0    |
| >CTNNB1-D3 YLDSGIHSGA' | 255  | >CTNNB1-D3 YLGSGIHSGA'  | 346  | 91   |
| >CTNNB1-D3 YLDSGIHS    | 66   | >CTNNB1-D3 YLGSGIHS     | 46   | 20   |
| >CTNNB1-D3 YLDSGIHSG   | 13   | >CTNNB1-D3 YLGSGIHSG    | 10   | 3    |
| >CTNNB1-D3 YLDSGIHSGA  | 2    | >CTNNB1-D3 YLGSGIHSGA   | 2    | 0    |

|                        |      |                        |      |      |
|------------------------|------|------------------------|------|------|
| >CTNNB1-D3 YLDSGIHSGA` | 36   | >CTNNB1-D3 YLGSGIHSGA` | 27   | 9    |
| >CTNNB1-D3 SYLDSGIHSG/ | 410  | >CTNNB1-D3 SYLGSGIHSG/ | 259  | 151  |
| >CTNNB1-D3 QSYLDSGI    | 46   | >CTNNB1-D3 QSYLGSGI    | 14   | 32   |
| >CTNNB1-D3 QSYLDSGIH   | 1475 | >CTNNB1-D3 QSYLGSGIH   | 444  | 1031 |
| >CTNNB1-D3 QSYLDSGI    | 22   | >CTNNB1-D3 QSYLGSGI    | 18   | 4    |
| >CTNNB1-D3 QQSYLDSGI   | 417  | >CTNNB1-D3 QQSYLGS     | 67   | 350  |
| >CTNNB1-D3 QQQSYLDSGI  | 381  | >CTNNB1-D3 QQQSYLGSGI  | 194  | 187  |
| >CTNNB1-D3 WQQQSYLDS   | 268  | >CTNNB1-D3 WQQQSYLGS   | 136  | 132  |
| >CTNNB1-D3 WQQQSYLDS   | 760  | >CTNNB1-D3 WQQQSYLGS   | 411  | 349  |
| >CTNNB1-D3 WQQQSYLDS   | 431  | >CTNNB1-D3 WQQQSYLGS   | 250  | 181  |
| >CTNNB1-D3 WQQQSYLDS   | 187  | >CTNNB1-D3 WQQQSYLGS   | 78   | 109  |
| >CTNNB1-D3 WQQQSYLDS   | 742  | >CTNNB1-D3 WQQQSYLGS   | 240  | 502  |
| >CTNNB1-D3 HWQQQSYL    | 297  | >CTNNB1-D3 HWQQQSYL    | 371  | 74   |
| >CTNNB1-D3 YLDSGIHSGA  | 78   | >CTNNB1-D3 YLHSGIHSGA  | 127  | 49   |
| >CTNNB1-D3 YLDSGIHSGA` | 212  | >CTNNB1-D3 YLHSGIHSGA` | 505  | 293  |
| >CTNNB1-D3 YLDSGIHSG   | 278  | >CTNNB1-D3 YLHSGIHSG   | 202  | 76   |
| >CTNNB1-D3 YLDSGIHSGA  | 24   | >CTNNB1-D3 YLHSGIHSGA  | 18   | 6    |
| >CTNNB1-D3 YLDSGIHSGA` | 284  | >CTNNB1-D3 YLHSGIHSGA` | 249  | 35   |
| >CTNNB1-D3 YLDSGIHS    | 2792 | >CTNNB1-D3 YLHSGIHS    | 240  | 2552 |
| >CTNNB1-D3 YLDSGIHSG   | 1353 | >CTNNB1-D3 YLHSGIHSG   | 96   | 1257 |
| >CTNNB1-D3 YLDSGIHSGA  | 32   | >CTNNB1-D3 YLHSGIHSGA  | 18   | 14   |
| >CTNNB1-D3 YLDSGIHSGA` | 78   | >CTNNB1-D3 YLHSGIHSGA` | 8    | 70   |
| >CTNNB1-D3 YLDSGIHS    | 419  | >CTNNB1-D3 YLHSGIHS    | 1709 | 1290 |
| >CTNNB1-D3 YLDSGIHSGA  | 280  | >CTNNB1-D3 YLHSGIHSGA  | 484  | 204  |
| >CTNNB1-D3 YLDSGIHSGA` | 178  | >CTNNB1-D3 YLHSGIHSGA` | 685  | 507  |
| >CTNNB1-D3 YLDSGIHS    | 47   | >CTNNB1-D3 YLHSGIHS    | 85   | 38   |
| >CTNNB1-D3 YLDSGIHSG   | 15   | >CTNNB1-D3 YLHSGIHSG   | 24   | 9    |
| >CTNNB1-D3 YLDSGIHSGA  | 2    | >CTNNB1-D3 YLHSGIHSGA  | 3    | 1    |
| >CTNNB1-D3 YLDSGIHSGA` | 12   | >CTNNB1-D3 YLHSGIHSGA` | 18   | 6    |
| >CTNNB1-D3 YLDSGIHS    | 395  | >CTNNB1-D3 YLHSGIHS    | 1612 | 1217 |
| >CTNNB1-D3 YLDSGIHSG   | 139  | >CTNNB1-D3 YLHSGIHSG   | 403  | 264  |
| >CTNNB1-D3 YLDSGIHSGA  | 8    | >CTNNB1-D3 YLHSGIHSGA  | 20   | 12   |
| >CTNNB1-D3 YLDSGIHSGA` | 83   | >CTNNB1-D3 YLHSGIHSGA` | 338  | 255  |
| >CTNNB1-D3 YLDSGIHS    | 101  | >CTNNB1-D3 YLHSGIHS    | 746  | 645  |
| >CTNNB1-D3 YLDSGIHSG   | 140  | >CTNNB1-D3 YLHSGIHSG   | 888  | 748  |
| >CTNNB1-D3 YLDSGIHSGA  | 7    | >CTNNB1-D3 YLHSGIHSGA  | 14   | 7    |
| >CTNNB1-D3 YLDSGIHSGA` | 121  | >CTNNB1-D3 YLHSGIHSGA` | 545  | 424  |
| >CTNNB1-D3 YLDSGIHSGA  | 7    | >CTNNB1-D3 YLHSGIHSGA  | 41   | 34   |
| >CTNNB1-D3 YLDSGIHSGA` | 255  | >CTNNB1-D3 YLHSGIHSGA` | 1448 | 1193 |
| >CTNNB1-D3 YLDSGIHS    | 66   | >CTNNB1-D3 YLHSGIHS    | 37   | 29   |
| >CTNNB1-D3 YLDSGIHSG   | 13   | >CTNNB1-D3 YLHSGIHSG   | 9    | 4    |
| >CTNNB1-D3 YLDSGIHSGA  | 2    | >CTNNB1-D3 YLHSGIHSGA  | 2    | 0    |
| >CTNNB1-D3 YLDSGIHSGA` | 36   | >CTNNB1-D3 YLHSGIHSGA` | 22   | 14   |

|                        |      |                        |      |      |
|------------------------|------|------------------------|------|------|
| >CTNNB1-D3 SYLDSGIHSG/ | 410  | >CTNNB1-D3 SYLHSGIHSG/ | 543  | 133  |
| >CTNNB1-D3 QSYLDSGI    | 3494 | >CTNNB1-D3 QSYLHSGI    | 47   | 3447 |
| >CTNNB1-D3 QSYLDSGI    | 46   | >CTNNB1-D3 QSYLHSGI    | 19   | 27   |
| >CTNNB1-D3 QSYLDSGI    | 22   | >CTNNB1-D3 QSYLHSGI    | 24   | 2    |
| >CTNNB1-D3 QQSYLDSGI   | 417  | >CTNNB1-D3 QQSYLHSGI   | 75   | 342  |
| >CTNNB1-D3 QQQSYLDSGI  | 381  | >CTNNB1-D3 QQQSYLHSGI  | 128  | 253  |
| >CTNNB1-D3 WQQQSYLDS   | 268  | >CTNNB1-D3 WQQQSYLHS   | 173  | 95   |
| >CTNNB1-D3 WQQQSYLDS   | 760  | >CTNNB1-D3 WQQQSYLHS   | 332  | 428  |
| >CTNNB1-D3 WQQQSYLDS   | 431  | >CTNNB1-D3 WQQQSYLHS   | 237  | 194  |
| >CTNNB1-D3 WQQQSYLDS   | 187  | >CTNNB1-D3 WQQQSYLHS   | 77   | 110  |
| >CTNNB1-D3 WQQQSYLDS   | 742  | >CTNNB1-D3 WQQQSYLHS   | 253  | 489  |
| >CTNNB1-D3 HWQQQSYLH   | 2450 | >CTNNB1-D3 HWQQQSYLH   | 293  | 2157 |
| >CTNNB1-D3 HWQQQSYLH   | 297  | >CTNNB1-D3 HWQQQSYLH   | 279  | 18   |
| >CTNNB1-D3 YLDSGIHSGA  | 78   | >CTNNB1-D3 YLNSGIHSGA  | 160  | 82   |
| >CTNNB1-D3 YLDSGIHSGA  | 212  | >CTNNB1-D3 YLNSGIHSGA  | 399  | 187  |
| >CTNNB1-D3 YLDSGIHS    | 1509 | >CTNNB1-D3 YLNSGIHS    | 381  | 1128 |
| >CTNNB1-D3 YLDSGIHSG   | 278  | >CTNNB1-D3 YLNSGIHSG   | 61   | 217  |
| >CTNNB1-D3 YLDSGIHSGA  | 24   | >CTNNB1-D3 YLNSGIHSGA  | 22   | 2    |
| >CTNNB1-D3 YLDSGIHSGA  | 284  | >CTNNB1-D3 YLNSGIHSGA  | 70   | 214  |
| >CTNNB1-D3 YLDSGIHS    | 2792 | >CTNNB1-D3 YLNSGIHS    | 110  | 2682 |
| >CTNNB1-D3 YLDSGIHSG   | 1353 | >CTNNB1-D3 YLNSGIHSG   | 42   | 1311 |
| >CTNNB1-D3 YLDSGIHSGA  | 32   | >CTNNB1-D3 YLNSGIHSGA  | 20   | 12   |
| >CTNNB1-D3 YLDSGIHSGA  | 78   | >CTNNB1-D3 YLNSGIHSGA  | 6    | 72   |
| >CTNNB1-D3 YLDSGIHS    | 419  | >CTNNB1-D3 YLNSGIHS    | 1202 | 783  |
| >CTNNB1-D3 YLDSGIHSGA  | 280  | >CTNNB1-D3 YLNSGIHSGA  | 544  | 264  |
| >CTNNB1-D3 YLDSGIHSGA  | 178  | >CTNNB1-D3 YLNSGIHSGA  | 475  | 297  |
| >CTNNB1-D3 YLDSGIHS    | 47   | >CTNNB1-D3 YLNSGIHS    | 86   | 39   |
| >CTNNB1-D3 YLDSGIHSG   | 15   | >CTNNB1-D3 YLNSGIHSG   | 23   | 8    |
| >CTNNB1-D3 YLDSGIHSGA  | 2    | >CTNNB1-D3 YLNSGIHSGA  | 3    | 1    |
| >CTNNB1-D3 YLDSGIHSGA  | 12   | >CTNNB1-D3 YLNSGIHSGA  | 18   | 6    |
| >CTNNB1-D3 YLDSGIHS    | 395  | >CTNNB1-D3 YLNSGIHS    | 1025 | 630  |
| >CTNNB1-D3 YLDSGIHSG   | 139  | >CTNNB1-D3 YLNSGIHSG   | 260  | 121  |
| >CTNNB1-D3 YLDSGIHSGA  | 8    | >CTNNB1-D3 YLNSGIHSGA  | 14   | 6    |
| >CTNNB1-D3 YLDSGIHSGA  | 83   | >CTNNB1-D3 YLNSGIHSGA  | 206  | 123  |
| >CTNNB1-D3 YLDSGIHS    | 101  | >CTNNB1-D3 YLNSGIHS    | 295  | 194  |
| >CTNNB1-D3 YLDSGIHSG   | 140  | >CTNNB1-D3 YLNSGIHSG   | 351  | 211  |
| >CTNNB1-D3 YLDSGIHSGA  | 7    | >CTNNB1-D3 YLNSGIHSGA  | 10   | 3    |
| >CTNNB1-D3 YLDSGIHSGA  | 121  | >CTNNB1-D3 YLNSGIHSGA  | 309  | 188  |
| >CTNNB1-D3 YLDSGIHSGA  | 7    | >CTNNB1-D3 YLNSGIHSGA  | 7    | 0    |
| >CTNNB1-D3 YLDSGIHSGA  | 255  | >CTNNB1-D3 YLNSGIHSGA  | 334  | 79   |
| >CTNNB1-D3 YLDSGIHS    | 66   | >CTNNB1-D3 YLNSGIHS    | 38   | 28   |
| >CTNNB1-D3 YLDSGIHSG   | 13   | >CTNNB1-D3 YLNSGIHSG   | 9    | 4    |
| >CTNNB1-D3 YLDSGIHSGA  | 2    | >CTNNB1-D3 YLNSGIHSGA  | 2    | 0    |

|                        |       |                        |      |       |
|------------------------|-------|------------------------|------|-------|
| >CTNNB1-D3 YLDSGIHSGA` | 36    | >CTNNB1-D3 YLNSGIHSGA` | 23   | 13    |
| >CTNNB1-D3 SYLDSGIHSG/ | 410   | >CTNNB1-D3 SYLNSGIHSG/ | 428  | 18    |
| >CTNNB1-D3 QSYLDSGI    | 46    | >CTNNB1-D3 QSYLNSGI    | 22   | 24    |
| >CTNNB1-D3 QSYLDSGI    | 22    | >CTNNB1-D3 QSYLNSGI    | 29   | 7     |
| >CTNNB1-D3 QQSYLDSGI   | 417   | >CTNNB1-D3 QQSYLNSGI   | 109  | 308   |
| >CTNNB1-D3 QQQSYLDSGI  | 381   | >CTNNB1-D3 QQQSYLNSGI  | 134  | 247   |
| >CTNNB1-D3 WQQQSYLDS   | 638   | >CTNNB1-D3 WQQQSYLNS   | 487  | 151   |
| >CTNNB1-D3 WQQQSYLDS   | 268   | >CTNNB1-D3 WQQQSYLNS   | 167  | 101   |
| >CTNNB1-D3 WQQQSYLDS   | 760   | >CTNNB1-D3 WQQQSYLNS   | 470  | 290   |
| >CTNNB1-D3 WQQQSYLDS   | 431   | >CTNNB1-D3 WQQQSYLNS   | 366  | 65    |
| >CTNNB1-D3 WQQQSYLDS   | 187   | >CTNNB1-D3 WQQQSYLNS   | 87   | 100   |
| >CTNNB1-D3 WQQQSYLDS   | 742   | >CTNNB1-D3 WQQQSYLNS   | 335  | 407   |
| >CTNNB1-D3 HWQQQSYL    | 2450  | >CTNNB1-D3 HWQQQSYL    | 368  | 2082  |
| >CTNNB1-D3 HWQQQSYL    | 297   | >CTNNB1-D3 HWQQQSYL    | 306  | 9     |
| >CTNNB1-D3 LDSGIHSGA   | 9281  | >CTNNB1-D3 LVSGIHSGA   | 128  | 9153  |
| >CTNNB1-D3 LDSGIHSGA   | 12118 | >CTNNB1-D3 LVSGIHSGA   | 109  | 12009 |
| >CTNNB1-D3 LDSGIHSGA   | 27407 | >CTNNB1-D3 LVSGIHSGA   | 186  | 27221 |
| >CTNNB1-D3 LDSGIHSGA   | 11478 | >CTNNB1-D3 LVSGIHSGA   | 51   | 11427 |
| >CTNNB1-D3 YLDSGIHSGA  | 78    | >CTNNB1-D3 YLVSGIHSGA  | 91   | 13    |
| >CTNNB1-D3 YLDSGIHSGA` | 212   | >CTNNB1-D3 YLVSGIHSGA` | 404  | 192   |
| >CTNNB1-D3 YLDSGIHS    | 1509  | >CTNNB1-D3 YLVSGIHS    | 459  | 1050  |
| >CTNNB1-D3 YLDSGIHSG   | 278   | >CTNNB1-D3 YLVSGIHSG   | 62   | 216   |
| >CTNNB1-D3 YLDSGIHSGA  | 24    | >CTNNB1-D3 YLVSGIHSGA  | 15   | 9     |
| >CTNNB1-D3 YLDSGIHSGA` | 284   | >CTNNB1-D3 YLVSGIHSGA` | 98   | 186   |
| >CTNNB1-D3 YLDSGIHS    | 2792  | >CTNNB1-D3 YLVSGIHS    | 246  | 2546  |
| >CTNNB1-D3 YLDSGIHSG   | 1353  | >CTNNB1-D3 YLVSGIHSG   | 84   | 1269  |
| >CTNNB1-D3 YLDSGIHSGA  | 32    | >CTNNB1-D3 YLVSGIHSGA  | 16   | 16    |
| >CTNNB1-D3 YLDSGIHSGA` | 78    | >CTNNB1-D3 YLVSGIHSGA` | 9    | 69    |
| >CTNNB1-D3 YLDSGIHS    | 419   | >CTNNB1-D3 YLVSGIHS    | 207  | 212   |
| >CTNNB1-D3 YLDSGIHSG   | 570   | >CTNNB1-D3 YLVSGIHSG   | 319  | 251   |
| >CTNNB1-D3 YLDSGIHSGA  | 280   | >CTNNB1-D3 YLVSGIHSGA  | 110  | 170   |
| >CTNNB1-D3 YLDSGIHSGA` | 178   | >CTNNB1-D3 YLVSGIHSGA` | 101  | 77    |
| >CTNNB1-D3 YLDSGIHS    | 47    | >CTNNB1-D3 YLVSGIHS    | 132  | 85    |
| >CTNNB1-D3 YLDSGIHSG   | 15    | >CTNNB1-D3 YLVSGIHSG   | 34   | 19    |
| >CTNNB1-D3 YLDSGIHSGA  | 2     | >CTNNB1-D3 YLVSGIHSGA  | 3    | 1     |
| >CTNNB1-D3 YLDSGIHSGA` | 12    | >CTNNB1-D3 YLVSGIHSGA` | 26   | 14    |
| >CTNNB1-D3 YLDSGIHS    | 395   | >CTNNB1-D3 YLVSGIHS    | 1154 | 759   |
| >CTNNB1-D3 YLDSGIHSG   | 139   | >CTNNB1-D3 YLVSGIHSG   | 372  | 233   |
| >CTNNB1-D3 YLDSGIHSGA  | 8     | >CTNNB1-D3 YLVSGIHSGA  | 15   | 7     |
| >CTNNB1-D3 YLDSGIHSGA` | 83    | >CTNNB1-D3 YLVSGIHSGA` | 260  | 177   |
| >CTNNB1-D3 YLDSGIHS    | 101   | >CTNNB1-D3 YLVSGIHS    | 645  | 544   |
| >CTNNB1-D3 YLDSGIHSG   | 140   | >CTNNB1-D3 YLVSGIHSG   | 786  | 646   |
| >CTNNB1-D3 YLDSGIHSGA  | 7     | >CTNNB1-D3 YLVSGIHSGA  | 12   | 5     |

|                        |       |                        |     |       |
|------------------------|-------|------------------------|-----|-------|
| >CTNNB1-D3 YLDSGIHSGA` | 121   | >CTNNB1-D3 YLVSGIHSGA` | 475 | 354   |
| >CTNNB1-D3 YLDSGIHSGA  | 7     | >CTNNB1-D3 YLVSGIHSGA  | 19  | 12    |
| >CTNNB1-D3 YLDSGIHSGA` | 255   | >CTNNB1-D3 YLVSGIHSGA` | 847 | 592   |
| >CTNNB1-D3 YLDSGIHS    | 66    | >CTNNB1-D3 YLVSGIHS    | 47  | 19    |
| >CTNNB1-D3 YLDSGIHSG   | 13    | >CTNNB1-D3 YLVSGIHSG   | 10  | 3     |
| >CTNNB1-D3 YLDSGIHSGA  | 2     | >CTNNB1-D3 YLVSGIHSGA  | 2   | 0     |
| >CTNNB1-D3 YLDSGIHSGA` | 36    | >CTNNB1-D3 YLVSGIHSGA` | 26  | 10    |
| >CTNNB1-D3 YLDSGIHSGA  | 1702  | >CTNNB1-D3 YLVSGIHSGA  | 214 | 1488  |
| >CTNNB1-D3 SYLDSGIHSG/ | 410   | >CTNNB1-D3 SYLVSGIHSG/ | 502 | 92    |
| >CTNNB1-D3 QSYLDSGI    | 3494  | >CTNNB1-D3 QSYLVSGI    | 275 | 3219  |
| >CTNNB1-D3 QSYLDSGI    | 2043  | >CTNNB1-D3 QSYLVSGI    | 464 | 1579  |
| >CTNNB1-D3 QSYLDSGI    | 1029  | >CTNNB1-D3 QSYLVSGI    | 195 | 834   |
| >CTNNB1-D3 QSYLDSGI    | 46    | >CTNNB1-D3 QSYLVSGI    | 35  | 11    |
| >CTNNB1-D3 QSYLDSGIH   | 1475  | >CTNNB1-D3 QSYLVSGIH   | 269 | 1206  |
| >CTNNB1-D3 QSYLDSGI    | 22    | >CTNNB1-D3 QSYLVSGI    | 23  | 1     |
| >CTNNB1-D3 QQSYLDSGI   | 2494  | >CTNNB1-D3 QQSYLVSIGI  | 366 | 2128  |
| >CTNNB1-D3 QQSYLDSGI   | 2469  | >CTNNB1-D3 QQSYLVSIGI  | 430 | 2039  |
| >CTNNB1-D3 QQSYLDSGI   | 2282  | >CTNNB1-D3 QQSYLVSIGI  | 82  | 2200  |
| >CTNNB1-D3 QQSYLDSGI   | 1017  | >CTNNB1-D3 QQSYLVSIGI  | 201 | 816   |
| >CTNNB1-D3 QQSYLDSGI   | 417   | >CTNNB1-D3 QQSYLVSIGI  | 69  | 348   |
| >CTNNB1-D3 QQQSYLDSGI  | 381   | >CTNNB1-D3 QQQSYLVSGI  | 82  | 299   |
| >CTNNB1-D3 WQQQSYLDS   | 638   | >CTNNB1-D3 WQQQSYLVS   | 265 | 373   |
| >CTNNB1-D3 WQQQSYLD    | 22386 | >CTNNB1-D3 WQQQSYLV    | 205 | 22181 |
| >CTNNB1-D3 WQQQSYLD    | 23077 | >CTNNB1-D3 WQQQSYLV    | 309 | 22768 |
| >CTNNB1-D3 WQQQSYLDS   | 2088  | >CTNNB1-D3 WQQQSYLVS   | 359 | 1729  |
| >CTNNB1-D3 WQQQSYLD    | 20935 | >CTNNB1-D3 WQQQSYLV    | 26  | 20909 |
| >CTNNB1-D3 WQQQSYLDS   | 268   | >CTNNB1-D3 WQQQSYLVS   | 106 | 162   |
| >CTNNB1-D3 WQQQSYLD    | 28071 | >CTNNB1-D3 WQQQSYLV    | 255 | 27816 |
| >CTNNB1-D3 WQQQSYLD    | 21109 | >CTNNB1-D3 WQQQSYLV    | 263 | 20846 |
| >CTNNB1-D3 WQQQSYLDS   | 760   | >CTNNB1-D3 WQQQSYLVS   | 239 | 521   |
| >CTNNB1-D3 WQQQSYLDS   | 431   | >CTNNB1-D3 WQQQSYLVS   | 199 | 232   |
| >CTNNB1-D3 WQQQSYLD    | 15299 | >CTNNB1-D3 WQQQSYLV    | 284 | 15015 |
| >CTNNB1-D3 WQQQSYLDS   | 187   | >CTNNB1-D3 WQQQSYLVS   | 70  | 117   |
| >CTNNB1-D3 WQQQSYLD    | 16254 | >CTNNB1-D3 WQQQSYLV    | 428 | 15826 |
| >CTNNB1-D3 WQQQSYLDS   | 1316  | >CTNNB1-D3 WQQQSYLVS   | 416 | 900   |
| >CTNNB1-D3 WQQQSYLDS   | 742   | >CTNNB1-D3 WQQQSYLVS   | 211 | 531   |
| >CTNNB1-D3 HWQQQSYL    | 1246  | >CTNNB1-D3 HWQQQSYLV   | 367 | 879   |
| >CTNNB1-D3 HWQQQSYL    | 297   | >CTNNB1-D3 HWQQQSYLV   | 423 | 126   |
| >CTNNB1-D3 SHWQQQSYL   | 27466 | >CTNNB1-D3 SHWQQQSYLV  | 422 | 27044 |
| >CTNNB1-D3 VSHWQQQS\   | 21798 | >CTNNB1-D3 VSHWQQQS\   | 450 | 21348 |
| >CTNNB1-D3 VSHWQQQS\   | 24720 | >CTNNB1-D3 VSHWQQQS\   | 491 | 24229 |
| >CTNNB1-D3 VSHWQQQS\   | 21763 | >CTNNB1-D3 VSHWQQQS\   | 40  | 21723 |
| >CTNNB1-D3 VSHWQQQS\   | 11312 | >CTNNB1-D3 VSHWQQQS\   | 18  | 11294 |

|                       |       |                       |     |       |
|-----------------------|-------|-----------------------|-----|-------|
| >CTNNB1-D3 VSHWQQQS\  | 24415 | >CTNNB1-D3 VSHWQQQS\  | 155 | 24260 |
| >CTNNB1-D3 VSHWQQQS\  | 13848 | >CTNNB1-D3 VSHWQQQS\  | 6   | 13842 |
| >CTNNB1-D3 VSHWQQQS\  | 19813 | >CTNNB1-D3 VSHWQQQS\  | 239 | 19574 |
| >CTNNB1-D3 VSHWQQQS\  | 23533 | >CTNNB1-D3 VSHWQQQS\  | 163 | 23370 |
| >CTNNB1-D3 YLDSGIHS   | 603   | >CTNNB1-D3 YLYSGIHS   | 180 | 423   |
| >CTNNB1-D3 YLDSGIHSG  | 773   | >CTNNB1-D3 YLYSGIHSG  | 210 | 563   |
| >CTNNB1-D3 YLDSGIHSGA | 78    | >CTNNB1-D3 YLYSGIHSGA | 23  | 55    |
| >CTNNB1-D3 YLDSGIHSGA | 212   | >CTNNB1-D3 YLYSGIHSGA | 77  | 135   |
| >CTNNB1-D3 YLDSGIHS   | 1509  | >CTNNB1-D3 YLYSGIHS   | 225 | 1284  |
| >CTNNB1-D3 YLDSGIHSG  | 278   | >CTNNB1-D3 YLYSGIHSG  | 42  | 236   |
| >CTNNB1-D3 YLDSGIHSGA | 24    | >CTNNB1-D3 YLYSGIHSGA | 7   | 17    |
| >CTNNB1-D3 YLDSGIHSGA | 284   | >CTNNB1-D3 YLYSGIHSGA | 53  | 231   |
| >CTNNB1-D3 YLDSGIHS   | 2792  | >CTNNB1-D3 YLYSGIHS   | 49  | 2743  |
| >CTNNB1-D3 YLDSGIHSG  | 1353  | >CTNNB1-D3 YLYSGIHSG  | 25  | 1328  |
| >CTNNB1-D3 YLDSGIHSGA | 32    | >CTNNB1-D3 YLYSGIHSGA | 8   | 24    |
| >CTNNB1-D3 YLDSGIHSGA | 78    | >CTNNB1-D3 YLYSGIHSGA | 4   | 74    |
| >CTNNB1-D3 YLDSGIHS   | 419   | >CTNNB1-D3 YLYSGIHS   | 164 | 255   |
| >CTNNB1-D3 YLDSGIHSG  | 570   | >CTNNB1-D3 YLYSGIHSG  | 310 | 260   |
| >CTNNB1-D3 YLDSGIHSGA | 280   | >CTNNB1-D3 YLYSGIHSGA | 78  | 202   |
| >CTNNB1-D3 YLDSGIHSGA | 178   | >CTNNB1-D3 YLYSGIHSGA | 84  | 94    |
| >CTNNB1-D3 YLDSGIHS   | 47    | >CTNNB1-D3 YLYSGIHS   | 11  | 36    |
| >CTNNB1-D3 YLDSGIHSG  | 15    | >CTNNB1-D3 YLYSGIHSG  | 5   | 10    |
| >CTNNB1-D3 YLDSGIHSGA | 2     | >CTNNB1-D3 YLYSGIHSGA | 2   | 0     |
| >CTNNB1-D3 YLDSGIHSGA | 12    | >CTNNB1-D3 YLYSGIHSGA | 4   | 8     |
| >CTNNB1-D3 YLDSGIHS   | 395   | >CTNNB1-D3 YLYSGIHS   | 193 | 202   |
| >CTNNB1-D3 YLDSGIHSG  | 139   | >CTNNB1-D3 YLYSGIHSG  | 98  | 41    |
| >CTNNB1-D3 YLDSGIHSGA | 8     | >CTNNB1-D3 YLYSGIHSGA | 6   | 2     |
| >CTNNB1-D3 YLDSGIHSGA | 83    | >CTNNB1-D3 YLYSGIHSGA | 51  | 32    |
| >CTNNB1-D3 YLDSGIHS   | 101   | >CTNNB1-D3 YLYSGIHS   | 38  | 63    |
| >CTNNB1-D3 YLDSGIHSG  | 140   | >CTNNB1-D3 YLYSGIHSG  | 46  | 94    |
| >CTNNB1-D3 YLDSGIHSGA | 7     | >CTNNB1-D3 YLYSGIHSGA | 5   | 2     |
| >CTNNB1-D3 YLDSGIHSGA | 121   | >CTNNB1-D3 YLYSGIHSGA | 49  | 72    |
| >CTNNB1-D3 YLDSGIHSGA | 7     | >CTNNB1-D3 YLYSGIHSGA | 7   | 0     |
| >CTNNB1-D3 YLDSGIHSGA | 255   | >CTNNB1-D3 YLYSGIHSGA | 365 | 110   |
| >CTNNB1-D3 YLDSGIHS   | 66    | >CTNNB1-D3 YLYSGIHS   | 11  | 55    |
| >CTNNB1-D3 YLDSGIHSG  | 13    | >CTNNB1-D3 YLYSGIHSG  | 5   | 8     |
| >CTNNB1-D3 YLDSGIHSGA | 2     | >CTNNB1-D3 YLYSGIHSGA | 2   | 0     |
| >CTNNB1-D3 YLDSGIHSGA | 36    | >CTNNB1-D3 YLYSGIHSGA | 8   | 28    |
| >CTNNB1-D3 YLDSGIHSGA | 1702  | >CTNNB1-D3 YLYSGIHSGA | 113 | 1589  |
| >CTNNB1-D3 YLDSGIHSGA | 554   | >CTNNB1-D3 YLYSGIHSGA | 177 | 377   |
| >CTNNB1-D3 YLDSGIHSG  | 9693  | >CTNNB1-D3 YLYSGIHSG  | 303 | 9390  |
| >CTNNB1-D3 YLDSGIHSGA | 10884 | >CTNNB1-D3 YLYSGIHSGA | 435 | 10449 |
| >CTNNB1-D3 YLDSGIHSGA | 7537  | >CTNNB1-D3 YLYSGIHSGA | 379 | 7158  |

|                        |       |                        |     |       |
|------------------------|-------|------------------------|-----|-------|
| >CTNNB1-D3 YLDSGIHSGA  | 5059  | >CTNNB1-D3 YLYSGIHSGA  | 209 | 4850  |
| >CTNNB1-D3 SYLDSGIHSGA | 410   | >CTNNB1-D3 SYLYSGIHSGA | 303 | 107   |
| >CTNNB1-D3 QSYLDSGI    | 3494  | >CTNNB1-D3 QSYLYSGI    | 4   | 3490  |
| >CTNNB1-D3 QSYLDSGI    | 1029  | >CTNNB1-D3 QSYLYSGI    | 460 | 569   |
| >CTNNB1-D3 QSYLDSGI    | 46    | >CTNNB1-D3 QSYLYSGI    | 19  | 27    |
| >CTNNB1-D3 QSYLDSGI    | 22    | >CTNNB1-D3 QSYLYSGI    | 21  | 1     |
| >CTNNB1-D3 QQSYLDSGI   | 2494  | >CTNNB1-D3 QQSYLESGI   | 369 | 2125  |
| >CTNNB1-D3 QQSYLDSGI   | 2282  | >CTNNB1-D3 QQSYLESGI   | 256 | 2026  |
| >CTNNB1-D3 QQSYLDSGI   | 1017  | >CTNNB1-D3 QQSYLESGI   | 330 | 687   |
| >CTNNB1-D3 QQSYLDSGI   | 417   | >CTNNB1-D3 QQSYLESGI   | 53  | 364   |
| >CTNNB1-D3 QQQSYLDSGI  | 381   | >CTNNB1-D3 QQQSYLESGI  | 96  | 285   |
| >CTNNB1-D3 WQQQSYLDS   | 638   | >CTNNB1-D3 WQQQSYLYS   | 243 | 395   |
| >CTNNB1-D3 WQQQSYLDS   | 268   | >CTNNB1-D3 WQQQSYLYS   | 80  | 188   |
| >CTNNB1-D3 WQQQSYLD    | 22771 | >CTNNB1-D3 WQQQSYLY    | 68  | 22703 |
| >CTNNB1-D3 WQQQSYLD    | 32860 | >CTNNB1-D3 WQQQSYLY    | 259 | 32601 |
| >CTNNB1-D3 WQQQSYLD    | 13452 | >CTNNB1-D3 WQQQSYLY    | 49  | 13403 |
| >CTNNB1-D3 WQQQSYLDS   | 760   | >CTNNB1-D3 WQQQSYLYS   | 351 | 409   |
| >CTNNB1-D3 WQQQSYLDS   | 431   | >CTNNB1-D3 WQQQSYLYS   | 361 | 70    |
| >CTNNB1-D3 WQQQSYLD    | 24838 | >CTNNB1-D3 WQQQSYLY    | 54  | 24784 |
| >CTNNB1-D3 WQQQSYLD    | 15299 | >CTNNB1-D3 WQQQSYLY    | 22  | 15277 |
| >CTNNB1-D3 WQQQSYLDS   | 187   | >CTNNB1-D3 WQQQSYLYS   | 65  | 122   |
| >CTNNB1-D3 WQQQSYLDS   | 742   | >CTNNB1-D3 WQQQSYLYS   | 179 | 563   |
| >CTNNB1-D3 WQQQSYLD    | 37955 | >CTNNB1-D3 WQQQSYLY    | 364 | 37591 |
| >CTNNB1-D3 HWQQQSYLL   | 16762 | >CTNNB1-D3 HWQQQSYLY   | 13  | 16749 |
| >CTNNB1-D3 HWQQQSYLL   | 17586 | >CTNNB1-D3 HWQQQSYLY   | 51  | 17535 |
| >CTNNB1-D3 HWQQQSYLL   | 26368 | >CTNNB1-D3 HWQQQSYLY   | 119 | 26249 |
| >CTNNB1-D3 HWQQQSYLL   | 36062 | >CTNNB1-D3 HWQQQSYLY   | 240 | 35822 |
| >CTNNB1-D3 HWQQQSYLL   | 36033 | >CTNNB1-D3 HWQQQSYLY   | 391 | 35642 |
| >CTNNB1-D3 HWQQQSYLL   | 2450  | >CTNNB1-D3 HWQQQSYLY   | 248 | 2202  |
| >CTNNB1-D3 HWQQQSYLL   | 2963  | >CTNNB1-D3 HWQQQSYLY   | 228 | 2735  |
| >CTNNB1-D3 HWQQQSYLL   | 297   | >CTNNB1-D3 HWQQQSYLY   | 354 | 57    |
| >CTNNB1-D3 SHWQQQSYL   | 33567 | >CTNNB1-D3 SHWQQQSYL   | 456 | 33111 |
| >CTNNB1-D3 SHWQQQSYL   | 31480 | >CTNNB1-D3 SHWQQQSYL   | 263 | 31217 |
| >CTNNB1-D3 SHWQQQSYL   | 24848 | >CTNNB1-D3 SHWQQQSYL   | 75  | 24773 |
| >CTNNB1-D3 SHWQQQSYL   | 19088 | >CTNNB1-D3 SHWQQQSYL   | 221 | 18867 |
| >CTNNB1-D5 DVDTSQVLY   | 25    | >CTNNB1-D5 NVDTSQVLY   | 14  | 11    |
| >CTNNB1-D5 DVDTSQVLY   | 577   | >CTNNB1-D5 NVDTSQVLY   | 304 | 273   |
| >CTNNB1-D5 DVDTSQVLY   | 3406  | >CTNNB1-D5 NVDTSQVLY   | 418 | 2988  |
| >CTNNB1-D5 DVDTSQVL    | 4082  | >CTNNB1-D5 NVDTSQVL    | 314 | 3768  |
| >CTNNB1-D5 DVDTSQVLYE  | 2523  | >CTNNB1-D5 NVDTSQVLYE  | 424 | 2099  |
| >CTNNB1-D5 DVDTSQVLY   | 404   | >CTNNB1-D5 NVDTSQVLY   | 432 | 28    |
| >CTNNB1-D5 EDVDTSQV    | 1247  | >CTNNB1-D5 ENVDTSQV    | 160 | 1087  |
| >CTNNB1-D5 EDVDTSQV    | 1007  | >CTNNB1-D5 ENVDTSQV    | 327 | 680   |



|                        |      |                        |      |      |
|------------------------|------|------------------------|------|------|
| >CTNNB1-D5 EDVDTSQVL   | 675  | >CTNNB1-D5 ENVDTSQVL   | 198  | 477  |
| >CTNNB1-D5 EDVDTSQV    | 205  | >CTNNB1-D5 ENVDTSQV    | 9322 | 9117 |
| >CTNNB1-D5 EEDVDTSQV   | 208  | >CTNNB1-D5 EENVDTSQV   | 63   | 145  |
| >CTNNB1-D5 EEDVDTSQVL  | 274  | >CTNNB1-D5 EENVDTSQVL  | 806  | 532  |
| >CTNNB1-D5 EEDVDTSQVL  | 601  | >CTNNB1-D5 EENVDTSQVL  | 424  | 177  |
| >CTNNB1-D5 EEDVDTSQVL  | 1017 | >CTNNB1-D5 EENVDTSQVL  | 201  | 816  |
| >CTNNB1-D5 EEDVDTSQVL  | 476  | >CTNNB1-D5 EENVDTSQVL  | 145  | 331  |
| >CTNNB1-D5 EEDVDTSQV   | 2611 | >CTNNB1-D5 EENVDTSQV   | 258  | 2353 |
| >CTNNB1-D5 EEDVDTSQV   | 464  | >CTNNB1-D5 EENVDTSQV   | 200  | 264  |
| >CTNNB1-D5 EEEDVDTSQV  | 178  | >CTNNB1-D5 EEENVDTSQV  | 137  | 41   |
| >CTNNB1-D5 EEEDVDTSQV  | 50   | >CTNNB1-D5 EEENVDTSQV  | 52   | 2    |
| >CTNNB1-D5 EEEDVDTSQV  | 445  | >CTNNB1-D5 EEENVDTSQV  | 708  | 263  |
| >CTNNB1-D5 PEEEDVDTSC  | 790  | >CTNNB1-D5 PEEENVDTSC  | 477  | 313  |
| >CTNNB1-D5 PEEEDVDTSC  | 368  | >CTNNB1-D5 PEEENVDTSC  | 256  | 112  |
| >CTNNB1-D5 NPEEEDVDTSC | 474  | >CTNNB1-D5 NPEEENVDTSC | 908  | 434  |
| >CTNNB1-D5 DTSQVLYEWI  | 285  | >CTNNB1-D5 NTSQVLYEWI  | 446  | 161  |
| >CTNNB1-D5 DTSQVLYEW   | 677  | >CTNNB1-D5 NTSQVLYEW   | 142  | 535  |
| >CTNNB1-D5 DTSQVLYEW   | 144  | >CTNNB1-D5 NTSQVLYEW   | 86   | 58   |
| >CTNNB1-D5 DTSQVLYEW   | 134  | >CTNNB1-D5 NTSQVLYEW   | 23   | 111  |
| >CTNNB1-D5 VDTSQVLY    | 648  | >CTNNB1-D5 VNTSQVLY    | 216  | 432  |
| >CTNNB1-D5 VDTSQVLYEV  | 3315 | >CTNNB1-D5 VNTSQVLYEV  | 147  | 3168 |
| >CTNNB1-D5 VDTSQVLYEV  | 1128 | >CTNNB1-D5 VNTSQVLYEV  | 495  | 633  |
| >CTNNB1-D5 DVDTSQVLY   | 25   | >CTNNB1-D5 DVNTSQVLY   | 1113 | 1088 |
| >CTNNB1-D5 DVDTSQVLY   | 4668 | >CTNNB1-D5 DVNTSQVLY   | 218  | 4450 |
| >CTNNB1-D5 DVDTSQVLY   | 577  | >CTNNB1-D5 DVNTSQVLY   | 189  | 388  |
| >CTNNB1-D5 DVDTSQVLY   | 1738 | >CTNNB1-D5 DVNTSQVLY   | 395  | 1343 |
| >CTNNB1-D5 DVDTSQVLY   | 1048 | >CTNNB1-D5 DVNTSQVLY   | 126  | 922  |
| >CTNNB1-D5 DVDTSQVLY   | 404  | >CTNNB1-D5 DVNTSQVLY   | 776  | 372  |
| >CTNNB1-D5 EDVDTSQV    | 205  | >CTNNB1-D5 EDVNTSQV    | 290  | 85   |
| >CTNNB1-D5 EEDVDTSQV   | 208  | >CTNNB1-D5 EEDVNTSQV   | 88   | 120  |
| >CTNNB1-D5 EEDVDTSQVL  | 274  | >CTNNB1-D5 EEDVNTSQVL  | 221  | 53   |
| >CTNNB1-D5 EEDVDTSQVL  | 476  | >CTNNB1-D5 EEDVNTSQVL  | 324  | 152  |
| >CTNNB1-D5 EEDVDTSQV   | 464  | >CTNNB1-D5 EEDVNTSQV   | 344  | 120  |
| >CTNNB1-D5 EEDVDTSQVL  | 677  | >CTNNB1-D5 EEDVNTSQVL  | 487  | 190  |
| >CTNNB1-D5 EEEDVDTSQV  | 178  | >CTNNB1-D5 EEEDVNTSQV  | 102  | 76   |
| >CTNNB1-D5 EEEDVDTSQV  | 636  | >CTNNB1-D5 EEEDVNTSQV  | 290  | 346  |
| >CTNNB1-D5 EEEDVDTSQV  | 50   | >CTNNB1-D5 EEEDVNTSQV  | 41   | 9    |
| >CTNNB1-D5 EEEDVDTSQV  | 445  | >CTNNB1-D5 EEEDVNTSQV  | 494  | 49   |
| >CTNNB1-D5 PEEEDVDTSC  | 368  | >CTNNB1-D5 PEEEDVNTSC  | 343  | 25   |
| >CTNNB1-D5 NPEEEDVDTSC | 474  | >CTNNB1-D5 NPEEEDVNTSC | 885  | 411  |
| >CTNNB1-D6 DLMELDMA    | 4412 | >CTNNB1-D6 GLMELDMA    | 27   | 4385 |
| >CTNNB1-D6 DLMELDMAN   | 5360 | >CTNNB1-D6 GLMELDMAN   | 30   | 5330 |
| >CTNNB1-D6 DLMELDMA    | 755  | >CTNNB1-D6 GLMELDMA    | 10   | 745  |

|                      |      |                      |       |       |
|----------------------|------|----------------------|-------|-------|
| >CTNNB1-D6 DLMELDMAN | 1596 | >CTNNB1-D6 GLMELDMAN | 34    | 1562  |
| >CTNNB1-D6 DLMELDMA  | 1489 | >CTNNB1-D6 GLMELDMA  | 14    | 1475  |
| >CTNNB1-D6 DLMELDMAN | 6678 | >CTNNB1-D6 GLMELDMAN | 92    | 6586  |
| >CTNNB1-D6 DLMELDMA  | 2690 | >CTNNB1-D6 GLMELDMA  | 44    | 2646  |
| >CTNNB1-D6 DLMELDMAN | 3729 | >CTNNB1-D6 GLMELDMAN | 85    | 3644  |
| >CTNNB1-D6 DLMELDMA  | 477  | >CTNNB1-D6 GLMELDMA  | 17    | 460   |
| >CTNNB1-D6 DLMELDMAN | 1158 | >CTNNB1-D6 GLMELDMAN | 47    | 1111  |
| >CTNNB1-D6 DLMELDMA  | 1163 | >CTNNB1-D6 GLMELDMA  | 13    | 1150  |
| >CTNNB1-D6 DLMELDMAN | 516  | >CTNNB1-D6 GLMELDMAN | 7     | 509   |
| >CTNNB1-D6 DLMELDMA  | 570  | >CTNNB1-D6 GLMELDMA  | 25    | 545   |
| >CTNNB1-D6 DLMELDMAN | 3684 | >CTNNB1-D6 GLMELDMAN | 82    | 3602  |
| >CTNNB1-D6 DLMELDMA  | 223  | >CTNNB1-D6 GLMELDMA  | 168   | 55    |
| >CTNNB1-D6 DLMELDMAN | 317  | >CTNNB1-D6 GLMELDMAN | 256   | 61    |
| >CTNNB1-D6 DLMELDMA  | 976  | >CTNNB1-D6 GLMELDMA  | 25    | 951   |
| >CTNNB1-D6 DLMELDMAN | 3097 | >CTNNB1-D6 GLMELDMAN | 86    | 3011  |
| >CTNNB1-D6 DLMELDMAN | 317  | >CTNNB1-D6 GLMELDMAN | 7888  | 7571  |
| >CTNNB1-D6 DLMELDMAN | 450  | >CTNNB1-D6 GLMELDMAN | 12230 | 11780 |
| >CTNNB1-D6 DLMELDMAN | 442  | >CTNNB1-D6 GLMELDMAN | 7179  | 6737  |
| >CTNNB1-D6 DLMELDMAN | 3409 | >CTNNB1-D6 GLMELDMAN | 146   | 3263  |
| >CTNNB1-D6 DLMELDMAN | 71   | >CTNNB1-D6 GLMELDMAN | 555   | 484   |
| >CTNNB1-D6 ADLMELDMA | 112  | >CTNNB1-D6 AGLMELDMA | 8976  | 8864  |
| >CTNNB1-D6 ADLMELDMA | 493  | >CTNNB1-D6 AGLMELDMA | 22576 | 22083 |
| >CTNNB1-D6 QADLMELDM | 51   | >CTNNB1-D6 QAGLMELDM | 110   | 59    |
| >CTNNB1-D6 TQADLMEL  | 123  | >CTNNB1-D6 TQAGLMEL  | 398   | 275   |
| >CTNNB1-D6 TQADLMEL  | 21   | >CTNNB1-D6 TQAGLMEL  | 32    | 11    |
| >CTNNB1-D6 TQADLMELD | 164  | >CTNNB1-D6 TQAGLMELD | 243   | 79    |
| >CTNNB1-D6 TQADLMEL  | 131  | >CTNNB1-D6 TQAGLMEL  | 258   | 127   |
| >CTNNB1-D6 TQADLMELD | 272  | >CTNNB1-D6 TQAGLMELD | 578   | 306   |
| >CTNNB1-D6 TQADLMEL  | 13   | >CTNNB1-D6 TQAGLMEL  | 21    | 8     |
| >CTNNB1-D6 TQADLMELD | 29   | >CTNNB1-D6 TQAGLMELD | 42    | 13    |
| >CTNNB1-D6 TQADLMEL  | 83   | >CTNNB1-D6 TQAGLMEL  | 46    | 37    |
| >CTNNB1-D6 ATQADLMEL | 465  | >CTNNB1-D6 ATQAGLMEL | 605   | 140   |
| >CTNNB1-D6 ATQADLMEL | 353  | >CTNNB1-D6 ATQAGLMEL | 221   | 132   |
| >CTNNB1-D6 ATQADLMEL | 830  | >CTNNB1-D6 ATQAGLMEL | 309   | 521   |
| >CTNNB1-D6 ATQADLMEL | 436  | >CTNNB1-D6 ATQAGLMEL | 842   | 406   |
| >CTNNB1-D6 ATQADLMEL | 84   | >CTNNB1-D6 ATQAGLMEL | 16    | 68    |
| >CTNNB1-D6 ATQADLMEL | 111  | >CTNNB1-D6 ATQAGLMEL | 33    | 78    |
| >CTNNB1-D6 ATQADLMEL | 1187 | >CTNNB1-D6 ATQAGLMEL | 361   | 826   |
| >CTNNB1-D6 ATQADLMEL | 733  | >CTNNB1-D6 ATQAGLMEL | 347   | 386   |
| >CTNNB1-D6 MATQADLMI | 466  | >CTNNB1-D6 MATQAGLMI | 496   | 30    |
| >CTNNB1-D6 MATQADLMI | 825  | >CTNNB1-D6 MATQAGLMI | 398   | 427   |
| >CTNNB1-D6 MATQADLMI | 339  | >CTNNB1-D6 MATQAGLMI | 481   | 142   |
| >CTNNB1-D6 MATQADLM  | 283  | >CTNNB1-D6 MATQAGLM  | 92    | 191   |

|                       |       |                       |       |       |
|-----------------------|-------|-----------------------|-------|-------|
| >CTNNB1-D6 MATQADLMI  | 122   | >CTNNB1-D6 MATQAGLMI  | 41    | 81    |
| >CTNNB1-D6 MATQADLM   | 19    | >CTNNB1-D6 MATQAGLM   | 33    | 14    |
| >CTNNB1-D6 MATQADLM   | 491   | >CTNNB1-D6 MATQAGLM   | 1395  | 904   |
| >CTNNB1-D6 MATQADLM   | 199   | >CTNNB1-D6 MATQAGLM   | 596   | 397   |
| >CTNNB1-D6 MATQADLMI  | 283   | >CTNNB1-D6 MATQAGLMI  | 527   | 244   |
| >CTNNB1-D6 MATQADLM   | 459   | >CTNNB1-D6 MATQAGLM   | 181   | 278   |
| >CTNNB1-E1 EPDRKAAV   | 323   | >CTNNB1-E1 KPDRKAAV   | 12091 | 11768 |
| >CTNNB1-E1 EPDRKAAV   | 880   | >CTNNB1-E1 KPDRKAAV   | 32    | 848   |
| >CTNNB1-E1 EPDRKAAVST | 83    | >CTNNB1-E1 KPDRKAAVST | 254   | 171   |
| >CTNNB1-E1 EPDRKAAVST | 15788 | >CTNNB1-E1 KPDRKAAVST | 413   | 15375 |
| >CTNNB1-E1 EPDRKAAVST | 13    | >CTNNB1-E1 KPDRKAAVST | 18    | 5     |
| >CTNNB1-E1 MEPDRKAAV  | 112   | >CTNNB1-E1 MKPDRKAAV  | 8999  | 8887  |
| >CTNNB1-E1 MEPDRKAAV  | 196   | >CTNNB1-E1 MKPDRKAAV  | 26750 | 26554 |
| >CTNNB1-E1 AMEPDRKAA  | 855   | >CTNNB1-E1 AMKPDRKAA  | 478   | 377   |
| >CTNNB1-E1 AMEPDRKAA  | 5938  | >CTNNB1-E1 AMKPDRKAA  | 330   | 5608  |
| >CTNNB1-E1 AMEPDRKAA  | 346   | >CTNNB1-E1 AMKPDRKAA  | 87    | 259   |
| >CTNNB1-E1 AMEPDRKAA  | 46    | >CTNNB1-E1 AMKPDRKAA  | 88    | 42    |
| >CTNNB1-E1 AMEPDRKAA  | 71    | >CTNNB1-E1 AMKPDRKAA  | 138   | 67    |
| >CTNNB1-E1 AMEPDRKA   | 304   | >CTNNB1-E1 AMKPDRKA   | 369   | 65    |
| >CTNNB1-E1 AMEPDRKAA  | 241   | >CTNNB1-E1 AMKPDRKAA  | 315   | 74    |
| >CTNNB1-E1 AMEPDRKAA  | 3     | >CTNNB1-E1 AMKPDRKAA  | 3     | 0     |
| >CTNNB1-E1 AMEPDRKAA  | 12156 | >CTNNB1-E1 AMKPDRKAA  | 333   | 11823 |
| >CTNNB1-E1 AMEPDRKAA  | 11698 | >CTNNB1-E1 AMKPDRKAA  | 320   | 11378 |
| >CTNNB1-E1 AMEPDRKAA  | 4806  | >CTNNB1-E1 AMKPDRKAA  | 456   | 4350  |
| >CTNNB1-E1 AMEPDRKAA  | 3348  | >CTNNB1-E1 AMKPDRKAA  | 252   | 3096  |
| >CTNNB1-E1 MAMEPDRK/  | 299   | >CTNNB1-E1 MAMKPDRK/  | 1481  | 1182  |
| >CTNNB1-E1 MAMEPDRK/  | 258   | >CTNNB1-E1 MAMKPDRK/  | 693   | 435   |
| >CTNNB1-E1 MAMEPDRK/  | 165   | >CTNNB1-E1 MAMKPDRK/  | 582   | 417   |
| >CTNNB1-E1 MAMEPDRK/  | 45    | >CTNNB1-E1 MAMKPDRK/  | 167   | 122   |
| >CTNNB1-E1 MAMEPDRK/  | 35    | >CTNNB1-E1 MAMKPDRK/  | 351   | 316   |
| >CTNNB1-E1 MAMEPDRK/  | 453   | >CTNNB1-E1 MAMKPDRK/  | 2743  | 2290  |
| >CTNNB1-E1 MAMEPDRK/  | 76    | >CTNNB1-E1 MAMKPDRK/  | 439   | 363   |
| >CTNNB1-E1 MAMEPDRK   | 62    | >CTNNB1-E1 MAMKPDRK   | 64    | 2     |
| >CTNNB1-E1 MAMEPDRK   | 45    | >CTNNB1-E1 MAMKPDRK   | 64    | 19    |
| >CTNNB1-E1 MAMEPDRK/  | 108   | >CTNNB1-E1 MAMKPDRK/  | 458   | 350   |
| >CTNNB1-E1 MAMEPDRK/  | 7     | >CTNNB1-E1 MAMKPDRK/  | 12    | 5     |
| >CTNNB1-E1 MAMEPDRK/  | 24    | >CTNNB1-E1 MAMKPDRK/  | 97    | 73    |
| >CTNNB1-E1 MAMEPDRK/  | 667   | >CTNNB1-E1 MAMKPDRK/  | 395   | 272   |
| >CTNNB1-E1 MAMEPDRK/  | 372   | >CTNNB1-E1 MAMKPDRK/  | 955   | 583   |
| >CTNNB1-E1 MAMEPDRK/  | 285   | >CTNNB1-E1 MAMKPDRK/  | 297   | 12    |
| >CTNNB1-E1 DMAMEPDR   | 291   | >CTNNB1-E1 DMAMKPDR   | 137   | 154   |
| >CTNNB1-E1 DMAMEPDR   | 128   | >CTNNB1-E1 DMAMKPDR   | 189   | 61    |
| >CTNNB1-E1 MELDMAME   | 385   | >CTNNB1-E1 MELDMAMK   | 231   | 154   |

|                       |       |                       |       |       |
|-----------------------|-------|-----------------------|-------|-------|
| >CTNNB1-E1.MELDMAME   | 395   | >CTNNB1-E1.MELDMAMK   | 383   | 12    |
| >CTNNB1-E1.MELDMAME   | 525   | >CTNNB1-E1.MELDMAMK   | 376   | 149   |
| >CTNNB1-E1.DLMELDMAN  | 34701 | >CTNNB1-E1.DLMELDMAN  | 461   | 34240 |
| >CTNNB1-E1.DLMELDMAN  | 22071 | >CTNNB1-E1.DLMELDMAN  | 40    | 22031 |
| >CTNNB1-E5.EEEDVDTSQ\ | 178   | >CTNNB1-E5.KEEDVDTSQ\ | 366   | 188   |
| >CTNNB1-E5.EEEDVDTSQ\ | 50    | >CTNNB1-E5.KEEDVDTSQ\ | 12    | 38    |
| >CTNNB1-E5.EEEDVDTSQ\ | 1960  | >CTNNB1-E5.KEEDVDTSQ\ | 284   | 1676  |
| >CTNNB1-E5.EEEDVDTSQ\ | 445   | >CTNNB1-E5.KEEDVDTSQ\ | 1147  | 702   |
| >CTNNB1-E5.EEEDVDTSQ\ | 3147  | >CTNNB1-E5.KEEDVDTSQ\ | 285   | 2862  |
| >CTNNB1-E5.EEEDVDTSQ\ | 4019  | >CTNNB1-E5.KEEDVDTSQ\ | 215   | 3804  |
| >CTNNB1-E5.PEEEDVDTSC | 368   | >CTNNB1-E5.PKEEDVDTSC | 29167 | 28799 |
| >CTNNB1-E5.NPEEEDVDTS | 474   | >CTNNB1-E5.NPKEEDVDTS | 2008  | 1534  |
| >CTNNB1-E5.LSGKGNPE   | 28675 | >CTNNB1-E5.LSGKGNPK   | 395   | 28280 |
| >CTNNB1-E5.SLSGKGNPE  | 21055 | >CTNNB1-E5.SLSGKGNPK  | 141   | 20914 |
| >CTNNB1-E5.SLSGKGNPE  | 24718 | >CTNNB1-E5.SLSGKGNPK  | 78    | 24640 |
| >CTNNB1-E5.EEDVDTSQV  | 208   | >CTNNB1-E5.GEDVDTSQV  | 491   | 283   |
| >CTNNB1-E5.EEDVDTSQVL | 274   | >CTNNB1-E5.GEDVDTSQVL | 1212  | 938   |
| >CTNNB1-E5.EEDVDTSQVL | 601   | >CTNNB1-E5.GEDVDTSQVL | 459   | 142   |
| >CTNNB1-E5.EEDVDTSQVL | 1017  | >CTNNB1-E5.GEDVDTSQVL | 450   | 567   |
| >CTNNB1-E5.EEDVDTSQVL | 476   | >CTNNB1-E5.GEDVDTSQVL | 864   | 388   |
| >CTNNB1-E5.EEDVDTSQV  | 464   | >CTNNB1-E5.GEDVDTSQV  | 18    | 446   |
| >CTNNB1-E5.EEDVDTSQVL | 677   | >CTNNB1-E5.GEDVDTSQVL | 146   | 531   |
| >CTNNB1-E5.EEEDVDTSQ\ | 178   | >CTNNB1-E5.EGEDVDTSQ\ | 18050 | 17872 |
| >CTNNB1-E5.EEEDVDTSQ\ | 50    | >CTNNB1-E5.EGEDVDTSQ\ | 18862 | 18812 |
| >CTNNB1-E5.EEEDVDTSQ\ | 445   | >CTNNB1-E5.EGEDVDTSQ\ | 28172 | 27727 |
| >CTNNB1-E5.PEEEDVDTSC | 368   | >CTNNB1-E5.PEGEDVDTSC | 500   | 132   |
| >CTNNB1-E5.NPEEEDVDTS | 474   | >CTNNB1-E5.NPEGEDVDTS | 705   | 231   |
| >CTNNB1-E5.EEDVDTSQV  | 208   | >CTNNB1-E5.KEDVDTSQV  | 488   | 280   |
| >CTNNB1-E5.EEDVDTSQVL | 274   | >CTNNB1-E5.KEDVDTSQVL | 1020  | 746   |
| >CTNNB1-E5.EEDVDTSQVL | 601   | >CTNNB1-E5.KEDVDTSQVL | 284   | 317   |
| >CTNNB1-E5.EEDVDTSQVL | 476   | >CTNNB1-E5.KEDVDTSQVL | 1088  | 612   |
| >CTNNB1-E5.EEDVDTSQV  | 464   | >CTNNB1-E5.KEDVDTSQV  | 24    | 440   |
| >CTNNB1-E5.EEDVDTSQVL | 677   | >CTNNB1-E5.KEDVDTSQVL | 65    | 612   |
| >CTNNB1-E5.EEEDVDTSQ\ | 178   | >CTNNB1-E5.EKEDVDTSQ\ | 8937  | 8759  |
| >CTNNB1-E5.EEEDVDTSQ\ | 636   | >CTNNB1-E5.EKEDVDTSQ\ | 244   | 392   |
| >CTNNB1-E5.EEEDVDTSQ\ | 50    | >CTNNB1-E5.EKEDVDTSQ\ | 13270 | 13220 |
| >CTNNB1-E5.EEEDVDTSQ\ | 445   | >CTNNB1-E5.EKEDVDTSQ\ | 17492 | 17047 |
| >CTNNB1-E5.PEEEDVDTSC | 368   | >CTNNB1-E5.PEKEDVDTSC | 126   | 242   |
| >CTNNB1-E5.NPEEEDVDTS | 474   | >CTNNB1-E5.NPEKEDVDTS | 1167  | 693   |
| >CTNNB1-E5.SGKGNPEE   | 11552 | >CTNNB1-E5.SGKGNPEK   | 68    | 11484 |
| >CTNNB1-E5.SLSGKGNPEE | 20309 | >CTNNB1-E5.SLSGKGNPEK | 85    | 20224 |
| >CTNNB1-E5.SLSGKGNPEE | 31782 | >CTNNB1-E5.SLSGKGNPEK | 65    | 31717 |
| >CTNNB1-E5.EDVDTSQV   | 205   | >CTNNB1-E5.GDVDTSQV   | 175   | 30    |

|                         |       |                         |       |       |
|-------------------------|-------|-------------------------|-------|-------|
| >CTNNB1-E5.EEDVDTSQV    | 208   | >CTNNB1-E5.EGDVDTSQV    | 22899 | 22691 |
| >CTNNB1-E5.EEDVDTSQVL   | 274   | >CTNNB1-E5.EGDVDTSQVI   | 3666  | 3392  |
| >CTNNB1-E5.EEDVDTSQVLI  | 476   | >CTNNB1-E5.EGDVDTSQVLI  | 36208 | 35732 |
| >CTNNB1-E5.EEDVDTSQVLI  | 464   | >CTNNB1-E5.EGDVDTSQVLI  | 37811 | 37347 |
| >CTNNB1-E5.EEEDVDTSQV   | 178   | >CTNNB1-E5.EEGDVDTSQV   | 294   | 116   |
| >CTNNB1-E5.EEEDVDTSQVLI | 50    | >CTNNB1-E5.EEGDVDTSQVLI | 331   | 281   |
| >CTNNB1-E5.EEEDVDTSQVLI | 839   | >CTNNB1-E5.EEGDVDTSQVLI | 432   | 407   |
| >CTNNB1-E5.EEEDVDTSQVLI | 445   | >CTNNB1-E5.EEGDVDTSQVLI | 2126  | 1681  |
| >CTNNB1-E5.PEEEDVDTSQV  | 368   | >CTNNB1-E5.PEEGDVDTSQV  | 1300  | 932   |
| >CTNNB1-E5.NPEEEDVDTSQV | 474   | >CTNNB1-E5.NPEEGDVDTSQV | 425   | 49    |
| >CTNNB1-E5.EDVDTSQV     | 205   | >CTNNB1-E5.KDVDTSQV     | 126   | 79    |
| >CTNNB1-E5.EEDVDTSQV    | 208   | >CTNNB1-E5.EKDVDTSQV    | 11902 | 11694 |
| >CTNNB1-E5.EEDVDTSQVLI  | 274   | >CTNNB1-E5.EKDVDTSQVLI  | 100   | 174   |
| >CTNNB1-E5.EEDVDTSQVLI  | 476   | >CTNNB1-E5.EKDVDTSQVLI  | 22177 | 21701 |
| >CTNNB1-E5.EEDVDTSQVLI  | 464   | >CTNNB1-E5.EKDVDTSQVLI  | 30139 | 29675 |
| >CTNNB1-E5.SLSGKGNPEE   | 21739 | >CTNNB1-E5.SLSGKGNPEE   | 469   | 21270 |
| >CTNNB1-E5.SLSGKGNPEE   | 26024 | >CTNNB1-E5.SLSGKGNPEE   | 140   | 25884 |
| >CTNNB1-E5.EEEDVDTSQV   | 178   | >CTNNB1-E5.EEKDVDTSQV   | 266   | 88    |
| >CTNNB1-E5.EEEDVDTSQVLI | 50    | >CTNNB1-E5.EEKDVDTSQVLI | 298   | 248   |
| >CTNNB1-E5.EEEDVDTSQVLI | 1960  | >CTNNB1-E5.EEKDVDTSQVLI | 395   | 1565  |
| >CTNNB1-E5.EEEDVDTSQVLI | 445   | >CTNNB1-E5.EEKDVDTSQVLI | 1897  | 1452  |
| >CTNNB1-E5.PEEEDVDTSQV  | 368   | >CTNNB1-E5.PEEKDVDTSQV  | 486   | 118   |
| >CTNNB1-E5.NPEEEDVDTSQV | 474   | >CTNNB1-E5.NPEEKDVDTSQV | 1238  | 764   |
| >CTNNB1-E6.EQGFSQSF     | 4943  | >CTNNB1-E6.KQGFSQSF     | 120   | 4823  |
| >CTNNB1-E6.EQGFSQSF     | 74    | >CTNNB1-E6.KQGFSQSF     | 38    | 36    |
| >CTNNB1-E6.EQGFSQSF     | 24    | >CTNNB1-E6.KQGFSQSF     | 4     | 20    |
| >CTNNB1-E6.WEQGFSQSF    | 467   | >CTNNB1-E6.WKQGFSQSF    | 14795 | 14328 |
| >CTNNB1-E6.WEQGFSQSF    | 114   | >CTNNB1-E6.WKQGFSQSF    | 1139  | 1025  |
| >CTNNB1-E6.WEQGFSQSF    | 129   | >CTNNB1-E6.WKQGFSQSF    | 224   | 95    |
| >CTNNB1-E6.WEQGFSQSF    | 62    | >CTNNB1-E6.WKQGFSQSF    | 5     | 57    |
| >CTNNB1-E6.WEQGFSQSF    | 5     | >CTNNB1-E6.WKQGFSQSF    | 1421  | 1416  |
| >CTNNB1-E6.WEQGFSQSF    | 43    | >CTNNB1-E6.WKQGFSQSF    | 14839 | 14796 |
| >CTNNB1-E6.WEQGFSQSF    | 73    | >CTNNB1-E6.WKQGFSQSF    | 15266 | 15193 |
| >CTNNB1-E6.WEQGFSQSF    | 77    | >CTNNB1-E6.WKQGFSQSF    | 14140 | 14063 |
| >CTNNB1-E6.WEQGFSQSF    | 220   | >CTNNB1-E6.WKQGFSQSF    | 12479 | 12259 |
| >CTNNB1-E6.WEQGFSQSF    | 213   | >CTNNB1-E6.WKQGFSQSF    | 20823 | 20610 |
| >CTNNB1-E6.WEQGFSQSF    | 105   | >CTNNB1-E6.WKQGFSQSF    | 21299 | 21194 |
| >CTNNB1-E6.WEQGFSQSF    | 47    | >CTNNB1-E6.WKQGFSQSF    | 15567 | 15520 |
| >CTNNB1-E6.EWEQGFSQS    | 261   | >CTNNB1-E6.EWKQGFSQS    | 129   | 132   |
| >CTNNB1-E6.EWEQGFSQS    | 525   | >CTNNB1-E6.EWKQGFSQS    | 151   | 374   |
| >CTNNB1-E6.EWEQGFSQS    | 91    | >CTNNB1-E6.EWKQGFSQS    | 52    | 39    |
| >CTNNB1-E6.EWEQGFSQS    | 305   | >CTNNB1-E6.EWKQGFSQS    | 427   | 122   |
| >CTNNB1-E6.YEWKQGFSS    | 98    | >CTNNB1-E6.YEWKQGFSS    | 82    | 16    |

|                       |       |                       |      |       |
|-----------------------|-------|-----------------------|------|-------|
| >CTNNB1-E6 YEWEQGFSSQ | 100   | >CTNNB1-E6 YEWKQGFSSQ | 153  | 53    |
| >CTNNB1-E6 YEWEQGFSSQ | 128   | >CTNNB1-E6 YEWKQGFSSQ | 115  | 13    |
| >CTNNB1-E6 YEWEQGFSSQ | 98    | >CTNNB1-E6 YEWKQGFSSQ | 138  | 40    |
| >CTNNB1-E6 YEWEQGFSSQ | 6     | >CTNNB1-E6 YEWKQGFSSQ | 5    | 1     |
| >CTNNB1-E6 YEWEQGFSSQ | 15    | >CTNNB1-E6 YEWKQGFSSQ | 43   | 28    |
| >CTNNB1-E6 YEWEQGFSSQ | 4     | >CTNNB1-E6 YEWKQGFSSQ | 5    | 1     |
| >CTNNB1-E6 YEWEQGFSSQ | 63    | >CTNNB1-E6 YEWKQGFSSQ | 172  | 109   |
| >CTNNB1-E6 YEWEQGFSSQ | 109   | >CTNNB1-E6 YEWKQGFSSQ | 179  | 70    |
| >CTNNB1-E6 YEWEQGFSSQ | 423   | >CTNNB1-E6 YEWKQGFSSQ | 584  | 161   |
| >CTNNB1-E6 YEWEQGFSSQ | 613   | >CTNNB1-E6 YEWKQGFSSQ | 459  | 154   |
| >CTNNB1-E6 YEWEQGFSSQ | 63    | >CTNNB1-E6 YEWKQGFSSQ | 73   | 10    |
| >CTNNB1-E6 YEWEQGFSSQ | 209   | >CTNNB1-E6 YEWKQGFSSQ | 221  | 12    |
| >CTNNB1-E6 YEWEQGFSSQ | 82    | >CTNNB1-E6 YEWKQGFSSQ | 130  | 48    |
| >CTNNB1-E6 YEWEQGFSSQ | 30    | >CTNNB1-E6 YEWKQGFSSQ | 47   | 17    |
| >CTNNB1-E6 LYEWKQGF   | 328   | >CTNNB1-E6 LYEWKQGF   | 506  | 178   |
| >CTNNB1-E6 LYEWKQGF   | 16    | >CTNNB1-E6 LYEWKQGF   | 23   | 7     |
| >CTNNB1-E6 VLYEWKQGF  | 90    | >CTNNB1-E6 VLYEWKQGF  | 92   | 2     |
| >CTNNB1-E6 VLYEWKQGF  | 293   | >CTNNB1-E6 VLYEWKQGF  | 462  | 169   |
| >CTNNB1-E6 VLYEWKQGF  | 22    | >CTNNB1-E6 VLYEWKQGF  | 53   | 31    |
| >CTNNB1-E6 VLYEWKQGF  | 4     | >CTNNB1-E6 VLYEWKQGF  | 4    | 0     |
| >CTNNB1-E6 VLYEWKQGF! | 14    | >CTNNB1-E6 VLYEWKQGF! | 14   | 0     |
| >CTNNB1-E6 VLYEWKQGF! | 6     | >CTNNB1-E6 VLYEWKQGF! | 10   | 4     |
| >CTNNB1-E6 VLYEWKQGF  | 222   | >CTNNB1-E6 VLYEWKQGF  | 408  | 186   |
| >CTNNB1-E6 VLYEWKQGF! | 128   | >CTNNB1-E6 VLYEWKQGF! | 294  | 166   |
| >CTNNB1-E6 VLYEWKQGF  | 432   | >CTNNB1-E6 VLYEWKQGF  | 1180 | 748   |
| >CTNNB1-E6 VLYEWKQGF  | 125   | >CTNNB1-E6 VLYEWKQGF  | 336  | 211   |
| >CTNNB1-E6 VLYEWKQGF! | 129   | >CTNNB1-E6 VLYEWKQGF! | 199  | 70    |
| >CTNNB1-E6 VLYEWKQGF! | 20    | >CTNNB1-E6 VLYEWKQGF! | 37   | 17    |
| >CTNNB1-E6 VLYEWKQGF  | 193   | >CTNNB1-E6 VLYEWKQGF  | 412  | 219   |
| >CTNNB1-E6 VLYEWKQGF  | 13    | >CTNNB1-E6 VLYEWKQGF  | 15   | 2     |
| >CTNNB1-E6 VLYEWKQGF! | 71    | >CTNNB1-E6 VLYEWKQGF! | 83   | 12    |
| >CTNNB1-E6 VLYEWKQGF! | 4     | >CTNNB1-E6 VLYEWKQGF! | 6    | 2     |
| >CTNNB1-E6 VLYEWKQGF  | 153   | >CTNNB1-E6 VLYEWKQGF  | 118  | 35    |
| >CTNNB1-E6 VLYEWKQGF  | 146   | >CTNNB1-E6 VLYEWKQGF  | 91   | 55    |
| >CTNNB1-E6 VLYEWKQGF  | 50    | >CTNNB1-E6 VLYEWKQGF  | 70   | 20    |
| >CTNNB1-E6 VLYEWKQGF  | 63    | >CTNNB1-E6 VLYEWKQGF  | 82   | 19    |
| >CTNNB1-E6 QVLYEWKQGF | 151   | >CTNNB1-E6 QVLYEWKQGF | 328  | 177   |
| >CTNNB1-E6 QVLYEWKQGF | 492   | >CTNNB1-E6 QVLYEWKQGF | 402  | 90    |
| >CTNNB1-E6 SQVLYEWKQ  | 185   | >CTNNB1-E6 SQVLYEWKQ  | 274  | 89    |
| >CTNNB1-E6 SQVLYEWK   | 27085 | >CTNNB1-E6 SQVLYEWK   | 120  | 26965 |
| >CTNNB1-E6 SQVLYEWKQ  | 272   | >CTNNB1-E6 SQVLYEWKQ  | 309  | 37    |
| >CTNNB1-E6 SQVLYEWKQ  | 24    | >CTNNB1-E6 SQVLYEWKQ  | 33   | 9     |
| >CTNNB1-E6 TSQVLYEWK  | 22597 | >CTNNB1-E6 TSQVLYEWK  | 36   | 22561 |

|                        |       |                        |     |       |
|------------------------|-------|------------------------|-----|-------|
| >CTNNB1-E6 TSQVLYEWE   | 15593 | >CTNNB1-E6 TSQVLYEWK   | 425 | 15168 |
| >CTNNB1-E6 TSQVLYEWE   | 19307 | >CTNNB1-E6 TSQVLYEWK   | 156 | 19151 |
| >CTNNB1-E6 TSQVLYEWE   | 8424  | >CTNNB1-E6 TSQVLYEWK   | 233 | 8191  |
| >CTNNB1-E6 DTSQVLYEWI  | 30391 | >CTNNB1-E6 DTSQVLYEWI  | 41  | 30350 |
| >CTNNB1-E6 DTSQVLYEWI  | 15054 | >CTNNB1-E6 DTSQVLYEWI  | 12  | 15042 |
| >CTNNB1-E6 DTSQVLYEWI  | 285   | >CTNNB1-E6 DTSQVLYEWI  | 394 | 109   |
| >CTNNB1-E6 DTSQVLYEWI  | 11107 | >CTNNB1-E6 DTSQVLYEWI  | 347 | 10760 |
| >CTNNB1-G2 GSPVDSVLFY  | 314   | >CTNNB1-G2 ASPVDSVLFY  | 156 | 158   |
| >CTNNB1-G2 GSPVDSVLFY  | 231   | >CTNNB1-G2 ASPVDSVLFY  | 85  | 146   |
| >CTNNB1-G2 GSPVDSVLFY  | 3861  | >CTNNB1-G2 ASPVDSVLFY  | 379 | 3482  |
| >CTNNB1-G2 GSPVDSVLFY  | 102   | >CTNNB1-G2 ASPVDSVLFY  | 76  | 26    |
| >CTNNB1-G2 GSPVDSVLFY  | 317   | >CTNNB1-G2 ASPVDSVLFY  | 156 | 161   |
| >CTNNB1-G2 GSPVDSVLF   | 1845  | >CTNNB1-G2 ASPVDSVLF   | 433 | 1412  |
| >CTNNB1-G2 GSPVDSVLF   | 955   | >CTNNB1-G2 ASPVDSVLF   | 154 | 801   |
| >CTNNB1-G2 GSPVDSVLFY  | 253   | >CTNNB1-G2 ASPVDSVLFY  | 58  | 195   |
| >CTNNB1-G2 GSPVDSVL    | 146   | >CTNNB1-G2 ASPVDSVL    | 37  | 109   |
| >CTNNB1-G2 GSPVDSVLF   | 12    | >CTNNB1-G2 ASPVDSVLF   | 6   | 6     |
| >CTNNB1-G2 GSPVDSVLFY  | 270   | >CTNNB1-G2 ASPVDSVLFY  | 114 | 156   |
| >CTNNB1-G2 GSPVDSVLFY  | 232   | >CTNNB1-G2 ASPVDSVLFY  | 90  | 142   |
| >CTNNB1-G2 GSPVDSVLFY  | 124   | >CTNNB1-G2 ASPVDSVLFY  | 96  | 28    |
| >CTNNB1-G2 LGSPVDSVLF' | 2562  | >CTNNB1-G2 LASPVDSVLF' | 230 | 2332  |
| >CTNNB1-G2 LGSPVDSV    | 689   | >CTNNB1-G2 LASPVDSV    | 173 | 516   |
| >CTNNB1-G2 LGSPVDSV    | 6975  | >CTNNB1-G2 LASPVDSV    | 457 | 6518  |
| >CTNNB1-G2 LGSPVDSV    | 2460  | >CTNNB1-G2 LASPVDSV    | 225 | 2235  |
| >CTNNB1-G2 LGSPVDSV    | 4499  | >CTNNB1-G2 LASPVDSV    | 409 | 4090  |
| >CTNNB1-G2 LGSPVDSV    | 3766  | >CTNNB1-G2 LASPVDSV    | 103 | 3663  |
| >CTNNB1-G2 LGSPVDSVLF' | 162   | >CTNNB1-G2 LASPVDSVLF' | 51  | 111   |
| >CTNNB1-G2 LGSPVDSVLF' | 101   | >CTNNB1-G2 LASPVDSVLF' | 86  | 15    |
| >CTNNB1-G2 LGSPVDSVLF' | 7388  | >CTNNB1-G2 LASPVDSVLF' | 444 | 6944  |
| >CTNNB1-G2 LGSPVDSV    | 1377  | >CTNNB1-G2 LASPVDSV    | 73  | 1304  |
| >CTNNB1-G2 LGSPVDSVLF' | 852   | >CTNNB1-G2 LASPVDSVLF' | 269 | 583   |
| >CTNNB1-G2 LGSPVDSVLF  | 540   | >CTNNB1-G2 LASPVDSVLF  | 206 | 334   |
| >CTNNB1-G2 LGSPVDSVLF' | 170   | >CTNNB1-G2 LASPVDSVLF' | 88  | 82    |
| >CTNNB1-G2 LGSPVDSVLF  | 814   | >CTNNB1-G2 LASPVDSVLF  | 132 | 682   |
| >CTNNB1-G2 LGSPVDSVLF' | 2088  | >CTNNB1-G2 LASPVDSVLF' | 346 | 1742  |
| >CTNNB1-G2 LGSPVDSVL   | 5531  | >CTNNB1-G2 LASPVDSVL   | 150 | 5381  |
| >CTNNB1-G2 LGSPVDSVLF  | 1180  | >CTNNB1-G2 LASPVDSVLF  | 18  | 1162  |
| >CTNNB1-G2 LGSPVDSVLF' | 261   | >CTNNB1-G2 LASPVDSVLF' | 9   | 252   |
| >CTNNB1-G2 LGSPVDSVL   | 1227  | >CTNNB1-G2 LASPVDSVL   | 105 | 1122  |
| >CTNNB1-G2 LGSPVDSVLF' | 252   | >CTNNB1-G2 LASPVDSVLF' | 25  | 227   |
| >CTNNB1-G2 LGSPVDSVLF' | 6221  | >CTNNB1-G2 LASPVDSVLF' | 244 | 5977  |
| >CTNNB1-G2 LGSPVDSVLF  | 4723  | >CTNNB1-G2 LASPVDSVLF  | 298 | 4425  |
| >CTNNB1-G2 LGSPVDSVLF' | 4585  | >CTNNB1-G2 LASPVDSVLF' | 259 | 4326  |

|                        |      |                        |     |      |
|------------------------|------|------------------------|-----|------|
| >CTNNB1-G2 LGSPVDSVL   | 2816 | >CTNNB1-G2 LASPVDSVL   | 67  | 2749 |
| >CTNNB1-G2 LGSPVDSVLF  | 255  | >CTNNB1-G2 LASPVDSVLF  | 21  | 234  |
| >CTNNB1-G2 LGSPVDSVLF' | 194  | >CTNNB1-G2 LASPVDSVLF' | 19  | 175  |
| >CTNNB1-G2 LGSPVDSVL   | 101  | >CTNNB1-G2 LASPVDSVL   | 64  | 37   |
| >CTNNB1-G2 LGSPVDSVLF  | 60   | >CTNNB1-G2 LASPVDSVLF  | 81  | 21   |
| >CTNNB1-G2 LGSPVDSVLF' | 131  | >CTNNB1-G2 LASPVDSVLF' | 85  | 46   |
| >CTNNB1-G2 LGSPVDSVLF' | 4069 | >CTNNB1-G2 LASPVDSVLF' | 366 | 3703 |
| >CTNNB1-G2 LGSPVDSVL   | 624  | >CTNNB1-G2 LASPVDSVL   | 108 | 516  |
| >CTNNB1-G2 MLGSPVDSV   | 38   | >CTNNB1-G2 MLASPVDSV   | 13  | 25   |
| >CTNNB1-G2 MLGSPVDSVI  | 520  | >CTNNB1-G2 MLASPVDSVI  | 313 | 207  |
| >CTNNB1-G2 MLGSPVDSV   | 7    | >CTNNB1-G2 MLASPVDSV   | 2   | 5    |
| >CTNNB1-G2 MLGSPVDSVI  | 19   | >CTNNB1-G2 MLASPVDSVI  | 10  | 9    |
| >CTNNB1-G2 MLGSPVDSVI  | 512  | >CTNNB1-G2 MLASPVDSVI  | 34  | 478  |
| >CTNNB1-G2 MLGSPVDSV   | 6    | >CTNNB1-G2 MLASPVDSV   | 2   | 4    |
| >CTNNB1-G2 MLGSPVDSVI  | 113  | >CTNNB1-G2 MLASPVDSVI  | 57  | 56   |
| >CTNNB1-G2 MLGSPVDSV   | 89   | >CTNNB1-G2 MLASPVDSV   | 14  | 75   |
| >CTNNB1-G2 MLGSPVDSV   | 2    | >CTNNB1-G2 MLASPVDSV   | 2   | 0    |
| >CTNNB1-G2 MLGSPVDSVI  | 9    | >CTNNB1-G2 MLASPVDSVI  | 9   | 0    |
| >CTNNB1-G2 MLGSPVDSV   | 4    | >CTNNB1-G2 MLASPVDSV   | 5   | 1    |
| >CTNNB1-G2 MLGSPVDSVI  | 36   | >CTNNB1-G2 MLASPVDSVI  | 41  | 5    |
| >CTNNB1-G2 MLGSPVDSV   | 8    | >CTNNB1-G2 MLASPVDSV   | 6   | 2    |
| >CTNNB1-G2 MLGSPVDSVI  | 51   | >CTNNB1-G2 MLASPVDSVI  | 25  | 26   |
| >CTNNB1-G2 MLGSPVDSV   | 2    | >CTNNB1-G2 MLASPVDSV   | 2   | 0    |
| >CTNNB1-G2 MLGSPVDSVI  | 61   | >CTNNB1-G2 MLASPVDSVI  | 28  | 33   |
| >CTNNB1-G2 MLGSPVDSV   | 2    | >CTNNB1-G2 MLASPVDSV   | 2   | 0    |
| >CTNNB1-G2 MLGSPVDSVI  | 6    | >CTNNB1-G2 MLASPVDSVI  | 4   | 2    |
| >CTNNB1-G2 MLGSPVDSVI  | 944  | >CTNNB1-G2 MLASPVDSVI  | 366 | 578  |
| >CTNNB1-G2 MLGSPVDSVI  | 613  | >CTNNB1-G2 MLASPVDSVI  | 438 | 175  |
| >CTNNB1-G2 MLGSPVDSV   | 165  | >CTNNB1-G2 MLASPVDSV   | 13  | 152  |
| >CTNNB1-G2 MLGSPVDSV   | 224  | >CTNNB1-G2 MLASPVDSV   | 34  | 190  |
| >CTNNB1-G2 MLGSPVDSVI  | 502  | >CTNNB1-G2 MLASPVDSVI  | 265 | 237  |
| >CTNNB1-G2 MLGSPVDSVI  | 131  | >CTNNB1-G2 MLASPVDSVI  | 82  | 49   |
| >CTNNB1-G2 MLGSPVDSVI  | 580  | >CTNNB1-G2 MLASPVDSVI  | 156 | 424  |
| >CTNNB1-G2 MLGSPVDSVI  | 1425 | >CTNNB1-G2 MLASPVDSVI  | 276 | 1149 |
| >CTNNB1-G2 MLGSPVDSVI  | 79   | >CTNNB1-G2 MLASPVDSVI  | 16  | 63   |
| >CTNNB1-G2 MLGSPVDSVI  | 1611 | >CTNNB1-G2 MLASPVDSVI  | 223 | 1388 |
| >CTNNB1-G2 MLGSPVDSVI  | 5868 | >CTNNB1-G2 MLASPVDSVI  | 435 | 5433 |
| >CTNNB1-G2 MLGSPVDSVI  | 1278 | >CTNNB1-G2 MLASPVDSVI  | 308 | 970  |
| >CTNNB1-G2 KMLGSPVDS\  | 1488 | >CTNNB1-G2 KMLASPVDS\  | 293 | 1195 |
| >CTNNB1-G2 KMLGSPVDS\  | 16   | >CTNNB1-G2 KMLASPVDS\  | 17  | 1    |
| >CTNNB1-G2 KMLGSPVDS\  | 74   | >CTNNB1-G2 KMLASPVDS\  | 49  | 25   |
| >CTNNB1-G2 KMLGSPVDS\  | 16   | >CTNNB1-G2 KMLASPVDS\  | 16  | 0    |
| >CTNNB1-G2 KMLGSPVDS\  | 261  | >CTNNB1-G2 KMLASPVDS\  | 192 | 69   |



|                       |      |                       |     |      |
|-----------------------|------|-----------------------|-----|------|
| >CTNNB1-G2 KMLGSPVDS\ | 15   | >CTNNB1-G2 KMLASPVDS\ | 13  | 2    |
| >CTNNB1-G2 KMLGSPVDS\ | 276  | >CTNNB1-G2 KMLASPVDS\ | 168 | 108  |
| >CTNNB1-G2 KMLGSPVDS\ | 43   | >CTNNB1-G2 KMLASPVDS\ | 52  | 9    |
| >CTNNB1-G2 KMLGSPVDS\ | 301  | >CTNNB1-G2 KMLASPVDS\ | 204 | 97   |
| >CTNNB1-G2 KMLGSPVDS\ | 2    | >CTNNB1-G2 KMLASPVDS\ | 2   | 0    |
| >CTNNB1-G2 KMLGSPVDS\ | 6    | >CTNNB1-G2 KMLASPVDS\ | 7   | 1    |
| >CTNNB1-G2 KMLGSPVDS\ | 3    | >CTNNB1-G2 KMLASPVDS\ | 3   | 0    |
| >CTNNB1-G2 KMLGSPVDS\ | 10   | >CTNNB1-G2 KMLASPVDS\ | 9   | 1    |
| >CTNNB1-G2 KMLGSPVDS\ | 5    | >CTNNB1-G2 KMLASPVDS\ | 5   | 0    |
| >CTNNB1-G2 KMLGSPVDS\ | 10   | >CTNNB1-G2 KMLASPVDS\ | 12  | 2    |
| >CTNNB1-G2 KMLGSPVDS\ | 3    | >CTNNB1-G2 KMLASPVDS\ | 3   | 0    |
| >CTNNB1-G2 KMLGSPVDS\ | 26   | >CTNNB1-G2 KMLASPVDS\ | 45  | 19   |
| >CTNNB1-G2 KMLGSPVDS\ | 3    | >CTNNB1-G2 KMLASPVDS\ | 4   | 1    |
| >CTNNB1-G2 KMLGSPVDS\ | 14   | >CTNNB1-G2 KMLASPVDS\ | 28  | 14   |
| >CTNNB1-G2 KMLGSPVDS\ | 54   | >CTNNB1-G2 KMLASPVDS\ | 85  | 31   |
| >CTNNB1-G2 KMLGSPVDS\ | 50   | >CTNNB1-G2 KMLASPVDS\ | 86  | 36   |
| >CTNNB1-G2 KMLGSPVDS\ | 705  | >CTNNB1-G2 KMLASPVDS\ | 373 | 332  |
| >CTNNB1-G2 KMLGSPVDS  | 2081 | >CTNNB1-G2 KMLASPVDS  | 309 | 1772 |
| >CTNNB1-G2 KMLGSPVDS\ | 94   | >CTNNB1-G2 KMLASPVDS\ | 26  | 68   |
| >CTNNB1-G2 KMLGSPVDS\ | 49   | >CTNNB1-G2 KMLASPVDS\ | 18  | 31   |
| >CTNNB1-G2 KMLGSPVDS\ | 261  | >CTNNB1-G2 KMLASPVDS\ | 253 | 8    |
| >CTNNB1-G2 KMLGSPVDS\ | 377  | >CTNNB1-G2 KMLASPVDS\ | 244 | 133  |
| >CTNNB1-G2 KMLGSPVDS\ | 182  | >CTNNB1-G2 KMLASPVDS\ | 130 | 52   |
| >CTNNB1-G2 KMLGSPVDS\ | 306  | >CTNNB1-G2 KMLASPVDS\ | 140 | 166  |
| >CTNNB1-G2 VKMLGSPV   | 43   | >CTNNB1-G2 VKMLASPV   | 46  | 3    |
| >CTNNB1-G2 VKMLGSPVD: | 120  | >CTNNB1-G2 VKMLASPV:  | 106 | 14   |
| >CTNNB1-G2 LVKMLGSPV  | 23   | >CTNNB1-G2 LVKMLASPV  | 22  | 1    |
| >CTNNB1-G2 LVKMLGSPV  | 806  | >CTNNB1-G2 LVKMLASPV  | 409 | 397  |
| >CTNNB1-G2 LVKMLGSPV  | 126  | >CTNNB1-G2 LVKMLASPV  | 85  | 41   |
| >CTNNB1-G2 LVKMLGSPV  | 142  | >CTNNB1-G2 LVKMLASPV  | 130 | 12   |
| >CTNNB1-G2 LVKMLGSPV  | 1451 | >CTNNB1-G2 LVKMLASPV  | 438 | 1013 |
| >CTNNB1-G2 LVKMLGSPV  | 222  | >CTNNB1-G2 LVKMLASPV  | 512 | 290  |
| >CTNNB1-G2 LVKMLGSPV  | 318  | >CTNNB1-G2 LVKMLASPV  | 287 | 31   |
| >CTNNB1-G2 ALVKMLGSP\ | 219  | >CTNNB1-G2 ALVKMLASP\ | 252 | 33   |
| >CTNNB1-G2 ALVKMLGSP\ | 87   | >CTNNB1-G2 ALVKMLASP\ | 66  | 21   |
| >CTNNB1-G2 ALVKMLGSP\ | 25   | >CTNNB1-G2 ALVKMLASP\ | 20  | 5    |
| >CTNNB1-G2 ALVKMLGSP\ | 97   | >CTNNB1-G2 ALVKMLASP\ | 191 | 94   |
| >CTNNB1-G2 ALVKMLGSP\ | 7    | >CTNNB1-G2 ALVKMLASP\ | 6   | 1    |
| >CTNNB1-G2 ALVKMLGSP\ | 14   | >CTNNB1-G2 ALVKMLASP\ | 8   | 6    |
| >CTNNB1-G2 ALVKMLGSP\ | 15   | >CTNNB1-G2 ALVKMLASP\ | 11  | 4    |
| >CTNNB1-G2 ALVKMLGSP\ | 468  | >CTNNB1-G2 ALVKMLASP\ | 98  | 370  |
| >CTNNB1-G2 ALVKMLGSP\ | 3    | >CTNNB1-G2 ALVKMLASP\ | 2   | 1    |
| >CTNNB1-G2 IPALVKMLG  | 231  | >CTNNB1-G2 IPALVKMLA  | 12  | 219  |

|                        |       |                        |      |       |
|------------------------|-------|------------------------|------|-------|
| >CTNNB1-G2 IPALVKMLGS  | 381   | >CTNNB1-G2 IPALVKMLAS  | 268  | 113   |
| >CTNNB1-G3 GIHSGATTTA  | 432   | >CTNNB1-G3 EIHSGATTTA  | 2761 | 2329  |
| >CTNNB1-G3 GIHSGATTTA  | 276   | >CTNNB1-G3 EIHSGATTTA  | 893  | 617   |
| >CTNNB1-G3 GIHSGATTTA  | 362   | >CTNNB1-G3 EIHSGATTTA  | 3702 | 3340  |
| >CTNNB1-G3 SGIHSGAT    | 38807 | >CTNNB1-G3 SEIHSGAT    | 172  | 38635 |
| >CTNNB1-G3 SGIHSGATTT  | 36861 | >CTNNB1-G3 SEIHSGATTT  | 468  | 36393 |
| >CTNNB1-G3 SGIHSGATTT  | 28613 | >CTNNB1-G3 SEIHSGATTT  | 244  | 28369 |
| >CTNNB1-G3 SGIHSGAT    | 37611 | >CTNNB1-G3 SEIHSGAT    | 74   | 37537 |
| >CTNNB1-G3 SGIHSGATT   | 38530 | >CTNNB1-G3 SEIHSGATT   | 85   | 38445 |
| >CTNNB1-G3 SGIHSGATTT  | 20355 | >CTNNB1-G3 SEIHSGATTT  | 107  | 20248 |
| >CTNNB1-G3 SGIHSGATTT, | 32546 | >CTNNB1-G3 SEIHSGATTT/ | 17   | 32529 |
| >CTNNB1-G3 HWQQQSYLLE  | 297   | >CTNNB1-G3 HWQQQSYLLE  | 343  | 46    |
| >CTNNB1-G3 YLDSGIHSGA  | 78    | >CTNNB1-G3 YLDSEIHSGA  | 61   | 17    |
| >CTNNB1-G3 YLDSGIHSGA  | 212   | >CTNNB1-G3 YLDSEIHSGA  | 274  | 62    |
| >CTNNB1-G3 YLDSGIHSG   | 278   | >CTNNB1-G3 YLDSEIHSG   | 118  | 160   |
| >CTNNB1-G3 YLDSGIHSGA  | 24    | >CTNNB1-G3 YLDSEIHSGA  | 33   | 9     |
| >CTNNB1-G3 YLDSGIHSGA  | 284   | >CTNNB1-G3 YLDSEIHSGA  | 175  | 109   |
| >CTNNB1-G3 YLDSGIHSGA  | 32    | >CTNNB1-G3 YLDSEIHSGA  | 31   | 1     |
| >CTNNB1-G3 YLDSGIHSGA  | 78    | >CTNNB1-G3 YLDSEIHSGA  | 158  | 80    |
| >CTNNB1-G3 YLDSGIHS    | 419   | >CTNNB1-G3 YLDSEIHS    | 926  | 507   |
| >CTNNB1-G3 YLDSGIHSGA  | 280   | >CTNNB1-G3 YLDSEIHSGA  | 203  | 77    |
| >CTNNB1-G3 YLDSGIHSGA  | 178   | >CTNNB1-G3 YLDSEIHSGA  | 367  | 189   |
| >CTNNB1-G3 YLDSGIHS    | 47    | >CTNNB1-G3 YLDSEIHS    | 98   | 51    |
| >CTNNB1-G3 YLDSGIHSG   | 15    | >CTNNB1-G3 YLDSEIHSG   | 28   | 13    |
| >CTNNB1-G3 YLDSGIHSGA  | 2     | >CTNNB1-G3 YLDSEIHSGA  | 3    | 1     |
| >CTNNB1-G3 YLDSGIHSGA  | 12    | >CTNNB1-G3 YLDSEIHSGA  | 17   | 5     |
| >CTNNB1-G3 YLDSGIHS    | 395   | >CTNNB1-G3 YLDSEIHS    | 651  | 256   |
| >CTNNB1-G3 YLDSGIHSG   | 139   | >CTNNB1-G3 YLDSEIHSG   | 181  | 42    |
| >CTNNB1-G3 YLDSGIHSGA  | 8     | >CTNNB1-G3 YLDSEIHSGA  | 8    | 0     |
| >CTNNB1-G3 YLDSGIHSGA  | 83    | >CTNNB1-G3 YLDSEIHSGA  | 106  | 23    |
| >CTNNB1-G3 YLDSGIHS    | 101   | >CTNNB1-G3 YLDSEIHS    | 169  | 68    |
| >CTNNB1-G3 YLDSGIHSG   | 140   | >CTNNB1-G3 YLDSEIHSG   | 393  | 253   |
| >CTNNB1-G3 YLDSGIHSGA  | 7     | >CTNNB1-G3 YLDSEIHSGA  | 7    | 0     |
| >CTNNB1-G3 YLDSGIHSGA  | 121   | >CTNNB1-G3 YLDSEIHSGA  | 219  | 98    |
| >CTNNB1-G3 YLDSGIHSGA  | 7     | >CTNNB1-G3 YLDSEIHSGA  | 8    | 1     |
| >CTNNB1-G3 YLDSGIHSGA  | 255   | >CTNNB1-G3 YLDSEIHSGA  | 439  | 184   |
| >CTNNB1-G3 YLDSGIHS    | 66    | >CTNNB1-G3 YLDSEIHS    | 124  | 58    |
| >CTNNB1-G3 YLDSGIHSG   | 13    | >CTNNB1-G3 YLDSEIHSG   | 37   | 24    |
| >CTNNB1-G3 YLDSGIHSGA  | 2     | >CTNNB1-G3 YLDSEIHSGA  | 2    | 0     |
| >CTNNB1-G3 YLDSGIHSGA  | 36    | >CTNNB1-G3 YLDSEIHSGA  | 58   | 22    |
| >CTNNB1-G3 SYLDSGIHSG/ | 410   | >CTNNB1-G3 SYLDSEIHSG/ | 619  | 209   |
| >CTNNB1-G3 QSYLDSEI    | 46    | >CTNNB1-G3 QSYLDSEI    | 71   | 25    |
| >CTNNB1-G3 QSYLDSEI    | 22    | >CTNNB1-G3 QSYLDSEI    | 28   | 6     |

|                        |       |                        |      |       |
|------------------------|-------|------------------------|------|-------|
| >CTNNB1-G3 QQSYLDSGI   | 417   | >CTNNB1-G3 QQSYLDSEI   | 143  | 274   |
| >CTNNB1-G3 QQQSYLDSGI  | 381   | >CTNNB1-G3 QQQSYLDSEI  | 178  | 203   |
| >CTNNB1-G3 WQQQSYLDS   | 638   | >CTNNB1-G3 WQQQSYLDS   | 454  | 184   |
| >CTNNB1-G3 WQQQSYLDS   | 268   | >CTNNB1-G3 WQQQSYLDS   | 312  | 44    |
| >CTNNB1-G3 WQQQSYLDS   | 431   | >CTNNB1-G3 WQQQSYLDS   | 382  | 49    |
| >CTNNB1-G3 WQQQSYLDS   | 187   | >CTNNB1-G3 WQQQSYLDS   | 87   | 100   |
| >CTNNB1-G3 GIHSGATTTA  | 432   | >CTNNB1-G3 RIHSGATTTA  | 507  | 75    |
| >CTNNB1-G3 GIHSGATTTA  | 276   | >CTNNB1-G3 RIHSGATTTA  | 178  | 98    |
| >CTNNB1-G3 GIHSGATTTA  | 362   | >CTNNB1-G3 RIHSGATTTA  | 530  | 168   |
| >CTNNB1-G3 GIHSGATTTA  | 2370  | >CTNNB1-G3 RIHSGATTTA  | 50   | 2320  |
| >CTNNB1-G3 GIHSGATTTA  | 11218 | >CTNNB1-G3 RIHSGATTTA  | 469  | 10749 |
| >CTNNB1-G3 SGIHSGATTT, | 7248  | >CTNNB1-G3 SRIHSGATTT/ | 296  | 6952  |
| >CTNNB1-G3 HWQQQSYLL   | 23937 | >CTNNB1-G3 HWQQQSYLL   | 446  | 23491 |
| >CTNNB1-G3 HWQQQSYLL   | 11311 | >CTNNB1-G3 HWQQQSYLL   | 16   | 11295 |
| >CTNNB1-G3 HWQQQSYLL   | 297   | >CTNNB1-G3 HWQQQSYLL   | 328  | 31    |
| >CTNNB1-G3 YLDSGIHSGA  | 78    | >CTNNB1-G3 YLDSRIHSGA  | 234  | 156   |
| >CTNNB1-G3 YLDSGIHSGA` | 212   | >CTNNB1-G3 YLDSRIHSGA` | 272  | 60    |
| >CTNNB1-G3 YLDSGIHSG   | 278   | >CTNNB1-G3 YLDSRIHSG   | 284  | 6     |
| >CTNNB1-G3 YLDSGIHSGA  | 24    | >CTNNB1-G3 YLDSRIHSGA  | 62   | 38    |
| >CTNNB1-G3 YLDSGIHSGA` | 284   | >CTNNB1-G3 YLDSRIHSGA` | 281  | 3     |
| >CTNNB1-G3 YLDSGIHSGA  | 32    | >CTNNB1-G3 YLDSRIHSGA  | 39   | 7     |
| >CTNNB1-G3 YLDSGIHSGA` | 78    | >CTNNB1-G3 YLDSRIHSGA` | 105  | 27    |
| >CTNNB1-G3 YLDSGIHS    | 419   | >CTNNB1-G3 YLDSRIHS    | 947  | 528   |
| >CTNNB1-G3 YLDSGIHSGA  | 280   | >CTNNB1-G3 YLDSRIHSGA  | 539  | 259   |
| >CTNNB1-G3 YLDSGIHSGA` | 178   | >CTNNB1-G3 YLDSRIHSGA` | 367  | 189   |
| >CTNNB1-G3 YLDSGIHS    | 47    | >CTNNB1-G3 YLDSRIHS    | 177  | 130   |
| >CTNNB1-G3 YLDSGIHSG   | 15    | >CTNNB1-G3 YLDSRIHSG   | 32   | 17    |
| >CTNNB1-G3 YLDSGIHSGA  | 2     | >CTNNB1-G3 YLDSRIHSGA  | 3    | 1     |
| >CTNNB1-G3 YLDSGIHSGA` | 12    | >CTNNB1-G3 YLDSRIHSGA` | 18   | 6     |
| >CTNNB1-G3 YLDSGIHS    | 395   | >CTNNB1-G3 YLDSRIHS    | 1571 | 1176  |
| >CTNNB1-G3 YLDSGIHSG   | 139   | >CTNNB1-G3 YLDSRIHSG   | 274  | 135   |
| >CTNNB1-G3 YLDSGIHSGA  | 8     | >CTNNB1-G3 YLDSRIHSGA  | 11   | 3     |
| >CTNNB1-G3 YLDSGIHSGA` | 83    | >CTNNB1-G3 YLDSRIHSGA` | 140  | 57    |
| >CTNNB1-G3 YLDSGIHS    | 101   | >CTNNB1-G3 YLDSRIHS    | 401  | 300   |
| >CTNNB1-G3 YLDSGIHSG   | 140   | >CTNNB1-G3 YLDSRIHSG   | 514  | 374   |
| >CTNNB1-G3 YLDSGIHSGA  | 7     | >CTNNB1-G3 YLDSRIHSGA  | 9    | 2     |
| >CTNNB1-G3 YLDSGIHSGA` | 121   | >CTNNB1-G3 YLDSRIHSGA` | 263  | 142   |
| >CTNNB1-G3 YLDSGIHSGA  | 7     | >CTNNB1-G3 YLDSRIHSGA  | 17   | 10    |
| >CTNNB1-G3 YLDSGIHSGA` | 255   | >CTNNB1-G3 YLDSRIHSGA` | 740  | 485   |
| >CTNNB1-G3 YLDSGIHS    | 66    | >CTNNB1-G3 YLDSRIHS    | 104  | 38    |
| >CTNNB1-G3 YLDSGIHSG   | 13    | >CTNNB1-G3 YLDSRIHSG   | 31   | 18    |
| >CTNNB1-G3 YLDSGIHSGA  | 2     | >CTNNB1-G3 YLDSRIHSGA  | 3    | 1     |
| >CTNNB1-G3 YLDSGIHSGA` | 36    | >CTNNB1-G3 YLDSRIHSGA` | 55   | 19    |

|                        |       |                        |      |       |
|------------------------|-------|------------------------|------|-------|
| >CTNNB1-G3 SYLDSGIHSG/ | 1218  | >CTNNB1-G3 SYLDSRIHSG/ | 419  | 799   |
| >CTNNB1-G3 SYLDSGIHSG/ | 410   | >CTNNB1-G3 SYLDSRIHSG/ | 268  | 142   |
| >CTNNB1-G3 QSYLDSGI    | 46    | >CTNNB1-G3 QSYLDSRI    | 41   | 5     |
| >CTNNB1-G3 QSYLDSGI    | 22    | >CTNNB1-G3 QSYLDSRI    | 27   | 5     |
| >CTNNB1-G3 QQSYLDSGI   | 417   | >CTNNB1-G3 QQSYLDSRI   | 694  | 277   |
| >CTNNB1-G3 QQQSYLDSG   | 23645 | >CTNNB1-G3 QQQSYLDSR   | 341  | 23304 |
| >CTNNB1-G3 QQQSYLDSGI  | 381   | >CTNNB1-G3 QQQSYLDSRI  | 533  | 152   |
| >CTNNB1-G3 WQQQSYLDS   | 268   | >CTNNB1-G3 WQQQSYLDS   | 1095 | 827   |
| >CTNNB1-G3 WQQQSYLDS   | 431   | >CTNNB1-G3 WQQQSYLDS   | 596  | 165   |
| >CTNNB1-G3 WQQQSYLDS   | 187   | >CTNNB1-G3 WQQQSYLDS   | 266  | 79    |
| >CTNNB1-G3 GIHSGATTTA  | 432   | >CTNNB1-G3 VIHSGATTTA  | 969  | 537   |
| >CTNNB1-G3 GIHSGATTTA  | 276   | >CTNNB1-G3 VIHSGATTTA  | 346  | 70    |
| >CTNNB1-G3 GIHSGATTTA  | 362   | >CTNNB1-G3 VIHSGATTTA  | 118  | 244   |
| >CTNNB1-G3 SGIHSGATTT/ | 8661  | >CTNNB1-G3 SVIHSGATTT/ | 70   | 8591  |
| >CTNNB1-G3 SGIHSGATTT/ | 5002  | >CTNNB1-G3 SVIHSGATTT/ | 207  | 4795  |
| >CTNNB1-G3 SGIHSGATTT/ | 7798  | >CTNNB1-G3 SVIHSGATTT/ | 145  | 7653  |
| >CTNNB1-G3 HWQQQSYL    | 297   | >CTNNB1-G3 HWQQQSYL    | 112  | 185   |
| >CTNNB1-G3 YLDSGIHS    | 603   | >CTNNB1-G3 YLDSVIHS    | 165  | 438   |
| >CTNNB1-G3 YLDSGIHSG   | 773   | >CTNNB1-G3 YLDSVIHSG   | 408  | 365   |
| >CTNNB1-G3 YLDSGIHSGA  | 78    | >CTNNB1-G3 YLDSVIHSGA  | 106  | 28    |
| >CTNNB1-G3 YLDSGIHSGA` | 212   | >CTNNB1-G3 YLDSVIHSGA` | 163  | 49    |
| >CTNNB1-G3 YLDSGIHS    | 1509  | >CTNNB1-G3 YLDSVIHS    | 339  | 1170  |
| >CTNNB1-G3 YLDSGIHSG   | 278   | >CTNNB1-G3 YLDSVIHSG   | 80   | 198   |
| >CTNNB1-G3 YLDSGIHSGA  | 24    | >CTNNB1-G3 YLDSVIHSGA  | 32   | 8     |
| >CTNNB1-G3 YLDSGIHSGA` | 284   | >CTNNB1-G3 YLDSVIHSGA` | 130  | 154   |
| >CTNNB1-G3 YLDSGIHSGA  | 32    | >CTNNB1-G3 YLDSVIHSGA  | 34   | 2     |
| >CTNNB1-G3 YLDSGIHSGA` | 78    | >CTNNB1-G3 YLDSVIHSGA` | 88   | 10    |
| >CTNNB1-G3 YLDSGIHS    | 419   | >CTNNB1-G3 YLDSVIHS    | 457  | 38    |
| >CTNNB1-G3 YLDSGIHSGA  | 280   | >CTNNB1-G3 YLDSVIHSGA  | 237  | 43    |
| >CTNNB1-G3 YLDSGIHSGA` | 178   | >CTNNB1-G3 YLDSVIHSGA` | 262  | 84    |
| >CTNNB1-G3 YLDSGIHS    | 47    | >CTNNB1-G3 YLDSVIHS    | 17   | 30    |
| >CTNNB1-G3 YLDSGIHSG   | 15    | >CTNNB1-G3 YLDSVIHSG   | 7    | 8     |
| >CTNNB1-G3 YLDSGIHSGA  | 2     | >CTNNB1-G3 YLDSVIHSGA  | 2    | 0     |
| >CTNNB1-G3 YLDSGIHSGA` | 12    | >CTNNB1-G3 YLDSVIHSGA` | 8    | 4     |
| >CTNNB1-G3 YLDSGIHS    | 395   | >CTNNB1-G3 YLDSVIHS    | 286  | 109   |
| >CTNNB1-G3 YLDSGIHSG   | 139   | >CTNNB1-G3 YLDSVIHSG   | 160  | 21    |
| >CTNNB1-G3 YLDSGIHSGA  | 8     | >CTNNB1-G3 YLDSVIHSGA  | 9    | 1     |
| >CTNNB1-G3 YLDSGIHSGA` | 83    | >CTNNB1-G3 YLDSVIHSGA` | 88   | 5     |
| >CTNNB1-G3 YLDSGIHS    | 101   | >CTNNB1-G3 YLDSVIHS    | 51   | 50    |
| >CTNNB1-G3 YLDSGIHSG   | 140   | >CTNNB1-G3 YLDSVIHSG   | 79   | 61    |
| >CTNNB1-G3 YLDSGIHSGA  | 7     | >CTNNB1-G3 YLDSVIHSGA  | 7    | 0     |
| >CTNNB1-G3 YLDSGIHSGA` | 121   | >CTNNB1-G3 YLDSVIHSGA` | 93   | 28    |
| >CTNNB1-G3 YLDSGIHSGA  | 7     | >CTNNB1-G3 YLDSVIHSGA  | 9    | 2     |

|                        |       |                        |     |       |
|------------------------|-------|------------------------|-----|-------|
| >CTNNB1-G3 YLDSGIHSGA` | 255   | >CTNNB1-G3 YLDSVIHSGA` | 314 | 59    |
| >CTNNB1-G3 YLDSGIHS    | 66    | >CTNNB1-G3 YLDSVIHS    | 71  | 5     |
| >CTNNB1-G3 YLDSGIHSG   | 13    | >CTNNB1-G3 YLDSVIHSG   | 34  | 21    |
| >CTNNB1-G3 YLDSGIHSGA  | 2     | >CTNNB1-G3 YLDSVIHSGA  | 3   | 1     |
| >CTNNB1-G3 YLDSGIHSGA` | 36    | >CTNNB1-G3 YLDSVIHSGA` | 60  | 24    |
| >CTNNB1-G3 SYLDSGIHSG/ | 410   | >CTNNB1-G3 SYLDSVIHSG/ | 369 | 41    |
| >CTNNB1-G3 QSYLDSGI    | 46    | >CTNNB1-G3 QSYLDSVI    | 74  | 28    |
| >CTNNB1-G3 QSYLDSGI    | 22    | >CTNNB1-G3 QSYLDSVI    | 16  | 6     |
| >CTNNB1-G3 QQSYLDSG    | 13170 | >CTNNB1-G3 QQSYLDSV    | 130 | 13040 |
| >CTNNB1-G3 QQSYLDSG    | 18338 | >CTNNB1-G3 QQSYLDSV    | 315 | 18023 |
| >CTNNB1-G3 QQSYLDSG    | 7965  | >CTNNB1-G3 QQSYLDSV    | 38  | 7927  |
| >CTNNB1-G3 QQSYLDSGI   | 1545  | >CTNNB1-G3 QQSYLDSVI   | 294 | 1251  |
| >CTNNB1-G3 QQSYLDSG    | 10950 | >CTNNB1-G3 QQSYLDSV    | 399 | 10551 |
| >CTNNB1-G3 QQSYLDSGI   | 417   | >CTNNB1-G3 QQSYLDSVI   | 116 | 301   |
| >CTNNB1-G3 QQSYLDSGIH  | 2269  | >CTNNB1-G3 QQSYLDSVIH  | 444 | 1825  |
| >CTNNB1-G3 QQQSYLDSG   | 22348 | >CTNNB1-G3 QQQSYLDSV   | 195 | 22153 |
| >CTNNB1-G3 QQQSYLDSG   | 14745 | >CTNNB1-G3 QQQSYLDSV   | 110 | 14635 |
| >CTNNB1-G3 QQQSYLDSG   | 17320 | >CTNNB1-G3 QQQSYLDSV   | 163 | 17157 |
| >CTNNB1-G3 QQQSYLDSG   | 4627  | >CTNNB1-G3 QQQSYLDSV   | 10  | 4617  |
| >CTNNB1-G3 QQQSYLDSG   | 8940  | >CTNNB1-G3 QQQSYLDSV   | 294 | 8646  |
| >CTNNB1-G3 QQQSYLDSGI  | 381   | >CTNNB1-G3 QQQSYLDSVI  | 140 | 241   |
| >CTNNB1-G3 WQQQSYLDS   | 18561 | >CTNNB1-G3 WQQQSYLDS   | 271 | 18290 |
| >CTNNB1-G3 WQQQSYLDS   | 23155 | >CTNNB1-G3 WQQQSYLDS   | 233 | 22922 |
| >CTNNB1-G3 WQQQSYLDS   | 17548 | >CTNNB1-G3 WQQQSYLDS   | 130 | 17418 |
| >CTNNB1-G3 WQQQSYLDS   | 268   | >CTNNB1-G3 WQQQSYLDS   | 953 | 685   |
| >CTNNB1-G3 WQQQSYLDS   | 22894 | >CTNNB1-G3 WQQQSYLDS   | 327 | 22567 |
| >CTNNB1-G3 WQQQSYLDS   | 760   | >CTNNB1-G3 WQQQSYLDS   | 432 | 328   |
| >CTNNB1-G3 WQQQSYLDS   | 431   | >CTNNB1-G3 WQQQSYLDS   | 143 | 288   |
| >CTNNB1-G3 WQQQSYLDS   | 6011  | >CTNNB1-G3 WQQQSYLDS   | 141 | 5870  |
| >CTNNB1-G3 WQQQSYLDS   | 187   | >CTNNB1-G3 WQQQSYLDS   | 72  | 115   |
| >CTNNB1-G3 WQQQSYLDS   | 2815  | >CTNNB1-G3 WQQQSYLDS   | 340 | 2475  |
| >CTNNB1-G3 GATTTAPSL   | 272   | >CTNNB1-G3 AATTTAPSL   | 45  | 227   |
| >CTNNB1-G3 GATTTAPSL   | 346   | >CTNNB1-G3 AATTTAPSL   | 144 | 202   |
| >CTNNB1-G3 SGATTTAPS   | 5737  | >CTNNB1-G3 SAATTTAPS   | 380 | 5357  |
| >CTNNB1-G3 SGATTTAPSL  | 6001  | >CTNNB1-G3 SAATTTAPSL  | 149 | 5852  |
| >CTNNB1-G3 SGATTTAPSL  | 4864  | >CTNNB1-G3 SAATTTAPSL  | 119 | 4745  |
| >CTNNB1-G3 SGATTTAPSL  | 741   | >CTNNB1-G3 SAATTTAPSL  | 115 | 626   |
| >CTNNB1-G3 SGATTTAPSL  | 2885  | >CTNNB1-G3 SAATTTAPSL  | 192 | 2693  |
| >CTNNB1-G3 HSGATTTA    | 4911  | >CTNNB1-G3 HSAATTTA    | 84  | 4827  |
| >CTNNB1-G3 HSGATTTAPS  | 8036  | >CTNNB1-G3 HSAATTTAPS  | 386 | 7650  |
| >CTNNB1-G3 HSGATTTAPS  | 1270  | >CTNNB1-G3 HSAATTTAPS  | 212 | 1058  |
| >CTNNB1-G3 HSGATTTAPS  | 1025  | >CTNNB1-G3 HSAATTTAPS  | 206 | 819   |
| >CTNNB1-G3 HSGATTTAPS  | 33    | >CTNNB1-G3 HSAATTTAPS  | 7   | 26    |

|                        |       |                        |      |       |
|------------------------|-------|------------------------|------|-------|
| >CTNNB1-G3 HSGATTTAPS  | 506   | >CTNNB1-G3 HSAATTTAPS  | 24   | 482   |
| >CTNNB1-G3 HSGATTTAPS  | 1205  | >CTNNB1-G3 HSAATTTAPS  | 119  | 1086  |
| >CTNNB1-G3 HSGATTTAPS  | 2590  | >CTNNB1-G3 HSAATTTAPS  | 317  | 2273  |
| >CTNNB1-G3 HSGATTTAPS  | 654   | >CTNNB1-G3 HSAATTTAPS  | 162  | 492   |
| >CTNNB1-G3 GIHSGATTTA  | 432   | >CTNNB1-G3 GIHSAATTTA  | 604  | 172   |
| >CTNNB1-G3 GIHSGATTTA  | 276   | >CTNNB1-G3 GIHSAATTTA  | 259  | 17    |
| >CTNNB1-G3 GIHSGATTTA  | 362   | >CTNNB1-G3 GIHSAATTTA  | 849  | 487   |
| >CTNNB1-G3 YLDSGIHSG   | 773   | >CTNNB1-G3 YLDSGIHSA   | 9    | 764   |
| >CTNNB1-G3 YLDSGIHSGA  | 78    | >CTNNB1-G3 YLDSGIHSAA  | 85   | 7     |
| >CTNNB1-G3 YLDSGIHSGA` | 212   | >CTNNB1-G3 YLDSGIHSAA` | 33   | 179   |
| >CTNNB1-G3 YLDSGIHSG   | 278   | >CTNNB1-G3 YLDSGIHSA   | 7    | 271   |
| >CTNNB1-G3 YLDSGIHSGA  | 24    | >CTNNB1-G3 YLDSGIHSAA  | 21   | 3     |
| >CTNNB1-G3 YLDSGIHSGA` | 284   | >CTNNB1-G3 YLDSGIHSAA` | 67   | 217   |
| >CTNNB1-G3 YLDSGIHSG   | 1353  | >CTNNB1-G3 YLDSGIHSA   | 5    | 1348  |
| >CTNNB1-G3 YLDSGIHSGA  | 32    | >CTNNB1-G3 YLDSGIHSAA  | 33   | 1     |
| >CTNNB1-G3 YLDSGIHSGA` | 78    | >CTNNB1-G3 YLDSGIHSAA` | 40   | 38    |
| >CTNNB1-G3 YLDSGIHSG   | 570   | >CTNNB1-G3 YLDSGIHSA   | 9    | 561   |
| >CTNNB1-G3 YLDSGIHSGA  | 280   | >CTNNB1-G3 YLDSGIHSAA  | 260  | 20    |
| >CTNNB1-G3 YLDSGIHSGA` | 178   | >CTNNB1-G3 YLDSGIHSAA` | 55   | 123   |
| >CTNNB1-G3 YLDSGIHSG   | 15    | >CTNNB1-G3 YLDSGIHSA   | 2    | 13    |
| >CTNNB1-G3 YLDSGIHSGA  | 2     | >CTNNB1-G3 YLDSGIHSAA  | 3    | 1     |
| >CTNNB1-G3 YLDSGIHSGA` | 12    | >CTNNB1-G3 YLDSGIHSAA` | 6    | 6     |
| >CTNNB1-G3 YLDSGIHSG   | 139   | >CTNNB1-G3 YLDSGIHSA   | 3    | 136   |
| >CTNNB1-G3 YLDSGIHSGA  | 8     | >CTNNB1-G3 YLDSGIHSAA  | 8    | 0     |
| >CTNNB1-G3 YLDSGIHSGA` | 83    | >CTNNB1-G3 YLDSGIHSAA` | 15   | 68    |
| >CTNNB1-G3 YLDSGIHSG   | 140   | >CTNNB1-G3 YLDSGIHSA   | 5    | 135   |
| >CTNNB1-G3 YLDSGIHSGA  | 7     | >CTNNB1-G3 YLDSGIHSAA  | 9    | 2     |
| >CTNNB1-G3 YLDSGIHSGA` | 121   | >CTNNB1-G3 YLDSGIHSAA` | 42   | 79    |
| >CTNNB1-G3 YLDSGIHSG   | 1226  | >CTNNB1-G3 YLDSGIHSA   | 2    | 1224  |
| >CTNNB1-G3 YLDSGIHSGA  | 7     | >CTNNB1-G3 YLDSGIHSAA  | 12   | 5     |
| >CTNNB1-G3 YLDSGIHSGA` | 255   | >CTNNB1-G3 YLDSGIHSAA` | 31   | 224   |
| >CTNNB1-G3 YLDSGIHSG   | 13    | >CTNNB1-G3 YLDSGIHSA   | 2    | 11    |
| >CTNNB1-G3 YLDSGIHSGA  | 2     | >CTNNB1-G3 YLDSGIHSAA  | 2    | 0     |
| >CTNNB1-G3 YLDSGIHSGA` | 36    | >CTNNB1-G3 YLDSGIHSAA` | 7    | 29    |
| >CTNNB1-G3 YLDSGIHSG   | 11462 | >CTNNB1-G3 YLDSGIHSA   | 221  | 11241 |
| >CTNNB1-G3 SYLDSGIHSG/ | 410   | >CTNNB1-G3 SYLDSGIHSA/ | 256  | 154   |
| >CTNNB1-G3 GATTTAPSL   | 272   | >CTNNB1-G3 DATTTAPSL   | 4419 | 4147  |
| >CTNNB1-G3 GATTTAPSL   | 346   | >CTNNB1-G3 DATTTAPSL   | 4086 | 3740  |
| >CTNNB1-G3 SGATTTAPSL  | 741   | >CTNNB1-G3 SDATTTAPSL  | 431  | 310   |
| >CTNNB1-G3 SGATTTAPSL  | 22434 | >CTNNB1-G3 SDATTTAPSL  | 309  | 22125 |
| >CTNNB1-G3 HSGATTTAPS  | 1270  | >CTNNB1-G3 HSDATTTAPS  | 284  | 986   |
| >CTNNB1-G3 HSGATTTAPS  | 33    | >CTNNB1-G3 HSDATTTAPS  | 16   | 17    |
| >CTNNB1-G3 HSGATTTAPS  | 506   | >CTNNB1-G3 HSDATTTAPS  | 27   | 479   |

|                        |       |                        |      |       |
|------------------------|-------|------------------------|------|-------|
| >CTNNB1-G3 GIHSGATTTA  | 432   | >CTNNB1-G3 GIHSDATTTA  | 512  | 80    |
| >CTNNB1-G3 GIHSGATTTA  | 276   | >CTNNB1-G3 GIHSDATTTA  | 292  | 16    |
| >CTNNB1-G3 GIHSGATTTA  | 362   | >CTNNB1-G3 GIHSDATTTA  | 582  | 220   |
| >CTNNB1-G3 YLDSGIHSGA  | 78    | >CTNNB1-G3 YLDSGIHSDA  | 239  | 161   |
| >CTNNB1-G3 YLDSGIHSGA  | 212   | >CTNNB1-G3 YLDSGIHSDA  | 96   | 116   |
| >CTNNB1-G3 YLDSGIHSG   | 278   | >CTNNB1-G3 YLDSGIHSD   | 1711 | 1433  |
| >CTNNB1-G3 YLDSGIHSGA  | 24    | >CTNNB1-G3 YLDSGIHSDA  | 57   | 33    |
| >CTNNB1-G3 YLDSGIHSGA  | 284   | >CTNNB1-G3 YLDSGIHSDA  | 80   | 204   |
| >CTNNB1-G3 YLDSGIHSGA  | 32    | >CTNNB1-G3 YLDSGIHSDA  | 85   | 53    |
| >CTNNB1-G3 YLDSGIHSGA  | 78    | >CTNNB1-G3 YLDSGIHSDA  | 165  | 87    |
| >CTNNB1-G3 YLDSGIHSGA  | 280   | >CTNNB1-G3 YLDSGIHSDA  | 1360 | 1080  |
| >CTNNB1-G3 YLDSGIHSGA  | 178   | >CTNNB1-G3 YLDSGIHSDA  | 74   | 104   |
| >CTNNB1-G3 YLDSGIHSG   | 15    | >CTNNB1-G3 YLDSGIHSD   | 61   | 46    |
| >CTNNB1-G3 YLDSGIHSGA  | 2     | >CTNNB1-G3 YLDSGIHSDA  | 7    | 5     |
| >CTNNB1-G3 YLDSGIHSGA  | 12    | >CTNNB1-G3 YLDSGIHSDA  | 9    | 3     |
| >CTNNB1-G3 YLDSGIHSG   | 139   | >CTNNB1-G3 YLDSGIHSD   | 705  | 566   |
| >CTNNB1-G3 YLDSGIHSGA  | 8     | >CTNNB1-G3 YLDSGIHSDA  | 36   | 28    |
| >CTNNB1-G3 YLDSGIHSGA  | 83    | >CTNNB1-G3 YLDSGIHSDA  | 25   | 58    |
| >CTNNB1-G3 YLDSGIHSG   | 140   | >CTNNB1-G3 YLDSGIHSD   | 1051 | 911   |
| >CTNNB1-G3 YLDSGIHSGA  | 7     | >CTNNB1-G3 YLDSGIHSDA  | 11   | 4     |
| >CTNNB1-G3 YLDSGIHSGA  | 121   | >CTNNB1-G3 YLDSGIHSDA  | 46   | 75    |
| >CTNNB1-G3 YLDSGIHSGA  | 7     | >CTNNB1-G3 YLDSGIHSDA  | 42   | 35    |
| >CTNNB1-G3 YLDSGIHSGA  | 255   | >CTNNB1-G3 YLDSGIHSDA  | 74   | 181   |
| >CTNNB1-G3 YLDSGIHSG   | 13    | >CTNNB1-G3 YLDSGIHSD   | 34   | 21    |
| >CTNNB1-G3 YLDSGIHSGA  | 2     | >CTNNB1-G3 YLDSGIHSDA  | 3    | 1     |
| >CTNNB1-G3 YLDSGIHSGA  | 36    | >CTNNB1-G3 YLDSGIHSDA  | 26   | 10    |
| >CTNNB1-G3 SYLDSGIHSGA | 410   | >CTNNB1-G3 SYLDSGIHSDA | 666  | 256   |
| >CTNNB1-G3 GATTTAPSL   | 272   | >CTNNB1-G3 PATTTAPSL   | 8869 | 8597  |
| >CTNNB1-G3 GATTTAPSL   | 346   | >CTNNB1-G3 PATTTAPSL   | 1225 | 879   |
| >CTNNB1-G3 SGATTTAPSL  | 24543 | >CTNNB1-G3 SPATTTAPSL  | 89   | 24454 |
| >CTNNB1-G3 SGATTTAPSL  | 6001  | >CTNNB1-G3 SPATTTAPSL  | 471  | 5530  |
| >CTNNB1-G3 SGATTTAPS   | 19325 | >CTNNB1-G3 SPATTTAPS   | 226  | 19099 |
| >CTNNB1-G3 SGATTTAPSL  | 14921 | >CTNNB1-G3 SPATTTAPSL  | 35   | 14886 |
| >CTNNB1-G3 SGATTTAPS   | 9843  | >CTNNB1-G3 SPATTTAPS   | 168  | 9675  |
| >CTNNB1-G3 SGATTTAPSL  | 741   | >CTNNB1-G3 SPATTTAPSL  | 14   | 727   |
| >CTNNB1-G3 HSGATTTA    | 4911  | >CTNNB1-G3 HSPATTTA    | 457  | 4454  |
| >CTNNB1-G3 HSGATTTAPS  | 33    | >CTNNB1-G3 HSPATTTAPS  | 126  | 93    |
| >CTNNB1-G3 HSGATTTAPS  | 2590  | >CTNNB1-G3 HSPATTTAPS  | 7    | 2583  |
| >CTNNB1-G3 HSGATTTAPS  | 654   | >CTNNB1-G3 HSPATTTAPS  | 483  | 171   |
| >CTNNB1-G3 GIHSGATTTA  | 432   | >CTNNB1-G3 GIHSPATTTA  | 1063 | 631   |
| >CTNNB1-G3 GIHSGATTTA  | 276   | >CTNNB1-G3 GIHSPATTTA  | 290  | 14    |
| >CTNNB1-G3 GIHSGATTTA  | 362   | >CTNNB1-G3 GIHSPATTTA  | 841  | 479   |
| >CTNNB1-G3 YLDSGIHSGA  | 78    | >CTNNB1-G3 YLDSGIHSPA  | 50   | 28    |

|                        |       |                        |     |       |
|------------------------|-------|------------------------|-----|-------|
| >CTNNB1-G3 YLDSGIHSGA' | 212   | >CTNNB1-G3 YLDSGIHSPA' | 25  | 187   |
| >CTNNB1-G3 YLDSGIHSG   | 278   | >CTNNB1-G3 YLDSGIHSP   | 452 | 174   |
| >CTNNB1-G3 YLDSGIHSGA  | 24    | >CTNNB1-G3 YLDSGIHSPA  | 15  | 9     |
| >CTNNB1-G3 YLDSGIHSGA' | 284   | >CTNNB1-G3 YLDSGIHSPA' | 199 | 85    |
| >CTNNB1-G3 YLDSGIHSGA  | 32    | >CTNNB1-G3 YLDSGIHSPA  | 29  | 3     |
| >CTNNB1-G3 YLDSGIHSGA' | 78    | >CTNNB1-G3 YLDSGIHSPA' | 116 | 38    |
| >CTNNB1-G3 YLDSGIHSGA  | 280   | >CTNNB1-G3 YLDSGIHSPA  | 180 | 100   |
| >CTNNB1-G3 YLDSGIHSGA' | 178   | >CTNNB1-G3 YLDSGIHSPA' | 35  | 143   |
| >CTNNB1-G3 YLDSGIHSG   | 15    | >CTNNB1-G3 YLDSGIHSP   | 31  | 16    |
| >CTNNB1-G3 YLDSGIHSGA  | 2     | >CTNNB1-G3 YLDSGIHSPA  | 3   | 1     |
| >CTNNB1-G3 YLDSGIHSGA' | 12    | >CTNNB1-G3 YLDSGIHSPA' | 6   | 6     |
| >CTNNB1-G3 YLDSGIHSG   | 139   | >CTNNB1-G3 YLDSGIHSP   | 322 | 183   |
| >CTNNB1-G3 YLDSGIHSGA  | 8     | >CTNNB1-G3 YLDSGIHSPA  | 8   | 0     |
| >CTNNB1-G3 YLDSGIHSGA' | 83    | >CTNNB1-G3 YLDSGIHSPA' | 25  | 58    |
| >CTNNB1-G3 YLDSGIHSG   | 140   | >CTNNB1-G3 YLDSGIHSP   | 359 | 219   |
| >CTNNB1-G3 YLDSGIHSGA  | 7     | >CTNNB1-G3 YLDSGIHSPA  | 7   | 0     |
| >CTNNB1-G3 YLDSGIHSGA' | 121   | >CTNNB1-G3 YLDSGIHSPA' | 17  | 104   |
| >CTNNB1-G3 YLDSGIHSGA  | 7     | >CTNNB1-G3 YLDSGIHSPA  | 12  | 5     |
| >CTNNB1-G3 YLDSGIHSGA' | 255   | >CTNNB1-G3 YLDSGIHSPA' | 29  | 226   |
| >CTNNB1-G3 YLDSGIHSG   | 13    | >CTNNB1-G3 YLDSGIHSP   | 18  | 5     |
| >CTNNB1-G3 YLDSGIHSGA  | 2     | >CTNNB1-G3 YLDSGIHSPA  | 2   | 0     |
| >CTNNB1-G3 YLDSGIHSGA' | 36    | >CTNNB1-G3 YLDSGIHSPA' | 7   | 29    |
| >CTNNB1-G3 YLDSGIHSGA  | 554   | >CTNNB1-G3 YLDSGIHSPA  | 314 | 240   |
| >CTNNB1-G3 SYLDSGIHSG/ | 1218  | >CTNNB1-G3 SYLDSGIHSP/ | 186 | 1032  |
| >CTNNB1-G3 SYLDSGIHSG/ | 410   | >CTNNB1-G3 SYLDSGIHSP/ | 348 | 62    |
| >CTNNB1-G4 TAPSLSGK    | 164   | >CTNNB1-G4 TAPSLSDK    | 293 | 129   |
| >CTNNB1-G4 TTAPSLSGK   | 86    | >CTNNB1-G4 TTAPSLSDK   | 151 | 65    |
| >CTNNB1-G4 TTAPSLSGK   | 10    | >CTNNB1-G4 TTAPSLSDK   | 14  | 4     |
| >CTNNB1-G4 TTAPSLSGK   | 5     | >CTNNB1-G4 TTAPSLSDK   | 8   | 3     |
| >CTNNB1-G4 TTAPSLSGK   | 198   | >CTNNB1-G4 TTAPSLSDK   | 135 | 63    |
| >CTNNB1-G4 TTTAPSLSGK  | 59    | >CTNNB1-G4 TTTAPSLSDK  | 140 | 81    |
| >CTNNB1-G4 TTTAPSLSGK  | 15    | >CTNNB1-G4 TTTAPSLSDK  | 16  | 1     |
| >CTNNB1-G4 TTTAPSLSGK  | 439   | >CTNNB1-G4 TTTAPSLSDK  | 880 | 441   |
| >CTNNB1-G4 TTTAPSLSGK  | 8     | >CTNNB1-G4 TTTAPSLSDK  | 14  | 6     |
| >CTNNB1-G4 ATTTAPSLSGI | 216   | >CTNNB1-G4 ATTTAPSLSDI | 394 | 178   |
| >CTNNB1-G4 ATTTAPSLSGI | 36    | >CTNNB1-G4 ATTTAPSLSDI | 57  | 21    |
| >CTNNB1-G4 ATTTAPSLSGI | 51    | >CTNNB1-G4 ATTTAPSLSDI | 110 | 59    |
| >CTNNB1-G4 ATTTAPSLSGI | 129   | >CTNNB1-G4 ATTTAPSLSDI | 295 | 166   |
| >CTNNB1-G4 ATTTAPSLSGI | 404   | >CTNNB1-G4 ATTTAPSLSDI | 275 | 129   |
| >CTNNB1-G4 SGKGNPEEEEL | 11249 | >CTNNB1-G4 SVKGNPEEEEL | 95  | 11154 |
| >CTNNB1-G4 GATTTAPSLSV | 36257 | >CTNNB1-G4 GATTTAPSLSV | 447 | 35810 |
| >CTNNB1-G4 TAPSLSGK    | 164   | >CTNNB1-G4 TAPSLSVK    | 168 | 4     |
| >CTNNB1-G4 TTAPSLSG    | 16520 | >CTNNB1-G4 TTAPSLSV    | 165 | 16355 |



|                        |       |                        |     |       |
|------------------------|-------|------------------------|-----|-------|
| >CTNNB1-G4 TTAPSLSG    | 15629 | >CTNNB1-G4 TTAPSLSV    | 47  | 15582 |
| >CTNNB1-G4 TTAPSLSG    | 15944 | >CTNNB1-G4 TTAPSLSV    | 43  | 15901 |
| >CTNNB1-G4 TTAPSLSG    | 26818 | >CTNNB1-G4 TTAPSLSV    | 449 | 26369 |
| >CTNNB1-G4 TTAPSLSG    | 33015 | >CTNNB1-G4 TTAPSLSV    | 93  | 32922 |
| >CTNNB1-G4 TTAPSLSGK   | 86    | >CTNNB1-G4 TTAPSLSVK   | 89  | 3     |
| >CTNNB1-G4 TTAPSLSGK   | 10    | >CTNNB1-G4 TTAPSLSVK   | 10  | 0     |
| >CTNNB1-G4 TTAPSLSGK   | 677   | >CTNNB1-G4 TTAPSLSVK   | 362 | 315   |
| >CTNNB1-G4 TTAPSLSGK   | 5     | >CTNNB1-G4 TTAPSLSVK   | 7   | 2     |
| >CTNNB1-G4 TTAPSLSG    | 1429  | >CTNNB1-G4 TTAPSLSV    | 6   | 1423  |
| >CTNNB1-G4 TTAPSLSG    | 9923  | >CTNNB1-G4 TTAPSLSV    | 9   | 9914  |
| >CTNNB1-G4 TTAPSLSG    | 2988  | >CTNNB1-G4 TTAPSLSV    | 67  | 2921  |
| >CTNNB1-G4 TTAPSLSG    | 5083  | >CTNNB1-G4 TTAPSLSV    | 66  | 5017  |
| >CTNNB1-G4 TTAPSLSGK   | 1449  | >CTNNB1-G4 TTAPSLSVK   | 224 | 1225  |
| >CTNNB1-G4 TTAPSLSGK   | 198   | >CTNNB1-G4 TTAPSLSVK   | 278 | 80    |
| >CTNNB1-G4 TTAPSLSG    | 12806 | >CTNNB1-G4 TTAPSLSV    | 454 | 12352 |
| >CTNNB1-G4 TTTAPSLSG   | 23904 | >CTNNB1-G4 TTTAPSLSV   | 250 | 23654 |
| >CTNNB1-G4 TTTAPSLSGK  | 59    | >CTNNB1-G4 TTTAPSLSVK  | 81  | 22    |
| >CTNNB1-G4 TTTAPSLSGK  | 15    | >CTNNB1-G4 TTTAPSLSVK  | 14  | 1     |
| >CTNNB1-G4 TTTAPSLSGK  | 439   | >CTNNB1-G4 TTTAPSLSVK  | 266 | 173   |
| >CTNNB1-G4 TTTAPSLSGK  | 8     | >CTNNB1-G4 TTTAPSLSVK  | 12  | 4     |
| >CTNNB1-G4 TTTAPSLSG   | 3204  | >CTNNB1-G4 TTTAPSLSV   | 7   | 3197  |
| >CTNNB1-G4 TTTAPSLSG   | 9819  | >CTNNB1-G4 TTTAPSLSV   | 10  | 9809  |
| >CTNNB1-G4 TTTAPSLSG   | 5607  | >CTNNB1-G4 TTTAPSLSV   | 233 | 5374  |
| >CTNNB1-G4 TTTAPSLSG   | 1259  | >CTNNB1-G4 TTTAPSLSV   | 48  | 1211  |
| >CTNNB1-G4 ATTTAPSLSG  | 19163 | >CTNNB1-G4 ATTTAPSLSV  | 268 | 18895 |
| >CTNNB1-G4 ATTTAPSLSG  | 20152 | >CTNNB1-G4 ATTTAPSLSV  | 115 | 20037 |
| >CTNNB1-G4 ATTTAPSLSG  | 20918 | >CTNNB1-G4 ATTTAPSLSV  | 439 | 20479 |
| >CTNNB1-G4 ATTTAPSLSG  | 35051 | >CTNNB1-G4 ATTTAPSLSV  | 175 | 34876 |
| >CTNNB1-G4 ATTTAPSLSGI | 216   | >CTNNB1-G4 ATTTAPSLSVI | 230 | 14    |
| >CTNNB1-G4 ATTTAPSLSGI | 36    | >CTNNB1-G4 ATTTAPSLSVI | 32  | 4     |
| >CTNNB1-G4 ATTTAPSLSG  | 2592  | >CTNNB1-G4 ATTTAPSLSV  | 401 | 2191  |
| >CTNNB1-G4 ATTTAPSLSGI | 51    | >CTNNB1-G4 ATTTAPSLSVI | 33  | 18    |
| >CTNNB1-G4 ATTTAPSLSGI | 129   | >CTNNB1-G4 ATTTAPSLSVI | 180 | 51    |
| >CTNNB1-G4 ATTTAPSLSG  | 27045 | >CTNNB1-G4 ATTTAPSLSV  | 169 | 26876 |
| >CTNNB1-G4 ATTTAPSLSG  | 6384  | >CTNNB1-G4 ATTTAPSLSV  | 287 | 6097  |
| >CTNNB1-G4 ATTTAPSLSG  | 3920  | >CTNNB1-G4 ATTTAPSLSV  | 122 | 3798  |
| >CTNNB1-G4 ATTTAPSLSG  | 1846  | >CTNNB1-G4 ATTTAPSLSV  | 48  | 1798  |
| >CTNNB1-G4 ATTTAPSLSGI | 2057  | >CTNNB1-G4 ATTTAPSLSVI | 438 | 1619  |
| >CTNNB1-G4 ATTTAPSLSGI | 404   | >CTNNB1-G4 ATTTAPSLSVI | 450 | 46    |
| >CTNNB1-G5 KGNPEEEDV   | 14507 | >CTNNB1-G5 KDNPEEEDV   | 120 | 14387 |
| >CTNNB1-G5 GTQQQFVEG   | 146   | >CTNNB1-G5 ATQQQFVEG   | 83  | 63    |
| >CTNNB1-G5 GTQQQFVEG   | 272   | >CTNNB1-G5 ATQQQFVEG   | 74  | 198   |
| >CTNNB1-G5 GTQQQFVEG   | 359   | >CTNNB1-G5 ATQQQFVEG   | 173 | 186   |

|                      |      |                      |     |      |
|----------------------|------|----------------------|-----|------|
| >CTNNB1-G5 GTQQQFVEG | 777  | >CTNNB1-G5 ATQQQFVEG | 496 | 281  |
| >CTNNB1-G5 GTQQQFVEG | 2351 | >CTNNB1-G5 ATQQQFVEG | 482 | 1869 |
| >CTNNB1-G5 GTQQQFVEG | 533  | >CTNNB1-G5 ATQQQFVEG | 337 | 196  |
| >CTNNB1-G5 GGTQQQFV  | 2101 | >CTNNB1-G5 GATQQQFV  | 326 | 1775 |
| >CTNNB1-G5 GGTQQQFV  | 3288 | >CTNNB1-G5 GATQQQFV  | 119 | 3169 |
| >CTNNB1-G5 GGTQQQFVE | 5106 | >CTNNB1-G5 GATQQQFVE | 151 | 4955 |
| >CTNNB1-G5 MGGTQQQF\ | 2298 | >CTNNB1-G5 MGATQQQF\ | 178 | 2120 |
| >CTNNB1-G5 MGGTQQQF\ | 2525 | >CTNNB1-G5 MGATQQQF\ | 80  | 2445 |
| >CTNNB1-G5 MGGTQQQF  | 1873 | >CTNNB1-G5 MGATQQQF  | 401 | 1472 |
| >CTNNB1-G5 MGGTQQQF  | 2450 | >CTNNB1-G5 MGATQQQF  | 417 | 2033 |
| >CTNNB1-G5 MGGTQQQF  | 1752 | >CTNNB1-G5 MGATQQQF  | 177 | 1575 |
| >CTNNB1-G5 MGGTQQQF  | 1454 | >CTNNB1-G5 MGATQQQF  | 172 | 1282 |
| >CTNNB1-G5 SMGGTQQQ\ | 212  | >CTNNB1-G5 SMGATQQQ\ | 212 | 0    |
| >CTNNB1-G5 SMGGTQQQ\ | 97   | >CTNNB1-G5 SMGATQQQ\ | 89  | 8    |
| >CTNNB1-G5 SMGGTQQQ\ | 198  | >CTNNB1-G5 SMGATQQQ\ | 166 | 32   |
| >CTNNB1-G5 SMGGTQQQ\ | 444  | >CTNNB1-G5 SMGATQQQ\ | 805 | 361  |
| >CTNNB1-G5 SMGGTQQQ\ | 2    | >CTNNB1-G5 SMGATQQQ\ | 2   | 0    |
| >CTNNB1-G5 SMGGTQQQ\ | 6    | >CTNNB1-G5 SMGATQQQ\ | 6   | 0    |
| >CTNNB1-G5 SMGGTQQQ\ | 4    | >CTNNB1-G5 SMGATQQQ\ | 5   | 1    |
| >CTNNB1-G5 SMGGTQQQ\ | 6    | >CTNNB1-G5 SMGATQQQ\ | 7   | 1    |
| >CTNNB1-G5 SMGGTQQQ  | 32   | >CTNNB1-G5 SMGATQQQ  | 105 | 73   |
| >CTNNB1-G5 SMGGTQQQ\ | 257  | >CTNNB1-G5 SMGATQQQ\ | 868 | 611  |
| >CTNNB1-G5 SMGGTQQQ\ | 2    | >CTNNB1-G5 SMGATQQQ\ | 2   | 0    |
| >CTNNB1-G5 SMGGTQQQ\ | 357  | >CTNNB1-G5 SMGATQQQ\ | 637 | 280  |
| >CTNNB1-G5 SMGGTQQQ\ | 441  | >CTNNB1-G5 SMGATQQQ\ | 993 | 552  |
| >CTNNB1-G5 SMGGTQQQ\ | 90   | >CTNNB1-G5 SMGATQQQ\ | 55  | 35   |
| >CTNNB1-G5 SMGGTQQQ\ | 184  | >CTNNB1-G5 SMGATQQQ\ | 129 | 55   |
| >CTNNB1-G5 SMGGTQQQ\ | 134  | >CTNNB1-G5 SMGATQQQ\ | 25  | 109  |
| >CTNNB1-G5 SMGGTQQQ\ | 1080 | >CTNNB1-G5 SMGATQQQ\ | 379 | 701  |
| >CTNNB1-G5 TSMGGTQQC | 301  | >CTNNB1-G5 TSMGATQQC | 182 | 119  |
| >CTNNB1-G5 TSMGGTQQC | 219  | >CTNNB1-G5 TSMGATQQC | 263 | 44   |
| >CTNNB1-G5 TSMGGTQQC | 100  | >CTNNB1-G5 TSMGATQQC | 134 | 34   |
| >CTNNB1-G5 TSMGGTQQC | 166  | >CTNNB1-G5 TSMGATQQC | 201 | 35   |
| >CTNNB1-G5 TSMGGTQQC | 14   | >CTNNB1-G5 TSMGATQQC | 11  | 3    |
| >CTNNB1-G5 TSMGGTQQC | 82   | >CTNNB1-G5 TSMGATQQC | 63  | 19   |
| >CTNNB1-G5 TSMGGTQQC | 280  | >CTNNB1-G5 TSMGATQQC | 239 | 41   |
| >CTNNB1-G5 TSMGGTQQC | 223  | >CTNNB1-G5 TSMGATQQC | 126 | 97   |
| >CTNNB1-G5 TSMGGTQQC | 4    | >CTNNB1-G5 TSMGATQQC | 4   | 0    |
| >CTNNB1-G5 TSMGGTQQC | 127  | >CTNNB1-G5 TSMGATQQC | 66  | 61   |
| >CTNNB1-G5 TSMGGTQQC | 23   | >CTNNB1-G5 TSMGATQQC | 20  | 3    |
| >CTNNB1-G5 TSMGGTQQC | 174  | >CTNNB1-G5 TSMGATQQC | 130 | 44   |
| >CTNNB1-G5 RTSMGGTQC | 115  | >CTNNB1-G5 RTSMGATQC | 67  | 48   |
| >CTNNB1-G5 RTSMGGTQC | 103  | >CTNNB1-G5 RTSMGATQC | 119 | 16   |

|                      |       |                      |      |       |
|----------------------|-------|----------------------|------|-------|
| >CTNNB1-G5 RTSMGGTQC | 48    | >CTNNB1-G5 RTSMGATQC | 49   | 1     |
| >CTNNB1-G5 RTSMGGTQC | 311   | >CTNNB1-G5 RTSMGATQC | 59   | 252   |
| >CTNNB1-G5 RTSMGGTQC | 116   | >CTNNB1-G5 RTSMGATQC | 51   | 65    |
| >CTNNB1-G5 RTSMGGTQC | 147   | >CTNNB1-G5 RTSMGATQC | 113  | 34    |
| >CTNNB1-G5 RTSMGGTQC | 3     | >CTNNB1-G5 RTSMGATQC | 3    | 0     |
| >CTNNB1-G5 RTSMGGTQC | 281   | >CTNNB1-G5 RTSMGATQC | 224  | 57    |
| >CTNNB1-G5 RTSMGGTQC | 20    | >CTNNB1-G5 RTSMGATQC | 15   | 5     |
| >CTNNB1-G5 RTSMGGTQC | 104   | >CTNNB1-G5 RTSMGATQC | 99   | 5     |
| >CTNNB1-G5 RTSMGGTQC | 8     | >CTNNB1-G5 RTSMGATQC | 8    | 0     |
| >CTNNB1-G5 RRTSMGGT  | 300   | >CTNNB1-G5 RRTSMGAT  | 390  | 90    |
| >CTNNB1-G5 RRTSMGGTQ | 434   | >CTNNB1-G5 RRTSMGATQ | 382  | 52    |
| >CTNNB1-G5 RRTSMGGTQ | 103   | >CTNNB1-G5 RRTSMGATQ | 142  | 39    |
| >CTNNB1-G5 RRTSMGGTQ | 537   | >CTNNB1-G5 RRTSMGATQ | 437  | 100   |
| >CTNNB1-G5 RRTSMGGTQ | 207   | >CTNNB1-G5 RRTSMGATQ | 187  | 20    |
| >CTNNB1-G5 RRTSMGGTQ | 320   | >CTNNB1-G5 RRTSMGATQ | 411  | 91    |
| >CTNNB1-G5 RRTSMGGTQ | 402   | >CTNNB1-G5 RRTSMGATQ | 447  | 45    |
| >CTNNB1-G5 TQRRTSMGG | 292   | >CTNNB1-G5 TQRRTSMGA | 21   | 271   |
| >CTNNB1-G5 TQRRTSMGG | 4027  | >CTNNB1-G5 TQRRTSMGA | 315  | 3712  |
| >CTNNB1-H2 HWQQQSYL  | 22    | >CTNNB1-H2 RWQQQSYL  | 10   | 12    |
| >CTNNB1-H2 HWQQQSYLE | 6379  | >CTNNB1-H2 RWQQQSYLE | 445  | 5934  |
| >CTNNB1-H2 HWQQQSYL  | 116   | >CTNNB1-H2 RWQQQSYL  | 52   | 64    |
| >CTNNB1-H2 HWQQQSYLE | 297   | >CTNNB1-H2 RWQQQSYLE | 127  | 170   |
| >CTNNB1-H2 SHWQQQSY  | 180   | >CTNNB1-H2 SRWQQQSY  | 780  | 600   |
| >CTNNB1-H2 SHWQQQSY  | 158   | >CTNNB1-H2 SRWQQQSY  | 218  | 60    |
| >CTNNB1-H2 SHWQQQSY  | 63    | >CTNNB1-H2 SRWQQQSY  | 41   | 22    |
| >CTNNB1-H2 SHWQQQSYL | 608   | >CTNNB1-H2 SRWQQQSYL | 226  | 382   |
| >CTNNB1-H2 SHWQQQSYL | 75    | >CTNNB1-H2 SRWQQQSYL | 1780 | 1705  |
| >CTNNB1-H2 SHWQQQSY  | 14069 | >CTNNB1-H2 SRWQQQSY  | 63   | 14006 |
| >CTNNB1-H2 SHWQQQSYL | 14723 | >CTNNB1-H2 SRWQQQSYL | 53   | 14670 |
| >CTNNB1-H2 SHWQQQSYL | 5160  | >CTNNB1-H2 SRWQQQSYL | 179  | 4981  |
| >CTNNB1-H2 SHWQQQSYL | 4588  | >CTNNB1-H2 SRWQQQSYL | 76   | 4512  |
| >CTNNB1-H2 SHWQQQSYL | 3166  | >CTNNB1-H2 SRWQQQSYL | 12   | 3154  |
| >CTNNB1-H2 MEPDRKAAV | 27793 | >CTNNB1-H2 MEPDRKAAV | 308  | 27485 |
| >CTNNB1-H2 VSHWQQQSY | 2225  | >CTNNB1-H2 VSRWQQQSY | 245  | 1980  |
| >CTNNB1-H2 VSHWQQQSY | 1076  | >CTNNB1-H2 VSRWQQQSY | 96   | 980   |
| >CTNNB1-H2 VSHWQQQSY | 27    | >CTNNB1-H2 VSRWQQQSY | 41   | 14    |
| >CTNNB1-H2 VSHWQQQSY | 403   | >CTNNB1-H2 VSRWQQQSY | 230  | 173   |
| >CTNNB1-H2 VSHWQQQSY | 212   | >CTNNB1-H2 VSRWQQQSY | 109  | 103   |
| >CTNNB1-H2 VSHWQQQSY | 6     | >CTNNB1-H2 VSRWQQQSY | 5    | 1     |
| >CTNNB1-H2 VSHWQQQSY | 18    | >CTNNB1-H2 VSRWQQQSY | 8    | 10    |
| >CTNNB1-H2 VSHWQQQSY | 283   | >CTNNB1-H2 VSRWQQQSY | 2004 | 1721  |
| >CTNNB1-H2 VSHWQQQSY | 479   | >CTNNB1-H2 VSRWQQQSY | 61   | 418   |
| >CTNNB1-H2 VSHWQQQSY | 139   | >CTNNB1-H2 VSRWQQQSY | 82   | 57    |

|                       |       |                       |      |       |
|-----------------------|-------|-----------------------|------|-------|
| >CTNNB1-H2 VSHWQQQSY  | 396   | >CTNNB1-H2 VSRWQQQSY  | 550  | 154   |
| >CTNNB1-H2 AVSHWQQQ!  | 77    | >CTNNB1-H2 AVSRWQQQ!  | 160  | 83    |
| >CTNNB1-H2 AVSHWQQQ!  | 245   | >CTNNB1-H2 AVSRWQQQ!  | 620  | 375   |
| >CTNNB1-H2 AVSHWQQQ!  | 368   | >CTNNB1-H2 AVSRWQQQ!  | 307  | 61    |
| >CTNNB1-H2 AVSHWQQQ!  | 40    | >CTNNB1-H2 AVSRWQQQ!  | 21   | 19    |
| >CTNNB1-H2 AVSHWQQQ!  | 163   | >CTNNB1-H2 AVSRWQQQ!  | 94   | 69    |
| >CTNNB1-H2 AVSHWQQQ!  | 140   | >CTNNB1-H2 AVSRWQQQ!  | 119  | 21    |
| >CTNNB1-H2 AVSHWQQQ!  | 488   | >CTNNB1-H2 AVSRWQQQ!  | 1345 | 857   |
| >CTNNB1-H2 AVSHWQQQ!  | 333   | >CTNNB1-H2 AVSRWQQQ!  | 397  | 64    |
| >CTNNB1-H2 AVSHWQQQ!  | 121   | >CTNNB1-H2 AVSRWQQQ!  | 168  | 47    |
| >CTNNB1-H2 AVSHWQQQ!  | 396   | >CTNNB1-H2 AVSRWQQQ!  | 751  | 355   |
| >CTNNB1-H2 AVSHWQQQ!  | 116   | >CTNNB1-H2 AVSRWQQQ!  | 513  | 397   |
| >CTNNB1-H2 AVSHWQQQ!  | 378   | >CTNNB1-H2 AVSRWQQQ!  | 185  | 193   |
| >CTNNB1-H2 AVSHWQQQ!  | 460   | >CTNNB1-H2 AVSRWQQQ!  | 495  | 35    |
| >CTNNB1-H2 AVSHWQQQ!  | 282   | >CTNNB1-H2 AVSRWQQQ!  | 140  | 142   |
| >CTNNB1-H2 AAVSHWQQ!  | 61    | >CTNNB1-H2 AAVSRWQQ!  | 324  | 263   |
| >CTNNB1-H2 AAVSHWQQ!  | 459   | >CTNNB1-H2 AAVSRWQQ!  | 1120 | 661   |
| >CTNNB1-H2 AAVSHWQQ!  | 540   | >CTNNB1-H2 AAVSRWQQ!  | 486  | 54    |
| >CTNNB1-H2 AAVSHWQQ!  | 144   | >CTNNB1-H2 AAVSRWQQ!  | 215  | 71    |
| >CTNNB1-H2 AAVSHWQQ!  | 58    | >CTNNB1-H2 AAVSRWQQ!  | 85   | 27    |
| >CTNNB1-H2 AAVSHWQQ!  | 10    | >CTNNB1-H2 AAVSRWQQ!  | 9    | 1     |
| >CTNNB1-H2 AAVSHWQQ!  | 91    | >CTNNB1-H2 AAVSRWQQ!  | 317  | 226   |
| >CTNNB1-H2 AAVSHWQQ!  | 112   | >CTNNB1-H2 AAVSRWQQ!  | 242  | 130   |
| >CTNNB1-H2 RKA AVSHW  | 55    | >CTNNB1-H2 RKA AVSRW  | 151  | 96    |
| >CTNNB1-H2 RKA AVSHW  | 38    | >CTNNB1-H2 RKA AVSRW  | 160  | 122   |
| >CTNNB1-H2 RKA AVSHW  | 203   | >CTNNB1-H2 RKA AVSRW  | 263  | 60    |
| >CTNNB1-H2 EPDRKAAVSH | 83    | >CTNNB1-H2 EPDRKAAVSR | 74   | 9     |
| >CTNNB1-H2 EPDRKAAVSH | 13    | >CTNNB1-H2 EPDRKAAVSR | 16   | 3     |
| >CTNNB1-H2 HWQQQSYL   | 22    | >CTNNB1-H2 YWQQQSYL   | 9    | 13    |
| >CTNNB1-H2 HWQQQSYL   | 116   | >CTNNB1-H2 YWQQQSYL   | 135  | 19    |
| >CTNNB1-H2 HWQQQSYLD  | 297   | >CTNNB1-H2 YWQQQSYLD  | 307  | 10    |
| >CTNNB1-H2 SHWQQQSYL  | 957   | >CTNNB1-H2 SYWQQQSYL  | 6    | 951   |
| >CTNNB1-H2 SHWQQQSY   | 20918 | >CTNNB1-H2 SYWQQQSY   | 323  | 20595 |
| >CTNNB1-H2 SHWQQQSYL  | 8027  | >CTNNB1-H2 SYWQQQSYL  | 7    | 8020  |
| >CTNNB1-H2 SHWQQQSY   | 180   | >CTNNB1-H2 SYWQQQSY   | 22   | 158   |
| >CTNNB1-H2 SHWQQQSY   | 158   | >CTNNB1-H2 SYWQQQSY   | 42   | 116   |
| >CTNNB1-H2 SHWQQQSY   | 2110  | >CTNNB1-H2 SYWQQQSY   | 226  | 1884  |
| >CTNNB1-H2 SHWQQQSY   | 63    | >CTNNB1-H2 SYWQQQSY   | 701  | 638   |
| >CTNNB1-H2 SHWQQQSYL  | 75    | >CTNNB1-H2 SYWQQQSYL  | 2911 | 2836  |
| >CTNNB1-H2 SHWQQQSYL  | 14310 | >CTNNB1-H2 SYWQQQSYL  | 208  | 14102 |
| >CTNNB1-H2 MEPDRKAAV  | 3553  | >CTNNB1-H2 MEPDRKAAV  | 55   | 3498  |
| >CTNNB1-H2 VSHWQQQSY  | 3176  | >CTNNB1-H2 VSYWQQQSY  | 408  | 2768  |
| >CTNNB1-H2 VSHWQQQSY  | 551   | >CTNNB1-H2 VSYWQQQSY  | 112  | 439   |

|                       |       |                       |     |       |
|-----------------------|-------|-----------------------|-----|-------|
| >CTNNB1-H2 VSHWQQQS\  | 27    | >CTNNB1-H2 VSYWQQQS\  | 17  | 10    |
| >CTNNB1-H2 VSHWQQQS\  | 403   | >CTNNB1-H2 VSYWQQQS\  | 169 | 234   |
| >CTNNB1-H2 VSHWQQQS\  | 212   | >CTNNB1-H2 VSYWQQQS\  | 46  | 166   |
| >CTNNB1-H2 VSHWQQQS\  | 6     | >CTNNB1-H2 VSYWQQQS\  | 4   | 2     |
| >CTNNB1-H2 VSHWQQQS\  | 18    | >CTNNB1-H2 VSYWQQQS\  | 7   | 11    |
| >CTNNB1-H2 VSHWQQQS\  | 636   | >CTNNB1-H2 VSYWQQQS\  | 148 | 488   |
| >CTNNB1-H2 VSHWQQQS\  | 1219  | >CTNNB1-H2 VSYWQQQS\  | 345 | 874   |
| >CTNNB1-H2 VSHWQQQS\  | 283   | >CTNNB1-H2 VSYWQQQS\  | 28  | 255   |
| >CTNNB1-H2 VSHWQQQS\  | 829   | >CTNNB1-H2 VSYWQQQS\  | 61  | 768   |
| >CTNNB1-H2 VSHWQQQS\  | 479   | >CTNNB1-H2 VSYWQQQS\  | 100 | 379   |
| >CTNNB1-H2 VSHWQQQS\  | 139   | >CTNNB1-H2 VSYWQQQS\  | 68  | 71    |
| >CTNNB1-H2 VSHWQQQS\  | 396   | >CTNNB1-H2 VSYWQQQS\  | 176 | 220   |
| >CTNNB1-H2 AVSHWQQQ\  | 77    | >CTNNB1-H2 AVSYWQQQ\  | 61  | 16    |
| >CTNNB1-H2 AVSHWQQQ\  | 245   | >CTNNB1-H2 AVSYWQQQ\  | 407 | 162   |
| >CTNNB1-H2 AVSHWQQQ\  | 368   | >CTNNB1-H2 AVSYWQQQ\  | 807 | 439   |
| >CTNNB1-H2 AVSHWQQQ\  | 40    | >CTNNB1-H2 AVSYWQQQ\  | 95  | 55    |
| >CTNNB1-H2 AVSHWQQQ\  | 681   | >CTNNB1-H2 AVSYWQQQ\  | 165 | 516   |
| >CTNNB1-H2 AVSHWQQQ\  | 679   | >CTNNB1-H2 AVSYWQQQ\  | 203 | 476   |
| >CTNNB1-H2 AVSHWQQQ\  | 163   | >CTNNB1-H2 AVSYWQQQ\  | 86  | 77    |
| >CTNNB1-H2 AVSHWQQQ\  | 140   | >CTNNB1-H2 AVSYWQQQ\  | 74  | 66    |
| >CTNNB1-H2 AVSHWQQQ\  | 488   | >CTNNB1-H2 AVSYWQQQ\  | 349 | 139   |
| >CTNNB1-H2 AVSHWQQQ\  | 333   | >CTNNB1-H2 AVSYWQQQ\  | 541 | 208   |
| >CTNNB1-H2 AVSHWQQQ\  | 121   | >CTNNB1-H2 AVSYWQQQ\  | 118 | 3     |
| >CTNNB1-H2 AVSHWQQQ\  | 396   | >CTNNB1-H2 AVSYWQQQ\  | 602 | 206   |
| >CTNNB1-H2 AVSHWQQQ\  | 116   | >CTNNB1-H2 AVSYWQQQ\  | 218 | 102   |
| >CTNNB1-H2 AVSHWQQQ\  | 378   | >CTNNB1-H2 AVSYWQQQ\  | 91  | 287   |
| >CTNNB1-H2 AVSHWQQQ\  | 460   | >CTNNB1-H2 AVSYWQQQ\  | 295 | 165   |
| >CTNNB1-H2 AVSHWQQQ\  | 282   | >CTNNB1-H2 AVSYWQQQ\  | 271 | 11    |
| >CTNNB1-H2 AAVSHWQQ\  | 61    | >CTNNB1-H2 AAVSYWQQ\  | 129 | 68    |
| >CTNNB1-H2 AAVSHWQQ\  | 459   | >CTNNB1-H2 AAVSYWQQ\  | 434 | 25    |
| >CTNNB1-H2 AAVSHWQQ\  | 540   | >CTNNB1-H2 AAVSYWQQ\  | 311 | 229   |
| >CTNNB1-H2 AAVSHWQQ\  | 144   | >CTNNB1-H2 AAVSYWQQ\  | 158 | 14    |
| >CTNNB1-H2 AAVSHWQQ\  | 58    | >CTNNB1-H2 AAVSYWQQ\  | 41  | 17    |
| >CTNNB1-H2 AAVSHWQQ\  | 10    | >CTNNB1-H2 AAVSYWQQ\  | 8   | 2     |
| >CTNNB1-H2 AAVSHWQQ\  | 91    | >CTNNB1-H2 AAVSYWQQ\  | 86  | 5     |
| >CTNNB1-H2 AAVSHWQQ\  | 112   | >CTNNB1-H2 AAVSYWQQ\  | 100 | 12    |
| >CTNNB1-H2 KAAVSHWQ\  | 537   | >CTNNB1-H2 KAAVSYWQ\  | 315 | 222   |
| >CTNNB1-H2 RKA AVSHW  | 55    | >CTNNB1-H2 RKA AVSYW  | 43  | 12    |
| >CTNNB1-H2 RKA AVSHW  | 556   | >CTNNB1-H2 RKA AVSYW  | 352 | 204   |
| >CTNNB1-H2 RKA AVSHW  | 38    | >CTNNB1-H2 RKA AVSYW  | 41  | 3     |
| >CTNNB1-H2 RKA AVSHW  | 203   | >CTNNB1-H2 RKA AVSYW  | 87  | 116   |
| >CTNNB1-H2 EPDRKAAVSH | 83    | >CTNNB1-H2 EPDRKAAVSY | 61  | 22    |
| >CTNNB1-H2 EPDRKAAVSH | 21716 | >CTNNB1-H2 EPDRKAAVSY | 48  | 21668 |

|                        |       |                        |      |       |
|------------------------|-------|------------------------|------|-------|
| >CTNNB1-H2 EPDRKAAVSI  | 13    | >CTNNB1-H2 EPDRKAAVSY  | 14   | 1     |
| >CTNNB1-H3 HSGATTTAPS  | 33    | >CTNNB1-H3 PSGATTTAPS  | 6311 | 6278  |
| >CTNNB1-H3 IHSGATTTA   | 20124 | >CTNNB1-H3 IPSGATTTA   | 73   | 20051 |
| >CTNNB1-H3 IHSGATTT    | 21023 | >CTNNB1-H3 IPSGATTT    | 129  | 20894 |
| >CTNNB1-H3 IHSGATTTA   | 17696 | >CTNNB1-H3 IPSGATTTA   | 44   | 17652 |
| >CTNNB1-H3 IHSGATTTAP: | 16254 | >CTNNB1-H3 IPSGATTTAP: | 61   | 16193 |
| >CTNNB1-H3 IHSGATTTA   | 15775 | >CTNNB1-H3 IPSGATTTA   | 34   | 15741 |
| >CTNNB1-H3 IHSGATTTAP: | 22550 | >CTNNB1-H3 IPSGATTTAP: | 447  | 22103 |
| >CTNNB1-H3 GIHSGATTTA  | 432   | >CTNNB1-H3 GIPSGATTTA  | 514  | 82    |
| >CTNNB1-H3 GIHSGATTTA  | 276   | >CTNNB1-H3 GIPSGATTTA  | 482  | 206   |
| >CTNNB1-H3 GIHSGATTTA  | 362   | >CTNNB1-H3 GIPSGATTTA  | 505  | 143   |
| >CTNNB1-H3 YLDSGIHS    | 603   | >CTNNB1-H3 YLDSGIPS    | 186  | 417   |
| >CTNNB1-H3 YLDSGIHSGA  | 78    | >CTNNB1-H3 YLDSGIPSGA  | 50   | 28    |
| >CTNNB1-H3 YLDSGIHSGA  | 212   | >CTNNB1-H3 YLDSGIPSGA  | 267  | 55    |
| >CTNNB1-H3 YLDSGIHSG   | 278   | >CTNNB1-H3 YLDSGIPSG   | 2161 | 1883  |
| >CTNNB1-H3 YLDSGIHSGA  | 24    | >CTNNB1-H3 YLDSGIPSGA  | 19   | 5     |
| >CTNNB1-H3 YLDSGIHSGA  | 284   | >CTNNB1-H3 YLDSGIPSGA  | 1021 | 737   |
| >CTNNB1-H3 YLDSGIHSGA  | 32    | >CTNNB1-H3 YLDSGIPSGA  | 17   | 15    |
| >CTNNB1-H3 YLDSGIHSGA  | 78    | >CTNNB1-H3 YLDSGIPSGA  | 230  | 152   |
| >CTNNB1-H3 YLDSGIHS    | 419   | >CTNNB1-H3 YLDSGIPS    | 226  | 193   |
| >CTNNB1-H3 YLDSGIHSG   | 570   | >CTNNB1-H3 YLDSGIPSG   | 382  | 188   |
| >CTNNB1-H3 YLDSGIHSGA  | 280   | >CTNNB1-H3 YLDSGIPSGA  | 190  | 90    |
| >CTNNB1-H3 YLDSGIHSGA  | 178   | >CTNNB1-H3 YLDSGIPSGA  | 206  | 28    |
| >CTNNB1-H3 YLDSGIHS    | 47    | >CTNNB1-H3 YLDSGIPS    | 29   | 18    |
| >CTNNB1-H3 YLDSGIHSG   | 15    | >CTNNB1-H3 YLDSGIPSG   | 19   | 4     |
| >CTNNB1-H3 YLDSGIHSGA  | 2     | >CTNNB1-H3 YLDSGIPSGA  | 2    | 0     |
| >CTNNB1-H3 YLDSGIHSGA  | 12    | >CTNNB1-H3 YLDSGIPSGA  | 10   | 2     |
| >CTNNB1-H3 YLDSGIHS    | 395   | >CTNNB1-H3 YLDSGIPS    | 306  | 89    |
| >CTNNB1-H3 YLDSGIHSG   | 139   | >CTNNB1-H3 YLDSGIPSG   | 569  | 430   |
| >CTNNB1-H3 YLDSGIHSGA  | 8     | >CTNNB1-H3 YLDSGIPSGA  | 7    | 1     |
| >CTNNB1-H3 YLDSGIHSGA  | 83    | >CTNNB1-H3 YLDSGIPSGA  | 142  | 59    |
| >CTNNB1-H3 YLDSGIHS    | 101   | >CTNNB1-H3 YLDSGIPS    | 150  | 49    |
| >CTNNB1-H3 YLDSGIHSG   | 140   | >CTNNB1-H3 YLDSGIPSG   | 93   | 47    |
| >CTNNB1-H3 YLDSGIHSGA  | 7     | >CTNNB1-H3 YLDSGIPSGA  | 6    | 1     |
| >CTNNB1-H3 YLDSGIHSGA  | 121   | >CTNNB1-H3 YLDSGIPSGA  | 91   | 30    |
| >CTNNB1-H3 YLDSGIHSGA  | 7     | >CTNNB1-H3 YLDSGIPSGA  | 4    | 3     |
| >CTNNB1-H3 YLDSGIHSGA  | 255   | >CTNNB1-H3 YLDSGIPSGA  | 275  | 20    |
| >CTNNB1-H3 YLDSGIHS    | 66    | >CTNNB1-H3 YLDSGIPS    | 85   | 19    |
| >CTNNB1-H3 YLDSGIHSG   | 13    | >CTNNB1-H3 YLDSGIPSG   | 32   | 19    |
| >CTNNB1-H3 YLDSGIHSGA  | 2     | >CTNNB1-H3 YLDSGIPSGA  | 2    | 0     |
| >CTNNB1-H3 YLDSGIHSGA  | 36    | >CTNNB1-H3 YLDSGIPSGA  | 39   | 3     |
| >CTNNB1-H3 SYLDSGIHSG/ | 410   | >CTNNB1-H3 SYLDSGIPSG/ | 365  | 45    |
| >CTNNB1-H3 HSGATTTAPS  | 1110  | >CTNNB1-H3 RSGATTTAPS  | 319  | 791   |

|                        |       |                        |      |       |
|------------------------|-------|------------------------|------|-------|
| >CTNNB1-H3 HSGATTTAPS  | 984   | >CTNNB1-H3 RSGATTTAPS  | 103  | 881   |
| >CTNNB1-H3 HSGATTTAPS  | 1025  | >CTNNB1-H3 RSGATTTAPS  | 230  | 795   |
| >CTNNB1-H3 HSGATTTAPS  | 33    | >CTNNB1-H3 RSGATTTAPS  | 7    | 26    |
| >CTNNB1-H3 HSGATTTAPS  | 1205  | >CTNNB1-H3 RSGATTTAPS  | 74   | 1131  |
| >CTNNB1-H3 HSGATTTAPS  | 2590  | >CTNNB1-H3 RSGATTTAPS  | 471  | 2119  |
| >CTNNB1-H3 HSGATTTAPS  | 654   | >CTNNB1-H3 RSGATTTAPS  | 96   | 558   |
| >CTNNB1-H3 GIHSGATTTA  | 432   | >CTNNB1-H3 GIRSGATTTA  | 1264 | 832   |
| >CTNNB1-H3 GIHSGATTTA  | 276   | >CTNNB1-H3 GIRSGATTTA  | 494  | 218   |
| >CTNNB1-H3 GIHSGATTTA  | 362   | >CTNNB1-H3 GIRSGATTTA  | 1188 | 826   |
| >CTNNB1-H3 GIHSGATTTA  | 2370  | >CTNNB1-H3 GIRSGATTTA  | 361  | 2009  |
| >CTNNB1-H3 YLDSGIHSGA  | 78    | >CTNNB1-H3 YLDSGIRSGA  | 173  | 95    |
| >CTNNB1-H3 YLDSGIHSGA  | 212   | >CTNNB1-H3 YLDSGIRSGA  | 672  | 460   |
| >CTNNB1-H3 YLDSGIHSG   | 278   | >CTNNB1-H3 YLDSGIRSG   | 4331 | 4053  |
| >CTNNB1-H3 YLDSGIHSGA  | 24    | >CTNNB1-H3 YLDSGIRSGA  | 35   | 11    |
| >CTNNB1-H3 YLDSGIHSGA  | 284   | >CTNNB1-H3 YLDSGIRSGA  | 1146 | 862   |
| >CTNNB1-H3 YLDSGIHSGA  | 32    | >CTNNB1-H3 YLDSGIRSGA  | 47   | 15    |
| >CTNNB1-H3 YLDSGIHSGA  | 78    | >CTNNB1-H3 YLDSGIRSGA  | 195  | 117   |
| >CTNNB1-H3 YLDSGIHS    | 419   | >CTNNB1-H3 YLDSGIRS    | 2097 | 1678  |
| >CTNNB1-H3 YLDSGIHSGA  | 280   | >CTNNB1-H3 YLDSGIRSGA  | 422  | 142   |
| >CTNNB1-H3 YLDSGIHSGA  | 178   | >CTNNB1-H3 YLDSGIRSGA  | 499  | 321   |
| >CTNNB1-H3 YLDSGIHS    | 47    | >CTNNB1-H3 YLDSGIRS    | 47   | 0     |
| >CTNNB1-H3 YLDSGIHSG   | 15    | >CTNNB1-H3 YLDSGIRSG   | 91   | 76    |
| >CTNNB1-H3 YLDSGIHSGA  | 2     | >CTNNB1-H3 YLDSGIRSGA  | 6    | 4     |
| >CTNNB1-H3 YLDSGIHSGA  | 12    | >CTNNB1-H3 YLDSGIRSGA  | 22   | 10    |
| >CTNNB1-H3 YLDSGIHS    | 395   | >CTNNB1-H3 YLDSGIRS    | 2191 | 1796  |
| >CTNNB1-H3 YLDSGIHSG   | 139   | >CTNNB1-H3 YLDSGIRSG   | 2276 | 2137  |
| >CTNNB1-H3 YLDSGIHSGA  | 8     | >CTNNB1-H3 YLDSGIRSGA  | 31   | 23    |
| >CTNNB1-H3 YLDSGIHSGA  | 83    | >CTNNB1-H3 YLDSGIRSGA  | 282  | 199   |
| >CTNNB1-H3 YLDSGIHS    | 101   | >CTNNB1-H3 YLDSGIRS    | 682  | 581   |
| >CTNNB1-H3 YLDSGIHSG   | 140   | >CTNNB1-H3 YLDSGIRSG   | 2748 | 2608  |
| >CTNNB1-H3 YLDSGIHSGA  | 7     | >CTNNB1-H3 YLDSGIRSGA  | 12   | 5     |
| >CTNNB1-H3 YLDSGIHSGA  | 121   | >CTNNB1-H3 YLDSGIRSGA  | 267  | 146   |
| >CTNNB1-H3 YLDSGIHSGA  | 7     | >CTNNB1-H3 YLDSGIRSGA  | 25   | 18    |
| >CTNNB1-H3 YLDSGIHSGA  | 255   | >CTNNB1-H3 YLDSGIRSGA  | 899  | 644   |
| >CTNNB1-H3 YLDSGIHS    | 66    | >CTNNB1-H3 YLDSGIRS    | 94   | 28    |
| >CTNNB1-H3 YLDSGIHSG   | 13    | >CTNNB1-H3 YLDSGIRSG   | 1044 | 1031  |
| >CTNNB1-H3 YLDSGIHSGA  | 2     | >CTNNB1-H3 YLDSGIRSGA  | 3    | 1     |
| >CTNNB1-H3 YLDSGIHSGA  | 36    | >CTNNB1-H3 YLDSGIRSGA  | 66   | 30    |
| >CTNNB1-H3 SYLDSGIH    | 13317 | >CTNNB1-H3 SYLDSGIR    | 220  | 13097 |
| >CTNNB1-H3 SYLDSGIH    | 16883 | >CTNNB1-H3 SYLDSGIR    | 42   | 16841 |
| >CTNNB1-H3 SYLDSGIHSG/ | 410   | >CTNNB1-H3 SYLDSGIRSG/ | 326  | 84    |
| >CTNNB1-H3 QSYLDSGIH   | 14611 | >CTNNB1-H3 QSYLDSGIR   | 244  | 14367 |
| >CTNNB1-H3 HSGATTTAPS  | 2105  | >CTNNB1-H3 YSGATTTAPS  | 486  | 1619  |

|                       |       |                       |     |       |
|-----------------------|-------|-----------------------|-----|-------|
| >CTNNB1-H3 HSGATTTAPS | 1025  | >CTNNB1-H3 YSGATTTAPS | 203 | 822   |
| >CTNNB1-H3 HSGATTTAPS | 33    | >CTNNB1-H3 YSGATTTAPS | 15  | 18    |
| >CTNNB1-H3 HSGATTTAPS | 506   | >CTNNB1-H3 YSGATTTAPS | 391 | 115   |
| >CTNNB1-H3 HSGATTTAPS | 2590  | >CTNNB1-H3 YSGATTTAPS | 94  | 2496  |
| >CTNNB1-H3 HSGATTTAPS | 3589  | >CTNNB1-H3 YSGATTTAPS | 444 | 3145  |
| >CTNNB1-H3 IHSGATTTA  | 17709 | >CTNNB1-H3 IYSGATTTA  | 437 | 17272 |
| >CTNNB1-H3 QQQSYLDSGI | 10136 | >CTNNB1-H3 QQQSYLDSGI | 74  | 10062 |
| >CTNNB1-H3 QQQSYLDSGI | 4026  | >CTNNB1-H3 QQQSYLDSGI | 75  | 3951  |
| >CTNNB1-H3 QQQSYLDSGI | 5809  | >CTNNB1-H3 QQQSYLDSGI | 144 | 5665  |
| >CTNNB1-H3 QQQSYLDSGI | 2245  | >CTNNB1-H3 QQQSYLDSGI | 81  | 2164  |
| >CTNNB1-H3 GIHSGATTTA | 432   | >CTNNB1-H3 GIYSGATTTA | 59  | 373   |
| >CTNNB1-H3 GIHSGATT   | 2383  | >CTNNB1-H3 GIYSGATT   | 332 | 2051  |
| >CTNNB1-H3 GIHSGATTT  | 1717  | >CTNNB1-H3 GIYSGATTT  | 208 | 1509  |
| >CTNNB1-H3 GIHSGATTTA | 276   | >CTNNB1-H3 GIYSGATTTA | 52  | 224   |
| >CTNNB1-H3 GIHSGATTTA | 2515  | >CTNNB1-H3 GIYSGATTTA | 206 | 2309  |
| >CTNNB1-H3 GIHSGATTTA | 3137  | >CTNNB1-H3 GIYSGATTTA | 160 | 2977  |
| >CTNNB1-H3 GIHSGATTTA | 362   | >CTNNB1-H3 GIYSGATTTA | 63  | 299   |
| >CTNNB1-H3 YLDSGIHS   | 603   | >CTNNB1-H3 YLDSGIYS   | 88  | 515   |
| >CTNNB1-H3 YLDSGIHSG  | 773   | >CTNNB1-H3 YLDSGIYSG  | 176 | 597   |
| >CTNNB1-H3 YLDSGIHSGA | 78    | >CTNNB1-H3 YLDSGIYSGA | 66  | 12    |
| >CTNNB1-H3 YLDSGIHSGA | 212   | >CTNNB1-H3 YLDSGIYSGA | 111 | 101   |
| >CTNNB1-H3 YLDSGIHS   | 1509  | >CTNNB1-H3 YLDSGIYS   | 286 | 1223  |
| >CTNNB1-H3 YLDSGIHSG  | 278   | >CTNNB1-H3 YLDSGIYSG  | 135 | 143   |
| >CTNNB1-H3 YLDSGIHSGA | 24    | >CTNNB1-H3 YLDSGIYSGA | 16  | 8     |
| >CTNNB1-H3 YLDSGIHSGA | 284   | >CTNNB1-H3 YLDSGIYSGA | 163 | 121   |
| >CTNNB1-H3 YLDSGIHSGA | 32    | >CTNNB1-H3 YLDSGIYSGA | 26  | 6     |
| >CTNNB1-H3 YLDSGIHSGA | 78    | >CTNNB1-H3 YLDSGIYSGA | 106 | 28    |
| >CTNNB1-H3 YLDSGIHS   | 419   | >CTNNB1-H3 YLDSGIYS   | 273 | 146   |
| >CTNNB1-H3 YLDSGIHSGA | 280   | >CTNNB1-H3 YLDSGIYSGA | 179 | 101   |
| >CTNNB1-H3 YLDSGIHSGA | 178   | >CTNNB1-H3 YLDSGIYSGA | 145 | 33    |
| >CTNNB1-H3 YLDSGIHS   | 47    | >CTNNB1-H3 YLDSGIYS   | 10  | 37    |
| >CTNNB1-H3 YLDSGIHSG  | 15    | >CTNNB1-H3 YLDSGIYSG  | 15  | 0     |
| >CTNNB1-H3 YLDSGIHSGA | 2     | >CTNNB1-H3 YLDSGIYSGA | 2   | 0     |
| >CTNNB1-H3 YLDSGIHSGA | 12    | >CTNNB1-H3 YLDSGIYSGA | 8   | 4     |
| >CTNNB1-H3 YLDSGIHS   | 395   | >CTNNB1-H3 YLDSGIYS   | 135 | 260   |
| >CTNNB1-H3 YLDSGIHSG  | 139   | >CTNNB1-H3 YLDSGIYSG  | 99  | 40    |
| >CTNNB1-H3 YLDSGIHSGA | 8     | >CTNNB1-H3 YLDSGIYSGA | 6   | 2     |
| >CTNNB1-H3 YLDSGIHSGA | 83    | >CTNNB1-H3 YLDSGIYSGA | 61  | 22    |
| >CTNNB1-H3 YLDSGIHS   | 101   | >CTNNB1-H3 YLDSGIYS   | 64  | 37    |
| >CTNNB1-H3 YLDSGIHSG  | 140   | >CTNNB1-H3 YLDSGIYSG  | 186 | 46    |
| >CTNNB1-H3 YLDSGIHSGA | 7     | >CTNNB1-H3 YLDSGIYSGA | 6   | 1     |
| >CTNNB1-H3 YLDSGIHSGA | 121   | >CTNNB1-H3 YLDSGIYSGA | 93  | 28    |
| >CTNNB1-H3 YLDSGIHS   | 2599  | >CTNNB1-H3 YLDSGIYS   | 498 | 2101  |



|                       |       |                        |     |       |
|-----------------------|-------|------------------------|-----|-------|
| >CTNNB1-H3 YLDSGIHSGA | 7     | >CTNNB1-H3 YLDSGIYSGA  | 4   | 3     |
| >CTNNB1-H3 YLDSGIHSGA | 255   | >CTNNB1-H3 YLDSGIYSGA  | 199 | 56    |
| >CTNNB1-H3 YLDSGIHS   | 66    | >CTNNB1-H3 YLDSGIYS    | 41  | 25    |
| >CTNNB1-H3 YLDSGIHSG  | 13    | >CTNNB1-H3 YLDSGIYSG   | 71  | 58    |
| >CTNNB1-H3 YLDSGIHSGA | 2     | >CTNNB1-H3 YLDSGIYSGA  | 2   | 0     |
| >CTNNB1-H3 YLDSGIHSGA | 36    | >CTNNB1-H3 YLDSGIYSGA  | 30  | 6     |
| >CTNNB1-H3 SYLDSGIH   | 5044  | >CTNNB1-H3 SYLDSGIY    | 45  | 4999  |
| >CTNNB1-H3 SYLDSGIH   | 8471  | >CTNNB1-H3 SYLDSGIY    | 102 | 8369  |
| >CTNNB1-H3 SYLDSGIH   | 17651 | >CTNNB1-H3 SYLDSGIY    | 178 | 17473 |
| >CTNNB1-H3 SYLDSGIH   | 12833 | >CTNNB1-H3 SYLDSGIY    | 392 | 12441 |
| >CTNNB1-H3 SYLDSGIHSG | 410   | >CTNNB1-H3 SYLDSGIYSGA | 274 | 136   |
| >CTNNB1-H3 QSYLDSGIH  | 14535 | >CTNNB1-H3 QSYLDSGIY   | 300 | 14235 |
| >CTNNB1-H3 QSYLDSGIH  | 7576  | >CTNNB1-H3 QSYLDSGIY   | 49  | 7527  |
| >CTNNB1-H3 QSYLDSGIH  | 5809  | >CTNNB1-H3 QSYLDSGIY   | 13  | 5796  |
| >CTNNB1-H3 QSYLDSGIH  | 7398  | >CTNNB1-H3 QSYLDSGIY   | 340 | 7058  |
| >CTNNB1-H3 QSYLDSGIH  | 1475  | >CTNNB1-H3 QSYLDSGIY   | 57  | 1418  |
| >CTNNB1-H3 QQSYLDSGIH | 19659 | >CTNNB1-H3 QQSYLDSGIY  | 90  | 19569 |
| >CTNNB1-H3 QQSYLDSGIH | 3508  | >CTNNB1-H3 QQSYLDSGIY  | 70  | 3438  |
| >CTNNB1-H3 QQSYLDSGIH | 7814  | >CTNNB1-H3 QQSYLDSGIY  | 174 | 7640  |
| >CTNNB1-H3 QQSYLDSGIH | 2269  | >CTNNB1-H3 QQSYLDSGIY  | 78  | 2191  |
| >CTNNB1-H3 QQSYLDSGIH | 17188 | >CTNNB1-H3 QQSYLDSGIY  | 137 | 17051 |
| >CTNNB1-I19 IVRTMQNTN | 216   | >CTNNB1-I19 LVRTMQNTN  | 91  | 125   |
| >CTNNB1-I19 IVRTMQNT  | 436   | >CTNNB1-I19 LVRTMQNT   | 453 | 17    |
| >CTNNB1-I19 IVRTMQNTN | 93    | >CTNNB1-I19 LVRTMQNTN  | 96  | 3     |
| >CTNNB1-I19 AIVRTMQNT | 4398  | >CTNNB1-I19 ALVRTMQNT  | 488 | 3910  |
| >CTNNB1-I19 AIVRTMQNT | 6859  | >CTNNB1-I19 ALVRTMQNT  | 98  | 6761  |
| >CTNNB1-I19 IMRSPQMVS | 1077  | >CTNNB1-I19 IMRSPQMVS  | 302 | 775   |
| >CTNNB1-I19 IMRSPQMVS | 19    | >CTNNB1-I19 IMRSPQMVS  | 32  | 13    |
| >CTNNB1-I19 IMRSPQMVS | 42    | >CTNNB1-I19 IMRSPQMVS  | 48  | 6     |
| >CTNNB1-I19 IMRSPQMVS | 52    | >CTNNB1-I19 IMRSPQMVS  | 14  | 38    |
| >CTNNB1-I19 IMRSPQMVS | 118   | >CTNNB1-I19 IMRSPQMVS  | 371 | 253   |
| >CTNNB1-I19 IMRSPQMVS | 1180  | >CTNNB1-I19 IMRSPQMVS  | 101 | 1079  |
| >CTNNB1-I19 IMRSPQMVS | 143   | >CTNNB1-I19 IMRSPQMVS  | 72  | 71    |
| >CTNNB1-I19 IMRSPQMVS | 849   | >CTNNB1-I19 IMRSPQMVS  | 390 | 459   |
| >CTNNB1-I19 IMRSPQMVS | 9     | >CTNNB1-I19 IMRSPQMVS  | 6   | 3     |
| >CTNNB1-I19 IMRSPQMVS | 1594  | >CTNNB1-I19 IMRSPQMVS  | 390 | 1204  |
| >CTNNB1-I19 IMRSPQMVS | 377   | >CTNNB1-I19 IMRSPQMVS  | 172 | 205   |
| >CTNNB1-I19 VSAIVRTM  | 21    | >CTNNB1-I19 VSALVRTM   | 41  | 20    |
| >CTNNB1-I19 VSAIVRTM  | 454   | >CTNNB1-I19 VSALVRTM   | 520 | 66    |
| >CTNNB1-I19 VSAIVRTM  | 140   | >CTNNB1-I19 VSALVRTM   | 86  | 54    |
| >CTNNB1-I19 MVSAIVRT  | 346   | >CTNNB1-I19 MVSALVRT   | 693 | 347   |
| >CTNNB1-I19 MVSAIVRTM | 201   | >CTNNB1-I19 MVSALVRTM  | 560 | 359   |
| >CTNNB1-I19 MVSAIVRTM | 298   | >CTNNB1-I19 MVSALVRTM  | 490 | 192   |

|                         |      |                         |      |      |
|-------------------------|------|-------------------------|------|------|
| >CTNNB1-I19 MVSAIVRTM   | 258  | >CTNNB1-I19 MVSALVRTM   | 651  | 393  |
| >CTNNB1-I19 MVSAIVRT    | 39   | >CTNNB1-I19 MVSALVRT    | 158  | 119  |
| >CTNNB1-I19 MVSAIVRTM   | 58   | >CTNNB1-I19 MVSALVRTM   | 388  | 330  |
| >CTNNB1-I19 MVSAIVRTM   | 412  | >CTNNB1-I19 MVSALVRTM   | 233  | 179  |
| >CTNNB1-I19 MVSAIVRTM   | 526  | >CTNNB1-I19 MVSALVRTM   | 300  | 226  |
| >CTNNB1-I19 MVSAIVRTM   | 54   | >CTNNB1-I19 MVSALVRTM   | 54   | 0    |
| >CTNNB1-I19 MVSAIVRTM   | 105  | >CTNNB1-I19 MVSALVRTM   | 129  | 24   |
| >CTNNB1-I19 MVSAIVRTM   | 139  | >CTNNB1-I19 MVSALVRTM   | 155  | 16   |
| >CTNNB1-I19 QMVSAIVRTI  | 223  | >CTNNB1-I19 QMVSALVRTI  | 250  | 27   |
| >CTNNB1-I19 QMVSAIVRTI  | 352  | >CTNNB1-I19 QMVSALVRTI  | 392  | 40   |
| >CTNNB1-I19 QMVSAIVRTI  | 258  | >CTNNB1-I19 QMVSALVRTI  | 489  | 231  |
| >CTNNB1-I19 QMVSAIVRT   | 354  | >CTNNB1-I19 QMVSALVRT   | 819  | 465  |
| >CTNNB1-I19 QMVSAIVRTI  | 129  | >CTNNB1-I19 QMVSALVRTI  | 89   | 40   |
| >CTNNB1-I19 QMVSAIVR    | 177  | >CTNNB1-I19 QMVSALVR    | 306  | 129  |
| >CTNNB1-I19 QMVSAIVR    | 85   | >CTNNB1-I19 QMVSALVR    | 172  | 87   |
| >CTNNB1-I19 QMVSAIVRTI  | 128  | >CTNNB1-I19 QMVSALVRTI  | 126  | 2    |
| >CTNNB1-I19 QMVSAIVRTI  | 47   | >CTNNB1-I19 QMVSALVRTI  | 58   | 11   |
| >CTNNB1-I19 QMVSAIVR    | 66   | >CTNNB1-I19 QMVSALVR    | 81   | 15   |
| >CTNNB1-I19 PQMVSAIV    | 360  | >CTNNB1-I19 PQMVSALV    | 118  | 242  |
| >CTNNB1-I19 PQMVSAIV    | 490  | >CTNNB1-I19 PQMVSALV    | 1131 | 641  |
| >CTNNB1-I19 PQMVSAIVRTI | 82   | >CTNNB1-I19 PQMVSALVRTI | 81   | 1    |
| >CTNNB1-I19 SPQMVSAL    | 287  | >CTNNB1-I19 SPQMVSAL    | 711  | 424  |
| >CTNNB1-I19 SPQMVSAL    | 1210 | >CTNNB1-I19 SPQMVSAL    | 485  | 725  |
| >CTNNB1-I19 SPQMVSAL    | 52   | >CTNNB1-I19 SPQMVSAL    | 20   | 32   |
| >CTNNB1-I19 SPQMVSALV   | 177  | >CTNNB1-I19 SPQMVSALV   | 724  | 547  |
| >CTNNB1-I19 SPQMVSAL    | 899  | >CTNNB1-I19 SPQMVSAL    | 307  | 592  |
| >CTNNB1-I19 SPQMVSAL    | 1046 | >CTNNB1-I19 SPQMVSAL    | 212  | 834  |
| >CTNNB1-I19 SPQMVSAL    | 2450 | >CTNNB1-I19 SPQMVSAL    | 176  | 2274 |
| >CTNNB1-I19 SPQMVSAL    | 524  | >CTNNB1-I19 SPQMVSAL    | 143  | 381  |
| >CTNNB1-I19 RSPQMVSAL   | 318  | >CTNNB1-I19 RSPQMVSAL   | 374  | 56   |
| >CTNNB1-I19 RSPQMVSALI  | 368  | >CTNNB1-I19 RSPQMVSALI  | 620  | 252  |
| >CTNNB1-I19 RSPQMVSAL   | 50   | >CTNNB1-I19 RSPQMVSAL   | 134  | 84   |
| >CTNNB1-I19 RSPQMVSALI  | 225  | >CTNNB1-I19 RSPQMVSALI  | 103  | 122  |
| >CTNNB1-I19 RSPQMVSAL   | 71   | >CTNNB1-I19 RSPQMVSAL   | 19   | 52   |
| >CTNNB1-I19 RSPQMVSAL   | 9    | >CTNNB1-I19 RSPQMVSAL   | 4    | 5    |
| >CTNNB1-I19 RSPQMVSALI  | 5    | >CTNNB1-I19 RSPQMVSALI  | 4    | 1    |
| >CTNNB1-I19 RSPQMVSAL   | 927  | >CTNNB1-I19 RSPQMVSAL   | 398  | 529  |
| >CTNNB1-I19 RSPQMVSALI  | 149  | >CTNNB1-I19 RSPQMVSALI  | 131  | 18   |
| >CTNNB1-I19 RSPQMVSAL   | 1877 | >CTNNB1-I19 RSPQMVSAL   | 373  | 1504 |
| >CTNNB1-I19 RSPQMVSALI  | 231  | >CTNNB1-I19 RSPQMVSALI  | 205  | 26   |
| >CTNNB1-I19 RSPQMVSAL   | 16   | >CTNNB1-I19 RSPQMVSAL   | 152  | 136  |
| >CTNNB1-I19 MRSPQMVSAL  | 1014 | >CTNNB1-I19 MRSPQMVSAL  | 191  | 823  |
| >CTNNB1-I19 MRSPQMVSAL  | 94   | >CTNNB1-I19 MRSPQMVSAL  | 60   | 34   |

|                                     |       |                                     |       |       |
|-------------------------------------|-------|-------------------------------------|-------|-------|
| >CTNNB1-I1 <sup>ε</sup> MRSPQMVS/   | 283   | >CTNNB1-I1 <sup>ε</sup> MRSPQMVS/   | 588   | 305   |
| >CTNNB1-I1 <sup>ε</sup> MRSPQMVS/   | 694   | >CTNNB1-I1 <sup>ε</sup> MRSPQMVS/   | 208   | 486   |
| >CTNNB1-I1 <sup>ε</sup> MRSPQMVS/   | 96    | >CTNNB1-I1 <sup>ε</sup> MRSPQMVS/   | 13    | 83    |
| >CTNNB1-I1 <sup>ε</sup> MRSPQMVS/   | 197   | >CTNNB1-I1 <sup>ε</sup> MRSPQMVS/   | 534   | 337   |
| >CTNNB1-I1 <sup>ε</sup> MRSPQMVS/   | 788   | >CTNNB1-I1 <sup>ε</sup> MRSPQMVS/   | 224   | 564   |
| >CTNNB1-I1 <sup>ε</sup> MRSPQMVS/   | 362   | >CTNNB1-I1 <sup>ε</sup> MRSPQMVS/   | 301   | 61    |
| >CTNNB1-I3 <sup>ε</sup> GIHSGATTTA  | 432   | >CTNNB1-I3 <sup>ε</sup> GKHSGATTTA/ | 13865 | 13433 |
| >CTNNB1-I3 <sup>ε</sup> GIHSGATTTA  | 276   | >CTNNB1-I3 <sup>ε</sup> GKHSGATTTA/ | 11901 | 11625 |
| >CTNNB1-I3 <sup>ε</sup> GIHSGATTTA  | 362   | >CTNNB1-I3 <sup>ε</sup> GKHSGATTTA/ | 25672 | 25310 |
| >CTNNB1-I3 <sup>ε</sup> WQQQSYLDS   | 268   | >CTNNB1-I3 <sup>ε</sup> WQQQSYLDS   | 19797 | 19529 |
| >CTNNB1-I3 <sup>ε</sup> WQQQSYLDS   | 431   | >CTNNB1-I3 <sup>ε</sup> WQQQSYLDS   | 8518  | 8087  |
| >CTNNB1-I3 <sup>ε</sup> WQQQSYLDS   | 187   | >CTNNB1-I3 <sup>ε</sup> WQQQSYLDS   | 1405  | 1218  |
| >CTNNB1-I3 <sup>ε</sup> YLDSGIHSGA  | 78    | >CTNNB1-I3 <sup>ε</sup> YLDSGKHSGA  | 505   | 427   |
| >CTNNB1-I3 <sup>ε</sup> YLDSGIHSGA  | 212   | >CTNNB1-I3 <sup>ε</sup> YLDSGKHSGA  | 923   | 711   |
| >CTNNB1-I3 <sup>ε</sup> YLDSGIHSG   | 278   | >CTNNB1-I3 <sup>ε</sup> YLDSGKHSG   | 5498  | 5220  |
| >CTNNB1-I3 <sup>ε</sup> YLDSGIHSGA  | 24    | >CTNNB1-I3 <sup>ε</sup> YLDSGKHSGA  | 76    | 52    |
| >CTNNB1-I3 <sup>ε</sup> YLDSGIHSGA  | 284   | >CTNNB1-I3 <sup>ε</sup> YLDSGKHSGA  | 1422  | 1138  |
| >CTNNB1-I3 <sup>ε</sup> YLDSGIHSGA  | 32    | >CTNNB1-I3 <sup>ε</sup> YLDSGKHSGA  | 86    | 54    |
| >CTNNB1-I3 <sup>ε</sup> YLDSGIHSGA  | 78    | >CTNNB1-I3 <sup>ε</sup> YLDSGKHSGA  | 504   | 426   |
| >CTNNB1-I3 <sup>ε</sup> YLDSGIHS    | 419   | >CTNNB1-I3 <sup>ε</sup> YLDSGKHS    | 4466  | 4047  |
| >CTNNB1-I3 <sup>ε</sup> YLDSGIHSGA  | 280   | >CTNNB1-I3 <sup>ε</sup> YLDSGKHSGA  | 977   | 697   |
| >CTNNB1-I3 <sup>ε</sup> YLDSGIHSGA  | 178   | >CTNNB1-I3 <sup>ε</sup> YLDSGKHSGA  | 673   | 495   |
| >CTNNB1-I3 <sup>ε</sup> YLDSGIHS    | 47    | >CTNNB1-I3 <sup>ε</sup> YLDSGKHS    | 360   | 313   |
| >CTNNB1-I3 <sup>ε</sup> YLDSGIHSG   | 15    | >CTNNB1-I3 <sup>ε</sup> YLDSGKHSG   | 143   | 128   |
| >CTNNB1-I3 <sup>ε</sup> YLDSGIHSGA  | 2     | >CTNNB1-I3 <sup>ε</sup> YLDSGKHSGA  | 4     | 2     |
| >CTNNB1-I3 <sup>ε</sup> YLDSGIHSGA  | 12    | >CTNNB1-I3 <sup>ε</sup> YLDSGKHSGA  | 28    | 16    |
| >CTNNB1-I3 <sup>ε</sup> YLDSGIHS    | 395   | >CTNNB1-I3 <sup>ε</sup> YLDSGKHS    | 3404  | 3009  |
| >CTNNB1-I3 <sup>ε</sup> YLDSGIHSG   | 139   | >CTNNB1-I3 <sup>ε</sup> YLDSGKHSG   | 913   | 774   |
| >CTNNB1-I3 <sup>ε</sup> YLDSGIHSGA  | 8     | >CTNNB1-I3 <sup>ε</sup> YLDSGKHSGA  | 16    | 8     |
| >CTNNB1-I3 <sup>ε</sup> YLDSGIHSGA  | 83    | >CTNNB1-I3 <sup>ε</sup> YLDSGKHSGA  | 226   | 143   |
| >CTNNB1-I3 <sup>ε</sup> YLDSGIHS    | 101   | >CTNNB1-I3 <sup>ε</sup> YLDSGKHS    | 865   | 764   |
| >CTNNB1-I3 <sup>ε</sup> YLDSGIHSG   | 140   | >CTNNB1-I3 <sup>ε</sup> YLDSGKHSG   | 889   | 749   |
| >CTNNB1-I3 <sup>ε</sup> YLDSGIHSGA  | 7     | >CTNNB1-I3 <sup>ε</sup> YLDSGKHSGA  | 10    | 3     |
| >CTNNB1-I3 <sup>ε</sup> YLDSGIHSGA  | 121   | >CTNNB1-I3 <sup>ε</sup> YLDSGKHSGA  | 254   | 133   |
| >CTNNB1-I3 <sup>ε</sup> YLDSGIHSGA  | 7     | >CTNNB1-I3 <sup>ε</sup> YLDSGKHSGA  | 21    | 14    |
| >CTNNB1-I3 <sup>ε</sup> YLDSGIHSGA  | 255   | >CTNNB1-I3 <sup>ε</sup> YLDSGKHSGA  | 870   | 615   |
| >CTNNB1-I3 <sup>ε</sup> YLDSGIHS    | 66    | >CTNNB1-I3 <sup>ε</sup> YLDSGKHS    | 428   | 362   |
| >CTNNB1-I3 <sup>ε</sup> YLDSGIHSG   | 13    | >CTNNB1-I3 <sup>ε</sup> YLDSGKHSG   | 57    | 44    |
| >CTNNB1-I3 <sup>ε</sup> YLDSGIHSGA  | 2     | >CTNNB1-I3 <sup>ε</sup> YLDSGKHSGA  | 3     | 1     |
| >CTNNB1-I3 <sup>ε</sup> YLDSGIHSGA  | 36    | >CTNNB1-I3 <sup>ε</sup> YLDSGKHSGA  | 62    | 26    |
| >CTNNB1-I3 <sup>ε</sup> SYLDSGIHSG/ | 410   | >CTNNB1-I3 <sup>ε</sup> SYLDSGKHSG  | 569   | 159   |
| >CTNNB1-I3 <sup>ε</sup> QSYLDSGI    | 21737 | >CTNNB1-I3 <sup>ε</sup> QSYLDSGK    | 415   | 21322 |
| >CTNNB1-I3 <sup>ε</sup> QSYLDSGI    | 24753 | >CTNNB1-I3 <sup>ε</sup> QSYLDSGK    | 106   | 24647 |

|                        |       |                        |       |       |
|------------------------|-------|------------------------|-------|-------|
| >CTNNB1-I35 QSYLDSGI   | 25423 | >CTNNB1-I35 QSYLDSGK   | 130   | 25293 |
| >CTNNB1-I35 QSYLDSGI   | 46    | >CTNNB1-I35 QSYLDSGK   | 11092 | 11046 |
| >CTNNB1-I35 QSYLDSGI   | 22    | >CTNNB1-I35 QSYLDSGK   | 33925 | 33903 |
| >CTNNB1-I35 QQSYLDSGI  | 417   | >CTNNB1-I35 QQSYLDSGK  | 2803  | 2386  |
| >CTNNB1-I35 QQQSYLDSGI | 381   | >CTNNB1-I35 QQQSYLDSGI | 2880  | 2499  |
| >CTNNB1-I35 IHSGATTTA  | 4304  | >CTNNB1-I35 MHSGATTTA  | 191   | 4113  |
| >CTNNB1-I35 IHSGATTTAP | 3465  | >CTNNB1-I35 MHSGATTTA  | 213   | 3252  |
| >CTNNB1-I35 GIHSGATTTA | 432   | >CTNNB1-I35 GMHSGATTT  | 57    | 375   |
| >CTNNB1-I35 GIHSGATT   | 2383  | >CTNNB1-I35 GMHSGATT   | 160   | 2223  |
| >CTNNB1-I35 GIHSGATTT  | 1717  | >CTNNB1-I35 GMHSGATTT  | 95    | 1622  |
| >CTNNB1-I35 GIHSGATTTA | 276   | >CTNNB1-I35 GMHSGATTT  | 67    | 209   |
| >CTNNB1-I35 GIHSGATT   | 7121  | >CTNNB1-I35 GMHSGATT   | 210   | 6911  |
| >CTNNB1-I35 GIHSGATTT  | 9090  | >CTNNB1-I35 GMHSGATTT  | 396   | 8694  |
| >CTNNB1-I35 GIHSGATTTA | 2515  | >CTNNB1-I35 GMHSGATTT  | 37    | 2478  |
| >CTNNB1-I35 GIHSGATTTA | 6211  | >CTNNB1-I35 GMHSGATTT  | 90    | 6121  |
| >CTNNB1-I35 GIHSGATTTA | 3137  | >CTNNB1-I35 GMHSGATTT  | 74    | 3063  |
| >CTNNB1-I35 GIHSGATT   | 6304  | >CTNNB1-I35 GMHSGATT   | 154   | 6150  |
| >CTNNB1-I35 GIHSGATTT  | 5448  | >CTNNB1-I35 GMHSGATTT  | 110   | 5338  |
| >CTNNB1-I35 GIHSGATTTA | 362   | >CTNNB1-I35 GMHSGATTT  | 12    | 350   |
| >CTNNB1-I35 WQQQSYLDS  | 268   | >CTNNB1-I35 WQQQSYLDS  | 1319  | 1051  |
| >CTNNB1-I35 WQQQSYLDS  | 431   | >CTNNB1-I35 WQQQSYLDS  | 65    | 366   |
| >CTNNB1-I35 WQQQSYLDS  | 1235  | >CTNNB1-I35 WQQQSYLDS  | 141   | 1094  |
| >CTNNB1-I35 WQQQSYLDS  | 187   | >CTNNB1-I35 WQQQSYLDS  | 69    | 118   |
| >CTNNB1-I35 YLDSGIHSGA | 78    | >CTNNB1-I35 YLDSGMHSG  | 105   | 27    |
| >CTNNB1-I35 YLDSGIHSGA | 212   | >CTNNB1-I35 YLDSGMHSG  | 267   | 55    |
| >CTNNB1-I35 YLDSGIHSG  | 278   | >CTNNB1-I35 YLDSGMHSG  | 459   | 181   |
| >CTNNB1-I35 YLDSGIHSGA | 24    | >CTNNB1-I35 YLDSGMHSG  | 29    | 5     |
| >CTNNB1-I35 YLDSGIHSGA | 284   | >CTNNB1-I35 YLDSGMHSG  | 339   | 55    |
| >CTNNB1-I35 YLDSGIHSGA | 32    | >CTNNB1-I35 YLDSGMHSG  | 39    | 7     |
| >CTNNB1-I35 YLDSGIHSGA | 78    | >CTNNB1-I35 YLDSGMHSG  | 80    | 2     |
| >CTNNB1-I35 YLDSGIHS   | 419   | >CTNNB1-I35 YLDSGMHS   | 450   | 31    |
| >CTNNB1-I35 YLDSGIHSG  | 570   | >CTNNB1-I35 YLDSGMHSG  | 445   | 125   |
| >CTNNB1-I35 YLDSGIHSGA | 280   | >CTNNB1-I35 YLDSGMHSG  | 364   | 84    |
| >CTNNB1-I35 YLDSGIHSGA | 178   | >CTNNB1-I35 YLDSGMHSG  | 160   | 18    |
| >CTNNB1-I35 YLDSGIHS   | 47    | >CTNNB1-I35 YLDSGMHS   | 109   | 62    |
| >CTNNB1-I35 YLDSGIHSG  | 15    | >CTNNB1-I35 YLDSGMHSG  | 62    | 47    |
| >CTNNB1-I35 YLDSGIHSGA | 2     | >CTNNB1-I35 YLDSGMHSG  | 4     | 2     |
| >CTNNB1-I35 YLDSGIHSGA | 12    | >CTNNB1-I35 YLDSGMHSG  | 19    | 7     |
| >CTNNB1-I35 YLDSGIHS   | 395   | >CTNNB1-I35 YLDSGMHS   | 539   | 144   |
| >CTNNB1-I35 YLDSGIHSG  | 139   | >CTNNB1-I35 YLDSGMHSG  | 274   | 135   |
| >CTNNB1-I35 YLDSGIHSGA | 8     | >CTNNB1-I35 YLDSGMHSG  | 13    | 5     |
| >CTNNB1-I35 YLDSGIHSGA | 83    | >CTNNB1-I35 YLDSGMHSG  | 117   | 34    |
| >CTNNB1-I35 YLDSGIHS   | 101   | >CTNNB1-I35 YLDSGMHS   | 182   | 81    |

|                         |      |                        |       |       |
|-------------------------|------|------------------------|-------|-------|
| >CTNNB1-I3E YLDSGIHSG   | 140  | >CTNNB1-I3E YLDSGMHSG  | 468   | 328   |
| >CTNNB1-I3E YLDSGIHSGA  | 7    | >CTNNB1-I3E YLDSGMHSG  | 8     | 1     |
| >CTNNB1-I3E YLDSGIHSGA  | 121  | >CTNNB1-I3E YLDSGMHSG  | 191   | 70    |
| >CTNNB1-I3E YLDSGIHSGA  | 7    | >CTNNB1-I3E YLDSGMHSG  | 13    | 6     |
| >CTNNB1-I3E YLDSGIHSGA  | 255  | >CTNNB1-I3E YLDSGMHSG  | 669   | 414   |
| >CTNNB1-I3E YLDSGIHS    | 66   | >CTNNB1-I3E YLDSGMHS   | 79    | 13    |
| >CTNNB1-I3E YLDSGIHSG   | 13   | >CTNNB1-I3E YLDSGMHSG  | 48    | 35    |
| >CTNNB1-I3E YLDSGIHSGA  | 2    | >CTNNB1-I3E YLDSGMHSG  | 2     | 0     |
| >CTNNB1-I3E YLDSGIHSGA  | 36   | >CTNNB1-I3E YLDSGMHSG  | 51    | 15    |
| >CTNNB1-I3E YLDSGIHSGA  | 554  | >CTNNB1-I3E YLDSGMHSG  | 433   | 121   |
| >CTNNB1-I3E SYLDSGIHSG/ | 410  | >CTNNB1-I3E SYLDSGMHS/ | 370   | 40    |
| >CTNNB1-I3E QSYLDSGI    | 46   | >CTNNB1-I3E QSYLDSGM   | 11    | 35    |
| >CTNNB1-I3E QSYLDSGI    | 22   | >CTNNB1-I3E QSYLDSGM   | 689   | 667   |
| >CTNNB1-I3E QQS YLDSGI  | 1545 | >CTNNB1-I3E QQS YLDSGM | 115   | 1430  |
| >CTNNB1-I3E QQS YLDSGI  | 417  | >CTNNB1-I3E QQS YLDSGM | 166   | 251   |
| >CTNNB1-I3E QQQSYLDSGI  | 1950 | >CTNNB1-I3E QQQSYLDSGI | 153   | 1797  |
| >CTNNB1-I3E QQQSYLDSGI  | 381  | >CTNNB1-I3E QQQSYLDSGI | 164   | 217   |
| >CTNNB1-I3E GIHSGATTTA  | 432  | >CTNNB1-I3E GNHSGATTT/ | 7614  | 7182  |
| >CTNNB1-I3E GIHSGATTTA  | 276  | >CTNNB1-I3E GNHSGATTT/ | 8008  | 7732  |
| >CTNNB1-I3E GIHSGATTTA  | 362  | >CTNNB1-I3E GNHSGATTT/ | 30436 | 30074 |
| >CTNNB1-I3E WQQQSYLDS   | 268  | >CTNNB1-I3E WQQQSYLDS  | 19334 | 19066 |
| >CTNNB1-I3E WQQQSYLDS   | 431  | >CTNNB1-I3E WQQQSYLDS  | 6839  | 6408  |
| >CTNNB1-I3E WQQQSYLDS   | 187  | >CTNNB1-I3E WQQQSYLDS  | 7359  | 7172  |
| >CTNNB1-I3E YLDSGIHSGA  | 78   | >CTNNB1-I3E YLDSGNHSG/ | 231   | 153   |
| >CTNNB1-I3E YLDSGIHSGA  | 212  | >CTNNB1-I3E YLDSGNHSG/ | 329   | 117   |
| >CTNNB1-I3E YLDSGIHSG   | 278  | >CTNNB1-I3E YLDSGNHSG  | 1041  | 763   |
| >CTNNB1-I3E YLDSGIHSGA  | 24   | >CTNNB1-I3E YLDSGNHSG/ | 39    | 15    |
| >CTNNB1-I3E YLDSGIHSGA  | 284  | >CTNNB1-I3E YLDSGNHSG/ | 532   | 248   |
| >CTNNB1-I3E YLDSGIHSGA  | 32   | >CTNNB1-I3E YLDSGNHSG/ | 54    | 22    |
| >CTNNB1-I3E YLDSGIHSGA  | 78   | >CTNNB1-I3E YLDSGNHSG/ | 222   | 144   |
| >CTNNB1-I3E YLDSGIHS    | 419  | >CTNNB1-I3E YLDSGNHS   | 842   | 423   |
| >CTNNB1-I3E YLDSGIHSGA  | 280  | >CTNNB1-I3E YLDSGNHSG/ | 699   | 419   |
| >CTNNB1-I3E YLDSGIHSGA  | 178  | >CTNNB1-I3E YLDSGNHSG/ | 294   | 116   |
| >CTNNB1-I3E YLDSGIHS    | 47   | >CTNNB1-I3E YLDSGNHS   | 235   | 188   |
| >CTNNB1-I3E YLDSGIHSG   | 15   | >CTNNB1-I3E YLDSGNHSG  | 89    | 74    |
| >CTNNB1-I3E YLDSGIHSGA  | 2    | >CTNNB1-I3E YLDSGNHSG/ | 3     | 1     |
| >CTNNB1-I3E YLDSGIHSGA  | 12   | >CTNNB1-I3E YLDSGNHSG/ | 19    | 7     |
| >CTNNB1-I3E YLDSGIHS    | 395  | >CTNNB1-I3E YLDSGNHS   | 706   | 311   |
| >CTNNB1-I3E YLDSGIHSG   | 139  | >CTNNB1-I3E YLDSGNHSG  | 320   | 181   |
| >CTNNB1-I3E YLDSGIHSGA  | 8    | >CTNNB1-I3E YLDSGNHSG/ | 8     | 0     |
| >CTNNB1-I3E YLDSGIHSGA  | 83   | >CTNNB1-I3E YLDSGNHSG/ | 92    | 9     |
| >CTNNB1-I3E YLDSGIHS    | 101  | >CTNNB1-I3E YLDSGNHS   | 341   | 240   |
| >CTNNB1-I3E YLDSGIHSG   | 140  | >CTNNB1-I3E YLDSGNHSG  | 615   | 475   |

|                         |      |                        |       |       |
|-------------------------|------|------------------------|-------|-------|
| >CTNNB1-I3E YLDSGIHSGA  | 7    | >CTNNB1-I3E YLDSGNHSG/ | 8     | 1     |
| >CTNNB1-I3E YLDSGIHSGA  | 121  | >CTNNB1-I3E YLDSGNHSG/ | 189   | 68    |
| >CTNNB1-I3E YLDSGIHSGA  | 7    | >CTNNB1-I3E YLDSGNHSG/ | 10    | 3     |
| >CTNNB1-I3E YLDSGIHSGA  | 255  | >CTNNB1-I3E YLDSGNHSG/ | 425   | 170   |
| >CTNNB1-I3E YLDSGIHS    | 66   | >CTNNB1-I3E YLDSGNHS   | 239   | 173   |
| >CTNNB1-I3E YLDSGIHSG   | 13   | >CTNNB1-I3E YLDSGNHSG  | 53    | 40    |
| >CTNNB1-I3E YLDSGIHSGA  | 2    | >CTNNB1-I3E YLDSGNHSG/ | 2     | 0     |
| >CTNNB1-I3E YLDSGIHSGA  | 36   | >CTNNB1-I3E YLDSGNHSG/ | 50    | 14    |
| >CTNNB1-I3E SYLDSGIHSG/ | 410  | >CTNNB1-I3E SYLDSGNHSC | 403   | 7     |
| >CTNNB1-I3E QSYLDSGI    | 46   | >CTNNB1-I3E QSYLDSGN   | 7119  | 7073  |
| >CTNNB1-I3E QSYLDSGI    | 22   | >CTNNB1-I3E QSYLDSGN   | 29644 | 29622 |
| >CTNNB1-I3E QQS YLDSGI  | 417  | >CTNNB1-I3E QQS YLDSGN | 9662  | 9245  |
| >CTNNB1-I3E QQQSYLDSGI  | 381  | >CTNNB1-I3E QQQSYLDSGI | 9752  | 9371  |
| >CTNNB1-I3E GIHSGATTTA  | 432  | >CTNNB1-I3E GSHSGATTTA | 5932  | 5500  |
| >CTNNB1-I3E GIHSGATTTA  | 276  | >CTNNB1-I3E GSHSGATTTA | 5160  | 4884  |
| >CTNNB1-I3E GIHSGATTTA  | 362  | >CTNNB1-I3E GSHSGATTTA | 26300 | 25938 |
| >CTNNB1-I3E GIHSGATTT   | 3234 | >CTNNB1-I3E GSHSGATTT  | 204   | 3030  |
| >CTNNB1-I3E WQQQSYLDS   | 268  | >CTNNB1-I3E WQQQSYLDS  | 6258  | 5990  |
| >CTNNB1-I3E WQQQSYLDS   | 431  | >CTNNB1-I3E WQQQSYLDS  | 4199  | 3768  |
| >CTNNB1-I3E WQQQSYLDS   | 187  | >CTNNB1-I3E WQQQSYLDS  | 4330  | 4143  |
| >CTNNB1-I3E YLDSGIHSGA  | 78   | >CTNNB1-I3E YLDSGSHSGA | 195   | 117   |
| >CTNNB1-I3E YLDSGIHSGA  | 212  | >CTNNB1-I3E YLDSGSHSGA | 294   | 82    |
| >CTNNB1-I3E YLDSGIHSG   | 278  | >CTNNB1-I3E YLDSGSHSG  | 750   | 472   |
| >CTNNB1-I3E YLDSGIHSGA  | 24   | >CTNNB1-I3E YLDSGSHSGA | 34    | 10    |
| >CTNNB1-I3E YLDSGIHSGA  | 284  | >CTNNB1-I3E YLDSGSHSGA | 392   | 108   |
| >CTNNB1-I3E YLDSGIHSGA  | 32   | >CTNNB1-I3E YLDSGSHSGA | 38    | 6     |
| >CTNNB1-I3E YLDSGIHSGA  | 78   | >CTNNB1-I3E YLDSGSHSGA | 124   | 46    |
| >CTNNB1-I3E YLDSGIHS    | 419  | >CTNNB1-I3E YLDSGSHS   | 818   | 399   |
| >CTNNB1-I3E YLDSGIHSGA  | 280  | >CTNNB1-I3E YLDSGSHSGA | 480   | 200   |
| >CTNNB1-I3E YLDSGIHSGA  | 178  | >CTNNB1-I3E YLDSGSHSGA | 263   | 85    |
| >CTNNB1-I3E YLDSGIHS    | 47   | >CTNNB1-I3E YLDSGSHS   | 113   | 66    |
| >CTNNB1-I3E YLDSGIHSG   | 15   | >CTNNB1-I3E YLDSGSHSG  | 49    | 34    |
| >CTNNB1-I3E YLDSGIHSGA  | 2    | >CTNNB1-I3E YLDSGSHSGA | 3     | 1     |
| >CTNNB1-I3E YLDSGIHSGA  | 12   | >CTNNB1-I3E YLDSGSHSGA | 16    | 4     |
| >CTNNB1-I3E YLDSGIHS    | 395  | >CTNNB1-I3E YLDSGSHS   | 491   | 96    |
| >CTNNB1-I3E YLDSGIHSG   | 139  | >CTNNB1-I3E YLDSGSHSG  | 161   | 22    |
| >CTNNB1-I3E YLDSGIHSGA  | 8    | >CTNNB1-I3E YLDSGSHSGA | 8     | 0     |
| >CTNNB1-I3E YLDSGIHSGA  | 83   | >CTNNB1-I3E YLDSGSHSGA | 71    | 12    |
| >CTNNB1-I3E YLDSGIHS    | 101  | >CTNNB1-I3E YLDSGSHS   | 191   | 90    |
| >CTNNB1-I3E YLDSGIHSG   | 140  | >CTNNB1-I3E YLDSGSHSG  | 264   | 124   |
| >CTNNB1-I3E YLDSGIHSGA  | 7    | >CTNNB1-I3E YLDSGSHSGA | 8     | 1     |
| >CTNNB1-I3E YLDSGIHSGA  | 121  | >CTNNB1-I3E YLDSGSHSGA | 141   | 20    |
| >CTNNB1-I3E YLDSGIHSGA  | 7    | >CTNNB1-I3E YLDSGSHSGA | 10    | 3     |

|                         |      |                        |       |       |
|-------------------------|------|------------------------|-------|-------|
| >CTNNB1-I3E YLDSGIHSGA  | 255  | >CTNNB1-I3E YLDSGSHSGA | 283   | 28    |
| >CTNNB1-I3E YLDSGIHS    | 66   | >CTNNB1-I3E YLDSGSHS   | 95    | 29    |
| >CTNNB1-I3E YLDSGIHSG   | 13   | >CTNNB1-I3E YLDSGSHSG  | 33    | 20    |
| >CTNNB1-I3E YLDSGIHSGA  | 2    | >CTNNB1-I3E YLDSGSHSGA | 2     | 0     |
| >CTNNB1-I3E YLDSGIHSGA  | 36   | >CTNNB1-I3E YLDSGSHSGA | 45    | 9     |
| >CTNNB1-I3E SYLDSGIHSGA | 410  | >CTNNB1-I3E SYLDSGSHSG | 392   | 18    |
| >CTNNB1-I3E QSYLDSGI    | 46   | >CTNNB1-I3E QSYLDSGS   | 5295  | 5249  |
| >CTNNB1-I3E QSYLDSGI    | 22   | >CTNNB1-I3E QSYLDSGS   | 24025 | 24003 |
| >CTNNB1-I3E QQS YLDSGI  | 417  | >CTNNB1-I3E QQS YLDSGS | 7042  | 6625  |
| >CTNNB1-I3E QQQSYLDSGI  | 381  | >CTNNB1-I3E QQQSYLDSG  | 6575  | 6194  |
| >CTNNB1-I3E GIHSGATTTA  | 432  | >CTNNB1-I3E GTHSGATTTA | 1033  | 601   |
| >CTNNB1-I3E GIHSGATTTA  | 276  | >CTNNB1-I3E GTHSGATTTA | 714   | 438   |
| >CTNNB1-I3E GIHSGATTTA  | 362  | >CTNNB1-I3E GTHSGATTTA | 9233  | 8871  |
| >CTNNB1-I3E GIHSGATTT   | 3234 | >CTNNB1-I3E GTHSGATTT  | 71    | 3163  |
| >CTNNB1-I3E WQQQSYLDS   | 268  | >CTNNB1-I3E WQQQSYLDS  | 2563  | 2295  |
| >CTNNB1-I3E WQQQSYLDS   | 431  | >CTNNB1-I3E WQQQSYLDS  | 4811  | 4380  |
| >CTNNB1-I3E WQQQSYLDS   | 187  | >CTNNB1-I3E WQQQSYLDS  | 4083  | 3896  |
| >CTNNB1-I3E YLDSGIHSGA  | 78   | >CTNNB1-I3E YLDSGTHSGA | 129   | 51    |
| >CTNNB1-I3E YLDSGIHSGA  | 212  | >CTNNB1-I3E YLDSGTHSGA | 266   | 54    |
| >CTNNB1-I3E YLDSGIHSG   | 278  | >CTNNB1-I3E YLDSGTHSG  | 433   | 155   |
| >CTNNB1-I3E YLDSGIHSGA  | 24   | >CTNNB1-I3E YLDSGTHSGA | 29    | 5     |
| >CTNNB1-I3E YLDSGIHSGA  | 284  | >CTNNB1-I3E YLDSGTHSGA | 337   | 53    |
| >CTNNB1-I3E YLDSGIHSGA  | 32   | >CTNNB1-I3E YLDSGTHSGA | 35    | 3     |
| >CTNNB1-I3E YLDSGIHSGA  | 78   | >CTNNB1-I3E YLDSGTHSGA | 92    | 14    |
| >CTNNB1-I3E YLDSGIHS    | 419  | >CTNNB1-I3E YLDSGTHS   | 498   | 79    |
| >CTNNB1-I3E YLDSGIHSGA  | 280  | >CTNNB1-I3E YLDSGTHSGA | 289   | 9     |
| >CTNNB1-I3E YLDSGIHSGA  | 178  | >CTNNB1-I3E YLDSGTHSGA | 236   | 58    |
| >CTNNB1-I3E YLDSGIHS    | 47   | >CTNNB1-I3E YLDSGTHS   | 130   | 83    |
| >CTNNB1-I3E YLDSGIHSG   | 15   | >CTNNB1-I3E YLDSGTHSG  | 46    | 31    |
| >CTNNB1-I3E YLDSGIHSGA  | 2    | >CTNNB1-I3E YLDSGTHSGA | 3     | 1     |
| >CTNNB1-I3E YLDSGIHSGA  | 12   | >CTNNB1-I3E YLDSGTHSGA | 18    | 6     |
| >CTNNB1-I3E YLDSGIHS    | 395  | >CTNNB1-I3E YLDSGTHS   | 682   | 287   |
| >CTNNB1-I3E YLDSGIHSG   | 139  | >CTNNB1-I3E YLDSGTHSG  | 170   | 31    |
| >CTNNB1-I3E YLDSGIHSGA  | 8    | >CTNNB1-I3E YLDSGTHSGA | 7     | 1     |
| >CTNNB1-I3E YLDSGIHSGA  | 83   | >CTNNB1-I3E YLDSGTHSGA | 72    | 11    |
| >CTNNB1-I3E YLDSGIHS    | 101  | >CTNNB1-I3E YLDSGTHS   | 177   | 76    |
| >CTNNB1-I3E YLDSGIHSG   | 140  | >CTNNB1-I3E YLDSGTHSG  | 275   | 135   |
| >CTNNB1-I3E YLDSGIHSGA  | 7    | >CTNNB1-I3E YLDSGTHSGA | 7     | 0     |
| >CTNNB1-I3E YLDSGIHSGA  | 121  | >CTNNB1-I3E YLDSGTHSGA | 157   | 36    |
| >CTNNB1-I3E YLDSGIHSGA  | 7    | >CTNNB1-I3E YLDSGTHSGA | 7     | 0     |
| >CTNNB1-I3E YLDSGIHSGA  | 255  | >CTNNB1-I3E YLDSGTHSGA | 249   | 6     |
| >CTNNB1-I3E YLDSGIHS    | 66   | >CTNNB1-I3E YLDSGTHS   | 72    | 6     |
| >CTNNB1-I3E YLDSGIHSG   | 13   | >CTNNB1-I3E YLDSGTHSG  | 23    | 10    |

|                                     |      |                                     |       |       |
|-------------------------------------|------|-------------------------------------|-------|-------|
| >CTNNB1-I3 <sup>E</sup> YLDSGIHSGA  | 2    | >CTNNB1-I3 <sup>E</sup> YLD SGTHSGA | 2     | 0     |
| >CTNNB1-I3 <sup>E</sup> YLDSGIHSGA  | 36   | >CTNNB1-I3 <sup>E</sup> YLD SGTHSGA | 44    | 8     |
| >CTNNB1-I3 <sup>E</sup> YLDSGIHSGA  | 554  | >CTNNB1-I3 <sup>E</sup> YLD SGTHSGA | 380   | 174   |
| >CTNNB1-I3 <sup>E</sup> SYLDSGIHSG/ | 410  | >CTNNB1-I3 <sup>E</sup> SYLD SGTHSG | 350   | 60    |
| >CTNNB1-I3 <sup>E</sup> QSYLDSGI    | 46   | >CTNNB1-I3 <sup>E</sup> QSYLD SGT   | 3266  | 3220  |
| >CTNNB1-I3 <sup>E</sup> QSYLDSGI    | 22   | >CTNNB1-I3 <sup>E</sup> QSYLD SGT   | 25275 | 25253 |
| >CTNNB1-I3 <sup>E</sup> QQSYLDSGI   | 417  | >CTNNB1-I3 <sup>E</sup> QQSYLD SGT  | 8138  | 7721  |
| >CTNNB1-I3 <sup>E</sup> QQQSYLDSGI  | 381  | >CTNNB1-I3 <sup>E</sup> QQQSYLD SG  | 7223  | 6842  |
| >CTNNB1-K1 KAAVSHWQ                 | 7326 | >CTNNB1-K1 DAAVSHWQ                 | 396   | 6930  |
| >CTNNB1-K1 RKA AVSHW                | 55   | >CTNNB1-K1 RDA AVSHW                | 9833  | 9778  |
| >CTNNB1-K1 RKA AVSHW                | 38   | >CTNNB1-K1 RDA AVSHW                | 77    | 39    |
| >CTNNB1-K1 RKA AVSHW                | 203  | >CTNNB1-K1 RDA AVSHW                | 5369  | 5166  |
| >CTNNB1-K1 EPDRKAAV                 | 323  | >CTNNB1-K1 EPDRDAAV                 | 282   | 41    |
| >CTNNB1-K1 EPDRKAAVSH               | 83   | >CTNNB1-K1 EPDRDAAVSH               | 32    | 51    |
| >CTNNB1-K1 EPDRKAAVSH               | 13   | >CTNNB1-K1 EPDRDAAVSH               | 11    | 2     |
| >CTNNB1-K1 MEPDRKAAV                | 112  | >CTNNB1-K1 MEPDRDAAV                | 1210  | 1098  |
| >CTNNB1-K1 MEPDRKAAV                | 805  | >CTNNB1-K1 MEPDRDAAV                | 425   | 380   |
| >CTNNB1-K1 MEPDRKAAV                | 196  | >CTNNB1-K1 MEPDRDAAV                | 224   | 28    |
| >CTNNB1-K1 AMEPDRKAA                | 1615 | >CTNNB1-K1 AMEPDRDAA                | 486   | 1129  |
| >CTNNB1-K1 AMEPDRKAA                | 855  | >CTNNB1-K1 AMEPDRDAA                | 207   | 648   |
| >CTNNB1-K1 AMEPDRKAA                | 346  | >CTNNB1-K1 AMEPDRDAA                | 321   | 25    |
| >CTNNB1-K1 AMEPDRKAA                | 46   | >CTNNB1-K1 AMEPDRDAA                | 39    | 7     |
| >CTNNB1-K1 AMEPDRKAA                | 71   | >CTNNB1-K1 AMEPDRDAA                | 24    | 47    |
| >CTNNB1-K1 AMEPDRKAA                | 514  | >CTNNB1-K1 AMEPDRDAA                | 197   | 317   |
| >CTNNB1-K1 AMEPDRKA                 | 304  | >CTNNB1-K1 AMEPDRDA                 | 498   | 194   |
| >CTNNB1-K1 AMEPDRKAA                | 241  | >CTNNB1-K1 AMEPDRDAA                | 185   | 56    |
| >CTNNB1-K1 AMEPDRKAA                | 3    | >CTNNB1-K1 AMEPDRDAA                | 4     | 1     |
| >CTNNB1-K1 MAMEPDRK/                | 299  | >CTNNB1-K1 MAMEPDRD/                | 191   | 108   |
| >CTNNB1-K1 MAMEPDRK/                | 258  | >CTNNB1-K1 MAMEPDRD/                | 185   | 73    |
| >CTNNB1-K1 MAMEPDRK/                | 165  | >CTNNB1-K1 MAMEPDRD/                | 155   | 10    |
| >CTNNB1-K1 MAMEPDRK/                | 45   | >CTNNB1-K1 MAMEPDRD/                | 38    | 7     |
| >CTNNB1-K1 MAMEPDRK/                | 35   | >CTNNB1-K1 MAMEPDRD/                | 54    | 19    |
| >CTNNB1-K1 MAMEPDRK/                | 453  | >CTNNB1-K1 MAMEPDRD/                | 251   | 202   |
| >CTNNB1-K1 MAMEPDRK/                | 76   | >CTNNB1-K1 MAMEPDRD/                | 98    | 22    |
| >CTNNB1-K1 MAMEPDRK                 | 62   | >CTNNB1-K1 MAMEPDRD                 | 27244 | 27182 |
| >CTNNB1-K1 MAMEPDRK                 | 45   | >CTNNB1-K1 MAMEPDRD                 | 21811 | 21766 |
| >CTNNB1-K1 MAMEPDRK/                | 108  | >CTNNB1-K1 MAMEPDRD/                | 595   | 487   |
| >CTNNB1-K1 MAMEPDRK/                | 1399 | >CTNNB1-K1 MAMEPDRD/                | 344   | 1055  |
| >CTNNB1-K1 MAMEPDRK/                | 7    | >CTNNB1-K1 MAMEPDRD/                | 8     | 1     |
| >CTNNB1-K1 MAMEPDRK/                | 24   | >CTNNB1-K1 MAMEPDRD/                | 52    | 28    |
| >CTNNB1-K1 MAMEPDRK/                | 372  | >CTNNB1-K1 MAMEPDRD/                | 107   | 265   |
| >CTNNB1-K1 MAMEPDRK/                | 285  | >CTNNB1-K1 MAMEPDRD/                | 386   | 101   |
| >CTNNB1-K3 KLLWTTSRV                | 12   | >CTNNB1-K3 ILLWTTSRV                | 17    | 5     |



|                       |       |                        |      |       |
|-----------------------|-------|------------------------|------|-------|
| >CTNNB1-K3 KLLWTTSRVL | 278   | >CTNNB1-K3 ILLWTTSRVL  | 274  | 4     |
| >CTNNB1-K3 KLLWTTSRV  | 45    | >CTNNB1-K3 ILLWTTSRV   | 47   | 2     |
| >CTNNB1-K3 KLLWTTSRVL | 219   | >CTNNB1-K3 ILLWTTSRVL  | 228  | 9     |
| >CTNNB1-K3 KLLWTTSRV  | 7     | >CTNNB1-K3 ILLWTTSRV   | 8    | 1     |
| >CTNNB1-K3 KLLWTTSRVL | 168   | >CTNNB1-K3 ILLWTTSRVL  | 167  | 1     |
| >CTNNB1-K3 KLLWTTSRV  | 27    | >CTNNB1-K3 ILLWTTSRV   | 57   | 30    |
| >CTNNB1-K3 KLLWTTSRVL | 408   | >CTNNB1-K3 ILLWTTSRVL  | 513  | 105   |
| >CTNNB1-K3 KLLWTTSRV  | 1     | >CTNNB1-K3 ILLWTTSRV   | 1    | 0     |
| >CTNNB1-K3 KLLWTTSRVL | 5     | >CTNNB1-K3 ILLWTTSRVL  | 5    | 0     |
| >CTNNB1-K3 KLLWTTSRV  | 4     | >CTNNB1-K3 ILLWTTSRV   | 5    | 1     |
| >CTNNB1-K3 KLLWTTSRVL | 17    | >CTNNB1-K3 ILLWTTSRVL  | 38   | 21    |
| >CTNNB1-K3 KLLWTTSRV  | 5     | >CTNNB1-K3 ILLWTTSRV   | 5    | 0     |
| >CTNNB1-K3 KLLWTTSRVL | 19    | >CTNNB1-K3 ILLWTTSRVL  | 29   | 10    |
| >CTNNB1-K3 KLLWTTSRV  | 2     | >CTNNB1-K3 ILLWTTSRV   | 2    | 0     |
| >CTNNB1-K3 KLLWTTSRVL | 19    | >CTNNB1-K3 ILLWTTSRVL  | 10   | 9     |
| >CTNNB1-K3 KLLWTTSRV  | 2     | >CTNNB1-K3 ILLWTTSRV   | 2    | 0     |
| >CTNNB1-K3 KLLWTTSRVL | 13    | >CTNNB1-K3 ILLWTTSRVL  | 9    | 4     |
| >CTNNB1-K3 KLLWTTSRVL | 785   | >CTNNB1-K3 ILLWTTSRVLk | 323  | 462   |
| >CTNNB1-K3 KLLWTTSR   | 84    | >CTNNB1-K3 ILLWTTSR    | 211  | 127   |
| >CTNNB1-K3 KLLWTTSRVL | 27    | >CTNNB1-K3 ILLWTTSRVLk | 30   | 3     |
| >CTNNB1-K3 KLLWTTSRVL | 19    | >CTNNB1-K3 ILLWTTSRVLk | 23   | 4     |
| >CTNNB1-K3 KLLWTTSRVL | 14    | >CTNNB1-K3 ILLWTTSRVLk | 288  | 274   |
| >CTNNB1-K3 KLLWTTSR   | 15    | >CTNNB1-K3 ILLWTTSR    | 56   | 41    |
| >CTNNB1-K3 KLLWTTSRVL | 63    | >CTNNB1-K3 ILLWTTSRVLk | 474  | 411   |
| >CTNNB1-K3 KLLWTTSR   | 176   | >CTNNB1-K3 ILLWTTSR    | 3513 | 3337  |
| >CTNNB1-K3 KLLWTTSRV  | 157   | >CTNNB1-K3 ILLWTTSRV   | 2385 | 2228  |
| >CTNNB1-K3 KLLWTTSRVL | 19    | >CTNNB1-K3 ILLWTTSRVL  | 391  | 372   |
| >CTNNB1-K3 KLLWTTSR   | 2102  | >CTNNB1-K3 ILLWTTSR    | 100  | 2002  |
| >CTNNB1-K3 KLLWTTSR   | 1658  | >CTNNB1-K3 ILLWTTSR    | 205  | 1453  |
| >CTNNB1-K3 KLLWTTSRVL | 2212  | >CTNNB1-K3 ILLWTTSRVLk | 224  | 1988  |
| >CTNNB1-K3 KLLWTTSRV  | 194   | >CTNNB1-K3 ILLWTTSRV   | 122  | 72    |
| >CTNNB1-K3 KLLWTTSRVL | 454   | >CTNNB1-K3 ILLWTTSRVL  | 428  | 26    |
| >CTNNB1-K3 KLLWTTSR   | 17    | >CTNNB1-K3 ILLWTTSR    | 63   | 46    |
| >CTNNB1-K3 KLLWTTSRVL | 76    | >CTNNB1-K3 ILLWTTSRVLk | 564  | 488   |
| >CTNNB1-K3 EKLLWTTSRV | 6643  | >CTNNB1-K3 EILLWTTSRV  | 83   | 6560  |
| >CTNNB1-K3 EKLLWTTSRV | 4921  | >CTNNB1-K3 EILLWTTSRV  | 180  | 4741  |
| >CTNNB1-K3 EKLLWTTSRV | 5613  | >CTNNB1-K3 EILLWTTSRV  | 41   | 5572  |
| >CTNNB1-K3 EKLLWTTSRV | 10514 | >CTNNB1-K3 EILLWTTSRV  | 93   | 10421 |
| >CTNNB1-K3 EKLLWTTSRV | 7303  | >CTNNB1-K3 EILLWTTSRV  | 9    | 7294  |
| >CTNNB1-K3 EKLLWTTSRV | 12844 | >CTNNB1-K3 EILLWTTSRV  | 18   | 12826 |
| >CTNNB1-K3 EKLLWTTSR  | 387   | >CTNNB1-K3 EILLWTTSR   | 13   | 374   |
| >CTNNB1-K3 EKLLWTTSR  | 935   | >CTNNB1-K3 EILLWTTSR   | 28   | 907   |
| >CTNNB1-K3 EKLLWTTSRV | 6604  | >CTNNB1-K3 EILLWTTSRV  | 214  | 6390  |

|                        |      |                        |       |       |
|------------------------|------|------------------------|-------|-------|
| >CTNNB1-K3 EKLLWTTSRV  | 357  | >CTNNB1-K3 EILLWTTSRV  | 4     | 353   |
| >CTNNB1-K3 EKLLWTTSRV  | 8156 | >CTNNB1-K3 EILLWTTSRVI | 87    | 8069  |
| >CTNNB1-K3 EKLLWTTSRV  | 303  | >CTNNB1-K3 EILLWTTSRVI | 8967  | 8664  |
| >CTNNB1-K3 EKLLWTTSRV  | 90   | >CTNNB1-K3 EILLWTTSRVI | 1222  | 1132  |
| >CTNNB1-K3 EKLLWTTSR   | 295  | >CTNNB1-K3 EILLWTTSR   | 70    | 225   |
| >CTNNB1-K3 VNIMRITYTYE | 9381 | >CTNNB1-K3 VNIMRITYTYE | 250   | 9131  |
| >CTNNB1-K3 VNIMRITYTYE | 345  | >CTNNB1-K3 VNIMRITYTYE | 22870 | 22525 |
| >CTNNB1-K3 YEKLLWTT    | 280  | >CTNNB1-K3 YEILLWTT    | 354   | 74    |
| >CTNNB1-K3 YEKLLWTTSR  | 44   | >CTNNB1-K3 YEILLWTTSR\ | 60    | 16    |
| >CTNNB1-K3 YEKLLWTTSR  | 3647 | >CTNNB1-K3 YEILLWTTSR\ | 148   | 3499  |
| >CTNNB1-K3 YEKLLWTT    | 231  | >CTNNB1-K3 YEILLWTT    | 65    | 166   |
| >CTNNB1-K3 YEKLLWTT    | 517  | >CTNNB1-K3 YEILLWTT    | 102   | 415   |
| >CTNNB1-K3 YEKLLWTTSR  | 1742 | >CTNNB1-K3 YEILLWTTSR\ | 463   | 1279  |
| >CTNNB1-K3 YEKLLWTTSR  | 889  | >CTNNB1-K3 YEILLWTTSR\ | 106   | 783   |
| >CTNNB1-K3 YEKLLWTT    | 64   | >CTNNB1-K3 YEILLWTT    | 53    | 11    |
| >CTNNB1-K3 YEKLLWTT    | 113  | >CTNNB1-K3 YEILLWTT    | 81    | 32    |
| >CTNNB1-K3 YEKLLWTTSR  | 423  | >CTNNB1-K3 YEILLWTTSR  | 280   | 143   |
| >CTNNB1-K3 YEKLLWTTSR  | 173  | >CTNNB1-K3 YEILLWTTSR\ | 139   | 34    |
| >CTNNB1-K3 YEKLLWTT    | 485  | >CTNNB1-K3 YEILLWTT    | 375   | 110   |
| >CTNNB1-K3 YEKLLWTT    | 214  | >CTNNB1-K3 YEILLWTT    | 52    | 162   |
| >CTNNB1-K3 YEKLLWTT    | 130  | >CTNNB1-K3 YEILLWTT    | 59    | 71    |
| >CTNNB1-K3 YEKLLWTTSR  | 5    | >CTNNB1-K3 YEILLWTTSR\ | 3     | 2     |
| >CTNNB1-K3 YEKLLWTTSR  | 570  | >CTNNB1-K3 YEILLWTTSR  | 458   | 112   |
| >CTNNB1-K3 TYEKLLWTT   | 248  | >CTNNB1-K3 TYEILLWTT   | 753   | 505   |
| >CTNNB1-K3 TYEKLLWTT   | 104  | >CTNNB1-K3 TYEILLWTTSF | 88    | 16    |
| >CTNNB1-K3 TYEKLLWTT   | 69   | >CTNNB1-K3 TYEILLWTTSF | 66    | 3     |
| >CTNNB1-K3 TYEKLLWTT   | 523  | >CTNNB1-K3 TYEILLWTTSF | 495   | 28    |
| >CTNNB1-K3 TYEKLLWTT   | 38   | >CTNNB1-K3 TYEILLWTTSF | 50    | 12    |
| >CTNNB1-K3 YTYEKLLWT   | 103  | >CTNNB1-K3 YTYEILLWT   | 35    | 68    |
| >CTNNB1-K3 YTYEKLLWTT  | 73   | >CTNNB1-K3 YTYEILLWTT  | 45    | 28    |
| >CTNNB1-K3 YTYEKLLWT   | 1329 | >CTNNB1-K3 YTYEILLWT   | 187   | 1142  |
| >CTNNB1-K3 YTYEKLLWTT  | 95   | >CTNNB1-K3 YTYEILLWTT  | 56    | 39    |
| >CTNNB1-K3 YTYEKLLWT   | 76   | >CTNNB1-K3 YTYEILLWT   | 52    | 24    |
| >CTNNB1-K3 YTYEKLLWTT  | 72   | >CTNNB1-K3 YTYEILLWTT  | 74    | 2     |
| >CTNNB1-K3 YTYEKLLWTT  | 662  | >CTNNB1-K3 YTYEILLWTT  | 468   | 194   |
| >CTNNB1-K3 YTYEKLLWT   | 43   | >CTNNB1-K3 YTYEILLWT   | 19    | 24    |
| >CTNNB1-K3 YTYEKLLWTT  | 27   | >CTNNB1-K3 YTYEILLWTT  | 27    | 0     |
| >CTNNB1-K3 YTYEKLLWTT  | 157  | >CTNNB1-K3 YTYEILLWTT  | 85    | 72    |
| >CTNNB1-K3 YTYEKLLWT   | 43   | >CTNNB1-K3 YTYEILLWT   | 20    | 23    |
| >CTNNB1-K3 YTYEKLLWTT  | 9    | >CTNNB1-K3 YTYEILLWTT  | 6     | 3     |
| >CTNNB1-K3 YTYEKLLWTT  | 321  | >CTNNB1-K3 YTYEILLWTT  | 172   | 149   |
| >CTNNB1-K3 YTYEKLLWTT  | 154  | >CTNNB1-K3 YTYEILLWTT  | 145   | 9     |
| >CTNNB1-K3 YTYEKLLWT   | 914  | >CTNNB1-K3 YTYEILLWT   | 295   | 619   |

|                       |      |                       |     |      |
|-----------------------|------|-----------------------|-----|------|
| >CTNNB1-K3 YTYEKLLWTT | 112  | >CTNNB1-K3 YTYEILLWTT | 58  | 54   |
| >CTNNB1-K3 YTYEKLLWT  | 827  | >CTNNB1-K3 YTYEILLWT  | 353 | 474  |
| >CTNNB1-K3 YTYEKLLWTT | 141  | >CTNNB1-K3 YTYEILLWTT | 86  | 55   |
| >CTNNB1-K3 YTYEKLLW   | 789  | >CTNNB1-K3 YTYEILLW   | 242 | 547  |
| >CTNNB1-K3 YTYEKLLW   | 1455 | >CTNNB1-K3 YTYEILLW   | 276 | 1179 |
| >CTNNB1-K3 YTYEKLLWTT | 127  | >CTNNB1-K3 YTYEILLWTT | 60  | 67   |
| >CTNNB1-K3 YTYEKLLWT  | 481  | >CTNNB1-K3 YTYEILLWT  | 63  | 418  |
| >CTNNB1-K3 YTYEKLLWTT | 78   | >CTNNB1-K3 YTYEILLWTT | 26  | 52   |
| >CTNNB1-K3 YTYEKLLW   | 3    | >CTNNB1-K3 YTYEILLW   | 3   | 0    |
| >CTNNB1-K3 YTYEKLLWT  | 83   | >CTNNB1-K3 YTYEILLWT  | 221 | 138  |
| >CTNNB1-K3 YTYEKLLWTT | 114  | >CTNNB1-K3 YTYEILLWTT | 171 | 57   |
| >CTNNB1-K3 YTYEKLLWTT | 163  | >CTNNB1-K3 YTYEILLWTT | 365 | 202  |
| >CTNNB1-K3 YTYEKLLW   | 550  | >CTNNB1-K3 YTYEILLW   | 245 | 305  |
| >CTNNB1-K3 YTYEKLLW   | 51   | >CTNNB1-K3 YTYEILLW   | 40  | 11   |
| >CTNNB1-K3 YTYEKLLW   | 14   | >CTNNB1-K3 YTYEILLW   | 11  | 3    |
| >CTNNB1-K3 YTYEKLLW   | 1772 | >CTNNB1-K3 YTYEILLW   | 325 | 1447 |
| >CTNNB1-K3 YTYEKLLWT  | 1782 | >CTNNB1-K3 YTYEILLWT  | 214 | 1568 |
| >CTNNB1-K3 YTYEKLLWTT | 530  | >CTNNB1-K3 YTYEILLWTT | 129 | 401  |
| >CTNNB1-K3 YTYEKLLW   | 188  | >CTNNB1-K3 YTYEILLW   | 42  | 146  |
| >CTNNB1-K3 TYTYEKLL   | 877  | >CTNNB1-K3 TYTYEILL   | 458 | 419  |
| >CTNNB1-K3 TYTYEKLLW  | 211  | >CTNNB1-K3 TYTYEILLW  | 65  | 146  |
| >CTNNB1-K3 TYTYEKLLW  | 237  | >CTNNB1-K3 TYTYEILLW  | 108 | 129  |
| >CTNNB1-K3 TYTYEKLL   | 107  | >CTNNB1-K3 TYTYEILL   | 44  | 63   |
| >CTNNB1-K3 TYTYEKLLW  | 151  | >CTNNB1-K3 TYTYEILLW  | 39  | 112  |
| >CTNNB1-K3 TYTYEKLL   | 760  | >CTNNB1-K3 TYTYEILL   | 361 | 399  |
| >CTNNB1-K3 TYTYEKLLW  | 785  | >CTNNB1-K3 TYTYEILLW  | 266 | 519  |
| >CTNNB1-K3 TYTYEKLLWT | 1103 | >CTNNB1-K3 TYTYEILLWT | 374 | 729  |
| >CTNNB1-K3 RTYTYEKL   | 6    | >CTNNB1-K3 RTYTYEIL   | 8   | 2    |
| >CTNNB1-K3 RTYTYEKLL  | 88   | >CTNNB1-K3 RTYTYEILL  | 51  | 37   |
| >CTNNB1-K3 RTYTYEKLL  | 7508 | >CTNNB1-K3 RTYTYEILL  | 252 | 7256 |
| >CTNNB1-K3 RTYTYEKL   | 381  | >CTNNB1-K3 RTYTYEIL   | 668 | 287  |
| >CTNNB1-K3 RTYTYEKLL  | 2175 | >CTNNB1-K3 RTYTYEILL  | 312 | 1863 |
| >CTNNB1-K3 RTYTYEKLL  | 996  | >CTNNB1-K3 RTYTYEILL  | 128 | 868  |
| >CTNNB1-K3 RTYTYEKL   | 68   | >CTNNB1-K3 RTYTYEIL   | 54  | 14   |
| >CTNNB1-K3 RTYTYEKLL  | 397  | >CTNNB1-K3 RTYTYEILL  | 124 | 273  |
| >CTNNB1-K3 RTYTYEKLLW | 106  | >CTNNB1-K3 RTYTYEILLW | 42  | 64   |
| >CTNNB1-K3 RTYTYEKL   | 275  | >CTNNB1-K3 RTYTYEIL   | 109 | 166  |
| >CTNNB1-K3 RTYTYEKLL  | 310  | >CTNNB1-K3 RTYTYEILL  | 360 | 50   |
| >CTNNB1-K3 RTYTYEKL   | 4    | >CTNNB1-K3 RTYTYEIL   | 6   | 2    |
| >CTNNB1-K3 RTYTYEKLL  | 4    | >CTNNB1-K3 RTYTYEILL  | 4   | 0    |
| >CTNNB1-K3 RTYTYEKLLW | 3    | >CTNNB1-K3 RTYTYEILLW | 3   | 0    |
| >CTNNB1-K3 RTYTYEKLLW | 54   | >CTNNB1-K3 RTYTYEILLW | 80  | 26   |
| >CTNNB1-K3 RTYTYEKLL  | 907  | >CTNNB1-K3 RTYTYEILL  | 249 | 658  |

|                        |       |                        |       |       |
|------------------------|-------|------------------------|-------|-------|
| >CTNNB1-K3 RTYTYEKLL   | 428   | >CTNNB1-K3 RTYTYEILL   | 986   | 558   |
| >CTNNB1-K3 RTYTYEKLLW  | 37    | >CTNNB1-K3 RTYTYEILLW  | 35    | 2     |
| >CTNNB1-K3 RTYTYEKL    | 196   | >CTNNB1-K3 RTYTYEIL    | 87    | 109   |
| >CTNNB1-K3 RTYTYEKLL   | 768   | >CTNNB1-K3 RTYTYEILL   | 119   | 649   |
| >CTNNB1-K3 RTYTYEKLLW  | 10    | >CTNNB1-K3 RTYTYEILLW  | 9     | 1     |
| >CTNNB1-K3 RTYTYEKLL   | 285   | >CTNNB1-K3 RTYTYEILL   | 62    | 223   |
| >CTNNB1-K3 RTYTYEKLLW  | 1990  | >CTNNB1-K3 RTYTYEILLW  | 376   | 1614  |
| >CTNNB1-K3 RTYTYEKLL   | 34    | >CTNNB1-K3 RTYTYEILL   | 37    | 3     |
| >CTNNB1-K3 RTYTYEKLLW  | 299   | >CTNNB1-K3 RTYTYEILLW  | 256   | 43    |
| >CTNNB1-K3 RTYTYEKLLW  | 976   | >CTNNB1-K3 RTYTYEILLW  | 490   | 486   |
| >CTNNB1-K3 RTYTYEKL    | 414   | >CTNNB1-K3 RTYTYEIL    | 734   | 320   |
| >CTNNB1-K3 RTYTYEKLL   | 243   | >CTNNB1-K3 RTYTYEILL   | 78    | 165   |
| >CTNNB1-K3 RTYTYEKLL   | 823   | >CTNNB1-K3 RTYTYEILL   | 178   | 645   |
| >CTNNB1-K3 RTYTYEKL    | 57    | >CTNNB1-K3 RTYTYEIL    | 55    | 2     |
| >CTNNB1-K3 RTYTYEKLL   | 124   | >CTNNB1-K3 RTYTYEILL   | 115   | 9     |
| >CTNNB1-K3 MRTYTYEK    | 414   | >CTNNB1-K3 MRTYTYEI    | 31688 | 31274 |
| >CTNNB1-K3 MRTYTYEK    | 1517  | >CTNNB1-K3 MRTYTYEI    | 207   | 1310  |
| >CTNNB1-K3 MRTYTYEKL   | 206   | >CTNNB1-K3 MRTYTYEIL   | 84    | 122   |
| >CTNNB1-K3 MRTYTYEKLL  | 289   | >CTNNB1-K3 MRTYTYEILL  | 267   | 22    |
| >CTNNB1-K3 MRTYTYEK    | 138   | >CTNNB1-K3 MRTYTYEI    | 293   | 155   |
| >CTNNB1-K3 MRTYTYEKL   | 200   | >CTNNB1-K3 MRTYTYEIL   | 675   | 475   |
| >CTNNB1-K3 MRTYTYEKLL  | 52    | >CTNNB1-K3 MRTYTYEILL  | 35    | 17    |
| >CTNNB1-K3 MRTYTYEKL   | 2879  | >CTNNB1-K3 MRTYTYEIL   | 324   | 2555  |
| >CTNNB1-K3 MRTYTYEKLL  | 1707  | >CTNNB1-K3 MRTYTYEILL  | 253   | 1454  |
| >CTNNB1-K3 MRTYTYEKLL  | 409   | >CTNNB1-K3 MRTYTYEILL  | 275   | 134   |
| >CTNNB1-K3 MRTYTYEKLL  | 972   | >CTNNB1-K3 MRTYTYEILL  | 307   | 665   |
| >CTNNB1-K3 MRTYTYEKL   | 569   | >CTNNB1-K3 MRTYTYEIL   | 345   | 224   |
| >CTNNB1-K3 MRTYTYEKLL  | 229   | >CTNNB1-K3 MRTYTYEILL  | 121   | 108   |
| >CTNNB1-K3 MRTYTYEKL   | 470   | >CTNNB1-K3 MRTYTYEIL   | 294   | 176   |
| >CTNNB1-K3 MRTYTYEKLL  | 97    | >CTNNB1-K3 MRTYTYEILL  | 53    | 44    |
| >CTNNB1-K3 MRTYTYEK    | 4660  | >CTNNB1-K3 MRTYTYEI    | 112   | 4548  |
| >CTNNB1-K3 MRTYTYEKL   | 223   | >CTNNB1-K3 MRTYTYEIL   | 223   | 0     |
| >CTNNB1-K3 MRTYTYEKLL  | 8     | >CTNNB1-K3 MRTYTYEILL  | 7     | 1     |
| >CTNNB1-K3 IMRTYTYEKLI | 203   | >CTNNB1-K3 IMRTYTYEILL | 127   | 76    |
| >CTNNB1-K3 IMRTYTYEK   | 16873 | >CTNNB1-K3 IMRTYTYEI   | 25    | 16848 |
| >CTNNB1-K3 IMRTYTYEKLI | 952   | >CTNNB1-K3 IMRTYTYEILL | 119   | 833   |
| >CTNNB1-K3 IMRTYTYEK   | 4855  | >CTNNB1-K3 IMRTYTYEI   | 11    | 4844  |
| >CTNNB1-K3 IMRTYTYEKL  | 90    | >CTNNB1-K3 IMRTYTYEIL  | 123   | 33    |
| >CTNNB1-K3 IMRTYTYEKLI | 114   | >CTNNB1-K3 IMRTYTYEILL | 37    | 77    |
| >CTNNB1-K3 IMRTYTYEK   | 11738 | >CTNNB1-K3 IMRTYTYEI   | 13    | 11725 |
| >CTNNB1-K3 IMRTYTYEKL  | 296   | >CTNNB1-K3 IMRTYTYEIL  | 314   | 18    |
| >CTNNB1-K3 IMRTYTYEKLI | 189   | >CTNNB1-K3 IMRTYTYEILL | 131   | 58    |
| >CTNNB1-K3 IMRTYTYEK   | 8407  | >CTNNB1-K3 IMRTYTYEI   | 13    | 8394  |

|                        |       |                        |       |       |
|------------------------|-------|------------------------|-------|-------|
| >CTNNB1-K3 IMRTYTYEKL  | 84    | >CTNNB1-K3 IMRTYTYEIL  | 233   | 149   |
| >CTNNB1-K3 IMRTYTYEKLI | 279   | >CTNNB1-K3 IMRTYTYEILL | 76    | 203   |
| >CTNNB1-K3 IMRTYTYEK   | 14425 | >CTNNB1-K3 IMRTYTYEI   | 27    | 14398 |
| >CTNNB1-K3 IMRTYTYEKL  | 594   | >CTNNB1-K3 IMRTYTYEIL  | 426   | 168   |
| >CTNNB1-K3 IMRTYTYEKLI | 1258  | >CTNNB1-K3 IMRTYTYEILL | 406   | 852   |
| >CTNNB1-K3 IMRTYTYEK   | 20734 | >CTNNB1-K3 IMRTYTYEI   | 118   | 20616 |
| >CTNNB1-K3 IMRTYTYEK   | 5043  | >CTNNB1-K3 IMRTYTYEI   | 19    | 5024  |
| >CTNNB1-K3 IMRTYTYEKL  | 25    | >CTNNB1-K3 IMRTYTYEIL  | 51    | 26    |
| >CTNNB1-K3 IMRTYTYEKLI | 44    | >CTNNB1-K3 IMRTYTYEILL | 15    | 29    |
| >CTNNB1-K3 IMRTYTYEK   | 51    | >CTNNB1-K3 IMRTYTYEI   | 15486 | 15435 |
| >CTNNB1-K3 IMRTYTYEK   | 60    | >CTNNB1-K3 IMRTYTYEI   | 22873 | 22813 |
| >CTNNB1-K3 IMRTYTYEK   | 7     | >CTNNB1-K3 IMRTYTYEI   | 71    | 64    |
| >CTNNB1-K3 IMRTYTYEKLI | 544   | >CTNNB1-K3 IMRTYTYEILL | 155   | 389   |
| >CTNNB1-K3 IMRTYTYEK   | 16    | >CTNNB1-K3 IMRTYTYEI   | 3890  | 3874  |
| >CTNNB1-K3 IMRTYTYEK   | 13635 | >CTNNB1-K3 IMRTYTYEI   | 153   | 13482 |
| >CTNNB1-K3 IMRTYTYEK   | 11409 | >CTNNB1-K3 IMRTYTYEI   | 253   | 11156 |
| >CTNNB1-K3 IMRTYTYEKLI | 395   | >CTNNB1-K3 IMRTYTYEILL | 859   | 464   |
| >CTNNB1-K3 IMRTYTYEK   | 98    | >CTNNB1-K3 IMRTYTYEI   | 21    | 77    |
| >CTNNB1-K3 IMRTYTYEKL  | 24    | >CTNNB1-K3 IMRTYTYEIL  | 11    | 13    |
| >CTNNB1-K3 IMRTYTYEKLI | 30    | >CTNNB1-K3 IMRTYTYEILL | 40    | 10    |
| >CTNNB1-K3 IMRTYTYEK   | 23431 | >CTNNB1-K3 IMRTYTYEI   | 446   | 22985 |
| >CTNNB1-K3 IMRTYTYEK   | 251   | >CTNNB1-K3 IMRTYTYEI   | 22951 | 22700 |
| >CTNNB1-K3 NIMRTYTYEK  | 9068  | >CTNNB1-K3 NIMRTYTYEI  | 175   | 8893  |
| >CTNNB1-K3 NIMRTYTYEK  | 10426 | >CTNNB1-K3 NIMRTYTYEI  | 97    | 10329 |
| >CTNNB1-K3 NIMRTYTYEK  | 132   | >CTNNB1-K3 NIMRTYTYEIL | 225   | 93    |
| >CTNNB1-K3 NIMRTYTYEK  | 8950  | >CTNNB1-K3 NIMRTYTYEI  | 78    | 8872  |
| >CTNNB1-K3 NIMRTYTYEK  | 9795  | >CTNNB1-K3 NIMRTYTYEI  | 95    | 9700  |
| >CTNNB1-K3 NIMRTYTYEK  | 21483 | >CTNNB1-K3 NIMRTYTYEI  | 312   | 21171 |
| >CTNNB1-K3 NIMRTYTYEK  | 17746 | >CTNNB1-K3 NIMRTYTYEI  | 208   | 17538 |
| >CTNNB1-K3 NIMRTYTYEK  | 18960 | >CTNNB1-K3 NIMRTYTYEI  | 134   | 18826 |
| >CTNNB1-K3 NIMRTYTYEK  | 45    | >CTNNB1-K3 NIMRTYTYEI  | 14132 | 14087 |
| >CTNNB1-K3 NIMRTYTYEK  | 15    | >CTNNB1-K3 NIMRTYTYEI  | 26480 | 26465 |
| >CTNNB1-K3 NIMRTYTYEK  | 432   | >CTNNB1-K3 NIMRTYTYEI  | 10677 | 10245 |
| >CTNNB1-K3 NIMRTYTYEK  | 17216 | >CTNNB1-K3 NIMRTYTYEI  | 453   | 16763 |
| >CTNNB1-K3 NIMRTYTYEK  | 18    | >CTNNB1-K3 NIMRTYTYEI  | 14886 | 14868 |
| >CTNNB1-K3 NIMRTYTYEK  | 18140 | >CTNNB1-K3 NIMRTYTYEI  | 103   | 18037 |
| >CTNNB1-K3 NIMRTYTYEK  | 159   | >CTNNB1-K3 NIMRTYTYEIL | 317   | 158   |
| >CTNNB1-K3 NIMRTYTYEK  | 8305  | >CTNNB1-K3 NIMRTYTYEI  | 30    | 8275  |
| >CTNNB1-K3 NIMRTYTYEK  | 222   | >CTNNB1-K3 NIMRTYTYEIL | 577   | 355   |
| >CTNNB1-K3 NIMRTYTYEK  | 725   | >CTNNB1-K3 NIMRTYTYEIL | 421   | 304   |
| >CTNNB1-K4 GKGNEEED\   | 29485 | >CTNNB1-K4 GEGNEEED\   | 284   | 29201 |
| >CTNNB1-K4 ATTTAPSLSGI | 216   | >CTNNB1-K4 ATTTAPSLSGI | 20732 | 20516 |
| >CTNNB1-K4 ATTTAPSLSGI | 36    | >CTNNB1-K4 ATTTAPSLSGI | 19310 | 19274 |

|                        |      |                        |       |       |
|------------------------|------|------------------------|-------|-------|
| >CTNNB1-K4 ATTTAPSLSGI | 51   | >CTNNB1-K4 ATTTAPSLSGI | 11723 | 11672 |
| >CTNNB1-K4 ATTTAPSLSGI | 129  | >CTNNB1-K4 ATTTAPSLSGI | 19431 | 19302 |
| >CTNNB1-K4 ATTTAPSLSGI | 404  | >CTNNB1-K4 ATTTAPSLSGI | 7141  | 6737  |
| >CTNNB1-K4 TAPSLSGK    | 164  | >CTNNB1-K4 TAPSLSGE    | 17902 | 17738 |
| >CTNNB1-K4 TTAPSLSGK   | 86   | >CTNNB1-K4 TTAPSLSGE   | 19698 | 19612 |
| >CTNNB1-K4 TTAPSLSGK   | 10   | >CTNNB1-K4 TTAPSLSGE   | 15108 | 15098 |
| >CTNNB1-K4 TTAPSLSGK   | 5    | >CTNNB1-K4 TTAPSLSGE   | 774   | 769   |
| >CTNNB1-K4 TTAPSLSGK   | 198  | >CTNNB1-K4 TTAPSLSGE   | 8422  | 8224  |
| >CTNNB1-K4 TTTAPSLSGK  | 59   | >CTNNB1-K4 TTTAPSLSGE  | 20582 | 20523 |
| >CTNNB1-K4 TTTAPSLSGK  | 15   | >CTNNB1-K4 TTTAPSLSGE  | 27657 | 27642 |
| >CTNNB1-K4 TTTAPSLSGK  | 439  | >CTNNB1-K4 TTTAPSLSGE  | 15776 | 15337 |
| >CTNNB1-K4 TTTAPSLSGK  | 8    | >CTNNB1-K4 TTTAPSLSGE  | 12668 | 12660 |
| >CTNNB1-K4 ATTTAPSLSGI | 216  | >CTNNB1-K4 ATTTAPSLSGI | 4491  | 4275  |
| >CTNNB1-K4 ATTTAPSLSGI | 36   | >CTNNB1-K4 ATTTAPSLSGI | 404   | 368   |
| >CTNNB1-K4 ATTTAPSLSGI | 51   | >CTNNB1-K4 ATTTAPSLSGI | 4057  | 4006  |
| >CTNNB1-K4 ATTTAPSLSGI | 3829 | >CTNNB1-K4 ATTTAPSLSGI | 255   | 3574  |
| >CTNNB1-K4 ATTTAPSLSGI | 129  | >CTNNB1-K4 ATTTAPSLSGI | 32    | 97    |
| >CTNNB1-K4 ATTTAPSLSGI | 404  | >CTNNB1-K4 ATTTAPSLSGI | 638   | 234   |
| >CTNNB1-K4 APSLSGKGNF  | 1071 | >CTNNB1-K4 APSLSGRGNF  | 472   | 599   |
| >CTNNB1-K4 TAPSLSGK    | 164  | >CTNNB1-K4 TAPSLSGR    | 48    | 116   |
| >CTNNB1-K4 TTAPSLSGK   | 86   | >CTNNB1-K4 TTAPSLSGR   | 1842  | 1756  |
| >CTNNB1-K4 TTAPSLSGK   | 10   | >CTNNB1-K4 TTAPSLSGR   | 62    | 52    |
| >CTNNB1-K4 TTAPSLSGK   | 2033 | >CTNNB1-K4 TTAPSLSGR   | 93    | 1940  |
| >CTNNB1-K4 TTAPSLSGK   | 5    | >CTNNB1-K4 TTAPSLSGR   | 3     | 2     |
| >CTNNB1-K4 TTAPSLSGK   | 198  | >CTNNB1-K4 TTAPSLSGR   | 318   | 120   |
| >CTNNB1-K4 TTTAPSLSGK  | 59   | >CTNNB1-K4 TTTAPSLSGR  | 1213  | 1154  |
| >CTNNB1-K4 TTTAPSLSGK  | 15   | >CTNNB1-K4 TTTAPSLSGR  | 103   | 88    |
| >CTNNB1-K4 TTTAPSLSGK  | 439  | >CTNNB1-K4 TTTAPSLSGR  | 9892  | 9453  |
| >CTNNB1-K4 TTTAPSLSGK  | 1850 | >CTNNB1-K4 TTTAPSLSGR  | 114   | 1736  |
| >CTNNB1-K4 TTTAPSLSGK  | 8    | >CTNNB1-K4 TTTAPSLSGR  | 4     | 4     |
| >CTNNB1-L3: YLDSGIHSGA | 78   | >CTNNB1-L3: YQDSGIHSGA | 2356  | 2278  |
| >CTNNB1-L3: YLDSGIHSGA | 212  | >CTNNB1-L3: YQDSGIHSGA | 2087  | 1875  |
| >CTNNB1-L3: YLDSGIHSG  | 278  | >CTNNB1-L3: YQDSGIHSG  | 6139  | 5861  |
| >CTNNB1-L3: YLDSGIHSGA | 24   | >CTNNB1-L3: YQDSGIHSGA | 304   | 280   |
| >CTNNB1-L3: YLDSGIHSGA | 284  | >CTNNB1-L3: YQDSGIHSGA | 5481  | 5197  |
| >CTNNB1-L3: YLDSGIHSGA | 32   | >CTNNB1-L3: YQDSGIHSGA | 302   | 270   |
| >CTNNB1-L3: YLDSGIHSGA | 78   | >CTNNB1-L3: YQDSGIHSGA | 2591  | 2513  |
| >CTNNB1-L3: YLDSGIHS   | 419  | >CTNNB1-L3: YQDSGIHS   | 171   | 248   |
| >CTNNB1-L3: YLDSGIHSG  | 570  | >CTNNB1-L3: YQDSGIHSG  | 106   | 464   |
| >CTNNB1-L3: YLDSGIHSGA | 280  | >CTNNB1-L3: YQDSGIHSGA | 310   | 30    |
| >CTNNB1-L3: YLDSGIHSGA | 178  | >CTNNB1-L3: YQDSGIHSGA | 51    | 127   |
| >CTNNB1-L3: YLDSGIHS   | 47   | >CTNNB1-L3: YQDSGIHS   | 3092  | 3045  |
| >CTNNB1-L3: YLDSGIHSG  | 15   | >CTNNB1-L3: YQDSGIHSG  | 980   | 965   |

|                       |      |                       |       |       |
|-----------------------|------|-----------------------|-------|-------|
| >CTNNB1-L3:YLDSGIHSGA | 2    | >CTNNB1-L3:YQDSGIHSGA | 60    | 58    |
| >CTNNB1-L3:YLDSGIHSGA | 12   | >CTNNB1-L3:YQDSGIHSGA | 771   | 759   |
| >CTNNB1-L3:YLDSGIHS   | 395  | >CTNNB1-L3:YQDSGIHS   | 8073  | 7678  |
| >CTNNB1-L3:YLDSGIHSG  | 139  | >CTNNB1-L3:YQDSGIHSG  | 2421  | 2282  |
| >CTNNB1-L3:YLDSGIHSGA | 8    | >CTNNB1-L3:YQDSGIHSGA | 343   | 335   |
| >CTNNB1-L3:YLDSGIHSGA | 83   | >CTNNB1-L3:YQDSGIHSGA | 3288  | 3205  |
| >CTNNB1-L3:YLDSGIHS   | 101  | >CTNNB1-L3:YQDSGIHS   | 7264  | 7163  |
| >CTNNB1-L3:YLDSGIHSG  | 140  | >CTNNB1-L3:YQDSGIHSG  | 6050  | 5910  |
| >CTNNB1-L3:YLDSGIHSGA | 7    | >CTNNB1-L3:YQDSGIHSGA | 341   | 334   |
| >CTNNB1-L3:YLDSGIHSGA | 121  | >CTNNB1-L3:YQDSGIHSGA | 5984  | 5863  |
| >CTNNB1-L3:YLDSGIHSGA | 7    | >CTNNB1-L3:YQDSGIHSGA | 1038  | 1031  |
| >CTNNB1-L3:YLDSGIHSGA | 255  | >CTNNB1-L3:YQDSGIHSGA | 9215  | 8960  |
| >CTNNB1-L3:YLDSGIHS   | 66   | >CTNNB1-L3:YQDSGIHS   | 22664 | 22598 |
| >CTNNB1-L3:YLDSGIHSG  | 13   | >CTNNB1-L3:YQDSGIHSG  | 16113 | 16100 |
| >CTNNB1-L3:YLDSGIHSGA | 2    | >CTNNB1-L3:YQDSGIHSGA | 1112  | 1110  |
| >CTNNB1-L3:YLDSGIHSGA | 36   | >CTNNB1-L3:YQDSGIHSGA | 11593 | 11557 |
| >CTNNB1-L3:AVSHWQQQ   | 77   | >CTNNB1-L3:AVSHWQQQ   | 7588  | 7511  |
| >CTNNB1-L3:AVSHWQQQ   | 245  | >CTNNB1-L3:AVSHWQQQ   | 12708 | 12463 |
| >CTNNB1-L3:AVSHWQQQ   | 368  | >CTNNB1-L3:AVSHWQQQ   | 13968 | 13600 |
| >CTNNB1-L3:AVSHWQQQ   | 40   | >CTNNB1-L3:AVSHWQQQ   | 4408  | 4368  |
| >CTNNB1-L3:AVSHWQQQ   | 488  | >CTNNB1-L3:AVSHWQQQ   | 14691 | 14203 |
| >CTNNB1-L3:AVSHWQQQ   | 460  | >CTNNB1-L3:AVSHWQQQ   | 5032  | 4572  |
| >CTNNB1-L3:SYLDSGIHSG | 410  | >CTNNB1-L3:SYQDSGIHSG | 824   | 414   |
| >CTNNB1-L3:QSYLDSGI   | 46   | >CTNNB1-L3:QSYQDSGI   | 30    | 16    |
| >CTNNB1-L3:QSYLDSGI   | 22   | >CTNNB1-L3:QSYQDSGI   | 19    | 3     |
| >CTNNB1-L3:QQSYLDSGI  | 417  | >CTNNB1-L3:QQSYQDSGI  | 407   | 10    |
| >CTNNB1-L3:QQQSYLDSGI | 381  | >CTNNB1-L3:QQQSYQDSG  | 336   | 45    |
| >CTNNB1-L3:WQQQSYLDS  | 268  | >CTNNB1-L3:WQQQSYQD   | 404   | 136   |
| >CTNNB1-L3:WQQQSYLDS  | 431  | >CTNNB1-L3:WQQQSYQD   | 552   | 121   |
| >CTNNB1-L3:WQQQSYLDS  | 187  | >CTNNB1-L3:WQQQSYQD   | 167   | 20    |
| >CTNNB1-L3:HWQQQSYL   | 22   | >CTNNB1-L3:HWQQQSYQ   | 4936  | 4914  |
| >CTNNB1-L3:HWQQQSYL   | 1430 | >CTNNB1-L3:HWQQQSYQ   | 108   | 1322  |
| >CTNNB1-L3:HWQQQSYL   | 116  | >CTNNB1-L3:HWQQQSYQ   | 455   | 339   |
| >CTNNB1-L3:HWQQQSYL   | 297  | >CTNNB1-L3:HWQQQSYQ   | 457   | 160   |
| >CTNNB1-L3:SHWQQQSYL  | 75   | >CTNNB1-L3:SHWQQQSYC  | 623   | 548   |
| >CTNNB1-L3:VSHWQQQS   | 18   | >CTNNB1-L3:VSHWQQQS   | 5559  | 5541  |
| >CTNNB1-L3:VSHWQQQS   | 139  | >CTNNB1-L3:VSHWQQQS   | 5255  | 5116  |
| >CTNNB1-L3:VSHWQQQS   | 396  | >CTNNB1-L3:VSHWQQQS   | 30693 | 30297 |
| >CTNNB1-L3:YLDSGIHSGA | 78   | >CTNNB1-L3:YWDSGIHSG  | 20212 | 20134 |
| >CTNNB1-L3:YLDSGIHSGA | 212  | >CTNNB1-L3:YWDSGIHSG  | 18048 | 17836 |
| >CTNNB1-L3:YLDSGIHSG  | 278  | >CTNNB1-L3:YWDSGIHSG  | 12454 | 12176 |
| >CTNNB1-L3:YLDSGIHSGA | 24   | >CTNNB1-L3:YWDSGIHSG  | 7320  | 7296  |
| >CTNNB1-L3:YLDSGIHSGA | 284  | >CTNNB1-L3:YWDSGIHSG  | 12485 | 12201 |

|                        |       |                       |       |       |
|------------------------|-------|-----------------------|-------|-------|
| >CTNNB1-L3:YLDSGIHSGA  | 32    | >CTNNB1-L3:YWDSGIHSG/ | 10472 | 10440 |
| >CTNNB1-L3:YLDSGIHSGA  | 78    | >CTNNB1-L3:YWDSGIHSG/ | 19342 | 19264 |
| >CTNNB1-L3:YLDSGIHS    | 419   | >CTNNB1-L3:YWDSGIHS   | 11862 | 11443 |
| >CTNNB1-L3:YLDSGIHSGA  | 280   | >CTNNB1-L3:YWDSGIHSG/ | 10329 | 10049 |
| >CTNNB1-L3:YLDSGIHSGA  | 178   | >CTNNB1-L3:YWDSGIHSG/ | 4639  | 4461  |
| >CTNNB1-L3:YLDSGIHS    | 47    | >CTNNB1-L3:YWDSGIHS   | 16945 | 16898 |
| >CTNNB1-L3:YLDSGIHSG   | 15    | >CTNNB1-L3:YWDSGIHSG  | 11317 | 11302 |
| >CTNNB1-L3:YLDSGIHSGA  | 2     | >CTNNB1-L3:YWDSGIHSG/ | 2040  | 2038  |
| >CTNNB1-L3:YLDSGIHSGA  | 12    | >CTNNB1-L3:YWDSGIHSG/ | 9327  | 9315  |
| >CTNNB1-L3:YLDSGIHS    | 395   | >CTNNB1-L3:YWDSGIHS   | 20611 | 20216 |
| >CTNNB1-L3:YLDSGIHSG   | 139   | >CTNNB1-L3:YWDSGIHSG  | 14941 | 14802 |
| >CTNNB1-L3:YLDSGIHSGA  | 8     | >CTNNB1-L3:YWDSGIHSG/ | 10995 | 10987 |
| >CTNNB1-L3:YLDSGIHSGA  | 83    | >CTNNB1-L3:YWDSGIHSG/ | 18517 | 18434 |
| >CTNNB1-L3:YLDSGIHS    | 101   | >CTNNB1-L3:YWDSGIHS   | 17472 | 17371 |
| >CTNNB1-L3:YLDSGIHSG   | 140   | >CTNNB1-L3:YWDSGIHSG  | 16415 | 16275 |
| >CTNNB1-L3:YLDSGIHSGA  | 7     | >CTNNB1-L3:YWDSGIHSG/ | 6278  | 6271  |
| >CTNNB1-L3:YLDSGIHSGA  | 121   | >CTNNB1-L3:YWDSGIHSG/ | 17680 | 17559 |
| >CTNNB1-L3:YLDSGIHSGA  | 7     | >CTNNB1-L3:YWDSGIHSG/ | 13871 | 13864 |
| >CTNNB1-L3:YLDSGIHSGA  | 255   | >CTNNB1-L3:YWDSGIHSG/ | 22578 | 22323 |
| >CTNNB1-L3:YLDSGIHS    | 66    | >CTNNB1-L3:YWDSGIHS   | 29306 | 29240 |
| >CTNNB1-L3:YLDSGIHSG   | 13    | >CTNNB1-L3:YWDSGIHSG  | 23857 | 23844 |
| >CTNNB1-L3:YLDSGIHSGA  | 2     | >CTNNB1-L3:YWDSGIHSG/ | 8007  | 8005  |
| >CTNNB1-L3:YLDSGIHSGA  | 36    | >CTNNB1-L3:YWDSGIHSG/ | 22574 | 22538 |
| >CTNNB1-L3:YLDSGIHSG   | 27095 | >CTNNB1-L3:YWDSGIHSG  | 475   | 26620 |
| >CTNNB1-L3:AVSHWQQQ    | 77    | >CTNNB1-L3:AVSHWQQQ   | 19682 | 19605 |
| >CTNNB1-L3:AVSHWQQQ    | 245   | >CTNNB1-L3:AVSHWQQQ   | 18643 | 18398 |
| >CTNNB1-L3:AVSHWQQQ    | 368   | >CTNNB1-L3:AVSHWQQQ   | 23701 | 23333 |
| >CTNNB1-L3:AVSHWQQQ    | 40    | >CTNNB1-L3:AVSHWQQQ   | 25749 | 25709 |
| >CTNNB1-L3:AVSHWQQQ    | 488   | >CTNNB1-L3:AVSHWQQQ   | 23325 | 22837 |
| >CTNNB1-L3:AVSHWQQQ    | 1661  | >CTNNB1-L3:AVSHWQQQ   | 47    | 1614  |
| >CTNNB1-L3:AVSHWQQQ    | 20188 | >CTNNB1-L3:AVSHWQQQ   | 353   | 19835 |
| >CTNNB1-L3:AVSHWQQQ    | 6807  | >CTNNB1-L3:AVSHWQQQ   | 18    | 6789  |
| >CTNNB1-L3:AVSHWQQQ    | 460   | >CTNNB1-L3:AVSHWQQQ   | 835   | 375   |
| >CTNNB1-L3:SYLDSGIHSG/ | 410   | >CTNNB1-L3:SYWDSGIHSC | 314   | 96    |
| >CTNNB1-L3:QSYLDSGI    | 3179  | >CTNNB1-L3:QSYWDSGI   | 327   | 2852  |
| >CTNNB1-L3:QSYLDSGI    | 46    | >CTNNB1-L3:QSYWDSGI   | 36    | 10    |
| >CTNNB1-L3:QSYLDSGI    | 22    | >CTNNB1-L3:QSYWDSGI   | 12    | 10    |
| >CTNNB1-L3:QQSYLDSGI   | 1017  | >CTNNB1-L3:QQSYWDSGI  | 286   | 731   |
| >CTNNB1-L3:QQSYLDSGI   | 417   | >CTNNB1-L3:QQSYWDSGI  | 415   | 2     |
| >CTNNB1-L3:QQQSYLDSGI  | 381   | >CTNNB1-L3:QQQSYWDSGI | 386   | 5     |
| >CTNNB1-L3:WQQQSYLDS   | 268   | >CTNNB1-L3:WQQQSYWD   | 92    | 176   |
| >CTNNB1-L3:WQQQSYLDS   | 431   | >CTNNB1-L3:WQQQSYWD   | 657   | 226   |
| >CTNNB1-L3:WQQQSYLDS   | 187   | >CTNNB1-L3:WQQQSYWD   | 226   | 39    |



|                        |       |                       |       |       |
|------------------------|-------|-----------------------|-------|-------|
| >CTNNB1-L3:HWQQQSYL    | 22    | >CTNNB1-L3:HWQQQSYW   | 27    | 5     |
| >CTNNB1-L3:HWQQQSYL    | 116   | >CTNNB1-L3:HWQQQSYW   | 209   | 93    |
| >CTNNB1-L3:HWQQQSYLF   | 297   | >CTNNB1-L3:HWQQQSYW   | 313   | 16    |
| >CTNNB1-L3:SHWQQQSYL   | 75    | >CTNNB1-L3:SHWQQQSYL  | 410   | 335   |
| >CTNNB1-L3:SHWQQQSYL   | 17855 | >CTNNB1-L3:SHWQQQSYL  | 110   | 17745 |
| >CTNNB1-L3:VSHWQQQS\   | 18    | >CTNNB1-L3:VSHWQQQS\  | 5     | 13    |
| >CTNNB1-L3:VSHWQQQS\   | 6295  | >CTNNB1-L3:VSHWQQQS\  | 47    | 6248  |
| >CTNNB1-L3:VSHWQQQS\   | 829   | >CTNNB1-L3:VSHWQQQS\  | 10    | 819   |
| >CTNNB1-L3:VSHWQQQS\   | 139   | >CTNNB1-L3:VSHWQQQS\  | 1636  | 1497  |
| >CTNNB1-L3:VSHWQQQS\   | 15086 | >CTNNB1-L3:VSHWQQQS\  | 197   | 14889 |
| >CTNNB1-L3:VSHWQQQS\   | 396   | >CTNNB1-L3:VSHWQQQS\  | 31836 | 31440 |
| >CTNNB1-L4(HSGATTTAPS  | 1270  | >CTNNB1-L4(HSGATTTAPS | 106   | 1164  |
| >CTNNB1-L4(HSGATTTAPS  | 33    | >CTNNB1-L4(HSGATTTAPS | 1137  | 1104  |
| >CTNNB1-L4(TAPSLSGK    | 663   | >CTNNB1-L4(TAPSVSGK   | 489   | 174   |
| >CTNNB1-L4(TAPSLSGK    | 164   | >CTNNB1-L4(TAPSVSGK   | 64    | 100   |
| >CTNNB1-L4(TTAPSLSGK   | 86    | >CTNNB1-L4(TTAPSVSGK  | 79    | 7     |
| >CTNNB1-L4(TTAPSLSGK   | 10    | >CTNNB1-L4(TTAPSVSGK  | 9     | 1     |
| >CTNNB1-L4(TTAPSLSGK   | 5     | >CTNNB1-L4(TTAPSVSGK  | 4     | 1     |
| >CTNNB1-L4(TTAPSLSG    | 1429  | >CTNNB1-L4(TTAPSVSG   | 360   | 1069  |
| >CTNNB1-L4(TTAPSLSGK   | 198   | >CTNNB1-L4(TTAPSVSGK  | 165   | 33    |
| >CTNNB1-L4(TTTAPSLSGK  | 59    | >CTNNB1-L4(TTTAPSVSGK | 128   | 69    |
| >CTNNB1-L4(TTTAPSLSGK  | 15    | >CTNNB1-L4(TTTAPSVSGK | 24    | 9     |
| >CTNNB1-L4(TTTAPSLSGK  | 439   | >CTNNB1-L4(TTTAPSVSGK | 591   | 152   |
| >CTNNB1-L4(TTTAPSLSGK  | 8     | >CTNNB1-L4(TTTAPSVSGK | 11    | 3     |
| >CTNNB1-L4(TTTAPSL     | 338   | >CTNNB1-L4(TTTAPSV    | 618   | 280   |
| >CTNNB1-L4(ATTTAPSL    | 1617  | >CTNNB1-L4(ATTTAPSV   | 241   | 1376  |
| >CTNNB1-L4(ATTTAPSL    | 4890  | >CTNNB1-L4(ATTTAPSV   | 284   | 4606  |
| >CTNNB1-L4(ATTTAPSL    | 2436  | >CTNNB1-L4(ATTTAPSV   | 85    | 2351  |
| >CTNNB1-L4(ATTTAPSLSGI | 216   | >CTNNB1-L4(ATTTAPSVSG | 240   | 24    |
| >CTNNB1-L4(ATTTAPSLSGI | 36    | >CTNNB1-L4(ATTTAPSVSG | 37    | 1     |
| >CTNNB1-L4(ATTTAPSLSGI | 51    | >CTNNB1-L4(ATTTAPSVSG | 57    | 6     |
| >CTNNB1-L4(ATTTAPSLSGI | 129   | >CTNNB1-L4(ATTTAPSVSG | 141   | 12    |
| >CTNNB1-L4(ATTTAPSL    | 4093  | >CTNNB1-L4(ATTTAPSV   | 434   | 3659  |
| >CTNNB1-L4(ATTTAPSL    | 16    | >CTNNB1-L4(ATTTAPSV   | 505   | 489   |
| >CTNNB1-L4(ATTTAPSL    | 362   | >CTNNB1-L4(ATTTAPSV   | 525   | 163   |
| >CTNNB1-L4(ATTTAPSLSGI | 404   | >CTNNB1-L4(ATTTAPSVSG | 406   | 2     |
| >CTNNB1-L4(ATTTAPSL    | 368   | >CTNNB1-L4(ATTTAPSV   | 2302  | 1934  |
| >CTNNB1-L4(GATTTAPSL   | 5173  | >CTNNB1-L4(GATTTAPSV  | 196   | 4977  |
| >CTNNB1-L4(GATTTAPSL   | 272   | >CTNNB1-L4(GATTTAPSV  | 6753  | 6481  |
| >CTNNB1-L4(GATTTAPSL   | 346   | >CTNNB1-L4(GATTTAPSV  | 1919  | 1573  |
| >CTNNB1-M\MELDMAME     | 385   | >CTNNB1-M\MELDMAMEP   | 661   | 276   |
| >CTNNB1-M\MELDMAME     | 395   | >CTNNB1-M\MELDMAMEPI  | 576   | 181   |
| >CTNNB1-M\MELDMAM      | 399   | >CTNNB1-M\MELDMAM     | 869   | 470   |

|                      |      |                       |      |      |
|----------------------|------|-----------------------|------|------|
| >CTNNB1-MξDLMELDMA   | 477  | >CTNNB1-MξDLIELDMA    | 959  | 482  |
| >CTNNB1-MξDLMELDMA   | 223  | >CTNNB1-MξDLIELDMA    | 6778 | 6555 |
| >CTNNB1-MξDLMELDMAN  | 317  | >CTNNB1-MξDLIELDMAM   | 9708 | 9391 |
| >CTNNB1-MξDLMELDMAN  | 317  | >CTNNB1-MξDLIELDMAM   | 100  | 217  |
| >CTNNB1-MξDLMELDMAN  | 1499 | >CTNNB1-MξDLIELDMAM   | 180  | 1319 |
| >CTNNB1-MξDLMELDMAN  | 450  | >CTNNB1-MξDLIELDMAM   | 121  | 329  |
| >CTNNB1-MξDLMELDMAN  | 442  | >CTNNB1-MξDLIELDMAM   | 1217 | 775  |
| >CTNNB1-MξDLMELDMAN  | 71   | >CTNNB1-MξDLIELDMAM   | 103  | 32   |
| >CTNNB1-MξADLMELDMA  | 112  | >CTNNB1-MξADLIELDMAN  | 449  | 337  |
| >CTNNB1-MξADLMELDMA  | 656  | >CTNNB1-MξADLIELDMA   | 485  | 171  |
| >CTNNB1-MξADLMELDMA  | 493  | >CTNNB1-MξADLIELDMAN  | 380  | 113  |
| >CTNNB1-MξQADLMELDM  | 51   | >CTNNB1-MξQADLIELDM   | 57   | 6    |
| >CTNNB1-MξTQADLMEL   | 123  | >CTNNB1-MξTQADLIEL    | 84   | 39   |
| >CTNNB1-MξTQADLMEL   | 21   | >CTNNB1-MξTQADLIEL    | 28   | 7    |
| >CTNNB1-MξTQADLMELD  | 164  | >CTNNB1-MξTQADLIELDM  | 150  | 14   |
| >CTNNB1-MξTQADLMEL   | 131  | >CTNNB1-MξTQADLIEL    | 271  | 140  |
| >CTNNB1-MξTQADLMELD  | 272  | >CTNNB1-MξTQADLIELDM  | 256  | 16   |
| >CTNNB1-MξTQADLMEL   | 13   | >CTNNB1-MξTQADLIEL    | 10   | 3    |
| >CTNNB1-MξTQADLMELD  | 29   | >CTNNB1-MξTQADLIELDM  | 27   | 2    |
| >CTNNB1-MξTQADLMEL   | 83   | >CTNNB1-MξTQADLIEL    | 76   | 7    |
| >CTNNB1-MξATQADLMEL  | 465  | >CTNNB1-MξATQADLIEL   | 731  | 266  |
| >CTNNB1-MξATQADLMEL  | 353  | >CTNNB1-MξATQADLIEL   | 304  | 49   |
| >CTNNB1-MξATQADLMEL  | 436  | >CTNNB1-MξATQADLIEL   | 204  | 232  |
| >CTNNB1-MξATQADLMELI | 506  | >CTNNB1-MξATQADLIELDI | 424  | 82   |
| >CTNNB1-MξATQADLMEL  | 84   | >CTNNB1-MξATQADLIEL   | 83   | 1    |
| >CTNNB1-MξATQADLMELI | 111  | >CTNNB1-MξATQADLIELDI | 172  | 61   |
| >CTNNB1-MξMATQADLMI  | 466  | >CTNNB1-MξMATQADLIEL  | 927  | 461  |
| >CTNNB1-MξMATQADLMI  | 339  | >CTNNB1-MξMATQADLIEL  | 559  | 220  |
| >CTNNB1-MξMATQADLM   | 2882 | >CTNNB1-MξMATQADLI    | 142  | 2740 |
| >CTNNB1-MξMATQADLM   | 283  | >CTNNB1-MξMATQADLI    | 2215 | 1932 |
| >CTNNB1-MξMATQADLMI  | 122  | >CTNNB1-MξMATQADLIEL  | 157  | 35   |
| >CTNNB1-MξMATQADLM   | 19   | >CTNNB1-MξMATQADLI    | 640  | 621  |
| >CTNNB1-MξMATQADLMI  | 696  | >CTNNB1-MξMATQADLIE   | 357  | 339  |
| >CTNNB1-MξMATQADLM   | 491  | >CTNNB1-MξMATQADLI    | 275  | 216  |
| >CTNNB1-MξMATQADLM   | 199  | >CTNNB1-MξMATQADLI    | 289  | 90   |
| >CTNNB1-MξMATQADLMI  | 283  | >CTNNB1-MξMATQADLIEL  | 559  | 276  |
| >CTNNB1-MξMATQADLM   | 459  | >CTNNB1-MξMATQADLI    | 2685 | 2226 |
| >CTNNB1-MξMATQADLM   | 975  | >CTNNB1-MξMATQADLI    | 154  | 821  |
| >CTNNB1-MξMATQADLM   | 3044 | >CTNNB1-MξMATQADLI    | 84   | 2960 |
| >CTNNB1-N2NKTNVKFLAI | 1183 | >CTNNB1-N2SKTNVKFLAI  | 413  | 770  |
| >CTNNB1-N2LNKTNVKFL  | 3705 | >CTNNB1-N2LSKTNVKFL   | 124  | 3581 |
| >CTNNB1-N2LNKTNVKFLA | 3513 | >CTNNB1-N2LSKTNVKFLA  | 129  | 3384 |
| >CTNNB1-N2LNKTNVKFLA | 2222 | >CTNNB1-N2LSKTNVKFLAI | 57   | 2165 |

|                       |       |                        |     |       |
|-----------------------|-------|------------------------|-----|-------|
| >CTNNB1-N2 LNKTNVKFLA | 255   | >CTNNB1-N2 LSKTNVKFLAI | 348 | 93    |
| >CTNNB1-N2 LNKTNVKF   | 3302  | >CTNNB1-N2 LSKTNVKF    | 454 | 2848  |
| >CTNNB1-N2 LNKTNVKF   | 102   | >CTNNB1-N2 LSKTNVKF    | 20  | 82    |
| >CTNNB1-N2 LNKTNVKFLA | 1179  | >CTNNB1-N2 LSKTNVKFLAI | 188 | 991   |
| >CTNNB1-N2 LNKTNVKF   | 13703 | >CTNNB1-N2 LSKTNVKF    | 7   | 13696 |
| >CTNNB1-N2 LNKTNVKFL  | 20706 | >CTNNB1-N2 LSKTNVKFL   | 66  | 20640 |
| >CTNNB1-N2 LNKTNVKFLA | 23667 | >CTNNB1-N2 LSKTNVKFLAI | 293 | 23374 |
| >CTNNB1-N2 LNKTNVKFLA | 4257  | >CTNNB1-N2 LSKTNVKFLAI | 213 | 4044  |
| >CTNNB1-N2 LLNKTNVKFL | 418   | >CTNNB1-N2 LLSKTNVKFL/ | 276 | 142   |
| >CTNNB1-N2 LLNKTNVKFL | 324   | >CTNNB1-N2 LLSKTNVKFL  | 105 | 219   |
| >CTNNB1-N2 LLNKTNVKFL | 52    | >CTNNB1-N2 LLSKTNVKFL/ | 25  | 27    |
| >CTNNB1-N2 LLNKTNVKFL | 227   | >CTNNB1-N2 LLSKTNVKFL  | 123 | 104   |
| >CTNNB1-N2 LLNKTNVKFL | 113   | >CTNNB1-N2 LLSKTNVKFL/ | 161 | 48    |
| >CTNNB1-N2 LLNKTNVKFL | 22    | >CTNNB1-N2 LLSKTNVKFL  | 47  | 25    |
| >CTNNB1-N2 LLNKTNVKFL | 63    | >CTNNB1-N2 LLSKTNVKFL/ | 152 | 89    |
| >CTNNB1-N2 LLNKTNVKFL | 58    | >CTNNB1-N2 LLSKTNVKFL  | 80  | 22    |
| >CTNNB1-N2 LLNKTNVKFL | 475   | >CTNNB1-N2 LLSKTNVKFL/ | 629 | 154   |
| >CTNNB1-N2 LLNKTNVKFL | 66    | >CTNNB1-N2 LLSKTNVKFL  | 72  | 6     |
| >CTNNB1-N2 LLNKTNVKFL | 108   | >CTNNB1-N2 LLSKTNVKFL/ | 108 | 0     |
| >CTNNB1-N2 LLNKTNVKFL | 70    | >CTNNB1-N2 LLSKTNVKFL  | 75  | 5     |
| >CTNNB1-N2 LLNKTNVKFL | 10    | >CTNNB1-N2 LLSKTNVKFL  | 8   | 2     |
| >CTNNB1-N2 LLNKTNVKFL | 14    | >CTNNB1-N2 LLSKTNVKFL/ | 12  | 2     |
| >CTNNB1-N2 LLNKTNVK   | 94    | >CTNNB1-N2 LLSKTNVK    | 119 | 25    |
| >CTNNB1-N2 LLNKTNVKF  | 413   | >CTNNB1-N2 LLSKTNVKF   | 974 | 561   |
| >CTNNB1-N2 LLNKTNVKF  | 141   | >CTNNB1-N2 LLSKTNVKF   | 166 | 25    |
| >CTNNB1-N2 LLNKTNVKF  | 22    | >CTNNB1-N2 LLSKTNVKF   | 23  | 1     |
| >CTNNB1-N2 ALLNKTNV   | 33    | >CTNNB1-N2 ALLSKTNV    | 27  | 6     |
| >CTNNB1-N2 ALLNKTNVKF | 92    | >CTNNB1-N2 ALLSKTNVKFI | 73  | 19    |
| >CTNNB1-N2 ALLNKTNV   | 46    | >CTNNB1-N2 ALLSKTNV    | 23  | 23    |
| >CTNNB1-N2 ALLNKTNVKF | 71    | >CTNNB1-N2 ALLSKTNVKFI | 37  | 34    |
| >CTNNB1-N2 ALLNKTNV   | 14    | >CTNNB1-N2 ALLSKTNV    | 11  | 3     |
| >CTNNB1-N2 ALLNKTNVKF | 111   | >CTNNB1-N2 ALLSKTNVKFI | 83  | 28    |
| >CTNNB1-N2 ALLNKTNV   | 60    | >CTNNB1-N2 ALLSKTNV    | 72  | 12    |
| >CTNNB1-N2 ALLNKTNVKF | 349   | >CTNNB1-N2 ALLSKTNVKFI | 471 | 122   |
| >CTNNB1-N2 ALLNKTNV   | 3     | >CTNNB1-N2 ALLSKTNV    | 3   | 0     |
| >CTNNB1-N2 ALLNKTNVKF | 6     | >CTNNB1-N2 ALLSKTNVKFI | 7   | 1     |
| >CTNNB1-N2 ALLNKTNV   | 6     | >CTNNB1-N2 ALLSKTNV    | 9   | 3     |
| >CTNNB1-N2 ALLNKTNVKF | 7     | >CTNNB1-N2 ALLSKTNVKFI | 12  | 5     |
| >CTNNB1-N2 ALLNKTNV   | 5     | >CTNNB1-N2 ALLSKTNV    | 6   | 1     |
| >CTNNB1-N2 ALLNKTNVKF | 13    | >CTNNB1-N2 ALLSKTNVKFI | 16  | 3     |
| >CTNNB1-N2 ALLNKTNV   | 5     | >CTNNB1-N2 ALLSKTNV    | 5   | 0     |
| >CTNNB1-N2 ALLNKTNVKF | 10    | >CTNNB1-N2 ALLSKTNVKFI | 9   | 1     |
| >CTNNB1-N2 ALLNKTNV   | 2     | >CTNNB1-N2 ALLSKTNV    | 2   | 0     |

|                       |     |                        |      |      |
|-----------------------|-----|------------------------|------|------|
| >CTNNB1-N2 ALLNKTNVKF | 5   | >CTNNB1-N2 ALLSKTNVKFI | 6    | 1    |
| >CTNNB1-N2 ALLNKTNVK  | 79  | >CTNNB1-N2 ALLSKTNVK   | 77   | 2    |
| >CTNNB1-N2 ALLNKTNVK  | 101 | >CTNNB1-N2 ALLSKTNVK   | 107  | 6    |
| >CTNNB1-N2 ALLNKTNVK  | 155 | >CTNNB1-N2 ALLSKTNVK   | 179  | 24   |
| >CTNNB1-N2 ALLNKTNVKF | 27  | >CTNNB1-N2 ALLSKTNVKF  | 45   | 18   |
| >CTNNB1-N2 ALLNKTNVKF | 28  | >CTNNB1-N2 ALLSKTNVKF  | 20   | 8    |
| >CTNNB1-N2 VALLNKTNV  | 9   | >CTNNB1-N2 VALLSKTNV   | 1446 | 1437 |
| >CTNNB1-N2 VALLNKTNVK | 236 | >CTNNB1-N2 VALLSKTNVK  | 223  | 13   |
| >CTNNB1-N2 VALLNKTNVK | 131 | >CTNNB1-N2 VALLSKTNVK  | 61   | 70   |
| >CTNNB1-N2 VALLNKTNVK | 18  | >CTNNB1-N2 VALLSKTNVK  | 10   | 8    |
| >CTNNB1-N2 MVALLNKTN' | 428 | >CTNNB1-N2 MVALLSKTN\  | 341  | 87   |
| >CTNNB1-N2 MVALLNKTN' | 199 | >CTNNB1-N2 MVALLSKTN\  | 123  | 76   |
| >CTNNB1-N2 MVALLNKTN' | 416 | >CTNNB1-N2 MVALLSKTN\  | 279  | 137  |
| >CTNNB1-N2 MVALLNKTN' | 52  | >CTNNB1-N2 MVALLSKTN\  | 43   | 9    |
| >CTNNB1-N2 MVALLNKTN' | 276 | >CTNNB1-N2 MVALLSKTN\  | 171  | 105  |
| >CTNNB1-N2 MVALLNKTN' | 60  | >CTNNB1-N2 MVALLSKTN\  | 52   | 8    |
| >CTNNB1-N2 MVALLNKTN' | 152 | >CTNNB1-N2 MVALLSKTN\  | 110  | 42   |
| >CTNNB1-N2 MVALLNKTN' | 13  | >CTNNB1-N2 MVALLSKTN\  | 14   | 1    |
| >CTNNB1-N2 MVALLNKTN  | 233 | >CTNNB1-N2 MVALLSKT    | 294  | 61   |
| >CTNNB1-N2 MVALLNKTN' | 182 | >CTNNB1-N2 MVALLSKTN\  | 157  | 25   |
| >CTNNB1-N2 MVALLNKTN' | 103 | >CTNNB1-N2 MVALLSKTN\  | 85   | 18   |
| >CTNNB1-N2 KMVALLNKTI | 59  | >CTNNB1-N2 KMVALLSKTN  | 53   | 6    |
| >CTNNB1-N2 KMVALLNKTI | 94  | >CTNNB1-N2 KMVALLSKT   | 185  | 91   |
| >CTNNB1-N2 KMVALLNKTI | 13  | >CTNNB1-N2 KMVALLSKTN  | 13   | 0    |
| >CTNNB1-N2 KMVALLNKTI | 80  | >CTNNB1-N2 KMVALLSKT   | 29   | 51   |
| >CTNNB1-N2 KMVALLNKTI | 6   | >CTNNB1-N2 KMVALLSKTN  | 5    | 1    |
| >CTNNB1-N2 KMVALLNKTI | 162 | >CTNNB1-N2 KMVALLSKT   | 192  | 30   |
| >CTNNB1-N2 KMVALLNKTI | 22  | >CTNNB1-N2 KMVALLSKTN  | 19   | 3    |
| >CTNNB1-N2 KMVALLNKTI | 633 | >CTNNB1-N2 KMVALLSKT   | 252  | 381  |
| >CTNNB1-N2 KMVALLNKTI | 6   | >CTNNB1-N2 KMVALLSKTN  | 6    | 0    |
| >CTNNB1-N2 KMVALLNKTI | 11  | >CTNNB1-N2 KMVALLSKTN  | 17   | 6    |
| >CTNNB1-N2 KMVALLNKTI | 13  | >CTNNB1-N2 KMVALLSKTN  | 11   | 2    |
| >CTNNB1-N2 KMVALLNKTI | 69  | >CTNNB1-N2 KMVALLSKTN  | 64   | 5    |
| >CTNNB1-N2 KMVALLNKTI | 4   | >CTNNB1-N2 KMVALLSKTN  | 4    | 0    |
| >CTNNB1-N2 KMVALLNK   | 37  | >CTNNB1-N2 KMVALLSK    | 35   | 2    |
| >CTNNB1-N2 KMVALLNK   | 20  | >CTNNB1-N2 KMVALLSK    | 18   | 2    |
| >CTNNB1-N2 KMVALLNK   | 35  | >CTNNB1-N2 KMVALLSK    | 28   | 7    |
| >CTNNB1-N2 KMVALLNK   | 76  | >CTNNB1-N2 KMVALLSK    | 122  | 46   |
| >CTNNB1-N2 KMVALLNKTI | 453 | >CTNNB1-N2 KMVALLSKTN  | 249  | 204  |
| >CTNNB1-N2 KMVALLNK   | 106 | >CTNNB1-N2 KMVALLSK    | 173  | 67   |
| >CTNNB1-N2 QKMVALLNK  | 675 | >CTNNB1-N2 QKMVALLSK   | 308  | 367  |
| >CTNNB1-N2 LQKMVALLNI | 145 | >CTNNB1-N2 LQKMVALLSK  | 111  | 34   |
| >CTNNB1-N2 LQKMVALLNI | 97  | >CTNNB1-N2 LQKMVALLSK  | 99   | 2    |

|                       |       |                       |      |       |
|-----------------------|-------|-----------------------|------|-------|
| >CTNNB1-N2 LQKMVALLNI | 43    | >CTNNB1-N2 LQKMVALLSK | 31   | 12    |
| >CTNNB1-N2 GLQKMVALLI | 89    | >CTNNB1-N2 GLQKMVALL! | 102  | 13    |
| >CTNNB1-N2 GLQKMVALLI | 40    | >CTNNB1-N2 GLQKMVALL! | 43   | 3     |
| >CTNNB1-N5 NPEEEDVDTS | 474   | >CTNNB1-N5 SPEEEDVDTS | 1033 | 559   |
| >CTNNB1-P4 GIHSGATTTA | 13393 | >CTNNB1-P4 GIHSGATTTA | 49   | 13344 |
| >CTNNB1-P4 TAPSLSGK   | 663   | >CTNNB1-P4 TAASLSGK   | 82   | 581   |
| >CTNNB1-P4 TAPSLSGK   | 164   | >CTNNB1-P4 TAASLSGK   | 13   | 151   |
| >CTNNB1-P4 TTAPSLSGK  | 86    | >CTNNB1-P4 TTAASLSGK  | 63   | 23    |
| >CTNNB1-P4 TTAPSLSGK  | 10    | >CTNNB1-P4 TTAASLSGK  | 10   | 0     |
| >CTNNB1-P4 TTAPSLSGK  | 5     | >CTNNB1-P4 TTAASLSGK  | 4    | 1     |
| >CTNNB1-P4 TTAPSLSGK  | 198   | >CTNNB1-P4 TTAASLSGK  | 528  | 330   |
| >CTNNB1-P4 TTTAPSLSGK | 59    | >CTNNB1-P4 TTTAASLSGK | 43   | 16    |
| >CTNNB1-P4 TTTAPSLSGK | 15    | >CTNNB1-P4 TTTAASLSGK | 13   | 2     |
| >CTNNB1-P4 TTTAPSLSGK | 439   | >CTNNB1-P4 TTTAASLSGK | 149  | 290   |
| >CTNNB1-P4 TTTAPSLSGK | 8     | >CTNNB1-P4 TTTAASLSGK | 10   | 2     |
| >CTNNB1-P4 TTTAPSL    | 338   | >CTNNB1-P4 TTTAASLS   | 461  | 123   |
| >CTNNB1-P4 ATTTAPSLGI | 216   | >CTNNB1-P4 ATTTAASLSG | 202  | 14    |
| >CTNNB1-P4 ATTTAPSLGI | 36    | >CTNNB1-P4 ATTTAASLSG | 35   | 1     |
| >CTNNB1-P4 ATTTAPSLGI | 51    | >CTNNB1-P4 ATTTAASLSG | 67   | 16    |
| >CTNNB1-P4 ATTTAPSLGI | 129   | >CTNNB1-P4 ATTTAASLSG | 67   | 62    |
| >CTNNB1-P4 ATTTAPSL   | 16    | >CTNNB1-P4 ATTTAASL   | 8    | 8     |
| >CTNNB1-P4 ATTTAPSL   | 535   | >CTNNB1-P4 ATTTAASL   | 106  | 429   |
| >CTNNB1-P4 ATTTAPSL   | 362   | >CTNNB1-P4 ATTTAASLS  | 115  | 247   |
| >CTNNB1-P4 ATTTAPSLGI | 404   | >CTNNB1-P4 ATTTAASLSG | 694  | 290   |
| >CTNNB1-P4 ATTTAPSL   | 368   | >CTNNB1-P4 ATTTAASL   | 277  | 91    |
| >CTNNB1-P4 GATTTAPSL  | 272   | >CTNNB1-P4 GATTTAASL  | 100  | 172   |
| >CTNNB1-P4 GATTTAPSL  | 346   | >CTNNB1-P4 GATTTAASL  | 284  | 62    |
| >CTNNB1-P4 GATTTAPSL  | 1097  | >CTNNB1-P4 GATTTAASL  | 461  | 636   |
| >CTNNB1-P4 SGATTTAPSL | 741   | >CTNNB1-P4 SGATTTAASL | 491  | 250   |
| >CTNNB1-P4 HSGATTTAPS | 33    | >CTNNB1-P4 HSGATTTAAS | 21   | 12    |
| >CTNNB1-P4 HSGATTTAPS | 506   | >CTNNB1-P4 HSGATTTAAS | 366  | 140   |
| >CTNNB1-P4 HSGATTTAPS | 654   | >CTNNB1-P4 HSGATTTAAS | 464  | 190   |
| >CTNNB1-P4 GIHSGATTTA | 20169 | >CTNNB1-P4 GIHSGATTTA | 407  | 19762 |
| >CTNNB1-P4 GIHSGATTTA | 13393 | >CTNNB1-P4 GIHSGATTTA | 63   | 13330 |
| >CTNNB1-P4 GIHSGATTTA | 28600 | >CTNNB1-P4 GIHSGATTTA | 205  | 28395 |
| >CTNNB1-P4 TAPSLSGK   | 663   | >CTNNB1-P4 TALSLSGK   | 53   | 610   |
| >CTNNB1-P4 TAPSLSGK   | 164   | >CTNNB1-P4 TALSLSGK   | 113  | 51    |
| >CTNNB1-P4 TTAPSLSGK  | 86    | >CTNNB1-P4 TTALSLSGK  | 143  | 57    |
| >CTNNB1-P4 TTAPSLSGK  | 10    | >CTNNB1-P4 TTALSLSGK  | 14   | 4     |
| >CTNNB1-P4 TTAPSLSGK  | 5     | >CTNNB1-P4 TTALSLSGK  | 5    | 0     |
| >CTNNB1-P4 TTAPSLSGK  | 198   | >CTNNB1-P4 TTALSLSGK  | 552  | 354   |
| >CTNNB1-P4 TTTAPSLSGK | 59    | >CTNNB1-P4 TTTALSLSGK | 51   | 8     |
| >CTNNB1-P4 TTTAPSLSGK | 15    | >CTNNB1-P4 TTTALSLSGK | 14   | 1     |

|                        |       |                        |     |       |
|------------------------|-------|------------------------|-----|-------|
| >CTNNB1-P4 TTTAPSLSGK  | 439   | >CTNNB1-P4 TTTALSLSGK  | 441 | 2     |
| >CTNNB1-P4 TTTAPSLSGK  | 8     | >CTNNB1-P4 TTTALSLSGK  | 8   | 0     |
| >CTNNB1-P4 TTTAPSL     | 338   | >CTNNB1-P4 TTTALS      | 440 | 102   |
| >CTNNB1-P4 ATTTAPSLSGI | 216   | >CTNNB1-P4 ATTTALSLSGI | 250 | 34    |
| >CTNNB1-P4 ATTTAPSLSGI | 36    | >CTNNB1-P4 ATTTALSLSGI | 29  | 7     |
| >CTNNB1-P4 ATTTAPSLSGI | 51    | >CTNNB1-P4 ATTTALSLSGI | 64  | 13    |
| >CTNNB1-P4 ATTTAPSLSGI | 129   | >CTNNB1-P4 ATTTALSLSGI | 85  | 44    |
| >CTNNB1-P4 ATTTAPSL    | 16    | >CTNNB1-P4 ATTTALS     | 11  | 5     |
| >CTNNB1-P4 ATTTAPSL    | 535   | >CTNNB1-P4 ATTTALS     | 122 | 413   |
| >CTNNB1-P4 ATTTAPSL    | 1956  | >CTNNB1-P4 ATTTALS     | 497 | 1459  |
| >CTNNB1-P4 ATTTAPSL    | 1096  | >CTNNB1-P4 ATTTALS     | 256 | 840   |
| >CTNNB1-P4 ATTTAPSL    | 362   | >CTNNB1-P4 ATTTALS     | 150 | 212   |
| >CTNNB1-P4 ATTTAPSLSGI | 404   | >CTNNB1-P4 ATTTALSLSGI | 557 | 153   |
| >CTNNB1-P4 ATTTAPSL    | 368   | >CTNNB1-P4 ATTTALS     | 430 | 62    |
| >CTNNB1-P4 GATTTAPSL   | 272   | >CTNNB1-P4 GATTTALS    | 127 | 145   |
| >CTNNB1-P4 GATTTAPSL   | 346   | >CTNNB1-P4 GATTTALS    | 508 | 162   |
| >CTNNB1-P4 HSGATTTAP   | 11902 | >CTNNB1-P4 HSGATTTAL   | 225 | 11677 |
| >CTNNB1-P4 HSGATTTAPS  | 984   | >CTNNB1-P4 HSGATTTALS  | 450 | 534   |
| >CTNNB1-P4 HSGATTTAP   | 9191  | >CTNNB1-P4 HSGATTTAL   | 396 | 8795  |
| >CTNNB1-P4 HSGATTTAP   | 22285 | >CTNNB1-P4 HSGATTTAL   | 73  | 22212 |
| >CTNNB1-P4 HSGATTTAPS  | 33    | >CTNNB1-P4 HSGATTTALS  | 21  | 12    |
| >CTNNB1-P4 HSGATTTAP   | 22423 | >CTNNB1-P4 HSGATTTAL   | 260 | 22163 |
| >CTNNB1-P4 HSGATTTAPS  | 506   | >CTNNB1-P4 HSGATTTALS  | 389 | 117   |
| >CTNNB1-P4 IHSGATTTAP  | 6508  | >CTNNB1-P4 IHSGATTTAL  | 214 | 6294  |
| >CTNNB1-P4 IHSGATTTAP  | 14066 | >CTNNB1-P4 IHSGATTTAL  | 22  | 14044 |
| >CTNNB1-P4 TAPSLSGK    | 663   | >CTNNB1-P4 TASSLSGK    | 62  | 601   |
| >CTNNB1-P4 TAPSLSGK    | 164   | >CTNNB1-P4 TASSLSGK    | 26  | 138   |
| >CTNNB1-P4 TTAPSLSGK   | 86    | >CTNNB1-P4 TTASSLSGK   | 77  | 9     |
| >CTNNB1-P4 TTAPSLSGK   | 10    | >CTNNB1-P4 TTASSLSGK   | 12  | 2     |
| >CTNNB1-P4 TTAPSLSGK   | 5     | >CTNNB1-P4 TTASSLSGK   | 3   | 2     |
| >CTNNB1-P4 TTAPSLSGK   | 198   | >CTNNB1-P4 TTASSLSGK   | 285 | 87    |
| >CTNNB1-P4 TTTAPSLSGK  | 59    | >CTNNB1-P4 TTTASSLSGK  | 74  | 15    |
| >CTNNB1-P4 TTTAPSLSGK  | 15    | >CTNNB1-P4 TTTASSLSGK  | 16  | 1     |
| >CTNNB1-P4 TTTAPSLSGK  | 439   | >CTNNB1-P4 TTTASSLSGK  | 197 | 242   |
| >CTNNB1-P4 TTTAPSLSGK  | 8     | >CTNNB1-P4 TTTASSLSGK  | 13  | 5     |
| >CTNNB1-P4 TTTAPSL     | 338   | >CTNNB1-P4 TTTASSLS    | 505 | 167   |
| >CTNNB1-P4 ATTTAPSLSGI | 216   | >CTNNB1-P4 ATTTASSLSGI | 173 | 43    |
| >CTNNB1-P4 ATTTAPSLSGI | 36    | >CTNNB1-P4 ATTTASSLSGI | 33  | 3     |
| >CTNNB1-P4 ATTTAPSLSGI | 51    | >CTNNB1-P4 ATTTASSLSGI | 41  | 10    |
| >CTNNB1-P4 ATTTAPSLSGI | 129   | >CTNNB1-P4 ATTTASSLSGI | 78  | 51    |
| >CTNNB1-P4 ATTTAPSL    | 16    | >CTNNB1-P4 ATTTASSL    | 9   | 7     |
| >CTNNB1-P4 ATTTAPSL    | 535   | >CTNNB1-P4 ATTTASSL    | 285 | 250   |
| >CTNNB1-P4 ATTTAPSL    | 1096  | >CTNNB1-P4 ATTTASSL    | 460 | 636   |

|                        |       |                        |       |       |
|------------------------|-------|------------------------|-------|-------|
| >CTNNB1-P4 ATTTAPSL    | 362   | >CTNNB1-P4 ATTTASSL    | 137   | 225   |
| >CTNNB1-P4 ATTTAPSLGI  | 404   | >CTNNB1-P4 ATTTASSLSGI | 598   | 194   |
| >CTNNB1-P4 ATTTAPSL    | 368   | >CTNNB1-P4 ATTTASSL    | 210   | 158   |
| >CTNNB1-P4 GATTTAPSL   | 272   | >CTNNB1-P4 GATTTASSL   | 144   | 128   |
| >CTNNB1-P4 GATTTAPSL   | 346   | >CTNNB1-P4 GATTTASSL   | 1172  | 826   |
| >CTNNB1-P4 GATTTAPSL   | 1097  | >CTNNB1-P4 GATTTASSL   | 35    | 1062  |
| >CTNNB1-P4 SGATTTAPSL  | 5130  | >CTNNB1-P4 SGATTTASSL  | 395   | 4735  |
| >CTNNB1-P4 HSGATTTAPS  | 33    | >CTNNB1-P4 HSGATTTASS  | 24    | 9     |
| >CTNNB1-P4 HSGATTTAPS  | 506   | >CTNNB1-P4 HSGATTTASS  | 448   | 58    |
| >CTNNB1-P4 HSGATTTAPS  | 3589  | >CTNNB1-P4 HSGATTTASS  | 336   | 3253  |
| >CTNNB1-P4 HSGATTTAPS  | 654   | >CTNNB1-P4 HSGATTTASS  | 339   | 315   |
| >CTNNB1-P5 PEEEDVDTSC  | 790   | >CTNNB1-P5 LEEEDVDTSQ  | 68    | 722   |
| >CTNNB1-P5 PEEEDVDTSC  | 368   | >CTNNB1-P5 LEEEDVDTSQ  | 30    | 338   |
| >CTNNB1-P5 NPEEEDVDTSC | 474   | >CTNNB1-P5 NLEEEDVDTSC | 16057 | 15583 |
| >CTNNB1-P5 TAPSLSGKGN  | 16209 | >CTNNB1-P5 TAPSLSGKGN  | 86    | 16123 |
| >CTNNB1-P5 SLSGKGNP    | 7826  | >CTNNB1-P5 SLSGKGNL    | 34    | 7792  |
| >CTNNB1-P5 SLSGKGNP    | 11698 | >CTNNB1-P5 SLSGKGNL    | 89    | 11609 |
| >CTNNB1-P5 SLSGKGNP    | 17275 | >CTNNB1-P5 SLSGKGNL    | 129   | 17146 |
| >CTNNB1-P5 SLSGKGNP    | 17504 | >CTNNB1-P5 SLSGKGNL    | 108   | 17396 |
| >CTNNB1-P5 SLSGKGNP    | 11981 | >CTNNB1-P5 SLSGKGNL    | 8     | 11973 |
| >CTNNB1-P5 APSLSGKGNP  | 7959  | >CTNNB1-P5 APSLSGKGNL  | 73    | 7886  |
| >CTNNB1-Q1 QLSKKEASR   | 408   | >CTNNB1-Q1 PLSKKEASR   | 6325  | 5917  |
| >CTNNB1-Q1 HQLSKKEASR  | 213   | >CTNNB1-Q1 HPLSKKEASR  | 1773  | 1560  |
| >CTNNB1-Q1 HQLSKKEA    | 30770 | >CTNNB1-Q1 HPLSKKEA    | 219   | 30551 |
| >CTNNB1-Q1 HQLSKKEASR  | 194   | >CTNNB1-Q1 HPLSKKEASR  | 428   | 234   |
| >CTNNB1-Q1 MVHQLSKK    | 114   | >CTNNB1-Q1 MVHPLSKK    | 72    | 42    |
| >CTNNB1-Q1 MVHQLSKK    | 54    | >CTNNB1-Q1 MVHPLSKK    | 26    | 28    |
| >CTNNB1-Q1 MVHQLSKK    | 11    | >CTNNB1-Q1 MVHPLSKK    | 7     | 4     |
| >CTNNB1-Q1 MVHQLSKKE   | 243   | >CTNNB1-Q1 MVHPLSKKE   | 63    | 180   |
| >CTNNB1-Q1 MVHQLSKK    | 799   | >CTNNB1-Q1 MVHPLSKK    | 223   | 576   |
| >CTNNB1-Q1 MVHQLSKK    | 25    | >CTNNB1-Q1 MVHPLSKK    | 32    | 7     |
| >CTNNB1-Q1 VMVHQLSKK   | 126   | >CTNNB1-Q1 VMVHPLSKKI  | 180   | 54    |
| >CTNNB1-Q1 VMVHQLSKK   | 395   | >CTNNB1-Q1 VMVHPLSKKI  | 165   | 230   |
| >CTNNB1-Q1 VMVHQLSKK   | 125   | >CTNNB1-Q1 VMVHPLSKKI  | 146   | 21    |
| >CTNNB1-Q1 VMVHQLSK    | 52    | >CTNNB1-Q1 VMVHPLSK    | 45    | 7     |
| >CTNNB1-Q1 VMVHQLSKK   | 58    | >CTNNB1-Q1 VMVHPLSKK   | 45    | 13    |
| >CTNNB1-Q1 VMVHQLSK    | 65    | >CTNNB1-Q1 VMVHPLSK    | 43    | 22    |
| >CTNNB1-Q1 VMVHQLSKK   | 141   | >CTNNB1-Q1 VMVHPLSKK   | 111   | 30    |
| >CTNNB1-Q1 VMVHQLSK    | 704   | >CTNNB1-Q1 VMVHPLSK    | 443   | 261   |
| >CTNNB1-Q1 AVMVHQLSK   | 36    | >CTNNB1-Q1 AVMVHPLSK   | 38    | 2     |
| >CTNNB1-Q1 AVMVHQLSK   | 17    | >CTNNB1-Q1 AVMVHPLSK   | 14    | 3     |
| >CTNNB1-Q1 AVMVHQLSK   | 13    | >CTNNB1-Q1 AVMVHPLSK   | 11    | 2     |
| >CTNNB1-Q1 AVMVHQLSK   | 12    | >CTNNB1-Q1 AVMVHPLSK   | 10    | 2     |

|                      |      |                      |       |       |
|----------------------|------|----------------------|-------|-------|
| >CTNNB1-Q1AVMVHQLSK  | 9    | >CTNNB1-Q1AVMVHPLSK  | 9     | 0     |
| >CTNNB1-Q1AVMVHQLSK  | 28   | >CTNNB1-Q1AVMVHPLSK  | 39    | 11    |
| >CTNNB1-Q1AVMVHQLSK  | 53   | >CTNNB1-Q1AVMVHPLSK  | 35    | 18    |
| >CTNNB1-Q1AVMVHQLSK  | 69   | >CTNNB1-Q1AVMVHPLSK  | 58    | 11    |
| >CTNNB1-Q1AVMVHQLSK  | 169  | >CTNNB1-Q1AVMVHPLSK  | 202   | 33    |
| >CTNNB1-Q1AAVMVHQL   | 1482 | >CTNNB1-Q1AAVMVHPL   | 272   | 1210  |
| >CTNNB1-Q1AAVMVHQLS  | 129  | >CTNNB1-Q1AAVMVHPLS  | 93    | 36    |
| >CTNNB1-Q1AAVMVHQLS  | 27   | >CTNNB1-Q1AAVMVHPLS  | 18    | 9     |
| >CTNNB1-Q1AAVMVHQLS  | 97   | >CTNNB1-Q1AAVMVHPLS  | 71    | 26    |
| >CTNNB1-Q1AAVMVHQLS  | 68   | >CTNNB1-Q1AAVMVHPLS  | 44    | 24    |
| >CTNNB1-Q1AAVMVHQLS  | 373  | >CTNNB1-Q1AAVMVHPLS  | 346   | 27    |
| >CTNNB1-Q1AAVMVHQLS  | 352  | >CTNNB1-Q1AAVMVHPLS  | 276   | 76    |
| >CTNNB1-Q1AAVMVHQLS  | 327  | >CTNNB1-Q1AAVMVHPLS  | 284   | 43    |
| >CTNNB1-Q1AAVMVHQL   | 48   | >CTNNB1-Q1AAVMVHPL   | 66    | 18    |
| >CTNNB1-Q1AAVMVHQLS  | 568  | >CTNNB1-Q1AAVMVHPLS  | 348   | 220   |
| >CTNNB1-Q1KAAVMVHQL  | 186  | >CTNNB1-Q1KAAVMVHPL  | 98    | 88    |
| >CTNNB1-Q1KAAVMVHQL  | 1606 | >CTNNB1-Q1KAAVMVHPL  | 205   | 1401  |
| >CTNNB1-Q1KAAVMVHQL  | 96   | >CTNNB1-Q1KAAVMVHPL  | 100   | 4     |
| >CTNNB1-Q1KAAVMVHQL  | 35   | >CTNNB1-Q1KAAVMVHPL  | 26    | 9     |
| >CTNNB1-Q1KAAVMVHQL  | 25   | >CTNNB1-Q1KAAVMVHPL  | 19    | 6     |
| >CTNNB1-Q1KAAVMVHQL  | 3164 | >CTNNB1-Q1KAAVMVHPL  | 202   | 2962  |
| >CTNNB1-Q1KAAVMVHQL  | 17   | >CTNNB1-Q1KAAVMVHPL  | 29    | 12    |
| >CTNNB1-Q1KAAVMVHQL  | 20   | >CTNNB1-Q1KAAVMVHPL  | 41    | 21    |
| >CTNNB1-Q1KAAVMVHQL  | 312  | >CTNNB1-Q1KAAVMVHPL  | 260   | 52    |
| >CTNNB1-Q1NKAAMVHCF  | 1226 | >CTNNB1-Q1NKAAMVHCF  | 362   | 864   |
| >CTNNB1-Q1NKAAMVHCF  | 31   | >CTNNB1-Q1NKAAMVHCF  | 13    | 18    |
| >CTNNB1-Q4QADLMELDM  | 771  | >CTNNB1-Q4HADLMELDM  | 180   | 591   |
| >CTNNB1-Q4QADLMELDM  | 51   | >CTNNB1-Q4HADLMELDM  | 23    | 28    |
| >CTNNB1-Q4TQADLMEL   | 123  | >CTNNB1-Q4THADLMEL   | 20006 | 19883 |
| >CTNNB1-Q4TQADLMEL   | 21   | >CTNNB1-Q4THADLMEL   | 1590  | 1569  |
| >CTNNB1-Q4TQADLMELD  | 164  | >CTNNB1-Q4THADLMELDI | 6524  | 6360  |
| >CTNNB1-Q4TQADLMEL   | 131  | >CTNNB1-Q4THADLMEL   | 15881 | 15750 |
| >CTNNB1-Q4TQADLMELD  | 272  | >CTNNB1-Q4THADLMELDI | 16280 | 16008 |
| >CTNNB1-Q4TQADLMEL   | 13   | >CTNNB1-Q4THADLMEL   | 11313 | 11300 |
| >CTNNB1-Q4TQADLMELD  | 29   | >CTNNB1-Q4THADLMELDI | 14312 | 14283 |
| >CTNNB1-Q4TQADLMEL   | 83   | >CTNNB1-Q4THADLMEL   | 44    | 39    |
| >CTNNB1-Q4ATQADLMEL  | 465  | >CTNNB1-Q4ATHADLMEL  | 273   | 192   |
| >CTNNB1-Q4ATQADLMEL  | 1039 | >CTNNB1-Q4ATHADLMEL  | 279   | 760   |
| >CTNNB1-Q4ATQADLMEL  | 353  | >CTNNB1-Q4ATHADLMEL  | 291   | 62    |
| >CTNNB1-Q4ATQADLMEL  | 436  | >CTNNB1-Q4ATHADLMEL  | 116   | 320   |
| >CTNNB1-Q4ATQADLMELI | 506  | >CTNNB1-Q4ATHADLMELI | 187   | 319   |
| >CTNNB1-Q4ATQADLMEL  | 4078 | >CTNNB1-Q4ATHADLMEL  | 115   | 3963  |
| >CTNNB1-Q4ATQADLMEL  | 84   | >CTNNB1-Q4ATHADLMEL  | 39    | 45    |



|                      |       |                       |      |       |
|----------------------|-------|-----------------------|------|-------|
| >CTNNB1-Q4ATQADLMELI | 111   | >CTNNB1-Q4ATHADLMELI  | 46   | 65    |
| >CTNNB1-Q4MATQADLMI  | 466   | >CTNNB1-Q4MATHADLMELI | 1019 | 553   |
| >CTNNB1-Q4MATQADLMI  | 339   | >CTNNB1-Q4MATHADLMELI | 425  | 86    |
| >CTNNB1-Q4MATQADLMI  | 629   | >CTNNB1-Q4MATHADLMELI | 403  | 226   |
| >CTNNB1-Q4MATQADLM   | 283   | >CTNNB1-Q4MATHADLM    | 287  | 4     |
| >CTNNB1-Q4MATQADLMI  | 122   | >CTNNB1-Q4MATHADLMELI | 120  | 2     |
| >CTNNB1-Q4MATQADLM   | 19    | >CTNNB1-Q4MATHADLM    | 21   | 2     |
| >CTNNB1-Q4MATQADLM   | 491   | >CTNNB1-Q4MATHADLM    | 568  | 77    |
| >CTNNB1-Q4MATQADLM   | 199   | >CTNNB1-Q4MATHADLM    | 185  | 14    |
| >CTNNB1-Q4MATQADLMI  | 283   | >CTNNB1-Q4MATHADLMELI | 276  | 7     |
| >CTNNB1-Q4MATQADLM   | 459   | >CTNNB1-Q4MATHADLM    | 246  | 213   |
| >CTNNB1-Q4MATQADLM   | 975   | >CTNNB1-Q4MATHADLM    | 472  | 503   |
| >CTNNB1-Q6QVLYEWEQG  | 151   | >CTNNB1-Q6LVLYEWEQGI  | 929  | 778   |
| >CTNNB1-Q6QVLYEWEQG  | 775   | >CTNNB1-Q6LVLYEWEQGI  | 355  | 420   |
| >CTNNB1-Q6QVLYEWEQG  | 492   | >CTNNB1-Q6LVLYEWEQGI  | 145  | 347   |
| >CTNNB1-Q6SQVLYEWEQI | 185   | >CTNNB1-Q6SLVLYEWEQGI | 2008 | 1823  |
| >CTNNB1-Q6SQVLYEWEQ  | 27729 | >CTNNB1-Q6SLVLYEWEQ   | 35   | 27694 |
| >CTNNB1-Q6SQVLYEWEQI | 272   | >CTNNB1-Q6SLVLYEWEQGI | 1278 | 1006  |
| >CTNNB1-Q6SQVLYEWEQI | 24    | >CTNNB1-Q6SLVLYEWEQGI | 512  | 488   |
| >CTNNB1-Q6NPEEEDVDTS | 474   | >CTNNB1-Q6NPEEEDVDTS  | 114  | 360   |
| >CTNNB1-Q6NPEEEDVDTS | 4849  | >CTNNB1-Q6NPEEEDVDTS  | 111  | 4738  |
| >CTNNB1-Q6TSQVLYEW   | 53    | >CTNNB1-Q6TSLVLYEW    | 13   | 40    |
| >CTNNB1-Q6TSQVLYEW   | 1313  | >CTNNB1-Q6TSLVLYEW    | 485  | 828   |
| >CTNNB1-Q6TSQVLYEW   | 53    | >CTNNB1-Q6TSLVLYEW    | 39   | 14    |
| >CTNNB1-Q6TSQVLYEW   | 18    | >CTNNB1-Q6TSLVLYEW    | 13   | 5     |
| >CTNNB1-Q6TSQVLYEW   | 459   | >CTNNB1-Q6TSLVLYEW    | 81   | 378   |
| >CTNNB1-Q6DTSQVLYEWI | 285   | >CTNNB1-Q6DTSLVLYEWE  | 401  | 116   |
| >CTNNB1-Q6DTSQVLYEW  | 144   | >CTNNB1-Q6DTSLVLYEW   | 255  | 111   |
| >CTNNB1-Q6DTSQVLYEW  | 134   | >CTNNB1-Q6DTSLVLYEW   | 295  | 161   |
| >CTNNB1-Q6VDTSQVLY   | 648   | >CTNNB1-Q6VDTSLVLY    | 473  | 175   |
| >CTNNB1-Q6DVDTSQVLY  | 25    | >CTNNB1-Q6DVDTSLVLY   | 26   | 1     |
| >CTNNB1-Q6DVDTSQVLY  | 577   | >CTNNB1-Q6DVDTSLVLY   | 465  | 112   |
| >CTNNB1-Q6DVDTSQVLY  | 404   | >CTNNB1-Q6DVDTSLVLY   | 556  | 152   |
| >CTNNB1-Q6EDVDTSQVL  | 675   | >CTNNB1-Q6EDVDTSLVL   | 348  | 327   |
| >CTNNB1-Q6EDVDTSQV   | 205   | >CTNNB1-Q6EDVDTSLV    | 76   | 129   |
| >CTNNB1-Q6EDVDTSQVL  | 915   | >CTNNB1-Q6EDVDTSLVL   | 376  | 539   |
| >CTNNB1-Q6EEDVDTSQ   | 5256  | >CTNNB1-Q6EEDVDTSL    | 303  | 4953  |
| >CTNNB1-Q6EEDVDTSQV  | 208   | >CTNNB1-Q6EEDVDTSLV   | 92   | 116   |
| >CTNNB1-Q6EEDVDTSQVI | 274   | >CTNNB1-Q6EEDVDTSLVL  | 179  | 95    |
| >CTNNB1-Q6EEDVDTSQ   | 15079 | >CTNNB1-Q6EEDVDTSL    | 189  | 14890 |
| >CTNNB1-Q6EEDVDTSQVI | 601   | >CTNNB1-Q6EEDVDTSLVL  | 359  | 242   |
| >CTNNB1-Q6EEDVDTSQVI | 476   | >CTNNB1-Q6EEDVDTSLVL  | 394  | 82    |
| >CTNNB1-Q6EEDVDTSQV  | 464   | >CTNNB1-Q6EEDVDTSLV   | 488  | 24    |

|                       |       |                        |       |       |
|-----------------------|-------|------------------------|-------|-------|
| >CTNNB1-Q6 EEEDVDTSQV | 178   | >CTNNB1-Q6 EEEDVDTSLV  | 116   | 62    |
| >CTNNB1-Q6 EEEDVDTSQV | 636   | >CTNNB1-Q6 EEEDVDTSLV  | 434   | 202   |
| >CTNNB1-Q6 EEEDVDTSQ  | 12968 | >CTNNB1-Q6 EEEDVDTSL   | 54    | 12914 |
| >CTNNB1-Q6 EEEDVDTSQV | 50    | >CTNNB1-Q6 EEEDVDTSLV  | 47    | 3     |
| >CTNNB1-Q6 EEEDVDTSQV | 445   | >CTNNB1-Q6 EEEDVDTSLV  | 326   | 119   |
| >CTNNB1-Q6 PEEEDVDTSC | 790   | >CTNNB1-Q6 PEEEDVDTSL' | 435   | 355   |
| >CTNNB1-Q6 PEEEDVDTSC | 368   | >CTNNB1-Q6 PEEEDVDTSL' | 363   | 5     |
| >CTNNB1-Q6 QVLYEWEQG  | 2683  | >CTNNB1-Q6 RVLYEWEQG   | 383   | 2300  |
| >CTNNB1-Q6 QVLYEWEQG  | 151   | >CTNNB1-Q6 RVLYEWEQG   | 851   | 700   |
| >CTNNB1-Q6 QVLYEWEQG  | 513   | >CTNNB1-Q6 RVLYEWEQG   | 58    | 455   |
| >CTNNB1-Q6 QVLYEWEQG  | 775   | >CTNNB1-Q6 RVLYEWEQG   | 147   | 628   |
| >CTNNB1-Q6 QVLYEWEQG  | 492   | >CTNNB1-Q6 RVLYEWEQG   | 23    | 469   |
| >CTNNB1-Q6 SQVLYEWEQ  | 185   | >CTNNB1-Q6 SRVLYEWEQ   | 17515 | 17330 |
| >CTNNB1-Q6 SQVLYEWEQ  | 272   | >CTNNB1-Q6 SRVLYEWEQ   | 18574 | 18302 |
| >CTNNB1-Q6 SQVLYEWEQ  | 24    | >CTNNB1-Q6 SRVLYEWEQ   | 188   | 164   |
| >CTNNB1-Q6 SQVLYEWEQ  | 6415  | >CTNNB1-Q6 SRVLYEWEQ   | 394   | 6021  |
| >CTNNB1-Q6 NPEEEDVDTS | 474   | >CTNNB1-Q6 NPEEEDVDTS  | 2001  | 1527  |
| >CTNNB1-Q6 TSQVLYEW   | 53    | >CTNNB1-Q6 TSRVLYEW    | 12    | 41    |
| >CTNNB1-Q6 TSQVLYEW   | 53    | >CTNNB1-Q6 TSRVLYEW    | 35    | 18    |
| >CTNNB1-Q6 TSQVLYEW   | 18    | >CTNNB1-Q6 TSRVLYEW    | 39    | 21    |
| >CTNNB1-Q6 TSQVLYEW   | 459   | >CTNNB1-Q6 TSRVLYEW    | 1758  | 1299  |
| >CTNNB1-Q6 DTSQVLYEWI | 285   | >CTNNB1-Q6 DTSRVLYEWE  | 343   | 58    |
| >CTNNB1-Q6 DTSQVLYEW  | 144   | >CTNNB1-Q6 DTSRVLYEW   | 96    | 48    |
| >CTNNB1-Q6 DTSQVLYEW  | 134   | >CTNNB1-Q6 DTSRVLYEW   | 74    | 60    |
| >CTNNB1-Q6 DVDTSQVLY  | 25    | >CTNNB1-Q6 DVDTSRVLY   | 48    | 23    |
| >CTNNB1-Q6 DVDTSQVLY  | 404   | >CTNNB1-Q6 DVDTSRVLY   | 617   | 213   |
| >CTNNB1-Q6 EDVDTSQV   | 205   | >CTNNB1-Q6 EDVDTSRV    | 268   | 63    |
| >CTNNB1-Q6 EEDVDTSQV  | 208   | >CTNNB1-Q6 EEDVDTSRV   | 1224  | 1016  |
| >CTNNB1-Q6 EEDVDTSQVL | 274   | >CTNNB1-Q6 EEDVDTSRVL  | 789   | 515   |
| >CTNNB1-Q6 EEDVDTSQVL | 601   | >CTNNB1-Q6 EEDVDTSRVL  | 467   | 134   |
| >CTNNB1-Q6 EEDVDTSQVL | 476   | >CTNNB1-Q6 EEDVDTSRVL  | 606   | 130   |
| >CTNNB1-Q6 EEDVDTSQV  | 464   | >CTNNB1-Q6 EEDVDTSRV   | 1063  | 599   |
| >CTNNB1-Q6 EEEDVDTSQV | 178   | >CTNNB1-Q6 EEEDVDTSRV  | 655   | 477   |
| >CTNNB1-Q6 EEEDVDTSQ  | 22263 | >CTNNB1-Q6 EEEDVDTSR   | 416   | 21847 |
| >CTNNB1-Q6 EEEDVDTSQV | 50    | >CTNNB1-Q6 EEEDVDTSRV  | 119   | 69    |
| >CTNNB1-Q6 EEEDVDTSQV | 445   | >CTNNB1-Q6 EEEDVDTSRV  | 1566  | 1121  |
| >CTNNB1-Q6 PEEEDVDTSC | 368   | >CTNNB1-Q6 PEEEDVDTSR  | 776   | 408   |
| >CTNNB1-R4 RLHYGLPV   | 25    | >CTNNB1-R4 CLHYGLPV    | 73    | 48    |
| >CTNNB1-R4 RLHYGLPVV  | 22    | >CTNNB1-R4 CLHYGLPVV   | 67    | 45    |
| >CTNNB1-R4 RLHYGLPVVV | 78    | >CTNNB1-R4 CLHYGLPVVV  | 324   | 246   |
| >CTNNB1-R4 RLHYGLPV   | 72    | >CTNNB1-R4 CLHYGLPV    | 194   | 122   |
| >CTNNB1-R4 RLHYGLPVV  | 198   | >CTNNB1-R4 CLHYGLPVV   | 438   | 240   |
| >CTNNB1-R4 RLHYGLPVVV | 74    | >CTNNB1-R4 CLHYGLPVVV  | 157   | 83    |

|                       |      |                       |       |       |
|-----------------------|------|-----------------------|-------|-------|
| >CTNNB1-R4 RLHYGLPV   | 5    | >CTNNB1-R4 CLHYGLPV   | 19    | 14    |
| >CTNNB1-R4 RLHYGLPVV  | 6    | >CTNNB1-R4 CLHYGLPVV  | 25    | 19    |
| >CTNNB1-R4 RLHYGLPVVV | 36   | >CTNNB1-R4 CLHYGLPVVV | 90    | 54    |
| >CTNNB1-R4 RLHYGLPV   | 36   | >CTNNB1-R4 CLHYGLPV   | 190   | 154   |
| >CTNNB1-R4 RLHYGLPVV  | 19   | >CTNNB1-R4 CLHYGLPVV  | 112   | 93    |
| >CTNNB1-R4 RLHYGLPV   | 4    | >CTNNB1-R4 CLHYGLPV   | 16    | 12    |
| >CTNNB1-R4 RLHYGLPVV  | 4    | >CTNNB1-R4 CLHYGLPVV  | 19    | 15    |
| >CTNNB1-R4 RLHYGLPVVV | 4    | >CTNNB1-R4 CLHYGLPVVV | 17    | 13    |
| >CTNNB1-R4 RLHYGLPV   | 12   | >CTNNB1-R4 CLHYGLPV   | 40    | 28    |
| >CTNNB1-R4 RLHYGLPVV  | 8    | >CTNNB1-R4 CLHYGLPVV  | 29    | 21    |
| >CTNNB1-R4 RLHYGLPVVV | 11   | >CTNNB1-R4 CLHYGLPVVV | 43    | 32    |
| >CTNNB1-R4 RLHYGLPV   | 14   | >CTNNB1-R4 CLHYGLPV   | 93    | 79    |
| >CTNNB1-R4 RLHYGLPVV  | 9    | >CTNNB1-R4 CLHYGLPVV  | 50    | 41    |
| >CTNNB1-R4 RLHYGLPVVV | 14   | >CTNNB1-R4 CLHYGLPVVV | 95    | 81    |
| >CTNNB1-R4 RLHYGLPV   | 437  | >CTNNB1-R4 CLHYGLPV   | 416   | 21    |
| >CTNNB1-R4 RLHYGLPVV  | 46   | >CTNNB1-R4 CLHYGLPVV  | 63    | 17    |
| >CTNNB1-R4 RLHYGLPVVV | 136  | >CTNNB1-R4 CLHYGLPVVV | 158   | 22    |
| >CTNNB1-R4 RLHYGLPV   | 4    | >CTNNB1-R4 CLHYGLPV   | 8     | 4     |
| >CTNNB1-R4 RLHYGLPVV  | 5    | >CTNNB1-R4 CLHYGLPVV  | 8     | 3     |
| >CTNNB1-R4 RLHYGLPVVV | 7    | >CTNNB1-R4 CLHYGLPVVV | 11    | 4     |
| >CTNNB1-R4 RLHYGLPVVV | 39   | >CTNNB1-R4 CLHYGLPVVV | 164   | 125   |
| >CTNNB1-R4 RLHYGLPVVV | 164  | >CTNNB1-R4 CLHYGLPVVV | 515   | 351   |
| >CTNNB1-R4 RLHYGLPV   | 24   | >CTNNB1-R4 CLHYGLPV   | 1887  | 1863  |
| >CTNNB1-R4 RLHYGLPVV  | 32   | >CTNNB1-R4 CLHYGLPVV  | 2915  | 2883  |
| >CTNNB1-R4 RLHYGLPVVV | 85   | >CTNNB1-R4 CLHYGLPVVV | 4988  | 4903  |
| >CTNNB1-R4 RLHYGLPVVV | 7    | >CTNNB1-R4 CLHYGLPVVV | 192   | 185   |
| >CTNNB1-R4 RLHYGLPVVV | 231  | >CTNNB1-R4 CLHYGLPVVV | 3878  | 3647  |
| >CTNNB1-R4 RLHYGLPV   | 432  | >CTNNB1-R4 CLHYGLPV   | 11404 | 10972 |
| >CTNNB1-R4 RLHYGLPVVV | 208  | >CTNNB1-R4 CLHYGLPVVV | 6787  | 6579  |
| >CTNNB1-R4 RLHYGLPV   | 250  | >CTNNB1-R4 CLHYGLPV   | 3328  | 3078  |
| >CTNNB1-R4 RLHYGLPVV  | 371  | >CTNNB1-R4 CLHYGLPVV  | 5923  | 5552  |
| >CTNNB1-R4 RLHYGLPV   | 274  | >CTNNB1-R4 CLHYGLPV   | 2042  | 1768  |
| >CTNNB1-R4 RLHYGLPVVV | 418  | >CTNNB1-R4 CLHYGLPVVV | 3245  | 2827  |
| >CTNNB1-R4 VRLHYGLPV  | 2607 | >CTNNB1-R4 VCLHYGLPV  | 183   | 2424  |
| >CTNNB1-R4 VRLHYGLPVV | 2969 | >CTNNB1-R4 VCLHYGLPVV | 233   | 2736  |
| >CTNNB1-R4 VRLHYGLPVV | 2859 | >CTNNB1-R4 VCLHYGLPVV | 211   | 2648  |
| >CTNNB1-R4 VRLHYGLPV  | 37   | >CTNNB1-R4 VCLHYGLPV  | 380   | 343   |
| >CTNNB1-R4 VRLHYGLPVV | 130  | >CTNNB1-R4 VCLHYGLPVV | 1832  | 1702  |
| >CTNNB1-R4 VRLHYGLPVV | 76   | >CTNNB1-R4 VCLHYGLPVV | 964   | 888   |
| >CTNNB1-R4 VRLHYGLPV  | 141  | >CTNNB1-R4 VCLHYGLPV  | 21573 | 21432 |
| >CTNNB1-R4 VRLHYGLPVV | 327  | >CTNNB1-R4 VCLHYGLPVV | 31671 | 31344 |
| >CTNNB1-R4 VRLHYGLPVV | 247  | >CTNNB1-R4 VCLHYGLPVV | 23231 | 22984 |
| >CTNNB1-R4 QEAEMAQN/  | 2551 | >CTNNB1-R4 QEAEMAQN/  | 323   | 2228  |

|                       |      |                       |      |      |
|-----------------------|------|-----------------------|------|------|
| >CTNNB1-R4 AVRLHYGLPV | 1163 | >CTNNB1-R4 AVCLHYGLPV | 433  | 730  |
| >CTNNB1-R4 AVRLHYGLPV | 470  | >CTNNB1-R4 AVCLHYGLPV | 271  | 199  |
| >CTNNB1-R4 AVRLHYGLPV | 138  | >CTNNB1-R4 AVCLHYGLPV | 256  | 118  |
| >CTNNB1-R4 AVRLHYGLPV | 881  | >CTNNB1-R4 AVCLHYGLPV | 133  | 748  |
| >CTNNB1-R4 AVRLHYGLPV | 676  | >CTNNB1-R4 AVCLHYGLPV | 116  | 560  |
| >CTNNB1-R4 AVRLHYGLPV | 583  | >CTNNB1-R4 AVCLHYGLPV | 392  | 191  |
| >CTNNB1-R4 AVRLHYGLPV | 188  | >CTNNB1-R4 AVCLHYGLPV | 145  | 43   |
| >CTNNB1-R4 AVRLHYGL   | 24   | >CTNNB1-R4 AVCLHYGL   | 4797 | 4773 |
| >CTNNB1-R4 AVRLHYGLP  | 105  | >CTNNB1-R4 AVCLHYGLP  | 7684 | 7579 |
| >CTNNB1-R4 AVRLHYGLPV | 6    | >CTNNB1-R4 AVCLHYGLPV | 674  | 668  |
| >CTNNB1-R4 AVRLHYGLPV | 8    | >CTNNB1-R4 AVCLHYGLPV | 1447 | 1439 |
| >CTNNB1-R4 NAVRLHYGLF | 313  | >CTNNB1-R4 NAVCLHYGLF | 161  | 152  |
| >CTNNB1-R4 NAVRLHYGL  | 46   | >CTNNB1-R4 NAVCLHYGL  | 15   | 31   |
| >CTNNB1-R4 NAVRLHYGLF | 46   | >CTNNB1-R4 NAVCLHYGLF | 20   | 26   |
| >CTNNB1-R4 NAVRLHYGL  | 236  | >CTNNB1-R4 NAVCLHYGL  | 70   | 166  |
| >CTNNB1-R4 NAVRLHYGLF | 30   | >CTNNB1-R4 NAVCLHYGLF | 15   | 15   |
| >CTNNB1-R4 QNAVRLHY   | 260  | >CTNNB1-R4 QNAVCLHY   | 113  | 147  |
| >CTNNB1-R4 QNAVRLHY   | 1090 | >CTNNB1-R4 QNAVCLHY   | 407  | 683  |
| >CTNNB1-R4 AQNAVRLHY  | 169  | >CTNNB1-R4 AQNAVCLHY  | 67   | 102  |
| >CTNNB1-R4 AQNAVRLHY  | 1024 | >CTNNB1-R4 AQNAVCLHY  | 417  | 607  |
| >CTNNB1-R4 AQNAVRLHY  | 83   | >CTNNB1-R4 AQNAVCLHY  | 32   | 51   |
| >CTNNB1-R4 AQNAVRLHY  | 428  | >CTNNB1-R4 AQNAVCLHY  | 552  | 124  |
| >CTNNB1-R4 AQNAVRLHY  | 249  | >CTNNB1-R4 AQNAVCLHY  | 418  | 169  |
| >CTNNB1-R4 AQNAVRLHY  | 481  | >CTNNB1-R4 AQNAVCLHY  | 166  | 315  |
| >CTNNB1-R4 AQNAVRLHY  | 80   | >CTNNB1-R4 AQNAVCLHY  | 103  | 23   |
| >CTNNB1-R4 AQNAVRLHY  | 34   | >CTNNB1-R4 AQNAVCLHY  | 34   | 0    |
| >CTNNB1-R4 AQNAVRLHY  | 28   | >CTNNB1-R4 AQNAVCLHY  | 25   | 3    |
| >CTNNB1-R4 AQNAVRLHY  | 260  | >CTNNB1-R4 AQNAVCLHY  | 198  | 62   |
| >CTNNB1-R4 AQNAVRLHY  | 13   | >CTNNB1-R4 AQNAVCLHY  | 14   | 1    |
| >CTNNB1-R4 AQNAVRLHY  | 201  | >CTNNB1-R4 AQNAVCLHY  | 176  | 25   |
| >CTNNB1-R4 AQNAVRLHY  | 231  | >CTNNB1-R4 AQNAVCLHY  | 462  | 231  |
| >CTNNB1-R4 AQNAVRLHY  | 425  | >CTNNB1-R4 AQNAVCLHY  | 304  | 121  |
| >CTNNB1-R4 AQNAVRLHY  | 495  | >CTNNB1-R4 AQNAVCLHY  | 624  | 129  |
| >CTNNB1-R4 AQNAVRLHY  | 419  | >CTNNB1-R4 AQNAVCLHY  | 953  | 534  |
| >CTNNB1-R4 MAQNAVRLF  | 639  | >CTNNB1-R4 MAQNAVCLF  | 397  | 242  |
| >CTNNB1-R4 MAQNAVRLF  | 840  | >CTNNB1-R4 MAQNAVCLF  | 303  | 537  |
| >CTNNB1-R4 MAQNAVRLF  | 258  | >CTNNB1-R4 MAQNAVCLF  | 114  | 144  |
| >CTNNB1-R4 MAQNAVRLF  | 446  | >CTNNB1-R4 MAQNAVCLF  | 405  | 41   |
| >CTNNB1-R4 MAQNAVRLF  | 65   | >CTNNB1-R4 MAQNAVCLF  | 42   | 23   |
| >CTNNB1-R4 MAQNAVRLF  | 263  | >CTNNB1-R4 MAQNAVCLF  | 211  | 52   |
| >CTNNB1-R4 MAQNAVRL   | 113  | >CTNNB1-R4 MAQNAVCL   | 1390 | 1277 |
| >CTNNB1-R4 MAQNAVRLF  | 65   | >CTNNB1-R4 MAQNAVCLF  | 44   | 21   |
| >CTNNB1-R4 MAQNAVRLF  | 187  | >CTNNB1-R4 MAQNAVCLF  | 65   | 122  |

|                       |      |                       |       |       |
|-----------------------|------|-----------------------|-------|-------|
| >CTNNB1-R4 EMAQNAVRL  | 388  | >CTNNB1-R4 EMAQNAVCL  | 432   | 44    |
| >CTNNB1-R4 EMAQNAVRL  | 112  | >CTNNB1-R4 EMAQNAVCL  | 522   | 410   |
| >CTNNB1-R4 EMAQNAVRL  | 982  | >CTNNB1-R4 EMAQNAVCL  | 432   | 550   |
| >CTNNB1-R4 EMAQNAVRL  | 500  | >CTNNB1-R4 EMAQNAVCL  | 146   | 354   |
| >CTNNB1-R4 EMAQNAVRL  | 69   | >CTNNB1-R4 EMAQNAVCL  | 35    | 34    |
| >CTNNB1-R4 EMAQNAVRL  | 17   | >CTNNB1-R4 EMAQNAVCL  | 79    | 62    |
| >CTNNB1-R4 EMAQNAVRL  | 95   | >CTNNB1-R4 EMAQNAVCL  | 126   | 31    |
| >CTNNB1-R4 EMAQNAVRL  | 23   | >CTNNB1-R4 EMAQNAVCL  | 20    | 3     |
| >CTNNB1-R4 EMAQNAVRL  | 128  | >CTNNB1-R4 EMAQNAVCL  | 171   | 43    |
| >CTNNB1-R4 EMAQNAVR   | 9    | >CTNNB1-R4 EMAQNAVC   | 22553 | 22544 |
| >CTNNB1-R4 EMAQNAVRL  | 322  | >CTNNB1-R4 EMAQNAVCL  | 334   | 12    |
| >CTNNB1-R4 EMAQNAVRL  | 189  | >CTNNB1-R4 EMAQNAVCL  | 868   | 679   |
| >CTNNB1-R4 EMAQNAVRL  | 164  | >CTNNB1-R4 EMAQNAVCL  | 164   | 0     |
| >CTNNB1-R4 EMAQNAVRL  | 57   | >CTNNB1-R4 EMAQNAVCL  | 51    | 6     |
| >CTNNB1-R4 EMAQNAVRL  | 422  | >CTNNB1-R4 EMAQNAVCL  | 442   | 20    |
| >CTNNB1-R4 EMAQNAVRL  | 228  | >CTNNB1-R4 EMAQNAVCL  | 183   | 45    |
| >CTNNB1-R4 EMAQNAVRL  | 267  | >CTNNB1-R4 EMAQNAVCL  | 46    | 221   |
| >CTNNB1-R4 EMAQNAVRL  | 437  | >CTNNB1-R4 EMAQNAVCL  | 586   | 149   |
| >CTNNB1-R4 EMAQNAVR   | 74   | >CTNNB1-R4 EMAQNAVC   | 35583 | 35509 |
| >CTNNB1-R4 AEMAQNAVF  | 105  | >CTNNB1-R4 AEMAQNAVC  | 27    | 78    |
| >CTNNB1-R4 AEMAQNAVF  | 343  | >CTNNB1-R4 AEMAQNAVC  | 206   | 137   |
| >CTNNB1-R4 AEMAQNAVF  | 345  | >CTNNB1-R4 AEMAQNAVC  | 404   | 59    |
| >CTNNB1-R4 AEMAQNAVF  | 200  | >CTNNB1-R4 AEMAQNAVC  | 197   | 3     |
| >CTNNB1-R4 AEMAQNAVF  | 462  | >CTNNB1-R4 AEMAQNAVC  | 572   | 110   |
| >CTNNB1-R4 AEMAQNAVF  | 393  | >CTNNB1-R4 AEMAQNAVC  | 238   | 155   |
| >CTNNB1-R4 AEMAQNAVF  | 374  | >CTNNB1-R4 AEMAQNAVC  | 546   | 172   |
| >CTNNB1-R4 AEMAQNAVF  | 305  | >CTNNB1-R4 AEMAQNAVC  | 41    | 264   |
| >CTNNB1-R4 AEMAQNAVF  | 466  | >CTNNB1-R4 AEMAQNAVC  | 989   | 523   |
| >CTNNB1-R4 AEMAQNAVF  | 635  | >CTNNB1-R4 AEMAQNAVC  | 88    | 547   |
| >CTNNB1-R4 AEMAQNAVF  | 15   | >CTNNB1-R4 AEMAQNAVC  | 11    | 4     |
| >CTNNB1-R4 AEMAQNAVF  | 1006 | >CTNNB1-R4 AEMAQNAVC  | 405   | 601   |
| >CTNNB1-R4 EAEMAQNAV  | 116  | >CTNNB1-R4 EAEMAQNAV  | 37330 | 37214 |
| >CTNNB1-S2: SHWQQQSY  | 180  | >CTNNB1-S2: GHWQQQSY  | 172   | 8     |
| >CTNNB1-S2: SHWQQQSY  | 158  | >CTNNB1-S2: GHWQQQSY  | 304   | 146   |
| >CTNNB1-S2: SHWQQQSY  | 63   | >CTNNB1-S2: GHWQQQSY  | 173   | 110   |
| >CTNNB1-S2: SHWQQQSYL | 75   | >CTNNB1-S2: GHWQQQSYL | 168   | 93    |
| >CTNNB1-S2: VSHWQQQS  | 27   | >CTNNB1-S2: VGHWQQQS  | 62    | 35    |
| >CTNNB1-S2: VSHWQQQS  | 403  | >CTNNB1-S2: VGHWQQQS  | 2156  | 1753  |
| >CTNNB1-S2: VSHWQQQS  | 212  | >CTNNB1-S2: VGHWQQQS  | 2892  | 2680  |
| >CTNNB1-S2: VSHWQQQS  | 6    | >CTNNB1-S2: VGHWQQQS  | 608   | 602   |
| >CTNNB1-S2: VSHWQQQS  | 18   | >CTNNB1-S2: VGHWQQQS  | 5562  | 5544  |
| >CTNNB1-S2: VSHWQQQS  | 283  | >CTNNB1-S2: VGHWQQQS  | 10451 | 10168 |
| >CTNNB1-S2: VSHWQQQS  | 479  | >CTNNB1-S2: VGHWQQQS  | 4427  | 3948  |

|                        |     |                        |       |       |
|------------------------|-----|------------------------|-------|-------|
| >CTNNB1-S2: VSHWQQQS\  | 139 | >CTNNB1-S2: VGHWQQQS   | 2551  | 2412  |
| >CTNNB1-S2: VSHWQQQS\  | 396 | >CTNNB1-S2: VGHWQQQS   | 17009 | 16613 |
| >CTNNB1-S2: AVSHWQQQ\  | 77  | >CTNNB1-S2: AVGHWQQQ   | 636   | 559   |
| >CTNNB1-S2: AVSHWQQQ\  | 245 | >CTNNB1-S2: AVGHWQQQ   | 2166  | 1921  |
| >CTNNB1-S2: AVSHWQQQ\  | 368 | >CTNNB1-S2: AVGHWQQQ   | 237   | 131   |
| >CTNNB1-S2: AVSHWQQQ\  | 40  | >CTNNB1-S2: AVGHWQQQ   | 63    | 23    |
| >CTNNB1-S2: AVSHWQQQ\  | 163 | >CTNNB1-S2: AVGHWQQQ   | 191   | 28    |
| >CTNNB1-S2: AVSHWQQQ\  | 140 | >CTNNB1-S2: AVGHWQQQ   | 335   | 195   |
| >CTNNB1-S2: AVSHWQQQ\  | 488 | >CTNNB1-S2: AVGHWQQQ   | 3515  | 3027  |
| >CTNNB1-S2: AVSHWQQQ\  | 333 | >CTNNB1-S2: AVGHWQQQ   | 87    | 246   |
| >CTNNB1-S2: AVSHWQQQ\  | 121 | >CTNNB1-S2: AVGHWQQQ   | 160   | 39    |
| >CTNNB1-S2: AVSHWQQQ\  | 396 | >CTNNB1-S2: AVGHWQQQ   | 2354  | 1958  |
| >CTNNB1-S2: AVSHWQQQ\  | 116 | >CTNNB1-S2: AVGHWQQQ   | 850   | 734   |
| >CTNNB1-S2: AVSHWQQQ\  | 378 | >CTNNB1-S2: AVGHWQQQ   | 2881  | 2503  |
| >CTNNB1-S2: AVSHWQQQ\  | 460 | >CTNNB1-S2: AVGHWQQQ   | 1921  | 1461  |
| >CTNNB1-S2: AVSHWQQQ\  | 282 | >CTNNB1-S2: AVGHWQQQ   | 3345  | 3063  |
| >CTNNB1-S2: AAVSHWQQ\  | 61  | >CTNNB1-S2: AAVGHWQQ   | 50    | 11    |
| >CTNNB1-S2: AAVSHWQQ\  | 459 | >CTNNB1-S2: AAVGHWQQ   | 379   | 80    |
| >CTNNB1-S2: AAVSHWQQ\  | 144 | >CTNNB1-S2: AAVGHWQQ   | 196   | 52    |
| >CTNNB1-S2: AAVSHWQQ\  | 58  | >CTNNB1-S2: AAVGHWQQ   | 398   | 340   |
| >CTNNB1-S2: AAVSHWQQ\  | 10  | >CTNNB1-S2: AAVGHWQQ   | 8     | 2     |
| >CTNNB1-S2: AAVSHWQQ\  | 91  | >CTNNB1-S2: AAVGHWQQ   | 95    | 4     |
| >CTNNB1-S2: AAVSHWQQ\  | 112 | >CTNNB1-S2: AAVGHWQQ   | 281   | 169   |
| >CTNNB1-S2: RKA AVSHW  | 55  | >CTNNB1-S2: RKA AVGHW  | 365   | 310   |
| >CTNNB1-S2: RKA AVSHW  | 38  | >CTNNB1-S2: RKA AVGHW  | 90    | 52    |
| >CTNNB1-S2: RKA AVSHW  | 203 | >CTNNB1-S2: RKA AVGHW  | 104   | 99    |
| >CTNNB1-S2: EPDRKAAVSH | 83  | >CTNNB1-S2: EPDRKAAVGH | 137   | 54    |
| >CTNNB1-S2: EPDRKAAVSH | 13  | >CTNNB1-S2: EPDRKAAVGH | 16    | 3     |
| >CTNNB1-S2: SHWQQQSY   | 180 | >CTNNB1-S2: NHWQQQSY   | 492   | 312   |
| >CTNNB1-S2: SHWQQQSY   | 158 | >CTNNB1-S2: NHWQQQSY   | 699   | 541   |
| >CTNNB1-S2: SHWQQQSY   | 63  | >CTNNB1-S2: NHWQQQSY   | 173   | 110   |
| >CTNNB1-S2: SHWQQQSYL  | 75  | >CTNNB1-S2: NHWQQQSYL  | 56    | 19    |
| >CTNNB1-S2: SHWQQQSYL  | 892 | >CTNNB1-S2: NHWQQQSYL  | 420   | 472   |
| >CTNNB1-S2: VSHWQQQS\  | 27  | >CTNNB1-S2: VNHWQQQS   | 201   | 174   |
| >CTNNB1-S2: VSHWQQQS\  | 403 | >CTNNB1-S2: VNHWQQQS   | 3240  | 2837  |
| >CTNNB1-S2: VSHWQQQS\  | 212 | >CTNNB1-S2: VNHWQQQS   | 1279  | 1067  |
| >CTNNB1-S2: VSHWQQQS\  | 6   | >CTNNB1-S2: VNHWQQQS   | 6078  | 6072  |
| >CTNNB1-S2: VSHWQQQS\  | 18  | >CTNNB1-S2: VNHWQQQS   | 16950 | 16932 |
| >CTNNB1-S2: VSHWQQQS\  | 283 | >CTNNB1-S2: VNHWQQQS   | 17458 | 17175 |
| >CTNNB1-S2: VSHWQQQS\  | 479 | >CTNNB1-S2: VNHWQQQS   | 5879  | 5400  |
| >CTNNB1-S2: VSHWQQQS\  | 139 | >CTNNB1-S2: VNHWQQQS   | 8968  | 8829  |
| >CTNNB1-S2: VSHWQQQS\  | 396 | >CTNNB1-S2: VNHWQQQS   | 14961 | 14565 |
| >CTNNB1-S2: AVSHWQQQ\  | 77  | >CTNNB1-S2: AVNHWQQQ   | 151   | 74    |

|                        |       |                        |       |       |
|------------------------|-------|------------------------|-------|-------|
| >CTNNB1-S2: AVSHWQQQ:  | 245   | >CTNNB1-S2: AVNHWQQQ   | 177   | 68    |
| >CTNNB1-S2: AVSHWQQQ:  | 368   | >CTNNB1-S2: AVNHWQQQ   | 161   | 207   |
| >CTNNB1-S2: AVSHWQQQ:  | 40    | >CTNNB1-S2: AVNHWQQQ   | 48    | 8     |
| >CTNNB1-S2: AVSHWQQQ:  | 163   | >CTNNB1-S2: AVNHWQQQ   | 148   | 15    |
| >CTNNB1-S2: AVSHWQQQ:  | 140   | >CTNNB1-S2: AVNHWQQQ   | 361   | 221   |
| >CTNNB1-S2: AVSHWQQQ:  | 488   | >CTNNB1-S2: AVNHWQQQ   | 683   | 195   |
| >CTNNB1-S2: AVSHWQQQ:  | 333   | >CTNNB1-S2: AVNHWQQQ   | 183   | 150   |
| >CTNNB1-S2: AVSHWQQQ:  | 121   | >CTNNB1-S2: AVNHWQQQ   | 105   | 16    |
| >CTNNB1-S2: AVSHWQQQ:  | 396   | >CTNNB1-S2: AVNHWQQQ   | 396   | 0     |
| >CTNNB1-S2: AVSHWQQQ:  | 116   | >CTNNB1-S2: AVNHWQQQ   | 181   | 65    |
| >CTNNB1-S2: AVSHWQQQ:  | 378   | >CTNNB1-S2: AVNHWQQQ   | 3080  | 2702  |
| >CTNNB1-S2: AVSHWQQQ:  | 460   | >CTNNB1-S2: AVNHWQQQ   | 847   | 387   |
| >CTNNB1-S2: AVSHWQQQ:  | 282   | >CTNNB1-S2: AVNHWQQQ   | 327   | 45    |
| >CTNNB1-S2: AAVSHWQQQ: | 61    | >CTNNB1-S2: AAVNHWQQ   | 157   | 96    |
| >CTNNB1-S2: AAVSHWQQQ: | 459   | >CTNNB1-S2: AAVNHWQQ   | 719   | 260   |
| >CTNNB1-S2: AAVSHWQQQ: | 144   | >CTNNB1-S2: AAVNHWQQ   | 148   | 4     |
| >CTNNB1-S2: AAVSHWQQQ: | 58    | >CTNNB1-S2: AAVNHWQQ   | 74    | 16    |
| >CTNNB1-S2: AAVSHWQQQ: | 10    | >CTNNB1-S2: AAVNHWQQ   | 10    | 0     |
| >CTNNB1-S2: AAVSHWQQQ: | 91    | >CTNNB1-S2: AAVNHWQQ   | 110   | 19    |
| >CTNNB1-S2: AAVSHWQQQ: | 112   | >CTNNB1-S2: AAVNHWQQ   | 137   | 25    |
| >CTNNB1-S2: RKA AVSHW  | 55    | >CTNNB1-S2: RKA AVNHW  | 109   | 54    |
| >CTNNB1-S2: RKA AVSHW  | 38    | >CTNNB1-S2: RKA AVNHW  | 60    | 22    |
| >CTNNB1-S2: RKA AVSHW  | 203   | >CTNNB1-S2: RKA AVNHW  | 285   | 82    |
| >CTNNB1-S2: EPDRKAAVSH | 83    | >CTNNB1-S2: EPDRKAAVNI | 115   | 32    |
| >CTNNB1-S2: EPDRKAAVSH | 13    | >CTNNB1-S2: EPDRKAAVNI | 15    | 2     |
| >CTNNB1-S2: SHWQQQSY   | 180   | >CTNNB1-S2: RHWQQQSY   | 513   | 333   |
| >CTNNB1-S2: SHWQQQSY   | 158   | >CTNNB1-S2: RHWQQQSY   | 147   | 11    |
| >CTNNB1-S2: SHWQQQSY   | 63    | >CTNNB1-S2: RHWQQQSY   | 13    | 50    |
| >CTNNB1-S2: SHWQQQSYL  | 608   | >CTNNB1-S2: RHWQQQSYI  | 111   | 497   |
| >CTNNB1-S2: SHWQQQSYL  | 75    | >CTNNB1-S2: RHWQQQSYI  | 237   | 162   |
| >CTNNB1-S2: SHWQQQSYL  | 4588  | >CTNNB1-S2: RHWQQQSYI  | 190   | 4398  |
| >CTNNB1-S2: SHWQQQSYL  | 3166  | >CTNNB1-S2: RHWQQQSYI  | 188   | 2978  |
| >CTNNB1-S2: VSHWQQQS'  | 27    | >CTNNB1-S2: VRHWQQQS'  | 208   | 181   |
| >CTNNB1-S2: VSHWQQQS'  | 403   | >CTNNB1-S2: VRHWQQQS'  | 12763 | 12360 |
| >CTNNB1-S2: VSHWQQQS'  | 212   | >CTNNB1-S2: VRHWQQQS'  | 152   | 60    |
| >CTNNB1-S2: VSHWQQQS'  | 6     | >CTNNB1-S2: VRHWQQQS'  | 15923 | 15917 |
| >CTNNB1-S2: VSHWQQQS'  | 18    | >CTNNB1-S2: VRHWQQQS'  | 23212 | 23194 |
| >CTNNB1-S2: VSHWQQQS'  | 19198 | >CTNNB1-S2: VRHWQQQS'  | 51    | 19147 |
| >CTNNB1-S2: VSHWQQQS'  | 283   | >CTNNB1-S2: VRHWQQQS'  | 20782 | 20499 |
| >CTNNB1-S2: VSHWQQQS'  | 479   | >CTNNB1-S2: VRHWQQQS'  | 12014 | 11535 |
| >CTNNB1-S2: VSHWQQQS'  | 139   | >CTNNB1-S2: VRHWQQQS'  | 12253 | 12114 |
| >CTNNB1-S2: VSHWQQQS'  | 20604 | >CTNNB1-S2: VRHWQQQS'  | 333   | 20271 |
| >CTNNB1-S2: VSHWQQQS'  | 14679 | >CTNNB1-S2: VRHWQQQS'  | 89    | 14590 |

|                        |       |                        |       |       |
|------------------------|-------|------------------------|-------|-------|
| >CTNNB1-S2:VSHWQQQS'   | 396   | >CTNNB1-S2:VRHWQQQS'   | 17987 | 17591 |
| >CTNNB1-S2:AMEPDRKAA   | 20359 | >CTNNB1-S2:AMEPDRKAA   | 155   | 20204 |
| >CTNNB1-S2:AVSHWQQQ:   | 77    | >CTNNB1-S2:AVRHWQQQ    | 3178  | 3101  |
| >CTNNB1-S2:AVSHWQQQ:   | 245   | >CTNNB1-S2:AVRHWQQQ    | 849   | 604   |
| >CTNNB1-S2:AVSHWQQQ:   | 368   | >CTNNB1-S2:AVRHWQQQ    | 1730  | 1362  |
| >CTNNB1-S2:AVSHWQQQ:   | 40    | >CTNNB1-S2:AVRHWQQQ    | 141   | 101   |
| >CTNNB1-S2:AVSHWQQQ:   | 163   | >CTNNB1-S2:AVRHWQQQ    | 95    | 68    |
| >CTNNB1-S2:AVSHWQQQ    | 6798  | >CTNNB1-S2:AVRHWQQQ    | 53    | 6745  |
| >CTNNB1-S2:AVSHWQQQ:   | 10330 | >CTNNB1-S2:AVRHWQQQ    | 85    | 10245 |
| >CTNNB1-S2:AVSHWQQQ:   | 3665  | >CTNNB1-S2:AVRHWQQQ    | 17    | 3648  |
| >CTNNB1-S2:AVSHWQQQ:   | 1880  | >CTNNB1-S2:AVRHWQQQ    | 10    | 1870  |
| >CTNNB1-S2:AVSHWQQQ:   | 140   | >CTNNB1-S2:AVRHWQQQ    | 609   | 469   |
| >CTNNB1-S2:AVSHWQQQ:   | 488   | >CTNNB1-S2:AVRHWQQQ    | 6921  | 6433  |
| >CTNNB1-S2:AVSHWQQQ:   | 333   | >CTNNB1-S2:AVRHWQQQ    | 863   | 530   |
| >CTNNB1-S2:AVSHWQQQ:   | 10747 | >CTNNB1-S2:AVRHWQQQ    | 499   | 10248 |
| >CTNNB1-S2:AVSHWQQQ:   | 121   | >CTNNB1-S2:AVRHWQQQ    | 80    | 41    |
| >CTNNB1-S2:AVSHWQQQ:   | 396   | >CTNNB1-S2:AVRHWQQQ    | 147   | 249   |
| >CTNNB1-S2:AVSHWQQQ:   | 116   | >CTNNB1-S2:AVRHWQQQ    | 20    | 96    |
| >CTNNB1-S2:AVSHWQQQ:   | 1661  | >CTNNB1-S2:AVRHWQQQ    | 282   | 1379  |
| >CTNNB1-S2:AVSHWQQQ:   | 378   | >CTNNB1-S2:AVRHWQQQ    | 831   | 453   |
| >CTNNB1-S2:AVSHWQQQ:   | 460   | >CTNNB1-S2:AVRHWQQQ    | 150   | 310   |
| >CTNNB1-S2:AVSHWQQQ:   | 282   | >CTNNB1-S2:AVRHWQQQ    | 2508  | 2226  |
| >CTNNB1-S2:AAVSHWQQQ:  | 61    | >CTNNB1-S2:AAVRHWQQQ:  | 74    | 13    |
| >CTNNB1-S2:AAVSHWQQQ:  | 459   | >CTNNB1-S2:AAVRHWQQQ:  | 1477  | 1018  |
| >CTNNB1-S2:AAVSHWQQQ:  | 144   | >CTNNB1-S2:AAVRHWQQQ:  | 213   | 69    |
| >CTNNB1-S2:AAVSHWQQQ:  | 58    | >CTNNB1-S2:AAVRHWQQQ:  | 90    | 32    |
| >CTNNB1-S2:AAVSHWQQQ:  | 10    | >CTNNB1-S2:AAVRHWQQQ:  | 15    | 5     |
| >CTNNB1-S2:AAVSHWQQQ:  | 91    | >CTNNB1-S2:AAVRHWQQQ:  | 210   | 119   |
| >CTNNB1-S2:AAVSHWQQQ:  | 112   | >CTNNB1-S2:AAVRHWQQQ:  | 111   | 1     |
| >CTNNB1-S2:RKA AVSHW   | 55    | >CTNNB1-S2:RKA AVRHW   | 163   | 108   |
| >CTNNB1-S2:RKA AVSHW   | 556   | >CTNNB1-S2:RKA AVRHW   | 324   | 232   |
| >CTNNB1-S2:RKA AVSHW   | 38    | >CTNNB1-S2:RKA AVRHW   | 186   | 148   |
| >CTNNB1-S2:RKA AVSHW   | 203   | >CTNNB1-S2:RKA AVRHW   | 1715  | 1512  |
| >CTNNB1-S2:EPDRKAAVSH  | 83    | >CTNNB1-S2:EPDRKAAVRH  | 183   | 100   |
| >CTNNB1-S2:EPDRKAAVSH  | 13    | >CTNNB1-S2:EPDRKAAVRH  | 13    | 0     |
| >CTNNB1-S2:SYLDSGIHSG/ | 410   | >CTNNB1-S2:AYLDSGIHSG/ | 1172  | 762   |
| >CTNNB1-S2:QSYLDSGI    | 46    | >CTNNB1-S2:QAYLDSGI    | 359   | 313   |
| >CTNNB1-S2:QSYLDSGI    | 22    | >CTNNB1-S2:QAYLDSGI    | 77    | 55    |
| >CTNNB1-S2:QQSYLDSGI   | 1017  | >CTNNB1-S2:QQAYLDSGI   | 445   | 572   |
| >CTNNB1-S2:QQSYLDSGI   | 417   | >CTNNB1-S2:QQAYLDSGI   | 466   | 49    |
| >CTNNB1-S2:QQQSYLDSGI  | 381   | >CTNNB1-S2:QQQAYLDSG   | 664   | 283   |
| >CTNNB1-S2:WQQQSYLDS   | 268   | >CTNNB1-S2:WQQQAYLDS   | 191   | 77    |
| >CTNNB1-S2:WQQQSYLDS   | 431   | >CTNNB1-S2:WQQQAYLDS   | 431   | 0     |



|                      |      |                      |      |      |
|----------------------|------|----------------------|------|------|
| >CTNNB1-S2:WQQQSYLDS | 187  | >CTNNB1-S2:WQQQAYLDS | 414  | 227  |
| >CTNNB1-S2:HWQQQSYL  | 22   | >CTNNB1-S2:HWQQQAYL  | 24   | 2    |
| >CTNNB1-S2:HWQQQSYL  | 116  | >CTNNB1-S2:HWQQQAYL  | 137  | 21   |
| >CTNNB1-S2:HWQQQSYLI | 297  | >CTNNB1-S2:HWQQQAYLI | 298  | 1    |
| >CTNNB1-S2:SHWQQQSY  | 180  | >CTNNB1-S2:SHWQQQAY  | 121  | 59   |
| >CTNNB1-S2:SHWQQQSY  | 158  | >CTNNB1-S2:SHWQQQAY  | 188  | 30   |
| >CTNNB1-S2:SHWQQQSY  | 63   | >CTNNB1-S2:SHWQQQAY  | 67   | 4    |
| >CTNNB1-S2:SHWQQQSYL | 75   | >CTNNB1-S2:SHWQQQAYI | 61   | 14   |
| >CTNNB1-S2:SHWQQQSY  | 1709 | >CTNNB1-S2:SHWQQQAY  | 422  | 1287 |
| >CTNNB1-S2:VSHWQQQS\ | 551  | >CTNNB1-S2:VSHWQQQA' | 358  | 193  |
| >CTNNB1-S2:VSHWQQQS\ | 27   | >CTNNB1-S2:VSHWQQQA' | 32   | 5    |
| >CTNNB1-S2:VSHWQQQS\ | 403  | >CTNNB1-S2:VSHWQQQA' | 450  | 47   |
| >CTNNB1-S2:VSHWQQQS\ | 212  | >CTNNB1-S2:VSHWQQQA' | 167  | 45   |
| >CTNNB1-S2:VSHWQQQS\ | 6    | >CTNNB1-S2:VSHWQQQA' | 7    | 1    |
| >CTNNB1-S2:VSHWQQQS\ | 18   | >CTNNB1-S2:VSHWQQQA' | 17   | 1    |
| >CTNNB1-S2:VSHWQQQS\ | 636  | >CTNNB1-S2:VSHWQQQA' | 111  | 525  |
| >CTNNB1-S2:VSHWQQQS\ | 283  | >CTNNB1-S2:VSHWQQQA' | 1369 | 1086 |
| >CTNNB1-S2:VSHWQQQS\ | 479  | >CTNNB1-S2:VSHWQQQA' | 1088 | 609  |
| >CTNNB1-S2:VSHWQQQS\ | 139  | >CTNNB1-S2:VSHWQQQA' | 182  | 43   |
| >CTNNB1-S2:VSHWQQQS\ | 396  | >CTNNB1-S2:VSHWQQQA' | 983  | 587  |
| >CTNNB1-S2:AVSHWQQQ: | 680  | >CTNNB1-S2:AVSHWQQQ: | 424  | 256  |
| >CTNNB1-S2:AVSHWQQQ: | 77   | >CTNNB1-S2:AVSHWQQQ: | 48   | 29   |
| >CTNNB1-S2:AVSHWQQQ: | 245  | >CTNNB1-S2:AVSHWQQQ: | 266  | 21   |
| >CTNNB1-S2:AVSHWQQQ: | 614  | >CTNNB1-S2:AVSHWQQQ: | 367  | 247  |
| >CTNNB1-S2:AVSHWQQQ: | 368  | >CTNNB1-S2:AVSHWQQQ: | 261  | 107  |
| >CTNNB1-S2:AVSHWQQQ: | 9160 | >CTNNB1-S2:AVSHWQQQ: | 95   | 9065 |
| >CTNNB1-S2:AVSHWQQQ: | 40   | >CTNNB1-S2:AVSHWQQQ: | 28   | 12   |
| >CTNNB1-S2:AVSHWQQQ: | 163  | >CTNNB1-S2:AVSHWQQQ: | 83   | 80   |
| >CTNNB1-S2:AVSHWQQQ: | 140  | >CTNNB1-S2:AVSHWQQQ: | 174  | 34   |
| >CTNNB1-S2:AVSHWQQQ: | 488  | >CTNNB1-S2:AVSHWQQQ: | 281  | 207  |
| >CTNNB1-S2:AVSHWQQQ: | 333  | >CTNNB1-S2:AVSHWQQQ: | 435  | 102  |
| >CTNNB1-S2:AVSHWQQQ: | 121  | >CTNNB1-S2:AVSHWQQQ: | 127  | 6    |
| >CTNNB1-S2:AVSHWQQQ: | 396  | >CTNNB1-S2:AVSHWQQQ: | 377  | 19   |
| >CTNNB1-S2:AVSHWQQQ: | 116  | >CTNNB1-S2:AVSHWQQQ: | 201  | 85   |
| >CTNNB1-S2:AVSHWQQQ: | 378  | >CTNNB1-S2:AVSHWQQQ: | 1651 | 1273 |
| >CTNNB1-S2:AVSHWQQQ: | 460  | >CTNNB1-S2:AVSHWQQQ: | 2485 | 2025 |
| >CTNNB1-S2:AVSHWQQQ: | 282  | >CTNNB1-S2:AVSHWQQQ: | 104  | 178  |
| >CTNNB1-S2:AAVSHWQQ( | 61   | >CTNNB1-S2:AAVSHWQQ( | 33   | 28   |
| >CTNNB1-S2:AAVSHWQQ( | 459  | >CTNNB1-S2:AAVSHWQQ( | 304  | 155  |
| >CTNNB1-S2:AAVSHWQQ( | 144  | >CTNNB1-S2:AAVSHWQQ( | 158  | 14   |
| >CTNNB1-S2:AAVSHWQQ( | 58   | >CTNNB1-S2:AAVSHWQQ( | 53   | 5    |
| >CTNNB1-S2:AAVSHWQQ( | 10   | >CTNNB1-S2:AAVSHWQQ( | 13   | 3    |
| >CTNNB1-S2:AAVSHWQQ( | 91   | >CTNNB1-S2:AAVSHWQQ( | 32   | 59   |

|                        |       |                        |       |       |
|------------------------|-------|------------------------|-------|-------|
| >CTNNB1-S2!AAVSHWQQ    | 112   | >CTNNB1-S2!AAVSHWQQ    | 47    | 65    |
| >CTNNB1-S2!SYLDSGIHSG/ | 4720  | >CTNNB1-S2!FYLDSGIHSG/ | 305   | 4415  |
| >CTNNB1-S2!SYLDSGIHSG/ | 410   | >CTNNB1-S2!FYLDSGIHSG/ | 1179  | 769   |
| >CTNNB1-S2!QSYLDSGI    | 46    | >CTNNB1-S2!QFYLDSGI    | 25368 | 25322 |
| >CTNNB1-S2!QSYLDSGI    | 22    | >CTNNB1-S2!QFYLDSGI    | 4419  | 4397  |
| >CTNNB1-S2!KAAVSHWQC   | 14406 | >CTNNB1-S2!KAAVSHWQC   | 29    | 14377 |
| >CTNNB1-S2!KAAVSHWQC   | 3295  | >CTNNB1-S2!KAAVSHWQC   | 5     | 3290  |
| >CTNNB1-S2!KAAVSHWQC   | 4258  | >CTNNB1-S2!KAAVSHWQC   | 41    | 4217  |
| >CTNNB1-S2!KAAVSHWQC   | 2736  | >CTNNB1-S2!KAAVSHWQC   | 9     | 2727  |
| >CTNNB1-S2!QQSYLDSGI   | 1017  | >CTNNB1-S2!QQFYLDSGI   | 247   | 770   |
| >CTNNB1-S2!QQSYLDSGI   | 4403  | >CTNNB1-S2!QQFYLDSGI   | 199   | 4204  |
| >CTNNB1-S2!QQSYLDSGI   | 1545  | >CTNNB1-S2!QQFYLDSGI   | 451   | 1094  |
| >CTNNB1-S2!QQSYLDSGI   | 417   | >CTNNB1-S2!QQFYLDSGI   | 59    | 358   |
| >CTNNB1-S2!QQSYLDSGIH  | 2269  | >CTNNB1-S2!QQFYLDSGIH  | 341   | 1928  |
| >CTNNB1-S2!QQQSYLDSGI  | 381   | >CTNNB1-S2!QQQFYLDSGI  | 1358  | 977   |
| >CTNNB1-S2!WQQQSYLDS   | 638   | >CTNNB1-S2!WQQQFYLDS   | 427   | 211   |
| >CTNNB1-S2!WQQQSYLDS   | 268   | >CTNNB1-S2!WQQQFYLDS   | 153   | 115   |
| >CTNNB1-S2!WQQQSYLDS   | 431   | >CTNNB1-S2!WQQQFYLDS   | 747   | 316   |
| >CTNNB1-S2!WQQQSYLDS   | 187   | >CTNNB1-S2!WQQQFYLDS   | 262   | 75    |
| >CTNNB1-S2!WQQQSYLDS   | 742   | >CTNNB1-S2!WQQQFYLDS   | 284   | 458   |
| >CTNNB1-S2!HWQQQSYL    | 22    | >CTNNB1-S2!HWQQQFYL    | 10    | 12    |
| >CTNNB1-S2!HWQQQSYL    | 1430  | >CTNNB1-S2!HWQQQFYL    | 269   | 1161  |
| >CTNNB1-S2!HWQQQSYLE   | 2450  | >CTNNB1-S2!HWQQQFYLE   | 375   | 2075  |
| >CTNNB1-S2!HWQQQSYL    | 116   | >CTNNB1-S2!HWQQQFYL    | 80    | 36    |
| >CTNNB1-S2!HWQQQSYLE   | 297   | >CTNNB1-S2!HWQQQFYLE   | 210   | 87    |
| >CTNNB1-S2!SHWQQQSY    | 180   | >CTNNB1-S2!SHWQQQFY    | 44    | 136   |
| >CTNNB1-S2!SHWQQQSY    | 158   | >CTNNB1-S2!SHWQQQFY    | 98    | 60    |
| >CTNNB1-S2!SHWQQQSY    | 2110  | >CTNNB1-S2!SHWQQQFY    | 159   | 1951  |
| >CTNNB1-S2!SHWQQQSY    | 63    | >CTNNB1-S2!SHWQQQFY    | 178   | 115   |
| >CTNNB1-S2!SHWQQQSYL   | 75    | >CTNNB1-S2!SHWQQQFYL   | 92    | 17    |
| >CTNNB1-S2!VSHWQQQS)   | 2007  | >CTNNB1-S2!VSHWQQQF)   | 367   | 1640  |
| >CTNNB1-S2!VSHWQQQS)   | 551   | >CTNNB1-S2!VSHWQQQF)   | 147   | 404   |
| >CTNNB1-S2!VSHWQQQS)   | 27    | >CTNNB1-S2!VSHWQQQF)   | 19    | 8     |
| >CTNNB1-S2!VSHWQQQS)   | 3899  | >CTNNB1-S2!VSHWQQQF)   | 353   | 3546  |
| >CTNNB1-S2!VSHWQQQS)   | 403   | >CTNNB1-S2!VSHWQQQF)   | 2432  | 2029  |
| >CTNNB1-S2!VSHWQQQS    | 23019 | >CTNNB1-S2!VSHWQQQF    | 167   | 22852 |
| >CTNNB1-S2!VSHWQQQS)   | 212   | >CTNNB1-S2!VSHWQQQF)   | 830   | 618   |
| >CTNNB1-S2!VSHWQQQS    | 6507  | >CTNNB1-S2!VSHWQQQF    | 4     | 6503  |
| >CTNNB1-S2!VSHWQQQS)   | 6     | >CTNNB1-S2!VSHWQQQF)   | 6     | 0     |
| >CTNNB1-S2!VSHWQQQS)   | 18    | >CTNNB1-S2!VSHWQQQF)   | 25    | 7     |
| >CTNNB1-S2!VSHWQQQS    | 18660 | >CTNNB1-S2!VSHWQQQF    | 56    | 18604 |
| >CTNNB1-S2!VSHWQQQS)   | 283   | >CTNNB1-S2!VSHWQQQF)   | 288   | 5     |
| >CTNNB1-S2!VSHWQQQS)   | 829   | >CTNNB1-S2!VSHWQQQF)   | 161   | 668   |

|                       |       |                       |      |       |
|-----------------------|-------|-----------------------|------|-------|
| >CTNNB1-S2:VSHWQQQS   | 8670  | >CTNNB1-S2:VSHWQQQF   | 146  | 8524  |
| >CTNNB1-S2:VSHWQQQS\  | 479   | >CTNNB1-S2:VSHWQQQF\  | 344  | 135   |
| >CTNNB1-S2:VSHWQQQS\  | 139   | >CTNNB1-S2:VSHWQQQF\  | 120  | 19    |
| >CTNNB1-S2:VSHWQQQS\  | 396   | >CTNNB1-S2:VSHWQQQF\  | 3354 | 2958  |
| >CTNNB1-S2:AVSHWQQQ:  | 680   | >CTNNB1-S2:AVSHWQQQ:  | 178  | 502   |
| >CTNNB1-S2:AVSHWQQQ:  | 1211  | >CTNNB1-S2:AVSHWQQQ:  | 183  | 1028  |
| >CTNNB1-S2:AVSHWQQQ:  | 77    | >CTNNB1-S2:AVSHWQQQ:  | 36   | 41    |
| >CTNNB1-S2:AVSHWQQQ:  | 245   | >CTNNB1-S2:AVSHWQQQ:  | 623  | 378   |
| >CTNNB1-S2:AVSHWQQQ:  | 614   | >CTNNB1-S2:AVSHWQQQ:  | 94   | 520   |
| >CTNNB1-S2:AVSHWQQQ:  | 368   | >CTNNB1-S2:AVSHWQQQ:  | 138  | 230   |
| >CTNNB1-S2:AVSHWQQQ:  | 1243  | >CTNNB1-S2:AVSHWQQQ:  | 265  | 978   |
| >CTNNB1-S2:AVSHWQQQ:  | 1493  | >CTNNB1-S2:AVSHWQQQ:  | 241  | 1252  |
| >CTNNB1-S2:AVSHWQQQ:  | 40    | >CTNNB1-S2:AVSHWQQQ:  | 22   | 18    |
| >CTNNB1-S2:AVSHWQQQ:  | 681   | >CTNNB1-S2:AVSHWQQQ:  | 171  | 510   |
| >CTNNB1-S2:AVSHWQQQ:  | 679   | >CTNNB1-S2:AVSHWQQQ:  | 153  | 526   |
| >CTNNB1-S2:AVSHWQQQ:  | 163   | >CTNNB1-S2:AVSHWQQQ:  | 60   | 103   |
| >CTNNB1-S2:AVSHWQQQ:  | 1161  | >CTNNB1-S2:AVSHWQQQ:  | 189  | 972   |
| >CTNNB1-S2:AVSHWQQQ:  | 140   | >CTNNB1-S2:AVSHWQQQ:  | 58   | 82    |
| >CTNNB1-S2:AVSHWQQQ:  | 24670 | >CTNNB1-S2:AVSHWQQQ:  | 479  | 24191 |
| >CTNNB1-S2:AVSHWQQQ:  | 488   | >CTNNB1-S2:AVSHWQQQ:  | 212  | 276   |
| >CTNNB1-S2:AVSHWQQQ:  | 333   | >CTNNB1-S2:AVSHWQQQ:  | 35   | 298   |
| >CTNNB1-S2:AVSHWQQQ:  | 16257 | >CTNNB1-S2:AVSHWQQQ:  | 229  | 16028 |
| >CTNNB1-S2:AVSHWQQQ:  | 121   | >CTNNB1-S2:AVSHWQQQ:  | 333  | 212   |
| >CTNNB1-S2:AVSHWQQQ:  | 22526 | >CTNNB1-S2:AVSHWQQQ:  | 238  | 22288 |
| >CTNNB1-S2:AVSHWQQQ:  | 396   | >CTNNB1-S2:AVSHWQQQ:  | 1441 | 1045  |
| >CTNNB1-S2:AVSHWQQQ:  | 19492 | >CTNNB1-S2:AVSHWQQQ:  | 42   | 19450 |
| >CTNNB1-S2:AVSHWQQQ:  | 116   | >CTNNB1-S2:AVSHWQQQ:  | 266  | 150   |
| >CTNNB1-S2:AVSHWQQQ:  | 20539 | >CTNNB1-S2:AVSHWQQQ:  | 319  | 20220 |
| >CTNNB1-S2:AVSHWQQQ:  | 15646 | >CTNNB1-S2:AVSHWQQQ:  | 347  | 15299 |
| >CTNNB1-S2:AVSHWQQQ:  | 378   | >CTNNB1-S2:AVSHWQQQ:  | 294  | 84    |
| >CTNNB1-S2:AVSHWQQQ:  | 460   | >CTNNB1-S2:AVSHWQQQ:  | 3131 | 2671  |
| >CTNNB1-S2:AVSHWQQQ:  | 282   | >CTNNB1-S2:AVSHWQQQ:  | 628  | 346   |
| >CTNNB1-S2:AAVSHWQQQ: | 23017 | >CTNNB1-S2:AAVSHWQQQ: | 169  | 22848 |
| >CTNNB1-S2:AAVSHWQQQ: | 61    | >CTNNB1-S2:AAVSHWQQQ: | 25   | 36    |
| >CTNNB1-S2:AAVSHWQQQ: | 459   | >CTNNB1-S2:AAVSHWQQQ: | 128  | 331   |
| >CTNNB1-S2:AAVSHWQQQ: | 540   | >CTNNB1-S2:AAVSHWQQQ: | 345  | 195   |
| >CTNNB1-S2:AAVSHWQQQ: | 17913 | >CTNNB1-S2:AAVSHWQQQ: | 284  | 17629 |
| >CTNNB1-S2:AAVSHWQQQ: | 144   | >CTNNB1-S2:AAVSHWQQQ: | 482  | 338   |
| >CTNNB1-S2:AAVSHWQQQ: | 10709 | >CTNNB1-S2:AAVSHWQQQ: | 34   | 10675 |
| >CTNNB1-S2:AAVSHWQQQ: | 58    | >CTNNB1-S2:AAVSHWQQQ: | 162  | 104   |
| >CTNNB1-S2:AAVSHWQQQ: | 9325  | >CTNNB1-S2:AAVSHWQQQ: | 6    | 9319  |
| >CTNNB1-S2:AAVSHWQQQ: | 10    | >CTNNB1-S2:AAVSHWQQQ: | 14   | 4     |
| >CTNNB1-S2:AAVSHWQQQ: | 91    | >CTNNB1-S2:AAVSHWQQQ: | 321  | 230   |

|                       |       |                       |       |       |
|-----------------------|-------|-----------------------|-------|-------|
| >CTNNB1-S2:AAVSHWQQQ  | 19254 | >CTNNB1-S2:AAVSHWQQQ  | 281   | 18973 |
| >CTNNB1-S2:AAVSHWQQQ  | 112   | >CTNNB1-S2:AAVSHWQQQ  | 276   | 164   |
| >CTNNB1-S2:SYLDSGIHSG | 410   | >CTNNB1-S2:PYLDSGIHSG | 4881  | 4471  |
| >CTNNB1-S2:QSYLDSGI   | 46    | >CTNNB1-S2:QPYLDSGI   | 18394 | 18348 |
| >CTNNB1-S2:QSYLDSGIH  | 7398  | >CTNNB1-S2:QPYLDSGIH  | 168   | 7230  |
| >CTNNB1-S2:QSYLDSGI   | 22    | >CTNNB1-S2:QPYLDSGI   | 1169  | 1147  |
| >CTNNB1-S2:QQSYLDSGI  | 417   | >CTNNB1-S2:QQPYLDSGI  | 2569  | 2152  |
| >CTNNB1-S2:QQQSYLDSGI | 381   | >CTNNB1-S2:QQQPYLDSGI | 694   | 313   |
| >CTNNB1-S2:WQQQSYLDS  | 268   | >CTNNB1-S2:WQQQPYLDS  | 330   | 62    |
| >CTNNB1-S2:WQQQSYLDS  | 431   | >CTNNB1-S2:WQQQPYLDS  | 816   | 385   |
| >CTNNB1-S2:WQQQSYLDS  | 187   | >CTNNB1-S2:WQQQPYLDS  | 353   | 166   |
| >CTNNB1-S2:HWQQQSYL   | 22    | >CTNNB1-S2:HWQQQPYL   | 30    | 8     |
| >CTNNB1-S2:HWQQQSYL   | 116   | >CTNNB1-S2:HWQQQPYL   | 102   | 14    |
| >CTNNB1-S2:HWQQQSYLE  | 297   | >CTNNB1-S2:HWQQQPYLE  | 216   | 81    |
| >CTNNB1-S2:SHWQQQSY   | 180   | >CTNNB1-S2:SHWQQQPYPY | 119   | 61    |
| >CTNNB1-S2:SHWQQQSY   | 158   | >CTNNB1-S2:SHWQQQPYPY | 340   | 182   |
| >CTNNB1-S2:SHWQQQSY   | 63    | >CTNNB1-S2:SHWQQQPYPY | 62    | 1     |
| >CTNNB1-S2:SHWQQQSYL  | 75    | >CTNNB1-S2:SHWQQQPYLE | 68    | 7     |
| >CTNNB1-S2:VSHWQQQS   | 551   | >CTNNB1-S2:VSHWQQQP   | 395   | 156   |
| >CTNNB1-S2:VSHWQQQS   | 1076  | >CTNNB1-S2:VSHWQQQP   | 325   | 751   |
| >CTNNB1-S2:VSHWQQQS   | 27    | >CTNNB1-S2:VSHWQQQP   | 77    | 50    |
| >CTNNB1-S2:VSHWQQQS   | 403   | >CTNNB1-S2:VSHWQQQP   | 247   | 156   |
| >CTNNB1-S2:VSHWQQQS   | 212   | >CTNNB1-S2:VSHWQQQP   | 186   | 26    |
| >CTNNB1-S2:VSHWQQQS   | 6     | >CTNNB1-S2:VSHWQQQP   | 5     | 1     |
| >CTNNB1-S2:VSHWQQQS   | 18    | >CTNNB1-S2:VSHWQQQP   | 24    | 6     |
| >CTNNB1-S2:VSHWQQQS   | 636   | >CTNNB1-S2:VSHWQQQP   | 140   | 496   |
| >CTNNB1-S2:VSHWQQQS   | 283   | >CTNNB1-S2:VSHWQQQP   | 1101  | 818   |
| >CTNNB1-S2:VSHWQQQS   | 479   | >CTNNB1-S2:VSHWQQQP   | 2220  | 1741  |
| >CTNNB1-S2:VSHWQQQS   | 139   | >CTNNB1-S2:VSHWQQQP   | 406   | 267   |
| >CTNNB1-S2:VSHWQQQS   | 396   | >CTNNB1-S2:VSHWQQQP   | 1990  | 1594  |
| >CTNNB1-S2:AVSHWQQQ   | 1211  | >CTNNB1-S2:AVSHWQQQ   | 445   | 766   |
| >CTNNB1-S2:AVSHWQQQ   | 77    | >CTNNB1-S2:AVSHWQQQ   | 155   | 78    |
| >CTNNB1-S2:AVSHWQQQ   | 245   | >CTNNB1-S2:AVSHWQQQ   | 775   | 530   |
| >CTNNB1-S2:AVSHWQQQ   | 614   | >CTNNB1-S2:AVSHWQQQ   | 236   | 378   |
| >CTNNB1-S2:AVSHWQQQ   | 368   | >CTNNB1-S2:AVSHWQQQ   | 223   | 145   |
| >CTNNB1-S2:AVSHWQQQ   | 1243  | >CTNNB1-S2:AVSHWQQQ   | 300   | 943   |
| >CTNNB1-S2:AVSHWQQQ   | 40    | >CTNNB1-S2:AVSHWQQQ   | 24    | 16    |
| >CTNNB1-S2:AVSHWQQQ   | 163   | >CTNNB1-S2:AVSHWQQQ   | 109   | 54    |
| >CTNNB1-S2:AVSHWQQQ   | 140   | >CTNNB1-S2:AVSHWQQQ   | 196   | 56    |
| >CTNNB1-S2:AVSHWQQQ   | 488   | >CTNNB1-S2:AVSHWQQQ   | 1710  | 1222  |
| >CTNNB1-S2:AVSHWQQQ   | 333   | >CTNNB1-S2:AVSHWQQQ   | 301   | 32    |
| >CTNNB1-S2:AVSHWQQQ   | 121   | >CTNNB1-S2:AVSHWQQQ   | 92    | 29    |
| >CTNNB1-S2:AVSHWQQQ   | 396   | >CTNNB1-S2:AVSHWQQQ   | 383   | 13    |

|                       |       |                       |       |       |
|-----------------------|-------|-----------------------|-------|-------|
| >CTNNB1-S2:AVSHWQQQ   | 116   | >CTNNB1-S2:AVSHWQQQ   | 106   | 10    |
| >CTNNB1-S2:AVSHWQQQ   | 378   | >CTNNB1-S2:AVSHWQQQ   | 1390  | 1012  |
| >CTNNB1-S2:AVSHWQQQ   | 460   | >CTNNB1-S2:AVSHWQQQ   | 3819  | 3359  |
| >CTNNB1-S2:AVSHWQQQ   | 282   | >CTNNB1-S2:AVSHWQQQ   | 184   | 98    |
| >CTNNB1-S2:AAVSHWQQ   | 61    | >CTNNB1-S2:AAVSHWQQ   | 44    | 17    |
| >CTNNB1-S2:AAVSHWQQ   | 459   | >CTNNB1-S2:AAVSHWQQ   | 337   | 122   |
| >CTNNB1-S2:AAVSHWQQ   | 144   | >CTNNB1-S2:AAVSHWQQ   | 108   | 36    |
| >CTNNB1-S2:AAVSHWQQ   | 58    | >CTNNB1-S2:AAVSHWQQ   | 55    | 3     |
| >CTNNB1-S2:AAVSHWQQ   | 10    | >CTNNB1-S2:AAVSHWQQ   | 9     | 1     |
| >CTNNB1-S2:AAVSHWQQ   | 91    | >CTNNB1-S2:AAVSHWQQ   | 31    | 60    |
| >CTNNB1-S2:AAVSHWQQ   | 112   | >CTNNB1-S2:AAVSHWQQ   | 77    | 35    |
| >CTNNB1-S2:SYLDSGIHSG | 3100  | >CTNNB1-S2:YYLDSGIHSG | 481   | 2619  |
| >CTNNB1-S2:SYLDSGIHSG | 1853  | >CTNNB1-S2:YYLDSGIHSG | 423   | 1430  |
| >CTNNB1-S2:SYLDSGIHSG | 410   | >CTNNB1-S2:YYLDSGIHSG | 1171  | 761   |
| >CTNNB1-S2:QSYLDSGI   | 23464 | >CTNNB1-S2:QYYLDSGI   | 109   | 23355 |
| >CTNNB1-S2:QSYLDSGI   | 21127 | >CTNNB1-S2:QYYLDSGI   | 72    | 21055 |
| >CTNNB1-S2:QSYLDSGI   | 46    | >CTNNB1-S2:QYYLDSGI   | 23832 | 23786 |
| >CTNNB1-S2:QSYLDSGI   | 22    | >CTNNB1-S2:QYYLDSGI   | 2709  | 2687  |
| >CTNNB1-S2:KAAVSHWQC  | 23195 | >CTNNB1-S2:KAAVSHWQC  | 285   | 22910 |
| >CTNNB1-S2:KAAVSHWQC  | 19127 | >CTNNB1-S2:KAAVSHWQC  | 73    | 19054 |
| >CTNNB1-S2:KAAVSHWQC  | 25432 | >CTNNB1-S2:KAAVSHWQC  | 456   | 24976 |
| >CTNNB1-S2:KAAVSHWQC  | 14406 | >CTNNB1-S2:KAAVSHWQC  | 108   | 14298 |
| >CTNNB1-S2:KAAVSHWQC  | 3295  | >CTNNB1-S2:KAAVSHWQC  | 6     | 3289  |
| >CTNNB1-S2:KAAVSHWQC  | 4258  | >CTNNB1-S2:KAAVSHWQC  | 49    | 4209  |
| >CTNNB1-S2:KAAVSHWQC  | 2736  | >CTNNB1-S2:KAAVSHWQC  | 11    | 2725  |
| >CTNNB1-S2:KAAVSHWQC  | 35493 | >CTNNB1-S2:KAAVSHWQC  | 315   | 35178 |
| >CTNNB1-S2:QQSYLDSGI  | 2494  | >CTNNB1-S2:QQYYLDSGI  | 194   | 2300  |
| >CTNNB1-S2:QQSYLDSGI  | 1017  | >CTNNB1-S2:QQYYLDSGI  | 245   | 772   |
| >CTNNB1-S2:QQSYLDSGI  | 417   | >CTNNB1-S2:QQYYLDSGI  | 72    | 345   |
| >CTNNB1-S2:QQSYLDSGIH | 2269  | >CTNNB1-S2:QQYYLDSGIH | 420   | 1849  |
| >CTNNB1-S2:QQQSYLDSGI | 381   | >CTNNB1-S2:QQQYYLDSGI | 520   | 139   |
| >CTNNB1-S2:WQQQSYLDS  | 638   | >CTNNB1-S2:WQQQYYLDS  | 388   | 250   |
| >CTNNB1-S2:WQQQSYLDS  | 268   | >CTNNB1-S2:WQQQYYLDS  | 130   | 138   |
| >CTNNB1-S2:WQQQSYLDS  | 431   | >CTNNB1-S2:WQQQYYLDS  | 496   | 65    |
| >CTNNB1-S2:WQQQSYLDS  | 187   | >CTNNB1-S2:WQQQYYLDS  | 277   | 90    |
| >CTNNB1-S2:WQQQSYLDS  | 742   | >CTNNB1-S2:WQQQYYLDS  | 307   | 435   |
| >CTNNB1-S2:HWQQQSYL   | 22    | >CTNNB1-S2:HWQQQYYL   | 11    | 11    |
| >CTNNB1-S2:HWQQQSYL   | 1430  | >CTNNB1-S2:HWQQQYYL   | 208   | 1222  |
| >CTNNB1-S2:HWQQQSYL   | 116   | >CTNNB1-S2:HWQQQYYL   | 76    | 40    |
| >CTNNB1-S2:HWQQQSYLE  | 297   | >CTNNB1-S2:HWQQQYYLE  | 219   | 78    |
| >CTNNB1-S2:SHWQQQSY   | 180   | >CTNNB1-S2:SHWQQQYY   | 35    | 145   |
| >CTNNB1-S2:SHWQQQSY   | 158   | >CTNNB1-S2:SHWQQQYY   | 107   | 51    |
| >CTNNB1-S2:SHWQQQSY   | 63    | >CTNNB1-S2:SHWQQQYY   | 141   | 78    |

|                      |       |                      |      |       |
|----------------------|-------|----------------------|------|-------|
| >CTNNB1-S2:SHWQQQSYL | 75    | >CTNNB1-S2:SHWQQQYYL | 103  | 28    |
| >CTNNB1-S2:SHWQQQSYL | 892   | >CTNNB1-S2:SHWQQQYYL | 443  | 449   |
| >CTNNB1-S2:VSHWQQQS  | 24840 | >CTNNB1-S2:VSHWQQQY  | 205  | 24635 |
| >CTNNB1-S2:VSHWQQQS\ | 551   | >CTNNB1-S2:VSHWQQQY\ | 109  | 442   |
| >CTNNB1-S2:VSHWQQQS  | 15177 | >CTNNB1-S2:VSHWQQQY  | 68   | 15109 |
| >CTNNB1-S2:VSHWQQQS\ | 27    | >CTNNB1-S2:VSHWQQQY\ | 23   | 4     |
| >CTNNB1-S2:VSHWQQQS\ | 403   | >CTNNB1-S2:VSHWQQQY\ | 1695 | 1292  |
| >CTNNB1-S2:VSHWQQQS\ | 212   | >CTNNB1-S2:VSHWQQQY\ | 642  | 430   |
| >CTNNB1-S2:VSHWQQQS  | 6507  | >CTNNB1-S2:VSHWQQQY  | 5    | 6502  |
| >CTNNB1-S2:VSHWQQQS\ | 6     | >CTNNB1-S2:VSHWQQQY\ | 6    | 0     |
| >CTNNB1-S2:VSHWQQQS\ | 18    | >CTNNB1-S2:VSHWQQQY\ | 38   | 20    |
| >CTNNB1-S2:VSHWQQQS  | 18660 | >CTNNB1-S2:VSHWQQQY  | 199  | 18461 |
| >CTNNB1-S2:VSHWQQQS\ | 283   | >CTNNB1-S2:VSHWQQQY\ | 98   | 185   |
| >CTNNB1-S2:VSHWQQQS\ | 829   | >CTNNB1-S2:VSHWQQQY\ | 275  | 554   |
| >CTNNB1-S2:VSHWQQQS  | 8670  | >CTNNB1-S2:VSHWQQQY  | 137  | 8533  |
| >CTNNB1-S2:VSHWQQQS\ | 479   | >CTNNB1-S2:VSHWQQQY\ | 418  | 61    |
| >CTNNB1-S2:VSHWQQQS\ | 139   | >CTNNB1-S2:VSHWQQQY\ | 414  | 275   |
| >CTNNB1-S2:VSHWQQQS\ | 396   | >CTNNB1-S2:VSHWQQQY\ | 2111 | 1715  |
| >CTNNB1-S2:AVSHWQQQ: | 680   | >CTNNB1-S2:AVSHWQQQ' | 146  | 534   |
| >CTNNB1-S2:AVSHWQQQ: | 1211  | >CTNNB1-S2:AVSHWQQQ' | 219  | 992   |
| >CTNNB1-S2:AVSHWQQQ: | 77    | >CTNNB1-S2:AVSHWQQQ' | 31   | 46    |
| >CTNNB1-S2:AVSHWQQQ: | 245   | >CTNNB1-S2:AVSHWQQQ' | 631  | 386   |
| >CTNNB1-S2:AVSHWQQQ: | 614   | >CTNNB1-S2:AVSHWQQQ' | 276  | 338   |
| >CTNNB1-S2:AVSHWQQQ: | 368   | >CTNNB1-S2:AVSHWQQQ' | 161  | 207   |
| >CTNNB1-S2:AVSHWQQQ: | 2464  | >CTNNB1-S2:AVSHWQQQ' | 465  | 1999  |
| >CTNNB1-S2:AVSHWQQQ: | 1493  | >CTNNB1-S2:AVSHWQQQ' | 343  | 1150  |
| >CTNNB1-S2:AVSHWQQQ: | 40    | >CTNNB1-S2:AVSHWQQQ' | 43   | 3     |
| >CTNNB1-S2:AVSHWQQQ: | 681   | >CTNNB1-S2:AVSHWQQQ' | 175  | 506   |
| >CTNNB1-S2:AVSHWQQQ: | 679   | >CTNNB1-S2:AVSHWQQQ' | 158  | 521   |
| >CTNNB1-S2:AVSHWQQQ: | 31405 | >CTNNB1-S2:AVSHWQQQ' | 152  | 31253 |
| >CTNNB1-S2:AVSHWQQQ: | 163   | >CTNNB1-S2:AVSHWQQQ' | 109  | 54    |
| >CTNNB1-S2:AVSHWQQQ: | 13603 | >CTNNB1-S2:AVSHWQQQ' | 25   | 13578 |
| >CTNNB1-S2:AVSHWQQQ: | 1161  | >CTNNB1-S2:AVSHWQQQ' | 253  | 908   |
| >CTNNB1-S2:AVSHWQQQ: | 18962 | >CTNNB1-S2:AVSHWQQQ' | 43   | 18919 |
| >CTNNB1-S2:AVSHWQQQ: | 140   | >CTNNB1-S2:AVSHWQQQ' | 74   | 66    |
| >CTNNB1-S2:AVSHWQQQ: | 488   | >CTNNB1-S2:AVSHWQQQ' | 154  | 334   |
| >CTNNB1-S2:AVSHWQQQ: | 27540 | >CTNNB1-S2:AVSHWQQQ' | 257  | 27283 |
| >CTNNB1-S2:AVSHWQQQ: | 333   | >CTNNB1-S2:AVSHWQQQ' | 109  | 224   |
| >CTNNB1-S2:AVSHWQQQ: | 16257 | >CTNNB1-S2:AVSHWQQQ' | 190  | 16067 |
| >CTNNB1-S2:AVSHWQQQ: | 121   | >CTNNB1-S2:AVSHWQQQ' | 266  | 145   |
| >CTNNB1-S2:AVSHWQQQ: | 396   | >CTNNB1-S2:AVSHWQQQ' | 1054 | 658   |
| >CTNNB1-S2:AVSHWQQQ: | 19492 | >CTNNB1-S2:AVSHWQQQ' | 63   | 19429 |
| >CTNNB1-S2:AVSHWQQQ: | 116   | >CTNNB1-S2:AVSHWQQQ' | 204  | 88    |

|                        |       |                       |      |       |
|------------------------|-------|-----------------------|------|-------|
| >CTNNB1-S2:AVSHWQQQ'   | 15646 | >CTNNB1-S2:AVSHWQQQ'  | 217  | 15429 |
| >CTNNB1-S2:AVSHWQQQ'   | 378   | >CTNNB1-S2:AVSHWQQQ'  | 330  | 48    |
| >CTNNB1-S2:AVSHWQQQ'   | 460   | >CTNNB1-S2:AVSHWQQQ'  | 3606 | 3146  |
| >CTNNB1-S2:AVSHWQQQ'   | 34091 | >CTNNB1-S2:AVSHWQQQ'  | 437  | 33654 |
| >CTNNB1-S2:AVSHWQQQ'   | 282   | >CTNNB1-S2:AVSHWQQQ'  | 829  | 547   |
| >CTNNB1-S2:AVSHWQQQ'   | 34612 | >CTNNB1-S2:AVSHWQQQ'  | 391  | 34221 |
| >CTNNB1-S2:AAVSHWQQQ'  | 23017 | >CTNNB1-S2:AAVSHWQQQ' | 55   | 22962 |
| >CTNNB1-S2:AAVSHWQQQ'  | 61    | >CTNNB1-S2:AAVSHWQQQ' | 43   | 18    |
| >CTNNB1-S2:AAVSHWQQQ'  | 459   | >CTNNB1-S2:AAVSHWQQQ' | 93   | 366   |
| >CTNNB1-S2:AAVSHWQQQ'  | 540   | >CTNNB1-S2:AAVSHWQQQ' | 420  | 120   |
| >CTNNB1-S2:AAVSHWQQQ'  | 17913 | >CTNNB1-S2:AAVSHWQQQ' | 242  | 17671 |
| >CTNNB1-S2:AAVSHWQQQ'  | 144   | >CTNNB1-S2:AAVSHWQQQ' | 371  | 227   |
| >CTNNB1-S2:AAVSHWQQQ'  | 10709 | >CTNNB1-S2:AAVSHWQQQ' | 120  | 10589 |
| >CTNNB1-S2:AAVSHWQQQ'  | 58    | >CTNNB1-S2:AAVSHWQQQ' | 140  | 82    |
| >CTNNB1-S2:AAVSHWQQQ'  | 9325  | >CTNNB1-S2:AAVSHWQQQ' | 8    | 9317  |
| >CTNNB1-S2:AAVSHWQQQ'  | 10    | >CTNNB1-S2:AAVSHWQQQ' | 14   | 4     |
| >CTNNB1-S2:AAVSHWQQQ'  | 91    | >CTNNB1-S2:AAVSHWQQQ' | 298  | 207   |
| >CTNNB1-S2:AAVSHWQQQ'  | 28061 | >CTNNB1-S2:AAVSHWQQQ' | 173  | 27888 |
| >CTNNB1-S2:AAVSHWQQQ'  | 112   | >CTNNB1-S2:AAVSHWQQQ' | 368  | 256   |
| >CTNNB1-S3:YLDAGIHS    | 603   | >CTNNB1-S3:YLDAGIHS   | 487  | 116   |
| >CTNNB1-S3:YLDAGIHSGA  | 78    | >CTNNB1-S3:YLDAGIHSGA | 74   | 4     |
| >CTNNB1-S3:YLDAGIHSGA' | 212   | >CTNNB1-S3:YLDAGIHSGA | 188  | 24    |
| >CTNNB1-S3:YLDAGIHSG   | 278   | >CTNNB1-S3:YLDAGIHSG  | 186  | 92    |
| >CTNNB1-S3:YLDAGIHSGA  | 24    | >CTNNB1-S3:YLDAGIHSGA | 30   | 6     |
| >CTNNB1-S3:YLDAGIHSGA' | 284   | >CTNNB1-S3:YLDAGIHSGA | 206  | 78    |
| >CTNNB1-S3:YLDAGIHSGA  | 32    | >CTNNB1-S3:YLDAGIHSGA | 32   | 0     |
| >CTNNB1-S3:YLDAGIHSGA' | 78    | >CTNNB1-S3:YLDAGIHSGA | 72   | 6     |
| >CTNNB1-S3:YLDAGIHS    | 419   | >CTNNB1-S3:YLDAGIHS   | 279  | 140   |
| >CTNNB1-S3:YLDAGIHSG   | 570   | >CTNNB1-S3:YLDAGIHSG  | 446  | 124   |
| >CTNNB1-S3:YLDAGIHSGA  | 280   | >CTNNB1-S3:YLDAGIHSGA | 290  | 10    |
| >CTNNB1-S3:YLDAGIHSGA' | 178   | >CTNNB1-S3:YLDAGIHSGA | 111  | 67    |
| >CTNNB1-S3:YLDAGIHS    | 47    | >CTNNB1-S3:YLDAGIHS   | 45   | 2     |
| >CTNNB1-S3:YLDAGIHSG   | 15    | >CTNNB1-S3:YLDAGIHSG  | 14   | 1     |
| >CTNNB1-S3:YLDAGIHSGA  | 2     | >CTNNB1-S3:YLDAGIHSGA | 2    | 0     |
| >CTNNB1-S3:YLDAGIHSGA' | 12    | >CTNNB1-S3:YLDAGIHSGA | 11   | 1     |
| >CTNNB1-S3:YLDAGIHS    | 395   | >CTNNB1-S3:YLDAGIHS   | 410  | 15    |
| >CTNNB1-S3:YLDAGIHSG   | 139   | >CTNNB1-S3:YLDAGIHSG  | 147  | 8     |
| >CTNNB1-S3:YLDAGIHSGA  | 8     | >CTNNB1-S3:YLDAGIHSGA | 8    | 0     |
| >CTNNB1-S3:YLDAGIHSGA' | 83    | >CTNNB1-S3:YLDAGIHSGA | 83   | 0     |
| >CTNNB1-S3:YLDAGIHS    | 101   | >CTNNB1-S3:YLDAGIHS   | 97   | 4     |
| >CTNNB1-S3:YLDAGIHSG   | 140   | >CTNNB1-S3:YLDAGIHSG  | 139  | 1     |
| >CTNNB1-S3:YLDAGIHSGA  | 7     | >CTNNB1-S3:YLDAGIHSGA | 7    | 0     |
| >CTNNB1-S3:YLDAGIHSGA' | 121   | >CTNNB1-S3:YLDAGIHSGA | 121  | 0     |

|                       |      |                       |      |      |
|-----------------------|------|-----------------------|------|------|
| >CTNNB1-S3:YLDSGIHSGA | 7    | >CTNNB1-S3:YLDAGIHSGA | 7    | 0    |
| >CTNNB1-S3:YLDSGIHSGA | 255  | >CTNNB1-S3:YLDAGIHSGA | 332  | 77   |
| >CTNNB1-S3:YLDSGIHS   | 66   | >CTNNB1-S3:YLDAGIHS   | 60   | 6    |
| >CTNNB1-S3:YLDSGIHSG  | 13   | >CTNNB1-S3:YLDAGIHSG  | 12   | 1    |
| >CTNNB1-S3:YLDSGIHSGA | 2    | >CTNNB1-S3:YLDAGIHSGA | 2    | 0    |
| >CTNNB1-S3:YLDSGIHSGA | 36   | >CTNNB1-S3:YLDAGIHSGA | 32   | 4    |
| >CTNNB1-S3:YLDSGIHSGA | 554  | >CTNNB1-S3:YLDAGIHSGA | 492  | 62   |
| >CTNNB1-S3:SYLDSGIHSG | 410  | >CTNNB1-S3:SYLDAGIHSG | 591  | 181  |
| >CTNNB1-S3:QSYLDSGI   | 46   | >CTNNB1-S3:QSYLDAGI   | 35   | 11   |
| >CTNNB1-S3:QSYLDSGI   | 22   | >CTNNB1-S3:QSYLDAGI   | 29   | 7    |
| >CTNNB1-S3:QQSYLDSGI  | 1017 | >CTNNB1-S3:QQSYLDAGI  | 468  | 549  |
| >CTNNB1-S3:QQSYLDSGI  | 417  | >CTNNB1-S3:QQSYLDAGI  | 1203 | 786  |
| >CTNNB1-S3:QQQSYLDSGI | 381  | >CTNNB1-S3:QQQSYLDAG  | 717  | 336  |
| >CTNNB1-S3:WQQQSYLDS  | 268  | >CTNNB1-S3:WQQQSYLDA  | 158  | 110  |
| >CTNNB1-S3:WQQQSYLDS  | 431  | >CTNNB1-S3:WQQQSYLDA  | 406  | 25   |
| >CTNNB1-S3:WQQQSYLDS  | 1891 | >CTNNB1-S3:WQQQSYLDA  | 326  | 1565 |
| >CTNNB1-S3:WQQQSYLDS  | 187  | >CTNNB1-S3:WQQQSYLDA  | 349  | 162  |
| >CTNNB1-S3:HWQQQSYL   | 297  | >CTNNB1-S3:HWQQQSYL   | 207  | 90   |
| >CTNNB1-S3:YLDSGIHS   | 603  | >CTNNB1-S3:YLDCGIHS   | 497  | 106  |
| >CTNNB1-S3:YLDSGIHSGA | 78   | >CTNNB1-S3:YLDCGIHSGA | 69   | 9    |
| >CTNNB1-S3:YLDSGIHSGA | 212  | >CTNNB1-S3:YLDCGIHSGA | 223  | 11   |
| >CTNNB1-S3:YLDSGIHSG  | 278  | >CTNNB1-S3:YLDCGIHSG  | 644  | 366  |
| >CTNNB1-S3:YLDSGIHSGA | 24   | >CTNNB1-S3:YLDCGIHSGA | 43   | 19   |
| >CTNNB1-S3:YLDSGIHSGA | 284  | >CTNNB1-S3:YLDCGIHSGA | 453  | 169  |
| >CTNNB1-S3:YLDSGIHSGA | 32   | >CTNNB1-S3:YLDCGIHSGA | 60   | 28   |
| >CTNNB1-S3:YLDSGIHSGA | 78   | >CTNNB1-S3:YLDCGIHSGA | 82   | 4    |
| >CTNNB1-S3:YLDSGIHS   | 419  | >CTNNB1-S3:YLDCGIHS   | 437  | 18   |
| >CTNNB1-S3:YLDSGIHSGA | 280  | >CTNNB1-S3:YLDCGIHSGA | 235  | 45   |
| >CTNNB1-S3:YLDSGIHSGA | 178  | >CTNNB1-S3:YLDCGIHSGA | 158  | 20   |
| >CTNNB1-S3:YLDSGIHS   | 47   | >CTNNB1-S3:YLDCGIHS   | 49   | 2    |
| >CTNNB1-S3:YLDSGIHSG  | 15   | >CTNNB1-S3:YLDCGIHSG  | 14   | 1    |
| >CTNNB1-S3:YLDSGIHSGA | 2    | >CTNNB1-S3:YLDCGIHSGA | 2    | 0    |
| >CTNNB1-S3:YLDSGIHSGA | 12   | >CTNNB1-S3:YLDCGIHSGA | 11   | 1    |
| >CTNNB1-S3:YLDSGIHS   | 395  | >CTNNB1-S3:YLDCGIHS   | 108  | 287  |
| >CTNNB1-S3:YLDSGIHSG  | 139  | >CTNNB1-S3:YLDCGIHSG  | 50   | 89   |
| >CTNNB1-S3:YLDSGIHSGA | 8    | >CTNNB1-S3:YLDCGIHSGA | 5    | 3    |
| >CTNNB1-S3:YLDSGIHSGA | 83   | >CTNNB1-S3:YLDCGIHSGA | 32   | 51   |
| >CTNNB1-S3:YLDSGIHS   | 101  | >CTNNB1-S3:YLDCGIHS   | 262  | 161  |
| >CTNNB1-S3:YLDSGIHSG  | 140  | >CTNNB1-S3:YLDCGIHSG  | 356  | 216  |
| >CTNNB1-S3:YLDSGIHSGA | 7    | >CTNNB1-S3:YLDCGIHSGA | 9    | 2    |
| >CTNNB1-S3:YLDSGIHSGA | 121  | >CTNNB1-S3:YLDCGIHSGA | 232  | 111  |
| >CTNNB1-S3:YLDSGIHSGA | 7    | >CTNNB1-S3:YLDCGIHSGA | 10   | 3    |
| >CTNNB1-S3:YLDSGIHSGA | 255  | >CTNNB1-S3:YLDCGIHSGA | 486  | 231  |



|                       |      |                       |     |      |
|-----------------------|------|-----------------------|-----|------|
| >CTNNB1-S3:YLDSGIHS   | 66   | >CTNNB1-S3:YLDCGIHS   | 275 | 209  |
| >CTNNB1-S3:YLDSGIHSG  | 13   | >CTNNB1-S3:YLDCGIHSG  | 61  | 48   |
| >CTNNB1-S3:YLDSGIHSGA | 2    | >CTNNB1-S3:YLDCGIHSGA | 3   | 1    |
| >CTNNB1-S3:YLDSGIHSGA | 36   | >CTNNB1-S3:YLDCGIHSGA | 108 | 72   |
| >CTNNB1-S3:YLDSGIHSGA | 554  | >CTNNB1-S3:YLDCGIHSGA | 406 | 148  |
| >CTNNB1-S3:SYLDSGIHSG | 410  | >CTNNB1-S3:SYLDCGIHSG | 749 | 339  |
| >CTNNB1-S3:QSYLDSGI   | 46   | >CTNNB1-S3:QSYLDCGI   | 99  | 53   |
| >CTNNB1-S3:QSYLDSGI   | 22   | >CTNNB1-S3:QSYLDCGI   | 58  | 36   |
| >CTNNB1-S3:QQSYLDSGI  | 417  | >CTNNB1-S3:QQSYLDCGI  | 952 | 535  |
| >CTNNB1-S3:QQQSYLDSGI | 381  | >CTNNB1-S3:QQQSYLDCG  | 780 | 399  |
| >CTNNB1-S3:WQQQSYLDS  | 638  | >CTNNB1-S3:WQQQSYLDC  | 446 | 192  |
| >CTNNB1-S3:WQQQSYLDS  | 268  | >CTNNB1-S3:WQQQSYLDC  | 245 | 23   |
| >CTNNB1-S3:WQQQSYLDS  | 431  | >CTNNB1-S3:WQQQSYLDC  | 357 | 74   |
| >CTNNB1-S3:WQQQSYLDS  | 187  | >CTNNB1-S3:WQQQSYLDC  | 316 | 129  |
| >CTNNB1-S3:HWQQQSYLI  | 297  | >CTNNB1-S3:HWQQQSYLI  | 545 | 248  |
| >CTNNB1-S3:SGIHSGATTT | 5002 | >CTNNB1-S3:FGIHSGATTT | 385 | 4617 |
| >CTNNB1-S3:SHWQQQSYL  | 7629 | >CTNNB1-S3:SHWQQQSYL  | 18  | 7611 |
| >CTNNB1-S3:YLDSGIHSGA | 78   | >CTNNB1-S3:YLDFGIHSGA | 98  | 20   |
| >CTNNB1-S3:YLDSGIHSGA | 212  | >CTNNB1-S3:YLDFGIHSGA | 329 | 117  |
| >CTNNB1-S3:YLDSGIHSG  | 278  | >CTNNB1-S3:YLDFGIHSG  | 476 | 198  |
| >CTNNB1-S3:YLDSGIHSGA | 24   | >CTNNB1-S3:YLDFGIHSGA | 60  | 36   |
| >CTNNB1-S3:YLDSGIHSGA | 284  | >CTNNB1-S3:YLDFGIHSGA | 385 | 101  |
| >CTNNB1-S3:YLDSGIHSGA | 32   | >CTNNB1-S3:YLDFGIHSGA | 93  | 61   |
| >CTNNB1-S3:YLDSGIHSGA | 78   | >CTNNB1-S3:YLDFGIHSGA | 103 | 25   |
| >CTNNB1-S3:YLDSGIHS   | 419  | >CTNNB1-S3:YLDFGIHS   | 932 | 513  |
| >CTNNB1-S3:YLDSGIHSGA | 280  | >CTNNB1-S3:YLDFGIHSGA | 384 | 104  |
| >CTNNB1-S3:YLDSGIHSGA | 178  | >CTNNB1-S3:YLDFGIHSGA | 319 | 141  |
| >CTNNB1-S3:YLDSGIHS   | 47   | >CTNNB1-S3:YLDFGIHS   | 62  | 15   |
| >CTNNB1-S3:YLDSGIHSG  | 15   | >CTNNB1-S3:YLDFGIHSG  | 25  | 10   |
| >CTNNB1-S3:YLDSGIHSGA | 2    | >CTNNB1-S3:YLDFGIHSGA | 3   | 1    |
| >CTNNB1-S3:YLDSGIHSGA | 12   | >CTNNB1-S3:YLDFGIHSGA | 18  | 6    |
| >CTNNB1-S3:YLDSGIHS   | 395  | >CTNNB1-S3:YLDFGIHS   | 455 | 60   |
| >CTNNB1-S3:YLDSGIHSG  | 139  | >CTNNB1-S3:YLDFGIHSG  | 184 | 45   |
| >CTNNB1-S3:YLDSGIHSGA | 8    | >CTNNB1-S3:YLDFGIHSGA | 10  | 2    |
| >CTNNB1-S3:YLDSGIHSGA | 83   | >CTNNB1-S3:YLDFGIHSGA | 110 | 27   |
| >CTNNB1-S3:YLDSGIHS   | 101  | >CTNNB1-S3:YLDFGIHS   | 259 | 158  |
| >CTNNB1-S3:YLDSGIHSG  | 140  | >CTNNB1-S3:YLDFGIHSG  | 412 | 272  |
| >CTNNB1-S3:YLDSGIHSGA | 7    | >CTNNB1-S3:YLDFGIHSGA | 8   | 1    |
| >CTNNB1-S3:YLDSGIHSGA | 121  | >CTNNB1-S3:YLDFGIHSGA | 235 | 114  |
| >CTNNB1-S3:YLDSGIHSGA | 7    | >CTNNB1-S3:YLDFGIHSGA | 9   | 2    |
| >CTNNB1-S3:YLDSGIHSGA | 255  | >CTNNB1-S3:YLDFGIHSGA | 362 | 107  |
| >CTNNB1-S3:YLDSGIHS   | 66   | >CTNNB1-S3:YLDFGIHS   | 165 | 99   |
| >CTNNB1-S3:YLDSGIHSG  | 13   | >CTNNB1-S3:YLDFGIHSG  | 32  | 19   |

|                        |       |                        |      |       |
|------------------------|-------|------------------------|------|-------|
| >CTNNB1-S3:YLDSGIHSGA  | 2     | >CTNNB1-S3:YLDFGIHSGA  | 3    | 1     |
| >CTNNB1-S3:YLDSGIHSGA` | 36    | >CTNNB1-S3:YLDFGIHSGA` | 77   | 41    |
| >CTNNB1-S3:SYLDSGIHSG/ | 410   | >CTNNB1-S3:SYLDFGIHSG/ | 326  | 84    |
| >CTNNB1-S3:QSYLDSGI    | 1029  | >CTNNB1-S3:QSYLDFGI    | 371  | 658   |
| >CTNNB1-S3:QSYLDSGI    | 46    | >CTNNB1-S3:QSYLDFGI    | 118  | 72    |
| >CTNNB1-S3:QSYLDSGI    | 22    | >CTNNB1-S3:QSYLDFGI    | 27   | 5     |
| >CTNNB1-S3:QQSYLDSGI   | 1017  | >CTNNB1-S3:QQSYLDFGI   | 57   | 960   |
| >CTNNB1-S3:QQSYLDSGI   | 417   | >CTNNB1-S3:QQSYLDFGI   | 1866 | 1449  |
| >CTNNB1-S3:QQQSYLDS    | 13343 | >CTNNB1-S3:QQQSYLDF    | 93   | 13250 |
| >CTNNB1-S3:QQQSYLDS    | 4426  | >CTNNB1-S3:QQQSYLDF    | 7    | 4419  |
| >CTNNB1-S3:QQQSYLDSGI  | 381   | >CTNNB1-S3:QQQSYLDFGI  | 1170 | 789   |
| >CTNNB1-S3:WQQQSYLDS   | 268   | >CTNNB1-S3:WQQQSYLDF   | 63   | 205   |
| >CTNNB1-S3:WQQQSYLDS   | 24100 | >CTNNB1-S3:WQQQSYLDF   | 196  | 23904 |
| >CTNNB1-S3:WQQQSYLDS   | 21827 | >CTNNB1-S3:WQQQSYLDF   | 132  | 21695 |
| >CTNNB1-S3:WQQQSYLDS   | 7265  | >CTNNB1-S3:WQQQSYLDF   | 42   | 7223  |
| >CTNNB1-S3:WQQQSYLDS   | 431   | >CTNNB1-S3:WQQQSYLDF   | 867  | 436   |
| >CTNNB1-S3:WQQQSYLDS   | 14970 | >CTNNB1-S3:WQQQSYLDF   | 118  | 14852 |
| >CTNNB1-S3:WQQQSYLDS   | 1891  | >CTNNB1-S3:WQQQSYLDF   | 4    | 1887  |
| >CTNNB1-S3:WQQQSYLDS   | 187   | >CTNNB1-S3:WQQQSYLDF   | 456  | 269   |
| >CTNNB1-S3:HWQQQSYLLE  | 32947 | >CTNNB1-S3:HWQQQSYLLE  | 100  | 32847 |
| >CTNNB1-S3:HWQQQSYLLE  | 30561 | >CTNNB1-S3:HWQQQSYLLE  | 204  | 30357 |
| >CTNNB1-S3:HWQQQSYLLE  | 6490  | >CTNNB1-S3:HWQQQSYLLE  | 6    | 6484  |
| >CTNNB1-S3:HWQQQSYLLE  | 297   | >CTNNB1-S3:HWQQQSYLLE  | 96   | 201   |
| >CTNNB1-S3:SHWQQQSYL   | 7629  | >CTNNB1-S3:SHWQQQSYL   | 429  | 7200  |
| >CTNNB1-S3:SHWQQQSYL   | 5754  | >CTNNB1-S3:SHWQQQSYL   | 457  | 5297  |
| >CTNNB1-S3:YLDSGIHSGA  | 78    | >CTNNB1-S3:YLDLGIHSGA  | 81   | 3     |
| >CTNNB1-S3:YLDSGIHSGA` | 212   | >CTNNB1-S3:YLDLGIHSGA` | 548  | 336   |
| >CTNNB1-S3:YLDSGIHSG   | 278   | >CTNNB1-S3:YLDLGIHSG   | 955  | 677   |
| >CTNNB1-S3:YLDSGIHSGA  | 24    | >CTNNB1-S3:YLDLGIHSGA  | 50   | 26    |
| >CTNNB1-S3:YLDSGIHSGA` | 284   | >CTNNB1-S3:YLDLGIHSGA` | 696  | 412   |
| >CTNNB1-S3:YLDSGIHSGA  | 32    | >CTNNB1-S3:YLDLGIHSGA  | 65   | 33    |
| >CTNNB1-S3:YLDSGIHSGA` | 78    | >CTNNB1-S3:YLDLGIHSGA` | 313  | 235   |
| >CTNNB1-S3:YLDSGIHS    | 419   | >CTNNB1-S3:YLDLGIHS    | 1571 | 1152  |
| >CTNNB1-S3:YLDSGIHSGA  | 280   | >CTNNB1-S3:YLDLGIHSGA  | 255  | 25    |
| >CTNNB1-S3:YLDSGIHSGA` | 178   | >CTNNB1-S3:YLDLGIHSGA` | 499  | 321   |
| >CTNNB1-S3:YLDSGIHS    | 47    | >CTNNB1-S3:YLDLGIHS    | 159  | 112   |
| >CTNNB1-S3:YLDSGIHSG   | 15    | >CTNNB1-S3:YLDLGIHSG   | 60   | 45    |
| >CTNNB1-S3:YLDSGIHSGA  | 2     | >CTNNB1-S3:YLDLGIHSGA  | 4    | 2     |
| >CTNNB1-S3:YLDSGIHSGA` | 12    | >CTNNB1-S3:YLDLGIHSGA` | 36   | 24    |
| >CTNNB1-S3:YLDSGIHS    | 395   | >CTNNB1-S3:YLDLGIHS    | 909  | 514   |
| >CTNNB1-S3:YLDSGIHSG   | 139   | >CTNNB1-S3:YLDLGIHSG   | 331  | 192   |
| >CTNNB1-S3:YLDSGIHSGA  | 8     | >CTNNB1-S3:YLDLGIHSGA  | 13   | 5     |
| >CTNNB1-S3:YLDSGIHSGA` | 83    | >CTNNB1-S3:YLDLGIHSGA` | 181  | 98    |

|                        |       |                        |     |       |
|------------------------|-------|------------------------|-----|-------|
| >CTNNB1-S3:YLDSEIHS    | 101   | >CTNNB1-S3:YLDLGIHS    | 295 | 194   |
| >CTNNB1-S3:YLDSEIHSG   | 140   | >CTNNB1-S3:YLDLGIHSG   | 541 | 401   |
| >CTNNB1-S3:YLDSEIHSGA  | 7     | >CTNNB1-S3:YLDLGIHSGA  | 9   | 2     |
| >CTNNB1-S3:YLDSEIHSGA  | 121   | >CTNNB1-S3:YLDLGIHSGA  | 297 | 176   |
| >CTNNB1-S3:YLDSEIHSGA  | 7     | >CTNNB1-S3:YLDLGIHSGA  | 12  | 5     |
| >CTNNB1-S3:YLDSEIHSGA  | 255   | >CTNNB1-S3:YLDLGIHSGA  | 647 | 392   |
| >CTNNB1-S3:YLDSEIHS    | 66    | >CTNNB1-S3:YLDLGIHS    | 242 | 176   |
| >CTNNB1-S3:YLDSEIHSG   | 13    | >CTNNB1-S3:YLDLGIHSG   | 41  | 28    |
| >CTNNB1-S3:YLDSEIHSGA  | 2     | >CTNNB1-S3:YLDLGIHSGA  | 3   | 1     |
| >CTNNB1-S3:YLDSEIHSGA  | 36    | >CTNNB1-S3:YLDLGIHSGA  | 91  | 55    |
| >CTNNB1-S3:SYLDSEIHSG/ | 410   | >CTNNB1-S3:SYLDLGIHSG/ | 405 | 5     |
| >CTNNB1-S3:QSYLDSEI    | 46    | >CTNNB1-S3:QSYLDLGI    | 59  | 13    |
| >CTNNB1-S3:QSYLDSEI    | 22    | >CTNNB1-S3:QSYLDLGI    | 35  | 13    |
| >CTNNB1-S3:QQSYLDSEI   | 1017  | >CTNNB1-S3:QQSYLDLGI   | 469 | 548   |
| >CTNNB1-S3:QQSYLDSEI   | 417   | >CTNNB1-S3:QQSYLDLGI   | 928 | 511   |
| >CTNNB1-S3:QQQSYLDS    | 4426  | >CTNNB1-S3:QQQSYLDL    | 116 | 4310  |
| >CTNNB1-S3:QQQSYLDSEI  | 381   | >CTNNB1-S3:QQQSYLDLGI  | 780 | 399   |
| >CTNNB1-S3:WQQQSYLDS   | 268   | >CTNNB1-S3:WQQQSYLDL   | 176 | 92    |
| >CTNNB1-S3:WQQQSYLDS   | 7265  | >CTNNB1-S3:WQQQSYLDL   | 350 | 6915  |
| >CTNNB1-S3:WQQQSYLDS   | 431   | >CTNNB1-S3:WQQQSYLDL   | 459 | 28    |
| >CTNNB1-S3:WQQQSYLDS   | 1891  | >CTNNB1-S3:WQQQSYLDL   | 35  | 1856  |
| >CTNNB1-S3:WQQQSYLDS   | 187   | >CTNNB1-S3:WQQQSYLDL   | 295 | 108   |
| >CTNNB1-S3:WQQQSYLDS   | 20926 | >CTNNB1-S3:WQQQSYLDL   | 140 | 20786 |
| >CTNNB1-S3:WQQQSYLDS   | 17969 | >CTNNB1-S3:WQQQSYLDL   | 317 | 17652 |
| >CTNNB1-S3:WQQQSYLDS   | 14182 | >CTNNB1-S3:WQQQSYLDL   | 161 | 14021 |
| >CTNNB1-S3:HWQQQSYLLE  | 6490  | >CTNNB1-S3:HWQQQSYLLE  | 23  | 6467  |
| >CTNNB1-S3:HWQQQSYLLE  | 12747 | >CTNNB1-S3:HWQQQSYLLE  | 430 | 12317 |
| >CTNNB1-S3:HWQQQSYLLE  | 6379  | >CTNNB1-S3:HWQQQSYLLE  | 301 | 6078  |
| >CTNNB1-S3:HWQQQSYLLE  | 297   | >CTNNB1-S3:HWQQQSYLLE  | 413 | 116   |
| >CTNNB1-S3:YLDSEIHSGA  | 78    | >CTNNB1-S3:YLDNGIHSGA  | 54  | 24    |
| >CTNNB1-S3:YLDSEIHSGA  | 212   | >CTNNB1-S3:YLDNGIHSGA  | 257 | 45    |
| >CTNNB1-S3:YLDSEIHSG   | 278   | >CTNNB1-S3:YLDNGIHSG   | 717 | 439   |
| >CTNNB1-S3:YLDSEIHSGA  | 24    | >CTNNB1-S3:YLDNGIHSGA  | 27  | 3     |
| >CTNNB1-S3:YLDSEIHSGA  | 284   | >CTNNB1-S3:YLDNGIHSGA  | 604 | 320   |
| >CTNNB1-S3:YLDSEIHSGA  | 32    | >CTNNB1-S3:YLDNGIHSGA  | 36  | 4     |
| >CTNNB1-S3:YLDSEIHSGA  | 78    | >CTNNB1-S3:YLDNGIHSGA  | 103 | 25    |
| >CTNNB1-S3:YLDSEIHS    | 419   | >CTNNB1-S3:YLDNGIHS    | 396 | 23    |
| >CTNNB1-S3:YLDSEIHSGA  | 280   | >CTNNB1-S3:YLDNGIHSGA  | 215 | 65    |
| >CTNNB1-S3:YLDSEIHSGA  | 178   | >CTNNB1-S3:YLDNGIHSGA  | 150 | 28    |
| >CTNNB1-S3:YLDSEIHS    | 47    | >CTNNB1-S3:YLDNGIHS    | 32  | 15    |
| >CTNNB1-S3:YLDSEIHSG   | 15    | >CTNNB1-S3:YLDNGIHSG   | 12  | 3     |
| >CTNNB1-S3:YLDSEIHSGA  | 2     | >CTNNB1-S3:YLDNGIHSGA  | 2   | 0     |
| >CTNNB1-S3:YLDSEIHSGA  | 12    | >CTNNB1-S3:YLDNGIHSGA  | 10  | 2     |

|                       |     |                       |      |     |
|-----------------------|-----|-----------------------|------|-----|
| >CTNNB1-S3:YLDSGIHS   | 395 | >CTNNB1-S3:YLDNGIHS   | 130  | 265 |
| >CTNNB1-S3:YLDSGIHSG  | 139 | >CTNNB1-S3:YLDNGIHSG  | 65   | 74  |
| >CTNNB1-S3:YLDSGIHSGA | 8   | >CTNNB1-S3:YLDNGIHSGA | 6    | 2   |
| >CTNNB1-S3:YLDSGIHSGA | 83  | >CTNNB1-S3:YLDNGIHSGA | 43   | 40  |
| >CTNNB1-S3:YLDSGIHS   | 101 | >CTNNB1-S3:YLDNGIHS   | 86   | 15  |
| >CTNNB1-S3:YLDSGIHSG  | 140 | >CTNNB1-S3:YLDNGIHSG  | 94   | 46  |
| >CTNNB1-S3:YLDSGIHSGA | 7   | >CTNNB1-S3:YLDNGIHSGA | 6    | 1   |
| >CTNNB1-S3:YLDSGIHSGA | 121 | >CTNNB1-S3:YLDNGIHSGA | 93   | 28  |
| >CTNNB1-S3:YLDSGIHSGA | 7   | >CTNNB1-S3:YLDNGIHSGA | 8    | 1   |
| >CTNNB1-S3:YLDSGIHSGA | 255 | >CTNNB1-S3:YLDNGIHSGA | 260  | 5   |
| >CTNNB1-S3:YLDSGIHS   | 66  | >CTNNB1-S3:YLDNGIHS   | 58   | 8   |
| >CTNNB1-S3:YLDSGIHSG  | 13  | >CTNNB1-S3:YLDNGIHSG  | 13   | 0   |
| >CTNNB1-S3:YLDSGIHSGA | 2   | >CTNNB1-S3:YLDNGIHSGA | 2    | 0   |
| >CTNNB1-S3:YLDSGIHSGA | 36  | >CTNNB1-S3:YLDNGIHSGA | 35   | 1   |
| >CTNNB1-S3:SYLDSGIHSG | 410 | >CTNNB1-S3:SYLDNGIHSG | 615  | 205 |
| >CTNNB1-S3:QSYLDSGI   | 46  | >CTNNB1-S3:QSYLDNGI   | 349  | 303 |
| >CTNNB1-S3:QSYLDSGI   | 22  | >CTNNB1-S3:QSYLDNGI   | 48   | 26  |
| >CTNNB1-S3:QQSYLDSGI  | 417 | >CTNNB1-S3:QQSYLDNGI  | 1115 | 698 |
| >CTNNB1-S3:QQQSYLDSGI | 381 | >CTNNB1-S3:QQQSYLDNG  | 768  | 387 |
| >CTNNB1-S3:WQQQSYLDS  | 268 | >CTNNB1-S3:WQQQSYLDN  | 245  | 23  |
| >CTNNB1-S3:WQQQSYLDS  | 431 | >CTNNB1-S3:WQQQSYLDN  | 828  | 397 |
| >CTNNB1-S3:WQQQSYLDS  | 187 | >CTNNB1-S3:WQQQSYLDN  | 358  | 171 |
| >CTNNB1-S3:HWQQQSYL   | 297 | >CTNNB1-S3:HWQQQSYL   | 730  | 433 |
| >CTNNB1-S3:YLDSGIHSGA | 78  | >CTNNB1-S3:YLDPGIHSGA | 72   | 6   |
| >CTNNB1-S3:YLDSGIHSGA | 212 | >CTNNB1-S3:YLDPGIHSGA | 244  | 32  |
| >CTNNB1-S3:YLDSGIHSG  | 278 | >CTNNB1-S3:YLDPGIHSG  | 296  | 18  |
| >CTNNB1-S3:YLDSGIHSGA | 24  | >CTNNB1-S3:YLDPGIHSGA | 48   | 24  |
| >CTNNB1-S3:YLDSGIHSGA | 284 | >CTNNB1-S3:YLDPGIHSGA | 312  | 28  |
| >CTNNB1-S3:YLDSGIHSGA | 32  | >CTNNB1-S3:YLDPGIHSGA | 52   | 20  |
| >CTNNB1-S3:YLDSGIHSGA | 78  | >CTNNB1-S3:YLDPGIHSGA | 81   | 3   |
| >CTNNB1-S3:YLDSGIHS   | 419 | >CTNNB1-S3:YLDPGIHS   | 194  | 225 |
| >CTNNB1-S3:YLDSGIHSG  | 570 | >CTNNB1-S3:YLDPGIHSG  | 187  | 383 |
| >CTNNB1-S3:YLDSGIHSGA | 280 | >CTNNB1-S3:YLDPGIHSGA | 197  | 83  |
| >CTNNB1-S3:YLDSGIHSGA | 178 | >CTNNB1-S3:YLDPGIHSGA | 73   | 105 |
| >CTNNB1-S3:YLDSGIHS   | 47  | >CTNNB1-S3:YLDPGIHS   | 34   | 13  |
| >CTNNB1-S3:YLDSGIHSG  | 15  | >CTNNB1-S3:YLDPGIHSG  | 14   | 1   |
| >CTNNB1-S3:YLDSGIHSGA | 2   | >CTNNB1-S3:YLDPGIHSGA | 2    | 0   |
| >CTNNB1-S3:YLDSGIHSGA | 12  | >CTNNB1-S3:YLDPGIHSGA | 11   | 1   |
| >CTNNB1-S3:YLDSGIHS   | 395 | >CTNNB1-S3:YLDPGIHS   | 314  | 81  |
| >CTNNB1-S3:YLDSGIHSG  | 139 | >CTNNB1-S3:YLDPGIHSG  | 95   | 44  |
| >CTNNB1-S3:YLDSGIHSGA | 8   | >CTNNB1-S3:YLDPGIHSGA | 7    | 1   |
| >CTNNB1-S3:YLDSGIHSGA | 83  | >CTNNB1-S3:YLDPGIHSGA | 60   | 23  |
| >CTNNB1-S3:YLDSGIHS   | 101 | >CTNNB1-S3:YLDPGIHS   | 85   | 16  |

|                       |      |                       |      |     |
|-----------------------|------|-----------------------|------|-----|
| >CTNNB1-S3:YLDSGIHSG  | 140  | >CTNNB1-S3:YLDPGIHSG  | 90   | 50  |
| >CTNNB1-S3:YLDSGIHSGA | 7    | >CTNNB1-S3:YLDPGIHSGA | 6    | 1   |
| >CTNNB1-S3:YLDSGIHSGA | 121  | >CTNNB1-S3:YLDPGIHSGA | 93   | 28  |
| >CTNNB1-S3:YLDSGIHSGA | 7    | >CTNNB1-S3:YLDPGIHSGA | 7    | 0   |
| >CTNNB1-S3:YLDSGIHSGA | 255  | >CTNNB1-S3:YLDPGIHSGA | 232  | 23  |
| >CTNNB1-S3:YLDSGIHS   | 66   | >CTNNB1-S3:YLDPGIHS   | 34   | 32  |
| >CTNNB1-S3:YLDSGIHSG  | 13   | >CTNNB1-S3:YLDPGIHSG  | 6    | 7   |
| >CTNNB1-S3:YLDSGIHSGA | 2    | >CTNNB1-S3:YLDPGIHSGA | 2    | 0   |
| >CTNNB1-S3:YLDSGIHSGA | 36   | >CTNNB1-S3:YLDPGIHSGA | 19   | 17  |
| >CTNNB1-S3:SYLDSGIHSG | 410  | >CTNNB1-S3:SYLDPGIHSG | 527  | 117 |
| >CTNNB1-S3:QSYLDSGI   | 46   | >CTNNB1-S3:QSYLDPGI   | 101  | 55  |
| >CTNNB1-S3:QSYLDSGI   | 22   | >CTNNB1-S3:QSYLDPGI   | 33   | 11  |
| >CTNNB1-S3:QQSYLDSGI  | 1017 | >CTNNB1-S3:QQSYLDPGI  | 232  | 785 |
| >CTNNB1-S3:QQSYLDSGI  | 417  | >CTNNB1-S3:QQSYLDPGI  | 1127 | 710 |
| >CTNNB1-S3:QQQSYLDSGI | 381  | >CTNNB1-S3:QQQSYLDPGI | 703  | 322 |
| >CTNNB1-S3:WQQQSYLDS  | 268  | >CTNNB1-S3:WQQQSYLDF  | 140  | 128 |
| >CTNNB1-S3:WQQQSYLDS  | 431  | >CTNNB1-S3:WQQQSYLDF  | 670  | 239 |
| >CTNNB1-S3:WQQQSYLDS  | 187  | >CTNNB1-S3:WQQQSYLDF  | 357  | 170 |
| >CTNNB1-S3:HWQQQSYLI  | 297  | >CTNNB1-S3:HWQQQSYLI  | 408  | 111 |
| >CTNNB1-S3:YLDSGIHSGA | 78   | >CTNNB1-S3:YLDTGIHSGA | 95   | 17  |
| >CTNNB1-S3:YLDSGIHSGA | 212  | >CTNNB1-S3:YLDTGIHSGA | 304  | 92  |
| >CTNNB1-S3:YLDSGIHSG  | 278  | >CTNNB1-S3:YLDTGIHSG  | 618  | 340 |
| >CTNNB1-S3:YLDSGIHSGA | 24   | >CTNNB1-S3:YLDTGIHSGA | 36   | 12  |
| >CTNNB1-S3:YLDSGIHSGA | 284  | >CTNNB1-S3:YLDTGIHSGA | 509  | 225 |
| >CTNNB1-S3:YLDSGIHSGA | 32   | >CTNNB1-S3:YLDTGIHSGA | 44   | 12  |
| >CTNNB1-S3:YLDSGIHSGA | 78   | >CTNNB1-S3:YLDTGIHSGA | 132  | 54  |
| >CTNNB1-S3:YLDSGIHS   | 419  | >CTNNB1-S3:YLDTGIHS   | 622  | 203 |
| >CTNNB1-S3:YLDSGIHSGA | 280  | >CTNNB1-S3:YLDTGIHSGA | 250  | 30  |
| >CTNNB1-S3:YLDSGIHSGA | 178  | >CTNNB1-S3:YLDTGIHSGA | 221  | 43  |
| >CTNNB1-S3:YLDSGIHS   | 47   | >CTNNB1-S3:YLDTGIHS   | 83   | 36  |
| >CTNNB1-S3:YLDSGIHSG  | 15   | >CTNNB1-S3:YLDTGIHSG  | 31   | 16  |
| >CTNNB1-S3:YLDSGIHSGA | 2    | >CTNNB1-S3:YLDTGIHSGA | 3    | 1   |
| >CTNNB1-S3:YLDSGIHSGA | 12   | >CTNNB1-S3:YLDTGIHSGA | 21   | 9   |
| >CTNNB1-S3:YLDSGIHS   | 395  | >CTNNB1-S3:YLDTGIHS   | 398  | 3   |
| >CTNNB1-S3:YLDSGIHSG  | 139  | >CTNNB1-S3:YLDTGIHSG  | 166  | 27  |
| >CTNNB1-S3:YLDSGIHSGA | 8    | >CTNNB1-S3:YLDTGIHSGA | 9    | 1   |
| >CTNNB1-S3:YLDSGIHSGA | 83   | >CTNNB1-S3:YLDTGIHSGA | 95   | 12  |
| >CTNNB1-S3:YLDSGIHS   | 101  | >CTNNB1-S3:YLDTGIHS   | 175  | 74  |
| >CTNNB1-S3:YLDSGIHSG  | 140  | >CTNNB1-S3:YLDTGIHSG  | 311  | 171 |
| >CTNNB1-S3:YLDSGIHSGA | 7    | >CTNNB1-S3:YLDTGIHSGA | 8    | 1   |
| >CTNNB1-S3:YLDSGIHSGA | 121  | >CTNNB1-S3:YLDTGIHSGA | 202  | 81  |
| >CTNNB1-S3:YLDSGIHSGA | 7    | >CTNNB1-S3:YLDTGIHSGA | 9    | 2   |
| >CTNNB1-S3:YLDSGIHSGA | 255  | >CTNNB1-S3:YLDTGIHSGA | 468  | 213 |

|                       |       |                       |     |       |
|-----------------------|-------|-----------------------|-----|-------|
| >CTNNB1-S3:YLDSGIHS   | 66    | >CTNNB1-S3:YLDTGIHS   | 109 | 43    |
| >CTNNB1-S3:YLDSGIHSG  | 13    | >CTNNB1-S3:YLDTGIHSG  | 20  | 7     |
| >CTNNB1-S3:YLDSGIHSGA | 2     | >CTNNB1-S3:YLDTGIHSGA | 2   | 0     |
| >CTNNB1-S3:YLDSGIHSGA | 36    | >CTNNB1-S3:YLDTGIHSGA | 52  | 16    |
| >CTNNB1-S3:SYLDSGIHSG | 410   | >CTNNB1-S3:SYLDTGIHSG | 251 | 159   |
| >CTNNB1-S3:QSYLDSGI   | 46    | >CTNNB1-S3:QSYLDTGI   | 90  | 44    |
| >CTNNB1-S3:QSYLDSGI   | 22    | >CTNNB1-S3:QSYLDTGI   | 27  | 5     |
| >CTNNB1-S3:QQSYLDSGI  | 417   | >CTNNB1-S3:QQSYLDTGI  | 630 | 213   |
| >CTNNB1-S3:QQQSYLDSGI | 381   | >CTNNB1-S3:QQQSYLDTGI | 520 | 139   |
| >CTNNB1-S3:WQQQSYLDS  | 268   | >CTNNB1-S3:WQQQSYLDT  | 189 | 79    |
| >CTNNB1-S3:WQQQSYLDS  | 431   | >CTNNB1-S3:WQQQSYLDT  | 535 | 104   |
| >CTNNB1-S3:WQQQSYLDS  | 187   | >CTNNB1-S3:WQQQSYLDT  | 236 | 49    |
| >CTNNB1-S3:HWQQQSYL   | 297   | >CTNNB1-S3:HWQQQSYL   | 343 | 46    |
| >CTNNB1-S3:SHWQQQSYL  | 17173 | >CTNNB1-S3:SHWQQQSYL  | 30  | 17143 |
| >CTNNB1-S3:SHWQQQSYL  | 22306 | >CTNNB1-S3:SHWQQQSYL  | 329 | 21977 |
| >CTNNB1-S3:SHWQQQSYL  | 23709 | >CTNNB1-S3:SHWQQQSYL  | 186 | 23523 |
| >CTNNB1-S3:SHWQQQSYL  | 7629  | >CTNNB1-S3:SHWQQQSYL  | 67  | 7562  |
| >CTNNB1-S3:YLDSGIHSGA | 78    | >CTNNB1-S3:YLDYGIHSGA | 67  | 11    |
| >CTNNB1-S3:YLDSGIHSGA | 212   | >CTNNB1-S3:YLDYGIHSGA | 281 | 69    |
| >CTNNB1-S3:YLDSGIHSG  | 278   | >CTNNB1-S3:YLDYGIHSG  | 596 | 318   |
| >CTNNB1-S3:YLDSGIHSGA | 24    | >CTNNB1-S3:YLDYGIHSGA | 45  | 21    |
| >CTNNB1-S3:YLDSGIHSGA | 284   | >CTNNB1-S3:YLDYGIHSGA | 420 | 136   |
| >CTNNB1-S3:YLDSGIHSGA | 32    | >CTNNB1-S3:YLDYGIHSGA | 51  | 19    |
| >CTNNB1-S3:YLDSGIHSGA | 78    | >CTNNB1-S3:YLDYGIHSGA | 164 | 86    |
| >CTNNB1-S3:YLDSGIHS   | 419   | >CTNNB1-S3:YLDYGIHS   | 686 | 267   |
| >CTNNB1-S3:YLDSGIHSGA | 280   | >CTNNB1-S3:YLDYGIHSGA | 264 | 16    |
| >CTNNB1-S3:YLDSGIHSGA | 178   | >CTNNB1-S3:YLDYGIHSGA | 300 | 122   |
| >CTNNB1-S3:YLDSGIHS   | 47    | >CTNNB1-S3:YLDYGIHS   | 140 | 93    |
| >CTNNB1-S3:YLDSGIHSG  | 15    | >CTNNB1-S3:YLDYGIHSG  | 63  | 48    |
| >CTNNB1-S3:YLDSGIHSGA | 2     | >CTNNB1-S3:YLDYGIHSGA | 4   | 2     |
| >CTNNB1-S3:YLDSGIHSGA | 12    | >CTNNB1-S3:YLDYGIHSGA | 37  | 25    |
| >CTNNB1-S3:YLDSGIHS   | 395   | >CTNNB1-S3:YLDYGIHS   | 428 | 33    |
| >CTNNB1-S3:YLDSGIHSG  | 139   | >CTNNB1-S3:YLDYGIHSG  | 174 | 35    |
| >CTNNB1-S3:YLDSGIHSGA | 8     | >CTNNB1-S3:YLDYGIHSGA | 10  | 2     |
| >CTNNB1-S3:YLDSGIHSGA | 83    | >CTNNB1-S3:YLDYGIHSGA | 109 | 26    |
| >CTNNB1-S3:YLDSGIHS   | 101   | >CTNNB1-S3:YLDYGIHS   | 392 | 291   |
| >CTNNB1-S3:YLDSGIHSG  | 140   | >CTNNB1-S3:YLDYGIHSG  | 623 | 483   |
| >CTNNB1-S3:YLDSGIHSGA | 7     | >CTNNB1-S3:YLDYGIHSGA | 10  | 3     |
| >CTNNB1-S3:YLDSGIHSGA | 121   | >CTNNB1-S3:YLDYGIHSGA | 342 | 221   |
| >CTNNB1-S3:YLDSGIHSGA | 7     | >CTNNB1-S3:YLDYGIHSGA | 19  | 12    |
| >CTNNB1-S3:YLDSGIHSGA | 255   | >CTNNB1-S3:YLDYGIHSGA | 896 | 641   |
| >CTNNB1-S3:YLDSGIHS   | 66    | >CTNNB1-S3:YLDYGIHS   | 289 | 223   |
| >CTNNB1-S3:YLDSGIHSG  | 13    | >CTNNB1-S3:YLDYGIHSG  | 75  | 62    |

|                        |       |                        |      |       |
|------------------------|-------|------------------------|------|-------|
| >CTNNB1-S3:YLDSEIHSQA  | 2     | >CTNNB1-S3:YLDYGIHSQA  | 4    | 2     |
| >CTNNB1-S3:YLDSEIHSQA  | 36    | >CTNNB1-S3:YLDYGIHSQA  | 126  | 90    |
| >CTNNB1-S3:SYLDSEIHSQA | 410   | >CTNNB1-S3:SYLDYGIHSQA | 483  | 73    |
| >CTNNB1-S3:QSYLDSEI    | 1029  | >CTNNB1-S3:QSYLDYGI    | 326  | 703   |
| >CTNNB1-S3:QSYLDSEI    | 46    | >CTNNB1-S3:QSYLDYGI    | 168  | 122   |
| >CTNNB1-S3:QSYLDSEI    | 22    | >CTNNB1-S3:QSYLDYGI    | 38   | 16    |
| >CTNNB1-S3:QQSYLDSEI   | 2469  | >CTNNB1-S3:QQSYLDYGI   | 474  | 1995  |
| >CTNNB1-S3:QQSYLDSEI   | 1017  | >CTNNB1-S3:QQSYLDYGI   | 332  | 685   |
| >CTNNB1-S3:QQSYLDSEI   | 4403  | >CTNNB1-S3:QQSYLDYGI   | 177  | 4226  |
| >CTNNB1-S3:QQSYLDSEI   | 417   | >CTNNB1-S3:QQSYLDYGI   | 1190 | 773   |
| >CTNNB1-S3:QQQSYLDSEI  | 1088  | >CTNNB1-S3:QQQSYLDYGI  | 469  | 619   |
| >CTNNB1-S3:QQQSYLDSEI  | 2186  | >CTNNB1-S3:QQQSYLDYGI  | 486  | 1700  |
| >CTNNB1-S3:QQQSYLDS    | 23904 | >CTNNB1-S3:QQQSYLDY    | 351  | 23553 |
| >CTNNB1-S3:QQQSYLDS    | 28495 | >CTNNB1-S3:QQQSYLDY    | 435  | 28060 |
| >CTNNB1-S3:QQQSYLDS    | 13343 | >CTNNB1-S3:QQQSYLDY    | 82   | 13261 |
| >CTNNB1-S3:QQQSYLDS    | 25703 | >CTNNB1-S3:QQQSYLDY    | 341  | 25362 |
| >CTNNB1-S3:QQQSYLDS    | 4426  | >CTNNB1-S3:QQQSYLDY    | 18   | 4408  |
| >CTNNB1-S3:QQQSYLDSEI  | 381   | >CTNNB1-S3:QQQSYLDYGI  | 836  | 455   |
| >CTNNB1-S3:WQQQSYLDS   | 268   | >CTNNB1-S3:WQQQSYLDY   | 153  | 115   |
| >CTNNB1-S3:WQQQSYLDS   | 22645 | >CTNNB1-S3:WQQQSYLDY   | 155  | 22490 |
| >CTNNB1-S3:WQQQSYLDS   | 7265  | >CTNNB1-S3:WQQQSYLDY   | 44   | 7221  |
| >CTNNB1-S3:WQQQSYLDS   | 431   | >CTNNB1-S3:WQQQSYLDY   | 682  | 251   |
| >CTNNB1-S3:WQQQSYLDS   | 14970 | >CTNNB1-S3:WQQQSYLDY   | 59   | 14911 |
| >CTNNB1-S3:WQQQSYLDS   | 1891  | >CTNNB1-S3:WQQQSYLDY   | 7    | 1884  |
| >CTNNB1-S3:WQQQSYLDS   | 187   | >CTNNB1-S3:WQQQSYLDY   | 343  | 156   |
| >CTNNB1-S3:HWQQQSYLLE  | 22727 | >CTNNB1-S3:HWQQQSYLLE  | 119  | 22608 |
| >CTNNB1-S3:HWQQQSYLLE  | 26225 | >CTNNB1-S3:HWQQQSYLLE  | 398  | 25827 |
| >CTNNB1-S3:HWQQQSYLLE  | 25789 | >CTNNB1-S3:HWQQQSYLLE  | 270  | 25519 |
| >CTNNB1-S3:HWQQQSYLLE  | 12747 | >CTNNB1-S3:HWQQQSYLLE  | 424  | 12323 |
| >CTNNB1-S3:HWQQQSYLLE  | 297   | >CTNNB1-S3:HWQQQSYLLE  | 174  | 123   |
| >CTNNB1-S3:HSGATTTAPS  | 1270  | >CTNNB1-S3:HAGATTTAPS  | 405  | 865   |
| >CTNNB1-S3:HSGATTTAPS  | 33    | >CTNNB1-S3:HAGATTTAPS  | 247  | 214   |
| >CTNNB1-S3:HSGATTTAPS  | 506   | >CTNNB1-S3:HAGATTTAPS  | 455  | 51    |
| >CTNNB1-S3:GIHSGATTTA  | 432   | >CTNNB1-S3:GIHAGATTTA  | 680  | 248   |
| >CTNNB1-S3:GIHSGATTTA  | 276   | >CTNNB1-S3:GIHAGATTTA  | 268  | 8     |
| >CTNNB1-S3:GIHSGATTTA  | 362   | >CTNNB1-S3:GIHAGATTTA  | 303  | 59    |
| >CTNNB1-S3:YLDSEIHS    | 603   | >CTNNB1-S3:YLDSEIHA    | 19   | 584   |
| >CTNNB1-S3:YLDSEIHSQA  | 78    | >CTNNB1-S3:YLDSEIHAGA  | 50   | 28    |
| >CTNNB1-S3:YLDSEIHSQA  | 212   | >CTNNB1-S3:YLDSEIHAGA  | 313  | 101   |
| >CTNNB1-S3:YLDSEIHS    | 1509  | >CTNNB1-S3:YLDSEIHA    | 64   | 1445  |
| >CTNNB1-S3:YLDSEIHS    | 278   | >CTNNB1-S3:YLDSEIHAG   | 301  | 23    |
| >CTNNB1-S3:YLDSEIHSQA  | 24    | >CTNNB1-S3:YLDSEIHAGA  | 25   | 1     |
| >CTNNB1-S3:YLDSEIHSQA  | 284   | >CTNNB1-S3:YLDSEIHAGA  | 455  | 171   |

|                         |      |                         |       |       |
|-------------------------|------|-------------------------|-------|-------|
| >CTNNB1-S3' YLDSGIHS    | 2792 | >CTNNB1-S3' YLDSGIHA    | 44    | 2748  |
| >CTNNB1-S3' YLDSGIHSGA  | 32   | >CTNNB1-S3' YLDSGIHAGA  | 36    | 4     |
| >CTNNB1-S3' YLDSGIHSGA' | 78   | >CTNNB1-S3' YLDSGIHAGA  | 109   | 31    |
| >CTNNB1-S3' YLDSGIHS    | 419  | >CTNNB1-S3' YLDSGIHA    | 20    | 399   |
| >CTNNB1-S3' YLDSGIHSG   | 570  | >CTNNB1-S3' YLDSGIHAG   | 375   | 195   |
| >CTNNB1-S3' YLDSGIHSGA  | 280  | >CTNNB1-S3' YLDSGIHAGA  | 291   | 11    |
| >CTNNB1-S3' YLDSGIHSGA' | 178  | >CTNNB1-S3' YLDSGIHAGA  | 180   | 2     |
| >CTNNB1-S3' YLDSGIHS    | 47   | >CTNNB1-S3' YLDSGIHA    | 4     | 43    |
| >CTNNB1-S3' YLDSGIHSG   | 15   | >CTNNB1-S3' YLDSGIHAG   | 13    | 2     |
| >CTNNB1-S3' YLDSGIHSGA  | 2    | >CTNNB1-S3' YLDSGIHAGA  | 2     | 0     |
| >CTNNB1-S3' YLDSGIHSGA' | 12   | >CTNNB1-S3' YLDSGIHAGA  | 14    | 2     |
| >CTNNB1-S3' YLDSGIHS    | 395  | >CTNNB1-S3' YLDSGIHA    | 6     | 389   |
| >CTNNB1-S3' YLDSGIHSG   | 139  | >CTNNB1-S3' YLDSGIHAG   | 76    | 63    |
| >CTNNB1-S3' YLDSGIHSGA  | 8    | >CTNNB1-S3' YLDSGIHAGA  | 6     | 2     |
| >CTNNB1-S3' YLDSGIHSGA' | 83   | >CTNNB1-S3' YLDSGIHAGA  | 121   | 38    |
| >CTNNB1-S3' YLDSGIHS    | 101  | >CTNNB1-S3' YLDSGIHA    | 6     | 95    |
| >CTNNB1-S3' YLDSGIHSG   | 140  | >CTNNB1-S3' YLDSGIHAG   | 255   | 115   |
| >CTNNB1-S3' YLDSGIHSGA  | 7    | >CTNNB1-S3' YLDSGIHAGA  | 6     | 1     |
| >CTNNB1-S3' YLDSGIHSGA' | 121  | >CTNNB1-S3' YLDSGIHAGA  | 152   | 31    |
| >CTNNB1-S3' YLDSGIHS    | 2599 | >CTNNB1-S3' YLDSGIHA    | 33    | 2566  |
| >CTNNB1-S3' YLDSGIHSGA  | 7    | >CTNNB1-S3' YLDSGIHAGA  | 5     | 2     |
| >CTNNB1-S3' YLDSGIHSGA' | 255  | >CTNNB1-S3' YLDSGIHAGA  | 314   | 59    |
| >CTNNB1-S3' YLDSGIHS    | 66   | >CTNNB1-S3' YLDSGIHA    | 3     | 63    |
| >CTNNB1-S3' YLDSGIHSG   | 13   | >CTNNB1-S3' YLDSGIHAG   | 28    | 15    |
| >CTNNB1-S3' YLDSGIHSGA  | 2    | >CTNNB1-S3' YLDSGIHAGA  | 2     | 0     |
| >CTNNB1-S3' YLDSGIHSGA' | 36   | >CTNNB1-S3' YLDSGIHAGA  | 40    | 4     |
| >CTNNB1-S3' YLDSGIHSGA  | 554  | >CTNNB1-S3' YLDSGIHAGA  | 248   | 306   |
| >CTNNB1-S3' SYLDSGIHS   | 3574 | >CTNNB1-S3' SYLDSGIHA   | 303   | 3271  |
| >CTNNB1-S3' SYLDSGIHSG/ | 410  | >CTNNB1-S3' SYLDSGIHAG/ | 484   | 74    |
| >CTNNB1-S3' HSGATTTAPS  | 33   | >CTNNB1-S3' HCGATTTAPS  | 14396 | 14363 |
| >CTNNB1-S3' GIHSGATTTA  | 432  | >CTNNB1-S3' GIHCGATTTA  | 1157  | 725   |
| >CTNNB1-S3' GIHSGATTTA  | 276  | >CTNNB1-S3' GIHCGATTTA  | 641   | 365   |
| >CTNNB1-S3' GIHSGATTTA  | 362  | >CTNNB1-S3' GIHCGATTTA  | 1828  | 1466  |
| >CTNNB1-S3' YLDSGIHSGA  | 78   | >CTNNB1-S3' YLDSGIHCGA  | 60    | 18    |
| >CTNNB1-S3' YLDSGIHSGA' | 212  | >CTNNB1-S3' YLDSGIHCGA  | 231   | 19    |
| >CTNNB1-S3' YLDSGIHSG   | 278  | >CTNNB1-S3' YLDSGIHCG   | 938   | 660   |
| >CTNNB1-S3' YLDSGIHSGA  | 24   | >CTNNB1-S3' YLDSGIHCGA  | 29    | 5     |
| >CTNNB1-S3' YLDSGIHSGA' | 284  | >CTNNB1-S3' YLDSGIHCGA  | 441   | 157   |
| >CTNNB1-S3' YLDSGIHSGA  | 32   | >CTNNB1-S3' YLDSGIHCGA  | 46    | 14    |
| >CTNNB1-S3' YLDSGIHSGA' | 78   | >CTNNB1-S3' YLDSGIHCGA  | 149   | 71    |
| >CTNNB1-S3' YLDSGIHS    | 419  | >CTNNB1-S3' YLDSGIHC    | 243   | 176   |
| >CTNNB1-S3' YLDSGIHSGA  | 280  | >CTNNB1-S3' YLDSGIHCGA  | 278   | 2     |
| >CTNNB1-S3' YLDSGIHSGA' | 178  | >CTNNB1-S3' YLDSGIHCGA  | 252   | 74    |



|                         |       |                         |       |       |
|-------------------------|-------|-------------------------|-------|-------|
| >CTNNB1-S3' YLDSGIHS    | 47    | >CTNNB1-S3' YLDSGIHC    | 7     | 40    |
| >CTNNB1-S3' YLDSGIHSG   | 15    | >CTNNB1-S3' YLDSGIHCG   | 59    | 44    |
| >CTNNB1-S3' YLDSGIHSGA  | 2     | >CTNNB1-S3' YLDSGIHCGA  | 2     | 0     |
| >CTNNB1-S3' YLDSGIHSGA' | 12    | >CTNNB1-S3' YLDSGIHCGA  | 28    | 16    |
| >CTNNB1-S3' YLDSGIHS    | 395   | >CTNNB1-S3' YLDSGIHC    | 18    | 377   |
| >CTNNB1-S3' YLDSGIHSG   | 139   | >CTNNB1-S3' YLDSGIHCG   | 210   | 71    |
| >CTNNB1-S3' YLDSGIHSGA  | 8     | >CTNNB1-S3' YLDSGIHCGA  | 7     | 1     |
| >CTNNB1-S3' YLDSGIHSGA' | 83    | >CTNNB1-S3' YLDSGIHCGA  | 285   | 202   |
| >CTNNB1-S3' YLDSGIHS    | 101   | >CTNNB1-S3' YLDSGIHC    | 22    | 79    |
| >CTNNB1-S3' YLDSGIHSG   | 140   | >CTNNB1-S3' YLDSGIHCG   | 118   | 22    |
| >CTNNB1-S3' YLDSGIHSGA  | 7     | >CTNNB1-S3' YLDSGIHCGA  | 5     | 2     |
| >CTNNB1-S3' YLDSGIHSGA' | 121   | >CTNNB1-S3' YLDSGIHCGA  | 197   | 76    |
| >CTNNB1-S3' YLDSGIHS    | 2599  | >CTNNB1-S3' YLDSGIHC    | 139   | 2460  |
| >CTNNB1-S3' YLDSGIHSGA  | 7     | >CTNNB1-S3' YLDSGIHCGA  | 5     | 2     |
| >CTNNB1-S3' YLDSGIHSGA' | 255   | >CTNNB1-S3' YLDSGIHCGA  | 378   | 123   |
| >CTNNB1-S3' YLDSGIHS    | 66    | >CTNNB1-S3' YLDSGIHC    | 6     | 60    |
| >CTNNB1-S3' YLDSGIHSG   | 13    | >CTNNB1-S3' YLDSGIHCG   | 79    | 66    |
| >CTNNB1-S3' YLDSGIHSGA  | 2     | >CTNNB1-S3' YLDSGIHCGA  | 2     | 0     |
| >CTNNB1-S3' YLDSGIHSGA' | 36    | >CTNNB1-S3' YLDSGIHCGA  | 47    | 11    |
| >CTNNB1-S3' SYLDSGIHSG/ | 410   | >CTNNB1-S3' SYLDSGIHCG/ | 547   | 137   |
| >CTNNB1-S3' SGATTTAPSL  | 741   | >CTNNB1-S3' FGATTTAPSL  | 108   | 633   |
| >CTNNB1-S3' HSGATTTAPS  | 15711 | >CTNNB1-S3' HFGATTTAPS  | 180   | 15531 |
| >CTNNB1-S3' HSGATTTAPS  | 33    | >CTNNB1-S3' HFGATTTAPS  | 24568 | 24535 |
| >CTNNB1-S3' QQSYLDSGIH  | 4497  | >CTNNB1-S3' QQSYLDSGIH  | 36    | 4461  |
| >CTNNB1-S3' QQSYLDSGIH  | 3255  | >CTNNB1-S3' QQSYLDSGIH  | 6     | 3249  |
| >CTNNB1-S3' GIHSGATTTA  | 432   | >CTNNB1-S3' GIHFGATTTA  | 1488  | 1056  |
| >CTNNB1-S3' GIHSGATTTA  | 276   | >CTNNB1-S3' GIHFGATTTA  | 765   | 489   |
| >CTNNB1-S3' GIHSGATTTA  | 362   | >CTNNB1-S3' GIHFGATTTA  | 1164  | 802   |
| >CTNNB1-S3' YLDSGIHSG   | 773   | >CTNNB1-S3' YLDSGIHFG   | 289   | 484   |
| >CTNNB1-S3' YLDSGIHSGA  | 78    | >CTNNB1-S3' YLDSGIHFGA  | 17    | 61    |
| >CTNNB1-S3' YLDSGIHSGA' | 212   | >CTNNB1-S3' YLDSGIHFGA' | 140   | 72    |
| >CTNNB1-S3' YLDSGIHSG   | 278   | >CTNNB1-S3' YLDSGIHFG   | 71    | 207   |
| >CTNNB1-S3' YLDSGIHSGA  | 24    | >CTNNB1-S3' YLDSGIHFGA  | 15    | 9     |
| >CTNNB1-S3' YLDSGIHSGA' | 284   | >CTNNB1-S3' YLDSGIHFGA' | 177   | 107   |
| >CTNNB1-S3' YLDSGIHSGA  | 32    | >CTNNB1-S3' YLDSGIHFGA  | 83    | 51    |
| >CTNNB1-S3' YLDSGIHSGA' | 78    | >CTNNB1-S3' YLDSGIHFGA' | 58    | 20    |
| >CTNNB1-S3' YLDSGIHS    | 419   | >CTNNB1-S3' YLDSGIHF    | 152   | 267   |
| >CTNNB1-S3' YLDSGIHSG   | 570   | >CTNNB1-S3' YLDSGIHFG   | 378   | 192   |
| >CTNNB1-S3' YLDSGIHSGA  | 280   | >CTNNB1-S3' YLDSGIHFGA  | 113   | 167   |
| >CTNNB1-S3' YLDSGIHSGA' | 178   | >CTNNB1-S3' YLDSGIHFGA' | 49    | 129   |
| >CTNNB1-S3' YLDSGIHS    | 47    | >CTNNB1-S3' YLDSGIHF    | 38    | 9     |
| >CTNNB1-S3' YLDSGIHSG   | 15    | >CTNNB1-S3' YLDSGIHFG   | 10    | 5     |
| >CTNNB1-S3' YLDSGIHSGA  | 2     | >CTNNB1-S3' YLDSGIHFGA  | 2     | 0     |

|                         |       |                         |       |       |
|-------------------------|-------|-------------------------|-------|-------|
| >CTNNB1-S3' YLDSGIHSGA' | 12    | >CTNNB1-S3' YLDSGIHFGA' | 10    | 2     |
| >CTNNB1-S3' YLDSGIHS    | 395   | >CTNNB1-S3' YLDSGIHF    | 382   | 13    |
| >CTNNB1-S3' YLDSGIHSG   | 139   | >CTNNB1-S3' YLDSGIHFG   | 107   | 32    |
| >CTNNB1-S3' YLDSGIHSGA  | 8     | >CTNNB1-S3' YLDSGIHFGA  | 4     | 4     |
| >CTNNB1-S3' YLDSGIHSGA' | 83    | >CTNNB1-S3' YLDSGIHFGA' | 100   | 17    |
| >CTNNB1-S3' YLDSGIHS    | 101   | >CTNNB1-S3' YLDSGIHF    | 320   | 219   |
| >CTNNB1-S3' YLDSGIHSG   | 140   | >CTNNB1-S3' YLDSGIHFG   | 35    | 105   |
| >CTNNB1-S3' YLDSGIHSGA  | 7     | >CTNNB1-S3' YLDSGIHFGA  | 5     | 2     |
| >CTNNB1-S3' YLDSGIHSGA' | 121   | >CTNNB1-S3' YLDSGIHFGA' | 133   | 12    |
| >CTNNB1-S3' YLDSGIHSG   | 1226  | >CTNNB1-S3' YLDSGIHFG   | 455   | 771   |
| >CTNNB1-S3' YLDSGIHSGA  | 7     | >CTNNB1-S3' YLDSGIHFGA  | 3     | 4     |
| >CTNNB1-S3' YLDSGIHSGA' | 255   | >CTNNB1-S3' YLDSGIHFGA' | 290   | 35    |
| >CTNNB1-S3' YLDSGIHS    | 66    | >CTNNB1-S3' YLDSGIHF    | 128   | 62    |
| >CTNNB1-S3' YLDSGIHSG   | 13    | >CTNNB1-S3' YLDSGIHFG   | 19    | 6     |
| >CTNNB1-S3' YLDSGIHSGA  | 2     | >CTNNB1-S3' YLDSGIHFGA  | 2     | 0     |
| >CTNNB1-S3' YLDSGIHSGA' | 36    | >CTNNB1-S3' YLDSGIHFGA' | 27    | 9     |
| >CTNNB1-S3' YLDSGIHSGA  | 554   | >CTNNB1-S3' YLDSGIHFGA  | 92    | 462   |
| >CTNNB1-S3' YLDSGIHS    | 16129 | >CTNNB1-S3' YLDSGIHF    | 183   | 15946 |
| >CTNNB1-S3' YLDSGIHS    | 17249 | >CTNNB1-S3' YLDSGIHF    | 166   | 17083 |
| >CTNNB1-S3' YLDSGIHS    | 20483 | >CTNNB1-S3' YLDSGIHF    | 341   | 20142 |
| >CTNNB1-S3' SYLDSGIHS   | 22449 | >CTNNB1-S3' SYLDSGIHF   | 105   | 22344 |
| >CTNNB1-S3' SYLDSGIHS   | 23640 | >CTNNB1-S3' SYLDSGIHF   | 426   | 23214 |
| >CTNNB1-S3' SYLDSGIHS   | 5646  | >CTNNB1-S3' SYLDSGIHF   | 6     | 5640  |
| >CTNNB1-S3' SYLDSGIHS   | 21091 | >CTNNB1-S3' SYLDSGIHF   | 209   | 20882 |
| >CTNNB1-S3' SYLDSGIHSG/ | 410   | >CTNNB1-S3' SYLDSGIHFG/ | 372   | 38    |
| >CTNNB1-S3' QSYLDSGIHS  | 14435 | >CTNNB1-S3' QSYLDSGIHF  | 162   | 14273 |
| >CTNNB1-S3' QSYLDSGIHS  | 9763  | >CTNNB1-S3' QSYLDSGIHF  | 37    | 9726  |
| >CTNNB1-S3' QSYLDSGIHS  | 5959  | >CTNNB1-S3' QSYLDSGIHF  | 5     | 5954  |
| >CTNNB1-S3' QSYLDSGIHS  | 20586 | >CTNNB1-S3' QSYLDSGIHF  | 404   | 20182 |
| >CTNNB1-S3' QSYLDSGIHS  | 11123 | >CTNNB1-S3' QSYLDSGIHF  | 65    | 11058 |
| >CTNNB1-S3' HSGATTTAPS  | 27187 | >CTNNB1-S3' HPGATTTAPS  | 83    | 27104 |
| >CTNNB1-S3' HSGATTTA    | 22628 | >CTNNB1-S3' HPGATTTA    | 268   | 22360 |
| >CTNNB1-S3' HSGATTTAPS  | 5984  | >CTNNB1-S3' HPGATTTAPS  | 30    | 5954  |
| >CTNNB1-S3' HSGATTTAPS  | 33    | >CTNNB1-S3' HPGATTTAPS  | 19122 | 19089 |
| >CTNNB1-S3' HSGATTTA    | 14137 | >CTNNB1-S3' HPGATTTA    | 312   | 13825 |
| >CTNNB1-S3' HSGATTTAPS  | 6245  | >CTNNB1-S3' HPGATTTAPS  | 104   | 6141  |
| >CTNNB1-S3' HSGATTTAPS  | 506   | >CTNNB1-S3' HPGATTTAPS  | 35    | 471   |
| >CTNNB1-S3' HSGATTTA    | 27780 | >CTNNB1-S3' HPGATTTA    | 291   | 27489 |
| >CTNNB1-S3' GIHSGATTTA  | 432   | >CTNNB1-S3' GIHPGATTTA  | 1189  | 757   |
| >CTNNB1-S3' GIHSGATTTA  | 276   | >CTNNB1-S3' GIHPGATTTA  | 468   | 192   |
| >CTNNB1-S3' GIHSGATTTA  | 362   | >CTNNB1-S3' GIHPGATTTA  | 114   | 248   |
| >CTNNB1-S3' YLDSGIHSG   | 773   | >CTNNB1-S3' YLDSGIHPG   | 362   | 411   |
| >CTNNB1-S3' YLDSGIHSGA  | 78    | >CTNNB1-S3' YLDSGIHPGA  | 35    | 43    |

|                         |      |                         |      |      |
|-------------------------|------|-------------------------|------|------|
| >CTNNB1-S3' YLDSGIHSGA' | 212  | >CTNNB1-S3' YLDSGIHPGA' | 201  | 11   |
| >CTNNB1-S3' YLDSGIHSG   | 278  | >CTNNB1-S3' YLDSGIHPG   | 226  | 52   |
| >CTNNB1-S3' YLDSGIHSGA  | 24   | >CTNNB1-S3' YLDSGIHPGA  | 42   | 18   |
| >CTNNB1-S3' YLDSGIHSGA' | 284  | >CTNNB1-S3' YLDSGIHPGA' | 406  | 122  |
| >CTNNB1-S3' YLDSGIHSGA  | 32   | >CTNNB1-S3' YLDSGIHPGA  | 83   | 51   |
| >CTNNB1-S3' YLDSGIHSGA' | 78   | >CTNNB1-S3' YLDSGIHPGA' | 65   | 13   |
| >CTNNB1-S3' YLDSGIHS    | 419  | >CTNNB1-S3' YLDSGIHP    | 2114 | 1695 |
| >CTNNB1-S3' YLDSGIHSG   | 570  | >CTNNB1-S3' YLDSGIHPG   | 238  | 332  |
| >CTNNB1-S3' YLDSGIHSGA  | 280  | >CTNNB1-S3' YLDSGIHPGA  | 139  | 141  |
| >CTNNB1-S3' YLDSGIHSGA' | 178  | >CTNNB1-S3' YLDSGIHPGA' | 350  | 172  |
| >CTNNB1-S3' YLDSGIHS    | 47   | >CTNNB1-S3' YLDSGIHP    | 289  | 242  |
| >CTNNB1-S3' YLDSGIHSG   | 15   | >CTNNB1-S3' YLDSGIHPG   | 14   | 1    |
| >CTNNB1-S3' YLDSGIHSGA  | 2    | >CTNNB1-S3' YLDSGIHPGA  | 2    | 0    |
| >CTNNB1-S3' YLDSGIHSGA' | 12   | >CTNNB1-S3' YLDSGIHPGA' | 8    | 4    |
| >CTNNB1-S3' YLDSGIHS    | 395  | >CTNNB1-S3' YLDSGIHP    | 2087 | 1692 |
| >CTNNB1-S3' YLDSGIHSG   | 139  | >CTNNB1-S3' YLDSGIHPG   | 57   | 82   |
| >CTNNB1-S3' YLDSGIHSGA  | 8    | >CTNNB1-S3' YLDSGIHPGA  | 9    | 1    |
| >CTNNB1-S3' YLDSGIHSGA' | 83   | >CTNNB1-S3' YLDSGIHPGA' | 105  | 22   |
| >CTNNB1-S3' YLDSGIHS    | 101  | >CTNNB1-S3' YLDSGIHP    | 785  | 684  |
| >CTNNB1-S3' YLDSGIHSG   | 140  | >CTNNB1-S3' YLDSGIHPG   | 111  | 29   |
| >CTNNB1-S3' YLDSGIHSGA  | 7    | >CTNNB1-S3' YLDSGIHPGA  | 5    | 2    |
| >CTNNB1-S3' YLDSGIHSGA' | 121  | >CTNNB1-S3' YLDSGIHPGA' | 135  | 14   |
| >CTNNB1-S3' YLDSGIHSGA  | 7    | >CTNNB1-S3' YLDSGIHPGA  | 4    | 3    |
| >CTNNB1-S3' YLDSGIHSGA' | 255  | >CTNNB1-S3' YLDSGIHPGA' | 296  | 41   |
| >CTNNB1-S3' YLDSGIHS    | 66   | >CTNNB1-S3' YLDSGIHP    | 629  | 563  |
| >CTNNB1-S3' YLDSGIHSG   | 13   | >CTNNB1-S3' YLDSGIHPG   | 24   | 11   |
| >CTNNB1-S3' YLDSGIHSGA  | 2    | >CTNNB1-S3' YLDSGIHPGA  | 2    | 0    |
| >CTNNB1-S3' YLDSGIHSGA' | 36   | >CTNNB1-S3' YLDSGIHPGA' | 50   | 14   |
| >CTNNB1-S3' YLDSGIHSGA  | 554  | >CTNNB1-S3' YLDSGIHPGA  | 117  | 437  |
| >CTNNB1-S3' SYLDSGIHSG/ | 1218 | >CTNNB1-S3' SYLDSGIHPG/ | 434  | 784  |
| >CTNNB1-S3' SYLDSGIHSG/ | 410  | >CTNNB1-S3' SYLDSGIHPG/ | 454  | 44   |
| >CTNNB1-S3' SGATTTAPSL  | 741  | >CTNNB1-S3' TGATTTAPSL  | 321  | 420  |
| >CTNNB1-S3' HSGATTTAPS  | 2771 | >CTNNB1-S3' HTGATTTAPS  | 433  | 2338 |
| >CTNNB1-S3' HSGATTTAPS  | 984  | >CTNNB1-S3' HTGATTTAPS  | 250  | 734  |
| >CTNNB1-S3' HSGATTTA    | 4911 | >CTNNB1-S3' HTGATTTA    | 488  | 4423 |
| >CTNNB1-S3' HSGATTTAPS  | 1270 | >CTNNB1-S3' HTGATTTAPS  | 65   | 1205 |
| >CTNNB1-S3' HSGATTTAPS  | 33   | >CTNNB1-S3' HTGATTTAPS  | 23   | 10   |
| >CTNNB1-S3' HSGATTTAPS  | 654  | >CTNNB1-S3' HTGATTTAPS  | 375  | 279  |
| >CTNNB1-S3' GIHSGATTTA  | 432  | >CTNNB1-S3' GIHTGATTTA  | 889  | 457  |
| >CTNNB1-S3' GIHSGATTTA  | 276  | >CTNNB1-S3' GIHTGATTTA  | 399  | 123  |
| >CTNNB1-S3' GIHSGATTTA  | 362  | >CTNNB1-S3' GIHTGATTTA  | 643  | 281  |
| >CTNNB1-S3' YLDSGIHS    | 603  | >CTNNB1-S3' YLDSGIHT    | 76   | 527  |
| >CTNNB1-S3' YLDSGIHSGA  | 78   | >CTNNB1-S3' YLDSGIHTGA  | 53   | 25   |

|                         |       |                         |       |       |
|-------------------------|-------|-------------------------|-------|-------|
| >CTNNB1-S3' YLDSGIHSGA' | 212   | >CTNNB1-S3' YLDSGIHTGA' | 176   | 36    |
| >CTNNB1-S3' YLDSGIHSG   | 278   | >CTNNB1-S3' YLDSGIHTG   | 708   | 430   |
| >CTNNB1-S3' YLDSGIHSGA  | 24    | >CTNNB1-S3' YLDSGIHTGA  | 26    | 2     |
| >CTNNB1-S3' YLDSGIHSGA' | 284   | >CTNNB1-S3' YLDSGIHTGA' | 253   | 31    |
| >CTNNB1-S3' YLDSGIHSGA  | 32    | >CTNNB1-S3' YLDSGIHTGA  | 39    | 7     |
| >CTNNB1-S3' YLDSGIHSGA' | 78    | >CTNNB1-S3' YLDSGIHTGA' | 58    | 20    |
| >CTNNB1-S3' YLDSGIHS    | 419   | >CTNNB1-S3' YLDSGIHT    | 100   | 319   |
| >CTNNB1-S3' YLDSGIHSGA  | 280   | >CTNNB1-S3' YLDSGIHTGA  | 278   | 2     |
| >CTNNB1-S3' YLDSGIHSGA' | 178   | >CTNNB1-S3' YLDSGIHTGA' | 170   | 8     |
| >CTNNB1-S3' YLDSGIHS    | 47    | >CTNNB1-S3' YLDSGIHT    | 11    | 36    |
| >CTNNB1-S3' YLDSGIHSG   | 15    | >CTNNB1-S3' YLDSGIHTG   | 9     | 6     |
| >CTNNB1-S3' YLDSGIHSGA  | 2     | >CTNNB1-S3' YLDSGIHTGA  | 3     | 1     |
| >CTNNB1-S3' YLDSGIHSGA' | 12    | >CTNNB1-S3' YLDSGIHTGA' | 11    | 1     |
| >CTNNB1-S3' YLDSGIHS    | 395   | >CTNNB1-S3' YLDSGIHT    | 43    | 352   |
| >CTNNB1-S3' YLDSGIHSG   | 139   | >CTNNB1-S3' YLDSGIHTG   | 55    | 84    |
| >CTNNB1-S3' YLDSGIHSGA  | 8     | >CTNNB1-S3' YLDSGIHTGA  | 11    | 3     |
| >CTNNB1-S3' YLDSGIHSGA' | 83    | >CTNNB1-S3' YLDSGIHTGA' | 72    | 11    |
| >CTNNB1-S3' YLDSGIHS    | 101   | >CTNNB1-S3' YLDSGIHT    | 14    | 87    |
| >CTNNB1-S3' YLDSGIHSG   | 140   | >CTNNB1-S3' YLDSGIHTG   | 63    | 77    |
| >CTNNB1-S3' YLDSGIHSGA  | 7     | >CTNNB1-S3' YLDSGIHTGA  | 6     | 1     |
| >CTNNB1-S3' YLDSGIHSGA' | 121   | >CTNNB1-S3' YLDSGIHTGA' | 113   | 8     |
| >CTNNB1-S3' YLDSGIHS    | 2599  | >CTNNB1-S3' YLDSGIHT    | 214   | 2385  |
| >CTNNB1-S3' YLDSGIHSGA  | 7     | >CTNNB1-S3' YLDSGIHTGA  | 7     | 0     |
| >CTNNB1-S3' YLDSGIHSGA' | 255   | >CTNNB1-S3' YLDSGIHTGA' | 190   | 65    |
| >CTNNB1-S3' YLDSGIHS    | 66    | >CTNNB1-S3' YLDSGIHT    | 9     | 57    |
| >CTNNB1-S3' YLDSGIHSG   | 13    | >CTNNB1-S3' YLDSGIHTG   | 11    | 2     |
| >CTNNB1-S3' YLDSGIHSGA  | 2     | >CTNNB1-S3' YLDSGIHTGA  | 2     | 0     |
| >CTNNB1-S3' YLDSGIHSGA' | 36    | >CTNNB1-S3' YLDSGIHTGA' | 26    | 10    |
| >CTNNB1-S3' SYLDSGIHSG/ | 410   | >CTNNB1-S3' SYLDSGIHTG/ | 485   | 75    |
| >CTNNB1-S3' SGATTTAPSL  | 741   | >CTNNB1-S3' YGATTTAPSL  | 100   | 641   |
| >CTNNB1-S3' HSGATTTAPS  | 11547 | >CTNNB1-S3' HYGATTTAPS  | 61    | 11486 |
| >CTNNB1-S3' HSGATTTAPS  | 15711 | >CTNNB1-S3' HYGATTTAPS  | 13    | 15698 |
| >CTNNB1-S3' HSGATTTAPS  | 33    | >CTNNB1-S3' HYGATTTAPS  | 23287 | 23254 |
| >CTNNB1-S3' HSGATTTAPS  | 506   | >CTNNB1-S3' HYGATTTAPS  | 495   | 11    |
| >CTNNB1-S3' QQSYLDSGIH  | 24026 | >CTNNB1-S3' QQSYLDSGIH  | 426   | 23600 |
| >CTNNB1-S3' QQSYLDSGIH  | 26039 | >CTNNB1-S3' QQSYLDSGIH  | 224   | 25815 |
| >CTNNB1-S3' QQSYLDSGIH  | 4497  | >CTNNB1-S3' QQSYLDSGIH  | 39    | 4458  |
| >CTNNB1-S3' QQSYLDSGIH  | 24277 | >CTNNB1-S3' QQSYLDSGIH  | 348   | 23929 |
| >CTNNB1-S3' QQSYLDSGIH  | 3255  | >CTNNB1-S3' QQSYLDSGIH  | 16    | 3239  |
| >CTNNB1-S3' GIHSGATTTA  | 432   | >CTNNB1-S3' GIHYGATTTA  | 1077  | 645   |
| >CTNNB1-S3' GIHSGATTTA  | 276   | >CTNNB1-S3' GIHYGATTTA  | 406   | 130   |
| >CTNNB1-S3' GIHSGATTTA  | 362   | >CTNNB1-S3' GIHYGATTTA  | 2025  | 1663  |
| >CTNNB1-S3' YLDSGIHS    | 9233  | >CTNNB1-S3' YLDSGIHY    | 19    | 9214  |

|                         |       |                         |      |       |
|-------------------------|-------|-------------------------|------|-------|
| >CTNNB1-S3' YLDSGIHSG   | 773   | >CTNNB1-S3' YLDSGIHYG   | 169  | 604   |
| >CTNNB1-S3' YLDSGIHSGA  | 78    | >CTNNB1-S3' YLDSGIHYGA  | 18   | 60    |
| >CTNNB1-S3' YLDSGIHSGA' | 212   | >CTNNB1-S3' YLDSGIHYGA' | 202  | 10    |
| >CTNNB1-S3' YLDSGIHSG   | 278   | >CTNNB1-S3' YLDSGIHYG   | 73   | 205   |
| >CTNNB1-S3' YLDSGIHSGA  | 24    | >CTNNB1-S3' YLDSGIHYGA  | 14   | 10    |
| >CTNNB1-S3' YLDSGIHSGA' | 284   | >CTNNB1-S3' YLDSGIHYGA' | 226  | 58    |
| >CTNNB1-S3' YLDSGIHSGA  | 32    | >CTNNB1-S3' YLDSGIHYGA  | 71   | 39    |
| >CTNNB1-S3' YLDSGIHSGA' | 78    | >CTNNB1-S3' YLDSGIHYGA' | 58   | 20    |
| >CTNNB1-S3' YLDSGIHS    | 419   | >CTNNB1-S3' YLDSGIHY    | 1812 | 1393  |
| >CTNNB1-S3' YLDSGIHSG   | 570   | >CTNNB1-S3' YLDSGIHYG   | 348  | 222   |
| >CTNNB1-S3' YLDSGIHSGA  | 280   | >CTNNB1-S3' YLDSGIHYGA  | 88   | 192   |
| >CTNNB1-S3' YLDSGIHSGA' | 178   | >CTNNB1-S3' YLDSGIHYGA' | 140  | 38    |
| >CTNNB1-S3' YLDSGIHS    | 47    | >CTNNB1-S3' YLDSGIHY    | 148  | 101   |
| >CTNNB1-S3' YLDSGIHSG   | 15    | >CTNNB1-S3' YLDSGIHYG   | 5    | 10    |
| >CTNNB1-S3' YLDSGIHSGA  | 2     | >CTNNB1-S3' YLDSGIHYGA  | 2    | 0     |
| >CTNNB1-S3' YLDSGIHSGA' | 12    | >CTNNB1-S3' YLDSGIHYGA' | 10   | 2     |
| >CTNNB1-S3' YLDSGIHS    | 395   | >CTNNB1-S3' YLDSGIHY    | 1130 | 735   |
| >CTNNB1-S3' YLDSGIHSG   | 139   | >CTNNB1-S3' YLDSGIHYG   | 48   | 91    |
| >CTNNB1-S3' YLDSGIHSGA  | 8     | >CTNNB1-S3' YLDSGIHYGA  | 4    | 4     |
| >CTNNB1-S3' YLDSGIHSGA' | 83    | >CTNNB1-S3' YLDSGIHYGA' | 124  | 41    |
| >CTNNB1-S3' YLDSGIHS    | 101   | >CTNNB1-S3' YLDSGIHY    | 351  | 250   |
| >CTNNB1-S3' YLDSGIHSG   | 140   | >CTNNB1-S3' YLDSGIHYG   | 36   | 104   |
| >CTNNB1-S3' YLDSGIHSGA  | 7     | >CTNNB1-S3' YLDSGIHYGA  | 5    | 2     |
| >CTNNB1-S3' YLDSGIHSGA' | 121   | >CTNNB1-S3' YLDSGIHYGA' | 129  | 8     |
| >CTNNB1-S3' YLDSGIHSG   | 1226  | >CTNNB1-S3' YLDSGIHYG   | 133  | 1093  |
| >CTNNB1-S3' YLDSGIHSGA  | 7     | >CTNNB1-S3' YLDSGIHYGA  | 3    | 4     |
| >CTNNB1-S3' YLDSGIHSGA' | 255   | >CTNNB1-S3' YLDSGIHYGA' | 309  | 54    |
| >CTNNB1-S3' YLDSGIHS    | 66    | >CTNNB1-S3' YLDSGIHY    | 119  | 53    |
| >CTNNB1-S3' YLDSGIHSG   | 13    | >CTNNB1-S3' YLDSGIHYG   | 10   | 3     |
| >CTNNB1-S3' YLDSGIHSGA  | 2     | >CTNNB1-S3' YLDSGIHYGA  | 2    | 0     |
| >CTNNB1-S3' YLDSGIHSGA' | 36    | >CTNNB1-S3' YLDSGIHYGA' | 30   | 6     |
| >CTNNB1-S3' YLDSGIHS    | 13894 | >CTNNB1-S3' YLDSGIHY    | 63   | 13831 |
| >CTNNB1-S3' YLDSGIHS    | 20913 | >CTNNB1-S3' YLDSGIHY    | 385  | 20528 |
| >CTNNB1-S3' YLDSGIHSGA  | 554   | >CTNNB1-S3' YLDSGIHYGA  | 193  | 361   |
| >CTNNB1-S3' YLDSGIHS    | 21602 | >CTNNB1-S3' YLDSGIHY    | 30   | 21572 |
| >CTNNB1-S3' YLDSGIHS    | 16129 | >CTNNB1-S3' YLDSGIHY    | 152  | 15977 |
| >CTNNB1-S3' YLDSGIHS    | 17249 | >CTNNB1-S3' YLDSGIHY    | 66   | 17183 |
| >CTNNB1-S3' YLDSGIHS    | 29707 | >CTNNB1-S3' YLDSGIHY    | 217  | 29490 |
| >CTNNB1-S3' SYLDSGIHS   | 13518 | >CTNNB1-S3' SYLDSGIHY   | 32   | 13486 |
| >CTNNB1-S3' SYLDSGIHS   | 25811 | >CTNNB1-S3' SYLDSGIHY   | 127  | 25684 |
| >CTNNB1-S3' SYLDSGIHSGA | 410   | >CTNNB1-S3' SYLDSGIHYGA | 299  | 111   |
| >CTNNB1-S3' QSYLDSGIHS  | 30523 | >CTNNB1-S3' QSYLDSGIHY  | 262  | 30261 |
| >CTNNB1-S3' QSYLDSGIHS  | 29430 | >CTNNB1-S3' QSYLDSGIHY  | 157  | 29273 |

|                         |       |                          |      |       |
|-------------------------|-------|--------------------------|------|-------|
| >CTNNB1-S3' QSYLDSGIHS  | 28690 | >CTNNB1-S3' QSYLDSGIHY   | 238  | 28452 |
| >CTNNB1-S3' QSYLDSGIHS  | 28044 | >CTNNB1-S3' QSYLDSGIHY   | 300  | 27744 |
| >CTNNB1-S3' QSYLDSGIHS  | 22990 | >CTNNB1-S3' QSYLDSGIHY   | 82   | 22908 |
| >CTNNB1-S3' QSYLDSGIHS  | 14435 | >CTNNB1-S3' QSYLDSGIHY   | 126  | 14309 |
| >CTNNB1-S3' QSYLDSGIHS  | 9763  | >CTNNB1-S3' QSYLDSGIHY   | 129  | 9634  |
| >CTNNB1-S3' QSYLDSGIHS  | 5959  | >CTNNB1-S3' QSYLDSGIHY   | 6    | 5953  |
| >CTNNB1-S3' QSYLDSGIHS  | 11123 | >CTNNB1-S3' QSYLDSGIHY   | 60   | 11063 |
| >CTNNB1-S4! APSLSGKGNF  | 1071  | >CTNNB1-S4! APALS G KGNF | 217  | 854   |
| >CTNNB1-S4! TAPSLSGK    | 164   | >CTNNB1-S4! TAPALSGK     | 264  | 100   |
| >CTNNB1-S4! TTAPSLSGK   | 86    | >CTNNB1-S4! TTAPALSGK    | 157  | 71    |
| >CTNNB1-S4! TTAPSLSGK   | 10    | >CTNNB1-S4! TTAPALSGK    | 16   | 6     |
| >CTNNB1-S4! TTAPSLSGK   | 5     | >CTNNB1-S4! TTAPALSGK    | 5    | 0     |
| >CTNNB1-S4! TTAPSLSGK   | 198   | >CTNNB1-S4! TTAPALSGK    | 609  | 411   |
| >CTNNB1-S4! TTTAPSLSGK  | 59    | >CTNNB1-S4! TTTAPALSGK   | 63   | 4     |
| >CTNNB1-S4! TTTAPSLSGK  | 15    | >CTNNB1-S4! TTTAPALSGK   | 16   | 1     |
| >CTNNB1-S4! TTTAPSLSGK  | 439   | >CTNNB1-S4! TTTAPALSGK   | 774  | 335   |
| >CTNNB1-S4! TTTAPSLSGK  | 8     | >CTNNB1-S4! TTTAPALSGK   | 10   | 2     |
| >CTNNB1-S4! TTTAPSL     | 338   | >CTNNB1-S4! TTTAPALS     | 252  | 86    |
| >CTNNB1-S4! ATTTAPSLSGI | 216   | >CTNNB1-S4! ATTTAPALSG   | 308  | 92    |
| >CTNNB1-S4! ATTTAPSLSGI | 36    | >CTNNB1-S4! ATTTAPALSG   | 44   | 8     |
| >CTNNB1-S4! ATTTAPSL    | 838   | >CTNNB1-S4! ATTTAPAL     | 397  | 441   |
| >CTNNB1-S4! ATTTAPSLSGI | 51    | >CTNNB1-S4! ATTTAPALSG   | 38   | 13    |
| >CTNNB1-S4! ATTTAPSLSGI | 129   | >CTNNB1-S4! ATTTAPALSG   | 140  | 11    |
| >CTNNB1-S4! ATTTAPSL    | 16    | >CTNNB1-S4! ATTTAPAL     | 20   | 4     |
| >CTNNB1-S4! ATTTAPSL    | 535   | >CTNNB1-S4! ATTTAPAL     | 246  | 289   |
| >CTNNB1-S4! ATTTAPSL    | 362   | >CTNNB1-S4! ATTTAPALS    | 4939 | 4577  |
| >CTNNB1-S4! ATTTAPSLSGI | 404   | >CTNNB1-S4! ATTTAPALSG   | 568  | 164   |
| >CTNNB1-S4! ATTTAPSL    | 368   | >CTNNB1-S4! ATTTAPAL     | 1069 | 701   |
| >CTNNB1-S4! GATTTAPSL   | 272   | >CTNNB1-S4! GATTTAPAL    | 496  | 224   |
| >CTNNB1-S4! GATTTAPSL   | 346   | >CTNNB1-S4! GATTTAPAL    | 461  | 115   |
| >CTNNB1-S4! SGATTTAPSL  | 741   | >CTNNB1-S4! SGATTTAPAL   | 274  | 467   |
| >CTNNB1-S4! HSGATTTAPS  | 2126  | >CTNNB1-S4! HSGATTTAPA   | 212  | 1914  |
| >CTNNB1-S4! HSGATTTAPS  | 33    | >CTNNB1-S4! HSGATTTAPA   | 48   | 15    |
| >CTNNB1-S4! HSGATTTAPS  | 506   | >CTNNB1-S4! HSGATTTAPA   | 163  | 343   |
| >CTNNB1-S4! TAPSLSGK    | 164   | >CTNNB1-S4! TAPCLSGK     | 361  | 197   |
| >CTNNB1-S4! TTAPSLSGK   | 86    | >CTNNB1-S4! TTAPCLSGK    | 126  | 40    |
| >CTNNB1-S4! TTAPSLSGK   | 10    | >CTNNB1-S4! TTAPCLSGK    | 16   | 6     |
| >CTNNB1-S4! TTAPSLSGK   | 5     | >CTNNB1-S4! TTAPCLSGK    | 8    | 3     |
| >CTNNB1-S4! TTAPSLSGK   | 198   | >CTNNB1-S4! TTAPCLSGK    | 286  | 88    |
| >CTNNB1-S4! TTTAPSLSGK  | 59    | >CTNNB1-S4! TTTAPCLSGK   | 70   | 11    |
| >CTNNB1-S4! TTTAPSLSGK  | 15    | >CTNNB1-S4! TTTAPCLSGK   | 22   | 7     |
| >CTNNB1-S4! TTTAPSLSGK  | 439   | >CTNNB1-S4! TTTAPCLSGK   | 2113 | 1674  |
| >CTNNB1-S4! TTTAPSLSGK  | 8     | >CTNNB1-S4! TTTAPCLSGK   | 21   | 13    |

|                        |       |                        |       |       |
|------------------------|-------|------------------------|-------|-------|
| >CTNNB1-S4:TTTAPSL     | 338   | >CTNNB1-S4:TTTAPCLS    | 777   | 439   |
| >CTNNB1-S4:ATTTAPSLSGI | 216   | >CTNNB1-S4:ATTTAPCLSG  | 325   | 109   |
| >CTNNB1-S4:ATTTAPSLSGI | 36    | >CTNNB1-S4:ATTTAPCLSG  | 43    | 7     |
| >CTNNB1-S4:ATTTAPSLSGI | 51    | >CTNNB1-S4:ATTTAPCLSG  | 78    | 27    |
| >CTNNB1-S4:ATTTAPSLSGI | 129   | >CTNNB1-S4:ATTTAPCLSG  | 215   | 86    |
| >CTNNB1-S4:ATTTAPSL    | 16    | >CTNNB1-S4:ATTTAPCL    | 133   | 117   |
| >CTNNB1-S4:ATTTAPSL    | 535   | >CTNNB1-S4:ATTTAPCL    | 289   | 246   |
| >CTNNB1-S4:ATTTAPSL    | 362   | >CTNNB1-S4:ATTTAPCLS   | 10670 | 10308 |
| >CTNNB1-S4:ATTTAPSLSGI | 404   | >CTNNB1-S4:ATTTAPCLSG  | 412   | 8     |
| >CTNNB1-S4:ATTTAPSL    | 368   | >CTNNB1-S4:ATTTAPCL    | 1710  | 1342  |
| >CTNNB1-S4:GATTTAPSL   | 272   | >CTNNB1-S4:GATTTAPCL   | 5504  | 5232  |
| >CTNNB1-S4:GATTTAPSL   | 346   | >CTNNB1-S4:GATTTAPCL   | 1488  | 1142  |
| >CTNNB1-S4:HSGATTTAPS  | 33    | >CTNNB1-S4:HSGATTTAPC  | 353   | 320   |
| >CTNNB1-S4:SLSGKGNPE   | 5128  | >CTNNB1-S4:FLSGKGNPE   | 314   | 4814  |
| >CTNNB1-S4:SLSGKGNPEE  | 4830  | >CTNNB1-S4:FLSGKGNPEE  | 287   | 4543  |
| >CTNNB1-S4:SLSGKGNPEE  | 2752  | >CTNNB1-S4:FLSGKGNPEE  | 287   | 2465  |
| >CTNNB1-S4:IHSGATTTAP  | 10237 | >CTNNB1-S4:IHSGATTTAP  | 18    | 10219 |
| >CTNNB1-S4:IHSGATTTAP  | 3465  | >CTNNB1-S4:IHSGATTTAP  | 32    | 3433  |
| >CTNNB1-S4:TAPSLSGK    | 663   | >CTNNB1-S4:TAPFLSGK    | 321   | 342   |
| >CTNNB1-S4:TAPSLSGK    | 164   | >CTNNB1-S4:TAPFLSGK    | 103   | 61    |
| >CTNNB1-S4:TTAPSLSGK   | 86    | >CTNNB1-S4:TTAPFLSGK   | 101   | 15    |
| >CTNNB1-S4:TTAPSLSGK   | 10    | >CTNNB1-S4:TTAPFLSGK   | 7     | 3     |
| >CTNNB1-S4:TTAPSLSGK   | 5     | >CTNNB1-S4:TTAPFLSGK   | 3     | 2     |
| >CTNNB1-S4:TTAPSLSGK   | 198   | >CTNNB1-S4:TTAPFLSGK   | 135   | 63    |
| >CTNNB1-S4:TTTAPSLSGK  | 59    | >CTNNB1-S4:TTTAPFLSGK  | 67    | 8     |
| >CTNNB1-S4:TTTAPSLSGK  | 15    | >CTNNB1-S4:TTTAPFLSGK  | 12    | 3     |
| >CTNNB1-S4:TTTAPSLSGK  | 439   | >CTNNB1-S4:TTTAPFLSGK  | 652   | 213   |
| >CTNNB1-S4:TTTAPSLSGK  | 8     | >CTNNB1-S4:TTTAPFLSGK  | 9     | 1     |
| >CTNNB1-S4:TTTAPSL     | 338   | >CTNNB1-S4:TTTAPFLS    | 107   | 231   |
| >CTNNB1-S4:TTTAPSLSG   | 1259  | >CTNNB1-S4:TTTAPFLSG   | 317   | 942   |
| >CTNNB1-S4:ATTTAPSL    | 1617  | >CTNNB1-S4:ATTTAPFL    | 435   | 1182  |
| >CTNNB1-S4:ATTTAPSLSGI | 216   | >CTNNB1-S4:ATTTAPFLSGI | 223   | 7     |
| >CTNNB1-S4:ATTTAPSLSGI | 36    | >CTNNB1-S4:ATTTAPFLSGI | 22    | 14    |
| >CTNNB1-S4:ATTTAPSL    | 838   | >CTNNB1-S4:ATTTAPFL    | 275   | 563   |
| >CTNNB1-S4:ATTTAPSL    | 997   | >CTNNB1-S4:ATTTAPFL    | 310   | 687   |
| >CTNNB1-S4:ATTTAPSLSGI | 51    | >CTNNB1-S4:ATTTAPFLSGI | 48    | 3     |
| >CTNNB1-S4:ATTTAPSLSGI | 129   | >CTNNB1-S4:ATTTAPFLSGI | 81    | 48    |
| >CTNNB1-S4:ATTTAPSL    | 16    | >CTNNB1-S4:ATTTAPFL    | 23    | 7     |
| >CTNNB1-S4:ATTTAPSL    | 535   | >CTNNB1-S4:ATTTAPFL    | 117   | 418   |
| >CTNNB1-S4:ATTTAPSL    | 362   | >CTNNB1-S4:ATTTAPFLS   | 6031  | 5669  |
| >CTNNB1-S4:ATTTAPSLSGI | 404   | >CTNNB1-S4:ATTTAPFLSGI | 209   | 195   |
| >CTNNB1-S4:ATTTAPSL    | 368   | >CTNNB1-S4:ATTTAPFL    | 489   | 121   |
| >CTNNB1-S4:GATTTAPS    | 24693 | >CTNNB1-S4:GATTTAPF    | 214   | 24479 |

|                        |       |                       |      |       |
|------------------------|-------|-----------------------|------|-------|
| >CTNNB1-S4:GATTTAPS    | 19548 | >CTNNB1-S4!GATTTAPF   | 33   | 19515 |
| >CTNNB1-S4:GATTTAPSL   | 272   | >CTNNB1-S4!GATTTAPFL  | 727  | 455   |
| >CTNNB1-S4:GATTTAPS    | 13995 | >CTNNB1-S4!GATTTAPF   | 322  | 13673 |
| >CTNNB1-S4:GATTTAPSL   | 346   | >CTNNB1-S4!GATTTAPFL  | 62   | 284   |
| >CTNNB1-S4:SGATTTAPS   | 15488 | >CTNNB1-S4!SGATTTAPF  | 104  | 15384 |
| >CTNNB1-S4:SGATTTAPS   | 20060 | >CTNNB1-S4!SGATTTAPF  | 116  | 19944 |
| >CTNNB1-S4:SGATTTAPS   | 9843  | >CTNNB1-S4!SGATTTAPF  | 185  | 9658  |
| >CTNNB1-S4:HSGATTTAPS  | 18922 | >CTNNB1-S4!HSGATTTAPF | 479  | 18443 |
| >CTNNB1-S4:HSGATTTAPS  | 1110  | >CTNNB1-S4!HSGATTTAPF | 376  | 734   |
| >CTNNB1-S4:HSGATTTAPS  | 14286 | >CTNNB1-S4!HSGATTTAPF | 88   | 14198 |
| >CTNNB1-S4:HSGATTTAPS  | 9015  | >CTNNB1-S4!HSGATTTAPF | 40   | 8975  |
| >CTNNB1-S4:HSGATTTAPS  | 15389 | >CTNNB1-S4!HSGATTTAPF | 25   | 15364 |
| >CTNNB1-S4:HSGATTTAPS  | 9021  | >CTNNB1-S4!HSGATTTAPF | 9    | 9012  |
| >CTNNB1-S4:HSGATTTAPS  | 33    | >CTNNB1-S4!HSGATTTAPF | 51   | 18    |
| >CTNNB1-S4:HSGATTTAPS  | 19096 | >CTNNB1-S4!HSGATTTAPF | 71   | 19025 |
| >CTNNB1-S4:TAPSLSGK    | 164   | >CTNNB1-S4!TAPPLSGK   | 414  | 250   |
| >CTNNB1-S4:TTAPSLSGK   | 86    | >CTNNB1-S4!TTAPPLSGK  | 96   | 10    |
| >CTNNB1-S4:TTAPSLSGK   | 10    | >CTNNB1-S4!TTAPPLSGK  | 11   | 1     |
| >CTNNB1-S4:TTAPSLSGK   | 5     | >CTNNB1-S4!TTAPPLSGK  | 11   | 6     |
| >CTNNB1-S4:TTAPSLSGK   | 198   | >CTNNB1-S4!TTAPPLSGK  | 845  | 647   |
| >CTNNB1-S4:TTTAPSLSGK  | 59    | >CTNNB1-S4!TTTAPPLSGK | 61   | 2     |
| >CTNNB1-S4:TTTAPSLSGK  | 15    | >CTNNB1-S4!TTTAPPLSGK | 15   | 0     |
| >CTNNB1-S4:TTTAPSLSGK  | 439   | >CTNNB1-S4!TTTAPPLSGK | 1041 | 602   |
| >CTNNB1-S4:TTTAPSLSGK  | 8     | >CTNNB1-S4!TTTAPPLSGK | 10   | 2     |
| >CTNNB1-S4:TTTAPSL     | 338   | >CTNNB1-S4!TTTAPPL    | 1842 | 1504  |
| >CTNNB1-S4:ATTTAPSLSGI | 216   | >CTNNB1-S4!ATTTAPPLSG | 270  | 54    |
| >CTNNB1-S4:ATTTAPSLSGI | 36    | >CTNNB1-S4!ATTTAPPLSG | 39   | 3     |
| >CTNNB1-S4:ATTTAPSL    | 838   | >CTNNB1-S4!ATTTAPPL   | 467  | 371   |
| >CTNNB1-S4:ATTTAPSL    | 997   | >CTNNB1-S4!ATTTAPPL   | 400  | 597   |
| >CTNNB1-S4:ATTTAPSLSGI | 51    | >CTNNB1-S4!ATTTAPPLSG | 58   | 7     |
| >CTNNB1-S4:ATTTAPSLSGI | 129   | >CTNNB1-S4!ATTTAPPLSG | 232  | 103   |
| >CTNNB1-S4:ATTTAPSL    | 16    | >CTNNB1-S4!ATTTAPPL   | 15   | 1     |
| >CTNNB1-S4:ATTTAPSL    | 535   | >CTNNB1-S4!ATTTAPPL   | 296  | 239   |
| >CTNNB1-S4:ATTTAPSL    | 362   | >CTNNB1-S4!ATTTAPPL   | 8596 | 8234  |
| >CTNNB1-S4:ATTTAPSLSGI | 404   | >CTNNB1-S4!ATTTAPPLSG | 457  | 53    |
| >CTNNB1-S4:ATTTAPSL    | 368   | >CTNNB1-S4!ATTTAPPL   | 1003 | 635   |
| >CTNNB1-S4:GATTTAPSL   | 272   | >CTNNB1-S4!GATTTAPPL  | 191  | 81    |
| >CTNNB1-S4:GATTTAPSL   | 346   | >CTNNB1-S4!GATTTAPPL  | 336  | 10    |
| >CTNNB1-S4:SGATTTAPSL  | 741   | >CTNNB1-S4!SGATTTAPPL | 428  | 313   |
| >CTNNB1-S4:HSGATTTAPS  | 1270  | >CTNNB1-S4!HSGATTTAPF | 407  | 863   |
| >CTNNB1-S4:HSGATTTAPS  | 33    | >CTNNB1-S4!HSGATTTAPF | 29   | 4     |
| >CTNNB1-S4:HSGATTTAPS  | 506   | >CTNNB1-S4!HSGATTTAPF | 295  | 211   |
| >CTNNB1-S4:TAPSLSGK    | 164   | >CTNNB1-S4!TAPPLSGK   | 300  | 136   |



|                        |       |                        |      |       |
|------------------------|-------|------------------------|------|-------|
| >CTNNB1-S4:TTAPSLSGK   | 86    | >CTNNB1-S4:TTAPTLSGK   | 161  | 75    |
| >CTNNB1-S4:TTAPSLSGK   | 10    | >CTNNB1-S4:TTAPTLSGK   | 13   | 3     |
| >CTNNB1-S4:TTAPSLSGK   | 5     | >CTNNB1-S4:TTAPTLSGK   | 5    | 0     |
| >CTNNB1-S4:TTAPSLSGK   | 198   | >CTNNB1-S4:TTAPTLSGK   | 394  | 196   |
| >CTNNB1-S4:TTTAPSLSGK  | 59    | >CTNNB1-S4:TTTAPTLSGK  | 50   | 9     |
| >CTNNB1-S4:TTTAPSLSGK  | 15    | >CTNNB1-S4:TTTAPTLSGK  | 12   | 3     |
| >CTNNB1-S4:TTTAPSLSGK  | 439   | >CTNNB1-S4:TTTAPTLSGK  | 485  | 46    |
| >CTNNB1-S4:TTTAPSLSGK  | 8     | >CTNNB1-S4:TTTAPTLSGK  | 11   | 3     |
| >CTNNB1-S4:TTTAPSL     | 338   | >CTNNB1-S4:TTTAPTLS    | 272  | 66    |
| >CTNNB1-S4:ATTTAPSLSGK | 216   | >CTNNB1-S4:ATTTAPTLSGK | 300  | 84    |
| >CTNNB1-S4:ATTTAPSLSGK | 36    | >CTNNB1-S4:ATTTAPTLSGK | 44   | 8     |
| >CTNNB1-S4:ATTTAPSLSGK | 51    | >CTNNB1-S4:ATTTAPTLSGK | 66   | 15    |
| >CTNNB1-S4:ATTTAPSLSGK | 129   | >CTNNB1-S4:ATTTAPTLSGK | 164  | 35    |
| >CTNNB1-S4:ATTTAPSL    | 16    | >CTNNB1-S4:ATTTAPTL    | 11   | 5     |
| >CTNNB1-S4:ATTTAPSL    | 362   | >CTNNB1-S4:ATTTAPTLS   | 2156 | 1794  |
| >CTNNB1-S4:ATTTAPSLSGK | 404   | >CTNNB1-S4:ATTTAPTLSGK | 440  | 36    |
| >CTNNB1-S4:ATTTAPSL    | 368   | >CTNNB1-S4:ATTTAPTL    | 426  | 58    |
| >CTNNB1-S4:GATTTAPSL   | 272   | >CTNNB1-S4:GATTTAPTL   | 90   | 182   |
| >CTNNB1-S4:GATTTAPSL   | 346   | >CTNNB1-S4:GATTTAPTL   | 262  | 84    |
| >CTNNB1-S4:GATTTAPSL   | 1097  | >CTNNB1-S4:GATTTAPTL   | 482  | 615   |
| >CTNNB1-S4:HSGATTTAPS  | 984   | >CTNNB1-S4:HSGATTTAPT  | 498  | 486   |
| >CTNNB1-S4:HSGATTTAPS  | 33    | >CTNNB1-S4:HSGATTTAPT  | 17   | 16    |
| >CTNNB1-S4:HSGATTTAPS  | 506   | >CTNNB1-S4:HSGATTTAPT  | 458  | 48    |
| >CTNNB1-S4:SLSGKGNPEE  | 2752  | >CTNNB1-S4:YLSGKGNPEE  | 221  | 2531  |
| >CTNNB1-S4:IHSGATTTAP  | 23725 | >CTNNB1-S4:IHSGATTTAP  | 264  | 23461 |
| >CTNNB1-S4:IHSGATTTAP  | 28856 | >CTNNB1-S4:IHSGATTTAP  | 265  | 28591 |
| >CTNNB1-S4:IHSGATTTAP  | 10237 | >CTNNB1-S4:IHSGATTTAP  | 62   | 10175 |
| >CTNNB1-S4:IHSGATTTAP  | 16254 | >CTNNB1-S4:IHSGATTTAP  | 170  | 16084 |
| >CTNNB1-S4:IHSGATTTAP  | 3465  | >CTNNB1-S4:IHSGATTTAP  | 36   | 3429  |
| >CTNNB1-S4:TAPSLSGK    | 164   | >CTNNB1-S4:TAPYLSGK    | 117  | 47    |
| >CTNNB1-S4:TTAPSLSGK   | 86    | >CTNNB1-S4:TTAPYLSGK   | 118  | 32    |
| >CTNNB1-S4:TTAPSLSGK   | 10    | >CTNNB1-S4:TTAPYLSGK   | 10   | 0     |
| >CTNNB1-S4:TTAPSLSGK   | 5     | >CTNNB1-S4:TTAPYLSGK   | 5    | 0     |
| >CTNNB1-S4:TTAPSLSGK   | 198   | >CTNNB1-S4:TTAPYLSGK   | 184  | 14    |
| >CTNNB1-S4:TTTAPSLSGK  | 59    | >CTNNB1-S4:TTTAPYLSGK  | 74   | 15    |
| >CTNNB1-S4:TTTAPSLSGK  | 15    | >CTNNB1-S4:TTTAPYLSGK  | 14   | 1     |
| >CTNNB1-S4:TTTAPSLSGK  | 439   | >CTNNB1-S4:TTTAPYLSGK  | 524  | 85    |
| >CTNNB1-S4:TTTAPSLSGK  | 8     | >CTNNB1-S4:TTTAPYLSGK  | 10   | 2     |
| >CTNNB1-S4:TTTAPSL     | 338   | >CTNNB1-S4:TTTAPYLS    | 106  | 232   |
| >CTNNB1-S4:ATTTAPSLSGK | 216   | >CTNNB1-S4:ATTTAPYLSGK | 341  | 125   |
| >CTNNB1-S4:ATTTAPSLSGK | 36    | >CTNNB1-S4:ATTTAPYLSGK | 28   | 8     |
| >CTNNB1-S4:ATTTAPSL    | 838   | >CTNNB1-S4:ATTTAPYL    | 407  | 431   |
| >CTNNB1-S4:ATTTAPSL    | 997   | >CTNNB1-S4:ATTTAPYL    | 497  | 500   |

|                        |       |                       |      |       |
|------------------------|-------|-----------------------|------|-------|
| >CTNNB1-S4:ATTTAPSLSGI | 51    | >CTNNB1-S4:ATTTAPYLSG | 64   | 13    |
| >CTNNB1-S4:ATTTAPSLSGI | 129   | >CTNNB1-S4:ATTTAPYLSG | 123  | 6     |
| >CTNNB1-S4:ATTTAPSL    | 16    | >CTNNB1-S4:ATTTAPYL   | 26   | 10    |
| >CTNNB1-S4:ATTTAPSL    | 535   | >CTNNB1-S4:ATTTAPYL   | 203  | 332   |
| >CTNNB1-S4:ATTTAPSL    | 1956  | >CTNNB1-S4:ATTTAPYLS  | 479  | 1477  |
| >CTNNB1-S4:ATTTAPSL    | 362   | >CTNNB1-S4:ATTTAPYLS  | 7635 | 7273  |
| >CTNNB1-S4:ATTTAPSLSGI | 404   | >CTNNB1-S4:ATTTAPYLSG | 249  | 155   |
| >CTNNB1-S4:ATTTAPSL    | 368   | >CTNNB1-S4:ATTTAPYL   | 1184 | 816   |
| >CTNNB1-S4:GATTTAPS    | 24865 | >CTNNB1-S4:GATTTAPY   | 281  | 24584 |
| >CTNNB1-S4:GATTTAPS    | 29434 | >CTNNB1-S4:GATTTAPY   | 257  | 29177 |
| >CTNNB1-S4:GATTTAPS    | 19548 | >CTNNB1-S4:GATTTAPY   | 44   | 19504 |
| >CTNNB1-S4:GATTTAPSL   | 272   | >CTNNB1-S4:GATTTAPYL  | 504  | 232   |
| >CTNNB1-S4:GATTTAPS    | 13995 | >CTNNB1-S4:GATTTAPY   | 108  | 13887 |
| >CTNNB1-S4:GATTTAPSL   | 346   | >CTNNB1-S4:GATTTAPYL  | 72   | 274   |
| >CTNNB1-S4:SGATTTAPS   | 21836 | >CTNNB1-S4:SGATTTAPY  | 58   | 21778 |
| >CTNNB1-S4:SGATTTAPS   | 15488 | >CTNNB1-S4:SGATTTAPY  | 88   | 15400 |
| >CTNNB1-S4:SGATTTAPS   | 27138 | >CTNNB1-S4:SGATTTAPY  | 296  | 26842 |
| >CTNNB1-S4:SGATTTAPS   | 9843  | >CTNNB1-S4:SGATTTAPY  | 68   | 9775  |
| >CTNNB1-S4:SGATTTAPSL  | 2885  | >CTNNB1-S4:SGATTTAPYL | 499  | 2386  |
| >CTNNB1-S4:SGATTTAPS   | 28824 | >CTNNB1-S4:SGATTTAPY  | 233  | 28591 |
| >CTNNB1-S4:HSGATTTAPS  | 28409 | >CTNNB1-S4:HSGATTTAPY | 131  | 28278 |
| >CTNNB1-S4:HSGATTTAPS  | 19870 | >CTNNB1-S4:HSGATTTAPY | 465  | 19405 |
| >CTNNB1-S4:HSGATTTAPS  | 28747 | >CTNNB1-S4:HSGATTTAPY | 272  | 28475 |
| >CTNNB1-S4:HSGATTTAPS  | 18922 | >CTNNB1-S4:HSGATTTAPY | 61   | 18861 |
| >CTNNB1-S4:HSGATTTAPS  | 24256 | >CTNNB1-S4:HSGATTTAPY | 88   | 24168 |
| >CTNNB1-S4:HSGATTTAPS  | 11350 | >CTNNB1-S4:HSGATTTAPY | 62   | 11288 |
| >CTNNB1-S4:HSGATTTAPS  | 23969 | >CTNNB1-S4:HSGATTTAPY | 119  | 23850 |
| >CTNNB1-S4:HSGATTTAPS  | 9015  | >CTNNB1-S4:HSGATTTAPY | 43   | 8972  |
| >CTNNB1-S4:HSGATTTAPS  | 28978 | >CTNNB1-S4:HSGATTTAPY | 432  | 28546 |
| >CTNNB1-S4:HSGATTTAPS  | 15389 | >CTNNB1-S4:HSGATTTAPY | 100  | 15289 |
| >CTNNB1-S4:HSGATTTAPS  | 9021  | >CTNNB1-S4:HSGATTTAPY | 11   | 9010  |
| >CTNNB1-S4:HSGATTTAPS  | 33    | >CTNNB1-S4:HSGATTTAPY | 48   | 15    |
| >CTNNB1-S4:HSGATTTAPS  | 19096 | >CTNNB1-S4:HSGATTTAPY | 311  | 18785 |
| >CTNNB1-S4:HSGATTTAPS  | 1205  | >CTNNB1-S4:HSGATTTAPY | 391  | 814   |
| >CTNNB1-S4:HSGATTTAPS  | 2590  | >CTNNB1-S4:HSGATTTAPY | 494  | 2096  |
| >CTNNB1-S4:TAPSLSGK    | 164   | >CTNNB1-S4:TAPSLCGK   | 231  | 67    |
| >CTNNB1-S4:TTAPSLSGK   | 86    | >CTNNB1-S4:TTAPSLCGK  | 182  | 96    |
| >CTNNB1-S4:TTAPSLSGK   | 10    | >CTNNB1-S4:TTAPSLCGK  | 11   | 1     |
| >CTNNB1-S4:TTAPSLSGK   | 677   | >CTNNB1-S4:TTAPSLCGK  | 269  | 408   |
| >CTNNB1-S4:TTAPSLSGK   | 5     | >CTNNB1-S4:TTAPSLCGK  | 6    | 1     |
| >CTNNB1-S4:TTAPSLSGK   | 198   | >CTNNB1-S4:TTAPSLCGK  | 170  | 28    |
| >CTNNB1-S4:TTTAPSLSGK  | 59    | >CTNNB1-S4:TTTAPSLCGK | 93   | 34    |
| >CTNNB1-S4:TTTAPSLSGK  | 15    | >CTNNB1-S4:TTTAPSLCGK | 16   | 1     |

|                         |       |                         |      |       |
|-------------------------|-------|-------------------------|------|-------|
| >CTNNB1-S4' TTTAPSLSGK  | 439   | >CTNNB1-S4' TTTAPSLCGK  | 345  | 94    |
| >CTNNB1-S4' TTTAPSLSGK  | 8     | >CTNNB1-S4' TTTAPSLCGK  | 8    | 0     |
| >CTNNB1-S4' TTTAPSLSL   | 338   | >CTNNB1-S4' TTTAPSLC    | 1500 | 1162  |
| >CTNNB1-S4' ATTTAPSLSGI | 216   | >CTNNB1-S4' ATTTAPSLCG  | 387  | 171   |
| >CTNNB1-S4' ATTTAPSLSGI | 36    | >CTNNB1-S4' ATTTAPSLCG  | 38   | 2     |
| >CTNNB1-S4' ATTTAPSLSGI | 51    | >CTNNB1-S4' ATTTAPSLCG  | 30   | 21    |
| >CTNNB1-S4' ATTTAPSLSGI | 129   | >CTNNB1-S4' ATTTAPSLCG  | 196  | 67    |
| >CTNNB1-S4' ATTTAPSLSL  | 1956  | >CTNNB1-S4' ATTTAPSLC   | 491  | 1465  |
| >CTNNB1-S4' ATTTAPSLSL  | 362   | >CTNNB1-S4' ATTTAPSLC   | 675  | 313   |
| >CTNNB1-S4' ATTTAPSLSGI | 404   | >CTNNB1-S4' ATTTAPSLCG  | 352  | 52    |
| >CTNNB1-S4' TAPSLSGK    | 164   | >CTNNB1-S4' TAPSLGGK    | 505  | 341   |
| >CTNNB1-S4' TTAPSLSGK   | 86    | >CTNNB1-S4' TTAPSLGGK   | 136  | 50    |
| >CTNNB1-S4' TTAPSLSGK   | 10    | >CTNNB1-S4' TTAPSLGGK   | 18   | 8     |
| >CTNNB1-S4' TTAPSLSGK   | 5     | >CTNNB1-S4' TTAPSLGGK   | 11   | 6     |
| >CTNNB1-S4' TTAPSLSGK   | 198   | >CTNNB1-S4' TTAPSLGGK   | 190  | 8     |
| >CTNNB1-S4' TTTAPSLSGK  | 59    | >CTNNB1-S4' TTTAPSLGGK  | 178  | 119   |
| >CTNNB1-S4' TTTAPSLSGK  | 15    | >CTNNB1-S4' TTTAPSLGGK  | 33   | 18    |
| >CTNNB1-S4' TTTAPSLSGK  | 439   | >CTNNB1-S4' TTTAPSLGGK  | 743  | 304   |
| >CTNNB1-S4' TTTAPSLSGK  | 8     | >CTNNB1-S4' TTTAPSLGGK  | 23   | 15    |
| >CTNNB1-S4' TTTAPSLSL   | 338   | >CTNNB1-S4' TTTAPSLG    | 2472 | 2134  |
| >CTNNB1-S4' ATTTAPSLSGI | 216   | >CTNNB1-S4' ATTTAPSLGG  | 318  | 102   |
| >CTNNB1-S4' ATTTAPSLSGI | 36    | >CTNNB1-S4' ATTTAPSLGG  | 58   | 22    |
| >CTNNB1-S4' ATTTAPSLSGI | 51    | >CTNNB1-S4' ATTTAPSLGG  | 64   | 13    |
| >CTNNB1-S4' ATTTAPSLSGI | 129   | >CTNNB1-S4' ATTTAPSLGG  | 300  | 171   |
| >CTNNB1-S4' ATTTAPSLSL  | 362   | >CTNNB1-S4' ATTTAPSLG   | 845  | 483   |
| >CTNNB1-S4' ATTTAPSLSGI | 404   | >CTNNB1-S4' ATTTAPSLGG  | 357  | 47    |
| >CTNNB1-S4' SGATTTAPSLI | 26184 | >CTNNB1-S4' SGATTTAPSLI | 103  | 26081 |
| >CTNNB1-S4' TAPSLSGK    | 663   | >CTNNB1-S4' TAPSLIGK    | 340  | 323   |
| >CTNNB1-S4' TAPSLSGK    | 164   | >CTNNB1-S4' TAPSLIGK    | 214  | 50    |
| >CTNNB1-S4' TTAPSLSGK   | 86    | >CTNNB1-S4' TTAPSLIGK   | 85   | 1     |
| >CTNNB1-S4' TTAPSLSGK   | 10    | >CTNNB1-S4' TTAPSLIGK   | 8    | 2     |
| >CTNNB1-S4' TTAPSLSGK   | 677   | >CTNNB1-S4' TTAPSLIGK   | 175  | 502   |
| >CTNNB1-S4' TTAPSLSGK   | 5     | >CTNNB1-S4' TTAPSLIGK   | 8    | 3     |
| >CTNNB1-S4' TTAPSLSGK   | 198   | >CTNNB1-S4' TTAPSLIGK   | 107  | 91    |
| >CTNNB1-S4' TTTAPSLSGK  | 59    | >CTNNB1-S4' TTTAPSLIGK  | 63   | 4     |
| >CTNNB1-S4' TTTAPSLSGK  | 15    | >CTNNB1-S4' TTTAPSLIGK  | 9    | 6     |
| >CTNNB1-S4' TTTAPSLSGK  | 439   | >CTNNB1-S4' TTTAPSLIGK  | 208  | 231   |
| >CTNNB1-S4' TTTAPSLSGK  | 8     | >CTNNB1-S4' TTTAPSLIGK  | 8    | 0     |
| >CTNNB1-S4' TTTAPSLSL   | 338   | >CTNNB1-S4' TTTAPSLI    | 12   | 326   |
| >CTNNB1-S4' TTTAPSLSL   | 12449 | >CTNNB1-S4' TTTAPSLI    | 240  | 12209 |
| >CTNNB1-S4' TTTAPSLSL   | 9934  | >CTNNB1-S4' TTTAPSLI    | 261  | 9673  |
| >CTNNB1-S4' TTTAPSLSL   | 25283 | >CTNNB1-S4' TTTAPSLI    | 86   | 25197 |
| >CTNNB1-S4' TTTAPSLSL   | 2132  | >CTNNB1-S4' TTTAPSLI    | 54   | 2078  |

|                         |       |                         |      |       |
|-------------------------|-------|-------------------------|------|-------|
| >CTNNB1-S4' TTTAPSL     | 28073 | >CTNNB1-S4' TTTAPSLI    | 35   | 28038 |
| >CTNNB1-S4' ATTTAPSLSGI | 216   | >CTNNB1-S4' ATTTAPSLIGk | 199  | 17    |
| >CTNNB1-S4' ATTTAPSLSGI | 36    | >CTNNB1-S4' ATTTAPSLIGk | 26   | 10    |
| >CTNNB1-S4' ATTTAPSLSGI | 51    | >CTNNB1-S4' ATTTAPSLIGk | 24   | 27    |
| >CTNNB1-S4' ATTTAPSLSGI | 129   | >CTNNB1-S4' ATTTAPSLIGk | 226  | 97    |
| >CTNNB1-S4' ATTTAPSL    | 8638  | >CTNNB1-S4' ATTTAPSLI   | 461  | 8177  |
| >CTNNB1-S4' ATTTAPSL    | 9775  | >CTNNB1-S4' ATTTAPSLI   | 184  | 9591  |
| >CTNNB1-S4' ATTTAPSL    | 1956  | >CTNNB1-S4' ATTTAPSLI   | 46   | 1910  |
| >CTNNB1-S4' ATTTAPSL    | 362   | >CTNNB1-S4' ATTTAPSLI   | 22   | 340   |
| >CTNNB1-S4' ATTTAPSLSGI | 404   | >CTNNB1-S4' ATTTAPSLIGk | 244  | 160   |
| >CTNNB1-S4' ATTTAPSL    | 24717 | >CTNNB1-S4' ATTTAPSLI   | 24   | 24693 |
| >CTNNB1-S4' GATTTAPSL   | 31775 | >CTNNB1-S4' GATTTAPSLI  | 71   | 31704 |
| >CTNNB1-S4' TAPSLSGK    | 164   | >CTNNB1-S4' TAPSLNGK    | 190  | 26    |
| >CTNNB1-S4' TTAPSLSGK   | 86    | >CTNNB1-S4' TTAPSLNGK   | 227  | 141   |
| >CTNNB1-S4' TTAPSLSGK   | 10    | >CTNNB1-S4' TTAPSLNGK   | 13   | 3     |
| >CTNNB1-S4' TTAPSLSGK   | 677   | >CTNNB1-S4' TTAPSLNGK   | 486  | 191   |
| >CTNNB1-S4' TTAPSLSGK   | 5     | >CTNNB1-S4' TTAPSLNGK   | 6    | 1     |
| >CTNNB1-S4' TTAPSLSGK   | 198   | >CTNNB1-S4' TTAPSLNGK   | 202  | 4     |
| >CTNNB1-S4' TTTAPSLSGK  | 59    | >CTNNB1-S4' TTTAPSLNGK  | 264  | 205   |
| >CTNNB1-S4' TTTAPSLSGK  | 15    | >CTNNB1-S4' TTTAPSLNGK  | 21   | 6     |
| >CTNNB1-S4' TTTAPSLSGK  | 439   | >CTNNB1-S4' TTTAPSLNGK  | 387  | 52    |
| >CTNNB1-S4' TTTAPSLSGK  | 8     | >CTNNB1-S4' TTTAPSLNGK  | 11   | 3     |
| >CTNNB1-S4' TTTAPSL     | 338   | >CTNNB1-S4' TTTAPSLN    | 7405 | 7067  |
| >CTNNB1-S4' ATTTAPSLSGI | 216   | >CTNNB1-S4' ATTTAPSLNG  | 487  | 271   |
| >CTNNB1-S4' ATTTAPSLSGI | 36    | >CTNNB1-S4' ATTTAPSLNG  | 46   | 10    |
| >CTNNB1-S4' ATTTAPSLSGI | 51    | >CTNNB1-S4' ATTTAPSLNG  | 41   | 10    |
| >CTNNB1-S4' ATTTAPSLSGI | 129   | >CTNNB1-S4' ATTTAPSLNG  | 170  | 41    |
| >CTNNB1-S4' ATTTAPSL    | 362   | >CTNNB1-S4' ATTTAPSLN   | 385  | 23    |
| >CTNNB1-S4' ATTTAPSLSGI | 404   | >CTNNB1-S4' ATTTAPSLNG  | 399  | 5     |
| >CTNNB1-S4' SGATTTAPSLI | 29188 | >CTNNB1-S4' SGATTTAPSLI | 167  | 29021 |
| >CTNNB1-S4' TAPSLSGK    | 164   | >CTNNB1-S4' TAPSLRGK    | 463  | 299   |
| >CTNNB1-S4' TTAPSLSGK   | 86    | >CTNNB1-S4' TTAPSLRGK   | 262  | 176   |
| >CTNNB1-S4' TTAPSLSGK   | 10    | >CTNNB1-S4' TTAPSLRGK   | 25   | 15    |
| >CTNNB1-S4' TTAPSLSGK   | 5     | >CTNNB1-S4' TTAPSLRGK   | 18   | 13    |
| >CTNNB1-S4' TTAPSLSGK   | 198   | >CTNNB1-S4' TTAPSLRGK   | 138  | 60    |
| >CTNNB1-S4' TTTAPSLSGK  | 59    | >CTNNB1-S4' TTTAPSLRGK  | 146  | 87    |
| >CTNNB1-S4' TTTAPSL     | 13774 | >CTNNB1-S4' TTTAPSLR    | 110  | 13664 |
| >CTNNB1-S4' TTTAPSLSGK  | 15    | >CTNNB1-S4' TTTAPSLRGK  | 29   | 14    |
| >CTNNB1-S4' TTTAPSLSGK  | 439   | >CTNNB1-S4' TTTAPSLRGK  | 561  | 122   |
| >CTNNB1-S4' TTTAPSL     | 17857 | >CTNNB1-S4' TTTAPSLR    | 130  | 17727 |
| >CTNNB1-S4' TTTAPSL     | 28633 | >CTNNB1-S4' TTTAPSLR    | 203  | 28430 |
| >CTNNB1-S4' TTTAPSL     | 4515  | >CTNNB1-S4' TTTAPSLR    | 5    | 4510  |
| >CTNNB1-S4' TTTAPSLSGK  | 8     | >CTNNB1-S4' TTTAPSLRGK  | 26   | 18    |

|                         |       |                        |      |       |
|-------------------------|-------|------------------------|------|-------|
| >CTNNB1-S4' TTTAPSL     | 338   | >CTNNB1-S4' TTTAPSLR   | 9162 | 8824  |
| >CTNNB1-S4' ATTTAPSLSGI | 216   | >CTNNB1-S4' ATTTAPSLRG | 536  | 320   |
| >CTNNB1-S4' ATTTAPSL    | 14386 | >CTNNB1-S4' ATTTAPSLR  | 212  | 14174 |
| >CTNNB1-S4' ATTTAPSLSGI | 36    | >CTNNB1-S4' ATTTAPSLRG | 79   | 43    |
| >CTNNB1-S4' ATTTAPSLSGI | 51    | >CTNNB1-S4' ATTTAPSLRG | 51   | 0     |
| >CTNNB1-S4' ATTTAPSL    | 18301 | >CTNNB1-S4' ATTTAPSLR  | 154  | 18147 |
| >CTNNB1-S4' ATTTAPSL    | 20711 | >CTNNB1-S4' ATTTAPSLR  | 20   | 20691 |
| >CTNNB1-S4' ATTTAPSLSGI | 129   | >CTNNB1-S4' ATTTAPSLRG | 537  | 408   |
| >CTNNB1-S4' ATTTAPSL    | 362   | >CTNNB1-S4' ATTTAPSLR  | 501  | 139   |
| >CTNNB1-S4' ATTTAPSL    | 9526  | >CTNNB1-S4' ATTTAPSLR  | 472  | 9054  |
| >CTNNB1-S4' ATTTAPSLSGI | 404   | >CTNNB1-S4' ATTTAPSLRG | 319  | 85    |
| >CTNNB1-S4' GATTTAPSL   | 33431 | >CTNNB1-S4' GATTTAPSLR | 151  | 33280 |
| >CTNNB1-S4' TAPSLSGK    | 164   | >CTNNB1-S4' TAPSLTGK   | 166  | 2     |
| >CTNNB1-S4' TTAPSLSGK   | 86    | >CTNNB1-S4' TTAPSLTGK  | 104  | 18    |
| >CTNNB1-S4' TTAPSLSGK   | 10    | >CTNNB1-S4' TTAPSLTGK  | 13   | 3     |
| >CTNNB1-S4' TTAPSLSGK   | 5     | >CTNNB1-S4' TTAPSLTGK  | 7    | 2     |
| >CTNNB1-S4' TTAPSLSGK   | 198   | >CTNNB1-S4' TTAPSLTGK  | 158  | 40    |
| >CTNNB1-S4' TTTAPSLSGK  | 59    | >CTNNB1-S4' TTTAPSLTGK | 82   | 23    |
| >CTNNB1-S4' TTTAPSLSGK  | 15    | >CTNNB1-S4' TTTAPSLTGK | 14   | 1     |
| >CTNNB1-S4' TTTAPSLSGK  | 439   | >CTNNB1-S4' TTTAPSLTGK | 915  | 476   |
| >CTNNB1-S4' TTTAPSLSGK  | 8     | >CTNNB1-S4' TTTAPSLTGK | 9    | 1     |
| >CTNNB1-S4' TTTAPSL     | 338   | >CTNNB1-S4' TTTAPSLT   | 332  | 6     |
| >CTNNB1-S4' ATTTAPSLSGI | 216   | >CTNNB1-S4' ATTTAPSLTG | 252  | 36    |
| >CTNNB1-S4' ATTTAPSLSGI | 36    | >CTNNB1-S4' ATTTAPSLTG | 43   | 7     |
| >CTNNB1-S4' ATTTAPSLSGI | 51    | >CTNNB1-S4' ATTTAPSLTG | 111  | 60    |
| >CTNNB1-S4' ATTTAPSLSGI | 129   | >CTNNB1-S4' ATTTAPSLTG | 174  | 45    |
| >CTNNB1-S4' ATTTAPSL    | 362   | >CTNNB1-S4' ATTTAPSLT  | 228  | 134   |
| >CTNNB1-S4' ATTTAPSLSGI | 404   | >CTNNB1-S4' ATTTAPSLTG | 336  | 68    |
| >CTNNB1-S6' SQVLYEWEQ   | 185   | >CTNNB1-S6' CQVLYEWEQ  | 690  | 505   |
| >CTNNB1-S6' SQVLYEWEQ   | 272   | >CTNNB1-S6' CQVLYEWEQ  | 1516 | 1244  |
| >CTNNB1-S6' SQVLYEWEQ   | 24    | >CTNNB1-S6' CQVLYEWEQ  | 45   | 21    |
| >CTNNB1-S6' TSQVLYEW    | 53    | >CTNNB1-S6' TCQVLYEW   | 9526 | 9473  |
| >CTNNB1-S6' TSQVLYEW    | 53    | >CTNNB1-S6' TCQVLYEW   | 5036 | 4983  |
| >CTNNB1-S6' TSQVLYEW    | 18    | >CTNNB1-S6' TCQVLYEW   | 1771 | 1753  |
| >CTNNB1-S6' TSQVLYEW    | 459   | >CTNNB1-S6' TCQVLYEW   | 566  | 107   |
| >CTNNB1-S6' DTSQVLYEW   | 856   | >CTNNB1-S6' DTCQVLYEW  | 138  | 718   |
| >CTNNB1-S6' DTSQVLYEW   | 2580  | >CTNNB1-S6' DTCQVLYEW  | 158  | 2422  |
| >CTNNB1-S6' DTSQVLYEW   | 285   | >CTNNB1-S6' DTCQVLYEW  | 614  | 329   |
| >CTNNB1-S6' DTSQVLYEW   | 677   | >CTNNB1-S6' DTCQVLYEW  | 462  | 215   |
| >CTNNB1-S6' DTSQVLYEW   | 144   | >CTNNB1-S6' DTCQVLYEW  | 556  | 412   |
| >CTNNB1-S6' DTSQVLYEW   | 134   | >CTNNB1-S6' DTCQVLYEW  | 726  | 592   |
| >CTNNB1-S6' DVDTSQVLY   | 25    | >CTNNB1-S6' DVDTCQVLY  | 35   | 10    |
| >CTNNB1-S6' DVDTSQVLY   | 577   | >CTNNB1-S6' DVDTCQVLY  | 318  | 259   |

|                       |      |                       |       |       |
|-----------------------|------|-----------------------|-------|-------|
| >CTNNB1-S6 DVDTSQVLY  | 404  | >CTNNB1-S6 DVDTCQVLY  | 181   | 223   |
| >CTNNB1-S6 EDVDTSQV   | 205  | >CTNNB1-S6 EDVDTCQV   | 146   | 59    |
| >CTNNB1-S6 EEDVDTSQV  | 208  | >CTNNB1-S6 EEDVDTCQV  | 121   | 87    |
| >CTNNB1-S6 EEDVDTSQVL | 274  | >CTNNB1-S6 EEDVDTCQVI | 1119  | 845   |
| >CTNNB1-S6 EEDVDTSQVL | 476  | >CTNNB1-S6 EEDVDTCQVI | 467   | 9     |
| >CTNNB1-S6 EEDVDTSQV  | 464  | >CTNNB1-S6 EEDVDTCQV  | 303   | 161   |
| >CTNNB1-S6 EEDVDTSQVL | 677  | >CTNNB1-S6 EEDVDTCQVI | 200   | 477   |
| >CTNNB1-S6 EEEDVDTSQV | 178  | >CTNNB1-S6 EEEDVDTCQV | 130   | 48    |
| >CTNNB1-S6 EEEDVDTSQV | 50   | >CTNNB1-S6 EEEDVDTCQV | 65    | 15    |
| >CTNNB1-S6 EEEDVDTSQV | 445  | >CTNNB1-S6 EEEDVDTCQV | 1329  | 884   |
| >CTNNB1-S6 PEEEDVDTSC | 368  | >CTNNB1-S6 PEEEDVDTC  | 316   | 52    |
| >CTNNB1-S6 NPEEEDVDTS | 474  | >CTNNB1-S6 NPEEEDVDTC | 878   | 404   |
| >CTNNB1-S6 SQVLYEWEQ  | 897  | >CTNNB1-S6 FQVLYEWEQ  | 66    | 831   |
| >CTNNB1-S6 SQVLYEWEQ  | 185  | >CTNNB1-S6 FQVLYEWEQ  | 22    | 163   |
| >CTNNB1-S6 SQVLYEWEQ  | 272  | >CTNNB1-S6 FQVLYEWEQ  | 195   | 77    |
| >CTNNB1-S6 SQVLYEWEQ  | 24   | >CTNNB1-S6 FQVLYEWEQ  | 8     | 16    |
| >CTNNB1-S6 TSQVLYEW   | 2983 | >CTNNB1-S6 TFQVLYEW   | 67    | 2916  |
| >CTNNB1-S6 TSQVLYEW   | 6019 | >CTNNB1-S6 TFQVLYEW   | 445   | 5574  |
| >CTNNB1-S6 TSQVLYEW   | 7749 | >CTNNB1-S6 TFQVLYEW   | 33    | 7716  |
| >CTNNB1-S6 TSQVLYEW   | 53   | >CTNNB1-S6 TFQVLYEW   | 16088 | 16035 |
| >CTNNB1-S6 TSQVLYEW   | 53   | >CTNNB1-S6 TFQVLYEW   | 12988 | 12935 |
| >CTNNB1-S6 TSQVLYEW   | 18   | >CTNNB1-S6 TFQVLYEW   | 1219  | 1201  |
| >CTNNB1-S6 TSQVLYEW   | 459  | >CTNNB1-S6 TFQVLYEW   | 2721  | 2262  |
| >CTNNB1-S6 DTSQVLYEW  | 706  | >CTNNB1-S6 DTFQVLYEW  | 426   | 280   |
| >CTNNB1-S6 DTSQVLYEW  | 2580 | >CTNNB1-S6 DTFQVLYEW  | 244   | 2336  |
| >CTNNB1-S6 DTSQVLYEW  | 1729 | >CTNNB1-S6 DTFQVLYEW  | 50    | 1679  |
| >CTNNB1-S6 DTSQVLYEWI | 2734 | >CTNNB1-S6 DTFQVLYEWI | 494   | 2240  |
| >CTNNB1-S6 DTSQVLYE   | 1237 | >CTNNB1-S6 DTFQVLYE   | 152   | 1085  |
| >CTNNB1-S6 DTSQVLYEW  | 2054 | >CTNNB1-S6 DTFQVLYEW  | 345   | 1709  |
| >CTNNB1-S6 DTSQVLYEWI | 285  | >CTNNB1-S6 DTFQVLYEWI | 47    | 238   |
| >CTNNB1-S6 DTSQVLYEW  | 677  | >CTNNB1-S6 DTFQVLYEW  | 109   | 568   |
| >CTNNB1-S6 DTSQVLYEW  | 1921 | >CTNNB1-S6 DTFQVLYEW  | 346   | 1575  |
| >CTNNB1-S6 DTSQVLYEW  | 144  | >CTNNB1-S6 DTFQVLYEW  | 62    | 82    |
| >CTNNB1-S6 DTSQVLYEW  | 134  | >CTNNB1-S6 DTFQVLYEW  | 108   | 26    |
| >CTNNB1-S6 VDTSQVLY   | 648  | >CTNNB1-S6 VDTFQVLY   | 377   | 271   |
| >CTNNB1-S6 DVDTSQVLY  | 25   | >CTNNB1-S6 DVDTFQVLY  | 18    | 7     |
| >CTNNB1-S6 DVDTSQVLY  | 577  | >CTNNB1-S6 DVDTFQVLY  | 227   | 350   |
| >CTNNB1-S6 DVDTSQVLY  | 404  | >CTNNB1-S6 DVDTFQVLY  | 474   | 70    |
| >CTNNB1-S6 EDVDTSQV   | 1247 | >CTNNB1-S6 EDVDTFQV   | 395   | 852   |
| >CTNNB1-S6 EDVDTSQV   | 1007 | >CTNNB1-S6 EDVDTFQV   | 159   | 848   |
| >CTNNB1-S6 EDVDTSQV   | 205  | >CTNNB1-S6 EDVDTFQV   | 70    | 135   |
| >CTNNB1-S6 EEDVDTSQV  | 208  | >CTNNB1-S6 EEDVDTFQV  | 257   | 49    |
| >CTNNB1-S6 EEDVDTSQV  | 3614 | >CTNNB1-S6 EEDVDTFQV  | 476   | 3138  |

|                       |       |                       |      |       |
|-----------------------|-------|-----------------------|------|-------|
| >CTNNB1-S6:EEDVDTSQVL | 274   | >CTNNB1-S6:EEDVDTFQVL | 348  | 74    |
| >CTNNB1-S6:EEDVDTSQVL | 601   | >CTNNB1-S6:EEDVDTFQVL | 350  | 251   |
| >CTNNB1-S6:EEDVDTSQVL | 476   | >CTNNB1-S6:EEDVDTFQVL | 311  | 165   |
| >CTNNB1-S6:EEDVDTSQV  | 464   | >CTNNB1-S6:EEDVDTFQV  | 125  | 339   |
| >CTNNB1-S6:EEDVDTSQVL | 677   | >CTNNB1-S6:EEDVDTFQVL | 432  | 245   |
| >CTNNB1-S6:EEEDVDTSQV | 178   | >CTNNB1-S6:EEEDVDTFQV | 146  | 32    |
| >CTNNB1-S6:EEEDVDTS   | 11373 | >CTNNB1-S6:EEEDVDTF   | 301  | 11072 |
| >CTNNB1-S6:EEEDVDTSQV | 50    | >CTNNB1-S6:EEEDVDTFQV | 33   | 17    |
| >CTNNB1-S6:EEEDVDTSQV | 1147  | >CTNNB1-S6:EEEDVDTFQV | 370  | 777   |
| >CTNNB1-S6:EEEDVDTS   | 4603  | >CTNNB1-S6:EEEDVDTF   | 144  | 4459  |
| >CTNNB1-S6:EEEDVDTSQV | 839   | >CTNNB1-S6:EEEDVDTFQV | 486  | 353   |
| >CTNNB1-S6:EEEDVDTSQV | 445   | >CTNNB1-S6:EEEDVDTFQV | 385  | 60    |
| >CTNNB1-S6:EEEDVDTSQV | 1034  | >CTNNB1-S6:EEEDVDTFQV | 481  | 553   |
| >CTNNB1-S6:PEEEDVDTSC | 368   | >CTNNB1-S6:PEEEDVDTFC | 175  | 193   |
| >CTNNB1-S6:NPEEEDVDTS | 474   | >CTNNB1-S6:NPEEEDVDTF | 1688 | 1214  |
| >CTNNB1-S6:NPEEEDVDTS | 15173 | >CTNNB1-S6:NPEEEDVDTF | 99   | 15074 |
| >CTNNB1-S6:NPEEEDVDTS | 8419  | >CTNNB1-S6:NPEEEDVDTF | 35   | 8384  |
| >CTNNB1-T3:TQADLMEL   | 123   | >CTNNB1-T3:SQADLMEL   | 48   | 75    |
| >CTNNB1-T3:TQADLMEL   | 21    | >CTNNB1-T3:SQADLMEL   | 12   | 9     |
| >CTNNB1-T3:TQADLMELD  | 164   | >CTNNB1-T3:SQADLMELD  | 79   | 85    |
| >CTNNB1-T3:TQADLMEL   | 131   | >CTNNB1-T3:SQADLMEL   | 68   | 63    |
| >CTNNB1-T3:TQADLMELD  | 272   | >CTNNB1-T3:SQADLMELD  | 154  | 118   |
| >CTNNB1-T3:TQADLMEL   | 13    | >CTNNB1-T3:SQADLMEL   | 7    | 6     |
| >CTNNB1-T3:TQADLMELD  | 29    | >CTNNB1-T3:SQADLMELD  | 15   | 14    |
| >CTNNB1-T3:TQADLMEL   | 2425  | >CTNNB1-T3:SQADLMEL   | 486  | 1939  |
| >CTNNB1-T3:TQADLMEL   | 3237  | >CTNNB1-T3:SQADLMEL   | 327  | 2910  |
| >CTNNB1-T3:TQADLMELD  | 932   | >CTNNB1-T3:SQADLMELD  | 397  | 535   |
| >CTNNB1-T3:TQADLMEL   | 636   | >CTNNB1-T3:SQADLMEL   | 268  | 368   |
| >CTNNB1-T3:TQADLMEL   | 83    | >CTNNB1-T3:SQADLMEL   | 198  | 115   |
| >CTNNB1-T3:ATQADLMEL  | 465   | >CTNNB1-T3:ASQADLMEL  | 2069 | 1604  |
| >CTNNB1-T3:ATQADLMEL  | 353   | >CTNNB1-T3:ASQADLMEL  | 2372 | 2019  |
| >CTNNB1-T3:ATQADLMEL  | 436   | >CTNNB1-T3:ASQADLMEL  | 3450 | 3014  |
| >CTNNB1-T3:ATQADLMEL  | 84    | >CTNNB1-T3:ASQADLMEL  | 155  | 71    |
| >CTNNB1-T3:ATQADLMELI | 111   | >CTNNB1-T3:ASQADLMELI | 181  | 70    |
| >CTNNB1-T3:MATQADLMI  | 466   | >CTNNB1-T3:MASQADLMI  | 137  | 329   |
| >CTNNB1-T3:MATQADLMI  | 825   | >CTNNB1-T3:MASQADLMI  | 336  | 489   |
| >CTNNB1-T3:MATQADLMI  | 339   | >CTNNB1-T3:MASQADLMI  | 218  | 121   |
| >CTNNB1-T3:MATQADLMI  | 629   | >CTNNB1-T3:MASQADLMI  | 389  | 240   |
| >CTNNB1-T3:MATQADLM   | 283   | >CTNNB1-T3:MASQADLM   | 207  | 76    |
| >CTNNB1-T3:MATQADLMI  | 122   | >CTNNB1-T3:MASQADLMI  | 88   | 34    |
| >CTNNB1-T3:MATQADLM   | 19    | >CTNNB1-T3:MASQADLM   | 15   | 4     |
| >CTNNB1-T3:MATQADLM   | 491   | >CTNNB1-T3:MASQADLM   | 409  | 82    |
| >CTNNB1-T3:MATQADLM   | 199   | >CTNNB1-T3:MASQADLM   | 144  | 55    |

|                        |      |                        |       |      |
|------------------------|------|------------------------|-------|------|
| >CTNNB1-T3:MATQADLMI   | 283  | >CTNNB1-T3:MASQADLMI   | 224   | 59   |
| >CTNNB1-T3:MATQADLM    | 459  | >CTNNB1-T3:MASQADLM    | 1103  | 644  |
| >CTNNB1-T4:TTTAPSLSGK  | 59   | >CTNNB1-T4:ATTAPSLSGK  | 27    | 32   |
| >CTNNB1-T4:TTTAPSLSGK  | 15   | >CTNNB1-T4:ATTAPSLSGK  | 11    | 4    |
| >CTNNB1-T4:TTTAPSLSGK  | 439  | >CTNNB1-T4:ATTAPSLSGK  | 51    | 388  |
| >CTNNB1-T4:TTTAPSLSGK  | 8    | >CTNNB1-T4:ATTAPSLSGK  | 30    | 22   |
| >CTNNB1-T4:TTTAPSL     | 338  | >CTNNB1-T4:ATTAPSL     | 7222  | 6884 |
| >CTNNB1-T4:ATTTAPSLSGI | 216  | >CTNNB1-T4:AATTAPSLSG  | 1230  | 1014 |
| >CTNNB1-T4:ATTTAPSLSGI | 36   | >CTNNB1-T4:AATTAPSLSG  | 163   | 127  |
| >CTNNB1-T4:ATTTAPSLSGI | 51   | >CTNNB1-T4:AATTAPSLSG  | 307   | 256  |
| >CTNNB1-T4:ATTTAPSLSGI | 129  | >CTNNB1-T4:AATTAPSLSG  | 757   | 628  |
| >CTNNB1-T4:ATTTAPSL    | 16   | >CTNNB1-T4:AATTAPSL    | 158   | 142  |
| >CTNNB1-T4:ATTTAPSL    | 362  | >CTNNB1-T4:AATTAPSL    | 6756  | 6394 |
| >CTNNB1-T4:ATTTAPSLSGI | 404  | >CTNNB1-T4:AATTAPSLSG  | 2087  | 1683 |
| >CTNNB1-T4:ATTTAPSL    | 368  | >CTNNB1-T4:AATTAPSL    | 2680  | 2312 |
| >CTNNB1-T4:YLDSGIHSGA  | 212  | >CTNNB1-T4:YLDSGIHSGA  | 48    | 164  |
| >CTNNB1-T4:YLDSGIHSGA  | 284  | >CTNNB1-T4:YLDSGIHSGA  | 37    | 247  |
| >CTNNB1-T4:YLDSGIHSGA  | 78   | >CTNNB1-T4:YLDSGIHSGA  | 9     | 69   |
| >CTNNB1-T4:YLDSGIHSGA  | 178  | >CTNNB1-T4:YLDSGIHSGA  | 38    | 140  |
| >CTNNB1-T4:YLDSGIHSGA  | 12   | >CTNNB1-T4:YLDSGIHSGA  | 4     | 8    |
| >CTNNB1-T4:YLDSGIHSGA  | 83   | >CTNNB1-T4:YLDSGIHSGA  | 10    | 73   |
| >CTNNB1-T4:YLDSGIHSGA  | 121  | >CTNNB1-T4:YLDSGIHSGA  | 19    | 102  |
| >CTNNB1-T4:YLDSGIHSGA  | 255  | >CTNNB1-T4:YLDSGIHSGA  | 52    | 203  |
| >CTNNB1-T4:YLDSGIHSGA  | 36   | >CTNNB1-T4:YLDSGIHSGA  | 7     | 29   |
| >CTNNB1-T4:GATTTAPSL   | 272  | >CTNNB1-T4:GAATTAPSL   | 148   | 124  |
| >CTNNB1-T4:GATTTAPSL   | 346  | >CTNNB1-T4:GAATTAPSL   | 869   | 523  |
| >CTNNB1-T4:SGATTTAPSL  | 741  | >CTNNB1-T4:SGAATTAPSL  | 411   | 330  |
| >CTNNB1-T4:HSGATTTAPS  | 33   | >CTNNB1-T4:HSGAATTAPS  | 43    | 10   |
| >CTNNB1-T4:GIHSGATTTA  | 432  | >CTNNB1-T4:GIHSGAATTA  | 935   | 503  |
| >CTNNB1-T4:GIHSGATTTA  | 276  | >CTNNB1-T4:GIHSGAATTA  | 907   | 631  |
| >CTNNB1-T4:GIHSGATTTA  | 362  | >CTNNB1-T4:GIHSGAATTA  | 456   | 94   |
| >CTNNB1-T4:TTTAPSLSGK  | 59   | >CTNNB1-T4:ITTAPSLSGK  | 33    | 26   |
| >CTNNB1-T4:TTTAPSLSGK  | 15   | >CTNNB1-T4:ITTAPSLSGK  | 22    | 7    |
| >CTNNB1-T4:TTTAPSLSGK  | 439  | >CTNNB1-T4:ITTAPSLSGK  | 212   | 227  |
| >CTNNB1-T4:TTTAPSLSGK  | 8    | >CTNNB1-T4:ITTAPSLSGK  | 23    | 15   |
| >CTNNB1-T4:TTTAPSL     | 338  | >CTNNB1-T4:ITTAPSL     | 4623  | 4285 |
| >CTNNB1-T4:ATTTAPSL    | 2436 | >CTNNB1-T4:AITTAPSL    | 60    | 2376 |
| >CTNNB1-T4:ATTTAPSLSGI | 216  | >CTNNB1-T4:AITTAPSLSGK | 153   | 63   |
| >CTNNB1-T4:ATTTAPSLSGI | 36   | >CTNNB1-T4:AITTAPSLSGK | 61    | 25   |
| >CTNNB1-T4:ATTTAPSLSGI | 51   | >CTNNB1-T4:AITTAPSLSGK | 269   | 218  |
| >CTNNB1-T4:ATTTAPSLSGI | 129  | >CTNNB1-T4:AITTAPSLSGK | 895   | 766  |
| >CTNNB1-T4:ATTTAPSL    | 16   | >CTNNB1-T4:AITTAPSL    | 4957  | 4941 |
| >CTNNB1-T4:ATTTAPSL    | 362  | >CTNNB1-T4:AITTAPSL    | 10098 | 9736 |



|                        |       |                        |       |       |
|------------------------|-------|------------------------|-------|-------|
| >CTNNB1-T4 ATTTAPSLSGI | 404   | >CTNNB1-T4 AITTAPSLSGK | 3882  | 3478  |
| >CTNNB1-T4 ATTTAPSL    | 368   | >CTNNB1-T4 AITTAPSL    | 16675 | 16307 |
| >CTNNB1-T4 YLDSGIHSGA  | 212   | >CTNNB1-T4 YLDSGIHSGA  | 25    | 187   |
| >CTNNB1-T4 YLDSGIHSGA  | 284   | >CTNNB1-T4 YLDSGIHSGA  | 18    | 266   |
| >CTNNB1-T4 YLDSGIHSGA  | 78    | >CTNNB1-T4 YLDSGIHSGA  | 8     | 70    |
| >CTNNB1-T4 YLDSGIHSGA  | 178   | >CTNNB1-T4 YLDSGIHSGA  | 27    | 151   |
| >CTNNB1-T4 YLDSGIHSGA  | 12    | >CTNNB1-T4 YLDSGIHSGA  | 2     | 10    |
| >CTNNB1-T4 YLDSGIHSGA  | 83    | >CTNNB1-T4 YLDSGIHSGA  | 4     | 79    |
| >CTNNB1-T4 YLDSGIHSGA  | 121   | >CTNNB1-T4 YLDSGIHSGA  | 13    | 108   |
| >CTNNB1-T4 YLDSGIHSGA  | 255   | >CTNNB1-T4 YLDSGIHSGA  | 18    | 237   |
| >CTNNB1-T4 YLDSGIHSGA  | 36    | >CTNNB1-T4 YLDSGIHSGA  | 7     | 29    |
| >CTNNB1-T4 YLDSGIHSGA  | 4106  | >CTNNB1-T4 YLDSGIHSGA  | 163   | 3943  |
| >CTNNB1-T4 GATTTAPSL   | 272   | >CTNNB1-T4 GAITTAPSL   | 52    | 220   |
| >CTNNB1-T4 GATTTAPSL   | 346   | >CTNNB1-T4 GAITTAPSL   | 2191  | 1845  |
| >CTNNB1-T4 HSGATTTAPS  | 984   | >CTNNB1-T4 HSGAITTAPSI | 350   | 634   |
| >CTNNB1-T4 HSGATTTAPS  | 33    | >CTNNB1-T4 HSGAITTAPSI | 92    | 59    |
| >CTNNB1-T4 GIHSGATTTA  | 432   | >CTNNB1-T4 GIHSGAITTA  | 321   | 111   |
| >CTNNB1-T4 GIHSGATTTA  | 276   | >CTNNB1-T4 GIHSGAITTA  | 198   | 78    |
| >CTNNB1-T4 GIHSGATTTA  | 362   | >CTNNB1-T4 GIHSGAITTA  | 224   | 138   |
| >CTNNB1-T4 LDSGIHSGAT  | 10422 | >CTNNB1-T4 LDSGIHSGAI  | 337   | 10085 |
| >CTNNB1-T4 TTTAPSLSGK  | 59    | >CTNNB1-T4 STTAPSLSGK  | 37    | 22    |
| >CTNNB1-T4 TTTAPSLSGK  | 15    | >CTNNB1-T4 STTAPSLSGK  | 10    | 5     |
| >CTNNB1-T4 TTTAPSLSGK  | 439   | >CTNNB1-T4 STTAPSLSGK  | 83    | 356   |
| >CTNNB1-T4 TTTAPSLSGK  | 8     | >CTNNB1-T4 STTAPSLSGK  | 14    | 6     |
| >CTNNB1-T4 TTTAPSLS    | 338   | >CTNNB1-T4 STTAPSLS    | 1312  | 974   |
| >CTNNB1-T4 ATTTAPSLSGI | 216   | >CTNNB1-T4 ASTTAPSLSGI | 400   | 184   |
| >CTNNB1-T4 ATTTAPSLSGI | 36    | >CTNNB1-T4 ASTTAPSLSGI | 48    | 12    |
| >CTNNB1-T4 ATTTAPSLSGI | 51    | >CTNNB1-T4 ASTTAPSLSGI | 106   | 55    |
| >CTNNB1-T4 ATTTAPSLSGI | 129   | >CTNNB1-T4 ASTTAPSLSGI | 880   | 751   |
| >CTNNB1-T4 ATTTAPSL    | 16    | >CTNNB1-T4 ASTTAPSL    | 22    | 6     |
| >CTNNB1-T4 ATTTAPSLS   | 362   | >CTNNB1-T4 ASTTAPSLS   | 1129  | 767   |
| >CTNNB1-T4 ATTTAPSLSGI | 404   | >CTNNB1-T4 ASTTAPSLSGI | 653   | 249   |
| >CTNNB1-T4 ATTTAPSL    | 368   | >CTNNB1-T4 ASTTAPSL    | 555   | 187   |
| >CTNNB1-T4 YLDSGIHSGA  | 212   | >CTNNB1-T4 YLDSGIHSGA  | 1097  | 885   |
| >CTNNB1-T4 YLDSGIHSGA  | 284   | >CTNNB1-T4 YLDSGIHSGA  | 858   | 574   |
| >CTNNB1-T4 YLDSGIHSGA  | 78    | >CTNNB1-T4 YLDSGIHSGA  | 647   | 569   |
| >CTNNB1-T4 YLDSGIHSGA  | 178   | >CTNNB1-T4 YLDSGIHSGA  | 596   | 418   |
| >CTNNB1-T4 YLDSGIHSGA  | 12    | >CTNNB1-T4 YLDSGIHSGA  | 49    | 37    |
| >CTNNB1-T4 YLDSGIHSGA  | 83    | >CTNNB1-T4 YLDSGIHSGA  | 543   | 460   |
| >CTNNB1-T4 YLDSGIHSGA  | 121   | >CTNNB1-T4 YLDSGIHSGA  | 852   | 731   |
| >CTNNB1-T4 YLDSGIHSGA  | 255   | >CTNNB1-T4 YLDSGIHSGA  | 2533  | 2278  |
| >CTNNB1-T4 YLDSGIHSGA  | 36    | >CTNNB1-T4 YLDSGIHSGA  | 251   | 215   |
| >CTNNB1-T4 GATTTAPSL   | 272   | >CTNNB1-T4 GASTTAPSL   | 203   | 69    |

|                        |      |                       |      |      |
|------------------------|------|-----------------------|------|------|
| >CTNNB1-T4 GATTTAPSL   | 346  | >CTNNB1-T4 GASTTAPSL  | 1497 | 1151 |
| >CTNNB1-T4 HSGATTTAPS  | 33   | >CTNNB1-T4 HSGASTTAPS | 18   | 15   |
| >CTNNB1-T4 GIHSGATTTA  | 432  | >CTNNB1-T4 GIHSGASTTA | 613  | 181  |
| >CTNNB1-T4 GIHSGATTTA  | 276  | >CTNNB1-T4 GIHSGASTTA | 495  | 219  |
| >CTNNB1-T4 GIHSGATTTA  | 362  | >CTNNB1-T4 GIHSGASTTA | 521  | 159  |
| >CTNNB1-T4 TTAPSLSGK   | 86   | >CTNNB1-T4 ATAPSLSGK  | 70   | 16   |
| >CTNNB1-T4 TTAPSLSGK   | 10   | >CTNNB1-T4 ATAPSLSGK  | 11   | 1    |
| >CTNNB1-T4 TTAPSLSGK   | 677  | >CTNNB1-T4 ATAPSLSGK  | 69   | 608  |
| >CTNNB1-T4 TTAPSLSGK   | 5    | >CTNNB1-T4 ATAPSLSGK  | 37   | 32   |
| >CTNNB1-T4 TTAPSLSGK   | 198  | >CTNNB1-T4 ATAPSLSGK  | 69   | 129  |
| >CTNNB1-T4 TTTAPSLSGK  | 59   | >CTNNB1-T4 TATAPSLSGK | 229  | 170  |
| >CTNNB1-T4 TTTAPSLSGK  | 15   | >CTNNB1-T4 TATAPSLSGK | 65   | 50   |
| >CTNNB1-T4 TTTAPSLSGK  | 439  | >CTNNB1-T4 TATAPSLSGK | 2246 | 1807 |
| >CTNNB1-T4 TTTAPSLSGK  | 8    | >CTNNB1-T4 TATAPSLSGK | 22   | 14   |
| >CTNNB1-T4 TTTAPSLS    | 338  | >CTNNB1-T4 TATAPSLS   | 3434 | 3096 |
| >CTNNB1-T4 ATTTAPSL    | 4101 | >CTNNB1-T4 ATATAPSL   | 428  | 3673 |
| >CTNNB1-T4 ATTTAPSLSGI | 216  | >CTNNB1-T4 ATATAPSLSG | 81   | 135  |
| >CTNNB1-T4 ATTTAPSLSGI | 36   | >CTNNB1-T4 ATATAPSLSG | 21   | 15   |
| >CTNNB1-T4 ATTTAPSL    | 838  | >CTNNB1-T4 ATATAPSL   | 331  | 507  |
| >CTNNB1-T4 ATTTAPSLSGI | 51   | >CTNNB1-T4 ATATAPSLSG | 65   | 14   |
| >CTNNB1-T4 ATTTAPSLSGI | 129  | >CTNNB1-T4 ATATAPSLSG | 40   | 89   |
| >CTNNB1-T4 ATTTAPSL    | 16   | >CTNNB1-T4 ATATAPSL   | 11   | 5    |
| >CTNNB1-T4 ATTTAPSL    | 535  | >CTNNB1-T4 ATATAPSL   | 158  | 377  |
| >CTNNB1-T4 ATTTAPSLS   | 362  | >CTNNB1-T4 ATATAPSLS  | 374  | 12   |
| >CTNNB1-T4 ATTTAPSLSGI | 404  | >CTNNB1-T4 ATATAPSLSG | 173  | 231  |
| >CTNNB1-T4 ATTTAPSL    | 368  | >CTNNB1-T4 ATATAPSL   | 132  | 236  |
| >CTNNB1-T4 GATTTAPSL   | 272  | >CTNNB1-T4 GATATAPSL  | 105  | 167  |
| >CTNNB1-T4 GATTTAPSL   | 346  | >CTNNB1-T4 GATATAPSL  | 233  | 113  |
| >CTNNB1-T4 HSGATTTAPS  | 33   | >CTNNB1-T4 HSGATATAPS | 17   | 16   |
| >CTNNB1-T4 HSGATTTAPS  | 506  | >CTNNB1-T4 HSGATATAPS | 351  | 155  |
| >CTNNB1-T4 GIHSGATTTA  | 432  | >CTNNB1-T4 GIHSGATATA | 408  | 24   |
| >CTNNB1-T4 GIHSGATT    | 2383 | >CTNNB1-T4 GIHSGATA   | 161  | 2222 |
| >CTNNB1-T4 GIHSGATTTA  | 276  | >CTNNB1-T4 GIHSGATATA | 232  | 44   |
| >CTNNB1-T4 GIHSGATTTA  | 362  | >CTNNB1-T4 GIHSGATATA | 327  | 35   |
| >CTNNB1-T4 TTAPSLSGK   | 86   | >CTNNB1-T4 ITAPSLSGK  | 54   | 32   |
| >CTNNB1-T4 TTAPSLSGK   | 10   | >CTNNB1-T4 ITAPSLSGK  | 14   | 4    |
| >CTNNB1-T4 TTAPSLSGK   | 677  | >CTNNB1-T4 ITAPSLSGK  | 314  | 363  |
| >CTNNB1-T4 TTAPSLSGK   | 5    | >CTNNB1-T4 ITAPSLSGK  | 11   | 6    |
| >CTNNB1-T4 TTAPSLSG    | 2988 | >CTNNB1-T4 ITAPSLSG   | 386  | 2602 |
| >CTNNB1-T4 TTAPSLSGK   | 2743 | >CTNNB1-T4 ITAPSLSGK  | 329  | 2414 |
| >CTNNB1-T4 TTAPSLSGKG  | 2026 | >CTNNB1-T4 ITAPSLSGKG | 227  | 1799 |
| >CTNNB1-T4 TTAPSLSGK   | 1449 | >CTNNB1-T4 ITAPSLSGK  | 394  | 1055 |
| >CTNNB1-T4 TTAPSLSGK   | 198  | >CTNNB1-T4 ITAPSLSGK  | 254  | 56   |

|                        |       |                        |       |       |
|------------------------|-------|------------------------|-------|-------|
| >CTNNB1-T4 TTTAPSLSGK  | 59    | >CTNNB1-T4 TITAPSLSGK  | 41    | 18    |
| >CTNNB1-T4 TTTAPSLSGK  | 15    | >CTNNB1-T4 TITAPSLSGK  | 28    | 13    |
| >CTNNB1-T4 TTTAPSLSGK  | 439   | >CTNNB1-T4 TITAPSLSGK  | 2053  | 1614  |
| >CTNNB1-T4 TTTAPSLSGK  | 8     | >CTNNB1-T4 TITAPSLSGK  | 18    | 10    |
| >CTNNB1-T4 TTTAPSL     | 338   | >CTNNB1-T4 TITAPSL     | 2945  | 2607  |
| >CTNNB1-T4 LDSGIHSGAT  | 13138 | >CTNNB1-T4 LDSGIHSGAT  | 373   | 12765 |
| >CTNNB1-T4 ATTTAPSL    | 1617  | >CTNNB1-T4 ATITAPSL    | 286   | 1331  |
| >CTNNB1-T4 ATTTAPSLSGI | 216   | >CTNNB1-T4 ATITAPSLSGK | 169   | 47    |
| >CTNNB1-T4 ATTTAPSLSGI | 36    | >CTNNB1-T4 ATITAPSLSGK | 17    | 19    |
| >CTNNB1-T4 ATTTAPSL    | 838   | >CTNNB1-T4 ATITAPSL    | 28    | 810   |
| >CTNNB1-T4 ATTTAPSLSGI | 51    | >CTNNB1-T4 ATITAPSLSGK | 37    | 14    |
| >CTNNB1-T4 ATTTAPSL    | 1253  | >CTNNB1-T4 ATITAPSL    | 375   | 878   |
| >CTNNB1-T4 ATTTAPSLSGI | 129   | >CTNNB1-T4 ATITAPSLSGK | 53    | 76    |
| >CTNNB1-T4 ATTTAPSL    | 16    | >CTNNB1-T4 ATITAPSL    | 8     | 8     |
| >CTNNB1-T4 ATTTAPSL    | 362   | >CTNNB1-T4 ATITAPSL    | 714   | 352   |
| >CTNNB1-T4 ATTTAPSLSGI | 404   | >CTNNB1-T4 ATITAPSLSGK | 199   | 205   |
| >CTNNB1-T4 ATTTAPSL    | 368   | >CTNNB1-T4 ATITAPSL    | 306   | 62    |
| >CTNNB1-T4 GATTTAPSL   | 272   | >CTNNB1-T4 GATITAPSL   | 59    | 213   |
| >CTNNB1-T4 GATTTAPSL   | 346   | >CTNNB1-T4 GATITAPSL   | 354   | 8     |
| >CTNNB1-T4 HSGATTTAPS  | 33    | >CTNNB1-T4 HSGATITAPSI | 26    | 7     |
| >CTNNB1-T4 GIHSGATTTA  | 432   | >CTNNB1-T4 GIHSGATITA  | 426   | 6     |
| >CTNNB1-T4 GIHSGATT    | 2383  | >CTNNB1-T4 GIHSGATI    | 116   | 2267  |
| >CTNNB1-T4 GIHSGATTTA  | 276   | >CTNNB1-T4 GIHSGATITA  | 462   | 186   |
| >CTNNB1-T4 GIHSGATT    | 7121  | >CTNNB1-T4 GIHSGATI    | 381   | 6740  |
| >CTNNB1-T4 GIHSGATTTA  | 362   | >CTNNB1-T4 GIHSGATITA  | 574   | 212   |
| >CTNNB1-T4 SGIHSGATT   | 30919 | >CTNNB1-T4 SGIHSGATI   | 238   | 30681 |
| >CTNNB1-T4 DSGIHSGATT  | 25191 | >CTNNB1-T4 DSGIHSGATI  | 88    | 25103 |
| >CTNNB1-T4 TTAPSLSGK   | 86    | >CTNNB1-T4 NTAPSLSGK   | 471   | 385   |
| >CTNNB1-T4 TTAPSLSGK   | 10    | >CTNNB1-T4 NTAPSLSGK   | 46    | 36    |
| >CTNNB1-T4 TTAPSLSGK   | 5     | >CTNNB1-T4 NTAPSLSGK   | 6     | 1     |
| >CTNNB1-T4 TTAPSLSGK   | 198   | >CTNNB1-T4 NTAPSLSGK   | 683   | 485   |
| >CTNNB1-T4 TTTAPSLSGK  | 59    | >CTNNB1-T4 TNTAPSLSGK  | 5660  | 5601  |
| >CTNNB1-T4 TTTAPSLSGK  | 15    | >CTNNB1-T4 TNTAPSLSGK  | 4972  | 4957  |
| >CTNNB1-T4 TTTAPSLSGK  | 439   | >CTNNB1-T4 TNTAPSLSGK  | 9156  | 8717  |
| >CTNNB1-T4 TTTAPSLSGK  | 8     | >CTNNB1-T4 TNTAPSLSGK  | 1434  | 1426  |
| >CTNNB1-T4 TTTAPSL     | 338   | >CTNNB1-T4 TNTAPSL     | 13105 | 12767 |
| >CTNNB1-T4 ATTTAPSLSGI | 216   | >CTNNB1-T4 ATNTAPSLSG  | 77    | 139   |
| >CTNNB1-T4 ATTTAPSLSGI | 36    | >CTNNB1-T4 ATNTAPSLSG  | 19    | 17    |
| >CTNNB1-T4 ATTTAPSL    | 997   | >CTNNB1-T4 ATNTAPSL    | 258   | 739   |
| >CTNNB1-T4 ATTTAPSLSGI | 51    | >CTNNB1-T4 ATNTAPSLSG  | 18    | 33    |
| >CTNNB1-T4 ATTTAPSL    | 1253  | >CTNNB1-T4 ATNTAPSL    | 404   | 849   |
| >CTNNB1-T4 ATTTAPSLSGI | 129   | >CTNNB1-T4 ATNTAPSLSG  | 203   | 74    |
| >CTNNB1-T4 ATTTAPSL    | 16    | >CTNNB1-T4 ATNTAPSL    | 17    | 1     |

|                       |      |                        |       |       |
|-----------------------|------|------------------------|-------|-------|
| >CTNNB1-T4 ATTTAPSL   | 362  | >CTNNB1-T4 ATNTAPSL    | 712   | 350   |
| >CTNNB1-T4 ATTTAPSLSG | 404  | >CTNNB1-T4 ATNTAPSLSG  | 499   | 95    |
| >CTNNB1-T4 ATTTAPSL   | 368  | >CTNNB1-T4 ATNTAPSL    | 581   | 213   |
| >CTNNB1-T4 GATTTAPSL  | 272  | >CTNNB1-T4 GATNTAPSL   | 231   | 41    |
| >CTNNB1-T4 GATTTAPSL  | 346  | >CTNNB1-T4 GATNTAPSL   | 759   | 413   |
| >CTNNB1-T4 HSGATTTAPS | 33   | >CTNNB1-T4 HSGATNTAPSL | 36    | 3     |
| >CTNNB1-T4 GIHSGATTTA | 432  | >CTNNB1-T4 GIHSGATNTA  | 630   | 198   |
| >CTNNB1-T4 GIHSGATTTA | 276  | >CTNNB1-T4 GIHSGATNTA  | 598   | 322   |
| >CTNNB1-T4 GIHSGATTTA | 362  | >CTNNB1-T4 GIHSGATNTA  | 1058  | 696   |
| >CTNNB1-T4 TTAPSLSGK  | 86   | >CTNNB1-T4 PTAPSLSGK   | 1691  | 1605  |
| >CTNNB1-T4 TTAPSLSGK  | 10   | >CTNNB1-T4 PTAPSLSGK   | 315   | 305   |
| >CTNNB1-T4 TTAPSLSGK  | 5    | >CTNNB1-T4 PTAPSLSGK   | 306   | 301   |
| >CTNNB1-T4 TTAPSLSGK  | 198  | >CTNNB1-T4 PTAPSLSGK   | 1871  | 1673  |
| >CTNNB1-T4 TTTAPSLSGK | 59   | >CTNNB1-T4 TPTAPSLSGK  | 3979  | 3920  |
| >CTNNB1-T4 TTTAPSLSGK | 15   | >CTNNB1-T4 TPTAPSLSGK  | 3987  | 3972  |
| >CTNNB1-T4 TTTAPSLSGK | 439  | >CTNNB1-T4 TPTAPSLSGK  | 17515 | 17076 |
| >CTNNB1-T4 TTTAPSLSGK | 8    | >CTNNB1-T4 TPTAPSLSGK  | 774   | 766   |
| >CTNNB1-T4 TTTAPSL    | 338  | >CTNNB1-T4 TPTAPSL     | 18258 | 17920 |
| >CTNNB1-T4 ATTTAPSLSG | 216  | >CTNNB1-T4 ATPTAPSLSG  | 490   | 274   |
| >CTNNB1-T4 ATTTAPSLSG | 36   | >CTNNB1-T4 ATPTAPSLSG  | 85    | 49    |
| >CTNNB1-T4 ATTTAPSLSG | 51   | >CTNNB1-T4 ATPTAPSLSG  | 293   | 242   |
| >CTNNB1-T4 ATTTAPSLSG | 129  | >CTNNB1-T4 ATPTAPSLSG  | 860   | 731   |
| >CTNNB1-T4 ATTTAPSL   | 16   | >CTNNB1-T4 ATPTAPSL    | 236   | 220   |
| >CTNNB1-T4 ATTTAPSL   | 535  | >CTNNB1-T4 ATPTAPSL    | 6     | 529   |
| >CTNNB1-T4 ATTTAPSL   | 1956 | >CTNNB1-T4 ATPTAPSL    | 55    | 1901  |
| >CTNNB1-T4 ATTTAPSLSG | 3920 | >CTNNB1-T4 ATPTAPSLSG  | 209   | 3711  |
| >CTNNB1-T4 ATTTAPSL   | 362  | >CTNNB1-T4 ATPTAPSL    | 4843  | 4481  |
| >CTNNB1-T4 ATTTAPSLSG | 404  | >CTNNB1-T4 ATPTAPSLSG  | 1165  | 761   |
| >CTNNB1-T4 ATTTAPSL   | 368  | >CTNNB1-T4 ATPTAPSL    | 503   | 135   |
| >CTNNB1-T4 GATTTAPSL  | 272  | >CTNNB1-T4 GATPTAPSL   | 25    | 247   |
| >CTNNB1-T4 GATTTAPSL  | 346  | >CTNNB1-T4 GATPTAPSL   | 143   | 203   |
| >CTNNB1-T4 GATTTAPSL  | 5318 | >CTNNB1-T4 GATPTAPSL   | 430   | 4888  |
| >CTNNB1-T4 HSGATTTAPS | 33   | >CTNNB1-T4 HSGATPTAPS  | 29    | 4     |
| >CTNNB1-T4 GIHSGATTTA | 432  | >CTNNB1-T4 GIHSGATPTA  | 789   | 357   |
| >CTNNB1-T4 GIHSGATTTA | 276  | >CTNNB1-T4 GIHSGATPTA  | 745   | 469   |
| >CTNNB1-T4 GIHSGATTTA | 362  | >CTNNB1-T4 GIHSGATPTA  | 268   | 94    |
| >CTNNB1-T4 GIHSGATTTA | 2370 | >CTNNB1-T4 GIHSGATPTA  | 449   | 1921  |
| >CTNNB1-T4 TTAPSLSGK  | 86   | >CTNNB1-T4 STAPSLSGK   | 79    | 7     |
| >CTNNB1-T4 TTAPSLSGK  | 10   | >CTNNB1-T4 STAPSLSGK   | 8     | 2     |
| >CTNNB1-T4 TTAPSLSGK  | 677  | >CTNNB1-T4 STAPSLSGK   | 117   | 560   |
| >CTNNB1-T4 TTAPSLSGK  | 5    | >CTNNB1-T4 STAPSLSGK   | 9     | 4     |
| >CTNNB1-T4 TTAPSLSGK  | 1449 | >CTNNB1-T4 STAPSLSGK   | 430   | 1019  |
| >CTNNB1-T4 TTAPSLSGK  | 198  | >CTNNB1-T4 STAPSLSGK   | 73    | 125   |

|                        |      |                        |      |      |
|------------------------|------|------------------------|------|------|
| >CTNNB1-T4 TTTAPSLSGK  | 59   | >CTNNB1-T4 TSTAPSLSGK  | 107  | 48   |
| >CTNNB1-T4 TTTAPSLSGK  | 15   | >CTNNB1-T4 TSTAPSLSGK  | 24   | 9    |
| >CTNNB1-T4 TTTAPSLSGK  | 439  | >CTNNB1-T4 TSTAPSLSGK  | 943  | 504  |
| >CTNNB1-T4 TTTAPSLSGK  | 8    | >CTNNB1-T4 TSTAPSLSGK  | 16   | 8    |
| >CTNNB1-T4 TTTAPSL     | 338  | >CTNNB1-T4 TSTAPSL     | 3957 | 3619 |
| >CTNNB1-T4 ATTTAPSLSGI | 216  | >CTNNB1-T4 ATSTAPSLSGI | 89   | 127  |
| >CTNNB1-T4 ATTTAPSLSGI | 36   | >CTNNB1-T4 ATSTAPSLSGI | 19   | 17   |
| >CTNNB1-T4 ATTTAPSLSGI | 51   | >CTNNB1-T4 ATSTAPSLSGI | 30   | 21   |
| >CTNNB1-T4 ATTTAPSLSGI | 129  | >CTNNB1-T4 ATSTAPSLSGI | 115  | 14   |
| >CTNNB1-T4 ATTTAPSL    | 16   | >CTNNB1-T4 ATSTAPSL    | 13   | 3    |
| >CTNNB1-T4 ATTTAPSL    | 362  | >CTNNB1-T4 ATSTAPSL    | 343  | 19   |
| >CTNNB1-T4 ATTTAPSLSGI | 404  | >CTNNB1-T4 ATSTAPSLSGI | 199  | 205  |
| >CTNNB1-T4 ATTTAPSL    | 368  | >CTNNB1-T4 ATSTAPSL    | 293  | 75   |
| >CTNNB1-T4 GATTTAPSL   | 272  | >CTNNB1-T4 GATSTAPSL   | 218  | 54   |
| >CTNNB1-T4 GATTTAPSL   | 346  | >CTNNB1-T4 GATSTAPSL   | 209  | 137  |
| >CTNNB1-T4 GATTTAPSL   | 1097 | >CTNNB1-T4 GATSTAPSL   | 365  | 732  |
| >CTNNB1-T4 HSGATTTAPS  | 33   | >CTNNB1-T4 HSGATSTAPS  | 22   | 11   |
| >CTNNB1-T4 HSGATTTAPS  | 506  | >CTNNB1-T4 HSGATSTAPS  | 461  | 45   |
| >CTNNB1-T4 GIHSGATTTA  | 432  | >CTNNB1-T4 GIHSGATSTA  | 364  | 68   |
| >CTNNB1-T4 GIHSGATTTA  | 276  | >CTNNB1-T4 GIHSGATSTA  | 215  | 61   |
| >CTNNB1-T4 GIHSGATTTA  | 362  | >CTNNB1-T4 GIHSGATSTA  | 406  | 44   |
| >CTNNB1-T4 TAPSLSGK    | 164  | >CTNNB1-T4 AAPSLSGK    | 2993 | 2829 |
| >CTNNB1-T4 TTAPSLSGK   | 86   | >CTNNB1-T4 TAAPSLSGK   | 393  | 307  |
| >CTNNB1-T4 TTAPSLSGK   | 10   | >CTNNB1-T4 TAAPSLSGK   | 40   | 30   |
| >CTNNB1-T4 TTAPSLSGK   | 5    | >CTNNB1-T4 TAAPSLSGK   | 15   | 10   |
| >CTNNB1-T4 TTAPSLSGK   | 198  | >CTNNB1-T4 TAAPSLSGK   | 1557 | 1359 |
| >CTNNB1-T4 TTTAPSLSGK  | 59   | >CTNNB1-T4 TTAAPSLSGK  | 45   | 14   |
| >CTNNB1-T4 TTTAPSLSGK  | 15   | >CTNNB1-T4 TTAAPSLSGK  | 15   | 0    |
| >CTNNB1-T4 TTTAPSLSGK  | 439  | >CTNNB1-T4 TTAAPSLSGK  | 540  | 101  |
| >CTNNB1-T4 TTTAPSLSGK  | 8    | >CTNNB1-T4 TTAAPSLSGK  | 5    | 3    |
| >CTNNB1-T4 TTTAPSL     | 338  | >CTNNB1-T4 TTAAPSL     | 56   | 282  |
| >CTNNB1-T4 ATTTAPSLSGI | 216  | >CTNNB1-T4 ATTAAPSLSG  | 166  | 50   |
| >CTNNB1-T4 ATTTAPSLSGI | 36   | >CTNNB1-T4 ATTAAPSLSG  | 28   | 8    |
| >CTNNB1-T4 ATTTAPSLSGI | 51   | >CTNNB1-T4 ATTAAPSLSG  | 37   | 14   |
| >CTNNB1-T4 ATTTAPSLSGI | 129  | >CTNNB1-T4 ATTAAPSLSG  | 123  | 6    |
| >CTNNB1-T4 ATTTAPSL    | 16   | >CTNNB1-T4 ATTAAPSL    | 10   | 6    |
| >CTNNB1-T4 ATTTAPSL    | 1096 | >CTNNB1-T4 ATTAAPSL    | 433  | 663  |
| >CTNNB1-T4 ATTTAPSL    | 362  | >CTNNB1-T4 ATTAAPSL    | 524  | 162  |
| >CTNNB1-T4 ATTTAPSLSGI | 404  | >CTNNB1-T4 ATTAAPSLSG  | 468  | 64   |
| >CTNNB1-T4 ATTTAPSL    | 368  | >CTNNB1-T4 ATTAAPSL    | 350  | 18   |
| >CTNNB1-T4 GATTTAPSL   | 272  | >CTNNB1-T4 GATTAAPSL   | 386  | 114  |
| >CTNNB1-T4 GATTTAPSL   | 346  | >CTNNB1-T4 GATTAAPSL   | 270  | 76   |
| >CTNNB1-T4 HSGATTTAPS  | 33   | >CTNNB1-T4 HSGATTAAPS  | 29   | 4    |

|                        |       |                        |       |       |
|------------------------|-------|------------------------|-------|-------|
| >CTNNB1-T4 HSGATTTAPS  | 506   | >CTNNB1-T4 HSGATTAAPS  | 485   | 21    |
| >CTNNB1-T4 GIHSGATTTA  | 432   | >CTNNB1-T4 GIHSGATTAA  | 605   | 173   |
| >CTNNB1-T4 GIHSGATTT   | 1717  | >CTNNB1-T4 GIHSGATTA   | 89    | 1628  |
| >CTNNB1-T4 GIHSGATTTA  | 276   | >CTNNB1-T4 GIHSGATTAA  | 378   | 102   |
| >CTNNB1-T4 GIHSGATTTA  | 362   | >CTNNB1-T4 GIHSGATTAA  | 1142  | 780   |
| >CTNNB1-T4 TAPSLSGK    | 164   | >CTNNB1-T4 IAPSLSGK    | 564   | 400   |
| >CTNNB1-T4 TTAPSLSGK   | 86    | >CTNNB1-T4 TIAPSLSGK   | 68    | 18    |
| >CTNNB1-T4 TTAPSLSGK   | 10    | >CTNNB1-T4 TIAPSLSGK   | 15    | 5     |
| >CTNNB1-T4 TTAPSLSGK   | 5     | >CTNNB1-T4 TIAPSLSGK   | 21    | 16    |
| >CTNNB1-T4 TTAPSLSGK   | 198   | >CTNNB1-T4 TIAPSLSGK   | 4178  | 3980  |
| >CTNNB1-T4 DSGIHS GATT | 35074 | >CTNNB1-T4 DSGIHS GATT | 440   | 34634 |
| >CTNNB1-T4 TTTAPSLSGK  | 59    | >CTNNB1-T4 TTIAPSLSGK  | 28    | 31    |
| >CTNNB1-T4 TTTAPSLSGK  | 15    | >CTNNB1-T4 TTIAPSLSGK  | 9     | 6     |
| >CTNNB1-T4 TTTAPSLSGK  | 439   | >CTNNB1-T4 TTIAPSLSGK  | 312   | 127   |
| >CTNNB1-T4 TTTAPSLSGK  | 8     | >CTNNB1-T4 TTIAPSLSGK  | 4     | 4     |
| >CTNNB1-T4 TTTAPSL     | 338   | >CTNNB1-T4 TTIAPSL     | 100   | 238   |
| >CTNNB1-T4 ATTTAPSLSGI | 216   | >CTNNB1-T4 ATTIAPSLSGK | 424   | 208   |
| >CTNNB1-T4 ATTTAPSLSGI | 36    | >CTNNB1-T4 ATTIAPSLSGK | 42    | 6     |
| >CTNNB1-T4 ATTTAPSLSGI | 51    | >CTNNB1-T4 ATTIAPSLSGK | 71    | 20    |
| >CTNNB1-T4 ATTTAPSLSGI | 129   | >CTNNB1-T4 ATTIAPSLSGK | 156   | 27    |
| >CTNNB1-T4 ATTTAPSL    | 16    | >CTNNB1-T4 ATTIAPSL    | 9     | 7     |
| >CTNNB1-T4 ATTTAPSL    | 362   | >CTNNB1-T4 ATTIAPSL    | 645   | 283   |
| >CTNNB1-T4 ATTTAPSLSGI | 404   | >CTNNB1-T4 ATTIAPSLSGK | 257   | 147   |
| >CTNNB1-T4 ATTTAPSL    | 368   | >CTNNB1-T4 ATTIAPSL    | 234   | 134   |
| >CTNNB1-T4 GATTTAPSL   | 272   | >CTNNB1-T4 GATTIAPSL   | 1219  | 947   |
| >CTNNB1-T4 GATTTAPSL   | 346   | >CTNNB1-T4 GATTIAPSL   | 445   | 99    |
| >CTNNB1-T4 HSGATTTAPS  | 33    | >CTNNB1-T4 HSGATTIAPSI | 65    | 32    |
| >CTNNB1-T4 HSGATTTAPS  | 506   | >CTNNB1-T4 HSGATTIAPSI | 459   | 47    |
| >CTNNB1-T4 IHSGATTT    | 9165  | >CTNNB1-T4 IHSGATTI    | 320   | 8845  |
| >CTNNB1-T4 GIHSGATTT   | 20527 | >CTNNB1-T4 GIHSGATTI   | 457   | 20070 |
| >CTNNB1-T4 GIHSGATTTA  | 432   | >CTNNB1-T4 GIHSGATTIA  | 1332  | 900   |
| >CTNNB1-T4 GIHSGATTT   | 1717  | >CTNNB1-T4 GIHSGATTI   | 64    | 1653  |
| >CTNNB1-T4 GIHSGATTTA  | 276   | >CTNNB1-T4 GIHSGATTIA  | 875   | 599   |
| >CTNNB1-T4 GIHSGATTTA  | 362   | >CTNNB1-T4 GIHSGATTIA  | 1748  | 1386  |
| >CTNNB1-T4 GIHSGATTT   | 17885 | >CTNNB1-T4 GIHSGATTI   | 277   | 17608 |
| >CTNNB1-T4 GIHSGATTT   | 3234  | >CTNNB1-T4 GIHSGATTI   | 398   | 2836  |
| >CTNNB1-T4 TAPSLSGK    | 164   | >CTNNB1-T4 RAPSLSGK    | 3609  | 3445  |
| >CTNNB1-T4 TTAPSLSGK   | 86    | >CTNNB1-T4 TRAPSLSGK   | 16755 | 16669 |
| >CTNNB1-T4 TTAPSLSGK   | 10    | >CTNNB1-T4 TRAPSLSGK   | 12572 | 12562 |
| >CTNNB1-T4 TTAPSLSGK   | 5     | >CTNNB1-T4 TRAPSLSGK   | 1813  | 1808  |
| >CTNNB1-T4 TTAPSLSGK   | 29605 | >CTNNB1-T4 TRAPSLSGK   | 348   | 29257 |
| >CTNNB1-T4 TTAPSLSGK   | 198   | >CTNNB1-T4 TRAPSLSGK   | 10066 | 9868  |
| >CTNNB1-T4 DSGIHS GATT | 34204 | >CTNNB1-T4 DSGIHS GATT | 469   | 33735 |

|                        |       |                        |      |       |
|------------------------|-------|------------------------|------|-------|
| >CTNNB1-T4 DSGIHSGATT  | 33302 | >CTNNB1-T4 DSGIHSGATT  | 263  | 33039 |
| >CTNNB1-T4 TTTAPSLSGK  | 59    | >CTNNB1-T4 TTRAPSLSGK  | 46   | 13    |
| >CTNNB1-T4 TTTAPSLSGK  | 15    | >CTNNB1-T4 TTRAPSLSGK  | 54   | 39    |
| >CTNNB1-T4 TTTAPSL     | 11986 | >CTNNB1-T4 TTRAPSL     | 126  | 11860 |
| >CTNNB1-T4 TTTAPSLSG   | 8554  | >CTNNB1-T4 TTRAPSLSG   | 32   | 8522  |
| >CTNNB1-T4 TTTAPSLSGK  | 439   | >CTNNB1-T4 TTRAPSLSGK  | 5    | 434   |
| >CTNNB1-T4 TTTAPSLSGK  | 13446 | >CTNNB1-T4 TTRAPSLSGK  | 263  | 13183 |
| >CTNNB1-T4 TTTAPSLSGK  | 8     | >CTNNB1-T4 TTRAPSLSGK  | 25   | 17    |
| >CTNNB1-T4 TTTAPSL     | 338   | >CTNNB1-T4 TTRAPSL     | 7415 | 7077  |
| >CTNNB1-T4 ATTTAPSLSGI | 216   | >CTNNB1-T4 ATTRAPSLSG  | 203  | 13    |
| >CTNNB1-T4 ATTTAPSLSGI | 36    | >CTNNB1-T4 ATTRAPSLSG  | 40   | 4     |
| >CTNNB1-T4 ATTTAPSLSGI | 51    | >CTNNB1-T4 ATTRAPSLSG  | 27   | 24    |
| >CTNNB1-T4 ATTTAPSLSGI | 129   | >CTNNB1-T4 ATTRAPSLSG  | 189  | 60    |
| >CTNNB1-T4 ATTTAPSL    | 16    | >CTNNB1-T4 ATTRAPSL    | 22   | 6     |
| >CTNNB1-T4 ATTTAPSL    | 362   | >CTNNB1-T4 ATTRAPSL    | 389  | 27    |
| >CTNNB1-T4 ATTTAPSLSGI | 404   | >CTNNB1-T4 ATTRAPSLSG  | 380  | 24    |
| >CTNNB1-T4 ATTTAPSL    | 368   | >CTNNB1-T4 ATTRAPSL    | 435  | 67    |
| >CTNNB1-T4 GATTTAPSL   | 272   | >CTNNB1-T4 GATTRAPSL   | 397  | 125   |
| >CTNNB1-T4 GATTTAPSL   | 346   | >CTNNB1-T4 GATTRAPSL   | 1893 | 1547  |
| >CTNNB1-T4 HSGATTTAPS  | 33    | >CTNNB1-T4 HSGATTRAPS  | 49   | 16    |
| >CTNNB1-T4 GIHSGATTTA  | 432   | >CTNNB1-T4 GIHSGATTRA  | 1123 | 691   |
| >CTNNB1-T4 GIHSGATTTA  | 276   | >CTNNB1-T4 GIHSGATTRA  | 1142 | 866   |
| >CTNNB1-T4 GIHSGATTTA  | 362   | >CTNNB1-T4 GIHSGATTRA  | 465  | 103   |
| >CTNNB1-T4 GIHSGATTT   | 24169 | >CTNNB1-T4 GIHSGATTR   | 284  | 23885 |
| >CTNNB1-T4 GIHSGATTT   | 33553 | >CTNNB1-T4 GIHSGATTR   | 439  | 33114 |
| >CTNNB1-T4 TAPSLSGK    | 663   | >CTNNB1-T4 SAPSLSGK    | 399  | 264   |
| >CTNNB1-T4 TAPSLSGK    | 164   | >CTNNB1-T4 SAPSLSGK    | 500  | 336   |
| >CTNNB1-T4 TTAPSLSGK   | 86    | >CTNNB1-T4 TSAPSLSGK   | 137  | 51    |
| >CTNNB1-T4 TTAPSLSGK   | 10    | >CTNNB1-T4 TSAPSLSGK   | 14   | 4     |
| >CTNNB1-T4 TTAPSLSGK   | 5     | >CTNNB1-T4 TSAPSLSGK   | 16   | 11    |
| >CTNNB1-T4 TTAPSLSGK   | 198   | >CTNNB1-T4 TSAPSLSGK   | 296  | 98    |
| >CTNNB1-T4 TTTAPSLSGK  | 59    | >CTNNB1-T4 TTSAPSLSGK  | 35   | 24    |
| >CTNNB1-T4 TTTAPSLSGK  | 15    | >CTNNB1-T4 TTSAPSLSGK  | 10   | 5     |
| >CTNNB1-T4 TTTAPSLSGK  | 439   | >CTNNB1-T4 TTSAPSLSGK  | 225  | 214   |
| >CTNNB1-T4 TTTAPSLSGK  | 8     | >CTNNB1-T4 TTSAPSLSGK  | 6    | 2     |
| >CTNNB1-T4 TTTAPSL     | 338   | >CTNNB1-T4 TTSAPSL     | 231  | 107   |
| >CTNNB1-T4 ATTTAPSLSGI | 216   | >CTNNB1-T4 ATTSAPSLSGI | 213  | 3     |
| >CTNNB1-T4 ATTTAPSLSGI | 36    | >CTNNB1-T4 ATTSAPSLSGI | 35   | 1     |
| >CTNNB1-T4 ATTTAPSLSGI | 51    | >CTNNB1-T4 ATTSAPSLSGI | 59   | 8     |
| >CTNNB1-T4 ATTTAPSLSGI | 129   | >CTNNB1-T4 ATTSAPSLSGI | 79   | 50    |
| >CTNNB1-T4 ATTTAPSL    | 16    | >CTNNB1-T4 ATTSAPSL    | 13   | 3     |
| >CTNNB1-T4 ATTTAPSL    | 1096  | >CTNNB1-T4 ATTSAPSL    | 409  | 687   |
| >CTNNB1-T4 ATTTAPSL    | 362   | >CTNNB1-T4 ATTSAPSL    | 122  | 240   |

|                         |      |                         |      |      |
|-------------------------|------|-------------------------|------|------|
| >CTNNB1-T4. ATTTAPSLSGI | 404  | >CTNNB1-T4. ATTSAPSLSGI | 284  | 120  |
| >CTNNB1-T4. ATTTAPSL    | 368  | >CTNNB1-T4. ATTSAPSL    | 263  | 105  |
| >CTNNB1-T4. GATTTAPSL   | 272  | >CTNNB1-T4. GATTSAPSL   | 79   | 193  |
| >CTNNB1-T4. GATTTAPSL   | 346  | >CTNNB1-T4. GATTSAPSL   | 375  | 29   |
| >CTNNB1-T4. HSGATTTAPS  | 33   | >CTNNB1-T4. HSGATTSAPS  | 21   | 12   |
| >CTNNB1-T4. GIHSGATTTA  | 432  | >CTNNB1-T4. GIHSGATTSA  | 375  | 57   |
| >CTNNB1-T4. GIHSGATTTA  | 276  | >CTNNB1-T4. GIHSGATTSA  | 238  | 38   |
| >CTNNB1-T4. GIHSGATTTA  | 362  | >CTNNB1-T4. GIHSGATTSA  | 427  | 65   |
| >CTNNB1-T7. FTQEQVADI   | 369  | >CTNNB1-T7. FAQEQVADI   | 1294 | 925  |
| >CTNNB1-T7. FTQEQVADI   | 72   | >CTNNB1-T7. FAQEQVADI   | 269  | 197  |
| >CTNNB1-T7. FTQEQVADI   | 369  | >CTNNB1-T7. FAQEQVADI   | 606  | 237  |
| >CTNNB1-T7. FTQEQVADI   | 220  | >CTNNB1-T7. FAQEQVADI   | 958  | 738  |
| >CTNNB1-T7. FTQEQVADI   | 237  | >CTNNB1-T7. FAQEQVADI   | 1665 | 1428 |
| >CTNNB1-T7. FTQEQVADI   | 413  | >CTNNB1-T7. FAQEQVADI   | 2471 | 2058 |
| >CTNNB1-T7. FTQEQVADI   | 428  | >CTNNB1-T7. FAQEQVADI   | 2047 | 1619 |
| >CTNNB1-T7. FTQEQVADI   | 194  | >CTNNB1-T7. FAQEQVADI   | 2396 | 2202 |
| >CTNNB1-T7. FTQEQVADI   | 186  | >CTNNB1-T7. FAQEQVADI   | 637  | 451  |
| >CTNNB1-T7. EWEQGFSQS   | 305  | >CTNNB1-T7. EWEQGFSQS   | 137  | 168  |
| >CTNNB1-T7. SFTQEQVADI  | 519  | >CTNNB1-T7. SFAQEQVADI  | 398  | 121  |
| >CTNNB1-T7. QSFTQEQVAI  | 293  | >CTNNB1-T7. QSFAQEQVAI  | 200  | 93   |
| >CTNNB1-T7. QSFTQEQV    | 80   | >CTNNB1-T7. QSFAQEQV    | 48   | 32   |
| >CTNNB1-T7. QSFTQEQVAI  | 215  | >CTNNB1-T7. QSFAQEQVAI  | 101  | 114  |
| >CTNNB1-T7. QSFTQEQVAI  | 184  | >CTNNB1-T7. QSFAQEQVAI  | 176  | 8    |
| >CTNNB1-T7. SQSFTQEQV   | 174  | >CTNNB1-T7. SQSFAQEQV   | 145  | 29   |
| >CTNNB1-T7. SQSFTQEQV   | 288  | >CTNNB1-T7. SQSFAQEQV   | 269  | 19   |
| >CTNNB1-T7. SQSFTQEQV   | 130  | >CTNNB1-T7. SQSFAQEQV   | 94   | 36   |
| >CTNNB1-T7. SQSFTQEQV   | 363  | >CTNNB1-T7. SQSFAQEQV   | 749  | 386  |
| >CTNNB1-T7. SQSFTQEQV   | 265  | >CTNNB1-T7. SQSFAQEQV   | 323  | 58   |
| >CTNNB1-T7. FSQSFTQEQV  | 345  | >CTNNB1-T7. FSQSFAQEQV  | 563  | 218  |
| >CTNNB1-T7. FSQSFTQEQV  | 215  | >CTNNB1-T7. FSQSFAQEQV  | 456  | 241  |
| >CTNNB1-T7. FSQSFTQEQV  | 247  | >CTNNB1-T7. FSQSFAQEQV  | 278  | 31   |
| >CTNNB1-T7. FSQSFTQEQV  | 207  | >CTNNB1-T7. FSQSFAQEQV  | 150  | 57   |
| >CTNNB1-T7. WEQGFSSQSF  | 43   | >CTNNB1-T7. WEQGFSSQSF  | 34   | 9    |
| >CTNNB1-T7. WEQGFSSQSF  | 1402 | >CTNNB1-T7. WEQGFSSQSF  | 297  | 1105 |
| >CTNNB1-T7. WEQGFSSQSF  | 47   | >CTNNB1-T7. WEQGFSSQSF  | 57   | 10   |
| >CTNNB1-V2. VSHWQQQS\   | 2007 | >CTNNB1-V2. ASHWQQQS\   | 441  | 1566 |
| >CTNNB1-V2. VSHWQQQS\   | 2225 | >CTNNB1-V2. ASHWQQQS\   | 212  | 2013 |
| >CTNNB1-V2. VSHWQQQS\   | 1076 | >CTNNB1-V2. ASHWQQQS\   | 83   | 993  |
| >CTNNB1-V2. VSHWQQQS\   | 27   | >CTNNB1-V2. ASHWQQQS\   | 35   | 8    |
| >CTNNB1-V2. VSHWQQQS\   | 403  | >CTNNB1-V2. ASHWQQQS\   | 269  | 134  |
| >CTNNB1-V2. VSHWQQQS\   | 212  | >CTNNB1-V2. ASHWQQQS\   | 149  | 63   |
| >CTNNB1-V2. VSHWQQQS\   | 6    | >CTNNB1-V2. ASHWQQQS\   | 6    | 0    |
| >CTNNB1-V2. VSHWQQQS\   | 18   | >CTNNB1-V2. ASHWQQQS\   | 20   | 2    |



|                      |      |                      |      |      |
|----------------------|------|----------------------|------|------|
| >CTNNB1-V2 VSHWQQQS\ | 283  | >CTNNB1-V2 ASHWQQQS\ | 1871 | 1588 |
| >CTNNB1-V2 VSHWQQQS\ | 479  | >CTNNB1-V2 ASHWQQQS\ | 768  | 289  |
| >CTNNB1-V2 VSHWQQQS\ | 139  | >CTNNB1-V2 ASHWQQQS\ | 131  | 8    |
| >CTNNB1-V2 VSHWQQQS\ | 396  | >CTNNB1-V2 ASHWQQQS\ | 1095 | 699  |
| >CTNNB1-V2 AVSHWQQQ\ | 77   | >CTNNB1-V2 AASHWQQQ\ | 452  | 375  |
| >CTNNB1-V2 AVSHWQQQ\ | 245  | >CTNNB1-V2 AASHWQQQ\ | 2227 | 1982 |
| >CTNNB1-V2 AVSHWQQQ\ | 368  | >CTNNB1-V2 AASHWQQQ\ | 1677 | 1309 |
| >CTNNB1-V2 AVSHWQQQ\ | 40   | >CTNNB1-V2 AASHWQQQ\ | 757  | 717  |
| >CTNNB1-V2 AVSHWQQQ\ | 163  | >CTNNB1-V2 AASHWQQQ\ | 3718 | 3555 |
| >CTNNB1-V2 AVSHWQQQ\ | 140  | >CTNNB1-V2 AASHWQQQ\ | 165  | 25   |
| >CTNNB1-V2 AVSHWQQQ\ | 488  | >CTNNB1-V2 AASHWQQQ\ | 2057 | 1569 |
| >CTNNB1-V2 AVSHWQQQ\ | 333  | >CTNNB1-V2 AASHWQQQ\ | 4750 | 4417 |
| >CTNNB1-V2 AVSHWQQQ\ | 121  | >CTNNB1-V2 AASHWQQQ\ | 167  | 46   |
| >CTNNB1-V2 AVSHWQQQ\ | 396  | >CTNNB1-V2 AASHWQQQ\ | 85   | 311  |
| >CTNNB1-V2 AVSHWQQQ\ | 116  | >CTNNB1-V2 AASHWQQQ\ | 16   | 100  |
| >CTNNB1-V2 AVSHWQQQ\ | 1661 | >CTNNB1-V2 AASHWQQQ\ | 189  | 1472 |
| >CTNNB1-V2 AVSHWQQQ\ | 3744 | >CTNNB1-V2 AASHWQQQ\ | 469  | 3275 |
| >CTNNB1-V2 AVSHWQQQ\ | 378  | >CTNNB1-V2 AASHWQQQ\ | 661  | 283  |
| >CTNNB1-V2 AVSHWQQQ\ | 460  | >CTNNB1-V2 AASHWQQQ\ | 747  | 287  |
| >CTNNB1-V2 AVSHWQQQ\ | 282  | >CTNNB1-V2 AASHWQQQ\ | 579  | 297  |
| >CTNNB1-V2 MAMEPDRK\ | 299  | >CTNNB1-V2 MAMEPDRK\ | 3596 | 3297 |
| >CTNNB1-V2 MAMEPDRK\ | 258  | >CTNNB1-V2 MAMEPDRK\ | 2673 | 2415 |
| >CTNNB1-V2 MAMEPDRK\ | 165  | >CTNNB1-V2 MAMEPDRK\ | 1176 | 1011 |
| >CTNNB1-V2 MAMEPDRK\ | 45   | >CTNNB1-V2 MAMEPDRK\ | 196  | 151  |
| >CTNNB1-V2 MAMEPDRK\ | 35   | >CTNNB1-V2 MAMEPDRK\ | 1906 | 1871 |
| >CTNNB1-V2 MAMEPDRK\ | 453  | >CTNNB1-V2 MAMEPDRK\ | 7964 | 7511 |
| >CTNNB1-V2 MAMEPDRK\ | 76   | >CTNNB1-V2 MAMEPDRK\ | 7013 | 6937 |
| >CTNNB1-V2 MAMEPDRK\ | 7    | >CTNNB1-V2 MAMEPDRK\ | 31   | 24   |
| >CTNNB1-V2 MAMEPDRK\ | 24   | >CTNNB1-V2 MAMEPDRK\ | 385  | 361  |
| >CTNNB1-V2 MAMEPDRK\ | 372  | >CTNNB1-V2 MAMEPDRK\ | 295  | 77   |
| >CTNNB1-V2 MAMEPDRK\ | 285  | >CTNNB1-V2 MAMEPDRK\ | 83   | 202  |
| >CTNNB1-V2 AAVSHWQQ\ | 61   | >CTNNB1-V2 AAASHWQQ\ | 269  | 208  |
| >CTNNB1-V2 AAVSHWQQ\ | 459  | >CTNNB1-V2 AAASHWQQ\ | 318  | 141  |
| >CTNNB1-V2 AAVSHWQQ\ | 540  | >CTNNB1-V2 AAASHWQQ\ | 174  | 366  |
| >CTNNB1-V2 AAVSHWQQ\ | 144  | >CTNNB1-V2 AAASHWQQ\ | 115  | 29   |
| >CTNNB1-V2 AAVSHWQQ\ | 58   | >CTNNB1-V2 AAASHWQQ\ | 66   | 8    |
| >CTNNB1-V2 AAVSHWQQ\ | 10   | >CTNNB1-V2 AAASHWQQ\ | 20   | 10   |
| >CTNNB1-V2 AAVSHWQQ\ | 91   | >CTNNB1-V2 AAASHWQQ\ | 84   | 7    |
| >CTNNB1-V2 AAVSHWQQ\ | 112  | >CTNNB1-V2 AAASHWQQ\ | 79   | 33   |
| >CTNNB1-V2 KAAVSHWQC | 641  | >CTNNB1-V2 KAAASHWQC | 385  | 256  |
| >CTNNB1-V2 KAAVSHWQC | 537  | >CTNNB1-V2 KAAASHWQC | 299  | 238  |
| >CTNNB1-V2 RKAASHW   | 55   | >CTNNB1-V2 RKAASHW   | 44   | 11   |
| >CTNNB1-V2 RKAASHW   | 556  | >CTNNB1-V2 RKAASHW   | 460  | 96   |

|                       |      |                        |      |      |
|-----------------------|------|------------------------|------|------|
| >CTNNB1-V2 RKA AVSHW  | 38   | >CTNNB1-V2 RKA AASHW   | 94   | 56   |
| >CTNNB1-V2 RKA AVSHW  | 203  | >CTNNB1-V2 RKA AASHW   | 157  | 46   |
| >CTNNB1-V2 EPDRKAAV   | 323  | >CTNNB1-V2 EPDRKAAA    | 5148 | 4825 |
| >CTNNB1-V2 EPDRKAAV\$ | 83   | >CTNNB1-V2 EPDRKAAAS\$ | 111  | 28   |
| >CTNNB1-V2 EPDRKAAV\$ | 13   | >CTNNB1-V2 EPDRKAAAS\$ | 16   | 3    |
| >CTNNB1-V2 MEPDRKAAV  | 112  | >CTNNB1-V2 MEPDRKAAA   | 6939 | 6827 |
| >CTNNB1-V2 MEPDRKAAV  | 196  | >CTNNB1-V2 MEPDRKAAA   | 4331 | 4135 |
| >CTNNB1-V2 AMEPDRKAA  | 346  | >CTNNB1-V2 AMEPDRKAA   | 2266 | 1920 |
| >CTNNB1-V2 AMEPDRKAA  | 46   | >CTNNB1-V2 AMEPDRKAA   | 1649 | 1603 |
| >CTNNB1-V2 AMEPDRKAA  | 71   | >CTNNB1-V2 AMEPDRKAA   | 2264 | 2193 |
| >CTNNB1-V2 AMEPDRKAA  | 3    | >CTNNB1-V2 AMEPDRKAA   | 51   | 48   |
| >CTNNB1-V2 VSHWQQQS\$ | 551  | >CTNNB1-V2 ISHWQQQSY   | 367  | 184  |
| >CTNNB1-V2 VSHWQQQS\$ | 1076 | >CTNNB1-V2 ISHWQQQSY   | 402  | 674  |
| >CTNNB1-V2 VSHWQQQS\$ | 27   | >CTNNB1-V2 ISHWQQQSY   | 26   | 1    |
| >CTNNB1-V2 VSHWQQQS\$ | 403  | >CTNNB1-V2 ISHWQQQSY   | 328  | 75   |
| >CTNNB1-V2 VSHWQQQS\$ | 212  | >CTNNB1-V2 ISHWQQQSY   | 99   | 113  |
| >CTNNB1-V2 VSHWQQQS\$ | 6    | >CTNNB1-V2 ISHWQQQSY   | 4    | 2    |
| >CTNNB1-V2 VSHWQQQS\$ | 18   | >CTNNB1-V2 ISHWQQQSY   | 10   | 8    |
| >CTNNB1-V2 VSHWQQQS\$ | 636  | >CTNNB1-V2 ISHWQQQSY   | 379  | 257  |
| >CTNNB1-V2 VSHWQQQS\$ | 1219 | >CTNNB1-V2 ISHWQQQSY   | 309  | 910  |
| >CTNNB1-V2 VSHWQQQS\$ | 283  | >CTNNB1-V2 ISHWQQQSY   | 145  | 138  |
| >CTNNB1-V2 VSHWQQQS\$ | 829  | >CTNNB1-V2 ISHWQQQSY   | 383  | 446  |
| >CTNNB1-V2 VSHWQQQS\$ | 479  | >CTNNB1-V2 ISHWQQQSY   | 258  | 221  |
| >CTNNB1-V2 VSHWQQQS\$ | 139  | >CTNNB1-V2 ISHWQQQSY   | 262  | 123  |
| >CTNNB1-V2 VSHWQQQS\$ | 396  | >CTNNB1-V2 ISHWQQQSY   | 255  | 141  |
| >CTNNB1-V2 AVSHWQQQ\$ | 77   | >CTNNB1-V2 AISHWQQQS   | 32   | 45   |
| >CTNNB1-V2 AVSHWQQQ\$ | 245  | >CTNNB1-V2 AISHWQQQS   | 95   | 150  |
| >CTNNB1-V2 AVSHWQQQ\$ | 368  | >CTNNB1-V2 AISHWQQQS   | 115  | 253  |
| >CTNNB1-V2 AVSHWQQQ\$ | 1243 | >CTNNB1-V2 AISHWQQQS   | 417  | 826  |
| >CTNNB1-V2 AVSHWQQQ\$ | 40   | >CTNNB1-V2 AISHWQQQS   | 15   | 25   |
| >CTNNB1-V2 AVSHWQQQ\$ | 681  | >CTNNB1-V2 AISHWQQQS   | 484  | 197  |
| >CTNNB1-V2 AVSHWQQQ\$ | 163  | >CTNNB1-V2 AISHWQQQS   | 615  | 452  |
| >CTNNB1-V2 AVSHWQQQ\$ | 140  | >CTNNB1-V2 AISHWQQQS   | 202  | 62   |
| >CTNNB1-V2 AVSHWQQQ\$ | 488  | >CTNNB1-V2 AISHWQQQS   | 1576 | 1088 |
| >CTNNB1-V2 AVSHWQQQ\$ | 333  | >CTNNB1-V2 AISHWQQQS   | 872  | 539  |
| >CTNNB1-V2 AVSHWQQQ\$ | 121  | >CTNNB1-V2 AISHWQQQS   | 114  | 7    |
| >CTNNB1-V2 AVSHWQQQ\$ | 396  | >CTNNB1-V2 AISHWQQQS   | 280  | 116  |
| >CTNNB1-V2 AVSHWQQQ\$ | 116  | >CTNNB1-V2 AISHWQQQS   | 538  | 422  |
| >CTNNB1-V2 AVSHWQQQ\$ | 378  | >CTNNB1-V2 AISHWQQQS   | 484  | 106  |
| >CTNNB1-V2 AVSHWQQQ\$ | 460  | >CTNNB1-V2 AISHWQQQS   | 1478 | 1018 |
| >CTNNB1-V2 AVSHWQQQ\$ | 282  | >CTNNB1-V2 AISHWQQQS   | 267  | 15   |
| >CTNNB1-V2 MAMEPDRK/  | 299  | >CTNNB1-V2 MAMEPDRK/   | 1599 | 1300 |
| >CTNNB1-V2 MAMEPDRK/  | 258  | >CTNNB1-V2 MAMEPDRK/   | 1270 | 1012 |

|                        |      |                       |      |      |
|------------------------|------|-----------------------|------|------|
| >CTNNB1-V2 MAMEPDRK/   | 165  | >CTNNB1-V2 MAMEPDRK/  | 1021 | 856  |
| >CTNNB1-V2 MAMEPDRK/   | 45   | >CTNNB1-V2 MAMEPDRK/  | 148  | 103  |
| >CTNNB1-V2 MAMEPDRK/   | 35   | >CTNNB1-V2 MAMEPDRK/  | 497  | 462  |
| >CTNNB1-V2 MAMEPDRK/   | 453  | >CTNNB1-V2 MAMEPDRK/  | 3640 | 3187 |
| >CTNNB1-V2 MAMEPDRK/   | 76   | >CTNNB1-V2 MAMEPDRK/  | 6098 | 6022 |
| >CTNNB1-V2 MAMEPDRK/   | 7    | >CTNNB1-V2 MAMEPDRK/  | 14   | 7    |
| >CTNNB1-V2 MAMEPDRK/   | 24   | >CTNNB1-V2 MAMEPDRK/  | 96   | 72   |
| >CTNNB1-V2 MAMEPDRK/   | 1133 | >CTNNB1-V2 MAMEPDRK/  | 153  | 980  |
| >CTNNB1-V2 MAMEPDRK/   | 372  | >CTNNB1-V2 MAMEPDRK/  | 251  | 121  |
| >CTNNB1-V2 MAMEPDRK/   | 285  | >CTNNB1-V2 MAMEPDRK/  | 1399 | 1114 |
| >CTNNB1-V2 MAMEPDRK/   | 2808 | >CTNNB1-V2 MAMEPDRK/  | 56   | 2752 |
| >CTNNB1-V2 AAVSHWQQC   | 61   | >CTNNB1-V2 AAISHWQQC  | 29   | 32   |
| >CTNNB1-V2 AAVSHWQQC   | 459  | >CTNNB1-V2 AAISHWQQC  | 196  | 263  |
| >CTNNB1-V2 AAVSHWQQC   | 540  | >CTNNB1-V2 AAISHWQQC  | 329  | 211  |
| >CTNNB1-V2 AAVSHWQQC   | 144  | >CTNNB1-V2 AAISHWQQC  | 87   | 57   |
| >CTNNB1-V2 AAVSHWQQC   | 58   | >CTNNB1-V2 AAISHWQQC  | 39   | 19   |
| >CTNNB1-V2 AAVSHWQQC   | 10   | >CTNNB1-V2 AAISHWQQC  | 11   | 1    |
| >CTNNB1-V2 AAVSHWQQC   | 91   | >CTNNB1-V2 AAISHWQQC  | 95   | 4    |
| >CTNNB1-V2 AAVSHWQQC   | 112  | >CTNNB1-V2 AAISHWQQC  | 112  | 0    |
| >CTNNB1-V2 RKA AVSHW   | 55   | >CTNNB1-V2 RKA AISHW  | 63   | 8    |
| >CTNNB1-V2 RKA AVSHW   | 38   | >CTNNB1-V2 RKA AISHW  | 82   | 44   |
| >CTNNB1-V2 RKA AVSHW   | 203  | >CTNNB1-V2 RKA AISHW  | 119  | 84   |
| >CTNNB1-V2 EPDRKAAV    | 323  | >CTNNB1-V2 EPDRKAAI   | 1609 | 1286 |
| >CTNNB1-V2 EPDRKAAVSH  | 83   | >CTNNB1-V2 EPDRKAAISH | 89   | 6    |
| >CTNNB1-V2 EPDRKAAVSH  | 13   | >CTNNB1-V2 EPDRKAAISH | 13   | 0    |
| >CTNNB1-V2 MEPDRKAAV   | 112  | >CTNNB1-V2 MEPDRKAAI  | 19   | 93   |
| >CTNNB1-V2 MEPDRKAAV   | 196  | >CTNNB1-V2 MEPDRKAAI  | 66   | 130  |
| >CTNNB1-V2 AMEPDRKAA   | 346  | >CTNNB1-V2 AMEPDRKAA  | 1252 | 906  |
| >CTNNB1-V2 AMEPDRKAA   | 46   | >CTNNB1-V2 AMEPDRKAA  | 452  | 406  |
| >CTNNB1-V2 AMEPDRKAA   | 71   | >CTNNB1-V2 AMEPDRKAA  | 514  | 443  |
| >CTNNB1-V2 AMEPDRKAA   | 3    | >CTNNB1-V2 AMEPDRKAA  | 47   | 44   |
| >CTNNB1-V5 VDTSQVLYEV  | 4325 | >CTNNB1-V5 ADTSQVLYEV | 248  | 4077 |
| >CTNNB1-V5 DV DTSQVLY  | 25   | >CTNNB1-V5 DADTSQVLY  | 34   | 9    |
| >CTNNB1-V5 DV DTSQVLY  | 1299 | >CTNNB1-V5 DADTSQVLY  | 448  | 851  |
| >CTNNB1-V5 DV DTSQVLYE | 2833 | >CTNNB1-V5 DADTSQVLYE | 323  | 2510 |
| >CTNNB1-V5 DV DTSQVLY  | 404  | >CTNNB1-V5 DADTSQVLY  | 979  | 575  |
| >CTNNB1-V5 EDVDTSQV    | 1247 | >CTNNB1-V5 EDADTSQV   | 291  | 956  |
| >CTNNB1-V5 EDVDTSQV    | 1007 | >CTNNB1-V5 EDADTSQV   | 473  | 534  |
| >CTNNB1-V5 EDVDTSQV    | 205  | >CTNNB1-V5 EDADTSQV   | 177  | 28   |
| >CTNNB1-V5 EEDVDTSQV   | 208  | >CTNNB1-V5 EEDADTSQV  | 382  | 174  |
| >CTNNB1-V5 EEDVDTSQVL  | 274  | >CTNNB1-V5 EEDADTSQVL | 79   | 195  |
| >CTNNB1-V5 EEDVDTSQVL  | 601  | >CTNNB1-V5 EEDADTSQVL | 484  | 117  |
| >CTNNB1-V5 EEDVDTSQVL  | 476  | >CTNNB1-V5 EEDADTSQVL | 355  | 121  |

|                         |       |                         |       |       |
|-------------------------|-------|-------------------------|-------|-------|
| >CTNNB1-V5 EEDVDTSQV    | 464   | >CTNNB1-V5 EEDADTSQV    | 605   | 141   |
| >CTNNB1-V5 EEEDVDTSQV   | 178   | >CTNNB1-V5 EEEDADTSQV   | 288   | 110   |
| >CTNNB1-V5 EEEDVDTSQV   | 50    | >CTNNB1-V5 EEEDADTSQV   | 50    | 0     |
| >CTNNB1-V5 EEEDVDTSQV   | 445   | >CTNNB1-V5 EEEDADTSQV   | 448   | 3     |
| >CTNNB1-V5 PEEEDVDTSQV  | 368   | >CTNNB1-V5 PEEEDADTSQV  | 931   | 563   |
| >CTNNB1-V5 NPEEEDVDTSQV | 474   | >CTNNB1-V5 NPEEEDADTSQV | 417   | 57    |
| >CTNNB1-V5 VDTSQVLY     | 648   | >CTNNB1-V5 MDTSQVLY     | 135   | 513   |
| >CTNNB1-V5 VDTSQVLYEV   | 1128  | >CTNNB1-V5 MDTSQVLYEV   | 400   | 728   |
| >CTNNB1-V5 VDTSQVLYEV   | 5803  | >CTNNB1-V5 MDTSQVLYEV   | 302   | 5501  |
| >CTNNB1-V5 DVDTSQVLY    | 25    | >CTNNB1-V5 DMDTSQVLY    | 25    | 0     |
| >CTNNB1-V5 DVDTSQVLY    | 577   | >CTNNB1-V5 DMDTSQVLY    | 181   | 396   |
| >CTNNB1-V5 DVDTSQVL     | 4082  | >CTNNB1-V5 DMDTSQVL     | 443   | 3639  |
| >CTNNB1-V5 DVDTSQVLY    | 404   | >CTNNB1-V5 DMDTSQVLY    | 295   | 109   |
| >CTNNB1-V5 EDVDTSQV     | 1247  | >CTNNB1-V5 EDMDTSQV     | 339   | 908   |
| >CTNNB1-V5 EDVDTSQV     | 1007  | >CTNNB1-V5 EDMDTSQV     | 173   | 834   |
| >CTNNB1-V5 EDVDTSQVL    | 675   | >CTNNB1-V5 EDMDTSQVL    | 133   | 542   |
| >CTNNB1-V5 EDVDTSQV     | 205   | >CTNNB1-V5 EDMDTSQV     | 186   | 19    |
| >CTNNB1-V5 EEDVDTSQV    | 208   | >CTNNB1-V5 EEDMDTSQV    | 68    | 140   |
| >CTNNB1-V5 EEDVDTSQVL   | 274   | >CTNNB1-V5 EEDMDTSQV    | 333   | 59    |
| >CTNNB1-V5 EEDVDTSQVL   | 476   | >CTNNB1-V5 EEDMDTSQV    | 471   | 5     |
| >CTNNB1-V5 EEDVDTSQV    | 464   | >CTNNB1-V5 EEDMDTSQV    | 914   | 450   |
| >CTNNB1-V5 EEDVDTSQVL   | 677   | >CTNNB1-V5 EEDMDTSQV    | 114   | 563   |
| >CTNNB1-V5 EEEDVDTSQV   | 178   | >CTNNB1-V5 EEEDMDTSQV   | 172   | 6     |
| >CTNNB1-V5 EEEDVDTSQV   | 50    | >CTNNB1-V5 EEEDMDTSQV   | 71    | 21    |
| >CTNNB1-V5 EEEDVDTSQV   | 445   | >CTNNB1-V5 EEEDMDTSQV   | 324   | 121   |
| >CTNNB1-V5 PEEEDVDTSQV  | 368   | >CTNNB1-V5 PEEEDMDTSQV  | 567   | 199   |
| >CTNNB1-V5 NPEEEDVDTSQV | 474   | >CTNNB1-V5 NPEEEDMDTSQV | 527   | 53    |
| >CTNNB1-W:WQQQSYLDS     | 268   | >CTNNB1-W:LQQQSYLDS     | 729   | 461   |
| >CTNNB1-W:WQQQSYLDS     | 760   | >CTNNB1-W:LQQQSYLDS     | 453   | 307   |
| >CTNNB1-W:WQQQSYLDS     | 431   | >CTNNB1-W:LQQQSYLDS     | 259   | 172   |
| >CTNNB1-W:WQQQSYLDS     | 187   | >CTNNB1-W:LQQQSYLDS     | 184   | 3     |
| >CTNNB1-W:HWQQQSYL      | 21857 | >CTNNB1-W:HLQQQSYL      | 408   | 21449 |
| >CTNNB1-W:HWQQQSYL      | 5478  | >CTNNB1-W:HLQQQSYL      | 16    | 5462  |
| >CTNNB1-W:HWQQQSYL      | 22150 | >CTNNB1-W:HLQQQSYL      | 465   | 21685 |
| >CTNNB1-W:HWQQQSYL      | 20859 | >CTNNB1-W:HLQQQSYL      | 49    | 20810 |
| >CTNNB1-W:HWQQQSYL      | 19227 | >CTNNB1-W:HLQQQSYL      | 14    | 19213 |
| >CTNNB1-W:HWQQQSYL      | 23956 | >CTNNB1-W:HLQQQSYL      | 180   | 23776 |
| >CTNNB1-W:HWQQQSYL      | 22650 | >CTNNB1-W:HLQQQSYL      | 272   | 22378 |
| >CTNNB1-W:HWQQQSYL      | 22227 | >CTNNB1-W:HLQQQSYL      | 7     | 22220 |
| >CTNNB1-W:HWQQQSYL      | 22    | >CTNNB1-W:HLQQQSYL      | 6423  | 6401  |
| >CTNNB1-W:HWQQQSYL      | 116   | >CTNNB1-W:HLQQQSYL      | 24225 | 24109 |
| >CTNNB1-W:HWQQQSYL      | 297   | >CTNNB1-W:HLQQQSYL      | 30752 | 30455 |
| >CTNNB1-W:EPDRKAAVSH    | 83    | >CTNNB1-W:EPDRKAAVSH    | 3276  | 3193  |

|                       |       |                       |       |       |
|-----------------------|-------|-----------------------|-------|-------|
| >CTNNB1-W; EPDRKAAVSH | 13    | >CTNNB1-W; EPDRKAAVSH | 2698  | 2685  |
| >CTNNB1-W; SHWQQQSYL  | 957   | >CTNNB1-W; SHLQQQSYL  | 354   | 603   |
| >CTNNB1-W; SHWQQQSY   | 180   | >CTNNB1-W; SHLQQQSY   | 1011  | 831   |
| >CTNNB1-W; SHWQQQSY   | 158   | >CTNNB1-W; SHLQQQSY   | 444   | 286   |
| >CTNNB1-W; SHWQQQSY   | 63    | >CTNNB1-W; SHLQQQSY   | 120   | 57    |
| >CTNNB1-W; SHWQQQSYL  | 75    | >CTNNB1-W; SHLQQQSYL  | 226   | 151   |
| >CTNNB1-W; SHWQQQSYL  | 892   | >CTNNB1-W; SHLQQQSYL  | 343   | 549   |
| >CTNNB1-W; VSHWQQQS)  | 27    | >CTNNB1-W; VSHLQQQSY  | 136   | 109   |
| >CTNNB1-W; VSHWQQQS)  | 403   | >CTNNB1-W; VSHLQQQSY  | 409   | 6     |
| >CTNNB1-W; VSHWQQQS)  | 212   | >CTNNB1-W; VSHLQQQSY  | 177   | 35    |
| >CTNNB1-W; VSHWQQQS)  | 6     | >CTNNB1-W; VSHLQQQSY  | 9     | 3     |
| >CTNNB1-W; VSHWQQQS)  | 18    | >CTNNB1-W; VSHLQQQSYI | 31    | 13    |
| >CTNNB1-W; VSHWQQQS)  | 283   | >CTNNB1-W; VSHLQQQSY  | 2050  | 1767  |
| >CTNNB1-W; VSHWQQQS)  | 479   | >CTNNB1-W; VSHLQQQSY  | 905   | 426   |
| >CTNNB1-W; VSHWQQQS)  | 139   | >CTNNB1-W; VSHLQQQSYI | 118   | 21    |
| >CTNNB1-W; VSHWQQQS)  | 396   | >CTNNB1-W; VSHLQQQSYI | 2393  | 1997  |
| >CTNNB1-W; AVSHWQQQ)  | 77    | >CTNNB1-W; AVSHLQQQS' | 38    | 39    |
| >CTNNB1-W; AVSHWQQQ)  | 245   | >CTNNB1-W; AVSHLQQQS' | 468   | 223   |
| >CTNNB1-W; AVSHWQQQ)  | 368   | >CTNNB1-W; AVSHLQQQS' | 1891  | 1523  |
| >CTNNB1-W; AVSHWQQQ)  | 40    | >CTNNB1-W; AVSHLQQQS' | 274   | 234   |
| >CTNNB1-W; AVSHWQQQ)  | 163   | >CTNNB1-W; AVSHLQQQS' | 490   | 327   |
| >CTNNB1-W; AVSHWQQQ)  | 140   | >CTNNB1-W; AVSHLQQQS' | 392   | 252   |
| >CTNNB1-W; AVSHWQQQ)  | 488   | >CTNNB1-W; AVSHLQQQS' | 544   | 56    |
| >CTNNB1-W; AVSHWQQQ)  | 333   | >CTNNB1-W; AVSHLQQQS' | 251   | 82    |
| >CTNNB1-W; AVSHWQQQ)  | 121   | >CTNNB1-W; AVSHLQQQS' | 149   | 28    |
| >CTNNB1-W; AVSHWQQQ)  | 396   | >CTNNB1-W; AVSHLQQQS' | 464   | 68    |
| >CTNNB1-W; AVSHWQQQ)  | 116   | >CTNNB1-W; AVSHLQQQS' | 173   | 57    |
| >CTNNB1-W; AVSHWQQQ)  | 378   | >CTNNB1-W; AVSHLQQQS' | 343   | 35    |
| >CTNNB1-W; AVSHWQQQ)  | 460   | >CTNNB1-W; AVSHLQQQS' | 434   | 26    |
| >CTNNB1-W; AVSHWQQQ)  | 282   | >CTNNB1-W; AVSHLQQQS' | 110   | 172   |
| >CTNNB1-W; AAVSHWQQQ) | 61    | >CTNNB1-W; AAVSHLQQQ  | 26    | 35    |
| >CTNNB1-W; AAVSHWQQQ) | 459   | >CTNNB1-W; AAVSHLQQQ  | 788   | 329   |
| >CTNNB1-W; AAVSHWQQQ) | 144   | >CTNNB1-W; AAVSHLQQQ  | 151   | 7     |
| >CTNNB1-W; AAVSHWQQQ) | 58    | >CTNNB1-W; AAVSHLQQQ  | 53    | 5     |
| >CTNNB1-W; AAVSHWQQQ) | 10    | >CTNNB1-W; AAVSHLQQQ  | 10    | 0     |
| >CTNNB1-W; AAVSHWQQQ) | 91    | >CTNNB1-W; AAVSHLQQQ  | 223   | 132   |
| >CTNNB1-W; AAVSHWQQQ) | 112   | >CTNNB1-W; AAVSHLQQQ  | 190   | 78    |
| >CTNNB1-W; RKA AVSHW  | 55    | >CTNNB1-W; RKA AVSHL  | 15    | 40    |
| >CTNNB1-W; RKA AVSHW  | 38    | >CTNNB1-W; RKA AVSHL  | 11467 | 11429 |
| >CTNNB1-W; RKA AVSHW  | 4938  | >CTNNB1-W; RKA AVSHL  | 352   | 4586  |
| >CTNNB1-W; RKA AVSHW  | 203   | >CTNNB1-W; RKA AVSHL  | 24597 | 24394 |
| >CTNNB1-W; DRKA AVSHW | 22349 | >CTNNB1-W; DRKA AVSHL | 445   | 21904 |
| >CTNNB1-W; WTLRNLSDA) | 265   | >CTNNB1-W; GTLRNLSDAA | 1175  | 910   |

|                       |     |                      |       |       |
|-----------------------|-----|----------------------|-------|-------|
| >CTNNB1-W:WTLRNLSDA/  | 432 | >CTNNB1-W:GTLRNLSDAA | 10060 | 9628  |
| >CTNNB1-W:LWTLRNL     | 419 | >CTNNB1-W:LGTLRNL    | 35889 | 35470 |
| >CTNNB1-W:LWTLRNLSDA/ | 87  | >CTNNB1-W:LGTLRNLSDA | 31116 | 31029 |
| >CTNNB1-W:PSQRLVQNCI  | 465 | >CTNNB1-W:PSQRLVQNCI | 25580 | 25115 |
| >CTNNB1-W:PSQRLVQNCI  | 298 | >CTNNB1-W:PSQRLVQNCI | 21615 | 21317 |
| >CTNNB1-W:CLWTLRNL    | 262 | >CTNNB1-W:CLGTLRNL   | 6405  | 6143  |
| >CTNNB1-W:CLWTLRNL    | 150 | >CTNNB1-W:CLGTLRNL   | 2327  | 2177  |
| >CTNNB1-W:CLWTLRNL    | 387 | >CTNNB1-W:CLGTLRNL   | 3309  | 2922  |
| >CTNNB1-W:CLWTLRNL    | 87  | >CTNNB1-W:CLGTLRNL   | 484   | 397   |
| >CTNNB1-W:CLWTLRNLSE  | 178 | >CTNNB1-W:CLGTLRNLSD | 1065  | 887   |
| >CTNNB1-W:CLWTLRNL    | 474 | >CTNNB1-W:CLGTLRNL   | 1066  | 592   |
| >CTNNB1-W:QNCLWTLR    | 144 | >CTNNB1-W:QNCLGTLR   | 747   | 603   |
| >CTNNB1-W:VQNCLWTL    | 304 | >CTNNB1-W:VQNCLGTL   | 6663  | 6359  |
| >CTNNB1-W:VQNCLWTL    | 246 | >CTNNB1-W:VQNCLGTL   | 1232  | 986   |
| >CTNNB1-W:VQNCLWTL    | 236 | >CTNNB1-W:VQNCLGTL   | 246   | 10    |
| >CTNNB1-W:VQNCLWTLR   | 402 | >CTNNB1-W:VQNCLGTLR  | 439   | 37    |
| >CTNNB1-W:VQNCLWTL    | 13  | >CTNNB1-W:VQNCLGTL   | 153   | 140   |
| >CTNNB1-W:VQNCLWTLR   | 297 | >CTNNB1-W:VQNCLGTLR  | 854   | 557   |
| >CTNNB1-W:VQNCLWTL    | 158 | >CTNNB1-W:VQNCLGTL   | 1610  | 1452  |
| >CTNNB1-W:VQNCLWTL    | 145 | >CTNNB1-W:VQNCLGTL   | 1743  | 1598  |
| >CTNNB1-W:VQNCLWTLR   | 19  | >CTNNB1-W:VQNCLGTLR  | 32    | 13    |
| >CTNNB1-W:VQNCLWTL    | 835 | >CTNNB1-W:VQNCLGTL   | 361   | 474   |
| >CTNNB1-W:VQNCLWTL    | 115 | >CTNNB1-W:VQNCLGTL   | 179   | 64    |
| >CTNNB1-W:VQNCLWTLR   | 156 | >CTNNB1-W:VQNCLGTLR  | 88    | 68    |
| >CTNNB1-W:VQNCLWTLR   | 314 | >CTNNB1-W:VQNCLGTLR  | 1499  | 1185  |
| >CTNNB1-W:LVQNCLWTL   | 39  | >CTNNB1-W:LVQNCLGTL  | 2470  | 2431  |
| >CTNNB1-W:LVQNCLWTL   | 139 | >CTNNB1-W:LVQNCLGTL  | 1923  | 1784  |
| >CTNNB1-W:LVQNCLWTL   | 9   | >CTNNB1-W:LVQNCLGTL  | 482   | 473   |
| >CTNNB1-W:LVQNCLWTL   | 110 | >CTNNB1-W:LVQNCLGTL  | 3994  | 3884  |
| >CTNNB1-W:LVQNCLWTL   | 10  | >CTNNB1-W:LVQNCLGTL  | 1509  | 1499  |
| >CTNNB1-W:LVQNCLWTL   | 87  | >CTNNB1-W:LVQNCLGTL  | 6171  | 6084  |
| >CTNNB1-W:LVQNCLWTL   | 8   | >CTNNB1-W:LVQNCLGTL  | 716   | 708   |
| >CTNNB1-W:LVQNCLWTL   | 183 | >CTNNB1-W:LVQNCLGTL  | 5563  | 5380  |
| >CTNNB1-W:LVQNCLWTL   | 399 | >CTNNB1-W:LVQNCLGTL  | 4838  | 4439  |
| >CTNNB1-W:LVQNCLWTLI  | 30  | >CTNNB1-W:LVQNCLGTLR | 41    | 11    |
| >CTNNB1-W:LVQNCLWTLI  | 542 | >CTNNB1-W:LVQNCLGTLR | 244   | 298   |
| >CTNNB1-W:LVQNCLWTLI  | 55  | >CTNNB1-W:LVQNCLGTLR | 43    | 12    |
| >CTNNB1-W:LVQNCLWTL   | 878 | >CTNNB1-W:LVQNCLGTL  | 96    | 782   |
| >CTNNB1-W:RLVQNCLWT   | 19  | >CTNNB1-W:RLVQNCLGTL | 144   | 125   |
| >CTNNB1-W:RLVQNCLWT   | 37  | >CTNNB1-W:RLVQNCLGTL | 130   | 93    |
| >CTNNB1-W:RLVQNCLWT   | 60  | >CTNNB1-W:RLVQNCLGTL | 28    | 32    |
| >CTNNB1-W:RLVQNCLWT   | 49  | >CTNNB1-W:RLVQNCLGTL | 309   | 260   |
| >CTNNB1-W:RLVQNCLWT   | 9   | >CTNNB1-W:RLVQNCLGTL | 34    | 25    |

|                      |       |                       |       |       |
|----------------------|-------|-----------------------|-------|-------|
| >CTNNB1-W:RLVQNCLWT  | 17    | >CTNNB1-W:RLVQNCLGTL  | 61    | 44    |
| >CTNNB1-W:RLVQNCLWT  | 38    | >CTNNB1-W:RLVQNCLGTL  | 431   | 393   |
| >CTNNB1-W:RLVQNCLWT  | 119   | >CTNNB1-W:RLVQNCLGTL  | 1480  | 1361  |
| >CTNNB1-W:RLVQNCLWT  | 230   | >CTNNB1-W:RLVQNCLGT   | 494   | 264   |
| >CTNNB1-W:RLVQNCLWT  | 4     | >CTNNB1-W:RLVQNCLGTL  | 11    | 7     |
| >CTNNB1-W:RLVQNCLWT  | 434   | >CTNNB1-W:RLVQNCLGTL  | 574   | 140   |
| >CTNNB1-W:RLVQNCLWT  | 66    | >CTNNB1-W:RLVQNCLGTL  | 105   | 39    |
| >CTNNB1-W:RLVQNCLWT  | 105   | >CTNNB1-W:RLVQNCLGTL  | 562   | 457   |
| >CTNNB1-W:RLVQNCLW   | 35    | >CTNNB1-W:RLVQNCLG    | 18995 | 18960 |
| >CTNNB1-W:RLVQNCLWT  | 176   | >CTNNB1-W:RLVQNCLGTL  | 193   | 17    |
| >CTNNB1-W:RLVQNCLW   | 298   | >CTNNB1-W:RLVQNCLG    | 24185 | 23887 |
| >CTNNB1-W:RLVQNCLW   | 23    | >CTNNB1-W:RLVQNCLG    | 19956 | 19933 |
| >CTNNB1-W:RLVQNCLWT  | 26    | >CTNNB1-W:RLVQNCLGTL  | 41    | 15    |
| >CTNNB1-W:RLVQNCLWT  | 273   | >CTNNB1-W:RLVQNCLGTL  | 4634  | 4361  |
| >CTNNB1-W:QRLVQNCLW  | 99    | >CTNNB1-W:QRLVQNCLG   | 174   | 75    |
| >CTNNB1-W:QRLVQNCLW  | 157   | >CTNNB1-W:QRLVQNCLG   | 1007  | 850   |
| >CTNNB1-W:QRLVQNCLW  | 424   | >CTNNB1-W:QRLVQNCLG   | 695   | 271   |
| >CTNNB1-W:QRLVQNCLW  | 121   | >CTNNB1-W:QRLVQNCLG   | 141   | 20    |
| >CTNNB1-W:QRLVQNCLW  | 404   | >CTNNB1-W:QRLVQNCLG   | 503   | 99    |
| >CTNNB1-W:QRLVQNCLW  | 102   | >CTNNB1-W:QRLVQNCLG   | 58    | 44    |
| >CTNNB1-W:QRLVQNCLW  | 117   | >CTNNB1-W:QRLVQNCLG   | 33392 | 33275 |
| >CTNNB1-W:WTLRNLSDA/ | 265   | >CTNNB1-W:RTLRLNSDAA  | 444   | 179   |
| >CTNNB1-W:WTLRNLSDA  | 12184 | >CTNNB1-W:RTLRLNSDA   | 78    | 12106 |
| >CTNNB1-W:WTLRNLSDA/ | 11655 | >CTNNB1-W:RTLRLNSDAA  | 70    | 11585 |
| >CTNNB1-W:WTLRNLSDA/ | 432   | >CTNNB1-W:RTLRLNSDAA  | 5174  | 4742  |
| >CTNNB1-W:WTLRNLSDA/ | 3545  | >CTNNB1-W:RTLRLNSDAA  | 342   | 3203  |
| >CTNNB1-W:LWTLRNL    | 419   | >CTNNB1-W:LRTLRLNS    | 35693 | 35274 |
| >CTNNB1-W:LWTLRNLSD/ | 87    | >CTNNB1-W:LRTLRLNSDA/ | 30568 | 30481 |
| >CTNNB1-W:PSQRLVQNCI | 465   | >CTNNB1-W:PSQRLVQNCI  | 25587 | 25122 |
| >CTNNB1-W:PSQRLVQNCI | 298   | >CTNNB1-W:PSQRLVQNCI  | 22234 | 21936 |
| >CTNNB1-W:CLWTLRNL   | 262   | >CTNNB1-W:CLRTLRLNL   | 12791 | 12529 |
| >CTNNB1-W:CLWTLRNLSE | 905   | >CTNNB1-W:CLRTLRLNSD/ | 452   | 453   |
| >CTNNB1-W:CLWTLRNL   | 150   | >CTNNB1-W:CLRTLRLNL   | 7970  | 7820  |
| >CTNNB1-W:CLWTLRNL   | 387   | >CTNNB1-W:CLRTLRLNL   | 14481 | 14094 |
| >CTNNB1-W:CLWTLRNL   | 87    | >CTNNB1-W:CLRTLRLNL   | 870   | 783   |
| >CTNNB1-W:CLWTLRNLSE | 178   | >CTNNB1-W:CLRTLRLNSD/ | 1853  | 1675  |
| >CTNNB1-W:CLWTLRNL   | 474   | >CTNNB1-W:CLRTLRLNL   | 1162  | 688   |
| >CTNNB1-W:QNCLWTLR   | 144   | >CTNNB1-W:QNCLRTLRL   | 262   | 118   |
| >CTNNB1-W:VQNCLWTL   | 304   | >CTNNB1-W:VQNCLRRTL   | 8125  | 7821  |
| >CTNNB1-W:VQNCLWTL   | 246   | >CTNNB1-W:VQNCLRRTL   | 2338  | 2092  |
| >CTNNB1-W:VQNCLWTL   | 236   | >CTNNB1-W:VQNCLRRTL   | 666   | 430   |
| >CTNNB1-W:VQNCLWTLR  | 402   | >CTNNB1-W:VQNCLRTLRL  | 846   | 444   |
| >CTNNB1-W:VQNCLWTL   | 13    | >CTNNB1-W:VQNCLRRTL   | 364   | 351   |

|                      |       |                       |       |       |
|----------------------|-------|-----------------------|-------|-------|
| >CTNNB1-W:VQNCLWTLR  | 297   | >CTNNB1-W:VQNCLRTRLR  | 1597  | 1300  |
| >CTNNB1-W:VQNCLWTL   | 158   | >CTNNB1-W:VQNCLRRTL   | 2991  | 2833  |
| >CTNNB1-W:VQNCLWTL   | 145   | >CTNNB1-W:VQNCLRRTL   | 4212  | 4067  |
| >CTNNB1-W:VQNCLWTLR  | 19    | >CTNNB1-W:VQNCLRTRLR  | 12    | 7     |
| >CTNNB1-W:VQNCLWTL   | 115   | >CTNNB1-W:VQNCLRRTL   | 89    | 26    |
| >CTNNB1-W:VQNCLWTLR  | 156   | >CTNNB1-W:VQNCLRTRLR  | 92    | 64    |
| >CTNNB1-W:VQNCLWTLR  | 314   | >CTNNB1-W:VQNCLRTRLR  | 525   | 211   |
| >CTNNB1-W:LVQNCLWTL  | 39    | >CTNNB1-W:LVQNCLRRTL  | 3208  | 3169  |
| >CTNNB1-W:LVQNCLWTL  | 139   | >CTNNB1-W:LVQNCLRRTL  | 2978  | 2839  |
| >CTNNB1-W:LVQNCLWTL  | 9     | >CTNNB1-W:LVQNCLRRTL  | 1219  | 1210  |
| >CTNNB1-W:LVQNCLWTL  | 110   | >CTNNB1-W:LVQNCLRRTL  | 3967  | 3857  |
| >CTNNB1-W:LVQNCLWTL  | 10    | >CTNNB1-W:LVQNCLRRTL  | 1919  | 1909  |
| >CTNNB1-W:LVQNCLWTL  | 87    | >CTNNB1-W:LVQNCLRRTL  | 5934  | 5847  |
| >CTNNB1-W:LVQNCLWTL  | 8     | >CTNNB1-W:LVQNCLRRTL  | 1044  | 1036  |
| >CTNNB1-W:LVQNCLWTL  | 183   | >CTNNB1-W:LVQNCLRRTL  | 6212  | 6029  |
| >CTNNB1-W:LVQNCLWTL  | 399   | >CTNNB1-W:LVQNCLRRTL  | 8188  | 7789  |
| >CTNNB1-W:LVQNCLWTLI | 30    | >CTNNB1-W:LVQNCLRTRLR | 13    | 17    |
| >CTNNB1-W:LVQNCLWTLI | 542   | >CTNNB1-W:LVQNCLRTRLR | 305   | 237   |
| >CTNNB1-W:LVQNCLWTLI | 55    | >CTNNB1-W:LVQNCLRTRLR | 76    | 21    |
| >CTNNB1-W:LVQNCLWTL  | 878   | >CTNNB1-W:LVQNCLRRTL  | 235   | 643   |
| >CTNNB1-W:RLVQNCLWT  | 19    | >CTNNB1-W:RLVQNCLRRTL | 232   | 213   |
| >CTNNB1-W:RLVQNCLWT  | 37    | >CTNNB1-W:RLVQNCLRRTL | 185   | 148   |
| >CTNNB1-W:RLVQNCLWT  | 60    | >CTNNB1-W:RLVQNCLRRTL | 52    | 8     |
| >CTNNB1-W:RLVQNCLWT  | 49    | >CTNNB1-W:RLVQNCLRRTL | 414   | 365   |
| >CTNNB1-W:RLVQNCLWT  | 9     | >CTNNB1-W:RLVQNCLRRTL | 38    | 29    |
| >CTNNB1-W:RLVQNCLWT  | 17    | >CTNNB1-W:RLVQNCLRRTL | 97    | 80    |
| >CTNNB1-W:RLVQNCLWT  | 38    | >CTNNB1-W:RLVQNCLRRTL | 809   | 771   |
| >CTNNB1-W:RLVQNCLWT  | 119   | >CTNNB1-W:RLVQNCLRRTL | 1931  | 1812  |
| >CTNNB1-W:RLVQNCLWT  | 230   | >CTNNB1-W:RLVQNCLRRT  | 340   | 110   |
| >CTNNB1-W:RLVQNCLWT  | 4     | >CTNNB1-W:RLVQNCLRRTL | 15    | 11    |
| >CTNNB1-W:RLVQNCLWT  | 434   | >CTNNB1-W:RLVQNCLRRTL | 374   | 60    |
| >CTNNB1-W:RLVQNCLW   | 15786 | >CTNNB1-W:RLVQNCLR    | 80    | 15706 |
| >CTNNB1-W:RLVQNCLWT  | 66    | >CTNNB1-W:RLVQNCLRRTL | 57    | 9     |
| >CTNNB1-W:RLVQNCLWT  | 105   | >CTNNB1-W:RLVQNCLRRTL | 159   | 54    |
| >CTNNB1-W:RLVQNCLW   | 35    | >CTNNB1-W:RLVQNCLR    | 19573 | 19538 |
| >CTNNB1-W:RLVQNCLWT  | 176   | >CTNNB1-W:RLVQNCLRRTL | 187   | 11    |
| >CTNNB1-W:RLVQNCLW   | 298   | >CTNNB1-W:RLVQNCLR    | 24313 | 24015 |
| >CTNNB1-W:RLVQNCLW   | 23    | >CTNNB1-W:RLVQNCLR    | 21404 | 21381 |
| >CTNNB1-W:RLVQNCLW   | 13065 | >CTNNB1-W:RLVQNCLR    | 23    | 13042 |
| >CTNNB1-W:RLVQNCLWT  | 26    | >CTNNB1-W:RLVQNCLRRTL | 30    | 4     |
| >CTNNB1-W:RLVQNCLWT  | 273   | >CTNNB1-W:RLVQNCLRRTL | 3302  | 3029  |
| >CTNNB1-W:QRLVQNCLW  | 2648  | >CTNNB1-W:QRLVQNCLR   | 249   | 2399  |
| >CTNNB1-W:QRLVQNCLW  | 99    | >CTNNB1-W:QRLVQNCLR   | 148   | 49    |



|                      |       |                      |       |       |
|----------------------|-------|----------------------|-------|-------|
| >CTNNB1-W:QRLVQNCLW  | 157   | >CTNNB1-W:QRLVQNCLR  | 1046  | 889   |
| >CTNNB1-W:QRLVQNCLW  | 424   | >CTNNB1-W:QRLVQNCLR  | 1016  | 592   |
| >CTNNB1-W:QRLVQNCLW  | 121   | >CTNNB1-W:QRLVQNCLR  | 102   | 19    |
| >CTNNB1-W:QRLVQNCLW  | 404   | >CTNNB1-W:QRLVQNCLR  | 719   | 315   |
| >CTNNB1-W:QRLVQNCLW  | 102   | >CTNNB1-W:QRLVQNCLR  | 35    | 67    |
| >CTNNB1-W:QRLVQNCLW  | 117   | >CTNNB1-W:QRLVQNCLR  | 31278 | 31161 |
| >CTNNB1-W:QRLVQNCLW  | 31618 | >CTNNB1-W:QRLVQNCLR  | 148   | 31470 |
| >CTNNB1-W:SQRLVQNCL  | 4833  | >CTNNB1-W:SQRLVQNCLF | 454   | 4379  |
| >CTNNB1-W:SQRLVQNCL  | 21281 | >CTNNB1-W:SQRLVQNCLF | 47    | 21234 |
| >CTNNB1-W:SQRLVQNCL  | 27880 | >CTNNB1-W:SQRLVQNCLF | 425   | 27455 |
| >CTNNB1-W{WEQGFSQSF  | 467   | >CTNNB1-W{LEQGFSQSF  | 703   | 236   |
| >CTNNB1-W{WEQGFSQSF  | 114   | >CTNNB1-W{LEQGFSQSF  | 78    | 36    |
| >CTNNB1-W{WEQGFSQSF  | 129   | >CTNNB1-W{LEQGFSQSF  | 467   | 338   |
| >CTNNB1-W{WEQGFSQSF  | 62    | >CTNNB1-W{LEQGFSQSF  | 65    | 3     |
| >CTNNB1-W{WEQGFSQSF  | 5     | >CTNNB1-W{LEQGFSQSF  | 8     | 3     |
| >CTNNB1-W{WEQGFSQSF  | 43    | >CTNNB1-W{LEQGFSQSFT | 189   | 146   |
| >CTNNB1-W{WEQGFSQSF  | 73    | >CTNNB1-W{LEQGFSQSF  | 263   | 190   |
| >CTNNB1-W{WEQGFSQSF  | 77    | >CTNNB1-W{LEQGFSQSF  | 175   | 98    |
| >CTNNB1-W{WEQGFSQSF  | 220   | >CTNNB1-W{LEQGFSQSF  | 155   | 65    |
| >CTNNB1-W{WEQGFSQSF  | 213   | >CTNNB1-W{LEQGFSQSF  | 126   | 87    |
| >CTNNB1-W{WEQGFSQSF  | 105   | >CTNNB1-W{LEQGFSQSF  | 612   | 507   |
| >CTNNB1-W{WEQGFSQSF  | 47    | >CTNNB1-W{LEQGFSQSFT | 817   | 770   |
| >CTNNB1-W{EWEQGFSQS  | 261   | >CTNNB1-W{ELEQGFSQSF | 14166 | 13905 |
| >CTNNB1-W{EWEQGFSQS  | 91    | >CTNNB1-W{ELEQGFSQSF | 9910  | 9819  |
| >CTNNB1-W{EWEQGFSQS  | 5550  | >CTNNB1-W{ELEQGFSQSF | 135   | 5415  |
| >CTNNB1-W{EWEQGFSQS  | 305   | >CTNNB1-W{ELEQGFSQSF | 27706 | 27401 |
| >CTNNB1-W{DVDTSQVLYE | 23457 | >CTNNB1-W{DVDTSQVLYE | 467   | 22990 |
| >CTNNB1-W{DVDTSQVLYE | 16612 | >CTNNB1-W{DVDTSQVLYE | 278   | 16334 |
| >CTNNB1-W{YEWEQGFS   | 98    | >CTNNB1-W{YELEQGFS   | 97    | 1     |
| >CTNNB1-W{YEWEQGFSQ  | 100   | >CTNNB1-W{YELEQGFSQS | 227   | 127   |
| >CTNNB1-W{YEWEQGFSQ  | 128   | >CTNNB1-W{YELEQGFSQS | 166   | 38    |
| >CTNNB1-W{YEWEQGFSQ  | 98    | >CTNNB1-W{YELEQGFSQS | 121   | 23    |
| >CTNNB1-W{YEWEQGFSQ  | 6     | >CTNNB1-W{YELEQGFSQS | 10    | 4     |
| >CTNNB1-W{YEWEQGFSQ  | 15    | >CTNNB1-W{YELEQGFSQ  | 25    | 10    |
| >CTNNB1-W{YEWEQGFSQ  | 4     | >CTNNB1-W{YELEQGFSQS | 4     | 0     |
| >CTNNB1-W{YEWEQGFSQ  | 63    | >CTNNB1-W{YELEQGFSQS | 408   | 345   |
| >CTNNB1-W{YEWEQGFSQ  | 109   | >CTNNB1-W{YELEQGFSQS | 63    | 46    |
| >CTNNB1-W{YEWEQGFSQ  | 423   | >CTNNB1-W{YELEQGFSQ  | 403   | 20    |
| >CTNNB1-W{YEWEQGFSQ  | 63    | >CTNNB1-W{YELEQGFSQS | 54    | 9     |
| >CTNNB1-W{YEWEQGFSQ  | 209   | >CTNNB1-W{YELEQGFSQS | 238   | 29    |
| >CTNNB1-W{YEWEQGFSQ  | 82    | >CTNNB1-W{YELEQGFSQS | 69    | 13    |
| >CTNNB1-W{YEWEQGFSQ  | 30    | >CTNNB1-W{YELEQGFSQS | 22    | 8     |
| >CTNNB1-W{LYEWEQGF   | 328   | >CTNNB1-W{LYELEQGF   | 927   | 599   |

|                        |       |                        |       |       |
|------------------------|-------|------------------------|-------|-------|
| >CTNNB1-W{LYEWEQGF     | 16    | >CTNNB1-W{LYELEQGF     | 22    | 6     |
| >CTNNB1-W{VLYEWEQGF    | 90    | >CTNNB1-W{VLYELEQGF    | 187   | 97    |
| >CTNNB1-W{VLYEWEQGF    | 293   | >CTNNB1-W{VLYELEQGF    | 614   | 321   |
| >CTNNB1-W{VLYEWEQG     | 22    | >CTNNB1-W{VLYELEQG     | 57    | 35    |
| >CTNNB1-W{VLYEWEQGF    | 4     | >CTNNB1-W{VLYELEQGF    | 18    | 14    |
| >CTNNB1-W{VLYEWEQGF!   | 14    | >CTNNB1-W{VLYELEQGF!   | 69    | 55    |
| >CTNNB1-W{VLYEWEQGF!   | 6     | >CTNNB1-W{VLYELEQGF!   | 20    | 14    |
| >CTNNB1-W{VLYEWEQGF    | 222   | >CTNNB1-W{VLYELEQGF    | 1534  | 1312  |
| >CTNNB1-W{VLYEWEQGF!   | 128   | >CTNNB1-W{VLYELEQGF!   | 450   | 322   |
| >CTNNB1-W{VLYEWEQG     | 432   | >CTNNB1-W{VLYELEQG     | 1028  | 596   |
| >CTNNB1-W{VLYEWEQGF    | 125   | >CTNNB1-W{VLYELEQGF    | 674   | 549   |
| >CTNNB1-W{VLYEWEQGF!   | 129   | >CTNNB1-W{VLYELEQGF!   | 407   | 278   |
| >CTNNB1-W{VLYEWEQGF!   | 20    | >CTNNB1-W{VLYELEQGF!   | 38    | 18    |
| >CTNNB1-W{VLYEWEQG     | 193   | >CTNNB1-W{VLYELEQG     | 495   | 302   |
| >CTNNB1-W{VLYEWEQGF    | 13    | >CTNNB1-W{VLYELEQGF    | 139   | 126   |
| >CTNNB1-W{VLYEWEQGF!   | 71    | >CTNNB1-W{VLYELEQGF!   | 481   | 410   |
| >CTNNB1-W{VLYEWEQGF!   | 4     | >CTNNB1-W{VLYELEQGF!   | 8     | 4     |
| >CTNNB1-W{VLYEWEQGF    | 153   | >CTNNB1-W{VLYELEQGF    | 225   | 72    |
| >CTNNB1-W{VLYEWEQGF    | 146   | >CTNNB1-W{VLYELEQGF    | 167   | 21    |
| >CTNNB1-W{VLYEWEQGF    | 50    | >CTNNB1-W{VLYELEQGF    | 59    | 9     |
| >CTNNB1-W{VLYEWEQGF    | 63    | >CTNNB1-W{VLYELEQGF    | 74    | 11    |
| >CTNNB1-W{QVLYEWEQG    | 151   | >CTNNB1-W{QVLYELEQGF   | 84    | 67    |
| >CTNNB1-W{QVLYEWEQG    | 513   | >CTNNB1-W{QVLYELEQGF   | 213   | 300   |
| >CTNNB1-W{QVLYEWEQG    | 492   | >CTNNB1-W{QVLYELEQGF   | 487   | 5     |
| >CTNNB1-W{SQVLYEWEQ!   | 185   | >CTNNB1-W{SQVLYELEQG   | 545   | 360   |
| >CTNNB1-W{SQVLYEWEQ!   | 272   | >CTNNB1-W{SQVLYELEQG   | 168   | 104   |
| >CTNNB1-W{SQVLYEWEQ!   | 24    | >CTNNB1-W{SQVLYELEQG   | 21    | 3     |
| >CTNNB1-W{TSQVLYEW     | 53    | >CTNNB1-W{TSQVLYEL     | 1088  | 1035  |
| >CTNNB1-W{TSQVLYEW     | 53    | >CTNNB1-W{TSQVLYEL     | 8937  | 8884  |
| >CTNNB1-W{TSQVLYEW     | 18    | >CTNNB1-W{TSQVLYEL     | 4379  | 4361  |
| >CTNNB1-W{TSQVLYEW     | 459   | >CTNNB1-W{TSQVLYEL     | 24674 | 24215 |
| >CTNNB1-W{DTSQVLYEW    | 856   | >CTNNB1-W{DTSQVLYEL    | 137   | 719   |
| >CTNNB1-W{DTSQVLYEW!   | 285   | >CTNNB1-W{DTSQVLYELE!  | 484   | 199   |
| >CTNNB1-W{DTSQVLYEW    | 12720 | >CTNNB1-W{DTSQVLYEL    | 11    | 12709 |
| >CTNNB1-W{DTSQVLYEW    | 13143 | >CTNNB1-W{DTSQVLYEL    | 117   | 13026 |
| >CTNNB1-W{DTSQVLYEW    | 144   | >CTNNB1-W{DTSQVLYEL    | 17229 | 17085 |
| >CTNNB1-W{DTSQVLYEW    | 134   | >CTNNB1-W{DTSQVLYEL    | 11773 | 11639 |
| >CTNNB1-W{VDTSQVLYEV   | 13041 | >CTNNB1-W{VDTSQVLYEL   | 247   | 12794 |
| >CTNNB1-Y3 YLDSGIHSGA  | 78    | >CTNNB1-Y3 CLDSGIHSGA  | 2635  | 2557  |
| >CTNNB1-Y3 YLDSGIHSGA! | 212   | >CTNNB1-Y3 CLDSGIHSGA! | 4161  | 3949  |
| >CTNNB1-Y3 YLDSGIHSG   | 278   | >CTNNB1-Y3 CLDSGIHSG   | 6040  | 5762  |
| >CTNNB1-Y3 YLDSGIHSGA  | 24    | >CTNNB1-Y3 CLDSGIHSGA  | 222   | 198   |
| >CTNNB1-Y3 YLDSGIHSGA! | 284   | >CTNNB1-Y3 CLDSGIHSGA! | 5096  | 4812  |

|                        |     |                        |       |       |
|------------------------|-----|------------------------|-------|-------|
| >CTNNB1-Y3 YLDSGIHSGA  | 32  | >CTNNB1-Y3 CLDSGIHSGA  | 369   | 337   |
| >CTNNB1-Y3 YLDSGIHSGA  | 78  | >CTNNB1-Y3 CLDSGIHSGA  | 2150  | 2072  |
| >CTNNB1-Y3 YLDSGIHS    | 419 | >CTNNB1-Y3 CLDSGIHS    | 8955  | 8536  |
| >CTNNB1-Y3 YLDSGIHSGA  | 280 | >CTNNB1-Y3 CLDSGIHSGA  | 5375  | 5095  |
| >CTNNB1-Y3 YLDSGIHSGA  | 178 | >CTNNB1-Y3 CLDSGIHSGA  | 4787  | 4609  |
| >CTNNB1-Y3 YLDSGIHS    | 47  | >CTNNB1-Y3 CLDSGIHS    | 3002  | 2955  |
| >CTNNB1-Y3 YLDSGIHSG   | 15  | >CTNNB1-Y3 CLDSGIHSG   | 1133  | 1118  |
| >CTNNB1-Y3 YLDSGIHSGA  | 2   | >CTNNB1-Y3 CLDSGIHSGA  | 38    | 36    |
| >CTNNB1-Y3 YLDSGIHSGA  | 12  | >CTNNB1-Y3 CLDSGIHSGA  | 649   | 637   |
| >CTNNB1-Y3 YLDSGIHS    | 395 | >CTNNB1-Y3 CLDSGIHS    | 8008  | 7613  |
| >CTNNB1-Y3 YLDSGIHSG   | 139 | >CTNNB1-Y3 CLDSGIHSG   | 3154  | 3015  |
| >CTNNB1-Y3 YLDSGIHSGA  | 8   | >CTNNB1-Y3 CLDSGIHSGA  | 293   | 285   |
| >CTNNB1-Y3 YLDSGIHSGA  | 83  | >CTNNB1-Y3 CLDSGIHSGA  | 3364  | 3281  |
| >CTNNB1-Y3 YLDSGIHS    | 101 | >CTNNB1-Y3 CLDSGIHS    | 8699  | 8598  |
| >CTNNB1-Y3 YLDSGIHSG   | 140 | >CTNNB1-Y3 CLDSGIHSG   | 9965  | 9825  |
| >CTNNB1-Y3 YLDSGIHSGA  | 7   | >CTNNB1-Y3 CLDSGIHSGA  | 293   | 286   |
| >CTNNB1-Y3 YLDSGIHSGA  | 121 | >CTNNB1-Y3 CLDSGIHSGA  | 5558  | 5437  |
| >CTNNB1-Y3 YLDSGIHSGA  | 7   | >CTNNB1-Y3 CLDSGIHSGA  | 123   | 116   |
| >CTNNB1-Y3 YLDSGIHSGA  | 255 | >CTNNB1-Y3 CLDSGIHSGA  | 2428  | 2173  |
| >CTNNB1-Y3 YLDSGIHS    | 66  | >CTNNB1-Y3 CLDSGIHS    | 5122  | 5056  |
| >CTNNB1-Y3 YLDSGIHSG   | 13  | >CTNNB1-Y3 CLDSGIHSG   | 2181  | 2168  |
| >CTNNB1-Y3 YLDSGIHSGA  | 2   | >CTNNB1-Y3 CLDSGIHSGA  | 28    | 26    |
| >CTNNB1-Y3 YLDSGIHSGA  | 36  | >CTNNB1-Y3 CLDSGIHSGA  | 1461  | 1425  |
| >CTNNB1-Y3 SYLDSGIHSG/ | 410 | >CTNNB1-Y3 SCLDSGIHSG/ | 31354 | 30944 |
| >CTNNB1-Y3 AAVSHWQQ(   | 61  | >CTNNB1-Y3 AAVSHWQQ(   | 26558 | 26497 |
| >CTNNB1-Y3 AAVSHWQQ(   | 459 | >CTNNB1-Y3 AAVSHWQQ(   | 25561 | 25102 |
| >CTNNB1-Y3 AAVSHWQQ(   | 144 | >CTNNB1-Y3 AAVSHWQQ(   | 17135 | 16991 |
| >CTNNB1-Y3 AAVSHWQQ(   | 58  | >CTNNB1-Y3 AAVSHWQQ(   | 6603  | 6545  |
| >CTNNB1-Y3 AAVSHWQQ(   | 10  | >CTNNB1-Y3 AAVSHWQQ(   | 12321 | 12311 |
| >CTNNB1-Y3 AAVSHWQQ(   | 91  | >CTNNB1-Y3 AAVSHWQQ(   | 15593 | 15502 |
| >CTNNB1-Y3 AAVSHWQQ(   | 112 | >CTNNB1-Y3 AAVSHWQQ(   | 32738 | 32626 |
| >CTNNB1-Y3 QSYLDSGI    | 46  | >CTNNB1-Y3 QSCLDSGI    | 630   | 584   |
| >CTNNB1-Y3 QSYLDSGI    | 22  | >CTNNB1-Y3 QSCLDSGI    | 73    | 51    |
| >CTNNB1-Y3 QQSYLDSGI   | 417 | >CTNNB1-Y3 QQSCLDSGI   | 405   | 12    |
| >CTNNB1-Y3 QQQSYLDSGI  | 381 | >CTNNB1-Y3 QQQSCLDSGI  | 497   | 116   |
| >CTNNB1-Y3 WQQQSYLDS   | 268 | >CTNNB1-Y3 WQQQSCLDS   | 289   | 21    |
| >CTNNB1-Y3 WQQQSYLDS   | 431 | >CTNNB1-Y3 WQQQSCLDS   | 403   | 28    |
| >CTNNB1-Y3 WQQQSYLDS   | 187 | >CTNNB1-Y3 WQQQSCLDS   | 273   | 86    |
| >CTNNB1-Y3 HWQQQSYL    | 22  | >CTNNB1-Y3 HWQQQSCL    | 286   | 264   |
| >CTNNB1-Y3 HWQQQSYL    | 116 | >CTNNB1-Y3 HWQQQSCL    | 418   | 302   |
| >CTNNB1-Y3 HWQQQSYLI   | 297 | >CTNNB1-Y3 HWQQQSCLI   | 487   | 190   |
| >CTNNB1-Y3 SHWQQQSY    | 180 | >CTNNB1-Y3 SHWQQQSC    | 24918 | 24738 |
| >CTNNB1-Y3 SHWQQQSY    | 158 | >CTNNB1-Y3 SHWQQQSC    | 23525 | 23367 |

|                        |       |                        |       |       |
|------------------------|-------|------------------------|-------|-------|
| >CTNNB1-Y3 SHWQQQSY    | 63    | >CTNNB1-Y3 SHWQQQSC    | 8451  | 8388  |
| >CTNNB1-Y3 SHWQQQSYL   | 75    | >CTNNB1-Y3 SHWQQQSCI   | 260   | 185   |
| >CTNNB1-Y3 SHWQQQSYL   | 892   | >CTNNB1-Y3 SHWQQQSCI   | 137   | 755   |
| >CTNNB1-Y3 VSHWQQQS\   | 27    | >CTNNB1-Y3 VSHWQQQS\   | 13966 | 13939 |
| >CTNNB1-Y3 VSHWQQQS\   | 403   | >CTNNB1-Y3 VSHWQQQS\   | 21210 | 20807 |
| >CTNNB1-Y3 VSHWQQQS\   | 212   | >CTNNB1-Y3 VSHWQQQS\   | 19202 | 18990 |
| >CTNNB1-Y3 VSHWQQQS\   | 6     | >CTNNB1-Y3 VSHWQQQS\   | 6486  | 6480  |
| >CTNNB1-Y3 VSHWQQQS\   | 18    | >CTNNB1-Y3 VSHWQQQS\   | 139   | 121   |
| >CTNNB1-Y3 VSHWQQQS\   | 283   | >CTNNB1-Y3 VSHWQQQS\   | 13871 | 13588 |
| >CTNNB1-Y3 VSHWQQQS\   | 479   | >CTNNB1-Y3 VSHWQQQS\   | 24249 | 23770 |
| >CTNNB1-Y3 VSHWQQQS\   | 139   | >CTNNB1-Y3 VSHWQQQS\   | 730   | 591   |
| >CTNNB1-Y3 VSHWQQQS\   | 396   | >CTNNB1-Y3 VSHWQQQS\   | 202   | 194   |
| >CTNNB1-Y3 AVSHWQQQ\   | 77    | >CTNNB1-Y3 AVSHWQQQ\   | 484   | 407   |
| >CTNNB1-Y3 AVSHWQQQ\   | 245   | >CTNNB1-Y3 AVSHWQQQ\   | 1984  | 1739  |
| >CTNNB1-Y3 AVSHWQQQ\   | 368   | >CTNNB1-Y3 AVSHWQQQ\   | 3988  | 3620  |
| >CTNNB1-Y3 AVSHWQQQ\   | 40    | >CTNNB1-Y3 AVSHWQQQ\   | 260   | 220   |
| >CTNNB1-Y3 AVSHWQQQ\   | 163   | >CTNNB1-Y3 AVSHWQQQ\   | 33331 | 33168 |
| >CTNNB1-Y3 AVSHWQQQ\   | 140   | >CTNNB1-Y3 AVSHWQQQ\   | 27543 | 27403 |
| >CTNNB1-Y3 AVSHWQQQ\   | 488   | >CTNNB1-Y3 AVSHWQQQ\   | 2985  | 2497  |
| >CTNNB1-Y3 AVSHWQQQ\   | 333   | >CTNNB1-Y3 AVSHWQQQ\   | 27444 | 27111 |
| >CTNNB1-Y3 AVSHWQQQ\   | 121   | >CTNNB1-Y3 AVSHWQQQ\   | 15653 | 15532 |
| >CTNNB1-Y3 AVSHWQQQ\   | 396   | >CTNNB1-Y3 AVSHWQQQ\   | 14566 | 14170 |
| >CTNNB1-Y3 AVSHWQQQ\   | 116   | >CTNNB1-Y3 AVSHWQQQ\   | 21457 | 21341 |
| >CTNNB1-Y3 AVSHWQQQ\   | 378   | >CTNNB1-Y3 AVSHWQQQ\   | 26470 | 26092 |
| >CTNNB1-Y3 AVSHWQQQ\   | 460   | >CTNNB1-Y3 AVSHWQQQ\   | 1715  | 1255  |
| >CTNNB1-Y3 AVSHWQQQ\   | 282   | >CTNNB1-Y3 AVSHWQQQ\   | 36049 | 35767 |
| >CXCR7-S15L FSDISWPC   | 12417 | >CXCR7-S15L FLDISWPC   | 221   | 12196 |
| >CXCR7-S15L FSDISWPC   | 10812 | >CXCR7-S15L FLDISWPC   | 318   | 10494 |
| >CXCR7-S15L FSDISWPC   | 706   | >CXCR7-S15L FLDISWPC   | 68    | 638   |
| >CXCR7-S15L FSDISWPC   | 3719  | >CXCR7-S15L FLDISWPC   | 5     | 3714  |
| >CXCR7-S15L FSDISWPCNS | 13287 | >CXCR7-S15L FLDISWPCNS | 63    | 13224 |
| >CXCR7-S15L FSDISWPCNS | 22512 | >CXCR7-S15L FLDISWPCNS | 394   | 22118 |
| >CXCR7-S15L FSDISWPC   | 12262 | >CXCR7-S15L FLDISWPC   | 33    | 12229 |
| >CXCR7-S15L FSDISWPC   | 12521 | >CXCR7-S15L FLDISWPC   | 22    | 12499 |
| >CXCR7-S15L FSDISWPCNS | 17315 | >CXCR7-S15L FLDISWPCNS | 139   | 17176 |
| >CXCR7-S15L FSDISWPC   | 18320 | >CXCR7-S15L FLDISWPC   | 216   | 18104 |
| >CXCR7-S15L FSDISWPC   | 23636 | >CXCR7-S15L FLDISWPC   | 9     | 23627 |
| >CXCR7-S15L FSDISWPCNS | 33339 | >CXCR7-S15L FLDISWPCNS | 139   | 33200 |
| >CXCR7-S15L LFDYSEPGNF | 3913  | >CXCR7-S15L LFDYSEPGNF | 495   | 3418  |
| >CXCR7-S15L NFSDISWPC  | 475   | >CXCR7-S15L NFLDISWPC  | 491   | 16    |
| >CXCR7-S15L EPGNFSDI   | 743   | >CXCR7-S15L EPGNFLDI   | 450   | 293   |
| >CXCR7-S15L EPGNFSDISW | 19    | >CXCR7-S15L EPGNFLDISW | 20    | 1     |
| >CXCR7-S15L SEPGNFSDI  | 36    | >CXCR7-S15L SEPGNFLDI  | 43    | 7     |

|                         |       |                         |      |       |
|-------------------------|-------|-------------------------|------|-------|
| >CXCR7-S15L SEPGNFSDIS\ | 125   | >CXCR7-S15L SEPGNFLDIS\ | 90   | 35    |
| >CXCR7-S15L SEPGNFSDI   | 62    | >CXCR7-S15L SEPGNFLDI   | 77   | 15    |
| >CXCR7-S15L YSEPGNFS    | 7161  | >CXCR7-S15L YSEPGNFL    | 44   | 7117  |
| >CXCR7-S15L YSEPGNFSDI  | 141   | >CXCR7-S15L YSEPGNFLDI  | 166  | 25    |
| >CXCR7-S15L YSEPGNFS    | 20067 | >CXCR7-S15L YSEPGNFL    | 110  | 19957 |
| >CXCR7-S15L YSEPGNFSDI  | 699   | >CXCR7-S15L YSEPGNFLDI  | 399  | 300   |
| >CXCR7-S15L YSEPGNFS    | 3979  | >CXCR7-S15L YSEPGNFL    | 117  | 3862  |
| >CXCR7-S15L YSEPGNFS    | 22299 | >CXCR7-S15L YSEPGNFL    | 205  | 22094 |
| >CXCR7-S15L YSEPGNFSDI  | 144   | >CXCR7-S15L YSEPGNFLDI  | 249  | 105   |
| >CXCR7-S15L DYSEPGNFSD  | 661   | >CXCR7-S15L DYSEPGNFLD  | 485  | 176   |
| >CXCR7-S15L FDYSEPGNFS  | 26790 | >CXCR7-S15L FDYSEPGNFL  | 477  | 26313 |
| >CYLD-A154\AERTVSGI     | 84    | >CYLD-A154\VERTVSGI     | 84   | 0     |
| >CYLD-A154\AERTVSGIFF   | 910   | >CYLD-A154\VERTVSGIFF   | 362  | 548   |
| >CYLD-A154\AERTVSGIF    | 215   | >CYLD-A154\VERTVSGIF    | 320  | 105   |
| >CYLD-A154\AERTVSGIFF   | 51    | >CYLD-A154\VERTVSGIFF   | 78   | 27    |
| >CYLD-A154\AERTVSGIF    | 1933  | >CYLD-A154\VERTVSGIF    | 211  | 1722  |
| >CYLD-A154\AERTVSGI     | 326   | >CYLD-A154\VERTVSGI     | 1702 | 1376  |
| >CYLD-A154\AERTVSGIFF   | 30    | >CYLD-A154\VERTVSGIFF   | 504  | 474   |
| >CYLD-A154\AERTVSGIF    | 166   | >CYLD-A154\VERTVSGIF    | 968  | 802   |
| >CYLD-A154\AERTVSGIFF   | 105   | >CYLD-A154\VERTVSGIFF   | 1207 | 1102  |
| >CYLD-A154\AERTVSGI     | 345   | >CYLD-A154\VERTVSGI     | 6976 | 6631  |
| >CYLD-A154\AERTVSGIFFC  | 245   | >CYLD-A154\VERTVSGIFFC  | 5535 | 5290  |
| >CYLD-A154\AERTVSGIF    | 505   | >CYLD-A154\VERTVSGIF    | 312  | 193   |
| >CYLD-A154\AERTVSGI     | 19    | >CYLD-A154\VERTVSGI     | 52   | 33    |
| >CYLD-A154\AERTVSGIF    | 17    | >CYLD-A154\VERTVSGIF    | 50   | 33    |
| >CYLD-A154\AERTVSGIFF   | 25    | >CYLD-A154\VERTVSGIFF   | 88   | 63    |
| >CYLD-A154\AERTVSGIFFC  | 217   | >CYLD-A154\VERTVSGIFFC  | 937  | 720   |
| >CYLD-A154\LAERTVSGIFF  | 371   | >CYLD-A154\LVERTVSGIFF  | 1192 | 821   |
| >CYLD-A154\LAERTVSGIF   | 452   | >CYLD-A154\LVERTVSGIF   | 3178 | 2726  |
| >CYLD-A154\LAERTVSGIFF  | 74    | >CYLD-A154\LVERTVSGIFF  | 807  | 733   |
| >CYLD-A154\LAERTVSGIF   | 185   | >CYLD-A154\LVERTVSGIF   | 136  | 49    |
| >CYLD-A154\LAERTVSGIFF  | 215   | >CYLD-A154\LVERTVSGIFF  | 112  | 103   |
| >CYLD-A154\LAERTVSGI    | 142   | >CYLD-A154\LVERTVSGI    | 1081 | 939   |
| >CYLD-A154\GVVRFrgPLL   | 2536  | >CYLD-A154\GVVRFrgPLL   | 366  | 2170  |
| >CYLD-A154\GVVRFrgPLL   | 10430 | >CYLD-A154\GVVRFrgPLL   | 144  | 10286 |
| >CYLD-A154\LLAERTVSGI   | 450   | >CYLD-A154\LLVERTVSGI   | 624  | 174   |
| >CYLD-A154\LLAERTVS     | 461   | >CYLD-A154\LLVERTVS     | 1908 | 1447  |
| >CYLD-A154\LLAERTVSG    | 110   | >CYLD-A154\LLVERTVSG    | 590  | 480   |
| >CYLD-A154\LLAERTVSGI   | 28    | >CYLD-A154\LLVERTVSGI   | 62   | 34    |
| >CYLD-A154\LLAERTVSGIF  | 425   | >CYLD-A154\LLVERTVSGIF  | 1747 | 1322  |
| >CYLD-A154\LLAERTVSG    | 435   | >CYLD-A154\LLVERTVSG    | 1253 | 818   |
| >CYLD-A154\LLAERTVSGI   | 21    | >CYLD-A154\LLVERTVSGI   | 24   | 3     |
| >CYLD-A154\LLAERTVSGI   | 490   | >CYLD-A154\LLVERTVSGI   | 259  | 231   |

|                        |       |                        |     |       |
|------------------------|-------|------------------------|-----|-------|
| >CYLD-A154\LLAERTVSGI  | 4     | >CYLD-A154\LLVERTVSGI  | 4   | 0     |
| >CYLD-A154\LLAERTVSGI  | 7     | >CYLD-A154\LLVERTVSGI  | 8   | 1     |
| >CYLD-A154\LLAERTVSGI  | 11    | >CYLD-A154\LLVERTVSGI  | 26  | 15    |
| >CYLD-A154\LLAERTVSGI  | 5     | >CYLD-A154\LLVERTVSGI  | 36  | 31    |
| >CYLD-A154\LLAERTVSGI  | 230   | >CYLD-A154\LLVERTVSGI  | 642 | 412   |
| >CYLD-A154\LLAERTVSGI  | 241   | >CYLD-A154\LLVERTVSGI  | 738 | 497   |
| >CYLD-A154\LLAERTVSGI  | 3     | >CYLD-A154\LLVERTVSGI  | 4   | 1     |
| >CYLD-A154\LLAERTVSGIF | 59    | >CYLD-A154\LLVERTVSGIF | 77  | 18    |
| >CYLD-A154\LLAERTVSGIF | 130   | >CYLD-A154\LLVERTVSGIF | 237 | 107   |
| >CYLD-A154\LLAERTVSGIF | 173   | >CYLD-A154\LLVERTVSGIF | 132 | 41    |
| >CYLD-A154\LLAERTVSGIF | 36    | >CYLD-A154\LLVERTVSGIF | 91  | 55    |
| >CYLD-A154\PLLAERTV    | 161   | >CYLD-A154\PLLVERTV    | 445 | 284   |
| >CYLD-A154\PLLAERTVSGI | 44    | >CYLD-A154\PLLVERTV    | 84  | 40    |
| >CYLD-A154\PLLAERTVSGI | 462   | >CYLD-A154\PLLVERTVSGI | 757 | 295   |
| >CYLD-A154\PLLAERTVSGI | 122   | >CYLD-A154\PLLVERTVSGI | 245 | 123   |
| >CYLD-A154\PLLAERTVSGI | 402   | >CYLD-A154\PLLVERTVSGI | 601 | 199   |
| >CYLD-A154\PLLAERTVSGI | 16    | >CYLD-A154\PLLVERTVSGI | 26  | 10    |
| >CYLD-A154\PLLAERTVSGI | 140   | >CYLD-A154\PLLVERTVSGI | 358 | 218   |
| >CYLD-A154\RGPLLAER    | 171   | >CYLD-A154\RGPLLVER    | 96  | 75    |
| >CYLD-A154\FRGPLLAER   | 521   | >CYLD-A154\FRGPLLVER   | 269 | 252   |
| >CYLD-A154\RFRGPLLA    | 6     | >CYLD-A154\RFRGPLLV    | 8   | 2     |
| >CYLD-A154\RFRGPLLAE   | 306   | >CYLD-A154\RFRGPLLVE   | 516 | 210   |
| >CYLD-A154\RFRGPLLAER  | 17    | >CYLD-A154\RFRGPLLVER  | 23  | 6     |
| >CYLD-A154\RFRGPLLAER  | 5     | >CYLD-A154\RFRGPLLVER  | 6   | 1     |
| >CYLD-A154\RFRGPLLAER  | 397   | >CYLD-A154\RFRGPLLVER  | 385 | 12    |
| >CYLD-A154\RFRGPLLAER  | 230   | >CYLD-A154\RFRGPLLVER  | 203 | 27    |
| >CYLD-A154\RFRGPLLAER  | 88    | >CYLD-A154\RFRGPLLVER  | 55  | 33    |
| >CYLD-A154\RFRGPLLA    | 515   | >CYLD-A154\RFRGPLLV    | 454 | 61    |
| >CYLD-A154\VRFRGPLLA   | 1410  | >CYLD-A154\VRFRGPLLV   | 282 | 1128  |
| >CYLD-A154\VRFRGPLLA   | 154   | >CYLD-A154\VRFRGPLLV   | 60  | 94    |
| >CYLD-A154\VRFRGPLLAE  | 74    | >CYLD-A154\VRFRGPLLVE  | 57  | 17    |
| >CYLD-A154\VRFRGPLLA   | 365   | >CYLD-A154\VRFRGPLLV   | 806 | 441   |
| >CYLD-A154\VRFRGPLLA   | 1469  | >CYLD-A154\VRFRGPLLV   | 284 | 1185  |
| >CYLD-A154\VRFRGPLLA   | 230   | >CYLD-A154\VRFRGPLLV   | 37  | 193   |
| >CYLD-A154\VRFRGPLLAE  | 448   | >CYLD-A154\VRFRGPLLVE  | 361 | 87    |
| >CYLD-A154\VVRFRGPLLA  | 11712 | >CYLD-A154\VVRFRGPLLV  | 143 | 11569 |
| >CYLD-A154\VVRFRGPLLA  | 13    | >CYLD-A154\VVRFRGPLLV  | 21  | 8     |
| >CYLD-A154\VVRFRGPLLA  | 3405  | >CYLD-A154\VVRFRGPLLV  | 479 | 2926  |
| >CYTSB-S131 SVSSPTSSNT | 426   | >CYTSB-S131 LVSSPTSSNT | 510 | 84    |
| >CYTSB-S131 SVSSPTSSN  | 398   | >CYTSB-S131 LVSSPTSSN  | 501 | 103   |
| >CYTSB-S131 KSVSSPTSS  | 15629 | >CYTSB-S131 KLVSSPTSS  | 160 | 15469 |
| >CYTSB-S131 KSVSSPTSSN | 11748 | >CYTSB-S131 KLVSSPTSSN | 53  | 11695 |
| >CYTSB-S131 KSVSSPTSSN | 35271 | >CYTSB-S131 KLVSSPTSSN | 456 | 34815 |

|                           |       |                           |       |       |
|---------------------------|-------|---------------------------|-------|-------|
| >CYTSB-S131 KSVSSPTS      | 245   | >CYTSB-S131 KLVSSPTS      | 12265 | 12020 |
| >CYTSB-S131 KSVSSPTSS     | 487   | >CYTSB-S131 KLVSSPTSS     | 13857 | 13370 |
| >CYTSB-S131 KSVSSPTSSN    | 98    | >CYTSB-S131 KLVSSPTSSN    | 10089 | 9991  |
| >CYTSB-S131 VPRGPSNPRK    | 1167  | >CYTSB-S131 VPRGPSNPRK    | 14    | 1153  |
| >CYTSB-S131 RKS SVSSPT    | 134   | >CYTSB-S131 RKL SVSSPT    | 86    | 48    |
| >CYTSB-S131 RKS SVSSPTS   | 131   | >CYTSB-S131 RKL SVSSPTS   | 74    | 57    |
| >CYTSB-S131 RKS SVSSPTSS  | 56    | >CYTSB-S131 RKL SVSSPTSS  | 39    | 17    |
| >CYTSB-S131 RKS SVSSPTSSN | 268   | >CYTSB-S131 RKL SVSSPTSSN | 182   | 86    |
| >CYTSB-S131 NPRKSVSS      | 454   | >CYTSB-S131 NPRKLVSS      | 1385  | 931   |
| >CYTSB-S131 NPRKSVSSPT    | 456   | >CYTSB-S131 NPRKLVSSPT    | 729   | 273   |
| >CYTSB-S131 GPSNPRKS      | 19446 | >CYTSB-S131 GPSNPRKL      | 216   | 19230 |
| >CYTSB-S131 GPSNPRKSV     | 51    | >CYTSB-S131 GPSNPRKLV     | 868   | 817   |
| >CYTSB-S312 TSGSSSSDV     | 14759 | >CYTSB-S312 TPGSSSSDV     | 48    | 14711 |
| >CYTSB-S312 TSGSSSSDVTI   | 81    | >CYTSB-S312 TPGSSSSDVTI   | 14318 | 14237 |
| >CYTSB-S312 TSGSSSSDVTI   | 112   | >CYTSB-S312 TPGSSSSDVTI   | 2547  | 2435  |
| >CYTSB-S312 RTSGSSSSDV    | 162   | >CYTSB-S312 RTPGSSSSDV    | 434   | 272   |
| >CYTSB-S312 RTSGSSSSDV    | 291   | >CYTSB-S312 RTPGSSSSDV    | 472   | 181   |
| >CYTSB-S312 RTSGSSSSDV    | 278   | >CYTSB-S312 RTPGSSSSDV    | 2343  | 2065  |
| >CYTSB-S312 RTSGSSSSDV    | 148   | >CYTSB-S312 RTPGSSSSDV    | 146   | 2     |
| >CYTSB-S312 RTSGSSSS      | 132   | >CYTSB-S312 RTPGSSSS      | 1259  | 1127  |
| >CYTSB-S312 RTSGSSSSD     | 290   | >CYTSB-S312 RTPGSSSSD     | 1751  | 1461  |
| >CYTSB-S312 RTSGSSSSDV    | 12    | >CYTSB-S312 RTPGSSSSDV    | 222   | 210   |
| >CYTSB-S312 RTSGSSSSDV    | 236   | >CYTSB-S312 RTPGSSSSDV    | 2085  | 1849  |
| >CYTSB-S312 RTSGSSSSDV    | 1461  | >CYTSB-S312 RTPGSSSSDV    | 9     | 1452  |
| >CYTSB-S312 RTSGSSSSDV    | 11621 | >CYTSB-S312 RTPGSSSSDV    | 118   | 11503 |
| >CYTSB-S312 RTSGSSSSD     | 328   | >CYTSB-S312 RTPGSSSSD     | 3208  | 2880  |
| >CYTSB-S312 RTSGSSSSDV    | 34    | >CYTSB-S312 RTPGSSSSDV    | 84    | 50    |
| >CYTSB-S312 RTSGSSSSDV    | 226   | >CYTSB-S312 RTPGSSSSDV    | 3039  | 2813  |
| >CYTSB-S312 LRTSGSSSSD    | 200   | >CYTSB-S312 LRTPGSSSSD    | 340   | 140   |
| >CYTSB-S312 ALRTSGSS      | 244   | >CYTSB-S312 ALRTPGSS      | 792   | 548   |
| >CYTSB-S312 ALRTSGSSS     | 250   | >CYTSB-S312 ALRTPGSSS     | 1028  | 778   |
| >CYTSB-S312 ALRTSGSSSS    | 173   | >CYTSB-S312 ALRTPGSSSS    | 396   | 223   |
| >CYTSB-S312 ALRTSGSSS     | 435   | >CYTSB-S312 ALRTPGSSS     | 1314  | 879   |
| >CYTSB-T144 TKHLRTPSTK    | 685   | >CYTSB-T144 RKHLRTPSTK    | 13    | 672   |
| >CYTSB-T144 TKHLRTPSTK    | 1510  | >CYTSB-T144 RKHLRTPSTK    | 156   | 1354  |
| >CYTSB-T144 TKHLRTPSTK    | 13136 | >CYTSB-T144 RKHLRTPSTK    | 343   | 12793 |
| >CYTSB-T144 PTKHLRTPSTI   | 15    | >CYTSB-T144 PRKHLRTPSTI   | 2021  | 2006  |
| >CYTSB-T144 SPTSSNTPTPI   | 385   | >CYTSB-T144 SPTSSNTPTPI   | 10081 | 9696  |
| >CYTSB-T144 TPTKHLRT      | 10639 | >CYTSB-T144 TPRKHLRT      | 383   | 10256 |
| >CYTSB-T144 TPTKHLRTPS    | 488   | >CYTSB-T144 TPRKHLRTPS    | 185   | 303   |
| >CYTSB-T144 TPTKHLRTPS    | 1497  | >CYTSB-T144 TPRKHLRTPS    | 45    | 1452  |
| >CYTSB-T144 TPTPTKHL      | 510   | >CYTSB-T144 TPTPRKHL      | 373   | 137   |
| >CYTSB-T144 TPTPTKHLR     | 167   | >CYTSB-T144 TPTPRKHLR     | 354   | 187   |

|                         |       |                         |      |       |
|-------------------------|-------|-------------------------|------|-------|
| >CYTSB-T144 TPTPTKHL    | 418   | >CYTSB-T144 TPTPRKHL    | 143  | 275   |
| >CYTSB-T144 TPTPTKHLR   | 464   | >CYTSB-T144 TPTPRKHLR   | 468  | 4     |
| >CYTSB-T144 NTPTPTKHL   | 419   | >CYTSB-T144 NTPTPRKHL   | 1587 | 1168  |
| >CYTSB-T144 NTPTPTKHLR  | 159   | >CYTSB-T144 NTPTPRKHLR  | 105  | 54    |
| >CYTSB-T144 NTPTPTKHLR  | 666   | >CYTSB-T144 NTPTPRKHLR  | 472  | 194   |
| >CYTSB-T144 NTPTPTKHLR  | 6     | >CYTSB-T144 NTPTPRKHLR  | 7    | 1     |
| >CYTSB-T144 NTPTPTKHL   | 82    | >CYTSB-T144 NTPTPRKHL   | 128  | 46    |
| >CYTSB-T144 NTPTPTKHL   | 10    | >CYTSB-T144 NTPTPRKHL   | 28   | 18    |
| >CYTSB-T144 NTPTPTKHLR  | 313   | >CYTSB-T144 NTPTPRKHLR  | 515  | 202   |
| >CYTSB-T144 SNTPTPTKHL  | 438   | >CYTSB-T144 SNTPTPRKHL  | 874  | 436   |
| >CYTSB-T144 SSNTPTPTK   | 101   | >CYTSB-T144 SSNTPTPRK   | 81   | 20    |
| >CYTSB-T144 SSNTPTPT    | 18287 | >CYTSB-T144 SSNTPTPR    | 78   | 18209 |
| >CYTSB-T144 SSNTPTPTK   | 16    | >CYTSB-T144 SSNTPTPRK   | 14   | 2     |
| >CYTSB-T144 SSNTPTPTK   | 16    | >CYTSB-T144 SSNTPTPRK   | 32   | 16    |
| >CYTSB-T144 SSNTPTPT    | 16781 | >CYTSB-T144 SSNTPTPR    | 23   | 16758 |
| >CYTSB-T144 SSNTPTPT    | 30068 | >CYTSB-T144 SSNTPTPR    | 122  | 29946 |
| >CYTSB-T144 SSNTPTPTK   | 410   | >CYTSB-T144 SSNTPTPRK   | 746  | 336   |
| >CYTSB-T144 SSNTPTPTKH  | 131   | >CYTSB-T144 SSNTPTPRKH  | 284  | 153   |
| >CYTSB-T144 SSNTPTPTKH  | 233   | >CYTSB-T144 SSNTPTPRKH  | 503  | 270   |
| >CYTSB-T144 TSSNTPTPTK  | 213   | >CYTSB-T144 TSSNTPTPRK  | 424  | 211   |
| >CYTSB-T144 TSSNTPTPT   | 19933 | >CYTSB-T144 TSSNTPTPR   | 152  | 19781 |
| >CYTSB-T144 TSSNTPTPTK  | 12    | >CYTSB-T144 TSSNTPTPRK  | 19   | 7     |
| >CYTSB-T144 TSSNTPTPTK  | 116   | >CYTSB-T144 TSSNTPTPRK  | 261  | 145   |
| >CYTSB-T144 TSSNTPTPT   | 20549 | >CYTSB-T144 TSSNTPTPR   | 45   | 20504 |
| >CYTSB-T144 TSSNTPTPT   | 23206 | >CYTSB-T144 TSSNTPTPR   | 22   | 23184 |
| >CYTSB-T144 TSSNTPTPTK  | 49    | >CYTSB-T144 TSSNTPTPRK  | 120  | 71    |
| >CYTSB-T144 TSSNTPTPTKI | 490   | >CYTSB-T144 TSSNTPTPRKI | 1630 | 1140  |
| >CYTSB-T144 TSSNTPTPT   | 16130 | >CYTSB-T144 TSSNTPTPR   | 434  | 15696 |
| >CYTSB-T144 TSSNTPTPTK  | 349   | >CYTSB-T144 TSSNTPTPRK  | 287  | 62    |
| >CYTSB-T144 PTSSNTPTPT  | 32892 | >CYTSB-T144 PTSSNTPTPR  | 454  | 32438 |
| >CYTSB-T144 PTSSNTPTPTI | 450   | >CYTSB-T144 PTSSNTPTPRI | 401  | 49    |
| >CYTSB-T144 PTSSNTPTPTI | 162   | >CYTSB-T144 PTSSNTPTPRI | 379  | 217   |
| >CYTSB-T144 PTSSNTPTPT  | 35690 | >CYTSB-T144 PTSSNTPTPR  | 262  | 35428 |
| >DDB2-T338I TPIKAAWHPF  | 196   | >DDB2-T338I PPIKAAWHPF  | 995  | 799   |
| >DDB2-T338I TPIKAAWHPF  | 316   | >DDB2-T338I PPIKAAWHPF  | 933  | 617   |
| >DDB2-T338I TPIKAAWHPF  | 409   | >DDB2-T338I PPIKAAWHPF  | 3866 | 3457  |
| >DDB2-T338I TPIKAAWHPF  | 27    | >DDB2-T338I PPIKAAWHPF  | 275  | 248   |
| >DDB2-T338I TPIKAAWHPF  | 94    | >DDB2-T338I PPIKAAWHPF  | 205  | 111   |
| >DDB2-T338I TPIKAAWHPF  | 189   | >DDB2-T338I PPIKAAWHPF  | 604  | 415   |
| >DDB2-T338I TPIKAAWHPF  | 428   | >DDB2-T338I PPIKAAWHPF  | 2849 | 2421  |
| >DDB2-T338I TPIKAAWHPF  | 67    | >DDB2-T338I PPIKAAWHPF  | 151  | 84    |
| >DDB2-T338I LTPIKAAWHF  | 63    | >DDB2-T338I LPPIKAAWHF  | 6023 | 5960  |
| >DDB2-T338I LTPIKAAWHF  | 122   | >DDB2-T338I LPPIKAAWHF  | 5660 | 5538  |



|                        |      |                        |       |       |
|------------------------|------|------------------------|-------|-------|
| >DDB2-T338 LTPIKAAW    | 40   | >DDB2-T338 LPPIKAAW    | 10792 | 10752 |
| >DDB2-T338 LTPIKAAW    | 9973 | >DDB2-T338 LPPIKAAW    | 52    | 9921  |
| >DDB2-T338 LTPIKAAW    | 428  | >DDB2-T338 LPPIKAAW    | 18977 | 18549 |
| >DDB2-T338 LTPIKAAW    | 419  | >DDB2-T338 LPPIKAAW    | 15186 | 14767 |
| >DDB2-T338 LTPIKAAWH   | 43   | >DDB2-T338 LPPIKAAWH   | 12501 | 12458 |
| >DDB2-T338 LTPIKAAWHF  | 120  | >DDB2-T338 LPPIKAAWHF  | 16234 | 16114 |
| >DDB2-T338 LTPIKAAWHF  | 183  | >DDB2-T338 LPPIKAAWHF  | 16511 | 16328 |
| >DDB2-T338 LTPIKAAW    | 2966 | >DDB2-T338 LPPIKAAW    | 16    | 2950  |
| >DDB2-T338 LTPIKAAWHF  | 213  | >DDB2-T338 LPPIKAAWHF  | 221   | 8     |
| >DDB2-T338 HLTPIKAA    | 341  | >DDB2-T338 HLPPIKAA    | 630   | 289   |
| >DDB2-T338 HLTPIKAA    | 320  | >DDB2-T338 HLPPIKAA    | 222   | 98    |
| >DDB2-T338 HLTPIKAA    | 585  | >DDB2-T338 HLPPIKAA    | 354   | 231   |
| >DDB2-T338 HLTPIKAA    | 23   | >DDB2-T338 HLPPIKAA    | 54    | 31    |
| >DDB2-T338 HLTPIKAAW   | 485  | >DDB2-T338 HLPPIKAAW   | 3749  | 3264  |
| >DDB2-T338 HLTPIKAAW   | 150  | >DDB2-T338 HLPPIKAAW   | 1617  | 1467  |
| >DDB2-T338 QHLTPIKAAW  | 543  | >DDB2-T338 QHLPPIKAAW  | 224   | 319   |
| >DDB2-T338 FQHLTPIKAA  | 242  | >DDB2-T338 FQHLPPIKAA  | 331   | 89    |
| >DDB2-T338 FQHLTPIKAA  | 351  | >DDB2-T338 FQHLPPIKAA  | 574   | 223   |
| >DDB2-T338 FQHLTPIK    | 376  | >DDB2-T338 FQHLPPIK    | 462   | 86    |
| >DDB2-T338 FQHLTPIKAA  | 116  | >DDB2-T338 FQHLPPIKAA  | 221   | 105   |
| >DDB2-T338 FQHLTPIKAA' | 102  | >DDB2-T338 FQHLPPIKAA' | 172   | 70    |
| >DDB2-T338 FQHLTPIKAA' | 379  | >DDB2-T338 FQHLPPIKAA' | 775   | 396   |
| >DDB2-T338 HFQHLTPI    | 348  | >DDB2-T338 HFQHLPPI    | 480   | 132   |
| >DDB2-T338 HFQHLTPIK   | 31   | >DDB2-T338 HFQHLPPIK   | 46    | 15    |
| >DDB2-T338 HFQHLTPIK   | 250  | >DDB2-T338 HFQHLPPIK   | 834   | 584   |
| >DDB2-T338 RHFQHLTPI   | 526  | >DDB2-T338 RHFQHLPPI   | 399   | 127   |
| >DDB2-T338 RHFQHLTPIK  | 507  | >DDB2-T338 RHFQHLPPIK  | 276   | 231   |
| >DDB2-T338 RHFQHLTPI   | 107  | >DDB2-T338 RHFQHLPPI   | 345   | 238   |
| >DDB2-T338 RHFQHLTPI   | 36   | >DDB2-T338 RHFQHLPPI   | 72    | 36    |
| >DDB2-T338 RHFQHLTPIK  | 438  | >DDB2-T338 RHFQHLPPIK  | 515   | 77    |
| >DDB2-T338 RHFQHLTPIK  | 150  | >DDB2-T338 RHFQHLPPIK  | 83    | 67    |
| >DDB2-T338 RHFQHLTPI   | 607  | >DDB2-T338 RHFQHLPPI   | 425   | 182   |
| >DDB2-T338 RHFQHLTPI   | 88   | >DDB2-T338 RHFQHLPPI   | 70    | 18    |
| >DDB2-T338 RHFQHLTPI   | 738  | >DDB2-T338 RHFQHLPPI   | 329   | 409   |
| >DDB2-T338 RHFQHLTPI   | 261  | >DDB2-T338 RHFQHLPPI   | 351   | 90    |
| >DDB2-T338 RHFQHLTPIK  | 334  | >DDB2-T338 RHFQHLPPIK  | 568   | 234   |
| >DDB2-T338 RHFQHLTPI   | 424  | >DDB2-T338 RHFQHLPPI   | 452   | 28    |
| >DDB2-T338 HRHFQHLTPI  | 589  | >DDB2-T338 HRHFQHLPPI  | 101   | 488   |
| >DDB2-T338 HRHFQHLTPI  | 16   | >DDB2-T338 HRHFQHLPPI  | 18    | 2     |
| >DDB2-T338 HRHFQHLTPI  | 440  | >DDB2-T338 HRHFQHLPPI  | 706   | 266   |
| >DDB2-T338 HRHFQHLTPI  | 55   | >DDB2-T338 HRHFQHLPPI  | 51    | 4     |
| >DDB2-T338 HRHFQHLTPI  | 297  | >DDB2-T338 HRHFQHLPPI  | 262   | 35    |
| >DDB2-T338 HRHFQHLTPI  | 281  | >DDB2-T338 HRHFQHLPPI  | 295   | 14    |

|                         |       |                         |      |       |
|-------------------------|-------|-------------------------|------|-------|
| >DDIT3-A115AGKQRMKEK    | 199   | >DDIT3-A115VGKQRMKEK    | 1980 | 1781  |
| >DDIT3-A115RAGKQRMK     | 600   | >DDIT3-A115RVGKQRMK     | 103  | 497   |
| >DDIT3-A115RAGKQRMKE    | 1409  | >DDIT3-A115RVGKQRMKE    | 240  | 1169  |
| >DDIT3-A115RAGKQRMK     | 747   | >DDIT3-A115RVGKQRMK     | 141  | 606   |
| >DDIT3-A115RAGKQRMK     | 87    | >DDIT3-A115RVGKQRMK     | 28   | 59    |
| >DDIT3-A115RAGKQRMKE    | 85    | >DDIT3-A115RVGKQRMKE    | 29   | 56    |
| >DDIT3-A115RKQSGHSPAIF  | 287   | >DDIT3-A115RKQSGHSPAIF  | 48   | 239   |
| >DDIT3-A115ARAGKQRM     | 120   | >DDIT3-A115ARVGKQRM     | 140  | 20    |
| >DDIT3-A115ARAGKQRMK    | 71    | >DDIT3-A115ARVGKQRMK    | 88   | 17    |
| >DDIT3-A115ARAGKQRMK    | 124   | >DDIT3-A115ARVGKQRMK    | 155  | 31    |
| >DDIT3-A115PARAGKQRM    | 40    | >DDIT3-A115PARVGKQRM    | 58   | 18    |
| >DDIT3-A115SPARAGKQRI   | 30    | >DDIT3-A115SPARVGKQRI   | 700  | 670   |
| >DDIT3-A115SPARAGKQRI   | 83    | >DDIT3-A115SPARVGKQRI   | 92   | 9     |
| >DDIT3-A115HSPARAGK     | 196   | >DDIT3-A115HSPARVGK     | 238  | 42    |
| >DDIT3-A115HSPARAGK     | 354   | >DDIT3-A115HSPARVGK     | 402  | 48    |
| >DDIT3-A115HSPARAGKQI   | 240   | >DDIT3-A115HSPARVGKQI   | 114  | 126   |
| >DDIT3-A115HSPARAGKQI   | 190   | >DDIT3-A115HSPARVGKQI   | 251  | 61    |
| >DDIT3-A115HSPARAGKQI   | 428   | >DDIT3-A115HSPARVGKQI   | 388  | 40    |
| >DDIT3-A115SGHSPARAGI   | 102   | >DDIT3-A115SGHSPARVGI   | 160  | 58    |
| >DDIT3-A115QSGHSPARAGI  | 525   | >DDIT3-A115QSGHSPARVGI  | 377  | 148   |
| >DDIT3-A115KQSGHSPARAGI | 1730  | >DDIT3-A115KQSGHSPARVGI | 281  | 1449  |
| >DDIT3-A115KQSGHSPARAGI | 617   | >DDIT3-A115KQSGHSPARVGI | 103  | 514   |
| >DDIT3-A115KQSGHSPARAGI | 2785  | >DDIT3-A115KQSGHSPARVGI | 94   | 2691  |
| >DDIT3-A115KQSGHSPARAGI | 17631 | >DDIT3-A115KQSGHSPARVGI | 435  | 17196 |
| >DDIT3-A115KQSGHSPARAGI | 1529  | >DDIT3-A115KQSGHSPARVGI | 288  | 1241  |
| >DDIT3-D32YDENGGETYV    | 287   | >DDIT3-D32YDENGGETYV    | 28   | 259   |
| >DDIT3-D32YDENGGETYV    | 13473 | >DDIT3-D32YDENGGETYV    | 120  | 13353 |
| >DDIT3-D32YDENGGETYV    | 12149 | >DDIT3-D32YDENGGETYV    | 82   | 12067 |
| >DDIT3-D32YDENGGETYV    | 11677 | >DDIT3-D32YDENGGETYV    | 222  | 11455 |
| >DDIT3-D32YDENGGETYV    | 15010 | >DDIT3-D32YDENGGETYV    | 75   | 14935 |
| >DDIT3-D32YDENGGETYV    | 82    | >DDIT3-D32YDENGGETYV    | 285  | 203   |
| >DDIT3-D32YDENGGETYVS   | 35    | >DDIT3-D32YDENGGETYVS   | 104  | 69    |
| >DDIT3-D32YDENGGETYVSIF | 241   | >DDIT3-D32YDENGGETYVSIF | 815  | 574   |
| >DDIT3-D32YDENGGETYV    | 2427  | >DDIT3-D32YDENGGETYV    | 41   | 2386  |
| >DDIT3-D32YDENGGETYV    | 5642  | >DDIT3-D32YDENGGETYV    | 190  | 5452  |
| >DDIT3-D32YDENGGETYVS   | 6999  | >DDIT3-D32YDENGGETYVS   | 267  | 6732  |
| >DDIT3-D32YDENGGETYVSIF | 2297  | >DDIT3-D32YDENGGETYVSIF | 489  | 1808  |
| >DDIT3-D32YDENGGETYV    | 1338  | >DDIT3-D32YDENGGETYV    | 462  | 876   |
| >DDIT3-D32YDENGGETYVS   | 1062  | >DDIT3-D32YDENGGETYVS   | 341  | 721   |
| >DDIT3-D32YDENGGETYV    | 12938 | >DDIT3-D32YDENGGETYV    | 400  | 12538 |
| >DDIT3-D32YSDENGGETYV   | 25507 | >DDIT3-D32YSYENGGETYV   | 19   | 25488 |
| >DDIT3-D32YSDENGGETY    | 5065  | >DDIT3-D32YSYENGGETY    | 249  | 4816  |
| >DDIT3-D32YSDENGGETY    | 1437  | >DDIT3-D32YSYENGGETY    | 79   | 1358  |

|                        |       |                         |      |       |
|------------------------|-------|-------------------------|------|-------|
| >DDIT3-D32YSDENGGTY    | 1439  | >DDIT3-D32YSYENGGTY     | 267  | 1172  |
| >DDIT3-D32YSDENGGTY    | 4236  | >DDIT3-D32YSYENGGTY     | 234  | 4002  |
| >DDIT3-D32Y YEDLQEVLSI | 3953  | >DDIT3-D32Y YEDLQEVLSI' | 48   | 3905  |
| >DDIT3-D32YSSDENGGTY\  | 1337  | >DDIT3-D32YSSYENGGTYV   | 155  | 1182  |
| >DDIT3-D32YSSDENGGTY\  | 1061  | >DDIT3-D32YSSYENGGTYV   | 309  | 752   |
| >DDIT3-D32YSSDENGGTY   | 8     | >DDIT3-D32YSSYENGGTY    | 761  | 753   |
| >DDIT3-D32YSSDENGGTY\  | 2783  | >DDIT3-D32YSSYENGGTYV   | 292  | 2491  |
| >DDIT3-D32YSSDENGGTY\  | 1876  | >DDIT3-D32YSSYENGGTYV   | 138  | 1738  |
| >DDIT3-D32YSSDENGGTY\  | 1383  | >DDIT3-D32YSSYENGGTYV   | 312  | 1071  |
| >DDIT3-D32YSSDENGGTY\  | 57    | >DDIT3-D32YSSYENGGTYV   | 13   | 44    |
| >DDIT3-D32YSSDENGGTY\  | 328   | >DDIT3-D32YSSYENGGTYV   | 84   | 244   |
| >DDIT3-D32YSSDENGGTY   | 14082 | >DDIT3-D32YSSYENGGTY    | 415  | 13667 |
| >DDIT3-D32YSSDENGGTY   | 10090 | >DDIT3-D32YSSYENGGTY    | 132  | 9958  |
| >DDIT3-D32YSSDENGGTY   | 5574  | >DDIT3-D32YSSYENGGTY    | 306  | 5268  |
| >DDIT3-D32YSSDENGGTY   | 1540  | >DDIT3-D32YSSYENGGTY    | 83   | 1457  |
| >DDIT3-D32YSSDENGGTY   | 68    | >DDIT3-D32YSSYENGGTY    | 18   | 50    |
| >DDIT3-D32YSSDENGGTY\  | 765   | >DDIT3-D32YSSYENGGTYV   | 53   | 712   |
| >DDIT3-D32YSSDENGGTY\  | 85    | >DDIT3-D32YSSYENGGTYV   | 34   | 51    |
| >DDIT3-D32YSSDENGGTY   | 2884  | >DDIT3-D32YSSYENGGTY    | 60   | 2824  |
| >DDIT3-D32YSSDENGGTY   | 793   | >DDIT3-D32YSSYENGGTY    | 45   | 748   |
| >DDIT3-D32YSSDENGGTY   | 8331  | >DDIT3-D32YSSYENGGTY    | 227  | 8104  |
| >DDIT3-D32YSSDENGGTY   | 30    | >DDIT3-D32YSSYENGGTY    | 5    | 25    |
| >DDIT3-D32YSSDENGGTY\  | 3799  | >DDIT3-D32YSSYENGGTYV   | 188  | 3611  |
| >DDIT3-D32YSSDENGGTY   | 883   | >DDIT3-D32YSSYENGGTY    | 182  | 701   |
| >DDIT3-D32YSSDENGGTY   | 181   | >DDIT3-D32YSSYENGGTY    | 28   | 153   |
| >DDIT3-D32YSSDENGGTY\  | 769   | >DDIT3-D32YSSYENGGTYV   | 113  | 656   |
| >DDIT3-D32YLSSDENGGTY  | 60    | >DDIT3-D32YLSSYENGGTY   | 185  | 125   |
| >DDIT3-D32YLSSDENGGTY  | 188   | >DDIT3-D32YLSSYENGGTY   | 475  | 287   |
| >DDIT3-D32YLSSDENGGTY  | 448   | >DDIT3-D32YLSSYENGGTY   | 1748 | 1300  |
| >DDIT3-D32YLSSDENGGTY  | 531   | >DDIT3-D32YLSSYENGGTY   | 297  | 234   |
| >DDIT3-D32YLSSDENGGTY  | 33    | >DDIT3-D32YLSSYENGGTY   | 23   | 10    |
| >DDIT3-D32YLSSDENGGTY  | 493   | >DDIT3-D32YLSSYENGGTY   | 390  | 103   |
| >DDIT3-D32YLSSDENGGTY  | 97    | >DDIT3-D32YLSSYENGGTY   | 87   | 10    |
| >DDIT3-D32YLSSDENGGTY  | 9     | >DDIT3-D32YLSSYENGGTY   | 13   | 4     |
| >DDIT3-D32YLSSDENGGTY  | 20    | >DDIT3-D32YLSSYENGGTY   | 16   | 4     |
| >DDIT3-D32YLSSDENGGTY  | 559   | >DDIT3-D32YLSSYENGGTY   | 348  | 211   |
| >DDIT3-D32YVLSSDENGGT  | 626   | >DDIT3-D32YVLSSYENGGT   | 396  | 230   |
| >DDIT3-D32YVLSSDENGGT  | 498   | >DDIT3-D32YVLSSYENGGT   | 649  | 151   |
| >DDIT3-D32YVLSSDENGGT  | 205   | >DDIT3-D32YVLSSYENGGT   | 125  | 80    |
| >DDIT3-D32YVLSSDENGGT  | 10    | >DDIT3-D32YVLSSYENGGT   | 11   | 1     |
| >DDIT3-D32YVLSSDENGGT  | 610   | >DDIT3-D32YVLSSYENGGT   | 235  | 375   |
| >DDIT3-D32YVLSSDENGGT  | 196   | >DDIT3-D32YVLSSYENGGT   | 134  | 62    |
| >DDIT3-D32YVLSSDENGGT  | 135   | >DDIT3-D32YVLSSYENGGT   | 133  | 2     |

|                        |       |                       |     |       |
|------------------------|-------|-----------------------|-----|-------|
| >DDIT3-D32YVLSSDENGGT  | 734   | >DDIT3-D32YVLSSYENGGT | 352 | 382   |
| >DDIT3-D32YVLSSDENGGT  | 509   | >DDIT3-D32YVLSSYENGGT | 287 | 222   |
| >DDIT3-D32YVLSSDENGGT  | 554   | >DDIT3-D32YVLSSYENGGT | 407 | 147   |
| >DDIT3-D32YEVLSSDENGGE | 791   | >DDIT3-D32YEVLSSYENGG | 220 | 571   |
| >DDIT3-D32YLQEVLSSD    | 32969 | >DDIT3-D32YLQEVLSSY   | 197 | 32772 |
| >DDIT3-D32YLQEVLSSD    | 15817 | >DDIT3-D32YLQEVLSSY   | 79  | 15738 |
| >DDIT3-D32YLQEVLSSD    | 31975 | >DDIT3-D32YLQEVLSSY   | 399 | 31576 |
| >DDIT3-D32YLQEVLSSD    | 19005 | >DDIT3-D32YLQEVLSSY   | 84  | 18921 |
| >DDIT3-D32YDLQEVLSSD   | 12657 | >DDIT3-D32YDLQEVLSSY  | 30  | 12627 |
| >DDIT3-D32YDLQEVLSSD   | 17938 | >DDIT3-D32YDLQEVLSSY  | 25  | 17913 |
| >DDIT3-D32YDLQEVLSSD   | 32414 | >DDIT3-D32YDLQEVLSSY  | 136 | 32278 |
| >DDIT3-D32YDLQEVLSSD   | 31185 | >DDIT3-D32YDLQEVLSSY  | 190 | 30995 |
| >DDIT3-D32YDLQEVLSSD   | 29167 | >DDIT3-D32YDLQEVLSSY  | 118 | 29049 |
| >DDIT3-D32YEDLQEVLSSD  | 33865 | >DDIT3-D32YEDLQEVLSSY | 455 | 33410 |
| >DDIT3-D32YEDLQEVLSSD  | 33482 | >DDIT3-D32YEDLQEVLSSY | 142 | 33340 |
| >DDIT3-G35EDENGGTYV    | 287   | >DDIT3-G35EDENEGTYV   | 111 | 176   |
| >DDIT3-G35EDENGGTYV    | 82    | >DDIT3-G35EDENEGTYV   | 64  | 18    |
| >DDIT3-G35EDENGGTYVS   | 35    | >DDIT3-G35EDENEGTYVS  | 20  | 15    |
| >DDIT3-G35EDENGGTYVSF  | 241   | >DDIT3-G35EDENEGTYVSF | 148 | 93    |
| >DDIT3-G35ESSDENGGTY   | 8     | >DDIT3-G35ESSDENEGTY  | 11  | 3     |
| >DDIT3-G35ESSDENGGTY\  | 57    | >DDIT3-G35ESSDENEGTYV | 105 | 48    |
| >DDIT3-G35ESSDENGGTY\  | 328   | >DDIT3-G35ESSDENEGTYV | 490 | 162   |
| >DDIT3-G35ESSDENGGTY   | 68    | >DDIT3-G35ESSDENEGTY  | 63  | 5     |
| >DDIT3-G35ESSDENGGTY\  | 765   | >DDIT3-G35ESSDENEGTYV | 459 | 306   |
| >DDIT3-G35ESSDENGGTY\  | 85    | >DDIT3-G35ESSDENEGTYV | 322 | 237   |
| >DDIT3-G35ESSDENGGTY   | 30    | >DDIT3-G35ESSDENEGTY  | 51  | 21    |
| >DDIT3-G35ESSDENGGTY   | 181   | >DDIT3-G35ESSDENEGTY  | 827 | 646   |
| >DDIT3-G35ESSDENGGTY   | 821   | >DDIT3-G35ESSDENEGTY  | 468 | 353   |
| >DDIT3-G35ELSSDENGGTY  | 60    | >DDIT3-G35ELSSDENEGTY | 56  | 4     |
| >DDIT3-G35ELSSDENGGTY  | 188   | >DDIT3-G35ELSSDENEGTY | 91  | 97    |
| >DDIT3-G35ELSSDENGGTY  | 448   | >DDIT3-G35ELSSDENEGTY | 415 | 33    |
| >DDIT3-G35ELSSDENGGTY  | 33    | >DDIT3-G35ELSSDENEGTY | 47  | 14    |
| >DDIT3-G35ELSSDENGGTY  | 493   | >DDIT3-G35ELSSDENEGTY | 501 | 8     |
| >DDIT3-G35ELSSDENGGTY  | 97    | >DDIT3-G35ELSSDENEGTY | 198 | 101   |
| >DDIT3-G35ELSSDENGGTY  | 9     | >DDIT3-G35ELSSDENEGTY | 12  | 3     |
| >DDIT3-G35ELSSDENGGTY  | 20    | >DDIT3-G35ELSSDENEGTY | 22  | 2     |
| >DDIT3-G35EVLSSDENGGT  | 752   | >DDIT3-G35EVLSSDENEGT | 256 | 496   |
| >DDIT3-G35EVLSSDENGGT  | 498   | >DDIT3-G35EVLSSDENEGT | 150 | 348   |
| >DDIT3-G35EVLSSDENGGT  | 205   | >DDIT3-G35EVLSSDENEGT | 407 | 202   |
| >DDIT3-G35EVLSSDENGGT  | 10    | >DDIT3-G35EVLSSDENEGT | 10  | 0     |
| >DDIT3-G35EVLSSDENGGT  | 196   | >DDIT3-G35EVLSSDENEGT | 410 | 214   |
| >DDIT3-G35EVLSSDENGGT  | 135   | >DDIT3-G35EVLSSDENEGT | 373 | 238   |
| >DDIT3-G35EVLSSDENGGT  | 637   | >DDIT3-G35EVLSSDENEGT | 434 | 203   |

|                           |       |                           |       |       |
|---------------------------|-------|---------------------------|-------|-------|
| >DDIT3-G35E VLSSDENGGT    | 554   | >DDIT3-G35E VLSSDENEGT    | 393   | 161   |
| >DDIT3-L25R SWELEAWYE     | 491   | >DDIT3-L25R SWELEAWYE     | 12595 | 12104 |
| >DDIT3-L25R SWELEAWYE     | 12705 | >DDIT3-L25R SWELEAWYE     | 39    | 12666 |
| >DDIT3-L25R SWELEAWYE     | 130   | >DDIT3-L25R SWELEAWYE     | 429   | 299   |
| >DDIT3-L25R YEDLQEV       | 14    | >DDIT3-L25R YEDRQEV       | 74    | 60    |
| >DDIT3-L25R YEDLQEV       | 283   | >DDIT3-L25R YEDRQEV       | 453   | 170   |
| >DDIT3-L25R YEDLQEV       | 25    | >DDIT3-L25R YEDRQEV       | 30    | 5     |
| >DDIT3-L25R YEDLQEV       | 401   | >DDIT3-L25R YEDRQEV       | 734   | 333   |
| >DDIT3-L25R YEDLQEV       | 270   | >DDIT3-L25R YEDRQEV       | 1946  | 1676  |
| >DDIT3-L25R WYEDLQEV      | 106   | >DDIT3-L25R WYEDRQEV      | 133   | 27    |
| >DDIT3-L25R WYEDLQEV      | 386   | >DDIT3-L25R WYEDRQEV      | 955   | 569   |
| >DDIT3-L25R WYEDLQEV      | 33    | >DDIT3-L25R WYEDRQEV      | 71    | 38    |
| >DDIT3-L25R AWYEDLQEV     | 213   | >DDIT3-L25R AWYEDRQEV     | 2329  | 2116  |
| >DDIT3-L25R AWYEDLQEV     | 50    | >DDIT3-L25R AWYEDRQEV     | 966   | 916   |
| >DDIT3-L25R AWYEDLQEV     | 48    | >DDIT3-L25R AWYEDRQEV     | 939   | 891   |
| >DDIT3-L25R AWYEDLQEV     | 181   | >DDIT3-L25R AWYEDRQEV     | 2077  | 1896  |
| >DDIT3-L25R AWYEDLQEV     | 48    | >DDIT3-L25R AWYEDRQEV     | 163   | 115   |
| >DDIT3-L25R AWYEDLQEV     | 145   | >DDIT3-L25R AWYEDRQEV     | 309   | 164   |
| >DDIT3-L25R AWYEDLQEV     | 394   | >DDIT3-L25R AWYEDRQEV     | 424   | 30    |
| >DDIT3-L25R AWYEDLQEV     | 214   | >DDIT3-L25R AWYEDRQEV     | 313   | 99    |
| >DDIT3-L25R EAWYEDLQEV    | 119   | >DDIT3-L25R EAWYEDRQEV    | 101   | 18    |
| >DDIT3-L25R EAWYEDLQEV    | 37    | >DDIT3-L25R EAWYEDRQEV    | 117   | 80    |
| >DDIT3-L25R EAWYEDLQEV    | 285   | >DDIT3-L25R EAWYEDRQEV    | 690   | 405   |
| >DDIT3-L25R LEAWYEDLQEV   | 53    | >DDIT3-L25R LEAWYEDRQEV   | 113   | 60    |
| >DDIT3-L25R LEAWYEDLQEV   | 403   | >DDIT3-L25R LEAWYEDRQEV   | 669   | 266   |
| >DDIT3-L25R LEAWYEDLQEV   | 20    | >DDIT3-L25R LEAWYEDRQEV   | 7517  | 7497  |
| >DDIT3-L25R LEAWYEDLQEV   | 80    | >DDIT3-L25R LEAWYEDRQEV   | 108   | 28    |
| >DDIT3-L25R LEAWYEDLQEV   | 176   | >DDIT3-L25R LEAWYEDRQEV   | 239   | 63    |
| >DDIT3-L25R LEAWYEDLQEV   | 40    | >DDIT3-L25R LEAWYEDRQEV   | 97    | 57    |
| >DDIT3-L25R ELEAWYEDLQEV  | 63    | >DDIT3-L25R ELEAWYEDRQEV  | 23135 | 23072 |
| >DDIT3-L25R ELEAWYEDLQEV  | 24309 | >DDIT3-L25R ELEAWYEDRQEV  | 224   | 24085 |
| >DDIT3-L25R ELEAWYEDLQEV  | 33467 | >DDIT3-L25R ELEAWYEDRQEV  | 182   | 33285 |
| >DDIT3-L25R WELEAWYEDLQEV | 86    | >DDIT3-L25R WELEAWYEDRQEV | 6685  | 6599  |
| >DDIT3-L25R WELEAWYEDLQEV | 107   | >DDIT3-L25R WELEAWYEDRQEV | 206   | 99    |
| >DDIT3-L25R WELEAWYEDLQEV | 394   | >DDIT3-L25R WELEAWYEDRQEV | 22355 | 21961 |
| >DDIT3-L25R WELEAWYEDLQEV | 313   | >DDIT3-L25R WELEAWYEDRQEV | 3000  | 2687  |
| >DDIT3-L25R WELEAWYEDLQEV | 12    | >DDIT3-L25R WELEAWYEDRQEV | 7408  | 7396  |
| >DDIT3-L25R WELEAWYEDLQEV | 141   | >DDIT3-L25R WELEAWYEDRQEV | 232   | 91    |
| >DDX10-L56 RLEGTEHRQ      | 66    | >DDX10-L56 RVEGTEHRQ      | 9715  | 9649  |
| >DDX10-L56 RLEGTEHR       | 96    | >DDX10-L56 RVEGTEHR       | 59    | 37    |
| >DDX10-L56 RLEGTEHR       | 3426  | >DDX10-L56 RVEGTEHR       | 427   | 2999  |
| >DDX10-L56 RLEGTEHR       | 90    | >DDX10-L56 RVEGTEHR       | 142   | 52    |
| >DDX10-L56 MSILQGGKF      | 3624  | >DDX10-L56 MSILQGGKF      | 395   | 3229  |

|                       |       |                       |      |       |
|-----------------------|-------|-----------------------|------|-------|
| >DDX10-L56{MSILQGGKF  | 11    | >DDX10-L56{MSILQGGKF  | 195  | 184   |
| >DDX10-L56{KRLEGTEH   | 498   | >DDX10-L56{KRVEGTEH   | 1202 | 704   |
| >DDX10-L56{KRLEGTEHR  | 174   | >DDX10-L56{KRVEGTEHR  | 432  | 258   |
| >DDX10-L56{KRLEGTEHRC | 192   | >DDX10-L56{KRVEGTEHRC | 280  | 88    |
| >DDX10-L56{KRLEGTEH   | 489   | >DDX10-L56{KRVEGTEH   | 539  | 50    |
| >DDX10-L56{KRLEGTEHRC | 417   | >DDX10-L56{KRVEGTEHRC | 1048 | 631   |
| >DDX10-L56{KRLEGTEHR  | 63    | >DDX10-L56{KRVEGTEHR  | 113  | 50    |
| >DDX10-L56{GKRLEGTEH  | 1266  | >DDX10-L56{GKRVEGTEH  | 455  | 811   |
| >DDX10-L56{LQKGGKRL   | 395   | >DDX10-L56{LQKGGKRV   | 1217 | 822   |
| >DDX10-L56{ILQKGGKRL  | 3172  | >DDX10-L56{ILQKGGKRV  | 237  | 2935  |
| >DDX10-L56{ILQKGGKRL  | 374   | >DDX10-L56{ILQKGGKRV  | 17   | 357   |
| >DDX10-L56{ILQKGGKRL  | 2478  | >DDX10-L56{ILQKGGKRV  | 261  | 2217  |
| >DDX10-L56{ILQKGGKRL  | 3491  | >DDX10-L56{ILQKGGKRV  | 187  | 3304  |
| >DDX10-L56{ILQKGGKRL  | 25    | >DDX10-L56{ILQKGGKRV  | 4    | 21    |
| >DDX10-L56{SILQKGGKRL | 753   | >DDX10-L56{SILQKGGKRV | 33   | 720   |
| >DDX10-L56{SILQKGGKRL | 1899  | >DDX10-L56{SILQKGGKRV | 108  | 1791  |
| >DDX10-L56{SILQKGGKRL | 982   | >DDX10-L56{SILQKGGKRV | 29   | 953   |
| >DDX5-G533 GVYSAANYT  | 837   | >DDX5-G533 AVYSAANYT  | 272  | 565   |
| >DDX5-G533 GVYSAANY   | 126   | >DDX5-G533 AVYSAANY   | 83   | 43    |
| >DDX5-G533 GVYSAANY   | 134   | >DDX5-G533 AVYSAANY   | 69   | 65    |
| >DDX5-G533 GVYSAANY   | 222   | >DDX5-G533 AVYSAANY   | 17   | 205   |
| >DDX5-G533 GVYSAANY   | 24    | >DDX5-G533 AVYSAANY   | 31   | 7     |
| >DDX5-G533 GVYSAANY   | 66    | >DDX5-G533 AVYSAANY   | 35   | 31    |
| >DDX5-G533 GVYSAANY   | 1686  | >DDX5-G533 AVYSAANY   | 184  | 1502  |
| >DDX5-G533 GVYSAANY   | 194   | >DDX5-G533 AVYSAANY   | 109  | 85    |
| >DDX5-G533 GVYSAANY   | 326   | >DDX5-G533 AVYSAANY   | 305  | 21    |
| >DDX5-G533 GVYSAANY   | 695   | >DDX5-G533 AVYSAANY   | 87   | 608   |
| >DDX5-G533 GVYSAANY   | 21    | >DDX5-G533 AVYSAANY   | 8    | 13    |
| >DDX5-G533 GVYSAANY   | 1589  | >DDX5-G533 AVYSAANY   | 404  | 1185  |
| >DDX5-G533 NGVYSAANY  | 8086  | >DDX5-G533 NAVYSAANY  | 214  | 7872  |
| >DDX5-G533 NGVYSAANY  | 3819  | >DDX5-G533 NAVYSAANY  | 148  | 3671  |
| >DDX5-G533 NGVYSAANY  | 11372 | >DDX5-G533 NAVYSAANY  | 330  | 11042 |
| >DDX5-G533 NGVYSAANY  | 2230  | >DDX5-G533 NAVYSAANY  | 342  | 1888  |
| >DDX5-G533 NGVYSAANY  | 397   | >DDX5-G533 NAVYSAANY  | 11   | 386   |
| >DDX5-G533 NGVYSAANY  | 503   | >DDX5-G533 NAVYSAANY  | 50   | 453   |
| >DDX5-G533 QNGVYSAAN  | 408   | >DDX5-G533 QNAVYSAAN  | 199  | 209   |
| >DDX5-G533 QNGVYSAAN  | 299   | >DDX5-G533 QNAVYSAAN  | 156  | 143   |
| >DDX5-G533 TQNGVYSA   | 169   | >DDX5-G533 TQNAVYSA   | 112  | 57    |
| >DDX5-G533 TQNGVYSAA  | 71    | >DDX5-G533 TQNAVYSAA  | 44   | 27    |
| >DDX5-G533 TQNGVYSA   | 90    | >DDX5-G533 TQNAVYSA   | 65   | 25    |
| >DDX5-G533 TQNGVYSAA  | 101   | >DDX5-G533 TQNAVYSAA  | 70   | 31    |
| >DDX5-G533 TQNGVYSAAI | 118   | >DDX5-G533 TQNAVYSAAI | 106  | 12    |
| >DDX5-G533 TQNGVYSAA  | 999   | >DDX5-G533 TQNAVYSAA  | 424  | 575   |

|                         |      |                         |      |      |
|-------------------------|------|-------------------------|------|------|
| >DDX5-G533 TQNGVYSAAI   | 73   | >DDX5-G533 TQNAVYSAAI   | 62   | 11   |
| >DDX5-G533 TQNGVYSAAI   | 186  | >DDX5-G533 TQNAVYSAAI   | 151  | 35   |
| >DDX5-G533 TQNGVYSAA    | 1982 | >DDX5-G533 TQNAVYSAA    | 447  | 1535 |
| >DDX5-G533 TQNGVYSAAI   | 54   | >DDX5-G533 TQNAVYSAAI   | 17   | 37   |
| >DDX5-G533 KTQNGVYSA    | 399  | >DDX5-G533 KTQNAVYSA    | 452  | 53   |
| >DDX5-G533 KTQNGVYSA    | 143  | >DDX5-G533 KTQNAVYSA    | 45   | 98   |
| >DDX5-G533 KTQNGVYSA/   | 131  | >DDX5-G533 KTQNAVYSA/   | 50   | 81   |
| >DDX5-G533 KTQNGVYSA    | 53   | >DDX5-G533 KTQNAVYSA    | 51   | 2    |
| >DDX5-G533 AKTQNGVY     | 419  | >DDX5-G533 AKTQNAVY     | 549  | 130  |
| >DDX5-G533 AKTQNGVY     | 49   | >DDX5-G533 AKTQNAVY     | 18   | 31   |
| >DDX5-G533 AKTQNGVYS/   | 331  | >DDX5-G533 AKTQNAVYS/   | 342  | 11   |
| >DDX5-G533 GAKTQNGVY    | 609  | >DDX5-G533 GAKTQNAVY    | 256  | 353  |
| >DDX5-G533 GAKTQNGVY    | 80   | >DDX5-G533 GAKTQNAVY    | 126  | 46   |
| >DDX5-G533 GAKTQNGVY    | 396  | >DDX5-G533 GAKTQNAVY    | 179  | 217  |
| >DDX5-G533 GAKTQNGVY    | 1497 | >DDX5-G533 GAKTQNAVY    | 129  | 1368 |
| >DDX5-G533 GAKTQNGVY    | 223  | >DDX5-G533 GAKTQNAVY    | 241  | 18   |
| >DDX5-G533 FGAKTQNGV    | 95   | >DDX5-G533 FGAKTQNAV    | 70   | 25   |
| >DDX5-G533 FGAKTQNGV    | 481  | >DDX5-G533 FGAKTQNAV    | 363  | 118  |
| >DDX5-G533 FGAKTQNGV    | 675  | >DDX5-G533 FGAKTQNAV    | 398  | 277  |
| >DDX5-G533 FGAKTQNGV    | 219  | >DDX5-G533 FGAKTQNAV    | 337  | 118  |
| >DDX5-G533 FGAKTQNGV    | 297  | >DDX5-G533 FGAKTQNAV    | 408  | 111  |
| >DDX5-G533 FGAKTQNGV    | 291  | >DDX5-G533 FGAKTQNAV    | 147  | 144  |
| >DDX5-G533 FGAKTQNGV    | 177  | >DDX5-G533 FGAKTQNAV    | 185  | 8    |
| >DDX5-G533 FGAKTQNGV    | 1679 | >DDX5-G533 FGAKTQNAV    | 368  | 1311 |
| >DDX5-G533 FGAKTQNGV    | 526  | >DDX5-G533 FGAKTQNAV    | 100  | 426  |
| >DDX5-G533 RDFGAKTQN    | 458  | >DDX5-G533 RDFGAKTQN    | 152  | 306  |
| >DDX5-G533 RDFGAKTQN    | 372  | >DDX5-G533 RDFGAKTQN    | 311  | 61   |
| >DDX5-I300V HINIGALEL   | 444  | >DDX5-I300V HVNIGALEL   | 1656 | 1212 |
| >DDX5-I300V HINIGALELSA | 1333 | >DDX5-I300V HVNIGALELS/ | 429  | 904  |
| >DDX5-I300V HINIGALEL   | 407  | >DDX5-I300V HVNIGALEL   | 88   | 319  |
| >DDX5-I300V AEDFLKDYIH  | 434  | >DDX5-I300V AEDFLKDYIH  | 3337 | 2903 |
| >DDX5-I300V AEDFLKDYIH  | 35   | >DDX5-I300V AEDFLKDYIH  | 75   | 40   |
| >DDX5-I300V AEDFLKDYIH  | 744  | >DDX5-I300V AEDFLKDYIH  | 197  | 547  |
| >DDX5-I300V AEDFLKDYIH  | 44   | >DDX5-I300V AEDFLKDYIH  | 151  | 107  |
| >DDX5-I300V IHINIGAL    | 408  | >DDX5-I300V IHVNIGAL    | 551  | 143  |
| >DDX5-I300V IHINIGALEL  | 326  | >DDX5-I300V IHVNIGALEL  | 462  | 136  |
| >DDX5-I300V IHINIGAL    | 137  | >DDX5-I300V IHVNIGAL    | 219  | 82   |
| >DDX5-I300V IHINIGALEL  | 146  | >DDX5-I300V IHVNIGALEL  | 225  | 79   |
| >DDX5-I300V YIHINIGAL   | 616  | >DDX5-I300V YIHVNIGAL   | 273  | 343  |
| >DDX5-I300V YIHINIGALEL | 993  | >DDX5-I300V YIHVNIGALEL | 497  | 496  |
| >DDX5-I300V YIHINIGAL   | 361  | >DDX5-I300V YIHVNIGAL   | 326  | 35   |
| >DDX5-I300V YIHINIGALEL | 413  | >DDX5-I300V YIHVNIGALEL | 397  | 16   |
| >DDX5-I300V YIHINIGA    | 90   | >DDX5-I300V YIHVNIGA    | 131  | 41   |

|                         |     |                          |     |     |
|-------------------------|-----|--------------------------|-----|-----|
| >DDX5-I300V YIHINIGAL   | 29  | >DDX5-I300V YIHAVNIGAL   | 38  | 9   |
| >DDX5-I300V YIHINIGALEL | 97  | >DDX5-I300V YIHAVNIGALEL | 114 | 17  |
| >DDX5-I300V YIHINIGA    | 374 | >DDX5-I300V YIHAVNIGA    | 298 | 76  |
| >DDX5-I300V YIHINIGAL   | 457 | >DDX5-I300V YIHAVNIGAL   | 348 | 109 |
| >DDX5-I300V YIHINIGALEL | 411 | >DDX5-I300V YIHAVNIGALEL | 320 | 91  |
| >DDX5-I300V YIHINIGA    | 62  | >DDX5-I300V YIHAVNIGA    | 99  | 37  |
| >DDX5-I300V YIHINIGAL   | 17  | >DDX5-I300V YIHAVNIGAL   | 34  | 17  |
| >DDX5-I300V YIHINIGALEL | 25  | >DDX5-I300V YIHAVNIGALEL | 46  | 21  |
| >DDX5-I300V YIHINIGAL   | 426 | >DDX5-I300V YIHAVNIGAL   | 250 | 176 |
| >DDX5-I300V YIHINIGALEL | 394 | >DDX5-I300V YIHAVNIGALEL | 554 | 160 |
| >DDX5-I300V YIHINIGA    | 54  | >DDX5-I300V YIHAVNIGA    | 94  | 40  |
| >DDX5-I300V YIHINIGAL   | 30  | >DDX5-I300V YIHAVNIGAL   | 49  | 19  |
| >DDX5-I300V YIHINIGALEL | 10  | >DDX5-I300V YIHAVNIGALEL | 13  | 3   |
| >DDX5-I300V YIHINIGALEL | 324 | >DDX5-I300V YIHAVNIGALEL | 596 | 272 |
| >DDX5-I300V DYIHINIGAL  | 182 | >DDX5-I300V DYIHAVNIGAL  | 142 | 40  |
| >DDX5-I300V DYIHINIGAL  | 302 | >DDX5-I300V DYIHAVNIGAL  | 249 | 53  |
| >DDX5-I300V DYIHINIGAL  | 455 | >DDX5-I300V DYIHAVNIGAL  | 456 | 1   |
| >DDX5-I300V KDYIHINI    | 277 | >DDX5-I300V KDYIHAVNI    | 369 | 92  |
| >DDX5-I300V KDYIHINIGAL | 108 | >DDX5-I300V KDYIHAVNIGA  | 116 | 8   |
| >DDX5-I300V KDYIHINI    | 426 | >DDX5-I300V KDYIHAVNI    | 137 | 289 |
| >DDX5-I300V KDYIHINIGAL | 84  | >DDX5-I300V KDYIHAVNIGA  | 78  | 6   |
| >DDX5-I300V KDYIHINI    | 132 | >DDX5-I300V KDYIHAVNI    | 112 | 20  |
| >DDX5-I300V KDYIHINIGAL | 228 | >DDX5-I300V KDYIHAVNIGA  | 229 | 1   |
| >DDX5-I300V FLKDYIHI    | 20  | >DDX5-I300V FLKDYIHAV    | 11  | 9   |
| >DDX5-I300V FLKDYIHINI  | 31  | >DDX5-I300V FLKDYIHAVNI  | 53  | 22  |
| >DDX5-I300V FLKDYIHI    | 6   | >DDX5-I300V FLKDYIHAV    | 4   | 2   |
| >DDX5-I300V FLKDYIHIN   | 98  | >DDX5-I300V FLKDYIHAVN   | 109 | 11  |
| >DDX5-I300V FLKDYIHINI  | 13  | >DDX5-I300V FLKDYIHAVNI  | 17  | 4   |
| >DDX5-I300V FLKDYIHINIG | 47  | >DDX5-I300V FLKDYIHAVNIC | 51  | 4   |
| >DDX5-I300V FLKDYIHI    | 3   | >DDX5-I300V FLKDYIHAV    | 2   | 1   |
| >DDX5-I300V FLKDYIHIN   | 258 | >DDX5-I300V FLKDYIHAVN   | 325 | 67  |
| >DDX5-I300V FLKDYIHINI  | 20  | >DDX5-I300V FLKDYIHAVNI  | 21  | 1   |
| >DDX5-I300V FLKDYIHINIG | 66  | >DDX5-I300V FLKDYIHAVNIC | 61  | 5   |
| >DDX5-I300V FLKDYIHI    | 15  | >DDX5-I300V FLKDYIHAV    | 5   | 10  |
| >DDX5-I300V FLKDYIHIN   | 159 | >DDX5-I300V FLKDYIHAVNI  | 274 | 115 |
| >DDX5-I300V FLKDYIHI    | 8   | >DDX5-I300V FLKDYIHAV    | 2   | 6   |
| >DDX5-I300V FLKDYIHIN   | 988 | >DDX5-I300V FLKDYIHAVN   | 310 | 678 |
| >DDX5-I300V FLKDYIHINI  | 8   | >DDX5-I300V FLKDYIHAVNI  | 9   | 1   |
| >DDX5-I300V FLKDYIHI    | 7   | >DDX5-I300V FLKDYIHAV    | 3   | 4   |
| >DDX5-I300V FLKDYIHINI  | 14  | >DDX5-I300V FLKDYIHAVNI  | 14  | 0   |
| >DDX5-I300V FLKDYIHI    | 39  | >DDX5-I300V FLKDYIHAV    | 7   | 32  |
| >DDX5-I300V FLKDYIHINI  | 102 | >DDX5-I300V FLKDYIHAVNI  | 104 | 2   |
| >DDX5-I300V FLKDYIHI    | 175 | >DDX5-I300V FLKDYIHAV    | 11  | 164 |



|                         |      |                         |      |      |
|-------------------------|------|-------------------------|------|------|
| >DDX5-I300V FLKDYIHINI  | 109  | >DDX5-I300V FLKDYIHVNI  | 83   | 26   |
| >DDX5-I300V FLKDYIHI    | 3    | >DDX5-I300V FLKDYIHV    | 1    | 2    |
| >DDX5-I300V FLKDYIHIN   | 27   | >DDX5-I300V FLKDYIHVN   | 19   | 8    |
| >DDX5-I300V FLKDYIHINI  | 3    | >DDX5-I300V FLKDYIHVNI  | 3    | 0    |
| >DDX5-I300V FLKDYIHINIG | 249  | >DDX5-I300V FLKDYIHVNIC | 290  | 41   |
| >DDX5-I300V FLKDYIHI    | 1377 | >DDX5-I300V FLKDYIHV    | 315  | 1062 |
| >DDX5-I300V FLKDYIHI    | 419  | >DDX5-I300V FLKDYIHV    | 703  | 284  |
| >DDX5-I300V FLKDYIHINI  | 624  | >DDX5-I300V FLKDYIHVNI  | 338  | 286  |
| >DDX5-I300V DFLKDYIHINI | 724  | >DDX5-I300V DFLKDYIHVNI | 417  | 307  |
| >DDX5-I300V DFLKDYIHI   | 465  | >DDX5-I300V DFLKDYIHV   | 6250 | 5785 |
| >DDX5-I300V EDFLKDYIHI  | 230  | >DDX5-I300V EDFLKDYIHV  | 499  | 269  |
| >DDX5-Y535(YSAANYTNG    | 121  | >DDX5-Y535(CSAANYTNG    | 2206 | 2085 |
| >DDX5-Y535(YSAANYTNG!   | 179  | >DDX5-Y535(CSAANYTNG!   | 6593 | 6414 |
| >DDX5-Y535(YSAANYTNG!   | 312  | >DDX5-Y535(CSAANYTNG!   | 2355 | 2043 |
| >DDX5-Y535(YSAANYTNG!   | 40   | >DDX5-Y535(CSAANYTNG!   | 439  | 399  |
| >DDX5-Y535(YSAANYTNG!   | 326  | >DDX5-Y535(CSAANYTNG!   | 7768 | 7442 |
| >DDX5-Y535(YSAANYTNG!   | 11   | >DDX5-Y535(CSAANYTNG!   | 89   | 78   |
| >DDX5-Y535(YSAANYTNG!   | 4    | >DDX5-Y535(CSAANYTNG!   | 26   | 22   |
| >DDX5-Y535(YSAANYTNG!   | 121  | >DDX5-Y535(CSAANYTNG!   | 1429 | 1308 |
| >DDX5-Y535(YSAANYTNG!   | 43   | >DDX5-Y535(CSAANYTNG!   | 70   | 27   |
| >DDX5-Y535(YSAANYTNG!   | 317  | >DDX5-Y535(CSAANYTNG!   | 3105 | 2788 |
| >DDX5-Y535(YSAANYTNG!   | 32   | >DDX5-Y535(CSAANYTNG!   | 816  | 784  |
| >DDX5-Y535(GVYSAANY     | 126  | >DDX5-Y535(GVCSAANY     | 3687 | 3561 |
| >DDX5-Y535(GVYSAANY     | 134  | >DDX5-Y535(GVCSAANY     | 688  | 554  |
| >DDX5-Y535(GVYSAANY     | 222  | >DDX5-Y535(GVCSAANY     | 326  | 104  |
| >DDX5-Y535(GVYSAANY     | 24   | >DDX5-Y535(GVCSAANY     | 90   | 66   |
| >DDX5-Y535(GVYSAANY     | 66   | >DDX5-Y535(GVCSAANY     | 115  | 49   |
| >DDX5-Y535(GVYSAANY     | 194  | >DDX5-Y535(GVCSAANY     | 540  | 346  |
| >DDX5-Y535(GVYSAANY     | 326  | >DDX5-Y535(GVCSAANY     | 3125 | 2799 |
| >DDX5-Y535(GVYSAANY     | 21   | >DDX5-Y535(GVCSAANY     | 241  | 220  |
| >DDX5-Y535(NGVYSAANY    | 397  | >DDX5-Y535(NGVCSAANY    | 561  | 164  |
| >DDX5-Y535(NGVYSAANY    | 503  | >DDX5-Y535(NGVCSAANY    | 234  | 269  |
| >DDX5-Y535(QNGVYSAAN    | 408  | >DDX5-Y535(QNGVCSAAN    | 685  | 277  |
| >DDX5-Y535(QNGVYSAAN    | 299  | >DDX5-Y535(QNGVCSAAN    | 665  | 366  |
| >DDX5-Y535(TQNGVYSA     | 169  | >DDX5-Y535(TQNGVCSA     | 284  | 115  |
| >DDX5-Y535(TQNGVYSAA    | 71   | >DDX5-Y535(TQNGVCSAA    | 169  | 98   |
| >DDX5-Y535(TQNGVYSA     | 90   | >DDX5-Y535(TQNGVCSA     | 141  | 51   |
| >DDX5-Y535(TQNGVYSAA    | 101  | >DDX5-Y535(TQNGVCSAA    | 169  | 68   |
| >DDX5-Y535(TQNGVYSAA    | 118  | >DDX5-Y535(TQNGVCSAA    | 119  | 1    |
| >DDX5-Y535(TQNGVYSAA    | 73   | >DDX5-Y535(TQNGVCSAA    | 70   | 3    |
| >DDX5-Y535(TQNGVYSAA    | 186  | >DDX5-Y535(TQNGVCSAA    | 212  | 26   |
| >DDX5-Y535(TQNGVYSAA    | 54   | >DDX5-Y535(TQNGVCSAA    | 79   | 25   |
| >DDX5-Y535(KTQNGVYSA    | 399  | >DDX5-Y535(KTQNGVCSA    | 671  | 272  |

|                        |       |                        |       |       |
|------------------------|-------|------------------------|-------|-------|
| >DDX5-Y535(KTQNGVYSA   | 143   | >DDX5-Y535(KTQNGVCSA   | 52    | 91    |
| >DDX5-Y535(KTQNGVYSA,  | 131   | >DDX5-Y535(KTQNGVCSA,  | 283   | 152   |
| >DDX5-Y535(KTQNGVYSA   | 53    | >DDX5-Y535(KTQNGVCSA   | 417   | 364   |
| >DDX5-Y535(AKTQNGVY    | 419   | >DDX5-Y535(AKTQNGVC    | 31447 | 31028 |
| >DDX5-Y535(AKTQNGVY    | 49    | >DDX5-Y535(AKTQNGVC    | 6669  | 6620  |
| >DDX5-Y535(AKTQNGVYS,  | 331   | >DDX5-Y535(AKTQNGVCS,  | 485   | 154   |
| >DDX5-Y535(GAKTQNGVY   | 609   | >DDX5-Y535(GAKTQNGVC   | 314   | 295   |
| >DDX5-Y535(GAKTQNGVY   | 80    | >DDX5-Y535(GAKTQNGVC   | 26187 | 26107 |
| >DDX5-Y535(GAKTQNGVY   | 396   | >DDX5-Y535(GAKTQNGVC   | 19387 | 18991 |
| >DDX5-Y535(GAKTQNGVY   | 223   | >DDX5-Y535(GAKTQNGVC   | 19624 | 19401 |
| >DDX5-Y535(FGAKTQNGV   | 219   | >DDX5-Y535(FGAKTQNGV   | 29608 | 29389 |
| >DDX5-Y535(FGAKTQNGV   | 291   | >DDX5-Y535(FGAKTQNGV   | 18800 | 18509 |
| >DDX5-Y535(FGAKTQNGV   | 177   | >DDX5-Y535(FGAKTQNGV   | 24743 | 24566 |
| >DDX6-K356IKMRQEHRNF   | 65    | >DDX6-K356IEMRQEHRNF   | 939   | 874   |
| >DDX6-K356IKMRQEHRNF   | 9     | >DDX6-K356IEMRQEHRNF   | 35    | 26    |
| >DDX6-K356IKMRQEHRNF   | 37    | >DDX6-K356IEMRQEHRNF   | 12099 | 12062 |
| >DDX6-K356IKMRQEHRNF   | 19    | >DDX6-K356IEMRQEHRNF   | 8768  | 8749  |
| >DDX6-K356IKMRQEHRNF   | 382   | >DDX6-K356IEMRQEHRNF   | 15707 | 15325 |
| >DDX6-K356IKMRQEHRNF   | 17    | >DDX6-K356IEMRQEHRNF   | 2018  | 2001  |
| >DDX6-K356IKMRQEHRNF   | 242   | >DDX6-K356IEMRQEHRNF   | 8581  | 8339  |
| >DDX6-K356IKMRQEHRNF   | 5117  | >DDX6-K356IEMRQEHRNF   | 92    | 5025  |
| >DDX6-K356IKMRQEHRNF   | 923   | >DDX6-K356IEMRQEHRNF   | 292   | 631   |
| >DDX6-K356IKMRQEHRNF   | 37    | >DDX6-K356IEMRQEHRNF   | 78    | 41    |
| >DDX6-K356IKMRQEHRNF   | 501   | >DDX6-K356IEMRQEHRNF   | 298   | 203   |
| >DDX6-K356IKMRQEHRNF   | 414   | >DDX6-K356IEMRQEHRNF   | 3450  | 3036  |
| >DDX6-K356IKMRQEHRNF   | 6     | >DDX6-K356IEMRQEHRNF   | 21    | 15    |
| >DDX6-K356IKMRQEHRNF   | 48    | >DDX6-K356IEMRQEHRNF   | 1697  | 1649  |
| >DDX6-K356IKMRQEHRNF   | 44    | >DDX6-K356IEMRQEHRNF   | 255   | 211   |
| >DDX6-K356IAKMRQEHRN   | 422   | >DDX6-K356IAEMRQEHRN   | 866   | 444   |
| >DDX6-K356IAKMRQEHRN   | 486   | >DDX6-K356IAEMRQEHRN   | 10844 | 10358 |
| >DDX6-K356IAKMRQEHRN   | 264   | >DDX6-K356IAEMRQEHRN   | 6974  | 6710  |
| >DDX6-K356IAKMRQEHRN   | 27400 | >DDX6-K356IAEMRQEHRN   | 239   | 27161 |
| >DDX6-K356IAKMRQEHRN   | 27535 | >DDX6-K356IAEMRQEHRN   | 235   | 27300 |
| >DDX6-K356IAKMRQEHRN   | 16436 | >DDX6-K356IAEMRQEHRN   | 29    | 16407 |
| >DDX6-K356IAKMRQEHRN   | 3679  | >DDX6-K356IAEMRQEHRN   | 11    | 3668  |
| >DDX6-K356ILGYSCFYIHAk | 375   | >DDX6-K356ILGYSCFYIHAe | 21364 | 20989 |
| >DDX6-K356ILGYSCFYIHAk | 160   | >DDX6-K356ILGYSCFYIHAe | 22888 | 22728 |
| >DDX6-K356ILGYSCFYIHAk | 280   | >DDX6-K356ILGYSCFYIHAe | 13101 | 12821 |
| >DDX6-K356ILGYSCFYIHAk | 477   | >DDX6-K356ILGYSCFYIHAe | 20957 | 20480 |
| >DDX6-K356ILGYSCFYIHAk | 316   | >DDX6-K356ILGYSCFYIHAe | 11215 | 10899 |
| >DDX6-K356ILGYSCFYIHAk | 406   | >DDX6-K356ILGYSCFYIHAe | 12900 | 12494 |
| >DDX6-K356IHAKMRQEHF   | 258   | >DDX6-K356IHAEMRQEHF   | 10809 | 10551 |
| >DDX6-K356IHAKMRQEHF   | 10    | >DDX6-K356IHAEMRQEHF   | 82    | 72    |

|                        |      |                        |       |       |
|------------------------|------|------------------------|-------|-------|
| >DDX6-K356IHAKMRQEHF   | 23   | >DDX6-K356IHAEMRQEHF   | 243   | 220   |
| >DDX6-K356IHAKMRQEHF   | 25   | >DDX6-K356IHAEMRQEHF   | 90    | 65    |
| >DDX6-K356IHAKMRQEHF   | 48   | >DDX6-K356IHAEMRQEHF   | 228   | 180   |
| >DDX6-K356IHAKMRQEHF   | 90   | >DDX6-K356IHAEMRQEHF   | 128   | 38    |
| >DDX6-K356IHAKMRQEHF   | 203  | >DDX6-K356IHAEMRQEHF   | 265   | 62    |
| >DDX6-K356IYIHAKMRQEI  | 63   | >DDX6-K356IYIHAEMRQEI  | 344   | 281   |
| >DDX6-K356IYIHAKMRQEI  | 282  | >DDX6-K356IYIHAEMRQEI  | 615   | 333   |
| >DDX6-K356IYIHAKMRQEI  | 66   | >DDX6-K356IYIHAEMRQEI  | 53    | 13    |
| >DDX6-K356IYIHAKMRQEI  | 201  | >DDX6-K356IYIHAEMRQEI  | 172   | 29    |
| >DDX6-K356IYIHAKMR     | 411  | >DDX6-K356IYIHAEMR     | 224   | 187   |
| >DDX6-K356IYIHAKMRQ    | 791  | >DDX6-K356IYIHAEMRQ    | 491   | 300   |
| >DDX6-K356IYIHAKMR     | 210  | >DDX6-K356IYIHAEMR     | 162   | 48    |
| >DDX6-K356IYIHAKMR     | 164  | >DDX6-K356IYIHAEMR     | 54    | 110   |
| >DDX6-K356IYIHAKMR     | 73   | >DDX6-K356IYIHAEMR     | 117   | 44    |
| >DDX6-K356ICFYIHAKM    | 235  | >DDX6-K356ICFYIHAEM    | 302   | 67    |
| >DDX6-K356ICFYIHAKMR   | 162  | >DDX6-K356ICFYIHAEMR   | 108   | 54    |
| >DDX6-K356ICFYIHAKMR   | 935  | >DDX6-K356ICFYIHAEMR   | 198   | 737   |
| >DDX6-K356ICFYIHAKMR   | 36   | >DDX6-K356ICFYIHAEMR   | 65    | 29    |
| >DDX6-K356ISCFYIHAK    | 484  | >DDX6-K356ISCFYIHAE    | 28335 | 27851 |
| >DDX6-K356ISCFYIHAK    | 161  | >DDX6-K356ISCFYIHAE    | 14828 | 14667 |
| >DDX6-K356ISCFYIHAK    | 496  | >DDX6-K356ISCFYIHAE    | 13345 | 12849 |
| >DDX6-K356ISCFYIHAKMR  | 295  | >DDX6-K356ISCFYIHAEMR  | 374   | 79    |
| >DDX6-K356ISCFYIHAK    | 179  | >DDX6-K356ISCFYIHAE    | 16176 | 15997 |
| >DDX6-K356ISCFYIHAKM   | 1505 | >DDX6-K356ISCFYIHAEM   | 478   | 1027  |
| >DDX6-K356ISCFYIHAKM   | 10   | >DDX6-K356ISCFYIHAEM   | 12    | 2     |
| >DDX6-K356ISCFYIHAK    | 367  | >DDX6-K356ISCFYIHAE    | 9772  | 9405  |
| >DDX6-K356ISCFYIHAKMR  | 114  | >DDX6-K356ISCFYIHAEMR  | 170   | 56    |
| >DDX6-K356IYSCFYIHAK   | 13   | >DDX6-K356IYSCFYIHAE   | 18931 | 18918 |
| >DDX6-K356IYSCFYIHAKM  | 79   | >DDX6-K356IYSCFYIHAEM  | 59    | 20    |
| >DDX6-K356IYSCFYIHAK   | 125  | >DDX6-K356IYSCFYIHAE   | 11626 | 11501 |
| >DDX6-K356IYSCFYIHAKM  | 121  | >DDX6-K356IYSCFYIHAEM  | 94    | 27    |
| >DDX6-K356IYSCFYIHAKM  | 355  | >DDX6-K356IYSCFYIHAEM  | 249   | 106   |
| >DDX6-K356IYSCFYIHAK   | 12   | >DDX6-K356IYSCFYIHAE   | 2898  | 2886  |
| >DDX6-K356IYSCFYIHAKM  | 14   | >DDX6-K356IYSCFYIHAEM  | 6     | 8     |
| >DDX6-K356IYSCFYIHAKM  | 338  | >DDX6-K356IYSCFYIHAEM  | 177   | 161   |
| >DDX6-K356IYSCFYIHAKM  | 797  | >DDX6-K356IYSCFYIHAEM  | 190   | 607   |
| >DDX6-K356IYSCFYIHAKM  | 700  | >DDX6-K356IYSCFYIHAEM  | 296   | 404   |
| >DDX6-K356IYSCFYIHAKM  | 7    | >DDX6-K356IYSCFYIHAEM  | 8     | 1     |
| >DDX6-K356IYSCFYIHAKM  | 121  | >DDX6-K356IYSCFYIHAEM  | 235   | 114   |
| >DDX6-K356IYSCFYIHAKM  | 25   | >DDX6-K356IYSCFYIHAEM  | 30    | 5     |
| >DDX6-K356IYSCFYIHAK   | 126  | >DDX6-K356IYSCFYIHAE   | 3430  | 3304  |
| >DDX6-K356IGYSCFYIHAKI | 121  | >DDX6-K356IGYSCFYIHAEI | 58    | 63    |
| >DDX6-K356IGYSCFYIHAK  | 167  | >DDX6-K356IGYSCFYIHAE  | 14461 | 14294 |

|                       |      |                       |       |       |
|-----------------------|------|-----------------------|-------|-------|
| >DDX6-K356IGYSCFYIHAK | 126  | >DDX6-K356IGYSCFYIHAE | 3217  | 3091  |
| >DDX6-K356IGYSCFYIHAK | 263  | >DDX6-K356IGYSCFYIHAE | 10365 | 10102 |
| >DEK-K348N·KKVYENYPTY | 447  | >DEK-K348N·NKVYENYPTY | 1292  | 845   |
| >DEK-K348N·KKVYENYPT  | 414  | >DEK-K348N·NKVYENYPT  | 4326  | 3912  |
| >DEK-K348N·KKVYENYPTY | 4    | >DEK-K348N·NKVYENYPTY | 15    | 11    |
| >DEK-K348N·CKKVYENY   | 29   | >DEK-K348N·CNKVYENY   | 2366  | 2337  |
| >DEK-K348N·CKKVYENYPT | 15   | >DEK-K348N·CNKVYENYPT | 1164  | 1149  |
| >DEK-K348N·ICKKVYENY  | 1496 | >DEK-K348N·ICNKVYENY  | 310   | 1186  |
| >DEK-K348N·ICKKVYENY  | 152  | >DEK-K348N·ICNKVYENY  | 266   | 114   |
| >DEK-K348N·QICKKVYENY | 193  | >DEK-K348N·QICNKVYENY | 201   | 8     |
| >DEK-K348N·QICKKVYENY | 126  | >DEK-K348N·QICNKVYENY | 282   | 156   |
| >DEK-K348N·KQICKKVY   | 612  | >DEK-K348N·KQICNKVY   | 323   | 289   |
| >DEK-K348N·KQICKKVY   | 73   | >DEK-K348N·KQICNKVY   | 58    | 15    |
| >DEK-K348N·KQICKKVYEN | 89   | >DEK-K348N·KQICNKVYEN | 72    | 17    |
| >DEK-K348N·KQICKKVY   | 8    | >DEK-K348N·KQICNKVY   | 4     | 4     |
| >DEK-K348N·KQICKKVYEN | 7    | >DEK-K348N·KQICNKVYEN | 4     | 3     |
| >DEK-K348N·MKQICKKVY  | 30   | >DEK-K348N·MKQICNKVY  | 10    | 20    |
| >DEK-K348N·TMKQICKKV  | 835  | >DEK-K348N·TMKQICNKV  | 41    | 794   |
| >DEK-K348N·TMKQICKKV  | 43   | >DEK-K348N·TMKQICNKV  | 14    | 29    |
| >DEK-K348N·TMKQICKKV  | 18   | >DEK-K348N·TMKQICNKV  | 9     | 9     |
| >DEK-K348N·TMKQICKK   | 246  | >DEK-K348N·TMKQICNK   | 169   | 77    |
| >DEK-K348N·TMKQICKK   | 408  | >DEK-K348N·TMKQICNK   | 201   | 207   |
| >DEK-K348N·TMKQICKK   | 346  | >DEK-K348N·TMKQICNK   | 153   | 193   |
| >DEK-K348N·TMKQICKK   | 352  | >DEK-K348N·TMKQICNK   | 222   | 130   |
| >DEK-K348N·TMKQICKK   | 440  | >DEK-K348N·TMKQICNK   | 274   | 166   |
| >DEK-K348N·TMKQICKKVY | 98   | >DEK-K348N·TMKQICNKV  | 67    | 31    |
| >DEK-K348N·TMKQICKKVY | 256  | >DEK-K348N·TMKQICNKV  | 151   | 105   |
| >DEK-K348N·TMKQICKKVY | 208  | >DEK-K348N·TMKQICNKV  | 118   | 90    |
| >DEK-K348N·VTMKQICKK\ | 420  | >DEK-K348N·VTMKQICNK\ | 253   | 167   |
| >DEK-K348N·VTMKQICKK\ | 339  | >DEK-K348N·VTMKQICNK\ | 251   | 88    |
| >DEK-K348N·VTMKQICKK\ | 374  | >DEK-K348N·VTMKQICNK\ | 201   | 173   |
| >DEK-K348N·VTMKQICK   | 76   | >DEK-K348N·VTMKQICN   | 18767 | 18691 |
| >DEK-K348N·VTMKQICKK  | 66   | >DEK-K348N·VTMKQICNK  | 57    | 9     |
| >DEK-K348N·VTMKQICK   | 11   | >DEK-K348N·VTMKQICN   | 11579 | 11568 |
| >DEK-K348N·VTMKQICKK  | 9    | >DEK-K348N·VTMKQICNK  | 9     | 0     |
| >DEK-K348N·VTMKQICKK\ | 257  | >DEK-K348N·VTMKQICNK\ | 147   | 110   |
| >DEK-K348N·VTMKQICK   | 181  | >DEK-K348N·VTMKQICN   | 13312 | 13131 |
| >DEK-K348N·VTMKQICKK  | 93   | >DEK-K348N·VTMKQICNK  | 41    | 52    |
| >DEK-K348N·VTMKQICKK\ | 142  | >DEK-K348N·VTMKQICNK\ | 120   | 22    |
| >DEK-K348N·VTMKQICKK  | 507  | >DEK-K348N·VTMKQICNK  | 246   | 261   |
| >DEK-K348N·VTMKQICK   | 127  | >DEK-K348N·VTMKQICN   | 19031 | 18904 |
| >DEK-K348N·VTMKQICKK  | 100  | >DEK-K348N·VTMKQICNK  | 112   | 12    |
| >DEK-K348N·VTMKQICKK\ | 1215 | >DEK-K348N·VTMKQICNK\ | 358   | 857   |

|                        |      |                        |       |       |
|------------------------|------|------------------------|-------|-------|
| >DEK-K348N·VTMKQICKK\  | 1262 | >DEK-K348N·VTMKQICNK\  | 345   | 917   |
| >DEK-K348N·VTMKQICKK\  | 250  | >DEK-K348N·VTMKQICNK\  | 135   | 115   |
| >DEK-K348N·VTMKQICKK\  | 303  | >DEK-K348N·VTMKQICNK\  | 161   | 142   |
| >DEK-K348N·VTMKQICKK\  | 391  | >DEK-K348N·VTMKQICNK\  | 1052  | 661   |
| >DEK-K348N·VTMKQICKK\  | 6    | >DEK-K348N·VTMKQICNK\  | 5     | 1     |
| >DEK-K348N·VTMKQICKK\  | 356  | >DEK-K348N·VTMKQICNK\  | 462   | 106   |
| >DEK-K348N·VTMKQICKK\  | 27   | >DEK-K348N·VTMKQICNK\  | 28    | 1     |
| >DEK-K348N·VTMKQICKK   | 591  | >DEK-K348N·VTMKQICNK   | 325   | 266   |
| >DEK-K348N·EVTMKQICKK  | 575  | >DEK-K348N·EVTMKQICNI  | 415   | 160   |
| >DEK-K348N·EVTMKQICK   | 14   | >DEK-K348N·EVTMKQICN   | 6005  | 5991  |
| >DEK-K348N·EVTMKQICKK  | 133  | >DEK-K348N·EVTMKQICNI  | 165   | 32    |
| >DEK-K348N·EVTMKQICKK  | 97   | >DEK-K348N·EVTMKQICNI  | 23    | 74    |
| >DICER1-D87DADSAYCV    | 5226 | >DICER1-D87GADSAYCV    | 207   | 5019  |
| >DICER1-D87DADSAYCV    | 88   | >DICER1-D87GADSAYCV    | 5353  | 5265  |
| >DICER1-D87DADSAYCVLF  | 188  | >DICER1-D87GADSAYCVLF  | 7820  | 7632  |
| >DICER1-D87TDADSAYCV   | 209  | >DICER1-D87TGADSAYCV   | 49    | 160   |
| >DICER1-D87TDADSAYCVL  | 416  | >DICER1-D87TGADSAYCVL  | 739   | 323   |
| >DICER1-D87TDADSAYCV   | 26   | >DICER1-D87TGADSAYCV   | 3321  | 3295  |
| >DICER1-D87TDADSAYCVL  | 101  | >DICER1-D87TGADSAYCVL  | 11259 | 11158 |
| >DICER1-D87PTDADSAY    | 11   | >DICER1-D87PTGADSAY    | 950   | 939   |
| >DICER1-D87PTDADSAY    | 4016 | >DICER1-D87PTGADSAY    | 210   | 3806  |
| >DICER1-D87PTDADSAY    | 6113 | >DICER1-D87PTGADSAY    | 442   | 5671  |
| >DICER1-D87PTDADSAY    | 1014 | >DICER1-D87PTGADSAY    | 346   | 668   |
| >DICER1-D87PTDADSAY    | 463  | >DICER1-D87PTGADSAY    | 246   | 217   |
| >DICER1-D87PTDADSAY    | 436  | >DICER1-D87PTGADSAY    | 1541  | 1105  |
| >DICER1-D87KPTDADSAY   | 422  | >DICER1-D87KPTGADSAY   | 415   | 7     |
| >DICER1-D87KPTDADSA    | 576  | >DICER1-D87KPTGADSA    | 270   | 306   |
| >DICER1-D87KPTDADSAYC  | 674  | >DICER1-D87KPTGADSAYC  | 387   | 287   |
| >DICER1-D87KPTDADSAY   | 904  | >DICER1-D87KPTGADSAY   | 403   | 501   |
| >DICER1-D87KPTDADSAY   | 7    | >DICER1-D87KPTGADSAY   | 8     | 1     |
| >DICER1-D87KPTDADSAY   | 400  | >DICER1-D87KPTGADSAY   | 394   | 6     |
| >DICER1-D87KPTDADSA    | 562  | >DICER1-D87KPTGADSA    | 349   | 213   |
| >DICER1-D87KPTDADSAY   | 518  | >DICER1-D87KPTGADSAY   | 403   | 115   |
| >DICER1-D87KPTDADSAY   | 10   | >DICER1-D87KPTGADSAY   | 15    | 5     |
| >DICER1-D87KPTDADSAY   | 422  | >DICER1-D87KPTGADSAY   | 694   | 272   |
| >DICER1-D87FKPTDADSAY  | 814  | >DICER1-D87FKPTGADSAY  | 243   | 571   |
| >DICER1-D87FKPTDADSAY  | 22   | >DICER1-D87FKPTGADSAY  | 23    | 1     |
| >DICER1-D87EFKPTDADSA  | 471  | >DICER1-D87EFKPTGADSA  | 363   | 108   |
| >DICER1-D87EFKPTDADSA  | 141  | >DICER1-D87EFKPTGADSA  | 94    | 47    |
| >DICER1-D87EFKPTDADSA  | 173  | >DICER1-D87EFKPTGADSA  | 348   | 175   |
| >DICER1-D87LEFKPTDA    | 481  | >DICER1-D87LEFKPTGA    | 434   | 47    |
| >DICER1-D87LEFKPTDADS. | 245  | >DICER1-D87LEFKPTGADS. | 227   | 18    |
| >DICER1-D87LEFKPTDADS. | 553  | >DICER1-D87LEFKPTGADS. | 485   | 68    |

|                        |       |                        |       |       |
|------------------------|-------|------------------------|-------|-------|
| >DICER1-D87LEFKPTDADS. | 219   | >DICER1-D87LEFKPTGADS. | 180   | 39    |
| >DICER1-D87ALEFKPTDA   | 817   | >DICER1-D87ALEFKPTGA   | 107   | 710   |
| >DICER1-D87ALEFKPTDA   | 572   | >DICER1-D87ALEFKPTGA   | 156   | 416   |
| >DICER1-E50EEVLRKFR    | 222   | >DICER1-E50KEVLRKFR    | 490   | 268   |
| >DICER1-E50EEVLRKFR    | 10283 | >DICER1-E50KEVLRKFR    | 200   | 10083 |
| >DICER1-E50EEVLRKFR    | 276   | >DICER1-E50KEVLRKFR    | 13391 | 13115 |
| >DICER1-E50EEVLRKFRA   | 52    | >DICER1-E50KEVLRKFRA   | 153   | 101   |
| >DICER1-E50EEVLRKFR    | 295   | >DICER1-E50KEVLRKFR    | 39    | 256   |
| >DICER1-E50QEEVLRKF    | 5933  | >DICER1-E50QKEVLRKF    | 401   | 5532  |
| >DICER1-E50QEEVLRKF    | 194   | >DICER1-E50QKEVLRKF    | 18817 | 18623 |
| >DICER1-E50QEEVLRKFRA  | 465   | >DICER1-E50QKEVLRKFRA  | 28808 | 28343 |
| >DICER1-E50QEEVLRKFRA  | 66    | >DICER1-E50QKEVLRKFRA  | 6028  | 5962  |
| >DICER1-E50KQMEAEFRK   | 20947 | >DICER1-E50KQMEAEFRK   | 232   | 20715 |
| >DICER1-E50KQMEAEFRK   | 21056 | >DICER1-E50KQMEAEFRK   | 52    | 21004 |
| >DICER1-E50KQMEAEFRK   | 13816 | >DICER1-E50KQMEAEFRK   | 139   | 13677 |
| >DICER1-E50KQMEAEFRK   | 9756  | >DICER1-E50KQMEAEFRK   | 237   | 9519  |
| >DICER1-E50KQMEAEFRK   | 11113 | >DICER1-E50KQMEAEFRK   | 203   | 10910 |
| >DICER1-E50KQEEVLRKFR  | 159   | >DICER1-E50KQKEVLRKFR  | 285   | 126   |
| >DICER1-E50KQEEVLRK    | 1137  | >DICER1-E50KQKEVLRK    | 216   | 921   |
| >DICER1-E50KQEEVLRK    | 506   | >DICER1-E50KQKEVLRK    | 433   | 73    |
| >DICER1-E50KQEEVLRK    | 2854  | >DICER1-E50KQKEVLRK    | 13    | 2841  |
| >DICER1-E50KQEEVLRKFR  | 9693  | >DICER1-E50KQKEVLRKFR  | 175   | 9518  |
| >DICER1-E50KQEEVLRKFR  | 12106 | >DICER1-E50KQKEVLRKFR  | 366   | 11740 |
| >DICER1-E50KQEEVLRK    | 3269  | >DICER1-E50KQKEVLRK    | 218   | 3051  |
| >DICER1-E50KQEEVLRKFR  | 73    | >DICER1-E50KQKEVLRKFR  | 11    | 62    |
| >DICER1-E50KQEEVLRKF   | 4362  | >DICER1-E50KQKEVLRKF   | 193   | 4169  |
| >DICER1-E50KQEEVLRKF   | 313   | >DICER1-E50KQKEVLRKF   | 13    | 300   |
| >DICER1-E50KQEEVLRKFR  | 151   | >DICER1-E50KQKEVLRKFR  | 120   | 31    |
| >DICER1-E50RKQEEVLRKF  | 10    | >DICER1-E50RKQKEVLRKF  | 8     | 2     |
| >DICER1-E50RKQEEVLRKF  | 394   | >DICER1-E50RKQKEVLRKF  | 334   | 60    |
| >DICER1-E50RKQEEVLRKF  | 452   | >DICER1-E50RKQKEVLRKF  | 732   | 280   |
| >DICER1-E50RKQEEVLR    | 316   | >DICER1-E50RKQKEVLR    | 191   | 125   |
| >DICER1-E50RKQEEVLRKF  | 212   | >DICER1-E50RKQKEVLRKF  | 117   | 95    |
| >DICER1-E50FRKQEEVL    | 2464  | >DICER1-E50FRKQKEVL    | 213   | 2251  |
| >DICER1-E50FRKQEEVL    | 425   | >DICER1-E50FRKQKEVL    | 714   | 289   |
| >DICER1-E50FRKQEEVLRK  | 69    | >DICER1-E50FRKQKEVLRK  | 120   | 51    |
| >DICER1-E50FRKQEEVLR   | 678   | >DICER1-E50FRKQKEVLR   | 461   | 217   |
| >DICER1-E50FRKQEEVLRK  | 458   | >DICER1-E50FRKQKEVLRK  | 389   | 69    |
| >DICER1-E50FRKQEEVLRK  | 295   | >DICER1-E50FRKQKEVLRK  | 235   | 60    |
| >DICER1-E50EFRKQEEVLR  | 574   | >DICER1-E50EFRKQKEVLR  | 184   | 390   |
| >DICER1-E50EFRKQEEVLR  | 215   | >DICER1-E50EFRKQKEVLR  | 219   | 4     |
| >DICER1-E50EFRKQEEVLR  | 135   | >DICER1-E50EFRKQKEVLR  | 112   | 23    |
| >DICER1-E50AEFRKQEEV   | 114   | >DICER1-E50AEFRKQKEV   | 24    | 90    |

|                        |       |                        |      |       |
|------------------------|-------|------------------------|------|-------|
| >DICER1-E50 AEFRKQEEVL | 663   | >DICER1-E50 AEFRKQKEVL | 181  | 482   |
| >DICER1-E50 AEFRKQEEV  | 398   | >DICER1-E50 AEFRKQKEV  | 2373 | 1975  |
| >DICER1-E50 AEFRKQEEV  | 65    | >DICER1-E50 AEFRKQKEV  | 72   | 7     |
| >DICER1-E50 AEFRKQEEVL | 246   | >DICER1-E50 AEFRKQKEVL | 202  | 44    |
| >DICER1-E50 AEFRKQEEV  | 636   | >DICER1-E50 AEFRKQKEV  | 472  | 164   |
| >DICER1-E50 AEFRKQEEV  | 499   | >DICER1-E50 AEFRKQKEV  | 242  | 257   |
| >DICER1-E50 AEFRKQEEV  | 76    | >DICER1-E50 AEFRKQKEV  | 128  | 52    |
| >DICER1-E50 AEFRKQEEV  | 21    | >DICER1-E50 AEFRKQKEV  | 52   | 31    |
| >DICER1-E50 AEFRKQEEVL | 24    | >DICER1-E50 AEFRKQKEVL | 29   | 5     |
| >DICER1-E50 EAEFRKQE   | 12955 | >DICER1-E50 EAEFRKQK   | 73   | 12882 |
| >DICER1-E50 MEAEFRKQE  | 17    | >DICER1-E50 MEAEFRKQK  | 9    | 8     |
| >DICER1-E50 MEAEFRKQE  | 22186 | >DICER1-E50 MEAEFRKQK  | 309  | 21877 |
| >DICER1-E50 MEAEFRKQE  | 205   | >DICER1-E50 MEAEFRKQK  | 1466 | 1261  |
| >DICER1-E50 MEAEFRKQE  | 540   | >DICER1-E50 MEAEFRKQK  | 422  | 118   |
| >DICER1-E50 MEAEFRKQE  | 301   | >DICER1-E50 MEAEFRKQK  | 280  | 21    |
| >DICER1-E50 MEAEFRKQE  | 320   | >DICER1-E50 MEAEFRKQK  | 1104 | 784   |
| >DICER1-E50 MEAEFRKQE  | 378   | >DICER1-E50 MEAEFRKQK  | 354  | 24    |
| >DICER1-E50 MEAEFRKQE  | 34    | >DICER1-E50 MEAEFRKQK  | 39   | 5     |
| >DICER1-E50 MEAEFRKQE  | 25    | >DICER1-E50 MEAEFRKQK  | 52   | 27    |
| >DICER1-Q84 QIRGDFSRNG | 26    | >DICER1-Q84 EIRGDFSRNG | 918  | 892   |
| >DICER1-Q84 QIRGDFSR   | 260   | >DICER1-Q84 EIRGDFSR   | 1571 | 1311  |
| >DICER1-Q84 QIRGDFSR   | 166   | >DICER1-Q84 EIRGDFSR   | 24   | 142   |
| >DICER1-Q84 QIRGDFSR   | 374   | >DICER1-Q84 EIRGDFSR   | 27   | 347   |
| >DICER1-Q84 QIRGDFSRNG | 1414  | >DICER1-Q84 EIRGDFSRNG | 94   | 1320  |
| >DICER1-Q84 QIRGDFSR   | 316   | >DICER1-Q84 EIRGDFSR   | 515  | 199   |
| >DICER1-Q84 YQIRGDFS   | 54    | >DICER1-Q84 YEIRGDFS   | 7587 | 7533  |
| >DICER1-Q84 YQIRGDFSR  | 96    | >DICER1-Q84 YEIRGDFSR  | 6924 | 6828  |
| >DICER1-Q84 YQIRGDFSR  | 162   | >DICER1-Q84 YEIRGDFSR  | 380  | 218   |
| >DICER1-Q84 YQIRGDFSR  | 459   | >DICER1-Q84 YEIRGDFSR  | 9253 | 8794  |
| >DICER1-Q84 YQIRGDFSR  | 12713 | >DICER1-Q84 YEIRGDFSR  | 288  | 12425 |
| >DICER1-Q84 SYQIRGDF   | 464   | >DICER1-Q84 SYEIRGDF   | 2135 | 1671  |
| >DICER1-Q84 SYQIRGDF   | 263   | >DICER1-Q84 SYEIRGDF   | 1487 | 1224  |
| >DICER1-Q84 SYQIRGDF   | 396   | >DICER1-Q84 SYEIRGDF   | 1460 | 1064  |
| >DICER1-Q84 SYQIRGDF   | 8     | >DICER1-Q84 SYEIRGDF   | 25   | 17    |
| >DICER1-Q84 SYQIRGDFSR | 81    | >DICER1-Q84 SYEIRGDFSR | 487  | 406   |
| >DICER1-Q84 SYQIRGDFSR | 101   | >DICER1-Q84 SYEIRGDFSR | 275  | 174   |
| >DICER1-Q84 SYQIRGDFSR | 136   | >DICER1-Q84 SYEIRGDFSR | 130  | 6     |
| >DICER1-Q84 LSYQIRGDFS | 33    | >DICER1-Q84 LSYEIRGDFS | 25   | 8     |
| >DICER1-Q84 LSYQIRGDFS | 143   | >DICER1-Q84 LSYEIRGDFS | 73   | 70    |
| >DICER1-Q84 LSYQIRGDFS | 14    | >DICER1-Q84 LSYEIRGDFS | 11   | 3     |
| >DICER1-Q84 LSYQIRGDF  | 371   | >DICER1-Q84 LSYEIRGDF  | 682  | 311   |
| >DICER1-Q84 LSYQIRGDF  | 128   | >DICER1-Q84 LSYEIRGDF  | 110  | 18    |
| >DICER1-Q84 LSYQIRGDF  | 15    | >DICER1-Q84 LSYEIRGDF  | 19   | 4     |

|                         |      |                         |      |      |
|-------------------------|------|-------------------------|------|------|
| >DICER1-Q84 LSYQIRGDF   | 46   | >DICER1-Q84 LSYEIRGDF   | 184  | 138  |
| >DICER1-Q84 KELSYQIR    | 289  | >DICER1-Q84 KELSYEIR    | 651  | 362  |
| >DICER1-Q84 KELSYQIRGDI | 116  | >DICER1-Q84 KELSYEIRGDF | 138  | 22   |
| >DICER1-Q84 KELSYQIRGDI | 184  | >DICER1-Q84 KELSYEIRGDF | 270  | 86   |
| >DICER1-Q84 KELSYQIRGDI | 114  | >DICER1-Q84 KELSYEIRGDF | 151  | 37   |
| >DICER1-Q84 KELSYQIRGDI | 39   | >DICER1-Q84 KELSYEIRGDF | 56   | 17   |
| >DICER1-Q84 KELSYQIR    | 79   | >DICER1-Q84 KELSYEIR    | 94   | 15   |
| >DICER1-Q84 LTKELSYQI   | 414  | >DICER1-Q84 LTKELSYEI   | 196  | 218  |
| >DICER1-Q84 LTKELSYQI   | 143  | >DICER1-Q84 LTKELSYEI   | 140  | 3    |
| >DICER1-Q84 LTKELSYQIR  | 310  | >DICER1-Q84 LTKELSYEIR  | 1686 | 1376 |
| >DICER1-Q84 LTKELSYQIR  | 128  | >DICER1-Q84 LTKELSYEIR  | 155  | 27   |
| >DICER1-Q84 LTKELSYQI   | 249  | >DICER1-Q84 LTKELSYEI   | 272  | 23   |
| >DICER1-Q84 LTKELSYQIR  | 87   | >DICER1-Q84 LTKELSYEIR  | 38   | 49   |
| >DICER1-Q84 LTKELSYQI   | 209  | >DICER1-Q84 LTKELSYEI   | 78   | 131  |
| >DICER1-Q84 LTKELSYQI   | 394  | >DICER1-Q84 LTKELSYEI   | 534  | 140  |
| >DICER1-Q84 LTKELSYQI   | 41   | >DICER1-Q84 LTKELSYEI   | 97   | 56   |
| >DICER1-Q84 LTKELSYQI   | 238  | >DICER1-Q84 LTKELSYEI   | 565  | 327  |
| >DICER1-Q84 LTKELSYQI   | 455  | >DICER1-Q84 LTKELSYEI   | 943  | 488  |
| >DICER1-Q84 LTKELSYQI   | 82   | >DICER1-Q84 LTKELSYEI   | 284  | 202  |
| >DICER1-Q84 LLTKELSYQI  | 593  | >DICER1-Q84 LLTKELSYEI  | 234  | 359  |
| >DICER1-Q84 LLTKELSYQ   | 491  | >DICER1-Q84 LLTKELSYE   | 3690 | 3199 |
| >DICER1-Q84 LLTKELSYQI  | 98   | >DICER1-Q84 LLTKELSYEI  | 58   | 40   |
| >DICER1-Q84 LLTKELSYQI  | 404  | >DICER1-Q84 LLTKELSYEI  | 184  | 220  |
| >DICER1-Q84 LLTKELSYQI  | 489  | >DICER1-Q84 LLTKELSYEI  | 271  | 218  |
| >DICER1-Q84 LLTKELSYQI  | 21   | >DICER1-Q84 LLTKELSYEI  | 18   | 3    |
| >DICER1-Q84 LLTKELSYQI  | 21   | >DICER1-Q84 LLTKELSYEI  | 12   | 9    |
| >DICER1-Q84 LLTKELSYQI  | 38   | >DICER1-Q84 LLTKELSYEI  | 31   | 7    |
| >DICER1-Q84 LLTKELSYQI  | 81   | >DICER1-Q84 LLTKELSYEI  | 153  | 72   |
| >DICER1-Q84 LLTKELSYQ   | 43   | >DICER1-Q84 LLTKELSYE   | 3439 | 3396 |
| >DICER1-Q84 LLTKELSYQI  | 7    | >DICER1-Q84 LLTKELSYEI  | 7    | 0    |
| >DICER1-Q84 VLLTKELSYQI | 45   | >DICER1-Q84 VLLTKELSYEI | 25   | 20   |
| >DICER1-Q84 VLLTKELSYQI | 200  | >DICER1-Q84 VLLTKELSYEI | 130  | 70   |
| >DICER1-Q84 VLLTKELSYQI | 412  | >DICER1-Q84 VLLTKELSYEI | 388  | 24   |
| >DICER1-Q84 VLLTKELSYQI | 436  | >DICER1-Q84 VLLTKELSYEI | 246  | 190  |
| >DICER1-Q84 VLLTKELSYQI | 7    | >DICER1-Q84 VLLTKELSYEI | 6    | 1    |
| >DICER1-Q84 VLLTKELSYQI | 17   | >DICER1-Q84 VLLTKELSYEI | 11   | 6    |
| >DICER1-Q84 VLLTKELSYQI | 16   | >DICER1-Q84 VLLTKELSYEI | 14   | 2    |
| >DICER1-Q84 VLLTKELSYQI | 13   | >DICER1-Q84 VLLTKELSYEI | 19   | 6    |
| >DICER1-Q84 VLLTKELSYQ  | 120  | >DICER1-Q84 VLLTKELSYE  | 5883 | 5763 |
| >DICER1-Q84 VLLTKELSYQI | 12   | >DICER1-Q84 VLLTKELSYEI | 12   | 0    |
| >DICER1-Q84 VLLTKELSYQI | 245  | >DICER1-Q84 VLLTKELSYEI | 272  | 27   |
| >DICER1-T80 TAKPIPQI    | 584  | >DICER1-T80 MAKPIPQI    | 34   | 550  |
| >DICER1-T80 TAKPIPQIPH  | 4283 | >DICER1-T80 MAKPIPQIPH  | 426  | 3857 |



|                         |       |                        |      |       |
|-------------------------|-------|------------------------|------|-------|
| >DICER1-T80 TAKPIPQIPH  | 3732  | >DICER1-T80 MAKPIPQIPH | 333  | 3399  |
| >DICER1-T80 TAKPIPQIPH  | 417   | >DICER1-T80 MAKPIPQIPH | 120  | 297   |
| >DICER1-T80 TAKPIPQIPH  | 272   | >DICER1-T80 MAKPIPQIPH | 31   | 241   |
| >DICER1-T80 TAKPIPQI    | 1373  | >DICER1-T80 MAKPIPQI   | 152  | 1221  |
| >DICER1-T80 TAKPIPQIPH  | 35    | >DICER1-T80 MAKPIPQIPH | 8    | 27    |
| >DICER1-T80 TAKPIPQIPH  | 4927  | >DICER1-T80 MAKPIPQIPH | 412  | 4515  |
| >DICER1-T80 TAKPIPQIPH  | 230   | >DICER1-T80 MAKPIPQIPH | 110  | 120   |
| >DICER1-T80 TAKPIPQIPH  | 1617  | >DICER1-T80 MAKPIPQIPH | 86   | 1531  |
| >DICER1-T80 TAKPIPQI    | 164   | >DICER1-T80 MAKPIPQI   | 57   | 107   |
| >DICER1-T80 LTAKPIPQI   | 3039  | >DICER1-T80 LMAKPIPQI  | 48   | 2991  |
| >DICER1-T80 LTAKPIPQI   | 2600  | >DICER1-T80 LMAKPIPQI  | 70   | 2530  |
| >DICER1-T80 LTAKPIPQI   | 1868  | >DICER1-T80 LMAKPIPQI  | 20   | 1848  |
| >DICER1-T80 LTAKPIPQI   | 776   | >DICER1-T80 LMAKPIPQI  | 87   | 689   |
| >DICER1-T80 LTAKPIPQI   | 201   | >DICER1-T80 LMAKPIPQI  | 3    | 198   |
| >DICER1-T80 LTAKPIPQI   | 14445 | >DICER1-T80 LMAKPIPQI  | 99   | 14346 |
| >DICER1-T80 LTAKPIPQI   | 1197  | >DICER1-T80 LMAKPIPQI  | 13   | 1184  |
| >DICER1-T80 LTAKPIPQI   | 7211  | >DICER1-T80 LMAKPIPQI  | 7    | 7204  |
| >DICER1-T80 LTAKPIPQ    | 22547 | >DICER1-T80 LMAKPIPQ   | 254  | 22293 |
| >DICER1-T80 LTAKPIPQI   | 1575  | >DICER1-T80 LMAKPIPQI  | 5    | 1570  |
| >DICER1-T80 LTAKPIPQI   | 243   | >DICER1-T80 LMAKPIPQI  | 7048 | 6805  |
| >DICER1-T80 LTAKPIPQI   | 29    | >DICER1-T80 LMAKPIPQI  | 223  | 194   |
| >DICER1-T80 LTAKPIPQI   | 4054  | >DICER1-T80 LMAKPIPQI  | 250  | 3804  |
| >DICER1-T80 LTAKPIPQI   | 35    | >DICER1-T80 LMAKPIPQI  | 4284 | 4249  |
| >DICER1-T80 LTAKPIPQI   | 236   | >DICER1-T80 LMAKPIPQI  | 1707 | 1471  |
| >DICER1-T80 LTAKPIPQI   | 53    | >DICER1-T80 LMAKPIPQI  | 6122 | 6069  |
| >DICER1-T80 LTAKPIPQI   | 183   | >DICER1-T80 LMAKPIPQI  | 9990 | 9807  |
| >DICER1-T80 LTAKPIPQI   | 9     | >DICER1-T80 LMAKPIPQI  | 140  | 131   |
| >DICER1-T80 ILTAKPIPQI  | 583   | >DICER1-T80 ILMAKPIPQI | 25   | 558   |
| >DICER1-T80 ILTAKPIPQI  | 225   | >DICER1-T80 ILMAKPIPQI | 28   | 197   |
| >DICER1-T80 ILTAKPIPQI  | 125   | >DICER1-T80 ILMAKPIPQI | 22   | 103   |
| >DICER1-T80 ILTAKPIPQI  | 1247  | >DICER1-T80 ILMAKPIPQI | 128  | 1119  |
| >DICER1-T80 ILTAKPIPQI  | 8     | >DICER1-T80 ILMAKPIPQI | 3    | 5     |
| >DICER1-T80 ILTAKPIPQI  | 254   | >DICER1-T80 ILMAKPIPQI | 24   | 230   |
| >DICER1-T80 ILTAKPIPQI  | 33    | >DICER1-T80 ILMAKPIPQI | 25   | 8     |
| >DICER1-T80 ILTAKPIPQI  | 80    | >DICER1-T80 ILMAKPIPQI | 5    | 75    |
| >DICER1-T80 ILTAKPIPQ   | 508   | >DICER1-T80 ILMAKPIPQ  | 436  | 72    |
| >DICER1-T80 ILTAKPIPQI  | 9     | >DICER1-T80 ILMAKPIPQI | 9    | 0     |
| >DICER1-T80 ILTAKPIPQI  | 4425  | >DICER1-T80 ILMAKPIPQI | 324  | 4101  |
| >DICER1-T80 GILTAKPIPQI | 179   | >DICER1-T80 GILMAKPIPQ | 131  | 48    |
| >DICER1-T80 GILTAKPIPQI | 129   | >DICER1-T80 GILMAKPIPQ | 108  | 21    |
| >DICER1-T80 GILTAKPIPQI | 397   | >DICER1-T80 GILMAKPIPQ | 273  | 124   |
| >DICER1-T80 FGILTAKPI   | 520   | >DICER1-T80 FGILMAKPI  | 419  | 101   |
| >DICER1-T80 CFGILTAKPI  | 397   | >DICER1-T80 CFGILMAKPI | 633  | 236   |

|                         |       |                         |       |       |
|-------------------------|-------|-------------------------|-------|-------|
| >DICER1-T80 RCFGILTAK   | 268   | >DICER1-T80 RCFGILMAK   | 112   | 156   |
| >DICER1-T80 RCFGILTAK   | 2601  | >DICER1-T80 RCFGILMAK   | 377   | 2224  |
| >DICER1-T80 RCFGILTAK   | 129   | >DICER1-T80 RCFGILMAK   | 11    | 118   |
| >DICER1-T80 RCFGILTAKPI | 852   | >DICER1-T80 RCFGILMAKP  | 475   | 377   |
| >DICER1-T80 RCFGILTAK   | 235   | >DICER1-T80 RCFGILMAK   | 392   | 157   |
| >DICER1-T80 RCFGILTA    | 204   | >DICER1-T80 RCFGILMA    | 1507  | 1303  |
| >DICER1-T80 RCFGILTAK   | 230   | >DICER1-T80 RCFGILMAK   | 245   | 15    |
| >DICER1-T80 RCFGILTAKPI | 9     | >DICER1-T80 RCFGILMAKP  | 8     | 1     |
| >DICER1-T80 RCFGILTAK   | 335   | >DICER1-T80 RCFGILMAK   | 131   | 204   |
| >DICER1-T80 RCFGILTAKPI | 107   | >DICER1-T80 RCFGILMAKP  | 180   | 73    |
| >DICER1-T80 TRCFGILTAK  | 552   | >DICER1-T80 TRCFGILMAK  | 237   | 315   |
| >DICER1-T80 TRCFGILTAK  | 1146  | >DICER1-T80 TRCFGILMAK  | 235   | 911   |
| >DICER1-T80 TTRCFGILT   | 7092  | >DICER1-T80 TTRCFGILM   | 453   | 6639  |
| >DICER1-T80 TTRCFGILTA  | 293   | >DICER1-T80 TTRCFGILMA  | 800   | 507   |
| >DICER1-T80 TTRCFGILTAK | 150   | >DICER1-T80 TTRCFGILMA  | 90    | 60    |
| >DICER1-T80 TTRCFGILTAK | 79    | >DICER1-T80 TTRCFGILMA  | 32    | 47    |
| >DICER1-T80 TTRCFGILT   | 4253  | >DICER1-T80 TTRCFGILM   | 18    | 4235  |
| >DICER1-T80 TTRCFGILT   | 149   | >DICER1-T80 TTRCFGILM   | 19    | 130   |
| >DICER1-T80 TTRCFGILTA  | 11    | >DICER1-T80 TTRCFGILMA  | 15    | 4     |
| >DICER1-T80 TTRCFGILTAK | 6     | >DICER1-T80 TTRCFGILMA  | 4     | 2     |
| >DICER1-T80 TTRCFGILTAK | 160   | >DICER1-T80 TTRCFGILMA  | 241   | 81    |
| >DICER1-T80 TTRCFGILTAK | 416   | >DICER1-T80 TTRCFGILMA  | 411   | 5     |
| >DICER1-T80 TTRCFGILTAK | 48    | >DICER1-T80 TTRCFGILMA  | 45    | 3     |
| >DICER1-T80 TTRCFGILT   | 7250  | >DICER1-T80 TTRCFGILM   | 39    | 7211  |
| >DICER1-T80 TTRCFGILT   | 5336  | >DICER1-T80 TTRCFGILM   | 173   | 5163  |
| >DICER1-T80 TTRCFGILT   | 229   | >DICER1-T80 TTRCFGILM   | 5     | 224   |
| >DICER1-T80 TTRCFGILTAK | 642   | >DICER1-T80 TTRCFGILMA  | 358   | 284   |
| >DICER1-T80 DTTRCFGILT  | 15716 | >DICER1-T80 DTTRCFGILM  | 170   | 15546 |
| >DICER1-T80 DTTRCFGILT  | 16155 | >DICER1-T80 DTTRCFGILM  | 199   | 15956 |
| >DICER1-T80 DTTRCFGILT/ | 422   | >DICER1-T80 DTTRCFGILM  | 412   | 10    |
| >DICER1-T80 DTTRCFGILT  | 5154  | >DICER1-T80 DTTRCFGILM  | 38    | 5116  |
| >DNMT3A-A: AIYEV LQV    | 17    | >DNMT3A-A: DIYEV LQV    | 2688  | 2671  |
| >DNMT3A-A: AIYEV LQVA   | 182   | >DNMT3A-A: DIYEV LQVA   | 13829 | 13647 |
| >DNMT3A-A: AIYEV LQV    | 25    | >DNMT3A-A: DIYEV LQV    | 1182  | 1157  |
| >DNMT3A-A: AIYEV LQVA   | 268   | >DNMT3A-A: DIYEV LQVA   | 6041  | 5773  |
| >DNMT3A-A: AIYEV LQV    | 5     | >DNMT3A-A: DIYEV LQV    | 193   | 188   |
| >DNMT3A-A: AIYEV LQVA   | 15    | >DNMT3A-A: DIYEV LQVA   | 1528  | 1513  |
| >DNMT3A-A: AIYEV LQVAS! | 217   | >DNMT3A-A: DIYEV LQVAS! | 8281  | 8064  |
| >DNMT3A-A: AIYEV LQV    | 8     | >DNMT3A-A: DIYEV LQV    | 331   | 323   |
| >DNMT3A-A: AIYEV LQVA   | 18    | >DNMT3A-A: DIYEV LQVA   | 2515  | 2497  |
| >DNMT3A-A: AIYEV LQVAS! | 435   | >DNMT3A-A: DIYEV LQVAS! | 11474 | 11039 |
| >DNMT3A-A: AIYEV LQV    | 2     | >DNMT3A-A: DIYEV LQV    | 8     | 6     |
| >DNMT3A-A: AIYEV LQVA   | 6     | >DNMT3A-A: DIYEV LQVA   | 184   | 178   |

|                         |       |                         |       |       |
|-------------------------|-------|-------------------------|-------|-------|
| >DNMT3A-A: AIYEV LQVAS  | 294   | >DNMT3A-A: DIYEV LQVAS  | 6156  | 5862  |
| >DNMT3A-A: AIYEV LQVAS! | 162   | >DNMT3A-A: DIYEV LQVAS! | 4643  | 4481  |
| >DNMT3A-A: AIYEV LQV    | 26    | >DNMT3A-A: DIYEV LQV    | 1223  | 1197  |
| >DNMT3A-A: AIYEV LQVA   | 358   | >DNMT3A-A: DIYEV LQVA   | 7133  | 6775  |
| >DNMT3A-A: AIYEV LQV    | 5     | >DNMT3A-A: DIYEV LQV    | 22    | 17    |
| >DNMT3A-A: AIYEV LQVA   | 39    | >DNMT3A-A: DIYEV LQVA   | 1051  | 1012  |
| >DNMT3A-A: AIYEV LQV    | 20    | >DNMT3A-A: DIYEV LQV    | 102   | 82    |
| >DNMT3A-A: AIYEV LQV    | 2     | >DNMT3A-A: DIYEV LQV    | 17    | 15    |
| >DNMT3A-A: AIYEV LQVA   | 18    | >DNMT3A-A: DIYEV LQVA   | 3532  | 3514  |
| >DNMT3A-A: AIYEV LQV    | 943   | >DNMT3A-A: DIYEV LQV    | 121   | 822   |
| >DNMT3A-A: AIYEV LQV    | 42    | >DNMT3A-A: DIYEV LQV    | 7     | 35    |
| >DNMT3A-A: AIYEV LQVA   | 3874  | >DNMT3A-A: DIYEV LQVA   | 288   | 3586  |
| >DNMT3A-A: KAIYEV LQV   | 381   | >DNMT3A-A: KDIYEV LQV   | 16771 | 16390 |
| >DNMT3A-A: KAIYEV LQV   | 241   | >DNMT3A-A: KDIYEV LQV   | 6240  | 5999  |
| >DNMT3A-A: KAIYEV LQV   | 76    | >DNMT3A-A: KDIYEV LQV   | 6228  | 6152  |
| >DNMT3A-A: KAIYEV LQV   | 116   | >DNMT3A-A: KDIYEV LQV   | 20776 | 20660 |
| >DNMT3A-A: KAIYEV LQV   | 298   | >DNMT3A-A: KDIYEV LQV   | 21175 | 20877 |
| >DNMT3A-A: KAIYEV LQV   | 9355  | >DNMT3A-A: KDIYEV LQV   | 132   | 9223  |
| >DNMT3A-A: KAIYEV LQV   | 30906 | >DNMT3A-A: KDIYEV LQV   | 163   | 30743 |
| >DNMT3A-A: RKAIYEV L    | 26    | >DNMT3A-A: RKDIYEV L    | 747   | 721   |
| >DNMT3A-A: RKAIYEV LQV  | 85    | >DNMT3A-A: RKDIYEV LQV  | 1871  | 1786  |
| >DNMT3A-A: RKAIYEV LQV, | 266   | >DNMT3A-A: RKDIYEV LQV, | 5147  | 4881  |
| >DNMT3A-A: YRKAIYEV     | 1621  | >DNMT3A-A: YRKDIYEV     | 279   | 1342  |
| >DNMT3A-A: YRKAIYEV     | 346   | >DNMT3A-A: YRKDIYEV     | 679   | 333   |
| >DNMT3A-A: YRKAIYEV L   | 156   | >DNMT3A-A: YRKDIYEV L   | 286   | 130   |
| >DNMT3A-A: YRKAIYEV LQ\ | 356   | >DNMT3A-A: YRKDIYEV LQ\ | 652   | 296   |
| >DNMT3A-A: YRKAIYEV     | 150   | >DNMT3A-A: YRKDIYEV     | 330   | 180   |
| >DNMT3A-A: YRKAIYEV L   | 117   | >DNMT3A-A: YRKDIYEV L   | 256   | 139   |
| >DNMT3A-A: YRKAIYEV LQ\ | 199   | >DNMT3A-A: YRKDIYEV LQ\ | 386   | 187   |
| >DNMT3A-A: YRKAIYEV L   | 228   | >DNMT3A-A: YRKDIYEV L   | 511   | 283   |
| >DNMT3A-A: YRKAIYEV L   | 203   | >DNMT3A-A: YRKDIYEV L   | 544   | 341   |
| >DNMT3A-A: YRKAIYEV L   | 203   | >DNMT3A-A: YRKDIYEV L   | 335   | 132   |
| >DNMT3A-A: MYRKAIYEV    | 207   | >DNMT3A-A: MYRKDIYEV    | 194   | 13    |
| >DNMT3A-A: MYRKAIYEV    | 133   | >DNMT3A-A: MYRKDIYEV    | 348   | 215   |
| >DNMT3A-A: MYRKAIYEV L  | 327   | >DNMT3A-A: MYRKDIYEV L  | 680   | 353   |
| >DNMT3A-A: MYRKAIYEV L  | 379   | >DNMT3A-A: MYRKDIYEV L  | 654   | 275   |
| >DNMT3A-A: MYRKAIYEV    | 29    | >DNMT3A-A: MYRKDIYEV    | 76    | 47    |
| >DNMT3A-A: MYRKAIYEV L  | 6     | >DNMT3A-A: MYRKDIYEV L  | 8     | 2     |
| >DNMT3A-A: MYRKAIYE     | 63    | >DNMT3A-A: MYRKDIYE     | 523   | 460   |
| >DNMT3A-A: MYRKAIYEV    | 7     | >DNMT3A-A: MYRKDIYEV    | 60    | 53    |
| >DNMT3A-A: MYRKAIYEV L  | 29    | >DNMT3A-A: MYRKDIYEV L  | 205   | 176   |
| >DNMT3A-A: MYRKAIYEV L  | 41    | >DNMT3A-A: MYRKDIYEV L  | 272   | 231   |
| >DNMT3A-A: MYRKAIYEV    | 417   | >DNMT3A-A: MYRKDIYEV    | 580   | 163   |

|                       |       |                       |      |       |
|-----------------------|-------|-----------------------|------|-------|
| >DNMT3A-A:PMYRKAIYEV  | 183   | >DNMT3A-A:PMYRKDIYEV  | 207  | 24    |
| >DNMT3A-A:PMYRKAIYEV  | 442   | >DNMT3A-A:PMYRKDIYEV  | 602  | 160   |
| >DNMT3A-A:PMYRKAIYEV  | 466   | >DNMT3A-A:PMYRKDIYEV  | 658  | 192   |
| >DNMT3A-A:PMYRKAIYEV  | 140   | >DNMT3A-A:PMYRKDIYEV  | 212  | 72    |
| >DNMT3A-A:PMYRKAIYEV  | 3     | >DNMT3A-A:PMYRKDIYEV  | 4    | 1     |
| >DNMT3A-A:PMYRKAIYEV  | 44    | >DNMT3A-A:PMYRKDIYEV  | 60   | 16    |
| >DNMT3A-A:PMYRKAIYEV  | 18    | >DNMT3A-A:PMYRKDIYEV  | 18   | 0     |
| >DNMT3A-A:PMYRKAIYEV  | 9     | >DNMT3A-A:PMYRKDIYEV  | 9    | 0     |
| >DNMT3A-A:PMYRKAIYEV  | 319   | >DNMT3A-A:PMYRKDIYEV  | 265  | 54    |
| >DNMT3A-A:PMYRKAIYEV  | 12    | >DNMT3A-A:PMYRKDIYEV  | 31   | 19    |
| >DNMT3A-A:PMYRKAIYEV  | 6     | >DNMT3A-A:PMYRKDIYEV  | 7    | 1     |
| >DNMT3A-A:PMYRKAIYEV  | 71    | >DNMT3A-A:PMYRKDIYEV  | 71   | 0     |
| >DNMT3A-A:PMYRKAIY    | 109   | >DNMT3A-A:PMYRKDIY    | 302  | 193   |
| >DNMT3A-A:PMYRKAIY    | 279   | >DNMT3A-A:PMYRKDIY    | 565  | 286   |
| >DNMT3A-A:PMYRKAIY    | 414   | >DNMT3A-A:PMYRKDIY    | 492  | 78    |
| >DNMT3A-A:PMYRKAIY    | 118   | >DNMT3A-A:PMYRKDIY    | 458  | 340   |
| >DNMT3A-A:QPMYRKAIYE  | 220   | >DNMT3A-A:QPMYRKDIYE  | 422  | 202   |
| >DNMT3A-A:QPMYRKAIYE  | 490   | >DNMT3A-A:QPMYRKDIYE  | 784  | 294   |
| >DNMT3A-A:QPMYRKAI    | 26    | >DNMT3A-A:QPMYRKDI    | 330  | 304   |
| >DNMT3A-A:QPMYRKAIYE  | 166   | >DNMT3A-A:QPMYRKDIYE  | 429  | 263   |
| >DNMT3A-A:QPMYRKAI    | 33    | >DNMT3A-A:QPMYRKDI    | 134  | 101   |
| >DNMT3A-A:QPMYRKAIYE  | 164   | >DNMT3A-A:QPMYRKDIYE  | 337  | 173   |
| >DNMT3A-A:QPMYRKAIY   | 154   | >DNMT3A-A:QPMYRKDIY   | 170  | 16    |
| >DNMT3A-A:QPMYRKAIY   | 263   | >DNMT3A-A:QPMYRKDIY   | 490  | 227   |
| >DNMT3A-A:QPMYRKAIYE  | 363   | >DNMT3A-A:QPMYRKDIYE  | 563  | 200   |
| >DNMT3A-A:QPMYRKAIY   | 307   | >DNMT3A-A:QPMYRKDIY   | 1724 | 1417  |
| >DNMT3A-A:KQPMYRKAI   | 186   | >DNMT3A-A:KQPMYRKDI   | 181  | 5     |
| >DNMT3A-A:KQPMYRKAIY  | 118   | >DNMT3A-A:KQPMYRKDIY  | 715  | 597   |
| >DNMT3A-A:KQPMYRKAIY  | 236   | >DNMT3A-A:KQPMYRKDIY  | 935  | 699   |
| >DNMT3A-A:KQPMYRKAI   | 56    | >DNMT3A-A:KQPMYRKDI   | 287  | 231   |
| >DNMT3A-A:KQPMYRKAIY  | 24    | >DNMT3A-A:KQPMYRKDIY  | 82   | 58    |
| >DNMT3A-A:NKQPMYRKA   | 215   | >DNMT3A-A:NKQPMYRKD   | 198  | 17    |
| >DNMT3A-A:NKQPMYRKA   | 261   | >DNMT3A-A:NKQPMYRKD   | 624  | 363   |
| >DNMT3A-A:ARPKEGDDRI  | 233   | >DNMT3A-A:VRPKEGDDRI  | 351  | 118   |
| >DNMT3A-A:FFEFYRLLHDV | 13696 | >DNMT3A-A:FFEFYRLLHDV | 376  | 13320 |
| >DNMT3A-A:LLHDARPK    | 234   | >DNMT3A-A:LLHDVRPK    | 152  | 82    |
| >DNMT3A-A:LLHDARPK    | 738   | >DNMT3A-A:LLHDVRPK    | 334  | 404   |
| >DNMT3A-A:LLHDARPK    | 31    | >DNMT3A-A:LLHDVRPK    | 45   | 14    |
| >DNMT3A-A:RLLHDARPK   | 67    | >DNMT3A-A:RLLHDVRPK   | 63   | 4     |
| >DNMT3A-A:RLLHDARPK   | 587   | >DNMT3A-A:RLLHDVRPK   | 330  | 257   |
| >DNMT3A-A:RLLHDARPK   | 59    | >DNMT3A-A:RLLHDVRPK   | 42   | 17    |
| >DNMT3A-A:YRLLHDAR    | 194   | >DNMT3A-A:YRLLHDVR    | 179  | 15    |
| >DNMT3A-A:FYRLLHDARP  | 48    | >DNMT3A-A:FYRLLHDVRP  | 44   | 4     |

|                        |      |                        |       |      |
|------------------------|------|------------------------|-------|------|
| >DNMT3A-A: FYRLLHDAR   | 224  | >DNMT3A-A: FYRLLHDVR   | 396   | 172  |
| >DNMT3A-A: FYRLLHDAR   | 17   | >DNMT3A-A: FYRLLHDVR   | 39    | 22   |
| >DNMT3A-A: FYRLLHDAR   | 132  | >DNMT3A-A: FYRLLHDVR   | 104   | 28   |
| >DNMT3A-A: EFYRLLHDAR  | 116  | >DNMT3A-A: EFYRLLHDVR  | 262   | 146  |
| >DNMT3A-A: EFYRLLHDAR  | 34   | >DNMT3A-A: EFYRLLHDVR  | 80    | 46   |
| >DNMT3A-A: EFYRLLHDAR  | 201  | >DNMT3A-A: EFYRLLHDVR  | 355   | 154  |
| >DNMT3A-A: EFYRLLHDAR  | 76   | >DNMT3A-A: EFYRLLHDVR  | 64    | 12   |
| >DNMT3A-A: EFYRLLHDA   | 2362 | >DNMT3A-A: EFYRLLHDV   | 398   | 1964 |
| >DNMT3A-A: FEFYRLLHDA  | 87   | >DNMT3A-A: FEFYRLLHDV  | 9     | 78   |
| >DNMT3A-A: FEFYRLLHDA  | 2780 | >DNMT3A-A: FEFYRLLHDV  | 484   | 2296 |
| >DNMT3A-A: FEFYRLLHDAI | 210  | >DNMT3A-A: FEFYRLLHDVI | 214   | 4    |
| >DNMT3A-A: FEFYRLLHDA  | 956  | >DNMT3A-A: FEFYRLLHDV  | 419   | 537  |
| >DNMT3A-A: FEFYRLLHDA  | 70   | >DNMT3A-A: FEFYRLLHDV  | 40    | 30   |
| >DNMT3A-A: FEFYRLLHDA  | 158  | >DNMT3A-A: FEFYRLLHDV  | 535   | 377  |
| >DNMT3A-A: FEFYRLLHDA  | 324  | >DNMT3A-A: FEFYRLLHDV  | 17    | 307  |
| >DNMT3A-A: HLFAPLKEYF/ | 57   | >DNMT3A-A: HLFAPLKEYF/ | 344   | 287  |
| >DNMT3A-A: HLFAPLKEYF/ | 17   | >DNMT3A-A: HLFAPLKEYF/ | 86    | 69   |
| >DNMT3A-A: HLFAPLKEYF/ | 84   | >DNMT3A-A: HLFAPLKEYF/ | 945   | 861  |
| >DNMT3A-A: HLFAPLKEYF/ | 321  | >DNMT3A-A: HLFAPLKEYF/ | 1526  | 1205 |
| >DNMT3A-A: HLFAPLKEYF/ | 14   | >DNMT3A-A: HLFAPLKEYF/ | 74    | 60   |
| >DNMT3A-A: HLFAPLKEYF/ | 58   | >DNMT3A-A: HLFAPLKEYF/ | 697   | 639  |
| >DNMT3A-A: HLFAPLKEYF/ | 60   | >DNMT3A-A: HLFAPLKEYF/ | 569   | 509  |
| >DNMT3A-A: HLFAPLKEYF/ | 29   | >DNMT3A-A: HLFAPLKEYF/ | 198   | 169  |
| >DNMT3A-A: HLFAPLKEYF/ | 124  | >DNMT3A-A: HLFAPLKEYF/ | 1458  | 1334 |
| >DNMT3A-A: LKEYFACV    | 661  | >DNMT3A-A: LKEYFTCV    | 398   | 263  |
| >DNMT3A-A: PLKEYFACV   | 218  | >DNMT3A-A: PLKEYFTCV   | 235   | 17   |
| >DNMT3A-A: PLKEYFACV   | 95   | >DNMT3A-A: PLKEYFTCV   | 80    | 15   |
| >DNMT3A-A: PLKEYFACV   | 70   | >DNMT3A-A: PLKEYFTCV   | 194   | 124  |
| >DNMT3A-A: PLKEYFACV   | 180  | >DNMT3A-A: PLKEYFTCV   | 733   | 553  |
| >DNMT3A-A: PLKEYFACV   | 328  | >DNMT3A-A: PLKEYFTCV   | 314   | 14   |
| >DNMT3A-A: PLKEYFACV   | 143  | >DNMT3A-A: PLKEYFTCV   | 718   | 575  |
| >DNMT3A-A: PLKEYFACV   | 10   | >DNMT3A-A: PLKEYFTCV   | 11    | 1    |
| >DNMT3A-A: PLKEYFACV   | 160  | >DNMT3A-A: PLKEYFTCV   | 217   | 57   |
| >DNMT3A-A: FAPLKEYFAC\ | 282  | >DNMT3A-A: FAPLKEYFTC\ | 326   | 44   |
| >DNMT3A-A: FAPLKEYFAC\ | 78   | >DNMT3A-A: FAPLKEYFTC\ | 81    | 3    |
| >DNMT3A-A: FAPLKEYFAC\ | 194  | >DNMT3A-A: FAPLKEYFTC\ | 247   | 53   |
| >DNMT3A-A: FAPLKEYFA   | 496  | >DNMT3A-A: FAPLKEYFT   | 4912  | 4416 |
| >DNMT3A-A: FAPLKEYFAC\ | 96   | >DNMT3A-A: FAPLKEYFTC\ | 158   | 62   |
| >DNMT3A-A: FAPLKEYFA   | 459  | >DNMT3A-A: FAPLKEYFT   | 10167 | 9708 |
| >DNMT3A-A: FAPLKEYFAC\ | 118  | >DNMT3A-A: FAPLKEYFTC\ | 232   | 114  |
| >DNMT3A-A: LFAPLKEYFA  | 278  | >DNMT3A-A: LFAPLKEYFT  | 1749  | 1471 |
| >DNMT3A-E: EQEPRGKEE   | 845  | >DNMT3A-E: EQAEPGKEE   | 135   | 710  |
| >DNMT3A-E: KDGEEQEPF   | 662  | >DNMT3A-E: KDGEEQAEPF  | 343   | 319  |

|                                    |       |                                    |       |       |
|------------------------------------|-------|------------------------------------|-------|-------|
| >DNMT3A-F <sup>Δ</sup> FQPSGPKGL   | 162   | >DNMT3A-F <sup>Δ</sup> SQPSGPKGL   | 2312  | 2150  |
| >DNMT3A-F <sup>Δ</sup> FQPSGPKGL   | 184   | >DNMT3A-F <sup>Δ</sup> SQPSGPKGL   | 2684  | 2500  |
| >DNMT3A-F <sup>Δ</sup> FQPSGPKGL   | 217   | >DNMT3A-F <sup>Δ</sup> SQPSGPKGL   | 800   | 583   |
| >DNMT3A-F <sup>Δ</sup> GFQPSGPK    | 792   | >DNMT3A-F <sup>Δ</sup> GSQPSGPK    | 22    | 770   |
| >DNMT3A-F <sup>Δ</sup> GFQPSGPK    | 715   | >DNMT3A-F <sup>Δ</sup> GSQPSGPK    | 199   | 516   |
| >DNMT3A-F <sup>Δ</sup> GFQPSGPKGI  | 21681 | >DNMT3A-F <sup>Δ</sup> GSQPSGPKGI  | 17    | 21664 |
| >DNMT3A-F <sup>Δ</sup> GFQPSGPKGI  | 16557 | >DNMT3A-F <sup>Δ</sup> GSQPSGPKGI  | 321   | 16236 |
| >DNMT3A-F <sup>Δ</sup> GFQPSGPK    | 5180  | >DNMT3A-F <sup>Δ</sup> GSQPSGPK    | 408   | 4772  |
| >DNMT3A-F <sup>Δ</sup> KPMIEWALG   | 129   | >DNMT3A-F <sup>Δ</sup> KPMIEWALG   | 11773 | 11644 |
| >DNMT3A-F <sup>Δ</sup> KPMIEWALG   | 264   | >DNMT3A-F <sup>Δ</sup> KPMIEWALG   | 9580  | 9316  |
| >DNMT3A-F <sup>Δ</sup> GGFQPSGPK   | 446   | >DNMT3A-F <sup>Δ</sup> GGSQPSGPK   | 2454  | 2008  |
| >DNMT3A-F <sup>Δ</sup> ALGGFQPS    | 173   | >DNMT3A-F <sup>Δ</sup> ALGGSQPS    | 221   | 48    |
| >DNMT3A-F <sup>Δ</sup> ALGGFQPSG   | 292   | >DNMT3A-F <sup>Δ</sup> ALGGSQPSG   | 345   | 53    |
| >DNMT3A-F <sup>Δ</sup> ALGGFQPSGI  | 71    | >DNMT3A-F <sup>Δ</sup> ALGGSQPSGI  | 64    | 7     |
| >DNMT3A-F <sup>Δ</sup> ALGGFQPSGI  | 95    | >DNMT3A-F <sup>Δ</sup> ALGGSQPSGI  | 158   | 63    |
| >DNMT3A-F <sup>Δ</sup> WALGGFQPS   | 392   | >DNMT3A-F <sup>Δ</sup> WALGGSQPS   | 3592  | 3200  |
| >DNMT3A-F <sup>Δ</sup> WALGGFQPS   | 772   | >DNMT3A-F <sup>Δ</sup> WALGGSQPS   | 236   | 536   |
| >DNMT3A-F <sup>Δ</sup> EWALGGFQ    | 301   | >DNMT3A-F <sup>Δ</sup> EWALGGSQ    | 821   | 520   |
| >DNMT3A-F <sup>Δ</sup> IEWALGGF    | 227   | >DNMT3A-F <sup>Δ</sup> IEWALGGS    | 16978 | 16751 |
| >DNMT3A-F <sup>Δ</sup> IEWALGGF    | 16    | >DNMT3A-F <sup>Δ</sup> IEWALGGS    | 1650  | 1634  |
| >DNMT3A-F <sup>Δ</sup> IEWALGGFQ   | 755   | >DNMT3A-F <sup>Δ</sup> IEWALGGSQ   | 230   | 525   |
| >DNMT3A-F <sup>Δ</sup> IEWALGGFQI  | 143   | >DNMT3A-F <sup>Δ</sup> IEWALGGSQI  | 194   | 51    |
| >DNMT3A-F <sup>Δ</sup> IEWALGGF    | 320   | >DNMT3A-F <sup>Δ</sup> IEWALGGS    | 10741 | 10421 |
| >DNMT3A-F <sup>Δ</sup> IEWALGGFQI  | 278   | >DNMT3A-F <sup>Δ</sup> IEWALGGSQI  | 914   | 636   |
| >DNMT3A-F <sup>Δ</sup> IEWALGGFQI  | 475   | >DNMT3A-F <sup>Δ</sup> IEWALGGSQI  | 784   | 309   |
| >DNMT3A-F <sup>Δ</sup> IEWALGGF    | 438   | >DNMT3A-F <sup>Δ</sup> IEWALGGS    | 9969  | 9531  |
| >DNMT3A-F <sup>Δ</sup> IEWALGGF    | 226   | >DNMT3A-F <sup>Δ</sup> IEWALGGS    | 8680  | 8454  |
| >DNMT3A-F <sup>Δ</sup> MIEWALGGF   | 377   | >DNMT3A-F <sup>Δ</sup> MIEWALGGS   | 15513 | 15136 |
| >DNMT3A-F <sup>Δ</sup> PMIEWALGG   | 218   | >DNMT3A-F <sup>Δ</sup> PMIEWALGG   | 18562 | 18344 |
| >DNMT3A-F <sup>Δ</sup> RHLFAPLKEYI | 355   | >DNMT3A-F <sup>Δ</sup> RHLFAPLKEYI | 29012 | 28657 |
| >DNMT3A-F <sup>Δ</sup> RHLFAPLKEYI | 147   | >DNMT3A-F <sup>Δ</sup> RHLFAPLKEYI | 16664 | 16517 |
| >DNMT3A-F <sup>Δ</sup> RHLFAPLKEYI | 37    | >DNMT3A-F <sup>Δ</sup> RHLFAPLKEYI | 13150 | 13113 |
| >DNMT3A-F <sup>Δ</sup> PLKEYFACV   | 218   | >DNMT3A-F <sup>Δ</sup> PLKEYCACV   | 399   | 181   |
| >DNMT3A-F <sup>Δ</sup> PLKEYFACV   | 95    | >DNMT3A-F <sup>Δ</sup> PLKEYCACV   | 210   | 115   |
| >DNMT3A-F <sup>Δ</sup> PLKEYFACV   | 70    | >DNMT3A-F <sup>Δ</sup> PLKEYCACV   | 365   | 295   |
| >DNMT3A-F <sup>Δ</sup> PLKEYFACV   | 180   | >DNMT3A-F <sup>Δ</sup> PLKEYCACV   | 868   | 688   |
| >DNMT3A-F <sup>Δ</sup> PLKEYFACV   | 328   | >DNMT3A-F <sup>Δ</sup> PLKEYCACV   | 979   | 651   |
| >DNMT3A-F <sup>Δ</sup> PLKEYFACV   | 143   | >DNMT3A-F <sup>Δ</sup> PLKEYCACV   | 279   | 136   |
| >DNMT3A-F <sup>Δ</sup> PLKEYFACV   | 10    | >DNMT3A-F <sup>Δ</sup> PLKEYCACV   | 14    | 4     |
| >DNMT3A-F <sup>Δ</sup> PLKEYFACV   | 160   | >DNMT3A-F <sup>Δ</sup> PLKEYCACV   | 1531  | 1371  |
| >DNMT3A-F <sup>Δ</sup> FAPLKEYFACV | 282   | >DNMT3A-F <sup>Δ</sup> FAPLKEYCACV | 578   | 296   |
| >DNMT3A-F <sup>Δ</sup> FAPLKEYFACV | 78    | >DNMT3A-F <sup>Δ</sup> FAPLKEYCACV | 356   | 278   |
| >DNMT3A-F <sup>Δ</sup> FAPLKEYFACV | 194   | >DNMT3A-F <sup>Δ</sup> FAPLKEYCACV | 308   | 114   |

|                                                |      |                                                |       |       |
|------------------------------------------------|------|------------------------------------------------|-------|-------|
| >DNMT3A-F <sup>9</sup> FAPLKEYFA               | 496  | >DNMT3A-F <sup>9</sup> FAPLKEYCA               | 4970  | 4474  |
| >DNMT3A-F <sup>9</sup> FAPLKEYFAC <sup>1</sup> | 96   | >DNMT3A-F <sup>9</sup> FAPLKEYCAC <sup>1</sup> | 276   | 180   |
| >DNMT3A-F <sup>9</sup> FAPLKEYFA               | 459  | >DNMT3A-F <sup>9</sup> FAPLKEYCA               | 743   | 284   |
| >DNMT3A-F <sup>9</sup> FAPLKEYF                | 455  | >DNMT3A-F <sup>9</sup> FAPLKEYC                | 6292  | 5837  |
| >DNMT3A-F <sup>9</sup> FAPLKEYFAC <sup>1</sup> | 118  | >DNMT3A-F <sup>9</sup> FAPLKEYCAC <sup>1</sup> | 533   | 415   |
| >DNMT3A-F <sup>9</sup> LFAPLKEYF               | 202  | >DNMT3A-F <sup>9</sup> LFAPLKEYC               | 29628 | 29426 |
| >DNMT3A-F <sup>9</sup> LFAPLKEYF               | 9    | >DNMT3A-F <sup>9</sup> LFAPLKEYC               | 9901  | 9892  |
| >DNMT3A-F <sup>9</sup> LFAPLKEYF               | 242  | >DNMT3A-F <sup>9</sup> LFAPLKEYC               | 12976 | 12734 |
| >DNMT3A-F <sup>9</sup> LFAPLKEYF               | 498  | >DNMT3A-F <sup>9</sup> LFAPLKEYC               | 288   | 210   |
| >DNMT3A-F <sup>9</sup> LFAPLKEYFA              | 278  | >DNMT3A-F <sup>9</sup> LFAPLKEYCA              | 1615  | 1337  |
| >DNMT3A-F <sup>9</sup> HLFAPLKEYFA             | 57   | >DNMT3A-F <sup>9</sup> HLFAPLKEYCA             | 174   | 117   |
| >DNMT3A-F <sup>9</sup> HLFAPLKEYFA             | 17   | >DNMT3A-F <sup>9</sup> HLFAPLKEYCA             | 78    | 61    |
| >DNMT3A-F <sup>9</sup> HLFAPLKEYFA             | 84   | >DNMT3A-F <sup>9</sup> HLFAPLKEYCA             | 545   | 461   |
| >DNMT3A-F <sup>9</sup> HLFAPLKEYFA             | 321  | >DNMT3A-F <sup>9</sup> HLFAPLKEYCA             | 1739  | 1418  |
| >DNMT3A-F <sup>9</sup> HLFAPLKEYF              | 144  | >DNMT3A-F <sup>9</sup> HLFAPLKEYC              | 18    | 126   |
| >DNMT3A-F <sup>9</sup> HLFAPLKEYFA             | 14   | >DNMT3A-F <sup>9</sup> HLFAPLKEYCA             | 67    | 53    |
| >DNMT3A-F <sup>9</sup> HLFAPLKEYFA             | 58   | >DNMT3A-F <sup>9</sup> HLFAPLKEYCA             | 124   | 66    |
| >DNMT3A-F <sup>9</sup> HLFAPLKEYFA             | 60   | >DNMT3A-F <sup>9</sup> HLFAPLKEYCA             | 167   | 107   |
| >DNMT3A-F <sup>9</sup> HLFAPLKEYF              | 2554 | >DNMT3A-F <sup>9</sup> HLFAPLKEYC              | 76    | 2478  |
| >DNMT3A-F <sup>9</sup> HLFAPLKEYFA             | 29   | >DNMT3A-F <sup>9</sup> HLFAPLKEYCA             | 64    | 35    |
| >DNMT3A-F <sup>9</sup> HLFAPLKEYF              | 385  | >DNMT3A-F <sup>9</sup> HLFAPLKEYC              | 14621 | 14236 |
| >DNMT3A-F <sup>9</sup> HLFAPLKEYFA             | 124  | >DNMT3A-F <sup>9</sup> HLFAPLKEYCA             | 791   | 667   |
| >DNMT3A-F <sup>9</sup> HLFAPLKEYF              | 94   | >DNMT3A-F <sup>9</sup> HLFAPLKEYC              | 16022 | 15928 |
| >DNMT3A-F <sup>9</sup> HLFAPLKEYF              | 50   | >DNMT3A-F <sup>9</sup> HLFAPLKEYC              | 7960  | 7910  |
| >DNMT3A-F <sup>9</sup> HLFAPLKEYF              | 22   | >DNMT3A-F <sup>9</sup> HLFAPLKEYC              | 8672  | 8650  |
| >DNMT3A-F <sup>9</sup> HLFAPLKEYF              | 460  | >DNMT3A-F <sup>9</sup> HLFAPLKEYC              | 23584 | 23124 |
| >DNMT3A-K <sup>4</sup> RKSTAEPKV               | 218  | >DNMT3A-K <sup>4</sup> RKSTAEPKV               | 163   | 55    |
| >DNMT3A-K <sup>4</sup> KVKEIIDER               | 841  | >DNMT3A-K <sup>4</sup> KVREIIDER               | 109   | 732   |
| >DNMT3A-K <sup>4</sup> KVKEIIDERTR             | 377  | >DNMT3A-K <sup>4</sup> KVREIIDERTR             | 57    | 320   |
| >DNMT3A-K <sup>4</sup> KVKEIIDER               | 18   | >DNMT3A-K <sup>4</sup> KVREIIDER               | 24    | 6     |
| >DNMT3A-K <sup>4</sup> KVKEIIDERTR             | 31   | >DNMT3A-K <sup>4</sup> KVREIIDERTR             | 47    | 16    |
| >DNMT3A-K <sup>4</sup> KVKEIIDER               | 118  | >DNMT3A-K <sup>4</sup> KVREIIDER               | 374   | 256   |
| >DNMT3A-K <sup>4</sup> KVKEIIDER               | 222  | >DNMT3A-K <sup>4</sup> KVREIIDER               | 313   | 91    |
| >DNMT3A-K <sup>4</sup> KVKEIIDERTR             | 426  | >DNMT3A-K <sup>4</sup> KVREIIDERTR             | 582   | 156   |
| >DNMT3A-K <sup>4</sup> KPKVKEII                | 1788 | >DNMT3A-K <sup>4</sup> KPKVREII                | 433   | 1355  |
| >DNMT3A-K <sup>4</sup> AEKPKVKEI               | 12   | >DNMT3A-K <sup>4</sup> AEKPKVREI               | 30    | 18    |
| >DNMT3A-K <sup>4</sup> AEKPKVKEII              | 30   | >DNMT3A-K <sup>4</sup> AEKPKVREII              | 46    | 16    |
| >DNMT3A-K <sup>4</sup> AEKPKVKEI               | 229  | >DNMT3A-K <sup>4</sup> AEKPKVREI               | 156   | 73    |
| >DNMT3A-K <sup>4</sup> AEKPKVKEII              | 505  | >DNMT3A-K <sup>4</sup> AEKPKVREII              | 415   | 90    |
| >DNMT3A-K <sup>4</sup> AEKPKVKEI               | 578  | >DNMT3A-K <sup>4</sup> AEKPKVREI               | 323   | 255   |
| >DNMT3A-K <sup>4</sup> AEKPKVKEI               | 19   | >DNMT3A-K <sup>4</sup> AEKPKVREI               | 32    | 13    |
| >DNMT3A-K <sup>4</sup> AEKPKVKEII              | 37   | >DNMT3A-K <sup>4</sup> AEKPKVREII              | 27    | 10    |
| >DNMT3A-K <sup>4</sup> TAEKPKVK                | 1518 | >DNMT3A-K <sup>4</sup> TAEKPKVR                | 458   | 1060  |

|                                    |      |                                    |      |      |
|------------------------------------|------|------------------------------------|------|------|
| >DNMT3A-K $\zeta$ STAEKPKVKE       | 505  | >DNMT3A-K $\zeta$ STAEKPKVRE       | 420  | 85   |
| >DNMT3A-K $\zeta$ STAEKPKVK        | 113  | >DNMT3A-K $\zeta$ STAEKPKVR        | 3107 | 2994 |
| >DNMT3A-K $\zeta$ STAEKPKVK        | 456  | >DNMT3A-K $\zeta$ STAEKPKVR        | 114  | 342  |
| >DNMT3A-K $\zeta$ STAEKPKVKE       | 178  | >DNMT3A-K $\zeta$ STAEKPKVRE       | 133  | 45   |
| >DNMT3A-K $\zeta$ STAEKPKVKE       | 70   | >DNMT3A-K $\zeta$ STAEKPKVRE       | 110  | 40   |
| >DNMT3A-K $\zeta$ STAEKPKVK        | 161  | >DNMT3A-K $\zeta$ STAEKPKVR        | 263  | 102  |
| >DNMT3A-K $\zeta$ STAEKPKVKE       | 59   | >DNMT3A-K $\zeta$ STAEKPKVRE       | 66   | 7    |
| >DNMT3A-K $\zeta$ KSTAEKPKVK       | 73   | >DNMT3A-K $\zeta$ KSTAEKPKVR       | 4736 | 4663 |
| >DNMT3A-K $\zeta$ KSTAEKPKVK       | 4645 | >DNMT3A-K $\zeta$ KSTAEKPKVR       | 389  | 4256 |
| >DNMT3A-K $\zeta$ KSTAEKPKVK       | 3941 | >DNMT3A-K $\zeta$ KSTAEKPKVR       | 285  | 3656 |
| >DNMT3A-K $\xi$ KVRTITTR           | 257  | >DNMT3A-K $\xi$ RVRTITTR           | 261  | 4    |
| >DNMT3A-K $\xi$ KVRTITTR           | 10   | >DNMT3A-K $\xi$ RVRTITTR           | 10   | 0    |
| >DNMT3A-K $\xi$ KVRTITTRS          | 38   | >DNMT3A-K $\xi$ RVRTITTRS          | 35   | 3    |
| >DNMT3A-K $\xi$ KVRTITTRSN         | 30   | >DNMT3A-K $\xi$ RVRTITTRSN         | 27   | 3    |
| >DNMT3A-K $\xi$ KVRTITTRSN $\zeta$ | 10   | >DNMT3A-K $\xi$ RVRTITTRSN $\zeta$ | 10   | 0    |
| >DNMT3A-K $\xi$ KVRTITTR           | 8    | >DNMT3A-K $\xi$ RVRTITTR           | 7    | 1    |
| >DNMT3A-K $\xi$ KVRTITTR           | 586  | >DNMT3A-K $\xi$ RVRTITTR           | 338  | 248  |
| >DNMT3A-K $\xi$ KVRTITTR           | 61   | >DNMT3A-K $\xi$ RVRTITTR           | 98   | 37   |
| >DNMT3A-K $\xi$ SKVRTITTR          | 113  | >DNMT3A-K $\xi$ SRVRTITTR          | 654  | 541  |
| >DNMT3A-K $\xi$ SKVRTITTR          | 6542 | >DNMT3A-K $\xi$ SRVRTITTR          | 117  | 6425 |
| >DNMT3A-K $\xi$ FSKVRTITTR         | 107  | >DNMT3A-K $\xi$ FSRVRTITTR         | 96   | 11   |
| >DNMT3A-K $\xi$ FSKVRTITTR         | 67   | >DNMT3A-K $\xi$ FSRVRTITTR         | 118  | 51   |
| >DNMT3A-K $\xi$ KFSKVRTI           | 47   | >DNMT3A-K $\xi$ KFSRVRTI           | 40   | 7    |
| >DNMT3A-K $\xi$ KFSKVRTI           | 501  | >DNMT3A-K $\xi$ KFSRVRTI           | 357  | 144  |
| >DNMT3A-K $\xi$ KFSKVRTI           | 242  | >DNMT3A-K $\xi$ KFSRVRTI           | 268  | 26   |
| >DNMT3A-K $\xi$ KFSKVRTITTR        | 7    | >DNMT3A-K $\xi$ KFSRVRTITTR        | 6    | 1    |
| >DNMT3A-K $\xi$ KFSKVRTI           | 367  | >DNMT3A-K $\xi$ KFSRVRTI           | 241  | 126  |
| >DNMT3A-K $\xi$ KFSKVRTITTR        | 24   | >DNMT3A-K $\xi$ KFSRVRTITTR        | 42   | 18   |
| >DNMT3A-K $\xi$ KFSKVRTI           | 137  | >DNMT3A-K $\xi$ KFSRVRTI           | 102  | 35   |
| >DNMT3A-K $\xi$ KFSKVRTITTR        | 636  | >DNMT3A-K $\xi$ KFSRVRTITTR        | 480  | 156  |
| >DNMT3A-K $\xi$ AKFSKVRT           | 832  | >DNMT3A-K $\xi$ AKFSRVRT           | 357  | 475  |
| >DNMT3A-K $\xi$ AKFSKVRTI          | 10   | >DNMT3A-K $\xi$ AKFSRVRTI          | 7    | 3    |
| >DNMT3A-K $\xi$ AKFSKVRTIT         | 225  | >DNMT3A-K $\xi$ AKFSRVRTIT         | 148  | 77   |
| >DNMT3A-K $\xi$ AKFSKVRTITT        | 257  | >DNMT3A-K $\xi$ AKFSRVRTITT        | 173  | 84   |
| >DNMT3A-K $\xi$ IAKFSKVRTI         | 346  | >DNMT3A-K $\xi$ IAKFSRVRTI         | 125  | 221  |
| >DNMT3A-K $\xi$ IAKFSKVR           | 49   | >DNMT3A-K $\xi$ IAKFSRVR           | 36   | 13   |
| >DNMT3A-K $\xi$ IAKFSKVR           | 562  | >DNMT3A-K $\xi$ IAKFSRVR           | 297  | 265  |
| >DNMT3A-K $\xi$ IAKFSKVR           | 154  | >DNMT3A-K $\xi$ IAKFSRVR           | 112  | 42   |
| >DNMT3A-K $\xi$ IAKFSKVRTI         | 217  | >DNMT3A-K $\xi$ IAKFSRVRTI         | 201  | 16   |
| >DNMT3A-K $\xi$ RIAKFSKV           | 580  | >DNMT3A-K $\xi$ RIAKFSRV           | 211  | 369  |
| >DNMT3A-K $\xi$ RIAKFSKV           | 814  | >DNMT3A-K $\xi$ RIAKFSRV           | 499  | 315  |
| >DNMT3A-K $\xi$ RIAKFSKV           | 68   | >DNMT3A-K $\xi$ RIAKFSRV           | 55   | 13   |
| >DNMT3A-K $\xi$ RIAKFSKV           | 15   | >DNMT3A-K $\xi$ RIAKFSRV           | 13   | 2    |



|                        |       |                        |       |       |
|------------------------|-------|------------------------|-------|-------|
| >DNMT3A-KË RIAKFSKVRTI | 124   | >DNMT3A-KË RIAKFSRVRTI | 110   | 14    |
| >DNMT3A-KË RIAKFSKV    | 89    | >DNMT3A-KË RIAKFSRV    | 71    | 18    |
| >DNMT3A-KË RIAKFSKV    | 67    | >DNMT3A-KË RIAKFSRV    | 40    | 27    |
| >DNMT3A-KË RIAKFSKV    | 119   | >DNMT3A-KË RIAKFSRV    | 172   | 53    |
| >DNMT3A-KË RIAKFSKV    | 22    | >DNMT3A-KË RIAKFSRV    | 19    | 3     |
| >DNMT3A-KË RIAKFSKVR   | 869   | >DNMT3A-KË RIAKFSRVR   | 440   | 429   |
| >DNMT3A-KË RIAKFSKVR   | 66    | >DNMT3A-KË RIAKFSRVR   | 52    | 14    |
| >DNMT3A-KË RIAKFSKVRTI | 17    | >DNMT3A-KË RIAKFSRVRTI | 15    | 2     |
| >DNMT3A-KË RIAKFSKVR   | 442   | >DNMT3A-KË RIAKFSRVR   | 401   | 41    |
| >DNMT3A-KË RIAKFSKV    | 746   | >DNMT3A-KË RIAKFSRV    | 479   | 267   |
| >DNMT3A-KË RIAKFSKVR   | 24    | >DNMT3A-KË RIAKFSRVR   | 42    | 18    |
| >DNMT3A-KË RIAKFSKVRTI | 221   | >DNMT3A-KË RIAKFSRVRTI | 190   | 31    |
| >DNMT3A-KË GRIAKFSK    | 66    | >DNMT3A-KË GRIAKFSR    | 115   | 49    |
| >DNMT3A-KË GRIAKFSKV   | 225   | >DNMT3A-KË GRIAKFSRV   | 358   | 133   |
| >DNMT3A-KË GRIAKFSKVR  | 70    | >DNMT3A-KË GRIAKFSRVR  | 65    | 5     |
| >DNMT3A-KË GRIAKFSKV   | 81    | >DNMT3A-KË GRIAKFSRV   | 63    | 18    |
| >DNMT3A-KË HGRIAKFSK   | 5     | >DNMT3A-KË HGRIAKFSR   | 116   | 111   |
| >DNMT3A-KË HGRIAKFSKV  | 141   | >DNMT3A-KË HGRIAKFSRV  | 140   | 1     |
| >DNMT3A-KË HGRIAKFSKV  | 219   | >DNMT3A-KË HGRIAKFSRV  | 147   | 72    |
| >DNMT3A-KË HGRIAKFSK   | 894   | >DNMT3A-KË HGRIAKFSR   | 45    | 849   |
| >DNMT3A-KË HGRIAKFSKV  | 323   | >DNMT3A-KË HGRIAKFSRV  | 271   | 52    |
| >DNMT3A-KË HGRIAKFSK   | 6593  | >DNMT3A-KË HGRIAKFSR   | 483   | 6110  |
| >DNMT3A-KË HGRIAKFSKV  | 283   | >DNMT3A-KË HGRIAKFSRV  | 483   | 200   |
| >DNMT3A-KË KQGKDQHFP   | 99    | >DNMT3A-KË QQGKDQHFF   | 917   | 818   |
| >DNMT3A-KË KQGKDQHFP   | 32    | >DNMT3A-KË QQGKDQHFF   | 331   | 299   |
| >DNMT3A-KË KQGKDQHFP   | 56    | >DNMT3A-KË QQGKDQHFF   | 1189  | 1133  |
| >DNMT3A-KË KQGKDQHF    | 61    | >DNMT3A-KË QQGKDQHF    | 86    | 25    |
| >DNMT3A-KË KQGKDQHFP   | 53    | >DNMT3A-KË QQGKDQHFF   | 68    | 15    |
| >DNMT3A-KË KQGKDQHF    | 17    | >DNMT3A-KË QQGKDQHF    | 49    | 32    |
| >DNMT3A-KË KQGKDQHFP   | 8     | >DNMT3A-KË QQGKDQHFF   | 17    | 9     |
| >DNMT3A-KË IKQGKDQHFF  | 14654 | >DNMT3A-KË IQQGKDQHFI  | 277   | 14377 |
| >DNMT3A-KË IKQGKDQHFF  | 3073  | >DNMT3A-KË IQQGKDQHFI  | 31    | 3042  |
| >DNMT3A-KË IKQGKDQHFF  | 3551  | >DNMT3A-KË IQQGKDQHFI  | 166   | 3385  |
| >DNMT3A-KË IKQGKDQHFF  | 9184  | >DNMT3A-KË IQQGKDQHFI  | 288   | 8896  |
| >DNMT3A-KË IKQGKDQHFF  | 3113  | >DNMT3A-KË IQQGKDQHFI  | 249   | 2864  |
| >DNMT3A-KË IKQGKDQHF   | 8061  | >DNMT3A-KË IQQGKDQHF   | 49    | 8012  |
| >DNMT3A-KË IKQGKDQHF   | 105   | >DNMT3A-KË IQQGKDQHF   | 116   | 11    |
| >DNMT3A-KË RTITTRSNSIK | 84    | >DNMT3A-KË RTITTRSNSIQ | 17279 | 17195 |
| >DNMT3A-KË RTITTRSNSIK | 15    | >DNMT3A-KË RTITTRSNSIQ | 15066 | 15051 |
| >DNMT3A-KË RTITTRSNSIK | 6     | >DNMT3A-KË RTITTRSNSIQ | 402   | 396   |
| >DNMT3A-KË RTITTRSNSIK | 88    | >DNMT3A-KË RTITTRSNSIQ | 4529  | 4441  |
| >DNMT3A-KË RTITTRSNSIK | 55    | >DNMT3A-KË RTITTRSNSIQ | 4026  | 3971  |
| >DNMT3A-KË RTITTRSNSIK | 188   | >DNMT3A-KË RTITTRSNSIQ | 55    | 133   |

|                       |      |                       |       |       |
|-----------------------|------|-----------------------|-------|-------|
| >DNMT3A-KξSIKQGKDQHF  | 103  | >DNMT3A-KξSIQQGKDQH   | 187   | 84    |
| >DNMT3A-KξNSIKQGKDQF  | 212  | >DNMT3A-KξNSIQQGKDQ   | 107   | 105   |
| >DNMT3A-KξNSIKQGKDQF  | 420  | >DNMT3A-KξNSIQQGKDQ   | 311   | 109   |
| >DNMT3A-KξNSIKQGKDQF  | 309  | >DNMT3A-KξNSIQQGKDQ   | 474   | 165   |
| >DNMT3A-KξNSIKQGKDQF  | 61   | >DNMT3A-KξNSIQQGKDQ   | 29    | 32    |
| >DNMT3A-KξRSNSIKQGK   | 191  | >DNMT3A-KξRSNSIQQGK   | 108   | 83    |
| >DNMT3A-KξRSNSIKQGK   | 83   | >DNMT3A-KξRSNSIQQGK   | 59    | 24    |
| >DNMT3A-KξRSNSIKQGK   | 31   | >DNMT3A-KξRSNSIQQGK   | 17    | 14    |
| >DNMT3A-KξRSNSIKQGK   | 46   | >DNMT3A-KξRSNSIQQGK   | 64    | 18    |
| >DNMT3A-KξTTRSNSIK    | 179  | >DNMT3A-KξTTRSNSIQ    | 19144 | 18965 |
| >DNMT3A-KξTTRSNSIKQG  | 350  | >DNMT3A-KξTTRSNSIQQG  | 251   | 99    |
| >DNMT3A-KξTTRSNSIK    | 196  | >DNMT3A-KξTTRSNSIQ    | 25085 | 24889 |
| >DNMT3A-KξTTRSNSIKQG  | 529  | >DNMT3A-KξTTRSNSIQQG  | 449   | 80    |
| >DNMT3A-KξTTRSNSIK    | 4    | >DNMT3A-KξTTRSNSIQ    | 198   | 194   |
| >DNMT3A-KξTTRSNSIKQ   | 77   | >DNMT3A-KξTTRSNSIQQ   | 54    | 23    |
| >DNMT3A-KξTTRSNSIKQG  | 269  | >DNMT3A-KξTTRSNSIQQG  | 136   | 133   |
| >DNMT3A-KξTTRSNSIKQG  | 6    | >DNMT3A-KξTTRSNSIQQG  | 5     | 1     |
| >DNMT3A-KξTTRSNSIK    | 49   | >DNMT3A-KξTTRSNSIQ    | 3625  | 3576  |
| >DNMT3A-KξTTRSNSIKQG  | 85   | >DNMT3A-KξTTRSNSIQQG  | 62    | 23    |
| >DNMT3A-KξITTRSNSIK   | 178  | >DNMT3A-KξITTRSNSIQ   | 20233 | 20055 |
| >DNMT3A-KξITTRSNSIK   | 44   | >DNMT3A-KξITTRSNSIQ   | 22203 | 22159 |
| >DNMT3A-KξITTRSNSIK   | 52   | >DNMT3A-KξITTRSNSIQ   | 6157  | 6105  |
| >DNMT3A-KξITTRSNSIK   | 21   | >DNMT3A-KξITTRSNSIQ   | 1666  | 1645  |
| >DNMT3A-KξITTRSNSIK   | 98   | >DNMT3A-KξITTRSNSIQ   | 32    | 66    |
| >DNMT3A-KξTITTRSNSIK  | 94   | >DNMT3A-KξTITTRSNSIQ  | 21750 | 21656 |
| >DNMT3A-KξTITTRSNSIK  | 64   | >DNMT3A-KξTITTRSNSIQ  | 31450 | 31386 |
| >DNMT3A-KξTITTRSNSIK  | 107  | >DNMT3A-KξTITTRSNSIQ  | 19725 | 19618 |
| >DNMT3A-L7LLHDARPK    | 914  | >DNMT3A-L7FLHDARPK    | 166   | 748   |
| >DNMT3A-L7LLHDARPK    | 506  | >DNMT3A-L7FLHDARPK    | 80    | 426   |
| >DNMT3A-L7LLHDARPK    | 1658 | >DNMT3A-L7FLHDARPK    | 321   | 1337  |
| >DNMT3A-L7LLHDARPK    | 234  | >DNMT3A-L7FLHDARPK    | 674   | 440   |
| >DNMT3A-L7LLHDARPK    | 31   | >DNMT3A-L7FLHDARPK    | 473   | 442   |
| >DNMT3A-L7RLLHDARPK   | 67   | >DNMT3A-L7RFLHDARPK   | 3605  | 3538  |
| >DNMT3A-L7RLLHDARPK   | 59   | >DNMT3A-L7RFLHDARPK   | 31    | 28    |
| >DNMT3A-L7RLLHDARPK   | 1495 | >DNMT3A-L7RFLHDARPK   | 241   | 1254  |
| >DNMT3A-L7TGRLFFEFYRI | 2725 | >DNMT3A-L7TGRLFFEFYRF | 444   | 2281  |
| >DNMT3A-L7YRLLHDAR    | 194  | >DNMT3A-L7YRFLHDAR    | 80    | 114   |
| >DNMT3A-L7YRLLHDARPK  | 648  | >DNMT3A-L7YRFLHDARPK  | 310   | 338   |
| >DNMT3A-L7YRLLHDARPK  | 1547 | >DNMT3A-L7YRFLHDARPK  | 366   | 1181  |
| >DNMT3A-L7YRLLHDAR    | 665  | >DNMT3A-L7YRFLHDAR    | 309   | 356   |
| >DNMT3A-L7FYRLLHDARPK | 48   | >DNMT3A-L7FYRFLHDARPK | 30    | 18    |
| >DNMT3A-L7FYRLLHDAR   | 224  | >DNMT3A-L7FYRFLHDAR   | 102   | 122   |
| >DNMT3A-L7FYRLLHDAR   | 17   | >DNMT3A-L7FYRFLHDAR   | 16    | 1     |

|                       |      |                       |       |       |
|-----------------------|------|-----------------------|-------|-------|
| >DNMT3A-L7FYRLLHDAR   | 132  | >DNMT3A-L7FYRFLHDAR   | 153   | 21    |
| >DNMT3A-L7EFYRLLHDAR  | 116  | >DNMT3A-L7EFYRFLHDAR  | 54    | 62    |
| >DNMT3A-L7EFYRLLHDAR  | 34   | >DNMT3A-L7EFYRFLHDAR  | 20    | 14    |
| >DNMT3A-L7EFYRLLHDAR  | 201  | >DNMT3A-L7EFYRFLHDAR  | 146   | 55    |
| >DNMT3A-L7EFYRLLHDAR  | 1871 | >DNMT3A-L7EFYRFLHDAR  | 488   | 1383  |
| >DNMT3A-L7EFYRLLHDAR  | 76   | >DNMT3A-L7EFYRFLHDAR  | 54    | 22    |
| >DNMT3A-L7FEFYRLLH    | 388  | >DNMT3A-L7FEFYRFLH    | 347   | 41    |
| >DNMT3A-L7FEFYRLLHDA  | 87   | >DNMT3A-L7FEFYRFLHDA  | 110   | 23    |
| >DNMT3A-L7FEFYRLLHDAI | 829  | >DNMT3A-L7FEFYRFLHDAI | 498   | 331   |
| >DNMT3A-L7FEFYRLLHDAI | 210  | >DNMT3A-L7FEFYRFLHDAI | 114   | 96    |
| >DNMT3A-L7FEFYRLLH    | 694  | >DNMT3A-L7FEFYRFLH    | 462   | 232   |
| >DNMT3A-L7FEFYRLLHDA  | 70   | >DNMT3A-L7FEFYRFLHDA  | 72    | 2     |
| >DNMT3A-L7FEFYRLLHDA  | 158  | >DNMT3A-L7FEFYRFLHDA  | 173   | 15    |
| >DNMT3A-L7FEFYRLLHD   | 206  | >DNMT3A-L7FEFYRFLHD   | 294   | 88    |
| >DNMT3A-L7FEFYRLLHDA  | 324  | >DNMT3A-L7FEFYRFLHDA  | 276   | 48    |
| >DNMT3A-L7FEFYRLLHDAI | 635  | >DNMT3A-L7FEFYRFLHDAI | 305   | 330   |
| >DNMT3A-L7FFEYRLL     | 809  | >DNMT3A-L7FFEYRFL     | 252   | 557   |
| >DNMT3A-L7FFEYRLL     | 756  | >DNMT3A-L7FFEYRFL     | 313   | 443   |
| >DNMT3A-L7FFEYRLLH    | 89   | >DNMT3A-L7FFEYRFLH    | 134   | 45    |
| >DNMT3A-L7FFEYRLLH    | 1887 | >DNMT3A-L7FFEYRFLH    | 474   | 1413  |
| >DNMT3A-L7FFEYRLL     | 559  | >DNMT3A-L7FFEYRFL     | 193   | 366   |
| >DNMT3A-L7LFFEYRLL    | 24   | >DNMT3A-L7LFFEYRFL    | 425   | 401   |
| >DNMT3A-L7LFFEYRLL    | 23   | >DNMT3A-L7LFFEYRFL    | 72    | 49    |
| >DNMT3A-L7LFFEYRLL    | 65   | >DNMT3A-L7LFFEYRFL    | 2411  | 2346  |
| >DNMT3A-L7LFFEYRLL    | 231  | >DNMT3A-L7LFFEYRFL    | 109   | 122   |
| >DNMT3A-L7LFFEYRLL    | 327  | >DNMT3A-L7LFFEYRFL    | 10335 | 10008 |
| >DNMT3A-L7LFFEYRLL    | 1074 | >DNMT3A-L7LFFEYRFL    | 259   | 815   |
| >DNMT3A-L7LFFEYRLL    | 146  | >DNMT3A-L7LFFEYRFL    | 26    | 120   |
| >DNMT3A-L7LFFEYRLL    | 1143 | >DNMT3A-L7LFFEYRFL    | 191   | 952   |
| >DNMT3A-L7LFFEYRLL    | 27   | >DNMT3A-L7LFFEYRFL    | 8     | 19    |
| >DNMT3A-L7LFFEYRLL    | 40   | >DNMT3A-L7LFFEYRFL    | 20    | 20    |
| >DNMT3A-L7LFFEYRLL    | 3052 | >DNMT3A-L7LFFEYRFL    | 76    | 2976  |
| >DNMT3A-L7LFFEYRLLH   | 360  | >DNMT3A-L7LFFEYRFLH   | 87    | 273   |
| >DNMT3A-L7LFFEYRLLH   | 234  | >DNMT3A-L7LFFEYRFLH   | 101   | 133   |
| >DNMT3A-L7LFFEYRLL    | 3084 | >DNMT3A-L7LFFEYRFL    | 159   | 2925  |
| >DNMT3A-L7LFFEYRLL    | 485  | >DNMT3A-L7LFFEYRFL    | 807   | 322   |
| >DNMT3A-L7LFFEYRLL    | 298  | >DNMT3A-L7LFFEYRFL    | 896   | 598   |
| >DNMT3A-L7LFFEYRLL    | 106  | >DNMT3A-L7LFFEYRFL    | 43    | 63    |
| >DNMT3A-L7RLFEEFYRLL  | 16   | >DNMT3A-L7RLFEEFYRFL  | 1432  | 1416  |
| >DNMT3A-L7RLFEEFYRLL  | 152  | >DNMT3A-L7RLFEEFYRFL  | 63    | 89    |
| >DNMT3A-L7RLFEEFYRLL  | 4    | >DNMT3A-L7RLFEEFYRFL  | 221   | 217   |
| >DNMT3A-L7RLFEEFYRLL  | 46   | >DNMT3A-L7RLFEEFYRFL  | 37    | 9     |
| >DNMT3A-L7RLFEEFYRLL  | 46   | >DNMT3A-L7RLFEEFYRFL  | 4649  | 4603  |

|                       |       |                       |       |       |
|-----------------------|-------|-----------------------|-------|-------|
| >DNMT3A-L7RLFFEFYRL   | 166   | >DNMT3A-L7RLFFEFYRFL  | 153   | 13    |
| >DNMT3A-L7RLFFEFYRL   | 95    | >DNMT3A-L7RLFFEFYRF   | 1056  | 961   |
| >DNMT3A-L7RLFFEFYRL   | 662   | >DNMT3A-L7RLFFEFYRFL  | 425   | 237   |
| >DNMT3A-L7RLFFEFYRL   | 4     | >DNMT3A-L7RLFFEFYRF   | 214   | 210   |
| >DNMT3A-L7RLFFEFYRL   | 8     | >DNMT3A-L7RLFFEFYRFL  | 5     | 3     |
| >DNMT3A-L7RLFFEFYRL   | 13    | >DNMT3A-L7RLFFEFYRF   | 3629  | 3616  |
| >DNMT3A-L7RLFFEFYRL   | 108   | >DNMT3A-L7RLFFEFYRFL  | 37    | 71    |
| >DNMT3A-L7RLFFEFYRL   | 43    | >DNMT3A-L7RLFFEFYRF   | 10647 | 10604 |
| >DNMT3A-L7RLFFEFYRL   | 121   | >DNMT3A-L7RLFFEFYRFL  | 39    | 82    |
| >DNMT3A-L7RLFFEFYRL   | 96    | >DNMT3A-L7RLFFEFYRF   | 16671 | 16575 |
| >DNMT3A-L7RLFFEFYRL   | 1008  | >DNMT3A-L7RLFFEFYRFL  | 269   | 739   |
| >DNMT3A-L7RLFFEFYRL   | 8     | >DNMT3A-L7RLFFEFYRF   | 6025  | 6017  |
| >DNMT3A-L7RLFFEFYRL   | 24    | >DNMT3A-L7RLFFEFYRFL  | 21    | 3     |
| >DNMT3A-L7RLFFEFYRLLH | 63    | >DNMT3A-L7RLFFEFYRFLH | 73    | 10    |
| >DNMT3A-L7RLFFEFYRLLH | 246   | >DNMT3A-L7RLFFEFYRFLH | 128   | 118   |
| >DNMT3A-L7RLFFEFYRL   | 91    | >DNMT3A-L7RLFFEFYRF   | 16    | 75    |
| >DNMT3A-L7RLFFEFYRL   | 1973  | >DNMT3A-L7RLFFEFYRF   | 253   | 1720  |
| >DNMT3A-L7RLFFEFYRL   | 1571  | >DNMT3A-L7RLFFEFYRF   | 75    | 1496  |
| >DNMT3A-L7RLFFEFYRL   | 6490  | >DNMT3A-L7RLFFEFYRF   | 138   | 6352  |
| >DNMT3A-L7RLFFEFYRLLH | 312   | >DNMT3A-L7RLFFEFYRFLH | 416   | 104   |
| >DNMT3A-L7RLFFEFYRLL  | 804   | >DNMT3A-L7RLFFEFYRFL  | 226   | 578   |
| >DNMT3A-L7RLFFEFYRLLH | 357   | >DNMT3A-L7RLFFEFYRFLH | 76    | 281   |
| >DNMT3A-L7RLFFEFYRL   | 10    | >DNMT3A-L7RLFFEFYRF   | 6     | 4     |
| >DNMT3A-L7RLFFEFYRLL  | 26    | >DNMT3A-L7RLFFEFYRFL  | 54    | 28    |
| >DNMT3A-L7RLFFEFYRL   | 594   | >DNMT3A-L7RLFFEFYRF   | 53    | 541   |
| >DNMT3A-L7RLFFEFYRL   | 316   | >DNMT3A-L7RLFFEFYRF   | 11    | 305   |
| >DNMT3A-L7RLFFEFYRLL  | 204   | >DNMT3A-L7RLFFEFYRFL  | 116   | 88    |
| >DNMT3A-L7RLFFEFYRL   | 2594  | >DNMT3A-L7RLFFEFYRF   | 172   | 2422  |
| >DNMT3A-L7RLFFEFYRL   | 1382  | >DNMT3A-L7RLFFEFYRF   | 213   | 1169  |
| >DNMT3A-L7GRLFFEFYRL  | 3098  | >DNMT3A-L7GRLFFEFYRF  | 238   | 2860  |
| >DNMT3A-L7GRLFFEFYRL  | 25    | >DNMT3A-L7GRLFFEFYRF  | 40    | 15    |
| >DNMT3A-L7GRLFFEFYRLL | 53    | >DNMT3A-L7GRLFFEFYRFL | 70    | 17    |
| >DNMT3A-L7GRLFFEFYRLL | 55    | >DNMT3A-L7GRLFFEFYRFL | 76    | 21    |
| >DNMT3A-L7GRLFFEFYRLL | 6     | >DNMT3A-L7GRLFFEFYRFL | 8     | 2     |
| >DNMT3A-P7NPARKGLY    | 2675  | >DNMT3A-P7NLARKGLY    | 87    | 2588  |
| >DNMT3A-P7NPARKGLY    | 3829  | >DNMT3A-P7NLARKGLY    | 387   | 3442  |
| >DNMT3A-P7NPARKGLY    | 1961  | >DNMT3A-P7NLARKGLY    | 35    | 1926  |
| >DNMT3A-P7NPARKGLY    | 2523  | >DNMT3A-P7NLARKGLY    | 163   | 2360  |
| >DNMT3A-P7NPARKGLY    | 285   | >DNMT3A-P7NLARKGLY    | 9150  | 8865  |
| >DNMT3A-P7NPARKGLY    | 65    | >DNMT3A-P7NLARKGLY    | 3612  | 3547  |
| >DNMT3A-P7SPCNDLSIVNI | 34226 | >DNMT3A-P7SPCNDLSIVNI | 44    | 34182 |
| >DNMT3A-P7IVNPARKGLY  | 71    | >DNMT3A-P7IVNLARKGLY  | 32    | 39    |
| >DNMT3A-P7IVNPARKGLY  | 301   | >DNMT3A-P7IVNLARKGLY  | 524   | 223   |

|                       |       |                       |      |       |
|-----------------------|-------|-----------------------|------|-------|
| >DNMT3A-P;IVNPARKGLY  | 323   | >DNMT3A-P;IVNLARKGLY  | 2018 | 1695  |
| >DNMT3A-P;SIVNPARK    | 250   | >DNMT3A-P;SIVNLARK    | 378  | 128   |
| >DNMT3A-P;SIVNPARK    | 53    | >DNMT3A-P;SIVNLARK    | 42   | 11    |
| >DNMT3A-P;SIVNPARKGL  | 184   | >DNMT3A-P;SIVNLARKGL  | 173  | 11    |
| >DNMT3A-P;SIVNPARKGL  | 291   | >DNMT3A-P;SIVNLARKGL  | 738  | 447   |
| >DNMT3A-P;SIVNPARKGL  | 92    | >DNMT3A-P;SIVNLARKGL  | 66   | 26    |
| >DNMT3A-P;SIVNPARKGL  | 232   | >DNMT3A-P;SIVNLARKGL  | 163  | 69    |
| >DNMT3A-P;SIVNPARK    | 391   | >DNMT3A-P;SIVNLARK    | 165  | 226   |
| >DNMT3A-P;SIVNPARKGL  | 243   | >DNMT3A-P;SIVNLARKGL  | 63   | 180   |
| >DNMT3A-P;SIVNPARKGL  | 346   | >DNMT3A-P;SIVNLARKGL  | 1196 | 850   |
| >DNMT3A-P;SIVNPARKGL  | 74    | >DNMT3A-P;SIVNLARKGL  | 72   | 2     |
| >DNMT3A-P;LSIVNPARKGI | 995   | >DNMT3A-P;LSIVNLARKGI | 422  | 573   |
| >DNMT3A-P;LSIVNPARK   | 173   | >DNMT3A-P;LSIVNLARK   | 167  | 6     |
| >DNMT3A-P;LSIVNPARK   | 339   | >DNMT3A-P;LSIVNLARK   | 387  | 48    |
| >DNMT3A-P;LSIVNPARK   | 92    | >DNMT3A-P;LSIVNLARK   | 82   | 10    |
| >DNMT3A-P;LSIVNPARK   | 46    | >DNMT3A-P;LSIVNLARK   | 50   | 4     |
| >DNMT3A-P;LSIVNPARK   | 118   | >DNMT3A-P;LSIVNLARK   | 91   | 27    |
| >DNMT3A-P;LSIVNPARKGI | 11    | >DNMT3A-P;LSIVNLARKGI | 13   | 2     |
| >DNMT3A-P;LSIVNPARK   | 413   | >DNMT3A-P;LSIVNLARK   | 675  | 262   |
| >DNMT3A-P;DLSIVNPARK  | 791   | >DNMT3A-P;DLSIVNLARK  | 345  | 446   |
| >DNMT3A-P;DLSIVNPARK  | 30    | >DNMT3A-P;DLSIVNLARK  | 28   | 2     |
| >DNMT3A-P;DLSIVNPARK  | 29    | >DNMT3A-P;DLSIVNLARK  | 31   | 2     |
| >DNMT3A-P;DLSIVNPARK  | 122   | >DNMT3A-P;DLSIVNLARK  | 69   | 53    |
| >DNMT3A-P;PLKEYFACV   | 984   | >DNMT3A-P;LLKEYFACV   | 17   | 967   |
| >DNMT3A-P;PLKEYFACV   | 218   | >DNMT3A-P;LLKEYFACV   | 9    | 209   |
| >DNMT3A-P;PLKEYFAC    | 8923  | >DNMT3A-P;LLKEYFAC    | 433  | 8490  |
| >DNMT3A-P;PLKEYFACV   | 95    | >DNMT3A-P;LLKEYFACV   | 4    | 91    |
| >DNMT3A-P;PLKEYFACV   | 1184  | >DNMT3A-P;LLKEYFACV   | 14   | 1170  |
| >DNMT3A-P;PLKEYFAC    | 2703  | >DNMT3A-P;LLKEYFAC    | 140  | 2563  |
| >DNMT3A-P;PLKEYFACV   | 70    | >DNMT3A-P;LLKEYFACV   | 5    | 65    |
| >DNMT3A-P;PLKEYFAC    | 8460  | >DNMT3A-P;LLKEYFAC    | 400  | 8060  |
| >DNMT3A-P;PLKEYFACV   | 180   | >DNMT3A-P;LLKEYFACV   | 5    | 175   |
| >DNMT3A-P;PLKEYFACV   | 328   | >DNMT3A-P;LLKEYFACV   | 30   | 298   |
| >DNMT3A-P;PLKEYFACV   | 143   | >DNMT3A-P;LLKEYFACV   | 10   | 133   |
| >DNMT3A-P;PLKEYFAC    | 1540  | >DNMT3A-P;LLKEYFAC    | 24   | 1516  |
| >DNMT3A-P;PLKEYFACV   | 10    | >DNMT3A-P;LLKEYFACV   | 2    | 8     |
| >DNMT3A-P;PLKEYFACV   | 160   | >DNMT3A-P;LLKEYFACV   | 33   | 127   |
| >DNMT3A-P;PLKEYFACV   | 11881 | >DNMT3A-P;LLKEYFACV   | 448  | 11433 |
| >DNMT3A-P;APLKEYFA    | 22072 | >DNMT3A-P;ALLKEYFA    | 32   | 22040 |
| >DNMT3A-P;APLKEYFACV  | 9939  | >DNMT3A-P;ALLKEYFACV  | 35   | 9904  |
| >DNMT3A-P;APLKEYFA    | 28293 | >DNMT3A-P;ALLKEYFA    | 44   | 28249 |
| >DNMT3A-P;APLKEYFACV  | 9724  | >DNMT3A-P;ALLKEYFACV  | 81   | 9643  |
| >DNMT3A-P;APLKEYFA    | 22033 | >DNMT3A-P;ALLKEYFA    | 479  | 21554 |

|                       |       |                       |       |       |
|-----------------------|-------|-----------------------|-------|-------|
| >DNMT3A-PϙAPLKEYFACV  | 9227  | >DNMT3A-PϙALLKEYFACV  | 30    | 9197  |
| >DNMT3A-PϙAPLKEYFA    | 16086 | >DNMT3A-PϙALLKEYFA    | 82    | 16004 |
| >DNMT3A-PϙAPLKEYFAC   | 20811 | >DNMT3A-PϙALLKEYFAC   | 180   | 20631 |
| >DNMT3A-PϙAPLKEYFACV  | 5505  | >DNMT3A-PϙALLKEYFACV  | 105   | 5400  |
| >DNMT3A-PϙAPLKEYFA    | 21083 | >DNMT3A-PϙALLKEYFA    | 12    | 21071 |
| >DNMT3A-PϙAPLKEYFAC   | 22141 | >DNMT3A-PϙALLKEYFAC   | 24    | 22117 |
| >DNMT3A-PϙAPLKEYFACV  | 6694  | >DNMT3A-PϙALLKEYFACV  | 3     | 6691  |
| >DNMT3A-PϙAPLKEYFA    | 20551 | >DNMT3A-PϙALLKEYFA    | 27    | 20524 |
| >DNMT3A-PϙAPLKEYFAC   | 21319 | >DNMT3A-PϙALLKEYFAC   | 98    | 21221 |
| >DNMT3A-PϙAPLKEYFACV  | 13223 | >DNMT3A-PϙALLKEYFACV  | 3     | 13220 |
| >DNMT3A-PϙAPLKEYFA    | 20240 | >DNMT3A-PϙALLKEYFA    | 11    | 20229 |
| >DNMT3A-PϙAPLKEYFAC   | 25744 | >DNMT3A-PϙALLKEYFAC   | 266   | 25478 |
| >DNMT3A-PϙAPLKEYFACV  | 7527  | >DNMT3A-PϙALLKEYFACV  | 4     | 7523  |
| >DNMT3A-PϙAPLKEYFA    | 19391 | >DNMT3A-PϙALLKEYFA    | 109   | 19282 |
| >DNMT3A-PϙAPLKEYFACV  | 15869 | >DNMT3A-PϙALLKEYFACV  | 3     | 15866 |
| >DNMT3A-PϙAPLKEYFA    | 33320 | >DNMT3A-PϙALLKEYFA    | 16    | 33304 |
| >DNMT3A-PϙAPLKEYFAC   | 35549 | >DNMT3A-PϙALLKEYFAC   | 40    | 35509 |
| >DNMT3A-PϙAPLKEYFACV  | 13953 | >DNMT3A-PϙALLKEYFACV  | 3     | 13950 |
| >DNMT3A-PϙSVPVIRHLFAI | 18823 | >DNMT3A-PϙSVPVIRHLFAL | 253   | 18570 |
| >DNMT3A-PϙSVPVIRHLFAI | 7376  | >DNMT3A-PϙSVPVIRHLFAL | 95    | 7281  |
| >DNMT3A-PϙSVPVIRHLFAI | 7760  | >DNMT3A-PϙSVPVIRHLFAL | 39    | 7721  |
| >DNMT3A-PϙSVPVIRHLFAI | 6958  | >DNMT3A-PϙSVPVIRHLFAL | 24    | 6934  |
| >DNMT3A-PϙFAPLKEYFAC\ | 744   | >DNMT3A-PϙFALLKEYFAC\ | 98    | 646   |
| >DNMT3A-PϙFAPLKEYFAC\ | 282   | >DNMT3A-PϙFALLKEYFAC\ | 222   | 60    |
| >DNMT3A-PϙFAPLKEYFA   | 892   | >DNMT3A-PϙFALLKEYFA   | 180   | 712   |
| >DNMT3A-PϙFAPLKEYFAC\ | 78    | >DNMT3A-PϙFALLKEYFAC\ | 24    | 54    |
| >DNMT3A-PϙFAPLKEYFAC\ | 578   | >DNMT3A-PϙFALLKEYFAC\ | 88    | 490   |
| >DNMT3A-PϙFAPLKEYFAC\ | 2564  | >DNMT3A-PϙFALLKEYFAC\ | 129   | 2435  |
| >DNMT3A-PϙFAPLKEYFAC\ | 1112  | >DNMT3A-PϙFALLKEYFAC\ | 94    | 1018  |
| >DNMT3A-PϙFAPLKEYFAC\ | 2318  | >DNMT3A-PϙFALLKEYFAC\ | 79    | 2239  |
| >DNMT3A-PϙFAPLKEYFAC\ | 194   | >DNMT3A-PϙFALLKEYFAC\ | 100   | 94    |
| >DNMT3A-PϙFAPLKEYFA   | 496   | >DNMT3A-PϙFALLKEYFA   | 3008  | 2512  |
| >DNMT3A-PϙFAPLKEYFAC\ | 96    | >DNMT3A-PϙFALLKEYFAC\ | 517   | 421   |
| >DNMT3A-PϙFAPLKEYFAC\ | 3031  | >DNMT3A-PϙFALLKEYFAC\ | 317   | 2714  |
| >DNMT3A-PϙFAPLKEYFAC\ | 1001  | >DNMT3A-PϙFALLKEYFAC\ | 183   | 818   |
| >DNMT3A-PϙFAPLKEYF    | 3197  | >DNMT3A-PϙFALLKEYF    | 267   | 2930  |
| >DNMT3A-PϙFAPLKEYF    | 3841  | >DNMT3A-PϙFALLKEYF    | 61    | 3780  |
| >DNMT3A-PϙFAPLKEYFA   | 459   | >DNMT3A-PϙFALLKEYFA   | 70    | 389   |
| >DNMT3A-PϙFAPLKEYFAC\ | 1196  | >DNMT3A-PϙFALLKEYFAC\ | 257   | 939   |
| >DNMT3A-PϙFAPLKEYF    | 12988 | >DNMT3A-PϙFALLKEYF    | 410   | 12578 |
| >DNMT3A-PϙFAPLKEYF    | 455   | >DNMT3A-PϙFALLKEYF    | 27878 | 27423 |
| >DNMT3A-PϙFAPLKEYFAC\ | 118   | >DNMT3A-PϙFALLKEYFAC\ | 9770  | 9652  |
| >DNMT3A-PϙLFAPLKEYF   | 202   | >DNMT3A-PϙLFALLKEYF   | 1312  | 1110  |

|                                    |      |                                    |      |      |
|------------------------------------|------|------------------------------------|------|------|
| >DNMT3A-P <sup>ϕ</sup> LFAPLKEYF   | 9    | >DNMT3A-P <sup>ϕ</sup> LFALLKEYF   | 27   | 18   |
| >DNMT3A-P <sup>ϕ</sup> LFAPLKEY    | 26   | >DNMT3A-P <sup>ϕ</sup> LFALLKEY    | 43   | 17   |
| >DNMT3A-P <sup>ϕ</sup> LFAPLKEYF   | 242  | >DNMT3A-P <sup>ϕ</sup> LFALLKEYF   | 877  | 635  |
| >DNMT3A-P <sup>ϕ</sup> LFAPLKEYF   | 498  | >DNMT3A-P <sup>ϕ</sup> LFALLKEYF   | 2279 | 1781 |
| >DNMT3A-P <sup>ϕ</sup> LFAPLKEYFA  | 278  | >DNMT3A-P <sup>ϕ</sup> LFALLKEYFA  | 915  | 637  |
| >DNMT3A-P <sup>ϕ</sup> HLFAPLKEYFA | 57   | >DNMT3A-P <sup>ϕ</sup> HLFALLKEYFA | 34   | 23   |
| >DNMT3A-P <sup>ϕ</sup> HLFAPLKEYF  | 1028 | >DNMT3A-P <sup>ϕ</sup> HLFALLKEYF  | 474  | 554  |
| >DNMT3A-P <sup>ϕ</sup> HLFAPLKEYFA | 17   | >DNMT3A-P <sup>ϕ</sup> HLFALLKEYFA | 10   | 7    |
| >DNMT3A-P <sup>ϕ</sup> HLFAPLKEYFA | 84   | >DNMT3A-P <sup>ϕ</sup> HLFALLKEYFA | 57   | 27   |
| >DNMT3A-P <sup>ϕ</sup> HLFAPLKEYFA | 321  | >DNMT3A-P <sup>ϕ</sup> HLFALLKEYFA | 232  | 89   |
| >DNMT3A-P <sup>ϕ</sup> HLFAPLKEYF  | 144  | >DNMT3A-P <sup>ϕ</sup> HLFALLKEYF  | 316  | 172  |
| >DNMT3A-P <sup>ϕ</sup> HLFAPLKEYFA | 14   | >DNMT3A-P <sup>ϕ</sup> HLFALLKEYFA | 19   | 5    |
| >DNMT3A-P <sup>ϕ</sup> HLFAPLKEYFA | 58   | >DNMT3A-P <sup>ϕ</sup> HLFALLKEYFA | 50   | 8    |
| >DNMT3A-P <sup>ϕ</sup> HLFAPLKEYFA | 60   | >DNMT3A-P <sup>ϕ</sup> HLFALLKEYFA | 40   | 20   |
| >DNMT3A-P <sup>ϕ</sup> HLFAPLKEYFA | 29   | >DNMT3A-P <sup>ϕ</sup> HLFALLKEYFA | 25   | 4    |
| >DNMT3A-P <sup>ϕ</sup> HLFAPLKEY   | 214  | >DNMT3A-P <sup>ϕ</sup> HLFALLKEY   | 318  | 104  |
| >DNMT3A-P <sup>ϕ</sup> HLFAPLKEY   | 137  | >DNMT3A-P <sup>ϕ</sup> HLFALLKEY   | 81   | 56   |
| >DNMT3A-P <sup>ϕ</sup> HLFAPLKEYF  | 385  | >DNMT3A-P <sup>ϕ</sup> HLFALLKEYF  | 177  | 208  |
| >DNMT3A-P <sup>ϕ</sup> HLFAPLKEYFA | 124  | >DNMT3A-P <sup>ϕ</sup> HLFALLKEYFA | 189  | 65   |
| >DNMT3A-P <sup>ϕ</sup> HLFAPLKEY   | 171  | >DNMT3A-P <sup>ϕ</sup> HLFALLKEY   | 24   | 147  |
| >DNMT3A-P <sup>ϕ</sup> HLFAPLKEY   | 109  | >DNMT3A-P <sup>ϕ</sup> HLFALLKEY   | 98   | 11   |
| >DNMT3A-P <sup>ϕ</sup> HLFAPLKEYF  | 94   | >DNMT3A-P <sup>ϕ</sup> HLFALLKEYF  | 103  | 9    |
| >DNMT3A-P <sup>ϕ</sup> HLFAPLKEY   | 14   | >DNMT3A-P <sup>ϕ</sup> HLFALLKEY   | 49   | 35   |
| >DNMT3A-P <sup>ϕ</sup> HLFAPLKEYF  | 50   | >DNMT3A-P <sup>ϕ</sup> HLFALLKEYF  | 186  | 136  |
| >DNMT3A-P <sup>ϕ</sup> HLFAPLKEY   | 23   | >DNMT3A-P <sup>ϕ</sup> HLFALLKEY   | 49   | 26   |
| >DNMT3A-P <sup>ϕ</sup> HLFAPLKEYF  | 22   | >DNMT3A-P <sup>ϕ</sup> HLFALLKEYF  | 49   | 27   |
| >DNMT3A-P <sup>ϕ</sup> HLFAPLKEY   | 119  | >DNMT3A-P <sup>ϕ</sup> HLFALLKEY   | 252  | 133  |
| >DNMT3A-P <sup>ϕ</sup> HLFAPLKEYF  | 460  | >DNMT3A-P <sup>ϕ</sup> HLFALLKEYF  | 1108 | 648  |
| >DNMT3A-P <sup>ϕ</sup> HLFAPLKEY   | 91   | >DNMT3A-P <sup>ϕ</sup> HLFALLKEY   | 53   | 38   |
| >DNMT3A-P <sup>ϕ</sup> HLFAPLKEY   | 123  | >DNMT3A-P <sup>ϕ</sup> HLFALLKEY   | 186  | 63   |
| >DNMT3A-P <sup>ϕ</sup> RHLFAPLKEYI | 355  | >DNMT3A-P <sup>ϕ</sup> RHLFALLKEYF | 537  | 182  |
| >DNMT3A-P <sup>ϕ</sup> RHLFAPLKEYI | 147  | >DNMT3A-P <sup>ϕ</sup> RHLFALLKEYF | 98   | 49   |
| >DNMT3A-P <sup>ϕ</sup> RHLFAPLK    | 138  | >DNMT3A-P <sup>ϕ</sup> RHLFALLK    | 203  | 65   |
| >DNMT3A-P <sup>ϕ</sup> RHLFAPLKEY  | 705  | >DNMT3A-P <sup>ϕ</sup> RHLFALLKEY  | 493  | 212  |
| >DNMT3A-P <sup>ϕ</sup> RHLFAPLKEY  | 354  | >DNMT3A-P <sup>ϕ</sup> RHLFALLKEY  | 193  | 161  |
| >DNMT3A-P <sup>ϕ</sup> RHLFAPLKEY  | 53   | >DNMT3A-P <sup>ϕ</sup> RHLFALLKEY  | 100  | 47   |
| >DNMT3A-P <sup>ϕ</sup> RHLFAPLKEYI | 37   | >DNMT3A-P <sup>ϕ</sup> RHLFALLKEYF | 57   | 20   |
| >DNMT3A-P <sup>ϕ</sup> RHLFAPLKEY  | 451  | >DNMT3A-P <sup>ϕ</sup> RHLFALLKEY  | 357  | 94   |
| >DNMT3A-P <sup>ϕ</sup> IRHLFAPL    | 22   | >DNMT3A-P <sup>ϕ</sup> IRHLFALL    | 67   | 45   |
| >DNMT3A-P <sup>ϕ</sup> IRHLFAPLK   | 359  | >DNMT3A-P <sup>ϕ</sup> IRHLFALLK   | 659  | 300  |
| >DNMT3A-P <sup>ϕ</sup> IRHLFAPL    | 141  | >DNMT3A-P <sup>ϕ</sup> IRHLFALL    | 483  | 342  |
| >DNMT3A-P <sup>ϕ</sup> IRHLFAPLKEY | 57   | >DNMT3A-P <sup>ϕ</sup> IRHLFALLKEY | 71   | 14   |
| >DNMT3A-P <sup>ϕ</sup> IRHLFAPL    | 103  | >DNMT3A-P <sup>ϕ</sup> IRHLFALL    | 96   | 7    |

|                              |       |                              |      |       |
|------------------------------|-------|------------------------------|------|-------|
| >DNMT3A-P $\Psi$ IRHLFAPLK   | 91    | >DNMT3A-P $\Psi$ IRHLFALLK   | 39   | 52    |
| >DNMT3A-P $\Psi$ IRHLFAPLKEY | 735   | >DNMT3A-P $\Psi$ IRHLFALLKEY | 285  | 450   |
| >DNMT3A-P $\Psi$ IRHLFAPL    | 294   | >DNMT3A-P $\Psi$ IRHLFALL    | 1020 | 726   |
| >DNMT3A-P $\Psi$ IRHLFAPL    | 82    | >DNMT3A-P $\Psi$ IRHLFALL    | 106  | 24    |
| >DNMT3A-P $\Psi$ IRHLFAPL    | 169   | >DNMT3A-P $\Psi$ IRHLFALL    | 464  | 295   |
| >DNMT3A-P $\Psi$ IRHLFAPLK   | 49    | >DNMT3A-P $\Psi$ IRHLFALLK   | 29   | 20    |
| >DNMT3A-P $\Psi$ IRHLFAPLKEY | 949   | >DNMT3A-P $\Psi$ IRHLFALLKEY | 442  | 507   |
| >DNMT3A-P $\Psi$ VIRHLFAP    | 25350 | >DNMT3A-P $\Psi$ VIRHLFAL    | 438  | 24912 |
| >DNMT3A-P $\Psi$ VIRHLFAPL   | 48    | >DNMT3A-P $\Psi$ VIRHLFALL   | 75   | 27    |
| >DNMT3A-P $\Psi$ VIRHLFAP    | 15564 | >DNMT3A-P $\Psi$ VIRHLFAL    | 249  | 15315 |
| >DNMT3A-P $\Psi$ VIRHLFAPL   | 85    | >DNMT3A-P $\Psi$ VIRHLFALL   | 237  | 152   |
| >DNMT3A-P $\Psi$ VIRHLFAP    | 12843 | >DNMT3A-P $\Psi$ VIRHLFAL    | 226  | 12617 |
| >DNMT3A-P $\Psi$ VIRHLFAPL   | 232   | >DNMT3A-P $\Psi$ VIRHLFALL   | 744  | 512   |
| >DNMT3A-P $\Psi$ VIRHLFAP    | 28731 | >DNMT3A-P $\Psi$ VIRHLFAL    | 494  | 28237 |
| >DNMT3A-P $\Psi$ VIRHLFAPLK  | 169   | >DNMT3A-P $\Psi$ VIRHLFALLK  | 58   | 111   |
| >DNMT3A-P $\Psi$ VIRHLFAPLK  | 231   | >DNMT3A-P $\Psi$ VIRHLFALLK  | 75   | 156   |
| >DNMT3A-P $\Psi$ VIRHLFAP    | 3477  | >DNMT3A-P $\Psi$ VIRHLFAL    | 353  | 3124  |
| >DNMT3A-P $\Psi$ VIRHLFAPL   | 65    | >DNMT3A-P $\Psi$ VIRHLFALL   | 149  | 84    |
| >DNMT3A-P $\Psi$ VIRHLFAPLK  | 6     | >DNMT3A-P $\Psi$ VIRHLFALLK  | 7    | 1     |
| >DNMT3A-P $\Psi$ VIRHLFAPLK  | 618   | >DNMT3A-P $\Psi$ VIRHLFALLK  | 223  | 395   |
| >DNMT3A-P $\Psi$ VIRHLFAPL   | 212   | >DNMT3A-P $\Psi$ VIRHLFALL   | 7694 | 7482  |
| >DNMT3A-P $\Psi$ VIRHLFAP    | 10845 | >DNMT3A-P $\Psi$ VIRHLFAL    | 297  | 10548 |
| >DNMT3A-P $\Psi$ VIRHLFAPL   | 63    | >DNMT3A-P $\Psi$ VIRHLFALL   | 476  | 413   |
| >DNMT3A-P $\Psi$ VIRHLFAPL   | 117   | >DNMT3A-P $\Psi$ VIRHLFALL   | 1941 | 1824  |
| >DNMT3A-P $\Psi$ VIRHLFAPL   | 359   | >DNMT3A-P $\Psi$ VIRHLFALL   | 1758 | 1399  |
| >DNMT3A-P $\Psi$ VIRHLFAPL   | 1996  | >DNMT3A-P $\Psi$ VIRHLFALL   | 154  | 1842  |
| >DNMT3A-P $\Psi$ PVIRHLFAP   | 14555 | >DNMT3A-P $\Psi$ PVIRHLFAL   | 161  | 14394 |
| >DNMT3A-P $\Psi$ PVIRHLFAPLK | 129   | >DNMT3A-P $\Psi$ PVIRHLFALLK | 76   | 53    |
| >DNMT3A-P $\Psi$ PVIRHLFAP   | 1329  | >DNMT3A-P $\Psi$ PVIRHLFAL   | 7    | 1322  |
| >DNMT3A-P $\Psi$ PVIRHLFAPL  | 16    | >DNMT3A-P $\Psi$ PVIRHLFALL  | 62   | 46    |
| >DNMT3A-P $\Psi$ PVIRHLFAPLK | 280   | >DNMT3A-P $\Psi$ PVIRHLFALLK | 409  | 129   |
| >DNMT3A-P $\Psi$ VPVIRHLFAP  | 41267 | >DNMT3A-P $\Psi$ VPVIRHLFAL  | 285  | 40982 |
| >DNMT3A-P $\Psi$ VPVIRHLFAP  | 8474  | >DNMT3A-P $\Psi$ VPVIRHLFAL  | 133  | 8341  |
| >DNMT3A-P $\Psi$ VPVIRHLFAPI | 18    | >DNMT3A-P $\Psi$ VPVIRHLFALL | 105  | 87    |
| >DNMT3A-P $\Psi$ VPVIRHLFAPI | 152   | >DNMT3A-P $\Psi$ VPVIRHLFALL | 625  | 473   |
| >DNMT3A-P $\Psi$ VPVIRHLFAPI | 296   | >DNMT3A-P $\Psi$ VPVIRHLFALL | 2296 | 2000  |
| >DNMT3A-P $\Psi$ VPVIRHLFAP  | 477   | >DNMT3A-P $\Psi$ VPVIRHLFAL  | 1019 | 542   |
| >DNMT3A-R $\Psi$ RLFFEFYRL   | 16    | >DNMT3A-R $\Psi$ QLFFEFYRL   | 30   | 14    |
| >DNMT3A-R $\Psi$ RLFFEFYRL   | 152   | >DNMT3A-R $\Psi$ QLFFEFYRLL  | 314  | 162   |
| >DNMT3A-R $\Psi$ RLFFEFYRL   | 4     | >DNMT3A-R $\Psi$ QLFFEFYRL   | 5    | 1     |
| >DNMT3A-R $\Psi$ RLFFEFYRLL  | 46    | >DNMT3A-R $\Psi$ QLFFEFYRLL  | 58   | 12    |
| >DNMT3A-R $\Psi$ RLFFEFYRL   | 46    | >DNMT3A-R $\Psi$ QLFFEFYRL   | 261  | 215   |
| >DNMT3A-R $\Psi$ RLFFEFYRLL  | 166   | >DNMT3A-R $\Psi$ QLFFEFYRLL  | 267  | 101   |



|                      |       |                      |      |       |
|----------------------|-------|----------------------|------|-------|
| >DNMT3A-R:RLFFEFYRL  | 95    | >DNMT3A-R:QLFFEFYRL  | 135  | 40    |
| >DNMT3A-R:RLFFEFYRL  | 4     | >DNMT3A-R:QLFFEFYRL  | 15   | 11    |
| >DNMT3A-R:RLFFEFYRL  | 8     | >DNMT3A-R:QLFFEFYRL  | 43   | 35    |
| >DNMT3A-R:RLFFEFYRL  | 13    | >DNMT3A-R:QLFFEFYRL  | 50   | 37    |
| >DNMT3A-R:RLFFEFYRL  | 108   | >DNMT3A-R:QLFFEFYRL  | 503  | 395   |
| >DNMT3A-R:RLFFEFYRL  | 43    | >DNMT3A-R:QLFFEFYRL  | 348  | 305   |
| >DNMT3A-R:RLFFEFYRL  | 121   | >DNMT3A-R:QLFFEFYRL  | 756  | 635   |
| >DNMT3A-R:RLFFEFYRL  | 96    | >DNMT3A-R:QLFFEFYRL  | 151  | 55    |
| >DNMT3A-R:RLFFEFYRL  | 8     | >DNMT3A-R:QLFFEFYRL  | 14   | 6     |
| >DNMT3A-R:RLFFEFYRL  | 24    | >DNMT3A-R:QLFFEFYRL  | 57   | 33    |
| >DNMT3A-R:RLFFEFYR   | 47    | >DNMT3A-R:QLFFEFYR   | 292  | 245   |
| >DNMT3A-R:RLFFEFYRL  | 63    | >DNMT3A-R:QLFFEFYRL  | 409  | 346   |
| >DNMT3A-R:RLFFEFYR   | 25    | >DNMT3A-R:QLFFEFYR   | 81   | 56    |
| >DNMT3A-R:RLFFEFYRL  | 246   | >DNMT3A-R:QLFFEFYRL  | 1484 | 1238  |
| >DNMT3A-R:RLFFEFYRL  | 91    | >DNMT3A-R:QLFFEFYRL  | 357  | 266   |
| >DNMT3A-R:RLFFEFYRL  | 312   | >DNMT3A-R:QLFFEFYRL  | 120  | 192   |
| >DNMT3A-R:RLFFEFYR   | 6     | >DNMT3A-R:QLFFEFYR   | 13   | 7     |
| >DNMT3A-R:RLFFEFYRL  | 357   | >DNMT3A-R:QLFFEFYRL  | 4582 | 4225  |
| >DNMT3A-R:RLFFEFYRL  | 10    | >DNMT3A-R:QLFFEFYRL  | 36   | 26    |
| >DNMT3A-R:RLFFEFYRL  | 26    | >DNMT3A-R:QLFFEFYRL  | 214  | 188   |
| >DNMT3A-R:RLFFEFYR   | 83    | >DNMT3A-R:QLFFEFYR   | 35   | 48    |
| >DNMT3A-R:RLFFEFYR   | 21    | >DNMT3A-R:QLFFEFYR   | 6    | 15    |
| >DNMT3A-R:RLFFEFYRL  | 2320  | >DNMT3A-R:QLFFEFYRL  | 127  | 2193  |
| >DNMT3A-R:RLFFEFYRL  | 316   | >DNMT3A-R:QLFFEFYRL  | 1297 | 981   |
| >DNMT3A-R:RLFFEFYRL  | 204   | >DNMT3A-R:QLFFEFYRL  | 803  | 599   |
| >DNMT3A-R:RLFFEFYR   | 662   | >DNMT3A-R:QLFFEFYR   | 295  | 367   |
| >DNMT3A-R:RLFFEFYR   | 12    | >DNMT3A-R:QLFFEFYR   | 18   | 6     |
| >DNMT3A-R:RLFFEFYRL  | 583   | >DNMT3A-R:QLFFEFYRL  | 307  | 276   |
| >DNMT3A-R:GRLFFEFYRL | 5499  | >DNMT3A-R:GQLFFEFYRL | 234  | 5265  |
| >DNMT3A-R:GRLFFEFYRL | 2398  | >DNMT3A-R:GQLFFEFYRL | 111  | 2287  |
| >DNMT3A-R:GRLFFEFYRL | 3396  | >DNMT3A-R:GQLFFEFYRL | 113  | 3283  |
| >DNMT3A-R:GRLFFEFYRL | 17382 | >DNMT3A-R:GQLFFEFYRL | 143  | 17239 |
| >DNMT3A-R:GRLFFEFYRL | 12149 | >DNMT3A-R:GQLFFEFYRL | 344  | 11805 |
| >DNMT3A-R:GRLFFEFYRL | 13171 | >DNMT3A-R:GQLFFEFYRL | 210  | 12961 |
| >DNMT3A-R:GRLFFEFY   | 16680 | >DNMT3A-R:GQLFFEFY   | 363  | 16317 |
| >DNMT3A-R:GRLFFEFYR  | 6545  | >DNMT3A-R:GQLFFEFYR  | 33   | 6512  |
| >DNMT3A-R:GRLFFEFY   | 201   | >DNMT3A-R:GQLFFEFY   | 67   | 134   |
| >DNMT3A-R:GRLFFEFY   | 610   | >DNMT3A-R:GQLFFEFY   | 127  | 483   |
| >DNMT3A-R:GRLFFEFYR  | 598   | >DNMT3A-R:GQLFFEFYR  | 6    | 592   |
| >DNMT3A-R:GRLFFEFYR  | 959   | >DNMT3A-R:GQLFFEFYR  | 317  | 642   |
| >DNMT3A-R:GRLFFEFY   | 16542 | >DNMT3A-R:GQLFFEFY   | 322  | 16220 |
| >DNMT3A-R:GRLFFEFY   | 478   | >DNMT3A-R:GQLFFEFY   | 48   | 430   |
| >DNMT3A-R:GRLFFEFYRL | 2036  | >DNMT3A-R:GQLFFEFYRL | 381  | 1655  |

|                       |      |                       |      |      |
|-----------------------|------|-----------------------|------|------|
| >DNMT3A-R:GRLFFEFY    | 215  | >DNMT3A-R:GQLFFEFY    | 4697 | 4482 |
| >DNMT3A-R:GRLFFEFYR   | 137  | >DNMT3A-R:GQLFFEFYR   | 3123 | 2986 |
| >DNMT3A-R:GRLFFEFYRL  | 25   | >DNMT3A-R:GQLFFEFYRL  | 1443 | 1418 |
| >DNMT3A-R:GRLFFEFYRLL | 53   | >DNMT3A-R:GQLFFEFYRLI | 1576 | 1523 |
| >DNMT3A-R:GRLFFEFYRL  | 7243 | >DNMT3A-R:GQLFFEFYRL  | 283  | 6960 |
| >DNMT3A-R:GRLFFEFYRLL | 2885 | >DNMT3A-R:GQLFFEFYRLI | 83   | 2802 |
| >DNMT3A-R:GRLFFEFYRLL | 55   | >DNMT3A-R:GQLFFEFYRLI | 938  | 883  |
| >DNMT3A-R:GRLFFEFYRLL | 6    | >DNMT3A-R:GQLFFEFYRLI | 67   | 61   |
| >DNMT3A-R:GRLFFEFYR   | 988  | >DNMT3A-R:GQLFFEFYR   | 252  | 736  |
| >DNMT3A-R:GRLFFEFYR   | 84   | >DNMT3A-R:GQLFFEFYR   | 51   | 33   |
| >DNMT3A-R:ARKGLYEGTC  | 233  | >DNMT3A-R:ARKGLYEGTC  | 3187 | 2954 |
| >DNMT3A-R:TGRLFFEFY   | 1018 | >DNMT3A-R:TGQLFFEFY   | 447  | 571  |
| >DNMT3A-R:TGRLFFEFYR  | 23   | >DNMT3A-R:TGQLFFEFYR  | 32   | 9    |
| >DNMT3A-R:TGRLFFEFYR  | 94   | >DNMT3A-R:TGQLFFEFYR  | 103  | 9    |
| >DNMT3A-R:TGRLFFEFY   | 143  | >DNMT3A-R:TGQLFFEFY   | 608  | 465  |
| >DNMT3A-R:TGRLFFEFYR  | 54   | >DNMT3A-R:TGQLFFEFYR  | 40   | 14   |
| >DNMT3A-R:GTGRLFFEFY  | 337  | >DNMT3A-R:GTGQLFFEFY  | 291  | 46   |
| >DNMT3A-R:GTGRLFFEFY  | 691  | >DNMT3A-R:GTGQLFFEFY  | 432  | 259  |
| >DNMT3A-R:GTGRLFFEFYI | 19   | >DNMT3A-R:GTGQLFFEFY  | 32   | 13   |
| >DNMT3A-R:GTGRLFFEF   | 370  | >DNMT3A-R:GTGQLFFEF   | 582  | 212  |
| >DNMT3A-R:GTGRLFFEF   | 59   | >DNMT3A-R:GTGQLFFEF   | 37   | 22   |
| >DNMT3A-R:GTGRLFFEFY  | 1038 | >DNMT3A-R:GTGQLFFEFY  | 266  | 772  |
| >DNMT3A-R:GTGRLFFEF   | 764  | >DNMT3A-R:GTGQLFFEF   | 329  | 435  |
| >DNMT3A-R:GTGRLFFEFY  | 68   | >DNMT3A-R:GTGQLFFEFY  | 54   | 14   |
| >DNMT3A-R:GTGRLFFEFY  | 114  | >DNMT3A-R:GTGQLFFEFY  | 234  | 120  |
| >DNMT3A-R:GTGRLFFEFYI | 7    | >DNMT3A-R:GTGQLFFEFY  | 12   | 5    |
| >DNMT3A-R:GTGRLFFEF   | 340  | >DNMT3A-R:GTGQLFFEF   | 284  | 56   |
| >DNMT3A-R:GTGRLFFEFYI | 214  | >DNMT3A-R:GTGQLFFEFY  | 262  | 48   |
| >DNMT3A-R:GTGRLFFEFYI | 36   | >DNMT3A-R:GTGQLFFEFY  | 35   | 1    |
| >DNMT3A-R:GTGRLFFEFY  | 24   | >DNMT3A-R:GTGQLFFEFY  | 33   | 9    |
| >DNMT3A-R:GTGRLFFEF   | 938  | >DNMT3A-R:GTGQLFFEF   | 449  | 489  |
| >DNMT3A-R:GTGRLFFEF   | 356  | >DNMT3A-R:GTGQLFFEF   | 66   | 290  |
| >DNMT3A-R:GTGRLFFEF   | 257  | >DNMT3A-R:GTGQLFFEF   | 522  | 265  |
| >DNMT3A-R:GTGRLFFEF   | 1027 | >DNMT3A-R:GTGQLFFEF   | 458  | 569  |
| >DNMT3A-R:GTGRLFFEF   | 34   | >DNMT3A-R:GTGQLFFEF   | 30   | 4    |
| >DNMT3A-R:GTGRLFFEFY  | 75   | >DNMT3A-R:GTGQLFFEFY  | 184  | 109  |
| >DNMT3A-R:GTGRLFFEF   | 405  | >DNMT3A-R:GTGQLFFEF   | 343  | 62   |
| >DNMT3A-R:GTGRLFFEFY  | 293  | >DNMT3A-R:GTGQLFFEFY  | 259  | 34   |
| >DNMT3A-R:GTGRLFFEFYI | 109  | >DNMT3A-R:GTGQLFFEFY  | 92   | 17   |
| >DNMT3A-R:GTGRLFFEFYI | 198  | >DNMT3A-R:GTGQLFFEFY  | 86   | 112  |
| >DNMT3A-R:EGTGRLFFEF  | 704  | >DNMT3A-R:EGTGQLFFEF  | 264  | 440  |
| >DNMT3A-R:YEGTGRLF    | 10   | >DNMT3A-R:YEGTGQLF    | 21   | 11   |
| >DNMT3A-R:YEGTGRLFF   | 105  | >DNMT3A-R:YEGTGQLFF   | 194  | 89   |

|                       |      |                      |     |      |
|-----------------------|------|----------------------|-----|------|
| >DNMT3A-R;YEGTGRLFFEI | 329  | >DNMT3A-R;YEGTGQLFFE | 408 | 79   |
| >DNMT3A-R;YEGTGRLF    | 454  | >DNMT3A-R;YEGTGQLF   | 268 | 186  |
| >DNMT3A-R;YEGTGRLFF   | 405  | >DNMT3A-R;YEGTGQLFF  | 489 | 84   |
| >DNMT3A-R;YEGTGRLFFEI | 245  | >DNMT3A-R;YEGTGQLFFE | 287 | 42   |
| >DNMT3A-R;YEGTGRLF    | 50   | >DNMT3A-R;YEGTGQLF   | 63  | 13   |
| >DNMT3A-R;YEGTGRLFF   | 20   | >DNMT3A-R;YEGTGQLFF  | 41  | 21   |
| >DNMT3A-R;YEGTGRLFFEI | 11   | >DNMT3A-R;YEGTGQLFFE | 14  | 3    |
| >DNMT3A-R;YEGTGRLF    | 568  | >DNMT3A-R;YEGTGQLF   | 299 | 269  |
| >DNMT3A-R;YEGTGRLFF   | 234  | >DNMT3A-R;YEGTGQLFF  | 261 | 27   |
| >DNMT3A-R;YEGTGRLFFEI | 106  | >DNMT3A-R;YEGTGQLFFE | 108 | 2    |
| >DNMT3A-R;YEGTGRLFFEI | 203  | >DNMT3A-R;YEGTGQLFFE | 216 | 13   |
| >DNMT3A-R;YEGTGRLF    | 509  | >DNMT3A-R;YEGTGQLF   | 338 | 171  |
| >DNMT3A-R;YEGTGRLFF   | 446  | >DNMT3A-R;YEGTGQLFF  | 251 | 195  |
| >DNMT3A-R;YEGTGRLFFEI | 216  | >DNMT3A-R;YEGTGQLFFE | 154 | 62   |
| >DNMT3A-R;YEGTGRLFF   | 97   | >DNMT3A-R;YEGTGQLFF  | 130 | 33   |
| >DNMT3A-R;YEGTGRLFFEI | 30   | >DNMT3A-R;YEGTGQLFFE | 33  | 3    |
| >DNMT3A-R;LYEGTGRL    | 296  | >DNMT3A-R;LYEGTGQL   | 178 | 118  |
| >DNMT3A-R;LYEGTGRLF   | 458  | >DNMT3A-R;LYEGTGQLF  | 95  | 363  |
| >DNMT3A-R;LYEGTGRLFF  | 31   | >DNMT3A-R;LYEGTGQLFF | 49  | 18   |
| >DNMT3A-R;LYEGTGRLF   | 361  | >DNMT3A-R;LYEGTGQLF  | 135 | 226  |
| >DNMT3A-R;LYEGTGRLFF  | 77   | >DNMT3A-R;LYEGTGQLFF | 105 | 28   |
| >DNMT3A-R;LYEGTGRL    | 49   | >DNMT3A-R;LYEGTGQL   | 17  | 32   |
| >DNMT3A-R;LYEGTGRLF   | 18   | >DNMT3A-R;LYEGTGQLF  | 8   | 10   |
| >DNMT3A-R;LYEGTGRLFF  | 9    | >DNMT3A-R;LYEGTGQLFF | 7   | 2    |
| >DNMT3A-R;LYEGTGRLFF  | 24   | >DNMT3A-R;LYEGTGQLFF | 26  | 2    |
| >DNMT3A-R;LYEGTGRLFF  | 336  | >DNMT3A-R;LYEGTGQLFF | 387 | 51   |
| >DNMT3A-R;GLYEGTGRL   | 72   | >DNMT3A-R;GLYEGTGQL  | 66  | 6    |
| >DNMT3A-R;GLYEGTGRL   | 27   | >DNMT3A-R;GLYEGTGQL  | 18  | 9    |
| >DNMT3A-R;GLYEGTGRL   | 5    | >DNMT3A-R;GLYEGTGQL  | 4   | 1    |
| >DNMT3A-R;GLYEGTGRLF  | 740  | >DNMT3A-R;GLYEGTGQLF | 499 | 241  |
| >DNMT3A-R;GLYEGTGRL   | 264  | >DNMT3A-R;GLYEGTGQL  | 150 | 114  |
| >DNMT3A-R;GLYEGTGRLF  | 508  | >DNMT3A-R;GLYEGTGQLF | 419 | 89   |
| >DNMT3A-R;GLYEGTGR    | 1259 | >DNMT3A-R;GLYEGTGQ   | 128 | 1131 |
| >DNMT3A-R;GLYEGTGRL   | 3    | >DNMT3A-R;GLYEGTGQL  | 3   | 0    |
| >DNMT3A-R;GLYEGTGRLF  | 170  | >DNMT3A-R;GLYEGTGQLF | 65  | 105  |
| >DNMT3A-R;GLYEGTGRLF  | 126  | >DNMT3A-R;GLYEGTGQLF | 44  | 82   |
| >DNMT3A-R;GLYEGTGRL   | 10   | >DNMT3A-R;GLYEGTGQL  | 9   | 1    |
| >DNMT3A-R;GLYEGTGR    | 4379 | >DNMT3A-R;GLYEGTGQ   | 182 | 4197 |
| >DNMT3A-R;GLYEGTGRL   | 8    | >DNMT3A-R;GLYEGTGQL  | 6   | 2    |
| >DNMT3A-R;GLYEGTGRLF  | 1042 | >DNMT3A-R;GLYEGTGQLF | 363 | 679  |
| >DNMT3A-R;GLYEGTGRL   | 170  | >DNMT3A-R;GLYEGTGQL  | 54  | 116  |
| >DNMT3A-R;GLYEGTGR    | 1488 | >DNMT3A-R;GLYEGTGQ   | 26  | 1462 |
| >DNMT3A-R;GLYEGTGRL   | 3    | >DNMT3A-R;GLYEGTGQL  | 3   | 0    |

|                       |      |                       |       |       |
|-----------------------|------|-----------------------|-------|-------|
| >DNMT3A-R; GLYEGTGRLF | 2031 | >DNMT3A-R; GLYEGTGQLF | 299   | 1732  |
| >DNMT3A-R; GLYEGTGRLF | 433  | >DNMT3A-R; GLYEGTGQLF | 314   | 119   |
| >DNMT3A-R; GLYEGTGR   | 190  | >DNMT3A-R; GLYEGTGQ   | 11372 | 11182 |
| >DNMT3A-R; GLYEGTGRLF | 82   | >DNMT3A-R; GLYEGTGQLF | 57    | 25    |
| >DNMT3A-R; GLYEGTGRLF | 151  | >DNMT3A-R; GLYEGTGQLF | 94    | 57    |
| >DNMT3A-R; GLYEGTGRLF | 100  | >DNMT3A-R; GLYEGTGQLF | 97    | 3     |
| >DNMT3A-R; GLYEGTGRL  | 437  | >DNMT3A-R; GLYEGTGQL  | 296   | 141   |
| >DNMT3A-R; GLYEGTGRLF | 35   | >DNMT3A-R; GLYEGTGQLF | 26    | 9     |
| >DNMT3A-R; GLYEGTGRLF | 91   | >DNMT3A-R; GLYEGTGQLF | 76    | 15    |
| >DNMT3A-R; GLYEGTGRLF | 457  | >DNMT3A-R; GLYEGTGQLF | 190   | 267   |
| >DNMT3A-R; GLYEGTGRLF | 261  | >DNMT3A-R; GLYEGTGQLF | 286   | 25    |
| >DNMT3A-R; GLYEGTGRLF | 246  | >DNMT3A-R; GLYEGTGQLF | 136   | 110   |
| >DNMT3A-R; GLYEGTGRLF | 202  | >DNMT3A-R; GLYEGTGQLF | 136   | 66    |
| >DNMT3A-R; KGLYEGTGRL | 210  | >DNMT3A-R; KGLYEGTGQL | 105   | 105   |
| >DNMT3A-R; KGLYEGTGRL | 420  | >DNMT3A-R; KGLYEGTGQL | 191   | 229   |
| >DNMT3A-R; KGLYEGTGRL | 203  | >DNMT3A-R; KGLYEGTGQL | 162   | 41    |
| >DNMT3A-R; KGLYEGTGR  | 174  | >DNMT3A-R; KGLYEGTGQ  | 17708 | 17534 |
| >DNMT3A-R; RLFFEFYRL  | 16   | >DNMT3A-R; WLFFEFYRL  | 12    | 4     |
| >DNMT3A-R; RLFFEFYRL  | 152  | >DNMT3A-R; WLFFEFYRL  | 190   | 38    |
| >DNMT3A-R; RLFFEFYRL  | 4    | >DNMT3A-R; WLFFEFYRL  | 3     | 1     |
| >DNMT3A-R; RLFFEFYRL  | 46   | >DNMT3A-R; WLFFEFYRL  | 36    | 10    |
| >DNMT3A-R; RLFFEFYRL  | 46   | >DNMT3A-R; WLFFEFYRL  | 41    | 5     |
| >DNMT3A-R; RLFFEFYRL  | 166  | >DNMT3A-R; WLFFEFYRL  | 164   | 2     |
| >DNMT3A-R; RLFFEFYRL  | 95   | >DNMT3A-R; WLFFEFYRL  | 27    | 68    |
| >DNMT3A-R; RLFFEFYRL  | 662  | >DNMT3A-R; WLFFEFYRL  | 478   | 184   |
| >DNMT3A-R; RLFFEFYRL  | 4    | >DNMT3A-R; WLFFEFYRL  | 4     | 0     |
| >DNMT3A-R; RLFFEFYRL  | 8    | >DNMT3A-R; WLFFEFYRL  | 8     | 0     |
| >DNMT3A-R; RLFFEFYRL  | 13   | >DNMT3A-R; WLFFEFYRL  | 14    | 1     |
| >DNMT3A-R; RLFFEFYRL  | 108  | >DNMT3A-R; WLFFEFYRL  | 98    | 10    |
| >DNMT3A-R; RLFFEFYRL  | 43   | >DNMT3A-R; WLFFEFYRL  | 30    | 13    |
| >DNMT3A-R; RLFFEFYRL  | 121  | >DNMT3A-R; WLFFEFYRL  | 77    | 44    |
| >DNMT3A-R; RLFFEFYRL  | 96   | >DNMT3A-R; WLFFEFYRL  | 10    | 86    |
| >DNMT3A-R; RLFFEFYRL  | 1008 | >DNMT3A-R; WLFFEFYRL  | 130   | 878   |
| >DNMT3A-R; RLFFEFYRL  | 8    | >DNMT3A-R; WLFFEFYRL  | 5     | 3     |
| >DNMT3A-R; RLFFEFYRL  | 24   | >DNMT3A-R; WLFFEFYRL  | 12    | 12    |
| >DNMT3A-R; RLFFEFYR   | 47   | >DNMT3A-R; WLFFEFYR   | 1706  | 1659  |
| >DNMT3A-R; RLFFEFYRL  | 63   | >DNMT3A-R; WLFFEFYRL  | 1928  | 1865  |
| >DNMT3A-R; RLFFEFYR   | 25   | >DNMT3A-R; WLFFEFYR   | 617   | 592   |
| >DNMT3A-R; RLFFEFYRL  | 246  | >DNMT3A-R; WLFFEFYRL  | 7663  | 7417  |
| >DNMT3A-R; RLFFEFYRL  | 91   | >DNMT3A-R; WLFFEFYRL  | 110   | 19    |
| >DNMT3A-R; RLFFEFYRL  | 312  | >DNMT3A-R; WLFFEFYRL  | 61    | 251   |
| >DNMT3A-R; RLFFEFYR   | 6    | >DNMT3A-R; WLFFEFYR   | 32    | 26    |
| >DNMT3A-R; RLFFEFYRL  | 357  | >DNMT3A-R; WLFFEFYRL  | 9027  | 8670  |

|                         |       |                       |       |       |
|-------------------------|-------|-----------------------|-------|-------|
| >DNMT3A-R: RLFFEFYRL    | 10    | >DNMT3A-R: WLFFEFYRL  | 941   | 931   |
| >DNMT3A-R: RLFFEFYRLL   | 26    | >DNMT3A-R: WLFFEFYRLL | 4012  | 3986  |
| >DNMT3A-R: RLFFEFYR     | 83    | >DNMT3A-R: WLFFEFYR   | 54    | 29    |
| >DNMT3A-R: RLFFEFYR     | 21    | >DNMT3A-R: WLFFEFYR   | 8     | 13    |
| >DNMT3A-R: RLFFEFYRL    | 2320  | >DNMT3A-R: WLFFEFYRL  | 90    | 2230  |
| >DNMT3A-R: RLFFEFYRL    | 510   | >DNMT3A-R: WLFFEFYRL  | 364   | 146   |
| >DNMT3A-R: RLFFEFYRL    | 316   | >DNMT3A-R: WLFFEFYRL  | 507   | 191   |
| >DNMT3A-R: RLFFEFYRLL   | 204   | >DNMT3A-R: WLFFEFYRLL | 324   | 120   |
| >DNMT3A-R: RLFFEFYR     | 12    | >DNMT3A-R: WLFFEFYR   | 16    | 4     |
| >DNMT3A-R: GRLLFFEFYRLL | 1653  | >DNMT3A-R: GWLFFEFYRL | 148   | 1505  |
| >DNMT3A-R: GRLLFFEFYRL  | 17030 | >DNMT3A-R: GWLFFEFYRL | 91    | 16939 |
| >DNMT3A-R: GRLLFFEFYRL  | 17777 | >DNMT3A-R: GWLFFEFYRL | 87    | 17690 |
| >DNMT3A-R: GRLLFFEFYRLL | 20647 | >DNMT3A-R: GWLFFEFYRL | 168   | 20479 |
| >DNMT3A-R: GRLLFFEFY    | 201   | >DNMT3A-R: GWLFFEFY   | 13    | 188   |
| >DNMT3A-R: GRLLFFEFY    | 610   | >DNMT3A-R: GWLFFEFY   | 109   | 501   |
| >DNMT3A-R: GRLLFFEFYR   | 598   | >DNMT3A-R: GWLFFEFYR  | 13    | 585   |
| >DNMT3A-R: GRLLFFEFYR   | 2658  | >DNMT3A-R: GWLFFEFYR  | 272   | 2386  |
| >DNMT3A-R: GRLLFFEFY    | 478   | >DNMT3A-R: GWLFFEFY   | 6334  | 5856  |
| >DNMT3A-R: GRLLFFEFY    | 215   | >DNMT3A-R: GWLFFEFY   | 13110 | 12895 |
| >DNMT3A-R: GRLLFFEFYR   | 137   | >DNMT3A-R: GWLFFEFYR  | 13704 | 13567 |
| >DNMT3A-R: GRLLFFEFYRL  | 25    | >DNMT3A-R: GWLFFEFYRL | 1854  | 1829  |
| >DNMT3A-R: GRLLFFEFYRLL | 53    | >DNMT3A-R: GWLFFEFYRL | 10401 | 10348 |
| >DNMT3A-R: GRLLFFEFYRLL | 55    | >DNMT3A-R: GWLFFEFYRL | 5551  | 5496  |
| >DNMT3A-R: GRLLFFEFYRLL | 6     | >DNMT3A-R: GWLFFEFYRL | 1788  | 1782  |
| >DNMT3A-R: GRLLFFEFYR   | 84    | >DNMT3A-R: GWLFFEFYR  | 12    | 72    |
| >DNMT3A-R: GRLLFFEFY    | 30344 | >DNMT3A-R: GWLFFEFY   | 129   | 30215 |
| >DNMT3A-R: GRLLFFEFYR   | 33095 | >DNMT3A-R: GWLFFEFYR  | 237   | 32858 |
| >DNMT3A-R: GRLLFFEFYRL  | 28305 | >DNMT3A-R: GWLFFEFYRL | 350   | 27955 |
| >DNMT3A-R: GRLLFFEFYRLL | 27119 | >DNMT3A-R: GWLFFEFYRL | 96    | 27023 |
| >DNMT3A-R: ARKGLYEGTC   | 233   | >DNMT3A-R: ARKGLYEGTC | 2241  | 2008  |
| >DNMT3A-R: TGRLLFFEFYRL | 698   | >DNMT3A-R: TGWLFFEFYR | 248   | 450   |
| >DNMT3A-R: TGRLLFFEF    | 3343  | >DNMT3A-R: TGWLFFEF   | 494   | 2849  |
| >DNMT3A-R: TGRLLFFEFY   | 902   | >DNMT3A-R: TGWLFFEFY  | 48    | 854   |
| >DNMT3A-R: TGRLLFFEFY   | 1018  | >DNMT3A-R: TGWLFFEFY  | 265   | 753   |
| >DNMT3A-R: TGRLLFFEFYR  | 23    | >DNMT3A-R: TGWLFFEFYR | 31    | 8     |
| >DNMT3A-R: TGRLLFFEFYR  | 94    | >DNMT3A-R: TGWLFFEFYR | 100   | 6     |
| >DNMT3A-R: TGRLLFFEF    | 3907  | >DNMT3A-R: TGWLFFEF   | 227   | 3680  |
| >DNMT3A-R: TGRLLFFEFY   | 143   | >DNMT3A-R: TGWLFFEFY  | 572   | 429   |
| >DNMT3A-R: TGRLLFFEFYR  | 54    | >DNMT3A-R: TGWLFFEFYR | 13    | 41    |
| >DNMT3A-R: GTGRLFFEFY   | 337   | >DNMT3A-R: GTGWLFFEFY | 340   | 3     |
| >DNMT3A-R: GTGRLFFEFY   | 691   | >DNMT3A-R: GTGWLFFEFY | 357   | 334   |
| >DNMT3A-R: GTGRLFFEFYI  | 19    | >DNMT3A-R: GTGWLFFEFY | 13    | 6     |
| >DNMT3A-R: GTGRLFFEF    | 370   | >DNMT3A-R: GTGWLFFEF  | 673   | 303   |

|                       |      |                      |     |      |
|-----------------------|------|----------------------|-----|------|
| >DNMT3A-R;GTGRLFFEF   | 59   | >DNMT3A-R;GTGWLFFEF  | 59  | 0    |
| >DNMT3A-R;GTGRLFFEF   | 764  | >DNMT3A-R;GTGWLFFEF  | 250 | 514  |
| >DNMT3A-R;GTGRLFFEFY  | 68   | >DNMT3A-R;GTGWLFFEFY | 48  | 20   |
| >DNMT3A-R;GTGRLFFEFY  | 114  | >DNMT3A-R;GTGWLFFEFY | 143 | 29   |
| >DNMT3A-R;GTGRLFFEFYI | 7    | >DNMT3A-R;GTGWLFFEFY | 7   | 0    |
| >DNMT3A-R;GTGRLFFEF   | 340  | >DNMT3A-R;GTGWLFFEF  | 98  | 242  |
| >DNMT3A-R;GTGRLFFEFYI | 214  | >DNMT3A-R;GTGWLFFEFY | 124 | 90   |
| >DNMT3A-R;GTGRLFFEFYI | 36   | >DNMT3A-R;GTGWLFFEFY | 16  | 20   |
| >DNMT3A-R;GTGRLFFEFY  | 24   | >DNMT3A-R;GTGWLFFEFY | 52  | 28   |
| >DNMT3A-R;GTGRLFFEF   | 356  | >DNMT3A-R;GTGWLFFEF  | 107 | 249  |
| >DNMT3A-R;GTGRLFFEF   | 257  | >DNMT3A-R;GTGWLFFEF  | 302 | 45   |
| >DNMT3A-R;GTGRLFFEF   | 1027 | >DNMT3A-R;GTGWLFFEF  | 293 | 734  |
| >DNMT3A-R;GTGRLFFEF   | 34   | >DNMT3A-R;GTGWLFFEF  | 42  | 8    |
| >DNMT3A-R;GTGRLFFEFY  | 75   | >DNMT3A-R;GTGWLFFEFY | 63  | 12   |
| >DNMT3A-R;GTGRLFFEF   | 405  | >DNMT3A-R;GTGWLFFEF  | 474 | 69   |
| >DNMT3A-R;GTGRLFFEFY  | 293  | >DNMT3A-R;GTGWLFFEFY | 348 | 55   |
| >DNMT3A-R;GTGRLFFEFYI | 109  | >DNMT3A-R;GTGWLFFEFY | 122 | 13   |
| >DNMT3A-R;GTGRLFFEFYI | 198  | >DNMT3A-R;GTGWLFFEFY | 72  | 126  |
| >DNMT3A-R;EGTGRLFFEF  | 704  | >DNMT3A-R;EGTGWLFFEF | 174 | 530  |
| >DNMT3A-R;EGTGRLFFEF  | 1630 | >DNMT3A-R;EGTGWLFFEF | 331 | 1299 |
| >DNMT3A-R;EGTGRLFFEF  | 1371 | >DNMT3A-R;EGTGWLFFEF | 355 | 1016 |
| >DNMT3A-R;YEGTGRLF    | 10   | >DNMT3A-R;YEGTGWLF   | 57  | 47   |
| >DNMT3A-R;YEGTGRLFF   | 105  | >DNMT3A-R;YEGTGWLFF  | 91  | 14   |
| >DNMT3A-R;YEGTGRLFFEI | 329  | >DNMT3A-R;YEGTGWLFFE | 324 | 5    |
| >DNMT3A-R;YEGTGRLFF   | 1673 | >DNMT3A-R;YEGTGWLFF  | 341 | 1332 |
| >DNMT3A-R;YEGTGRLF    | 454  | >DNMT3A-R;YEGTGWLF   | 561 | 107  |
| >DNMT3A-R;YEGTGRLFF   | 405  | >DNMT3A-R;YEGTGWLFF  | 601 | 196  |
| >DNMT3A-R;YEGTGRLFFEI | 245  | >DNMT3A-R;YEGTGWLFFE | 375 | 130  |
| >DNMT3A-R;YEGTGRLF    | 50   | >DNMT3A-R;YEGTGWLF   | 17  | 33   |
| >DNMT3A-R;YEGTGRLFF   | 20   | >DNMT3A-R;YEGTGWLFF  | 28  | 8    |
| >DNMT3A-R;YEGTGRLFFEI | 11   | >DNMT3A-R;YEGTGWLFFE | 11  | 0    |
| >DNMT3A-R;YEGTGRLF    | 568  | >DNMT3A-R;YEGTGWLF   | 138 | 430  |
| >DNMT3A-R;YEGTGRLFF   | 234  | >DNMT3A-R;YEGTGWLFF  | 67  | 167  |
| >DNMT3A-R;YEGTGRLFFEI | 106  | >DNMT3A-R;YEGTGWLFFE | 42  | 64   |
| >DNMT3A-R;YEGTGRLFF   | 508  | >DNMT3A-R;YEGTGWLFF  | 327 | 181  |
| >DNMT3A-R;YEGTGRLFFEI | 203  | >DNMT3A-R;YEGTGWLFFE | 157 | 46   |
| >DNMT3A-R;YEGTGRLF    | 509  | >DNMT3A-R;YEGTGWLF   | 108 | 401  |
| >DNMT3A-R;YEGTGRLFF   | 446  | >DNMT3A-R;YEGTGWLFF  | 66  | 380  |
| >DNMT3A-R;YEGTGRLFFEI | 216  | >DNMT3A-R;YEGTGWLFFE | 82  | 134  |
| >DNMT3A-R;YEGTGRLF    | 951  | >DNMT3A-R;YEGTGWLF   | 295 | 656  |
| >DNMT3A-R;YEGTGRLFF   | 97   | >DNMT3A-R;YEGTGWLFF  | 47  | 50   |
| >DNMT3A-R;YEGTGRLFFEI | 30   | >DNMT3A-R;YEGTGWLFFE | 19  | 11   |
| >DNMT3A-R;LYEGTGRL    | 296  | >DNMT3A-R;LYEGTGWL   | 227 | 69   |

|                       |      |                      |       |       |
|-----------------------|------|----------------------|-------|-------|
| >DNMT3A-R:LYEGTGRLF   | 458  | >DNMT3A-R:LYEGTGWLF  | 49    | 409   |
| >DNMT3A-R:LYEGTGRLFF  | 31   | >DNMT3A-R:LYEGTGWLFF | 17    | 14    |
| >DNMT3A-R:LYEGTGRLF   | 361  | >DNMT3A-R:LYEGTGWLF  | 43    | 318   |
| >DNMT3A-R:LYEGTGRLFF  | 77   | >DNMT3A-R:LYEGTGWLFF | 53    | 24    |
| >DNMT3A-R:LYEGTGRL    | 49   | >DNMT3A-R:LYEGTGWL   | 16    | 33    |
| >DNMT3A-R:LYEGTGRLF   | 18   | >DNMT3A-R:LYEGTGWLF  | 6     | 12    |
| >DNMT3A-R:LYEGTGRLFF  | 9    | >DNMT3A-R:LYEGTGWLFF | 8     | 1     |
| >DNMT3A-R:LYEGTGRLF   | 3028 | >DNMT3A-R:LYEGTGWLF  | 440   | 2588  |
| >DNMT3A-R:LYEGTGRLFF  | 24   | >DNMT3A-R:LYEGTGWLFF | 18    | 6     |
| >DNMT3A-R:LYEGTGRLF   | 5650 | >DNMT3A-R:LYEGTGWLF  | 172   | 5478  |
| >DNMT3A-R:LYEGTGRLFF  | 4032 | >DNMT3A-R:LYEGTGWLFF | 61    | 3971  |
| >DNMT3A-R:LYEGTGRLF   | 1412 | >DNMT3A-R:LYEGTGWLF  | 268   | 1144  |
| >DNMT3A-R:LYEGTGRLFF  | 336  | >DNMT3A-R:LYEGTGWLFF | 90    | 246   |
| >DNMT3A-R:LYEGTGRLFFI | 1165 | >DNMT3A-R:LYEGTGWLFF | 432   | 733   |
| >DNMT3A-R:GLYEGTGRL   | 72   | >DNMT3A-R:GLYEGTGWL  | 36    | 36    |
| >DNMT3A-R:GLYEGTGRL   | 27   | >DNMT3A-R:GLYEGTGWL  | 14    | 13    |
| >DNMT3A-R:GLYEGTGRLF  | 1844 | >DNMT3A-R:GLYEGTGWLI | 262   | 1582  |
| >DNMT3A-R:GLYEGTGRL   | 5    | >DNMT3A-R:GLYEGTGWL  | 4     | 1     |
| >DNMT3A-R:GLYEGTGRLF  | 740  | >DNMT3A-R:GLYEGTGWLI | 467   | 273   |
| >DNMT3A-R:GLYEGTGRL   | 264  | >DNMT3A-R:GLYEGTGWL  | 77    | 187   |
| >DNMT3A-R:GLYEGTGRLF  | 508  | >DNMT3A-R:GLYEGTGWLI | 154   | 354   |
| >DNMT3A-R:GLYEGTGRL   | 3    | >DNMT3A-R:GLYEGTGWL  | 3     | 0     |
| >DNMT3A-R:GLYEGTGRLF  | 170  | >DNMT3A-R:GLYEGTGWLI | 17    | 153   |
| >DNMT3A-R:GLYEGTGRLF  | 126  | >DNMT3A-R:GLYEGTGWLI | 33    | 93    |
| >DNMT3A-R:GLYEGTGRL   | 10   | >DNMT3A-R:GLYEGTGWL  | 12    | 2     |
| >DNMT3A-R:GLYEGTGRLF  | 4603 | >DNMT3A-R:GLYEGTGWLI | 252   | 4351  |
| >DNMT3A-R:GLYEGTGRL   | 8    | >DNMT3A-R:GLYEGTGWL  | 7     | 1     |
| >DNMT3A-R:GLYEGTGRLF  | 5006 | >DNMT3A-R:GLYEGTGWLI | 229   | 4777  |
| >DNMT3A-R:GLYEGTGRLF  | 1042 | >DNMT3A-R:GLYEGTGWLI | 277   | 765   |
| >DNMT3A-R:GLYEGTGRL   | 170  | >DNMT3A-R:GLYEGTGWL  | 149   | 21    |
| >DNMT3A-R:GLYEGTGRL   | 3    | >DNMT3A-R:GLYEGTGWL  | 3     | 0     |
| >DNMT3A-R:GLYEGTGRLF  | 2031 | >DNMT3A-R:GLYEGTGWLI | 89    | 1942  |
| >DNMT3A-R:GLYEGTGRLF  | 433  | >DNMT3A-R:GLYEGTGWLI | 375   | 58    |
| >DNMT3A-R:GLYEGTGR    | 190  | >DNMT3A-R:GLYEGTGW   | 16396 | 16206 |
| >DNMT3A-R:GLYEGTGRLF  | 82   | >DNMT3A-R:GLYEGTGWLI | 63    | 19    |
| >DNMT3A-R:GLYEGTGRLF  | 151  | >DNMT3A-R:GLYEGTGWLI | 261   | 110   |
| >DNMT3A-R:GLYEGTGRLF  | 100  | >DNMT3A-R:GLYEGTGWLI | 97    | 3     |
| >DNMT3A-R:GLYEGTGR    | 5709 | >DNMT3A-R:GLYEGTGW   | 474   | 5235  |
| >DNMT3A-R:GLYEGTGRL   | 437  | >DNMT3A-R:GLYEGTGWL  | 500   | 63    |
| >DNMT3A-R:GLYEGTGRLF  | 35   | >DNMT3A-R:GLYEGTGWLI | 46    | 11    |
| >DNMT3A-R:GLYEGTGRLF  | 91   | >DNMT3A-R:GLYEGTGWLI | 39    | 52    |
| >DNMT3A-R:GLYEGTGRLF  | 457  | >DNMT3A-R:GLYEGTGWLI | 422   | 35    |
| >DNMT3A-R:GLYEGTGRLF  | 261  | >DNMT3A-R:GLYEGTGWLI | 298   | 37    |

|                       |       |                       |       |       |
|-----------------------|-------|-----------------------|-------|-------|
| >DNMT3A-R;GLYEGTGR    | 24641 | >DNMT3A-R;GLYEGTGW    | 38    | 24603 |
| >DNMT3A-R;GLYEGTGRLF  | 246   | >DNMT3A-R;GLYEGTGWLI  | 246   | 0     |
| >DNMT3A-R;GLYEGTGRLF  | 202   | >DNMT3A-R;GLYEGTGWLI  | 109   | 93    |
| >DNMT3A-R;GLYEGTGRLF  | 5187  | >DNMT3A-R;GLYEGTGWLI  | 403   | 4784  |
| >DNMT3A-R;KGLYEGTGRL  | 210   | >DNMT3A-R;KGLYEGTGW   | 218   | 8     |
| >DNMT3A-R;KGLYEGTGR   | 24103 | >DNMT3A-R;KGLYEGTGW   | 178   | 23925 |
| >DNMT3A-R;KGLYEGTGRL  | 420   | >DNMT3A-R;KGLYEGTGW   | 438   | 18    |
| >DNMT3A-R;KGLYEGTGR   | 24451 | >DNMT3A-R;KGLYEGTGW   | 203   | 24248 |
| >DNMT3A-R;KGLYEGTGR   | 21710 | >DNMT3A-R;KGLYEGTGW   | 124   | 21586 |
| >DNMT3A-R;KGLYEGTGRL  | 5094  | >DNMT3A-R;KGLYEGTGW   | 293   | 4801  |
| >DNMT3A-R;KGLYEGTGRL  | 203   | >DNMT3A-R;KGLYEGTGW   | 469   | 266   |
| >DNMT3A-R;KGLYEGTGR   | 174   | >DNMT3A-R;KGLYEGTGW   | 31761 | 31587 |
| >DNMT3A-R;RKGLYEGTGR  | 30050 | >DNMT3A-R;RKGLYEGTGV  | 388   | 29662 |
| >DNMT3A-R;RLLHDARPK   | 67    | >DNMT3A-R;HLLHDARPK   | 142   | 75    |
| >DNMT3A-R;RLLHDARPK   | 59    | >DNMT3A-R;HLLHDARPK   | 231   | 172   |
| >DNMT3A-R;YRLLHDAR    | 194   | >DNMT3A-R;YHLLHDAR    | 16260 | 16066 |
| >DNMT3A-R;GTGRLFFEFYI | 19    | >DNMT3A-R;GTGRLFFEFYI | 169   | 150   |
| >DNMT3A-R;GTGRLFFEFYI | 7     | >DNMT3A-R;GTGRLFFEFYI | 378   | 371   |
| >DNMT3A-R;GTGRLFFEFYI | 214   | >DNMT3A-R;GTGRLFFEFYI | 21614 | 21400 |
| >DNMT3A-R;GTGRLFFEFYI | 36    | >DNMT3A-R;GTGRLFFEFYI | 7619  | 7583  |
| >DNMT3A-R;GTGRLFFEFYI | 109   | >DNMT3A-R;GTGRLFFEFYI | 271   | 162   |
| >DNMT3A-R;GTGRLFFEFYI | 198   | >DNMT3A-R;GTGRLFFEFYI | 26273 | 26075 |
| >DNMT3A-R;FYRLLHDARP  | 48    | >DNMT3A-R;FYHLLHDARP  | 450   | 402   |
| >DNMT3A-R;FYRLLHDAR   | 224   | >DNMT3A-R;FYHLLHDAR   | 357   | 133   |
| >DNMT3A-R;FYRLLHDAR   | 17    | >DNMT3A-R;FYHLLHDAR   | 48    | 31    |
| >DNMT3A-R;FYRLLHDAR   | 2086  | >DNMT3A-R;FYHLLHDAR   | 443   | 1643  |
| >DNMT3A-R;FYRLLHDAR   | 132   | >DNMT3A-R;FYHLLHDAR   | 56    | 76    |
| >DNMT3A-R;EFYRLLHDAR  | 116   | >DNMT3A-R;EFYHLLHDAR  | 76    | 40    |
| >DNMT3A-R;EFYRLLHDAR  | 34    | >DNMT3A-R;EFYHLLHDAR  | 42    | 8     |
| >DNMT3A-R;EFYRLLHDAR  | 201   | >DNMT3A-R;EFYHLLHDAR  | 122   | 79    |
| >DNMT3A-R;EFYRLLHDAR  | 76    | >DNMT3A-R;EFYHLLHDAR  | 45    | 31    |
| >DNMT3A-R;FEFYRLLH    | 388   | >DNMT3A-R;FEFYHLLH    | 124   | 264   |
| >DNMT3A-R;FEFYRLLHDA  | 87    | >DNMT3A-R;FEFYHLLHDA  | 196   | 109   |
| >DNMT3A-R;FEFYRLLHDAI | 210   | >DNMT3A-R;FEFYHLLHDA  | 162   | 48    |
| >DNMT3A-R;FEFYRLLH    | 694   | >DNMT3A-R;FEFYHLLH    | 231   | 463   |
| >DNMT3A-R;FEFYRLLHDAI | 589   | >DNMT3A-R;FEFYHLLHDA  | 223   | 366   |
| >DNMT3A-R;FEFYRLLHDA  | 70    | >DNMT3A-R;FEFYHLLHDA  | 79    | 9     |
| >DNMT3A-R;FEFYRLLHDAI | 713   | >DNMT3A-R;FEFYHLLHDA  | 443   | 270   |
| >DNMT3A-R;FEFYRLLHDA  | 158   | >DNMT3A-R;FEFYHLLHDA  | 108   | 50    |
| >DNMT3A-R;FEFYRLLHD   | 206   | >DNMT3A-R;FEFYHLLHD   | 91    | 115   |
| >DNMT3A-R;FEFYRLLHDA  | 324   | >DNMT3A-R;FEFYHLLHDA  | 120   | 204   |
| >DNMT3A-R;FEFYRLLHDAI | 667   | >DNMT3A-R;FEFYHLLHDA  | 396   | 271   |
| >DNMT3A-R;FFEFYRLL    | 809   | >DNMT3A-R;FFEFYHLL    | 95    | 714   |



|                        |      |                        |     |      |
|------------------------|------|------------------------|-----|------|
| >DNMT3A-R; FFEFYRLL    | 1396 | >DNMT3A-R; FFEFYHLL    | 252 | 1144 |
| >DNMT3A-R; FFEFYRLL    | 756  | >DNMT3A-R; FFEFYHLL    | 227 | 529  |
| >DNMT3A-R; FFEFYRLLH   | 89   | >DNMT3A-R; FFEFYHLLH   | 31  | 58   |
| >DNMT3A-R; FFEFYRLL    | 559  | >DNMT3A-R; FFEFYHLL    | 453 | 106  |
| >DNMT3A-R; LFFEFYRL    | 24   | >DNMT3A-R; LFFEFYHL    | 22  | 2    |
| >DNMT3A-R; LFFEFYRLL   | 23   | >DNMT3A-R; LFFEFYHLL   | 28  | 5    |
| >DNMT3A-R; LFFEFYRLL   | 7052 | >DNMT3A-R; LFFEFYHLL   | 470 | 6582 |
| >DNMT3A-R; LFFEFYRL    | 65   | >DNMT3A-R; LFFEFYHL    | 26  | 39   |
| >DNMT3A-R; LFFEFYRLL   | 231  | >DNMT3A-R; LFFEFYHLL   | 14  | 217  |
| >DNMT3A-R; LFFEFYRL    | 327  | >DNMT3A-R; LFFEFYHL    | 273 | 54   |
| >DNMT3A-R; LFFEFYRLL   | 1074 | >DNMT3A-R; LFFEFYHLL   | 108 | 966  |
| >DNMT3A-R; LFFEFYRLL   | 6903 | >DNMT3A-R; LFFEFYHLL   | 106 | 6797 |
| >DNMT3A-R; LFFEFYRL    | 146  | >DNMT3A-R; LFFEFYHL    | 64  | 82   |
| >DNMT3A-R; LFFEFYRLL   | 1250 | >DNMT3A-R; LFFEFYHLL   | 88  | 1162 |
| >DNMT3A-R; LFFEFYRLL   | 1151 | >DNMT3A-R; LFFEFYHLL   | 264 | 887  |
| >DNMT3A-R; LFFEFYRL    | 27   | >DNMT3A-R; LFFEFYHL    | 15  | 12   |
| >DNMT3A-R; LFFEFYRLL   | 40   | >DNMT3A-R; LFFEFYHLL   | 13  | 27   |
| >DNMT3A-R; LFFEFYRLLH  | 360  | >DNMT3A-R; LFFEFYHLLH  | 806 | 446  |
| >DNMT3A-R; LFFEFYRLLH  | 234  | >DNMT3A-R; LFFEFYHLLH  | 139 | 95   |
| >DNMT3A-R; LFFEFYRL    | 485  | >DNMT3A-R; LFFEFYHL    | 252 | 233  |
| >DNMT3A-R; LFFEFYRLL   | 713  | >DNMT3A-R; LFFEFYHLL   | 355 | 358  |
| >DNMT3A-R; LFFEFYRL    | 298  | >DNMT3A-R; LFFEFYHL    | 266 | 32   |
| >DNMT3A-R; LFFEFYRLL   | 106  | >DNMT3A-R; LFFEFYHLL   | 59  | 47   |
| >DNMT3A-R; RLFFEFYRL   | 16   | >DNMT3A-R; RLFFEFYHL   | 16  | 0    |
| >DNMT3A-R; RLFFEFYRLL  | 152  | >DNMT3A-R; RLFFEFYHLL  | 69  | 83   |
| >DNMT3A-R; RLFFEFYRL   | 4    | >DNMT3A-R; RLFFEFYHL   | 3   | 1    |
| >DNMT3A-R; RLFFEFYRLL  | 46   | >DNMT3A-R; RLFFEFYHLL  | 21  | 25   |
| >DNMT3A-R; RLFFEFYRL   | 46   | >DNMT3A-R; RLFFEFYHL   | 35  | 11   |
| >DNMT3A-R; RLFFEFYRLL  | 166  | >DNMT3A-R; RLFFEFYHLL  | 118 | 48   |
| >DNMT3A-R; RLFFEFYRL   | 95   | >DNMT3A-R; RLFFEFYHL   | 18  | 77   |
| >DNMT3A-R; RLFFEFYRLL  | 662  | >DNMT3A-R; RLFFEFYHLL  | 309 | 353  |
| >DNMT3A-R; RLFFEFYRL   | 4    | >DNMT3A-R; RLFFEFYHL   | 6   | 2    |
| >DNMT3A-R; RLFFEFYRLL  | 8    | >DNMT3A-R; RLFFEFYHLL  | 4   | 4    |
| >DNMT3A-R; RLFFEFYRL   | 13   | >DNMT3A-R; RLFFEFYHL   | 6   | 7    |
| >DNMT3A-R; RLFFEFYRLL  | 108  | >DNMT3A-R; RLFFEFYHLL  | 11  | 97   |
| >DNMT3A-R; RLFFEFYRL   | 43   | >DNMT3A-R; RLFFEFYHL   | 17  | 26   |
| >DNMT3A-R; RLFFEFYRLL  | 121  | >DNMT3A-R; RLFFEFYHLL  | 16  | 105  |
| >DNMT3A-R; RLFFEFYRL   | 96   | >DNMT3A-R; RLFFEFYHL   | 126 | 30   |
| >DNMT3A-R; RLFFEFYRLL  | 1008 | >DNMT3A-R; RLFFEFYHLL  | 85  | 923  |
| >DNMT3A-R; RLFFEFYRL   | 8    | >DNMT3A-R; RLFFEFYHL   | 11  | 3    |
| >DNMT3A-R; RLFFEFYRLL  | 24   | >DNMT3A-R; RLFFEFYHLL  | 6   | 18   |
| >DNMT3A-R; RLFFEFYR    | 47   | >DNMT3A-R; RLFFEFYH    | 91  | 44   |
| >DNMT3A-R; RLFFEFYRLLH | 63   | >DNMT3A-R; RLFFEFYHLLH | 68  | 5    |

|                       |     |                       |       |       |
|-----------------------|-----|-----------------------|-------|-------|
| >DNMT3A-R:RLFFEFYR    | 25  | >DNMT3A-R:RLFFEFYH    | 153   | 128   |
| >DNMT3A-R:RLFFEFYRLLH | 246 | >DNMT3A-R:RLFFEFYHLLH | 256   | 10    |
| >DNMT3A-R:RLFFEFYRL   | 91  | >DNMT3A-R:RLFFEFYHL   | 63    | 28    |
| >DNMT3A-R:RLFFEFYRLLH | 312 | >DNMT3A-R:RLFFEFYHLLH | 128   | 184   |
| >DNMT3A-R:RLFFEFYR    | 6   | >DNMT3A-R:RLFFEFYH    | 88    | 82    |
| >DNMT3A-R:RLFFEFYRL   | 832 | >DNMT3A-R:RLFFEFYHL   | 283   | 549   |
| >DNMT3A-R:RLFFEFYRLLH | 357 | >DNMT3A-R:RLFFEFYHLLH | 324   | 33    |
| >DNMT3A-R:RLFFEFYRL   | 10  | >DNMT3A-R:RLFFEFYHL   | 17    | 7     |
| >DNMT3A-R:RLFFEFYRLL  | 26  | >DNMT3A-R:RLFFEFYHLL  | 22    | 4     |
| >DNMT3A-R:RLFFEFYR    | 83  | >DNMT3A-R:RLFFEFYH    | 14691 | 14608 |
| >DNMT3A-R:RLFFEFYR    | 21  | >DNMT3A-R:RLFFEFYH    | 3913  | 3892  |
| >DNMT3A-R:RLFFEFYRLLH | 638 | >DNMT3A-R:RLFFEFYHLLH | 178   | 460   |
| >DNMT3A-R:RLFFEFYRL   | 510 | >DNMT3A-R:RLFFEFYHL   | 350   | 160   |
| >DNMT3A-R:RLFFEFYRL   | 594 | >DNMT3A-R:RLFFEFYHL   | 104   | 490   |
| >DNMT3A-R:RLFFEFYRL   | 316 | >DNMT3A-R:RLFFEFYHL   | 78    | 238   |
| >DNMT3A-R:RLFFEFYRLL  | 204 | >DNMT3A-R:RLFFEFYHLL  | 143   | 61    |
| >DNMT3A-R:RLFFEFYR    | 12  | >DNMT3A-R:RLFFEFYH    | 637   | 625   |
| >DNMT3A-R:RLFFEFYRL   | 583 | >DNMT3A-R:RLFFEFYHL   | 268   | 315   |
| >DNMT3A-R:GRLFFEFYR   | 137 | >DNMT3A-R:GRLFFEFYH   | 353   | 216   |
| >DNMT3A-R:GRLFFEFYRL  | 25  | >DNMT3A-R:GRLFFEFYHL  | 22    | 3     |
| >DNMT3A-R:GRLFFEFYRLL | 53  | >DNMT3A-R:GRLFFEFYHLL | 35    | 18    |
| >DNMT3A-R:GRLFFEFYRLL | 55  | >DNMT3A-R:GRLFFEFYHLL | 59    | 4     |
| >DNMT3A-R:GRLFFEFYRL  | 522 | >DNMT3A-R:GRLFFEFYHL  | 336   | 186   |
| >DNMT3A-R:GRLFFEFYRLL | 6   | >DNMT3A-R:GRLFFEFYHLL | 7     | 1     |
| >DNMT3A-R:GRLFFEFYR   | 84  | >DNMT3A-R:GRLFFEFYH   | 23085 | 23001 |
| >DNMT3A-R:TGRLFFEFYR  | 23  | >DNMT3A-R:TGRLFFEFYH  | 1789  | 1766  |
| >DNMT3A-R:TGRLFFEFYR  | 94  | >DNMT3A-R:TGRLFFEFYH  | 3601  | 3507  |
| >DNMT3A-R:TGRLFFEFYR  | 54  | >DNMT3A-R:TGRLFFEFYH  | 15235 | 15181 |
| >DNMT3A-R:RYFWGNLPG   | 19  | >DNMT3A-R:HYFWGNLPG   | 51    | 32    |
| >DNMT3A-R:RYFWGNLPG   | 487 | >DNMT3A-R:HYFWGNLPG   | 1504  | 1017  |
| >DNMT3A-R:RYFWGNLPG   | 178 | >DNMT3A-R:HYFWGNLPG   | 756   | 578   |
| >DNMT3A-R:RYFWGNLPG   | 149 | >DNMT3A-R:HYFWGNLPG   | 616   | 467   |
| >DNMT3A-R:RYFWGNLPG   | 369 | >DNMT3A-R:HYFWGNLPG   | 3122  | 2753  |
| >DNMT3A-R:RYFWGNLPG   | 90  | >DNMT3A-R:HYFWGNLPG   | 121   | 31    |
| >DNMT3A-R:RYFWGNLP    | 85  | >DNMT3A-R:HYFWGNLP    | 198   | 113   |
| >DNMT3A-R:RYFWGNLPG   | 80  | >DNMT3A-R:HYFWGNLPG   | 183   | 103   |
| >DNMT3A-R:RYFWGNLPG   | 79  | >DNMT3A-R:HYFWGNLPG   | 284   | 205   |
| >DNMT3A-R:RYFWGNLPG   | 164 | >DNMT3A-R:HYFWGNLPG   | 441   | 277   |
| >DNMT3A-R:ARYFWGNL    | 785 | >DNMT3A-R:AHYFWGNL    | 170   | 615   |
| >DNMT3A-R:ARYFWGNLP   | 252 | >DNMT3A-R:AHYFWGNLP   | 75    | 177   |
| >DNMT3A-R:ARYFWGNL    | 310 | >DNMT3A-R:AHYFWGNL    | 669   | 359   |
| >DNMT3A-R:ARYFWGNLP   | 226 | >DNMT3A-R:AHYFWGNLP   | 366   | 140   |
| >DNMT3A-R:ARYFWGNL    | 61  | >DNMT3A-R:AHYFWGNL    | 13862 | 13801 |

|                     |      |                     |       |       |
|---------------------|------|---------------------|-------|-------|
| >DNMT3A-R:ARYFWGNLP | 41   | >DNMT3A-R:AHYFWGNLP | 10952 | 10911 |
| >DNMT3A-R:ARYFWGNLP | 488  | >DNMT3A-R:AHYFWGNLP | 11486 | 10998 |
| >DNMT3A-R:ARYFWGNLP | 255  | >DNMT3A-R:AHYFWGNLP | 11301 | 11046 |
| >DNMT3A-R:ARYFWGNLP | 29   | >DNMT3A-R:AHYFWGNLP | 4385  | 4356  |
| >DNMT3A-R:RARYFWGNL | 117  | >DNMT3A-R:RAHYFWGNL | 43    | 74    |
| >DNMT3A-R:RARYFWGN  | 151  | >DNMT3A-R:RAHYFWGN  | 1473  | 1322  |
| >DNMT3A-R:RARYFWGNL | 5    | >DNMT3A-R:RAHYFWGNL | 13    | 8     |
| >DNMT3A-R:RARYFWGNL | 32   | >DNMT3A-R:RAHYFWGNL | 283   | 251   |
| >DNMT3A-R:RARYFWGNL | 6    | >DNMT3A-R:RAHYFWGNL | 23    | 17    |
| >DNMT3A-R:RARYFWGNL | 143  | >DNMT3A-R:RAHYFWGNL | 2025  | 1882  |
| >DNMT3A-R:RARYFWGNL | 14   | >DNMT3A-R:RAHYFWGNL | 46    | 32    |
| >DNMT3A-R:RARYFWGNL | 280  | >DNMT3A-R:RAHYFWGNL | 1852  | 1572  |
| >DNMT3A-R:RARYFWGNL | 453  | >DNMT3A-R:RAHYFWGNL | 1359  | 906   |
| >DNMT3A-R:RARYFWGNL | 274  | >DNMT3A-R:RAHYFWGNL | 113   | 161   |
| >DNMT3A-R:HRARYFWGN | 173  | >DNMT3A-R:HRAHYFWGN | 287   | 114   |
| >DNMT3A-R:HRARYFWGN | 13   | >DNMT3A-R:HRAHYFWGN | 13    | 0     |
| >DNMT3A-R:HRARYFWGN | 243  | >DNMT3A-R:HRAHYFWGN | 154   | 89    |
| >DNMT3A-R:HRARYFWGN | 182  | >DNMT3A-R:HRAHYFWGN | 789   | 607   |
| >DNMT3A-R:HRARYFWGN | 71   | >DNMT3A-R:HRAHYFWGN | 158   | 87    |
| >DNMT3A-R:AHRARYFW  | 151  | >DNMT3A-R:AHRAHYFW  | 56    | 95    |
| >DNMT3A-R:AAHRARYF  | 869  | >DNMT3A-R:AAHRAHYF  | 166   | 703   |
| >DNMT3A-R:AAHRARYF  | 523  | >DNMT3A-R:AAHRAHYF  | 388   | 135   |
| >DNMT3A-R:AAHRARYFW | 277  | >DNMT3A-R:AAHRAHYFW | 185   | 92    |
| >DNMT3A-R:AAHRARYFW | 182  | >DNMT3A-R:AAHRAHYFW | 168   | 14    |
| >DNMT3A-R:AAHRARYF  | 62   | >DNMT3A-R:AAHRAHYF  | 53    | 9     |
| >DNMT3A-R:AAHRARYF  | 59   | >DNMT3A-R:AAHRAHYF  | 20    | 39    |
| >DNMT3A-R:AAHRARYFW | 219  | >DNMT3A-R:AAHRAHYFW | 52    | 167   |
| >DNMT3A-R:AAHRARYF  | 618  | >DNMT3A-R:AAHRAHYF  | 328   | 290   |
| >DNMT3A-R:AAHRARYFW | 41   | >DNMT3A-R:AAHRAHYFW | 35    | 6     |
| >DNMT3A-R:AAHRARYF  | 3977 | >DNMT3A-R:AAHRAHYF  | 353   | 3624  |
| >DNMT3A-R:AAHRARYFW | 57   | >DNMT3A-R:AAHRAHYFW | 32    | 25    |
| >DNMT3A-R:SAHRARY   | 452  | >DNMT3A-R:SAHRAHY   | 187   | 265   |
| >DNMT3A-R:SAHRARY   | 109  | >DNMT3A-R:SAHRAHY   | 57    | 52    |
| >DNMT3A-R:SAHRARY   | 1439 | >DNMT3A-R:SAHRAHY   | 409   | 1030  |
| >DNMT3A-R:SAHRARY   | 512  | >DNMT3A-R:SAHRAHY   | 135   | 377   |
| >DNMT3A-R:SAHRARYF  | 182  | >DNMT3A-R:SAHRAHYF  | 137   | 45    |
| >DNMT3A-R:SAHRARY   | 29   | >DNMT3A-R:SAHRAHY   | 41    | 12    |
| >DNMT3A-R:SAHRARYF  | 18   | >DNMT3A-R:SAHRAHYF  | 11    | 7     |
| >DNMT3A-R:SAHRARYFV | 133  | >DNMT3A-R:SAHRAHYFV | 56    | 77    |
| >DNMT3A-R:SAHRARYFV | 48   | >DNMT3A-R:SAHRAHYFV | 42    | 6     |
| >DNMT3A-R:SAHRARYF  | 5070 | >DNMT3A-R:SAHRAHYF  | 66    | 5004  |
| >DNMT3A-R:SAHRARYFV | 48   | >DNMT3A-R:SAHRAHYFV | 17    | 31    |
| >DNMT3A-R:SAHRARYF  | 501  | >DNMT3A-R:SAHRAHYF  | 430   | 71    |

|                     |      |                     |       |       |
|---------------------|------|---------------------|-------|-------|
| >DNMT3A-R;VSAHRARY  | 199  | >DNMT3A-R;VSAHRAHY  | 344   | 145   |
| >DNMT3A-R;VSAHRARY  | 110  | >DNMT3A-R;VSAHRAHY  | 45    | 65    |
| >DNMT3A-R;VSAHRARYF | 1316 | >DNMT3A-R;VSAHRAHYI | 457   | 859   |
| >DNMT3A-R;VSAHRARY  | 207  | >DNMT3A-R;VSAHRAHY  | 129   | 78    |
| >DNMT3A-R;VSAHRARY  | 24   | >DNMT3A-R;VSAHRAHY  | 21    | 3     |
| >DNMT3A-R;VSAHRAR   | 52   | >DNMT3A-R;VSAHRAH   | 9835  | 9783  |
| >DNMT3A-R;VSAHRAR   | 182  | >DNMT3A-R;VSAHRAH   | 18723 | 18541 |
| >DNMT3A-R;VSAHRARY  | 151  | >DNMT3A-R;VSAHRAHY  | 49    | 102   |
| >DNMT3A-R;VSAHRARYF | 346  | >DNMT3A-R;VSAHRAHYI | 214   | 132   |
| >DNMT3A-R;VSAHRARY  | 724  | >DNMT3A-R;VSAHRAHY  | 216   | 508   |
| >DNMT3A-R;VSAHRARYF | 98   | >DNMT3A-R;VSAHRAHYI | 68    | 30    |
| >DNMT3A-R;VSAHRARY  | 5    | >DNMT3A-R;VSAHRAHY  | 7     | 2     |
| >DNMT3A-R;VSAHRARYF | 6    | >DNMT3A-R;VSAHRAHYI | 5     | 1     |
| >DNMT3A-R;VSAHRARYF | 20   | >DNMT3A-R;VSAHRAHYI | 13    | 7     |
| >DNMT3A-R;VSAHRARYF | 266  | >DNMT3A-R;VSAHRAHYI | 182   | 84    |
| >DNMT3A-R;VSAHRARYF | 44   | >DNMT3A-R;VSAHRAHYI | 41    | 3     |
| >DNMT3A-R;VSAHRARY  | 115  | >DNMT3A-R;VSAHRAHY  | 43    | 72    |
| >DNMT3A-R;VSAHRARYF | 80   | >DNMT3A-R;VSAHRAHYI | 16    | 64    |
| >DNMT3A-R;VSAHRARYF | 10   | >DNMT3A-R;VSAHRAHYI | 9     | 1     |
| >DNMT3A-R;VSAHRARYF | 112  | >DNMT3A-R;VSAHRAHYI | 35    | 77    |
| >DNMT3A-R;VSAHRARYF | 262  | >DNMT3A-R;VSAHRAHYI | 109   | 153   |
| >DNMT3A-R;VSAHRARY  | 167  | >DNMT3A-R;VSAHRAHY  | 977   | 810   |
| >DNMT3A-R;VSAHRARYF | 120  | >DNMT3A-R;VSAHRAHYI | 277   | 157   |
| >DNMT3A-R;VSAHRARYF | 152  | >DNMT3A-R;VSAHRAHYI | 129   | 23    |
| >DNMT3A-R;VSAHRARY  | 459  | >DNMT3A-R;VSAHRAHY  | 928   | 469   |
| >DNMT3A-R;EVSAHRARY | 837  | >DNMT3A-R;EVSAHRAH) | 241   | 596   |
| >DNMT3A-R;EVSAHRARY | 256  | >DNMT3A-R;EVSAHRAH) | 416   | 160   |
| >DNMT3A-R;EVSAHRARY | 407  | >DNMT3A-R;EVSAHRAH) | 416   | 9     |
| >DNMT3A-R;EVSAHRARY | 426  | >DNMT3A-R;EVSAHRAH) | 408   | 18    |
| >DNMT3A-R;EVSAHRARY | 9    | >DNMT3A-R;EVSAHRAH) | 6     | 3     |
| >DNMT3A-R;EVSAHRARY | 58   | >DNMT3A-R;EVSAHRAH) | 26    | 32    |
| >DNMT3A-R;EVSAHRARY | 402  | >DNMT3A-R;EVSAHRAH) | 430   | 28    |
| >DNMT3A-R;EVSAHRAR  | 124  | >DNMT3A-R;EVSAHRAH  | 24943 | 24819 |
| >DNMT3A-R;EVSAHRAR  | 6    | >DNMT3A-R;EVSAHRAH  | 2641  | 2635  |
| >DNMT3A-R;EVSAHRARY | 225  | >DNMT3A-R;EVSAHRAH) | 240   | 15    |
| >DNMT3A-R;EVSAHRARY | 2100 | >DNMT3A-R;EVSAHRAH) | 420   | 1680  |
| >DNMT3A-R;EVSAHRARY | 512  | >DNMT3A-R;EVSAHRAH) | 137   | 375   |
| >DNMT3A-R;KEVSAHRAF | 242  | >DNMT3A-R;KEVSAHRAF | 212   | 30    |
| >DNMT3A-R;KEVSAHRAF | 494  | >DNMT3A-R;KEVSAHRAF | 17321 | 16827 |
| >DNMT3A-R;KEVSAHRAF | 861  | >DNMT3A-R;KEVSAHRAF | 214   | 647   |
| >DNMT3A-R;KEVSAHRAF | 617  | >DNMT3A-R;KEVSAHRAF | 195   | 422   |
| >DNMT3A-R;KEVSAHRAF | 246  | >DNMT3A-R;KEVSAHRAF | 153   | 93    |
| >DNMT3A-R;KEVSAHRAF | 861  | >DNMT3A-R;KEVSAHRAF | 323   | 538   |

|                      |       |                      |       |       |
|----------------------|-------|----------------------|-------|-------|
| >DNMT3A-R:KEVSAAHRAF | 132   | >DNMT3A-R:KEVSAAHRAF | 128   | 4     |
| >DNMT3A-R:KEVSAAHRAF | 214   | >DNMT3A-R:KEVSAAHRAF | 22560 | 22346 |
| >DNMT3A-R:RPLASTVNDK | 29    | >DNMT3A-R:SPLASTVNDK | 19    | 10    |
| >DNMT3A-R:RPLASTVNDK | 59    | >DNMT3A-R:SPLASTVNDK | 210   | 151   |
| >DNMT3A-R:RPLASTVNDK | 741   | >DNMT3A-R:SPLASTVNDK | 435   | 306   |
| >DNMT3A-R:NRPLASTV   | 8486  | >DNMT3A-R:NSPLASTV   | 103   | 8383  |
| >DNMT3A-R:NRPLASTV   | 31105 | >DNMT3A-R:NSPLASTV   | 351   | 30754 |
| >DNMT3A-R:YFWGNLPGM  | 42    | >DNMT3A-R:YFWGNLPGM  | 18117 | 18075 |
| >DNMT3A-R:YFWGNLPGM  | 49    | >DNMT3A-R:YFWGNLPGM  | 20099 | 20050 |
| >DNMT3A-R:YFWGNLPGM  | 466   | >DNMT3A-R:YFWGNLPGM  | 36487 | 36021 |
| >DNMT3A-R:YFWGNLPGM  | 27    | >DNMT3A-R:YFWGNLPGM  | 8005  | 7978  |
| >DNMT3A-R:MNRPLASTV  | 346   | >DNMT3A-R:MNSPLASTV  | 12994 | 12648 |
| >DNMT3A-R:MNRPLASTV  | 4649  | >DNMT3A-R:MNSPLASTV  | 73    | 4576  |
| >DNMT3A-R:MNRPLASTV  | 22    | >DNMT3A-R:MNSPLASTV  | 71    | 49    |
| >DNMT3A-R:GMNRPLAST  | 147   | >DNMT3A-R:GMNSPLAST  | 33    | 114   |
| >DNMT3A-R:GMNRPLAST  | 54    | >DNMT3A-R:GMNSPLAST  | 17    | 37    |
| >DNMT3A-R:GMNRPLAST  | 35    | >DNMT3A-R:GMNSPLAST  | 22    | 13    |
| >DNMT3A-R:GMNRPLAST  | 90    | >DNMT3A-R:GMNSPLAST  | 48    | 42    |
| >DNMT3A-R:GMNRPLAST  | 3     | >DNMT3A-R:GMNSPLAST  | 2     | 1     |
| >DNMT3A-R:GMNRPLAST  | 675   | >DNMT3A-R:GMNSPLAST  | 467   | 208   |
| >DNMT3A-R:GMNRPLAST  | 3     | >DNMT3A-R:GMNSPLAST  | 3     | 0     |
| >DNMT3A-R:GMNRPLAST  | 9     | >DNMT3A-R:GMNSPLAST  | 7     | 2     |
| >DNMT3A-R:GMNRPLAST  | 17    | >DNMT3A-R:GMNSPLAST  | 8     | 9     |
| >DNMT3A-R:GMNRPLAST  | 149   | >DNMT3A-R:GMNSPLAST  | 135   | 14    |
| >DNMT3A-R:GMNRPLAST  | 3     | >DNMT3A-R:GMNSPLAST  | 2     | 1     |
| >DNMT3A-R:GMNRPLAST  | 740   | >DNMT3A-R:GMNSPLAST  | 452   | 288   |
| >DNMT3A-R:LPGMNRPL   | 16    | >DNMT3A-R:LPGMNSPL   | 25    | 9     |
| >DNMT3A-R:LPGMNRPL   | 452   | >DNMT3A-R:LPGMNSPL   | 106   | 346   |
| >DNMT3A-R:LPGMNRPLA  | 33    | >DNMT3A-R:LPGMNSPLA  | 27    | 6     |
| >DNMT3A-R:NLPGMNRPL  | 357   | >DNMT3A-R:NLPGMNSPL  | 40    | 317   |
| >DNMT3A-R:NLPGMNRPL  | 567   | >DNMT3A-R:NLPGMNSPL  | 61    | 506   |
| >DNMT3A-R:NLPGMNRPL  | 1059  | >DNMT3A-R:NLPGMNSPL  | 411   | 648   |
| >DNMT3A-R:NLPGMNRPL  | 243   | >DNMT3A-R:NLPGMNSPL  | 20    | 223   |
| >DNMT3A-R:NLPGMNRPL  | 155   | >DNMT3A-R:NLPGMNSPL  | 57    | 98    |
| >DNMT3A-R:NLPGMNRPL  | 2294  | >DNMT3A-R:NLPGMNSPL  | 287   | 2007  |
| >DNMT3A-R:FWGNLPGMI  | 38    | >DNMT3A-R:FWGNLPGMI  | 11205 | 11167 |
| >DNMT3A-R:FWGNLPGMI  | 1042  | >DNMT3A-R:FWGNLPGMI  | 479   | 563   |
| >DNMT3A-R:RLARQRL    | 61    | >DNMT3A-R:CLARQRL    | 151   | 90    |
| >DNMT3A-R:RLARQRL    | 158   | >DNMT3A-R:CLARQRL    | 738   | 580   |
| >DNMT3A-R:RLARQRL    | 404   | >DNMT3A-R:CLARQRL    | 2840  | 2436  |
| >DNMT3A-R:RLARQRL    | 31    | >DNMT3A-R:CLARQRL    | 83    | 52    |
| >DNMT3A-R:RLARQRLGR  | 160   | >DNMT3A-R:CLARQRLGR  | 1005  | 845   |
| >DNMT3A-R:RLARQRLGR  | 33    | >DNMT3A-R:CLARQRLGR  | 248   | 215   |

|                      |      |                      |       |       |
|----------------------|------|----------------------|-------|-------|
| >DNMT3A-R{RLARQRL    | 280  | >DNMT3A-R{CLARQRL    | 9435  | 9155  |
| >DNMT3A-R{RLARQRLGR  | 74   | >DNMT3A-R{CLARQRLGR  | 335   | 261   |
| >DNMT3A-R{RLARQRLGR  | 95   | >DNMT3A-R{CLARQRLGR  | 219   | 124   |
| >DNMT3A-R{SRLARQRL   | 85   | >DNMT3A-R{SCLARQRL   | 24312 | 24227 |
| >DNMT3A-R{SRLARQRL   | 39   | >DNMT3A-R{SCLARQRL   | 21462 | 21423 |
| >DNMT3A-R{SRLARQRLG  | 55   | >DNMT3A-R{SCLARQRLG  | 22617 | 22562 |
| >DNMT3A-R{SRLARQRL   | 92   | >DNMT3A-R{SCLARQRL   | 20187 | 20095 |
| >DNMT3A-R{SRLARQRL   | 207  | >DNMT3A-R{SCLARQRL   | 11098 | 10891 |
| >DNMT3A-R{SRLARQRL   | 10   | >DNMT3A-R{SCLARQRL   | 10243 | 10233 |
| >DNMT3A-R{SRLARQRLG  | 231  | >DNMT3A-R{SCLARQRLG  | 23531 | 23300 |
| >DNMT3A-R{SRLARQRLG  | 409  | >DNMT3A-R{SCLARQRLG  | 176   | 233   |
| >DNMT3A-R{VHYTDVSNM  | 264  | >DNMT3A-R{VHYTDVSNM  | 1209  | 945   |
| >DNMT3A-R{MSRLARQR   | 22   | >DNMT3A-R{MSCLARQR   | 4435  | 4413  |
| >DNMT3A-R{MSRLARQRL  | 7    | >DNMT3A-R{MSCLARQRL  | 1673  | 1666  |
| >DNMT3A-R{MSRLARQRLI | 7    | >DNMT3A-R{MSCLARQRLI | 1315  | 1308  |
| >DNMT3A-R{MSRLARQRLI | 8    | >DNMT3A-R{MSCLARQRLI | 1603  | 1595  |
| >DNMT3A-R{MSRLARQR   | 33   | >DNMT3A-R{MSCLARQR   | 51    | 18    |
| >DNMT3A-R{MSRLARQR   | 264  | >DNMT3A-R{MSCLARQR   | 369   | 105   |
| >DNMT3A-R{MSRLARQR   | 104  | >DNMT3A-R{MSCLARQR   | 20    | 84    |
| >DNMT3A-R{MSRLARQRL  | 261  | >DNMT3A-R{MSCLARQRL  | 16850 | 16589 |
| >DNMT3A-R{MSRLARQRL  | 7    | >DNMT3A-R{MSCLARQRL  | 43    | 36    |
| >DNMT3A-R{MSRLARQRLI | 15   | >DNMT3A-R{MSCLARQRLI | 105   | 90    |
| >DNMT3A-R{MSRLARQRL  | 264  | >DNMT3A-R{MSCLARQRL  | 1744  | 1480  |
| >DNMT3A-R{MSRLARQRLI | 139  | >DNMT3A-R{MSCLARQRLI | 361   | 222   |
| >DNMT3A-R{NMSRLARQR  | 532  | >DNMT3A-R{NMSCLARQR  | 262   | 270   |
| >DNMT3A-R{NMSRLARQR  | 126  | >DNMT3A-R{NMSCLARQR  | 61    | 65    |
| >DNMT3A-R{NMSRLARQR  | 648  | >DNMT3A-R{NMSCLARQR  | 209   | 439   |
| >DNMT3A-R{NMSRLARQR  | 166  | >DNMT3A-R{NMSCLARQR  | 598   | 432   |
| >DNMT3A-R{NMSRLARQR  | 191  | >DNMT3A-R{NMSCLARQR  | 171   | 20    |
| >DNMT3A-R{NMSRLARQR  | 1082 | >DNMT3A-R{NMSCLARQR  | 317   | 765   |
| >DNMT3A-R{SNMSRLARQ  | 72   | >DNMT3A-R{SNMSCLARQ  | 191   | 119   |
| >DNMT3A-R{SNMSRLAR   | 196  | >DNMT3A-R{SNMSCLAR   | 413   | 217   |
| >DNMT3A-R{SNMSRLARQ  | 208  | >DNMT3A-R{SNMSCLARQ  | 165   | 43    |
| >DNMT3A-R{SNMSRLARQ  | 230  | >DNMT3A-R{SNMSCLARQ  | 3449  | 3219  |
| >DNMT3A-R{SNMSRLAR   | 893  | >DNMT3A-R{SNMSCLAR   | 391   | 502   |
| >DNMT3A-R{VSNMSRLAR  | 83   | >DNMT3A-R{VSNMSCLAR  | 118   | 35    |
| >DNMT3A-R{VSNMSRLAR  | 22   | >DNMT3A-R{VSNMSCLAR  | 72    | 50    |
| >DNMT3A-R{VSNMSRLAR  | 67   | >DNMT3A-R{VSNMSCLAR  | 147   | 80    |
| >DNMT3A-R{VSNMSRLAR  | 298  | >DNMT3A-R{VSNMSCLAR  | 338   | 40    |
| >DNMT3A-R{DVSNSRLA   | 664  | >DNMT3A-R{DVSNSCLA   | 321   | 343   |
| >DNMT3A-R{DVSNSRLA   | 32   | >DNMT3A-R{DVSNSCLA   | 112   | 80    |
| >DNMT3A-R{DVSNSRLA   | 47   | >DNMT3A-R{DVSNSCLA   | 38    | 9     |
| >DNMT3A-R{DVSNSRLA   | 13   | >DNMT3A-R{DVSNSCLA   | 10    | 3     |

|                       |      |                       |       |       |
|-----------------------|------|-----------------------|-------|-------|
| >DNMT3A-R{DVSNM SRL   | 264  | >DNMT3A-R{DVSNM SCL   | 417   | 153   |
| >DNMT3A-R{DVSNM SRLA  | 1836 | >DNMT3A-R{DVSNM SCLA  | 350   | 1486  |
| >DNMT3A-R{TDVSNMSR    | 261  | >DNMT3A-R{TDVSNMSC    | 39759 | 39498 |
| >DNMT3A-R{YTDVSNMSR   | 210  | >DNMT3A-R{YTDVSNMSC   | 101   | 109   |
| >DNMT3A-R{YTDVSNMSR   | 1768 | >DNMT3A-R{YTDVSNMSC   | 348   | 1420  |
| >DNMT3A-R{YTDVSNMSR   | 461  | >DNMT3A-R{YTDVSNMSC   | 1240  | 779   |
| >DNMT3A-R{YTDVSNMSR   | 285  | >DNMT3A-R{YTDVSNMSC   | 36933 | 36648 |
| >DNMT3A-R{YTDVSNMSR   | 10   | >DNMT3A-R{YTDVSNMSC   | 28509 | 28499 |
| >DNMT3A-R{YTDVSNMSR   | 149  | >DNMT3A-R{YTDVSNMSC   | 510   | 361   |
| >DNMT3A-R{YTDVSNMSR   | 1208 | >DNMT3A-R{YTDVSNMSC   | 346   | 862   |
| >DNMT3A-R{YTDVSNMSR   | 5    | >DNMT3A-R{YTDVSNMSC   | 18    | 13    |
| >DNMT3A-R{YTDVSNMSR   | 2009 | >DNMT3A-R{YTDVSNMSC   | 493   | 1516  |
| >DNMT3A-R{YTDVSNMSR   | 161  | >DNMT3A-R{YTDVSNMSC   | 279   | 118   |
| >DNMT3A-R{YTDVSNMSR   | 131  | >DNMT3A-R{YTDVSNMSC   | 252   | 121   |
| >DNMT3A-R{YTDVSNMSR   | 297  | >DNMT3A-R{YTDVSNMSC   | 228   | 69    |
| >DNMT3A-R{HYTDVSNMS   | 70   | >DNMT3A-R{HYTDVSNMS   | 275   | 205   |
| >DNMT3A-R{HYTDVSNMS   | 20   | >DNMT3A-R{HYTDVSNMS   | 63    | 43    |
| >DNMT3A-R{HYTDVSNMS   | 141  | >DNMT3A-R{HYTDVSNMS   | 25302 | 25161 |
| >DNMT3A-R{HYTDVSNMS   | 148  | >DNMT3A-R{HYTDVSNMS   | 18512 | 18364 |
| >DNMT3A-R{HYTDVSNMS   | 113  | >DNMT3A-R{HYTDVSNMS   | 34490 | 34377 |
| >DNMT3A-R{HYTDVSNMS   | 21   | >DNMT3A-R{HYTDVSNMS   | 30203 | 30182 |
| >DNMT3A-R{RLARQ RLL   | 61   | >DNMT3A-R{HLARQ RLL   | 47    | 14    |
| >DNMT3A-R{RLARQ RLL   | 158  | >DNMT3A-R{HLARQ RLL   | 451   | 293   |
| >DNMT3A-R{RLARQ RLL   | 404  | >DNMT3A-R{HLARQ RLL   | 1528  | 1124  |
| >DNMT3A-R{RLARQ RLL   | 31   | >DNMT3A-R{HLARQ RLL   | 30    | 1     |
| >DNMT3A-R{RLARQ RLLGR | 160  | >DNMT3A-R{HLARQ RLLGF | 697   | 537   |
| >DNMT3A-R{RLARQ RLLGR | 33   | >DNMT3A-R{HLARQ RLLGF | 210   | 177   |
| >DNMT3A-R{RLARQ RLL   | 280  | >DNMT3A-R{HLARQ RLL   | 10406 | 10126 |
| >DNMT3A-R{RLARQ RLLGR | 74   | >DNMT3A-R{HLARQ RLLGF | 307   | 233   |
| >DNMT3A-R{RLARQ RLLGR | 95   | >DNMT3A-R{HLARQ RLLGF | 88    | 7     |
| >DNMT3A-R{SRLARQ RLL  | 8198 | >DNMT3A-R{SHLARQ RLL  | 382   | 7816  |
| >DNMT3A-R{SRLARQ RLL  | 85   | >DNMT3A-R{SHLARQ RLL  | 17779 | 17694 |
| >DNMT3A-R{SRLARQ RLL  | 39   | >DNMT3A-R{SHLARQ RLL  | 12688 | 12649 |
| >DNMT3A-R{SRLARQ RLLG | 55   | >DNMT3A-R{SHLARQ RLLG | 12128 | 12073 |
| >DNMT3A-R{SRLARQ RLL  | 507  | >DNMT3A-R{SHLARQ RLL  | 180   | 327   |
| >DNMT3A-R{SRLARQ RLL  | 758  | >DNMT3A-R{SHLARQ RLL  | 277   | 481   |
| >DNMT3A-R{SRLARQ RLL  | 92   | >DNMT3A-R{SHLARQ RLL  | 4910  | 4818  |
| >DNMT3A-R{SRLARQ RLL  | 207  | >DNMT3A-R{SHLARQ RLL  | 6667  | 6460  |
| >DNMT3A-R{SRLARQ RLL  | 10   | >DNMT3A-R{SHLARQ RLL  | 1422  | 1412  |
| >DNMT3A-R{SRLARQ RLLG | 231  | >DNMT3A-R{SHLARQ RLLG | 8974  | 8743  |
| >DNMT3A-R{SRLARQ RLLG | 409  | >DNMT3A-R{SHLARQ RLLG | 403   | 6     |
| >DNMT3A-R{VHYTDVSNM   | 264  | >DNMT3A-R{VHYTDVSNM   | 189   | 75    |
| >DNMT3A-R{MSRLARQ RLL | 1034 | >DNMT3A-R{MSHLARQ RLL | 359   | 675   |

|                      |      |                      |       |       |
|----------------------|------|----------------------|-------|-------|
| >DNMT3A-R{MSRLARQR   | 22   | >DNMT3A-R{MSHLARQR   | 186   | 164   |
| >DNMT3A-R{MSRLARQRL  | 7    | >DNMT3A-R{MSHLARQRL  | 36    | 29    |
| >DNMT3A-R{MSRLARQRLI | 7    | >DNMT3A-R{MSHLARQRLI | 32    | 25    |
| >DNMT3A-R{MSRLARQRLI | 8    | >DNMT3A-R{MSHLARQRLI | 41    | 33    |
| >DNMT3A-R{MSRLARQR   | 33   | >DNMT3A-R{MSHLARQR   | 43    | 10    |
| >DNMT3A-R{MSRLARQR   | 264  | >DNMT3A-R{MSHLARQR   | 967   | 703   |
| >DNMT3A-R{MSRLARQR   | 104  | >DNMT3A-R{MSHLARQR   | 21    | 83    |
| >DNMT3A-R{MSRLARQRL  | 261  | >DNMT3A-R{MSHLARQRL  | 6023  | 5762  |
| >DNMT3A-R{MSRLARQRL  | 7    | >DNMT3A-R{MSHLARQRL  | 18    | 11    |
| >DNMT3A-R{MSRLARQRLI | 15   | >DNMT3A-R{MSHLARQRLI | 56    | 41    |
| >DNMT3A-R{MSRLARQRL  | 264  | >DNMT3A-R{MSHLARQRL  | 1788  | 1524  |
| >DNMT3A-R{MSRLARQRLI | 139  | >DNMT3A-R{MSHLARQRLI | 255   | 116   |
| >DNMT3A-R{NMSRLARQR  | 126  | >DNMT3A-R{NMSHLARQR  | 63    | 63    |
| >DNMT3A-R{NMSRLARQR  | 648  | >DNMT3A-R{NMSHLARQR  | 253   | 395   |
| >DNMT3A-R{NMSRLARQR  | 166  | >DNMT3A-R{NMSHLARQR  | 304   | 138   |
| >DNMT3A-R{NMSRLARQR  | 191  | >DNMT3A-R{NMSHLARQR  | 195   | 4     |
| >DNMT3A-R{SNMSRLARQ  | 72   | >DNMT3A-R{SNMSHLARQ  | 101   | 29    |
| >DNMT3A-R{SNMSRLAR   | 196  | >DNMT3A-R{SNMSHLAR   | 174   | 22    |
| >DNMT3A-R{SNMSRLARQ  | 208  | >DNMT3A-R{SNMSHLARQ  | 279   | 71    |
| >DNMT3A-R{SNMSRLAR   | 557  | >DNMT3A-R{SNMSHLAR   | 472   | 85    |
| >DNMT3A-R{SNMSRLARQ  | 230  | >DNMT3A-R{SNMSHLARQ  | 412   | 182   |
| >DNMT3A-R{VSNMSRLAR  | 83   | >DNMT3A-R{VSNMSHLAR  | 66    | 17    |
| >DNMT3A-R{VSNMSRLAR  | 22   | >DNMT3A-R{VSNMSHLAR  | 19    | 3     |
| >DNMT3A-R{VSNMSRLAR  | 67   | >DNMT3A-R{VSNMSHLAR  | 67    | 0     |
| >DNMT3A-R{VSNMSRLAR  | 298  | >DNMT3A-R{VSNMSHLAR  | 326   | 28    |
| >DNMT3A-R{DVSNMSRLA  | 664  | >DNMT3A-R{DVSNMSHLA  | 393   | 271   |
| >DNMT3A-R{DVSNMSRL   | 863  | >DNMT3A-R{DVSNMSHL   | 428   | 435   |
| >DNMT3A-R{DVSNMSRLA  | 32   | >DNMT3A-R{DVSNMSHLA  | 54    | 22    |
| >DNMT3A-R{DVSNMSRLA  | 47   | >DNMT3A-R{DVSNMSHLA  | 30    | 17    |
| >DNMT3A-R{DVSNMSRLA  | 13   | >DNMT3A-R{DVSNMSHLA  | 15    | 2     |
| >DNMT3A-R{DVSNMSRL   | 264  | >DNMT3A-R{DVSNMSHL   | 104   | 160   |
| >DNMT3A-R{DVSNMSRLA  | 1836 | >DNMT3A-R{DVSNMSHLA  | 64    | 1772  |
| >DNMT3A-R{TDVSNMSR   | 261  | >DNMT3A-R{TDVSNMSH   | 21027 | 20766 |
| >DNMT3A-R{TDVSNMSRL  | 572  | >DNMT3A-R{TDVSNMSHL  | 495   | 77    |
| >DNMT3A-R{YTDVSNMSR  | 1138 | >DNMT3A-R{YTDVSNMSH  | 94    | 1044  |
| >DNMT3A-R{YTDVSNMSRI | 1233 | >DNMT3A-R{YTDVSNMSH  | 425   | 808   |
| >DNMT3A-R{YTDVSNMSRI | 210  | >DNMT3A-R{YTDVSNMSH  | 39    | 171   |
| >DNMT3A-R{YTDVSNMSRI | 1768 | >DNMT3A-R{YTDVSNMSH  | 236   | 1532  |
| >DNMT3A-R{YTDVSNMSRI | 461  | >DNMT3A-R{YTDVSNMSH  | 593   | 132   |
| >DNMT3A-R{YTDVSNMSR  | 285  | >DNMT3A-R{YTDVSNMSH  | 28424 | 28139 |
| >DNMT3A-R{YTDVSNMSR  | 10   | >DNMT3A-R{YTDVSNMSH  | 5323  | 5313  |
| >DNMT3A-R{YTDVSNMSRI | 502  | >DNMT3A-R{YTDVSNMSH  | 381   | 121   |
| >DNMT3A-R{YTDVSNMSRI | 149  | >DNMT3A-R{YTDVSNMSH  | 103   | 46    |



|                      |       |                      |       |       |
|----------------------|-------|----------------------|-------|-------|
| >DNMT3A-R{YTDVSNMSR  | 1208  | >DNMT3A-R{YTDVSNMSH  | 112   | 1096  |
| >DNMT3A-R{YTDVSNMSR  | 4128  | >DNMT3A-R{YTDVSNMSH  | 259   | 3869  |
| >DNMT3A-R{YTDVSNMSR  | 5     | >DNMT3A-R{YTDVSNMSH  | 7     | 2     |
| >DNMT3A-R{YTDVSNMSR  | 161   | >DNMT3A-R{YTDVSNMSH  | 136   | 25    |
| >DNMT3A-R{YTDVSNMSR  | 3833  | >DNMT3A-R{YTDVSNMSH  | 295   | 3538  |
| >DNMT3A-R{YTDVSNMSR  | 131   | >DNMT3A-R{YTDVSNMSH  | 218   | 87    |
| >DNMT3A-R{YTDVSNMSR  | 297   | >DNMT3A-R{YTDVSNMSH  | 175   | 122   |
| >DNMT3A-R{HYTDVSNMS  | 70    | >DNMT3A-R{HYTDVSNMS  | 30    | 40    |
| >DNMT3A-R{HYTDVSNMS  | 20    | >DNMT3A-R{HYTDVSNMS  | 12    | 8     |
| >DNMT3A-R{HYTDVSNMS  | 141   | >DNMT3A-R{HYTDVSNMS  | 9231  | 9090  |
| >DNMT3A-R{HYTDVSNMS  | 148   | >DNMT3A-R{HYTDVSNMS  | 6049  | 5901  |
| >DNMT3A-R{HYTDVSNMS  | 113   | >DNMT3A-R{HYTDVSNMS  | 13573 | 13460 |
| >DNMT3A-R{HYTDVSNMS  | 21    | >DNMT3A-R{HYTDVSNMS  | 12646 | 12625 |
| >DNMT3A-R{RLARQRL    | 61    | >DNMT3A-R{PLARQRL    | 1274  | 1213  |
| >DNMT3A-R{RLARQRL    | 158   | >DNMT3A-R{PLARQRL    | 6490  | 6332  |
| >DNMT3A-R{RLARQRL    | 404   | >DNMT3A-R{PLARQRL    | 5819  | 5415  |
| >DNMT3A-R{RLARQRL    | 31    | >DNMT3A-R{PLARQRL    | 167   | 136   |
| >DNMT3A-R{RLARQRLGR  | 160   | >DNMT3A-R{PLARQRLGR  | 5539  | 5379  |
| >DNMT3A-R{RLARQRLGR  | 33    | >DNMT3A-R{PLARQRLGR  | 2282  | 2249  |
| >DNMT3A-R{RLARQRL    | 280   | >DNMT3A-R{PLARQRL    | 26585 | 26305 |
| >DNMT3A-R{RLARQRLGR  | 74    | >DNMT3A-R{PLARQRLGR  | 1796  | 1722  |
| >DNMT3A-R{RLARQRLGR  | 95    | >DNMT3A-R{PLARQRLGR  | 534   | 439   |
| >DNMT3A-R{SRLARQRL   | 13893 | >DNMT3A-R{SPLARQRL   | 28    | 13865 |
| >DNMT3A-R{SRLARQRL   | 34074 | >DNMT3A-R{SPLARQRL   | 353   | 33721 |
| >DNMT3A-R{SRLARQRL   | 20713 | >DNMT3A-R{SPLARQRL   | 33    | 20680 |
| >DNMT3A-R{SRLARQRL   | 22223 | >DNMT3A-R{SPLARQRL   | 51    | 22172 |
| >DNMT3A-R{SRLARQRL   | 1043  | >DNMT3A-R{SPLARQRL   | 130   | 913   |
| >DNMT3A-R{SRLARQRL   | 1322  | >DNMT3A-R{SPLARQRL   | 126   | 1196  |
| >DNMT3A-R{SRLARQRL   | 85    | >DNMT3A-R{SPLARQRL   | 24062 | 23977 |
| >DNMT3A-R{SRLARQRL   | 39    | >DNMT3A-R{SPLARQRL   | 21034 | 20995 |
| >DNMT3A-R{SRLARQRLG  | 55    | >DNMT3A-R{SPLARQRLG  | 22038 | 21983 |
| >DNMT3A-R{SRLARQRL   | 92    | >DNMT3A-R{SPLARQRL   | 14224 | 14132 |
| >DNMT3A-R{SRLARQRL   | 207   | >DNMT3A-R{SPLARQRL   | 10358 | 10151 |
| >DNMT3A-R{SRLARQRL   | 10    | >DNMT3A-R{SPLARQRL   | 6036  | 6026  |
| >DNMT3A-R{SRLARQRLG  | 231   | >DNMT3A-R{SPLARQRLG  | 18229 | 17998 |
| >DNMT3A-R{SRLARQRLG  | 409   | >DNMT3A-R{SPLARQRLG  | 454   | 45    |
| >DNMT3A-R{VHYTDVSNM  | 264   | >DNMT3A-R{VHYTDVSNM  | 1273  | 1009  |
| >DNMT3A-R{MSRLARQRL  | 1034  | >DNMT3A-R{MSPLARQRL  | 306   | 728   |
| >DNMT3A-R{MSRLARQR   | 22    | >DNMT3A-R{MSPLARQR   | 10781 | 10759 |
| >DNMT3A-R{MSRLARQRL  | 7     | >DNMT3A-R{MSPLARQRL  | 6916  | 6909  |
| >DNMT3A-R{MSRLARQRLI | 7     | >DNMT3A-R{MSPLARQRLI | 5936  | 5929  |
| >DNMT3A-R{MSRLARQRLI | 8     | >DNMT3A-R{MSPLARQRLI | 6633  | 6625  |
| >DNMT3A-R{MSRLARQR   | 33    | >DNMT3A-R{MSPLARQR   | 531   | 498   |

|                       |      |                       |       |       |
|-----------------------|------|-----------------------|-------|-------|
| >DNMT3A-R{MSRLARQR    | 264  | >DNMT3A-R{MSPLARQR    | 3393  | 3129  |
| >DNMT3A-R{MSRLARQR    | 104  | >DNMT3A-R{MSPLARQR    | 63    | 41    |
| >DNMT3A-R{MSRLARQRL   | 8861 | >DNMT3A-R{MSPLARQRL   | 310   | 8551  |
| >DNMT3A-R{MSRLARQRL   | 261  | >DNMT3A-R{MSPLARQRL   | 14189 | 13928 |
| >DNMT3A-R{MSRLARQRL   | 7    | >DNMT3A-R{MSPLARQRL   | 613   | 606   |
| >DNMT3A-R{MSRLARQRLLI | 15   | >DNMT3A-R{MSPLARQRLLI | 1960  | 1945  |
| >DNMT3A-R{MSRLARQRL   | 6759 | >DNMT3A-R{MSPLARQRL   | 11    | 6748  |
| >DNMT3A-R{MSRLARQRLLI | 1915 | >DNMT3A-R{MSPLARQRLLI | 4     | 1911  |
| >DNMT3A-R{MSRLARQRL   | 264  | >DNMT3A-R{MSPLARQRL   | 8348  | 8084  |
| >DNMT3A-R{MSRLARQRLLI | 139  | >DNMT3A-R{MSPLARQRLLI | 304   | 165   |
| >DNMT3A-R{NMSRLARQR   | 532  | >DNMT3A-R{NMSPLARQR   | 254   | 278   |
| >DNMT3A-R{NMSRLARQR   | 126  | >DNMT3A-R{NMSPLARQR   | 48    | 78    |
| >DNMT3A-R{NMSRLARQR   | 648  | >DNMT3A-R{NMSPLARQR   | 241   | 407   |
| >DNMT3A-R{NMSRLARQR   | 166  | >DNMT3A-R{NMSPLARQR   | 60    | 106   |
| >DNMT3A-R{NMSRLARQR   | 935  | >DNMT3A-R{NMSPLARQR   | 346   | 589   |
| >DNMT3A-R{NMSRLARQR   | 191  | >DNMT3A-R{NMSPLARQR   | 190   | 1     |
| >DNMT3A-R{NMSRLARQR   | 1082 | >DNMT3A-R{NMSPLARQR   | 409   | 673   |
| >DNMT3A-R{SNMSRLARQ   | 72   | >DNMT3A-R{SNMSPLARQ   | 341   | 269   |
| >DNMT3A-R{SNMSRLAR    | 196  | >DNMT3A-R{SNMSPLAR    | 831   | 635   |
| >DNMT3A-R{SNMSRLARQ   | 208  | >DNMT3A-R{SNMSPLARQ   | 358   | 150   |
| >DNMT3A-R{SNMSRLARQ   | 230  | >DNMT3A-R{SNMSPLARQ   | 5314  | 5084  |
| >DNMT3A-R{VSNMSRLAR   | 83   | >DNMT3A-R{VSNMSPLAR   | 73    | 10    |
| >DNMT3A-R{VSNMSRLAR   | 22   | >DNMT3A-R{VSNMSPLAR   | 106   | 84    |
| >DNMT3A-R{VSNMSRLAR   | 67   | >DNMT3A-R{VSNMSPLAR   | 155   | 88    |
| >DNMT3A-R{VSNMSRLAR   | 298  | >DNMT3A-R{VSNMSPLAR   | 766   | 468   |
| >DNMT3A-R{DVSNMSRLA   | 664  | >DNMT3A-R{DVSNMSPLA   | 342   | 322   |
| >DNMT3A-R{DVSNMSRLA   | 32   | >DNMT3A-R{DVSNMSPLA   | 137   | 105   |
| >DNMT3A-R{DVSNMSRLA   | 47   | >DNMT3A-R{DVSNMSPLA   | 138   | 91    |
| >DNMT3A-R{DVSNMSRLA   | 13   | >DNMT3A-R{DVSNMSPLA   | 13    | 0     |
| >DNMT3A-R{DVSNMSRL    | 264  | >DNMT3A-R{DVSNMSPL    | 72    | 192   |
| >DNMT3A-R{DVSNMSRL    | 3024 | >DNMT3A-R{DVSNMSPL    | 295   | 2729  |
| >DNMT3A-R{TDVSNMSR    | 261  | >DNMT3A-R{TDVSNMSP    | 36807 | 36546 |
| >DNMT3A-R{YTDVSNMSR   | 210  | >DNMT3A-R{YTDVSNMSPI  | 113   | 97    |
| >DNMT3A-R{YTDVSNMSR   | 640  | >DNMT3A-R{YTDVSNMSPI  | 197   | 443   |
| >DNMT3A-R{YTDVSNMSR   | 1357 | >DNMT3A-R{YTDVSNMSPI  | 392   | 965   |
| >DNMT3A-R{YTDVSNMSR   | 1119 | >DNMT3A-R{YTDVSNMSPI  | 190   | 929   |
| >DNMT3A-R{YTDVSNMSR   | 1768 | >DNMT3A-R{YTDVSNMSPI  | 197   | 1571  |
| >DNMT3A-R{YTDVSNMSR   | 461  | >DNMT3A-R{YTDVSNMSPI  | 369   | 92    |
| >DNMT3A-R{YTDVSNMSR   | 1751 | >DNMT3A-R{YTDVSNMSPI  | 350   | 1401  |
| >DNMT3A-R{YTDVSNMSR   | 285  | >DNMT3A-R{YTDVSNMSP   | 35756 | 35471 |
| >DNMT3A-R{YTDVSNMSR   | 10   | >DNMT3A-R{YTDVSNMSP   | 22991 | 22981 |
| >DNMT3A-R{YTDVSNMSR   | 502  | >DNMT3A-R{YTDVSNMSPI  | 234   | 268   |
| >DNMT3A-R{YTDVSNMSR   | 149  | >DNMT3A-R{YTDVSNMSPI  | 26    | 123   |

|                      |       |                      |       |       |
|----------------------|-------|----------------------|-------|-------|
| >DNMT3A-R{YTDVSNMSR  | 1208  | >DNMT3A-R{YTDVSNMSPI | 135   | 1073  |
| >DNMT3A-R{YTDVSNMSR  | 5     | >DNMT3A-R{YTDVSNMSPI | 5     | 0     |
| >DNMT3A-R{YTDVSNMSR  | 2009  | >DNMT3A-R{YTDVSNMSPI | 199   | 1810  |
| >DNMT3A-R{YTDVSNMSR  | 161   | >DNMT3A-R{YTDVSNMSPI | 86    | 75    |
| >DNMT3A-R{YTDVSNMSR  | 131   | >DNMT3A-R{YTDVSNMSPI | 161   | 30    |
| >DNMT3A-R{YTDVSNMSR  | 297   | >DNMT3A-R{YTDVSNMSPI | 292   | 5     |
| >DNMT3A-R{HYTDVSNMS  | 70    | >DNMT3A-R{HYTDVSNMS  | 26    | 44    |
| >DNMT3A-R{HYTDVSNMS  | 20    | >DNMT3A-R{HYTDVSNMS  | 31    | 11    |
| >DNMT3A-R{HYTDVSNMS  | 141   | >DNMT3A-R{HYTDVSNMS  | 27607 | 27466 |
| >DNMT3A-R{HYTDVSNMS  | 148   | >DNMT3A-R{HYTDVSNMS  | 20057 | 19909 |
| >DNMT3A-R{HYTDVSNMS  | 113   | >DNMT3A-R{HYTDVSNMS  | 31807 | 31694 |
| >DNMT3A-R{HYTDVSNMS  | 4196  | >DNMT3A-R{HYTDVSNMS  | 489   | 3707  |
| >DNMT3A-R{HYTDVSNMS  | 21    | >DNMT3A-R{HYTDVSNMS  | 27002 | 26981 |
| >DNMT3A-R{RLARQRL    | 61    | >DNMT3A-R{SLARQRL    | 38    | 23    |
| >DNMT3A-R{RLARQRL    | 158   | >DNMT3A-R{SLARQRL    | 165   | 7     |
| >DNMT3A-R{RLARQRL    | 404   | >DNMT3A-R{SLARQRL    | 314   | 90    |
| >DNMT3A-R{RLARQRL    | 855   | >DNMT3A-R{SLARQRL    | 137   | 718   |
| >DNMT3A-R{RLARQRL    | 31    | >DNMT3A-R{SLARQRL    | 14    | 17    |
| >DNMT3A-R{RLARQRL GR | 160   | >DNMT3A-R{SLARQRL GR | 371   | 211   |
| >DNMT3A-R{RLARQRL GR | 33    | >DNMT3A-R{SLARQRL GR | 109   | 76    |
| >DNMT3A-R{RLARQRL    | 280   | >DNMT3A-R{SLARQRL    | 14245 | 13965 |
| >DNMT3A-R{RLARQRL GR | 74    | >DNMT3A-R{SLARQRL GR | 142   | 68    |
| >DNMT3A-R{RLARQRL GR | 95    | >DNMT3A-R{SLARQRL GR | 253   | 158   |
| >DNMT3A-R{SRLARQRL   | 2957  | >DNMT3A-R{SSLARQRL   | 245   | 2712  |
| >DNMT3A-R{SRLARQRL G | 22190 | >DNMT3A-R{SSLARQRL G | 201   | 21989 |
| >DNMT3A-R{SRLARQRL G | 10309 | >DNMT3A-R{SSLARQRL G | 90    | 10219 |
| >DNMT3A-R{SRLARQRL   | 24157 | >DNMT3A-R{SSLARQRL   | 26    | 24131 |
| >DNMT3A-R{SRLARQRL   | 26010 | >DNMT3A-R{SSLARQRL   | 112   | 25898 |
| >DNMT3A-R{SRLARQRL   | 85    | >DNMT3A-R{SSLARQRL   | 18955 | 18870 |
| >DNMT3A-R{SRLARQRL   | 39    | >DNMT3A-R{SSLARQRL   | 15136 | 15097 |
| >DNMT3A-R{SRLARQRL G | 55    | >DNMT3A-R{SSLARQRL G | 15567 | 15512 |
| >DNMT3A-R{SRLARQRL   | 92    | >DNMT3A-R{SSLARQRL   | 8151  | 8059  |
| >DNMT3A-R{SRLARQRL   | 207   | >DNMT3A-R{SSLARQRL   | 10001 | 9794  |
| >DNMT3A-R{SRLARQRL   | 10    | >DNMT3A-R{SSLARQRL   | 3660  | 3650  |
| >DNMT3A-R{SRLARQRL G | 231   | >DNMT3A-R{SSLARQRL G | 14592 | 14361 |
| >DNMT3A-R{SRLARQRL G | 5176  | >DNMT3A-R{SSLARQRL G | 180   | 4996  |
| >DNMT3A-R{SRLARQRL G | 409   | >DNMT3A-R{SSLARQRL G | 615   | 206   |
| >DNMT3A-R{VHYTDVSNM  | 264   | >DNMT3A-R{VHYTDVSNM  | 1443  | 1179  |
| >DNMT3A-R{MSRLARQR   | 22    | >DNMT3A-R{MSSLARQR   | 4099  | 4077  |
| >DNMT3A-R{MSRLARQRL  | 7     | >DNMT3A-R{MSSLARQRL  | 1387  | 1380  |
| >DNMT3A-R{MSRLARQRL  | 7     | >DNMT3A-R{MSSLARQRL  | 1161  | 1154  |
| >DNMT3A-R{MSRLARQRL  | 8     | >DNMT3A-R{MSSLARQRL  | 1356  | 1348  |
| >DNMT3A-R{MSRLARQR   | 33    | >DNMT3A-R{MSSLARQR   | 79    | 46    |

|                      |      |                       |       |       |
|----------------------|------|-----------------------|-------|-------|
| >DNMT3A-R{MSRLARQR   | 264  | >DNMT3A-R{MSSLARQR    | 928   | 664   |
| >DNMT3A-R{MSRLARQR   | 104  | >DNMT3A-R{MSSLARQR    | 12    | 92    |
| >DNMT3A-R{MSRLARQRL  | 8861 | >DNMT3A-R{MSSLARQRL   | 299   | 8562  |
| >DNMT3A-R{MSRLARQRL  | 261  | >DNMT3A-R{MSSLARQRL   | 9284  | 9023  |
| >DNMT3A-R{MSRLARQRL  | 7    | >DNMT3A-R{MSSLARQRL   | 22    | 15    |
| >DNMT3A-R{MSRLARQRLL | 15   | >DNMT3A-R{MSSLARQRLL  | 68    | 53    |
| >DNMT3A-R{MSRLARQRLL | 1915 | >DNMT3A-R{MSSLARQRLL  | 487   | 1428  |
| >DNMT3A-R{MSRLARQRL  | 264  | >DNMT3A-R{MSSLARQRL   | 877   | 613   |
| >DNMT3A-R{MSRLARQRLL | 139  | >DNMT3A-R{MSSLARQRLL  | 81    | 58    |
| >DNMT3A-R{NMSRLARQR  | 532  | >DNMT3A-R{NMSSLARQR   | 93    | 439   |
| >DNMT3A-R{NMSRLARQR  | 126  | >DNMT3A-R{NMSSLARQR   | 40    | 86    |
| >DNMT3A-R{NMSRLARQR  | 648  | >DNMT3A-R{NMSSLARQR   | 241   | 407   |
| >DNMT3A-R{NMSRLARQR  | 166  | >DNMT3A-R{NMSSLARQR   | 140   | 26    |
| >DNMT3A-R{NMSRLARQR  | 191  | >DNMT3A-R{NMSSLARQR   | 80    | 111   |
| >DNMT3A-R{SNMSRLARQ  | 72   | >DNMT3A-R{SNMSSLARQ   | 287   | 215   |
| >DNMT3A-R{SNMSRLAR   | 196  | >DNMT3A-R{SNMSSLAR    | 576   | 380   |
| >DNMT3A-R{SNMSRLARQ  | 208  | >DNMT3A-R{SNMSSLARQ   | 440   | 232   |
| >DNMT3A-R{SNMSRLAR   | 557  | >DNMT3A-R{SNMSSLAR    | 336   | 221   |
| >DNMT3A-R{SNMSRLARQ  | 230  | >DNMT3A-R{SNMSSLARQ   | 2549  | 2319  |
| >DNMT3A-R{VSNMSRLAR  | 83   | >DNMT3A-R{VSNMSSLAR   | 63    | 20    |
| >DNMT3A-R{VSNMSRLAR  | 22   | >DNMT3A-R{VSNMSSLAR   | 70    | 48    |
| >DNMT3A-R{VSNMSRLAR  | 67   | >DNMT3A-R{VSNMSSLAR   | 120   | 53    |
| >DNMT3A-R{VSNMSRLAR  | 298  | >DNMT3A-R{VSNMSSLAR   | 381   | 83    |
| >DNMT3A-R{DVSNM SRLA | 664  | >DNMT3A-R{DVSNM SSLAI | 267   | 397   |
| >DNMT3A-R{DVSNM SRLA | 32   | >DNMT3A-R{DVSNM SSLAI | 108   | 76    |
| >DNMT3A-R{DVSNM SRLA | 47   | >DNMT3A-R{DVSNM SSLAI | 58    | 11    |
| >DNMT3A-R{DVSNM SRLA | 13   | >DNMT3A-R{DVSNM SSLAI | 8     | 5     |
| >DNMT3A-R{DVSNM SRL  | 264  | >DNMT3A-R{DVSNM SSL   | 129   | 135   |
| >DNMT3A-R{DVSNM SRLA | 1836 | >DNMT3A-R{DVSNM SSLA  | 174   | 1662  |
| >DNMT3A-R{TDVSNMSR   | 261  | >DNMT3A-R{TDVSNMSS    | 30923 | 30662 |
| >DNMT3A-R{YTDVSNMSR  | 1138 | >DNMT3A-R{YTDVSNMSS   | 284   | 854   |
| >DNMT3A-R{YTDVSNMSR  | 210  | >DNMT3A-R{YTDVSNMSSI  | 79    | 131   |
| >DNMT3A-R{YTDVSNMSR  | 640  | >DNMT3A-R{YTDVSNMSSI  | 230   | 410   |
| >DNMT3A-R{YTDVSNMSR  | 1357 | >DNMT3A-R{YTDVSNMSSI  | 298   | 1059  |
| >DNMT3A-R{YTDVSNMSR  | 1119 | >DNMT3A-R{YTDVSNMSSI  | 299   | 820   |
| >DNMT3A-R{YTDVSNMSR  | 1768 | >DNMT3A-R{YTDVSNMSSI  | 472   | 1296  |
| >DNMT3A-R{YTDVSNMSR  | 461  | >DNMT3A-R{YTDVSNMSSI  | 399   | 62    |
| >DNMT3A-R{YTDVSNMSR  | 285  | >DNMT3A-R{YTDVSNMSS   | 32052 | 31767 |
| >DNMT3A-R{YTDVSNMSR  | 10   | >DNMT3A-R{YTDVSNMSS   | 13748 | 13738 |
| >DNMT3A-R{YTDVSNMSR  | 502  | >DNMT3A-R{YTDVSNMSSI  | 331   | 171   |
| >DNMT3A-R{YTDVSNMSR  | 149  | >DNMT3A-R{YTDVSNMSSI  | 67    | 82    |
| >DNMT3A-R{YTDVSNMSR  | 5    | >DNMT3A-R{YTDVSNMSSI  | 5     | 0     |
| >DNMT3A-R{YTDVSNMSR  | 2009 | >DNMT3A-R{YTDVSNMSSI  | 351   | 1658  |

|                       |       |                       |       |       |
|-----------------------|-------|-----------------------|-------|-------|
| >DNMT3A-R{YTDVSNMSR}  | 161   | >DNMT3A-R{YTDVSNMSSI  | 91    | 70    |
| >DNMT3A-R{YTDVSNMSR}  | 131   | >DNMT3A-R{YTDVSNMSSI  | 64    | 67    |
| >DNMT3A-R{YTDVSNMSR}  | 1458  | >DNMT3A-R{YTDVSNMSSI  | 144   | 1314  |
| >DNMT3A-R{YTDVSNMSR}  | 297   | >DNMT3A-R{YTDVSNMSSI  | 170   | 127   |
| >DNMT3A-R{HYTDVSNMS   | 70    | >DNMT3A-R{HYTDVSNMS   | 20    | 50    |
| >DNMT3A-R{HYTDVSNMS   | 20    | >DNMT3A-R{HYTDVSNMS   | 13    | 7     |
| >DNMT3A-R{HYTDVSNMS   | 2840  | >DNMT3A-R{HYTDVSNMS   | 426   | 2414  |
| >DNMT3A-R{HYTDVSNMS   | 141   | >DNMT3A-R{HYTDVSNMS   | 22436 | 22295 |
| >DNMT3A-R{HYTDVSNMS   | 148   | >DNMT3A-R{HYTDVSNMS   | 16758 | 16610 |
| >DNMT3A-R{HYTDVSNMS   | 113   | >DNMT3A-R{HYTDVSNMS   | 29799 | 29686 |
| >DNMT3A-R{HYTDVSNMS   | 21    | >DNMT3A-R{HYTDVSNMS   | 18592 | 18571 |
| >EGFR-A104{LSATSNNSTV | 1813  | >EGFR-A104{LSATSNNSTV | 138   | 1675  |
| >EGFR-A104{LSATSNNSTV | 830   | >EGFR-A104{LSATSNNSTV | 139   | 691   |
| >EGFR-A104{LSATSNNSTV | 1873  | >EGFR-A104{LSATSNNSTV | 231   | 1642  |
| >EGFR-A104{TVACIDRNG  | 283   | >EGFR-A104{TVVCCIDRNG | 682   | 399   |
| >EGFR-A104{TVACIDRNG  | 448   | >EGFR-A104{TVVCCIDRNG | 609   | 161   |
| >EGFR-A104{STVACIDRNG | 349   | >EGFR-A104{STVVCIDRNG | 1231  | 882   |
| >EGFR-A104{STVACIDRNG | 432   | >EGFR-A104{STVVCIDRNG | 1055  | 623   |
| >EGFR-A104{STVACIDR   | 251   | >EGFR-A104{STVVCIDR   | 439   | 188   |
| >EGFR-A104{STVACIDRNG | 73    | >EGFR-A104{STVVCIDRNG | 158   | 85    |
| >EGFR-A104{STVACIDR   | 319   | >EGFR-A104{STVVCIDR   | 262   | 57    |
| >EGFR-A104{STVACIDR   | 17    | >EGFR-A104{STVVCIDR   | 19    | 2     |
| >EGFR-A104{STVACIDRNG | 20    | >EGFR-A104{STVVCIDRNG | 52    | 32    |
| >EGFR-A104{STVACIDRNG | 106   | >EGFR-A104{STVVCIDRNG | 116   | 10    |
| >EGFR-A104{STVACIDRNG | 421   | >EGFR-A104{STVVCIDRNG | 882   | 461   |
| >EGFR-A104{STVACIDRNG | 451   | >EGFR-A104{STVVCIDRNG | 415   | 36    |
| >EGFR-A104{STVACIDR   | 196   | >EGFR-A104{STVVCIDR   | 137   | 59    |
| >EGFR-A104{STVACIDR   | 352   | >EGFR-A104{STVVCIDR   | 1103  | 751   |
| >EGFR-A104{NSTVACIDR  | 967   | >EGFR-A104{NSTVVCIDR  | 188   | 779   |
| >EGFR-A104{NSTVACIDR  | 51    | >EGFR-A104{NSTVVCIDR  | 21    | 30    |
| >EGFR-A104{NNSTVACIDR | 360   | >EGFR-A104{NNSTVVCIDR | 192   | 168   |
| >EGFR-A104{TSNNSTVA   | 1424  | >EGFR-A104{TSNNSTVV   | 91    | 1333  |
| >EGFR-A104{TSNNSTVACI | 187   | >EGFR-A104{TSNNSTVVCI | 250   | 63    |
| >EGFR-A104{TSNNSTVACI | 79    | >EGFR-A104{TSNNSTVVCI | 169   | 90    |
| >EGFR-A104{ATSNNSTVA  | 1388  | >EGFR-A104{ATSNNSTVV  | 118   | 1270  |
| >EGFR-A104{ATSNNSTVA  | 8591  | >EGFR-A104{ATSNNSTVV  | 331   | 8260  |
| >EGFR-A104{ATSNNSTVA  | 11993 | >EGFR-A104{ATSNNSTVV  | 117   | 11876 |
| >EGFR-A104{ATSNNSTVAC | 449   | >EGFR-A104{ATSNNSTVVC | 1281  | 832   |
| >EGFR-A104{ATSNNSTVAC | 347   | >EGFR-A104{ATSNNSTVVC | 119   | 228   |
| >EGFR-A104{ATSNNSTVA  | 4300  | >EGFR-A104{ATSNNSTVV  | 243   | 4057  |
| >EGFR-A104{ATSNNSTVAC | 399   | >EGFR-A104{ATSNNSTVVC | 795   | 396   |
| >EGFR-A104{ATSNNSTVA  | 1355  | >EGFR-A104{ATSNNSTVV  | 135   | 1220  |
| >EGFR-A104{ATSNNSTVAC | 80    | >EGFR-A104{ATSNNSTVVC | 97    | 17    |

|                        |       |                        |       |       |
|------------------------|-------|------------------------|-------|-------|
| >EGFR-A104{SATSNNSTVA  | 12767 | >EGFR-A104{SATSNNSTVV  | 216   | 12551 |
| >EGFR-A289I ATCVKKCPR  | 430   | >EGFR-A289I DTCVKKCPR  | 12273 | 11843 |
| >EGFR-A289I ATCVKKCPRN | 583   | >EGFR-A289I DTCVKKCPRN | 215   | 368   |
| >EGFR-A289I ATCVKKCPRN | 447   | >EGFR-A289I DTCVKKCPRN | 50    | 397   |
| >EGFR-A289I ATCVKKCPRN | 496   | >EGFR-A289I DTCVKKCPRN | 2755  | 2259  |
| >EGFR-A289I ATCVKKCPR  | 10    | >EGFR-A289I DTCVKKCPR  | 80    | 70    |
| >EGFR-A289I ATCVKKCPR  | 165   | >EGFR-A289I DTCVKKCPR  | 11    | 154   |
| >EGFR-A289I ATCVKKCPR  | 494   | >EGFR-A289I DTCVKKCPR  | 35    | 459   |
| >EGFR-A289I ATCVKKCPRN | 12    | >EGFR-A289I DTCVKKCPRN | 824   | 812   |
| >EGFR-A289I GATCVKKCPF | 150   | >EGFR-A289I GDTCVKKCPF | 2227  | 2077  |
| >EGFR-A289I GATCVKKCPF | 293   | >EGFR-A289I GDTCVKKCPF | 19144 | 18851 |
| >EGFR-A289I FGATCVKKCF | 466   | >EGFR-A289I FGDTCVKKCF | 5179  | 4713  |
| >EGFR-A289I FGATCVKKCF | 91    | >EGFR-A289I FGDTCVKKCF | 330   | 239   |
| >EGFR-A289I SFGATCVK   | 395   | >EGFR-A289I SFGDTCVK   | 431   | 36    |
| >EGFR-A289I YSFGATCV   | 188   | >EGFR-A289I YSFGDTCV   | 248   | 60    |
| >EGFR-A289I YSFGATCV   | 109   | >EGFR-A289I YSFGDTCV   | 172   | 63    |
| >EGFR-A289I YSFGATCV   | 49    | >EGFR-A289I YSFGDTCV   | 114   | 65    |
| >EGFR-A289I YSFGATCV   | 100   | >EGFR-A289I YSFGDTCV   | 145   | 45    |
| >EGFR-A289I YSFGATCV   | 80    | >EGFR-A289I YSFGDTCV   | 97    | 17    |
| >EGFR-A289I YSFGATCV   | 86    | >EGFR-A289I YSFGDTCV   | 109   | 23    |
| >EGFR-A289I YSFGATCVK  | 260   | >EGFR-A289I YSFGDTCVK  | 769   | 509   |
| >EGFR-A289I YSFGATCVKK | 66    | >EGFR-A289I YSFGDTCVKK | 329   | 263   |
| >EGFR-A289I YSFGATCVK  | 24    | >EGFR-A289I YSFGDTCVK  | 45    | 21    |
| >EGFR-A289I YSFGATCVKK | 18    | >EGFR-A289I YSFGDTCVKK | 28    | 10    |
| >EGFR-A289I YSFGATCVK  | 41    | >EGFR-A289I YSFGDTCVK  | 934   | 893   |
| >EGFR-A289I YSFGATCVKK | 190   | >EGFR-A289I YSFGDTCVKK | 1386  | 1196  |
| >EGFR-A289I YSFGATCVK  | 7     | >EGFR-A289I YSFGDTCVK  | 12    | 5     |
| >EGFR-A289I YSFGATCVKK | 7     | >EGFR-A289I YSFGDTCVKK | 12    | 5     |
| >EGFR-A289I YSFGATCV   | 33    | >EGFR-A289I YSFGDTCV   | 55    | 22    |
| >EGFR-A289I YSFGATCV   | 258   | >EGFR-A289I YSFGDTCV   | 1313  | 1055  |
| >EGFR-A289I YSFGATCV   | 307   | >EGFR-A289I YSFGDTCV   | 587   | 280   |
| >EGFR-A289I YSFGATCV   | 205   | >EGFR-A289I YSFGDTCV   | 771   | 566   |
| >EGFR-A289I YSFGATCV   | 245   | >EGFR-A289I YSFGDTCV   | 1345  | 1100  |
| >EGFR-A289I YSFGATCVKK | 537   | >EGFR-A289I YSFGDTCVKK | 379   | 158   |
| >EGFR-A289I KYSFGATCV  | 218   | >EGFR-A289I KYSFGDTCV  | 449   | 231   |
| >EGFR-A289I KYSFGATCVK | 322   | >EGFR-A289I KYSFGDTCVK | 2002  | 1680  |
| >EGFR-A289I KYSFGATCVK | 19    | >EGFR-A289I KYSFGDTCVK | 54    | 35    |
| >EGFR-A289I KYSFGATCVK | 45    | >EGFR-A289I KYSFGDTCVK | 91    | 46    |
| >EGFR-A289I KYSFGATCVK | 366   | >EGFR-A289I KYSFGDTCVK | 1151  | 785   |
| >EGFR-A289I KYSFGATCVK | 401   | >EGFR-A289I KYSFGDTCVK | 414   | 13    |
| >EGFR-A289I KYSFGATCVK | 471   | >EGFR-A289I KYSFGDTCVK | 2014  | 1543  |
| >EGFR-A289I KYSFGATCVK | 107   | >EGFR-A289I KYSFGDTCVK | 126   | 19    |
| >EGFR-A289I KYSFGATCVK | 190   | >EGFR-A289I KYSFGDTCVK | 181   | 9     |

|                        |      |                        |       |       |
|------------------------|------|------------------------|-------|-------|
| >EGFR-A289I KYSFGATC   | 221  | >EGFR-A289I KYSFGDTC   | 126   | 95    |
| >EGFR-A289I KYSFGATCV  | 369  | >EGFR-A289I KYSFGDTCV  | 374   | 5     |
| >EGFR-A289I GKYSFGATC  | 274  | >EGFR-A289I GKYSFGDTC  | 945   | 671   |
| >EGFR-A289I GKYSFGATCV | 25   | >EGFR-A289I GKYSFGDTCV | 72    | 47    |
| >EGFR-A289I GKYSFGATCV | 123  | >EGFR-A289I GKYSFGDTCV | 226   | 103   |
| >EGFR-A289I PEGKYSFGA  | 121  | >EGFR-A289I PEGKYSFGD  | 10447 | 10326 |
| >EGFR-A289I NPEGKYSFGA | 254  | >EGFR-A289I NPEGKYSFGC | 11591 | 11337 |
| >EGFR-A289I ATCVKKCPR  | 430  | >EGFR-A289I TTCVKKCPR  | 385   | 45    |
| >EGFR-A289I ATCVKKCPRN | 583  | >EGFR-A289I TTCVKKCPRN | 492   | 91    |
| >EGFR-A289I ATCVKKCPRN | 447  | >EGFR-A289I TTCVKKCPRN | 151   | 296   |
| >EGFR-A289I ATCVKKCPRN | 496  | >EGFR-A289I TTCVKKCPRN | 804   | 308   |
| >EGFR-A289I ATCVKKCPR  | 10   | >EGFR-A289I TTCVKKCPR  | 12    | 2     |
| >EGFR-A289I ATCVKKCPR  | 165  | >EGFR-A289I TTCVKKCPR  | 32    | 133   |
| >EGFR-A289I ATCVKKCPR  | 494  | >EGFR-A289I TTCVKKCPR  | 29    | 465   |
| >EGFR-A289I ATCVKKCPRN | 12   | >EGFR-A289I TTCVKKCPRN | 37    | 25    |
| >EGFR-A289I ATCVKKCPR  | 1300 | >EGFR-A289I TTCVKKCPR  | 289   | 1011  |
| >EGFR-A289I GATCVKKCPF | 150  | >EGFR-A289I GTTCVKKCPR | 62    | 88    |
| >EGFR-A289I GATCVKKCPF | 293  | >EGFR-A289I GTTCVKKCPR | 109   | 184   |
| >EGFR-A289I FGATCVKKCP | 466  | >EGFR-A289I FGTTCVKKCP | 1015  | 549   |
| >EGFR-A289I FGATCVKKCP | 91   | >EGFR-A289I FGTTCVKKCP | 109   | 18    |
| >EGFR-A289I SFGATCVK   | 395  | >EGFR-A289I SFGTTCVK   | 366   | 29    |
| >EGFR-A289I YSFGATCV   | 188  | >EGFR-A289I YSFGTTCV   | 126   | 62    |
| >EGFR-A289I YSFGATCV   | 109  | >EGFR-A289I YSFGTTCV   | 106   | 3     |
| >EGFR-A289I YSFGATCV   | 49   | >EGFR-A289I YSFGTTCV   | 49    | 0     |
| >EGFR-A289I YSFGATCV   | 100  | >EGFR-A289I YSFGTTCV   | 60    | 40    |
| >EGFR-A289I YSFGATCV   | 80   | >EGFR-A289I YSFGTTCV   | 67    | 13    |
| >EGFR-A289I YSFGATCV   | 86   | >EGFR-A289I YSFGTTCV   | 62    | 24    |
| >EGFR-A289I YSFGATCVK  | 260  | >EGFR-A289I YSFGTTCVK  | 276   | 16    |
| >EGFR-A289I YSFGATCVKK | 66   | >EGFR-A289I YSFGTTCVKK | 89    | 23    |
| >EGFR-A289I YSFGATCVK  | 24   | >EGFR-A289I YSFGTTCVK  | 21    | 3     |
| >EGFR-A289I YSFGATCVKK | 18   | >EGFR-A289I YSFGTTCVKK | 22    | 4     |
| >EGFR-A289I YSFGATCVK  | 41   | >EGFR-A289I YSFGTTCVK  | 41    | 0     |
| >EGFR-A289I YSFGATCVKK | 190  | >EGFR-A289I YSFGTTCVKK | 207   | 17    |
| >EGFR-A289I YSFGATCVK  | 7    | >EGFR-A289I YSFGTTCVK  | 7     | 0     |
| >EGFR-A289I YSFGATCVKK | 7    | >EGFR-A289I YSFGTTCVKK | 8     | 1     |
| >EGFR-A289I YSFGATCV   | 33   | >EGFR-A289I YSFGTTCV   | 41    | 8     |
| >EGFR-A289I YSFGATCV   | 258  | >EGFR-A289I YSFGTTCV   | 245   | 13    |
| >EGFR-A289I YSFGATCV   | 307  | >EGFR-A289I YSFGTTCV   | 153   | 154   |
| >EGFR-A289I YSFGATCVK  | 852  | >EGFR-A289I YSFGTTCVK  | 382   | 470   |
| >EGFR-A289I YSFGATCV   | 205  | >EGFR-A289I YSFGTTCV   | 273   | 68    |
| >EGFR-A289I YSFGATCV   | 245  | >EGFR-A289I YSFGTTCV   | 112   | 133   |
| >EGFR-A289I YSFGATCVKK | 537  | >EGFR-A289I YSFGTTCVKK | 437   | 100   |
| >EGFR-A289I KYSFGATCV  | 218  | >EGFR-A289I KYSFGTTCV  | 107   | 111   |

|                       |     |                       |      |      |
|-----------------------|-----|-----------------------|------|------|
| >EGFR-A289\KYSFGATCVK | 322 | >EGFR-A289\KYSFGTTCVK | 219  | 103  |
| >EGFR-A289\KYSFGATCVK | 19  | >EGFR-A289\KYSFGTTCVK | 13   | 6    |
| >EGFR-A289\KYSFGATCVK | 45  | >EGFR-A289\KYSFGTTCVK | 31   | 14   |
| >EGFR-A289\KYSFGATCVK | 366 | >EGFR-A289\KYSFGTTCVK | 261  | 105  |
| >EGFR-A289\KYSFGATCVK | 401 | >EGFR-A289\KYSFGTTCVK | 232  | 169  |
| >EGFR-A289\KYSFGATCVK | 471 | >EGFR-A289\KYSFGTTCVK | 1634 | 1163 |
| >EGFR-A289\KYSFGATCVK | 107 | >EGFR-A289\KYSFGTTCVK | 69   | 38   |
| >EGFR-A289\KYSFGATCVK | 190 | >EGFR-A289\KYSFGTTCVK | 134  | 56   |
| >EGFR-A289\KYSFGATC   | 221 | >EGFR-A289\KYSFGTTC   | 222  | 1    |
| >EGFR-A289\KYSFGATCV  | 369 | >EGFR-A289\KYSFGTTCV  | 399  | 30   |
| >EGFR-A289\GKYSFGATC  | 274 | >EGFR-A289\GKYSFGTTC  | 142  | 132  |
| >EGFR-A289\GKYSFGATCV | 25  | >EGFR-A289\GKYSFGTTCV | 18   | 7    |
| >EGFR-A289\GKYSFGATCV | 123 | >EGFR-A289\GKYSFGTTCV | 79   | 44   |
| >EGFR-A289\PEGKYSFGA  | 121 | >EGFR-A289\PEGKYSFGT  | 827  | 706  |
| >EGFR-A289\NPEGKYSFGA | 254 | >EGFR-A289\NPEGKYSFGT | 7698 | 7444 |
| >EGFR-A289\ATCVKKCPR  | 430 | >EGFR-A289\VTCVKKCPR  | 972  | 542  |
| >EGFR-A289\ATCVKKCPRM | 447 | >EGFR-A289\VTCVKKCPRM | 483  | 36   |
| >EGFR-A289\ATCVKKCPRM | 496 | >EGFR-A289\VTCVKKCPRM | 311  | 185  |
| >EGFR-A289\ATCVKKCPR  | 10  | >EGFR-A289\VTCVKKCPR  | 13   | 3    |
| >EGFR-A289\ATCVKKCPR  | 165 | >EGFR-A289\VTCVKKCPR  | 60   | 105  |
| >EGFR-A289\ATCVKKCPR  | 494 | >EGFR-A289\VTCVKKCPR  | 329  | 165  |
| >EGFR-A289\ATCVKKCPRM | 12  | >EGFR-A289\VTCVKKCPRM | 16   | 4    |
| >EGFR-A289\GATCVKKCPF | 150 | >EGFR-A289\GVTCVKKCPF | 69   | 81   |
| >EGFR-A289\GATCVKKCPF | 293 | >EGFR-A289\GVTCVKKCPF | 170  | 123  |
| >EGFR-A289\FGATCVKKCP | 466 | >EGFR-A289\FGVTCVKKCP | 943  | 477  |
| >EGFR-A289\FGATCVKKCP | 91  | >EGFR-A289\FGVTCVKKCP | 68   | 23   |
| >EGFR-A289\SFGATCVK   | 395 | >EGFR-A289\SFGVTCVK   | 1398 | 1003 |
| >EGFR-A289\YSFGATCV   | 188 | >EGFR-A289\YSFGVTCV   | 58   | 130  |
| >EGFR-A289\YSFGATCV   | 109 | >EGFR-A289\YSFGVTCV   | 64   | 45   |
| >EGFR-A289\YSFGATCV   | 780 | >EGFR-A289\YSFGVTCV   | 278  | 502  |
| >EGFR-A289\YSFGATCV   | 49  | >EGFR-A289\YSFGVTCV   | 37   | 12   |
| >EGFR-A289\YSFGATCV   | 100 | >EGFR-A289\YSFGVTCV   | 22   | 78   |
| >EGFR-A289\YSFGATCV   | 80  | >EGFR-A289\YSFGVTCV   | 36   | 44   |
| >EGFR-A289\YSFGATCV   | 86  | >EGFR-A289\YSFGVTCV   | 71   | 15   |
| >EGFR-A289\YSFGATCVK  | 260 | >EGFR-A289\YSFGVTCVK  | 135  | 125  |
| >EGFR-A289\YSFGATCVKK | 66  | >EGFR-A289\YSFGVTCVKK | 70   | 4    |
| >EGFR-A289\YSFGATCVK  | 24  | >EGFR-A289\YSFGVTCVK  | 14   | 10   |
| >EGFR-A289\YSFGATCVKK | 18  | >EGFR-A289\YSFGVTCVKK | 25   | 7    |
| >EGFR-A289\YSFGATCVK  | 41  | >EGFR-A289\YSFGVTCVK  | 166  | 125  |
| >EGFR-A289\YSFGATCVKK | 190 | >EGFR-A289\YSFGVTCVKK | 491  | 301  |
| >EGFR-A289\YSFGATCVK  | 7   | >EGFR-A289\YSFGVTCVK  | 4    | 3    |
| >EGFR-A289\YSFGATCVKK | 7   | >EGFR-A289\YSFGVTCVKK | 6    | 1    |
| >EGFR-A289\YSFGATCV   | 33  | >EGFR-A289\YSFGVTCV   | 20   | 13   |



|                       |      |                       |       |       |
|-----------------------|------|-----------------------|-------|-------|
| >EGFR-A289\YSGFATCV   | 258  | >EGFR-A289\YSGVTCV    | 371   | 113   |
| >EGFR-A289\YSGFATCV   | 307  | >EGFR-A289\YSGVTCV    | 329   | 22    |
| >EGFR-A289\YSGFATCV   | 205  | >EGFR-A289\YSGVTCV    | 582   | 377   |
| >EGFR-A289\YSGFATCV   | 245  | >EGFR-A289\YSGVTCV    | 288   | 43    |
| >EGFR-A289\KYSFGATCV  | 218  | >EGFR-A289\KYSFGVTCV  | 174   | 44    |
| >EGFR-A289\KYSFGATCVK | 322  | >EGFR-A289\KYSFGVTCVK | 318   | 4     |
| >EGFR-A289\KYSFGATCVK | 19   | >EGFR-A289\KYSFGVTCVK | 20    | 1     |
| >EGFR-A289\KYSFGATCVK | 45   | >EGFR-A289\KYSFGVTCVK | 41    | 4     |
| >EGFR-A289\KYSFGATCVK | 366  | >EGFR-A289\KYSFGVTCVK | 187   | 179   |
| >EGFR-A289\KYSFGATCVK | 401  | >EGFR-A289\KYSFGVTCVK | 251   | 150   |
| >EGFR-A289\KYSFGATCVK | 471  | >EGFR-A289\KYSFGVTCVK | 1366  | 895   |
| >EGFR-A289\KYSFGATCVK | 107  | >EGFR-A289\KYSFGVTCVK | 98    | 9     |
| >EGFR-A289\KYSFGATCVK | 190  | >EGFR-A289\KYSFGVTCVK | 199   | 9     |
| >EGFR-A289\KYSFGATC   | 221  | >EGFR-A289\KYSFGVTC   | 173   | 48    |
| >EGFR-A289\KYSFGATCV  | 369  | >EGFR-A289\KYSFGVTCV  | 290   | 79    |
| >EGFR-A289\GKYSFGATC  | 274  | >EGFR-A289\GKYSFGVTC  | 118   | 156   |
| >EGFR-A289\GKYSFGATCV | 25   | >EGFR-A289\GKYSFGVTCV | 16    | 9     |
| >EGFR-A289\GKYSFGATCV | 123  | >EGFR-A289\GKYSFGVTCV | 111   | 12    |
| >EGFR-A289\EGKYSFGA   | 5031 | >EGFR-A289\EGKYSFGV   | 457   | 4574  |
| >EGFR-A289\PEGKYSFGA  | 121  | >EGFR-A289\PEGKYSFGV  | 590   | 469   |
| >EGFR-A289\PEGKYSFGA  | 8019 | >EGFR-A289\PEGKYSFGV  | 338   | 7681  |
| >EGFR-A289\NPEGKYSFGA | 3197 | >EGFR-A289\NPEGKYSFGV | 383   | 2814  |
| >EGFR-A289\NPEGKYSFGA | 254  | >EGFR-A289\NPEGKYSFGV | 610   | 356   |
| >EGFR-A597\DGPHCVKTCI | 234  | >EGFR-A597\DGPHCVKTCI | 302   | 68    |
| >EGFR-A597\CPAGVMGEN  | 289  | >EGFR-A597\CPPGVMGEN  | 1211  | 922   |
| >EGFR-A597\KTCPAGVM   | 7    | >EGFR-A597\KTCPPGVM   | 9     | 2     |
| >EGFR-A597\KTCPAGVMG  | 643  | >EGFR-A597\KTCPPGVMG  | 423   | 220   |
| >EGFR-A597\KTCPAGVM   | 497  | >EGFR-A597\KTCPPGVM   | 698   | 201   |
| >EGFR-A597\KTCPAGVM   | 441  | >EGFR-A597\KTCPPGVM   | 419   | 22    |
| >EGFR-A597\KTCPAGVM   | 56   | >EGFR-A597\KTCPPGVM   | 52    | 4     |
| >EGFR-A597\VKTCPAGVM  | 271  | >EGFR-A597\VKTCPPGVM  | 183   | 88    |
| >EGFR-A597\VKTCPAGVM  | 350  | >EGFR-A597\VKTCPPGVM  | 1118  | 768   |
| >EGFR-A597\CVKTCPAGV  | 70   | >EGFR-A597\CVKTCPPGV  | 323   | 253   |
| >EGFR-A597\CVKTCPAGV  | 128  | >EGFR-A597\CVKTCPPGV  | 2945  | 2817  |
| >EGFR-A597\CVKTCPAGV\ | 2102 | >EGFR-A597\CVKTCPPGV\ | 484   | 1618  |
| >EGFR-A597\HCVKTCPAG\ | 596  | >EGFR-A597\HCVKTCPPG\ | 285   | 311   |
| >EGFR-A597\HCVKTCPAG\ | 165  | >EGFR-A597\HCVKTCPPG\ | 338   | 173   |
| >EGFR-A597\GPHCVKTCP\ | 364  | >EGFR-A597\GPHCVKTCPF | 14502 | 14138 |
| >EGFR-A597\DGPHCVKTCI | 234  | >EGFR-A597\DGPHCVKTCI | 350   | 116   |
| >EGFR-A597\CPAGVMGEN  | 289  | >EGFR-A597\CPTGVMGEN  | 333   | 44    |
| >EGFR-A597\KTCPAGVM   | 610  | >EGFR-A597\KTCPTGVM   | 430   | 180   |
| >EGFR-A597\KTCPAGVM   | 546  | >EGFR-A597\KTCPTGVM   | 454   | 92    |
| >EGFR-A597\KTCPAGVM   | 7    | >EGFR-A597\KTCPTGVM   | 9     | 2     |

|                         |       |                        |       |       |
|-------------------------|-------|------------------------|-------|-------|
| >EGFR-A597KTCPCAGVM     | 497   | >EGFR-A597KTCPTGVM     | 227   | 270   |
| >EGFR-A597KTCPCAGVM     | 441   | >EGFR-A597KTCPTGVM     | 201   | 240   |
| >EGFR-A597KTCPCAGVM     | 56    | >EGFR-A597KTCPTGVM     | 48    | 8     |
| >EGFR-A597VKTCPCAGVM    | 271   | >EGFR-A597VKTCPTGVM    | 211   | 60    |
| >EGFR-A597VKTCPCAGVM    | 350   | >EGFR-A597VKTCPTGVM    | 932   | 582   |
| >EGFR-A597CVKTCPCAGV    | 70    | >EGFR-A597CVKTCPTGV    | 63    | 7     |
| >EGFR-A597CVKTCPCAGV    | 128   | >EGFR-A597CVKTCPTGV    | 349   | 221   |
| >EGFR-A597HCVKTCPCAGV   | 165   | >EGFR-A597HCVKTCPTGV   | 204   | 39    |
| >EGFR-A597GPHCVKTCPCAGV | 364   | >EGFR-A597GPHCVKTCPTGV | 10024 | 9660  |
| >EGFR-A698APNQALLRI     | 22    | >EGFR-A698TPNQALLRI    | 28    | 6     |
| >EGFR-A698APNQALLRIL    | 329   | >EGFR-A698TPNQALLRIL   | 406   | 77    |
| >EGFR-A698APNQALLRI     | 145   | >EGFR-A698TPNQALLRI    | 1299  | 1154  |
| >EGFR-A698APNQALLRIL    | 109   | >EGFR-A698TPNQALLRIL   | 85    | 24    |
| >EGFR-A698APNQALLRI     | 386   | >EGFR-A698TPNQALLRI    | 207   | 179   |
| >EGFR-A698APNQALLRIL    | 293   | >EGFR-A698TPNQALLRIL   | 1174  | 881   |
| >EGFR-A698EAPNQALL      | 6362  | >EGFR-A698ETPNQALL     | 301   | 6061  |
| >EGFR-A698EAPNQALL      | 11510 | >EGFR-A698ETPNQALL     | 345   | 11165 |
| >EGFR-A698EAPNQALLRII   | 8649  | >EGFR-A698ETPNQALLRII  | 239   | 8410  |
| >EGFR-A698EAPNQALLRII   | 10454 | >EGFR-A698ETPNQALLRII  | 456   | 9998  |
| >EGFR-A698EAPNQALLR     | 26    | >EGFR-A698ETPNQALLR    | 9     | 17    |
| >EGFR-A698EAPNQALL      | 173   | >EGFR-A698ETPNQALL     | 27    | 146   |
| >EGFR-A698EAPNQALLRI    | 1836  | >EGFR-A698ETPNQALLRI   | 217   | 1619  |
| >EGFR-A698EAPNQALLRI    | 2035  | >EGFR-A698ETPNQALLRI   | 391   | 1644  |
| >EGFR-A698EAPNQALL      | 1773  | >EGFR-A698ETPNQALL     | 43    | 1730  |
| >EGFR-A698EAPNQALLRI    | 931   | >EGFR-A698ETPNQALLRI   | 56    | 875   |
| >EGFR-A698EAPNQALLRII   | 136   | >EGFR-A698ETPNQALLRII  | 11    | 125   |
| >EGFR-A698EAPNQALLR     | 592   | >EGFR-A698ETPNQALLR    | 380   | 212   |
| >EGFR-A698GEAPNQALL     | 250   | >EGFR-A698GETPNQALL    | 543   | 293   |
| >EGFR-A698GEAPNQALLF    | 42    | >EGFR-A698GETPNQALLF   | 72    | 30    |
| >EGFR-A698GEAPNQAL      | 22    | >EGFR-A698GETPNQAL     | 16    | 6     |
| >EGFR-A698GEAPNQALL     | 54    | >EGFR-A698GETPNQALL    | 45    | 9     |
| >EGFR-A698GEAPNQALLF    | 227   | >EGFR-A698GETPNQALLF   | 194   | 33    |
| >EGFR-A698GEAPNQAL      | 187   | >EGFR-A698GETPNQAL     | 89    | 98    |
| >EGFR-A698GEAPNQALL     | 1140  | >EGFR-A698GETPNQALL    | 493   | 647   |
| >EGFR-A698GEAPNQALLF    | 819   | >EGFR-A698GETPNQALLF   | 424   | 395   |
| >EGFR-A698GEAPNQALL     | 46    | >EGFR-A698GETPNQALL    | 87    | 41    |
| >EGFR-A698GEAPNQALLF    | 7     | >EGFR-A698GETPNQALLF   | 10    | 3     |
| >EGFR-A698TPSGEAPNQALL  | 99    | >EGFR-A698TPSGETPNQALL | 64    | 35    |
| >EGFR-A698TPSGEAPNQALL  | 144   | >EGFR-A698TPSGETPNQALL | 106   | 38    |
| >EGFR-A698TPSGEAPNQALL  | 28    | >EGFR-A698TPSGETPNQALL | 36    | 8     |
| >EGFR-A698LTPSGEAP      | 456   | >EGFR-A698LTPSGETP     | 780   | 324   |
| >EGFR-A698LTPSGEAPNC    | 326   | >EGFR-A698LTPSGETPNQ   | 568   | 242   |
| >EGFR-A698LTPSGEAPNC    | 333   | >EGFR-A698LTPSGETPNQ   | 643   | 310   |

|                                     |      |                                     |      |      |
|-------------------------------------|------|-------------------------------------|------|------|
| >EGFR-A698 <sup>†</sup> PLTPSGEA    | 247  | >EGFR-A698 <sup>†</sup> PLTPSGET    | 2435 | 2188 |
| >EGFR-A698 <sup>†</sup> EPLTPSGEA   | 294  | >EGFR-A698 <sup>†</sup> EPLTPSGET   | 969  | 675  |
| >EGFR-A698 <sup>†</sup> EPLTPSGEA   | 192  | >EGFR-A698 <sup>†</sup> EPLTPSGET   | 4471 | 4279 |
| >EGFR-A702 <sup>‡</sup> ALLRILKET   | 151  | >EGFR-A702 <sup>‡</sup> SLLRILKET   | 116  | 35   |
| >EGFR-A702 <sup>‡</sup> ALLRILKET   | 1293 | >EGFR-A702 <sup>‡</sup> SLLRILKET   | 453  | 840  |
| >EGFR-A702 <sup>‡</sup> ALLRILKET   | 90   | >EGFR-A702 <sup>‡</sup> SLLRILKET   | 126  | 36   |
| >EGFR-A702 <sup>‡</sup> ALLRILKETEF | 153  | >EGFR-A702 <sup>‡</sup> SLLRILKETEF | 220  | 67   |
| >EGFR-A702 <sup>‡</sup> ALLRILKETEF | 58   | >EGFR-A702 <sup>‡</sup> SLLRILKETEF | 123  | 65   |
| >EGFR-A702 <sup>‡</sup> QALLRILK    | 715  | >EGFR-A702 <sup>‡</sup> QSLLRILK    | 246  | 469  |
| >EGFR-A702 <sup>‡</sup> QALLRILK    | 62   | >EGFR-A702 <sup>‡</sup> QSLLRILK    | 23   | 39   |
| >EGFR-A702 <sup>‡</sup> QALLRILK    | 145  | >EGFR-A702 <sup>‡</sup> QSLLRILK    | 53   | 92   |
| >EGFR-A702 <sup>‡</sup> QALLRILK    | 771  | >EGFR-A702 <sup>‡</sup> QSLLRILK    | 211  | 560  |
| >EGFR-A702 <sup>‡</sup> LTPSGEAPNC  | 333  | >EGFR-A702 <sup>‡</sup> LTPSGEAPNC  | 469  | 136  |
| >EGFR-A702 <sup>‡</sup> NQALLRILK   | 117  | >EGFR-A702 <sup>‡</sup> NQSLLRILK   | 73   | 44   |
| >EGFR-A702 <sup>‡</sup> NQALLRIL    | 152  | >EGFR-A702 <sup>‡</sup> NQSLLRIL    | 233  | 81   |
| >EGFR-A702 <sup>‡</sup> APNQALLRI   | 22   | >EGFR-A702 <sup>‡</sup> APNQSLLRI   | 438  | 416  |
| >EGFR-A702 <sup>‡</sup> APNQALLRIL  | 329  | >EGFR-A702 <sup>‡</sup> APNQSLLRIL  | 2251 | 1922 |
| >EGFR-A702 <sup>‡</sup> APNQALLRI   | 145  | >EGFR-A702 <sup>‡</sup> APNQSLLRI   | 114  | 31   |
| >EGFR-A702 <sup>‡</sup> APNQALLRIL  | 109  | >EGFR-A702 <sup>‡</sup> APNQSLLRIL  | 112  | 3    |
| >EGFR-A702 <sup>‡</sup> APNQALLRI   | 386  | >EGFR-A702 <sup>‡</sup> APNQSLLRI   | 349  | 37   |
| >EGFR-A702 <sup>‡</sup> APNQALLRIL  | 293  | >EGFR-A702 <sup>‡</sup> APNQSLLRIL  | 485  | 192  |
| >EGFR-A702 <sup>‡</sup> EAPNQALLR   | 26   | >EGFR-A702 <sup>‡</sup> EAPNQSLLR   | 35   | 9    |
| >EGFR-A702 <sup>‡</sup> EAPNQALL    | 173  | >EGFR-A702 <sup>‡</sup> EAPNQSLL    | 240  | 67   |
| >EGFR-A702 <sup>‡</sup> EAPNQALLRII | 136  | >EGFR-A702 <sup>‡</sup> EAPNQSLLRII | 134  | 2    |
| >EGFR-A702 <sup>‡</sup> GEAPNQALL   | 250  | >EGFR-A702 <sup>‡</sup> GEAPNQSLL   | 156  | 94   |
| >EGFR-A702 <sup>‡</sup> GEAPNQALLF  | 42   | >EGFR-A702 <sup>‡</sup> GEAPNQSLLF  | 40   | 2    |
| >EGFR-A702 <sup>‡</sup> GEAPNQAL    | 22   | >EGFR-A702 <sup>‡</sup> GEAPNQSL    | 36   | 14   |
| >EGFR-A702 <sup>‡</sup> GEAPNQALL   | 54   | >EGFR-A702 <sup>‡</sup> GEAPNQSLL   | 62   | 8    |
| >EGFR-A702 <sup>‡</sup> GEAPNQALLF  | 227  | >EGFR-A702 <sup>‡</sup> GEAPNQSLLF  | 288  | 61   |
| >EGFR-A702 <sup>‡</sup> GEAPNQAL    | 187  | >EGFR-A702 <sup>‡</sup> GEAPNQSL    | 149  | 38   |
| >EGFR-A702 <sup>‡</sup> GEAPNQALL   | 1140 | >EGFR-A702 <sup>‡</sup> GEAPNQSLL   | 324  | 816  |
| >EGFR-A702 <sup>‡</sup> GEAPNQALL   | 46   | >EGFR-A702 <sup>‡</sup> GEAPNQSLL   | 47   | 1    |
| >EGFR-A702 <sup>‡</sup> GEAPNQALLF  | 7    | >EGFR-A702 <sup>‡</sup> GEAPNQSLLF  | 7    | 0    |
| >EGFR-A702 <sup>‡</sup> TPSGEAPNQ/  | 99   | >EGFR-A702 <sup>‡</sup> TPSGEAPNQ/  | 170  | 71   |
| >EGFR-A702 <sup>‡</sup> TPSGEAPNQ/  | 144  | >EGFR-A702 <sup>‡</sup> TPSGEAPNQ/  | 627  | 483  |
| >EGFR-A702 <sup>‡</sup> TPSGEAPNQ/  | 28   | >EGFR-A702 <sup>‡</sup> TPSGEAPNQ/  | 61   | 33   |
| >EGFR-A702 <sup>‡</sup> ALLRILKET   | 151  | >EGFR-A702 <sup>‡</sup> TLLRILKET   | 813  | 662  |
| >EGFR-A702 <sup>‡</sup> ALLRILKET   | 90   | >EGFR-A702 <sup>‡</sup> TLLRILKET   | 636  | 546  |
| >EGFR-A702 <sup>‡</sup> ALLRILKETEF | 153  | >EGFR-A702 <sup>‡</sup> TLLRILKETEF | 577  | 424  |
| >EGFR-A702 <sup>‡</sup> ALLRILKETEF | 58   | >EGFR-A702 <sup>‡</sup> TLLRILKETEF | 243  | 185  |
| >EGFR-A702 <sup>‡</sup> QALLRILK    | 715  | >EGFR-A702 <sup>‡</sup> QTLLRILK    | 157  | 558  |
| >EGFR-A702 <sup>‡</sup> QALLRILK    | 62   | >EGFR-A702 <sup>‡</sup> QTLLRILK    | 21   | 41   |
| >EGFR-A702 <sup>‡</sup> QALLRILK    | 145  | >EGFR-A702 <sup>‡</sup> QTLLRILK    | 27   | 118  |

|                        |      |                        |      |      |
|------------------------|------|------------------------|------|------|
| >EGFR-A702\QALLRILK    | 636  | >EGFR-A702\QTLLRILK    | 117  | 519  |
| >EGFR-A702\QALLRILK    | 771  | >EGFR-A702\QTLLRILK    | 176  | 595  |
| >EGFR-A702\LTPSGEAPNC  | 333  | >EGFR-A702\LTPSGEAPNC  | 678  | 345  |
| >EGFR-A702\NQALLRILK   | 117  | >EGFR-A702\NQTLLRILK   | 198  | 81   |
| >EGFR-A702\NQALLRIL    | 152  | >EGFR-A702\NQTLLRIL    | 948  | 796  |
| >EGFR-A702\APNQALLRI   | 22   | >EGFR-A702\APNQTLLRI   | 1208 | 1186 |
| >EGFR-A702\APNQALLRIL  | 329  | >EGFR-A702\APNQTLLRIL  | 4416 | 4087 |
| >EGFR-A702\APNQALLRI   | 145  | >EGFR-A702\APNQTLLRI   | 159  | 14   |
| >EGFR-A702\APNQALLRIL  | 109  | >EGFR-A702\APNQTLLRIL  | 106  | 3    |
| >EGFR-A702\APNQALLRI   | 386  | >EGFR-A702\APNQTLLRI   | 214  | 172  |
| >EGFR-A702\APNQALLRIL  | 293  | >EGFR-A702\APNQTLLRIL  | 752  | 459  |
| >EGFR-A702\EAPNQALLR   | 26   | >EGFR-A702\EAPNQTLLR   | 21   | 5    |
| >EGFR-A702\EAPNQALL    | 173  | >EGFR-A702\EAPNQTLL    | 187  | 14   |
| >EGFR-A702\EAPNQALLRII | 136  | >EGFR-A702\EAPNQTLLRII | 133  | 3    |
| >EGFR-A702\EAPNQALLR   | 592  | >EGFR-A702\EAPNQTLLR   | 217  | 375  |
| >EGFR-A702\GEAPNQALL   | 250  | >EGFR-A702\GEAPNQTLL   | 380  | 130  |
| >EGFR-A702\GEAPNQALLF  | 42   | >EGFR-A702\GEAPNQTLLF  | 45   | 3    |
| >EGFR-A702\GEAPNQAL    | 22   | >EGFR-A702\GEAPNQTL    | 24   | 2    |
| >EGFR-A702\GEAPNQALL   | 54   | >EGFR-A702\GEAPNQTLL   | 59   | 5    |
| >EGFR-A702\GEAPNQALLF  | 227  | >EGFR-A702\GEAPNQTLLF  | 280  | 53   |
| >EGFR-A702\GEAPNQAL    | 187  | >EGFR-A702\GEAPNQTL    | 331  | 144  |
| >EGFR-A702\GEAPNQALL   | 1140 | >EGFR-A702\GEAPNQTLL   | 252  | 888  |
| >EGFR-A702\GEAPNQALL   | 46   | >EGFR-A702\GEAPNQTLL   | 44   | 2    |
| >EGFR-A702\GEAPNQALLF  | 7    | >EGFR-A702\GEAPNQTLLF  | 7    | 0    |
| >EGFR-A702\TPSGEAPNQ\  | 99   | >EGFR-A702\TPSGEAPNQ\  | 473  | 374  |
| >EGFR-A702\TPSGEAPNQ\  | 144  | >EGFR-A702\TPSGEAPNQ\  | 349  | 205  |
| >EGFR-A702\TPSGEAPNQ\  | 28   | >EGFR-A702\TPSGEAPNQ\  | 56   | 28   |
| >EGFR-A722\AFGTVYKGL   | 152  | >EGFR-A722\VFGTVYKGL   | 223  | 71   |
| >EGFR-A722\AFGTVYKGLV  | 249  | >EGFR-A722\VFGTVYKGLV  | 344  | 95   |
| >EGFR-A722\GAFGTVYKGL  | 1115 | >EGFR-A722\GVFGTVYKGL  | 429  | 686  |
| >EGFR-A722\GAFGTVYKGL  | 922  | >EGFR-A722\GVFGTVYKGL  | 323  | 599  |
| >EGFR-A722\GAFGTVYKGL  | 372  | >EGFR-A722\GVFGTVYKGL  | 76   | 296  |
| >EGFR-A722\GAFGTVYKGL  | 2075 | >EGFR-A722\GVFGTVYKGL  | 314  | 1761 |
| >EGFR-A722\GAFGTVYKGL  | 2875 | >EGFR-A722\GVFGTVYKGL  | 211  | 2664 |
| >EGFR-A722\GAFGTVYK    | 122  | >EGFR-A722\GVFGTVYK    | 45   | 77   |
| >EGFR-A722\GAFGTVYK    | 9    | >EGFR-A722\GVFGTVYK    | 7    | 2    |
| >EGFR-A722\GAFGTVYK    | 98   | >EGFR-A722\GVFGTVYK    | 29   | 69   |
| >EGFR-A722\GAFGTVYK    | 222  | >EGFR-A722\GVFGTVYK    | 93   | 129  |
| >EGFR-A722\GAFGTVYKGL  | 2913 | >EGFR-A722\GVFGTVYKGL  | 355  | 2558 |
| >EGFR-A722\GAFGTVYK    | 23   | >EGFR-A722\GVFGTVYK    | 16   | 7    |
| >EGFR-A722\GAFGTVYKGL  | 158  | >EGFR-A722\GVFGTVYKGL  | 1095 | 937  |
| >EGFR-A722\GAFGTVYKGL  | 38   | >EGFR-A722\GVFGTVYKGL  | 183  | 145  |
| >EGFR-A722\GAFGTVYKGL  | 456  | >EGFR-A722\GVFGTVYKGL  | 3395 | 2939 |

|                        |      |                        |     |      |
|------------------------|------|------------------------|-----|------|
| >EGFR-A722\GAFGTVYKGL  | 46   | >EGFR-A722\GVFGTVYKGL  | 239 | 193  |
| >EGFR-A722\GAFGTVYKGL  | 34   | >EGFR-A722\GVFGTVYKGL  | 126 | 92   |
| >EGFR-A722\GAFGTVYKGL  | 279  | >EGFR-A722\GVFGTVYKGL  | 142 | 137  |
| >EGFR-A722\GAFGTVYKGL  | 33   | >EGFR-A722\GVFGTVYKGL  | 314 | 281  |
| >EGFR-A722\GAFGTVYK    | 150  | >EGFR-A722\GVFGTVYK    | 174 | 24   |
| >EGFR-A722\FKKIKVLGSG\ | 1311 | >EGFR-A722\FKKIKVLGSG\ | 249 | 1062 |
| >EGFR-A722\SGAFGTVYK   | 49   | >EGFR-A722\SGVFGTVYK   | 74  | 25   |
| >EGFR-A722\SGAFGTVY    | 87   | >EGFR-A722\SGVFGTVY    | 289 | 202  |
| >EGFR-A722\SGAFGTVYK   | 178  | >EGFR-A722\SGVFGTVYK   | 290 | 112  |
| >EGFR-A722\SGAFGTVY    | 188  | >EGFR-A722\SGVFGTVY    | 235 | 47   |
| >EGFR-A722\SGAFGTVY    | 460  | >EGFR-A722\SGVFGTVY    | 833 | 373  |
| >EGFR-A722\SGAFGTVYK   | 342  | >EGFR-A722\SGVFGTVYK   | 461 | 119  |
| >EGFR-A722\GSGAFGTVYK  | 46   | >EGFR-A722\GSGVFGTVYK  | 94  | 48   |
| >EGFR-A722\GSGAFGTVYK  | 29   | >EGFR-A722\GSGVFGTVYK  | 45  | 16   |
| >EGFR-A722\GSGAFGTVY   | 432  | >EGFR-A722\GSGVFGTVY   | 429 | 3    |
| >EGFR-A722\GSGAFGTVYK  | 224  | >EGFR-A722\GSGVFGTVYK  | 359 | 135  |
| >EGFR-A722\GSGAFGTVY   | 78   | >EGFR-A722\GSGVFGTVY   | 152 | 74   |
| >EGFR-A722\GSGAFGTVY   | 349  | >EGFR-A722\GSGVFGTVY   | 536 | 187  |
| >EGFR-A722\GSGAFGTVY   | 62   | >EGFR-A722\GSGVFGTVY   | 79  | 17   |
| >EGFR-A722\GSGAFGTVY   | 11   | >EGFR-A722\GSGVFGTVY   | 11  | 0    |
| >EGFR-A722\GSGAFGTVYK  | 337  | >EGFR-A722\GSGVFGTVYK  | 245 | 92   |
| >EGFR-A722\LGSGAFGTVY  | 559  | >EGFR-A722\LGSGVFGTVY  | 314 | 245  |
| >EGFR-A722\LGSGAFGTVY  | 125  | >EGFR-A722\LGSGVFGTVY  | 79  | 46   |
| >EGFR-A722\LGSGAFGTVY  | 478  | >EGFR-A722\LGSGVFGTVY  | 555 | 77   |
| >EGFR-A722\LGSGAFGTVY  | 931  | >EGFR-A722\LGSGVFGTVY  | 446 | 485  |
| >EGFR-A722\LGSGAFGTVY  | 93   | >EGFR-A722\LGSGVFGTVY  | 127 | 34   |
| >EGFR-A722\LGSGAFGTVY  | 94   | >EGFR-A722\LGSGVFGTVY  | 156 | 62   |
| >EGFR-A722\VLGSGAFGT   | 2098 | >EGFR-A722\VLGSGVFGT   | 307 | 1791 |
| >EGFR-A722\VLGSGAFGTV  | 73   | >EGFR-A722\VLGSGVFGTV  | 59  | 14   |
| >EGFR-A722\VLGSGAFGTV  | 41   | >EGFR-A722\VLGSGVFGTV  | 34  | 7    |
| >EGFR-A722\VLGSGAFGT   | 1992 | >EGFR-A722\VLGSGVFGT   | 336 | 1656 |
| >EGFR-A722\VLGSGAFGTV  | 21   | >EGFR-A722\VLGSGVFGTV  | 17  | 4    |
| >EGFR-A722\VLGSGAFGT   | 68   | >EGFR-A722\VLGSGVFGT   | 14  | 54   |
| >EGFR-A722\VLGSGAFGTV  | 3    | >EGFR-A722\VLGSGVFGTV  | 2   | 1    |
| >EGFR-A722\VLGSGAFGT   | 505  | >EGFR-A722\VLGSGVFGT   | 230 | 275  |
| >EGFR-A722\VLGSGAFGTV  | 7    | >EGFR-A722\VLGSGVFGTV  | 6   | 1    |
| >EGFR-A722\VLGSGAFGT   | 103  | >EGFR-A722\VLGSGVFGT   | 35  | 68   |
| >EGFR-A722\VLGSGAFGTV  | 7    | >EGFR-A722\VLGSGVFGTV  | 6   | 1    |
| >EGFR-A722\VLGSGAFGT   | 75   | >EGFR-A722\VLGSGVFGT   | 16  | 59   |
| >EGFR-A722\VLGSGAFGTV  | 5    | >EGFR-A722\VLGSGVFGTV  | 4   | 1    |
| >EGFR-A722\VLGSGAFGT   | 14   | >EGFR-A722\VLGSGVFGT   | 9   | 5    |
| >EGFR-A722\VLGSGAFGTV  | 2    | >EGFR-A722\VLGSGVFGTV  | 2   | 0    |
| >EGFR-A722\VLGSGAFGTV  | 64   | >EGFR-A722\VLGSGVFGTV  | 95  | 31   |

|                        |       |                        |      |       |
|------------------------|-------|------------------------|------|-------|
| >EGFR-A722\VLGSGAFGTV  | 54    | >EGFR-A722\VLGSGVFGTV  | 59   | 5     |
| >EGFR-A722\VLGSGAFGTV  | 26    | >EGFR-A722\VLGSGVFGTV  | 37   | 11    |
| >EGFR-A722\VLGSGAFGTV  | 73    | >EGFR-A722\VLGSGVFGTV  | 62   | 11    |
| >EGFR-A722\VLGSGAFGTV  | 87    | >EGFR-A722\VLGSGVFGTV  | 114  | 27    |
| >EGFR-A722\VLGSGAFGTV  | 421   | >EGFR-A722\VLGSGVFGTV  | 341  | 80    |
| >EGFR-A722\VLGSGAFGTV  | 227   | >EGFR-A722\VLGSGVFGTV  | 351  | 124   |
| >EGFR-A722\KVLGSGAFGT  | 294   | >EGFR-A722\KVLGSGVFGT  | 260  | 34    |
| >EGFR-A722\KVLGSGAFGT  | 123   | >EGFR-A722\KVLGSGVFGT  | 204  | 81    |
| >EGFR-A722\KVLGSGAFGT  | 602   | >EGFR-A722\KVLGSGVFGT  | 233  | 369   |
| >EGFR-A722\KVLGSGAFGT  | 9     | >EGFR-A722\KVLGSGVFGT  | 10   | 1     |
| >EGFR-A722\KVLGSGAFGT  | 12    | >EGFR-A722\KVLGSGVFGT  | 9    | 3     |
| >EGFR-A722\KVLGSGAFGT  | 78    | >EGFR-A722\KVLGSGVFGT  | 81   | 3     |
| >EGFR-A722\KVLGSGAFGT  | 28    | >EGFR-A722\KVLGSGVFGT  | 24   | 4     |
| >EGFR-A722\KVLGSGAFGT  | 176   | >EGFR-A722\KVLGSGVFGT  | 243  | 67    |
| >EGFR-A722\KVLGSGAFGT  | 15    | >EGFR-A722\KVLGSGVFGT  | 19   | 4     |
| >EGFR-A722\KVLGSGAFG   | 103   | >EGFR-A722\KVLGSGVFG   | 183  | 80    |
| >EGFR-A722\KVLGSGAFGT  | 76    | >EGFR-A722\KVLGSGVFGT  | 146  | 70    |
| >EGFR-A722\KVLGSGAF    | 32    | >EGFR-A722\KVLGSGVF    | 56   | 24    |
| >EGFR-A722\KVLGSGAFGT  | 807   | >EGFR-A722\KVLGSGVFGT  | 320  | 487   |
| >EGFR-A722\KVLGSGAFGT  | 324   | >EGFR-A722\KVLGSGVFGT  | 416  | 92    |
| >EGFR-A722\KVLGSGAF    | 172   | >EGFR-A722\KVLGSGVF    | 183  | 11    |
| >EGFR-A722\KVLGSGAF    | 345   | >EGFR-A722\KVLGSGVF    | 716  | 371   |
| >EGFR-A722\KVLGSGAF    | 165   | >EGFR-A722\KVLGSGVF    | 246  | 81    |
| >EGFR-A722\KVLGSGAF    | 16    | >EGFR-A722\KVLGSGVF    | 16   | 0     |
| >EGFR-A722\KVLGSGAF    | 476   | >EGFR-A722\KVLGSGVF    | 122  | 354   |
| >EGFR-A722\IKVLGSGA    | 1624  | >EGFR-A722\IKVLGSGV    | 317  | 1307  |
| >EGFR-A722\IKVLGSGAF   | 9     | >EGFR-A722\IKVLGSGVF   | 14   | 5     |
| >EGFR-A722\KIKVLGSGA   | 405   | >EGFR-A722\KIKVLGSGV   | 39   | 366   |
| >EGFR-A722\KIKVLGSGA   | 15210 | >EGFR-A722\KIKVLGSGV   | 393  | 14817 |
| >EGFR-A722\KIKVLGSGA   | 72    | >EGFR-A722\KIKVLGSGV   | 148  | 76    |
| >EGFR-A722\KIKVLGSGAF  | 50    | >EGFR-A722\KIKVLGSGVF  | 68   | 18    |
| >EGFR-A722\KIKVLGSGAF  | 63    | >EGFR-A722\KIKVLGSGVF  | 62   | 1     |
| >EGFR-A722\KIKVLGSGAF  | 245   | >EGFR-A722\KIKVLGSGVF  | 395  | 150   |
| >EGFR-A722\KIKVLGSGAF  | 523   | >EGFR-A722\KIKVLGSGVF  | 446  | 77    |
| >EGFR-A722\KIKVLGSGAF  | 513   | >EGFR-A722\KIKVLGSGVF  | 218  | 295   |
| >EGFR-A722\KKIKVLGSGA  | 700   | >EGFR-A722\KKIKVLGSGV  | 156  | 544   |
| >EGFR-A722\KKIKVLGSGAI | 7     | >EGFR-A722\KKIKVLGSGVI | 9    | 2     |
| >EGFR-A743I AIKELREA   | 369   | >EGFR-A743I PIKELREA   | 7522 | 7153  |
| >EGFR-A743I AIKELREA   | 496   | >EGFR-A743I PIKELREA   | 7130 | 6634  |
| >EGFR-A743I VAIKELREA  | 13015 | >EGFR-A743I VP IKELREA | 310  | 12705 |
| >EGFR-A743I PVAIKELR   | 386   | >EGFR-A743I PVPIKELR   | 3023 | 2637  |
| >EGFR-A743I IPVAIKEL   | 25    | >EGFR-A743I IPVPIKEL   | 170  | 145   |
| >EGFR-A743I IPVAIKELR  | 150   | >EGFR-A743I IPVPIKELR  | 212  | 62    |

|                        |      |                        |      |      |
|------------------------|------|------------------------|------|------|
| >EGFR-A743IIPVAIKEL    | 151  | >EGFR-A743IIPVPIKEL    | 150  | 1    |
| >EGFR-A743IIPVAIKEL    | 406  | >EGFR-A743IIPVPIKEL    | 585  | 179  |
| >EGFR-A743IIPVAIKEL    | 340  | >EGFR-A743IIPVPIKEL    | 509  | 169  |
| >EGFR-A743IIPVAIKELREA | 30   | >EGFR-A743IIPVPIKELREA | 45   | 15   |
| >EGFR-A743IIPVAIKEL    | 248  | >EGFR-A743IIPVPIKEL    | 435  | 187  |
| >EGFR-A743IIPVAIKEL    | 498  | >EGFR-A743IIPVPIKEL    | 460  | 38   |
| >EGFR-A743IKIPVAIKELR  | 78   | >EGFR-A743IKIPVPIKELR  | 65   | 13   |
| >EGFR-A743IKIPVAIKELR  | 68   | >EGFR-A743IKIPVPIKELR  | 65   | 3    |
| >EGFR-A743IKIPVAIKEL   | 331  | >EGFR-A743IKIPVPIKEL   | 256  | 75   |
| >EGFR-A743IKIPVAIKELR  | 66   | >EGFR-A743IKIPVPIKELR  | 78   | 12   |
| >EGFR-A743IVKIPVAIKEL  | 87   | >EGFR-A743IVKIPVPIKEL  | 61   | 26   |
| >EGFR-A743IKVKIPVAIK   | 124  | >EGFR-A743IKVKIPVPIK   | 150  | 26   |
| >EGFR-A743IKVKIPVAIK   | 183  | >EGFR-A743IKVKIPVPIK   | 157  | 26   |
| >EGFR-A743IKVKIPVAI    | 10   | >EGFR-A743IKVKIPVPI    | 6    | 4    |
| >EGFR-A743IKVKIPVAIK   | 4    | >EGFR-A743IKVKIPVPIK   | 3    | 1    |
| >EGFR-A743IKVKIPVAIKEL | 29   | >EGFR-A743IKVKIPVPIKEL | 39   | 10   |
| >EGFR-A743IKVKIPVAIK   | 43   | >EGFR-A743IKVKIPVPIK   | 151  | 108  |
| >EGFR-A743IKVKIPVAI    | 71   | >EGFR-A743IKVKIPVPI    | 87   | 16   |
| >EGFR-A743IKVKIPVAIKEL | 148  | >EGFR-A743IKVKIPVPIKEL | 180  | 32   |
| >EGFR-A743IEKVKIPVAI   | 1234 | >EGFR-A743IEKVKIPVPI   | 265  | 969  |
| >EGFR-A743IEKVKIPVAI   | 151  | >EGFR-A743IEKVKIPVPI   | 150  | 1    |
| >EGFR-A743IEKVKIPVAI   | 444  | >EGFR-A743IEKVKIPVPI   | 670  | 226  |
| >EGFR-A743IEKVKIPVAI   | 501  | >EGFR-A743IEKVKIPVPI   | 245  | 256  |
| >EGFR-A743IEKVKIPVA    | 118  | >EGFR-A743IEKVKIPVP    | 2784 | 2666 |
| >EGFR-A743IEKVKIPVAI   | 188  | >EGFR-A743IEKVKIPVPI   | 154  | 34   |
| >EGFR-A743IEKVKIPVA    | 26   | >EGFR-A743IEKVKIPVP    | 3660 | 3634 |
| >EGFR-A743IEKVKIPVA    | 132  | >EGFR-A743IEKVKIPVP    | 1217 | 1085 |
| >EGFR-A743IEKVKIPVAI   | 45   | >EGFR-A743IEKVKIPVPI   | 72   | 27   |
| >EGFR-A743IAIKELREA    | 369  | >EGFR-A743IAIKELREA    | 415  | 46   |
| >EGFR-A743IAIKELREA    | 496  | >EGFR-A743IAIKELREA    | 860  | 364  |
| >EGFR-A743IPVAIKELR    | 386  | >EGFR-A743IPVSIKELR    | 666  | 280  |
| >EGFR-A743IPVAIKEL     | 25   | >EGFR-A743IPVSIKEL     | 38   | 13   |
| >EGFR-A743IPVAIKELR    | 150  | >EGFR-A743IPVSIKELR    | 96   | 54   |
| >EGFR-A743IPVAIKEL     | 151  | >EGFR-A743IPVSIKEL     | 148  | 3    |
| >EGFR-A743IPVAIKEL     | 406  | >EGFR-A743IPVSIKEL     | 473  | 67   |
| >EGFR-A743IPVAIKEL     | 340  | >EGFR-A743IPVSIKEL     | 267  | 73   |
| >EGFR-A743IPVAIKELREA  | 30   | >EGFR-A743IPVSIKELREA  | 41   | 11   |
| >EGFR-A743IPVAIKEL     | 248  | >EGFR-A743IPVSIKEL     | 331  | 83   |
| >EGFR-A743IPVAIKEL     | 498  | >EGFR-A743IPVSIKEL     | 256  | 242  |
| >EGFR-A743KIPVAIKELR   | 78   | >EGFR-A743KIPVSIKELR   | 73   | 5    |
| >EGFR-A743KIPVAIKELR   | 68   | >EGFR-A743KIPVSIKELR   | 96   | 28   |
| >EGFR-A743KIPVAIKEL    | 331  | >EGFR-A743KIPVSIKEL    | 422  | 91   |
| >EGFR-A743KIPVAIKELR   | 777  | >EGFR-A743KIPVSIKELR   | 490  | 287  |

|                                     |     |                                     |      |      |
|-------------------------------------|-----|-------------------------------------|------|------|
| >EGFR-A743 <sup>!</sup> KIPVAIKELR  | 66  | >EGFR-A743 <sup>!</sup> KIPVSIKELR  | 79   | 13   |
| >EGFR-A743 <sup>!</sup> VKIPVAIK    | 662 | >EGFR-A743 <sup>!</sup> VKIPVSIK    | 284  | 378  |
| >EGFR-A743 <sup>!</sup> VKIPVAIKEL  | 87  | >EGFR-A743 <sup>!</sup> VKIPVSIKEL  | 48   | 39   |
| >EGFR-A743 <sup>!</sup> KVKIPVAIK   | 124 | >EGFR-A743 <sup>!</sup> KVKIPVSIK   | 86   | 38   |
| >EGFR-A743 <sup>!</sup> KVKIPVAIK   | 183 | >EGFR-A743 <sup>!</sup> KVKIPVSIK   | 140  | 43   |
| >EGFR-A743 <sup>!</sup> KVKIPVAI    | 10  | >EGFR-A743 <sup>!</sup> KVKIPVSI    | 9    | 1    |
| >EGFR-A743 <sup>!</sup> KVKIPVAIK   | 4   | >EGFR-A743 <sup>!</sup> KVKIPVSIK   | 4    | 0    |
| >EGFR-A743 <sup>!</sup> KVKIPVAIKEL | 29  | >EGFR-A743 <sup>!</sup> KVKIPVSIKEL | 40   | 11   |
| >EGFR-A743 <sup>!</sup> KVKIPVAIK   | 43  | >EGFR-A743 <sup>!</sup> KVKIPVSIK   | 101  | 58   |
| >EGFR-A743 <sup>!</sup> KVKIPVAI    | 71  | >EGFR-A743 <sup>!</sup> KVKIPVSI    | 81   | 10   |
| >EGFR-A743 <sup>!</sup> KVKIPVAIKEL | 148 | >EGFR-A743 <sup>!</sup> KVKIPVSIKEL | 97   | 51   |
| >EGFR-A743 <sup>!</sup> KVKIPVAI    | 974 | >EGFR-A743 <sup>!</sup> KVKIPVSI    | 396  | 578  |
| >EGFR-A743 <sup>!</sup> EKVKIPVAI   | 151 | >EGFR-A743 <sup>!</sup> EKVKIPVSI   | 164  | 13   |
| >EGFR-A743 <sup>!</sup> EKVKIPVAI   | 444 | >EGFR-A743 <sup>!</sup> EKVKIPVSI   | 1587 | 1143 |
| >EGFR-A743 <sup>!</sup> GEKVKIPVAI  | 501 | >EGFR-A743 <sup>!</sup> GEKVKIPVSI  | 213  | 288  |
| >EGFR-A743 <sup>!</sup> GEKVKIPVA   | 118 | >EGFR-A743 <sup>!</sup> GEKVKIPVS   | 593  | 475  |
| >EGFR-A743 <sup>!</sup> GEKVKIPVAI  | 188 | >EGFR-A743 <sup>!</sup> GEKVKIPVSI  | 190  | 2    |
| >EGFR-A743 <sup>!</sup> GEKVKIPVA   | 26  | >EGFR-A743 <sup>!</sup> GEKVKIPVS   | 576  | 550  |
| >EGFR-A743 <sup>!</sup> GEKVKIPVA   | 132 | >EGFR-A743 <sup>!</sup> GEKVKIPVS   | 749  | 617  |
| >EGFR-A743 <sup>!</sup> GEKVKIPVAI  | 45  | >EGFR-A743 <sup>!</sup> GEKVKIPVSI  | 47   | 2    |
| >EGFR-A743 <sup>!</sup> AIKELREA    | 369 | >EGFR-A743 <sup>!</sup> TIKELREA    | 788  | 419  |
| >EGFR-A743 <sup>!</sup> AIKELREA    | 496 | >EGFR-A743 <sup>!</sup> TIKELREA    | 3378 | 2882 |
| >EGFR-A743 <sup>!</sup> PVAIKELR    | 386 | >EGFR-A743 <sup>!</sup> PVTIKELR    | 588  | 202  |
| >EGFR-A743 <sup>!</sup> IPVAIKEL    | 25  | >EGFR-A743 <sup>!</sup> IPVTIKEL    | 76   | 51   |
| >EGFR-A743 <sup>!</sup> IPVAIKELR   | 150 | >EGFR-A743 <sup>!</sup> IPVTIKELR   | 170  | 20   |
| >EGFR-A743 <sup>!</sup> IPVAIKEL    | 151 | >EGFR-A743 <sup>!</sup> IPVTIKEL    | 239  | 88   |
| >EGFR-A743 <sup>!</sup> IPVAIKEL    | 406 | >EGFR-A743 <sup>!</sup> IPVTIKEL    | 548  | 142  |
| >EGFR-A743 <sup>!</sup> IPVAIKEL    | 340 | >EGFR-A743 <sup>!</sup> IPVTIKEL    | 240  | 100  |
| >EGFR-A743 <sup>!</sup> IPVAIKELREA | 30  | >EGFR-A743 <sup>!</sup> IPVTIKELREA | 41   | 11   |
| >EGFR-A743 <sup>!</sup> IPVAIKEL    | 248 | >EGFR-A743 <sup>!</sup> IPVTIKEL    | 854  | 606  |
| >EGFR-A743 <sup>!</sup> IPVAIKEL    | 498 | >EGFR-A743 <sup>!</sup> IPVTIKEL    | 453  | 45   |
| >EGFR-A743 <sup>!</sup> KIPVAIKELR  | 78  | >EGFR-A743 <sup>!</sup> KIPVTIKELR  | 86   | 8    |
| >EGFR-A743 <sup>!</sup> KIPVAIKELR  | 68  | >EGFR-A743 <sup>!</sup> KIPVTIKELR  | 96   | 28   |
| >EGFR-A743 <sup>!</sup> KIPVAIKEL   | 331 | >EGFR-A743 <sup>!</sup> KIPVTIKEL   | 474  | 143  |
| >EGFR-A743 <sup>!</sup> KIPVAIKELR  | 66  | >EGFR-A743 <sup>!</sup> KIPVTIKELR  | 58   | 8    |
| >EGFR-A743 <sup>!</sup> VKIPVAIK    | 662 | >EGFR-A743 <sup>!</sup> VKIPVTIK    | 387  | 275  |
| >EGFR-A743 <sup>!</sup> VKIPVAIKEL  | 87  | >EGFR-A743 <sup>!</sup> VKIPVTIKEL  | 64   | 23   |
| >EGFR-A743 <sup>!</sup> KVKIPVAIK   | 124 | >EGFR-A743 <sup>!</sup> KVKIPVTIK   | 112  | 12   |
| >EGFR-A743 <sup>!</sup> KVKIPVAIK   | 183 | >EGFR-A743 <sup>!</sup> KVKIPVTIK   | 206  | 23   |
| >EGFR-A743 <sup>!</sup> KVKIPVAI    | 10  | >EGFR-A743 <sup>!</sup> KVKIPVTI    | 13   | 3    |
| >EGFR-A743 <sup>!</sup> KVKIPVAIK   | 4   | >EGFR-A743 <sup>!</sup> KVKIPVTIK   | 6    | 2    |
| >EGFR-A743 <sup>!</sup> KVKIPVAIKEL | 29  | >EGFR-A743 <sup>!</sup> KVKIPVTIKEL | 55   | 26   |
| >EGFR-A743 <sup>!</sup> KVKIPVAIK   | 43  | >EGFR-A743 <sup>!</sup> KVKIPVTIK   | 70   | 27   |



|                         |     |                         |       |       |
|-------------------------|-----|-------------------------|-------|-------|
| >EGFR-A743`KVKIPVAI     | 71  | >EGFR-A743`KVKIPVTI     | 38    | 33    |
| >EGFR-A743`KVKIPVAIKEL  | 148 | >EGFR-A743`KVKIPVTIKEL  | 175   | 27    |
| >EGFR-A743`KVKIPVAI     | 974 | >EGFR-A743`KVKIPVTI     | 422   | 552   |
| >EGFR-A743`EKVKIPVAI    | 151 | >EGFR-A743`EKVKIPVTI    | 272   | 121   |
| >EGFR-A743`EKVKIPVAI    | 444 | >EGFR-A743`EKVKIPVTI    | 1404  | 960   |
| >EGFR-A743`GEKVKIPVAI   | 501 | >EGFR-A743`GEKVKIPVTI   | 383   | 118   |
| >EGFR-A743`GEKVKIPVA    | 118 | >EGFR-A743`GEKVKIPVT    | 133   | 15    |
| >EGFR-A743`GEKVKIPVAI   | 188 | >EGFR-A743`GEKVKIPVTI   | 151   | 37    |
| >EGFR-A743`GEKVKIPVA    | 26  | >EGFR-A743`GEKVKIPVT    | 128   | 102   |
| >EGFR-A743`GEKVKIPVA    | 132 | >EGFR-A743`GEKVKIPVT    | 99    | 33    |
| >EGFR-A743`GEKVKIPVAI   | 45  | >EGFR-A743`GEKVKIPVTI   | 64    | 19    |
| >EGFR-A750I`ATSPKANK    | 145 | >EGFR-A750I`PTSPKANK    | 3766  | 3621  |
| >EGFR-A750I`ATSPKANK    | 29  | >EGFR-A750I`PTSPKANK    | 1083  | 1054  |
| >EGFR-A750I`ATSPKANK    | 36  | >EGFR-A750I`PTSPKANK    | 1379  | 1343  |
| >EGFR-A750I`ATSPKANK    | 389 | >EGFR-A750I`PTSPKANK    | 7090  | 6701  |
| >EGFR-A750I`ATSPKANK    | 445 | >EGFR-A750I`PTSPKANK    | 2227  | 1782  |
| >EGFR-A750I`ATSPKANKEI  | 35  | >EGFR-A750I`PTSPKANKEI  | 4369  | 4334  |
| >EGFR-A750I`ATSPKANKEII | 55  | >EGFR-A750I`PTSPKANKEII | 5186  | 5131  |
| >EGFR-A750I`ATSPKANKEII | 468 | >EGFR-A750I`PTSPKANKEII | 4244  | 3776  |
| >EGFR-A750I`ATSPKANKEI  | 347 | >EGFR-A750I`PTSPKANKEI  | 3471  | 3124  |
| >EGFR-A750I`ATSPKANKEII | 295 | >EGFR-A750I`PTSPKANKEII | 8799  | 8504  |
| >EGFR-A750I`ATSPKANK    | 121 | >EGFR-A750I`PTSPKANK    | 4058  | 3937  |
| >EGFR-A750I`EATSPKANK   | 18  | >EGFR-A750I`EPTSPKANK   | 542   | 524   |
| >EGFR-A750I`EATSPKANKE  | 158 | >EGFR-A750I`EPTSPKANKE  | 5305  | 5147  |
| >EGFR-A750I`IPVAIKELREA | 30  | >EGFR-A750I`IPVAIKELREP | 1117  | 1087  |
| >EGFR-A750I`REATSPKA    | 39  | >EGFR-A750I`REPTSPKA    | 2059  | 2020  |
| >EGFR-A750I`ELREATSPKA  | 122 | >EGFR-A750I`ELREPTSPKA  | 125   | 3     |
| >EGFR-A750I`ELREATSPK   | 226 | >EGFR-A750I`ELREPTSPK   | 126   | 100   |
| >EGFR-A750I`ELREATSPK   | 924 | >EGFR-A750I`ELREPTSPK   | 205   | 719   |
| >EGFR-A750I`ELREATSPK   | 86  | >EGFR-A750I`ELREPTSPK   | 456   | 370   |
| >EGFR-A750I`ELREATSPK   | 517 | >EGFR-A750I`ELREPTSPK   | 347   | 170   |
| >EGFR-A750I`ELREATSPK   | 139 | >EGFR-A750I`ELREPTSPK   | 265   | 126   |
| >EGFR-A750I`KELREATSPK/ | 449 | >EGFR-A750I`KELREPTSPK/ | 489   | 40    |
| >EGFR-A750I`KELREATSPK/ | 71  | >EGFR-A750I`KELREPTSPK/ | 124   | 53    |
| >EGFR-A750I`KELREATSPK/ | 319 | >EGFR-A750I`KELREPTSPK/ | 317   | 2     |
| >EGFR-A750I`AIKELREA    | 369 | >EGFR-A750I`AIKELREP    | 18535 | 18166 |
| >EGFR-A750I`AIKELREA    | 496 | >EGFR-A750I`AIKELREP    | 7365  | 6869  |
| >EGFR-A755I`KANKEILDEA` | 126 | >EGFR-A755I`KDNKEILDEA` | 1816  | 1690  |
| >EGFR-A755I`KANKEILDEA` | 385 | >EGFR-A755I`KDNKEILDEA` | 1744  | 1359  |
| >EGFR-A755I`KANKEILDEA` | 255 | >EGFR-A755I`KDNKEILDEA` | 4937  | 4682  |
| >EGFR-A755I`KANKEILDEA` | 293 | >EGFR-A755I`KDNKEILDEA` | 2723  | 2430  |
| >EGFR-A755I`KANKEILDEA` | 140 | >EGFR-A755I`KDNKEILDEA` | 18143 | 18003 |
| >EGFR-A755I`KANKEILDEA` | 200 | >EGFR-A755I`KDNKEILDEA` | 7428  | 7228  |

|                         |      |                         |       |       |
|-------------------------|------|-------------------------|-------|-------|
| >EGFR-A755I KANKEILDEA' | 86   | >EGFR-A755I KDNKEILDEA' | 17174 | 17088 |
| >EGFR-A755I KANKEILDEA' | 473  | >EGFR-A755I KDNKEILDEA' | 2601  | 2128  |
| >EGFR-A755I KELREATSPK/ | 449  | >EGFR-A755I KELREATSPKI | 7459  | 7010  |
| >EGFR-A755I KELREATSPK/ | 71   | >EGFR-A755I KELREATSPKI | 7156  | 7085  |
| >EGFR-A755I KELREATSPK/ | 319  | >EGFR-A755I KELREATSPKI | 1310  | 991   |
| >EGFR-A755I SPKANKEI    | 133  | >EGFR-A755I SPKDNKEI    | 4152  | 4019  |
| >EGFR-A755I SPKANKEIL   | 187  | >EGFR-A755I SPKDNKEIL   | 3408  | 3221  |
| >EGFR-A755I SPKANKEIL   | 193  | >EGFR-A755I SPKDNKEIL   | 232   | 39    |
| >EGFR-A755I TSPKANKEI   | 54   | >EGFR-A755I TSPKDNKEI   | 793   | 739   |
| >EGFR-A755I TSPKANKEIL  | 9    | >EGFR-A755I TSPKDNKEIL  | 33    | 24    |
| >EGFR-A755I TSPKANKEI   | 159  | >EGFR-A755I TSPKDNKEI   | 215   | 56    |
| >EGFR-A755I ATSPKANK    | 145  | >EGFR-A755I ATSPKDNK    | 1495  | 1350  |
| >EGFR-A755I ATSPKANK    | 29   | >EGFR-A755I ATSPKDNK    | 52    | 23    |
| >EGFR-A755I ATSPKANK    | 36   | >EGFR-A755I ATSPKDNK    | 405   | 369   |
| >EGFR-A755I ATSPKANK    | 389  | >EGFR-A755I ATSPKDNK    | 2140  | 1751  |
| >EGFR-A755I ATSPKANK    | 445  | >EGFR-A755I ATSPKDNK    | 645   | 200   |
| >EGFR-A755I ATSPKANKEI  | 35   | >EGFR-A755I ATSPKDNKEI  | 89    | 54    |
| >EGFR-A755I ATSPKANKEII | 55   | >EGFR-A755I ATSPKDNKEII | 88    | 33    |
| >EGFR-A755I ATSPKANKEII | 468  | >EGFR-A755I ATSPKDNKEII | 1324  | 856   |
| >EGFR-A755I ATSPKANKEI  | 347  | >EGFR-A755I ATSPKDNKEI  | 648   | 301   |
| >EGFR-A755I ATSPKANKEII | 295  | >EGFR-A755I ATSPKDNKEII | 638   | 343   |
| >EGFR-A755I ATSPKANK    | 121  | >EGFR-A755I ATSPKDNK    | 139   | 18    |
| >EGFR-A755I EATSPKANK   | 18   | >EGFR-A755I EATSPKDNK   | 28    | 10    |
| >EGFR-A755I EATSPKANKE  | 158  | >EGFR-A755I EATSPKDNKE  | 329   | 171   |
| >EGFR-A755I REATSPKA    | 39   | >EGFR-A755I REATSPKD    | 4155  | 4116  |
| >EGFR-A755I ELREATSPKA  | 122  | >EGFR-A755I ELREATSPKD  | 23528 | 23406 |
| >EGFR-A767\ ASVDNPHVCI  | 1077 | >EGFR-A767\ VSVDNPHVCI  | 304   | 773   |
| >EGFR-A767\ ASVDNPHV    | 291  | >EGFR-A767\ VSVDNPHV    | 409   | 118   |
| >EGFR-A767\ ASVDNPHVCI  | 300  | >EGFR-A767\ VSVDNPHVCI  | 1046  | 746   |
| >EGFR-A767\ ASVDNPHVCI  | 389  | >EGFR-A767\ VSVDNPHVCI  | 1316  | 927   |
| >EGFR-A767\ ASVDNPHVCI  | 113  | >EGFR-A767\ VSVDNPHVCI  | 219   | 106   |
| >EGFR-A767\ ASVDNPHVCI  | 423  | >EGFR-A767\ VSVDNPHVCI  | 698   | 275   |
| >EGFR-A767\ ASVDNPHV    | 496  | >EGFR-A767\ VSVDNPHV    | 430   | 66    |
| >EGFR-A767\ ASVDNPHVCI  | 6    | >EGFR-A767\ VSVDNPHVCI  | 5     | 1     |
| >EGFR-A767\ ASVDNPHVCI  | 1697 | >EGFR-A767\ VSVDNPHVCI  | 342   | 1355  |
| >EGFR-A767\ ASVDNPHVCI  | 154  | >EGFR-A767\ VSVDNPHVCI  | 1352  | 1198  |
| >EGFR-A767\ MASVDNPHV   | 2817 | >EGFR-A767\ MVSVDNPHV   | 419   | 2398  |
| >EGFR-A767\ MASVDNPHV   | 1391 | >EGFR-A767\ MVSVDNPHV   | 240   | 1151  |
| >EGFR-A767\ MASVDNPHV   | 3031 | >EGFR-A767\ MVSVDNPHV   | 310   | 2721  |
| >EGFR-A767\ MASVDNPHV   | 162  | >EGFR-A767\ MVSVDNPHV   | 28    | 134   |
| >EGFR-A767\ MASVDNPHV   | 1303 | >EGFR-A767\ MVSVDNPHV   | 99    | 1204  |
| >EGFR-A767\ MASVDNPHV   | 3192 | >EGFR-A767\ MVSVDNPHV   | 175   | 3017  |
| >EGFR-A767\ MASVDNPHV   | 162  | >EGFR-A767\ MVSVDNPHV   | 17    | 145   |

|                       |      |                       |      |      |
|-----------------------|------|-----------------------|------|------|
| >EGFR-A767\MASVDNPHV  | 2026 | >EGFR-A767\MVSVDNPHV  | 389  | 1637 |
| >EGFR-A767\MASVDNPHV  | 74   | >EGFR-A767\MVSVDNPHV  | 45   | 29   |
| >EGFR-A767\MASVDNPHV  | 268  | >EGFR-A767\MVSVDNPHV  | 168  | 100  |
| >EGFR-A767\MASVDNPHV  | 9    | >EGFR-A767\MVSVDNPHV  | 6    | 3    |
| >EGFR-A767\MASVDNPHV  | 258  | >EGFR-A767\MVSVDNPHV  | 60   | 198  |
| >EGFR-A767\MASVDNPHV  | 161  | >EGFR-A767\MVSVDNPHV  | 55   | 106  |
| >EGFR-A767\MASVDNPH   | 55   | >EGFR-A767\MVSVDNPH   | 188  | 133  |
| >EGFR-A767\KEILDEAYVM | 1622 | >EGFR-A767\KEILDEAYVM | 65   | 1557 |
| >EGFR-A767\KEILDEAYVM | 289  | >EGFR-A767\KEILDEAYVM | 265  | 24   |
| >EGFR-A767\KEILDEAYVM | 50   | >EGFR-A767\KEILDEAYVM | 217  | 167  |
| >EGFR-A767\KEILDEAYVM | 468  | >EGFR-A767\KEILDEAYVM | 13   | 455  |
| >EGFR-A767\VMASVDNPH  | 148  | >EGFR-A767\VMVSVDNPH  | 156  | 8    |
| >EGFR-A767\VMASVDNPH  | 84   | >EGFR-A767\VMVSVDNPH  | 187  | 103  |
| >EGFR-A767\VMASVDNPH  | 209  | >EGFR-A767\VMVSVDNPH  | 208  | 1    |
| >EGFR-A767\VMASVDNPH  | 303  | >EGFR-A767\VMVSVDNPH  | 172  | 131  |
| >EGFR-A767\VMASVDNPH  | 3    | >EGFR-A767\VMVSVDNPH  | 4    | 1    |
| >EGFR-A767\VMASVDNPH  | 37   | >EGFR-A767\VMVSVDNPH  | 47   | 10   |
| >EGFR-A767\VMASVDNPH  | 7    | >EGFR-A767\VMVSVDNPH  | 7    | 0    |
| >EGFR-A767\VMASVDNPH  | 258  | >EGFR-A767\VMVSVDNPH  | 258  | 0    |
| >EGFR-A767\VMASVDNPH  | 5    | >EGFR-A767\VMVSVDNPH  | 6    | 1    |
| >EGFR-A767\VMASVDNPH  | 6    | >EGFR-A767\VMVSVDNPH  | 21   | 15   |
| >EGFR-A767\VMASVDNPH  | 233  | >EGFR-A767\VMVSVDNPH  | 1512 | 1279 |
| >EGFR-A767\VMASVDNPH  | 3    | >EGFR-A767\VMVSVDNPH  | 4    | 1    |
| >EGFR-A767\VMASVDNPH  | 75   | >EGFR-A767\VMVSVDNPH  | 150  | 75   |
| >EGFR-A767\YVMASVDNP  | 10   | >EGFR-A767\YVMVSVDNP  | 16   | 6    |
| >EGFR-A767\YVMASVDNP  | 13   | >EGFR-A767\YVMVSVDNP  | 31   | 18   |
| >EGFR-A767\YVMASVDNP  | 8    | >EGFR-A767\YVMVSVDNP  | 16   | 8    |
| >EGFR-A767\YVMASVDNP  | 4    | >EGFR-A767\YVMVSVDNP  | 4    | 0    |
| >EGFR-A767\YVMASVDNP  | 8    | >EGFR-A767\YVMVSVDNP  | 21   | 13   |
| >EGFR-A767\YVMASVDNP  | 7    | >EGFR-A767\YVMVSVDNP  | 9    | 2    |
| >EGFR-A767\YVMASVDNP  | 10   | >EGFR-A767\YVMVSVDNP  | 13   | 3    |
| >EGFR-A767\YVMASVDNP  | 4    | >EGFR-A767\YVMVSVDNP  | 4    | 0    |
| >EGFR-A767\YVMASVDNP  | 3    | >EGFR-A767\YVMVSVDNP  | 5    | 2    |
| >EGFR-A767\YVMASVDNP  | 397  | >EGFR-A767\YVMVSVDNP  | 944  | 547  |
| >EGFR-A767\YVMASVDNP  | 457  | >EGFR-A767\YVMVSVDNP  | 1087 | 630  |
| >EGFR-A767\YVMASVDNP  | 17   | >EGFR-A767\YVMVSVDNP  | 39   | 22   |
| >EGFR-A767\YVMASVDNP  | 7    | >EGFR-A767\YVMVSVDNP  | 11   | 4    |
| >EGFR-A767\YVMASVDNP  | 424  | >EGFR-A767\YVMVSVDNP  | 927  | 503  |
| >EGFR-A767\EAYVMASV   | 18   | >EGFR-A767\EAYVMVSV   | 16   | 2    |
| >EGFR-A767\EAYVMASV   | 8    | >EGFR-A767\EAYVMVSV   | 10   | 2    |
| >EGFR-A767\DEAYVMASV  | 25   | >EGFR-A767\DEAYVMVSV  | 29   | 4    |
| >EGFR-A767\DEAYVMASV  | 64   | >EGFR-A767\DEAYVMVSV  | 81   | 17   |
| >EGFR-A767\DEAYVMAS   | 98   | >EGFR-A767\DEAYVMVS   | 236  | 138  |

|                       |      |                       |      |      |
|-----------------------|------|-----------------------|------|------|
| >EGFR-A767\DEAYVMASV  | 43   | >EGFR-A767\DEAYVMVSV  | 43   | 0    |
| >EGFR-A767\DEAYVMASV  | 423  | >EGFR-A767\DEAYVMVSV  | 308  | 115  |
| >EGFR-A767\LDEAYVMA   | 2286 | >EGFR-A767\LDEAYVMV   | 85   | 2201 |
| >EGFR-A767\LDEAYVMAS\ | 144  | >EGFR-A767\LDEAYVMVS\ | 163  | 19   |
| >EGFR-A767\ILDEAYVMA  | 38   | >EGFR-A767\ILDEAYVMV  | 11   | 27   |
| >EGFR-A767\ILDEAYVMAS | 11   | >EGFR-A767\ILDEAYVMVS | 11   | 0    |
| >EGFR-A767\ILDEAYVMA  | 44   | >EGFR-A767\ILDEAYVMV  | 7    | 37   |
| >EGFR-A767\ILDEAYVMAS | 5    | >EGFR-A767\ILDEAYVMVS | 6    | 1    |
| >EGFR-A767\ILDEAYVMA  | 172  | >EGFR-A767\ILDEAYVMV  | 31   | 141  |
| >EGFR-A767\ILDEAYVMAS | 10   | >EGFR-A767\ILDEAYVMVS | 19   | 9    |
| >EGFR-A767\ILDEAYVMA  | 44   | >EGFR-A767\ILDEAYVMV  | 8    | 36   |
| >EGFR-A767\ILDEAYVMAS | 8    | >EGFR-A767\ILDEAYVMVS | 9    | 1    |
| >EGFR-A767\ILDEAYVMA  | 6    | >EGFR-A767\ILDEAYVMV  | 2    | 4    |
| >EGFR-A767\ILDEAYVMAS | 56   | >EGFR-A767\ILDEAYVMVS | 112  | 56   |
| >EGFR-A767\ILDEAYVMAS | 2    | >EGFR-A767\ILDEAYVMVS | 2    | 0    |
| >EGFR-A767\ILDEAYVMA  | 63   | >EGFR-A767\ILDEAYVMV  | 4    | 59   |
| >EGFR-A767\ILDEAYVMAS | 3    | >EGFR-A767\ILDEAYVMVS | 3    | 0    |
| >EGFR-A767\ILDEAYVMA  | 11   | >EGFR-A767\ILDEAYVMV  | 4    | 7    |
| >EGFR-A767\ILDEAYVMAS | 5    | >EGFR-A767\ILDEAYVMVS | 4    | 1    |
| >EGFR-A767\ILDEAYVMA  | 43   | >EGFR-A767\ILDEAYVMV  | 2    | 41   |
| >EGFR-A767\ILDEAYVMAS | 3    | >EGFR-A767\ILDEAYVMVS | 3    | 0    |
| >EGFR-A767\ILDEAYVMA  | 8    | >EGFR-A767\ILDEAYVMV  | 2    | 6    |
| >EGFR-A767\ILDEAYVMAS | 2    | >EGFR-A767\ILDEAYVMVS | 2    | 0    |
| >EGFR-A767\ILDEAYVMA  | 1743 | >EGFR-A767\ILDEAYVMV  | 57   | 1686 |
| >EGFR-A767\ILDEAYVMAS | 82   | >EGFR-A767\ILDEAYVMVS | 124  | 42   |
| >EGFR-A767\EILDEAYVMA | 2907 | >EGFR-A767\EILDEAYVMV | 416  | 2491 |
| >EGFR-A767\EILDEAYVMA | 1091 | >EGFR-A767\EILDEAYVMV | 205  | 886  |
| >EGFR-A767\EILDEAYVMA | 994  | >EGFR-A767\EILDEAYVMV | 17   | 977  |
| >EGFR-A767\EILDEAYVMA | 7812 | >EGFR-A767\EILDEAYVMV | 349  | 7463 |
| >EGFR-A767\EILDEAYVMA | 2004 | >EGFR-A767\EILDEAYVMV | 28   | 1976 |
| >EGFR-A767\EILDEAYVMA | 635  | >EGFR-A767\EILDEAYVMV | 12   | 623  |
| >EGFR-A767\EILDEAYVMA | 2189 | >EGFR-A767\EILDEAYVMV | 17   | 2172 |
| >EGFR-A767\EILDEAYVMA | 16   | >EGFR-A767\EILDEAYVMV | 4    | 12   |
| >EGFR-A839\AARNVLVK   | 338  | >EGFR-A839\TARNVLVK   | 462  | 124  |
| >EGFR-A839\AARNVLVK   | 5    | >EGFR-A839\TARNVLVK   | 10   | 5    |
| >EGFR-A839\AARNVLVKTF | 404  | >EGFR-A839\TARNVLVKTP | 2214 | 1810 |
| >EGFR-A839\AARNVLVK   | 4976 | >EGFR-A839\TARNVLVK   | 381  | 4595 |
| >EGFR-A839\LAARNVLV   | 312  | >EGFR-A839\LTARNVLV   | 110  | 202  |
| >EGFR-A839\LAARNVLV   | 497  | >EGFR-A839\LTARNVLV   | 162  | 335  |
| >EGFR-A839\LAARNVLV   | 337  | >EGFR-A839\LTARNVLV   | 202  | 135  |
| >EGFR-A839\LAARNVLV   | 672  | >EGFR-A839\LTARNVLV   | 180  | 492  |
| >EGFR-A839\LAARNVLV   | 54   | >EGFR-A839\LTARNVLV   | 41   | 13   |
| >EGFR-A839\LAARNVLVK  | 458  | >EGFR-A839\LTARNVLVK  | 97   | 361  |

|                                    |       |                                    |      |       |
|------------------------------------|-------|------------------------------------|------|-------|
| >EGFR-A839 <sup>T</sup> LAARNVLVK  | 230   | >EGFR-A839 <sup>T</sup> LTARNVLVK  | 27   | 203   |
| >EGFR-A839 <sup>T</sup> LAARNVLVK  | 398   | >EGFR-A839 <sup>T</sup> LTARNVLVK  | 71   | 327   |
| >EGFR-A839 <sup>T</sup> LAARNVLVK  | 267   | >EGFR-A839 <sup>T</sup> LTARNVLVK  | 73   | 194   |
| >EGFR-A839 <sup>T</sup> LAARNVLV   | 119   | >EGFR-A839 <sup>T</sup> LTARNVLV   | 19   | 100   |
| >EGFR-A839 <sup>T</sup> LAARNVLV   | 1159  | >EGFR-A839 <sup>T</sup> LTARNVLV   | 202  | 957   |
| >EGFR-A839 <sup>T</sup> LAARNVLV   | 4686  | >EGFR-A839 <sup>T</sup> LTARNVLV   | 202  | 4484  |
| >EGFR-A839 <sup>T</sup> LAARNVLVKT | 13834 | >EGFR-A839 <sup>T</sup> LTARNVLVKT | 296  | 13538 |
| >EGFR-A839 <sup>T</sup> LAARNVLVK  | 1554  | >EGFR-A839 <sup>T</sup> LTARNVLVK  | 307  | 1247  |
| >EGFR-A839 <sup>T</sup> DLAARNVLV  | 88    | >EGFR-A839 <sup>T</sup> DLTARNVLV  | 887  | 799   |
| >EGFR-A839 <sup>T</sup> DLAARNVLV  | 340   | >EGFR-A839 <sup>T</sup> DLTARNVLV  | 941  | 601   |
| >EGFR-A839 <sup>T</sup> DLAARNVLV  | 65    | >EGFR-A839 <sup>T</sup> DLTARNVLV  | 158  | 93    |
| >EGFR-A839 <sup>T</sup> DLAARNVLV  | 158   | >EGFR-A839 <sup>T</sup> DLTARNVLV  | 1284 | 1126  |
| >EGFR-A839 <sup>T</sup> DLAARNVL   | 326   | >EGFR-A839 <sup>T</sup> DLTARNVL   | 353  | 27    |
| >EGFR-A839 <sup>T</sup> DLAARNVLV  | 17    | >EGFR-A839 <sup>T</sup> DLTARNVLV  | 19   | 2     |
| >EGFR-A839 <sup>T</sup> DLAARNVLVK | 382   | >EGFR-A839 <sup>T</sup> DLTARNVLVK | 609  | 227   |
| >EGFR-A839 <sup>T</sup> DLAARNVLV  | 64    | >EGFR-A839 <sup>T</sup> DLTARNVLV  | 340  | 276   |
| >EGFR-A839 <sup>T</sup> DLAARNVLV  | 334   | >EGFR-A839 <sup>T</sup> DLTARNVLV  | 1441 | 1107  |
| >EGFR-A839 <sup>T</sup> RDLAARNVL  | 377   | >EGFR-A839 <sup>T</sup> RDLTARNVLV | 533  | 156   |
| >EGFR-A839 <sup>T</sup> RDLAARNVL  | 97    | >EGFR-A839 <sup>T</sup> RDLTARNVL  | 405  | 308   |
| >EGFR-A839 <sup>T</sup> RDLAARNV   | 187   | >EGFR-A839 <sup>T</sup> RDLTARNV   | 485  | 298   |
| >EGFR-A839 <sup>T</sup> RDLAARNVL  | 656   | >EGFR-A839 <sup>T</sup> RDLTARNVL  | 297  | 359   |
| >EGFR-A839 <sup>T</sup> RDLAARNV   | 210   | >EGFR-A839 <sup>T</sup> RDLTARNV   | 235  | 25    |
| >EGFR-A839 <sup>T</sup> RDLAARNVL  | 96    | >EGFR-A839 <sup>T</sup> RDLTARNVLV | 118  | 22    |
| >EGFR-A839 <sup>T</sup> HRDLAARNV  | 62    | >EGFR-A839 <sup>T</sup> HRDLTARNVI | 74   | 12    |
| >EGFR-A839 <sup>T</sup> HRDLAARNV  | 21    | >EGFR-A839 <sup>T</sup> HRDLTARNVI | 16   | 5     |
| >EGFR-A839 <sup>T</sup> HRDLAARNV  | 574   | >EGFR-A839 <sup>T</sup> HRDLTARNVI | 366  | 208   |
| >EGFR-A839 <sup>T</sup> HRDLAARNV  | 347   | >EGFR-A839 <sup>T</sup> HRDLTARNVI | 258  | 89    |
| >EGFR-A839 <sup>T</sup> VHRDLAARN  | 471   | >EGFR-A839 <sup>T</sup> VHRDLTARN  | 633  | 162   |
| >EGFR-A839 <sup>T</sup> LVHRDLAARN | 138   | >EGFR-A839 <sup>T</sup> LVHRDLTARN | 140  | 2     |
| >EGFR-A839 <sup>T</sup> LVHRDLAARN | 72    | >EGFR-A839 <sup>T</sup> LVHRDLTARN | 77   | 5     |
| >EGFR-A839 <sup>T</sup> LVHRDLAA   | 291   | >EGFR-A839 <sup>T</sup> LVHRDLTA   | 408  | 117   |
| >EGFR-A839 <sup>T</sup> LVHRDLAARN | 474   | >EGFR-A839 <sup>T</sup> LVHRDLTARN | 854  | 380   |
| >EGFR-A839 <sup>T</sup> LVHRDLAAR  | 34    | >EGFR-A839 <sup>T</sup> LVHRDLTAR  | 52   | 18    |
| >EGFR-A839 <sup>T</sup> LVHRDLAAR  | 174   | >EGFR-A839 <sup>T</sup> LVHRDLTAR  | 285  | 111   |
| >EGFR-A839 <sup>T</sup> RLVHRDLA   | 174   | >EGFR-A839 <sup>T</sup> RLVHRDLT   | 2194 | 2020  |
| >EGFR-A839 <sup>T</sup> RLVHRDLAA  | 166   | >EGFR-A839 <sup>T</sup> RLVHRDLTA  | 192  | 26    |
| >EGFR-A839 <sup>T</sup> RLVHRDLAA  | 344   | >EGFR-A839 <sup>T</sup> RLVHRDLTA  | 902  | 558   |
| >EGFR-A839 <sup>T</sup> RLVHRDLAA  | 785   | >EGFR-A839 <sup>T</sup> RLVHRDLTA  | 382  | 403   |
| >EGFR-A839 <sup>T</sup> RLVHRDLA   | 452   | >EGFR-A839 <sup>T</sup> RLVHRDLT   | 4133 | 3681  |
| >EGFR-A839 <sup>T</sup> RLVHRDLAA  | 796   | >EGFR-A839 <sup>T</sup> RLVHRDLTA  | 223  | 573   |
| >EGFR-A839 <sup>T</sup> RLVHRDLAAF | 26    | >EGFR-A839 <sup>T</sup> RLVHRDLTAR | 64   | 38    |
| >EGFR-A839 <sup>T</sup> RLVHRDLAAF | 136   | >EGFR-A839 <sup>T</sup> RLVHRDLTAR | 138  | 2     |
| >EGFR-A839 <sup>T</sup> RLVHRDLAAF | 132   | >EGFR-A839 <sup>T</sup> RLVHRDLTAR | 142  | 10    |

|                                                |      |                                                |      |      |
|------------------------------------------------|------|------------------------------------------------|------|------|
| >EGFR-A839 <sup>T</sup> RRLVHRDLAA             | 713  | >EGFR-A839 <sup>T</sup> RRLVHRDLTA             | 435  | 278  |
| >EGFR-A839 <sup>T</sup> RRLVHRDLA              | 102  | >EGFR-A839 <sup>T</sup> RRLVHRDLT              | 206  | 104  |
| >EGFR-A839 <sup>T</sup> RRLVHRDLAA             | 34   | >EGFR-A839 <sup>T</sup> RRLVHRDLTA             | 31   | 3    |
| >EGFR-A839 <sup>T</sup> RRLVHRDLAA             | 29   | >EGFR-A839 <sup>T</sup> RRLVHRDLTA             | 27   | 2    |
| >EGFR-A839 <sup>T</sup> RRLVHRDLA              | 91   | >EGFR-A839 <sup>T</sup> RRLVHRDLT              | 71   | 20   |
| >EGFR-A839 <sup>T</sup> RRLVHRDLAA             | 38   | >EGFR-A839 <sup>T</sup> RRLVHRDLTA             | 30   | 8    |
| >EGFR-A839 <sup>T</sup> RRLVHRDLAA             | 224  | >EGFR-A839 <sup>T</sup> RRLVHRDLTA             | 167  | 57   |
| >EGFR-A839 <sup>T</sup> RRLVHRDLA              | 57   | >EGFR-A839 <sup>T</sup> RRLVHRDLT              | 128  | 71   |
| >EGFR-A839 <sup>T</sup> RRLVHRDLAA             | 72   | >EGFR-A839 <sup>T</sup> RRLVHRDLTA             | 62   | 10   |
| >EGFR-A839 <sup>T</sup> RRLVHRDLAA             | 121  | >EGFR-A839 <sup>T</sup> RRLVHRDLTA             | 147  | 26   |
| >EGFR-A859 <sup>T</sup> AKLLGAEKE <sup>T</sup> | 23   | >EGFR-A859 <sup>T</sup> TKLLGAEKE <sup>N</sup> | 96   | 73   |
| >EGFR-A859 <sup>T</sup> LAKLLGAE EK            | 2408 | >EGFR-A859 <sup>T</sup> LTKLLGAE EK            | 313  | 2095 |
| >EGFR-A859 <sup>T</sup> LAKLLGAE EK            | 377  | >EGFR-A859 <sup>T</sup> LTKLLGAE EK            | 73   | 304  |
| >EGFR-A859 <sup>T</sup> LAKLLGAE EK            | 1217 | >EGFR-A859 <sup>T</sup> LTKLLGAE EK            | 318  | 899  |
| >EGFR-A859 <sup>T</sup> GLAKLLGA               | 216  | >EGFR-A859 <sup>T</sup> GLTKLLGA               | 1062 | 846  |
| >EGFR-A859 <sup>T</sup> GLAKLLGA               | 32   | >EGFR-A859 <sup>T</sup> GLTKLLGA               | 346  | 314  |
| >EGFR-A859 <sup>T</sup> GLAKLLGA               | 13   | >EGFR-A859 <sup>T</sup> GLTKLLGA               | 81   | 68   |
| >EGFR-A859 <sup>T</sup> GLAKLLGA               | 235  | >EGFR-A859 <sup>T</sup> GLTKLLGA               | 678  | 443  |
| >EGFR-A859 <sup>T</sup> GLAKLLGA               | 151  | >EGFR-A859 <sup>T</sup> GLTKLLGA               | 437  | 286  |
| >EGFR-A859 <sup>T</sup> GLAKLLGA               | 251  | >EGFR-A859 <sup>T</sup> GLTKLLGA               | 442  | 191  |
| >EGFR-A859 <sup>T</sup> GLAKLLGA               | 44   | >EGFR-A859 <sup>T</sup> GLTKLLGA               | 93   | 49   |
| >EGFR-A859 <sup>T</sup> GLAKLLGA               | 31   | >EGFR-A859 <sup>T</sup> GLTKLLGA               | 39   | 8    |
| >EGFR-A859 <sup>T</sup> GLAKLLGAE E            | 347  | >EGFR-A859 <sup>T</sup> GLTKLLGAE E            | 1112 | 765  |
| >EGFR-A859 <sup>T</sup> FGLAKLLGA              | 123  | >EGFR-A859 <sup>T</sup> FGLTKLLGA              | 350  | 227  |
| >EGFR-A859 <sup>T</sup> TDFGLAKLL              | 145  | >EGFR-A859 <sup>T</sup> TDFGLTKLL              | 119  | 26   |
| >EGFR-A859 <sup>T</sup> TDFGLAKL               | 624  | >EGFR-A859 <sup>T</sup> TDFGLTKL               | 195  | 429  |
| >EGFR-A859 <sup>T</sup> TDFGLAKLL              | 352  | >EGFR-A859 <sup>T</sup> TDFGLTKLL              | 190  | 162  |
| >EGFR-A859 <sup>T</sup> TDFGLAKLL              | 295  | >EGFR-A859 <sup>T</sup> TDFGLTKLL              | 533  | 238  |
| >EGFR-A859 <sup>T</sup> ITDFGLAK               | 290  | >EGFR-A859 <sup>T</sup> ITDFGLTK               | 312  | 22   |
| >EGFR-A859 <sup>T</sup> ITDFGLAK               | 33   | >EGFR-A859 <sup>T</sup> ITDFGLTK               | 41   | 8    |
| >EGFR-A859 <sup>T</sup> ITDFGLAKL              | 6    | >EGFR-A859 <sup>T</sup> ITDFGLTKL              | 10   | 4    |
| >EGFR-A859 <sup>T</sup> ITDFGLAKLL             | 15   | >EGFR-A859 <sup>T</sup> ITDFGLTKLL             | 31   | 16   |
| >EGFR-A859 <sup>T</sup> ITDFGLAKLL             | 276  | >EGFR-A859 <sup>T</sup> ITDFGLTKLL             | 406  | 130  |
| >EGFR-A859 <sup>T</sup> ITDFGLAKL              | 97   | >EGFR-A859 <sup>T</sup> ITDFGLTKL              | 37   | 60   |
| >EGFR-A859 <sup>T</sup> ITDFGLAK               | 474  | >EGFR-A859 <sup>T</sup> ITDFGLTK               | 432  | 42   |
| >EGFR-A859 <sup>T</sup> ITDFGLAKLL             | 613  | >EGFR-A859 <sup>T</sup> ITDFGLTKLL             | 490  | 123  |
| >EGFR-A859 <sup>T</sup> KITDFGLAKL             | 91   | >EGFR-A859 <sup>T</sup> KITDFGLTKL             | 110  | 19   |
| >EGFR-A859 <sup>T</sup> KITDFGLAKLL            | 228  | >EGFR-A859 <sup>T</sup> KITDFGLTKLL            | 132  | 96   |
| >EGFR-A859 <sup>T</sup> KITDFGLA               | 348  | >EGFR-A859 <sup>T</sup> KITDFGLT               | 3839 | 3491 |
| >EGFR-A859 <sup>T</sup> KITDFGLAKL             | 81   | >EGFR-A859 <sup>T</sup> KITDFGLTKL             | 103  | 22   |
| >EGFR-A859 <sup>T</sup> KITDFGLA               | 117  | >EGFR-A859 <sup>T</sup> KITDFGLT               | 1354 | 1237 |
| >EGFR-A859 <sup>T</sup> KITDFGLAKL             | 432  | >EGFR-A859 <sup>T</sup> KITDFGLTKL             | 447  | 15   |
| >EGFR-A859 <sup>T</sup> KITDFGLAKLL            | 462  | >EGFR-A859 <sup>T</sup> KITDFGLTKLL            | 400  | 62   |

|                         |       |                         |       |       |
|-------------------------|-------|-------------------------|-------|-------|
| >EGFR-A859T KITDFGLAKL  | 188   | >EGFR-A859T KITDFGLTKL  | 337   | 149   |
| >EGFR-A859T KITDFGLAKL  | 478   | >EGFR-A859T KITDFGLTKL  | 383   | 95    |
| >EGFR-A859T KITDFGLAKL  | 29    | >EGFR-A859T KITDFGLTKL  | 29    | 0     |
| >EGFR-A859T KITDFGLAKLL | 183   | >EGFR-A859T KITDFGLTKLL | 97    | 86    |
| >EGFR-A859T KITDFGLAK   | 102   | >EGFR-A859T KITDFGLTK   | 109   | 7     |
| >EGFR-A859T KITDFGLAK   | 17    | >EGFR-A859T KITDFGLTK   | 19    | 2     |
| >EGFR-A859T KITDFGLAK   | 22    | >EGFR-A859T KITDFGLTK   | 23    | 1     |
| >EGFR-A859T KITDFGLAKL  | 725   | >EGFR-A859T KITDFGLTKL  | 435   | 290   |
| >EGFR-A859T KITDFGLAKLL | 679   | >EGFR-A859T KITDFGLTKLL | 310   | 369   |
| >EGFR-A859T KITDFGLAK   | 98    | >EGFR-A859T KITDFGLTK   | 95    | 3     |
| >EGFR-A859T VKITDFGLAK  | 252   | >EGFR-A859T VKITDFGLTK  | 414   | 162   |
| >EGFR-A859T VKITDFGLAKI | 295   | >EGFR-A859T VKITDFGLTKL | 169   | 126   |
| >EGFR-A859T HVKITDFGLA  | 276   | >EGFR-A859T HVKITDFGLTI | 324   | 48    |
| >EGFR-A859T HVKITDFGLA  | 33    | >EGFR-A859T HVKITDFGLT  | 965   | 932   |
| >EGFR-A859T HVKITDFGLA  | 4     | >EGFR-A859T HVKITDFGLTI | 4     | 0     |
| >EGFR-A859T HVKITDFGLA  | 201   | >EGFR-A859T HVKITDFGLTI | 240   | 39    |
| >EGFR-A859T HVKITDFGLA  | 130   | >EGFR-A859T HVKITDFGLTI | 97    | 33    |
| >EGFR-A864I AEEKEYHAEG  | 412   | >EGFR-A864I EEEKEYHAEG  | 2003  | 1591  |
| >EGFR-A864I AEEKEYHA    | 15    | >EGFR-A864I EEEKEYHA    | 32    | 17    |
| >EGFR-A864I AEEKEYHAE   | 159   | >EGFR-A864I EEEKEYHAE   | 449   | 290   |
| >EGFR-A864I AEEKEYHAEG  | 75    | >EGFR-A864I EEEKEYHAEG  | 299   | 224   |
| >EGFR-A864I GAEEKEYHA   | 31914 | >EGFR-A864I GEEEKEYHA   | 145   | 31769 |
| >EGFR-A864I LGAEEKEY    | 425   | >EGFR-A864I LGEEEKEY    | 1529  | 1104  |
| >EGFR-A864I LLGAEEKEYH, | 248   | >EGFR-A864I LLGEEEKEYH, | 241   | 7     |
| >EGFR-A864I LLGAEEKEYH, | 181   | >EGFR-A864I LLGEEEKEYH, | 38    | 143   |
| >EGFR-A864I LLGAEEKEYH, | 186   | >EGFR-A864I LLGEEEKEYH, | 48    | 138   |
| >EGFR-A864I LLGAEEKEYH, | 194   | >EGFR-A864I LLGEEEKEYH, | 58    | 136   |
| >EGFR-A864I LLGAEEKEYH, | 1976  | >EGFR-A864I LLGEEEKEYH, | 494   | 1482  |
| >EGFR-A864I LLGAEEKEYH, | 24    | >EGFR-A864I LLGEEEKEYH, | 11    | 13    |
| >EGFR-A864I KLLGAEEK    | 169   | >EGFR-A864I KLLGEEK     | 509   | 340   |
| >EGFR-A864I KLLGAEEK    | 322   | >EGFR-A864I KLLGEEK     | 639   | 317   |
| >EGFR-A864I AKLLGAEEKE' | 23    | >EGFR-A864I AKLLGEEKE'  | 29    | 6     |
| >EGFR-A864I LAKLLGAEEK  | 377   | >EGFR-A864I LAKLLGEEK   | 1783  | 1406  |
| >EGFR-A864I GLAKLLGA    | 216   | >EGFR-A864I GLAKLLGE    | 21243 | 21027 |
| >EGFR-A864I GLAKLLGA    | 32    | >EGFR-A864I GLAKLLGE    | 5971  | 5939  |
| >EGFR-A864I GLAKLLGA    | 13    | >EGFR-A864I GLAKLLGE    | 8528  | 8515  |
| >EGFR-A864I GLAKLLGA    | 235   | >EGFR-A864I GLAKLLGE    | 16970 | 16735 |
| >EGFR-A864I GLAKLLGA    | 151   | >EGFR-A864I GLAKLLGE    | 16493 | 16342 |
| >EGFR-A864I GLAKLLGA    | 251   | >EGFR-A864I GLAKLLGE    | 18365 | 18114 |
| >EGFR-A864I GLAKLLGA    | 44    | >EGFR-A864I GLAKLLGE    | 14235 | 14191 |
| >EGFR-A864I GLAKLLGA    | 31    | >EGFR-A864I GLAKLLGE    | 13645 | 13614 |
| >EGFR-A864I GLAKLLGAEE  | 347   | >EGFR-A864I GLAKLLGEEI  | 791   | 444   |
| >EGFR-A864I FGLAKLLGA   | 123   | >EGFR-A864I FGLAKLLGE   | 12762 | 12639 |

|                        |       |                          |       |       |
|------------------------|-------|--------------------------|-------|-------|
| >EGFR-A864T AEEKEYHAEG | 412   | >EGFR-A864T TEEKEYHAEG   | 4313  | 3901  |
| >EGFR-A864T AEEKEYHA   | 15    | >EGFR-A864T TEEKEYHA     | 106   | 91    |
| >EGFR-A864T AEEKEYHAE  | 159   | >EGFR-A864T TEEKEYHAE    | 1743  | 1584  |
| >EGFR-A864T AEEKEYHAEG | 75    | >EGFR-A864T TEEKEYHAEG   | 954   | 879   |
| >EGFR-A864T LGAEEKEY   | 425   | >EGFR-A864T LGTTEEKEY    | 796   | 371   |
| >EGFR-A864T LLGAEKEYH, | 248   | >EGFR-A864T LLGTTEEKEYH, | 555   | 307   |
| >EGFR-A864T LLGAEKEYH, | 181   | >EGFR-A864T LLGTTEEKEYH, | 452   | 271   |
| >EGFR-A864T LLGAEKEYH, | 186   | >EGFR-A864T LLGTTEEKEYH, | 225   | 39    |
| >EGFR-A864T LLGAEKEYH, | 194   | >EGFR-A864T LLGTTEEKEYH, | 347   | 153   |
| >EGFR-A864T LLGAEKEYH, | 24    | >EGFR-A864T LLGTTEEKEYH, | 43    | 19    |
| >EGFR-A864T KLLGAEK    | 169   | >EGFR-A864T KLLGTEEK     | 151   | 18    |
| >EGFR-A864T KLLGAEK    | 322   | >EGFR-A864T KLLGTEEK     | 185   | 137   |
| >EGFR-A864T KLLGAEK    | 623   | >EGFR-A864T KLLGTEEK     | 447   | 176   |
| >EGFR-A864T KLLGAEKEY  | 552   | >EGFR-A864T KLLGTEEKEY   | 315   | 237   |
| >EGFR-A864T KLLGAEKEY  | 551   | >EGFR-A864T KLLGTEEKEY   | 459   | 92    |
| >EGFR-A864T AKLLGAEKE' | 23    | >EGFR-A864T AKLLGTEEKE'  | 19    | 4     |
| >EGFR-A864T LAKLLGAEK  | 377   | >EGFR-A864T LAKLLGTEEK   | 465   | 88    |
| >EGFR-A864T GLAKLLGA   | 216   | >EGFR-A864T GLAKLLGT     | 1777  | 1561  |
| >EGFR-A864T GLAKLLGA   | 32    | >EGFR-A864T GLAKLLGT     | 282   | 250   |
| >EGFR-A864T GLAKLLGA   | 13    | >EGFR-A864T GLAKLLGT     | 116   | 103   |
| >EGFR-A864T GLAKLLGA   | 235   | >EGFR-A864T GLAKLLGT     | 1630  | 1395  |
| >EGFR-A864T GLAKLLGA   | 151   | >EGFR-A864T GLAKLLGT     | 1188  | 1037  |
| >EGFR-A864T GLAKLLGA   | 251   | >EGFR-A864T GLAKLLGT     | 3858  | 3607  |
| >EGFR-A864T GLAKLLGA   | 44    | >EGFR-A864T GLAKLLGT     | 557   | 513   |
| >EGFR-A864T GLAKLLGA   | 31    | >EGFR-A864T GLAKLLGT     | 396   | 365   |
| >EGFR-A864T GLAKLLGAEE | 347   | >EGFR-A864T GLAKLLGTTEEI | 269   | 78    |
| >EGFR-A864T GLAKLLGAEE | 630   | >EGFR-A864T GLAKLLGTTEEI | 419   | 211   |
| >EGFR-A864T FGLAKLLGA  | 123   | >EGFR-A864T FGLAKLLGT    | 1167  | 1044  |
| >EGFR-A871I AEGGKVPI   | 155   | >EGFR-A871I EEGGKVPI     | 876   | 721   |
| >EGFR-A871I AEGGKVPI   | 177   | >EGFR-A871I EEGGKVPI     | 1344  | 1167  |
| >EGFR-A871I AEGGKVPIKM | 76    | >EGFR-A871I EEGGKVPIKM   | 260   | 184   |
| >EGFR-A871I AEGGKVPIKM | 137   | >EGFR-A871I EEGGKVPIKM   | 300   | 163   |
| >EGFR-A871I AEGGKVPIKM | 222   | >EGFR-A871I EEGGKVPIKM   | 398   | 176   |
| >EGFR-A871I AEGGKVPI   | 54    | >EGFR-A871I EEGGKVPI     | 161   | 107   |
| >EGFR-A871I AEGGKVPIKM | 278   | >EGFR-A871I EEGGKVPIKM   | 789   | 511   |
| >EGFR-A871I AEGGKVPI   | 110   | >EGFR-A871I EEGGKVPI     | 1688  | 1578  |
| >EGFR-A871I AEGGKVPIKM | 277   | >EGFR-A871I EEGGKVPIKM   | 3710  | 3433  |
| >EGFR-A871I HAEGGKVP   | 28969 | >EGFR-A871I HEEGGKVP     | 106   | 28863 |
| >EGFR-A871I HAEGGKVPI  | 20165 | >EGFR-A871I HEEGGKVPI    | 70    | 20095 |
| >EGFR-A871I HAEGGKVPIK | 176   | >EGFR-A871I HEEGGKVPIK   | 12568 | 12392 |
| >EGFR-A871I HAEGGKVPIK | 19074 | >EGFR-A871I HEEGGKVPIK   | 361   | 18713 |
| >EGFR-A871I HAEGGKVPI  | 943   | >EGFR-A871I HEEGGKVPI    | 258   | 685   |
| >EGFR-A871I HAEGGKVPI  | 11227 | >EGFR-A871I HEEGGKVPI    | 7     | 11220 |



|                       |       |                       |       |       |
|-----------------------|-------|-----------------------|-------|-------|
| >EGFR-A871IHAEGGKVPIK | 24158 | >EGFR-A871IHEEGGKVPIK | 194   | 23964 |
| >EGFR-A871IHAEGGKVPIK | 134   | >EGFR-A871IHEEGGKVPIK | 7009  | 6875  |
| >EGFR-A871IHAEGGKVPIK | 165   | >EGFR-A871IHEEGGKVPIK | 16466 | 16301 |
| >EGFR-A871IHAEGGKVPIK | 448   | >EGFR-A871IHEEGGKVPIK | 15995 | 15547 |
| >EGFR-A871IHAEGGKVPI  | 25010 | >EGFR-A871IHEEGGKVPI  | 84    | 24926 |
| >EGFR-A871IHAEGGKVPIK | 476   | >EGFR-A871IHEEGGKVPIK | 5156  | 4680  |
| >EGFR-A871ILLGAEKEYH  | 248   | >EGFR-A871ILLGAEKEYH  | 13585 | 13337 |
| >EGFR-A871ILLGAEKEYH  | 181   | >EGFR-A871ILLGAEKEYH  | 16658 | 16477 |
| >EGFR-A871ILLGAEKEYH  | 186   | >EGFR-A871ILLGAEKEYH  | 13652 | 13466 |
| >EGFR-A871ILLGAEKEYH  | 194   | >EGFR-A871ILLGAEKEYH  | 17144 | 16950 |
| >EGFR-A871ILLGAEKEYH  | 24    | >EGFR-A871ILLGAEKEYH  | 12647 | 12623 |
| >EGFR-A871IYHAEGGKVPI | 486   | >EGFR-A871IYHEEGGKVPI | 4298  | 3812  |
| >EGFR-A871IYHAEGGKVPI | 306   | >EGFR-A871IYHEEGGKVPI | 1158  | 852   |
| >EGFR-A871IYHAEGGKVPI | 22    | >EGFR-A871IYHEEGGKVPI | 33    | 11    |
| >EGFR-A871IYHAEGGKVF  | 173   | >EGFR-A871IYHEEGGKVF  | 1199  | 1026  |
| >EGFR-A871IYHAEGGKVF  | 270   | >EGFR-A871IYHEEGGKVF  | 330   | 60    |
| >EGFR-A871IKEYHAEGGK\ | 130   | >EGFR-A871IKEYHEEGGK\ | 271   | 141   |
| >EGFR-A871IKEYHAEGGK\ | 65    | >EGFR-A871IKEYHEEGGK\ | 69    | 4     |
| >EGFR-A871IEEKEYHAE   | 180   | >EGFR-A871IEEKEYHEE   | 394   | 214   |
| >EGFR-A871IEEKEYHAE   | 142   | >EGFR-A871IEEKEYHEEG  | 194   | 52    |
| >EGFR-A871IAEEKEYHAE  | 412   | >EGFR-A871IAEEKEYHEEG | 978   | 566   |
| >EGFR-A871IAEEKEYHA   | 15    | >EGFR-A871IAEEKEYHE   | 1494  | 1479  |
| >EGFR-A871IAEEKEYHAE  | 159   | >EGFR-A871IAEEKEYHEE  | 373   | 214   |
| >EGFR-A871IAEEKEYHAE  | 75    | >EGFR-A871IAEEKEYHEEG | 150   | 75    |
| >EGFR-A871(AEGGKVPI   | 155   | >EGFR-A871(GEGGKVPI   | 139   | 16    |
| >EGFR-A871(AEGGKVPI   | 177   | >EGFR-A871(GEGGKVPI   | 208   | 31    |
| >EGFR-A871(AEGGKVPIKV | 76    | >EGFR-A871(GEGGKVPIKV | 1235  | 1159  |
| >EGFR-A871(AEGGKVPIKV | 137   | >EGFR-A871(GEGGKVPIKV | 759   | 622   |
| >EGFR-A871(AEGGKVPIKV | 222   | >EGFR-A871(GEGGKVPIKV | 717   | 495   |
| >EGFR-A871(AEGGKVPI   | 54    | >EGFR-A871(GEGGKVPI   | 486   | 432   |
| >EGFR-A871(AEGGKVPIKV | 278   | >EGFR-A871(GEGGKVPIKV | 1953  | 1675  |
| >EGFR-A871(AEGGKVPI   | 110   | >EGFR-A871(GEGGKVPI   | 88    | 22    |
| >EGFR-A871(AEGGKVPIKV | 277   | >EGFR-A871(GEGGKVPIKV | 1354  | 1077  |
| >EGFR-A871(HAEGGKVPIK | 176   | >EGFR-A871(HGEGGKVPIK | 3220  | 3044  |
| >EGFR-A871(HAEGGKVPIK | 134   | >EGFR-A871(HGEGGKVPIK | 3895  | 3761  |
| >EGFR-A871(HAEGGKVPIK | 165   | >EGFR-A871(HGEGGKVPIK | 2085  | 1920  |
| >EGFR-A871(HAEGGKVPIK | 448   | >EGFR-A871(HGEGGKVPIK | 3740  | 3292  |
| >EGFR-A871(HAEGGKVPIK | 476   | >EGFR-A871(HGEGGKVPIK | 3935  | 3459  |
| >EGFR-A871(LLGAEKEYH  | 248   | >EGFR-A871(LLGAEKEYH  | 5938  | 5690  |
| >EGFR-A871(LLGAEKEYH  | 181   | >EGFR-A871(LLGAEKEYH  | 7514  | 7333  |
| >EGFR-A871(LLGAEKEYH  | 186   | >EGFR-A871(LLGAEKEYH  | 6823  | 6637  |
| >EGFR-A871(LLGAEKEYH  | 194   | >EGFR-A871(LLGAEKEYH  | 10632 | 10438 |
| >EGFR-A871(LLGAEKEYH  | 24    | >EGFR-A871(LLGAEKEYH  | 11285 | 11261 |

|                       |      |                       |      |      |
|-----------------------|------|-----------------------|------|------|
| >EGFR-A871(YHAEGGKVPI | 486  | >EGFR-A871(YHGEGGKVPI | 2185 | 1699 |
| >EGFR-A871(YHAEGGKVPI | 306  | >EGFR-A871(YHGEGGKVPI | 959  | 653  |
| >EGFR-A871(YHAEGGKVPI | 22   | >EGFR-A871(YHGEGGKVPI | 228  | 206  |
| >EGFR-A871(EYHAEGGKVI | 173  | >EGFR-A871(EYHGEGGKVI | 634  | 461  |
| >EGFR-A871(EYHAEGGKVI | 270  | >EGFR-A871(EYHGEGGKVI | 216  | 54   |
| >EGFR-A871(KEYHAEGGK\ | 130  | >EGFR-A871(KEYHGEGGK\ | 317  | 187  |
| >EGFR-A871(KEYHAEGGK\ | 65   | >EGFR-A871(KEYHGEGGK\ | 210  | 145  |
| >EGFR-A871(EEKEYHAE   | 180  | >EGFR-A871(EEKEYHGE   | 648  | 468  |
| >EGFR-A871(EEKEYHAE   | 142  | >EGFR-A871(EEKEYHGEG  | 504  | 362  |
| >EGFR-A871(AEEKEYHAE  | 412  | >EGFR-A871(AEEKEYHGEC | 582  | 170  |
| >EGFR-A871(AEEKEYHA   | 15   | >EGFR-A871(AEEKEYHG   | 917  | 902  |
| >EGFR-A871(AEEKEYHAE  | 159  | >EGFR-A871(AEEKEYHGE  | 540  | 381  |
| >EGFR-A871(AEEKEYHAE  | 75   | >EGFR-A871(AEEKEYHGEC | 80   | 5    |
| >EGFR-A871AEGGKVPI    | 155  | >EGFR-A871TEGGKVPI    | 402  | 247  |
| >EGFR-A871AEGGKVPI    | 177  | >EGFR-A871TEGGKVPI    | 410  | 233  |
| >EGFR-A871AEGGKVPIK\  | 76   | >EGFR-A871TEGGKVPIK\  | 715  | 639  |
| >EGFR-A871AEGGKVPIK\  | 137  | >EGFR-A871TEGGKVPIK\  | 834  | 697  |
| >EGFR-A871AEGGKVPIK\  | 222  | >EGFR-A871TEGGKVPIK\  | 1140 | 918  |
| >EGFR-A871AEGGKVPI    | 54   | >EGFR-A871TEGGKVPI    | 657  | 603  |
| >EGFR-A871AEGGKVPIK\  | 278  | >EGFR-A871TEGGKVPIK\  | 2551 | 2273 |
| >EGFR-A871AEGGKVPI    | 110  | >EGFR-A871TEGGKVPI    | 775  | 665  |
| >EGFR-A871AEGGKVPIK\  | 277  | >EGFR-A871TEGGKVPIK\  | 1292 | 1015 |
| >EGFR-A871HAEGGKVPIK  | 675  | >EGFR-A871HTEGGKVPIK  | 99   | 576  |
| >EGFR-A871HAEGGKVPI   | 5394 | >EGFR-A871HTEGGKVPI   | 242  | 5152 |
| >EGFR-A871HAEGGKVPI   | 2247 | >EGFR-A871HTEGGKVPI   | 177  | 2070 |
| >EGFR-A871HAEGGKVPI   | 3208 | >EGFR-A871HTEGGKVPI   | 261  | 2947 |
| >EGFR-A871HAEGGKVPIK  | 176  | >EGFR-A871HTEGGKVPIK  | 24   | 152  |
| >EGFR-A871HAEGGKVPIK  | 134  | >EGFR-A871HTEGGKVPIK  | 2782 | 2648 |
| >EGFR-A871HAEGGKVPIK  | 165  | >EGFR-A871HTEGGKVPIK  | 113  | 52   |
| >EGFR-A871HAEGGKVPIK  | 448  | >EGFR-A871HTEGGKVPIK  | 385  | 63   |
| >EGFR-A871HAEGGKVPIK  | 476  | >EGFR-A871HTEGGKVPIK  | 6056 | 5580 |
| >EGFR-A871HAEGGKVPI   | 1627 | >EGFR-A871HTEGGKVPI   | 387  | 1240 |
| >EGFR-A871LLGAEKEYH,  | 248  | >EGFR-A871LLGAEKEYH'  | 1890 | 1642 |
| >EGFR-A871LLGAEKEYH,  | 181  | >EGFR-A871LLGAEKEYH'  | 1262 | 1081 |
| >EGFR-A871LLGAEKEYH,  | 186  | >EGFR-A871LLGAEKEYH'  | 1735 | 1549 |
| >EGFR-A871LLGAEKEYH,  | 194  | >EGFR-A871LLGAEKEYH'  | 1527 | 1333 |
| >EGFR-A871LLGAEKEYH,  | 24   | >EGFR-A871LLGAEKEYH'  | 225  | 201  |
| >EGFR-A871YHAEGGKVPI  | 486  | >EGFR-A871YHTEGGKVPI  | 988  | 502  |
| >EGFR-A871YHAEGGKVPI  | 306  | >EGFR-A871YHTEGGKVPI  | 670  | 364  |
| >EGFR-A871YHAEGGKVPI  | 22   | >EGFR-A871YHTEGGKVPI  | 79   | 57   |
| >EGFR-A871EYHAEGGKVI  | 173  | >EGFR-A871EYHTEGGKVI  | 363  | 190  |
| >EGFR-A871EYHAEGGKVI  | 270  | >EGFR-A871EYHTEGGKVI  | 432  | 162  |
| >EGFR-A871KEYHAEGGK\  | 130  | >EGFR-A871KEYHTEGGK\  | 94   | 36   |

|                         |       |                         |      |       |
|-------------------------|-------|-------------------------|------|-------|
| >EGFR-A871TKEYHAEGGK\   | 65    | >EGFR-A871TKEYHTEGGKV   | 38   | 27    |
| >EGFR-A871T EEKEYHAE    | 180   | >EGFR-A871T EEKEYHTE    | 467  | 287   |
| >EGFR-A871T EEKEYHAEG   | 142   | >EGFR-A871T EEKEYHTEG   | 203  | 61    |
| >EGFR-A871T AEEKEYHAEG  | 412   | >EGFR-A871T AEEKEYHTEG  | 544  | 132   |
| >EGFR-A871T AEEKEYHA    | 15    | >EGFR-A871T AEEKEYHT    | 67   | 52    |
| >EGFR-A871T AEEKEYHAE   | 159   | >EGFR-A871T AEEKEYHTE   | 488  | 329   |
| >EGFR-A871T AEEKEYHAEG  | 75    | >EGFR-A871T AEEKEYHTEG  | 72   | 3     |
| >EGFR-C219C KLTKIICAQQC | 303   | >EGFR-C219C KLTKIICAQQC | 4926 | 4623  |
| >EGFR-C219C KLTKIICAQQC | 37    | >EGFR-C219C KLTKIICAQQC | 4437 | 4400  |
| >EGFR-C219C QQCSGR      | 430   | >EGFR-C219C QQCSGR      | 1563 | 1133  |
| >EGFR-C219C AQQCSGR     | 257   | >EGFR-C219C AQQCSGR     | 1588 | 1331  |
| >EGFR-C219C CAQQCSGR    | 90    | >EGFR-C219C CAQQCSGR    | 356  | 266   |
| >EGFR-C219C CAQQCSGR    | 367   | >EGFR-C219C CAQQCSGR    | 654  | 287   |
| >EGFR-C219C IICAQQCSGR  | 144   | >EGFR-C219C IICAQQCSGR  | 184  | 40    |
| >EGFR-C219C IICAQQCSGR  | 208   | >EGFR-C219C IICAQQCSGR  | 388  | 180   |
| >EGFR-C219C IICAQQCSGR  | 383   | >EGFR-C219C IICAQQCSGR  | 311  | 72    |
| >EGFR-C219C IICAQQCSGR  | 182   | >EGFR-C219C IICAQQCSGR  | 408  | 226   |
| >EGFR-C219C KIICAQQCSG  | 200   | >EGFR-C219C KIICAQQCSG  | 207  | 7     |
| >EGFR-C219C KIICAQQCSG  | 57    | >EGFR-C219C KIICAQQCSG  | 61   | 4     |
| >EGFR-C311S CGADSYEM    | 460   | >EGFR-C311S SGADSYEM    | 644  | 184   |
| >EGFR-C311S ACGADSYEM   | 20609 | >EGFR-C311S ASGADSYEM   | 217  | 20392 |
| >EGFR-C311S RACGADSY    | 163   | >EGFR-C311S RASGADSY    | 76   | 87    |
| >EGFR-C311S RACGADSY    | 141   | >EGFR-C311S RASGADSY    | 139  | 2     |
| >EGFR-C311S RACGADSY    | 16    | >EGFR-C311S RASGADSY    | 10   | 6     |
| >EGFR-C311S RACGADSYEM  | 17    | >EGFR-C311S RASGADSYEM  | 17   | 0     |
| >EGFR-C311S RACGADSY    | 195   | >EGFR-C311S RASGADSY    | 55   | 140   |
| >EGFR-C311S RACGADSY    | 1488  | >EGFR-C311S RASGADSY    | 272  | 1216  |
| >EGFR-C311S RACGADSYEM  | 1496  | >EGFR-C311S RASGADSYEM  | 249  | 1247  |
| >EGFR-C311S RACGADSY    | 718   | >EGFR-C311S RASGADSY    | 64   | 654   |
| >EGFR-C311S RACGADSYEM  | 469   | >EGFR-C311S RASGADSYEM  | 51   | 418   |
| >EGFR-C311S RACGADSY    | 921   | >EGFR-C311S RASGADSY    | 284  | 637   |
| >EGFR-C311S RACGADSYEM  | 482   | >EGFR-C311S RASGADSYEM  | 92   | 390   |
| >EGFR-C311S RACGADSY    | 2279  | >EGFR-C311S RASGADSY    | 338  | 1941  |
| >EGFR-C311S VRACGADSY   | 554   | >EGFR-C311S VRASGADSY   | 72   | 482   |
| >EGFR-C311S VRACGADSY   | 205   | >EGFR-C311S VRASGADSY   | 203  | 2     |
| >EGFR-C311S VRACGADSYE  | 293   | >EGFR-C311S VRASGADSYE  | 303  | 10    |
| >EGFR-C311S VRACGADSYE  | 455   | >EGFR-C311S VRASGADSYE  | 450  | 5     |
| >EGFR-C311S VRACGADSYE  | 865   | >EGFR-C311S VRASGADSYE  | 313  | 552   |
| >EGFR-C311S CVRACGADS\  | 626   | >EGFR-C311S CVRASGADS\  | 384  | 242   |
| >EGFR-C311S CVRACGADS\  | 811   | >EGFR-C311S CVRASGADS\  | 245  | 566   |
| >EGFR-C311S CVRACGADS\  | 276   | >EGFR-C311S CVRASGADS\  | 190  | 86    |
| >EGFR-C311S CVRACGADS\  | 986   | >EGFR-C311S CVRASGADS\  | 254  | 732   |
| >EGFR-C311S CVRACGADS\  | 556   | >EGFR-C311S CVRASGADS\  | 170  | 386   |

|                        |       |                       |      |       |
|------------------------|-------|-----------------------|------|-------|
| >EGFR-C311\SCVRACGAD\  | 234   | >EGFR-C311\SCVRASGAD\ | 169  | 65    |
| >EGFR-C311\SCVRACGAD\  | 124   | >EGFR-C311\SCVRASGAD\ | 117  | 7     |
| >EGFR-C326\CKKCEGPCR   | 793   | >EGFR-C326\YKKCEGPCR  | 153  | 640   |
| >EGFR-C326\CKKCEGPCRK  | 3244  | >EGFR-C326\YKKCEGPCRK | 435  | 2809  |
| >EGFR-C326\CKKCEGPCRK  | 831   | >EGFR-C326\YKKCEGPCRK | 108  | 723   |
| >EGFR-C326\KCKKCEGPCR  | 2262  | >EGFR-C326\KYKKCEGPCR | 197  | 2065  |
| >EGFR-C326\KCKKCEGPCR  | 17    | >EGFR-C326\KYKKCEGPCR | 5    | 12    |
| >EGFR-C326\KCKKCEGPCR  | 165   | >EGFR-C326\KYKKCEGPCR | 54   | 111   |
| >EGFR-C326\KCKKCEGPCR  | 2900  | >EGFR-C326\KYKKCEGPCR | 94   | 2806  |
| >EGFR-C326\KCKKCEGPCR  | 99    | >EGFR-C326\KYKKCEGPCR | 19   | 80    |
| >EGFR-C326\KCKKCEGPCR  | 545   | >EGFR-C326\KYKKCEGPCR | 54   | 491   |
| >EGFR-C326\YEMEEDGVR   | 24003 | >EGFR-C326\YEMEEDGVR  | 225  | 23778 |
| >EGFR-C326\YEMEEDGVR   | 1090  | >EGFR-C326\YEMEEDGVR  | 11   | 1079  |
| >EGFR-C326\YEMEEDGVR   | 5920  | >EGFR-C326\YEMEEDGVR  | 169  | 5751  |
| >EGFR-C326\YEMEEDGVR   | 50    | >EGFR-C326\YEMEEDGVR  | 181  | 131   |
| >EGFR-C326\RKCKKCEGPC  | 1035  | >EGFR-C326\RKYKKCEGPC | 89   | 946   |
| >EGFR-C326\RKCKKCEGPC  | 925   | >EGFR-C326\RKYKKCEGPC | 365  | 560   |
| >EGFR-C326\EEDGVRKC    | 17053 | >EGFR-C326\EEDGVRKY   | 270  | 16783 |
| >EGFR-C326\EEDGVRKC    | 8419  | >EGFR-C326\EEDGVRKY   | 339  | 8080  |
| >EGFR-C326\MEEDGVRKC   | 4609  | >EGFR-C326\MEEDGVRKY  | 26   | 4583  |
| >EGFR-C326\MEEDGVRKC   | 7371  | >EGFR-C326\MEEDGVRKY  | 235  | 7136  |
| >EGFR-C326\MEEDGVRKC   | 492   | >EGFR-C326\MEEDGVRKY  | 1918 | 1426  |
| >EGFR-C326\EMEEDGVRK   | 30594 | >EGFR-C326\EMEEDGVRK  | 173  | 30421 |
| >EGFR-C326\EMEEDGVRK   | 617   | >EGFR-C326\EMEEDGVRK  | 225  | 392   |
| >EGFR-C326\EMEEDGVRK   | 26374 | >EGFR-C326\EMEEDGVRK  | 296  | 26078 |
| >EGFR-C620\LCHPNCTY    | 2033  | >EGFR-C620\LWHPNCTY   | 185  | 1848  |
| >EGFR-C620\LCHPNCTY    | 1870  | >EGFR-C620\LWHPNCTY   | 292  | 1578  |
| >EGFR-C620\LCHPNCTY    | 346   | >EGFR-C620\LWHPNCTY   | 776  | 430   |
| >EGFR-C620\LCHPNCTY    | 35058 | >EGFR-C620\LWHPNCTY   | 220  | 34838 |
| >EGFR-C620\LCHPNCTY G  | 29854 | >EGFR-C620\LWHPNCTY G | 68   | 29786 |
| >EGFR-C620\LCHPNCTY GC | 32559 | >EGFR-C620\LWHPNCTY G | 276  | 32283 |
| >EGFR-C620\YADAGHVCH   | 17676 | >EGFR-C620\YADAGHVCH  | 94   | 17582 |
| >EGFR-C620\YADAGHVCH   | 29967 | >EGFR-C620\YADAGHVCH  | 242  | 29725 |
| >EGFR-C620\YADAGHVCH   | 23901 | >EGFR-C620\YADAGHVCH  | 196  | 23705 |
| >EGFR-C620\YADAGHVCH   | 14117 | >EGFR-C620\YADAGHVCH  | 14   | 14103 |
| >EGFR-C620\YADAGHVCH   | 25251 | >EGFR-C620\YADAGHVCH  | 121  | 25130 |
| >EGFR-C620\HLCHPNCTY C | 431   | >EGFR-C620\HLWHPNCTY  | 32   | 399   |
| >EGFR-C620\HLCHPNCTY C | 1060  | >EGFR-C620\HLWHPNCTY  | 45   | 1015  |
| >EGFR-C620\HLCHPNCTY C | 6806  | >EGFR-C620\HLWHPNCTY  | 230  | 6576  |
| >EGFR-C620\HLCHPNCTY C | 649   | >EGFR-C620\HLWHPNCTY  | 68   | 581   |
| >EGFR-C620\HLCHPNCTY   | 1308  | >EGFR-C620\HLWHPNCTY  | 417  | 891   |
| >EGFR-C620\HLCHPNCTY   | 1002  | >EGFR-C620\HLWHPNCTY  | 103  | 899   |
| >EGFR-C620\HLCHPNCTY   | 579   | >EGFR-C620\HLWHPNCTY  | 218  | 361   |

|                       |       |                       |     |       |
|-----------------------|-------|-----------------------|-----|-------|
| >EGFR-C620\HLCHPNCTY  | 1665  | >EGFR-C620\HLWHPNCTY  | 147 | 1518  |
| >EGFR-C620\HLCHPNCTY  | 73    | >EGFR-C620\HLWHPNCTY  | 90  | 17    |
| >EGFR-C620\HLCHPNCTY  | 36    | >EGFR-C620\HLWHPNCTY  | 17  | 19    |
| >EGFR-C620\HLCHPNCTY  | 226   | >EGFR-C620\HLWHPNCTY  | 21  | 205   |
| >EGFR-C620\HLCHPNCTY  | 300   | >EGFR-C620\HLWHPNCTY  | 77  | 223   |
| >EGFR-C620\HLCHPNCTY  | 621   | >EGFR-C620\HLWHPNCTY  | 53  | 568   |
| >EGFR-C620\HLCHPNCTY  | 307   | >EGFR-C620\HLWHPNCTY  | 689 | 382   |
| >EGFR-C620\CHLCHPNCTY | 62    | >EGFR-C620\CHLWHPNCT  | 314 | 252   |
| >EGFR-C620\AGHVCHLC   | 26719 | >EGFR-C620\AGHVCHLW   | 455 | 26264 |
| >EGFR-C620\AGHVCHLC   | 25034 | >EGFR-C620\AGHVCHLW   | 465 | 24569 |
| >EGFR-C620\DAGHVCHLC  | 21218 | >EGFR-C620\DAGHVCHLW  | 490 | 20728 |
| >EGFR-C620\ADAGHVCHL  | 29028 | >EGFR-C620\ADAGHVCHL  | 198 | 28830 |
| >EGFR-C620\LCHPNCTY   | 22229 | >EGFR-C620\LYHPNCTY   | 281 | 21948 |
| >EGFR-C620\LCHPNCTY   | 2033  | >EGFR-C620\LYHPNCTY   | 93  | 1940  |
| >EGFR-C620\LCHPNCTY   | 1870  | >EGFR-C620\LYHPNCTY   | 265 | 1605  |
| >EGFR-C620\LCHPNCTY   | 346   | >EGFR-C620\LYHPNCTY   | 479 | 133   |
| >EGFR-C620\LCHPNCTYG  | 29854 | >EGFR-C620\LYHPNCTYG  | 412 | 29442 |
| >EGFR-C620\YADAGHVCH  | 12423 | >EGFR-C620\YADAGHVCH  | 13  | 12410 |
| >EGFR-C620\YADAGHVCH  | 16522 | >EGFR-C620\YADAGHVCH  | 47  | 16475 |
| >EGFR-C620\YADAGHVCH  | 23475 | >EGFR-C620\YADAGHVCH  | 403 | 23072 |
| >EGFR-C620\YADAGHVCH  | 25252 | >EGFR-C620\YADAGHVCH  | 69  | 25183 |
| >EGFR-C620\YADAGHVCH  | 17676 | >EGFR-C620\YADAGHVCH  | 112 | 17564 |
| >EGFR-C620\YADAGHVCH  | 10576 | >EGFR-C620\YADAGHVCH  | 34  | 10542 |
| >EGFR-C620\YADAGHVCH  | 14117 | >EGFR-C620\YADAGHVCH  | 468 | 13649 |
| >EGFR-C620\YADAGHVCH  | 17370 | >EGFR-C620\YADAGHVCH  | 184 | 17186 |
| >EGFR-C620\YADAGHVCH  | 35709 | >EGFR-C620\YADAGHVCH  | 283 | 35426 |
| >EGFR-C620\HLCHPNCTYC | 431   | >EGFR-C620\HLYHPNCTYC | 34  | 397   |
| >EGFR-C620\HLCHPNCTYC | 1060  | >EGFR-C620\HLYHPNCTYC | 52  | 1008  |
| >EGFR-C620\HLCHPNCTYC | 649   | >EGFR-C620\HLYHPNCTYC | 54  | 595   |
| >EGFR-C620\HLCHPNCTY  | 1308  | >EGFR-C620\HLYHPNCTY  | 77  | 1231  |
| >EGFR-C620\HLCHPNCTY  | 1002  | >EGFR-C620\HLYHPNCTY  | 236 | 766   |
| >EGFR-C620\HLCHPNCTY  | 579   | >EGFR-C620\HLYHPNCTY  | 379 | 200   |
| >EGFR-C620\HLCHPNCTY  | 1665  | >EGFR-C620\HLYHPNCTY  | 216 | 1449  |
| >EGFR-C620\HLCHPNCTY  | 73    | >EGFR-C620\HLYHPNCTY  | 37  | 36    |
| >EGFR-C620\HLCHPNCTY  | 36    | >EGFR-C620\HLYHPNCTY  | 10  | 26    |
| >EGFR-C620\HLCHPNCTY  | 226   | >EGFR-C620\HLYHPNCTY  | 18  | 208   |
| >EGFR-C620\HLCHPNCTY  | 300   | >EGFR-C620\HLYHPNCTY  | 19  | 281   |
| >EGFR-C620\HLCHPNCTY  | 621   | >EGFR-C620\HLYHPNCTY  | 155 | 466   |
| >EGFR-C620\HLCHPNCTY  | 8179  | >EGFR-C620\HLYHPNCTY  | 328 | 7851  |
| >EGFR-C620\HLCHPNCTY  | 307   | >EGFR-C620\HLYHPNCTY  | 326 | 19    |
| >EGFR-C620\CHLCHPNCTY | 62    | >EGFR-C620\CHLYHPNCTY | 58  | 4     |
| >EGFR-C620\AGHVCHLC   | 25484 | >EGFR-C620\AGHVCHLY   | 314 | 25170 |
| >EGFR-C620\AGHVCHLC   | 22374 | >EGFR-C620\AGHVCHLY   | 49  | 22325 |

|                        |       |                        |     |       |
|------------------------|-------|------------------------|-----|-------|
| >EGFR-C620\DAGHVCHLC   | 22057 | >EGFR-C620\DAGHVCHLY   | 151 | 21906 |
| >EGFR-C620\DAGHVCHLC   | 28692 | >EGFR-C620\DAGHVCHLY   | 125 | 28567 |
| >EGFR-C620\DAGHVCHLC   | 24163 | >EGFR-C620\DAGHVCHLY   | 367 | 23796 |
| >EGFR-C624FCTYGCTGPGL  | 3510  | >EGFR-C624FCTYGCTGPGL  | 140 | 3370  |
| >EGFR-C624FCTYGCTGPGL  | 344   | >EGFR-C624FCTYGCTGPGL  | 24  | 320   |
| >EGFR-C624FCTYGCTGPGL  | 1057  | >EGFR-C624FCTYGCTGPGL  | 71  | 986   |
| >EGFR-C624FCTYGCTGPGL  | 223   | >EGFR-C624FCTYGCTGPGL  | 26  | 197   |
| >EGFR-C624FCTYGCTGPGL  | 906   | >EGFR-C624FCTYGCTGPGL  | 15  | 891   |
| >EGFR-C624FCTYGCTGPGL  | 3575  | >EGFR-C624FCTYGCTGPGL  | 140 | 3435  |
| >EGFR-C624FCTYGCTGPGL  | 3830  | >EGFR-C624FCTYGCTGPGL  | 61  | 3769  |
| >EGFR-C624FCTYGCTGPGL  | 3865  | >EGFR-C624FCTYGCTGPGL  | 45  | 3820  |
| >EGFR-C624FCTYGCTGPGL  | 669   | >EGFR-C624FCTYGCTGPGL  | 345 | 324   |
| >EGFR-C624FCTYGCTGPG   | 1299  | >EGFR-C624FCTYGCTGPG   | 307 | 992   |
| >EGFR-C624FCTYGCTGPGL  | 235   | >EGFR-C624FCTYGCTGPGL  | 77  | 158   |
| >EGFR-C624FCTYGCTGPGL  | 513   | >EGFR-C624FCTYGCTGPGL  | 18  | 495   |
| >EGFR-C624FCTYGCTGPGL  | 18    | >EGFR-C624FCTYGCTGPGL  | 6   | 12    |
| >EGFR-C624FCTYGCTGPGL  | 408   | >EGFR-C624FCTYGCTGPGL  | 151 | 257   |
| >EGFR-C624FCTYGCTGPGL  | 235   | >EGFR-C624FCTYGCTGPGL  | 245 | 10    |
| >EGFR-C624FGHVCHLCHPI  | 14221 | >EGFR-C624FGHVCHLCHPI  | 127 | 14094 |
| >EGFR-C624FLCHPNCTY    | 2033  | >EGFR-C624FLCHPNFTY    | 207 | 1826  |
| >EGFR-C624FLCHPNCTY    | 1870  | >EGFR-C624FLCHPNFTY    | 498 | 1372  |
| >EGFR-C624FLCHPNCTY    | 346   | >EGFR-C624FLCHPNFTY    | 381 | 35    |
| >EGFR-C624FLCHPNCTY    | 1067  | >EGFR-C624FLCHPNFTY    | 453 | 614   |
| >EGFR-C624FLCHPNCTY    | 431   | >EGFR-C624FLCHPNFTY    | 227 | 204   |
| >EGFR-C624FLCHPNCTY    | 1308  | >EGFR-C624FLCHPNFTY    | 366 | 942   |
| >EGFR-C624FLCHPNCTY    | 1002  | >EGFR-C624FLCHPNFTY    | 50  | 952   |
| >EGFR-C624FLCHPNCTY    | 579   | >EGFR-C624FLCHPNFTY    | 72  | 507   |
| >EGFR-C624FLCHPNCTY    | 1515  | >EGFR-C624FLCHPNFTY    | 46  | 1469  |
| >EGFR-C624FLCHPNCTY    | 73    | >EGFR-C624FLCHPNFTY    | 146 | 73    |
| >EGFR-C624FLCHPNCTY    | 36    | >EGFR-C624FLCHPNFTY    | 42  | 6     |
| >EGFR-C624FLCHPNCTY    | 226   | >EGFR-C624FLCHPNFTY    | 346 | 120   |
| >EGFR-C624FLCHPNCTY    | 300   | >EGFR-C624FLCHPNFTY    | 192 | 108   |
| >EGFR-C624FLCHPNCTY    | 621   | >EGFR-C624FLCHPNFTY    | 184 | 437   |
| >EGFR-C624FLCHPNCTY    | 307   | >EGFR-C624FLCHPNFTY    | 47  | 260   |
| >EGFR-C624FCHLCHPNC    | 28084 | >EGFR-C624FCHLCHPNF    | 178 | 27906 |
| >EGFR-C624FCHLCHPNC    | 12459 | >EGFR-C624FCHLCHPNF    | 48  | 12411 |
| >EGFR-C624FCHLCHPNCTY  | 62    | >EGFR-C624FCHLCHPNFTY  | 106 | 44    |
| >EGFR-C624FVCHLCHPNC   | 965   | >EGFR-C624FVCHLCHPNFT  | 249 | 716   |
| >EGFR-C624FVCHLCHPNC   | 619   | >EGFR-C624FVCHLCHPNFT  | 340 | 279   |
| >EGFR-C624FHVCHLCHPNI  | 25165 | >EGFR-C624FHVCHLCHPNI  | 197 | 24968 |
| >EGFR-C624FHVCHLCHPNI  | 23623 | >EGFR-C624FHVCHLCHPNI  | 227 | 23396 |
| >EGFR-C636\CPTNGPKI    | 1531  | >EGFR-C636\YPTNGPKI    | 179 | 1352  |
| >EGFR-C636\CPTNGPKIPSI | 1311  | >EGFR-C636\YPTNGPKIPSI | 145 | 1166  |

|                        |       |                        |      |       |
|------------------------|-------|------------------------|------|-------|
| >EGFR-C636\CPTNGPKIPSI | 3231  | >EGFR-C636\YPTNGPKIPSI | 215  | 3016  |
| >EGFR-C636\CPTNGPKIPSI | 542   | >EGFR-C636\YPTNGPKIPSI | 334  | 208   |
| >EGFR-C636\CPTNGPKI    | 180   | >EGFR-C636\YPTNGPKI    | 171  | 9     |
| >EGFR-C636\CPTNGPKIPSI | 141   | >EGFR-C636\YPTNGPKIPSI | 134  | 7     |
| >EGFR-C636\CPTNGPKIPSI | 510   | >EGFR-C636\YPTNGPKIPSI | 439  | 71    |
| >EGFR-C636\CPTNGPKIPSI | 234   | >EGFR-C636\YPTNGPKIPSI | 1298 | 1064  |
| >EGFR-C636\GCPTNGPKI   | 18053 | >EGFR-C636\GYPTNGPKI   | 20   | 18033 |
| >EGFR-C636\YGCTGPGLEC  | 23446 | >EGFR-C636\YGCTGPGLEC  | 187  | 23259 |
| >EGFR-C636\YGCTGPGLEC  | 29542 | >EGFR-C636\YGCTGPGLEC  | 439  | 29103 |
| >EGFR-C636\EGCPTNGPK   | 1956  | >EGFR-C636\EGYPTNGPK   | 491  | 1465  |
| >EGFR-C636\LEGCPTNGPK  | 674   | >EGFR-C636\LEGYPTNGPK  | 242  | 432   |
| >EGFR-C636\LEGCPTNGPK  | 27    | >EGFR-C636\LEGYPTNGPK  | 28   | 1     |
| >EGFR-C636\TGPGLEG     | 4985  | >EGFR-C636\TGPGLEGY    | 439  | 4546  |
| >EGFR-C636\TGPGLEGCP   | 447   | >EGFR-C636\TGPGLEGYP   | 281  | 166   |
| >EGFR-C636\CTGPGLEG    | 21554 | >EGFR-C636\CTGPGLEGY   | 171  | 21383 |
| >EGFR-C636\CTGPGLEG    | 24303 | >EGFR-C636\CTGPGLEGY   | 34   | 24269 |
| >EGFR-C636\CTGPGLEG    | 29728 | >EGFR-C636\CTGPGLEGY   | 248  | 29480 |
| >EGFR-C636\CTGPGLEG    | 23726 | >EGFR-C636\CTGPGLEGY   | 79   | 23647 |
| >EGFR-C636\CTGPGLEG    | 27331 | >EGFR-C636\CTGPGLEGY   | 137  | 27194 |
| >EGFR-C636\CTGPGLEG    | 25184 | >EGFR-C636\CTGPGLEGY   | 244  | 24940 |
| >EGFR-C636\CTGPGLEG    | 18117 | >EGFR-C636\CTGPGLEGY   | 39   | 18078 |
| >EGFR-C775\CRLLGICL    | 1649  | >EGFR-C775\YRLLGICL    | 301  | 1348  |
| >EGFR-C775\CRLLGICL    | 260   | >EGFR-C775\YRLLGICL    | 42   | 218   |
| >EGFR-C775\CRLLGICLT   | 2932  | >EGFR-C775\YRLLGICLT   | 456  | 2476  |
| >EGFR-C775\CRLLGICLTST | 3056  | >EGFR-C775\YRLLGICLTST | 491  | 2565  |
| >EGFR-C775\CRLLGICL    | 752   | >EGFR-C775\YRLLGICL    | 31   | 721   |
| >EGFR-C775\VMASVDNPF   | 37    | >EGFR-C775\VMASVDNPF   | 1250 | 1213  |
| >EGFR-C775\VMASVDNPF   | 258   | >EGFR-C775\VMASVDNPF   | 6181 | 5923  |
| >EGFR-C775\VMASVDNPF   | 233   | >EGFR-C775\VMASVDNPF   | 6524 | 6291  |
| >EGFR-C775\VMASVDNPF   | 75    | >EGFR-C775\VMASVDNPF   | 2095 | 2020  |
| >EGFR-C775\VMASVDNPF   | 16272 | >EGFR-C775\VMASVDNPF   | 16   | 16256 |
| >EGFR-C775\VMASVDNPF   | 3789  | >EGFR-C775\VMASVDNPF   | 5    | 3784  |
| >EGFR-C775\VMASVDNPF   | 24813 | >EGFR-C775\VMASVDNPF   | 75   | 24738 |
| >EGFR-C775\VMASVDNPF   | 9283  | >EGFR-C775\VMASVDNPF   | 46   | 9237  |
| >EGFR-C775\VMASVDNPF   | 16896 | >EGFR-C775\VMASVDNPF   | 53   | 16843 |
| >EGFR-C775\VMASVDNPF   | 4438  | >EGFR-C775\VMASVDNPF   | 23   | 4415  |
| >EGFR-C775\VMASVDNPF   | 12913 | >EGFR-C775\VMASVDNPF   | 163  | 12750 |
| >EGFR-C775\VMASVDNPF   | 9670  | >EGFR-C775\VMASVDNPF   | 138  | 9532  |
| >EGFR-C775\HVCRLGI     | 1625  | >EGFR-C775\HVYRLLGI    | 94   | 1531  |
| >EGFR-C775\HVCRLGI     | 720   | >EGFR-C775\HVYRLLGI    | 104  | 616   |
| >EGFR-C775\HVCRLGI     | 5296  | >EGFR-C775\HVYRLLGI    | 465  | 4831  |
| >EGFR-C775\HVCRLGI     | 804   | >EGFR-C775\HVYRLLGI    | 266  | 538   |
| >EGFR-C775\HVCRLGI     | 1639  | >EGFR-C775\HVYRLLGI    | 206  | 1433  |

|                       |       |                       |     |       |
|-----------------------|-------|-----------------------|-----|-------|
| >EGFR-C775\HVCRLG     | 1031  | >EGFR-C775\HVYRLLGI   | 127 | 904   |
| >EGFR-C775\HVCRLG     | 2981  | >EGFR-C775\HVYRLLGI   | 61  | 2920  |
| >EGFR-C775\HVCRLG     | 870   | >EGFR-C775\HVYRLLGI   | 242 | 628   |
| >EGFR-C775\NPHVCRL    | 65    | >EGFR-C775\NPHVYRLL   | 95  | 30    |
| >EGFR-C775\NPHVCRL    | 1920  | >EGFR-C775\NPHVYRLL   | 446 | 1474  |
| >EGFR-C775\NPHVCRLGI  | 1176  | >EGFR-C775\NPHVYRLLGI | 490 | 686   |
| >EGFR-C775\VDNPHVCR   | 3291  | >EGFR-C775\VDNPHVYR   | 329 | 2962  |
| >EGFR-C775\VDNPHVCRL  | 538   | >EGFR-C775\VDNPHVYRL  | 281 | 257   |
| >EGFR-C775\VDNPHVCRLI | 719   | >EGFR-C775\VDNPHVYRLI | 488 | 231   |
| >EGFR-C775\SVDNPHVC   | 18538 | >EGFR-C775\SVDNPHVY   | 92  | 18446 |
| >EGFR-C775\SVDNPHVCRI | 75    | >EGFR-C775\SVDNPHVYRI | 37  | 38    |
| >EGFR-C775\SVDNPHVCRI | 1156  | >EGFR-C775\SVDNPHVYRI | 315 | 841   |
| >EGFR-C775\SVDNPHVCRI | 449   | >EGFR-C775\SVDNPHVYRI | 514 | 65    |
| >EGFR-C775\SVDNPHVCRI | 204   | >EGFR-C775\SVDNPHVYRI | 381 | 177   |
| >EGFR-C775\SVDNPHVC   | 23436 | >EGFR-C775\SVDNPHVY   | 436 | 23000 |
| >EGFR-C775\SVDNPHVCR  | 184   | >EGFR-C775\SVDNPHVYR  | 48  | 136   |
| >EGFR-C775\SVDNPHVC   | 23542 | >EGFR-C775\SVDNPHVY   | 328 | 23214 |
| >EGFR-C775\SVDNPHVC   | 21804 | >EGFR-C775\SVDNPHVY   | 154 | 21650 |
| >EGFR-C775\SVDNPHVCR  | 237   | >EGFR-C775\SVDNPHVYR  | 23  | 214   |
| >EGFR-C775\SVDNPHVCR  | 1972  | >EGFR-C775\SVDNPHVYR  | 479 | 1493  |
| >EGFR-C775\SVDNPHVCR  | 118   | >EGFR-C775\SVDNPHVYR  | 60  | 58    |
| >EGFR-C775\SVDNPHVCRI | 627   | >EGFR-C775\SVDNPHVYRI | 192 | 435   |
| >EGFR-C775\SVDNPHVC   | 25377 | >EGFR-C775\SVDNPHVY   | 133 | 25244 |
| >EGFR-C775\SVDNPHVC   | 38245 | >EGFR-C775\SVDNPHVY   | 398 | 37847 |
| >EGFR-C775\SVDNPHVCR  | 7244  | >EGFR-C775\SVDNPHVYR  | 315 | 6929  |
| >EGFR-C775\ASVDNPHVCI | 300   | >EGFR-C775\ASVDNPHVYI | 42  | 258   |
| >EGFR-C775\ASVDNPHVC  | 13806 | >EGFR-C775\ASVDNPHVY  | 23  | 13783 |
| >EGFR-C775\ASVDNPHVCI | 389   | >EGFR-C775\ASVDNPHVYI | 150 | 239   |
| >EGFR-C775\ASVDNPHVC  | 23589 | >EGFR-C775\ASVDNPHVY  | 82  | 23507 |
| >EGFR-C775\ASVDNPHVC  | 14293 | >EGFR-C775\ASVDNPHVY  | 24  | 14269 |
| >EGFR-C775\ASVDNPHVCI | 113   | >EGFR-C775\ASVDNPHVYI | 64  | 49    |
| >EGFR-C775\ASVDNPHVCI | 423   | >EGFR-C775\ASVDNPHVYI | 25  | 398   |
| >EGFR-C775\ASVDNPHVC  | 17700 | >EGFR-C775\ASVDNPHVY  | 231 | 17469 |
| >EGFR-C775\ASVDNPHVC  | 12828 | >EGFR-C775\ASVDNPHVY  | 126 | 12702 |
| >EGFR-C775\ASVDNPHVC  | 5346  | >EGFR-C775\ASVDNPHVY  | 4   | 5342  |
| >EGFR-C775\ASVDNPHVCI | 6     | >EGFR-C775\ASVDNPHVYI | 7   | 1     |
| >EGFR-C775\ASVDNPHVC  | 9546  | >EGFR-C775\ASVDNPHVY  | 116 | 9430  |
| >EGFR-C775\ASVDNPHVCI | 1837  | >EGFR-C775\ASVDNPHVYI | 432 | 1405  |
| >EGFR-C775\ASVDNPHVC  | 7331  | >EGFR-C775\ASVDNPHVY  | 421 | 6910  |
| >EGFR-C775\ASVDNPHVCI | 154   | >EGFR-C775\ASVDNPHVYI | 106 | 48    |
| >EGFR-C775\ASVDNPHVCI | 1271  | >EGFR-C775\ASVDNPHVYI | 477 | 794   |
| >EGFR-C775\ASVDNPHVCI | 3035  | >EGFR-C775\ASVDNPHVYI | 285 | 2750  |
| >EGFR-C775\MASVDNPHV  | 31650 | >EGFR-C775\MASVDNPHV  | 222 | 31428 |



|                       |       |                       |     |       |
|-----------------------|-------|-----------------------|-----|-------|
| >EGFR-C775\MASVDNPHV  | 74    | >EGFR-C775\MASVDNPHV  | 18  | 56    |
| >EGFR-C775\MASVDNPHV  | 268   | >EGFR-C775\MASVDNPHV  | 85  | 183   |
| >EGFR-C775\MASVDNPHV  | 9     | >EGFR-C775\MASVDNPHV  | 5   | 4     |
| >EGFR-C775\MASVDNPHV  | 18466 | >EGFR-C775\MASVDNPHV  | 275 | 18191 |
| >EGFR-C775\MASVDNPHV  | 14229 | >EGFR-C775\MASVDNPHV  | 197 | 14032 |
| >EGFR-C775\MASVDNPHV  | 17819 | >EGFR-C775\MASVDNPHV  | 34  | 17785 |
| >EGFR-C775\MASVDNPHV  | 3952  | >EGFR-C775\MASVDNPHV  | 38  | 3914  |
| >EGFR-C775\MASVDNPHV  | 3297  | >EGFR-C775\MASVDNPHV  | 285 | 3012  |
| >EGFR-C797\CLLDYVRE   | 5026  | >EGFR-C797\YLLDYVRE   | 78  | 4948  |
| >EGFR-C797\CLLDYVREH  | 4523  | >EGFR-C797\YLLDYVREH  | 61  | 4462  |
| >EGFR-C797\CLLDYVREHK | 3891  | >EGFR-C797\YLLDYVREHK | 87  | 3804  |
| >EGFR-C797\CLLDYVREHK | 5498  | >EGFR-C797\YLLDYVREHK | 128 | 5370  |
| >EGFR-C797\CLLDYVRE   | 5335  | >EGFR-C797\YLLDYVRE   | 41  | 5294  |
| >EGFR-C797\CLLDYVREH  | 12038 | >EGFR-C797\YLLDYVREH  | 264 | 11774 |
| >EGFR-C797\CLLDYVREHK | 4944  | >EGFR-C797\YLLDYVREHK | 44  | 4900  |
| >EGFR-C797\CLLDYVREHK | 8458  | >EGFR-C797\YLLDYVREHK | 111 | 8347  |
| >EGFR-C797\CLLDYVREHK | 74    | >EGFR-C797\YLLDYVREHK | 65  | 9     |
| >EGFR-C797\CLLDYVREHK | 144   | >EGFR-C797\YLLDYVREHK | 143 | 1     |
| >EGFR-C797\CLLDYVREHK | 2021  | >EGFR-C797\YLLDYVREHK | 467 | 1554  |
| >EGFR-C797\GCLLDYVR   | 1847  | >EGFR-C797\GYLLDYVR   | 108 | 1739  |
| >EGFR-C797\GCLLDYVR   | 7546  | >EGFR-C797\GYLLDYVR   | 424 | 7122  |
| >EGFR-C797\GCLLDYVR   | 361   | >EGFR-C797\GYLLDYVR   | 40  | 321   |
| >EGFR-C797\QLITQLMPFG | 20248 | >EGFR-C797\QLITQLMPFG | 69  | 20179 |
| >EGFR-C797\QLITQLMPFG | 31787 | >EGFR-C797\QLITQLMPFG | 230 | 31557 |
| >EGFR-C797\QLITQLMPFG | 16279 | >EGFR-C797\QLITQLMPFG | 16  | 16263 |
| >EGFR-C797\QLITQLMPFG | 27346 | >EGFR-C797\QLITQLMPFG | 300 | 27046 |
| >EGFR-C797\QLITQLMPFG | 24345 | >EGFR-C797\QLITQLMPFG | 21  | 24324 |
| >EGFR-C797\QLITQLMPFG | 18115 | >EGFR-C797\QLITQLMPFG | 492 | 17623 |
| >EGFR-C797\FGCLLDYV   | 218   | >EGFR-C797\FGYLLDYV   | 58  | 160   |
| >EGFR-C797\FGCLLDYV   | 151   | >EGFR-C797\FGYLLDYV   | 35  | 116   |
| >EGFR-C797\FGCLLDYV   | 862   | >EGFR-C797\FGYLLDYV   | 70  | 792   |
| >EGFR-C797\FGCLLDYV   | 3018  | >EGFR-C797\FGYLLDYV   | 70  | 2948  |
| >EGFR-C797\FGCLLDYVR  | 542   | >EGFR-C797\FGYLLDYVR  | 148 | 394   |
| >EGFR-C797\FGCLLDYV   | 1571  | >EGFR-C797\FGYLLDYV   | 296 | 1275  |
| >EGFR-C797\FGCLLDYVR  | 78    | >EGFR-C797\FGYLLDYVR  | 46  | 32    |
| >EGFR-C797\PFGLLDY    | 31    | >EGFR-C797\PFGLLDY    | 20  | 11    |
| >EGFR-C797\PFGLLDY    | 341   | >EGFR-C797\PFGLLDY    | 237 | 104   |
| >EGFR-C797\PFGLLDYVR  | 35    | >EGFR-C797\PFGLLDYVR  | 56  | 21    |
| >EGFR-C797\MPFGCLLDY  | 79    | >EGFR-C797\MPFGYLLDY  | 451 | 372   |
| >EGFR-C797\MPFGCLLDY\ | 8     | >EGFR-C797\MPFGYLLDY\ | 12  | 4     |
| >EGFR-C797\MPFGCLLDY\ | 203   | >EGFR-C797\MPFGYLLDY\ | 270 | 67    |
| >EGFR-C797\MPFGCLLDY\ | 131   | >EGFR-C797\MPFGYLLDY\ | 119 | 12    |
| >EGFR-C797\MPFGCLLDY\ | 399   | >EGFR-C797\MPFGYLLDY\ | 173 | 226   |

|                        |      |                        |      |      |
|------------------------|------|------------------------|------|------|
| >EGFR-C797\MPPFGCLLDY  | 17   | >EGFR-C797\MPPFGYLLDY  | 12   | 5    |
| >EGFR-C797\MPPFGCLLDY\ | 498  | >EGFR-C797\MPPFGYLLDY\ | 359  | 139  |
| >EGFR-C797\MPPFGCLLDY\ | 425  | >EGFR-C797\MPPFGYLLDY\ | 283  | 142  |
| >EGFR-C797\MPPFGCLLDY\ | 63   | >EGFR-C797\MPPFGYLLDY\ | 39   | 24   |
| >EGFR-C797\MPPFGCLLDY\ | 1122 | >EGFR-C797\MPPFGYLLDY\ | 460  | 662  |
| >EGFR-C797\MPPFGCLLDY\ | 282  | >EGFR-C797\MPPFGYLLDY\ | 94   | 188  |
| >EGFR-C797\MPPFGCLLDY  | 359  | >EGFR-C797\MPPFGYLLDY  | 130  | 229  |
| >EGFR-C797\MPPFGCLLDY  | 480  | >EGFR-C797\MPPFGYLLDY  | 302  | 178  |
| >EGFR-C797\MPPFGCLLDY  | 297  | >EGFR-C797\MPPFGYLLDY  | 258  | 39   |
| >EGFR-C797\MPPFGCLLDY  | 8    | >EGFR-C797\MPPFGYLLDY  | 10   | 2    |
| >EGFR-C797\MPPFGCLLDY\ | 80   | >EGFR-C797\MPPFGYLLDY\ | 86   | 6    |
| >EGFR-C797\MPPFGCLLDY  | 13   | >EGFR-C797\MPPFGYLLDY  | 26   | 13   |
| >EGFR-C797\MPPFGCLLD   | 63   | >EGFR-C797\MPPFGYLLD   | 82   | 19   |
| >EGFR-C797\MPPFGCLLDY  | 254  | >EGFR-C797\MPPFGYLLDY  | 1680 | 1426 |
| >EGFR-C797\MPPFGCLLDY\ | 25   | >EGFR-C797\MPPFGYLLDY\ | 13   | 12   |
| >EGFR-C797\MPPFGCLLDY\ | 43   | >EGFR-C797\MPPFGYLLDY\ | 117  | 74   |
| >EGFR-C797\MPPFGCLLDY  | 1087 | >EGFR-C797\MPPFGYLLDY  | 83   | 1004 |
| >EGFR-C797\MPPFGCLLDY  | 95   | >EGFR-C797\MPPFGYLLDY  | 82   | 13   |
| >EGFR-C797\MPPFGCLLDY  | 101  | >EGFR-C797\MPPFGYLLDY  | 39   | 62   |
| >EGFR-C797\MPPFGCLLDY  | 494  | >EGFR-C797\MPPFGYLLDY  | 814  | 320  |
| >EGFR-C797\MPPFGCLLDY\ | 32   | >EGFR-C797\MPPFGYLLDY\ | 58   | 26   |
| >EGFR-C797\LMPFGCLL    | 297  | >EGFR-C797\LMPFGYLL    | 81   | 216  |
| >EGFR-C797\LMPFGCLLDY  | 24   | >EGFR-C797\LMPFGYLLDY  | 23   | 1    |
| >EGFR-C797\LMPFGCLL    | 71   | >EGFR-C797\LMPFGYLL    | 22   | 49   |
| >EGFR-C797\LMPFGCLLDY  | 12   | >EGFR-C797\LMPFGYLLDY  | 10   | 2    |
| >EGFR-C797\LMPFGCLL    | 80   | >EGFR-C797\LMPFGYLL    | 53   | 27   |
| >EGFR-C797\LMPFGCLLDY  | 8    | >EGFR-C797\LMPFGYLLDY  | 7    | 1    |
| >EGFR-C797\LMPFGCLL    | 248  | >EGFR-C797\LMPFGYLL    | 181  | 67   |
| >EGFR-C797\LMPFGCLLDY  | 12   | >EGFR-C797\LMPFGYLLDY  | 14   | 2    |
| >EGFR-C797\LMPFGCLL    | 35   | >EGFR-C797\LMPFGYLL    | 15   | 20   |
| >EGFR-C797\LMPFGCLLDY  | 3    | >EGFR-C797\LMPFGYLLDY  | 3    | 0    |
| >EGFR-C797\LMPFGCLL    | 522  | >EGFR-C797\LMPFGYLL    | 93   | 429  |
| >EGFR-C797\LMPFGCLLDY  | 14   | >EGFR-C797\LMPFGYLLDY  | 9    | 5    |
| >EGFR-C797\LMPFGCLL    | 83   | >EGFR-C797\LMPFGYLL    | 63   | 20   |
| >EGFR-C797\LMPFGCLLDY  | 8    | >EGFR-C797\LMPFGYLLDY  | 7    | 1    |
| >EGFR-C797\LMPFGCLL    | 489  | >EGFR-C797\LMPFGYLL    | 248  | 241  |
| >EGFR-C797\LMPFGCLLDY  | 6    | >EGFR-C797\LMPFGYLLDY  | 6    | 0    |
| >EGFR-C797\LMPFGCLL    | 8    | >EGFR-C797\LMPFGYLL    | 8    | 0    |
| >EGFR-C797\LMPFGCLLDY  | 3    | >EGFR-C797\LMPFGYLLDY  | 3    | 0    |
| >EGFR-C797\LMPFGCLLDY  | 254  | >EGFR-C797\LMPFGYLLDY  | 336  | 82   |
| >EGFR-C797\LMPFGCLLDY  | 689  | >EGFR-C797\LMPFGYLLDY  | 464  | 225  |
| >EGFR-C797\LMPFGCLLDY  | 326  | >EGFR-C797\LMPFGYLLDY  | 221  | 105  |
| >EGFR-C797\LMPFGCLLDY  | 259  | >EGFR-C797\LMPFGYLLDY  | 324  | 65   |

|                       |      |                       |      |      |
|-----------------------|------|-----------------------|------|------|
| >EGFR-C797\LMPFGCLLDY | 592  | >EGFR-C797\LMPFGYLLDY | 377  | 215  |
| >EGFR-C797\LMPFGCLLDY | 97   | >EGFR-C797\LMPFGYLLDY | 53   | 44   |
| >EGFR-C797\LMPFGCLLDY | 117  | >EGFR-C797\LMPFGYLLDY | 112  | 5    |
| >EGFR-C797\LMPFGCLLDY | 596  | >EGFR-C797\LMPFGYLLDY | 329  | 267  |
| >EGFR-C797\LMPFGCLL   | 9    | >EGFR-C797\LMPFGYLL   | 10   | 1    |
| >EGFR-C797\LMPFGCLLDY | 509  | >EGFR-C797\LMPFGYLLDY | 303  | 206  |
| >EGFR-C797\LMPFGCLLDY | 344  | >EGFR-C797\LMPFGYLLDY | 632  | 288  |
| >EGFR-C797\QLMPFGCL   | 2165 | >EGFR-C797\QLMPFGYL   | 380  | 1785 |
| >EGFR-C797\QLMPFGCL   | 215  | >EGFR-C797\QLMPFGYL   | 32   | 183  |
| >EGFR-C797\QLMPFGCLL  | 39   | >EGFR-C797\QLMPFGYLL  | 12   | 27   |
| >EGFR-C797\QLMPFGCL   | 30   | >EGFR-C797\QLMPFGYL   | 6    | 24   |
| >EGFR-C797\QLMPFGCLL  | 8    | >EGFR-C797\QLMPFGYLL  | 3    | 5    |
| >EGFR-C797\QLMPFGCL   | 212  | >EGFR-C797\QLMPFGYL   | 25   | 187  |
| >EGFR-C797\QLMPFGCLL  | 53   | >EGFR-C797\QLMPFGYLL  | 46   | 7    |
| >EGFR-C797\QLMPFGCL   | 201  | >EGFR-C797\QLMPFGYL   | 21   | 180  |
| >EGFR-C797\QLMPFGCLL  | 45   | >EGFR-C797\QLMPFGYLL  | 29   | 16   |
| >EGFR-C797\QLMPFGCL   | 123  | >EGFR-C797\QLMPFGYL   | 10   | 113  |
| >EGFR-C797\QLMPFGCLL  | 17   | >EGFR-C797\QLMPFGYLL  | 15   | 2    |
| >EGFR-C797\QLMPFGCL   | 120  | >EGFR-C797\QLMPFGYL   | 22   | 98   |
| >EGFR-C797\QLMPFGCLL  | 42   | >EGFR-C797\QLMPFGYLL  | 10   | 32   |
| >EGFR-C797\QLMPFGCL   | 485  | >EGFR-C797\QLMPFGYL   | 212  | 273  |
| >EGFR-C797\QLMPFGCLL  | 96   | >EGFR-C797\QLMPFGYLL  | 151  | 55   |
| >EGFR-C797\QLMPFGCL   | 77   | >EGFR-C797\QLMPFGYL   | 18   | 59   |
| >EGFR-C797\QLMPFGCLL  | 37   | >EGFR-C797\QLMPFGYLL  | 15   | 22   |
| >EGFR-C797\QLMPFGCL   | 36   | >EGFR-C797\QLMPFGYL   | 10   | 26   |
| >EGFR-C797\QLMPFGCLL  | 4    | >EGFR-C797\QLMPFGYLL  | 6    | 2    |
| >EGFR-C797\QLMPFGCLLI | 723  | >EGFR-C797\QLMPFGYLLI | 371  | 352  |
| >EGFR-C797\QLMPFGCLLI | 15   | >EGFR-C797\QLMPFGYLLI | 7    | 8    |
| >EGFR-C797\QLMPFGCLLI | 328  | >EGFR-C797\QLMPFGYLLI | 202  | 126  |
| >EGFR-C797\QLMPFGCLL  | 2135 | >EGFR-C797\QLMPFGYLL  | 203  | 1932 |
| >EGFR-C797\QLMPFGCL   | 1232 | >EGFR-C797\QLMPFGYL   | 114  | 1118 |
| >EGFR-C797\QLMPFGCLL  | 1222 | >EGFR-C797\QLMPFGYLL  | 135  | 1087 |
| >EGFR-C797\QLMPFGCL   | 2410 | >EGFR-C797\QLMPFGYL   | 137  | 2273 |
| >EGFR-C797\QLMPFGCLL  | 639  | >EGFR-C797\QLMPFGYLL  | 322  | 317  |
| >EGFR-C797\QLMPFGCLLI | 23   | >EGFR-C797\QLMPFGYLLI | 10   | 13   |
| >EGFR-C797\QLMPFGCLLI | 111  | >EGFR-C797\QLMPFGYLLI | 124  | 13   |
| >EGFR-C797\QLMPFGCLLI | 92   | >EGFR-C797\QLMPFGYLLI | 70   | 22   |
| >EGFR-C797\QLMPFGCLLI | 124  | >EGFR-C797\QLMPFGYLLI | 93   | 31   |
| >EGFR-C797\QLMPFGCLLI | 550  | >EGFR-C797\QLMPFGYLLI | 298  | 252  |
| >EGFR-C797\TQLMPFGCLI | 623  | >EGFR-C797\TQLMPFGYLL | 240  | 383  |
| >EGFR-C797\TQLMPFGC   | 325  | >EGFR-C797\TQLMPFGY   | 2034 | 1709 |
| >EGFR-C797\TQLMPFGCL  | 200  | >EGFR-C797\TQLMPFGYL  | 17   | 183  |
| >EGFR-C797\TQLMPFGCLI | 128  | >EGFR-C797\TQLMPFGYLL | 55   | 73   |

|                       |       |                       |     |       |
|-----------------------|-------|-----------------------|-----|-------|
| >EGFR-C797\TQLMPFGC   | 24473 | >EGFR-C797\TQLMPFGY   | 473 | 24000 |
| >EGFR-C797\TQLMPFGC   | 32716 | >EGFR-C797\TQLMPFGY   | 337 | 32379 |
| >EGFR-C797\TQLMPFGC   | 24659 | >EGFR-C797\TQLMPFGY   | 199 | 24460 |
| >EGFR-C797\TQLMPFGC   | 32253 | >EGFR-C797\TQLMPFGY   | 307 | 31946 |
| >EGFR-C797\TQLMPFGC   | 17753 | >EGFR-C797\TQLMPFGY   | 244 | 17509 |
| >EGFR-C797\TQLMPFGC   | 19607 | >EGFR-C797\TQLMPFGY   | 190 | 19417 |
| >EGFR-C797\TQLMPFGC   | 10890 | >EGFR-C797\TQLMPFGY   | 64  | 10826 |
| >EGFR-C797\TQLMPFGCL  | 581   | >EGFR-C797\TQLMPFGYL  | 425 | 156   |
| >EGFR-C797\TQLMPFGCLI | 251   | >EGFR-C797\TQLMPFGYLL | 220 | 31    |
| >EGFR-C797\TQLMPFGCLI | 420   | >EGFR-C797\TQLMPFGYLL | 213 | 207   |
| >EGFR-C797\TQLMPFGCLI | 1070  | >EGFR-C797\TQLMPFGYLL | 238 | 832   |
| >EGFR-C797\ITQLMPFGC  | 19469 | >EGFR-C797\ITQLMPFGY  | 66  | 19403 |
| >EGFR-C797\ITQLMPFGCL | 2317  | >EGFR-C797\ITQLMPFGYL | 478 | 1839  |
| >EGFR-C797\ITQLMPFGC  | 20716 | >EGFR-C797\ITQLMPFGY  | 59  | 20657 |
| >EGFR-C797\ITQLMPFGC  | 20013 | >EGFR-C797\ITQLMPFGY  | 20  | 19993 |
| >EGFR-C797\ITQLMPFGC  | 24251 | >EGFR-C797\ITQLMPFGY  | 91  | 24160 |
| >EGFR-C797\ITQLMPFGCL | 1587  | >EGFR-C797\ITQLMPFGYL | 362 | 1225  |
| >EGFR-C797\ITQLMPFGC  | 23859 | >EGFR-C797\ITQLMPFGY  | 91  | 23768 |
| >EGFR-C797\ITQLMPFGC  | 5057  | >EGFR-C797\ITQLMPFGY  | 5   | 5052  |
| >EGFR-C797\ITQLMPFGCL | 365   | >EGFR-C797\ITQLMPFGYL | 40  | 325   |
| >EGFR-C797\ITQLMPFGCL | 17    | >EGFR-C797\ITQLMPFGYL | 26  | 9     |
| >EGFR-C797\ITQLMPFGC  | 15588 | >EGFR-C797\ITQLMPFGY  | 351 | 15237 |
| >EGFR-C797\ITQLMPFGCL | 719   | >EGFR-C797\ITQLMPFGYL | 102 | 617   |
| >EGFR-C797\ITQLMPFGCL | 120   | >EGFR-C797\ITQLMPFGYL | 32  | 88    |
| >EGFR-C797\ITQLMPFGC  | 13812 | >EGFR-C797\ITQLMPFGY  | 132 | 13680 |
| >EGFR-C797\ITQLMPFGCL | 187   | >EGFR-C797\ITQLMPFGYL | 40  | 147   |
| >EGFR-C797\ITQLMPFGCL | 132   | >EGFR-C797\ITQLMPFGYL | 79  | 53    |
| >EGFR-C797\LITQLMPFGC | 1263  | >EGFR-C797\LITQLMPFGY | 286 | 977   |
| >EGFR-C797\LITQLMPFGC | 1123  | >EGFR-C797\LITQLMPFGY | 131 | 992   |
| >EGFR-C797\LITQLMPFGC | 3904  | >EGFR-C797\LITQLMPFGY | 342 | 3562  |
| >EGFR-C797\LITQLMPFGC | 623   | >EGFR-C797\LITQLMPFGY | 103 | 520   |
| >EGFR-C797\LITQLMPFGC | 26837 | >EGFR-C797\LITQLMPFGY | 295 | 26542 |
| >EGFR-C797\LITQLMPFGC | 25493 | >EGFR-C797\LITQLMPFGY | 103 | 25390 |
| >EGFR-C797\LITQLMPFGC | 24466 | >EGFR-C797\LITQLMPFGY | 74  | 24392 |
| >EGFR-C797\LITQLMPFGC | 14577 | >EGFR-C797\LITQLMPFGY | 48  | 14529 |
| >EGFR-C818\CVQIAKGMN  | 982   | >EGFR-C818\YVQIAKGMN  | 425 | 557   |
| >EGFR-C818\CVQIAKGMN  | 2867  | >EGFR-C818\YVQIAKGMN  | 213 | 2654  |
| >EGFR-C818\CVQIAKGMN  | 5229  | >EGFR-C818\YVQIAKGMN  | 199 | 5030  |
| >EGFR-C818\CVQIAKGMN  | 10287 | >EGFR-C818\YVQIAKGMN  | 224 | 10063 |
| >EGFR-C818\CVQIAKGMN  | 1098  | >EGFR-C818\YVQIAKGMN  | 260 | 838   |
| >EGFR-C818\CVQIAKGMN  | 329   | >EGFR-C818\YVQIAKGMN  | 242 | 87    |
| >EGFR-C818\CVQIAKGMN  | 1462  | >EGFR-C818\YVQIAKGMN  | 466 | 996   |
| >EGFR-C818\CVQIAKGMN  | 301   | >EGFR-C818\YVQIAKGMN  | 65  | 236   |

|                       |       |                        |      |       |
|-----------------------|-------|------------------------|------|-------|
| >EGFR-C818\CVQIAKGMN  | 3863  | >EGFR-C818\YVQIAKGMN   | 287  | 3576  |
| >EGFR-C818\CVQIAKGMN  | 3277  | >EGFR-C818\YVQIAKGMN   | 172  | 3105  |
| >EGFR-C818\CVQIAKGMN  | 3025  | >EGFR-C818\YVQIAKGMN   | 151  | 2874  |
| >EGFR-C818\CVQIAKGMN  | 969   | >EGFR-C818\YVQIAKGMN   | 108  | 861   |
| >EGFR-C818\CVQIAKGMN  | 9116  | >EGFR-C818\YVQIAKGMN   | 483  | 8633  |
| >EGFR-C818\WCVQIAKGM  | 25570 | >EGFR-C818\WYVQIAKGM   | 115  | 25455 |
| >EGFR-C818\WCVQIAKGM  | 23373 | >EGFR-C818\WYVQIAKGM   | 213  | 23160 |
| >EGFR-C818\WCVQIAKGM  | 249   | >EGFR-C818\WYVQIAKGM   | 306  | 57    |
| >EGFR-C818\WCVQIAKGM  | 610   | >EGFR-C818\WYVQIAKGM   | 32   | 578   |
| >EGFR-C818\WCVQIAKGM  | 454   | >EGFR-C818\WYVQIAKGM   | 218  | 236   |
| >EGFR-C818\WCVQIAKGM  | 176   | >EGFR-C818\WYVQIAKGM   | 1655 | 1479  |
| >EGFR-C818\WCVQIAKGM  | 127   | >EGFR-C818\WYVQIAKGM   | 978  | 851   |
| >EGFR-C818\WCVQIAKGM  | 2926  | >EGFR-C818\WYVQIAKGM   | 265  | 2661  |
| >EGFR-C818\NIGSQYLLNW | 24415 | >EGFR-C818\NIGSQYLLNW  | 178  | 24237 |
| >EGFR-C818\NIGSQYLLNW | 22386 | >EGFR-C818\NIGSQYLLNW  | 308  | 22078 |
| >EGFR-C818\NIGSQYLLNW | 26314 | >EGFR-C818\NIGSQYLLNW  | 164  | 26150 |
| >EGFR-C818\NWCVQIAK   | 292   | >EGFR-C818\NWYVQIAK    | 130  | 162   |
| >EGFR-C818\NWCVQIAK   | 1026  | >EGFR-C818\NWYVQIAK    | 408  | 618   |
| >EGFR-C818\LLNWCVQI   | 39    | >EGFR-C818\LLNWWYVQI   | 33   | 6     |
| >EGFR-C818\LLNWCVQIA  | 168   | >EGFR-C818\LLNWWYVQIA  | 98   | 70    |
| >EGFR-C818\LLNWCVQI   | 20    | >EGFR-C818\LLNWWYVQI   | 13   | 7     |
| >EGFR-C818\LLNWCVQIA  | 58    | >EGFR-C818\LLNWWYVQIA  | 24   | 34    |
| >EGFR-C818\LLNWCVQI   | 12    | >EGFR-C818\LLNWWYVQI   | 8    | 4     |
| >EGFR-C818\LLNWCVQIA  | 7     | >EGFR-C818\LLNWWYVQIA  | 6    | 1     |
| >EGFR-C818\LLNWCVQI   | 659   | >EGFR-C818\LLNWWYVQI   | 468  | 191   |
| >EGFR-C818\LLNWCVQI   | 6     | >EGFR-C818\LLNWWYVQI   | 3    | 3     |
| >EGFR-C818\LLNWCVQIA  | 40    | >EGFR-C818\LLNWWYVQIA  | 7    | 33    |
| >EGFR-C818\LLNWCVQIA† | 971   | >EGFR-C818\LLNWWYVQIA† | 280  | 691   |
| >EGFR-C818\LLNWCVQI   | 100   | >EGFR-C818\LLNWWYVQI   | 56   | 44    |
| >EGFR-C818\LLNWCVQIA  | 231   | >EGFR-C818\LLNWWYVQIA  | 225  | 6     |
| >EGFR-C818\LLNWCVQI   | 28    | >EGFR-C818\LLNWWYVQI   | 18   | 10    |
| >EGFR-C818\LLNWCVQIA  | 98    | >EGFR-C818\LLNWWYVQIA  | 60   | 38    |
| >EGFR-C818\LLNWCVQI   | 14    | >EGFR-C818\LLNWWYVQI   | 12   | 2     |
| >EGFR-C818\LLNWCVQIA  | 68    | >EGFR-C818\LLNWWYVQIA  | 91   | 23    |
| >EGFR-C818\LLNWCVQI   | 3     | >EGFR-C818\LLNWWYVQI   | 3    | 0     |
| >EGFR-C818\LLNWCVQIA  | 4     | >EGFR-C818\LLNWWYVQIA  | 3    | 1     |
| >EGFR-C818\LLNWCVQIA† | 494   | >EGFR-C818\LLNWWYVQIA† | 307  | 187   |
| >EGFR-C818\LLNWCVQIA† | 511   | >EGFR-C818\LLNWWYVQIA† | 331  | 180   |
| >EGFR-C818\LLNWCVQIA† | 42    | >EGFR-C818\LLNWWYVQIA† | 40   | 2     |
| >EGFR-C818\LLNWCVQIA† | 100   | >EGFR-C818\LLNWWYVQIA† | 62   | 38    |
| >EGFR-C818\LLNWCVQIA† | 223   | >EGFR-C818\LLNWWYVQIA† | 398  | 175   |
| >EGFR-C818\LLNWCVQI   | 607   | >EGFR-C818\LLNWWYVQI   | 482  | 125   |
| >EGFR-C818\YLLNWCVQ   | 1146  | >EGFR-C818\YLLNWWYVQ   | 347  | 799   |

|                          |      |                          |     |      |
|--------------------------|------|--------------------------|-----|------|
| >EGFR-C818\YLLNWCVCVQI   | 7    | >EGFR-C818\YLLNWCVCVQI   | 8   | 1    |
| >EGFR-C818\YLLNWCVCVQI/A | 19   | >EGFR-C818\YLLNWCVCVQI/A | 21  | 2    |
| >EGFR-C818\YLLNWCVCVQI   | 32   | >EGFR-C818\YLLNWCVCVQI   | 26  | 6    |
| >EGFR-C818\YLLNWCVCVQI/A | 51   | >EGFR-C818\YLLNWCVCVQI/A | 23  | 28   |
| >EGFR-C818\YLLNWCVCVQI   | 21   | >EGFR-C818\YLLNWCVCVQI   | 13  | 8    |
| >EGFR-C818\YLLNWCVCVQI/A | 23   | >EGFR-C818\YLLNWCVCVQI/A | 18  | 5    |
| >EGFR-C818\YLLNWCVCVQ    | 540  | >EGFR-C818\YLLNWCVCVQ    | 485 | 55   |
| >EGFR-C818\YLLNWCVCVQI   | 12   | >EGFR-C818\YLLNWCVCVQI   | 15  | 3    |
| >EGFR-C818\YLLNWCVCVQI/A | 57   | >EGFR-C818\YLLNWCVCVQI/A | 65  | 8    |
| >EGFR-C818\YLLNWCVCVQ    | 16   | >EGFR-C818\YLLNWCVCVQ    | 9   | 7    |
| >EGFR-C818\YLLNWCVCVQI   | 1    | >EGFR-C818\YLLNWCVCVQI   | 1   | 0    |
| >EGFR-C818\YLLNWCVCVQI/A | 3    | >EGFR-C818\YLLNWCVCVQI/A | 2   | 1    |
| >EGFR-C818\YLLNWCVCVQI/A | 30   | >EGFR-C818\YLLNWCVCVQI/A | 22  | 8    |
| >EGFR-C818\YLLNWCVCVQ    | 200  | >EGFR-C818\YLLNWCVCVQ    | 43  | 157  |
| >EGFR-C818\YLLNWCVCVQI   | 4    | >EGFR-C818\YLLNWCVCVQI   | 3   | 1    |
| >EGFR-C818\YLLNWCVCVQI/A | 6    | >EGFR-C818\YLLNWCVCVQI/A | 4   | 2    |
| >EGFR-C818\YLLNWCVCVQ    | 24   | >EGFR-C818\YLLNWCVCVQ    | 27  | 3    |
| >EGFR-C818\YLLNWCVCVQI   | 4    | >EGFR-C818\YLLNWCVCVQI   | 4   | 0    |
| >EGFR-C818\YLLNWCVCVQI/A | 6    | >EGFR-C818\YLLNWCVCVQI/A | 5   | 1    |
| >EGFR-C818\YLLNWCVCVQI/A | 526  | >EGFR-C818\YLLNWCVCVQI/A | 296 | 230  |
| >EGFR-C818\YLLNWCVCVQ    | 448  | >EGFR-C818\YLLNWCVCVQ    | 245 | 203  |
| >EGFR-C818\YLLNWCVCVQI   | 2    | >EGFR-C818\YLLNWCVCVQI   | 2   | 0    |
| >EGFR-C818\YLLNWCVCVQI/A | 5    | >EGFR-C818\YLLNWCVCVQI/A | 4   | 1    |
| >EGFR-C818\YLLNWCVCVQ    | 6    | >EGFR-C818\YLLNWCVCVQ    | 8   | 2    |
| >EGFR-C818\YLLNWCVCVQI   | 2    | >EGFR-C818\YLLNWCVCVQI   | 2   | 0    |
| >EGFR-C818\YLLNWCVCVQI/A | 2    | >EGFR-C818\YLLNWCVCVQI/A | 2   | 0    |
| >EGFR-C818\YLLNWCVCVQI/A | 52   | >EGFR-C818\YLLNWCVCVQI/A | 46  | 6    |
| >EGFR-C818\YLLNWCVCVQI/A | 79   | >EGFR-C818\YLLNWCVCVQI/A | 70  | 9    |
| >EGFR-C818\YLLNWCVCVQI/A | 83   | >EGFR-C818\YLLNWCVCVQI/A | 48  | 35   |
| >EGFR-C818\YLLNWCVCVQI   | 46   | >EGFR-C818\YLLNWCVCVQI   | 31  | 15   |
| >EGFR-C818\YLLNWCVCVQI   | 1424 | >EGFR-C818\YLLNWCVCVQI   | 292 | 1132 |
| >EGFR-C818\YLLNWCVCVQI   | 1348 | >EGFR-C818\YLLNWCVCVQI   | 142 | 1206 |
| >EGFR-C818\YLLNWCVCVQI   | 65   | >EGFR-C818\YLLNWCVCVQI   | 109 | 44   |
| >EGFR-C818\YLLNWCVCVQI/A | 417  | >EGFR-C818\YLLNWCVCVQI/A | 452 | 35   |
| >EGFR-C818\YLLNWCVCVQI   | 22   | >EGFR-C818\YLLNWCVCVQI   | 11  | 11   |
| >EGFR-C818\YLLNWCVCVQI/A | 1116 | >EGFR-C818\YLLNWCVCVQI/A | 319 | 797  |
| >EGFR-C818\YLLNWCVCVQI   | 288  | >EGFR-C818\YLLNWCVCVQI   | 148 | 140  |
| >EGFR-C818\YLLNWCVCVQI/A | 816  | >EGFR-C818\YLLNWCVCVQI/A | 480 | 336  |
| >EGFR-C818\YLLNWCVCV     | 808  | >EGFR-C818\YLLNWCVCV     | 287 | 521  |
| >EGFR-C818\YLLNWCVCVQ    | 106  | >EGFR-C818\YLLNWCVCVQ    | 308 | 202  |
| >EGFR-C818\YLLNWCVCV     | 2493 | >EGFR-C818\YLLNWCVCV     | 211 | 2282 |
| >EGFR-C818\YLLNWCVCV     | 3506 | >EGFR-C818\YLLNWCVCV     | 360 | 3146 |
| >EGFR-C818\YLLNWCVCV     | 368  | >EGFR-C818\YLLNWCVCV     | 33  | 335  |

|                       |       |                       |      |       |
|-----------------------|-------|-----------------------|------|-------|
| >EGFR-C818\QYLLNWCVQ  | 11    | >EGFR-C818\QYLLNWCVQ  | 8    | 3     |
| >EGFR-C818\QYLLNWCVQ  | 302   | >EGFR-C818\QYLLNWCVQ  | 104  | 198   |
| >EGFR-C818\QYLLNWCV   | 512   | >EGFR-C818\QYLLNWCV   | 164  | 348   |
| >EGFR-C818\QYLLNWCVQ  | 2752  | >EGFR-C818\QYLLNWCVQ  | 361  | 2391  |
| >EGFR-C818\SQYLLNWCV( | 1026  | >EGFR-C818\SQYLLNWCV( | 356  | 670   |
| >EGFR-C818\SQYLLNWCV( | 52    | >EGFR-C818\SQYLLNWCV( | 84   | 32    |
| >EGFR-C818\SQYLLNWCV  | 19    | >EGFR-C818\SQYLLNWCV  | 8    | 11    |
| >EGFR-C818\SQYLLNWCV( | 221   | >EGFR-C818\SQYLLNWCV( | 192  | 29    |
| >EGFR-C818\SQYLLNWCV  | 85    | >EGFR-C818\SQYLLNWCV  | 15   | 70    |
| >EGFR-C818\SQYLLNWCV( | 601   | >EGFR-C818\SQYLLNWCV( | 367  | 234   |
| >EGFR-C818\SQYLLNWCV  | 559   | >EGFR-C818\SQYLLNWCV  | 45   | 514   |
| >EGFR-C818\SQYLLNWCV( | 570   | >EGFR-C818\SQYLLNWCV( | 277  | 293   |
| >EGFR-C818\SQYLLNWC   | 418   | >EGFR-C818\SQYLLNWC   | 2107 | 1689  |
| >EGFR-C818\SQYLLNWCV  | 6     | >EGFR-C818\SQYLLNWCV  | 3    | 3     |
| >EGFR-C818\SQYLLNWCV( | 51    | >EGFR-C818\SQYLLNWCV( | 45   | 6     |
| >EGFR-C818\SQYLLNWCV  | 30    | >EGFR-C818\SQYLLNWCV  | 3    | 27    |
| >EGFR-C818\SQYLLNWCV( | 264   | >EGFR-C818\SQYLLNWCV( | 78   | 186   |
| >EGFR-C818\SQYLLNWCV  | 21    | >EGFR-C818\SQYLLNWCV  | 6    | 15    |
| >EGFR-C818\SQYLLNWCV  | 10    | >EGFR-C818\SQYLLNWCV  | 6    | 4     |
| >EGFR-C818\SQYLLNWCV( | 254   | >EGFR-C818\SQYLLNWCV( | 132  | 122   |
| >EGFR-C818\SQYLLNWCV  | 999   | >EGFR-C818\SQYLLNWCV  | 164  | 835   |
| >EGFR-C818\SQYLLNWCV  | 375   | >EGFR-C818\SQYLLNWCV  | 51   | 324   |
| >EGFR-C818\SQYLLNWC   | 25628 | >EGFR-C818\SQYLLNWC   | 131  | 25497 |
| >EGFR-C818\SQYLLNWCV( | 165   | >EGFR-C818\SQYLLNWCV( | 197  | 32    |
| >EGFR-C818\SQYLLNWCV  | 4099  | >EGFR-C818\SQYLLNWCV  | 227  | 3872  |
| >EGFR-C818\SQYLLNWC   | 15017 | >EGFR-C818\SQYLLNWC   | 117  | 14900 |
| >EGFR-C818\SQYLLNWC   | 23442 | >EGFR-C818\SQYLLNWC   | 254  | 23188 |
| >EGFR-C818\SQYLLNWC   | 9432  | >EGFR-C818\SQYLLNWC   | 63   | 9369  |
| >EGFR-C818\SQYLLNWCV  | 458   | >EGFR-C818\SQYLLNWCV  | 373  | 85    |
| >EGFR-C818\SQYLLNWCV( | 161   | >EGFR-C818\SQYLLNWCV( | 114  | 47    |
| >EGFR-C818\SQYLLNWCV  | 297   | >EGFR-C818\SQYLLNWCV  | 2087 | 1790  |
| >EGFR-C818\SQYLLNWCV( | 636   | >EGFR-C818\SQYLLNWCV( | 325  | 311   |
| >EGFR-C818\SQYLLNWCV( | 185   | >EGFR-C818\SQYLLNWCV( | 228  | 43    |
| >EGFR-C818\SQYLLNWCV( | 502   | >EGFR-C818\SQYLLNWCV( | 417  | 85    |
| >EGFR-C818\GSQYLLNWC' | 3286  | >EGFR-C818\GSQYLLNWC' | 458  | 2828  |
| >EGFR-C818\GSQYLLNWC' | 1929  | >EGFR-C818\GSQYLLNWC' | 424  | 1505  |
| >EGFR-C818\GSQYLLNWC  | 31381 | >EGFR-C818\GSQYLLNWC  | 209  | 31172 |
| >EGFR-C818\GSQYLLNWC  | 23267 | >EGFR-C818\GSQYLLNWC  | 38   | 23229 |
| >EGFR-C818\GSQYLLNWC  | 26654 | >EGFR-C818\GSQYLLNWC  | 244  | 26410 |
| >EGFR-C818\GSQYLLNWC  | 1563  | >EGFR-C818\GSQYLLNWC  | 5    | 1558  |
| >EGFR-C818\GSQYLLNWC' | 1216  | >EGFR-C818\GSQYLLNWC' | 162  | 1054  |
| >EGFR-C818\IGSQYLLNWC | 936   | >EGFR-C818\IGSQYLLNWC | 149  | 787   |
| >EGFR-C818\IGSQYLLNWC | 1706  | >EGFR-C818\IGSQYLLNWC | 186  | 1520  |

|                       |       |                       |      |       |
|-----------------------|-------|-----------------------|------|-------|
| >EGFR-C818\IGSQYLLNWC | 3870  | >EGFR-C818\IGSQYLLNWC | 310  | 3560  |
| >EGFR-C818\IGSQYLLNWC | 31691 | >EGFR-C818\IGSQYLLNWC | 405  | 31286 |
| >EGFR-C818\IGSQYLLNWC | 24749 | >EGFR-C818\IGSQYLLNWC | 406  | 24343 |
| >EGFR-D101;VDADEYLI   | 290   | >EGFR-D101;VHADEYLI   | 9884 | 9594  |
| >EGFR-D101;VDADEYLI   | 25    | >EGFR-D101;VHADEYLI   | 4522 | 4497  |
| >EGFR-D101;VVDADEYL   | 354   | >EGFR-D101;VVHADEYL   | 379  | 25    |
| >EGFR-D101;VVDADEYL   | 237   | >EGFR-D101;VVHADEYL   | 945  | 708   |
| >EGFR-D101;VVDADEYL   | 223   | >EGFR-D101;VVHADEYL   | 410  | 187   |
| >EGFR-D101;VVDADEYL   | 946   | >EGFR-D101;VVHADEYL   | 485  | 461   |
| >EGFR-D101;DVVDADEY   | 34    | >EGFR-D101;DVVHADEY   | 119  | 85    |
| >EGFR-D101;DVVDADEY   | 7     | >EGFR-D101;DVVHADEY   | 9    | 2     |
| >EGFR-D101;DVVDADEYL  | 34    | >EGFR-D101;DVVHADEYL  | 55   | 21    |
| >EGFR-D101;DVVDADEY   | 450   | >EGFR-D101;DVVHADEY   | 500  | 50    |
| >EGFR-D101;DVVDADEY   | 264   | >EGFR-D101;DVVHADEY   | 462  | 198   |
| >EGFR-D101;DVVDADEYL  | 13    | >EGFR-D101;DVVHADEYL  | 17   | 4     |
| >EGFR-D101;DVVDADEYLI | 313   | >EGFR-D101;DVVHADEYLI | 373  | 60    |
| >EGFR-D101;DVVDADEYL  | 457   | >EGFR-D101;DVVHADEYL  | 2664 | 2207  |
| >EGFR-D101;DVVDADEY   | 73    | >EGFR-D101;DVVHADEY   | 80   | 7     |
| >EGFR-D101;DDVVDADEY  | 43    | >EGFR-D101;DDVVHADEY  | 40   | 3     |
| >EGFR-D101;DMDDVVDAI  | 107   | >EGFR-D101;DMDDVVHAI  | 68   | 39    |
| >EGFR-D101;DMDDVVDA   | 250   | >EGFR-D101;DMDDVVHA   | 46   | 204   |
| >EGFR-D101;DMDDVVDA   | 2112  | >EGFR-D101;DMDDVVHA   | 381  | 1731  |
| >EGFR-D101;DMDDVVDA   | 158   | >EGFR-D101;DMDDVVHA   | 42   | 116   |
| >EGFR-D101;DMDDVVDA   | 660   | >EGFR-D101;DMDDVVHA   | 165  | 495   |
| >EGFR-D101;DMDDVVDA   | 918   | >EGFR-D101;DMDDVVHA   | 231  | 687   |
| >EGFR-D101;DMDDVVDAI  | 829   | >EGFR-D101;DMDDVVHAI  | 469  | 360   |
| >EGFR-D101;DMDDVVDAI  | 364   | >EGFR-D101;DMDDVVHAI  | 359  | 5     |
| >EGFR-D101;EEDMDDVV   | 408   | >EGFR-D101;EEDMDDVVF  | 435  | 27    |
| >EGFR-D256;DEATCKDT   | 12042 | >EGFR-D256;AEATCKDT   | 163  | 11879 |
| >EGFR-D256;DEATCKDTCF | 6143  | >EGFR-D256;AEATCKDTCF | 421  | 5722  |
| >EGFR-D256;DEATCKDTC  | 12742 | >EGFR-D256;AEATCKDTC  | 318  | 12424 |
| >EGFR-D256;FRDEATCK   | 827   | >EGFR-D256;FRAEATCK   | 99   | 728   |
| >EGFR-D256;KFRDEATC   | 1270  | >EGFR-D256;KFRAEATC   | 378  | 892   |
| >EGFR-D256;KFRDEATCK  | 13    | >EGFR-D256;KFRAEATCK  | 8    | 5     |
| >EGFR-D256;KFRDEATCK  | 793   | >EGFR-D256;KFRAEATCK  | 479  | 314   |
| >EGFR-D256;RKFRDEAT   | 218   | >EGFR-D256;RKFRAEAT   | 123  | 95    |
| >EGFR-D256;RKFRDEATC  | 187   | >EGFR-D256;RKFRAEATC  | 177  | 10    |
| >EGFR-D256;RKFRDEATCK | 35    | >EGFR-D256;RKFRAEATCK | 26   | 9     |
| >EGFR-D256;VCRKFRDEA  | 2016  | >EGFR-D256;VCRKFRAEA  | 114  | 1902  |
| >EGFR-D256;CLVCRKFRDE | 1357  | >EGFR-D256;CLVCRKFRAE | 387  | 970   |
| >EGFR-D256;CLVCRKFRDE | 1913  | >EGFR-D256;CLVCRKFRAE | 487  | 1426  |
| >EGFR-D46N DHFLSLQR   | 361   | >EGFR-D46N NHFLSLQR   | 541  | 180   |
| >EGFR-D46N DHFLSLQRMI | 318   | >EGFR-D46N NHFLSLQRMI | 74   | 244   |



|                       |      |                       |     |      |
|-----------------------|------|-----------------------|-----|------|
| >EGFR-D46N DHFSLSLQRM | 902  | >EGFR-D46N NHFSLSLQRM | 464 | 438  |
| >EGFR-D46N DHFSLSLQR  | 1083 | >EGFR-D46N NHFSLSLQR  | 329 | 754  |
| >EGFR-D46N EDHFSLSLQR | 174  | >EGFR-D46N ENHFSLSLQR | 39  | 135  |
| >EGFR-D46N FEDHFLSL   | 52   | >EGFR-D46N FENHFLSL   | 58  | 6    |
| >EGFR-D46N FEDHFLSLQ  | 1397 | >EGFR-D46N FENHFLSLQ  | 395 | 1002 |
| >EGFR-D46N FEDHFLSLQR | 206  | >EGFR-D46N FENHFLSLQR | 62  | 144  |
| >EGFR-D46N FEDHFLSL   | 1263 | >EGFR-D46N FENHFLSL   | 388 | 875  |
| >EGFR-D46N FEDHFLSL   | 86   | >EGFR-D46N FENHFLSL   | 198 | 112  |
| >EGFR-D46N FEDHFLSL   | 3129 | >EGFR-D46N FENHFLSL   | 126 | 3003 |
| >EGFR-D46N FEDHFLSLQR | 6643 | >EGFR-D46N FENHFLSLQR | 430 | 6213 |
| >EGFR-D46N FEDHFLSL   | 518  | >EGFR-D46N FENHFLSL   | 169 | 349  |
| >EGFR-D46N FEDHFLSL   | 136  | >EGFR-D46N FENHFLSL   | 381 | 245  |
| >EGFR-D46N FEDHFLSL   | 13   | >EGFR-D46N FENHFLSL   | 18  | 5    |
| >EGFR-D46N FEDHFLSLQR | 286  | >EGFR-D46N FENHFLSLQR | 601 | 315  |
| >EGFR-D46N FEDHFLSL   | 40   | >EGFR-D46N FENHFLSL   | 14  | 26   |
| >EGFR-D46N FEDHFLSLQR | 501  | >EGFR-D46N FENHFLSLQR | 416 | 85   |
| >EGFR-D46N FEDHFLSLQR | 772  | >EGFR-D46N FENHFLSLQR | 156 | 616  |
| >EGFR-D46N FEDHFLSL   | 1803 | >EGFR-D46N FENHFLSL   | 383 | 1420 |
| >EGFR-D46N FEDHFLSLQR | 72   | >EGFR-D46N FENHFLSLQR | 41  | 31   |
| >EGFR-D46N TFEDHFLSL  | 810  | >EGFR-D46N TFENHFLSL  | 454 | 356  |
| >EGFR-D46N TFEDHFLSL  | 689  | >EGFR-D46N TFENHFLSL  | 236 | 453  |
| >EGFR-D46N TFEDHFLSLQ | 169  | >EGFR-D46N TFENHFLSLQ | 103 | 66   |
| >EGFR-D46N TFEDHFLSLQ | 473  | >EGFR-D46N TFENHFLSLQ | 586 | 113  |
| >EGFR-D46N TFEDHFLSLQ | 475  | >EGFR-D46N TFENHFLSLQ | 511 | 36   |
| >EGFR-D46N TFEDHFLSL  | 2053 | >EGFR-D46N TFENHFLSL  | 389 | 1664 |
| >EGFR-D46N TFEDHFLSLQ | 48   | >EGFR-D46N TFENHFLSLQ | 88  | 40   |
| >EGFR-D46N TFEDHFLSL  | 138  | >EGFR-D46N TFENHFLSL  | 149 | 11   |
| >EGFR-D46N GTFEDHFL   | 229  | >EGFR-D46N GTFENHFL   | 194 | 35   |
| >EGFR-D46N GTFEDHFLSL | 205  | >EGFR-D46N GTFENHFLSL | 282 | 77   |
| >EGFR-D46N GTFEDHFL   | 36   | >EGFR-D46N GTFENHFL   | 30  | 6    |
| >EGFR-D46N GTFEDHFLSL | 43   | >EGFR-D46N GTFENHFLSL | 73  | 30   |
| >EGFR-D46N GTFEDHFLSL | 142  | >EGFR-D46N GTFENHFLSL | 113 | 29   |
| >EGFR-D46N GTFEDHFL   | 77   | >EGFR-D46N GTFENHFL   | 78  | 1    |
| >EGFR-D46N GTFEDHFLSL | 124  | >EGFR-D46N GTFENHFLSL | 228 | 104  |
| >EGFR-D46N GTFEDHFL   | 42   | >EGFR-D46N GTFENHFL   | 22  | 20   |
| >EGFR-D46N GTFEDHFLSL | 50   | >EGFR-D46N GTFENHFLSL | 37  | 13   |
| >EGFR-D46N GTFEDHFL   | 113  | >EGFR-D46N GTFENHFL   | 73  | 40   |
| >EGFR-D46N GTFEDHFLSL | 473  | >EGFR-D46N GTFENHFLSL | 288 | 185  |
| >EGFR-D46N GTFEDHFL   | 59   | >EGFR-D46N GTFENHFL   | 81  | 22   |
| >EGFR-D46N GTFEDHFLSL | 346  | >EGFR-D46N GTFENHFLSL | 458 | 112  |
| >EGFR-D46N GTFEDHFL   | 401  | >EGFR-D46N GTFENHFL   | 284 | 117  |
| >EGFR-D46N GTFEDHFLSL | 499  | >EGFR-D46N GTFENHFLSL | 549 | 50   |
| >EGFR-D46N GTFEDHFLSL | 69   | >EGFR-D46N GTFENHFLSL | 38  | 31   |

|                        |      |                        |       |       |
|------------------------|------|------------------------|-------|-------|
| >EGFR-D46N GTFEDHFLSLI | 514  | >EGFR-D46N GTFENHFLSLI | 327   | 187   |
| >EGFR-D46N GTFEDHFL    | 392  | >EGFR-D46N GTFENHFL    | 186   | 206   |
| >EGFR-D46N GTFEDHFLSL  | 472  | >EGFR-D46N GTFENHFLSL  | 422   | 50    |
| >EGFR-D46N GTFEDHFL    | 1124 | >EGFR-D46N GTFENHFL    | 335   | 789   |
| >EGFR-D46N GTFEDHFL    | 43   | >EGFR-D46N GTFENHFL    | 26    | 17    |
| >EGFR-D46N GTFEDHFLSL  | 18   | >EGFR-D46N GTFENHFLSL  | 13    | 5     |
| >EGFR-D46N GTFEDHFL    | 1804 | >EGFR-D46N GTFENHFL    | 458   | 1346  |
| >EGFR-D46N GTFEDHFLSL  | 188  | >EGFR-D46N GTFENHFLSL  | 115   | 73    |
| >EGFR-D46N GTFEDHFLSL  | 678  | >EGFR-D46N GTFENHFLSL  | 315   | 363   |
| >EGFR-D46N GTFEDHFLSLI | 50   | >EGFR-D46N GTFENHFLSLI | 71    | 21    |
| >EGFR-D46N GTFEDHFL    | 636  | >EGFR-D46N GTFENHFL    | 499   | 137   |
| >EGFR-D46N GTFEDHFLS   | 310  | >EGFR-D46N GTFENHFLS   | 219   | 91    |
| >EGFR-D46N GTFEDHFLSL  | 183  | >EGFR-D46N GTFENHFLSL  | 153   | 30    |
| >EGFR-D46N GTFEDHFLSLI | 468  | >EGFR-D46N GTFENHFLSLI | 381   | 87    |
| >EGFR-D46N GTFEDHFL    | 261  | >EGFR-D46N GTFENHFL    | 321   | 60    |
| >EGFR-D46N QLGTEDHFL   | 310  | >EGFR-D46N QLGTEDHFL   | 356   | 46    |
| >EGFR-D46N QLGTEDHFL   | 19   | >EGFR-D46N QLGTEDHFL   | 24    | 5     |
| >EGFR-D46N QLGTEDHFL   | 563  | >EGFR-D46N QLGTEDHFL   | 350   | 213   |
| >EGFR-D46N QLGTEDHFL   | 234  | >EGFR-D46N QLGTEDHFL   | 193   | 41    |
| >EGFR-D46N QLGTEDHFL   | 143  | >EGFR-D46N QLGTEDHFL   | 134   | 9     |
| >EGFR-D46N QLGTEDHFL   | 197  | >EGFR-D46N QLGTEDHFL   | 306   | 109   |
| >EGFR-D46N QLGTEDHFL   | 317  | >EGFR-D46N QLGTEDHFL   | 146   | 171   |
| >EGFR-D46N QLGTEDHFL   | 47   | >EGFR-D46N QLGTEDHFL   | 30    | 17    |
| >EGFR-D46N QLGTEDHF    | 1186 | >EGFR-D46N QLGTEDHF    | 347   | 839   |
| >EGFR-D46N TQLGTEDHF   | 833  | >EGFR-D46N TQLGTEDHF   | 395   | 438   |
| >EGFR-D46N TQLGTEDHF   | 434  | >EGFR-D46N TQLGTEDHF   | 202   | 232   |
| >EGFR-D46N TQLGTEDHF   | 13   | >EGFR-D46N TQLGTEDHF   | 9     | 4     |
| >EGFR-D46N TQLGTEDHF   | 806  | >EGFR-D46N TQLGTEDHF   | 465   | 341   |
| >EGFR-D46N TQLGTEDHF   | 261  | >EGFR-D46N TQLGTEDHF   | 157   | 104   |
| >EGFR-D46N TQLGTEDHF   | 37   | >EGFR-D46N TQLGTEDHF   | 15    | 22    |
| >EGFR-D46N TQLGTEDHF   | 96   | >EGFR-D46N TQLGTEDHF   | 44    | 52    |
| >EGFR-D46N LTQLGTEDH   | 323  | >EGFR-D46N LTQLGTEDH   | 355   | 32    |
| >EGFR-D46N LTQLGTEDH   | 534  | >EGFR-D46N LTQLGTEDH   | 325   | 209   |
| >EGFR-D46N LTQLGTEDH   | 23   | >EGFR-D46N LTQLGTEDH   | 19    | 4     |
| >EGFR-D46N LTQLGTEDH   | 138  | >EGFR-D46N LTQLGTEDH   | 177   | 39    |
| >EGFR-D46N LTQLGTEDH   | 209  | >EGFR-D46N LTQLGTEDH   | 111   | 98    |
| >EGFR-D761I(DEAYVMASV  | 25   | >EGFR-D761I(GEAYVMASV  | 28    | 3     |
| >EGFR-D761I(DEAYVMASV  | 64   | >EGFR-D761I(GEAYVMASV  | 2787  | 2723  |
| >EGFR-D761I(DEAYVMAS   | 98   | >EGFR-D761I(GEAYVMAS   | 10707 | 10609 |
| >EGFR-D761I(DEAYVMASV  | 43   | >EGFR-D761I(GEAYVMASV  | 7789  | 7746  |
| >EGFR-D761I(DEAYVMASV  | 1670 | >EGFR-D761I(GEAYVMASV  | 34    | 1636  |
| >EGFR-D761I(DEAYVMAS   | 2751 | >EGFR-D761I(GEAYVMAS   | 168   | 2583  |
| >EGFR-D761I(DEAYVMASV  | 985  | >EGFR-D761I(GEAYVMASV  | 55    | 930   |

|                        |      |                        |       |       |
|------------------------|------|------------------------|-------|-------|
| >EGFR-D761(LDEAYVMASV  | 423  | >EGFR-D761(LGEAYVMASV  | 5     | 418   |
| >EGFR-D761(LDEAYVMAS)  | 144  | >EGFR-D761(LGEAYVMAS)  | 12617 | 12473 |
| >EGFR-D761(LILDEAYVM   | 111  | >EGFR-D761(LILGEAYVM   | 473   | 362   |
| >EGFR-D761(LILDEAYVMA  | 38   | >EGFR-D761(LILGEAYVMA  | 150   | 112   |
| >EGFR-D761(LILDEAYVMAS | 11   | >EGFR-D761(LILGEAYVMAS | 20    | 9     |
| >EGFR-D761(LILDEAYVM   | 192  | >EGFR-D761(LILGEAYVM   | 196   | 4     |
| >EGFR-D761(LILDEAYVMA  | 44   | >EGFR-D761(LILGEAYVMA  | 43    | 1     |
| >EGFR-D761(LILDEAYVMAS | 5    | >EGFR-D761(LILGEAYVMAS | 6     | 1     |
| >EGFR-D761(LILDEAYVMA  | 172  | >EGFR-D761(LILGEAYVMA  | 79    | 93    |
| >EGFR-D761(LILDEAYVMAS | 10   | >EGFR-D761(LILGEAYVMAS | 6     | 4     |
| >EGFR-D761(LILDEAYVM   | 334  | >EGFR-D761(LILGEAYVM   | 2051  | 1717  |
| >EGFR-D761(LILDEAYVMA  | 44   | >EGFR-D761(LILGEAYVMA  | 304   | 260   |
| >EGFR-D761(LILDEAYVMAS | 8    | >EGFR-D761(LILGEAYVMAS | 21    | 13    |
| >EGFR-D761(LILDEAYVM   | 17   | >EGFR-D761(LILGEAYVM   | 38    | 21    |
| >EGFR-D761(LILDEAYVMA  | 6    | >EGFR-D761(LILGEAYVMA  | 9     | 3     |
| >EGFR-D761(LILDEAYVMAS | 56   | >EGFR-D761(LILGEAYVMAS | 171   | 115   |
| >EGFR-D761(LILDEAYVMAS | 2    | >EGFR-D761(LILGEAYVMAS | 2     | 0     |
| >EGFR-D761(LILDEAYVM   | 31   | >EGFR-D761(LILGEAYVM   | 69    | 38    |
| >EGFR-D761(LILDEAYVMA  | 63   | >EGFR-D761(LILGEAYVMA  | 149   | 86    |
| >EGFR-D761(LILDEAYVMAS | 3    | >EGFR-D761(LILGEAYVMAS | 4     | 1     |
| >EGFR-D761(LILDEAYVM   | 76   | >EGFR-D761(LILGEAYVM   | 228   | 152   |
| >EGFR-D761(LILDEAYVMA  | 11   | >EGFR-D761(LILGEAYVMA  | 21    | 10    |
| >EGFR-D761(LILDEAYVMAS | 5    | >EGFR-D761(LILGEAYVMAS | 6     | 1     |
| >EGFR-D761(LILDEAYVM   | 31   | >EGFR-D761(LILGEAYVM   | 43    | 12    |
| >EGFR-D761(LILDEAYVMA  | 43   | >EGFR-D761(LILGEAYVMA  | 80    | 37    |
| >EGFR-D761(LILDEAYVMAS | 3    | >EGFR-D761(LILGEAYVMAS | 3     | 0     |
| >EGFR-D761(LILDEAYVM   | 77   | >EGFR-D761(LILGEAYVM   | 52    | 25    |
| >EGFR-D761(LILDEAYVMA  | 8    | >EGFR-D761(LILGEAYVMA  | 6     | 2     |
| >EGFR-D761(LILDEAYVMAS | 726  | >EGFR-D761(LILGEAYVMAS | 460   | 266   |
| >EGFR-D761(LILDEAYVMAS | 2    | >EGFR-D761(LILGEAYVMAS | 2     | 0     |
| >EGFR-D761(LILDEAYVMAS | 82   | >EGFR-D761(LILGEAYVMAS | 399   | 317   |
| >EGFR-D761(LILDEAYVM   | 5343 | >EGFR-D761(LILGEAYVM   | 371   | 4972  |
| >EGFR-D761(LILDEAYV    | 471  | >EGFR-D761(LILGEAYV    | 723   | 252   |
| >EGFR-D761(LILDEAYV    | 100  | >EGFR-D761(LILGEAYV    | 185   | 85    |
| >EGFR-D761(LILDEAYV    | 11   | >EGFR-D761(LILGEAYV    | 15    | 4     |
| >EGFR-D761(LILDEAYV    | 83   | >EGFR-D761(LILGEAYV    | 368   | 285   |
| >EGFR-D761(LILDEAYV    | 24   | >EGFR-D761(LILGEAYV    | 33    | 9     |
| >EGFR-D761(LILDEAYV    | 5    | >EGFR-D761(LILGEAYV    | 8     | 3     |
| >EGFR-D761(LILDEAYVM   | 362  | >EGFR-D761(LILGEAYVM   | 1027  | 665   |
| >EGFR-D761(LILDEAYV    | 11   | >EGFR-D761(LILGEAYV    | 15    | 4     |
| >EGFR-D761(LILDEAYVM   | 39   | >EGFR-D761(LILGEAYVM   | 21    | 18    |
| >EGFR-D761(LILDEAYV    | 34   | >EGFR-D761(LILGEAYV    | 41    | 7     |
| >EGFR-D761(LILDEAYV    | 5    | >EGFR-D761(LILGEAYV    | 6     | 1     |

|                        |      |                        |      |      |
|------------------------|------|------------------------|------|------|
| >EGFR-D761(EILDEAYVM   | 33   | >EGFR-D761(EILGEAYVM   | 135  | 102  |
| >EGFR-D761(EILDEAYVMA  | 16   | >EGFR-D761(EILGEAYVMA  | 44   | 28   |
| >EGFR-D761(KEILDEAY    | 2599 | >EGFR-D761(KEILGEAY    | 171  | 2428 |
| >EGFR-D761(KEILDEAYV   | 841  | >EGFR-D761(KEILGEAYV   | 413  | 428  |
| >EGFR-D761(KEILDEAY    | 1004 | >EGFR-D761(KEILGEAY    | 424  | 580  |
| >EGFR-D761(KEILDEAY    | 256  | >EGFR-D761(KEILGEAY    | 93   | 163  |
| >EGFR-D761(KEILDEAYV   | 310  | >EGFR-D761(KEILGEAYV   | 118  | 192  |
| >EGFR-D761(KEILDEAYVM  | 163  | >EGFR-D761(KEILGEAYVM  | 189  | 26   |
| >EGFR-D761(KEILDEAYVM  | 289  | >EGFR-D761(KEILGEAYVM  | 126  | 163  |
| >EGFR-D761(KEILDEAY    | 363  | >EGFR-D761(KEILGEAY    | 468  | 105  |
| >EGFR-D761(KEILDEAY    | 273  | >EGFR-D761(KEILGEAY    | 244  | 29   |
| >EGFR-D761(KEILDEAYV   | 536  | >EGFR-D761(KEILGEAYV   | 242  | 294  |
| >EGFR-D761(KEILDEAYVM  | 50   | >EGFR-D761(KEILGEAYVM  | 31   | 19   |
| >EGFR-D761(KEILDEAYV   | 32   | >EGFR-D761(KEILGEAYV   | 14   | 18   |
| >EGFR-D761(KEILDEAYVM  | 15   | >EGFR-D761(KEILGEAYVM  | 25   | 10   |
| >EGFR-D761(KEILDEAYVM  | 468  | >EGFR-D761(KEILGEAYVM  | 206  | 262  |
| >EGFR-D761(NKEILDEAYVI | 676  | >EGFR-D761(NKEILGEAYVI | 444  | 232  |
| >EGFR-D761(ANKEILDEAY  | 848  | >EGFR-D761(ANKEILGEAY  | 496  | 352  |
| >EGFR-D761(KANKEILDEA' | 126  | >EGFR-D761(KANKEILGEA' | 142  | 16   |
| >EGFR-D761(KANKEILDEA' | 385  | >EGFR-D761(KANKEILGEA' | 221  | 164  |
| >EGFR-D761(KANKEILDEA' | 255  | >EGFR-D761(KANKEILGEA' | 163  | 92   |
| >EGFR-D761(KANKEILDEA' | 293  | >EGFR-D761(KANKEILGEA' | 115  | 178  |
| >EGFR-D761(KANKEILDEA' | 140  | >EGFR-D761(KANKEILGEA' | 84   | 56   |
| >EGFR-D761(KANKEILDEA' | 200  | >EGFR-D761(KANKEILGEA' | 410  | 210  |
| >EGFR-D761(KANKEILDEA' | 86   | >EGFR-D761(KANKEILGEA' | 144  | 58   |
| >EGFR-D761(KANKEILDEA' | 473  | >EGFR-D761(KANKEILGEA' | 390  | 83   |
| >EGFR-D761IDEAYVMASV   | 25   | >EGFR-D761INEAYVMASV   | 11   | 14   |
| >EGFR-D761IDEAYVMASV   | 64   | >EGFR-D761INEAYVMASV   | 36   | 28   |
| >EGFR-D761IDEAYVMAS    | 98   | >EGFR-D761INEAYVMAS    | 357  | 259  |
| >EGFR-D761IDEAYVMASV   | 43   | >EGFR-D761INEAYVMASV   | 154  | 111  |
| >EGFR-D761IDEAYVMAS    | 2751 | >EGFR-D761INEAYVMAS    | 200  | 2551 |
| >EGFR-D761IDEAYVMASV   | 985  | >EGFR-D761INEAYVMASV   | 73   | 912  |
| >EGFR-D761IDEAYVMASV   | 423  | >EGFR-D761INEAYVMASV   | 21   | 402  |
| >EGFR-D761ILDEAYVMAS'  | 144  | >EGFR-D761ILNEAYVMAS'  | 5424 | 5280 |
| >EGFR-D761IILDEAYVM    | 111  | >EGFR-D761IILNEAYVM    | 231  | 120  |
| >EGFR-D761IILDEAYVMA   | 38   | >EGFR-D761IILNEAYVMA   | 67   | 29   |
| >EGFR-D761IILDEAYVMAS  | 11   | >EGFR-D761IILNEAYVMAS  | 13   | 2    |
| >EGFR-D761IILDEAYVM    | 192  | >EGFR-D761IILNEAYVM    | 42   | 150  |
| >EGFR-D761IILDEAYVMA   | 44   | >EGFR-D761IILNEAYVMA   | 11   | 33   |
| >EGFR-D761IILDEAYVMAS  | 5    | >EGFR-D761IILNEAYVMAS  | 3    | 2    |
| >EGFR-D761IILDEAYVM    | 3472 | >EGFR-D761IILNEAYVM    | 187  | 3285 |
| >EGFR-D761IILDEAYVMA   | 172  | >EGFR-D761IILNEAYVMA   | 8    | 164  |
| >EGFR-D761IILDEAYVMAS  | 10   | >EGFR-D761IILNEAYVMAS  | 2    | 8    |

|                       |      |                       |      |      |
|-----------------------|------|-----------------------|------|------|
| >EGFR-D761IILDEAYVM   | 334  | >EGFR-D761IILNEAYVM   | 1039 | 705  |
| >EGFR-D761IILDEAYVMA  | 44   | >EGFR-D761IILNEAYVMA  | 115  | 71   |
| >EGFR-D761IILDEAYVMAS | 8    | >EGFR-D761IILNEAYVMAS | 13   | 5    |
| >EGFR-D761IILDEAYVM   | 17   | >EGFR-D761IILNEAYVM   | 29   | 12   |
| >EGFR-D761IILDEAYVMA  | 6    | >EGFR-D761IILNEAYVMA  | 8    | 2    |
| >EGFR-D761IILDEAYVMAS | 56   | >EGFR-D761IILNEAYVMAS | 114  | 58   |
| >EGFR-D761IILDEAYVMAS | 2    | >EGFR-D761IILNEAYVMAS | 2    | 0    |
| >EGFR-D761IILDEAYVM   | 31   | >EGFR-D761IILNEAYVM   | 67   | 36   |
| >EGFR-D761IILDEAYVMA  | 63   | >EGFR-D761IILNEAYVMA  | 154  | 91   |
| >EGFR-D761IILDEAYVMAS | 3    | >EGFR-D761IILNEAYVMAS | 4    | 1    |
| >EGFR-D761IILDEAYVM   | 76   | >EGFR-D761IILNEAYVM   | 260  | 184  |
| >EGFR-D761IILDEAYVMA  | 11   | >EGFR-D761IILNEAYVMA  | 28   | 17   |
| >EGFR-D761IILDEAYVMAS | 5    | >EGFR-D761IILNEAYVMAS | 6    | 1    |
| >EGFR-D761IILDEAYVM   | 31   | >EGFR-D761IILNEAYVM   | 38   | 7    |
| >EGFR-D761IILDEAYVMA  | 43   | >EGFR-D761IILNEAYVMA  | 70   | 27   |
| >EGFR-D761IILDEAYVMAS | 3    | >EGFR-D761IILNEAYVMAS | 3    | 0    |
| >EGFR-D761IILDEAYVM   | 77   | >EGFR-D761IILNEAYVM   | 42   | 35   |
| >EGFR-D761IILDEAYVMA  | 8    | >EGFR-D761IILNEAYVMA  | 6    | 2    |
| >EGFR-D761IILDEAYVMAS | 726  | >EGFR-D761IILNEAYVMAS | 358  | 368  |
| >EGFR-D761IILDEAYVMAS | 2    | >EGFR-D761IILNEAYVMAS | 2    | 0    |
| >EGFR-D761IILDEAYVMAS | 2358 | >EGFR-D761IILNEAYVMAS | 246  | 2112 |
| >EGFR-D761IILDEAYVMAS | 82   | >EGFR-D761IILNEAYVMAS | 198  | 116  |
| >EGFR-D761IILDEAYVM   | 5343 | >EGFR-D761IILNEAYVM   | 217  | 5126 |
| >EGFR-D761IILDEAYVM   | 5816 | >EGFR-D761IILNEAYVM   | 418  | 5398 |
| >EGFR-D761IILDEAYV    | 471  | >EGFR-D761IILNEAYV    | 1648 | 1177 |
| >EGFR-D761IILDEAYV    | 100  | >EGFR-D761IILNEAYV    | 251  | 151  |
| >EGFR-D761IILDEAYV    | 11   | >EGFR-D761IILNEAYV    | 17   | 6    |
| >EGFR-D761IILDEAYV    | 83   | >EGFR-D761IILNEAYV    | 114  | 31   |
| >EGFR-D761IILDEAYV    | 24   | >EGFR-D761IILNEAYV    | 39   | 15   |
| >EGFR-D761IILDEAYV    | 5    | >EGFR-D761IILNEAYV    | 10   | 5    |
| >EGFR-D761IILDEAYVM   | 362  | >EGFR-D761IILNEAYVM   | 1419 | 1057 |
| >EGFR-D761IILDEAYV    | 11   | >EGFR-D761IILNEAYV    | 38   | 27   |
| >EGFR-D761IILDEAYVM   | 39   | >EGFR-D761IILNEAYVM   | 100  | 61   |
| >EGFR-D761IILDEAYV    | 34   | >EGFR-D761IILNEAYV    | 60   | 26   |
| >EGFR-D761IILDEAYV    | 5    | >EGFR-D761IILNEAYV    | 6    | 1    |
| >EGFR-D761IILDEAYVM   | 33   | >EGFR-D761IILNEAYVM   | 125  | 92   |
| >EGFR-D761IILDEAYVMA  | 16   | >EGFR-D761IILNEAYVMA  | 39   | 23   |
| >EGFR-D761IILDEAY     | 1004 | >EGFR-D761IILNEAY     | 372  | 632  |
| >EGFR-D761IILDEAY     | 256  | >EGFR-D761IILNEAY     | 126  | 130  |
| >EGFR-D761IILDEAYV    | 310  | >EGFR-D761IILNEAYV    | 350  | 40   |
| >EGFR-D761IILDEAYVM   | 163  | >EGFR-D761IILNEAYVM   | 143  | 20   |
| >EGFR-D761IILDEAYVM   | 289  | >EGFR-D761IILNEAYVM   | 129  | 160  |
| >EGFR-D761IILDEAY     | 363  | >EGFR-D761IILNEAY     | 364  | 1    |

|                          |       |                          |       |       |
|--------------------------|-------|--------------------------|-------|-------|
| >EGFR-D761I KEILDEAY     | 273   | >EGFR-D761I KEILNEAY     | 210   | 63    |
| >EGFR-D761I KEILDEAYV    | 536   | >EGFR-D761I KEILNEAYV    | 401   | 135   |
| >EGFR-D761I KEILDEAYVM   | 50    | >EGFR-D761I KEILNEAYVM   | 37    | 13    |
| >EGFR-D761I KEILDEAYV    | 32    | >EGFR-D761I KEILNEAYV    | 21    | 11    |
| >EGFR-D761I KEILDEAYVM   | 15    | >EGFR-D761I KEILNEAYVM   | 11    | 4     |
| >EGFR-D761I KEILDEAYVM   | 468   | >EGFR-D761I KEILNEAYVM   | 364   | 104   |
| >EGFR-D761I INKEILDEAYVI | 676   | >EGFR-D761I INKEILNEAYVI | 358   | 318   |
| >EGFR-D761I KANKEILDEA'  | 126   | >EGFR-D761I KANKEILNEA'  | 111   | 15    |
| >EGFR-D761I KANKEILDEA'  | 385   | >EGFR-D761I KANKEILNEA'  | 297   | 88    |
| >EGFR-D761I KANKEILDEA'  | 255   | >EGFR-D761I KANKEILNEA'  | 225   | 30    |
| >EGFR-D761I KANKEILDEA'  | 293   | >EGFR-D761I KANKEILNEA'  | 120   | 173   |
| >EGFR-D761I KANKEILDEA'  | 140   | >EGFR-D761I KANKEILNEA'  | 114   | 26    |
| >EGFR-D761I KANKEILDEA'  | 200   | >EGFR-D761I KANKEILNEA'  | 357   | 157   |
| >EGFR-D761I KANKEILDEA'  | 86    | >EGFR-D761I KANKEILNEA'  | 95    | 9     |
| >EGFR-D761I KANKEILDEA'  | 473   | >EGFR-D761I KANKEILNEA'  | 402   | 71    |
| >EGFR-D761I DEAYVMAS     | 1479  | >EGFR-D761I YEAYVMAS     | 172   | 1307  |
| >EGFR-D761I DEAYVMASV    | 25    | >EGFR-D761I YEAYVMASV    | 10    | 15    |
| >EGFR-D761I DEAYVMASV    | 9783  | >EGFR-D761I YEAYVMASV    | 106   | 9677  |
| >EGFR-D761I DEAYVMASV    | 9781  | >EGFR-D761I YEAYVMASV    | 113   | 9668  |
| >EGFR-D761I DEAYVMASV    | 10804 | >EGFR-D761I YEAYVMASV    | 28    | 10776 |
| >EGFR-D761I DEAYVMASV    | 64    | >EGFR-D761I YEAYVMASV    | 64    | 0     |
| >EGFR-D761I DEAYVMAS     | 98    | >EGFR-D761I YEAYVMAS     | 335   | 237   |
| >EGFR-D761I DEAYVMASV    | 43    | >EGFR-D761I YEAYVMASV    | 157   | 114   |
| >EGFR-D761I DEAYVMASV    | 1670  | >EGFR-D761I YEAYVMASV    | 25    | 1645  |
| >EGFR-D761I DEAYVMASV    | 985   | >EGFR-D761I YEAYVMASV    | 291   | 694   |
| >EGFR-D761I DEAYVMASV    | 423   | >EGFR-D761I YEAYVMASV    | 4     | 419   |
| >EGFR-D761I LDEAYVMAS'   | 12203 | >EGFR-D761I LYEAYVMAS'   | 368   | 11835 |
| >EGFR-D761I LDEAYVMAS'   | 26088 | >EGFR-D761I LYEAYVMAS'   | 437   | 25651 |
| >EGFR-D761I LDEAYVMAS'   | 144   | >EGFR-D761I LYEAYVMAS'   | 19744 | 19600 |
| >EGFR-D761I TSPKANKEIL   | 2961  | >EGFR-D761I TSPKANKEILY  | 293   | 2668  |
| >EGFR-D761I ILDEAYVMA    | 15574 | >EGFR-D761I ILYEAYVMA    | 478   | 15096 |
| >EGFR-D761I ILDEAYVMAS   | 10302 | >EGFR-D761I ILYEAYVMAS'  | 275   | 10027 |
| >EGFR-D761I ILDEAYVM     | 111   | >EGFR-D761I ILYEAYVM     | 38    | 73    |
| >EGFR-D761I ILDEAYVMA    | 38    | >EGFR-D761I ILYEAYVMA    | 18    | 20    |
| >EGFR-D761I ILDEAYVMAS   | 1251  | >EGFR-D761I ILYEAYVMAS   | 371   | 880   |
| >EGFR-D761I ILDEAYVMAS   | 11    | >EGFR-D761I ILYEAYVMAS'  | 9     | 2     |
| >EGFR-D761I ILDEAYVM     | 192   | >EGFR-D761I ILYEAYVM     | 49    | 143   |
| >EGFR-D761I ILDEAYVMA    | 44    | >EGFR-D761I ILYEAYVMA    | 11    | 33    |
| >EGFR-D761I ILDEAYVMAS   | 1246  | >EGFR-D761I ILYEAYVMAS   | 108   | 1138  |
| >EGFR-D761I ILDEAYVMAS   | 5     | >EGFR-D761I ILYEAYVMAS'  | 3     | 2     |
| >EGFR-D761I ILDEAYVM     | 3472  | >EGFR-D761I ILYEAYVM     | 72    | 3400  |
| >EGFR-D761I ILDEAYVMA    | 172   | >EGFR-D761I ILYEAYVMA    | 6     | 166   |
| >EGFR-D761I ILDEAYVMAS   | 3132  | >EGFR-D761I ILYEAYVMAS   | 296   | 2836  |

|                       |      |                        |      |      |
|-----------------------|------|------------------------|------|------|
| >EGFR-D761'ILDEAYVMAS | 10   | >EGFR-D761'ILYEAYVMAS' | 3    | 7    |
| >EGFR-D761'ILDEAYVM   | 334  | >EGFR-D761'ILYEAYVM    | 128  | 206  |
| >EGFR-D761'ILDEAYVMA  | 44   | >EGFR-D761'ILYEAYVMA   | 23   | 21   |
| >EGFR-D761'ILDEAYVMAS | 8    | >EGFR-D761'ILYEAYVMAS' | 7    | 1    |
| >EGFR-D761'ILDEAYVM   | 17   | >EGFR-D761'ILYEAYVM    | 5    | 12   |
| >EGFR-D761'ILDEAYVMA  | 6    | >EGFR-D761'ILYEAYVMA   | 2    | 4    |
| >EGFR-D761'ILDEAYVMAS | 56   | >EGFR-D761'ILYEAYVMAS' | 11   | 45   |
| >EGFR-D761'ILDEAYVMAS | 2    | >EGFR-D761'ILYEAYVMAS' | 1    | 1    |
| >EGFR-D761'ILDEAYVM   | 31   | >EGFR-D761'ILYEAYVM    | 20   | 11   |
| >EGFR-D761'ILDEAYVMA  | 63   | >EGFR-D761'ILYEAYVMA   | 35   | 28   |
| >EGFR-D761'ILDEAYVMAS | 3    | >EGFR-D761'ILYEAYVMAS' | 3    | 0    |
| >EGFR-D761'ILDEAYVM   | 76   | >EGFR-D761'ILYEAYVM    | 29   | 47   |
| >EGFR-D761'ILDEAYVMA  | 11   | >EGFR-D761'ILYEAYVMA   | 8    | 3    |
| >EGFR-D761'ILDEAYVMAS | 5    | >EGFR-D761'ILYEAYVMAS' | 4    | 1    |
| >EGFR-D761'ILDEAYVM   | 31   | >EGFR-D761'ILYEAYVM    | 43   | 12   |
| >EGFR-D761'ILDEAYVMA  | 43   | >EGFR-D761'ILYEAYVMA   | 78   | 35   |
| >EGFR-D761'ILDEAYVMAS | 3    | >EGFR-D761'ILYEAYVMAS' | 3    | 0    |
| >EGFR-D761'ILDEAYVM   | 77   | >EGFR-D761'ILYEAYVM    | 13   | 64   |
| >EGFR-D761'ILDEAYVMA  | 8    | >EGFR-D761'ILYEAYVMA   | 4    | 4    |
| >EGFR-D761'ILDEAYVMAS | 726  | >EGFR-D761'ILYEAYVMAS' | 60   | 666  |
| >EGFR-D761'ILDEAYVMAS | 2    | >EGFR-D761'ILYEAYVMAS' | 2    | 0    |
| >EGFR-D761'ILDEAYVMAS | 2358 | >EGFR-D761'ILYEAYVMAS' | 255  | 2103 |
| >EGFR-D761'ILDEAYVMAS | 82   | >EGFR-D761'ILYEAYVMAS' | 30   | 52   |
| >EGFR-D761'ILDEAYVM   | 5343 | >EGFR-D761'ILYEAYVM    | 108  | 5235 |
| >EGFR-D761'ILDEAYVM   | 9054 | >EGFR-D761'ILYEAYVM    | 481  | 8573 |
| >EGFR-D761'ILDEAYVM   | 5816 | >EGFR-D761'ILYEAYVM    | 60   | 5756 |
| >EGFR-D761'ILDEAYVMAS | 7814 | >EGFR-D761'ILYEAYVMAS' | 123  | 7691 |
| >EGFR-D761'ILDEAYVM   | 1677 | >EGFR-D761'ILYEAYVM    | 357  | 1320 |
| >EGFR-D761'EILDEAYV   | 471  | >EGFR-D761'EILYEAYV    | 909  | 438  |
| >EGFR-D761'EILDEAYV   | 100  | >EGFR-D761'EILYEAYV    | 258  | 158  |
| >EGFR-D761'EILDEAYV   | 11   | >EGFR-D761'EILYEAYV    | 76   | 65   |
| >EGFR-D761'EILDEAYV   | 83   | >EGFR-D761'EILYEAYV    | 326  | 243  |
| >EGFR-D761'EILDEAYV   | 24   | >EGFR-D761'EILYEAYV    | 177  | 153  |
| >EGFR-D761'EILDEAYV   | 5    | >EGFR-D761'EILYEAYV    | 31   | 26   |
| >EGFR-D761'EILDEAYVM  | 362  | >EGFR-D761'EILYEAYVM   | 5493 | 5131 |
| >EGFR-D761'EILDEAYV   | 11   | >EGFR-D761'EILYEAYV    | 180  | 169  |
| >EGFR-D761'EILDEAYVM  | 39   | >EGFR-D761'EILYEAYVM   | 32   | 7    |
| >EGFR-D761'EILDEAYV   | 34   | >EGFR-D761'EILYEAYV    | 32   | 2    |
| >EGFR-D761'EILDEAYV   | 5    | >EGFR-D761'EILYEAYV    | 6    | 1    |
| >EGFR-D761'EILDEAYVM  | 33   | >EGFR-D761'EILYEAYVM   | 231  | 198  |
| >EGFR-D761'EILDEAYVMA | 16   | >EGFR-D761'EILYEAYVMA  | 61   | 45   |
| >EGFR-D761'KEILDEAYV  | 1524 | >EGFR-D761'KEILYEAYV   | 215  | 1309 |
| >EGFR-D761'KEILDEAYV  | 841  | >EGFR-D761'KEILYEAYV   | 275  | 566  |

|                        |       |                        |      |       |
|------------------------|-------|------------------------|------|-------|
| >EGFR-D761'KEILDEAY    | 1004  | >EGFR-D761'KEILYEAY    | 200  | 804   |
| >EGFR-D761'KEILDEAY    | 256   | >EGFR-D761'KEILYEAY    | 74   | 182   |
| >EGFR-D761'KEILDEAYV   | 310   | >EGFR-D761'KEILYEAYV   | 315  | 5     |
| >EGFR-D761'KEILDEAYV   | 1806  | >EGFR-D761'KEILYEAYV   | 314  | 1492  |
| >EGFR-D761'KEILDEAYVM  | 163   | >EGFR-D761'KEILYEAYVM  | 254  | 91    |
| >EGFR-D761'KEILDEAYVM  | 289   | >EGFR-D761'KEILYEAYVM, | 74   | 215   |
| >EGFR-D761'KEILDEAY    | 363   | >EGFR-D761'KEILYEAY    | 272  | 91    |
| >EGFR-D761'KEILDEAY    | 273   | >EGFR-D761'KEILYEAY    | 118  | 155   |
| >EGFR-D761'KEILDEAYV   | 536   | >EGFR-D761'KEILYEAYV   | 92   | 444   |
| >EGFR-D761'KEILDEAYVM  | 50    | >EGFR-D761'KEILYEAYVM, | 17   | 33    |
| >EGFR-D761'KEILDEAYV   | 32    | >EGFR-D761'KEILYEAYV   | 11   | 21    |
| >EGFR-D761'KEILDEAYVM  | 15    | >EGFR-D761'KEILYEAYVM  | 12   | 3     |
| >EGFR-D761'KEILDEAYVM  | 468   | >EGFR-D761'KEILYEAYVM, | 170  | 298   |
| >EGFR-D761'NKEILDEAYVI | 676   | >EGFR-D761'NKEILYEAYVI | 430  | 246   |
| >EGFR-D761'KANKEILD    | 28687 | >EGFR-D761'KANKEILY    | 148  | 28539 |
| >EGFR-D761'KANKEILDEA' | 126   | >EGFR-D761'KANKEILYEA\ | 143  | 17    |
| >EGFR-D761'KANKEILD    | 26145 | >EGFR-D761'KANKEILY    | 64   | 26081 |
| >EGFR-D761'KANKEILDEA' | 385   | >EGFR-D761'KANKEILYEA\ | 288  | 97    |
| >EGFR-D761'KANKEILDEA' | 255   | >EGFR-D761'KANKEILYEA\ | 212  | 43    |
| >EGFR-D761'KANKEILDEA' | 293   | >EGFR-D761'KANKEILYEA\ | 89   | 204   |
| >EGFR-D761'KANKEILD    | 22006 | >EGFR-D761'KANKEILY    | 70   | 21936 |
| >EGFR-D761'KANKEILDEA' | 140   | >EGFR-D761'KANKEILYEA\ | 142  | 2     |
| >EGFR-D761'KANKEILDEA' | 200   | >EGFR-D761'KANKEILYEA\ | 377  | 177   |
| >EGFR-D761'KANKEILD    | 19509 | >EGFR-D761'KANKEILY    | 316  | 19193 |
| >EGFR-D761'KANKEILD    | 17168 | >EGFR-D761'KANKEILY    | 51   | 17117 |
| >EGFR-D761'KANKEILDEA' | 86    | >EGFR-D761'KANKEILYEA\ | 56   | 30    |
| >EGFR-D761'KANKEILDEA' | 473   | >EGFR-D761'KANKEILYEA\ | 330  | 143   |
| >EGFR-D770IDNPHVCRLLC  | 1013  | >EGFR-D770INNPHVCRLLC  | 389  | 624   |
| >EGFR-D770IVDNPHVCRL   | 6275  | >EGFR-D770IVNNPHVCRL   | 406  | 5869  |
| >EGFR-D770IVDNPHVCR    | 3291  | >EGFR-D770IVNNPHVCR    | 352  | 2939  |
| >EGFR-D770ISVDNPHVCRI  | 75    | >EGFR-D770ISVNNPHVCRI  | 142  | 67    |
| >EGFR-D770ISVDNPHVCRI  | 449   | >EGFR-D770ISVNNPHVCRI  | 1398 | 949   |
| >EGFR-D770ISVDNPHVCRI  | 204   | >EGFR-D770ISVNNPHVCRI  | 116  | 88    |
| >EGFR-D770ISVDNPHVCR   | 184   | >EGFR-D770ISVNNPHVCR   | 54   | 130   |
| >EGFR-D770ISVDNPHVCR   | 237   | >EGFR-D770ISVNNPHVCR   | 18   | 219   |
| >EGFR-D770ISVDNPHVCR   | 1972  | >EGFR-D770ISVNNPHVCR   | 354  | 1618  |
| >EGFR-D770ISVDNPHVCR   | 118   | >EGFR-D770ISVNNPHVCR   | 28   | 90    |
| >EGFR-D770ISVDNPHVCRI  | 755   | >EGFR-D770ISVNNPHVCRI  | 355  | 400   |
| >EGFR-D770IASVDNPHV    | 291   | >EGFR-D770IASVNNPHV    | 670  | 379   |
| >EGFR-D770IASVDNPHVCI  | 300   | >EGFR-D770IASVNNPHVCI  | 261  | 39    |
| >EGFR-D770IASVDNPHVCI  | 389   | >EGFR-D770IASVNNPHVCI  | 664  | 275   |
| >EGFR-D770IASVDNPHVCI  | 113   | >EGFR-D770IASVNNPHVCI  | 89   | 24    |
| >EGFR-D770IASVDNPHVCI  | 423   | >EGFR-D770IASVNNPHVCI  | 599  | 176   |



|                       |      |                       |     |      |
|-----------------------|------|-----------------------|-----|------|
| >EGFR-D770IASVDNPHV   | 496  | >EGFR-D770IASVNNPHV   | 850 | 354  |
| >EGFR-D770IASVDNPHVC  | 6    | >EGFR-D770IASVNNPHVC  | 8   | 2    |
| >EGFR-D770IASVDNPHVC  | 154  | >EGFR-D770IASVNNPHVC  | 121 | 33   |
| >EGFR-D770IMASVDNPHV  | 162  | >EGFR-D770IMASVNNPHV  | 239 | 77   |
| >EGFR-D770IMASVDNPHV  | 162  | >EGFR-D770IMASVNNPHV  | 114 | 48   |
| >EGFR-D770IMASVDNPHV  | 74   | >EGFR-D770IMASVNNPHV  | 36  | 38   |
| >EGFR-D770IMASVDNPHV  | 268  | >EGFR-D770IMASVNNPHV  | 308 | 40   |
| >EGFR-D770IMASVDNPHV  | 9    | >EGFR-D770IMASVNNPHV  | 7   | 2    |
| >EGFR-D770IMASVDNPHV  | 258  | >EGFR-D770IMASVNNPHV  | 95  | 163  |
| >EGFR-D770IMASVDNPHV  | 161  | >EGFR-D770IMASVNNPHV  | 95  | 66   |
| >EGFR-D770IMASVDNPH   | 55   | >EGFR-D770IMASVNNPH   | 80  | 25   |
| >EGFR-D770IMASVDNPH   | 148  | >EGFR-D770IMASVNNPH   | 170 | 22   |
| >EGFR-D770IMASVDNPH   | 84   | >EGFR-D770IMASVNNPH   | 75  | 9    |
| >EGFR-D770IMASVDNPH   | 209  | >EGFR-D770IMASVNNPH   | 152 | 57   |
| >EGFR-D770IMASVDNPH   | 303  | >EGFR-D770IMASVNNPH   | 390 | 87   |
| >EGFR-D770IMASVDNPH   | 3    | >EGFR-D770IMASVNNPH   | 3   | 0    |
| >EGFR-D770IMASVDNPH   | 37   | >EGFR-D770IMASVNNPH   | 29  | 8    |
| >EGFR-D770IMASVDNPH   | 7    | >EGFR-D770IMASVNNPH   | 6   | 1    |
| >EGFR-D770IMASVDNPH   | 258  | >EGFR-D770IMASVNNPH   | 304 | 46   |
| >EGFR-D770IMASVDNPH   | 5    | >EGFR-D770IMASVNNPH   | 5   | 0    |
| >EGFR-D770IMASVDNPH   | 6    | >EGFR-D770IMASVNNPH   | 4   | 2    |
| >EGFR-D770IMASVDNPH   | 233  | >EGFR-D770IMASVNNPH   | 165 | 68   |
| >EGFR-D770IMASVDNPH   | 3    | >EGFR-D770IMASVNNPH   | 3   | 0    |
| >EGFR-D770IMASVDNPH   | 75   | >EGFR-D770IMASVNNPH   | 77  | 2    |
| >EGFR-D770IMASVDNPH   | 1650 | >EGFR-D770IMASVNNPH   | 346 | 1304 |
| >EGFR-D770IMASVDNPH   | 649  | >EGFR-D770IMASVNNPH   | 328 | 321  |
| >EGFR-D770IYMASVDNP   | 10   | >EGFR-D770IYMASVNNP   | 10  | 0    |
| >EGFR-D770IYMASVDNP   | 767  | >EGFR-D770IYMASVNNP   | 499 | 268  |
| >EGFR-D770IYMASVDNP   | 13   | >EGFR-D770IYMASVNNP   | 12  | 1    |
| >EGFR-D770IYMASVDNP   | 8    | >EGFR-D770IYMASVNNP   | 7   | 1    |
| >EGFR-D770IYMASVDNP   | 4    | >EGFR-D770IYMASVNNP   | 4   | 0    |
| >EGFR-D770IYMASVDNP   | 8    | >EGFR-D770IYMASVNNP   | 7   | 1    |
| >EGFR-D770IYMASVDNP   | 7    | >EGFR-D770IYMASVNNP   | 6   | 1    |
| >EGFR-D770IYMASVDNP   | 10   | >EGFR-D770IYMASVNNP   | 12  | 2    |
| >EGFR-D770IYMASVDNP   | 4    | >EGFR-D770IYMASVNNP   | 4   | 0    |
| >EGFR-D770IYMASVDNP   | 3    | >EGFR-D770IYMASVNNP   | 3   | 0    |
| >EGFR-D770IYMASVDNP   | 397  | >EGFR-D770IYMASVNNP   | 404 | 7    |
| >EGFR-D770IYMASVDNP   | 457  | >EGFR-D770IYMASVNNP   | 525 | 68   |
| >EGFR-D770IYMASVDNP   | 17   | >EGFR-D770IYMASVNNP   | 12  | 5    |
| >EGFR-D770IYMASVDNP   | 7    | >EGFR-D770IYMASVNNP   | 6   | 1    |
| >EGFR-D770IYMASVDNP   | 424  | >EGFR-D770IYMASVNNP   | 317 | 107  |
| >EGFR-D770IYMASVDNP   | 560  | >EGFR-D770IYMASVNNP   | 388 | 172  |
| >EGFR-D800IDYVREHKDNI | 1402 | >EGFR-D800INYVREHKDNI | 100 | 1302 |

|                       |      |                       |      |      |
|-----------------------|------|-----------------------|------|------|
| >EGFR-D800ILDYVREHKDM | 5542 | >EGFR-D800ILNYVREHKDM | 330  | 5212 |
| >EGFR-D800ILDYVREHKDM | 101  | >EGFR-D800ILNYVREHKDM | 436  | 335  |
| >EGFR-D800ILDYVREHKDM | 286  | >EGFR-D800ILNYVREHKDM | 5359 | 5073 |
| >EGFR-D800ILDYVREHKDM | 387  | >EGFR-D800ILNYVREHKDM | 3509 | 3122 |
| >EGFR-D800ILDYVREHKDM | 62   | >EGFR-D800ILNYVREHKDM | 3652 | 3590 |
| >EGFR-D800ILLDYVREHK  | 1369 | >EGFR-D800ILLNYVREHK  | 150  | 1219 |
| >EGFR-D800ILLDYVREHK  | 3397 | >EGFR-D800ILLNYVREHK  | 129  | 3268 |
| >EGFR-D800ILLDYVREHK  | 738  | >EGFR-D800ILLNYVREHK  | 158  | 580  |
| >EGFR-D800ICLLDYVREHK | 74   | >EGFR-D800ICLLNYVREHK | 59   | 15   |
| >EGFR-D800ICLLDYVREHK | 144  | >EGFR-D800ICLLNYVREHK | 134  | 10   |
| >EGFR-D800ICLLDYVREHK | 570  | >EGFR-D800ICLLNYVREHK | 477  | 93   |
| >EGFR-D800IGCLLDYVR   | 361  | >EGFR-D800IGCLLNIVR   | 180  | 181  |
| >EGFR-D800IFGCLLDYV   | 218  | >EGFR-D800IFGCLLNIV   | 137  | 81   |
| >EGFR-D800IFGCLLDYV   | 151  | >EGFR-D800IFGCLLNIV   | 123  | 28   |
| >EGFR-D800IFGCLLDYVR  | 542  | >EGFR-D800IFGCLLNIVR  | 392  | 150  |
| >EGFR-D800IFGCLLDYVR  | 78   | >EGFR-D800IFGCLLNIVR  | 56   | 22   |
| >EGFR-D800IPFGCLLDY   | 31   | >EGFR-D800IPFGCLLNIV  | 30   | 1    |
| >EGFR-D800IPFGCLLDY   | 341  | >EGFR-D800IPFGCLLNIV  | 204  | 137  |
| >EGFR-D800IPFGCLLDYVR | 35   | >EGFR-D800IPFGCLLNIVR | 28   | 7    |
| >EGFR-D800IMPFGLLDY   | 79   | >EGFR-D800IMPFGLLNIV  | 85   | 6    |
| >EGFR-D800IMPFGLLDY\  | 8    | >EGFR-D800IMPFGLLNIV\ | 12   | 4    |
| >EGFR-D800IMPFGLLDY\  | 203  | >EGFR-D800IMPFGLLNIV\ | 195  | 8    |
| >EGFR-D800IMPFGLLDY\  | 781  | >EGFR-D800IMPFGLLNIV\ | 461  | 320  |
| >EGFR-D800IMPFGLLDY\  | 131  | >EGFR-D800IMPFGLLNIV\ | 140  | 9    |
| >EGFR-D800IMPFGLLDY\  | 399  | >EGFR-D800IMPFGLLNIV\ | 442  | 43   |
| >EGFR-D800IMPFGLLDY   | 17   | >EGFR-D800IMPFGLLNIV  | 19   | 2    |
| >EGFR-D800IMPFGLLDY\  | 498  | >EGFR-D800IMPFGLLNIV\ | 254  | 244  |
| >EGFR-D800IMPFGLLDY\  | 425  | >EGFR-D800IMPFGLLNIV\ | 278  | 147  |
| >EGFR-D800IMPFGLLDY\  | 63   | >EGFR-D800IMPFGLLNIV\ | 43   | 20   |
| >EGFR-D800IMPFGLLDY\  | 282  | >EGFR-D800IMPFGLLNIV\ | 151  | 131  |
| >EGFR-D800IMPFGLLDY   | 359  | >EGFR-D800IMPFGLLNIV  | 209  | 150  |
| >EGFR-D800IMPFGLLDY   | 480  | >EGFR-D800IMPFGLLNIV  | 303  | 177  |
| >EGFR-D800IMPFGLLDY   | 297  | >EGFR-D800IMPFGLLNIV  | 196  | 101  |
| >EGFR-D800IMPFGLLDY   | 8    | >EGFR-D800IMPFGLLNIV  | 8    | 0    |
| >EGFR-D800IMPFGLLDY\  | 80   | >EGFR-D800IMPFGLLNIV\ | 133  | 53   |
| >EGFR-D800IMPFGLLDY   | 13   | >EGFR-D800IMPFGLLNIV  | 8    | 5    |
| >EGFR-D800IMPFGLLD    | 63   | >EGFR-D800IMPFGLLN    | 54   | 9    |
| >EGFR-D800IMPFGLLDY   | 254  | >EGFR-D800IMPFGLLNIV  | 96   | 158  |
| >EGFR-D800IMPFGLLDY\  | 25   | >EGFR-D800IMPFGLLNIV\ | 26   | 1    |
| >EGFR-D800IMPFGLLDY\  | 43   | >EGFR-D800IMPFGLLNIV\ | 34   | 9    |
| >EGFR-D800IMPFGLLDY   | 616  | >EGFR-D800IMPFGLLNIV  | 282  | 334  |
| >EGFR-D800IMPFGLLDY   | 95   | >EGFR-D800IMPFGLLNIV  | 64   | 31   |
| >EGFR-D800IMPFGLLDY   | 101  | >EGFR-D800IMPFGLLNIV  | 83   | 18   |

|                        |      |                        |      |      |
|------------------------|------|------------------------|------|------|
| >EGFR-D800I MPFGCLLDY  | 494  | >EGFR-D800I MPFGCLLN   | 538  | 44   |
| >EGFR-D800I MPFGCLLDY\ | 32   | >EGFR-D800I MPFGCLLN\  | 28   | 4    |
| >EGFR-D800I LMPFGCLLDY | 24   | >EGFR-D800I LMPFGCLLN  | 21   | 3    |
| >EGFR-D800I LMPFGCLLDY | 12   | >EGFR-D800I LMPFGCLLN  | 11   | 1    |
| >EGFR-D800I LMPFGCLLDY | 8    | >EGFR-D800I LMPFGCLLN  | 6    | 2    |
| >EGFR-D800I LMPFGCLLDY | 12   | >EGFR-D800I LMPFGCLLN  | 12   | 0    |
| >EGFR-D800I LMPFGCLLDY | 3    | >EGFR-D800I LMPFGCLLN  | 4    | 1    |
| >EGFR-D800I LMPFGCLLDY | 14   | >EGFR-D800I LMPFGCLLN  | 14   | 0    |
| >EGFR-D800I LMPFGCLLDY | 8    | >EGFR-D800I LMPFGCLLN  | 9    | 1    |
| >EGFR-D800I LMPFGCLLDY | 6    | >EGFR-D800I LMPFGCLLN  | 7    | 1    |
| >EGFR-D800I LMPFGCLLDY | 3    | >EGFR-D800I LMPFGCLLN  | 3    | 0    |
| >EGFR-D800I LMPFGCLLDY | 254  | >EGFR-D800I LMPFGCLLN  | 137  | 117  |
| >EGFR-D800I LMPFGCLLDY | 689  | >EGFR-D800I LMPFGCLLN  | 329  | 360  |
| >EGFR-D800I LMPFGCLLDY | 326  | >EGFR-D800I LMPFGCLLN  | 136  | 190  |
| >EGFR-D800I LMPFGCLLDY | 259  | >EGFR-D800I LMPFGCLLN  | 186  | 73   |
| >EGFR-D800I LMPFGCLLDY | 592  | >EGFR-D800I LMPFGCLLN  | 458  | 134  |
| >EGFR-D800I LMPFGCLLDY | 97   | >EGFR-D800I LMPFGCLLN  | 66   | 31   |
| >EGFR-D800I LMPFGCLLDY | 117  | >EGFR-D800I LMPFGCLLN  | 99   | 18   |
| >EGFR-D800I LMPFGCLLDY | 596  | >EGFR-D800I LMPFGCLLN  | 422  | 174  |
| >EGFR-D800I LMPFGCLLDY | 509  | >EGFR-D800I LMPFGCLLN  | 209  | 300  |
| >EGFR-D800I LMPFGCLLDY | 344  | >EGFR-D800I LMPFGCLLN  | 254  | 90   |
| >EGFR-D800I QLMPFGCLLI | 522  | >EGFR-D800I QLMPFGCLLI | 174  | 348  |
| >EGFR-D800I QLMPFGCLLI | 723  | >EGFR-D800I QLMPFGCLLI | 173  | 550  |
| >EGFR-D800I QLMPFGCLLI | 15   | >EGFR-D800I QLMPFGCLLI | 16   | 1    |
| >EGFR-D800I QLMPFGCLLI | 328  | >EGFR-D800I QLMPFGCLLI | 322  | 6    |
| >EGFR-D800I QLMPFGCLLI | 23   | >EGFR-D800I QLMPFGCLLI | 19   | 4    |
| >EGFR-D800I QLMPFGCLLI | 111  | >EGFR-D800I QLMPFGCLLI | 94   | 17   |
| >EGFR-D800I QLMPFGCLLI | 92   | >EGFR-D800I QLMPFGCLLI | 90   | 2    |
| >EGFR-D800I QLMPFGCLLI | 124  | >EGFR-D800I QLMPFGCLLI | 86   | 38   |
| >EGFR-D800I QLMPFGCLLI | 537  | >EGFR-D800I QLMPFGCLLI | 129  | 408  |
| >EGFR-D807I DNIGSQYLL  | 620  | >EGFR-D807I NNIGSQYLL  | 242  | 378  |
| >EGFR-D807I DNIGSQYLL  | 4228 | >EGFR-D807I NNIGSQYLL  | 256  | 3972 |
| >EGFR-D807I KDNIGSQY   | 626  | >EGFR-D807I KNNIGSQY   | 157  | 469  |
| >EGFR-D807I KDNIGSQYLL | 329  | >EGFR-D807I KNNIGSQYLL | 8806 | 8477 |
| >EGFR-D807I HKDNIGSQY  | 1183 | >EGFR-D807I HKNNIGSQY  | 345  | 838  |
| >EGFR-D807I HKDNIGSQY  | 198  | >EGFR-D807I HKNNIGSQY  | 8    | 190  |
| >EGFR-D807I HKDNIGSQYL | 1188 | >EGFR-D807I HKNNIGSQYL | 45   | 1143 |
| >EGFR-D807I HKDNIGSQYL | 2234 | >EGFR-D807I HKNNIGSQYL | 134  | 2100 |
| >EGFR-D807I HKDNIGSQYL | 372  | >EGFR-D807I HKNNIGSQYL | 1196 | 824  |
| >EGFR-D807I HKDNIGSQYL | 71   | >EGFR-D807I HKNNIGSQYL | 196  | 125  |
| >EGFR-D807I HKDNIGSQYL | 2877 | >EGFR-D807I HKNNIGSQYL | 475  | 2402 |
| >EGFR-D807I HKDNIGSQY  | 125  | >EGFR-D807I HKNNIGSQY  | 65   | 60   |
| >EGFR-D807I REHKDNIGSC | 364  | >EGFR-D807I REHKNNIGSC | 304  | 60   |

|                        |      |                        |       |       |
|------------------------|------|------------------------|-------|-------|
| >EGFR-D807IREHKDNIGSC  | 104  | >EGFR-D807IREHKNNIGSC  | 68    | 36    |
| >EGFR-D807IREHKDNIGSC  | 773  | >EGFR-D807IREHKNNIGSC  | 349   | 424   |
| >EGFR-D807IREHKDNIGS   | 1350 | >EGFR-D807IREHKNNIGS   | 326   | 1024  |
| >EGFR-D807IREHKDNIGSC  | 360  | >EGFR-D807IREHKNNIGSC  | 247   | 113   |
| >EGFR-D807IREHKDNIGS   | 394  | >EGFR-D807IREHKNNIGS   | 458   | 64    |
| >EGFR-D807IREHKDNIGSC  | 362  | >EGFR-D807IREHKNNIGSC  | 477   | 115   |
| >EGFR-D807IYVREHKDNI   | 519  | >EGFR-D807IYVREHKNNI   | 178   | 341   |
| >EGFR-D807IYVREHKDNI   | 1535 | >EGFR-D807IYVREHKNNI   | 154   | 1381  |
| >EGFR-D807IYVREHKDNI   | 1901 | >EGFR-D807IYVREHKNNI   | 283   | 1618  |
| >EGFR-D807ILDYVREHKDN  | 101  | >EGFR-D807ILDYVREHKNN  | 107   | 6     |
| >EGFR-D807ILDYVREHKDN  | 286  | >EGFR-D807ILDYVREHKNN  | 391   | 105   |
| >EGFR-D807ILDYVREHKDN  | 387  | >EGFR-D807ILDYVREHKNN  | 538   | 151   |
| >EGFR-D807ILDYVREHKDN  | 62   | >EGFR-D807ILDYVREHKNN  | 88    | 26    |
| >EGFR-D855(DFGLAKLLGA  | 969  | >EGFR-D855(GFGLAKLLGA  | 449   | 520   |
| >EGFR-D855(TDFGLAKLL   | 145  | >EGFR-D855(TGFGLAKLL   | 5397  | 5252  |
| >EGFR-D855(TDFGLAKLL   | 352  | >EGFR-D855(TGFGLAKLL   | 32647 | 32295 |
| >EGFR-D855(TDFGLAKLL   | 1110 | >EGFR-D855(TGFGLAKLL   | 348   | 762   |
| >EGFR-D855(TDFGLAKLL   | 295  | >EGFR-D855(TGFGLAKLL   | 22342 | 22047 |
| >EGFR-D855(ITDFGLAK    | 290  | >EGFR-D855(ITGFGLAK    | 149   | 141   |
| >EGFR-D855(ITDFGLAK    | 33   | >EGFR-D855(ITGFGLAK    | 33    | 0     |
| >EGFR-D855(ITDFGLAK    | 3611 | >EGFR-D855(ITGFGLAK    | 430   | 3181  |
| >EGFR-D855(ITDFGLAK    | 558  | >EGFR-D855(ITGFGLAK    | 373   | 185   |
| >EGFR-D855(ITDFGLAKL   | 6    | >EGFR-D855(ITGFGLAKL   | 9     | 3     |
| >EGFR-D855(ITDFGLAKLL  | 15   | >EGFR-D855(ITGFGLAKLL  | 28    | 13    |
| >EGFR-D855(ITDFGLAKLL  | 276  | >EGFR-D855(ITGFGLAKLL  | 234   | 42    |
| >EGFR-D855(ITDFGLAKL   | 97   | >EGFR-D855(ITGFGLAKL   | 121   | 24    |
| >EGFR-D855(ITDFGLAK    | 474  | >EGFR-D855(ITGFGLAK    | 511   | 37    |
| >EGFR-D855(KITDFGLAKL  | 91   | >EGFR-D855(KITGFGLAKL  | 137   | 46    |
| >EGFR-D855(KITDFGLAKLL | 228  | >EGFR-D855(KITGFGLAKLL | 413   | 185   |
| >EGFR-D855(KITDFGLA    | 348  | >EGFR-D855(KITGFGLA    | 685   | 337   |
| >EGFR-D855(KITDFGLAKL  | 81   | >EGFR-D855(KITGFGLAKL  | 80    | 1     |
| >EGFR-D855(KITDFGLA    | 117  | >EGFR-D855(KITGFGLA    | 375   | 258   |
| >EGFR-D855(KITDFGLAKL  | 432  | >EGFR-D855(KITGFGLAKL  | 552   | 120   |
| >EGFR-D855(KITDFGLAKLL | 462  | >EGFR-D855(KITGFGLAKLL | 1494  | 1032  |
| >EGFR-D855(KITDFGLAKL  | 188  | >EGFR-D855(KITGFGLAKL  | 348   | 160   |
| >EGFR-D855(KITDFGLAKL  | 478  | >EGFR-D855(KITGFGLAKL  | 874   | 396   |
| >EGFR-D855(KITDFGLAKL  | 29   | >EGFR-D855(KITGFGLAKL  | 57    | 28    |
| >EGFR-D855(KITDFGLAKLL | 183  | >EGFR-D855(KITGFGLAKLL | 444   | 261   |
| >EGFR-D855(KITDFGLAK   | 102  | >EGFR-D855(KITGFGLAK   | 69    | 33    |
| >EGFR-D855(KITDFGLAK   | 17   | >EGFR-D855(KITGFGLAK   | 21    | 4     |
| >EGFR-D855(KITDFGLAK   | 22   | >EGFR-D855(KITGFGLAK   | 26    | 4     |
| >EGFR-D855(KITDFGLAKL  | 725  | >EGFR-D855(KITGFGLAKL  | 233   | 492   |
| >EGFR-D855(KITDFGLAKLL | 679  | >EGFR-D855(KITGFGLAKLL | 233   | 446   |

|                        |      |                        |       |       |
|------------------------|------|------------------------|-------|-------|
| >EGFR-D855(KITDFGLAK   | 98   | >EGFR-D855(KITGFGLAK   | 132   | 34    |
| >EGFR-D855(VKITDFGL    | 279  | >EGFR-D855(VKITGFGL    | 132   | 147   |
| >EGFR-D855(VKITDFGLAK  | 252  | >EGFR-D855(VKITGFGLAK  | 295   | 43    |
| >EGFR-D855(VKITDFGLAKI | 295  | >EGFR-D855(VKITGFGLAKI | 293   | 2     |
| >EGFR-D855(HVKITDFGLA  | 520  | >EGFR-D855(HVKITGFGLA  | 223   | 297   |
| >EGFR-D855(HVKITDFGLA  | 276  | >EGFR-D855(HVKITGFGLA  | 198   | 78    |
| >EGFR-D855(HVKITDFG    | 229  | >EGFR-D855(HVKITGFG    | 41    | 188   |
| >EGFR-D855(HVKITDFGL   | 168  | >EGFR-D855(HVKITGFGL   | 53    | 115   |
| >EGFR-D855(HVKITDFGLA  | 33   | >EGFR-D855(HVKITGFGLA  | 13    | 20    |
| >EGFR-D855(HVKITDFGLA  | 4    | >EGFR-D855(HVKITGFGLA  | 4     | 0     |
| >EGFR-D855(HVKITDFGLA  | 201  | >EGFR-D855(HVKITGFGLA  | 189   | 12    |
| >EGFR-D855(HVKITDFGLA  | 130  | >EGFR-D855(HVKITGFGLA  | 294   | 164   |
| >EGFR-D855(HVKITDFGL   | 328  | >EGFR-D855(HVKITGFGL   | 170   | 158   |
| >EGFR-D855(QHVKITDF    | 107  | >EGFR-D855(QHVKITGF    | 165   | 58    |
| >EGFR-D855(QHVKITDFGL  | 380  | >EGFR-D855(QHVKITGFGL  | 246   | 134   |
| >EGFR-D855(PQHVKITDF   | 82   | >EGFR-D855(PQHVKITGF   | 135   | 53    |
| >EGFR-D855(TPQHVKITDF  | 80   | >EGFR-D855(TPQHVKITGF  | 1297  | 1217  |
| >EGFR-D855(TPQHVKITDF  | 125  | >EGFR-D855(TPQHVKITGF  | 114   | 11    |
| >EGFR-D855(TPQHVKITDF  | 769  | >EGFR-D855(TPQHVKITGF  | 312   | 457   |
| >EGFR-D855(TPQHVKITDF  | 234  | >EGFR-D855(TPQHVKITGF  | 604   | 370   |
| >EGFR-D855(KTPQHVKITD  | 461  | >EGFR-D855(KTPQHVKITG  | 192   | 269   |
| >EGFR-D855(KTPQHVKITD  | 41   | >EGFR-D855(KTPQHVKITG  | 47    | 6     |
| >EGFR-D855(KTPQHVKITD  | 44   | >EGFR-D855(KTPQHVKITG  | 11    | 33    |
| >EGFR-D855(KTPQHVKITD  | 1351 | >EGFR-D855(KTPQHVKITG  | 362   | 989   |
| >EGFR-D855(KTPQHVKITD  | 7    | >EGFR-D855(KTPQHVKITG  | 5     | 2     |
| >EGFR-D855ITDFGLAKL    | 5019 | >EGFR-D855ITNFGGLAKL   | 228   | 4791  |
| >EGFR-D855ITDFGLAKLL   | 5491 | >EGFR-D855ITNFGGLAKLL  | 262   | 5229  |
| >EGFR-D855ITDFGLAKLL   | 145  | >EGFR-D855ITNFGGLAKLL  | 598   | 453   |
| >EGFR-D855ITDFGLAKLL   | 352  | >EGFR-D855ITNFGGLAKLL  | 17220 | 16868 |
| >EGFR-D855ITDFGLAKLL   | 295  | >EGFR-D855ITNFGGLAKLL  | 13398 | 13103 |
| >EGFR-D855IITDFGLAKL   | 1387 | >EGFR-D855IITNFGGLAKL  | 413   | 974   |
| >EGFR-D855IITDFGLAKL   | 2920 | >EGFR-D855IITNFGGLAKL  | 177   | 2743  |
| >EGFR-D855IITDFGLAK    | 290  | >EGFR-D855IITNFGGLAK   | 62    | 228   |
| >EGFR-D855IITDFGLAK    | 33   | >EGFR-D855IITNFGGLAK   | 16    | 17    |
| >EGFR-D855IITDFGLAK    | 3611 | >EGFR-D855IITNFGGLAK   | 42    | 3569  |
| >EGFR-D855IITDFGLAK    | 6790 | >EGFR-D855IITNFGGLAK   | 331   | 6459  |
| >EGFR-D855IITDFGLAK    | 558  | >EGFR-D855IITNFGGLAK   | 86    | 472   |
| >EGFR-D855IITDFGLAKL   | 5434 | >EGFR-D855IITNFGGLAKL  | 343   | 5091  |
| >EGFR-D855IITDFGLAKL   | 6    | >EGFR-D855IITNFGGLAKL  | 5     | 1     |
| >EGFR-D855IITDFGLAKLL  | 15   | >EGFR-D855IITNFGGLAKLL | 9     | 6     |
| >EGFR-D855IITDFGLAKLL  | 276  | >EGFR-D855IITNFGGLAKLL | 234   | 42    |
| >EGFR-D855IITDFGLAKL   | 97   | >EGFR-D855IITNFGGLAKL  | 48    | 49    |
| >EGFR-D855IITDFGLAK    | 474  | >EGFR-D855IITNFGGLAK   | 472   | 2     |

|                        |      |                        |      |      |
|------------------------|------|------------------------|------|------|
| >EGFR-D855IITDFGLAKLL  | 613  | >EGFR-D855IITNFGLAKLL  | 415  | 198  |
| >EGFR-D855IKITDFGLAKL  | 91   | >EGFR-D855IKITNFGLAKL  | 108  | 17   |
| >EGFR-D855IKITDFGLAKLL | 228  | >EGFR-D855IKITNFGLAKLL | 837  | 609  |
| >EGFR-D855IKITDFGLA    | 348  | >EGFR-D855IKITNFGLA    | 694  | 346  |
| >EGFR-D855IKITDFGLAKL  | 81   | >EGFR-D855IKITNFGLAKL  | 81   | 0    |
| >EGFR-D855IKITDFGLA    | 117  | >EGFR-D855IKITNFGLA    | 439  | 322  |
| >EGFR-D855IKITDFGLAKL  | 432  | >EGFR-D855IKITNFGLAKL  | 688  | 256  |
| >EGFR-D855IKITDFGLAKLL | 462  | >EGFR-D855IKITNFGLAKLL | 1425 | 963  |
| >EGFR-D855IKITDFGLAKL  | 188  | >EGFR-D855IKITNFGLAKL  | 473  | 285  |
| >EGFR-D855IKITDFGLAKL  | 478  | >EGFR-D855IKITNFGLAKL  | 888  | 410  |
| >EGFR-D855IKITDFGLAKL  | 29   | >EGFR-D855IKITNFGLAKL  | 187  | 158  |
| >EGFR-D855IKITDFGLAKLL | 183  | >EGFR-D855IKITNFGLAKLL | 1434 | 1251 |
| >EGFR-D855IKITDFGLAK   | 102  | >EGFR-D855IKITNFGLAK   | 56   | 46   |
| >EGFR-D855IKITDFGLAK   | 17   | >EGFR-D855IKITNFGLAK   | 18   | 1    |
| >EGFR-D855IKITDFGLAK   | 22   | >EGFR-D855IKITNFGLAK   | 19   | 3    |
| >EGFR-D855IKITDFGLAKL  | 725  | >EGFR-D855IKITNFGLAKL  | 251  | 474  |
| >EGFR-D855IKITDFGLAKLL | 679  | >EGFR-D855IKITNFGLAKLL | 251  | 428  |
| >EGFR-D855IKITDFGLAK   | 98   | >EGFR-D855IKITNFGLAK   | 247  | 149  |
| >EGFR-D855IVKITDFGL    | 279  | >EGFR-D855IVKITNFGL    | 126  | 153  |
| >EGFR-D855IVKITDFGLAK  | 252  | >EGFR-D855IVKITNFGLAK  | 156  | 96   |
| >EGFR-D855IVKITDFGLAKI | 295  | >EGFR-D855IVKITNFGLAKI | 222  | 73   |
| >EGFR-D855IHVKITDFGLA  | 520  | >EGFR-D855IHVKITNFGLA  | 219  | 301  |
| >EGFR-D855IHVKITDFGLA  | 276  | >EGFR-D855IHVKITNFGLA  | 170  | 106  |
| >EGFR-D855IHVKITDFG    | 229  | >EGFR-D855IHVKITNFG    | 23   | 206  |
| >EGFR-D855IHVKITDFGL   | 168  | >EGFR-D855IHVKITNFGL   | 27   | 141  |
| >EGFR-D855IHVKITDFGLA  | 33   | >EGFR-D855IHVKITNFGLA  | 10   | 23   |
| >EGFR-D855IHVKITDFGLA  | 4    | >EGFR-D855IHVKITNFGLA  | 4    | 0    |
| >EGFR-D855IHVKITDFGLA  | 201  | >EGFR-D855IHVKITNFGLA  | 131  | 70   |
| >EGFR-D855IHVKITDFGLA  | 130  | >EGFR-D855IHVKITNFGLA  | 133  | 3    |
| >EGFR-D855IHVKITDFGL   | 328  | >EGFR-D855IHVKITNFGL   | 394  | 66   |
| >EGFR-D855IQHVKITDF    | 107  | >EGFR-D855IQHVKITNF    | 52   | 55   |
| >EGFR-D855IQHVKITDFGL  | 380  | >EGFR-D855IQHVKITNFGL  | 92   | 288  |
| >EGFR-D855IPQHVKITDF   | 82   | >EGFR-D855IPQHVKITNF   | 40   | 42   |
| >EGFR-D855IPQHVKITDF   | 80   | >EGFR-D855IPQHVKITNF   | 87   | 7    |
| >EGFR-D855IPQHVKITDF   | 125  | >EGFR-D855IPQHVKITNF   | 224  | 99   |
| >EGFR-D855IPQHVKITDF   | 769  | >EGFR-D855IPQHVKITNF   | 441  | 328  |
| >EGFR-D855IPQHVKITDF   | 234  | >EGFR-D855IPQHVKITNF   | 168  | 66   |
| >EGFR-D855IKTPQHVKITD  | 461  | >EGFR-D855IKTPQHVKITN  | 158  | 303  |
| >EGFR-D855IKTPQHVKITD  | 41   | >EGFR-D855IKTPQHVKITN  | 38   | 3    |
| >EGFR-D855IKTPQHVKITD  | 693  | >EGFR-D855IKTPQHVKITN  | 457  | 236  |
| >EGFR-D855IKTPQHVKITD  | 44   | >EGFR-D855IKTPQHVKITN  | 14   | 30   |
| >EGFR-D855IKTPQHVKITD  | 7    | >EGFR-D855IKTPQHVKITN  | 4    | 3    |
| >EGFR-E602CENNTLVWKY   | 1645 | >EGFR-E602CQNNTLVWKY   | 421  | 1224 |

|                       |       |                       |       |       |
|-----------------------|-------|-----------------------|-------|-------|
| >EGFR-E602C ENNTLVWKY | 927   | >EGFR-E602C QNNTLVWKY | 360   | 567   |
| >EGFR-E602C ENNTLVWK  | 126   | >EGFR-E602C QNNTLVWK  | 1899  | 1773  |
| >EGFR-E602C ENNTLVWKY | 1749  | >EGFR-E602C QNNTLVWKY | 245   | 1504  |
| >EGFR-E602C ENNTLVWKY | 411   | >EGFR-E602C QNNTLVWKY | 355   | 56    |
| >EGFR-E602C GENNTLVWK | 12315 | >EGFR-E602C GQNNTLVWk | 142   | 12173 |
| >EGFR-E602C GENNTLVWK | 7314  | >EGFR-E602C GQNNTLVWk | 54    | 7260  |
| >EGFR-E602C GENNTLVWK | 1172  | >EGFR-E602C GQNNTLVWk | 313   | 859   |
| >EGFR-E602C GENNTLVWK | 10535 | >EGFR-E602C GQNNTLVWk | 350   | 10185 |
| >EGFR-E602C GENNTLVW  | 8851  | >EGFR-E602C GQNNTLVW  | 240   | 8611  |
| >EGFR-E602C GENNTLVWK | 6587  | >EGFR-E602C GQNNTLVWk | 220   | 6367  |
| >EGFR-E602C GENNTLVW  | 9058  | >EGFR-E602C GQNNTLVW  | 416   | 8642  |
| >EGFR-E602C GENNTLVWK | 3029  | >EGFR-E602C GQNNTLVWk | 61    | 2968  |
| >EGFR-E602C GENNTLVWK | 208   | >EGFR-E602C GQNNTLVWk | 9457  | 9249  |
| >EGFR-E602C GENNTLVW  | 62    | >EGFR-E602C GQNNTLVW  | 2920  | 2858  |
| >EGFR-E602C GENNTLVWK | 250   | >EGFR-E602C GQNNTLVWk | 14266 | 14016 |
| >EGFR-E602C GENNTLVW  | 33    | >EGFR-E602C GQNNTLVW  | 1397  | 1364  |
| >EGFR-E602C GENNTLVWK | 272   | >EGFR-E602C GQNNTLVWk | 15053 | 14781 |
| >EGFR-E602C GENNTLVWK | 22    | >EGFR-E602C GQNNTLVWk | 3564  | 3542  |
| >EGFR-E602C GENNTLVWK | 308   | >EGFR-E602C GQNNTLVWk | 16112 | 15804 |
| >EGFR-E602C MGENNTLVV | 407   | >EGFR-E602C MGQNNTLV\ | 164   | 243   |
| >EGFR-E602C MGENNTLVV | 155   | >EGFR-E602C MGQNNTLV\ | 63    | 92    |
| >EGFR-E602C MGENNTLVV | 512   | >EGFR-E602C MGQNNTLV\ | 391   | 121   |
| >EGFR-E602C MGENNTLVV | 153   | >EGFR-E602C MGQNNTLV\ | 211   | 58    |
| >EGFR-E602C MGENNTLVV | 271   | >EGFR-E602C MGQNNTLV\ | 23    | 248   |
| >EGFR-E602C MGENNTLVV | 159   | >EGFR-E602C MGQNNTLV\ | 559   | 400   |
| >EGFR-E602C MGENNTLVV | 155   | >EGFR-E602C MGQNNTLV\ | 278   | 123   |
| >EGFR-E602C VMGENNTL  | 757   | >EGFR-E602C VMGQNNTL  | 321   | 436   |
| >EGFR-E602C VMGENNTLV | 668   | >EGFR-E602C VMGQNNTLV | 136   | 532   |
| >EGFR-E602C VMGENNTL  | 253   | >EGFR-E602C VMGQNNTL  | 1606  | 1353  |
| >EGFR-E602C VMGENNTLV | 36    | >EGFR-E602C VMGQNNTLV | 213   | 177   |
| >EGFR-E602C VMGENNTL  | 48    | >EGFR-E602C VMGQNNTL  | 144   | 96    |
| >EGFR-E602C VMGENNTLV | 11    | >EGFR-E602C VMGQNNTLV | 30    | 19    |
| >EGFR-E602C VMGENNTL  | 193   | >EGFR-E602C VMGQNNTL  | 865   | 672   |
| >EGFR-E602C VMGENNTLV | 9     | >EGFR-E602C VMGQNNTLV | 31    | 22    |
| >EGFR-E602C VMGENNTLV | 50    | >EGFR-E602C VMGQNNTLV | 486   | 436   |
| >EGFR-E602C VMGENNTL  | 6     | >EGFR-E602C VMGQNNTL  | 15    | 9     |
| >EGFR-E602C VMGENNTLV | 2     | >EGFR-E602C VMGQNNTLV | 4     | 2     |
| >EGFR-E602C VMGENNTL  | 6     | >EGFR-E602C VMGQNNTL  | 18    | 12    |
| >EGFR-E602C VMGENNTLV | 4     | >EGFR-E602C VMGQNNTLV | 12    | 8     |
| >EGFR-E602C VMGENNTL  | 28    | >EGFR-E602C VMGQNNTL  | 67    | 39    |
| >EGFR-E602C VMGENNTLV | 6     | >EGFR-E602C VMGQNNTLV | 10    | 4     |
| >EGFR-E602C VMGENNTL  | 15    | >EGFR-E602C VMGQNNTL  | 59    | 44    |
| >EGFR-E602C VMGENNTLV | 3     | >EGFR-E602C VMGQNNTLV | 8     | 5     |

|                         |       |                         |       |       |
|-------------------------|-------|-------------------------|-------|-------|
| >EGFR-E602C VMGENNTL    | 5     | >EGFR-E602C VMGQNNTL    | 6     | 1     |
| >EGFR-E602C VMGENNTLV   | 2     | >EGFR-E602C VMGQNNTLV   | 2     | 0     |
| >EGFR-E602C VMGENNTLV   | 499   | >EGFR-E602C VMGQNNTLV   | 1402  | 903   |
| >EGFR-E602C VMGENNTLV   | 102   | >EGFR-E602C VMGQNNTLV   | 151   | 49    |
| >EGFR-E602C VMGENNTLV   | 167   | >EGFR-E602C VMGQNNTLV   | 275   | 108   |
| >EGFR-E602C VMGENNTLV   | 509   | >EGFR-E602C VMGQNNTLV   | 329   | 180   |
| >EGFR-E602C VMGENNTLV   | 404   | >EGFR-E602C VMGQNNTLV   | 470   | 66    |
| >EGFR-E602C VMGENNTLV   | 34    | >EGFR-E602C VMGQNNTLV   | 29    | 5     |
| >EGFR-E602C GVMGENNTL   | 113   | >EGFR-E602C GVMGQNNTL   | 304   | 191   |
| >EGFR-E602C GVMGENNTL   | 31    | >EGFR-E602C GVMGQNNTL   | 42    | 11    |
| >EGFR-E602C GVMGENNTL   | 48    | >EGFR-E602C GVMGQNNTL   | 95    | 47    |
| >EGFR-E602C GVMGENNTL   | 54    | >EGFR-E602C GVMGQNNTL   | 71    | 17    |
| >EGFR-E602C GVMGENNTL   | 431   | >EGFR-E602C GVMGQNNTL   | 513   | 82    |
| >EGFR-E602C GVMGENNTL   | 174   | >EGFR-E602C GVMGQNNTL   | 312   | 138   |
| >EGFR-E602C GVMGENNTL   | 238   | >EGFR-E602C GVMGQNNTL   | 318   | 80    |
| >EGFR-E602C GVMGENNTL   | 533   | >EGFR-E602C GVMGQNNTL   | 466   | 67    |
| >EGFR-E602C GVMGENNTL   | 175   | >EGFR-E602C GVMGQNNTL   | 229   | 54    |
| >EGFR-E602C GVMGENNTL   | 289   | >EGFR-E602C GVMGQNNTL   | 316   | 27    |
| >EGFR-E602C GVMGENNTL   | 318   | >EGFR-E602C GVMGQNNTL   | 512   | 194   |
| >EGFR-E602C GVMGENNTL   | 594   | >EGFR-E602C GVMGQNNTL   | 414   | 180   |
| >EGFR-E602C GVMGENNTL   | 16    | >EGFR-E602C GVMGQNNTL   | 16    | 0     |
| >EGFR-E602C GVMGENNTL   | 128   | >EGFR-E602C GVMGQNNTL   | 91    | 37    |
| >EGFR-E602C GVMGENNTL   | 129   | >EGFR-E602C GVMGQNNTL   | 99    | 30    |
| >EGFR-E602C GVMGENNTL   | 217   | >EGFR-E602C GVMGQNNTL   | 136   | 81    |
| >EGFR-E602C GVMGENNTL   | 51    | >EGFR-E602C GVMGQNNTL   | 54    | 3     |
| >EGFR-E602C GVMGENNTL   | 441   | >EGFR-E602C GVMGQNNTL   | 405   | 36    |
| >EGFR-E602C CPAGVMGEN   | 289   | >EGFR-E602C CPAGVMGQI   | 241   | 48    |
| >EGFR-E602C KTCPAGVMG   | 643   | >EGFR-E602C KTCPAGVMG   | 241   | 402   |
| >EGFR-E709/ ETEFKKIK    | 4936  | >EGFR-E709/ ATEFKKIK    | 350   | 4586  |
| >EGFR-E709/ ETEFKKIK    | 46    | >EGFR-E709/ ATEFKKIK    | 2791  | 2745  |
| >EGFR-E709/ ETEFKKIKV   | 201   | >EGFR-E709/ ATEFKKIKV   | 6885  | 6684  |
| >EGFR-E709/ ETEFKKIKVL  | 1775  | >EGFR-E709/ ATEFKKIKVL  | 148   | 1627  |
| >EGFR-E709/ ETEFKKIK    | 2685  | >EGFR-E709/ ATEFKKIK    | 235   | 2450  |
| >EGFR-E709/ KETEFKKI    | 82    | >EGFR-E709/ KATEFKKI    | 24080 | 23998 |
| >EGFR-E709/ KETEFKKIKV  | 274   | >EGFR-E709/ KATEFKKIKV  | 27024 | 26750 |
| >EGFR-E709/ KETEFKKIKVL | 128   | >EGFR-E709/ KATEFKKIKVL | 25028 | 24900 |
| >EGFR-E709/ KETEFKKIK   | 10511 | >EGFR-E709/ KATEFKKIK   | 313   | 10198 |
| >EGFR-E709/ KETEFKKIKVL | 21152 | >EGFR-E709/ KATEFKKIKVL | 251   | 20901 |
| >EGFR-E709/ KETEFKKI    | 165   | >EGFR-E709/ KATEFKKI    | 22499 | 22334 |
| >EGFR-E709/ KETEFKKIKV  | 51    | >EGFR-E709/ KATEFKKIKV  | 20199 | 20148 |
| >EGFR-E709/ KETEFKKI    | 289   | >EGFR-E709/ KATEFKKI    | 36025 | 35736 |
| >EGFR-E709/ KETEFKKIKVL | 75    | >EGFR-E709/ KATEFKKIKVL | 28357 | 28282 |
| >EGFR-E709/ KETEFKKIKVL | 105   | >EGFR-E709/ KATEFKKIKVL | 25636 | 25531 |



|                        |      |                        |      |      |
|------------------------|------|------------------------|------|------|
| >EGFR-E709/KETEFKKI    | 3569 | >EGFR-E709/KATEFKKI    | 96   | 3473 |
| >EGFR-E709/LKETEFKKI   | 757  | >EGFR-E709/LKATEFKKI   | 439  | 318  |
| >EGFR-E709/LKETEFKKI   | 1464 | >EGFR-E709/LKATEFKKI   | 80   | 1384 |
| >EGFR-E709/LKETEFKKIKV | 4576 | >EGFR-E709/LKATEFKKIKV | 477  | 4099 |
| >EGFR-E709/ILKETEFKKI  | 144  | >EGFR-E709/ILKATEFKKI  | 106  | 38   |
| >EGFR-E709/ILKETEFKKI  | 259  | >EGFR-E709/ILKATEFKKI  | 1187 | 928  |
| >EGFR-E709/ILKETEFKKI  | 63   | >EGFR-E709/ILKATEFKKI  | 154  | 91   |
| >EGFR-E709/ILKETEFK    | 129  | >EGFR-E709/ILKATEFK    | 72   | 57   |
| >EGFR-E709/ILKETEFKK   | 144  | >EGFR-E709/ILKATEFKK   | 83   | 61   |
| >EGFR-E709/ILKETEFKKIK | 549  | >EGFR-E709/ILKATEFKKIK | 288  | 261  |
| >EGFR-E709/ILKETEFK    | 431  | >EGFR-E709/ILKATEFK    | 193  | 238  |
| >EGFR-E709/ILKETEFKK   | 502  | >EGFR-E709/ILKATEFKK   | 209  | 293  |
| >EGFR-E709/ILKETEFK    | 97   | >EGFR-E709/ILKATEFK    | 30   | 67   |
| >EGFR-E709/ILKETEFKK   | 235  | >EGFR-E709/ILKATEFKK   | 81   | 154  |
| >EGFR-E709/ILKETEFKKIK | 224  | >EGFR-E709/ILKATEFKKIK | 88   | 136  |
| >EGFR-E709/ILKETEFK    | 561  | >EGFR-E709/ILKATEFK    | 223  | 338  |
| >EGFR-E709/ILKETEFKK   | 528  | >EGFR-E709/ILKATEFKK   | 244  | 284  |
| >EGFR-E709/ILKETEFK    | 352  | >EGFR-E709/ILKATEFK    | 276  | 76   |
| >EGFR-E709/RILKETEFK   | 83   | >EGFR-E709/RILKATEFK   | 52   | 31   |
| >EGFR-E709/RILKETEFKK  | 111  | >EGFR-E709/RILKATEFKK  | 34   | 77   |
| >EGFR-E709/RILKETEFK   | 23   | >EGFR-E709/RILKATEFK   | 19   | 4    |
| >EGFR-E709/RILKETEFKK  | 58   | >EGFR-E709/RILKATEFKK  | 26   | 32   |
| >EGFR-E709/RILKETEF    | 267  | >EGFR-E709/RILKATEF    | 199  | 68   |
| >EGFR-E709/RILKETEFK   | 37   | >EGFR-E709/RILKATEFK   | 8    | 29   |
| >EGFR-E709/RILKETEFKK  | 71   | >EGFR-E709/RILKATEFKK  | 18   | 53   |
| >EGFR-E709/RILKETEFKKI | 2042 | >EGFR-E709/RILKATEFKKI | 488  | 1554 |
| >EGFR-E709/RILKETEFK   | 508  | >EGFR-E709/RILKATEFK   | 151  | 357  |
| >EGFR-E709/RILKETEFKK  | 503  | >EGFR-E709/RILKATEFKK  | 166  | 337  |
| >EGFR-E709/RILKETEF    | 40   | >EGFR-E709/RILKATEF    | 21   | 19   |
| >EGFR-E709/RILKETEFKKI | 128  | >EGFR-E709/RILKATEFKKI | 109  | 19   |
| >EGFR-E709/RILKETEF    | 851  | >EGFR-E709/RILKATEF    | 256  | 595  |
| >EGFR-E709/RILKETEF    | 62   | >EGFR-E709/RILKATEF    | 46   | 16   |
| >EGFR-E709/RILKETEF    | 111  | >EGFR-E709/RILKATEF    | 41   | 70   |
| >EGFR-E709/RILKETEF    | 814  | >EGFR-E709/RILKATEF    | 418  | 396  |
| >EGFR-E709/RILKETEF    | 2712 | >EGFR-E709/RILKATEF    | 372  | 2340 |
| >EGFR-E709/RILKETEFK   | 64   | >EGFR-E709/RILKATEFK   | 88   | 24   |
| >EGFR-E709/RILKETEFKK  | 149  | >EGFR-E709/RILKATEFKK  | 160  | 11   |
| >EGFR-E709/LRILKETEF   | 106  | >EGFR-E709/LRILKATEF   | 60   | 46   |
| >EGFR-E709/LRILKETEF   | 1405 | >EGFR-E709/LRILKATEF   | 390  | 1015 |
| >EGFR-E709/LRILKETEFK  | 302  | >EGFR-E709/LRILKATEFK  | 235  | 67   |
| >EGFR-E709/LRILKETEFKK | 185  | >EGFR-E709/LRILKATEFKK | 104  | 81   |
| >EGFR-E709/LLRILKETEFK | 286  | >EGFR-E709/LLRILKATEFK | 119  | 167  |
| >EGFR-E709/LLRILKETEFK | 60   | >EGFR-E709/LLRILKATEFK | 15   | 45   |

|                        |       |                        |       |       |
|------------------------|-------|------------------------|-------|-------|
| >EGFR-E709/LLRILKETEFK | 618   | >EGFR-E709/LLRILKATEFK | 254   | 364   |
| >EGFR-E709/LLRILKETEF  | 167   | >EGFR-E709/LLRILKATEF  | 92    | 75    |
| >EGFR-E709/LLRILKETEF  | 119   | >EGFR-E709/LLRILKATEF  | 83    | 36    |
| >EGFR-E709/LLRILKETEF  | 422   | >EGFR-E709/LLRILKATEF  | 74    | 348   |
| >EGFR-E709/LLRILKETEF  | 547   | >EGFR-E709/LLRILKATEF  | 343   | 204   |
| >EGFR-E709/ALLRILKE    | 20096 | >EGFR-E709/ALLRILKA    | 163   | 19933 |
| >EGFR-E709/ALLRILKE    | 11684 | >EGFR-E709/ALLRILKA    | 456   | 11228 |
| >EGFR-E709/ALLRILKE    | 17985 | >EGFR-E709/ALLRILKA    | 172   | 17813 |
| >EGFR-E709/ALLRILKE    | 15701 | >EGFR-E709/ALLRILKA    | 283   | 15418 |
| >EGFR-E709/ALLRILKE    | 6802  | >EGFR-E709/ALLRILKA    | 18    | 6784  |
| >EGFR-E709/ALLRILKET   | 151   | >EGFR-E709/ALLRILKAT   | 173   | 22    |
| >EGFR-E709/ALLRILKE    | 18726 | >EGFR-E709/ALLRILKA    | 280   | 18446 |
| >EGFR-E709/ALLRILKE    | 13478 | >EGFR-E709/ALLRILKA    | 34    | 13444 |
| >EGFR-E709/ALLRILKE    | 4905  | >EGFR-E709/ALLRILKA    | 8     | 4897  |
| >EGFR-E709/ALLRILKET   | 90    | >EGFR-E709/ALLRILKAT   | 308   | 218   |
| >EGFR-E709/ALLRILKETEF | 153   | >EGFR-E709/ALLRILKATEF | 66    | 87    |
| >EGFR-E709/ALLRILKETEF | 58    | >EGFR-E709/ALLRILKATEF | 40    | 18    |
| >EGFR-E709(ETEFKKIK    | 46    | >EGFR-E709(GTEFKKIK    | 3428  | 3382  |
| >EGFR-E709(ETEFKKIKV   | 201   | >EGFR-E709(GTEFKKIKV   | 12888 | 12687 |
| >EGFR-E709(ETEFKKIK    | 2685  | >EGFR-E709(GTEFKKIK    | 460   | 2225  |
| >EGFR-E709(KETEFKKI    | 82    | >EGFR-E709(KGTEFKKI    | 32650 | 32568 |
| >EGFR-E709(KETEFKKIKV  | 274   | >EGFR-E709(KGTEFKKIKV  | 23855 | 23581 |
| >EGFR-E709(KETEFKKIKVL | 128   | >EGFR-E709(KGTEFKKIKVL | 22990 | 22862 |
| >EGFR-E709(KETEFKKI    | 165   | >EGFR-E709(KGTEFKKI    | 23825 | 23660 |
| >EGFR-E709(KETEFKKIKVL | 51    | >EGFR-E709(KGTEFKKIKVL | 22338 | 22287 |
| >EGFR-E709(KETEFKKI    | 289   | >EGFR-E709(KGTEFKKI    | 37851 | 37562 |
| >EGFR-E709(KETEFKKIKVL | 75    | >EGFR-E709(KGTEFKKIKVL | 31921 | 31846 |
| >EGFR-E709(KETEFKKIKVL | 105   | >EGFR-E709(KGTEFKKIKVL | 29904 | 29799 |
| >EGFR-E709(KETEFKKI    | 3569  | >EGFR-E709(KGTEFKKI    | 454   | 3115  |
| >EGFR-E709(ILKETEFKKI  | 144   | >EGFR-E709(ILKGTEFKKI  | 130   | 14    |
| >EGFR-E709(ILKETEFKKI  | 259   | >EGFR-E709(ILKGTEFKKI  | 784   | 525   |
| >EGFR-E709(ILKETEFKKI  | 63    | >EGFR-E709(ILKGTEFKKI  | 57    | 6     |
| >EGFR-E709(ILKETEFK    | 129   | >EGFR-E709(ILKGTEFK    | 99    | 30    |
| >EGFR-E709(ILKETEFKK   | 144   | >EGFR-E709(ILKGTEFKK   | 128   | 16    |
| >EGFR-E709(ILKETEFKKIK | 549   | >EGFR-E709(ILKGTEFKKIK | 483   | 66    |
| >EGFR-E709(ILKETEFK    | 431   | >EGFR-E709(ILKGTEFK    | 412   | 19    |
| >EGFR-E709(ILKETEFK    | 97    | >EGFR-E709(ILKGTEFK    | 71    | 26    |
| >EGFR-E709(ILKETEFKK   | 235   | >EGFR-E709(ILKGTEFKK   | 204   | 31    |
| >EGFR-E709(ILKETEFKKIK | 224   | >EGFR-E709(ILKGTEFKKIK | 196   | 28    |
| >EGFR-E709(ILKETEFK    | 561   | >EGFR-E709(ILKGTEFK    | 481   | 80    |
| >EGFR-E709(ILKETEFK    | 352   | >EGFR-E709(ILKGTEFK    | 438   | 86    |
| >EGFR-E709(RILKETEFK   | 83    | >EGFR-E709(RILKGTEFK   | 46    | 37    |
| >EGFR-E709(RILKETEFKK  | 111   | >EGFR-E709(RILKGTEFKK  | 39    | 72    |

|                         |       |                         |       |       |
|-------------------------|-------|-------------------------|-------|-------|
| >EGFR-E709C RILKETEFK   | 23    | >EGFR-E709C RILKGTEFK   | 18    | 5     |
| >EGFR-E709C RILKETEFKK  | 58    | >EGFR-E709C RILKGTEFKK  | 35    | 23    |
| >EGFR-E709C RILKETEF    | 267   | >EGFR-E709C RILKGTEF    | 288   | 21    |
| >EGFR-E709C RILKETEFK   | 37    | >EGFR-E709C RILKGTEFK   | 14    | 23    |
| >EGFR-E709C RILKETEFKK  | 71    | >EGFR-E709C RILKGTEFKK  | 35    | 36    |
| >EGFR-E709C RILKETEFK   | 508   | >EGFR-E709C RILKGTEFK   | 95    | 413   |
| >EGFR-E709C RILKETEFKK  | 503   | >EGFR-E709C RILKGTEFKK  | 201   | 302   |
| >EGFR-E709C RILKETEF    | 40    | >EGFR-E709C RILKGTEF    | 37    | 3     |
| >EGFR-E709C RILKETEFKKI | 128   | >EGFR-E709C RILKGTEFKKI | 104   | 24    |
| >EGFR-E709C RILKETEF    | 851   | >EGFR-E709C RILKGTEF    | 184   | 667   |
| >EGFR-E709C RILKETEF    | 62    | >EGFR-E709C RILKGTEF    | 44    | 18    |
| >EGFR-E709C RILKETEF    | 111   | >EGFR-E709C RILKGTEF    | 41    | 70    |
| >EGFR-E709C RILKETEF    | 2712  | >EGFR-E709C RILKGTEF    | 293   | 2419  |
| >EGFR-E709C RILKETEFK   | 64    | >EGFR-E709C RILKGTEFK   | 199   | 135   |
| >EGFR-E709C RILKETEFKK  | 149   | >EGFR-E709C RILKGTEFKK  | 277   | 128   |
| >EGFR-E709C RILKETEFKKI | 669   | >EGFR-E709C RILKGTEFKKI | 484   | 185   |
| >EGFR-E709C LRILKETEF   | 106   | >EGFR-E709C LRILKGTEF   | 30    | 76    |
| >EGFR-E709C LRILKETEFK  | 302   | >EGFR-E709C LRILKGTEFK  | 188   | 114   |
| >EGFR-E709C LRILKETEFKK | 185   | >EGFR-E709C LRILKGTEFKK | 113   | 72    |
| >EGFR-E709C LLRILKETEFK | 286   | >EGFR-E709C LLRILKGTEFK | 120   | 166   |
| >EGFR-E709C LLRILKETEFK | 60    | >EGFR-E709C LLRILKGTEFK | 23    | 37    |
| >EGFR-E709C LLRILKETEFK | 618   | >EGFR-E709C LLRILKGTEFK | 435   | 183   |
| >EGFR-E709C LLRILKETEF  | 167   | >EGFR-E709C LLRILKGTEF  | 83    | 84    |
| >EGFR-E709C LLRILKETEF  | 119   | >EGFR-E709C LLRILKGTEF  | 112   | 7     |
| >EGFR-E709C LLRILKETEF  | 422   | >EGFR-E709C LLRILKGTEF  | 201   | 221   |
| >EGFR-E709C LLRILKETEF  | 547   | >EGFR-E709C LLRILKGTEF  | 339   | 208   |
| >EGFR-E709C ALLRILKET   | 151   | >EGFR-E709C ALLRILKGT   | 149   | 2     |
| >EGFR-E709C ALLRILKET   | 90    | >EGFR-E709C ALLRILKGT   | 140   | 50    |
| >EGFR-E709C ALLRILKETEF | 153   | >EGFR-E709C ALLRILKGTEF | 177   | 24    |
| >EGFR-E709C ALLRILKETEF | 58    | >EGFR-E709C ALLRILKGTEF | 42    | 16    |
| >EGFR-E709F ETEFKKIK    | 13012 | >EGFR-E709F HTEFKKIK    | 266   | 12746 |
| >EGFR-E709F ETEFKKIK    | 46    | >EGFR-E709F HTEFKKIK    | 258   | 212   |
| >EGFR-E709F ETEFKKIKV   | 201   | >EGFR-E709F HTEFKKIKV   | 688   | 487   |
| >EGFR-E709F ETEFKKIKVL  | 1775  | >EGFR-E709F HTEFKKIKVL  | 137   | 1638  |
| >EGFR-E709F KETEFKKI    | 82    | >EGFR-E709F KHTEFKKI    | 24904 | 24822 |
| >EGFR-E709F KETEFKKIKV  | 274   | >EGFR-E709F KHTEFKKIKV  | 11336 | 11062 |
| >EGFR-E709F KETEFKKIKVL | 128   | >EGFR-E709F KHTEFKKIKVL | 9868  | 9740  |
| >EGFR-E709F KETEFKKI    | 165   | >EGFR-E709F KHTEFKKI    | 22066 | 21901 |
| >EGFR-E709F KETEFKKIKVL | 51    | >EGFR-E709F KHTEFKKIKVL | 19598 | 19547 |
| >EGFR-E709F KETEFKKI    | 289   | >EGFR-E709F KHTEFKKI    | 29837 | 29548 |
| >EGFR-E709F KETEFKKIKVL | 75    | >EGFR-E709F KHTEFKKIKVL | 20300 | 20225 |
| >EGFR-E709F KETEFKKIKVL | 105   | >EGFR-E709F KHTEFKKIKVL | 18372 | 18267 |
| >EGFR-E709F LKETEFKKI   | 1464  | >EGFR-E709F LKHTEFKKI   | 43    | 1421  |

|                         |      |                         |      |      |
|-------------------------|------|-------------------------|------|------|
| >EGFR-E709† LKETEFKKIK  | 5598 | >EGFR-E709† LKHTEFKKIK  | 332  | 5266 |
| >EGFR-E709† LKETEFKKIKV | 4576 | >EGFR-E709† LKHTEFKKIKV | 296  | 4280 |
| >EGFR-E709† ILKETEFKKI  | 144  | >EGFR-E709† ILKHTEFKKI  | 303  | 159  |
| >EGFR-E709† ILKETEFKKI  | 259  | >EGFR-E709† ILKHTEFKKI  | 2280 | 2021 |
| >EGFR-E709† ILKETEFKKI  | 63   | >EGFR-E709† ILKHTEFKKI  | 409  | 346  |
| >EGFR-E709† ILKETEFK    | 129  | >EGFR-E709† ILKHTEFK    | 73   | 56   |
| >EGFR-E709† ILKETEFKK   | 144  | >EGFR-E709† ILKHTEFKK   | 99   | 45   |
| >EGFR-E709† ILKETEFKKIK | 549  | >EGFR-E709† ILKHTEFKKIK | 345  | 204  |
| >EGFR-E709† ILKETEFK    | 431  | >EGFR-E709† ILKHTEFK    | 406  | 25   |
| >EGFR-E709† ILKETEFK    | 97   | >EGFR-E709† ILKHTEFK    | 35   | 62   |
| >EGFR-E709† ILKETEFKK   | 235  | >EGFR-E709† ILKHTEFKK   | 92   | 143  |
| >EGFR-E709† ILKETEFKKIK | 224  | >EGFR-E709† ILKHTEFKKIK | 97   | 127  |
| >EGFR-E709† ILKETEFK    | 561  | >EGFR-E709† ILKHTEFK    | 207  | 354  |
| >EGFR-E709† ILKETEFKK   | 528  | >EGFR-E709† ILKHTEFKK   | 306  | 222  |
| >EGFR-E709† ILKETEFK    | 352  | >EGFR-E709† ILKHTEFK    | 505  | 153  |
| >EGFR-E709† RILKETEFK   | 83   | >EGFR-E709† RILKHTEFK   | 38   | 45   |
| >EGFR-E709† RILKETEFKK  | 111  | >EGFR-E709† RILKHTEFKK  | 31   | 80   |
| >EGFR-E709† RILKETEFK   | 23   | >EGFR-E709† RILKHTEFK   | 20   | 3    |
| >EGFR-E709† RILKETEFKK  | 58   | >EGFR-E709† RILKHTEFKK  | 29   | 29   |
| >EGFR-E709† RILKETEF    | 267  | >EGFR-E709† RILKHTEF    | 260  | 7    |
| >EGFR-E709† RILKETEFK   | 37   | >EGFR-E709† RILKHTEFK   | 12   | 25   |
| >EGFR-E709† RILKETEFKK  | 71   | >EGFR-E709† RILKHTEFKK  | 26   | 45   |
| >EGFR-E709† RILKETEFK   | 508  | >EGFR-E709† RILKHTEFK   | 41   | 467  |
| >EGFR-E709† RILKETEFKK  | 503  | >EGFR-E709† RILKHTEFKK  | 80   | 423  |
| >EGFR-E709† RILKETEF    | 40   | >EGFR-E709† RILKHTEF    | 17   | 23   |
| >EGFR-E709† RILKETEFKKI | 128  | >EGFR-E709† RILKHTEFKKI | 76   | 52   |
| >EGFR-E709† RILKETEF    | 851  | >EGFR-E709† RILKHTEF    | 181  | 670  |
| >EGFR-E709† RILKETEF    | 62   | >EGFR-E709† RILKHTEF    | 36   | 26   |
| >EGFR-E709† RILKETEF    | 111  | >EGFR-E709† RILKHTEF    | 58   | 53   |
| >EGFR-E709† RILKETEFK   | 64   | >EGFR-E709† RILKHTEFK   | 63   | 1    |
| >EGFR-E709† RILKETEFKK  | 149  | >EGFR-E709† RILKHTEFKK  | 138  | 11   |
| >EGFR-E709† LRILKETEF   | 106  | >EGFR-E709† LRILKHTEF   | 45   | 61   |
| >EGFR-E709† LRILKETEFK  | 302  | >EGFR-E709† LRILKHTEFK  | 227  | 75   |
| >EGFR-E709† LRILKETEFKK | 185  | >EGFR-E709† LRILKHTEFKK | 166  | 19   |
| >EGFR-E709† LLRILKETEFK | 286  | >EGFR-E709† LLRILKHTEFK | 113  | 173  |
| >EGFR-E709† LLRILKETEFK | 60   | >EGFR-E709† LLRILKHTEFK | 19   | 41   |
| >EGFR-E709† LLRILKETEFK | 618  | >EGFR-E709† LLRILKHTEFK | 155  | 463  |
| >EGFR-E709† LLRILKETEF  | 167  | >EGFR-E709† LLRILKHTEF  | 92   | 75   |
| >EGFR-E709† LLRILKETEF  | 119  | >EGFR-E709† LLRILKHTEF  | 71   | 48   |
| >EGFR-E709† LLRILKETEF  | 422  | >EGFR-E709† LLRILKHTEF  | 150  | 272  |
| >EGFR-E709† LLRILKETEF  | 547  | >EGFR-E709† LLRILKHTEF  | 428  | 119  |
| >EGFR-E709† ALLRILKET   | 151  | >EGFR-E709† ALLRILKHT   | 388  | 237  |
| >EGFR-E709† ALLRILKET   | 90   | >EGFR-E709† ALLRILKHT   | 206  | 116  |

|                         |       |                         |       |       |
|-------------------------|-------|-------------------------|-------|-------|
| >EGFR-E709† ALLRILKETEF | 153   | >EGFR-E709† ALLRILKHTEF | 108   | 45    |
| >EGFR-E709† ALLRILKETEF | 58    | >EGFR-E709† ALLRILKHTEF | 41    | 17    |
| >EGFR-E709† ETEFKKIK    | 4936  | >EGFR-E709† KTEFKKIK    | 418   | 4518  |
| >EGFR-E709† ETEFKKIK    | 13012 | >EGFR-E709† KTEFKKIK    | 76    | 12936 |
| >EGFR-E709† ETEFKKIK    | 14212 | >EGFR-E709† KTEFKKIK    | 486   | 13726 |
| >EGFR-E709† ETEFKKIK    | 46    | >EGFR-E709† KTEFKKIK    | 4494  | 4448  |
| >EGFR-E709† ETEFKKIKV   | 201   | >EGFR-E709† KTEFKKIKV   | 10832 | 10631 |
| >EGFR-E709† ETEFKKIKVL  | 1775  | >EGFR-E709† KTEFKKIKVL  | 36    | 1739  |
| >EGFR-E709† KETEFKKI    | 82    | >EGFR-E709† KKTEFKKI    | 18415 | 18333 |
| >EGFR-E709† KETEFKKIKV  | 274   | >EGFR-E709† KKTEFKKIKV  | 11597 | 11323 |
| >EGFR-E709† KETEFKKIKVL | 128   | >EGFR-E709† KKTEFKKIKVL | 9870  | 9742  |
| >EGFR-E709† KETEFKKI    | 5057  | >EGFR-E709† KKTEFKKI    | 292   | 4765  |
| >EGFR-E709† KETEFKKIKVL | 2499  | >EGFR-E709† KKTEFKKIKVL | 89    | 2410  |
| >EGFR-E709† KETEFKKI    | 165   | >EGFR-E709† KKTEFKKI    | 21718 | 21553 |
| >EGFR-E709† KETEFKKIKVL | 51    | >EGFR-E709† KKTEFKKIKVL | 19195 | 19144 |
| >EGFR-E709† KETEFKKI    | 289   | >EGFR-E709† KKTEFKKI    | 29478 | 29189 |
| >EGFR-E709† KETEFKKIKVL | 75    | >EGFR-E709† KKTEFKKIKVL | 20666 | 20591 |
| >EGFR-E709† KETEFKKIKVL | 105   | >EGFR-E709† KKTEFKKIKVL | 17030 | 16925 |
| >EGFR-E709† LKETEFKKI   | 1464  | >EGFR-E709† LKKTEFKKI   | 61    | 1403  |
| >EGFR-E709† LKETEFKKIK  | 5598  | >EGFR-E709† LKKTEFKKIK  | 482   | 5116  |
| >EGFR-E709† LKETEFKKIKV | 4576  | >EGFR-E709† LKKTEFKKIKV | 409   | 4167  |
| >EGFR-E709† ILKETEFKKI  | 144   | >EGFR-E709† ILKKTEFKKI  | 225   | 81    |
| >EGFR-E709† ILKETEFKKI  | 259   | >EGFR-E709† ILKKTEFKKI  | 2574  | 2315  |
| >EGFR-E709† ILKETEFKKI  | 63    | >EGFR-E709† ILKKTEFKKI  | 399   | 336   |
| >EGFR-E709† ILKETEFK    | 129   | >EGFR-E709† ILKKTEFK    | 89    | 40    |
| >EGFR-E709† ILKETEFKK   | 144   | >EGFR-E709† ILKKTEFKK   | 109   | 35    |
| >EGFR-E709† ILKETEFKKIK | 549   | >EGFR-E709† ILKKTEFKKIK | 390   | 159   |
| >EGFR-E709† ILKETEFK    | 431   | >EGFR-E709† ILKKTEFK    | 455   | 24    |
| >EGFR-E709† ILKETEFK    | 97    | >EGFR-E709† ILKKTEFK    | 46    | 51    |
| >EGFR-E709† ILKETEFKK   | 235   | >EGFR-E709† ILKKTEFKK   | 114   | 121   |
| >EGFR-E709† ILKETEFKKIK | 224   | >EGFR-E709† ILKKTEFKKIK | 118   | 106   |
| >EGFR-E709† ILKETEFK    | 561   | >EGFR-E709† ILKKTEFK    | 230   | 331   |
| >EGFR-E709† ILKETEFKK   | 528   | >EGFR-E709† ILKKTEFKK   | 340   | 188   |
| >EGFR-E709† ILKETEFK    | 352   | >EGFR-E709† ILKKTEFK    | 459   | 107   |
| >EGFR-E709† RILKETEFK   | 83    | >EGFR-E709† RILKKTEFK   | 50    | 33    |
| >EGFR-E709† RILKETEFKK  | 111   | >EGFR-E709† RILKKTEFKK  | 42    | 69    |
| >EGFR-E709† RILKETEFK   | 23    | >EGFR-E709† RILKKTEFK   | 21    | 2     |
| >EGFR-E709† RILKETEFKK  | 58    | >EGFR-E709† RILKKTEFKK  | 55    | 3     |
| >EGFR-E709† RILKETEF    | 267   | >EGFR-E709† RILKKTEF    | 580   | 313   |
| >EGFR-E709† RILKETEFK   | 37    | >EGFR-E709† RILKKTEFK   | 15    | 22    |
| >EGFR-E709† RILKETEFKK  | 71    | >EGFR-E709† RILKKTEFKK  | 33    | 38    |
| >EGFR-E709† RILKETEFK   | 508   | >EGFR-E709† RILKKTEFK   | 45    | 463   |
| >EGFR-E709† RILKETEFKK  | 503   | >EGFR-E709† RILKKTEFKK  | 124   | 379   |

|                         |       |                         |       |       |
|-------------------------|-------|-------------------------|-------|-------|
| >EGFR-E709† RILKETEF    | 40    | >EGFR-E709† RILKKTEF    | 42    | 2     |
| >EGFR-E709† RILKETEFKKI | 128   | >EGFR-E709† RILKKTEFKKI | 102   | 26    |
| >EGFR-E709† RILKETEF    | 62    | >EGFR-E709† RILKKTEF    | 122   | 60    |
| >EGFR-E709† RILKETEF    | 111   | >EGFR-E709† RILKKTEF    | 92    | 19    |
| >EGFR-E709† RILKETEFK   | 64    | >EGFR-E709† RILKKTEFK   | 81    | 17    |
| >EGFR-E709† RILKETEFKK  | 149   | >EGFR-E709† RILKKTEFKK  | 153   | 4     |
| >EGFR-E709† LRILKETEF   | 106   | >EGFR-E709† LRILKKTEF   | 154   | 48    |
| >EGFR-E709† LRILKETEFK  | 302   | >EGFR-E709† LRILKKTEFK  | 260   | 42    |
| >EGFR-E709† LRILKETEFKK | 185   | >EGFR-E709† LRILKKTEFKK | 126   | 59    |
| >EGFR-E709† LLRILKETEFK | 286   | >EGFR-E709† LLRILKKTEFK | 186   | 100   |
| >EGFR-E709† LLRILKETEFK | 60    | >EGFR-E709† LLRILKKTEFK | 25    | 35    |
| >EGFR-E709† LLRILKETEFK | 618   | >EGFR-E709† LLRILKKTEFK | 328   | 290   |
| >EGFR-E709† LLRILKETEF  | 167   | >EGFR-E709† LLRILKKTEF  | 184   | 17    |
| >EGFR-E709† LLRILKETEF  | 119   | >EGFR-E709† LLRILKKTEF  | 118   | 1     |
| >EGFR-E709† LLRILKETEF  | 422   | >EGFR-E709† LLRILKKTEF  | 390   | 32    |
| >EGFR-E709† LLRILKETEF  | 547   | >EGFR-E709† LLRILKKTEF  | 438   | 109   |
| >EGFR-E709† ALLRILKET   | 151   | >EGFR-E709† ALLRILKKT   | 437   | 286   |
| >EGFR-E709† ALLRILKET   | 90    | >EGFR-E709† ALLRILKKT   | 225   | 135   |
| >EGFR-E709† ALLRILKE    | 16150 | >EGFR-E709† ALLRILKK    | 49    | 16101 |
| >EGFR-E709† ALLRILKE    | 23380 | >EGFR-E709† ALLRILKK    | 42    | 23338 |
| >EGFR-E709† ALLRILKE    | 14368 | >EGFR-E709† ALLRILKK    | 145   | 14223 |
| >EGFR-E709† ALLRILKETEF | 153   | >EGFR-E709† ALLRILKKTEF | 204   | 51    |
| >EGFR-E709† ALLRILKETEF | 58    | >EGFR-E709† ALLRILKKTEF | 79    | 21    |
| >EGFR-E709† QALLRILKE   | 21713 | >EGFR-E709† QALLRILKK   | 430   | 21283 |
| >EGFR-E709† QALLRILKE   | 26008 | >EGFR-E709† QALLRILKK   | 82    | 25926 |
| >EGFR-E709† QALLRILKE   | 16271 | >EGFR-E709† QALLRILKK   | 453   | 15818 |
| >EGFR-E709† QALLRILKE   | 10422 | >EGFR-E709† QALLRILKK   | 449   | 9973  |
| >EGFR-E709† NQALLRILKE  | 33921 | >EGFR-E709† NQALLRILKK  | 239   | 33682 |
| >EGFR-E709\ ETEFKKIK    | 46    | >EGFR-E709\ VTEFKKIK    | 1935  | 1889  |
| >EGFR-E709\ ETEFKKIKV   | 201   | >EGFR-E709\ VTEFKKIKV   | 6498  | 6297  |
| >EGFR-E709\ ETEFKKIKVL  | 1775  | >EGFR-E709\ VTEFKKIKVL  | 136   | 1639  |
| >EGFR-E709\ KETEFKKI    | 82    | >EGFR-E709\ KVTEFKKI    | 34126 | 34044 |
| >EGFR-E709\ KETEFKKIKV  | 274   | >EGFR-E709\ KVTEFKKIKV  | 24707 | 24433 |
| >EGFR-E709\ KETEFKKIKVL | 128   | >EGFR-E709\ KVTEFKKIKVL | 24581 | 24453 |
| >EGFR-E709\ KETEFKKIKV  | 7441  | >EGFR-E709\ KVTEFKKIKV  | 221   | 7220  |
| >EGFR-E709\ KETEFKKIKV  | 9797  | >EGFR-E709\ KVTEFKKIKV  | 364   | 9433  |
| >EGFR-E709\ KETEFKKIKV  | 14387 | >EGFR-E709\ KVTEFKKIKV  | 59    | 14328 |
| >EGFR-E709\ KETEFKKIK   | 21711 | >EGFR-E709\ KVTEFKKIK   | 225   | 21486 |
| >EGFR-E709\ KETEFKKIK   | 10511 | >EGFR-E709\ KVTEFKKIK   | 80    | 10431 |
| >EGFR-E709\ KETEFKKI    | 9214  | >EGFR-E709\ KVTEFKKI    | 326   | 8888  |
| >EGFR-E709\ KETEFKKI    | 165   | >EGFR-E709\ KVTEFKKI    | 23530 | 23365 |
| >EGFR-E709\ KETEFKKIKVL | 51    | >EGFR-E709\ KVTEFKKIKVL | 21921 | 21870 |
| >EGFR-E709\ KETEFKKI    | 289   | >EGFR-E709\ KVTEFKKI    | 38121 | 37832 |

|                         |      |                         |       |       |
|-------------------------|------|-------------------------|-------|-------|
| >EGFR-E709\ KETEFKKIKVL | 75   | >EGFR-E709\ KVTEFKKIKVL | 32050 | 31975 |
| >EGFR-E709\ KETEFKKIKVL | 105  | >EGFR-E709\ KVTEFKKIKVL | 27762 | 27657 |
| >EGFR-E709\ LKETEFKKI   | 1464 | >EGFR-E709\ LKVTEFKKI   | 54    | 1410  |
| >EGFR-E709\ LKETEFKKIK  | 5598 | >EGFR-E709\ LKVTEFKKIK  | 455   | 5143  |
| >EGFR-E709\ LKETEFKKIKV | 4576 | >EGFR-E709\ LKVTEFKKIKV | 333   | 4243  |
| >EGFR-E709\ ILKETEFKKI  | 144  | >EGFR-E709\ ILKVTEFKKI  | 258   | 114   |
| >EGFR-E709\ ILKETEFKKI  | 259  | >EGFR-E709\ ILKVTEFKKI  | 3462  | 3203  |
| >EGFR-E709\ ILKETEFKKI  | 63   | >EGFR-E709\ ILKVTEFKKI  | 444   | 381   |
| >EGFR-E709\ ILKETEFK    | 129  | >EGFR-E709\ ILKVTEFK    | 115   | 14    |
| >EGFR-E709\ ILKETEFKK   | 144  | >EGFR-E709\ ILKVTEFKK   | 157   | 13    |
| >EGFR-E709\ ILKETEFK    | 431  | >EGFR-E709\ ILKVTEFK    | 303   | 128   |
| >EGFR-E709\ ILKETEFKK   | 502  | >EGFR-E709\ ILKVTEFKK   | 416   | 86    |
| >EGFR-E709\ ILKETEFK    | 97   | >EGFR-E709\ ILKVTEFK    | 52    | 45    |
| >EGFR-E709\ ILKETEFKK   | 235  | >EGFR-E709\ ILKVTEFKK   | 125   | 110   |
| >EGFR-E709\ ILKETEFKKIK | 224  | >EGFR-E709\ ILKVTEFKKIK | 128   | 96    |
| >EGFR-E709\ ILKETEFK    | 561  | >EGFR-E709\ ILKVTEFK    | 157   | 404   |
| >EGFR-E709\ ILKETEFKK   | 528  | >EGFR-E709\ ILKVTEFKK   | 228   | 300   |
| >EGFR-E709\ ILKETEFK    | 352  | >EGFR-E709\ ILKVTEFK    | 259   | 93    |
| >EGFR-E709\ RILKETEFKKI | 1156 | >EGFR-E709\ RILKVTEFKKI | 289   | 867   |
| >EGFR-E709\ RILKETEFK   | 83   | >EGFR-E709\ RILKVTEFK   | 39    | 44    |
| >EGFR-E709\ RILKETEFKK  | 111  | >EGFR-E709\ RILKVTEFKK  | 37    | 74    |
| >EGFR-E709\ RILKETEFK   | 23   | >EGFR-E709\ RILKVTEFK   | 13    | 10    |
| >EGFR-E709\ RILKETEFKK  | 58   | >EGFR-E709\ RILKVTEFKK  | 37    | 21    |
| >EGFR-E709\ RILKETEF    | 267  | >EGFR-E709\ RILKVTEF    | 133   | 134   |
| >EGFR-E709\ RILKETEFK   | 37   | >EGFR-E709\ RILKVTEFK   | 17    | 20    |
| >EGFR-E709\ RILKETEFKK  | 71   | >EGFR-E709\ RILKVTEFKK  | 36    | 35    |
| >EGFR-E709\ RILKETEFK   | 508  | >EGFR-E709\ RILKVTEFK   | 52    | 456   |
| >EGFR-E709\ RILKETEFKK  | 503  | >EGFR-E709\ RILKVTEFKK  | 106   | 397   |
| >EGFR-E709\ RILKETEF    | 40   | >EGFR-E709\ RILKVTEF    | 13    | 27    |
| >EGFR-E709\ RILKETEFKKI | 128  | >EGFR-E709\ RILKVTEFKKI | 55    | 73    |
| >EGFR-E709\ RILKETEFK   | 1295 | >EGFR-E709\ RILKVTEFK   | 170   | 1125  |
| >EGFR-E709\ RILKETEF    | 851  | >EGFR-E709\ RILKVTEF    | 248   | 603   |
| >EGFR-E709\ RILKETEF    | 62   | >EGFR-E709\ RILKVTEF    | 57    | 5     |
| >EGFR-E709\ RILKETEF    | 111  | >EGFR-E709\ RILKVTEF    | 135   | 24    |
| >EGFR-E709\ RILKETEF    | 814  | >EGFR-E709\ RILKVTEF    | 116   | 698   |
| >EGFR-E709\ RILKETEF    | 2712 | >EGFR-E709\ RILKVTEF    | 383   | 2329  |
| >EGFR-E709\ RILKETEFK   | 64   | >EGFR-E709\ RILKVTEFK   | 107   | 43    |
| >EGFR-E709\ RILKETEFKK  | 149  | >EGFR-E709\ RILKVTEFKK  | 240   | 91    |
| >EGFR-E709\ LRILKETEF   | 106  | >EGFR-E709\ LRILKVTEF   | 36    | 70    |
| >EGFR-E709\ LRILKETEF   | 1405 | >EGFR-E709\ LRILKVTEF   | 373   | 1032  |
| >EGFR-E709\ LRILKETEFK  | 302  | >EGFR-E709\ LRILKVTEFK  | 128   | 174   |
| >EGFR-E709\ LRILKETEFKK | 185  | >EGFR-E709\ LRILKVTEFKK | 105   | 80    |
| >EGFR-E709\ LLRILKETEFK | 286  | >EGFR-E709\ LLRILKVTEFK | 106   | 180   |

|                        |       |                        |       |       |
|------------------------|-------|------------------------|-------|-------|
| >EGFR-E709\LLRILKETEFK | 60    | >EGFR-E709\LLRILKVTEFK | 22    | 38    |
| >EGFR-E709\LLRILKETEFK | 618   | >EGFR-E709\LLRILKVTEFK | 184   | 434   |
| >EGFR-E709\LLRILKETEF  | 167   | >EGFR-E709\LLRILKVTEF  | 76    | 91    |
| >EGFR-E709\LLRILKETEF  | 119   | >EGFR-E709\LLRILKVTEF  | 50    | 69    |
| >EGFR-E709\LLRILKETEF  | 422   | >EGFR-E709\LLRILKVTEF  | 160   | 262   |
| >EGFR-E709\ALLRILKE    | 20096 | >EGFR-E709\ALLRILKV    | 20    | 20076 |
| >EGFR-E709\ALLRILKE    | 11684 | >EGFR-E709\ALLRILKV    | 74    | 11610 |
| >EGFR-E709\ALLRILKE    | 17985 | >EGFR-E709\ALLRILKV    | 27    | 17958 |
| >EGFR-E709\ALLRILKE    | 15701 | >EGFR-E709\ALLRILKV    | 23    | 15678 |
| >EGFR-E709\ALLRILKE    | 6802  | >EGFR-E709\ALLRILKV    | 2     | 6800  |
| >EGFR-E709\ALLRILKET   | 151   | >EGFR-E709\ALLRILKVT   | 431   | 280   |
| >EGFR-E709\ALLRILKE    | 18726 | >EGFR-E709\ALLRILKV    | 6     | 18720 |
| >EGFR-E709\ALLRILKE    | 13478 | >EGFR-E709\ALLRILKV    | 5     | 13473 |
| >EGFR-E709\ALLRILKE    | 23266 | >EGFR-E709\ALLRILKV    | 4     | 23262 |
| >EGFR-E709\ALLRILKE    | 4905  | >EGFR-E709\ALLRILKV    | 2     | 4903  |
| >EGFR-E709\ALLRILKET   | 90    | >EGFR-E709\ALLRILKVT   | 341   | 251   |
| >EGFR-E709\ALLRILKETEF | 153   | >EGFR-E709\ALLRILKVTEF | 72    | 81    |
| >EGFR-E709\ALLRILKETEF | 58    | >EGFR-E709\ALLRILKVTEF | 36    | 22    |
| >EGFR-E709\NQALLRILKE  | 24897 | >EGFR-E709\NQALLRILKV  | 291   | 24606 |
| >EGFR-E709\NQALLRILKE  | 21577 | >EGFR-E709\NQALLRILKV  | 254   | 21323 |
| >EGFR-E711†EFKKIKVL    | 15030 | >EGFR-E711†KFKKIKVL    | 172   | 14858 |
| >EGFR-E711†EFKKIKVLG   | 15723 | >EGFR-E711†KFKKIKVLG   | 336   | 15387 |
| >EGFR-E711†EFKKIKVLGS  | 16172 | >EGFR-E711†KFKKIKVLGS  | 422   | 15750 |
| >EGFR-E711†EFKKIKVLGSC | 16007 | >EGFR-E711†KFKKIKVLGSC | 297   | 15710 |
| >EGFR-E711†TEFKKIKVL   | 51    | >EGFR-E711†TKFKKIKVL   | 4137  | 4086  |
| >EGFR-E711†TEFKKIKV    | 8155  | >EGFR-E711†TKFKKIKV    | 488   | 7667  |
| >EGFR-E711†TEFKKIKVL   | 1926  | >EGFR-E711†TKFKKIKVL   | 36    | 1890  |
| >EGFR-E711†TEFKKIKVL   | 462   | >EGFR-E711†TKFKKIKVL   | 20414 | 19952 |
| >EGFR-E711†TEFKKIKVL   | 284   | >EGFR-E711†TKFKKIKVL   | 21483 | 21199 |
| >EGFR-E711†TEFKKIKV    | 361   | >EGFR-E711†TKFKKIKV    | 29086 | 28725 |
| >EGFR-E711†TEFKKIKVL   | 68    | >EGFR-E711†TKFKKIKVL   | 16526 | 16458 |
| >EGFR-E711†TEFKKIKVL   | 460   | >EGFR-E711†TKFKKIKVL   | 26827 | 26367 |
| >EGFR-E711†TEFKKIKVL   | 85    | >EGFR-E711†TKFKKIKVL   | 17318 | 17233 |
| >EGFR-E711†ETEFKKIK    | 46    | >EGFR-E711†ETKFKKIK    | 35    | 11    |
| >EGFR-E711†ETEFKKIKV   | 201   | >EGFR-E711†ETKFKKIKV   | 126   | 75    |
| >EGFR-E711†KETEFKKI    | 82    | >EGFR-E711†KETKFKKI    | 76    | 6     |
| >EGFR-E711†KETEFKKIKV  | 274   | >EGFR-E711†KETKFKKIKV  | 435   | 161   |
| >EGFR-E711†KETEFKKIKVL | 128   | >EGFR-E711†KETKFKKIKVL | 196   | 68    |
| >EGFR-E711†KETEFKKI    | 165   | >EGFR-E711†KETKFKKI    | 392   | 227   |
| >EGFR-E711†KETEFKKIKVL | 51    | >EGFR-E711†KETKFKKIKVL | 101   | 50    |
| >EGFR-E711†KETEFKKI    | 289   | >EGFR-E711†KETKFKKI    | 373   | 84    |
| >EGFR-E711†KETEFKKIKVL | 75    | >EGFR-E711†KETKFKKIKVL | 101   | 26    |
| >EGFR-E711†KETEFKKIKVL | 105   | >EGFR-E711†KETKFKKIKVL | 164   | 59    |



|                         |       |                        |      |       |
|-------------------------|-------|------------------------|------|-------|
| >EGFR-E711†LKETEFKKI    | 757   | >EGFR-E711†LKETKFKKI   | 436  | 321   |
| >EGFR-E711†ILKETEFKKI   | 144   | >EGFR-E711†ILKETKFKKI  | 227  | 83    |
| >EGFR-E711†ILKETEFKKI   | 259   | >EGFR-E711†ILKETKFKKI  | 283  | 24    |
| >EGFR-E711†ILKETEFKKI   | 63    | >EGFR-E711†ILKETKFKKI  | 71   | 8     |
| >EGFR-E711†ILKETEFLK    | 129   | >EGFR-E711†ILKETKFK    | 78   | 51    |
| >EGFR-E711†ILKETEFLK    | 144   | >EGFR-E711†ILKETKFKK   | 86   | 58    |
| >EGFR-E711†ILKETEFLKIK  | 549   | >EGFR-E711†ILKETKFKKIK | 356  | 193   |
| >EGFR-E711†ILKETEFLK    | 431   | >EGFR-E711†ILKETKFK    | 824  | 393   |
| >EGFR-E711†ILKETEFLK    | 502   | >EGFR-E711†ILKETKFKK   | 498  | 4     |
| >EGFR-E711†ILKETEFLK    | 97    | >EGFR-E711†ILKETKFK    | 24   | 73    |
| >EGFR-E711†ILKETEFLK    | 235   | >EGFR-E711†ILKETKFKK   | 95   | 140   |
| >EGFR-E711†ILKETEFLKIK  | 224   | >EGFR-E711†ILKETKFKKIK | 123  | 101   |
| >EGFR-E711†ILKETEFLK    | 561   | >EGFR-E711†ILKETKFK    | 314  | 247   |
| >EGFR-E711†ILKETEFLK    | 528   | >EGFR-E711†ILKETKFKK   | 61   | 467   |
| >EGFR-E711†ILKETEFLK    | 352   | >EGFR-E711†ILKETKFK    | 1245 | 893   |
| >EGFR-E711†RILKETEFLK   | 83    | >EGFR-E711†RILKETKFK   | 59   | 24    |
| >EGFR-E711†RILKETEFLK   | 111   | >EGFR-E711†RILKETKFKK  | 51   | 60    |
| >EGFR-E711†RILKETEFLK   | 23    | >EGFR-E711†RILKETKFK   | 45   | 22    |
| >EGFR-E711†RILKETEFLK   | 58    | >EGFR-E711†RILKETKFKK  | 54   | 4     |
| >EGFR-E711†RILKETEFL    | 267   | >EGFR-E711†RILKETKF    | 550  | 283   |
| >EGFR-E711†RILKETEFLK   | 37    | >EGFR-E711†RILKETKFK   | 9    | 28    |
| >EGFR-E711†RILKETEFLK   | 71    | >EGFR-E711†RILKETKFKK  | 28   | 43    |
| >EGFR-E711†RILKETEFLK   | 503   | >EGFR-E711†RILKETKFKK  | 173  | 330   |
| >EGFR-E711†RILKETEFL    | 40    | >EGFR-E711†RILKETKF    | 57   | 17    |
| >EGFR-E711†RILKETEFLKI  | 128   | >EGFR-E711†RILKETKFKKI | 162  | 34    |
| >EGFR-E711†RILKETEFL    | 62    | >EGFR-E711†RILKETKF    | 111  | 49    |
| >EGFR-E711†RILKETEFL    | 111   | >EGFR-E711†RILKETKF    | 86   | 25    |
| >EGFR-E711†RILKETEFLK   | 64    | >EGFR-E711†RILKETKFK   | 46   | 18    |
| >EGFR-E711†RILKETEFLK   | 149   | >EGFR-E711†RILKETKFKK  | 98   | 51    |
| >EGFR-E711†LRILKETEFL   | 106   | >EGFR-E711†LRILKETKF   | 236  | 130   |
| >EGFR-E711†LRILKETE     | 11388 | >EGFR-E711†LRILKETK    | 303  | 11085 |
| >EGFR-E711†LRILKETEFLK  | 302   | >EGFR-E711†LRILKETKFK  | 205  | 97    |
| >EGFR-E711†LRILKETEFLK  | 185   | >EGFR-E711†LRILKETKFKK | 119  | 66    |
| >EGFR-E711†LLRILKETEFLK | 286   | >EGFR-E711†LLRILKETKFK | 207  | 79    |
| >EGFR-E711†LLRILKETE    | 13863 | >EGFR-E711†LLRILKETK   | 326  | 13537 |
| >EGFR-E711†LLRILKETEFLK | 60    | >EGFR-E711†LLRILKETKFK | 24   | 36    |
| >EGFR-E711†LLRILKETEFL  | 167   | >EGFR-E711†LLRILKETKF  | 681  | 514   |
| >EGFR-E711†LLRILKETEFL  | 119   | >EGFR-E711†LLRILKETKF  | 250  | 131   |
| >EGFR-E711†LLRILKETEFL  | 422   | >EGFR-E711†LLRILKETKF  | 403  | 19    |
| >EGFR-E711†LLRILKETEFL  | 547   | >EGFR-E711†LLRILKETKF  | 297  | 250   |
| >EGFR-E711†ALLRILKETE   | 16634 | >EGFR-E711†ALLRILKETK  | 70   | 16564 |
| >EGFR-E711†ALLRILKETE   | 33565 | >EGFR-E711†ALLRILKETK  | 116  | 33449 |
| >EGFR-E711†ALLRILKETEFL | 153   | >EGFR-E711†ALLRILKETKF | 170  | 17    |

|                        |       |                        |      |       |
|------------------------|-------|------------------------|------|-------|
| >EGFR-E711†ALLRILKETEF | 58    | >EGFR-E711†ALLRILKETKF | 106  | 48    |
| >EGFR-E734†GTVYKGLWIF  | 19060 | >EGFR-E734†GTVYKGLWIF  | 23   | 19037 |
| >EGFR-E734†GTVYKGLWIF  | 11101 | >EGFR-E734†GTVYKGLWIF  | 99   | 11002 |
| >EGFR-E734†GTVYKGLWIF  | 2607  | >EGFR-E734†GTVYKGLWIF  | 133  | 2474  |
| >EGFR-E734†IPEGEKVKIPV | 188   | >EGFR-E734†IPKGEKVKIPV | 159  | 29    |
| >EGFR-E734†IPEGEKVKI   | 142   | >EGFR-E734†IPKGEKVKI   | 807  | 665   |
| >EGFR-E734†IPEGEKVKIPV | 311   | >EGFR-E734†IPKGEKVKIPV | 187  | 124   |
| >EGFR-E734†WIPEGEKV    | 298   | >EGFR-E734†WIPKGEKV    | 1067 | 769   |
| >EGFR-E734†WIPEGEKV    | 191   | >EGFR-E734†WIPKGEKV    | 794  | 603   |
| >EGFR-E734†WIPEGEKV    | 25    | >EGFR-E734†WIPKGEKV    | 199  | 174   |
| >EGFR-E734†WIPEGEKV    | 69    | >EGFR-E734†WIPKGEKV    | 293  | 224   |
| >EGFR-E734†WIPEGEKV    | 284   | >EGFR-E734†WIPKGEKV    | 2471 | 2187  |
| >EGFR-E734†WIPEGEKV    | 10    | >EGFR-E734†WIPKGEKV    | 35   | 25    |
| >EGFR-E734†WIPEGEKVKI  | 453   | >EGFR-E734†WIPKGEKVKI  | 2152 | 1699  |
| >EGFR-E734†WIPEGEKV    | 381   | >EGFR-E734†WIPKGEKV    | 728  | 347   |
| >EGFR-E734†LWIPEGEKVK  | 158   | >EGFR-E734†LWIPKGEKVK  | 279  | 121   |
| >EGFR-E734†LWIPEGEKVK  | 37    | >EGFR-E734†LWIPKGEKVK  | 65   | 28    |
| >EGFR-E734†LWIPEGEKV   | 270   | >EGFR-E734†LWIPKGEKV   | 224  | 46    |
| >EGFR-E734†LWIPEGEKVK  | 270   | >EGFR-E734†LWIPKGEKVK  | 240  | 30    |
| >EGFR-E734†GLWIPEGEKV  | 251   | >EGFR-E734†GLWIPKGEKV  | 604  | 353   |
| >EGFR-E734†GLWIPEGEKV  | 329   | >EGFR-E734†GLWIPKGEKV  | 511  | 182   |
| >EGFR-E734†GLWIPEGEKV  | 3     | >EGFR-E734†GLWIPKGEKV  | 3    | 0     |
| >EGFR-E734†GLWIPEGEKV  | 28    | >EGFR-E734†GLWIPKGEKV  | 41   | 13    |
| >EGFR-E734†GLWIPEGEKV  | 6     | >EGFR-E734†GLWIPKGEKV  | 8    | 2     |
| >EGFR-E734†GLWIPEGEKV  | 87    | >EGFR-E734†GLWIPKGEKV  | 128  | 41    |
| >EGFR-E734†GLWIPEGEKV  | 7     | >EGFR-E734†GLWIPKGEKV  | 7    | 0     |
| >EGFR-E734†GLWIPEGEK   | 421   | >EGFR-E734†GLWIPKGEK   | 196  | 225   |
| >EGFR-E734†KGLWIPEGEK  | 229   | >EGFR-E734†KGLWIPKGEK  | 398  | 169   |
| >EGFR-E734†KGLWIPEGEK  | 499   | >EGFR-E734†KGLWIPKGEK  | 1041 | 542   |
| >EGFR-E734†VYKGLWIPE   | 2095  | >EGFR-E734†VYKGLWIPK   | 5    | 2090  |
| >EGFR-E734†VYKGLWIPE   | 7732  | >EGFR-E734†VYKGLWIPK   | 74   | 7658  |
| >EGFR-E734†VYKGLWIPE   | 8523  | >EGFR-E734†VYKGLWIPK   | 295  | 8228  |
| >EGFR-E734†VYKGLWIPE   | 7778  | >EGFR-E734†VYKGLWIPK   | 48   | 7730  |
| >EGFR-E734†TVYKGLWIPE  | 16082 | >EGFR-E734†TVYKGLWIPK  | 38   | 16044 |
| >EGFR-E734†TVYKGLWIPE  | 23431 | >EGFR-E734†TVYKGLWIPK  | 14   | 23417 |
| >EGFR-E734†TVYKGLWIPE  | 9932  | >EGFR-E734†TVYKGLWIPK  | 36   | 9896  |
| >EGFR-E734†TVYKGLWIPE  | 17084 | >EGFR-E734†TVYKGLWIPK  | 19   | 17065 |
| >EGFR-E734†TVYKGLWIPE  | 6652  | >EGFR-E734†TVYKGLWIPK  | 496  | 6156  |
| >EGFR-E734(IPEGEKVKIPV | 188   | >EGFR-E734(IPQGEKVKIPV | 105  | 83    |
| >EGFR-E734(IPEGEKVKI   | 142   | >EGFR-E734(IPQGEKVKI   | 197  | 55    |
| >EGFR-E734(IPEGEKVKIPV | 311   | >EGFR-E734(IPQGEKVKIPV | 229  | 82    |
| >EGFR-E734(WIPEGEKV    | 298   | >EGFR-E734(WIPQGEKV    | 1169 | 871   |
| >EGFR-E734(WIPEGEKV    | 191   | >EGFR-E734(WIPQGEKV    | 731  | 540   |

|                         |       |                         |       |       |
|-------------------------|-------|-------------------------|-------|-------|
| >EGFR-E734CWIPEGEKV     | 25    | >EGFR-E734CWIPQGEKV     | 107   | 82    |
| >EGFR-E734CWIPEGEKV     | 69    | >EGFR-E734CWIPQGEKV     | 217   | 148   |
| >EGFR-E734CWIPEGEKV     | 284   | >EGFR-E734CWIPQGEKV     | 1842  | 1558  |
| >EGFR-E734CWIPEGEKV     | 10    | >EGFR-E734CWIPQGEKV     | 17    | 7     |
| >EGFR-E734CWIPEGEKVKI   | 453   | >EGFR-E734CWIPQGEKVKI   | 941   | 488   |
| >EGFR-E734CWIPEGEKV     | 381   | >EGFR-E734CWIPQGEKV     | 828   | 447   |
| >EGFR-E734CLWIPEGEKVK   | 158   | >EGFR-E734CLWIPQGEKV    | 432   | 274   |
| >EGFR-E734CLWIPEGEKVK   | 37    | >EGFR-E734CLWIPQGEKV    | 36    | 1     |
| >EGFR-E734CLWIPEGEKV    | 270   | >EGFR-E734CLWIPQGEKV    | 240   | 30    |
| >EGFR-E734CLWIPEGEKVK   | 270   | >EGFR-E734CLWIPQGEKV    | 250   | 20    |
| >EGFR-E734CLWIPEGEKV    | 251   | >EGFR-E734CLWIPQGEKV    | 380   | 129   |
| >EGFR-E734CLWIPEGEKV    | 329   | >EGFR-E734CLWIPQGEKV    | 458   | 129   |
| >EGFR-E734CLWIPEGEKV    | 3     | >EGFR-E734CLWIPQGEKV    | 3     | 0     |
| >EGFR-E734CLWIPEGEKV    | 28    | >EGFR-E734CLWIPQGEKV    | 22    | 6     |
| >EGFR-E734CLWIPEGEKV    | 6     | >EGFR-E734CLWIPQGEKV    | 6     | 0     |
| >EGFR-E734CLWIPEGEKV    | 87    | >EGFR-E734CLWIPQGEKV    | 45    | 42    |
| >EGFR-E734CLWIPEGEKV    | 7     | >EGFR-E734CLWIPQGEKV    | 6     | 1     |
| >EGFR-E734CLWIPEGEK     | 421   | >EGFR-E734CLWIPQGEK     | 113   | 308   |
| >EGFR-E734CKGLWIPEGEK   | 229   | >EGFR-E734CKGLWIPQGEK   | 223   | 6     |
| >EGFR-E734CKGLWIPEGEK   | 499   | >EGFR-E734CKGLWIPQGEK   | 412   | 87    |
| >EGFR-E734CVYKGLWIPE    | 2095  | >EGFR-E734CVYKGLWIPQ    | 302   | 1793  |
| >EGFR-E746I ELREATSPKA  | 1973  | >EGFR-E746I ILREATSPKA  | 145   | 1828  |
| >EGFR-E746I ELREATSPKA  | 2026  | >EGFR-E746I ILREATSPKA  | 255   | 1771  |
| >EGFR-E746I ELREATSPKA  | 122   | >EGFR-E746I ILREATSPKA  | 12    | 110   |
| >EGFR-E746I ELREATSPK   | 226   | >EGFR-E746I ILREATSPK   | 36    | 190   |
| >EGFR-E746I ELREATSPK   | 86    | >EGFR-E746I ILREATSPK   | 5     | 81    |
| >EGFR-E746I ELREATSPKA  | 2381  | >EGFR-E746I ILREATSPKA  | 29    | 2352  |
| >EGFR-E746I ELREATSPK   | 139   | >EGFR-E746I ILREATSPK   | 2463  | 2324  |
| >EGFR-E746I KELREATSPK/ | 6806  | >EGFR-E746I KILREATSPKA | 365   | 6441  |
| >EGFR-E746I KELREATSPK  | 3803  | >EGFR-E746I KILREATSPK  | 19    | 3784  |
| >EGFR-E746I KELREATSPK  | 18799 | >EGFR-E746I KILREATSPK  | 101   | 18698 |
| >EGFR-E746I KELREATSPK  | 1031  | >EGFR-E746I KILREATSPK  | 11    | 1020  |
| >EGFR-E746I KELREATSPK/ | 7407  | >EGFR-E746I KILREATSPKA | 143   | 7264  |
| >EGFR-E746I KELREATSPK/ | 449   | >EGFR-E746I KILREATSPKA | 39261 | 38812 |
| >EGFR-E746I KELREATSPK/ | 71    | >EGFR-E746I KILREATSPKA | 37438 | 37367 |
| >EGFR-E746I KELREATSPK/ | 319   | >EGFR-E746I KILREATSPKA | 36945 | 36626 |
| >EGFR-E746I KELREATSPK  | 1380  | >EGFR-E746I KILREATSPK  | 251   | 1129  |
| >EGFR-E746I IKELREATSPK | 5338  | >EGFR-E746I IKILREATSPK | 330   | 5008  |
| >EGFR-E746I AIKELREA    | 369   | >EGFR-E746I AIKILREA    | 997   | 628   |
| >EGFR-E746I AIKELREA    | 496   | >EGFR-E746I AIKILREA    | 302   | 194   |
| >EGFR-E746I PVAIKELR    | 386   | >EGFR-E746I PVAIKILR    | 319   | 67    |
| >EGFR-E746I IPVAIKEL    | 25    | >EGFR-E746I IPVAIKIL    | 81    | 56    |
| >EGFR-E746I IPVAIKELR   | 150   | >EGFR-E746I IPVAIKILR   | 170   | 20    |

|                         |       |                         |       |       |
|-------------------------|-------|-------------------------|-------|-------|
| >EGFR-E746I IPVAIKEL    | 151   | >EGFR-E746I IPVAIKIL    | 128   | 23    |
| >EGFR-E746I IPVAIKEL    | 406   | >EGFR-E746I IPVAIKIL    | 653   | 247   |
| >EGFR-E746I IPVAIKEL    | 340   | >EGFR-E746I IPVAIKIL    | 250   | 90    |
| >EGFR-E746I IPVAIKELR   | 2526  | >EGFR-E746I IPVAIKILR   | 354   | 2172  |
| >EGFR-E746I IPVAIKELREA | 30    | >EGFR-E746I IPVAIKILREA | 11    | 19    |
| >EGFR-E746I IPVAIKEL    | 248   | >EGFR-E746I IPVAIKIL    | 774   | 526   |
| >EGFR-E746I IPVAIKEL    | 498   | >EGFR-E746I IPVAIKIL    | 869   | 371   |
| >EGFR-E746I IPVAIKELR   | 547   | >EGFR-E746I IPVAIKILR   | 124   | 423   |
| >EGFR-E746I KIPVAIKELR  | 1982  | >EGFR-E746I KIPVAIKILR  | 494   | 1488  |
| >EGFR-E746I KIPVAIKELR  | 78    | >EGFR-E746I KIPVAIKILR  | 34    | 44    |
| >EGFR-E746I KIPVAIKE    | 18296 | >EGFR-E746I KIPVAIKI    | 313   | 17983 |
| >EGFR-E746I KIPVAIKELR  | 68    | >EGFR-E746I KIPVAIKILR  | 69    | 1     |
| >EGFR-E746I KIPVAIKEL   | 331   | >EGFR-E746I KIPVAIKIL   | 42    | 289   |
| >EGFR-E746I KIPVAIKELR  | 777   | >EGFR-E746I KIPVAIKILR  | 344   | 433   |
| >EGFR-E746I KIPVAIKELR  | 66    | >EGFR-E746I KIPVAIKILR  | 35    | 31    |
| >EGFR-E746I VKIPVAIKE   | 10095 | >EGFR-E746I VKIPVAIKI   | 484   | 9611  |
| >EGFR-E746I VKIPVAIKEL  | 87    | >EGFR-E746I VKIPVAIKIL  | 72    | 15    |
| >EGFR-E746I KVKIPVAIKE  | 878   | >EGFR-E746I KVKIPVAIKI  | 11    | 867   |
| >EGFR-E746I KVKIPVAIKEL | 29    | >EGFR-E746I KVKIPVAIKIL | 26    | 3     |
| >EGFR-E746I KVKIPVAIKEL | 148   | >EGFR-E746I KVKIPVAIKIL | 578   | 430   |
| >EGFR-E746I ELREATSPKA  | 1973  | >EGFR-E746I KLREATSPKA  | 147   | 1826  |
| >EGFR-E746I ELREATSPKA  | 7141  | >EGFR-E746I KLREATSPKA  | 417   | 6724  |
| >EGFR-E746I ELREATSPKA  | 2026  | >EGFR-E746I KLREATSPKA  | 114   | 1912  |
| >EGFR-E746I ELREATSPKA  | 122   | >EGFR-E746I KLREATSPKA  | 20    | 102   |
| >EGFR-E746I ELREATSPK   | 226   | >EGFR-E746I KLREATSPK   | 31    | 195   |
| >EGFR-E746I ELREATSP    | 15589 | >EGFR-E746I KLREATSP    | 408   | 15181 |
| >EGFR-E746I ELREATSPK   | 86    | >EGFR-E746I KLREATSPK   | 3     | 83    |
| >EGFR-E746I ELREATSPKA  | 2381  | >EGFR-E746I KLREATSPKA  | 5     | 2376  |
| >EGFR-E746I ELREATSPKAI | 14232 | >EGFR-E746I KLREATSPKAI | 189   | 14043 |
| >EGFR-E746I ELREATSPK   | 10697 | >EGFR-E746I KLREATSPK   | 149   | 10548 |
| >EGFR-E746I ELREATSPK   | 139   | >EGFR-E746I KLREATSPK   | 10753 | 10614 |
| >EGFR-E746I KELREATSPK  | 1031  | >EGFR-E746I KKLREATSPK  | 202   | 829   |
| >EGFR-E746I KELREATSP   | 7522  | >EGFR-E746I KKLREATSP   | 230   | 7292  |
| >EGFR-E746I KELREATSPK  | 1812  | >EGFR-E746I KKLREATSPK  | 56    | 1756  |
| >EGFR-E746I KELREATSPK/ | 7373  | >EGFR-E746I KKLREATSPK/ | 197   | 7176  |
| >EGFR-E746I KELREATSPK/ | 449   | >EGFR-E746I KKLREATSPK/ | 30603 | 30154 |
| >EGFR-E746I KELREATSPK/ | 71    | >EGFR-E746I KKLREATSPK/ | 23240 | 23169 |
| >EGFR-E746I KELREATSPK/ | 319   | >EGFR-E746I KKLREATSPK/ | 27848 | 27529 |
| >EGFR-E746I EKVKIPVAIKE | 21121 | >EGFR-E746I EKVKIPVAIKK | 478   | 20643 |
| >EGFR-E746I IKELREATSPK | 11096 | >EGFR-E746I IKKLREATSPK | 333   | 10763 |
| >EGFR-E746I IKELREATSPK | 5338  | >EGFR-E746I IKKLREATSPK | 461   | 4877  |
| >EGFR-E746I AIKELREA    | 369   | >EGFR-E746I AIKKLREA    | 1188  | 819   |
| >EGFR-E746I AIKELREA    | 496   | >EGFR-E746I AIKKLREA    | 198   | 298   |

|                        |       |                        |       |       |
|------------------------|-------|------------------------|-------|-------|
| >EGFR-E746†PVAIKELR    | 386   | >EGFR-E746†PVAIKKLR    | 1121  | 735   |
| >EGFR-E746†IPVAIKEL    | 25    | >EGFR-E746†IPVAIKKL    | 70    | 45    |
| >EGFR-E746†IPVAIKELR   | 150   | >EGFR-E746†IPVAIKKLR   | 876   | 726   |
| >EGFR-E746†IPVAIKEL    | 151   | >EGFR-E746†IPVAIKKL    | 328   | 177   |
| >EGFR-E746†IPVAIKEL    | 406   | >EGFR-E746†IPVAIKKL    | 1898  | 1492  |
| >EGFR-E746†IPVAIKEL    | 340   | >EGFR-E746†IPVAIKKL    | 547   | 207   |
| >EGFR-E746†IPVAIKELREA | 30    | >EGFR-E746†IPVAIKKLR   | 16    | 14    |
| >EGFR-E746†IPVAIKEL    | 248   | >EGFR-E746†IPVAIKKL    | 1176  | 928   |
| >EGFR-E746†IPVAIKEL    | 498   | >EGFR-E746†IPVAIKKL    | 1076  | 578   |
| >EGFR-E746†IPVAIKELR   | 547   | >EGFR-E746†IPVAIKKLR   | 353   | 194   |
| >EGFR-E746†KIPVAIKE    | 19970 | >EGFR-E746†KIPVAIKK    | 191   | 19779 |
| >EGFR-E746†KIPVAIKE    | 28300 | >EGFR-E746†KIPVAIKK    | 290   | 28010 |
| >EGFR-E746†KIPVAIKE    | 14977 | >EGFR-E746†KIPVAIKK    | 236   | 14741 |
| >EGFR-E746†KIPVAIKELR  | 78    | >EGFR-E746†KIPVAIKKLR  | 70    | 8     |
| >EGFR-E746†KIPVAIKELR  | 68    | >EGFR-E746†KIPVAIKKLR  | 434   | 366   |
| >EGFR-E746†KIPVAIKEL   | 331   | >EGFR-E746†KIPVAIKKL   | 122   | 209   |
| >EGFR-E746†KIPVAIKELR  | 66    | >EGFR-E746†KIPVAIKKLR  | 53    | 13    |
| >EGFR-E746†VKIPVAIKEL  | 87    | >EGFR-E746†VKIPVAIKKL  | 187   | 100   |
| >EGFR-E746†KVKIPVAIKE  | 21053 | >EGFR-E746†KVKIPVAIKK  | 100   | 20953 |
| >EGFR-E746†KVKIPVAIKE  | 32257 | >EGFR-E746†KVKIPVAIKK  | 65    | 32192 |
| >EGFR-E746†KVKIPVAIKE  | 878   | >EGFR-E746†KVKIPVAIKK  | 4     | 874   |
| >EGFR-E746†KVKIPVAIKEL | 29    | >EGFR-E746†KVKIPVAIKKL | 39    | 10    |
| >EGFR-E746†KVKIPVAIKE  | 8979  | >EGFR-E746†KVKIPVAIKK  | 167   | 8812  |
| >EGFR-E746†KVKIPVAIKEL | 148   | >EGFR-E746†KVKIPVAIKKL | 145   | 3     |
| >EGFR-E746\ELREATSPKA  | 1973  | >EGFR-E746\VLREATSPKA  | 119   | 1854  |
| >EGFR-E746\ELREATSPKA  | 2026  | >EGFR-E746\VLREATSPKA  | 123   | 1903  |
| >EGFR-E746\ELREATSPKA  | 122   | >EGFR-E746\VLREATSPKA  | 9     | 113   |
| >EGFR-E746\ELREATSPK   | 226   | >EGFR-E746\VLREATSPK   | 39    | 187   |
| >EGFR-E746\ELREATSPK   | 86    | >EGFR-E746\VLREATSPK   | 8     | 78    |
| >EGFR-E746\ELREATSPKA  | 2381  | >EGFR-E746\VLREATSPKA  | 80    | 2301  |
| >EGFR-E746\ELREATSPK   | 139   | >EGFR-E746\VLREATSPK   | 5827  | 5688  |
| >EGFR-E746\KELREATSPK/ | 6806  | >EGFR-E746\KVLREATSPK/ | 324   | 6482  |
| >EGFR-E746\KELREATSPK  | 3803  | >EGFR-E746\KVLREATSPK  | 24    | 3779  |
| >EGFR-E746\KELREATSPK  | 18799 | >EGFR-E746\KVLREATSPK  | 82    | 18717 |
| >EGFR-E746\KELREATSPK  | 1031  | >EGFR-E746\KVLREATSPK  | 7     | 1024  |
| >EGFR-E746\KELREATSPK/ | 7407  | >EGFR-E746\KVLREATSPK/ | 58    | 7349  |
| >EGFR-E746\KELREATSPK/ | 449   | >EGFR-E746\KVLREATSPK/ | 38092 | 37643 |
| >EGFR-E746\KELREATSPK/ | 71    | >EGFR-E746\KVLREATSPK/ | 35565 | 35494 |
| >EGFR-E746\KELREATSPK/ | 319   | >EGFR-E746\KVLREATSPK/ | 35863 | 35544 |
| >EGFR-E746\IKELREATSPK | 5338  | >EGFR-E746\IKVLREATSPK | 475   | 4863  |
| >EGFR-E746\AIKELREA    | 369   | >EGFR-E746\AIKVLREA    | 1252  | 883   |
| >EGFR-E746\AIKELREA    | 496   | >EGFR-E746\AIKVLREA    | 230   | 266   |
| >EGFR-E746\PVAIKELR    | 386   | >EGFR-E746\PVAIKVLR    | 316   | 70    |

|                        |       |                        |       |       |
|------------------------|-------|------------------------|-------|-------|
| >EGFR-E746\IPVAIKEL    | 25    | >EGFR-E746\IPVAIKVL    | 54    | 29    |
| >EGFR-E746\IPVAIKELR   | 150   | >EGFR-E746\IPVAIKVLR   | 125   | 25    |
| >EGFR-E746\IPVAIKEL    | 151   | >EGFR-E746\IPVAIKVL    | 70    | 81    |
| >EGFR-E746\IPVAIKEL    | 406   | >EGFR-E746\IPVAIKVL    | 399   | 7     |
| >EGFR-E746\IPVAIKEL    | 340   | >EGFR-E746\IPVAIKVL    | 293   | 47    |
| >EGFR-E746\IPVAIKELR   | 2526  | >EGFR-E746\IPVAIKVLR   | 232   | 2294  |
| >EGFR-E746\IPVAIKELREA | 30    | >EGFR-E746\IPVAIKVLR   | 11    | 19    |
| >EGFR-E746\IPVAIKEL    | 248   | >EGFR-E746\IPVAIKVL    | 245   | 3     |
| >EGFR-E746\IPVAIKEL    | 498   | >EGFR-E746\IPVAIKVL    | 531   | 33    |
| >EGFR-E746\IPVAIKELR   | 547   | >EGFR-E746\IPVAIKVLR   | 109   | 438   |
| >EGFR-E746\KIPVAIKE    | 25444 | >EGFR-E746\KIPVAIKV    | 376   | 25068 |
| >EGFR-E746\KIPVAIKE    | 25530 | >EGFR-E746\KIPVAIKV    | 128   | 25402 |
| >EGFR-E746\KIPVAIKE    | 28653 | >EGFR-E746\KIPVAIKV    | 132   | 28521 |
| >EGFR-E746\KIPVAIKE    | 24665 | >EGFR-E746\KIPVAIKV    | 105   | 24560 |
| >EGFR-E746\KIPVAIKE    | 33684 | >EGFR-E746\KIPVAIKV    | 64    | 33620 |
| >EGFR-E746\KIPVAIKELR  | 78    | >EGFR-E746\KIPVAIKVLR  | 31    | 47    |
| >EGFR-E746\KIPVAIKELR  | 68    | >EGFR-E746\KIPVAIKVLR  | 64    | 4     |
| >EGFR-E746\KIPVAIKEL   | 331   | >EGFR-E746\KIPVAIKVL   | 82    | 249   |
| >EGFR-E746\KIPVAIKELR  | 777   | >EGFR-E746\KIPVAIKVLR  | 440   | 337   |
| >EGFR-E746\KIPVAIKELR  | 66    | >EGFR-E746\KIPVAIKVLR  | 32    | 34    |
| >EGFR-E746\VKIPVAIKEL  | 87    | >EGFR-E746\VKIPVAIKVL  | 67    | 20    |
| >EGFR-E746\KVKIPVAIKE  | 35110 | >EGFR-E746\KVKIPVAIKV  | 402   | 34708 |
| >EGFR-E746\KVKIPVAIKE  | 878   | >EGFR-E746\KVKIPVAIKV  | 15    | 863   |
| >EGFR-E746\KVKIPVAIKEL | 29    | >EGFR-E746\KVKIPVAIKVL | 30    | 1     |
| >EGFR-E746\KVKIPVAIKEL | 148   | >EGFR-E746\KVKIPVAIKVL | 267   | 119   |
| >EGFR-E758[EILDEAYV    | 471   | >EGFR-E758[DILDEAYV    | 1759  | 1288  |
| >EGFR-E758[EILDEAYV    | 100   | >EGFR-E758[DILDEAYV    | 584   | 484   |
| >EGFR-E758[EILDEAYV    | 11    | >EGFR-E758[DILDEAYV    | 34    | 23    |
| >EGFR-E758[EILDEAYV    | 83    | >EGFR-E758[DILDEAYV    | 305   | 222   |
| >EGFR-E758[EILDEAYV    | 24    | >EGFR-E758[DILDEAYV    | 47    | 23    |
| >EGFR-E758[EILDEAYV    | 5     | >EGFR-E758[DILDEAYV    | 10    | 5     |
| >EGFR-E758[EILDEAYVM   | 362   | >EGFR-E758[DILDEAYVM   | 1204  | 842   |
| >EGFR-E758[EILDEAYV    | 11    | >EGFR-E758[DILDEAYV    | 34    | 23    |
| >EGFR-E758[EILDEAYVM   | 39    | >EGFR-E758[DILDEAYVM   | 297   | 258   |
| >EGFR-E758[EILDEAYV    | 34    | >EGFR-E758[DILDEAYV    | 262   | 228   |
| >EGFR-E758[EILDEAYV    | 5     | >EGFR-E758[DILDEAYV    | 11    | 6     |
| >EGFR-E758[EILDEAYVM   | 33    | >EGFR-E758[DILDEAYVM   | 204   | 171   |
| >EGFR-E758[EILDEAYVMA  | 16    | >EGFR-E758[DILDEAYVMA  | 67    | 51    |
| >EGFR-E758[KEILDEAY    | 256   | >EGFR-E758[KDILDEAY    | 10000 | 9744  |
| >EGFR-E758[KEILDEAYV   | 310   | >EGFR-E758[KDILDEAYV   | 20622 | 20312 |
| >EGFR-E758[KEILDEAYVM  | 163   | >EGFR-E758[KDILDEAYVM  | 16309 | 16146 |
| >EGFR-E758[KEILDEAYVM  | 289   | >EGFR-E758[KDILDEAYVM  | 3639  | 3350  |
| >EGFR-E758[KEILDEAY    | 363   | >EGFR-E758[KDILDEAY    | 7683  | 7320  |

|                         |      |                        |       |       |
|-------------------------|------|------------------------|-------|-------|
| >EGFR-E758[ KEILDEAY    | 273  | >EGFR-E758[ KDILDEAY   | 12222 | 11949 |
| >EGFR-E758[ KEILDEAYVM  | 50   | >EGFR-E758[ KDILDEAYVM | 10350 | 10300 |
| >EGFR-E758[ KEILDEAYV   | 32   | >EGFR-E758[ KDILDEAYV  | 3453  | 3421  |
| >EGFR-E758[ KEILDEAYVM  | 15   | >EGFR-E758[ KDILDEAYVM | 1136  | 1121  |
| >EGFR-E758[ KEILDEAYVM  | 468  | >EGFR-E758[ KDILDEAYVM | 11888 | 11420 |
| >EGFR-E758[ KEILDEAYV   | 7414 | >EGFR-E758[ KDILDEAYV  | 118   | 7296  |
| >EGFR-E758[ KEILDEAYVM  | 9170 | >EGFR-E758[ KDILDEAYVM | 294   | 8876  |
| >EGFR-E758[ NKEILDEAYVI | 676  | >EGFR-E758[ NKDILDEAYV | 372   | 304   |
| >EGFR-E758[ KANKEILDEA' | 126  | >EGFR-E758[ KANKDILDEA | 87    | 39    |
| >EGFR-E758[ KANKEILDEA' | 385  | >EGFR-E758[ KANKDILDEA | 525   | 140   |
| >EGFR-E758[ KANKEILDEA' | 255  | >EGFR-E758[ KANKDILDEA | 233   | 22    |
| >EGFR-E758[ KANKEILDEA' | 293  | >EGFR-E758[ KANKDILDEA | 315   | 22    |
| >EGFR-E758[ KANKEILDEA' | 140  | >EGFR-E758[ KANKDILDEA | 275   | 135   |
| >EGFR-E758[ KANKEILDEA' | 200  | >EGFR-E758[ KANKDILDEA | 164   | 36    |
| >EGFR-E758[ KANKEILDEA' | 86   | >EGFR-E758[ KANKDILDEA | 101   | 15    |
| >EGFR-E758[ KANKEILDEA' | 473  | >EGFR-E758[ KANKDILDEA | 676   | 203   |
| >EGFR-E758[ SPKANKEI    | 133  | >EGFR-E758[ SPKANKDI   | 57    | 76    |
| >EGFR-E758[ SPKANKEIL   | 187  | >EGFR-E758[ SPKANKDIL  | 131   | 56    |
| >EGFR-E758[ SPKANKEIL   | 193  | >EGFR-E758[ SPKANKDIL  | 157   | 36    |
| >EGFR-E758[ TSPKANKEI   | 54   | >EGFR-E758[ TSPKANKDI  | 85    | 31    |
| >EGFR-E758[ TSPKANKEIL  | 9    | >EGFR-E758[ TSPKANKDIL | 10    | 1     |
| >EGFR-E758[ TSPKANKEI   | 159  | >EGFR-E758[ TSPKANKDI  | 322   | 163   |
| >EGFR-E758[ ATSPKANKEI  | 35   | >EGFR-E758[ ATSPKANKDI | 99    | 64    |
| >EGFR-E758[ ATSPKANKEII | 55   | >EGFR-E758[ ATSPKANKDI | 90    | 35    |
| >EGFR-E758[ ATSPKANKEII | 468  | >EGFR-E758[ ATSPKANKDI | 490   | 22    |
| >EGFR-E758[ ATSPKANKEI  | 347  | >EGFR-E758[ ATSPKANKDI | 630   | 283   |
| >EGFR-E758[ ATSPKANKEII | 295  | >EGFR-E758[ ATSPKANKDI | 390   | 95    |
| >EGFR-E758[ EATSPKANKE  | 158  | >EGFR-E758[ EATSPKANKE | 1201  | 1043  |
| >EGFR-E758( EILDEAYV    | 659  | >EGFR-E758( GILDEAYV   | 23    | 636   |
| >EGFR-E758( EILDEAYV    | 471  | >EGFR-E758( GILDEAYV   | 41    | 430   |
| >EGFR-E758( EILDEAYV    | 2587 | >EGFR-E758( GILDEAYV   | 105   | 2482  |
| >EGFR-E758( EILDEAYV    | 100  | >EGFR-E758( GILDEAYV   | 15    | 85    |
| >EGFR-E758( EILDEAYVMA  | 1091 | >EGFR-E758( GILDEAYVMA | 494   | 597   |
| >EGFR-E758( EILDEAYV    | 11   | >EGFR-E758( GILDEAYV   | 4     | 7     |
| >EGFR-E758( EILDEAYVM   | 3049 | >EGFR-E758( GILDEAYVM  | 497   | 2552  |
| >EGFR-E758( EILDEAYVMA  | 994  | >EGFR-E758( GILDEAYVMA | 115   | 879   |
| >EGFR-E758( EILDEAYV    | 83   | >EGFR-E758( GILDEAYV   | 5     | 78    |
| >EGFR-E758( EILDEAYVM   | 5039 | >EGFR-E758( GILDEAYVM  | 174   | 4865  |
| >EGFR-E758( EILDEAYV    | 24   | >EGFR-E758( GILDEAYV   | 7     | 17    |
| >EGFR-E758( EILDEAYVMA  | 2004 | >EGFR-E758( GILDEAYVMA | 146   | 1858  |
| >EGFR-E758( EILDEAYV    | 5    | >EGFR-E758( GILDEAYV   | 6     | 1     |
| >EGFR-E758( EILDEAYVM   | 362  | >EGFR-E758( GILDEAYVM  | 795   | 433   |
| >EGFR-E758( EILDEAYV    | 11   | >EGFR-E758( GILDEAYV   | 4     | 7     |

|                         |      |                        |       |       |
|-------------------------|------|------------------------|-------|-------|
| >EGFR-E758C EILDEAYVMA  | 2189 | >EGFR-E758C GILDEAYVMA | 211   | 1978  |
| >EGFR-E758C EILDEAYVM   | 39   | >EGFR-E758C GILDEAYVM  | 8610  | 8571  |
| >EGFR-E758C EILDEAYV    | 34   | >EGFR-E758C GILDEAYV   | 7099  | 7065  |
| >EGFR-E758C EILDEAYV    | 5    | >EGFR-E758C GILDEAYV   | 554   | 549   |
| >EGFR-E758C EILDEAYVM   | 33   | >EGFR-E758C GILDEAYVM  | 8252  | 8219  |
| >EGFR-E758C EILDEAYVMA  | 16   | >EGFR-E758C GILDEAYVMA | 3858  | 3842  |
| >EGFR-E758C KEILDEAY    | 1429 | >EGFR-E758C KGILDEAY   | 222   | 1207  |
| >EGFR-E758C KEILDEAY    | 256  | >EGFR-E758C KGILDEAY   | 18037 | 17781 |
| >EGFR-E758C KEILDEAYV   | 310  | >EGFR-E758C KGILDEAYV  | 22444 | 22134 |
| >EGFR-E758C KEILDEAYVM  | 163  | >EGFR-E758C KGILDEAYVM | 33232 | 33069 |
| >EGFR-E758C KEILDEAYVM  | 289  | >EGFR-E758C KGILDEAYVM | 37642 | 37353 |
| >EGFR-E758C KEILDEAY    | 363  | >EGFR-E758C KGILDEAY   | 20680 | 20317 |
| >EGFR-E758C KEILDEAY    | 273  | >EGFR-E758C KGILDEAY   | 35367 | 35094 |
| >EGFR-E758C KEILDEAYVM  | 50   | >EGFR-E758C KGILDEAYVM | 31664 | 31614 |
| >EGFR-E758C KEILDEAYV   | 32   | >EGFR-E758C KGILDEAYV  | 30879 | 30847 |
| >EGFR-E758C KEILDEAYVM  | 15   | >EGFR-E758C KGILDEAYVM | 25605 | 25590 |
| >EGFR-E758C KEILDEAYVM  | 468  | >EGFR-E758C KGILDEAYVM | 36781 | 36313 |
| >EGFR-E758C KANKEILDEA' | 126  | >EGFR-E758C KANKGILDEA | 70    | 56    |
| >EGFR-E758C KANKEILDEA' | 385  | >EGFR-E758C KANKGILDEA | 337   | 48    |
| >EGFR-E758C KANKEILDEA' | 255  | >EGFR-E758C KANKGILDEA | 148   | 107   |
| >EGFR-E758C KANKEILDEA' | 293  | >EGFR-E758C KANKGILDEA | 300   | 7     |
| >EGFR-E758C KANKEILDEA' | 140  | >EGFR-E758C KANKGILDEA | 79    | 61    |
| >EGFR-E758C KANKEILDEA' | 200  | >EGFR-E758C KANKGILDEA | 159   | 41    |
| >EGFR-E758C KANKEILDEA' | 86   | >EGFR-E758C KANKGILDEA | 66    | 20    |
| >EGFR-E758C KANKEILDEA' | 473  | >EGFR-E758C KANKGILDEA | 972   | 499   |
| >EGFR-E758C SPKANKEI    | 133  | >EGFR-E758C SPKANKGI   | 750   | 617   |
| >EGFR-E758C SPKANKEIL   | 187  | >EGFR-E758C SPKANKGIL  | 161   | 26    |
| >EGFR-E758C SPKANKEIL   | 193  | >EGFR-E758C SPKANKGIL  | 39    | 154   |
| >EGFR-E758C TSPKANKEI   | 54   | >EGFR-E758C TSPKANKGI  | 43    | 11    |
| >EGFR-E758C TSPKANKEIL  | 9    | >EGFR-E758C TSPKANKGIL | 12    | 3     |
| >EGFR-E758C TSPKANKEI   | 159  | >EGFR-E758C TSPKANKGI  | 175   | 16    |
| >EGFR-E758C ATSPKANKEI  | 35   | >EGFR-E758C ATSPKANKGI | 27    | 8     |
| >EGFR-E758C ATSPKANKEII | 55   | >EGFR-E758C ATSPKANKGI | 43    | 12    |
| >EGFR-E758C ATSPKANKEII | 468  | >EGFR-E758C ATSPKANKGI | 662   | 194   |
| >EGFR-E758C ATSPKANKEI  | 347  | >EGFR-E758C ATSPKANKGI | 393   | 46    |
| >EGFR-E758C ATSPKANKEII | 295  | >EGFR-E758C ATSPKANKGI | 231   | 64    |
| >EGFR-E758C ATSPKANKEII | 716  | >EGFR-E758C ATSPKANKGI | 495   | 221   |
| >EGFR-E758C EATSPKANKE  | 158  | >EGFR-E758C EATSPKANKC | 160   | 2     |
| >EGFR-E758C EATSPKANKE  | 549  | >EGFR-E758C EATSPKANKC | 264   | 285   |
| >EGFR-E804C REHKDNIGSC  | 2095 | >EGFR-E804C RGHKDNIGSC | 332   | 1763  |
| >EGFR-E804C REHKDNIGSC  | 364  | >EGFR-E804C RGHKDNIGSC | 458   | 94    |
| >EGFR-E804C REHKDNIGSC  | 104  | >EGFR-E804C RGHKDNIGSC | 731   | 627   |
| >EGFR-E804C REHKDNIGSC  | 8095 | >EGFR-E804C RGHKDNIGSC | 315   | 7780  |



|                        |       |                        |       |       |
|------------------------|-------|------------------------|-------|-------|
| >EGFR-E804C REHKDNIGSC | 360   | >EGFR-E804C RGHKDNIGSC | 37223 | 36863 |
| >EGFR-E804C REHKDNIGS  | 394   | >EGFR-E804C RGHKDNIGS  | 39017 | 38623 |
| >EGFR-E804C REHKDNIGSC | 362   | >EGFR-E804C RGHKDNIGSC | 83    | 279   |
| >EGFR-E804C LDYVREHKDM | 101   | >EGFR-E804C LDYVRGHKDI | 121   | 20    |
| >EGFR-E804C LDYVREHKDM | 286   | >EGFR-E804C LDYVRGHKDI | 299   | 13    |
| >EGFR-E804C LDYVREHKDM | 387   | >EGFR-E804C LDYVRGHKDI | 1369  | 982   |
| >EGFR-E804C LDYVREHKDM | 62    | >EGFR-E804C LDYVRGHKDI | 94    | 32    |
| >EGFR-E804C LLDYVREHK  | 1369  | >EGFR-E804C LLDYVRGHK  | 168   | 1201  |
| >EGFR-E804C CLLDYVREHK | 74    | >EGFR-E804C CLLDYVRGHK | 49    | 25    |
| >EGFR-E804C CLLDYVREHK | 144   | >EGFR-E804C CLLDYVRGHK | 313   | 169   |
| >EGFR-E829K EDRRLVHR   | 10191 | >EGFR-E829K KDRRLVHR   | 162   | 10029 |
| >EGFR-E829K EDRRLVHR   | 3164  | >EGFR-E829K KDRRLVHR   | 293   | 2871  |
| >EGFR-E829K LEDRRLVHRC | 355   | >EGFR-E829K LKDRRLVHRC | 12614 | 12259 |
| >EGFR-E829K LEDRRLVHRC | 275   | >EGFR-E829K LKDRRLVHRC | 20572 | 20297 |
| >EGFR-E829K VQIAKGMNY  | 20917 | >EGFR-E829K VQIAKGMNY  | 19    | 20898 |
| >EGFR-E829K YLEDRRLV   | 188   | >EGFR-E829K YLKDRRLV   | 234   | 46    |
| >EGFR-E829K YLEDRRLV   | 44    | >EGFR-E829K YLKDRRLV   | 50    | 6     |
| >EGFR-E829K YLEDRRLV   | 32    | >EGFR-E829K YLKDRRLV   | 4     | 28    |
| >EGFR-E829K YLEDRRLV   | 198   | >EGFR-E829K YLKDRRLV   | 411   | 213   |
| >EGFR-E829K YLEDRRLV   | 17    | >EGFR-E829K YLKDRRLV   | 31    | 14    |
| >EGFR-E829K YLEDRRLV   | 47    | >EGFR-E829K YLKDRRLV   | 104   | 57    |
| >EGFR-E829K YLEDRRLV   | 62    | >EGFR-E829K YLKDRRLV   | 136   | 74    |
| >EGFR-E829K YLEDRRLV   | 2     | >EGFR-E829K YLKDRRLV   | 2     | 0     |
| >EGFR-E829K YLEDRRLVHR | 418   | >EGFR-E829K YLKDRRLVHR | 559   | 141   |
| >EGFR-E829K YLEDRRLVHR | 253   | >EGFR-E829K YLKDRRLVHR | 315   | 62    |
| >EGFR-E829K YLEDRRLVHR | 229   | >EGFR-E829K YLKDRRLVHR | 27    | 202   |
| >EGFR-E829K YLEDRRLVHR | 420   | >EGFR-E829K YLKDRRLVHR | 141   | 279   |
| >EGFR-E829K YLEDRRLV   | 3760  | >EGFR-E829K YLKDRRLV   | 187   | 3573  |
| >EGFR-E829K YLEDRRLVHR | 93    | >EGFR-E829K YLKDRRLVHR | 106   | 13    |
| >EGFR-E829K YLEDRRLVHR | 162   | >EGFR-E829K YLKDRRLVHR | 119   | 43    |
| >EGFR-E829K NYLEDRRL   | 1050  | >EGFR-E829K NYLKDRRL   | 309   | 741   |
| >EGFR-E829K NYLEDRRL   | 81    | >EGFR-E829K NYLKDRRL   | 68    | 13    |
| >EGFR-E829K NYLEDRRLVH | 159   | >EGFR-E829K NYLKDRRLVH | 108   | 51    |
| >EGFR-E829K NYLEDRRLVH | 17    | >EGFR-E829K NYLKDRRLVH | 26    | 9     |
| >EGFR-E829K NYLEDRRLVH | 26    | >EGFR-E829K NYLKDRRLVH | 19    | 7     |
| >EGFR-E829K MNYLEDRRL  | 536   | >EGFR-E829K MNYLKDRRL  | 79    | 457   |
| >EGFR-E829K MNYLEDRR   | 145   | >EGFR-E829K MNYLKDRR   | 190   | 45    |
| >EGFR-E829K MNYLEDRR   | 474   | >EGFR-E829K MNYLKDRR   | 417   | 57    |
| >EGFR-E829K GMNYLEDRR  | 308   | >EGFR-E829K GMNYLKDRR  | 733   | 425   |
| >EGFR-E829K GMNYLEDRR  | 54    | >EGFR-E829K GMNYLKDRR  | 102   | 48    |
| >EGFR-E829K GMNYLEDRR  | 42    | >EGFR-E829K GMNYLKDRR  | 56    | 14    |
| >EGFR-E829K GMNYLEDRR  | 61    | >EGFR-E829K GMNYLKDRR  | 97    | 36    |
| >EGFR-E829K GMNYLEDRR  | 95    | >EGFR-E829K GMNYLKDRR  | 206   | 111   |

|                       |       |                       |      |       |
|-----------------------|-------|-----------------------|------|-------|
| >EGFR-E829†GMNYLEDRR  | 75    | >EGFR-E829†GMNYLKDRR  | 128  | 53    |
| >EGFR-E829†GMNYLEDRR  | 39    | >EGFR-E829†GMNYLKDRR  | 45   | 6     |
| >EGFR-E829†GMNYLED    | 92    | >EGFR-E829†GMNYLKDR   | 59   | 33    |
| >EGFR-E829†GMNYLEDRR  | 155   | >EGFR-E829†GMNYLKDRR  | 24   | 131   |
| >EGFR-E829†KGMNYLED   | 159   | >EGFR-E829†KGMNYLKDR  | 249  | 90    |
| >EGFR-E829†KGMNYLED   | 481   | >EGFR-E829†KGMNYLKDR  | 187  | 294   |
| >EGFR-E829†KGMNYLED   | 425   | >EGFR-E829†KGMNYLKDR  | 196  | 229   |
| >EGFR-E829†KGMNYLED   | 306   | >EGFR-E829†KGMNYLKDR  | 179  | 127   |
| >EGFR-E829†IAKGMNYLE  | 23212 | >EGFR-E829†IAKGMNYLK  | 71   | 23141 |
| >EGFR-E829†IAKGMNYLE  | 9729  | >EGFR-E829†IAKGMNYLK  | 18   | 9711  |
| >EGFR-E829†IAKGMNYLE  | 10387 | >EGFR-E829†IAKGMNYLK  | 78   | 10309 |
| >EGFR-E829†IAKGMNYLE† | 143   | >EGFR-E829†IAKGMNYLKE | 190  | 47    |
| >EGFR-E829†IAKGMNYLE† | 310   | >EGFR-E829†IAKGMNYLKE | 449  | 139   |
| >EGFR-E829†IAKGMNYLE  | 11367 | >EGFR-E829†IAKGMNYLK  | 79   | 11288 |
| >EGFR-E829†IAKGMNYLE† | 174   | >EGFR-E829†IAKGMNYLKE | 541  | 367   |
| >EGFR-E829†QIAKGMNYLI | 18014 | >EGFR-E829†QIAKGMNYLI | 67   | 17947 |
| >EGFR-E829†QIAKGMNYLI | 30626 | >EGFR-E829†QIAKGMNYLI | 37   | 30589 |
| >EGFR-E829†QIAKGMNYLI | 13153 | >EGFR-E829†QIAKGMNYLI | 11   | 13142 |
| >EGFR-E829†LEDRLVHRC  | 355   | >EGFR-E829†LQDRRLVHRI | 7928 | 7573  |
| >EGFR-E829†LEDRLVHR   | 3711  | >EGFR-E829†LQDRRLVHR  | 77   | 3634  |
| >EGFR-E829†LEDRLVHRC  | 275   | >EGFR-E829†LQDRRLVHRI | 9234 | 8959  |
| >EGFR-E829†YLEDRLV    | 188   | >EGFR-E829†YLQDRRLV   | 30   | 158   |
| >EGFR-E829†YLEDRLV    | 44    | >EGFR-E829†YLQDRRLV   | 28   | 16    |
| >EGFR-E829†YLEDRLV    | 32    | >EGFR-E829†YLQDRRLV   | 8    | 24    |
| >EGFR-E829†YLEDRLV    | 198   | >EGFR-E829†YLQDRRLV   | 109  | 89    |
| >EGFR-E829†YLEDRLV    | 17    | >EGFR-E829†YLQDRRLV   | 5    | 12    |
| >EGFR-E829†YLEDRLV    | 47    | >EGFR-E829†YLQDRRLV   | 11   | 36    |
| >EGFR-E829†YLEDRLV    | 62    | >EGFR-E829†YLQDRRLV   | 20   | 42    |
| >EGFR-E829†YLEDRLV    | 670   | >EGFR-E829†YLQDRRLV   | 38   | 632   |
| >EGFR-E829†YLEDRLV    | 2     | >EGFR-E829†YLQDRRLV   | 2    | 0     |
| >EGFR-E829†YLEDRLVHR  | 418   | >EGFR-E829†YLQDRRLVHF | 175  | 243   |
| >EGFR-E829†YLEDRLVHR  | 253   | >EGFR-E829†YLQDRRLVHF | 115  | 138   |
| >EGFR-E829†YLEDRLVHR  | 229   | >EGFR-E829†YLQDRRLVHF | 34   | 195   |
| >EGFR-E829†YLEDRLVHR  | 420   | >EGFR-E829†YLQDRRLVHF | 124  | 296   |
| >EGFR-E829†YLEDRLVHR  | 93    | >EGFR-E829†YLQDRRLVHF | 74   | 19    |
| >EGFR-E829†YLEDRLVHR  | 162   | >EGFR-E829†YLQDRRLVHF | 170  | 8     |
| >EGFR-E829†NYLEDRL    | 1050  | >EGFR-E829†NYLQDRRL   | 401  | 649   |
| >EGFR-E829†NYLEDRL    | 81    | >EGFR-E829†NYLQDRRL   | 51   | 30    |
| >EGFR-E829†NYLEDRLVH  | 159   | >EGFR-E829†NYLQDRRLV† | 251  | 92    |
| >EGFR-E829†NYLEDRLVH  | 17    | >EGFR-E829†NYLQDRRLV† | 26   | 9     |
| >EGFR-E829†NYLEDRLVH  | 26    | >EGFR-E829†NYLQDRRLV† | 18   | 8     |
| >EGFR-E829†MNYLEDRL   | 536   | >EGFR-E829†MNYLQDRRL  | 242  | 294   |
| >EGFR-E829†MNYLEDRR   | 145   | >EGFR-E829†MNYLQDRR   | 145  | 0     |

|                          |      |                        |       |       |
|--------------------------|------|------------------------|-------|-------|
| >EGFR-E829C MNYLED RR    | 474  | >EGFR-E829C MNYLQDRR   | 384   | 90    |
| >EGFR-E829C GMNYLED RR   | 308  | >EGFR-E829C GMNYLQDRF  | 485   | 177   |
| >EGFR-E829C GMNYLED RR   | 54   | >EGFR-E829C GMNYLQDRF  | 49    | 5     |
| >EGFR-E829C GMNYLED RR   | 42   | >EGFR-E829C GMNYLQDRF  | 31    | 11    |
| >EGFR-E829C GMNYLED RR   | 61   | >EGFR-E829C GMNYLQDRF  | 65    | 4     |
| >EGFR-E829C GMNYLED RR   | 95   | >EGFR-E829C GMNYLQDRF  | 109   | 14    |
| >EGFR-E829C GMNYLED RR   | 75   | >EGFR-E829C GMNYLQDRF  | 91    | 16    |
| >EGFR-E829C GMNYLED RR   | 39   | >EGFR-E829C GMNYLQDRF  | 33    | 6     |
| >EGFR-E829C GMNYLED R    | 92   | >EGFR-E829C GMNYLQDR   | 48    | 44    |
| >EGFR-E829C GMNYLED RR   | 155  | >EGFR-E829C GMNYLQDRF  | 48    | 107   |
| >EGFR-E829C KGMNYLED R   | 159  | >EGFR-E829C KGMNYLQDF  | 115   | 44    |
| >EGFR-E829C KGMNYLED R   | 481  | >EGFR-E829C KGMNYLQDF  | 286   | 195   |
| >EGFR-E829C KGMNYLED R   | 425  | >EGFR-E829C KGMNYLQDF  | 321   | 104   |
| >EGFR-E829C KGMNYLED R   | 306  | >EGFR-E829C KGMNYLQDF  | 243   | 63    |
| >EGFR-E829C IAKGMNYLE C  | 143  | >EGFR-E829C IAKGMNYLQI | 104   | 39    |
| >EGFR-E829C IAKGMNYLE C  | 310  | >EGFR-E829C IAKGMNYLQI | 269   | 41    |
| >EGFR-E829C IAKGMNYLE C  | 174  | >EGFR-E829C IAKGMNYLQI | 355   | 181   |
| >EGFR-E866C EEKEYHAE     | 180  | >EGFR-E866C EGKEYHAE   | 37145 | 36965 |
| >EGFR-E866C EEKEYHAEG    | 142  | >EGFR-E866C EGKEYHAEG  | 37023 | 36881 |
| >EGFR-E866C AEEKEYHAEG   | 412  | >EGFR-E866C AEGKEYHAEC | 2892  | 2480  |
| >EGFR-E866C AEEKEYHA     | 15   | >EGFR-E866C AEGKEYHA   | 11    | 4     |
| >EGFR-E866C AEEKEYHAE    | 159  | >EGFR-E866C AEGKEYHAE  | 95    | 64    |
| >EGFR-E866C AEEKEYHAEG   | 75   | >EGFR-E866C AEGKEYHAEC | 358   | 283   |
| >EGFR-E866C AEEKEYHAEG   | 580  | >EGFR-E866C AEGKEYHAEC | 345   | 235   |
| >EGFR-E866C LGAEEKEY     | 425  | >EGFR-E866C LGAEGKEY   | 419   | 6     |
| >EGFR-E866C LLGAEKEYH,   | 248  | >EGFR-E866C LLGAEGKEYH | 249   | 1     |
| >EGFR-E866C LLGAEKEYH,   | 181  | >EGFR-E866C LLGAEGKEYH | 155   | 26    |
| >EGFR-E866C LLGAEKEYH,   | 186  | >EGFR-E866C LLGAEGKEYH | 201   | 15    |
| >EGFR-E866C LLGAEKEYH,   | 194  | >EGFR-E866C LLGAEGKEYH | 226   | 32    |
| >EGFR-E866C LLGAEKEYH,   | 24   | >EGFR-E866C LLGAEGKEYH | 25    | 1     |
| >EGFR-E866C LLGAEKEY     | 778  | >EGFR-E866C LLGAEGKEY  | 277   | 501   |
| >EGFR-E866C LLGAEKEY     | 615  | >EGFR-E866C LLGAEGKEY  | 111   | 504   |
| >EGFR-E866C LLGAEKEY     | 2223 | >EGFR-E866C LLGAEGKEY  | 237   | 1986  |
| >EGFR-E866C KLLGAE EK    | 169  | >EGFR-E866C KLLGAEGK   | 108   | 61    |
| >EGFR-E866C KLLGAE EK    | 2182 | >EGFR-E866C KLLGAEGKEY | 430   | 1752  |
| >EGFR-E866C KLLGAE EK    | 322  | >EGFR-E866C KLLGAEGK   | 508   | 186   |
| >EGFR-E866C KLLGAE EK    | 768  | >EGFR-E866C KLLGAEGKEY | 431   | 337   |
| >EGFR-E866C KLLGAE EK    | 833  | >EGFR-E866C KLLGAEGKEY | 373   | 460   |
| >EGFR-E866C KLLGAE EK    | 1038 | >EGFR-E866C KLLGAEGKEY | 286   | 752   |
| >EGFR-E866C KLLGAE EK    | 552  | >EGFR-E866C KLLGAEGKEY | 414   | 138   |
| >EGFR-E866C KLLGAE EK    | 551  | >EGFR-E866C KLLGAEGKEY | 271   | 280   |
| >EGFR-E866C AKLLGAE EKE' | 23   | >EGFR-E866C AKLLGAEGKE | 18    | 5     |
| >EGFR-E866C LAKLLGAE EK  | 377  | >EGFR-E866C LAKLLGAEGK | 568   | 191   |

|                        |       |                         |       |       |
|------------------------|-------|-------------------------|-------|-------|
| >EGFR-E866C GLAKLLGAEE | 347   | >EGFR-E866C GLAKLLGAEG  | 276   | 71    |
| >EGFR-E866K EEKEYHAE   | 180   | >EGFR-E866K EKKEYHAE    | 25728 | 25548 |
| >EGFR-E866K EEKEYHAEG  | 142   | >EGFR-E866K EKKEYHAEG   | 26398 | 26256 |
| >EGFR-E866K AEEKEYHAEG | 412   | >EGFR-E866K AEKKEYHAEG  | 770   | 358   |
| >EGFR-E866K AEEKEYHA   | 15    | >EGFR-E866K AEKKEYHA    | 12    | 3     |
| >EGFR-E866K AEEKEYHAE  | 159   | >EGFR-E866K AEKKEYHAE   | 132   | 27    |
| >EGFR-E866K AEEKEYHAEG | 75    | >EGFR-E866K AEKKEYHAEG  | 294   | 219   |
| >EGFR-E866K LGAEKEY    | 425   | >EGFR-E866K LGAEKKEY    | 1923  | 1498  |
| >EGFR-E866K LLGAEKEYH. | 248   | >EGFR-E866K LLGAEKKEYH. | 501   | 253   |
| >EGFR-E866K LLGAEKEYH. | 181   | >EGFR-E866K LLGAEKKEYH. | 323   | 142   |
| >EGFR-E866K LLGAEKEYH. | 186   | >EGFR-E866K LLGAEKKEYH. | 344   | 158   |
| >EGFR-E866K LLGAEKEYH. | 194   | >EGFR-E866K LLGAEKKEYH. | 370   | 176   |
| >EGFR-E866K LLGAEKEYH. | 24    | >EGFR-E866K LLGAEKKEYH. | 33    | 9     |
| >EGFR-E866K LLGAEKEY   | 615   | >EGFR-E866K LLGAEKKEY   | 397   | 218   |
| >EGFR-E866K KLLGAEK    | 169   | >EGFR-E866K KLLGAEK     | 99    | 70    |
| >EGFR-E866K KLLGAEK    | 322   | >EGFR-E866K KLLGAEK     | 439   | 117   |
| >EGFR-E866K KLLGAEKEY  | 551   | >EGFR-E866K KLLGAEKKEY  | 468   | 83    |
| >EGFR-E866K AKLLGAEKE' | 23    | >EGFR-E866K AKLLGAEKKE' | 28    | 5     |
| >EGFR-E866K LAKLLGAE   | 12219 | >EGFR-E866K LAKLLGAEK   | 45    | 12174 |
| >EGFR-E866K LAKLLGAEK  | 377   | >EGFR-E866K LAKLLGAEK   | 510   | 133   |
| >EGFR-E866K GLAKLLGAEE | 23575 | >EGFR-E866K GLAKLLGAEK  | 168   | 23407 |
| >EGFR-E866K GLAKLLGAEE | 347   | >EGFR-E866K GLAKLLGAEK  | 198   | 149   |
| >EGFR-E866K GLAKLLGAEE | 35517 | >EGFR-E866K GLAKLLGAEK  | 431   | 35086 |
| >EGFR-E868I EYHAEGGKVI | 173   | >EGFR-E868I DYHAEGGKVI  | 151   | 22    |
| >EGFR-E868I EYHAEGGKVI | 270   | >EGFR-E868I DYHAEGGKVI  | 1216  | 946   |
| >EGFR-E868I KEYHAEGGK\ | 130   | >EGFR-E868I KDYHAEGGK\  | 5004  | 4874  |
| >EGFR-E868I KEYHAEGGK\ | 65    | >EGFR-E868I KDYHAEGGK\  | 5344  | 5279  |
| >EGFR-E868I KEYHAEGGK\ | 5575  | >EGFR-E868I KDYHAEGGK\  | 98    | 5477  |
| >EGFR-E868I EEKEYHAE   | 180   | >EGFR-E868I EEKDYHAE    | 273   | 93    |
| >EGFR-E868I EEKEYHAEG  | 142   | >EGFR-E868I EEKDYHAEG   | 280   | 138   |
| >EGFR-E868I AEEKEYHAEG | 412   | >EGFR-E868I AEEKDYHAEG  | 464   | 52    |
| >EGFR-E868I AEEKEYHA   | 15    | >EGFR-E868I AEEKDYHA    | 16    | 1     |
| >EGFR-E868I AEEKEYHAE  | 159   | >EGFR-E868I AEEKDYHAE   | 115   | 44    |
| >EGFR-E868I AEEKEYHAEG | 75    | >EGFR-E868I AEEKDYHAEG  | 64    | 11    |
| >EGFR-E868I AEEKEYHAEG | 580   | >EGFR-E868I AEEKDYHAEG  | 462   | 118   |
| >EGFR-E868I LGAEKEY    | 425   | >EGFR-E868I LGAEKDY     | 1413  | 988   |
| >EGFR-E868I LLGAEKEYH. | 248   | >EGFR-E868I LLGAEKDYH.  | 312   | 64    |
| >EGFR-E868I LLGAEKEYH. | 181   | >EGFR-E868I LLGAEKDYH.  | 330   | 149   |
| >EGFR-E868I LLGAEKEYH. | 186   | >EGFR-E868I LLGAEKDYH.  | 175   | 11    |
| >EGFR-E868I LLGAEKEYH. | 194   | >EGFR-E868I LLGAEKDYH.  | 238   | 44    |
| >EGFR-E868I LLGAEKEYH. | 24    | >EGFR-E868I LLGAEKDYH.  | 39    | 15    |
| >EGFR-E868I AKLLGAEKE' | 23    | >EGFR-E868I AKLLGAEKKE' | 33    | 10    |
| >EGFR-E868C EYHAEGGKVI | 173   | >EGFR-E868C GYHAEGGKVI  | 56    | 117   |

|                        |      |                        |       |       |
|------------------------|------|------------------------|-------|-------|
| >EGFR-E868C EYHAEGGKVI | 270  | >EGFR-E868C GYHAEGGKV  | 73    | 197   |
| >EGFR-E868C EYHAEGGK   | 5564 | >EGFR-E868C GYHAEGGK   | 234   | 5330  |
| >EGFR-E868C KEYHAEGGK\ | 130  | >EGFR-E868C KGYHAEGGK' | 23008 | 22878 |
| >EGFR-E868C KEYHAEGGK  | 2986 | >EGFR-E868C KGYHAEGGK  | 366   | 2620  |
| >EGFR-E868C KEYHAEGGK\ | 65   | >EGFR-E868C KGYHAEGGK' | 32322 | 32257 |
| >EGFR-E868C EEKEYHAE   | 180  | >EGFR-E868C EEKGYHAE   | 109   | 71    |
| >EGFR-E868C EEKEYHAEG  | 142  | >EGFR-E868C EEKGYHAEG  | 108   | 34    |
| >EGFR-E868C AEEKEYHAEG | 412  | >EGFR-E868C AEEKGYHAEC | 737   | 325   |
| >EGFR-E868C AEEKEYHA   | 15   | >EGFR-E868C AEEKGYHA   | 11    | 4     |
| >EGFR-E868C AEEKEYHAE  | 159  | >EGFR-E868C AEEKGYHAE  | 53    | 106   |
| >EGFR-E868C AEEKEYHAEG | 75   | >EGFR-E868C AEEKGYHAEC | 54    | 21    |
| >EGFR-E868C AEEKEYHAEG | 580  | >EGFR-E868C AEEKGYHAEC | 280   | 300   |
| >EGFR-E868C LGAEEKEY   | 425  | >EGFR-E868C LGAEEKGY   | 1310  | 885   |
| >EGFR-E868C LLGAEKEYH, | 248  | >EGFR-E868C LLGAEKEYH  | 252   | 4     |
| >EGFR-E868C LLGAEKEYH, | 181  | >EGFR-E868C LLGAEKEYH  | 133   | 48    |
| >EGFR-E868C LLGAEKEYH, | 186  | >EGFR-E868C LLGAEKEYH  | 143   | 43    |
| >EGFR-E868C LLGAEKEYH, | 194  | >EGFR-E868C LLGAEKEYH  | 197   | 3     |
| >EGFR-E868C LLGAEKEYH, | 24   | >EGFR-E868C LLGAEKEYH  | 26    | 2     |
| >EGFR-E868C KLLGAEKEY  | 551  | >EGFR-E868C KLLGAEKEY  | 363   | 188   |
| >EGFR-E868C AKLLGAEKE' | 23   | >EGFR-E868C AKLLGAEKG  | 49    | 26    |
| >EGFR-E872C AEGGKVPI   | 155  | >EGFR-E872C AGGGKVPI   | 23862 | 23707 |
| >EGFR-E872C AEGGKVPI   | 177  | >EGFR-E872C AGGGKVPI   | 36209 | 36032 |
| >EGFR-E872C AEGGKVPIK  | 76   | >EGFR-E872C AGGGKVPIK  | 15847 | 15771 |
| >EGFR-E872C AEGGKVPIK  | 137  | >EGFR-E872C AGGGKVPIK  | 22781 | 22644 |
| >EGFR-E872C AEGGKVPIK  | 222  | >EGFR-E872C AGGGKVPIK  | 35815 | 35593 |
| >EGFR-E872C AEGGKVPI   | 54   | >EGFR-E872C AGGGKVPI   | 34049 | 33995 |
| >EGFR-E872C AEGGKVPIK  | 278  | >EGFR-E872C AGGGKVPIK  | 35690 | 35412 |
| >EGFR-E872C AEGGKVPI   | 110  | >EGFR-E872C AGGGKVPI   | 12583 | 12473 |
| >EGFR-E872C AEGGKVPIK  | 277  | >EGFR-E872C AGGGKVPIK  | 33857 | 33580 |
| >EGFR-E872C HAEGGKVPIK | 176  | >EGFR-E872C HAGGGKVPIK | 348   | 172   |
| >EGFR-E872C HAEGGKVPIK | 134  | >EGFR-E872C HAGGGKVPIK | 214   | 80    |
| >EGFR-E872C HAEGGKVPIK | 165  | >EGFR-E872C HAGGGKVPIK | 78    | 87    |
| >EGFR-E872C HAEGGKVPIK | 448  | >EGFR-E872C HAGGGKVPIK | 60    | 388   |
| >EGFR-E872C HAEGGKVPIK | 476  | >EGFR-E872C HAGGGKVPIK | 1358  | 882   |
| >EGFR-E872C YHAEGGKVPI | 486  | >EGFR-E872C YHAGGGKVP  | 1188  | 702   |
| >EGFR-E872C YHAEGGKV   | 657  | >EGFR-E872C YHAGGGKV   | 370   | 287   |
| >EGFR-E872C YHAEGGKVPI | 306  | >EGFR-E872C YHAGGGKVP  | 205   | 101   |
| >EGFR-E872C YHAEGGKVPI | 22   | >EGFR-E872C YHAGGGKVP  | 22    | 0     |
| >EGFR-E872C EYHAEGGKVI | 173  | >EGFR-E872C EYHAGGGKV  | 19    | 154   |
| >EGFR-E872C EYHAEGGKVI | 270  | >EGFR-E872C EYHAGGGKV  | 292   | 22    |
| >EGFR-E872C KEYHAEGG   | 4079 | >EGFR-E872C KEYHAGGG   | 450   | 3629  |
| >EGFR-E872C KEYHAEGGK\ | 130  | >EGFR-E872C KEYHAGGGK' | 155   | 25    |
| >EGFR-E872C KEYHAEGGK\ | 65   | >EGFR-E872C KEYHAGGGK' | 81    | 16    |

|                         |       |                         |       |       |
|-------------------------|-------|-------------------------|-------|-------|
| >EGFR-E872C EEKEYHAE    | 180   | >EGFR-E872C EEKEYHAG    | 87    | 93    |
| >EGFR-E872C EEKEYHAEG   | 142   | >EGFR-E872C EEKEYHAGG   | 245   | 103   |
| >EGFR-E872C AEEKEYHAEG  | 412   | >EGFR-E872C AEEKEYHAGC  | 1062  | 650   |
| >EGFR-E872C AEEKEYHAE   | 159   | >EGFR-E872C AEEKEYHAG   | 80    | 79    |
| >EGFR-E872C AEEKEYHAEG  | 75    | >EGFR-E872C AEEKEYHAGC  | 168   | 93    |
| >EGFR-E884K ESILHRIY    | 466   | >EGFR-E884K KSILHRIY    | 10538 | 10072 |
| >EGFR-E884K ESILHRIY    | 7     | >EGFR-E884K KSILHRIY    | 354   | 347   |
| >EGFR-E884K ESILHRIYTH  | 127   | >EGFR-E884K KSILHRIYTH  | 6836  | 6709  |
| >EGFR-E884K ESILHRIYTHQ | 420   | >EGFR-E884K KSILHRIYTHQ | 14617 | 14197 |
| >EGFR-E884K ESILHRIY    | 331   | >EGFR-E884K KSILHRIY    | 7737  | 7406  |
| >EGFR-E884K ESILHRIYT   | 16638 | >EGFR-E884K KSILHRIYT   | 383   | 16255 |
| >EGFR-E884K ESILHRIY    | 2478  | >EGFR-E884K KSILHRIY    | 187   | 2291  |
| >EGFR-E884K ESILHRIYTH  | 4209  | >EGFR-E884K KSILHRIYTH  | 182   | 4027  |
| >EGFR-E884K ESILHRIY    | 1891  | >EGFR-E884K KSILHRIY    | 143   | 1748  |
| >EGFR-E884K ESILHRIY    | 77    | >EGFR-E884K KSILHRIY    | 7     | 70    |
| >EGFR-E884K ESILHRIYTH  | 6233  | >EGFR-E884K KSILHRIYTH  | 163   | 6070  |
| >EGFR-E884K ESILHRIY    | 12117 | >EGFR-E884K KSILHRIY    | 376   | 11741 |
| >EGFR-E884K ESILHRIY    | 14376 | >EGFR-E884K KSILHRIY    | 110   | 14266 |
| >EGFR-E884K ESILHRIY    | 1744  | >EGFR-E884K KSILHRIY    | 408   | 1336  |
| >EGFR-E884K LESILHRI    | 247   | >EGFR-E884K LKSILHRI    | 22900 | 22653 |
| >EGFR-E884K LESILHRIY   | 1552  | >EGFR-E884K LKSILHRIY   | 27    | 1525  |
| >EGFR-E884K LESILHRIY   | 12    | >EGFR-E884K LKSILHRIY   | 4228  | 4216  |
| >EGFR-E884K LESILHRIYTH | 142   | >EGFR-E884K LKSILHRIYTH | 15691 | 15549 |
| >EGFR-E884K LESILHRI    | 268   | >EGFR-E884K LKSILHRI    | 22453 | 22185 |
| >EGFR-E884K LESILHRIY   | 393   | >EGFR-E884K LKSILHRIY   | 25541 | 25148 |
| >EGFR-E884K LESILHRI    | 165   | >EGFR-E884K LKSILHRI    | 8374  | 8209  |
| >EGFR-E884K ALESILHRIY  | 375   | >EGFR-E884K ALKSILHRIY  | 2108  | 1733  |
| >EGFR-E884K ALESILHRI   | 110   | >EGFR-E884K ALKSILHRI   | 169   | 59    |
| >EGFR-E884K ALESILHRI   | 7     | >EGFR-E884K ALKSILHRI   | 8     | 1     |
| >EGFR-E884K ALESILHRIYT | 264   | >EGFR-E884K ALKSILHRIYT | 317   | 53    |
| >EGFR-E884K ALESILHRI   | 73    | >EGFR-E884K ALKSILHRI   | 5     | 68    |
| >EGFR-E884K ALESILHRIYT | 2759  | >EGFR-E884K ALKSILHRIYT | 153   | 2606  |
| >EGFR-E884K ALESILHRI   | 22    | >EGFR-E884K ALKSILHRI   | 41    | 19    |
| >EGFR-E884K ALESILHRI   | 49    | >EGFR-E884K ALKSILHRI   | 115   | 66    |
| >EGFR-E884K ALESILHRI   | 395   | >EGFR-E884K ALKSILHRI   | 1019  | 624   |
| >EGFR-E884K ALESILHRI   | 312   | >EGFR-E884K ALKSILHRI   | 510   | 198   |
| >EGFR-E884K ALESILHRI   | 4     | >EGFR-E884K ALKSILHRI   | 4     | 0     |
| >EGFR-E884K ALESILHRIYT | 81    | >EGFR-E884K ALKSILHRIYT | 92    | 11    |
| >EGFR-E884K ALESILHR    | 86    | >EGFR-E884K ALKSILHR    | 14    | 72    |
| >EGFR-E884K ALESILHRIY  | 304   | >EGFR-E884K ALKSILHRIY  | 203   | 101   |
| >EGFR-E884K ALESILHRIY  | 3125  | >EGFR-E884K ALKSILHRIY  | 157   | 2968  |
| >EGFR-E884K ALESILHRIY  | 3950  | >EGFR-E884K ALKSILHRIY  | 229   | 3721  |
| >EGFR-E884K MALESILHRI  | 343   | >EGFR-E884K MALKSILHRI  | 941   | 598   |

|                         |     |                         |      |      |
|-------------------------|-----|-------------------------|------|------|
| >EGFR-E884f MALESILHRI  | 329 | >EGFR-E884f MALKSILHRI  | 500  | 171  |
| >EGFR-E884f MALESILHRI  | 124 | >EGFR-E884f MALKSILHRI  | 416  | 292  |
| >EGFR-E884f MALESILHRI  | 22  | >EGFR-E884f MALKSILHRI  | 221  | 199  |
| >EGFR-E884f MALESILHRI  | 352 | >EGFR-E884f MALKSILHRI  | 2892 | 2540 |
| >EGFR-E884f MALESILHRI  | 182 | >EGFR-E884f MALKSILHRI  | 1359 | 1177 |
| >EGFR-E884f MALESILHR   | 286 | >EGFR-E884f MALKSILHR   | 334  | 48   |
| >EGFR-E884f MALESILHRIY | 197 | >EGFR-E884f MALKSILHRIY | 337  | 140  |
| >EGFR-E884f MALESILHR   | 23  | >EGFR-E884f MALKSILHR   | 16   | 7    |
| >EGFR-E884f MALESILHR   | 47  | >EGFR-E884f MALKSILHR   | 102  | 55   |
| >EGFR-E884f MALESILHR   | 16  | >EGFR-E884f MALKSILHR   | 20   | 4    |
| >EGFR-E884f MALESILHRI  | 116 | >EGFR-E884f MALKSILHRI  | 386  | 270  |
| >EGFR-E884f MALESILHRI  | 14  | >EGFR-E884f MALKSILHRI  | 66   | 52   |
| >EGFR-E884f MALESILHRIY | 959 | >EGFR-E884f MALKSILHRIY | 483  | 476  |
| >EGFR-E884f MALESILHRIY | 53  | >EGFR-E884f MALKSILHRIY | 36   | 17   |
| >EGFR-E884f MALESILHRI  | 52  | >EGFR-E884f MALKSILHRI  | 91   | 39   |
| >EGFR-E884f MALESILHRIY | 8   | >EGFR-E884f MALKSILHRIY | 12   | 4    |
| >EGFR-E884f MALESILH    | 201 | >EGFR-E884f MALKSILH    | 585  | 384  |
| >EGFR-E884f MALESILHRIY | 17  | >EGFR-E884f MALKSILHRIY | 32   | 15   |
| >EGFR-E884f MALESILHRIY | 397 | >EGFR-E884f MALKSILHRIY | 499  | 102  |
| >EGFR-E884f MALESILHRIY | 284 | >EGFR-E884f MALKSILHRIY | 242  | 42   |
| >EGFR-E884f MALESILHRI  | 55  | >EGFR-E884f MALKSILHRI  | 76   | 21   |
| >EGFR-E884f MALESILHRIY | 341 | >EGFR-E884f MALKSILHRIY | 442  | 101  |
| >EGFR-E884f MALESILHRIY | 628 | >EGFR-E884f MALKSILHRIY | 193  | 435  |
| >EGFR-E884f MALESILHR   | 102 | >EGFR-E884f MALKSILHR   | 56   | 46   |
| >EGFR-E884f WMALESILHF  | 54  | >EGFR-E884f WMALKSILHF  | 61   | 7    |
| >EGFR-E884f WMALESIL    | 19  | >EGFR-E884f WMALKSIL    | 33   | 14   |
| >EGFR-E884f WMALESILHF  | 8   | >EGFR-E884f WMALKSILHF  | 12   | 4    |
| >EGFR-E884f WMALESIL    | 69  | >EGFR-E884f WMALKSIL    | 49   | 20   |
| >EGFR-E884f WMALESILHF  | 17  | >EGFR-E884f WMALKSILHF  | 12   | 5    |
| >EGFR-E884f WMALESIL    | 357 | >EGFR-E884f WMALKSIL    | 651  | 294  |
| >EGFR-E884f WMALESILHF  | 85  | >EGFR-E884f WMALKSILHF  | 128  | 43   |
| >EGFR-E884f WMALESIL    | 280 | >EGFR-E884f WMALKSIL    | 275  | 5    |
| >EGFR-E884f WMALESILHF  | 21  | >EGFR-E884f WMALKSILHF  | 18   | 3    |
| >EGFR-E884f WMALESIL    | 135 | >EGFR-E884f WMALKSIL    | 196  | 61   |
| >EGFR-E884f WMALESILHF  | 54  | >EGFR-E884f WMALKSILHF  | 53   | 1    |
| >EGFR-E884f WMALESIL    | 87  | >EGFR-E884f WMALKSIL    | 143  | 56   |
| >EGFR-E884f WMALESILHF  | 42  | >EGFR-E884f WMALKSILHF  | 48   | 6    |
| >EGFR-E884f WMALESIL    | 55  | >EGFR-E884f WMALKSIL    | 71   | 16   |
| >EGFR-E884f WMALESILHF  | 11  | >EGFR-E884f WMALKSILHF  | 11   | 0    |
| >EGFR-E884f WMALESIL    | 25  | >EGFR-E884f WMALKSIL    | 28   | 3    |
| >EGFR-E884f WMALESILHF  | 13  | >EGFR-E884f WMALKSILHF  | 14   | 1    |
| >EGFR-E884f WMALESILHF  | 954 | >EGFR-E884f WMALKSILHF  | 263  | 691  |
| >EGFR-E884f WMALESILHF  | 181 | >EGFR-E884f WMALKSILHF  | 219  | 38   |

|                         |       |                         |      |       |
|-------------------------|-------|-------------------------|------|-------|
| >EGFR-E884f WMALESIL    | 3609  | >EGFR-E884f WMALKSIL    | 354  | 3255  |
| >EGFR-E884f WMALESIL    | 222   | >EGFR-E884f WMALKSIL    | 460  | 238   |
| >EGFR-E884f WMALESIL    | 96    | >EGFR-E884f WMALKSIL    | 172  | 76    |
| >EGFR-E884f WMALESILHF  | 24    | >EGFR-E884f WMALKSILHF  | 23   | 1     |
| >EGFR-E884f WMALESILHF  | 42    | >EGFR-E884f WMALKSILHF  | 44   | 2     |
| >EGFR-E884f KWMALESI    | 27    | >EGFR-E884f KWMALKSI    | 61   | 34    |
| >EGFR-E884f KWMALESIL   | 62    | >EGFR-E884f KWMALKSIL   | 40   | 22    |
| >EGFR-E884f KWMALESI    | 295   | >EGFR-E884f KWMALKSI    | 1954 | 1659  |
| >EGFR-E884f KWMALESI    | 382   | >EGFR-E884f KWMALKSI    | 1712 | 1330  |
| >EGFR-E884f KWMALESI    | 267   | >EGFR-E884f KWMALKSI    | 390  | 123   |
| >EGFR-E884f KWMALESI    | 47    | >EGFR-E884f KWMALKSI    | 96   | 49    |
| >EGFR-E884f KWMALESIL   | 178   | >EGFR-E884f KWMALKSIL   | 318  | 140   |
| >EGFR-E884f KWMALESILf  | 32    | >EGFR-E884f KWMALKSILf  | 18   | 14    |
| >EGFR-E884f KWMALESILf  | 328   | >EGFR-E884f KWMALKSILf  | 256  | 72    |
| >EGFR-E884f KWMALESILf  | 8     | >EGFR-E884f KWMALKSILf  | 7    | 1     |
| >EGFR-E884f KWMALESI    | 22    | >EGFR-E884f KWMALKSI    | 21   | 1     |
| >EGFR-E884f KWMALESIL   | 31    | >EGFR-E884f KWMALKSIL   | 24   | 7     |
| >EGFR-E884f KWMALESILf  | 130   | >EGFR-E884f KWMALKSILf  | 112  | 18    |
| >EGFR-E884f IKWMALESI   | 72    | >EGFR-E884f IKWMALKSI   | 22   | 50    |
| >EGFR-E884f IKWMALESI   | 20    | >EGFR-E884f IKWMALKSI   | 11   | 9     |
| >EGFR-E884f IKWMALESIL  | 11    | >EGFR-E884f IKWMALKSIL  | 10   | 1     |
| >EGFR-E884f IKWMALESILf | 228   | >EGFR-E884f IKWMALKSILf | 238  | 10    |
| >EGFR-E884f IKWMALESIL  | 404   | >EGFR-E884f IKWMALKSIL  | 471  | 67    |
| >EGFR-E884f PIKWMALE    | 15603 | >EGFR-E884f PIKWMALE    | 205  | 15398 |
| >EGFR-E884f VPIKWMALEf  | 350   | >EGFR-E884f VPIKWMALEf  | 478  | 128   |
| >EGFR-E884f VPIKWMALEf  | 251   | >EGFR-E884f VPIKWMALEf  | 178  | 73    |
| >EGFR-E884f VPIKWMALEf  | 192   | >EGFR-E884f VPIKWMALEf  | 224  | 32    |
| >EGFR-E884f VPIKWMALEf  | 138   | >EGFR-E884f VPIKWMALEf  | 271  | 133   |
| >EGFR-E884f VPIKWMALEf  | 881   | >EGFR-E884f VPIKWMALEf  | 438  | 443   |
| >EGFR-E884f KVPIKWMALE  | 13235 | >EGFR-E884f KVPIKWMALE  | 90   | 13145 |
| >EGFR-E884f KVPIKWMALE  | 32505 | >EGFR-E884f KVPIKWMALE  | 124  | 32381 |
| >EGFR-E884f KVPIKWMALE  | 9471  | >EGFR-E884f KVPIKWMALE  | 24   | 9447  |
| >EGFR-E884f KVPIKWMALE  | 7365  | >EGFR-E884f KVPIKWMALE  | 308  | 7057  |
| >EGFR-E884f KVPIKWMALE  | 32068 | >EGFR-E884f KVPIKWMALE  | 477  | 31591 |
| >EGFR-E884f KVPIKWMALE  | 12906 | >EGFR-E884f KVPIKWMALE  | 254  | 12652 |
| >EGFR-F712L EFKKIKVL    | 674   | >EGFR-F712L ELKKIKVL    | 49   | 625   |
| >EGFR-F712L ALLRILKETEF | 9396  | >EGFR-F712L ALLRILKETEL | 87   | 9309  |
| >EGFR-F712L ALLRILKETEF | 2743  | >EGFR-F712L ALLRILKETEL | 55   | 2688  |
| >EGFR-F712L ALLRILKETEF | 10020 | >EGFR-F712L ALLRILKETEL | 302  | 9718  |
| >EGFR-F712L ALLRILKETEF | 2364  | >EGFR-F712L ALLRILKETEL | 375  | 1989  |
| >EGFR-F712L ALLRILKETEF | 1376  | >EGFR-F712L ALLRILKETEL | 14   | 1362  |
| >EGFR-F712L ALLRILKETEF | 11092 | >EGFR-F712L ALLRILKETEL | 56   | 11036 |
| >EGFR-F712L ALLRILKETEF | 9321  | >EGFR-F712L ALLRILKETEL | 21   | 9300  |



|                         |       |                         |      |       |
|-------------------------|-------|-------------------------|------|-------|
| >EGFR-F712L ALLRILKETEF | 15032 | >EGFR-F712L ALLRILKETEL | 87   | 14945 |
| >EGFR-F712L ALLRILKETEF | 1230  | >EGFR-F712L ALLRILKETEL | 5    | 1225  |
| >EGFR-F712L ALLRILKETEF | 153   | >EGFR-F712L ALLRILKETEL | 701  | 548   |
| >EGFR-F712L ALLRILKETEF | 58    | >EGFR-F712L ALLRILKETEL | 1714 | 1656  |
| >EGFR-F712L TEFKKIKV    | 513   | >EGFR-F712L TELKKIKV    | 393  | 120   |
| >EGFR-F712L TEFKKIKVL   | 51    | >EGFR-F712L TELKKIKVL   | 45   | 6     |
| >EGFR-F712L TEFKKIKVL   | 462   | >EGFR-F712L TELKKIKVL   | 920  | 458   |
| >EGFR-F712L TEFKKIKVL   | 284   | >EGFR-F712L TELKKIKVL   | 1379 | 1095  |
| >EGFR-F712L TEFKKIKV    | 361   | >EGFR-F712L TELKKIKV    | 957  | 596   |
| >EGFR-F712L TEFKKIKVL   | 68    | >EGFR-F712L TELKKIKVL   | 155  | 87    |
| >EGFR-F712L TEFKKIKVL   | 460   | >EGFR-F712L TELKKIKVL   | 1144 | 684   |
| >EGFR-F712L TEFKKIKVL   | 85    | >EGFR-F712L TELKKIKVL   | 196  | 111   |
| >EGFR-F712L ETEFKKIK    | 46    | >EGFR-F712L ETELKKIK    | 160  | 114   |
| >EGFR-F712L ETEFKKIKV   | 201   | >EGFR-F712L ETELKKIKV   | 1216 | 1015  |
| >EGFR-F712L KETEFKKI    | 82    | >EGFR-F712L KETELKKI    | 114  | 32    |
| >EGFR-F712L KETEFKKIKV  | 274   | >EGFR-F712L KETELKKIKV  | 245  | 29    |
| >EGFR-F712L KETEFKKIKVL | 128   | >EGFR-F712L KETELKKIKVL | 143  | 15    |
| >EGFR-F712L KETEFKKI    | 165   | >EGFR-F712L KETELKKI    | 339  | 174   |
| >EGFR-F712L KETEFKKIKVL | 51    | >EGFR-F712L KETELKKIKVL | 67   | 16    |
| >EGFR-F712L KETEFKKI    | 289   | >EGFR-F712L KETELKKI    | 381  | 92    |
| >EGFR-F712L KETEFKKIKVL | 75    | >EGFR-F712L KETELKKIKVL | 78   | 3     |
| >EGFR-F712L KETEFKKI    | 949   | >EGFR-F712L KETELKKI    | 335  | 614   |
| >EGFR-F712L KETEFKKIKVL | 105   | >EGFR-F712L KETELKKIKVL | 140  | 35    |
| >EGFR-F712L ILKETEFKKI  | 144   | >EGFR-F712L ILKETELKKI  | 100  | 44    |
| >EGFR-F712L ILKETEFKKI  | 259   | >EGFR-F712L ILKETELKKI  | 363  | 104   |
| >EGFR-F712L ILKETEFKKI  | 63    | >EGFR-F712L ILKETELKKI  | 76   | 13    |
| >EGFR-F712L ILKETEFK    | 129   | >EGFR-F712L ILKETELK    | 177  | 48    |
| >EGFR-F712L ILKETEFKK   | 144   | >EGFR-F712L ILKETELKK   | 110  | 34    |
| >EGFR-F712L ILKETEFK    | 431   | >EGFR-F712L ILKETELK    | 857  | 426   |
| >EGFR-F712L ILKETEFK    | 97    | >EGFR-F712L ILKETELK    | 287  | 190   |
| >EGFR-F712L ILKETEFKK   | 235   | >EGFR-F712L ILKETELKK   | 123  | 112   |
| >EGFR-F712L ILKETEFKKIK | 224   | >EGFR-F712L ILKETELKKIK | 253  | 29    |
| >EGFR-F712L ILKETEFK    | 352   | >EGFR-F712L ILKETELK    | 1085 | 733   |
| >EGFR-F712L RILKETEF    | 2738  | >EGFR-F712L RILKETEL    | 395  | 2343  |
| >EGFR-F712L RILKETEF    | 12944 | >EGFR-F712L RILKETEL    | 367  | 12577 |
| >EGFR-F712L RILKETEF    | 25758 | >EGFR-F712L RILKETEL    | 454  | 25304 |
| >EGFR-F712L RILKETEFK   | 83    | >EGFR-F712L RILKETELK   | 125  | 42    |
| >EGFR-F712L RILKETEFKK  | 111   | >EGFR-F712L RILKETELKK  | 55   | 56    |
| >EGFR-F712L RILKETEFK   | 23    | >EGFR-F712L RILKETELK   | 39   | 16    |
| >EGFR-F712L RILKETEFKK  | 58    | >EGFR-F712L RILKETELKK  | 64   | 6     |
| >EGFR-F712L RILKETEF    | 267   | >EGFR-F712L RILKETEL    | 3762 | 3495  |
| >EGFR-F712L RILKETEFK   | 37    | >EGFR-F712L RILKETELK   | 159  | 122   |
| >EGFR-F712L RILKETEFKK  | 71    | >EGFR-F712L RILKETELKK  | 63   | 8     |

|                          |       |                          |       |       |
|--------------------------|-------|--------------------------|-------|-------|
| >EGFR-F712L RILKETEF     | 40    | >EGFR-F712L RILKETEL     | 182   | 142   |
| >EGFR-F712L RILKETEFKKI  | 128   | >EGFR-F712L RILKETELKKI  | 132   | 4     |
| >EGFR-F712L RILKETEF     | 62    | >EGFR-F712L RILKETEL     | 1762  | 1700  |
| >EGFR-F712L RILKETEF     | 111   | >EGFR-F712L RILKETEL     | 1956  | 1845  |
| >EGFR-F712L RILKETEFK    | 64    | >EGFR-F712L RILKETEFLK   | 156   | 92    |
| >EGFR-F712L RILKETEFLK   | 149   | >EGFR-F712L RILKETEFLKK  | 176   | 27    |
| >EGFR-F712L LRILKETEF    | 106   | >EGFR-F712L LRILKETEL    | 1570  | 1464  |
| >EGFR-F712L LRILKETEFLK  | 302   | >EGFR-F712L LRILKETEFLK  | 413   | 111   |
| >EGFR-F712L LRILKETEFLKK | 185   | >EGFR-F712L LRILKETEFLKK | 214   | 29    |
| >EGFR-F712L LLRILKETEF   | 13376 | >EGFR-F712L LLRILKETEL   | 293   | 13083 |
| >EGFR-F712L LLRILKETEF   | 9583  | >EGFR-F712L LLRILKETEL   | 13    | 9570  |
| >EGFR-F712L LLRILKETEFLK | 286   | >EGFR-F712L LLRILKETEFLK | 447   | 161   |
| >EGFR-F712L LLRILKETEFLK | 60    | >EGFR-F712L LLRILKETEFLK | 197   | 137   |
| >EGFR-F712L LLRILKETEF   | 167   | >EGFR-F712L LLRILKETEL   | 3857  | 3690  |
| >EGFR-F712L LLRILKETEF   | 119   | >EGFR-F712L LLRILKETEL   | 2732  | 2613  |
| >EGFR-F712L LLRILKETEF   | 422   | >EGFR-F712L LLRILKETEL   | 5134  | 4712  |
| >EGFR-F712S EFKKIKVL     | 21044 | >EGFR-F712S ESKKIKVL     | 435   | 20609 |
| >EGFR-F712S ALLRILKETEF  | 153   | >EGFR-F712S ALLRILKETES  | 17669 | 17516 |
| >EGFR-F712S ALLRILKETEF  | 58    | >EGFR-F712S ALLRILKETES  | 15355 | 15297 |
| >EGFR-F712S TEFKKIKVL    | 51    | >EGFR-F712S TESKKIKVL    | 229   | 178   |
| >EGFR-F712S TEFKKIKVL    | 462   | >EGFR-F712S TESKKIKVL    | 1972  | 1510  |
| >EGFR-F712S TEFKKIKVL    | 284   | >EGFR-F712S TESKKIKVL    | 1063  | 779   |
| >EGFR-F712S TEFKKIKV     | 361   | >EGFR-F712S TESKKIKV     | 3091  | 2730  |
| >EGFR-F712S TEFKKIKVL    | 68    | >EGFR-F712S TESKKIKVL    | 377   | 309   |
| >EGFR-F712S TEFKKIKVL    | 460   | >EGFR-F712S TESKKIKVL    | 2836  | 2376  |
| >EGFR-F712S TEFKKIKVL    | 85    | >EGFR-F712S TESKKIKVL    | 585   | 500   |
| >EGFR-F712S ETEFKKIK     | 46    | >EGFR-F712S ETESKKIK     | 70    | 24    |
| >EGFR-F712S ETEFKKIKV    | 201   | >EGFR-F712S ETESKKIKV    | 539   | 338   |
| >EGFR-F712S ETEFKKIKV    | 511   | >EGFR-F712S ETESKKIKV    | 338   | 173   |
| >EGFR-F712S KETEFLK      | 82    | >EGFR-F712S KETESKKI     | 58    | 24    |
| >EGFR-F712S KETEFLKIKV   | 274   | >EGFR-F712S KETESKKIKV   | 394   | 120   |
| >EGFR-F712S KETEFLKIKVL  | 128   | >EGFR-F712S KETESKKIKVL  | 179   | 51    |
| >EGFR-F712S KETEFLK      | 165   | >EGFR-F712S KETESKKI     | 284   | 119   |
| >EGFR-F712S KETEFLKIKVL  | 51    | >EGFR-F712S KETESKKIKVL  | 58    | 7     |
| >EGFR-F712S KETEFLK      | 289   | >EGFR-F712S KETESKKI     | 874   | 585   |
| >EGFR-F712S KETEFLKIKVL  | 75    | >EGFR-F712S KETESKKIKVL  | 149   | 74    |
| >EGFR-F712S KETEFLKIKVL  | 105   | >EGFR-F712S KETESKKIKVL  | 211   | 106   |
| >EGFR-F712S ILKETEFK     | 144   | >EGFR-F712S ILKETESKKI   | 297   | 153   |
| >EGFR-F712S ILKETEFK     | 259   | >EGFR-F712S ILKETESKKI   | 530   | 271   |
| >EGFR-F712S ILKETEFK     | 63    | >EGFR-F712S ILKETESKKI   | 106   | 43    |
| >EGFR-F712S ILKETEFLK    | 129   | >EGFR-F712S ILKETEFLK    | 368   | 239   |
| >EGFR-F712S ILKETEFLK    | 144   | >EGFR-F712S ILKETEFLK    | 178   | 34    |
| >EGFR-F712S ILKETEFLK    | 431   | >EGFR-F712S ILKETEFLK    | 2840  | 2409  |

|                         |       |                         |       |       |
|-------------------------|-------|-------------------------|-------|-------|
| >EGFR-F712S ILKETEFK    | 97    | >EGFR-F712S ILKETESK    | 308   | 211   |
| >EGFR-F712S ILKETEFKK   | 235   | >EGFR-F712S ILKETESKK   | 367   | 132   |
| >EGFR-F712S ILKETEFKKIK | 224   | >EGFR-F712S ILKETESKKIK | 242   | 18    |
| >EGFR-F712S ILKETEFK    | 352   | >EGFR-F712S ILKETESK    | 1813  | 1461  |
| >EGFR-F712S RILKETEFK   | 83    | >EGFR-F712S RILKETESK   | 227   | 144   |
| >EGFR-F712S RILKETEFKK  | 111   | >EGFR-F712S RILKETESKK  | 90    | 21    |
| >EGFR-F712S RILKETEFK   | 23    | >EGFR-F712S RILKETESK   | 63    | 40    |
| >EGFR-F712S RILKETEFKK  | 58    | >EGFR-F712S RILKETESKK  | 241   | 183   |
| >EGFR-F712S RILKETEF    | 267   | >EGFR-F712S RILKETES    | 18388 | 18121 |
| >EGFR-F712S RILKETEFK   | 37    | >EGFR-F712S RILKETESK   | 124   | 87    |
| >EGFR-F712S RILKETEFKK  | 71    | >EGFR-F712S RILKETESKK  | 106   | 35    |
| >EGFR-F712S RILKETEF    | 40    | >EGFR-F712S RILKETES    | 9178  | 9138  |
| >EGFR-F712S RILKETEFKKI | 128   | >EGFR-F712S RILKETESKKI | 60    | 68    |
| >EGFR-F712S RILKETEF    | 62    | >EGFR-F712S RILKETES    | 17802 | 17740 |
| >EGFR-F712S RILKETEF    | 111   | >EGFR-F712S RILKETES    | 22527 | 22416 |
| >EGFR-F712S RILKETEFK   | 64    | >EGFR-F712S RILKETESK   | 374   | 310   |
| >EGFR-F712S RILKETEFKK  | 149   | >EGFR-F712S RILKETESKK  | 765   | 616   |
| >EGFR-F712S LRILKETEF   | 106   | >EGFR-F712S LRILKETES   | 14137 | 14031 |
| >EGFR-F712S LRILKETEFK  | 302   | >EGFR-F712S LRILKETESK  | 773   | 471   |
| >EGFR-F712S LRILKETEFKK | 185   | >EGFR-F712S LRILKETESKK | 326   | 141   |
| >EGFR-F712S LLRILKETEFK | 286   | >EGFR-F712S LLRILKETESK | 855   | 569   |
| >EGFR-F712S LLRILKETEFK | 60    | >EGFR-F712S LLRILKETESK | 165   | 105   |
| >EGFR-F712S LLRILKETEF  | 167   | >EGFR-F712S LLRILKETES  | 15989 | 15822 |
| >EGFR-F712S LLRILKETEF  | 119   | >EGFR-F712S LLRILKETES  | 18353 | 18234 |
| >EGFR-F712S LLRILKETEF  | 422   | >EGFR-F712S LLRILKETES  | 22358 | 21936 |
| >EGFR-F723S FGTVYKGL    | 354   | >EGFR-F723S SGTVYKGL    | 87    | 267   |
| >EGFR-F723S FGTVYKGLW   | 393   | >EGFR-F723S SGTVYKGLW   | 2242  | 1849  |
| >EGFR-F723S FGTVYKGLW   | 29    | >EGFR-F723S SGTVYKGLW   | 890   | 861   |
| >EGFR-F723S AFGTVYKGL   | 152   | >EGFR-F723S ASGTVYKGL   | 16048 | 15896 |
| >EGFR-F723S AFGTVYKGLV  | 249   | >EGFR-F723S ASGTVYKGLV  | 14908 | 14659 |
| >EGFR-F723S AFGTVYKGLV  | 16465 | >EGFR-F723S ASGTVYKGLV  | 156   | 16309 |
| >EGFR-F723S AFGTVYKGLV  | 21017 | >EGFR-F723S ASGTVYKGLV  | 362   | 20655 |
| >EGFR-F723S AFGTVYKGLV  | 8157  | >EGFR-F723S ASGTVYKGLV  | 77    | 8080  |
| >EGFR-F723S AFGTVYKGLV  | 11361 | >EGFR-F723S ASGTVYKGLV  | 90    | 11271 |
| >EGFR-F723S KKIKVLGSGAI | 7     | >EGFR-F723S KKIKVLGSGAI | 3924  | 3917  |
| >EGFR-F723S GAFGTVYKGI  | 372   | >EGFR-F723S GASGTVYKGI  | 3930  | 3558  |
| >EGFR-F723S GAFGTVYK    | 122   | >EGFR-F723S GASGTVYK    | 454   | 332   |
| >EGFR-F723S GAFGTVYK    | 9     | >EGFR-F723S GASGTVYK    | 20    | 11    |
| >EGFR-F723S GAFGTVYK    | 98    | >EGFR-F723S GASGTVYK    | 605   | 507   |
| >EGFR-F723S GAFGTVYK    | 222   | >EGFR-F723S GASGTVYK    | 1437  | 1215  |
| >EGFR-F723S GAFGTVYK    | 23    | >EGFR-F723S GASGTVYK    | 199   | 176   |
| >EGFR-F723S GAFGTVYKGI  | 158   | >EGFR-F723S GASGTVYKGI  | 873   | 715   |
| >EGFR-F723S GAFGTVYKGI  | 38    | >EGFR-F723S GASGTVYKGI  | 150   | 112   |

|                        |      |                        |      |      |
|------------------------|------|------------------------|------|------|
| >EGFR-F723S GAFGTVYKGL | 456  | >EGFR-F723S GASGTVYKGL | 268  | 188  |
| >EGFR-F723S GAFGTVYKGL | 46   | >EGFR-F723S GASGTVYKGL | 110  | 64   |
| >EGFR-F723S GAFGTVYKGL | 34   | >EGFR-F723S GASGTVYKGL | 42   | 8    |
| >EGFR-F723S GAFGTVYKGL | 279  | >EGFR-F723S GASGTVYKGL | 1202 | 923  |
| >EGFR-F723S GAFGTVYKGL | 33   | >EGFR-F723S GASGTVYKGL | 70   | 37   |
| >EGFR-F723S GAFGTVYK   | 150  | >EGFR-F723S GASGTVYK   | 356  | 206  |
| >EGFR-F723S SGAFGTVYK  | 49   | >EGFR-F723S SGASGTVYK  | 77   | 28   |
| >EGFR-F723S SGAFGTVY   | 87   | >EGFR-F723S SGASGTVY   | 79   | 8    |
| >EGFR-F723S SGAFGTVYK  | 178  | >EGFR-F723S SGASGTVYK  | 247  | 69   |
| >EGFR-F723S SGAFGTVY   | 188  | >EGFR-F723S SGASGTVY   | 125  | 63   |
| >EGFR-F723S SGAFGTVY   | 460  | >EGFR-F723S SGASGTVY   | 221  | 239  |
| >EGFR-F723S SGAFGTVY   | 520  | >EGFR-F723S SGASGTVY   | 369  | 151  |
| >EGFR-F723S SGAFGTVYK  | 342  | >EGFR-F723S SGASGTVYK  | 379  | 37   |
| >EGFR-F723S GSGAFGTVYK | 46   | >EGFR-F723S GSGASGTVYK | 94   | 48   |
| >EGFR-F723S GSGAFGTVYK | 29   | >EGFR-F723S GSGASGTVYK | 44   | 15   |
| >EGFR-F723S GSGAFGTVY  | 432  | >EGFR-F723S GSGASGTVY  | 626  | 194  |
| >EGFR-F723S GSGAFGTVYK | 224  | >EGFR-F723S GSGASGTVYK | 607  | 383  |
| >EGFR-F723S GSGAFGTVY  | 78   | >EGFR-F723S GSGASGTVY  | 54   | 24   |
| >EGFR-F723S GSGAFGTVY  | 349  | >EGFR-F723S GSGASGTVY  | 309  | 40   |
| >EGFR-F723S GSGAFGTVY  | 62   | >EGFR-F723S GSGASGTVY  | 12   | 50   |
| >EGFR-F723S GSGAFGTVY  | 11   | >EGFR-F723S GSGASGTVY  | 16   | 5    |
| >EGFR-F723S GSGAFGTVYK | 337  | >EGFR-F723S GSGASGTVYK | 528  | 191  |
| >EGFR-F723S LGSGAFGTVY | 125  | >EGFR-F723S LGSGASGTVY | 334  | 209  |
| >EGFR-F723S LGSGAFGTVY | 478  | >EGFR-F723S LGSGASGTVY | 390  | 88   |
| >EGFR-F723S LGSGAFGTVY | 93   | >EGFR-F723S LGSGASGTVY | 76   | 17   |
| >EGFR-F723S LGSGAFGTVY | 2359 | >EGFR-F723S LGSGASGTVY | 483  | 1876 |
| >EGFR-F723S LGSGAFGTVY | 94   | >EGFR-F723S LGSGASGTVY | 74   | 20   |
| >EGFR-F723S LGSGAFGTVY | 905  | >EGFR-F723S LGSGASGTVY | 465  | 440  |
| >EGFR-F723S VLGSAGFTV  | 73   | >EGFR-F723S VLGSAGFTV  | 269  | 196  |
| >EGFR-F723S VLGSAGFTV  | 41   | >EGFR-F723S VLGSAGFTV  | 61   | 20   |
| >EGFR-F723S VLGSAGFTV  | 21   | >EGFR-F723S VLGSAGFTV  | 40   | 19   |
| >EGFR-F723S VLGSAGFT   | 68   | >EGFR-F723S VLGSAGFT   | 427  | 359  |
| >EGFR-F723S VLGSAGFTV  | 3    | >EGFR-F723S VLGSAGFTV  | 3    | 0    |
| >EGFR-F723S VLGSAGFTV  | 7    | >EGFR-F723S VLGSAGFTV  | 8    | 1    |
| >EGFR-F723S VLGSAGFT   | 103  | >EGFR-F723S VLGSAGFT   | 806  | 703  |
| >EGFR-F723S VLGSAGFTV  | 7    | >EGFR-F723S VLGSAGFTV  | 8    | 1    |
| >EGFR-F723S VLGSAGFT   | 75   | >EGFR-F723S VLGSAGFT   | 817  | 742  |
| >EGFR-F723S VLGSAGFTV  | 5    | >EGFR-F723S VLGSAGFTV  | 5    | 0    |
| >EGFR-F723S VLGSAGFT   | 14   | >EGFR-F723S VLGSAGFT   | 39   | 25   |
| >EGFR-F723S VLGSAGFTV  | 2    | >EGFR-F723S VLGSAGFTV  | 2    | 0    |
| >EGFR-F723S VLGSAGFTV  | 64   | >EGFR-F723S VLGSAGFTV  | 147  | 83   |
| >EGFR-F723S VLGSAGFTV  | 54   | >EGFR-F723S VLGSAGFTV  | 65   | 11   |
| >EGFR-F723S VLGSAGFTV  | 26   | >EGFR-F723S VLGSAGFTV  | 67   | 41   |

|                        |      |                        |       |       |
|------------------------|------|------------------------|-------|-------|
| >EGFR-F723S VLGSGAFGTV | 73   | >EGFR-F723S VLGSGASGTV | 55    | 18    |
| >EGFR-F723S VLGSGAFGTV | 87   | >EGFR-F723S VLGSGASGTV | 51    | 36    |
| >EGFR-F723S VLGSGAFGTV | 421  | >EGFR-F723S VLGSGASGTV | 264   | 157   |
| >EGFR-F723S VLGSGAFGTV | 227  | >EGFR-F723S VLGSGASGTV | 105   | 122   |
| >EGFR-F723S KVLGSGAFGT | 294  | >EGFR-F723S KVLGSGASGT | 502   | 208   |
| >EGFR-F723S KVLGSGAFGT | 123  | >EGFR-F723S KVLGSGASGT | 142   | 19    |
| >EGFR-F723S KVLGSGAFGT | 9    | >EGFR-F723S KVLGSGASGT | 21    | 12    |
| >EGFR-F723S KVLGSGAFGT | 12   | >EGFR-F723S KVLGSGASGT | 14    | 2     |
| >EGFR-F723S KVLGSGAFGT | 78   | >EGFR-F723S KVLGSGASGT | 68    | 10    |
| >EGFR-F723S KVLGSGAFGT | 28   | >EGFR-F723S KVLGSGASGT | 32    | 4     |
| >EGFR-F723S KVLGSGAFGT | 176  | >EGFR-F723S KVLGSGASGT | 148   | 28    |
| >EGFR-F723S KVLGSGAFGT | 15   | >EGFR-F723S KVLGSGASGT | 16    | 1     |
| >EGFR-F723S KVLGSGAFG  | 103  | >EGFR-F723S KVLGSGASG  | 413   | 310   |
| >EGFR-F723S KVLGSGAFGT | 76   | >EGFR-F723S KVLGSGASGT | 66    | 10    |
| >EGFR-F723S KVLGSGAF   | 32   | >EGFR-F723S KVLGSGAS   | 7319  | 7287  |
| >EGFR-F723S KVLGSGAFGT | 807  | >EGFR-F723S KVLGSGASGT | 380   | 427   |
| >EGFR-F723S KVLGSGAFGT | 324  | >EGFR-F723S KVLGSGASGT | 430   | 106   |
| >EGFR-F723S KVLGSGAF   | 172  | >EGFR-F723S KVLGSGAS   | 15331 | 15159 |
| >EGFR-F723S KVLGSGAF   | 345  | >EGFR-F723S KVLGSGAS   | 22043 | 21698 |
| >EGFR-F723S KVLGSGAF   | 165  | >EGFR-F723S KVLGSGAS   | 21948 | 21783 |
| >EGFR-F723S KVLGSGAF   | 16   | >EGFR-F723S KVLGSGAS   | 10304 | 10288 |
| >EGFR-F723S KVLGSGAF   | 476  | >EGFR-F723S KVLGSGAS   | 20800 | 20324 |
| >EGFR-F723S IKVLGSGAF  | 9    | >EGFR-F723S IKVLGSGAS  | 8209  | 8200  |
| >EGFR-F723S KIKVLGSGAF | 903  | >EGFR-F723S KIKVLGSGAS | 259   | 644   |
| >EGFR-F723S KIKVLGSGAF | 50   | >EGFR-F723S KIKVLGSGAS | 132   | 82    |
| >EGFR-F723S KIKVLGSGAF | 63   | >EGFR-F723S KIKVLGSGAS | 10466 | 10403 |
| >EGFR-F723S KIKVLGSGAF | 245  | >EGFR-F723S KIKVLGSGAS | 19252 | 19007 |
| >EGFR-F795S FGCLLDYV   | 218  | >EGFR-F795S SGCLLDYV   | 1882  | 1664  |
| >EGFR-F795S FGCLLDYV   | 151  | >EGFR-F795S SGCLLDYV   | 1613  | 1462  |
| >EGFR-F795S FGCLLDYVR  | 1663 | >EGFR-F795S SGCLLDYVR  | 295   | 1368  |
| >EGFR-F795S FGCLLDYVR  | 78   | >EGFR-F795S SGCLLDYVR  | 67    | 11    |
| >EGFR-F795S PFGCLLDY   | 31   | >EGFR-F795S PSGCLLDY   | 285   | 254   |
| >EGFR-F795S PFGCLLDY   | 341  | >EGFR-F795S PSGCLLDY   | 622   | 281   |
| >EGFR-F795S PFGCLLDYVR | 35   | >EGFR-F795S PSGCLLDYVR | 510   | 475   |
| >EGFR-F795S TVQLITQLMP | 469  | >EGFR-F795S TVQLITQLMP | 23390 | 22921 |
| >EGFR-F795S TVQLITQLMP | 188  | >EGFR-F795S TVQLITQLMP | 16928 | 16740 |
| >EGFR-F795S MPFGCLLDY  | 79   | >EGFR-F795S MPSGCLLDY  | 1065  | 986   |
| >EGFR-F795S MPFGCLLDY\ | 8    | >EGFR-F795S MPSGCLLDY\ | 70    | 62    |
| >EGFR-F795S MPFGCLLDY\ | 203  | >EGFR-F795S MPSGCLLDY\ | 493   | 290   |
| >EGFR-F795S MPFGCLLDY\ | 131  | >EGFR-F795S MPSGCLLDY\ | 311   | 180   |
| >EGFR-F795S MPFGCLLDY\ | 399  | >EGFR-F795S MPSGCLLDY\ | 3090  | 2691  |
| >EGFR-F795S MPFGCLLDY  | 17   | >EGFR-F795S MPSGCLLDY  | 42    | 25    |
| >EGFR-F795S MPFGCLLDY\ | 498  | >EGFR-F795S MPSGCLLDY\ | 2803  | 2305  |

|                        |     |                        |      |      |
|------------------------|-----|------------------------|------|------|
| >EGFR-F795S MPFGCLLDY\ | 425 | >EGFR-F795S MPSGCLLDY\ | 1922 | 1497 |
| >EGFR-F795S MPFGCLLDY\ | 63  | >EGFR-F795S MPSGCLLDY\ | 357  | 294  |
| >EGFR-F795S MPFGCLLDY\ | 282 | >EGFR-F795S MPSGCLLDY\ | 1177 | 895  |
| >EGFR-F795S MPFGCLLDY  | 359 | >EGFR-F795S MPSGCLLDY  | 865  | 506  |
| >EGFR-F795S MPFGCLLDY  | 480 | >EGFR-F795S MPSGCLLDY  | 2544 | 2064 |
| >EGFR-F795S MPFGCLLDY  | 297 | >EGFR-F795S MPSGCLLDY  | 1911 | 1614 |
| >EGFR-F795S MPFGCLLDY  | 8   | >EGFR-F795S MPSGCLLDY  | 8    | 0    |
| >EGFR-F795S MPFGCLLDY\ | 80  | >EGFR-F795S MPSGCLLDY\ | 95   | 15   |
| >EGFR-F795S MPFGCLLDY  | 13  | >EGFR-F795S MPSGCLLDY  | 12   | 1    |
| >EGFR-F795S MPFGCLLD   | 63  | >EGFR-F795S MPSGCLLD   | 327  | 264  |
| >EGFR-F795S MPFGCLLDY  | 254 | >EGFR-F795S MPSGCLLDY  | 2598 | 2344 |
| >EGFR-F795S MPFGCLLDY\ | 25  | >EGFR-F795S MPSGCLLDY\ | 34   | 9    |
| >EGFR-F795S MPFGCLLDY\ | 43  | >EGFR-F795S MPSGCLLDY\ | 237  | 194  |
| >EGFR-F795S MPFGCLLDY  | 95  | >EGFR-F795S MPSGCLLDY  | 274  | 179  |
| >EGFR-F795S MPFGCLLDY  | 101 | >EGFR-F795S MPSGCLLDY  | 419  | 318  |
| >EGFR-F795S MPFGCLLDY  | 494 | >EGFR-F795S MPSGCLLDY  | 789  | 295  |
| >EGFR-F795S MPFGCLLDY\ | 32  | >EGFR-F795S MPSGCLLDY\ | 71   | 39   |
| >EGFR-F795S LMPFGCLL   | 297 | >EGFR-F795S LMPSGCLL   | 230  | 67   |
| >EGFR-F795S LMPFGCLLDY | 24  | >EGFR-F795S LMPSGCLLDY | 17   | 7    |
| >EGFR-F795S LMPFGCLL   | 71  | >EGFR-F795S LMPSGCLL   | 50   | 21   |
| >EGFR-F795S LMPFGCLLDY | 12  | >EGFR-F795S LMPSGCLLDY | 8    | 4    |
| >EGFR-F795S LMPFGCLL   | 80  | >EGFR-F795S LMPSGCLL   | 56   | 24   |
| >EGFR-F795S LMPFGCLLDY | 8   | >EGFR-F795S LMPSGCLLDY | 5    | 3    |
| >EGFR-F795S LMPFGCLL   | 248 | >EGFR-F795S LMPSGCLL   | 200  | 48   |
| >EGFR-F795S LMPFGCLLDY | 12  | >EGFR-F795S LMPSGCLLDY | 8    | 4    |
| >EGFR-F795S LMPFGCLL   | 35  | >EGFR-F795S LMPSGCLL   | 26   | 9    |
| >EGFR-F795S LMPFGCLLDY | 3   | >EGFR-F795S LMPSGCLLDY | 3    | 0    |
| >EGFR-F795S LMPFGCLL   | 522 | >EGFR-F795S LMPSGCLL   | 420  | 102  |
| >EGFR-F795S LMPFGCLLDY | 14  | >EGFR-F795S LMPSGCLLDY | 11   | 3    |
| >EGFR-F795S LMPFGCLL   | 83  | >EGFR-F795S LMPSGCLL   | 47   | 36   |
| >EGFR-F795S LMPFGCLLDY | 8   | >EGFR-F795S LMPSGCLLDY | 7    | 1    |
| >EGFR-F795S LMPFGCLL   | 489 | >EGFR-F795S LMPSGCLL   | 414  | 75   |
| >EGFR-F795S LMPFGCLLDY | 6   | >EGFR-F795S LMPSGCLLDY | 5    | 1    |
| >EGFR-F795S LMPFGCLL   | 8   | >EGFR-F795S LMPSGCLL   | 5    | 3    |
| >EGFR-F795S LMPFGCLLDY | 3   | >EGFR-F795S LMPSGCLLDY | 2    | 1    |
| >EGFR-F795S LMPFGCLLDY | 254 | >EGFR-F795S LMPSGCLLDY | 565  | 311  |
| >EGFR-F795S LMPFGCLLDY | 326 | >EGFR-F795S LMPSGCLLDY | 624  | 298  |
| >EGFR-F795S LMPFGCLLDY | 259 | >EGFR-F795S LMPSGCLLDY | 551  | 292  |
| >EGFR-F795S LMPFGCLLDY | 97  | >EGFR-F795S LMPSGCLLDY | 122  | 25   |
| >EGFR-F795S LMPFGCLLDY | 117 | >EGFR-F795S LMPSGCLLDY | 93   | 24   |
| >EGFR-F795S LMPFGCLLDY | 596 | >EGFR-F795S LMPSGCLLDY | 164  | 432  |
| >EGFR-F795S LMPFGCLL   | 9   | >EGFR-F795S LMPSGCLL   | 9    | 0    |
| >EGFR-F795S LMPFGCLLDY | 509 | >EGFR-F795S LMPSGCLLDY | 127  | 382  |

|                        |      |                         |       |       |
|------------------------|------|-------------------------|-------|-------|
| >EGFR-F795S LMPFGCLLDY | 344  | >EGFR-F795S LMPMSGCLLDY | 598   | 254   |
| >EGFR-F795S QLMPFGCL   | 215  | >EGFR-F795S QLMPMSGCL   | 709   | 494   |
| >EGFR-F795S QLMPFGCLL  | 39   | >EGFR-F795S QLMPMSGCLL  | 148   | 109   |
| >EGFR-F795S QLMPFGCL   | 30   | >EGFR-F795S QLMPMSGCL   | 41    | 11    |
| >EGFR-F795S QLMPFGCLL  | 8    | >EGFR-F795S QLMPMSGCLL  | 12    | 4     |
| >EGFR-F795S QLMPFGCL   | 212  | >EGFR-F795S QLMPMSGCL   | 264   | 52    |
| >EGFR-F795S QLMPFGCLL  | 53   | >EGFR-F795S QLMPMSGCLL  | 55    | 2     |
| >EGFR-F795S QLMPFGCL   | 201  | >EGFR-F795S QLMPMSGCL   | 1066  | 865   |
| >EGFR-F795S QLMPFGCLL  | 45   | >EGFR-F795S QLMPMSGCLL  | 114   | 69    |
| >EGFR-F795S QLMPFGCL   | 123  | >EGFR-F795S QLMPMSGCL   | 281   | 158   |
| >EGFR-F795S QLMPFGCLL  | 17   | >EGFR-F795S QLMPMSGCLL  | 51    | 34    |
| >EGFR-F795S QLMPFGCL   | 120  | >EGFR-F795S QLMPMSGCL   | 108   | 12    |
| >EGFR-F795S QLMPFGCLL  | 42   | >EGFR-F795S QLMPMSGCLL  | 47    | 5     |
| >EGFR-F795S QLMPFGCL   | 485  | >EGFR-F795S QLMPMSGCL   | 534   | 49    |
| >EGFR-F795S QLMPFGCLL  | 96   | >EGFR-F795S QLMPMSGCLL  | 112   | 16    |
| >EGFR-F795S QLMPFGCL   | 77   | >EGFR-F795S QLMPMSGCL   | 76    | 1     |
| >EGFR-F795S QLMPFGCLL  | 37   | >EGFR-F795S QLMPMSGCLL  | 49    | 12    |
| >EGFR-F795S QLMPFGCL   | 36   | >EGFR-F795S QLMPMSGCL   | 48    | 12    |
| >EGFR-F795S QLMPFGCLL  | 4    | >EGFR-F795S QLMPMSGCLL  | 7     | 3     |
| >EGFR-F795S QLMPFGCLLI | 522  | >EGFR-F795S QLMPMSGCLLI | 451   | 71    |
| >EGFR-F795S QLMPFGCLLI | 15   | >EGFR-F795S QLMPMSGCLLI | 24    | 9     |
| >EGFR-F795S QLMPFGCLLI | 328  | >EGFR-F795S QLMPMSGCLLI | 419   | 91    |
| >EGFR-F795S QLMPFGCLLI | 23   | >EGFR-F795S QLMPMSGCLLI | 55    | 32    |
| >EGFR-F795S QLMPFGCLL  | 1175 | >EGFR-F795S QLMPMSGCLL  | 467   | 708   |
| >EGFR-F795S QLMPFGCLLI | 111  | >EGFR-F795S QLMPMSGCLLI | 81    | 30    |
| >EGFR-F795S QLMPFGCLLI | 92   | >EGFR-F795S QLMPMSGCLLI | 76    | 16    |
| >EGFR-F795S QLMPFGCLL  | 623  | >EGFR-F795S QLMPMSGCLL  | 353   | 270   |
| >EGFR-F795S QLMPFGCLLI | 124  | >EGFR-F795S QLMPMSGCLLI | 71    | 53    |
| >EGFR-F795S QLMPFGCLL  | 2008 | >EGFR-F795S QLMPMSGCLL  | 419   | 1589  |
| >EGFR-F795S QLMPFGCLLI | 537  | >EGFR-F795S QLMPMSGCLLI | 129   | 408   |
| >EGFR-F795S QLMPFGCLLI | 550  | >EGFR-F795S QLMPMSGCLLI | 466   | 84    |
| >EGFR-F795S TQLMPFGC   | 325  | >EGFR-F795S TQLMPMSGC   | 2679  | 2354  |
| >EGFR-F795S TQLMPFGCL  | 200  | >EGFR-F795S TQLMPMSGCL  | 2025  | 1825  |
| >EGFR-F795S TQLMPFGCLI | 128  | >EGFR-F795S TQLMPMSGCLI | 331   | 203   |
| >EGFR-F795S TQLMPFGCLI | 251  | >EGFR-F795S TQLMPMSGCLI | 213   | 38    |
| >EGFR-F795S TQLMPFGCL  | 626  | >EGFR-F795S TQLMPMSGCL  | 303   | 323   |
| >EGFR-F795S TQLMPFGCLI | 420  | >EGFR-F795S TQLMPMSGCLI | 265   | 155   |
| >EGFR-F795S ITQLMPFGCL | 365  | >EGFR-F795S ITQLMPMSGCL | 127   | 238   |
| >EGFR-F795S ITQLMPFGCL | 17   | >EGFR-F795S ITQLMPMSGCL | 12    | 5     |
| >EGFR-F795S ITQLMPFGCL | 120  | >EGFR-F795S ITQLMPMSGCL | 200   | 80    |
| >EGFR-F795S ITQLMPFGCL | 187  | >EGFR-F795S ITQLMPMSGCL | 72    | 115   |
| >EGFR-F795S ITQLMPFGCL | 132  | >EGFR-F795S ITQLMPMSGCL | 60    | 72    |
| >EGFR-F795S LITQLMPF   | 228  | >EGFR-F795S LITQLMPF    | 15866 | 15638 |

|                         |      |                         |       |       |
|-------------------------|------|-------------------------|-------|-------|
| >EGFR-F795S LITQLMPF    | 388  | >EGFR-F795S LITQLMPS    | 21962 | 21574 |
| >EGFR-F795S QLITQLMPF   | 1090 | >EGFR-F795S QLITQLMPS   | 435   | 655   |
| >EGFR-F795S QLITQLMPF   | 212  | >EGFR-F795S QLITQLMPS   | 915   | 703   |
| >EGFR-F795S QLITQLMPF   | 23   | >EGFR-F795S QLITQLMPS   | 8903  | 8880  |
| >EGFR-F795S QLITQLMPF   | 154  | >EGFR-F795S QLITQLMPS   | 20064 | 19910 |
| >EGFR-F795S QLITQLMPF   | 67   | >EGFR-F795S QLITQLMPS   | 10951 | 10884 |
| >EGFR-F795S QLITQLMPF   | 496  | >EGFR-F795S QLITQLMPS   | 23668 | 23172 |
| >EGFR-F795S QLITQLMPF   | 14   | >EGFR-F795S QLITQLMPS   | 10055 | 10041 |
| >EGFR-F795S VQLITQLMPF  | 75   | >EGFR-F795S VQLITQLMPS  | 9335  | 9260  |
| >EGFR-F795S VQLITQLMPF  | 3    | >EGFR-F795S VQLITQLMPS  | 1417  | 1414  |
| >EGFR-F856L FGLAKLLGA   | 123  | >EGFR-F856L LGLAKLLGA   | 2780  | 2657  |
| >EGFR-F856L KTPQHVKITD  | 461  | >EGFR-F856L KTPQHVKITD  | 3383  | 2922  |
| >EGFR-F856L KTPQHVKITD  | 41   | >EGFR-F856L KTPQHVKITD  | 178   | 137   |
| >EGFR-F856L KTPQHVKITD  | 44   | >EGFR-F856L KTPQHVKITD  | 212   | 168   |
| >EGFR-F856L KTPQHVKITD  | 7    | >EGFR-F856L KTPQHVKITD  | 5     | 2     |
| >EGFR-F856L TDFGLAKLL   | 145  | >EGFR-F856L TDLGLAKLL   | 214   | 69    |
| >EGFR-F856L TDFGLAKLL   | 352  | >EGFR-F856L TDLGLAKLL   | 2033  | 1681  |
| >EGFR-F856L TDFGLAKLL   | 295  | >EGFR-F856L TDLGLAKLL   | 166   | 129   |
| >EGFR-F856L ITDFGLAK    | 290  | >EGFR-F856L ITDLGLAK    | 658   | 368   |
| >EGFR-F856L ITDFGLAK    | 33   | >EGFR-F856L ITDLGLAK    | 53    | 20    |
| >EGFR-F856L ITDFGLAKL   | 6    | >EGFR-F856L ITDLGLAKL   | 6     | 0     |
| >EGFR-F856L ITDFGLAKLL  | 15   | >EGFR-F856L ITDLGLAKLL  | 13    | 2     |
| >EGFR-F856L ITDFGLAKLL  | 276  | >EGFR-F856L ITDLGLAKLL  | 206   | 70    |
| >EGFR-F856L ITDFGLAKL   | 97   | >EGFR-F856L ITDLGLAKL   | 299   | 202   |
| >EGFR-F856L ITDFGLAK    | 474  | >EGFR-F856L ITDLGLAK    | 1315  | 841   |
| >EGFR-F856L KITDFGLAKL  | 91   | >EGFR-F856L KITDLGLAKL  | 228   | 137   |
| >EGFR-F856L KITDFGLAKLL | 228  | >EGFR-F856L KITDLGLAKLL | 389   | 161   |
| >EGFR-F856L KITDFGLA    | 348  | >EGFR-F856L KITDLGLA    | 306   | 42    |
| >EGFR-F856L KITDFGLAKL  | 81   | >EGFR-F856L KITDLGLAKL  | 150   | 69    |
| >EGFR-F856L KITDFGLA    | 117  | >EGFR-F856L KITDLGLA    | 238   | 121   |
| >EGFR-F856L KITDFGLAKL  | 432  | >EGFR-F856L KITDLGLAKL  | 616   | 184   |
| >EGFR-F856L KITDFGLAKLL | 462  | >EGFR-F856L KITDLGLAKLL | 664   | 202   |
| >EGFR-F856L KITDFGLAKL  | 188  | >EGFR-F856L KITDLGLAKL  | 461   | 273   |
| >EGFR-F856L KITDFGLAKL  | 478  | >EGFR-F856L KITDLGLAKL  | 444   | 34    |
| >EGFR-F856L KITDFGLAKL  | 29   | >EGFR-F856L KITDLGLAKL  | 47    | 18    |
| >EGFR-F856L KITDFGLAKLL | 183  | >EGFR-F856L KITDLGLAKLL | 320   | 137   |
| >EGFR-F856L KITDFGLAK   | 102  | >EGFR-F856L KITDLGLAK   | 148   | 46    |
| >EGFR-F856L KITDFGLAK   | 17   | >EGFR-F856L KITDLGLAK   | 35    | 18    |
| >EGFR-F856L KITDFGLAK   | 22   | >EGFR-F856L KITDLGLAK   | 52    | 30    |
| >EGFR-F856L KITDFGLAK   | 98   | >EGFR-F856L KITDLGLAK   | 391   | 293   |
| >EGFR-F856L VKITDFGL    | 279  | >EGFR-F856L VKITDLGL    | 276   | 3     |
| >EGFR-F856L VKITDFGLAK  | 252  | >EGFR-F856L VKITDLGLAK  | 624   | 372   |
| >EGFR-F856L VKITDFGLAKI | 295  | >EGFR-F856L VKITDLGLAKI | 535   | 240   |



|                         |     |                         |       |       |
|-------------------------|-----|-------------------------|-------|-------|
| >EGFR-F856L HVKITDFGLA  | 276 | >EGFR-F856L HVKITDLGLA  | 529   | 253   |
| >EGFR-F856L HVKITDFG    | 229 | >EGFR-F856L HVKITDLG    | 697   | 468   |
| >EGFR-F856L HVKITDFGL   | 168 | >EGFR-F856L HVKITDLGL   | 84    | 84    |
| >EGFR-F856L HVKITDFGLA  | 33  | >EGFR-F856L HVKITDLGLA  | 32    | 1     |
| >EGFR-F856L HVKITDFGLA  | 4   | >EGFR-F856L HVKITDLGLA  | 4     | 0     |
| >EGFR-F856L HVKITDFGLA  | 201 | >EGFR-F856L HVKITDLGLA  | 693   | 492   |
| >EGFR-F856L HVKITDFGLA  | 130 | >EGFR-F856L HVKITDLGLA  | 347   | 217   |
| >EGFR-F856L HVKITDFGL   | 328 | >EGFR-F856L HVKITDLGL   | 200   | 128   |
| >EGFR-F856L QHVKITDF    | 107 | >EGFR-F856L QHVKITDL    | 1978  | 1871  |
| >EGFR-F856L QHVKITDFGL  | 380 | >EGFR-F856L QHVKITDLGL  | 472   | 92    |
| >EGFR-F856L PQHVKITDF   | 82  | >EGFR-F856L PQHVKITDL   | 1996  | 1914  |
| >EGFR-F856L TPQHVKITDF  | 80  | >EGFR-F856L TPQHVKITDL  | 91    | 11    |
| >EGFR-F856L TPQHVKITDF  | 125 | >EGFR-F856L TPQHVKITDL  | 82    | 43    |
| >EGFR-F856L TPQHVKITDF  | 234 | >EGFR-F856L TPQHVKITDL  | 2825  | 2591  |
| >EGFR-F856S FGLAKLLGA   | 123 | >EGFR-F856S SGLAKLLGA   | 2767  | 2644  |
| >EGFR-F856S KTPQHVKITD  | 461 | >EGFR-F856S KTPQHVKITD  | 24378 | 23917 |
| >EGFR-F856S KTPQHVKITD  | 41  | >EGFR-F856S KTPQHVKITD  | 8982  | 8941  |
| >EGFR-F856S KTPQHVKITD  | 44  | >EGFR-F856S KTPQHVKITD  | 14387 | 14343 |
| >EGFR-F856S KTPQHVKITD  | 7   | >EGFR-F856S KTPQHVKITD  | 411   | 404   |
| >EGFR-F856S TDFGLAKLL   | 145 | >EGFR-F856S TDSGLAKLL   | 873   | 728   |
| >EGFR-F856S TDFGLAKLL   | 352 | >EGFR-F856S TDSGLAKLL   | 5977  | 5625  |
| >EGFR-F856S TDFGLAKLL   | 295 | >EGFR-F856S TDSGLAKLL   | 326   | 31    |
| >EGFR-F856S ITDFGLAKL   | 919 | >EGFR-F856S ITDSGLAKL   | 441   | 478   |
| >EGFR-F856S ITDFGLAK    | 290 | >EGFR-F856S ITDSGLAK    | 284   | 6     |
| >EGFR-F856S ITDFGLAK    | 33  | >EGFR-F856S ITDSGLAK    | 44    | 11    |
| >EGFR-F856S ITDFGLAKL   | 6   | >EGFR-F856S ITDSGLAKL   | 6     | 0     |
| >EGFR-F856S ITDFGLAKLL  | 15  | >EGFR-F856S ITDSGLAKLL  | 14    | 1     |
| >EGFR-F856S ITDFGLAKL   | 748 | >EGFR-F856S ITDSGLAKL   | 206   | 542   |
| >EGFR-F856S ITDFGLAKLL  | 276 | >EGFR-F856S ITDSGLAKLL  | 95    | 181   |
| >EGFR-F856S ITDFGLAKL   | 97  | >EGFR-F856S ITDSGLAKL   | 46    | 51    |
| >EGFR-F856S ITDFGLAK    | 474 | >EGFR-F856S ITDSGLAK    | 824   | 350   |
| >EGFR-F856S KITDFGLAKL  | 91  | >EGFR-F856S KITDSGLAKL  | 213   | 122   |
| >EGFR-F856S KITDFGLAKLL | 228 | >EGFR-F856S KITDSGLAKLL | 570   | 342   |
| >EGFR-F856S KITDFGLA    | 348 | >EGFR-F856S KITDSGLA    | 476   | 128   |
| >EGFR-F856S KITDFGLAKL  | 81  | >EGFR-F856S KITDSGLAKL  | 189   | 108   |
| >EGFR-F856S KITDFGLA    | 117 | >EGFR-F856S KITDSGLA    | 671   | 554   |
| >EGFR-F856S KITDFGLAKL  | 432 | >EGFR-F856S KITDSGLAKL  | 1078  | 646   |
| >EGFR-F856S KITDFGLAKLL | 462 | >EGFR-F856S KITDSGLAKLL | 766   | 304   |
| >EGFR-F856S KITDFGLAKL  | 188 | >EGFR-F856S KITDSGLAKL  | 443   | 255   |
| >EGFR-F856S KITDFGLAKL  | 478 | >EGFR-F856S KITDSGLAKL  | 532   | 54    |
| >EGFR-F856S KITDFGLAKL  | 29  | >EGFR-F856S KITDSGLAKL  | 22    | 7     |
| >EGFR-F856S KITDFGLAKLL | 183 | >EGFR-F856S KITDSGLAKLL | 214   | 31    |
| >EGFR-F856S KITDFGLAK   | 102 | >EGFR-F856S KITDSGLAK   | 87    | 15    |

|                         |      |                         |       |       |
|-------------------------|------|-------------------------|-------|-------|
| >EGFR-F856S KITDFGLAK   | 17   | >EGFR-F856S KITDSGLAK   | 28    | 11    |
| >EGFR-F856S KITDFGLAK   | 22   | >EGFR-F856S KITDSGLAK   | 21    | 1     |
| >EGFR-F856S KITDFGLAKL  | 693  | >EGFR-F856S KITDSGLAKL  | 156   | 537   |
| >EGFR-F856S KITDFGLAK   | 98   | >EGFR-F856S KITDSGLAK   | 1116  | 1018  |
| >EGFR-F856S VKITDFGL    | 279  | >EGFR-F856S VKITDSGL    | 124   | 155   |
| >EGFR-F856S VKITDFGLAK  | 252  | >EGFR-F856S VKITDSGLAK  | 260   | 8     |
| >EGFR-F856S VKITDFGLAKI | 295  | >EGFR-F856S VKITDSGLAKI | 262   | 33    |
| >EGFR-F856S HVKITDFGLA  | 276  | >EGFR-F856S HVKITDSGLA  | 619   | 343   |
| >EGFR-F856S HVKITDFG    | 229  | >EGFR-F856S HVKITDSG    | 741   | 512   |
| >EGFR-F856S HVKITDFGL   | 168  | >EGFR-F856S HVKITDSGL   | 267   | 99    |
| >EGFR-F856S HVKITDFGLA  | 33   | >EGFR-F856S HVKITDSGLA  | 29    | 4     |
| >EGFR-F856S HVKITDFGLA  | 4    | >EGFR-F856S HVKITDSGLA  | 4     | 0     |
| >EGFR-F856S HVKITDFGLA  | 201  | >EGFR-F856S HVKITDSGLA  | 609   | 408   |
| >EGFR-F856S HVKITDFGLA  | 130  | >EGFR-F856S HVKITDSGLA  | 189   | 59    |
| >EGFR-F856S HVKITDFGL   | 328  | >EGFR-F856S HVKITDSGL   | 197   | 131   |
| >EGFR-F856S QHVKITDF    | 107  | >EGFR-F856S QHVKITDS    | 16821 | 16714 |
| >EGFR-F856S QHVKITDFGL  | 380  | >EGFR-F856S QHVKITDSGL  | 467   | 87    |
| >EGFR-F856S PQHVKITDF   | 82   | >EGFR-F856S PQHVKITDS   | 18418 | 18336 |
| >EGFR-F856S TPQHVKITDF  | 80   | >EGFR-F856S TPQHVKITDS  | 29497 | 29417 |
| >EGFR-F856S TPQHVKITDF  | 125  | >EGFR-F856S TPQHVKITDS  | 3415  | 3290  |
| >EGFR-F856S TPQHVKITDF  | 769  | >EGFR-F856S TPQHVKITDS  | 262   | 507   |
| >EGFR-F856S TPQHVKITDF  | 234  | >EGFR-F856S TPQHVKITDS  | 20962 | 20728 |
| >EGFR-F968L FSKMARDPQ   | 4034 | >EGFR-F968L LSKMARDPQ   | 332   | 3702  |
| >EGFR-F968L FSKMARDPQ   | 705  | >EGFR-F968L LSKMARDPQ   | 289   | 416   |
| >EGFR-F968L FSKMARDPQ   | 480  | >EGFR-F968L LSKMARDPQ   | 298   | 182   |
| >EGFR-F968L FSKMARDPQ   | 118  | >EGFR-F968L LSKMARDPQ   | 723   | 605   |
| >EGFR-F968L FSKMARDPQ   | 178  | >EGFR-F968L LSKMARDPQ   | 164   | 14    |
| >EGFR-F968L FSKMARDPQ   | 130  | >EGFR-F968L LSKMARDPQ   | 326   | 196   |
| >EGFR-F968L FSKMARDPQ   | 21   | >EGFR-F968L LSKMARDPQ   | 17    | 4     |
| >EGFR-F968L FSKMARDPQ   | 139  | >EGFR-F968L LSKMARDPQ   | 125   | 14    |
| >EGFR-F968L EFSKMARDPQ  | 229  | >EGFR-F968L ELSKMARDPQ  | 1171  | 942   |
| >EGFR-F968L EFSKMARDPQ  | 55   | >EGFR-F968L ELSKMARDPQ  | 30    | 25    |
| >EGFR-F968L EFSKMARDPQ  | 251  | >EGFR-F968L ELSKMARDPQ  | 1360  | 1109  |
| >EGFR-F968L RPKFRELIIEF | 141  | >EGFR-F968L RPKFRELIIEI | 40    | 101   |
| >EGFR-F968L RPKFRELIIEF | 615  | >EGFR-F968L RPKFRELIIEI | 190   | 425   |
| >EGFR-F968L RPKFRELIIEF | 414  | >EGFR-F968L RPKFRELIIEI | 6734  | 6320  |
| >EGFR-F968L IEFKMAR     | 439  | >EGFR-F968L IELSKMAR    | 1301  | 862   |
| >EGFR-F968L IEFKMAR     | 266  | >EGFR-F968L IELSKMAR    | 499   | 233   |
| >EGFR-F968L IIEFSKMAR   | 174  | >EGFR-F968L IIELSKMAR   | 357   | 183   |
| >EGFR-F968L IIEFSKMAR   | 64   | >EGFR-F968L IIELSKMAR   | 203   | 139   |
| >EGFR-F968L IIEFSKMAR   | 343  | >EGFR-F968L IIELSKMAR   | 372   | 29    |
| >EGFR-F968L LIIEFSKM    | 32   | >EGFR-F968L LIIELSKM    | 1495  | 1463  |
| >EGFR-F968L LIIEFSKMA   | 118  | >EGFR-F968L LIIELSKMA   | 183   | 65    |

|                          |      |                          |      |      |
|--------------------------|------|--------------------------|------|------|
| >EGFR-F968L LIIIEFSKM    | 254  | >EGFR-F968L LIIELSKM     | 482  | 228  |
| >EGFR-F968L LIIIEFSKMA   | 291  | >EGFR-F968L LIIELSKMA    | 604  | 313  |
| >EGFR-F968L LIIIEFSKMA   | 230  | >EGFR-F968L LIIELSKMA    | 730  | 500  |
| >EGFR-F968L LIIIEFSKMAR  | 136  | >EGFR-F968L LIIELSKMAR   | 295  | 159  |
| >EGFR-F968L LIIIEFSKM    | 204  | >EGFR-F968L LIIELSKM     | 115  | 89   |
| >EGFR-F968L LIIIEFSKMAR  | 17   | >EGFR-F968L LIIELSKMAR   | 33   | 16   |
| >EGFR-F968L LIIIEFSKMAR  | 64   | >EGFR-F968L LIIELSKMAR   | 136  | 72   |
| >EGFR-F968L LIIIEFSKMAR  | 13   | >EGFR-F968L LIIELSKMAR   | 16   | 3    |
| >EGFR-F968L LIIIEFSKMAR  | 287  | >EGFR-F968L LIIELSKMAR   | 496  | 209  |
| >EGFR-F968L ELIIIEFSKM   | 58   | >EGFR-F968L ELIIIELSKM   | 30   | 28   |
| >EGFR-F968L ELIIIEFSKM   | 46   | >EGFR-F968L ELIIIELSKM   | 10   | 36   |
| >EGFR-F968L ELIIIEFSKMAR | 84   | >EGFR-F968L ELIIIELSKMAR | 130  | 46   |
| >EGFR-F968L ELIIIEFSK    | 24   | >EGFR-F968L ELIIIELSK    | 83   | 59   |
| >EGFR-F968L ELIIIEFSKMAR | 15   | >EGFR-F968L ELIIIELSKMAR | 23   | 8    |
| >EGFR-F968L ELIIIEFSKMAR | 254  | >EGFR-F968L ELIIIELSKMAR | 644  | 390  |
| >EGFR-F968L RELIIIEFS    | 315  | >EGFR-F968L RELIIIELS    | 427  | 112  |
| >EGFR-F968L RELIIIEFSK   | 425  | >EGFR-F968L RELIIIELSK   | 357  | 68   |
| >EGFR-F968L RELIIIEFSKM  | 366  | >EGFR-F968L RELIIIELSKM  | 607  | 241  |
| >EGFR-F968L RELIIIEFSKMA | 48   | >EGFR-F968L RELIIIELSKMA | 50   | 2    |
| >EGFR-F968L RELIIIEFS    | 461  | >EGFR-F968L RELIIIELS    | 1285 | 824  |
| >EGFR-F968L RELIIIEFSKMA | 31   | >EGFR-F968L RELIIIELSKMA | 61   | 30   |
| >EGFR-F968L RELIIIEFSKM  | 978  | >EGFR-F968L RELIIIELSKM  | 490  | 488  |
| >EGFR-F968L RELIIIEFSK   | 487  | >EGFR-F968L RELIIIELSK   | 1724 | 1237 |
| >EGFR-F968L RELIIIEFSKM  | 17   | >EGFR-F968L RELIIIELSKM  | 16   | 1    |
| >EGFR-F968L RELIIIEFSKMA | 138  | >EGFR-F968L RELIIIELSKMA | 234  | 96   |
| >EGFR-F968L FRELIIEF     | 580  | >EGFR-F968L FRELIIEL     | 467  | 113  |
| >EGFR-F968L FRELIIEFSK   | 1026 | >EGFR-F968L FRELIIELSK   | 394  | 632  |
| >EGFR-F968L FRELIIEFSKM  | 294  | >EGFR-F968L FRELIIELSKM  | 310  | 16   |
| >EGFR-F968L FRELIIEF     | 2173 | >EGFR-F968L FRELIIEL     | 88   | 2085 |
| >EGFR-F968L FRELIIEF     | 1321 | >EGFR-F968L FRELIIEL     | 222  | 1099 |
| >EGFR-F968L FRELIIEF     | 1123 | >EGFR-F968L FRELIIEL     | 434  | 689  |
| >EGFR-F968L FRELIIEFSKM  | 418  | >EGFR-F968L FRELIIELSKM  | 681  | 263  |
| >EGFR-F968L KFRELIIIEF   | 284  | >EGFR-F968L KFRELIIIEL   | 6132 | 5848 |
| >EGFR-F968L KFRELIIIEF   | 18   | >EGFR-F968L KFRELIIIEL   | 257  | 239  |
| >EGFR-F968L KFRELIIIEF   | 124  | >EGFR-F968L KFRELIIIEL   | 13   | 111  |
| >EGFR-F968L KFRELIIIEFS  | 81   | >EGFR-F968L KFRELIIIELS  | 275  | 194  |
| >EGFR-F968L KFRELIIIEFSK | 4    | >EGFR-F968L KFRELIIIELSK | 4    | 0    |
| >EGFR-F968L KFRELIIIEFSK | 20   | >EGFR-F968L KFRELIIIELSK | 122  | 102  |
| >EGFR-F968L KFRELIIIEFSK | 171  | >EGFR-F968L KFRELIIIELSK | 165  | 6    |
| >EGFR-F968L KFRELIIIEF   | 1223 | >EGFR-F968L KFRELIIIEL   | 363  | 860  |
| >EGFR-F968L PKFRELIIIEF  | 8    | >EGFR-F968L PKFRELIIIEL  | 173  | 165  |
| >EGFR-G598' GVMGENNTL    | 113  | >EGFR-G598' VVMGENNTL    | 104  | 9    |
| >EGFR-G598' GVMGENNTL    | 31   | >EGFR-G598' VVMGENNTL    | 39   | 8    |

|                       |       |                       |      |       |
|-----------------------|-------|-----------------------|------|-------|
| >EGFR-G598'GVMGENNTL  | 48    | >EGFR-G598'VVMGENNTL  | 85   | 37    |
| >EGFR-G598'GVMGENNTL  | 54    | >EGFR-G598'VVMGENNTL  | 68   | 14    |
| >EGFR-G598'GVMGENNTL  | 431   | >EGFR-G598'VVMGENNTL  | 167  | 264   |
| >EGFR-G598'GVMGENNTL  | 174   | >EGFR-G598'VVMGENNTL  | 136  | 38    |
| >EGFR-G598'GVMGENNTL  | 238   | >EGFR-G598'VVMGENNTL  | 81   | 157   |
| >EGFR-G598'GVMGENNTL  | 175   | >EGFR-G598'VVMGENNTL  | 317  | 142   |
| >EGFR-G598'GVMGENNTL  | 289   | >EGFR-G598'VVMGENNTL  | 344  | 55    |
| >EGFR-G598'GVMGENNTL  | 318   | >EGFR-G598'VVMGENNTL  | 34   | 284   |
| >EGFR-G598'GVMGENNTL  | 594   | >EGFR-G598'VVMGENNTL  | 158  | 436   |
| >EGFR-G598'GVMGENNTL  | 16    | >EGFR-G598'VVMGENNTL  | 7    | 9     |
| >EGFR-G598'GVMGENNTL  | 128   | >EGFR-G598'VVMGENNTL  | 84   | 44    |
| >EGFR-G598'GVMGENNTL  | 129   | >EGFR-G598'VVMGENNTL  | 97   | 32    |
| >EGFR-G598'GVMGENNTL  | 1359  | >EGFR-G598'VVMGENNTL  | 466  | 893   |
| >EGFR-G598'GVMGENNTL  | 217   | >EGFR-G598'VVMGENNTL  | 67   | 150   |
| >EGFR-G598'GVMGENNTL  | 986   | >EGFR-G598'VVMGENNTL  | 346  | 640   |
| >EGFR-G598'GVMGENNTL  | 614   | >EGFR-G598'VVMGENNTL  | 207  | 407   |
| >EGFR-G598'GVMGENNTL  | 51    | >EGFR-G598'VVMGENNTL  | 15   | 36    |
| >EGFR-G598'GVMGENNTL  | 441   | >EGFR-G598'VVMGENNTL  | 726  | 285   |
| >EGFR-G598'AGVMGENN   | 8363  | >EGFR-G598'AVVMGENN   | 339  | 8024  |
| >EGFR-G598'AGVMGENN   | 5203  | >EGFR-G598'AVVMGENN   | 495  | 4708  |
| >EGFR-G598'AGVMGENN   | 10148 | >EGFR-G598'AVVMGENN   | 128  | 10020 |
| >EGFR-G598'AGVMGENN   | 2586  | >EGFR-G598'AVVMGENN   | 55   | 2531  |
| >EGFR-G598'AGVMGENN   | 5694  | >EGFR-G598'AVVMGENN   | 20   | 5674  |
| >EGFR-G598'AGVMGENN   | 28482 | >EGFR-G598'AVVMGENN   | 250  | 28232 |
| >EGFR-G598'AGVMGENN   | 12870 | >EGFR-G598'AVVMGENN   | 494  | 12376 |
| >EGFR-G598'GPHCVKTCP/ | 21209 | >EGFR-G598'GPHCVKTCP/ | 292  | 20917 |
| >EGFR-G598'CPAGVMGEN  | 289   | >EGFR-G598'CPAVVMGEN  | 255  | 34    |
| >EGFR-G598'KTCPAGVM   | 610   | >EGFR-G598'KTCPAVVM   | 352  | 258   |
| >EGFR-G598'KTCPAGVM   | 4401  | >EGFR-G598'KTCPAVVM   | 271  | 4130  |
| >EGFR-G598'KTCPAGVM   | 546   | >EGFR-G598'KTCPAVVM   | 435  | 111   |
| >EGFR-G598'KTCPAGVM   | 7     | >EGFR-G598'KTCPAVVM   | 5    | 2     |
| >EGFR-G598'KTCPAGVM   | 497   | >EGFR-G598'KTCPAVVM   | 121  | 376   |
| >EGFR-G598'KTCPAGVM   | 441   | >EGFR-G598'KTCPAVVM   | 345  | 96    |
| >EGFR-G598'KTCPAGVM   | 56    | >EGFR-G598'KTCPAVVM   | 97   | 41    |
| >EGFR-G598'VKTCPAGV   | 954   | >EGFR-G598'VKTCPAVV   | 144  | 810   |
| >EGFR-G598'VKTCPAGVM  | 271   | >EGFR-G598'VKTCPAVVM  | 16   | 255   |
| >EGFR-G598'VKTCPAGVM  | 350   | >EGFR-G598'VKTCPAVVM  | 1220 | 870   |
| >EGFR-G598'CVKTCPAG   | 20480 | >EGFR-G598'CVKTCPAV   | 348  | 20132 |
| >EGFR-G598'CVKTCPAGV  | 70    | >EGFR-G598'CVKTCPAVV  | 222  | 152   |
| >EGFR-G598'CVKTCPAGV  | 128   | >EGFR-G598'CVKTCPAVV  | 573  | 445   |
| >EGFR-G598'HCVKTCPAG  | 20003 | >EGFR-G598'HCVKTCPAV  | 482  | 19521 |
| >EGFR-G598'HCVKTCPAG\ | 165   | >EGFR-G598'HCVKTCPAV\ | 352  | 187   |
| >EGFR-G63R·GNLEITYV   | 827   | >EGFR-G63R·RNLEITYV   | 269  | 558   |

|                        |       |                        |      |       |
|------------------------|-------|------------------------|------|-------|
| >EGFR-G63R·GNLEITYV    | 181   | >EGFR-G63R·RNLEITYV    | 89   | 92    |
| >EGFR-G63R·GNLEITYV    | 278   | >EGFR-G63R·RNLEITYV    | 525  | 247   |
| >EGFR-G63R·GNLEITYVQR  | 2966  | >EGFR-G63R·RNLEITYVQR  | 198  | 2768  |
| >EGFR-G63R·GNLEITYVQR  | 818   | >EGFR-G63R·RNLEITYVQR  | 37   | 781   |
| >EGFR-G63R·LGNLEITYV   | 382   | >EGFR-G63R·LRNLEITYV   | 2579 | 2197  |
| >EGFR-G63R·LGNLEITYVQI | 355   | >EGFR-G63R·LRNLEITYVQI | 5150 | 4795  |
| >EGFR-G63R·LGNLEITY    | 4478  | >EGFR-G63R·LRNLEITY    | 262  | 4216  |
| >EGFR-G63R·LGNLEITYVQI | 23734 | >EGFR-G63R·LRNLEITYVQI | 319  | 23415 |
| >EGFR-G63R·LGNLEITY    | 176   | >EGFR-G63R·LRNLEITY    | 4512 | 4336  |
| >EGFR-G63R·RMFNNCEVV   | 342   | >EGFR-G63R·RMFNNCEVV   | 1953 | 1611  |
| >EGFR-G63R·RMFNNCEVV   | 11524 | >EGFR-G63R·RMFNNCEVV   | 77   | 11447 |
| >EGFR-G63R·RMFNNCEVV   | 16060 | >EGFR-G63R·RMFNNCEVV   | 75   | 15985 |
| >EGFR-G63R·RMFNNCEVV   | 6223  | >EGFR-G63R·RMFNNCEVV   | 9    | 6214  |
| >EGFR-G63R·RMFNNCEVV   | 331   | >EGFR-G63R·RMFNNCEVV   | 295  | 36    |
| >EGFR-G63R·RMFNNCEVV   | 32429 | >EGFR-G63R·RMFNNCEVV   | 76   | 32353 |
| >EGFR-G63R·RMFNNCEVV   | 900   | >EGFR-G63R·RMFNNCEVV   | 53   | 847   |
| >EGFR-G63R·RMFNNCEVV   | 14518 | >EGFR-G63R·RMFNNCEVV   | 23   | 14495 |
| >EGFR-G63R·VLGNLEITYV  | 13    | >EGFR-G63R·VLRNLEITYV  | 34   | 21    |
| >EGFR-G63R·VLGNLEITYV  | 23    | >EGFR-G63R·VLRNLEITYV  | 50   | 27    |
| >EGFR-G63R·VLGNLEITYV  | 17    | >EGFR-G63R·VLRNLEITYV  | 20   | 3     |
| >EGFR-G63R·VLGNLEITYV  | 122   | >EGFR-G63R·VLRNLEITYV  | 334  | 212   |
| >EGFR-G63R·VLGNLEITYV  | 2     | >EGFR-G63R·VLRNLEITYV  | 4    | 2     |
| >EGFR-G63R·VLGNLEITYV  | 4     | >EGFR-G63R·VLRNLEITYV  | 17   | 13    |
| >EGFR-G63R·VLGNLEITYV  | 5     | >EGFR-G63R·VLRNLEITYV  | 11   | 6     |
| >EGFR-G63R·VLGNLEITYV  | 3     | >EGFR-G63R·VLRNLEITYV  | 40   | 37    |
| >EGFR-G63R·VLGNLEIT    | 426   | >EGFR-G63R·VLRNLEIT    | 942  | 516   |
| >EGFR-G63R·VLGNLEITYV  | 2     | >EGFR-G63R·VLRNLEITYV  | 2    | 0     |
| >EGFR-G63R·VLGNLEITYVC | 293   | >EGFR-G63R·VLRNLEITYVC | 676  | 383   |
| >EGFR-G63R·VLGNLEITY   | 376   | >EGFR-G63R·VLRNLEITY   | 720  | 344   |
| >EGFR-G63R·VLGNLEITY   | 184   | >EGFR-G63R·VLRNLEITY   | 225  | 41    |
| >EGFR-G63R·VLGNLEITY   | 41    | >EGFR-G63R·VLRNLEITY   | 428  | 387   |
| >EGFR-G63R·VLGNLEITY   | 534   | >EGFR-G63R·VLRNLEITY   | 181  | 353   |
| >EGFR-G63R·VLGNLEITY   | 2132  | >EGFR-G63R·VLRNLEITY   | 418  | 1714  |
| >EGFR-G63R·VLGNLEITY   | 1977  | >EGFR-G63R·VLRNLEITY   | 166  | 1811  |
| >EGFR-G63R·VLGNLEITY   | 2098  | >EGFR-G63R·VLRNLEITY   | 184  | 1914  |
| >EGFR-G63R·VVLGNLEI    | 2598  | >EGFR-G63R·VVLRNLEI    | 445  | 2153  |
| >EGFR-G63R·VVLGNLEITY\ | 1333  | >EGFR-G63R·VVLRNLEITY\ | 225  | 1108  |
| >EGFR-G63R·VVLGNLEITY\ | 46    | >EGFR-G63R·VVLRNLEITY\ | 109  | 63    |
| >EGFR-G63R·VVLGNLEITY\ | 110   | >EGFR-G63R·VVLRNLEITY\ | 405  | 295   |
| >EGFR-G63R·VVLGNLEITY\ | 85    | >EGFR-G63R·VVLRNLEITY\ | 143  | 58    |
| >EGFR-G63R·VVLGNLEI    | 68    | >EGFR-G63R·VVLRNLEI    | 163  | 95    |
| >EGFR-G63R·VVLGNLEITY\ | 6     | >EGFR-G63R·VVLRNLEITY\ | 9    | 3     |
| >EGFR-G63R·VVLGNLEI    | 60    | >EGFR-G63R·VVLRNLEI    | 224  | 164   |

|                        |       |                        |      |       |
|------------------------|-------|------------------------|------|-------|
| >EGFR-G63R·VVLGNLEITY\ | 4     | >EGFR-G63R·VVLRNLEITY\ | 5    | 1     |
| >EGFR-G63R·VVLGNLEITY\ | 20    | >EGFR-G63R·VVLRNLEITY\ | 20   | 0     |
| >EGFR-G63R·VVLGNLEITY\ | 13    | >EGFR-G63R·VVLRNLEITY\ | 22   | 9     |
| >EGFR-G63R·VVLGNLEI    | 332   | >EGFR-G63R·VVLRNLEI    | 1924 | 1592  |
| >EGFR-G63R·VVLGNLEITY\ | 5     | >EGFR-G63R·VVLRNLEITY\ | 9    | 4     |
| >EGFR-G63R·VVLGNLEI    | 167   | >EGFR-G63R·VVLRNLEI    | 1074 | 907   |
| >EGFR-G63R·VVLGNLEITY\ | 4     | >EGFR-G63R·VVLRNLEITY\ | 6    | 2     |
| >EGFR-G63R·VVLGNLEITY  | 80    | >EGFR-G63R·VVLRNLEITY  | 120  | 40    |
| >EGFR-G63R·VVLGNLEI    | 454   | >EGFR-G63R·VVLRNLEI    | 869  | 415   |
| >EGFR-G63R·VVLGNLEITY\ | 317   | >EGFR-G63R·VVLRNLEITY\ | 738  | 421   |
| >EGFR-G63R·VVLGNLEITY\ | 142   | >EGFR-G63R·VVLRNLEITY\ | 185  | 43    |
| >EGFR-G63R·VVLGNLEITY  | 261   | >EGFR-G63R·VVLRNLEITY  | 89   | 172   |
| >EGFR-G63R·VVLGNLEITY  | 126   | >EGFR-G63R·VVLRNLEITY  | 427  | 301   |
| >EGFR-G63R·EVLGNLEITY\ | 189   | >EGFR-G63R·EVLRNLEITY  | 231  | 42    |
| >EGFR-G63R·EVLGNLEITY\ | 154   | >EGFR-G63R·EVLRNLEITY  | 172  | 18    |
| >EGFR-G63R·EVLGNLEIT   | 482   | >EGFR-G63R·EVLRNLEIT   | 938  | 456   |
| >EGFR-G63R·EVLGNLEITY\ | 7     | >EGFR-G63R·EVLRNLEITY  | 15   | 8     |
| >EGFR-G63R·EVLGNLEITY\ | 27    | >EGFR-G63R·EVLRNLEITY  | 26   | 1     |
| >EGFR-G63R·EVLGNLEITY\ | 328   | >EGFR-G63R·EVLRNLEITY  | 762  | 434   |
| >EGFR-G63R·EVLGNLEITY\ | 242   | >EGFR-G63R·EVLRNLEITY  | 214  | 28    |
| >EGFR-G63R·EVLGNLEI    | 43    | >EGFR-G63R·EVLRNLEI    | 112  | 69    |
| >EGFR-G63R·EVLGNLEI    | 74    | >EGFR-G63R·EVLRNLEI    | 450  | 376   |
| >EGFR-G63R·EVLGNLEITY\ | 33    | >EGFR-G63R·EVLRNLEITY  | 82   | 49    |
| >EGFR-G63R·CEVVLGNLEI  | 276   | >EGFR-G63R·CEVVLRNLEI  | 96   | 180   |
| >EGFR-G63R·CEVVLGNL    | 774   | >EGFR-G63R·CEVVLRNL    | 410  | 364   |
| >EGFR-G63R·CEVVLGNL    | 89    | >EGFR-G63R·CEVVLRNL    | 237  | 148   |
| >EGFR-G63R·CEVVLGNL    | 398   | >EGFR-G63R·CEVVLRNL    | 236  | 162   |
| >EGFR-G63R·CEVVLGNLEI  | 493   | >EGFR-G63R·CEVVLRNLEI  | 267  | 226   |
| >EGFR-G63R·CEVVLGNLEI  | 328   | >EGFR-G63R·CEVVLRNLEI  | 215  | 113   |
| >EGFR-G63R·CEVVLGNLEIT | 643   | >EGFR-G63R·CEVVLRNLEIT | 309  | 334   |
| >EGFR-G63R·CEVVLGNL    | 2202  | >EGFR-G63R·CEVVLRNL    | 466  | 1736  |
| >EGFR-G63R·NNCEVVLG    | 34198 | >EGFR-G63R·NNCEVVLN    | 95   | 34103 |
| >EGFR-G63R·FNNCEVVLG   | 33226 | >EGFR-G63R·FNNCEVVLN   | 146  | 33080 |
| >EGFR-G63R·MFNNCEVVL   | 12429 | >EGFR-G63R·MFNNCEVVL   | 10   | 12419 |
| >EGFR-G63R·MFNNCEVVL   | 7274  | >EGFR-G63R·MFNNCEVVL   | 19   | 7255  |
| >EGFR-G63R·MFNNCEVVL   | 23979 | >EGFR-G63R·MFNNCEVVL   | 24   | 23955 |
| >EGFR-G63R·MFNNCEVVL   | 29828 | >EGFR-G63R·MFNNCEVVL   | 395  | 29433 |
| >EGFR-G63R·MFNNCEVVL   | 25053 | >EGFR-G63R·MFNNCEVVL   | 31   | 25022 |
| >EGFR-G719,GSGAFGTVYk  | 46    | >EGFR-G719,ASGAFGTVYk  | 23   | 23    |
| >EGFR-G719,GSGAFGTVYk  | 29    | >EGFR-G719,ASGAFGTVYk  | 13   | 16    |
| >EGFR-G719,GSGAFGTVYk  | 711   | >EGFR-G719,ASGAFGTVYk  | 89   | 622   |
| >EGFR-G719,GSGAFGTVY   | 432   | >EGFR-G719,ASGAFGTVY   | 241  | 191   |
| >EGFR-G719,GSGAFGTVYk  | 224   | >EGFR-G719,ASGAFGTVYk  | 94   | 130   |

|                         |      |                         |     |      |
|-------------------------|------|-------------------------|-----|------|
| >EGFR-G719, GSGAFGTVY   | 78   | >EGFR-G719, ASGAFGTVY   | 61  | 17   |
| >EGFR-G719, GSGAFGTVY   | 349  | >EGFR-G719, ASGAFGTVY   | 45  | 304  |
| >EGFR-G719, GSGAFGTVY   | 62   | >EGFR-G719, ASGAFGTVY   | 17  | 45   |
| >EGFR-G719, GSGAFGTVY   | 11   | >EGFR-G719, ASGAFGTVY   | 22  | 11   |
| >EGFR-G719, GSGAFGTVYk  | 337  | >EGFR-G719, ASGAFGTVYk  | 199 | 138  |
| >EGFR-G719, LGSGAFGTV   | 4567 | >EGFR-G719, LASGAFGTV   | 243 | 4324 |
| >EGFR-G719, LGSGAFGTV   | 860  | >EGFR-G719, LASGAFGTV   | 67  | 793  |
| >EGFR-G719, LGSGAFGTV   | 2612 | >EGFR-G719, LASGAFGTV   | 64  | 2548 |
| >EGFR-G719, LGSGAFGTVY  | 1260 | >EGFR-G719, LASGAFGTVY  | 210 | 1050 |
| >EGFR-G719, LGSGAFGTVY  | 559  | >EGFR-G719, LASGAFGTVY  | 52  | 507  |
| >EGFR-G719, LGSGAFGTVY  | 125  | >EGFR-G719, LASGAFGTVY  | 82  | 43   |
| >EGFR-G719, LGSGAFGTVY  | 1180 | >EGFR-G719, LASGAFGTVY  | 156 | 1024 |
| >EGFR-G719, LGSGAFGTVY  | 478  | >EGFR-G719, LASGAFGTVY  | 248 | 230  |
| >EGFR-G719, LGSGAFGTVY  | 931  | >EGFR-G719, LASGAFGTVY  | 36  | 895  |
| >EGFR-G719, LGSGAFGTV   | 2637 | >EGFR-G719, LASGAFGTV   | 113 | 2524 |
| >EGFR-G719, LGSGAFGTVY  | 93   | >EGFR-G719, LASGAFGTVY  | 61  | 32   |
| >EGFR-G719, LGSGAFGTVY  | 1516 | >EGFR-G719, LASGAFGTVY  | 282 | 1234 |
| >EGFR-G719, LGSGAFGTVY  | 2359 | >EGFR-G719, LASGAFGTVY  | 41  | 2318 |
| >EGFR-G719, LGSGAFGTVY  | 7234 | >EGFR-G719, LASGAFGTVY  | 421 | 6813 |
| >EGFR-G719, LGSGAFGTVY  | 94   | >EGFR-G719, LASGAFGTVY  | 140 | 46   |
| >EGFR-G719, LGSGAFGTVY  | 905  | >EGFR-G719, LASGAFGTVY  | 342 | 563  |
| >EGFR-G719, ETEFKKIKVLG | 8873 | >EGFR-G719, ETEFKKIKVLA | 322 | 8551 |
| >EGFR-G719, VLGSAGFGT   | 2098 | >EGFR-G719, VLASGAFGT   | 298 | 1800 |
| >EGFR-G719, VLGSAGFGTV  | 73   | >EGFR-G719, VLASGAFGTV  | 48  | 25   |
| >EGFR-G719, VLGSAGFGT   | 3530 | >EGFR-G719, VLASGAFGT   | 264 | 3266 |
| >EGFR-G719, VLGSAGFGTV  | 41   | >EGFR-G719, VLASGAFGTV  | 20  | 21   |
| >EGFR-G719, VLGSAGFGT   | 1992 | >EGFR-G719, VLASGAFGT   | 87  | 1905 |
| >EGFR-G719, VLGSAGFGTV  | 21   | >EGFR-G719, VLASGAFGTV  | 14  | 7    |
| >EGFR-G719, VLGSAGFGT   | 827  | >EGFR-G719, VLASGAFGT   | 61  | 766  |
| >EGFR-G719, VLGSAGFGTV  | 779  | >EGFR-G719, VLASGAFGTV  | 306 | 473  |
| >EGFR-G719, VLGSAGFGT   | 68   | >EGFR-G719, VLASGAFGT   | 55  | 13   |
| >EGFR-G719, VLGSAGFGTV  | 3    | >EGFR-G719, VLASGAFGTV  | 3   | 0    |
| >EGFR-G719, VLGSAGFGTV  | 7    | >EGFR-G719, VLASGAFGTV  | 7   | 0    |
| >EGFR-G719, VLGSAGFGT   | 103  | >EGFR-G719, VLASGAFGT   | 43  | 60   |
| >EGFR-G719, VLGSAGFGTV  | 7    | >EGFR-G719, VLASGAFGTV  | 6   | 1    |
| >EGFR-G719, VLGSAGFGT   | 75   | >EGFR-G719, VLASGAFGT   | 35  | 40   |
| >EGFR-G719, VLGSAGFGTV  | 5    | >EGFR-G719, VLASGAFGTV  | 4   | 1    |
| >EGFR-G719, VLGSAGFGT   | 14   | >EGFR-G719, VLASGAFGT   | 9   | 5    |
| >EGFR-G719, VLGSAGFGTV  | 2    | >EGFR-G719, VLASGAFGTV  | 2   | 0    |
| >EGFR-G719, VLGSAGFGTV  | 1160 | >EGFR-G719, VLASGAFGTV  | 366 | 794  |
| >EGFR-G719, VLGSAGFGTV  | 64   | >EGFR-G719, VLASGAFGTV  | 31  | 33   |
| >EGFR-G719, VLGSAGFGTV  | 54   | >EGFR-G719, VLASGAFGTV  | 22  | 32   |
| >EGFR-G719, VLGSAGFGTV  | 4138 | >EGFR-G719, VLASGAFGTV  | 371 | 3767 |

|                        |      |                        |     |      |
|------------------------|------|------------------------|-----|------|
| >EGFR-G719,VLGSGAFGTV  | 2129 | >EGFR-G719,VLASGAFGTV  | 433 | 1696 |
| >EGFR-G719,VLGSGAFGTV  | 26   | >EGFR-G719,VLASGAFGTV  | 37  | 11   |
| >EGFR-G719,VLGSGAFGTV  | 73   | >EGFR-G719,VLASGAFGTV  | 55  | 18   |
| >EGFR-G719,VLGSGAFGTV  | 87   | >EGFR-G719,VLASGAFGTV  | 31  | 56   |
| >EGFR-G719,VLGSGAFGTV  | 421  | >EGFR-G719,VLASGAFGTV  | 88  | 333  |
| >EGFR-G719,VLGSGAFGTV  | 227  | >EGFR-G719,VLASGAFGTV  | 70  | 157  |
| >EGFR-G719,VLGSGAFGTV  | 1223 | >EGFR-G719,VLASGAFGTV  | 495 | 728  |
| >EGFR-G719,KVLGSGAFGT  | 294  | >EGFR-G719,KVLASGAFGT  | 201 | 93   |
| >EGFR-G719,KVLGSGAFGT  | 123  | >EGFR-G719,KVLASGAFGT  | 83  | 40   |
| >EGFR-G719,KVLGSGAF    | 553  | >EGFR-G719,KVLASGAF    | 427 | 126  |
| >EGFR-G719,KVLGSGAFGT  | 9    | >EGFR-G719,KVLASGAFGT  | 8   | 1    |
| >EGFR-G719,KVLGSGAFGT  | 12   | >EGFR-G719,KVLASGAFGT  | 16  | 4    |
| >EGFR-G719,KVLGSGAFGT  | 78   | >EGFR-G719,KVLASGAFGT  | 58  | 20   |
| >EGFR-G719,KVLGSGAFGT  | 28   | >EGFR-G719,KVLASGAFGT  | 35  | 7    |
| >EGFR-G719,KVLGSGAFGT  | 176  | >EGFR-G719,KVLASGAFGT  | 293 | 117  |
| >EGFR-G719,KVLGSGAFGT  | 15   | >EGFR-G719,KVLASGAFGT  | 37  | 22   |
| >EGFR-G719,KVLGSGAFG   | 103  | >EGFR-G719,KVLASGAFG   | 38  | 65   |
| >EGFR-G719,KVLGSGAFGT  | 76   | >EGFR-G719,KVLASGAFGT  | 36  | 40   |
| >EGFR-G719,KVLGSGAF    | 32   | >EGFR-G719,KVLASGAF    | 56  | 24   |
| >EGFR-G719,KVLGSGAFGT  | 324  | >EGFR-G719,KVLASGAFGT  | 154 | 170  |
| >EGFR-G719,KVLGSGAF    | 172  | >EGFR-G719,KVLASGAF    | 97  | 75   |
| >EGFR-G719,KVLGSGAF    | 345  | >EGFR-G719,KVLASGAF    | 347 | 2    |
| >EGFR-G719,KVLGSGAF    | 165  | >EGFR-G719,KVLASGAF    | 47  | 118  |
| >EGFR-G719,KVLGSGAF    | 16   | >EGFR-G719,KVLASGAF    | 14  | 2    |
| >EGFR-G719,KVLGSGAF    | 476  | >EGFR-G719,KVLASGAF    | 206 | 270  |
| >EGFR-G719,IKVLGSGAF   | 9    | >EGFR-G719,IKVLASGAF   | 10  | 1    |
| >EGFR-G719,KIKVLGSGA   | 405  | >EGFR-G719,KIKVLASGA   | 333 | 72   |
| >EGFR-G719,KIKVLGSG    | 289  | >EGFR-G719,KIKVLASG    | 132 | 157  |
| >EGFR-G719,KIKVLGSGA   | 72   | >EGFR-G719,KIKVLASGA   | 68  | 4    |
| >EGFR-G719,KIKVLGSGAF  | 50   | >EGFR-G719,KIKVLASGAF  | 44  | 6    |
| >EGFR-G719,KIKVLGSGAF  | 63   | >EGFR-G719,KIKVLASGAF  | 83  | 20   |
| >EGFR-G719,KIKVLGSGAF  | 245  | >EGFR-G719,KIKVLASGAF  | 265 | 20   |
| >EGFR-G719,KIKVLGSGAF  | 523  | >EGFR-G719,KIKVLASGAF  | 413 | 110  |
| >EGFR-G719,KIKVLGSGAF  | 513  | >EGFR-G719,KIKVLASGAF  | 440 | 73   |
| >EGFR-G719,KKIKVLGSGAI | 7    | >EGFR-G719,KKIKVLASGAI | 5   | 2    |
| >EGFR-G719,TEFKKIKVLGS | 696  | >EGFR-G719,TEFKKIKVLAS | 201 | 495  |
| >EGFR-G719,TEFKKIKVLG  | 1065 | >EGFR-G719,TEFKKIKVLA  | 173 | 892  |
| >EGFR-G719(GSGAFGTVY   | 1885 | >EGFR-G719(CSGAFGTVY   | 119 | 1766 |
| >EGFR-G719(GSGAFGTVYK  | 46   | >EGFR-G719(CSGAFGTVYK  | 53  | 7    |
| >EGFR-G719(GSGAFGTVYK  | 29   | >EGFR-G719(CSGAFGTVYK  | 42  | 13   |
| >EGFR-G719(GSGAFGTVY   | 432  | >EGFR-G719(CSGAFGTVY   | 349 | 83   |
| >EGFR-G719(GSGAFGTVYK  | 224  | >EGFR-G719(CSGAFGTVYK  | 84  | 140  |
| >EGFR-G719(GSGAFGTVY   | 78   | >EGFR-G719(CSGAFGTVY   | 178 | 100  |



|                       |      |                       |      |      |
|-----------------------|------|-----------------------|------|------|
| >EGFR-G719(GSGAFGTVY  | 349  | >EGFR-G719(CSGAFGTVY  | 206  | 143  |
| >EGFR-G719(GSGAFGTVY  | 62   | >EGFR-G719(CSGAFGTVY  | 198  | 136  |
| >EGFR-G719(GSGAFGTVY  | 11   | >EGFR-G719(CSGAFGTVY  | 96   | 85   |
| >EGFR-G719(GSGAFGTVYK | 337  | >EGFR-G719(CSGAFGTVYK | 1414 | 1077 |
| >EGFR-G719(GSGAFGTV   | 2861 | >EGFR-G719(CSGAFGTV   | 278  | 2583 |
| >EGFR-G719(LGSGAFGTV  | 2612 | >EGFR-G719(LCSGAFGTV  | 415  | 2197 |
| >EGFR-G719(LGSGAFGTVY | 125  | >EGFR-G719(LCSGAFGTVY | 75   | 50   |
| >EGFR-G719(LGSGAFGTVY | 478  | >EGFR-G719(LCSGAFGTVY | 317  | 161  |
| >EGFR-G719(LGSGAFGTVY | 93   | >EGFR-G719(LCSGAFGTVY | 900  | 807  |
| >EGFR-G719(LGSGAFGTVY | 94   | >EGFR-G719(LCSGAFGTVY | 612  | 518  |
| >EGFR-G719(VLGSAGFGTV | 73   | >EGFR-G719(VLCSGAFGTV | 51   | 22   |
| >EGFR-G719(VLGSAGFGTV | 41   | >EGFR-G719(VLCSGAFGTV | 48   | 7    |
| >EGFR-G719(VLGSAGFGTV | 21   | >EGFR-G719(VLCSGAFGTV | 18   | 3    |
| >EGFR-G719(VLGSAGFGT  | 827  | >EGFR-G719(VLCSGAFGT  | 295  | 532  |
| >EGFR-G719(VLGSAGFGTV | 779  | >EGFR-G719(VLCSGAFGTV | 324  | 455  |
| >EGFR-G719(VLGSAGFGT  | 68   | >EGFR-G719(VLCSGAFGT  | 74   | 6    |
| >EGFR-G719(VLGSAGFGTV | 3    | >EGFR-G719(VLCSGAFGTV | 3    | 0    |
| >EGFR-G719(VLGSAGFGTV | 7    | >EGFR-G719(VLCSGAFGTV | 42   | 35   |
| >EGFR-G719(VLGSAGFGT  | 103  | >EGFR-G719(VLCSGAFGT  | 590  | 487  |
| >EGFR-G719(VLGSAGFGTV | 7    | >EGFR-G719(VLCSGAFGTV | 14   | 7    |
| >EGFR-G719(VLGSAGFGT  | 75   | >EGFR-G719(VLCSGAFGT  | 832  | 757  |
| >EGFR-G719(VLGSAGFGTV | 5    | >EGFR-G719(VLCSGAFGTV | 20   | 15   |
| >EGFR-G719(VLGSAGFGT  | 14   | >EGFR-G719(VLCSGAFGT  | 19   | 5    |
| >EGFR-G719(VLGSAGFGTV | 2    | >EGFR-G719(VLCSGAFGTV | 2    | 0    |
| >EGFR-G719(VLGSAGFGTV | 64   | >EGFR-G719(VLCSGAFGTV | 74   | 10   |
| >EGFR-G719(VLGSAGFGTV | 54   | >EGFR-G719(VLCSGAFGTV | 39   | 15   |
| >EGFR-G719(VLGSAGFGTV | 26   | >EGFR-G719(VLCSGAFGTV | 45   | 19   |
| >EGFR-G719(VLGSAGFGTV | 73   | >EGFR-G719(VLCSGAFGTV | 66   | 7    |
| >EGFR-G719(VLGSAGFGTV | 87   | >EGFR-G719(VLCSGAFGTV | 75   | 12   |
| >EGFR-G719(VLGSAGFGTV | 421  | >EGFR-G719(VLCSGAFGTV | 209  | 212  |
| >EGFR-G719(VLGSAGFGTV | 227  | >EGFR-G719(VLCSGAFGTV | 118  | 109  |
| >EGFR-G719(KVLGSGAFGT | 294  | >EGFR-G719(KVLCSGAFGT | 245  | 49   |
| >EGFR-G719(KVLGSGAFGT | 123  | >EGFR-G719(KVLCSGAFGT | 90   | 33   |
| >EGFR-G719(KVLGSGAFGT | 9    | >EGFR-G719(KVLCSGAFGT | 9    | 0    |
| >EGFR-G719(KVLGSGAFGT | 12   | >EGFR-G719(KVLCSGAFGT | 15   | 3    |
| >EGFR-G719(KVLGSGAFGT | 78   | >EGFR-G719(KVLCSGAFGT | 20   | 58   |
| >EGFR-G719(KVLGSGAFGT | 28   | >EGFR-G719(KVLCSGAFGT | 63   | 35   |
| >EGFR-G719(KVLGSGAFGT | 176  | >EGFR-G719(KVLCSGAFGT | 393  | 217  |
| >EGFR-G719(KVLGSGAFGT | 15   | >EGFR-G719(KVLCSGAFGT | 184  | 169  |
| >EGFR-G719(KVLGSGAFG  | 103  | >EGFR-G719(KVLCSGAFG  | 65   | 38   |
| >EGFR-G719(KVLGSGAFGT | 76   | >EGFR-G719(KVLCSGAFGT | 54   | 22   |
| >EGFR-G719(KVLGSGAF   | 32   | >EGFR-G719(KVLCSGAF   | 71   | 39   |
| >EGFR-G719(KVLGSGAFGT | 324  | >EGFR-G719(KVLCSGAFGT | 118  | 206  |

|                        |      |                        |      |      |
|------------------------|------|------------------------|------|------|
| >EGFR-G719IKVLGSGAF    | 172  | >EGFR-G719(KVLCSGAF    | 128  | 44   |
| >EGFR-G719(KVLGSGAF    | 345  | >EGFR-G719(KVLCSGAF    | 1191 | 846  |
| >EGFR-G719IKVLGSGAF    | 165  | >EGFR-G719(KVLCSGAF    | 37   | 128  |
| >EGFR-G719(KVLGSGAF    | 16   | >EGFR-G719(KVLCSGAF    | 31   | 15   |
| >EGFR-G719IKVLGSGAF    | 763  | >EGFR-G719(KVLCSGAF    | 436  | 327  |
| >EGFR-G719(KVLGSGAF    | 476  | >EGFR-G719(KVLCSGAF    | 1562 | 1086 |
| >EGFR-G719IKVLGSGAF    | 9    | >EGFR-G719IKVLCSGAF    | 12   | 3    |
| >EGFR-G719(KIKVLGSGA   | 405  | >EGFR-G719(KIKVLCSGA   | 324  | 81   |
| >EGFR-G719(KIKVLGSG    | 289  | >EGFR-G719(KIKVLCSG    | 175  | 114  |
| >EGFR-G719(KIKVLGSGA   | 72   | >EGFR-G719(KIKVLCSGA   | 163  | 91   |
| >EGFR-G719(KIKVLGSGAF  | 50   | >EGFR-G719(KIKVLCSGAF  | 68   | 18   |
| >EGFR-G719(KIKVLGSGAF  | 63   | >EGFR-G719(KIKVLCSGAF  | 77   | 14   |
| >EGFR-G719(KIKVLGSGAF  | 245  | >EGFR-G719(KIKVLCSGAF  | 254  | 9    |
| >EGFR-G719(KIKVLGSGAF  | 513  | >EGFR-G719(KIKVLCSGAF  | 357  | 156  |
| >EGFR-G719(KKIKVLGSGA  | 7    | >EGFR-G719(KKIKVLCSGA  | 5    | 2    |
| >EGFR-G719(TEFKKIKVLGS | 696  | >EGFR-G719(TEFKKIKVLCS | 349  | 347  |
| >EGFR-G719IGSGAFGTVYK  | 46   | >EGFR-G719IDSGAFGTVYK  | 282  | 236  |
| >EGFR-G719IGSGAFGTVYK  | 29   | >EGFR-G719IDSGAFGTVYK  | 164  | 135  |
| >EGFR-G719IGSGAFGTVY   | 432  | >EGFR-G719IDSGAFGTVY   | 1645 | 1213 |
| >EGFR-G719IGSGAFGTVYK  | 224  | >EGFR-G719IDSGAFGTVYK  | 33   | 191  |
| >EGFR-G719IGSGAFGTV    | 9629 | >EGFR-G719IDSGAFGTV    | 441  | 9188 |
| >EGFR-G719IGSGAFGTVY   | 78   | >EGFR-G719IDSGAFGTVY   | 1257 | 1179 |
| >EGFR-G719IGSGAFGTVY   | 349  | >EGFR-G719IDSGAFGTVY   | 2257 | 1908 |
| >EGFR-G719IGSGAFGTVY   | 62   | >EGFR-G719IDSGAFGTVY   | 1597 | 1535 |
| >EGFR-G719IGSGAFGTVY   | 11   | >EGFR-G719IDSGAFGTVY   | 288  | 277  |
| >EGFR-G719IGSGAFGTVYK  | 337  | >EGFR-G719IDSGAFGTVYK  | 1981 | 1644 |
| >EGFR-G719ILGSGAFGTVY  | 125  | >EGFR-G719ILDGSAFGTVY  | 318  | 193  |
| >EGFR-G719ILGSGAFGTVY  | 478  | >EGFR-G719ILDGSAFGTVY  | 1766 | 1288 |
| >EGFR-G719ILGSGAFGTVY  | 93   | >EGFR-G719ILDGSAFGTVY  | 452  | 359  |
| >EGFR-G719ILGSGAFGTVY  | 94   | >EGFR-G719ILDGSAFGTVY  | 1129 | 1035 |
| >EGFR-G719ILGSGAFGTV   | 8675 | >EGFR-G719ILDGSAFGTV   | 75   | 8600 |
| >EGFR-G719IVLGSAGFGTV  | 6869 | >EGFR-G719IVLDGSAFGTV  | 50   | 6819 |
| >EGFR-G719IVLGSAGFGT   | 2098 | >EGFR-G719IVLDGSAFGT   | 485  | 1613 |
| >EGFR-G719IVLGSAGFGTV  | 73   | >EGFR-G719IVLDGSAFGTV  | 54   | 19   |
| >EGFR-G719IVLGSAGFGTV  | 41   | >EGFR-G719IVLDGSAFGTV  | 56   | 15   |
| >EGFR-G719IVLGSAGFGTV  | 21   | >EGFR-G719IVLDGSAFGTV  | 30   | 9    |
| >EGFR-G719IVLGSAGFGT   | 827  | >EGFR-G719IVLDGSAFGT   | 115  | 712  |
| >EGFR-G719IVLGSAGFGTV  | 779  | >EGFR-G719IVLDGSAFGTV  | 418  | 361  |
| >EGFR-G719IVLGSAGFGT   | 68   | >EGFR-G719IVLDGSAFGT   | 25   | 43   |
| >EGFR-G719IVLGSAGFGTV  | 3    | >EGFR-G719IVLDGSAFGTV  | 2    | 1    |
| >EGFR-G719IVLGSAGFGT   | 505  | >EGFR-G719IVLDGSAFGT   | 199  | 306  |
| >EGFR-G719IVLGSAGFGTV  | 7    | >EGFR-G719IVLDGSAFGTV  | 5    | 2    |
| >EGFR-G719IVLGSAGFGT   | 103  | >EGFR-G719IVLDGSAFGT   | 44   | 59   |

|                         |      |                         |      |      |
|-------------------------|------|-------------------------|------|------|
| >EGFR-G719I VLGSGAFGTV  | 7    | >EGFR-G719I VLDSGAFGTV  | 5    | 2    |
| >EGFR-G719I VLGSGAFGT   | 75   | >EGFR-G719I VLDSGAFGT   | 57   | 18   |
| >EGFR-G719I VLGSGAFGTV  | 5    | >EGFR-G719I VLDSGAFGTV  | 4    | 1    |
| >EGFR-G719I VLGSGAFGT   | 14   | >EGFR-G719I VLDSGAFGT   | 20   | 6    |
| >EGFR-G719I VLGSGAFGTV  | 2    | >EGFR-G719I VLDSGAFGTV  | 2    | 0    |
| >EGFR-G719I VLGSGAFGTV  | 64   | >EGFR-G719I VLDSGAFGTV  | 299  | 235  |
| >EGFR-G719I VLGSGAFGTV  | 54   | >EGFR-G719I VLDSGAFGTV  | 113  | 59   |
| >EGFR-G719I VLGSGAFGTV  | 26   | >EGFR-G719I VLDSGAFGTV  | 76   | 50   |
| >EGFR-G719I VLGSGAFGTV  | 73   | >EGFR-G719I VLDSGAFGTV  | 462  | 389  |
| >EGFR-G719I VLGSGAFGTV  | 87   | >EGFR-G719I VLDSGAFGTV  | 111  | 24   |
| >EGFR-G719I VLGSGAFGTV  | 421  | >EGFR-G719I VLDSGAFGTV  | 1531 | 1110 |
| >EGFR-G719I VLGSGAFGTV  | 227  | >EGFR-G719I VLDSGAFGTV  | 201  | 26   |
| >EGFR-G719I VLGSGAFGTV  | 1223 | >EGFR-G719I VLDSGAFGTV  | 384  | 839  |
| >EGFR-G719I KVLGSGAFGT  | 294  | >EGFR-G719I KVLDSGAFGT  | 102  | 192  |
| >EGFR-G719I KVLGSGAFGT  | 668  | >EGFR-G719I KVLDSGAFGT  | 465  | 203  |
| >EGFR-G719I KVLGSGAFGT  | 123  | >EGFR-G719I KVLDSGAFGT  | 53   | 70   |
| >EGFR-G719I KVLGSGAF    | 553  | >EGFR-G719I KVLDSGAF    | 207  | 346  |
| >EGFR-G719I KVLGSGAFGT  | 602  | >EGFR-G719I KVLDSGAFGT  | 476  | 126  |
| >EGFR-G719I KVLGSGAFGT  | 9    | >EGFR-G719I KVLDSGAFGT  | 6    | 3    |
| >EGFR-G719I KVLGSGAFGT  | 12   | >EGFR-G719I KVLDSGAFGT  | 8    | 4    |
| >EGFR-G719I KVLGSGAFGT  | 78   | >EGFR-G719I KVLDSGAFGT  | 19   | 59   |
| >EGFR-G719I KVLGSGAFGT  | 28   | >EGFR-G719I KVLDSGAFGT  | 19   | 9    |
| >EGFR-G719I KVLGSGAFGT  | 176  | >EGFR-G719I KVLDSGAFGT  | 72   | 104  |
| >EGFR-G719I KVLGSGAFGT  | 15   | >EGFR-G719I KVLDSGAFGT  | 9    | 6    |
| >EGFR-G719I KVLGSGAFG   | 103  | >EGFR-G719I KVLDSGAFG   | 84   | 19   |
| >EGFR-G719I KVLGSGAFGT  | 76   | >EGFR-G719I KVLDSGAFGT  | 67   | 9    |
| >EGFR-G719I KVLGSGAF    | 32   | >EGFR-G719I KVLDSGAF    | 83   | 51   |
| >EGFR-G719I KVLGSGAFGT  | 324  | >EGFR-G719I KVLDSGAFGT  | 90   | 234  |
| >EGFR-G719I KVLGSGAF    | 172  | >EGFR-G719I KVLDSGAF    | 153  | 19   |
| >EGFR-G719I KVLGSGAF    | 345  | >EGFR-G719I KVLDSGAF    | 919  | 574  |
| >EGFR-G719I KVLGSGAF    | 165  | >EGFR-G719I KVLDSGAF    | 98   | 67   |
| >EGFR-G719I KVLGSGAF    | 16   | >EGFR-G719I KVLDSGAF    | 20   | 4    |
| >EGFR-G719I KVLGSGAF    | 476  | >EGFR-G719I KVLDSGAF    | 947  | 471  |
| >EGFR-G719I KVLGSGAF    | 9    | >EGFR-G719I KVLDSGAF    | 11   | 2    |
| >EGFR-G719I KIKVLGSGA   | 405  | >EGFR-G719I KIKVLDSGA   | 1748 | 1343 |
| >EGFR-G719I KIKVLGSG    | 289  | >EGFR-G719I KIKVLDSG    | 1524 | 1235 |
| >EGFR-G719I KIKVLGSGA   | 72   | >EGFR-G719I KIKVLDSGA   | 220  | 148  |
| >EGFR-G719I KIKVLGSGAF  | 50   | >EGFR-G719I KIKVLDSGAF  | 80   | 30   |
| >EGFR-G719I KIKVLGSGAF  | 63   | >EGFR-G719I KIKVLDSGAF  | 90   | 27   |
| >EGFR-G719I KIKVLGSGAF  | 245  | >EGFR-G719I KIKVLDSGAF  | 475  | 230  |
| >EGFR-G719I KKIKVLGSGAI | 7    | >EGFR-G719I KKIKVLDSGAI | 6    | 1    |
| >EGFR-G719I GSGAFGTVYK  | 46   | >EGFR-G719I SSGAFGTVYK  | 27   | 19   |
| >EGFR-G719I GSGAFGTVYK  | 29   | >EGFR-G719I SSGAFGTVYK  | 12   | 17   |

|                       |       |                       |     |       |
|-----------------------|-------|-----------------------|-----|-------|
| >EGFR-G719!GSGAFGTVYK | 711   | >EGFR-G719!SSGAFGTVYK | 141 | 570   |
| >EGFR-G719!GSGAFGTVY  | 432   | >EGFR-G719!SSGAFGTVY  | 216 | 216   |
| >EGFR-G719!GSGAFGTVYK | 224   | >EGFR-G719!SSGAFGTVYK | 33  | 191   |
| >EGFR-G719!GSGAFGTVY  | 3452  | >EGFR-G719!SSGAFGTVY  | 153 | 3299  |
| >EGFR-G719!GSGAFGTVY  | 78    | >EGFR-G719!SSGAFGTVY  | 57  | 21    |
| >EGFR-G719!GSGAFGTVY  | 349   | >EGFR-G719!SSGAFGTVY  | 103 | 246   |
| >EGFR-G719!GSGAFGTVY  | 62    | >EGFR-G719!SSGAFGTVY  | 46  | 16    |
| >EGFR-G719!GSGAFGTVY  | 11    | >EGFR-G719!SSGAFGTVY  | 10  | 1     |
| >EGFR-G719!GSGAFGTVYK | 1308  | >EGFR-G719!SSGAFGTVYK | 320 | 988   |
| >EGFR-G719!GSGAFGTVYK | 337   | >EGFR-G719!SSGAFGTVYK | 232 | 105   |
| >EGFR-G719!LGSGAFGTVY | 4564  | >EGFR-G719!LSSGAFGTVY | 125 | 4439  |
| >EGFR-G719!LGSGAFGTV  | 860   | >EGFR-G719!LSSGAFGTV  | 290 | 570   |
| >EGFR-G719!LGSGAFGTVY | 1260  | >EGFR-G719!LSSGAFGTVY | 91  | 1169  |
| >EGFR-G719!LGSGAFGTVY | 25307 | >EGFR-G719!LSSGAFGTVY | 300 | 25007 |
| >EGFR-G719!LGSGAFGTVY | 559   | >EGFR-G719!LSSGAFGTVY | 19  | 540   |
| >EGFR-G719!LGSGAFGTVY | 125   | >EGFR-G719!LSSGAFGTVY | 39  | 86    |
| >EGFR-G719!LGSGAFGTVY | 1180  | >EGFR-G719!LSSGAFGTVY | 54  | 1126  |
| >EGFR-G719!LGSGAFGTVY | 478   | >EGFR-G719!LSSGAFGTVY | 63  | 415   |
| >EGFR-G719!LGSGAFGTVY | 931   | >EGFR-G719!LSSGAFGTVY | 43  | 888   |
| >EGFR-G719!LGSGAFGTV  | 2637  | >EGFR-G719!LSSGAFGTV  | 134 | 2503  |
| >EGFR-G719!LGSGAFGTVY | 93    | >EGFR-G719!LSSGAFGTVY | 44  | 49    |
| >EGFR-G719!LGSGAFGTVY | 1516  | >EGFR-G719!LSSGAFGTVY | 147 | 1369  |
| >EGFR-G719!LGSGAFGTVY | 2359  | >EGFR-G719!LSSGAFGTVY | 8   | 2351  |
| >EGFR-G719!LGSGAFGTVY | 11130 | >EGFR-G719!LSSGAFGTVY | 498 | 10632 |
| >EGFR-G719!LGSGAFGTVY | 7234  | >EGFR-G719!LSSGAFGTVY | 125 | 7109  |
| >EGFR-G719!LGSGAFGTV  | 8938  | >EGFR-G719!LSSGAFGTV  | 316 | 8622  |
| >EGFR-G719!LGSGAFGTV  | 2426  | >EGFR-G719!LSSGAFGTV  | 206 | 2220  |
| >EGFR-G719!LGSGAFGTVY | 94    | >EGFR-G719!LSSGAFGTVY | 23  | 71    |
| >EGFR-G719!LGSGAFGTVY | 2476  | >EGFR-G719!LSSGAFGTVY | 378 | 2098  |
| >EGFR-G719!VLGSGAFGTV | 73    | >EGFR-G719!VLSSGAFGTV | 59  | 14    |
| >EGFR-G719!VLGSGAFGTV | 41    | >EGFR-G719!VLSSGAFGTV | 20  | 21    |
| >EGFR-G719!VLGSGAFGT  | 1992  | >EGFR-G719!VLSSGAFGT  | 184 | 1808  |
| >EGFR-G719!VLGSGAFGTV | 21    | >EGFR-G719!VLSSGAFGTV | 13  | 8     |
| >EGFR-G719!VLGSGAFGT  | 827   | >EGFR-G719!VLSSGAFGT  | 173 | 654   |
| >EGFR-G719!VLGSGAFGTV | 779   | >EGFR-G719!VLSSGAFGTV | 353 | 426   |
| >EGFR-G719!VLGSGAFGT  | 68    | >EGFR-G719!VLSSGAFGT  | 113 | 45    |
| >EGFR-G719!VLGSGAFGTV | 3     | >EGFR-G719!VLSSGAFGTV | 3   | 0     |
| >EGFR-G719!VLGSGAFGTV | 7     | >EGFR-G719!VLSSGAFGTV | 7   | 0     |
| >EGFR-G719!VLGSGAFGT  | 103   | >EGFR-G719!VLSSGAFGT  | 117 | 14    |
| >EGFR-G719!VLGSGAFGTV | 7     | >EGFR-G719!VLSSGAFGTV | 7   | 0     |
| >EGFR-G719!VLGSGAFGT  | 75    | >EGFR-G719!VLSSGAFGT  | 68  | 7     |
| >EGFR-G719!VLGSGAFGTV | 5     | >EGFR-G719!VLSSGAFGTV | 5   | 0     |
| >EGFR-G719!VLGSGAFGT  | 14    | >EGFR-G719!VLSSGAFGT  | 11  | 3     |

|                        |      |                        |     |      |
|------------------------|------|------------------------|-----|------|
| >EGFR-G719!VLGSGAFGTV  | 2    | >EGFR-G719!VLSSGAFGTV  | 2   | 0    |
| >EGFR-G719!VLGSGAFGTV  | 1160 | >EGFR-G719!VLSSGAFGTV  | 359 | 801  |
| >EGFR-G719!VLGSGAFGTV  | 64   | >EGFR-G719!VLSSGAFGTV  | 48  | 16   |
| >EGFR-G719!VLGSGAFGTV  | 54   | >EGFR-G719!VLSSGAFGTV  | 23  | 31   |
| >EGFR-G719!VLGSGAFGTV  | 26   | >EGFR-G719!VLSSGAFGTV  | 66  | 40   |
| >EGFR-G719!VLGSGAFGTV  | 73   | >EGFR-G719!VLSSGAFGTV  | 64  | 9    |
| >EGFR-G719!VLGSGAFGTV  | 87   | >EGFR-G719!VLSSGAFGTV  | 53  | 34   |
| >EGFR-G719!VLGSGAFGTV  | 421  | >EGFR-G719!VLSSGAFGTV  | 92  | 329  |
| >EGFR-G719!VLGSGAFGTV  | 227  | >EGFR-G719!VLSSGAFGTV  | 59  | 168  |
| >EGFR-G719!KVLGSGAFGT  | 294  | >EGFR-G719!KVLSSGAFGT  | 238 | 56   |
| >EGFR-G719!KVLGSGAFGT  | 123  | >EGFR-G719!KVLSSGAFGT  | 87  | 36   |
| >EGFR-G719!KVLGSGAFGT  | 9    | >EGFR-G719!KVLSSGAFGT  | 11  | 2    |
| >EGFR-G719!KVLGSGAFGT  | 12   | >EGFR-G719!KVLSSGAFGT  | 18  | 6    |
| >EGFR-G719!KVLGSGAFGT  | 78   | >EGFR-G719!KVLSSGAFGT  | 65  | 13   |
| >EGFR-G719!KVLGSGAFGT  | 28   | >EGFR-G719!KVLSSGAFGT  | 40  | 12   |
| >EGFR-G719!KVLGSGAFGT  | 176  | >EGFR-G719!KVLSSGAFGT  | 250 | 74   |
| >EGFR-G719!KVLGSGAFGT  | 15   | >EGFR-G719!KVLSSGAFGT  | 42  | 27   |
| >EGFR-G719!KVLGSGAFG   | 103  | >EGFR-G719!KVLSSGAFG   | 71  | 32   |
| >EGFR-G719!KVLGSGAFGT  | 76   | >EGFR-G719!KVLSSGAFGT  | 59  | 17   |
| >EGFR-G719!KVLGSGAF    | 32   | >EGFR-G719!KVLSSGAF    | 73  | 41   |
| >EGFR-G719!KVLGSGAFGT  | 324  | >EGFR-G719!KVLSSGAFGT  | 176 | 148  |
| >EGFR-G719!KVLGSGAF    | 172  | >EGFR-G719!KVLSSGAF    | 110 | 62   |
| >EGFR-G719!KVLGSGAF    | 345  | >EGFR-G719!KVLSSGAF    | 542 | 197  |
| >EGFR-G719!KVLGSGAF    | 165  | >EGFR-G719!KVLSSGAF    | 25  | 140  |
| >EGFR-G719!KVLGSGAF    | 16   | >EGFR-G719!KVLSSGAF    | 14  | 2    |
| >EGFR-G719!KVLGSGAF    | 476  | >EGFR-G719!KVLSSGAF    | 383 | 93   |
| >EGFR-G719!KVLGSGAFGT  | 709  | >EGFR-G719!KVLSSGAFGT  | 303 | 406  |
| >EGFR-G719!IKVLGSGAF   | 9    | >EGFR-G719!IKVLSSGAF   | 5   | 4    |
| >EGFR-G719!KIKVLGSGA   | 405  | >EGFR-G719!KIKVLSSGA   | 183 | 222  |
| >EGFR-G719!KIKVLGSG    | 289  | >EGFR-G719!KIKVLSSG    | 126 | 163  |
| >EGFR-G719!KIKVLGSGA   | 72   | >EGFR-G719!KIKVLSSGA   | 20  | 52   |
| >EGFR-G719!KIKVLGSGAF  | 903  | >EGFR-G719!KIKVLSSGAF  | 320 | 583  |
| >EGFR-G719!KIKVLGSGAF  | 50   | >EGFR-G719!KIKVLSSGAF  | 26  | 24   |
| >EGFR-G719!KIKVLGSGAF  | 63   | >EGFR-G719!KIKVLSSGAF  | 49  | 14   |
| >EGFR-G719!KIKVLGSGAF  | 245  | >EGFR-G719!KIKVLSSGAF  | 143 | 102  |
| >EGFR-G719!KIKVLGSGAF  | 523  | >EGFR-G719!KIKVLSSGAF  | 271 | 252  |
| >EGFR-G719!KIKVLGSGAF  | 513  | >EGFR-G719!KIKVLSSGAF  | 419 | 94   |
| >EGFR-G719!KKIKVLGSGA  | 700  | >EGFR-G719!KKIKVLSSGA  | 331 | 369  |
| >EGFR-G719!KKIKVLGSGA  | 7    | >EGFR-G719!KKIKVLSSGAF | 4   | 3    |
| >EGFR-G719!TEFKKIKVLGS | 696  | >EGFR-G719!TEFKKIKVLSS | 222 | 474  |
| >EGFR-G719!GSGAFGTV    | 9672 | >EGFR-G719!VSGAFGTV    | 341 | 9331 |
| >EGFR-G719!GSGAFGTVYK  | 46   | >EGFR-G719!VSGAFGTVYK  | 41  | 5    |
| >EGFR-G719!GSGAFGTVYK  | 29   | >EGFR-G719!VSGAFGTVYK  | 25  | 4    |

|                        |       |                        |      |       |
|------------------------|-------|------------------------|------|-------|
| >EGFR-G719\GSGAFGTVY   | 432   | >EGFR-G719\VSGAFGTVY   | 150  | 282   |
| >EGFR-G719\GSGAFGTVYk  | 224   | >EGFR-G719\VSGAFGTVYk  | 142  | 82    |
| >EGFR-G719\GSGAFGTVY   | 3452  | >EGFR-G719\VSGAFGTVY   | 174  | 3278  |
| >EGFR-G719\GSGAFGTVY   | 78    | >EGFR-G719\VSGAFGTVY   | 67   | 11    |
| >EGFR-G719\GSGAFGTVY   | 349   | >EGFR-G719\VSGAFGTVY   | 77   | 272   |
| >EGFR-G719\GSGAFGTVY   | 62    | >EGFR-G719\VSGAFGTVY   | 16   | 46    |
| >EGFR-G719\GSGAFGTVY   | 11    | >EGFR-G719\VSGAFGTVY   | 16   | 5     |
| >EGFR-G719\GSGAFGTVYk  | 337   | >EGFR-G719\VSGAFGTVYk  | 1241 | 904   |
| >EGFR-G719\LGSGAFGTV   | 2394  | >EGFR-G719\LVSGAFGTV   | 111  | 2283  |
| >EGFR-G719\LGSGAFGTV   | 4567  | >EGFR-G719\LVSGAFGTV   | 27   | 4540  |
| >EGFR-G719\LGSGAFGT    | 11406 | >EGFR-G719\LVSGAFGT    | 348  | 11058 |
| >EGFR-G719\LGSGAFGTV   | 860   | >EGFR-G719\LVSGAFGTV   | 18   | 842   |
| >EGFR-G719\LGSGAFGTV   | 6747  | >EGFR-G719\LVSGAFGTV   | 154  | 6593  |
| >EGFR-G719\LGSGAFGTV   | 8616  | >EGFR-G719\LVSGAFGTV   | 444  | 8172  |
| >EGFR-G719\LGSGAFGTV   | 2612  | >EGFR-G719\LVSGAFGTV   | 8    | 2604  |
| >EGFR-G719\LGSGAFGTVY  | 1260  | >EGFR-G719\LVSGAFGTVY  | 62   | 1198  |
| >EGFR-G719\LGSGAFGTVY  | 25307 | >EGFR-G719\LVSGAFGTVY  | 362  | 24945 |
| >EGFR-G719\LGSGAFGTVY  | 559   | >EGFR-G719\LVSGAFGTVY  | 18   | 541   |
| >EGFR-G719\LGSGAFGTVY  | 125   | >EGFR-G719\LVSGAFGTVY  | 55   | 70    |
| >EGFR-G719\LGSGAFGTVY  | 1180  | >EGFR-G719\LVSGAFGTVY  | 44   | 1136  |
| >EGFR-G719\LGSGAFGTVY  | 478   | >EGFR-G719\LVSGAFGTVY  | 231  | 247   |
| >EGFR-G719\LGSGAFGTVY  | 931   | >EGFR-G719\LVSGAFGTVY  | 28   | 903   |
| >EGFR-G719\LGSGAFGTV   | 2637  | >EGFR-G719\LVSGAFGTV   | 24   | 2613  |
| >EGFR-G719\LGSGAFGTV   | 9156  | >EGFR-G719\LVSGAFGTV   | 492  | 8664  |
| >EGFR-G719\LGSGAFGTVY  | 93    | >EGFR-G719\LVSGAFGTVY  | 49   | 44    |
| >EGFR-G719\LGSGAFGTVY  | 1015  | >EGFR-G719\LVSGAFGTVY  | 363  | 652   |
| >EGFR-G719\LGSGAFGTVY  | 94    | >EGFR-G719\LVSGAFGTVY  | 104  | 10    |
| >EGFR-G719\LGSGAFGTVY  | 905   | >EGFR-G719\LVSGAFGTVY  | 163  | 742   |
| >EGFR-G719\ETEFKKIKVLG | 8873  | >EGFR-G719\ETEFKKIKVLV | 34   | 8839  |
| >EGFR-G719\ETEFKKIKVLG | 18748 | >EGFR-G719\ETEFKKIKVLV | 266  | 18482 |
| >EGFR-G719\VLGSGAFGTV  | 73    | >EGFR-G719\VLVSGAFGTV  | 64   | 9     |
| >EGFR-G719\VLGSGAFGTV  | 41    | >EGFR-G719\VLVSGAFGTV  | 44   | 3     |
| >EGFR-G719\VLGSGAFGT   | 1992  | >EGFR-G719\VLVSGAFGT   | 339  | 1653  |
| >EGFR-G719\VLGSGAFGTV  | 21    | >EGFR-G719\VLVSGAFGTV  | 16   | 5     |
| >EGFR-G719\VLGSGAFGT   | 827   | >EGFR-G719\VLVSGAFGT   | 52   | 775   |
| >EGFR-G719\VLGSGAFGTV  | 779   | >EGFR-G719\VLVSGAFGTV  | 161  | 618   |
| >EGFR-G719\VLGSGAFGT   | 68    | >EGFR-G719\VLVSGAFGT   | 75   | 7     |
| >EGFR-G719\VLGSGAFGTV  | 3     | >EGFR-G719\VLVSGAFGTV  | 3    | 0     |
| >EGFR-G719\VLGSGAFGTV  | 7     | >EGFR-G719\VLVSGAFGTV  | 7    | 0     |
| >EGFR-G719\VLGSGAFGT   | 103   | >EGFR-G719\VLVSGAFGT   | 218  | 115   |
| >EGFR-G719\VLGSGAFGTV  | 7     | >EGFR-G719\VLVSGAFGTV  | 8    | 1     |
| >EGFR-G719\VLGSGAFGT   | 75    | >EGFR-G719\VLVSGAFGT   | 411  | 336   |
| >EGFR-G719\VLGSGAFGTV  | 5     | >EGFR-G719\VLVSGAFGTV  | 11   | 6     |

|                        |       |                        |     |       |
|------------------------|-------|------------------------|-----|-------|
| >EGFR-G719\VLGSGAFGT   | 14    | >EGFR-G719\VLVSGAFGT   | 13  | 1     |
| >EGFR-G719\VLGSGAFGTV  | 2     | >EGFR-G719\VLVSGAFGTV  | 2   | 0     |
| >EGFR-G719\VLGSGAFGTV  | 64    | >EGFR-G719\VLVSGAFGTV  | 47  | 17    |
| >EGFR-G719\VLGSGAFGTV  | 54    | >EGFR-G719\VLVSGAFGTV  | 57  | 3     |
| >EGFR-G719\VLGSGAFGTV  | 26    | >EGFR-G719\VLVSGAFGTV  | 71  | 45    |
| >EGFR-G719\VLGSGAFGTV  | 73    | >EGFR-G719\VLVSGAFGTV  | 66  | 7     |
| >EGFR-G719\VLGSGAFGTV  | 87    | >EGFR-G719\VLVSGAFGTV  | 53  | 34    |
| >EGFR-G719\VLGSGAFGTV  | 421   | >EGFR-G719\VLVSGAFGTV  | 74  | 347   |
| >EGFR-G719\VLGSGAFGTV  | 3111  | >EGFR-G719\VLVSGAFGTV  | 189 | 2922  |
| >EGFR-G719\VLGSGAFGTV  | 227   | >EGFR-G719\VLVSGAFGTV  | 70  | 157   |
| >EGFR-G719\KVLGSGAFGT  | 294   | >EGFR-G719\KVLVSGAFGT  | 768 | 474   |
| >EGFR-G719\KVLGSGAFGT  | 123   | >EGFR-G719\KVLVSGAFGT  | 274 | 151   |
| >EGFR-G719\KVLGSGAFGT  | 9     | >EGFR-G719\KVLVSGAFGT  | 14  | 5     |
| >EGFR-G719\KVLGSGAFGT  | 12    | >EGFR-G719\KVLVSGAFGT  | 55  | 43    |
| >EGFR-G719\KVLGSGAFGT  | 78    | >EGFR-G719\KVLVSGAFGT  | 112 | 34    |
| >EGFR-G719\KVLGSGAFGT  | 28    | >EGFR-G719\KVLVSGAFGT  | 63  | 35    |
| >EGFR-G719\KVLGSGAFGT  | 176   | >EGFR-G719\KVLVSGAFGT  | 493 | 317   |
| >EGFR-G719\KVLGSGAFGT  | 15    | >EGFR-G719\KVLVSGAFGT  | 99  | 84    |
| >EGFR-G719\KVLGSGAFG   | 103   | >EGFR-G719\KVLVSGAFG   | 58  | 45    |
| >EGFR-G719\KVLGSGAFGT  | 76    | >EGFR-G719\KVLVSGAFGT  | 50  | 26    |
| >EGFR-G719\KVLGSGAF    | 32    | >EGFR-G719\KVLVSGAF    | 90  | 58    |
| >EGFR-G719\KVLGSGAFGT  | 324   | >EGFR-G719\KVLVSGAFGT  | 393 | 69    |
| >EGFR-G719\KVLGSGAF    | 172   | >EGFR-G719\KVLVSGAF    | 217 | 45    |
| >EGFR-G719\KVLGSGAF    | 345   | >EGFR-G719\KVLVSGAF    | 825 | 480   |
| >EGFR-G719\KVLGSGAF    | 165   | >EGFR-G719\KVLVSGAF    | 75  | 90    |
| >EGFR-G719\KVLGSGAF    | 16    | >EGFR-G719\KVLVSGAF    | 21  | 5     |
| >EGFR-G719\KVLGSGAF    | 476   | >EGFR-G719\KVLVSGAF    | 274 | 202   |
| >EGFR-G719\IKVLGSGAF   | 9     | >EGFR-G719\IKVLVSGAF   | 15  | 6     |
| >EGFR-G719\KIKVLGSGA   | 405   | >EGFR-G719\KIKVLVSGA   | 45  | 360   |
| >EGFR-G719\KIKVLGSG    | 289   | >EGFR-G719\KIKVLVSG    | 164 | 125   |
| >EGFR-G719\KIKVLGSGA   | 72    | >EGFR-G719\KIKVLVSGA   | 49  | 23    |
| >EGFR-G719\KIKVLGSGAF  | 50    | >EGFR-G719\KIKVLVSGAF  | 39  | 11    |
| >EGFR-G719\KIKVLGSGAF  | 1315  | >EGFR-G719\KIKVLVSGAF  | 332 | 983   |
| >EGFR-G719\KIKVLGSGAF  | 63    | >EGFR-G719\KIKVLVSGAF  | 64  | 1     |
| >EGFR-G719\KIKVLGSGAF  | 245   | >EGFR-G719\KIKVLVSGAF  | 270 | 25    |
| >EGFR-G719\KKIKVLGSGA  | 700   | >EGFR-G719\KKIKVLVSGA  | 348 | 352   |
| >EGFR-G719\KKIKVLGSGAI | 7     | >EGFR-G719\KKIKVLVSGAI | 5   | 2     |
| >EGFR-G719\FKKIKVLG    | 12089 | >EGFR-G719\FKKIKVLV    | 474 | 11615 |
| >EGFR-G719\TEFKKIKVLG  | 3705  | >EGFR-G719\TEFKKIKVLV  | 15  | 3690  |
| >EGFR-G719\TEFKKIKVLG  | 1132  | >EGFR-G719\TEFKKIKVLV  | 233 | 899   |
| >EGFR-G719\TEFKKIKVLGS | 696   | >EGFR-G719\TEFKKIKVLVS | 308 | 388   |
| >EGFR-G719\TEFKKIKVLG  | 26865 | >EGFR-G719\TEFKKIKVLV  | 266 | 26599 |
| >EGFR-G721\GAFGTVYKGI  | 372   | >EGFR-G721\AAFGTVYKGI  | 228 | 144   |

|                        |      |                        |     |      |
|------------------------|------|------------------------|-----|------|
| >EGFR-G721, GAFGTVYK   | 122  | >EGFR-G721, AAFGTVYK   | 84  | 38   |
| >EGFR-G721, GAFGTVYK   | 9    | >EGFR-G721, AAFGTVYK   | 9   | 0    |
| >EGFR-G721, GAFGTVYK   | 98   | >EGFR-G721, AAFGTVYK   | 16  | 82   |
| >EGFR-G721, GAFGTVYK   | 222  | >EGFR-G721, AAFGTVYK   | 114 | 108  |
| >EGFR-G721, GAFGTVYK   | 23   | >EGFR-G721, AAFGTVYK   | 22  | 1    |
| >EGFR-G721, GAFGTVYKGL | 158  | >EGFR-G721, AAFGTVYKGL | 42  | 116  |
| >EGFR-G721, GAFGTVYKGL | 38   | >EGFR-G721, AAFGTVYKGL | 13  | 25   |
| >EGFR-G721, GAFGTVYKGL | 456  | >EGFR-G721, AAFGTVYKGL | 311 | 145  |
| >EGFR-G721, GAFGTVYKGL | 46   | >EGFR-G721, AAFGTVYKGL | 49  | 3    |
| >EGFR-G721, GAFGTVYKGL | 34   | >EGFR-G721, AAFGTVYKGL | 26  | 8    |
| >EGFR-G721, GAFGTVYKGL | 279  | >EGFR-G721, AAFGTVYKGL | 773 | 494  |
| >EGFR-G721, GAFGTVYKGL | 603  | >EGFR-G721, AAFGTVYKGL | 278 | 325  |
| >EGFR-G721, GAFGTVYKGL | 33   | >EGFR-G721, AAFGTVYKGL | 34  | 1    |
| >EGFR-G721, GAFGTVYK   | 150  | >EGFR-G721, AAFGTVYK   | 102 | 48   |
| >EGFR-G721, SGAFGTVYK  | 527  | >EGFR-G721, SAAFGTVYK  | 93  | 434  |
| >EGFR-G721, SGAFGTVYK  | 49   | >EGFR-G721, SAAFGTVYK  | 12  | 37   |
| >EGFR-G721, SGAFGTVY   | 580  | >EGFR-G721, SAAFGTVY   | 146 | 434  |
| >EGFR-G721, SGAFGTVYK  | 798  | >EGFR-G721, SAAFGTVYK  | 91  | 707  |
| >EGFR-G721, SGAFGTVY   | 87   | >EGFR-G721, SAAFGTVY   | 77  | 10   |
| >EGFR-G721, SGAFGTVYK  | 3142 | >EGFR-G721, SAAFGTVYK  | 357 | 2785 |
| >EGFR-G721, SGAFGTVYK  | 178  | >EGFR-G721, SAAFGTVYK  | 9   | 169  |
| >EGFR-G721, SGAFGTVYKC | 1872 | >EGFR-G721, SAAFGTVYKC | 116 | 1756 |
| >EGFR-G721, SGAFGTVYKC | 5911 | >EGFR-G721, SAAFGTVYKC | 441 | 5470 |
| >EGFR-G721, SGAFGTVY   | 188  | >EGFR-G721, SAAFGTVY   | 97  | 91   |
| >EGFR-G721, SGAFGTVY   | 460  | >EGFR-G721, SAAFGTVY   | 507 | 47   |
| >EGFR-G721, SGAFGTVY   | 2717 | >EGFR-G721, SAAFGTVY   | 458 | 2259 |
| >EGFR-G721, SGAFGTVY   | 2532 | >EGFR-G721, SAAFGTVY   | 77  | 2455 |
| >EGFR-G721, SGAFGTVY   | 520  | >EGFR-G721, SAAFGTVY   | 51  | 469  |
| >EGFR-G721, SGAFGTVYK  | 342  | >EGFR-G721, SAAFGTVYK  | 149 | 193  |
| >EGFR-G721, GSGAFGTVYK | 46   | >EGFR-G721, GSAAFGTVYK | 31  | 15   |
| >EGFR-G721, GSGAFGTVYK | 29   | >EGFR-G721, GSAAFGTVYK | 12  | 17   |
| >EGFR-G721, GSGAFGTVY  | 827  | >EGFR-G721, GSAAFGTVY  | 254 | 573  |
| >EGFR-G721, GSGAFGTVYK | 711  | >EGFR-G721, GSAAFGTVYK | 336 | 375  |
| >EGFR-G721, GSGAFGTVY  | 432  | >EGFR-G721, GSAAFGTVY  | 117 | 315  |
| >EGFR-G721, GSGAFGTVYK | 224  | >EGFR-G721, GSAAFGTVYK | 17  | 207  |
| >EGFR-G721, GSGAFGTVY  | 78   | >EGFR-G721, GSAAFGTVY  | 60  | 18   |
| >EGFR-G721, GSGAFGTVY  | 1561 | >EGFR-G721, GSAAFGTVY  | 453 | 1108 |
| >EGFR-G721, GSGAFGTVY  | 349  | >EGFR-G721, GSAAFGTVY  | 68  | 281  |
| >EGFR-G721, GSGAFGTVY  | 62   | >EGFR-G721, GSAAFGTVY  | 11  | 51   |
| >EGFR-G721, GSGAFGTVY  | 11   | >EGFR-G721, GSAAFGTVY  | 5   | 6    |
| >EGFR-G721, GSGAFGTVYK | 337  | >EGFR-G721, GSAAFGTVYK | 134 | 203  |
| >EGFR-G721, LGSGAFGTVY | 559  | >EGFR-G721, LGSAAFGTVY | 326 | 233  |
| >EGFR-G721, LGSGAFGTVY | 125  | >EGFR-G721, LGSAAFGTVY | 150 | 25   |



|                       |     |                        |     |     |
|-----------------------|-----|------------------------|-----|-----|
| >EGFR-G721/LGSGAFGTVY | 478 | >EGFR-G721/LGSAAFGTVY  | 640 | 162 |
| >EGFR-G721/LGSGAFGTVY | 93  | >EGFR-G721/LGSAAFGTVY  | 79  | 14  |
| >EGFR-G721/LGSGAFGTVY | 94  | >EGFR-G721/LGSAAFGTVY  | 89  | 5   |
| >EGFR-G721/LGSGAFGTVY | 905 | >EGFR-G721/LGSAAFGTVY  | 237 | 668 |
| >EGFR-G721/VLGSAGFGTV | 73  | >EGFR-G721/VLGSAAFAGTV | 85  | 12  |
| >EGFR-G721/VLGSAGFGTV | 41  | >EGFR-G721/VLGSAAFAGTV | 52  | 11  |
| >EGFR-G721/VLGSAGFGTV | 21  | >EGFR-G721/VLGSAAFAGTV | 22  | 1   |
| >EGFR-G721/VLGSAGFGT  | 68  | >EGFR-G721/VLGSAAFAGT  | 128 | 60  |
| >EGFR-G721/VLGSAGFGTV | 3   | >EGFR-G721/VLGSAAFAGTV | 3   | 0   |
| >EGFR-G721/VLGSAGFGTV | 7   | >EGFR-G721/VLGSAAFAGTV | 7   | 0   |
| >EGFR-G721/VLGSAGFGT  | 103 | >EGFR-G721/VLGSAAFAGT  | 118 | 15  |
| >EGFR-G721/VLGSAGFGTV | 7   | >EGFR-G721/VLGSAAFAGTV | 8   | 1   |
| >EGFR-G721/VLGSAGFGT  | 75  | >EGFR-G721/VLGSAAFAGT  | 65  | 10  |
| >EGFR-G721/VLGSAGFGTV | 5   | >EGFR-G721/VLGSAAFAGTV | 5   | 0   |
| >EGFR-G721/VLGSAGFGT  | 14  | >EGFR-G721/VLGSAAFAGT  | 29  | 15  |
| >EGFR-G721/VLGSAGFGTV | 2   | >EGFR-G721/VLGSAAFAGTV | 2   | 0   |
| >EGFR-G721/VLGSAGFGTV | 64  | >EGFR-G721/VLGSAAFAGTV | 113 | 49  |
| >EGFR-G721/VLGSAGFGTV | 54  | >EGFR-G721/VLGSAAFAGTV | 74  | 20  |
| >EGFR-G721/VLGSAGFGTV | 26  | >EGFR-G721/VLGSAAFAGTV | 40  | 14  |
| >EGFR-G721/VLGSAGFGTV | 73  | >EGFR-G721/VLGSAAFAGTV | 70  | 3   |
| >EGFR-G721/VLGSAGFGTV | 87  | >EGFR-G721/VLGSAAFAGTV | 166 | 79  |
| >EGFR-G721/VLGSAGFGTV | 421 | >EGFR-G721/VLGSAAFAGTV | 318 | 103 |
| >EGFR-G721/VLGSAGFGTV | 227 | >EGFR-G721/VLGSAAFAGTV | 323 | 96  |
| >EGFR-G721/KVLGSAGFGT | 294 | >EGFR-G721/KVLGSAAFAGT | 210 | 84  |
| >EGFR-G721/KVLGSAGFGT | 123 | >EGFR-G721/KVLGSAAFAGT | 101 | 22  |
| >EGFR-G721/KVLGSAGF   | 553 | >EGFR-G721/KVLGSAAF    | 117 | 436 |
| >EGFR-G721/KVLGSAGFGT | 602 | >EGFR-G721/KVLGSAAFAGT | 342 | 260 |
| >EGFR-G721/KVLGSAGFGT | 9   | >EGFR-G721/KVLGSAAFAGT | 7   | 2   |
| >EGFR-G721/KVLGSAGFGT | 12  | >EGFR-G721/KVLGSAAFAGT | 14  | 2   |
| >EGFR-G721/KVLGSAGFGT | 78  | >EGFR-G721/KVLGSAAFAGT | 66  | 12  |
| >EGFR-G721/KVLGSAGFGT | 28  | >EGFR-G721/KVLGSAAFAGT | 30  | 2   |
| >EGFR-G721/KVLGSAGFGT | 176 | >EGFR-G721/KVLGSAAFAGT | 106 | 70  |
| >EGFR-G721/KVLGSAGFGT | 15  | >EGFR-G721/KVLGSAAFAGT | 17  | 2   |
| >EGFR-G721/KVLGSAGF   | 540 | >EGFR-G721/KVLGSAAF    | 333 | 207 |
| >EGFR-G721/KVLGSAGFG  | 103 | >EGFR-G721/KVLGSAAFAG  | 95  | 8   |
| >EGFR-G721/KVLGSAGFGT | 76  | >EGFR-G721/KVLGSAAFAGT | 63  | 13  |
| >EGFR-G721/KVLGSAGF   | 32  | >EGFR-G721/KVLGSAAF    | 10  | 22  |
| >EGFR-G721/KVLGSAGFGT | 807 | >EGFR-G721/KVLGSAAFAGT | 471 | 336 |
| >EGFR-G721/KVLGSAGFGT | 324 | >EGFR-G721/KVLGSAAFAGT | 137 | 187 |
| >EGFR-G721/KVLGSAGF   | 172 | >EGFR-G721/KVLGSAAF    | 167 | 5   |
| >EGFR-G721/KVLGSAGF   | 345 | >EGFR-G721/KVLGSAAF    | 680 | 335 |
| >EGFR-G721/KVLGSAGF   | 165 | >EGFR-G721/KVLGSAAF    | 55  | 110 |
| >EGFR-G721/KVLGSAGF   | 16  | >EGFR-G721/KVLGSAAF    | 7   | 9   |

|                         |       |                        |      |       |
|-------------------------|-------|------------------------|------|-------|
| >EGFR-G721/KVLGSGAF     | 763   | >EGFR-G721/KVLGSAAF    | 354  | 409   |
| >EGFR-G721/KVLGSGAF     | 476   | >EGFR-G721/KVLGSAAF    | 85   | 391   |
| >EGFR-G721/IKVLGSGA     | 1624  | >EGFR-G721/IKVLGSAA    | 234  | 1390  |
| >EGFR-G721/IKVLGSGAF    | 9     | >EGFR-G721/IKVLGSAAF   | 4    | 5     |
| >EGFR-G721/KIKVLGSG     | 13022 | >EGFR-G721/KIKVLGSA    | 278  | 12744 |
| >EGFR-G721/KIKVLGSGA    | 405   | >EGFR-G721/KIKVLGSAA   | 440  | 35    |
| >EGFR-G721/KIKVLGSG     | 289   | >EGFR-G721/KIKVLGSA    | 21   | 268   |
| >EGFR-G721/KIKVLGSGA    | 72    | >EGFR-G721/KIKVLGSAA   | 26   | 46    |
| >EGFR-G721/KIKVLGSGAF   | 903   | >EGFR-G721/KIKVLGSAAF  | 334  | 569   |
| >EGFR-G721/KIKVLGSGAF   | 50    | >EGFR-G721/KIKVLGSAAF  | 41   | 9     |
| >EGFR-G721/KIKVLGSGAF   | 1315  | >EGFR-G721/KIKVLGSAAF  | 238  | 1077  |
| >EGFR-G721/KIKVLGSGAF   | 63    | >EGFR-G721/KIKVLGSAAF  | 45   | 18    |
| >EGFR-G721/KIKVLGSGAF   | 245   | >EGFR-G721/KIKVLGSAAF  | 50   | 195   |
| >EGFR-G721/KIKVLGSGAF   | 523   | >EGFR-G721/KIKVLGSAAF  | 206  | 317   |
| >EGFR-G721/KKIKVLGSGA   | 700   | >EGFR-G721/KKIKVLGSAA  | 183  | 517   |
| >EGFR-G721/KKIKVLGSGAI  | 7     | >EGFR-G721/KKIKVLGSAAI | 4    | 3     |
| >EGFR-G721/FKKIKVLGSGA/ | 1311  | >EGFR-G721/FKKIKVLGSA/ | 228  | 1083  |
| >EGFR-G721/GAFGTVYKGL   | 372   | >EGFR-G721/DAFGTVYKGL  | 5562 | 5190  |
| >EGFR-G721/GAFGTVYK     | 122   | >EGFR-G721/DAFGTVYK    | 3611 | 3489  |
| >EGFR-G721/GAFGTVYK     | 9     | >EGFR-G721/DAFGTVYK    | 208  | 199   |
| >EGFR-G721/GAFGTVYK     | 98    | >EGFR-G721/DAFGTVYK    | 3099 | 3001  |
| >EGFR-G721/GAFGTVYK     | 222   | >EGFR-G721/DAFGTVYK    | 3139 | 2917  |
| >EGFR-G721/GAFGTVYK     | 7304  | >EGFR-G721/DAFGTVYK    | 76   | 7228  |
| >EGFR-G721/GAFGTVYK     | 23    | >EGFR-G721/DAFGTVYK    | 3    | 20    |
| >EGFR-G721/GAFGTVYKGL   | 11016 | >EGFR-G721/DAFGTVYKGL  | 481  | 10535 |
| >EGFR-G721/GAFGTVYKGL   | 158   | >EGFR-G721/DAFGTVYKGL  | 2512 | 2354  |
| >EGFR-G721/GAFGTVYKGL   | 38    | >EGFR-G721/DAFGTVYKGL  | 936  | 898   |
| >EGFR-G721/GAFGTVYKGL   | 456   | >EGFR-G721/DAFGTVYKGL  | 694  | 238   |
| >EGFR-G721/GAFGTVYKGL   | 46    | >EGFR-G721/DAFGTVYKGL  | 125  | 79    |
| >EGFR-G721/GAFGTVYKGL   | 34    | >EGFR-G721/DAFGTVYKGL  | 438  | 404   |
| >EGFR-G721/GAFGTVYKGL   | 279   | >EGFR-G721/DAFGTVYKGL  | 7323 | 7044  |
| >EGFR-G721/GAFGTVYKGL   | 603   | >EGFR-G721/DAFGTVYKGL  | 349  | 254   |
| >EGFR-G721/GAFGTVYKGL   | 33    | >EGFR-G721/DAFGTVYKGL  | 167  | 134   |
| >EGFR-G721/GAFGTVYK     | 150   | >EGFR-G721/DAFGTVYK    | 744  | 594   |
| >EGFR-G721/SGAFGTVYK    | 49    | >EGFR-G721/SDAFGTVYK   | 821  | 772   |
| >EGFR-G721/SGAFGTVY     | 87    | >EGFR-G721/SDAFGTVY    | 1210 | 1123  |
| >EGFR-G721/SGAFGTVYK    | 178   | >EGFR-G721/SDAFGTVYK   | 446  | 268   |
| >EGFR-G721/SGAFGTVY     | 188   | >EGFR-G721/SDAFGTVY    | 1652 | 1464  |
| >EGFR-G721/SGAFGTVY     | 460   | >EGFR-G721/SDAFGTVY    | 2284 | 1824  |
| >EGFR-G721/SGAFGTVYK    | 342   | >EGFR-G721/SDAFGTVYK   | 1327 | 985   |
| >EGFR-G721/GSGAFGTVY    | 1885  | >EGFR-G721/GSDAFGTVY   | 18   | 1867  |
| >EGFR-G721/GSGAFGTVYK   | 46    | >EGFR-G721/GSDAFGTVYK  | 61   | 15    |
| >EGFR-G721/GSGAFGTVYK   | 29    | >EGFR-G721/GSDAFGTVYK  | 22   | 7     |

|                       |     |                       |      |      |
|-----------------------|-----|-----------------------|------|------|
| >EGFR-G721IGSGAFGTVY  | 432 | >EGFR-G721IGSDAFGTVY  | 535  | 103  |
| >EGFR-G721IGSGAFGTVYk | 224 | >EGFR-G721IGSDAFGTVYk | 238  | 14   |
| >EGFR-G721IGSGAFGTVY  | 78  | >EGFR-G721IGSDAFGTVY  | 756  | 678  |
| >EGFR-G721IGSGAFGTVY  | 349 | >EGFR-G721IGSDAFGTVY  | 1517 | 1168 |
| >EGFR-G721IGSGAFGTVY  | 62  | >EGFR-G721IGSDAFGTVY  | 33   | 29   |
| >EGFR-G721IGSGAFGTVY  | 11  | >EGFR-G721IGSDAFGTVY  | 9    | 2    |
| >EGFR-G721IGSGAFGTVYk | 337 | >EGFR-G721IGSDAFGTVYk | 350  | 13   |
| >EGFR-G721ILGSGAFGTV  | 860 | >EGFR-G721ILGSDAFGTV  | 330  | 530  |
| >EGFR-G721ILGSGAFGTVY | 559 | >EGFR-G721ILGSDAFGTVY | 452  | 107  |
| >EGFR-G721ILGSGAFGTVY | 125 | >EGFR-G721ILGSDAFGTVY | 179  | 54   |
| >EGFR-G721ILGSGAFGTVY | 478 | >EGFR-G721ILGSDAFGTVY | 772  | 294  |
| >EGFR-G721ILGSGAFGTVY | 93  | >EGFR-G721ILGSDAFGTVY | 79   | 14   |
| >EGFR-G721ILGSGAFGTVY | 94  | >EGFR-G721ILGSDAFGTVY | 86   | 8    |
| >EGFR-G721ILGSGAFGTVY | 905 | >EGFR-G721ILGSDAFGTVY | 433  | 472  |
| >EGFR-G721VLGSGAFGTV  | 73  | >EGFR-G721VLGSDAFGTV  | 71   | 2    |
| >EGFR-G721VLGSGAFGTV  | 41  | >EGFR-G721VLGSDAFGTV  | 47   | 6    |
| >EGFR-G721VLGSGAFGTV  | 21  | >EGFR-G721VLGSDAFGTV  | 22   | 1    |
| >EGFR-G721VLGSGAFGTV  | 779 | >EGFR-G721VLGSDAFGTV  | 424  | 355  |
| >EGFR-G721VLGSGAFGT   | 68  | >EGFR-G721VLGSDAFGT   | 127  | 59   |
| >EGFR-G721VLGSGAFGTV  | 3   | >EGFR-G721VLGSDAFGTV  | 3    | 0    |
| >EGFR-G721VLGSGAFGT   | 505 | >EGFR-G721VLGSDAFGT   | 344  | 161  |
| >EGFR-G721VLGSGAFGTV  | 7   | >EGFR-G721VLGSDAFGTV  | 6    | 1    |
| >EGFR-G721VLGSGAFGT   | 103 | >EGFR-G721VLGSDAFGT   | 208  | 105  |
| >EGFR-G721VLGSGAFGTV  | 7   | >EGFR-G721VLGSDAFGTV  | 8    | 1    |
| >EGFR-G721VLGSGAFGT   | 75  | >EGFR-G721VLGSDAFGT   | 85   | 10   |
| >EGFR-G721VLGSGAFGTV  | 5   | >EGFR-G721VLGSDAFGTV  | 5    | 0    |
| >EGFR-G721VLGSGAFGT   | 14  | >EGFR-G721VLGSDAFGT   | 29   | 15   |
| >EGFR-G721VLGSGAFGTV  | 2   | >EGFR-G721VLGSDAFGTV  | 2    | 0    |
| >EGFR-G721VLGSGAFGTV  | 64  | >EGFR-G721VLGSDAFGTV  | 109  | 45   |
| >EGFR-G721VLGSGAFGTV  | 54  | >EGFR-G721VLGSDAFGTV  | 66   | 12   |
| >EGFR-G721VLGSGAFGTV  | 26  | >EGFR-G721VLGSDAFGTV  | 38   | 12   |
| >EGFR-G721VLGSGAFGTV  | 73  | >EGFR-G721VLGSDAFGTV  | 101  | 28   |
| >EGFR-G721VLGSGAFGTV  | 87  | >EGFR-G721VLGSDAFGTV  | 243  | 156  |
| >EGFR-G721VLGSGAFGTV  | 421 | >EGFR-G721VLGSDAFGTV  | 420  | 1    |
| >EGFR-G721VLGSGAFGTV  | 227 | >EGFR-G721VLGSDAFGTV  | 461  | 234  |
| >EGFR-G721KVLGSGAFGT  | 294 | >EGFR-G721KVLGSDAFGT  | 196  | 98   |
| >EGFR-G721KVLGSGAFGT  | 123 | >EGFR-G721KVLGSDAFGT  | 196  | 73   |
| >EGFR-G721KVLGSGAF    | 553 | >EGFR-G721KVLGSDAF    | 236  | 317  |
| >EGFR-G721KVLGSGAFGT  | 602 | >EGFR-G721KVLGSDAFGT  | 485  | 117  |
| >EGFR-G721KVLGSGAFGT  | 9   | >EGFR-G721KVLGSDAFGT  | 10   | 1    |
| >EGFR-G721KVLGSGAFGT  | 12  | >EGFR-G721KVLGSDAFGT  | 19   | 7    |
| >EGFR-G721KVLGSGAFGT  | 78  | >EGFR-G721KVLGSDAFGT  | 56   | 22   |
| >EGFR-G721KVLGSGAFGT  | 28  | >EGFR-G721KVLGSDAFGT  | 25   | 3    |

|                       |       |                       |      |       |
|-----------------------|-------|-----------------------|------|-------|
| >EGFR-G721IKVLGSGAFGT | 176   | >EGFR-G721IKVLGSDAFGT | 173  | 3     |
| >EGFR-G721IKVLGSGAFGT | 15    | >EGFR-G721IKVLGSDAFGT | 16   | 1     |
| >EGFR-G721IKVLGSGAF   | 540   | >EGFR-G721IKVLGSDAF   | 493  | 47    |
| >EGFR-G721IKVLGSGAFG  | 103   | >EGFR-G721IKVLGSDAFG  | 317  | 214   |
| >EGFR-G721IKVLGSGAFGT | 76    | >EGFR-G721IKVLGSDAFGT | 124  | 48    |
| >EGFR-G721IKVLGSGAF   | 32    | >EGFR-G721IKVLGSDAF   | 14   | 18    |
| >EGFR-G721IKVLGSGAFGT | 324   | >EGFR-G721IKVLGSDAFGT | 531  | 207   |
| >EGFR-G721IKVLGSGAF   | 172   | >EGFR-G721IKVLGSDAF   | 382  | 210   |
| >EGFR-G721IKVLGSGAF   | 345   | >EGFR-G721IKVLGSDAF   | 846  | 501   |
| >EGFR-G721IKVLGSGAF   | 165   | >EGFR-G721IKVLGSDAF   | 250  | 85    |
| >EGFR-G721IKVLGSGAF   | 16    | >EGFR-G721IKVLGSDAF   | 33   | 17    |
| >EGFR-G721IKVLGSGAF   | 763   | >EGFR-G721IKVLGSDAF   | 241  | 522   |
| >EGFR-G721IKVLGSGAF   | 476   | >EGFR-G721IKVLGSDAF   | 169  | 307   |
| >EGFR-G721IKVLGSGAF   | 9     | >EGFR-G721IKVLGSDAF   | 6    | 3     |
| >EGFR-G721IKIKVLGSGA  | 405   | >EGFR-G721IKIKVLGSDA  | 2333 | 1928  |
| >EGFR-G721IKIKVLGSG   | 289   | >EGFR-G721IKIKVLGSD   | 1485 | 1196  |
| >EGFR-G721IKIKVLGSGA  | 72    | >EGFR-G721IKIKVLGSDA  | 180  | 108   |
| >EGFR-G721IKIKVLGSGAF | 50    | >EGFR-G721IKIKVLGSDAF | 86   | 36    |
| >EGFR-G721IKIKVLGSGAF | 1315  | >EGFR-G721IKIKVLGSDAF | 334  | 981   |
| >EGFR-G721IKIKVLGSGAF | 63    | >EGFR-G721IKIKVLGSDAF | 102  | 39    |
| >EGFR-G721IKIKVLGSGAF | 245   | >EGFR-G721IKIKVLGSDAF | 169  | 76    |
| >EGFR-G721IKIKVLGSGAI | 7     | >EGFR-G721IKIKVLGSDAI | 6    | 1     |
| >EGFR-G721!GAFGTVYKGL | 922   | >EGFR-G721!SAFGTVYKGL | 365  | 557   |
| >EGFR-G721!GAFGTVYKGL | 372   | >EGFR-G721!SAFGTVYKGL | 172  | 200   |
| >EGFR-G721!GAFGTVYK   | 122   | >EGFR-G721!SAFGTVYK   | 98   | 24    |
| >EGFR-G721!GAFGTVYK   | 9     | >EGFR-G721!SAFGTVYK   | 7    | 2     |
| >EGFR-G721!GAFGTVYK   | 98    | >EGFR-G721!SAFGTVYK   | 21   | 77    |
| >EGFR-G721!GAFGTVYK   | 222   | >EGFR-G721!SAFGTVYK   | 92   | 130   |
| >EGFR-G721!GAFGTVYK   | 23    | >EGFR-G721!SAFGTVYK   | 6    | 17    |
| >EGFR-G721!GAFGTVYKGL | 158   | >EGFR-G721!SAFGTVYKGL | 79   | 79    |
| >EGFR-G721!GAFGTVYKGL | 38    | >EGFR-G721!SAFGTVYKGL | 31   | 7     |
| >EGFR-G721!GAFGTVYKGL | 456   | >EGFR-G721!SAFGTVYKGL | 359  | 97    |
| >EGFR-G721!GAFGTVYKGL | 46    | >EGFR-G721!SAFGTVYKGL | 43   | 3     |
| >EGFR-G721!GAFGTVYKGL | 34    | >EGFR-G721!SAFGTVYKGL | 26   | 8     |
| >EGFR-G721!GAFGTVYKGL | 279   | >EGFR-G721!SAFGTVYKGL | 292  | 13    |
| >EGFR-G721!GAFGTVYKGL | 603   | >EGFR-G721!SAFGTVYKGL | 370  | 233   |
| >EGFR-G721!GAFGTVYKGL | 33    | >EGFR-G721!SAFGTVYKGL | 52   | 19    |
| >EGFR-G721!GAFGTVYK   | 150   | >EGFR-G721!SAFGTVYK   | 109  | 41    |
| >EGFR-G721!GAFGTVYK   | 1799  | >EGFR-G721!SAFGTVYK   | 315  | 1484  |
| >EGFR-G721!SGAFGTVY   | 14529 | >EGFR-G721!SSAFGTVY   | 200  | 14329 |
| >EGFR-G721!SGAFGTVYK  | 527   | >EGFR-G721!SSAFGTVYK  | 50   | 477   |
| >EGFR-G721!SGAFGTVYK  | 49    | >EGFR-G721!SSAFGTVYK  | 7    | 42    |
| >EGFR-G721!SGAFGTVY   | 18126 | >EGFR-G721!SSAFGTVY   | 352  | 17774 |

|                       |       |                       |     |       |
|-----------------------|-------|-----------------------|-----|-------|
| >EGFR-G721!SGAFGTVY   | 580   | >EGFR-G721!SSAFGTVY   | 92  | 488   |
| >EGFR-G721!SGAFGTVYK  | 798   | >EGFR-G721!SSAFGTVYK  | 33  | 765   |
| >EGFR-G721!SGAFGTVY   | 87    | >EGFR-G721!SSAFGTVY   | 29  | 58    |
| >EGFR-G721!SGAFGTVYK  | 3142  | >EGFR-G721!SSAFGTVYK  | 150 | 2992  |
| >EGFR-G721!SGAFGTVYK  | 178   | >EGFR-G721!SSAFGTVYK  | 9   | 169   |
| >EGFR-G721!SGAFGTVYK  | 1872  | >EGFR-G721!SSAFGTVYK  | 135 | 1737  |
| >EGFR-G721!SGAFGTVY   | 1768  | >EGFR-G721!SSAFGTVY   | 490 | 1278  |
| >EGFR-G721!SGAFGTVY   | 188   | >EGFR-G721!SSAFGTVY   | 64  | 124   |
| >EGFR-G721!SGAFGTVY   | 460   | >EGFR-G721!SSAFGTVY   | 875 | 415   |
| >EGFR-G721!SGAFGTVY   | 2717  | >EGFR-G721!SSAFGTVY   | 257 | 2460  |
| >EGFR-G721!SGAFGTVY   | 2532  | >EGFR-G721!SSAFGTVY   | 10  | 2522  |
| >EGFR-G721!SGAFGTVYK  | 10082 | >EGFR-G721!SSAFGTVYK  | 70  | 10012 |
| >EGFR-G721!SGAFGTVY   | 520   | >EGFR-G721!SSAFGTVY   | 481 | 39    |
| >EGFR-G721!SGAFGTVY   | 2918  | >EGFR-G721!SSAFGTVY   | 50  | 2868  |
| >EGFR-G721!SGAFGTVYK  | 342   | >EGFR-G721!SSAFGTVYK  | 82  | 260   |
| >EGFR-G721!SGAFGTVYK  | 3807  | >EGFR-G721!SSAFGTVYK  | 275 | 3532  |
| >EGFR-G721!GSGAFGTVY  | 1885  | >EGFR-G721!GSSAFGTVY  | 347 | 1538  |
| >EGFR-G721!GSGAFGTVYK | 46    | >EGFR-G721!GSSAFGTVYK | 25  | 21    |
| >EGFR-G721!GSGAFGTVYK | 29    | >EGFR-G721!GSSAFGTVYK | 8   | 21    |
| >EGFR-G721!GSGAFGTVY  | 827   | >EGFR-G721!GSSAFGTVY  | 392 | 435   |
| >EGFR-G721!GSGAFGTVYK | 711   | >EGFR-G721!GSSAFGTVYK | 140 | 571   |
| >EGFR-G721!GSGAFGTVY  | 432   | >EGFR-G721!GSSAFGTVY  | 112 | 320   |
| >EGFR-G721!GSGAFGTVYK | 224   | >EGFR-G721!GSSAFGTVYK | 28  | 196   |
| >EGFR-G721!GSGAFGTVY  | 78    | >EGFR-G721!GSSAFGTVY  | 71  | 7     |
| >EGFR-G721!GSGAFGTVY  | 349   | >EGFR-G721!GSSAFGTVY  | 70  | 279   |
| >EGFR-G721!GSGAFGTVY  | 62    | >EGFR-G721!GSSAFGTVY  | 11  | 51    |
| >EGFR-G721!GSGAFGTVY  | 11    | >EGFR-G721!GSSAFGTVY  | 4   | 7     |
| >EGFR-G721!GSGAFGTVYK | 337   | >EGFR-G721!GSSAFGTVYK | 156 | 181   |
| >EGFR-G721!LGSGAFGTVY | 559   | >EGFR-G721!LGSSAFGTVY | 402 | 157   |
| >EGFR-G721!LGSGAFGTVY | 125   | >EGFR-G721!LGSSAFGTVY | 138 | 13    |
| >EGFR-G721!LGSGAFGTVY | 478   | >EGFR-G721!LGSSAFGTVY | 724 | 246   |
| >EGFR-G721!LGSGAFGTVY | 93    | >EGFR-G721!LGSSAFGTVY | 74  | 19    |
| >EGFR-G721!LGSGAFGTVY | 1516  | >EGFR-G721!LGSSAFGTVY | 322 | 1194  |
| >EGFR-G721!LGSGAFGTVY | 94    | >EGFR-G721!LGSSAFGTVY | 78  | 16    |
| >EGFR-G721!LGSGAFGTVY | 905   | >EGFR-G721!LGSSAFGTVY | 279 | 626   |
| >EGFR-G721!VLGSGAFGTV | 73    | >EGFR-G721!VLGSSAFGTV | 92  | 19    |
| >EGFR-G721!VLGSGAFGTV | 41    | >EGFR-G721!VLGSSAFGTV | 51  | 10    |
| >EGFR-G721!VLGSGAFGTV | 21    | >EGFR-G721!VLGSSAFGTV | 19  | 2     |
| >EGFR-G721!VLGSGAFGT  | 68    | >EGFR-G721!VLGSSAFGT  | 114 | 46    |
| >EGFR-G721!VLGSGAFGTV | 3     | >EGFR-G721!VLGSSAFGTV | 3   | 0     |
| >EGFR-G721!VLGSGAFGTV | 7     | >EGFR-G721!VLGSSAFGTV | 7   | 0     |
| >EGFR-G721!VLGSGAFGT  | 103   | >EGFR-G721!VLGSSAFGT  | 209 | 106   |
| >EGFR-G721!VLGSGAFGTV | 7     | >EGFR-G721!VLGSSAFGTV | 8   | 1     |

|                       |      |                       |     |      |
|-----------------------|------|-----------------------|-----|------|
| >EGFR-G721!VLGSGAFGT  | 75   | >EGFR-G721!VLGSSAFGT  | 114 | 39   |
| >EGFR-G721!VLGSGAFGTV | 5    | >EGFR-G721!VLGSSAFGTV | 6   | 1    |
| >EGFR-G721!VLGSGAFGT  | 14   | >EGFR-G721!VLGSSAFGT  | 23  | 9    |
| >EGFR-G721!VLGSGAFGTV | 2    | >EGFR-G721!VLGSSAFGTV | 2   | 0    |
| >EGFR-G721!VLGSGAFGTV | 64   | >EGFR-G721!VLGSSAFGTV | 133 | 69   |
| >EGFR-G721!VLGSGAFGTV | 54   | >EGFR-G721!VLGSSAFGTV | 78  | 24   |
| >EGFR-G721!VLGSGAFGTV | 26   | >EGFR-G721!VLGSSAFGTV | 36  | 10   |
| >EGFR-G721!VLGSGAFGTV | 73   | >EGFR-G721!VLGSSAFGTV | 64  | 9    |
| >EGFR-G721!VLGSGAFGTV | 87   | >EGFR-G721!VLGSSAFGTV | 111 | 24   |
| >EGFR-G721!VLGSGAFGTV | 421  | >EGFR-G721!VLGSSAFGTV | 135 | 286  |
| >EGFR-G721!VLGSGAFGTV | 227  | >EGFR-G721!VLGSSAFGTV | 268 | 41   |
| >EGFR-G721!KVLGSGAFGT | 294  | >EGFR-G721!KVLGSSAFGT | 149 | 145  |
| >EGFR-G721!KVLGSGAFGT | 668  | >EGFR-G721!KVLGSSAFGT | 354 | 314  |
| >EGFR-G721!KVLGSGAFGT | 123  | >EGFR-G721!KVLGSSAFGT | 78  | 45   |
| >EGFR-G721!KVLGSGAF   | 553  | >EGFR-G721!KVLGSSAF   | 168 | 385  |
| >EGFR-G721!KVLGSGAFGT | 602  | >EGFR-G721!KVLGSSAFGT | 406 | 196  |
| >EGFR-G721!KVLGSGAFGT | 9    | >EGFR-G721!KVLGSSAFGT | 7   | 2    |
| >EGFR-G721!KVLGSGAFGT | 12   | >EGFR-G721!KVLGSSAFGT | 13  | 1    |
| >EGFR-G721!KVLGSGAFGT | 78   | >EGFR-G721!KVLGSSAFGT | 48  | 30   |
| >EGFR-G721!KVLGSGAFGT | 28   | >EGFR-G721!KVLGSSAFGT | 26  | 2    |
| >EGFR-G721!KVLGSGAFGT | 176  | >EGFR-G721!KVLGSSAFGT | 79  | 97   |
| >EGFR-G721!KVLGSGAFGT | 15   | >EGFR-G721!KVLGSSAFGT | 15  | 0    |
| >EGFR-G721!KVLGSGAF   | 540  | >EGFR-G721!KVLGSSAF   | 475 | 65   |
| >EGFR-G721!KVLGSGAFG  | 103  | >EGFR-G721!KVLGSSAFG  | 25  | 78   |
| >EGFR-G721!KVLGSGAFGT | 76   | >EGFR-G721!KVLGSSAFGT | 39  | 37   |
| >EGFR-G721!KVLGSGAF   | 32   | >EGFR-G721!KVLGSSAF   | 12  | 20   |
| >EGFR-G721!KVLGSGAFGT | 807  | >EGFR-G721!KVLGSSAFGT | 428 | 379  |
| >EGFR-G721!KVLGSGAFGT | 324  | >EGFR-G721!KVLGSSAFGT | 139 | 185  |
| >EGFR-G721!KVLGSGAF   | 172  | >EGFR-G721!KVLGSSAF   | 92  | 80   |
| >EGFR-G721!KVLGSGAF   | 345  | >EGFR-G721!KVLGSSAF   | 288 | 57   |
| >EGFR-G721!KVLGSGAF   | 165  | >EGFR-G721!KVLGSSAF   | 28  | 137  |
| >EGFR-G721!KVLGSGAF   | 16   | >EGFR-G721!KVLGSSAF   | 8   | 8    |
| >EGFR-G721!KVLGSGAF   | 763  | >EGFR-G721!KVLGSSAF   | 286 | 477  |
| >EGFR-G721!KVLGSGAF   | 476  | >EGFR-G721!KVLGSSAF   | 145 | 331  |
| >EGFR-G721!IKVLGSGA   | 1624 | >EGFR-G721!IKVLGSSA   | 228 | 1396 |
| >EGFR-G721!IKVLGSGAF  | 9    | >EGFR-G721!IKVLGSSAF  | 3   | 6    |
| >EGFR-G721!IKVLGSGAF  | 3670 | >EGFR-G721!IKVLGSSAF  | 279 | 3391 |
| >EGFR-G721!KIKVLGSGA  | 405  | >EGFR-G721!KIKVLGSSA  | 344 | 61   |
| >EGFR-G721!KIKVLGSG   | 289  | >EGFR-G721!KIKVLGSS   | 273 | 16   |
| >EGFR-G721!KIKVLGSGA  | 72   | >EGFR-G721!KIKVLGSSA  | 19  | 53   |
| >EGFR-G721!KIKVLGSGAF | 50   | >EGFR-G721!KIKVLGSSAF | 26  | 24   |
| >EGFR-G721!KIKVLGSGAF | 1315 | >EGFR-G721!KIKVLGSSAF | 430 | 885  |
| >EGFR-G721!KIKVLGSGAF | 63   | >EGFR-G721!KIKVLGSSAF | 44  | 19   |

|                        |       |                        |     |       |
|------------------------|-------|------------------------|-----|-------|
| >EGFR-G721!KIKVLGSGAF  | 672   | >EGFR-G721!KIKVLGSSAF  | 446 | 226   |
| >EGFR-G721!KIKVLGSGAF  | 245   | >EGFR-G721!KIKVLGSSAF  | 30  | 215   |
| >EGFR-G721!KIKVLGSGAF  | 523   | >EGFR-G721!KIKVLGSSAF  | 235 | 288   |
| >EGFR-G721!KKIKVLGSGA  | 700   | >EGFR-G721!KKIKVLGSSA  | 203 | 497   |
| >EGFR-G721!KKIKVLGSGAI | 7     | >EGFR-G721!KKIKVLGSSAF | 4   | 3     |
| >EGFR-G721!FKKIKVLGSGA | 1311  | >EGFR-G721!FKKIKVLGSSA | 263 | 1048  |
| >EGFR-G724!GTVYKGLW    | 14    | >EGFR-G724!STVYKGLW    | 11  | 3     |
| >EGFR-G724!GTVYKGLWI   | 24    | >EGFR-G724!STVYKGLWI   | 15  | 9     |
| >EGFR-G724!GTVYKGLW    | 199   | >EGFR-G724!STVYKGLW    | 163 | 36    |
| >EGFR-G724!GTVYKGLW    | 230   | >EGFR-G724!STVYKGLW    | 123 | 107   |
| >EGFR-G724!GTVYKGLWI   | 118   | >EGFR-G724!STVYKGLWI   | 114 | 4     |
| >EGFR-G724!GTVYKGLWI   | 166   | >EGFR-G724!STVYKGLWI   | 57  | 109   |
| >EGFR-G724!FGTVYKGL    | 354   | >EGFR-G724!FSTVYKGL    | 86  | 268   |
| >EGFR-G724!FGTVYKGL    | 13291 | >EGFR-G724!FSTVYKGL    | 101 | 13190 |
| >EGFR-G724!FGTVYKGLW   | 3874  | >EGFR-G724!FSTVYKGLW   | 21  | 3853  |
| >EGFR-G724!FGTVYKGLWI  | 13619 | >EGFR-G724!FSTVYKGLWI  | 189 | 13430 |
| >EGFR-G724!FGTVYKGLW   | 5872  | >EGFR-G724!FSTVYKGLW   | 245 | 5627  |
| >EGFR-G724!FGTVYKGLW   | 393   | >EGFR-G724!FSTVYKGLW   | 17  | 376   |
| >EGFR-G724!FGTVYKGLWI  | 6991  | >EGFR-G724!FSTVYKGLWI  | 361 | 6630  |
| >EGFR-G724!FGTVYKGL    | 14595 | >EGFR-G724!FSTVYKGL    | 417 | 14178 |
| >EGFR-G724!FGTVYKGLW   | 3440  | >EGFR-G724!FSTVYKGLW   | 258 | 3182  |
| >EGFR-G724!FGTVYKGLWI  | 2897  | >EGFR-G724!FSTVYKGLWI  | 218 | 2679  |
| >EGFR-G724!FGTVYKGLW   | 29    | >EGFR-G724!FSTVYKGLW   | 16  | 13    |
| >EGFR-G724!FGTVYKGLWI  | 7142  | >EGFR-G724!FSTVYKGLWI  | 61  | 7081  |
| >EGFR-G724!KIKVLGSGAF  | 50    | >EGFR-G724!KIKVLGSSAF  | 48  | 2     |
| >EGFR-G724!AFGTVYKGL   | 152   | >EGFR-G724!AFSTVYKGL   | 190 | 38    |
| >EGFR-G724!AFGTVYKGLV  | 249   | >EGFR-G724!AFSTVYKGLM  | 277 | 28    |
| >EGFR-G724!GAFGTVYKGL  | 372   | >EGFR-G724!GAFSTVYKGL  | 665 | 293   |
| >EGFR-G724!GAFGTVYK    | 122   | >EGFR-G724!GAFSTVYK    | 93  | 29    |
| >EGFR-G724!GAFGTVYK    | 9     | >EGFR-G724!GAFSTVYK    | 8   | 1     |
| >EGFR-G724!GAFGTVYK    | 98    | >EGFR-G724!GAFSTVYK    | 64  | 34    |
| >EGFR-G724!GAFGTVYK    | 222   | >EGFR-G724!GAFSTVYK    | 78  | 144   |
| >EGFR-G724!GAFGTVYK    | 23    | >EGFR-G724!GAFSTVYK    | 14  | 9     |
| >EGFR-G724!GAFGTVYKGL  | 158   | >EGFR-G724!GAFSTVYKGL  | 228 | 70    |
| >EGFR-G724!GAFGTVYKGL  | 38    | >EGFR-G724!GAFSTVYKGL  | 33  | 5     |
| >EGFR-G724!GAFGTVYKGL  | 456   | >EGFR-G724!GAFSTVYKGL  | 399 | 57    |
| >EGFR-G724!GAFGTVYKGL  | 46    | >EGFR-G724!GAFSTVYKGL  | 65  | 19    |
| >EGFR-G724!GAFGTVYKGL  | 34    | >EGFR-G724!GAFSTVYKGL  | 35  | 1     |
| >EGFR-G724!GAFGTVYKGL  | 279   | >EGFR-G724!GAFSTVYKGL  | 122 | 157   |
| >EGFR-G724!GAFGTVYKGL  | 603   | >EGFR-G724!GAFSTVYKGL  | 391 | 212   |
| >EGFR-G724!GAFGTVYKGL  | 33    | >EGFR-G724!GAFSTVYKGL  | 61  | 28    |
| >EGFR-G724!GAFGTVYK    | 150   | >EGFR-G724!GAFSTVYK    | 97  | 53    |
| >EGFR-G724!SGAFGTVYK   | 527   | >EGFR-G724!SGAFSTVYK   | 276 | 251   |

|                       |      |                       |     |      |
|-----------------------|------|-----------------------|-----|------|
| >EGFR-G724!SGAFGTVYK  | 49   | >EGFR-G724!SGAFSTVYK  | 21  | 28   |
| >EGFR-G724!SGAFGTVYK  | 798  | >EGFR-G724!SGAFSTVYK  | 298 | 500  |
| >EGFR-G724!SGAFGTVY   | 87   | >EGFR-G724!SGAFSTVY   | 119 | 32   |
| >EGFR-G724!SGAFGTVYK  | 178  | >EGFR-G724!SGAFSTVYK  | 59  | 119  |
| >EGFR-G724!SGAFGTVY   | 188  | >EGFR-G724!SGAFSTVY   | 138 | 50   |
| >EGFR-G724!SGAFGTVY   | 460  | >EGFR-G724!SGAFSTVY   | 768 | 308  |
| >EGFR-G724!SGAFGTVY   | 520  | >EGFR-G724!SGAFSTVY   | 337 | 183  |
| >EGFR-G724!SGAFGTVY   | 1957 | >EGFR-G724!SGAFSTVY   | 423 | 1534 |
| >EGFR-G724!SGAFGTVYK  | 342  | >EGFR-G724!SGAFSTVYK  | 218 | 124  |
| >EGFR-G724!GSGAFGTVYK | 46   | >EGFR-G724!GSGAFSTVYK | 36  | 10   |
| >EGFR-G724!GSGAFGTVYK | 29   | >EGFR-G724!GSGAFSTVYK | 16  | 13   |
| >EGFR-G724!GSGAFGTVYK | 711  | >EGFR-G724!GSGAFSTVYK | 294 | 417  |
| >EGFR-G724!GSGAFGTVY  | 432  | >EGFR-G724!GSGAFSTVY  | 306 | 126  |
| >EGFR-G724!GSGAFGTVYK | 224  | >EGFR-G724!GSGAFSTVYK | 77  | 147  |
| >EGFR-G724!GSGAFGTVY  | 78   | >EGFR-G724!GSGAFSTVY  | 56  | 22   |
| >EGFR-G724!GSGAFGTVY  | 349  | >EGFR-G724!GSGAFSTVY  | 382 | 33   |
| >EGFR-G724!GSGAFGTVY  | 62   | >EGFR-G724!GSGAFSTVY  | 32  | 30   |
| >EGFR-G724!GSGAFGTVY  | 11   | >EGFR-G724!GSGAFSTVY  | 12  | 1    |
| >EGFR-G724!GSGAFGTVYK | 337  | >EGFR-G724!GSGAFSTVYK | 233 | 104  |
| >EGFR-G724!LGSGAFGTV  | 860  | >EGFR-G724!LGSGAFSTV  | 231 | 629  |
| >EGFR-G724!LGSGAFGTV  | 2612 | >EGFR-G724!LGSGAFSTV  | 294 | 2318 |
| >EGFR-G724!LGSGAFGTVY | 559  | >EGFR-G724!LGSGAFSTVY | 278 | 281  |
| >EGFR-G724!LGSGAFGTVY | 125  | >EGFR-G724!LGSGAFSTVY | 109 | 16   |
| >EGFR-G724!LGSGAFGTVY | 478  | >EGFR-G724!LGSGAFSTVY | 543 | 65   |
| >EGFR-G724!LGSGAFGTVY | 93   | >EGFR-G724!LGSGAFSTVY | 72  | 21   |
| >EGFR-G724!LGSGAFGTV  | 2426 | >EGFR-G724!LGSGAFSTV  | 198 | 2228 |
| >EGFR-G724!LGSGAFGTVY | 94   | >EGFR-G724!LGSGAFSTVY | 47  | 47   |
| >EGFR-G724!LGSGAFGTVY | 905  | >EGFR-G724!LGSGAFSTVY | 413 | 492  |
| >EGFR-G724!VLGSGAFGTV | 73   | >EGFR-G724!VLGSGAFSTV | 41  | 32   |
| >EGFR-G724!VLGSGAFGTV | 41   | >EGFR-G724!VLGSGAFSTV | 19  | 22   |
| >EGFR-G724!VLGSGAFGTV | 21   | >EGFR-G724!VLGSGAFSTV | 16  | 5    |
| >EGFR-G724!VLGSGAFGTV | 779  | >EGFR-G724!VLGSGAFSTV | 336 | 443  |
| >EGFR-G724!VLGSGAFGT  | 68   | >EGFR-G724!VLGSGAFST  | 91  | 23   |
| >EGFR-G724!VLGSGAFGTV | 3    | >EGFR-G724!VLGSGAFSTV | 2   | 1    |
| >EGFR-G724!VLGSGAFGTV | 7    | >EGFR-G724!VLGSGAFSTV | 4   | 3    |
| >EGFR-G724!VLGSGAFGT  | 103  | >EGFR-G724!VLGSGAFST  | 142 | 39   |
| >EGFR-G724!VLGSGAFGTV | 7    | >EGFR-G724!VLGSGAFSTV | 5   | 2    |
| >EGFR-G724!VLGSGAFGT  | 75   | >EGFR-G724!VLGSGAFST  | 109 | 34   |
| >EGFR-G724!VLGSGAFGTV | 5    | >EGFR-G724!VLGSGAFSTV | 2   | 3    |
| >EGFR-G724!VLGSGAFGT  | 14   | >EGFR-G724!VLGSGAFST  | 12  | 2    |
| >EGFR-G724!VLGSGAFGTV | 2    | >EGFR-G724!VLGSGAFSTV | 2   | 0    |
| >EGFR-G724!VLGSGAFGTV | 64   | >EGFR-G724!VLGSGAFSTV | 64  | 0    |
| >EGFR-G724!VLGSGAFGTV | 54   | >EGFR-G724!VLGSGAFSTV | 42  | 12   |



|                       |       |                       |      |       |
|-----------------------|-------|-----------------------|------|-------|
| >EGFR-G724!VLGSGAFGTV | 26    | >EGFR-G724!VLGSGAFSTV | 21   | 5     |
| >EGFR-G724!VLGSGAFGTV | 73    | >EGFR-G724!VLGSGAFSTV | 54   | 19    |
| >EGFR-G724!VLGSGAFGTV | 87    | >EGFR-G724!VLGSGAFSTV | 102  | 15    |
| >EGFR-G724!VLGSGAFGTV | 421   | >EGFR-G724!VLGSGAFSTV | 363  | 58    |
| >EGFR-G724!VLGSGAFGTV | 227   | >EGFR-G724!VLGSGAFSTV | 202  | 25    |
| >EGFR-G724!KVLGSGAFGT | 294   | >EGFR-G724!KVLGSGAFST | 113  | 181   |
| >EGFR-G724!KVLGSGAFGT | 668   | >EGFR-G724!KVLGSGAFST | 312  | 356   |
| >EGFR-G724!KVLGSGAFGT | 123   | >EGFR-G724!KVLGSGAFST | 59   | 64    |
| >EGFR-G724!KVLGSGAFGT | 9     | >EGFR-G724!KVLGSGAFST | 6    | 3     |
| >EGFR-G724!KVLGSGAFGT | 12    | >EGFR-G724!KVLGSGAFST | 8    | 4     |
| >EGFR-G724!KVLGSGAFGT | 78    | >EGFR-G724!KVLGSGAFST | 23   | 55    |
| >EGFR-G724!KVLGSGAFGT | 28    | >EGFR-G724!KVLGSGAFST | 16   | 12    |
| >EGFR-G724!KVLGSGAFGT | 176   | >EGFR-G724!KVLGSGAFST | 37   | 139   |
| >EGFR-G724!KVLGSGAFGT | 15    | >EGFR-G724!KVLGSGAFST | 6    | 9     |
| >EGFR-G724!KVLGSGAFG  | 103   | >EGFR-G724!KVLGSGAFS  | 98   | 5     |
| >EGFR-G724!KVLGSGAFGT | 76    | >EGFR-G724!KVLGSGAFST | 60   | 16    |
| >EGFR-G724!KVLGSGAFGT | 807   | >EGFR-G724!KVLGSGAFST | 385  | 422   |
| >EGFR-G724!KVLGSGAFGT | 324   | >EGFR-G724!KVLGSGAFST | 279  | 45    |
| >EGFR-G724!KVLGSGAFGT | 709   | >EGFR-G724!KVLGSGAFST | 132  | 577   |
| >EGFR-G729!GLWIPEGEKV | 251   | >EGFR-G729!ELWIPEGEKV | 1398 | 1147  |
| >EGFR-G729!GLWIPEGEKV | 329   | >EGFR-G729!ELWIPEGEKV | 1064 | 735   |
| >EGFR-G729!GLWIPEGEKV | 3     | >EGFR-G729!ELWIPEGEKV | 7    | 4     |
| >EGFR-G729!GLWIPEGEKV | 28    | >EGFR-G729!ELWIPEGEKV | 765  | 737   |
| >EGFR-G729!GLWIPEGEKV | 6     | >EGFR-G729!ELWIPEGEKV | 22   | 16    |
| >EGFR-G729!GLWIPEGEKV | 87    | >EGFR-G729!ELWIPEGEKV | 44   | 43    |
| >EGFR-G729!GLWIPEGEKV | 7     | >EGFR-G729!ELWIPEGEKV | 15   | 8     |
| >EGFR-G729!GLWIPEGEK  | 421   | >EGFR-G729!ELWIPEGEK  | 3956 | 3535  |
| >EGFR-G729!GLWIPEGEKV | 7185  | >EGFR-G729!ELWIPEGEKV | 69   | 7116  |
| >EGFR-G729!KGLWIPEGEK | 229   | >EGFR-G729!KELWIPEGEK | 348  | 119   |
| >EGFR-G729!KGLWIPEGEK | 499   | >EGFR-G729!KELWIPEGEK | 993  | 494   |
| >EGFR-G729!KGLWIPEGEK | 22593 | >EGFR-G729!KELWIPEGEK | 57   | 22536 |
| >EGFR-G729!KGLWIPEGEK | 21269 | >EGFR-G729!KELWIPEGEK | 11   | 21258 |
| >EGFR-G729!TVYKGLWI   | 153   | >EGFR-G729!TVYKELWI   | 426  | 273   |
| >EGFR-G729!TVYKGLWI   | 168   | >EGFR-G729!TVYKELWI   | 306  | 138   |
| >EGFR-G729!TVYKGLWI   | 444   | >EGFR-G729!TVYKELWI   | 920  | 476   |
| >EGFR-G729!TVYKGLWI   | 463   | >EGFR-G729!TVYKELWI   | 1117 | 654   |
| >EGFR-G729!TVYKGLWI   | 191   | >EGFR-G729!TVYKELWI   | 599  | 408   |
| >EGFR-G729!TVYKGLWI   | 265   | >EGFR-G729!TVYKELWI   | 843  | 578   |
| >EGFR-G729!GTVYKGLW   | 14    | >EGFR-G729!GTVYKELW   | 17   | 3     |
| >EGFR-G729!GTVYKGLWI  | 24    | >EGFR-G729!GTVYKELWI  | 81   | 57    |
| >EGFR-G729!GTVYKGLW   | 199   | >EGFR-G729!GTVYKELW   | 104  | 95    |
| >EGFR-G729!GTVYKGLW   | 230   | >EGFR-G729!GTVYKELW   | 65   | 165   |
| >EGFR-G729!GTVYKGLWI  | 118   | >EGFR-G729!GTVYKELWI  | 499  | 381   |

|                       |       |                       |      |       |
|-----------------------|-------|-----------------------|------|-------|
| >EGFR-G729IGTVYKGLWI  | 166   | >EGFR-G729IGTVYKELWI  | 1242 | 1076  |
| >EGFR-G729IFGTVYKGL   | 354   | >EGFR-G729IFGTVYKEL   | 782  | 428   |
| >EGFR-G729IFGTVYKGLW  | 393   | >EGFR-G729IFGTVYKELW  | 79   | 314   |
| >EGFR-G729IFGTVYKGLW  | 1564  | >EGFR-G729IFGTVYKELW  | 477  | 1087  |
| >EGFR-G729IFGTVYKGLW  | 29    | >EGFR-G729IFGTVYKELW  | 59   | 30    |
| >EGFR-G729IAFGTVYKGL  | 152   | >EGFR-G729IAFGTVYKEL  | 33   | 119   |
| >EGFR-G729IAFGTVYKGLV | 591   | >EGFR-G729IAFGTVYKELV | 434  | 157   |
| >EGFR-G729IAFGTVYKGLV | 249   | >EGFR-G729IAFGTVYKELV | 180  | 69    |
| >EGFR-G729IAFGTVYKGL  | 1140  | >EGFR-G729IAFGTVYKEL  | 409  | 731   |
| >EGFR-G729IAFGTVYKGL  | 372   | >EGFR-G729IAFGTVYKEL  | 398  | 26    |
| >EGFR-G729IAFGTVYKGL  | 158   | >EGFR-G729IAFGTVYKEL  | 209  | 51    |
| >EGFR-G729IAFGTVYKGL  | 38    | >EGFR-G729IAFGTVYKEL  | 40   | 2     |
| >EGFR-G729IAFGTVYKGL  | 456   | >EGFR-G729IAFGTVYKEL  | 165  | 291   |
| >EGFR-G729IAFGTVYKGL  | 46    | >EGFR-G729IAFGTVYKEL  | 35   | 11    |
| >EGFR-G729IAFGTVYKGL  | 34    | >EGFR-G729IAFGTVYKEL  | 17   | 17    |
| >EGFR-G729IAFGTVYKGL  | 279   | >EGFR-G729IAFGTVYKEL  | 343  | 64    |
| >EGFR-G729IAFGTVYKGL  | 603   | >EGFR-G729IAFGTVYKEL  | 312  | 291   |
| >EGFR-G729IAFGTVYKGL  | 33    | >EGFR-G729IAFGTVYKEL  | 45   | 12    |
| >EGFR-G729IGLWIPEGEKV | 251   | >EGFR-G729IRLWIPEGEKV | 276  | 25    |
| >EGFR-G729IGLWIPEGEKV | 329   | >EGFR-G729IRLWIPEGEKV | 201  | 128   |
| >EGFR-G729IGLWIPEGEKV | 790   | >EGFR-G729IRLWIPEGEKV | 353  | 437   |
| >EGFR-G729IGLWIPEGEKV | 3     | >EGFR-G729IRLWIPEGEKV | 2    | 1     |
| >EGFR-G729IGLWIPEGEKV | 28    | >EGFR-G729IRLWIPEGEKV | 47   | 19    |
| >EGFR-G729IGLWIPEGEKV | 6     | >EGFR-G729IRLWIPEGEKV | 7    | 1     |
| >EGFR-G729IGLWIPEGEKV | 87    | >EGFR-G729IRLWIPEGEKV | 40   | 47    |
| >EGFR-G729IGLWIPEGEKV | 7     | >EGFR-G729IRLWIPEGEKV | 8    | 1     |
| >EGFR-G729IGLWIPEGEK  | 421   | >EGFR-G729IRLWIPEGEK  | 77   | 344   |
| >EGFR-G729IGLWIPEGEKV | 1063  | >EGFR-G729IRLWIPEGEKV | 148  | 915   |
| >EGFR-G729IKGLWIPEGEK | 229   | >EGFR-G729IKRLWIPEGEK | 826  | 597   |
| >EGFR-G729IKGLWIPEGEK | 499   | >EGFR-G729IKRLWIPEGEK | 2879 | 2380  |
| >EGFR-G729IKGLWIPEGEK | 21913 | >EGFR-G729IKRLWIPEGEK | 42   | 21871 |
| >EGFR-G729IKGLWIPEGEK | 22177 | >EGFR-G729IKRLWIPEGEK | 141  | 22036 |
| >EGFR-G729IKGLWIPEGEK | 17546 | >EGFR-G729IKRLWIPEGEK | 157  | 17389 |
| >EGFR-G729IKGLWIPEGEK | 27468 | >EGFR-G729IKRLWIPEGEK | 303  | 27165 |
| >EGFR-G729IKGLWIPEGEK | 22695 | >EGFR-G729IKRLWIPEGEK | 362  | 22333 |
| >EGFR-G729IKGLWIPEGEK | 28616 | >EGFR-G729IKRLWIPEGEK | 253  | 28363 |
| >EGFR-G729IGSGAFGTVYK | 21662 | >EGFR-G729IGSGAFGTVYK | 78   | 21584 |
| >EGFR-G729ITVYKGLWI   | 153   | >EGFR-G729ITVYKRLWI   | 264  | 111   |
| >EGFR-G729ITVYKGLWI   | 168   | >EGFR-G729ITVYKRLWI   | 293  | 125   |
| >EGFR-G729ITVYKGLWI   | 444   | >EGFR-G729ITVYKRLWI   | 1440 | 996   |
| >EGFR-G729ITVYKGLWI   | 463   | >EGFR-G729ITVYKRLWI   | 375  | 88    |
| >EGFR-G729ITVYKGLWI   | 191   | >EGFR-G729ITVYKRLWI   | 560  | 369   |
| >EGFR-G729ITVYKGLWI   | 265   | >EGFR-G729ITVYKRLWI   | 508  | 243   |

|                        |       |                        |      |       |
|------------------------|-------|------------------------|------|-------|
| >EGFR-G729IGTVYKGLW    | 14    | >EGFR-G729IGTVYKRLW    | 16   | 2     |
| >EGFR-G729IGTVYKGLWI   | 24    | >EGFR-G729IGTVYKRLWI   | 109  | 85    |
| >EGFR-G729IGTVYKGLW    | 199   | >EGFR-G729IGTVYKRLW    | 95   | 104   |
| >EGFR-G729IGTVYKGLW    | 230   | >EGFR-G729IGTVYKRLW    | 440  | 210   |
| >EGFR-G729IGTVYKGLWI   | 118   | >EGFR-G729IGTVYKRLWI   | 264  | 146   |
| >EGFR-G729IGTVYKGLWI   | 166   | >EGFR-G729IGTVYKRLWI   | 363  | 197   |
| >EGFR-G729IFGTVYKGL    | 354   | >EGFR-G729IFGTVYKRL    | 102  | 252   |
| >EGFR-G729IFGTVYKGLW   | 393   | >EGFR-G729IFGTVYKRLW   | 1492 | 1099  |
| >EGFR-G729IFGTVYKGLW   | 29    | >EGFR-G729IFGTVYKRLW   | 2148 | 2119  |
| >EGFR-G729IAFGTVYKGL   | 152   | >EGFR-G729IAFGTVYKRL   | 162  | 10    |
| >EGFR-G729IAFGTVYKGLV  | 249   | >EGFR-G729IAFGTVYKRLV  | 227  | 22    |
| >EGFR-G729IAFGTVYKGL   | 19133 | >EGFR-G729IAFGTVYKRL   | 23   | 19110 |
| >EGFR-G729IAFGTVYKGL   | 33917 | >EGFR-G729IAFGTVYKRL   | 103  | 33814 |
| >EGFR-G729IAFGTVYKGL   | 372   | >EGFR-G729IAFGTVYKRL   | 525  | 153   |
| >EGFR-G729IAFGTVYKGL   | 21801 | >EGFR-G729IAFGTVYKRL   | 155  | 21646 |
| >EGFR-G729IAFGTVYKGL   | 18843 | >EGFR-G729IAFGTVYKRL   | 21   | 18822 |
| >EGFR-G729IAFGTVYKGL   | 24540 | >EGFR-G729IAFGTVYKRL   | 13   | 24527 |
| >EGFR-G729IAFGTVYKGL   | 158   | >EGFR-G729IAFGTVYKRL   | 139  | 19    |
| >EGFR-G729IAFGTVYKGL   | 38    | >EGFR-G729IAFGTVYKRL   | 33   | 5     |
| >EGFR-G729IAFGTVYKGL   | 456   | >EGFR-G729IAFGTVYKRL   | 495  | 39    |
| >EGFR-G729IAFGTVYKGL   | 46    | >EGFR-G729IAFGTVYKRL   | 34   | 12    |
| >EGFR-G729IAFGTVYKGL   | 34    | >EGFR-G729IAFGTVYKRL   | 73   | 39    |
| >EGFR-G729IAFGTVYKGL   | 279   | >EGFR-G729IAFGTVYKRL   | 505  | 226   |
| >EGFR-G729IAFGTVYKGL   | 603   | >EGFR-G729IAFGTVYKRL   | 427  | 176   |
| >EGFR-G729IAFGTVYKGL   | 33    | >EGFR-G729IAFGTVYKRL   | 389  | 356   |
| >EGFR-G729IAFGTVYKGL   | 12938 | >EGFR-G729IAFGTVYKRL   | 327  | 12611 |
| >EGFR-G729IAFGTVYKGL   | 35850 | >EGFR-G729IAFGTVYKRL   | 273  | 35577 |
| >EGFR-G729ISGAFGTVYKGL | 33356 | >EGFR-G729ISGAFGTVYKRL | 240  | 33116 |
| >EGFR-G735!GEKVKIPV    | 1681  | >EGFR-G735!SEKVKIPV    | 152  | 1529  |
| >EGFR-G735!GEKVKIPVAI  | 501   | >EGFR-G735!SEKVKIPVAI  | 119  | 382   |
| >EGFR-G735!GEKVKIPV    | 101   | >EGFR-G735!SEKVKIPV    | 193  | 92    |
| >EGFR-G735!GEKVKIPVA   | 118   | >EGFR-G735!SEKVKIPVA   | 232  | 114   |
| >EGFR-G735!GEKVKIPVAI  | 188   | >EGFR-G735!SEKVKIPVAI  | 160  | 28    |
| >EGFR-G735!GEKVKIPVAI  | 2726  | >EGFR-G735!SEKVKIPVAI  | 277  | 2449  |
| >EGFR-G735!GEKVKIPVAI  | 3417  | >EGFR-G735!SEKVKIPVAI  | 485  | 2932  |
| >EGFR-G735!GEKVKIPV    | 155   | >EGFR-G735!SEKVKIPV    | 71   | 84    |
| >EGFR-G735!GEKVKIPVA   | 26    | >EGFR-G735!SEKVKIPVA   | 14   | 12    |
| >EGFR-G735!GEKVKIPVAI  | 2902  | >EGFR-G735!SEKVKIPVAI  | 392  | 2510  |
| >EGFR-G735!GEKVKIPVA   | 132   | >EGFR-G735!SEKVKIPVA   | 985  | 853   |
| >EGFR-G735!GEKVKIPVAI  | 45    | >EGFR-G735!SEKVKIPVAI  | 69   | 24    |
| >EGFR-G735!EGEKVKIPV   | 1948  | >EGFR-G735!ESEKVKIPV   | 103  | 1845  |
| >EGFR-G735!EGEKVKIPV   | 5934  | >EGFR-G735!ESEKVKIPV   | 359  | 5575  |
| >EGFR-G735!IPEGEKVKIPV | 188   | >EGFR-G735!IPESEKVKIPV | 246  | 58    |

|                        |      |                        |      |      |
|------------------------|------|------------------------|------|------|
| >EGFR-G735!IPEGEKVKI   | 142  | >EGFR-G735!IPESEKVKI   | 85   | 57   |
| >EGFR-G735!IPEGEKVKIPV | 311  | >EGFR-G735!IPESEKVKIPV | 518  | 207  |
| >EGFR-G735!WIPEGEKV    | 298  | >EGFR-G735!WIPESEKV    | 222  | 76   |
| >EGFR-G735!WIPEGEKV    | 191  | >EGFR-G735!WIPESEKV    | 182  | 9    |
| >EGFR-G735!WIPEGEKV    | 25   | >EGFR-G735!WIPESEKV    | 34   | 9    |
| >EGFR-G735!WIPEGEKV    | 69   | >EGFR-G735!WIPESEKV    | 81   | 12   |
| >EGFR-G735!WIPEGEKV    | 284  | >EGFR-G735!WIPESEKV    | 195  | 89   |
| >EGFR-G735!WIPEGEKV    | 10   | >EGFR-G735!WIPESEKV    | 10   | 0    |
| >EGFR-G735!WIPEGEKVKI  | 453  | >EGFR-G735!WIPESEKVKI  | 881  | 428  |
| >EGFR-G735!WIPEGEKV    | 381  | >EGFR-G735!WIPESEKV    | 181  | 200  |
| >EGFR-G735!LWIPEGEKVK  | 158  | >EGFR-G735!LWIPESEKVKI | 91   | 67   |
| >EGFR-G735!LWIPEGEKVK  | 37   | >EGFR-G735!LWIPESEKVKI | 29   | 8    |
| >EGFR-G735!LWIPEGEKV   | 270  | >EGFR-G735!LWIPESEKV   | 303  | 33   |
| >EGFR-G735!LWIPEGEKVK  | 270  | >EGFR-G735!LWIPESEKVKI | 285  | 15   |
| >EGFR-G735!GLWIPEGEKV  | 251  | >EGFR-G735!GLWIPESEKV  | 155  | 96   |
| >EGFR-G735!GLWIPEGEKV  | 329  | >EGFR-G735!GLWIPESEKV  | 148  | 181  |
| >EGFR-G735!GLWIPEGEKV  | 3    | >EGFR-G735!GLWIPESEKV  | 3    | 0    |
| >EGFR-G735!GLWIPEGEKV  | 28   | >EGFR-G735!GLWIPESEKV  | 13   | 15   |
| >EGFR-G735!GLWIPEGEKV  | 6    | >EGFR-G735!GLWIPESEKV  | 5    | 1    |
| >EGFR-G735!GLWIPEGEKV  | 87   | >EGFR-G735!GLWIPESEKV  | 17   | 70   |
| >EGFR-G735!GLWIPEGEKV  | 7    | >EGFR-G735!GLWIPESEKV  | 5    | 2    |
| >EGFR-G735!GLWIPEGEK   | 421  | >EGFR-G735!GLWIPESEK   | 235  | 186  |
| >EGFR-G735!GLWIPEGEK   | 1255 | >EGFR-G735!GLWIPESEK   | 370  | 885  |
| >EGFR-G735!KGLWIPEGEK  | 229  | >EGFR-G735!KGLWIPESEK  | 228  | 1    |
| >EGFR-G735!KGLWIPEGEK  | 499  | >EGFR-G735!KGLWIPESEK  | 400  | 99   |
| >EGFR-G779!GICLTSTV    | 138  | >EGFR-G779!GICLTSTV    | 456  | 318  |
| >EGFR-G779!GICLTSTV    | 122  | >EGFR-G779!GICLTSTV    | 676  | 554  |
| >EGFR-G779!GICLTSTV    | 314  | >EGFR-G779!GICLTSTV    | 4925 | 4611 |
| >EGFR-G779!GICLTSTV    | 38   | >EGFR-G779!GICLTSTV    | 224  | 186  |
| >EGFR-G779!GICLTSTVQLI | 5225 | >EGFR-G779!GICLTSTVQLI | 475  | 4750 |
| >EGFR-G779!LGICLTSTV   | 3421 | >EGFR-G779!LGICLTSTV   | 275  | 3146 |
| >EGFR-G779!LGICLTSTV   | 713  | >EGFR-G779!LGICLTSTV   | 280  | 433  |
| >EGFR-G779!LGICLTSTV   | 256  | >EGFR-G779!LGICLTSTV   | 132  | 124  |
| >EGFR-G779!LLGICLTSTV  | 63   | >EGFR-G779!LLGICLTSTV  | 53   | 10   |
| >EGFR-G779!LLGICLTST   | 415  | >EGFR-G779!LLGICLTST   | 419  | 4    |
| >EGFR-G779!LLGICLTSTV  | 17   | >EGFR-G779!LLGICLTSTV  | 20   | 3    |
| >EGFR-G779!LLGICLTST   | 295  | >EGFR-G779!LLGICLTST   | 211  | 84   |
| >EGFR-G779!LLGICLTSTV  | 14   | >EGFR-G779!LLGICLTSTV  | 13   | 1    |
| >EGFR-G779!LLGICLTSTV  | 98   | >EGFR-G779!LLGICLTSTV  | 58   | 40   |
| >EGFR-G779!LLGICLTSTV  | 4    | >EGFR-G779!LLGICLTSTV  | 4    | 0    |
| >EGFR-G779!LLGICLTSTV  | 5    | >EGFR-G779!LLGICLTSTV  | 32   | 27   |
| >EGFR-G779!LLGICLTSTV  | 9    | >EGFR-G779!LLGICLTSTV  | 25   | 16   |
| >EGFR-G779!LLGICLTSTV  | 6    | >EGFR-G779!LLGICLTSTV  | 38   | 32   |

|                          |      |                          |      |      |
|--------------------------|------|--------------------------|------|------|
| >EGFR-G779( LLGICLTST    | 30   | >EGFR-G779( LLCICLTST    | 56   | 26   |
| >EGFR-G779( LLGICLTSTV   | 2    | >EGFR-G779( LLCICLTSTV   | 2    | 0    |
| >EGFR-G779( LLGICLTSTVQ  | 272  | >EGFR-G779( LLCICLTSTVQ  | 404  | 132  |
| >EGFR-G779( RLLGICLT     | 229  | >EGFR-G779( RLLCICLT     | 164  | 65   |
| >EGFR-G779( RLLGICLTST   | 73   | >EGFR-G779( RLLCICLTST   | 87   | 14   |
| >EGFR-G779( RLLGICLTSTV  | 15   | >EGFR-G779( RLLCICLTSTV  | 14   | 1    |
| >EGFR-G779( RLLGICLTST   | 207  | >EGFR-G779( RLLCICLTST   | 337  | 130  |
| >EGFR-G779( RLLGICLTSTV  | 29   | >EGFR-G779( RLLCICLTSTV  | 44   | 15   |
| >EGFR-G779( RLLGICLTST   | 52   | >EGFR-G779( RLLCICLTST   | 104  | 52   |
| >EGFR-G779( RLLGICLTSTV  | 13   | >EGFR-G779( RLLCICLTSTV  | 13   | 0    |
| >EGFR-G779( RLLGICLT     | 310  | >EGFR-G779( RLLCICLT     | 315  | 5    |
| >EGFR-G779( RLLGICLTST   | 87   | >EGFR-G779( RLLCICLTST   | 115  | 28   |
| >EGFR-G779( RLLGICLTSTV  | 19   | >EGFR-G779( RLLCICLTSTV  | 20   | 1    |
| >EGFR-G779( RLLGICLT     | 35   | >EGFR-G779( RLLCICLT     | 66   | 31   |
| >EGFR-G779( RLLGICLTST   | 95   | >EGFR-G779( RLLCICLTST   | 152  | 57   |
| >EGFR-G779( RLLGICLTSTV  | 2    | >EGFR-G779( RLLCICLTSTV  | 2    | 0    |
| >EGFR-G779( RLLGICLTSTV  | 5    | >EGFR-G779( RLLCICLTSTV  | 3    | 2    |
| >EGFR-G779( RLLGICLT     | 112  | >EGFR-G779( RLLCICLT     | 398  | 286  |
| >EGFR-G779( RLLGICLTST   | 401  | >EGFR-G779( RLLCICLTST   | 1279 | 878  |
| >EGFR-G779( RLLGICLTSTV  | 5    | >EGFR-G779( RLLCICLTSTV  | 6    | 1    |
| >EGFR-G779( RLLGICLTSTV  | 2    | >EGFR-G779( RLLCICLTSTV  | 3    | 1    |
| >EGFR-G779( RLLGICLT     | 30   | >EGFR-G779( RLLCICLT     | 341  | 311  |
| >EGFR-G779( RLLGICLTST   | 34   | >EGFR-G779( RLLCICLTST   | 614  | 580  |
| >EGFR-G779( RLLGICLTSTV  | 2    | >EGFR-G779( RLLCICLTSTV  | 3    | 1    |
| >EGFR-G779( RLLGICLTS    | 163  | >EGFR-G779( RLLCICLTS    | 315  | 152  |
| >EGFR-G779( RLLGICLTST   | 360  | >EGFR-G779( RLLCICLTST   | 642  | 282  |
| >EGFR-G779( RLLGICLTSTV  | 23   | >EGFR-G779( RLLCICLTSTV  | 32   | 9    |
| >EGFR-G779( RLLGICLTSTV  | 779  | >EGFR-G779( RLLCICLTSTV  | 374  | 405  |
| >EGFR-G779( RLLGICLTSTV  | 1293 | >EGFR-G779( RLLCICLTSTV  | 209  | 1084 |
| >EGFR-G779( RLLGICLTSTV  | 241  | >EGFR-G779( RLLCICLTSTV  | 191  | 50   |
| >EGFR-G779( CRLLGICL     | 260  | >EGFR-G779( CRLLCICL     | 678  | 418  |
| >EGFR-G779( CRLLGICLTS   | 999  | >EGFR-G779( CRLLCICLTS   | 243  | 756  |
| >EGFR-G779( CRLLGICL     | 910  | >EGFR-G779( CRLLCICL     | 487  | 423  |
| >EGFR-G779( CRLLGICLTS   | 577  | >EGFR-G779( CRLLCICLTS   | 290  | 287  |
| >EGFR-G779( DNPHVCRLLC   | 1013 | >EGFR-G779( DNPHVCRLLC   | 424  | 589  |
| >EGFR-G779( GICLTSTV     | 3825 | >EGFR-G779( FICLTSTV     | 143  | 3682 |
| >EGFR-G779( GICLTSTV     | 1157 | >EGFR-G779( FICLTSTV     | 68   | 1089 |
| >EGFR-G779( GICLTSTVQQL  | 1192 | >EGFR-G779( FICLTSTVQQL  | 191  | 1001 |
| >EGFR-G779( GICLTSTVQQLI | 2350 | >EGFR-G779( FICLTSTVQQLI | 138  | 2212 |
| >EGFR-G779( GICLTSTV     | 138  | >EGFR-G779( FICLTSTV     | 12   | 126  |
| >EGFR-G779( GICLTSTVQQL  | 1657 | >EGFR-G779( FICLTSTVQQL  | 207  | 1450 |
| >EGFR-G779( GICLTSTVQQLI | 1160 | >EGFR-G779( FICLTSTVQQLI | 75   | 1085 |
| >EGFR-G779( GICLTSTV     | 858  | >EGFR-G779( FICLTSTV     | 31   | 827  |

|                        |       |                        |     |       |
|------------------------|-------|------------------------|-----|-------|
| >EGFR-G779IGICLTSTVQL  | 2964  | >EGFR-G779IFICLTSTVQL  | 151 | 2813  |
| >EGFR-G779IGICLTSTVQLI | 5916  | >EGFR-G779IFICLTSTVQLI | 318 | 5598  |
| >EGFR-G779IGICLTSTV    | 122   | >EGFR-G779IFICLTSTV    | 9   | 113   |
| >EGFR-G779IGICLTSTVQL  | 3135  | >EGFR-G779IFICLTSTVQL  | 228 | 2907  |
| >EGFR-G779IGICLTSTVQLI | 2073  | >EGFR-G779IFICLTSTVQLI | 152 | 1921  |
| >EGFR-G779IGICLTSTV    | 660   | >EGFR-G779IFICLTSTV    | 173 | 487   |
| >EGFR-G779IGICLTSTV    | 314   | >EGFR-G779IFICLTSTV    | 62  | 252   |
| >EGFR-G779IGICLTSTV    | 2964  | >EGFR-G779IFICLTSTV    | 96  | 2868  |
| >EGFR-G779IGICLTSTV    | 38    | >EGFR-G779IFICLTSTV    | 4   | 34    |
| >EGFR-G779IGICLTSTVQL  | 1022  | >EGFR-G779IFICLTSTVQL  | 37  | 985   |
| >EGFR-G779IGICLTSTVQLI | 5374  | >EGFR-G779IFICLTSTVQLI | 282 | 5092  |
| >EGFR-G779IGICLTSTVQL  | 8060  | >EGFR-G779IFICLTSTVQL  | 393 | 7667  |
| >EGFR-G779ILGICLTSTV   | 3176  | >EGFR-G779ILFICLTSTV   | 31  | 3145  |
| >EGFR-G779ILGICLTSTVQL | 9356  | >EGFR-G779ILFICLTSTVQL | 338 | 9018  |
| >EGFR-G779ILGICLTSTV   | 946   | >EGFR-G779ILFICLTSTV   | 297 | 649   |
| >EGFR-G779ILGICLTSTVQL | 1400  | >EGFR-G779ILFICLTSTVQL | 393 | 1007  |
| >EGFR-G779ILGICLTSTV   | 3421  | >EGFR-G779ILFICLTSTV   | 447 | 2974  |
| >EGFR-G779ILGICLTSTVQL | 10522 | >EGFR-G779ILFICLTSTVQL | 112 | 10410 |
| >EGFR-G779ILGICLTSTVQL | 17800 | >EGFR-G779ILFICLTSTVQL | 31  | 17769 |
| >EGFR-G779ILGICLTSTV   | 256   | >EGFR-G779ILFICLTSTV   | 739 | 483   |
| >EGFR-G779ILLGICLTST   | 1769  | >EGFR-G779ILLFICLTST   | 82  | 1687  |
| >EGFR-G779ILLGICLTSTV  | 63    | >EGFR-G779ILLFICLTSTV  | 24  | 39    |
| >EGFR-G779ILLGICLTST   | 415   | >EGFR-G779ILLFICLTST   | 73  | 342   |
| >EGFR-G779ILLGICLTSTV  | 17    | >EGFR-G779ILLFICLTSTV  | 11  | 6     |
| >EGFR-G779ILLGICLTSTVQ | 2533  | >EGFR-G779ILLFICLTSTVQ | 464 | 2069  |
| >EGFR-G779ILLGICLTST   | 295   | >EGFR-G779ILLFICLTST   | 25  | 270   |
| >EGFR-G779ILLGICLTSTV  | 14    | >EGFR-G779ILLFICLTSTV  | 8   | 6     |
| >EGFR-G779ILLGICLTST   | 3049  | >EGFR-G779ILLFICLTST   | 309 | 2740  |
| >EGFR-G779ILLGICLTSTV  | 98    | >EGFR-G779ILLFICLTSTV  | 42  | 56    |
| >EGFR-G779ILLGICLTST   | 1639  | >EGFR-G779ILLFICLTST   | 152 | 1487  |
| >EGFR-G779ILLGICLTSTV  | 4     | >EGFR-G779ILLFICLTSTV  | 2   | 2     |
| >EGFR-G779ILLGICLTSTV  | 5     | >EGFR-G779ILLFICLTSTV  | 4   | 1     |
| >EGFR-G779ILLGICLTSTV  | 9     | >EGFR-G779ILLFICLTSTV  | 6   | 3     |
| >EGFR-G779ILLGICLTSTV  | 6     | >EGFR-G779ILLFICLTSTV  | 7   | 1     |
| >EGFR-G779ILLGICLTS    | 1301  | >EGFR-G779ILLFICLTS    | 227 | 1074  |
| >EGFR-G779ILLGICLTST   | 30    | >EGFR-G779ILLFICLTST   | 14  | 16    |
| >EGFR-G779ILLGICLTSTV  | 2     | >EGFR-G779ILLFICLTSTV  | 2   | 0     |
| >EGFR-G779ILLGICLTSTVQ | 272   | >EGFR-G779ILLFICLTSTVQ | 63  | 209   |
| >EGFR-G779ILLGICLTSTV  | 4610  | >EGFR-G779ILLFICLTSTV  | 157 | 4453  |
| >EGFR-G779IRLLGICLT    | 229   | >EGFR-G779IRLLFICLT    | 313 | 84    |
| >EGFR-G779IRLLGICLTST  | 73    | >EGFR-G779IRLLFICLTST  | 131 | 58    |
| >EGFR-G779IRLLGICLTSTV | 15    | >EGFR-G779IRLLFICLTSTV | 18  | 3     |
| >EGFR-G779IRLLGICLTST  | 207   | >EGFR-G779IRLLFICLTST  | 454 | 247   |

|                        |       |                        |      |       |
|------------------------|-------|------------------------|------|-------|
| >EGFR-G779IRLLGICLTSTV | 29    | >EGFR-G779IRLLFICLTSTV | 54   | 25    |
| >EGFR-G779IRLLGICLTST  | 52    | >EGFR-G779IRLLFICLTST  | 172  | 120   |
| >EGFR-G779IRLLGICLTSTV | 13    | >EGFR-G779IRLLFICLTSTV | 15   | 2     |
| >EGFR-G779IRLLGICLT    | 310   | >EGFR-G779IRLLFICLT    | 713  | 403   |
| >EGFR-G779IRLLGICLTST  | 87    | >EGFR-G779IRLLFICLTST  | 202  | 115   |
| >EGFR-G779IRLLGICLTSTV | 19    | >EGFR-G779IRLLFICLTSTV | 39   | 20    |
| >EGFR-G779IRLLGICLT    | 35    | >EGFR-G779IRLLFICLT    | 88   | 53    |
| >EGFR-G779IRLLGICLTST  | 95    | >EGFR-G779IRLLFICLTST  | 317  | 222   |
| >EGFR-G779IRLLGICLTSTV | 2     | >EGFR-G779IRLLFICLTSTV | 2    | 0     |
| >EGFR-G779IRLLGICLTSTV | 5     | >EGFR-G779IRLLFICLTSTV | 5    | 0     |
| >EGFR-G779IRLLGICLT    | 112   | >EGFR-G779IRLLFICLT    | 345  | 233   |
| >EGFR-G779IRLLGICLTST  | 401   | >EGFR-G779IRLLFICLTST  | 1262 | 861   |
| >EGFR-G779IRLLGICLTSTV | 5     | >EGFR-G779IRLLFICLTSTV | 6    | 1     |
| >EGFR-G779IRLLGICLTSTV | 2     | >EGFR-G779IRLLFICLTSTV | 3    | 1     |
| >EGFR-G779IRLLGICLT    | 30    | >EGFR-G779IRLLFICLT    | 200  | 170   |
| >EGFR-G779IRLLGICLTST  | 34    | >EGFR-G779IRLLFICLTST  | 351  | 317   |
| >EGFR-G779IRLLGICLTSTV | 2     | >EGFR-G779IRLLFICLTSTV | 3    | 1     |
| >EGFR-G779IRLLGICLTS   | 163   | >EGFR-G779IRLLFICLTS   | 188  | 25    |
| >EGFR-G779IRLLGICLTST  | 360   | >EGFR-G779IRLLFICLTST  | 424  | 64    |
| >EGFR-G779IRLLGICLTSTV | 23    | >EGFR-G779IRLLFICLTSTV | 24   | 1     |
| >EGFR-G779IRLLGICLTSTV | 241   | >EGFR-G779IRLLFICLTSTV | 180  | 61    |
| >EGFR-G779ICRLLGICL    | 260   | >EGFR-G779ICRLLFICL    | 113  | 147   |
| >EGFR-G779ICRLLGICLTS  | 999   | >EGFR-G779ICRLLFICLTS  | 411  | 588   |
| >EGFR-G779ICRLLGICL    | 910   | >EGFR-G779ICRLLFICL    | 162  | 748   |
| >EGFR-G779ICRLLGICLTS  | 577   | >EGFR-G779ICRLLFICLTS  | 463  | 114   |
| >EGFR-G779HVCRLGCI     | 720   | >EGFR-G779HVCRLFI      | 221  | 499   |
| >EGFR-G779HVCRLGCI     | 804   | >EGFR-G779HVCRLFI      | 70   | 734   |
| >EGFR-G779HVCRLGCI     | 1031  | >EGFR-G779HVCRLFI      | 312  | 719   |
| >EGFR-G779HVCRLGCI     | 870   | >EGFR-G779HVCRLFI      | 367  | 503   |
| >EGFR-G779INPHVCRLGCI  | 3651  | >EGFR-G779INPHVCRLFI   | 435  | 3216  |
| >EGFR-G779INPHVCRLG    | 34463 | >EGFR-G779INPHVCRLFI   | 136  | 34327 |
| >EGFR-G779INPHVCRLGCI  | 2392  | >EGFR-G779INPHVCRLFI   | 108  | 2284  |
| >EGFR-G779INPHVCRLG    | 17766 | >EGFR-G779INPHVCRLFI   | 72   | 17694 |
| >EGFR-G779INPHVCRLG    | 12005 | >EGFR-G779INPHVCRLFI   | 271  | 11734 |
| >EGFR-G779INPHVCRLG    | 8074  | >EGFR-G779INPHVCRLFI   | 66   | 8008  |
| >EGFR-G779DNPHVCRLG    | 1013  | >EGFR-G779DNPHVCRLFI   | 95   | 918   |
| >EGFR-G779:GICLTSTV    | 138   | >EGFR-G779:SICTSTV     | 86   | 52    |
| >EGFR-G779:GICLTSTV    | 858   | >EGFR-G779:SICTSTV     | 496  | 362   |
| >EGFR-G779:GICLTSTV    | 122   | >EGFR-G779:SICTSTV     | 51   | 71    |
| >EGFR-G779:GICLTSTV    | 314   | >EGFR-G779:SICTSTV     | 147  | 167   |
| >EGFR-G779:GICLTSTV    | 38    | >EGFR-G779:SICTSTV     | 17   | 21    |
| >EGFR-G779:GICLTSTVQL  | 1022  | >EGFR-G779:SICTSTVQL   | 478  | 544   |
| >EGFR-G779:LGICLTSTV   | 946   | >EGFR-G779:LSICTSTV    | 470  | 476   |

|                        |       |                        |     |       |
|------------------------|-------|------------------------|-----|-------|
| >EGFR-G779!LGICLTSTV   | 1268  | >EGFR-G779!LSICLTSTV   | 206 | 1062  |
| >EGFR-G779!LGICLTSTV   | 518   | >EGFR-G779!LSICLTSTV   | 153 | 365   |
| >EGFR-G779!LGICLTSTV   | 713   | >EGFR-G779!LSICLTSTV   | 32  | 681   |
| >EGFR-G779!LGICLTSTVQL | 4178  | >EGFR-G779!LSICLTSTVQL | 273 | 3905  |
| >EGFR-G779!LGICLTSTV   | 3930  | >EGFR-G779!LSICLTSTV   | 287 | 3643  |
| >EGFR-G779!LGICLTSTV   | 3500  | >EGFR-G779!LSICLTSTV   | 201 | 3299  |
| >EGFR-G779!LGICLTSTVQL | 2466  | >EGFR-G779!LSICLTSTVQL | 147 | 2319  |
| >EGFR-G779!LGICLTSTV   | 12870 | >EGFR-G779!LSICLTSTV   | 157 | 12713 |
| >EGFR-G779!LGICLTSTVQL | 2011  | >EGFR-G779!LSICLTSTVQL | 9   | 2002  |
| >EGFR-G779!LGICLTSTVQL | 8883  | >EGFR-G779!LSICLTSTVQL | 208 | 8675  |
| >EGFR-G779!LGICLTSTV   | 256   | >EGFR-G779!LSICLTSTV   | 22  | 234   |
| >EGFR-G779!LGICLTSTVQL | 1494  | >EGFR-G779!LSICLTSTVQL | 212 | 1282  |
| >EGFR-G779!LGICLTSTVQL | 4518  | >EGFR-G779!LSICLTSTVQL | 208 | 4310  |
| >EGFR-G779!LLGICLTSTV  | 63    | >EGFR-G779!LLSICLTSTV  | 54  | 9     |
| >EGFR-G779!LLGICLTST   | 415   | >EGFR-G779!LLSICLTST   | 37  | 378   |
| >EGFR-G779!LLGICLTSTV  | 17    | >EGFR-G779!LLSICLTSTV  | 11  | 6     |
| >EGFR-G779!LLGICLTSTVQ | 2533  | >EGFR-G779!LLSICLTSTVQ | 468 | 2065  |
| >EGFR-G779!LLGICLTST   | 295   | >EGFR-G779!LLSICLTST   | 25  | 270   |
| >EGFR-G779!LLGICLTSTV  | 14    | >EGFR-G779!LLSICLTSTV  | 10  | 4     |
| >EGFR-G779!LLGICLTSTV  | 98    | >EGFR-G779!LLSICLTSTV  | 60  | 38    |
| >EGFR-G779!LLGICLTSTV  | 4     | >EGFR-G779!LLSICLTSTV  | 5   | 1     |
| >EGFR-G779!LLGICLTSTV  | 5     | >EGFR-G779!LLSICLTSTV  | 6   | 1     |
| >EGFR-G779!LLGICLTSTV  | 9     | >EGFR-G779!LLSICLTSTV  | 10  | 1     |
| >EGFR-G779!LLGICLTSTV  | 6     | >EGFR-G779!LLSICLTSTV  | 6   | 0     |
| >EGFR-G779!LLGICLTST   | 30    | >EGFR-G779!LLSICLTST   | 21  | 9     |
| >EGFR-G779!LLGICLTSTV  | 2     | >EGFR-G779!LLSICLTSTV  | 2   | 0     |
| >EGFR-G779!LLGICLTSTVQ | 272   | >EGFR-G779!LLSICLTSTVQ | 171 | 101   |
| >EGFR-G779!RLLGICLT    | 229   | >EGFR-G779!RLLSICLT    | 193 | 36    |
| >EGFR-G779!RLLGICLTST  | 73    | >EGFR-G779!RLLSICLTST  | 86  | 13    |
| >EGFR-G779!RLLGICLTSTV | 15    | >EGFR-G779!RLLSICLTSTV | 13  | 2     |
| >EGFR-G779!RLLGICLTST  | 207   | >EGFR-G779!RLLSICLTST  | 128 | 79    |
| >EGFR-G779!RLLGICLTSTV | 29    | >EGFR-G779!RLLSICLTSTV | 26  | 3     |
| >EGFR-G779!RLLGICLTST  | 52    | >EGFR-G779!RLLSICLTST  | 43  | 9     |
| >EGFR-G779!RLLGICLTSTV | 13    | >EGFR-G779!RLLSICLTSTV | 10  | 3     |
| >EGFR-G779!RLLGICLT    | 310   | >EGFR-G779!RLLSICLT    | 353 | 43    |
| >EGFR-G779!RLLGICLTST  | 87    | >EGFR-G779!RLLSICLTST  | 108 | 21    |
| >EGFR-G779!RLLGICLTSTV | 19    | >EGFR-G779!RLLSICLTSTV | 19  | 0     |
| >EGFR-G779!RLLGICLT    | 35    | >EGFR-G779!RLLSICLT    | 61  | 26    |
| >EGFR-G779!RLLGICLTST  | 95    | >EGFR-G779!RLLSICLTST  | 172 | 77    |
| >EGFR-G779!RLLGICLTSTV | 2     | >EGFR-G779!RLLSICLTSTV | 2   | 0     |
| >EGFR-G779!RLLGICLTSTV | 5     | >EGFR-G779!RLLSICLTSTV | 4   | 1     |
| >EGFR-G779!RLLGICLT    | 112   | >EGFR-G779!RLLSICLT    | 180 | 68    |
| >EGFR-G779!RLLGICLTST  | 401   | >EGFR-G779!RLLSICLTST  | 640 | 239   |



|                        |       |                        |     |       |
|------------------------|-------|------------------------|-----|-------|
| >EGFR-G779!RLLGICLTSTV | 5     | >EGFR-G779!RLLSICLTSTV | 5   | 0     |
| >EGFR-G779!RLLGICLTSTV | 2     | >EGFR-G779!RLLSICLTSTV | 2   | 0     |
| >EGFR-G779!RLLGICLT    | 30    | >EGFR-G779!RLLSICLT    | 88  | 58    |
| >EGFR-G779!RLLGICLTST  | 34    | >EGFR-G779!RLLSICLTST  | 112 | 78    |
| >EGFR-G779!RLLGICLTSTV | 2     | >EGFR-G779!RLLSICLTSTV | 2   | 0     |
| >EGFR-G779!RLLGICLTS   | 163   | >EGFR-G779!RLLSICLTS   | 394 | 231   |
| >EGFR-G779!RLLGICLTST  | 360   | >EGFR-G779!RLLSICLTST  | 778 | 418   |
| >EGFR-G779!RLLGICLTSTV | 23    | >EGFR-G779!RLLSICLTSTV | 39  | 16    |
| >EGFR-G779!RLLGICLTSTV | 1293  | >EGFR-G779!RLLSICLTSTV | 226 | 1067  |
| >EGFR-G779!RLLGICLTSTV | 241   | >EGFR-G779!RLLSICLTSTV | 105 | 136   |
| >EGFR-G779!CRLLGICL    | 260   | >EGFR-G779!CRLLSICL    | 305 | 45    |
| >EGFR-G779!CRLLGICLTS  | 577   | >EGFR-G779!CRLLSICLTS  | 478 | 99    |
| >EGFR-G779!HVCRLLGI    | 804   | >EGFR-G779!HVCRLLSI    | 214 | 590   |
| >EGFR-G779!HVCRLLGI    | 1639  | >EGFR-G779!HVCRLLSI    | 366 | 1273  |
| >EGFR-G779!HVCRLLGI    | 870   | >EGFR-G779!HVCRLLSI    | 313 | 557   |
| >EGFR-G779!NPHVCRLLGI  | 2392  | >EGFR-G779!NPHVCRLLSI  | 492 | 1900  |
| >EGFR-G796,GCLLDYVR    | 361   | >EGFR-G796,ACLLDYVR    | 296 | 65    |
| >EGFR-G796,FGCLLDYV    | 5362  | >EGFR-G796,FACLLDYV    | 387 | 4975  |
| >EGFR-G796,FGCLLDYV    | 218   | >EGFR-G796,FACLLDYV    | 65  | 153   |
| >EGFR-G796,FGCLLDYV    | 151   | >EGFR-G796,FACLLDYV    | 20  | 131   |
| >EGFR-G796,FGCLLDYV    | 862   | >EGFR-G796,FACLLDYV    | 66  | 796   |
| >EGFR-G796,FGCLLDYV    | 6772  | >EGFR-G796,FACLLDYV    | 362 | 6410  |
| >EGFR-G796,FGCLLDYVR   | 1663  | >EGFR-G796,FACLLDYVR   | 353 | 1310  |
| >EGFR-G796,FGCLLDYVR   | 2597  | >EGFR-G796,FACLLDYVR   | 61  | 2536  |
| >EGFR-G796,FGCLLDYVR   | 542   | >EGFR-G796,FACLLDYVR   | 26  | 516   |
| >EGFR-G796,FGCLLDYV    | 1571  | >EGFR-G796,FACLLDYV    | 90  | 1481  |
| >EGFR-G796,FGCLLDYVRE  | 3465  | >EGFR-G796,FACLLDYVRE  | 481 | 2984  |
| >EGFR-G796,FGCLLDYVR   | 78    | >EGFR-G796,FACLLDYVR   | 126 | 48    |
| >EGFR-G796,VQLITQLMPF  | 2043  | >EGFR-G796,VQLITQLMPF  | 33  | 2010  |
| >EGFR-G796,VQLITQLMPF  | 13452 | >EGFR-G796,VQLITQLMPF  | 328 | 13124 |
| >EGFR-G796,PFGLLDYV    | 2162  | >EGFR-G796,PFACLLDYV   | 216 | 1946  |
| >EGFR-G796,PFGLLDY     | 31    | >EGFR-G796,PFACLLDY    | 16  | 15    |
| >EGFR-G796,PFGLLDY     | 341   | >EGFR-G796,PFACLLDY    | 567 | 226   |
| >EGFR-G796,PFGLLDY     | 700   | >EGFR-G796,PFACLLDY    | 214 | 486   |
| >EGFR-G796,PFGLLDYVR   | 35    | >EGFR-G796,PFACLLDYVR  | 43  | 8     |
| >EGFR-G796,MPFGCLLDY   | 79    | >EGFR-G796,MPFACLLDY   | 32  | 47    |
| >EGFR-G796,MPFGCLLDY\  | 8     | >EGFR-G796,MPFACLLDY\  | 5   | 3     |
| >EGFR-G796,MPFGCLLDY\  | 203   | >EGFR-G796,MPFACLLDY\  | 189 | 14    |
| >EGFR-G796,MPFGCLLDY\  | 131   | >EGFR-G796,MPFACLLDY\  | 193 | 62    |
| >EGFR-G796,MPFGCLLDY\  | 399   | >EGFR-G796,MPFACLLDY\  | 608 | 209   |
| >EGFR-G796,MPFGCLLDY   | 17    | >EGFR-G796,MPFACLLDY   | 22  | 5     |
| >EGFR-G796,MPFGCLLDY\  | 498   | >EGFR-G796,MPFACLLDY\  | 250 | 248   |
| >EGFR-G796,MPFGCLLDY\  | 425   | >EGFR-G796,MPFACLLDY\  | 523 | 98    |

|                       |      |                       |     |     |
|-----------------------|------|-----------------------|-----|-----|
| >EGFR-G796,MPFGCLLDY\ | 63   | >EGFR-G796,MPFACLLDY\ | 56  | 7   |
| >EGFR-G796,MPFGCLLDY\ | 1122 | >EGFR-G796,MPFACLLDY\ | 319 | 803 |
| >EGFR-G796,MPFGCLLDY\ | 282  | >EGFR-G796,MPFACLLDY\ | 163 | 119 |
| >EGFR-G796,MPFGCLLDY  | 359  | >EGFR-G796,MPFACLLDY  | 44  | 315 |
| >EGFR-G796,MPFGCLLDY  | 480  | >EGFR-G796,MPFACLLDY  | 117 | 363 |
| >EGFR-G796,MPFGCLLDY  | 297  | >EGFR-G796,MPFACLLDY  | 510 | 213 |
| >EGFR-G796,MPFGCLLDY  | 8    | >EGFR-G796,MPFACLLDY  | 8   | 0   |
| >EGFR-G796,MPFGCLLDY\ | 80   | >EGFR-G796,MPFACLLDY\ | 76  | 4   |
| >EGFR-G796,MPFGCLLDY  | 13   | >EGFR-G796,MPFACLLDY  | 11  | 2   |
| >EGFR-G796,MPFGCLLD   | 63   | >EGFR-G796,MPFACLLD   | 57  | 6   |
| >EGFR-G796,MPFGCLLDY  | 254  | >EGFR-G796,MPFACLLDY  | 285 | 31  |
| >EGFR-G796,MPFGCLLDY\ | 25   | >EGFR-G796,MPFACLLDY\ | 33  | 8   |
| >EGFR-G796,MPFGCLLDY\ | 43   | >EGFR-G796,MPFACLLDY\ | 41  | 2   |
| >EGFR-G796,MPFGCLLDY  | 1087 | >EGFR-G796,MPFACLLDY  | 231 | 856 |
| >EGFR-G796,MPFGCLLDY  | 95   | >EGFR-G796,MPFACLLDY  | 100 | 5   |
| >EGFR-G796,MPFGCLLDY  | 101  | >EGFR-G796,MPFACLLDY  | 210 | 109 |
| >EGFR-G796,MPFGCLLDY  | 494  | >EGFR-G796,MPFACLLDY  | 818 | 324 |
| >EGFR-G796,MPFGCLLDY\ | 32   | >EGFR-G796,MPFACLLDY\ | 30  | 2   |
| >EGFR-G796,LMPFGCLLDY | 930  | >EGFR-G796,LMPFACLLDY | 406 | 524 |
| >EGFR-G796,LMPFGCLL   | 297  | >EGFR-G796,LMPFACLL   | 216 | 81  |
| >EGFR-G796,LMPFGCLLDY | 24   | >EGFR-G796,LMPFACLLDY | 23  | 1   |
| >EGFR-G796,LMPFGCLL   | 71   | >EGFR-G796,LMPFACLL   | 36  | 35  |
| >EGFR-G796,LMPFGCLLDY | 12   | >EGFR-G796,LMPFACLLDY | 8   | 4   |
| >EGFR-G796,LMPFGCLL   | 80   | >EGFR-G796,LMPFACLL   | 81  | 1   |
| >EGFR-G796,LMPFGCLLDY | 8    | >EGFR-G796,LMPFACLLDY | 9   | 1   |
| >EGFR-G796,LMPFGCLL   | 248  | >EGFR-G796,LMPFACLL   | 212 | 36  |
| >EGFR-G796,LMPFGCLLDY | 12   | >EGFR-G796,LMPFACLLDY | 13  | 1   |
| >EGFR-G796,LMPFGCLL   | 35   | >EGFR-G796,LMPFACLL   | 56  | 21  |
| >EGFR-G796,LMPFGCLLDY | 3    | >EGFR-G796,LMPFACLLDY | 4   | 1   |
| >EGFR-G796,LMPFGCLLDY | 14   | >EGFR-G796,LMPFACLLDY | 17  | 3   |
| >EGFR-G796,LMPFGCLL   | 83   | >EGFR-G796,LMPFACLL   | 103 | 20  |
| >EGFR-G796,LMPFGCLLDY | 8    | >EGFR-G796,LMPFACLLDY | 9   | 1   |
| >EGFR-G796,LMPFGCLL   | 489  | >EGFR-G796,LMPFACLL   | 237 | 252 |
| >EGFR-G796,LMPFGCLLDY | 6    | >EGFR-G796,LMPFACLLDY | 5   | 1   |
| >EGFR-G796,LMPFGCLL   | 8    | >EGFR-G796,LMPFACLL   | 11  | 3   |
| >EGFR-G796,LMPFGCLLDY | 3    | >EGFR-G796,LMPFACLLDY | 4   | 1   |
| >EGFR-G796,LMPFGCLLDY | 254  | >EGFR-G796,LMPFACLLDY | 221 | 33  |
| >EGFR-G796,LMPFGCLLDY | 689  | >EGFR-G796,LMPFACLLDY | 488 | 201 |
| >EGFR-G796,LMPFGCLLDY | 326  | >EGFR-G796,LMPFACLLDY | 125 | 201 |
| >EGFR-G796,LMPFGCLLDY | 259  | >EGFR-G796,LMPFACLLDY | 234 | 25  |
| >EGFR-G796,LMPFGCLLDY | 592  | >EGFR-G796,LMPFACLLDY | 415 | 177 |
| >EGFR-G796,LMPFGCLLDY | 97   | >EGFR-G796,LMPFACLLDY | 133 | 36  |
| >EGFR-G796,LMPFGCLLDY | 117  | >EGFR-G796,LMPFACLLDY | 106 | 11  |

|                        |      |                        |     |      |
|------------------------|------|------------------------|-----|------|
| >EGFR-G796, LMPFGCLLDY | 596  | >EGFR-G796, LMPFACLLDY | 340 | 256  |
| >EGFR-G796, LMPFGCLL   | 9    | >EGFR-G796, LMPFACLL   | 8   | 1    |
| >EGFR-G796, LMPFGCLLDY | 509  | >EGFR-G796, LMPFACLLDY | 134 | 375  |
| >EGFR-G796, LMPFGCLLDY | 344  | >EGFR-G796, LMPFACLLDY | 239 | 105  |
| >EGFR-G796, QLMPFGCL   | 215  | >EGFR-G796, QLMPFACL   | 37  | 178  |
| >EGFR-G796, QLMPFGCLL  | 39   | >EGFR-G796, QLMPFACLL  | 26  | 13   |
| >EGFR-G796, QLMPFGCL   | 30   | >EGFR-G796, QLMPFACL   | 10  | 20   |
| >EGFR-G796, QLMPFGCLL  | 8    | >EGFR-G796, QLMPFACLL  | 6   | 2    |
| >EGFR-G796, QLMPFGCL   | 212  | >EGFR-G796, QLMPFACL   | 113 | 99   |
| >EGFR-G796, QLMPFGCLL  | 53   | >EGFR-G796, QLMPFACLL  | 51  | 2    |
| >EGFR-G796, QLMPFGCL   | 201  | >EGFR-G796, QLMPFACL   | 40  | 161  |
| >EGFR-G796, QLMPFGCLL  | 45   | >EGFR-G796, QLMPFACLL  | 27  | 18   |
| >EGFR-G796, QLMPFGCL   | 123  | >EGFR-G796, QLMPFACL   | 51  | 72   |
| >EGFR-G796, QLMPFGCLL  | 17   | >EGFR-G796, QLMPFACLL  | 21  | 4    |
| >EGFR-G796, QLMPFGCL   | 120  | >EGFR-G796, QLMPFACL   | 25  | 95   |
| >EGFR-G796, QLMPFGCLL  | 42   | >EGFR-G796, QLMPFACLL  | 35  | 7    |
| >EGFR-G796, QLMPFGCL   | 485  | >EGFR-G796, QLMPFACL   | 222 | 263  |
| >EGFR-G796, QLMPFGCLL  | 96   | >EGFR-G796, QLMPFACLL  | 110 | 14   |
| >EGFR-G796, QLMPFGCL   | 77   | >EGFR-G796, QLMPFACL   | 11  | 66   |
| >EGFR-G796, QLMPFGCLL  | 37   | >EGFR-G796, QLMPFACLL  | 16  | 21   |
| >EGFR-G796, QLMPFGCL   | 36   | >EGFR-G796, QLMPFACL   | 10  | 26   |
| >EGFR-G796, QLMPFGCLL  | 4    | >EGFR-G796, QLMPFACLL  | 4   | 0    |
| >EGFR-G796, QLMPFGCLLI | 522  | >EGFR-G796, QLMPFACLLI | 359 | 163  |
| >EGFR-G796, QLMPFGCLLI | 15   | >EGFR-G796, QLMPFACLLI | 14  | 1    |
| >EGFR-G796, QLMPFGCLLI | 328  | >EGFR-G796, QLMPFACLLI | 302 | 26   |
| >EGFR-G796, QLMPFGCLL  | 2135 | >EGFR-G796, QLMPFACLL  | 340 | 1795 |
| >EGFR-G796, QLMPFGCL   | 1232 | >EGFR-G796, QLMPFACL   | 436 | 796  |
| >EGFR-G796, QLMPFGCLL  | 1222 | >EGFR-G796, QLMPFACLL  | 459 | 763  |
| >EGFR-G796, QLMPFGCLL  | 639  | >EGFR-G796, QLMPFACLL  | 165 | 474  |
| >EGFR-G796, QLMPFGCLLI | 23   | >EGFR-G796, QLMPFACLLI | 17  | 6    |
| >EGFR-G796, QLMPFGCL   | 1080 | >EGFR-G796, QLMPFACL   | 322 | 758  |
| >EGFR-G796, QLMPFGCLLI | 111  | >EGFR-G796, QLMPFACLLI | 134 | 23   |
| >EGFR-G796, QLMPFGCLLI | 92   | >EGFR-G796, QLMPFACLLI | 143 | 51   |
| >EGFR-G796, QLMPFGCL   | 1014 | >EGFR-G796, QLMPFACL   | 410 | 604  |
| >EGFR-G796, QLMPFGCLLI | 124  | >EGFR-G796, QLMPFACLLI | 121 | 3    |
| >EGFR-G796, QLMPFGCLLI | 537  | >EGFR-G796, QLMPFACLLI | 317 | 220  |
| >EGFR-G796, QLMPFGCLLI | 550  | >EGFR-G796, QLMPFACLLI | 406 | 144  |
| >EGFR-G796, TQLMPFGCLI | 623  | >EGFR-G796, TQLMPFACLI | 454 | 169  |
| >EGFR-G796, TQLMPFGC   | 325  | >EGFR-G796, TQLMPFAC   | 188 | 137  |
| >EGFR-G796, TQLMPFGCL  | 200  | >EGFR-G796, TQLMPFACL  | 34  | 166  |
| >EGFR-G796, TQLMPFGCLI | 128  | >EGFR-G796, TQLMPFACLI | 231 | 103  |
| >EGFR-G796, TQLMPFGCL  | 581  | >EGFR-G796, TQLMPFACL  | 68  | 513  |
| >EGFR-G796, TQLMPFGCLI | 251  | >EGFR-G796, TQLMPFACLI | 155 | 96   |

|                       |       |                        |      |       |
|-----------------------|-------|------------------------|------|-------|
| >EGFR-G796,TQLMPFGCL  | 626   | >EGFR-G796,TQLMPFACL   | 84   | 542   |
| >EGFR-G796,TQLMPFGCLI | 420   | >EGFR-G796,TQLMPFACLI  | 103  | 317   |
| >EGFR-G796,ITQLMPFGCL | 365   | >EGFR-G796,ITQLMPFACL  | 116  | 249   |
| >EGFR-G796,ITQLMPFGCL | 17    | >EGFR-G796,ITQLMPFACL  | 15   | 2     |
| >EGFR-G796,ITQLMPFGCL | 719   | >EGFR-G796,ITQLMPFACL  | 181  | 538   |
| >EGFR-G796,ITQLMPFGCL | 120   | >EGFR-G796,ITQLMPFACL  | 94   | 26    |
| >EGFR-G796,ITQLMPFGCL | 187   | >EGFR-G796,ITQLMPFACL  | 294  | 107   |
| >EGFR-G796,ITQLMPFGCL | 132   | >EGFR-G796,ITQLMPFACL  | 111  | 21    |
| >EGFR-G796,ITQLMPFGCL | 686   | >EGFR-G796,ITQLMPFACL  | 397  | 289   |
| >EGFR-G796,LITQLMPFG  | 9976  | >EGFR-G796,LITQLMPFA   | 458  | 9518  |
| >EGFR-G796,LITQLMPFGC | 1263  | >EGFR-G796,LITQLMPFAC  | 444  | 819   |
| >EGFR-G796,LITQLMPFG  | 6647  | >EGFR-G796,LITQLMPFA   | 59   | 6588  |
| >EGFR-G796,LITQLMPFGC | 1123  | >EGFR-G796,LITQLMPFAC  | 348  | 775   |
| >EGFR-G796,LITQLMPFG  | 14335 | >EGFR-G796,LITQLMPFA   | 267  | 14068 |
| >EGFR-G796,LITQLMPFG  | 17756 | >EGFR-G796,LITQLMPFA   | 198  | 17558 |
| >EGFR-G796,LITQLMPFGC | 623   | >EGFR-G796,LITQLMPFAC  | 93   | 530   |
| >EGFR-G796,QLITQLMPFG | 5787  | >EGFR-G796,QLITQLMPFA  | 197  | 5590  |
| >EGFR-G796,QLITQLMPFG | 7416  | >EGFR-G796,QLITQLMPFA  | 182  | 7234  |
| >EGFR-G796,QLITQLMPFG | 8566  | >EGFR-G796,QLITQLMPFA  | 184  | 8382  |
| >EGFR-G796,QLITQLMPFG | 7914  | >EGFR-G796,QLITQLMPFA  | 154  | 7760  |
| >EGFR-G796,QLITQLMPFG | 10365 | >EGFR-G796,QLITQLMPFA  | 423  | 9942  |
| >EGFR-G796,QLITQLMPFG | 9680  | >EGFR-G796,QLITQLMPFA  | 282  | 9398  |
| >EGFR-G796,QLITQLMPFG | 533   | >EGFR-G796,QLITQLMPFA  | 480  | 53    |
| >EGFR-G796,QLITQLMPFG | 13769 | >EGFR-G796,QLITQLMPFA  | 395  | 13374 |
| >EGFR-G796,QLITQLMPFG | 12549 | >EGFR-G796,QLITQLMPFA  | 72   | 12477 |
| >EGFR-G796!GCLLDYVR   | 361   | >EGFR-G796!SCLLDYVR    | 73   | 288   |
| >EGFR-G796!FGCLLDYV   | 218   | >EGFR-G796!FSCCLLDYV   | 90   | 128   |
| >EGFR-G796!FGCLLDYV   | 151   | >EGFR-G796!FSCCLLDYV   | 59   | 92    |
| >EGFR-G796!FGCLLDYV   | 862   | >EGFR-G796!FSCCLLDYV   | 426  | 436   |
| >EGFR-G796!FGCLLDYVR  | 1663  | >EGFR-G796!FSCCLLDYVR  | 249  | 1414  |
| >EGFR-G796!FGCLLDYVR  | 2597  | >EGFR-G796!FSCCLLDYVR  | 99   | 2498  |
| >EGFR-G796!FGCLLDYVR  | 542   | >EGFR-G796!FSCCLLDYVR  | 36   | 506   |
| >EGFR-G796!FGCLLDYV   | 1571  | >EGFR-G796!FSCCLLDYV   | 94   | 1477  |
| >EGFR-G796!FGCLLDYVR  | 78    | >EGFR-G796!FSCCLLDYVR  | 159  | 81    |
| >EGFR-G796!PFGCLLDYV  | 2162  | >EGFR-G796!PFSCCLLDYV  | 491  | 1671  |
| >EGFR-G796!PFGCLLDY   | 31    | >EGFR-G796!PFSCCLLDY   | 23   | 8     |
| >EGFR-G796!PFGCLLDYVR | 1752  | >EGFR-G796!PFSCCLLDYVR | 355  | 1397  |
| >EGFR-G796!PFGCLLDY   | 341   | >EGFR-G796!PFSCCLLDY   | 1061 | 720   |
| >EGFR-G796!PFGCLLDY   | 700   | >EGFR-G796!PFSCCLLDY   | 268  | 432   |
| >EGFR-G796!PFGCLLDYVR | 35    | >EGFR-G796!PFSCCLLDYVR | 47   | 12    |
| >EGFR-G796!MPFGCLLDY  | 79    | >EGFR-G796!MPFSCCLLDY  | 37   | 42    |
| >EGFR-G796!MPFGCLLDY\ | 8     | >EGFR-G796!MPFSCCLLDYV | 6    | 2     |
| >EGFR-G796!MPFGCLLDY\ | 203   | >EGFR-G796!MPFSCCLLDYV | 126  | 77    |

|                       |      |                       |     |     |
|-----------------------|------|-----------------------|-----|-----|
| >EGFR-G796!MPFGCLLDY\ | 131  | >EGFR-G796!MPFSCLLDYV | 171 | 40  |
| >EGFR-G796!MPFGCLLDY\ | 399  | >EGFR-G796!MPFSCLLDYV | 667 | 268 |
| >EGFR-G796!MPFGCLLDY  | 17   | >EGFR-G796!MPFSCLLDY  | 21  | 4   |
| >EGFR-G796!MPFGCLLDY  | 770  | >EGFR-G796!MPFSCLLDY  | 251 | 519 |
| >EGFR-G796!MPFGCLLDY\ | 498  | >EGFR-G796!MPFSCLLDYV | 200 | 298 |
| >EGFR-G796!MPFGCLLDY\ | 425  | >EGFR-G796!MPFSCLLDYV | 434 | 9   |
| >EGFR-G796!MPFGCLLDY\ | 63   | >EGFR-G796!MPFSCLLDYV | 44  | 19  |
| >EGFR-G796!MPFGCLLDY\ | 282  | >EGFR-G796!MPFSCLLDYV | 174 | 108 |
| >EGFR-G796!MPFGCLLDY  | 359  | >EGFR-G796!MPFSCLLDY  | 108 | 251 |
| >EGFR-G796!MPFGCLLDY  | 480  | >EGFR-G796!MPFSCLLDY  | 62  | 418 |
| >EGFR-G796!MPFGCLLDY  | 297  | >EGFR-G796!MPFSCLLDY  | 590 | 293 |
| >EGFR-G796!MPFGCLLDY  | 8    | >EGFR-G796!MPFSCLLDY  | 8   | 0   |
| >EGFR-G796!MPFGCLLDY\ | 80   | >EGFR-G796!MPFSCLLDYV | 75  | 5   |
| >EGFR-G796!MPFGCLLDY  | 13   | >EGFR-G796!MPFSCLLDY  | 10  | 3   |
| >EGFR-G796!MPFGCLLD   | 63   | >EGFR-G796!MPFSCLLD   | 83  | 20  |
| >EGFR-G796!MPFGCLLDY  | 254  | >EGFR-G796!MPFSCLLDY  | 567 | 313 |
| >EGFR-G796!MPFGCLLDY\ | 25   | >EGFR-G796!MPFSCLLDYV | 17  | 8   |
| >EGFR-G796!MPFGCLLDY\ | 43   | >EGFR-G796!MPFSCLLDYV | 57  | 14  |
| >EGFR-G796!MPFGCLLDY  | 616  | >EGFR-G796!MPFSCLLDY  | 259 | 357 |
| >EGFR-G796!MPFGCLLDY  | 1087 | >EGFR-G796!MPFSCLLDY  | 261 | 826 |
| >EGFR-G796!MPFGCLLDY  | 95   | >EGFR-G796!MPFSCLLDY  | 43  | 52  |
| >EGFR-G796!MPFGCLLDY  | 101  | >EGFR-G796!MPFSCLLDY  | 378 | 277 |
| >EGFR-G796!MPFGCLLDY  | 494  | >EGFR-G796!MPFSCLLDY  | 834 | 340 |
| >EGFR-G796!MPFGCLLDY\ | 32   | >EGFR-G796!MPFSCLLDYV | 40  | 8   |
| >EGFR-G796!LMPFGCLLDY | 930  | >EGFR-G796!LMPFSCLLDY | 482 | 448 |
| >EGFR-G796!LMPFGCLL   | 297  | >EGFR-G796!LMPFSCLL   | 171 | 126 |
| >EGFR-G796!LMPFGCLLDY | 24   | >EGFR-G796!LMPFSCLLDY | 25  | 1   |
| >EGFR-G796!LMPFGCLL   | 71   | >EGFR-G796!LMPFSCLL   | 31  | 40  |
| >EGFR-G796!LMPFGCLLDY | 12   | >EGFR-G796!LMPFSCLLDY | 10  | 2   |
| >EGFR-G796!LMPFGCLL   | 80   | >EGFR-G796!LMPFSCLL   | 58  | 22  |
| >EGFR-G796!LMPFGCLLDY | 8    | >EGFR-G796!LMPFSCLLDY | 8   | 0   |
| >EGFR-G796!LMPFGCLL   | 248  | >EGFR-G796!LMPFSCLL   | 260 | 12  |
| >EGFR-G796!LMPFGCLLDY | 12   | >EGFR-G796!LMPFSCLLDY | 15  | 3   |
| >EGFR-G796!LMPFGCLL   | 35   | >EGFR-G796!LMPFSCLL   | 48  | 13  |
| >EGFR-G796!LMPFGCLLDY | 3    | >EGFR-G796!LMPFSCLLDY | 4   | 1   |
| >EGFR-G796!LMPFGCLL   | 522  | >EGFR-G796!LMPFSCLL   | 386 | 136 |
| >EGFR-G796!LMPFGCLLDY | 14   | >EGFR-G796!LMPFSCLLDY | 15  | 1   |
| >EGFR-G796!LMPFGCLL   | 83   | >EGFR-G796!LMPFSCLL   | 116 | 33  |
| >EGFR-G796!LMPFGCLLDY | 8    | >EGFR-G796!LMPFSCLLDY | 10  | 2   |
| >EGFR-G796!LMPFGCLL   | 489  | >EGFR-G796!LMPFSCLL   | 219 | 270 |
| >EGFR-G796!LMPFGCLLDY | 6    | >EGFR-G796!LMPFSCLLDY | 7   | 1   |
| >EGFR-G796!LMPFGCLL   | 8    | >EGFR-G796!LMPFSCLL   | 10  | 2   |
| >EGFR-G796!LMPFGCLLDY | 3    | >EGFR-G796!LMPFSCLLDY | 4   | 1   |

|                       |      |                       |     |      |
|-----------------------|------|-----------------------|-----|------|
| >EGFR-G796!LMPFGCLLDY | 254  | >EGFR-G796!LMPFSCLLDY | 385 | 131  |
| >EGFR-G796!LMPFGCLLDY | 326  | >EGFR-G796!LMPFSCLLDY | 121 | 205  |
| >EGFR-G796!LMPFGCLLDY | 259  | >EGFR-G796!LMPFSCLLDY | 319 | 60   |
| >EGFR-G796!LMPFGCLLDY | 97   | >EGFR-G796!LMPFSCLLDY | 140 | 43   |
| >EGFR-G796!LMPFGCLLDY | 117  | >EGFR-G796!LMPFSCLLDY | 101 | 16   |
| >EGFR-G796!LMPFGCLLDY | 596  | >EGFR-G796!LMPFSCLLDY | 142 | 454  |
| >EGFR-G796!LMPFGCLL   | 9    | >EGFR-G796!LMPFSCLL   | 9   | 0    |
| >EGFR-G796!LMPFGCLLDY | 509  | >EGFR-G796!LMPFSCLLDY | 168 | 341  |
| >EGFR-G796!LMPFGCLLDY | 344  | >EGFR-G796!LMPFSCLLDY | 238 | 106  |
| >EGFR-G796!QLMPFGCL   | 215  | >EGFR-G796!QLMPFSCL   | 48  | 167  |
| >EGFR-G796!QLMPFGCLL  | 39   | >EGFR-G796!QLMPFSCLL  | 15  | 24   |
| >EGFR-G796!QLMPFGCL   | 30   | >EGFR-G796!QLMPFSCL   | 9   | 21   |
| >EGFR-G796!QLMPFGCLL  | 8    | >EGFR-G796!QLMPFSCLL  | 4   | 4    |
| >EGFR-G796!QLMPFGCL   | 212  | >EGFR-G796!QLMPFSCL   | 81  | 131  |
| >EGFR-G796!QLMPFGCLL  | 53   | >EGFR-G796!QLMPFSCLL  | 29  | 24   |
| >EGFR-G796!QLMPFGCL   | 201  | >EGFR-G796!QLMPFSCL   | 58  | 143  |
| >EGFR-G796!QLMPFGCLL  | 45   | >EGFR-G796!QLMPFSCLL  | 22  | 23   |
| >EGFR-G796!QLMPFGCL   | 123  | >EGFR-G796!QLMPFSCL   | 65  | 58   |
| >EGFR-G796!QLMPFGCLL  | 17   | >EGFR-G796!QLMPFSCLL  | 14  | 3    |
| >EGFR-G796!QLMPFGCL   | 120  | >EGFR-G796!QLMPFSCL   | 29  | 91   |
| >EGFR-G796!QLMPFGCLL  | 42   | >EGFR-G796!QLMPFSCLL  | 17  | 25   |
| >EGFR-G796!QLMPFGCL   | 485  | >EGFR-G796!QLMPFSCL   | 202 | 283  |
| >EGFR-G796!QLMPFGCLL  | 96   | >EGFR-G796!QLMPFSCLL  | 62  | 34   |
| >EGFR-G796!QLMPFGCL   | 77   | >EGFR-G796!QLMPFSCL   | 13  | 64   |
| >EGFR-G796!QLMPFGCLL  | 37   | >EGFR-G796!QLMPFSCLL  | 8   | 29   |
| >EGFR-G796!QLMPFGCL   | 36   | >EGFR-G796!QLMPFSCL   | 11  | 25   |
| >EGFR-G796!QLMPFGCLL  | 4    | >EGFR-G796!QLMPFSCLL  | 3   | 1    |
| >EGFR-G796!QLMPFGCLL  | 522  | >EGFR-G796!QLMPFSCLLD | 293 | 229  |
| >EGFR-G796!QLMPFGCLL  | 15   | >EGFR-G796!QLMPFSCLLD | 15  | 0    |
| >EGFR-G796!QLMPFGCLL  | 328  | >EGFR-G796!QLMPFSCLLD | 225 | 103  |
| >EGFR-G796!QLMPFGCLL  | 2135 | >EGFR-G796!QLMPFSCLL  | 244 | 1891 |
| >EGFR-G796!QLMPFGCLL  | 1222 | >EGFR-G796!QLMPFSCLL  | 255 | 967  |
| >EGFR-G796!QLMPFGCLL  | 639  | >EGFR-G796!QLMPFSCLL  | 156 | 483  |
| >EGFR-G796!QLMPFGCLL  | 23   | >EGFR-G796!QLMPFSCLLD | 18  | 5    |
| >EGFR-G796!QLMPFGCL   | 1080 | >EGFR-G796!QLMPFSCL   | 223 | 857  |
| >EGFR-G796!QLMPFGCLL  | 111  | >EGFR-G796!QLMPFSCLLD | 95  | 16   |
| >EGFR-G796!QLMPFGCLL  | 92   | >EGFR-G796!QLMPFSCLLD | 114 | 22   |
| >EGFR-G796!QLMPFGCL   | 1014 | >EGFR-G796!QLMPFSCL   | 213 | 801  |
| >EGFR-G796!QLMPFGCLL  | 124  | >EGFR-G796!QLMPFSCLLD | 92  | 32   |
| >EGFR-G796!QLMPFGCLL  | 537  | >EGFR-G796!QLMPFSCLLD | 371 | 166  |
| >EGFR-G796!TQLMPFGCL  | 623  | >EGFR-G796!TQLMPFSCLL | 409 | 214  |
| >EGFR-G796!TQLMPFGC   | 325  | >EGFR-G796!TQLMPFSC   | 258 | 67   |
| >EGFR-G796!TQLMPFGCL  | 200  | >EGFR-G796!TQLMPFSCL  | 64  | 136  |

|                        |       |                        |      |       |
|------------------------|-------|------------------------|------|-------|
| >EGFR-G796!TQLMPFGCLI  | 128   | >EGFR-G796!TQLMPFSCLL  | 128  | 0     |
| >EGFR-G796!TQLMPFGCL   | 581   | >EGFR-G796!TQLMPFSCL   | 25   | 556   |
| >EGFR-G796!TQLMPFGCLI  | 251   | >EGFR-G796!TQLMPFSCLL  | 86   | 165   |
| >EGFR-G796!TQLMPFGCL   | 626   | >EGFR-G796!TQLMPFSCL   | 121  | 505   |
| >EGFR-G796!TQLMPFGCLI  | 420   | >EGFR-G796!TQLMPFSCLL  | 131  | 289   |
| >EGFR-G796!ITQLMPFGCL  | 365   | >EGFR-G796!ITQLMPFSCL  | 140  | 225   |
| >EGFR-G796!ITQLMPFGCL  | 17    | >EGFR-G796!ITQLMPFSCLI | 14   | 3     |
| >EGFR-G796!ITQLMPFGCL  | 719   | >EGFR-G796!ITQLMPFSCL  | 366  | 353   |
| >EGFR-G796!ITQLMPFGCL  | 120   | >EGFR-G796!ITQLMPFSCLI | 79   | 41    |
| >EGFR-G796!ITQLMPFGCL  | 187   | >EGFR-G796!ITQLMPFSCL  | 253  | 66    |
| >EGFR-G796!ITQLMPFGCL  | 132   | >EGFR-G796!ITQLMPFSCLI | 104  | 28    |
| >EGFR-G796!ITQLMPFGCL  | 686   | >EGFR-G796!ITQLMPFSCL  | 171  | 515   |
| >EGFR-G796!LITQLMPFGC  | 623   | >EGFR-G796!LITQLMPFSCL | 134  | 489   |
| >EGFR-G796!QLITQLMPFGC | 502   | >EGFR-G796!QLITQLMPFS  | 364  | 138   |
| >EGFR-G810!GSQYLLNW    | 29    | >EGFR-G810!DSQYLLNW    | 705  | 676   |
| >EGFR-G810!GSQYLLNW    | 328   | >EGFR-G810!DSQYLLNW    | 1865 | 1537  |
| >EGFR-G810!GSQYLLNW    | 47    | >EGFR-G810!DSQYLLNW    | 858  | 811   |
| >EGFR-G810!IGSQYLLNW   | 58    | >EGFR-G810!IDSQYLLNW   | 3488 | 3430  |
| >EGFR-G810!IGSQYLLNW   | 35    | >EGFR-G810!IDSQYLLNW   | 2806 | 2771  |
| >EGFR-G810!IGSQYLLNWC  | 12834 | >EGFR-G810!IDSQYLLNWC  | 127  | 12707 |
| >EGFR-G810!NIGSQYLL    | 248   | >EGFR-G810!NIDSQYLL    | 214  | 34    |
| >EGFR-G810!DNIGSQYLL   | 620   | >EGFR-G810!DNIDSQYLL   | 347  | 273   |
| >EGFR-G810!KDNIGSQYLL  | 329   | >EGFR-G810!KDNIDSQYLL  | 163  | 166   |
| >EGFR-G810!HKDNIGSQY   | 198   | >EGFR-G810!HKDNIDSQY   | 942  | 744   |
| >EGFR-G810!HKDNIGSQYL  | 372   | >EGFR-G810!HKDNIDSQYL  | 860  | 488   |
| >EGFR-G810!HKDNIGSQYL  | 71    | >EGFR-G810!HKDNIDSQYL  | 125  | 54    |
| >EGFR-G810!HKDNIGSQY   | 125   | >EGFR-G810!HKDNIDSQY   | 570  | 445   |
| >EGFR-G810!REHKDNIGSC  | 364   | >EGFR-G810!REHKDNIDSC  | 580  | 216   |
| >EGFR-G810!REHKDNIGSC  | 104   | >EGFR-G810!REHKDNIDSC  | 249  | 145   |
| >EGFR-G810!REHKDNIGSC  | 360   | >EGFR-G810!REHKDNIDSC  | 367  | 7     |
| >EGFR-G810!REHKDNIGS   | 394   | >EGFR-G810!REHKDNIDS   | 618  | 224   |
| >EGFR-G810!REHKDNIGSC  | 362   | >EGFR-G810!REHKDNIDSC  | 775  | 413   |
| >EGFR-G810!GSQYLLNWC   | 2146  | >EGFR-G810!SSQYLLNWC   | 384  | 1762  |
| >EGFR-G810!GSQYLLNW    | 29    | >EGFR-G810!SSQYLLNW    | 22   | 7     |
| >EGFR-G810!GSQYLLNW    | 328   | >EGFR-G810!SSQYLLNW    | 232  | 96    |
| >EGFR-G810!GSQYLLNW    | 47    | >EGFR-G810!SSQYLLNW    | 36   | 11    |
| >EGFR-G810!GSQYLLNWC   | 1216  | >EGFR-G810!SSQYLLNWC   | 285  | 931   |
| >EGFR-G810!IGSQYLLNWC  | 936   | >EGFR-G810!ISSQYLLNWC  | 359  | 577   |
| >EGFR-G810!IGSQYLLNW   | 58    | >EGFR-G810!ISSQYLLNW   | 4    | 54    |
| >EGFR-G810!IGSQYLLNW   | 596   | >EGFR-G810!ISSQYLLNW   | 206  | 390   |
| >EGFR-G810!IGSQYLLNW   | 523   | >EGFR-G810!ISSQYLLNW   | 50   | 473   |
| >EGFR-G810!IGSQYLLNW   | 35    | >EGFR-G810!ISSQYLLNW   | 10   | 25    |
| >EGFR-G810!IGSQYLLNW   | 739   | >EGFR-G810!ISSQYLLNW   | 304  | 435   |

|                        |       |                        |      |       |
|------------------------|-------|------------------------|------|-------|
| >EGFR-G810!IGSQYLLNW   | 1048  | >EGFR-G810!ISSQYLLNW   | 256  | 792   |
| >EGFR-G810!NIGSQYLL    | 248   | >EGFR-G810!NISSQYLL    | 35   | 213   |
| >EGFR-G810!NIGSQYLL    | 1762  | >EGFR-G810!NISSQYLL    | 180  | 1582  |
| >EGFR-G810!KDNIGSQYLL  | 329   | >EGFR-G810!KDNISSQYLL  | 106  | 223   |
| >EGFR-G810!HKDNIGSQY   | 198   | >EGFR-G810!HKDNISSQY   | 233  | 35    |
| >EGFR-G810!HKDNIGSQYL  | 372   | >EGFR-G810!HKDNISSQYL  | 211  | 161   |
| >EGFR-G810!HKDNIGSQYL  | 71    | >EGFR-G810!HKDNISSQYL  | 40   | 31    |
| >EGFR-G810!HKDNIGSQY   | 125   | >EGFR-G810!HKDNISSQY   | 147  | 22    |
| >EGFR-G810!REHKDNIGSC  | 364   | >EGFR-G810!REHKDNISSQ  | 239  | 125   |
| >EGFR-G810!REHKDNIGSC  | 104   | >EGFR-G810!REHKDNISSQ  | 78   | 26    |
| >EGFR-G810!REHKDNIGS   | 1350  | >EGFR-G810!REHKDNISS   | 250  | 1100  |
| >EGFR-G810!REHKDNIGSC  | 360   | >EGFR-G810!REHKDNISSQ  | 401  | 41    |
| >EGFR-G810!REHKDNIGS   | 394   | >EGFR-G810!REHKDNISS   | 267  | 127   |
| >EGFR-G810!REHKDNIGSC  | 362   | >EGFR-G810!REHKDNISSQ  | 354  | 8     |
| >EGFR-G857!GLAKLLGA    | 216   | >EGFR-G857!ELAKLLGA    | 6722 | 6506  |
| >EGFR-G857!GLAKLLGA    | 32    | >EGFR-G857!ELAKLLGA    | 538  | 506   |
| >EGFR-G857!GLAKLLGA    | 13    | >EGFR-G857!ELAKLLGA    | 229  | 216   |
| >EGFR-G857!GLAKLLGA    | 235   | >EGFR-G857!ELAKLLGA    | 1511 | 1276  |
| >EGFR-G857!GLAKLLGA    | 151   | >EGFR-G857!ELAKLLGA    | 1259 | 1108  |
| >EGFR-G857!GLAKLLGA    | 251   | >EGFR-G857!ELAKLLGA    | 5973 | 5722  |
| >EGFR-G857!GLAKLLGA    | 44    | >EGFR-G857!ELAKLLGA    | 635  | 591   |
| >EGFR-G857!GLAKLLGA    | 31    | >EGFR-G857!ELAKLLGA    | 334  | 303   |
| >EGFR-G857!GLAKLLGAEE  | 347   | >EGFR-G857!ELAKLLGAEEI | 2935 | 2588  |
| >EGFR-G857!GLAKLLGAEE  | 2620  | >EGFR-G857!ELAKLLGAEEI | 45   | 2575  |
| >EGFR-G857!FGLAKLLGA   | 123   | >EGFR-G857!FELAKLLGA   | 105  | 18    |
| >EGFR-G857!FGLAKLLGA   | 36756 | >EGFR-G857!FELAKLLGA   | 63   | 36693 |
| >EGFR-G857!FGLAKLLGA   | 40529 | >EGFR-G857!FELAKLLGA   | 332  | 40197 |
| >EGFR-G857!FGLAKLLGA   | 37521 | >EGFR-G857!FELAKLLGA   | 389  | 37132 |
| >EGFR-G857!ITDFGLAKLL  | 145   | >EGFR-G857!ITDFELAKLL  | 38   | 107   |
| >EGFR-G857!ITDFGLAKL   | 624   | >EGFR-G857!ITDFELAKL   | 479  | 145   |
| >EGFR-G857!ITDFGLAKLL  | 352   | >EGFR-G857!ITDFELAKLL  | 251  | 101   |
| >EGFR-G857!ITDFGLAKLLG | 657   | >EGFR-G857!ITDFELAKLLG | 423  | 234   |
| >EGFR-G857!ITDFGLAKLL  | 295   | >EGFR-G857!ITDFELAKLL  | 149  | 146   |
| >EGFR-G857!ITDFGLAK    | 290   | >EGFR-G857!ITDFELAK    | 909  | 619   |
| >EGFR-G857!ITDFGLAK    | 33    | >EGFR-G857!ITDFELAK    | 41   | 8     |
| >EGFR-G857!ITDFGLAK    | 558   | >EGFR-G857!ITDFELAK    | 313  | 245   |
| >EGFR-G857!ITDFGLAKL   | 6     | >EGFR-G857!ITDFELAKL   | 15   | 9     |
| >EGFR-G857!ITDFGLAKLL  | 15    | >EGFR-G857!ITDFELAKLL  | 29   | 14    |
| >EGFR-G857!ITDFGLAKL   | 748   | >EGFR-G857!ITDFELAKL   | 411  | 337   |
| >EGFR-G857!ITDFGLAKLL  | 276   | >EGFR-G857!ITDFELAKLL  | 188  | 88    |
| >EGFR-G857!ITDFGLAKL   | 97    | >EGFR-G857!ITDFELAKL   | 484  | 387   |
| >EGFR-G857!ITDFGLAK    | 474   | >EGFR-G857!ITDFELAK    | 549  | 75    |
| >EGFR-G857!KITDFGLA    | 883   | >EGFR-G857!KITDFELA    | 266  | 617   |



|                        |       |                        |      |       |
|------------------------|-------|------------------------|------|-------|
| >EGFR-G857IKITDFGLAKL  | 91    | >EGFR-G857IKITDFELAKL  | 71   | 20    |
| >EGFR-G857IKITDFGLAKLL | 228   | >EGFR-G857IKITDFELAKLL | 236  | 8     |
| >EGFR-G857IKITDFGLA    | 348   | >EGFR-G857IKITDFELA    | 1089 | 741   |
| >EGFR-G857IKITDFGLAKL  | 81    | >EGFR-G857IKITDFELAKL  | 120  | 39    |
| >EGFR-G857IKITDFGLA    | 117   | >EGFR-G857IKITDFELA    | 70   | 47    |
| >EGFR-G857IKITDFGLAKL  | 432   | >EGFR-G857IKITDFELAKL  | 255  | 177   |
| >EGFR-G857IKITDFGLAKLL | 462   | >EGFR-G857IKITDFELAKLL | 557  | 95    |
| >EGFR-G857IKITDFGLAKL  | 188   | >EGFR-G857IKITDFELAKL  | 362  | 174   |
| >EGFR-G857IKITDFGLAKL  | 478   | >EGFR-G857IKITDFELAKL  | 815  | 337   |
| >EGFR-G857IKITDFGLA    | 751   | >EGFR-G857IKITDFELA    | 329  | 422   |
| >EGFR-G857IKITDFGLAKL  | 29    | >EGFR-G857IKITDFELAKL  | 40   | 11    |
| >EGFR-G857IKITDFGLAKLL | 183   | >EGFR-G857IKITDFELAKLL | 183  | 0     |
| >EGFR-G857IKITDFGLAK   | 102   | >EGFR-G857IKITDFELAK   | 172  | 70    |
| >EGFR-G857IKITDFGLAK   | 17    | >EGFR-G857IKITDFELAK   | 23   | 6     |
| >EGFR-G857IKITDFGLAK   | 22    | >EGFR-G857IKITDFELAK   | 60   | 38    |
| >EGFR-G857IKITDFGLAK   | 98    | >EGFR-G857IKITDFELAK   | 71   | 27    |
| >EGFR-G857IVKITDFGL    | 279   | >EGFR-G857IVKITDFEL    | 88   | 191   |
| >EGFR-G857IVKITDFGLAK  | 252   | >EGFR-G857IVKITDFELAK  | 285  | 33    |
| >EGFR-G857IVKITDFGLAKI | 295   | >EGFR-G857IVKITDFELAKI | 175  | 120   |
| >EGFR-G857IHVKITDFGLA  | 276   | >EGFR-G857IHVKITDFELAI | 308  | 32    |
| >EGFR-G857IHVKITDFG    | 229   | >EGFR-G857IHVKITDFE    | 1664 | 1435  |
| >EGFR-G857IHVKITDFGL   | 168   | >EGFR-G857IHVKITDFEL   | 88   | 80    |
| >EGFR-G857IHVKITDFGLA  | 33    | >EGFR-G857IHVKITDFELA  | 126  | 93    |
| >EGFR-G857IHVKITDFGLA  | 4     | >EGFR-G857IHVKITDFELAI | 5    | 1     |
| >EGFR-G857IHVKITDFGLA  | 201   | >EGFR-G857IHVKITDFELAI | 248  | 47    |
| >EGFR-G857IHVKITDFGLA  | 130   | >EGFR-G857IHVKITDFELAI | 68   | 62    |
| >EGFR-G857IHVKITDFGL   | 328   | >EGFR-G857IHVKITDFEL   | 525  | 197   |
| >EGFR-G857IQHVKITDFGL  | 380   | >EGFR-G857IQHVKITDFEL  | 245  | 135   |
| >EGFR-G857IGLAKLLGA    | 216   | >EGFR-G857IRLAKLLGA    | 169  | 47    |
| >EGFR-G857IGLAKLLGA    | 32    | >EGFR-G857IRLAKLLGA    | 38   | 6     |
| >EGFR-G857IGLAKLLGA    | 13    | >EGFR-G857IRLAKLLGA    | 9    | 4     |
| >EGFR-G857IGLAKLLGA    | 235   | >EGFR-G857IRLAKLLGA    | 85   | 150   |
| >EGFR-G857IGLAKLLGA    | 151   | >EGFR-G857IRLAKLLGA    | 70   | 81    |
| >EGFR-G857IGLAKLLGA    | 251   | >EGFR-G857IRLAKLLGA    | 492  | 241   |
| >EGFR-G857IGLAKLLGA    | 44    | >EGFR-G857IRLAKLLGA    | 73   | 29    |
| >EGFR-G857IGLAKLLGA    | 31    | >EGFR-G857IRLAKLLGA    | 41   | 10    |
| >EGFR-G857IGLAKLLGAEE  | 347   | >EGFR-G857IRLAKLLGAEEI | 76   | 271   |
| >EGFR-G857IGLAKLLGAEE  | 630   | >EGFR-G857IRLAKLLGAEEI | 288  | 342   |
| >EGFR-G857IFGLAKLLGA   | 123   | >EGFR-G857IFRLAKLLGA   | 1387 | 1264  |
| >EGFR-G857IFGLAKLLGA   | 21323 | >EGFR-G857IFRLAKLLGA   | 168  | 21155 |
| >EGFR-G857ITPQHVKITDF  | 38073 | >EGFR-G857ITPQHVKITDF  | 144  | 37929 |
| >EGFR-G857ITDFGLAKLL   | 145   | >EGFR-G857ITDFRLAKLL   | 38   | 107   |
| >EGFR-G857ITDFGLAKLL   | 352   | >EGFR-G857ITDFRLAKLL   | 518  | 166   |

|                        |       |                        |      |       |
|------------------------|-------|------------------------|------|-------|
| >EGFR-G857ITDFGLAKLL   | 295   | >EGFR-G857ITDFRLAKLL   | 284  | 11    |
| >EGFR-G857IITDFGLAK    | 290   | >EGFR-G857IITDFRLAK    | 151  | 139   |
| >EGFR-G857IITDFGLAK    | 33    | >EGFR-G857IITDFRLAK    | 27   | 6     |
| >EGFR-G857IITDFGLAK    | 558   | >EGFR-G857IITDFRLAK    | 265  | 293   |
| >EGFR-G857IITDFGLAKL   | 6     | >EGFR-G857IITDFRLAKL   | 8    | 2     |
| >EGFR-G857IITDFGLAKLL  | 15    | >EGFR-G857IITDFRLAKLL  | 24   | 9     |
| >EGFR-G857IITDFGLAKLL  | 276   | >EGFR-G857IITDFRLAKLL  | 338  | 62    |
| >EGFR-G857IITDFGLAKL   | 97    | >EGFR-G857IITDFRLAKL   | 230  | 133   |
| >EGFR-G857IITDFGLAK    | 474   | >EGFR-G857IITDFRLAK    | 438  | 36    |
| >EGFR-G857IITDFGLAKLL  | 613   | >EGFR-G857IITDFRLAKLL  | 380  | 233   |
| >EGFR-G857IKITDFGLAKL  | 91    | >EGFR-G857IKITDFRLAKL  | 142  | 51    |
| >EGFR-G857IKITDFGLAKLL | 228   | >EGFR-G857IKITDFRLAKLL | 400  | 172   |
| >EGFR-G857IKITDFGLA    | 348   | >EGFR-G857IKITDFRLA    | 1088 | 740   |
| >EGFR-G857IKITDFGLAKL  | 81    | >EGFR-G857IKITDFRLAKL  | 149  | 68    |
| >EGFR-G857IKITDFGLA    | 117   | >EGFR-G857IKITDFRLA    | 338  | 221   |
| >EGFR-G857IKITDFGLAKL  | 432   | >EGFR-G857IKITDFRLAKL  | 449  | 17    |
| >EGFR-G857IKITDFGLAKLL | 462   | >EGFR-G857IKITDFRLAKLL | 859  | 397   |
| >EGFR-G857IKITDFGLAKL  | 188   | >EGFR-G857IKITDFRLAKL  | 781  | 593   |
| >EGFR-G857IKITDFGLAKL  | 478   | >EGFR-G857IKITDFRLAKL  | 1977 | 1499  |
| >EGFR-G857IKITDFGLAKL  | 29    | >EGFR-G857IKITDFRLAKL  | 35   | 6     |
| >EGFR-G857IKITDFGLAKLL | 183   | >EGFR-G857IKITDFRLAKLL | 201  | 18    |
| >EGFR-G857IKITDFGLAK   | 102   | >EGFR-G857IKITDFRLAK   | 74   | 28    |
| >EGFR-G857IKITDFGLAK   | 17    | >EGFR-G857IKITDFRLAK   | 14   | 3     |
| >EGFR-G857IKITDFGLAK   | 22    | >EGFR-G857IKITDFRLAK   | 9    | 13    |
| >EGFR-G857IKITDFGLAK   | 1216  | >EGFR-G857IKITDFRLAK   | 201  | 1015  |
| >EGFR-G857IKITDFGLAK   | 98    | >EGFR-G857IKITDFRLAK   | 56   | 42    |
| >EGFR-G857IVKITDFGL    | 279   | >EGFR-G857IVKITDFRL    | 275  | 4     |
| >EGFR-G857IVKITDFGLAK  | 252   | >EGFR-G857IVKITDFRLAK  | 221  | 31    |
| >EGFR-G857IVKITDFGLAKI | 295   | >EGFR-G857IVKITDFRLAKI | 187  | 108   |
| >EGFR-G857IHVKITDFGLA  | 520   | >EGFR-G857IHVKITDFRLAI | 377  | 143   |
| >EGFR-G857IHVKITDFGLA  | 276   | >EGFR-G857IHVKITDFRLAI | 237  | 39    |
| >EGFR-G857IHVKITDFG    | 229   | >EGFR-G857IHVKITDFR    | 71   | 158   |
| >EGFR-G857IHVKITDFGL   | 168   | >EGFR-G857IHVKITDFRL   | 136  | 32    |
| >EGFR-G857IHVKITDFGLA  | 33    | >EGFR-G857IHVKITDFRLA  | 26   | 7     |
| >EGFR-G857IHVKITDFGLA  | 4     | >EGFR-G857IHVKITDFRLAI | 4    | 0     |
| >EGFR-G857IHVKITDFG    | 14121 | >EGFR-G857IHVKITDFR    | 10   | 14111 |
| >EGFR-G857IHVKITDFGLA  | 201   | >EGFR-G857IHVKITDFRLAI | 76   | 125   |
| >EGFR-G857IHVKITDFG    | 22614 | >EGFR-G857IHVKITDFR    | 29   | 22585 |
| >EGFR-G857IHVKITDFG    | 18261 | >EGFR-G857IHVKITDFR    | 6    | 18255 |
| >EGFR-G857IHVKITDFGLA  | 130   | >EGFR-G857IHVKITDFRLAI | 66   | 64    |
| >EGFR-G857IHVKITDFGL   | 328   | >EGFR-G857IHVKITDFRL   | 269  | 59    |
| >EGFR-G857IHVKITDFG    | 32875 | >EGFR-G857IHVKITDFR    | 61   | 32814 |
| >EGFR-G857IQHVKITDFG   | 34918 | >EGFR-G857IQHVKITDFR   | 85   | 34833 |

|                       |       |                       |      |       |
|-----------------------|-------|-----------------------|------|-------|
| >EGFR-G857IQHVKITDFGL | 380   | >EGFR-G857IQHVKITDFRL | 484  | 104   |
| >EGFR-G857IQHVKITDFG  | 32135 | >EGFR-G857IQHVKITDFR  | 48   | 32087 |
| >EGFR-G863ILGAEKEY    | 425   | >EGFR-G863ILDAEKEY    | 2762 | 2337  |
| >EGFR-G863ILGAEKEYH,  | 1255  | >EGFR-G863ILLDAEKEYH, | 334  | 921   |
| >EGFR-G863ILGAEKEYH,  | 248   | >EGFR-G863ILLDAEKEYH, | 244  | 4     |
| >EGFR-G863ILGAEKEYH,  | 181   | >EGFR-G863ILLDAEKEYH, | 70   | 111   |
| >EGFR-G863ILGAEKEYH,  | 186   | >EGFR-G863ILLDAEKEYH, | 100  | 86    |
| >EGFR-G863ILGAEKEYH,  | 194   | >EGFR-G863ILLDAEKEYH, | 78   | 116   |
| >EGFR-G863ILGAEKEYH,  | 24    | >EGFR-G863ILLDAEKEYH, | 31   | 7     |
| >EGFR-G863KLLGAEK     | 169   | >EGFR-G863KLLDAEK     | 378  | 209   |
| >EGFR-G863KLLGAEK     | 322   | >EGFR-G863KLLDAEK     | 234  | 88    |
| >EGFR-G863KLLGAEKEY   | 552   | >EGFR-G863KLLDAEKEY   | 312  | 240   |
| >EGFR-G863KLLGAEKEY   | 551   | >EGFR-G863KLLDAEKEY   | 349  | 202   |
| >EGFR-G863AKLLGAEKE'  | 23    | >EGFR-G863AKLLDAEKE'  | 23   | 0     |
| >EGFR-G863LAKLLGAEK   | 377   | >EGFR-G863LAKLLDAEK   | 961  | 584   |
| >EGFR-G863GLAKLLGA    | 216   | >EGFR-G863GLAKLLDA    | 737  | 521   |
| >EGFR-G863GLAKLLGA    | 32    | >EGFR-G863GLAKLLDA    | 106  | 74    |
| >EGFR-G863GLAKLLGA    | 13    | >EGFR-G863GLAKLLDA    | 38   | 25    |
| >EGFR-G863GLAKLLGA    | 235   | >EGFR-G863GLAKLLDA    | 1244 | 1009  |
| >EGFR-G863GLAKLLGA    | 151   | >EGFR-G863GLAKLLDA    | 1289 | 1138  |
| >EGFR-G863GLAKLLGA    | 251   | >EGFR-G863GLAKLLDA    | 1161 | 910   |
| >EGFR-G863GLAKLLGA    | 44    | >EGFR-G863GLAKLLDA    | 83   | 39    |
| >EGFR-G863GLAKLLGA    | 31    | >EGFR-G863GLAKLLDA    | 82   | 51    |
| >EGFR-G863GLAKLLGAEE  | 347   | >EGFR-G863GLAKLLDAEE  | 1068 | 721   |
| >EGFR-G863IFGLAKLLGA  | 123   | >EGFR-G863IFGLAKLLDA  | 2552 | 2429  |
| >EGFR-G863!LGAEKEY    | 1269  | >EGFR-G863!LSAEKEY    | 306  | 963   |
| >EGFR-G863!LGAEKEY    | 4606  | >EGFR-G863!LSAEKEY    | 18   | 4588  |
| >EGFR-G863!LGAEKEY    | 425   | >EGFR-G863!LSAEKEY    | 376  | 49    |
| >EGFR-G863!LLGAEKEYH, | 248   | >EGFR-G863!LLSAEKEYH/ | 35   | 213   |
| >EGFR-G863!LLGAEKEYH, | 2439  | >EGFR-G863!LLSAEKEYH/ | 299  | 2140  |
| >EGFR-G863!LLGAEKEYH, | 181   | >EGFR-G863!LLSAEKEYH/ | 295  | 114   |
| >EGFR-G863!LLGAEKEYH, | 186   | >EGFR-G863!LLSAEKEYH/ | 230  | 44    |
| >EGFR-G863!LLGAEKEYH, | 194   | >EGFR-G863!LLSAEKEYH/ | 222  | 28    |
| >EGFR-G863!LLGAEKEYH, | 24    | >EGFR-G863!LLSAEKEYH/ | 18   | 6     |
| >EGFR-G863!LLGAEKEY   | 615   | >EGFR-G863!LLSAEKEY   | 413  | 202   |
| >EGFR-G863!KLLGAEK    | 169   | >EGFR-G863!KLLSAEK    | 128  | 41    |
| >EGFR-G863!KLLGAEK    | 322   | >EGFR-G863!KLLSAEK    | 172  | 150   |
| >EGFR-G863!KLLGAEK    | 623   | >EGFR-G863!KLLSAEK    | 410  | 213   |
| >EGFR-G863!KLLGAEKEY  | 833   | >EGFR-G863!KLLSAEKEY  | 387  | 446   |
| >EGFR-G863!KLLGAEKEY  | 552   | >EGFR-G863!KLLSAEKEY  | 84   | 468   |
| >EGFR-G863!AKLLGAEK   | 1973  | >EGFR-G863!AKLLSAEK   | 469  | 1504  |
| >EGFR-G863!AKLLGAEKE' | 23    | >EGFR-G863!AKLLSAEKEY | 12   | 11    |
| >EGFR-G863!LAKLLGAEK  | 377   | >EGFR-G863!LAKLLSAEK  | 159  | 218   |

|                       |       |                        |      |       |
|-----------------------|-------|------------------------|------|-------|
| >EGFR-G863!LAKLLGAEEK | 1217  | >EGFR-G863!LAKLLSAEEK  | 316  | 901   |
| >EGFR-G863!GLAKLLGA   | 216   | >EGFR-G863!GLAKLLSA    | 124  | 92    |
| >EGFR-G863!GLAKLLGA   | 32    | >EGFR-G863!GLAKLLSA    | 21   | 11    |
| >EGFR-G863!GLAKLLGA   | 13    | >EGFR-G863!GLAKLLSA    | 10   | 3     |
| >EGFR-G863!GLAKLLGA   | 235   | >EGFR-G863!GLAKLLSA    | 264  | 29    |
| >EGFR-G863!GLAKLLGA   | 151   | >EGFR-G863!GLAKLLSA    | 163  | 12    |
| >EGFR-G863!GLAKLLGA   | 251   | >EGFR-G863!GLAKLLSA    | 224  | 27    |
| >EGFR-G863!GLAKLLGA   | 44    | >EGFR-G863!GLAKLLSA    | 47   | 3     |
| >EGFR-G863!GLAKLLGA   | 31    | >EGFR-G863!GLAKLLSA    | 16   | 15    |
| >EGFR-G863!GLAKLLGAEE | 347   | >EGFR-G863!GLAKLLSAEEI | 252  | 95    |
| >EGFR-G863!GLAKLLGAEE | 630   | >EGFR-G863!GLAKLLSAEEI | 264  | 366   |
| >EGFR-G863!FGLAKLLGA  | 123   | >EGFR-G863!FGLAKLLSA   | 85   | 38    |
| >EGFR-G863!FGLAKLLGA  | 4708  | >EGFR-G863!FGLAKLLSA   | 421  | 4287  |
| >EGFR-G863!TDFGLAKLLG | 657   | >EGFR-G863!TDFGLAKLLS/ | 209  | 448   |
| >EGFR-G873!GGKVPIKWM  | 475   | >EGFR-G873!EGKVPIKWM   | 5738 | 5263  |
| >EGFR-G873!EGGKVPIKW  | 18250 | >EGFR-G873!EEGKVPIKW   | 483  | 17767 |
| >EGFR-G873!EGGKVPIKW  | 21637 | >EGFR-G873!EEGKVPIKW   | 35   | 21602 |
| >EGFR-G873!EGGKVPIKWI | 26287 | >EGFR-G873!EEGKVPIKWI  | 16   | 26271 |
| >EGFR-G873!EGGKVPIKWI | 35588 | >EGFR-G873!EEGKVPIKWI  | 491  | 35097 |
| >EGFR-G873!AEGGKVPI   | 155   | >EGFR-G873!AEEGKVPI    | 29   | 126   |
| >EGFR-G873!AEGGKVPIKM | 2180  | >EGFR-G873!AEEGKVPIKM  | 354  | 1826  |
| >EGFR-G873!AEGGKVPI   | 177   | >EGFR-G873!AEEGKVPI    | 603  | 426   |
| >EGFR-G873!AEGGKVPIKM | 76    | >EGFR-G873!AEEGKVPIKM  | 19   | 57    |
| >EGFR-G873!AEGGKVPIKM | 137   | >EGFR-G873!AEEGKVPIKM  | 70   | 67    |
| >EGFR-G873!AEGGKVPIKM | 222   | >EGFR-G873!AEEGKVPIKM  | 388  | 166   |
| >EGFR-G873!AEGGKVPI   | 54    | >EGFR-G873!AEEGKVPI    | 78   | 24    |
| >EGFR-G873!AEGGKVPIKM | 278   | >EGFR-G873!AEEGKVPIKM  | 347  | 69    |
| >EGFR-G873!AEGGKVPI   | 110   | >EGFR-G873!AEEGKVPI    | 147  | 37    |
| >EGFR-G873!AEGGKVPIKM | 277   | >EGFR-G873!AEEGKVPIKM  | 165  | 112   |
| >EGFR-G873!HAEGGKVPIK | 176   | >EGFR-G873!HAEEGKVPIK  | 84   | 92    |
| >EGFR-G873!HAEGGKVPIK | 134   | >EGFR-G873!HAEEGKVPIK  | 112  | 22    |
| >EGFR-G873!HAEGGKVPIK | 165   | >EGFR-G873!HAEEGKVPIK  | 265  | 100   |
| >EGFR-G873!HAEGGKVPIK | 448   | >EGFR-G873!HAEEGKVPIK  | 496  | 48    |
| >EGFR-G873!HAEGGKVPIK | 476   | >EGFR-G873!HAEEGKVPIK  | 1567 | 1091  |
| >EGFR-G873!YHAEGGKVPI | 486   | >EGFR-G873!YHAEEGKVPI  | 406  | 80    |
| >EGFR-G873!YHAEGGKVPI | 306   | >EGFR-G873!YHAEEGKVPI  | 512  | 206   |
| >EGFR-G873!YHAEGGKVPI | 22    | >EGFR-G873!YHAEEGKVPI  | 35   | 13    |
| >EGFR-G873!EYHAEGGKVI | 173   | >EGFR-G873!EYHAEEGKVFI | 148  | 25    |
| >EGFR-G873!EYHAEGGKVI | 270   | >EGFR-G873!EYHAEEGKVFI | 301  | 31    |
| >EGFR-G873!EYHAEGGK   | 758   | >EGFR-G873!EYHAEEGK    | 356  | 402   |
| >EGFR-G873!KEYHAEGGK\ | 130   | >EGFR-G873!KEYHAEEGKV  | 121  | 9     |
| >EGFR-G873!KEYHAEGGK\ | 65    | >EGFR-G873!KEYHAEEGKV  | 120  | 55    |
| >EGFR-G873!EEKEYHAEG  | 142   | >EGFR-G873!EEKEYHAEE   | 282  | 140   |

|                       |       |                       |      |       |
|-----------------------|-------|-----------------------|------|-------|
| >EGFR-G873IAEEKEYHAEG | 412   | >EGFR-G873IAEEKEYHAEE | 4156 | 3744  |
| >EGFR-G873IAEEKEYHAEG | 75    | >EGFR-G873IAEEKEYHAEE | 301  | 226   |
| >EGFR-G873IAEEKEYHAEG | 580   | >EGFR-G873IAEEKEYHAEE | 419  | 161   |
| >EGFR-G874!GKVPIKWMA  | 535   | >EGFR-G874!SKVPIKWMA  | 218  | 317   |
| >EGFR-G874!GKVPIKWMA  | 544   | >EGFR-G874!SKVPIKWMA  | 121  | 423   |
| >EGFR-G874!GGKVPIKWM  | 3988  | >EGFR-G874!GSKVPIKWM  | 337  | 3651  |
| >EGFR-G874!GGKVPIKW   | 2055  | >EGFR-G874!GSKVPIKW   | 12   | 2043  |
| >EGFR-G874!GGKVPIKWM  | 8412  | >EGFR-G874!GSKVPIKWM  | 57   | 8355  |
| >EGFR-G874!GGKVPIKWM  | 13214 | >EGFR-G874!GSKVPIKWM  | 114  | 13100 |
| >EGFR-G874!GGKVPIKW   | 1236  | >EGFR-G874!GSKVPIKW   | 57   | 1179  |
| >EGFR-G874!GGKVPIKW   | 6915  | >EGFR-G874!GSKVPIKW   | 333  | 6582  |
| >EGFR-G874!GGKVPIKWM  | 475   | >EGFR-G874!GSKVPIKWM  | 32   | 443   |
| >EGFR-G874!AEEKEYHAEG | 580   | >EGFR-G874!AEEKEYHAEG | 180  | 400   |
| >EGFR-G874!AEGGKVPI   | 155   | >EGFR-G874!AEGSKVPI   | 283  | 128   |
| >EGFR-G874!AEGGKVPI   | 177   | >EGFR-G874!AEGSKVPI   | 208  | 31    |
| >EGFR-G874!AEGGKVPIKW | 76    | >EGFR-G874!AEGSKVPIKW | 85   | 9     |
| >EGFR-G874!AEGGKVPIKW | 137   | >EGFR-G874!AEGSKVPIKW | 125  | 12    |
| >EGFR-G874!AEGGKVPIKW | 222   | >EGFR-G874!AEGSKVPIKW | 230  | 8     |
| >EGFR-G874!AEGGKVPI   | 54    | >EGFR-G874!AEGSKVPI   | 73   | 19    |
| >EGFR-G874!AEGGKVPIKW | 278   | >EGFR-G874!AEGSKVPIKW | 426  | 148   |
| >EGFR-G874!AEGGKVPI   | 110   | >EGFR-G874!AEGSKVPI   | 70   | 40    |
| >EGFR-G874!AEGGKVPIKW | 277   | >EGFR-G874!AEGSKVPIKW | 247  | 30    |
| >EGFR-G874!HAEGGKVPIK | 675   | >EGFR-G874!HAEGSKVPIK | 332  | 343   |
| >EGFR-G874!HAEGGKVPIK | 176   | >EGFR-G874!HAEGSKVPIK | 98   | 78    |
| >EGFR-G874!HAEGGKVPIK | 134   | >EGFR-G874!HAEGSKVPIK | 118  | 16    |
| >EGFR-G874!HAEGGKVPIK | 165   | >EGFR-G874!HAEGSKVPIK | 76   | 89    |
| >EGFR-G874!HAEGGKVPIK | 448   | >EGFR-G874!HAEGSKVPIK | 321  | 127   |
| >EGFR-G874!HAEGGKVPIK | 476   | >EGFR-G874!HAEGSKVPIK | 461  | 15    |
| >EGFR-G874!YHAEGGKVPI | 1513  | >EGFR-G874!YHAEGSKVPI | 494  | 1019  |
| >EGFR-G874!YHAEGGKVPI | 486   | >EGFR-G874!YHAEGSKVPI | 282  | 204   |
| >EGFR-G874!YHAEGGKV   | 657   | >EGFR-G874!YHAEGSKV   | 357  | 300   |
| >EGFR-G874!YHAEGGKVPI | 306   | >EGFR-G874!YHAEGSKVPI | 365  | 59    |
| >EGFR-G874!YHAEGGKV   | 1229  | >EGFR-G874!YHAEGSKV   | 276  | 953   |
| >EGFR-G874!YHAEGGKVPI | 22    | >EGFR-G874!YHAEGSKVPI | 16   | 6     |
| >EGFR-G874!EYHAEGGKVI | 173   | >EGFR-G874!EYHAEGSKVP | 78   | 95    |
| >EGFR-G874!EYHAEGGKVI | 270   | >EGFR-G874!EYHAEGSKVP | 317  | 47    |
| >EGFR-G874!KEYHAEGGK\ | 130   | >EGFR-G874!KEYHAEGSKV | 122  | 8     |
| >EGFR-G874!KEYHAEGGK\ | 722   | >EGFR-G874!KEYHAEGSKV | 453  | 269   |
| >EGFR-G874!KEYHAEGGK\ | 509   | >EGFR-G874!KEYHAEGSKV | 402  | 107   |
| >EGFR-G874!KEYHAEGGK\ | 65    | >EGFR-G874!KEYHAEGSKV | 39   | 26    |
| >EGFR-H773IHVCRLGI    | 720   | >EGFR-H773ILVCRLGI    | 248  | 472   |
| >EGFR-H773IHVCRLGI    | 870   | >EGFR-H773ILVCRLGI    | 435  | 435   |
| >EGFR-H773IPHVCRLGI   | 15502 | >EGFR-H773IPLVCRLGI   | 471  | 15031 |

|                        |       |                        |      |       |
|------------------------|-------|------------------------|------|-------|
| >EGFR-H773I PHVCRLGI   | 27933 | >EGFR-H773I PLVCRLGI   | 435  | 27498 |
| >EGFR-H773I AYVMASVDN  | 19788 | >EGFR-H773I AYVMASVDN  | 30   | 19758 |
| >EGFR-H773I AYVMASVDN  | 10890 | >EGFR-H773I AYVMASVDN  | 67   | 10823 |
| >EGFR-H773I NPHVCRLI   | 65    | >EGFR-H773I NPLVCRLI   | 191  | 126   |
| >EGFR-H773I SVDNPHVCRI | 75    | >EGFR-H773I SVDNPLVCRL | 58   | 17    |
| >EGFR-H773I SVDNPHVCRI | 449   | >EGFR-H773I SVDNPLVCRL | 156  | 293   |
| >EGFR-H773I SVDNPHVCRI | 204   | >EGFR-H773I SVDNPLVCRL | 149  | 55    |
| >EGFR-H773I SVDNPHVCR  | 184   | >EGFR-H773I SVDNPLVCR  | 168  | 16    |
| >EGFR-H773I SVDNPHVCR  | 237   | >EGFR-H773I SVDNPLVCR  | 608  | 371   |
| >EGFR-H773I SVDNPHVCR  | 118   | >EGFR-H773I SVDNPLVCR  | 229  | 111   |
| >EGFR-H773I ASVDNPHV   | 291   | >EGFR-H773I ASVDNPLV   | 374  | 83    |
| >EGFR-H773I ASVDNPHVCI | 300   | >EGFR-H773I ASVDNPLVCF | 145  | 155   |
| >EGFR-H773I ASVDNPHVCI | 389   | >EGFR-H773I ASVDNPLVCF | 1438 | 1049  |
| >EGFR-H773I ASVDNPHVCI | 113   | >EGFR-H773I ASVDNPLVCF | 131  | 18    |
| >EGFR-H773I ASVDNPHVCI | 423   | >EGFR-H773I ASVDNPLVCF | 147  | 276   |
| >EGFR-H773I ASVDNPHV   | 496   | >EGFR-H773I ASVDNPLV   | 569  | 73    |
| >EGFR-H773I ASVDNPHVCI | 6     | >EGFR-H773I ASVDNPLVCF | 5    | 1     |
| >EGFR-H773I ASVDNPHVCI | 154   | >EGFR-H773I ASVDNPLVCF | 194  | 40    |
| >EGFR-H773I MASVDNPH   | 28347 | >EGFR-H773I MASVDNPL   | 218  | 28129 |
| >EGFR-H773I MASVDNPHV  | 1391  | >EGFR-H773I MASVDNPLV  | 439  | 952   |
| >EGFR-H773I MASVDNPHV  | 162   | >EGFR-H773I MASVDNPLV  | 168  | 6     |
| >EGFR-H773I MASVDNPHV  | 162   | >EGFR-H773I MASVDNPLV  | 135  | 27    |
| >EGFR-H773I MASVDNPHV  | 74    | >EGFR-H773I MASVDNPLV  | 104  | 30    |
| >EGFR-H773I MASVDNPHV  | 268   | >EGFR-H773I MASVDNPLV  | 358  | 90    |
| >EGFR-H773I MASVDNPHV  | 9     | >EGFR-H773I MASVDNPLV  | 11   | 2     |
| >EGFR-H773I MASVDNPH   | 15412 | >EGFR-H773I MASVDNPL   | 75   | 15337 |
| >EGFR-H773I MASVDNPHV  | 258   | >EGFR-H773I MASVDNPLV  | 233  | 25    |
| >EGFR-H773I MASVDNPHV  | 161   | >EGFR-H773I MASVDNPLV  | 144  | 17    |
| >EGFR-H773I MASVDNPH   | 55    | >EGFR-H773I MASVDNPL   | 38   | 17    |
| >EGFR-H773I VMASVDNPH  | 21365 | >EGFR-H773I VMASVDNPL  | 461  | 20904 |
| >EGFR-H773I VMASVDNPH  | 22464 | >EGFR-H773I VMASVDNPL  | 48   | 22416 |
| >EGFR-H773I VMASVDNPH  | 148   | >EGFR-H773I VMASVDNPL  | 72   | 76    |
| >EGFR-H773I VMASVDNPH  | 7412  | >EGFR-H773I VMASVDNPL  | 5    | 7407  |
| >EGFR-H773I VMASVDNPH  | 84    | >EGFR-H773I VMASVDNPL  | 32   | 52    |
| >EGFR-H773I VMASVDNPH  | 14779 | >EGFR-H773I VMASVDNPL  | 21   | 14758 |
| >EGFR-H773I VMASVDNPH  | 209   | >EGFR-H773I VMASVDNPL  | 126  | 83    |
| >EGFR-H773I VMASVDNPH  | 12117 | >EGFR-H773I VMASVDNPL  | 109  | 12008 |
| >EGFR-H773I VMASVDNPH  | 303   | >EGFR-H773I VMASVDNPL  | 210  | 93    |
| >EGFR-H773I VMASVDNPH  | 15666 | >EGFR-H773I VMASVDNPL  | 15   | 15651 |
| >EGFR-H773I VMASVDNPH  | 3     | >EGFR-H773I VMASVDNPL  | 3    | 0     |
| >EGFR-H773I VMASVDNPH  | 37    | >EGFR-H773I VMASVDNPL  | 72   | 35    |
| >EGFR-H773I VMASVDNPH  | 19588 | >EGFR-H773I VMASVDNPL  | 20   | 19568 |
| >EGFR-H773I VMASVDNPH  | 7     | >EGFR-H773I VMASVDNPL  | 12   | 5     |

|                      |       |                      |      |       |
|----------------------|-------|----------------------|------|-------|
| >EGFR-H773IVMASVDNPF | 258   | >EGFR-H773IVMASVDNPL | 1100 | 842   |
| >EGFR-H773IVMASVDNPF | 18472 | >EGFR-H773IVMASVDNPL | 17   | 18455 |
| >EGFR-H773IVMASVDNPF | 5     | >EGFR-H773IVMASVDNPL | 5    | 0     |
| >EGFR-H773IVMASVDNPF | 23339 | >EGFR-H773IVMASVDNPL | 208  | 23131 |
| >EGFR-H773IVMASVDNPF | 6     | >EGFR-H773IVMASVDNPL | 5    | 1     |
| >EGFR-H773IVMASVDNPF | 233   | >EGFR-H773IVMASVDNPL | 1022 | 789   |
| >EGFR-H773IVMASVDNPF | 22828 | >EGFR-H773IVMASVDNPL | 23   | 22805 |
| >EGFR-H773IVMASVDNPF | 3     | >EGFR-H773IVMASVDNPL | 3    | 0     |
| >EGFR-H773IVMASVDNPF | 75    | >EGFR-H773IVMASVDNPL | 298  | 223   |
| >EGFR-H773IVMASVDNPF | 661   | >EGFR-H773IVMASVDNPL | 190  | 471   |
| >EGFR-H773IVMASVDNPF | 1650  | >EGFR-H773IVMASVDNPL | 200  | 1450  |
| >EGFR-H773IYVMASVDNP | 9865  | >EGFR-H773IYVMASVDNP | 42   | 9823  |
| >EGFR-H773IYVMASVDNP | 10    | >EGFR-H773IYVMASVDNP | 8    | 2     |
| >EGFR-H773IYVMASVDNP | 5296  | >EGFR-H773IYVMASVDNP | 11   | 5285  |
| >EGFR-H773IYVMASVDNP | 13    | >EGFR-H773IYVMASVDNP | 6    | 7     |
| >EGFR-H773IYVMASVDNP | 13483 | >EGFR-H773IYVMASVDNP | 42   | 13441 |
| >EGFR-H773IYVMASVDNP | 8     | >EGFR-H773IYVMASVDNP | 6    | 2     |
| >EGFR-H773IYVMASVDNP | 9236  | >EGFR-H773IYVMASVDNP | 43   | 9193  |
| >EGFR-H773IYVMASVDNP | 4     | >EGFR-H773IYVMASVDNP | 4    | 0     |
| >EGFR-H773IYVMASVDNP | 20730 | >EGFR-H773IYVMASVDNP | 79   | 20651 |
| >EGFR-H773IYVMASVDNP | 8     | >EGFR-H773IYVMASVDNP | 8    | 0     |
| >EGFR-H773IYVMASVDNP | 16482 | >EGFR-H773IYVMASVDNP | 27   | 16455 |
| >EGFR-H773IYVMASVDNP | 7     | >EGFR-H773IYVMASVDNP | 12   | 5     |
| >EGFR-H773IYVMASVDNP | 23060 | >EGFR-H773IYVMASVDNP | 257  | 22803 |
| >EGFR-H773IYVMASVDNP | 10    | >EGFR-H773IYVMASVDNP | 14   | 4     |
| >EGFR-H773IYVMASVDNP | 20088 | >EGFR-H773IYVMASVDNP | 91   | 19997 |
| >EGFR-H773IYVMASVDNP | 4     | >EGFR-H773IYVMASVDNP | 3    | 1     |
| >EGFR-H773IYVMASVDNP | 26783 | >EGFR-H773IYVMASVDNP | 74   | 26709 |
| >EGFR-H773IYVMASVDNP | 3     | >EGFR-H773IYVMASVDNP | 3    | 0     |
| >EGFR-H773IYVMASVDNP | 397   | >EGFR-H773IYVMASVDNP | 98   | 299   |
| >EGFR-H773IYVMASVDNP | 457   | >EGFR-H773IYVMASVDNP | 2192 | 1735  |
| >EGFR-H773IYVMASVDNP | 23641 | >EGFR-H773IYVMASVDNP | 74   | 23567 |
| >EGFR-H773IYVMASVDNP | 17    | >EGFR-H773IYVMASVDNP | 17   | 0     |
| >EGFR-H773IYVMASVDNP | 13625 | >EGFR-H773IYVMASVDNP | 55   | 13570 |
| >EGFR-H773IYVMASVDNP | 7     | >EGFR-H773IYVMASVDNP | 6    | 1     |
| >EGFR-H773IYVMASVDNP | 424   | >EGFR-H773IYVMASVDNP | 153  | 271   |
| >EGFR-H773IYVMASVDNP | 655   | >EGFR-H773IYVMASVDNP | 478  | 177   |
| >EGFR-H773IYVMASVDNP | 2919  | >EGFR-H773IYVMASVDNP | 416  | 2503  |
| >EGFR-H773IYVMASVDNP | 8635  | >EGFR-H773IYVMASVDNP | 453  | 8182  |
| >EGFR-H773IYVMASVDNP | 9457  | >EGFR-H773IYVMASVDNP | 45   | 9412  |
| >EGFR-H773IHVCRLGI   | 720   | >EGFR-H773IRVCRLGI   | 256  | 464   |
| >EGFR-H773IHVCRLGI   | 804   | >EGFR-H773IRVCRLGI   | 206  | 598   |
| >EGFR-H773IHVCRLGI   | 1639  | >EGFR-H773IRVCRLGI   | 157  | 1482  |

|                       |       |                       |      |       |
|-----------------------|-------|-----------------------|------|-------|
| >EGFR-H773IHVCRLGI    | 870   | >EGFR-H773IRVCRLGI    | 207  | 663   |
| >EGFR-H773IAYVMASVDN  | 12574 | >EGFR-H773IAYVMASVDN  | 103  | 12471 |
| >EGFR-H773IAYVMASVDN  | 24467 | >EGFR-H773IAYVMASVDN  | 76   | 24391 |
| >EGFR-H773INPHVCRL    | 65    | >EGFR-H773INPRVCRL    | 15   | 50    |
| >EGFR-H773INPHVCRLGI  | 1149  | >EGFR-H773INPRVCRLGI  | 419  | 730   |
| >EGFR-H773INPHVCRLGI  | 4181  | >EGFR-H773INPRVCRLGI  | 452  | 3729  |
| >EGFR-H773ISVDNPHVCRI | 75    | >EGFR-H773ISVDNPRVCRI | 326  | 251   |
| >EGFR-H773ISVDNPHVCRI | 449   | >EGFR-H773ISVDNPRVCRI | 763  | 314   |
| >EGFR-H773ISVDNPHVCRI | 204   | >EGFR-H773ISVDNPRVCRI | 214  | 10    |
| >EGFR-H773ISVDNPHVCR  | 184   | >EGFR-H773ISVDNPRVCR  | 215  | 31    |
| >EGFR-H773ISVDNPHVCR  | 237   | >EGFR-H773ISVDNPRVCR  | 329  | 92    |
| >EGFR-H773ISVDNPHVCR  | 118   | >EGFR-H773ISVDNPRVCR  | 110  | 8     |
| >EGFR-H773IASVDNPHV   | 291   | >EGFR-H773IASVDNPRV   | 969  | 678   |
| >EGFR-H773IASVDNPHVCI | 300   | >EGFR-H773IASVDNPRVCI | 525  | 225   |
| >EGFR-H773IASVDNPHVCI | 389   | >EGFR-H773IASVDNPRVCI | 1458 | 1069  |
| >EGFR-H773IASVDNPHVCI | 113   | >EGFR-H773IASVDNPRVCI | 62   | 51    |
| >EGFR-H773IASVDNPHVCI | 423   | >EGFR-H773IASVDNPRVCI | 313  | 110   |
| >EGFR-H773IASVDNPHV   | 496   | >EGFR-H773IASVDNPRV   | 223  | 273   |
| >EGFR-H773IASVDNPHVCI | 6     | >EGFR-H773IASVDNPRVCI | 7    | 1     |
| >EGFR-H773IASVDNPHVCI | 154   | >EGFR-H773IASVDNPRVCI | 361  | 207   |
| >EGFR-H773IMASVDNPHV  | 162   | >EGFR-H773IMASVDNPRV  | 789  | 627   |
| >EGFR-H773IMASVDNPHV  | 162   | >EGFR-H773IMASVDNPRV  | 99   | 63    |
| >EGFR-H773IMASVDNPH   | 13076 | >EGFR-H773IMASVDNPR   | 70   | 13006 |
| >EGFR-H773IMASVDNPHV  | 74    | >EGFR-H773IMASVDNPRV  | 97   | 23    |
| >EGFR-H773IMASVDNPH   | 27242 | >EGFR-H773IMASVDNPR   | 201  | 27041 |
| >EGFR-H773IMASVDNPHV  | 268   | >EGFR-H773IMASVDNPRV  | 323  | 55    |
| >EGFR-H773IMASVDNPH   | 3002  | >EGFR-H773IMASVDNPR   | 9    | 2993  |
| >EGFR-H773IMASVDNPHV  | 9     | >EGFR-H773IMASVDNPRV  | 9    | 0     |
| >EGFR-H773IMASVDNPHV  | 258   | >EGFR-H773IMASVDNPRV  | 341  | 83    |
| >EGFR-H773IMASVDNPHV  | 161   | >EGFR-H773IMASVDNPRV  | 268  | 107   |
| >EGFR-H773IMASVDNPH   | 55    | >EGFR-H773IMASVDNPR   | 1255 | 1200  |
| >EGFR-H773IVMASVDNPR  | 148   | >EGFR-H773IVMASVDNPR  | 236  | 88    |
| >EGFR-H773IVMASVDNPR  | 84    | >EGFR-H773IVMASVDNPR  | 90   | 6     |
| >EGFR-H773IVMASVDNPR  | 209   | >EGFR-H773IVMASVDNPR  | 320  | 111   |
| >EGFR-H773IVMASVDNPR  | 303   | >EGFR-H773IVMASVDNPR  | 547  | 244   |
| >EGFR-H773IVMASVDNPR  | 3     | >EGFR-H773IVMASVDNPR  | 3    | 0     |
| >EGFR-H773IVMASVDNPR  | 37    | >EGFR-H773IVMASVDNPR  | 131  | 94    |
| >EGFR-H773IVMASVDNPR  | 7     | >EGFR-H773IVMASVDNPR  | 15   | 8     |
| >EGFR-H773IVMASVDNPR  | 258   | >EGFR-H773IVMASVDNPR  | 2300 | 2042  |
| >EGFR-H773IVMASVDNPR  | 5     | >EGFR-H773IVMASVDNPR  | 6    | 1     |
| >EGFR-H773IVMASVDNPR  | 6     | >EGFR-H773IVMASVDNPR  | 5    | 1     |
| >EGFR-H773IVMASVDNPR  | 233   | >EGFR-H773IVMASVDNPR  | 2843 | 2610  |
| >EGFR-H773IVMASVDNPR  | 3     | >EGFR-H773IVMASVDNPR  | 3    | 0     |



|                       |       |                        |      |       |
|-----------------------|-------|------------------------|------|-------|
| >EGFR-H773IVMASVDNPF  | 75    | >EGFR-H773IVMASVDNPR   | 1400 | 1325  |
| >EGFR-H773IVMASVDNPF  | 9109  | >EGFR-H773IVMASVDNPR   | 28   | 9081  |
| >EGFR-H773IVMASVDNPF  | 27561 | >EGFR-H773IVMASVDNPR   | 234  | 27327 |
| >EGFR-H773IVMASVDNPF  | 12809 | >EGFR-H773IVMASVDNPR   | 63   | 12746 |
| >EGFR-H773IVMASVDNPF  | 32309 | >EGFR-H773IVMASVDNPR   | 306  | 32003 |
| >EGFR-H773IYVMASVDNP  | 10    | >EGFR-H773IYVMASVDNP   | 10   | 0     |
| >EGFR-H773IYVMASVDNP  | 13    | >EGFR-H773IYVMASVDNP   | 13   | 0     |
| >EGFR-H773IYVMASVDNP  | 8     | >EGFR-H773IYVMASVDNP   | 9    | 1     |
| >EGFR-H773IYVMASVDNP  | 4     | >EGFR-H773IYVMASVDNP   | 5    | 1     |
| >EGFR-H773IYVMASVDNP  | 8     | >EGFR-H773IYVMASVDNP   | 7    | 1     |
| >EGFR-H773IYVMASVDNP  | 7     | >EGFR-H773IYVMASVDNP   | 15   | 8     |
| >EGFR-H773IYVMASVDNP  | 10    | >EGFR-H773IYVMASVDNP   | 18   | 8     |
| >EGFR-H773IYVMASVDNP  | 4     | >EGFR-H773IYVMASVDNP   | 3    | 1     |
| >EGFR-H773IYVMASVDNP  | 3     | >EGFR-H773IYVMASVDNP   | 3    | 0     |
| >EGFR-H773IYVMASVDNP  | 12283 | >EGFR-H773IYVMASVDNP   | 244  | 12039 |
| >EGFR-H773IYVMASVDNP  | 397   | >EGFR-H773IYVMASVDNP   | 4502 | 4105  |
| >EGFR-H773IYVMASVDNP  | 457   | >EGFR-H773IYVMASVDNP   | 948  | 491   |
| >EGFR-H773IYVMASVDNP  | 9695  | >EGFR-H773IYVMASVDNP   | 87   | 9608  |
| >EGFR-H773IYVMASVDNP  | 9394  | >EGFR-H773IYVMASVDNP   | 210  | 9184  |
| >EGFR-H773IYVMASVDNP  | 662   | >EGFR-H773IYVMASVDNP   | 4    | 658   |
| >EGFR-H773IYVMASVDNP  | 17    | >EGFR-H773IYVMASVDNP   | 20   | 3     |
| >EGFR-H773IYVMASVDNP  | 7     | >EGFR-H773IYVMASVDNP   | 8    | 1     |
| >EGFR-H773IYVMASVDNP  | 424   | >EGFR-H773IYVMASVDNP   | 6589 | 6165  |
| >EGFR-H773IYVMASVDNP  | 30268 | >EGFR-H773IYVMASVDNP   | 277  | 29991 |
| >EGFR-H773'HVCRLG     | 1625  | >EGFR-H773'YVCRLG      | 138  | 1487  |
| >EGFR-H773'HVCRLG     | 720   | >EGFR-H773'YVCRLG      | 34   | 686   |
| >EGFR-H773'HVCRLGICL  | 2291  | >EGFR-H773'YVCRLGICL   | 201  | 2090  |
| >EGFR-H773'HVCRLG     | 5296  | >EGFR-H773'YVCRLG      | 138  | 5158  |
| >EGFR-H773'HVCRLG     | 8676  | >EGFR-H773'YVCRLG      | 478  | 8198  |
| >EGFR-H773'HVCRLGICL  | 662   | >EGFR-H773'YVCRLGICL   | 326  | 336   |
| >EGFR-H773'PHVCRLG    | 17306 | >EGFR-H773'PYVCRLG     | 314  | 16992 |
| >EGFR-H773'PHVCRLG    | 23164 | >EGFR-H773'PYVCRLG     | 416  | 22748 |
| >EGFR-H773'AYVMASVDN  | 10487 | >EGFR-H773'AYVMASVDN   | 177  | 10310 |
| >EGFR-H773'AYVMASVDN  | 11113 | >EGFR-H773'AYVMASVDN   | 243  | 10870 |
| >EGFR-H773'AYVMASVDN  | 27047 | >EGFR-H773'AYVMASVDN   | 269  | 26778 |
| >EGFR-H773'NPHVCRL    | 65    | >EGFR-H773'NPYVCRL     | 68   | 3     |
| >EGFR-H773'NPHVCRL    | 1234  | >EGFR-H773'NPYVCRL     | 327  | 907   |
| >EGFR-H773'NPHVCRLG   | 1801  | >EGFR-H773'NPYVCRLG    | 222  | 1579  |
| >EGFR-H773'VDNPHVCRL  | 538   | >EGFR-H773'VDNPHYVCRL  | 222  | 316   |
| >EGFR-H773'VDNPHVCRL  | 719   | >EGFR-H773'VDNPHYVCRL  | 480  | 239   |
| >EGFR-H773'SVDNPHVCRI | 75    | >EGFR-H773'SVDNPHYVCRL | 54   | 21    |
| >EGFR-H773'SVDNPHVCRI | 449   | >EGFR-H773'SVDNPHYVCRL | 217  | 232   |
| >EGFR-H773'SVDNPHVCRI | 204   | >EGFR-H773'SVDNPHYVCRL | 136  | 68    |

|                       |       |                       |     |       |
|-----------------------|-------|-----------------------|-----|-------|
| >EGFR-H773'SVDNPHVCR  | 184   | >EGFR-H773'SVDNPYVCR  | 101 | 83    |
| >EGFR-H773'SVDNPHVCR  | 237   | >EGFR-H773'SVDNPYVCR  | 271 | 34    |
| >EGFR-H773'SVDNPHVCR  | 118   | >EGFR-H773'SVDNPYVCR  | 175 | 57    |
| >EGFR-H773'SVDNPHVCRI | 627   | >EGFR-H773'SVDNPYVCRI | 388 | 239   |
| >EGFR-H773'ASVDNPHV   | 291   | >EGFR-H773'ASVDNPYV   | 142 | 149   |
| >EGFR-H773'ASVDNPHV   | 918   | >EGFR-H773'ASVDNPYV   | 142 | 776   |
| >EGFR-H773'ASVDNPHVCI | 300   | >EGFR-H773'ASVDNPYVCI | 106 | 194   |
| >EGFR-H773'ASVDNPHVCI | 389   | >EGFR-H773'ASVDNPYVCI | 742 | 353   |
| >EGFR-H773'ASVDNPHVCI | 113   | >EGFR-H773'ASVDNPYVCI | 118 | 5     |
| >EGFR-H773'ASVDNPHVCI | 423   | >EGFR-H773'ASVDNPYVCI | 172 | 251   |
| >EGFR-H773'ASVDNPHV   | 1074  | >EGFR-H773'ASVDNPYV   | 367 | 707   |
| >EGFR-H773'ASVDNPHV   | 496   | >EGFR-H773'ASVDNPYV   | 456 | 40    |
| >EGFR-H773'ASVDNPHVCI | 6     | >EGFR-H773'ASVDNPYVCI | 6   | 0     |
| >EGFR-H773'ASVDNPHVCI | 154   | >EGFR-H773'ASVDNPYVCI | 133 | 21    |
| >EGFR-H773'MASVDNPHV  | 2817  | >EGFR-H773'MASVDNPYV  | 401 | 2416  |
| >EGFR-H773'MASVDNPHV  | 1391  | >EGFR-H773'MASVDNPYV  | 174 | 1217  |
| >EGFR-H773'MASVDNPHV  | 162   | >EGFR-H773'MASVDNPYV  | 42  | 120   |
| >EGFR-H773'MASVDNPHV  | 2835  | >EGFR-H773'MASVDNPYV  | 306 | 2529  |
| >EGFR-H773'MASVDNPHV  | 1303  | >EGFR-H773'MASVDNPYV  | 442 | 861   |
| >EGFR-H773'MASVDNPHV  | 3192  | >EGFR-H773'MASVDNPYV  | 132 | 3060  |
| >EGFR-H773'MASVDNPHV  | 162   | >EGFR-H773'MASVDNPYV  | 64  | 98    |
| >EGFR-H773'MASVDNPH   | 16517 | >EGFR-H773'MASVDNPY   | 236 | 16281 |
| >EGFR-H773'MASVDNPH   | 11329 | >EGFR-H773'MASVDNPY   | 65  | 11264 |
| >EGFR-H773'MASVDNPHV  | 74    | >EGFR-H773'MASVDNPYV  | 56  | 18    |
| >EGFR-H773'MASVDNPHV  | 268   | >EGFR-H773'MASVDNPYV  | 272 | 4     |
| >EGFR-H773'MASVDNPH   | 3002  | >EGFR-H773'MASVDNPY   | 410 | 2592  |
| >EGFR-H773'MASVDNPHV  | 9     | >EGFR-H773'MASVDNPYV  | 9   | 0     |
| >EGFR-H773'MASVDNPHV  | 258   | >EGFR-H773'MASVDNPYV  | 75  | 183   |
| >EGFR-H773'MASVDNPHV  | 161   | >EGFR-H773'MASVDNPYV  | 31  | 130   |
| >EGFR-H773'MASVDNPH   | 9174  | >EGFR-H773'MASVDNPY   | 163 | 9011  |
| >EGFR-H773'MASVDNPH   | 6008  | >EGFR-H773'MASVDNPY   | 229 | 5779  |
| >EGFR-H773'MASVDNPH   | 14726 | >EGFR-H773'MASVDNPY   | 74  | 14652 |
| >EGFR-H773'MASVDNPH   | 55    | >EGFR-H773'MASVDNPY   | 8   | 47    |
| >EGFR-H773'MASVDNPH   | 17490 | >EGFR-H773'MASVDNPY   | 261 | 17229 |
| >EGFR-H773'MASVDNPH   | 32300 | >EGFR-H773'MASVDNPY   | 427 | 31873 |
| >EGFR-H773'MASVDNPH   | 5323  | >EGFR-H773'MASVDNPY   | 120 | 5203  |
| >EGFR-H773'VMASVDNPH  | 148   | >EGFR-H773'VMASVDNPY  | 23  | 125   |
| >EGFR-H773'VMASVDNPH  | 84    | >EGFR-H773'VMASVDNPY  | 20  | 64    |
| >EGFR-H773'VMASVDNPH  | 209   | >EGFR-H773'VMASVDNPY  | 52  | 157   |
| >EGFR-H773'VMASVDNPH  | 303   | >EGFR-H773'VMASVDNPY  | 109 | 194   |
| >EGFR-H773'VMASVDNPH  | 3     | >EGFR-H773'VMASVDNPY  | 2   | 1     |
| >EGFR-H773'VMASVDNPH  | 37    | >EGFR-H773'VMASVDNPY  | 37  | 0     |
| >EGFR-H773'VMASVDNPH  | 7     | >EGFR-H773'VMASVDNPY  | 4   | 3     |

|                       |       |                        |      |       |
|-----------------------|-------|------------------------|------|-------|
| >EGFR-H773'VMASVDNPF  | 258   | >EGFR-H773'VMASVDNPY   | 186  | 72    |
| >EGFR-H773'VMASVDNPF  | 5     | >EGFR-H773'VMASVDNPY   | 5    | 0     |
| >EGFR-H773'VMASVDNPF  | 6     | >EGFR-H773'VMASVDNPY   | 3    | 3     |
| >EGFR-H773'VMASVDNPF  | 233   | >EGFR-H773'VMASVDNPY   | 225  | 8     |
| >EGFR-H773'VMASVDNPF  | 3     | >EGFR-H773'VMASVDNPY   | 3    | 0     |
| >EGFR-H773'VMASVDNPF  | 75    | >EGFR-H773'VMASVDNPY   | 244  | 169   |
| >EGFR-H773'VMASVDNPF  | 4211  | >EGFR-H773'VMASVDNPY   | 23   | 4188  |
| >EGFR-H773'VMASVDNPF  | 889   | >EGFR-H773'VMASVDNPY   | 8    | 881   |
| >EGFR-H773'VMASVDNPF  | 17986 | >EGFR-H773'VMASVDNPY   | 334  | 17652 |
| >EGFR-H773'VMASVDNPF  | 661   | >EGFR-H773'VMASVDNPY   | 33   | 628   |
| >EGFR-H773'VMASVDNPF  | 1511  | >EGFR-H773'VMASVDNPY   | 38   | 1473  |
| >EGFR-H773'VMASVDNPF  | 1650  | >EGFR-H773'VMASVDNPY   | 25   | 1625  |
| >EGFR-H773'VMASVDNPF  | 655   | >EGFR-H773'VMASVDNPY   | 33   | 622   |
| >EGFR-H773'VMASVDNPF  | 32594 | >EGFR-H773'VMASVDNPY   | 259  | 32335 |
| >EGFR-H773'YVMASVDNP  | 10    | >EGFR-H773'YVMASVDNP   | 7    | 3     |
| >EGFR-H773'YVMASVDNP  | 13    | >EGFR-H773'YVMASVDNP   | 4    | 9     |
| >EGFR-H773'YVMASVDNP  | 8     | >EGFR-H773'YVMASVDNP   | 5    | 3     |
| >EGFR-H773'YVMASVDNP  | 4     | >EGFR-H773'YVMASVDNP   | 3    | 1     |
| >EGFR-H773'YVMASVDNP  | 8     | >EGFR-H773'YVMASVDNP   | 3    | 5     |
| >EGFR-H773'YVMASVDNP  | 7     | >EGFR-H773'YVMASVDNP   | 4    | 3     |
| >EGFR-H773'YVMASVDNP  | 10    | >EGFR-H773'YVMASVDNP   | 8    | 2     |
| >EGFR-H773'YVMASVDNP  | 4     | >EGFR-H773'YVMASVDNP   | 2    | 2     |
| >EGFR-H773'YVMASVDNP  | 3     | >EGFR-H773'YVMASVDNP   | 3    | 0     |
| >EGFR-H773'YVMASVDNP  | 12283 | >EGFR-H773'YVMASVDNP   | 448  | 11835 |
| >EGFR-H773'YVMASVDNP  | 6749  | >EGFR-H773'YVMASVDNP   | 110  | 6639  |
| >EGFR-H773'YVMASVDNP  | 397   | >EGFR-H773'YVMASVDNP   | 7    | 390   |
| >EGFR-H773'YVMASVDNP  | 457   | >EGFR-H773'YVMASVDNP   | 462  | 5     |
| >EGFR-H773'YVMASVDNP  | 7334  | >EGFR-H773'YVMASVDNP   | 170  | 7164  |
| >EGFR-H773'YVMASVDNP  | 16887 | >EGFR-H773'YVMASVDNP   | 137  | 16750 |
| >EGFR-H773'YVMASVDNP  | 12984 | >EGFR-H773'YVMASVDNP   | 69   | 12915 |
| >EGFR-H773'YVMASVDNP  | 662   | >EGFR-H773'YVMASVDNP   | 70   | 592   |
| >EGFR-H773'YVMASVDNP  | 17    | >EGFR-H773'YVMASVDNP   | 11   | 6     |
| >EGFR-H773'YVMASVDNP  | 7     | >EGFR-H773'YVMASVDNP   | 4    | 3     |
| >EGFR-H773'YVMASVDNP  | 12932 | >EGFR-H773'YVMASVDNP   | 63   | 12869 |
| >EGFR-H773'YVMASVDNP  | 424   | >EGFR-H773'YVMASVDNP   | 39   | 385   |
| >EGFR-H773'YVMASVDNP  | 655   | >EGFR-H773'YVMASVDNP   | 28   | 627   |
| >EGFR-H773'YVMASVDNP  | 2919  | >EGFR-H773'YVMASVDNP   | 64   | 2855  |
| >EGFR-H773'YVMASVDNP  | 8635  | >EGFR-H773'YVMASVDNP   | 58   | 8577  |
| >EGFR-H773'YVMASVDNP  | 10447 | >EGFR-H773'YVMASVDNP   | 43   | 10404 |
| >EGFR-H805IHKDNIGSQY  | 198   | >EGFR-H805IHKDNIGSQY   | 81   | 117   |
| >EGFR-H805IHKDNIGSQYL | 1188  | >EGFR-H805IHKDNIGSQYL  | 449  | 739   |
| >EGFR-H805IHKDNIGSQYL | 372   | >EGFR-H805IHKDNIGSQYL  | 6756 | 6384  |
| >EGFR-H805IHKDNIGSQYL | 71    | >EGFR-H805IHKDNIGSQYLL | 1774 | 1703  |

|                       |       |                        |      |       |
|-----------------------|-------|------------------------|------|-------|
| >EGFR-H805IHKDNIGSQY  | 125   | >EGFR-H805IHKDNIGSQY   | 30   | 95    |
| >EGFR-H805IEHKDNIGSQY | 23228 | >EGFR-H805IEIKDNIGSQYI | 396  | 22832 |
| >EGFR-H805IEHKDNIGSQ  | 7874  | >EGFR-H805IEIKDNIGSQ   | 164  | 7710  |
| >EGFR-H805IEHKDNIGSQY | 2618  | >EGFR-H805IEIKDNIGSQY  | 98   | 2520  |
| >EGFR-H805IEHKDNIGSQ  | 15361 | >EGFR-H805IEIKDNIGSQ   | 146  | 15215 |
| >EGFR-H805IEHKDNIGSQY | 5707  | >EGFR-H805IEIKDNIGSQY  | 277  | 5430  |
| >EGFR-H805IEHKDNIGSQY | 13333 | >EGFR-H805IEIKDNIGSQYI | 74   | 13259 |
| >EGFR-H805IEHKDNIGSQY | 2566  | >EGFR-H805IEIKDNIGSQY  | 27   | 2539  |
| >EGFR-H805IEHKDNIGSQY | 19124 | >EGFR-H805IEIKDNIGSQYI | 453  | 18671 |
| >EGFR-H805IEHKDNIGSQY | 19681 | >EGFR-H805IEIKDNIGSQYI | 429  | 19252 |
| >EGFR-H805IEHKDNIGSQY | 13218 | >EGFR-H805IEIKDNIGSQY  | 409  | 12809 |
| >EGFR-H805IREHKDNIGSC | 364   | >EGFR-H805IREIKDNIGSQ` | 222  | 142   |
| >EGFR-H805IREHKDNIGSC | 104   | >EGFR-H805IREIKDNIGSQ` | 95   | 9     |
| >EGFR-H805IREHKDNIGSC | 773   | >EGFR-H805IREIKDNIGSQ` | 393  | 380   |
| >EGFR-H805IREHKDNIGSC | 984   | >EGFR-H805IREIKDNIGSQ` | 457  | 527   |
| >EGFR-H805IREHKDNIGSC | 360   | >EGFR-H805IREIKDNIGSQ` | 133  | 227   |
| >EGFR-H805IREHKDNIGS  | 394   | >EGFR-H805IREIKDNIGS   | 906  | 512   |
| >EGFR-H805IREHKDNIGSC | 362   | >EGFR-H805IREIKDNIGSQ` | 308  | 54    |
| >EGFR-H805IREHKDNIGSC | 1211  | >EGFR-H805IREIKDNIGSQ` | 456  | 755   |
| >EGFR-H805ILDYVREHKDN | 101   | >EGFR-H805ILDYVREIKDN  | 86   | 15    |
| >EGFR-H805ILDYVREHKDN | 286   | >EGFR-H805ILDYVREIKDN  | 246  | 40    |
| >EGFR-H805ILDYVREHKDN | 387   | >EGFR-H805ILDYVREIKDN  | 260  | 127   |
| >EGFR-H805ILDYVREHKDN | 62    | >EGFR-H805ILDYVREIKDN  | 89   | 27    |
| >EGFR-H805ILLDYVREH   | 22436 | >EGFR-H805ILLDYVREI    | 212  | 22224 |
| >EGFR-H805ILLDYVREH   | 15925 | >EGFR-H805ILLDYVREI    | 195  | 15730 |
| >EGFR-H805ILLDYVREH   | 13441 | >EGFR-H805ILLDYVREI    | 21   | 13420 |
| >EGFR-H805ILLDYVREH   | 21735 | >EGFR-H805ILLDYVREI    | 219  | 21516 |
| >EGFR-H805ILLDYVREH   | 23139 | >EGFR-H805ILLDYVREI    | 162  | 22977 |
| >EGFR-H805ILLDYVREH   | 22426 | >EGFR-H805ILLDYVREI    | 132  | 22294 |
| >EGFR-H805ICLLDYVREH  | 18476 | >EGFR-H805ICLLDYVREI   | 19   | 18457 |
| >EGFR-H805ICLLDYVREH  | 7180  | >EGFR-H805ICLLDYVREI   | 134  | 7046  |
| >EGFR-H805ICLLDYVREH  | 17840 | >EGFR-H805ICLLDYVREI   | 43   | 17797 |
| >EGFR-H805ICLLDYVREH  | 24092 | >EGFR-H805ICLLDYVREI   | 262  | 23830 |
| >EGFR-H805ICLLDYVREH  | 4523  | >EGFR-H805ICLLDYVREI   | 3    | 4520  |
| >EGFR-H805ICLLDYVREH  | 15843 | >EGFR-H805ICLLDYVREI   | 17   | 15826 |
| >EGFR-H805ICLLDYVREH  | 21672 | >EGFR-H805ICLLDYVREI   | 128  | 21544 |
| >EGFR-H805ICLLDYVREH  | 16425 | >EGFR-H805ICLLDYVREI   | 10   | 16415 |
| >EGFR-H805ICLLDYVREH  | 12038 | >EGFR-H805ICLLDYVREI   | 14   | 12024 |
| >EGFR-H805ICLLDYVREHK | 74    | >EGFR-H805ICLLDYVREIK  | 127  | 53    |
| >EGFR-H805ICLLDYVREHK | 144   | >EGFR-H805ICLLDYVREIK  | 247  | 103   |
| >EGFR-H835IHRDLAARNV  | 62    | >EGFR-H835ILRDLAARNVL  | 617  | 555   |
| >EGFR-H835IHRDLAARNV  | 21    | >EGFR-H835ILRDLAARNVL  | 167  | 146   |
| >EGFR-H835IHRDLAARNV  | 347   | >EGFR-H835ILRDLAARNVL  | 2132 | 1785  |

|                       |       |                       |       |       |
|-----------------------|-------|-----------------------|-------|-------|
| >EGFR-H835IVHRDLAARN' | 20516 | >EGFR-H835IVLRDLAARN\ | 367   | 20149 |
| >EGFR-H835IVHRDLAARN' | 22870 | >EGFR-H835IVLRDLAARN\ | 170   | 22700 |
| >EGFR-H835IVHRDLAARN' | 22280 | >EGFR-H835IVLRDLAARN\ | 217   | 22063 |
| >EGFR-H835IVHRDLAARN' | 17449 | >EGFR-H835IVLRDLAARN\ | 22    | 17427 |
| >EGFR-H835IVHRDLAARN' | 26256 | >EGFR-H835IVLRDLAARN\ | 453   | 25803 |
| >EGFR-H835IVHRDLAARN' | 23594 | >EGFR-H835IVLRDLAARN\ | 171   | 23423 |
| >EGFR-H835IVHRDLAARN' | 21853 | >EGFR-H835IVLRDLAARN\ | 98    | 21755 |
| >EGFR-H835IVHRDLAARN' | 23398 | >EGFR-H835IVLRDLAARN\ | 175   | 23223 |
| >EGFR-H835IVHRDLAARN' | 11828 | >EGFR-H835IVLRDLAARN\ | 3     | 11825 |
| >EGFR-H835IVHRDLAARN' | 23461 | >EGFR-H835IVLRDLAARN\ | 7     | 23454 |
| >EGFR-H835IVHRDLAAR   | 2598  | >EGFR-H835IVLRDLAAR   | 56    | 2542  |
| >EGFR-H835IVHRDLAAR   | 4332  | >EGFR-H835IVLRDLAAR   | 189   | 4143  |
| >EGFR-H835IVHRDLAARN' | 471   | >EGFR-H835IVLRDLAARN\ | 10842 | 10371 |
| >EGFR-H835IMNYLEDRRLL | 13421 | >EGFR-H835IMNYLEDRRLL | 403   | 13018 |
| >EGFR-H835ILVHRDLAARN | 138   | >EGFR-H835ILVLRDLAARN | 443   | 305   |
| >EGFR-H835ILVHRDLAA   | 1073  | >EGFR-H835ILVLRDLAA   | 82    | 991   |
| >EGFR-H835ILVHRDLAARN | 787   | >EGFR-H835ILVLRDLAARN | 144   | 643   |
| >EGFR-H835ILVHRDLAARN | 542   | >EGFR-H835ILVLRDLAARN | 132   | 410   |
| >EGFR-H835ILVHRDLAARN | 2053  | >EGFR-H835ILVLRDLAARN | 348   | 1705  |
| >EGFR-H835ILVHRDLAARN | 5771  | >EGFR-H835ILVLRDLAARN | 207   | 5564  |
| >EGFR-H835ILVHRDLAARN | 72    | >EGFR-H835ILVLRDLAARN | 43    | 29    |
| >EGFR-H835ILVHRDLAA   | 291   | >EGFR-H835ILVLRDLAA   | 3168  | 2877  |
| >EGFR-H835ILVHRDLAARN | 474   | >EGFR-H835ILVLRDLAARN | 3786  | 3312  |
| >EGFR-H835ILVHRDLAAR  | 34    | >EGFR-H835ILVLRDLAAR  | 34    | 0     |
| >EGFR-H835ILVHRDLAAR  | 867   | >EGFR-H835ILVLRDLAAR  | 394   | 473   |
| >EGFR-H835ILVHRDLAAR  | 174   | >EGFR-H835ILVLRDLAAR  | 425   | 251   |
| >EGFR-H835ILVHRDLAARN | 4547  | >EGFR-H835ILVLRDLAARN | 180   | 4367  |
| >EGFR-H835IRLVHRDLA   | 174   | >EGFR-H835IRLVLRDLA   | 646   | 472   |
| >EGFR-H835IRLVHRDLAA  | 166   | >EGFR-H835IRLVLRDLAA  | 613   | 447   |
| >EGFR-H835IRLVHRDLAA  | 344   | >EGFR-H835IRLVLRDLAA  | 1172  | 828   |
| >EGFR-H835IRLVHRDLA   | 452   | >EGFR-H835IRLVLRDLA   | 670   | 218   |
| >EGFR-H835IRLVHRDLAAF | 26    | >EGFR-H835IRLVLRDLAAR | 33    | 7     |
| >EGFR-H835IRLVHRDLAAF | 136   | >EGFR-H835IRLVLRDLAAR | 176   | 40    |
| >EGFR-H835IRLVHRDLAAF | 132   | >EGFR-H835IRLVLRDLAAR | 107   | 25    |
| >EGFR-H835IRRLVHRDL   | 220   | >EGFR-H835IRRLVLRDL   | 403   | 183   |
| >EGFR-H835IRRLVHRDL   | 45    | >EGFR-H835IRRLVLRDL   | 23    | 22    |
| >EGFR-H835IRRLVHRDLA  | 102   | >EGFR-H835IRRLVLRDLA  | 48    | 54    |
| >EGFR-H835IRRLVHRDLAA | 34    | >EGFR-H835IRRLVLRDLAA | 19    | 15    |
| >EGFR-H835IRRLVHRDLAA | 29    | >EGFR-H835IRRLVLRDLAA | 20    | 9     |
| >EGFR-H835IRRLVHRDL   | 15    | >EGFR-H835IRRLVLRDL   | 8     | 7     |
| >EGFR-H835IRRLVHRDLA  | 91    | >EGFR-H835IRRLVLRDLA  | 48    | 43    |
| >EGFR-H835IRRLVHRDLAA | 38    | >EGFR-H835IRRLVLRDLAA | 31    | 7     |
| >EGFR-H835IRRLVHRDLAA | 224   | >EGFR-H835IRRLVLRDLAA | 140   | 84    |

|                        |       |                        |       |       |
|------------------------|-------|------------------------|-------|-------|
| >EGFR-H835I RRLVHRDL   | 34    | >EGFR-H835I RRLVLRDL   | 16    | 18    |
| >EGFR-H835I RRLVHRDLA  | 57    | >EGFR-H835I RRLVLRDLA  | 44    | 13    |
| >EGFR-H835I RRLVHRDLAA | 72    | >EGFR-H835I RRLVLRDLAA | 37    | 35    |
| >EGFR-H835I RRLVHRDLAA | 121   | >EGFR-H835I RRLVLRDLAA | 107   | 14    |
| >EGFR-H835I RRLVHRDLAA | 625   | >EGFR-H835I RRLVLRDLAA | 454   | 171   |
| >EGFR-H835I DRRLVHRDL  | 652   | >EGFR-H835I DRRLVLRDL  | 489   | 163   |
| >EGFR-H835I DRRLVHRDL  | 505   | >EGFR-H835I DRRLVLRDL  | 303   | 202   |
| >EGFR-H835I LEDRRLVHRC | 355   | >EGFR-H835I LEDRRLVLRD | 71    | 284   |
| >EGFR-H835I LEDRRLVH   | 12693 | >EGFR-H835I LEDRRLVL   | 100   | 12593 |
| >EGFR-H835I LEDRRLVHRC | 275   | >EGFR-H835I LEDRRLVLRD | 326   | 51    |
| >EGFR-H835I LEDRRLVHRC | 1197  | >EGFR-H835I LEDRRLVLRD | 323   | 874   |
| >EGFR-H835I YLEDRRLVH  | 22076 | >EGFR-H835I YLEDRRLVL  | 456   | 21620 |
| >EGFR-H835I YLEDRRLVH  | 19923 | >EGFR-H835I YLEDRRLVL  | 182   | 19741 |
| >EGFR-H835I YLEDRRLVH  | 21046 | >EGFR-H835I YLEDRRLVL  | 217   | 20829 |
| >EGFR-H835I YLEDRRLVH  | 24865 | >EGFR-H835I YLEDRRLVL  | 285   | 24580 |
| >EGFR-H835I YLEDRRLVH  | 2373  | >EGFR-H835I YLEDRRLVL  | 3     | 2370  |
| >EGFR-H835I YLEDRRLVHR | 418   | >EGFR-H835I YLEDRRLVLR | 374   | 44    |
| >EGFR-H835I YLEDRRLVHR | 253   | >EGFR-H835I YLEDRRLVLR | 1088  | 835   |
| >EGFR-H835I YLEDRRLVHR | 229   | >EGFR-H835I YLEDRRLVLR | 198   | 31    |
| >EGFR-H835I YLEDRRLVHR | 420   | >EGFR-H835I YLEDRRLVLR | 106   | 314   |
| >EGFR-H835I YLEDRRLVHR | 1518  | >EGFR-H835I YLEDRRLVLR | 298   | 1220  |
| >EGFR-H835I YLEDRRLVH  | 17351 | >EGFR-H835I YLEDRRLVL  | 459   | 16892 |
| >EGFR-H835I YLEDRRLVH  | 9535  | >EGFR-H835I YLEDRRLVL  | 83    | 9452  |
| >EGFR-H835I YLEDRRLVH  | 20961 | >EGFR-H835I YLEDRRLVL  | 246   | 20715 |
| >EGFR-H835I YLEDRRLVHR | 93    | >EGFR-H835I YLEDRRLVLR | 106   | 13    |
| >EGFR-H835I YLEDRRLVHR | 162   | >EGFR-H835I YLEDRRLVLR | 232   | 70    |
| >EGFR-H835I NYLEDRRLVH | 20195 | >EGFR-H835I NYLEDRRLVL | 292   | 19903 |
| >EGFR-H835I NYLEDRRLVH | 4930  | >EGFR-H835I NYLEDRRLVL | 26    | 4904  |
| >EGFR-H835I NYLEDRRLVH | 159   | >EGFR-H835I NYLEDRRLVL | 180   | 21    |
| >EGFR-H835I NYLEDRRLVH | 17    | >EGFR-H835I NYLEDRRLVL | 17    | 0     |
| >EGFR-H835I NYLEDRRLVH | 26    | >EGFR-H835I NYLEDRRLVL | 38    | 12    |
| >EGFR-H850I HVKITDFGLA | 276   | >EGFR-H850I DVKITDFGLA | 3044  | 2768  |
| >EGFR-H850I HVKITDFG   | 229   | >EGFR-H850I DVKITDFG   | 10969 | 10740 |
| >EGFR-H850I HVKITDFGL  | 168   | >EGFR-H850I DVKITDFGL  | 11527 | 11359 |
| >EGFR-H850I HVKITDFGLA | 33    | >EGFR-H850I DVKITDFGLA | 7230  | 7197  |
| >EGFR-H850I HVKITDFGLA | 4     | >EGFR-H850I DVKITDFGLA | 460   | 456   |
| >EGFR-H850I HVKITDFGLA | 201   | >EGFR-H850I DVKITDFGLA | 6382  | 6181  |
| >EGFR-H850I HVKITDFGLA | 1803  | >EGFR-H850I DVKITDFGLA | 484   | 1319  |
| >EGFR-H850I HVKITDFGLA | 130   | >EGFR-H850I DVKITDFGLA | 118   | 12    |
| >EGFR-H850I HVKITDFGL  | 328   | >EGFR-H850I DVKITDFGL  | 10380 | 10052 |
| >EGFR-H850I QHVKITDF   | 107   | >EGFR-H850I QDVKITDF   | 1902  | 1795  |
| >EGFR-H850I QHVKITDFGL | 380   | >EGFR-H850I QDVKITDFGL | 14984 | 14604 |
| >EGFR-H850I PQHVKITDF  | 82    | >EGFR-H850I PQDVKITDF  | 2280  | 2198  |

|                       |     |                       |      |      |
|-----------------------|-----|-----------------------|------|------|
| >EGFR-H850ITPQHVKITDF | 80  | >EGFR-H850ITPQDVKITDF | 137  | 57   |
| >EGFR-H850ITPQHVKITDF | 125 | >EGFR-H850ITPQDVKITDF | 216  | 91   |
| >EGFR-H850ITPQHVKITDF | 234 | >EGFR-H850ITPQDVKITDF | 378  | 144  |
| >EGFR-H850IKTPQHVKITD | 461 | >EGFR-H850IKTPQDVKITD | 720  | 259  |
| >EGFR-H850IKTPQHVKI   | 23  | >EGFR-H850IKTPQDVKI   | 46   | 23   |
| >EGFR-H850IKTPQHVKITD | 41  | >EGFR-H850IKTPQDVKITD | 73   | 32   |
| >EGFR-H850IKTPQHVKI   | 299 | >EGFR-H850IKTPQDVKI   | 918  | 619  |
| >EGFR-H850IKTPQHVKITD | 44  | >EGFR-H850IKTPQDVKITD | 105  | 61   |
| >EGFR-H850IKTPQHVKI   | 33  | >EGFR-H850IKTPQDVKI   | 227  | 194  |
| >EGFR-H850IKTPQHVKIT  | 77  | >EGFR-H850IKTPQDVKIT  | 881  | 804  |
| >EGFR-H850IKTPQHVKITD | 7   | >EGFR-H850IKTPQDVKITD | 18   | 11   |
| >EGFR-H850IKTPQHVKI   | 51  | >EGFR-H850IKTPQDVKI   | 44   | 7    |
| >EGFR-H850IVKTPQHVKI  | 395 | >EGFR-H850IVKTPQDVKI  | 1356 | 961  |
| >EGFR-H850LVKTPQHV    | 262 | >EGFR-H850LVKTPQDV    | 776  | 514  |
| >EGFR-H850LVKTPQHV    | 42  | >EGFR-H850LVKTPQDV    | 168  | 126  |
| >EGFR-H850LVKTPQHVK   | 322 | >EGFR-H850LVKTPQDVK   | 2669 | 2347 |
| >EGFR-H850LVKTPQHVK   | 207 | >EGFR-H850LVKTPQDVK   | 1161 | 954  |
| >EGFR-H850LVKTPQHV    | 173 | >EGFR-H850LVKTPQDV    | 1842 | 1669 |
| >EGFR-H850LVKTPQHVK   | 15  | >EGFR-H850LVKTPQDVK   | 128  | 113  |
| >EGFR-H850LVKTPQHVKI  | 126 | >EGFR-H850LVKTPQDVKI  | 1240 | 1114 |
| >EGFR-H850LVKTPQHVK   | 399 | >EGFR-H850LVKTPQDVK   | 5896 | 5497 |
| >EGFR-H850LVKTPQHVK   | 357 | >EGFR-H850LVKTPQDVK   | 661  | 304  |
| >EGFR-H850VLVKTQHV    | 476 | >EGFR-H850VLVKTQDV    | 2025 | 1549 |
| >EGFR-H850VLVKTQHV    | 215 | >EGFR-H850VLVKTQDV    | 871  | 656  |
| >EGFR-H850VLVKTQHV    | 22  | >EGFR-H850VLVKTQDV    | 41   | 19   |
| >EGFR-H850VLVKTQHVk   | 269 | >EGFR-H850VLVKTQDVk   | 480  | 211  |
| >EGFR-H850VLVKTQHV    | 248 | >EGFR-H850VLVKTQDV    | 2205 | 1957 |
| >EGFR-H850VLVKTQHV    | 3   | >EGFR-H850VLVKTQDV    | 9    | 6    |
| >EGFR-H850VLVKTQHVk   | 25  | >EGFR-H850VLVKTQDVk   | 70   | 45   |
| >EGFR-H850VLVKTQHV    | 6   | >EGFR-H850VLVKTQDV    | 31   | 25   |
| >EGFR-H850VLVKTQHVk   | 241 | >EGFR-H850VLVKTQDVk   | 201  | 40   |
| >EGFR-H850VLVKTQHV    | 7   | >EGFR-H850VLVKTQDV    | 13   | 6    |
| >EGFR-H850VLVKTQHVk   | 97  | >EGFR-H850VLVKTQDVk   | 96   | 1    |
| >EGFR-H850VLVKTQHV    | 30  | >EGFR-H850VLVKTQDV    | 146  | 116  |
| >EGFR-H850VLVKTQHV    | 3   | >EGFR-H850VLVKTQDV    | 5    | 2    |
| >EGFR-H850VLVKTQHVk   | 26  | >EGFR-H850VLVKTQDVk   | 46   | 20   |
| >EGFR-H850VLVKTQHVk   | 415 | >EGFR-H850VLVKTQDVk   | 1393 | 978  |
| >EGFR-H850NVLVKTQHV   | 424 | >EGFR-H850NVLVKTQDV   | 1592 | 1168 |
| >EGFR-H850NVLVKTQHV   | 178 | >EGFR-H850NVLVKTQDV   | 840  | 662  |
| >EGFR-H850NVLVKTQHV   | 179 | >EGFR-H850NVLVKTQDV   | 494  | 315  |
| >EGFR-H850NVLVKTQHV   | 269 | >EGFR-H850NVLVKTQDV   | 574  | 305  |
| >EGFR-H850NVLVKTQHV   | 225 | >EGFR-H850NVLVKTQDV   | 676  | 451  |
| >EGFR-H850NVLVKTQHV   | 318 | >EGFR-H850NVLVKTQDV   | 535  | 217  |

|                       |     |                       |       |       |
|-----------------------|-----|-----------------------|-------|-------|
| >EGFR-H850INVLVKTPQH  | 29  | >EGFR-H850INVLVKTPQD  | 117   | 88    |
| >EGFR-H850IHVKITDFGLA | 276 | >EGFR-H850INVKITDFGLA | 543   | 267   |
| >EGFR-H850IHVKITDFG   | 229 | >EGFR-H850INVKITDFG   | 8278  | 8049  |
| >EGFR-H850IHVKITDFGL  | 168 | >EGFR-H850INVKITDFGL  | 8770  | 8602  |
| >EGFR-H850IHVKITDFGLA | 33  | >EGFR-H850INVKITDFGLA | 3819  | 3786  |
| >EGFR-H850IHVKITDFGLA | 4   | >EGFR-H850INVKITDFGLA | 69    | 65    |
| >EGFR-H850IHVKITDFGLA | 201 | >EGFR-H850INVKITDFGLA | 2295  | 2094  |
| >EGFR-H850IHVKITDFGLA | 130 | >EGFR-H850INVKITDFGLA | 134   | 4     |
| >EGFR-H850IHVKITDFGL  | 328 | >EGFR-H850INVKITDFGL  | 7874  | 7546  |
| >EGFR-H850IQHVKITDF   | 107 | >EGFR-H850IQNVKITDF   | 634   | 527   |
| >EGFR-H850IQHVKITDFGL | 380 | >EGFR-H850IQNVKITDFGL | 11031 | 10651 |
| >EGFR-H850IPQHVKITDF  | 82  | >EGFR-H850IPQNVKITDF  | 115   | 33    |
| >EGFR-H850ITPQHVKITDF | 80  | >EGFR-H850ITPQNVKITDF | 28    | 52    |
| >EGFR-H850ITPQHVKITDF | 125 | >EGFR-H850ITPQNVKITDF | 143   | 18    |
| >EGFR-H850ITPQHVKITDF | 234 | >EGFR-H850ITPQNVKITDF | 553   | 319   |
| >EGFR-H850IKTPQHVKITD | 461 | >EGFR-H850IKTPQNVKITD | 1151  | 690   |
| >EGFR-H850IKTPQHVKI   | 23  | >EGFR-H850IKTPQNVKI   | 22    | 1     |
| >EGFR-H850IKTPQHVKITD | 41  | >EGFR-H850IKTPQNVKITD | 43    | 2     |
| >EGFR-H850IKTPQHVKI   | 299 | >EGFR-H850IKTPQNVKI   | 414   | 115   |
| >EGFR-H850IKTPQHVKITD | 44  | >EGFR-H850IKTPQNVKITD | 41    | 3     |
| >EGFR-H850IKTPQHVKI   | 33  | >EGFR-H850IKTPQNVKI   | 53    | 20    |
| >EGFR-H850IKTPQHVKIT  | 77  | >EGFR-H850IKTPQNVKIT  | 290   | 213   |
| >EGFR-H850IKTPQHVKITD | 7   | >EGFR-H850IKTPQNVKITD | 11    | 4     |
| >EGFR-H850IKTPQHVKI   | 51  | >EGFR-H850IKTPQNVKI   | 71    | 20    |
| >EGFR-H850IVKTPQHVKI  | 395 | >EGFR-H850IVKTPQNVKI  | 521   | 126   |
| >EGFR-H850LVKTPQHV    | 262 | >EGFR-H850LVKTPQNV    | 208   | 54    |
| >EGFR-H850LVKTPQHV    | 42  | >EGFR-H850LVKTPQNV    | 81    | 39    |
| >EGFR-H850LVKTPQHVK   | 322 | >EGFR-H850LVKTPQNVK   | 461   | 139   |
| >EGFR-H850LVKTPQHVK   | 207 | >EGFR-H850LVKTPQNVK   | 870   | 663   |
| >EGFR-H850LVKTPQHV    | 173 | >EGFR-H850LVKTPQNV    | 246   | 73    |
| >EGFR-H850LVKTPQHVK   | 15  | >EGFR-H850LVKTPQNVK   | 13    | 2     |
| >EGFR-H850LVKTPQHVKI  | 126 | >EGFR-H850LVKTPQNVKI  | 205   | 79    |
| >EGFR-H850LVKTPQHVK   | 399 | >EGFR-H850LVKTPQNVK   | 2007  | 1608  |
| >EGFR-H850LVKTPQHVK   | 357 | >EGFR-H850LVKTPQNVK   | 586   | 229   |
| >EGFR-H850VLVVKTPQHV  | 476 | >EGFR-H850VLVVKTPQNV  | 414   | 62    |
| >EGFR-H850VLVVKTPQHV  | 215 | >EGFR-H850VLVVKTPQNV  | 167   | 48    |
| >EGFR-H850VLVVKTPQHVK | 703 | >EGFR-H850VLVVKTPQNVK | 451   | 252   |
| >EGFR-H850VLVVKTPQHVK | 22  | >EGFR-H850VLVVKTPQNV  | 15    | 7     |
| >EGFR-H850VLVVKTPQHVK | 269 | >EGFR-H850VLVVKTPQNVK | 232   | 37    |
| >EGFR-H850VLVVKTPQHVK | 248 | >EGFR-H850VLVVKTPQNV  | 978   | 730   |
| >EGFR-H850VLVVKTPQHVK | 3   | >EGFR-H850VLVVKTPQNV  | 3     | 0     |
| >EGFR-H850VLVVKTPQHVK | 25  | >EGFR-H850VLVVKTPQNVK | 36    | 11    |
| >EGFR-H850VLVVKTPQHVK | 6   | >EGFR-H850VLVVKTPQNV  | 10    | 4     |



|                        |      |                        |      |      |
|------------------------|------|------------------------|------|------|
| >EGFR-H850I VLVKTPQHVK | 241  | >EGFR-H850I VLVKTPQNVK | 157  | 84   |
| >EGFR-H850I VLVKTPQHV  | 7    | >EGFR-H850I VLVKTPQNV  | 8    | 1    |
| >EGFR-H850I VLVKTPQHVK | 97   | >EGFR-H850I VLVKTPQNVK | 102  | 5    |
| >EGFR-H850I VLVKTPQHV  | 30   | >EGFR-H850I VLVKTPQNV  | 11   | 19   |
| >EGFR-H850I VLVKTPQHV  | 3    | >EGFR-H850I VLVKTPQNV  | 3    | 0    |
| >EGFR-H850I VLVKTPQHVK | 26   | >EGFR-H850I VLVKTPQNVK | 34   | 8    |
| >EGFR-H850I VLVKTPQHVK | 415  | >EGFR-H850I VLVKTPQNVK | 1032 | 617  |
| >EGFR-H850I NVLVKTPQH\ | 521  | >EGFR-H850I NVLVKTPQN\ | 278  | 243  |
| >EGFR-H850I NVLVKTPQH\ | 424  | >EGFR-H850I NVLVKTPQN\ | 502  | 78   |
| >EGFR-H850I NVLVKTPQH\ | 178  | >EGFR-H850I NVLVKTPQN\ | 369  | 191  |
| >EGFR-H850I NVLVKTPQH\ | 179  | >EGFR-H850I NVLVKTPQN\ | 91   | 88   |
| >EGFR-H850I NVLVKTPQH\ | 269  | >EGFR-H850I NVLVKTPQN\ | 337  | 68   |
| >EGFR-H850I NVLVKTPQH\ | 225  | >EGFR-H850I NVLVKTPQN\ | 540  | 315  |
| >EGFR-H850I NVLVKTPQH\ | 318  | >EGFR-H850I NVLVKTPQN\ | 477  | 159  |
| >EGFR-H850I NVLVKTPQH\ | 29   | >EGFR-H850I NVLVKTPQN\ | 18   | 11   |
| >EGFR-H870I HAEGGKVPK  | 176  | >EGFR-H870I NAEGGKVPK  | 2224 | 2048 |
| >EGFR-H870I HAEGGKVPK  | 134  | >EGFR-H870I NAEGGKVPK  | 150  | 16   |
| >EGFR-H870I HAEGGKVPK  | 165  | >EGFR-H870I NAEGGKVPK  | 2468 | 2303 |
| >EGFR-H870I HAEGGKVPK  | 448  | >EGFR-H870I NAEGGKVPK  | 4275 | 3827 |
| >EGFR-H870I HAEGGKVPK  | 476  | >EGFR-H870I NAEGGKVPK  | 6299 | 5823 |
| >EGFR-H870I YHAEGGKVPK | 486  | >EGFR-H870I YNAEGGKVPK | 2551 | 2065 |
| >EGFR-H870I YHAEGGKVPK | 306  | >EGFR-H870I YNAEGGKVPK | 7876 | 7570 |
| >EGFR-H870I YHAEGGKVPK | 22   | >EGFR-H870I YNAEGGKVPK | 832  | 810  |
| >EGFR-H870I EYHAEGGKVI | 173  | >EGFR-H870I EYNAEGGKVI | 229  | 56   |
| >EGFR-H870I EYHAEGGKVI | 270  | >EGFR-H870I EYNAEGGKVI | 1211 | 941  |
| >EGFR-H870I KEYHAEGGK\ | 130  | >EGFR-H870I KEYNAEGGK\ | 255  | 125  |
| >EGFR-H870I KEYHAEGGK\ | 65   | >EGFR-H870I KEYNAEGGK\ | 44   | 21   |
| >EGFR-H870I EEKEYHAE   | 180  | >EGFR-H870I EEKEYNAE   | 615  | 435  |
| >EGFR-H870I EEKEYHAE   | 142  | >EGFR-H870I EEKEYNAE   | 443  | 301  |
| >EGFR-H870I AEEKEYHAE  | 412  | >EGFR-H870I AEEKEYNAE  | 267  | 145  |
| >EGFR-H870I AEEKEYHA   | 15   | >EGFR-H870I AEEKEYNA   | 14   | 1    |
| >EGFR-H870I AEEKEYHAE  | 159  | >EGFR-H870I AEEKEYNAE  | 550  | 391  |
| >EGFR-H870I AEEKEYHAE  | 75   | >EGFR-H870I AEEKEYNAE  | 103  | 28   |
| >EGFR-H870I LLGAEKEYH. | 248  | >EGFR-H870I LLGAEKEYN. | 166  | 82   |
| >EGFR-H870I LLGAEKEYH. | 181  | >EGFR-H870I LLGAEKEYN. | 215  | 34   |
| >EGFR-H870I LLGAEKEYH. | 186  | >EGFR-H870I LLGAEKEYN. | 293  | 107  |
| >EGFR-H870I LLGAEKEYH. | 194  | >EGFR-H870I LLGAEKEYN. | 339  | 145  |
| >EGFR-H870I LLGAEKEYH. | 24   | >EGFR-H870I LLGAEKEYN. | 26   | 2    |
| >EGFR-H870I HAEGGKVPK  | 675  | >EGFR-H870I RAEGGKVPK  | 165  | 510  |
| >EGFR-H870I HAEGGKVPK  | 3208 | >EGFR-H870I RAEGGKVPK  | 437  | 2771 |
| >EGFR-H870I HAEGGKVPK  | 176  | >EGFR-H870I RAEGGKVPK  | 39   | 137  |
| >EGFR-H870I HAEGGKVPK  | 134  | >EGFR-H870I RAEGGKVPK  | 1113 | 979  |
| >EGFR-H870I HAEGGKVPK  | 165  | >EGFR-H870I RAEGGKVPK  | 81   | 84   |

|                       |       |                       |      |       |
|-----------------------|-------|-----------------------|------|-------|
| >EGFR-H870IHAEGGKVPIK | 448   | >EGFR-H870IRAEGGKVPIK | 69   | 379   |
| >EGFR-H870IHAEGGKVPIK | 476   | >EGFR-H870IRAEGGKVPIK | 277  | 199   |
| >EGFR-H870IHAEGGKVPI  | 1627  | >EGFR-H870IRAEGGKVPI  | 393  | 1234  |
| >EGFR-H870IYHAEGGKVPI | 486   | >EGFR-H870IYRAEGGKVPI | 152  | 334   |
| >EGFR-H870IYHAEGGKVPI | 306   | >EGFR-H870IYRAEGGKVPI | 5301 | 4995  |
| >EGFR-H870IYHAEGGKV   | 19621 | >EGFR-H870IYRAEGGKV   | 278  | 19343 |
| >EGFR-H870IYHAEGGKVPI | 15363 | >EGFR-H870IYRAEGGKVPI | 164  | 15199 |
| >EGFR-H870IYHAEGGKVPI | 22    | >EGFR-H870IYRAEGGKVPI | 31   | 9     |
| >EGFR-H870IKLLGAEKEYI | 3884  | >EGFR-H870IKLLGAEKEYI | 40   | 3844  |
| >EGFR-H870IKLLGAEKEYI | 11686 | >EGFR-H870IKLLGAEKEYI | 19   | 11667 |
| >EGFR-H870IEYHAEGGKVF | 173   | >EGFR-H870IEYRAEGGKVF | 924  | 751   |
| >EGFR-H870IEYHAEGGKVF | 270   | >EGFR-H870IEYRAEGGKVF | 1640 | 1370  |
| >EGFR-H870IKEYHAEGGK\ | 130   | >EGFR-H870IKEYRAEGGK\ | 126  | 4     |
| >EGFR-H870IKEYHAEGGK\ | 65    | >EGFR-H870IKEYRAEGGK\ | 35   | 30    |
| >EGFR-H870IEEKEYHAE   | 180   | >EGFR-H870IEEKEYRAE   | 733  | 553   |
| >EGFR-H870IEEKEYHAE   | 142   | >EGFR-H870IEEKEYRAE   | 632  | 490   |
| >EGFR-H870IAEEKEYHAE  | 412   | >EGFR-H870IAEEKEYRAE  | 818  | 406   |
| >EGFR-H870IAEEKEYHAE  | 15    | >EGFR-H870IAEEKEYRAE  | 16   | 1     |
| >EGFR-H870IAEEKEYHAE  | 159   | >EGFR-H870IAEEKEYRAE  | 615  | 456   |
| >EGFR-H870IAEEKEYHAE  | 75    | >EGFR-H870IAEEKEYRAE  | 100  | 25    |
| >EGFR-H870IGAEKEYH    | 16836 | >EGFR-H870IGAEKEYR    | 457  | 16379 |
| >EGFR-H870ILGAEKEYH   | 24920 | >EGFR-H870ILGAEKEYR   | 309  | 24611 |
| >EGFR-H870ILLGAEKEYH, | 248   | >EGFR-H870ILLGAEKEYR, | 296  | 48    |
| >EGFR-H870ILLGAEKEYH, | 181   | >EGFR-H870ILLGAEKEYR, | 132  | 49    |
| >EGFR-H870ILLGAEKEYH, | 186   | >EGFR-H870ILLGAEKEYR, | 414  | 228   |
| >EGFR-H870ILLGAEKEYH, | 194   | >EGFR-H870ILLGAEKEYR, | 520  | 326   |
| >EGFR-H870ILLGAEKEYH, | 24    | >EGFR-H870ILLGAEKEYR, | 17   | 7     |
| >EGFR-H870ILLGAEKEYH  | 29848 | >EGFR-H870ILLGAEKEYR  | 158  | 29690 |
| >EGFR-H870'HAEGGKVPIK | 176   | >EGFR-H870'YAEGGKVPIK | 54   | 122   |
| >EGFR-H870'HAEGGKVPIK | 134   | >EGFR-H870'YAEGGKVPIK | 102  | 32    |
| >EGFR-H870'HAEGGKVPIK | 165   | >EGFR-H870'YAEGGKVPIK | 481  | 316   |
| >EGFR-H870'HAEGGKVPIK | 448   | >EGFR-H870'YAEGGKVPIK | 360  | 88    |
| >EGFR-H870'HAEGGKVPIK | 874   | >EGFR-H870'YAEGGKVPIK | 247  | 627   |
| >EGFR-H870'HAEGGKVPIK | 476   | >EGFR-H870'YAEGGKVPIK | 1381 | 905   |
| >EGFR-H870'YHAEGGKVPI | 7087  | >EGFR-H870'YYAEGGKVPI | 23   | 7064  |
| >EGFR-H870'YHAEGGKV   | 1702  | >EGFR-H870'YYAEGGKV   | 217  | 1485  |
| >EGFR-H870'YHAEGGKV   | 2423  | >EGFR-H870'YYAEGGKV   | 258  | 2165  |
| >EGFR-H870'YHAEGGKV   | 1678  | >EGFR-H870'YYAEGGKV   | 64   | 1614  |
| >EGFR-H870'YHAEGGKV   | 19205 | >EGFR-H870'YYAEGGKV   | 105  | 19100 |
| >EGFR-H870'YHAEGGKVPI | 14126 | >EGFR-H870'YYAEGGKVPI | 15   | 14111 |
| >EGFR-H870'YHAEGGKVPI | 486   | >EGFR-H870'YYAEGGKVPI | 4294 | 3808  |
| >EGFR-H870'YHAEGGKVPI | 306   | >EGFR-H870'YYAEGGKVPI | 7529 | 7223  |
| >EGFR-H870'YHAEGGKVPI | 22    | >EGFR-H870'YYAEGGKVPI | 909  | 887   |

|                         |       |                         |      |       |
|-------------------------|-------|-------------------------|------|-------|
| >EGFR-H870`KLLGAEKEYI   | 2686  | >EGFR-H870`KLLGAEKEY`   | 398  | 2288  |
| >EGFR-H870`KLLGAEKEYI   | 13098 | >EGFR-H870`KLLGAEKEY`   | 195  | 12903 |
| >EGFR-H870`KLLGAEKEYI   | 12489 | >EGFR-H870`KLLGAEKEY`   | 154  | 12335 |
| >EGFR-H870`KLLGAEKEYI   | 19972 | >EGFR-H870`KLLGAEKEY`   | 384  | 19588 |
| >EGFR-H870`KLLGAEKEYI   | 15268 | >EGFR-H870`KLLGAEKEY`   | 427  | 14841 |
| >EGFR-H870`EYHAEGGKVI   | 173   | >EGFR-H870`EYHAEGGKVF   | 323  | 150   |
| >EGFR-H870`EYHAEGGKVI   | 270   | >EGFR-H870`EYHAEGGKVF   | 258  | 12    |
| >EGFR-H870`EYHAEGGK     | 758   | >EGFR-H870`EYHAEGGK     | 240  | 518   |
| >EGFR-H870`EYHAEGGK     | 1512  | >EGFR-H870`EYHAEGGK     | 424  | 1088  |
| >EGFR-H870`KEYHAEGGK\   | 130   | >EGFR-H870`KEYHAEGGKV   | 135  | 5     |
| >EGFR-H870`KEYHAEGGK\   | 509   | >EGFR-H870`KEYHAEGGKV   | 235  | 274   |
| >EGFR-H870`KEYHAEGGK\   | 1252  | >EGFR-H870`KEYHAEGGKV   | 382  | 870   |
| >EGFR-H870`KEYHAEGGK\   | 65    | >EGFR-H870`KEYHAEGGKV   | 26   | 39    |
| >EGFR-H870`EEKEYHAE     | 180   | >EGFR-H870`EEKEYYAE     | 172  | 8     |
| >EGFR-H870`EEKEYHAE     | 142   | >EGFR-H870`EEKEYYAE     | 162  | 20    |
| >EGFR-H870`AEEKEYHAE    | 412   | >EGFR-H870`AEEKEYYAE    | 215  | 197   |
| >EGFR-H870`AEEKEYHAE    | 870   | >EGFR-H870`AEEKEYYAE    | 460  | 410   |
| >EGFR-H870`AEEKEYHA     | 15    | >EGFR-H870`AEEKEYYA     | 9    | 6     |
| >EGFR-H870`AEEKEYHAE    | 159   | >EGFR-H870`AEEKEYYAE    | 153  | 6     |
| >EGFR-H870`AEEKEYHAE    | 75    | >EGFR-H870`AEEKEYYAE    | 42   | 33    |
| >EGFR-H870`AEEKEYHAE    | 580   | >EGFR-H870`AEEKEYYAE    | 451  | 129   |
| >EGFR-H870`LLGAEKEYH,   | 1255  | >EGFR-H870`LLGAEKEYY/   | 276  | 979   |
| >EGFR-H870`LLGAEKEYH,   | 248   | >EGFR-H870`LLGAEKEYY/   | 55   | 193   |
| >EGFR-H870`LLGAEKEYH,   | 181   | >EGFR-H870`LLGAEKEYY/   | 30   | 151   |
| >EGFR-H870`LLGAEKEYH,   | 186   | >EGFR-H870`LLGAEKEYY/   | 82   | 104   |
| >EGFR-H870`LLGAEKEYH,   | 194   | >EGFR-H870`LLGAEKEYY/   | 114  | 80    |
| >EGFR-H870`LLGAEKEYH,   | 1976  | >EGFR-H870`LLGAEKEYY/   | 164  | 1812  |
| >EGFR-H870`LLGAEKEYH,   | 24    | >EGFR-H870`LLGAEKEYY/   | 13   | 11    |
| >EGFR-H870`LLGAEKEYH    | 20230 | >EGFR-H870`LLGAEKEYY    | 406  | 19824 |
| >EGFR-H870`LLGAEKEYH    | 12066 | >EGFR-H870`LLGAEKEYY    | 314  | 11752 |
| >EGFR-I706T`ILKETEFKKI  | 144   | >EGFR-I706T`TLKETEFKKI  | 199  | 55    |
| >EGFR-I706T`ILKETEFKKI  | 259   | >EGFR-I706T`TLKETEFKKI  | 1144 | 885   |
| >EGFR-I706T`ILKETEFKKI  | 63    | >EGFR-I706T`TLKETEFKKI  | 248  | 185   |
| >EGFR-I706T`ILKETEFK    | 129   | >EGFR-I706T`TLKETEFK    | 250  | 121   |
| >EGFR-I706T`ILKETEFKK   | 144   | >EGFR-I706T`TLKETEFKK   | 263  | 119   |
| >EGFR-I706T`ILKETEFK    | 431   | >EGFR-I706T`TLKETEFK    | 165  | 266   |
| >EGFR-I706T`ILKETEFKK   | 502   | >EGFR-I706T`TLKETEFKK   | 173  | 329   |
| >EGFR-I706T`ILKETEFK    | 97    | >EGFR-I706T`TLKETEFK    | 190  | 93    |
| >EGFR-I706T`ILKETEFKK   | 235   | >EGFR-I706T`TLKETEFKK   | 510  | 275   |
| >EGFR-I706T`ILKETEFKKIK | 224   | >EGFR-I706T`TLKETEFKKIK | 473  | 249   |
| >EGFR-I706T`ILKETEFK    | 352   | >EGFR-I706T`TLKETEFK    | 97   | 255   |
| >EGFR-I706T`ILKETEFKK   | 708   | >EGFR-I706T`TLKETEFKK   | 204  | 504   |
| >EGFR-I706T`RILKETEFK   | 83    | >EGFR-I706T`RTLKETEFK   | 110  | 27    |

|                         |       |                         |       |       |
|-------------------------|-------|-------------------------|-------|-------|
| >EGFR-I706T RILKETEFKK  | 111   | >EGFR-I706T RTLKETEFKK  | 177   | 66    |
| >EGFR-I706T RILKETEFK   | 23    | >EGFR-I706T RTLKETEFK   | 16    | 7     |
| >EGFR-I706T RILKETEFKK  | 58    | >EGFR-I706T RTLKETEFKK  | 20    | 38    |
| >EGFR-I706T RILKETEF    | 267   | >EGFR-I706T RTLKETEF    | 75    | 192   |
| >EGFR-I706T RILKETEFK   | 37    | >EGFR-I706T RTLKETEFK   | 12    | 25    |
| >EGFR-I706T RILKETEFKK  | 71    | >EGFR-I706T RTLKETEFKK  | 20    | 51    |
| >EGFR-I706T RILKETEFKKI | 2042  | >EGFR-I706T RTLKETEFKKI | 482   | 1560  |
| >EGFR-I706T RILKETEFK   | 508   | >EGFR-I706T RTLKETEFK   | 126   | 382   |
| >EGFR-I706T RILKETEF    | 40    | >EGFR-I706T RTLKETEF    | 15    | 25    |
| >EGFR-I706T RILKETEFKKI | 128   | >EGFR-I706T RTLKETEFKKI | 49    | 79    |
| >EGFR-I706T RILKETEFK   | 1295  | >EGFR-I706T RTLKETEFK   | 199   | 1096  |
| >EGFR-I706T RILKETEF    | 62    | >EGFR-I706T RTLKETEF    | 29    | 33    |
| >EGFR-I706T RILKETEF    | 111   | >EGFR-I706T RTLKETEF    | 4     | 107   |
| >EGFR-I706T RILKETEFKKI | 8766  | >EGFR-I706T RTLKETEFKKI | 42    | 8724  |
| >EGFR-I706T RILKETEF    | 4526  | >EGFR-I706T RTLKETEF    | 155   | 4371  |
| >EGFR-I706T RILKETEF    | 814   | >EGFR-I706T RTLKETEF    | 43    | 771   |
| >EGFR-I706T RILKETEF    | 2712  | >EGFR-I706T RTLKETEF    | 112   | 2600  |
| >EGFR-I706T RILKETEFKKI | 10660 | >EGFR-I706T RTLKETEFKKI | 491   | 10169 |
| >EGFR-I706T RILKETEFK   | 5619  | >EGFR-I706T RTLKETEFK   | 303   | 5316  |
| >EGFR-I706T RILKETEFKK  | 4246  | >EGFR-I706T RTLKETEFKK  | 384   | 3862  |
| >EGFR-I706T RILKETEFK   | 64    | >EGFR-I706T RTLKETEFK   | 216   | 152   |
| >EGFR-I706T RILKETEFKK  | 149   | >EGFR-I706T RTLKETEFKK  | 614   | 465   |
| >EGFR-I706T RILKETEFKKI | 669   | >EGFR-I706T RTLKETEFKKI | 13    | 656   |
| >EGFR-I706T GEAPNQALLF  | 42    | >EGFR-I706T GEAPNQALLF  | 10044 | 10002 |
| >EGFR-I706T GEAPNQALLF  | 227   | >EGFR-I706T GEAPNQALLF  | 8892  | 8665  |
| >EGFR-I706T GEAPNQALLF  | 7     | >EGFR-I706T GEAPNQALLF  | 244   | 237   |
| >EGFR-I706T LRILKETEF   | 106   | >EGFR-I706T LRILKETEF   | 379   | 273   |
| >EGFR-I706T LRILKETEFK  | 302   | >EGFR-I706T LRILKETEFK  | 1303  | 1001  |
| >EGFR-I706T LRILKETEFKK | 185   | >EGFR-I706T LRILKETEFKK | 219   | 34    |
| >EGFR-I706T LLRILKETEFK | 286   | >EGFR-I706T LLRILKETEFK | 159   | 127   |
| >EGFR-I706T LLRILKETEFK | 60    | >EGFR-I706T LLRILKETEFK | 44    | 16    |
| >EGFR-I706T LLRILKETEF  | 167   | >EGFR-I706T LLRILKETEF  | 153   | 14    |
| >EGFR-I706T LLRILKETEF  | 119   | >EGFR-I706T LLRILKETEF  | 45    | 74    |
| >EGFR-I706T LLRILKETEF  | 422   | >EGFR-I706T LLRILKETEF  | 1314  | 892   |
| >EGFR-I706T ALLRILKET   | 151   | >EGFR-I706T ALLRILKET   | 146   | 5     |
| >EGFR-I706T ALLRILKET   | 90    | >EGFR-I706T ALLRILKET   | 83    | 7     |
| >EGFR-I706T ALLRILKETEF | 153   | >EGFR-I706T ALLRILKETEF | 449   | 296   |
| >EGFR-I706T ALLRILKETEF | 58    | >EGFR-I706T ALLRILKETEF | 26    | 32    |
| >EGFR-I706T QALLRILK    | 62    | >EGFR-I706T QALLRILK    | 123   | 61    |
| >EGFR-I706T QALLRILK    | 145   | >EGFR-I706T QALLRILK    | 547   | 402   |
| >EGFR-I706T NQALLRIL    | 1660  | >EGFR-I706T NQALLRIL    | 417   | 1243  |
| >EGFR-I706T NQALLRILK   | 117   | >EGFR-I706T NQALLRILK   | 474   | 357   |
| >EGFR-I706T NQALLRIL    | 152   | >EGFR-I706T NQALLRIL    | 185   | 33    |

|                         |     |                         |       |      |
|-------------------------|-----|-------------------------|-------|------|
| >EGFR-I706T APNQALLRI   | 22  | >EGFR-I706T APNQALLRT   | 7789  | 7767 |
| >EGFR-I706T APNQALLRIL  | 329 | >EGFR-I706T APNQALLRTL  | 152   | 177  |
| >EGFR-I706T APNQALLRI   | 145 | >EGFR-I706T APNQALLRT   | 2057  | 1912 |
| >EGFR-I706T APNQALLRIL  | 109 | >EGFR-I706T APNQALLRTL  | 179   | 70   |
| >EGFR-I706T APNQALLRI   | 386 | >EGFR-I706T APNQALLRT   | 10226 | 9840 |
| >EGFR-I706T APNQALLRIL  | 293 | >EGFR-I706T APNQALLRTL  | 56    | 237  |
| >EGFR-I706T EAPNQALLRI  | 136 | >EGFR-I706T EAPNQALLRT  | 308   | 172  |
| >EGFR-I715L IKVLGSGAF   | 9   | >EGFR-I715L LKVLGSGAF   | 12    | 3    |
| >EGFR-I715L KIKVLGSGA   | 405 | >EGFR-I715L KLKVLGSGA   | 44    | 361  |
| >EGFR-I715L KIKVLGSG    | 289 | >EGFR-I715L KLKVLGSG    | 885   | 596  |
| >EGFR-I715L KIKVLGSGA   | 72  | >EGFR-I715L KLKVLGSGA   | 226   | 154  |
| >EGFR-I715L KIKVLGSGAF  | 50  | >EGFR-I715L KLKVLGSGAF  | 127   | 77   |
| >EGFR-I715L KIKVLGSGAF  | 63  | >EGFR-I715L KLKVLGSGAF  | 41    | 22   |
| >EGFR-I715L KIKVLGSGAF  | 672 | >EGFR-I715L KLKVLGSGAF  | 123   | 549  |
| >EGFR-I715L KIKVLGSGAF  | 245 | >EGFR-I715L KLKVLGSGAF  | 58    | 187  |
| >EGFR-I715L KIKVLGSGAF  | 513 | >EGFR-I715L KLKVLGSGAF  | 495   | 18   |
| >EGFR-I715L RILKETEFKKI | 128 | >EGFR-I715L RILKETEFKKL | 365   | 237  |
| >EGFR-I715L KKIKVLGSGAI | 7   | >EGFR-I715L KKLKVLGSGA  | 7     | 0    |
| >EGFR-I715L TEFKKIKV    | 513 | >EGFR-I715L TEFKKLKV    | 378   | 135  |
| >EGFR-I715L TEFKKIKVL   | 51  | >EGFR-I715L TEFKKLKV    | 24    | 27   |
| >EGFR-I715L TEFKKIKVL   | 462 | >EGFR-I715L TEFKKLKV    | 352   | 110  |
| >EGFR-I715L TEFKKIKVL   | 284 | >EGFR-I715L TEFKKLKV    | 221   | 63   |
| >EGFR-I715L TEFKKIKV    | 361 | >EGFR-I715L TEFKKLKV    | 309   | 52   |
| >EGFR-I715L TEFKKIKVL   | 68  | >EGFR-I715L TEFKKLKV    | 82    | 14   |
| >EGFR-I715L TEFKKIKVL   | 460 | >EGFR-I715L TEFKKLKV    | 740   | 280  |
| >EGFR-I715L TEFKKIKVL   | 85  | >EGFR-I715L TEFKKLKV    | 57    | 28   |
| >EGFR-I715L ETEFKKIK    | 46  | >EGFR-I715L ETEFKKIK    | 20    | 26   |
| >EGFR-I715L ETEFKKIKV   | 201 | >EGFR-I715L ETEFKKIKV   | 739   | 538  |
| >EGFR-I715L KETEFKKI    | 82  | >EGFR-I715L KETEFKKL    | 235   | 153  |
| >EGFR-I715L KETEFKKIKV  | 274 | >EGFR-I715L KETEFKKLKV  | 164   | 110  |
| >EGFR-I715L KETEFKKIKVL | 128 | >EGFR-I715L KETEFKKLKVI | 67    | 61   |
| >EGFR-I715L KETEFKKI    | 165 | >EGFR-I715L KETEFKKL    | 41    | 124  |
| >EGFR-I715L KETEFKKIKVL | 51  | >EGFR-I715L KETEFKKLKVI | 46    | 5    |
| >EGFR-I715L KETEFKKI    | 289 | >EGFR-I715L KETEFKKL    | 134   | 155  |
| >EGFR-I715L KETEFKKIKVL | 75  | >EGFR-I715L KETEFKKLKVI | 86    | 11   |
| >EGFR-I715L KETEFKKIKVL | 105 | >EGFR-I715L KETEFKKLKVI | 80    | 25   |
| >EGFR-I715L ILKETEFKKI  | 702 | >EGFR-I715L ILKETEFKKL  | 374   | 328  |
| >EGFR-I715L ILKETEFKKI  | 144 | >EGFR-I715L ILKETEFKKL  | 207   | 63   |
| >EGFR-I715L ILKETEFKKI  | 259 | >EGFR-I715L ILKETEFKKL  | 307   | 48   |
| >EGFR-I715L ILKETEFKKI  | 63  | >EGFR-I715L ILKETEFKKL  | 17    | 46   |
| >EGFR-I715L ILKETEFKKIK | 549 | >EGFR-I715L ILKETEFKKLK | 160   | 389  |
| >EGFR-I715L ILKETEFKKIK | 224 | >EGFR-I715L ILKETEFKKLK | 136   | 88   |
| >EGFR-I715L IKVLGSGAF   | 9   | >EGFR-I715L SKVLGSGAF   | 21    | 12   |

|                         |      |                         |       |       |
|-------------------------|------|-------------------------|-------|-------|
| >EGFR-I715S·KIKVLGSGA   | 405  | >EGFR-I715S·KSKVLGSGA   | 7856  | 7451  |
| >EGFR-I715S·KIKVLGSG    | 289  | >EGFR-I715S·KSKVLGSG    | 102   | 187   |
| >EGFR-I715S·KIKVLGSGA   | 72   | >EGFR-I715S·KSKVLGSGA   | 29    | 43    |
| >EGFR-I715S·KIKVLGSGAF  | 903  | >EGFR-I715S·KSKVLGSGAF  | 327   | 576   |
| >EGFR-I715S·KIKVLGSGAF  | 50   | >EGFR-I715S·KSKVLGSGAF  | 24    | 26    |
| >EGFR-I715S·KIKVLGSGAF  | 63   | >EGFR-I715S·KSKVLGSGAF  | 60    | 3     |
| >EGFR-I715S·KIKVLGSGAF  | 245  | >EGFR-I715S·KSKVLGSGAF  | 41    | 204   |
| >EGFR-I715S·KIKVLGSGAF  | 523  | >EGFR-I715S·KSKVLGSGAF  | 6     | 517   |
| >EGFR-I715S·KIKVLGSGAF  | 513  | >EGFR-I715S·KSKVLGSGAF  | 44    | 469   |
| >EGFR-I715S·RILKETEFKKI | 128  | >EGFR-I715S·RILKETEFKKS | 10893 | 10765 |
| >EGFR-I715S·KKIKVLGSGA  | 7    | >EGFR-I715S·KSKVLGSGA   | 9     | 2     |
| >EGFR-I715S·FKKIKVLGSGA | 1311 | >EGFR-I715S·FKKSKVLGSG  | 289   | 1022  |
| >EGFR-I715S·TEFKKIKVL   | 51   | >EGFR-I715S·TEFKKSKVL   | 23    | 28    |
| >EGFR-I715S·TEFKKIKVL   | 462  | >EGFR-I715S·TEFKKSKVL   | 912   | 450   |
| >EGFR-I715S·TEFKKIKVL   | 284  | >EGFR-I715S·TEFKKSKVL   | 161   | 123   |
| >EGFR-I715S·TEFKKIKV    | 361  | >EGFR-I715S·TEFKKSKV    | 585   | 224   |
| >EGFR-I715S·TEFKKIKVL   | 68   | >EGFR-I715S·TEFKKSKVL   | 114   | 46    |
| >EGFR-I715S·TEFKKIKVL   | 460  | >EGFR-I715S·TEFKKSKVL   | 744   | 284   |
| >EGFR-I715S·TEFKKIKVL   | 85   | >EGFR-I715S·TEFKKSKVL   | 241   | 156   |
| >EGFR-I715S·ETEFKKIK    | 46   | >EGFR-I715S·ETEFKKS     | 26    | 20    |
| >EGFR-I715S·ETEFKKIKV   | 201  | >EGFR-I715S·ETEFKSKV    | 119   | 82    |
| >EGFR-I715S·KETEFKKI    | 82   | >EGFR-I715S·KETEFKKS    | 4564  | 4482  |
| >EGFR-I715S·KETEFKKIKV  | 274  | >EGFR-I715S·KETEFKSKV   | 120   | 154   |
| >EGFR-I715S·KETEFKKIKVL | 128  | >EGFR-I715S·KETEFKSKVI  | 82    | 46    |
| >EGFR-I715S·KETEFKKI    | 165  | >EGFR-I715S·KETEFKKS    | 16790 | 16625 |
| >EGFR-I715S·KETEFKKIKVL | 51   | >EGFR-I715S·KETEFKSKVI  | 50    | 1     |
| >EGFR-I715S·KETEFKKI    | 289  | >EGFR-I715S·KETEFKKS    | 2333  | 2044  |
| >EGFR-I715S·KETEFKKIKVL | 75   | >EGFR-I715S·KETEFKSKVI  | 88    | 13    |
| >EGFR-I715S·KETEFKKIKVL | 105  | >EGFR-I715S·KETEFKSKVI  | 184   | 79    |
| >EGFR-I715S·ILKETEFKKI  | 144  | >EGFR-I715S·ILKETEFKKS  | 8180  | 8036  |
| >EGFR-I715S·ILKETEFKKI  | 259  | >EGFR-I715S·ILKETEFKKS  | 10869 | 10610 |
| >EGFR-I715S·ILKETEFKKI  | 63   | >EGFR-I715S·ILKETEFKKS  | 4985  | 4922  |
| >EGFR-I715S·ILKETEFKKIK | 549  | >EGFR-I715S·ILKETEFKSK  | 302   | 247   |
| >EGFR-I715S·ILKETEFKKIK | 224  | >EGFR-I715S·ILKETEFKSK  | 113   | 111   |
| >EGFR-I732T·IPEGEKVKIPV | 188  | >EGFR-I732T·TPEGEKVKIPV | 916   | 728   |
| >EGFR-I732T·IPEGEKVKI   | 142  | >EGFR-I732T·TPEGEKVKI   | 306   | 164   |
| >EGFR-I732T·IPEGEKVKIPV | 311  | >EGFR-I732T·TPEGEKVKIPV | 3006  | 2695  |
| >EGFR-I732T·WIPEGEKV    | 298  | >EGFR-I732T·WTPEGEKV    | 2209  | 1911  |
| >EGFR-I732T·WIPEGEKV    | 191  | >EGFR-I732T·WTPEGEKV    | 567   | 376   |
| >EGFR-I732T·WIPEGEKV    | 25   | >EGFR-I732T·WTPEGEKV    | 101   | 76    |
| >EGFR-I732T·WIPEGEKV    | 69   | >EGFR-I732T·WTPEGEKV    | 478   | 409   |
| >EGFR-I732T·WIPEGEKV    | 284  | >EGFR-I732T·WTPEGEKV    | 6145  | 5861  |
| >EGFR-I732T·WIPEGEKV    | 10   | >EGFR-I732T·WTPEGEKV    | 175   | 165   |

|                         |       |                         |       |       |
|-------------------------|-------|-------------------------|-------|-------|
| >EGFR-I732T WIPEGEKVKI  | 453   | >EGFR-I732T WTPEGEKVKI  | 7825  | 7372  |
| >EGFR-I732T WIPEGEKV    | 381   | >EGFR-I732T WTPEGEKV    | 68    | 313   |
| >EGFR-I732T WIPEGEKV    | 6995  | >EGFR-I732T WTPEGEKV    | 28    | 6967  |
| >EGFR-I732T WIPEGEKVKI  | 20304 | >EGFR-I732T WTPEGEKVKI  | 263   | 20041 |
| >EGFR-I732T WIPEGEKVKI  | 6467  | >EGFR-I732T WTPEGEKVKI  | 186   | 6281  |
| >EGFR-I732T AFGTVYKGLV  | 249   | >EGFR-I732T AFGTVYKGLV  | 11397 | 11148 |
| >EGFR-I732T LWIPEGEKVK  | 158   | >EGFR-I732T LWTPEGEKVK  | 1629  | 1471  |
| >EGFR-I732T LWIPEGEKVK  | 37    | >EGFR-I732T LWTPEGEKVK  | 81    | 44    |
| >EGFR-I732T LWIPEGEKV   | 270   | >EGFR-I732T LWTPEGEKV   | 274   | 4     |
| >EGFR-I732T LWIPEGEKVK  | 270   | >EGFR-I732T LWTPEGEKVK  | 265   | 5     |
| >EGFR-I732T GLWIPEGEKV  | 251   | >EGFR-I732T GLWTPEGEKV  | 151   | 100   |
| >EGFR-I732T GLWIPEGEKV  | 329   | >EGFR-I732T GLWTPEGEKV  | 295   | 34    |
| >EGFR-I732T GLWIPEGEKV  | 3     | >EGFR-I732T GLWTPEGEKV  | 3     | 0     |
| >EGFR-I732T GLWIPEGEKV  | 28    | >EGFR-I732T GLWTPEGEKV  | 14    | 14    |
| >EGFR-I732T GLWIPEGEKV  | 6     | >EGFR-I732T GLWTPEGEKV  | 7     | 1     |
| >EGFR-I732T GLWIPEGEKV  | 87    | >EGFR-I732T GLWTPEGEKV  | 36    | 51    |
| >EGFR-I732T GLWIPEGEKV  | 7     | >EGFR-I732T GLWTPEGEKV  | 6     | 1     |
| >EGFR-I732T GLWIPEGEK   | 421   | >EGFR-I732T GLWTPEGEK   | 190   | 231   |
| >EGFR-I732T KGLWIPEGEK  | 229   | >EGFR-I732T KGLWTPEGEK  | 235   | 6     |
| >EGFR-I732T KGLWIPEGEK  | 499   | >EGFR-I732T KGLWTPEGEK  | 430   | 69    |
| >EGFR-I732T TVYKGLWI    | 153   | >EGFR-I732T TVYKGLWT    | 2463  | 2310  |
| >EGFR-I732T TVYKGLWI    | 168   | >EGFR-I732T TVYKGLWT    | 1309  | 1141  |
| >EGFR-I732T TVYKGLWI    | 444   | >EGFR-I732T TVYKGLWT    | 5640  | 5196  |
| >EGFR-I732T TVYKGLWI    | 463   | >EGFR-I732T TVYKGLWT    | 7583  | 7120  |
| >EGFR-I732T TVYKGLWI    | 191   | >EGFR-I732T TVYKGLWT    | 3386  | 3195  |
| >EGFR-I732T TVYKGLWI    | 265   | >EGFR-I732T TVYKGLWT    | 37050 | 36785 |
| >EGFR-I732T GTVYKGLWI   | 24    | >EGFR-I732T GTVYKGLWT   | 2322  | 2298  |
| >EGFR-I732T GTVYKGLWI   | 118   | >EGFR-I732T GTVYKGLWT   | 1107  | 989   |
| >EGFR-I732T GTVYKGLWI   | 166   | >EGFR-I732T GTVYKGLWT   | 37160 | 36994 |
| >EGFR-I740T IPVAIKEL    | 25    | >EGFR-I740T TPVAIKEL    | 42    | 17    |
| >EGFR-I740T IPVAIKELR   | 150   | >EGFR-I740T TPVAIKELR   | 42    | 108   |
| >EGFR-I740T IPVAIKEL    | 151   | >EGFR-I740T TPVAIKEL    | 775   | 624   |
| >EGFR-I740T IPVAIKEL    | 406   | >EGFR-I740T TPVAIKEL    | 626   | 220   |
| >EGFR-I740T IPVAIKEL    | 4289  | >EGFR-I740T TPVAIKEL    | 440   | 3849  |
| >EGFR-I740T IPVAIKEL    | 340   | >EGFR-I740T TPVAIKEL    | 800   | 460   |
| >EGFR-I740T IPVAIKELREA | 30    | >EGFR-I740T TPVAIKELREA | 176   | 146   |
| >EGFR-I740T IPVAIKEL    | 248   | >EGFR-I740T TPVAIKEL    | 541   | 293   |
| >EGFR-I740T IPVAIKEL    | 498   | >EGFR-I740T TPVAIKEL    | 924   | 426   |
| >EGFR-I740T KIPVAIKELR  | 78    | >EGFR-I740T KTPVAIKELR  | 71    | 7     |
| >EGFR-I740T KIPVAIKELR  | 68    | >EGFR-I740T KTPVAIKELR  | 24    | 44    |
| >EGFR-I740T KIPVAIKEL   | 10191 | >EGFR-I740T KTPVAIKEL   | 77    | 10114 |
| >EGFR-I740T KIPVAIKEL   | 331   | >EGFR-I740T KTPVAIKEL   | 4     | 327   |
| >EGFR-I740T KIPVAIKELR  | 13590 | >EGFR-I740T KTPVAIKELR  | 227   | 13363 |

|                         |       |                         |       |       |
|-------------------------|-------|-------------------------|-------|-------|
| >EGFR-I740T KIPVAIKELR  | 66    | >EGFR-I740T KTPVAIKELR  | 233   | 167   |
| >EGFR-I740T KIPVAIKEL   | 18568 | >EGFR-I740T KTPVAIKEL   | 447   | 18121 |
| >EGFR-I740T LWIPEGEKVK  | 158   | >EGFR-I740T LWIPEGEKVK  | 19145 | 18987 |
| >EGFR-I740T LWIPEGEKVK  | 37    | >EGFR-I740T LWIPEGEKVK  | 5541  | 5504  |
| >EGFR-I740T LWIPEGEKVK  | 270   | >EGFR-I740T LWIPEGEKVK  | 845   | 575   |
| >EGFR-I740T VKIPVAIKEL  | 87    | >EGFR-I740T VKTPVAIKEL  | 320   | 233   |
| >EGFR-I740T KVKIPVAI    | 641   | >EGFR-I740T KVKTPVAI    | 476   | 165   |
| >EGFR-I740T KVKIPVAIK   | 124   | >EGFR-I740T KVKTPVAIK   | 64    | 60    |
| >EGFR-I740T KVKIPVAIK   | 183   | >EGFR-I740T KVKTPVAIK   | 109   | 74    |
| >EGFR-I740T KVKIPVAI    | 10    | >EGFR-I740T KVKTPVAI    | 8     | 2     |
| >EGFR-I740T KVKIPVAIK   | 4     | >EGFR-I740T KVKTPVAIK   | 4     | 0     |
| >EGFR-I740T KVKIPVAIKEL | 29    | >EGFR-I740T KVKTPVAIKEL | 23    | 6     |
| >EGFR-I740T KVKIPVAIK   | 43    | >EGFR-I740T KVKTPVAIK   | 56    | 13    |
| >EGFR-I740T KVKIPVAI    | 71    | >EGFR-I740T KVKTPVAI    | 45    | 26    |
| >EGFR-I740T KVKIPVAIKEL | 148   | >EGFR-I740T KVKTPVAIKEL | 568   | 420   |
| >EGFR-I740T EKVKIPVAI   | 151   | >EGFR-I740T EKVKTPVAI   | 33    | 118   |
| >EGFR-I740T EKVKIPVAI   | 444   | >EGFR-I740T EKVKTPVAI   | 157   | 287   |
| >EGFR-I740T GEKVKIPVAI  | 501   | >EGFR-I740T GEKVKTPVAI  | 266   | 235   |
| >EGFR-I740T GEKVKIPV    | 101   | >EGFR-I740T GEKVKTPV    | 125   | 24    |
| >EGFR-I740T GEKVKIPVA   | 118   | >EGFR-I740T GEKVKTPVA   | 191   | 73    |
| >EGFR-I740T GEKVKIPVAI  | 188   | >EGFR-I740T GEKVKTPVAI  | 245   | 57    |
| >EGFR-I740T GEKVKIPV    | 155   | >EGFR-I740T GEKVKTPV    | 302   | 147   |
| >EGFR-I740T GEKVKIPVA   | 26    | >EGFR-I740T GEKVKTPVA   | 36    | 10    |
| >EGFR-I740T GEKVKIPVA   | 132   | >EGFR-I740T GEKVKTPVA   | 136   | 4     |
| >EGFR-I740T GEKVKIPVAI  | 45    | >EGFR-I740T GEKVKTPVAI  | 44    | 1     |
| >EGFR-I740T IPEGEKVKIPV | 188   | >EGFR-I740T IPEGEKVKTPV | 112   | 76    |
| >EGFR-I740T IPEGEKVKI   | 142   | >EGFR-I740T IPEGEKVKT   | 3791  | 3649  |
| >EGFR-I740T IPEGEKVKIPV | 311   | >EGFR-I740T IPEGEKVKTPV | 522   | 211   |
| >EGFR-I740T WIPEGEKVKI  | 453   | >EGFR-I740T WIPEGEKVKT  | 3446  | 2993  |
| >EGFR-I744M AIKELREA    | 369   | >EGFR-I744M AMKELREA    | 27    | 342   |
| >EGFR-I744M AIKELREA    | 3218  | >EGFR-I744M AMKELREA    | 68    | 3150  |
| >EGFR-I744M AIKELREA    | 496   | >EGFR-I744M AMKELREA    | 732   | 236   |
| >EGFR-I744M PVAIKELR    | 386   | >EGFR-I744M PVAMKELR    | 355   | 31    |
| >EGFR-I744M IPVAIKEL    | 25    | >EGFR-I744M IPVAMKEL    | 23    | 2     |
| >EGFR-I744M IPVAIKELR   | 150   | >EGFR-I744M IPVAMKELR   | 401   | 251   |
| >EGFR-I744M IPVAIKEL    | 151   | >EGFR-I744M IPVAMKEL    | 59    | 92    |
| >EGFR-I744M IPVAIKEL    | 406   | >EGFR-I744M IPVAMKEL    | 421   | 15    |
| >EGFR-I744M IPVAIKEL    | 340   | >EGFR-I744M IPVAMKEL    | 341   | 1     |
| >EGFR-I744M IPVAIKELREA | 30    | >EGFR-I744M IPVAMKELRE  | 29    | 1     |
| >EGFR-I744M IPVAIKEL    | 248   | >EGFR-I744M IPVAMKEL    | 376   | 128   |
| >EGFR-I744M IPVAIKEL    | 498   | >EGFR-I744M IPVAMKEL    | 926   | 428   |
| >EGFR-I744M KIPVAIKELR  | 78    | >EGFR-I744M KIPVAMKELR  | 104   | 26    |
| >EGFR-I744M KIPVAIKELR  | 68    | >EGFR-I744M KIPVAMKELR  | 91    | 23    |



|                         |       |                         |     |       |
|-------------------------|-------|-------------------------|-----|-------|
| >EGFR-I744M KIPVAIKEL   | 331   | >EGFR-I744M KIPVAMKEL   | 502 | 171   |
| >EGFR-I744M KIPVAIKELR  | 66    | >EGFR-I744M KIPVAMKELR  | 110 | 44    |
| >EGFR-I744M VKIPVAIKEL  | 87    | >EGFR-I744M VKIPVAMKEL  | 82  | 5     |
| >EGFR-I744M KVKIPVAIK   | 124   | >EGFR-I744M KVKIPVAMK   | 82  | 42    |
| >EGFR-I744M KVKIPVAIK   | 183   | >EGFR-I744M KVKIPVAMK   | 92  | 91    |
| >EGFR-I744M KVKIPVAI    | 10    | >EGFR-I744M KVKIPVAM    | 19  | 9     |
| >EGFR-I744M KVKIPVAIK   | 4     | >EGFR-I744M KVKIPVAMK   | 4   | 0     |
| >EGFR-I744M KVKIPVAIKEL | 29    | >EGFR-I744M KVKIPVAMKE  | 29  | 0     |
| >EGFR-I744M KVKIPVAIK   | 43    | >EGFR-I744M KVKIPVAMK   | 39  | 4     |
| >EGFR-I744M KVKIPVAI    | 71    | >EGFR-I744M KVKIPVAM    | 879 | 808   |
| >EGFR-I744M KVKIPVAI    | 1682  | >EGFR-I744M KVKIPVAM    | 266 | 1416  |
| >EGFR-I744M KVKIPVAIKEL | 148   | >EGFR-I744M KVKIPVAMKE  | 61  | 87    |
| >EGFR-I744M EKVKIPVAI   | 151   | >EGFR-I744M EKVKIPVAM   | 44  | 107   |
| >EGFR-I744M EKVKIPVAI   | 444   | >EGFR-I744M EKVKIPVAM   | 139 | 305   |
| >EGFR-I744M GEKVKIPVAI  | 188   | >EGFR-I744M GEKVKIPVAN  | 265 | 77    |
| >EGFR-I744M GEKVKIPVAI  | 45    | >EGFR-I744M GEKVKIPVAN  | 483 | 438   |
| >EGFR-I744V AIKELREA    | 369   | >EGFR-I744V AVKELREA    | 862 | 493   |
| >EGFR-I744V AIKELREA    | 496   | >EGFR-I744V AVKELREA    | 140 | 356   |
| >EGFR-I744V PVAIKELR    | 386   | >EGFR-I744V PVAVKELR    | 411 | 25    |
| >EGFR-I744V IPVAIKEL    | 25    | >EGFR-I744V IPVAVKEL    | 21  | 4     |
| >EGFR-I744V IPVAIKELR   | 150   | >EGFR-I744V IPVAVKELR   | 177 | 27    |
| >EGFR-I744V IPVAIKEL    | 151   | >EGFR-I744V IPVAVKEL    | 133 | 18    |
| >EGFR-I744V IPVAIKEL    | 406   | >EGFR-I744V IPVAVKEL    | 336 | 70    |
| >EGFR-I744V IPVAIKEL    | 340   | >EGFR-I744V IPVAVKEL    | 343 | 3     |
| >EGFR-I744V IPVAIKELREA | 30    | >EGFR-I744V IPVAVKELRE/ | 36  | 6     |
| >EGFR-I744V IPVAIKEL    | 248   | >EGFR-I744V IPVAVKEL    | 179 | 69    |
| >EGFR-I744V IPVAIKEL    | 498   | >EGFR-I744V IPVAVKEL    | 562 | 64    |
| >EGFR-I744V KIPVAIKELR  | 78    | >EGFR-I744V KIPVAVKELR  | 109 | 31    |
| >EGFR-I744V KIPVAIKELR  | 68    | >EGFR-I744V KIPVAVKELR  | 133 | 65    |
| >EGFR-I744V KIPVAIKEL   | 331   | >EGFR-I744V KIPVAVKEL   | 743 | 412   |
| >EGFR-I744V KIPVAIKELR  | 777   | >EGFR-I744V KIPVAVKELR  | 472 | 305   |
| >EGFR-I744V KIPVAIKELR  | 66    | >EGFR-I744V KIPVAVKELR  | 102 | 36    |
| >EGFR-I744V VKIPVAIKEL  | 87    | >EGFR-I744V VKIPVAVKEL  | 55  | 32    |
| >EGFR-I744V KVKIPVAI    | 641   | >EGFR-I744V KVKIPVAV    | 97  | 544   |
| >EGFR-I744V KVKIPVAI    | 13348 | >EGFR-I744V KVKIPVAV    | 411 | 12937 |
| >EGFR-I744V KVKIPVAIK   | 124   | >EGFR-I744V KVKIPVAVK   | 108 | 16    |
| >EGFR-I744V KVKIPVAIK   | 183   | >EGFR-I744V KVKIPVAVK   | 182 | 1     |
| >EGFR-I744V KVKIPVAI    | 10    | >EGFR-I744V KVKIPVAV    | 13  | 3     |
| >EGFR-I744V KVKIPVAIK   | 4     | >EGFR-I744V KVKIPVAVK   | 4   | 0     |
| >EGFR-I744V KVKIPVAIKEL | 29    | >EGFR-I744V KVKIPVAVKEI | 30  | 1     |
| >EGFR-I744V KVKIPVAIK   | 43    | >EGFR-I744V KVKIPVAVK   | 38  | 5     |
| >EGFR-I744V KVKIPVAI    | 71    | >EGFR-I744V KVKIPVAV    | 919 | 848   |
| >EGFR-I744V KVKIPVAIKEL | 148   | >EGFR-I744V KVKIPVAVKEI | 116 | 32    |

|                        |      |                        |       |       |
|------------------------|------|------------------------|-------|-------|
| >EGFR-I744V EKVKIPVAI  | 1234 | >EGFR-I744V EKVKIPVAV  | 236   | 998   |
| >EGFR-I744V EKVKIPVAI  | 151  | >EGFR-I744V EKVKIPVAV  | 190   | 39    |
| >EGFR-I744V EKVKIPVAI  | 444  | >EGFR-I744V EKVKIPVAV  | 605   | 161   |
| >EGFR-I744V GEKVKIPVAI | 188  | >EGFR-I744V GEKVKIPVAV | 254   | 66    |
| >EGFR-I744V GEKVKIPVAI | 45   | >EGFR-I744V GEKVKIPVAV | 373   | 328   |
| >EGFR-I759N ILDEAYVM   | 111  | >EGFR-I759N NLDEAYVM   | 613   | 502   |
| >EGFR-I759N ILDEAYVMA  | 38   | >EGFR-I759N NLDEAYVMA  | 164   | 126   |
| >EGFR-I759N ILDEAYVMAS | 11   | >EGFR-I759N NLDEAYVMA  | 16    | 5     |
| >EGFR-I759N ILDEAYVM   | 192  | >EGFR-I759N NLDEAYVM   | 505   | 313   |
| >EGFR-I759N ILDEAYVMA  | 44   | >EGFR-I759N NLDEAYVMA  | 147   | 103   |
| >EGFR-I759N ILDEAYVMAS | 5    | >EGFR-I759N NLDEAYVMA  | 9     | 4     |
| >EGFR-I759N ILDEAYVMA  | 172  | >EGFR-I759N NLDEAYVMA  | 440   | 268   |
| >EGFR-I759N ILDEAYVMAS | 10   | >EGFR-I759N NLDEAYVMA  | 16    | 6     |
| >EGFR-I759N ILDEAYVM   | 334  | >EGFR-I759N NLDEAYVM   | 1129  | 795   |
| >EGFR-I759N ILDEAYVMA  | 44   | >EGFR-I759N NLDEAYVMA  | 89    | 45    |
| >EGFR-I759N ILDEAYVMAS | 8    | >EGFR-I759N NLDEAYVMA  | 12    | 4     |
| >EGFR-I759N ILDEAYVM   | 17   | >EGFR-I759N NLDEAYVM   | 104   | 87    |
| >EGFR-I759N ILDEAYVMA  | 6    | >EGFR-I759N NLDEAYVMA  | 23    | 17    |
| >EGFR-I759N ILDEAYVMAS | 56   | >EGFR-I759N NLDEAYVMA  | 454   | 398   |
| >EGFR-I759N ILDEAYVMAS | 2    | >EGFR-I759N NLDEAYVMA  | 3     | 1     |
| >EGFR-I759N ILDEAYVM   | 31   | >EGFR-I759N NLDEAYVM   | 57    | 26    |
| >EGFR-I759N ILDEAYVMA  | 63   | >EGFR-I759N NLDEAYVMA  | 143   | 80    |
| >EGFR-I759N ILDEAYVMAS | 3    | >EGFR-I759N NLDEAYVMA  | 4     | 1     |
| >EGFR-I759N ILDEAYVM   | 76   | >EGFR-I759N NLDEAYVM   | 479   | 403   |
| >EGFR-I759N ILDEAYVMA  | 11   | >EGFR-I759N NLDEAYVMA  | 35    | 24    |
| >EGFR-I759N ILDEAYVMAS | 5    | >EGFR-I759N NLDEAYVMA  | 6     | 1     |
| >EGFR-I759N ILDEAYVM   | 31   | >EGFR-I759N NLDEAYVM   | 116   | 85    |
| >EGFR-I759N ILDEAYVMA  | 43   | >EGFR-I759N NLDEAYVMA  | 215   | 172   |
| >EGFR-I759N ILDEAYVMAS | 3    | >EGFR-I759N NLDEAYVMA  | 5     | 2     |
| >EGFR-I759N ILDEAYVM   | 77   | >EGFR-I759N NLDEAYVM   | 1047  | 970   |
| >EGFR-I759N ILDEAYVMA  | 8    | >EGFR-I759N NLDEAYVMA  | 98    | 90    |
| >EGFR-I759N ILDEAYVMAS | 2    | >EGFR-I759N NLDEAYVMA  | 4     | 2     |
| >EGFR-I759N ILDEAYVMAS | 2358 | >EGFR-I759N NLDEAYVMA  | 302   | 2056  |
| >EGFR-I759N ILDEAYVMA  | 1743 | >EGFR-I759N NLDEAYVMA  | 84    | 1659  |
| >EGFR-I759N ILDEAYVMAS | 82   | >EGFR-I759N NLDEAYVMA  | 10    | 72    |
| >EGFR-I759N ILDEAYVM   | 4425 | >EGFR-I759N NLDEAYVM   | 467   | 3958  |
| >EGFR-I759N EILDEAYV   | 471  | >EGFR-I759N ENLDEAYV   | 10834 | 10363 |
| >EGFR-I759N EILDEAYV   | 100  | >EGFR-I759N ENLDEAYV   | 4651  | 4551  |
| >EGFR-I759N EILDEAYV   | 11   | >EGFR-I759N ENLDEAYV   | 4195  | 4184  |
| >EGFR-I759N EILDEAYV   | 83   | >EGFR-I759N ENLDEAYV   | 13763 | 13680 |
| >EGFR-I759N EILDEAYV   | 24   | >EGFR-I759N ENLDEAYV   | 9366  | 9342  |
| >EGFR-I759N EILDEAYV   | 5    | >EGFR-I759N ENLDEAYV   | 8199  | 8194  |
| >EGFR-I759N EILDEAYVM  | 362  | >EGFR-I759N ENLDEAYVM  | 17124 | 16762 |

|                         |     |                         |       |       |
|-------------------------|-----|-------------------------|-------|-------|
| >EGFR-I759N EILDEAYV    | 11  | >EGFR-I759N ENLDEAYV    | 11556 | 11545 |
| >EGFR-I759N EILDEAYVM   | 39  | >EGFR-I759N ENLDEAYVM   | 3493  | 3454  |
| >EGFR-I759N EILDEAYV    | 34  | >EGFR-I759N ENLDEAYV    | 568   | 534   |
| >EGFR-I759N EILDEAYV    | 5   | >EGFR-I759N ENLDEAYV    | 109   | 104   |
| >EGFR-I759N EILDEAYVM   | 33  | >EGFR-I759N ENLDEAYVM   | 3846  | 3813  |
| >EGFR-I759N EILDEAYVMA  | 16  | >EGFR-I759N ENLDEAYVM   | 1374  | 1358  |
| >EGFR-I759N EATSPKANKE  | 158 | >EGFR-I759N EATSPKANKE  | 17888 | 17730 |
| >EGFR-I759N KEILDEAY    | 256 | >EGFR-I759N KENLDEAY    | 610   | 354   |
| >EGFR-I759N KEILDEAYV   | 310 | >EGFR-I759N KENLDEAYV   | 1475  | 1165  |
| >EGFR-I759N KEILDEAYVM  | 163 | >EGFR-I759N KENLDEAYVM  | 217   | 54    |
| >EGFR-I759N KEILDEAYVM  | 289 | >EGFR-I759N KENLDEAYVM  | 435   | 146   |
| >EGFR-I759N KEILDEAY    | 363 | >EGFR-I759N KENLDEAY    | 323   | 40    |
| >EGFR-I759N KEILDEAY    | 273 | >EGFR-I759N KENLDEAY    | 618   | 345   |
| >EGFR-I759N KEILDEAYV   | 536 | >EGFR-I759N KENLDEAYV   | 436   | 100   |
| >EGFR-I759N KEILDEAYVM  | 50  | >EGFR-I759N KENLDEAYVM  | 41    | 9     |
| >EGFR-I759N KEILDEAYV   | 32  | >EGFR-I759N KENLDEAYV   | 310   | 278   |
| >EGFR-I759N KEILDEAYVM  | 15  | >EGFR-I759N KENLDEAYVM  | 53    | 38    |
| >EGFR-I759N KEILDEAYVM  | 468 | >EGFR-I759N KENLDEAYVM  | 3520  | 3052  |
| >EGFR-I759N NKEILDEAYVI | 676 | >EGFR-I759N NKENLDEAYV  | 352   | 324   |
| >EGFR-I759N KANKEILDEA' | 126 | >EGFR-I759N KANKENLDEA' | 100   | 26    |
| >EGFR-I759N KANKEILDEA' | 385 | >EGFR-I759N KANKENLDEA' | 403   | 18    |
| >EGFR-I759N KANKEILDEA' | 255 | >EGFR-I759N KANKENLDEA' | 241   | 14    |
| >EGFR-I759N KANKEILDEA' | 293 | >EGFR-I759N KANKENLDEA' | 236   | 57    |
| >EGFR-I759N KANKEILDEA' | 140 | >EGFR-I759N KANKENLDEA' | 222   | 82    |
| >EGFR-I759N KANKEILDEA' | 200 | >EGFR-I759N KANKENLDEA' | 144   | 56    |
| >EGFR-I759N KANKEILDEA' | 86  | >EGFR-I759N KANKENLDEA' | 121   | 35    |
| >EGFR-I759N KANKEILDEA' | 473 | >EGFR-I759N KANKENLDEA' | 519   | 46    |
| >EGFR-I759N SPKANKEI    | 133 | >EGFR-I759N SPKANKEN    | 31310 | 31177 |
| >EGFR-I759N SPKANKEIL   | 187 | >EGFR-I759N SPKANKENL   | 11    | 176   |
| >EGFR-I759N SPKANKEIL   | 193 | >EGFR-I759N SPKANKENL   | 383   | 190   |
| >EGFR-I759N TSPKANKEI   | 54  | >EGFR-I759N TSPKANKEN   | 9529  | 9475  |
| >EGFR-I759N TSPKANKEIL  | 9   | >EGFR-I759N TSPKANKENL  | 23    | 14    |
| >EGFR-I759N TSPKANKEI   | 159 | >EGFR-I759N TSPKANKEN   | 37640 | 37481 |
| >EGFR-I759N ATSPKANKEI  | 35  | >EGFR-I759N ATSPKANKEN  | 4898  | 4863  |
| >EGFR-I759N ATSPKANKEII | 55  | >EGFR-I759N ATSPKANKEN  | 26    | 29    |
| >EGFR-I759N ATSPKANKEII | 468 | >EGFR-I759N ATSPKANKEN  | 1245  | 777   |
| >EGFR-I759N ATSPKANKEI  | 347 | >EGFR-I759N ATSPKANKEN  | 8838  | 8491  |
| >EGFR-I759N ATSPKANKEII | 295 | >EGFR-I759N ATSPKANKEN  | 1234  | 939   |
| >EGFR-I759V ILDEAYVM    | 111 | >EGFR-I759V VLDEAYVM    | 162   | 51    |
| >EGFR-I759V ILDEAYVMA   | 38  | >EGFR-I759V VLDEAYVMA   | 48    | 10    |
| >EGFR-I759V ILDEAYVMAS  | 11  | >EGFR-I759V VLDEAYVMA   | 11    | 0     |
| >EGFR-I759V ILDEAYVM    | 192 | >EGFR-I759V VLDEAYVM    | 435   | 243   |
| >EGFR-I759V ILDEAYVMA   | 44  | >EGFR-I759V VLDEAYVMA   | 111   | 67    |

|                        |      |                        |     |      |
|------------------------|------|------------------------|-----|------|
| >EGFR-I759V ILDEAYVMAS | 5    | >EGFR-I759V VLDEAYVMA  | 8   | 3    |
| >EGFR-I759V ILDEAYVMA  | 172  | >EGFR-I759V VLDEAYVMA  | 223 | 51   |
| >EGFR-I759V ILDEAYVMAS | 10   | >EGFR-I759V VLDEAYVMA  | 12  | 2    |
| >EGFR-I759V ILDEAYVM   | 334  | >EGFR-I759V VLDEAYVM   | 505 | 171  |
| >EGFR-I759V ILDEAYVMA  | 44   | >EGFR-I759V VLDEAYVMA  | 63  | 19   |
| >EGFR-I759V ILDEAYVMAS | 8    | >EGFR-I759V VLDEAYVMA  | 9   | 1    |
| >EGFR-I759V ILDEAYVM   | 17   | >EGFR-I759V VLDEAYVM   | 14  | 3    |
| >EGFR-I759V ILDEAYVMA  | 6    | >EGFR-I759V VLDEAYVMA  | 5   | 1    |
| >EGFR-I759V ILDEAYVMAS | 56   | >EGFR-I759V VLDEAYVMA  | 47  | 9    |
| >EGFR-I759V ILDEAYVMAS | 2    | >EGFR-I759V VLDEAYVMA  | 2   | 0    |
| >EGFR-I759V ILDEAYVM   | 31   | >EGFR-I759V VLDEAYVM   | 23  | 8    |
| >EGFR-I759V ILDEAYVMA  | 63   | >EGFR-I759V VLDEAYVMA  | 45  | 18   |
| >EGFR-I759V ILDEAYVMAS | 3    | >EGFR-I759V VLDEAYVMA  | 3   | 0    |
| >EGFR-I759V ILDEAYVM   | 76   | >EGFR-I759V VLDEAYVM   | 44  | 32   |
| >EGFR-I759V ILDEAYVMA  | 11   | >EGFR-I759V VLDEAYVMA  | 8   | 3    |
| >EGFR-I759V ILDEAYVMAS | 5    | >EGFR-I759V VLDEAYVMA  | 4   | 1    |
| >EGFR-I759V ILDEAYVM   | 31   | >EGFR-I759V VLDEAYVM   | 33  | 2    |
| >EGFR-I759V ILDEAYVMA  | 43   | >EGFR-I759V VLDEAYVMA  | 48  | 5    |
| >EGFR-I759V ILDEAYVMAS | 3    | >EGFR-I759V VLDEAYVMA  | 3   | 0    |
| >EGFR-I759V ILDEAYVM   | 77   | >EGFR-I759V VLDEAYVM   | 55  | 22   |
| >EGFR-I759V ILDEAYVMA  | 8    | >EGFR-I759V VLDEAYVMA  | 7   | 1    |
| >EGFR-I759V ILDEAYVMAS | 2    | >EGFR-I759V VLDEAYVMA  | 2   | 0    |
| >EGFR-I759V ILDEAYVMAS | 82   | >EGFR-I759V VLDEAYVMA  | 89  | 7    |
| >EGFR-I759V EILDEAYV   | 471  | >EGFR-I759V EVLDEAYV   | 908 | 437  |
| >EGFR-I759V EILDEAYV   | 100  | >EGFR-I759V EVLDEAYV   | 94  | 6    |
| >EGFR-I759V EILDEAYV   | 11   | >EGFR-I759V EVLDEAYV   | 28  | 17   |
| >EGFR-I759V EILDEAYV   | 83   | >EGFR-I759V EVLDEAYV   | 174 | 91   |
| >EGFR-I759V EILDEAYV   | 24   | >EGFR-I759V EVLDEAYV   | 61  | 37   |
| >EGFR-I759V EILDEAYV   | 5    | >EGFR-I759V EVLDEAYV   | 9   | 4    |
| >EGFR-I759V EILDEAYVM  | 362  | >EGFR-I759V EVLDEAYVM  | 699 | 337  |
| >EGFR-I759V EILDEAYV   | 11   | >EGFR-I759V EVLDEAYV   | 24  | 13   |
| >EGFR-I759V EILDEAYVM  | 1229 | >EGFR-I759V EVLDEAYVM  | 440 | 789  |
| >EGFR-I759V EILDEAYV   | 1571 | >EGFR-I759V EVLDEAYV   | 448 | 1123 |
| >EGFR-I759V EILDEAYVM  | 39   | >EGFR-I759V EVLDEAYVM  | 11  | 28   |
| >EGFR-I759V EILDEAYV   | 34   | >EGFR-I759V EVLDEAYV   | 12  | 22   |
| >EGFR-I759V EILDEAYV   | 5    | >EGFR-I759V EVLDEAYV   | 4   | 1    |
| >EGFR-I759V EILDEAYVM  | 33   | >EGFR-I759V EVLDEAYVM  | 20  | 13   |
| >EGFR-I759V EILDEAYVMA | 16   | >EGFR-I759V EVLDEAYVM  | 11  | 5    |
| >EGFR-I759V EILDEAYVMA | 940  | >EGFR-I759V EVLDEAYVM  | 470 | 470  |
| >EGFR-I759V EILDEAYVM  | 550  | >EGFR-I759V EVLDEAYVM  | 120 | 430  |
| >EGFR-I759V EATSPKANKE | 158  | >EGFR-I759V EATSPKANKE | 34  | 124  |
| >EGFR-I759V EATSPKANKE | 549  | >EGFR-I759V EATSPKANKE | 79  | 470  |
| >EGFR-I759V KEILDEAY   | 256  | >EGFR-I759V KEVLDEAY   | 252 | 4    |

|                         |       |                         |      |       |
|-------------------------|-------|-------------------------|------|-------|
| >EGFR-I759V KEILDEAYV   | 310   | >EGFR-I759V KEVLDEAYV   | 402  | 92    |
| >EGFR-I759V KEILDEAYVM  | 163   | >EGFR-I759V KEVLDEAYVM  | 198  | 35    |
| >EGFR-I759V KEILDEAYVM  | 289   | >EGFR-I759V KEVLDEAYVM  | 503  | 214   |
| >EGFR-I759V KEILDEAY    | 363   | >EGFR-I759V KEVLDEAY    | 500  | 137   |
| >EGFR-I759V KEILDEAY    | 273   | >EGFR-I759V KEVLDEAY    | 391  | 118   |
| >EGFR-I759V KEILDEAYVM  | 50    | >EGFR-I759V KEVLDEAYVM  | 64   | 14    |
| >EGFR-I759V KEILDEAYV   | 32    | >EGFR-I759V KEVLDEAYV   | 68   | 36    |
| >EGFR-I759V KEILDEAYVM  | 15    | >EGFR-I759V KEVLDEAYVM  | 55   | 40    |
| >EGFR-I759V KEILDEAYVM  | 468   | >EGFR-I759V KEVLDEAYVM  | 1143 | 675   |
| >EGFR-I759V NKEILDEAYVI | 676   | >EGFR-I759V NKEVLDEAYV  | 375  | 301   |
| >EGFR-I759V KANKEILDEA' | 126   | >EGFR-I759V KANKEVLDEA' | 160  | 34    |
| >EGFR-I759V KANKEILDEA' | 385   | >EGFR-I759V KANKEVLDEA' | 322  | 63    |
| >EGFR-I759V KANKEILDEA' | 255   | >EGFR-I759V KANKEVLDEA' | 203  | 52    |
| >EGFR-I759V KANKEILDEA' | 293   | >EGFR-I759V KANKEVLDEA' | 205  | 88    |
| >EGFR-I759V KANKEILDEA' | 140   | >EGFR-I759V KANKEVLDEA' | 125  | 15    |
| >EGFR-I759V KANKEILDEA' | 200   | >EGFR-I759V KANKEVLDEA' | 175  | 25    |
| >EGFR-I759V KANKEILDEA' | 86    | >EGFR-I759V KANKEVLDEA' | 55   | 31    |
| >EGFR-I759V KANKEILDEA' | 473   | >EGFR-I759V KANKEVLDEA' | 379  | 94    |
| >EGFR-I759V SPKANKEI    | 133   | >EGFR-I759V SPKANKEV    | 311  | 178   |
| >EGFR-I759V SPKANKEIL   | 187   | >EGFR-I759V SPKANKEVL   | 104  | 83    |
| >EGFR-I759V SPKANKEIL   | 193   | >EGFR-I759V SPKANKEVL   | 81   | 112   |
| >EGFR-I759V SPKANKEIL   | 515   | >EGFR-I759V SPKANKEVL   | 348  | 167   |
| >EGFR-I759V TSPKANKEI   | 1678  | >EGFR-I759V TSPKANKEV   | 269  | 1409  |
| >EGFR-I759V TSPKANKEI   | 54    | >EGFR-I759V TSPKANKEV   | 118  | 64    |
| >EGFR-I759V TSPKANKEIL  | 9     | >EGFR-I759V TSPKANKEVL  | 14   | 5     |
| >EGFR-I759V TSPKANKEI   | 159   | >EGFR-I759V TSPKANKEV   | 8074 | 7915  |
| >EGFR-I759V ATSPKANKEI  | 13915 | >EGFR-I759V ATSPKANKEV  | 334  | 13581 |
| >EGFR-I759V ATSPKANKEI  | 35    | >EGFR-I759V ATSPKANKEV  | 185  | 150   |
| >EGFR-I759V ATSPKANKEII | 55    | >EGFR-I759V ATSPKANKEV  | 38   | 17    |
| >EGFR-I759V ATSPKANKEII | 468   | >EGFR-I759V ATSPKANKEV  | 740  | 272   |
| >EGFR-I759V ATSPKANKEI  | 347   | >EGFR-I759V ATSPKANKEV  | 261  | 86    |
| >EGFR-I759V ATSPKANKEII | 295   | >EGFR-I759V ATSPKANKEV  | 269  | 26    |
| >EGFR-I821T IAKGMNYLEC  | 143   | >EGFR-I821T TAKGMNYLEI  | 169  | 26    |
| >EGFR-I821T IAKGMNYLEC  | 310   | >EGFR-I821T TAKGMNYLEI  | 360  | 50    |
| >EGFR-I821T IAKGMNYLEC  | 174   | >EGFR-I821T TAKGMNYLEI  | 53   | 121   |
| >EGFR-I821T IAKGMNYL    | 365   | >EGFR-I821T TAKGMNYL    | 2810 | 2445  |
| >EGFR-I821T QIAKGMNY    | 7740  | >EGFR-I821T QTAKGMNY    | 191  | 7549  |
| >EGFR-I821T QIAKGMNYL   | 15    | >EGFR-I821T QTAKGMNYL   | 51   | 36    |
| >EGFR-I821T QIAKGMNYL   | 164   | >EGFR-I821T QTAKGMNYL   | 1104 | 940   |
| >EGFR-I821T QIAKGMNYL   | 81    | >EGFR-I821T QTAKGMNYL   | 279  | 198   |
| >EGFR-I821T QIAKGMNY    | 769   | >EGFR-I821T QTAKGMNY    | 209  | 560   |
| >EGFR-I821T QIAKGMNYL   | 529   | >EGFR-I821T QTAKGMNYL   | 100  | 429   |
| >EGFR-I821T QIAKGMNY    | 522   | >EGFR-I821T QTAKGMNY    | 81   | 441   |

|                        |      |                        |       |       |
|------------------------|------|------------------------|-------|-------|
| >EGFR-I821T QIAKGMNYL  | 1261 | >EGFR-I821T QTAKGMNYL  | 173   | 1088  |
| >EGFR-I821T QIAKGMNY   | 124  | >EGFR-I821T QTAKGMNY   | 26    | 98    |
| >EGFR-I821T QIAKGMNYL  | 88   | >EGFR-I821T QTAKGMNYL  | 17    | 71    |
| >EGFR-I821T QIAKGMNY   | 1410 | >EGFR-I821T QTAKGMNY   | 137   | 1273  |
| >EGFR-I821T QIAKGMNY   | 90   | >EGFR-I821T QTAKGMNY   | 50    | 40    |
| >EGFR-I821T QIAKGMNY   | 274  | >EGFR-I821T QTAKGMNY   | 146   | 128   |
| >EGFR-I821T QIAKGMNYL  | 48   | >EGFR-I821T QTAKGMNYL  | 15    | 33    |
| >EGFR-I821T QIAKGMNYL  | 142  | >EGFR-I821T QTAKGMNYL  | 50    | 92    |
| >EGFR-I821T QIAKGMNY   | 24   | >EGFR-I821T QTAKGMNY   | 15    | 9     |
| >EGFR-I821T QIAKGMNY   | 269  | >EGFR-I821T QTAKGMNY   | 1130  | 861   |
| >EGFR-I821T QIAKGMNY   | 2368 | >EGFR-I821T QTAKGMNY   | 10    | 2358  |
| >EGFR-I821T QIAKGMNYL  | 9739 | >EGFR-I821T QTAKGMNYL  | 76    | 9663  |
| >EGFR-I821T QIAKGMNYL  | 8185 | >EGFR-I821T QTAKGMNYL  | 61    | 8124  |
| >EGFR-I821T QIAKGMNY   | 1672 | >EGFR-I821T QTAKGMNY   | 62    | 1610  |
| >EGFR-I821T QIAKGMNYL  | 2392 | >EGFR-I821T QTAKGMNYL  | 53    | 2339  |
| >EGFR-I821T SQYLLNWCVI | 52   | >EGFR-I821T SQYLLNWCVI | 10111 | 10059 |
| >EGFR-I821T SQYLLNWCVI | 221  | >EGFR-I821T SQYLLNWCVI | 3018  | 2797  |
| >EGFR-I821T SQYLLNWCVI | 51   | >EGFR-I821T SQYLLNWCVI | 417   | 366   |
| >EGFR-I821T SQYLLNWCVI | 264  | >EGFR-I821T SQYLLNWCVI | 4106  | 3842  |
| >EGFR-I821T SQYLLNWCVI | 254  | >EGFR-I821T SQYLLNWCVI | 4196  | 3942  |
| >EGFR-I821T SQYLLNWCVI | 165  | >EGFR-I821T SQYLLNWCVI | 10701 | 10536 |
| >EGFR-I821T SQYLLNWCVI | 161  | >EGFR-I821T SQYLLNWCVI | 3882  | 3721  |
| >EGFR-I821T SQYLLNWCVI | 185  | >EGFR-I821T SQYLLNWCVI | 6972  | 6787  |
| >EGFR-I821T VQIAKGMNY  | 300  | >EGFR-I821T VQTAKGMNY  | 861   | 561   |
| >EGFR-I821T VQIAKGMNY  | 332  | >EGFR-I821T VQTAKGMNY  | 1113  | 781   |
| >EGFR-I821T VQIAKGMNY  | 327  | >EGFR-I821T VQTAKGMNY  | 1089  | 762   |
| >EGFR-I821T VQIAKGMNY  | 22   | >EGFR-I821T VQTAKGMNY  | 25    | 3     |
| >EGFR-I821T VQIAKGMNY  | 63   | >EGFR-I821T VQTAKGMNY  | 388   | 325   |
| >EGFR-I821T VQIAKGMNY  | 344  | >EGFR-I821T VQTAKGMNY  | 4724  | 4380  |
| >EGFR-I821T VQIAKGMNY  | 192  | >EGFR-I821T VQTAKGMNY  | 207   | 15    |
| >EGFR-I821T VQIAKGMNY  | 8    | >EGFR-I821T VQTAKGMNY  | 24    | 16    |
| >EGFR-I821T VQIAKGMNY  | 73   | >EGFR-I821T VQTAKGMNY  | 309   | 236   |
| >EGFR-I821T CVQIAKGMN  | 329  | >EGFR-I821T CVQTAKGMN  | 491   | 162   |
| >EGFR-I821T CVQIAKGMN  | 301  | >EGFR-I821T CVQTAKGMN  | 273   | 28    |
| >EGFR-I821T WCVQIAKGM  | 249  | >EGFR-I821T WCVQTAKGM  | 167   | 82    |
| >EGFR-I821T WCVQIAKGM  | 454  | >EGFR-I821T WCVQTAKGM  | 980   | 526   |
| >EGFR-I821T WCVQIAKGM  | 1143 | >EGFR-I821T WCVQTAKGM  | 461   | 682   |
| >EGFR-I821T WCVQIAKGM  | 176  | >EGFR-I821T WCVQTAKGM  | 233   | 57    |
| >EGFR-I821T WCVQIAKGM  | 127  | >EGFR-I821T WCVQTAKGM  | 142   | 15    |
| >EGFR-I821T NWCVQIAK   | 292  | >EGFR-I821T NWCVQTAK   | 487   | 195   |
| >EGFR-I821T LLNWCVQI   | 39   | >EGFR-I821T LLNWCVQT   | 664   | 625   |
| >EGFR-I821T LLNWCVQIA  | 168  | >EGFR-I821T LLNWCVQTA  | 71    | 97    |
| >EGFR-I821T LLNWCVQI   | 20   | >EGFR-I821T LLNWCVQT   | 292   | 272   |

|                         |     |                        |       |       |
|-------------------------|-----|------------------------|-------|-------|
| >EGFR-I821T LLNWCVQIA   | 58  | >EGFR-I821T LLNWCVQTA  | 47    | 11    |
| >EGFR-I821T LLNWCVQI    | 12  | >EGFR-I821T LLNWCVQT   | 114   | 102   |
| >EGFR-I821T LLNWCVQIA   | 7   | >EGFR-I821T LLNWCVQTA  | 6     | 1     |
| >EGFR-I821T LLNWCVQI    | 6   | >EGFR-I821T LLNWCVQT   | 72    | 66    |
| >EGFR-I821T LLNWCVQIA   | 40  | >EGFR-I821T LLNWCVQTA  | 6     | 34    |
| >EGFR-I821T LLNWCVQI    | 100 | >EGFR-I821T LLNWCVQT   | 6633  | 6533  |
| >EGFR-I821T LLNWCVQIA   | 231 | >EGFR-I821T LLNWCVQTA  | 38    | 193   |
| >EGFR-I821T LLNWCVQI    | 28  | >EGFR-I821T LLNWCVQT   | 545   | 517   |
| >EGFR-I821T LLNWCVQIA   | 98  | >EGFR-I821T LLNWCVQTA  | 30    | 68    |
| >EGFR-I821T LLNWCVQI    | 14  | >EGFR-I821T LLNWCVQT   | 428   | 414   |
| >EGFR-I821T LLNWCVQIA   | 68  | >EGFR-I821T LLNWCVQTA  | 19    | 49    |
| >EGFR-I821T LLNWCVQI    | 3   | >EGFR-I821T LLNWCVQT   | 8     | 5     |
| >EGFR-I821T LLNWCVQIA   | 4   | >EGFR-I821T LLNWCVQTA  | 3     | 1     |
| >EGFR-I821T LLNWCVQIA#  | 494 | >EGFR-I821T LLNWCVQTA  | 324   | 170   |
| >EGFR-I821T LLNWCVQIA#  | 42  | >EGFR-I821T LLNWCVQTA  | 50    | 8     |
| >EGFR-I821T LLNWCVQIA#  | 100 | >EGFR-I821T LLNWCVQTA  | 201   | 101   |
| >EGFR-I821T LLNWCVQIA#  | 223 | >EGFR-I821T LLNWCVQTA  | 370   | 147   |
| >EGFR-I821T YLLNWCVQI   | 7   | >EGFR-I821T YLLNWCVQT  | 15    | 8     |
| >EGFR-I821T YLLNWCVQIA# | 19  | >EGFR-I821T YLLNWCVQT, | 9     | 10    |
| >EGFR-I821T YLLNWCVQI   | 32  | >EGFR-I821T YLLNWCVQT  | 541   | 509   |
| >EGFR-I821T YLLNWCVQIA# | 51  | >EGFR-I821T YLLNWCVQT, | 19    | 32    |
| >EGFR-I821T YLLNWCVQI   | 21  | >EGFR-I821T YLLNWCVQT  | 212   | 191   |
| >EGFR-I821T YLLNWCVQIA# | 23  | >EGFR-I821T YLLNWCVQT, | 12    | 11    |
| >EGFR-I821T YLLNWCVQI   | 12  | >EGFR-I821T YLLNWCVQT  | 60    | 48    |
| >EGFR-I821T YLLNWCVQIA# | 57  | >EGFR-I821T YLLNWCVQT, | 31    | 26    |
| >EGFR-I821T YLLNWCVQI   | 1   | >EGFR-I821T YLLNWCVQT  | 3     | 2     |
| >EGFR-I821T YLLNWCVQIA# | 3   | >EGFR-I821T YLLNWCVQT, | 2     | 1     |
| >EGFR-I821T YLLNWCVQIA# | 30  | >EGFR-I821T YLLNWCVQT, | 49    | 19    |
| >EGFR-I821T YLLNWCVQI   | 4   | >EGFR-I821T YLLNWCVQT  | 42    | 38    |
| >EGFR-I821T YLLNWCVQIA# | 6   | >EGFR-I821T YLLNWCVQT, | 4     | 2     |
| >EGFR-I821T YLLNWCVQI   | 4   | >EGFR-I821T YLLNWCVQT  | 9     | 5     |
| >EGFR-I821T YLLNWCVQIA# | 6   | >EGFR-I821T YLLNWCVQT, | 5     | 1     |
| >EGFR-I821T YLLNWCVQI   | 2   | >EGFR-I821T YLLNWCVQT  | 9     | 7     |
| >EGFR-I821T YLLNWCVQIA# | 5   | >EGFR-I821T YLLNWCVQT, | 3     | 2     |
| >EGFR-I821T YLLNWCVQI   | 2   | >EGFR-I821T YLLNWCVQT  | 3     | 1     |
| >EGFR-I821T YLLNWCVQIA# | 2   | >EGFR-I821T YLLNWCVQT, | 2     | 0     |
| >EGFR-I821T YLLNWCVQIA# | 52  | >EGFR-I821T YLLNWCVQT, | 47    | 5     |
| >EGFR-I821T YLLNWCVQIA# | 79  | >EGFR-I821T YLLNWCVQT, | 88    | 9     |
| >EGFR-I821T YLLNWCVQIA# | 83  | >EGFR-I821T YLLNWCVQT, | 188   | 105   |
| >EGFR-I821T YLLNWCVQI   | 46  | >EGFR-I821T YLLNWCVQT  | 10789 | 10743 |
| >EGFR-I821T YLLNWCVQI   | 65  | >EGFR-I821T YLLNWCVQT  | 9350  | 9285  |
| >EGFR-I821T YLLNWCVQIA# | 417 | >EGFR-I821T YLLNWCVQT, | 379   | 38    |
| >EGFR-I821T YLLNWCVQI   | 22  | >EGFR-I821T YLLNWCVQT  | 715   | 693   |

|                         |       |                        |       |       |
|-------------------------|-------|------------------------|-------|-------|
| >EGFR-I821T YLLNWCVQIA  | 1116  | >EGFR-I821T YLLNWCVQT  | 318   | 798   |
| >EGFR-I821T YLLNWCVQI   | 288   | >EGFR-I821T YLLNWCVQT  | 3901  | 3613  |
| >EGFR-I821T QYLLNWCVQ   | 106   | >EGFR-I821T QYLLNWCVQ  | 12107 | 12001 |
| >EGFR-I821T QYLLNWCVQ   | 11    | >EGFR-I821T QYLLNWCVQ  | 644   | 633   |
| >EGFR-I853T ITDFGLAK    | 290   | >EGFR-I853T TTDFGLAK   | 648   | 358   |
| >EGFR-I853T ITDFGLAK    | 33    | >EGFR-I853T TTDFGLAK   | 21    | 12    |
| >EGFR-I853T ITDFGLAK    | 558   | >EGFR-I853T TTDFGLAK   | 149   | 409   |
| >EGFR-I853T ITDFGLAKL   | 5434  | >EGFR-I853T TTDFGLAKL  | 417   | 5017  |
| >EGFR-I853T ITDFGLAKL   | 732   | >EGFR-I853T TTDFGLAKL  | 79    | 653   |
| >EGFR-I853T ITDFGLAKLL  | 2110  | >EGFR-I853T TTDFGLAKLL | 339   | 1771  |
| >EGFR-I853T ITDFGLAKL   | 6     | >EGFR-I853T TTDFGLAKL  | 33    | 27    |
| >EGFR-I853T ITDFGLAKLL  | 15    | >EGFR-I853T TTDFGLAKLL | 114   | 99    |
| >EGFR-I853T ITDFGLAKLL  | 276   | >EGFR-I853T TTDFGLAKLL | 365   | 89    |
| >EGFR-I853T ITDFGLAKL   | 97    | >EGFR-I853T TTDFGLAKL  | 453   | 356   |
| >EGFR-I853T ITDFGLAK    | 474   | >EGFR-I853T TTDFGLAK   | 420   | 54    |
| >EGFR-I853T KITDFGLAKL  | 91    | >EGFR-I853T KTTDFGLAKL | 216   | 125   |
| >EGFR-I853T KITDFGLAKLL | 228   | >EGFR-I853T KTTDFGLAKL | 929   | 701   |
| >EGFR-I853T KITDFGLA    | 348   | >EGFR-I853T KTTDFGLA   | 2342  | 1994  |
| >EGFR-I853T KITDFGLAKL  | 81    | >EGFR-I853T KTTDFGLAKL | 207   | 126   |
| >EGFR-I853T KITDFGLA    | 117   | >EGFR-I853T KTTDFGLA   | 435   | 318   |
| >EGFR-I853T KITDFGLAKL  | 432   | >EGFR-I853T KTTDFGLAKL | 474   | 42    |
| >EGFR-I853T KITDFGLAKLL | 462   | >EGFR-I853T KTTDFGLAKL | 1056  | 594   |
| >EGFR-I853T KITDFGLAKL  | 188   | >EGFR-I853T KTTDFGLAKL | 888   | 700   |
| >EGFR-I853T KITDFGLAKL  | 478   | >EGFR-I853T KTTDFGLAKL | 2724  | 2246  |
| >EGFR-I853T KITDFGLAKL  | 29    | >EGFR-I853T KTTDFGLAKL | 1157  | 1128  |
| >EGFR-I853T KITDFGLAKLL | 183   | >EGFR-I853T KTTDFGLAKL | 5197  | 5014  |
| >EGFR-I853T KITDFGLAK   | 102   | >EGFR-I853T KTTDFGLAK  | 126   | 24    |
| >EGFR-I853T KITDFGLAK   | 17    | >EGFR-I853T KTTDFGLAK  | 12    | 5     |
| >EGFR-I853T KITDFGLA    | 2125  | >EGFR-I853T KTTDFGLA   | 395   | 1730  |
| >EGFR-I853T KITDFGLAK   | 22    | >EGFR-I853T KTTDFGLAK  | 8     | 14    |
| >EGFR-I853T KITDFGLAK   | 1216  | >EGFR-I853T KTTDFGLAK  | 322   | 894   |
| >EGFR-I853T KITDFGLAKL  | 725   | >EGFR-I853T KTTDFGLAKL | 209   | 516   |
| >EGFR-I853T KITDFGLAKLL | 679   | >EGFR-I853T KTTDFGLAKL | 219   | 460   |
| >EGFR-I853T KITDFGLAKL  | 693   | >EGFR-I853T KTTDFGLAKL | 4     | 689   |
| >EGFR-I853T KITDFGLAKLL | 2501  | >EGFR-I853T KTTDFGLAKL | 7     | 2494  |
| >EGFR-I853T KITDFGLAKL  | 6828  | >EGFR-I853T KTTDFGLAKL | 421   | 6407  |
| >EGFR-I853T KITDFGLAKL  | 2446  | >EGFR-I853T KTTDFGLAKL | 22    | 2424  |
| >EGFR-I853T KITDFGLAKLL | 1376  | >EGFR-I853T KTTDFGLAKL | 11    | 1365  |
| >EGFR-I853T KITDFGLAKL  | 1056  | >EGFR-I853T KTTDFGLAKL | 38    | 1018  |
| >EGFR-I853T KITDFGLAKLL | 1241  | >EGFR-I853T KTTDFGLAKL | 28    | 1213  |
| >EGFR-I853T KITDFGLAK   | 6535  | >EGFR-I853T KTTDFGLAK  | 452   | 6083  |
| >EGFR-I853T KITDFGLAK   | 98    | >EGFR-I853T KTTDFGLAK  | 392   | 294   |
| >EGFR-I853T KITDFGLAKLL | 12000 | >EGFR-I853T KTTDFGLAKL | 220   | 11780 |



|                          |     |                          |       |       |
|--------------------------|-----|--------------------------|-------|-------|
| >EGFR-I853T VLVKTPQHVK   | 269 | >EGFR-I853T VLVKTPQHVK   | 3729  | 3460  |
| >EGFR-I853T VLVKTPQHVK   | 25  | >EGFR-I853T VLVKTPQHVK   | 815   | 790   |
| >EGFR-I853T VLVKTPQHVK   | 241 | >EGFR-I853T VLVKTPQHVK   | 9210  | 8969  |
| >EGFR-I853T VLVKTPQHVK   | 97  | >EGFR-I853T VLVKTPQHVK   | 2809  | 2712  |
| >EGFR-I853T VLVKTPQHVK   | 26  | >EGFR-I853T VLVKTPQHVK   | 241   | 215   |
| >EGFR-I853T VKITDFGL     | 279 | >EGFR-I853T VKTTDFGL     | 911   | 632   |
| >EGFR-I853T VKITDFGLAK   | 252 | >EGFR-I853T VKTTDFGLAK   | 953   | 701   |
| >EGFR-I853T VKITDFGLAKI  | 295 | >EGFR-I853T VKTTDFGLAK   | 955   | 660   |
| >EGFR-I853T HVKITDFGLA   | 520 | >EGFR-I853T HVKTTDFGLA   | 264   | 256   |
| >EGFR-I853T HVKITDFGLA   | 276 | >EGFR-I853T HVKTTDFGLA   | 214   | 62    |
| >EGFR-I853T HVKITDFG     | 229 | >EGFR-I853T HVKTTDFG     | 124   | 105   |
| >EGFR-I853T HVKITDFGL    | 168 | >EGFR-I853T HVKTTDFGL    | 110   | 58    |
| >EGFR-I853T HVKITDFGLA   | 33  | >EGFR-I853T HVKTTDFGLA   | 26    | 7     |
| >EGFR-I853T HVKITDFGLA   | 4   | >EGFR-I853T HVKTTDFGLA   | 4     | 0     |
| >EGFR-I853T HVKITDFGLA   | 201 | >EGFR-I853T HVKTTDFGLA   | 246   | 45    |
| >EGFR-I853T HVKITDFGLA   | 130 | >EGFR-I853T HVKTTDFGLA   | 138   | 8     |
| >EGFR-I853T HVKITDFGL    | 328 | >EGFR-I853T HVKTTDFGL    | 1554  | 1226  |
| >EGFR-I853T QHVKITDF     | 107 | >EGFR-I853T QHVKTTDF     | 49    | 58    |
| >EGFR-I853T QHVKITDFGL   | 380 | >EGFR-I853T QHVKTTDFGI   | 148   | 232   |
| >EGFR-I853T PQHVKITDF    | 82  | >EGFR-I853T PQHVKTTDF    | 70    | 12    |
| >EGFR-I853T TPQHVKITDF   | 80  | >EGFR-I853T TPQHVKTTDF   | 116   | 36    |
| >EGFR-I853T TPQHVKITDF   | 125 | >EGFR-I853T TPQHVKTTDF   | 77    | 48    |
| >EGFR-I853T TPQHVKITDF   | 890 | >EGFR-I853T TPQHVKTTDF   | 358   | 532   |
| >EGFR-I853T TPQHVKITDF   | 234 | >EGFR-I853T TPQHVKTTDF   | 331   | 97    |
| >EGFR-I853T KTPQHVKITD   | 461 | >EGFR-I853T KTPQHVKTTL   | 676   | 215   |
| >EGFR-I853T KTPQHVKI     | 23  | >EGFR-I853T KTPQHVKT     | 2443  | 2420  |
| >EGFR-I853T KTPQHVKITD   | 41  | >EGFR-I853T KTPQHVKTTL   | 17    | 24    |
| >EGFR-I853T KTPQHVKI     | 299 | >EGFR-I853T KTPQHVKT     | 8026  | 7727  |
| >EGFR-I853T KTPQHVKITD   | 44  | >EGFR-I853T KTPQHVKTTL   | 40    | 4     |
| >EGFR-I853T KTPQHVKI     | 33  | >EGFR-I853T KTPQHVKT     | 8419  | 8386  |
| >EGFR-I853T KTPQHVKIT    | 77  | >EGFR-I853T KTPQHVKTT    | 236   | 159   |
| >EGFR-I853T KTPQHVKITD   | 7   | >EGFR-I853T KTPQHVKTTL   | 13    | 6     |
| >EGFR-I853T KTPQHVKI     | 51  | >EGFR-I853T KTPQHVKT     | 28771 | 28720 |
| >EGFR-I853T VKTPQHVKI    | 395 | >EGFR-I853T VKTPQHVKT    | 5843  | 5448  |
| >EGFR-I853T LVKTPQHVKI   | 126 | >EGFR-I853T LVKTPQHVKT   | 2634  | 2508  |
| >EGFR-I91L-v IALNTVERIPL | 225 | >EGFR-I91L-r LALNTVERIPL | 653   | 428   |
| >EGFR-I91L-v IALNTVERI   | 144 | >EGFR-I91L-r LALNTVERI   | 147   | 3     |
| >EGFR-I91L-v IALNTVER    | 57  | >EGFR-I91L-r LALNTVER    | 75    | 18    |
| >EGFR-I91L-v IALNTVER    | 60  | >EGFR-I91L-r LALNTVER    | 83    | 23    |
| >EGFR-I91L-v IALNTVERIPL | 153 | >EGFR-I91L-r LALNTVERIPL | 209   | 56    |
| >EGFR-I91L-v IALNTVERI   | 289 | >EGFR-I91L-r LALNTVERI   | 624   | 335   |
| >EGFR-I91L-v IALNTVERIPL | 124 | >EGFR-I91L-r LALNTVERIPL | 237   | 113   |
| >EGFR-I91L-v IALNTVERI   | 226 | >EGFR-I91L-r LALNTVERI   | 308   | 82    |

|                          |      |                          |     |      |
|--------------------------|------|--------------------------|-----|------|
| >EGFR-I91L-v IALNTVERI   | 275  | >EGFR-I91L-r LALNTVERI   | 142 | 133  |
| >EGFR-I91L-v LIALNTVERI  | 448  | >EGFR-I91L-r LLALNTVERI  | 65  | 383  |
| >EGFR-I91L-v LIALNTVERI  | 663  | >EGFR-I91L-r LLALNTVERI  | 138 | 525  |
| >EGFR-I91L-v LIALNTVERI  | 469  | >EGFR-I91L-r LLALNTVERI  | 17  | 452  |
| >EGFR-I91L-v LIALNTVERI  | 3627 | >EGFR-I91L-r LLALNTVERI  | 64  | 3563 |
| >EGFR-I91L-v LIALNTVERI  | 2807 | >EGFR-I91L-r LLALNTVERI  | 99  | 2708 |
| >EGFR-I91L-v LIALNTVERI  | 545  | >EGFR-I91L-r LLALNTVERI  | 14  | 531  |
| >EGFR-I91L-v LIALNTVERI  | 264  | >EGFR-I91L-r LLALNTVERI  | 9   | 255  |
| >EGFR-I91L-v LIALNTVER   | 460  | >EGFR-I91L-r LLALNTVER   | 448 | 12   |
| >EGFR-I91L-v LIALNTVER   | 23   | >EGFR-I91L-r LLALNTVER   | 53  | 30   |
| >EGFR-I91L-v LIALNTVER   | 159  | >EGFR-I91L-r LLALNTVER   | 230 | 71   |
| >EGFR-I91L-v TIQEVAGYVL  | 1337 | >EGFR-I91L-r TIQEVAGYVL  | 377 | 960  |
| >EGFR-I91L-v TIQEVAGYVL  | 434  | >EGFR-I91L-r TIQEVAGYVL  | 506 | 72   |
| >EGFR-I91L-v TIQEVAGYVL  | 2083 | >EGFR-I91L-r TIQEVAGYVL  | 474 | 1609 |
| >EGFR-I91L-v TIQEVAGYVL  | 107  | >EGFR-I91L-r TIQEVAGYVL  | 231 | 124  |
| >EGFR-I91L-v TIQEVAGYVL  | 352  | >EGFR-I91L-r TIQEVAGYVL  | 660 | 308  |
| >EGFR-I91L-v VLIALNTV    | 15   | >EGFR-I91L-r VLLALNTV    | 13  | 2    |
| >EGFR-I91L-v VLIALNTVERI | 64   | >EGFR-I91L-r VLLALNTVERI | 54  | 10   |
| >EGFR-I91L-v VLIALNTV    | 10   | >EGFR-I91L-r VLLALNTV    | 31  | 21   |
| >EGFR-I91L-v VLIALNTVERI | 40   | >EGFR-I91L-r VLLALNTVERI | 190 | 150  |
| >EGFR-I91L-v VLIALNTV    | 5    | >EGFR-I91L-r VLLALNTV    | 20  | 15   |
| >EGFR-I91L-v VLIALNTVERI | 19   | >EGFR-I91L-r VLLALNTVERI | 160 | 141  |
| >EGFR-I91L-v VLIALNTV    | 14   | >EGFR-I91L-r VLLALNTV    | 14  | 0    |
| >EGFR-I91L-v VLIALNTVERI | 300  | >EGFR-I91L-r VLLALNTVERI | 263 | 37   |
| >EGFR-I91L-v VLIALNTV    | 3    | >EGFR-I91L-r VLLALNTV    | 2   | 1    |
| >EGFR-I91L-v VLIALNTVERI | 10   | >EGFR-I91L-r VLLALNTVERI | 4   | 6    |
| >EGFR-I91L-v VLIALNTV    | 4    | >EGFR-I91L-r VLLALNTV    | 4   | 0    |
| >EGFR-I91L-v VLIALNTVERI | 64   | >EGFR-I91L-r VLLALNTVERI | 40  | 24   |
| >EGFR-I91L-v VLIALNTV    | 9    | >EGFR-I91L-r VLLALNTV    | 5   | 4    |
| >EGFR-I91L-v VLIALNTVERI | 90   | >EGFR-I91L-r VLLALNTVERI | 16  | 74   |
| >EGFR-I91L-v VLIALNTV    | 12   | >EGFR-I91L-r VLLALNTV    | 2   | 10   |
| >EGFR-I91L-v VLIALNTVERI | 322  | >EGFR-I91L-r VLLALNTVERI | 13  | 309  |
| >EGFR-I91L-v VLIALNTV    | 2    | >EGFR-I91L-r VLLALNTV    | 2   | 0    |
| >EGFR-I91L-v VLIALNTVERI | 13   | >EGFR-I91L-r VLLALNTVERI | 10  | 3    |
| >EGFR-I91L-v VLIALNTVER  | 393  | >EGFR-I91L-r VLLALNTVER  | 648 | 255  |
| >EGFR-I91L-v VLIALNTVER  | 214  | >EGFR-I91L-r VLLALNTVER  | 204 | 10   |
| >EGFR-I91L-v VLIALNTVERI | 417  | >EGFR-I91L-r VLLALNTVERI | 233 | 184  |
| >EGFR-I91L-v VLIALNTVER  | 58   | >EGFR-I91L-r VLLALNTVER  | 349 | 291  |
| >EGFR-I91L-v VLIALNTVER  | 199  | >EGFR-I91L-r VLLALNTVER  | 118 | 81   |
| >EGFR-I91L-v YVLLALNTV   | 28   | >EGFR-I91L-r YVLLALNTV   | 29  | 1    |
| >EGFR-I91L-v YVLLALNTV   | 100  | >EGFR-I91L-r YVLLALNTV   | 110 | 10   |
| >EGFR-I91L-v YVLLALNTV   | 30   | >EGFR-I91L-r YVLLALNTV   | 37  | 7    |
| >EGFR-I91L-v YVLLALNT    | 236  | >EGFR-I91L-r YVLLALNT    | 285 | 49   |

|                          |      |                          |     |      |
|--------------------------|------|--------------------------|-----|------|
| >EGFR-I91L-v YVLIALNTV   | 4    | >EGFR-I91L-r YVLLALNTV   | 4   | 0    |
| >EGFR-I91L-v YVLIALNTV   | 4    | >EGFR-I91L-r YVLLALNTV   | 8   | 4    |
| >EGFR-I91L-v YVLIALNTV   | 6    | >EGFR-I91L-r YVLLALNTV   | 6   | 0    |
| >EGFR-I91L-v YVLIALNTV   | 8    | >EGFR-I91L-r YVLLALNTV   | 11  | 3    |
| >EGFR-I91L-v YVLIALNTV   | 6    | >EGFR-I91L-r YVLLALNTV   | 4   | 2    |
| >EGFR-I91L-v YVLIALNTV   | 3    | >EGFR-I91L-r YVLLALNTV   | 4   | 1    |
| >EGFR-I91L-v YVLIALNTVEF | 123  | >EGFR-I91L-r YVLLALNTVEI | 174 | 51   |
| >EGFR-I91L-v YVLIALNTVEF | 404  | >EGFR-I91L-r YVLLALNTVEI | 224 | 180  |
| >EGFR-I91L-v YVLIALNTVEF | 20   | >EGFR-I91L-r YVLLALNTVEI | 21  | 1    |
| >EGFR-I91L-v YVLIALNTV   | 154  | >EGFR-I91L-r YVLLALNTV   | 153 | 1    |
| >EGFR-I91L-v YVLIALNTV   | 8    | >EGFR-I91L-r YVLLALNTV   | 10  | 2    |
| >EGFR-I91L-v YVLIALNTVEF | 273  | >EGFR-I91L-r YVLLALNTVEI | 271 | 2    |
| >EGFR-I91L-v GYVLIALNTV  | 134  | >EGFR-I91L-r GYVLLALNTV  | 150 | 16   |
| >EGFR-I91L-v GYVLIALNTV  | 409  | >EGFR-I91L-r GYVLLALNTV  | 433 | 24   |
| >EGFR-I91L-v GYVLIALNTV  | 360  | >EGFR-I91L-r GYVLLALNTV  | 266 | 94   |
| >EGFR-I91L-v AGYVLIAL    | 110  | >EGFR-I91L-r AGYVLLAL    | 166 | 56   |
| >EGFR-I91L-v AGYVLIALNT  | 304  | >EGFR-I91L-r AGYVLLALNT  | 220 | 84   |
| >EGFR-I91L-v AGYVLIALNT  | 187  | >EGFR-I91L-r AGYVLLALNT  | 151 | 36   |
| >EGFR-I91L-v EVAGYVLI    | 688  | >EGFR-I91L-r EVAGYVLL    | 245 | 443  |
| >EGFR-I91L-v EVAGYVLIAL  | 372  | >EGFR-I91L-r EVAGYVLLAL  | 289 | 83   |
| >EGFR-I91L-v EVAGYVLIAL  | 742  | >EGFR-I91L-r EVAGYVLLAL  | 403 | 339  |
| >EGFR-I91L-v EVAGYVLIAL  | 419  | >EGFR-I91L-r EVAGYVLLAL  | 378 | 41   |
| >EGFR-I91L-v EVAGYVLIAL  | 235  | >EGFR-I91L-r EVAGYVLLAL  | 175 | 60   |
| >EGFR-I91L-v EVAGYVLI    | 841  | >EGFR-I91L-r EVAGYVLL    | 128 | 713  |
| >EGFR-I91L-v EVAGYVLI    | 422  | >EGFR-I91L-r EVAGYVLL    | 64  | 358  |
| >EGFR-I91L-v EVAGYVLIAL  | 7    | >EGFR-I91L-r EVAGYVLLAL  | 9   | 2    |
| >EGFR-I91L-v EVAGYVLIAL  | 449  | >EGFR-I91L-r EVAGYVLLAL  | 505 | 56   |
| >EGFR-I91L-v EVAGYVLI    | 6    | >EGFR-I91L-r EVAGYVLL    | 7   | 1    |
| >EGFR-I91L-v EVAGYVLI    | 43   | >EGFR-I91L-r EVAGYVLLA   | 12  | 31   |
| >EGFR-I91L-v EVAGYVLIAL  | 32   | >EGFR-I91L-r EVAGYVLLAL  | 67  | 35   |
| >EGFR-I91L-v EVAGYVLI    | 16   | >EGFR-I91L-r EVAGYVLL    | 26  | 10   |
| >EGFR-I91L-v EVAGYVLI    | 214  | >EGFR-I91L-r EVAGYVLLA   | 55  | 159  |
| >EGFR-I91L-v EVAGYVLIAL  | 20   | >EGFR-I91L-r EVAGYVLLAL  | 20  | 0    |
| >EGFR-I91L-v EVAGYVLIAL  | 288  | >EGFR-I91L-r EVAGYVLLAL  | 435 | 147  |
| >EGFR-I91L-v QEVAGYVLI   | 29   | >EGFR-I91L-r QEVAGYVLL   | 782 | 753  |
| >EGFR-I91L-v QEVAGYVLI   | 2118 | >EGFR-I91L-r QEVAGYVLL   | 492 | 1626 |
| >EGFR-I91L-v QEVAGYVLI   | 57   | >EGFR-I91L-r QEVAGYVLLA  | 65  | 8    |
| >EGFR-I91L-v QEVAGYVLI   | 2341 | >EGFR-I91L-r QEVAGYVLL   | 174 | 2167 |
| >EGFR-I91L-v QEVAGYVLI   | 86   | >EGFR-I91L-r QEVAGYVLLA  | 102 | 16   |
| >EGFR-I91L-v QEVAGYVLI   | 18   | >EGFR-I91L-r QEVAGYVLL   | 7   | 11   |
| >EGFR-I91L-v QEVAGYVLI   | 5    | >EGFR-I91L-r QEVAGYVLLA  | 6   | 1    |
| >EGFR-I91L-v QEVAGYVLI   | 428  | >EGFR-I91L-r QEVAGYVLL   | 178 | 250  |
| >EGFR-I91L-v QEVAGYVLI   | 335  | >EGFR-I91L-r QEVAGYVLLA  | 266 | 69   |

|                         |       |                         |       |       |
|-------------------------|-------|-------------------------|-------|-------|
| >EGFR-I91L-v QEVAGYVLIA | 74    | >EGFR-I91L-r QEVAGYVLLA | 57    | 17    |
| >EGFR-I91L-v QEVAGYVLIA | 976   | >EGFR-I91L-r QEVAGYVLLA | 367   | 609   |
| >EGFR-I91L-v QEVAGYVLIA | 465   | >EGFR-I91L-r QEVAGYVLLA | 396   | 69    |
| >EGFR-I91L-v QEVAGYVLI  | 150   | >EGFR-I91L-r QEVAGYVLL  | 421   | 271   |
| >EGFR-I91L-v QEVAGYVLIA | 79    | >EGFR-I91L-r QEVAGYVLLA | 42    | 37    |
| >EGFR-I91L-v QEVAGYVLIA | 143   | >EGFR-I91L-r QEVAGYVLLA | 241   | 98    |
| >EGFR-I91L-v QEVAGYVLI  | 1483  | >EGFR-I91L-r QEVAGYVLL  | 210   | 1273  |
| >EGFR-I91L-v QEVAGYVLIA | 285   | >EGFR-I91L-r QEVAGYVLLA | 355   | 70    |
| >EGFR-I91L-v QEVAGYVLI  | 7     | >EGFR-I91L-r QEVAGYVLL  | 23    | 16    |
| >EGFR-I91L-v QEVAGYVLIA | 23    | >EGFR-I91L-r QEVAGYVLLA | 33    | 10    |
| >EGFR-I91L-v IQEVAGYVLI | 693   | >EGFR-I91L-r IQEVAGYVLL | 495   | 198   |
| >EGFR-I91L-v IQEVAGYVLI | 4581  | >EGFR-I91L-r IQEVAGYVLL | 429   | 4152  |
| >EGFR-K708E KETEFKKI    | 82    | >EGFR-K708E EETEFKKI    | 38    | 44    |
| >EGFR-K708E KETEFKKIKV  | 274   | >EGFR-K708E EETEFKKIKV  | 112   | 162   |
| >EGFR-K708E KETEFKKIKVL | 128   | >EGFR-K708E EETEFKKIKVL | 48    | 80    |
| >EGFR-K708E KETEFKKI    | 165   | >EGFR-K708E EETEFKKI    | 1119  | 954   |
| >EGFR-K708E KETEFKKIKVL | 51    | >EGFR-K708E EETEFKKIKVL | 449   | 398   |
| >EGFR-K708E KETEFKKI    | 289   | >EGFR-K708E EETEFKKI    | 1804  | 1515  |
| >EGFR-K708E KETEFKKIKVL | 75    | >EGFR-K708E EETEFKKIKVL | 497   | 422   |
| >EGFR-K708E KETEFKKI    | 1167  | >EGFR-K708E EETEFKKI    | 431   | 736   |
| >EGFR-K708E KETEFKKIKVL | 876   | >EGFR-K708E EETEFKKIKVL | 331   | 545   |
| >EGFR-K708E KETEFKKI    | 1324  | >EGFR-K708E EETEFKKI    | 347   | 977   |
| >EGFR-K708E KETEFKKIKVL | 105   | >EGFR-K708E EETEFKKIKVL | 2008  | 1903  |
| >EGFR-K708E LKETEFKKI   | 757   | >EGFR-K708E LEETEFKKI   | 18    | 739   |
| >EGFR-K708E LKETEFKKIKV | 10167 | >EGFR-K708E LEETEFKKIKV | 252   | 9915  |
| >EGFR-K708E LKETEFKKI   | 11837 | >EGFR-K708E LEETEFKKI   | 20    | 11817 |
| >EGFR-K708E LKETEFKKIKV | 21369 | >EGFR-K708E LEETEFKKIKV | 165   | 21204 |
| >EGFR-K708E ILKETEFKKI  | 144   | >EGFR-K708E ILEETEFKKI  | 667   | 523   |
| >EGFR-K708E ILKETEFKKI  | 259   | >EGFR-K708E ILEETEFKKI  | 131   | 128   |
| >EGFR-K708E ILKETEFKKI  | 650   | >EGFR-K708E ILEETEFKKI  | 352   | 298   |
| >EGFR-K708E ILKETEFKKI  | 63    | >EGFR-K708E ILEETEFKKI  | 51    | 12    |
| >EGFR-K708E ILKETEFK    | 129   | >EGFR-K708E ILEETEFK    | 708   | 579   |
| >EGFR-K708E ILKETEFKK   | 144   | >EGFR-K708E ILEETEFKK   | 760   | 616   |
| >EGFR-K708E ILKETEFK    | 431   | >EGFR-K708E ILEETEFK    | 468   | 37    |
| >EGFR-K708E ILKETEFK    | 97    | >EGFR-K708E ILEETEFK    | 8078  | 7981  |
| >EGFR-K708E ILKETEFKK   | 235   | >EGFR-K708E ILEETEFKK   | 11637 | 11402 |
| >EGFR-K708E ILKETEFKKIK | 224   | >EGFR-K708E ILEETEFKKIK | 11181 | 10957 |
| >EGFR-K708E ILKETEFK    | 352   | >EGFR-K708E ILEETEFK    | 426   | 74    |
| >EGFR-K708E RILKETEF    | 2738  | >EGFR-K708E RILEETEF    | 333   | 2405  |
| >EGFR-K708E RILKETEFKKI | 1067  | >EGFR-K708E RILEETEFKKI | 187   | 880   |
| >EGFR-K708E RILKETEFKKI | 1156  | >EGFR-K708E RILEETEFKKI | 105   | 1051  |
| >EGFR-K708E RILKETEFK   | 83    | >EGFR-K708E RILEETEFK   | 114   | 31    |
| >EGFR-K708E RILKETEFKK  | 111   | >EGFR-K708E RILEETEFKK  | 186   | 75    |

|                         |      |                         |       |       |
|-------------------------|------|-------------------------|-------|-------|
| >EGFR-K708E RILKETEFK   | 23   | >EGFR-K708E RILEETEFK   | 21    | 2     |
| >EGFR-K708E RILKETEFKK  | 58   | >EGFR-K708E RILEETEFKK  | 48    | 10    |
| >EGFR-K708E RILKETEF    | 267  | >EGFR-K708E RILEETEF    | 407   | 140   |
| >EGFR-K708E RILKETEFK   | 37   | >EGFR-K708E RILEETEFK   | 76    | 39    |
| >EGFR-K708E RILKETEFKK  | 71   | >EGFR-K708E RILEETEFKK  | 127   | 56    |
| >EGFR-K708E RILKETEF    | 40   | >EGFR-K708E RILEETEF    | 33    | 7     |
| >EGFR-K708E RILKETEFKKI | 128  | >EGFR-K708E RILEETEFKKI | 86    | 42    |
| >EGFR-K708E RILKETEF    | 62   | >EGFR-K708E RILEETEF    | 74    | 12    |
| >EGFR-K708E RILKETEF    | 111  | >EGFR-K708E RILEETEF    | 59    | 52    |
| >EGFR-K708E RILKETEF    | 814  | >EGFR-K708E RILEETEF    | 473   | 341   |
| >EGFR-K708E RILKETEFK   | 64   | >EGFR-K708E RILEETEFK   | 116   | 52    |
| >EGFR-K708E RILKETEFKK  | 149  | >EGFR-K708E RILEETEFKK  | 256   | 107   |
| >EGFR-K708E LRILKETEF   | 106  | >EGFR-K708E LRILEETEF   | 44    | 62    |
| >EGFR-K708E LRILKETEFK  | 302  | >EGFR-K708E LRILEETEFK  | 361   | 59    |
| >EGFR-K708E LRILKETEFKK | 185  | >EGFR-K708E LRILEETEFKK | 239   | 54    |
| >EGFR-K708E LLRILKET    | 724  | >EGFR-K708E LLRILEET    | 302   | 422   |
| >EGFR-K708E LLRILKETEFK | 286  | >EGFR-K708E LLRILEETEFK | 454   | 168   |
| >EGFR-K708E LLRILKETEFK | 60   | >EGFR-K708E LLRILEETEFK | 102   | 42    |
| >EGFR-K708E LLRILKETEF  | 167  | >EGFR-K708E LLRILEETEF  | 184   | 17    |
| >EGFR-K708E LLRILKETEF  | 119  | >EGFR-K708E LLRILEETEF  | 70    | 49    |
| >EGFR-K708E LLRILKETEF  | 422  | >EGFR-K708E LLRILEETEF  | 464   | 42    |
| >EGFR-K708E LLRILKETEF  | 547  | >EGFR-K708E LLRILEETEF  | 248   | 299   |
| >EGFR-K708E ALLRILKET   | 2514 | >EGFR-K708E ALLRILEET   | 285   | 2229  |
| >EGFR-K708E ALLRILKET   | 1772 | >EGFR-K708E ALLRILEET   | 130   | 1642  |
| >EGFR-K708E ALLRILKET   | 1906 | >EGFR-K708E ALLRILEET   | 207   | 1699  |
| >EGFR-K708E ALLRILKET   | 151  | >EGFR-K708E ALLRILEET   | 27    | 124   |
| >EGFR-K708E ALLRILKET   | 1293 | >EGFR-K708E ALLRILEET   | 195   | 1098  |
| >EGFR-K708E ALLRILKET   | 4200 | >EGFR-K708E ALLRILEET   | 376   | 3824  |
| >EGFR-K708E ALLRILKET   | 90   | >EGFR-K708E ALLRILEET   | 27    | 63    |
| >EGFR-K708E ALLRILKETEF | 153  | >EGFR-K708E ALLRILEETEF | 124   | 29    |
| >EGFR-K708E ALLRILKETEF | 58   | >EGFR-K708E ALLRILEETEF | 55    | 3     |
| >EGFR-K708E QALLRILK    | 62   | >EGFR-K708E QALLRILE    | 23735 | 23673 |
| >EGFR-K708E QALLRILK    | 145  | >EGFR-K708E QALLRILE    | 14827 | 14682 |
| >EGFR-K708E NQALLRILK   | 117  | >EGFR-K708E NQALLRILE   | 26262 | 26145 |
| >EGFR-K708I KETEFKKI    | 82   | >EGFR-K708I METEFKKI    | 37    | 45    |
| >EGFR-K708I KETEFKKIKV  | 274  | >EGFR-K708I METEFKKIKV  | 56    | 218   |
| >EGFR-K708I KETEFKKIKVL | 128  | >EGFR-K708I METEFKKIKV  | 27    | 101   |
| >EGFR-K708I KETEFKKIKVL | 1810 | >EGFR-K708I METEFKKIKV  | 96    | 1714  |
| >EGFR-K708I KETEFKKI    | 165  | >EGFR-K708I METEFKKI    | 139   | 26    |
| >EGFR-K708I KETEFKKIKV  | 51   | >EGFR-K708I METEFKKIKV  | 50    | 1     |
| >EGFR-K708I KETEFKKI    | 289  | >EGFR-K708I METEFKKI    | 555   | 266   |
| >EGFR-K708I KETEFKKIKV  | 75   | >EGFR-K708I METEFKKIKV  | 117   | 42    |
| >EGFR-K708I KETEFKKI    | 1167 | >EGFR-K708I METEFKKI    | 304   | 863   |

|                         |       |                         |      |       |
|-------------------------|-------|-------------------------|------|-------|
| >EGFR-K708I KETEFKKIKVL | 876   | >EGFR-K708I METEFKKIKV  | 228  | 648   |
| >EGFR-K708I KETEFKKI    | 1324  | >EGFR-K708I METEFKKI    | 269  | 1055  |
| >EGFR-K708I KETEFKKIKVL | 105   | >EGFR-K708I METEFKKIKV  | 95   | 10    |
| >EGFR-K708I LKETEFKKIKV | 22115 | >EGFR-K708I LMETEFKKIKV | 89   | 22026 |
| >EGFR-K708I LKETEFKKIKV | 22292 | >EGFR-K708I LMETEFKKIKV | 190  | 22102 |
| >EGFR-K708I LKETEFKKIKV | 17246 | >EGFR-K708I LMETEFKKIKV | 6    | 17240 |
| >EGFR-K708I LKETEFKK    | 21254 | >EGFR-K708I LMETEFKK    | 453  | 20801 |
| >EGFR-K708I APNQALLRILI | 27970 | >EGFR-K708I APNQALLRILI | 21   | 27949 |
| >EGFR-K708I APNQALLRILI | 14212 | >EGFR-K708I APNQALLRILI | 39   | 14173 |
| >EGFR-K708I APNQALLRILI | 11565 | >EGFR-K708I APNQALLRILI | 150  | 11415 |
| >EGFR-K708I APNQALLRILI | 12487 | >EGFR-K708I APNQALLRILI | 357  | 12130 |
| >EGFR-K708I ILKETEFKKI  | 6635  | >EGFR-K708I ILMETEFKKI  | 97   | 6538  |
| >EGFR-K708I ILKETEFK    | 5746  | >EGFR-K708I ILMETEFK    | 233  | 5513  |
| >EGFR-K708I ILKETEFKKI  | 702   | >EGFR-K708I ILMETEFKKI  | 73   | 629   |
| >EGFR-K708I ILKETEFKKI  | 144   | >EGFR-K708I ILMETEFKKI  | 28   | 116   |
| >EGFR-K708I ILKETEFKKI  | 6482  | >EGFR-K708I ILMETEFKKI  | 204  | 6278  |
| >EGFR-K708I ILKETEFKKI  | 259   | >EGFR-K708I ILMETEFKKI  | 10   | 249   |
| >EGFR-K708I ILKETEFKKI  | 650   | >EGFR-K708I ILMETEFKKI  | 20   | 630   |
| >EGFR-K708I ILKETEFKKI  | 1975  | >EGFR-K708I ILMETEFKKI  | 85   | 1890  |
| >EGFR-K708I ILKETEFKKI  | 3411  | >EGFR-K708I ILMETEFKKI  | 13   | 3398  |
| >EGFR-K708I ILKETEFKK   | 2119  | >EGFR-K708I ILMETEFKK   | 270  | 1849  |
| >EGFR-K708I ILKETEFKKI  | 63    | >EGFR-K708I ILMETEFKKI  | 13   | 50    |
| >EGFR-K708I ILKETEFK    | 129   | >EGFR-K708I ILMETEFK    | 44   | 85    |
| >EGFR-K708I ILKETEFKK   | 144   | >EGFR-K708I ILMETEFKK   | 49   | 95    |
| >EGFR-K708I ILKETEFKKIK | 549   | >EGFR-K708I ILMETEFKKIK | 100  | 449   |
| >EGFR-K708I ILKETEFK    | 431   | >EGFR-K708I ILMETEFK    | 20   | 411   |
| >EGFR-K708I ILKETEFKK   | 502   | >EGFR-K708I ILMETEFKK   | 23   | 479   |
| >EGFR-K708I ILKETEFKKIK | 3295  | >EGFR-K708I ILMETEFKKIK | 174  | 3121  |
| >EGFR-K708I ILKETEFK    | 97    | >EGFR-K708I ILMETEFK    | 1786 | 1689  |
| >EGFR-K708I ILKETEFKK   | 235   | >EGFR-K708I ILMETEFKK   | 3962 | 3727  |
| >EGFR-K708I ILKETEFKKIK | 224   | >EGFR-K708I ILMETEFKKIK | 3781 | 3557  |
| >EGFR-K708I ILKETEFK    | 352   | >EGFR-K708I ILMETEFK    | 56   | 296   |
| >EGFR-K708I ILKETEFKK   | 708   | >EGFR-K708I ILMETEFKK   | 91   | 617   |
| >EGFR-K708I RILKETEFK   | 83    | >EGFR-K708I RILMETEFK   | 117  | 34    |
| >EGFR-K708I RILKETEFKK  | 111   | >EGFR-K708I RILMETEFKK  | 48   | 63    |
| >EGFR-K708I RILKETEFK   | 23    | >EGFR-K708I RILMETEFK   | 19   | 4     |
| >EGFR-K708I RILKETEFKK  | 58    | >EGFR-K708I RILMETEFKK  | 16   | 42    |
| >EGFR-K708I RILKETEFL   | 267   | >EGFR-K708I RILMETEFL   | 496  | 229   |
| >EGFR-K708I RILKETEFK   | 37    | >EGFR-K708I RILMETEFK   | 37   | 0     |
| >EGFR-K708I RILKETEFKK  | 71    | >EGFR-K708I RILMETEFKK  | 72   | 1     |
| >EGFR-K708I RILKETEFK   | 508   | >EGFR-K708I RILMETEFK   | 344  | 164   |
| >EGFR-K708I RILKETEFKK  | 503   | >EGFR-K708I RILMETEFKK  | 414  | 89    |
| >EGFR-K708I RILKETEFL   | 40    | >EGFR-K708I RILMETEFL   | 30   | 10    |

|                         |       |                         |       |       |
|-------------------------|-------|-------------------------|-------|-------|
| >EGFR-K708I RILKETEFKKI | 128   | >EGFR-K708I RILMETEFKKI | 124   | 4     |
| >EGFR-K708I RILKETEF    | 62    | >EGFR-K708I RILMETEF    | 49    | 13    |
| >EGFR-K708I RILKETEF    | 111   | >EGFR-K708I RILMETEF    | 65    | 46    |
| >EGFR-K708I RILKETEFK   | 64    | >EGFR-K708I RILMETEFK   | 93    | 29    |
| >EGFR-K708I RILKETEFKK  | 149   | >EGFR-K708I RILMETEFKK  | 220   | 71    |
| >EGFR-K708I LRILKETEF   | 106   | >EGFR-K708I LRILMETEF   | 93    | 13    |
| >EGFR-K708I LRILKETEFK  | 302   | >EGFR-K708I LRILMETEFK  | 219   | 83    |
| >EGFR-K708I LRILKETEFKK | 185   | >EGFR-K708I LRILMETEFKK | 123   | 62    |
| >EGFR-K708I LLRILKET    | 724   | >EGFR-K708I LLRILMET    | 119   | 605   |
| >EGFR-K708I LLRILKETEFK | 286   | >EGFR-K708I LLRILMETEFK | 195   | 91    |
| >EGFR-K708I LLRILKETEFK | 60    | >EGFR-K708I LLRILMETEFK | 42    | 18    |
| >EGFR-K708I LLRILKETEF  | 167   | >EGFR-K708I LLRILMETEF  | 98    | 69    |
| >EGFR-K708I LLRILKETEF  | 119   | >EGFR-K708I LLRILMETEF  | 78    | 41    |
| >EGFR-K708I LLRILKETEF  | 422   | >EGFR-K708I LLRILMETEF  | 113   | 309   |
| >EGFR-K708I LLRILKETEF  | 547   | >EGFR-K708I LLRILMETEF  | 128   | 419   |
| >EGFR-K708I ALLRILKET   | 2514  | >EGFR-K708I ALLRILMET   | 110   | 2404  |
| >EGFR-K708I ALLRILKET   | 1772  | >EGFR-K708I ALLRILMET   | 295   | 1477  |
| >EGFR-K708I ALLRILKET   | 1513  | >EGFR-K708I ALLRILMET   | 303   | 1210  |
| >EGFR-K708I ALLRILKET   | 1906  | >EGFR-K708I ALLRILMET   | 317   | 1589  |
| >EGFR-K708I ALLRILKET   | 151   | >EGFR-K708I ALLRILMET   | 35    | 116   |
| >EGFR-K708I ALLRILKET   | 4271  | >EGFR-K708I ALLRILMET   | 482   | 3789  |
| >EGFR-K708I ALLRILKET   | 1293  | >EGFR-K708I ALLRILMET   | 116   | 1177  |
| >EGFR-K708I ALLRILKET   | 90    | >EGFR-K708I ALLRILMET   | 12    | 78    |
| >EGFR-K708I ALLRILKETEF | 1230  | >EGFR-K708I ALLRILMETEF | 469   | 761   |
| >EGFR-K708I ALLRILKETEF | 153   | >EGFR-K708I ALLRILMETEF | 67    | 86    |
| >EGFR-K708I ALLRILKETEF | 58    | >EGFR-K708I ALLRILMETEF | 46    | 12    |
| >EGFR-K708I QALLRILK    | 62    | >EGFR-K708I QALLRILM    | 20633 | 20571 |
| >EGFR-K708I QALLRILK    | 145   | >EGFR-K708I QALLRILM    | 6149  | 6004  |
| >EGFR-K708I NQALLRILK   | 117   | >EGFR-K708I NQALLRILM   | 23832 | 23715 |
| >EGFR-K708I NQALLRILK   | 14015 | >EGFR-K708I NQALLRILM   | 241   | 13774 |
| >EGFR-K708F KETEFKKI    | 82    | >EGFR-K708F RETEFKKI    | 441   | 359   |
| >EGFR-K708F KETEFKKIKV  | 274   | >EGFR-K708F RETEFKKIKV  | 287   | 13    |
| >EGFR-K708F KETEFKKIKVL | 128   | >EGFR-K708F RETEFKKIKVL | 137   | 9     |
| >EGFR-K708F KETEFKKI    | 165   | >EGFR-K708F RETEFKKI    | 43    | 122   |
| >EGFR-K708F KETEFKKIKVL | 51    | >EGFR-K708F RETEFKKIKVL | 18    | 33    |
| >EGFR-K708F KETEFKKI    | 289   | >EGFR-K708F RETEFKKI    | 248   | 41    |
| >EGFR-K708F KETEFKKIKVL | 75    | >EGFR-K708F RETEFKKIKVL | 64    | 11    |
| >EGFR-K708F KETEFKKIKV  | 846   | >EGFR-K708F RETEFKKIKV  | 495   | 351   |
| >EGFR-K708F KETEFKKIKVL | 105   | >EGFR-K708F RETEFKKIKVL | 49    | 56    |
| >EGFR-K708F ILKETEFKKI  | 144   | >EGFR-K708F ILRETEFKKI  | 278   | 134   |
| >EGFR-K708F ILKETEFKKI  | 259   | >EGFR-K708F ILRETEFKKI  | 126   | 133   |
| >EGFR-K708F ILKETEFKKI  | 63    | >EGFR-K708F ILRETEFKKI  | 44    | 19    |
| >EGFR-K708F ILKETEFK    | 129   | >EGFR-K708F ILRETEFK    | 71    | 58    |

|                             |      |                             |      |      |
|-----------------------------|------|-----------------------------|------|------|
| >EGFR-K708FILKETEFKK        | 144  | >EGFR-K708FILRETEFKK        | 82   | 62   |
| >EGFR-K708FILKETEFKKIK      | 549  | >EGFR-K708FILRETEFKKIK      | 220  | 329  |
| >EGFR-K708FILKETEFK         | 431  | >EGFR-K708FILRETEFK         | 1539 | 1108 |
| >EGFR-K708FILKETEFK         | 97   | >EGFR-K708FILRETEFK         | 20   | 77   |
| >EGFR-K708FILKETEFKK        | 235  | >EGFR-K708FILRETEFKK        | 38   | 197  |
| >EGFR-K708FILKETEFKKIK      | 224  | >EGFR-K708FILRETEFKKIK      | 34   | 190  |
| >EGFR-K708FILKETEFK         | 352  | >EGFR-K708FILRETEFK         | 1052 | 700  |
| >EGFR-K708F RILKETEFK       | 83   | >EGFR-K708F RILRETEFK       | 82   | 1    |
| >EGFR-K708F RILKETEFKK      | 111  | >EGFR-K708F RILRETEFKK      | 88   | 23   |
| >EGFR-K708F RILKETEFK       | 23   | >EGFR-K708F RILRETEFK       | 21   | 2    |
| >EGFR-K708F RILKETEFKK      | 58   | >EGFR-K708F RILRETEFKK      | 59   | 1    |
| >EGFR-K708F RILKETE F       | 267  | >EGFR-K708F RILRETE F       | 337  | 70   |
| >EGFR-K708F RILKETE F K     | 37   | >EGFR-K708F RILRETE F K     | 18   | 19   |
| >EGFR-K708F RILKETE F K K   | 71   | >EGFR-K708F RILRETE F K K   | 39   | 32   |
| >EGFR-K708F RILKETE F K     | 508  | >EGFR-K708F RILRETE F K     | 289  | 219  |
| >EGFR-K708F RILKETE F       | 40   | >EGFR-K708F RILRETE F       | 35   | 5    |
| >EGFR-K708F RILKETE F K K I | 128  | >EGFR-K708F RILRETE F K K I | 96   | 32   |
| >EGFR-K708F RILKETE F       | 62   | >EGFR-K708F RILRETE F       | 47   | 15   |
| >EGFR-K708F RILKETE F       | 111  | >EGFR-K708F RILRETE F       | 213  | 102  |
| >EGFR-K708F RILKETE F       | 814  | >EGFR-K708F RILRETE F       | 261  | 553  |
| >EGFR-K708F RILKETE F K     | 64   | >EGFR-K708F RILRETE F K     | 145  | 81   |
| >EGFR-K708F RILKETE F K K   | 149  | >EGFR-K708F RILRETE F K K   | 331  | 182  |
| >EGFR-K708F LRILKETE F      | 106  | >EGFR-K708F LRILRETE F      | 59   | 47   |
| >EGFR-K708F LRILKETE F K    | 302  | >EGFR-K708F LRILRETE F K    | 170  | 132  |
| >EGFR-K708F LRILKETE F K K  | 185  | >EGFR-K708F LRILRETE F K K  | 113  | 72   |
| >EGFR-K708F LLRILKETE F K   | 286  | >EGFR-K708F LLRILRETE F K   | 209  | 77   |
| >EGFR-K708F LLRILKETE F K   | 60   | >EGFR-K708F LLRILRETE F K   | 24   | 36   |
| >EGFR-K708F LLRILKETE F K   | 618  | >EGFR-K708F LLRILRETE F K   | 442  | 176  |
| >EGFR-K708F LLRILKETE F     | 167  | >EGFR-K708F LLRILRETE F     | 120  | 47   |
| >EGFR-K708F LLRILKETE F     | 119  | >EGFR-K708F LLRILRETE F     | 60   | 59   |
| >EGFR-K708F LLRILKETE F     | 422  | >EGFR-K708F LLRILRETE F     | 412  | 10   |
| >EGFR-K708F LLRILKETE F     | 547  | >EGFR-K708F LLRILRETE F     | 237  | 310  |
| >EGFR-K708F ALLRILK E T     | 151  | >EGFR-K708F ALLRILR E T     | 105  | 46   |
| >EGFR-K708F ALLRILK E T     | 90   | >EGFR-K708F ALLRILR E T     | 159  | 69   |
| >EGFR-K708F ALLRILK E T E F | 153  | >EGFR-K708F ALLRILR E T E F | 127  | 26   |
| >EGFR-K708F ALLRILK E T E F | 58   | >EGFR-K708F ALLRILR E T E F | 58   | 0    |
| >EGFR-K708F QALLRIL K       | 62   | >EGFR-K708F QALLRIL R       | 1887 | 1825 |
| >EGFR-K708F QALLRIL K       | 145  | >EGFR-K708F QALLRIL R       | 7418 | 7273 |
| >EGFR-K708F QALLRIL K       | 1900 | >EGFR-K708F QALLRIL R       | 82   | 1818 |
| >EGFR-K708F QALLRIL K       | 2316 | >EGFR-K708F QALLRIL R       | 78   | 2238 |
| >EGFR-K708F QALLRIL K       | 636  | >EGFR-K708F QALLRIL R       | 165  | 471  |
| >EGFR-K708F QALLRIL K       | 4224 | >EGFR-K708F QALLRIL R       | 170  | 4054 |
| >EGFR-K708F NQALLRIL K      | 117  | >EGFR-K708F NQALLRIL R      | 4579 | 4462 |



|                         |       |                         |       |       |
|-------------------------|-------|-------------------------|-------|-------|
| >EGFR-K708F NQALLRILK   | 2757  | >EGFR-K708F NQALLRILR   | 155   | 2602  |
| >EGFR-K708F NQALLRILK   | 6799  | >EGFR-K708F NQALLRILR   | 314   | 6485  |
| >EGFR-K708F NQALLRILK   | 611   | >EGFR-K708F NQALLRILR   | 174   | 437   |
| >EGFR-K708F NQALLRILK   | 3733  | >EGFR-K708F NQALLRILR   | 130   | 3603  |
| >EGFR-K713F KKIKVLGSGAI | 7     | >EGFR-K713F FKIKVLGSGAI | 5     | 2     |
| >EGFR-K713F LLRILKETEFK | 286   | >EGFR-K713F LLRILKETEFF | 20350 | 20064 |
| >EGFR-K713F LLRILKETEFK | 60    | >EGFR-K713F LLRILKETEFF | 8988  | 8928  |
| >EGFR-K713F LLRILKETEFK | 17243 | >EGFR-K713F LLRILKETEFF | 98    | 17145 |
| >EGFR-K713F LLRILKETEFK | 13515 | >EGFR-K713F LLRILKETEFF | 160   | 13355 |
| >EGFR-K713F TEFKKIKV    | 513   | >EGFR-K713F TEFFKIKV    | 324   | 189   |
| >EGFR-K713F TEFKKIKVL   | 51    | >EGFR-K713F TEFFKIKVL   | 93    | 42    |
| >EGFR-K713F TEFKKIKVL   | 462   | >EGFR-K713F TEFFKIKVL   | 317   | 145   |
| >EGFR-K713F TEFKKIKV    | 711   | >EGFR-K713F TEFFKIKV    | 231   | 480   |
| >EGFR-K713F TEFKKIKVL   | 284   | >EGFR-K713F TEFFKIKVL   | 98    | 186   |
| >EGFR-K713F TEFKKIKV    | 361   | >EGFR-K713F TEFFKIKV    | 357   | 4     |
| >EGFR-K713F TEFKKIKVL   | 68    | >EGFR-K713F TEFFKIKVL   | 72    | 4     |
| >EGFR-K713F TEFKKIKVL   | 460   | >EGFR-K713F TEFFKIKVL   | 505   | 45    |
| >EGFR-K713F TEFKKIKVL   | 85    | >EGFR-K713F TEFFKIKVL   | 209   | 124   |
| >EGFR-K713F ETEFFKIK    | 46    | >EGFR-K713F ETEFFKIK    | 14    | 32    |
| >EGFR-K713F ETEFFKIKV   | 201   | >EGFR-K713F ETEFFKIKV   | 38    | 163   |
| >EGFR-K713F ETEFFKIKV   | 511   | >EGFR-K713F ETEFFKIKV   | 22    | 489   |
| >EGFR-K713F ETEFFKIK    | 2685  | >EGFR-K713F ETEFFKIK    | 338   | 2347  |
| >EGFR-K713F KETEFFKI    | 82    | >EGFR-K713F KETEFFKI    | 169   | 87    |
| >EGFR-K713F KETEFFKIKV  | 274   | >EGFR-K713F KETEFFKIKV  | 196   | 78    |
| >EGFR-K713F KETEFFKIKVL | 128   | >EGFR-K713F KETEFFKIKVL | 154   | 26    |
| >EGFR-K713F KETEFFKI    | 165   | >EGFR-K713F KETEFFKI    | 24    | 141   |
| >EGFR-K713F KETEFFKIKVL | 51    | >EGFR-K713F KETEFFKIKVL | 28    | 23    |
| >EGFR-K713F KETEFFKI    | 289   | >EGFR-K713F KETEFFKI    | 62    | 227   |
| >EGFR-K713F KETEFFKIKVL | 75    | >EGFR-K713F KETEFFKIKVL | 36    | 39    |
| >EGFR-K713F KETEFFKI    | 1167  | >EGFR-K713F KETEFFKI    | 478   | 689   |
| >EGFR-K713F KETEFFKIKVL | 876   | >EGFR-K713F KETEFFKIKVL | 426   | 450   |
| >EGFR-K713F KETEFFKI    | 1324  | >EGFR-K713F KETEFFKI    | 125   | 1199  |
| >EGFR-K713F KETEFFKI    | 949   | >EGFR-K713F KETEFFKI    | 113   | 836   |
| >EGFR-K713F KETEFFKIKV  | 846   | >EGFR-K713F KETEFFKIKV  | 256   | 590   |
| >EGFR-K713F KETEFFKIKVL | 105   | >EGFR-K713F KETEFFKIKVL | 40    | 65    |
| >EGFR-K713F KETEFFKIK   | 1181  | >EGFR-K713F KETEFFKIK   | 343   | 838   |
| >EGFR-K713F ILKETEFFKI  | 6635  | >EGFR-K713F ILKETEFFKI  | 261   | 6374  |
| >EGFR-K713F ILKETEFFKI  | 702   | >EGFR-K713F ILKETEFFKI  | 75    | 627   |
| >EGFR-K713F ILKETEFFKI  | 144   | >EGFR-K713F ILKETEFFKI  | 141   | 3     |
| >EGFR-K713F ILKETEFFKI  | 6482  | >EGFR-K713F ILKETEFFKI  | 498   | 5984  |
| >EGFR-K713F ILKETEFFKI  | 259   | >EGFR-K713F ILKETEFFKI  | 35    | 224   |
| >EGFR-K713F ILKETEFFKI  | 650   | >EGFR-K713F ILKETEFFKI  | 42    | 608   |
| >EGFR-K713F ILKETEFFKI  | 1975  | >EGFR-K713F ILKETEFFKI  | 192   | 1783  |

|                         |       |                         |       |       |
|-------------------------|-------|-------------------------|-------|-------|
| >EGFR-K713FILKETEFKKI   | 3411  | >EGFR-K713FILKETEFFKI   | 273   | 3138  |
| >EGFR-K713FILKETEFKKI   | 63    | >EGFR-K713FILKETEFFKI   | 10    | 53    |
| >EGFR-K713FILKETEFLK    | 129   | >EGFR-K713FILKETEFFF    | 19571 | 19442 |
| >EGFR-K713FILKETEFLKK   | 144   | >EGFR-K713FILKETEFFFK   | 57    | 87    |
| >EGFR-K713FILKETEFLKKIK | 549   | >EGFR-K713FILKETEFFFKIK | 233   | 316   |
| >EGFR-K713FILKETEFLK    | 431   | >EGFR-K713FILKETEFFF    | 24538 | 24107 |
| >EGFR-K713FILKETEFLKK   | 502   | >EGFR-K713FILKETEFFFK   | 62    | 440   |
| >EGFR-K713FILKETEFLK    | 97    | >EGFR-K713FILKETEFFF    | 10809 | 10712 |
| >EGFR-K713FILKETEFLKK   | 235   | >EGFR-K713FILKETEFFFK   | 22    | 213   |
| >EGFR-K713FILKETEFLKKIK | 224   | >EGFR-K713FILKETEFFFKIK | 86    | 138   |
| >EGFR-K713FILKETEFLKK   | 528   | >EGFR-K713FILKETEFFFK   | 55    | 473   |
| >EGFR-K713FILKETEFLKK   | 3236  | >EGFR-K713FILKETEFFFK   | 193   | 3043  |
| >EGFR-K713FILKETEFLK    | 352   | >EGFR-K713FILKETEFFF    | 20510 | 20158 |
| >EGFR-K713FILKETEFLKK   | 708   | >EGFR-K713FILKETEFFFK   | 101   | 607   |
| >EGFR-K713FILKETEFLK    | 19009 | >EGFR-K713FILKETEFFF    | 154   | 18855 |
| >EGFR-K713FILKETEFLK    | 6618  | >EGFR-K713FILKETEFFF    | 47    | 6571  |
| >EGFR-K713FILKETEFLKKI  | 6677  | >EGFR-K713FILKETEFFFKI  | 438   | 6239  |
| >EGFR-K713FILKETEFLK    | 15804 | >EGFR-K713FILKETEFFF    | 436   | 15368 |
| >EGFR-K713FILKETEFLKKI  | 1067  | >EGFR-K713FILKETEFFFKI  | 43    | 1024  |
| >EGFR-K713FILKETEFLKKI  | 1156  | >EGFR-K713FILKETEFFFKI  | 148   | 1008  |
| >EGFR-K713FILKETEFLKKI  | 3306  | >EGFR-K713FILKETEFFFKI  | 353   | 2953  |
| >EGFR-K713FILKETEFLK    | 83    | >EGFR-K713FILKETEFFF    | 17803 | 17720 |
| >EGFR-K713FILKETEFLKK   | 111   | >EGFR-K713FILKETEFFFK   | 28    | 83    |
| >EGFR-K713FILKETEFLK    | 23    | >EGFR-K713FILKETEFFF    | 18080 | 18057 |
| >EGFR-K713FILKETEFLKK   | 58    | >EGFR-K713FILKETEFFFK   | 17    | 41    |
| >EGFR-K713FILKETEFLK    | 11949 | >EGFR-K713FILKETEFFF    | 56    | 11893 |
| >EGFR-K713FILKETEFLK    | 37    | >EGFR-K713FILKETEFFF    | 7657  | 7620  |
| >EGFR-K713FILKETEFLKK   | 71    | >EGFR-K713FILKETEFFFK   | 15    | 56    |
| >EGFR-K713FILKETEFLKK   | 503   | >EGFR-K713FILKETEFFFK   | 83    | 420   |
| >EGFR-K713FILKETEFLK    | 6980  | >EGFR-K713FILKETEFFF    | 53    | 6927  |
| >EGFR-K713FILKETEFLKKI  | 128   | >EGFR-K713FILKETEFFFKI  | 49    | 79    |
| >EGFR-K713FILKETEFLK    | 11024 | >EGFR-K713FILKETEFFF    | 102   | 10922 |
| >EGFR-K713FILKETEFLK    | 19835 | >EGFR-K713FILKETEFFF    | 200   | 19635 |
| >EGFR-K713FILKETEFLKK   | 2214  | >EGFR-K713FILKETEFFFK   | 423   | 1791  |
| >EGFR-K713FILKETEFLK    | 64    | >EGFR-K713FILKETEFFF    | 13148 | 13084 |
| >EGFR-K713FILKETEFLKK   | 149   | >EGFR-K713FILKETEFFFK   | 83    | 66    |
| >EGFR-K713FILKETEFLKKI  | 669   | >EGFR-K713FILKETEFFFKI  | 466   | 203   |
| >EGFR-K713FLRILKETEFLK  | 7496  | >EGFR-K713FLRILKETEFFF  | 156   | 7340  |
| >EGFR-K713FLRILKETEFLK  | 302   | >EGFR-K713FLRILKETEFFF  | 135   | 167   |
| >EGFR-K713FLRILKETEFLKK | 185   | >EGFR-K713FLRILKETEFFFK | 223   | 38    |
| >EGFR-K728FKGLWIPEGEK   | 229   | >EGFR-K728FKGLWIPEGEK   | 240   | 11    |
| >EGFR-K728FKGLWIPEGEK   | 499   | >EGFR-K728FKGLWIPEGEK   | 1231  | 732   |
| >EGFR-K728FYKGLWIPEGE   | 8696  | >EGFR-K728FYKGLWIPEGE   | 280   | 8416  |

|                       |      |                       |      |      |
|-----------------------|------|-----------------------|------|------|
| >EGFR-K728FLGSGAFGTVY | 5036 | >EGFR-K728FLGSGAFGTVY | 395  | 4641 |
| >EGFR-K728FLGSGAFGTVY | 931  | >EGFR-K728FLGSGAFGTVY | 235  | 696  |
| >EGFR-K728FLGSGAFGTVY | 2410 | >EGFR-K728FLGSGAFGTVY | 123  | 2287 |
| >EGFR-K728FVYKGLWIPE  | 2095 | >EGFR-K728FVYRGLWIPE  | 452  | 1643 |
| >EGFR-K728FVYKGLWIPEC | 1937 | >EGFR-K728FVYRGLWIPEC | 357  | 1580 |
| >EGFR-K728FTVYKGLWI   | 153  | >EGFR-K728FTVYRGLWI   | 164  | 11   |
| >EGFR-K728FTVYKGLWI   | 168  | >EGFR-K728FTVYRGLWI   | 161  | 7    |
| >EGFR-K728FTVYKGLWI   | 444  | >EGFR-K728FTVYRGLWI   | 368  | 76   |
| >EGFR-K728FTVYKGLWI   | 893  | >EGFR-K728FTVYRGLWI   | 459  | 434  |
| >EGFR-K728FTVYKGLWI   | 463  | >EGFR-K728FTVYRGLWI   | 479  | 16   |
| >EGFR-K728FTVYKGLWI   | 191  | >EGFR-K728FTVYRGLWI   | 223  | 32   |
| >EGFR-K728FTVYKGLWI   | 265  | >EGFR-K728FTVYRGLWI   | 255  | 10   |
| >EGFR-K728FGTVYKGLW   | 14   | >EGFR-K728FGTVYRGLW   | 14   | 0    |
| >EGFR-K728FGTVYKGLWI  | 24   | >EGFR-K728FGTVYRGLWI  | 31   | 7    |
| >EGFR-K728FGTVYKGLW   | 199  | >EGFR-K728FGTVYRGLW   | 152  | 47   |
| >EGFR-K728FGTVYKGLW   | 230  | >EGFR-K728FGTVYRGLW   | 178  | 52   |
| >EGFR-K728FGTVYKGLWI  | 118  | >EGFR-K728FGTVYRGLWI  | 69   | 49   |
| >EGFR-K728FGTVYKGLWI  | 166  | >EGFR-K728FGTVYRGLWI  | 77   | 89   |
| >EGFR-K728FGTVYKGL    | 354  | >EGFR-K728FGTVYRGL    | 152  | 202  |
| >EGFR-K728FGTVYKGLW   | 393  | >EGFR-K728FGTVYRGLW   | 312  | 81   |
| >EGFR-K728FGTVYKGLW   | 29   | >EGFR-K728FGTVYRGLW   | 17   | 12   |
| >EGFR-K728FAFGTVYKGL  | 152  | >EGFR-K728FAFGTVYRGL  | 244  | 92   |
| >EGFR-K728FAFGTVYKGLV | 249  | >EGFR-K728FAFGTVYRGLV | 275  | 26   |
| >EGFR-K728FAGFGTVYKGL | 372  | >EGFR-K728FAGFGTVYRGL | 278  | 94   |
| >EGFR-K728FAGFGTVYK   | 122  | >EGFR-K728FAGFGTVYR   | 2359 | 2237 |
| >EGFR-K728FAGFGTVYK   | 9    | >EGFR-K728FAGFGTVYR   | 70   | 61   |
| >EGFR-K728FAGFGTVYK   | 98   | >EGFR-K728FAGFGTVYR   | 6435 | 6337 |
| >EGFR-K728FAGFGTVYK   | 222  | >EGFR-K728FAGFGTVYR   | 13   | 209  |
| >EGFR-K728FAGFGTVYK   | 7304 | >EGFR-K728FAGFGTVYR   | 294  | 7010 |
| >EGFR-K728FAGFGTVYK   | 23   | >EGFR-K728FAGFGTVYR   | 10   | 13   |
| >EGFR-K728FAGFGTVYKGL | 158  | >EGFR-K728FAGFGTVYRGL | 207  | 49   |
| >EGFR-K728FAGFGTVYKGL | 38   | >EGFR-K728FAGFGTVYRGL | 38   | 0    |
| >EGFR-K728FAGFGTVYKGL | 456  | >EGFR-K728FAGFGTVYRGL | 531  | 75   |
| >EGFR-K728FAGFGTVYKGL | 46   | >EGFR-K728FAGFGTVYRGL | 44   | 2    |
| >EGFR-K728FAGFGTVYKGL | 34   | >EGFR-K728FAGFGTVYRGL | 29   | 5    |
| >EGFR-K728FAGFGTVYKGL | 279  | >EGFR-K728FAGFGTVYRGL | 266  | 13   |
| >EGFR-K728FAGFGTVYKGL | 603  | >EGFR-K728FAGFGTVYRGL | 488  | 115  |
| >EGFR-K728FAGFGTVYKGL | 33   | >EGFR-K728FAGFGTVYRGL | 29   | 4    |
| >EGFR-K728FAGFGTVYK   | 150  | >EGFR-K728FAGFGTVYR   | 216  | 66   |
| >EGFR-K728FAGFGTVYK   | 1799 | >EGFR-K728FAGFGTVYR   | 107  | 1692 |
| >EGFR-K728FSGAFGTVYK  | 49   | >EGFR-K728FSGAFGTVYR  | 1215 | 1166 |
| >EGFR-K728FSGAFGTVYK  | 3142 | >EGFR-K728FSGAFGTVYR  | 102  | 3040 |
| >EGFR-K728FSGAFGTVYK  | 178  | >EGFR-K728FSGAFGTVYR  | 55   | 123  |

|                         |      |                         |      |      |
|-------------------------|------|-------------------------|------|------|
| >EGFR-K728F SGAFGTVYK   | 342  | >EGFR-K728F SGAFGTVYR   | 586  | 244  |
| >EGFR-K728F SGAFGTVYK   | 1101 | >EGFR-K728F SGAFGTVYR   | 87   | 1014 |
| >EGFR-K728F GSGAFGTVYK  | 46   | >EGFR-K728F GSGAFGTVYF  | 715  | 669  |
| >EGFR-K728F GSGAFGTVYK  | 29   | >EGFR-K728F GSGAFGTVYF  | 268  | 239  |
| >EGFR-K728F GSGAFGTVYK  | 3035 | >EGFR-K728F GSGAFGTVYF  | 227  | 2808 |
| >EGFR-K728F GSGAFGTVYK  | 224  | >EGFR-K728F GSGAFGTVYF  | 74   | 150  |
| >EGFR-K728F GSGAFGTVYK  | 337  | >EGFR-K728F GSGAFGTVYF  | 561  | 224  |
| >EGFR-K728F GSGAFGTVYK  | 3744 | >EGFR-K728F GSGAFGTVYF  | 298  | 3446 |
| >EGFR-K745F KELREATSPK/ | 449  | >EGFR-K745F RELREATSPK/ | 348  | 101  |
| >EGFR-K745F KELREATSPK/ | 71   | >EGFR-K745F RELREATSPK/ | 55   | 16   |
| >EGFR-K745F KELREATSPK/ | 319  | >EGFR-K745F RELREATSPK/ | 137  | 182  |
| >EGFR-K745F AIKELREA    | 369  | >EGFR-K745F AIRELREA    | 786  | 417  |
| >EGFR-K745F AIKELREA    | 496  | >EGFR-K745F AIRELREA    | 70   | 426  |
| >EGFR-K745F PVAIKELR    | 386  | >EGFR-K745F PVAIRELR    | 253  | 133  |
| >EGFR-K745F IPVAIKEL    | 25   | >EGFR-K745F IPVAIREL    | 37   | 12   |
| >EGFR-K745F IPVAIKELR   | 150  | >EGFR-K745F IPVAIRELR   | 80   | 70   |
| >EGFR-K745F IPVAIKEL    | 151  | >EGFR-K745F IPVAIREL    | 38   | 113  |
| >EGFR-K745F IPVAIKEL    | 406  | >EGFR-K745F IPVAIREL    | 259  | 147  |
| >EGFR-K745F IPVAIKEL    | 340  | >EGFR-K745F IPVAIREL    | 468  | 128  |
| >EGFR-K745F IPVAIKELREA | 30   | >EGFR-K745F IPVAIRELREA | 29   | 1    |
| >EGFR-K745F IPVAIKEL    | 248  | >EGFR-K745F IPVAIREL    | 97   | 151  |
| >EGFR-K745F IPVAIKEL    | 498  | >EGFR-K745F IPVAIREL    | 372  | 126  |
| >EGFR-K745F IPVAIKELR   | 547  | >EGFR-K745F IPVAIRELR   | 479  | 68   |
| >EGFR-K745F KIPVAIKELR  | 78   | >EGFR-K745F KIPVAIRELR  | 33   | 45   |
| >EGFR-K745F KIPVAIKELR  | 68   | >EGFR-K745F KIPVAIRELR  | 53   | 15   |
| >EGFR-K745F KIPVAIKEL   | 331  | >EGFR-K745F KIPVAIREL   | 218  | 113  |
| >EGFR-K745F KIPVAIKELR  | 66   | >EGFR-K745F KIPVAIRELR  | 82   | 16   |
| >EGFR-K745F VKIPVAIKEL  | 87   | >EGFR-K745F VKIPVAIREL  | 130  | 43   |
| >EGFR-K745F KVKIPVAIK   | 124  | >EGFR-K745F KVKIPVAIR   | 2150 | 2026 |
| >EGFR-K745F KVKIPVAIK   | 183  | >EGFR-K745F KVKIPVAIR   | 2619 | 2436 |
| >EGFR-K745F KVKIPVAIK   | 4    | >EGFR-K745F KVKIPVAIR   | 26   | 22   |
| >EGFR-K745F KVKIPVAIKEL | 29   | >EGFR-K745F KVKIPVAIREL | 21   | 8    |
| >EGFR-K745F KVKIPVAIK   | 43   | >EGFR-K745F KVKIPVAIR   | 9    | 34   |
| >EGFR-K745F KVKIPVAIKEL | 148  | >EGFR-K745F KVKIPVAIREL | 228  | 80   |
| >EGFR-K745F KVKIPVAIK   | 5037 | >EGFR-K745F KVKIPVAIR   | 217  | 4820 |
| >EGFR-K754F KANKEILDEA' | 126  | >EGFR-K754F RANKEILDEA' | 244  | 118  |
| >EGFR-K754F KANKEILDEA' | 385  | >EGFR-K754F RANKEILDEA' | 284  | 101  |
| >EGFR-K754F KANKEILDEA' | 255  | >EGFR-K754F RANKEILDEA' | 115  | 140  |
| >EGFR-K754F KANKEILDEA' | 293  | >EGFR-K754F RANKEILDEA' | 197  | 96   |
| >EGFR-K754F KANKEILDEA' | 140  | >EGFR-K754F RANKEILDEA' | 48   | 92   |
| >EGFR-K754F KANKEILDEA' | 200  | >EGFR-K754F RANKEILDEA' | 116  | 84   |
| >EGFR-K754F KANKEILDEA' | 86   | >EGFR-K754F RANKEILDEA' | 119  | 33   |
| >EGFR-K754F KANKEILDEA' | 473  | >EGFR-K754F RANKEILDEA' | 312  | 161  |

|                         |       |                         |      |       |
|-------------------------|-------|-------------------------|------|-------|
| >EGFR-K754F SPKANKEI    | 133   | >EGFR-K754F SPRANKEI    | 1113 | 980   |
| >EGFR-K754F SPKANKEIL   | 187   | >EGFR-K754F SPRANKEIL   | 1679 | 1492  |
| >EGFR-K754F SPKANKEI    | 741   | >EGFR-K754F SPRANKEI    | 32   | 709   |
| >EGFR-K754F SPKANKEIL   | 193   | >EGFR-K754F SPRANKEIL   | 17   | 176   |
| >EGFR-K754F TSPKANKEI   | 54    | >EGFR-K754F TSPRANKEI   | 125  | 71    |
| >EGFR-K754F TSPKANKEIL  | 9     | >EGFR-K754F TSPRANKEIL  | 15   | 6     |
| >EGFR-K754F TSPKANKEI   | 159   | >EGFR-K754F TSPRANKEI   | 160  | 1     |
| >EGFR-K754F ATSPKANK    | 145   | >EGFR-K754F ATSPRANK    | 83   | 62    |
| >EGFR-K754F ATSPKANK    | 29    | >EGFR-K754F ATSPRANK    | 20   | 9     |
| >EGFR-K754F ATSPKANK    | 36    | >EGFR-K754F ATSPRANK    | 16   | 20    |
| >EGFR-K754F ATSPKANK    | 389   | >EGFR-K754F ATSPRANK    | 249  | 140   |
| >EGFR-K754F ATSPKANK    | 445   | >EGFR-K754F ATSPRANK    | 229  | 216   |
| >EGFR-K754F ATSPKANKEI  | 35    | >EGFR-K754F ATSPRANKEI  | 46   | 11    |
| >EGFR-K754F ATSPKANKEIL | 55    | >EGFR-K754F ATSPRANKEIL | 63   | 8     |
| >EGFR-K754F ATSPKANKEI  | 468   | >EGFR-K754F ATSPRANKEI  | 367  | 101   |
| >EGFR-K754F ATSPKANKEIL | 347   | >EGFR-K754F ATSPRANKEI  | 249  | 98    |
| >EGFR-K754F ATSPKANKEI  | 295   | >EGFR-K754F ATSPRANKEI  | 204  | 91    |
| >EGFR-K754F ATSPKANK    | 121   | >EGFR-K754F ATSPRANK    | 127  | 6     |
| >EGFR-K754F ATSPKANKEIL | 716   | >EGFR-K754F ATSPRANKEIL | 431  | 285   |
| >EGFR-K754F EATSPKANK   | 18    | >EGFR-K754F EATSPRANK   | 11   | 7     |
| >EGFR-K754F EATSPKANKE  | 158   | >EGFR-K754F EATSPRANKE  | 98   | 60    |
| >EGFR-K754F REATSPKA    | 39    | >EGFR-K754F REATSPRA    | 36   | 3     |
| >EGFR-K754F ELREATSPKA  | 122   | >EGFR-K754F ELREATSPRA  | 70   | 52    |
| >EGFR-K754F ELREATSPK   | 226   | >EGFR-K754F ELREATSPR   | 5142 | 4916  |
| >EGFR-K754F ELREATSPK   | 86    | >EGFR-K754F ELREATSPR   | 5078 | 4992  |
| >EGFR-K754F ELREATSPK   | 517   | >EGFR-K754F ELREATSPR   | 26   | 491   |
| >EGFR-K754F ELREATSPK   | 139   | >EGFR-K754F ELREATSPR   | 37   | 102   |
| >EGFR-K754F KELREATSPK/ | 449   | >EGFR-K754F KELREATSPR/ | 403  | 46    |
| >EGFR-K754F KELREATSPK/ | 71    | >EGFR-K754F KELREATSPR/ | 62   | 9     |
| >EGFR-K754F KELREATSPK/ | 319   | >EGFR-K754F KELREATSPR/ | 411  | 92    |
| >EGFR-K754F KELREATSPK  | 1380  | >EGFR-K754F KELREATSPR  | 54   | 1326  |
| >EGFR-K806/ KDNIGSQYLL  | 329   | >EGFR-K806/ ADNIGSQYLL  | 185  | 144   |
| >EGFR-K806/ HKDNIGSQY   | 8840  | >EGFR-K806/ HADNIGSQY   | 95   | 8745  |
| >EGFR-K806/ HKDNIGSQY   | 1183  | >EGFR-K806/ HADNIGSQY   | 374  | 809   |
| >EGFR-K806/ HKDNIGSQYL  | 15641 | >EGFR-K806/ HADNIGSQYL  | 458  | 15183 |
| >EGFR-K806/ HKDNIGSQY   | 198   | >EGFR-K806/ HADNIGSQY   | 4191 | 3993  |
| >EGFR-K806/ HKDNIGSQY   | 16930 | >EGFR-K806/ HADNIGSQY   | 134  | 16796 |
| >EGFR-K806/ HKDNIGSQYL  | 22750 | >EGFR-K806/ HADNIGSQYL  | 471  | 22279 |
| >EGFR-K806/ HKDNIGSQY   | 5881  | >EGFR-K806/ HADNIGSQY   | 63   | 5818  |
| >EGFR-K806/ HKDNIGSQYL  | 372   | >EGFR-K806/ HADNIGSQYL  | 3353 | 2981  |
| >EGFR-K806/ HKDNIGSQYL  | 71    | >EGFR-K806/ HADNIGSQYL  | 660  | 589   |
| >EGFR-K806/ HKDNIGSQY   | 125   | >EGFR-K806/ HADNIGSQY   | 19   | 106   |
| >EGFR-K806/ HKDNIGSQY   | 2961  | >EGFR-K806/ HADNIGSQY   | 385  | 2576  |

|                        |       |                        |       |       |
|------------------------|-------|------------------------|-------|-------|
| >EGFR-K806/HKDNIGSQY   | 1019  | >EGFR-K806/HADNIGSQY   | 439   | 580   |
| >EGFR-K806/EHKDNIGSQY  | 731   | >EGFR-K806/EHADNIGSQY  | 184   | 547   |
| >EGFR-K806/EHKDNIGSQY  | 8747  | >EGFR-K806/EHADNIGSQY  | 258   | 8489  |
| >EGFR-K806/REHKDNIGSC  | 364   | >EGFR-K806/REHADNIGSC  | 250   | 114   |
| >EGFR-K806/REHKDNIGSC  | 104   | >EGFR-K806/REHADNIGSC  | 103   | 1     |
| >EGFR-K806/REHKDNIGSC  | 360   | >EGFR-K806/REHADNIGSC  | 313   | 47    |
| >EGFR-K806/REHKDNIGS   | 394   | >EGFR-K806/REHADNIGS   | 174   | 220   |
| >EGFR-K806/REHKDNIGSC  | 362   | >EGFR-K806/REHADNIGSC  | 605   | 243   |
| >EGFR-K806/YVREHKDNI   | 519   | >EGFR-K806/YVREHADNI   | 84    | 435   |
| >EGFR-K806/YVREHKDNI   | 2207  | >EGFR-K806/YVREHADNI   | 392   | 1815  |
| >EGFR-K806/LDYVREHKDN  | 101   | >EGFR-K806/LDYVREHADN  | 82    | 19    |
| >EGFR-K806/LDYVREHKDN  | 286   | >EGFR-K806/LDYVREHADN  | 175   | 111   |
| >EGFR-K806/LDYVREHKDN  | 387   | >EGFR-K806/LDYVREHADN  | 378   | 9     |
| >EGFR-K806/LDYVREHKDN  | 62    | >EGFR-K806/LDYVREHADN  | 37    | 25    |
| >EGFR-K806/LLDYVREHK   | 18127 | >EGFR-K806/LLDYVREHA   | 369   | 17758 |
| >EGFR-K806/LLDYVREHK   | 18378 | >EGFR-K806/LLDYVREHA   | 315   | 18063 |
| >EGFR-K806/LLDYVREHK   | 18113 | >EGFR-K806/LLDYVREHA   | 295   | 17818 |
| >EGFR-K806/CLLDYVREHK  | 10484 | >EGFR-K806/CLLDYVREHA  | 401   | 10083 |
| >EGFR-K806/CLLDYVREHK  | 11054 | >EGFR-K806/CLLDYVREHA  | 215   | 10839 |
| >EGFR-K806/CLLDYVREHK  | 3891  | >EGFR-K806/CLLDYVREHA  | 46    | 3845  |
| >EGFR-K806/CLLDYVREHK  | 14923 | >EGFR-K806/CLLDYVREHA  | 319   | 14604 |
| >EGFR-K806/CLLDYVREHK  | 15996 | >EGFR-K806/CLLDYVREHA  | 306   | 15690 |
| >EGFR-K806/CLLDYVREHK  | 15285 | >EGFR-K806/CLLDYVREHA  | 238   | 15047 |
| >EGFR-K806/CLLDYVREHK  | 4944  | >EGFR-K806/CLLDYVREHA  | 45    | 4899  |
| >EGFR-K806/CLLDYVREHK  | 74    | >EGFR-K806/CLLDYVREHA  | 22188 | 22114 |
| >EGFR-K806/CLLDYVREHK  | 144   | >EGFR-K806/CLLDYVREHA  | 34412 | 34268 |
| >EGFR-K806EKDNIGSQYLL  | 329   | >EGFR-K806EKDNIGSQYLL  | 520   | 191   |
| >EGFR-K806EHKDNIGSQYL  | 12403 | >EGFR-K806EHKDNIGSQYL  | 477   | 11926 |
| >EGFR-K806EHKDNIGSQYL  | 13206 | >EGFR-K806EHKDNIGSQYL  | 360   | 12846 |
| >EGFR-K806EHKDNIGSQY   | 198   | >EGFR-K806EHKDNIGSQY   | 4595  | 4397  |
| >EGFR-K806EHKDNIGSQY   | 12642 | >EGFR-K806EHKDNIGSQY   | 186   | 12456 |
| >EGFR-K806EHKDNIGSQYL  | 372   | >EGFR-K806EHKDNIGSQYL  | 1094  | 722   |
| >EGFR-K806EHKDNIGSQYL  | 71    | >EGFR-K806EHKDNIGSQYL  | 173   | 102   |
| >EGFR-K806EHKDNIGSQYL  | 9587  | >EGFR-K806EHKDNIGSQYL  | 10    | 9577  |
| >EGFR-K806EHKDNIGSQYL  | 25856 | >EGFR-K806EHKDNIGSQYL  | 376   | 25480 |
| >EGFR-K806EHKDNIGSQYL  | 22060 | >EGFR-K806EHKDNIGSQYL  | 65    | 21995 |
| >EGFR-K806EHKDNIGSQY   | 23738 | >EGFR-K806EHKDNIGSQY   | 371   | 23367 |
| >EGFR-K806EHKDNIGSQY   | 125   | >EGFR-K806EHKDNIGSQY   | 166   | 41    |
| >EGFR-K806EHKDNIGSQYL  | 18962 | >EGFR-K806EHKDNIGSQYL  | 431   | 18531 |
| >EGFR-K806EHKDNIGSQYL  | 16411 | >EGFR-K806EHKDNIGSQYL  | 90    | 16321 |
| >EGFR-K806E REHKDNIGSC | 364   | >EGFR-K806E REHKDNIGSC | 401   | 37    |
| >EGFR-K806E REHKDNIGSC | 104   | >EGFR-K806E REHKDNIGSC | 157   | 53    |
| >EGFR-K806E REHKDNIGSC | 773   | >EGFR-K806E REHKDNIGSC | 289   | 484   |

|                        |      |                        |       |       |
|------------------------|------|------------------------|-------|-------|
| >EGFR-K806E REHKDNIGSC | 360  | >EGFR-K806E REHEDNIGSC | 223   | 137   |
| >EGFR-K806E REHKDNIGS  | 394  | >EGFR-K806E REHEDNIGS  | 247   | 147   |
| >EGFR-K806E REHKDNIGSC | 362  | >EGFR-K806E REHEDNIGSC | 957   | 595   |
| >EGFR-K806E YVREHKDNI  | 519  | >EGFR-K806E YVREHEDNI  | 489   | 30    |
| >EGFR-K806E LDYVREHKDN | 101  | >EGFR-K806E LDYVREHEDN | 184   | 83    |
| >EGFR-K806E LDYVREHKDN | 286  | >EGFR-K806E LDYVREHEDN | 275   | 11    |
| >EGFR-K806E LDYVREHKDN | 387  | >EGFR-K806E LDYVREHEDN | 307   | 80    |
| >EGFR-K806E LDYVREHKDN | 62   | >EGFR-K806E LDYVREHEDN | 55    | 7     |
| >EGFR-K806E CLLDYVREHK | 74   | >EGFR-K806E CLLDYVREHE | 20802 | 20728 |
| >EGFR-K806E CLLDYVREHK | 144  | >EGFR-K806E CLLDYVREHE | 33449 | 33305 |
| >EGFR-K846F KTPQHVKITD | 1001 | >EGFR-K846F RTPQHVKITD | 194   | 807   |
| >EGFR-K846F KTPQHVKITD | 461  | >EGFR-K846F RTPQHVKITD | 372   | 89    |
| >EGFR-K846F KTPQHVKI   | 23   | >EGFR-K846F RTPQHVKI   | 30    | 7     |
| >EGFR-K846F KTPQHVKITD | 41   | >EGFR-K846F RTPQHVKITD | 45    | 4     |
| >EGFR-K846F KTPQHVKITD | 693  | >EGFR-K846F RTPQHVKITD | 432   | 261   |
| >EGFR-K846F KTPQHVKI   | 299  | >EGFR-K846F RTPQHVKI   | 116   | 183   |
| >EGFR-K846F KTPQHVKITD | 44   | >EGFR-K846F RTPQHVKITD | 16    | 28    |
| >EGFR-K846F KTPQHVKI   | 33   | >EGFR-K846F RTPQHVKI   | 38    | 5     |
| >EGFR-K846F KTPQHVKIT  | 77   | >EGFR-K846F RTPQHVKIT  | 55    | 22    |
| >EGFR-K846F KTPQHVKITD | 7    | >EGFR-K846F RTPQHVKITD | 6     | 1     |
| >EGFR-K846F KTPQHVKI   | 51   | >EGFR-K846F RTPQHVKI   | 28    | 23    |
| >EGFR-K846F VKTPQHVKI  | 395  | >EGFR-K846F VRTPQHVKI  | 1214  | 819   |
| >EGFR-K846F RDLAARNVL  | 377  | >EGFR-K846F RDLAARNVL  | 9593  | 9216  |
| >EGFR-K846F RDLAARNVL  | 3721 | >EGFR-K846F RDLAARNVL  | 227   | 3494  |
| >EGFR-K846F LVKTPQHV   | 262  | >EGFR-K846F LVRTPQHV   | 569   | 307   |
| >EGFR-K846F LVKTPQHV   | 42   | >EGFR-K846F LVRTPQHV   | 32    | 10    |
| >EGFR-K846F LVKTPQHVK  | 322  | >EGFR-K846F LVRTPQHVK  | 132   | 190   |
| >EGFR-K846F LVKTPQHVK  | 207  | >EGFR-K846F LVRTPQHVK  | 658   | 451   |
| >EGFR-K846F LVKTPQHV   | 173  | >EGFR-K846F LVRTPQHV   | 27    | 146   |
| >EGFR-K846F LVKTPQHVK  | 15   | >EGFR-K846F LVRTPQHVK  | 6     | 9     |
| >EGFR-K846F LVKTPQHVKI | 126  | >EGFR-K846F LVRTPQHVKI | 25    | 101   |
| >EGFR-K846F LVKTPQHVK  | 399  | >EGFR-K846F LVRTPQHVK  | 827   | 428   |
| >EGFR-K846F LVKTPQHVK  | 357  | >EGFR-K846F LVRTPQHVK  | 1059  | 702   |
| >EGFR-K846F VLVKTPQHV  | 476  | >EGFR-K846F VLVRTQHV   | 803   | 327   |
| >EGFR-K846F VLVKTPQHV  | 215  | >EGFR-K846F VLVRTQHV   | 347   | 132   |
| >EGFR-K846F VLVKTPQHV  | 22   | >EGFR-K846F VLVRTQHV   | 22    | 0     |
| >EGFR-K846F VLVKTPQHVK | 269  | >EGFR-K846F VLVRTQHVK  | 281   | 12    |
| >EGFR-K846F VLVKTPQHV  | 248  | >EGFR-K846F VLVRTQHV   | 314   | 66    |
| >EGFR-K846F VLVKTPQHV  | 3    | >EGFR-K846F VLVRTQHV   | 3     | 0     |
| >EGFR-K846F VLVKTPQHVK | 25   | >EGFR-K846F VLVRTQHVK  | 20    | 5     |
| >EGFR-K846F VLVKTPQHV  | 6    | >EGFR-K846F VLVRTQHV   | 6     | 0     |
| >EGFR-K846F VLVKTPQHVK | 241  | >EGFR-K846F VLVRTQHVK  | 186   | 55    |
| >EGFR-K846F VLVKTPQHV  | 7    | >EGFR-K846F VLVRTQHV   | 7     | 0     |

|                        |       |                         |      |       |
|------------------------|-------|-------------------------|------|-------|
| >EGFR-K846F VLVKTPQHVK | 97    | >EGFR-K846F VLV RTPQHVK | 147  | 50    |
| >EGFR-K846F VLVKTPQHV  | 30    | >EGFR-K846F VLV RTPQH V | 24   | 6     |
| >EGFR-K846F VLVKTPQHV  | 3     | >EGFR-K846F VLV RTPQH V | 3    | 0     |
| >EGFR-K846F VLVKTPQHVK | 26    | >EGFR-K846F VLV RTPQHVK | 15   | 11    |
| >EGFR-K846F VLVKTPQHVK | 415   | >EGFR-K846F VLV RTPQHVK | 312  | 103   |
| >EGFR-K846F NVLVKTPQH\ | 424   | >EGFR-K846F NVLV RTPQH\ | 465  | 41    |
| >EGFR-K846F NVLVKTPQH\ | 178   | >EGFR-K846F NVLV RTPQH\ | 201  | 23    |
| >EGFR-K846F NVLVKTPQH\ | 179   | >EGFR-K846F NVLV RTPQH\ | 301  | 122   |
| >EGFR-K846F NVLVKTPQH\ | 269   | >EGFR-K846F NVLV RTPQH\ | 206  | 63    |
| >EGFR-K846F NVLVKTPQH\ | 225   | >EGFR-K846F NVLV RTPQH\ | 163  | 62    |
| >EGFR-K846F NVLVKTPQH\ | 318   | >EGFR-K846F NVLV RTPQH\ | 231  | 87    |
| >EGFR-K846F NVLVKTPQH\ | 29    | >EGFR-K846F NVLV RTPQH\ | 29   | 0     |
| >EGFR-K846F ARNVLVKTPC | 531   | >EGFR-K846F ARNVLV RTPC | 369  | 162   |
| >EGFR-K846F AARNVLVK   | 338   | >EGFR-K846F AARNVLVR    | 6765 | 6427  |
| >EGFR-K846F AARNVLVK   | 5     | >EGFR-K846F AARNVLVR    | 86   | 81    |
| >EGFR-K846F AARNVLVKTf | 404   | >EGFR-K846F AARNVLVRTf  | 171  | 233   |
| >EGFR-K846F AARNVLVK   | 2329  | >EGFR-K846F AARNVLVR    | 102  | 2227  |
| >EGFR-K846F LAARNVLVK  | 458   | >EGFR-K846F LAARNVLVR   | 8227 | 7769  |
| >EGFR-K846F LAARNVLVK  | 230   | >EGFR-K846F LAARNVLVR   | 6037 | 5807  |
| >EGFR-K846F LAARNVLVK  | 398   | >EGFR-K846F LAARNVLVR   | 9500 | 9102  |
| >EGFR-K846F LAARNVLVK  | 267   | >EGFR-K846F LAARNVLVR   | 86   | 181   |
| >EGFR-K846F DLAARNVLVK | 382   | >EGFR-K846F DLAARNVLVf  | 4294 | 3912  |
| >EGFR-K846F DLAARNVLVK | 745   | >EGFR-K846F DLAARNVLVf  | 243  | 502   |
| >EGFR-K846F DLAARNVLVK | 10875 | >EGFR-K846F DLAARNVLVf  | 487  | 10388 |
| >EGFR-K852↑KITDFGLAKL  | 91    | >EGFR-K852↑NITDFGLAKL   | 210  | 119   |
| >EGFR-K852↑KITDFGLAKLL | 228   | >EGFR-K852↑NITDFGLAKLI  | 507  | 279   |
| >EGFR-K852↑KITDFGLA    | 348   | >EGFR-K852↑NITDFGLA     | 861  | 513   |
| >EGFR-K852↑KITDFGLAKL  | 81    | >EGFR-K852↑NITDFGLAKL   | 135  | 54    |
| >EGFR-K852↑KITDFGLA    | 117   | >EGFR-K852↑NITDFGLA     | 926  | 809   |
| >EGFR-K852↑KITDFGLAKL  | 432   | >EGFR-K852↑NITDFGLAKL   | 1245 | 813   |
| >EGFR-K852↑KITDFGLAKLL | 462   | >EGFR-K852↑NITDFGLAKLI  | 2267 | 1805  |
| >EGFR-K852↑KITDFGLAKL  | 188   | >EGFR-K852↑NITDFGLAKL   | 1619 | 1431  |
| >EGFR-K852↑KITDFGLAKL  | 478   | >EGFR-K852↑NITDFGLAKL   | 4308 | 3830  |
| >EGFR-K852↑KITDFGLAKL  | 29    | >EGFR-K852↑NITDFGLAKL   | 184  | 155   |
| >EGFR-K852↑KITDFGLAKLL | 183   | >EGFR-K852↑NITDFGLAKLI  | 1225 | 1042  |
| >EGFR-K852↑KITDFGLAK   | 102   | >EGFR-K852↑NITDFGLAK    | 2378 | 2276  |
| >EGFR-K852↑KITDFGLAK   | 17    | >EGFR-K852↑NITDFGLAK    | 89   | 72    |
| >EGFR-K852↑KITDFGLAK   | 22    | >EGFR-K852↑NITDFGLAK    | 6915 | 6893  |
| >EGFR-K852↑KITDFGLAK   | 3531  | >EGFR-K852↑NITDFGLAK    | 143  | 3388  |
| >EGFR-K852↑KITDFGLA    | 10194 | >EGFR-K852↑NITDFGLA     | 415  | 9779  |
| >EGFR-K852↑KITDFGLAKL  | 7086  | >EGFR-K852↑NITDFGLAKL   | 386  | 6700  |
| >EGFR-K852↑KITDFGLAK   | 98    | >EGFR-K852↑NITDFGLAK    | 1691 | 1593  |
| >EGFR-K852↑VKITDFGL    | 279   | >EGFR-K852↑VNITDFGL     | 6431 | 6152  |



|                         |      |                        |       |       |
|-------------------------|------|------------------------|-------|-------|
| >EGFR-K852I VKITDFGLAK  | 252  | >EGFR-K852I VNITDFGLAK | 7393  | 7141  |
| >EGFR-K852I VKITDFGLAKI | 295  | >EGFR-K852I VNITDFGLAK | 6212  | 5917  |
| >EGFR-K852I NVLVKTPQH   | 225  | >EGFR-K852I NVLVKTPQH  | 27130 | 26905 |
| >EGFR-K852I NVLVKTPQH   | 318  | >EGFR-K852I NVLVKTPQH  | 21764 | 21446 |
| >EGFR-K852I HVKITDFGLA  | 520  | >EGFR-K852I HVNITDFGLA | 214   | 306   |
| >EGFR-K852I HVKITDFGLA  | 276  | >EGFR-K852I HVNITDFGLA | 47    | 229   |
| >EGFR-K852I HVKITDFG    | 229  | >EGFR-K852I HVNITDFG   | 3860  | 3631  |
| >EGFR-K852I HVKITDFGL   | 168  | >EGFR-K852I HVNITDFGL  | 3890  | 3722  |
| >EGFR-K852I HVKITDFGLA  | 33   | >EGFR-K852I HVNITDFGLA | 957   | 924   |
| >EGFR-K852I HVKITDFGLA  | 4    | >EGFR-K852I HVNITDFGLA | 15    | 11    |
| >EGFR-K852I HVKITDFGLA  | 201  | >EGFR-K852I HVNITDFGLA | 287   | 86    |
| >EGFR-K852I HVKITDFGLA  | 130  | >EGFR-K852I HVNITDFGLA | 65    | 65    |
| >EGFR-K852I HVKITDFGL   | 1241 | >EGFR-K852I HVNITDFGL  | 113   | 1128  |
| >EGFR-K852I HVKITDFGL   | 328  | >EGFR-K852I HVNITDFGL  | 431   | 103   |
| >EGFR-K852I QHVKITDF    | 107  | >EGFR-K852I QHVNITDF   | 70    | 37    |
| >EGFR-K852I QHVKITDFGL  | 380  | >EGFR-K852I QHVNITDFGL | 379   | 1     |
| >EGFR-K852I PQHVKITDF   | 82   | >EGFR-K852I PQHVNITDF  | 23    | 59    |
| >EGFR-K852I TPQHVKITDF  | 80   | >EGFR-K852I TPQHVNITDF | 45    | 35    |
| >EGFR-K852I TPQHVKITDF  | 125  | >EGFR-K852I TPQHVNITDF | 90    | 35    |
| >EGFR-K852I TPQHVKITDF  | 234  | >EGFR-K852I TPQHVNITDF | 91    | 143   |
| >EGFR-K852I KTPQHVKITD  | 1001 | >EGFR-K852I KTPQHVNITC | 467   | 534   |
| >EGFR-K852I KTPQHVKITD  | 461  | >EGFR-K852I KTPQHVNITC | 223   | 238   |
| >EGFR-K852I KTPQHVKI    | 23   | >EGFR-K852I KTPQHVNI   | 21    | 2     |
| >EGFR-K852I KTPQHVKITD  | 41   | >EGFR-K852I KTPQHVNITC | 33    | 8     |
| >EGFR-K852I KTPQHVKITD  | 693  | >EGFR-K852I KTPQHVNITC | 475   | 218   |
| >EGFR-K852I KTPQHVKI    | 299  | >EGFR-K852I KTPQHVNI   | 465   | 166   |
| >EGFR-K852I KTPQHVKITD  | 44   | >EGFR-K852I KTPQHVNITC | 76    | 32    |
| >EGFR-K852I KTPQHVKI    | 33   | >EGFR-K852I KTPQHVNI   | 111   | 78    |
| >EGFR-K852I KTPQHVKIT   | 77   | >EGFR-K852I KTPQHVNIT  | 20    | 57    |
| >EGFR-K852I KTPQHVKITD  | 1351 | >EGFR-K852I KTPQHVNITC | 395   | 956   |
| >EGFR-K852I KTPQHVKITD  | 7    | >EGFR-K852I KTPQHVNITC | 5     | 2     |
| >EGFR-K852I KTPQHVKI    | 51   | >EGFR-K852I KTPQHVNI   | 60    | 9     |
| >EGFR-K852I VKTPQHVKI   | 395  | >EGFR-K852I VKTPQHVNI  | 173   | 222   |
| >EGFR-K852I LVKTPQHVK   | 322  | >EGFR-K852I LVKTPQHVN  | 21237 | 20915 |
| >EGFR-K852I LVKTPQHVK   | 207  | >EGFR-K852I LVKTPQHVN  | 23238 | 23031 |
| >EGFR-K852I LVKTPQHVK   | 15   | >EGFR-K852I LVKTPQHVN  | 6766  | 6751  |
| >EGFR-K852I LVKTPQHVKI  | 126  | >EGFR-K852I LVKTPQHVNI | 68    | 58    |
| >EGFR-K852I LVKTPQHVK   | 399  | >EGFR-K852I LVKTPQHVN  | 14857 | 14458 |
| >EGFR-K852I LVKTPQHVK   | 357  | >EGFR-K852I LVKTPQHVN  | 24358 | 24001 |
| >EGFR-K852I VLVKTPQHVK  | 703  | >EGFR-K852I VLVKTPQHV  | 411   | 292   |
| >EGFR-K852I VLVKTPQHVK  | 269  | >EGFR-K852I VLVKTPQHV  | 146   | 123   |
| >EGFR-K852I VLVKTPQHVK  | 25   | >EGFR-K852I VLVKTPQHV  | 27    | 2     |
| >EGFR-K852I VLVKTPQHVK  | 241  | >EGFR-K852I VLVKTPQHV  | 145   | 96    |

|                          |       |                          |       |       |
|--------------------------|-------|--------------------------|-------|-------|
| >EGFR-K852I VLVKTPQHVI   | 97    | >EGFR-K852I VLVKTPQHVI   | 85    | 12    |
| >EGFR-K852I VLVKTPQHVI   | 26    | >EGFR-K852I VLVKTPQHVI   | 28    | 2     |
| >EGFR-K852I VLVKTPQHVI   | 415   | >EGFR-K852I VLVKTPQHVI   | 29123 | 28708 |
| >EGFR-K860E KLLGAE EK    | 169   | >EGFR-K860E ELLGAE EK    | 7817  | 7648  |
| >EGFR-K860E KLLGAE EK    | 322   | >EGFR-K860E ELLGAE EK    | 5764  | 5442  |
| >EGFR-K860E KLLGAE EKEY  | 10065 | >EGFR-K860E ELLGAE EKEY  | 247   | 9818  |
| >EGFR-K860E KLLGAE EK    | 12793 | >EGFR-K860E ELLGAE EK    | 270   | 12523 |
| >EGFR-K860E AKLLGAE EKE' | 23    | >EGFR-K860E AELLGAE EKE' | 1128  | 1105  |
| >EGFR-K860E AKLLGAE EKE' | 11008 | >EGFR-K860E AELLGAE EKE' | 121   | 10887 |
| >EGFR-K860E AKLLGAE EKE' | 13221 | >EGFR-K860E AELLGAE EKE' | 83    | 13138 |
| >EGFR-K860E AKLLGAE EK   | 29386 | >EGFR-K860E AELLGAE EK   | 405   | 28981 |
| >EGFR-K860E AKLLGAE EKE' | 28876 | >EGFR-K860E AELLGAE EKE' | 467   | 28409 |
| >EGFR-K860E HVKITDFGLA   | 276   | >EGFR-K860E HVKITDFGLA   | 25206 | 24930 |
| >EGFR-K860E HVKITDFGLA   | 4     | >EGFR-K860E HVKITDFGLA   | 1257  | 1253  |
| >EGFR-K860E HVKITDFGLA   | 201   | >EGFR-K860E HVKITDFGLA   | 11325 | 11124 |
| >EGFR-K860E HVKITDFGLA   | 130   | >EGFR-K860E HVKITDFGLA   | 16807 | 16677 |
| >EGFR-K860E LAKLLGAE EK  | 377   | >EGFR-K860E LAELLGAE EK  | 11317 | 10940 |
| >EGFR-K860E GLAKLLGA     | 216   | >EGFR-K860E GLAELLGA     | 44    | 172   |
| >EGFR-K860E GLAKLLGA     | 32    | >EGFR-K860E GLAELLGA     | 9     | 23    |
| >EGFR-K860E GLAKLLGA     | 13    | >EGFR-K860E GLAELLGA     | 6     | 7     |
| >EGFR-K860E GLAKLLGA     | 235   | >EGFR-K860E GLAELLGA     | 29    | 206   |
| >EGFR-K860E GLAKLLGA     | 151   | >EGFR-K860E GLAELLGA     | 18    | 133   |
| >EGFR-K860E GLAKLLGA     | 251   | >EGFR-K860E GLAELLGA     | 31    | 220   |
| >EGFR-K860E GLAKLLGA     | 44    | >EGFR-K860E GLAELLGA     | 14    | 30    |
| >EGFR-K860E GLAKLLGA     | 4181  | >EGFR-K860E GLAELLGA     | 429   | 3752  |
| >EGFR-K860E GLAKLLGA     | 31    | >EGFR-K860E GLAELLGA     | 7     | 24    |
| >EGFR-K860E GLAKLLGAE E  | 347   | >EGFR-K860E GLAELLGAE E  | 486   | 139   |
| >EGFR-K860E FGLAKLLGA    | 123   | >EGFR-K860E FGLAELLGA    | 57    | 66    |
| >EGFR-K860E TDFGLAKLL    | 145   | >EGFR-K860E TDFGLAELL    | 706   | 561   |
| >EGFR-K860E TDFGLAKL     | 624   | >EGFR-K860E TDFGLAEL     | 181   | 443   |
| >EGFR-K860E TDFGLAKLL    | 352   | >EGFR-K860E TDFGLAELL    | 348   | 4     |
| >EGFR-K860E TDFGLAKL     | 295   | >EGFR-K860E TDFGLAELL    | 93    | 202   |
| >EGFR-K860E ITDFGLAKL    | 1387  | >EGFR-K860E ITDFGLAEL    | 400   | 987   |
| >EGFR-K860E ITDFGLAKL    | 808   | >EGFR-K860E ITDFGLAEL    | 171   | 637   |
| >EGFR-K860E ITDFGLAKL    | 919   | >EGFR-K860E ITDFGLAEL    | 344   | 575   |
| >EGFR-K860E ITDFGLAK     | 290   | >EGFR-K860E ITDFGLAE     | 21184 | 20894 |
| >EGFR-K860E ITDFGLAK     | 33    | >EGFR-K860E ITDFGLAE     | 20813 | 20780 |
| >EGFR-K860E ITDFGLAKL    | 6     | >EGFR-K860E ITDFGLAEL    | 7     | 1     |
| >EGFR-K860E ITDFGLAKLL   | 15    | >EGFR-K860E ITDFGLAELL   | 30    | 15    |
| >EGFR-K860E ITDFGLAKLL   | 276   | >EGFR-K860E ITDFGLAELL   | 264   | 12    |
| >EGFR-K860E ITDFGLAKL    | 97    | >EGFR-K860E ITDFGLAEL    | 143   | 46    |
| >EGFR-K860E ITDFGLAK     | 474   | >EGFR-K860E ITDFGLAE     | 16657 | 16183 |
| >EGFR-K860E KITDFGLAKL   | 1756  | >EGFR-K860E KITDFGLAEL   | 477   | 1279  |

|                          |       |                          |       |       |
|--------------------------|-------|--------------------------|-------|-------|
| >EGFR-K860E KITDFGLAKLL  | 1619  | >EGFR-K860E KITDFGLAELL  | 417   | 1202  |
| >EGFR-K860E KITDFGLAKL   | 91    | >EGFR-K860E KITDFGLAEL   | 64    | 27    |
| >EGFR-K860E KITDFGLAKLL  | 228   | >EGFR-K860E KITDFGLAELL  | 38    | 190   |
| >EGFR-K860E KITDFGLAKL   | 81    | >EGFR-K860E KITDFGLAEL   | 49    | 32    |
| >EGFR-K860E KITDFGLAKL   | 432   | >EGFR-K860E KITDFGLAEL   | 177   | 255   |
| >EGFR-K860E KITDFGLAKLL  | 462   | >EGFR-K860E KITDFGLAELL  | 75    | 387   |
| >EGFR-K860E KITDFGLAKL   | 188   | >EGFR-K860E KITDFGLAEL   | 78    | 110   |
| >EGFR-K860E KITDFGLAKLL  | 810   | >EGFR-K860E KITDFGLAELL  | 304   | 506   |
| >EGFR-K860E KITDFGLAKL   | 1044  | >EGFR-K860E KITDFGLAEL   | 444   | 600   |
| >EGFR-K860E KITDFGLAKL   | 478   | >EGFR-K860E KITDFGLAEL   | 275   | 203   |
| >EGFR-K860E KITDFGLAKL   | 29    | >EGFR-K860E KITDFGLAEL   | 15    | 14    |
| >EGFR-K860E KITDFGLAKLL  | 183   | >EGFR-K860E KITDFGLAELL  | 70    | 113   |
| >EGFR-K860E KITDFGLAK    | 102   | >EGFR-K860E KITDFGLAE    | 17536 | 17434 |
| >EGFR-K860E KITDFGLAK    | 17    | >EGFR-K860E KITDFGLAE    | 16408 | 16391 |
| >EGFR-K860E KITDFGLAK    | 22    | >EGFR-K860E KITDFGLAE    | 10614 | 10592 |
| >EGFR-K860E KITDFGLAKLL  | 679   | >EGFR-K860E KITDFGLAELL  | 297   | 382   |
| >EGFR-K860E KITDFGLAK    | 98    | >EGFR-K860E KITDFGLAE    | 12343 | 12245 |
| >EGFR-K860E VKITDFGLAK   | 252   | >EGFR-K860E VKITDFGLAE   | 2352  | 2100  |
| >EGFR-K860E VKITDFGLAKI  | 295   | >EGFR-K860E VKITDFGLAEI  | 130   | 165   |
| >EGFR-K860I KLLGAE EK    | 169   | >EGFR-K860I ILLGAE EK    | 452   | 283   |
| >EGFR-K860I KLLGAE EK    | 322   | >EGFR-K860I ILLGAE EK    | 740   | 418   |
| >EGFR-K860I KLLGAE EKEY  | 1038  | >EGFR-K860I ILLGAE EKEY  | 352   | 686   |
| >EGFR-K860I AKLLGAE EK   | 17612 | >EGFR-K860I AILLGAE EK   | 125   | 17487 |
| >EGFR-K860I AKLLGAE EKE' | 23    | >EGFR-K860I AILLGAE EKEY | 2759  | 2736  |
| >EGFR-K860I AKLLGAE EKE' | 11060 | >EGFR-K860I AILLGAE EKEY | 365   | 10695 |
| >EGFR-K860I HVKITDFGLA   | 276   | >EGFR-K860I HVKITDFGLA   | 25865 | 25589 |
| >EGFR-K860I HVKITDFGLA   | 4     | >EGFR-K860I HVKITDFGLA   | 15    | 11    |
| >EGFR-K860I HVKITDFGLA   | 201   | >EGFR-K860I HVKITDFGLA   | 12876 | 12675 |
| >EGFR-K860I HVKITDFGLA   | 130   | >EGFR-K860I HVKITDFGLA   | 27914 | 27784 |
| >EGFR-K860I LAKLLGAE EK  | 2408  | >EGFR-K860I LAILLGAE EK  | 206   | 2202  |
| >EGFR-K860I LAKLLGAE EK  | 377   | >EGFR-K860I LAILLGAE EK  | 7326  | 6949  |
| >EGFR-K860I LAKLLGAE EK  | 1217  | >EGFR-K860I LAILLGAE EK  | 90    | 1127  |
| >EGFR-K860I GLAKLLGA     | 216   | >EGFR-K860I GLAILLGA     | 277   | 61    |
| >EGFR-K860I GLAKLLGA     | 32    | >EGFR-K860I GLAILLGA     | 35    | 3     |
| >EGFR-K860I GLAKLLGA     | 13    | >EGFR-K860I GLAILLGA     | 20    | 7     |
| >EGFR-K860I GLAKLLGA     | 235   | >EGFR-K860I GLAILLGA     | 470   | 235   |
| >EGFR-K860I GLAKLLGA     | 151   | >EGFR-K860I GLAILLGA     | 95    | 56    |
| >EGFR-K860I GLAKLLGA     | 251   | >EGFR-K860I GLAILLGA     | 421   | 170   |
| >EGFR-K860I GLAKLLGA     | 44    | >EGFR-K860I GLAILLGA     | 39    | 5     |
| >EGFR-K860I GLAKLLGA     | 31    | >EGFR-K860I GLAILLGA     | 22    | 9     |
| >EGFR-K860I GLAKLLGAEE   | 347   | >EGFR-K860I GLAILLGAEEK  | 689   | 342   |
| >EGFR-K860I FGLAKLLGA    | 123   | >EGFR-K860I FGLAILLGA    | 30    | 93    |
| >EGFR-K860I DFGLAKLLGA   | 969   | >EGFR-K860I DFGLAILLGA   | 314   | 655   |

|                         |       |                         |       |       |
|-------------------------|-------|-------------------------|-------|-------|
| >EGFR-K860I TDFGLAKLL   | 145   | >EGFR-K860I TDFGLAILL   | 1130  | 985   |
| >EGFR-K860I TDFGLAKLL   | 3517  | >EGFR-K860I TDFGLAILL   | 236   | 3281  |
| >EGFR-K860I TDFGLAKL    | 624   | >EGFR-K860I TDFGLAIL    | 255   | 369   |
| >EGFR-K860I TDFGLAKLL   | 352   | >EGFR-K860I TDFGLAILL   | 164   | 188   |
| >EGFR-K860I TDFGLAKLLG  | 657   | >EGFR-K860I TDFGLAILLG/ | 285   | 372   |
| >EGFR-K860I TDFGLAKLL   | 295   | >EGFR-K860I TDFGLAILL   | 208   | 87    |
| >EGFR-K860I ITDFGLAK    | 17248 | >EGFR-K860I ITDFGLAI    | 384   | 16864 |
| >EGFR-K860I ITDFGLAK    | 290   | >EGFR-K860I ITDFGLAI    | 21615 | 21325 |
| >EGFR-K860I ITDFGLAK    | 33    | >EGFR-K860I ITDFGLAI    | 21678 | 21645 |
| >EGFR-K860I ITDFGLAK    | 17271 | >EGFR-K860I ITDFGLAI    | 497   | 16774 |
| >EGFR-K860I ITDFGLAK    | 7108  | >EGFR-K860I ITDFGLAI    | 45    | 7063  |
| >EGFR-K860I ITDFGLAKL   | 6     | >EGFR-K860I ITDFGLAIL   | 13    | 7     |
| >EGFR-K860I ITDFGLAKLL  | 15    | >EGFR-K860I ITDFGLAILL  | 21    | 6     |
| >EGFR-K860I ITDFGLAKL   | 748   | >EGFR-K860I ITDFGLAIL   | 369   | 379   |
| >EGFR-K860I ITDFGLAKLL  | 276   | >EGFR-K860I ITDFGLAILL  | 108   | 168   |
| >EGFR-K860I ITDFGLAKL   | 97    | >EGFR-K860I ITDFGLAIL   | 45    | 52    |
| >EGFR-K860I ITDFGLAK    | 474   | >EGFR-K860I ITDFGLAI    | 11960 | 11486 |
| >EGFR-K860I ITDFGLAK    | 38536 | >EGFR-K860I ITDFGLAI    | 76    | 38460 |
| >EGFR-K860I ITDFGLAKLL  | 613   | >EGFR-K860I ITDFGLAILL  | 380   | 233   |
| >EGFR-K860I KITDFGLAK   | 22631 | >EGFR-K860I KITDFGLAI   | 321   | 22310 |
| >EGFR-K860I KITDFGLAKLL | 1619  | >EGFR-K860I KITDFGLAILL | 173   | 1446  |
| >EGFR-K860I KITDFGLAK   | 21625 | >EGFR-K860I KITDFGLAI   | 375   | 21250 |
| >EGFR-K860I KITDFGLAKL  | 91    | >EGFR-K860I KITDFGLAIL  | 114   | 23    |
| >EGFR-K860I KITDFGLAKLL | 228   | >EGFR-K860I KITDFGLAILL | 83    | 145   |
| >EGFR-K860I KITDFGLAK   | 20675 | >EGFR-K860I KITDFGLAI   | 294   | 20381 |
| >EGFR-K860I KITDFGLAKL  | 81    | >EGFR-K860I KITDFGLAIL  | 77    | 4     |
| >EGFR-K860I KITDFGLAK   | 12822 | >EGFR-K860I KITDFGLAI   | 28    | 12794 |
| >EGFR-K860I KITDFGLAKL  | 432   | >EGFR-K860I KITDFGLAIL  | 380   | 52    |
| >EGFR-K860I KITDFGLAKLL | 462   | >EGFR-K860I KITDFGLAILL | 51    | 411   |
| >EGFR-K860I KITDFGLAK   | 15573 | >EGFR-K860I KITDFGLAI   | 93    | 15480 |
| >EGFR-K860I KITDFGLAKL  | 188   | >EGFR-K860I KITDFGLAIL  | 503   | 315   |
| >EGFR-K860I KITDFGLAKLL | 810   | >EGFR-K860I KITDFGLAILL | 252   | 558   |
| >EGFR-K860I KITDFGLAKL  | 478   | >EGFR-K860I KITDFGLAIL  | 852   | 374   |
| >EGFR-K860I KITDFGLAKLL | 2225  | >EGFR-K860I KITDFGLAILL | 381   | 1844  |
| >EGFR-K860I KITDFGLAK   | 15818 | >EGFR-K860I KITDFGLAI   | 409   | 15409 |
| >EGFR-K860I KITDFGLAKL  | 29    | >EGFR-K860I KITDFGLAIL  | 56    | 27    |
| >EGFR-K860I KITDFGLAKLL | 183   | >EGFR-K860I KITDFGLAILL | 55    | 128   |
| >EGFR-K860I KITDFGLAK   | 102   | >EGFR-K860I KITDFGLAI   | 18514 | 18412 |
| >EGFR-K860I KITDFGLAK   | 17    | >EGFR-K860I KITDFGLAI   | 15785 | 15768 |
| >EGFR-K860I KITDFGLAK   | 22    | >EGFR-K860I KITDFGLAI   | 699   | 677   |
| >EGFR-K860I KITDFGLAK   | 6416  | >EGFR-K860I KITDFGLAI   | 36    | 6380  |
| >EGFR-K860I KITDFGLAKLL | 679   | >EGFR-K860I KITDFGLAILL | 357   | 322   |
| >EGFR-K860I KITDFGLAKLL | 1376  | >EGFR-K860I KITDFGLAILL | 411   | 965   |

|                         |       |                         |       |       |
|-------------------------|-------|-------------------------|-------|-------|
| >EGFR-K860I KITDFGLAK   | 98    | >EGFR-K860I KITDFGLAI   | 17446 | 17348 |
| >EGFR-K860I VKITDFGLAK  | 252   | >EGFR-K860I VKITDFGLAI  | 41    | 211   |
| >EGFR-K860I VKITDFGLAKI | 295   | >EGFR-K860I VKITDFGLAIL | 123   | 172   |
| >EGFR-K875F KVPIKWMAL   | 208   | >EGFR-K875F RVPIKWMAL   | 386   | 178   |
| >EGFR-K875F KVPIKWMAL   | 210   | >EGFR-K875F RVPIKWMAL   | 328   | 118   |
| >EGFR-K875F KVPIKWMAL   | 471   | >EGFR-K875F RVPIKWMAL   | 426   | 45    |
| >EGFR-K875F KVPIKWMAL   | 1971  | >EGFR-K875F RVPIKWMAL   | 442   | 1529  |
| >EGFR-K875F GKVPIKWM    | 10174 | >EGFR-K875F GRVPIKWM    | 233   | 9941  |
| >EGFR-K875F GKVPIKWMA   | 6603  | >EGFR-K875F GRVPIKWMA   | 81    | 6522  |
| >EGFR-K875F GKVPIKWMA   | 544   | >EGFR-K875F GRVPIKWMA   | 185   | 359   |
| >EGFR-K875F GKVPIKWMA   | 6150  | >EGFR-K875F GRVPIKWMA   | 140   | 6010  |
| >EGFR-K875F GGKVPKWK    | 2055  | >EGFR-K875F GGRVPIKW    | 457   | 1598  |
| >EGFR-K875F GGKVPKWK    | 475   | >EGFR-K875F GGRVPIKWM   | 132   | 343   |
| >EGFR-K875F AEGGKVPK    | 155   | >EGFR-K875F AEGGRVPI    | 202   | 47    |
| >EGFR-K875F AEGGKVPK    | 177   | >EGFR-K875F AEGGRVPI    | 125   | 52    |
| >EGFR-K875F AEGGKVPKVK  | 76    | >EGFR-K875F AEGGRVPIKV  | 86    | 10    |
| >EGFR-K875F AEGGKVPKVK  | 137   | >EGFR-K875F AEGGRVPIKV  | 154   | 17    |
| >EGFR-K875F AEGGKVPKVK  | 222   | >EGFR-K875F AEGGRVPIKV  | 228   | 6     |
| >EGFR-K875F AEGGKVPK    | 54    | >EGFR-K875F AEGGRVPI    | 46    | 8     |
| >EGFR-K875F AEGGKVPK    | 563   | >EGFR-K875F AEGGRVPIK   | 499   | 64    |
| >EGFR-K875F AEGGKVPKVK  | 278   | >EGFR-K875F AEGGRVPIKV  | 276   | 2     |
| >EGFR-K875F AEGGKVPK    | 110   | >EGFR-K875F AEGGRVPI    | 93    | 17    |
| >EGFR-K875F AEGGKVPKVK  | 277   | >EGFR-K875F AEGGRVPIKV  | 359   | 82    |
| >EGFR-K875F HAEGGKVPK   | 675   | >EGFR-K875F HAEGGRVPIK  | 196   | 479   |
| >EGFR-K875F HAEGGKVPK   | 2648  | >EGFR-K875F HAEGGRVPI   | 422   | 2226  |
| >EGFR-K875F HAEGGKVPK   | 176   | >EGFR-K875F HAEGGRVPIK  | 199   | 23    |
| >EGFR-K875F HAEGGKVPK   | 134   | >EGFR-K875F HAEGGRVPIK  | 169   | 35    |
| >EGFR-K875F HAEGGKVPK   | 165   | >EGFR-K875F HAEGGRVPIK  | 126   | 39    |
| >EGFR-K875F HAEGGKVPK   | 448   | >EGFR-K875F HAEGGRVPIK  | 349   | 99    |
| >EGFR-K875F HAEGGKVPK   | 476   | >EGFR-K875F HAEGGRVPIK  | 300   | 176   |
| >EGFR-K875F YHAEGGKVPK  | 486   | >EGFR-K875F YHAEGGRVPI  | 325   | 161   |
| >EGFR-K875F YHAEGGKVPK  | 306   | >EGFR-K875F YHAEGGRVPI  | 340   | 34    |
| >EGFR-K875F YHAEGGKVPK  | 22    | >EGFR-K875F YHAEGGRVPI  | 20    | 2     |
| >EGFR-K875F EYHAEGGKVP  | 173   | >EGFR-K875F EYHAEGGRVI  | 93    | 80    |
| >EGFR-K875F EYHAEGGKVP  | 270   | >EGFR-K875F EYHAEGGRVI  | 213   | 57    |
| >EGFR-K875F EYHAEGGK    | 6848  | >EGFR-K875F EYHAEGGR    | 288   | 6560  |
| >EGFR-K875F EYHAEGGK    | 758   | >EGFR-K875F EYHAEGGR    | 195   | 563   |
| >EGFR-K875F EYHAEGGK    | 1512  | >EGFR-K875F EYHAEGGR    | 61    | 1451  |
| >EGFR-K875F KEYHAEGGK\  | 130   | >EGFR-K875F KEYHAEGGR\  | 184   | 54    |
| >EGFR-K875F KEYHAEGGK\  | 65    | >EGFR-K875F KEYHAEGGR\  | 108   | 43    |
| >EGFR-K875F KEYHAEGGK   | 4175  | >EGFR-K875F KEYHAEGGR   | 175   | 4000  |
| >EGFR-L62R- LGNLEITYV   | 382   | >EGFR-L62R- RGNLEITYV   | 1765  | 1383  |
| >EGFR-L62R- LGNLEITY    | 835   | >EGFR-L62R- RGNLEITY    | 432   | 403   |

|                         |       |                         |       |       |
|-------------------------|-------|-------------------------|-------|-------|
| >EGFR-L62R- LGNLEITYVQI | 355   | >EGFR-L62R- RGNLEITYVQ  | 36    | 319   |
| >EGFR-L62R- LGNLEITY    | 2577  | >EGFR-L62R- RGNLEITY    | 294   | 2283  |
| >EGFR-L62R- LGNLEITY    | 176   | >EGFR-L62R- RGNLEITY    | 1131  | 955   |
| >EGFR-L62R- LGNLEITYVQI | 1127  | >EGFR-L62R- RGNLEITYVQ  | 123   | 1004  |
| >EGFR-L62R- VLGNLEITYV  | 13    | >EGFR-L62R- VRGNLEITYV  | 5648  | 5635  |
| >EGFR-L62R- VLGNLEITYV  | 23    | >EGFR-L62R- VRGNLEITYV  | 3432  | 3409  |
| >EGFR-L62R- VLGNLEITYV  | 17    | >EGFR-L62R- VRGNLEITYV  | 4903  | 4886  |
| >EGFR-L62R- VLGNLEITYV  | 122   | >EGFR-L62R- VRGNLEITYV  | 4170  | 4048  |
| >EGFR-L62R- VLGNLEITYV  | 2     | >EGFR-L62R- VRGNLEITYV  | 3163  | 3161  |
| >EGFR-L62R- VLGNLEITYV  | 4     | >EGFR-L62R- VRGNLEITYV  | 13877 | 13873 |
| >EGFR-L62R- VLGNLEITYV  | 5     | >EGFR-L62R- VRGNLEITYV  | 4859  | 4854  |
| >EGFR-L62R- VLGNLEITYV  | 3     | >EGFR-L62R- VRGNLEITYV  | 16986 | 16983 |
| >EGFR-L62R- VLGNLEIT    | 426   | >EGFR-L62R- VRGNLEIT    | 35850 | 35424 |
| >EGFR-L62R- VLGNLEITYV  | 2     | >EGFR-L62R- VRGNLEITYV  | 5767  | 5765  |
| >EGFR-L62R- VLGNLEITYV  | 293   | >EGFR-L62R- VRGNLEITYV  | 34953 | 34660 |
| >EGFR-L62R- VLGNLEITY   | 376   | >EGFR-L62R- VRGNLEITY   | 4530  | 4154  |
| >EGFR-L62R- VLGNLEITY   | 184   | >EGFR-L62R- VRGNLEITY   | 1375  | 1191  |
| >EGFR-L62R- VLGNLEITY   | 41    | >EGFR-L62R- VRGNLEITY   | 1963  | 1922  |
| >EGFR-L62R- QRMFNCEV    | 160   | >EGFR-L62R- QRMFNCEV    | 1253  | 1093  |
| >EGFR-L62R- QRMFNCEV    | 234   | >EGFR-L62R- QRMFNCEV    | 325   | 91    |
| >EGFR-L62R- QRMFNCEV    | 43    | >EGFR-L62R- QRMFNCEV    | 10396 | 10353 |
| >EGFR-L62R- QRMFNCEV    | 165   | >EGFR-L62R- QRMFNCEV    | 4380  | 4215  |
| >EGFR-L62R- QRMFNCEV    | 46    | >EGFR-L62R- QRMFNCEV    | 1765  | 1719  |
| >EGFR-L62R- QRMFNCEV    | 29882 | >EGFR-L62R- QRMFNCEV    | 225   | 29657 |
| >EGFR-L62R- VVLGNLEITY\ | 46    | >EGFR-L62R- VVRGNLEITY\ | 4271  | 4225  |
| >EGFR-L62R- VVLGNLEITY\ | 110   | >EGFR-L62R- VVRGNLEITY\ | 775   | 665   |
| >EGFR-L62R- VVLGNLEITY\ | 85    | >EGFR-L62R- VVRGNLEITY\ | 43    | 42    |
| >EGFR-L62R- VVLGNLEI    | 68    | >EGFR-L62R- VVRGNLEI    | 2398  | 2330  |
| >EGFR-L62R- VVLGNLEITY\ | 6     | >EGFR-L62R- VVRGNLEITY\ | 121   | 115   |
| >EGFR-L62R- VVLGNLEI    | 60    | >EGFR-L62R- VVRGNLEI    | 3151  | 3091  |
| >EGFR-L62R- VVLGNLEITY\ | 4     | >EGFR-L62R- VVRGNLEITY\ | 57    | 53    |
| >EGFR-L62R- VVLGNLEITY\ | 20    | >EGFR-L62R- VVRGNLEITY\ | 2110  | 2090  |
| >EGFR-L62R- VVLGNLEITY\ | 13    | >EGFR-L62R- VVRGNLEITY\ | 1052  | 1039  |
| >EGFR-L62R- VVLGNLEI    | 332   | >EGFR-L62R- VVRGNLEI    | 15557 | 15225 |
| >EGFR-L62R- VVLGNLEITY\ | 5     | >EGFR-L62R- VVRGNLEITY\ | 679   | 674   |
| >EGFR-L62R- VVLGNLEI    | 167   | >EGFR-L62R- VVRGNLEI    | 947   | 780   |
| >EGFR-L62R- VVLGNLEITY\ | 4     | >EGFR-L62R- VVRGNLEITY\ | 7     | 3     |
| >EGFR-L62R- VVLGNLEITY  | 80    | >EGFR-L62R- VVRGNLEITY  | 100   | 20    |
| >EGFR-L62R- VVLGNLEI    | 5209  | >EGFR-L62R- VVRGNLEI    | 108   | 5101  |
| >EGFR-L62R- VVLGNLEITY\ | 8219  | >EGFR-L62R- VVRGNLEITY\ | 352   | 7867  |
| >EGFR-L62R- VVLGNLEI    | 454   | >EGFR-L62R- VVRGNLEI    | 4810  | 4356  |
| >EGFR-L62R- VVLGNLEITY\ | 317   | >EGFR-L62R- VVRGNLEITY\ | 2061  | 1744  |
| >EGFR-L62R- VVLGNLEITY\ | 142   | >EGFR-L62R- VVRGNLEITY\ | 6345  | 6203  |

|                         |       |                        |       |       |
|-------------------------|-------|------------------------|-------|-------|
| >EGFR-L62R- VVLGNLEITY  | 261   | >EGFR-L62R- VVRGNLEITY | 1342  | 1081  |
| >EGFR-L62R- VVLGNLEITY  | 2208  | >EGFR-L62R- VVRGNLEITY | 389   | 1819  |
| >EGFR-L62R- VVLGNLEITY  | 126   | >EGFR-L62R- VVRGNLEITY | 62    | 64    |
| >EGFR-L62R- VVLGNLEITY  | 1053  | >EGFR-L62R- VVRGNLEITY | 362   | 691   |
| >EGFR-L62R- EVVLGNLEITY | 189   | >EGFR-L62R- EVVRGNLEIT | 285   | 96    |
| >EGFR-L62R- EVVLGNLEITY | 154   | >EGFR-L62R- EVVRGNLEIT | 47    | 107   |
| >EGFR-L62R- EVVLGNLEI   | 1003  | >EGFR-L62R- EVVRGNLEI  | 230   | 773   |
| >EGFR-L62R- EVVLGNLEIT  | 482   | >EGFR-L62R- EVVRGNLEIT | 160   | 322   |
| >EGFR-L62R- EVVLGNLEITY | 7     | >EGFR-L62R- EVVRGNLEIT | 5     | 2     |
| >EGFR-L62R- EVVLGNLEITY | 27    | >EGFR-L62R- EVVRGNLEIT | 16    | 11    |
| >EGFR-L62R- EVVLGNLEITY | 328   | >EGFR-L62R- EVVRGNLEIT | 538   | 210   |
| >EGFR-L62R- EVVLGNLEITY | 242   | >EGFR-L62R- EVVRGNLEIT | 206   | 36    |
| >EGFR-L62R- EVVLGNLEI   | 43    | >EGFR-L62R- EVVRGNLEI  | 43    | 0     |
| >EGFR-L62R- EVVLGNLEI   | 74    | >EGFR-L62R- EVVRGNLEI  | 51    | 23    |
| >EGFR-L62R- EVVLGNLEITY | 33    | >EGFR-L62R- EVVRGNLEIT | 37    | 4     |
| >EGFR-L62R- CEVVLGNLEI  | 276   | >EGFR-L62R- CEVVRGNLEI | 260   | 16    |
| >EGFR-L62R- CEVVLGNL    | 89    | >EGFR-L62R- CEVVRGNL   | 350   | 261   |
| >EGFR-L62R- CEVVLGNL    | 398   | >EGFR-L62R- CEVVRGNL   | 1007  | 609   |
| >EGFR-L62R- CEVVLGNLEI  | 493   | >EGFR-L62R- CEVVRGNLEI | 936   | 443   |
| >EGFR-L62R- CEVVLGNLEI  | 328   | >EGFR-L62R- CEVVRGNLEI | 1643  | 1315  |
| >EGFR-L62R- FNNCEVVL    | 31793 | >EGFR-L62R- FNNCEVVR   | 452   | 31341 |
| >EGFR-L62R- MFNNCEVVL   | 473   | >EGFR-L62R- MFNNCEVVR  | 7140  | 6667  |
| >EGFR-L62R- MFNNCEVVL   | 277   | >EGFR-L62R- MFNNCEVVR  | 9455  | 9178  |
| >EGFR-L62R- MFNNCEVVL   | 3909  | >EGFR-L62R- MFNNCEVVR  | 10    | 3899  |
| >EGFR-L62R- MFNNCEVVL   | 13815 | >EGFR-L62R- MFNNCEVVR  | 94    | 13721 |
| >EGFR-L62R- MFNNCEVVL   | 24874 | >EGFR-L62R- MFNNCEVVR  | 115   | 24759 |
| >EGFR-L62R- MFNNCEVVL   | 16730 | >EGFR-L62R- MFNNCEVVR  | 35    | 16695 |
| >EGFR-L62R- RMFNNCEVV   | 59    | >EGFR-L62R- RMFNNCEVV  | 4301  | 4242  |
| >EGFR-L62R- RMFNNCEVV   | 36    | >EGFR-L62R- RMFNNCEVV  | 6839  | 6803  |
| >EGFR-L62R- RMFNNCEVV   | 182   | >EGFR-L62R- RMFNNCEVV  | 9464  | 9282  |
| >EGFR-L62R- RMFNNCEVV   | 7     | >EGFR-L62R- RMFNNCEVV  | 4382  | 4375  |
| >EGFR-L62R- RMFNNCEVV   | 342   | >EGFR-L62R- RMFNNCEVV  | 227   | 115   |
| >EGFR-L62R- RMFNNCEVV   | 11    | >EGFR-L62R- RMFNNCEVV  | 14161 | 14150 |
| >EGFR-L62R- RMFNNCEVV   | 28    | >EGFR-L62R- RMFNNCEVV  | 16422 | 16394 |
| >EGFR-L62R- RMFNNCEVV   | 117   | >EGFR-L62R- RMFNNCEVV  | 23962 | 23845 |
| >EGFR-L62R- RMFNNCEVV   | 17    | >EGFR-L62R- RMFNNCEVV  | 12195 | 12178 |
| >EGFR-L62R- RMFNNCEVV   | 5860  | >EGFR-L62R- RMFNNCEVV  | 13    | 5847  |
| >EGFR-L62R- RMFNNCEVV   | 12    | >EGFR-L62R- RMFNNCEVV  | 284   | 272   |
| >EGFR-L62R- RMFNNCEVV   | 331   | >EGFR-L62R- RMFNNCEVV  | 293   | 38    |
| >EGFR-L62R- RMFNNCEVV   | 63    | >EGFR-L62R- RMFNNCEVV  | 3062  | 2999  |
| >EGFR-L62R- RMFNNCEVV   | 592   | >EGFR-L62R- RMFNNCEVV  | 443   | 149   |
| >EGFR-L62R- RMFNNCEVV   | 6     | >EGFR-L62R- RMFNNCEVV  | 27    | 21    |
| >EGFR-L62R- RMFNNCEVV   | 218   | >EGFR-L62R- RMFNNCEVV  | 16768 | 16550 |

|                         |       |                         |       |       |
|-------------------------|-------|-------------------------|-------|-------|
| >EGFR-L62R- RMFNNCEVV   | 91    | >EGFR-L62R- RMFNNCEVV   | 8126  | 8035  |
| >EGFR-L62R- RMFNNCEVV   | 23457 | >EGFR-L62R- RMFNNCEVV   | 143   | 23314 |
| >EGFR-L62R- RMFNNCEVV   | 7281  | >EGFR-L62R- RMFNNCEVV   | 27    | 7254  |
| >EGFR-L688F ELVEPLTPS   | 455   | >EGFR-L688F EPVEPLTPS   | 4740  | 4285  |
| >EGFR-L688F ELVEPLTPS   | 14824 | >EGFR-L688F EPVEPLTPS   | 154   | 14670 |
| >EGFR-L688F ELVEPLTPS   | 29000 | >EGFR-L688F EPVEPLTPS   | 343   | 28657 |
| >EGFR-L688F TLRRLQEREI  | 93    | >EGFR-L688F TLRRLQEREI  | 21130 | 21037 |
| >EGFR-L688F RELVEPLT    | 318   | >EGFR-L688F REPVEPLT    | 4440  | 4122  |
| >EGFR-L688F RELVEPLT    | 488   | >EGFR-L688F REPVEPLT    | 10935 | 10447 |
| >EGFR-L688F ERELVEPL    | 497   | >EGFR-L688F EREPVEPL    | 284   | 213   |
| >EGFR-L688F QERELVEPL   | 172   | >EGFR-L688F QEREPVEPL   | 5429  | 5257  |
| >EGFR-L688F QERELVEPL   | 34    | >EGFR-L688F QEREPVEPL   | 257   | 223   |
| >EGFR-L688F QERELVEPL   | 293   | >EGFR-L688F QEREPVEPL   | 298   | 5     |
| >EGFR-L688F QERELVEPL   | 26    | >EGFR-L688F QEREPVEPL   | 131   | 105   |
| >EGFR-L688F QERELVEPL   | 9     | >EGFR-L688F QEREPVEPL   | 17    | 8     |
| >EGFR-L688F LQERELVEPL  | 636   | >EGFR-L688F LQEREPVEPL  | 373   | 263   |
| >EGFR-L688F LLQERELV    | 53    | >EGFR-L688F LLQEREPV    | 42    | 11    |
| >EGFR-L688F LLQERELVEPI | 40    | >EGFR-L688F LLQEREPVEPI | 39    | 1     |
| >EGFR-L688F LLQERELV    | 33    | >EGFR-L688F LLQEREPV    | 41    | 8     |
| >EGFR-L688F LLQERELVEPI | 30    | >EGFR-L688F LLQEREPVEPI | 40    | 10    |
| >EGFR-L688F LLQERELV    | 46    | >EGFR-L688F LLQEREPV    | 27    | 19    |
| >EGFR-L688F LLQERELVEPI | 78    | >EGFR-L688F LLQEREPVEPI | 96    | 18    |
| >EGFR-L688F LLQERELV    | 153   | >EGFR-L688F LLQEREPV    | 70    | 83    |
| >EGFR-L688F LLQERELVEPI | 154   | >EGFR-L688F LLQEREPVEPI | 156   | 2     |
| >EGFR-L688F LLQERELV    | 7     | >EGFR-L688F LLQEREPV    | 5     | 2     |
| >EGFR-L688F LLQERELVEPI | 9     | >EGFR-L688F LLQEREPVEPI | 7     | 2     |
| >EGFR-L688F LLQERELV    | 21    | >EGFR-L688F LLQEREPV    | 10    | 11    |
| >EGFR-L688F LLQERELVEPI | 10    | >EGFR-L688F LLQEREPVEPI | 10    | 0     |
| >EGFR-L688F LLQERELV    | 25    | >EGFR-L688F LLQEREPV    | 21    | 4     |
| >EGFR-L688F LLQERELVEPI | 66    | >EGFR-L688F LLQEREPVEPI | 49    | 17    |
| >EGFR-L688F LLQERELV    | 59    | >EGFR-L688F LLQEREPV    | 37    | 22    |
| >EGFR-L688F LLQERELVEPI | 115   | >EGFR-L688F LLQEREPVEPI | 79    | 36    |
| >EGFR-L688F LLQERELV    | 2     | >EGFR-L688F LLQEREPV    | 2     | 0     |
| >EGFR-L688F LLQERELVEPI | 4     | >EGFR-L688F LLQEREPVEPI | 4     | 0     |
| >EGFR-L688F LLQERELVEPI | 436   | >EGFR-L688F LLQEREPVEPI | 764   | 328   |
| >EGFR-L688F LLQERELVEPI | 394   | >EGFR-L688F LLQEREPVEPI | 523   | 129   |
| >EGFR-L688F RLLQERELV   | 233   | >EGFR-L688F RLLQEREPV   | 156   | 77    |
| >EGFR-L688F RLLQERELV   | 112   | >EGFR-L688F RLLQEREPV   | 123   | 11    |
| >EGFR-L688F RLLQERELV   | 560   | >EGFR-L688F RLLQEREPV   | 256   | 304   |
| >EGFR-L688F RLLQERELV   | 141   | >EGFR-L688F RLLQEREPV   | 51    | 90    |
| >EGFR-L688F RLLQEREL    | 24    | >EGFR-L688F RLLQEREP    | 10503 | 10479 |
| >EGFR-L688F RLLQERELV   | 7     | >EGFR-L688F RLLQEREPV   | 5     | 2     |
| >EGFR-L688F RLLQEREL    | 452   | >EGFR-L688F RLLQEREP    | 20851 | 20399 |



|                         |      |                         |       |       |
|-------------------------|------|-------------------------|-------|-------|
| >EGFR-L688F RLLQERELV   | 189  | >EGFR-L688F RLLQEREPV   | 53    | 136   |
| >EGFR-L688F RLLQEREL    | 100  | >EGFR-L688F RLLQEREP    | 17665 | 17565 |
| >EGFR-L688F RLLQERELV   | 15   | >EGFR-L688F RLLQEREPV   | 11    | 4     |
| >EGFR-L688F RLLQERELV   | 102  | >EGFR-L688F RLLQEREPV   | 72    | 30    |
| >EGFR-L688F RLLQEREL    | 22   | >EGFR-L688F RLLQEREP    | 18602 | 18580 |
| >EGFR-L688F RLLQERELV   | 8    | >EGFR-L688F RLLQEREPV   | 6     | 2     |
| >EGFR-L688F RLLQEREL    | 430  | >EGFR-L688F RLLQEREP    | 13466 | 13036 |
| >EGFR-L688F RLLQERELV   | 2796 | >EGFR-L688F RLLQEREPV   | 459   | 2337  |
| >EGFR-L688F RRLQEREL    | 37   | >EGFR-L688F RRLQEREP    | 939   | 902   |
| >EGFR-L688F RRLQERELV   | 59   | >EGFR-L688F RRLQEREPV   | 98    | 39    |
| >EGFR-L688F RRLQEREL    | 39   | >EGFR-L688F RRLQEREP    | 1311  | 1272  |
| >EGFR-L688F RRLQERELV   | 91   | >EGFR-L688F RRLQEREPV   | 181   | 90    |
| >EGFR-L688F RRLQERELV   | 443  | >EGFR-L688F RRLQEREPV   | 854   | 411   |
| >EGFR-L688F RRLQEREL    | 26   | >EGFR-L688F RRLQEREP    | 4442  | 4416  |
| >EGFR-L688F RRLQERELV   | 138  | >EGFR-L688F RRLQEREPV   | 293   | 155   |
| >EGFR-L688F LRRLLQEREL  | 61   | >EGFR-L688F LRRLLQEREP  | 8641  | 8580  |
| >EGFR-L688F LRRLLQEREL  | 346  | >EGFR-L688F LRRLLQEREP  | 10780 | 10434 |
| >EGFR-L688F LRRLLQEREL  | 154  | >EGFR-L688F LRRLLQEREP  | 11173 | 11019 |
| >EGFR-L692F LTPSGEAP    | 456  | >EGFR-L692F PTPSGEAP    | 6876  | 6420  |
| >EGFR-L692F LTPSGEAPNC  | 326  | >EGFR-L692F PTPSGEAPNC  | 3789  | 3463  |
| >EGFR-L692F LTPSGEAPNC  | 333  | >EGFR-L692F PTPSGEAPNC  | 4997  | 4664  |
| >EGFR-L692F PLTPSGEA    | 247  | >EGFR-L692F PPTPSGEA    | 36099 | 35852 |
| >EGFR-L692F LLQERELVEPI | 40   | >EGFR-L692F LLQERELVEPI | 15490 | 15450 |
| >EGFR-L692F LLQERELVEPI | 30   | >EGFR-L692F LLQERELVEPI | 2652  | 2622  |
| >EGFR-L692F LLQERELVEPI | 78   | >EGFR-L692F LLQERELVEPI | 8702  | 8624  |
| >EGFR-L692F LLQERELVEPI | 154  | >EGFR-L692F LLQERELVEPI | 10616 | 10462 |
| >EGFR-L692F LLQERELVEPI | 9    | >EGFR-L692F LLQERELVEPI | 3941  | 3932  |
| >EGFR-L692F LLQERELVEPI | 10   | >EGFR-L692F LLQERELVEPI | 8518  | 8508  |
| >EGFR-L692F LLQERELVEPI | 66   | >EGFR-L692F LLQERELVEPI | 15243 | 15177 |
| >EGFR-L692F LLQERELVEPI | 115  | >EGFR-L692F LLQERELVEPI | 21226 | 21111 |
| >EGFR-L692F LLQERELVEPI | 4    | >EGFR-L692F LLQERELVEPI | 6900  | 6896  |
| >EGFR-L692F LLQERELVEPI | 436  | >EGFR-L692F LLQERELVEPI | 12727 | 12291 |
| >EGFR-L692F LLQERELVEPI | 394  | >EGFR-L692F LLQERELVEPI | 6257  | 5863  |
| >EGFR-L692F EPLTPSGEA   | 294  | >EGFR-L692F EPPTPSGEA   | 4520  | 4226  |
| >EGFR-L692F EPLTPSGEA   | 192  | >EGFR-L692F EPPTPSGEA   | 944   | 752   |
| >EGFR-L692F ELVEPLTPS   | 455  | >EGFR-L692F ELVEPPTPS   | 669   | 214   |
| >EGFR-L692F RELVEPLT    | 318  | >EGFR-L692F RELVEPPT    | 90    | 228   |
| >EGFR-L692F RELVEPLT    | 488  | >EGFR-L692F RELVEPPT    | 154   | 334   |
| >EGFR-L692F RELVEPLTPSC | 502  | >EGFR-L692F RELVEPPTPSK | 481   | 21    |
| >EGFR-L692F ERELVEPL    | 497  | >EGFR-L692F ERELVEPP    | 24011 | 23514 |
| >EGFR-L692F QERELVEPL   | 172  | >EGFR-L692F QERELVEPP   | 17136 | 16964 |
| >EGFR-L692F QERELVEPL   | 34   | >EGFR-L692F QERELVEPP   | 2117  | 2083  |
| >EGFR-L692F QERELVEPL   | 293  | >EGFR-L692F QERELVEPP   | 10071 | 9778  |

|                          |      |                          |       |       |
|--------------------------|------|--------------------------|-------|-------|
| >EGFR-L692F QERELVEPL    | 26   | >EGFR-L692F QERELVEPP    | 1226  | 1200  |
| >EGFR-L692F QERELVEPL    | 9    | >EGFR-L692F QERELVEPP    | 585   | 576   |
| >EGFR-L703F LLRILKET     | 2639 | >EGFR-L703F FLRILKET     | 370   | 2269  |
| >EGFR-L703F LLRILKET     | 724  | >EGFR-L703F FLRILKET     | 92    | 632   |
| >EGFR-L703F LLRILKETEFK  | 286  | >EGFR-L703F FLRILKETEFK  | 797   | 511   |
| >EGFR-L703F LLRILKETEFK  | 60   | >EGFR-L703F FLRILKETEFK  | 973   | 913   |
| >EGFR-L703F LLRILKETEFK  | 2022 | >EGFR-L703F FLRILKETEFK  | 476   | 1546  |
| >EGFR-L703F LLRILKETEFL  | 167  | >EGFR-L703F FLRILKETEFL  | 202   | 35    |
| >EGFR-L703F LLRILKETEFL  | 3230 | >EGFR-L703F FLRILKETEFL  | 448   | 2782  |
| >EGFR-L703F LLRILKETEFL  | 119  | >EGFR-L703F FLRILKETEFL  | 60    | 59    |
| >EGFR-L703F LLRILKETEFL  | 422  | >EGFR-L703F FLRILKETEFL  | 506   | 84    |
| >EGFR-L703F ALLRILKET    | 151  | >EGFR-L703F AFLRILKET    | 21541 | 21390 |
| >EGFR-L703F ALLRILKET    | 90   | >EGFR-L703F AFLRILKET    | 28370 | 28280 |
| >EGFR-L703F ALLRILKETEFL | 3760 | >EGFR-L703F AFLRILKETEFL | 187   | 3573  |
| >EGFR-L703F ALLRILKETEFL | 1187 | >EGFR-L703F AFLRILKETEFL | 11    | 1176  |
| >EGFR-L703F ALLRILKETEFL | 153  | >EGFR-L703F AFLRILKETEFL | 2733  | 2580  |
| >EGFR-L703F ALLRILKETEFL | 58   | >EGFR-L703F AFLRILKETEFL | 864   | 806   |
| >EGFR-L703F TPSGEAPNQ/   | 99   | >EGFR-L703F TPSGEAPNQ/   | 326   | 227   |
| >EGFR-L703F TPSGEAPNQ/   | 144  | >EGFR-L703F TPSGEAPNQ/   | 21    | 123   |
| >EGFR-L703F TPSGEAPNQ/   | 28   | >EGFR-L703F TPSGEAPNQ/   | 931   | 903   |
| >EGFR-L703F TPSGEAPNQ/   | 1039 | >EGFR-L703F TPSGEAPNQ/   | 243   | 796   |
| >EGFR-L703F TPSGEAPNQ/   | 2573 | >EGFR-L703F TPSGEAPNQ/   | 247   | 2326  |
| >EGFR-L703F TPSGEAPNQ/   | 3840 | >EGFR-L703F TPSGEAPNQ/   | 301   | 3539  |
| >EGFR-L703F QALLRILK     | 715  | >EGFR-L703F QAFLRILK     | 130   | 585   |
| >EGFR-L703F QALLRILK     | 62   | >EGFR-L703F QAFLRILK     | 23    | 39    |
| >EGFR-L703F QALLRILK     | 145  | >EGFR-L703F QAFLRILK     | 73    | 72    |
| >EGFR-L703F QALLRILK     | 636  | >EGFR-L703F QAFLRILK     | 27    | 609   |
| >EGFR-L703F QALLRILK     | 771  | >EGFR-L703F QAFLRILK     | 314   | 457   |
| >EGFR-L703F NQALLRILK    | 117  | >EGFR-L703F NQAFLRILK    | 63    | 54    |
| >EGFR-L703F NQALLRILK    | 611  | >EGFR-L703F NQAFLRILK    | 139   | 472   |
| >EGFR-L703F NQALLRIL     | 152  | >EGFR-L703F NQAFLRIL     | 225   | 73    |
| >EGFR-L703F APNQALLRI    | 22   | >EGFR-L703F APNQAFLRI    | 9     | 13    |
| >EGFR-L703F APNQALLRIL   | 329  | >EGFR-L703F APNQAFLRIL   | 263   | 66    |
| >EGFR-L703F APNQALLRI    | 145  | >EGFR-L703F APNQAFLRI    | 113   | 32    |
| >EGFR-L703F APNQALLRIL   | 109  | >EGFR-L703F APNQAFLRIL   | 100   | 9     |
| >EGFR-L703F APNQALLRI    | 386  | >EGFR-L703F APNQAFLRI    | 117   | 269   |
| >EGFR-L703F APNQALLRIL   | 293  | >EGFR-L703F APNQAFLRIL   | 283   | 10    |
| >EGFR-L703F EAPNQALLR    | 2831 | >EGFR-L703F EAPNQAFLR    | 290   | 2541  |
| >EGFR-L703F EAPNQALLR    | 26   | >EGFR-L703F EAPNQAFLR    | 7     | 19    |
| >EGFR-L703F EAPNQALL     | 173  | >EGFR-L703F EAPNQAFL     | 49    | 124   |
| >EGFR-L703F EAPNQALLRI   | 931  | >EGFR-L703F EAPNQAFLRI   | 300   | 631   |
| >EGFR-L703F EAPNQALLRII  | 136  | >EGFR-L703F EAPNQAFLRII  | 75    | 61    |
| >EGFR-L703F GEAPNQALL    | 250  | >EGFR-L703F GEAPNQAFL    | 56    | 194   |

|                         |       |                         |       |       |
|-------------------------|-------|-------------------------|-------|-------|
| >EGFR-L703F GEAPNQALLF  | 42    | >EGFR-L703F GEAPNQAF    | 174   | 3429  |
| >EGFR-L703F GEAPNQAL    | 3603  | >EGFR-L703F GEAPNQAF    | 180   | 158   |
| >EGFR-L703F GEAPNQAL    | 22    | >EGFR-L703F GEAPNQAF    | 52    | 2     |
| >EGFR-L703F GEAPNQALL   | 54    | >EGFR-L703F GEAPNQAF    | 139   | 88    |
| >EGFR-L703F GEAPNQALLF  | 227   | >EGFR-L703F GEAPNQAF    | 534   | 347   |
| >EGFR-L703F GEAPNQAL    | 187   | >EGFR-L703F GEAPNQAF    | 195   | 536   |
| >EGFR-L703F GEAPNQAL    | 731   | >EGFR-L703F GEAPNQAF    | 214   | 1393  |
| >EGFR-L703F GEAPNQAL    | 1607  | >EGFR-L703F GEAPNQAF    | 131   | 85    |
| >EGFR-L703F GEAPNQALL   | 46    | >EGFR-L703F GEAPNQAF    | 10    | 3     |
| >EGFR-L703F GEAPNQALLF  | 7     | >EGFR-L703F GEAPNQAF    | 131   | 3146  |
| >EGFR-L703F SGEAPNQAL   | 3277  | >EGFR-L703F PLRILKETEFK | 4248  | 3962  |
| >EGFR-L703F LLRILKETEFK | 286   | >EGFR-L703F PLRILKETEF  | 8449  | 8282  |
| >EGFR-L703F LLRILKETEFK | 60    | >EGFR-L703F PLRILKETEF  | 1820  | 1701  |
| >EGFR-L703F LLRILKETEF  | 167   | >EGFR-L703F PLRILKETEF  | 12642 | 12220 |
| >EGFR-L703F LLRILKETEF  | 119   | >EGFR-L703F APLRILKETEF | 80    | 32169 |
| >EGFR-L703F LLRILKETEF  | 422   | >EGFR-L703F APLRILKET   | 28200 | 28049 |
| >EGFR-L703F ALLRILKETEF | 32249 | >EGFR-L703F APLRILKET   | 36193 | 36103 |
| >EGFR-L703F ALLRILKET   | 151   | >EGFR-L703F APLRILKETEF | 15205 | 15052 |
| >EGFR-L703F ALLRILKET   | 90    | >EGFR-L703F APLRILKETEF | 419   | 22848 |
| >EGFR-L703F ALLRILKETEF | 153   | >EGFR-L703F APLRILKETEF | 409   | 351   |
| >EGFR-L703F ALLRILKETEF | 23267 | >EGFR-L703F APLRILKETEF | 294   | 10624 |
| >EGFR-L703F ALLRILKETEF | 58    | >EGFR-L703F APLRILKETEF | 120   | 5897  |
| >EGFR-L703F ALLRILKETEF | 10918 | >EGFR-L703F APLRILKETEF | 73    | 16950 |
| >EGFR-L703F ALLRILKETEF | 6017  | >EGFR-L703F TPSGEAPNQ/  | 18928 | 18829 |
| >EGFR-L703F ALLRILKETEF | 17023 | >EGFR-L703F TPSGEAPNQ/  | 3631  | 3487  |
| >EGFR-L703F TPSGEAPNQ/  | 99    | >EGFR-L703F TPSGEAPNQ/  | 11186 | 11158 |
| >EGFR-L703F TPSGEAPNQ/  | 144   | >EGFR-L703F QAPLRILK    | 689   | 627   |
| >EGFR-L703F TPSGEAPNQ/  | 28    | >EGFR-L703F QAPLRILK    | 3371  | 3226  |
| >EGFR-L703F QALLRILK    | 62    | >EGFR-L703F NQAPLRILK   | 92    | 25    |
| >EGFR-L703F QALLRILK    | 145   | >EGFR-L703F NQAPLRILK   | 370   | 241   |
| >EGFR-L703F NQALLRILK   | 117   | >EGFR-L703F NQAPLRIL    | 102   | 50    |
| >EGFR-L703F NQALLRILK   | 611   | >EGFR-L703F APNQAPLRIL  | 21    | 1     |
| >EGFR-L703F NQALLRIL    | 152   | >EGFR-L703F APNQAPLRIL  | 389   | 60    |
| >EGFR-L703F APNQALLRI   | 22    | >EGFR-L703F APNQAPLRIL  | 319   | 174   |
| >EGFR-L703F APNQALLRIL  | 329   | >EGFR-L703F APNQAPLRIL  | 95    | 14    |
| >EGFR-L703F APNQALLRI   | 145   | >EGFR-L703F APNQAPLRIL  | 168   | 218   |
| >EGFR-L703F APNQALLRIL  | 109   | >EGFR-L703F APNQAPLRIL  | 1886  | 1593  |
| >EGFR-L703F APNQALLRI   | 386   | >EGFR-L703F EAPNQAPLR   | 20    | 6     |
| >EGFR-L703F APNQALLRIL  | 293   | >EGFR-L703F EAPNQAPL    | 81    | 92    |
| >EGFR-L703F EAPNQALLR   | 26    | >EGFR-L703F EAPNQAPLRIL | 98    | 38    |
| >EGFR-L703F EAPNQALL    | 173   | >EGFR-L703F GEAPNQAPL   | 979   | 729   |
| >EGFR-L703F EAPNQALLRII | 136   |                         |       |       |
| >EGFR-L703F GEAPNQALL   | 250   |                         |       |       |

|                         |      |                         |       |       |
|-------------------------|------|-------------------------|-------|-------|
| >EGFR-L703F GEAPNQALLF  | 42   | >EGFR-L703F GEAPNQAPLI  | 131   | 89    |
| >EGFR-L703F GEAPNQAL    | 22   | >EGFR-L703F GEAPNQAP    | 3146  | 3124  |
| >EGFR-L703F GEAPNQALL   | 54   | >EGFR-L703F GEAPNQAPL   | 37    | 17    |
| >EGFR-L703F GEAPNQALLF  | 227  | >EGFR-L703F GEAPNQAPLI  | 299   | 72    |
| >EGFR-L703F GEAPNQAL    | 187  | >EGFR-L703F GEAPNQAP    | 7955  | 7768  |
| >EGFR-L703F GEAPNQALL   | 1140 | >EGFR-L703F GEAPNQAPL   | 179   | 961   |
| >EGFR-L703F GEAPNQALL   | 46   | >EGFR-L703F GEAPNQAPL   | 60    | 14    |
| >EGFR-L703F GEAPNQALLF  | 7    | >EGFR-L703F GEAPNQAPLI  | 11    | 4     |
| >EGFR-L703V LLRILKETEFK | 286  | >EGFR-L703V VLRILKETEFK | 190   | 96    |
| >EGFR-L703V LLRILKETEFK | 60   | >EGFR-L703V VLRILKETEFK | 161   | 101   |
| >EGFR-L703V LLRILKETE   | 167  | >EGFR-L703V VLRILKETE   | 516   | 349   |
| >EGFR-L703V LLRILKETE   | 119  | >EGFR-L703V VLRILKETE   | 210   | 91    |
| >EGFR-L703V LLRILKETE   | 422  | >EGFR-L703V VLRILKETE   | 356   | 66    |
| >EGFR-L703V ALLRILKET   | 151  | >EGFR-L703V AVLRLILKET  | 8682  | 8531  |
| >EGFR-L703V ALLRILKET   | 90   | >EGFR-L703V AVLRLILKET  | 11066 | 10976 |
| >EGFR-L703V ALLRILKETE  | 6421 | >EGFR-L703V AVLRLILKETE | 406   | 6015  |
| >EGFR-L703V ALLRILKETE  | 153  | >EGFR-L703V AVLRLILKETE | 171   | 18    |
| >EGFR-L703V ALLRILKETE  | 58   | >EGFR-L703V AVLRLILKETE | 348   | 290   |
| >EGFR-L703V ALLRILKETE  | 2778 | >EGFR-L703V AVLRLILKETE | 416   | 2362  |
| >EGFR-L703V ALLRILKETE  | 1979 | >EGFR-L703V AVLRLILKETE | 374   | 1605  |
| >EGFR-L703V TPSGEAPNQ/  | 99   | >EGFR-L703V TPSGEAPNQ/  | 431   | 332   |
| >EGFR-L703V TPSGEAPNQ/  | 144  | >EGFR-L703V TPSGEAPNQ/  | 995   | 851   |
| >EGFR-L703V TPSGEAPNQ/  | 28   | >EGFR-L703V TPSGEAPNQ/  | 470   | 442   |
| >EGFR-L703V QALLRILK    | 62   | >EGFR-L703V QAVLRILK    | 154   | 92    |
| >EGFR-L703V QALLRILK    | 145  | >EGFR-L703V QAVLRILK    | 1013  | 868   |
| >EGFR-L703V QALLRILK    | 636  | >EGFR-L703V QAVLRILK    | 155   | 481   |
| >EGFR-L703V NQALLRILK   | 117  | >EGFR-L703V NQAVLRILK   | 133   | 16    |
| >EGFR-L703V NQALLRILK   | 611  | >EGFR-L703V NQAVLRILK   | 467   | 144   |
| >EGFR-L703V NQALLRIL    | 152  | >EGFR-L703V NQAVLRIL    | 107   | 45    |
| >EGFR-L703V APNQALLRI   | 22   | >EGFR-L703V APNQAVLRI   | 14    | 8     |
| >EGFR-L703V APNQALLRIL  | 329  | >EGFR-L703V APNQAVLRIL  | 236   | 93    |
| >EGFR-L703V APNQALLRI   | 145  | >EGFR-L703V APNQAVLRI   | 197   | 52    |
| >EGFR-L703V APNQALLRIL  | 109  | >EGFR-L703V APNQAVLRIL  | 77    | 32    |
| >EGFR-L703V APNQALLRI   | 386  | >EGFR-L703V APNQAVLRI   | 204   | 182   |
| >EGFR-L703V APNQALLRIL  | 293  | >EGFR-L703V APNQAVLRIL  | 159   | 134   |
| >EGFR-L703V EAPNQALLR   | 26   | >EGFR-L703V EAPNQAVLR   | 11    | 15    |
| >EGFR-L703V EAPNQALL    | 173  | >EGFR-L703V EAPNQAVL    | 312   | 139   |
| >EGFR-L703V EAPNQALLRI  | 136  | >EGFR-L703V EAPNQAVLRI  | 147   | 11    |
| >EGFR-L703V GEAPNQALL   | 250  | >EGFR-L703V GEAPNQAVL   | 1393  | 1143  |
| >EGFR-L703V GEAPNQALLF  | 42   | >EGFR-L703V GEAPNQAVLI  | 53    | 11    |
| >EGFR-L703V GEAPNQAL    | 22   | >EGFR-L703V GEAPNQAV    | 137   | 115   |
| >EGFR-L703V GEAPNQALL   | 54   | >EGFR-L703V GEAPNQAVL   | 40    | 14    |
| >EGFR-L703V GEAPNQALLF  | 227  | >EGFR-L703V GEAPNQAVLI  | 250   | 23    |

|                         |       |                         |       |       |
|-------------------------|-------|-------------------------|-------|-------|
| >EGFR-L703\GEAPNQAL     | 187   | >EGFR-L703\GEAPNQAV     | 563   | 376   |
| >EGFR-L703\GEAPNQALL    | 1140  | >EGFR-L703\GEAPNQAVL    | 433   | 707   |
| >EGFR-L703\GEAPNQAL     | 1025  | >EGFR-L703\GEAPNQAV     | 97    | 928   |
| >EGFR-L703\GEAPNQAL     | 1004  | >EGFR-L703\GEAPNQAV     | 472   | 532   |
| >EGFR-L703\GEAPNQALL    | 46    | >EGFR-L703\GEAPNQAVL    | 127   | 81    |
| >EGFR-L703\GEAPNQALLF   | 7     | >EGFR-L703\GEAPNQAVLI   | 8     | 1     |
| >EGFR-L718F LGSGAFGTV   | 125   | >EGFR-L718F PGSGAFGTV   | 316   | 191   |
| >EGFR-L718F LGSGAFGTV   | 478   | >EGFR-L718F PGSGAFGTV   | 2175  | 1697  |
| >EGFR-L718F LGSGAFGTV   | 93    | >EGFR-L718F PGSGAFGTV   | 3814  | 3721  |
| >EGFR-L718F LGSGAFGTV   | 94    | >EGFR-L718F PGSGAFGTV   | 3137  | 3043  |
| >EGFR-L718F VLGSAGFGTV  | 21958 | >EGFR-L718F VPGSGAFGT   | 40    | 21918 |
| >EGFR-L718F VLGSAGFGTV  | 73    | >EGFR-L718F VPGSGAFGT   | 21255 | 21182 |
| >EGFR-L718F VLGSAGFGTV  | 41    | >EGFR-L718F VPGSGAFGT   | 15874 | 15833 |
| >EGFR-L718F VLGSAGFGTV  | 21    | >EGFR-L718F VPGSGAFGT   | 10943 | 10922 |
| >EGFR-L718F VLGSAGFGT   | 68    | >EGFR-L718F VPGSGAFGT   | 25961 | 25893 |
| >EGFR-L718F VLGSAGFGTV  | 3     | >EGFR-L718F VPGSGAFGT   | 9045  | 9042  |
| >EGFR-L718F VLGSAGFGTV  | 7     | >EGFR-L718F VPGSGAFGT   | 17424 | 17417 |
| >EGFR-L718F VLGSAGFGT   | 103   | >EGFR-L718F VPGSGAFGT   | 22203 | 22100 |
| >EGFR-L718F VLGSAGFGTV  | 7     | >EGFR-L718F VPGSGAFGT   | 12249 | 12242 |
| >EGFR-L718F VLGSAGFGT   | 75    | >EGFR-L718F VPGSGAFGT   | 19526 | 19451 |
| >EGFR-L718F VLGSAGFGTV  | 5     | >EGFR-L718F VPGSGAFGT   | 17045 | 17040 |
| >EGFR-L718F VLGSAGFGT   | 14    | >EGFR-L718F VPGSGAFGT   | 34165 | 34151 |
| >EGFR-L718F VLGSAGFGTV  | 2     | >EGFR-L718F VPGSGAFGT   | 13268 | 13266 |
| >EGFR-L718F VLGSAGFGTV  | 64    | >EGFR-L718F VPGSGAFGT   | 1247  | 1183  |
| >EGFR-L718F VLGSAGFGTV  | 54    | >EGFR-L718F VPGSGAFGT   | 700   | 646   |
| >EGFR-L718F VLGSAGFGTV  | 26    | >EGFR-L718F VPGSGAFGT   | 1442  | 1416  |
| >EGFR-L718F VLGSAGFGTV  | 73    | >EGFR-L718F VPGSGAFGT   | 5226  | 5153  |
| >EGFR-L718F VLGSAGFGTV  | 87    | >EGFR-L718F VPGSGAFGT   | 949   | 862   |
| >EGFR-L718F VLGSAGFGTV  | 421   | >EGFR-L718F VPGSGAFGT   | 2151  | 1730  |
| >EGFR-L718F VLGSAGFGTV  | 3137  | >EGFR-L718F VPGSGAFGT   | 30    | 3107  |
| >EGFR-L718F VLGSAGFGTV  | 29506 | >EGFR-L718F VPGSGAFGT   | 354   | 29152 |
| >EGFR-L718F VLGSAGFGTV  | 227   | >EGFR-L718F VPGSGAFGT   | 269   | 42    |
| >EGFR-L718F KETEFKKIKVL | 128   | >EGFR-L718F KETEFKKIKVP | 8742  | 8614  |
| >EGFR-L718F KETEFKKIKVL | 51    | >EGFR-L718F KETEFKKIKVP | 10398 | 10347 |
| >EGFR-L718F KETEFKKIKVL | 75    | >EGFR-L718F KETEFKKIKVP | 3448  | 3373  |
| >EGFR-L718F KETEFKKIKVL | 105   | >EGFR-L718F KETEFKKIKVP | 6003  | 5898  |
| >EGFR-L718F KVLGSGAFGT  | 294   | >EGFR-L718F KVPGSGAFGT  | 2806  | 2512  |
| >EGFR-L718F KVLGSGAFGT  | 123   | >EGFR-L718F KVPGSGAFGT  | 76    | 47    |
| >EGFR-L718F KVLGSGAFGT  | 9     | >EGFR-L718F KVPGSGAFGT  | 30    | 21    |
| >EGFR-L718F KVLGSGAFGT  | 12    | >EGFR-L718F KVPGSGAFGT  | 89    | 77    |
| >EGFR-L718F KVLGSGAFGT  | 78    | >EGFR-L718F KVPGSGAFGT  | 1944  | 1866  |
| >EGFR-L718F KVLGSGAFGT  | 28    | >EGFR-L718F KVPGSGAFGT  | 274   | 246   |
| >EGFR-L718F KVLGSGAFGT  | 176   | >EGFR-L718F KVPGSGAFGT  | 4732  | 4556  |

|                        |       |                        |       |       |
|------------------------|-------|------------------------|-------|-------|
| >EGFR-L718F KVLGSGAFGT | 15    | >EGFR-L718F KVPGSGAFG  | 36    | 21    |
| >EGFR-L718F KVLGSGAFG  | 103   | >EGFR-L718F KVPGSGAFG  | 2445  | 2342  |
| >EGFR-L718F KVLGSGAFGT | 76    | >EGFR-L718F KVPGSGAFG  | 1818  | 1742  |
| >EGFR-L718F KVLGSGAF   | 32    | >EGFR-L718F KVPGSGAF   | 132   | 100   |
| >EGFR-L718F KVLGSGAFGT | 324   | >EGFR-L718F KVPGSGAFG  | 6339  | 6015  |
| >EGFR-L718F KVLGSGAF   | 172   | >EGFR-L718F KVPGSGAF   | 363   | 191   |
| >EGFR-L718F KVLGSGAF   | 345   | >EGFR-L718F KVPGSGAF   | 1157  | 812   |
| >EGFR-L718F KVLGSGAF   | 165   | >EGFR-L718F KVPGSGAF   | 1682  | 1517  |
| >EGFR-L718F KVLGSGAF   | 16    | >EGFR-L718F KVPGSGAF   | 1286  | 1270  |
| >EGFR-L718F KVLGSGAF   | 476   | >EGFR-L718F KVPGSGAF   | 12828 | 12352 |
| >EGFR-L718F KVLGSGAF   | 32414 | >EGFR-L718F KVPGSGAF   | 402   | 32012 |
| >EGFR-L718F KVLGSGAFGT | 16659 | >EGFR-L718F KVPGSGAFG  | 135   | 16524 |
| >EGFR-L718F IKVLGSGAF  | 9     | >EGFR-L718F IKVPGSGAF  | 5     | 4     |
| >EGFR-L718F KIKVLGSGA  | 405   | >EGFR-L718F KIKVPGSGA  | 1360  | 955   |
| >EGFR-L718F KIKVLGSG   | 289   | >EGFR-L718F KIKVPGSG   | 312   | 23    |
| >EGFR-L718F KIKVLGSGA  | 72    | >EGFR-L718F KIKVPGSGA  | 90    | 18    |
| >EGFR-L718F KIKVLGSGAF | 50    | >EGFR-L718F KIKVPGSGAF | 57    | 7     |
| >EGFR-L718F KIKVLGSGAF | 63    | >EGFR-L718F KIKVPGSGAF | 62    | 1     |
| >EGFR-L718F KIKVLGSGAF | 672   | >EGFR-L718F KIKVPGSGAF | 157   | 515   |
| >EGFR-L718F KIKVLGSGAF | 245   | >EGFR-L718F KIKVPGSGAF | 113   | 132   |
| >EGFR-L718F KIKVLGSGAF | 523   | >EGFR-L718F KIKVPGSGAF | 204   | 319   |
| >EGFR-L718F KKIKVLGSGA | 700   | >EGFR-L718F KKIKVPGSGA | 348   | 352   |
| >EGFR-L718F KKIKVLGSGA | 7     | >EGFR-L718F KKIKVPGSGA | 5     | 2     |
| >EGFR-L718F TEFKKIKVL  | 51    | >EGFR-L718F TEFKKIKVP  | 5338  | 5287  |
| >EGFR-L718F TEFKKIKVL  | 462   | >EGFR-L718F TEFKKIKVP  | 10635 | 10173 |
| >EGFR-L718F TEFKKIKVL  | 284   | >EGFR-L718F TEFKKIKVP  | 16499 | 16215 |
| >EGFR-L718F TEFKKIKVL  | 68    | >EGFR-L718F TEFKKIKVP  | 2411  | 2343  |
| >EGFR-L718F TEFKKIKVL  | 460   | >EGFR-L718F TEFKKIKVP  | 6626  | 6166  |
| >EGFR-L718F TEFKKIKVL  | 85    | >EGFR-L718F TEFKKIKVP  | 7704  | 7619  |
| >EGFR-L730F LWIPEGEKV  | 1600  | >EGFR-L730F FWIPEGEKV  | 228   | 1372  |
| >EGFR-L730F LWIPEGEKV  | 1563  | >EGFR-L730F FWIPEGEKV  | 203   | 1360  |
| >EGFR-L730F LWIPEGEKVK | 158   | >EGFR-L730F FWIPEGEKVK | 78    | 80    |
| >EGFR-L730F LWIPEGEKV  | 1231  | >EGFR-L730F FWIPEGEKV  | 482   | 749   |
| >EGFR-L730F LWIPEGEKVK | 37    | >EGFR-L730F FWIPEGEKVK | 18    | 19    |
| >EGFR-L730F LWIPEGEKV  | 270   | >EGFR-L730F FWIPEGEKV  | 412   | 142   |
| >EGFR-L730F LWIPEGEKVK | 270   | >EGFR-L730F FWIPEGEKVK | 412   | 142   |
| >EGFR-L730F GLWIPEGEKV | 251   | >EGFR-L730F GFWIPEGEKV | 11525 | 11274 |
| >EGFR-L730F GLWIPEGEKV | 329   | >EGFR-L730F GFWIPEGEKV | 16638 | 16309 |
| >EGFR-L730F GLWIPEGEKV | 3     | >EGFR-L730F GFWIPEGEKV | 801   | 798   |
| >EGFR-L730F GLWIPEGEKV | 28    | >EGFR-L730F GFWIPEGEKV | 12908 | 12880 |
| >EGFR-L730F GLWIPEGEKV | 6     | >EGFR-L730F GFWIPEGEKV | 886   | 880   |
| >EGFR-L730F GLWIPEGEKV | 87    | >EGFR-L730F GFWIPEGEKV | 19753 | 19666 |
| >EGFR-L730F GLWIPEGEKV | 7     | >EGFR-L730F GFWIPEGEKV | 2772  | 2765  |

|                         |       |                         |       |       |
|-------------------------|-------|-------------------------|-------|-------|
| >EGFR-L730F GLWIPEGEK   | 421   | >EGFR-L730F GFWIPEGEK   | 11785 | 11364 |
| >EGFR-L730F KGLWIPEGEK  | 229   | >EGFR-L730F KGFWIPEGEK  | 146   | 83    |
| >EGFR-L730F KGLWIPEGEK  | 499   | >EGFR-L730F KGFWIPEGEK  | 518   | 19    |
| >EGFR-L730F TVYKGLWI    | 1110  | >EGFR-L730F TVYKGFWI    | 444   | 666   |
| >EGFR-L730F TVYKGLWI    | 153   | >EGFR-L730F TVYKGFWI    | 206   | 53    |
| >EGFR-L730F TVYKGLWI    | 168   | >EGFR-L730F TVYKGFWI    | 41    | 127   |
| >EGFR-L730F TVYKGLWI    | 444   | >EGFR-L730F TVYKGFWI    | 216   | 228   |
| >EGFR-L730F TVYKGLWI    | 994   | >EGFR-L730F TVYKGFWI    | 409   | 585   |
| >EGFR-L730F TVYKGLWI    | 463   | >EGFR-L730F TVYKGFWI    | 51    | 412   |
| >EGFR-L730F TVYKGLWI    | 191   | >EGFR-L730F TVYKGFWI    | 50    | 141   |
| >EGFR-L730F TVYKGLWI    | 265   | >EGFR-L730F TVYKGFWI    | 208   | 57    |
| >EGFR-L730F GTVYKGLW    | 14    | >EGFR-L730F GTVYKGFW    | 20    | 6     |
| >EGFR-L730F GTVYKGLWI   | 24    | >EGFR-L730F GTVYKGFWI   | 31    | 7     |
| >EGFR-L730F GTVYKGLW    | 199   | >EGFR-L730F GTVYKGFW    | 157   | 42    |
| >EGFR-L730F GTVYKGLW    | 230   | >EGFR-L730F GTVYKGFW    | 280   | 50    |
| >EGFR-L730F GTVYKGLWI   | 118   | >EGFR-L730F GTVYKGFWI   | 122   | 4     |
| >EGFR-L730F GTVYKGLWI   | 166   | >EGFR-L730F GTVYKGFWI   | 111   | 55    |
| >EGFR-L730F FGTVYKGL    | 354   | >EGFR-L730F FGTVYKGF    | 13680 | 13326 |
| >EGFR-L730F FGTVYKGLW   | 393   | >EGFR-L730F FGTVYKGFW   | 504   | 111   |
| >EGFR-L730F FGTVYKGLW   | 29    | >EGFR-L730F FGTVYKGFW   | 35    | 6     |
| >EGFR-L730F AFGTVYKGL   | 152   | >EGFR-L730F AFGTVYKGF   | 17    | 135   |
| >EGFR-L730F AFGTVYKGLV  | 591   | >EGFR-L730F AFGTVYKGFV  | 301   | 290   |
| >EGFR-L730F AFGTVYKGLV  | 249   | >EGFR-L730F AFGTVYKGFV  | 126   | 123   |
| >EGFR-L730F GAFGTVYKGL  | 372   | >EGFR-L730F GAFGTVYKGF  | 10311 | 9939  |
| >EGFR-L730F GAFGTVYKGL  | 3132  | >EGFR-L730F GAFGTVYKGF  | 124   | 3008  |
| >EGFR-L730F GAFGTVYKGL  | 158   | >EGFR-L730F GAFGTVYKGF  | 25    | 133   |
| >EGFR-L730F GAFGTVYKGL  | 38    | >EGFR-L730F GAFGTVYKGF  | 50    | 12    |
| >EGFR-L730F GAFGTVYKGL  | 456   | >EGFR-L730F GAFGTVYKGF  | 727   | 271   |
| >EGFR-L730F GAFGTVYKGL  | 46    | >EGFR-L730F GAFGTVYKGF  | 46    | 0     |
| >EGFR-L730F GAFGTVYKGL  | 34    | >EGFR-L730F GAFGTVYKGF  | 45    | 11    |
| >EGFR-L730F GAFGTVYKGL  | 279   | >EGFR-L730F GAFGTVYKGF  | 509   | 230   |
| >EGFR-L730F GAFGTVYKGL  | 33    | >EGFR-L730F GAFGTVYKGF  | 38    | 5     |
| >EGFR-L747F ELREATSPKA  | 122   | >EGFR-L747F EPREATSPKA  | 35810 | 35688 |
| >EGFR-L747F ELREATSPK   | 226   | >EGFR-L747F EPREATSPK   | 17989 | 17763 |
| >EGFR-L747F ELREATSPK   | 86    | >EGFR-L747F EPREATSPK   | 9638  | 9552  |
| >EGFR-L747F ELREATSPK   | 139   | >EGFR-L747F EPREATSPK   | 1168  | 1029  |
| >EGFR-L747F ELREATSPK   | 18246 | >EGFR-L747F EPREATSPK   | 425   | 17821 |
| >EGFR-L747F KVKIPVAIKEL | 29    | >EGFR-L747F KVKIPVAIKEP | 409   | 380   |
| >EGFR-L747F KVKIPVAIKEL | 148   | >EGFR-L747F KVKIPVAIKEP | 19294 | 19146 |
| >EGFR-L747F KELREATSPK/ | 449   | >EGFR-L747F KEPREATSPK/ | 4038  | 3589  |
| >EGFR-L747F KELREATSPK/ | 71    | >EGFR-L747F KEPREATSPK/ | 3277  | 3206  |
| >EGFR-L747F KELREATSPK/ | 319   | >EGFR-L747F KEPREATSPK/ | 2382  | 2063  |
| >EGFR-L747F AIKELREA    | 369   | >EGFR-L747F AIKEPREA    | 1183  | 814   |

|                         |      |                         |       |       |
|-------------------------|------|-------------------------|-------|-------|
| >EGFR-L747F AIKELREA    | 496  | >EGFR-L747F AIKEPREA    | 546   | 50    |
| >EGFR-L747F PVAIKELR    | 386  | >EGFR-L747F PVAIKEPR    | 833   | 447   |
| >EGFR-L747F IPVAIKEL    | 25   | >EGFR-L747F IPVAIKEP    | 35714 | 35689 |
| >EGFR-L747F IPVAIKELR   | 150  | >EGFR-L747F IPVAIKEPR   | 505   | 355   |
| >EGFR-L747F IPVAIKEL    | 151  | >EGFR-L747F IPVAIKEP    | 24797 | 24646 |
| >EGFR-L747F IPVAIKEL    | 406  | >EGFR-L747F IPVAIKEP    | 11549 | 11143 |
| >EGFR-L747F IPVAIKEL    | 340  | >EGFR-L747F IPVAIKEP    | 11707 | 11367 |
| >EGFR-L747F IPVAIKELREA | 30   | >EGFR-L747F IPVAIKEPREA | 43    | 13    |
| >EGFR-L747F IPVAIKEL    | 248  | >EGFR-L747F IPVAIKEP    | 15014 | 14766 |
| >EGFR-L747F IPVAIKEL    | 498  | >EGFR-L747F IPVAIKEP    | 21661 | 21163 |
| >EGFR-L747F IPVAIKELR   | 547  | >EGFR-L747F IPVAIKEPR   | 178   | 369   |
| >EGFR-L747F KIPVAIKELR  | 78   | >EGFR-L747F KIPVAIKEPR  | 69    | 9     |
| >EGFR-L747F KIPVAIKELR  | 68   | >EGFR-L747F KIPVAIKEPR  | 118   | 50    |
| >EGFR-L747F KIPVAIKEL   | 331  | >EGFR-L747F KIPVAIKEP   | 18063 | 17732 |
| >EGFR-L747F KIPVAIKELR  | 66   | >EGFR-L747F KIPVAIKEPR  | 37    | 29    |
| >EGFR-L747F VKIPVAIKEL  | 87   | >EGFR-L747F VKIPVAIKEP  | 2957  | 2870  |
| >EGFR-L747S ELREATSPKA  | 122  | >EGFR-L747S ESREATSPKA  | 33280 | 33158 |
| >EGFR-L747S ELREATSPK   | 226  | >EGFR-L747S ESREATSPK   | 1876  | 1650  |
| >EGFR-L747S ELREATSPK   | 924  | >EGFR-L747S ESREATSPK   | 459   | 465   |
| >EGFR-L747S ELREATSPK   | 86   | >EGFR-L747S ESREATSPK   | 16    | 70    |
| >EGFR-L747S ELREATSPKA  | 2381 | >EGFR-L747S ESREATSPKA  | 410   | 1971  |
| >EGFR-L747S ELREATSPK   | 139  | >EGFR-L747S ESREATSPK   | 31    | 108   |
| >EGFR-L747S KVKIPVAIKEL | 29   | >EGFR-L747S KVKIPVAIKES | 117   | 88    |
| >EGFR-L747S KVKIPVAIKEL | 148  | >EGFR-L747S KVKIPVAIKES | 13709 | 13561 |
| >EGFR-L747S KELREATSPK/ | 449  | >EGFR-L747S KESREATSPK/ | 1094  | 645   |
| >EGFR-L747S KELREATSPK/ | 71   | >EGFR-L747S KESREATSPK/ | 72    | 1     |
| >EGFR-L747S KELREATSPK/ | 319  | >EGFR-L747S KESREATSPK/ | 1251  | 932   |
| >EGFR-L747S AIKELREA    | 369  | >EGFR-L747S AIKESREA    | 589   | 220   |
| >EGFR-L747S AIKELREA    | 496  | >EGFR-L747S AIKESREA    | 160   | 336   |
| >EGFR-L747S PVAIKELR    | 386  | >EGFR-L747S PVAIKESR    | 707   | 321   |
| >EGFR-L747S IPVAIKEL    | 25   | >EGFR-L747S IPVAIKES    | 26394 | 26369 |
| >EGFR-L747S IPVAIKELR   | 150  | >EGFR-L747S IPVAIKESR   | 411   | 261   |
| >EGFR-L747S IPVAIKEL    | 151  | >EGFR-L747S IPVAIKES    | 20316 | 20165 |
| >EGFR-L747S IPVAIKEL    | 406  | >EGFR-L747S IPVAIKES    | 3112  | 2706  |
| >EGFR-L747S IPVAIKEL    | 340  | >EGFR-L747S IPVAIKES    | 14238 | 13898 |
| >EGFR-L747S IPVAIKELREA | 30   | >EGFR-L747S IPVAIKESREA | 47    | 17    |
| >EGFR-L747S IPVAIKEL    | 248  | >EGFR-L747S IPVAIKES    | 4720  | 4472  |
| >EGFR-L747S IPVAIKEL    | 498  | >EGFR-L747S IPVAIKES    | 15156 | 14658 |
| >EGFR-L747S KIPVAIKELR  | 78   | >EGFR-L747S KIPVAIKESR  | 122   | 44    |
| >EGFR-L747S KIPVAIKELR  | 68   | >EGFR-L747S KIPVAIKESR  | 292   | 224   |
| >EGFR-L747S KIPVAIKEL   | 331  | >EGFR-L747S KIPVAIKES   | 13745 | 13414 |
| >EGFR-L747S KIPVAIKELR  | 66   | >EGFR-L747S KIPVAIKESR  | 82    | 16    |
| >EGFR-L747S VKIPVAIKEL  | 87   | >EGFR-L747S VKIPVAIKES  | 3541  | 3454  |



|                         |       |                         |       |       |
|-------------------------|-------|-------------------------|-------|-------|
| >EGFR-L777C LLGICLTSTV  | 63    | >EGFR-L777C QLGICLTSTV  | 132   | 69    |
| >EGFR-L777C LLGICLTST   | 415   | >EGFR-L777C QLGICLTST   | 1135  | 720   |
| >EGFR-L777C LLGICLTSTV  | 17    | >EGFR-L777C QLGICLTSTV  | 28    | 11    |
| >EGFR-L777C LLGICLTST   | 295   | >EGFR-L777C QLGICLTST   | 1071  | 776   |
| >EGFR-L777C LLGICLTSTV  | 14    | >EGFR-L777C QLGICLTSTV  | 21    | 7     |
| >EGFR-L777C LLGICLTSTV  | 98    | >EGFR-L777C QLGICLTSTV  | 267   | 169   |
| >EGFR-L777C LLGICLTSTV  | 4     | >EGFR-L777C QLGICLTSTV  | 16    | 12    |
| >EGFR-L777C LLGICLTSTV  | 5     | >EGFR-L777C QLGICLTSTV  | 15    | 10    |
| >EGFR-L777C LLGICLTSTV  | 9     | >EGFR-L777C QLGICLTSTV  | 38    | 29    |
| >EGFR-L777C LLGICLTSTV  | 6     | >EGFR-L777C QLGICLTSTV  | 21    | 15    |
| >EGFR-L777C LLGICLTST   | 30    | >EGFR-L777C QLGICLTST   | 975   | 945   |
| >EGFR-L777C LLGICLTSTV  | 2     | >EGFR-L777C QLGICLTSTV  | 3     | 1     |
| >EGFR-L777C LLGICLTSTVQ | 272   | >EGFR-L777C QLGICLTSTVC | 4073  | 3801  |
| >EGFR-L777C RLLGICLT    | 229   | >EGFR-L777C RQLGICLT    | 3925  | 3696  |
| >EGFR-L777C RLLGICLTST  | 73    | >EGFR-L777C RQLGICLTST  | 963   | 890   |
| >EGFR-L777C RLLGICLTSTV | 15    | >EGFR-L777C RQLGICLTST\ | 49    | 34    |
| >EGFR-L777C RLLGICLTST  | 207   | >EGFR-L777C RQLGICLTST  | 1307  | 1100  |
| >EGFR-L777C RLLGICLTSTV | 29    | >EGFR-L777C RQLGICLTST\ | 376   | 347   |
| >EGFR-L777C RLLGICLTST  | 52    | >EGFR-L777C RQLGICLTST  | 261   | 209   |
| >EGFR-L777C RLLGICLTSTV | 13    | >EGFR-L777C RQLGICLTST\ | 71    | 58    |
| >EGFR-L777C RLLGICLT    | 310   | >EGFR-L777C RQLGICLT    | 50    | 260   |
| >EGFR-L777C RLLGICLTS   | 3450  | >EGFR-L777C RQLGICLTS   | 272   | 3178  |
| >EGFR-L777C RLLGICLTST  | 87    | >EGFR-L777C RQLGICLTST  | 90    | 3     |
| >EGFR-L777C RLLGICLTSTV | 19    | >EGFR-L777C RQLGICLTST\ | 4     | 15    |
| >EGFR-L777C RLLGICLT    | 35    | >EGFR-L777C RQLGICLT    | 2507  | 2472  |
| >EGFR-L777C RLLGICLTST  | 95    | >EGFR-L777C RQLGICLTST  | 6609  | 6514  |
| >EGFR-L777C RLLGICLTSTV | 2     | >EGFR-L777C RQLGICLTST\ | 17    | 15    |
| >EGFR-L777C RLLGICLTSTV | 5     | >EGFR-L777C RQLGICLTST\ | 52    | 47    |
| >EGFR-L777C RLLGICLT    | 112   | >EGFR-L777C RQLGICLT    | 6317  | 6205  |
| >EGFR-L777C RLLGICLTST  | 401   | >EGFR-L777C RQLGICLTST  | 12276 | 11875 |
| >EGFR-L777C RLLGICLTSTV | 5     | >EGFR-L777C RQLGICLTST\ | 38    | 33    |
| >EGFR-L777C RLLGICLTSTV | 2     | >EGFR-L777C RQLGICLTST\ | 160   | 158   |
| >EGFR-L777C RLLGICLT    | 30    | >EGFR-L777C RQLGICLT    | 21793 | 21763 |
| >EGFR-L777C RLLGICLTST  | 34    | >EGFR-L777C RQLGICLTST  | 25690 | 25656 |
| >EGFR-L777C RLLGICLTSTV | 2     | >EGFR-L777C RQLGICLTST\ | 286   | 284   |
| >EGFR-L777C RLLGICLTS   | 163   | >EGFR-L777C RQLGICLTS   | 511   | 348   |
| >EGFR-L777C RLLGICLTST  | 360   | >EGFR-L777C RQLGICLTST  | 1171  | 811   |
| >EGFR-L777C RLLGICLTSTV | 23    | >EGFR-L777C RQLGICLTST\ | 57    | 34    |
| >EGFR-L777C RLLGICLTSTV | 1293  | >EGFR-L777C RQLGICLTST\ | 54    | 1239  |
| >EGFR-L777C RLLGICLTSTV | 9277  | >EGFR-L777C RQLGICLTST\ | 467   | 8810  |
| >EGFR-L777C RLLGICLTSTV | 11688 | >EGFR-L777C RQLGICLTST\ | 384   | 11304 |
| >EGFR-L777C RLLGICLTSTV | 241   | >EGFR-L777C RQLGICLTST\ | 1501  | 1260  |
| >EGFR-L777C RLLGICLTSTV | 4038  | >EGFR-L777C RQLGICLTST\ | 404   | 3634  |

|                        |      |                        |       |       |
|------------------------|------|------------------------|-------|-------|
| >EGFR-L777C ASVDNPHVCI | 389  | >EGFR-L777C ASVDNPHVCI | 3915  | 3526  |
| >EGFR-L777C ASVDNPHVCI | 6    | >EGFR-L777C ASVDNPHVCI | 1043  | 1037  |
| >EGFR-L777C CRLLGICL   | 260  | >EGFR-L777C CRQLGICL   | 487   | 227   |
| >EGFR-L777C CRLLGICLTS | 1410 | >EGFR-L777C CRQLGICLTS | 444   | 966   |
| >EGFR-L777C CRLLGICLTS | 577  | >EGFR-L777C CRQLGICLTS | 258   | 319   |
| >EGFR-L777C HVCRLLGICL | 662  | >EGFR-L777C HVCRLGICL  | 415   | 247   |
| >EGFR-L777C HVCRLGI    | 804  | >EGFR-L777C HVCRLGI    | 447   | 357   |
| >EGFR-L777C NPHVCRLL   | 65   | >EGFR-L777C NPHVCRQL   | 40    | 25    |
| >EGFR-L777C SVDNPHVCRI | 75   | >EGFR-L777C SVDNPHVCRI | 6482  | 6407  |
| >EGFR-L777C SVDNPHVCRI | 449  | >EGFR-L777C SVDNPHVCRI | 11591 | 11142 |
| >EGFR-L777C SVDNPHVCRI | 204  | >EGFR-L777C SVDNPHVCRI | 7857  | 7653  |
| >EGFR-L792F LMPFGCLL   | 297  | >EGFR-L792F PMPFGCLL   | 9956  | 9659  |
| >EGFR-L792F LMPFGCLLDY | 24   | >EGFR-L792F PMPFGCLLDY | 1482  | 1458  |
| >EGFR-L792F LMPFGCLL   | 71   | >EGFR-L792F PMPFGCLL   | 2276  | 2205  |
| >EGFR-L792F LMPFGCLLDY | 12   | >EGFR-L792F PMPFGCLLDY | 275   | 263   |
| >EGFR-L792F LMPFGCLL   | 80   | >EGFR-L792F PMPFGCLL   | 3435  | 3355  |
| >EGFR-L792F LMPFGCLLDY | 8    | >EGFR-L792F PMPFGCLLDY | 229   | 221   |
| >EGFR-L792F LMPFGCLL   | 248  | >EGFR-L792F PMPFGCLL   | 11247 | 10999 |
| >EGFR-L792F LMPFGCLLDY | 12   | >EGFR-L792F PMPFGCLLDY | 455   | 443   |
| >EGFR-L792F LMPFGCLL   | 35   | >EGFR-L792F PMPFGCLL   | 787   | 752   |
| >EGFR-L792F LMPFGCLLDY | 3    | >EGFR-L792F PMPFGCLLDY | 23    | 20    |
| >EGFR-L792F LMPFGCLLDY | 14   | >EGFR-L792F PMPFGCLLDY | 439   | 425   |
| >EGFR-L792F LMPFGCLL   | 83   | >EGFR-L792F PMPFGCLL   | 1061  | 978   |
| >EGFR-L792F LMPFGCLLDY | 8    | >EGFR-L792F PMPFGCLLDY | 40    | 32    |
| >EGFR-L792F LMPFGCLL   | 489  | >EGFR-L792F PMPFGCLL   | 4488  | 3999  |
| >EGFR-L792F LMPFGCLLDY | 6    | >EGFR-L792F PMPFGCLLDY | 39    | 33    |
| >EGFR-L792F LMPFGCLL   | 8    | >EGFR-L792F PMPFGCLL   | 180   | 172   |
| >EGFR-L792F LMPFGCLLDY | 3    | >EGFR-L792F PMPFGCLLDY | 30    | 27    |
| >EGFR-L792F LMPFGCLLDY | 254  | >EGFR-L792F PMPFGCLLDY | 1888  | 1634  |
| >EGFR-L792F LMPFGCLLDY | 326  | >EGFR-L792F PMPFGCLLDY | 780   | 454   |
| >EGFR-L792F LMPFGCLLDY | 259  | >EGFR-L792F PMPFGCLLDY | 957   | 698   |
| >EGFR-L792F LMPFGCLLDY | 97   | >EGFR-L792F PMPFGCLLDY | 530   | 433   |
| >EGFR-L792F LMPFGCLLDY | 117  | >EGFR-L792F PMPFGCLLDY | 5224  | 5107  |
| >EGFR-L792F LMPFGCLL   | 9    | >EGFR-L792F PMPFGCLL   | 99    | 90    |
| >EGFR-L792F LMPFGCLLDY | 344  | >EGFR-L792F PMPFGCLLDY | 7310  | 6966  |
| >EGFR-L792F QLMPFGCL   | 215  | >EGFR-L792F QPMPFGCL   | 22942 | 22727 |
| >EGFR-L792F QLMPFGCLL  | 39   | >EGFR-L792F QPMPFGCLL  | 22029 | 21990 |
| >EGFR-L792F QLMPFGCL   | 30   | >EGFR-L792F QPMPFGCL   | 19223 | 19193 |
| >EGFR-L792F QLMPFGCLL  | 8    | >EGFR-L792F QPMPFGCLL  | 10868 | 10860 |
| >EGFR-L792F QLMPFGCL   | 212  | >EGFR-L792F QPMPFGCL   | 20731 | 20519 |
| >EGFR-L792F QLMPFGCLL  | 53   | >EGFR-L792F QPMPFGCLL  | 19875 | 19822 |
| >EGFR-L792F QLMPFGCL   | 201  | >EGFR-L792F QPMPFGCL   | 12828 | 12627 |
| >EGFR-L792F QLMPFGCLL  | 45   | >EGFR-L792F QPMPFGCLL  | 9062  | 9017  |

|                         |       |                         |       |       |
|-------------------------|-------|-------------------------|-------|-------|
| >EGFR-L792F QLMPFGCL    | 123   | >EGFR-L792F QPMPFGCL    | 25907 | 25784 |
| >EGFR-L792F QLMPFGCLL   | 17    | >EGFR-L792F QPMPFGCLL   | 20353 | 20336 |
| >EGFR-L792F QLMPFGCL    | 120   | >EGFR-L792F QPMPFGCL    | 24081 | 23961 |
| >EGFR-L792F QLMPFGCLL   | 42    | >EGFR-L792F QPMPFGCLL   | 23826 | 23784 |
| >EGFR-L792F QLMPFGCL    | 485   | >EGFR-L792F QPMPFGCL    | 25982 | 25497 |
| >EGFR-L792F QLMPFGCLL   | 96    | >EGFR-L792F QPMPFGCLL   | 24129 | 24033 |
| >EGFR-L792F QLMPFGCL    | 77    | >EGFR-L792F QPMPFGCL    | 22106 | 22029 |
| >EGFR-L792F QLMPFGCLL   | 37    | >EGFR-L792F QPMPFGCLL   | 20420 | 20383 |
| >EGFR-L792F QLMPFGCL    | 36    | >EGFR-L792F QPMPFGCL    | 31462 | 31426 |
| >EGFR-L792F QLMPFGCLL   | 4     | >EGFR-L792F QPMPFGCLL   | 25705 | 25701 |
| >EGFR-L792F QLMPFGCLLI  | 15    | >EGFR-L792F QPMPFGCLLI  | 216   | 201   |
| >EGFR-L792F QLMPFGCLLI  | 328   | >EGFR-L792F QPMPFGCLLI  | 3874  | 3546  |
| >EGFR-L792F QLMPFGCLLI  | 23    | >EGFR-L792F QPMPFGCLLI  | 847   | 824   |
| >EGFR-L792F QLMPFGCL    | 17075 | >EGFR-L792F QPMPFGCL    | 102   | 16973 |
| >EGFR-L792F QLMPFGCLL   | 16958 | >EGFR-L792F QPMPFGCLL   | 174   | 16784 |
| >EGFR-L792F QLMPFGCLLI  | 111   | >EGFR-L792F QPMPFGCLLI  | 8740  | 8629  |
| >EGFR-L792F QLMPFGCLLI  | 92    | >EGFR-L792F QPMPFGCLLI  | 921   | 829   |
| >EGFR-L792F QLMPFGCLLI  | 124   | >EGFR-L792F QPMPFGCLLI  | 665   | 541   |
| >EGFR-L792F QLMPFGCLLI  | 2166  | >EGFR-L792F QPMPFGCLLI  | 29    | 2137  |
| >EGFR-L792F QLMPFGCL    | 3762  | >EGFR-L792F QPMPFGCL    | 411   | 3351  |
| >EGFR-L792F QLMPFGCLL   | 3204  | >EGFR-L792F QPMPFGCLL   | 324   | 2880  |
| >EGFR-L792F QLMPFGCLLI  | 24667 | >EGFR-L792F QPMPFGCLLI  | 103   | 24564 |
| >EGFR-L792F LTSTVQLITQL | 119   | >EGFR-L792F LTSTVQLITQF | 13228 | 13109 |
| >EGFR-L792F LTSTVQLITQL | 223   | >EGFR-L792F LTSTVQLITQF | 13848 | 13625 |
| >EGFR-L792F LTSTVQLITQL | 49    | >EGFR-L792F LTSTVQLITQF | 17166 | 17117 |
| >EGFR-L792F LTSTVQLITQL | 78    | >EGFR-L792F LTSTVQLITQF | 11430 | 11352 |
| >EGFR-L792F LTSTVQLITQL | 117   | >EGFR-L792F LTSTVQLITQF | 13484 | 13367 |
| >EGFR-L792F LTSTVQLITQL | 30    | >EGFR-L792F LTSTVQLITQF | 3450  | 3420  |
| >EGFR-L792F LTSTVQLITQL | 298   | >EGFR-L792F LTSTVQLITQF | 27195 | 26897 |
| >EGFR-L792F TQLMPFGC    | 325   | >EGFR-L792F TQPMPFGC    | 1778  | 1453  |
| >EGFR-L792F TQLMPFGCL   | 200   | >EGFR-L792F TQPMPFGCL   | 1035  | 835   |
| >EGFR-L792F TQLMPFGCLI  | 128   | >EGFR-L792F TQPMPFGCLI  | 446   | 318   |
| >EGFR-L792F TQLMPFGCLI  | 251   | >EGFR-L792F TQPMPFGCLI  | 1797  | 1546  |
| >EGFR-L792F TQLMPFGCLI  | 420   | >EGFR-L792F TQPMPFGCLI  | 6273  | 5853  |
| >EGFR-L792F TQLMPFGCL   | 25005 | >EGFR-L792F TQPMPFGCL   | 448   | 24557 |
| >EGFR-L792F TQLMPFGCLI  | 15808 | >EGFR-L792F TQPMPFGCLI  | 58    | 15750 |
| >EGFR-L792F ITQLMPFGCL  | 365   | >EGFR-L792F ITQPMPFGCL  | 81    | 284   |
| >EGFR-L792F ITQLMPFGCL  | 17    | >EGFR-L792F ITQPMPFGCL  | 7     | 10    |
| >EGFR-L792F ITQLMPFGCL  | 2250  | >EGFR-L792F ITQPMPFGCL  | 371   | 1879  |
| >EGFR-L792F ITQLMPFGCL  | 719   | >EGFR-L792F ITQPMPFGCL  | 314   | 405   |
| >EGFR-L792F ITQLMPFGCL  | 120   | >EGFR-L792F ITQPMPFGCL  | 47    | 73    |
| >EGFR-L792F ITQLMPFGCL  | 187   | >EGFR-L792F ITQPMPFGCL  | 365   | 178   |
| >EGFR-L792F ITQLMPFGCL  | 132   | >EGFR-L792F ITQPMPFGCL  | 66    | 66    |

|                         |      |                         |       |       |
|-------------------------|------|-------------------------|-------|-------|
| >EGFR-L792F ITQLMPFGCL  | 1010 | >EGFR-L792F ITQPMPFGCL  | 163   | 847   |
| >EGFR-L792F LITQLMPF    | 228  | >EGFR-L792F LITQPMPF    | 439   | 211   |
| >EGFR-L792F LITQLMPF    | 388  | >EGFR-L792F LITQPMPF    | 170   | 218   |
| >EGFR-L792F LITQLMPF    | 506  | >EGFR-L792F LITQPMPF    | 335   | 171   |
| >EGFR-L792F QLITQLMPF   | 212  | >EGFR-L792F QLITQPMPF   | 4511  | 4299  |
| >EGFR-L792F QLITQLMPF   | 23   | >EGFR-L792F QLITQPMPF   | 543   | 520   |
| >EGFR-L792F QLITQLMPF   | 154  | >EGFR-L792F QLITQPMPF   | 64    | 90    |
| >EGFR-L792F QLITQLMPF   | 67   | >EGFR-L792F QLITQPMPF   | 153   | 86    |
| >EGFR-L792F QLITQLMPF   | 496  | >EGFR-L792F QLITQPMPF   | 373   | 123   |
| >EGFR-L792F QLITQLMPF   | 14   | >EGFR-L792F QLITQPMPF   | 9     | 5     |
| >EGFR-L792F VQLITQLM    | 332  | >EGFR-L792F VQLITQPM    | 133   | 199   |
| >EGFR-L792F VQLITQLM    | 1536 | >EGFR-L792F VQLITQPM    | 214   | 1322  |
| >EGFR-L792F VQLITQLMPF  | 75   | >EGFR-L792F VQLITQPMPF  | 125   | 50    |
| >EGFR-L792F VQLITQLM    | 58   | >EGFR-L792F VQLITQPM    | 14    | 44    |
| >EGFR-L792F VQLITQLMPF  | 3    | >EGFR-L792F VQLITQPMPF  | 3     | 0     |
| >EGFR-L792F TVQLITQLMP  | 469  | >EGFR-L792F TVQLITQPMF  | 1410  | 941   |
| >EGFR-L792F TVQLITQLMP  | 188  | >EGFR-L792F TVQLITQPMF  | 86    | 102   |
| >EGFR-L792F TVQLITQL    | 217  | >EGFR-L792F TVQLITQP    | 17122 | 16905 |
| >EGFR-L792F TVQLITQLM   | 996  | >EGFR-L792F TVQLITQPM   | 249   | 747   |
| >EGFR-L792F TVQLITQLM   | 4229 | >EGFR-L792F TVQLITQPM   | 263   | 3966  |
| >EGFR-L792F TVQLITQLMP  | 784  | >EGFR-L792F TVQLITQPMF  | 364   | 420   |
| >EGFR-L792F TVQLITQLM   | 410  | >EGFR-L792F TVQLITQPM   | 4522  | 4112  |
| >EGFR-L792F STVQLITQL   | 339  | >EGFR-L792F STVQLITQP   | 16522 | 16183 |
| >EGFR-L792F STVQLITQL   | 408  | >EGFR-L792F STVQLITQP   | 19409 | 19001 |
| >EGFR-L792F STVQLITQL   | 64   | >EGFR-L792F STVQLITQP   | 14691 | 14627 |
| >EGFR-L792F STVQLITQLM  | 18   | >EGFR-L792F STVQLITQPM  | 7     | 11    |
| >EGFR-L792F STVQLITQLM  | 139  | >EGFR-L792F STVQLITQPM  | 63    | 76    |
| >EGFR-L792F STVQLITQL   | 116  | >EGFR-L792F STVQLITQP   | 14009 | 13893 |
| >EGFR-L792F STVQLITQLM  | 296  | >EGFR-L792F STVQLITQPM  | 158   | 138   |
| >EGFR-L792F STVQLITQL   | 222  | >EGFR-L792F STVQLITQP   | 14660 | 14438 |
| >EGFR-L792F STVQLITQLM  | 528  | >EGFR-L792F STVQLITQPM  | 108   | 420   |
| >EGFR-L792F STVQLITQLM  | 2733 | >EGFR-L792F STVQLITQPM  | 315   | 2418  |
| >EGFR-L792F STVQLITQL   | 7    | >EGFR-L792F STVQLITQP   | 9643  | 9636  |
| >EGFR-L792F STVQLITQLM  | 18   | >EGFR-L792F STVQLITQPM  | 9     | 9     |
| >EGFR-L792F STVQLITQL   | 170  | >EGFR-L792F STVQLITQP   | 10005 | 9835  |
| >EGFR-L792F STVQLITQLM  | 72   | >EGFR-L792F STVQLITQPM  | 282   | 210   |
| >EGFR-L792F STVQLITQL   | 17   | >EGFR-L792F STVQLITQP   | 2230  | 2213  |
| >EGFR-L792F STVQLITQLM  | 24   | >EGFR-L792F STVQLITQPM  | 47    | 23    |
| >EGFR-L792F STVQLITQL   | 249  | >EGFR-L792F STVQLITQP   | 27231 | 26982 |
| >EGFR-L792F TSTVQLITQL  | 59   | >EGFR-L792F TSTVQLITQP  | 18919 | 18860 |
| >EGFR-L792F TSTVQLITQLM | 239  | >EGFR-L792F TSTVQLITQPI | 72    | 167   |
| >EGFR-L792F TSTVQLITQL  | 474  | >EGFR-L792F TSTVQLITQP  | 17891 | 17417 |
| >EGFR-L792F TSTVQLITQLM | 203  | >EGFR-L792F TSTVQLITQPI | 887   | 684   |

|                         |      |                         |       |       |
|-------------------------|------|-------------------------|-------|-------|
| >EGFR-L792F TSTVQLITQL  | 253  | >EGFR-L792F TSTVQLITQP  | 18348 | 18095 |
| >EGFR-L792F TSTVQLITQLM | 171  | >EGFR-L792F TSTVQLITQPI | 1657  | 1486  |
| >EGFR-L798F LLDYVREHK   | 738  | >EGFR-L798F FLDYVREHK   | 159   | 579   |
| >EGFR-L798F CLLDYVREHK  | 74   | >EGFR-L798F CFLDYVREHK  | 772   | 698   |
| >EGFR-L798F CLLDYVREHK  | 144  | >EGFR-L798F CFLDYVREHK  | 666   | 522   |
| >EGFR-L798F CLLDYVREHK  | 570  | >EGFR-L798F CFLDYVREHK  | 188   | 382   |
| >EGFR-L798F LITQLMPFGC  | 1674 | >EGFR-L798F LITQLMPFGC  | 240   | 1434  |
| >EGFR-L798F GCCLDYVR    | 361  | >EGFR-L798F GCFLDYVR    | 158   | 203   |
| >EGFR-L798F FGCLLDYV    | 218  | >EGFR-L798F FGCFLDYV    | 103   | 115   |
| >EGFR-L798F FGCLLDYV    | 151  | >EGFR-L798F FGCFLDYV    | 147   | 4     |
| >EGFR-L798F FGCLLDYV    | 862  | >EGFR-L798F FGCFLDYV    | 339   | 523   |
| >EGFR-L798F FGCLLDYVR   | 542  | >EGFR-L798F FGCFLDYVR   | 132   | 410   |
| >EGFR-L798F FGCLLDYV    | 1571 | >EGFR-L798F FGCFLDYV    | 417   | 1154  |
| >EGFR-L798F FGCLLDYVR   | 78   | >EGFR-L798F FGCFLDYVR   | 86    | 8     |
| >EGFR-L798F PFGCLLDY    | 31   | >EGFR-L798F PFGCLDY     | 24    | 7     |
| >EGFR-L798F PFGCLLDY    | 341  | >EGFR-L798F PFGCLDY     | 291   | 50    |
| >EGFR-L798F PFGCLLDYVR  | 1649 | >EGFR-L798F PFGCLDYVR   | 413   | 1236  |
| >EGFR-L798F PFGCLLDYVR  | 35   | >EGFR-L798F PFGCLDYVR   | 21    | 14    |
| >EGFR-L798F MPFGCLLDY   | 79   | >EGFR-L798F MPFGCLDY    | 27    | 52    |
| >EGFR-L798F MPFGCLLDY\  | 8    | >EGFR-L798F MPFGCLDY\   | 7     | 1     |
| >EGFR-L798F MPFGCLLDY\  | 203  | >EGFR-L798F MPFGCLDY\   | 192   | 11    |
| >EGFR-L798F MPFGCLLDY\  | 131  | >EGFR-L798F MPFGCLDY\   | 112   | 19    |
| >EGFR-L798F MPFGCLLDY\  | 399  | >EGFR-L798F MPFGCLDY\   | 358   | 41    |
| >EGFR-L798F MPFGCLLDY   | 17   | >EGFR-L798F MPFGCLDY    | 12    | 5     |
| >EGFR-L798F MPFGCLLDY\  | 498  | >EGFR-L798F MPFGCLDY\   | 276   | 222   |
| >EGFR-L798F MPFGCLLDY\  | 425  | >EGFR-L798F MPFGCLDY\   | 292   | 133   |
| >EGFR-L798F MPFGCLLDY\  | 63   | >EGFR-L798F MPFGCLDY\   | 37    | 26    |
| >EGFR-L798F MPFGCLLDY\  | 1122 | >EGFR-L798F MPFGCLDY\   | 412   | 710   |
| >EGFR-L798F MPFGCLLDY\  | 282  | >EGFR-L798F MPFGCLDY\   | 182   | 100   |
| >EGFR-L798F MPFGCLLDY   | 359  | >EGFR-L798F MPFGCLDY    | 195   | 164   |
| >EGFR-L798F MPFGCLLDY   | 480  | >EGFR-L798F MPFGCLDY    | 135   | 345   |
| >EGFR-L798F MPFGCLLDY   | 297  | >EGFR-L798F MPFGCLDY    | 278   | 19    |
| >EGFR-L798F MPFGCLLDY   | 8    | >EGFR-L798F MPFGCLDY    | 8     | 0     |
| >EGFR-L798F MPFGCLLDY\  | 80   | >EGFR-L798F MPFGCLDY\   | 61    | 19    |
| >EGFR-L798F MPFGCLLDY   | 13   | >EGFR-L798F MPFGCLDY    | 9     | 4     |
| >EGFR-L798F MPFGCLLD    | 63   | >EGFR-L798F MPFGCLD     | 16    | 47    |
| >EGFR-L798F MPFGCLLDY   | 254  | >EGFR-L798F MPFGCLDY    | 45    | 209   |
| >EGFR-L798F MPFGCLLDY\  | 25   | >EGFR-L798F MPFGCLDY\   | 31    | 6     |
| >EGFR-L798F MPFGCLLDY\  | 43   | >EGFR-L798F MPFGCLDY\   | 27    | 16    |
| >EGFR-L798F MPFGCLLDY   | 616  | >EGFR-L798F MPFGCLDY    | 430   | 186   |
| >EGFR-L798F MPFGCLLDY   | 95   | >EGFR-L798F MPFGCLDY    | 20    | 75    |
| >EGFR-L798F MPFGCLLDY   | 101  | >EGFR-L798F MPFGCLDY    | 79    | 22    |
| >EGFR-L798F MPFGCLLDY   | 494  | >EGFR-L798F MPFGCLDY    | 2039  | 1545  |

|                        |     |                        |       |       |
|------------------------|-----|------------------------|-------|-------|
| >EGFR-L798F MPFGCLLDY\ | 32  | >EGFR-L798F MPFGCFLDY  | 23    | 9     |
| >EGFR-L798F LMPFGCLL   | 297 | >EGFR-L798F LMPFGCFL   | 118   | 179   |
| >EGFR-L798F LMPFGCLLDY | 24  | >EGFR-L798F LMPFGCFLDY | 16    | 8     |
| >EGFR-L798F LMPFGCLL   | 71  | >EGFR-L798F LMPFGCFL   | 27    | 44    |
| >EGFR-L798F LMPFGCLLDY | 12  | >EGFR-L798F LMPFGCFLDY | 6     | 6     |
| >EGFR-L798F LMPFGCLL   | 80  | >EGFR-L798F LMPFGCFL   | 60    | 20    |
| >EGFR-L798F LMPFGCLLDY | 8   | >EGFR-L798F LMPFGCFLDY | 6     | 2     |
| >EGFR-L798F LMPFGCLL   | 248 | >EGFR-L798F LMPFGCFL   | 64    | 184   |
| >EGFR-L798F LMPFGCLLDY | 12  | >EGFR-L798F LMPFGCFLDY | 8     | 4     |
| >EGFR-L798F LMPFGCLL   | 35  | >EGFR-L798F LMPFGCFL   | 12    | 23    |
| >EGFR-L798F LMPFGCLLDY | 3   | >EGFR-L798F LMPFGCFLDY | 2     | 1     |
| >EGFR-L798F LMPFGCLL   | 522 | >EGFR-L798F LMPFGCFL   | 105   | 417   |
| >EGFR-L798F LMPFGCLLDY | 14  | >EGFR-L798F LMPFGCFLDY | 7     | 7     |
| >EGFR-L798F LMPFGCLL   | 83  | >EGFR-L798F LMPFGCFL   | 20    | 63    |
| >EGFR-L798F LMPFGCLLDY | 8   | >EGFR-L798F LMPFGCFLDY | 7     | 1     |
| >EGFR-L798F LMPFGCLL   | 489 | >EGFR-L798F LMPFGCFL   | 42    | 447   |
| >EGFR-L798F LMPFGCLLDY | 6   | >EGFR-L798F LMPFGCFLDY | 3     | 3     |
| >EGFR-L798F LMPFGCLL   | 8   | >EGFR-L798F LMPFGCFL   | 6     | 2     |
| >EGFR-L798F LMPFGCLLDY | 3   | >EGFR-L798F LMPFGCFLDY | 3     | 0     |
| >EGFR-L798F LMPFGCLLDY | 254 | >EGFR-L798F LMPFGCFLDY | 227   | 27    |
| >EGFR-L798F LMPFGCLLDY | 326 | >EGFR-L798F LMPFGCFLDY | 177   | 149   |
| >EGFR-L798F LMPFGCLLDY | 259 | >EGFR-L798F LMPFGCFLDY | 256   | 3     |
| >EGFR-L798F LMPFGCLLDY | 592 | >EGFR-L798F LMPFGCFLDY | 254   | 338   |
| >EGFR-L798F LMPFGCLLDY | 97  | >EGFR-L798F LMPFGCFLDY | 131   | 34    |
| >EGFR-L798F LMPFGCLLDY | 117 | >EGFR-L798F LMPFGCFLDY | 101   | 16    |
| >EGFR-L798F LMPFGCLLDY | 596 | >EGFR-L798F LMPFGCFLDY | 366   | 230   |
| >EGFR-L798F LMPFGCLL   | 9   | >EGFR-L798F LMPFGCFL   | 19    | 10    |
| >EGFR-L798F LMPFGCLLDY | 509 | >EGFR-L798F LMPFGCFLDY | 215   | 294   |
| >EGFR-L798F LMPFGCLLDY | 344 | >EGFR-L798F LMPFGCFLDY | 697   | 353   |
| >EGFR-L798F QLMPFGCL   | 215 | >EGFR-L798F QLMPFGCF   | 12497 | 12282 |
| >EGFR-L798F QLMPFGCLL  | 39  | >EGFR-L798F QLMPFGCFL  | 24    | 15    |
| >EGFR-L798F QLMPFGCL   | 30  | >EGFR-L798F QLMPFGCF   | 1334  | 1304  |
| >EGFR-L798F QLMPFGCLL  | 8   | >EGFR-L798F QLMPFGCFL  | 5     | 3     |
| >EGFR-L798F QLMPFGCL   | 212 | >EGFR-L798F QLMPFGCF   | 7804  | 7592  |
| >EGFR-L798F QLMPFGCLL  | 53  | >EGFR-L798F QLMPFGCFL  | 40    | 13    |
| >EGFR-L798F QLMPFGCL   | 201 | >EGFR-L798F QLMPFGCF   | 1044  | 843   |
| >EGFR-L798F QLMPFGCLL  | 45  | >EGFR-L798F QLMPFGCFL  | 14    | 31    |
| >EGFR-L798F QLMPFGCL   | 123 | >EGFR-L798F QLMPFGCF   | 6092  | 5969  |
| >EGFR-L798F QLMPFGCLL  | 17  | >EGFR-L798F QLMPFGCFL  | 8     | 9     |
| >EGFR-L798F QLMPFGCL   | 120 | >EGFR-L798F QLMPFGCF   | 11566 | 11446 |
| >EGFR-L798F QLMPFGCLL  | 42  | >EGFR-L798F QLMPFGCFL  | 11    | 31    |
| >EGFR-L798F QLMPFGCL   | 485 | >EGFR-L798F QLMPFGCF   | 17368 | 16883 |
| >EGFR-L798F QLMPFGCLL  | 96  | >EGFR-L798F QLMPFGCFL  | 26    | 70    |

|                        |      |                        |       |       |
|------------------------|------|------------------------|-------|-------|
| >EGFR-L798F QLMPFGCL   | 77   | >EGFR-L798F QLMPFGCF   | 10170 | 10093 |
| >EGFR-L798F QLMPFGCLL  | 37   | >EGFR-L798F QLMPFGCFL  | 9     | 28    |
| >EGFR-L798F QLMPFGCL   | 36   | >EGFR-L798F QLMPFGCF   | 9080  | 9044  |
| >EGFR-L798F QLMPFGCLL  | 4    | >EGFR-L798F QLMPFGCFL  | 4     | 0     |
| >EGFR-L798F QLMPFGCLLI | 522  | >EGFR-L798F QLMPFGCFLI | 320   | 202   |
| >EGFR-L798F QLMPFGCLLI | 723  | >EGFR-L798F QLMPFGCFLI | 367   | 356   |
| >EGFR-L798F QLMPFGCLLI | 15   | >EGFR-L798F QLMPFGCFLI | 14    | 1     |
| >EGFR-L798F QLMPFGCLLI | 328  | >EGFR-L798F QLMPFGCFLI | 282   | 46    |
| >EGFR-L798F QLMPFGCLL  | 639  | >EGFR-L798F QLMPFGCFL  | 224   | 415   |
| >EGFR-L798F QLMPFGCLLI | 23   | >EGFR-L798F QLMPFGCFLI | 19    | 4     |
| >EGFR-L798F QLMPFGCL   | 1947 | >EGFR-L798F QLMPFGCF   | 105   | 1842  |
| >EGFR-L798F QLMPFGCLLI | 111  | >EGFR-L798F QLMPFGCFLI | 75    | 36    |
| >EGFR-L798F QLMPFGCL   | 1295 | >EGFR-L798F QLMPFGCF   | 84    | 1211  |
| >EGFR-L798F QLMPFGCLLI | 92   | >EGFR-L798F QLMPFGCFLI | 86    | 6     |
| >EGFR-L798F QLMPFGCL   | 1014 | >EGFR-L798F QLMPFGCF   | 48    | 966   |
| >EGFR-L798F QLMPFGCLL  | 623  | >EGFR-L798F QLMPFGCFL  | 480   | 143   |
| >EGFR-L798F QLMPFGCLLI | 124  | >EGFR-L798F QLMPFGCFLI | 62    | 62    |
| >EGFR-L798F TQLMPFGCLI | 623  | >EGFR-L798F TQLMPFGCFI | 434   | 189   |
| >EGFR-L798F TQLMPFGCL  | 200  | >EGFR-L798F TQLMPFGCF  | 907   | 707   |
| >EGFR-L798F TQLMPFGCLI | 128  | >EGFR-L798F TQLMPFGCFI | 88    | 40    |
| >EGFR-L798F TQLMPFGCL  | 4069 | >EGFR-L798F TQLMPFGCF  | 141   | 3928  |
| >EGFR-L798F TQLMPFGCL  | 3852 | >EGFR-L798F TQLMPFGCF  | 364   | 3488  |
| >EGFR-L798F TQLMPFGCL  | 581  | >EGFR-L798F TQLMPFGCF  | 17    | 564   |
| >EGFR-L798F TQLMPFGCLI | 251  | >EGFR-L798F TQLMPFGCFI | 180   | 71    |
| >EGFR-L798F TQLMPFGCLI | 420  | >EGFR-L798F TQLMPFGCFI | 893   | 473   |
| >EGFR-L798F ITQLMPFGCL | 365  | >EGFR-L798F ITQLMPFGCF | 39    | 326   |
| >EGFR-L798F ITQLMPFGCL | 17   | >EGFR-L798F ITQLMPFGCF | 16    | 1     |
| >EGFR-L798F ITQLMPFGCL | 120  | >EGFR-L798F ITQLMPFGCF | 103   | 17    |
| >EGFR-L798F ITQLMPFGCL | 187  | >EGFR-L798F ITQLMPFGCF | 41    | 146   |
| >EGFR-L798F ITQLMPFGCL | 132  | >EGFR-L798F ITQLMPFGCF | 248   | 116   |
| >EGFR-L798F LLDYVREHK  | 1369 | >EGFR-L798F HLDYVREHK  | 478   | 891   |
| >EGFR-L798F LLDYVREHK  | 738  | >EGFR-L798F HLDYVREHK  | 215   | 523   |
| >EGFR-L798F CLLDYVREHK | 74   | >EGFR-L798F CHLDYVREHK | 18385 | 18311 |
| >EGFR-L798F CLLDYVREHK | 144  | >EGFR-L798F CHLDYVREHK | 21830 | 21686 |
| >EGFR-L798F GCLLDYVR   | 361  | >EGFR-L798F GCHLDYVR   | 727   | 366   |
| >EGFR-L798F FGCLLDYV   | 218  | >EGFR-L798F FGCHLDYV   | 126   | 92    |
| >EGFR-L798F FGCLLDYV   | 151  | >EGFR-L798F FGCHLDYV   | 122   | 29    |
| >EGFR-L798F FGCLLDYV   | 862  | >EGFR-L798F FGCHLDYV   | 422   | 440   |
| >EGFR-L798F FGCLLDYVR  | 542  | >EGFR-L798F FGCHLDYVR  | 481   | 61    |
| >EGFR-L798F FGCLLDYVR  | 78   | >EGFR-L798F FGCHLDYVR  | 73    | 5     |
| >EGFR-L798F PFGCLLDY   | 31   | >EGFR-L798F PFGCHLDY   | 23    | 8     |
| >EGFR-L798F PFGCLLDY   | 341  | >EGFR-L798F PFGCHLDY   | 960   | 619   |
| >EGFR-L798F PFGCLLDYVR | 35   | >EGFR-L798F PFGCHLDYVR | 40    | 5     |

|                        |     |                        |     |     |
|------------------------|-----|------------------------|-----|-----|
| >EGFR-L798F MPFGCLLDY  | 79  | >EGFR-L798F MPFGCHLDY  | 56  | 23  |
| >EGFR-L798F MPFGCLLDY\ | 8   | >EGFR-L798F MPFGCHLDY' | 9   | 1   |
| >EGFR-L798F MPFGCLLDY\ | 203 | >EGFR-L798F MPFGCHLDY' | 329 | 126 |
| >EGFR-L798F MPFGCLLDY\ | 131 | >EGFR-L798F MPFGCHLDY' | 397 | 266 |
| >EGFR-L798F MPFGCLLDY\ | 399 | >EGFR-L798F MPFGCHLDY' | 484 | 85  |
| >EGFR-L798F MPFGCLLDY  | 17  | >EGFR-L798F MPFGCHLDY  | 13  | 4   |
| >EGFR-L798F MPFGCLLDY\ | 498 | >EGFR-L798F MPFGCHLDY' | 319 | 179 |
| >EGFR-L798F MPFGCLLDY\ | 425 | >EGFR-L798F MPFGCHLDY' | 331 | 94  |
| >EGFR-L798F MPFGCLLDY\ | 63  | >EGFR-L798F MPFGCHLDY' | 40  | 23  |
| >EGFR-L798F MPFGCLLDY\ | 282 | >EGFR-L798F MPFGCHLDY' | 347 | 65  |
| >EGFR-L798F MPFGCLLDY  | 359 | >EGFR-L798F MPFGCHLDY  | 384 | 25  |
| >EGFR-L798F MPFGCLLDY  | 480 | >EGFR-L798F MPFGCHLDY  | 236 | 244 |
| >EGFR-L798F MPFGCLLDY  | 297 | >EGFR-L798F MPFGCHLDY  | 198 | 99  |
| >EGFR-L798F MPFGCLLDY  | 8   | >EGFR-L798F MPFGCHLDY  | 8   | 0   |
| >EGFR-L798F MPFGCLLDY\ | 80  | >EGFR-L798F MPFGCHLDY' | 56  | 24  |
| >EGFR-L798F MPFGCLLDY  | 13  | >EGFR-L798F MPFGCHLDY  | 21  | 8   |
| >EGFR-L798F MPFGCLLD   | 63  | >EGFR-L798F MPFGCHLD   | 39  | 24  |
| >EGFR-L798F MPFGCLLDY  | 254 | >EGFR-L798F MPFGCHLDY  | 670 | 416 |
| >EGFR-L798F MPFGCLLDY\ | 25  | >EGFR-L798F MPFGCHLDY' | 17  | 8   |
| >EGFR-L798F MPFGCLLDY\ | 43  | >EGFR-L798F MPFGCHLDY' | 67  | 24  |
| >EGFR-L798F MPFGCLLDY  | 616 | >EGFR-L798F MPFGCHLDY  | 461 | 155 |
| >EGFR-L798F MPFGCLLDY  | 95  | >EGFR-L798F MPFGCHLDY  | 136 | 41  |
| >EGFR-L798F MPFGCLLDY  | 101 | >EGFR-L798F MPFGCHLDY  | 69  | 32  |
| >EGFR-L798F MPFGCLLDY  | 494 | >EGFR-L798F MPFGCHLDY  | 714 | 220 |
| >EGFR-L798F MPFGCLLDY\ | 32  | >EGFR-L798F MPFGCHLDY' | 25  | 7   |
| >EGFR-L798F LMPFGCLL   | 297 | >EGFR-L798F LMPFGCHL   | 605 | 308 |
| >EGFR-L798F LMPFGCLLDY | 24  | >EGFR-L798F LMPFGCHLD' | 22  | 2   |
| >EGFR-L798F LMPFGCLL   | 71  | >EGFR-L798F LMPFGCHL   | 95  | 24  |
| >EGFR-L798F LMPFGCLLDY | 12  | >EGFR-L798F LMPFGCHLD' | 6   | 6   |
| >EGFR-L798F LMPFGCLL   | 80  | >EGFR-L798F LMPFGCHL   | 88  | 8   |
| >EGFR-L798F LMPFGCLLDY | 8   | >EGFR-L798F LMPFGCHLD' | 5   | 3   |
| >EGFR-L798F LMPFGCLL   | 248 | >EGFR-L798F LMPFGCHL   | 174 | 74  |
| >EGFR-L798F LMPFGCLLDY | 12  | >EGFR-L798F LMPFGCHLD' | 9   | 3   |
| >EGFR-L798F LMPFGCLL   | 35  | >EGFR-L798F LMPFGCHL   | 25  | 10  |
| >EGFR-L798F LMPFGCLLDY | 3   | >EGFR-L798F LMPFGCHLD' | 3   | 0   |
| >EGFR-L798F LMPFGCLL   | 522 | >EGFR-L798F LMPFGCHL   | 156 | 366 |
| >EGFR-L798F LMPFGCLLDY | 14  | >EGFR-L798F LMPFGCHLD' | 7   | 7   |
| >EGFR-L798F LMPFGCLL   | 83  | >EGFR-L798F LMPFGCHL   | 40  | 43  |
| >EGFR-L798F LMPFGCLLDY | 8   | >EGFR-L798F LMPFGCHLD' | 8   | 0   |
| >EGFR-L798F LMPFGCLL   | 489 | >EGFR-L798F LMPFGCHL   | 231 | 258 |
| >EGFR-L798F LMPFGCLLDY | 6   | >EGFR-L798F LMPFGCHLD' | 4   | 2   |
| >EGFR-L798F LMPFGCLL   | 8   | >EGFR-L798F LMPFGCHL   | 6   | 2   |
| >EGFR-L798F LMPFGCLLDY | 3   | >EGFR-L798F LMPFGCHLD' | 3   | 0   |



|                        |      |                        |       |       |
|------------------------|------|------------------------|-------|-------|
| >EGFR-L798F LMPFGCLLDY | 254  | >EGFR-L798F LMPFGCHLD' | 310   | 56    |
| >EGFR-L798F LMPFGCLLDY | 326  | >EGFR-L798F LMPFGCHLD' | 206   | 120   |
| >EGFR-L798F LMPFGCLLDY | 259  | >EGFR-L798F LMPFGCHLD' | 316   | 57    |
| >EGFR-L798F LMPFGCLLDY | 592  | >EGFR-L798F LMPFGCHLD' | 453   | 139   |
| >EGFR-L798F LMPFGCLLDY | 97   | >EGFR-L798F LMPFGCHLD' | 202   | 105   |
| >EGFR-L798F LMPFGCLL   | 1582 | >EGFR-L798F LMPFGCHL   | 330   | 1252  |
| >EGFR-L798F LMPFGCLLDY | 117  | >EGFR-L798F LMPFGCHLD' | 119   | 2     |
| >EGFR-L798F LMPFGCLLDY | 596  | >EGFR-L798F LMPFGCHLD' | 444   | 152   |
| >EGFR-L798F LMPFGCLL   | 9    | >EGFR-L798F LMPFGCHL   | 37    | 28    |
| >EGFR-L798F LMPFGCLLDY | 509  | >EGFR-L798F LMPFGCHLD' | 283   | 226   |
| >EGFR-L798F LMPFGCLLDY | 344  | >EGFR-L798F LMPFGCHLD' | 565   | 221   |
| >EGFR-L798F QLMPFGCL   | 215  | >EGFR-L798F QLMPFGCH   | 22589 | 22374 |
| >EGFR-L798F QLMPFGCLL  | 39   | >EGFR-L798F QLMPFGCHL  | 93    | 54    |
| >EGFR-L798F QLMPFGCL   | 30   | >EGFR-L798F QLMPFGCH   | 7631  | 7601  |
| >EGFR-L798F QLMPFGCLL  | 8    | >EGFR-L798F QLMPFGCHL  | 10    | 2     |
| >EGFR-L798F QLMPFGCL   | 212  | >EGFR-L798F QLMPFGCH   | 18021 | 17809 |
| >EGFR-L798F QLMPFGCLL  | 53   | >EGFR-L798F QLMPFGCHL  | 75    | 22    |
| >EGFR-L798F QLMPFGCL   | 201  | >EGFR-L798F QLMPFGCH   | 21347 | 21146 |
| >EGFR-L798F QLMPFGCLL  | 45   | >EGFR-L798F QLMPFGCHL  | 28    | 17    |
| >EGFR-L798F QLMPFGCL   | 123  | >EGFR-L798F QLMPFGCH   | 20896 | 20773 |
| >EGFR-L798F QLMPFGCLL  | 17   | >EGFR-L798F QLMPFGCHL  | 17    | 0     |
| >EGFR-L798F QLMPFGCL   | 120  | >EGFR-L798F QLMPFGCH   | 22442 | 22322 |
| >EGFR-L798F QLMPFGCLL  | 42   | >EGFR-L798F QLMPFGCHL  | 17    | 25    |
| >EGFR-L798F QLMPFGCL   | 485  | >EGFR-L798F QLMPFGCH   | 23308 | 22823 |
| >EGFR-L798F QLMPFGCLL  | 96   | >EGFR-L798F QLMPFGCHL  | 54    | 42    |
| >EGFR-L798F QLMPFGCL   | 77   | >EGFR-L798F QLMPFGCH   | 22828 | 22751 |
| >EGFR-L798F QLMPFGCLL  | 37   | >EGFR-L798F QLMPFGCHL  | 52    | 15    |
| >EGFR-L798F QLMPFGCL   | 36   | >EGFR-L798F QLMPFGCH   | 20125 | 20089 |
| >EGFR-L798F QLMPFGCLL  | 4    | >EGFR-L798F QLMPFGCHL  | 4     | 0     |
| >EGFR-L798F QLMPFGCLLI | 15   | >EGFR-L798F QLMPFGCHLI | 16    | 1     |
| >EGFR-L798F QLMPFGCLLI | 328  | >EGFR-L798F QLMPFGCHLI | 407   | 79    |
| >EGFR-L798F QLMPFGCLLI | 23   | >EGFR-L798F QLMPFGCHLI | 28    | 5     |
| >EGFR-L798F QLMPFGCLL  | 1175 | >EGFR-L798F QLMPFGCHL  | 168   | 1007  |
| >EGFR-L798F QLMPFGCLLI | 111  | >EGFR-L798F QLMPFGCHLI | 85    | 26    |
| >EGFR-L798F QLMPFGCLLI | 92   | >EGFR-L798F QLMPFGCHLI | 67    | 25    |
| >EGFR-L798F QLMPFGCLL  | 623  | >EGFR-L798F QLMPFGCHL  | 414   | 209   |
| >EGFR-L798F QLMPFGCLLI | 124  | >EGFR-L798F QLMPFGCHLI | 80    | 44    |
| >EGFR-L798F QLMPFGCLLI | 537  | >EGFR-L798F QLMPFGCHLI | 414   | 123   |
| >EGFR-L798F TQLMPFGCL  | 200  | >EGFR-L798F TQLMPFGCH  | 16962 | 16762 |
| >EGFR-L798F TQLMPFGCLI | 128  | >EGFR-L798F TQLMPFGCH  | 163   | 35    |
| >EGFR-L798F TQLMPFGCLI | 251  | >EGFR-L798F TQLMPFGCH  | 133   | 118   |
| >EGFR-L798F TQLMPFGCLI | 420  | >EGFR-L798F TQLMPFGCH  | 1503  | 1083  |
| >EGFR-L798F ITQLMPFGCL | 365  | >EGFR-L798F ITQLMPFGCH | 6656  | 6291  |

|                        |       |                         |       |       |
|------------------------|-------|-------------------------|-------|-------|
| >EGFR-L798F ITQLMPFGCL | 17    | >EGFR-L798F ITQLMPFGCF  | 13    | 4     |
| >EGFR-L798F ITQLMPFGCL | 120   | >EGFR-L798F ITQLMPFGCF  | 623   | 503   |
| >EGFR-L798F ITQLMPFGCL | 187   | >EGFR-L798F ITQLMPFGCF  | 3389  | 3202  |
| >EGFR-L798F ITQLMPFGCL | 132   | >EGFR-L798F ITQLMPFGCF  | 1042  | 910   |
| >EGFR-L799F LDYVREHKDI | 101   | >EGFR-L799F RDYVREHKDI  | 340   | 239   |
| >EGFR-L799F LDYVREHKDI | 286   | >EGFR-L799F RDYVREHKDI  | 63    | 223   |
| >EGFR-L799F LDYVREHKDI | 387   | >EGFR-L799F RDYVREHKDI  | 1872  | 1485  |
| >EGFR-L799F LDYVREHKDI | 62    | >EGFR-L799F RDYVREHKDI  | 60    | 2     |
| >EGFR-L799F ITQLMPFGCL | 12703 | >EGFR-L799F ITQLMPFGCL  | 58    | 12645 |
| >EGFR-L799F ITQLMPFGCL | 10408 | >EGFR-L799F ITQLMPFGCL  | 19    | 10389 |
| >EGFR-L799F ITQLMPFGCL | 11961 | >EGFR-L799F ITQLMPFGCL  | 54    | 11907 |
| >EGFR-L799F ITQLMPFGCL | 19129 | >EGFR-L799F ITQLMPFGCL  | 28    | 19101 |
| >EGFR-L799F ITQLMPFGCL | 17    | >EGFR-L799F ITQLMPFGCL  | 8383  | 8366  |
| >EGFR-L799F ITQLMPFGCL | 120   | >EGFR-L799F ITQLMPFGCL  | 10887 | 10767 |
| >EGFR-L799F ITQLMPFGCL | 132   | >EGFR-L799F ITQLMPFGCL  | 3734  | 3602  |
| >EGFR-L799F ITQLMPFGCL | 34561 | >EGFR-L799F ITQLMPFGCL  | 350   | 34211 |
| >EGFR-L799F CLLDYVREHK | 74    | >EGFR-L799F CLRDYVREHK  | 181   | 107   |
| >EGFR-L799F CLLDYVREHK | 144   | >EGFR-L799F CLRDYVREHK  | 1226  | 1082  |
| >EGFR-L799F CLLDYVREHK | 4522  | >EGFR-L799F CLRDYVREHK  | 55    | 4467  |
| >EGFR-L799F CLLDYVREHK | 570   | >EGFR-L799F CLRDYVREHK  | 393   | 177   |
| >EGFR-L799F GCLLDYVR   | 361   | >EGFR-L799F GCLR DYVR   | 622   | 261   |
| >EGFR-L799F FGCLLDYV   | 218   | >EGFR-L799F FGCLR DYV   | 1121  | 903   |
| >EGFR-L799F FGCLLDYV   | 151   | >EGFR-L799F FGCLR DYV   | 815   | 664   |
| >EGFR-L799F FGCLLDYVR  | 78    | >EGFR-L799F FGCLR DYVR  | 148   | 70    |
| >EGFR-L799F PFGCLLDY   | 31    | >EGFR-L799F PFGCLR DY   | 194   | 163   |
| >EGFR-L799F PFGCLLDY   | 341   | >EGFR-L799F PFGCLR DY   | 6541  | 6200  |
| >EGFR-L799F PFGCLLDYVR | 35    | >EGFR-L799F PFGCLR DYVR | 30    | 5     |
| >EGFR-L799F MPFGCLLDY  | 79    | >EGFR-L799F MPFGCLR DY  | 412   | 333   |
| >EGFR-L799F MPFGCLLDY\ | 8     | >EGFR-L799F MPFGCLR DY\ | 10    | 2     |
| >EGFR-L799F MPFGCLLDY\ | 203   | >EGFR-L799F MPFGCLR DY\ | 721   | 518   |
| >EGFR-L799F MPFGCLLDY\ | 131   | >EGFR-L799F MPFGCLR DY\ | 765   | 634   |
| >EGFR-L799F MPFGCLLDY\ | 399   | >EGFR-L799F MPFGCLR DY\ | 1820  | 1421  |
| >EGFR-L799F MPFGCLLDY  | 17    | >EGFR-L799F MPFGCLR DY  | 245   | 228   |
| >EGFR-L799F MPFGCLLDY\ | 498   | >EGFR-L799F MPFGCLR DY\ | 442   | 56    |
| >EGFR-L799F MPFGCLLDY\ | 425   | >EGFR-L799F MPFGCLR DY\ | 339   | 86    |
| >EGFR-L799F MPFGCLLDY\ | 63    | >EGFR-L799F MPFGCLR DY\ | 103   | 40    |
| >EGFR-L799F MPFGCLLDY\ | 282   | >EGFR-L799F MPFGCLR DY\ | 701   | 419   |
| >EGFR-L799F MPFGCLLDY  | 359   | >EGFR-L799F MPFGCLR DY  | 13291 | 12932 |
| >EGFR-L799F MPFGCLLDY  | 480   | >EGFR-L799F MPFGCLR DY  | 1057  | 577   |
| >EGFR-L799F MPFGCLLDY  | 297   | >EGFR-L799F MPFGCLR DY  | 469   | 172   |
| >EGFR-L799F MPFGCLLDY  | 8     | >EGFR-L799F MPFGCLR DY  | 11    | 3     |
| >EGFR-L799F MPFGCLLDY\ | 80    | >EGFR-L799F MPFGCLR DY\ | 202   | 122   |
| >EGFR-L799F MPFGCLLDY  | 13    | >EGFR-L799F MPFGCLR DY  | 36    | 23    |

|                       |       |                        |       |       |
|-----------------------|-------|------------------------|-------|-------|
| >EGFR-L799FMPFGCLLD   | 63    | >EGFR-L799FMPFGCLRD    | 192   | 129   |
| >EGFR-L799FMPFGCLLDY  | 254   | >EGFR-L799FMPFGCLRDY   | 242   | 12    |
| >EGFR-L799FMPFGCLLDY\ | 25    | >EGFR-L799FMPFGCLRDY\  | 52    | 27    |
| >EGFR-L799FMPFGCLLDY\ | 43    | >EGFR-L799FMPFGCLRDY\  | 49    | 6     |
| >EGFR-L799FMPFGCLLDY  | 1087  | >EGFR-L799FMPFGCLRDY   | 376   | 711   |
| >EGFR-L799FMPFGCLLDY  | 95    | >EGFR-L799FMPFGCLRDY   | 164   | 69    |
| >EGFR-L799FMPFGCLLDY  | 101   | >EGFR-L799FMPFGCLRDY   | 1578  | 1477  |
| >EGFR-L799FMPFGCLLDY  | 494   | >EGFR-L799FMPFGCLRDY   | 3264  | 2770  |
| >EGFR-L799FMPFGCLLDY\ | 32    | >EGFR-L799FMPFGCLRDY\  | 58    | 26    |
| >EGFR-L799FLMPFGCLL   | 297   | >EGFR-L799FLMPFGCLR    | 22400 | 22103 |
| >EGFR-L799FLMPFGCLLDY | 24    | >EGFR-L799FLMPFGCLRDY\ | 103   | 79    |
| >EGFR-L799FLMPFGCLL   | 71    | >EGFR-L799FLMPFGCLR    | 16163 | 16092 |
| >EGFR-L799FLMPFGCLLDY | 12    | >EGFR-L799FLMPFGCLRDY\ | 24    | 12    |
| >EGFR-L799FLMPFGCLL   | 80    | >EGFR-L799FLMPFGCLR    | 15164 | 15084 |
| >EGFR-L799FLMPFGCLLDY | 8     | >EGFR-L799FLMPFGCLRDY\ | 19    | 11    |
| >EGFR-L799FLMPFGCLL   | 248   | >EGFR-L799FLMPFGCLR    | 19684 | 19436 |
| >EGFR-L799FLMPFGCLLDY | 12    | >EGFR-L799FLMPFGCLRDY\ | 46    | 34    |
| >EGFR-L799FLMPFGCLL   | 35    | >EGFR-L799FLMPFGCLR    | 12953 | 12918 |
| >EGFR-L799FLMPFGCLLDY | 3     | >EGFR-L799FLMPFGCLRDY\ | 6     | 3     |
| >EGFR-L799FLMPFGCLLDY | 14    | >EGFR-L799FLMPFGCLRDY\ | 55    | 41    |
| >EGFR-L799FLMPFGCLL   | 83    | >EGFR-L799FLMPFGCLR    | 18787 | 18704 |
| >EGFR-L799FLMPFGCLLDY | 8     | >EGFR-L799FLMPFGCLRDY\ | 14    | 6     |
| >EGFR-L799FLMPFGCLL   | 489   | >EGFR-L799FLMPFGCLR    | 25311 | 24822 |
| >EGFR-L799FLMPFGCLLDY | 6     | >EGFR-L799FLMPFGCLRDY\ | 23    | 17    |
| >EGFR-L799FLMPFGCLL   | 8     | >EGFR-L799FLMPFGCLR    | 10451 | 10443 |
| >EGFR-L799FLMPFGCLLDY | 3     | >EGFR-L799FLMPFGCLRDY\ | 5     | 2     |
| >EGFR-L799FLMPFGCLLDY | 254   | >EGFR-L799FLMPFGCLRDY\ | 759   | 505   |
| >EGFR-L799FLMPFGCLLDY | 326   | >EGFR-L799FLMPFGCLRDY\ | 917   | 591   |
| >EGFR-L799FLMPFGCLLDY | 259   | >EGFR-L799FLMPFGCLRDY\ | 235   | 24    |
| >EGFR-L799FLMPFGCLL   | 15255 | >EGFR-L799FLMPFGCLR    | 188   | 15067 |
| >EGFR-L799FLMPFGCLL   | 32592 | >EGFR-L799FLMPFGCLR    | 387   | 32205 |
| >EGFR-L799FLMPFGCLLDY | 592   | >EGFR-L799FLMPFGCLRDY\ | 457   | 135   |
| >EGFR-L799FLMPFGCLLDY | 97    | >EGFR-L799FLMPFGCLRDY\ | 2148  | 2051  |
| >EGFR-L799FLMPFGCLLDY | 117   | >EGFR-L799FLMPFGCLRDY\ | 217   | 100   |
| >EGFR-L799FLMPFGCLL   | 9     | >EGFR-L799FLMPFGCLR    | 2756  | 2747  |
| >EGFR-L799FLMPFGCLLDY | 344   | >EGFR-L799FLMPFGCLRDY\ | 943   | 599   |
| >EGFR-L799FLMPFGCLL   | 30827 | >EGFR-L799FLMPFGCLR    | 235   | 30592 |
| >EGFR-L799FQLMPFGCLL  | 39    | >EGFR-L799FQLMPFGCLR   | 19997 | 19958 |
| >EGFR-L799FQLMPFGCLL  | 8     | >EGFR-L799FQLMPFGCLR   | 2187  | 2179  |
| >EGFR-L799FQLMPFGCLL  | 53    | >EGFR-L799FQLMPFGCLR   | 14374 | 14321 |
| >EGFR-L799FQLMPFGCLL  | 45    | >EGFR-L799FQLMPFGCLR   | 15387 | 15342 |
| >EGFR-L799FQLMPFGCLL  | 17    | >EGFR-L799FQLMPFGCLR   | 10431 | 10414 |
| >EGFR-L799FQLMPFGCLL  | 42    | >EGFR-L799FQLMPFGCLR   | 21233 | 21191 |

|                       |       |                       |       |       |
|-----------------------|-------|-----------------------|-------|-------|
| >EGFR-L799FQLMPFGCLL  | 96    | >EGFR-L799FQLMPFGCLR  | 18806 | 18710 |
| >EGFR-L799FQLMPFGCLL  | 37    | >EGFR-L799FQLMPFGCLR  | 20477 | 20440 |
| >EGFR-L799FQLMPFGCLL  | 4     | >EGFR-L799FQLMPFGCLR  | 5899  | 5895  |
| >EGFR-L799FQLMPFGCLL  | 13626 | >EGFR-L799FQLMPFGCLR  | 104   | 13522 |
| >EGFR-L799FQLMPFGCLLI | 15    | >EGFR-L799FQLMPFGCLRI | 61    | 46    |
| >EGFR-L799FQLMPFGCLLI | 328   | >EGFR-L799FQLMPFGCLRI | 396   | 68    |
| >EGFR-L799FQLMPFGCLL  | 11928 | >EGFR-L799FQLMPFGCLR  | 41    | 11887 |
| >EGFR-L799FQLMPFGCLL  | 19111 | >EGFR-L799FQLMPFGCLR  | 186   | 18925 |
| >EGFR-L799FQLMPFGCLL  | 22200 | >EGFR-L799FQLMPFGCLR  | 61    | 22139 |
| >EGFR-L799FQLMPFGCLLI | 23    | >EGFR-L799FQLMPFGCLRI | 314   | 291   |
| >EGFR-L799FQLMPFGCLLI | 111   | >EGFR-L799FQLMPFGCLRI | 207   | 96    |
| >EGFR-L799FQLMPFGCLLI | 92    | >EGFR-L799FQLMPFGCLRI | 88    | 4     |
| >EGFR-L799FQLMPFGCLLI | 124   | >EGFR-L799FQLMPFGCLRI | 182   | 58    |
| >EGFR-L799FQLMPFGCLL  | 11802 | >EGFR-L799FQLMPFGCLR  | 50    | 11752 |
| >EGFR-L799FTQLMPFGCLL | 128   | >EGFR-L799FTQLMPFGCLF | 7181  | 7053  |
| >EGFR-L799FTQLMPFGCLL | 29879 | >EGFR-L799FTQLMPFGCLF | 230   | 29649 |
| >EGFR-L799FTQLMPFGCLL | 7155  | >EGFR-L799FTQLMPFGCLF | 24    | 7131  |
| >EGFR-L799FTQLMPFGCLL | 16942 | >EGFR-L799FTQLMPFGCLF | 181   | 16761 |
| >EGFR-L799FTQLMPFGCLL | 24898 | >EGFR-L799FTQLMPFGCLF | 74    | 24824 |
| >EGFR-L799FTQLMPFGCLL | 251   | >EGFR-L799FTQLMPFGCLF | 1843  | 1592  |
| >EGFR-L799FTQLMPFGCLL | 420   | >EGFR-L799FTQLMPFGCLF | 21640 | 21220 |
| >EGFR-L799FTQLMPFGCLL | 27449 | >EGFR-L799FTQLMPFGCLF | 125   | 27324 |
| >EGFR-L814FLLNWCVQI   | 39    | >EGFR-L814FPLNWCVQI   | 3956  | 3917  |
| >EGFR-L814FLLNWCVQIA  | 168   | >EGFR-L814FPLNWCVQIA  | 9463  | 9295  |
| >EGFR-L814FLLNWCVQI   | 20    | >EGFR-L814FPLNWCVQI   | 956   | 936   |
| >EGFR-L814FLLNWCVQIA  | 58    | >EGFR-L814FPLNWCVQIA  | 3214  | 3156  |
| >EGFR-L814FLLNWCVQI   | 12    | >EGFR-L814FPLNWCVQI   | 699   | 687   |
| >EGFR-L814FLLNWCVQIA  | 7     | >EGFR-L814FPLNWCVQIA  | 572   | 565   |
| >EGFR-L814FLLNWCVQI   | 6     | >EGFR-L814FPLNWCVQI   | 73    | 67    |
| >EGFR-L814FLLNWCVQIA  | 40    | >EGFR-L814FPLNWCVQIA  | 1004  | 964   |
| >EGFR-L814FLLNWCVQI   | 100   | >EGFR-L814FPLNWCVQI   | 5085  | 4985  |
| >EGFR-L814FLLNWCVQIA  | 231   | >EGFR-L814FPLNWCVQIA  | 9631  | 9400  |
| >EGFR-L814FLLNWCVQI   | 28    | >EGFR-L814FPLNWCVQI   | 261   | 233   |
| >EGFR-L814FLLNWCVQIA  | 98    | >EGFR-L814FPLNWCVQIA  | 991   | 893   |
| >EGFR-L814FLLNWCVQI   | 14    | >EGFR-L814FPLNWCVQI   | 141   | 127   |
| >EGFR-L814FLLNWCVQIA  | 68    | >EGFR-L814FPLNWCVQIA  | 1290  | 1222  |
| >EGFR-L814FLLNWCVQI   | 3     | >EGFR-L814FPLNWCVQI   | 30    | 27    |
| >EGFR-L814FLLNWCVQIA  | 4     | >EGFR-L814FPLNWCVQIA  | 72    | 68    |
| >EGFR-L814FLLNWCVQIAI | 494   | >EGFR-L814FPLNWCVQIAI | 11145 | 10651 |
| >EGFR-L814FLLNWCVQIAI | 42    | >EGFR-L814FPLNWCVQIAI | 352   | 310   |
| >EGFR-L814FLLNWCVQIAI | 100   | >EGFR-L814FPLNWCVQIAI | 1243  | 1143  |
| >EGFR-L814FLLNWCVQIAI | 223   | >EGFR-L814FPLNWCVQIAI | 2771  | 2548  |
| >EGFR-L814FYLLNWCVQI  | 34931 | >EGFR-L814FYPLNWCVQI  | 110   | 34821 |

|                       |       |                       |       |       |
|-----------------------|-------|-----------------------|-------|-------|
| >EGFR-L814FYLLNWCVQI  | 7     | >EGFR-L814FYPLNWCVQI  | 10547 | 10540 |
| >EGFR-L814FYLLNWCVQI/ | 19    | >EGFR-L814FYPLNWCVQI/ | 8621  | 8602  |
| >EGFR-L814FYLLNWCVQI  | 32    | >EGFR-L814FYPLNWCVQI  | 26772 | 26740 |
| >EGFR-L814FYLLNWCVQI/ | 51    | >EGFR-L814FYPLNWCVQI/ | 11378 | 11327 |
| >EGFR-L814FYLLNWCVQI  | 21    | >EGFR-L814FYPLNWCVQI  | 16170 | 16149 |
| >EGFR-L814FYLLNWCVQI/ | 23    | >EGFR-L814FYPLNWCVQI/ | 10634 | 10611 |
| >EGFR-L814FYLLNWCVQI  | 12    | >EGFR-L814FYPLNWCVQI  | 4246  | 4234  |
| >EGFR-L814FYLLNWCVQI/ | 57    | >EGFR-L814FYPLNWCVQI/ | 2271  | 2214  |
| >EGFR-L814FYLLNWCVQ   | 16    | >EGFR-L814FYPLNWCVQ   | 18750 | 18734 |
| >EGFR-L814FYLLNWCVQI  | 1     | >EGFR-L814FYPLNWCVQI  | 1443  | 1442  |
| >EGFR-L814FYLLNWCVQI/ | 3     | >EGFR-L814FYPLNWCVQI/ | 6886  | 6883  |
| >EGFR-L814FYLLNWCVQI/ | 30    | >EGFR-L814FYPLNWCVQI/ | 21703 | 21673 |
| >EGFR-L814FYLLNWCVQ   | 200   | >EGFR-L814FYPLNWCVQ   | 23650 | 23450 |
| >EGFR-L814FYLLNWCVQI  | 4     | >EGFR-L814FYPLNWCVQI  | 14318 | 14314 |
| >EGFR-L814FYLLNWCVQI/ | 6     | >EGFR-L814FYPLNWCVQI/ | 15076 | 15070 |
| >EGFR-L814FYLLNWCVQ   | 24    | >EGFR-L814FYPLNWCVQ   | 19180 | 19156 |
| >EGFR-L814FYLLNWCVQI  | 4     | >EGFR-L814FYPLNWCVQI  | 6744  | 6740  |
| >EGFR-L814FYLLNWCVQI/ | 6     | >EGFR-L814FYPLNWCVQI/ | 11111 | 11105 |
| >EGFR-L814FYLLNWCVQ   | 448   | >EGFR-L814FYPLNWCVQ   | 21322 | 20874 |
| >EGFR-L814FYLLNWCVQI  | 2     | >EGFR-L814FYPLNWCVQI  | 9054  | 9052  |
| >EGFR-L814FYLLNWCVQI/ | 5     | >EGFR-L814FYPLNWCVQI/ | 13123 | 13118 |
| >EGFR-L814FYLLNWCVQ   | 6     | >EGFR-L814FYPLNWCVQ   | 27501 | 27495 |
| >EGFR-L814FYLLNWCVQI  | 2     | >EGFR-L814FYPLNWCVQI  | 12792 | 12790 |
| >EGFR-L814FYLLNWCVQI/ | 2     | >EGFR-L814FYPLNWCVQI/ | 16648 | 16646 |
| >EGFR-L814FYLLNWCVQI/ | 52    | >EGFR-L814FYPLNWCVQI/ | 33274 | 33222 |
| >EGFR-L814FYLLNWCVQI/ | 79    | >EGFR-L814FYPLNWCVQI/ | 13244 | 13165 |
| >EGFR-L814FYLLNWCVQI/ | 83    | >EGFR-L814FYPLNWCVQI/ | 9849  | 9766  |
| >EGFR-L814FYLLNWCVQI  | 46    | >EGFR-L814FYPLNWCVQI  | 297   | 251   |
| >EGFR-L814FYLLNWCVQI  | 65    | >EGFR-L814FYPLNWCVQI  | 11545 | 11480 |
| >EGFR-L814FYLLNWCVQI/ | 417   | >EGFR-L814FYPLNWCVQI/ | 3102  | 2685  |
| >EGFR-L814FYLLNWCVQI  | 22    | >EGFR-L814FYPLNWCVQI  | 65    | 43    |
| >EGFR-L814FYLLNWCVQI  | 288   | >EGFR-L814FYPLNWCVQI  | 1652  | 1364  |
| >EGFR-L814FYLLNWCVQ   | 14776 | >EGFR-L814FYPLNWCVQ   | 210   | 14566 |
| >EGFR-L814FYLLNWCVQI  | 15802 | >EGFR-L814FYPLNWCVQI  | 377   | 15425 |
| >EGFR-L814FYLLNWCVQI/ | 13264 | >EGFR-L814FYPLNWCVQI/ | 128   | 13136 |
| >EGFR-L814FYLLNWCVQI  | 5057  | >EGFR-L814FYPLNWCVQI  | 436   | 4621  |
| >EGFR-L814FYLLNWCVQI  | 12809 | >EGFR-L814FYPLNWCVQI  | 107   | 12702 |
| >EGFR-L814FYLLNWCVQI  | 25698 | >EGFR-L814FYPLNWCVQI  | 151   | 25547 |
| >EGFR-L814FYLLNWCVQ   | 30571 | >EGFR-L814FYPLNWCVQ   | 361   | 30210 |
| >EGFR-L814FYLLNWCVQI  | 23383 | >EGFR-L814FYPLNWCVQI  | 47    | 23336 |
| >EGFR-L814FYLLNWCVQI/ | 9523  | >EGFR-L814FYPLNWCVQI/ | 15    | 9508  |
| >EGFR-L814FYLLNWCVQI/ | 28612 | >EGFR-L814FYPLNWCVQI/ | 323   | 28289 |
| >EGFR-L814FYLLNWCVQI  | 12605 | >EGFR-L814FYPLNWCVQI  | 138   | 12467 |

|                        |      |                        |       |       |
|------------------------|------|------------------------|-------|-------|
| >EGFR-L814F QYLLNWCVQ  | 106  | >EGFR-L814F QYPLNWCVC  | 2803  | 2697  |
| >EGFR-L814F QYLLNWCV   | 681  | >EGFR-L814F QYPLNWCV   | 461   | 220   |
| >EGFR-L814F QYLLNWCVQ  | 3391 | >EGFR-L814F QYPLNWCVC  | 467   | 2924  |
| >EGFR-L814F QYLLNWCV   | 368  | >EGFR-L814F QYPLNWCV   | 275   | 93    |
| >EGFR-L814F QYLLNWCVQ  | 11   | >EGFR-L814F QYPLNWCVC  | 8     | 3     |
| >EGFR-L814F QYLLNWCVQ  | 302  | >EGFR-L814F QYPLNWCVC  | 607   | 305   |
| >EGFR-L814F SQYLLNWCV  | 52   | >EGFR-L814F SQYPLNWCV  | 79    | 27    |
| >EGFR-L814F SQYLLNWCV  | 19   | >EGFR-L814F SQYPLNWCV  | 11    | 8     |
| >EGFR-L814F SQYLLNWCV  | 221  | >EGFR-L814F SQYPLNWCV  | 73    | 148   |
| >EGFR-L814F SQYLLNWCV  | 85   | >EGFR-L814F SQYPLNWCV  | 27    | 58    |
| >EGFR-L814F SQYLLNWCV  | 601  | >EGFR-L814F SQYPLNWCV  | 286   | 315   |
| >EGFR-L814F SQYLLNWCV  | 559  | >EGFR-L814F SQYPLNWCV  | 202   | 357   |
| >EGFR-L814F SQYLLNWCV  | 570  | >EGFR-L814F SQYPLNWCV  | 261   | 309   |
| >EGFR-L814F SQYLLNWC   | 418  | >EGFR-L814F SQYPLNWC   | 65    | 353   |
| >EGFR-L814F SQYLLNWCV  | 6    | >EGFR-L814F SQYPLNWCV  | 3     | 3     |
| >EGFR-L814F SQYLLNWCV  | 51   | >EGFR-L814F SQYPLNWCV  | 10    | 41    |
| >EGFR-L814F SQYLLNWCV  | 30   | >EGFR-L814F SQYPLNWCV  | 7     | 23    |
| >EGFR-L814F SQYLLNWCV  | 264  | >EGFR-L814F SQYPLNWCV  | 52    | 212   |
| >EGFR-L814F SQYLLNWCV  | 21   | >EGFR-L814F SQYPLNWCV  | 8     | 13    |
| >EGFR-L814F SQYLLNWCV  | 10   | >EGFR-L814F SQYPLNWCV  | 6     | 4     |
| >EGFR-L814F SQYLLNWCV  | 254  | >EGFR-L814F SQYPLNWCV  | 77    | 177   |
| >EGFR-L814F SQYLLNWCV  | 999  | >EGFR-L814F SQYPLNWCV  | 403   | 596   |
| >EGFR-L814F SQYLLNWCV  | 375  | >EGFR-L814F SQYPLNWCV  | 26    | 349   |
| >EGFR-L814F SQYLLNWCV  | 165  | >EGFR-L814F SQYPLNWCV  | 184   | 19    |
| >EGFR-L814F SQYLLNWCV  | 1289 | >EGFR-L814F SQYPLNWCV  | 476   | 813   |
| >EGFR-L814F SQYLLNWCV  | 458  | >EGFR-L814F SQYPLNWCV  | 119   | 339   |
| >EGFR-L814F SQYLLNWCV  | 161  | >EGFR-L814F SQYPLNWCV  | 64    | 97    |
| >EGFR-L814F SQYLLNWCV  | 297  | >EGFR-L814F SQYPLNWCV  | 141   | 156   |
| >EGFR-L814F SQYLLNWCV  | 185  | >EGFR-L814F SQYPLNWCV  | 423   | 238   |
| >EGFR-L814F SQYLLNWCV  | 502  | >EGFR-L814F SQYPLNWCV  | 103   | 399   |
| >EGFR-L814F GSQYLLNW   | 29   | >EGFR-L814F GSQYPLNW   | 19    | 10    |
| >EGFR-L814F GSQYLLNW   | 328  | >EGFR-L814F GSQYPLNW   | 314   | 14    |
| >EGFR-L814F GSQYLLNW   | 47   | >EGFR-L814F GSQYPLNW   | 60    | 13    |
| >EGFR-L814F IGSQYLLNW  | 58   | >EGFR-L814F IGSQYPLNW  | 80    | 22    |
| >EGFR-L814F IGSQYLLNW  | 596  | >EGFR-L814F IGSQYPLNW  | 410   | 186   |
| >EGFR-L814F IGSQYLLNW  | 523  | >EGFR-L814F IGSQYPLNW  | 381   | 142   |
| >EGFR-L814F IGSQYLLNW  | 35   | >EGFR-L814F IGSQYPLNW  | 24    | 11    |
| >EGFR-L814F NIGSQYLL   | 248  | >EGFR-L814F NIGSQYPL   | 321   | 73    |
| >EGFR-L814F NIGSQYLL   | 2378 | >EGFR-L814F NIGSQYPL   | 438   | 1940  |
| >EGFR-L814F DNIGSQYLL  | 620  | >EGFR-L814F DNIGSQYPL  | 148   | 472   |
| >EGFR-L814F KDNIGSQYLL | 329  | >EGFR-L814F KDNIGSQYPL | 851   | 522   |
| >EGFR-L814F HKDNIGSQYL | 372  | >EGFR-L814F HKDNIGSQYF | 21313 | 20941 |
| >EGFR-L814F HKDNIGSQYL | 71   | >EGFR-L814F HKDNIGSQYF | 25    | 46    |

|                        |      |                        |       |       |
|------------------------|------|------------------------|-------|-------|
| >EGFR-L833V LVHRDLAARN | 138  | >EGFR-L833V VVHRDLAARI | 206   | 68    |
| >EGFR-L833V LVHRDLAARN | 542  | >EGFR-L833V VVHRDLAARI | 443   | 99    |
| >EGFR-L833V LVHRDLAARN | 72   | >EGFR-L833V VVHRDLAARI | 104   | 32    |
| >EGFR-L833V LVHRDLAA   | 291  | >EGFR-L833V VVHRDLAA   | 758   | 467   |
| >EGFR-L833V LVHRDLAARN | 474  | >EGFR-L833V VVHRDLAARI | 1109  | 635   |
| >EGFR-L833V LVHRDLAAR  | 34   | >EGFR-L833V VVHRDLAAR  | 44    | 10    |
| >EGFR-L833V LVHRDLAAR  | 174  | >EGFR-L833V VVHRDLAAR  | 417   | 243   |
| >EGFR-L833V RLVHRDLA   | 174  | >EGFR-L833V RVVHRDLA   | 3437  | 3263  |
| >EGFR-L833V RLVHRDLAA  | 166  | >EGFR-L833V RVVHRDLAA  | 3237  | 3071  |
| >EGFR-L833V RLVHRDLAA  | 344  | >EGFR-L833V RVVHRDLAA  | 358   | 14    |
| >EGFR-L833V RLVHRDLA   | 452  | >EGFR-L833V RVVHRDLA   | 20103 | 19651 |
| >EGFR-L833V RLVHRDLAA  | 2925 | >EGFR-L833V RVVHRDLAA  | 314   | 2611  |
| >EGFR-L833V RLVHRDLAAF | 26   | >EGFR-L833V RVVHRDLAAI | 22    | 4     |
| >EGFR-L833V RLVHRDLAAF | 1385 | >EGFR-L833V RVVHRDLAAI | 132   | 1253  |
| >EGFR-L833V RLVHRDLAAF | 136  | >EGFR-L833V RVVHRDLAAI | 493   | 357   |
| >EGFR-L833V RLVHRDLAAF | 132  | >EGFR-L833V RVVHRDLAAI | 215   | 83    |
| >EGFR-L833V RRLVHRDL   | 220  | >EGFR-L833V RRVVHRDL   | 317   | 97    |
| >EGFR-L833V RRLVHRDL   | 45   | >EGFR-L833V RRVVHRDL   | 89    | 44    |
| >EGFR-L833V RRLVHRDLA  | 102  | >EGFR-L833V RRVVHRDLA  | 198   | 96    |
| >EGFR-L833V RRLVHRDLAA | 34   | >EGFR-L833V RRVVHRDLA/ | 39    | 5     |
| >EGFR-L833V RRLVHRDLAA | 29   | >EGFR-L833V RRVVHRDLA/ | 48    | 19    |
| >EGFR-L833V RRLVHRDL   | 15   | >EGFR-L833V RRVVHRDL   | 15    | 0     |
| >EGFR-L833V RRLVHRDLA  | 91   | >EGFR-L833V RRVVHRDLA  | 140   | 49    |
| >EGFR-L833V RRLVHRDLAA | 38   | >EGFR-L833V RRVVHRDLA/ | 68    | 30    |
| >EGFR-L833V RRLVHRDLAA | 224  | >EGFR-L833V RRVVHRDLA/ | 373   | 149   |
| >EGFR-L833V RRLVHRDL   | 34   | >EGFR-L833V RRVVHRDL   | 50    | 16    |
| >EGFR-L833V RRLVHRDLA  | 57   | >EGFR-L833V RRVVHRDLA  | 116   | 59    |
| >EGFR-L833V RRLVHRDLAA | 72   | >EGFR-L833V RRVVHRDLA/ | 98    | 26    |
| >EGFR-L833V RRLVHRDLAA | 121  | >EGFR-L833V RRVVHRDLA/ | 238   | 117   |
| >EGFR-L833V DRRLVHRDL  | 652  | >EGFR-L833V DRRVVHRDL  | 409   | 243   |
| >EGFR-L833V DRRLVHRDL  | 505  | >EGFR-L833V DRRVVHRDL  | 435   | 70    |
| >EGFR-L833V LEDRRLVHRC | 355  | >EGFR-L833V LEDRRVVHRC | 518   | 163   |
| >EGFR-L833V LEDRRLVHRC | 275  | >EGFR-L833V LEDRRVVHRC | 364   | 89    |
| >EGFR-L833V YLEDRRLV   | 188  | >EGFR-L833V YLEDRRVV   | 557   | 369   |
| >EGFR-L833V YLEDRRLV   | 44   | >EGFR-L833V YLEDRRVV   | 154   | 110   |
| >EGFR-L833V YLEDRRLV   | 32   | >EGFR-L833V YLEDRRVV   | 71    | 39    |
| >EGFR-L833V YLEDRRLV   | 198  | >EGFR-L833V YLEDRRVV   | 483   | 285   |
| >EGFR-L833V YLEDRRLV   | 17   | >EGFR-L833V YLEDRRVV   | 16    | 1     |
| >EGFR-L833V YLEDRRLV   | 47   | >EGFR-L833V YLEDRRVV   | 31    | 16    |
| >EGFR-L833V YLEDRRLV   | 62   | >EGFR-L833V YLEDRRVV   | 81    | 19    |
| >EGFR-L833V YLEDRRLV   | 2    | >EGFR-L833V YLEDRRVV   | 2     | 0     |
| >EGFR-L833V YLEDRRLVHR | 418  | >EGFR-L833V YLEDRRVVHF | 350   | 68    |
| >EGFR-L833V YLEDRRLVHR | 253  | >EGFR-L833V YLEDRRVVHF | 206   | 47    |

|                         |       |                         |       |       |
|-------------------------|-------|-------------------------|-------|-------|
| >EGFR-L833V YLED RRLVHR | 229   | >EGFR-L833V YLED RRVVHF | 371   | 142   |
| >EGFR-L833V YLED RRLVHR | 420   | >EGFR-L833V YLED RRVVHF | 739   | 319   |
| >EGFR-L833V YLED RRLVHR | 93    | >EGFR-L833V YLED RRVVHF | 83    | 10    |
| >EGFR-L833V YLED RRLVHR | 162   | >EGFR-L833V YLED RRVVHF | 133   | 29    |
| >EGFR-L833V NYLED RRL   | 81    | >EGFR-L833V NYLED RRV   | 2042  | 1961  |
| >EGFR-L833V NYLED RRLVH | 159   | >EGFR-L833V NYLED RRVVH | 225   | 66    |
| >EGFR-L833V NYLED RRLVH | 17    | >EGFR-L833V NYLED RRVVH | 23    | 6     |
| >EGFR-L833V NYLED RRLVH | 26    | >EGFR-L833V NYLED RRVVH | 26    | 0     |
| >EGFR-L833V GMNYLED RR  | 308   | >EGFR-L833V GMNYLED RR  | 324   | 16    |
| >EGFR-L833V GMNYLED RR  | 54    | >EGFR-L833V GMNYLED RR  | 223   | 169   |
| >EGFR-L833V GMNYLED RR  | 42    | >EGFR-L833V GMNYLED RR  | 87    | 45    |
| >EGFR-L833V GMNYLED RR  | 838   | >EGFR-L833V GMNYLED RR  | 53    | 785   |
| >EGFR-L833V GMNYLED RR  | 61    | >EGFR-L833V GMNYLED RR  | 64    | 3     |
| >EGFR-L833V GMNYLED RR  | 824   | >EGFR-L833V GMNYLED RR  | 85    | 739   |
| >EGFR-L833V GMNYLED RR  | 95    | >EGFR-L833V GMNYLED RR  | 64    | 31    |
| >EGFR-L833V GMNYLED RR  | 1329  | >EGFR-L833V GMNYLED RR  | 70    | 1259  |
| >EGFR-L833V GMNYLED RR  | 75    | >EGFR-L833V GMNYLED RR  | 101   | 26    |
| >EGFR-L833V GMNYLED RR  | 1234  | >EGFR-L833V GMNYLED RR  | 50    | 1184  |
| >EGFR-L833V GMNYLED RR  | 39    | >EGFR-L833V GMNYLED RR  | 55    | 16    |
| >EGFR-L838F LAARNVLV    | 312   | >EGFR-L838F PAARNVLV    | 8407  | 8095  |
| >EGFR-L838F LAARNVLV    | 497   | >EGFR-L838F PAARNVLV    | 8184  | 7687  |
| >EGFR-L838F LAARNVLV    | 337   | >EGFR-L838F PAARNVLV    | 11425 | 11088 |
| >EGFR-L838F LAARNVLV    | 54    | >EGFR-L838F PAARNVLV    | 2500  | 2446  |
| >EGFR-L838F LAARNVLVK   | 458   | >EGFR-L838F PAARNVLVK   | 6647  | 6189  |
| >EGFR-L838F LAARNVLVK   | 230   | >EGFR-L838F PAARNVLVK   | 3555  | 3325  |
| >EGFR-L838F LAARNVLVK   | 398   | >EGFR-L838F PAARNVLVK   | 2673  | 2275  |
| >EGFR-L838F LAARNVLVK   | 267   | >EGFR-L838F PAARNVLVK   | 4901  | 4634  |
| >EGFR-L838F LAARNVLV    | 119   | >EGFR-L838F PAARNVLV    | 2946  | 2827  |
| >EGFR-L838F DLAARNVLV   | 88    | >EGFR-L838F DPAARNVLV   | 26113 | 26025 |
| >EGFR-L838F DLAARNVLV   | 340   | >EGFR-L838F DPAARNVLV   | 28772 | 28432 |
| >EGFR-L838F DLAARNVLV   | 65    | >EGFR-L838F DPAARNVLV   | 24600 | 24535 |
| >EGFR-L838F DLAARNVLV   | 158   | >EGFR-L838F DPAARNVLV   | 24247 | 24089 |
| >EGFR-L838F DLAARNVL    | 326   | >EGFR-L838F DPAARNVL    | 36398 | 36072 |
| >EGFR-L838F DLAARNVLV   | 17    | >EGFR-L838F DPAARNVLV   | 28395 | 28378 |
| >EGFR-L838F DLAARNVLVK  | 382   | >EGFR-L838F DPAARNVLVK  | 13360 | 12978 |
| >EGFR-L838F DLAARNVLV   | 64    | >EGFR-L838F DPAARNVLV   | 530   | 466   |
| >EGFR-L838F DLAARNVLV   | 334   | >EGFR-L838F DPAARNVLV   | 1278  | 944   |
| >EGFR-L838F DLAARNVL    | 11806 | >EGFR-L838F DPAARNVL    | 80    | 11726 |
| >EGFR-L838F DLAARNVL    | 3428  | >EGFR-L838F DPAARNVL    | 265   | 3163  |
| >EGFR-L838F LED RRLVHRC | 355   | >EGFR-L838F LED RRLVHRC | 15512 | 15157 |
| >EGFR-L838F LED RRLVHRC | 275   | >EGFR-L838F LED RRLVHRC | 13402 | 13127 |
| >EGFR-L838F RDLAARNVL   | 377   | >EGFR-L838F RDPAARNVL   | 4127  | 3750  |
| >EGFR-L838F RDLAARNVL   | 97    | >EGFR-L838F RDPAARNVL   | 1297  | 1200  |



|                        |      |                        |      |      |
|------------------------|------|------------------------|------|------|
| >EGFR-L838F RDLAARNV   | 187  | >EGFR-L838F RDPAARNV   | 7952 | 7765 |
| >EGFR-L838F RDLAARNV   | 210  | >EGFR-L838F RDPAARNV   | 2088 | 1878 |
| >EGFR-L838F RDLAARNVL  | 96   | >EGFR-L838F RDPAARNVL  | 904  | 808  |
| >EGFR-L838F HRDLAARNV  | 62   | >EGFR-L838F HRDPAARNV  | 140  | 78   |
| >EGFR-L838F HRDLAARNV  | 21   | >EGFR-L838F HRDPAARNV  | 15   | 6    |
| >EGFR-L838F HRDLAARNV  | 574  | >EGFR-L838F HRDPAARNV  | 296  | 278  |
| >EGFR-L838F HRDLAARNV  | 347  | >EGFR-L838F HRDPAARNV  | 633  | 286  |
| >EGFR-L838F VHRDLAARN  | 471  | >EGFR-L838F VHRDPAARN  | 797  | 326  |
| >EGFR-L838F LVHRDLAARN | 138  | >EGFR-L838F LVHRDPAARN | 193  | 55   |
| >EGFR-L838F LVHRDLAARN | 542  | >EGFR-L838F LVHRDPAARN | 388  | 154  |
| >EGFR-L838F LVHRDLAARN | 72   | >EGFR-L838F LVHRDPAARN | 80   | 8    |
| >EGFR-L838F LVHRDLAA   | 291  | >EGFR-L838F LVHRDPAA   | 192  | 99   |
| >EGFR-L838F LVHRDLAARN | 474  | >EGFR-L838F LVHRDPAARN | 369  | 105  |
| >EGFR-L838F LVHRDLAAR  | 34   | >EGFR-L838F LVHRDPAAR  | 102  | 68   |
| >EGFR-L838F LVHRDLAAR  | 174  | >EGFR-L838F LVHRDPAAR  | 172  | 2    |
| >EGFR-L838F RLVHRDLA   | 174  | >EGFR-L838F RLVHRDPA   | 99   | 75   |
| >EGFR-L838F RLVHRDLAA  | 166  | >EGFR-L838F RLVHRDPAA  | 211  | 45   |
| >EGFR-L838F RLVHRDLA   | 1150 | >EGFR-L838F RLVHRDPA   | 308  | 842  |
| >EGFR-L838F RLVHRDLAA  | 344  | >EGFR-L838F RLVHRDPAA  | 231  | 113  |
| >EGFR-L838F RLVHRDLAA  | 785  | >EGFR-L838F RLVHRDPAA  | 391  | 394  |
| >EGFR-L838F RLVHRDLA   | 452  | >EGFR-L838F RLVHRDPA   | 527  | 75   |
| >EGFR-L838F RLVHRDLAA  | 796  | >EGFR-L838F RLVHRDPAA  | 204  | 592  |
| >EGFR-L838F RLVHRDLAAF | 26   | >EGFR-L838F RLVHRDPAAF | 45   | 19   |
| >EGFR-L838F RLVHRDLAAF | 136  | >EGFR-L838F RLVHRDPAAF | 167  | 31   |
| >EGFR-L838F RLVHRDLAAF | 132  | >EGFR-L838F RLVHRDPAAF | 122  | 10   |
| >EGFR-L838F RRLVHRDL   | 220  | >EGFR-L838F RRLVHRDP   | 4474 | 4254 |
| >EGFR-L838F RRLVHRDLAA | 713  | >EGFR-L838F RRLVHRDPA/ | 400  | 313  |
| >EGFR-L838F RRLVHRDL   | 45   | >EGFR-L838F RRLVHRDP   | 1177 | 1132 |
| >EGFR-L838F RRLVHRDLA  | 102  | >EGFR-L838F RRLVHRDPA  | 72   | 30   |
| >EGFR-L838F RRLVHRDLAA | 34   | >EGFR-L838F RRLVHRDPA/ | 50   | 16   |
| >EGFR-L838F RRLVHRDLAA | 29   | >EGFR-L838F RRLVHRDPA/ | 33   | 4    |
| >EGFR-L838F RRLVHRDL   | 15   | >EGFR-L838F RRLVHRDP   | 244  | 229  |
| >EGFR-L838F RRLVHRDLA  | 91   | >EGFR-L838F RRLVHRDPA  | 230  | 139  |
| >EGFR-L838F RRLVHRDLAA | 38   | >EGFR-L838F RRLVHRDPA/ | 127  | 89   |
| >EGFR-L838F RRLVHRDLAA | 224  | >EGFR-L838F RRLVHRDPA/ | 322  | 98   |
| >EGFR-L838F RRLVHRDL   | 34   | >EGFR-L838F RRLVHRDP   | 946  | 912  |
| >EGFR-L838F RRLVHRDLA  | 57   | >EGFR-L838F RRLVHRDPA  | 250  | 193  |
| >EGFR-L838F RRLVHRDLAA | 72   | >EGFR-L838F RRLVHRDPA/ | 227  | 155  |
| >EGFR-L838F RRLVHRDLAA | 121  | >EGFR-L838F RRLVHRDPA/ | 162  | 41   |
| >EGFR-L838F RRLVHRDLAA | 625  | >EGFR-L838F RRLVHRDPA/ | 375  | 250  |
| >EGFR-L838V LAARNVLV   | 312  | >EGFR-L838V VAARNVLV   | 1033 | 721  |
| >EGFR-L838V LAARNVLV   | 497  | >EGFR-L838V VAARNVLV   | 772  | 275  |
| >EGFR-L838V LAARNVLV   | 337  | >EGFR-L838V VAARNVLV   | 445  | 108  |

|                       |      |                       |       |       |
|-----------------------|------|-----------------------|-------|-------|
| >EGFR-L838VLAARNVLV   | 54   | >EGFR-L838VVAARNVLV   | 81    | 27    |
| >EGFR-L838VLAARNVLVK  | 458  | >EGFR-L838VVAARNVLVK  | 278   | 180   |
| >EGFR-L838VLAARNVLVK  | 230  | >EGFR-L838VVAARNVLVK  | 88    | 142   |
| >EGFR-L838VLAARNVLVK  | 398  | >EGFR-L838VVAARNVLVK  | 1098  | 700   |
| >EGFR-L838VLAARNVLVK  | 267  | >EGFR-L838VVAARNVLVK  | 698   | 431   |
| >EGFR-L838VLAARNVLV   | 119  | >EGFR-L838VVAARNVLV   | 314   | 195   |
| >EGFR-L838VLAARNVLV   | 88   | >EGFR-L838VDVAARNVLV  | 2662  | 2574  |
| >EGFR-L838VLAARNVLV   | 340  | >EGFR-L838VDVAARNVLV  | 9293  | 8953  |
| >EGFR-L838VLAARNVLV   | 65   | >EGFR-L838VDVAARNVLV  | 5802  | 5737  |
| >EGFR-L838VLAARNVLV   | 158  | >EGFR-L838VDVAARNVLV  | 7148  | 6990  |
| >EGFR-L838VLAARNVL    | 326  | >EGFR-L838VDVAARNVL   | 15035 | 14709 |
| >EGFR-L838VLAARNVLV   | 17   | >EGFR-L838VDVAARNVLV  | 742   | 725   |
| >EGFR-L838VLAARNVLVK  | 382  | >EGFR-L838VDVAARNVLVI | 736   | 354   |
| >EGFR-L838VLAARNVLVK  | 751  | >EGFR-L838VDVAARNVLVI | 302   | 449   |
| >EGFR-L838VLAARNVLVK  | 745  | >EGFR-L838VDVAARNVLVI | 75    | 670   |
| >EGFR-L838VLAARNVL    | 1188 | >EGFR-L838VDVAARNVL   | 54    | 1134  |
| >EGFR-L838VLAARNVLV   | 64   | >EGFR-L838VDVAARNVLV  | 9     | 55    |
| >EGFR-L838VLAARNVLV   | 334  | >EGFR-L838VDVAARNVLV  | 52    | 282   |
| >EGFR-L838VLEDRRLVHRC | 355  | >EGFR-L838VLEDRRLVHRC | 151   | 204   |
| >EGFR-L838VLEDRRLVHRC | 275  | >EGFR-L838VLEDRRLVHRC | 2365  | 2090  |
| >EGFR-L838VRLAARNVL   | 377  | >EGFR-L838VRDVAARNVL  | 1874  | 1497  |
| >EGFR-L838VRLAARNVL   | 97   | >EGFR-L838VRDVAARNVL  | 172   | 75    |
| >EGFR-L838VRLAARNV    | 187  | >EGFR-L838VRDVAARNV   | 891   | 704   |
| >EGFR-L838VRLAARNV    | 210  | >EGFR-L838VRDVAARNV   | 435   | 225   |
| >EGFR-L838VRLAARNVL   | 96   | >EGFR-L838VRDVAARNVL  | 182   | 86    |
| >EGFR-L838VHRDLAARNVI | 62   | >EGFR-L838VHRDVAARNV  | 103   | 41    |
| >EGFR-L838VHRDLAARNVI | 21   | >EGFR-L838VHRDVAARNV  | 17    | 4     |
| >EGFR-L838VHRDLAARNVI | 574  | >EGFR-L838VHRDVAARNV  | 426   | 148   |
| >EGFR-L838VHRDLAARNVI | 347  | >EGFR-L838VHRDVAARNV  | 402   | 55    |
| >EGFR-L838VVRDLAARN'  | 471  | >EGFR-L838VVRDVAARN   | 431   | 40    |
| >EGFR-L838VLRDLAARN   | 138  | >EGFR-L838VLRDVAARI   | 133   | 5     |
| >EGFR-L838VLRDLAARN   | 542  | >EGFR-L838VLRDVAARI   | 381   | 161   |
| >EGFR-L838VLRDLAARN   | 72   | >EGFR-L838VLRDVAARI   | 66    | 6     |
| >EGFR-L838VLRDLAA     | 291  | >EGFR-L838VLRDVAA     | 474   | 183   |
| >EGFR-L838VLRDLAARN   | 474  | >EGFR-L838VLRDVAARI   | 447   | 27    |
| >EGFR-L838VLRDLAAR    | 34   | >EGFR-L838VLRDVAAR    | 54    | 20    |
| >EGFR-L838VLRDLAAR    | 174  | >EGFR-L838VLRDVAAR    | 96    | 78    |
| >EGFR-L838VRLVHRDLA   | 174  | >EGFR-L838VRLVHRDVA   | 414   | 240   |
| >EGFR-L838VRLVHRDLAA  | 166  | >EGFR-L838VRLVHRDVAA  | 204   | 38    |
| >EGFR-L838VRLVHRDLAA  | 344  | >EGFR-L838VRLVHRDVAA  | 258   | 86    |
| >EGFR-L838VRLVHRDLAA  | 785  | >EGFR-L838VRLVHRDVAA  | 333   | 452   |
| >EGFR-L838VRLVHRDLA   | 452  | >EGFR-L838VRLVHRDVA   | 629   | 177   |
| >EGFR-L838VRLVHRDLAA  | 796  | >EGFR-L838VRLVHRDVAA  | 409   | 387   |

|                        |       |                        |       |       |
|------------------------|-------|------------------------|-------|-------|
| >EGFR-L838V RLVHRDLAAF | 26    | >EGFR-L838V RLVHRDVAAI | 35    | 9     |
| >EGFR-L838V RLVHRDLAAF | 136   | >EGFR-L838V RLVHRDVAAI | 116   | 20    |
| >EGFR-L838V RLVHRDLAAF | 132   | >EGFR-L838V RLVHRDVAAI | 111   | 21    |
| >EGFR-L838V RRLVHRDL   | 220   | >EGFR-L838V RRLVHRDV   | 435   | 215   |
| >EGFR-L838V RRLVHRDLAA | 713   | >EGFR-L838V RRLVHRDVA/ | 381   | 332   |
| >EGFR-L838V RRLVHRDL   | 45    | >EGFR-L838V RRLVHRDV   | 115   | 70    |
| >EGFR-L838V RRLVHRDLA  | 102   | >EGFR-L838V RRLVHRDVA  | 178   | 76    |
| >EGFR-L838V RRLVHRDLAA | 34    | >EGFR-L838V RRLVHRDVA/ | 72    | 38    |
| >EGFR-L838V RRLVHRDLAA | 29    | >EGFR-L838V RRLVHRDVA/ | 30    | 1     |
| >EGFR-L838V RRLVHRDL   | 15    | >EGFR-L838V RRLVHRDV   | 58    | 43    |
| >EGFR-L838V RRLVHRDLA  | 91    | >EGFR-L838V RRLVHRDVA  | 142   | 51    |
| >EGFR-L838V RRLVHRDLAA | 38    | >EGFR-L838V RRLVHRDVA/ | 126   | 88    |
| >EGFR-L838V RRLVHRDLAA | 224   | >EGFR-L838V RRLVHRDVA/ | 249   | 25    |
| >EGFR-L838V RRLVHRDL   | 34    | >EGFR-L838V RRLVHRDV   | 181   | 147   |
| >EGFR-L838V RRLVHRDLA  | 57    | >EGFR-L838V RRLVHRDVA  | 172   | 115   |
| >EGFR-L838V RRLVHRDLAA | 72    | >EGFR-L838V RRLVHRDVA/ | 199   | 127   |
| >EGFR-L838V RRLVHRDLAA | 121   | >EGFR-L838V RRLVHRDVA/ | 144   | 23    |
| >EGFR-L844F LVKTPQHV   | 262   | >EGFR-L844F PVKTPQHV   | 7478  | 7216  |
| >EGFR-L844F LVKTPQHV   | 42    | >EGFR-L844F PVKTPQHV   | 1906  | 1864  |
| >EGFR-L844F LVKTPQHVK  | 322   | >EGFR-L844F PVKTPQHVK  | 5010  | 4688  |
| >EGFR-L844F LVKTPQHVK  | 207   | >EGFR-L844F PVKTPQHVK  | 2537  | 2330  |
| >EGFR-L844F LVKTPQHV   | 173   | >EGFR-L844F PVKTPQHV   | 1475  | 1302  |
| >EGFR-L844F LVKTPQHVK  | 15    | >EGFR-L844F PVKTPQHVK  | 73    | 58    |
| >EGFR-L844F LVKTPQHVKI | 126   | >EGFR-L844F PVKTPQHVKI | 951   | 825   |
| >EGFR-L844F LVKTPQHVK  | 399   | >EGFR-L844F PVKTPQHVK  | 6295  | 5896  |
| >EGFR-L844F LVKTPQHVK  | 357   | >EGFR-L844F PVKTPQHVK  | 5392  | 5035  |
| >EGFR-L844F VLVKTPQHV  | 39074 | >EGFR-L844F VPVKTPQHV  | 379   | 38695 |
| >EGFR-L844F VLVKTPQHVk | 36799 | >EGFR-L844F VPVKTPQHVl | 190   | 36609 |
| >EGFR-L844F VLVKTPQHV  | 476   | >EGFR-L844F VPVKTPQHV  | 23615 | 23139 |
| >EGFR-L844F VLVKTPQHV  | 215   | >EGFR-L844F VPVKTPQHV  | 31785 | 31570 |
| >EGFR-L844F VLVKTPQHV  | 22    | >EGFR-L844F VPVKTPQHV  | 19740 | 19718 |
| >EGFR-L844F VLVKTPQHVk | 269   | >EGFR-L844F VPVKTPQHVl | 23417 | 23148 |
| >EGFR-L844F VLVKTPQHV  | 248   | >EGFR-L844F VPVKTPQHV  | 16873 | 16625 |
| >EGFR-L844F VLVKTPQHV  | 3     | >EGFR-L844F VPVKTPQHV  | 12207 | 12204 |
| >EGFR-L844F VLVKTPQHVk | 25    | >EGFR-L844F VPVKTPQHVl | 23970 | 23945 |
| >EGFR-L844F VLVKTPQHV  | 6     | >EGFR-L844F VPVKTPQHV  | 20500 | 20494 |
| >EGFR-L844F VLVKTPQHVk | 241   | >EGFR-L844F VPVKTPQHVl | 24663 | 24422 |
| >EGFR-L844F VLVKTPQHV  | 7     | >EGFR-L844F VPVKTPQHV  | 17006 | 16999 |
| >EGFR-L844F VLVKTPQHVk | 97    | >EGFR-L844F VPVKTPQHVl | 25281 | 25184 |
| >EGFR-L844F VLVKTPQHV  | 30    | >EGFR-L844F VPVKTPQHV  | 23149 | 23119 |
| >EGFR-L844F VLVKTPQHV  | 3     | >EGFR-L844F VPVKTPQHV  | 18832 | 18829 |
| >EGFR-L844F VLVKTPQHVk | 26    | >EGFR-L844F VPVKTPQHVl | 33624 | 33598 |
| >EGFR-L844F VLVKTPQHVk | 415   | >EGFR-L844F VPVKTPQHVl | 19250 | 18835 |

|                        |       |                        |       |       |
|------------------------|-------|------------------------|-------|-------|
| >EGFR-L844F VLVKTPQHV  | 21264 | >EGFR-L844F VPVKTPQHV  | 221   | 21043 |
| >EGFR-L844F VLVKTPQHVK | 21352 | >EGFR-L844F VPVKTPQHVI | 211   | 21141 |
| >EGFR-L844F VLVKTPQHVK | 27346 | >EGFR-L844F VPVKTPQHVI | 350   | 26996 |
| >EGFR-L844F VHRDLAARN' | 471   | >EGFR-L844F VHRDLAARN' | 22963 | 22492 |
| >EGFR-L844F NVLVKTPQH\ | 424   | >EGFR-L844F NVPVKTPQH' | 2798  | 2374  |
| >EGFR-L844F NVLVKTPQH\ | 178   | >EGFR-L844F NVPVKTPQH' | 2342  | 2164  |
| >EGFR-L844F NVLVKTPQH\ | 179   | >EGFR-L844F NVPVKTPQH' | 4983  | 4804  |
| >EGFR-L844F NVLVKTPQH\ | 269   | >EGFR-L844F NVPVKTPQH' | 563   | 294   |
| >EGFR-L844F NVLVKTPQH\ | 225   | >EGFR-L844F NVPVKTPQH' | 2001  | 1776  |
| >EGFR-L844F NVLVKTPQH\ | 318   | >EGFR-L844F NVPVKTPQH' | 457   | 139   |
| >EGFR-L844F NVLVKTPQH\ | 29    | >EGFR-L844F NVPVKTPQH' | 1024  | 995   |
| >EGFR-L844F AARNVLVK   | 338   | >EGFR-L844F AARNVPVK   | 652   | 314   |
| >EGFR-L844F AARNVLVK   | 5     | >EGFR-L844F AARNVPVK   | 4     | 1     |
| >EGFR-L844F AARNVLVKTF | 404   | >EGFR-L844F AARNVPVKTF | 337   | 67    |
| >EGFR-L844F LAARNVLV   | 312   | >EGFR-L844F LAARNVPV   | 389   | 77    |
| >EGFR-L844F LAARNVLV   | 497   | >EGFR-L844F LAARNVPV   | 290   | 207   |
| >EGFR-L844F LAARNVLV   | 337   | >EGFR-L844F LAARNVPV   | 152   | 185   |
| >EGFR-L844F LAARNVLV   | 672   | >EGFR-L844F LAARNVPV   | 342   | 330   |
| >EGFR-L844F LAARNVLV   | 54    | >EGFR-L844F LAARNVPV   | 49    | 5     |
| >EGFR-L844F LAARNVLVK  | 458   | >EGFR-L844F LAARNVPVK  | 1701  | 1243  |
| >EGFR-L844F LAARNVLVK  | 230   | >EGFR-L844F LAARNVPVK  | 782   | 552   |
| >EGFR-L844F LAARNVLVK  | 398   | >EGFR-L844F LAARNVPVK  | 248   | 150   |
| >EGFR-L844F LAARNVLVK  | 267   | >EGFR-L844F LAARNVPVK  | 177   | 90    |
| >EGFR-L844F LAARNVLV   | 119   | >EGFR-L844F LAARNVPV   | 51    | 68    |
| >EGFR-L844F LAARNVLV   | 1159  | >EGFR-L844F LAARNVPV   | 185   | 974   |
| >EGFR-L844F DLAARNVLV  | 88    | >EGFR-L844F DLAARNVPV  | 104   | 16    |
| >EGFR-L844F DLAARNVLV  | 559   | >EGFR-L844F DLAARNVPV  | 235   | 324   |
| >EGFR-L844F DLAARNVLV  | 340   | >EGFR-L844F DLAARNVPV  | 130   | 210   |
| >EGFR-L844F DLAARNVLV  | 1714  | >EGFR-L844F DLAARNVPV  | 464   | 1250  |
| >EGFR-L844F DLAARNVLV  | 65    | >EGFR-L844F DLAARNVPV  | 40    | 25    |
| >EGFR-L844F DLAARNVLV  | 158   | >EGFR-L844F DLAARNVPV  | 94    | 64    |
| >EGFR-L844F DLAARNVL   | 326   | >EGFR-L844F DLAARNVP   | 29363 | 29037 |
| >EGFR-L844F DLAARNVLV  | 17    | >EGFR-L844F DLAARNVPV  | 13    | 4     |
| >EGFR-L844F DLAARNVLVK | 382   | >EGFR-L844F DLAARNVPVI | 1486  | 1104  |
| >EGFR-L844F DLAARNVLV  | 64    | >EGFR-L844F DLAARNVPV  | 21    | 43    |
| >EGFR-L844F DLAARNVLV  | 334   | >EGFR-L844F DLAARNVPV  | 67    | 267   |
| >EGFR-L844F RDLAARNVL\ | 377   | >EGFR-L844F RDLAARNVP\ | 264   | 113   |
| >EGFR-L844F RDLAARNVL  | 97    | >EGFR-L844F RDLAARNVP  | 6258  | 6161  |
| >EGFR-L844F RDLAARNVL\ | 96    | >EGFR-L844F RDLAARNVP\ | 247   | 151   |
| >EGFR-L844F HRDLAARNVI | 62    | >EGFR-L844F HRDLAARNVI | 7684  | 7622  |
| >EGFR-L844F HRDLAARNVI | 21    | >EGFR-L844F HRDLAARNVI | 8090  | 8069  |
| >EGFR-L844F HRDLAARNVI | 574   | >EGFR-L844F HRDLAARNVI | 140   | 434   |
| >EGFR-L844F HRDLAARNVI | 347   | >EGFR-L844F HRDLAARNVI | 12609 | 12262 |

|                         |      |                         |       |       |
|-------------------------|------|-------------------------|-------|-------|
| >EGFR-L858A LAKLLGAE EK | 377  | >EGFR-L858A AAKLLGAE EK | 101   | 276   |
| >EGFR-L858A GLAKLLGA    | 216  | >EGFR-L858A GAAKLLGA    | 13252 | 13036 |
| >EGFR-L858A GLAKLLGA    | 32   | >EGFR-L858A GAAKLLGA    | 5241  | 5209  |
| >EGFR-L858A GLAKLLGA    | 13   | >EGFR-L858A GAAKLLGA    | 1458  | 1445  |
| >EGFR-L858A GLAKLLGA    | 235  | >EGFR-L858A GAAKLLGA    | 2453  | 2218  |
| >EGFR-L858A GLAKLLGA    | 151  | >EGFR-L858A GAAKLLGA    | 15664 | 15513 |
| >EGFR-L858A GLAKLLGA    | 251  | >EGFR-L858A GAAKLLGA    | 18555 | 18304 |
| >EGFR-L858A GLAKLLGA    | 44   | >EGFR-L858A GAAKLLGA    | 13103 | 13059 |
| >EGFR-L858A GLAKLLGA    | 31   | >EGFR-L858A GAAKLLGA    | 20904 | 20873 |
| >EGFR-L858A GLAKLLGAEE  | 347  | >EGFR-L858A GAAKLLGAEE  | 5855  | 5508  |
| >EGFR-L858A FGLAKLLGA   | 2872 | >EGFR-L858A FGAAKLLGA   | 420   | 2452  |
| >EGFR-L858A FGLAKLLGA   | 123  | >EGFR-L858A FGAAKLLGA   | 296   | 173   |
| >EGFR-L858A TDFGLAKLL   | 145  | >EGFR-L858A TDFGAAKLL   | 171   | 26    |
| >EGFR-L858A TDFGLAKLL   | 352  | >EGFR-L858A TDFGAAKLL   | 1257  | 905   |
| >EGFR-L858A TDFGLAKLL   | 295  | >EGFR-L858A TDFGAAKLL   | 276   | 19    |
| >EGFR-L858A ITDFGLAK    | 290  | >EGFR-L858A ITDFGAAK    | 469   | 179   |
| >EGFR-L858A ITDFGLAK    | 33   | >EGFR-L858A ITDFGAAK    | 59    | 26    |
| >EGFR-L858A ITDFGLAK    | 558  | >EGFR-L858A ITDFGAAK    | 186   | 372   |
| >EGFR-L858A ITDFGLAKL   | 6    | >EGFR-L858A ITDFGAAKL   | 4     | 2     |
| >EGFR-L858A ITDFGLAKLL  | 15   | >EGFR-L858A ITDFGAAKLL  | 9     | 6     |
| >EGFR-L858A ITDFGLAKLL  | 276  | >EGFR-L858A ITDFGAAKLL  | 204   | 72    |
| >EGFR-L858A ITDFGLAKL   | 97   | >EGFR-L858A ITDFGAAKL   | 66    | 31    |
| >EGFR-L858A ITDFGLAK    | 474  | >EGFR-L858A ITDFGAAK    | 1591  | 1117  |
| >EGFR-L858A KITDFGLAKL  | 91   | >EGFR-L858A KITDFGAAKL  | 246   | 155   |
| >EGFR-L858A KITDFGLAKLL | 228  | >EGFR-L858A KITDFGAAKLI | 164   | 64    |
| >EGFR-L858A KITDFGLA    | 348  | >EGFR-L858A KITDFGAA    | 238   | 110   |
| >EGFR-L858A KITDFGLAKL  | 81   | >EGFR-L858A KITDFGAAKL  | 401   | 320   |
| >EGFR-L858A KITDFGLA    | 117  | >EGFR-L858A KITDFGAA    | 71    | 46    |
| >EGFR-L858A KITDFGLAKL  | 432  | >EGFR-L858A KITDFGAAKL  | 3316  | 2884  |
| >EGFR-L858A KITDFGLAKLL | 462  | >EGFR-L858A KITDFGAAKLI | 422   | 40    |
| >EGFR-L858A KITDFGLAKL  | 188  | >EGFR-L858A KITDFGAAKL  | 263   | 75    |
| >EGFR-L858A KITDFGLAKL  | 478  | >EGFR-L858A KITDFGAAKL  | 692   | 214   |
| >EGFR-L858A KITDFGLAKL  | 29   | >EGFR-L858A KITDFGAAKL  | 31    | 2     |
| >EGFR-L858A KITDFGLAKLL | 183  | >EGFR-L858A KITDFGAAKLI | 117   | 66    |
| >EGFR-L858A KITDFGLAK   | 102  | >EGFR-L858A KITDFGAAK   | 165   | 63    |
| >EGFR-L858A KITDFGLAK   | 17   | >EGFR-L858A KITDFGAAK   | 29    | 12    |
| >EGFR-L858A KITDFGLAK   | 22   | >EGFR-L858A KITDFGAAK   | 26    | 4     |
| >EGFR-L858A KITDFGLAK   | 1216 | >EGFR-L858A KITDFGAAK   | 182   | 1034  |
| >EGFR-L858A KITDFGLAKL  | 693  | >EGFR-L858A KITDFGAAKL  | 379   | 314   |
| >EGFR-L858A KITDFGLAK   | 98   | >EGFR-L858A KITDFGAAK   | 253   | 155   |
| >EGFR-L858A VKITDFGL    | 279  | >EGFR-L858A VKITDFGA    | 3408  | 3129  |
| >EGFR-L858A VKITDFGLAK  | 252  | >EGFR-L858A VKITDFGAAK  | 254   | 2     |
| >EGFR-L858A VKITDFGLAKI | 295  | >EGFR-L858A VKITDFGAAK  | 171   | 124   |

|                         |     |                         |       |       |
|-------------------------|-----|-------------------------|-------|-------|
| >EGFR-L858A HVKITDFGLA  | 276 | >EGFR-L858A HVKITDFGAA  | 549   | 273   |
| >EGFR-L858A HVKITDFGL   | 168 | >EGFR-L858A HVKITDFGA   | 52    | 116   |
| >EGFR-L858A HVKITDFGLA  | 33  | >EGFR-L858A HVKITDFGAA  | 38    | 5     |
| >EGFR-L858A HVKITDFGLA  | 4   | >EGFR-L858A HVKITDFGAA  | 4     | 0     |
| >EGFR-L858A HVKITDFGLA  | 201 | >EGFR-L858A HVKITDFGAA  | 57    | 144   |
| >EGFR-L858A HVKITDFGLA  | 130 | >EGFR-L858A HVKITDFGAA  | 58    | 72    |
| >EGFR-L858A HVKITDFGL   | 328 | >EGFR-L858A HVKITDFGA   | 17433 | 17105 |
| >EGFR-L858A QHVKITDFGL  | 380 | >EGFR-L858A QHVKITDFGA  | 22593 | 22213 |
| >EGFR-L858C LAKLLGAE EK | 377 | >EGFR-L858C GAKLLGAE EK | 702   | 325   |
| >EGFR-L858C GLAKLLGA    | 216 | >EGFR-L858C GGAKLLGA    | 21033 | 20817 |
| >EGFR-L858C GLAKLLGA    | 32  | >EGFR-L858C GGAKLLGA    | 10837 | 10805 |
| >EGFR-L858C GLAKLLGA    | 13  | >EGFR-L858C GGAKLLGA    | 9505  | 9492  |
| >EGFR-L858C GLAKLLGA    | 235 | >EGFR-L858C GGAKLLGA    | 13327 | 13092 |
| >EGFR-L858C GLAKLLGA    | 151 | >EGFR-L858C GGAKLLGA    | 24024 | 23873 |
| >EGFR-L858C GLAKLLGA    | 251 | >EGFR-L858C GGAKLLGA    | 23325 | 23074 |
| >EGFR-L858C GLAKLLGA    | 44  | >EGFR-L858C GGAKLLGA    | 18178 | 18134 |
| >EGFR-L858C GLAKLLGA    | 31  | >EGFR-L858C GGAKLLGA    | 31683 | 31652 |
| >EGFR-L858C GLAKLLGAEE  | 347 | >EGFR-L858C GGAKLLGAEE  | 13618 | 13271 |
| >EGFR-L858C FGLAKLLGA   | 123 | >EGFR-L858C FGGAKLLGA   | 3076  | 2953  |
| >EGFR-L858C TDFGLAKLL   | 145 | >EGFR-L858C TDFGGAKLL   | 674   | 529   |
| >EGFR-L858C TDFGLAKLL   | 352 | >EGFR-L858C TDFGGAKLL   | 1433  | 1081  |
| >EGFR-L858C TDFGLAKLL   | 295 | >EGFR-L858C TDFGGAKLL   | 879   | 584   |
| >EGFR-L858C ITDFGLAK    | 290 | >EGFR-L858C ITDFGGAK    | 685   | 395   |
| >EGFR-L858C ITDFGLAK    | 33  | >EGFR-L858C ITDFGGAK    | 97    | 64    |
| >EGFR-L858C ITDFGLAKL   | 6   | >EGFR-L858C ITDFGGAKL   | 6     | 0     |
| >EGFR-L858C ITDFGLAKLL  | 15  | >EGFR-L858C ITDFGGAKLL  | 11    | 4     |
| >EGFR-L858C ITDFGLAKLL  | 276 | >EGFR-L858C ITDFGGAKLL  | 446   | 170   |
| >EGFR-L858C ITDFGLAKL   | 97  | >EGFR-L858C ITDFGGAKL   | 78    | 19    |
| >EGFR-L858C ITDFGLAK    | 474 | >EGFR-L858C ITDFGGAK    | 1679  | 1205  |
| >EGFR-L858C KITDFGLAKL  | 91  | >EGFR-L858C KITDFGGAKL  | 319   | 228   |
| >EGFR-L858C KITDFGLAKLL | 228 | >EGFR-L858C KITDFGGAKLL | 420   | 192   |
| >EGFR-L858C KITDFGLA    | 348 | >EGFR-L858C KITDFGGA    | 281   | 67    |
| >EGFR-L858C KITDFGLAKL  | 81  | >EGFR-L858C KITDFGGAKL  | 478   | 397   |
| >EGFR-L858C KITDFGLA    | 117 | >EGFR-L858C KITDFGGA    | 133   | 16    |
| >EGFR-L858C KITDFGLAKL  | 432 | >EGFR-L858C KITDFGGAKL  | 1672  | 1240  |
| >EGFR-L858C KITDFGLAKLL | 462 | >EGFR-L858C KITDFGGAKLL | 932   | 470   |
| >EGFR-L858C KITDFGLAKL  | 188 | >EGFR-L858C KITDFGGAKL  | 388   | 200   |
| >EGFR-L858C KITDFGLAKL  | 478 | >EGFR-L858C KITDFGGAKL  | 1075  | 597   |
| >EGFR-L858C KITDFGLAKL  | 29  | >EGFR-L858C KITDFGGAKL  | 97    | 68    |
| >EGFR-L858C KITDFGLAKLL | 183 | >EGFR-L858C KITDFGGAKLL | 212   | 29    |
| >EGFR-L858C KITDFGLAK   | 102 | >EGFR-L858C KITDFGGAK   | 188   | 86    |
| >EGFR-L858C KITDFGLAK   | 17  | >EGFR-L858C KITDFGGAK   | 59    | 42    |
| >EGFR-L858C KITDFGLAK   | 22  | >EGFR-L858C KITDFGGAK   | 79    | 57    |

|                         |     |                         |       |       |
|-------------------------|-----|-------------------------|-------|-------|
| >EGFR-L858C KITDFGLAK   | 98  | >EGFR-L858C KITDFGGAK   | 665   | 567   |
| >EGFR-L858C VKITDFGL    | 279 | >EGFR-L858C VKITDFGG    | 13517 | 13238 |
| >EGFR-L858C VKITDFGLAK  | 252 | >EGFR-L858C VKITDFGGAK  | 1195  | 943   |
| >EGFR-L858C VKITDFGLAKI | 295 | >EGFR-L858C VKITDFGGAK  | 166   | 129   |
| >EGFR-L858C HVKITDFGLA  | 276 | >EGFR-L858C HVKITDFGGA  | 948   | 672   |
| >EGFR-L858C HVKITDFGL   | 168 | >EGFR-L858C HVKITDFGG   | 818   | 650   |
| >EGFR-L858C HVKITDFGLA  | 33  | >EGFR-L858C HVKITDFGGA  | 91    | 58    |
| >EGFR-L858C HVKITDFGLA  | 4   | >EGFR-L858C HVKITDFGGA  | 5     | 1     |
| >EGFR-L858C HVKITDFGLA  | 201 | >EGFR-L858C HVKITDFGGA  | 216   | 15    |
| >EGFR-L858C HVKITDFGLA  | 130 | >EGFR-L858C HVKITDFGGA  | 113   | 17    |
| >EGFR-L858C HVKITDFGL   | 328 | >EGFR-L858C HVKITDFGG   | 19552 | 19224 |
| >EGFR-L858C QHVKITDFGL  | 380 | >EGFR-L858C QHVKITDFGC  | 25438 | 25058 |
| >EGFR-L858K LAKLLGAEK   | 377 | >EGFR-L858K KAKLLGAEK   | 19    | 358   |
| >EGFR-L858K GLAKLLGA    | 216 | >EGFR-L858K GKAKLLGA    | 22581 | 22365 |
| >EGFR-L858K GLAKLLGA    | 32  | >EGFR-L858K GKAKLLGA    | 15024 | 14992 |
| >EGFR-L858K GLAKLLGA    | 13  | >EGFR-L858K GKAKLLGA    | 9389  | 9376  |
| >EGFR-L858K GLAKLLGA    | 235 | >EGFR-L858K GKAKLLGA    | 14112 | 13877 |
| >EGFR-L858K GLAKLLGA    | 151 | >EGFR-L858K GKAKLLGA    | 23997 | 23846 |
| >EGFR-L858K GLAKLLGA    | 251 | >EGFR-L858K GKAKLLGA    | 21431 | 21180 |
| >EGFR-L858K GLAKLLGA    | 44  | >EGFR-L858K GKAKLLGA    | 19582 | 19538 |
| >EGFR-L858K GLAKLLGA    | 31  | >EGFR-L858K GKAKLLGA    | 31556 | 31525 |
| >EGFR-L858K GLAKLLGAEE  | 347 | >EGFR-L858K GKAKLLGAEE  | 21184 | 20837 |
| >EGFR-L858K FGLAKLLGA   | 123 | >EGFR-L858K FGKAKLLGA   | 5021  | 4898  |
| >EGFR-L858K TDFGLAKLL   | 145 | >EGFR-L858K TDFGKAKLL   | 416   | 271   |
| >EGFR-L858K TDFGLAKLL   | 352 | >EGFR-L858K TDFGKAKLL   | 3085  | 2733  |
| >EGFR-L858K TDFGLAKLL   | 295 | >EGFR-L858K TDFGKAKLL   | 451   | 156   |
| >EGFR-L858K ITDFGLAK    | 290 | >EGFR-L858K ITDFGKAK    | 1705  | 1415  |
| >EGFR-L858K ITDFGLAK    | 33  | >EGFR-L858K ITDFGKAK    | 192   | 159   |
| >EGFR-L858K ITDFGLAKL   | 6   | >EGFR-L858K ITDFGKAKL   | 17    | 11    |
| >EGFR-L858K ITDFGLAKLL  | 15  | >EGFR-L858K ITDFGKAKLL  | 23    | 8     |
| >EGFR-L858K ITDFGLAKLL  | 276 | >EGFR-L858K ITDFGKAKLL  | 986   | 710   |
| >EGFR-L858K ITDFGLAKL   | 97  | >EGFR-L858K ITDFGKAKL   | 148   | 51    |
| >EGFR-L858K ITDFGLAK    | 474 | >EGFR-L858K ITDFGKAK    | 1427  | 953   |
| >EGFR-L858K KITDFGLAKL  | 91  | >EGFR-L858K KITDFGKAKL  | 532   | 441   |
| >EGFR-L858K KITDFGLAKLL | 228 | >EGFR-L858K KITDFGKAKLI | 543   | 315   |
| >EGFR-L858K KITDFGLA    | 348 | >EGFR-L858K KITDFGKA    | 1009  | 661   |
| >EGFR-L858K KITDFGLAKL  | 81  | >EGFR-L858K KITDFGKAKL  | 636   | 555   |
| >EGFR-L858K KITDFGLA    | 117 | >EGFR-L858K KITDFGKA    | 933   | 816   |
| >EGFR-L858K KITDFGLAKL  | 432 | >EGFR-L858K KITDFGKAKL  | 5082  | 4650  |
| >EGFR-L858K KITDFGLAKLL | 462 | >EGFR-L858K KITDFGKAKLI | 1893  | 1431  |
| >EGFR-L858K KITDFGLAKL  | 188 | >EGFR-L858K KITDFGKAKL  | 668   | 480   |
| >EGFR-L858K KITDFGLAKL  | 478 | >EGFR-L858K KITDFGKAKL  | 1965  | 1487  |
| >EGFR-L858K KITDFGLAKL  | 29  | >EGFR-L858K KITDFGKAKL  | 85    | 56    |

|                         |       |                         |       |       |
|-------------------------|-------|-------------------------|-------|-------|
| >EGFR-L858K KITDFGLAKLL | 183   | >EGFR-L858K KITDFGKAKLI | 322   | 139   |
| >EGFR-L858K KITDFGLAK   | 102   | >EGFR-L858K KITDFGKAK   | 685   | 583   |
| >EGFR-L858K KITDFGLAK   | 17    | >EGFR-L858K KITDFGKAK   | 142   | 125   |
| >EGFR-L858K KITDFGLAK   | 22    | >EGFR-L858K KITDFGKAK   | 105   | 83    |
| >EGFR-L858K KITDFGLAK   | 98    | >EGFR-L858K KITDFGKAK   | 277   | 179   |
| >EGFR-L858K VKITDFGL    | 279   | >EGFR-L858K VKITDFGK    | 3533  | 3254  |
| >EGFR-L858K VKITDFGLAK  | 252   | >EGFR-L858K VKITDFGKAK  | 267   | 15    |
| >EGFR-L858K VKITDFGLAKI | 295   | >EGFR-L858K VKITDFGKAKI | 366   | 71    |
| >EGFR-L858K HVKITDFGL   | 26190 | >EGFR-L858K HVKITDFGK   | 454   | 25736 |
| >EGFR-L858K HVKITDFGLA  | 276   | >EGFR-L858K HVKITDFGKA  | 1487  | 1211  |
| >EGFR-L858K HVKITDFGL   | 168   | >EGFR-L858K HVKITDFGK   | 6     | 162   |
| >EGFR-L858K HVKITDFGLA  | 33    | >EGFR-L858K HVKITDFGKA  | 78    | 45    |
| >EGFR-L858K HVKITDFGLA  | 4     | >EGFR-L858K HVKITDFGKA  | 5     | 1     |
| >EGFR-L858K HVKITDFGL   | 5459  | >EGFR-L858K HVKITDFGK   | 89    | 5370  |
| >EGFR-L858K HVKITDFGLA  | 201   | >EGFR-L858K HVKITDFGKA  | 229   | 28    |
| >EGFR-L858K HVKITDFGL   | 15337 | >EGFR-L858K HVKITDFGK   | 27    | 15310 |
| >EGFR-L858K HVKITDFGLA  | 130   | >EGFR-L858K HVKITDFGKA  | 251   | 121   |
| >EGFR-L858K HVKITDFGL   | 328   | >EGFR-L858K HVKITDFGK   | 21767 | 21439 |
| >EGFR-L858K QHVKITDFGL  | 380   | >EGFR-L858K QHVKITDFGK  | 22767 | 22387 |
| >EGFR-L858M LAKLLGAE EK | 377   | >EGFR-L858M MAKLLGAE EK | 59    | 318   |
| >EGFR-L858M LAKLLGAE EK | 1217  | >EGFR-L858M MAKLLGAE EK | 138   | 1079  |
| >EGFR-L858M GLAKLLGA    | 216   | >EGFR-L858M GMAKLLGA    | 151   | 65    |
| >EGFR-L858M GLAKLLGA    | 32    | >EGFR-L858M GMAKLLGA    | 36    | 4     |
| >EGFR-L858M GLAKLLGA    | 13    | >EGFR-L858M GMAKLLGA    | 11    | 2     |
| >EGFR-L858M GLAKLLGA    | 235   | >EGFR-L858M GMAKLLGA    | 145   | 90    |
| >EGFR-L858M GLAKLLGA    | 151   | >EGFR-L858M GMAKLLGA    | 87    | 64    |
| >EGFR-L858M GLAKLLGA    | 251   | >EGFR-L858M GMAKLLGA    | 143   | 108   |
| >EGFR-L858M GLAKLLGA    | 44    | >EGFR-L858M GMAKLLGA    | 41    | 3     |
| >EGFR-L858M GLAKLLGA    | 31    | >EGFR-L858M GMAKLLGA    | 61    | 30    |
| >EGFR-L858M GLAKLLGAEE  | 347   | >EGFR-L858M GMAKLLGAEE  | 284   | 63    |
| >EGFR-L858M GLAKLLGAEE  | 630   | >EGFR-L858M GMAKLLGAEE  | 135   | 495   |
| >EGFR-L858M FGLAKLLGA   | 2872  | >EGFR-L858M FGMAKLLGA   | 264   | 2608  |
| >EGFR-L858M FGLAKLLGA   | 123   | >EGFR-L858M FGMAKLLGA   | 55    | 68    |
| >EGFR-L858M TDFGLAKLL   | 145   | >EGFR-L858M TDFGMAKLL   | 121   | 24    |
| >EGFR-L858M TDFGLAKLL   | 352   | >EGFR-L858M TDFGMAKLL   | 311   | 41    |
| >EGFR-L858M TDFGLAKLL   | 295   | >EGFR-L858M TDFGMAKLL   | 271   | 24    |
| >EGFR-L858M ITDFGLAK    | 290   | >EGFR-L858M ITDFGMAK    | 199   | 91    |
| >EGFR-L858M ITDFGLAK    | 33    | >EGFR-L858M ITDFGMAK    | 25    | 8     |
| >EGFR-L858M ITDFGLAK    | 558   | >EGFR-L858M ITDFGMAK    | 258   | 300   |
| >EGFR-L858M ITDFGLAKL   | 732   | >EGFR-L858M ITDFGMAKL   | 467   | 265   |
| >EGFR-L858M ITDFGLAKL   | 6     | >EGFR-L858M ITDFGMAKL   | 4     | 2     |
| >EGFR-L858M ITDFGLAKLL  | 15    | >EGFR-L858M ITDFGMAKLL  | 9     | 6     |
| >EGFR-L858M ITDFGLAKL   | 748   | >EGFR-L858M ITDFGMAKL   | 440   | 308   |



|                         |       |                         |       |       |
|-------------------------|-------|-------------------------|-------|-------|
| >EGFR-L858M ITDFGLAKLL  | 276   | >EGFR-L858M ITDFGMAKLL  | 217   | 59    |
| >EGFR-L858M ITDFGLAKL   | 97    | >EGFR-L858M ITDFGMAKL   | 59    | 38    |
| >EGFR-L858M ITDFGLAK    | 474   | >EGFR-L858M ITDFGMAK    | 367   | 107   |
| >EGFR-L858M KITDFGLAKL  | 91    | >EGFR-L858M KITDFGMAKL  | 148   | 57    |
| >EGFR-L858M KITDFGLAKLL | 228   | >EGFR-L858M KITDFGMAKL  | 241   | 13    |
| >EGFR-L858M KITDFGLA    | 348   | >EGFR-L858M KITDFGMA    | 411   | 63    |
| >EGFR-L858M KITDFGLAKL  | 81    | >EGFR-L858M KITDFGMAKL  | 153   | 72    |
| >EGFR-L858M KITDFGLA    | 117   | >EGFR-L858M KITDFGMA    | 208   | 91    |
| >EGFR-L858M KITDFGLAKL  | 432   | >EGFR-L858M KITDFGMAKL  | 1319  | 887   |
| >EGFR-L858M KITDFGLAKLL | 462   | >EGFR-L858M KITDFGMAKL  | 557   | 95    |
| >EGFR-L858M KITDFGLAKL  | 188   | >EGFR-L858M KITDFGMAKL  | 288   | 100   |
| >EGFR-L858M KITDFGLAKL  | 478   | >EGFR-L858M KITDFGMAKL  | 659   | 181   |
| >EGFR-L858M KITDFGLAKL  | 29    | >EGFR-L858M KITDFGMAKL  | 34    | 5     |
| >EGFR-L858M KITDFGLAKLL | 183   | >EGFR-L858M KITDFGMAKL  | 111   | 72    |
| >EGFR-L858M KITDFGLAK   | 102   | >EGFR-L858M KITDFGMAK   | 74    | 28    |
| >EGFR-L858M KITDFGLAK   | 17    | >EGFR-L858M KITDFGMAK   | 13    | 4     |
| >EGFR-L858M KITDFGLAK   | 22    | >EGFR-L858M KITDFGMAK   | 14    | 8     |
| >EGFR-L858M KITDFGLAKL  | 693   | >EGFR-L858M KITDFGMAKL  | 444   | 249   |
| >EGFR-L858M KITDFGLAK   | 98    | >EGFR-L858M KITDFGMAK   | 124   | 26    |
| >EGFR-L858M VKITDFGL    | 279   | >EGFR-L858M VKITDFGM    | 173   | 106   |
| >EGFR-L858M VKITDFGLAK  | 252   | >EGFR-L858M VKITDFGMAK  | 153   | 99    |
| >EGFR-L858M VKITDFGLAKI | 295   | >EGFR-L858M VKITDFGMAK  | 250   | 45    |
| >EGFR-L858M HVKITDFGLA  | 520   | >EGFR-L858M HVKITDFGM/  | 414   | 106   |
| >EGFR-L858M HVKITDFGLA  | 276   | >EGFR-L858M HVKITDFGM/  | 216   | 60    |
| >EGFR-L858M HVKITDFGL   | 168   | >EGFR-L858M HVKITDFGM   | 168   | 0     |
| >EGFR-L858M HVKITDFGLA  | 33    | >EGFR-L858M HVKITDFGM/  | 64    | 31    |
| >EGFR-L858M HVKITDFGLA  | 4     | >EGFR-L858M HVKITDFGM/  | 4     | 0     |
| >EGFR-L858M HVKITDFGLA  | 201   | >EGFR-L858M HVKITDFGM/  | 113   | 88    |
| >EGFR-L858M HVKITDFGLA  | 130   | >EGFR-L858M HVKITDFGM/  | 60    | 70    |
| >EGFR-L858M HVKITDFGL   | 328   | >EGFR-L858M HVKITDFGM   | 182   | 146   |
| >EGFR-L858M QHVKITDFGL  | 380   | >EGFR-L858M QHVKITDFGM  | 1948  | 1568  |
| >EGFR-L858F LAKLLGAE EK | 377   | >EGFR-L858F PAKLLGAE EK | 2194  | 1817  |
| >EGFR-L858F GLAKLLGA    | 216   | >EGFR-L858F GPAKLLGA    | 23300 | 23084 |
| >EGFR-L858F GLAKLLGA    | 32    | >EGFR-L858F GPAKLLGA    | 26666 | 26634 |
| >EGFR-L858F GLAKLLGA    | 13    | >EGFR-L858F GPAKLLGA    | 15683 | 15670 |
| >EGFR-L858F GLAKLLGA    | 235   | >EGFR-L858F GPAKLLGA    | 22568 | 22333 |
| >EGFR-L858F GLAKLLGA    | 151   | >EGFR-L858F GPAKLLGA    | 28047 | 27896 |
| >EGFR-L858F GLAKLLGA    | 251   | >EGFR-L858F GPAKLLGA    | 23389 | 23138 |
| >EGFR-L858F GLAKLLGA    | 44    | >EGFR-L858F GPAKLLGA    | 23573 | 23529 |
| >EGFR-L858F GLAKLLGA    | 31    | >EGFR-L858F GPAKLLGA    | 35064 | 35033 |
| >EGFR-L858F GLAKLLGAEE  | 347   | >EGFR-L858F GPAKLLGAEE  | 19621 | 19274 |
| >EGFR-L858F FGLAKLLGA   | 24936 | >EGFR-L858F FGPAKLLGA   | 247   | 24689 |
| >EGFR-L858F FGLAKLLGAE  | 25588 | >EGFR-L858F FGPAKLLGAE  | 252   | 25336 |

|                         |       |                         |       |       |
|-------------------------|-------|-------------------------|-------|-------|
| >EGFR-L858F FGLAKLLGAE  | 26272 | >EGFR-L858F FGPAKLLGAE  | 350   | 25922 |
| >EGFR-L858F FGLAKLLGA   | 123   | >EGFR-L858F FGPAKLLGA   | 918   | 795   |
| >EGFR-L858F TDFGLAKLL   | 145   | >EGFR-L858F TDFGPAKLL   | 3063  | 2918  |
| >EGFR-L858F TDFGLAKLL   | 352   | >EGFR-L858F TDFGPAKLL   | 4457  | 4105  |
| >EGFR-L858F TDFGLAKLL   | 295   | >EGFR-L858F TDFGPAKLL   | 712   | 417   |
| >EGFR-L858F ITDFGLAK    | 290   | >EGFR-L858F ITDFGPAK    | 532   | 242   |
| >EGFR-L858F ITDFGLAK    | 33    | >EGFR-L858F ITDFGPAK    | 53    | 20    |
| >EGFR-L858F ITDFGLAKL   | 6     | >EGFR-L858F ITDFGPAKL   | 7     | 1     |
| >EGFR-L858F ITDFGLAKLL  | 15    | >EGFR-L858F ITDFGPAKLL  | 13    | 2     |
| >EGFR-L858F ITDFGLAKLL  | 276   | >EGFR-L858F ITDFGPAKLL  | 349   | 73    |
| >EGFR-L858F ITDFGLAKL   | 97    | >EGFR-L858F ITDFGPAKL   | 226   | 129   |
| >EGFR-L858F ITDFGLAK    | 474   | >EGFR-L858F ITDFGPAK    | 687   | 213   |
| >EGFR-L858F ITDFGLAKLL  | 613   | >EGFR-L858F ITDFGPAKLL  | 389   | 224   |
| >EGFR-L858F KITDFGLAKL  | 91    | >EGFR-L858F KITDFGPAKL  | 176   | 85    |
| >EGFR-L858F KITDFGLAKLL | 228   | >EGFR-L858F KITDFGPAKLL | 425   | 197   |
| >EGFR-L858F KITDFGLA    | 348   | >EGFR-L858F KITDFGPA    | 207   | 141   |
| >EGFR-L858F KITDFGLAKL  | 81    | >EGFR-L858F KITDFGPAKL  | 119   | 38    |
| >EGFR-L858F KITDFGLA    | 117   | >EGFR-L858F KITDFGPA    | 48    | 69    |
| >EGFR-L858F KITDFGLAKL  | 432   | >EGFR-L858F KITDFGPAKL  | 1807  | 1375  |
| >EGFR-L858F KITDFGLAKLL | 462   | >EGFR-L858F KITDFGPAKLL | 491   | 29    |
| >EGFR-L858F KITDFGLAKL  | 188   | >EGFR-L858F KITDFGPAKL  | 140   | 48    |
| >EGFR-L858F KITDFGLAKL  | 478   | >EGFR-L858F KITDFGPAKL  | 342   | 136   |
| >EGFR-L858F KITDFGLAKL  | 29    | >EGFR-L858F KITDFGPAKL  | 33    | 4     |
| >EGFR-L858F KITDFGLAKLL | 183   | >EGFR-L858F KITDFGPAKLL | 114   | 69    |
| >EGFR-L858F KITDFGLAK   | 102   | >EGFR-L858F KITDFGPAK   | 202   | 100   |
| >EGFR-L858F KITDFGLAK   | 17    | >EGFR-L858F KITDFGPAK   | 29    | 12    |
| >EGFR-L858F KITDFGLAK   | 22    | >EGFR-L858F KITDFGPAK   | 15    | 7     |
| >EGFR-L858F KITDFGLAKL  | 1056  | >EGFR-L858F KITDFGPAKL  | 349   | 707   |
| >EGFR-L858F KITDFGLAK   | 98    | >EGFR-L858F KITDFGPAK   | 416   | 318   |
| >EGFR-L858F VKITDFGL    | 279   | >EGFR-L858F VKITDFGP    | 7742  | 7463  |
| >EGFR-L858F VKITDFGLAK  | 252   | >EGFR-L858F VKITDFGPAK  | 243   | 9     |
| >EGFR-L858F VKITDFGLAKI | 295   | >EGFR-L858F VKITDFGPAKI | 137   | 158   |
| >EGFR-L858F HVKITDFGLA  | 276   | >EGFR-L858F HVKITDFGPA  | 517   | 241   |
| >EGFR-L858F HVKITDFGL   | 168   | >EGFR-L858F HVKITDFGP   | 2112  | 1944  |
| >EGFR-L858F HVKITDFGLA  | 33    | >EGFR-L858F HVKITDFGPA  | 19    | 14    |
| >EGFR-L858F HVKITDFGLA  | 4     | >EGFR-L858F HVKITDFGPA  | 4     | 0     |
| >EGFR-L858F HVKITDFGLA  | 201   | >EGFR-L858F HVKITDFGPA  | 134   | 67    |
| >EGFR-L858F HVKITDFGLA  | 130   | >EGFR-L858F HVKITDFGPA  | 93    | 37    |
| >EGFR-L858F HVKITDFGL   | 328   | >EGFR-L858F HVKITDFGP   | 23213 | 22885 |
| >EGFR-L858F QHVKITDFGL  | 380   | >EGFR-L858F QHVKITDFGP  | 24723 | 24343 |
| >EGFR-L858C LAKLLGAE EK | 377   | >EGFR-L858C QAKLLGAE EK | 516   | 139   |
| >EGFR-L858C GLAKLLGA    | 216   | >EGFR-L858C GQAKLLGA    | 3651  | 3435  |
| >EGFR-L858C GLAKLLGA    | 32    | >EGFR-L858C GQAKLLGA    | 1494  | 1462  |

|                         |     |                        |       |       |
|-------------------------|-----|------------------------|-------|-------|
| >EGFR-L858C GLAKLLGA    | 13  | >EGFR-L858C GQAKLLGA   | 205   | 192   |
| >EGFR-L858C GLAKLLGA    | 235 | >EGFR-L858C GQAKLLGA   | 74    | 161   |
| >EGFR-L858C GLAKLLGA    | 151 | >EGFR-L858C GQAKLLGA   | 9679  | 9528  |
| >EGFR-L858C GLAKLLGA    | 251 | >EGFR-L858C GQAKLLGA   | 8212  | 7961  |
| >EGFR-L858C GLAKLLGA    | 44  | >EGFR-L858C GQAKLLGA   | 5672  | 5628  |
| >EGFR-L858C GLAKLLGA    | 31  | >EGFR-L858C GQAKLLGA   | 25943 | 25912 |
| >EGFR-L858C GLAKLLGAEE  | 347 | >EGFR-L858C GQAKLLGAEE | 4703  | 4356  |
| >EGFR-L858C FGLAKLLGA   | 123 | >EGFR-L858C FGQAKLLGA  | 1855  | 1732  |
| >EGFR-L858C TDFGLAKLL   | 145 | >EGFR-L858C TDFGQAKLL  | 229   | 84    |
| >EGFR-L858C TDFGLAKLL   | 352 | >EGFR-L858C TDFGQAKLL  | 1497  | 1145  |
| >EGFR-L858C TDFGLAKLL   | 295 | >EGFR-L858C TDFGQAKLL  | 197   | 98    |
| >EGFR-L858C ITDFGLAK    | 290 | >EGFR-L858C ITDFGQAK   | 948   | 658   |
| >EGFR-L858C ITDFGLAK    | 33  | >EGFR-L858C ITDFGQAK   | 108   | 75    |
| >EGFR-L858C ITDFGLAK    | 558 | >EGFR-L858C ITDFGQAK   | 467   | 91    |
| >EGFR-L858C ITDFGLAKL   | 6   | >EGFR-L858C ITDFGQAKL  | 9     | 3     |
| >EGFR-L858C ITDFGLAKLL  | 15  | >EGFR-L858C ITDFGQAKLL | 16    | 1     |
| >EGFR-L858C ITDFGLAKLL  | 276 | >EGFR-L858C ITDFGQAKLL | 670   | 394   |
| >EGFR-L858C ITDFGLAKL   | 97  | >EGFR-L858C ITDFGQAKL  | 181   | 84    |
| >EGFR-L858C ITDFGLAK    | 474 | >EGFR-L858C ITDFGQAK   | 1722  | 1248  |
| >EGFR-L858C KITDFGLAKL  | 91  | >EGFR-L858C KITDFGQAKL | 321   | 230   |
| >EGFR-L858C KITDFGLAKLL | 228 | >EGFR-L858C KITDFGQAKL | 256   | 28    |
| >EGFR-L858C KITDFGLA    | 348 | >EGFR-L858C KITDFGQA   | 499   | 151   |
| >EGFR-L858C KITDFGLAKL  | 81  | >EGFR-L858C KITDFGQAKL | 853   | 772   |
| >EGFR-L858C KITDFGLA    | 117 | >EGFR-L858C KITDFGQA   | 311   | 194   |
| >EGFR-L858C KITDFGLAKL  | 432 | >EGFR-L858C KITDFGQAKL | 4934  | 4502  |
| >EGFR-L858C KITDFGLAKLL | 462 | >EGFR-L858C KITDFGQAKL | 749   | 287   |
| >EGFR-L858C KITDFGLAKL  | 188 | >EGFR-L858C KITDFGQAKL | 298   | 110   |
| >EGFR-L858C KITDFGLAKL  | 478 | >EGFR-L858C KITDFGQAKL | 649   | 171   |
| >EGFR-L858C KITDFGLA    | 751 | >EGFR-L858C KITDFGQA   | 344   | 407   |
| >EGFR-L858C KITDFGLAKL  | 29  | >EGFR-L858C KITDFGQAKL | 24    | 5     |
| >EGFR-L858C KITDFGLAKLL | 183 | >EGFR-L858C KITDFGQAKL | 113   | 70    |
| >EGFR-L858C KITDFGLAK   | 102 | >EGFR-L858C KITDFGQAK  | 434   | 332   |
| >EGFR-L858C KITDFGLAK   | 17  | >EGFR-L858C KITDFGQAK  | 69    | 52    |
| >EGFR-L858C KITDFGLAK   | 22  | >EGFR-L858C KITDFGQAK  | 40    | 18    |
| >EGFR-L858C KITDFGLAK   | 98  | >EGFR-L858C KITDFGQAK  | 395   | 297   |
| >EGFR-L858C VKITDFGL    | 279 | >EGFR-L858C VKITDFGQ   | 6461  | 6182  |
| >EGFR-L858C VKITDFGLAK  | 252 | >EGFR-L858C VKITDFGQAK | 185   | 67    |
| >EGFR-L858C VKITDFGLAKI | 295 | >EGFR-L858C VKITDFGQAK | 242   | 53    |
| >EGFR-L858C HVKITDFGLA  | 276 | >EGFR-L858C HVKITDFGQA | 1012  | 736   |
| >EGFR-L858C HVKITDFGL   | 168 | >EGFR-L858C HVKITDFGQ  | 804   | 636   |
| >EGFR-L858C HVKITDFGLA  | 33  | >EGFR-L858C HVKITDFGQA | 57    | 24    |
| >EGFR-L858C HVKITDFGLA  | 4   | >EGFR-L858C HVKITDFGQA | 5     | 1     |
| >EGFR-L858C HVKITDFGLA  | 201 | >EGFR-L858C HVKITDFGQA | 142   | 59    |

|                         |       |                         |       |       |
|-------------------------|-------|-------------------------|-------|-------|
| >EGFR-L858C HVKITDFGLA  | 130   | >EGFR-L858C HVKITDFGQA  | 148   | 18    |
| >EGFR-L858C HVKITDFGL   | 328   | >EGFR-L858C HVKITDFGQ   | 16570 | 16242 |
| >EGFR-L858C QHVKITDFGL  | 380   | >EGFR-L858C QHVKITDFGC  | 22044 | 21664 |
| >EGFR-L858F LAKLLGAE EK | 377   | >EGFR-L858F RAKLLGAE EK | 17    | 360   |
| >EGFR-L858F GLAKLLGA    | 216   | >EGFR-L858F GRAKLLGA    | 23088 | 22872 |
| >EGFR-L858F GLAKLLGA    | 32    | >EGFR-L858F GRAKLLGA    | 20419 | 20387 |
| >EGFR-L858F GLAKLLGA    | 13    | >EGFR-L858F GRAKLLGA    | 13769 | 13756 |
| >EGFR-L858F GLAKLLGA    | 235   | >EGFR-L858F GRAKLLGA    | 22116 | 21881 |
| >EGFR-L858F GLAKLLGA    | 151   | >EGFR-L858F GRAKLLGA    | 26664 | 26513 |
| >EGFR-L858F GLAKLLGA    | 251   | >EGFR-L858F GRAKLLGA    | 22958 | 22707 |
| >EGFR-L858F GLAKLLGA    | 44    | >EGFR-L858F GRAKLLGA    | 21974 | 21930 |
| >EGFR-L858F GLAKLLGA    | 31    | >EGFR-L858F GRAKLLGA    | 32462 | 32431 |
| >EGFR-L858F GLAKLLGAEE  | 347   | >EGFR-L858F GRAKLLGAEE  | 21542 | 21195 |
| >EGFR-L858F GLAKLLGA    | 20047 | >EGFR-L858F GRAKLLGA    | 406   | 19641 |
| >EGFR-L858F GLAKLLGAEE  | 18128 | >EGFR-L858F GRAKLLGAEE  | 125   | 18003 |
| >EGFR-L858F GLAKLLGAEE  | 17913 | >EGFR-L858F GRAKLLGAEE  | 213   | 17700 |
| >EGFR-L858F FGLAKLLGA   | 123   | >EGFR-L858F FGRAKLLGA   | 5912  | 5789  |
| >EGFR-L858F TDFGLAKLL   | 145   | >EGFR-L858F TDFGRAKLL   | 153   | 8     |
| >EGFR-L858F TDFGLAKLL   | 352   | >EGFR-L858F TDFGRAKLL   | 3449  | 3097  |
| >EGFR-L858F TDFGLAKLL   | 295   | >EGFR-L858F TDFGRAKLL   | 338   | 43    |
| >EGFR-L858F ITDFGLAK    | 290   | >EGFR-L858F ITDFGRAK    | 888   | 598   |
| >EGFR-L858F ITDFGLAK    | 33    | >EGFR-L858F ITDFGRAK    | 127   | 94    |
| >EGFR-L858F ITDFGLAKL   | 6     | >EGFR-L858F ITDFGRAKL   | 16    | 10    |
| >EGFR-L858F ITDFGLAKLL  | 15    | >EGFR-L858F ITDFGRAKLL  | 22    | 7     |
| >EGFR-L858F ITDFGLAKLL  | 276   | >EGFR-L858F ITDFGRAKLL  | 583   | 307   |
| >EGFR-L858F ITDFGLAKL   | 97    | >EGFR-L858F ITDFGRAKL   | 152   | 55    |
| >EGFR-L858F ITDFGLAK    | 474   | >EGFR-L858F ITDFGRAK    | 1696  | 1222  |
| >EGFR-L858F KITDFGLAKL  | 91    | >EGFR-L858F KITDFGRAKL  | 317   | 226   |
| >EGFR-L858F KITDFGLAKLL | 228   | >EGFR-L858F KITDFGRAKLI | 524   | 296   |
| >EGFR-L858F KITDFGLA    | 348   | >EGFR-L858F KITDFGRA    | 865   | 517   |
| >EGFR-L858F KITDFGLAKL  | 81    | >EGFR-L858F KITDFGRAKL  | 474   | 393   |
| >EGFR-L858F KITDFGLA    | 117   | >EGFR-L858F KITDFGRA    | 764   | 647   |
| >EGFR-L858F KITDFGLAKL  | 432   | >EGFR-L858F KITDFGRAKL  | 3394  | 2962  |
| >EGFR-L858F KITDFGLAKLL | 462   | >EGFR-L858F KITDFGRAKLI | 1544  | 1082  |
| >EGFR-L858F KITDFGLAKL  | 188   | >EGFR-L858F KITDFGRAKL  | 1012  | 824   |
| >EGFR-L858F KITDFGLAKL  | 478   | >EGFR-L858F KITDFGRAKL  | 2964  | 2486  |
| >EGFR-L858F KITDFGLAKL  | 29    | >EGFR-L858F KITDFGRAKL  | 100   | 71    |
| >EGFR-L858F KITDFGLAKLL | 183   | >EGFR-L858F KITDFGRAKLI | 358   | 175   |
| >EGFR-L858F KITDFGLAK   | 102   | >EGFR-L858F KITDFGRAK   | 365   | 263   |
| >EGFR-L858F KITDFGLAK   | 17    | >EGFR-L858F KITDFGRAK   | 100   | 83    |
| >EGFR-L858F KITDFGLAK   | 22    | >EGFR-L858F KITDFGRAK   | 53    | 31    |
| >EGFR-L858F KITDFGLAK   | 98    | >EGFR-L858F KITDFGRAK   | 715   | 617   |
| >EGFR-L858F VKITDFGL    | 279   | >EGFR-L858F VKITDFGR    | 2936  | 2657  |

|                        |       |                        |       |       |
|------------------------|-------|------------------------|-------|-------|
| >EGFR-L858FVKITDFGLAK  | 252   | >EGFR-L858FVKITDFGRAK  | 441   | 189   |
| >EGFR-L858FVKITDFGLAKI | 295   | >EGFR-L858FVKITDFGRAK  | 263   | 32    |
| >EGFR-L858FHVKITDFGLA  | 276   | >EGFR-L858FHVKITDFGRA  | 1351  | 1075  |
| >EGFR-L858FHVKITDFGL   | 168   | >EGFR-L858FHVKITDFGR   | 274   | 106   |
| >EGFR-L858FHVKITDFGLA  | 33    | >EGFR-L858FHVKITDFGRA  | 77    | 44    |
| >EGFR-L858FHVKITDFGLA  | 4     | >EGFR-L858FHVKITDFGRA  | 5     | 1     |
| >EGFR-L858FHVKITDFGL   | 5459  | >EGFR-L858FHVKITDFGR   | 11    | 5448  |
| >EGFR-L858FHVKITDFGLA  | 201   | >EGFR-L858FHVKITDFGRA  | 185   | 16    |
| >EGFR-L858FHVKITDFGL   | 14976 | >EGFR-L858FHVKITDFGR   | 44    | 14932 |
| >EGFR-L858FHVKITDFGL   | 15337 | >EGFR-L858FHVKITDFGR   | 11    | 15326 |
| >EGFR-L858FHVKITDFGLA  | 130   | >EGFR-L858FHVKITDFGRA  | 208   | 78    |
| >EGFR-L858FHVKITDFGL   | 328   | >EGFR-L858FHVKITDFGR   | 19514 | 19186 |
| >EGFR-L858FHVKITDFGL   | 30432 | >EGFR-L858FHVKITDFGR   | 107   | 30325 |
| >EGFR-L858FQHVKITDFGL  | 380   | >EGFR-L858FQHVKITDFGR  | 21954 | 21574 |
| >EGFR-L858FQHVKITDFGL  | 29083 | >EGFR-L858FQHVKITDFGR  | 111   | 28972 |
| >EGFR-L858VLAKLLGAE EK | 377   | >EGFR-L858VWAKLLGAE EK | 4560  | 4183  |
| >EGFR-L858VGLAKLLGA    | 216   | >EGFR-L858VWAKLLGA     | 20398 | 20182 |
| >EGFR-L858VGLAKLLGA    | 32    | >EGFR-L858VWAKLLGA     | 5703  | 5671  |
| >EGFR-L858VGLAKLLGA    | 13    | >EGFR-L858VWAKLLGA     | 10706 | 10693 |
| >EGFR-L858VGLAKLLGA    | 235   | >EGFR-L858VWAKLLGA     | 9473  | 9238  |
| >EGFR-L858VGLAKLLGA    | 151   | >EGFR-L858VWAKLLGA     | 25028 | 24877 |
| >EGFR-L858VGLAKLLGA    | 251   | >EGFR-L858VWAKLLGA     | 21543 | 21292 |
| >EGFR-L858VGLAKLLGA    | 44    | >EGFR-L858VWAKLLGA     | 20245 | 20201 |
| >EGFR-L858VGLAKLLGA    | 31    | >EGFR-L858VWAKLLGA     | 32489 | 32458 |
| >EGFR-L858VGLAKLLGAEE  | 347   | >EGFR-L858VWAKLLGAE    | 19357 | 19010 |
| >EGFR-L858VFGWAKLLGA   | 123   | >EGFR-L858VFGWAKLLGA   | 267   | 144   |
| >EGFR-L858VDFGLAKLLGA  | 969   | >EGFR-L858VDFGWAKLLG   | 472   | 497   |
| >EGFR-L858VTDFGLAKLL   | 145   | >EGFR-L858VTDFGWAKLL   | 193   | 48    |
| >EGFR-L858VTDFGLAKLL   | 352   | >EGFR-L858VTDFGWAKLL   | 1322  | 970   |
| >EGFR-L858VTDFGLAKLL   | 295   | >EGFR-L858VTDFGWAKLL   | 511   | 216   |
| >EGFR-L858VITDFGLAK    | 290   | >EGFR-L858VITDFGWAK    | 905   | 615   |
| >EGFR-L858VITDFGLAK    | 33    | >EGFR-L858VITDFGWAK    | 40    | 7     |
| >EGFR-L858VITDFGLAK    | 558   | >EGFR-L858VITDFGWAK    | 345   | 213   |
| >EGFR-L858VITDFGLAKL   | 6     | >EGFR-L858VITDFGWAKL   | 7     | 1     |
| >EGFR-L858VITDFGLAKLL  | 15    | >EGFR-L858VITDFGWAKLL  | 14    | 1     |
| >EGFR-L858VITDFGLAKLL  | 276   | >EGFR-L858VITDFGWAKLL  | 388   | 112   |
| >EGFR-L858VITDFGLAKL   | 97    | >EGFR-L858VITDFGWAKL   | 148   | 51    |
| >EGFR-L858VITDFGLAK    | 474   | >EGFR-L858VITDFGWAK    | 332   | 142   |
| >EGFR-L858VITDFGLAKLL  | 613   | >EGFR-L858VITDFGWAKLL  | 288   | 325   |
| >EGFR-L858VKITDFGLAKL  | 91    | >EGFR-L858VKITDFGWAKL  | 284   | 193   |
| >EGFR-L858VKITDFGLAKLL | 228   | >EGFR-L858VKITDFGWAKL  | 139   | 89    |
| >EGFR-L858VKITDFGLA    | 348   | >EGFR-L858VKITDFGWA    | 315   | 33    |
| >EGFR-L858VKITDFGLAKL  | 81    | >EGFR-L858VKITDFGWAKL  | 287   | 206   |

|                         |       |                        |       |       |
|-------------------------|-------|------------------------|-------|-------|
| >EGFR-L858V KITDFGLA    | 117   | >EGFR-L858V KITDFGWA   | 83    | 34    |
| >EGFR-L858V KITDFGLAKL  | 432   | >EGFR-L858V KITDFGWAKL | 2340  | 1908  |
| >EGFR-L858V KITDFGLAKLL | 462   | >EGFR-L858V KITDFGWAKL | 167   | 295   |
| >EGFR-L858V KITDFGLAKL  | 188   | >EGFR-L858V KITDFGWAKL | 94    | 94    |
| >EGFR-L858V KITDFGLAKLL | 810   | >EGFR-L858V KITDFGWAKL | 153   | 657   |
| >EGFR-L858V KITDFGLAKL  | 478   | >EGFR-L858V KITDFGWAKL | 161   | 317   |
| >EGFR-L858V KITDFGLA    | 751   | >EGFR-L858V KITDFGWA   | 204   | 547   |
| >EGFR-L858V KITDFGLAKL  | 29    | >EGFR-L858V KITDFGWAKL | 24    | 5     |
| >EGFR-L858V KITDFGLAKLL | 183   | >EGFR-L858V KITDFGWAKL | 32    | 151   |
| >EGFR-L858V KITDFGLAK   | 102   | >EGFR-L858V KITDFGWAK  | 306   | 204   |
| >EGFR-L858V KITDFGLAK   | 17    | >EGFR-L858V KITDFGWAK  | 15    | 2     |
| >EGFR-L858V KITDFGLAK   | 22    | >EGFR-L858V KITDFGWAK  | 103   | 81    |
| >EGFR-L858V KITDFGLAK   | 1216  | >EGFR-L858V KITDFGWAK  | 153   | 1063  |
| >EGFR-L858V KITDFGLAK   | 98    | >EGFR-L858V KITDFGWAK  | 44    | 54    |
| >EGFR-L858V VKITDFGL    | 279   | >EGFR-L858V VKITDFGW   | 1131  | 852   |
| >EGFR-L858V VKITDFGLAK  | 252   | >EGFR-L858V VKITDFGWAK | 412   | 160   |
| >EGFR-L858V VKITDFGLAKI | 295   | >EGFR-L858V VKITDFGWAK | 342   | 47    |
| >EGFR-L858V VKITDFGL    | 26047 | >EGFR-L858V VKITDFGW   | 335   | 25712 |
| >EGFR-L858V HVKITDFGLA  | 276   | >EGFR-L858V HVKITDFGW  | 304   | 28    |
| >EGFR-L858V HVKITDFGL   | 168   | >EGFR-L858V HVKITDFGW  | 5020  | 4852  |
| >EGFR-L858V HVKITDFGLA  | 33    | >EGFR-L858V HVKITDFGW  | 79    | 46    |
| >EGFR-L858V HVKITDFGLA  | 4     | >EGFR-L858V HVKITDFGW  | 5     | 1     |
| >EGFR-L858V HVKITDFGLA  | 201   | >EGFR-L858V HVKITDFGW  | 57    | 144   |
| >EGFR-L858V HVKITDFGLA  | 1803  | >EGFR-L858V HVKITDFGW  | 366   | 1437  |
| >EGFR-L858V HVKITDFGLA  | 130   | >EGFR-L858V HVKITDFGW  | 59    | 71    |
| >EGFR-L858V HVKITDFGL   | 328   | >EGFR-L858V HVKITDFGW  | 35    | 293   |
| >EGFR-L858V HVKITDFGL   | 18419 | >EGFR-L858V HVKITDFGW  | 168   | 18251 |
| >EGFR-L858V HVKITDFGL   | 17255 | >EGFR-L858V HVKITDFGW  | 104   | 17151 |
| >EGFR-L858V QHVKITDFGL  | 380   | >EGFR-L858V QHVKITDFGV | 18182 | 17802 |
| >EGFR-L858V QHVKITDFGL  | 19659 | >EGFR-L858V QHVKITDFGV | 273   | 19386 |
| >EGFR-L861F LLGAEKEYH   | 1255  | >EGFR-L861F FLGAEKEYH  | 122   | 1133  |
| >EGFR-L861F LLGAEKEYH   | 248   | >EGFR-L861F FLGAEKEYH  | 19    | 229   |
| >EGFR-L861F LLGAEKEYH   | 2439  | >EGFR-L861F FLGAEKEYH  | 196   | 2243  |
| >EGFR-L861F LLGAEKEYH   | 4990  | >EGFR-L861F FLGAEKEYH  | 477   | 4513  |
| >EGFR-L861F LLGAEKEYH   | 181   | >EGFR-L861F FLGAEKEYH  | 24    | 157   |
| >EGFR-L861F LLGAEKEYH   | 186   | >EGFR-L861F FLGAEKEYH  | 32    | 154   |
| >EGFR-L861F LLGAEKEYH   | 194   | >EGFR-L861F FLGAEKEYH  | 29    | 165   |
| >EGFR-L861F LLGAEKEYH   | 1976  | >EGFR-L861F FLGAEKEYH  | 252   | 1724  |
| >EGFR-L861F LLGAEKEYH   | 24    | >EGFR-L861F FLGAEKEYH  | 7     | 17    |
| >EGFR-L861F LLGAEKEY    | 778   | >EGFR-L861F FLGAEKEY   | 347   | 431   |
| >EGFR-L861F LLGAEKEY    | 2223  | >EGFR-L861F FLGAEKEY   | 292   | 1931  |
| >EGFR-L861F KLLGAEK     | 169   | >EGFR-L861F KFLGAEK    | 7923  | 7754  |
| >EGFR-L861F KLLGAEK     | 322   | >EGFR-L861F KFLGAEK    | 3947  | 3625  |

|                          |      |                          |       |       |
|--------------------------|------|--------------------------|-------|-------|
| >EGFR-L861F KLLGAE EK    | 623  | >EGFR-L861F KFLGAE EK    | 323   | 300   |
| >EGFR-L861F VKITDFGLAKI  | 295  | >EGFR-L861F VKITDFGLAKI  | 12    | 283   |
| >EGFR-L861F AKLLGAE EKE' | 23   | >EGFR-L861F AKFLGAE EKE' | 7     | 16    |
| >EGFR-L861F LAKLLGAE EK  | 377  | >EGFR-L861F LAKFLGAE EK  | 215   | 162   |
| >EGFR-L861F LAKLLGAE EK  | 1217 | >EGFR-L861F LAKFLGAE EK  | 201   | 1016  |
| >EGFR-L861F GLAKLLGA     | 216  | >EGFR-L861F GLAKFLGA     | 167   | 49    |
| >EGFR-L861F GLAKLLGA     | 32   | >EGFR-L861F GLAKFLGA     | 26    | 6     |
| >EGFR-L861F GLAKLLGA     | 13   | >EGFR-L861F GLAKFLGA     | 13    | 0     |
| >EGFR-L861F GLAKLLGA     | 235  | >EGFR-L861F GLAKFLGA     | 155   | 80    |
| >EGFR-L861F GLAKLLGA     | 151  | >EGFR-L861F GLAKFLGA     | 100   | 51    |
| >EGFR-L861F GLAKLLGA     | 251  | >EGFR-L861F GLAKFLGA     | 289   | 38    |
| >EGFR-L861F GLAKLLGA     | 44   | >EGFR-L861F GLAKFLGA     | 61    | 17    |
| >EGFR-L861F GLAKLLGA     | 31   | >EGFR-L861F GLAKFLGA     | 23    | 8     |
| >EGFR-L861F GLAKLLGAEE   | 347  | >EGFR-L861F GLAKFLGAEE   | 266   | 81    |
| >EGFR-L861F GLAKLLGAEE   | 630  | >EGFR-L861F GLAKFLGAEE   | 259   | 371   |
| >EGFR-L861F FGLAKLLGA    | 123  | >EGFR-L861F FGLAKFLGA    | 57    | 66    |
| >EGFR-L861F FGLAKLLGA    | 4708 | >EGFR-L861F FGLAKFLGA    | 492   | 4216  |
| >EGFR-L861F DFGLAKLLGA   | 969  | >EGFR-L861F DFGLAKFLGA   | 406   | 563   |
| >EGFR-L861F TDFGLAKLL    | 145  | >EGFR-L861F TDFGLAKFL    | 48    | 97    |
| >EGFR-L861F TDFGLAKLL    | 352  | >EGFR-L861F TDFGLAKFL    | 226   | 126   |
| >EGFR-L861F TDFGLAKLLG   | 657  | >EGFR-L861F TDFGLAKFLG   | 480   | 177   |
| >EGFR-L861F TDFGLAKLL    | 295  | >EGFR-L861F TDFGLAKFL    | 431   | 136   |
| >EGFR-L861F ITDFGLAKL    | 6    | >EGFR-L861F ITDFGLAKF    | 4     | 2     |
| >EGFR-L861F ITDFGLAKLL   | 15   | >EGFR-L861F ITDFGLAKFL   | 11    | 4     |
| >EGFR-L861F ITDFGLAKLL   | 276  | >EGFR-L861F ITDFGLAKFL   | 269   | 7     |
| >EGFR-L861F ITDFGLAKL    | 97   | >EGFR-L861F ITDFGLAKF    | 15    | 82    |
| >EGFR-L861F KITDFGLAKL   | 91   | >EGFR-L861F KITDFGLAKF   | 8869  | 8778  |
| >EGFR-L861F KITDFGLAKLL  | 228  | >EGFR-L861F KITDFGLAKFL  | 115   | 113   |
| >EGFR-L861F KITDFGLAKL   | 81   | >EGFR-L861F KITDFGLAKF   | 8329  | 8248  |
| >EGFR-L861F KITDFGLAKL   | 432  | >EGFR-L861F KITDFGLAKF   | 15087 | 14655 |
| >EGFR-L861F KITDFGLAKLL  | 462  | >EGFR-L861F KITDFGLAKFL  | 133   | 329   |
| >EGFR-L861F KITDFGLAKL   | 188  | >EGFR-L861F KITDFGLAKF   | 9571  | 9383  |
| >EGFR-L861F KITDFGLAKLL  | 810  | >EGFR-L861F KITDFGLAKFL  | 293   | 517   |
| >EGFR-L861F KITDFGLAKL   | 478  | >EGFR-L861F KITDFGLAKF   | 18475 | 17997 |
| >EGFR-L861F KITDFGLAKL   | 29   | >EGFR-L861F KITDFGLAKF   | 10102 | 10073 |
| >EGFR-L861F KITDFGLAKLL  | 183  | >EGFR-L861F KITDFGLAKFL  | 149   | 34    |
| >EGFR-L861F KITDFGLAKL   | 725  | >EGFR-L861F KITDFGLAKF   | 160   | 565   |
| >EGFR-L861F KITDFGLAKL   | 693  | >EGFR-L861F KITDFGLAKF   | 112   | 581   |
| >EGFR-L861F KITDFGLAKL   | 6828 | >EGFR-L861F KITDFGLAKF   | 347   | 6481  |
| >EGFR-L861F KITDFGLAKL   | 1056 | >EGFR-L861F KITDFGLAKF   | 112   | 944   |
| >EGFR-L861F LLGAE EKEYH, | 248  | >EGFR-L861F PLGAE EKEYH  | 6730  | 6482  |
| >EGFR-L861F LLGAE EKEYH, | 181  | >EGFR-L861F PLGAE EKEYH  | 3666  | 3485  |
| >EGFR-L861F LLGAE EKEYH, | 186  | >EGFR-L861F PLGAE EKEYH  | 5408  | 5222  |

|                         |       |                         |       |       |
|-------------------------|-------|-------------------------|-------|-------|
| >EGFR-L861F LLGAEKEYH,  | 194   | >EGFR-L861F PLGAEKEYH   | 1957  | 1763  |
| >EGFR-L861F LLGAEKEYH,  | 24    | >EGFR-L861F PLGAEKEYH   | 1341  | 1317  |
| >EGFR-L861F KLLGAEK     | 169   | >EGFR-L861F KPLGAEK     | 17470 | 17301 |
| >EGFR-L861F KLLGAEK     | 322   | >EGFR-L861F KPLGAEK     | 16069 | 15747 |
| >EGFR-L861F KLLGAEKEY   | 12970 | >EGFR-L861F KPLGAEKEY   | 462   | 12508 |
| >EGFR-L861F VKITDFGLAKI | 295   | >EGFR-L861F VKITDFGLAKI | 7223  | 6928  |
| >EGFR-L861F AKLLGAEKE'  | 23    | >EGFR-L861F AKPLGAEKE   | 278   | 255   |
| >EGFR-L861F LAKLLGAEK   | 377   | >EGFR-L861F LAKPLGAEK   | 180   | 197   |
| >EGFR-L861F GLAKLLGA    | 216   | >EGFR-L861F GLAKPLGA    | 721   | 505   |
| >EGFR-L861F GLAKLLGA    | 32    | >EGFR-L861F GLAKPLGA    | 275   | 243   |
| >EGFR-L861F GLAKLLGA    | 13    | >EGFR-L861F GLAKPLGA    | 25    | 12    |
| >EGFR-L861F GLAKLLGA    | 235   | >EGFR-L861F GLAKPLGA    | 1352  | 1117  |
| >EGFR-L861F GLAKLLGA    | 151   | >EGFR-L861F GLAKPLGA    | 94    | 57    |
| >EGFR-L861F GLAKLLGA    | 251   | >EGFR-L861F GLAKPLGA    | 488   | 237   |
| >EGFR-L861F GLAKLLGA    | 44    | >EGFR-L861F GLAKPLGA    | 85    | 41    |
| >EGFR-L861F GLAKLLGA    | 31    | >EGFR-L861F GLAKPLGA    | 55    | 24    |
| >EGFR-L861F GLAKLLGAEE  | 347   | >EGFR-L861F GLAKPLGAEE  | 253   | 94    |
| >EGFR-L861F FGLAKLLGA   | 123   | >EGFR-L861F FGLAKPLGA   | 3491  | 3368  |
| >EGFR-L861F TDFGLAKLL   | 145   | >EGFR-L861F TDFGLAKPL   | 636   | 491   |
| >EGFR-L861F TDFGLAKLL   | 352   | >EGFR-L861F TDFGLAKPL   | 64    | 288   |
| >EGFR-L861F TDFGLAKLL   | 295   | >EGFR-L861F TDFGLAKPL   | 1151  | 856   |
| >EGFR-L861F ITDFGLAKL   | 6     | >EGFR-L861F ITDFGLAKP   | 5741  | 5735  |
| >EGFR-L861F ITDFGLAKLL  | 15    | >EGFR-L861F ITDFGLAKPL  | 7     | 8     |
| >EGFR-L861F ITDFGLAKLL  | 276   | >EGFR-L861F ITDFGLAKPL  | 928   | 652   |
| >EGFR-L861F ITDFGLAKL   | 97    | >EGFR-L861F ITDFGLAKP   | 8695  | 8598  |
| >EGFR-L861F KITDFGLAKL  | 91    | >EGFR-L861F KITDFGLAKP  | 13898 | 13807 |
| >EGFR-L861F KITDFGLAKLL | 228   | >EGFR-L861F KITDFGLAKPL | 257   | 29    |
| >EGFR-L861F KITDFGLAKL  | 81    | >EGFR-L861F KITDFGLAKP  | 10173 | 10092 |
| >EGFR-L861F KITDFGLAKL  | 432   | >EGFR-L861F KITDFGLAKP  | 16795 | 16363 |
| >EGFR-L861F KITDFGLAKLL | 462   | >EGFR-L861F KITDFGLAKPL | 201   | 261   |
| >EGFR-L861F KITDFGLAKL  | 188   | >EGFR-L861F KITDFGLAKP  | 18137 | 17949 |
| >EGFR-L861F KITDFGLAKLL | 810   | >EGFR-L861F KITDFGLAKPL | 482   | 328   |
| >EGFR-L861F KITDFGLAKL  | 478   | >EGFR-L861F KITDFGLAKP  | 21907 | 21429 |
| >EGFR-L861F KITDFGLAKL  | 29    | >EGFR-L861F KITDFGLAKP  | 19320 | 19291 |
| >EGFR-L861F KITDFGLAKLL | 183   | >EGFR-L861F KITDFGLAKPL | 216   | 33    |
| >EGFR-L861F KITDFGLAKLL | 679   | >EGFR-L861F KITDFGLAKPL | 137   | 542   |
| >EGFR-L861C LLGAEKEYH,  | 248   | >EGFR-L861C QLGAEEKEYH  | 905   | 657   |
| >EGFR-L861C LLGAEKEYH,  | 181   | >EGFR-L861C QLGAEEKEYH  | 1438  | 1257  |
| >EGFR-L861C LLGAEKEYH,  | 186   | >EGFR-L861C QLGAEEKEYH  | 879   | 693   |
| >EGFR-L861C LLGAEKEYH,  | 194   | >EGFR-L861C QLGAEEKEYH  | 1377  | 1183  |
| >EGFR-L861C LLGAEKEYH,  | 24    | >EGFR-L861C QLGAEEKEYH  | 423   | 399   |
| >EGFR-L861C LLGAEKEY    | 778   | >EGFR-L861C QLGAEEKEY   | 393   | 385   |
| >EGFR-L861C KLLGAEK     | 169   | >EGFR-L861C KQLGAEK     | 2708  | 2539  |



|                         |      |                         |       |       |
|-------------------------|------|-------------------------|-------|-------|
| >EGFR-L861C KLLGAE EK   | 322  | >EGFR-L861C KQLGAE EK   | 417   | 95    |
| >EGFR-L861C KLLGAE EKEY | 552  | >EGFR-L861C KQLGAE EKEY | 24    | 528   |
| >EGFR-L861C VKITDFGLAKI | 295  | >EGFR-L861C VKITDFGLAKI | 6916  | 6621  |
| >EGFR-L861C AKLLGAE EKE | 23   | >EGFR-L861C AKQLGAE EKE | 88    | 65    |
| >EGFR-L861C LAKLLGAE EK | 377  | >EGFR-L861C LAKQLGAE EK | 661   | 284   |
| >EGFR-L861C GLAKLLGA    | 216  | >EGFR-L861C GLAKQLGA    | 756   | 540   |
| >EGFR-L861C GLAKLLGA    | 32   | >EGFR-L861C GLAKQLGA    | 105   | 73    |
| >EGFR-L861C GLAKLLGA    | 13   | >EGFR-L861C GLAKQLGA    | 26    | 13    |
| >EGFR-L861C GLAKLLGA    | 235  | >EGFR-L861C GLAKQLGA    | 1003  | 768   |
| >EGFR-L861C GLAKLLGA    | 151  | >EGFR-L861C GLAKQLGA    | 364   | 213   |
| >EGFR-L861C GLAKLLGA    | 251  | >EGFR-L861C GLAKQLGA    | 411   | 160   |
| >EGFR-L861C GLAKLLGA    | 44   | >EGFR-L861C GLAKQLGA    | 68    | 24    |
| >EGFR-L861C GLAKLLGA    | 31   | >EGFR-L861C GLAKQLGA    | 35    | 4     |
| >EGFR-L861C GLAKLLGAEE  | 347  | >EGFR-L861C GLAKQLGAEE  | 361   | 14    |
| >EGFR-L861C FGLAKLLGA   | 123  | >EGFR-L861C FGLAKQLGA   | 2171  | 2048  |
| >EGFR-L861C TDFGLAKLL   | 145  | >EGFR-L861C TDFGLAKQL   | 400   | 255   |
| >EGFR-L861C TDFGLAKLL   | 352  | >EGFR-L861C TDFGLAKQL   | 253   | 99    |
| >EGFR-L861C TDFGLAKLL   | 295  | >EGFR-L861C TDFGLAKQL   | 1099  | 804   |
| >EGFR-L861C ITDFGLAKL   | 6    | >EGFR-L861C ITDFGLAKQ   | 1093  | 1087  |
| >EGFR-L861C ITDFGLAKLL  | 15   | >EGFR-L861C ITDFGLAKQL  | 6     | 9     |
| >EGFR-L861C ITDFGLAKLL  | 276  | >EGFR-L861C ITDFGLAKQL  | 1227  | 951   |
| >EGFR-L861C ITDFGLAKL   | 97   | >EGFR-L861C ITDFGLAKQ   | 1810  | 1713  |
| >EGFR-L861C KITDFGLAKL  | 91   | >EGFR-L861C KITDFGLAKQ  | 13835 | 13744 |
| >EGFR-L861C KITDFGLAKLL | 228  | >EGFR-L861C KITDFGLAKQ  | 346   | 118   |
| >EGFR-L861C KITDFGLAKL  | 81   | >EGFR-L861C KITDFGLAKQ  | 12538 | 12457 |
| >EGFR-L861C KITDFGLAKL  | 432  | >EGFR-L861C KITDFGLAKQ  | 18063 | 17631 |
| >EGFR-L861C KITDFGLAKLL | 462  | >EGFR-L861C KITDFGLAKQ  | 846   | 384   |
| >EGFR-L861C KITDFGLAKL  | 188  | >EGFR-L861C KITDFGLAKQ  | 11552 | 11364 |
| >EGFR-L861C KITDFGLAKLL | 810  | >EGFR-L861C KITDFGLAKQ  | 477   | 333   |
| >EGFR-L861C KITDFGLAKL  | 478  | >EGFR-L861C KITDFGLAKQ  | 14102 | 13624 |
| >EGFR-L861C KITDFGLAKL  | 29   | >EGFR-L861C KITDFGLAKQ  | 2611  | 2582  |
| >EGFR-L861C KITDFGLAKLL | 183  | >EGFR-L861C KITDFGLAKQ  | 80    | 103   |
| >EGFR-L861C KITDFGLAKLL | 679  | >EGFR-L861C KITDFGLAKQ  | 339   | 340   |
| >EGFR-L861C KITDFGLAKLL | 2501 | >EGFR-L861C KITDFGLAKQ  | 487   | 2014  |
| >EGFR-L861F LLGAE EKEYH | 248  | >EGFR-L861F RLGAE EKEYH | 654   | 406   |
| >EGFR-L861F LLGAE EKEYH | 181  | >EGFR-L861F RLGAE EKEYH | 184   | 3     |
| >EGFR-L861F LLGAE EKEYH | 186  | >EGFR-L861F RLGAE EKEYH | 226   | 40    |
| >EGFR-L861F LLGAE EKEYH | 194  | >EGFR-L861F RLGAE EKEYH | 236   | 42    |
| >EGFR-L861F LLGAE EKEYH | 24   | >EGFR-L861F RLGAE EKEYH | 124   | 100   |
| >EGFR-L861F LLGAE EKEY  | 778  | >EGFR-L861F RLGAE EKEY  | 62    | 716   |
| >EGFR-L861F KLLGAE EK   | 169  | >EGFR-L861F KRLGAE EK   | 20656 | 20487 |
| >EGFR-L861F KLLGAE EK   | 322  | >EGFR-L861F KRLGAE EK   | 19572 | 19250 |
| >EGFR-L861F KLLGAE EKEY | 552  | >EGFR-L861F KRLGAE EKEY | 231   | 321   |

|                         |       |                        |       |       |
|-------------------------|-------|------------------------|-------|-------|
| >EGFR-L861FKLLGAE EK    | 16629 | >EGFR-L861FKRLGAE EK   | 93    | 16536 |
| >EGFR-L861FKLLGAE EKEY  | 23839 | >EGFR-L861FKRLGAE EKEY | 52    | 23787 |
| >EGFR-L861FVKITDFGLAKI  | 295   | >EGFR-L861FVKITDFGLAKI | 2905  | 2610  |
| >EGFR-L861FAKLLGAE EKE' | 23    | >EGFR-L861FAKRLGAE EKE | 15    | 8     |
| >EGFR-L861FLAKLLGAE EK  | 377   | >EGFR-L861FLAKRLGAE EK | 127   | 250   |
| >EGFR-L861FGLAKLLGA     | 216   | >EGFR-L861FGLAKRLGA    | 1468  | 1252  |
| >EGFR-L861FGLAKLLGA     | 32    | >EGFR-L861FGLAKRLGA    | 253   | 221   |
| >EGFR-L861FGLAKLLGA     | 13    | >EGFR-L861FGLAKRLGA    | 31    | 18    |
| >EGFR-L861FGLAKLLGA     | 235   | >EGFR-L861FGLAKRLGA    | 1012  | 777   |
| >EGFR-L861FGLAKLLGA     | 151   | >EGFR-L861FGLAKRLGA    | 915   | 764   |
| >EGFR-L861FGLAKLLGA     | 251   | >EGFR-L861FGLAKRLGA    | 1368  | 1117  |
| >EGFR-L861FGLAKLLGA     | 44    | >EGFR-L861FGLAKRLGA    | 204   | 160   |
| >EGFR-L861FGLAKLLGA     | 31    | >EGFR-L861FGLAKRLGA    | 48    | 17    |
| >EGFR-L861FGLAKLLGAEE   | 347   | >EGFR-L861FGLAKRLGAEE  | 212   | 135   |
| >EGFR-L861FGLAKLLGA     | 123   | >EGFR-L861FGLAKRLGA    | 3970  | 3847  |
| >EGFR-L861FTDFGLAKLL    | 145   | >EGFR-L861FTDFGLAKRL   | 1778  | 1633  |
| >EGFR-L861FTDFGLAKL     | 31699 | >EGFR-L861FTDFGLAKR    | 230   | 31469 |
| >EGFR-L861FTDFGLAKLL    | 352   | >EGFR-L861FTDFGLAKRL   | 570   | 218   |
| >EGFR-L861FTDFGLAKLL    | 295   | >EGFR-L861FTDFGLAKRL   | 1368  | 1073  |
| >EGFR-L861FITDFGLAKL    | 17330 | >EGFR-L861FITDFGLAKR   | 220   | 17110 |
| >EGFR-L861FITDFGLAKL    | 26045 | >EGFR-L861FITDFGLAKR   | 384   | 25661 |
| >EGFR-L861FITDFGLAKL    | 28999 | >EGFR-L861FITDFGLAKR   | 142   | 28857 |
| >EGFR-L861FITDFGLAKL    | 6     | >EGFR-L861FITDFGLAKR   | 2003  | 1997  |
| >EGFR-L861FITDFGLAKLL   | 15    | >EGFR-L861FITDFGLAKRL  | 7     | 8     |
| >EGFR-L861FITDFGLAKLL   | 276   | >EGFR-L861FITDFGLAKRL  | 1525  | 1249  |
| >EGFR-L861FITDFGLAKL    | 97    | >EGFR-L861FITDFGLAKR   | 4183  | 4086  |
| >EGFR-L861FKITDFGLAKL   | 91    | >EGFR-L861FKITDFGLAKR  | 11568 | 11477 |
| >EGFR-L861FKITDFGLAKLL  | 228   | >EGFR-L861FKITDFGLAKRI | 536   | 308   |
| >EGFR-L861FKITDFGLAKL   | 81    | >EGFR-L861FKITDFGLAKR  | 8585  | 8504  |
| >EGFR-L861FKITDFGLAKL   | 432   | >EGFR-L861FKITDFGLAKR  | 15078 | 14646 |
| >EGFR-L861FKITDFGLAKLL  | 462   | >EGFR-L861FKITDFGLAKRI | 1187  | 725   |
| >EGFR-L861FKITDFGLAKL   | 188   | >EGFR-L861FKITDFGLAKR  | 21700 | 21512 |
| >EGFR-L861FKITDFGLAKL   | 478   | >EGFR-L861FKITDFGLAKR  | 23186 | 22708 |
| >EGFR-L861FKITDFGLAKL   | 29    | >EGFR-L861FKITDFGLAKR  | 16484 | 16455 |
| >EGFR-L861FKITDFGLAKLL  | 183   | >EGFR-L861FKITDFGLAKRI | 110   | 73    |
| >EGFR-L861FKITDFGLAKL   | 11235 | >EGFR-L861FKITDFGLAKR  | 351   | 10884 |
| >EGFR-L861FKITDFGLAKL   | 3751  | >EGFR-L861FKITDFGLAKR  | 15    | 3736  |
| >EGFR-L861FKITDFGLAKL   | 30829 | >EGFR-L861FKITDFGLAKR  | 184   | 30645 |
| >EGFR-L861FKITDFGLAKL   | 28248 | >EGFR-L861FKITDFGLAKR  | 177   | 28071 |
| >EGFR-L861FKITDFGLAKL   | 14336 | >EGFR-L861FKITDFGLAKR  | 39    | 14297 |
| >EGFR-L861VLLGAE EKEYH, | 248   | >EGFR-L861VVLGAE EKEYH | 609   | 361   |
| >EGFR-L861VLLGAE EKEYH, | 181   | >EGFR-L861VVLGAE EKEYH | 156   | 25    |
| >EGFR-L861VLLGAE EKEYH, | 186   | >EGFR-L861VVLGAE EKEYH | 219   | 33    |

|                        |      |                        |      |      |
|------------------------|------|------------------------|------|------|
| >EGFR-L861VLLGAEKEYH   | 194  | >EGFR-L861VVLGAEKEYH   | 137  | 57   |
| >EGFR-L861VLLGAEKEYH   | 24   | >EGFR-L861VVLGAEKEYH   | 34   | 10   |
| >EGFR-L861VLLGAEKEY    | 778  | >EGFR-L861VVLGAEKEY    | 190  | 588  |
| >EGFR-L861VKLLGAEK     | 169  | >EGFR-L861VKVLGAEK     | 492  | 323  |
| >EGFR-L861VKLLGAEK     | 322  | >EGFR-L861VKVLGAEK     | 88   | 234  |
| >EGFR-L861VKLLGAEK     | 623  | >EGFR-L861VKVLGAEK     | 83   | 540  |
| >EGFR-L861VKLLGAEKEY   | 551  | >EGFR-L861VKVLGAEKEY   | 93   | 458  |
| >EGFR-L861VKITDFGLAKI  | 295  | >EGFR-L861VKITDFGLAKI  | 625  | 330  |
| >EGFR-L861VAKLLGAEKE   | 23   | >EGFR-L861VAKVLGAEKE   | 29   | 6    |
| >EGFR-L861VLAKLLGAEK   | 377  | >EGFR-L861VLAKVLGAEK   | 256  | 121  |
| >EGFR-L861VGLAKLLGA    | 216  | >EGFR-L861VGLAKVLGA    | 222  | 6    |
| >EGFR-L861VGLAKLLGA    | 32   | >EGFR-L861VGLAKVLGA    | 33   | 1    |
| >EGFR-L861VGLAKLLGA    | 13   | >EGFR-L861VGLAKVLGA    | 11   | 2    |
| >EGFR-L861VGLAKLLGA    | 235  | >EGFR-L861VGLAKVLGA    | 354  | 119  |
| >EGFR-L861VGLAKLLGA    | 151  | >EGFR-L861VGLAKVLGA    | 48   | 103  |
| >EGFR-L861VGLAKLLGA    | 251  | >EGFR-L861VGLAKVLGA    | 224  | 27   |
| >EGFR-L861VGLAKLLGA    | 44   | >EGFR-L861VGLAKVLGA    | 26   | 18   |
| >EGFR-L861VGLAKLLGA    | 31   | >EGFR-L861VGLAKVLGA    | 29   | 2    |
| >EGFR-L861VGLAKLLGAE   | 347  | >EGFR-L861VGLAKVLGAE   | 230  | 117  |
| >EGFR-L861VGLAKLLGAE   | 630  | >EGFR-L861VGLAKVLGAE   | 431  | 199  |
| >EGFR-L861VFLAKLLGA    | 123  | >EGFR-L861VFLAKVLGA    | 488  | 365  |
| >EGFR-L861VDFGLAKLL    | 145  | >EGFR-L861VDFGLAKVL    | 669  | 524  |
| >EGFR-L861VDFGLAKLL    | 3517 | >EGFR-L861VDFGLAKVL    | 473  | 3044 |
| >EGFR-L861VDFGLAKLL    | 352  | >EGFR-L861VDFGLAKVL    | 162  | 190  |
| >EGFR-L861VDFGLAKL     | 1395 | >EGFR-L861VDFGLAKV     | 236  | 1159 |
| >EGFR-L861VDFGLAKLL    | 295  | >EGFR-L861VDFGLAKVL    | 648  | 353  |
| >EGFR-L861VITDFGLAKL   | 2920 | >EGFR-L861VITDFGLAKV   | 366  | 2554 |
| >EGFR-L861VITDFGLAKL   | 808  | >EGFR-L861VITDFGLAKV   | 112  | 696  |
| >EGFR-L861VITDFGLAKL   | 919  | >EGFR-L861VITDFGLAKV   | 49   | 870  |
| >EGFR-L861VITDFGLAKL   | 4463 | >EGFR-L861VITDFGLAKV   | 454  | 4009 |
| >EGFR-L861VITDFGLAKL   | 3148 | >EGFR-L861VITDFGLAKV   | 335  | 2813 |
| >EGFR-L861VITDFGLAKL   | 5384 | >EGFR-L861VITDFGLAKV   | 250  | 5134 |
| >EGFR-L861VITDFGLAKL   | 732  | >EGFR-L861VITDFGLAKV   | 88   | 644  |
| >EGFR-L861VITDFGLAKL   | 6    | >EGFR-L861VITDFGLAKV   | 107  | 101  |
| >EGFR-L861VITDFGLAKLL  | 15   | >EGFR-L861VITDFGLAKVL  | 11   | 4    |
| >EGFR-L861VITDFGLAKLL  | 276  | >EGFR-L861VITDFGLAKVL  | 967  | 691  |
| >EGFR-L861VITDFGLAKL   | 97   | >EGFR-L861VITDFGLAKV   | 335  | 238  |
| >EGFR-L861VKITDFGLAKL  | 1756 | >EGFR-L861VKITDFGLAKV  | 331  | 1425 |
| >EGFR-L861VKITDFGLAKL  | 91   | >EGFR-L861VKITDFGLAKV  | 89   | 2    |
| >EGFR-L861VKITDFGLAKLL | 228  | >EGFR-L861VKITDFGLAKVI | 950  | 722  |
| >EGFR-L861VKITDFGLAKL  | 81   | >EGFR-L861VKITDFGLAKV  | 22   | 59   |
| >EGFR-L861VKITDFGLAKL  | 432  | >EGFR-L861VKITDFGLAKV  | 101  | 331  |
| >EGFR-L861VKITDFGLAKLL | 462  | >EGFR-L861VKITDFGLAKVI | 1077 | 615  |

|                         |       |                         |       |       |
|-------------------------|-------|-------------------------|-------|-------|
| >EGFR-L861V KITDFGLAKL  | 188   | >EGFR-L861V KITDFGLAKV  | 13    | 175   |
| >EGFR-L861V KITDFGLAKL  | 1044  | >EGFR-L861V KITDFGLAKV  | 97    | 947   |
| >EGFR-L861V KITDFGLAKL  | 478   | >EGFR-L861V KITDFGLAKV  | 29    | 449   |
| >EGFR-L861V KITDFGLAKL  | 3324  | >EGFR-L861V KITDFGLAKV  | 204   | 3120  |
| >EGFR-L861V KITDFGLAKL  | 29    | >EGFR-L861V KITDFGLAKV  | 4     | 25    |
| >EGFR-L861V KITDFGLAKLL | 183   | >EGFR-L861V KITDFGLAKVI | 330   | 147   |
| >EGFR-L861V KITDFGLAKLL | 679   | >EGFR-L861V KITDFGLAKVI | 333   | 346   |
| >EGFR-L862F LGAEEKEY    | 425   | >EGFR-L862F PGAAEKEY    | 7231  | 6806  |
| >EGFR-L862F LLGAAEKEYH  | 248   | >EGFR-L862F LPGAAEKEYH  | 29943 | 29695 |
| >EGFR-L862F LLGAAEKEYH  | 181   | >EGFR-L862F LPGAAEKEYH  | 27852 | 27671 |
| >EGFR-L862F LLGAAEKEYH  | 186   | >EGFR-L862F LPGAAEKEYH  | 23020 | 22834 |
| >EGFR-L862F LLGAAEKEYH  | 194   | >EGFR-L862F LPGAAEKEYH  | 25640 | 25446 |
| >EGFR-L862F LLGAAEKEYH  | 24    | >EGFR-L862F LPGAAEKEYH  | 35024 | 35000 |
| >EGFR-L862F LLGAAEKEY   | 5406  | >EGFR-L862F LPGAAEKEY   | 20    | 5386  |
| >EGFR-L862F LLGAAEKEY   | 25167 | >EGFR-L862F LPGAAEKEY   | 116   | 25051 |
| >EGFR-L862F LLGAAEKEYH  | 28935 | >EGFR-L862F LPGAAEKEYH  | 242   | 28693 |
| >EGFR-L862F KITDFGLAKLL | 228   | >EGFR-L862F KITDFGLAKLF | 17974 | 17746 |
| >EGFR-L862F KITDFGLAKLL | 462   | >EGFR-L862F KITDFGLAKLF | 16911 | 16449 |
| >EGFR-L862F KITDFGLAKLL | 183   | >EGFR-L862F KITDFGLAKLF | 28542 | 28359 |
| >EGFR-L862F KLLGAEK     | 169   | >EGFR-L862F KLPGAEK     | 915   | 746   |
| >EGFR-L862F KLLGAEK     | 322   | >EGFR-L862F KLPGAEK     | 3686  | 3364  |
| >EGFR-L862F AKLLGAEK    | 1973  | >EGFR-L862F AKLPGAEK    | 466   | 1507  |
| >EGFR-L862F AKLLGAEKE   | 23    | >EGFR-L862F AKLPGAEKE   | 11    | 12    |
| >EGFR-L862F LAKLLGAEK   | 377   | >EGFR-L862F LAKLPGAEK   | 363   | 14    |
| >EGFR-L862F GLAKLLGA    | 216   | >EGFR-L862F GLAKLPGA    | 228   | 12    |
| >EGFR-L862F GLAKLLGA    | 32    | >EGFR-L862F GLAKLPGA    | 73    | 41    |
| >EGFR-L862F GLAKLLGA    | 13    | >EGFR-L862F GLAKLPGA    | 17    | 4     |
| >EGFR-L862F GLAKLLGA    | 235   | >EGFR-L862F GLAKLPGA    | 398   | 163   |
| >EGFR-L862F GLAKLLGA    | 151   | >EGFR-L862F GLAKLPGA    | 91    | 60    |
| >EGFR-L862F GLAKLLGA    | 251   | >EGFR-L862F GLAKLPGA    | 221   | 30    |
| >EGFR-L862F GLAKLLGA    | 44    | >EGFR-L862F GLAKLPGA    | 27    | 17    |
| >EGFR-L862F GLAKLLGA    | 31    | >EGFR-L862F GLAKLPGA    | 44    | 13    |
| >EGFR-L862F GLAKLLGAEE  | 347   | >EGFR-L862F GLAKLPGAEE  | 291   | 56    |
| >EGFR-L862F FGLAKLLGA   | 123   | >EGFR-L862F FGLAKLPGA   | 85    | 38    |
| >EGFR-L862F TDFGLAKLL   | 145   | >EGFR-L862F TDFGLAKLP   | 12579 | 12434 |
| >EGFR-L862F TDFGLAKLL   | 352   | >EGFR-L862F TDFGLAKLP   | 11878 | 11526 |
| >EGFR-L862F TDFGLAKLL   | 295   | >EGFR-L862F TDFGLAKLP   | 19716 | 19421 |
| >EGFR-L862F ITDFGLAKLL  | 15    | >EGFR-L862F ITDFGLAKLP  | 9900  | 9885  |
| >EGFR-L862F ITDFGLAKLL  | 276   | >EGFR-L862F ITDFGLAKLP  | 12451 | 12175 |
| >EGFR-M766 MASVDNPHV    | 162   | >EGFR-M766 TASVDNPHV    | 1260  | 1098  |
| >EGFR-M766 MASVDNPHV    | 162   | >EGFR-M766 TASVDNPHV    | 1866  | 1704  |
| >EGFR-M766 MASVDNPHV    | 74    | >EGFR-M766 TASVDNPHV    | 421   | 347   |
| >EGFR-M766 MASVDNPHV    | 268   | >EGFR-M766 TASVDNPHV    | 712   | 444   |

|                       |       |                       |       |       |
|-----------------------|-------|-----------------------|-------|-------|
| >EGFR-M766 MASVDNPHV  | 9     | >EGFR-M766 TASVDNPHV  | 19    | 10    |
| >EGFR-M766 MASVDNPHV  | 258   | >EGFR-M766 TASVDNPHV  | 949   | 691   |
| >EGFR-M766 MASVDNPHV  | 161   | >EGFR-M766 TASVDNPHV  | 275   | 114   |
| >EGFR-M766 MASVDNPH   | 55    | >EGFR-M766 TASVDNPH   | 405   | 350   |
| >EGFR-M766 VMASVDNPH  | 148   | >EGFR-M766 VTASVDNPH  | 3533  | 3385  |
| >EGFR-M766 VMASVDNPH  | 84    | >EGFR-M766 VTASVDNPH  | 1518  | 1434  |
| >EGFR-M766 VMASVDNPH  | 209   | >EGFR-M766 VTASVDNPH  | 2339  | 2130  |
| >EGFR-M766 VMASVDNPH  | 303   | >EGFR-M766 VTASVDNPH  | 599   | 296   |
| >EGFR-M766 VMASVDNPH  | 3     | >EGFR-M766 VTASVDNPH  | 199   | 196   |
| >EGFR-M766 VMASVDNPH  | 37    | >EGFR-M766 VTASVDNPH  | 3822  | 3785  |
| >EGFR-M766 VMASVDNPH  | 7     | >EGFR-M766 VTASVDNPH  | 2240  | 2233  |
| >EGFR-M766 VMASVDNPH  | 258   | >EGFR-M766 VTASVDNPH  | 12867 | 12609 |
| >EGFR-M766 VMASVDNPH  | 5     | >EGFR-M766 VTASVDNPH  | 40    | 35    |
| >EGFR-M766 VMASVDNPH  | 6     | >EGFR-M766 VTASVDNPH  | 2589  | 2583  |
| >EGFR-M766 VMASVDNPH  | 233   | >EGFR-M766 VTASVDNPH  | 11675 | 11442 |
| >EGFR-M766 VMASVDNPH  | 3     | >EGFR-M766 VTASVDNPH  | 250   | 247   |
| >EGFR-M766 VMASVDNPH  | 75    | >EGFR-M766 VTASVDNPH  | 15020 | 14945 |
| >EGFR-M766 VMASVDNPH  | 2046  | >EGFR-M766 VTASVDNPH  | 167   | 1879  |
| >EGFR-M766 VMASVDNPH  | 1973  | >EGFR-M766 VTASVDNPH  | 227   | 1746  |
| >EGFR-M766 VMASVDNPH  | 14596 | >EGFR-M766 VTASVDNPH  | 471   | 14125 |
| >EGFR-M766 YVMASVDNP  | 10    | >EGFR-M766 YVTASVDNP  | 68    | 58    |
| >EGFR-M766 YVMASVDNP  | 13    | >EGFR-M766 YVTASVDNP  | 113   | 100   |
| >EGFR-M766 YVMASVDNP  | 8     | >EGFR-M766 YVTASVDNP  | 46    | 38    |
| >EGFR-M766 YVMASVDNP  | 4     | >EGFR-M766 YVTASVDNP  | 9     | 5     |
| >EGFR-M766 YVMASVDNP  | 8     | >EGFR-M766 YVTASVDNP  | 36    | 28    |
| >EGFR-M766 YVMASVDNP  | 7     | >EGFR-M766 YVTASVDNP  | 50    | 43    |
| >EGFR-M766 YVMASVDNP  | 10    | >EGFR-M766 YVTASVDNP  | 11    | 1     |
| >EGFR-M766 YVMASVDNP  | 4     | >EGFR-M766 YVTASVDNP  | 58    | 54    |
| >EGFR-M766 YVMASVDNP  | 3     | >EGFR-M766 YVTASVDNP  | 3     | 0     |
| >EGFR-M766 YVMASVDNP  | 397   | >EGFR-M766 YVTASVDNP  | 1303  | 906   |
| >EGFR-M766 YVMASVDNP  | 457   | >EGFR-M766 YVTASVDNP  | 1436  | 979   |
| >EGFR-M766 YVMASVDNP  | 17    | >EGFR-M766 YVTASVDNP  | 51    | 34    |
| >EGFR-M766 YVMASVDNP  | 7     | >EGFR-M766 YVTASVDNP  | 39    | 32    |
| >EGFR-M766 YVMASVDNP  | 424   | >EGFR-M766 YVTASVDNP  | 5785  | 5361  |
| >EGFR-M766 EAYVMASV   | 18    | >EGFR-M766 EAYVTASV   | 27    | 9     |
| >EGFR-M766 EAYVMASV   | 8     | >EGFR-M766 EAYVTASV   | 6     | 2     |
| >EGFR-M766 DEAYVMASV  | 25    | >EGFR-M766 DEAYVTASV  | 12    | 13    |
| >EGFR-M766 DEAYVMASV  | 64    | >EGFR-M766 DEAYVTASV  | 69    | 5     |
| >EGFR-M766 DEAYVMASV  | 98    | >EGFR-M766 DEAYVTASV  | 136   | 38    |
| >EGFR-M766 DEAYVMASV  | 43    | >EGFR-M766 DEAYVTASV  | 49    | 6     |
| >EGFR-M766 DEAYVMASV  | 423   | >EGFR-M766 DEAYVTASV  | 326   | 97    |
| >EGFR-M766 LDEAYVMASV | 144   | >EGFR-M766 LDEAYVTASV | 140   | 4     |
| >EGFR-M766 ILDEAYVM   | 111   | >EGFR-M766 ILDEAYVT   | 425   | 314   |

|                        |       |                        |       |       |
|------------------------|-------|------------------------|-------|-------|
| >EGFR-M766 ILDEAYVMA   | 38    | >EGFR-M766 ILDEAYVTA   | 37    | 1     |
| >EGFR-M766 ILDEAYVMAS  | 11    | >EGFR-M766 ILDEAYVTAS\ | 11    | 0     |
| >EGFR-M766 ILDEAYVM    | 192   | >EGFR-M766 ILDEAYVT    | 953   | 761   |
| >EGFR-M766 ILDEAYVMA   | 44    | >EGFR-M766 ILDEAYVTA   | 71    | 27    |
| >EGFR-M766 ILDEAYVMAS  | 5     | >EGFR-M766 ILDEAYVTAS\ | 6     | 1     |
| >EGFR-M766 ILDEAYVMA   | 172   | >EGFR-M766 ILDEAYVTA   | 106   | 66    |
| >EGFR-M766 ILDEAYVMAS  | 10    | >EGFR-M766 ILDEAYVTAS\ | 10    | 0     |
| >EGFR-M766 ILDEAYVM    | 334   | >EGFR-M766 ILDEAYVT    | 710   | 376   |
| >EGFR-M766 ILDEAYVMA   | 44    | >EGFR-M766 ILDEAYVTA   | 43    | 1     |
| >EGFR-M766 ILDEAYVMAS  | 8     | >EGFR-M766 ILDEAYVTAS\ | 10    | 2     |
| >EGFR-M766 ILDEAYVM    | 17    | >EGFR-M766 ILDEAYVT    | 41    | 24    |
| >EGFR-M766 ILDEAYVMA   | 6     | >EGFR-M766 ILDEAYVTA   | 5     | 1     |
| >EGFR-M766 ILDEAYVMAS  | 56    | >EGFR-M766 ILDEAYVTAS  | 71    | 15    |
| >EGFR-M766 ILDEAYVMAS  | 2     | >EGFR-M766 ILDEAYVTAS\ | 2     | 0     |
| >EGFR-M766 ILDEAYVM    | 31    | >EGFR-M766 ILDEAYVT    | 261   | 230   |
| >EGFR-M766 ILDEAYVMA   | 63    | >EGFR-M766 ILDEAYVTA   | 12    | 51    |
| >EGFR-M766 ILDEAYVMAS  | 3     | >EGFR-M766 ILDEAYVTAS\ | 3     | 0     |
| >EGFR-M766 ILDEAYVM    | 76    | >EGFR-M766 ILDEAYVT    | 204   | 128   |
| >EGFR-M766 ILDEAYVMA   | 11    | >EGFR-M766 ILDEAYVTA   | 9     | 2     |
| >EGFR-M766 ILDEAYVMAS  | 5     | >EGFR-M766 ILDEAYVTAS\ | 4     | 1     |
| >EGFR-M766 ILDEAYVM    | 31    | >EGFR-M766 ILDEAYVT    | 324   | 293   |
| >EGFR-M766 ILDEAYVMA   | 43    | >EGFR-M766 ILDEAYVTA   | 16    | 27    |
| >EGFR-M766 ILDEAYVMAS  | 3     | >EGFR-M766 ILDEAYVTAS\ | 2     | 1     |
| >EGFR-M766 ILDEAYVM    | 77    | >EGFR-M766 ILDEAYVT    | 128   | 51    |
| >EGFR-M766 ILDEAYVMA   | 8     | >EGFR-M766 ILDEAYVTA   | 5     | 3     |
| >EGFR-M766 ILDEAYVMAS  | 2     | >EGFR-M766 ILDEAYVTAS\ | 2     | 0     |
| >EGFR-M766 ILDEAYVMAS  | 82    | >EGFR-M766 ILDEAYVTAS\ | 94    | 12    |
| >EGFR-M766 EILDEAYVM   | 362   | >EGFR-M766 EILDEAYVT   | 2355  | 1993  |
| >EGFR-M766 EILDEAYVMA  | 635   | >EGFR-M766 EILDEAYVTA  | 439   | 196   |
| >EGFR-M766 EILDEAYVM   | 39    | >EGFR-M766 EILDEAYVT   | 10090 | 10051 |
| >EGFR-M766 EILDEAYVM   | 33    | >EGFR-M766 EILDEAYVT   | 618   | 585   |
| >EGFR-M766 EILDEAYVMA  | 16    | >EGFR-M766 EILDEAYVTA  | 24    | 8     |
| >EGFR-M766 KEILDEAYVM  | 163   | >EGFR-M766 KEILDEAYVT  | 431   | 268   |
| >EGFR-M766 KEILDEAYVM  | 289   | >EGFR-M766 KEILDEAYVT/ | 418   | 129   |
| >EGFR-M766 KEILDEAYVM  | 50    | >EGFR-M766 KEILDEAYVT/ | 45    | 5     |
| >EGFR-M766 KEILDEAYVM  | 15    | >EGFR-M766 KEILDEAYVT  | 133   | 118   |
| >EGFR-M766 KEILDEAYVM  | 468   | >EGFR-M766 KEILDEAYVT/ | 452   | 16    |
| >EGFR-N700!NQALLRILK   | 1745  | >EGFR-N700!SQALLRILK   | 244   | 1501  |
| >EGFR-N700!NQALLRILK   | 117   | >EGFR-N700!SQALLRILK   | 14    | 103   |
| >EGFR-N700!NQALLRIL    | 152   | >EGFR-N700!SQALLRIL    | 346   | 194   |
| >EGFR-N700!NQALLRILK   | 1248  | >EGFR-N700!SQALLRILK   | 290   | 958   |
| >EGFR-N700!PNQALLRILK  | 19370 | >EGFR-N700!PSQALLRILK  | 304   | 19066 |
| >EGFR-N700!EPLTPSGEAPI | 1014  | >EGFR-N700!EPLTPSGEAP! | 377   | 637   |

|                        |       |                        |     |       |
|------------------------|-------|------------------------|-----|-------|
| >EGFR-N700!APNQALLRI   | 22    | >EGFR-N700!APSQALLRI   | 37  | 15    |
| >EGFR-N700!APNQALLRIL  | 329   | >EGFR-N700!APSQALLRIL  | 584 | 255   |
| >EGFR-N700!APNQALLRI   | 145   | >EGFR-N700!APSQALLRI   | 138 | 7     |
| >EGFR-N700!APNQALLRIL  | 109   | >EGFR-N700!APSQALLRIL  | 118 | 9     |
| >EGFR-N700!APNQALLRI   | 386   | >EGFR-N700!APSQALLRI   | 574 | 188   |
| >EGFR-N700!APNQALLRIL  | 293   | >EGFR-N700!APSQALLRIL  | 234 | 59    |
| >EGFR-N700!EAPNQALLR   | 26    | >EGFR-N700!EAPSQALLR   | 20  | 6     |
| >EGFR-N700!EAPNQALL    | 173   | >EGFR-N700!EAPSQALL    | 133 | 40    |
| >EGFR-N700!EAPNQALLRI  | 931   | >EGFR-N700!EAPSQALLRI  | 282 | 649   |
| >EGFR-N700!EAPNQALLRII | 136   | >EGFR-N700!EAPSQALLRIL | 42  | 94    |
| >EGFR-N700!EAPNQALLR   | 592   | >EGFR-N700!EAPSQALLR   | 421 | 171   |
| >EGFR-N700!GEAPNQALL   | 250   | >EGFR-N700!GEAPSQALL   | 144 | 106   |
| >EGFR-N700!GEAPNQALLF  | 42    | >EGFR-N700!GEAPSQALLR  | 31  | 11    |
| >EGFR-N700!GEAPNQAL    | 22    | >EGFR-N700!GEAPSQAL    | 23  | 1     |
| >EGFR-N700!GEAPNQALL   | 54    | >EGFR-N700!GEAPSQALL   | 37  | 17    |
| >EGFR-N700!GEAPNQALLF  | 227   | >EGFR-N700!GEAPSQALLR  | 185 | 42    |
| >EGFR-N700!GEAPNQAL    | 187   | >EGFR-N700!GEAPSQAL    | 186 | 1     |
| >EGFR-N700!GEAPNQAL    | 731   | >EGFR-N700!GEAPSQAL    | 432 | 299   |
| >EGFR-N700!GEAPNQAL    | 1004  | >EGFR-N700!GEAPSQAL    | 418 | 586   |
| >EGFR-N700!GEAPNQALL   | 46    | >EGFR-N700!GEAPSQALL   | 46  | 0     |
| >EGFR-N700!GEAPNQALLF  | 7     | >EGFR-N700!GEAPSQALLR  | 7   | 0     |
| >EGFR-N700!TPSGEAPNQ/  | 99    | >EGFR-N700!TPSGEAPSQ/  | 58  | 41    |
| >EGFR-N700!TPSGEAPN    | 1108  | >EGFR-N700!TPSGEAPS    | 376 | 732   |
| >EGFR-N700!TPSGEAPNQ/  | 144   | >EGFR-N700!TPSGEAPSQ/  | 81  | 63    |
| >EGFR-N700!TPSGEAPNQ/  | 28    | >EGFR-N700!TPSGEAPSQ/  | 17  | 11    |
| >EGFR-N700!TPSGEAPNQ/  | 1579  | >EGFR-N700!TPSGEAPSQ/  | 480 | 1099  |
| >EGFR-N700!LTPSGEAPNC  | 326   | >EGFR-N700!LTPSGEAPSQ  | 338 | 12    |
| >EGFR-N700!LTPSGEAPNC  | 333   | >EGFR-N700!LTPSGEAPSQ  | 551 | 218   |
| >EGFR-N700'NQALLRIL    | 1777  | >EGFR-N700'YQALLRIL    | 202 | 1575  |
| >EGFR-N700'NQALLRIL    | 3230  | >EGFR-N700'YQALLRIL    | 463 | 2767  |
| >EGFR-N700'NQALLRIL    | 1660  | >EGFR-N700'YQALLRIL    | 74  | 1586  |
| >EGFR-N700'NQALLRILKET | 4294  | >EGFR-N700'YQALLRILKET | 349 | 3945  |
| >EGFR-N700'NQALLRILK   | 117   | >EGFR-N700'YQALLRILK   | 49  | 68    |
| >EGFR-N700'NQALLRILK   | 611   | >EGFR-N700'YQALLRILK   | 322 | 289   |
| >EGFR-N700'NQALLRIL    | 2324  | >EGFR-N700'YQALLRIL    | 141 | 2183  |
| >EGFR-N700'NQALLRILK   | 1460  | >EGFR-N700'YQALLRILK   | 127 | 1333  |
| >EGFR-N700'NQALLRIL    | 152   | >EGFR-N700'YQALLRIL    | 43  | 109   |
| >EGFR-N700'PNQALLRI    | 18724 | >EGFR-N700'PYQALLRI    | 123 | 18601 |
| >EGFR-N700'PNQALLRIL   | 21825 | >EGFR-N700'PYQALLRIL   | 318 | 21507 |
| >EGFR-N700'PNQALLRI    | 17116 | >EGFR-N700'PYQALLRI    | 109 | 17007 |
| >EGFR-N700'PNQALLRI    | 21240 | >EGFR-N700'PYQALLRI    | 370 | 20870 |
| >EGFR-N700'PNQALLRI    | 24188 | >EGFR-N700'PYQALLRI    | 59  | 24129 |
| >EGFR-N700'PNQALLRIL   | 25422 | >EGFR-N700'PYQALLRIL   | 155 | 25267 |

|                        |       |                        |     |       |
|------------------------|-------|------------------------|-----|-------|
| >EGFR-N700'EPLTPSGEAPI | 26005 | >EGFR-N700'EPLTPSGEAP' | 150 | 25855 |
| >EGFR-N700'EPLTPSGEAPI | 1014  | >EGFR-N700'EPLTPSGEAP' | 10  | 1004  |
| >EGFR-N700'EPLTPSGEAPI | 25282 | >EGFR-N700'EPLTPSGEAP' | 413 | 24869 |
| >EGFR-N700'EPLTPSGEAPI | 32857 | >EGFR-N700'EPLTPSGEAP' | 310 | 32547 |
| >EGFR-N700'APNQALLRI   | 22    | >EGFR-N700'APYQALLRI   | 9   | 13    |
| >EGFR-N700'APNQALLRIL  | 329   | >EGFR-N700'APYQALLRIL  | 53  | 276   |
| >EGFR-N700'APNQALLRI   | 145   | >EGFR-N700'APYQALLRI   | 75  | 70    |
| >EGFR-N700'APNQALLRIL  | 109   | >EGFR-N700'APYQALLRIL  | 85  | 24    |
| >EGFR-N700'APNQALLRI   | 1622  | >EGFR-N700'APYQALLRI   | 114 | 1508  |
| >EGFR-N700'APNQALLRI   | 386   | >EGFR-N700'APYQALLRI   | 430 | 44    |
| >EGFR-N700'APNQALLRIL  | 293   | >EGFR-N700'APYQALLRIL  | 212 | 81    |
| >EGFR-N700'APNQALLR    | 2685  | >EGFR-N700'APYQALLR    | 493 | 2192  |
| >EGFR-N700'APNQALLRI   | 3473  | >EGFR-N700'APYQALLRI   | 265 | 3208  |
| >EGFR-N700'EAPNQALLR   | 26    | >EGFR-N700'EAPYQALLR   | 13  | 13    |
| >EGFR-N700'EAPNQALL    | 173   | >EGFR-N700'EAPYQALL    | 71  | 102   |
| >EGFR-N700'EAPNQALLRII | 136   | >EGFR-N700'EAPYQALLRIL | 105 | 31    |
| >EGFR-N700'GEAPNQALL   | 250   | >EGFR-N700'GEAPYQALL   | 77  | 173   |
| >EGFR-N700'GEAPNQALLF  | 42    | >EGFR-N700'GEAPYQALLR  | 22  | 20    |
| >EGFR-N700'GEAPNQAL    | 22    | >EGFR-N700'GEAPYQAL    | 19  | 3     |
| >EGFR-N700'GEAPNQALL   | 54    | >EGFR-N700'GEAPYQALL   | 48  | 6     |
| >EGFR-N700'GEAPNQALLF  | 227   | >EGFR-N700'GEAPYQALLR  | 216 | 11    |
| >EGFR-N700'GEAPNQAL    | 187   | >EGFR-N700'GEAPYQAL    | 96  | 91    |
| >EGFR-N700'GEAPNQALL   | 1140  | >EGFR-N700'GEAPYQALL   | 435 | 705   |
| >EGFR-N700'GEAPNQALLF  | 819   | >EGFR-N700'GEAPYQALLR  | 462 | 357   |
| >EGFR-N700'GEAPNQAL    | 1025  | >EGFR-N700'GEAPYQAL    | 211 | 814   |
| >EGFR-N700'GEAPNQALL   | 46    | >EGFR-N700'GEAPYQALL   | 25  | 21    |
| >EGFR-N700'GEAPNQALLF  | 7     | >EGFR-N700'GEAPYQALLR  | 5   | 2     |
| >EGFR-N700'TPSGEAPNQ/  | 99    | >EGFR-N700'TPSGEAPYQ/  | 115 | 16    |
| >EGFR-N700'TPSGEAPN    | 1108  | >EGFR-N700'TPSGEAPY    | 10  | 1098  |
| >EGFR-N700'TPSGEAPNQ/  | 144   | >EGFR-N700'TPSGEAPYQ/  | 158 | 14    |
| >EGFR-N700'TPSGEAPNQ/  | 28    | >EGFR-N700'TPSGEAPYQ/  | 32  | 4     |
| >EGFR-N700'TPSGEAPN    | 18249 | >EGFR-N700'TPSGEAPY    | 152 | 18097 |
| >EGFR-N700'TPSGEAPNQ/  | 1579  | >EGFR-N700'TPSGEAPYQ/  | 188 | 1391  |
| >EGFR-N700'TPSGEAPN    | 33829 | >EGFR-N700'TPSGEAPY    | 189 | 33640 |
| >EGFR-N700'LTPSGEAPN   | 24065 | >EGFR-N700'LTPSGEAPY   | 36  | 24029 |
| >EGFR-N700'LTPSGEAPN   | 31607 | >EGFR-N700'LTPSGEAPY   | 296 | 31311 |
| >EGFR-N700'LTPSGEAPN   | 24075 | >EGFR-N700'LTPSGEAPY   | 193 | 23882 |
| >EGFR-N700'LTPSGEAPN   | 21008 | >EGFR-N700'LTPSGEAPY   | 64  | 20944 |
| >EGFR-N700'LTPSGEAPNC  | 952   | >EGFR-N700'LTPSGEAPYQ  | 347 | 605   |
| >EGFR-N700'LTPSGEAPN   | 18915 | >EGFR-N700'LTPSGEAPY   | 151 | 18764 |
| >EGFR-N700'LTPSGEAPN   | 15376 | >EGFR-N700'LTPSGEAPY   | 24  | 15352 |
| >EGFR-N700'LTPSGEAPN   | 20567 | >EGFR-N700'LTPSGEAPY   | 257 | 20310 |
| >EGFR-N700'LTPSGEAPN   | 2017  | >EGFR-N700'LTPSGEAPY   | 248 | 1769  |



|                         |       |                         |     |       |
|-------------------------|-------|-------------------------|-----|-------|
| >EGFR-N700'LTPSGEAPNC   | 326   | >EGFR-N700'LTPSGEAPYQ   | 62  | 264   |
| >EGFR-N700'LTPSGEAPNC   | 333   | >EGFR-N700'LTPSGEAPYQ   | 179 | 154   |
| >EGFR-N700'LTPSGEAPN    | 18770 | >EGFR-N700'LTPSGEAPY    | 475 | 18295 |
| >EGFR-N700'PLTPSGEAPN   | 1234  | >EGFR-N700'PLTPSGEAPY   | 451 | 783   |
| >EGFR-N700'PLTPSGEAPN   | 23620 | >EGFR-N700'PLTPSGEAPY   | 165 | 23455 |
| >EGFR-N756!'ANKEILDEAY' | 2301  | >EGFR-N756!'ASKEILDEAY\ | 498 | 1803  |
| >EGFR-N756!'ANKEILDEAY  | 5086  | >EGFR-N756!'ASKEILDEAY  | 187 | 4899  |
| >EGFR-N756!'ANKEILDEAY' | 5238  | >EGFR-N756!'ASKEILDEAY\ | 311 | 4927  |
| >EGFR-N756!'ANKEILDEAY  | 4111  | >EGFR-N756!'ASKEILDEAY  | 473 | 3638  |
| >EGFR-N756!'ANKEILDEAY  | 848   | >EGFR-N756!'ASKEILDEAY  | 148 | 700   |
| >EGFR-N756!'ANKEILDEAY  | 19438 | >EGFR-N756!'ASKEILDEAY  | 44  | 19394 |
| >EGFR-N756!'KANKEILDEA' | 126   | >EGFR-N756!'KASKEILDEAY | 122 | 4     |
| >EGFR-N756!'KANKEILDEA' | 385   | >EGFR-N756!'KASKEILDEAY | 583 | 198   |
| >EGFR-N756!'KANKEILDEA' | 255   | >EGFR-N756!'KASKEILDEAY | 295 | 40    |
| >EGFR-N756!'KANKEILDEA' | 293   | >EGFR-N756!'KASKEILDEAY | 306 | 13    |
| >EGFR-N756!'KANKEILDEA' | 140   | >EGFR-N756!'KASKEILDEAY | 101 | 39    |
| >EGFR-N756!'KANKEILDEA' | 200   | >EGFR-N756!'KASKEILDEAY | 148 | 52    |
| >EGFR-N756!'KANKEILDEA' | 86    | >EGFR-N756!'KASKEILDEAY | 129 | 43    |
| >EGFR-N756!'KANKEILDEA' | 473   | >EGFR-N756!'KASKEILDEAY | 374 | 99    |
| >EGFR-N756!'SPKANKEI    | 133   | >EGFR-N756!'SPKASKEI    | 124 | 9     |
| >EGFR-N756!'SPKANKEIL   | 187   | >EGFR-N756!'SPKASKEIL   | 178 | 9     |
| >EGFR-N756!'SPKANKEIL   | 193   | >EGFR-N756!'SPKASKEIL   | 146 | 47    |
| >EGFR-N756!'TSPKANKEI   | 54    | >EGFR-N756!'TSPKASKEI   | 31  | 23    |
| >EGFR-N756!'TSPKANKEIL  | 9     | >EGFR-N756!'TSPKASKEIL  | 6   | 3     |
| >EGFR-N756!'TSPKANKEI   | 159   | >EGFR-N756!'TSPKASKEI   | 164 | 5     |
| >EGFR-N756!'ATSPKANK    | 145   | >EGFR-N756!'ATSPKASK    | 136 | 9     |
| >EGFR-N756!'ATSPKANK    | 29    | >EGFR-N756!'ATSPKASK    | 27  | 2     |
| >EGFR-N756!'ATSPKANK    | 36    | >EGFR-N756!'ATSPKASK    | 28  | 8     |
| >EGFR-N756!'ATSPKANK    | 389   | >EGFR-N756!'ATSPKASK    | 665 | 276   |
| >EGFR-N756!'ATSPKANK    | 445   | >EGFR-N756!'ATSPKASK    | 359 | 86    |
| >EGFR-N756!'ATSPKANKEI  | 35    | >EGFR-N756!'ATSPKASKEI  | 15  | 20    |
| >EGFR-N756!'ATSPKANKEIL | 55    | >EGFR-N756!'ATSPKASKEIL | 20  | 35    |
| >EGFR-N756!'ATSPKANKEIL | 468   | >EGFR-N756!'ATSPKASKEIL | 373 | 95    |
| >EGFR-N756!'ATSPKANKEI  | 347   | >EGFR-N756!'ATSPKASKEI  | 148 | 199   |
| >EGFR-N756!'ATSPKANKEIL | 295   | >EGFR-N756!'ATSPKASKEIL | 79  | 216   |
| >EGFR-N756!'ATSPKANK    | 121   | >EGFR-N756!'ATSPKASK    | 176 | 55    |
| >EGFR-N756!'ATSPKANKEIL | 716   | >EGFR-N756!'ATSPKASKEIL | 407 | 309   |
| >EGFR-N756!'EATSPKANK   | 18    | >EGFR-N756!'EATSPKASK   | 17  | 1     |
| >EGFR-N756!'EATSPKANKE  | 158   | >EGFR-N756!'EATSPKASKEI | 154 | 4     |
| >EGFR-N756!'EATSPKANKE  | 549   | >EGFR-N756!'EATSPKASKEI | 453 | 96    |
| >EGFR-N756!'NKEILDEAY   | 2116  | >EGFR-N756!'YKEILDEAY   | 283 | 1833  |
| >EGFR-N756!'NKEILDEAYVI | 676   | >EGFR-N756!'YKEILDEAYVI | 241 | 435   |
| >EGFR-N756!'ANKEILDEAY' | 2301  | >EGFR-N756!'AYKEILDEAY\ | 496 | 1805  |

|                         |       |                         |      |       |
|-------------------------|-------|-------------------------|------|-------|
| >EGFR-N756' ANKEILDEAY\ | 7970  | >EGFR-N756' AYKEILDEAY\ | 440  | 7530  |
| >EGFR-N756' ANKEILDEAY  | 2857  | >EGFR-N756' AYKEILDEAY  | 89   | 2768  |
| >EGFR-N756' ANKEILDEAY\ | 5238  | >EGFR-N756' AYKEILDEAY\ | 319  | 4919  |
| >EGFR-N756' ELREATSPKA\ | 17229 | >EGFR-N756' ELREATSPKA\ | 248  | 16981 |
| >EGFR-N756' ELREATSPKA\ | 17538 | >EGFR-N756' ELREATSPKA\ | 109  | 17429 |
| >EGFR-N756' ELREATSPKA\ | 12276 | >EGFR-N756' ELREATSPKA\ | 17   | 12259 |
| >EGFR-N756' ELREATSPKA\ | 15904 | >EGFR-N756' ELREATSPKA\ | 179  | 15725 |
| >EGFR-N756' ELREATSPKA\ | 11743 | >EGFR-N756' ELREATSPKA\ | 39   | 11704 |
| >EGFR-N756' ELREATSPKA\ | 15087 | >EGFR-N756' ELREATSPKA\ | 93   | 14994 |
| >EGFR-N756' ELREATSPKA\ | 20577 | >EGFR-N756' ELREATSPKA\ | 279  | 20298 |
| >EGFR-N756' KANKEILDEA\ | 126   | >EGFR-N756' KAYKEILDEA\ | 188  | 62    |
| >EGFR-N756' KANKEILDEA\ | 385   | >EGFR-N756' KAYKEILDEA\ | 352  | 33    |
| >EGFR-N756' KANKEILDEA\ | 255   | >EGFR-N756' KAYKEILDEA\ | 130  | 125   |
| >EGFR-N756' KANKEILDEA\ | 293   | >EGFR-N756' KAYKEILDEA\ | 45   | 248   |
| >EGFR-N756' KANKEILDEA\ | 140   | >EGFR-N756' KAYKEILDEA\ | 13   | 127   |
| >EGFR-N756' KANKEILDEA\ | 200   | >EGFR-N756' KAYKEILDEA\ | 96   | 104   |
| >EGFR-N756' KANKEILDEA\ | 894   | >EGFR-N756' KAYKEILDEA\ | 319  | 575   |
| >EGFR-N756' KANKEILDEA\ | 86    | >EGFR-N756' KAYKEILDEA\ | 63   | 23    |
| >EGFR-N756' KANKEILDEA\ | 473   | >EGFR-N756' KAYKEILDEA\ | 349  | 124   |
| >EGFR-N756' SPKANKEI    | 133   | >EGFR-N756' SPKAYKEI    | 382  | 249   |
| >EGFR-N756' SPKANKEIL   | 187   | >EGFR-N756' SPKAYKEIL   | 1982 | 1795  |
| >EGFR-N756' SPKANKEIL   | 193   | >EGFR-N756' SPKAYKEIL   | 193  | 0     |
| >EGFR-N756' SPKANKEI    | 1303  | >EGFR-N756' SPKAYKEI    | 276  | 1027  |
| >EGFR-N756' SPKANKEIL   | 515   | >EGFR-N756' SPKAYKEIL   | 95   | 420   |
| >EGFR-N756' TSPKANKE    | 3523  | >EGFR-N756' TSPKAYKE    | 301  | 3222  |
| >EGFR-N756' TSPKANKEI   | 54    | >EGFR-N756' TSPKAYKEI   | 26   | 28    |
| >EGFR-N756' TSPKANKEIL  | 9     | >EGFR-N756' TSPKAYKEIL  | 5    | 4     |
| >EGFR-N756' TSPKANKEI   | 159   | >EGFR-N756' TSPKAYKEI   | 133  | 26    |
| >EGFR-N756' ATSPKANK    | 145   | >EGFR-N756' ATSPKAYK    | 89   | 56    |
| >EGFR-N756' ATSPKANK    | 29    | >EGFR-N756' ATSPKAYK    | 13   | 16    |
| >EGFR-N756' ATSPKANK    | 36    | >EGFR-N756' ATSPKAYK    | 19   | 17    |
| >EGFR-N756' ATSPKANK    | 389   | >EGFR-N756' ATSPKAYK    | 57   | 332   |
| >EGFR-N756' ATSPKANK    | 445   | >EGFR-N756' ATSPKAYK    | 113  | 332   |
| >EGFR-N756' ATSPKANKEI  | 35    | >EGFR-N756' ATSPKAYKEI  | 33   | 2     |
| >EGFR-N756' ATSPKANKEIL | 55    | >EGFR-N756' ATSPKAYKEIL | 34   | 21    |
| >EGFR-N756' ATSPKANKEII | 468   | >EGFR-N756' ATSPKAYKEIL | 220  | 248   |
| >EGFR-N756' ATSPKANKEI  | 347   | >EGFR-N756' ATSPKAYKEI  | 449  | 102   |
| >EGFR-N756' ATSPKANKEII | 295   | >EGFR-N756' ATSPKAYKEIL | 239  | 56    |
| >EGFR-N756' ATSPKANK    | 121   | >EGFR-N756' ATSPKAYK    | 104  | 17    |
| >EGFR-N756' EATSPKAN    | 24065 | >EGFR-N756' EATSPKAY    | 100  | 23965 |
| >EGFR-N756' EATSPKANK   | 18    | >EGFR-N756' EATSPKAYK   | 6    | 12    |
| >EGFR-N756' EATSPKANKE  | 158   | >EGFR-N756' EATSPKAYKEI | 122  | 36    |
| >EGFR-N756' EATSPKANKE  | 549   | >EGFR-N756' EATSPKAYKEI | 344  | 205   |

|                        |       |                        |     |       |
|------------------------|-------|------------------------|-----|-------|
| >EGFR-N756'EATSPKAN    | 14565 | >EGFR-N756'EATSPKAY    | 50  | 14515 |
| >EGFR-N756'REATSPKAN   | 6760  | >EGFR-N756'REATSPKAY   | 11  | 6749  |
| >EGFR-N756'REATSPKAN   | 19223 | >EGFR-N756'REATSPKAY   | 466 | 18757 |
| >EGFR-N756'REATSPKAN   | 4932  | >EGFR-N756'REATSPKAY   | 204 | 4728  |
| >EGFR-N756'REATSPKAN   | 7815  | >EGFR-N756'REATSPKAY   | 161 | 7654  |
| >EGFR-N756'LREATSPKAN  | 10737 | >EGFR-N756'LREATSPKAY  | 138 | 10599 |
| >EGFR-N756'LREATSPKAN  | 9122  | >EGFR-N756'LREATSPKAY  | 193 | 8929  |
| >EGFR-N826'NYLED RRL   | 1050  | >EGFR-N826'SYLED RRL   | 119 | 931   |
| >EGFR-N826'NYLED RRL   | 81    | >EGFR-N826'SYLED RRL   | 32  | 49    |
| >EGFR-N826'NYLED RRLVH | 159   | >EGFR-N826'SYLED RRLVH | 32  | 127   |
| >EGFR-N826'NYLED RRLVH | 17    | >EGFR-N826'SYLED RRLVH | 56  | 39    |
| >EGFR-N826'NYLED RRLVH | 26    | >EGFR-N826'SYLED RRLVH | 28  | 2     |
| >EGFR-N826'MNYLED RRL  | 536   | >EGFR-N826'MSYLED RRL  | 336 | 200   |
| >EGFR-N826'MNYLED RRL  | 4111  | >EGFR-N826'MSYLED RRL  | 155 | 3956  |
| >EGFR-N826'MNYLED RRL  | 145   | >EGFR-N826'MSYLED RRL  | 13  | 132   |
| >EGFR-N826'MNYLED RRL  | 10936 | >EGFR-N826'MSYLED RRL  | 9   | 10927 |
| >EGFR-N826'MNYLED RRLV | 23630 | >EGFR-N826'MSYLED RRLV | 241 | 23389 |
| >EGFR-N826'MNYLED RRL  | 474   | >EGFR-N826'MSYLED RRL  | 708 | 234   |
| >EGFR-N826'MNYLED RRL  | 3859  | >EGFR-N826'MSYLED RRL  | 213 | 3646  |
| >EGFR-N826'GMNYLED RRL | 308   | >EGFR-N826'GMSYLED RRL | 89  | 219   |
| >EGFR-N826'GMNYLED RRL | 54    | >EGFR-N826'GMSYLED RRL | 29  | 25    |
| >EGFR-N826'GMNYLED RRL | 42    | >EGFR-N826'GMSYLED RRL | 62  | 20    |
| >EGFR-N826'GMNYLED RRL | 61    | >EGFR-N826'GMSYLED RRL | 138 | 77    |
| >EGFR-N826'GMNYLED RRL | 95    | >EGFR-N826'GMSYLED RRL | 121 | 26    |
| >EGFR-N826'GMNYLED RRL | 75    | >EGFR-N826'GMSYLED RRL | 82  | 7     |
| >EGFR-N826'GMNYLED RRL | 39    | >EGFR-N826'GMSYLED RRL | 33  | 6     |
| >EGFR-N826'GMNYLED R   | 92    | >EGFR-N826'GMSYLED R   | 493 | 401   |
| >EGFR-N826'GMNYLED RRL | 155   | >EGFR-N826'GMSYLED RRL | 825 | 670   |
| >EGFR-N826'GMNYLED RRL | 895   | >EGFR-N826'GMSYLED RRL | 448 | 447   |
| >EGFR-N826'KGMNYLED R  | 159   | >EGFR-N826'KGMSYLED R  | 109 | 50    |
| >EGFR-N826'KGMNYLED R  | 481   | >EGFR-N826'KGMSYLED R  | 480 | 1     |
| >EGFR-N826'KGMNYLED R  | 425   | >EGFR-N826'KGMSYLED R  | 286 | 139   |
| >EGFR-N826'KGMNYLED R  | 306   | >EGFR-N826'KGMSYLED R  | 228 | 78    |
| >EGFR-N826'IAKGMNYLED  | 143   | >EGFR-N826'IAKGMSYLED  | 137 | 6     |
| >EGFR-N826'IAKGMNYLED  | 310   | >EGFR-N826'IAKGMSYLED  | 391 | 81    |
| >EGFR-N826'IAKGMNYLED  | 174   | >EGFR-N826'IAKGMSYLED  | 175 | 1     |
| >EGFR-N826'IAKGMNYL    | 365   | >EGFR-N826'IAKGMSYL    | 44  | 321   |
| >EGFR-N826'QIAKGMNYL   | 15    | >EGFR-N826'QIAKGMSYL   | 27  | 12    |
| >EGFR-N826'QIAKGMNYL   | 164   | >EGFR-N826'QIAKGMSYL   | 49  | 115   |
| >EGFR-N826'QIAKGMNYL   | 81    | >EGFR-N826'QIAKGMSYL   | 96  | 15    |
| >EGFR-N826'QIAKGMNY    | 769   | >EGFR-N826'QIAKGMSY    | 138 | 631   |
| >EGFR-N826'QIAKGMNY    | 522   | >EGFR-N826'QIAKGMSY    | 188 | 334   |
| >EGFR-N826'QIAKGMNY    | 124   | >EGFR-N826'QIAKGMSY    | 141 | 17    |

|                       |      |                       |      |      |
|-----------------------|------|-----------------------|------|------|
| >EGFR-N826:QIAKGMNYL  | 88   | >EGFR-N826:QIAKGMSYL  | 54   | 34   |
| >EGFR-N826:QIAKGMNY   | 90   | >EGFR-N826:QIAKGMSY   | 86   | 4    |
| >EGFR-N826:QIAKGMNY   | 274  | >EGFR-N826:QIAKGMSY   | 126  | 148  |
| >EGFR-N826:QIAKGMNYL  | 48   | >EGFR-N826:QIAKGMSYL  | 68   | 20   |
| >EGFR-N826:QIAKGMNYL  | 142  | >EGFR-N826:QIAKGMSYL  | 166  | 24   |
| >EGFR-N826:QIAKGMNY   | 24   | >EGFR-N826:QIAKGMSY   | 41   | 17   |
| >EGFR-N826:QIAKGMNY   | 685  | >EGFR-N826:QIAKGMSY   | 125  | 560  |
| >EGFR-N826:QIAKGMNY   | 269  | >EGFR-N826:QIAKGMSY   | 126  | 143  |
| >EGFR-N826:QIAKGMNYL  | 2392 | >EGFR-N826:QIAKGMSYL  | 221  | 2171 |
| >EGFR-N826:QIAKGMNY   | 1672 | >EGFR-N826:QIAKGMSY   | 399  | 1273 |
| >EGFR-N826:VQIAKGMNY  | 300  | >EGFR-N826:VQIAKGMSYI | 176  | 124  |
| >EGFR-N826:VQIAKGMNY  | 332  | >EGFR-N826:VQIAKGMSYI | 124  | 208  |
| >EGFR-N826:VQIAKGMNY  | 327  | >EGFR-N826:VQIAKGMSY  | 334  | 7    |
| >EGFR-N826:VQIAKGMNY  | 761  | >EGFR-N826:VQIAKGMSY  | 274  | 487  |
| >EGFR-N826:VQIAKGMNY  | 22   | >EGFR-N826:VQIAKGMSY  | 64   | 42   |
| >EGFR-N826:VQIAKGMNY  | 63   | >EGFR-N826:VQIAKGMSY  | 43   | 20   |
| >EGFR-N826:VQIAKGMNY  | 344  | >EGFR-N826:VQIAKGMSYI | 148  | 196  |
| >EGFR-N826:VQIAKGMNY  | 192  | >EGFR-N826:VQIAKGMSY  | 103  | 89   |
| >EGFR-N826:VQIAKGMNY  | 8    | >EGFR-N826:VQIAKGMSY  | 5    | 3    |
| >EGFR-N826:VQIAKGMNY  | 73   | >EGFR-N826:VQIAKGMSYI | 36   | 37   |
| >EGFR-N826:CVQIAKGMN  | 329  | >EGFR-N826:CVQIAKGMS' | 387  | 58   |
| >EGFR-N826:CVQIAKGMN  | 301  | >EGFR-N826:CVQIAKGMS' | 744  | 443  |
| >EGFR-N826:CVQIAKGMN  | 969  | >EGFR-N826:CVQIAKGMS' | 410  | 559  |
| >EGFR-N826:WCVQIAKGM  | 249  | >EGFR-N826:WCVQIAKGM  | 332  | 83   |
| >EGFR-N826:WCVQIAKGM  | 454  | >EGFR-N826:WCVQIAKGM  | 1153 | 699  |
| >EGFR-N826:WCVQIAKGM  | 1269 | >EGFR-N826:WCVQIAKGM  | 472  | 797  |
| >EGFR-N826:WCVQIAKGM  | 127  | >EGFR-N826:WCVQIAKGM  | 57   | 70   |
| >EGFR-N842 NVLVKTPQH\ | 424  | >EGFR-N842 DVLVKTPQH\ | 1995 | 1571 |
| >EGFR-N842 NVLVKTPQH\ | 178  | >EGFR-N842 DVLVKTPQH\ | 513  | 335  |
| >EGFR-N842 NVLVKTPQH\ | 179  | >EGFR-N842 DVLVKTPQH\ | 638  | 459  |
| >EGFR-N842 NVLVKTPQH\ | 269  | >EGFR-N842 DVLVKTPQH\ | 1162 | 893  |
| >EGFR-N842 NVLVKTPQH\ | 225  | >EGFR-N842 DVLVKTPQH\ | 1725 | 1500 |
| >EGFR-N842 NVLVKTPQH\ | 318  | >EGFR-N842 DVLVKTPQH\ | 251  | 67   |
| >EGFR-N842 NVLVKTPQH\ | 29   | >EGFR-N842 DVLVKTPQH\ | 33   | 4    |
| >EGFR-N842 AARNVLVK   | 338  | >EGFR-N842 AARDVLVK   | 999  | 661  |
| >EGFR-N842 AARNVLVK   | 5    | >EGFR-N842 AARDVLVK   | 6    | 1    |
| >EGFR-N842 AARNVLVKTF | 404  | >EGFR-N842 AARDVLVKTF | 557  | 153  |
| >EGFR-N842 LAARNVLV   | 312  | >EGFR-N842 LAARDVLV   | 439  | 127  |
| >EGFR-N842 LAARNVLV   | 497  | >EGFR-N842 LAARDVLV   | 724  | 227  |
| >EGFR-N842 LAARNVLV   | 337  | >EGFR-N842 LAARDVLV   | 311  | 26   |
| >EGFR-N842 LAARNVLV   | 54   | >EGFR-N842 LAARDVLV   | 77   | 23   |
| >EGFR-N842 LAARNVLVK  | 458  | >EGFR-N842 LAARDVLVK  | 1382 | 924  |
| >EGFR-N842 LAARNVLVK  | 230  | >EGFR-N842 LAARDVLVK  | 426  | 196  |

|                       |       |                       |       |       |
|-----------------------|-------|-----------------------|-------|-------|
| >EGFR-N842ILAARNVLVK  | 398   | >EGFR-N842ILAARDVLVK  | 2814  | 2416  |
| >EGFR-N842ILAARNVLVK  | 267   | >EGFR-N842ILAARDVLVK  | 540   | 273   |
| >EGFR-N842ILAARNVLV   | 119   | >EGFR-N842ILAARDVLV   | 234   | 115   |
| >EGFR-N842IDLAARNVLV  | 88    | >EGFR-N842IDLAARDVLV  | 227   | 139   |
| >EGFR-N842IDLAARNVLV  | 340   | >EGFR-N842IDLAARDVLV  | 713   | 373   |
| >EGFR-N842IDLAARNVLV  | 65    | >EGFR-N842IDLAARDVLV  | 43    | 22    |
| >EGFR-N842IDLAARNVLV  | 158   | >EGFR-N842IDLAARDVLV  | 797   | 639   |
| >EGFR-N842IDLAARNVL   | 326   | >EGFR-N842IDLAARDVL   | 458   | 132   |
| >EGFR-N842IDLAARNVLV  | 17    | >EGFR-N842IDLAARDVLV  | 22    | 5     |
| >EGFR-N842IDLAARNVLV  | 382   | >EGFR-N842IDLAARDVLV  | 1435  | 1053  |
| >EGFR-N842IDLAARNVLV  | 64    | >EGFR-N842IDLAARDVLV  | 95    | 31    |
| >EGFR-N842IDLAARNVLV  | 334   | >EGFR-N842IDLAARDVLV  | 2674  | 2340  |
| >EGFR-N842IRDLAARNVL  | 377   | >EGFR-N842IRDLAARDVLV | 1382  | 1005  |
| >EGFR-N842IRDLAARNVL  | 97    | >EGFR-N842IRDLAARDVL  | 125   | 28    |
| >EGFR-N842IRDLAARNV   | 187   | >EGFR-N842IRDLAARDV   | 154   | 33    |
| >EGFR-N842IRDLAARNVL  | 656   | >EGFR-N842IRDLAARDVL  | 471   | 185   |
| >EGFR-N842IRDLAARNV   | 210   | >EGFR-N842IRDLAARDV   | 215   | 5     |
| >EGFR-N842IRDLAARNVL  | 96    | >EGFR-N842IRDLAARDVLV | 77    | 19    |
| >EGFR-N842HRDLAARNVI  | 62    | >EGFR-N842HRDLAARDVI  | 107   | 45    |
| >EGFR-N842HRDLAARNVI  | 21    | >EGFR-N842HRDLAARDVI  | 34    | 13    |
| >EGFR-N842HRDLAARNVI  | 347   | >EGFR-N842HRDLAARDVI  | 683   | 336   |
| >EGFR-N842IVHRDLAARN' | 471   | >EGFR-N842IVHRDLAARD' | 1287  | 816   |
| >EGFR-N842LVHRDLAARN  | 138   | >EGFR-N842LVHRDLAARE  | 411   | 273   |
| >EGFR-N842LVHRDLAARN  | 72    | >EGFR-N842LVHRDLAARE  | 122   | 50    |
| >EGFR-N842LVHRDLAARN  | 474   | >EGFR-N842LVHRDLAARE  | 1871  | 1397  |
| >EGFR-P1367PMRNLQEI   | 3095  | >EGFR-P1367TMRNLQEI   | 91    | 3004  |
| >EGFR-P1367PMRNLQEI   | 976   | >EGFR-P1367TMRNLQEI   | 164   | 812   |
| >EGFR-P1367PMRNLQEI   | 736   | >EGFR-P1367TMRNLQEI   | 68    | 668   |
| >EGFR-P1367PMRNLQEIL  | 1784  | >EGFR-P1367TMRNLQEIL  | 281   | 1503  |
| >EGFR-P1367PMRNLQEI   | 1104  | >EGFR-P1367TMRNLQEI   | 468   | 636   |
| >EGFR-P1367LPMRNLQEI  | 1763  | >EGFR-P1367LTMRNLQEI  | 168   | 1595  |
| >EGFR-P1367LPMRNLQEI  | 61    | >EGFR-P1367LTMRNLQEI  | 32277 | 32216 |
| >EGFR-P1367LPMRNLQEIL | 133   | >EGFR-P1367LTMRNLQEIL | 32840 | 32707 |
| >EGFR-P1367LPMRNLQEI  | 16412 | >EGFR-P1367LTMRNLQEI  | 266   | 16146 |
| >EGFR-P1367LPMRNLQEIL | 11851 | >EGFR-P1367LTMRNLQEIL | 471   | 11380 |
| >EGFR-P1367LPMRNLQEI  | 15567 | >EGFR-P1367LTMRNLQEI  | 231   | 15336 |
| >EGFR-P1367LPMRNLQEI  | 12238 | >EGFR-P1367LTMRNLQEI  | 121   | 12117 |
| >EGFR-P1367LPMRNLQEI  | 14612 | >EGFR-P1367LTMRNLQEI  | 237   | 14375 |
| >EGFR-P1367LPMRNLQEI  | 16297 | >EGFR-P1367LTMRNLQEI  | 451   | 15846 |
| >EGFR-P1367LPMRNLQEI  | 17082 | >EGFR-P1367LTMRNLQEI  | 169   | 16913 |
| >EGFR-P1367LPMRNLQEI  | 3768  | >EGFR-P1367LTMRNLQEI  | 404   | 3364  |
| >EGFR-P1367LPMRNLQEI  | 38    | >EGFR-P1367LTMRNLQEI  | 15055 | 15017 |
| >EGFR-P1367LPMRNLQEIL | 181   | >EGFR-P1367LTMRNLQEIL | 25515 | 25334 |

|                       |       |                       |       |       |
|-----------------------|-------|-----------------------|-------|-------|
| >EGFR-P1367LPMRNLQEI  | 23556 | >EGFR-P1367LTMRNLQEI  | 91    | 23465 |
| >EGFR-P1367LPMRNLQEIL | 24124 | >EGFR-P1367LTMRNLQEIL | 160   | 23964 |
| >EGFR-P1367LPMRNLQEIL | 134   | >EGFR-P1367LTMRNLQEIL | 23865 | 23731 |
| >EGFR-P1367LPMRNLQEIL | 265   | >EGFR-P1367LTMRNLQEIL | 12124 | 11859 |
| >EGFR-P1367LPMRNLQEI  | 61    | >EGFR-P1367LTMRNLQEI  | 13280 | 13219 |
| >EGFR-P1367LPMRNLQEI  | 333   | >EGFR-P1367LTMRNLQEI  | 20485 | 20152 |
| >EGFR-P1367LPMRNLQEI  | 157   | >EGFR-P1367LTMRNLQEI  | 25618 | 25461 |
| >EGFR-P1367LPMRNLQEI  | 19654 | >EGFR-P1367LTMRNLQEI  | 194   | 19460 |
| >EGFR-P1367LPMRNLQEIL | 18030 | >EGFR-P1367LTMRNLQEIL | 103   | 17927 |
| >EGFR-P1367LPMRNLQEIL | 12807 | >EGFR-P1367LTMRNLQEIL | 57    | 12750 |
| >EGFR-P1367LPMRNLQEI  | 3513  | >EGFR-P1367LTMRNLQEI  | 72    | 3441  |
| >EGFR-P1367ELPMRNLQEI | 126   | >EGFR-P1367ELTMRNLQEI | 59    | 67    |
| >EGFR-P1367ELPMRNLQEI | 280   | >EGFR-P1367ELTMRNLQEI | 148   | 132   |
| >EGFR-P1367KELPMRNL   | 607   | >EGFR-P1367KELTMRNL   | 151   | 456   |
| >EGFR-P1367KELPMRNLQI | 15    | >EGFR-P1367KELTMRNLQI | 10    | 5     |
| >EGFR-P1367KELPMRNL   | 153   | >EGFR-P1367KELTMRNL   | 98    | 55    |
| >EGFR-P1367KELPMRNLQI | 365   | >EGFR-P1367KELTMRNLQI | 225   | 140   |
| >EGFR-P1367KELPMRNL   | 51    | >EGFR-P1367KELTMRNL   | 56    | 5     |
| >EGFR-P1367KELPMRNLQI | 40    | >EGFR-P1367KELTMRNLQI | 48    | 8     |
| >EGFR-P1367KELPMRNL   | 183   | >EGFR-P1367KELTMRNL   | 322   | 139   |
| >EGFR-P1367KELPMRNLQ  | 687   | >EGFR-P1367KELTMRNLQ  | 159   | 528   |
| >EGFR-P1367KELPMRNLQI | 5     | >EGFR-P1367KELTMRNLQI | 3     | 2     |
| >EGFR-P1367GLKELPMRNI | 135   | >EGFR-P1367GLKELTMRNI | 170   | 35    |
| >EGFR-P1367GLKELPMRNI | 158   | >EGFR-P1367GLKELTMRNI | 136   | 22    |
| >EGFR-P1367GLKELPMRNI | 377   | >EGFR-P1367GLKELTMRNI | 595   | 218   |
| >EGFR-P1367GLKELPMRNI | 454   | >EGFR-P1367GLKELTMRNI | 265   | 189   |
| >EGFR-P1367GLKELPMRNI | 103   | >EGFR-P1367GLKELTMRNI | 57    | 46    |
| >EGFR-P1367GLKELPMR   | 155   | >EGFR-P1367GLKELTMR   | 68    | 87    |
| >EGFR-P1367KTGLKELPMF | 150   | >EGFR-P1367KTGLKELTMR | 77    | 73    |
| >EGFR-P1367KTGLKELPM  | 1065  | >EGFR-P1367KTGLKELTM  | 415   | 650   |
| >EGFR-P1367KTGLKELPM  | 14    | >EGFR-P1367KTGLKELTM  | 11    | 3     |
| >EGFR-P1367KTGLKELPM  | 4026  | >EGFR-P1367KTGLKELTM  | 495   | 3531  |
| >EGFR-P1367KTGLKELPMF | 163   | >EGFR-P1367KTGLKELTMR | 201   | 38    |
| >EGFR-P596LCPAGVMGEN  | 29244 | >EGFR-P596LCLAGVMGEN  | 472   | 28772 |
| >EGFR-P596LCPAGVMGEN  | 289   | >EGFR-P596LCLAGVMGEN  | 29806 | 29517 |
| >EGFR-P596LKTCPAGVM   | 7     | >EGFR-P596LKTCLAGVM   | 12    | 5     |
| >EGFR-P596LKTCPAGVM   | 497   | >EGFR-P596LKTCLAGVM   | 1966  | 1469  |
| >EGFR-P596LKTCPAGVM   | 441   | >EGFR-P596LKTCLAGVM   | 170   | 271   |
| >EGFR-P596LKTCPAGVM   | 56    | >EGFR-P596LKTCLAGVM   | 244   | 188   |
| >EGFR-P596LVKTCPAGVM  | 271   | >EGFR-P596LVKTCLAGVM  | 729   | 458   |
| >EGFR-P596LVKTCPAGVM  | 350   | >EGFR-P596LVKTCLAGVM  | 377   | 27    |
| >EGFR-P596LCVKTCPAGV  | 70    | >EGFR-P596LCVKTCLAGV  | 28    | 42    |
| >EGFR-P596LCVKTCPAGV  | 6534  | >EGFR-P596LCVKTCLAGV  | 303   | 6231  |

|                         |       |                         |       |       |
|-------------------------|-------|-------------------------|-------|-------|
| >EGFR-P596L CVKTC PAGV  | 128   | >EGFR-P596L CVKTCLAGV   | 99    | 29    |
| >EGFR-P596L HCVKTC PAGV | 165   | >EGFR-P596L HCVKTCLAGV  | 142   | 23    |
| >EGFR-P596L GPHCVKTC P  | 26650 | >EGFR-P596L GPHCVKTCL   | 378   | 26272 |
| >EGFR-P596L GPHCVKTC P/ | 364   | >EGFR-P596L GPHCVKTCLA  | 429   | 65    |
| >EGFR-P596L DGPHCVKTCI  | 322   | >EGFR-P596L DGPHCVKTCI  | 107   | 215   |
| >EGFR-P596L DGPHCVKTCI  | 234   | >EGFR-P596L DGPHCVKTCI  | 181   | 53    |
| >EGFR-P691S PLTPSGEA    | 8296  | >EGFR-P691S SLTPSGEA    | 446   | 7850  |
| >EGFR-P691S PLTPSGEA    | 5683  | >EGFR-P691S SLTPSGEA    | 109   | 5574  |
| >EGFR-P691S PLTPSGEA    | 4389  | >EGFR-P691S SLTPSGEA    | 175   | 4214  |
| >EGFR-P691S PLTPSGEA    | 3694  | >EGFR-P691S SLTPSGEA    | 62    | 3632  |
| >EGFR-P691S PLTPSGEA    | 247   | >EGFR-P691S SLTPSGEA    | 11    | 236   |
| >EGFR-P691S PLTPSGEAPN  | 1234  | >EGFR-P691S SLTPSGEAPN  | 59    | 1175  |
| >EGFR-P691S EPLTPSGEA   | 8393  | >EGFR-P691S ESLTPSGEA   | 270   | 8123  |
| >EGFR-P691S EPLTPSGEA   | 294   | >EGFR-P691S ESLTPSGEA   | 220   | 74    |
| >EGFR-P691S EPLTPSGEA   | 192   | >EGFR-P691S ESLTPSGEA   | 28885 | 28693 |
| >EGFR-P691S VEPLTPSGEA  | 641   | >EGFR-P691S VESLTPSGEA  | 282   | 359   |
| >EGFR-P691S ELVEPLTPS   | 455   | >EGFR-P691S ELVESLTPS   | 1462  | 1007  |
| >EGFR-P691S RELVEPLT    | 318   | >EGFR-P691S RELVESLT    | 315   | 3     |
| >EGFR-P691S RELVEPLTPS  | 500   | >EGFR-P691S RELVESLTPS  | 417   | 83    |
| >EGFR-P691S RELVEPLT    | 488   | >EGFR-P691S RELVESLT    | 729   | 241   |
| >EGFR-P691S RELVEPLTPSC | 502   | >EGFR-P691S RELVESLTPSC | 436   | 66    |
| >EGFR-P691S ERELVEPL    | 497   | >EGFR-P691S ERELVESL    | 934   | 437   |
| >EGFR-P691S QERELVEPL   | 172   | >EGFR-P691S QERELVESL   | 167   | 5     |
| >EGFR-P691S QERELVEPL   | 34    | >EGFR-P691S QERELVESL   | 59    | 25    |
| >EGFR-P691S QERELVEPL   | 293   | >EGFR-P691S QERELVESL   | 484   | 191   |
| >EGFR-P691S QERELVEPL   | 26    | >EGFR-P691S QERELVESL   | 40    | 14    |
| >EGFR-P691S QERELVEPLT  | 517   | >EGFR-P691S QERELVESLT  | 446   | 71    |
| >EGFR-P691S QERELVEPL   | 9     | >EGFR-P691S QERELVESL   | 11    | 2     |
| >EGFR-P691S LLQERELVEPI | 40    | >EGFR-P691S LLQERELVESL | 53    | 13    |
| >EGFR-P691S LLQERELVEPI | 30    | >EGFR-P691S LLQERELVESL | 36    | 6     |
| >EGFR-P691S LLQERELVEPI | 78    | >EGFR-P691S LLQERELVESL | 106   | 28    |
| >EGFR-P691S LLQERELVEPI | 154   | >EGFR-P691S LLQERELVESL | 297   | 143   |
| >EGFR-P691S LLQERELVEPI | 9     | >EGFR-P691S LLQERELVESL | 10    | 1     |
| >EGFR-P691S LLQERELVEPI | 10    | >EGFR-P691S LLQERELVESL | 12    | 2     |
| >EGFR-P691S LLQERELVEPI | 66    | >EGFR-P691S LLQERELVESL | 78    | 12    |
| >EGFR-P691S LLQERELVEPI | 115   | >EGFR-P691S LLQERELVESL | 79    | 36    |
| >EGFR-P691S LLQERELVEP  | 2898  | >EGFR-P691S LLQERELVES  | 239   | 2659  |
| >EGFR-P691S LLQERELVEPI | 4     | >EGFR-P691S LLQERELVESL | 3     | 1     |
| >EGFR-P691S LLQERELVEPI | 436   | >EGFR-P691S LLQERELVESL | 327   | 109   |
| >EGFR-P691S LLQERELVEPI | 394   | >EGFR-P691S LLQERELVESL | 606   | 212   |
| >EGFR-P694L PSGEAPNQAI  | 13322 | >EGFR-P694L LSGEAPNQAI  | 354   | 12968 |
| >EGFR-P694L PSGEAPNQAI  | 10854 | >EGFR-P694L LSGEAPNQAI  | 266   | 10588 |
| >EGFR-P694L PSGEAPNQAI  | 3137  | >EGFR-P694L LSGEAPNQAI  | 127   | 3010  |

|                         |       |                         |       |       |
|-------------------------|-------|-------------------------|-------|-------|
| >EGFR-P694L PSGEAPNQAI  | 6441  | >EGFR-P694L LSGEAPNQAI  | 263   | 6178  |
| >EGFR-P694L PSGEAPNQAI  | 7546  | >EGFR-P694L LSGEAPNQAI  | 410   | 7136  |
| >EGFR-P694L TPSGEAPNQ/  | 27024 | >EGFR-P694L TLSGEAPNQ/  | 312   | 26712 |
| >EGFR-P694L TPSGEAPNQ/  | 23367 | >EGFR-P694L TLSGEAPNQ/  | 21    | 23346 |
| >EGFR-P694L TPSGEAPNQ/  | 22436 | >EGFR-P694L TLSGEAPNQ/  | 190   | 22246 |
| >EGFR-P694L TPSGEAPNQ/  | 23432 | >EGFR-P694L TLSGEAPNQ/  | 219   | 23213 |
| >EGFR-P694L TPSGEAPNQ/  | 26120 | >EGFR-P694L TLSGEAPNQ/  | 113   | 26007 |
| >EGFR-P694L TPSGEAPNQ/  | 25212 | >EGFR-P694L TLSGEAPNQ/  | 408   | 24804 |
| >EGFR-P694L TPSGEAPNQ/  | 25095 | >EGFR-P694L TLSGEAPNQ/  | 362   | 24733 |
| >EGFR-P694L TPSGEAPNQ/  | 25110 | >EGFR-P694L TLSGEAPNQ/  | 342   | 24768 |
| >EGFR-P694L TPSGEAPNQ/  | 23571 | >EGFR-P694L TLSGEAPNQ/  | 406   | 23165 |
| >EGFR-P694L TPSGEAPNQ/  | 24365 | >EGFR-P694L TLSGEAPNQ/  | 174   | 24191 |
| >EGFR-P694L TPSGEAPNQ   | 36386 | >EGFR-P694L TLSGEAPNQ   | 171   | 36215 |
| >EGFR-P694L TPSGEAPNQ/  | 33970 | >EGFR-P694L TLSGEAPNQ/  | 21    | 33949 |
| >EGFR-P694L TPSGEAPNQ/  | 29275 | >EGFR-P694L TLSGEAPNQ/  | 7     | 29268 |
| >EGFR-P694L TPSGEAPNQ/  | 99    | >EGFR-P694L TLSGEAPNQ/  | 13527 | 13428 |
| >EGFR-P694L TPSGEAPNQ/  | 144   | >EGFR-P694L TLSGEAPNQ/  | 5536  | 5392  |
| >EGFR-P694L TPSGEAPNQ/  | 28    | >EGFR-P694L TLSGEAPNQ/  | 268   | 240   |
| >EGFR-P694L QERELVEPLTI | 4457  | >EGFR-P694L QERELVEPLTI | 122   | 4335  |
| >EGFR-P694L QERELVEPLTI | 4524  | >EGFR-P694L QERELVEPLTI | 100   | 4424  |
| >EGFR-P694L QERELVEPLTI | 2149  | >EGFR-P694L QERELVEPLTI | 31    | 2118  |
| >EGFR-P694L LTPSGEAP    | 456   | >EGFR-P694L LTLSGEAP    | 27999 | 27543 |
| >EGFR-P694L LTPSGEAPNC  | 326   | >EGFR-P694L LTLSGEAPNQ  | 23696 | 23370 |
| >EGFR-P694L LTPSGEAPNC  | 333   | >EGFR-P694L LTLSGEAPNQ  | 22989 | 22656 |
| >EGFR-P694L PLTPSGEA    | 247   | >EGFR-P694L PLTLSGEA    | 2200  | 1953  |
| >EGFR-P694L EPLTPSGEA   | 294   | >EGFR-P694L EPLTLSGEA   | 603   | 309   |
| >EGFR-P694L EPLTPSGEA   | 192   | >EGFR-P694L EPLTLSGEA   | 334   | 142   |
| >EGFR-P694L VEPLTPSGEA  | 641   | >EGFR-P694L VEPLTLSGEA  | 365   | 276   |
| >EGFR-P694L ELVEPLTP    | 8335  | >EGFR-P694L ELVEPLTL    | 22    | 8313  |
| >EGFR-P694L ELVEPLTP    | 19182 | >EGFR-P694L ELVEPLTL    | 130   | 19052 |
| >EGFR-P694L ELVEPLTP    | 18786 | >EGFR-P694L ELVEPLTL    | 267   | 18519 |
| >EGFR-P694L ELVEPLTP    | 23186 | >EGFR-P694L ELVEPLTL    | 288   | 22898 |
| >EGFR-P694L ELVEPLTP    | 15153 | >EGFR-P694L ELVEPLTL    | 20    | 15133 |
| >EGFR-P694L ELVEPLTP    | 13127 | >EGFR-P694L ELVEPLTL    | 226   | 12901 |
| >EGFR-P694L ELVEPLTP    | 18575 | >EGFR-P694L ELVEPLTL    | 295   | 18280 |
| >EGFR-P694L ELVEPLTPS   | 455   | >EGFR-P694L ELVEPLTLS   | 1330  | 875   |
| >EGFR-P694L ELVEPLTP    | 10152 | >EGFR-P694L ELVEPLTL    | 58    | 10094 |
| >EGFR-P694L RELVEPLTP   | 10123 | >EGFR-P694L RELVEPLTL   | 416   | 9707  |
| >EGFR-P694L RELVEPLTP   | 4233  | >EGFR-P694L RELVEPLTL   | 32    | 4201  |
| >EGFR-P694L RELVEPLTP   | 4627  | >EGFR-P694L RELVEPLTL   | 57    | 4570  |
| >EGFR-P694L RELVEPLTP   | 2662  | >EGFR-P694L RELVEPLTL   | 15    | 2647  |
| >EGFR-P694L RELVEPLTP   | 11933 | >EGFR-P694L RELVEPLTL   | 429   | 11504 |
| >EGFR-P694L ERELVEPLTP  | 12766 | >EGFR-P694L ERELVEPLTL  | 160   | 12606 |



|                         |       |                         |       |       |
|-------------------------|-------|-------------------------|-------|-------|
| >EGFR-P694L ERELVEPLTP  | 21063 | >EGFR-P694L ERELVEPLTL  | 325   | 20738 |
| >EGFR-P694L ERELVEPLTP  | 14130 | >EGFR-P694L ERELVEPLTL  | 458   | 13672 |
| >EGFR-P694S PSGEAPNQAI  | 3137  | >EGFR-P694S SSGEAPNQAI  | 221   | 2916  |
| >EGFR-P694S PSGEAPNQAI  | 7546  | >EGFR-P694S SSGEAPNQAI  | 380   | 7166  |
| >EGFR-P694S TPSGEAPNQ/  | 99    | >EGFR-P694S TSSGEAPNQ/  | 16970 | 16871 |
| >EGFR-P694S TPSGEAPNQ/  | 20903 | >EGFR-P694S TSSGEAPNQ/  | 82    | 20821 |
| >EGFR-P694S TPSGEAPNQ/  | 144   | >EGFR-P694S TSSGEAPNQ/  | 3620  | 3476  |
| >EGFR-P694S TPSGEAPNQ/  | 28    | >EGFR-P694S TSSGEAPNQ/  | 354   | 326   |
| >EGFR-P694S LTPSGEAP    | 456   | >EGFR-P694S LTSSGEAP    | 22528 | 22072 |
| >EGFR-P694S LTPSGEAPNC  | 326   | >EGFR-P694S LTSSGEAPNQ  | 15801 | 15475 |
| >EGFR-P694S LTPSGEAPNC  | 333   | >EGFR-P694S LTSSGEAPNQ  | 16211 | 15878 |
| >EGFR-P694S PLTPSGEA    | 247   | >EGFR-P694S PLTSSGEA    | 620   | 373   |
| >EGFR-P694S EPLTPSGEA   | 294   | >EGFR-P694S EPLTSSGEA   | 737   | 443   |
| >EGFR-P694S EPLTPSGEA   | 192   | >EGFR-P694S EPLTSSGEA   | 612   | 420   |
| >EGFR-P694S ELVEPLTSS   | 455   | >EGFR-P694S ELVEPLTSS   | 1605  | 1150  |
| >EGFR-P699S APNQALLRI   | 22    | >EGFR-P699S ASNQALLRI   | 21308 | 21286 |
| >EGFR-P699S APNQALLRIL  | 329   | >EGFR-P699S ASNQALLRIL  | 30519 | 30190 |
| >EGFR-P699S APNQALLRILI | 8294  | >EGFR-P699S ASNQALLRILI | 115   | 8179  |
| >EGFR-P699S APNQALLR    | 16974 | >EGFR-P699S ASNQALLR    | 127   | 16847 |
| >EGFR-P699S APNQALLRILI | 2509  | >EGFR-P699S ASNQALLRILI | 11    | 2498  |
| >EGFR-P699S APNQALLRILI | 9539  | >EGFR-P699S ASNQALLRILI | 16    | 9523  |
| >EGFR-P699S APNQALLR    | 9533  | >EGFR-P699S ASNQALLR    | 182   | 9351  |
| >EGFR-P699S APNQALLR    | 6593  | >EGFR-P699S ASNQALLR    | 479   | 6114  |
| >EGFR-P699S APNQALLRI   | 145   | >EGFR-P699S ASNQALLRI   | 23161 | 23016 |
| >EGFR-P699S APNQALLRIL  | 109   | >EGFR-P699S ASNQALLRIL  | 21176 | 21067 |
| >EGFR-P699S APNQALLRI   | 18817 | >EGFR-P699S ASNQALLRI   | 33    | 18784 |
| >EGFR-P699S APNQALLRIL  | 20997 | >EGFR-P699S ASNQALLRIL  | 87    | 20910 |
| >EGFR-P699S APNQALLRI   | 386   | >EGFR-P699S ASNQALLRI   | 21549 | 21163 |
| >EGFR-P699S APNQALLRI   | 20848 | >EGFR-P699S ASNQALLRI   | 354   | 20494 |
| >EGFR-P699S APNQALLRIL  | 293   | >EGFR-P699S ASNQALLRIL  | 20139 | 19846 |
| >EGFR-P699S APNQALLR    | 5984  | >EGFR-P699S ASNQALLR    | 323   | 5661  |
| >EGFR-P699S APNQALLRILI | 4797  | >EGFR-P699S ASNQALLRILI | 312   | 4485  |
| >EGFR-P699S APNQALLRI   | 3473  | >EGFR-P699S ASNQALLRI   | 63    | 3410  |
| >EGFR-P699S APNQALLRIL  | 24938 | >EGFR-P699S ASNQALLRIL  | 303   | 24635 |
| >EGFR-P699S EAPNQALLR   | 26    | >EGFR-P699S EASNQALLR   | 7     | 19    |
| >EGFR-P699S EAPNQALL    | 173   | >EGFR-P699S EASNQALL    | 165   | 8     |
| >EGFR-P699S EAPNQALLRII | 136   | >EGFR-P699S EASNQALLRII | 12789 | 12653 |
| >EGFR-P699S GEAPNQALL   | 250   | >EGFR-P699S GEASNQALL   | 564   | 314   |
| >EGFR-P699S GEAPNQALLF  | 42    | >EGFR-P699S GEASNQALLF  | 70    | 28    |
| >EGFR-P699S GEAPNQAL    | 22    | >EGFR-P699S GEASNQAL    | 13    | 9     |
| >EGFR-P699S GEAPNQALL   | 54    | >EGFR-P699S GEASNQALL   | 25    | 29    |
| >EGFR-P699S GEAPNQALLF  | 227   | >EGFR-P699S GEASNQALLF  | 107   | 120   |
| >EGFR-P699S GEAPNQAL    | 187   | >EGFR-P699S GEASNQAL    | 142   | 45    |

|                         |       |                         |       |       |
|-------------------------|-------|-------------------------|-------|-------|
| >EGFR-P699S GEAPNQAL    | 731   | >EGFR-P699S GEASNQAL    | 358   | 373   |
| >EGFR-P699S GEAPNQALL   | 46    | >EGFR-P699S GEASNQALL   | 19    | 27    |
| >EGFR-P699S GEAPNQALLF  | 7     | >EGFR-P699S GEASNQALLF  | 5     | 2     |
| >EGFR-P699S TPSGEAPNQ/  | 99    | >EGFR-P699S TPSGEASNQ/  | 61    | 38    |
| >EGFR-P699S TPSGEAPNQ/  | 144   | >EGFR-P699S TPSGEASNQ/  | 116   | 28    |
| >EGFR-P699S TPSGEAPNQ/  | 28    | >EGFR-P699S TPSGEASNQ/  | 22    | 6     |
| >EGFR-P699S LTPSGEAP    | 456   | >EGFR-P699S LTPSGEAS    | 1817  | 1361  |
| >EGFR-P699S LTPSGEAPNC  | 326   | >EGFR-P699S LTPSGEASNC  | 436   | 110   |
| >EGFR-P699S LTPSGEAPNC  | 333   | >EGFR-P699S LTPSGEASNC  | 162   | 171   |
| >EGFR-P733L PEGEKVKIPV  | 932   | >EGFR-P733L LEGEKVKIPV  | 86    | 846   |
| >EGFR-P733L PEGEKVKIPV/ | 1026  | >EGFR-P733L LEGEKVKIPV/ | 241   | 785   |
| >EGFR-P733L IPEGEKVKIPV | 31260 | >EGFR-P733L ILEGEKVKIPV | 187   | 31073 |
| >EGFR-P733L IPEGEKVKIPV | 19379 | >EGFR-P733L ILEGEKVKIPV | 16    | 19363 |
| >EGFR-P733L IPEGEKVKIPV | 23469 | >EGFR-P733L ILEGEKVKIPV | 143   | 23326 |
| >EGFR-P733L IPEGEKVKIPV | 23443 | >EGFR-P733L ILEGEKVKIPV | 76    | 23367 |
| >EGFR-P733L IPEGEKVKI   | 33057 | >EGFR-P733L ILEGEKVKI   | 23    | 33034 |
| >EGFR-P733L IPEGEKVKIPV | 19851 | >EGFR-P733L ILEGEKVKIPV | 3     | 19848 |
| >EGFR-P733L IPEGEKVKIPV | 188   | >EGFR-P733L ILEGEKVKIPV | 23108 | 22920 |
| >EGFR-P733L IPEGEKVKI   | 142   | >EGFR-P733L ILEGEKVKI   | 17778 | 17636 |
| >EGFR-P733L IPEGEKVKIPV | 311   | >EGFR-P733L ILEGEKVKIPV | 30325 | 30014 |
| >EGFR-P733L WIPEGEKV    | 2791  | >EGFR-P733L WILEGEKV    | 408   | 2383  |
| >EGFR-P733L WIPEGEKV    | 298   | >EGFR-P733L WILEGEKV    | 499   | 201   |
| >EGFR-P733L WIPEGEKV    | 191   | >EGFR-P733L WILEGEKV    | 43    | 148   |
| >EGFR-P733L WIPEGEKV    | 25    | >EGFR-P733L WILEGEKV    | 5     | 20    |
| >EGFR-P733L WIPEGEKVKI  | 736   | >EGFR-P733L WILEGEKVKI  | 72    | 664   |
| >EGFR-P733L WIPEGEKV    | 1936  | >EGFR-P733L WILEGEKV    | 90    | 1846  |
| >EGFR-P733L WIPEGEKV    | 69    | >EGFR-P733L WILEGEKV    | 12    | 57    |
| >EGFR-P733L WIPEGEKVKI  | 1947  | >EGFR-P733L WILEGEKVKI  | 214   | 1733  |
| >EGFR-P733L WIPEGEKV    | 284   | >EGFR-P733L WILEGEKV    | 10    | 274   |
| >EGFR-P733L WIPEGEKVKI  | 7981  | >EGFR-P733L WILEGEKVKI  | 481   | 7500  |
| >EGFR-P733L WIPEGEKV    | 10    | >EGFR-P733L WILEGEKV    | 6     | 4     |
| >EGFR-P733L WIPEGEKVKI  | 453   | >EGFR-P733L WILEGEKVKI  | 198   | 255   |
| >EGFR-P733L WIPEGEKV    | 381   | >EGFR-P733L WILEGEKV    | 1634  | 1253  |
| >EGFR-P733L WIPEGEKV    | 1630  | >EGFR-P733L WILEGEKV    | 59    | 1571  |
| >EGFR-P733L LWIPEGEKVK  | 158   | >EGFR-P733L LWILEGEKVK  | 541   | 383   |
| >EGFR-P733L LWIPEGEKVK  | 37    | >EGFR-P733L LWILEGEKVK  | 172   | 135   |
| >EGFR-P733L LWIPEGEKV   | 270   | >EGFR-P733L LWILEGEKV   | 834   | 564   |
| >EGFR-P733L LWIPEGEKVK  | 270   | >EGFR-P733L LWILEGEKVK  | 666   | 396   |
| >EGFR-P733L GLWIPEGEKV  | 1248  | >EGFR-P733L GLWILEGEKV  | 320   | 928   |
| >EGFR-P733L GLWIPEGEKV  | 251   | >EGFR-P733L GLWILEGEKV  | 169   | 82    |
| >EGFR-P733L GLWIPEGEKV  | 329   | >EGFR-P733L GLWILEGEKV  | 244   | 85    |
| >EGFR-P733L GLWIPEGEKV  | 790   | >EGFR-P733L GLWILEGEKV  | 402   | 388   |
| >EGFR-P733L GLWIPEGEKV  | 3     | >EGFR-P733L GLWILEGEKV  | 4     | 1     |

|                         |       |                         |       |       |
|-------------------------|-------|-------------------------|-------|-------|
| >EGFR-P733L GLWIPEGEKV  | 28    | >EGFR-P733L GLWILEGEKV  | 30    | 2     |
| >EGFR-P733L GLWIPEGEKV  | 6     | >EGFR-P733L GLWILEGEKV  | 6     | 0     |
| >EGFR-P733L GLWIPEGEKV  | 87    | >EGFR-P733L GLWILEGEKV  | 90    | 3     |
| >EGFR-P733L GLWIPEGEKV  | 7     | >EGFR-P733L GLWILEGEKV  | 7     | 0     |
| >EGFR-P733L GLWIPEGEK   | 421   | >EGFR-P733L GLWILEGEK   | 743   | 322   |
| >EGFR-P733L KGLWIPEGEK  | 229   | >EGFR-P733L KGLWILEGEK  | 284   | 55    |
| >EGFR-P733L KGLWIPEGEK  | 499   | >EGFR-P733L KGLWILEGEK  | 478   | 21    |
| >EGFR-P733L VYKGLWIP    | 13267 | >EGFR-P733L VYKGLWIL    | 298   | 12969 |
| >EGFR-P733L VYKGLWIP    | 4480  | >EGFR-P733L VYKGLWIL    | 164   | 4316  |
| >EGFR-P733L VYKGLWIP    | 6926  | >EGFR-P733L VYKGLWIL    | 27    | 6899  |
| >EGFR-P733L TVYKGLWIP   | 20373 | >EGFR-P733L TVYKGLWIL   | 124   | 20249 |
| >EGFR-P733L TVYKGLWIP   | 18183 | >EGFR-P733L TVYKGLWIL   | 329   | 17854 |
| >EGFR-P733L TVYKGLWIP   | 14745 | >EGFR-P733L TVYKGLWIL   | 161   | 14584 |
| >EGFR-P733L TVYKGLWIP   | 2650  | >EGFR-P733L TVYKGLWIL   | 11    | 2639  |
| >EGFR-P733L TVYKGLWIP   | 15560 | >EGFR-P733L TVYKGLWIL   | 216   | 15344 |
| >EGFR-P733L TVYKGLWIP   | 20228 | >EGFR-P733L TVYKGLWIL   | 268   | 19960 |
| >EGFR-P733L TVYKGLWIP   | 17808 | >EGFR-P733L TVYKGLWIL   | 119   | 17689 |
| >EGFR-P733L TVYKGLWIP   | 23574 | >EGFR-P733L TVYKGLWIL   | 38    | 23536 |
| >EGFR-P733L TVYKGLWIP   | 16577 | >EGFR-P733L TVYKGLWIL   | 137   | 16440 |
| >EGFR-P733L TVYKGLWIP   | 15847 | >EGFR-P733L TVYKGLWIL   | 256   | 15591 |
| >EGFR-P733L TVYKGLWIP   | 8862  | >EGFR-P733L TVYKGLWIL   | 72    | 8790  |
| >EGFR-P733L TVYKGLWIP   | 24977 | >EGFR-P733L TVYKGLWIL   | 399   | 24578 |
| >EGFR-P733L GTVYKGLWIF  | 19137 | >EGFR-P733L GTVYKGLWIL  | 42    | 19095 |
| >EGFR-P733L GTVYKGLWIF  | 12559 | >EGFR-P733L GTVYKGLWIL  | 105   | 12454 |
| >EGFR-P733S PEGEKVKIPV  | 932   | >EGFR-P733S SEGEKVKIPV  | 81    | 851   |
| >EGFR-P733S PEGEKVKIPV  | 1026  | >EGFR-P733S SEGEKVKIPV  | 27    | 999   |
| >EGFR-P733S IPEGEKVKIPV | 188   | >EGFR-P733S ISEGEKVKIPV | 24233 | 24045 |
| >EGFR-P733S IPEGEKVKI   | 142   | >EGFR-P733S ISEGEKVKI   | 8743  | 8601  |
| >EGFR-P733S IPEGEKVKIPV | 311   | >EGFR-P733S ISEGEKVKIPV | 27985 | 27674 |
| >EGFR-P733S WIPEGEKV    | 1148  | >EGFR-P733S WISEGEKV    | 185   | 963   |
| >EGFR-P733S WIPEGEKV    | 298   | >EGFR-P733S WISEGEKV    | 84    | 214   |
| >EGFR-P733S WIPEGEKV    | 191   | >EGFR-P733S WISEGEKV    | 162   | 29    |
| >EGFR-P733S WIPEGEKV    | 25    | >EGFR-P733S WISEGEKV    | 28    | 3     |
| >EGFR-P733S WIPEGEKV    | 69    | >EGFR-P733S WISEGEKV    | 51    | 18    |
| >EGFR-P733S WIPEGEKV    | 284   | >EGFR-P733S WISEGEKV    | 47    | 237   |
| >EGFR-P733S WIPEGEKV    | 10    | >EGFR-P733S WISEGEKV    | 7     | 3     |
| >EGFR-P733S WIPEGEKVKI  | 453   | >EGFR-P733S WISEGEKVKI  | 268   | 185   |
| >EGFR-P733S WIPEGEKV    | 381   | >EGFR-P733S WISEGEKV    | 389   | 8     |
| >EGFR-P733S LWIPEGEKVK  | 158   | >EGFR-P733S LWISEGEKVK  | 119   | 39    |
| >EGFR-P733S LWIPEGEKVK  | 37    | >EGFR-P733S LWISEGEKVK  | 70    | 33    |
| >EGFR-P733S LWIPEGEKV   | 270   | >EGFR-P733S LWISEGEKV   | 450   | 180   |
| >EGFR-P733S LWIPEGEKVK  | 270   | >EGFR-P733S LWISEGEKVK  | 389   | 119   |
| >EGFR-P733S GLWIPEGEKV  | 1248  | >EGFR-P733S GLWISEGEKV  | 479   | 769   |

|                        |      |                        |       |       |
|------------------------|------|------------------------|-------|-------|
| >EGFR-P733SGLWIPEGEKV  | 251  | >EGFR-P733SGLWISEGEKV  | 144   | 107   |
| >EGFR-P733SGLWIPEGEKV  | 329  | >EGFR-P733SGLWISEGEKV  | 280   | 49    |
| >EGFR-P733SGLWIPEGEKV  | 3    | >EGFR-P733SGLWISEGEKV  | 4     | 1     |
| >EGFR-P733SGLWIPEGEKV  | 28   | >EGFR-P733SGLWISEGEKV  | 23    | 5     |
| >EGFR-P733SGLWIPEGEKV  | 6    | >EGFR-P733SGLWISEGEKV  | 6     | 0     |
| >EGFR-P733SGLWIPEGEKV  | 87   | >EGFR-P733SGLWISEGEKV  | 56    | 31    |
| >EGFR-P733SGLWIPEGEKV  | 7    | >EGFR-P733SGLWISEGEKV  | 6     | 1     |
| >EGFR-P733SGLWIPEGEK   | 421  | >EGFR-P733SGLWISEGEK   | 360   | 61    |
| >EGFR-P733SKGLWIPEGEK  | 229  | >EGFR-P733SKGLWISEGEK  | 352   | 123   |
| >EGFR-P733SKGLWIPEGEK  | 499  | >EGFR-P733SKGLWISEGEK  | 427   | 72    |
| >EGFR-P733IPEGEKVKIPV  | 932  | >EGFR-P733ITEGEKVKIPV  | 86    | 846   |
| >EGFR-P733IPEGEKVKIPV, | 1026 | >EGFR-P733ITEGEKVKIPV, | 68    | 958   |
| >EGFR-P733IPEGEKVKIPV  | 188  | >EGFR-P733ITEGEKVKIPV  | 22705 | 22517 |
| >EGFR-P733IPEGEKVKI    | 142  | >EGFR-P733ITEGEKVKI    | 11251 | 11109 |
| >EGFR-P733IPEGEKVKIPV  | 311  | >EGFR-P733ITEGEKVKIPV  | 28609 | 28298 |
| >EGFR-P733IWIPEGEKV    | 298  | >EGFR-P733IWITEGEKV    | 413   | 115   |
| >EGFR-P733IWIPEGEKV    | 191  | >EGFR-P733IWITEGEKV    | 158   | 33    |
| >EGFR-P733IWIPEGEKV    | 25   | >EGFR-P733IWITEGEKV    | 37    | 12    |
| >EGFR-P733IWIPEGEKV    | 69   | >EGFR-P733IWITEGEKV    | 41    | 28    |
| >EGFR-P733IWIPEGEKV    | 284  | >EGFR-P733IWITEGEKV    | 188   | 96    |
| >EGFR-P733IWIPEGEKV    | 10   | >EGFR-P733IWITEGEKV    | 6     | 4     |
| >EGFR-P733IWIPEGEKVKI  | 453  | >EGFR-P733IWITEGEKVKI  | 209   | 244   |
| >EGFR-P733IWIPEGEKV    | 381  | >EGFR-P733IWITEGEKV    | 492   | 111   |
| >EGFR-P733LWIPEGEKVK   | 158  | >EGFR-P733LWITEGEKVK   | 461   | 303   |
| >EGFR-P733LWIPEGEKVK   | 37   | >EGFR-P733LWITEGEKVK   | 207   | 170   |
| >EGFR-P733LWIPEGEKV    | 270  | >EGFR-P733LWITEGEKV    | 579   | 309   |
| >EGFR-P733LWIPEGEKVK   | 270  | >EGFR-P733LWITEGEKVK   | 494   | 224   |
| >EGFR-P733GLWIPEGEKV   | 251  | >EGFR-P733GLWITEGEKV   | 187   | 64    |
| >EGFR-P733GLWIPEGEKV   | 329  | >EGFR-P733GLWITEGEKV   | 246   | 83    |
| >EGFR-P733GLWIPEGEKV   | 790  | >EGFR-P733GLWITEGEKV   | 386   | 404   |
| >EGFR-P733GLWIPEGEKV   | 3    | >EGFR-P733GLWITEGEKV   | 3     | 0     |
| >EGFR-P733GLWIPEGEKV   | 28   | >EGFR-P733GLWITEGEKV   | 17    | 11    |
| >EGFR-P733GLWIPEGEKV   | 6    | >EGFR-P733GLWITEGEKV   | 5     | 1     |
| >EGFR-P733GLWIPEGEKV   | 87   | >EGFR-P733GLWITEGEKV   | 46    | 41    |
| >EGFR-P733GLWIPEGEKV   | 7    | >EGFR-P733GLWITEGEKV   | 6     | 1     |
| >EGFR-P733GLWIPEGEK    | 421  | >EGFR-P733GLWITEGEK    | 800   | 379   |
| >EGFR-P733KGLWIPEGEK   | 229  | >EGFR-P733KGLWITEGEK   | 362   | 133   |
| >EGFR-P733KGLWIPEGEK   | 499  | >EGFR-P733KGLWITEGEK   | 459   | 40    |
| >EGFR-P733TVYKGLWIP    | 2650 | >EGFR-P733TVYKGLWIT    | 115   | 2535  |
| >EGFR-P741F PVAIKELR   | 3344 | >EGFR-P741F HVAIKELR   | 67    | 3277  |
| >EGFR-P741F PVAIKELR   | 5378 | >EGFR-P741F HVAIKELR   | 277   | 5101  |
| >EGFR-P741F PVAIKELR   | 386  | >EGFR-P741F HVAIKELR   | 11    | 375   |
| >EGFR-P741F PVAIKELR   | 3536 | >EGFR-P741F HVAIKELR   | 169   | 3367  |

|                        |       |                        |       |       |
|------------------------|-------|------------------------|-------|-------|
| >EGFR-P741FIPVAIKEL    | 25    | >EGFR-P741FIHVAIKEL    | 23716 | 23691 |
| >EGFR-P741FIPVAIKELR   | 150   | >EGFR-P741FIHVAIKELR   | 356   | 206   |
| >EGFR-P741FIPVAIKEL    | 151   | >EGFR-P741FIHVAIKEL    | 25926 | 25775 |
| >EGFR-P741FIPVAIKEL    | 406   | >EGFR-P741FIHVAIKEL    | 21731 | 21325 |
| >EGFR-P741FIPVAIKEL    | 340   | >EGFR-P741FIHVAIKEL    | 20368 | 20028 |
| >EGFR-P741FIPVAIKELREA | 30    | >EGFR-P741FIHVAIKELREA | 12487 | 12457 |
| >EGFR-P741FIPVAIKEL    | 248   | >EGFR-P741FIHVAIKEL    | 18425 | 18177 |
| >EGFR-P741FIPVAIKEL    | 498   | >EGFR-P741FIHVAIKEL    | 25310 | 24812 |
| >EGFR-P741FIPVAIKELR   | 547   | >EGFR-P741FIHVAIKELR   | 434   | 113   |
| >EGFR-P741FKIPVAIKEL   | 8005  | >EGFR-P741FKIHVAIKEL   | 56    | 7949  |
| >EGFR-P741FKIPVAIKELR  | 11464 | >EGFR-P741FKIHVAIKELR  | 358   | 11106 |
| >EGFR-P741FKIPVAIKELR  | 78    | >EGFR-P741FKIHVAIKELR  | 45    | 33    |
| >EGFR-P741FKIPVAIKELR  | 68    | >EGFR-P741FKIHVAIKELR  | 165   | 97    |
| >EGFR-P741FKIPVAIKEL   | 331   | >EGFR-P741FKIHVAIKEL   | 20971 | 20640 |
| >EGFR-P741FKIPVAIKELR  | 66    | >EGFR-P741FKIHVAIKELR  | 49    | 17    |
| >EGFR-P741FKVIPVAIK    | 662   | >EGFR-P741FKVIHVAIK    | 484   | 178   |
| >EGFR-P741FKVIPVAIKEL  | 87    | >EGFR-P741FKVIHVAIKEL  | 51    | 36    |
| >EGFR-P741FKVKIPVAI    | 641   | >EGFR-P741FKVKIHVAI    | 238   | 403   |
| >EGFR-P741FKVKIPVAIKEL | 1724  | >EGFR-P741FKVKIHVAIKEL | 370   | 1354  |
| >EGFR-P741FKVKIPVAIK   | 124   | >EGFR-P741FKVKIHVAIK   | 78    | 46    |
| >EGFR-P741FKVKIPVAIK   | 183   | >EGFR-P741FKVKIHVAIK   | 230   | 47    |
| >EGFR-P741FKVKIPVAI    | 10    | >EGFR-P741FKVKIHVAI    | 6     | 4     |
| >EGFR-P741FKVKIPVAIK   | 4     | >EGFR-P741FKVKIHVAIK   | 3     | 1     |
| >EGFR-P741FKVKIPVAIKEL | 29    | >EGFR-P741FKVKIHVAIKEL | 18    | 11    |
| >EGFR-P741FKVKIPVAIK   | 43    | >EGFR-P741FKVKIHVAIK   | 17    | 26    |
| >EGFR-P741FKVKIPVAI    | 71    | >EGFR-P741FKVKIHVAI    | 60    | 11    |
| >EGFR-P741FKVKIPVAIKEL | 148   | >EGFR-P741FKVKIHVAIKEL | 220   | 72    |
| >EGFR-P741FEKVKIPVAI   | 151   | >EGFR-P741FEKVKIHVAI   | 161   | 10    |
| >EGFR-P741FEKVKIPVAI   | 444   | >EGFR-P741FEKVKIHVAI   | 750   | 306   |
| >EGFR-P741FGEKVKIPVAI  | 501   | >EGFR-P741FGEKVKIHVAI  | 362   | 139   |
| >EGFR-P741FGEKVKIPV    | 101   | >EGFR-P741FGEKVKIHV    | 875   | 774   |
| >EGFR-P741FGEKVKIPVA   | 118   | >EGFR-P741FGEKVKIHVA   | 164   | 46    |
| >EGFR-P741FGEKVKIPVAI  | 188   | >EGFR-P741FGEKVKIHVAI  | 173   | 15    |
| >EGFR-P741FGEKVKIPV    | 155   | >EGFR-P741FGEKVKIHV    | 418   | 263   |
| >EGFR-P741FGEKVKIPVA   | 26    | >EGFR-P741FGEKVKIHVA   | 25    | 1     |
| >EGFR-P741FGEKVKIPVA   | 132   | >EGFR-P741FGEKVKIHVA   | 1066  | 934   |
| >EGFR-P741FGEKVKIPVAI  | 45    | >EGFR-P741FGEKVKIHVAI  | 169   | 124   |
| >EGFR-P741FIPEGEKVKIPV | 188   | >EGFR-P741FIPEGEKVKIHV | 3601  | 3413  |
| >EGFR-P741FIPEGEKVKIPV | 311   | >EGFR-P741FIPEGEKVKIHV | 2388  | 2077  |
| >EGFR-P741LPVAIKELR    | 3344  | >EGFR-P741LLVAIKELR    | 152   | 3192  |
| >EGFR-P741LPVAIKELR    | 386   | >EGFR-P741LLVAIKELR    | 25    | 361   |
| >EGFR-P741LIPVAIKEL    | 25    | >EGFR-P741LILVAIKEL    | 24017 | 23992 |
| >EGFR-P741LIPVAIKEL    | 23572 | >EGFR-P741LILVAIKEL    | 278   | 23294 |

|                         |       |                         |       |       |
|-------------------------|-------|-------------------------|-------|-------|
| >EGFR-P741L IPVAIKEL    | 16345 | >EGFR-P741L ILVAIKEL    | 28    | 16317 |
| >EGFR-P741L IPVAIKELREA | 22767 | >EGFR-P741L ILVAIKELREA | 85    | 22682 |
| >EGFR-P741L IPVAIKEL    | 20929 | >EGFR-P741L ILVAIKEL    | 102   | 20827 |
| >EGFR-P741L IPVAIKELREA | 18508 | >EGFR-P741L ILVAIKELREA | 91    | 18417 |
| >EGFR-P741L IPVAIKEL    | 17523 | >EGFR-P741L ILVAIKEL    | 420   | 17103 |
| >EGFR-P741L IPVAIKEL    | 23826 | >EGFR-P741L ILVAIKEL    | 20    | 23806 |
| >EGFR-P741L IPVAIKELREA | 27818 | >EGFR-P741L ILVAIKELREA | 138   | 27680 |
| >EGFR-P741L IPVAIKEL    | 25181 | >EGFR-P741L ILVAIKEL    | 456   | 24725 |
| >EGFR-P741L IPVAIKEL    | 26034 | >EGFR-P741L ILVAIKEL    | 254   | 25780 |
| >EGFR-P741L IPVAIKEL    | 30449 | >EGFR-P741L ILVAIKEL    | 6     | 30443 |
| >EGFR-P741L IPVAIKELREA | 35581 | >EGFR-P741L ILVAIKELREA | 58    | 35523 |
| >EGFR-P741L IPVAIKELR   | 3090  | >EGFR-P741L ILVAIKELR   | 49    | 3041  |
| >EGFR-P741L IPVAIKELR   | 3431  | >EGFR-P741L ILVAIKELR   | 432   | 2999  |
| >EGFR-P741L IPVAIKELR   | 150   | >EGFR-P741L ILVAIKELR   | 25    | 125   |
| >EGFR-P741L IPVAIKEL    | 151   | >EGFR-P741L ILVAIKEL    | 21341 | 21190 |
| >EGFR-P741L IPVAIKEL    | 406   | >EGFR-P741L ILVAIKEL    | 17367 | 16961 |
| >EGFR-P741L IPVAIKEL    | 340   | >EGFR-P741L ILVAIKEL    | 28280 | 27940 |
| >EGFR-P741L IPVAIKELREA | 30    | >EGFR-P741L ILVAIKELREA | 20868 | 20838 |
| >EGFR-P741L IPVAIKEL    | 248   | >EGFR-P741L ILVAIKEL    | 11773 | 11525 |
| >EGFR-P741L IPVAIKEL    | 498   | >EGFR-P741L ILVAIKEL    | 25444 | 24946 |
| >EGFR-P741L IPVAIKELR   | 547   | >EGFR-P741L ILVAIKELR   | 131   | 416   |
| >EGFR-P741L WIPEGEKVKII | 28058 | >EGFR-P741L WIPEGEKVKII | 395   | 27663 |
| >EGFR-P741L KIPVAIKEL   | 1025  | >EGFR-P741L KILVAIKEL   | 227   | 798   |
| >EGFR-P741L KIPVAIKEL   | 2379  | >EGFR-P741L KILVAIKEL   | 303   | 2076  |
| >EGFR-P741L KIPVAIKEL   | 3785  | >EGFR-P741L KILVAIKEL   | 459   | 3326  |
| >EGFR-P741L KIPVAIKELR  | 78    | >EGFR-P741L KILVAIKELR  | 25    | 53    |
| >EGFR-P741L KIPVAIKELR  | 68    | >EGFR-P741L KILVAIKELR  | 161   | 93    |
| >EGFR-P741L KIPVAIKEL   | 331   | >EGFR-P741L KILVAIKEL   | 23823 | 23492 |
| >EGFR-P741L KIPVAIKELR  | 66    | >EGFR-P741L KILVAIKELR  | 36    | 30    |
| >EGFR-P741L VKIPVAIKEL  | 87    | >EGFR-P741L VKILVAIKEL  | 219   | 132   |
| >EGFR-P741L KVKIPVAI    | 641   | >EGFR-P741L KVKILVAI    | 232   | 409   |
| >EGFR-P741L KVKIPVAIK   | 124   | >EGFR-P741L KVKILVAIK   | 195   | 71    |
| >EGFR-P741L KVKIPVAIK   | 183   | >EGFR-P741L KVKILVAIK   | 171   | 12    |
| >EGFR-P741L KVKIPVAI    | 10    | >EGFR-P741L KVKILVAI    | 10    | 0     |
| >EGFR-P741L KVKIPVAIK   | 4     | >EGFR-P741L KVKILVAIK   | 4     | 0     |
| >EGFR-P741L KVKIPVAIKEL | 29    | >EGFR-P741L KVKILVAIKEL | 26    | 3     |
| >EGFR-P741L KVKIPVAIK   | 43    | >EGFR-P741L KVKILVAIK   | 23    | 20    |
| >EGFR-P741L KVKIPVAI    | 71    | >EGFR-P741L KVKILVAI    | 48    | 23    |
| >EGFR-P741L KVKIPVAIKEL | 148   | >EGFR-P741L KVKILVAIKEL | 279   | 131   |
| >EGFR-P741L EKVKIPVAI   | 151   | >EGFR-P741L EKVKILVAI   | 330   | 179   |
| >EGFR-P741L EKVKIPVAI   | 444   | >EGFR-P741L EKVKILVAI   | 2017  | 1573  |
| >EGFR-P741L GEKVKIPV    | 1681  | >EGFR-P741L GEKVKILV    | 196   | 1485  |
| >EGFR-P741L GEKVKIPVAI  | 501   | >EGFR-P741L GEKVKILVAI  | 177   | 324   |

|                         |       |                         |       |       |
|-------------------------|-------|-------------------------|-------|-------|
| >EGFR-P741L GEKVKIPV    | 101   | >EGFR-P741L GEKVKILV    | 481   | 380   |
| >EGFR-P741L GEKVKIPVA   | 118   | >EGFR-P741L GEKVKILVA   | 121   | 3     |
| >EGFR-P741L GEKVKIPVAI  | 188   | >EGFR-P741L GEKVKILVAI  | 173   | 15    |
| >EGFR-P741L GEKVKIPV    | 155   | >EGFR-P741L GEKVKILV    | 450   | 295   |
| >EGFR-P741L GEKVKIPVA   | 26    | >EGFR-P741L GEKVKILVA   | 41    | 15    |
| >EGFR-P741L GEKVKIPVA   | 132   | >EGFR-P741L GEKVKILVA   | 677   | 545   |
| >EGFR-P741L GEKVKIPVAI  | 45    | >EGFR-P741L GEKVKILVAI  | 52    | 7     |
| >EGFR-P741L PEGEKVKIPV  | 932   | >EGFR-P741L PEGEKVKILV  | 465   | 467   |
| >EGFR-P741L IPEGEKVKIPV | 188   | >EGFR-P741L IPEGEKVKILV | 3763  | 3575  |
| >EGFR-P741L IPEGEKVKIPV | 1319  | >EGFR-P741L IPEGEKVKILV | 496   | 823   |
| >EGFR-P741L IPEGEKVKIPV | 311   | >EGFR-P741L IPEGEKVKILV | 800   | 489   |
| >EGFR-P753F PKANKEIL    | 3170  | >EGFR-P753F FKANKEIL    | 92    | 3078  |
| >EGFR-P753F PKANKEIL    | 16953 | >EGFR-P753F FKANKEIL    | 324   | 16629 |
| >EGFR-P753F SPKANKEI    | 5123  | >EGFR-P753F SFKANKEI    | 268   | 4855  |
| >EGFR-P753F SPKANKEI    | 133   | >EGFR-P753F SFKANKEI    | 35131 | 34998 |
| >EGFR-P753F SPKANKEIL   | 187   | >EGFR-P753F SFKANKEIL   | 37335 | 37148 |
| >EGFR-P753F SPKANKEIL   | 193   | >EGFR-P753F SFKANKEIL   | 22511 | 22318 |
| >EGFR-P753F AIKELREATSP | 20379 | >EGFR-P753F AIKELREATSF | 440   | 19939 |
| >EGFR-P753F AIKELREATSP | 12551 | >EGFR-P753F AIKELREATSF | 83    | 12468 |
| >EGFR-P753F AIKELREATSP | 14587 | >EGFR-P753F AIKELREATSF | 104   | 14483 |
| >EGFR-P753F TSPKANKEI   | 1678  | >EGFR-P753F TSFKANKEI   | 286   | 1392  |
| >EGFR-P753F TSPKANKEI   | 8254  | >EGFR-P753F TSFKANKEI   | 452   | 7802  |
| >EGFR-P753F TSPKANKEI   | 11628 | >EGFR-P753F TSFKANKEI   | 291   | 11337 |
| >EGFR-P753F TSPKANKEIL  | 11693 | >EGFR-P753F TSFKANKEIL  | 387   | 11306 |
| >EGFR-P753F TSPKANKEI   | 54    | >EGFR-P753F TSFKANKEI   | 8880  | 8826  |
| >EGFR-P753F TSPKANKEIL  | 9     | >EGFR-P753F TSFKANKEIL  | 2231  | 2222  |
| >EGFR-P753F TSPKANKEI   | 159   | >EGFR-P753F TSFKANKEI   | 37    | 122   |
| >EGFR-P753F ATSPKANK    | 145   | >EGFR-P753F ATSFKANK    | 122   | 23    |
| >EGFR-P753F ATSPKANK    | 29    | >EGFR-P753F ATSFKANK    | 18    | 11    |
| >EGFR-P753F ATSPKANK    | 36    | >EGFR-P753F ATSFKANK    | 36    | 0     |
| >EGFR-P753F ATSPKANK    | 389   | >EGFR-P753F ATSFKANK    | 395   | 6     |
| >EGFR-P753F ATSPKANKEI  | 1387  | >EGFR-P753F ATSFKANKEI  | 399   | 988   |
| >EGFR-P753F ATSPKANK    | 445   | >EGFR-P753F ATSFKANK    | 95    | 350   |
| >EGFR-P753F ATSPKANKEI  | 35    | >EGFR-P753F ATSFKANKEI  | 103   | 68    |
| >EGFR-P753F ATSPKANKEIL | 55    | >EGFR-P753F ATSFKANKEIL | 170   | 115   |
| >EGFR-P753F ATSPKANKEIL | 468   | >EGFR-P753F ATSFKANKEIL | 1662  | 1194  |
| >EGFR-P753F ATSPKANKEI  | 347   | >EGFR-P753F ATSFKANKEI  | 135   | 212   |
| >EGFR-P753F ATSPKANKEIL | 295   | >EGFR-P753F ATSFKANKEIL | 249   | 46    |
| >EGFR-P753F ATSPKANK    | 121   | >EGFR-P753F ATSFKANK    | 115   | 6     |
| >EGFR-P753F EATSPKANK   | 18    | >EGFR-P753F EATSFKANK   | 5     | 13    |
| >EGFR-P753F EATSPKANKE  | 158   | >EGFR-P753F EATSFKANKE  | 151   | 7     |
| >EGFR-P753F EATSPKANKE  | 549   | >EGFR-P753F EATSFKANKE  | 435   | 114   |
| >EGFR-P753F REATSPKA    | 39    | >EGFR-P753F REATSFKA    | 14    | 25    |

|                         |       |                         |       |       |
|-------------------------|-------|-------------------------|-------|-------|
| >EGFR-P753F REATSPKAN   | 1635  | >EGFR-P753F REATSFKAN   | 168   | 1467  |
| >EGFR-P753F ELREATSPKA  | 122   | >EGFR-P753F ELREATSFKA  | 89    | 33    |
| >EGFR-P753F ELREATSPK   | 226   | >EGFR-P753F ELREATSFK   | 78    | 148   |
| >EGFR-P753F ELREATSP    | 19331 | >EGFR-P753F ELREATSF    | 293   | 19038 |
| >EGFR-P753F ELREATSPK   | 86    | >EGFR-P753F ELREATSFK   | 50    | 36    |
| >EGFR-P753F ELREATSPK   | 517   | >EGFR-P753F ELREATSFK   | 169   | 348   |
| >EGFR-P753F ELREATSPK   | 139   | >EGFR-P753F ELREATSFK   | 20    | 119   |
| >EGFR-P753F ELREATSP    | 13941 | >EGFR-P753F ELREATSF    | 102   | 13839 |
| >EGFR-P753F ELREATSP    | 25224 | >EGFR-P753F ELREATSF    | 212   | 25012 |
| >EGFR-P753F ELREATSP    | 16984 | >EGFR-P753F ELREATSF    | 45    | 16939 |
| >EGFR-P753F KELREATSP   | 19656 | >EGFR-P753F KELREATSF   | 221   | 19435 |
| >EGFR-P753F KELREATSP   | 7522  | >EGFR-P753F KELREATSF   | 11    | 7511  |
| >EGFR-P753F KELREATSP   | 21779 | >EGFR-P753F KELREATSF   | 373   | 21406 |
| >EGFR-P753F KELREATSP   | 3397  | >EGFR-P753F KELREATSF   | 139   | 3258  |
| >EGFR-P753F KELREATSPK/ | 449   | >EGFR-P753F KELREATSFK/ | 390   | 59    |
| >EGFR-P753F KELREATSP   | 11743 | >EGFR-P753F KELREATSF   | 470   | 11273 |
| >EGFR-P753F KELREATSP   | 10859 | >EGFR-P753F KELREATSF   | 121   | 10738 |
| >EGFR-P753F KELREATSPK/ | 71    | >EGFR-P753F KELREATSFK/ | 41    | 30    |
| >EGFR-P753F KELREATSP   | 4991  | >EGFR-P753F KELREATSF   | 181   | 4810  |
| >EGFR-P753F KELREATSPK/ | 319   | >EGFR-P753F KELREATSFK/ | 320   | 1     |
| >EGFR-P753F IKELREATSP  | 15002 | >EGFR-P753F IKELREATSF  | 39    | 14963 |
| >EGFR-P753S PKANKEIL    | 3170  | >EGFR-P753S SKANKEIL    | 457   | 2713  |
| >EGFR-P753S SPKANKEI    | 133   | >EGFR-P753S SSKANKEI    | 26351 | 26218 |
| >EGFR-P753S SPKANKEIL   | 187   | >EGFR-P753S SSKANKEIL   | 29939 | 29752 |
| >EGFR-P753S SPKANKEI    | 15297 | >EGFR-P753S SSKANKEI    | 144   | 15153 |
| >EGFR-P753S SPKANKEIL   | 193   | >EGFR-P753S SSKANKEIL   | 19470 | 19277 |
| >EGFR-P753S SPKANKEI    | 5753  | >EGFR-P753S SSKANKEI    | 356   | 5397  |
| >EGFR-P753S TSPKANKEI   | 54    | >EGFR-P753S TSSKANKEI   | 10686 | 10632 |
| >EGFR-P753S TSPKANKEIL  | 9     | >EGFR-P753S TSSKANKEIL  | 2155  | 2146  |
| >EGFR-P753S TSPKANKEI   | 159   | >EGFR-P753S TSSKANKEI   | 180   | 21    |
| >EGFR-P753S ATSPKANK    | 145   | >EGFR-P753S ATSSKANK    | 131   | 14    |
| >EGFR-P753S ATSPKANK    | 29    | >EGFR-P753S ATSSKANK    | 30    | 1     |
| >EGFR-P753S ATSPKANK    | 36    | >EGFR-P753S ATSSKANK    | 48    | 12    |
| >EGFR-P753S ATSPKANK    | 389   | >EGFR-P753S ATSSKANK    | 373   | 16    |
| >EGFR-P753S ATSPKANK    | 445   | >EGFR-P753S ATSSKANK    | 168   | 277   |
| >EGFR-P753S ATSPKANKEI  | 35    | >EGFR-P753S ATSSKANKEI  | 129   | 94    |
| >EGFR-P753S ATSPKANKEIL | 55    | >EGFR-P753S ATSSKANKEIL | 228   | 173   |
| >EGFR-P753S ATSPKANKEIL | 468   | >EGFR-P753S ATSSKANKEIL | 623   | 155   |
| >EGFR-P753S ATSPKANKEI  | 347   | >EGFR-P753S ATSSKANKEI  | 253   | 94    |
| >EGFR-P753S ATSPKANKEIL | 295   | >EGFR-P753S ATSSKANKEIL | 135   | 160   |
| >EGFR-P753S ATSPKANK    | 121   | >EGFR-P753S ATSSKANK    | 129   | 8     |
| >EGFR-P753S EATSPKANK   | 18    | >EGFR-P753S EATSSKANK   | 8     | 10    |
| >EGFR-P753S EATSPKANKE  | 158   | >EGFR-P753S EATSSKANKE  | 322   | 164   |



|                         |       |                         |       |       |
|-------------------------|-------|-------------------------|-------|-------|
| >EGFR-P753S REATSPKA    | 39    | >EGFR-P753S REATSSKA    | 54    | 15    |
| >EGFR-P753S ELREATSPKA  | 122   | >EGFR-P753S ELREATSSKA  | 185   | 63    |
| >EGFR-P753S ELREATSPK   | 226   | >EGFR-P753S ELREATSSK   | 215   | 11    |
| >EGFR-P753S ELREATSPK   | 86    | >EGFR-P753S ELREATSSK   | 184   | 98    |
| >EGFR-P753S ELREATSPK   | 139   | >EGFR-P753S ELREATSSK   | 110   | 29    |
| >EGFR-P753S KELREATSPK/ | 449   | >EGFR-P753S KELREATSSK/ | 587   | 138   |
| >EGFR-P753S KELREATSPK/ | 71    | >EGFR-P753S KELREATSSK/ | 130   | 59    |
| >EGFR-P753S KELREATSPK/ | 319   | >EGFR-P753S KELREATSSK/ | 539   | 220   |
| >EGFR-P848L PQHVKITDFG  | 5725  | >EGFR-P848L LQHVKITDFG  | 107   | 5618  |
| >EGFR-P848L PQHVKITDF   | 3811  | >EGFR-P848L LQHVKITDF   | 88    | 3723  |
| >EGFR-P848L PQHVKITDF   | 82    | >EGFR-P848L LQHVKITDF   | 6     | 76    |
| >EGFR-P848L PQHVKITDFG  | 3901  | >EGFR-P848L LQHVKITDFG  | 384   | 3517  |
| >EGFR-P848L TPQHVKITDF  | 80    | >EGFR-P848L TLQHVKITDF  | 28200 | 28120 |
| >EGFR-P848L TPQHVKITDF  | 125   | >EGFR-P848L TLQHVKITDF  | 26422 | 26297 |
| >EGFR-P848L TPQHVKITDF  | 234   | >EGFR-P848L TLQHVKITDF  | 20891 | 20657 |
| >EGFR-P848L LAARNVLVKT  | 16914 | >EGFR-P848L LAARNVLVKT  | 158   | 16756 |
| >EGFR-P848L LAARNVLVKT  | 14027 | >EGFR-P848L LAARNVLVKT  | 261   | 13766 |
| >EGFR-P848L KTPQHVKI    | 2932  | >EGFR-P848L KTLQHVKI    | 418   | 2514  |
| >EGFR-P848L KTPQHVKITD  | 461   | >EGFR-P848L KTLQHVKITD  | 314   | 147   |
| >EGFR-P848L KTPQHVKI    | 2714  | >EGFR-P848L KTLQHVKI    | 147   | 2567  |
| >EGFR-P848L KTPQHVKI    | 23    | >EGFR-P848L KTLQHVKI    | 8     | 15    |
| >EGFR-P848L KTPQHVKITD  | 41    | >EGFR-P848L KTLQHVKITD  | 14    | 27    |
| >EGFR-P848L KTPQHVKITD  | 693   | >EGFR-P848L KTLQHVKITD  | 49    | 644   |
| >EGFR-P848L KTPQHVKI    | 299   | >EGFR-P848L KTLQHVKI    | 8     | 291   |
| >EGFR-P848L KTPQHVKITD  | 44    | >EGFR-P848L KTLQHVKITD  | 4     | 40    |
| >EGFR-P848L KTPQHVKITD  | 4515  | >EGFR-P848L KTLQHVKITD  | 423   | 4092  |
| >EGFR-P848L KTPQHVKI    | 10935 | >EGFR-P848L KTLQHVKI    | 206   | 10729 |
| >EGFR-P848L KTPQHVKITD  | 7293  | >EGFR-P848L KTLQHVKITD  | 104   | 7189  |
| >EGFR-P848L KTPQHVKI    | 33    | >EGFR-P848L KTLQHVKI    | 12634 | 12601 |
| >EGFR-P848L KTPQHVKIT   | 77    | >EGFR-P848L KTLQHVKIT   | 15227 | 15150 |
| >EGFR-P848L KTPQHVKITD  | 7     | >EGFR-P848L KTLQHVKITD  | 4599  | 4592  |
| >EGFR-P848L KTPQHVKITD  | 3401  | >EGFR-P848L KTLQHVKITD  | 167   | 3234  |
| >EGFR-P848L KTPQHVKI    | 51    | >EGFR-P848L KTLQHVKI    | 29    | 22    |
| >EGFR-P848L VKTPQHVKI   | 395   | >EGFR-P848L VKTLQHVKI   | 1227  | 832   |
| >EGFR-P848L LVKTPQHV    | 262   | >EGFR-P848L LVKTLQHV    | 104   | 158   |
| >EGFR-P848L LVKTPQHV    | 42    | >EGFR-P848L LVKTLQHV    | 23    | 19    |
| >EGFR-P848L LVKTPQHVK   | 322   | >EGFR-P848L LVKTLQHVK   | 642   | 320   |
| >EGFR-P848L LVKTPQHVK   | 207   | >EGFR-P848L LVKTLQHVK   | 294   | 87    |
| >EGFR-P848L LVKTPQHV    | 173   | >EGFR-P848L LVKTLQHV    | 161   | 12    |
| >EGFR-P848L LVKTPQHVK   | 15    | >EGFR-P848L LVKTLQHVK   | 14    | 1     |
| >EGFR-P848L LVKTPQHVKI  | 126   | >EGFR-P848L LVKTLQHVKI  | 124   | 2     |
| >EGFR-P848L LVKTPQHVK   | 399   | >EGFR-P848L LVKTLQHVK   | 160   | 239   |
| >EGFR-P848L LVKTPQHVK   | 357   | >EGFR-P848L LVKTLQHVK   | 363   | 6     |

|                        |       |                         |     |       |
|------------------------|-------|-------------------------|-----|-------|
| >EGFR-P848L VLVKTPQHV  | 476   | >EGFR-P848L VLVKTLQHV   | 137 | 339   |
| >EGFR-P848L VLVKTPQHV  | 215   | >EGFR-P848L VLVKTLQHV   | 53  | 162   |
| >EGFR-P848L VLVKTPQHVK | 703   | >EGFR-P848L VLVKTLQHVK  | 424 | 279   |
| >EGFR-P848L VLVKTPQHV  | 22    | >EGFR-P848L VLVKTLQHV   | 11  | 11    |
| >EGFR-P848L VLVKTPQHVK | 269   | >EGFR-P848L VLVKTLQHVK  | 205 | 64    |
| >EGFR-P848L VLVKTPQHV  | 248   | >EGFR-P848L VLVKTLQHV   | 11  | 237   |
| >EGFR-P848L VLVKTPQHV  | 3     | >EGFR-P848L VLVKTLQHV   | 3   | 0     |
| >EGFR-P848L VLVKTPQHVK | 25    | >EGFR-P848L VLVKTLQHVK  | 35  | 10    |
| >EGFR-P848L VLVKTPQHV  | 6     | >EGFR-P848L VLVKTLQHV   | 4   | 2     |
| >EGFR-P848L VLVKTPQHVK | 241   | >EGFR-P848L VLVKTLQHVK  | 197 | 44    |
| >EGFR-P848L VLVKTPQHV  | 7     | >EGFR-P848L VLVKTLQHV   | 6   | 1     |
| >EGFR-P848L VLVKTPQHVK | 97    | >EGFR-P848L VLVKTLQHVK  | 110 | 13    |
| >EGFR-P848L VLVKTPQHV  | 30    | >EGFR-P848L VLVKTLQHV   | 15  | 15    |
| >EGFR-P848L VLVKTPQHV  | 3     | >EGFR-P848L VLVKTLQHV   | 2   | 1     |
| >EGFR-P848L VLVKTPQHVK | 26    | >EGFR-P848L VLVKTLQHVK  | 20  | 6     |
| >EGFR-P848L VLVKTPQHVK | 415   | >EGFR-P848L VLVKTLQHVK  | 575 | 160   |
| >EGFR-P848L NVLVKTPQH\ | 521   | >EGFR-P848L NVLVKTLQH\  | 331 | 190   |
| >EGFR-P848L NVLVKTPQH\ | 1226  | >EGFR-P848L NVLVKTLQH\  | 287 | 939   |
| >EGFR-P848L NVLVKTPQH\ | 424   | >EGFR-P848L NVLVKTLQH\  | 576 | 152   |
| >EGFR-P848L NVLVKTPQH\ | 539   | >EGFR-P848L NVLVKTLQH\  | 392 | 147   |
| >EGFR-P848L NVLVKTPQH\ | 178   | >EGFR-P848L NVLVKTLQH\  | 238 | 60    |
| >EGFR-P848L NVLVKTPQH\ | 179   | >EGFR-P848L NVLVKTLQH\  | 212 | 33    |
| >EGFR-P848L NVLVKTPQH\ | 269   | >EGFR-P848L NVLVKTLQH\  | 249 | 20    |
| >EGFR-P848L NVLVKTPQH\ | 225   | >EGFR-P848L NVLVKTLQH\  | 182 | 43    |
| >EGFR-P848L NVLVKTPQH\ | 318   | >EGFR-P848L NVLVKTLQH\  | 315 | 3     |
| >EGFR-P848L NVLVKTPQH\ | 29    | >EGFR-P848L NVLVKTLQH\  | 29  | 0     |
| >EGFR-P848L ARNVLVKTP  | 4821  | >EGFR-P848L ARNVLVKTL   | 291 | 4530  |
| >EGFR-P848L ARNVLVKTP  | 2421  | >EGFR-P848L ARNVLVKTL   | 65  | 2356  |
| >EGFR-P848L ARNVLVKTPC | 531   | >EGFR-P848L ARNVLVKTL C | 283 | 248   |
| >EGFR-P848L ARNVLVKTP  | 5692  | >EGFR-P848L ARNVLVKTL   | 153 | 5539  |
| >EGFR-P848L ARNVLVKTP  | 5860  | >EGFR-P848L ARNVLVKTL   | 21  | 5839  |
| >EGFR-P848L AARNVLVKTF | 1530  | >EGFR-P848L AARNVLVKTL  | 112 | 1418  |
| >EGFR-P848L AARNVLVKTF | 404   | >EGFR-P848L AARNVLVKTL  | 782 | 378   |
| >EGFR-P848L AARNVLVKTF | 15808 | >EGFR-P848L AARNVLVKTL  | 45  | 15763 |
| >EGFR-Q105 QIIRGNMYY   | 1109  | >EGFR-Q105 HIIRGNMYY    | 210 | 899   |
| >EGFR-Q105 QIIRGNMYY   | 156   | >EGFR-Q105 HIIRGNMYY    | 212 | 56    |
| >EGFR-Q105 QIIRGNMY    | 830   | >EGFR-Q105 HIIRGNMY     | 105 | 725   |
| >EGFR-Q105 QIIRGNMYY   | 247   | >EGFR-Q105 HIIRGNMYY    | 39  | 208   |
| >EGFR-Q105 QIIRGNMY    | 41    | >EGFR-Q105 HIIRGNMY     | 47  | 6     |
| >EGFR-Q105 QIIRGNMYY   | 22    | >EGFR-Q105 HIIRGNMYY    | 26  | 4     |
| >EGFR-Q105 QIIRGNMY    | 221   | >EGFR-Q105 HIIRGNMY     | 129 | 92    |
| >EGFR-Q105 QIIRGNMYY   | 479   | >EGFR-Q105 HIIRGNMYY    | 289 | 190   |
| >EGFR-Q105 QIIRGNMY    | 58    | >EGFR-Q105 HIIRGNMY     | 70  | 12    |

|                        |      |                        |       |       |
|------------------------|------|------------------------|-------|-------|
| >EGFR-Q105 QIIRGNMYY   | 16   | >EGFR-Q105 HIIRGNMYY   | 18    | 2     |
| >EGFR-Q105 QIIRGNMYY   | 3084 | >EGFR-Q105 HIIRGNMYY   | 228   | 2856  |
| >EGFR-Q105 QIIRGNMY    | 314  | >EGFR-Q105 HIIRGNMY    | 229   | 85    |
| >EGFR-Q105 QIIRGNMYY   | 172  | >EGFR-Q105 HIIRGNMYY   | 139   | 33    |
| >EGFR-Q105 QIIRGNMYY   | 607  | >EGFR-Q105 HIIRGNMYY   | 196   | 411   |
| >EGFR-Q105 QIIRGNMY    | 355  | >EGFR-Q105 HIIRGNMY    | 154   | 201   |
| >EGFR-Q105 QIIRGNMYY   | 32   | >EGFR-Q105 HIIRGNMYY   | 19    | 13    |
| >EGFR-Q105 QIIRGNMY    | 330  | >EGFR-Q105 HIIRGNMY    | 208   | 122   |
| >EGFR-Q105 QIIRGNMYY   | 226  | >EGFR-Q105 HIIRGNMYY   | 147   | 79    |
| >EGFR-Q105 QIIRGNMY    | 233  | >EGFR-Q105 HIIRGNMY    | 140   | 93    |
| >EGFR-Q105 QIIRGNMYY   | 280  | >EGFR-Q105 HIIRGNMYY   | 151   | 129   |
| >EGFR-Q105 QIIRGNMYY   | 713  | >EGFR-Q105 HIIRGNMYY   | 463   | 250   |
| >EGFR-Q105 QIIRGNMYY   | 1598 | >EGFR-Q105 HIIRGNMYY   | 448   | 1150  |
| >EGFR-Q105 QIIRGNMY    | 1407 | >EGFR-Q105 HIIRGNMY    | 182   | 1225  |
| >EGFR-Q105 LQIIRGNMYY  | 296  | >EGFR-Q105 LHIIRGNMYY  | 7731  | 7435  |
| >EGFR-Q105 LQIIRGNMYY  | 426  | >EGFR-Q105 LHIIRGNMYY  | 22672 | 22246 |
| >EGFR-Q105 LQIIRGNMY   | 425  | >EGFR-Q105 LHIIRGNMY   | 353   | 72    |
| >EGFR-Q105 LQIIRGNMYY  | 221  | >EGFR-Q105 LHIIRGNMYY  | 361   | 140   |
| >EGFR-Q105 LQIIRGNMY   | 245  | >EGFR-Q105 LHIIRGNMY   | 787   | 542   |
| >EGFR-Q105 LQIIRGNMYY  | 59   | >EGFR-Q105 LHIIRGNMYY  | 283   | 224   |
| >EGFR-Q105 LQIIRGNM    | 162  | >EGFR-Q105 LHIIRGNM    | 17862 | 17700 |
| >EGFR-Q105 LQIIRGNMY   | 63   | >EGFR-Q105 LHIIRGNMY   | 9760  | 9697  |
| >EGFR-Q105 LQIIRGNMYY  | 51   | >EGFR-Q105 LHIIRGNMYY  | 7514  | 7463  |
| >EGFR-Q105 LQIIRGNMY   | 206  | >EGFR-Q105 LHIIRGNMY   | 3441  | 3235  |
| >EGFR-Q105 LQIIRGNMYY  | 240  | >EGFR-Q105 LHIIRGNMYY  | 4351  | 4111  |
| >EGFR-Q105 LQIIRGNM    | 160  | >EGFR-Q105 LHIIRGNM    | 1908  | 1748  |
| >EGFR-Q105 LQIIRGNMY   | 14   | >EGFR-Q105 LHIIRGNMY   | 244   | 230   |
| >EGFR-Q105 LQIIRGNMYY  | 8    | >EGFR-Q105 LHIIRGNMYY  | 131   | 123   |
| >EGFR-Q105 LQIIRGNMYY  | 208  | >EGFR-Q105 LHIIRGNMYY  | 600   | 392   |
| >EGFR-Q105 LQIIRGNMYY  | 4478 | >EGFR-Q105 LHIIRGNMYY  | 417   | 4061  |
| >EGFR-Q105 NLQIIRGNMY  | 82   | >EGFR-Q105 NLHIIRGNMY  | 48    | 34    |
| >EGFR-Q105 NLQIIRGNMY  | 119  | >EGFR-Q105 NLHIIRGNMY  | 400   | 281   |
| >EGFR-Q105 NLQIIRGNMY  | 77   | >EGFR-Q105 NLHIIRGNMY  | 90    | 13    |
| >EGFR-Q105 NLQIIRGNMY  | 915  | >EGFR-Q105 NLHIIRGNMY  | 425   | 490   |
| >EGFR-Q105 NLQIIRGNMY  | 93   | >EGFR-Q105 NLHIIRGNMY  | 54    | 39    |
| >EGFR-Q105 NLQIIRGNMY  | 152  | >EGFR-Q105 NLHIIRGNMY  | 150   | 2     |
| >EGFR-Q105 NLQIIRGNMY  | 215  | >EGFR-Q105 NLHIIRGNMY  | 206   | 9     |
| >EGFR-Q105 ENLQIIRGNM  | 320  | >EGFR-Q105 ENLHIIRGNM  | 2024  | 1704  |
| >EGFR-Q105 ENLQIIRGNM  | 146  | >EGFR-Q105 ENLHIIRGNM  | 920   | 774   |
| >EGFR-Q105 LENLQIIRGNM | 168  | >EGFR-Q105 LENLHIIRGNM | 271   | 103   |
| >EGFR-Q105 LENLQIIRGNM | 500  | >EGFR-Q105 LENLHIIRGNM | 485   | 15    |
| >EGFR-Q105 LENLQIIRGNM | 346  | >EGFR-Q105 LENLHIIRGNM | 183   | 163   |
| >EGFR-Q105 IPLLENLQI   | 96   | >EGFR-Q105 IPLLENLHI   | 104   | 8     |

|                         |       |                         |       |       |
|-------------------------|-------|-------------------------|-------|-------|
| >EGFR-Q105 IPLLENLQII   | 582   | >EGFR-Q105 IPLLENLHII   | 53    | 529   |
| >EGFR-Q105 IPLLENLQII   | 566   | >EGFR-Q105 IPLLENLHII   | 366   | 200   |
| >EGFR-Q105 IPLLENLQI    | 85    | >EGFR-Q105 IPLLENLHI    | 72    | 13    |
| >EGFR-Q105 IPLLENLQII   | 33    | >EGFR-Q105 IPLLENLHII   | 30    | 3     |
| >EGFR-Q105 IPLLENLQI    | 134   | >EGFR-Q105 IPLLENLHI    | 108   | 26    |
| >EGFR-Q105 IPLLENLQII   | 301   | >EGFR-Q105 IPLLENLHII   | 89    | 212   |
| >EGFR-Q105 IPLLENLQII   | 431   | >EGFR-Q105 IPLLENLHII   | 72    | 359   |
| >EGFR-Q105 IPLLENLQI    | 486   | >EGFR-Q105 IPLLENLHI    | 542   | 56    |
| >EGFR-Q105 IPLLENLQIIR  | 546   | >EGFR-Q105 IPLLENLHIIR  | 247   | 299   |
| >EGFR-Q105 RIPLLENLQI   | 232   | >EGFR-Q105 RIPLLENLHI   | 946   | 714   |
| >EGFR-Q105 RIPLLENLQII  | 457   | >EGFR-Q105 RIPLLENLHII  | 446   | 11    |
| >EGFR-Q105 RIPLLENLQII  | 760   | >EGFR-Q105 RIPLLENLHII  | 197   | 563   |
| >EGFR-Q105 RIPLLENLQIIR | 43    | >EGFR-Q105 RIPLLENLHIIR | 33    | 10    |
| >EGFR-Q105 ERIPLENLQI   | 287   | >EGFR-Q105 ERIPLENLHI   | 179   | 108   |
| >EGFR-Q105 VERIPLENLQI  | 303   | >EGFR-Q105 VERIPLENLHI  | 659   | 356   |
| >EGFR-Q105 VERIPLENLQI  | 13    | >EGFR-Q105 VERIPLENLHI  | 20    | 7     |
| >EGFR-Q116·QISLDNPDY    | 190   | >EGFR-Q116·RISLDNPDY    | 469   | 279   |
| >EGFR-Q116·QISLDNPDY    | 93    | >EGFR-Q116·RISLDNPDY    | 34    | 59    |
| >EGFR-Q116·HQISLDNPDY   | 462   | >EGFR-Q116·HRISLDNPDY   | 2657  | 2195  |
| >EGFR-Q116·HQISLDNPDY   | 496   | >EGFR-Q116·HRISLDNPDY   | 2133  | 1637  |
| >EGFR-Q116·HQISLDNPDY   | 75    | >EGFR-Q116·HRISLDNPDY   | 10754 | 10679 |
| >EGFR-Q116·HQISLDNPDY   | 267   | >EGFR-Q116·HRISLDNPDY   | 5182  | 4915  |
| >EGFR-Q116·HQISLDNPDY   | 18    | >EGFR-Q116·HRISLDNPDY   | 199   | 181   |
| >EGFR-Q116·HQISLDNPDY   | 688   | >EGFR-Q116·HRISLDNPDY   | 15    | 673   |
| >EGFR-Q116·SHQISLDNPD   | 267   | >EGFR-Q116·SHRISLDNPD   | 517   | 250   |
| >EGFR-Q116·SHQISLDNPD   | 1726  | >EGFR-Q116·SHRISLDNPD   | 393   | 1333  |
| >EGFR-Q116·QKGSQISL     | 114   | >EGFR-Q116·QKGSQRISL    | 111   | 3     |
| >EGFR-Q116·AQKGSQIQI    | 327   | >EGFR-Q116·AQKGSQRIRI   | 455   | 128   |
| >EGFR-Q116·AQKGSQIQISL  | 192   | >EGFR-Q116·AQKGSQRISL   | 125   | 67    |
| >EGFR-Q116·AQKGSQIQI    | 347   | >EGFR-Q116·AQKGSQRIRI   | 571   | 224   |
| >EGFR-Q116·AQKGSQIQISL  | 94    | >EGFR-Q116·AQKGSQRISL   | 113   | 19    |
| >EGFR-Q116·AQKGSQIQI    | 190   | >EGFR-Q116·AQKGSQRIRI   | 404   | 214   |
| >EGFR-Q116·AQKGSQIQISL  | 24    | >EGFR-Q116·AQKGSQRISL   | 29    | 5     |
| >EGFR-Q116·WAQKGSQIQI   | 386   | >EGFR-Q116·WAQKGSQRIRI  | 1122  | 736   |
| >EGFR-Q116·WAQKGSQIQI   | 1662  | >EGFR-Q116·WAQKGSQRIRI  | 376   | 1286  |
| >EGFR-Q116·WAQKGSQIQI   | 375   | >EGFR-Q116·WAQKGSQRIRI  | 391   | 16    |
| >EGFR-Q116·WAQKGSQIQI   | 151   | >EGFR-Q116·WAQKGSQRIRI  | 282   | 131   |
| >EGFR-Q116·HWAQKGSQI    | 75    | >EGFR-Q116·HWAQKGSQIF   | 207   | 132   |
| >EGFR-Q116·HWAQKGSQI    | 21037 | >EGFR-Q116·HWAQKGSQIF   | 350   | 20687 |
| >EGFR-Q116·HWAQKGSQI    | 1103  | >EGFR-Q116·HWAQKGSQIF   | 18    | 1085  |
| >EGFR-Q787 QLITQLMPF    | 1090  | >EGFR-Q787 RLITQLMPF    | 247   | 843   |
| >EGFR-Q787 QLITQLMPF    | 212   | >EGFR-Q787 RLITQLMPF    | 131   | 81    |
| >EGFR-Q787 QLITQLMPFG   | 777   | >EGFR-Q787 RLITQLMPFG   | 115   | 662   |

|                        |       |                        |       |       |
|------------------------|-------|------------------------|-------|-------|
| >EGFR-Q787 QLITQLMPFG  | 533   | >EGFR-Q787 RLITQLMPFG  | 122   | 411   |
| >EGFR-Q787 QLITQLMPFG  | 502   | >EGFR-Q787 RLITQLMPFG  | 139   | 363   |
| >EGFR-Q787 QLITQLMPF   | 3149  | >EGFR-Q787 RLITQLMPF   | 499   | 2650  |
| >EGFR-Q787 QLITQLMPF   | 23    | >EGFR-Q787 RLITQLMPF   | 145   | 122   |
| >EGFR-Q787 QLITQLMPF   | 154   | >EGFR-Q787 RLITQLMPF   | 20    | 134   |
| >EGFR-Q787 QLITQLMPF   | 67    | >EGFR-Q787 RLITQLMPF   | 30    | 37    |
| >EGFR-Q787 QLITQLMPF   | 496   | >EGFR-Q787 RLITQLMPF   | 1977  | 1481  |
| >EGFR-Q787 QLITQLMPF   | 14    | >EGFR-Q787 RLITQLMPF   | 6     | 8     |
| >EGFR-Q787 QLITQLMPF   | 1374  | >EGFR-Q787 RLITQLMPF   | 75    | 1299  |
| >EGFR-Q787 VQLITQLM    | 332   | >EGFR-Q787 VRLITQLM    | 22985 | 22653 |
| >EGFR-Q787 VQLITQLMPF  | 75    | >EGFR-Q787 VRLITQLMPF  | 13382 | 13307 |
| >EGFR-Q787 VQLITQLM    | 58    | >EGFR-Q787 VRLITQLM    | 444   | 386   |
| >EGFR-Q787 VQLITQLMPF  | 3     | >EGFR-Q787 VRLITQLMPF  | 13    | 10    |
| >EGFR-Q787 VQLITQLM    | 3130  | >EGFR-Q787 VRLITQLM    | 125   | 3005  |
| >EGFR-Q787 VQLITQLMPF  | 13949 | >EGFR-Q787 VRLITQLMPF  | 244   | 13705 |
| >EGFR-Q787 VQLITQLMPF  | 10113 | >EGFR-Q787 VRLITQLMPF  | 344   | 9769  |
| >EGFR-Q787 LLGICLTSTVQ | 272   | >EGFR-Q787 LLGICLTSTVR | 9827  | 9555  |
| >EGFR-Q787 LLGICLTSTVQ | 15681 | >EGFR-Q787 LLGICLTSTVR | 352   | 15329 |
| >EGFR-Q787 LLGICLTSTVQ | 23626 | >EGFR-Q787 LLGICLTSTVR | 363   | 23263 |
| >EGFR-Q787 TVQLITQLMP  | 469   | >EGFR-Q787 TVRLITQLMP  | 298   | 171   |
| >EGFR-Q787 TVQLITQLM   | 9949  | >EGFR-Q787 TVRLITQLM   | 71    | 9878  |
| >EGFR-Q787 TVQLITQLMP  | 11545 | >EGFR-Q787 TVRLITQLMP  | 195   | 11350 |
| >EGFR-Q787 TVQLITQLMP  | 188   | >EGFR-Q787 TVRLITQLMP  | 784   | 596   |
| >EGFR-Q787 TVQLITQL    | 217   | >EGFR-Q787 TVRLITQL    | 1402  | 1185  |
| >EGFR-Q787 TVQLITQLMP  | 651   | >EGFR-Q787 TVRLITQLMP  | 328   | 323   |
| >EGFR-Q787 TVQLITQLMP  | 2000  | >EGFR-Q787 TVRLITQLMP  | 233   | 1767  |
| >EGFR-Q787 TVQLITQLM   | 410   | >EGFR-Q787 TVRLITQLM   | 79    | 331   |
| >EGFR-Q787 STVQLITQL   | 339   | >EGFR-Q787 STVRLITQL   | 480   | 141   |
| >EGFR-Q787 STVQLITQL   | 408   | >EGFR-Q787 STVRLITQL   | 574   | 166   |
| >EGFR-Q787 STVQLITQ    | 371   | >EGFR-Q787 STVRLITQ    | 504   | 133   |
| >EGFR-Q787 STVQLITQL   | 64    | >EGFR-Q787 STVRLITQL   | 67    | 3     |
| >EGFR-Q787 STVQLITQLM  | 18    | >EGFR-Q787 STVRLITQLM  | 18    | 0     |
| >EGFR-Q787 STVQLITQLM  | 139   | >EGFR-Q787 STVRLITQLM  | 582   | 443   |
| >EGFR-Q787 STVQLITQL   | 572   | >EGFR-Q787 STVRLITQL   | 456   | 116   |
| >EGFR-Q787 STVQLITQL   | 116   | >EGFR-Q787 STVRLITQL   | 90    | 26    |
| >EGFR-Q787 STVQLITQLM  | 296   | >EGFR-Q787 STVRLITQLM  | 223   | 73    |
| >EGFR-Q787 STVQLITQL   | 222   | >EGFR-Q787 STVRLITQL   | 451   | 229   |
| >EGFR-Q787 STVQLITQL   | 7     | >EGFR-Q787 STVRLITQL   | 15    | 8     |
| >EGFR-Q787 STVQLITQLM  | 18    | >EGFR-Q787 STVRLITQLM  | 52    | 34    |
| >EGFR-Q787 STVQLITQL   | 170   | >EGFR-Q787 STVRLITQL   | 412   | 242   |
| >EGFR-Q787 STVQLITQLM  | 72    | >EGFR-Q787 STVRLITQLM  | 151   | 79    |
| >EGFR-Q787 STVQLITQL   | 17    | >EGFR-Q787 STVRLITQL   | 21    | 4     |
| >EGFR-Q787 STVQLITQLM  | 24    | >EGFR-Q787 STVRLITQLM  | 19    | 5     |

|                        |       |                        |      |       |
|------------------------|-------|------------------------|------|-------|
| >EGFR-Q787 STVQLITQL   | 249   | >EGFR-Q787 STVRLITQL   | 399  | 150   |
| >EGFR-Q787 TSTVQLITQLM | 1030  | >EGFR-Q787 TSTVRLITQLM | 344  | 686   |
| >EGFR-Q787 TSTVQLITQL  | 59    | >EGFR-Q787 TSTVRLITQL  | 69   | 10    |
| >EGFR-Q787 TSTVQLITQLM | 239   | >EGFR-Q787 TSTVRLITQLM | 214  | 25    |
| >EGFR-Q787 TSTVQLITQL  | 474   | >EGFR-Q787 TSTVRLITQL  | 447  | 27    |
| >EGFR-Q787 TSTVQLITQLM | 203   | >EGFR-Q787 TSTVRLITQLM | 160  | 43    |
| >EGFR-Q787 TSTVQLITQL  | 253   | >EGFR-Q787 TSTVRLITQL  | 214  | 39    |
| >EGFR-Q787 TSTVQLITQLM | 171   | >EGFR-Q787 TSTVRLITQLM | 114  | 57    |
| >EGFR-Q787 LTSTVQLI    | 302   | >EGFR-Q787 LTSTVRLI    | 1609 | 1307  |
| >EGFR-Q787 LTSTVQLITQL | 119   | >EGFR-Q787 LTSTVRLITQL | 284  | 165   |
| >EGFR-Q787 LTSTVQLI    | 123   | >EGFR-Q787 LTSTVRLI    | 207  | 84    |
| >EGFR-Q787 LTSTVQLITQL | 223   | >EGFR-Q787 LTSTVRLITQL | 177  | 46    |
| >EGFR-Q787 LTSTVQLITQL | 49    | >EGFR-Q787 LTSTVRLITQL | 80   | 31    |
| >EGFR-Q787 LTSTVQLI    | 80    | >EGFR-Q787 LTSTVRLI    | 699  | 619   |
| >EGFR-Q787 LTSTVQLITQL | 78    | >EGFR-Q787 LTSTVRLITQL | 187  | 109   |
| >EGFR-Q787 LTSTVQLITQL | 117   | >EGFR-Q787 LTSTVRLITQL | 129  | 12    |
| >EGFR-Q787 LTSTVQLI    | 717   | >EGFR-Q787 LTSTVRLI    | 345  | 372   |
| >EGFR-Q787 LTSTVQLITQL | 30    | >EGFR-Q787 LTSTVRLITQL | 28   | 2     |
| >EGFR-Q787 LTSTVQLI    | 32    | >EGFR-Q787 LTSTVRLI    | 34   | 2     |
| >EGFR-Q787 LTSTVQLITQL | 298   | >EGFR-Q787 LTSTVRLITQL | 351  | 53    |
| >EGFR-Q787 CLTSTVQL    | 75    | >EGFR-Q787 CLTSTVRL    | 166  | 91    |
| >EGFR-Q787 CLTSTVQLI   | 187   | >EGFR-Q787 CLTSTVRLI   | 1001 | 814   |
| >EGFR-Q787 CLTSTVQL    | 312   | >EGFR-Q787 CLTSTVRL    | 550  | 238   |
| >EGFR-Q787 CLTSTVQLI   | 73    | >EGFR-Q787 CLTSTVRLI   | 144  | 71    |
| >EGFR-Q787 CLTSTVQL    | 143   | >EGFR-Q787 CLTSTVRL    | 245  | 102   |
| >EGFR-Q787 CLTSTVQLI   | 103   | >EGFR-Q787 CLTSTVRLI   | 373  | 270   |
| >EGFR-Q787 CLTSTVQL    | 364   | >EGFR-Q787 CLTSTVRL    | 581  | 217   |
| >EGFR-Q787 CLTSTVQLI   | 316   | >EGFR-Q787 CLTSTVRLI   | 2302 | 1986  |
| >EGFR-Q787 CLTSTVQL    | 227   | >EGFR-Q787 CLTSTVRL    | 843  | 616   |
| >EGFR-Q787 CLTSTVQLI   | 272   | >EGFR-Q787 CLTSTVRLI   | 3348 | 3076  |
| >EGFR-Q787 CLTSTVQL    | 77    | >EGFR-Q787 CLTSTVRL    | 326  | 249   |
| >EGFR-Q787 CLTSTVQLI   | 301   | >EGFR-Q787 CLTSTVRLI   | 2762 | 2461  |
| >EGFR-Q787 CLTSTVQL    | 7     | >EGFR-Q787 CLTSTVRL    | 14   | 7     |
| >EGFR-Q787 CLTSTVQLI   | 25    | >EGFR-Q787 CLTSTVRLI   | 715  | 690   |
| >EGFR-Q787 ICLTSTVQ    | 12278 | >EGFR-Q787 ICLTSTVR    | 102  | 12176 |
| >EGFR-Q812 QYLLNWCVQ   | 106   | >EGFR-Q812 RYLLNWCVQ   | 143  | 37    |
| >EGFR-Q812 QYLLNWCV    | 2188  | >EGFR-Q812 RYLLNWCV    | 307  | 1881  |
| >EGFR-Q812 QYLLNWCV    | 1329  | >EGFR-Q812 RYLLNWCV    | 341  | 988   |
| >EGFR-Q812 QYLLNWCV    | 681   | >EGFR-Q812 RYLLNWCV    | 172  | 509   |
| >EGFR-Q812 QYLLNWCV    | 368   | >EGFR-Q812 RYLLNWCV    | 59   | 309   |
| >EGFR-Q812 QYLLNWCVQ   | 11    | >EGFR-Q812 RYLLNWCVQ   | 6    | 5     |
| >EGFR-Q812 QYLLNWCVQ   | 2143  | >EGFR-Q812 RYLLNWCVQ   | 427  | 1716  |
| >EGFR-Q812 QYLLNWCVQ   | 5044  | >EGFR-Q812 RYLLNWCVQ   | 233  | 4811  |

|                       |       |                        |       |       |
|-----------------------|-------|------------------------|-------|-------|
| >EGFR-Q812 QYLLNWCVQ  | 3525  | >EGFR-Q812 RYLLNWCVQ   | 147   | 3378  |
| >EGFR-Q812 QYLLNWCVQ  | 2969  | >EGFR-Q812 RYLLNWCVQ   | 92    | 2877  |
| >EGFR-Q812 QYLLNWCVQ  | 2234  | >EGFR-Q812 RYLLNWCVQ   | 360   | 1874  |
| >EGFR-Q812 QYLLNWCVQ  | 302   | >EGFR-Q812 RYLLNWCVQ   | 88    | 214   |
| >EGFR-Q812 QYLLNWCV   | 512   | >EGFR-Q812 RYLLNWCV    | 242   | 270   |
| >EGFR-Q812 SQYLLNWCV  | 52    | >EGFR-Q812 SRYLLNWCV   | 121   | 69    |
| >EGFR-Q812 SQYLLNWCV  | 19    | >EGFR-Q812 SRYLLNWCV   | 13827 | 13808 |
| >EGFR-Q812 SQYLLNWCV  | 221   | >EGFR-Q812 SRYLLNWCV   | 18880 | 18659 |
| >EGFR-Q812 SQYLLNWCV  | 85    | >EGFR-Q812 SRYLLNWCV   | 6349  | 6264  |
| >EGFR-Q812 SQYLLNWC   | 418   | >EGFR-Q812 SRYLLNWC    | 19941 | 19523 |
| >EGFR-Q812 SQYLLNWCV  | 6     | >EGFR-Q812 SRYLLNWCV   | 3399  | 3393  |
| >EGFR-Q812 SQYLLNWCV  | 51    | >EGFR-Q812 SRYLLNWCV   | 7896  | 7845  |
| >EGFR-Q812 SQYLLNWCV  | 30    | >EGFR-Q812 SRYLLNWCV   | 3263  | 3233  |
| >EGFR-Q812 SQYLLNWCV  | 264   | >EGFR-Q812 SRYLLNWCV   | 9189  | 8925  |
| >EGFR-Q812 SQYLLNWCV  | 21    | >EGFR-Q812 SRYLLNWCV   | 8168  | 8147  |
| >EGFR-Q812 SQYLLNWCV  | 10    | >EGFR-Q812 SRYLLNWCV   | 412   | 402   |
| >EGFR-Q812 SQYLLNWCV  | 254   | >EGFR-Q812 SRYLLNWCV   | 11370 | 11116 |
| >EGFR-Q812 SQYLLNWCV  | 375   | >EGFR-Q812 SRYLLNWCV   | 8126  | 7751  |
| >EGFR-Q812 SQYLLNWCV  | 165   | >EGFR-Q812 SRYLLNWCV   | 4057  | 3892  |
| >EGFR-Q812 SQYLLNWCV  | 458   | >EGFR-Q812 SRYLLNWCV   | 2026  | 1568  |
| >EGFR-Q812 SQYLLNWCV  | 161   | >EGFR-Q812 SRYLLNWCV   | 851   | 690   |
| >EGFR-Q812 SQYLLNWCV  | 2091  | >EGFR-Q812 SRYLLNWCV   | 57    | 2034  |
| >EGFR-Q812 SQYLLNWCV  | 12212 | >EGFR-Q812 SRYLLNWCV   | 192   | 12020 |
| >EGFR-Q812 SQYLLNWCV  | 1724  | >EGFR-Q812 SRYLLNWCV   | 64    | 1660  |
| >EGFR-Q812 SQYLLNWCV  | 297   | >EGFR-Q812 SRYLLNWCV   | 379   | 82    |
| >EGFR-Q812 SQYLLNWCV  | 185   | >EGFR-Q812 SRYLLNWCV   | 2506  | 2321  |
| >EGFR-Q812 SQYLLNWCV  | 6479  | >EGFR-Q812 SRYLLNWCV   | 403   | 6076  |
| >EGFR-Q812 SQYLLNWCV  | 4115  | >EGFR-Q812 SRYLLNWCV   | 194   | 3921  |
| >EGFR-Q812 SQYLLNWCV  | 10019 | >EGFR-Q812 SRYLLNWCV   | 491   | 9528  |
| >EGFR-Q812 SQYLLNWCV  | 3398  | >EGFR-Q812 SRYLLNWCV   | 117   | 3281  |
| >EGFR-Q812 GSQYLLNWC  | 11301 | >EGFR-Q812 GSRYLLNWC   | 372   | 10929 |
| >EGFR-Q812 GSQYLLNW   | 29    | >EGFR-Q812 GSRYLLNW    | 10    | 19    |
| >EGFR-Q812 GSQYLLNW   | 328   | >EGFR-Q812 GSRYLLNW    | 96    | 232   |
| >EGFR-Q812 GSQYLLNW   | 47    | >EGFR-Q812 GSRYLLNW    | 229   | 182   |
| >EGFR-Q812 GSQYLLNWC  | 1563  | >EGFR-Q812 GSRYLLNWC   | 287   | 1276  |
| >EGFR-Q812 IGSQYLLNW  | 58    | >EGFR-Q812 IGSRYYLLNW  | 343   | 285   |
| >EGFR-Q812 IGSQYLLNW  | 523   | >EGFR-Q812 IGSRYYLLNW  | 324   | 199   |
| >EGFR-Q812 IGSQYLLNW  | 35    | >EGFR-Q812 IGSRYYLLNW  | 28    | 7     |
| >EGFR-Q812 IGSQYLLNW  | 1048  | >EGFR-Q812 IGSRYYLLNW  | 462   | 586   |
| >EGFR-Q812 NIGSQYLL   | 248   | >EGFR-Q812 NIGSRYYLL   | 580   | 332   |
| >EGFR-Q812 DNIGSQYLL  | 620   | >EGFR-Q812 DNIGSRYYLL  | 445   | 175   |
| >EGFR-Q812 KDNIGSQY   | 626   | >EGFR-Q812 KDNIGSRYY   | 353   | 273   |
| >EGFR-Q812 KDNIGSQYLL | 329   | >EGFR-Q812 KDNIGSRYYLL | 869   | 540   |

|                       |       |                        |      |       |
|-----------------------|-------|------------------------|------|-------|
| >EGFR-Q812 HKDNIGSQY  | 198   | >EGFR-Q812 HKDNIGSRY   | 385  | 187   |
| >EGFR-Q812 HKDNIGSQYL | 372   | >EGFR-Q812 HKDNIGSRYL  | 1118 | 746   |
| >EGFR-Q812 HKDNIGSQYL | 71    | >EGFR-Q812 HKDNIGSRYL  | 73   | 2     |
| >EGFR-Q812 HKDNIGSQY  | 125   | >EGFR-Q812 HKDNIGSRY   | 101  | 24    |
| >EGFR-Q812 REHKDNIGSC | 364   | >EGFR-Q812 REHKDNIGSR  | 489  | 125   |
| >EGFR-Q812 REHKDNIGSC | 104   | >EGFR-Q812 REHKDNIGSR  | 207  | 103   |
| >EGFR-Q812 REHKDNIGSC | 360   | >EGFR-Q812 REHKDNIGSR  | 347  | 13    |
| >EGFR-Q812 REHKDNIGSC | 362   | >EGFR-Q812 REHKDNIGSR  | 315  | 47    |
| >EGFR-Q812 REHKDNIGSC | 18559 | >EGFR-Q812 REHKDNIGSR  | 251  | 18308 |
| >EGFR-Q849 QHVKITDF   | 107   | >EGFR-Q849 LHVKITDF    | 54   | 53    |
| >EGFR-Q849 QHVKITDFGL | 380   | >EGFR-Q849 LHVKITDFGL  | 681  | 301   |
| >EGFR-Q849 QHVKITDF   | 7651  | >EGFR-Q849 LHVKITDF    | 393  | 7258  |
| >EGFR-Q849 PQHVKITDFG | 26325 | >EGFR-Q849 PLHVKITDFGI | 74   | 26251 |
| >EGFR-Q849 PQHVKITDF  | 82    | >EGFR-Q849 PLHVKITDF   | 1754 | 1672  |
| >EGFR-Q849 AARNVLVKTf | 404   | >EGFR-Q849 AARNVLVKTf  | 99   | 305   |
| >EGFR-Q849 AARNVLVKTf | 11309 | >EGFR-Q849 AARNVLVKTf  | 94   | 11215 |
| >EGFR-Q849 AARNVLVKTf | 15770 | >EGFR-Q849 AARNVLVKTf  | 283  | 15487 |
| >EGFR-Q849 TPQHVKITDF | 80    | >EGFR-Q849 TPLHVKITDF  | 30   | 50    |
| >EGFR-Q849 TPQHVKITDF | 125   | >EGFR-Q849 TPLHVKITDF  | 246  | 121   |
| >EGFR-Q849 TPQHVKITDF | 234   | >EGFR-Q849 TPLHVKITDF  | 40   | 194   |
| >EGFR-Q849 KTPQHVKITD | 461   | >EGFR-Q849 KTPLHVKITDf | 1427 | 966   |
| >EGFR-Q849 KTPQHVKI   | 23    | >EGFR-Q849 KTPLHVKI    | 30   | 7     |
| >EGFR-Q849 KTPQHVKITD | 41    | >EGFR-Q849 KTPLHVKITDf | 62   | 21    |
| >EGFR-Q849 KTPQHVKI   | 299   | >EGFR-Q849 KTPLHVKI    | 481  | 182   |
| >EGFR-Q849 KTPQHVKITD | 44    | >EGFR-Q849 KTPLHVKITDf | 62   | 18    |
| >EGFR-Q849 KTPQHVKI   | 33    | >EGFR-Q849 KTPLHVKI    | 23   | 10    |
| >EGFR-Q849 KTPQHVKIT  | 77    | >EGFR-Q849 KTPLHVKIT   | 77   | 0     |
| >EGFR-Q849 KTPQHVKITD | 7     | >EGFR-Q849 KTPLHVKITDf | 7    | 0     |
| >EGFR-Q849 KTPQHVKI   | 51    | >EGFR-Q849 KTPLHVKI    | 76   | 25    |
| >EGFR-Q849 VKTPQHVKI  | 395   | >EGFR-Q849 VKTPLHVKI   | 564  | 169   |
| >EGFR-Q849 LVKTPQHV   | 262   | >EGFR-Q849 LVKTPLHV    | 111  | 151   |
| >EGFR-Q849 LVKTPQHV   | 42    | >EGFR-Q849 LVKTPLHV    | 61   | 19    |
| >EGFR-Q849 LVKTPQHVK  | 322   | >EGFR-Q849 LVKTPLHVK   | 413  | 91    |
| >EGFR-Q849 LVKTPQHVK  | 207   | >EGFR-Q849 LVKTPLHVK   | 106  | 101   |
| >EGFR-Q849 LVKTPQHV   | 173   | >EGFR-Q849 LVKTPLHV    | 120  | 53    |
| >EGFR-Q849 LVKTPQHVK  | 15    | >EGFR-Q849 LVKTPLHVK   | 17   | 2     |
| >EGFR-Q849 LVKTPQHVKI | 126   | >EGFR-Q849 LVKTPLHVKI  | 171  | 45    |
| >EGFR-Q849 LVKTPQHVK  | 399   | >EGFR-Q849 LVKTPLHVK   | 253  | 146   |
| >EGFR-Q849 LVKTPQHVK  | 357   | >EGFR-Q849 LVKTPLHVK   | 655  | 298   |
| >EGFR-Q849 VLVKTQHV   | 476   | >EGFR-Q849 VLVKTPLHV   | 123  | 353   |
| >EGFR-Q849 VLVKTQHV   | 215   | >EGFR-Q849 VLVKTPLHV   | 395  | 180   |
| >EGFR-Q849 VLVKTQHV   | 22    | >EGFR-Q849 VLVKTPLHV   | 25   | 3     |
| >EGFR-Q849 VLVKTQHVf  | 269   | >EGFR-Q849 VLVKTPLHVK  | 283  | 14    |



|                       |       |                       |      |       |
|-----------------------|-------|-----------------------|------|-------|
| >EGFR-Q849 VLVKTQHV   | 248   | >EGFR-Q849 VLVKTPLHV  | 151  | 97    |
| >EGFR-Q849 VLVKTQHV   | 3     | >EGFR-Q849 VLVKTPLHV  | 4    | 1     |
| >EGFR-Q849 VLVKTQHVK  | 25    | >EGFR-Q849 VLVKTPLHVK | 24   | 1     |
| >EGFR-Q849 VLVKTQHV   | 6     | >EGFR-Q849 VLVKTPLHV  | 9    | 3     |
| >EGFR-Q849 VLVKTQHVK  | 241   | >EGFR-Q849 VLVKTPLHVK | 313  | 72    |
| >EGFR-Q849 VLVKTQHV   | 7     | >EGFR-Q849 VLVKTPLHV  | 7    | 0     |
| >EGFR-Q849 VLVKTQHVK  | 97    | >EGFR-Q849 VLVKTPLHVK | 76   | 21    |
| >EGFR-Q849 VLVKTQHV   | 30    | >EGFR-Q849 VLVKTPLHV  | 78   | 48    |
| >EGFR-Q849 VLVKTQHV   | 3     | >EGFR-Q849 VLVKTPLHV  | 4    | 1     |
| >EGFR-Q849 VLVKTQHVK  | 26    | >EGFR-Q849 VLVKTPLHVK | 33   | 7     |
| >EGFR-Q849 VLVKTQHVK  | 415   | >EGFR-Q849 VLVKTPLHVK | 152  | 263   |
| >EGFR-Q849 VLVKTQHVK  | 663   | >EGFR-Q849 VLVKTPLHVK | 282  | 381   |
| >EGFR-Q849 NVLVKTQHV  | 521   | >EGFR-Q849 NVLVKTPLHV | 190  | 331   |
| >EGFR-Q849 NVLVKTQHV  | 1226  | >EGFR-Q849 NVLVKTPLHV | 179  | 1047  |
| >EGFR-Q849 NVLVKTQHV  | 424   | >EGFR-Q849 NVLVKTPLHV | 620  | 196   |
| >EGFR-Q849 NVLVKTQHV  | 178   | >EGFR-Q849 NVLVKTPLHV | 192  | 14    |
| >EGFR-Q849 NVLVKTQHV  | 179   | >EGFR-Q849 NVLVKTPLHV | 391  | 212   |
| >EGFR-Q849 NVLVKTQHV  | 269   | >EGFR-Q849 NVLVKTPLHV | 515  | 246   |
| >EGFR-Q849 NVLVKTQHV  | 225   | >EGFR-Q849 NVLVKTPLHV | 132  | 93    |
| >EGFR-Q849 NVLVKTQHV  | 318   | >EGFR-Q849 NVLVKTPLHV | 334  | 16    |
| >EGFR-Q849 NVLVKTQ    | 7628  | >EGFR-Q849 NVLVKTPL   | 105  | 7523  |
| >EGFR-Q849 NVLVKTQHV  | 29    | >EGFR-Q849 NVLVKTPLHV | 25   | 4     |
| >EGFR-Q849 RNVLVKTQ   | 15791 | >EGFR-Q849 RNVLVKTPL  | 297  | 15494 |
| >EGFR-Q849 ARNVLVKTQ  | 5567  | >EGFR-Q849 ARNVLVKTPL | 377  | 5190  |
| >EGFR-Q849 ARNVLVKTQ  | 2428  | >EGFR-Q849 ARNVLVKTPL | 72   | 2356  |
| >EGFR-Q849 ARNVLVKTQ  | 531   | >EGFR-Q849 ARNVLVKTPL | 418  | 113   |
| >EGFR-Q849 ARNVLVKTQ  | 22608 | >EGFR-Q849 ARNVLVKTPL | 485  | 22123 |
| >EGFR-Q849 ARNVLVKTQ  | 3016  | >EGFR-Q849 ARNVLVKTPL | 279  | 2737  |
| >EGFR-Q849 ARNVLVKTQ  | 9691  | >EGFR-Q849 ARNVLVKTPL | 477  | 9214  |
| >EGFR-Q849 QHVKITDF   | 107   | >EGFR-Q849 RHVKITDF   | 26   | 81    |
| >EGFR-Q849 QHVKITDFGL | 8466  | >EGFR-Q849 RHVKITDFGL | 453  | 8013  |
| >EGFR-Q849 QHVKITDFGL | 380   | >EGFR-Q849 RHVKITDFGL | 494  | 114   |
| >EGFR-Q849 PQHVKITDF  | 82    | >EGFR-Q849 PRHVKITDF  | 506  | 424   |
| >EGFR-Q849 AARNVLVKTQ | 404   | >EGFR-Q849 AARNVLVKTQ | 154  | 250   |
| >EGFR-Q849 AARNVLVKTQ | 7780  | >EGFR-Q849 AARNVLVKTQ | 13   | 7767  |
| >EGFR-Q849 AARNVLVKTQ | 25686 | >EGFR-Q849 AARNVLVKTQ | 207  | 25479 |
| >EGFR-Q849 TPQHVKITDF | 80    | >EGFR-Q849 TPRHVKITDF | 1511 | 1431  |
| >EGFR-Q849 TPQHVKITDF | 125   | >EGFR-Q849 TPRHVKITDF | 57   | 68    |
| >EGFR-Q849 TPQHVKITDF | 234   | >EGFR-Q849 TPRHVKITDF | 881  | 647   |
| >EGFR-Q849 KTPQHVKITD | 461   | >EGFR-Q849 KTPRHVKITD | 450  | 11    |
| >EGFR-Q849 KTPQHVKI   | 23    | >EGFR-Q849 KTPRHVKI   | 28   | 5     |
| >EGFR-Q849 KTPQHVKITD | 41    | >EGFR-Q849 KTPRHVKITD | 51   | 10    |
| >EGFR-Q849 KTPQHVKITD | 693   | >EGFR-Q849 KTPRHVKITD | 446  | 247   |

|                       |       |                       |      |       |
|-----------------------|-------|-----------------------|------|-------|
| >EGFR-Q849 KTPQHVKI   | 299   | >EGFR-Q849 KTPRHVKI   | 990  | 691   |
| >EGFR-Q849 KTPQHVKITD | 44    | >EGFR-Q849 KTPRHVKITD | 134  | 90    |
| >EGFR-Q849 KTPQHVKI   | 33    | >EGFR-Q849 KTPRHVKI   | 37   | 4     |
| >EGFR-Q849 KTPQHVKIT  | 77    | >EGFR-Q849 KTPRHVKIT  | 220  | 143   |
| >EGFR-Q849 KTPQHVKITD | 7     | >EGFR-Q849 KTPRHVKITD | 12   | 5     |
| >EGFR-Q849 KTPQHVKI   | 51    | >EGFR-Q849 KTPRHVKI   | 63   | 12    |
| >EGFR-Q849 VKTPQHVKI  | 395   | >EGFR-Q849 VKTPRHVKI  | 494  | 99    |
| >EGFR-Q849 LVKTPQHV   | 262   | >EGFR-Q849 LVKTPRHV   | 584  | 322   |
| >EGFR-Q849 LVKTPQHV   | 42    | >EGFR-Q849 LVKTPRHV   | 362  | 320   |
| >EGFR-Q849 LVKTPQHVK  | 322   | >EGFR-Q849 LVKTPRHVK  | 356  | 34    |
| >EGFR-Q849 LVKTPQHVK  | 207   | >EGFR-Q849 LVKTPRHVK  | 136  | 71    |
| >EGFR-Q849 LVKTPQHV   | 173   | >EGFR-Q849 LVKTPRHV   | 132  | 41    |
| >EGFR-Q849 LVKTPQHVK  | 15    | >EGFR-Q849 LVKTPRHVK  | 10   | 5     |
| >EGFR-Q849 LVKTPQHVKI | 126   | >EGFR-Q849 LVKTPRHVKI | 74   | 52    |
| >EGFR-Q849 LVKTPQHVK  | 399   | >EGFR-Q849 LVKTPRHVK  | 114  | 285   |
| >EGFR-Q849 LVKTPQHVK  | 357   | >EGFR-Q849 LVKTPRHVK  | 288  | 69    |
| >EGFR-Q849 VLVKTQHV   | 476   | >EGFR-Q849 VLVKTQHV   | 2515 | 2039  |
| >EGFR-Q849 VLVKTQHV   | 215   | >EGFR-Q849 VLVKTQHV   | 1081 | 866   |
| >EGFR-Q849 VLVKTQHV   | 22    | >EGFR-Q849 VLVKTQHV   | 33   | 11    |
| >EGFR-Q849 VLVKTQHV   | 269   | >EGFR-Q849 VLVKTQHV   | 310  | 41    |
| >EGFR-Q849 VLVKTQHV   | 248   | >EGFR-Q849 VLVKTQHV   | 1890 | 1642  |
| >EGFR-Q849 VLVKTQHV   | 3     | >EGFR-Q849 VLVKTQHV   | 6    | 3     |
| >EGFR-Q849 VLVKTQHV   | 25    | >EGFR-Q849 VLVKTQHV   | 40   | 15    |
| >EGFR-Q849 VLVKTQHV   | 6     | >EGFR-Q849 VLVKTQHV   | 27   | 21    |
| >EGFR-Q849 VLVKTQHV   | 241   | >EGFR-Q849 VLVKTQHV   | 615  | 374   |
| >EGFR-Q849 VLVKTQHV   | 7     | >EGFR-Q849 VLVKTQHV   | 24   | 17    |
| >EGFR-Q849 VLVKTQHV   | 97    | >EGFR-Q849 VLVKTQHV   | 283  | 186   |
| >EGFR-Q849 VLVKTQHV   | 30    | >EGFR-Q849 VLVKTQHV   | 548  | 518   |
| >EGFR-Q849 VLVKTQHV   | 3     | >EGFR-Q849 VLVKTQHV   | 11   | 8     |
| >EGFR-Q849 VLVKTQHV   | 26    | >EGFR-Q849 VLVKTQHV   | 65   | 39    |
| >EGFR-Q849 VLVKTQHV   | 415   | >EGFR-Q849 VLVKTQHV   | 361  | 54    |
| >EGFR-Q849 NVLVKTQHV  | 521   | >EGFR-Q849 NVLVKTQHV  | 403  | 118   |
| >EGFR-Q849 NVLVKTQHV  | 424   | >EGFR-Q849 NVLVKTQHV  | 1022 | 598   |
| >EGFR-Q849 NVLVKTQHV  | 178   | >EGFR-Q849 NVLVKTQHV  | 966  | 788   |
| >EGFR-Q849 NVLVKTQHV  | 179   | >EGFR-Q849 NVLVKTQHV  | 984  | 805   |
| >EGFR-Q849 NVLVKTQHV  | 269   | >EGFR-Q849 NVLVKTQHV  | 1571 | 1302  |
| >EGFR-Q849 NVLVKTQHV  | 225   | >EGFR-Q849 NVLVKTQHV  | 178  | 47    |
| >EGFR-Q849 NVLVKTQ    | 13949 | >EGFR-Q849 NVLVKTQ    | 53   | 13896 |
| >EGFR-Q849 NVLVKTQ    | 13068 | >EGFR-Q849 NVLVKTQ    | 64   | 13004 |
| >EGFR-Q849 NVLVKTQ    | 9754  | >EGFR-Q849 NVLVKTQ    | 102  | 9652  |
| >EGFR-Q849 NVLVKTQHV  | 318   | >EGFR-Q849 NVLVKTQHV  | 306  | 12    |
| >EGFR-Q849 NVLVKTQHV  | 29    | >EGFR-Q849 NVLVKTQHV  | 86   | 57    |
| >EGFR-Q849 NVLVKTQ    | 25541 | >EGFR-Q849 NVLVKTQ    | 309  | 25232 |

|                        |       |                        |     |       |
|------------------------|-------|------------------------|-----|-------|
| >EGFR-Q849 RNVLVKTPQ   | 12287 | >EGFR-Q849 RNVLVKTPR   | 46  | 12241 |
| >EGFR-Q849 RNVLVKTPQ   | 20536 | >EGFR-Q849 RNVLVKTPR   | 107 | 20429 |
| >EGFR-Q849 ARNVLVKTPC  | 24944 | >EGFR-Q849 ARNVLVKTPF  | 369 | 24575 |
| >EGFR-Q849 ARNVLVKTPC  | 2428  | >EGFR-Q849 ARNVLVKTPF  | 230 | 2198  |
| >EGFR-R108†RGNMYYENS   | 266   | >EGFR-R108†KGNMYYENS   | 696 | 430   |
| >EGFR-R108†RGNMYYENS   | 268   | >EGFR-R108†KGNMYYENS   | 738 | 470   |
| >EGFR-R108†RGNMYYENS   | 192   | >EGFR-R108†KGNMYYENS   | 337 | 145   |
| >EGFR-R108†IRGNMYYENS  | 214   | >EGFR-R108†IKGNMYYENS  | 219 | 5     |
| >EGFR-R108†IRGNMYYENS  | 145   | >EGFR-R108†IKGNMYYENS  | 12  | 133   |
| >EGFR-R108†RIPLENLQIIR | 6210  | >EGFR-R108†RIPLENLQIIK | 478 | 5732  |
| >EGFR-R108†RIPLENLQIIR | 5771  | >EGFR-R108†RIPLENLQIIK | 265 | 5506  |
| >EGFR-R108†RIPLENLQIIR | 10282 | >EGFR-R108†RIPLENLQIIK | 359 | 9923  |
| >EGFR-R108†RIPLENLQIIR | 43    | >EGFR-R108†RIPLENLQIIK | 684 | 641   |
| >EGFR-R108†IIRGNMYY    | 244   | >EGFR-R108†IIKGNMYY    | 583 | 339   |
| >EGFR-R108†IIRGNMYY    | 240   | >EGFR-R108†IIKGNMYY    | 339 | 99    |
| >EGFR-R108†IIRGNMYY    | 19    | >EGFR-R108†IIKGNMYY    | 32  | 13    |
| >EGFR-R108†IIRGNMYY    | 65    | >EGFR-R108†IIKGNMYY    | 370 | 305   |
| >EGFR-R108†IIRGNMYY    | 61    | >EGFR-R108†IIKGNMYY    | 40  | 21    |
| >EGFR-R108†IIRGNMYY    | 301   | >EGFR-R108†IIKGNMYY    | 270 | 31    |
| >EGFR-R108†IIRGNMYY    | 167   | >EGFR-R108†IIKGNMYY    | 181 | 14    |
| >EGFR-R108†IIRGNMYY    | 294   | >EGFR-R108†IIKGNMYY    | 458 | 164   |
| >EGFR-R108†IIRGNMYY    | 82    | >EGFR-R108†IIKGNMYY    | 619 | 537   |
| >EGFR-R108†QIIRGNMYY   | 156   | >EGFR-R108†QIIKGNMYY   | 254 | 98    |
| >EGFR-R108†QIIRGNMY    | 830   | >EGFR-R108†QIIKGNMY    | 362 | 468   |
| >EGFR-R108†QIIRGNMYY   | 247   | >EGFR-R108†QIIKGNMYY   | 87  | 160   |
| >EGFR-R108†QIIRGNMY    | 41    | >EGFR-R108†QIIKGNMY    | 63  | 22    |
| >EGFR-R108†QIIRGNMYY   | 22    | >EGFR-R108†QIIKGNMYY   | 39  | 17    |
| >EGFR-R108†QIIRGNMY    | 221   | >EGFR-R108†QIIKGNMY    | 157 | 64    |
| >EGFR-R108†QIIRGNMYY   | 479   | >EGFR-R108†QIIKGNMYY   | 324 | 155   |
| >EGFR-R108†QIIRGNMY    | 58    | >EGFR-R108†QIIKGNMY    | 68  | 10    |
| >EGFR-R108†QIIRGNMYY   | 16    | >EGFR-R108†QIIKGNMYY   | 18  | 2     |
| >EGFR-R108†QIIRGNMY    | 314   | >EGFR-R108†QIIKGNMY    | 231 | 83    |
| >EGFR-R108†QIIRGNMYY   | 172   | >EGFR-R108†QIIKGNMYY   | 133 | 39    |
| >EGFR-R108†QIIRGNMY    | 355   | >EGFR-R108†QIIKGNMY    | 239 | 116   |
| >EGFR-R108†QIIRGNMYY   | 32    | >EGFR-R108†QIIKGNMYY   | 24  | 8     |
| >EGFR-R108†QIIRGNMY    | 330   | >EGFR-R108†QIIKGNMY    | 298 | 32    |
| >EGFR-R108†QIIRGNMYY   | 226   | >EGFR-R108†QIIKGNMYY   | 175 | 51    |
| >EGFR-R108†QIIRGNMY    | 233   | >EGFR-R108†QIIKGNMY    | 216 | 17    |
| >EGFR-R108†QIIRGNMYY   | 280   | >EGFR-R108†QIIKGNMYY   | 204 | 76    |
| >EGFR-R108†LQIIRGNMYY  | 296   | >EGFR-R108†LQIIKGNMYY  | 389 | 93    |
| >EGFR-R108†LQIIRGNMYY  | 426   | >EGFR-R108†LQIIKGNMYY  | 688 | 262   |
| >EGFR-R108†LQIIRGNMY   | 425   | >EGFR-R108†LQIIKGNMY   | 442 | 17    |
| >EGFR-R108†LQIIRGNMYY  | 221   | >EGFR-R108†LQIIKGNMYY  | 200 | 21    |

|                        |     |                        |       |       |
|------------------------|-----|------------------------|-------|-------|
| >EGFR-R108†LQIIRGNMY   | 245 | >EGFR-R108†LQIIKGNMY   | 181   | 64    |
| >EGFR-R108†LQIIRGNMY   | 59  | >EGFR-R108†LQIIKGNMY   | 65    | 6     |
| >EGFR-R108†LQIIRGNM    | 162 | >EGFR-R108†LQIIKGNM    | 263   | 101   |
| >EGFR-R108†LQIIRGNMY   | 63  | >EGFR-R108†LQIIKGNMY   | 72    | 9     |
| >EGFR-R108†LQIIRGNMY   | 51  | >EGFR-R108†LQIIKGNMY   | 54    | 3     |
| >EGFR-R108†LQIIRGNMY   | 206 | >EGFR-R108†LQIIKGNMY   | 419   | 213   |
| >EGFR-R108†LQIIRGNMY   | 240 | >EGFR-R108†LQIIKGNMY   | 377   | 137   |
| >EGFR-R108†LQIIRGNM    | 160 | >EGFR-R108†LQIIKGNM    | 356   | 196   |
| >EGFR-R108†LQIIRGNMY   | 14  | >EGFR-R108†LQIIKGNMY   | 26    | 12    |
| >EGFR-R108†LQIIRGNMY   | 8   | >EGFR-R108†LQIIKGNMY   | 12    | 4     |
| >EGFR-R108†LQIIRGNMY   | 208 | >EGFR-R108†LQIIKGNMY   | 302   | 94    |
| >EGFR-R108†NLQIIRGNMY  | 82  | >EGFR-R108†NLQIIKGNMY  | 112   | 30    |
| >EGFR-R108†NLQIIRGNMY  | 119 | >EGFR-R108†NLQIIKGNMY  | 129   | 10    |
| >EGFR-R108†NLQIIRGNMY  | 77  | >EGFR-R108†NLQIIKGNMY  | 104   | 27    |
| >EGFR-R108†NLQIIRGNMY  | 93  | >EGFR-R108†NLQIIKGNMY  | 91    | 2     |
| >EGFR-R108†NLQIIRGNMY  | 152 | >EGFR-R108†NLQIIKGNMY  | 172   | 20    |
| >EGFR-R108†NLQIIRGNMY  | 215 | >EGFR-R108†NLQIIKGNMY  | 190   | 25    |
| >EGFR-R108†ENLQIIRGNM  | 320 | >EGFR-R108†ENLQIIKGNM  | 626   | 306   |
| >EGFR-R108†ENLQIIRGNM  | 146 | >EGFR-R108†ENLQIIKGNM  | 201   | 55    |
| >EGFR-R108†LENLQIIRGNM | 168 | >EGFR-R108†LENLQIIKGNM | 133   | 35    |
| >EGFR-R108†LENLQIIRGNM | 346 | >EGFR-R108†LENLQIIKGNM | 636   | 290   |
| >EGFR-R222†RCRGKSPS    | 72  | >EGFR-R222†CCRGKSPS    | 3665  | 3593  |
| >EGFR-R222†RCRGKSPSD   | 170 | >EGFR-R222†CCRGKSPSD   | 3278  | 3108  |
| >EGFR-R222†KIICAQQCSGI | 200 | >EGFR-R222†KIICAQQCSGI | 18838 | 18638 |
| >EGFR-R222†KIICAQQCSGI | 57  | >EGFR-R222†KIICAQQCSGI | 31421 | 31364 |
| >EGFR-R222†QQCSGR      | 430 | >EGFR-R222†QQCSGCCR    | 437   | 7     |
| >EGFR-R222†AQQCSGR     | 765 | >EGFR-R222†AQQCSGCCR   | 434   | 331   |
| >EGFR-R222†AQQCSGR     | 797 | >EGFR-R222†AQQCSGCCR   | 309   | 488   |
| >EGFR-R222†AQQCSGR     | 257 | >EGFR-R222†AQQCSGCCR   | 185   | 72    |
| >EGFR-R222†CAQQCSGRC   | 90  | >EGFR-R222†CAQQCSGCC   | 56    | 34    |
| >EGFR-R222†CAQQCSGRC   | 957 | >EGFR-R222†CAQQCSGCC   | 217   | 740   |
| >EGFR-R222†CAQQCSGR    | 367 | >EGFR-R222†CAQQCSGC    | 41410 | 41043 |
| >EGFR-R222†IICAQQCSGR  | 144 | >EGFR-R222†IICAQQCSGC  | 28697 | 28553 |
| >EGFR-R222†IICAQQCSGR  | 208 | >EGFR-R222†IICAQQCSGC  | 26120 | 25912 |
| >EGFR-R222†IICAQQCSGR  | 383 | >EGFR-R222†IICAQQCSGC  | 37981 | 37598 |
| >EGFR-R222†IICAQQCSGR  | 182 | >EGFR-R222†IICAQQCSGC  | 34606 | 34424 |
| >EGFR-R252†RKFRDEAT    | 218 | >EGFR-R252†CKFRDEAT    | 2279  | 2061  |
| >EGFR-R252†RKFRDEATC   | 187 | >EGFR-R252†CKFRDEATC   | 1304  | 1117  |
| >EGFR-R252†RKFRDEATCK  | 35  | >EGFR-R252†CKFRDEATCK  | 400   | 365   |
| >EGFR-R252†CLVCRKFR    | 55  | >EGFR-R252†CLVCKFR     | 170   | 115   |
| >EGFR-R252†CLVCRKFR    | 125 | >EGFR-R252†CLVCKFR     | 239   | 114   |
| >EGFR-R252†CLVCRKFR    | 144 | >EGFR-R252†CLVCKFR     | 145   | 1     |
| >EGFR-R252†CLVCRKFR    | 39  | >EGFR-R252†CLVCKFR     | 28    | 11    |

|                        |       |                        |       |       |
|------------------------|-------|------------------------|-------|-------|
| >EGFR-R252(DCLVCRKFR   | 20    | >EGFR-R252(DCLVCKFR    | 28    | 8     |
| >EGFR-R252(DCLVCRKFR   | 109   | >EGFR-R252(DCLVCKFR    | 196   | 87    |
| >EGFR-R252(SDCLVCRKFR  | 48    | >EGFR-R252(SDCLVCKFR   | 138   | 90    |
| >EGFR-R252(SDCLVCRKFR  | 308   | >EGFR-R252(SDCLVCKFR   | 342   | 34    |
| >EGFR-R252(ESDCLVCRKFR | 193   | >EGFR-R252(ESDCLVCKFR  | 227   | 34    |
| >EGFR-R252(ESDCLVCR    | 41    | >EGFR-R252(ESDCLVCC    | 34927 | 34886 |
| >EGFR-R252(ESDCLVCRK   | 136   | >EGFR-R252(ESDCLVCK    | 103   | 33    |
| >EGFR-R252(ESDCLVCRKFR | 25    | >EGFR-R252(ESDCLVCKFR  | 29    | 4     |
| >EGFR-R252(RESDCLVCRK  | 196   | >EGFR-R252(RESDCLVCK   | 180   | 16    |
| >EGFR-R252(RESDCLVCRK  | 167   | >EGFR-R252(RESDCLVCK   | 289   | 122   |
| >EGFR-R252(RESDCLVCR   | 6388  | >EGFR-R252(RESDCLVCC   | 362   | 6026  |
| >EGFR-R252(RESDCLVCRK  | 92    | >EGFR-R252(RESDCLVCK   | 60    | 32    |
| >EGFR-R252(RESDCLVCRK  | 262   | >EGFR-R252(RESDCLVCK   | 195   | 67    |
| >EGFR-R252(RESDCLVCRK  | 179   | >EGFR-R252(RESDCLVCK   | 241   | 62    |
| >EGFR-R252(RESDCLVCR   | 457   | >EGFR-R252(RESDCLVCC   | 73    | 384   |
| >EGFR-R252(RESDCLVCRK  | 44    | >EGFR-R252(RESDCLVCK   | 21    | 23    |
| >EGFR-R252(RESDCLVCR   | 83    | >EGFR-R252(RESDCLVCC   | 30807 | 30724 |
| >EGFR-R324LVRKCKKCEG   | 4191  | >EGFR-R324LVLKCKKCEG   | 374   | 3817  |
| >EGFR-R324LDSYEMEEDG'  | 119   | >EGFR-R324LDSYEMEEDG'  | 18636 | 18517 |
| >EGFR-R324LDSYEMEEDG'  | 22    | >EGFR-R324LDSYEMEEDG'  | 15068 | 15046 |
| >EGFR-R324LMEEDGVRK    | 3285  | >EGFR-R324LMEEDGVLK    | 205   | 3080  |
| >EGFR-R324LMEEDGVRKC   | 492   | >EGFR-R324LMEEDGVLKC   | 163   | 329   |
| >EGFR-R324LMEEDGVR     | 200   | >EGFR-R324LMEEDGVL     | 32876 | 32676 |
| >EGFR-R324LMEEDGVRK    | 809   | >EGFR-R324LMEEDGVLK    | 298   | 511   |
| >EGFR-R324LYEMEEDGVR   | 1488  | >EGFR-R324LYEMEEDGVL   | 113   | 1375  |
| >EGFR-R324LYEMEEDGVR   | 18004 | >EGFR-R324LYEMEEDGVL   | 83    | 17921 |
| >EGFR-R324LYEMEEDGVR   | 11958 | >EGFR-R324LYEMEEDGVL   | 20    | 11938 |
| >EGFR-R324LYEMEEDGVR   | 6587  | >EGFR-R324LYEMEEDGVL   | 131   | 6456  |
| >EGFR-R324LYEMEEDGVR   | 1027  | >EGFR-R324LYEMEEDGVL   | 14    | 1013  |
| >EGFR-R324LYEMEEDGVR   | 50    | >EGFR-R324LYEMEEDGVLI  | 28    | 22    |
| >EGFR-R324LSYEMEEDGVI  | 5897  | >EGFR-R324LSYEMEEDGVI  | 125   | 5772  |
| >EGFR-R324LSYEMEEDGVI  | 228   | >EGFR-R324LSYEMEEDGVI  | 30227 | 29999 |
| >EGFR-R451FVSLNITSLGLR | 311   | >EGFR-R451FVSLNITSLGLF | 3516  | 3205  |
| >EGFR-R451FVSLNITSLGLR | 13001 | >EGFR-R451FVSLNITSLGLF | 299   | 12702 |
| >EGFR-R451FVSLNITSLGLR | 154   | >EGFR-R451FVSLNITSLGLF | 16394 | 16240 |
| >EGFR-R451FVSLNITSLGLR | 23775 | >EGFR-R451FVSLNITSLGLF | 442   | 23333 |
| >EGFR-R451FVSLNITSLGLR | 37    | >EGFR-R451FVSLNITSLGLF | 11278 | 11241 |
| >EGFR-R451FVSLNITSLGLR | 135   | >EGFR-R451FVSLNITSLGLF | 19211 | 19076 |
| >EGFR-R451FVSLNITSLGLR | 12421 | >EGFR-R451FVSLNITSLGLF | 137   | 12284 |
| >EGFR-R451FVSLNITSLGLR | 12892 | >EGFR-R451FVSLNITSLGLF | 8     | 12884 |
| >EGFR-R451FVSLNITSLGLR | 20539 | >EGFR-R451FVSLNITSLGLF | 97    | 20442 |
| >EGFR-R451FVSLNITSLGLR | 605   | >EGFR-R451FVSLNITSLGLF | 4     | 601   |
| >EGFR-R451FGLRSLKEI    | 9452  | >EGFR-R451FGLFSLKEI    | 97    | 9355  |

|                        |       |                        |      |       |
|------------------------|-------|------------------------|------|-------|
| >EGFR-R451FGLRSLKEI    | 1567  | >EGFR-R451FGLFSLKEI    | 36   | 1531  |
| >EGFR-R451FGLRSLKEI    | 202   | >EGFR-R451FGLFSLKEI    | 46   | 156   |
| >EGFR-R451FGLRSLKEI    | 602   | >EGFR-R451FGLFSLKEI    | 8    | 594   |
| >EGFR-R451FGLRSLKEI    | 2367  | >EGFR-R451FGLFSLKEI    | 54   | 2313  |
| >EGFR-R451FGLRSLKEI    | 2899  | >EGFR-R451FGLFSLKEI    | 24   | 2875  |
| >EGFR-R451FGLRSLKEI    | 143   | >EGFR-R451FGLFSLKEI    | 22   | 121   |
| >EGFR-R451FLGLRSLKEI   | 404   | >EGFR-R451FLGLFSLKEI   | 1162 | 758   |
| >EGFR-R451FSLGLRSLKEI  | 2871  | >EGFR-R451FSLGLFSLKEI  | 419  | 2452  |
| >EGFR-R451FSLGLRSLKEI  | 738   | >EGFR-R451FSLGLFSLKEI  | 141  | 597   |
| >EGFR-R451FSLGLRSLKEI  | 124   | >EGFR-R451FSLGLFSLKEI  | 37   | 87    |
| >EGFR-R451FSLGLRSLKEI  | 200   | >EGFR-R451FSLGLFSLKEI  | 53   | 147   |
| >EGFR-R451FSLGLRSLKEI  | 521   | >EGFR-R451FSLGLFSLKEI  | 303  | 218   |
| >EGFR-R451FSLGLRSLKEI  | 208   | >EGFR-R451FSLGLFSLKEI  | 108  | 100   |
| >EGFR-R451FSLGLRSLKEI  | 88    | >EGFR-R451FSLGLFSLKEI  | 64   | 24    |
| >EGFR-R451FSLGLRSLK    | 57    | >EGFR-R451FSLGLFSLK    | 62   | 5     |
| >EGFR-R451FSLGLRSLK    | 48    | >EGFR-R451FSLGLFSLK    | 18   | 30    |
| >EGFR-R451FTSLGLRSL    | 6412  | >EGFR-R451FTSLGLFSL    | 159  | 6253  |
| >EGFR-R451FTSLGLRSLK   | 129   | >EGFR-R451FTSLGLFSLK   | 86   | 43    |
| >EGFR-R451FTSLGLRSLK   | 10    | >EGFR-R451FTSLGLFSLK   | 6    | 4     |
| >EGFR-R451FTSLGLRSLK   | 148   | >EGFR-R451FTSLGLFSLK   | 377  | 229   |
| >EGFR-R451FTSLGLRSLK   | 302   | >EGFR-R451FTSLGLFSLK   | 210  | 92    |
| >EGFR-R451FTSLGLRSL    | 1281  | >EGFR-R451FTSLGLFSL    | 450  | 831   |
| >EGFR-R451FTSLGLRSLK   | 39    | >EGFR-R451FTSLGLFSLK   | 41   | 2     |
| >EGFR-R451FTSLGLRSL    | 2562  | >EGFR-R451FTSLGLFSL    | 214  | 2348  |
| >EGFR-R451FTSLGLRSL    | 71    | >EGFR-R451FTSLGLFSL    | 39   | 32    |
| >EGFR-R451FTSLGLRSLKEI | 313   | >EGFR-R451FTSLGLFSLKEI | 260  | 53    |
| >EGFR-R451FTSLGLRSL    | 334   | >EGFR-R451FTSLGLFSL    | 530  | 196   |
| >EGFR-R451FTSLGLRSLK   | 393   | >EGFR-R451FTSLGLFSLK   | 186  | 207   |
| >EGFR-R451FTSLGLRSLKEI | 643   | >EGFR-R451FTSLGLFSLKEI | 449  | 194   |
| >EGFR-R451FTSLGLRSLK   | 1883  | >EGFR-R451FTSLGLFSLK   | 114  | 1769  |
| >EGFR-R451FTSLGLRSLKEI | 202   | >EGFR-R451FTSLGLFSLKEI | 162  | 40    |
| >EGFR-R451FITSLGLRSL   | 12550 | >EGFR-R451FITSLGLFSL   | 436  | 12114 |
| >EGFR-R451FITSLGLRSL   | 2232  | >EGFR-R451FITSLGLFSL   | 106  | 2126  |
| >EGFR-R451FITSLGLRSL   | 1734  | >EGFR-R451FITSLGLFSL   | 52   | 1682  |
| >EGFR-R451FITSLGLRSLK  | 35    | >EGFR-R451FITSLGLFSLK  | 25   | 10    |
| >EGFR-R451FITSLGLRSLK  | 16    | >EGFR-R451FITSLGLFSLK  | 14   | 2     |
| >EGFR-R451FITSLGLRSLK  | 149   | >EGFR-R451FITSLGLFSLK  | 196  | 47    |
| >EGFR-R451FITSLGLRSLK  | 345   | >EGFR-R451FITSLGLFSLK  | 519  | 174   |
| >EGFR-R451FITSLGLRSLK  | 44    | >EGFR-R451FITSLGLFSLK  | 36   | 8     |
| >EGFR-R451FITSLGLRSL   | 10    | >EGFR-R451FITSLGLFSL   | 5    | 5     |
| >EGFR-R451FITSLGLRSL   | 12225 | >EGFR-R451FITSLGLFSL   | 499  | 11726 |
| >EGFR-R451FITSLGLRSL   | 640   | >EGFR-R451FITSLGLFSL   | 129  | 511   |
| >EGFR-R451FITSLGLRSL   | 108   | >EGFR-R451FITSLGLFSL   | 76   | 32    |

|                        |       |                       |       |       |
|------------------------|-------|-----------------------|-------|-------|
| >EGFR-R451FITSGLRSLK   | 1328  | >EGFR-R451FITSGLGFLSK | 212   | 1116  |
| >EGFR-R451FITSGLRSL    | 723   | >EGFR-R451FITSGLGFLSL | 310   | 413   |
| >EGFR-R451FNITSLGLRSL  | 607   | >EGFR-R451FNITSLGFLSL | 97    | 510   |
| >EGFR-R451FNITSLGLRSL  | 167   | >EGFR-R451FNITSLGFLSL | 228   | 61    |
| >EGFR-R451FNITSLGLRSL  | 3179  | >EGFR-R451FNITSLGFLSL | 370   | 2809  |
| >EGFR-R451FNITSLGLRSLK | 706   | >EGFR-R451FNITSLGFLSK | 439   | 267   |
| >EGFR-R451FNITSLGLRSLK | 165   | >EGFR-R451FNITSLGFLSK | 68    | 97    |
| >EGFR-R451FNITSLGLR    | 256   | >EGFR-R451FNITSLGLF   | 27489 | 27233 |
| >EGFR-R451FNITSLGLR    | 27    | >EGFR-R451FNITSLGLF   | 10091 | 10064 |
| >EGFR-R451FNITSLGLRSLK | 40    | >EGFR-R451FNITSLGFLSK | 30    | 10    |
| >EGFR-R451FLNITSLGLR   | 384   | >EGFR-R451FLNITSLGLF  | 24238 | 23854 |
| >EGFR-R451FLNITSLGLR   | 19904 | >EGFR-R451FLNITSLGLF  | 348   | 19556 |
| >EGFR-R451FLNITSLGLR   | 343   | >EGFR-R451FLNITSLGLF  | 15315 | 14972 |
| >EGFR-R451FLNITSLGLR   | 91    | >EGFR-R451FLNITSLGLF  | 21364 | 21273 |
| >EGFR-R451FLNITSLGLR   | 451   | >EGFR-R451FLNITSLGLF  | 37127 | 36676 |
| >EGFR-R451FLNITSLGLR   | 19908 | >EGFR-R451FLNITSLGLF  | 175   | 19733 |
| >EGFR-R451FLNITSLGLR   | 23301 | >EGFR-R451FLNITSLGLF  | 392   | 22909 |
| >EGFR-R451FLNITSLGLR   | 20996 | >EGFR-R451FLNITSLGLF  | 129   | 20867 |
| >EGFR-R451FLNITSLGLR   | 153   | >EGFR-R451FLNITSLGLF  | 31976 | 31823 |
| >EGFR-R677FRTLRRLLQER  | 426   | >EGFR-R677FHTLRRLLQER | 1809  | 1383  |
| >EGFR-R677FRTLRRLLQER  | 175   | >EGFR-R677FHTLRRLLQER | 653   | 478   |
| >EGFR-R677FRTLRRLLQ    | 50    | >EGFR-R677FHTLRRLLQ   | 186   | 136   |
| >EGFR-R677FRTLRRLLQER  | 54    | >EGFR-R677FHTLRRLLQER | 204   | 150   |
| >EGFR-R677FRTLRRLLQER  | 12    | >EGFR-R677FHTLRRLLQER | 64    | 52    |
| >EGFR-R677FRTLRRLLQER  | 1249  | >EGFR-R677FHTLRRLLQER | 347   | 902   |
| >EGFR-R677FRTLRRLLQER  | 1590  | >EGFR-R677FHTLRRLLQER | 184   | 1406  |
| >EGFR-R677FRTLRRLLQER  | 383   | >EGFR-R677FHTLRRLLQER | 467   | 84    |
| >EGFR-R677FKRTLRRLL    | 47    | >EGFR-R677FKHTLRRLL   | 9595  | 9548  |
| >EGFR-R677FKRTLRRLLQ   | 418   | >EGFR-R677FKHTLRRLLQ  | 16749 | 16331 |
| >EGFR-R677FKRTLRRLLQE  | 104   | >EGFR-R677FKHTLRRLLQE | 12255 | 12151 |
| >EGFR-R677FKRTLRRLL    | 15    | >EGFR-R677FKHTLRRLL   | 1762  | 1747  |
| >EGFR-R677FKRTLRRLLQ   | 106   | >EGFR-R677FKHTLRRLLQ  | 5843  | 5737  |
| >EGFR-R677FKRTLRRLLQE  | 216   | >EGFR-R677FKHTLRRLLQE | 17932 | 17716 |
| >EGFR-R677FKRTLRRLLQE  | 243   | >EGFR-R677FKHTLRRLLQE | 10639 | 10396 |
| >EGFR-R677FKRTLRRLL    | 73    | >EGFR-R677FKHTLRRLL   | 2779  | 2706  |
| >EGFR-R677FKRTLRRLLQ   | 148   | >EGFR-R677FKHTLRRLLQ  | 9240  | 9092  |
| >EGFR-R677FKRTLRRLLQE  | 412   | >EGFR-R677FKHTLRRLLQE | 23115 | 22703 |
| >EGFR-R677FKRTLRRLLQE  | 302   | >EGFR-R677FKHTLRRLLQE | 15156 | 14854 |
| >EGFR-R677FKRTLRRLLQE  | 413   | >EGFR-R677FKHTLRRLLQE | 333   | 80    |
| >EGFR-R677FMRRRRHIVRk  | 34    | >EGFR-R677FMRRRRHIVRk | 7150  | 7116  |
| >EGFR-R677FMRRRRHIVRk  | 68    | >EGFR-R677FMRRRRHIVRk | 16344 | 16276 |
| >EGFR-R677FMRRRRHIVRk  | 479   | >EGFR-R677FMRRRRHIVRk | 416   | 63    |
| >EGFR-R677FRKRTLRRLL   | 479   | >EGFR-R677FRKHTLRRLL  | 3706  | 3227  |

|                         |      |                         |      |      |
|-------------------------|------|-------------------------|------|------|
| >EGFR-R677F RKRTLRRLL   | 101  | >EGFR-R677F RKHTLRRLL   | 1139 | 1038 |
| >EGFR-R677F RKRTLRRLLQ  | 185  | >EGFR-R677F RKHTLRRLLQ  | 1660 | 1475 |
| >EGFR-R677F RKRTLRRLL   | 46   | >EGFR-R677F RKHTLRRLL   | 74   | 28   |
| >EGFR-R677F RKRTLRRLL   | 44   | >EGFR-R677F RKHTLRRLL   | 68   | 24   |
| >EGFR-R677F RKRTLRRLL   | 891  | >EGFR-R677F RKHTLRRLL   | 493  | 398  |
| >EGFR-R677F RKRTLRRLL   | 46   | >EGFR-R677F RKHTLRRLL   | 77   | 31   |
| >EGFR-R677F RKRTLRRLL   | 28   | >EGFR-R677F RKHTLRRLL   | 55   | 27   |
| >EGFR-R677F RKRTLRRLLQ  | 184  | >EGFR-R677F RKHTLRRLLQ  | 463  | 279  |
| >EGFR-R677F RKRTLRRLL   | 82   | >EGFR-R677F RKHTLRRLL   | 116  | 34   |
| >EGFR-R677F RKRTLRRLL   | 14   | >EGFR-R677F RKHTLRRLL   | 22   | 8    |
| >EGFR-R677F VRKRTLRRLL  | 444  | >EGFR-R677F VRKHTLRRLL  | 943  | 499  |
| >EGFR-R677F VRKRTLRRLL  | 264  | >EGFR-R677F VRKHTLRRLL  | 226  | 38   |
| >EGFR-R677F VRKRTLRRLL  | 387  | >EGFR-R677F VRKHTLRRLL  | 556  | 169  |
| >EGFR-R677F VRKRTLRRLL  | 135  | >EGFR-R677F VRKHTLRRLL  | 510  | 375  |
| >EGFR-R677F VRKRTLRRLL  | 67   | >EGFR-R677F VRKHTLRRLL  | 122  | 55   |
| >EGFR-R677F VRKRTLRRLL  | 125  | >EGFR-R677F VRKHTLRRLL  | 253  | 128  |
| >EGFR-R677F IVRKRTLRR   | 199  | >EGFR-R677F IVRKHTLRR   | 218  | 19   |
| >EGFR-R677F IVRKRTLRR   | 105  | >EGFR-R677F IVRKHTLRR   | 102  | 3    |
| >EGFR-R677F IVRKRTLRR   | 53   | >EGFR-R677F IVRKHTLRR   | 50   | 3    |
| >EGFR-R677F IVRKRTLRR   | 27   | >EGFR-R677F IVRKHTLRR   | 32   | 5    |
| >EGFR-R677F IVRKRTLRRLL | 33   | >EGFR-R677F IVRKHTLRRLL | 40   | 7    |
| >EGFR-R677F IVRKRTLRRLL | 18   | >EGFR-R677F IVRKHTLRRLL | 19   | 1    |
| >EGFR-R677F IVRKRTLRR   | 14   | >EGFR-R677F IVRKHTLRR   | 14   | 0    |
| >EGFR-R677F IVRKRTLRR   | 42   | >EGFR-R677F IVRKHTLRR   | 51   | 9    |
| >EGFR-R677F IVRKRTLRR   | 49   | >EGFR-R677F IVRKHTLRR   | 122  | 73   |
| >EGFR-R677F IVRKRTLRR   | 181  | >EGFR-R677F IVRKHTLRR   | 967  | 786  |
| >EGFR-R677F IVRKRTLRR   | 188  | >EGFR-R677F IVRKHTLRR   | 190  | 2    |
| >EGFR-R677F IVRKRTLRRLL | 36   | >EGFR-R677F IVRKHTLRRLL | 38   | 2    |
| >EGFR-R677F IVRKRTLRRLL | 272  | >EGFR-R677F IVRKHTLRRLL | 495  | 223  |
| >EGFR-R677F IVRKRTLRRLL | 184  | >EGFR-R677F IVRKHTLRRLL | 179  | 5    |
| >EGFR-R677F IVRKRTLRRLL | 210  | >EGFR-R677F IVRKHTLRRLL | 442  | 232  |
| >EGFR-R677F IVRKRTLRR   | 367  | >EGFR-R677F IVRKHTLRR   | 338  | 29   |
| >EGFR-R677F IVRKRTLRR   | 134  | >EGFR-R677F IVRKHTLRR   | 140  | 6    |
| >EGFR-R677F HIVRKRTL    | 2596 | >EGFR-R677F HIVRKHTL    | 206  | 2390 |
| >EGFR-R677F HIVRKRTLRR  | 11   | >EGFR-R677F HIVRKHTLRR  | 10   | 1    |
| >EGFR-R677F HIVRKRTLRR  | 101  | >EGFR-R677F HIVRKHTLRR  | 324  | 223  |
| >EGFR-R677F HIVRKRTLRR  | 42   | >EGFR-R677F HIVRKHTLRR  | 45   | 3    |
| >EGFR-R677F HIVRKRTLRR  | 26   | >EGFR-R677F HIVRKHTLRR  | 22   | 4    |
| >EGFR-R677F HIVRKRTLRR  | 227  | >EGFR-R677F HIVRKHTLRR  | 273  | 46   |
| >EGFR-R677F HIVRKRTL    | 284  | >EGFR-R677F HIVRKHTL    | 216  | 68   |
| >EGFR-R677F HIVRKRTLRR  | 83   | >EGFR-R677F HIVRKHTLRR  | 70   | 13   |
| >EGFR-R677F HIVRKRTLRR  | 35   | >EGFR-R677F HIVRKHTLRR  | 31   | 4    |
| >EGFR-R677F RHIVRKRTLRR | 69   | >EGFR-R677F RHIVRKHTLRR | 100  | 31   |



|                         |     |                        |       |       |
|-------------------------|-----|------------------------|-------|-------|
| >EGFR-R677F RHIVRKRTLRI | 435 | >EGFR-R677F RHIVRKHTLR | 233   | 202   |
| >EGFR-R677F RHIVRKRTL   | 509 | >EGFR-R677F RHIVRKHTL  | 475   | 34    |
| >EGFR-R677F RHIVRKRTL   | 680 | >EGFR-R677F RHIVRKHTLR | 335   | 345   |
| >EGFR-R677F RHIVRKRTL   | 850 | >EGFR-R677F RHIVRKHTL  | 43    | 807   |
| >EGFR-R677F RHIVRKRTL   | 240 | >EGFR-R677F RHIVRKHTL  | 302   | 62    |
| >EGFR-R677F RHIVRKRTL   | 259 | >EGFR-R677F RHIVRKHTL  | 304   | 45    |
| >EGFR-R677F RHIVRKRTL   | 516 | >EGFR-R677F RHIVRKHTLR | 220   | 296   |
| >EGFR-R677F RHIVRKRTLRI | 230 | >EGFR-R677F RHIVRKHTLR | 119   | 111   |
| >EGFR-R677F RRHIVRKRTL  | 489 | >EGFR-R677F RRHIVRKHTL | 382   | 107   |
| >EGFR-R677F RRHIVRKRTL  | 417 | >EGFR-R677F RRHIVRKHTL | 350   | 67    |
| >EGFR-R677F RRHIVRKR    | 32  | >EGFR-R677F RRHIVRKH   | 55    | 23    |
| >EGFR-R677F RRHIVRKRT   | 315 | >EGFR-R677F RRHIVRKHT  | 224   | 91    |
| >EGFR-R677F RRHIVRKRTL  | 16  | >EGFR-R677F RRHIVRKHTL | 13    | 3     |
| >EGFR-R677F RRHIVRKRTL  | 36  | >EGFR-R677F RRHIVRKHTL | 51    | 15    |
| >EGFR-R677F RRHIVRKR    | 97  | >EGFR-R677F RRHIVRKH   | 149   | 52    |
| >EGFR-R677F RRHIVRKRT   | 171 | >EGFR-R677F RRHIVRKHT  | 240   | 69    |
| >EGFR-R677F RRHIVRKRTL  | 15  | >EGFR-R677F RRHIVRKHTL | 14    | 1     |
| >EGFR-R677F RRHIVRKRTL  | 101 | >EGFR-R677F RRHIVRKHTL | 133   | 32    |
| >EGFR-R677F RRHIVRKR    | 392 | >EGFR-R677F RRHIVRKH   | 282   | 110   |
| >EGFR-R677F RRHIVRKRTL  | 21  | >EGFR-R677F RRHIVRKHTL | 17    | 4     |
| >EGFR-R677F RRHIVRKRTL  | 168 | >EGFR-R677F RRHIVRKHTL | 219   | 51    |
| >EGFR-R677F RRHIVRKR    | 392 | >EGFR-R677F RRHIVRKH   | 30660 | 30268 |
| >EGFR-R677F RRHIVRKRTL  | 268 | >EGFR-R677F RRHIVRKHTL | 196   | 72    |
| >EGFR-R677F RRRHIVRKRT  | 410 | >EGFR-R677F RRRHIVRKHT | 354   | 56    |
| >EGFR-R677F RRRHIVRKRT  | 59  | >EGFR-R677F RRRHIVRKHT | 62    | 3     |
| >EGFR-R677F RRRHIVRKR   | 38  | >EGFR-R677F RRRHIVRKH  | 65    | 27    |
| >EGFR-R677F RRRHIVRKRT  | 96  | >EGFR-R677F RRRHIVRKHT | 95    | 1     |
| >EGFR-R677F RRRHIVRKRT  | 47  | >EGFR-R677F RRRHIVRKHT | 30    | 17    |
| >EGFR-R677F RRRHIVRKR   | 86  | >EGFR-R677F RRRHIVRKH  | 76    | 10    |
| >EGFR-R677F RRRHIVRKRT  | 137 | >EGFR-R677F RRRHIVRKHT | 87    | 50    |
| >EGFR-R677F RRRHIVRKRT  | 14  | >EGFR-R677F RRRHIVRKHT | 15    | 1     |
| >EGFR-R677F RRRHIVRKR   | 143 | >EGFR-R677F RRRHIVRKH  | 161   | 18    |
| >EGFR-R677F RRRHIVRKRT  | 216 | >EGFR-R677F RRRHIVRKHT | 147   | 69    |
| >EGFR-R677F RRRHIVRKRT  | 6   | >EGFR-R677F RRRHIVRKHT | 7     | 1     |
| >EGFR-R677F MRRRHIVRK   | 74  | >EGFR-R677F MRRRHIVRK  | 7308  | 7234  |
| >EGFR-R677F MRRRHIVRK   | 60  | >EGFR-R677F MRRRHIVRK  | 257   | 197   |
| >EGFR-R677F MRRRHIVRK   | 330 | >EGFR-R677F MRRRHIVRK  | 740   | 410   |
| >EGFR-R677F MRRRHIVRK   | 453 | >EGFR-R677F MRRRHIVRK  | 1539  | 1086  |
| >EGFR-R680C RLLQEREL    | 37  | >EGFR-R680C RLLQEREL   | 268   | 231   |
| >EGFR-R680C RLLQERELV   | 59  | >EGFR-R680C RLLQERELV  | 565   | 506   |
| >EGFR-R680C RLLQEREL    | 39  | >EGFR-R680C RLLQEREL   | 661   | 622   |
| >EGFR-R680C RLLQERELV   | 91  | >EGFR-R680C RLLQERELV  | 3336  | 3245  |
| >EGFR-R680C RLLQERELV   | 443 | >EGFR-R680C RLLQERELV  | 7826  | 7383  |

|                        |      |                        |       |       |
|------------------------|------|------------------------|-------|-------|
| >EGFR-R680(RRLLQEREL   | 26   | >EGFR-R680(GRLLQEREL   | 80    | 54    |
| >EGFR-R680(RRLLQERELV  | 138  | >EGFR-R680(GRLLQERELV  | 3001  | 2863  |
| >EGFR-R680(LRLLQEREL   | 61   | >EGFR-R680(LGRLLQEREL  | 25749 | 25688 |
| >EGFR-R680(LRLLQEREL   | 346  | >EGFR-R680(LGRLLQEREL  | 28025 | 27679 |
| >EGFR-R680(LRLLQEREL   | 154  | >EGFR-R680(LGRLLQEREL  | 27348 | 27194 |
| >EGFR-R680(RRHIVRKRTLI | 489  | >EGFR-R680(RRHIVRKRTL  | 21346 | 20857 |
| >EGFR-R680(RRHIVRKRTLI | 36   | >EGFR-R680(RRHIVRKRTL  | 614   | 578   |
| >EGFR-R680(RRHIVRKRTLI | 101  | >EGFR-R680(RRHIVRKRTL  | 159   | 58    |
| >EGFR-R680(RRHIVRKRTLI | 168  | >EGFR-R680(RRHIVRKRTL  | 338   | 170   |
| >EGFR-R680(RRHIVRKRTLI | 268  | >EGFR-R680(RRHIVRKRTL  | 34068 | 33800 |
| >EGFR-R680(TLRRLLQEREI | 2169 | >EGFR-R680(TLGRLLQEREI | 351   | 1818  |
| >EGFR-R680(TLRRLLQEREI | 93   | >EGFR-R680(TLGRLLQEREI | 51    | 42    |
| >EGFR-R680(TLRRLLQER   | 29   | >EGFR-R680(TLGRLLQER   | 188   | 159   |
| >EGFR-R680(TLRRLLQER   | 179  | >EGFR-R680(TLGRLLQER   | 2219  | 2040  |
| >EGFR-R680(RTLRRLLQER  | 426  | >EGFR-R680(RTLGRLLQER  | 216   | 210   |
| >EGFR-R680(RTLRRLLQER  | 175  | >EGFR-R680(RTLGRLLQER  | 78    | 97    |
| >EGFR-R680(RTLRRLLQ    | 50   | >EGFR-R680(RTLGRLLQ    | 196   | 146   |
| >EGFR-R680(RTLRRLLQER  | 54   | >EGFR-R680(RTLGRLLQER  | 198   | 144   |
| >EGFR-R680(RTLRRLLQER  | 12   | >EGFR-R680(RTLGRLLQER  | 9     | 3     |
| >EGFR-R680(RTLRRLLQER  | 1590 | >EGFR-R680(RTLGRLLQER  | 251   | 1339  |
| >EGFR-R680(RTLRRLLQE   | 629  | >EGFR-R680(RTLGRLLQE   | 108   | 521   |
| >EGFR-R680(RTLRRLLQER  | 383  | >EGFR-R680(RTLGRLLQER  | 200   | 183   |
| >EGFR-R680(KRTLRRLL    | 47   | >EGFR-R680(KRTLGRLL    | 84    | 37    |
| >EGFR-R680(KRTLRRLLQ   | 418  | >EGFR-R680(KRTLGRLLQ   | 903   | 485   |
| >EGFR-R680(KRTLRRLLQEI | 104  | >EGFR-R680(KRTLGRLLQEI | 174   | 70    |
| >EGFR-R680(KRTLRRLL    | 15   | >EGFR-R680(KRTLGRLL    | 38    | 23    |
| >EGFR-R680(KRTLRRLLQ   | 106  | >EGFR-R680(KRTLGRLLQ   | 115   | 9     |
| >EGFR-R680(KRTLRRLLQE  | 216  | >EGFR-R680(KRTLGRLLQE  | 610   | 394   |
| >EGFR-R680(KRTLRRLLQEI | 243  | >EGFR-R680(KRTLGRLLQEI | 270   | 27    |
| >EGFR-R680(KRTLRRLL    | 73   | >EGFR-R680(KRTLGRLL    | 329   | 256   |
| >EGFR-R680(KRTLRRLLQ   | 148  | >EGFR-R680(KRTLGRLLQ   | 321   | 173   |
| >EGFR-R680(KRTLRRLLQE  | 412  | >EGFR-R680(KRTLGRLLQE  | 964   | 552   |
| >EGFR-R680(KRTLRRLLQEI | 302  | >EGFR-R680(KRTLGRLLQEI | 491   | 189   |
| >EGFR-R680(KRTLRRLLQEI | 413  | >EGFR-R680(KRTLGRLLQEI | 728   | 315   |
| >EGFR-R680(RKRTLRRLL   | 479  | >EGFR-R680(RKRTLGRLL   | 1154  | 675   |
| >EGFR-R680(RKRTLRRLL   | 101  | >EGFR-R680(RKRTLGRLL   | 563   | 462   |
| >EGFR-R680(RKRTLRRLLQ  | 185  | >EGFR-R680(RKRTLGRLLQ  | 485   | 300   |
| >EGFR-R680(RKRTLRRLL   | 46   | >EGFR-R680(RKRTLGRLL   | 101   | 55    |
| >EGFR-R680(RKRTLRRLL   | 44   | >EGFR-R680(RKRTLGRLL   | 25    | 19    |
| >EGFR-R680(RKRTLRRLL   | 46   | >EGFR-R680(RKRTLGRLL   | 161   | 115   |
| >EGFR-R680(RKRTLRRLL   | 28   | >EGFR-R680(RKRTLGRLL   | 40    | 12    |
| >EGFR-R680(RKRTLRRLLQ  | 184  | >EGFR-R680(RKRTLGRLLQ  | 131   | 53    |
| >EGFR-R680(RKRTLRRLL   | 82   | >EGFR-R680(RKRTLGRLL   | 308   | 226   |

|                        |       |                        |       |       |
|------------------------|-------|------------------------|-------|-------|
| >EGFR-R680(RKRTLRRLL   | 14    | >EGFR-R680(RKRTLGRLL   | 30    | 16    |
| >EGFR-R680(VRKRTLRRLL  | 444   | >EGFR-R680(VRKRTLGRLL  | 484   | 40    |
| >EGFR-R680(VRKRTLRRLL  | 264   | >EGFR-R680(VRKRTLGRLL  | 157   | 107   |
| >EGFR-R680(VRKRTLRRLL  | 387   | >EGFR-R680(VRKRTLGRLL  | 718   | 331   |
| >EGFR-R680(VRKRTLRRLL  | 135   | >EGFR-R680(VRKRTLGRLL  | 165   | 30    |
| >EGFR-R680(VRKRTLRRLL  | 67    | >EGFR-R680(VRKRTLGRLL  | 134   | 67    |
| >EGFR-R680(VRKRTLRRLL  | 125   | >EGFR-R680(VRKRTLGRLL  | 92    | 33    |
| >EGFR-R680(IVRKRTLRR   | 199   | >EGFR-R680(IVRKRTLGR   | 17368 | 17169 |
| >EGFR-R680(IVRKRTLRR   | 105   | >EGFR-R680(IVRKRTLGR   | 138   | 33    |
| >EGFR-R680(IVRKRTLRR   | 53    | >EGFR-R680(IVRKRTLGR   | 149   | 96    |
| >EGFR-R680(IVRKRTLRR   | 27    | >EGFR-R680(IVRKRTLGR   | 29    | 2     |
| >EGFR-R680(IVRKRTLRRLL | 33    | >EGFR-R680(IVRKRTLGRLL | 40    | 7     |
| >EGFR-R680(IVRKRTLRRLL | 18    | >EGFR-R680(IVRKRTLGRLL | 33    | 15    |
| >EGFR-R680(IVRKRTLRR   | 14    | >EGFR-R680(IVRKRTLGR   | 16097 | 16083 |
| >EGFR-R680(IVRKRTLRR   | 42    | >EGFR-R680(IVRKRTLGR   | 80    | 38    |
| >EGFR-R680(IVRKRTLRR   | 49    | >EGFR-R680(IVRKRTLGR   | 21393 | 21344 |
| >EGFR-R680(IVRKRTLRR   | 181   | >EGFR-R680(IVRKRTLGR   | 176   | 5     |
| >EGFR-R680(IVRKRTLRR   | 188   | >EGFR-R680(IVRKRTLGR   | 34017 | 33829 |
| >EGFR-R680(IVRKRTLRR   | 635   | >EGFR-R680(IVRKRTLGR   | 415   | 220   |
| >EGFR-R680(IVRKRTLRRLL | 36    | >EGFR-R680(IVRKRTLGRLL | 42    | 6     |
| >EGFR-R680(IVRKRTLRRLL | 272   | >EGFR-R680(IVRKRTLGRLL | 725   | 453   |
| >EGFR-R680(IVRKRTLRRLL | 184   | >EGFR-R680(IVRKRTLGRLL | 213   | 29    |
| >EGFR-R680(IVRKRTLRRLL | 210   | >EGFR-R680(IVRKRTLGRLL | 212   | 2     |
| >EGFR-R680(IVRKRTLRR   | 367   | >EGFR-R680(IVRKRTLGR   | 34481 | 34114 |
| >EGFR-R680(IVRKRTLRR   | 134   | >EGFR-R680(IVRKRTLGR   | 140   | 6     |
| >EGFR-R680(HIVRKRTLRR  | 11    | >EGFR-R680(HIVRKRTLGR  | 14160 | 14149 |
| >EGFR-R680(HIVRKRTLRR  | 101   | >EGFR-R680(HIVRKRTLGR  | 103   | 2     |
| >EGFR-R680(HIVRKRTLRR  | 42    | >EGFR-R680(HIVRKRTLGR  | 22961 | 22919 |
| >EGFR-R680(HIVRKRTLRR  | 26    | >EGFR-R680(HIVRKRTLGR  | 24735 | 24709 |
| >EGFR-R680(HIVRKRTLRR  | 227   | >EGFR-R680(HIVRKRTLGR  | 171   | 56    |
| >EGFR-R680(HIVRKRTLRR  | 83    | >EGFR-R680(HIVRKRTLGR  | 33348 | 33265 |
| >EGFR-R680(HIVRKRTLRR  | 35    | >EGFR-R680(HIVRKRTLGR  | 46    | 11    |
| >EGFR-R680(RHIVRKRTLRR | 69    | >EGFR-R680(RHIVRKRTLGR | 24173 | 24104 |
| >EGFR-R680(RHIVRKRTLRR | 435   | >EGFR-R680(RHIVRKRTLGR | 865   | 430   |
| >EGFR-R680(RHIVRKRTLRR | 230   | >EGFR-R680(RHIVRKRTLGR | 228   | 2     |
| >EGFR-R748I REATSPKA   | 39    | >EGFR-R748I IEATSPKA   | 391   | 352   |
| >EGFR-R748I LREATSPK   | 20159 | >EGFR-R748I LIEATSPK   | 168   | 19991 |
| >EGFR-R748I LREATSPK   | 7645  | >EGFR-R748I LIEATSPK   | 346   | 7299  |
| >EGFR-R748I ELREATSPKA | 1973  | >EGFR-R748I ELIEATSPKA | 179   | 1794  |
| >EGFR-R748I ELREATSPKA | 7141  | >EGFR-R748I ELIEATSPKA | 337   | 6804  |
| >EGFR-R748I ELREATSPKA | 2026  | >EGFR-R748I ELIEATSPKA | 145   | 1881  |
| >EGFR-R748I ELREATSPKA | 3005  | >EGFR-R748I ELIEATSPKA | 270   | 2735  |
| >EGFR-R748I ELREATSPKA | 122   | >EGFR-R748I ELIEATSPKA | 48    | 74    |

|                         |       |                         |       |       |
|-------------------------|-------|-------------------------|-------|-------|
| >EGFR-R748I ELREATSPK   | 226   | >EGFR-R748I ELIEATSPK   | 611   | 385   |
| >EGFR-R748I ELREATSPK   | 8453  | >EGFR-R748I ELIEATSPK   | 439   | 8014  |
| >EGFR-R748I ELREATSPK   | 86    | >EGFR-R748I ELIEATSPK   | 9345  | 9259  |
| >EGFR-R748I ELREATSPK   | 139   | >EGFR-R748I ELIEATSPK   | 14    | 125   |
| >EGFR-R748I ELREATSPKA  | 877   | >EGFR-R748I ELIEATSPKA  | 31    | 846   |
| >EGFR-R748I KELREATSPK/ | 449   | >EGFR-R748I KELIEATSPKA | 325   | 124   |
| >EGFR-R748I KELREATSPK/ | 71    | >EGFR-R748I KELIEATSPKA | 73    | 2     |
| >EGFR-R748I KELREATSPK/ | 319   | >EGFR-R748I KELIEATSPKA | 192   | 127   |
| >EGFR-R748I AIKELREA    | 369   | >EGFR-R748I AIKELIEA    | 77    | 292   |
| >EGFR-R748I AIKELREA    | 3218  | >EGFR-R748I AIKELIEA    | 391   | 2827  |
| >EGFR-R748I AIKELREA    | 496   | >EGFR-R748I AIKELIEA    | 323   | 173   |
| >EGFR-R748I VAIKELREA   | 5444  | >EGFR-R748I VAIKELIEA   | 419   | 5025  |
| >EGFR-R748I PVAIKELR    | 386   | >EGFR-R748I PVAIKELI    | 35287 | 34901 |
| >EGFR-R748I IPVAIKELR   | 37877 | >EGFR-R748I IPVAIKELI   | 426   | 37451 |
| >EGFR-R748I IPVAIKELR   | 150   | >EGFR-R748I IPVAIKELI   | 32909 | 32759 |
| >EGFR-R748I IPVAIKELR   | 19289 | >EGFR-R748I IPVAIKELI   | 188   | 19101 |
| >EGFR-R748I IPVAIKELR   | 7997  | >EGFR-R748I IPVAIKELI   | 32    | 7965  |
| >EGFR-R748I IPVAIKELR   | 2526  | >EGFR-R748I IPVAIKELI   | 295   | 2231  |
| >EGFR-R748I IPVAIKELREA | 30    | >EGFR-R748I IPVAIKELIEA | 18    | 12    |
| >EGFR-R748I KIPVAIKELR  | 78    | >EGFR-R748I KIPVAIKELI  | 15036 | 14958 |
| >EGFR-R748I KIPVAIKELR  | 68    | >EGFR-R748I KIPVAIKELI  | 31907 | 31839 |
| >EGFR-R748I KIPVAIKELR  | 13590 | >EGFR-R748I KIPVAIKELI  | 437   | 13153 |
| >EGFR-R748I KIPVAIKELR  | 66    | >EGFR-R748I KIPVAIKELI  | 25882 | 25816 |
| >EGFR-R748I REATSPKA    | 39    | >EGFR-R748I KEATSPKA    | 48    | 9     |
| >EGFR-R748I ELREATSPKA  | 122   | >EGFR-R748I ELKEATSPKA  | 189   | 67    |
| >EGFR-R748I ELREATSPK   | 226   | >EGFR-R748I ELKEATSPK   | 574   | 348   |
| >EGFR-R748I ELREATSPK   | 86    | >EGFR-R748I ELKEATSPK   | 559   | 473   |
| >EGFR-R748I ELREATSPK   | 139   | >EGFR-R748I ELKEATSPK   | 59    | 80    |
| >EGFR-R748I KELREATSPK/ | 449   | >EGFR-R748I KELKEATSPK/ | 395   | 54    |
| >EGFR-R748I KELREATSPK/ | 71    | >EGFR-R748I KELKEATSPK/ | 92    | 21    |
| >EGFR-R748I KELREATSPK/ | 319   | >EGFR-R748I KELKEATSPK/ | 169   | 150   |
| >EGFR-R748I AIKELREA    | 369   | >EGFR-R748I AIKELKEA    | 508   | 139   |
| >EGFR-R748I AIKELREA    | 496   | >EGFR-R748I AIKELKEA    | 1344  | 848   |
| >EGFR-R748I PVAIKELR    | 386   | >EGFR-R748I PVAIKELK    | 946   | 560   |
| >EGFR-R748I IPVAIKELR   | 150   | >EGFR-R748I IPVAIKELK   | 738   | 588   |
| >EGFR-R748I IPVAIKELREA | 30    | >EGFR-R748I IPVAIKELKEA | 25    | 5     |
| >EGFR-R748I KIPVAIKELR  | 3032  | >EGFR-R748I KIPVAIKELK  | 146   | 2886  |
| >EGFR-R748I KIPVAIKELR  | 1982  | >EGFR-R748I KIPVAIKELK  | 121   | 1861  |
| >EGFR-R748I KIPVAIKELR  | 78    | >EGFR-R748I KIPVAIKELK  | 1086  | 1008  |
| >EGFR-R748I KIPVAIKELR  | 68    | >EGFR-R748I KIPVAIKELK  | 228   | 160   |
| >EGFR-R748I KIPVAIKELR  | 66    | >EGFR-R748I KIPVAIKELK  | 1442  | 1376  |
| >EGFR-R776C RLLGICLT    | 229   | >EGFR-R776C CLLGICLT    | 886   | 657   |
| >EGFR-R776C RLLGICLTST  | 73    | >EGFR-R776C CLLGICLTST  | 209   | 136   |

|                        |      |                        |       |       |
|------------------------|------|------------------------|-------|-------|
| >EGFR-R776(RLLGICLTSTV | 15   | >EGFR-R776(CLLGICLTSTV | 29    | 14    |
| >EGFR-R776(RLLGICLTST  | 207  | >EGFR-R776(CLLGICLTST  | 391   | 184   |
| >EGFR-R776(RLLGICLTSTV | 29   | >EGFR-R776(CLLGICLTSTV | 96    | 67    |
| >EGFR-R776(RLLGICLTST  | 52   | >EGFR-R776(CLLGICLTST  | 124   | 72    |
| >EGFR-R776(RLLGICLTSTV | 13   | >EGFR-R776(CLLGICLTSTV | 68    | 55    |
| >EGFR-R776(RLLGICLT    | 310  | >EGFR-R776(CLLGICLT    | 2317  | 2007  |
| >EGFR-R776(RLLGICLTST  | 87   | >EGFR-R776(CLLGICLTST  | 205   | 118   |
| >EGFR-R776(RLLGICLTSTV | 19   | >EGFR-R776(CLLGICLTSTV | 111   | 92    |
| >EGFR-R776(RLLGICLT    | 35   | >EGFR-R776(CLLGICLT    | 281   | 246   |
| >EGFR-R776(RLLGICLTST  | 95   | >EGFR-R776(CLLGICLTST  | 977   | 882   |
| >EGFR-R776(RLLGICLTSTV | 2    | >EGFR-R776(CLLGICLTSTV | 4     | 2     |
| >EGFR-R776(RLLGICLTSTV | 5    | >EGFR-R776(CLLGICLTSTV | 9     | 4     |
| >EGFR-R776(RLLGICLT    | 112  | >EGFR-R776(CLLGICLT    | 1155  | 1043  |
| >EGFR-R776(RLLGICLTST  | 401  | >EGFR-R776(CLLGICLTST  | 3960  | 3559  |
| >EGFR-R776(RLLGICLTSTV | 5    | >EGFR-R776(CLLGICLTSTV | 10    | 5     |
| >EGFR-R776(RLLGICLTSTV | 2    | >EGFR-R776(CLLGICLTSTV | 2     | 0     |
| >EGFR-R776(RLLGICLT    | 30   | >EGFR-R776(CLLGICLT    | 96    | 66    |
| >EGFR-R776(RLLGICLTST  | 34   | >EGFR-R776(CLLGICLTST  | 157   | 123   |
| >EGFR-R776(RLLGICLTSTV | 2    | >EGFR-R776(CLLGICLTSTV | 3     | 1     |
| >EGFR-R776(RLLGICLTS   | 163  | >EGFR-R776(CLLGICLTS   | 10290 | 10127 |
| >EGFR-R776(RLLGICLTST  | 360  | >EGFR-R776(CLLGICLTST  | 13741 | 13381 |
| >EGFR-R776(RLLGICLTSTV | 23   | >EGFR-R776(CLLGICLTSTV | 1454  | 1431  |
| >EGFR-R776(RLLGICLTSTV | 241  | >EGFR-R776(CLLGICLTSTV | 3167  | 2926  |
| >EGFR-R776(CRLLGICL    | 260  | >EGFR-R776(CCLLGICL    | 24082 | 23822 |
| >EGFR-R776(MASVDNPHV   | 74   | >EGFR-R776(MASVDNPHV   | 21545 | 21471 |
| >EGFR-R776(MASVDNPHV   | 268  | >EGFR-R776(MASVDNPHV   | 35499 | 35231 |
| >EGFR-R776(MASVDNPHV   | 9    | >EGFR-R776(MASVDNPHV   | 22081 | 22072 |
| >EGFR-R776(HVCRLGI     | 720  | >EGFR-R776(HVCCLGI     | 373   | 347   |
| >EGFR-R776(HVCRLGI     | 1031 | >EGFR-R776(HVCCLGI     | 140   | 891   |
| >EGFR-R776(NPHVCRL     | 65   | >EGFR-R776(NPHVCCL     | 382   | 317   |
| >EGFR-R776(VDNPHVCRLI  | 719  | >EGFR-R776(VDNPHVCCLI  | 285   | 434   |
| >EGFR-R776(SVDNPHVCRI  | 75   | >EGFR-R776(SVDNPHVCCI  | 229   | 154   |
| >EGFR-R776(SVDNPHVCRI  | 1156 | >EGFR-R776(SVDNPHVCCI  | 315   | 841   |
| >EGFR-R776(SVDNPHVCRI  | 449  | >EGFR-R776(SVDNPHVCCI  | 246   | 203   |
| >EGFR-R776(SVDNPHVCRI  | 2975 | >EGFR-R776(SVDNPHVCCI  | 406   | 2569  |
| >EGFR-R776(SVDNPHVCRI  | 204  | >EGFR-R776(SVDNPHVCCI  | 714   | 510   |
| >EGFR-R776(SVDNPHVCR   | 184  | >EGFR-R776(SVDNPHVCC   | 19261 | 19077 |
| >EGFR-R776(SVDNPHVCR   | 237  | >EGFR-R776(SVDNPHVCC   | 22869 | 22632 |
| >EGFR-R776(SVDNPHVCR   | 118  | >EGFR-R776(SVDNPHVCC   | 37801 | 37683 |
| >EGFR-R776(ASVDNPHVCI  | 300  | >EGFR-R776(ASVDNPHVCI  | 33878 | 33578 |
| >EGFR-R776(ASVDNPHVCI  | 389  | >EGFR-R776(ASVDNPHVCI  | 346   | 43    |
| >EGFR-R776(ASVDNPHVCI  | 113  | >EGFR-R776(ASVDNPHVCI  | 29098 | 28985 |
| >EGFR-R776(ASVDNPHVCI  | 423  | >EGFR-R776(ASVDNPHVCI  | 39433 | 39010 |

|                        |      |                        |       |       |
|------------------------|------|------------------------|-------|-------|
| >EGFR-R776(ASVDNPHVCI  | 6    | >EGFR-R776(ASVDNPHVCI  | 28    | 22    |
| >EGFR-R776(ASVDNPHVCI  | 154  | >EGFR-R776(ASVDNPHVCI  | 10352 | 10198 |
| >EGFR-R776(RLLGICLT    | 229  | >EGFR-R776(GLLGICLT    | 306   | 77    |
| >EGFR-R776(RLLGICLTST  | 73   | >EGFR-R776(GLLGICLTST  | 109   | 36    |
| >EGFR-R776(RLLGICLTSTV | 15   | >EGFR-R776(GLLGICLTSTV | 16    | 1     |
| >EGFR-R776(RLLGICLT    | 582  | >EGFR-R776(GLLGICLT    | 419   | 163   |
| >EGFR-R776(RLLGICLTST  | 207  | >EGFR-R776(GLLGICLTST  | 166   | 41    |
| >EGFR-R776(RLLGICLTSTV | 29   | >EGFR-R776(GLLGICLTSTV | 27    | 2     |
| >EGFR-R776(RLLGICLTST  | 52   | >EGFR-R776(GLLGICLTST  | 68    | 16    |
| >EGFR-R776(RLLGICLTSTV | 13   | >EGFR-R776(GLLGICLTSTV | 20    | 7     |
| >EGFR-R776(RLLGICLT    | 310  | >EGFR-R776(GLLGICLT    | 948   | 638   |
| >EGFR-R776(RLLGICLTST  | 87   | >EGFR-R776(GLLGICLTST  | 192   | 105   |
| >EGFR-R776(RLLGICLTSTV | 19   | >EGFR-R776(GLLGICLTSTV | 38    | 19    |
| >EGFR-R776(RLLGICLT    | 35   | >EGFR-R776(GLLGICLT    | 64    | 29    |
| >EGFR-R776(RLLGICLTST  | 95   | >EGFR-R776(GLLGICLTST  | 203   | 108   |
| >EGFR-R776(RLLGICLTSTV | 2    | >EGFR-R776(GLLGICLTSTV | 2     | 0     |
| >EGFR-R776(RLLGICLTSTV | 5    | >EGFR-R776(GLLGICLTSTV | 4     | 1     |
| >EGFR-R776(RLLGICLT    | 112  | >EGFR-R776(GLLGICLT    | 62    | 50    |
| >EGFR-R776(RLLGICLTST  | 401  | >EGFR-R776(GLLGICLTST  | 212   | 189   |
| >EGFR-R776(RLLGICLTSTV | 5    | >EGFR-R776(GLLGICLTSTV | 5     | 0     |
| >EGFR-R776(RLLGICLTSTV | 2    | >EGFR-R776(GLLGICLTSTV | 3     | 1     |
| >EGFR-R776(RLLGICLT    | 30   | >EGFR-R776(GLLGICLT    | 25    | 5     |
| >EGFR-R776(RLLGICLTST  | 34   | >EGFR-R776(GLLGICLTST  | 28    | 6     |
| >EGFR-R776(RLLGICLTSTV | 2    | >EGFR-R776(GLLGICLTSTV | 2     | 0     |
| >EGFR-R776(RLLGICLTS   | 163  | >EGFR-R776(GLLGICLTS   | 4423  | 4260  |
| >EGFR-R776(RLLGICLTST  | 360  | >EGFR-R776(GLLGICLTST  | 7335  | 6975  |
| >EGFR-R776(RLLGICLTSTV | 23   | >EGFR-R776(GLLGICLTSTV | 411   | 388   |
| >EGFR-R776(RLLGICLTSTV | 241  | >EGFR-R776(GLLGICLTSTV | 298   | 57    |
| >EGFR-R776(CRLLGICL    | 260  | >EGFR-R776(CGLLGICL    | 22918 | 22658 |
| >EGFR-R776(MASVDNPHV   | 74   | >EGFR-R776(MASVDNPHV   | 20966 | 20892 |
| >EGFR-R776(MASVDNPHV   | 268  | >EGFR-R776(MASVDNPHV   | 33496 | 33228 |
| >EGFR-R776(MASVDNPHV   | 9    | >EGFR-R776(MASVDNPHV   | 19206 | 19197 |
| >EGFR-R776(HVCRLG      | 720  | >EGFR-R776(HVCGLLGI    | 327   | 393   |
| >EGFR-R776(HVCRLGICL   | 662  | >EGFR-R776(HVCGLLGI    | 447   | 215   |
| >EGFR-R776(HVCRLG      | 1031 | >EGFR-R776(HVCGLLGI    | 332   | 699   |
| >EGFR-R776(NPHVCRL     | 65   | >EGFR-R776(NPHVCGLL    | 97    | 32    |
| >EGFR-R776(VDNPHVCRL   | 538  | >EGFR-R776(VDNPHVCGL   | 473   | 65    |
| >EGFR-R776(VDNPHVCRLI  | 719  | >EGFR-R776(VDNPHVCGLI  | 195   | 524   |
| >EGFR-R776(SVDNPHVCRI  | 75   | >EGFR-R776(SVDNPHVCG   | 54    | 21    |
| >EGFR-R776(SVDNPHVCRI  | 449  | >EGFR-R776(SVDNPHVCG   | 189   | 260   |
| >EGFR-R776(SVDNPHVCRI  | 204  | >EGFR-R776(SVDNPHVCG   | 220   | 16    |
| >EGFR-R776(SVDNPHVCR   | 184  | >EGFR-R776(SVDNPHVCG   | 17582 | 17398 |
| >EGFR-R776(SVDNPHVCR   | 237  | >EGFR-R776(SVDNPHVCG   | 22371 | 22134 |

|                        |      |                        |       |       |
|------------------------|------|------------------------|-------|-------|
| >EGFR-R776(SVDNPHVCR   | 118  | >EGFR-R776(SVDNPHVCG   | 35006 | 34888 |
| >EGFR-R776(SVDNPHVCRI  | 627  | >EGFR-R776(SVDNPHVCG   | 146   | 481   |
| >EGFR-R776(SVDNPHVCRI  | 755  | >EGFR-R776(SVDNPHVCG   | 396   | 359   |
| >EGFR-R776(ASVDNPHVCI  | 300  | >EGFR-R776(ASVDNPHVCI  | 32739 | 32439 |
| >EGFR-R776(ASVDNPHVCI  | 389  | >EGFR-R776(ASVDNPHVCI  | 376   | 13    |
| >EGFR-R776(ASVDNPHVCI  | 113  | >EGFR-R776(ASVDNPHVCI  | 31001 | 30888 |
| >EGFR-R776(ASVDNPHVCI  | 423  | >EGFR-R776(ASVDNPHVCI  | 39069 | 38646 |
| >EGFR-R776(ASVDNPHVCI  | 6    | >EGFR-R776(ASVDNPHVCI  | 6     | 0     |
| >EGFR-R776(ASVDNPHVCI  | 154  | >EGFR-R776(ASVDNPHVCI  | 7615  | 7461  |
| >EGFR-R776†RLLGICLT    | 229  | >EGFR-R776†HLLGICLT    | 565   | 336   |
| >EGFR-R776†RLLGICLTST  | 73   | >EGFR-R776†HLLGICLTST  | 122   | 49    |
| >EGFR-R776†RLLGICLTSTV | 15   | >EGFR-R776†HLLGICLTSTV | 19    | 4     |
| >EGFR-R776†RLLGICLT    | 582  | >EGFR-R776†HLLGICLT    | 406   | 176   |
| >EGFR-R776†RLLGICLTST  | 207  | >EGFR-R776†HLLGICLTST  | 266   | 59    |
| >EGFR-R776†RLLGICLTSTV | 29   | >EGFR-R776†HLLGICLTSTV | 25    | 4     |
| >EGFR-R776†RLLGICLTST  | 52   | >EGFR-R776†HLLGICLTST  | 99    | 47    |
| >EGFR-R776†RLLGICLTSTV | 13   | >EGFR-R776†HLLGICLTSTV | 22    | 9     |
| >EGFR-R776†RLLGICLT    | 310  | >EGFR-R776†HLLGICLT    | 854   | 544   |
| >EGFR-R776†RLLGICLTST  | 87   | >EGFR-R776†HLLGICLTST  | 189   | 102   |
| >EGFR-R776†RLLGICLTSTV | 19   | >EGFR-R776†HLLGICLTSTV | 32    | 13    |
| >EGFR-R776†RLLGICLT    | 35   | >EGFR-R776†HLLGICLT    | 132   | 97    |
| >EGFR-R776†RLLGICLTST  | 95   | >EGFR-R776†HLLGICLTST  | 450   | 355   |
| >EGFR-R776†RLLGICLTSTV | 2    | >EGFR-R776†HLLGICLTSTV | 3     | 1     |
| >EGFR-R776†RLLGICLTSTV | 5    | >EGFR-R776†HLLGICLTSTV | 5     | 0     |
| >EGFR-R776†RLLGICLT    | 112  | >EGFR-R776†HLLGICLT    | 203   | 91    |
| >EGFR-R776†RLLGICLTST  | 401  | >EGFR-R776†HLLGICLTST  | 859   | 458   |
| >EGFR-R776†RLLGICLTSTV | 5    | >EGFR-R776†HLLGICLTSTV | 6     | 1     |
| >EGFR-R776†RLLGICLTSTV | 2    | >EGFR-R776†HLLGICLTSTV | 3     | 1     |
| >EGFR-R776†RLLGICLT    | 30   | >EGFR-R776†HLLGICLT    | 27    | 3     |
| >EGFR-R776†RLLGICLTST  | 34   | >EGFR-R776†HLLGICLTST  | 32    | 2     |
| >EGFR-R776†RLLGICLTSTV | 2    | >EGFR-R776†HLLGICLTSTV | 2     | 0     |
| >EGFR-R776†RLLGICLTS   | 163  | >EGFR-R776†HLLGICLTS   | 1548  | 1385  |
| >EGFR-R776†RLLGICLTST  | 360  | >EGFR-R776†HLLGICLTST  | 3076  | 2716  |
| >EGFR-R776†RLLGICLTSTV | 23   | >EGFR-R776†HLLGICLTSTV | 143   | 120   |
| >EGFR-R776†RLLGICLTSTV | 779  | >EGFR-R776†HLLGICLTSTV | 55    | 724   |
| >EGFR-R776†RLLGICLTSTV | 241  | >EGFR-R776†HLLGICLTSTV | 1089  | 848   |
| >EGFR-R776†CRLLGICL    | 260  | >EGFR-R776†CHLLGICL    | 19812 | 19552 |
| >EGFR-R776†CRLLGICL    | 752  | >EGFR-R776†CHLLGICL    | 213   | 539   |
| >EGFR-R776†MASVDNPHV   | 74   | >EGFR-R776†MASVDNPHV   | 9913  | 9839  |
| >EGFR-R776†MASVDNPHV   | 268  | >EGFR-R776†MASVDNPHV   | 25727 | 25459 |
| >EGFR-R776†MASVDNPHV   | 9    | >EGFR-R776†MASVDNPHV   | 2924  | 2915  |
| >EGFR-R776†MASVDNPHV   | 9418 | >EGFR-R776†MASVDNPHV   | 396   | 9022  |
| >EGFR-R776†HVCRLGI     | 720  | >EGFR-R776†HVCHLLGI    | 410   | 310   |

|                        |       |                        |       |       |
|------------------------|-------|------------------------|-------|-------|
| >EGFR-R776† HVCRLGI    | 1031  | >EGFR-R776† HVCHLLGI   | 338   | 693   |
| >EGFR-R776† NPHVCRLI   | 1600  | >EGFR-R776† NPHVCHLL   | 215   | 1385  |
| >EGFR-R776† NPHVCRLI   | 65    | >EGFR-R776† NPHVCHLL   | 136   | 71    |
| >EGFR-R776† NPHVCRLI   | 1428  | >EGFR-R776† NPHVCHLL   | 258   | 1170  |
| >EGFR-R776† NPHVCRLGI  | 1176  | >EGFR-R776† NPHVCHLLGI | 416   | 760   |
| >EGFR-R776† VDNPHVCRLI | 719   | >EGFR-R776† VDNPHVCHLI | 328   | 391   |
| >EGFR-R776† SVDNPHVCRI | 75    | >EGFR-R776† SVDNPHVCHI | 106   | 31    |
| >EGFR-R776† SVDNPHVCRI | 1156  | >EGFR-R776† SVDNPHVCHI | 312   | 844   |
| >EGFR-R776† SVDNPHVCRI | 449   | >EGFR-R776† SVDNPHVCHI | 162   | 287   |
| >EGFR-R776† SVDNPHVCRI | 2975  | >EGFR-R776† SVDNPHVCHI | 432   | 2543  |
| >EGFR-R776† SVDNPHVCRI | 204   | >EGFR-R776† SVDNPHVCHI | 330   | 126   |
| >EGFR-R776† SVDNPHVCRI | 3469  | >EGFR-R776† SVDNPHVCHI | 427   | 3042  |
| >EGFR-R776† SVDNPHVCR  | 184   | >EGFR-R776† SVDNPHVCH  | 1810  | 1626  |
| >EGFR-R776† SVDNPHVCR  | 237   | >EGFR-R776† SVDNPHVCH  | 14719 | 14482 |
| >EGFR-R776† SVDNPHVCR  | 118   | >EGFR-R776† SVDNPHVCH  | 16414 | 16296 |
| >EGFR-R776† SVDNPHVCRI | 627   | >EGFR-R776† SVDNPHVCHI | 422   | 205   |
| >EGFR-R776† SVDNPHVCRI | 1859  | >EGFR-R776† SVDNPHVCHI | 234   | 1625  |
| >EGFR-R776† ASVDNPHVCI | 300   | >EGFR-R776† ASVDNPHVCI | 12709 | 12409 |
| >EGFR-R776† ASVDNPHVCI | 389   | >EGFR-R776† ASVDNPHVCI | 206   | 183   |
| >EGFR-R776† ASVDNPHVCI | 113   | >EGFR-R776† ASVDNPHVCI | 13961 | 13848 |
| >EGFR-R776† ASVDNPHVCI | 423   | >EGFR-R776† ASVDNPHVCI | 26454 | 26031 |
| >EGFR-R776† ASVDNPHVCI | 6     | >EGFR-R776† ASVDNPHVCI | 10    | 4     |
| >EGFR-R776† ASVDNPHVCI | 154   | >EGFR-R776† ASVDNPHVCI | 819   | 665   |
| >EGFR-R803I REHKDNIGSC | 364   | >EGFR-R803I LEHKDNIGSQ | 385   | 21    |
| >EGFR-R803I REHKDNIGSC | 104   | >EGFR-R803I LEHKDNIGSQ | 213   | 109   |
| >EGFR-R803I REHKDNIGSC | 773   | >EGFR-R803I LEHKDNIGSQ | 78    | 695   |
| >EGFR-R803I REHKDNIGSC | 360   | >EGFR-R803I LEHKDNIGSQ | 414   | 54    |
| >EGFR-R803I REHKDNIGS  | 394   | >EGFR-R803I LEHKDNIGS  | 2425  | 2031  |
| >EGFR-R803I REHKDNIGSC | 362   | >EGFR-R803I LEHKDNIGSQ | 524   | 162   |
| >EGFR-R803I MPFGCLLDY\ | 8723  | >EGFR-R803I MPFGCLLDY\ | 10    | 8713  |
| >EGFR-R803I MPFGCLLDY\ | 498   | >EGFR-R803I MPFGCLLDY\ | 17685 | 17187 |
| >EGFR-R803I MPFGCLLDY\ | 425   | >EGFR-R803I MPFGCLLDY\ | 21565 | 21140 |
| >EGFR-R803I MPFGCLLDY\ | 63    | >EGFR-R803I MPFGCLLDY\ | 22683 | 22620 |
| >EGFR-R803I MPFGCLLDY\ | 12003 | >EGFR-R803I MPFGCLLDY\ | 52    | 11951 |
| >EGFR-R803I MPFGCLLDY\ | 80    | >EGFR-R803I MPFGCLLDY\ | 13    | 67    |
| >EGFR-R803I MPFGCLLDY\ | 7367  | >EGFR-R803I MPFGCLLDY\ | 22    | 7345  |
| >EGFR-R803I MPFGCLLDY\ | 1212  | >EGFR-R803I MPFGCLLDY\ | 24    | 1188  |
| >EGFR-R803I MPFGCLLDY\ | 43    | >EGFR-R803I MPFGCLLDY\ | 46    | 3     |
| >EGFR-R803I MPFGCLLDY\ | 8469  | >EGFR-R803I MPFGCLLDY\ | 184   | 8285  |
| >EGFR-R803I MPFGCLLDY\ | 1717  | >EGFR-R803I MPFGCLLDY\ | 216   | 1501  |
| >EGFR-R803I MPFGCLLDY\ | 32    | >EGFR-R803I MPFGCLLDY\ | 14221 | 14189 |
| >EGFR-R803I YVREHKDNI  | 11981 | >EGFR-R803I YVLEHKDNI  | 376   | 11605 |
| >EGFR-R803I YVREHKDNI  | 2207  | >EGFR-R803I YVLEHKDNI  | 63    | 2144  |



|                        |       |                        |       |       |
|------------------------|-------|------------------------|-------|-------|
| >EGFR-R803I YVREHKDNIG | 8599  | >EGFR-R803I YVLEHKDNIG | 309   | 8290  |
| >EGFR-R803I YVREHKDNI  | 1668  | >EGFR-R803I YVLEHKDNI  | 27    | 1641  |
| >EGFR-R803I YVREHKDNI  | 7361  | >EGFR-R803I YVLEHKDNI  | 119   | 7242  |
| >EGFR-R803I YVREHKDNI  | 11920 | >EGFR-R803I YVLEHKDNI  | 270   | 11650 |
| >EGFR-R803I YVREHKDNI  | 2233  | >EGFR-R803I YVLEHKDNI  | 19    | 2214  |
| >EGFR-R803I LDYVREHKDN | 101   | >EGFR-R803I LDYVLEHKDN | 95    | 6     |
| >EGFR-R803I LDYVREHKDN | 286   | >EGFR-R803I LDYVLEHKDN | 182   | 104   |
| >EGFR-R803I LDYVREHKDN | 387   | >EGFR-R803I LDYVLEHKDN | 408   | 21    |
| >EGFR-R803I LDYVREHKDN | 62    | >EGFR-R803I LDYVLEHKDN | 59    | 3     |
| >EGFR-R803I CLLDYVREHK | 74    | >EGFR-R803I CLLDYVLEHK | 40    | 34    |
| >EGFR-R803I CLLDYVREHK | 144   | >EGFR-R803I CLLDYVLEHK | 57    | 87    |
| >EGFR-R803I GCLLDYVR   | 361   | >EGFR-R803I GCLLDYVL   | 32999 | 32638 |
| >EGFR-R803I FGCLLDYVR  | 78    | >EGFR-R803I FGCLLDYVL  | 28732 | 28654 |
| >EGFR-R803I PFGCLLDYVR | 35    | >EGFR-R803I PFGCLLDYVL | 22136 | 22101 |
| >EGFR-R831C(RRLVHRDL   | 220   | >EGFR-R831C(RRLVHRDL   | 1567  | 1347  |
| >EGFR-R831C(RRLVHRDL   | 45    | >EGFR-R831C(RRLVHRDL   | 1367  | 1322  |
| >EGFR-R831C(RRLVHRDLA  | 102   | >EGFR-R831C(RRLVHRDLA  | 2747  | 2645  |
| >EGFR-R831C(RRLVHRDLAA | 34    | >EGFR-R831C(RRLVHRDLAA | 405   | 371   |
| >EGFR-R831C(RRLVHRDLAA | 29    | >EGFR-R831C(RRLVHRDLAA | 379   | 350   |
| >EGFR-R831C(RRLVHRDL   | 15    | >EGFR-R831C(RRLVHRDL   | 652   | 637   |
| >EGFR-R831C(RRLVHRDLA  | 91    | >EGFR-R831C(RRLVHRDLA  | 9059  | 8968  |
| >EGFR-R831C(RRLVHRDLAA | 38    | >EGFR-R831C(RRLVHRDLAA | 1072  | 1034  |
| >EGFR-R831C(RRLVHRDLAA | 224   | >EGFR-R831C(RRLVHRDLAA | 14934 | 14710 |
| >EGFR-R831C(RRLVHRDL   | 34    | >EGFR-R831C(RRLVHRDL   | 95    | 61    |
| >EGFR-R831C(RRLVHRDLA  | 57    | >EGFR-R831C(RRLVHRDLA  | 1267  | 1210  |
| >EGFR-R831C(RRLVHRDLAA | 72    | >EGFR-R831C(RRLVHRDLAA | 919   | 847   |
| >EGFR-R831C(RRLVHRDLAA | 121   | >EGFR-R831C(RRLVHRDLAA | 1152  | 1031  |
| >EGFR-R831C(IAKGMNYLEC | 143   | >EGFR-R831C(IAKGMNYLEC | 22416 | 22273 |
| >EGFR-R831C(IAKGMNYLEC | 310   | >EGFR-R831C(IAKGMNYLEC | 35563 | 35253 |
| >EGFR-R831C(IAKGMNYLEC | 174   | >EGFR-R831C(IAKGMNYLEC | 37377 | 37203 |
| >EGFR-R831C(EDRRLVHR   | 1500  | >EGFR-R831C(EDRRLVHR   | 379   | 1121  |
| >EGFR-R831C(LEDRLVHRD  | 355   | >EGFR-R831C(LEDRLVHRD  | 1301  | 946   |
| >EGFR-R831C(LEDRLVHRD  | 275   | >EGFR-R831C(LEDRLVHRD  | 204   | 71    |
| >EGFR-R831C(YLEDRLV    | 188   | >EGFR-R831C(YLEDRLV    | 48    | 140   |
| >EGFR-R831C(YLEDRLV    | 44    | >EGFR-R831C(YLEDRLV    | 13    | 31    |
| >EGFR-R831C(YLEDRLV    | 32    | >EGFR-R831C(YLEDRLV    | 17    | 15    |
| >EGFR-R831C(YLEDRLV    | 198   | >EGFR-R831C(YLEDRLV    | 68    | 130   |
| >EGFR-R831C(YLEDRLV    | 17    | >EGFR-R831C(YLEDRLV    | 14    | 3     |
| >EGFR-R831C(YLEDRLV    | 47    | >EGFR-R831C(YLEDRLV    | 16    | 31    |
| >EGFR-R831C(YLEDRLV    | 62    | >EGFR-R831C(YLEDRLV    | 35    | 27    |
| >EGFR-R831C(YLEDRLV    | 670   | >EGFR-R831C(YLEDRLV    | 80    | 590   |
| >EGFR-R831C(YLEDRLV    | 2     | >EGFR-R831C(YLEDRLV    | 2     | 0     |
| >EGFR-R831C(YLEDRLVHR  | 418   | >EGFR-R831C(YLEDRLVHR  | 503   | 85    |

|                                    |      |                                    |       |       |
|------------------------------------|------|------------------------------------|-------|-------|
| >EGFR-R831(YLED <del>R</del> RLVHR | 253  | >EGFR-R831(YLEDC <del>R</del> LVHR | 240   | 13    |
| >EGFR-R831(YLED <del>R</del> RLVHR | 229  | >EGFR-R831(YLEDC <del>R</del> LVHR | 170   | 59    |
| >EGFR-R831(YLED <del>R</del> RLVHR | 420  | >EGFR-R831(YLEDC <del>R</del> LVHR | 255   | 165   |
| >EGFR-R831(YLED <del>R</del> RLVHR | 1518 | >EGFR-R831(YLEDC <del>R</del> LVHR | 464   | 1054  |
| >EGFR-R831(YLED <del>R</del> RLVHR | 93   | >EGFR-R831(YLEDC <del>R</del> LVHR | 63    | 30    |
| >EGFR-R831(YLED <del>R</del> RLVHR | 162  | >EGFR-R831(YLEDC <del>R</del> LVHR | 55    | 107   |
| >EGFR-R831(NYLED <del>R</del> RL   | 81   | >EGFR-R831(NYLED <del>C</del> RL   | 55    | 26    |
| >EGFR-R831(NYLED <del>R</del> RLVH | 159  | >EGFR-R831(NYLED <del>C</del> RLVH | 450   | 291   |
| >EGFR-R831(NYLED <del>R</del> RLVH | 17   | >EGFR-R831(NYLED <del>C</del> RLVH | 25    | 8     |
| >EGFR-R831(NYLED <del>R</del> RLVH | 26   | >EGFR-R831(NYLED <del>C</del> RLVH | 34    | 8     |
| >EGFR-R831(MNYLED <del>R</del> RL  | 536  | >EGFR-R831(MNYLED <del>C</del> RL  | 399   | 137   |
| >EGFR-R831(MNYLED <del>R</del> R   | 145  | >EGFR-R831(MNYLED <del>C</del> R   | 107   | 38    |
| >EGFR-R831(MNYLED <del>R</del> R   | 474  | >EGFR-R831(MNYLED <del>C</del> R   | 564   | 90    |
| >EGFR-R831(GMNYLED <del>R</del> R  | 1051 | >EGFR-R831(GMNYLED <del>C</del> R  | 426   | 625   |
| >EGFR-R831(GMNYLED <del>R</del> R  | 308  | >EGFR-R831(GMNYLED <del>C</del> R  | 117   | 191   |
| >EGFR-R831(GMNYLED <del>R</del> R  | 54   | >EGFR-R831(GMNYLED <del>C</del> R  | 27    | 27    |
| >EGFR-R831(GMNYLED <del>R</del> R  | 42   | >EGFR-R831(GMNYLED <del>C</del> R  | 33    | 9     |
| >EGFR-R831(GMNYLED <del>R</del> R  | 838  | >EGFR-R831(GMNYLED <del>C</del> R  | 281   | 557   |
| >EGFR-R831(GMNYLED <del>R</del> R  | 61   | >EGFR-R831(GMNYLED <del>C</del> R  | 52    | 9     |
| >EGFR-R831(GMNYLED <del>R</del> R  | 824  | >EGFR-R831(GMNYLED <del>C</del> R  | 123   | 701   |
| >EGFR-R831(GMNYLED <del>R</del> R  | 95   | >EGFR-R831(GMNYLED <del>C</del> R  | 53    | 42    |
| >EGFR-R831(GMNYLED <del>R</del> R  | 1329 | >EGFR-R831(GMNYLED <del>C</del> R  | 96    | 1233  |
| >EGFR-R831(GMNYLED <del>R</del> R  | 75   | >EGFR-R831(GMNYLED <del>C</del> R  | 45    | 30    |
| >EGFR-R831(GMNYLED <del>R</del> R  | 1234 | >EGFR-R831(GMNYLED <del>C</del> R  | 141   | 1093  |
| >EGFR-R831(GMNYLED <del>R</del> R  | 39   | >EGFR-R831(GMNYLED <del>C</del> R  | 45    | 6     |
| >EGFR-R831(GMNYLED <del>R</del>    | 92   | >EGFR-R831(GMNYLED <del>C</del>    | 22702 | 22610 |
| >EGFR-R831(GMNYLED <del>R</del> R  | 155  | >EGFR-R831(GMNYLED <del>C</del> R  | 161   | 6     |
| >EGFR-R831(KGMNYLED <del>R</del>   | 159  | >EGFR-R831(KGMNYLED <del>C</del>   | 22782 | 22623 |
| >EGFR-R831(KGMNYLED <del>R</del>   | 481  | >EGFR-R831(KGMNYLED <del>C</del>   | 316   | 165   |
| >EGFR-R831(KGMNYLED <del>R</del>   | 425  | >EGFR-R831(KGMNYLED <del>C</del>   | 37057 | 36632 |
| >EGFR-R831(KGMNYLED <del>R</del>   | 306  | >EGFR-R831(KGMNYLED <del>C</del>   | 508   | 202   |
| >EGFR-R831H <del>R</del> RLVHRDL   | 220  | >EGFR-R831H <del>R</del> RLVHRDL   | 986   | 766   |
| >EGFR-R831H <del>R</del> RLVHRDL   | 45   | >EGFR-R831H <del>R</del> RLVHRDL   | 189   | 144   |
| >EGFR-R831H <del>R</del> RLVHRDLA  | 102  | >EGFR-R831H <del>R</del> RLVHRDLA  | 539   | 437   |
| >EGFR-R831H <del>R</del> RLVHRDLA/ | 34   | >EGFR-R831H <del>R</del> RLVHRDLA/ | 59    | 25    |
| >EGFR-R831H <del>R</del> RLVHRDLA/ | 29   | >EGFR-R831H <del>R</del> RLVHRDLA/ | 75    | 46    |
| >EGFR-R831H <del>R</del> RLVHRDL   | 15   | >EGFR-R831H <del>R</del> RLVHRDL   | 661   | 646   |
| >EGFR-R831H <del>R</del> RLVHRDLA  | 91   | >EGFR-R831H <del>R</del> RLVHRDLA  | 3187  | 3096  |
| >EGFR-R831H <del>R</del> RLVHRDLA/ | 38   | >EGFR-R831H <del>R</del> RLVHRDLA/ | 411   | 373   |
| >EGFR-R831H <del>R</del> RLVHRDLA/ | 224  | >EGFR-R831H <del>R</del> RLVHRDLA/ | 7202  | 6978  |
| >EGFR-R831H <del>R</del> RLVHRDL   | 34   | >EGFR-R831H <del>R</del> RLVHRDL   | 555   | 521   |
| >EGFR-R831H <del>R</del> RLVHRDLA  | 57   | >EGFR-R831H <del>R</del> RLVHRDLA  | 502   | 445   |
| >EGFR-R831H <del>R</del> RLVHRDLA/ | 72   | >EGFR-R831H <del>R</del> RLVHRDLA/ | 1089  | 1017  |

|                        |      |                        |       |       |
|------------------------|------|------------------------|-------|-------|
| >EGFR-R831F RRLVHRDLAA | 121  | >EGFR-R831F HRLVHRDLAA | 738   | 617   |
| >EGFR-R831F IAKGMNYLEC | 143  | >EGFR-R831F IAKGMNYLEC | 11210 | 11067 |
| >EGFR-R831F IAKGMNYLEC | 310  | >EGFR-R831F IAKGMNYLEC | 25851 | 25541 |
| >EGFR-R831F IAKGMNYLEC | 174  | >EGFR-R831F IAKGMNYLEC | 17836 | 17662 |
| >EGFR-R831F EDRLVHR    | 1500 | >EGFR-R831F EDHRLVHR   | 314   | 1186  |
| >EGFR-R831F LEDRLVHRC  | 355  | >EGFR-R831F LEDHRLVHRC | 397   | 42    |
| >EGFR-R831F LEDRLVHRC  | 275  | >EGFR-R831F LEDHRLVHRC | 206   | 69    |
| >EGFR-R831F YLEDRLV    | 188  | >EGFR-R831F YLEDHRLV   | 98    | 90    |
| >EGFR-R831F YLEDRLV    | 44   | >EGFR-R831F YLEDHRLV   | 20    | 24    |
| >EGFR-R831F YLEDRLV    | 32   | >EGFR-R831F YLEDHRLV   | 13    | 19    |
| >EGFR-R831F YLEDRLV    | 198  | >EGFR-R831F YLEDHRLV   | 102   | 96    |
| >EGFR-R831F YLEDRLV    | 17   | >EGFR-R831F YLEDHRLV   | 6     | 11    |
| >EGFR-R831F YLEDRLV    | 47   | >EGFR-R831F YLEDHRLV   | 18    | 29    |
| >EGFR-R831F YLEDRLV    | 62   | >EGFR-R831F YLEDHRLV   | 41    | 21    |
| >EGFR-R831F YLEDRLV    | 670  | >EGFR-R831F YLEDHRLV   | 275   | 395   |
| >EGFR-R831F YLEDRLV    | 2    | >EGFR-R831F YLEDHRLV   | 2     | 0     |
| >EGFR-R831F YLEDRLVHR  | 418  | >EGFR-R831F YLEDHRLVHR | 522   | 104   |
| >EGFR-R831F YLEDRLVHR  | 253  | >EGFR-R831F YLEDHRLVHR | 265   | 12    |
| >EGFR-R831F YLEDRLVHR  | 229  | >EGFR-R831F YLEDHRLVHR | 257   | 28    |
| >EGFR-R831F YLEDRLVHR  | 420  | >EGFR-R831F YLEDHRLVHR | 1662  | 1242  |
| >EGFR-R831F YLEDRLVHR  | 93   | >EGFR-R831F YLEDHRLVHR | 86    | 7     |
| >EGFR-R831F YLEDRLVHR  | 162  | >EGFR-R831F YLEDHRLVHR | 141   | 21    |
| >EGFR-R831F NYLEDRL    | 1780 | >EGFR-R831F NYLEDHRL   | 225   | 1555  |
| >EGFR-R831F NYLEDRL    | 81   | >EGFR-R831F NYLEDHRL   | 25    | 56    |
| >EGFR-R831F NYLEDRLVH  | 159  | >EGFR-R831F NYLEDHRLVH | 181   | 22    |
| >EGFR-R831F NYLEDRLVH  | 17   | >EGFR-R831F NYLEDHRLVH | 18    | 1     |
| >EGFR-R831F NYLEDRLVH  | 26   | >EGFR-R831F NYLEDHRLVH | 24    | 2     |
| >EGFR-R831F MNYLEDRR   | 145  | >EGFR-R831F MNYLEDHR   | 84    | 61    |
| >EGFR-R831F MNYLEDRR   | 474  | >EGFR-R831F MNYLEDHR   | 158   | 316   |
| >EGFR-R831F GMNYLEDRR  | 308  | >EGFR-R831F GMNYLEDHR  | 103   | 205   |
| >EGFR-R831F GMNYLEDRR  | 54   | >EGFR-R831F GMNYLEDHR  | 34    | 20    |
| >EGFR-R831F GMNYLEDRR  | 42   | >EGFR-R831F GMNYLEDHR  | 29    | 13    |
| >EGFR-R831F GMNYLEDRR  | 838  | >EGFR-R831F GMNYLEDHR  | 226   | 612   |
| >EGFR-R831F GMNYLEDRR  | 61   | >EGFR-R831F GMNYLEDHR  | 24    | 37    |
| >EGFR-R831F GMNYLEDRR  | 824  | >EGFR-R831F GMNYLEDHR  | 61    | 763   |
| >EGFR-R831F GMNYLEDRR  | 95   | >EGFR-R831F GMNYLEDHR  | 41    | 54    |
| >EGFR-R831F GMNYLEDRR  | 1329 | >EGFR-R831F GMNYLEDHR  | 117   | 1212  |
| >EGFR-R831F GMNYLEDRR  | 75   | >EGFR-R831F GMNYLEDHR  | 40    | 35    |
| >EGFR-R831F GMNYLEDRR  | 1234 | >EGFR-R831F GMNYLEDHR  | 84    | 1150  |
| >EGFR-R831F GMNYLEDRR  | 39   | >EGFR-R831F GMNYLEDHR  | 34    | 5     |
| >EGFR-R831F GMNYLEDH   | 92   | >EGFR-R831F GMNYLEDH   | 12643 | 12551 |
| >EGFR-R831F GMNYLEDRR  | 155  | >EGFR-R831F GMNYLEDHR  | 56    | 99    |
| >EGFR-R831F KGMNYLEDH  | 159  | >EGFR-R831F KGMNYLEDH  | 12977 | 12818 |

|                          |      |                          |       |       |
|--------------------------|------|--------------------------|-------|-------|
| >EGFR-R831F KGMNYLEDH    | 481  | >EGFR-R831F KGMNYLEDH    | 436   | 45    |
| >EGFR-R831F KGMNYLEDH    | 425  | >EGFR-R831F KGMNYLEDH    | 32368 | 31943 |
| >EGFR-R831F KGMNYLEDH    | 306  | >EGFR-R831F KGMNYLEDH    | 135   | 171   |
| >EGFR-R832(C RLVHRDLA    | 174  | >EGFR-R832(C RLVHRDLA    | 601   | 427   |
| >EGFR-R832(C RLVHRDLAA   | 166  | >EGFR-R832(C RLVHRDLAA   | 547   | 381   |
| >EGFR-R832(C RLVHRDLAA   | 344  | >EGFR-R832(C RLVHRDLAA   | 2587  | 2243  |
| >EGFR-R832(C RLVHRDLA    | 452  | >EGFR-R832(C RLVHRDLA    | 1886  | 1434  |
| >EGFR-R832(C RLVHRDLAAF  | 26   | >EGFR-R832(C RLVHRDLAAF  | 148   | 122   |
| >EGFR-R832(C RLVHRDLAAF  | 1562 | >EGFR-R832(C RLVHRDLAAF  | 447   | 1115  |
| >EGFR-R832(C RLVHRDLAAF  | 136  | >EGFR-R832(C RLVHRDLAAF  | 583   | 447   |
| >EGFR-R832(C RLVHRDLAAF  | 132  | >EGFR-R832(C RLVHRDLAAF  | 321   | 189   |
| >EGFR-R832(C RRLVHRDLAA  | 759  | >EGFR-R832(C RCLVHRDLAA  | 30    | 729   |
| >EGFR-R832(C RRLVHRDL    | 220  | >EGFR-R832(C RCLVHRDL    | 4640  | 4420  |
| >EGFR-R832(C RRLVHRDL    | 45   | >EGFR-R832(C RCLVHRDL    | 20587 | 20542 |
| >EGFR-R832(C RRLVHRDLA   | 102  | >EGFR-R832(C RCLVHRDLA   | 22330 | 22228 |
| >EGFR-R832(C RRLVHRDLAA  | 34   | >EGFR-R832(C RCLVHRDLAA  | 22834 | 22800 |
| >EGFR-R832(C RRLVHRDLAA  | 29   | >EGFR-R832(C RCLVHRDLAA  | 17756 | 17727 |
| >EGFR-R832(C RRLVHRDL    | 15   | >EGFR-R832(C RCLVHRDL    | 4305  | 4290  |
| >EGFR-R832(C RRLVHRDLA   | 91   | >EGFR-R832(C RCLVHRDLA   | 18753 | 18662 |
| >EGFR-R832(C RRLVHRDLAA  | 38   | >EGFR-R832(C RCLVHRDLAA  | 16479 | 16441 |
| >EGFR-R832(C RRLVHRDLAA  | 224  | >EGFR-R832(C RCLVHRDLAA  | 24654 | 24430 |
| >EGFR-R832(C RRLVHRDL    | 34   | >EGFR-R832(C RCLVHRDL    | 2605  | 2571  |
| >EGFR-R832(C RRLVHRDLA   | 57   | >EGFR-R832(C RCLVHRDLA   | 21712 | 21655 |
| >EGFR-R832(C RRLVHRDLAA  | 72   | >EGFR-R832(C RCLVHRDLAA  | 22785 | 22713 |
| >EGFR-R832(C RRLVHRDLAA  | 121  | >EGFR-R832(C RCLVHRDLAA  | 21308 | 21187 |
| >EGFR-R832(C RRLVHRDLAA  | 625  | >EGFR-R832(C RCLVHRDLAA  | 213   | 412   |
| >EGFR-R832(C LEDRRLVHRD  | 355  | >EGFR-R832(C LEDRCLVHRD  | 715   | 360   |
| >EGFR-R832(C LEDRRLVHRD  | 275  | >EGFR-R832(C LEDRCLVHRD  | 105   | 170   |
| >EGFR-R832(C YLED RRLV   | 188  | >EGFR-R832(C YLED RCLV   | 31    | 157   |
| >EGFR-R832(C YLED RRLV   | 44   | >EGFR-R832(C YLED RCLV   | 12    | 32    |
| >EGFR-R832(C YLED RRLV   | 32   | >EGFR-R832(C YLED RCLV   | 16    | 16    |
| >EGFR-R832(C YLED RRLV   | 198  | >EGFR-R832(C YLED RCLV   | 28    | 170   |
| >EGFR-R832(C YLED RRLV   | 17   | >EGFR-R832(C YLED RCLV   | 6     | 11    |
| >EGFR-R832(C YLED RRLV   | 47   | >EGFR-R832(C YLED RCLV   | 11    | 36    |
| >EGFR-R832(C YLED RRLV   | 62   | >EGFR-R832(C YLED RCLV   | 11    | 51    |
| >EGFR-R832(C YLED RRLV   | 670  | >EGFR-R832(C YLED RCLV   | 40    | 630   |
| >EGFR-R832(C YLED RRLV   | 2    | >EGFR-R832(C YLED RCLV   | 1     | 1     |
| >EGFR-R832(C YLED RRLVHR | 418  | >EGFR-R832(C YLED RCLVHR | 425   | 7     |
| >EGFR-R832(C YLED RRLVHR | 253  | >EGFR-R832(C YLED RCLVHR | 349   | 96    |
| >EGFR-R832(C YLED RRLVHR | 229  | >EGFR-R832(C YLED RCLVHR | 221   | 8     |
| >EGFR-R832(C YLED RRLVHR | 420  | >EGFR-R832(C YLED RCLVHR | 498   | 78    |
| >EGFR-R832(C YLED RRLVHR | 93   | >EGFR-R832(C YLED RCLVHR | 58    | 35    |
| >EGFR-R832(C YLED RRLVHR | 162  | >EGFR-R832(C YLED RCLVHR | 122   | 40    |

|                       |      |                       |       |       |
|-----------------------|------|-----------------------|-------|-------|
| >EGFR-R832(NYLEDRRL   | 81   | >EGFR-R832(NYLEDRCL   | 230   | 149   |
| >EGFR-R832(NYLEDRRLVH | 159  | >EGFR-R832(NYLEDRCLVH | 140   | 19    |
| >EGFR-R832(NYLEDRRLVH | 17   | >EGFR-R832(NYLEDRCLVH | 14    | 3     |
| >EGFR-R832(NYLEDRRLVH | 26   | >EGFR-R832(NYLEDRCLVH | 15    | 11    |
| >EGFR-R832(MNYLEDRR   | 145  | >EGFR-R832(MNYLEDRC   | 36164 | 36019 |
| >EGFR-R832(MNYLEDRR   | 474  | >EGFR-R832(MNYLEDRC   | 35748 | 35274 |
| >EGFR-R832(GMNYLEDRR  | 1051 | >EGFR-R832(GMNYLEDRC  | 203   | 848   |
| >EGFR-R832(GMNYLEDRR  | 308  | >EGFR-R832(GMNYLEDRC  | 440   | 132   |
| >EGFR-R832(GMNYLEDRR  | 54   | >EGFR-R832(GMNYLEDRC  | 20    | 34    |
| >EGFR-R832(GMNYLEDRR  | 42   | >EGFR-R832(GMNYLEDRC  | 31    | 11    |
| >EGFR-R832(GMNYLEDRR  | 61   | >EGFR-R832(GMNYLEDRC  | 21    | 40    |
| >EGFR-R832(GMNYLEDRR  | 824  | >EGFR-R832(GMNYLEDRC  | 486   | 338   |
| >EGFR-R832(GMNYLEDRR  | 95   | >EGFR-R832(GMNYLEDRC  | 24    | 71    |
| >EGFR-R832(GMNYLEDRR  | 75   | >EGFR-R832(GMNYLEDRC  | 14    | 61    |
| >EGFR-R832(GMNYLEDRR  | 2450 | >EGFR-R832(GMNYLEDRC  | 392   | 2058  |
| >EGFR-R832(GMNYLEDRR  | 39   | >EGFR-R832(GMNYLEDRC  | 13    | 26    |
| >EGFR-R832(GMNYLEDRR  | 155  | >EGFR-R832(GMNYLEDRC  | 23587 | 23432 |
| >EGFR-R832(KGMNYLEDR  | 481  | >EGFR-R832(KGMNYLEDR  | 31067 | 30586 |
| >EGFR-R832(KGMNYLEDR  | 306  | >EGFR-R832(KGMNYLEDR  | 36142 | 35836 |
| >EGFR-R832†RLVHRDLA   | 174  | >EGFR-R832†HLVHRDLA   | 447   | 273   |
| >EGFR-R832†RLVHRDLAA  | 166  | >EGFR-R832†HLVHRDLAA  | 412   | 246   |
| >EGFR-R832†RLVHRDLAA  | 344  | >EGFR-R832†HLVHRDLAA  | 1058  | 714   |
| >EGFR-R832†RLVHRDLA   | 452  | >EGFR-R832†HLVHRDLA   | 504   | 52    |
| >EGFR-R832†RLVHRDLAAF | 26   | >EGFR-R832†HLVHRDLAAF | 149   | 123   |
| >EGFR-R832†RLVHRDLAAF | 1562 | >EGFR-R832†HLVHRDLAAF | 441   | 1121  |
| >EGFR-R832†RLVHRDLAAF | 1385 | >EGFR-R832†HLVHRDLAAF | 136   | 1249  |
| >EGFR-R832†RLVHRDLAAF | 136  | >EGFR-R832†HLVHRDLAAF | 517   | 381   |
| >EGFR-R832†RLVHRDLAAF | 132  | >EGFR-R832†HLVHRDLAAF | 127   | 5     |
| >EGFR-R832†RRLVHRDLA† | 759  | >EGFR-R832†RHLVHRDLA† | 117   | 642   |
| >EGFR-R832†RRLVHRDL   | 220  | >EGFR-R832†RHLVHRDL   | 502   | 282   |
| >EGFR-R832†RRLVHRDL   | 45   | >EGFR-R832†RHLVHRDL   | 11995 | 11950 |
| >EGFR-R832†RRLVHRDLA  | 102  | >EGFR-R832†RHLVHRDLA  | 14508 | 14406 |
| >EGFR-R832†RRLVHRDLA† | 34   | >EGFR-R832†RHLVHRDLA† | 2643  | 2609  |
| >EGFR-R832†RRLVHRDLA† | 29   | >EGFR-R832†RHLVHRDLA† | 6293  | 6264  |
| >EGFR-R832†RRLVHRDL   | 15   | >EGFR-R832†RHLVHRDL   | 1347  | 1332  |
| >EGFR-R832†RRLVHRDLA  | 91   | >EGFR-R832†RHLVHRDLA  | 4639  | 4548  |
| >EGFR-R832†RRLVHRDLA† | 38   | >EGFR-R832†RHLVHRDLA† | 6749  | 6711  |
| >EGFR-R832†RRLVHRDLA† | 224  | >EGFR-R832†RHLVHRDLA† | 9098  | 8874  |
| >EGFR-R832†RRLVHRDL   | 34   | >EGFR-R832†RHLVHRDL   | 1108  | 1074  |
| >EGFR-R832†RRLVHRDLA  | 57   | >EGFR-R832†RHLVHRDLA  | 6521  | 6464  |
| >EGFR-R832†RRLVHRDLA† | 72   | >EGFR-R832†RHLVHRDLA† | 10940 | 10868 |
| >EGFR-R832†RRLVHRDLA† | 121  | >EGFR-R832†RHLVHRDLA† | 7600  | 7479  |
| >EGFR-R832†LEDRLVHRC  | 355  | >EGFR-R832†LEDRLVHRC  | 867   | 512   |

|                         |      |                         |       |       |
|-------------------------|------|-------------------------|-------|-------|
| >EGFR-R832I LEDRRLVHRC  | 275  | >EGFR-R832I LEDRHLVHRC  | 115   | 160   |
| >EGFR-R832I YLED RRLV   | 188  | >EGFR-R832I YLED RHLV   | 28    | 160   |
| >EGFR-R832I YLED RRLV   | 44   | >EGFR-R832I YLED RHLV   | 9     | 35    |
| >EGFR-R832I YLED RRLV   | 32   | >EGFR-R832I YLED RHLV   | 13    | 19    |
| >EGFR-R832I YLED RRLV   | 198  | >EGFR-R832I YLED RHLV   | 24    | 174   |
| >EGFR-R832I YLED RRLV   | 17   | >EGFR-R832I YLED RHLV   | 4     | 13    |
| >EGFR-R832I YLED RRLV   | 47   | >EGFR-R832I YLED RHLV   | 7     | 40    |
| >EGFR-R832I YLED RRLV   | 62   | >EGFR-R832I YLED RHLV   | 11    | 51    |
| >EGFR-R832I YLED RRLV   | 670  | >EGFR-R832I YLED RHLV   | 37    | 633   |
| >EGFR-R832I YLED RRLV   | 2    | >EGFR-R832I YLED RHLV   | 1     | 1     |
| >EGFR-R832I YLED RRLVHR | 418  | >EGFR-R832I YLED RHLVHR | 366   | 52    |
| >EGFR-R832I YLED RRLVHR | 253  | >EGFR-R832I YLED RHLVHR | 258   | 5     |
| >EGFR-R832I YLED RRLVHR | 229  | >EGFR-R832I YLED RHLVHR | 745   | 516   |
| >EGFR-R832I YLED RRLVHR | 420  | >EGFR-R832I YLED RHLVHR | 794   | 374   |
| >EGFR-R832I YLED RRLVHR | 93   | >EGFR-R832I YLED RHLVHR | 287   | 194   |
| >EGFR-R832I YLED RRLVHR | 162  | >EGFR-R832I YLED RHLVHR | 140   | 22    |
| >EGFR-R832I NYLED RRL   | 1050 | >EGFR-R832I NYLED RHL   | 429   | 621   |
| >EGFR-R832I NYLED RRLV  | 9845 | >EGFR-R832I NYLED RHLV  | 399   | 9446  |
| >EGFR-R832I NYLED RRL   | 81   | >EGFR-R832I NYLED RHL   | 31    | 50    |
| >EGFR-R832I NYLED RRLV  | 2247 | >EGFR-R832I NYLED RHLV  | 411   | 1836  |
| >EGFR-R832I NYLED RRLVH | 159  | >EGFR-R832I NYLED RHLVH | 90    | 69    |
| >EGFR-R832I NYLED RRLVH | 17   | >EGFR-R832I NYLED RHLVH | 17    | 0     |
| >EGFR-R832I NYLED RRLV  | 8283 | >EGFR-R832I NYLED RHLV  | 475   | 7808  |
| >EGFR-R832I NYLED RRLVH | 26   | >EGFR-R832I NYLED RHLVH | 17    | 9     |
| >EGFR-R832I MNYLED RR   | 145  | >EGFR-R832I MNYLED RH   | 15485 | 15340 |
| >EGFR-R832I MNYLED RR   | 474  | >EGFR-R832I MNYLED RH   | 29800 | 29326 |
| >EGFR-R832I GMNYLED RR  | 1051 | >EGFR-R832I GMNYLED RH  | 104   | 947   |
| >EGFR-R832I GMNYLED RR  | 308  | >EGFR-R832I GMNYLED RH  | 311   | 3     |
| >EGFR-R832I GMNYLED RR  | 54   | >EGFR-R832I GMNYLED RH  | 10    | 44    |
| >EGFR-R832I GMNYLED RR  | 42   | >EGFR-R832I GMNYLED RH  | 23    | 19    |
| >EGFR-R832I GMNYLED RR  | 61   | >EGFR-R832I GMNYLED RH  | 20    | 41    |
| >EGFR-R832I GMNYLED RR  | 824  | >EGFR-R832I GMNYLED RH  | 327   | 497   |
| >EGFR-R832I GMNYLED RR  | 95   | >EGFR-R832I GMNYLED RH  | 15    | 80    |
| >EGFR-R832I GMNYLED RR  | 1329 | >EGFR-R832I GMNYLED RH  | 443   | 886   |
| >EGFR-R832I GMNYLED RR  | 75   | >EGFR-R832I GMNYLED RH  | 15    | 60    |
| >EGFR-R832I GMNYLED RR  | 2450 | >EGFR-R832I GMNYLED RH  | 193   | 2257  |
| >EGFR-R832I GMNYLED RR  | 39   | >EGFR-R832I GMNYLED RH  | 10    | 29    |
| >EGFR-R832I GMNYLED RR  | 155  | >EGFR-R832I GMNYLED RH  | 13927 | 13772 |
| >EGFR-R832I KGMNYLED R  | 481  | >EGFR-R832I KGMNYLED R  | 16904 | 16423 |
| >EGFR-R832I KGMNYLED R  | 306  | >EGFR-R832I KGMNYLED R  | 29914 | 29608 |
| >EGFR-R832I RLVHRDLA    | 778  | >EGFR-R832I LLVHRDLA    | 248   | 530   |
| >EGFR-R832I RLVHRDLA    | 174  | >EGFR-R832I LLVHRDLA    | 138   | 36    |
| >EGFR-R832I RLVHRDLAA   | 166  | >EGFR-R832I LLVHRDLAA   | 135   | 31    |

|                        |       |                        |       |       |
|------------------------|-------|------------------------|-------|-------|
| >EGFR-R832I RLVHRDLAA  | 344   | >EGFR-R832I LLVHRDLAA  | 255   | 89    |
| >EGFR-R832I RLVHRDLA   | 452   | >EGFR-R832I LLVHRDLA   | 94    | 358   |
| >EGFR-R832I RLVHRDLAA  | 796   | >EGFR-R832I LLVHRDLAA  | 135   | 661   |
| >EGFR-R832I RLVHRDLAAF | 26    | >EGFR-R832I LLVHRDLAAR | 126   | 100   |
| >EGFR-R832I RLVHRDLAAF | 1562  | >EGFR-R832I LLVHRDLAAR | 444   | 1118  |
| >EGFR-R832I RLVHRDLAAF | 136   | >EGFR-R832I LLVHRDLAAR | 1329  | 1193  |
| >EGFR-R832I RLVHRDLAAF | 132   | >EGFR-R832I LLVHRDLAAR | 899   | 767   |
| >EGFR-R832I RRLVHRDLAA | 22368 | >EGFR-R832I RLLVHRDLAA | 310   | 22058 |
| >EGFR-R832I RRLVHRDLAA | 22041 | >EGFR-R832I RLLVHRDLAA | 350   | 21691 |
| >EGFR-R832I RRLVHRDLAA | 9907  | >EGFR-R832I RLLVHRDLAA | 355   | 9552  |
| >EGFR-R832I RRLVHRDL   | 27455 | >EGFR-R832I RLLVHRDL   | 233   | 27222 |
| >EGFR-R832I RRLVHRDLAA | 27926 | >EGFR-R832I RLLVHRDLAA | 420   | 27506 |
| >EGFR-R832I RRLVHRDL   | 34481 | >EGFR-R832I RLLVHRDL   | 156   | 34325 |
| >EGFR-R832I RRLVHRDLA  | 36937 | >EGFR-R832I RLLVHRDLA  | 407   | 36530 |
| >EGFR-R832I RRLVHRDLAA | 36515 | >EGFR-R832I RLLVHRDLAA | 403   | 36112 |
| >EGFR-R832I RRLVHRDLAA | 20960 | >EGFR-R832I RLLVHRDLAA | 419   | 20541 |
| >EGFR-R832I RRLVHRDLAA | 759   | >EGFR-R832I RLLVHRDLAA | 9     | 750   |
| >EGFR-R832I RRLVHRDL   | 12781 | >EGFR-R832I RLLVHRDL   | 356   | 12425 |
| >EGFR-R832I RRLVHRDL   | 220   | >EGFR-R832I RLLVHRDL   | 841   | 621   |
| >EGFR-R832I RRLVHRDL   | 45    | >EGFR-R832I RLLVHRDL   | 12435 | 12390 |
| >EGFR-R832I RRLVHRDLA  | 102   | >EGFR-R832I RLLVHRDLA  | 14474 | 14372 |
| >EGFR-R832I RRLVHRDLAA | 34    | >EGFR-R832I RLLVHRDLAA | 18213 | 18179 |
| >EGFR-R832I RRLVHRDLAA | 29    | >EGFR-R832I RLLVHRDLAA | 8080  | 8051  |
| >EGFR-R832I RRLVHRDL   | 15    | >EGFR-R832I RLLVHRDL   | 1337  | 1322  |
| >EGFR-R832I RRLVHRDLA  | 91    | >EGFR-R832I RLLVHRDLA  | 10116 | 10025 |
| >EGFR-R832I RRLVHRDLAA | 38    | >EGFR-R832I RLLVHRDLAA | 10800 | 10762 |
| >EGFR-R832I RRLVHRDLAA | 224   | >EGFR-R832I RLLVHRDLAA | 15951 | 15727 |
| >EGFR-R832I RRLVHRDL   | 34    | >EGFR-R832I RLLVHRDL   | 1927  | 1893  |
| >EGFR-R832I RRLVHRDLA  | 57    | >EGFR-R832I RLLVHRDLA  | 6824  | 6767  |
| >EGFR-R832I RRLVHRDLAA | 72    | >EGFR-R832I RLLVHRDLAA | 14192 | 14120 |
| >EGFR-R832I RRLVHRDLAA | 121   | >EGFR-R832I RLLVHRDLAA | 6966  | 6845  |
| >EGFR-R832I RRLVHRDLAA | 625   | >EGFR-R832I RLLVHRDLAA | 232   | 393   |
| >EGFR-R832I LEDRRLVHRD | 355   | >EGFR-R832I LEDRLLVHRD | 362   | 7     |
| >EGFR-R832I LEDRRLVHRD | 275   | >EGFR-R832I LEDRLLVHRD | 100   | 175   |
| >EGFR-R832I YLEDRLV    | 188   | >EGFR-R832I YLEDRLV    | 19    | 169   |
| >EGFR-R832I YLEDRLV    | 44    | >EGFR-R832I YLEDRLV    | 11    | 33    |
| >EGFR-R832I YLEDRLV    | 32    | >EGFR-R832I YLEDRLV    | 11    | 21    |
| >EGFR-R832I YLEDRLV    | 198   | >EGFR-R832I YLEDRLV    | 15    | 183   |
| >EGFR-R832I YLEDRLV    | 17    | >EGFR-R832I YLEDRLV    | 6     | 11    |
| >EGFR-R832I YLEDRLV    | 47    | >EGFR-R832I YLEDRLV    | 10    | 37    |
| >EGFR-R832I YLEDRLV    | 62    | >EGFR-R832I YLEDRLV    | 12    | 50    |
| >EGFR-R832I YLEDRLV    | 670   | >EGFR-R832I YLEDRLV    | 55    | 615   |
| >EGFR-R832I YLEDRLV    | 2     | >EGFR-R832I YLEDRLV    | 1     | 1     |

|                         |       |                         |       |       |
|-------------------------|-------|-------------------------|-------|-------|
| >EGFR-R832I YLEDRRLLVHR | 418   | >EGFR-R832I YLEDRLLVHR  | 271   | 147   |
| >EGFR-R832I YLEDRRLLVHR | 253   | >EGFR-R832I YLEDRLLVHR  | 195   | 58    |
| >EGFR-R832I YLEDRRLLVHR | 229   | >EGFR-R832I YLEDRLLVHR  | 421   | 192   |
| >EGFR-R832I YLEDRRLLVHR | 420   | >EGFR-R832I YLEDRLLVHR  | 592   | 172   |
| >EGFR-R832I YLEDRRLLVHR | 93    | >EGFR-R832I YLEDRLLVHR  | 218   | 125   |
| >EGFR-R832I YLEDRRLLVHR | 162   | >EGFR-R832I YLEDRLLVHR  | 180   | 18    |
| >EGFR-R832I NYLEDRRL    | 81    | >EGFR-R832I NYLEDRL     | 46    | 35    |
| >EGFR-R832I NYLEDRRLVH  | 159   | >EGFR-R832I NYLEDRLLVH  | 178   | 19    |
| >EGFR-R832I NYLEDRRLVH  | 17    | >EGFR-R832I NYLEDRLLVH  | 17    | 0     |
| >EGFR-R832I NYLEDRRLVH  | 26    | >EGFR-R832I NYLEDRLLVH  | 17    | 9     |
| >EGFR-R832I MNYLEDRRL   | 536   | >EGFR-R832I MNYLEDRL    | 496   | 40    |
| >EGFR-R832I MNYLEDRR    | 145   | >EGFR-R832I MNYLEDRL    | 26429 | 26284 |
| >EGFR-R832I MNYLEDRR    | 474   | >EGFR-R832I MNYLEDRL    | 32496 | 32022 |
| >EGFR-R832I GMNYLEDRR   | 1051  | >EGFR-R832I GMNYLEDRL   | 125   | 926   |
| >EGFR-R832I GMNYLEDRR   | 19752 | >EGFR-R832I GMNYLEDRL   | 24    | 19728 |
| >EGFR-R832I GMNYLEDRR   | 308   | >EGFR-R832I GMNYLEDRL   | 124   | 184   |
| >EGFR-R832I GMNYLEDRR   | 54    | >EGFR-R832I GMNYLEDRL   | 24    | 30    |
| >EGFR-R832I GMNYLEDRR   | 42    | >EGFR-R832I GMNYLEDRL   | 32    | 10    |
| >EGFR-R832I GMNYLEDRR   | 24312 | >EGFR-R832I GMNYLEDRL   | 376   | 23936 |
| >EGFR-R832I GMNYLEDRR   | 61    | >EGFR-R832I GMNYLEDRL   | 37    | 24    |
| >EGFR-R832I GMNYLEDRR   | 23458 | >EGFR-R832I GMNYLEDRL   | 345   | 23113 |
| >EGFR-R832I GMNYLEDRR   | 95    | >EGFR-R832I GMNYLEDRL   | 41    | 54    |
| >EGFR-R832I GMNYLEDRR   | 23194 | >EGFR-R832I GMNYLEDRL   | 234   | 22960 |
| >EGFR-R832I GMNYLEDRR   | 75    | >EGFR-R832I GMNYLEDRL   | 19    | 56    |
| >EGFR-R832I GMNYLEDRR   | 39    | >EGFR-R832I GMNYLEDRL   | 17    | 22    |
| >EGFR-R832I GMNYLEDRR   | 155   | >EGFR-R832I GMNYLEDRL   | 16667 | 16512 |
| >EGFR-R832I KGMNYLEDR   | 481   | >EGFR-R832I KGMNYLEDR   | 23136 | 22655 |
| >EGFR-R832I KGMNYLEDR   | 306   | >EGFR-R832I KGMNYLEDR   | 32325 | 32019 |
| >EGFR-R836(CDLAARNVL\   | 377   | >EGFR-R836(CDLAARNVL\   | 8251  | 7874  |
| >EGFR-R836(CDLAARNVL    | 97    | >EGFR-R836(CDLAARNVL    | 392   | 295   |
| >EGFR-R836(CDLAARNV     | 187   | >EGFR-R836(CDLAARNV     | 1190  | 1003  |
| >EGFR-R836(CDLAARNV     | 210   | >EGFR-R836(CDLAARNV     | 73    | 137   |
| >EGFR-R836(CDLAARNVL    | 1619  | >EGFR-R836(CDLAARNVL    | 440   | 1179  |
| >EGFR-R836(CDLAARNVL\   | 96    | >EGFR-R836(CDLAARNVL\   | 40    | 56    |
| >EGFR-R836(CHRDLAARNV\  | 62    | >EGFR-R836(CHCDLAARNV\  | 26353 | 26291 |
| >EGFR-R836(CHRDLAARNV\  | 21    | >EGFR-R836(CHCDLAARNV\  | 1056  | 1035  |
| >EGFR-R836(CHRDLAARNV\  | 347   | >EGFR-R836(CHCDLAARNV\  | 29497 | 29150 |
| >EGFR-R836(CNYLEDRRLVH  | 159   | >EGFR-R836(CNYLEDRRLVH  | 20237 | 20078 |
| >EGFR-R836(CNYLEDRRLVH  | 17    | >EGFR-R836(CNYLEDRRLVH  | 19540 | 19523 |
| >EGFR-R836(CNYLEDRRLVH  | 26    | >EGFR-R836(CNYLEDRRLVH  | 29336 | 29310 |
| >EGFR-R836(CVHRDLAARN'  | 471   | >EGFR-R836(CVHCDLAARN'  | 42    | 429   |
| >EGFR-R836(CLVHRDLAA    | 1116  | >EGFR-R836(CLVHCDLAA    | 422   | 694   |
| >EGFR-R836(CLVHRDLAARN' | 138   | >EGFR-R836(CLVHCDLAARN' | 61    | 77    |



|                       |       |                       |       |       |
|-----------------------|-------|-----------------------|-------|-------|
| >EGFR-R836(LVHRDLAA   | 1073  | >EGFR-R836(LVHCDLAA   | 419   | 654   |
| >EGFR-R836(LVHRDLAARN | 787   | >EGFR-R836(LVHCDLAARN | 446   | 341   |
| >EGFR-R836(LVHRDLAARN | 542   | >EGFR-R836(LVHCDLAARN | 286   | 256   |
| >EGFR-R836(LVHRDLAARN | 72    | >EGFR-R836(LVHCDLAARN | 252   | 180   |
| >EGFR-R836(LVHRDLAA   | 291   | >EGFR-R836(LVHCDLAA   | 976   | 685   |
| >EGFR-R836(LVHRDLAARN | 474   | >EGFR-R836(LVHCDLAARN | 1050  | 576   |
| >EGFR-R836(LVHRDLAAR  | 34    | >EGFR-R836(LVHCDLAAR  | 72    | 38    |
| >EGFR-R836(LVHRDLAAR  | 174   | >EGFR-R836(LVHCDLAAR  | 105   | 69    |
| >EGFR-R836(LVHRDLAARN | 1174  | >EGFR-R836(LVHCDLAARN | 319   | 855   |
| >EGFR-R836(RLVHRDLA   | 778   | >EGFR-R836(RLVHCDLA   | 144   | 634   |
| >EGFR-R836(RLVHRDLA   | 174   | >EGFR-R836(RLVHCDLA   | 83    | 91    |
| >EGFR-R836(RLVHRDLAA  | 166   | >EGFR-R836(RLVHCDLAA  | 143   | 23    |
| >EGFR-R836(RLVHRDLA   | 1150  | >EGFR-R836(RLVHCDLA   | 334   | 816   |
| >EGFR-R836(RLVHRDLAA  | 344   | >EGFR-R836(RLVHCDLAA  | 143   | 201   |
| >EGFR-R836(RLVHRDLAA  | 785   | >EGFR-R836(RLVHCDLAA  | 272   | 513   |
| >EGFR-R836(RLVHRDLA   | 452   | >EGFR-R836(RLVHCDLA   | 454   | 2     |
| >EGFR-R836(RLVHRDLAAF | 26    | >EGFR-R836(RLVHCDLAAF | 21    | 5     |
| >EGFR-R836(RLVHRDLAAF | 1385  | >EGFR-R836(RLVHCDLAAF | 448   | 937   |
| >EGFR-R836(RLVHRDLAAF | 136   | >EGFR-R836(RLVHCDLAAF | 86    | 50    |
| >EGFR-R836(RLVHRDLAAF | 132   | >EGFR-R836(RLVHCDLAAF | 49    | 83    |
| >EGFR-R836(RRLVHRDL   | 220   | >EGFR-R836(RRLVHCDL   | 221   | 1     |
| >EGFR-R836(RRLVHRDL   | 45    | >EGFR-R836(RRLVHCDL   | 125   | 80    |
| >EGFR-R836(RRLVHRDLA  | 102   | >EGFR-R836(RRLVHCDLA  | 652   | 550   |
| >EGFR-R836(RRLVHRDLAA | 34    | >EGFR-R836(RRLVHCDLAA | 40    | 6     |
| >EGFR-R836(RRLVHRDLAA | 29    | >EGFR-R836(RRLVHCDLAA | 58    | 29    |
| >EGFR-R836(RRLVHRDL   | 15    | >EGFR-R836(RRLVHCDL   | 28    | 13    |
| >EGFR-R836(RRLVHRDLA  | 91    | >EGFR-R836(RRLVHCDLA  | 219   | 128   |
| >EGFR-R836(RRLVHRDLAA | 38    | >EGFR-R836(RRLVHCDLAA | 34    | 4     |
| >EGFR-R836(RRLVHRDLAA | 224   | >EGFR-R836(RRLVHCDLAA | 376   | 152   |
| >EGFR-R836(RRLVHRDL   | 34    | >EGFR-R836(RRLVHCDL   | 107   | 73    |
| >EGFR-R836(RRLVHRDLA  | 57    | >EGFR-R836(RRLVHCDLA  | 133   | 76    |
| >EGFR-R836(RRLVHRDLAA | 72    | >EGFR-R836(RRLVHCDLAA | 109   | 37    |
| >EGFR-R836(RRLVHRDLAA | 121   | >EGFR-R836(RRLVHCDLAA | 246   | 125   |
| >EGFR-R836(LEDRRLVHRC | 355   | >EGFR-R836(LEDRRLVHCD | 227   | 128   |
| >EGFR-R836(LEDRRLVHRC | 275   | >EGFR-R836(LEDRRLVHCD | 198   | 77    |
| >EGFR-R836(YLEDRRLVHR | 12944 | >EGFR-R836(YLEDRRLVHC | 412   | 12532 |
| >EGFR-R836(YLEDRRLVHR | 17173 | >EGFR-R836(YLEDRRLVHC | 454   | 16719 |
| >EGFR-R836(YLEDRRLVHR | 418   | >EGFR-R836(YLEDRRLVHC | 6     | 412   |
| >EGFR-R836(YLEDRRLVHR | 253   | >EGFR-R836(YLEDRRLVHC | 895   | 642   |
| >EGFR-R836(YLEDRRLVHR | 229   | >EGFR-R836(YLEDRRLVHC | 29888 | 29659 |
| >EGFR-R836(YLEDRRLVHR | 420   | >EGFR-R836(YLEDRRLVHC | 30966 | 30546 |
| >EGFR-R836(YLEDRRLVHR | 93    | >EGFR-R836(YLEDRRLVHC | 29761 | 29668 |
| >EGFR-R836(YLEDRRLVHR | 162   | >EGFR-R836(YLEDRRLVHC | 35123 | 34961 |

|                         |       |                         |       |       |
|-------------------------|-------|-------------------------|-------|-------|
| >EGFR-R836S RDLAARNVL   | 377   | >EGFR-R836S SDLAARNVLV  | 3568  | 3191  |
| >EGFR-R836S RDLAARNVL   | 97    | >EGFR-R836S SDLAARNVL   | 333   | 236   |
| >EGFR-R836S RDLAARNV    | 187   | >EGFR-R836S SDLAARNV    | 355   | 168   |
| >EGFR-R836S RDLAARNV    | 210   | >EGFR-R836S SDLAARNV    | 171   | 39    |
| >EGFR-R836S RDLAARNVL   | 96    | >EGFR-R836S SDLAARNVLV  | 79    | 17    |
| >EGFR-R836S HRDLAARNVI  | 27449 | >EGFR-R836S HSDLAARNVI  | 362   | 27087 |
| >EGFR-R836S HRDLAARNVI  | 62    | >EGFR-R836S HSDLAARNVI  | 19446 | 19384 |
| >EGFR-R836S HRDLAARNVI  | 21    | >EGFR-R836S HSDLAARNVI  | 273   | 252   |
| >EGFR-R836S HRDLAARNVI  | 347   | >EGFR-R836S HSDLAARNVI  | 22976 | 22629 |
| >EGFR-R836S NYLED RRLVH | 159   | >EGFR-R836S NYLED RRLVH | 16974 | 16815 |
| >EGFR-R836S NYLED RRLVH | 17    | >EGFR-R836S NYLED RRLVH | 10993 | 10976 |
| >EGFR-R836S NYLED RRLVH | 26    | >EGFR-R836S NYLED RRLVH | 17202 | 17176 |
| >EGFR-R836S VHRDLAARN   | 471   | >EGFR-R836S VHSDLAARN   | 28    | 443   |
| >EGFR-R836S LVHRDLAA    | 1116  | >EGFR-R836S LVHSDLAA    | 470   | 646   |
| >EGFR-R836S LVHRDLAARN  | 138   | >EGFR-R836S LVHSDLAARN  | 61    | 77    |
| >EGFR-R836S LVHRDLAARN  | 542   | >EGFR-R836S LVHSDLAARN  | 339   | 203   |
| >EGFR-R836S LVHRDLAARN  | 72    | >EGFR-R836S LVHSDLAARN  | 62    | 10    |
| >EGFR-R836S LVHRDLAA    | 291   | >EGFR-R836S LVHSDLAA    | 708   | 417   |
| >EGFR-R836S LVHRDLAARN  | 474   | >EGFR-R836S LVHSDLAARN  | 1163  | 689   |
| >EGFR-R836S LVHRDLAAR   | 34    | >EGFR-R836S LVHSDLAAR   | 28    | 6     |
| >EGFR-R836S LVHRDLAAR   | 174   | >EGFR-R836S LVHSDLAAR   | 94    | 80    |
| >EGFR-R836S RLVHRDLA    | 778   | >EGFR-R836S RLVHSDLA    | 196   | 582   |
| >EGFR-R836S RLVHRDLA    | 174   | >EGFR-R836S RLVHSDLA    | 64    | 110   |
| >EGFR-R836S RLVHRDLAA   | 166   | >EGFR-R836S RLVHSDLAA   | 124   | 42    |
| >EGFR-R836S RLVHRDLA    | 1150  | >EGFR-R836S RLVHSDLA    | 418   | 732   |
| >EGFR-R836S RLVHRDLAA   | 344   | >EGFR-R836S RLVHSDLAA   | 225   | 119   |
| >EGFR-R836S RLVHRDLAA   | 785   | >EGFR-R836S RLVHSDLAA   | 413   | 372   |
| >EGFR-R836S RLVHRDLA    | 452   | >EGFR-R836S RLVHSDLA    | 339   | 113   |
| >EGFR-R836S RLVHRDLAAF  | 26    | >EGFR-R836S RLVHSDLAAR  | 47    | 21    |
| >EGFR-R836S RLVHRDLAA   | 814   | >EGFR-R836S RLVHSDLAA   | 313   | 501   |
| >EGFR-R836S RLVHRDLAAF  | 136   | >EGFR-R836S RLVHSDLAAR  | 87    | 49    |
| >EGFR-R836S RLVHRDLAAF  | 132   | >EGFR-R836S RLVHSDLAAR  | 151   | 19    |
| >EGFR-R836S RRLVHRDL    | 220   | >EGFR-R836S RRLVHSDL    | 90    | 130   |
| >EGFR-R836S RRLVHRDLAA  | 1006  | >EGFR-R836S RRLVHSDLAA  | 463   | 543   |
| >EGFR-R836S RRLVHRDL    | 45    | >EGFR-R836S RRLVHSDL    | 61    | 16    |
| >EGFR-R836S RRLVHRDLA   | 102   | >EGFR-R836S RRLVHSDLA   | 141   | 39    |
| >EGFR-R836S RRLVHRDLAA  | 34    | >EGFR-R836S RRLVHSDLAA  | 35    | 1     |
| >EGFR-R836S RRLVHRDLAA  | 29    | >EGFR-R836S RRLVHSDLAA  | 31    | 2     |
| >EGFR-R836S RRLVHRDL    | 15    | >EGFR-R836S RRLVHSDL    | 22    | 7     |
| >EGFR-R836S RRLVHRDLA   | 91    | >EGFR-R836S RRLVHSDLA   | 235   | 144   |
| >EGFR-R836S RRLVHRDLAA  | 38    | >EGFR-R836S RRLVHSDLAA  | 34    | 4     |
| >EGFR-R836S RRLVHRDLAA  | 224   | >EGFR-R836S RRLVHSDLAA  | 400   | 176   |
| >EGFR-R836S RRLVHRDL    | 34    | >EGFR-R836S RRLVHSDL    | 51    | 17    |

|                        |      |                        |       |       |
|------------------------|------|------------------------|-------|-------|
| >EGFR-R836S RRLVHRDLA  | 57   | >EGFR-R836S RRLVHSDLA  | 184   | 127   |
| >EGFR-R836S RRLVHRDLAA | 72   | >EGFR-R836S RRLVHSDLAA | 100   | 28    |
| >EGFR-R836S RRLVHRDLAA | 121  | >EGFR-R836S RRLVHSDLAA | 258   | 137   |
| >EGFR-R836S DRRLVHRDL  | 505  | >EGFR-R836S DRRLVHSDL  | 363   | 142   |
| >EGFR-R836S LEDRRLVHRC | 355  | >EGFR-R836S LEDRRLVHSD | 414   | 59    |
| >EGFR-R836S LEDRRLVHRC | 275  | >EGFR-R836S LEDRRLVHSD | 182   | 93    |
| >EGFR-R836S YLEDRRLVHR | 418  | >EGFR-R836S YLEDRRLVHS | 52    | 366   |
| >EGFR-R836S YLEDRRLVHR | 253  | >EGFR-R836S YLEDRRLVHS | 223   | 30    |
| >EGFR-R836S YLEDRRLVHR | 229  | >EGFR-R836S YLEDRRLVHS | 28445 | 28216 |
| >EGFR-R836S YLEDRRLVHR | 420  | >EGFR-R836S YLEDRRLVHS | 28612 | 28192 |
| >EGFR-R836S YLEDRRLVHR | 93   | >EGFR-R836S YLEDRRLVHS | 14801 | 14708 |
| >EGFR-R836S YLEDRRLVHR | 162  | >EGFR-R836S YLEDRRLVHS | 29085 | 28923 |
| >EGFR-R841F RRLVHRDLAA | 9636 | >EGFR-R841F RRLVHRDLAA | 440   | 9196  |
| >EGFR-R841F RRLVHRDLAA | 29   | >EGFR-R841F RRLVHRDLAA | 24    | 5     |
| >EGFR-R841F RRLVHRDLAA | 224  | >EGFR-R841F RRLVHRDLAA | 202   | 22    |
| >EGFR-R841F RRLVHRDLAA | 121  | >EGFR-R841F RRLVHRDLAA | 33    | 88    |
| >EGFR-R841F AARNVLVK   | 338  | >EGFR-R841F AAKNVLVK   | 927   | 589   |
| >EGFR-R841F AARNVLVK   | 576  | >EGFR-R841F AAKNVLVK   | 195   | 381   |
| >EGFR-R841F AARNVLVK   | 5    | >EGFR-R841F AAKNVLVK   | 9     | 4     |
| >EGFR-R841F AARNVLVKTF | 404  | >EGFR-R841F AAKNVLVKTF | 1890  | 1486  |
| >EGFR-R841F LAARNVLV   | 312  | >EGFR-R841F LAAKNVLV   | 194   | 118   |
| >EGFR-R841F LAARNVLV   | 497  | >EGFR-R841F LAAKNVLV   | 474   | 23    |
| >EGFR-R841F LAARNVLV   | 337  | >EGFR-R841F LAAKNVLV   | 363   | 26    |
| >EGFR-R841F LAARNVLV   | 54   | >EGFR-R841F LAAKNVLV   | 104   | 50    |
| >EGFR-R841F LAARNVLVK  | 458  | >EGFR-R841F LAAKNVLVK  | 504   | 46    |
| >EGFR-R841F LAARNVLVK  | 230  | >EGFR-R841F LAAKNVLVK  | 333   | 103   |
| >EGFR-R841F LAARNVLVK  | 398  | >EGFR-R841F LAAKNVLVK  | 909   | 511   |
| >EGFR-R841F LAARNVLVK  | 267  | >EGFR-R841F LAAKNVLVK  | 212   | 55    |
| >EGFR-R841F LAARNVLV   | 119  | >EGFR-R841F LAAKNVLV   | 118   | 1     |
| >EGFR-R841F DLAARNVLV  | 88   | >EGFR-R841F DLAAKNVLV  | 80    | 8     |
| >EGFR-R841F DLAARNVLV  | 340  | >EGFR-R841F DLAAKNVLV  | 237   | 103   |
| >EGFR-R841F DLAARNVLV  | 65   | >EGFR-R841F DLAAKNVLV  | 58    | 7     |
| >EGFR-R841F DLAARNVLV  | 158  | >EGFR-R841F DLAAKNVLV  | 54    | 104   |
| >EGFR-R841F DLAARNVL   | 326  | >EGFR-R841F DLAAKNVL   | 424   | 98    |
| >EGFR-R841F DLAARNVLV  | 17   | >EGFR-R841F DLAAKNVLV  | 18    | 1     |
| >EGFR-R841F DLAARNVLVf | 382  | >EGFR-R841F DLAAKNVLVf | 489   | 107   |
| >EGFR-R841F DLAARNVLV  | 64   | >EGFR-R841F DLAAKNVLV  | 41    | 23    |
| >EGFR-R841F DLAARNVLV  | 334  | >EGFR-R841F DLAAKNVLV  | 349   | 15    |
| >EGFR-R841F RDLAARNVL  | 377  | >EGFR-R841F RDLAAKNVL  | 1022  | 645   |
| >EGFR-R841F RDLAARNVL  | 97   | >EGFR-R841F RDLAAKNVL  | 275   | 178   |
| >EGFR-R841F RDLAARNV   | 187  | >EGFR-R841F RDLAAKNV   | 777   | 590   |
| >EGFR-R841F RDLAARNV   | 210  | >EGFR-R841F RDLAAKNV   | 133   | 77    |
| >EGFR-R841F RDLAARNVL  | 96   | >EGFR-R841F RDLAAKNVL  | 69    | 27    |



|                         |       |                         |       |       |
|-------------------------|-------|-------------------------|-------|-------|
| >EGFR-S720F GSGAFGTVYk  | 224   | >EGFR-S720F GFGAFGTVYk  | 560   | 336   |
| >EGFR-S720F GSGAFGTVY   | 78    | >EGFR-S720F GFGAFGTVY   | 466   | 388   |
| >EGFR-S720F GSGAFGTVY   | 1561  | >EGFR-S720F GFGAFGTVY   | 230   | 1331  |
| >EGFR-S720F GSGAFGTVY   | 349   | >EGFR-S720F GFGAFGTVY   | 6985  | 6636  |
| >EGFR-S720F GSGAFGTVY   | 62    | >EGFR-S720F GFGAFGTVY   | 26358 | 26296 |
| >EGFR-S720F GSGAFGTVY   | 11    | >EGFR-S720F GFGAFGTVY   | 286   | 275   |
| >EGFR-S720F GSGAFGTVYk  | 1308  | >EGFR-S720F GFGAFGTVYk  | 70    | 1238  |
| >EGFR-S720F GSGAFGTVYk  | 337   | >EGFR-S720F GFGAFGTVYk  | 3263  | 2926  |
| >EGFR-S720F GSGAFGTVYk  | 3744  | >EGFR-S720F GFGAFGTVYk  | 275   | 3469  |
| >EGFR-S720F TEFKKIKVLGS | 6906  | >EGFR-S720F TEFKKIKVLGF | 430   | 6476  |
| >EGFR-S720F TEFKKIKVLGS | 19850 | >EGFR-S720F TEFKKIKVLGF | 247   | 19603 |
| >EGFR-S720F TEFKKIKVLGS | 4713  | >EGFR-S720F TEFKKIKVLGF | 49    | 4664  |
| >EGFR-S720F TEFKKIKVLGS | 696   | >EGFR-S720F TEFKKIKVLGF | 120   | 576   |
| >EGFR-S720F TEFKKIKVLGS | 5993  | >EGFR-S720F TEFKKIKVLGF | 291   | 5702  |
| >EGFR-S720F TEFKKIKVLGS | 1963  | >EGFR-S720F TEFKKIKVLGF | 76    | 1887  |
| >EGFR-S720F TEFKKIKVLGS | 3741  | >EGFR-S720F TEFKKIKVLGF | 380   | 3361  |
| >EGFR-S720F LGSGAFGTV   | 14183 | >EGFR-S720F LGFGAFGTV   | 362   | 13821 |
| >EGFR-S720F LGSGAFGTV   | 860   | >EGFR-S720F LGFGAFGTV   | 137   | 723   |
| >EGFR-S720F LGSGAFGTVY  | 1260  | >EGFR-S720F LGFGAFGTVY  | 267   | 993   |
| >EGFR-S720F LGSGAFGTVY  | 559   | >EGFR-S720F LGFGAFGTVY  | 114   | 445   |
| >EGFR-S720F LGSGAFGTVY  | 125   | >EGFR-S720F LGFGAFGTVY  | 56    | 69    |
| >EGFR-S720F LGSGAFGTVY  | 1180  | >EGFR-S720F LGFGAFGTVY  | 220   | 960   |
| >EGFR-S720F LGSGAFGTVY  | 478   | >EGFR-S720F LGFGAFGTVY  | 236   | 242   |
| >EGFR-S720F LGSGAFGTVY  | 931   | >EGFR-S720F LGFGAFGTVY  | 144   | 787   |
| >EGFR-S720F LGSGAFGTVY  | 93    | >EGFR-S720F LGFGAFGTVY  | 58    | 35    |
| >EGFR-S720F LGSGAFGTVY  | 1015  | >EGFR-S720F LGFGAFGTVY  | 188   | 827   |
| >EGFR-S720F LGSGAFGTVY  | 1516  | >EGFR-S720F LGFGAFGTVY  | 208   | 1308  |
| >EGFR-S720F LGSGAFGTVY  | 2359  | >EGFR-S720F LGFGAFGTVY  | 418   | 1941  |
| >EGFR-S720F LGSGAFGTVY  | 94    | >EGFR-S720F LGFGAFGTVY  | 414   | 320   |
| >EGFR-S720F LGSGAFGTVY  | 2410  | >EGFR-S720F LGFGAFGTVY  | 355   | 2055  |
| >EGFR-S720F VLGSAGFTV   | 73    | >EGFR-S720F VLGFAGFTV   | 102   | 29    |
| >EGFR-S720F VLGSAGFTV   | 41    | >EGFR-S720F VLGFAGFTV   | 154   | 113   |
| >EGFR-S720F VLGSAGFTV   | 21    | >EGFR-S720F VLGFAGFTV   | 59    | 38    |
| >EGFR-S720F VLGSAGFT    | 68    | >EGFR-S720F VLGFAGFT    | 139   | 71    |
| >EGFR-S720F VLGSAGFTV   | 3     | >EGFR-S720F VLGFAGFTV   | 4     | 1     |
| >EGFR-S720F VLGSAGFTV   | 7     | >EGFR-S720F VLGFAGFTV   | 9     | 2     |
| >EGFR-S720F VLGSAGFT    | 103   | >EGFR-S720F VLGFAGFT    | 306   | 203   |
| >EGFR-S720F VLGSAGFTV   | 7     | >EGFR-S720F VLGFAGFTV   | 9     | 2     |
| >EGFR-S720F VLGSAGFT    | 75    | >EGFR-S720F VLGFAGFT    | 118   | 43    |
| >EGFR-S720F VLGSAGFTV   | 5     | >EGFR-S720F VLGFAGFTV   | 5     | 0     |
| >EGFR-S720F VLGSAGFT    | 14    | >EGFR-S720F VLGFAGFT    | 46    | 32    |
| >EGFR-S720F VLGSAGFTV   | 2     | >EGFR-S720F VLGFAGFTV   | 2     | 0     |
| >EGFR-S720F VLGSAGFTV   | 64    | >EGFR-S720F VLGFAGFTV   | 44    | 20    |

|                         |       |                         |      |       |
|-------------------------|-------|-------------------------|------|-------|
| >EGFR-S720F VLGSGAFGTV  | 54    | >EGFR-S720F VLGFGAFGTV  | 69   | 15    |
| >EGFR-S720F VLGSGAFGTV  | 26    | >EGFR-S720F VLGFGAFGTV  | 21   | 5     |
| >EGFR-S720F VLGSGAFGTV  | 73    | >EGFR-S720F VLGFGAFGTV  | 92   | 19    |
| >EGFR-S720F VLGSGAFGTV  | 87    | >EGFR-S720F VLGFGAFGTV  | 152  | 65    |
| >EGFR-S720F VLGSGAFGTV  | 421   | >EGFR-S720F VLGFGAFGTV  | 1104 | 683   |
| >EGFR-S720F VLGSGAFGTV  | 227   | >EGFR-S720F VLGFGAFGTV  | 393  | 166   |
| >EGFR-S720F KVLGSGAFGT  | 294   | >EGFR-S720F KVLGFGAFGT  | 124  | 170   |
| >EGFR-S720F KVLGSGAFGT  | 668   | >EGFR-S720F KVLGFGAFGT  | 303  | 365   |
| >EGFR-S720F KVLGSGAFGT  | 123   | >EGFR-S720F KVLGFGAFGT  | 114  | 9     |
| >EGFR-S720F KVLGSGAF    | 553   | >EGFR-S720F KVLGFGAF    | 162  | 391   |
| >EGFR-S720F KVLGSGAFGT  | 602   | >EGFR-S720F KVLGFGAFGT  | 228  | 374   |
| >EGFR-S720F KVLGSGAFGT  | 9     | >EGFR-S720F KVLGFGAFGT  | 8    | 1     |
| >EGFR-S720F KVLGSGAFGT  | 12    | >EGFR-S720F KVLGFGAFGT  | 7    | 5     |
| >EGFR-S720F KVLGSGAFGT  | 78    | >EGFR-S720F KVLGFGAFGT  | 71   | 7     |
| >EGFR-S720F KVLGSGAFGT  | 28    | >EGFR-S720F KVLGFGAFGT  | 25   | 3     |
| >EGFR-S720F KVLGSGAFGT  | 176   | >EGFR-S720F KVLGFGAFGT  | 140  | 36    |
| >EGFR-S720F KVLGSGAFGT  | 15    | >EGFR-S720F KVLGFGAFGT  | 14   | 1     |
| >EGFR-S720F KVLGSGAF    | 1056  | >EGFR-S720F KVLGFGAF    | 280  | 776   |
| >EGFR-S720F KVLGSGAF    | 540   | >EGFR-S720F KVLGFGAF    | 351  | 189   |
| >EGFR-S720F KVLGSGAFG   | 103   | >EGFR-S720F KVLGFGAFG   | 119  | 16    |
| >EGFR-S720F KVLGSGAFGT  | 76    | >EGFR-S720F KVLGFGAFGT  | 82   | 6     |
| >EGFR-S720F KVLGSGAF    | 32    | >EGFR-S720F KVLGFGAF    | 16   | 16    |
| >EGFR-S720F KVLGSGAFGT  | 807   | >EGFR-S720F KVLGFGAFGT  | 231  | 576   |
| >EGFR-S720F KVLGSGAFGT  | 324   | >EGFR-S720F KVLGFGAFGT  | 103  | 221   |
| >EGFR-S720F KVLGSGAF    | 172   | >EGFR-S720F KVLGFGAF    | 336  | 164   |
| >EGFR-S720F KVLGSGAF    | 345   | >EGFR-S720F KVLGFGAF    | 613  | 268   |
| >EGFR-S720F KVLGSGAF    | 165   | >EGFR-S720F KVLGFGAF    | 205  | 40    |
| >EGFR-S720F KVLGSGAF    | 16    | >EGFR-S720F KVLGFGAF    | 96   | 80    |
| >EGFR-S720F KVLGSGAF    | 476   | >EGFR-S720F KVLGFGAF    | 718  | 242   |
| >EGFR-S720F KVLGSGAFGT  | 709   | >EGFR-S720F KVLGFGAFGT  | 443  | 266   |
| >EGFR-S720F IKVLGSGAF   | 9     | >EGFR-S720F IKVLGFGAF   | 9    | 0     |
| >EGFR-S720F KIKVLGSGA   | 405   | >EGFR-S720F KIKVLGFGA   | 1323 | 918   |
| >EGFR-S720F KIKVLGSG    | 289   | >EGFR-S720F KIKVLGFG    | 85   | 204   |
| >EGFR-S720F KIKVLGSGA   | 72    | >EGFR-S720F KIKVLGFGA   | 47   | 25    |
| >EGFR-S720F KIKVLGSGAF  | 50    | >EGFR-S720F KIKVLGFGAF  | 44   | 6     |
| >EGFR-S720F KIKVLGSGAF  | 63    | >EGFR-S720F KIKVLGFGAF  | 79   | 16    |
| >EGFR-S720F KIKVLGSGAF  | 245   | >EGFR-S720F KIKVLGFGAF  | 287  | 42    |
| >EGFR-S720F KKIKVLGS    | 3739  | >EGFR-S720F KKIKVLGF    | 7    | 3732  |
| >EGFR-S720F KKIKVLGSGAI | 7     | >EGFR-S720F KKIKVLGFGAI | 8    | 1     |
| >EGFR-S720F FKKIKVLGS   | 8418  | >EGFR-S720F FKKIKVLGF   | 9    | 8409  |
| >EGFR-S720F EFKKIKVLGS  | 23746 | >EGFR-S720F EFKKIKVLGF  | 466  | 23280 |
| >EGFR-S720F SGAFGTVYK   | 49    | >EGFR-S720F PGAFGTVYK   | 4491 | 4442  |
| >EGFR-S720F SGAFGTVY    | 87    | >EGFR-S720F PGAFGTVY    | 638  | 551   |

|                        |       |                        |       |       |
|------------------------|-------|------------------------|-------|-------|
| >EGFR-S720F SGAFGTVYK  | 178   | >EGFR-S720F PGAFGTVYK  | 3415  | 3237  |
| >EGFR-S720F SGAFGTVY   | 188   | >EGFR-S720F PGAFGTVY   | 5588  | 5400  |
| >EGFR-S720F SGAFGTVY   | 460   | >EGFR-S720F PGAFGTVY   | 4539  | 4079  |
| >EGFR-S720F SGAFGTVYK  | 342   | >EGFR-S720F PGAFGTVYK  | 5631  | 5289  |
| >EGFR-S720F GSGAFGTVYK | 46    | >EGFR-S720F GPGAFGTVYK | 1235  | 1189  |
| >EGFR-S720F GSGAFGTVYK | 29    | >EGFR-S720F GPGAFGTVYK | 3748  | 3719  |
| >EGFR-S720F GSGAFGTVY  | 432   | >EGFR-S720F GPGAFGTVY  | 6081  | 5649  |
| >EGFR-S720F GSGAFGTVYK | 224   | >EGFR-S720F GPGAFGTVYK | 3969  | 3745  |
| >EGFR-S720F GSGAFGTVY  | 78    | >EGFR-S720F GPGAFGTVY  | 4349  | 4271  |
| >EGFR-S720F GSGAFGTVY  | 349   | >EGFR-S720F GPGAFGTVY  | 4015  | 3666  |
| >EGFR-S720F GSGAFGTVY  | 62    | >EGFR-S720F GPGAFGTVY  | 22065 | 22003 |
| >EGFR-S720F GSGAFGTVY  | 6064  | >EGFR-S720F GPGAFGTVY  | 129   | 5935  |
| >EGFR-S720F GSGAFGTVY  | 11    | >EGFR-S720F GPGAFGTVY  | 211   | 200   |
| >EGFR-S720F GSGAFGTVY  | 10189 | >EGFR-S720F GPGAFGTVY  | 109   | 10080 |
| >EGFR-S720F GSGAFGTVYK | 337   | >EGFR-S720F GPGAFGTVYK | 5364  | 5027  |
| >EGFR-S720F LGSGAFGTVY | 125   | >EGFR-S720F LGPGAFGTVY | 250   | 125   |
| >EGFR-S720F LGSGAFGTVY | 478   | >EGFR-S720F LGPGAFGTVY | 1177  | 699   |
| >EGFR-S720F LGSGAFGTVY | 93    | >EGFR-S720F LGPGAFGTVY | 293   | 200   |
| >EGFR-S720F LGSGAFGTV  | 8938  | >EGFR-S720F LGPGAFGTV  | 65    | 8873  |
| >EGFR-S720F LGSGAFGTVY | 94    | >EGFR-S720F LGPGAFGTVY | 569   | 475   |
| >EGFR-S720F VLGSAGFGTV | 73    | >EGFR-S720F VLPGAFGTV  | 66    | 7     |
| >EGFR-S720F VLGSAGFGTV | 41    | >EGFR-S720F VLPGAFGTV  | 99    | 58    |
| >EGFR-S720F VLGSAGFGTV | 21    | >EGFR-S720F VLPGAFGTV  | 31    | 10    |
| >EGFR-S720F VLGSAGFGT  | 827   | >EGFR-S720F VLPGAFGT   | 202   | 625   |
| >EGFR-S720F VLGSAGFGT  | 68    | >EGFR-S720F VLPGAFGT   | 59    | 9     |
| >EGFR-S720F VLGSAGFGTV | 3     | >EGFR-S720F VLPGAFGTV  | 3     | 0     |
| >EGFR-S720F VLGSAGFGT  | 505   | >EGFR-S720F VLPGAFGT   | 331   | 174   |
| >EGFR-S720F VLGSAGFGTV | 7     | >EGFR-S720F VLPGAFGTV  | 6     | 1     |
| >EGFR-S720F VLGSAGFGT  | 103   | >EGFR-S720F VLPGAFGT   | 65    | 38    |
| >EGFR-S720F VLGSAGFGTV | 7     | >EGFR-S720F VLPGAFGTV  | 6     | 1     |
| >EGFR-S720F VLGSAGFGT  | 75    | >EGFR-S720F VLPGAFGT   | 68    | 7     |
| >EGFR-S720F VLGSAGFGTV | 5     | >EGFR-S720F VLPGAFGTV  | 5     | 0     |
| >EGFR-S720F VLGSAGFGT  | 14    | >EGFR-S720F VLPGAFGT   | 7     | 7     |
| >EGFR-S720F VLGSAGFGTV | 2     | >EGFR-S720F VLPGAFGTV  | 2     | 0     |
| >EGFR-S720F VLGSAGFGTV | 64    | >EGFR-S720F VLPGAFGTV  | 51    | 13    |
| >EGFR-S720F VLGSAGFGTV | 54    | >EGFR-S720F VLPGAFGTV  | 78    | 24    |
| >EGFR-S720F VLGSAGFGTV | 26    | >EGFR-S720F VLPGAFGTV  | 30    | 4     |
| >EGFR-S720F VLGSAGFGTV | 73    | >EGFR-S720F VLPGAFGTV  | 68    | 5     |
| >EGFR-S720F VLGSAGFGTV | 87    | >EGFR-S720F VLPGAFGTV  | 108   | 21    |
| >EGFR-S720F VLGSAGFGTV | 421   | >EGFR-S720F VLPGAFGTV  | 636   | 215   |
| >EGFR-S720F VLGSAGFGTV | 227   | >EGFR-S720F VLPGAFGTV  | 442   | 215   |
| >EGFR-S720F KVLGSAGFGT | 294   | >EGFR-S720F KVLPGAFGT  | 406   | 112   |
| >EGFR-S720F KVLGSAGFGT | 123   | >EGFR-S720F KVLPGAFGT  | 295   | 172   |

|                        |      |                        |      |      |
|------------------------|------|------------------------|------|------|
| >EGFR-S720F KVLGSGAFGT | 9    | >EGFR-S720F KVLGPGAFGT | 12   | 3    |
| >EGFR-S720F KVLGSGAFGT | 12   | >EGFR-S720F KVLGPGAFGT | 8    | 4    |
| >EGFR-S720F KVLGSGAFGT | 78   | >EGFR-S720F KVLGPGAFGT | 114  | 36   |
| >EGFR-S720F KVLGSGAFGT | 28   | >EGFR-S720F KVLGPGAFGT | 37   | 9    |
| >EGFR-S720F KVLGSGAFGT | 176  | >EGFR-S720F KVLGPGAFGT | 215  | 39   |
| >EGFR-S720F KVLGSGAFGT | 15   | >EGFR-S720F KVLGPGAFGT | 20   | 5    |
| >EGFR-S720F KVLGSGAF   | 540  | >EGFR-S720F KVLGPGAF   | 261  | 279  |
| >EGFR-S720F KVLGSGAFG  | 103  | >EGFR-S720F KVLGPGAFG  | 413  | 310  |
| >EGFR-S720F KVLGSGAFGT | 76   | >EGFR-S720F KVLGPGAFGT | 175  | 99   |
| >EGFR-S720F KVLGSGAF   | 32   | >EGFR-S720F KVLGPGAF   | 25   | 7    |
| >EGFR-S720F KVLGSGAFGT | 324  | >EGFR-S720F KVLGPGAFGT | 122  | 202  |
| >EGFR-S720F KVLGSGAF   | 172  | >EGFR-S720F KVLGPGAF   | 811  | 639  |
| >EGFR-S720F KVLGSGAF   | 345  | >EGFR-S720F KVLGPGAF   | 434  | 89   |
| >EGFR-S720F KVLGSGAF   | 165  | >EGFR-S720F KVLGPGAF   | 327  | 162  |
| >EGFR-S720F KVLGSGAF   | 16   | >EGFR-S720F KVLGPGAF   | 48   | 32   |
| >EGFR-S720F KVLGSGAF   | 476  | >EGFR-S720F KVLGPGAF   | 952  | 476  |
| >EGFR-S720F KVLGSGAFGT | 709  | >EGFR-S720F KVLGPGAFGT | 439  | 270  |
| >EGFR-S720F IKVLGSGAF  | 9    | >EGFR-S720F IKVLGPGAF  | 11   | 2    |
| >EGFR-S720F KIKVLGSGA  | 405  | >EGFR-S720F KIKVLGPGA  | 2409 | 2004 |
| >EGFR-S720F KIKVLGSG   | 289  | >EGFR-S720F KIKVLGPG   | 107  | 182  |
| >EGFR-S720F KIKVLGSGA  | 72   | >EGFR-S720F KIKVLGPGA  | 17   | 55   |
| >EGFR-S720F KIKVLGSGAF | 50   | >EGFR-S720F KIKVLGPGAF | 42   | 8    |
| >EGFR-S720F KIKVLGSGAF | 63   | >EGFR-S720F KIKVLGPGAF | 164  | 101  |
| >EGFR-S720F KIKVLGSGAF | 245  | >EGFR-S720F KIKVLGPGAF | 352  | 107  |
| >EGFR-S720F KIKVLGSGAF | 513  | >EGFR-S720F KIKVLGPGAF | 364  | 149  |
| >EGFR-S720F KKIKVLGSGA | 7    | >EGFR-S720F KKIKVLGPGA | 7    | 0    |
| >EGFR-S720T SGAFGTVYK  | 49   | >EGFR-S720T TGAFGTVYK  | 78   | 29   |
| >EGFR-S720T SGAFGTVY   | 87   | >EGFR-S720T TGAFGTVY   | 171  | 84   |
| >EGFR-S720T SGAFGTVYK  | 178  | >EGFR-S720T TGAFGTVYK  | 57   | 121  |
| >EGFR-S720T SGAFGTVY   | 188  | >EGFR-S720T TGAFGTVY   | 418  | 230  |
| >EGFR-S720T SGAFGTVY   | 460  | >EGFR-S720T TGAFGTVY   | 654  | 194  |
| >EGFR-S720T SGAFGTVY   | 520  | >EGFR-S720T TGAFGTVY   | 290  | 230  |
| >EGFR-S720T SGAFGTVYK  | 342  | >EGFR-S720T TGAFGTVYK  | 773  | 431  |
| >EGFR-S720T GSGAFGTV   | 3555 | >EGFR-S720T GTGAFGTV   | 181  | 3374 |
| >EGFR-S720T GSGAFGTVYK | 46   | >EGFR-S720T GTGAFGTVYK | 32   | 14   |
| >EGFR-S720T GSGAFGTVYK | 29   | >EGFR-S720T GTGAFGTVYK | 18   | 11   |
| >EGFR-S720T GSGAFGTVY  | 827  | >EGFR-S720T GTGAFGTVY  | 191  | 636  |
| >EGFR-S720T GSGAFGTVYK | 711  | >EGFR-S720T GTGAFGTVYK | 351  | 360  |
| >EGFR-S720T GSGAFGTVY  | 432  | >EGFR-S720T GTGAFGTVY  | 424  | 8    |
| >EGFR-S720T GSGAFGTVYK | 224  | >EGFR-S720T GTGAFGTVYK | 88   | 136  |
| >EGFR-S720T GSGAFGTVY  | 78   | >EGFR-S720T GTGAFGTVY  | 91   | 13   |
| >EGFR-S720T GSGAFGTVY  | 349  | >EGFR-S720T GTGAFGTVY  | 1132 | 783  |
| >EGFR-S720T GSGAFGTVY  | 62   | >EGFR-S720T GTGAFGTVY  | 42   | 20   |



|                         |     |                         |      |      |
|-------------------------|-----|-------------------------|------|------|
| >EGFR-S720T GSGAFGTVY   | 11  | >EGFR-S720T GTGAFGTVY   | 6    | 5    |
| >EGFR-S720T GSGAFGTVYK  | 337 | >EGFR-S720T GTGAFGTVYK  | 237  | 100  |
| >EGFR-S720T TEFKKIKVLGS | 696 | >EGFR-S720T TEFKKIKVLGT | 156  | 540  |
| >EGFR-S720T LGSGAFGTVY  | 125 | >EGFR-S720T LGTGAFGTVY  | 284  | 159  |
| >EGFR-S720T LGSGAFGTVY  | 478 | >EGFR-S720T LGTGAFGTVY  | 1478 | 1000 |
| >EGFR-S720T LGSGAFGTVY  | 93  | >EGFR-S720T LGTGAFGTVY  | 447  | 354  |
| >EGFR-S720T LGSGAFGTVY  | 94  | >EGFR-S720T LGTGAFGTVY  | 117  | 23   |
| >EGFR-S720T VLGSAGFGTV  | 73  | >EGFR-S720T VLGTGAFGTV  | 103  | 30   |
| >EGFR-S720T VLGSAGFGTV  | 41  | >EGFR-S720T VLGTGAFGTV  | 77   | 36   |
| >EGFR-S720T VLGSAGFGTV  | 21  | >EGFR-S720T VLGTGAFGTV  | 29   | 8    |
| >EGFR-S720T VLGSAGFGT   | 68  | >EGFR-S720T VLGTGAFGT   | 184  | 116  |
| >EGFR-S720T VLGSAGFGTV  | 3   | >EGFR-S720T VLGTGAFGTV  | 4    | 1    |
| >EGFR-S720T VLGSAGFGTV  | 7   | >EGFR-S720T VLGTGAFGTV  | 7    | 0    |
| >EGFR-S720T VLGSAGFGT   | 103 | >EGFR-S720T VLGTGAFGT   | 223  | 120  |
| >EGFR-S720T VLGSAGFGTV  | 7   | >EGFR-S720T VLGTGAFGTV  | 9    | 2    |
| >EGFR-S720T VLGSAGFGT   | 75  | >EGFR-S720T VLGTGAFGT   | 166  | 91   |
| >EGFR-S720T VLGSAGFGTV  | 5   | >EGFR-S720T VLGTGAFGTV  | 6    | 1    |
| >EGFR-S720T VLGSAGFGT   | 14  | >EGFR-S720T VLGTGAFGT   | 24   | 10   |
| >EGFR-S720T VLGSAGFGTV  | 2   | >EGFR-S720T VLGTGAFGTV  | 2    | 0    |
| >EGFR-S720T VLGSAGFGTV  | 64  | >EGFR-S720T VLGTGAFGTV  | 91   | 27   |
| >EGFR-S720T VLGSAGFGTV  | 54  | >EGFR-S720T VLGTGAFGTV  | 90   | 36   |
| >EGFR-S720T VLGSAGFGTV  | 26  | >EGFR-S720T VLGTGAFGTV  | 32   | 6    |
| >EGFR-S720T VLGSAGFGTV  | 73  | >EGFR-S720T VLGTGAFGTV  | 121  | 48   |
| >EGFR-S720T VLGSAGFGTV  | 87  | >EGFR-S720T VLGTGAFGTV  | 132  | 45   |
| >EGFR-S720T VLGSAGFGTV  | 421 | >EGFR-S720T VLGTGAFGTV  | 652  | 231  |
| >EGFR-S720T VLGSAGFGTV  | 227 | >EGFR-S720T VLGTGAFGTV  | 564  | 337  |
| >EGFR-S720T KVLGSGAFGT  | 294 | >EGFR-S720T KVLGTGAFGT  | 301  | 7    |
| >EGFR-S720T KVLGSGAFGT  | 123 | >EGFR-S720T KVLGTGAFGT  | 154  | 31   |
| >EGFR-S720T KVLGSGAFGT  | 602 | >EGFR-S720T KVLGTGAFGT  | 339  | 263  |
| >EGFR-S720T KVLGSGAFGT  | 9   | >EGFR-S720T KVLGTGAFGT  | 10   | 1    |
| >EGFR-S720T KVLGSGAFGT  | 12  | >EGFR-S720T KVLGTGAFGT  | 9    | 3    |
| >EGFR-S720T KVLGSGAFGT  | 78  | >EGFR-S720T KVLGTGAFGT  | 55   | 23   |
| >EGFR-S720T KVLGSGAFGT  | 28  | >EGFR-S720T KVLGTGAFGT  | 22   | 6    |
| >EGFR-S720T KVLGSGAFGT  | 176 | >EGFR-S720T KVLGTGAFGT  | 127  | 49   |
| >EGFR-S720T KVLGSGAFGT  | 15  | >EGFR-S720T KVLGTGAFGT  | 16   | 1    |
| >EGFR-S720T KVLGSGAF    | 540 | >EGFR-S720T KVLGTGAF    | 366  | 174  |
| >EGFR-S720T KVLGSGAFG   | 103 | >EGFR-S720T KVLGTGAFG   | 77   | 26   |
| >EGFR-S720T KVLGSGAFGT  | 76  | >EGFR-S720T KVLGTGAFGT  | 63   | 13   |
| >EGFR-S720T KVLGSGAF    | 32  | >EGFR-S720T KVLGTGAF    | 16   | 16   |
| >EGFR-S720T KVLGSGAFGT  | 807 | >EGFR-S720T KVLGTGAFGT  | 472  | 335  |
| >EGFR-S720T KVLGSGAFGT  | 324 | >EGFR-S720T KVLGTGAFGT  | 234  | 90   |
| >EGFR-S720T KVLGSGAF    | 172 | >EGFR-S720T KVLGTGAF    | 277  | 105  |
| >EGFR-S720T KVLGSGAF    | 345 | >EGFR-S720T KVLGTGAF    | 516  | 171  |

|                        |       |                        |      |       |
|------------------------|-------|------------------------|------|-------|
| >EGFR-S720TKVLGSGAF    | 165   | >EGFR-S720TKVLGTGAF    | 248  | 83    |
| >EGFR-S720TKVLGSGAF    | 16    | >EGFR-S720TKVLGTGAF    | 35   | 19    |
| >EGFR-S720TKVLGSGAF    | 476   | >EGFR-S720TKVLGTGAF    | 326  | 150   |
| >EGFR-S720TIKVLGSGAF   | 9     | >EGFR-S720TIKVLGTGAF   | 12   | 3     |
| >EGFR-S720TIKVLGSGA    | 405   | >EGFR-S720TIKVLGTGA    | 441  | 36    |
| >EGFR-S720TIKVLGSG     | 289   | >EGFR-S720TIKVLGTG     | 495  | 206   |
| >EGFR-S720TIKVLGSGA    | 72    | >EGFR-S720TIKVLGTGA    | 247  | 175   |
| >EGFR-S720TIKVLGSGAF   | 50    | >EGFR-S720TIKVLGTGAF   | 66   | 16    |
| >EGFR-S720TIKVLGSGAF   | 1315  | >EGFR-S720TIKVLGTGAF   | 493  | 822   |
| >EGFR-S720TIKVLGSGAF   | 63    | >EGFR-S720TIKVLGTGAF   | 80   | 17    |
| >EGFR-S720TIKVLGSGAF   | 245   | >EGFR-S720TIKVLGTGAF   | 297  | 52    |
| >EGFR-S720TKKIKVLGSGAI | 7     | >EGFR-S720TKKIKVLGTGA  | 8    | 1     |
| >EGFR-S752FSPKANKEI    | 133   | >EGFR-S752FPPKANKEI    | 606  | 473   |
| >EGFR-S752FSPKANKEIL   | 187   | >EGFR-S752FPPKANKEIL   | 823  | 636   |
| >EGFR-S752FSPKANKEIL   | 193   | >EGFR-S752FPPKANKEIL   | 3878 | 3685  |
| >EGFR-S752FTSPKANKEI   | 7995  | >EGFR-S752FTPPKANKEI   | 10   | 7985  |
| >EGFR-S752FTSPKANKEIL  | 12385 | >EGFR-S752FTPPKANKEIL  | 17   | 12368 |
| >EGFR-S752FTSPKANKEIL  | 16909 | >EGFR-S752FTPPKANKEIL  | 82   | 16827 |
| >EGFR-S752FTSPKANKEI   | 54    | >EGFR-S752FTPPKANKEI   | 5549 | 5495  |
| >EGFR-S752FTSPKANKEIL  | 9     | >EGFR-S752FTPPKANKEIL  | 838  | 829   |
| >EGFR-S752FTSPKANKEI   | 159   | >EGFR-S752FTPPKANKEI   | 5193 | 5034  |
| >EGFR-S752FATSPKANK    | 145   | >EGFR-S752FATPPKANK    | 1037 | 892   |
| >EGFR-S752FATSPKANK    | 29    | >EGFR-S752FATPPKANK    | 187  | 158   |
| >EGFR-S752FATSPKANK    | 36    | >EGFR-S752FATPPKANK    | 398  | 362   |
| >EGFR-S752FATSPKANK    | 389   | >EGFR-S752FATPPKANK    | 1828 | 1439  |
| >EGFR-S752FATSPKANK    | 445   | >EGFR-S752FATPPKANK    | 2165 | 1720  |
| >EGFR-S752FATSPKANKEI  | 35    | >EGFR-S752FATPPKANKEI  | 705  | 670   |
| >EGFR-S752FATSPKANKEII | 55    | >EGFR-S752FATPPKANKEII | 930  | 875   |
| >EGFR-S752FATSPKANKEI  | 2858  | >EGFR-S752FATPPKANKEI  | 18   | 2840  |
| >EGFR-S752FATSPKANKEII | 468   | >EGFR-S752FATPPKANKEII | 4    | 464   |
| >EGFR-S752FATSPKANKEI  | 347   | >EGFR-S752FATPPKANKEI  | 1904 | 1557  |
| >EGFR-S752FATSPKANKEII | 295   | >EGFR-S752FATPPKANKEII | 4950 | 4655  |
| >EGFR-S752FATSPKANK    | 121   | >EGFR-S752FATPPKANK    | 802  | 681   |
| >EGFR-S752FEATSPKANK   | 18    | >EGFR-S752FEATPPKANK   | 47   | 29    |
| >EGFR-S752FEATSPKANKE  | 158   | >EGFR-S752FEATPPKANKE  | 99   | 59    |
| >EGFR-S752FREATSPKA    | 39    | >EGFR-S752FREATPPKA    | 64   | 25    |
| >EGFR-S752FELREATSPKA  | 122   | >EGFR-S752FELREATPPKA  | 114  | 8     |
| >EGFR-S752FELREATSPK   | 226   | >EGFR-S752FELREATPPK   | 399  | 173   |
| >EGFR-S752FELREATSPK   | 86    | >EGFR-S752FELREATPPK   | 22   | 64    |
| >EGFR-S752FELREATSPK   | 139   | >EGFR-S752FELREATPPK   | 340  | 201   |
| >EGFR-S752FKELREATSPK  | 1031  | >EGFR-S752FKELREATPPK  | 370  | 661   |
| >EGFR-S752FKELREATSPK/ | 449   | >EGFR-S752FKELREATPPK/ | 509  | 60    |
| >EGFR-S752FKELREATSPK/ | 71    | >EGFR-S752FKELREATPPK/ | 81   | 10    |

|                         |       |                         |      |       |
|-------------------------|-------|-------------------------|------|-------|
| >EGFR-S752F KELREATSPK/ | 319   | >EGFR-S752F KELREATPPK/ | 343  | 24    |
| >EGFR-S752Y SPKANKEI    | 133   | >EGFR-S752Y YPKANKEI    | 152  | 19    |
| >EGFR-S752Y SPKANKEIL   | 187   | >EGFR-S752Y YPKANKEIL   | 209  | 22    |
| >EGFR-S752Y SPKANKEI    | 741   | >EGFR-S752Y YPKANKEI    | 286  | 455   |
| >EGFR-S752Y SPKANKEIL   | 193   | >EGFR-S752Y YPKANKEIL   | 87   | 106   |
| >EGFR-S752Y SPKANKEI    | 1303  | >EGFR-S752Y YPKANKEI    | 493  | 810   |
| >EGFR-S752Y SPKANKEIL   | 515   | >EGFR-S752Y YPKANKEIL   | 199  | 316   |
| >EGFR-S752Y TSPKANKEI   | 16878 | >EGFR-S752Y TYPKANKEI   | 252  | 16626 |
| >EGFR-S752Y TSPKANKEIL  | 23488 | >EGFR-S752Y TYPKANKEIL  | 269  | 23219 |
| >EGFR-S752Y TSPKANKEI   | 9729  | >EGFR-S752Y TYPKANKEI   | 200  | 9529  |
| >EGFR-S752Y TSPKANKEIL  | 12854 | >EGFR-S752Y TYPKANKEIL  | 66   | 12788 |
| >EGFR-S752Y TSPKANKEI   | 11898 | >EGFR-S752Y TYPKANKEI   | 7    | 11891 |
| >EGFR-S752Y TSPKANKEIL  | 15598 | >EGFR-S752Y TYPKANKEIL  | 11   | 15587 |
| >EGFR-S752Y TSPKANKEI   | 54    | >EGFR-S752Y TYPKANKEI   | 9303 | 9249  |
| >EGFR-S752Y TSPKANKEIL  | 9     | >EGFR-S752Y TYPKANKEIL  | 2012 | 2003  |
| >EGFR-S752Y TSPKANKEI   | 159   | >EGFR-S752Y TYPKANKEI   | 9484 | 9325  |
| >EGFR-S752Y VAIKELREATS | 26380 | >EGFR-S752Y VAIKELREATY | 220  | 26160 |
| >EGFR-S752Y VAIKELREATS | 24921 | >EGFR-S752Y VAIKELREATY | 183  | 24738 |
| >EGFR-S752Y VAIKELREATS | 11918 | >EGFR-S752Y VAIKELREATY | 13   | 11905 |
| >EGFR-S752Y VAIKELREATS | 13455 | >EGFR-S752Y VAIKELREATY | 118  | 13337 |
| >EGFR-S752Y VAIKELREATS | 29517 | >EGFR-S752Y VAIKELREATY | 389  | 29128 |
| >EGFR-S752Y ATSPKANKEII | 10776 | >EGFR-S752Y ATYPKANKEII | 396  | 10380 |
| >EGFR-S752Y ATSPKANK    | 145   | >EGFR-S752Y ATYPKANK    | 38   | 107   |
| >EGFR-S752Y ATSPKANK    | 29    | >EGFR-S752Y ATYPKANK    | 15   | 14    |
| >EGFR-S752Y ATSPKANK    | 36    | >EGFR-S752Y ATYPKANK    | 19   | 17    |
| >EGFR-S752Y ATSPKANK    | 389   | >EGFR-S752Y ATYPKANK    | 83   | 306   |
| >EGFR-S752Y ATSPKANKEI  | 1387  | >EGFR-S752Y ATYPKANKEI  | 169  | 1218  |
| >EGFR-S752Y ATSPKANKEII | 3770  | >EGFR-S752Y ATYPKANKEII | 452  | 3318  |
| >EGFR-S752Y ATSPKANK    | 445   | >EGFR-S752Y ATYPKANK    | 103  | 342   |
| >EGFR-S752Y ATSPKANKEI  | 35    | >EGFR-S752Y ATYPKANKEI  | 11   | 24    |
| >EGFR-S752Y ATSPKANKEII | 55    | >EGFR-S752Y ATYPKANKEII | 16   | 39    |
| >EGFR-S752Y ATSPKANKEII | 468   | >EGFR-S752Y ATYPKANKEII | 447  | 21    |
| >EGFR-S752Y ATSPKANKEI  | 347   | >EGFR-S752Y ATYPKANKEI  | 594  | 247   |
| >EGFR-S752Y ATSPKANKEII | 295   | >EGFR-S752Y ATYPKANKEII | 147  | 148   |
| >EGFR-S752Y ATSPKANK    | 121   | >EGFR-S752Y ATYPKANK    | 100  | 21    |
| >EGFR-S752Y ATSPKANKEII | 716   | >EGFR-S752Y ATYPKANKEII | 114  | 602   |
| >EGFR-S752Y EATSPKANK   | 18    | >EGFR-S752Y EATYPKANK   | 13   | 5     |
| >EGFR-S752Y EATSPKANKE  | 158   | >EGFR-S752Y EATYPKANKE  | 76   | 82    |
| >EGFR-S752Y REATSPKA    | 39    | >EGFR-S752Y REATYPKA    | 19   | 20    |
| >EGFR-S752Y ELREATSPKA  | 122   | >EGFR-S752Y ELREATYPKA  | 111  | 11    |
| >EGFR-S752Y ELREATSPK   | 226   | >EGFR-S752Y ELREATYPK   | 641  | 415   |
| >EGFR-S752Y ELREATSPK   | 86    | >EGFR-S752Y ELREATYPK   | 99   | 13    |
| >EGFR-S752Y ELREATSPK   | 517   | >EGFR-S752Y ELREATYPK   | 156  | 361   |

|                        |       |                        |       |       |
|------------------------|-------|------------------------|-------|-------|
| >EGFR-S752YELREATSPK   | 139   | >EGFR-S752YELREATYPK   | 126   | 13    |
| >EGFR-S752YKELREATS    | 16645 | >EGFR-S752YKELREATY    | 138   | 16507 |
| >EGFR-S752YKELREATS    | 17893 | >EGFR-S752YKELREATY    | 447   | 17446 |
| >EGFR-S752YKELREATSPK/ | 449   | >EGFR-S752YKELREATYPK/ | 430   | 19    |
| >EGFR-S752YKELREATS    | 6512  | >EGFR-S752YKELREATY    | 232   | 6280  |
| >EGFR-S752YKELREATSPK/ | 71    | >EGFR-S752YKELREATYPK/ | 43    | 28    |
| >EGFR-S752YKELREATSPK/ | 319   | >EGFR-S752YKELREATYPK/ | 385   | 66    |
| >EGFR-S752YKELREATSPK  | 1380  | >EGFR-S752YKELREATYPK  | 129   | 1251  |
| >EGFR-S752YAIKELREATS  | 15967 | >EGFR-S752YAIKELREATY  | 147   | 15820 |
| >EGFR-S752YAIKELREATS  | 31123 | >EGFR-S752YAIKELREATY  | 324   | 30799 |
| >EGFR-S768CSVDNPHVCRI  | 75    | >EGFR-S768CVDNPHVCRI   | 925   | 850   |
| >EGFR-S768CSVDNPHVCRI  | 449   | >EGFR-S768CVDNPHVCRI   | 8732  | 8283  |
| >EGFR-S768CSVDNPHVCRI  | 204   | >EGFR-S768CVDNPHVCRI   | 2330  | 2126  |
| >EGFR-S768CSVDNPHVCR   | 184   | >EGFR-S768CVDNPHVCR    | 767   | 583   |
| >EGFR-S768CSVDNPHVCR   | 237   | >EGFR-S768CVDNPHVCR    | 665   | 428   |
| >EGFR-S768CSVDNPHVCR   | 118   | >EGFR-S768CVDNPHVCR    | 186   | 68    |
| >EGFR-S768CASVDNPHV    | 291   | >EGFR-S768ACVDNPHV     | 2166  | 1875  |
| >EGFR-S768CASVDNPHV    | 918   | >EGFR-S768ACVDNPHV     | 469   | 449   |
| >EGFR-S768CASVDNPHV    | 767   | >EGFR-S768ACVDNPHV     | 95    | 672   |
| >EGFR-S768CASVDNPHVCI  | 300   | >EGFR-S768ACVDNPHVC    | 13894 | 13594 |
| >EGFR-S768CASVDNPHVCI  | 389   | >EGFR-S768ACVDNPHVC    | 1908  | 1519  |
| >EGFR-S768CASVDNPHVCI  | 113   | >EGFR-S768ACVDNPHVC    | 625   | 512   |
| >EGFR-S768CASVDNPHVCI  | 423   | >EGFR-S768ACVDNPHVC    | 16666 | 16243 |
| >EGFR-S768CASVDNPHV    | 496   | >EGFR-S768ACVDNPHV     | 19186 | 18690 |
| >EGFR-S768CASVDNPHVCI  | 6     | >EGFR-S768ACVDNPHVC    | 3217  | 3211  |
| >EGFR-S768CASVDNPHVCI  | 154   | >EGFR-S768ACVDNPHVC    | 2422  | 2268  |
| >EGFR-S768CMASVDNPHV   | 162   | >EGFR-S768CMACVDNPHV   | 207   | 45    |
| >EGFR-S768CMASVDNPHV   | 162   | >EGFR-S768CMACVDNPHV   | 328   | 166   |
| >EGFR-S768CMASVDNPHV   | 74    | >EGFR-S768CMACVDNPHV   | 40    | 34    |
| >EGFR-S768CMASVDNPHV   | 268   | >EGFR-S768CMACVDNPHV   | 121   | 147   |
| >EGFR-S768CMASVDNPHV   | 9     | >EGFR-S768CMACVDNPHV   | 14    | 5     |
| >EGFR-S768CMASVDNPHV   | 258   | >EGFR-S768CMACVDNPHV   | 1467  | 1209  |
| >EGFR-S768CMASVDNPHV   | 161   | >EGFR-S768CMACVDNPHV   | 726   | 565   |
| >EGFR-S768CMASVDNPH    | 55    | >EGFR-S768CMACVDNPH    | 141   | 86    |
| >EGFR-S768CVMASVDNPH   | 148   | >EGFR-S768CVMACVDNPH   | 151   | 3     |
| >EGFR-S768CVMASVDNPH   | 84    | >EGFR-S768CVMACVDNPH   | 218   | 134   |
| >EGFR-S768CVMASVDNPH   | 209   | >EGFR-S768CVMACVDNPH   | 513   | 304   |
| >EGFR-S768CVMASVDNPH   | 303   | >EGFR-S768CVMACVDNPH   | 267   | 36    |
| >EGFR-S768CVMASVDNPH   | 3     | >EGFR-S768CVMACVDNPH   | 3     | 0     |
| >EGFR-S768CVMASVDNPH   | 37    | >EGFR-S768CVMACVDNPH   | 36    | 1     |
| >EGFR-S768CVMASVDNPH   | 7     | >EGFR-S768CVMACVDNPH   | 4     | 3     |
| >EGFR-S768CVMASVDNPH   | 258   | >EGFR-S768CVMACVDNPH   | 89    | 169   |
| >EGFR-S768CVMASVDNPH   | 5     | >EGFR-S768CVMACVDNPH   | 6     | 1     |

|                        |      |                        |     |      |
|------------------------|------|------------------------|-----|------|
| >EGFR-S768CVMASVDNPF   | 6    | >EGFR-S768CVMACVDNPF   | 10  | 4    |
| >EGFR-S768CVMASVDNPF   | 233  | >EGFR-S768CVMACVDNPF   | 416 | 183  |
| >EGFR-S768CVMASVDNPF   | 3    | >EGFR-S768CVMACVDNPF   | 5   | 2    |
| >EGFR-S768CVMASVDNPF   | 75   | >EGFR-S768CVMACVDNPF   | 320 | 245  |
| >EGFR-S768CVMASVDNPF   | 655  | >EGFR-S768CVMACVDNPF   | 422 | 233  |
| >EGFR-S768CYVMASVDNP   | 10   | >EGFR-S768CYVMACVDNF   | 8   | 2    |
| >EGFR-S768CYVMASVDNP   | 767  | >EGFR-S768CYVMACVDNF   | 337 | 430  |
| >EGFR-S768CYVMASVDNP   | 13   | >EGFR-S768CYVMACVDNF   | 9   | 4    |
| >EGFR-S768CYVMASVDNP   | 8    | >EGFR-S768CYVMACVDNF   | 8   | 0    |
| >EGFR-S768CYVMASVDNP   | 4    | >EGFR-S768CYVMACVDNF   | 4   | 0    |
| >EGFR-S768CYVMASVDNP   | 8    | >EGFR-S768CYVMACVDNF   | 11  | 3    |
| >EGFR-S768CYVMASVDNP   | 7    | >EGFR-S768CYVMACVDNF   | 7   | 0    |
| >EGFR-S768CYVMASVDNP   | 10   | >EGFR-S768CYVMACVDNF   | 12  | 2    |
| >EGFR-S768CYVMASVDNP   | 4    | >EGFR-S768CYVMACVDNF   | 3   | 1    |
| >EGFR-S768CYVMASVDNP   | 3    | >EGFR-S768CYVMACVDNF   | 3   | 0    |
| >EGFR-S768CYVMASVDNP   | 397  | >EGFR-S768CYVMACVDNF   | 635 | 238  |
| >EGFR-S768CYVMASVDNP   | 457  | >EGFR-S768CYVMACVDNF   | 688 | 231  |
| >EGFR-S768CYVMASVDNP   | 662  | >EGFR-S768CYVMACVDNF   | 323 | 339  |
| >EGFR-S768CYVMASVDNP   | 17   | >EGFR-S768CYVMACVDNF   | 16  | 1    |
| >EGFR-S768CYVMASVDNP   | 7    | >EGFR-S768CYVMACVDNF   | 11  | 4    |
| >EGFR-S768CYVMASVDNP   | 424  | >EGFR-S768CYVMACVDNF   | 700 | 276  |
| >EGFR-S768CEAYVMASV    | 18   | >EGFR-S768CEAYVMACV    | 32  | 14   |
| >EGFR-S768CEAYVMASV    | 8    | >EGFR-S768CEAYVMACV    | 20  | 12   |
| >EGFR-S768CDEAYVMAS    | 1479 | >EGFR-S768CDEAYVMAC    | 436 | 1043 |
| >EGFR-S768CDEAYVMASV   | 25   | >EGFR-S768CDEAYVMACV   | 14  | 11   |
| >EGFR-S768CDEAYVMASV   | 64   | >EGFR-S768CDEAYVMACV   | 183 | 119  |
| >EGFR-S768CDEAYVMAS    | 98   | >EGFR-S768CDEAYVMAC    | 170 | 72   |
| >EGFR-S768CDEAYVMASV   | 43   | >EGFR-S768CDEAYVMACV   | 136 | 93   |
| >EGFR-S768CDEAYVMASV   | 985  | >EGFR-S768CDEAYVMACV   | 365 | 620  |
| >EGFR-S768CDEAYVMASV   | 423  | >EGFR-S768CDEAYVMACV   | 534 | 111  |
| >EGFR-S768CILDEAYVMAS' | 144  | >EGFR-S768CILDEAYVMAC' | 209 | 65   |
| >EGFR-S768CILDEAYVMAS  | 11   | >EGFR-S768CILDEAYVMAC  | 12  | 1    |
| >EGFR-S768CILDEAYVMAS  | 5    | >EGFR-S768CILDEAYVMAC  | 8   | 3    |
| >EGFR-S768CILDEAYVMAS  | 10   | >EGFR-S768CILDEAYVMAC  | 40  | 30   |
| >EGFR-S768CILDEAYVMAS  | 8    | >EGFR-S768CILDEAYVMAC  | 16  | 8    |
| >EGFR-S768CILDEAYVMAS  | 56   | >EGFR-S768CILDEAYVMAC  | 7   | 49   |
| >EGFR-S768CILDEAYVMAS  | 2    | >EGFR-S768CILDEAYVMAC  | 2   | 0    |
| >EGFR-S768CILDEAYVMAS  | 1523 | >EGFR-S768CILDEAYVMAC  | 67  | 1456 |
| >EGFR-S768CILDEAYVMAS  | 3    | >EGFR-S768CILDEAYVMAC  | 4   | 1    |
| >EGFR-S768CILDEAYVMAS  | 1869 | >EGFR-S768CILDEAYVMAC  | 293 | 1576 |
| >EGFR-S768CILDEAYVMAS  | 5    | >EGFR-S768CILDEAYVMAC  | 5   | 0    |
| >EGFR-S768CILDEAYVMAS  | 6720 | >EGFR-S768CILDEAYVMAC  | 113 | 6607 |
| >EGFR-S768CILDEAYVMAS  | 3    | >EGFR-S768CILDEAYVMAC  | 3   | 0    |

|                        |       |                        |       |       |
|------------------------|-------|------------------------|-------|-------|
| >EGFR-S768C ILDEAYVMAS | 726   | >EGFR-S768C ILDEAYVMAC | 21    | 705   |
| >EGFR-S768C ILDEAYVMAS | 2     | >EGFR-S768C ILDEAYVMAC | 3     | 1     |
| >EGFR-S768C ILDEAYVMAS | 82    | >EGFR-S768C ILDEAYVMAC | 509   | 427   |
| >EGFR-S768I SVDNPHVCRI | 75    | >EGFR-S768I IVDNPHVCRL | 93    | 18    |
| >EGFR-S768I SVDNPHVCRI | 449   | >EGFR-S768I IVDNPHVCRL | 2209  | 1760  |
| >EGFR-S768I SVDNPHVCRI | 204   | >EGFR-S768I IVDNPHVCRL | 257   | 53    |
| >EGFR-S768I SVDNPHVCR  | 184   | >EGFR-S768I IVDNPHVCR  | 599   | 415   |
| >EGFR-S768I SVDNPHVCR  | 237   | >EGFR-S768I IVDNPHVCR  | 252   | 15    |
| >EGFR-S768I SVDNPHVCR  | 118   | >EGFR-S768I IVDNPHVCR  | 151   | 33    |
| >EGFR-S768I ASVDNPHV   | 4666  | >EGFR-S768I AIVDNPHV   | 188   | 4478  |
| >EGFR-S768I ASVDNPHV   | 3640  | >EGFR-S768I AIVDNPHV   | 243   | 3397  |
| >EGFR-S768I ASVDNPHVCI | 2505  | >EGFR-S768I AIVDNPHVCF | 135   | 2370  |
| >EGFR-S768I ASVDNPHV   | 4774  | >EGFR-S768I AIVDNPHV   | 41    | 4733  |
| >EGFR-S768I ASVDNPHVCI | 7036  | >EGFR-S768I AIVDNPHVCF | 119   | 6917  |
| >EGFR-S768I ASVDNPHV   | 291   | >EGFR-S768I AIVDNPHV   | 25    | 266   |
| >EGFR-S768I ASVDNPHVCI | 3224  | >EGFR-S768I AIVDNPHVCF | 368   | 2856  |
| >EGFR-S768I ASVDNPHV   | 918   | >EGFR-S768I AIVDNPHV   | 12    | 906   |
| >EGFR-S768I ASVDNPHVC  | 9814  | >EGFR-S768I AIVDNPHVC  | 287   | 9527  |
| >EGFR-S768I ASVDNPHVCI | 2458  | >EGFR-S768I AIVDNPHVCF | 23    | 2435  |
| >EGFR-S768I ASVDNPHV   | 5288  | >EGFR-S768I AIVDNPHV   | 43    | 5245  |
| >EGFR-S768I ASVDNPHVCI | 14895 | >EGFR-S768I AIVDNPHVCF | 335   | 14560 |
| >EGFR-S768I ASVDNPHV   | 3086  | >EGFR-S768I AIVDNPHV   | 18    | 3068  |
| >EGFR-S768I ASVDNPHV   | 15614 | >EGFR-S768I AIVDNPHV   | 217   | 15397 |
| >EGFR-S768I ASVDNPHV   | 767   | >EGFR-S768I AIVDNPHV   | 3     | 764   |
| >EGFR-S768I ASVDNPHVC  | 22072 | >EGFR-S768I AIVDNPHVC  | 123   | 21949 |
| >EGFR-S768I ASVDNPHVCI | 4029  | >EGFR-S768I AIVDNPHVCF | 5     | 4024  |
| >EGFR-S768I ASVDNPHVCI | 300   | >EGFR-S768I AIVDNPHVCF | 495   | 195   |
| >EGFR-S768I ASVDNPHVCI | 389   | >EGFR-S768I AIVDNPHVCF | 372   | 17    |
| >EGFR-S768I ASVDNPHVCI | 113   | >EGFR-S768I AIVDNPHVCF | 119   | 6     |
| >EGFR-S768I ASVDNPHVCI | 979   | >EGFR-S768I AIVDNPHVCF | 343   | 636   |
| >EGFR-S768I ASVDNPHVCI | 423   | >EGFR-S768I AIVDNPHVCF | 379   | 44    |
| >EGFR-S768I ASVDNPHV   | 1074  | >EGFR-S768I AIVDNPHV   | 241   | 833   |
| >EGFR-S768I ASVDNPHV   | 496   | >EGFR-S768I AIVDNPHV   | 16944 | 16448 |
| >EGFR-S768I ASVDNPHVCI | 6     | >EGFR-S768I AIVDNPHVCF | 571   | 565   |
| >EGFR-S768I ASVDNPHVCI | 154   | >EGFR-S768I AIVDNPHVCF | 1847  | 1693  |
| >EGFR-S768I ASVDNPHVCI | 3035  | >EGFR-S768I AIVDNPHVCF | 487   | 2548  |
| >EGFR-S768I EILDEAYVMA | 8265  | >EGFR-S768I EILDEAYVMA | 309   | 7956  |
| >EGFR-S768I EILDEAYVMA | 8069  | >EGFR-S768I EILDEAYVMA | 125   | 7944  |
| >EGFR-S768I EILDEAYVMA | 12698 | >EGFR-S768I EILDEAYVMA | 101   | 12597 |
| >EGFR-S768I EILDEAYVMA | 20744 | >EGFR-S768I EILDEAYVMA | 452   | 20292 |
| >EGFR-S768I EILDEAYVMA | 4627  | >EGFR-S768I EILDEAYVMA | 114   | 4513  |
| >EGFR-S768I EILDEAYVMA | 940   | >EGFR-S768I EILDEAYVMA | 7     | 933   |
| >EGFR-S768I MASVDNPHV  | 162   | >EGFR-S768I MAIVDNPHV  | 33    | 129   |

|                       |      |                        |      |      |
|-----------------------|------|------------------------|------|------|
| >EGFR-S768I·MASVDNPHV | 162  | >EGFR-S768I·MAIVDNPHV  | 167  | 5    |
| >EGFR-S768I·MASVDNPHV | 74   | >EGFR-S768I·MAIVDNPHV  | 46   | 28   |
| >EGFR-S768I·MASVDNPHV | 268  | >EGFR-S768I·MAIVDNPHV  | 167  | 101  |
| >EGFR-S768I·MASVDNPHV | 9    | >EGFR-S768I·MAIVDNPHV  | 7    | 2    |
| >EGFR-S768I·MASVDNPHV | 258  | >EGFR-S768I·MAIVDNPHV  | 122  | 136  |
| >EGFR-S768I·MASVDNPHV | 161  | >EGFR-S768I·MAIVDNPHV  | 45   | 116  |
| >EGFR-S768I·MASVDNPH  | 55   | >EGFR-S768I·MAIVDNPH   | 62   | 7    |
| >EGFR-S768I·VMASVDNPH | 148  | >EGFR-S768I·VMAIVDNPH  | 146  | 2    |
| >EGFR-S768I·VMASVDNPH | 84   | >EGFR-S768I·VMAIVDNPH  | 236  | 152  |
| >EGFR-S768I·VMASVDNPH | 209  | >EGFR-S768I·VMAIVDNPH  | 382  | 173  |
| >EGFR-S768I·VMASVDNPH | 303  | >EGFR-S768I·VMAIVDNPH  | 208  | 95   |
| >EGFR-S768I·VMASVDNPH | 3    | >EGFR-S768I·VMAIVDNPH  | 5    | 2    |
| >EGFR-S768I·VMASVDNPH | 37   | >EGFR-S768I·VMAIVDNPH  | 55   | 18   |
| >EGFR-S768I·VMASVDNPH | 7    | >EGFR-S768I·VMAIVDNPH  | 14   | 7    |
| >EGFR-S768I·VMASVDNPH | 258  | >EGFR-S768I·VMAIVDNPH  | 726  | 468  |
| >EGFR-S768I·VMASVDNPH | 5    | >EGFR-S768I·VMAIVDNPH  | 5    | 0    |
| >EGFR-S768I·VMASVDNPH | 6    | >EGFR-S768I·VMAIVDNPH  | 16   | 10   |
| >EGFR-S768I·VMASVDNPH | 233  | >EGFR-S768I·VMAIVDNPH  | 852  | 619  |
| >EGFR-S768I·VMASVDNPH | 3    | >EGFR-S768I·VMAIVDNPH  | 4    | 1    |
| >EGFR-S768I·VMASVDNPH | 75   | >EGFR-S768I·VMAIVDNPH  | 130  | 55   |
| >EGFR-S768I·YVMASVDNP | 10   | >EGFR-S768I·YVMAIVDNPI | 9    | 1    |
| >EGFR-S768I·YVMASVDNP | 767  | >EGFR-S768I·YVMAIVDNPI | 106  | 661  |
| >EGFR-S768I·YVMASVDNP | 13   | >EGFR-S768I·YVMAIVDNPI | 8    | 5    |
| >EGFR-S768I·YVMASVDNP | 8    | >EGFR-S768I·YVMAIVDNPI | 8    | 0    |
| >EGFR-S768I·YVMASVDNP | 4    | >EGFR-S768I·YVMAIVDNPI | 4    | 0    |
| >EGFR-S768I·YVMASVDNP | 8    | >EGFR-S768I·YVMAIVDNPI | 7    | 1    |
| >EGFR-S768I·YVMASVDNP | 7    | >EGFR-S768I·YVMAIVDNPI | 7    | 0    |
| >EGFR-S768I·YVMASVDNP | 10   | >EGFR-S768I·YVMAIVDNPI | 10   | 0    |
| >EGFR-S768I·YVMASVDNP | 4    | >EGFR-S768I·YVMAIVDNPI | 3    | 1    |
| >EGFR-S768I·YVMASVDNP | 3    | >EGFR-S768I·YVMAIVDNPI | 3    | 0    |
| >EGFR-S768I·YVMASVDNP | 397  | >EGFR-S768I·YVMAIVDNPI | 788  | 391  |
| >EGFR-S768I·YVMASVDNP | 457  | >EGFR-S768I·YVMAIVDNPI | 603  | 146  |
| >EGFR-S768I·YVMASVDNP | 662  | >EGFR-S768I·YVMAIVDNPI | 430  | 232  |
| >EGFR-S768I·YVMASVDNP | 17   | >EGFR-S768I·YVMAIVDNPI | 13   | 4    |
| >EGFR-S768I·YVMASVDNP | 7    | >EGFR-S768I·YVMAIVDNPI | 6    | 1    |
| >EGFR-S768I·YVMASVDNP | 424  | >EGFR-S768I·YVMAIVDNPI | 1055 | 631  |
| >EGFR-S768I·EAYVMASV  | 18   | >EGFR-S768I·EAYVMAIV   | 42   | 24   |
| >EGFR-S768I·EAYVMASV  | 8    | >EGFR-S768I·EAYVMAIV   | 14   | 6    |
| >EGFR-S768I·DEAYVMAS  | 1479 | >EGFR-S768I·DEAYVMAI   | 16   | 1463 |
| >EGFR-S768I·DEAYVMASV | 25   | >EGFR-S768I·DEAYVMAIV  | 30   | 5    |
| >EGFR-S768I·DEAYVMASV | 64   | >EGFR-S768I·DEAYVMAIV  | 311  | 247  |
| >EGFR-S768I·DEAYVMAS  | 98   | >EGFR-S768I·DEAYVMAI   | 50   | 48   |
| >EGFR-S768I·DEAYVMASV | 43   | >EGFR-S768I·DEAYVMAIV  | 103  | 60   |

|                        |       |                         |       |       |
|------------------------|-------|-------------------------|-------|-------|
| >EGFR-S768I·DEAYVMAS   | 16283 | >EGFR-S768I·DEAYVMAI    | 385   | 15898 |
| >EGFR-S768I·DEAYVMAS   | 20770 | >EGFR-S768I·DEAYVMAI    | 84    | 20686 |
| >EGFR-S768I·DEAYVMASV  | 423   | >EGFR-S768I·DEAYVMAIV   | 336   | 87    |
| >EGFR-S768I·LDEAYVMAS  | 24012 | >EGFR-S768I·LDEAYVMAI   | 250   | 23762 |
| >EGFR-S768I·LDEAYVMAS  | 7556  | >EGFR-S768I·LDEAYVMAI   | 38    | 7518  |
| >EGFR-S768I·LDEAYVMAS' | 144   | >EGFR-S768I·LDEAYVMAIV  | 85    | 59    |
| >EGFR-S768I·ILDEAYVMAS | 1251  | >EGFR-S768I·ILDEAYVMAI  | 39    | 1212  |
| >EGFR-S768I·ILDEAYVMAS | 11    | >EGFR-S768I·ILDEAYVMAI' | 16    | 5     |
| >EGFR-S768I·ILDEAYVMAS | 1246  | >EGFR-S768I·ILDEAYVMAI  | 19    | 1227  |
| >EGFR-S768I·ILDEAYVMAS | 5     | >EGFR-S768I·ILDEAYVMAI' | 11    | 6     |
| >EGFR-S768I·ILDEAYVMAS | 3132  | >EGFR-S768I·ILDEAYVMAI  | 50    | 3082  |
| >EGFR-S768I·ILDEAYVMAS | 10    | >EGFR-S768I·ILDEAYVMAI' | 17    | 7     |
| >EGFR-S768I·ILDEAYVMAS | 6193  | >EGFR-S768I·ILDEAYVMAI  | 173   | 6020  |
| >EGFR-S768I·ILDEAYVMAS | 8     | >EGFR-S768I·ILDEAYVMAI' | 12    | 4     |
| >EGFR-S768I·ILDEAYVMAS | 56    | >EGFR-S768I·ILDEAYVMAI  | 3     | 53    |
| >EGFR-S768I·ILDEAYVMAS | 2     | >EGFR-S768I·ILDEAYVMAI' | 2     | 0     |
| >EGFR-S768I·ILDEAYVMAS | 1523  | >EGFR-S768I·ILDEAYVMAI  | 6     | 1517  |
| >EGFR-S768I·ILDEAYVMAS | 3     | >EGFR-S768I·ILDEAYVMAI' | 4     | 1     |
| >EGFR-S768I·ILDEAYVMAS | 1869  | >EGFR-S768I·ILDEAYVMAI  | 10    | 1859  |
| >EGFR-S768I·ILDEAYVMAS | 5     | >EGFR-S768I·ILDEAYVMAI' | 5     | 0     |
| >EGFR-S768I·ILDEAYVMAS | 6720  | >EGFR-S768I·ILDEAYVMAI  | 7     | 6713  |
| >EGFR-S768I·ILDEAYVMAS | 3     | >EGFR-S768I·ILDEAYVMAI' | 4     | 1     |
| >EGFR-S768I·ILDEAYVMAS | 726   | >EGFR-S768I·ILDEAYVMAI  | 6     | 720   |
| >EGFR-S768I·ILDEAYVMAS | 2     | >EGFR-S768I·ILDEAYVMAI' | 3     | 1     |
| >EGFR-S768I·ILDEAYVMAS | 15431 | >EGFR-S768I·ILDEAYVMAI  | 467   | 14964 |
| >EGFR-S768I·ILDEAYVMAS | 82    | >EGFR-S768I·ILDEAYVMAI' | 324   | 242   |
| >EGFR-S768I·SVDNPHVCRI | 75    | >EGFR-S768I·NVDNPHVCR   | 655   | 580   |
| >EGFR-S768I·SVDNPHVCRI | 449   | >EGFR-S768I·NVDNPHVCR   | 6146  | 5697  |
| >EGFR-S768I·SVDNPHVCRI | 204   | >EGFR-S768I·NVDNPHVCR   | 2541  | 2337  |
| >EGFR-S768I·SVDNPHVCR  | 184   | >EGFR-S768I·NVDNPHVCR   | 3026  | 2842  |
| >EGFR-S768I·SVDNPHVCR  | 237   | >EGFR-S768I·NVDNPHVCR   | 1489  | 1252  |
| >EGFR-S768I·SVDNPHVCR  | 1972  | >EGFR-S768I·NVDNPHVCR   | 256   | 1716  |
| >EGFR-S768I·SVDNPHVCR  | 118   | >EGFR-S768I·NVDNPHVCR   | 64    | 54    |
| >EGFR-S768I·SVDNPHVCRI | 627   | >EGFR-S768I·NVDNPHVCR   | 237   | 390   |
| >EGFR-S768I·ASVDNPHV   | 291   | >EGFR-S768I·ANVDNPHV    | 1866  | 1575  |
| >EGFR-S768I·ASVDNPHVCI | 300   | >EGFR-S768I·ANVDNPHVC   | 17810 | 17510 |
| >EGFR-S768I·ASVDNPHVCI | 389   | >EGFR-S768I·ANVDNPHVC   | 10571 | 10182 |
| >EGFR-S768I·ASVDNPHVCI | 113   | >EGFR-S768I·ANVDNPHVC   | 2218  | 2105  |
| >EGFR-S768I·ASVDNPHVCI | 423   | >EGFR-S768I·ANVDNPHVC   | 12758 | 12335 |
| >EGFR-S768I·ASVDNPHV   | 496   | >EGFR-S768I·ANVDNPHV    | 24603 | 24107 |
| >EGFR-S768I·ASVDNPHVCI | 6     | >EGFR-S768I·ANVDNPHVC   | 7794  | 7788  |
| >EGFR-S768I·ASVDNPHVCI | 154   | >EGFR-S768I·ANVDNPHVC   | 1930  | 1776  |
| >EGFR-S768I·MASVDNPHV  | 162   | >EGFR-S768I·MANVDNPHV   | 227   | 65    |



|                       |      |                       |     |      |
|-----------------------|------|-----------------------|-----|------|
| >EGFR-S768M MASVDNPHV | 162  | >EGFR-S768M MANVDNPHV | 190 | 28   |
| >EGFR-S768M MASVDNPHV | 74   | >EGFR-S768M MANVDNPHV | 25  | 49   |
| >EGFR-S768M MASVDNPHV | 268  | >EGFR-S768M MANVDNPHV | 229 | 39   |
| >EGFR-S768M MASVDNPHV | 9    | >EGFR-S768M MANVDNPHV | 13  | 4    |
| >EGFR-S768M MASVDNPHV | 258  | >EGFR-S768M MANVDNPHV | 372 | 114  |
| >EGFR-S768M MASVDNPHV | 161  | >EGFR-S768M MANVDNPHV | 102 | 59   |
| >EGFR-S768M MASVDNPH  | 55   | >EGFR-S768M MANVDNPH  | 72  | 17   |
| >EGFR-S768M VMASVDNPH | 148  | >EGFR-S768M VMANVDNPH | 126 | 22   |
| >EGFR-S768M VMASVDNPH | 84   | >EGFR-S768M VMANVDNPH | 110 | 26   |
| >EGFR-S768M VMASVDNPH | 209  | >EGFR-S768M VMANVDNPH | 280 | 71   |
| >EGFR-S768M VMASVDNPH | 303  | >EGFR-S768M VMANVDNPH | 266 | 37   |
| >EGFR-S768M VMASVDNPH | 3    | >EGFR-S768M VMANVDNPH | 3   | 0    |
| >EGFR-S768M VMASVDNPH | 37   | >EGFR-S768M VMANVDNPH | 31  | 6    |
| >EGFR-S768M VMASVDNPH | 7    | >EGFR-S768M VMANVDNPH | 5   | 2    |
| >EGFR-S768M VMASVDNPH | 258  | >EGFR-S768M VMANVDNPH | 135 | 123  |
| >EGFR-S768M VMASVDNPH | 5    | >EGFR-S768M VMANVDNPH | 5   | 0    |
| >EGFR-S768M VMASVDNPH | 516  | >EGFR-S768M VMANVDNPH | 332 | 184  |
| >EGFR-S768M VMASVDNPH | 6    | >EGFR-S768M VMANVDNPH | 7   | 1    |
| >EGFR-S768M VMASVDNPH | 233  | >EGFR-S768M VMANVDNPH | 233 | 0    |
| >EGFR-S768M VMASVDNPH | 3    | >EGFR-S768M VMANVDNPH | 3   | 0    |
| >EGFR-S768M VMASVDNPH | 75   | >EGFR-S768M VMANVDNPH | 72  | 3    |
| >EGFR-S768M YVMASVDNP | 6430 | >EGFR-S768M YVMANVDNF | 391 | 6039 |
| >EGFR-S768M YVMASVDNP | 10   | >EGFR-S768M YVMANVDNF | 10  | 0    |
| >EGFR-S768M YVMASVDNP | 13   | >EGFR-S768M YVMANVDNF | 14  | 1    |
| >EGFR-S768M YVMASVDNP | 8    | >EGFR-S768M YVMANVDNF | 9   | 1    |
| >EGFR-S768M YVMASVDNP | 4    | >EGFR-S768M YVMANVDNF | 5   | 1    |
| >EGFR-S768M YVMASVDNP | 8    | >EGFR-S768M YVMANVDNF | 6   | 2    |
| >EGFR-S768M YVMASVDNP | 7    | >EGFR-S768M YVMANVDNF | 5   | 2    |
| >EGFR-S768M YVMASVDNP | 10   | >EGFR-S768M YVMANVDNF | 10  | 0    |
| >EGFR-S768M YVMASVDNP | 4    | >EGFR-S768M YVMANVDNF | 3   | 1    |
| >EGFR-S768M YVMASVDNP | 3    | >EGFR-S768M YVMANVDNF | 3   | 0    |
| >EGFR-S768M YVMASVDNP | 397  | >EGFR-S768M YVMANVDNF | 405 | 8    |
| >EGFR-S768M YVMASVDNP | 457  | >EGFR-S768M YVMANVDNF | 403 | 54   |
| >EGFR-S768M YVMASVDNP | 17   | >EGFR-S768M YVMANVDNF | 17  | 0    |
| >EGFR-S768M YVMASVDNP | 7    | >EGFR-S768M YVMANVDNF | 6   | 1    |
| >EGFR-S768M YVMASVDNP | 424  | >EGFR-S768M YVMANVDNF | 699 | 275  |
| >EGFR-S768M EAYVMASV  | 1698 | >EGFR-S768M EAYVMANV  | 444 | 1254 |
| >EGFR-S768M EAYVMASV  | 18   | >EGFR-S768M EAYVMANV  | 14  | 4    |
| >EGFR-S768M EAYVMASV  | 8    | >EGFR-S768M EAYVMANV  | 7   | 1    |
| >EGFR-S768M DEAYVMASV | 25   | >EGFR-S768M DEAYVMANV | 42  | 17   |
| >EGFR-S768M DEAYVMASV | 64   | >EGFR-S768M DEAYVMANV | 61  | 3    |
| >EGFR-S768M DEAYVMAS  | 98   | >EGFR-S768M DEAYVMAN  | 147 | 49   |
| >EGFR-S768M DEAYVMASV | 43   | >EGFR-S768M DEAYVMANV | 206 | 163  |

|                        |       |                        |       |       |
|------------------------|-------|------------------------|-------|-------|
| >EGFR-S768MDEAYVMASV   | 423   | >EGFR-S768MDEAYVMANV   | 551   | 128   |
| >EGFR-S768MLDEAYVMASV  | 144   | >EGFR-S768MLDEAYVMAN   | 127   | 17    |
| >EGFR-S768MILDEAYVMAS  | 11    | >EGFR-S768MILDEAYVMAN  | 11    | 0     |
| >EGFR-S768MILDEAYVMAS  | 5     | >EGFR-S768MILDEAYVMAN  | 6     | 1     |
| >EGFR-S768MILDEAYVMAS  | 10    | >EGFR-S768MILDEAYVMAN  | 12    | 2     |
| >EGFR-S768MILDEAYVMAS  | 8     | >EGFR-S768MILDEAYVMAN  | 11    | 3     |
| >EGFR-S768MILDEAYVMAS  | 56    | >EGFR-S768MILDEAYVMAN  | 268   | 212   |
| >EGFR-S768MILDEAYVMAS  | 2     | >EGFR-S768MILDEAYVMAN  | 2     | 0     |
| >EGFR-S768MILDEAYVMAS  | 3     | >EGFR-S768MILDEAYVMAN  | 4     | 1     |
| >EGFR-S768MILDEAYVMAS  | 5     | >EGFR-S768MILDEAYVMAN  | 5     | 0     |
| >EGFR-S768MILDEAYVMAS  | 3     | >EGFR-S768MILDEAYVMAN  | 3     | 0     |
| >EGFR-S768MILDEAYVMAS  | 2     | >EGFR-S768MILDEAYVMAN  | 2     | 0     |
| >EGFR-S768MILDEAYVMAS  | 82    | >EGFR-S768MILDEAYVMAN  | 74    | 8     |
| >EGFR-S784FSTVQLITQL   | 788   | >EGFR-S784FTVQLITQL    | 358   | 430   |
| >EGFR-S784FSTVQLITQL   | 5704  | >EGFR-S784FTVQLITQL    | 416   | 5288  |
| >EGFR-S784FSTVQLITQL   | 339   | >EGFR-S784FTVQLITQL    | 22    | 317   |
| >EGFR-S784FSTVQLITQL   | 907   | >EGFR-S784FTVQLITQL    | 58    | 849   |
| >EGFR-S784FSTVQLITQL   | 408   | >EGFR-S784FTVQLITQL    | 22    | 386   |
| >EGFR-S784FSTVQLITQL   | 706   | >EGFR-S784FTVQLITQL    | 87    | 619   |
| >EGFR-S784FSTVQLITQL   | 1041  | >EGFR-S784FTVQLITQL    | 72    | 969   |
| >EGFR-S784FSTVQLITQL   | 769   | >EGFR-S784FTVQLITQL    | 331   | 438   |
| >EGFR-S784FSTVQLITQ    | 371   | >EGFR-S784FTVQLITQ     | 760   | 389   |
| >EGFR-S784FSTVQLITQL   | 64    | >EGFR-S784FTVQLITQL    | 116   | 52    |
| >EGFR-S784FSTVQLITQLM  | 18    | >EGFR-S784FTVQLITQLM   | 32    | 14    |
| >EGFR-S784FSTVQLITQLM  | 139   | >EGFR-S784FTVQLITQLM   | 104   | 35    |
| >EGFR-S784FSTVQLITQL   | 116   | >EGFR-S784FTVQLITQL    | 38    | 78    |
| >EGFR-S784FSTVQLITQLM  | 296   | >EGFR-S784FTVQLITQLM   | 268   | 28    |
| >EGFR-S784FSTVQLITQL   | 222   | >EGFR-S784FTVQLITQL    | 63    | 159   |
| >EGFR-S784FSTVQLITQLM  | 528   | >EGFR-S784FTVQLITQLM   | 149   | 379   |
| >EGFR-S784FSTVQLITQL   | 7     | >EGFR-S784FTVQLITQL    | 9     | 2     |
| >EGFR-S784FSTVQLITQLM  | 18    | >EGFR-S784FTVQLITQLM   | 22    | 4     |
| >EGFR-S784FSTVQLITQL   | 2533  | >EGFR-S784FTVQLITQL    | 458   | 2075  |
| >EGFR-S784FSTVQLITQLM  | 1349  | >EGFR-S784FTVQLITQLM   | 233   | 1116  |
| >EGFR-S784FSTVQLITQL   | 170   | >EGFR-S784FTVQLITQL    | 98    | 72    |
| >EGFR-S784FSTVQLITQLM  | 72    | >EGFR-S784FTVQLITQLM   | 42    | 30    |
| >EGFR-S784FSTVQLITQL   | 17    | >EGFR-S784FTVQLITQL    | 32    | 15    |
| >EGFR-S784FSTVQLITQLM  | 24    | >EGFR-S784FTVQLITQLM   | 32    | 8     |
| >EGFR-S784FSTVQLITQL   | 249   | >EGFR-S784FTVQLITQL    | 441   | 192   |
| >EGFR-S784FTSTVQLITQL  | 16117 | >EGFR-S784FTFTVQLITQL  | 329   | 15788 |
| >EGFR-S784FTSTVQLITQL  | 59    | >EGFR-S784FTFTVQLITQL  | 24567 | 24508 |
| >EGFR-S784FTSTVQLITQLM | 239   | >EGFR-S784FTFTVQLITQLM | 26458 | 26219 |
| >EGFR-S784FTSTVQLITQL  | 474   | >EGFR-S784FTFTVQLITQL  | 14589 | 14115 |
| >EGFR-S784FTSTVQLITQLM | 203   | >EGFR-S784FTFTVQLITQLM | 10990 | 10787 |

|                        |       |                        |       |       |
|------------------------|-------|------------------------|-------|-------|
| >EGFR-S784FTSTVQLITQL  | 253   | >EGFR-S784FTFTVQLITQL  | 18213 | 17960 |
| >EGFR-S784FTSTVQLITQLM | 171   | >EGFR-S784FTFTVQLITQLM | 5011  | 4840  |
| >EGFR-S784FVCRLLGICLTS | 25902 | >EGFR-S784FVCRLLGICLTF | 496   | 25406 |
| >EGFR-S784FVCRLLGICLTS | 4705  | >EGFR-S784FVCRLLGICLTF | 69    | 4636  |
| >EGFR-S784FLTSTVQLI    | 302   | >EGFR-S784FLTFTVQLI    | 266   | 36    |
| >EGFR-S784FLTSTVQLITQL | 119   | >EGFR-S784FLTFTVQLITQL | 111   | 8     |
| >EGFR-S784FLTSTVQLI    | 2276  | >EGFR-S784FLTFTVQLI    | 471   | 1805  |
| >EGFR-S784FLTSTVQLI    | 2863  | >EGFR-S784FLTFTVQLI    | 174   | 2689  |
| >EGFR-S784FLTSTVQLITQL | 2730  | >EGFR-S784FLTFTVQLITQL | 176   | 2554  |
| >EGFR-S784FLTSTVQLI    | 3205  | >EGFR-S784FLTFTVQLI    | 147   | 3058  |
| >EGFR-S784FLTSTVQLITQL | 3481  | >EGFR-S784FLTFTVQLITQL | 154   | 3327  |
| >EGFR-S784FLTSTVQLI    | 123   | >EGFR-S784FLTFTVQLI    | 37    | 86    |
| >EGFR-S784FLTSTVQLITQL | 223   | >EGFR-S784FLTFTVQLITQL | 59    | 164   |
| >EGFR-S784FLTSTVQLI    | 715   | >EGFR-S784FLTFTVQLI    | 130   | 585   |
| >EGFR-S784FLTSTVQLITQL | 49    | >EGFR-S784FLTFTVQLITQL | 13    | 36    |
| >EGFR-S784FLTSTVQLI    | 80    | >EGFR-S784FLTFTVQLI    | 76    | 4     |
| >EGFR-S784FLTSTVQLITQL | 78    | >EGFR-S784FLTFTVQLITQL | 71    | 7     |
| >EGFR-S784FLTSTVQLITQL | 117   | >EGFR-S784FLTFTVQLITQL | 227   | 110   |
| >EGFR-S784FLTSTVQLIT   | 1172  | >EGFR-S784FLTFTVQLIT   | 223   | 949   |
| >EGFR-S784FLTSTVQLITQL | 30    | >EGFR-S784FLTFTVQLITQL | 11    | 19    |
| >EGFR-S784FLTSTVQLI    | 32    | >EGFR-S784FLTFTVQLI    | 12    | 20    |
| >EGFR-S784FLTSTVQLITQL | 298   | >EGFR-S784FLTFTVQLITQL | 55    | 243   |
| >EGFR-S784FCLTSTVQL    | 75    | >EGFR-S784FCLTFTVQL    | 128   | 53    |
| >EGFR-S784FCLTSTVQLI   | 187   | >EGFR-S784FCLTFTVQLI   | 344   | 157   |
| >EGFR-S784FCLTSTVQL    | 312   | >EGFR-S784FCLTFTVQL    | 407   | 95    |
| >EGFR-S784FCLTSTVQLI   | 73    | >EGFR-S784FCLTFTVQLI   | 122   | 49    |
| >EGFR-S784FCLTSTVQL    | 143   | >EGFR-S784FCLTFTVQL    | 190   | 47    |
| >EGFR-S784FCLTSTVQLI   | 103   | >EGFR-S784FCLTFTVQLI   | 199   | 96    |
| >EGFR-S784FCLTSTVQL    | 364   | >EGFR-S784FCLTFTVQL    | 587   | 223   |
| >EGFR-S784FCLTSTVQLI   | 316   | >EGFR-S784FCLTFTVQLI   | 555   | 239   |
| >EGFR-S784FCLTSTVQL    | 227   | >EGFR-S784FCLTFTVQL    | 447   | 220   |
| >EGFR-S784FCLTSTVQLI   | 272   | >EGFR-S784FCLTFTVQLI   | 846   | 574   |
| >EGFR-S784FCLTSTVQL    | 77    | >EGFR-S784FCLTFTVQL    | 95    | 18    |
| >EGFR-S784FCLTSTVQLI   | 301   | >EGFR-S784FCLTFTVQLI   | 580   | 279   |
| >EGFR-S784FCLTSTVQL    | 7     | >EGFR-S784FCLTFTVQL    | 13    | 6     |
| >EGFR-S784FCLTSTVQLI   | 25    | >EGFR-S784FCLTFTVQLI   | 85    | 60    |
| >EGFR-S784FICLTSTVQL   | 2246  | >EGFR-S784FICLTFTVQL   | 203   | 2043  |
| >EGFR-S784FGICLTSTV    | 138   | >EGFR-S784FGICLTFTV    | 301   | 163   |
| >EGFR-S784FGICLTSTV    | 858   | >EGFR-S784FGICLTFTV    | 104   | 754   |
| >EGFR-S784FGICLTSTV    | 122   | >EGFR-S784FGICLTFTV    | 47    | 75    |
| >EGFR-S784FGICLTSTV    | 660   | >EGFR-S784FGICLTFTV    | 333   | 327   |
| >EGFR-S784FGICLTSTV    | 314   | >EGFR-S784FGICLTFTV    | 98    | 216   |
| >EGFR-S784FGICLTSTV    | 38    | >EGFR-S784FGICLTFTV    | 23    | 15    |

|                         |       |                         |      |       |
|-------------------------|-------|-------------------------|------|-------|
| >EGFR-S784F LGICLTSTV   | 946   | >EGFR-S784F LGICLTFTV   | 398  | 548   |
| >EGFR-S784F LGICLTSTV   | 518   | >EGFR-S784F LGICLTFTV   | 30   | 488   |
| >EGFR-S784F LGICLTSTV   | 713   | >EGFR-S784F LGICLTFTV   | 178  | 535   |
| >EGFR-S784F LGICLTSTV   | 256   | >EGFR-S784F LGICLTFTV   | 4873 | 4617  |
| >EGFR-S784F LLGICLTSTV  | 63    | >EGFR-S784F LLGICLTFTV  | 22   | 41    |
| >EGFR-S784F LLGICLTST   | 415   | >EGFR-S784F LLGICLTFT   | 148  | 267   |
| >EGFR-S784F LLGICLTSTV  | 17    | >EGFR-S784F LLGICLTFTV  | 13   | 4     |
| >EGFR-S784F LLGICLTST   | 295   | >EGFR-S784F LLGICLTFT   | 441  | 146   |
| >EGFR-S784F LLGICLTSTV  | 14    | >EGFR-S784F LLGICLTFTV  | 45   | 31    |
| >EGFR-S784F LLGICLTSTV  | 98    | >EGFR-S784F LLGICLTFTV  | 62   | 36    |
| >EGFR-S784F LLGICLTSTV  | 4     | >EGFR-S784F LLGICLTFTV  | 3    | 1     |
| >EGFR-S784F LLGICLTSTV  | 5     | >EGFR-S784F LLGICLTFTV  | 4    | 1     |
| >EGFR-S784F LLGICLTSTV  | 9     | >EGFR-S784F LLGICLTFTV  | 6    | 3     |
| >EGFR-S784F LLGICLTSTV  | 6     | >EGFR-S784F LLGICLTFTV  | 3    | 3     |
| >EGFR-S784F LLGICLTST   | 30    | >EGFR-S784F LLGICLTFT   | 49   | 19    |
| >EGFR-S784F LLGICLTSTV  | 2     | >EGFR-S784F LLGICLTFTV  | 2    | 0     |
| >EGFR-S784F LLGICLTSTVQ | 272   | >EGFR-S784F LLGICLTFTVQ | 244  | 28    |
| >EGFR-S784F LLGICLTS    | 12948 | >EGFR-S784F LLGICLTF    | 94   | 12854 |
| >EGFR-S784F LLGICLTS    | 23796 | >EGFR-S784F LLGICLTF    | 356  | 23440 |
| >EGFR-S784F RLLGICLTST  | 73    | >EGFR-S784F RLLGICLTFT  | 46   | 27    |
| >EGFR-S784F RLLGICLTSTV | 15    | >EGFR-S784F RLLGICLTFTV | 9    | 6     |
| >EGFR-S784F RLLGICLTST  | 207   | >EGFR-S784F RLLGICLTFT  | 170  | 37    |
| >EGFR-S784F RLLGICLTSTV | 29    | >EGFR-S784F RLLGICLTFTV | 18   | 11    |
| >EGFR-S784F RLLGICLTST  | 52    | >EGFR-S784F RLLGICLTFT  | 97   | 45    |
| >EGFR-S784F RLLGICLTSTV | 13    | >EGFR-S784F RLLGICLTFTV | 25   | 12    |
| >EGFR-S784F RLLGICLTST  | 87    | >EGFR-S784F RLLGICLTFT  | 104  | 17    |
| >EGFR-S784F RLLGICLTSTV | 19    | >EGFR-S784F RLLGICLTFTV | 8    | 11    |
| >EGFR-S784F RLLGICLTS   | 510   | >EGFR-S784F RLLGICLTF   | 418  | 92    |
| >EGFR-S784F RLLGICLTST  | 95    | >EGFR-S784F RLLGICLTFT  | 62   | 33    |
| >EGFR-S784F RLLGICLTSTV | 2     | >EGFR-S784F RLLGICLTFTV | 2    | 0     |
| >EGFR-S784F RLLGICLTSTV | 5     | >EGFR-S784F RLLGICLTFTV | 4    | 1     |
| >EGFR-S784F RLLGICLTST  | 401   | >EGFR-S784F RLLGICLTFT  | 100  | 301   |
| >EGFR-S784F RLLGICLTSTV | 5     | >EGFR-S784F RLLGICLTFTV | 4    | 1     |
| >EGFR-S784F RLLGICLTST  | 658   | >EGFR-S784F RLLGICLTFT  | 288  | 370   |
| >EGFR-S784F RLLGICLTSTV | 2     | >EGFR-S784F RLLGICLTFTV | 2    | 0     |
| >EGFR-S784F RLLGICLTST  | 34    | >EGFR-S784F RLLGICLTFT  | 56   | 22    |
| >EGFR-S784F RLLGICLTSTV | 2     | >EGFR-S784F RLLGICLTFTV | 2    | 0     |
| >EGFR-S784F RLLGICLTS   | 26391 | >EGFR-S784F RLLGICLTF   | 49   | 26342 |
| >EGFR-S784F RLLGICLTS   | 20973 | >EGFR-S784F RLLGICLTF   | 183  | 20790 |
| >EGFR-S784F RLLGICLTS   | 18480 | >EGFR-S784F RLLGICLTF   | 74   | 18406 |
| >EGFR-S784F RLLGICLTS   | 9060  | >EGFR-S784F RLLGICLTF   | 204  | 8856  |
| >EGFR-S784F RLLGICLTS   | 163   | >EGFR-S784F RLLGICLTF   | 4    | 159   |
| >EGFR-S784F RLLGICLTST  | 360   | >EGFR-S784F RLLGICLTFT  | 2268 | 1908  |

|                         |       |                         |       |       |
|-------------------------|-------|-------------------------|-------|-------|
| >EGFR-S784F RLLGICLTSTV | 23    | >EGFR-S784F RLLGICLTFTV | 13    | 10    |
| >EGFR-S784F RLLGICLTSTV | 779   | >EGFR-S784F RLLGICLTFTV | 206   | 573   |
| >EGFR-S784F RLLGICLTS   | 12504 | >EGFR-S784F RLLGICLTF   | 128   | 12376 |
| >EGFR-S784F RLLGICLTS   | 14389 | >EGFR-S784F RLLGICLTF   | 57    | 14332 |
| >EGFR-S784F RLLGICLTS   | 13929 | >EGFR-S784F RLLGICLTF   | 37    | 13892 |
| >EGFR-S784F RLLGICLTS   | 20105 | >EGFR-S784F RLLGICLTF   | 471   | 19634 |
| >EGFR-S784F RLLGICLTS   | 6341  | >EGFR-S784F RLLGICLTF   | 64    | 6277  |
| >EGFR-S784F RLLGICLTSTV | 241   | >EGFR-S784F RLLGICLTFTV | 1789  | 1548  |
| >EGFR-S784F CRLLGICLTS  | 15417 | >EGFR-S784F CRLLGICLTF  | 104   | 15313 |
| >EGFR-S784F CRLLGICLTS  | 999   | >EGFR-S784F CRLLGICLTF  | 34    | 965   |
| >EGFR-S784F CRLLGICLTS  | 1410  | >EGFR-S784F CRLLGICLTF  | 411   | 999   |
| >EGFR-S784F CRLLGICLTS  | 577   | >EGFR-S784F CRLLGICLTF  | 166   | 411   |
| >EGFR-S784F STVQLITQL   | 339   | >EGFR-S784F PTVQLITQL   | 4061  | 3722  |
| >EGFR-S784F STVQLITQL   | 408   | >EGFR-S784F PTVQLITQL   | 13560 | 13152 |
| >EGFR-S784F STVQLITQ    | 371   | >EGFR-S784F PTVQLITQ    | 1824  | 1453  |
| >EGFR-S784F STVQLITQL   | 64    | >EGFR-S784F PTVQLITQL   | 281   | 217   |
| >EGFR-S784F STVQLITQLM  | 18    | >EGFR-S784F PTVQLITQLM  | 88    | 70    |
| >EGFR-S784F STVQLITQLM  | 139   | >EGFR-S784F PTVQLITQLM  | 407   | 268   |
| >EGFR-S784F STVQLITQL   | 116   | >EGFR-S784F PTVQLITQL   | 7930  | 7814  |
| >EGFR-S784F STVQLITQLM  | 296   | >EGFR-S784F PTVQLITQLM  | 5636  | 5340  |
| >EGFR-S784F STVQLITQL   | 222   | >EGFR-S784F PTVQLITQL   | 5647  | 5425  |
| >EGFR-S784F STVQLITQL   | 7     | >EGFR-S784F PTVQLITQL   | 454   | 447   |
| >EGFR-S784F STVQLITQLM  | 18    | >EGFR-S784F PTVQLITQLM  | 1751  | 1733  |
| >EGFR-S784F STVQLITQL   | 170   | >EGFR-S784F PTVQLITQL   | 1810  | 1640  |
| >EGFR-S784F STVQLITQLM  | 72    | >EGFR-S784F PTVQLITQLM  | 871   | 799   |
| >EGFR-S784F STVQLITQL   | 17    | >EGFR-S784F PTVQLITQL   | 2123  | 2106  |
| >EGFR-S784F STVQLITQLM  | 24    | >EGFR-S784F PTVQLITQLM  | 262   | 238   |
| >EGFR-S784F STVQLITQL   | 249   | >EGFR-S784F PTVQLITQL   | 11900 | 11651 |
| >EGFR-S784F TSTVQLITQL  | 24808 | >EGFR-S784F TPTVQLITQL  | 240   | 24568 |
| >EGFR-S784F TSTVQLITQL  | 59    | >EGFR-S784F TPTVQLITQL  | 18040 | 17981 |
| >EGFR-S784F TSTVQLITQLM | 239   | >EGFR-S784F TPTVQLITQLM | 21687 | 21448 |
| >EGFR-S784F TSTVQLITQLM | 3741  | >EGFR-S784F TPTVQLITQLM | 130   | 3611  |
| >EGFR-S784F TSTVQLITQLM | 17343 | >EGFR-S784F TPTVQLITQLM | 388   | 16955 |
| >EGFR-S784F TSTVQLITQL  | 474   | >EGFR-S784F TPTVQLITQL  | 9449  | 8975  |
| >EGFR-S784F TSTVQLITQLM | 203   | >EGFR-S784F TPTVQLITQLM | 6283  | 6080  |
| >EGFR-S784F TSTVQLITQL  | 253   | >EGFR-S784F TPTVQLITQL  | 20055 | 19802 |
| >EGFR-S784F TSTVQLITQLM | 171   | >EGFR-S784F TPTVQLITQLM | 4535  | 4364  |
| >EGFR-S784F LTSTVQLI    | 302   | >EGFR-S784F LTPTVQLI    | 2234  | 1932  |
| >EGFR-S784F LTSTVQLITQL | 119   | >EGFR-S784F LTPTVQLITQL | 970   | 851   |
| >EGFR-S784F LTSTVQLI    | 123   | >EGFR-S784F LTPTVQLI    | 131   | 8     |
| >EGFR-S784F LTSTVQLITQL | 223   | >EGFR-S784F LTPTVQLITQL | 222   | 1     |
| >EGFR-S784F LTSTVQLITQL | 49    | >EGFR-S784F LTPTVQLITQL | 824   | 775   |
| >EGFR-S784F LTSTVQLI    | 80    | >EGFR-S784F LTPTVQLI    | 8563  | 8483  |

|                         |      |                         |      |      |
|-------------------------|------|-------------------------|------|------|
| >EGFR-S784F LTSTVQLITQL | 78   | >EGFR-S784F LTPTVQLITQL | 8247 | 8169 |
| >EGFR-S784F LTSTVQLI    | 883  | >EGFR-S784F LTPTVQLI    | 5    | 878  |
| >EGFR-S784F LTSTVQLIT   | 9786 | >EGFR-S784F LTPTVQLIT   | 70   | 9716 |
| >EGFR-S784F LTSTVQLITQ  | 9466 | >EGFR-S784F LTPTVQLITQ  | 81   | 9385 |
| >EGFR-S784F LTSTVQLITQL | 117  | >EGFR-S784F LTPTVQLITQL | 2    | 115  |
| >EGFR-S784F LTSTVQLITQL | 30   | >EGFR-S784F LTPTVQLITQL | 541  | 511  |
| >EGFR-S784F LTSTVQLI    | 32   | >EGFR-S784F LTPTVQLI    | 54   | 22   |
| >EGFR-S784F LTSTVQLITQL | 298  | >EGFR-S784F LTPTVQLITQL | 443  | 145  |
| >EGFR-S784F CLTSTVQL    | 75   | >EGFR-S784F CLTPTVQL    | 99   | 24   |
| >EGFR-S784F CLTSTVQLI   | 187  | >EGFR-S784F CLTPTVQLI   | 198  | 11   |
| >EGFR-S784F CLTSTVQL    | 312  | >EGFR-S784F CLTPTVQL    | 388  | 76   |
| >EGFR-S784F CLTSTVQLI   | 73   | >EGFR-S784F CLTPTVQLI   | 64   | 9    |
| >EGFR-S784F CLTSTVQL    | 143  | >EGFR-S784F CLTPTVQL    | 100  | 43   |
| >EGFR-S784F CLTSTVQLI   | 103  | >EGFR-S784F CLTPTVQLI   | 81   | 22   |
| >EGFR-S784F CLTSTVQL    | 364  | >EGFR-S784F CLTPTVQL    | 282  | 82   |
| >EGFR-S784F CLTSTVQLI   | 316  | >EGFR-S784F CLTPTVQLI   | 196  | 120  |
| >EGFR-S784F CLTSTVQL    | 227  | >EGFR-S784F CLTPTVQL    | 182  | 45   |
| >EGFR-S784F CLTSTVQLI   | 272  | >EGFR-S784F CLTPTVQLI   | 153  | 119  |
| >EGFR-S784F CLTSTVQL    | 77   | >EGFR-S784F CLTPTVQL    | 81   | 4    |
| >EGFR-S784F CLTSTVQLI   | 301  | >EGFR-S784F CLTPTVQLI   | 300  | 1    |
| >EGFR-S784F CLTSTVQL    | 7    | >EGFR-S784F CLTPTVQL    | 5    | 2    |
| >EGFR-S784F CLTSTVQLI   | 25   | >EGFR-S784F CLTPTVQLI   | 10   | 15   |
| >EGFR-S784F CLTSTVQLITC | 549  | >EGFR-S784F CLTPTVQLITC | 172  | 377  |
| >EGFR-S784F CLTSTVQLI   | 869  | >EGFR-S784F CLTPTVQLI   | 340  | 529  |
| >EGFR-S784F GICLTSTV    | 138  | >EGFR-S784F GICLTPTV    | 308  | 170  |
| >EGFR-S784F GICLTSTV    | 122  | >EGFR-S784F GICLTPTV    | 56   | 66   |
| >EGFR-S784F GICLTSTV    | 314  | >EGFR-S784F GICLTPTV    | 121  | 193  |
| >EGFR-S784F GICLTSTV    | 38   | >EGFR-S784F GICLTPTV    | 39   | 1    |
| >EGFR-S784F LGICLTSTV   | 518  | >EGFR-S784F LGICLTPTV   | 122  | 396  |
| >EGFR-S784F LGICLTSTV   | 256  | >EGFR-S784F LGICLTPTV   | 5626 | 5370 |
| >EGFR-S784F LLGICLTSTV  | 63   | >EGFR-S784F LLGICLTPTV  | 29   | 34   |
| >EGFR-S784F LLGICLTST   | 415  | >EGFR-S784F LLGICLTPT   | 296  | 119  |
| >EGFR-S784F LLGICLTSTV  | 17   | >EGFR-S784F LLGICLTPTV  | 21   | 4    |
| >EGFR-S784F LLGICLTST   | 295  | >EGFR-S784F LLGICLTPT   | 186  | 109  |
| >EGFR-S784F LLGICLTSTV  | 14   | >EGFR-S784F LLGICLTPTV  | 30   | 16   |
| >EGFR-S784F LLGICLTSTV  | 98   | >EGFR-S784F LLGICLTPTV  | 56   | 42   |
| >EGFR-S784F LLGICLTSTV  | 4    | >EGFR-S784F LLGICLTPTV  | 3    | 1    |
| >EGFR-S784F LLGICLTSTV  | 5    | >EGFR-S784F LLGICLTPTV  | 6    | 1    |
| >EGFR-S784F LLGICLTSTV  | 9    | >EGFR-S784F LLGICLTPTV  | 6    | 3    |
| >EGFR-S784F LLGICLTSTV  | 6    | >EGFR-S784F LLGICLTPTV  | 5    | 1    |
| >EGFR-S784F LLGICLTST   | 30   | >EGFR-S784F LLGICLTPT   | 71   | 41   |
| >EGFR-S784F LLGICLTSTV  | 2    | >EGFR-S784F LLGICLTPTV  | 2    | 0    |
| >EGFR-S784F LLGICLTSTVQ | 272  | >EGFR-S784F LLGICLTPTVC | 384  | 112  |

|                         |      |                         |      |      |
|-------------------------|------|-------------------------|------|------|
| >EGFR-S784F RLLGICLTST  | 73   | >EGFR-S784F RLLGICLTPT  | 57   | 16   |
| >EGFR-S784F RLLGICLTSTV | 15   | >EGFR-S784F RLLGICLTPTV | 10   | 5    |
| >EGFR-S784F RLLGICLTST  | 207  | >EGFR-S784F RLLGICLTPT  | 153  | 54   |
| >EGFR-S784F RLLGICLTSTV | 29   | >EGFR-S784F RLLGICLTPTV | 36   | 7    |
| >EGFR-S784F RLLGICLTST  | 52   | >EGFR-S784F RLLGICLTPT  | 57   | 5    |
| >EGFR-S784F RLLGICLTSTV | 13   | >EGFR-S784F RLLGICLTPTV | 22   | 9    |
| >EGFR-S784F RLLGICLTST  | 87   | >EGFR-S784F RLLGICLTPT  | 70   | 17   |
| >EGFR-S784F RLLGICLTSTV | 19   | >EGFR-S784F RLLGICLTPTV | 11   | 8    |
| >EGFR-S784F RLLGICLTST  | 95   | >EGFR-S784F RLLGICLTPT  | 87   | 8    |
| >EGFR-S784F RLLGICLTSTV | 2    | >EGFR-S784F RLLGICLTPTV | 2    | 0    |
| >EGFR-S784F RLLGICLTSTV | 5    | >EGFR-S784F RLLGICLTPTV | 5    | 0    |
| >EGFR-S784F RLLGICLTST  | 401  | >EGFR-S784F RLLGICLTPT  | 323  | 78   |
| >EGFR-S784F RLLGICLTSTV | 5    | >EGFR-S784F RLLGICLTPTV | 4    | 1    |
| >EGFR-S784F RLLGICLTSTV | 2    | >EGFR-S784F RLLGICLTPTV | 2    | 0    |
| >EGFR-S784F RLLGICLTST  | 34   | >EGFR-S784F RLLGICLTPT  | 72   | 38   |
| >EGFR-S784F RLLGICLTSTV | 2    | >EGFR-S784F RLLGICLTPTV | 2    | 0    |
| >EGFR-S784F RLLGICLTS   | 163  | >EGFR-S784F RLLGICLTP   | 148  | 15   |
| >EGFR-S784F RLLGICLTST  | 360  | >EGFR-S784F RLLGICLTPT  | 436  | 76   |
| >EGFR-S784F RLLGICLTSTV | 23   | >EGFR-S784F RLLGICLTPTV | 21   | 2    |
| >EGFR-S784F RLLGICLTSTV | 779  | >EGFR-S784F RLLGICLTPTV | 268  | 511  |
| >EGFR-S784F RLLGICLTSTV | 241  | >EGFR-S784F RLLGICLTPTV | 2223 | 1982 |
| >EGFR-S784YSTVQLITQL    | 788  | >EGFR-S784YSTVQLITQL    | 276  | 512  |
| >EGFR-S784YSTVQLITQL    | 339  | >EGFR-S784YSTVQLITQL    | 58   | 281  |
| >EGFR-S784YSTVQLITQL    | 907  | >EGFR-S784YSTVQLITQL    | 99   | 808  |
| >EGFR-S784YSTVQLITQL    | 408  | >EGFR-S784YSTVQLITQL    | 37   | 371  |
| >EGFR-S784YSTVQLITQL    | 706  | >EGFR-S784YSTVQLITQL    | 63   | 643  |
| >EGFR-S784YSTVQLITQL    | 1041 | >EGFR-S784YSTVQLITQL    | 56   | 985  |
| >EGFR-S784YSTVQLITQ     | 2852 | >EGFR-S784YSTVQLITQ     | 421  | 2431 |
| >EGFR-S784YSTVQLITQL    | 769  | >EGFR-S784YSTVQLITQL    | 151  | 618  |
| >EGFR-S784YSTVQLITQLM   | 3103 | >EGFR-S784YSTVQLITQLM   | 469  | 2634 |
| >EGFR-S784YSTVQLITQ     | 371  | >EGFR-S784YSTVQLITQ     | 202  | 169  |
| >EGFR-S784YSTVQLITQL    | 64   | >EGFR-S784YSTVQLITQL    | 35   | 29   |
| >EGFR-S784YSTVQLITQLM   | 18   | >EGFR-S784YSTVQLITQLM   | 10   | 8    |
| >EGFR-S784YSTVQLITQLM   | 139  | >EGFR-S784YSTVQLITQLM   | 85   | 54   |
| >EGFR-S784YSTVQLITQL    | 116  | >EGFR-S784YSTVQLITQL    | 72   | 44   |
| >EGFR-S784YSTVQLITQLM   | 296  | >EGFR-S784YSTVQLITQLM   | 227  | 69   |
| >EGFR-S784YSTVQLITQL    | 222  | >EGFR-S784YSTVQLITQL    | 56   | 166  |
| >EGFR-S784YSTVQLITQLM   | 528  | >EGFR-S784YSTVQLITQLM   | 131  | 397  |
| >EGFR-S784YSTVQLITQL    | 7    | >EGFR-S784YSTVQLITQL    | 5    | 2    |
| >EGFR-S784YSTVQLITQLM   | 18   | >EGFR-S784YSTVQLITQLM   | 9    | 9    |
| >EGFR-S784YSTVQLITQL    | 2533 | >EGFR-S784YSTVQLITQL    | 485  | 2048 |
| >EGFR-S784YSTVQLITQLM   | 1349 | >EGFR-S784YSTVQLITQLM   | 238  | 1111 |
| >EGFR-S784YSTVQLITQL    | 170  | >EGFR-S784YSTVQLITQL    | 50   | 120  |

|                        |       |                         |       |       |
|------------------------|-------|-------------------------|-------|-------|
| >EGFR-S784YSTVQLITQLM  | 72    | >EGFR-S784Y YTVQLITQLM  | 22    | 50    |
| >EGFR-S784YSTVQLITQL   | 17    | >EGFR-S784Y YTVQLITQL   | 11    | 6     |
| >EGFR-S784YSTVQLITQLM  | 24    | >EGFR-S784Y YTVQLITQLM  | 22    | 2     |
| >EGFR-S784YSTVQLITQL   | 249   | >EGFR-S784Y YTVQLITQL   | 692   | 443   |
| >EGFR-S784YTSTVQLITQL  | 9530  | >EGFR-S784Y TYTVQLITQL  | 20    | 9510  |
| >EGFR-S784YTSTVQLITQL  | 16117 | >EGFR-S784Y TYTVQLITQL  | 17    | 16100 |
| >EGFR-S784YTSTVQLITQLM | 21719 | >EGFR-S784Y TYTVQLITQLM | 161   | 21558 |
| >EGFR-S784YTSTVQLITQL  | 59    | >EGFR-S784Y TYTVQLITQL  | 23212 | 23153 |
| >EGFR-S784YTSTVQLITQLM | 239   | >EGFR-S784Y TYTVQLITQLM | 25536 | 25297 |
| >EGFR-S784YTSTVQLITQL  | 474   | >EGFR-S784Y TYTVQLITQL  | 15438 | 14964 |
| >EGFR-S784YTSTVQLITQLM | 203   | >EGFR-S784Y TYTVQLITQLM | 11681 | 11478 |
| >EGFR-S784YTSTVQLITQL  | 253   | >EGFR-S784Y TYTVQLITQL  | 20884 | 20631 |
| >EGFR-S784YTSTVQLITQLM | 171   | >EGFR-S784Y TYTVQLITQLM | 6891  | 6720  |
| >EGFR-S784YVCRLLGICLTS | 24943 | >EGFR-S784Y VCRLLGICLTY | 326   | 24617 |
| >EGFR-S784YVCRLLGICLTS | 4705  | >EGFR-S784Y VCRLLGICLTY | 49    | 4656  |
| >EGFR-S784YLTSTVQLITQL | 9638  | >EGFR-S784Y LTYTVQLITQL | 479   | 9159  |
| >EGFR-S784YLTSTVQLI    | 302   | >EGFR-S784Y LTYTVQLI    | 431   | 129   |
| >EGFR-S784YLTSTVQLITQL | 119   | >EGFR-S784Y LTYTVQLITQL | 195   | 76    |
| >EGFR-S784YLTSTVQLI    | 791   | >EGFR-S784Y LTYTVQLI    | 239   | 552   |
| >EGFR-S784YLTSTVQLITQL | 931   | >EGFR-S784Y LTYTVQLITQL | 291   | 640   |
| >EGFR-S784YLTSTVQLI    | 2863  | >EGFR-S784Y LTYTVQLI    | 113   | 2750  |
| >EGFR-S784YLTSTVQLITQL | 2730  | >EGFR-S784Y LTYTVQLITQL | 119   | 2611  |
| >EGFR-S784YLTSTVQLITQL | 1934  | >EGFR-S784Y LTYTVQLITQL | 373   | 1561  |
| >EGFR-S784YLTSTVQLI    | 3205  | >EGFR-S784Y LTYTVQLI    | 437   | 2768  |
| >EGFR-S784YLTSTVQLITQL | 3481  | >EGFR-S784Y LTYTVQLITQL | 433   | 3048  |
| >EGFR-S784YLTSTVQLI    | 123   | >EGFR-S784Y LTYTVQLI    | 143   | 20    |
| >EGFR-S784YLTSTVQLITQL | 223   | >EGFR-S784Y LTYTVQLITQL | 256   | 33    |
| >EGFR-S784YLTSTVQLI    | 4309  | >EGFR-S784Y LTYTVQLI    | 480   | 3829  |
| >EGFR-S784YLTSTVQLI    | 715   | >EGFR-S784Y LTYTVQLI    | 100   | 615   |
| >EGFR-S784YLTSTVQLITQL | 49    | >EGFR-S784Y LTYTVQLITQL | 11    | 38    |
| >EGFR-S784YLTSTVQLI    | 80    | >EGFR-S784Y LTYTVQLI    | 50    | 30    |
| >EGFR-S784YLTSTVQLITQL | 78    | >EGFR-S784Y LTYTVQLITQL | 45    | 33    |
| >EGFR-S784YLTSTVQLI    | 883   | >EGFR-S784Y LTYTVQLI    | 407   | 476   |
| >EGFR-S784YLTSTVQLITQL | 117   | >EGFR-S784Y LTYTVQLITQL | 151   | 34    |
| >EGFR-S784YLTSTVQLITQL | 30    | >EGFR-S784Y LTYTVQLITQL | 19    | 11    |
| >EGFR-S784YLTSTVQLI    | 32    | >EGFR-S784Y LTYTVQLI    | 11    | 21    |
| >EGFR-S784YLTSTVQLITQL | 298   | >EGFR-S784Y LTYTVQLITQL | 52    | 246   |
| >EGFR-S784YCLTSTVQL    | 75    | >EGFR-S784Y CLTYTVQL    | 109   | 34    |
| >EGFR-S784YCLTSTVQLI   | 187   | >EGFR-S784Y CLTYTVQLI   | 354   | 167   |
| >EGFR-S784YCLTSTVQL    | 312   | >EGFR-S784Y CLTYTVQL    | 505   | 193   |
| >EGFR-S784YCLTSTVQLI   | 73    | >EGFR-S784Y CLTYTVQLI   | 206   | 133   |
| >EGFR-S784YCLTSTVQL    | 143   | >EGFR-S784Y CLTYTVQL    | 417   | 274   |
| >EGFR-S784YCLTSTVQLI   | 103   | >EGFR-S784Y CLTYTVQLI   | 543   | 440   |



|                        |       |                        |      |       |
|------------------------|-------|------------------------|------|-------|
| >EGFR-S784YCLTSTVQL    | 364   | >EGFR-S784YCLTYTVQL    | 533  | 169   |
| >EGFR-S784YCLTSTVQLI   | 316   | >EGFR-S784YCLTYTVQLI   | 556  | 240   |
| >EGFR-S784YCLTSTVQL    | 227   | >EGFR-S784YCLTYTVQL    | 754  | 527   |
| >EGFR-S784YCLTSTVQLI   | 272   | >EGFR-S784YCLTYTVQLI   | 1416 | 1144  |
| >EGFR-S784YCLTSTVQL    | 77    | >EGFR-S784YCLTYTVQL    | 388  | 311   |
| >EGFR-S784YCLTSTVQLI   | 301   | >EGFR-S784YCLTYTVQLI   | 2214 | 1913  |
| >EGFR-S784YCLTSTVQL    | 7     | >EGFR-S784YCLTYTVQL    | 24   | 17    |
| >EGFR-S784YCLTSTVQLI   | 25    | >EGFR-S784YCLTYTVQLI   | 223  | 198   |
| >EGFR-S784YGICLTSTV    | 138   | >EGFR-S784YGICLTYTV    | 289  | 151   |
| >EGFR-S784YGICLTSTV    | 122   | >EGFR-S784YGICLTYTV    | 55   | 67    |
| >EGFR-S784YGICLTSTV    | 660   | >EGFR-S784YGICLTYTV    | 251  | 409   |
| >EGFR-S784YGICLTSTV    | 314   | >EGFR-S784YGICLTYTV    | 170  | 144   |
| >EGFR-S784YGICLTSTV    | 38    | >EGFR-S784YGICLTYTV    | 35   | 3     |
| >EGFR-S784YLGICLTSTV   | 946   | >EGFR-S784YLGICLTYTV   | 272  | 674   |
| >EGFR-S784YLGICLTSTV   | 518   | >EGFR-S784YLGICLTYTV   | 158  | 360   |
| >EGFR-S784YLGICLTSTV   | 713   | >EGFR-S784YLGICLTYTV   | 91   | 622   |
| >EGFR-S784YLGICLTSTV   | 256   | >EGFR-S784YLGICLTYTV   | 5413 | 5157  |
| >EGFR-S784YLLGICLTST   | 1769  | >EGFR-S784YLLGICLTYT   | 452  | 1317  |
| >EGFR-S784YLLGICLTSTV  | 63    | >EGFR-S784YLLGICLTYTV  | 23   | 40    |
| >EGFR-S784YLLGICLTST   | 415   | >EGFR-S784YLLGICLTYT   | 152  | 263   |
| >EGFR-S784YLLGICLTSTV  | 17    | >EGFR-S784YLLGICLTYTV  | 11   | 6     |
| >EGFR-S784YLLGICLTST   | 295   | >EGFR-S784YLLGICLTYT   | 325  | 30    |
| >EGFR-S784YLLGICLTSTV  | 14    | >EGFR-S784YLLGICLTYTV  | 37   | 23    |
| >EGFR-S784YLLGICLTSTV  | 98    | >EGFR-S784YLLGICLTYTV  | 50   | 48    |
| >EGFR-S784YLLGICLTST   | 1639  | >EGFR-S784YLLGICLTYT   | 236  | 1403  |
| >EGFR-S784YLLGICLTSTV  | 4     | >EGFR-S784YLLGICLTYTV  | 3    | 1     |
| >EGFR-S784YLLGICLTSTV  | 5     | >EGFR-S784YLLGICLTYTV  | 3    | 2     |
| >EGFR-S784YLLGICLTSTV  | 9     | >EGFR-S784YLLGICLTYTV  | 7    | 2     |
| >EGFR-S784YLLGICLTSTV  | 6     | >EGFR-S784YLLGICLTYTV  | 3    | 3     |
| >EGFR-S784YLLGICLTST   | 30    | >EGFR-S784YLLGICLTYT   | 24   | 6     |
| >EGFR-S784YLLGICLTSTV  | 2     | >EGFR-S784YLLGICLTYTV  | 2    | 0     |
| >EGFR-S784YLLGICLTSTVQ | 272   | >EGFR-S784YLLGICLTYTVQ | 246  | 26    |
| >EGFR-S784YLLGICLTS    | 16986 | >EGFR-S784YLLGICLTY    | 28   | 16958 |
| >EGFR-S784YLLGICLTS    | 25684 | >EGFR-S784YLLGICLTY    | 110  | 25574 |
| >EGFR-S784YLLGICLTS    | 23730 | >EGFR-S784YLLGICLTY    | 59   | 23671 |
| >EGFR-S784YLLGICLTS    | 12948 | >EGFR-S784YLLGICLTY    | 99   | 12849 |
| >EGFR-S784YLLGICLTS    | 36039 | >EGFR-S784YLLGICLTY    | 349  | 35690 |
| >EGFR-S784YRLGICLTST   | 73    | >EGFR-S784YRLGICLTYT   | 25   | 48    |
| >EGFR-S784YRLGICLTSTV  | 15    | >EGFR-S784YRLGICLTYTV  | 10   | 5     |
| >EGFR-S784YRLGICLTST   | 207   | >EGFR-S784YRLGICLTYT   | 89   | 118   |
| >EGFR-S784YRLGICLTSTV  | 29    | >EGFR-S784YRLGICLTYTV  | 15   | 14    |
| >EGFR-S784YRLGICLTST   | 52    | >EGFR-S784YRLGICLTYT   | 45   | 7     |
| >EGFR-S784YRLGICLTSTV  | 13    | >EGFR-S784YRLGICLTYTV  | 24   | 11    |

|                         |       |                         |      |       |
|-------------------------|-------|-------------------------|------|-------|
| >EGFR-S784Y RLLGICLTST  | 87    | >EGFR-S784Y RLLGICLTYT  | 72   | 15    |
| >EGFR-S784Y RLLGICLTSTV | 19    | >EGFR-S784Y RLLGICLTYTV | 14   | 5     |
| >EGFR-S784Y RLLGICLTST  | 95    | >EGFR-S784Y RLLGICLTYT  | 25   | 70    |
| >EGFR-S784Y RLLGICLTSTV | 2     | >EGFR-S784Y RLLGICLTYTV | 2    | 0     |
| >EGFR-S784Y RLLGICLTSTV | 5     | >EGFR-S784Y RLLGICLTYTV | 4    | 1     |
| >EGFR-S784Y RLLGICLTST  | 401   | >EGFR-S784Y RLLGICLTYT  | 105  | 296   |
| >EGFR-S784Y RLLGICLTSTV | 5     | >EGFR-S784Y RLLGICLTYTV | 5    | 0     |
| >EGFR-S784Y RLLGICLTST  | 658   | >EGFR-S784Y RLLGICLTYT  | 139  | 519   |
| >EGFR-S784Y RLLGICLTSTV | 2     | >EGFR-S784Y RLLGICLTYTV | 2    | 0     |
| >EGFR-S784Y RLLGICLTST  | 34    | >EGFR-S784Y RLLGICLTYT  | 31   | 3     |
| >EGFR-S784Y RLLGICLTSTV | 2     | >EGFR-S784Y RLLGICLTYTV | 2    | 0     |
| >EGFR-S784Y RLLGICLTS   | 10974 | >EGFR-S784Y RLLGICLTY   | 87   | 10887 |
| >EGFR-S784Y RLLGICLTS   | 9060  | >EGFR-S784Y RLLGICLTY   | 9    | 9051  |
| >EGFR-S784Y RLLGICLTS   | 18545 | >EGFR-S784Y RLLGICLTY   | 84   | 18461 |
| >EGFR-S784Y RLLGICLTS   | 163   | >EGFR-S784Y RLLGICLTY   | 8    | 155   |
| >EGFR-S784Y RLLGICLTST  | 360   | >EGFR-S784Y RLLGICLTYT  | 2080 | 1720  |
| >EGFR-S784Y RLLGICLTSTV | 23    | >EGFR-S784Y RLLGICLTYTV | 9    | 14    |
| >EGFR-S784Y RLLGICLTSTV | 779   | >EGFR-S784Y RLLGICLTYTV | 390  | 389   |
| >EGFR-S784Y RLLGICLTS   | 18141 | >EGFR-S784Y RLLGICLTY   | 6    | 18135 |
| >EGFR-S784Y RLLGICLTS   | 12504 | >EGFR-S784Y RLLGICLTY   | 108  | 12396 |
| >EGFR-S784Y RLLGICLTS   | 14389 | >EGFR-S784Y RLLGICLTY   | 242  | 14147 |
| >EGFR-S784Y RLLGICLTS   | 13929 | >EGFR-S784Y RLLGICLTY   | 53   | 13876 |
| >EGFR-S784Y RLLGICLTS   | 6341  | >EGFR-S784Y RLLGICLTY   | 46   | 6295  |
| >EGFR-S784Y RLLGICLTSTV | 241   | >EGFR-S784Y RLLGICLTYTV | 2039 | 1798  |
| >EGFR-S784Y RLLGICLTS   | 29282 | >EGFR-S784Y RLLGICLTY   | 278  | 29004 |
| >EGFR-S784Y CRLLGICLTS  | 15417 | >EGFR-S784Y CRLLGICLTY  | 404  | 15013 |
| >EGFR-S784Y CRLLGICLTS  | 999   | >EGFR-S784Y CRLLGICLTY  | 21   | 978   |
| >EGFR-S811F SQYLLNWCV   | 52    | >EGFR-S811F FQYLLNWCV   | 50   | 2     |
| >EGFR-S811F SQYLLNWCV   | 19    | >EGFR-S811F FQYLLNWCV   | 8    | 11    |
| >EGFR-S811F SQYLLNWCV   | 221   | >EGFR-S811F FQYLLNWCV   | 29   | 192   |
| >EGFR-S811F SQYLLNWCV   | 85    | >EGFR-S811F FQYLLNWCV   | 8    | 77    |
| >EGFR-S811F SQYLLNWCV   | 601   | >EGFR-S811F FQYLLNWCV   | 33   | 568   |
| >EGFR-S811F SQYLLNWCV   | 559   | >EGFR-S811F FQYLLNWCV   | 50   | 509   |
| >EGFR-S811F SQYLLNWCV   | 570   | >EGFR-S811F FQYLLNWCV   | 65   | 505   |
| >EGFR-S811F SQYLLNWC    | 418   | >EGFR-S811F FQYLLNWC    | 51   | 367   |
| >EGFR-S811F SQYLLNWCV   | 6     | >EGFR-S811F FQYLLNWCV   | 3    | 3     |
| >EGFR-S811F SQYLLNWCV   | 51    | >EGFR-S811F FQYLLNWCV   | 10   | 41    |
| >EGFR-S811F SQYLLNWCV   | 30    | >EGFR-S811F FQYLLNWCV   | 7    | 23    |
| >EGFR-S811F SQYLLNWCV   | 264   | >EGFR-S811F FQYLLNWCV   | 46   | 218   |
| >EGFR-S811F SQYLLNWCV   | 21    | >EGFR-S811F FQYLLNWCV   | 6    | 15    |
| >EGFR-S811F SQYLLNWCV   | 1622  | >EGFR-S811F FQYLLNWCV   | 228  | 1394  |
| >EGFR-S811F SQYLLNWCV   | 10    | >EGFR-S811F FQYLLNWCV   | 7    | 3     |
| >EGFR-S811F SQYLLNWCV   | 254   | >EGFR-S811F FQYLLNWCV   | 113  | 141   |

|                       |       |                       |       |       |
|-----------------------|-------|-----------------------|-------|-------|
| >EGFR-S811FSQYLLNWCV  | 999   | >EGFR-S811FFQYLLNWCV  | 38    | 961   |
| >EGFR-S811FSQYLLNWCV  | 375   | >EGFR-S811FFQYLLNWCV  | 56    | 319   |
| >EGFR-S811FSQYLLNWCV  | 165   | >EGFR-S811FFQYLLNWCV  | 1313  | 1148  |
| >EGFR-S811FSQYLLNWCV  | 458   | >EGFR-S811FFQYLLNWCV  | 97    | 361   |
| >EGFR-S811FSQYLLNWCV  | 161   | >EGFR-S811FFQYLLNWCV  | 39    | 122   |
| >EGFR-S811FSQYLLNWCV  | 297   | >EGFR-S811FFQYLLNWCV  | 41    | 256   |
| >EGFR-S811FSQYLLNWCV  | 957   | >EGFR-S811FFQYLLNWCV  | 149   | 808   |
| >EGFR-S811FSQYLLNWCV  | 636   | >EGFR-S811FFQYLLNWCV  | 320   | 316   |
| >EGFR-S811FSQYLLNWCV  | 185   | >EGFR-S811FFQYLLNWCV  | 115   | 70    |
| >EGFR-S811FGSQYLLNW   | 14565 | >EGFR-S811FGFQYLLNW   | 345   | 14220 |
| >EGFR-S811FGSQYLLNW   | 17388 | >EGFR-S811FGFQYLLNW   | 285   | 17103 |
| >EGFR-S811FGSQYLLNW   | 29    | >EGFR-S811FGFQYLLNW   | 13760 | 13731 |
| >EGFR-S811FGSQYLLNW   | 328   | >EGFR-S811FGFQYLLNW   | 22281 | 21953 |
| >EGFR-S811FGSQYLLNW   | 47    | >EGFR-S811FGFQYLLNW   | 5139  | 5092  |
| >EGFR-S811FGSQYLLNWC  | 8507  | >EGFR-S811FGFQYLLNWC  | 249   | 8258  |
| >EGFR-S811FYVREHKDNIG | 11488 | >EGFR-S811FYVREHKDNIG | 103   | 11385 |
| >EGFR-S811FYVREHKDNIG | 15700 | >EGFR-S811FYVREHKDNIG | 166   | 15534 |
| >EGFR-S811FYVREHKDNIG | 18763 | >EGFR-S811FYVREHKDNIG | 236   | 18527 |
| >EGFR-S811FYVREHKDNIG | 23233 | >EGFR-S811FYVREHKDNIG | 253   | 22980 |
| >EGFR-S811FYVREHKDNIG | 20072 | >EGFR-S811FYVREHKDNIG | 50    | 20022 |
| >EGFR-S811FYVREHKDNIG | 15471 | >EGFR-S811FYVREHKDNIG | 385   | 15086 |
| >EGFR-S811FIGSQYLLNWC | 936   | >EGFR-S811FIGFQYLLNWC | 450   | 486   |
| >EGFR-S811FIGSQYLLNWC | 1706  | >EGFR-S811FIGFQYLLNWC | 303   | 1403  |
| >EGFR-S811FIGSQYLLNWC | 3870  | >EGFR-S811FIGFQYLLNWC | 343   | 3527  |
| >EGFR-S811FIGSQYLLNW  | 58    | >EGFR-S811FIGFQYLLNW  | 23    | 35    |
| >EGFR-S811FIGSQYLLNW  | 523   | >EGFR-S811FIGFQYLLNW  | 131   | 392   |
| >EGFR-S811FIGSQYLLNW  | 35    | >EGFR-S811FIGFQYLLNW  | 29    | 6     |
| >EGFR-S811FIGSQYLLNW  | 739   | >EGFR-S811FIGFQYLLNW  | 368   | 371   |
| >EGFR-S811FIGSQYLLNW  | 1048  | >EGFR-S811FIGFQYLLNW  | 297   | 751   |
| >EGFR-S811FNIGSQYLL   | 248   | >EGFR-S811FNIGFQYLL   | 325   | 77    |
| >EGFR-S811FDNIGSQYLL  | 620   | >EGFR-S811FDNIGFQYLL  | 207   | 413   |
| >EGFR-S811FKDNIGSQYL  | 962   | >EGFR-S811FKDNIGFQYL  | 364   | 598   |
| >EGFR-S811FKDNIGSQYLL | 329   | >EGFR-S811FKDNIGFQYLL | 312   | 17    |
| >EGFR-S811FHKDNIGSQY  | 198   | >EGFR-S811FHKDNIGFQY  | 779   | 581   |
| >EGFR-S811FHKDNIGSQYL | 372   | >EGFR-S811FHKDNIGFQYL | 449   | 77    |
| >EGFR-S811FHKDNIGSQYL | 71    | >EGFR-S811FHKDNIGFQYL | 60    | 11    |
| >EGFR-S811FHKDNIGSQY  | 125   | >EGFR-S811FHKDNIGFQY  | 2947  | 2822  |
| >EGFR-S811FHKDNIGSQY  | 1019  | >EGFR-S811FHKDNIGFQY  | 166   | 853   |
| >EGFR-S811FREHKDNIGSC | 1222  | >EGFR-S811FREHKDNIGFC | 310   | 912   |
| >EGFR-S811FREHKDNIGSC | 364   | >EGFR-S811FREHKDNIGFC | 630   | 266   |
| >EGFR-S811FREHKDNIGS  | 18834 | >EGFR-S811FREHKDNIGF  | 64    | 18770 |
| >EGFR-S811FREHKDNIGSC | 104   | >EGFR-S811FREHKDNIGFC | 275   | 171   |
| >EGFR-S811FREHKDNIGSC | 773   | >EGFR-S811FREHKDNIGFC | 319   | 454   |

|                        |       |                        |       |       |
|------------------------|-------|------------------------|-------|-------|
| >EGFR-S811FREHKDNIGS   | 1684  | >EGFR-S811FREHKDNIGF   | 14    | 1670  |
| >EGFR-S811FREHKDNIGS   | 1350  | >EGFR-S811FREHKDNIGF   | 147   | 1203  |
| >EGFR-S811FREHKDNIGS   | 7801  | >EGFR-S811FREHKDNIGF   | 281   | 7520  |
| >EGFR-S811FREHKDNIGSC  | 360   | >EGFR-S811FREHKDNIGFC  | 188   | 172   |
| >EGFR-S811FREHKDNIGS   | 394   | >EGFR-S811FREHKDNIGF   | 1214  | 820   |
| >EGFR-S811FREHKDNIGSC  | 362   | >EGFR-S811FREHKDNIGFC  | 2996  | 2634  |
| >EGFR-S811FREHKDNIGS   | 3482  | >EGFR-S811FREHKDNIGF   | 137   | 3345  |
| >EGFR-S921FSEISSILEK   | 1892  | >EGFR-S921FREISSILEK   | 416   | 1476  |
| >EGFR-S921FASEISSILEK  | 411   | >EGFR-S921FAREISSILEK  | 5193  | 4782  |
| >EGFR-S921FASEISSILEK  | 25    | >EGFR-S921FAREISSILEK  | 2774  | 2749  |
| >EGFR-S921FASEISSILEK  | 102   | >EGFR-S921FAREISSILEK  | 5550  | 5448  |
| >EGFR-S921FASEISSIL    | 23    | >EGFR-S921FAREISSIL    | 22436 | 22413 |
| >EGFR-S921FASEISSIL    | 6357  | >EGFR-S921FAREISSIL    | 173   | 6184  |
| >EGFR-S921FASEISSILEK  | 91    | >EGFR-S921FAREISSILEK  | 2920  | 2829  |
| >EGFR-S921FGSKPYDGIPA  | 15902 | >EGFR-S921FGSKPYDGIPA  | 46    | 15856 |
| >EGFR-S921FPASEISSILEK | 4297  | >EGFR-S921FPAREISSILEK | 21    | 4276  |
| >EGFR-S921FIPASEISSI   | 87    | >EGFR-S921FIPAREISSI   | 70    | 17    |
| >EGFR-S921FIPASEISSIL  | 328   | >EGFR-S921FIPAREISSIL  | 645   | 317   |
| >EGFR-S921FIPASEISSIL  | 288   | >EGFR-S921FIPAREISSIL  | 1185  | 897   |
| >EGFR-S921FIPASEISSI   | 241   | >EGFR-S921FIPAREISSI   | 274   | 33    |
| >EGFR-S921FIPASEISSI   | 80    | >EGFR-S921FIPAREISSI   | 208   | 128   |
| >EGFR-S921FIPASEISSIL  | 238   | >EGFR-S921FIPAREISSIL  | 174   | 64    |
| >EGFR-S921FIPASEISSIL  | 289   | >EGFR-S921FIPAREISSIL  | 454   | 165   |
| >EGFR-S921FIPASEISSI   | 366   | >EGFR-S921FIPAREISSI   | 533   | 167   |
| >EGFR-S921FGIPASEISSI  | 227   | >EGFR-S921FGIPAREISSI  | 582   | 355   |
| >EGFR-S921FGIPASEISSI  | 121   | >EGFR-S921FGIPAREISSI  | 216   | 95    |
| >EGFR-S921FGIPASEISSIL | 336   | >EGFR-S921FGIPAREISSIL | 1061  | 725   |
| >EGFR-S921FYDGIPASEI   | 246   | >EGFR-S921FYDGIPAREI   | 612   | 366   |
| >EGFR-S921FPYDGIPAS    | 31805 | >EGFR-S921FPYDGIPAR    | 347   | 31458 |
| >EGFR-S921FKPYDGIPASEI | 65    | >EGFR-S921FKPYDGIPAREI | 54    | 11    |
| >EGFR-S921FKPYDGIPASEI | 126   | >EGFR-S921FKPYDGIPAREI | 177   | 51    |
| >EGFR-S921FKPYDGIPAS   | 304   | >EGFR-S921FKPYDGIPAR   | 2286  | 1982  |
| >EGFR-S921FKPYDGIPAS   | 24415 | >EGFR-S921FKPYDGIPAR   | 86    | 24329 |
| >EGFR-S921FKPYDGIPASEI | 107   | >EGFR-S921FKPYDGIPAREI | 210   | 103   |
| >EGFR-T263FTCPPLMLY    | 232   | >EGFR-T263FPCPPLMLY    | 788   | 556   |
| >EGFR-T263FTCPPLMLY    | 104   | >EGFR-T263FPCPPLMLY    | 1423  | 1319  |
| >EGFR-T263FDTCPPLMLY   | 477   | >EGFR-T263FDPCPPLMLY   | 18986 | 18509 |
| >EGFR-T263FDTCPPLMLY   | 142   | >EGFR-T263FDPCPPLMLY   | 11121 | 10979 |
| >EGFR-T263FDTCPPLML    | 285   | >EGFR-T263FDPCPPLML    | 12381 | 12096 |
| >EGFR-T263FDTCPPLMLY   | 10    | >EGFR-T263FDPCPPLMLY   | 964   | 954   |
| >EGFR-T263FDTCPPLMLY   | 41    | >EGFR-T263FDPCPPLMLY   | 7059  | 7018  |
| >EGFR-T263FDTCPPLMLY   | 30    | >EGFR-T263FDPCPPLMLY   | 769   | 739   |
| >EGFR-T263FDTCPPLMLY   | 257   | >EGFR-T263FDPCPPLMLY   | 12990 | 12733 |

|                        |      |                       |       |       |
|------------------------|------|-----------------------|-------|-------|
| >EGFR-T263FDTCPPLMLY   | 191  | >EGFR-T263FDPCPPLMLY  | 6202  | 6011  |
| >EGFR-T263FDTCPPLML    | 276  | >EGFR-T263FDPCPPLML   | 22989 | 22713 |
| >EGFR-T263FDTCPPLMLY   | 65   | >EGFR-T263FDPCPPLMLY  | 20829 | 20764 |
| >EGFR-T263FDTCPPLMLY   | 8998 | >EGFR-T263FDPCPPLMLY  | 376   | 8622  |
| >EGFR-T263FDTCPPLMLY   | 84   | >EGFR-T263FDPCPPLMLY  | 4636  | 4552  |
| >EGFR-T263FDTCPPLMLY   | 223  | >EGFR-T263FDPCPPLMLY  | 2416  | 2193  |
| >EGFR-T263FKDTCPPMLY   | 230  | >EGFR-T263FKDPCPPLMLY | 1379  | 1149  |
| >EGFR-T263FCKDTCPPMLI  | 98   | >EGFR-T263FCKDPCPPLMI | 112   | 14    |
| >EGFR-T263FATCKDTCPPPL | 399  | >EGFR-T263FATCKDPCPPL | 461   | 62    |
| >EGFR-T263FATCKDTCPPPL | 129  | >EGFR-T263FATCKDPCPPL | 263   | 134   |
| >EGFR-T263FATCKDTCPPPL | 48   | >EGFR-T263FATCKDPCPPL | 54    | 6     |
| >EGFR-T263FATCKDTCPPPL | 83   | >EGFR-T263FATCKDPCPPL | 73    | 10    |
| >EGFR-T263FATCKDTCPPPL | 195  | >EGFR-T263FATCKDPCPPL | 198   | 3     |
| >EGFR-T263FEATCKDTCPP  | 345  | >EGFR-T263FEATCKDPCPP | 387   | 42    |
| >EGFR-T263FEATCKDTCPP  | 492  | >EGFR-T263FEATCKDPCPP | 321   | 171   |
| >EGFR-T263FEATCKDTCPP  | 408  | >EGFR-T263FEATCKDPCPP | 430   | 22    |
| >EGFR-T273MYPNTYQM     | 172  | >EGFR-T273MYPNTYQM    | 322   | 150   |
| >EGFR-T273MLYNPTTYQM   | 414  | >EGFR-T273MLYNPNTYQM  | 1167  | 753   |
| >EGFR-T273MLYNPTTYQMI  | 132  | >EGFR-T273MLYNPNTYQMI | 98    | 34    |
| >EGFR-T273MLYNPTTYQM   | 332  | >EGFR-T273MLYNPNTYQM  | 217   | 115   |
| >EGFR-T273MLYNPTTYQM   | 28   | >EGFR-T273MLYNPNTYQM  | 20    | 8     |
| >EGFR-T273MLYNPTTYQMI  | 165  | >EGFR-T273MLYNPNTYQMI | 117   | 48    |
| >EGFR-T273MLYNPTTYQM   | 575  | >EGFR-T273MLYNPNTYQM  | 425   | 150   |
| >EGFR-T273MLYNPTTYQI   | 50   | >EGFR-T273MLYNPNTYQI  | 76    | 26    |
| >EGFR-T273MLYNPTTYQ    | 84   | >EGFR-T273MLYNPNTYQ   | 167   | 83    |
| >EGFR-T273MLYNPTTYQI   | 11   | >EGFR-T273MLYNPNTYQI  | 15    | 4     |
| >EGFR-T273MLYNPTTYQ    | 129  | >EGFR-T273MLYNPNTYQ   | 476   | 347   |
| >EGFR-T273MLYNPTTYQI   | 67   | >EGFR-T273MLYNPNTYQI  | 115   | 48    |
| >EGFR-T273MLYNPTTYQI   | 110  | >EGFR-T273MLYNPNTYQI  | 253   | 143   |
| >EGFR-T273MLYNPTTY     | 61   | >EGFR-T273MLYNPNTY    | 111   | 50    |
| >EGFR-T273MLYNPTTYQ    | 11   | >EGFR-T273MLYNPNTYQ   | 20    | 9     |
| >EGFR-T273MLYNPTTYQI   | 2    | >EGFR-T273MLYNPNTYQI  | 3     | 1     |
| >EGFR-T273MLYNPTTYQI   | 262  | >EGFR-T273MLYNPNTYQI  | 306   | 44    |
| >EGFR-T273MLYNPTTYQI   | 14   | >EGFR-T273MLYNPNTYQI  | 21    | 7     |
| >EGFR-T273MLYNPTTYQ    | 129  | >EGFR-T273MLYNPNTYQ   | 410   | 281   |
| >EGFR-T273MLYNPTTYQI   | 17   | >EGFR-T273MLYNPNTYQI  | 28    | 11    |
| >EGFR-T273MLYNPTTYQI   | 14   | >EGFR-T273MLYNPNTYQI  | 30    | 16    |
| >EGFR-T273MLYNPTTY     | 85   | >EGFR-T273MLYNPNTY    | 310   | 225   |
| >EGFR-T273MLYNPTTYQ    | 7    | >EGFR-T273MLYNPNTYQ   | 12    | 5     |
| >EGFR-T273MLYNPTTYQI   | 4    | >EGFR-T273MLYNPNTYQI  | 5     | 1     |
| >EGFR-T273MLYNPTTY     | 36   | >EGFR-T273MLYNPNTY    | 55    | 19    |
| >EGFR-T273MLYNPTTY     | 448  | >EGFR-T273MLYNPNTY    | 684   | 236   |
| >EGFR-T273MLYNPTTY     | 13   | >EGFR-T273MLYNPNTY    | 16    | 3     |

|                                    |     |                                    |     |     |
|------------------------------------|-----|------------------------------------|-----|-----|
| >EGFR-T273 <sup>†</sup> MLYNPTTY   | 160 | >EGFR-T273 <sup>†</sup> MLYNPNTY   | 57  | 103 |
| >EGFR-T273 <sup>†</sup> MLYNPTTY   | 51  | >EGFR-T273 <sup>†</sup> MLYNPNTY   | 93  | 42  |
| >EGFR-T273 <sup>†</sup> MLYNPTTYQI | 75  | >EGFR-T273 <sup>†</sup> MLYNPNTYQ  | 136 | 61  |
| >EGFR-T273 <sup>†</sup> MLYNPTTY   | 298 | >EGFR-T273 <sup>†</sup> MLYNPNTY   | 391 | 93  |
| >EGFR-T273 <sup>†</sup> MLYNPTTYQ  | 326 | >EGFR-T273 <sup>†</sup> MLYNPNTYQ  | 504 | 178 |
| >EGFR-T273 <sup>†</sup> MLYNPTTYQI | 34  | >EGFR-T273 <sup>†</sup> MLYNPNTYQ  | 54  | 20  |
| >EGFR-T273 <sup>†</sup> MLYNPTTY   | 139 | >EGFR-T273 <sup>†</sup> MLYNPNTY   | 350 | 211 |
| >EGFR-T273 <sup>†</sup> MLYNPTTY   | 40  | >EGFR-T273 <sup>†</sup> MLYNPNTY   | 50  | 10  |
| >EGFR-T273 <sup>†</sup> MLYNPTTYQI | 84  | >EGFR-T273 <sup>†</sup> MLYNPNTYQ  | 107 | 23  |
| >EGFR-T273 <sup>†</sup> MLYNPTTY   | 17  | >EGFR-T273 <sup>†</sup> MLYNPNTY   | 16  | 1   |
| >EGFR-T273 <sup>†</sup> MLYNPTTYQI | 97  | >EGFR-T273 <sup>†</sup> MLYNPNTYQ  | 87  | 10  |
| >EGFR-T273 <sup>†</sup> MLYNPTTY   | 6   | >EGFR-T273 <sup>†</sup> MLYNPNTY   | 7   | 1   |
| >EGFR-T273 <sup>†</sup> MLYNPTTYQI | 26  | >EGFR-T273 <sup>†</sup> MLYNPNTYQ  | 35  | 9   |
| >EGFR-T273 <sup>†</sup> MLYNPTTY   | 21  | >EGFR-T273 <sup>†</sup> MLYNPNTY   | 69  | 48  |
| >EGFR-T273 <sup>†</sup> MLYNPTTYQI | 141 | >EGFR-T273 <sup>†</sup> MLYNPNTYQ  | 171 | 30  |
| >EGFR-T273 <sup>†</sup> MLYNPTTY   | 30  | >EGFR-T273 <sup>†</sup> MLYNPNTY   | 39  | 9   |
| >EGFR-T273 <sup>†</sup> MLYNPTTY   | 484 | >EGFR-T273 <sup>†</sup> MLYNPNTY   | 514 | 30  |
| >EGFR-T273 <sup>†</sup> LMLYNPTTYC | 180 | >EGFR-T273 <sup>†</sup> LMLYNPNTYC | 81  | 99  |
| >EGFR-T273 <sup>†</sup> LMLYNPTT   | 339 | >EGFR-T273 <sup>†</sup> LMLYNPNT   | 494 | 155 |
| >EGFR-T273 <sup>†</sup> LMLYNPTTYC | 74  | >EGFR-T273 <sup>†</sup> LMLYNPNTYC | 96  | 22  |
| >EGFR-T273 <sup>†</sup> LMLYNPTTYC | 325 | >EGFR-T273 <sup>†</sup> LMLYNPNTYC | 274 | 51  |
| >EGFR-T273 <sup>†</sup> LMLYNPTT   | 43  | >EGFR-T273 <sup>†</sup> LMLYNPNT   | 130 | 87  |
| >EGFR-T273 <sup>†</sup> LMLYNPTTYC | 150 | >EGFR-T273 <sup>†</sup> LMLYNPNTYC | 250 | 100 |
| >EGFR-T273 <sup>†</sup> LMLYNPTTYC | 12  | >EGFR-T273 <sup>†</sup> LMLYNPNTYC | 13  | 1   |
| >EGFR-T273 <sup>†</sup> LMLYNPTT   | 125 | >EGFR-T273 <sup>†</sup> LMLYNPNT   | 431 | 306 |
| >EGFR-T273 <sup>†</sup> LMLYNPTTYC | 16  | >EGFR-T273 <sup>†</sup> LMLYNPNTYC | 11  | 5   |
| >EGFR-T273 <sup>†</sup> LMLYNPTT   | 471 | >EGFR-T273 <sup>†</sup> LMLYNPNT   | 865 | 394 |
| >EGFR-T273 <sup>†</sup> LMLYNPTTYC | 167 | >EGFR-T273 <sup>†</sup> LMLYNPNTYC | 252 | 85  |
| >EGFR-T273 <sup>†</sup> LMLYNPTT   | 399 | >EGFR-T273 <sup>†</sup> LMLYNPNT   | 624 | 225 |
| >EGFR-T273 <sup>†</sup> LMLYNPTTYC | 15  | >EGFR-T273 <sup>†</sup> LMLYNPNTYC | 17  | 2   |
| >EGFR-T273 <sup>†</sup> LMLYNPTT   | 143 | >EGFR-T273 <sup>†</sup> LMLYNPNT   | 410 | 267 |
| >EGFR-T273 <sup>†</sup> LMLYNPTTYC | 216 | >EGFR-T273 <sup>†</sup> LMLYNPNTYC | 569 | 353 |
| >EGFR-T273 <sup>†</sup> LMLYNPTTYC | 76  | >EGFR-T273 <sup>†</sup> LMLYNPNTYC | 107 | 31  |
| >EGFR-T273 <sup>†</sup> LMLYNPTTY  | 10  | >EGFR-T273 <sup>†</sup> LMLYNPNTY  | 10  | 0   |
| >EGFR-T273 <sup>†</sup> LMLYNPTTYC | 197 | >EGFR-T273 <sup>†</sup> LMLYNPNTYC | 181 | 16  |
| >EGFR-T273 <sup>†</sup> LMLYNPTTY  | 71  | >EGFR-T273 <sup>†</sup> LMLYNPNTY  | 18  | 53  |
| >EGFR-T273 <sup>†</sup> LMLYNPTTY  | 90  | >EGFR-T273 <sup>†</sup> LMLYNPNTY  | 199 | 109 |
| >EGFR-T273 <sup>†</sup> LMLYNPTTYC | 340 | >EGFR-T273 <sup>†</sup> LMLYNPNTYC | 411 | 71  |
| >EGFR-T273 <sup>†</sup> LMLYNPTTY  | 66  | >EGFR-T273 <sup>†</sup> LMLYNPNTY  | 91  | 25  |
| >EGFR-T273 <sup>†</sup> LMLYNPTTYC | 179 | >EGFR-T273 <sup>†</sup> LMLYNPNTYC | 246 | 67  |
| >EGFR-T273 <sup>†</sup> LMLYNPTTY  | 92  | >EGFR-T273 <sup>†</sup> LMLYNPNTY  | 85  | 7   |
| >EGFR-T273 <sup>†</sup> LMLYNPTTY  | 4   | >EGFR-T273 <sup>†</sup> LMLYNPNTY  | 5   | 1   |
| >EGFR-T273 <sup>†</sup> LMLYNPTTYC | 421 | >EGFR-T273 <sup>†</sup> LMLYNPNTYC | 497 | 76  |

|                        |      |                        |      |      |
|------------------------|------|------------------------|------|------|
| >EGFR-T273M LMLYNPTTYC | 18   | >EGFR-T273M LMLYNPNTYC | 24   | 6    |
| >EGFR-T273M LMLYNPTTY  | 91   | >EGFR-T273M LMLYNPNTY  | 726  | 635  |
| >EGFR-T273M LMLYNPTTY  | 61   | >EGFR-T273M LMLYNPNTY  | 71   | 10   |
| >EGFR-T273M LMLYNPTTYC | 378  | >EGFR-T273M LMLYNPNTYC | 339  | 39   |
| >EGFR-T273M LMLYNPTTYC | 486  | >EGFR-T273M LMLYNPNTYC | 915  | 429  |
| >EGFR-T273M PLMLYNPTTY | 105  | >EGFR-T273M PLMLYNPNTY | 256  | 151  |
| >EGFR-T273M PLMLYNPTTY | 266  | >EGFR-T273M PLMLYNPNTY | 162  | 104  |
| >EGFR-T273M PPLMLYNPTT | 69   | >EGFR-T273M PPLMLYNPNT | 100  | 31   |
| >EGFR-T273M PPLMLYNPTT | 199  | >EGFR-T273M PPLMLYNPNT | 311  | 112  |
| >EGFR-T273M CPPLMLYNPT | 107  | >EGFR-T273M CPPLMLYNPN | 373  | 266  |
| >EGFR-T725/ TVYKGLWI   | 153  | >EGFR-T725/ AVYKGLWI   | 89   | 64   |
| >EGFR-T725/ TVYKGLWI   | 168  | >EGFR-T725/ AVYKGLWI   | 89   | 79   |
| >EGFR-T725/ TVYKGLWI   | 444  | >EGFR-T725/ AVYKGLWI   | 110  | 334  |
| >EGFR-T725/ TVYKGLWI   | 994  | >EGFR-T725/ AVYKGLWI   | 299  | 695  |
| >EGFR-T725/ TVYKGLWI   | 893  | >EGFR-T725/ AVYKGLWI   | 151  | 742  |
| >EGFR-T725/ TVYKGLWI   | 463  | >EGFR-T725/ AVYKGLWI   | 6601 | 6138 |
| >EGFR-T725/ TVYKGLWI   | 191  | >EGFR-T725/ AVYKGLWI   | 1902 | 1711 |
| >EGFR-T725/ TVYKGLWI   | 1937 | >EGFR-T725/ AVYKGLWI   | 476  | 1461 |
| >EGFR-T725/ TVYKGLWI   | 265  | >EGFR-T725/ AVYKGLWI   | 152  | 113  |
| >EGFR-T725/ GTVYKGLW   | 14   | >EGFR-T725/ GAVYKGLW   | 100  | 86   |
| >EGFR-T725/ GTVYKGLWI  | 24   | >EGFR-T725/ GAVYKGLWI  | 396  | 372  |
| >EGFR-T725/ GTVYKGLW   | 199  | >EGFR-T725/ GAVYKGLW   | 322  | 123  |
| >EGFR-T725/ GTVYKGLW   | 230  | >EGFR-T725/ GAVYKGLW   | 279  | 49   |
| >EGFR-T725/ GTVYKGLWI  | 118  | >EGFR-T725/ GAVYKGLWI  | 1567 | 1449 |
| >EGFR-T725/ GTVYKGLWI  | 166  | >EGFR-T725/ GAVYKGLWI  | 849  | 683  |
| >EGFR-T725/ FGTVYKGL   | 354  | >EGFR-T725/ FGAVYKGL   | 691  | 337  |
| >EGFR-T725/ FGTVYKGLW  | 393  | >EGFR-T725/ FGAVYKGLW  | 173  | 220  |
| >EGFR-T725/ FGTVYKGLW  | 29   | >EGFR-T725/ FGAVYKGLW  | 39   | 10   |
| >EGFR-T725/ AFGTVYKGL  | 152  | >EGFR-T725/ AFGAVYKGL  | 77   | 75   |
| >EGFR-T725/ AFGTVYKGLV | 591  | >EGFR-T725/ AFGAVYKGLV | 350  | 241  |
| >EGFR-T725/ AFGTVYKGLV | 249  | >EGFR-T725/ AFGAVYKGLV | 149  | 100  |
| >EGFR-T725/ GAFGTVYKGI | 372  | >EGFR-T725/ GAFGAVYKGI | 506  | 134  |
| >EGFR-T725/ GAFGTVYK   | 122  | >EGFR-T725/ GAFGAVYK   | 133  | 11   |
| >EGFR-T725/ GAFGTVYK   | 9    | >EGFR-T725/ GAFGAVYK   | 11   | 2    |
| >EGFR-T725/ GAFGTVYK   | 98   | >EGFR-T725/ GAFGAVYK   | 151  | 53   |
| >EGFR-T725/ GAFGTVYK   | 222  | >EGFR-T725/ GAFGAVYK   | 563  | 341  |
| >EGFR-T725/ GAFGTVYK   | 23   | >EGFR-T725/ GAFGAVYK   | 24   | 1    |
| >EGFR-T725/ GAFGTVYKGI | 158  | >EGFR-T725/ GAFGAVYKGI | 168  | 10   |
| >EGFR-T725/ GAFGTVYKGI | 38   | >EGFR-T725/ GAFGAVYKGI | 63   | 25   |
| >EGFR-T725/ GAFGTVYKGI | 456  | >EGFR-T725/ GAFGAVYKGI | 660  | 204  |
| >EGFR-T725/ GAFGTVYKGI | 46   | >EGFR-T725/ GAFGAVYKGI | 45   | 1    |
| >EGFR-T725/ GAFGTVYKGI | 34   | >EGFR-T725/ GAFGAVYKGI | 43   | 9    |
| >EGFR-T725/ GAFGTVYKGI | 279  | >EGFR-T725/ GAFGAVYKGI | 483  | 204  |

|                       |      |                       |     |      |
|-----------------------|------|-----------------------|-----|------|
| >EGFR-T725/GAFGTVYKGI | 33   | >EGFR-T725/GAFGAVYKGI | 33  | 0    |
| >EGFR-T725/GAFGTVYK   | 150  | >EGFR-T725/GAFGAVYK   | 226 | 76   |
| >EGFR-T725/SGAFGTVYK  | 49   | >EGFR-T725/SGAFGAVYK  | 83  | 34   |
| >EGFR-T725/SGAFGTVY   | 580  | >EGFR-T725/SGAFGAVY   | 394 | 186  |
| >EGFR-T725/SGAFGTVY   | 87   | >EGFR-T725/SGAFGAVY   | 39  | 48   |
| >EGFR-T725/SGAFGTVYK  | 178  | >EGFR-T725/SGAFGAVYK  | 220 | 42   |
| >EGFR-T725/SGAFGTVY   | 188  | >EGFR-T725/SGAFGAVY   | 225 | 37   |
| >EGFR-T725/SGAFGTVY   | 460  | >EGFR-T725/SGAFGAVY   | 460 | 0    |
| >EGFR-T725/SGAFGTVYK  | 342  | >EGFR-T725/SGAFGAVYK  | 571 | 229  |
| >EGFR-T725/GSGAFGTVYK | 46   | >EGFR-T725/GSGAFGAVYK | 65  | 19   |
| >EGFR-T725/GSGAFGTVYK | 29   | >EGFR-T725/GSGAFGAVYK | 38  | 9    |
| >EGFR-T725/GSGAFGTVY  | 827  | >EGFR-T725/GSGAFGAVY  | 384 | 443  |
| >EGFR-T725/GSGAFGTVY  | 432  | >EGFR-T725/GSGAFGAVY  | 76  | 356  |
| >EGFR-T725/GSGAFGTVYK | 224  | >EGFR-T725/GSGAFGAVYK | 251 | 27   |
| >EGFR-T725/GSGAFGTVY  | 78   | >EGFR-T725/GSGAFGAVY  | 66  | 12   |
| >EGFR-T725/GSGAFGTVY  | 349  | >EGFR-T725/GSGAFGAVY  | 675 | 326  |
| >EGFR-T725/GSGAFGTVY  | 62   | >EGFR-T725/GSGAFGAVY  | 28  | 34   |
| >EGFR-T725/GSGAFGTVY  | 11   | >EGFR-T725/GSGAFGAVY  | 22  | 11   |
| >EGFR-T725/GSGAFGTVYK | 337  | >EGFR-T725/GSGAFGAVYK | 493 | 156  |
| >EGFR-T725/LGSGAFGTVY | 125  | >EGFR-T725/LGSGAFGAVY | 131 | 6    |
| >EGFR-T725/LGSGAFGTVY | 478  | >EGFR-T725/LGSGAFGAVY | 170 | 308  |
| >EGFR-T725/LGSGAFGTVY | 93   | >EGFR-T725/LGSGAFGAVY | 84  | 9    |
| >EGFR-T725/LGSGAFGTVY | 94   | >EGFR-T725/LGSGAFGAVY | 95  | 1    |
| >EGFR-T725/VLGSAGFGT  | 2098 | >EGFR-T725/VLGSAGFGA  | 299 | 1799 |
| >EGFR-T725/VLGSAGFGTV | 73   | >EGFR-T725/VLGSAGFGA\ | 110 | 37   |
| >EGFR-T725/VLGSAGFGT  | 3530 | >EGFR-T725/VLGSAGFGA  | 474 | 3056 |
| >EGFR-T725/VLGSAGFGTV | 41   | >EGFR-T725/VLGSAGFGA\ | 55  | 14   |
| >EGFR-T725/VLGSAGFGT  | 1992 | >EGFR-T725/VLGSAGFGA  | 132 | 1860 |
| >EGFR-T725/VLGSAGFGTV | 21   | >EGFR-T725/VLGSAGFGA\ | 25  | 4    |
| >EGFR-T725/VLGSAGFGT  | 827  | >EGFR-T725/VLGSAGFGA  | 95  | 732  |
| >EGFR-T725/VLGSAGFGT  | 68   | >EGFR-T725/VLGSAGFGA  | 11  | 57   |
| >EGFR-T725/VLGSAGFGTV | 3    | >EGFR-T725/VLGSAGFGA\ | 3   | 0    |
| >EGFR-T725/VLGSAGFGT  | 505  | >EGFR-T725/VLGSAGFGA  | 26  | 479  |
| >EGFR-T725/VLGSAGFGTV | 7    | >EGFR-T725/VLGSAGFGA\ | 9   | 2    |
| >EGFR-T725/VLGSAGFGT  | 103  | >EGFR-T725/VLGSAGFGA  | 12  | 91   |
| >EGFR-T725/VLGSAGFGTV | 7    | >EGFR-T725/VLGSAGFGA\ | 11  | 4    |
| >EGFR-T725/VLGSAGFGT  | 75   | >EGFR-T725/VLGSAGFGA  | 10  | 65   |
| >EGFR-T725/VLGSAGFGTV | 5    | >EGFR-T725/VLGSAGFGA\ | 8   | 3    |
| >EGFR-T725/VLGSAGFGT  | 14   | >EGFR-T725/VLGSAGFGA  | 4   | 10   |
| >EGFR-T725/VLGSAGFGTV | 2    | >EGFR-T725/VLGSAGFGA\ | 2   | 0    |
| >EGFR-T725/VLGSAGFGTV | 64   | >EGFR-T725/VLGSAGFGA\ | 41  | 23   |
| >EGFR-T725/VLGSAGFGTV | 54   | >EGFR-T725/VLGSAGFGA\ | 20  | 34   |
| >EGFR-T725/VLGSAGFGTV | 26   | >EGFR-T725/VLGSAGFGA\ | 28  | 2    |



|                       |       |                       |      |       |
|-----------------------|-------|-----------------------|------|-------|
| >EGFR-T725/VLGSGAFGTV | 73    | >EGFR-T725/VLGSGAFGA\ | 68   | 5     |
| >EGFR-T725/VLGSGAFGTV | 87    | >EGFR-T725/VLGSGAFGA\ | 70   | 17    |
| >EGFR-T725/VLGSGAFGTV | 421   | >EGFR-T725/VLGSGAFGA\ | 690  | 269   |
| >EGFR-T725/VLGSGAFGTV | 227   | >EGFR-T725/VLGSGAFGA\ | 422  | 195   |
| >EGFR-T725/KVLGSGAFGT | 294   | >EGFR-T725/KVLGSGAFG\ | 358  | 64    |
| >EGFR-T725/KVLGSGAFGT | 123   | >EGFR-T725/KVLGSGAFG\ | 113  | 10    |
| >EGFR-T725/KVLGSGAFGT | 602   | >EGFR-T725/KVLGSGAFG\ | 180  | 422   |
| >EGFR-T725/KVLGSGAFGT | 9     | >EGFR-T725/KVLGSGAFG\ | 9    | 0     |
| >EGFR-T725/KVLGSGAFGT | 1193  | >EGFR-T725/KVLGSGAFG\ | 152  | 1041  |
| >EGFR-T725/KVLGSGAFGT | 12    | >EGFR-T725/KVLGSGAFG\ | 16   | 4     |
| >EGFR-T725/KVLGSGAFGT | 78    | >EGFR-T725/KVLGSGAFG\ | 148  | 70    |
| >EGFR-T725/KVLGSGAFGT | 2425  | >EGFR-T725/KVLGSGAFG\ | 239  | 2186  |
| >EGFR-T725/KVLGSGAFGT | 28    | >EGFR-T725/KVLGSGAFG\ | 68   | 40    |
| >EGFR-T725/KVLGSGAFGT | 176   | >EGFR-T725/KVLGSGAFG\ | 285  | 109   |
| >EGFR-T725/KVLGSGAFGT | 4594  | >EGFR-T725/KVLGSGAFG\ | 496  | 4098  |
| >EGFR-T725/KVLGSGAFGT | 15    | >EGFR-T725/KVLGSGAFG\ | 34   | 19    |
| >EGFR-T725/KVLGSGAFGT | 2433  | >EGFR-T725/KVLGSGAFG\ | 132  | 2301  |
| >EGFR-T725/KVLGSGAFGT | 76    | >EGFR-T725/KVLGSGAFG\ | 76   | 0     |
| >EGFR-T725/KVLGSGAFGT | 324   | >EGFR-T725/KVLGSGAFG\ | 227  | 97    |
| >EGFR-T725\TVYKGLWI   | 1110  | >EGFR-T725\MVYKGLWI   | 112  | 998   |
| >EGFR-T725\TVYKGLWI   | 1940  | >EGFR-T725\MVYKGLWI   | 199  | 1741  |
| >EGFR-T725\TVYKGLWI   | 153   | >EGFR-T725\MVYKGLWI   | 30   | 123   |
| >EGFR-T725\TVYKGLWI   | 168   | >EGFR-T725\MVYKGLWI   | 34   | 134   |
| >EGFR-T725\TVYKGLWIP  | 2650  | >EGFR-T725\MVYKGLWIP  | 430  | 2220  |
| >EGFR-T725\TVYKGLWI   | 444   | >EGFR-T725\MVYKGLWI   | 43   | 401   |
| >EGFR-T725\TVYKGLWI   | 994   | >EGFR-T725\MVYKGLWI   | 233  | 761   |
| >EGFR-T725\TVYKGLWI   | 893   | >EGFR-T725\MVYKGLWI   | 77   | 816   |
| >EGFR-T725\TVYKGLWI   | 463   | >EGFR-T725\MVYKGLWI   | 126  | 337   |
| >EGFR-T725\TVYKGLWI   | 191   | >EGFR-T725\MVYKGLWI   | 133  | 58    |
| >EGFR-T725\TVYKGLWI   | 1937  | >EGFR-T725\MVYKGLWI   | 228  | 1709  |
| >EGFR-T725\TVYKGLWI   | 265   | >EGFR-T725\MVYKGLWI   | 62   | 203   |
| >EGFR-T725\GTVYKGLWI  | 3261  | >EGFR-T725\GMVYKGLWI  | 109  | 3152  |
| >EGFR-T725\GTVYKGLWI  | 13114 | >EGFR-T725\GMVYKGLWI  | 323  | 12791 |
| >EGFR-T725\GTVYKGLWI  | 15455 | >EGFR-T725\GMVYKGLWI  | 469  | 14986 |
| >EGFR-T725\GTVYKGLW   | 14    | >EGFR-T725\GMVYKGLW   | 766  | 752   |
| >EGFR-T725\GTVYKGLWI  | 24    | >EGFR-T725\GMVYKGLWI  | 5773 | 5749  |
| >EGFR-T725\GTVYKGLW   | 199   | >EGFR-T725\GMVYKGLW   | 3297 | 3098  |
| >EGFR-T725\GTVYKGLW   | 230   | >EGFR-T725\GMVYKGLW   | 1139 | 909   |
| >EGFR-T725\GTVYKGLWI  | 118   | >EGFR-T725\GMVYKGLWI  | 6311 | 6193  |
| >EGFR-T725\GTVYKGLWI  | 166   | >EGFR-T725\GMVYKGLWI  | 7731 | 7565  |
| >EGFR-T725\IKVLGSGAFG | 10776 | >EGFR-T725\IKVLGSGAFG | 232  | 10544 |
| >EGFR-T725\FGTVYKGL   | 354   | >EGFR-T725\FGMVYKGL   | 51   | 303   |
| >EGFR-T725\FGTVYKGLW  | 393   | >EGFR-T725\FGMVYKGLM  | 120  | 273   |

|                       |      |                       |     |      |
|-----------------------|------|-----------------------|-----|------|
| >EGFR-T725MFGTVYKGLW  | 29   | >EGFR-T725MFGMVYKGLM  | 148 | 119  |
| >EGFR-T725MAFGTVYKGL  | 152  | >EGFR-T725MAFGMVYKGL  | 180 | 28   |
| >EGFR-T725MAFGTVYKGLV | 249  | >EGFR-T725MAFGMVYKGL' | 240 | 9    |
| >EGFR-T725MGAFGTVYKGL | 372  | >EGFR-T725MGAFGMVYKG  | 679 | 307  |
| >EGFR-T725MGAFGTVYK   | 122  | >EGFR-T725MGAFGMVYK   | 110 | 12   |
| >EGFR-T725MGAFGTVYK   | 9    | >EGFR-T725MGAFGMVYK   | 8   | 1    |
| >EGFR-T725MGAFGTVYK   | 98   | >EGFR-T725MGAFGMVYK   | 230 | 132  |
| >EGFR-T725MGAFGTVYK   | 222  | >EGFR-T725MGAFGMVYK   | 121 | 101  |
| >EGFR-T725MGAFGTVYK   | 23   | >EGFR-T725MGAFGMVYK   | 22  | 1    |
| >EGFR-T725MGAFGTVYKGL | 158  | >EGFR-T725MGAFGMVYKG  | 176 | 18   |
| >EGFR-T725MGAFGTVYKGL | 38   | >EGFR-T725MGAFGMVYKG  | 65  | 27   |
| >EGFR-T725MGAFGTVYKGL | 456  | >EGFR-T725MGAFGMVYKG  | 300 | 156  |
| >EGFR-T725MGAFGTVYKGL | 46   | >EGFR-T725MGAFGMVYKG  | 53  | 7    |
| >EGFR-T725MGAFGTVYKGL | 34   | >EGFR-T725MGAFGMVYKG  | 44  | 10   |
| >EGFR-T725MGAFGTVYKGL | 279  | >EGFR-T725MGAFGMVYKG  | 273 | 6    |
| >EGFR-T725MGAFGTVYKGL | 603  | >EGFR-T725MGAFGMVYKG  | 448 | 155  |
| >EGFR-T725MGAFGTVYKGL | 33   | >EGFR-T725MGAFGMVYKG  | 38  | 5    |
| >EGFR-T725MGAFGTVYK   | 150  | >EGFR-T725MGAFGMVYK   | 107 | 43   |
| >EGFR-T725MSGAFGTVYK  | 49   | >EGFR-T725MSGAFGMVYK  | 42  | 7    |
| >EGFR-T725MSGAFGTVY   | 580  | >EGFR-T725MSGAFGMVY   | 293 | 287  |
| >EGFR-T725MSGAFGTVY   | 87   | >EGFR-T725MSGAFGMVY   | 70  | 17   |
| >EGFR-T725MSGAFGTVYK  | 178  | >EGFR-T725MSGAFGMVYK  | 245 | 67   |
| >EGFR-T725MSGAFGTVY   | 188  | >EGFR-T725MSGAFGMVY   | 266 | 78   |
| >EGFR-T725MSGAFGTVY   | 460  | >EGFR-T725MSGAFGMVY   | 624 | 164  |
| >EGFR-T725MSGAFGTVYK  | 342  | >EGFR-T725MSGAFGMVYK  | 175 | 167  |
| >EGFR-T725MSGAFGTVY   | 1885 | >EGFR-T725MSGAFGMVY   | 431 | 1454 |
| >EGFR-T725MSGAFGTVYk  | 46   | >EGFR-T725MSGAFGMVY   | 36  | 10   |
| >EGFR-T725MSGAFGTVYk  | 29   | >EGFR-T725MSGAFGMVY   | 23  | 6    |
| >EGFR-T725MSGAFGTVY   | 827  | >EGFR-T725MSGAFGMVY   | 236 | 591  |
| >EGFR-T725MSGAFGTVYk  | 711  | >EGFR-T725MSGAFGMVY   | 444 | 267  |
| >EGFR-T725MSGAFGTVY   | 432  | >EGFR-T725MSGAFGMVY   | 372 | 60   |
| >EGFR-T725MSGAFGTVYk  | 224  | >EGFR-T725MSGAFGMVY   | 302 | 78   |
| >EGFR-T725MSGAFGTVY   | 3452 | >EGFR-T725MSGAFGMVY   | 307 | 3145 |
| >EGFR-T725MSGAFGTVY   | 78   | >EGFR-T725MSGAFGMVY   | 87  | 9    |
| >EGFR-T725MSGAFGTVY   | 349  | >EGFR-T725MSGAFGMVY   | 261 | 88   |
| >EGFR-T725MSGAFGTVY   | 62   | >EGFR-T725MSGAFGMVY   | 76  | 14   |
| >EGFR-T725MSGAFGTVY   | 11   | >EGFR-T725MSGAFGMVY   | 25  | 14   |
| >EGFR-T725MSGAFGTVYk  | 337  | >EGFR-T725MSGAFGMVY   | 192 | 145  |
| >EGFR-T725LGSGAFGTVY  | 559  | >EGFR-T725LGSGAFGMV   | 442 | 117  |
| >EGFR-T725LGSGAFGTVY  | 125  | >EGFR-T725LGSGAFGMV   | 98  | 27   |
| >EGFR-T725LGSGAFGTVY  | 478  | >EGFR-T725LGSGAFGMV   | 697 | 219  |
| >EGFR-T725LGSGAFGTVY  | 93   | >EGFR-T725LGSGAFGMV   | 109 | 16   |
| >EGFR-T725LGSGAFGTVY  | 94   | >EGFR-T725LGSGAFGMV   | 80  | 14   |

|                                    |       |                                    |     |       |
|------------------------------------|-------|------------------------------------|-----|-------|
| >EGFR-T725 <sup>M</sup> VLGSGAFGTV | 73    | >EGFR-T725 <sup>M</sup> VLGSGAFGM  | 167 | 94    |
| >EGFR-T725 <sup>M</sup> VLGSGAFGTV | 41    | >EGFR-T725 <sup>M</sup> VLGSGAFGM  | 74  | 33    |
| >EGFR-T725 <sup>M</sup> VLGSGAFGTV | 21    | >EGFR-T725 <sup>M</sup> VLGSGAFGM  | 43  | 22    |
| >EGFR-T725 <sup>M</sup> VLGSGAFGT  | 827   | >EGFR-T725 <sup>M</sup> VLGSGAFGM  | 407 | 420   |
| >EGFR-T725 <sup>M</sup> VLGSGAFGT  | 68    | >EGFR-T725 <sup>M</sup> VLGSGAFGM  | 21  | 47    |
| >EGFR-T725 <sup>M</sup> VLGSGAFGTV | 3     | >EGFR-T725 <sup>M</sup> VLGSGAFGM  | 3   | 0     |
| >EGFR-T725 <sup>M</sup> VLGSGAFGT  | 505   | >EGFR-T725 <sup>M</sup> VLGSGAFGM  | 54  | 451   |
| >EGFR-T725 <sup>M</sup> VLGSGAFGTV | 7     | >EGFR-T725 <sup>M</sup> VLGSGAFGM  | 24  | 17    |
| >EGFR-T725 <sup>M</sup> VLGSGAFGT  | 103   | >EGFR-T725 <sup>M</sup> VLGSGAFGM  | 33  | 70    |
| >EGFR-T725 <sup>M</sup> VLGSGAFGTV | 7     | >EGFR-T725 <sup>M</sup> VLGSGAFGM  | 8   | 1     |
| >EGFR-T725 <sup>M</sup> VLGSGAFGT  | 75    | >EGFR-T725 <sup>M</sup> VLGSGAFGM  | 11  | 64    |
| >EGFR-T725 <sup>M</sup> VLGSGAFGTV | 5     | >EGFR-T725 <sup>M</sup> VLGSGAFGM  | 8   | 3     |
| >EGFR-T725 <sup>M</sup> VLGSGAFGT  | 14    | >EGFR-T725 <sup>M</sup> VLGSGAFGM  | 10  | 4     |
| >EGFR-T725 <sup>M</sup> VLGSGAFGTV | 2     | >EGFR-T725 <sup>M</sup> VLGSGAFGM  | 2   | 0     |
| >EGFR-T725 <sup>M</sup> VLGSGAFGTV | 64    | >EGFR-T725 <sup>M</sup> VLGSGAFGM  | 31  | 33    |
| >EGFR-T725 <sup>M</sup> VLGSGAFGTV | 54    | >EGFR-T725 <sup>M</sup> VLGSGAFGM  | 48  | 6     |
| >EGFR-T725 <sup>M</sup> VLGSGAFGTV | 26    | >EGFR-T725 <sup>M</sup> VLGSGAFGM  | 9   | 17    |
| >EGFR-T725 <sup>M</sup> VLGSGAFGTV | 73    | >EGFR-T725 <sup>M</sup> VLGSGAFGM  | 77  | 4     |
| >EGFR-T725 <sup>M</sup> VLGSGAFGTV | 87    | >EGFR-T725 <sup>M</sup> VLGSGAFGM  | 90  | 3     |
| >EGFR-T725 <sup>M</sup> VLGSGAFGTV | 421   | >EGFR-T725 <sup>M</sup> VLGSGAFGM  | 364 | 57    |
| >EGFR-T725 <sup>M</sup> VLGSGAFGTV | 227   | >EGFR-T725 <sup>M</sup> VLGSGAFGM  | 395 | 168   |
| >EGFR-T725 <sup>M</sup> KVLGSGAFGT | 294   | >EGFR-T725 <sup>M</sup> KVLGSGAFGM | 351 | 57    |
| >EGFR-T725 <sup>M</sup> KVLGSGAFGT | 123   | >EGFR-T725 <sup>M</sup> KVLGSGAFGM | 190 | 67    |
| >EGFR-T725 <sup>M</sup> KVLGSGAFGT | 602   | >EGFR-T725 <sup>M</sup> KVLGSGAFGM | 461 | 141   |
| >EGFR-T725 <sup>M</sup> KVLGSGAFGT | 9     | >EGFR-T725 <sup>M</sup> KVLGSGAFGM | 15  | 6     |
| >EGFR-T725 <sup>M</sup> KVLGSGAFGT | 1193  | >EGFR-T725 <sup>M</sup> KVLGSGAFGM | 369 | 824   |
| >EGFR-T725 <sup>M</sup> KVLGSGAFGT | 12    | >EGFR-T725 <sup>M</sup> KVLGSGAFGM | 15  | 3     |
| >EGFR-T725 <sup>M</sup> KVLGSGAFGT | 78    | >EGFR-T725 <sup>M</sup> KVLGSGAFGM | 541 | 463   |
| >EGFR-T725 <sup>M</sup> KVLGSGAFGT | 28    | >EGFR-T725 <sup>M</sup> KVLGSGAFGM | 36  | 8     |
| >EGFR-T725 <sup>M</sup> KVLGSGAFGT | 2780  | >EGFR-T725 <sup>M</sup> KVLGSGAFGM | 449 | 2331  |
| >EGFR-T725 <sup>M</sup> KVLGSGAFGT | 176   | >EGFR-T725 <sup>M</sup> KVLGSGAFGM | 333 | 157   |
| >EGFR-T725 <sup>M</sup> KVLGSGAFGT | 15    | >EGFR-T725 <sup>M</sup> KVLGSGAFGM | 31  | 16    |
| >EGFR-T725 <sup>M</sup> KVLGSGAFGT | 22273 | >EGFR-T725 <sup>M</sup> KVLGSGAFGM | 485 | 21788 |
| >EGFR-T725 <sup>M</sup> KVLGSGAFGT | 2433  | >EGFR-T725 <sup>M</sup> KVLGSGAFGM | 384 | 2049  |
| >EGFR-T725 <sup>M</sup> KVLGSGAFGT | 76    | >EGFR-T725 <sup>M</sup> KVLGSGAFGM | 144 | 68    |
| >EGFR-T725 <sup>M</sup> KVLGSGAFGT | 324   | >EGFR-T725 <sup>M</sup> KVLGSGAFGM | 157 | 167   |
| >EGFR-T725 <sup>M</sup> KVLGSGAFGT | 3039  | >EGFR-T725 <sup>M</sup> KVLGSGAFGM | 10  | 3029  |
| >EGFR-T725 <sup>M</sup> KVLGSGAFGT | 16776 | >EGFR-T725 <sup>M</sup> KVLGSGAFGM | 294 | 16482 |
| >EGFR-T751I TSPKANKEI              | 54    | >EGFR-T751I ISPKANKEI              | 34  | 20    |
| >EGFR-T751I TSPKANKEIL             | 9     | >EGFR-T751I ISPKANKEIL             | 7   | 2     |
| >EGFR-T751I TSPKANKEI              | 159   | >EGFR-T751I ISPKANKEI              | 131 | 28    |
| >EGFR-T751I ATSPKANKEII            | 1788  | >EGFR-T751I AISPKANKEIL            | 423 | 1365  |
| >EGFR-T751I ATSPKANKEII            | 6461  | >EGFR-T751I AISPKANKEIL            | 338 | 6123  |

|                         |      |                         |       |       |
|-------------------------|------|-------------------------|-------|-------|
| >EGFR-T751I ATSPKANK    | 145  | >EGFR-T751I AISPANK     | 104   | 41    |
| >EGFR-T751I ATSPKANK    | 29   | >EGFR-T751I AISPANK     | 44    | 15    |
| >EGFR-T751I ATSPKANK    | 36   | >EGFR-T751I AISPANK     | 196   | 160   |
| >EGFR-T751I ATSPKANK    | 389  | >EGFR-T751I AISPANK     | 1551  | 1162  |
| >EGFR-T751I ATSPKANK    | 445  | >EGFR-T751I AISPANK     | 2395  | 1950  |
| >EGFR-T751I ATSPKANKEI  | 35   | >EGFR-T751I AISPKANKEI  | 5742  | 5707  |
| >EGFR-T751I ATSPKANKEII | 55   | >EGFR-T751I AISPKANKEIL | 6618  | 6563  |
| >EGFR-T751I ATSPKANKEII | 468  | >EGFR-T751I AISPKANKEIL | 18979 | 18511 |
| >EGFR-T751I ATSPKANKEI  | 347  | >EGFR-T751I AISPKANKEI  | 11693 | 11346 |
| >EGFR-T751I ATSPKANKEII | 295  | >EGFR-T751I AISPKANKEIL | 8967  | 8672  |
| >EGFR-T751I ATSPKANK    | 121  | >EGFR-T751I AISPANK     | 2153  | 2032  |
| >EGFR-T751I EATSPKANK   | 18   | >EGFR-T751I EAISPANK    | 15    | 3     |
| >EGFR-T751I EATSPKANKE  | 158  | >EGFR-T751I EAISPANKEI  | 53    | 105   |
| >EGFR-T751I EATSPKANKE  | 549  | >EGFR-T751I EAISPANKEI  | 126   | 423   |
| >EGFR-T751I REATSPKA    | 39   | >EGFR-T751I REAISPKA    | 35    | 4     |
| >EGFR-T751I ELREATSPKA  | 122  | >EGFR-T751I ELREAISPKA  | 73    | 49    |
| >EGFR-T751I ELREATSPK   | 226  | >EGFR-T751I ELREAISP    | 253   | 27    |
| >EGFR-T751I ELREATSPK   | 86   | >EGFR-T751I ELREAISP    | 142   | 56    |
| >EGFR-T751I ELREATSPK   | 517  | >EGFR-T751I ELREAISP    | 257   | 260   |
| >EGFR-T751I ELREATSPK   | 139  | >EGFR-T751I ELREAISP    | 197   | 58    |
| >EGFR-T751I KELREATSPK/ | 449  | >EGFR-T751I KELREAISPKA | 317   | 132   |
| >EGFR-T751I KELREATSPK/ | 71   | >EGFR-T751I KELREAISPKA | 52    | 19    |
| >EGFR-T751I KELREATSPK/ | 319  | >EGFR-T751I KELREAISPKA | 216   | 103   |
| >EGFR-T783I TSTVQLITQLM | 1030 | >EGFR-T783I ISTVQLITQLM | 461   | 569   |
| >EGFR-T783I TSTVQLITQL  | 59   | >EGFR-T783I ISTVQLITQL  | 11    | 48    |
| >EGFR-T783I TSTVQLITQLM | 239  | >EGFR-T783I ISTVQLITQLM | 32    | 207   |
| >EGFR-T783I TSTVQLITQL  | 2635 | >EGFR-T783I ISTVQLITQL  | 309   | 2326  |
| >EGFR-T783I TSTVQLITQLM | 1269 | >EGFR-T783I ISTVQLITQLM | 174   | 1095  |
| >EGFR-T783I TSTVQLITQL  | 474  | >EGFR-T783I ISTVQLITQL  | 359   | 115   |
| >EGFR-T783I TSTVQLITQLM | 203  | >EGFR-T783I ISTVQLITQLM | 140   | 63    |
| >EGFR-T783I TSTVQLITQL  | 253  | >EGFR-T783I ISTVQLITQL  | 412   | 159   |
| >EGFR-T783I TSTVQLITQLM | 171  | >EGFR-T783I ISTVQLITQLM | 43    | 128   |
| >EGFR-T783I LTSTVQLI    | 302  | >EGFR-T783I LISTVQLI    | 73    | 229   |
| >EGFR-T783I LTSTVQLITQL | 119  | >EGFR-T783I LISTVQLITQL | 31    | 88    |
| >EGFR-T783I LTSTVQLI    | 791  | >EGFR-T783I LISTVQLI    | 119   | 672   |
| >EGFR-T783I LTSTVQLITQL | 931  | >EGFR-T783I LISTVQLITQL | 138   | 793   |
| >EGFR-T783I LTSTVQLI    | 9868 | >EGFR-T783I LISTVQLI    | 429   | 9439  |
| >EGFR-T783I LTSTVQLITQL | 1934 | >EGFR-T783I LISTVQLITQL | 40    | 1894  |
| >EGFR-T783I LTSTVQLI    | 123  | >EGFR-T783I LISTVQLI    | 998   | 875   |
| >EGFR-T783I LTSTVQLITQL | 223  | >EGFR-T783I LISTVQLITQL | 1779  | 1556  |
| >EGFR-T783I LTSTVQLITQL | 49   | >EGFR-T783I LISTVQLITQL | 8336  | 8287  |
| >EGFR-T783I LTSTVQLI    | 80   | >EGFR-T783I LISTVQLI    | 1264  | 1184  |
| >EGFR-T783I LTSTVQLITQL | 78   | >EGFR-T783I LISTVQLITQL | 1342  | 1264  |

|                         |      |                         |       |       |
|-------------------------|------|-------------------------|-------|-------|
| >EGFR-T783I LTSTVQLITQL | 117  | >EGFR-T783I LISTVQLITQL | 10990 | 10873 |
| >EGFR-T783I LTSTVQLITQL | 30   | >EGFR-T783I LISTVQLITQL | 1157  | 1127  |
| >EGFR-T783I LTSTVQLI    | 32   | >EGFR-T783I LISTVQLI    | 3490  | 3458  |
| >EGFR-T783I LTSTVQLITQL | 298  | >EGFR-T783I LISTVQLITQL | 16307 | 16009 |
| >EGFR-T783I HVCRLLGICLT | 5094 | >EGFR-T783I HVCRLLGICLI | 328   | 4766  |
| >EGFR-T783I CLTSTVQL    | 835  | >EGFR-T783I CLISTVQL    | 115   | 720   |
| >EGFR-T783I CLTSTVQLI   | 809  | >EGFR-T783I CLISTVQLI   | 121   | 688   |
| >EGFR-T783I CLTSTVQL    | 75   | >EGFR-T783I CLISTVQL    | 40    | 35    |
| >EGFR-T783I CLTSTVQLI   | 187  | >EGFR-T783I CLISTVQLI   | 102   | 85    |
| >EGFR-T783I CLTSTVQL    | 312  | >EGFR-T783I CLISTVQL    | 64    | 248   |
| >EGFR-T783I CLTSTVQLI   | 73   | >EGFR-T783I CLISTVQLI   | 17    | 56    |
| >EGFR-T783I CLTSTVQL    | 143  | >EGFR-T783I CLISTVQL    | 45    | 98    |
| >EGFR-T783I CLTSTVQLI   | 103  | >EGFR-T783I CLISTVQLI   | 33    | 70    |
| >EGFR-T783I CLTSTVQL    | 364  | >EGFR-T783I CLISTVQL    | 68    | 296   |
| >EGFR-T783I CLTSTVQLI   | 316  | >EGFR-T783I CLISTVQLI   | 57    | 259   |
| >EGFR-T783I CLTSTVQL    | 227  | >EGFR-T783I CLISTVQL    | 333   | 106   |
| >EGFR-T783I CLTSTVQLI   | 272  | >EGFR-T783I CLISTVQLI   | 493   | 221   |
| >EGFR-T783I CLTSTVQL    | 77   | >EGFR-T783I CLISTVQL    | 110   | 33    |
| >EGFR-T783I CLTSTVQLI   | 301  | >EGFR-T783I CLISTVQLI   | 452   | 151   |
| >EGFR-T783I CLTSTVQL    | 7    | >EGFR-T783I CLISTVQL    | 11    | 4     |
| >EGFR-T783I CLTSTVQLI   | 25   | >EGFR-T783I CLISTVQLI   | 47    | 22    |
| >EGFR-T783I GICLTSTV    | 1157 | >EGFR-T783I GICLISTV    | 478   | 679   |
| >EGFR-T783I GICLTSTV    | 138  | >EGFR-T783I GICLISTV    | 97    | 41    |
| >EGFR-T783I GICLTSTV    | 858  | >EGFR-T783I GICLISTV    | 454   | 404   |
| >EGFR-T783I GICLTSTV    | 122  | >EGFR-T783I GICLISTV    | 72    | 50    |
| >EGFR-T783I GICLTSTV    | 314  | >EGFR-T783I GICLISTV    | 267   | 47    |
| >EGFR-T783I GICLTSTV    | 38   | >EGFR-T783I GICLISTV    | 30    | 8     |
| >EGFR-T783I LGICLTSTV   | 518  | >EGFR-T783I LGICLISTV   | 153   | 365   |
| >EGFR-T783I LGICLTSTV   | 256  | >EGFR-T783I LGICLISTV   | 284   | 28    |
| >EGFR-T783I LLGICLTSTV  | 63   | >EGFR-T783I LLGICLISTV  | 42    | 21    |
| >EGFR-T783I LLGICLTST   | 415  | >EGFR-T783I LLGICLIST   | 1213  | 798   |
| >EGFR-T783I LLGICLTSTV  | 17   | >EGFR-T783I LLGICLISTV  | 20    | 3     |
| >EGFR-T783I LLGICLTST   | 295  | >EGFR-T783I LLGICLIST   | 1654  | 1359  |
| >EGFR-T783I LLGICLTSTV  | 14   | >EGFR-T783I LLGICLISTV  | 16    | 2     |
| >EGFR-T783I LLGICLTSTV  | 98   | >EGFR-T783I LLGICLISTV  | 70    | 28    |
| >EGFR-T783I LLGICLTSTV  | 4    | >EGFR-T783I LLGICLISTV  | 3     | 1     |
| >EGFR-T783I LLGICLTSTV  | 5    | >EGFR-T783I LLGICLISTV  | 4     | 1     |
| >EGFR-T783I LLGICLTSTV  | 9    | >EGFR-T783I LLGICLISTV  | 8     | 1     |
| >EGFR-T783I LLGICLTSTV  | 6    | >EGFR-T783I LLGICLISTV  | 5     | 1     |
| >EGFR-T783I LLGICLTST   | 30   | >EGFR-T783I LLGICLIST   | 37    | 7     |
| >EGFR-T783I LLGICLTSTV  | 2    | >EGFR-T783I LLGICLISTV  | 2     | 0     |
| >EGFR-T783I LLGICLTSTVQ | 272  | >EGFR-T783I LLGICLISTVQ | 299   | 27    |
| >EGFR-T783I RLLGICLT    | 229  | >EGFR-T783I RLLGICLI    | 21    | 208   |

|                         |      |                         |       |       |
|-------------------------|------|-------------------------|-------|-------|
| >EGFR-T783I RLLGICLTST  | 73   | >EGFR-T783I RLLGICLIST  | 47    | 26    |
| >EGFR-T783I RLLGICLTSTV | 15   | >EGFR-T783I RLLGICLISTV | 14    | 1     |
| >EGFR-T783I RLLGICLT    | 582  | >EGFR-T783I RLLGICLI    | 58    | 524   |
| >EGFR-T783I RLLGICLTST  | 207  | >EGFR-T783I RLLGICLIST  | 204   | 3     |
| >EGFR-T783I RLLGICLTSTV | 29   | >EGFR-T783I RLLGICLISTV | 39    | 10    |
| >EGFR-T783I RLLGICLT    | 800  | >EGFR-T783I RLLGICLI    | 61    | 739   |
| >EGFR-T783I RLLGICLTST  | 52   | >EGFR-T783I RLLGICLIST  | 89    | 37    |
| >EGFR-T783I RLLGICLTSTV | 13   | >EGFR-T783I RLLGICLISTV | 13    | 0     |
| >EGFR-T783I RLLGICLT    | 310  | >EGFR-T783I RLLGICLI    | 37    | 273   |
| >EGFR-T783I RLLGICLTST  | 87   | >EGFR-T783I RLLGICLIST  | 66    | 21    |
| >EGFR-T783I RLLGICLTSTV | 19   | >EGFR-T783I RLLGICLISTV | 15    | 4     |
| >EGFR-T783I RLLGICLT    | 35   | >EGFR-T783I RLLGICLI    | 4     | 31    |
| >EGFR-T783I RLLGICLTST  | 95   | >EGFR-T783I RLLGICLIST  | 82    | 13    |
| >EGFR-T783I RLLGICLTSTV | 2    | >EGFR-T783I RLLGICLISTV | 2     | 0     |
| >EGFR-T783I RLLGICLT    | 2159 | >EGFR-T783I RLLGICLI    | 37    | 2122  |
| >EGFR-T783I RLLGICLTSTV | 5    | >EGFR-T783I RLLGICLISTV | 5     | 0     |
| >EGFR-T783I RLLGICLT    | 112  | >EGFR-T783I RLLGICLI    | 11    | 101   |
| >EGFR-T783I RLLGICLTST  | 401  | >EGFR-T783I RLLGICLIST  | 323   | 78    |
| >EGFR-T783I RLLGICLTSTV | 5    | >EGFR-T783I RLLGICLISTV | 5     | 0     |
| >EGFR-T783I RLLGICLT    | 541  | >EGFR-T783I RLLGICLI    | 13    | 528   |
| >EGFR-T783I RLLGICLTSTV | 2    | >EGFR-T783I RLLGICLISTV | 3     | 1     |
| >EGFR-T783I RLLGICLT    | 30   | >EGFR-T783I RLLGICLI    | 7     | 23    |
| >EGFR-T783I RLLGICLTST  | 34   | >EGFR-T783I RLLGICLIST  | 55    | 21    |
| >EGFR-T783I RLLGICLTSTV | 2    | >EGFR-T783I RLLGICLISTV | 2     | 0     |
| >EGFR-T783I RLLGICLT    | 2775 | >EGFR-T783I RLLGICLI    | 26    | 2749  |
| >EGFR-T783I RLLGICLTS   | 163  | >EGFR-T783I RLLGICLIS   | 1764  | 1601  |
| >EGFR-T783I RLLGICLTST  | 360  | >EGFR-T783I RLLGICLIST  | 573   | 213   |
| >EGFR-T783I RLLGICLTSTV | 23   | >EGFR-T783I RLLGICLISTV | 61    | 38    |
| >EGFR-T783I RLLGICLTSTV | 241  | >EGFR-T783I RLLGICLISTV | 261   | 20    |
| >EGFR-T783I CRLLGICLT   | 2932 | >EGFR-T783I CRLLGICLI   | 251   | 2681  |
| >EGFR-T783I CRLLGICLT   | 5670 | >EGFR-T783I CRLLGICLI   | 166   | 5504  |
| >EGFR-T783I CRLLGICLTS  | 577  | >EGFR-T783I CRLLGICLIS  | 462   | 115   |
| >EGFR-T785/TVQLITQL     | 2592 | >EGFR-T785/AVQLITQL     | 389   | 2203  |
| >EGFR-T785/TVQLITQLMP   | 469  | >EGFR-T785/AVQLITQLMF   | 546   | 77    |
| >EGFR-T785/TVQLITQL     | 1534 | >EGFR-T785/AVQLITQL     | 410   | 1124  |
| >EGFR-T785/TVQLITQLMP   | 188  | >EGFR-T785/AVQLITQLMF   | 62    | 126   |
| >EGFR-T785/TVQLITQL     | 217  | >EGFR-T785/AVQLITQL     | 5560  | 5343  |
| >EGFR-T785/TVQLITQLMP   | 651  | >EGFR-T785/AVQLITQLMF   | 251   | 400   |
| >EGFR-T785/TVQLITQLM    | 410  | >EGFR-T785/AVQLITQLM    | 321   | 89    |
| >EGFR-T785/STVQLITQL    | 788  | >EGFR-T785/SAVQLITQL    | 73    | 715   |
| >EGFR-T785/STVQLITQL    | 339  | >EGFR-T785/SAVQLITQL    | 937   | 598   |
| >EGFR-T785/STVQLITQL    | 408  | >EGFR-T785/SAVQLITQL    | 662   | 254   |
| >EGFR-T785/STVQLITQ     | 371  | >EGFR-T785/SAVQLITQ     | 11433 | 11062 |

|                        |     |                        |      |      |
|------------------------|-----|------------------------|------|------|
| >EGFR-T785/STVQLITQL   | 64  | >EGFR-T785/SAVQLITQL   | 1998 | 1934 |
| >EGFR-T785/STVQLITQLM  | 18  | >EGFR-T785/SAVQLITQLM  | 1193 | 1175 |
| >EGFR-T785/STVQLITQLM  | 139 | >EGFR-T785/SAVQLITQLM  | 5057 | 4918 |
| >EGFR-T785/STVQLITQL   | 116 | >EGFR-T785/SAVQLITQL   | 1569 | 1453 |
| >EGFR-T785/STVQLITQLM  | 296 | >EGFR-T785/SAVQLITQLM  | 2248 | 1952 |
| >EGFR-T785/STVQLITQL   | 222 | >EGFR-T785/SAVQLITQL   | 1347 | 1125 |
| >EGFR-T785/STVQLITQL   | 7   | >EGFR-T785/SAVQLITQL   | 32   | 25   |
| >EGFR-T785/STVQLITQLM  | 18  | >EGFR-T785/SAVQLITQLM  | 162  | 144  |
| >EGFR-T785/STVQLITQL   | 170 | >EGFR-T785/SAVQLITQL   | 1841 | 1671 |
| >EGFR-T785/STVQLITQLM  | 72  | >EGFR-T785/SAVQLITQLM  | 885  | 813  |
| >EGFR-T785/STVQLITQL   | 17  | >EGFR-T785/SAVQLITQL   | 344  | 327  |
| >EGFR-T785/STVQLITQLM  | 24  | >EGFR-T785/SAVQLITQLM  | 640  | 616  |
| >EGFR-T785/STVQLITQL   | 249 | >EGFR-T785/SAVQLITQL   | 2329 | 2080 |
| >EGFR-T785/TSTVQLITQL  | 59  | >EGFR-T785/TSAVQLITQL  | 37   | 22   |
| >EGFR-T785/TSTVQLITQLM | 239 | >EGFR-T785/TSAVQLITQLI | 168  | 71   |
| >EGFR-T785/TSTVQLITQL  | 474 | >EGFR-T785/TSAVQLITQL  | 653  | 179  |
| >EGFR-T785/TSTVQLITQLM | 203 | >EGFR-T785/TSAVQLITQLI | 310  | 107  |
| >EGFR-T785/TSTVQLITQL  | 253 | >EGFR-T785/TSAVQLITQL  | 375  | 122  |
| >EGFR-T785/TSTVQLITQLM | 171 | >EGFR-T785/TSAVQLITQLI | 168  | 3    |
| >EGFR-T785/LTSTVQLI    | 302 | >EGFR-T785/LTSAVQLI    | 101  | 201  |
| >EGFR-T785/LTSTVQLITQL | 119 | >EGFR-T785/LTSAVQLITQL | 54   | 65   |
| >EGFR-T785/LTSTVQLI    | 791 | >EGFR-T785/LTSAVQLI    | 483  | 308  |
| >EGFR-T785/LTSTVQLI    | 123 | >EGFR-T785/LTSAVQLI    | 56   | 67   |
| >EGFR-T785/LTSTVQLITQL | 223 | >EGFR-T785/LTSAVQLITQL | 129  | 94   |
| >EGFR-T785/LTSTVQLI    | 715 | >EGFR-T785/LTSAVQLI    | 373  | 342  |
| >EGFR-T785/LTSTVQLITQL | 49  | >EGFR-T785/LTSAVQLITQL | 24   | 25   |
| >EGFR-T785/LTSTVQLI    | 80  | >EGFR-T785/LTSAVQLI    | 50   | 30   |
| >EGFR-T785/LTSTVQLITQL | 78  | >EGFR-T785/LTSAVQLITQL | 43   | 35   |
| >EGFR-T785/LTSTVQLITQL | 117 | >EGFR-T785/LTSAVQLITQL | 92   | 25   |
| >EGFR-T785/LTSTVQLI    | 717 | >EGFR-T785/LTSAVQLI    | 311  | 406  |
| >EGFR-T785/LTSTVQLITQL | 30  | >EGFR-T785/LTSAVQLITQL | 38   | 8    |
| >EGFR-T785/LTSTVQLI    | 32  | >EGFR-T785/LTSAVQLI    | 30   | 2    |
| >EGFR-T785/LTSTVQLITQL | 298 | >EGFR-T785/LTSAVQLITQL | 260  | 38   |
| >EGFR-T785/CLTSTVQL    | 75  | >EGFR-T785/CLTSAVQL    | 58   | 17   |
| >EGFR-T785/CLTSTVQLI   | 187 | >EGFR-T785/CLTSAVQLI   | 53   | 134  |
| >EGFR-T785/CLTSTVQL    | 312 | >EGFR-T785/CLTSAVQL    | 393  | 81   |
| >EGFR-T785/CLTSTVQLI   | 73  | >EGFR-T785/CLTSAVQLI   | 55   | 18   |
| >EGFR-T785/CLTSTVQL    | 143 | >EGFR-T785/CLTSAVQL    | 292  | 149  |
| >EGFR-T785/CLTSTVQLI   | 103 | >EGFR-T785/CLTSAVQLI   | 227  | 124  |
| >EGFR-T785/CLTSTVQL    | 364 | >EGFR-T785/CLTSAVQL    | 845  | 481  |
| >EGFR-T785/CLTSTVQLI   | 316 | >EGFR-T785/CLTSAVQLI   | 697  | 381  |
| >EGFR-T785/CLTSTVQL    | 227 | >EGFR-T785/CLTSAVQL    | 331  | 104  |
| >EGFR-T785/CLTSTVQLI   | 272 | >EGFR-T785/CLTSAVQLI   | 341  | 69   |

|                        |      |                         |      |      |
|------------------------|------|-------------------------|------|------|
| >EGFR-T785/CLTSTVQL    | 77   | >EGFR-T785/CLTSAVQL     | 137  | 60   |
| >EGFR-T785/CLTSTVQLI   | 301  | >EGFR-T785/CLTSAVQLI    | 231  | 70   |
| >EGFR-T785/CLTSTVQL    | 7    | >EGFR-T785/CLTSAVQL     | 9    | 2    |
| >EGFR-T785/CLTSTVQLI   | 25   | >EGFR-T785/CLTSAVQLI    | 27   | 2    |
| >EGFR-T785/GICLTSTV    | 138  | >EGFR-T785/GICLTSVAV    | 111  | 27   |
| >EGFR-T785/GICLTSTV    | 858  | >EGFR-T785/GICLTSVAV    | 421  | 437  |
| >EGFR-T785/GICLTSTV    | 122  | >EGFR-T785/GICLTSVAV    | 138  | 16   |
| >EGFR-T785/GICLTSTV    | 314  | >EGFR-T785/GICLTSVAV    | 969  | 655  |
| >EGFR-T785/GICLTSTV    | 38   | >EGFR-T785/GICLTSVAV    | 83   | 45   |
| >EGFR-T785/LGICLTSTV   | 713  | >EGFR-T785/LGICLTSVAV   | 308  | 405  |
| >EGFR-T785/LGICLTSTV   | 256  | >EGFR-T785/LGICLTSVAV   | 1189 | 933  |
| >EGFR-T785/LLGICLTST   | 1769 | >EGFR-T785/LLGICLTSVAV  | 210  | 1559 |
| >EGFR-T785/LLGICLTSTV  | 63   | >EGFR-T785/LLGICLTSVAV  | 92   | 29   |
| >EGFR-T785/LLGICLTST   | 415  | >EGFR-T785/LLGICLTSVAV  | 67   | 348  |
| >EGFR-T785/LLGICLTSTV  | 17   | >EGFR-T785/LLGICLTSVAV  | 20   | 3    |
| >EGFR-T785/LLGICLTST   | 295  | >EGFR-T785/LLGICLTSVAV  | 24   | 271  |
| >EGFR-T785/LLGICLTSTV  | 14   | >EGFR-T785/LLGICLTSVAV  | 15   | 1    |
| >EGFR-T785/LLGICLTSTV  | 98   | >EGFR-T785/LLGICLTSVAV  | 87   | 11   |
| >EGFR-T785/LLGICLTST   | 1639 | >EGFR-T785/LLGICLTSVAV  | 226  | 1413 |
| >EGFR-T785/LLGICLTSTV  | 4    | >EGFR-T785/LLGICLTSVAV  | 4    | 0    |
| >EGFR-T785/LLGICLTSTV  | 5    | >EGFR-T785/LLGICLTSVAV  | 6    | 1    |
| >EGFR-T785/LLGICLTST   | 4277 | >EGFR-T785/LLGICLTSVAV  | 467  | 3810 |
| >EGFR-T785/LLGICLTSTV  | 9    | >EGFR-T785/LLGICLTSVAV  | 14   | 5    |
| >EGFR-T785/LLGICLTSTV  | 6    | >EGFR-T785/LLGICLTSVAV  | 7    | 1    |
| >EGFR-T785/LLGICLTST   | 30   | >EGFR-T785/LLGICLTSVAV  | 6    | 24   |
| >EGFR-T785/LLGICLTSTV  | 2    | >EGFR-T785/LLGICLTSVAV  | 2    | 0    |
| >EGFR-T785/LLGICLTSTVQ | 272  | >EGFR-T785/LLGICLTSVAVC | 203  | 69   |
| >EGFR-T785/RLLGICLTST  | 73   | >EGFR-T785/RLLGICLTSVAV | 30   | 43   |
| >EGFR-T785/RLLGICLTSTV | 15   | >EGFR-T785/RLLGICLTSVAV | 14   | 1    |
| >EGFR-T785/RLLGICLTST  | 207  | >EGFR-T785/RLLGICLTSVAV | 71   | 136  |
| >EGFR-T785/RLLGICLTSTV | 29   | >EGFR-T785/RLLGICLTSVAV | 15   | 14   |
| >EGFR-T785/RLLGICLTST  | 52   | >EGFR-T785/RLLGICLTSVAV | 25   | 27   |
| >EGFR-T785/RLLGICLTSTV | 13   | >EGFR-T785/RLLGICLTSVAV | 9    | 4    |
| >EGFR-T785/RLLGICLTST  | 87   | >EGFR-T785/RLLGICLTSVAV | 39   | 48   |
| >EGFR-T785/RLLGICLTSTV | 19   | >EGFR-T785/RLLGICLTSVAV | 11   | 8    |
| >EGFR-T785/RLLGICLTST  | 95   | >EGFR-T785/RLLGICLTSVAV | 17   | 78   |
| >EGFR-T785/RLLGICLTSTV | 2    | >EGFR-T785/RLLGICLTSVAV | 2    | 0    |
| >EGFR-T785/RLLGICLTST  | 2200 | >EGFR-T785/RLLGICLTSVAV | 170  | 2030 |
| >EGFR-T785/RLLGICLTSTV | 5    | >EGFR-T785/RLLGICLTSVAV | 5    | 0    |
| >EGFR-T785/RLLGICLTST  | 401  | >EGFR-T785/RLLGICLTSVAV | 31   | 370  |
| >EGFR-T785/RLLGICLTSTV | 5    | >EGFR-T785/RLLGICLTSVAV | 6    | 1    |
| >EGFR-T785/RLLGICLTST  | 658  | >EGFR-T785/RLLGICLTSVAV | 66   | 592  |
| >EGFR-T785/RLLGICLTSTV | 2    | >EGFR-T785/RLLGICLTSVAV | 3    | 1    |



|                         |       |                         |       |       |
|-------------------------|-------|-------------------------|-------|-------|
| >EGFR-T785/RLLGICLTST   | 34    | >EGFR-T785/RLLGICLTSA   | 7     | 27    |
| >EGFR-T785/RLLGICLTSTV  | 2     | >EGFR-T785/RLLGICLTSAV  | 2     | 0     |
| >EGFR-T785/RLLGICLTST   | 360   | >EGFR-T785/RLLGICLTSA   | 284   | 76    |
| >EGFR-T785/RLLGICLTSTV  | 23    | >EGFR-T785/RLLGICLTSAV  | 38    | 15    |
| >EGFR-T785/RLLGICLTSTV  | 241   | >EGFR-T785/RLLGICLTSAV  | 1040  | 799   |
| >EGFR-T785I TVQLITQLMP  | 469   | >EGFR-T785I IVQLITQLMP  | 2682  | 2213  |
| >EGFR-T785I TVQLITQLMP  | 188   | >EGFR-T785I IVQLITQLMP  | 137   | 51    |
| >EGFR-T785I TVQLITQL    | 217   | >EGFR-T785I IVQLITQL    | 3322  | 3105  |
| >EGFR-T785I TVQLITQLMP  | 651   | >EGFR-T785I IVQLITQLMP  | 297   | 354   |
| >EGFR-T785I TVQLITQLMP  | 2354  | >EGFR-T785I IVQLITQLMP  | 452   | 1902  |
| >EGFR-T785I TVQLITQLMP  | 2000  | >EGFR-T785I IVQLITQLMP  | 336   | 1664  |
| >EGFR-T785I TVQLITQLM   | 410   | >EGFR-T785I IVQLITQLM   | 95    | 315   |
| >EGFR-T785I STVQLITQL   | 339   | >EGFR-T785I SIVQLITQL   | 92    | 247   |
| >EGFR-T785I STVQLITQL   | 907   | >EGFR-T785I SIVQLITQL   | 111   | 796   |
| >EGFR-T785I STVQLITQL   | 408   | >EGFR-T785I SIVQLITQL   | 159   | 249   |
| >EGFR-T785I STVQLITQL   | 706   | >EGFR-T785I SIVQLITQL   | 138   | 568   |
| >EGFR-T785I STVQLITQL   | 1896  | >EGFR-T785I SIVQLITQL   | 199   | 1697  |
| >EGFR-T785I STVQLITQL   | 1041  | >EGFR-T785I SIVQLITQL   | 18    | 1023  |
| >EGFR-T785I STVQLITQ    | 371   | >EGFR-T785I SIVQLITQ    | 2523  | 2152  |
| >EGFR-T785I STVQLITQL   | 64    | >EGFR-T785I SIVQLITQL   | 404   | 340   |
| >EGFR-T785I STVQLITQLM  | 18    | >EGFR-T785I SIVQLITQLM  | 149   | 131   |
| >EGFR-T785I STVQLITQLM  | 139   | >EGFR-T785I SIVQLITQLM  | 1972  | 1833  |
| >EGFR-T785I STVQLITQL   | 116   | >EGFR-T785I SIVQLITQL   | 1410  | 1294  |
| >EGFR-T785I STVQLITQLM  | 296   | >EGFR-T785I SIVQLITQLM  | 1734  | 1438  |
| >EGFR-T785I STVQLITQL   | 222   | >EGFR-T785I SIVQLITQL   | 1120  | 898   |
| >EGFR-T785I STVQLITQL   | 7     | >EGFR-T785I SIVQLITQL   | 1825  | 1818  |
| >EGFR-T785I STVQLITQLM  | 18    | >EGFR-T785I SIVQLITQLM  | 4889  | 4871  |
| >EGFR-T785I STVQLITQL   | 170   | >EGFR-T785I SIVQLITQL   | 11108 | 10938 |
| >EGFR-T785I STVQLITQLM  | 72    | >EGFR-T785I SIVQLITQLM  | 7020  | 6948  |
| >EGFR-T785I STVQLITQL   | 17    | >EGFR-T785I SIVQLITQL   | 711   | 694   |
| >EGFR-T785I STVQLITQLM  | 24    | >EGFR-T785I SIVQLITQLM  | 453   | 429   |
| >EGFR-T785I STVQLITQL   | 249   | >EGFR-T785I SIVQLITQL   | 18159 | 17910 |
| >EGFR-T785I CRLLGICLTST | 3056  | >EGFR-T785I CRLLGICLTSA | 282   | 2774  |
| >EGFR-T785I CRLLGICLTST | 10605 | >EGFR-T785I CRLLGICLTSA | 406   | 10199 |
| >EGFR-T785I TSTVQLITQLM | 1030  | >EGFR-T785I TSIVQLITQLM | 197   | 833   |
| >EGFR-T785I TSTVQLITQL  | 4835  | >EGFR-T785I TSIVQLITQL  | 262   | 4573  |
| >EGFR-T785I TSTVQLITQLM | 2515  | >EGFR-T785I TSIVQLITQLM | 90    | 2425  |
| >EGFR-T785I TSTVQLITQL  | 59    | >EGFR-T785I TSIVQLITQL  | 20    | 39    |
| >EGFR-T785I TSTVQLITQLM | 239   | >EGFR-T785I TSIVQLITQLM | 73    | 166   |
| >EGFR-T785I TSTVQLITQL  | 474   | >EGFR-T785I TSIVQLITQL  | 3031  | 2557  |
| >EGFR-T785I TSTVQLITQLM | 203   | >EGFR-T785I TSIVQLITQLM | 1625  | 1422  |
| >EGFR-T785I TSTVQLITQL  | 253   | >EGFR-T785I TSIVQLITQL  | 672   | 419   |
| >EGFR-T785I TSTVQLITQLM | 171   | >EGFR-T785I TSIVQLITQLM | 326   | 155   |

|                         |       |                         |     |       |
|-------------------------|-------|-------------------------|-----|-------|
| >EGFR-T785I LTSTVQLI    | 302   | >EGFR-T785I LTSIVQLI    | 289 | 13    |
| >EGFR-T785I LTSTVQLITQL | 119   | >EGFR-T785I LTSIVQLITQL | 218 | 99    |
| >EGFR-T785I LTSTVQLI    | 123   | >EGFR-T785I LTSIVQLI    | 156 | 33    |
| >EGFR-T785I LTSTVQLITQL | 223   | >EGFR-T785I LTSIVQLITQL | 507 | 284   |
| >EGFR-T785I LTSTVQLI    | 715   | >EGFR-T785I LTSIVQLI    | 319 | 396   |
| >EGFR-T785I LTSTVQLITQL | 49    | >EGFR-T785I LTSIVQLITQL | 18  | 31    |
| >EGFR-T785I LTSTVQLI    | 80    | >EGFR-T785I LTSIVQLI    | 114 | 34    |
| >EGFR-T785I LTSTVQLITQL | 78    | >EGFR-T785I LTSIVQLITQL | 101 | 23    |
| >EGFR-T785I LTSTVQLITQL | 117   | >EGFR-T785I LTSIVQLITQL | 117 | 0     |
| >EGFR-T785I LTSTVQLITQ  | 785   | >EGFR-T785I LTSIVQLITQ  | 431 | 354   |
| >EGFR-T785I LTSTVQLITQL | 30    | >EGFR-T785I LTSIVQLITQL | 49  | 19    |
| >EGFR-T785I LTSTVQLI    | 32    | >EGFR-T785I LTSIVQLI    | 27  | 5     |
| >EGFR-T785I LTSTVQLITQL | 298   | >EGFR-T785I LTSIVQLITQL | 183 | 115   |
| >EGFR-T785I CLTSTVQL    | 835   | >EGFR-T785I CLTSIVQL    | 272 | 563   |
| >EGFR-T785I CLTSTVQLI   | 809   | >EGFR-T785I CLTSIVQLI   | 263 | 546   |
| >EGFR-T785I CLTSTVQL    | 75    | >EGFR-T785I CLTSIVQL    | 29  | 46    |
| >EGFR-T785I CLTSTVQLI   | 187   | >EGFR-T785I CLTSIVQLI   | 23  | 164   |
| >EGFR-T785I CLTSTVQL    | 312   | >EGFR-T785I CLTSIVQL    | 205 | 107   |
| >EGFR-T785I CLTSTVQLI   | 73    | >EGFR-T785I CLTSIVQLI   | 49  | 24    |
| >EGFR-T785I CLTSTVQL    | 143   | >EGFR-T785I CLTSIVQL    | 80  | 63    |
| >EGFR-T785I CLTSTVQLI   | 103   | >EGFR-T785I CLTSIVQLI   | 109 | 6     |
| >EGFR-T785I CLTSTVQL    | 364   | >EGFR-T785I CLTSIVQL    | 468 | 104   |
| >EGFR-T785I CLTSTVQLI   | 316   | >EGFR-T785I CLTSIVQLI   | 568 | 252   |
| >EGFR-T785I CLTSTVQL    | 227   | >EGFR-T785I CLTSIVQL    | 191 | 36    |
| >EGFR-T785I CLTSTVQLI   | 272   | >EGFR-T785I CLTSIVQLI   | 350 | 78    |
| >EGFR-T785I CLTSTVQL    | 77    | >EGFR-T785I CLTSIVQL    | 51  | 26    |
| >EGFR-T785I CLTSTVQLI   | 301   | >EGFR-T785I CLTSIVQLI   | 153 | 148   |
| >EGFR-T785I CLTSTVQL    | 7     | >EGFR-T785I CLTSIVQL    | 5   | 2     |
| >EGFR-T785I CLTSTVQLI   | 25    | >EGFR-T785I CLTSIVQLI   | 24  | 1     |
| >EGFR-T785I GICLTSTV    | 138   | >EGFR-T785I GICLTSIV    | 321 | 183   |
| >EGFR-T785I GICLTSTV    | 122   | >EGFR-T785I GICLTSIV    | 768 | 646   |
| >EGFR-T785I GICLTSTV    | 314   | >EGFR-T785I GICLTSIV    | 917 | 603   |
| >EGFR-T785I GICLTSTV    | 38    | >EGFR-T785I GICLTSIV    | 142 | 104   |
| >EGFR-T785I LGICLTSTV   | 256   | >EGFR-T785I LGICLTSIV   | 370 | 114   |
| >EGFR-T785I LGICLTST    | 33622 | >EGFR-T785I LGICLTSI    | 347 | 33275 |
| >EGFR-T785I LLGICLTST   | 1769  | >EGFR-T785I LLGICLTSI   | 88  | 1681  |
| >EGFR-T785I LLGICLTSTV  | 63    | >EGFR-T785I LLGICLTSIV  | 245 | 182   |
| >EGFR-T785I LLGICLTST   | 415   | >EGFR-T785I LLGICLTSI   | 61  | 354   |
| >EGFR-T785I LLGICLTSTV  | 17    | >EGFR-T785I LLGICLTSIV  | 39  | 22    |
| >EGFR-T785I LLGICLTST   | 295   | >EGFR-T785I LLGICLTSI   | 25  | 270   |
| >EGFR-T785I LLGICLTSTV  | 14    | >EGFR-T785I LLGICLTSIV  | 30  | 16    |
| >EGFR-T785I LLGICLTST   | 3049  | >EGFR-T785I LLGICLTSI   | 412 | 2637  |
| >EGFR-T785I LLGICLTSTV  | 98    | >EGFR-T785I LLGICLTSIV  | 253 | 155   |

|                         |      |                         |       |       |
|-------------------------|------|-------------------------|-------|-------|
| >EGFR-T785I LLGICLTST   | 1639 | >EGFR-T785I LLGICLTSI   | 52    | 1587  |
| >EGFR-T785I LLGICLTSTV  | 4    | >EGFR-T785I LLGICLTSIV  | 14    | 10    |
| >EGFR-T785I LLGICLTST   | 5717 | >EGFR-T785I LLGICLTSI   | 87    | 5630  |
| >EGFR-T785I LLGICLTSTV  | 5    | >EGFR-T785I LLGICLTSIV  | 9     | 4     |
| >EGFR-T785I LLGICLTST   | 4277 | >EGFR-T785I LLGICLTSI   | 198   | 4079  |
| >EGFR-T785I LLGICLTSTV  | 9    | >EGFR-T785I LLGICLTSIV  | 16    | 7     |
| >EGFR-T785I LLGICLTST   | 6957 | >EGFR-T785I LLGICLTSI   | 171   | 6786  |
| >EGFR-T785I LLGICLTSTV  | 6    | >EGFR-T785I LLGICLTSIV  | 13    | 7     |
| >EGFR-T785I LLGICLTST   | 30   | >EGFR-T785I LLGICLTSI   | 6     | 24    |
| >EGFR-T785I LLGICLTSTV  | 2    | >EGFR-T785I LLGICLTSIV  | 2     | 0     |
| >EGFR-T785I LLGICLTSTVQ | 272  | >EGFR-T785I LLGICLTSIVQ | 316   | 44    |
| >EGFR-T785I RLLGICLTST  | 73   | >EGFR-T785I RLLGICLTSI  | 19    | 54    |
| >EGFR-T785I RLLGICLTSTV | 15   | >EGFR-T785I RLLGICLTSIV | 24    | 9     |
| >EGFR-T785I RLLGICLTST  | 207  | >EGFR-T785I RLLGICLTSI  | 42    | 165   |
| >EGFR-T785I RLLGICLTSTV | 29   | >EGFR-T785I RLLGICLTSIV | 39    | 10    |
| >EGFR-T785I RLLGICLTST  | 52   | >EGFR-T785I RLLGICLTSI  | 18    | 34    |
| >EGFR-T785I RLLGICLTSTV | 13   | >EGFR-T785I RLLGICLTSIV | 15    | 2     |
| >EGFR-T785I RLLGICLTST  | 87   | >EGFR-T785I RLLGICLTSI  | 35    | 52    |
| >EGFR-T785I RLLGICLTSTV | 19   | >EGFR-T785I RLLGICLTSIV | 23    | 4     |
| >EGFR-T785I RLLGICLTST  | 95   | >EGFR-T785I RLLGICLTSI  | 7     | 88    |
| >EGFR-T785I RLLGICLTSTV | 2    | >EGFR-T785I RLLGICLTSIV | 3     | 1     |
| >EGFR-T785I RLLGICLTST  | 2200 | >EGFR-T785I RLLGICLTSI  | 36    | 2164  |
| >EGFR-T785I RLLGICLTSTV | 5    | >EGFR-T785I RLLGICLTSIV | 7     | 2     |
| >EGFR-T785I RLLGICLTST  | 401  | >EGFR-T785I RLLGICLTSI  | 19    | 382   |
| >EGFR-T785I RLLGICLTSTV | 5    | >EGFR-T785I RLLGICLTSIV | 6     | 1     |
| >EGFR-T785I RLLGICLTST  | 658  | >EGFR-T785I RLLGICLTSI  | 16    | 642   |
| >EGFR-T785I RLLGICLTSTV | 2    | >EGFR-T785I RLLGICLTSIV | 3     | 1     |
| >EGFR-T785I RLLGICLTST  | 34   | >EGFR-T785I RLLGICLTSI  | 7     | 27    |
| >EGFR-T785I RLLGICLTSTV | 2    | >EGFR-T785I RLLGICLTSIV | 3     | 1     |
| >EGFR-T785I RLLGICLTST  | 360  | >EGFR-T785I RLLGICLTSI  | 10    | 350   |
| >EGFR-T785I RLLGICLTSTV | 23   | >EGFR-T785I RLLGICLTSIV | 115   | 92    |
| >EGFR-T785I RLLGICLTSTV | 241  | >EGFR-T785I RLLGICLTSIV | 374   | 133   |
| >EGFR-T785I TVQLITQLMP  | 469  | >EGFR-T785I NVQLITQLMFI | 1158  | 689   |
| >EGFR-T785I TVQLITQLMP  | 188  | >EGFR-T785I NVQLITQLMFI | 812   | 624   |
| >EGFR-T785I TVQLITQL    | 217  | >EGFR-T785I NVQLITQL    | 317   | 100   |
| >EGFR-T785I TVQLITQLM   | 410  | >EGFR-T785I NVQLITQLM   | 1468  | 1058  |
| >EGFR-T785I STVQLITQL   | 339  | >EGFR-T785I SNVQLITQL   | 4014  | 3675  |
| >EGFR-T785I STVQLITQL   | 408  | >EGFR-T785I SNVQLITQL   | 13670 | 13262 |
| >EGFR-T785I STVQLITQ    | 371  | >EGFR-T785I SNVQLITQ    | 22518 | 22147 |
| >EGFR-T785I STVQLITQL   | 64   | >EGFR-T785I SNVQLITQL   | 12172 | 12108 |
| >EGFR-T785I STVQLITQLM  | 18   | >EGFR-T785I SNVQLITQLM  | 7344  | 7326  |
| >EGFR-T785I STVQLITQLM  | 139  | >EGFR-T785I SNVQLITQLM  | 5661  | 5522  |
| >EGFR-T785I STVQLITQL   | 116  | >EGFR-T785I SNVQLITQL   | 10169 | 10053 |

|                                     |     |                                     |       |       |
|-------------------------------------|-----|-------------------------------------|-------|-------|
| >EGFR-T785 <sup>†</sup> STVQLITQLM  | 296 | >EGFR-T785 <sup>†</sup> SNVQLITQLM  | 11536 | 11240 |
| >EGFR-T785 <sup>†</sup> STVQLITQL   | 222 | >EGFR-T785 <sup>†</sup> SNVQLITQL   | 13485 | 13263 |
| >EGFR-T785 <sup>†</sup> STVQLITQL   | 7   | >EGFR-T785 <sup>†</sup> SNVQLITQL   | 12925 | 12918 |
| >EGFR-T785 <sup>†</sup> STVQLITQLM  | 18  | >EGFR-T785 <sup>†</sup> SNVQLITQLM  | 16977 | 16959 |
| >EGFR-T785 <sup>†</sup> STVQLITQL   | 170 | >EGFR-T785 <sup>†</sup> SNVQLITQL   | 14629 | 14459 |
| >EGFR-T785 <sup>†</sup> STVQLITQLM  | 72  | >EGFR-T785 <sup>†</sup> SNVQLITQLM  | 10593 | 10521 |
| >EGFR-T785 <sup>†</sup> STVQLITQL   | 17  | >EGFR-T785 <sup>†</sup> SNVQLITQL   | 849   | 832   |
| >EGFR-T785 <sup>†</sup> STVQLITQLM  | 24  | >EGFR-T785 <sup>†</sup> SNVQLITQLM  | 2422  | 2398  |
| >EGFR-T785 <sup>†</sup> STVQLITQL   | 249 | >EGFR-T785 <sup>†</sup> SNVQLITQL   | 8742  | 8493  |
| >EGFR-T785 <sup>†</sup> TSTVQLITQL  | 59  | >EGFR-T785 <sup>†</sup> TSNVQLITQL  | 63    | 4     |
| >EGFR-T785 <sup>†</sup> TSTVQLITQLM | 239 | >EGFR-T785 <sup>†</sup> TSNVQLITQLI | 294   | 55    |
| >EGFR-T785 <sup>†</sup> TSTVQLITQL  | 474 | >EGFR-T785 <sup>†</sup> TSNVQLITQL  | 2847  | 2373  |
| >EGFR-T785 <sup>†</sup> TSTVQLITQLM | 203 | >EGFR-T785 <sup>†</sup> TSNVQLITQLI | 1519  | 1316  |
| >EGFR-T785 <sup>†</sup> TSTVQLITQL  | 253 | >EGFR-T785 <sup>†</sup> TSNVQLITQL  | 1867  | 1614  |
| >EGFR-T785 <sup>†</sup> TSTVQLITQLM | 171 | >EGFR-T785 <sup>†</sup> TSNVQLITQLI | 337   | 166   |
| >EGFR-T785 <sup>†</sup> LTSTVQLI    | 302 | >EGFR-T785 <sup>†</sup> LTSNVQLI    | 306   | 4     |
| >EGFR-T785 <sup>†</sup> LTSTVQLITQL | 119 | >EGFR-T785 <sup>†</sup> LTSNVQLITQI | 121   | 2     |
| >EGFR-T785 <sup>†</sup> LTSTVQLI    | 123 | >EGFR-T785 <sup>†</sup> LTSNVQLI    | 148   | 25    |
| >EGFR-T785 <sup>†</sup> LTSTVQLITQL | 223 | >EGFR-T785 <sup>†</sup> LTSNVQLITQI | 317   | 94    |
| >EGFR-T785 <sup>†</sup> LTSTVQLITQL | 49  | >EGFR-T785 <sup>†</sup> LTSNVQLITQI | 42    | 7     |
| >EGFR-T785 <sup>†</sup> LTSTVQLI    | 80  | >EGFR-T785 <sup>†</sup> LTSNVQLI    | 127   | 47    |
| >EGFR-T785 <sup>†</sup> LTSTVQLITQL | 78  | >EGFR-T785 <sup>†</sup> LTSNVQLITQI | 105   | 27    |
| >EGFR-T785 <sup>†</sup> LTSTVQLITQL | 117 | >EGFR-T785 <sup>†</sup> LTSNVQLITQI | 220   | 103   |
| >EGFR-T785 <sup>†</sup> LTSTVQLITQL | 30  | >EGFR-T785 <sup>†</sup> LTSNVQLITQI | 17    | 13    |
| >EGFR-T785 <sup>†</sup> LTSTVQLI    | 32  | >EGFR-T785 <sup>†</sup> LTSNVQLI    | 28    | 4     |
| >EGFR-T785 <sup>†</sup> LTSTVQLITQL | 298 | >EGFR-T785 <sup>†</sup> LTSNVQLITQI | 219   | 79    |
| >EGFR-T785 <sup>†</sup> CLTSTVQL    | 75  | >EGFR-T785 <sup>†</sup> CLTSNVQL    | 75    | 0     |
| >EGFR-T785 <sup>†</sup> CLTSTVQLI   | 187 | >EGFR-T785 <sup>†</sup> CLTSNVQLI   | 143   | 44    |
| >EGFR-T785 <sup>†</sup> CLTSTVQL    | 312 | >EGFR-T785 <sup>†</sup> CLTSNVQL    | 552   | 240   |
| >EGFR-T785 <sup>†</sup> CLTSTVQLI   | 73  | >EGFR-T785 <sup>†</sup> CLTSNVQLI   | 73    | 0     |
| >EGFR-T785 <sup>†</sup> CLTSTVQL    | 143 | >EGFR-T785 <sup>†</sup> CLTSNVQL    | 177   | 34    |
| >EGFR-T785 <sup>†</sup> CLTSTVQLI   | 103 | >EGFR-T785 <sup>†</sup> CLTSNVQLI   | 89    | 14    |
| >EGFR-T785 <sup>†</sup> CLTSTVQL    | 364 | >EGFR-T785 <sup>†</sup> CLTSNVQL    | 338   | 26    |
| >EGFR-T785 <sup>†</sup> CLTSTVQLI   | 316 | >EGFR-T785 <sup>†</sup> CLTSNVQLI   | 116   | 200   |
| >EGFR-T785 <sup>†</sup> CLTSTVQL    | 227 | >EGFR-T785 <sup>†</sup> CLTSNVQL    | 634   | 407   |
| >EGFR-T785 <sup>†</sup> CLTSTVQLI   | 272 | >EGFR-T785 <sup>†</sup> CLTSNVQLI   | 762   | 490   |
| >EGFR-T785 <sup>†</sup> CLTSTVQL    | 77  | >EGFR-T785 <sup>†</sup> CLTSNVQL    | 146   | 69    |
| >EGFR-T785 <sup>†</sup> CLTSTVQLI   | 301 | >EGFR-T785 <sup>†</sup> CLTSNVQLI   | 210   | 91    |
| >EGFR-T785 <sup>†</sup> CLTSTVQL    | 7   | >EGFR-T785 <sup>†</sup> CLTSNVQL    | 8     | 1     |
| >EGFR-T785 <sup>†</sup> CLTSTVQLI   | 25  | >EGFR-T785 <sup>†</sup> CLTSNVQLI   | 18    | 7     |
| >EGFR-T785 <sup>†</sup> CLTSTVQLITC | 549 | >EGFR-T785 <sup>†</sup> CLTSNVQLITC | 387   | 162   |
| >EGFR-T785 <sup>†</sup> GICLTSTV    | 138 | >EGFR-T785 <sup>†</sup> GICLTSNV    | 175   | 37    |
| >EGFR-T785 <sup>†</sup> GICLTSTV    | 122 | >EGFR-T785 <sup>†</sup> GICLTSNV    | 405   | 283   |

|                         |      |                         |       |       |
|-------------------------|------|-------------------------|-------|-------|
| >EGFR-T785M GICLTSTV    | 314  | >EGFR-T785M GICLTSNV    | 717   | 403   |
| >EGFR-T785M GICLTSTV    | 38   | >EGFR-T785M GICLTSNV    | 96    | 58    |
| >EGFR-T785M LGICLTSTV   | 713  | >EGFR-T785M LGICLTSNV   | 345   | 368   |
| >EGFR-T785M LGICLTSTV   | 256  | >EGFR-T785M LGICLTSNV   | 1725  | 1469  |
| >EGFR-T785M LLGICLTSTV  | 63   | >EGFR-T785M LLGICLTSNV  | 104   | 41    |
| >EGFR-T785M LLGICLTST   | 415  | >EGFR-T785M LLGICLTSN   | 3662  | 3247  |
| >EGFR-T785M LLGICLTSTV  | 17   | >EGFR-T785M LLGICLTSNV  | 25    | 8     |
| >EGFR-T785M LLGICLTST   | 295  | >EGFR-T785M LLGICLTSN   | 8691  | 8396  |
| >EGFR-T785M LLGICLTSTV  | 14   | >EGFR-T785M LLGICLTSNV  | 18    | 4     |
| >EGFR-T785M LLGICLTSTV  | 98   | >EGFR-T785M LLGICLTSNV  | 121   | 23    |
| >EGFR-T785M LLGICLTSTV  | 4    | >EGFR-T785M LLGICLTSNV  | 7     | 3     |
| >EGFR-T785M LLGICLTSTV  | 5    | >EGFR-T785M LLGICLTSNV  | 10    | 5     |
| >EGFR-T785M LLGICLTSTV  | 9    | >EGFR-T785M LLGICLTSNV  | 11    | 2     |
| >EGFR-T785M LLGICLTSTV  | 6    | >EGFR-T785M LLGICLTSNV  | 7     | 1     |
| >EGFR-T785M LLGICLTST   | 30   | >EGFR-T785M LLGICLTSN   | 5951  | 5921  |
| >EGFR-T785M LLGICLTSTV  | 2    | >EGFR-T785M LLGICLTSNV  | 2     | 0     |
| >EGFR-T785M LLGICLTSTVQ | 272  | >EGFR-T785M LLGICLTSNVC | 603   | 331   |
| >EGFR-T785M RLLGICLTST  | 73   | >EGFR-T785M RLLGICLTSN  | 3080  | 3007  |
| >EGFR-T785M RLLGICLTSTV | 15   | >EGFR-T785M RLLGICLTSNV | 15    | 0     |
| >EGFR-T785M RLLGICLTST  | 207  | >EGFR-T785M RLLGICLTSN  | 6499  | 6292  |
| >EGFR-T785M RLLGICLTSTV | 29   | >EGFR-T785M RLLGICLTSNV | 15    | 14    |
| >EGFR-T785M RLLGICLTST  | 52   | >EGFR-T785M RLLGICLTSN  | 3577  | 3525  |
| >EGFR-T785M RLLGICLTSTV | 13   | >EGFR-T785M RLLGICLTSNV | 10    | 3     |
| >EGFR-T785M RLLGICLTST  | 87   | >EGFR-T785M RLLGICLTSN  | 5637  | 5550  |
| >EGFR-T785M RLLGICLTSTV | 19   | >EGFR-T785M RLLGICLTSNV | 18    | 1     |
| >EGFR-T785M RLLGICLTST  | 95   | >EGFR-T785M RLLGICLTSN  | 2442  | 2347  |
| >EGFR-T785M RLLGICLTSTV | 2    | >EGFR-T785M RLLGICLTSNV | 2     | 0     |
| >EGFR-T785M RLLGICLTSTV | 5    | >EGFR-T785M RLLGICLTSNV | 8     | 3     |
| >EGFR-T785M RLLGICLTST  | 401  | >EGFR-T785M RLLGICLTSN  | 10786 | 10385 |
| >EGFR-T785M RLLGICLTSTV | 5    | >EGFR-T785M RLLGICLTSNV | 5     | 0     |
| >EGFR-T785M RLLGICLTSTV | 2    | >EGFR-T785M RLLGICLTSNV | 3     | 1     |
| >EGFR-T785M RLLGICLTST  | 34   | >EGFR-T785M RLLGICLTSN  | 4651  | 4617  |
| >EGFR-T785M RLLGICLTSTV | 2    | >EGFR-T785M RLLGICLTSNV | 2     | 0     |
| >EGFR-T785M RLLGICLTST  | 360  | >EGFR-T785M RLLGICLTSN  | 747   | 387   |
| >EGFR-T785M RLLGICLTSTV | 23   | >EGFR-T785M RLLGICLTSNV | 114   | 91    |
| >EGFR-T785M RLLGICLTSTV | 241  | >EGFR-T785M RLLGICLTSNV | 1258  | 1017  |
| >EGFR-T790M TQLMPFGCLI  | 623  | >EGFR-T790M TQLMPFGCL   | 241   | 382   |
| >EGFR-T790M TQLMPFGC    | 325  | >EGFR-T790M TQLMPFGC    | 52    | 273   |
| >EGFR-T790M TQLMPFGCL   | 200  | >EGFR-T790M TQLMPFGCL   | 29    | 171   |
| >EGFR-T790M TQLMPFGCLI  | 128  | >EGFR-T790M TQLMPFGCL   | 68    | 60    |
| >EGFR-T790M TQLMPFGCLI  | 1853 | >EGFR-T790M TQLMPFGCL   | 189   | 1664  |
| >EGFR-T790M TQLMPFGCL   | 581  | >EGFR-T790M TQLMPFGCL   | 46    | 535   |
| >EGFR-T790M TQLMPFGCLI  | 251  | >EGFR-T790M TQLMPFGCL   | 28    | 223   |

|                         |       |                         |       |       |
|-------------------------|-------|-------------------------|-------|-------|
| >EGFR-T790M TQLMPFGCL   | 626   | >EGFR-T790M MQLMPFGCL   | 442   | 184   |
| >EGFR-T790M TQLMPFGCLI  | 420   | >EGFR-T790M MQLMPFGCL   | 311   | 109   |
| >EGFR-T790M TQLMPFGCL   | 2314  | >EGFR-T790M MQLMPFGCL   | 276   | 2038  |
| >EGFR-T790M TQLMPFGCLI  | 1070  | >EGFR-T790M MQLMPFGCL   | 143   | 927   |
| >EGFR-T790M ITQLMPFGCL  | 972   | >EGFR-T790M IMQLMPFGC   | 382   | 590   |
| >EGFR-T790M ITQLMPFGCL  | 5856  | >EGFR-T790M IMQLMPFGC   | 118   | 5738  |
| >EGFR-T790M ITQLMPFGCL  | 2317  | >EGFR-T790M IMQLMPFGC   | 402   | 1915  |
| >EGFR-T790M ITQLMPFGCL  | 2606  | >EGFR-T790M IMQLMPFGC   | 117   | 2489  |
| >EGFR-T790M ITQLMPFGCL  | 3007  | >EGFR-T790M IMQLMPFGC   | 456   | 2551  |
| >EGFR-T790M ITQLMPFGCL  | 5366  | >EGFR-T790M IMQLMPFGC   | 416   | 4950  |
| >EGFR-T790M ITQLMPFGC   | 11022 | >EGFR-T790M IMQLMPFGC   | 188   | 10834 |
| >EGFR-T790M ITQLMPFGCL  | 12239 | >EGFR-T790M IMQLMPFGC   | 293   | 11946 |
| >EGFR-T790M ITQLMPFGCL  | 4496  | >EGFR-T790M IMQLMPFGC   | 33    | 4463  |
| >EGFR-T790M ITQLMPFGCL  | 12592 | >EGFR-T790M IMQLMPFGC   | 272   | 12320 |
| >EGFR-T790M ITQLMPFGCL  | 10928 | >EGFR-T790M IMQLMPFGC   | 71    | 10857 |
| >EGFR-T790M ITQLMPFGCL  | 12651 | >EGFR-T790M IMQLMPFGC   | 189   | 12462 |
| >EGFR-T790M ITQLMPFGC   | 15796 | >EGFR-T790M IMQLMPFGC   | 301   | 15495 |
| >EGFR-T790M ITQLMPFGCL  | 12878 | >EGFR-T790M IMQLMPFGC   | 382   | 12496 |
| >EGFR-T790M ITQLMPFGCL  | 12069 | >EGFR-T790M IMQLMPFGC   | 107   | 11962 |
| >EGFR-T790M ITQLMPFGC   | 27573 | >EGFR-T790M IMQLMPFGC   | 370   | 27203 |
| >EGFR-T790M ITQLMPFGCL  | 19021 | >EGFR-T790M IMQLMPFGC   | 169   | 18852 |
| >EGFR-T790M ITQLMPFGCL  | 6642  | >EGFR-T790M IMQLMPFGC   | 14    | 6628  |
| >EGFR-T790M ITQLMPFGCL  | 365   | >EGFR-T790M IMQLMPFGC   | 12420 | 12055 |
| >EGFR-T790M ITQLMPFGCL  | 17    | >EGFR-T790M IMQLMPFGC   | 3665  | 3648  |
| >EGFR-T790M ITQLMPFGCL  | 120   | >EGFR-T790M IMQLMPFGC   | 6056  | 5936  |
| >EGFR-T790M ITQLMPFGCL  | 187   | >EGFR-T790M IMQLMPFGC   | 9010  | 8823  |
| >EGFR-T790M ITQLMPFGCL  | 132   | >EGFR-T790M IMQLMPFGC   | 7961  | 7829  |
| >EGFR-T790M ICLTSTVQLIT | 8905  | >EGFR-T790M ICLTSTVQLIM | 194   | 8711  |
| >EGFR-T790M LITQLMPFGC  | 1263  | >EGFR-T790M LIMQLMPFGI  | 203   | 1060  |
| >EGFR-T790M LITQLMPF    | 1110  | >EGFR-T790M LIMQLMPF    | 139   | 971   |
| >EGFR-T790M LITQLMPFGC  | 1123  | >EGFR-T790M LIMQLMPFGI  | 155   | 968   |
| >EGFR-T790M LITQLMPFGC  | 2239  | >EGFR-T790M LIMQLMPFGI  | 485   | 1754  |
| >EGFR-T790M LITQLMPF    | 524   | >EGFR-T790M LIMQLMPF    | 154   | 370   |
| >EGFR-T790M LITQLMPF    | 2304  | >EGFR-T790M LIMQLMPF    | 220   | 2084  |
| >EGFR-T790M LITQLMPF    | 228   | >EGFR-T790M LIMQLMPF    | 36    | 192   |
| >EGFR-T790M LITQLMPF    | 388   | >EGFR-T790M LIMQLMPF    | 47    | 341   |
| >EGFR-T790M LITQLMPF    | 506   | >EGFR-T790M LIMQLMPF    | 107   | 399   |
| >EGFR-T790M LITQLMPF    | 571   | >EGFR-T790M LIMQLMPF    | 320   | 251   |
| >EGFR-T790M LITQLMPF    | 1038  | >EGFR-T790M LIMQLMPF    | 346   | 692   |
| >EGFR-T790M QLITQLMPF   | 212   | >EGFR-T790M QLIMQLMPF   | 425   | 213   |
| >EGFR-T790M QLITQLMPFG  | 502   | >EGFR-T790M QLIMQLMPFI  | 322   | 180   |
| >EGFR-T790M QLITQLMPF   | 23    | >EGFR-T790M QLIMQLMPF   | 65    | 42    |
| >EGFR-T790M QLITQLMPF   | 154   | >EGFR-T790M QLIMQLMPF   | 159   | 5     |

|                         |       |                        |     |       |
|-------------------------|-------|------------------------|-----|-------|
| >EGFR-T790M QLITQLMPF   | 67    | >EGFR-T790M QLIMQLMPF  | 41  | 26    |
| >EGFR-T790M QLITQLMPF   | 496   | >EGFR-T790M QLIMQLMPF  | 486 | 10    |
| >EGFR-T790M QLITQLMPF   | 14    | >EGFR-T790M QLIMQLMPF  | 17  | 3     |
| >EGFR-T790M VQLITQLM    | 332   | >EGFR-T790M VQLIMQLM   | 381 | 49    |
| >EGFR-T790M VQLITQLMPF  | 75    | >EGFR-T790M VQLIMQLMP  | 82  | 7     |
| >EGFR-T790M VQLITQLM    | 58    | >EGFR-T790M VQLIMQLM   | 194 | 136   |
| >EGFR-T790M VQLITQLMPF  | 3     | >EGFR-T790M VQLIMQLMP  | 5   | 2     |
| >EGFR-T790M TVQLITQLM   | 5118  | >EGFR-T790M TVQLIMQLM  | 275 | 4843  |
| >EGFR-T790M TVQLITQLMP  | 469   | >EGFR-T790M TVQLIMQLM  | 121 | 348   |
| >EGFR-T790M TVQLITQLMP  | 188   | >EGFR-T790M TVQLIMQLM  | 538 | 350   |
| >EGFR-T790M TVQLITQL    | 217   | >EGFR-T790M TVQLIMQL   | 116 | 101   |
| >EGFR-T790M TVQLITQLM   | 410   | >EGFR-T790M TVQLIMQLM  | 129 | 281   |
| >EGFR-T790M STVQLITQL   | 339   | >EGFR-T790M STVQLIMQL  | 650 | 311   |
| >EGFR-T790M STVQLITQL   | 408   | >EGFR-T790M STVQLIMQL  | 527 | 119   |
| >EGFR-T790M STVQLITQL   | 706   | >EGFR-T790M STVQLIMQL  | 426 | 280   |
| >EGFR-T790M STVQLITQ    | 371   | >EGFR-T790M STVQLIMQ   | 464 | 93    |
| >EGFR-T790M STVQLITQL   | 64    | >EGFR-T790M STVQLIMQL  | 60  | 4     |
| >EGFR-T790M STVQLITQLM  | 18    | >EGFR-T790M STVQLIMQLM | 7   | 11    |
| >EGFR-T790M STVQLITQLM  | 139   | >EGFR-T790M STVQLIMQLM | 229 | 90    |
| >EGFR-T790M STVQLITQL   | 116   | >EGFR-T790M STVQLIMQL  | 37  | 79    |
| >EGFR-T790M STVQLITQLM  | 296   | >EGFR-T790M STVQLIMQLM | 263 | 33    |
| >EGFR-T790M STVQLITQL   | 222   | >EGFR-T790M STVQLIMQL  | 70  | 152   |
| >EGFR-T790M STVQLITQLM  | 528   | >EGFR-T790M STVQLIMQLM | 332 | 196   |
| >EGFR-T790M STVQLITQL   | 7     | >EGFR-T790M STVQLIMQL  | 8   | 1     |
| >EGFR-T790M STVQLITQLM  | 18    | >EGFR-T790M STVQLIMQLM | 12  | 6     |
| >EGFR-T790M STVQLITQL   | 170   | >EGFR-T790M STVQLIMQL  | 151 | 19    |
| >EGFR-T790M STVQLITQLM  | 72    | >EGFR-T790M STVQLIMQLM | 64  | 8     |
| >EGFR-T790M STVQLITQL   | 17    | >EGFR-T790M STVQLIMQL  | 33  | 16    |
| >EGFR-T790M STVQLITQLM  | 24    | >EGFR-T790M STVQLIMQLM | 25  | 1     |
| >EGFR-T790M STVQLITQL   | 249   | >EGFR-T790M STVQLIMQL  | 986 | 737   |
| >EGFR-T790M TSTVQLIT    | 15920 | >EGFR-T790M TSTVQLIM   | 267 | 15653 |
| >EGFR-T790M TSTVQLITQL  | 59    | >EGFR-T790M TSTVQLIMQL | 82  | 23    |
| >EGFR-T790M TSTVQLITQLM | 239   | >EGFR-T790M TSTVQLIMQL | 136 | 103   |
| >EGFR-T790M TSTVQLIT    | 16957 | >EGFR-T790M TSTVQLIM   | 427 | 16530 |
| >EGFR-T790M TSTVQLITQL  | 474   | >EGFR-T790M TSTVQLIMQL | 385 | 89    |
| >EGFR-T790M TSTVQLITQLM | 203   | >EGFR-T790M TSTVQLIMQL | 167 | 36    |
| >EGFR-T790M TSTVQLIT    | 928   | >EGFR-T790M TSTVQLIM   | 43  | 885   |
| >EGFR-T790M TSTVQLITQL  | 253   | >EGFR-T790M TSTVQLIMQL | 225 | 28    |
| >EGFR-T790M TSTVQLITQLM | 171   | >EGFR-T790M TSTVQLIMQL | 93  | 78    |
| >EGFR-T790M LTSTVQLITQL | 119   | >EGFR-T790M LTSTVQLIMQ | 211 | 92    |
| >EGFR-T790M LTSTVQLITQL | 223   | >EGFR-T790M LTSTVQLIMQ | 116 | 107   |
| >EGFR-T790M LTSTVQLIT   | 16172 | >EGFR-T790M LTSTVQLIM  | 270 | 15902 |
| >EGFR-T790M LTSTVQLITQL | 49    | >EGFR-T790M LTSTVQLIMQ | 58  | 9     |

|                         |       |                        |       |       |
|-------------------------|-------|------------------------|-------|-------|
| >EGFR-T790M LTSTVQLIT   | 4933  | >EGFR-T790M LTSTVQLIM  | 18    | 4915  |
| >EGFR-T790M LTSTVQLITQL | 78    | >EGFR-T790M LTSTVQLIMQ | 43    | 35    |
| >EGFR-T790M LTSTVQLIT   | 9786  | >EGFR-T790M LTSTVQLIM  | 140   | 9646  |
| >EGFR-T790M LTSTVQLITQL | 117   | >EGFR-T790M LTSTVQLIMQ | 112   | 5     |
| >EGFR-T790M LTSTVQLIT   | 1172  | >EGFR-T790M LTSTVQLIM  | 9     | 1163  |
| >EGFR-T790M LTSTVQLITQL | 30    | >EGFR-T790M LTSTVQLIMQ | 50    | 20    |
| >EGFR-T790M LTSTVQLITQL | 298   | >EGFR-T790M LTSTVQLIMQ | 597   | 299   |
| >EGFR-T790M CLTSTVQLIT  | 23151 | >EGFR-T790M CLTSTVQLIM | 237   | 22914 |
| >EGFR-T847F TPQHVKITDF  | 80    | >EGFR-T847F APQHVKITDF | 63    | 17    |
| >EGFR-T847F TPQHVKITDF  | 125   | >EGFR-T847F APQHVKITDF | 167   | 42    |
| >EGFR-T847F TPQHVKITDF  | 1362  | >EGFR-T847F APQHVKITDF | 461   | 901   |
| >EGFR-T847F TPQHVKITDF  | 234   | >EGFR-T847F APQHVKITDF | 357   | 123   |
| >EGFR-T847F KTPQHVKITD  | 461   | >EGFR-T847F KAPQHVKITD | 11870 | 11409 |
| >EGFR-T847F KTPQHVKI    | 23    | >EGFR-T847F KAPQHVKI   | 541   | 518   |
| >EGFR-T847F KTPQHVKITD  | 41    | >EGFR-T847F KAPQHVKITD | 1570  | 1529  |
| >EGFR-T847F KTPQHVKITD  | 693   | >EGFR-T847F KAPQHVKITD | 395   | 298   |
| >EGFR-T847F KTPQHVKI    | 299   | >EGFR-T847F KAPQHVKI   | 3627  | 3328  |
| >EGFR-T847F KTPQHVKITD  | 44    | >EGFR-T847F KAPQHVKITD | 475   | 431   |
| >EGFR-T847F KTPQHVKI    | 33    | >EGFR-T847F KAPQHVKI   | 1041  | 1008  |
| >EGFR-T847F KTPQHVKIT   | 77    | >EGFR-T847F KAPQHVKIT  | 1316  | 1239  |
| >EGFR-T847F KTPQHVKITD  | 7     | >EGFR-T847F KAPQHVKITD | 73    | 66    |
| >EGFR-T847F KTPQHVKI    | 51    | >EGFR-T847F KAPQHVKI   | 184   | 133   |
| >EGFR-T847F VKTPQHVKI   | 395   | >EGFR-T847F VKAPQHVKI  | 148   | 247   |
| >EGFR-T847F LVKTPQHV    | 262   | >EGFR-T847F LVKAPQHV   | 154   | 108   |
| >EGFR-T847F LVKTPQHV    | 42    | >EGFR-T847F LVKAPQHV   | 25    | 17    |
| >EGFR-T847F LVKTPQHVK   | 322   | >EGFR-T847F LVKAPQHVK  | 220   | 102   |
| >EGFR-T847F LVKTPQHVK   | 207   | >EGFR-T847F LVKAPQHVK  | 131   | 76    |
| >EGFR-T847F LVKTPQHV    | 173   | >EGFR-T847F LVKAPQHV   | 114   | 59    |
| >EGFR-T847F LVKTPQHVK   | 15    | >EGFR-T847F LVKAPQHVK  | 11    | 4     |
| >EGFR-T847F LVKTPQHVKI  | 126   | >EGFR-T847F LVKAPQHVKI | 85    | 41    |
| >EGFR-T847F LVKTPQHVK   | 399   | >EGFR-T847F LVKAPQHVK  | 238   | 161   |
| >EGFR-T847F LVKTPQHVK   | 357   | >EGFR-T847F LVKAPQHVK  | 327   | 30    |
| >EGFR-T847F LVKTPQHV    | 918   | >EGFR-T847F LVKAPQHV   | 477   | 441   |
| >EGFR-T847F VLVKTPQHV   | 476   | >EGFR-T847F VLVKAPQHV  | 318   | 158   |
| >EGFR-T847F VLVKTPQHV   | 215   | >EGFR-T847F VLVKAPQHV  | 89    | 126   |
| >EGFR-T847F VLVKTPQHVK  | 703   | >EGFR-T847F VLVKAPQHVI | 440   | 263   |
| >EGFR-T847F VLVKTPQHV   | 22    | >EGFR-T847F VLVKAPQHV  | 16    | 6     |
| >EGFR-T847F VLVKTPQHVK  | 269   | >EGFR-T847F VLVKAPQHVI | 223   | 46    |
| >EGFR-T847F VLVKTPQHV   | 248   | >EGFR-T847F VLVKAPQHV  | 113   | 135   |
| >EGFR-T847F VLVKTPQHV   | 3     | >EGFR-T847F VLVKAPQHV  | 5     | 2     |
| >EGFR-T847F VLVKTPQHVK  | 25    | >EGFR-T847F VLVKAPQHVI | 40    | 15    |
| >EGFR-T847F VLVKTPQHV   | 6     | >EGFR-T847F VLVKAPQHV  | 10    | 4     |
| >EGFR-T847F VLVKTPQHVK  | 241   | >EGFR-T847F VLVKAPQHVI | 410   | 169   |



|                        |      |                        |       |       |
|------------------------|------|------------------------|-------|-------|
| >EGFR-T847/VLVKTPQHV   | 7    | >EGFR-T847/VLVKAPQHV   | 6     | 1     |
| >EGFR-T847/VLVKTPQHVK  | 97   | >EGFR-T847/VLVKAPQHVI  | 106   | 9     |
| >EGFR-T847/VLVKTPQHV   | 30   | >EGFR-T847/VLVKAPQHV   | 24    | 6     |
| >EGFR-T847/VLVKTPQHV   | 3    | >EGFR-T847/VLVKAPQHV   | 4     | 1     |
| >EGFR-T847/VLVKTPQHVK  | 26   | >EGFR-T847/VLVKAPQHVI  | 28    | 2     |
| >EGFR-T847/VLVKTPQHVK  | 415  | >EGFR-T847/VLVKAPQHVI  | 274   | 141   |
| >EGFR-T847/NVLVKTQHN   | 424  | >EGFR-T847/NVLVKAQHN   | 716   | 292   |
| >EGFR-T847/NVLVKTQHN   | 178  | >EGFR-T847/NVLVKAQHN   | 267   | 89    |
| >EGFR-T847/NVLVKTQHN   | 179  | >EGFR-T847/NVLVKAQHN   | 294   | 115   |
| >EGFR-T847/NVLVKTQHN   | 269  | >EGFR-T847/NVLVKAQHN   | 354   | 85    |
| >EGFR-T847/NVLVKTQHN   | 225  | >EGFR-T847/NVLVKAQHN   | 325   | 100   |
| >EGFR-T847/NVLVKTQHN   | 318  | >EGFR-T847/NVLVKAQHN   | 348   | 30    |
| >EGFR-T847/NVLVKTQHN   | 29   | >EGFR-T847/NVLVKAQHN   | 32    | 3     |
| >EGFR-T847/ARNVLVKTPC  | 531  | >EGFR-T847/ARNVLVKA    | 387   | 144   |
| >EGFR-T847/AARNVLVKT   | 1277 | >EGFR-T847/AARNVLVKA   | 41    | 1236  |
| >EGFR-T847/AARNVLVKT   | 404  | >EGFR-T847/AARNVLVKA   | 125   | 279   |
| >EGFR-T847/TPQHVKITDF  | 80   | >EGFR-T847/IPQHVKITDF  | 47    | 33    |
| >EGFR-T847/TPQHVKITDF  | 125  | >EGFR-T847/IPQHVKITDF  | 549   | 424   |
| >EGFR-T847/TPQHVKITDF  | 234  | >EGFR-T847/IPQHVKITDF  | 107   | 127   |
| >EGFR-T847/KTPQHVKITD  | 461  | >EGFR-T847/KIPQHVKITDI | 3396  | 2935  |
| >EGFR-T847/KTPQHVKI    | 23   | >EGFR-T847/KIPQHVKI    | 54    | 31    |
| >EGFR-T847/KTPQHVKITD  | 41   | >EGFR-T847/KIPQHVKITDI | 123   | 82    |
| >EGFR-T847/KTPQHVKI    | 299  | >EGFR-T847/KIPQHVKI    | 17501 | 17202 |
| >EGFR-T847/KTPQHVKITD  | 44   | >EGFR-T847/KIPQHVKITDI | 6306  | 6262  |
| >EGFR-T847/KTPQHVKI    | 33   | >EGFR-T847/KIPQHVKI    | 8792  | 8759  |
| >EGFR-T847/KTPQHVKIT   | 77   | >EGFR-T847/KIPQHVKIT   | 11321 | 11244 |
| >EGFR-T847/KTPQHVKITD  | 7    | >EGFR-T847/KIPQHVKITDI | 1135  | 1128  |
| >EGFR-T847/KTPQHVKI    | 51   | >EGFR-T847/KIPQHVKI    | 2729  | 2678  |
| >EGFR-T847/DLAARNVLVVK | 4656 | >EGFR-T847/DLAARNVLVVK | 497   | 4159  |
| >EGFR-T847/DLAARNVLVVK | 5658 | >EGFR-T847/DLAARNVLVVK | 329   | 5329  |
| >EGFR-T847/VKTPQHVKI   | 395  | >EGFR-T847/VKIPQHVKI   | 96    | 299   |
| >EGFR-T847/LVKTPQHV    | 262  | >EGFR-T847/LVKIPQHV    | 428   | 166   |
| >EGFR-T847/LVKTPQHV    | 42   | >EGFR-T847/LVKIPQHV    | 42    | 0     |
| >EGFR-T847/LVKTPQHVK   | 322  | >EGFR-T847/LVKIPQHVK   | 824   | 502   |
| >EGFR-T847/LVKTPQHVK   | 207  | >EGFR-T847/LVKIPQHVK   | 322   | 115   |
| >EGFR-T847/LVKTPQHV    | 173  | >EGFR-T847/LVKIPQHV    | 309   | 136   |
| >EGFR-T847/LVKTPQHVK   | 15   | >EGFR-T847/LVKIPQHVK   | 18    | 3     |
| >EGFR-T847/LVKTPQHVKI  | 126  | >EGFR-T847/LVKIPQHVKI  | 174   | 48    |
| >EGFR-T847/LVKTPQHVK   | 399  | >EGFR-T847/LVKIPQHVK   | 298   | 101   |
| >EGFR-T847/LVKTPQHVK   | 357  | >EGFR-T847/LVKIPQHVK   | 478   | 121   |
| >EGFR-T847/VLVKTPQHV   | 476  | >EGFR-T847/VLVKIPQHV   | 153   | 323   |
| >EGFR-T847/VLVKTPQHV   | 215  | >EGFR-T847/VLVKIPQHV   | 37    | 178   |
| >EGFR-T847/VLVKTPQHVK  | 703  | >EGFR-T847/VLVKIPQHVK  | 208   | 495   |

|                         |       |                         |      |       |
|-------------------------|-------|-------------------------|------|-------|
| >EGFR-T847I VLVKTPQHV   | 22    | >EGFR-T847I VLVKIPQHV   | 14   | 8     |
| >EGFR-T847I VLVKTPQHVK  | 269   | >EGFR-T847I VLVKIPQHVK  | 179  | 90    |
| >EGFR-T847I VLVKTPQHV   | 248   | >EGFR-T847I VLVKIPQHV   | 133  | 115   |
| >EGFR-T847I VLVKTPQHV   | 3     | >EGFR-T847I VLVKIPQHV   | 4    | 1     |
| >EGFR-T847I VLVKTPQHVK  | 25    | >EGFR-T847I VLVKIPQHVK  | 27   | 2     |
| >EGFR-T847I VLVKTPQHV   | 6     | >EGFR-T847I VLVKIPQHV   | 9    | 3     |
| >EGFR-T847I VLVKTPQHVK  | 241   | >EGFR-T847I VLVKIPQHVK  | 363  | 122   |
| >EGFR-T847I VLVKTPQHV   | 7     | >EGFR-T847I VLVKIPQHV   | 7    | 0     |
| >EGFR-T847I VLVKTPQHVK  | 97    | >EGFR-T847I VLVKIPQHVK  | 112  | 15    |
| >EGFR-T847I VLVKTPQHV   | 30    | >EGFR-T847I VLVKIPQHV   | 14   | 16    |
| >EGFR-T847I VLVKTPQHV   | 3     | >EGFR-T847I VLVKIPQHV   | 3    | 0     |
| >EGFR-T847I VLVKTPQHVK  | 26    | >EGFR-T847I VLVKIPQHVK  | 24   | 2     |
| >EGFR-T847I VLVKTPQHVK  | 415   | >EGFR-T847I VLVKIPQHVK  | 417  | 2     |
| >EGFR-T847I NVLVKTPQH   | 521   | >EGFR-T847I NVLVKIPQHV  | 483  | 38    |
| >EGFR-T847I NVLVKTPQH   | 424   | >EGFR-T847I NVLVKIPQHV  | 203  | 221   |
| >EGFR-T847I NVLVKTPQH   | 178   | >EGFR-T847I NVLVKIPQHV  | 129  | 49    |
| >EGFR-T847I NVLVKTPQH   | 179   | >EGFR-T847I NVLVKIPQHV  | 146  | 33    |
| >EGFR-T847I NVLVKTPQH   | 269   | >EGFR-T847I NVLVKIPQHV  | 184  | 85    |
| >EGFR-T847I NVLVKTPQH   | 225   | >EGFR-T847I NVLVKIPQHV  | 260  | 35    |
| >EGFR-T847I NVLVKTPQH   | 318   | >EGFR-T847I NVLVKIPQHV  | 370  | 52    |
| >EGFR-T847I NVLVKTPQH   | 29    | >EGFR-T847I NVLVKIPQHV  | 36   | 7     |
| >EGFR-T847I ARNVLVKT    | 1104  | >EGFR-T847I ARNVLVKI    | 88   | 1016  |
| >EGFR-T847I ARNVLVKTPC  | 531   | >EGFR-T847I ARNVLVKIPQ  | 319  | 212   |
| >EGFR-T847I ARNVLVKT    | 2155  | >EGFR-T847I ARNVLVKI    | 384  | 1771  |
| >EGFR-T847I ARNVLVKT    | 1048  | >EGFR-T847I ARNVLVKI    | 237  | 811   |
| >EGFR-T847I AARNVLVKT   | 1277  | >EGFR-T847I AARNVLVKI   | 45   | 1232  |
| >EGFR-T847I AARNVLVKTf  | 404   | >EGFR-T847I AARNVLVKIP  | 94   | 310   |
| >EGFR-T847I AARNVLVKT   | 36968 | >EGFR-T847I AARNVLVKI   | 347  | 36621 |
| >EGFR-T847I LAARNVLVKT  | 12277 | >EGFR-T847I LAARNVLVKI  | 156  | 12121 |
| >EGFR-T854/ TDFGLAKLL   | 145   | >EGFR-T854/ ADFGLAKLL   | 653  | 508   |
| >EGFR-T854/ TDFGLAKL    | 624   | >EGFR-T854/ ADFGLAKL    | 299  | 325   |
| >EGFR-T854/ TDFGLAKLL   | 352   | >EGFR-T854/ ADFGLAKLL   | 123  | 229   |
| >EGFR-T854/ TDFGLAKLLG  | 657   | >EGFR-T854/ ADFGLAKLLG  | 273  | 384   |
| >EGFR-T854/ TDFGLAKLL   | 295   | >EGFR-T854/ ADFGLAKLL   | 229  | 66    |
| >EGFR-T854/ ITDFGLAK    | 290   | >EGFR-T854/ IADFGLAK    | 1862 | 1572  |
| >EGFR-T854/ ITDFGLAK    | 33    | >EGFR-T854/ IADFGLAK    | 156  | 123   |
| >EGFR-T854/ ITDFGLAKL   | 6     | >EGFR-T854/ IADFGLAKL   | 64   | 58    |
| >EGFR-T854/ ITDFGLAKLL  | 15    | >EGFR-T854/ IADFGLAKLL  | 252  | 237   |
| >EGFR-T854/ ITDFGLAKLL  | 276   | >EGFR-T854/ IADFGLAKLL  | 2385 | 2109  |
| >EGFR-T854/ ITDFGLAKL   | 97    | >EGFR-T854/ IADFGLAKL   | 2312 | 2215  |
| >EGFR-T854/ ITDFGLAK    | 474   | >EGFR-T854/ IADFGLAK    | 3757 | 3283  |
| >EGFR-T854/ LVKTPQHVKI  | 6251  | >EGFR-T854/ LVKTPQHVKI  | 416  | 5835  |
| >EGFR-T854/ KITDFGLAKLL | 1619  | >EGFR-T854/ KIADFGLAKLI | 441  | 1178  |

|                        |      |                        |     |      |
|------------------------|------|------------------------|-----|------|
| >EGFR-T854/KITDFGLA    | 883  | >EGFR-T854/KIADFGLA    | 83  | 800  |
| >EGFR-T854/KITDFGLAKL  | 91   | >EGFR-T854/KIADFGLAKL  | 29  | 62   |
| >EGFR-T854/KITDFGLAKLL | 228  | >EGFR-T854/KIADFGLAKLL | 26  | 202  |
| >EGFR-T854/KITDFGLA    | 348  | >EGFR-T854/KIADFGLA    | 38  | 310  |
| >EGFR-T854/KITDFGLAKL  | 81   | >EGFR-T854/KIADFGLAKL  | 47  | 34   |
| >EGFR-T854/KITDFGLAKLL | 1619 | >EGFR-T854/KIADFGLAKLL | 173 | 1446 |
| >EGFR-T854/KITDFGLA    | 117  | >EGFR-T854/KIADFGLA    | 44  | 73   |
| >EGFR-T854/KITDFGLAKL  | 432  | >EGFR-T854/KIADFGLAKL  | 240 | 192  |
| >EGFR-T854/KITDFGLAKLL | 462  | >EGFR-T854/KIADFGLAKLL | 175 | 287  |
| >EGFR-T854/KITDFGLAKL  | 188  | >EGFR-T854/KIADFGLAKL  | 68  | 120  |
| >EGFR-T854/KITDFGLAKLL | 810  | >EGFR-T854/KIADFGLAKLL | 321 | 489  |
| >EGFR-T854/KITDFGLAKL  | 478  | >EGFR-T854/KIADFGLAKL  | 213 | 265  |
| >EGFR-T854/KITDFGLAKL  | 3324 | >EGFR-T854/KIADFGLAKL  | 462 | 2862 |
| >EGFR-T854/KITDFGLAKL  | 29   | >EGFR-T854/KIADFGLAKL  | 26  | 3    |
| >EGFR-T854/KITDFGLAKLL | 183  | >EGFR-T854/KIADFGLAKLL | 150 | 33   |
| >EGFR-T854/KITDFGLAK   | 102  | >EGFR-T854/KIADFGLAK   | 52  | 50   |
| >EGFR-T854/KITDFGLAK   | 17   | >EGFR-T854/KIADFGLAK   | 12  | 5    |
| >EGFR-T854/KITDFGLAK   | 22   | >EGFR-T854/KIADFGLAK   | 26  | 4    |
| >EGFR-T854/KITDFGLAKL  | 725  | >EGFR-T854/KIADFGLAKL  | 385 | 340  |
| >EGFR-T854/KITDFGLAKLL | 679  | >EGFR-T854/KIADFGLAKLL | 394 | 285  |
| >EGFR-T854/KITDFGLAKL  | 693  | >EGFR-T854/KIADFGLAKL  | 459 | 234  |
| >EGFR-T854/KITDFGLAK   | 98   | >EGFR-T854/KIADFGLAK   | 76  | 22   |
| >EGFR-T854/VKITDFGL    | 279  | >EGFR-T854/VKIADFGL    | 358 | 79   |
| >EGFR-T854/VKITDFGLAK  | 252  | >EGFR-T854/VKIADFGLAK  | 289 | 37   |
| >EGFR-T854/VKITDFGLAKI | 295  | >EGFR-T854/VKIADFGLAKI | 322 | 27   |
| >EGFR-T854/HVKITDFGLA  | 276  | >EGFR-T854/HVKIADFGLA  | 332 | 56   |
| >EGFR-T854/HVKITDFG    | 229  | >EGFR-T854/HVKIADFG    | 330 | 101  |
| >EGFR-T854/HVKITDFGL   | 168  | >EGFR-T854/HVKIADFGL   | 163 | 5    |
| >EGFR-T854/HVKITDFGLA  | 33   | >EGFR-T854/HVKIADFGLA  | 32  | 1    |
| >EGFR-T854/HVKITDFGLA  | 4    | >EGFR-T854/HVKIADFGLA  | 4   | 0    |
| >EGFR-T854/HVKITDFGLA  | 201  | >EGFR-T854/HVKIADFGLA  | 321 | 120  |
| >EGFR-T854/HVKITDFGLA  | 130  | >EGFR-T854/HVKIADFGLA  | 130 | 0    |
| >EGFR-T854/HVKITDFGL   | 1241 | >EGFR-T854/HVKIADFGL   | 373 | 868  |
| >EGFR-T854/HVKITDFGL   | 328  | >EGFR-T854/HVKIADFGL   | 581 | 253  |
| >EGFR-T854/QHVKITDF    | 107  | >EGFR-T854/QHVKIADF    | 206 | 99   |
| >EGFR-T854/QHVKITDFGL  | 380  | >EGFR-T854/QHVKIADFGL  | 410 | 30   |
| >EGFR-T854/PQHVKITDF   | 82   | >EGFR-T854/PQHVKIADF   | 181 | 99   |
| >EGFR-T854/TPQHVKITDF  | 80   | >EGFR-T854/TPQHVKIADF  | 163 | 83   |
| >EGFR-T854/TPQHVKITDF  | 125  | >EGFR-T854/TPQHVKIADF  | 145 | 20   |
| >EGFR-T854/TPQHVKITDF  | 234  | >EGFR-T854/TPQHVKIADF  | 164 | 70   |
| >EGFR-T854/KTPQHVKITD  | 461  | >EGFR-T854/KTPQHVKIAD  | 146 | 315  |
| >EGFR-T854/KTPQHVKITD  | 41   | >EGFR-T854/KTPQHVKIAD  | 55  | 14   |
| >EGFR-T854/KTPQHVKITD  | 44   | >EGFR-T854/KTPQHVKIAD  | 29  | 15   |

|                        |      |                        |      |      |
|------------------------|------|------------------------|------|------|
| >EGFR-T854/KTPQHVKIT   | 77   | >EGFR-T854/KTPQHVKIA   | 37   | 40   |
| >EGFR-T854/KTPQHVKITD  | 7    | >EGFR-T854/KTPQHVKIAD  | 4    | 3    |
| >EGFR-V292I VKKCPRNY   | 9    | >EGFR-V292I LKKCPRNY   | 7    | 2    |
| >EGFR-V292I VKKCPRNYV  | 59   | >EGFR-V292I LKKCPRNYV  | 37   | 22   |
| >EGFR-V292I VKKCPRNYV\ | 63   | >EGFR-V292I LKKCPRNYVV | 39   | 24   |
| >EGFR-V292I VKKCPRNYV\ | 499  | >EGFR-V292I LKKCPRNYVV | 267  | 232  |
| >EGFR-V292I CVKKCPRNY\ | 1458 | >EGFR-V292I CLKKCPRNYV | 104  | 1354 |
| >EGFR-V292I CVKKCPRNYV | 920  | >EGFR-V292I CLKKCPRNYV | 112  | 808  |
| >EGFR-V292I CVKKCPRNYV | 1550 | >EGFR-V292I CLKKCPRNYV | 101  | 1449 |
| >EGFR-V292I CVKKCPRNYV | 6034 | >EGFR-V292I CLKKCPRNYV | 269  | 5765 |
| >EGFR-V292I CVKKCPRNYV | 3986 | >EGFR-V292I CLKKCPRNYV | 48   | 3938 |
| >EGFR-V292I CVKKCPRNYV | 4793 | >EGFR-V292I CLKKCPRNYV | 54   | 4739 |
| >EGFR-V292I CVKKCPRNYV | 185  | >EGFR-V292I CLKKCPRNYV | 1626 | 1441 |
| >EGFR-V292I CVKKCPRNY  | 436  | >EGFR-V292I CLKKCPRNY  | 426  | 10   |
| >EGFR-V292I CVKKCPRNY  | 2036 | >EGFR-V292I CLKKCPRNY  | 390  | 1646 |
| >EGFR-V292I CVKKCPRNY  | 948  | >EGFR-V292I CLKKCPRNY  | 441  | 507  |
| >EGFR-V292I TCVKKCPR   | 959  | >EGFR-V292I TCLKKCPR   | 391  | 568  |
| >EGFR-V292I TCVKKCPRNY | 286  | >EGFR-V292I TCLKKCPRNY | 1129 | 843  |
| >EGFR-V292I TCVKKCPRNY | 1742 | >EGFR-V292I TCLKKCPRNY | 484  | 1258 |
| >EGFR-V292I TCVKKCPR   | 87   | >EGFR-V292I TCLKKCPR   | 54   | 33   |
| >EGFR-V292I ATCVKKCPR  | 430  | >EGFR-V292I ATCLKKCPR  | 331  | 99   |
| >EGFR-V292I ATCVKKCPRN | 583  | >EGFR-V292I ATCLKKCPRN | 491  | 92   |
| >EGFR-V292I ATCVKKCPRN | 447  | >EGFR-V292I ATCLKKCPRN | 480  | 33   |
| >EGFR-V292I ATCVKKCPRN | 496  | >EGFR-V292I ATCLKKCPRN | 1027 | 531  |
| >EGFR-V292I ATCVKKCPR  | 10   | >EGFR-V292I ATCLKKCPR  | 11   | 1    |
| >EGFR-V292I ATCVKKCPR  | 165  | >EGFR-V292I ATCLKKCPR  | 132  | 33   |
| >EGFR-V292I ATCVKKCPR  | 494  | >EGFR-V292I ATCLKKCPR  | 560  | 66   |
| >EGFR-V292I ATCVKKCPRN | 12   | >EGFR-V292I ATCLKKCPRN | 14   | 2    |
| >EGFR-V292I GATCVKKCPF | 150  | >EGFR-V292I GATCLKKCPR | 146  | 4    |
| >EGFR-V292I GATCVKKCPF | 293  | >EGFR-V292I GATCLKKCPR | 454  | 161  |
| >EGFR-V292I FGATCVKKCP | 466  | >EGFR-V292I FGATCLKKCP | 661  | 195  |
| >EGFR-V292I FGATCVKKCP | 91   | >EGFR-V292I FGATCLKKCP | 95   | 4    |
| >EGFR-V292I SFGATCVK   | 1162 | >EGFR-V292I SFGATCLK   | 290  | 872  |
| >EGFR-V292I SFGATCVKK  | 975  | >EGFR-V292I SFGATCLKK  | 387  | 588  |
| >EGFR-V292I SFGATCVK   | 961  | >EGFR-V292I SFGATCLK   | 473  | 488  |
| >EGFR-V292I SFGATCVK   | 395  | >EGFR-V292I SFGATCLK   | 287  | 108  |
| >EGFR-V292I YSFGATCV   | 188  | >EGFR-V292I YSFGATCL   | 1109 | 921  |
| >EGFR-V292I YSFGATCV   | 109  | >EGFR-V292I YSFGATCL   | 136  | 27   |
| >EGFR-V292I YSFGATCV   | 49   | >EGFR-V292I YSFGATCL   | 353  | 304  |
| >EGFR-V292I YSFGATCV   | 100  | >EGFR-V292I YSFGATCL   | 1334 | 1234 |
| >EGFR-V292I YSFGATCV   | 80   | >EGFR-V292I YSFGATCL   | 1375 | 1295 |
| >EGFR-V292I YSFGATCV   | 86   | >EGFR-V292I YSFGATCL   | 2728 | 2642 |
| >EGFR-V292I YSFGATCVK  | 260  | >EGFR-V292I YSFGATCLK  | 96   | 164  |

|                         |      |                         |      |      |
|-------------------------|------|-------------------------|------|------|
| >EGFR-V292I YSFGATCVKK  | 66   | >EGFR-V292I YSFGATCLKK  | 35   | 31   |
| >EGFR-V292I YSFGATCVK   | 24   | >EGFR-V292I YSFGATCLK   | 11   | 13   |
| >EGFR-V292I YSFGATCVKK  | 18   | >EGFR-V292I YSFGATCLKK  | 12   | 6    |
| >EGFR-V292I YSFGATCVK   | 41   | >EGFR-V292I YSFGATCLK   | 25   | 16   |
| >EGFR-V292I YSFGATCVKK  | 190  | >EGFR-V292I YSFGATCLKK  | 113  | 77   |
| >EGFR-V292I YSFGATCVK   | 7    | >EGFR-V292I YSFGATCLK   | 3    | 4    |
| >EGFR-V292I YSFGATCVKK  | 7    | >EGFR-V292I YSFGATCLKK  | 9    | 2    |
| >EGFR-V292I YSFGATCV    | 33   | >EGFR-V292I YSFGATCL    | 250  | 217  |
| >EGFR-V292I YSFGATCV    | 258  | >EGFR-V292I YSFGATCL    | 2292 | 2034 |
| >EGFR-V292I YSFGATCV    | 307  | >EGFR-V292I YSFGATCL    | 121  | 186  |
| >EGFR-V292I YSFGATCV    | 205  | >EGFR-V292I YSFGATCL    | 11   | 194  |
| >EGFR-V292I YSFGATCV    | 2166 | >EGFR-V292I YSFGATCL    | 111  | 2055 |
| >EGFR-V292I YSFGATCV    | 245  | >EGFR-V292I YSFGATCL    | 74   | 171  |
| >EGFR-V292I YSFGATCVK   | 1061 | >EGFR-V292I YSFGATCLK   | 499  | 562  |
| >EGFR-V292I YSFGATCVKK  | 537  | >EGFR-V292I YSFGATCLKK  | 424  | 113  |
| >EGFR-V292I YSFGATCV    | 985  | >EGFR-V292I YSFGATCL    | 195  | 790  |
| >EGFR-V292I KYSFGATCV   | 218  | >EGFR-V292I KYSFGATCL   | 48   | 170  |
| >EGFR-V292I KYSFGATCVK  | 322  | >EGFR-V292I KYSFGATCLK  | 123  | 199  |
| >EGFR-V292I KYSFGATCVK  | 789  | >EGFR-V292I KYSFGATCLKI | 456  | 333  |
| >EGFR-V292I KYSFGATCV   | 5804 | >EGFR-V292I KYSFGATCL   | 200  | 5604 |
| >EGFR-V292I KYSFGATCVK  | 19   | >EGFR-V292I KYSFGATCLK  | 14   | 5    |
| >EGFR-V292I KYSFGATCVK  | 45   | >EGFR-V292I KYSFGATCLKI | 32   | 13   |
| >EGFR-V292I KYSFGATCVK  | 366  | >EGFR-V292I KYSFGATCLK  | 119  | 247  |
| >EGFR-V292I KYSFGATCVK  | 401  | >EGFR-V292I KYSFGATCLKI | 992  | 591  |
| >EGFR-V292I KYSFGATCVK  | 471  | >EGFR-V292I KYSFGATCLK  | 161  | 310  |
| >EGFR-V292I KYSFGATCVK  | 107  | >EGFR-V292I KYSFGATCLK  | 91   | 16   |
| >EGFR-V292I KYSFGATCVK  | 190  | >EGFR-V292I KYSFGATCLKI | 202  | 12   |
| >EGFR-V292I KYSFGATCV   | 369  | >EGFR-V292I KYSFGATCL   | 307  | 62   |
| >EGFR-V292I KYSFGATCVK  | 559  | >EGFR-V292I KYSFGATCLKI | 495  | 64   |
| >EGFR-V292I GKYSFGATCV  | 25   | >EGFR-V292I GKYSFGATCL  | 13   | 12   |
| >EGFR-V292I GKYSFGATCV  | 123  | >EGFR-V292I GKYSFGATCL  | 371  | 248  |
| >EGFR-V292I GKYSFGATCV  | 5246 | >EGFR-V292I GKYSFGATCL  | 477  | 4769 |
| >EGFR-V60L- VVLGNLEI    | 522  | >EGFR-V60L- LVLGNLEI    | 321  | 201  |
| >EGFR-V60L- VVLGNLEITY\ | 46   | >EGFR-V60L- LVLGNLEITYV | 34   | 12   |
| >EGFR-V60L- VVLGNLEITY\ | 110  | >EGFR-V60L- LVLGNLEITYV | 52   | 58   |
| >EGFR-V60L- VVLGNLEITY\ | 85   | >EGFR-V60L- LVLGNLEITYV | 64   | 21   |
| >EGFR-V60L- VVLGNLEI    | 68   | >EGFR-V60L- LVLGNLEI    | 45   | 23   |
| >EGFR-V60L- VVLGNLEITY\ | 6    | >EGFR-V60L- LVLGNLEITYV | 5    | 1    |
| >EGFR-V60L- VVLGNLEI    | 60   | >EGFR-V60L- LVLGNLEI    | 76   | 16   |
| >EGFR-V60L- VVLGNLEITY\ | 4    | >EGFR-V60L- LVLGNLEITYV | 4    | 0    |
| >EGFR-V60L- VVLGNLEITY\ | 20   | >EGFR-V60L- LVLGNLEITYV | 18   | 2    |
| >EGFR-V60L- VVLGNLEITY\ | 13   | >EGFR-V60L- LVLGNLEITYV | 16   | 3    |
| >EGFR-V60L- VVLGNLEI    | 332  | >EGFR-V60L- LVLGNLEI    | 458  | 126  |

|                         |      |                         |      |      |
|-------------------------|------|-------------------------|------|------|
| >EGFR-V60L- VVLGNLEITYV | 5    | >EGFR-V60L- LVLGNLEITYV | 6    | 1    |
| >EGFR-V60L- VVLGNLEI    | 167  | >EGFR-V60L- LVLGNLEI    | 101  | 66   |
| >EGFR-V60L- VVLGNLEITYV | 4    | >EGFR-V60L- LVLGNLEITYV | 3    | 1    |
| >EGFR-V60L- VVLGNLEITY  | 80   | >EGFR-V60L- LVLGNLEITY  | 92   | 12   |
| >EGFR-V60L- VVLGNLEI    | 454  | >EGFR-V60L- LVLGNLEI    | 902  | 448  |
| >EGFR-V60L- VVLGNLEITYV | 317  | >EGFR-V60L- LVLGNLEITYV | 121  | 196  |
| >EGFR-V60L- VVLGNLEI    | 1428 | >EGFR-V60L- LVLGNLEI    | 499  | 929  |
| >EGFR-V60L- VVLGNLEITYV | 142  | >EGFR-V60L- LVLGNLEITYV | 52   | 90   |
| >EGFR-V60L- VVLGNLEITY  | 261  | >EGFR-V60L- LVLGNLEITY  | 1259 | 998  |
| >EGFR-V60L- VVLGNLEITY  | 126  | >EGFR-V60L- LVLGNLEITY  | 138  | 12   |
| >EGFR-V60L- VVLGNLEITY  | 1053 | >EGFR-V60L- LVLGNLEITY  | 321  | 732  |
| >EGFR-V60L- EVVLGNLEITY | 189  | >EGFR-V60L- ELVLGNLEITY | 1350 | 1161 |
| >EGFR-V60L- EVVLGNLEITY | 154  | >EGFR-V60L- ELVLGNLEITY | 1342 | 1188 |
| >EGFR-V60L- EVVLGNLEIT  | 482  | >EGFR-V60L- ELVLGNLEIT  | 7517 | 7035 |
| >EGFR-V60L- EVVLGNLEITY | 7    | >EGFR-V60L- ELVLGNLEITY | 122  | 115  |
| >EGFR-V60L- EVVLGNLEITY | 27   | >EGFR-V60L- ELVLGNLEITY | 165  | 138  |
| >EGFR-V60L- EVVLGNLEITY | 328  | >EGFR-V60L- ELVLGNLEITY | 375  | 47   |
| >EGFR-V60L- EVVLGNLEITY | 242  | >EGFR-V60L- ELVLGNLEITY | 1920 | 1678 |
| >EGFR-V60L- EVVLGNLEI   | 43   | >EGFR-V60L- ELVLGNLEI   | 1248 | 1205 |
| >EGFR-V60L- EVVLGNLEI   | 74   | >EGFR-V60L- ELVLGNLEI   | 523  | 449  |
| >EGFR-V60L- EVVLGNLEITY | 33   | >EGFR-V60L- ELVLGNLEITY | 153  | 120  |
| >EGFR-V60L- SLQRMFNNC   | 52   | >EGFR-V60L- SLQRMFNNC   | 198  | 146  |
| >EGFR-V60L- SLQRMFNNC   | 43   | >EGFR-V60L- SLQRMFNNC   | 47   | 4    |
| >EGFR-V60L- SLQRMFNNC   | 41   | >EGFR-V60L- SLQRMFNNC   | 506  | 465  |
| >EGFR-V60L- SLQRMFNNC   | 236  | >EGFR-V60L- SLQRMFNNC   | 1948 | 1712 |
| >EGFR-V60L- SLQRMFNNC   | 6    | >EGFR-V60L- SLQRMFNNC   | 54   | 48   |
| >EGFR-V60L- SLQRMFNNC   | 7    | >EGFR-V60L- SLQRMFNNC   | 37   | 30   |
| >EGFR-V60L- SLQRMFNNC   | 11   | >EGFR-V60L- SLQRMFNNC   | 85   | 74   |
| >EGFR-V60L- SLQRMFNNC   | 70   | >EGFR-V60L- SLQRMFNNC   | 1058 | 988  |
| >EGFR-V60L- SLQRMFNNC   | 2    | >EGFR-V60L- SLQRMFNNC   | 4    | 2    |
| >EGFR-V60L- SLQRMFNNC   | 1445 | >EGFR-V60L- SLQRMFNNC   | 376  | 1069 |
| >EGFR-V60L- CEVVLGNL    | 601  | >EGFR-V60L- CELVLGNL    | 476  | 125  |
| >EGFR-V60L- CEVVLGNLEI  | 276  | >EGFR-V60L- CELVLGNLEI  | 87   | 189  |
| >EGFR-V60L- CEVVLGNL    | 89   | >EGFR-V60L- CELVLGNL    | 231  | 142  |
| >EGFR-V60L- CEVVLGNL    | 398  | >EGFR-V60L- CELVLGNL    | 159  | 239  |
| >EGFR-V60L- CEVVLGNLEI  | 493  | >EGFR-V60L- CELVLGNLEI  | 774  | 281  |
| >EGFR-V60L- CEVVLGNLEIT | 853  | >EGFR-V60L- CELVLGNLEIT | 386  | 467  |
| >EGFR-V60L- CEVVLGNLEI  | 328  | >EGFR-V60L- CELVLGNLEI  | 407  | 79   |
| >EGFR-V60L- CEVVLGNLEI  | 1094 | >EGFR-V60L- CELVLGNLEI  | 279  | 815  |
| >EGFR-V60L- CEVVLGNLEIT | 643  | >EGFR-V60L- CELVLGNLEIT | 351  | 292  |
| >EGFR-V60L- MFNNCEVV    | 649  | >EGFR-V60L- MFNNCELV    | 150  | 499  |
| >EGFR-V60L- MFNNCEVVL   | 473  | >EGFR-V60L- MFNNCELV    | 632  | 159  |
| >EGFR-V60L- MFNNCEVVL   | 277  | >EGFR-V60L- MFNNCELV    | 399  | 122  |

|                       |      |                       |     |      |
|-----------------------|------|-----------------------|-----|------|
| >EGFR-V60L- RMFNNCEV  | 11   | >EGFR-V60L- RMFNNCEL  | 22  | 11   |
| >EGFR-V60L- RMFNNCEVV | 32   | >EGFR-V60L- RMFNNCELV | 12  | 20   |
| >EGFR-V60L- RMFNNCEVV | 59   | >EGFR-V60L- RMFNNCELV | 29  | 30   |
| >EGFR-V60L- RMFNNCEV  | 9    | >EGFR-V60L- RMFNNCEL  | 12  | 3    |
| >EGFR-V60L- RMFNNCEVV | 27   | >EGFR-V60L- RMFNNCELV | 7   | 20   |
| >EGFR-V60L- RMFNNCEVV | 36   | >EGFR-V60L- RMFNNCELV | 22  | 14   |
| >EGFR-V60L- RMFNNCEV  | 8    | >EGFR-V60L- RMFNNCEL  | 40  | 32   |
| >EGFR-V60L- RMFNNCEVV | 11   | >EGFR-V60L- RMFNNCELV | 6   | 5    |
| >EGFR-V60L- RMFNNCEVV | 182  | >EGFR-V60L- RMFNNCELV | 89  | 93   |
| >EGFR-V60L- RMFNNCEV  | 14   | >EGFR-V60L- RMFNNCEL  | 79  | 65   |
| >EGFR-V60L- RMFNNCEVV | 36   | >EGFR-V60L- RMFNNCELV | 15  | 21   |
| >EGFR-V60L- RMFNNCEVV | 683  | >EGFR-V60L- RMFNNCELV | 337 | 346  |
| >EGFR-V60L- RMFNNCEV  | 2    | >EGFR-V60L- RMFNNCEL  | 3   | 1    |
| >EGFR-V60L- RMFNNCEVV | 2    | >EGFR-V60L- RMFNNCELV | 2   | 0    |
| >EGFR-V60L- RMFNNCEVV | 7    | >EGFR-V60L- RMFNNCELV | 8   | 1    |
| >EGFR-V60L- RMFNNCEVV | 342  | >EGFR-V60L- RMFNNCELV | 447 | 105  |
| >EGFR-V60L- RMFNNCEV  | 4    | >EGFR-V60L- RMFNNCEL  | 9   | 5    |
| >EGFR-V60L- RMFNNCEVV | 4    | >EGFR-V60L- RMFNNCELV | 5   | 1    |
| >EGFR-V60L- RMFNNCEVV | 11   | >EGFR-V60L- RMFNNCELV | 16  | 5    |
| >EGFR-V60L- RMFNNCEV  | 5    | >EGFR-V60L- RMFNNCEL  | 12  | 7    |
| >EGFR-V60L- RMFNNCEVV | 8    | >EGFR-V60L- RMFNNCELV | 7   | 1    |
| >EGFR-V60L- RMFNNCEVV | 28   | >EGFR-V60L- RMFNNCELV | 29  | 1    |
| >EGFR-V60L- RMFNNCEV  | 6    | >EGFR-V60L- RMFNNCEL  | 39  | 33   |
| >EGFR-V60L- RMFNNCEVV | 7    | >EGFR-V60L- RMFNNCELV | 7   | 0    |
| >EGFR-V60L- RMFNNCEVV | 117  | >EGFR-V60L- RMFNNCELV | 221 | 104  |
| >EGFR-V60L- RMFNNCEV  | 2    | >EGFR-V60L- RMFNNCEL  | 5   | 3    |
| >EGFR-V60L- RMFNNCEVV | 5    | >EGFR-V60L- RMFNNCELV | 4   | 1    |
| >EGFR-V60L- RMFNNCEVV | 17   | >EGFR-V60L- RMFNNCELV | 18  | 1    |
| >EGFR-V60L- RMFNNCEV  | 498  | >EGFR-V60L- RMFNNCEL  | 811 | 313  |
| >EGFR-V60L- RMFNNCEV  | 53   | >EGFR-V60L- RMFNNCEL  | 14  | 39   |
| >EGFR-V60L- RMFNNCEVV | 49   | >EGFR-V60L- RMFNNCELV | 89  | 40   |
| >EGFR-V60L- RMFNNCEVV | 12   | >EGFR-V60L- RMFNNCELV | 18  | 6    |
| >EGFR-V60L- RMFNNCEVV | 331  | >EGFR-V60L- RMFNNCELV | 570 | 239  |
| >EGFR-V60L- RMFNNCEV  | 155  | >EGFR-V60L- RMFNNCEL  | 73  | 82   |
| >EGFR-V60L- RMFNNCEVV | 76   | >EGFR-V60L- RMFNNCELV | 483 | 407  |
| >EGFR-V60L- RMFNNCEVV | 63   | >EGFR-V60L- RMFNNCELV | 71  | 8    |
| >EGFR-V60L- RMFNNCEV  | 20   | >EGFR-V60L- RMFNNCEL  | 11  | 9    |
| >EGFR-V60L- RMFNNCEVV | 17   | >EGFR-V60L- RMFNNCELV | 58  | 41   |
| >EGFR-V60L- RMFNNCEVV | 6    | >EGFR-V60L- RMFNNCELV | 9   | 3    |
| >EGFR-V60L- RMFNNCEV  | 3300 | >EGFR-V60L- RMFNNCEL  | 208 | 3092 |
| >EGFR-V60L- RMFNNCEVV | 218  | >EGFR-V60L- RMFNNCELV | 415 | 197  |
| >EGFR-V60L- RMFNNCEVV | 91   | >EGFR-V60L- RMFNNCELV | 118 | 27   |
| >EGFR-V60L- QRMFNNCEV | 528  | >EGFR-V60L- QRMFNNCEL | 254 | 274  |

|                      |      |                      |      |      |
|----------------------|------|----------------------|------|------|
| >EGFR-V60L- QRMFNCEV | 160  | >EGFR-V60L- QRMFNCEV | 242  | 82   |
| >EGFR-V60L- QRMFNCEV | 921  | >EGFR-V60L- QRMFNCEV | 343  | 578  |
| >EGFR-V60L- QRMFNCEV | 234  | >EGFR-V60L- QRMFNCEV | 200  | 34   |
| >EGFR-V60L- QRMFNCEV | 4200 | >EGFR-V60L- QRMFNCEV | 332  | 3868 |
| >EGFR-V60L- QRMFNCEV | 43   | >EGFR-V60L- QRMFNCEV | 55   | 12   |
| >EGFR-V60L- QRMFNCEV | 1436 | >EGFR-V60L- QRMFNCEV | 217  | 1219 |
| >EGFR-V60L- QRMFNCEV | 165  | >EGFR-V60L- QRMFNCEV | 100  | 65   |
| >EGFR-V60L- QRMFNCEV | 644  | >EGFR-V60L- QRMFNCEV | 51   | 593  |
| >EGFR-V60L- QRMFNCEV | 46   | >EGFR-V60L- QRMFNCEV | 29   | 17   |
| >EGFR-V60L- LQRMFNCE | 298  | >EGFR-V60L- LQRMFNCE | 1730 | 1432 |
| >EGFR-V60L- LQRMFNCE | 613  | >EGFR-V60L- LQRMFNCE | 214  | 399  |
| >EGFR-V60L- LQRMFNCE | 242  | >EGFR-V60L- LQRMFNCE | 402  | 160  |
| >EGFR-V60L- LQRMFNCE | 241  | >EGFR-V60L- LQRMFNCE | 101  | 140  |
| >EGFR-V60L- LQRMFNCE | 139  | >EGFR-V60L- LQRMFNCE | 800  | 661  |
| >EGFR-V60L- LQRMFNCE | 31   | >EGFR-V60L- LQRMFNCE | 17   | 14   |
| >EGFR-V60L- LQRMFNCE | 25   | >EGFR-V60L- LQRMFNCE | 65   | 40   |
| >EGFR-V651FVGALLLL   | 1203 | >EGFR-V651FVGALLLL   | 209  | 994  |
| >EGFR-V651FVGALLLLV  | 821  | >EGFR-V651FVGALLLLV  | 145  | 676  |
| >EGFR-V651FVGALLLLV  | 945  | >EGFR-V651FVGALLLLV  | 216  | 729  |
| >EGFR-V651FVGALLLLV  | 8223 | >EGFR-V651FVGALLLLV  | 224  | 7999 |
| >EGFR-V651FVVGALLLL  | 180  | >EGFR-V651FVVGALLLL  | 16   | 164  |
| >EGFR-V651FVVGALLLL  | 103  | >EGFR-V651FVVGALLLL  | 14   | 89   |
| >EGFR-V651FVVGALLLLV | 88   | >EGFR-V651FVVGALLLLV | 18   | 70   |
| >EGFR-V651FVVGALLLLV | 116  | >EGFR-V651FVVGALLLLV | 15   | 101  |
| >EGFR-V651FVVGALLLL  | 92   | >EGFR-V651FVVGALLLL  | 8    | 84   |
| >EGFR-V651FVVGALLLL  | 81   | >EGFR-V651FVVGALLLL  | 8    | 73   |
| >EGFR-V651FVVGALLLLV | 69   | >EGFR-V651FVVGALLLLV | 13   | 56   |
| >EGFR-V651FVVGALLLLV | 278  | >EGFR-V651FVVGALLLLV | 21   | 257  |
| >EGFR-V651FVVGALLLL  | 606  | >EGFR-V651FVVGALLLL  | 33   | 573  |
| >EGFR-V651FVVGALLLL  | 526  | >EGFR-V651FVVGALLLL  | 35   | 491  |
| >EGFR-V651FVVGALLLLV | 46   | >EGFR-V651FVVGALLLLV | 12   | 34   |
| >EGFR-V651FVVGALLLLV | 140  | >EGFR-V651FVVGALLLLV | 13   | 127  |
| >EGFR-V651FVVGALLLL  | 130  | >EGFR-V651FVVGALLLL  | 65   | 65   |
| >EGFR-V651FVVGALLLL  | 113  | >EGFR-V651FVVGALLLL  | 60   | 53   |
| >EGFR-V651FVVGALLLLV | 68   | >EGFR-V651FVVGALLLLV | 52   | 16   |
| >EGFR-V651FVVGALLLLV | 40   | >EGFR-V651FVVGALLLLV | 21   | 19   |
| >EGFR-V651FVVGALLLL  | 930  | >EGFR-V651FVVGALLLL  | 7    | 923  |
| >EGFR-V651FVVGALLLL  | 848  | >EGFR-V651FVVGALLLL  | 6    | 842  |
| >EGFR-V651FVVGALLLLV | 51   | >EGFR-V651FVVGALLLLV | 2    | 49   |
| >EGFR-V651FVVGALLLLV | 54   | >EGFR-V651FVVGALLLLV | 2    | 52   |
| >EGFR-V651FVVGALLLL  | 5583 | >EGFR-V651FVVGALLLL  | 26   | 5557 |
| >EGFR-V651FVVGALLLL  | 6102 | >EGFR-V651FVVGALLLL  | 29   | 6073 |
| >EGFR-V651FVVGALLLLV | 841  | >EGFR-V651FVVGALLLLV | 6    | 835  |



|                        |      |                         |      |      |
|------------------------|------|-------------------------|------|------|
| >EGFR-V651F MVGALLLLL  | 566  | >EGFR-V651F MMGALLLLL   | 5    | 561  |
| >EGFR-V651F MVGALLLL   | 2202 | >EGFR-V651F MMGALLLL    | 21   | 2181 |
| >EGFR-V651F MVGALLLLL  | 1853 | >EGFR-V651F MMGALLLLL   | 21   | 1832 |
| >EGFR-V651F MVGALLLLL  | 124  | >EGFR-V651F MMGALLLLL   | 6    | 118  |
| >EGFR-V651F MVGALLLLL  | 175  | >EGFR-V651F MMGALLLLL   | 7    | 168  |
| >EGFR-V651F MVGALLLL   | 5806 | >EGFR-V651F MMGALLLL    | 33   | 5773 |
| >EGFR-V651F MVGALLLLL  | 6561 | >EGFR-V651F MMGALLLLL   | 52   | 6509 |
| >EGFR-V651F MVGALLLLL  | 651  | >EGFR-V651F MMGALLLLL   | 4    | 647  |
| >EGFR-V651F MVGALLLLL  | 453  | >EGFR-V651F MMGALLLLL   | 4    | 449  |
| >EGFR-V651F MVGALLLL   | 220  | >EGFR-V651F MMGALLLL    | 3    | 217  |
| >EGFR-V651F MVGALLLLL  | 262  | >EGFR-V651F MMGALLLLL   | 3    | 259  |
| >EGFR-V651F MVGALLLLL  | 9    | >EGFR-V651F MMGALLLLL   | 2    | 7    |
| >EGFR-V651F MVGALLLLL  | 14   | >EGFR-V651F MMGALLLLL   | 2    | 12   |
| >EGFR-V651F MVGALLLLL  | 1864 | >EGFR-V651F MMGALLLLL   | 463  | 1401 |
| >EGFR-V651F MVGALLLL   | 229  | >EGFR-V651F MMGALLLL    | 6020 | 5791 |
| >EGFR-V651F MVGALLLLL  | 199  | >EGFR-V651F MMGALLLLL   | 6060 | 5861 |
| >EGFR-V651F MVGALLLLL  | 390  | >EGFR-V651F MMGALLLLL   | 1220 | 830  |
| >EGFR-V651F MVGALLLLL  | 66   | >EGFR-V651F MMGALLLLL   | 2272 | 2206 |
| >EGFR-V651F MVGALLLLL  | 49   | >EGFR-V651F MMGALLLLL   | 263  | 214  |
| >EGFR-V651F MVGALLLLL  | 138  | >EGFR-V651F MMGALLLLL   | 704  | 566  |
| >EGFR-V651F MVGALLLLL  | 331  | >EGFR-V651F MMGALLLLL   | 488  | 157  |
| >EGFR-V651F MVGALLLLL  | 3602 | >EGFR-V651F MMGALLLLL   | 308  | 3294 |
| >EGFR-V651F MVGALLLLL  | 217  | >EGFR-V651F MMGALLLLL   | 81   | 136  |
| >EGFR-V651F PKIPSIATGM | 1510 | >EGFR-V651F PKIPSIATGMI | 426  | 1084 |
| >EGFR-V651F GMVGALL    | 83   | >EGFR-V651F GMMGALL     | 12   | 71   |
| >EGFR-V651F GMVGALLLL  | 29   | >EGFR-V651F GMMGALLLL   | 8    | 21   |
| >EGFR-V651F GMVGALLLLL | 74   | >EGFR-V651F GMMGALLLL   | 13   | 61   |
| >EGFR-V651F GMVGALLLLL | 15   | >EGFR-V651F GMMGALLLL   | 7    | 8    |
| >EGFR-V651F GMVGALL    | 23   | >EGFR-V651F GMMGALL     | 6    | 17   |
| >EGFR-V651F GMVGALLLL  | 10   | >EGFR-V651F GMMGALLLL   | 3    | 7    |
| >EGFR-V651F GMVGALLLLL | 15   | >EGFR-V651F GMMGALLLL   | 7    | 8    |
| >EGFR-V651F GMVGALLLLL | 12   | >EGFR-V651F GMMGALLLL   | 4    | 8    |
| >EGFR-V651F GMVGALL    | 47   | >EGFR-V651F GMMGALL     | 12   | 35   |
| >EGFR-V651F GMVGALLLL  | 26   | >EGFR-V651F GMMGALLLL   | 8    | 18   |
| >EGFR-V651F GMVGALLLLL | 54   | >EGFR-V651F GMMGALLLL   | 18   | 36   |
| >EGFR-V651F GMVGALLLLL | 8    | >EGFR-V651F GMMGALLLL   | 4    | 4    |
| >EGFR-V651F GMVGALL    | 71   | >EGFR-V651F GMMGALL     | 24   | 47   |
| >EGFR-V651F GMVGALLLL  | 28   | >EGFR-V651F GMMGALLLL   | 11   | 17   |
| >EGFR-V651F GMVGALLLLL | 96   | >EGFR-V651F GMMGALLLL   | 56   | 40   |
| >EGFR-V651F GMVGALLLLL | 10   | >EGFR-V651F GMMGALLLL   | 5    | 5    |
| >EGFR-V651F GMVGALL    | 27   | >EGFR-V651F GMMGALL     | 10   | 17   |
| >EGFR-V651F GMVGALLLL  | 19   | >EGFR-V651F GMMGALLLL   | 8    | 11   |
| >EGFR-V651F GMVGALLLLL | 18   | >EGFR-V651F GMMGALLLL   | 7    | 11   |

|                        |      |                        |     |      |
|------------------------|------|------------------------|-----|------|
| >EGFR-V651I GMVGALLLL  | 4    | >EGFR-V651I GMMGALLLL  | 2   | 2    |
| >EGFR-V651I GMVGALLL   | 56   | >EGFR-V651I GMMGALLL   | 9   | 47   |
| >EGFR-V651I GMVGALLLL  | 43   | >EGFR-V651I GMMGALLLL  | 7   | 36   |
| >EGFR-V651I GMVGALLLL  | 43   | >EGFR-V651I GMMGALLLL  | 7   | 36   |
| >EGFR-V651I GMVGALLLL  | 7    | >EGFR-V651I GMMGALLLL  | 3   | 4    |
| >EGFR-V651I GMVGALLL   | 27   | >EGFR-V651I GMMGALLL   | 15  | 12   |
| >EGFR-V651I GMVGALLLL  | 20   | >EGFR-V651I GMMGALLLL  | 12  | 8    |
| >EGFR-V651I GMVGALLLL  | 23   | >EGFR-V651I GMMGALLLL  | 14  | 9    |
| >EGFR-V651I GMVGALLLL  | 6    | >EGFR-V651I GMMGALLLL  | 5   | 1    |
| >EGFR-V651I GMVGALLL   | 977  | >EGFR-V651I GMMGALLL   | 13  | 964  |
| >EGFR-V651I GMVGALLLL  | 462  | >EGFR-V651I GMMGALLLL  | 8   | 454  |
| >EGFR-V651I GMVGALLLL  | 721  | >EGFR-V651I GMMGALLLL  | 12  | 709  |
| >EGFR-V651I GMVGALLLL  | 49   | >EGFR-V651I GMMGALLLL  | 3   | 46   |
| >EGFR-V651I GMVGALLL   | 7    | >EGFR-V651I GMMGALLL   | 4   | 3    |
| >EGFR-V651I GMVGALLLL  | 5    | >EGFR-V651I GMMGALLLL  | 3   | 2    |
| >EGFR-V651I GMVGALLLL  | 5    | >EGFR-V651I GMMGALLLL  | 4   | 1    |
| >EGFR-V651I GMVGALLLL  | 2    | >EGFR-V651I GMMGALLLL  | 2   | 0    |
| >EGFR-V651I GMVGALLLL  | 375  | >EGFR-V651I GMMGALLLL  | 396 | 21   |
| >EGFR-V651I GMVGALLL   | 1420 | >EGFR-V651I GMMGALLL   | 365 | 1055 |
| >EGFR-V651I GMVGALLL   | 425  | >EGFR-V651I GMMGALLL   | 194 | 231  |
| >EGFR-V651I GMVGALLLL  | 354  | >EGFR-V651I GMMGALLLL  | 169 | 185  |
| >EGFR-V651I GMVGALLLL  | 305  | >EGFR-V651I GMMGALLLL  | 150 | 155  |
| >EGFR-V651I GMVGALLLL  | 404  | >EGFR-V651I GMMGALLLL  | 200 | 204  |
| >EGFR-V651I ATGMVGAL   | 245  | >EGFR-V651I ATGMMGAL   | 60  | 185  |
| >EGFR-V651I ATGMVGALL  | 172  | >EGFR-V651I ATGMMGALI  | 31  | 141  |
| >EGFR-V651I ATGMVGALL  | 67   | >EGFR-V651I ATGMMGALI  | 21  | 46   |
| >EGFR-V651I ATGMVGALL  | 127  | >EGFR-V651I ATGMMGALI  | 39  | 88   |
| >EGFR-V651I ATGMVGALL  | 17   | >EGFR-V651I ATGMMGALI  | 19  | 2    |
| >EGFR-V651I ATGMVGALL  | 48   | >EGFR-V651I ATGMMGALI  | 42  | 6    |
| >EGFR-V651I ATGMVGALL  | 28   | >EGFR-V651I ATGMMGALI  | 29  | 1    |
| >EGFR-V651I ATGMVGALL  | 74   | >EGFR-V651I ATGMMGALI  | 90  | 16   |
| >EGFR-V651I ATGMVGALL  | 650  | >EGFR-V651I ATGMMGALI  | 228 | 422  |
| >EGFR-V651I ATGMVGALL  | 168  | >EGFR-V651I ATGMMGALI  | 190 | 22   |
| >EGFR-V651I IATGMVGAL  | 697  | >EGFR-V651I IATGMMGAL  | 253 | 444  |
| >EGFR-V651I IATGMVGAL  | 305  | >EGFR-V651I IATGMMGAL  | 106 | 199  |
| >EGFR-V651I IATGMVGALI | 237  | >EGFR-V651I IATGMMGALI | 80  | 157  |
| >EGFR-V651I IATGMVGALI | 93   | >EGFR-V651I IATGMMGALI | 51  | 42   |
| >EGFR-V651I IATGMVGALI | 46   | >EGFR-V651I IATGMMGALI | 41  | 5    |
| >EGFR-V651I IATGMVGALI | 114  | >EGFR-V651I IATGMMGALI | 83  | 31   |
| >EGFR-V651I IATGMVGALI | 443  | >EGFR-V651I IATGMMGALI | 250 | 193  |
| >EGFR-V651I SIATGMVGAI | 394  | >EGFR-V651I SIATGMMGA  | 439 | 45   |
| >EGFR-V651I SIATGMVGA  | 375  | >EGFR-V651I SIATGMMGA  | 603 | 228  |
| >EGFR-V651I SIATGMVGAI | 111  | >EGFR-V651I SIATGMMGA  | 89  | 22   |

|                         |       |                         |       |       |
|-------------------------|-------|-------------------------|-------|-------|
| >EGFR-V651I SIATGMVGAI  | 24    | >EGFR-V651I SIATGMMGA   | 30    | 6     |
| >EGFR-V651I SIATGMVGA   | 34    | >EGFR-V651I SIATGMMGA   | 13    | 21    |
| >EGFR-V651I SIATGMVGAI  | 119   | >EGFR-V651I SIATGMMGA   | 111   | 8     |
| >EGFR-V651I SIATGMVGAI  | 58    | >EGFR-V651I SIATGMMGA   | 40    | 18    |
| >EGFR-V651I SIATGMVGA   | 81    | >EGFR-V651I SIATGMMGA   | 82    | 1     |
| >EGFR-V651I SIATGMVGAI  | 156   | >EGFR-V651I SIATGMMGA   | 191   | 35    |
| >EGFR-V651I SIATGMVGAI  | 255   | >EGFR-V651I SIATGMMGA   | 499   | 244   |
| >EGFR-V651I SIATGMVGA   | 304   | >EGFR-V651I SIATGMMGA   | 247   | 57    |
| >EGFR-V651I SIATGMVGAI  | 236   | >EGFR-V651I SIATGMMGA   | 377   | 141   |
| >EGFR-V651I SIATGMVGAI  | 88    | >EGFR-V651I SIATGMMGA   | 67    | 21    |
| >EGFR-V651I SIATGMVGAI  | 95    | >EGFR-V651I SIATGMMGA   | 49    | 46    |
| >EGFR-V651I SIATGMVGA   | 51    | >EGFR-V651I SIATGMMGA   | 37    | 14    |
| >EGFR-V651I SIATGMVGAI  | 483   | >EGFR-V651I SIATGMMGA   | 369   | 114   |
| >EGFR-V651I SIATGMVGAI  | 84    | >EGFR-V651I SIATGMMGA   | 123   | 39    |
| >EGFR-V651I SIATGMVGA   | 583   | >EGFR-V651I SIATGMMGA   | 331   | 252   |
| >EGFR-V651I SIATGMVGAI  | 644   | >EGFR-V651I SIATGMMGA   | 389   | 255   |
| >EGFR-V651I PSATGMV     | 14578 | >EGFR-V651I PSATGMM     | 338   | 14240 |
| >EGFR-V651I PSATGMVG/   | 697   | >EGFR-V651I PSATGMMG    | 344   | 353   |
| >EGFR-V651I PSATGMV     | 5906  | >EGFR-V651I PSATGMM     | 374   | 5532  |
| >EGFR-V651I IPSIATGMV   | 1316  | >EGFR-V651I IPSIATGMM   | 95    | 1221  |
| >EGFR-V651I IPSIATGMV   | 79    | >EGFR-V651I IPSIATGMM   | 22    | 57    |
| >EGFR-V651I IPSIATGMV   | 2504  | >EGFR-V651I IPSIATGMM   | 26    | 2478  |
| >EGFR-V651I IPSIATGMV   | 480   | >EGFR-V651I IPSIATGMM   | 2043  | 1563  |
| >EGFR-V651I IPSIATGMVG  | 74    | >EGFR-V651I IPSIATGMMG  | 151   | 77    |
| >EGFR-V651I KIPSIATGMV  | 442   | >EGFR-V651I KIPSIATGMM  | 2073  | 1631  |
| >EGFR-V651I KIPSIATGMV  | 91    | >EGFR-V651I KIPSIATGMM  | 2463  | 2372  |
| >EGFR-V651I KIPSIATGMV  | 454   | >EGFR-V651I KIPSIATGMM  | 6342  | 5888  |
| >EGFR-V651I KIPSIATGMV  | 73    | >EGFR-V651I KIPSIATGMM  | 5697  | 5624  |
| >EGFR-V651I KIPSIATGMV  | 149   | >EGFR-V651I KIPSIATGMM  | 11193 | 11044 |
| >EGFR-V651I KIPSIATGMV  | 99    | >EGFR-V651I KIPSIATGMM  | 15021 | 14922 |
| >EGFR-V651I KIPSIATGMV  | 706   | >EGFR-V651I KIPSIATGMM  | 130   | 576   |
| >EGFR-V651I KIPSIATGMV  | 5407  | >EGFR-V651I KIPSIATGMM  | 152   | 5255  |
| >EGFR-V689I LVEPLTPSGE/ | 6341  | >EGFR-V689I LLEPLTPSGE/ | 390   | 5951  |
| >EGFR-V689I LVEPLTPSGE/ | 3186  | >EGFR-V689I LLEPLTPSGE/ | 22    | 3164  |
| >EGFR-V689I LRRLLQEREL\ | 917   | >EGFR-V689I LRRLLQEREL  | 373   | 544   |
| >EGFR-V689I LRRLLQEREL\ | 1240  | >EGFR-V689I LRRLLQEREL  | 220   | 1020  |
| >EGFR-V689I LRRLLQEREL\ | 919   | >EGFR-V689I LRRLLQEREL  | 56    | 863   |
| >EGFR-V689I ELVEPLTPS   | 2247  | >EGFR-V689I ELLEPLTPS   | 348   | 1899  |
| >EGFR-V689I ELVEPLTPS   | 455   | >EGFR-V689I ELLEPLTPS   | 2647  | 2192  |
| >EGFR-V689I ELVEPLTPS   | 979   | >EGFR-V689I ELLEPLTPS   | 155   | 824   |
| >EGFR-V689I RELVEPLT    | 318   | >EGFR-V689I RELLEPLT    | 176   | 142   |
| >EGFR-V689I RELVEPLTPS  | 500   | >EGFR-V689I RELLEPLTPS  | 424   | 76    |
| >EGFR-V689I RELVEPLT    | 488   | >EGFR-V689I RELLEPLT    | 591   | 103   |

|                         |      |                         |      |      |
|-------------------------|------|-------------------------|------|------|
| >EGFR-V689I RELVEPLTPSC | 502  | >EGFR-V689I RELLEPLTPSC | 471  | 31   |
| >EGFR-V689I ERELVEPL    | 497  | >EGFR-V689I ERELLEPL    | 964  | 467  |
| >EGFR-V689I ERELVEPL    | 1599 | >EGFR-V689I ERELLEPL    | 340  | 1259 |
| >EGFR-V689I QERELVEPL   | 172  | >EGFR-V689I QERELLEPL   | 138  | 34   |
| >EGFR-V689I QERELVEPL   | 34   | >EGFR-V689I QERELLEPL   | 28   | 6    |
| >EGFR-V689I QERELVEPL   | 293  | >EGFR-V689I QERELLEPL   | 216  | 77   |
| >EGFR-V689I QERELVEPL   | 26   | >EGFR-V689I QERELLEPL   | 26   | 0    |
| >EGFR-V689I QERELVEPLT  | 517  | >EGFR-V689I QERELLEPLT  | 399  | 118  |
| >EGFR-V689I QERELVEPL   | 9    | >EGFR-V689I QERELLEPL   | 8    | 1    |
| >EGFR-V689I LQERELVEPL  | 951  | >EGFR-V689I LQERELLEPL  | 497  | 454  |
| >EGFR-V689I LLQERELV    | 53   | >EGFR-V689I LLQERELL    | 164  | 111  |
| >EGFR-V689I LLQERELVEPI | 40   | >EGFR-V689I LLQERELLEPL | 29   | 11   |
| >EGFR-V689I LLQERELV    | 33   | >EGFR-V689I LLQERELL    | 37   | 4    |
| >EGFR-V689I LLQERELVEPI | 30   | >EGFR-V689I LLQERELLEPL | 22   | 8    |
| >EGFR-V689I LLQERELV    | 46   | >EGFR-V689I LLQERELL    | 556  | 510  |
| >EGFR-V689I LLQERELVEPI | 78   | >EGFR-V689I LLQERELLEPL | 74   | 4    |
| >EGFR-V689I LLQERELV    | 153  | >EGFR-V689I LLQERELL    | 1250 | 1097 |
| >EGFR-V689I LLQERELVEPI | 154  | >EGFR-V689I LLQERELLEPL | 80   | 74   |
| >EGFR-V689I LLQERELV    | 7    | >EGFR-V689I LLQERELL    | 65   | 58   |
| >EGFR-V689I LLQERELVEPI | 9    | >EGFR-V689I LLQERELLEPL | 11   | 2    |
| >EGFR-V689I LLQERELV    | 21   | >EGFR-V689I LLQERELL    | 117  | 96   |
| >EGFR-V689I LLQERELVEPI | 10   | >EGFR-V689I LLQERELLEPL | 11   | 1    |
| >EGFR-V689I LLQERELV    | 25   | >EGFR-V689I LLQERELL    | 380  | 355  |
| >EGFR-V689I LLQERELVEPI | 66   | >EGFR-V689I LLQERELLEPL | 76   | 10   |
| >EGFR-V689I LLQERELV    | 59   | >EGFR-V689I LLQERELL    | 1048 | 989  |
| >EGFR-V689I LLQERELVEPI | 115  | >EGFR-V689I LLQERELLEPL | 148  | 33   |
| >EGFR-V689I LLQERELV    | 2    | >EGFR-V689I LLQERELL    | 6    | 4    |
| >EGFR-V689I LLQERELVEPI | 4    | >EGFR-V689I LLQERELLEPL | 4    | 0    |
| >EGFR-V689I LLQERELVEPI | 436  | >EGFR-V689I LLQERELLEPL | 629  | 193  |
| >EGFR-V689I LLQERELVEPI | 394  | >EGFR-V689I LLQERELLEPL | 740  | 346  |
| >EGFR-V689I RLLQERELV   | 233  | >EGFR-V689I RLLQERELL   | 1147 | 914  |
| >EGFR-V689I RLLQERELV   | 112  | >EGFR-V689I RLLQERELL   | 146  | 34   |
| >EGFR-V689I RLLQERELV   | 141  | >EGFR-V689I RLLQERELL   | 1410 | 1269 |
| >EGFR-V689I RLLQERELV   | 7    | >EGFR-V689I RLLQERELL   | 88   | 81   |
| >EGFR-V689I RLLQERELV   | 189  | >EGFR-V689I RLLQERELL   | 1925 | 1736 |
| >EGFR-V689I RLLQERELV   | 15   | >EGFR-V689I RLLQERELL   | 214  | 199  |
| >EGFR-V689I RLLQERELV   | 102  | >EGFR-V689I RLLQERELL   | 2260 | 2158 |
| >EGFR-V689I RLLQERELV   | 8    | >EGFR-V689I RLLQERELL   | 24   | 16   |
| >EGFR-V689I RLLQERELV   | 59   | >EGFR-V689I RLLQERELL   | 14   | 45   |
| >EGFR-V689I RLLQERELV   | 91   | >EGFR-V689I RLLQERELL   | 22   | 69   |
| >EGFR-V689I RLLQERELV   | 443  | >EGFR-V689I RLLQERELLE  | 297  | 146  |
| >EGFR-V689I RLLQERELV   | 138  | >EGFR-V689I RLLQERELL   | 35   | 103  |
| >EGFR-V717/VLGSAGFGTV   | 73   | >EGFR-V717/VLGSAGFGTV   | 64   | 9    |

|                       |      |                       |      |      |
|-----------------------|------|-----------------------|------|------|
| >EGFR-V717/VLGSAGFGTV | 41   | >EGFR-V717/ALGSAGFGTV | 22   | 19   |
| >EGFR-V717/VLGSAGFGTV | 21   | >EGFR-V717/ALGSAGFGTV | 13   | 8    |
| >EGFR-V717/VLGSAGFGT  | 68   | >EGFR-V717/ALGSAGFGT  | 94   | 26   |
| >EGFR-V717/VLGSAGFGTV | 3    | >EGFR-V717/ALGSAGFGTV | 3    | 0    |
| >EGFR-V717/VLGSAGFGTV | 7    | >EGFR-V717/ALGSAGFGTV | 7    | 0    |
| >EGFR-V717/VLGSAGFGT  | 103  | >EGFR-V717/ALGSAGFGT  | 130  | 27   |
| >EGFR-V717/VLGSAGFGTV | 7    | >EGFR-V717/ALGSAGFGTV | 7    | 0    |
| >EGFR-V717/VLGSAGFGT  | 75   | >EGFR-V717/ALGSAGFGT  | 211  | 136  |
| >EGFR-V717/VLGSAGFGTV | 5    | >EGFR-V717/ALGSAGFGTV | 8    | 3    |
| >EGFR-V717/VLGSAGFGT  | 14   | >EGFR-V717/ALGSAGFGT  | 14   | 0    |
| >EGFR-V717/VLGSAGFGTV | 2    | >EGFR-V717/ALGSAGFGTV | 2    | 0    |
| >EGFR-V717/VLGSAGFGTV | 64   | >EGFR-V717/ALGSAGFGTV | 107  | 43   |
| >EGFR-V717/VLGSAGFGTV | 54   | >EGFR-V717/ALGSAGFGTV | 80   | 26   |
| >EGFR-V717/VLGSAGFGTV | 26   | >EGFR-V717/ALGSAGFGTV | 55   | 29   |
| >EGFR-V717/VLGSAGFGTV | 73   | >EGFR-V717/ALGSAGFGTV | 65   | 8    |
| >EGFR-V717/VLGSAGFGTV | 87   | >EGFR-V717/ALGSAGFGTV | 125  | 38   |
| >EGFR-V717/VLGSAGFGTV | 421  | >EGFR-V717/ALGSAGFGTV | 293  | 128  |
| >EGFR-V717/VLGSAGFGTV | 227  | >EGFR-V717/ALGSAGFGTV | 372  | 145  |
| >EGFR-V717/KVLGSAGFGT | 294  | >EGFR-V717/KALGSAGFGT | 2237 | 1943 |
| >EGFR-V717/KVLGSAGFGT | 123  | >EGFR-V717/KALGSAGFGT | 1013 | 890  |
| >EGFR-V717/KVLGSAGFGT | 9    | >EGFR-V717/KALGSAGFGT | 26   | 17   |
| >EGFR-V717/KVLGSAGFGT | 12   | >EGFR-V717/KALGSAGFGT | 47   | 35   |
| >EGFR-V717/KVLGSAGFGT | 78   | >EGFR-V717/KALGSAGFGT | 1267 | 1189 |
| >EGFR-V717/KVLGSAGFGT | 28   | >EGFR-V717/KALGSAGFGT | 211  | 183  |
| >EGFR-V717/KVLGSAGFGT | 176  | >EGFR-V717/KALGSAGFGT | 2109 | 1933 |
| >EGFR-V717/KVLGSAGFGT | 15   | >EGFR-V717/KALGSAGFGT | 184  | 169  |
| >EGFR-V717/KVLGSAGFG  | 103  | >EGFR-V717/KALGSAGFG  | 392  | 289  |
| >EGFR-V717/KVLGSAGFGT | 76   | >EGFR-V717/KALGSAGFGT | 278  | 202  |
| >EGFR-V717/KVLGSAGF   | 32   | >EGFR-V717/KALGSAGF   | 454  | 422  |
| >EGFR-V717/KVLGSAGFGT | 324  | >EGFR-V717/KALGSAGFGT | 944  | 620  |
| >EGFR-V717/KVLGSAGF   | 172  | >EGFR-V717/KALGSAGF   | 264  | 92   |
| >EGFR-V717/KVLGSAGF   | 345  | >EGFR-V717/KALGSAGF   | 1246 | 901  |
| >EGFR-V717/KVLGSAGF   | 165  | >EGFR-V717/KALGSAGF   | 42   | 123  |
| >EGFR-V717/KVLGSAGF   | 16   | >EGFR-V717/KALGSAGF   | 6    | 10   |
| >EGFR-V717/KVLGSAGFGT | 3039 | >EGFR-V717/KALGSAGFGT | 337  | 2702 |
| >EGFR-V717/KVLGSAGFGT | 1414 | >EGFR-V717/KALGSAGFGT | 153  | 1261 |
| >EGFR-V717/KVLGSAGF   | 763  | >EGFR-V717/KALGSAGF   | 259  | 504  |
| >EGFR-V717/KVLGSAGF   | 476  | >EGFR-V717/KALGSAGF   | 69   | 407  |
| >EGFR-V717/IKVLGSAGF  | 9    | >EGFR-V717/IKALGSAGF  | 9    | 0    |
| >EGFR-V717/KIKVLGSGA  | 405  | >EGFR-V717/KIKALGSGA  | 69   | 336  |
| >EGFR-V717/KIKVLGSG   | 289  | >EGFR-V717/KIKALGSG   | 142  | 147  |
| >EGFR-V717/KIKVLGSGA  | 72   | >EGFR-V717/KIKALGSGA  | 45   | 27   |
| >EGFR-V717/KIKVLGSGAF | 50   | >EGFR-V717/KIKALGSGAF | 36   | 14   |

|                        |       |                        |      |       |
|------------------------|-------|------------------------|------|-------|
| >EGFR-V717/KIKVLGSGAF  | 63    | >EGFR-V717/KIKALGSGAF  | 44   | 19    |
| >EGFR-V717/KIKVLGSGAF  | 672   | >EGFR-V717/KIKALGSGAF  | 328  | 344   |
| >EGFR-V717/KIKVLGSGAF  | 245   | >EGFR-V717/KIKALGSGAF  | 196  | 49    |
| >EGFR-V717/KKIKVLGSGA  | 700   | >EGFR-V717/KKIKALGSGA  | 489  | 211   |
| >EGFR-V717/KKIKVLGSGA  | 7     | >EGFR-V717/KKIKALGSGA  | 5    | 2     |
| >EGFR-V717/EFKKIKVL    | 674   | >EGFR-V717/EFKKIKAL    | 309  | 365   |
| >EGFR-V717/TEFKKIKVL   | 51    | >EGFR-V717/TEFKKIKAL   | 55   | 4     |
| >EGFR-V717/TEFKKIKVL   | 462   | >EGFR-V717/TEFKKIKAL   | 161  | 301   |
| >EGFR-V717/TEFKKIKVL   | 284   | >EGFR-V717/TEFKKIKAL   | 108  | 176   |
| >EGFR-V717/TEFKKIKV    | 361   | >EGFR-V717/TEFKKIIKA   | 421  | 60    |
| >EGFR-V717/TEFKKIKVL   | 68    | >EGFR-V717/TEFKKIKAL   | 48   | 20    |
| >EGFR-V717/TEFKKIKVL   | 460   | >EGFR-V717/TEFKKIKAL   | 299  | 161   |
| >EGFR-V717/TEFKKIKV    | 1892  | >EGFR-V717/TEFKKIIKA   | 336  | 1556  |
| >EGFR-V717/TEFKKIKVL   | 85    | >EGFR-V717/TEFKKIKAL   | 64   | 21    |
| >EGFR-V717/ETEFKKIKV   | 201   | >EGFR-V717/ETEFKKIIKA  | 2908 | 2707  |
| >EGFR-V717/KETEFKKIKV  | 274   | >EGFR-V717/KETEFKKIIKA | 7380 | 7106  |
| >EGFR-V717/KETEFKKIKVL | 128   | >EGFR-V717/KETEFKKIKAL | 156  | 28    |
| >EGFR-V717/KETEFKKIKVL | 51    | >EGFR-V717/KETEFKKIKAL | 28   | 23    |
| >EGFR-V717/KETEFKKIKVL | 75    | >EGFR-V717/KETEFKKIKAL | 52   | 23    |
| >EGFR-V717/KETEFKKIKVL | 105   | >EGFR-V717/KETEFKKIKAL | 84   | 21    |
| >EGFR-V726I VYKGLWIPE  | 2095  | >EGFR-V726I MYKGLWIPE  | 145  | 1950  |
| >EGFR-V726I VYKGLWIPE  | 1937  | >EGFR-V726I MYKGLWIPE  | 108  | 1829  |
| >EGFR-V726I TVYKGLWI   | 1110  | >EGFR-V726I TMYKGLWI   | 45   | 1065  |
| >EGFR-V726I TVYKGLWI   | 1940  | >EGFR-V726I TMYKGLWI   | 147  | 1793  |
| >EGFR-V726I TVYKGLWI   | 153   | >EGFR-V726I TMYKGLWI   | 14   | 139   |
| >EGFR-V726I TVYKGLWI   | 168   | >EGFR-V726I TMYKGLWI   | 121  | 47    |
| >EGFR-V726I TVYKGLWI   | 444   | >EGFR-V726I TMYKGLWI   | 6    | 438   |
| >EGFR-V726I TVYKGLWIPE | 6449  | >EGFR-V726I TMYKGLWIPI | 101  | 6348  |
| >EGFR-V726I TVYKGLWI   | 5788  | >EGFR-V726I TMYKGLWI   | 99   | 5689  |
| >EGFR-V726I TVYKGLWI   | 994   | >EGFR-V726I TMYKGLWI   | 20   | 974   |
| >EGFR-V726I TVYKGLWI   | 893   | >EGFR-V726I TMYKGLWI   | 14   | 879   |
| >EGFR-V726I TVYKGLWI   | 463   | >EGFR-V726I TMYKGLWI   | 6055 | 5592  |
| >EGFR-V726I TVYKGLWI   | 191   | >EGFR-V726I TMYKGLWI   | 719  | 528   |
| >EGFR-V726I TVYKGLWI   | 265   | >EGFR-V726I TMYKGLWI   | 632  | 367   |
| >EGFR-V726I KVLGSGAFGT | 294   | >EGFR-V726I KVLGSGAFGT | 5876 | 5582  |
| >EGFR-V726I KVLGSGAFGT | 123   | >EGFR-V726I KVLGSGAFGT | 5560 | 5437  |
| >EGFR-V726I KVLGSGAFGT | 9     | >EGFR-V726I KVLGSGAFGT | 142  | 133   |
| >EGFR-V726I KVLGSGAFGT | 12    | >EGFR-V726I KVLGSGAFGT | 1294 | 1282  |
| >EGFR-V726I KVLGSGAFGT | 78    | >EGFR-V726I KVLGSGAFGT | 6049 | 5971  |
| >EGFR-V726I KVLGSGAFGT | 28    | >EGFR-V726I KVLGSGAFGT | 5001 | 4973  |
| >EGFR-V726I KVLGSGAFGT | 176   | >EGFR-V726I KVLGSGAFGT | 5127 | 4951  |
| >EGFR-V726I KVLGSGAFGT | 15    | >EGFR-V726I KVLGSGAFGT | 7296 | 7281  |
| >EGFR-V726I KVLGSGAFGT | 11348 | >EGFR-V726I KVLGSGAFGT | 283  | 11065 |

|                        |      |                        |      |      |
|------------------------|------|------------------------|------|------|
| >EGFR-V726I KVLGSGAFGT | 7686 | >EGFR-V726I KVLGSGAFGT | 191  | 7495 |
| >EGFR-V726I KVLGSGAFGT | 76   | >EGFR-V726I KVLGSGAFGT | 114  | 38   |
| >EGFR-V726I KVLGSGAFGT | 324  | >EGFR-V726I KVLGSGAFGT | 3240 | 2916 |
| >EGFR-V726I KVLGSGAFGT | 1414 | >EGFR-V726I KVLGSGAFGT | 40   | 1374 |
| >EGFR-V726I KVLGSGAFGT | 709  | >EGFR-V726I KVLGSGAFGT | 38   | 671  |
| >EGFR-V726I GTVYKGLW   | 14   | >EGFR-V726I GTMYKGLW   | 19   | 5    |
| >EGFR-V726I GTVYKGLWI  | 24   | >EGFR-V726I GTMYKGLWI  | 29   | 5    |
| >EGFR-V726I GTVYKGLW   | 199  | >EGFR-V726I GTMYKGLW   | 110  | 89   |
| >EGFR-V726I GTVYKGLW   | 230  | >EGFR-V726I GTMYKGLW   | 91   | 139  |
| >EGFR-V726I GTVYKGLWI  | 118  | >EGFR-V726I GTMYKGLWI  | 68   | 50   |
| >EGFR-V726I GTVYKGLWI  | 166  | >EGFR-V726I GTMYKGLWI  | 59   | 107  |
| >EGFR-V726I FGTVYKGL   | 354  | >EGFR-V726I FGTVYKGL   | 230  | 124  |
| >EGFR-V726I FGTVYKGLW  | 393  | >EGFR-V726I FGTVYKGLW  | 750  | 357  |
| >EGFR-V726I FGTVYKGLW  | 29   | >EGFR-V726I FGTVYKGLW  | 31   | 2    |
| >EGFR-V726I AFGTVYKGL  | 152  | >EGFR-V726I AFGTVYKGL  | 393  | 241  |
| >EGFR-V726I AFGTVYKGLV | 249  | >EGFR-V726I AFGTVYKGLV | 439  | 190  |
| >EGFR-V726I GAFGTVYKGL | 372  | >EGFR-V726I GAFGTVYKGL | 1223 | 851  |
| >EGFR-V726I GAFGTVYK   | 122  | >EGFR-V726I GAFGTVYK   | 78   | 44   |
| >EGFR-V726I GAFGTVYK   | 9    | >EGFR-V726I GAFGTVYK   | 6    | 3    |
| >EGFR-V726I GAFGTVYK   | 98   | >EGFR-V726I GAFGTVYK   | 47   | 51   |
| >EGFR-V726I GAFGTVYK   | 222  | >EGFR-V726I GAFGTVYK   | 216  | 6    |
| >EGFR-V726I GAFGTVYK   | 23   | >EGFR-V726I GAFGTVYK   | 26   | 3    |
| >EGFR-V726I GAFGTVYKGL | 158  | >EGFR-V726I GAFGTVYKGL | 65   | 93   |
| >EGFR-V726I GAFGTVYKGL | 38   | >EGFR-V726I GAFGTVYKGL | 35   | 3    |
| >EGFR-V726I GAFGTVYKGL | 456  | >EGFR-V726I GAFGTVYKGL | 693  | 237  |
| >EGFR-V726I GAFGTVYKGL | 46   | >EGFR-V726I GAFGTVYKGL | 54   | 8    |
| >EGFR-V726I GAFGTVYKGL | 34   | >EGFR-V726I GAFGTVYKGL | 46   | 12   |
| >EGFR-V726I GAFGTVYKGL | 279  | >EGFR-V726I GAFGTVYKGL | 156  | 123  |
| >EGFR-V726I GAFGTVYKGL | 33   | >EGFR-V726I GAFGTVYKGL | 24   | 9    |
| >EGFR-V726I GAFGTVYK   | 150  | >EGFR-V726I GAFGTVYK   | 105  | 45   |
| >EGFR-V726I SGAFGTVYK  | 527  | >EGFR-V726I SGAFGTVYK  | 162  | 365  |
| >EGFR-V726I SGAFGTVYK  | 49   | >EGFR-V726I SGAFGTVYK  | 19   | 30   |
| >EGFR-V726I SGAFGTVY   | 580  | >EGFR-V726I SGAFGTVY   | 147  | 433  |
| >EGFR-V726I SGAFGTVYK  | 798  | >EGFR-V726I SGAFGTVYK  | 189  | 609  |
| >EGFR-V726I SGAFGTVY   | 87   | >EGFR-V726I SGAFGTVY   | 91   | 4    |
| >EGFR-V726I SGAFGTVYK  | 178  | >EGFR-V726I SGAFGTVYK  | 164  | 14   |
| >EGFR-V726I SGAFGTVY   | 188  | >EGFR-V726I SGAFGTVY   | 565  | 377  |
| >EGFR-V726I SGAFGTVY   | 460  | >EGFR-V726I SGAFGTVY   | 525  | 65   |
| >EGFR-V726I SGAFGTVYK  | 342  | >EGFR-V726I SGAFGTVYK  | 301  | 41   |
| >EGFR-V726I GSGAFGTVYK | 46   | >EGFR-V726I GSGAFGTVYK | 27   | 19   |
| >EGFR-V726I GSGAFGTVYK | 29   | >EGFR-V726I GSGAFGTVYK | 15   | 14   |
| >EGFR-V726I GSGAFGTVY  | 827  | >EGFR-V726I GSGAFGTVY  | 192  | 635  |
| >EGFR-V726I GSGAFGTVYK | 711  | >EGFR-V726I GSGAFGTVYK | 277  | 434  |

|                        |       |                        |       |       |
|------------------------|-------|------------------------|-------|-------|
| >EGFR-V726I GSGAFGTVY  | 432   | >EGFR-V726I GSGAFGTM   | 461   | 29    |
| >EGFR-V726I GSGAFGTVYk | 224   | >EGFR-V726I GSGAFGTM   | 233   | 9     |
| >EGFR-V726I GSGAFGTVY  | 78    | >EGFR-V726I GSGAFGTM   | 224   | 146   |
| >EGFR-V726I GSGAFGTVY  | 349   | >EGFR-V726I GSGAFGTM   | 737   | 388   |
| >EGFR-V726I GSGAFGTVY  | 62    | >EGFR-V726I GSGAFGTM   | 65    | 3     |
| >EGFR-V726I GSGAFGTV   | 5923  | >EGFR-V726I GSGAFGTM   | 351   | 5572  |
| >EGFR-V726I GSGAFGTVY  | 11    | >EGFR-V726I GSGAFGTM   | 6     | 5     |
| >EGFR-V726I GSGAFGTVYk | 337   | >EGFR-V726I GSGAFGTM   | 287   | 50    |
| >EGFR-V726I LGSGAFGTVY | 559   | >EGFR-V726I LGSGAFGTM  | 242   | 317   |
| >EGFR-V726I LGSGAFGTVY | 125   | >EGFR-V726I LGSGAFGTM  | 101   | 24    |
| >EGFR-V726I LGSGAFGTVY | 1180  | >EGFR-V726I LGSGAFGTM  | 485   | 695   |
| >EGFR-V726I LGSGAFGTVY | 478   | >EGFR-V726I LGSGAFGTM  | 219   | 259   |
| >EGFR-V726I LGSGAFGTVY | 93    | >EGFR-V726I LGSGAFGTM  | 193   | 100   |
| >EGFR-V726I LGSGAFGTV  | 12124 | >EGFR-V726I LGSGAFGTM  | 245   | 11879 |
| >EGFR-V726I LGSGAFGTV  | 2426  | >EGFR-V726I LGSGAFGTM  | 160   | 2266  |
| >EGFR-V726I LGSGAFGTVY | 94    | >EGFR-V726I LGSGAFGTM  | 55    | 39    |
| >EGFR-V726I VLGSGAFGTV | 73    | >EGFR-V726I VLGSGAFGTM | 1575  | 1502  |
| >EGFR-V726I VLGSGAFGTV | 41    | >EGFR-V726I VLGSGAFGTM | 161   | 120   |
| >EGFR-V726I VLGSGAFGTV | 21    | >EGFR-V726I VLGSGAFGTM | 426   | 405   |
| >EGFR-V726I VLGSGAFGTV | 3     | >EGFR-V726I VLGSGAFGTM | 81    | 78    |
| >EGFR-V726I VLGSGAFGTV | 7     | >EGFR-V726I VLGSGAFGTM | 432   | 425   |
| >EGFR-V726I VLGSGAFGTV | 7     | >EGFR-V726I VLGSGAFGTM | 303   | 296   |
| >EGFR-V726I VLGSGAFGTV | 5     | >EGFR-V726I VLGSGAFGTM | 251   | 246   |
| >EGFR-V726I VLGSGAFGTV | 2     | >EGFR-V726I VLGSGAFGTM | 45    | 43    |
| >EGFR-V726I VLGSGAFGTV | 64    | >EGFR-V726I VLGSGAFGTM | 25    | 39    |
| >EGFR-V726I VLGSGAFGTV | 54    | >EGFR-V726I VLGSGAFGTM | 56    | 2     |
| >EGFR-V726I VLGSGAFGTV | 26    | >EGFR-V726I VLGSGAFGTM | 20    | 6     |
| >EGFR-V726I VLGSGAFGTV | 5081  | >EGFR-V726I VLGSGAFGTM | 406   | 4675  |
| >EGFR-V726I VLGSGAFGTV | 73    | >EGFR-V726I VLGSGAFGTM | 140   | 67    |
| >EGFR-V726I VLGSGAFGTV | 87    | >EGFR-V726I VLGSGAFGTM | 95    | 8     |
| >EGFR-V726I VLGSGAFGTV | 421   | >EGFR-V726I VLGSGAFGTM | 649   | 228   |
| >EGFR-V726I VLGSGAFGTV | 227   | >EGFR-V726I VLGSGAFGTM | 142   | 85    |
| >EGFR-V738<VKIPVAIKEL  | 87    | >EGFR-V738<KGKIPVAIKEL | 294   | 207   |
| >EGFR-V738<KVKIPVAIK   | 124   | >EGFR-V738<KGKIPVAIK   | 3773  | 3649  |
| >EGFR-V738<KVKIPVAIK   | 183   | >EGFR-V738<KGKIPVAIK   | 4983  | 4800  |
| >EGFR-V738<KVKIPVAI    | 10    | >EGFR-V738<KGKIPVAI    | 185   | 175   |
| >EGFR-V738<KVKIPVAIK   | 4     | >EGFR-V738<KGKIPVAIK   | 10    | 6     |
| >EGFR-V738<KVKIPVAIKEL | 29    | >EGFR-V738<KGKIPVAIKEL | 901   | 872   |
| >EGFR-V738<KVKIPVAIK   | 43    | >EGFR-V738<KGKIPVAIK   | 1182  | 1139  |
| >EGFR-V738<KVKIPVAI    | 71    | >EGFR-V738<KGKIPVAI    | 5427  | 5356  |
| >EGFR-V738<KVKIPVAIKEL | 148   | >EGFR-V738<KGKIPVAIKEL | 957   | 809   |
| >EGFR-V738<KGLWIPEGEK  | 229   | >EGFR-V738<KGLWIPEGEK  | 23660 | 23431 |
| >EGFR-V738<KGLWIPEGEK  | 499   | >EGFR-V738<KGLWIPEGEK  | 24643 | 24144 |



|                        |      |                        |       |       |
|------------------------|------|------------------------|-------|-------|
| >EGFR-V738(EKVKIPVAI   | 151  | >EGFR-V738(EKKGKIPVAI  | 762   | 611   |
| >EGFR-V738(EKVKIPVAI   | 444  | >EGFR-V738(EKKGKIPVAI  | 7444  | 7000  |
| >EGFR-V738(GEKVKIPV    | 644  | >EGFR-V738(GEKKGKIPV   | 197   | 447   |
| >EGFR-V738(GEKVKIPV    | 101  | >EGFR-V738(GEKKGKIPV   | 100   | 1     |
| >EGFR-V738(GEKVKIPVA   | 118  | >EGFR-V738(GEKKGKIPVA  | 139   | 21    |
| >EGFR-V738(GEKVKIPVAI  | 188  | >EGFR-V738(GEKKGKIPVAI | 231   | 43    |
| >EGFR-V738(GEKVKIPV    | 155  | >EGFR-V738(GEKKGKIPV   | 105   | 50    |
| >EGFR-V738(GEKVKIPVA   | 26   | >EGFR-V738(GEKKGKIPVA  | 21    | 5     |
| >EGFR-V738(GEKVKIPVA   | 132  | >EGFR-V738(GEKKGKIPVA  | 621   | 489   |
| >EGFR-V738(GEKVKIPVAI  | 45   | >EGFR-V738(GEKKGKIPVAI | 28    | 17    |
| >EGFR-V738(IPEGEKVKIPV | 188  | >EGFR-V738(IPEGEKGKIPV | 134   | 54    |
| >EGFR-V738(IPEGEKVKI   | 142  | >EGFR-V738(IPEGEKGKI   | 635   | 493   |
| >EGFR-V738(IPEGEKVKIPV | 311  | >EGFR-V738(IPEGEKGKIPV | 539   | 228   |
| >EGFR-V738(WIPEGEKV    | 298  | >EGFR-V738(WIPEGEKG    | 20322 | 20024 |
| >EGFR-V738(WIPEGEKV    | 191  | >EGFR-V738(WIPEGEKG    | 18445 | 18254 |
| >EGFR-V738(WIPEGEKV    | 25   | >EGFR-V738(WIPEGEKG    | 16808 | 16783 |
| >EGFR-V738(WIPEGEKV    | 69   | >EGFR-V738(WIPEGEKG    | 20183 | 20114 |
| >EGFR-V738(WIPEGEKV    | 284  | >EGFR-V738(WIPEGEKG    | 25322 | 25038 |
| >EGFR-V738(WIPEGEKV    | 10   | >EGFR-V738(WIPEGEKG    | 23298 | 23288 |
| >EGFR-V738(WIPEGEKVKI  | 453  | >EGFR-V738(WIPEGEKGKI  | 1281  | 828   |
| >EGFR-V738(WIPEGEKV    | 381  | >EGFR-V738(WIPEGEKG    | 18072 | 17691 |
| >EGFR-V738(LWIPEGEKVK  | 158  | >EGFR-V738(LWIPEGEKGK  | 616   | 458   |
| >EGFR-V738(LWIPEGEKVK  | 37   | >EGFR-V738(LWIPEGEKGK  | 59    | 22    |
| >EGFR-V738(LWIPEGEKV   | 270  | >EGFR-V738(LWIPEGEKG   | 723   | 453   |
| >EGFR-V738(LWIPEGEKVK  | 270  | >EGFR-V738(LWIPEGEKGK  | 251   | 19    |
| >EGFR-V738(GLWIPEGEKV  | 251  | >EGFR-V738(GLWIPEGEKC  | 15934 | 15683 |
| >EGFR-V738(GLWIPEGEKV  | 329  | >EGFR-V738(GLWIPEGEKC  | 22612 | 22283 |
| >EGFR-V738(GLWIPEGEKV  | 3    | >EGFR-V738(GLWIPEGEKC  | 2350  | 2347  |
| >EGFR-V738(GLWIPEGEKV  | 28   | >EGFR-V738(GLWIPEGEKC  | 16860 | 16832 |
| >EGFR-V738(GLWIPEGEKV  | 6    | >EGFR-V738(GLWIPEGEKC  | 6671  | 6665  |
| >EGFR-V738(GLWIPEGEKV  | 87   | >EGFR-V738(GLWIPEGEKC  | 24837 | 24750 |
| >EGFR-V738(GLWIPEGEKV  | 7    | >EGFR-V738(GLWIPEGEKC  | 12729 | 12722 |
| >EGFR-V742/PVAIKELR    | 386  | >EGFR-V742/PAAIKELR    | 730   | 344   |
| >EGFR-V742/IPEGEKVKIPV | 188  | >EGFR-V742/IPEGEKVKIPA | 844   | 656   |
| >EGFR-V742/IPEGEKVKIPV | 311  | >EGFR-V742/IPEGEKVKIPA | 81    | 230   |
| >EGFR-V742/IPVAIKEL    | 25   | >EGFR-V742/IPAAIKEL    | 89    | 64    |
| >EGFR-V742/IPVAIKELR   | 150  | >EGFR-V742/IPAAIKELR   | 71    | 79    |
| >EGFR-V742/IPVAIKEL    | 151  | >EGFR-V742/IPAAIKEL    | 60    | 91    |
| >EGFR-V742/IPVAIKELREA | 2196 | >EGFR-V742/IPAAIKELREA | 420   | 1776  |
| >EGFR-V742/IPVAIKEL    | 406  | >EGFR-V742/IPAAIKEL    | 497   | 91    |
| >EGFR-V742/IPVAIKEL    | 340  | >EGFR-V742/IPAAIKEL    | 588   | 248   |
| >EGFR-V742/IPVAIKELREA | 30   | >EGFR-V742/IPAAIKELREA | 48    | 18    |
| >EGFR-V742/IPVAIKEL    | 248  | >EGFR-V742/IPAAIKEL    | 136   | 112   |

|                        |      |                        |     |      |
|------------------------|------|------------------------|-----|------|
| >EGFR-V742/IPVAIKEL    | 498  | >EGFR-V742/IPAAIKEL    | 658 | 160  |
| >EGFR-V742/KIPVAIKEL   | 2304 | >EGFR-V742/KIPAAIKEL   | 483 | 1821 |
| >EGFR-V742/KIPVAIKEL   | 1025 | >EGFR-V742/KIPAAIKEL   | 396 | 629  |
| >EGFR-V742/KIPVAIKEL   | 1437 | >EGFR-V742/KIPAAIKEL   | 454 | 983  |
| >EGFR-V742/KIPVAIKELR  | 78   | >EGFR-V742/KIPAAIKELR  | 51  | 27   |
| >EGFR-V742/KIPVAIKELR  | 68   | >EGFR-V742/KIPAAIKELR  | 36  | 32   |
| >EGFR-V742/KIPVAIKEL   | 331  | >EGFR-V742/KIPAAIKEL   | 115 | 216  |
| >EGFR-V742/KIPVAIKELR  | 777  | >EGFR-V742/KIPAAIKELR  | 316 | 461  |
| >EGFR-V742/KIPVAIKELR  | 66   | >EGFR-V742/KIPAAIKELR  | 39  | 27   |
| >EGFR-V742/VKIPVAIKEL  | 87   | >EGFR-V742/VKIPAAIKEL  | 56  | 31   |
| >EGFR-V742/KVKIPVAIK   | 124  | >EGFR-V742/KVKIPAAIK   | 133 | 9    |
| >EGFR-V742/KVKIPVAIK   | 183  | >EGFR-V742/KVKIPAAIK   | 293 | 110  |
| >EGFR-V742/KVKIPVAI    | 10   | >EGFR-V742/KVKIPAAI    | 9   | 1    |
| >EGFR-V742/KVKIPVAIK   | 4    | >EGFR-V742/KVKIPAAIK   | 4   | 0    |
| >EGFR-V742/KVKIPVAIKEL | 29   | >EGFR-V742/KVKIPAAIKEL | 32  | 3    |
| >EGFR-V742/KVKIPVAIK   | 43   | >EGFR-V742/KVKIPAAIK   | 114 | 71   |
| >EGFR-V742/KVKIPVAI    | 71   | >EGFR-V742/KVKIPAAI    | 181 | 110  |
| >EGFR-V742/KVKIPVAIKEL | 148  | >EGFR-V742/KVKIPAAIKEL | 100 | 48   |
| >EGFR-V742/EKVKIPVAI   | 151  | >EGFR-V742/EKVKIPAAI   | 394 | 243  |
| >EGFR-V742/EKVKIPVAI   | 444  | >EGFR-V742/EKVKIPAAI   | 561 | 117  |
| >EGFR-V742/GEKVKIPVAI  | 501  | >EGFR-V742/GEKVKIPAAI  | 356 | 145  |
| >EGFR-V742/GEKVKIPV    | 101  | >EGFR-V742/GEKVKIPA    | 121 | 20   |
| >EGFR-V742/GEKVKIPVA   | 118  | >EGFR-V742/GEKVKIPAA   | 71  | 47   |
| >EGFR-V742/GEKVKIPVAI  | 188  | >EGFR-V742/GEKVKIPAAI  | 299 | 111  |
| >EGFR-V742/GEKVKIPV    | 155  | >EGFR-V742/GEKVKIPA    | 35  | 120  |
| >EGFR-V742/GEKVKIPVA   | 26   | >EGFR-V742/GEKVKIPAA   | 17  | 9    |
| >EGFR-V742/GEKVKIPVA   | 132  | >EGFR-V742/GEKVKIPAA   | 126 | 6    |
| >EGFR-V742/GEKVKIPVAI  | 45   | >EGFR-V742/GEKVKIPAAI  | 73  | 28   |
| >EGFR-V765I VMASVDNPI  | 148  | >EGFR-V765I MMASVDNPI  | 36  | 112  |
| >EGFR-V765I VMASVDNP   | 1497 | >EGFR-V765I MMASVDNP   | 173 | 1324 |
| >EGFR-V765I VMASVDNPI  | 84   | >EGFR-V765I MMASVDNPI  | 20  | 64   |
| >EGFR-V765I VMASVDNPI  | 2440 | >EGFR-V765I MMASVDNPI  | 290 | 2150 |
| >EGFR-V765I VMASVDNPI  | 209  | >EGFR-V765I MMASVDNPI  | 50  | 159  |
| >EGFR-V765I VMASVDNPI  | 2390 | >EGFR-V765I MMASVDNPI  | 473 | 1917 |
| >EGFR-V765I VMASVDNPI  | 303  | >EGFR-V765I MMASVDNPI  | 86  | 217  |
| >EGFR-V765I VMASVDNPI  | 3    | >EGFR-V765I MMASVDNPI  | 3   | 0    |
| >EGFR-V765I VMASVDNPI  | 37   | >EGFR-V765I MMASVDNPI  | 20  | 17   |
| >EGFR-V765I VMASVDNPI  | 7    | >EGFR-V765I MMASVDNPI  | 5   | 2    |
| >EGFR-V765I VMASVDNPI  | 258  | >EGFR-V765I MMASVDNPI  | 140 | 118  |
| >EGFR-V765I VMASVDNPI  | 5    | >EGFR-V765I MMASVDNPI  | 5   | 0    |
| >EGFR-V765I VMASVDNPI  | 516  | >EGFR-V765I MMASVDNPI  | 469 | 47   |
| >EGFR-V765I VMASVDNPI  | 6    | >EGFR-V765I MMASVDNPI  | 6   | 0    |
| >EGFR-V765I VMASVDNPI  | 233  | >EGFR-V765I MMASVDNPI  | 164 | 69   |

|                        |       |                        |      |       |
|------------------------|-------|------------------------|------|-------|
| >EGFR-V765I VMASVDNPI  | 3     | >EGFR-V765I MMASVDNPI  | 3    | 0     |
| >EGFR-V765I VMASVDNPI  | 75    | >EGFR-V765I MMASVDNPI  | 40   | 35    |
| >EGFR-V765I VMASVDNPI  | 2046  | >EGFR-V765I MMASVDNPI  | 145  | 1901  |
| >EGFR-V765I VMASVDNPI  | 1973  | >EGFR-V765I MMASVDNPI  | 91   | 1882  |
| >EGFR-V765I VMASVDNPI  | 661   | >EGFR-V765I MMASVDNPI  | 251  | 410   |
| >EGFR-V765I VMASVDNPI  | 873   | >EGFR-V765I MMASVDNPI  | 345  | 528   |
| >EGFR-V765I VMASVDNPI  | 649   | >EGFR-V765I MMASVDNPI  | 220  | 429   |
| >EGFR-V765I VMASVDNPI  | 655   | >EGFR-V765I MMASVDNPI  | 66   | 589   |
| >EGFR-V765I YVMASVDNP  | 10    | >EGFR-V765I YMMASVDNI  | 6    | 4     |
| >EGFR-V765I YVMASVDNP  | 767   | >EGFR-V765I YMMASVDNI  | 26   | 741   |
| >EGFR-V765I YVMASVDNP  | 13    | >EGFR-V765I YMMASVDNI  | 2    | 11    |
| >EGFR-V765I YVMASVDNP  | 3407  | >EGFR-V765I YMMASVDNI  | 133  | 3274  |
| >EGFR-V765I YVMASVDNP  | 8     | >EGFR-V765I YMMASVDNI  | 3    | 5     |
| >EGFR-V765I YVMASVDNP  | 4     | >EGFR-V765I YMMASVDNI  | 3    | 1     |
| >EGFR-V765I YVMASVDNP  | 14943 | >EGFR-V765I YMMASVDNI  | 399  | 14544 |
| >EGFR-V765I YVMASVDNP  | 8     | >EGFR-V765I YMMASVDNI  | 1    | 7     |
| >EGFR-V765I YVMASVDNP  | 7     | >EGFR-V765I YMMASVDNI  | 2    | 5     |
| >EGFR-V765I YVMASVDNP  | 10    | >EGFR-V765I YMMASVDNI  | 4    | 6     |
| >EGFR-V765I YVMASVDNP  | 4     | >EGFR-V765I YMMASVDNI  | 2    | 2     |
| >EGFR-V765I YVMASVDNP  | 3     | >EGFR-V765I YMMASVDNI  | 2    | 1     |
| >EGFR-V765I YVMASVDNP  | 397   | >EGFR-V765I YMMASVDNI  | 6601 | 6204  |
| >EGFR-V765I YVMASVDNP  | 457   | >EGFR-V765I YMMASVDNI  | 5108 | 4651  |
| >EGFR-V765I YVMASVDNP  | 17    | >EGFR-V765I YMMASVDNI  | 429  | 412   |
| >EGFR-V765I YVMASVDNP  | 7     | >EGFR-V765I YMMASVDNI  | 18   | 11    |
| >EGFR-V765I YVMASVDNP  | 424   | >EGFR-V765I YMMASVDNI  | 70   | 354   |
| >EGFR-V765I YVMASVDNP  | 560   | >EGFR-V765I YMMASVDNI  | 89   | 471   |
| >EGFR-V765I YVMASVDNP  | 655   | >EGFR-V765I YMMASVDNI  | 70   | 585   |
| >EGFR-V765I YVMASVDNP  | 2919  | >EGFR-V765I YMMASVDNI  | 62   | 2857  |
| >EGFR-V765I YVMASVDNP  | 1501  | >EGFR-V765I YMMASVDNI  | 29   | 1472  |
| >EGFR-V765I EAYVMASV   | 1217  | >EGFR-V765I EAYMMASV   | 472  | 745   |
| >EGFR-V765I EAYVMASV   | 18    | >EGFR-V765I EAYMMASV   | 17   | 1     |
| >EGFR-V765I EAYVMASV   | 8     | >EGFR-V765I EAYMMASV   | 9    | 1     |
| >EGFR-V765I DEAYVMASV  | 25    | >EGFR-V765I DEAYMMASV  | 34   | 9     |
| >EGFR-V765I DEAYVMASV  | 64    | >EGFR-V765I DEAYMMASV  | 257  | 193   |
| >EGFR-V765I DEAYVMAS   | 98    | >EGFR-V765I DEAYMMAS   | 98   | 0     |
| >EGFR-V765I DEAYVMASV  | 43    | >EGFR-V765I DEAYMMASV  | 39   | 4     |
| >EGFR-V765I DEAYVMASV  | 423   | >EGFR-V765I DEAYMMASV  | 150  | 273   |
| >EGFR-V765I LDEAYVMASV | 144   | >EGFR-V765I LDEAYMMAS  | 120  | 24    |
| >EGFR-V765I ILDEAYVM   | 111   | >EGFR-V765I ILDEAYMM   | 52   | 59    |
| >EGFR-V765I ILDEAYVMA  | 38    | >EGFR-V765I ILDEAYMMA  | 38   | 0     |
| >EGFR-V765I ILDEAYVMAS | 11    | >EGFR-V765I ILDEAYMMAV | 11   | 0     |
| >EGFR-V765I ILDEAYVM   | 192   | >EGFR-V765I ILDEAYMM   | 106  | 86    |
| >EGFR-V765I ILDEAYVMA  | 44    | >EGFR-V765I ILDEAYMMA  | 71   | 27    |

|                        |      |                        |      |      |
|------------------------|------|------------------------|------|------|
| >EGFR-V765I ILDEAYVMAS | 5    | >EGFR-V765I ILDEAYMMAI | 6    | 1    |
| >EGFR-V765I ILDEAYVMA  | 172  | >EGFR-V765I ILDEAYMMA  | 52   | 120  |
| >EGFR-V765I ILDEAYVMAS | 10   | >EGFR-V765I ILDEAYMMAI | 8    | 2    |
| >EGFR-V765I ILDEAYVM   | 334  | >EGFR-V765I ILDEAYMM   | 210  | 124  |
| >EGFR-V765I ILDEAYVMA  | 44   | >EGFR-V765I ILDEAYMMA  | 46   | 2    |
| >EGFR-V765I ILDEAYVMAS | 8    | >EGFR-V765I ILDEAYMMAI | 9    | 1    |
| >EGFR-V765I ILDEAYVM   | 17   | >EGFR-V765I ILDEAYMM   | 10   | 7    |
| >EGFR-V765I ILDEAYVMA  | 6    | >EGFR-V765I ILDEAYMMA  | 6    | 0    |
| >EGFR-V765I ILDEAYVMAS | 56   | >EGFR-V765I ILDEAYMMAI | 125  | 69   |
| >EGFR-V765I ILDEAYVMAS | 2    | >EGFR-V765I ILDEAYMMAI | 2    | 0    |
| >EGFR-V765I ILDEAYVM   | 31   | >EGFR-V765I ILDEAYMM   | 46   | 15   |
| >EGFR-V765I ILDEAYVMA  | 63   | >EGFR-V765I ILDEAYMMA  | 60   | 3    |
| >EGFR-V765I ILDEAYVMAS | 3    | >EGFR-V765I ILDEAYMMAI | 3    | 0    |
| >EGFR-V765I ILDEAYVM   | 76   | >EGFR-V765I ILDEAYMM   | 44   | 32   |
| >EGFR-V765I ILDEAYVMA  | 11   | >EGFR-V765I ILDEAYMMA  | 11   | 0    |
| >EGFR-V765I ILDEAYVMAS | 5    | >EGFR-V765I ILDEAYMMAI | 5    | 0    |
| >EGFR-V765I ILDEAYVM   | 31   | >EGFR-V765I ILDEAYMM   | 25   | 6    |
| >EGFR-V765I ILDEAYVMA  | 43   | >EGFR-V765I ILDEAYMMA  | 48   | 5    |
| >EGFR-V765I ILDEAYVMAS | 3    | >EGFR-V765I ILDEAYMMAI | 3    | 0    |
| >EGFR-V765I ILDEAYVM   | 77   | >EGFR-V765I ILDEAYMM   | 51   | 26   |
| >EGFR-V765I ILDEAYVMA  | 8    | >EGFR-V765I ILDEAYMMA  | 6    | 2    |
| >EGFR-V765I ILDEAYVMAS | 2    | >EGFR-V765I ILDEAYMMAI | 2    | 0    |
| >EGFR-V765I ILDEAYVMAS | 82   | >EGFR-V765I ILDEAYMMAI | 88   | 6    |
| >EGFR-V765I EILDEAYV   | 471  | >EGFR-V765I EILDEAYM   | 4801 | 4330 |
| >EGFR-V765I EILDEAYV   | 100  | >EGFR-V765I EILDEAYM   | 2859 | 2759 |
| >EGFR-V765I EILDEAYVMA | 1091 | >EGFR-V765I EILDEAYMMI | 362  | 729  |
| >EGFR-V765I EILDEAYV   | 11   | >EGFR-V765I EILDEAYM   | 930  | 919  |
| >EGFR-V765I EILDEAYV   | 83   | >EGFR-V765I EILDEAYM   | 6250 | 6167 |
| >EGFR-V765I EILDEAYV   | 24   | >EGFR-V765I EILDEAYM   | 6329 | 6305 |
| >EGFR-V765I EILDEAYV   | 5    | >EGFR-V765I EILDEAYM   | 141  | 136  |
| >EGFR-V765I EILDEAYVM  | 362  | >EGFR-V765I EILDEAYMM  | 279  | 83   |
| >EGFR-V765I EILDEAYV   | 11   | >EGFR-V765I EILDEAYM   | 4525 | 4514 |
| >EGFR-V765I EILDEAYV   | 6272 | >EGFR-V765I EILDEAYM   | 372  | 5900 |
| >EGFR-V765I EILDEAYV   | 1571 | >EGFR-V765I EILDEAYM   | 18   | 1553 |
| >EGFR-V765I EILDEAYVM  | 39   | >EGFR-V765I EILDEAYMM  | 58   | 19   |
| >EGFR-V765I EILDEAYV   | 34   | >EGFR-V765I EILDEAYM   | 3319 | 3285 |
| >EGFR-V765I EILDEAYV   | 5    | >EGFR-V765I EILDEAYM   | 17   | 12   |
| >EGFR-V765I EILDEAYVM  | 33   | >EGFR-V765I EILDEAYMM  | 8    | 25   |
| >EGFR-V765I EILDEAYVMA | 16   | >EGFR-V765I EILDEAYMMI | 9    | 7    |
| >EGFR-V765I EILDEAYVMA | 940  | >EGFR-V765I EILDEAYMMI | 427  | 513  |
| >EGFR-V765I KEILDEAYV  | 310  | >EGFR-V765I KEILDEAYM  | 201  | 109  |
| >EGFR-V765I KEILDEAYVM | 163  | >EGFR-V765I KEILDEAYMM | 197  | 34   |
| >EGFR-V765I KEILDEAYVM | 289  | >EGFR-V765I KEILDEAYMM | 253  | 36   |

|                        |       |                        |      |       |
|------------------------|-------|------------------------|------|-------|
| >EGFR-V765I KEILDEAYVM | 50    | >EGFR-V765I KEILDEAYMM | 62   | 12    |
| >EGFR-V765I KEILDEAYV  | 32    | >EGFR-V765I KEILDEAYM  | 115  | 83    |
| >EGFR-V765I KEILDEAYVM | 15    | >EGFR-V765I KEILDEAYMM | 13   | 2     |
| >EGFR-V765I KEILDEAYVM | 468   | >EGFR-V765I KEILDEAYMM | 520  | 52    |
| >EGFR-V769I SVDNPHVCRI | 1829  | >EGFR-V769I SLDNPHVCRL | 90   | 1739  |
| >EGFR-V769I SVDNPHVCRI | 5297  | >EGFR-V769I SLDNPHVCRL | 413  | 4884  |
| >EGFR-V769I SVDNPHVCRI | 3632  | >EGFR-V769I SLDNPHVCRL | 441  | 3191  |
| >EGFR-V769I SVDNPHVC   | 1522  | >EGFR-V769I SLDNPHVC   | 17   | 1505  |
| >EGFR-V769I SVDNPHVCRI | 75    | >EGFR-V769I SLDNPHVCRL | 4    | 71    |
| >EGFR-V769I SVDNPHVCRI | 1156  | >EGFR-V769I SLDNPHVCRL | 18   | 1138  |
| >EGFR-V769I SVDNPHVC   | 9023  | >EGFR-V769I SLDNPHVC   | 294  | 8729  |
| >EGFR-V769I SVDNPHVCRI | 3255  | >EGFR-V769I SLDNPHVCRL | 35   | 3220  |
| >EGFR-V769I SVDNPHVCRI | 9067  | >EGFR-V769I SLDNPHVCRL | 397  | 8670  |
| >EGFR-V769I SVDNPHVC   | 10928 | >EGFR-V769I SLDNPHVC   | 445  | 10483 |
| >EGFR-V769I SVDNPHVCRI | 449   | >EGFR-V769I SLDNPHVCRL | 11   | 438   |
| >EGFR-V769I SVDNPHVCRI | 2975  | >EGFR-V769I SLDNPHVCRL | 43   | 2932  |
| >EGFR-V769I SVDNPHVCRI | 7476  | >EGFR-V769I SLDNPHVCRL | 198  | 7278  |
| >EGFR-V769I SVDNPHVC   | 8666  | >EGFR-V769I SLDNPHVC   | 71   | 8595  |
| >EGFR-V769I SVDNPHVCRI | 204   | >EGFR-V769I SLDNPHVCRL | 5    | 199   |
| >EGFR-V769I SVDNPHVCRI | 3469  | >EGFR-V769I SLDNPHVCRL | 64   | 3405  |
| >EGFR-V769I SVDNPHVCR  | 184   | >EGFR-V769I SLDNPHVCR  | 1362 | 1178  |
| >EGFR-V769I SVDNPHVCR  | 237   | >EGFR-V769I SLDNPHVCR  | 520  | 283   |
| >EGFR-V769I SVDNPHVCR  | 118   | >EGFR-V769I SLDNPHVCR  | 649  | 531   |
| >EGFR-V769I ILDEAYVMAS | 11    | >EGFR-V769I ILDEAYVMAS | 17   | 6     |
| >EGFR-V769I ILDEAYVMAS | 5     | >EGFR-V769I ILDEAYVMAS | 8    | 3     |
| >EGFR-V769I ILDEAYVMAS | 10    | >EGFR-V769I ILDEAYVMAS | 53   | 43    |
| >EGFR-V769I ILDEAYVMAS | 8     | >EGFR-V769I ILDEAYVMAS | 25   | 17    |
| >EGFR-V769I ILDEAYVMAS | 2     | >EGFR-V769I ILDEAYVMAS | 3    | 1     |
| >EGFR-V769I ILDEAYVMAS | 3     | >EGFR-V769I ILDEAYVMAS | 7    | 4     |
| >EGFR-V769I ILDEAYVMAS | 5     | >EGFR-V769I ILDEAYVMAS | 10   | 5     |
| >EGFR-V769I ILDEAYVMAS | 3     | >EGFR-V769I ILDEAYVMAS | 9    | 6     |
| >EGFR-V769I ILDEAYVMAS | 2     | >EGFR-V769I ILDEAYVMAS | 4    | 2     |
| >EGFR-V769I ILDEAYVMAS | 82    | >EGFR-V769I ILDEAYVMAS | 988  | 906   |
| >EGFR-V769I ASVDNPHV   | 291   | >EGFR-V769I ASLDNPHV   | 234  | 57    |
| >EGFR-V769I ASVDNPHV   | 918   | >EGFR-V769I ASLDNPHV   | 147  | 771   |
| >EGFR-V769I ASVDNPHVCI | 2458  | >EGFR-V769I ASLDNPHVCF | 412  | 2046  |
| >EGFR-V769I ASVDNPHV   | 3086  | >EGFR-V769I ASLDNPHV   | 289  | 2797  |
| >EGFR-V769I ASVDNPHV   | 767   | >EGFR-V769I ASLDNPHV   | 356  | 411   |
| >EGFR-V769I ASVDNPHVCI | 300   | >EGFR-V769I ASLDNPHVCF | 146  | 154   |
| >EGFR-V769I ASVDNPHVCI | 389   | >EGFR-V769I ASLDNPHVCF | 3022 | 2633  |
| >EGFR-V769I ASVDNPHVCI | 113   | >EGFR-V769I ASLDNPHVCF | 51   | 62    |
| >EGFR-V769I ASVDNPHVCI | 423   | >EGFR-V769I ASLDNPHVCF | 1411 | 988   |
| >EGFR-V769I ASVDNPHV   | 1074  | >EGFR-V769I ASLDNPHV   | 220  | 854   |

|                        |      |                        |     |      |
|------------------------|------|------------------------|-----|------|
| >EGFR-V769I ASVDNPHV   | 496  | >EGFR-V769I ASLDNPHV   | 713 | 217  |
| >EGFR-V769I ASVDNPHVCI | 6    | >EGFR-V769I ASLDNPHVCF | 6   | 0    |
| >EGFR-V769I ASVDNPHVCI | 154  | >EGFR-V769I ASLDNPHVCF | 97  | 57   |
| >EGFR-V769I MASVDNPHV  | 162  | >EGFR-V769I MASLDNPHV  | 154 | 8    |
| >EGFR-V769I MASVDNPHV  | 162  | >EGFR-V769I MASLDNPHV  | 279 | 117  |
| >EGFR-V769I MASVDNPHV  | 74   | >EGFR-V769I MASLDNPHV  | 118 | 44   |
| >EGFR-V769I MASVDNPHV  | 268  | >EGFR-V769I MASLDNPHV  | 221 | 47   |
| >EGFR-V769I MASVDNPHV  | 9    | >EGFR-V769I MASLDNPHV  | 11  | 2    |
| >EGFR-V769I MASVDNPHV  | 258  | >EGFR-V769I MASLDNPHV  | 292 | 34   |
| >EGFR-V769I MASVDNPHV  | 161  | >EGFR-V769I MASLDNPHV  | 238 | 77   |
| >EGFR-V769I MASVDNPH   | 55   | >EGFR-V769I MASLDNPH   | 52  | 3    |
| >EGFR-V769I VMASVDNPH  | 148  | >EGFR-V769I VMASLDNPH  | 82  | 66   |
| >EGFR-V769I VMASVDNPH  | 84   | >EGFR-V769I VMASLDNPH  | 62  | 22   |
| >EGFR-V769I VMASVDNPH  | 209  | >EGFR-V769I VMASLDNPH  | 135 | 74   |
| >EGFR-V769I VMASVDNPH  | 303  | >EGFR-V769I VMASLDNPH  | 192 | 111  |
| >EGFR-V769I VMASVDNPH  | 3    | >EGFR-V769I VMASLDNPH  | 5   | 2    |
| >EGFR-V769I VMASVDNPH  | 37   | >EGFR-V769I VMASLDNPH  | 88  | 51   |
| >EGFR-V769I VMASVDNPH  | 7    | >EGFR-V769I VMASLDNPH  | 8   | 1    |
| >EGFR-V769I VMASVDNPH  | 258  | >EGFR-V769I VMASLDNPH  | 326 | 68   |
| >EGFR-V769I VMASVDNPH  | 5    | >EGFR-V769I VMASLDNPH  | 5   | 0    |
| >EGFR-V769I VMASVDNPH  | 6    | >EGFR-V769I VMASLDNPH  | 7   | 1    |
| >EGFR-V769I VMASVDNPH  | 233  | >EGFR-V769I VMASLDNPH  | 342 | 109  |
| >EGFR-V769I VMASVDNPH  | 3    | >EGFR-V769I VMASLDNPH  | 3   | 0    |
| >EGFR-V769I VMASVDNPH  | 75   | >EGFR-V769I VMASLDNPH  | 76  | 1    |
| >EGFR-V769I YVMASVDNP  | 10   | >EGFR-V769I YVMASLDNP  | 9   | 1    |
| >EGFR-V769I YVMASVDNP  | 13   | >EGFR-V769I YVMASLDNP  | 12  | 1    |
| >EGFR-V769I YVMASVDNP  | 8    | >EGFR-V769I YVMASLDNP  | 8   | 0    |
| >EGFR-V769I YVMASVDNP  | 4    | >EGFR-V769I YVMASLDNP  | 4   | 0    |
| >EGFR-V769I YVMASVDNP  | 8    | >EGFR-V769I YVMASLDNP  | 10  | 2    |
| >EGFR-V769I YVMASVDNP  | 7    | >EGFR-V769I YVMASLDNP  | 7   | 0    |
| >EGFR-V769I YVMASVDNP  | 10   | >EGFR-V769I YVMASLDNP  | 12  | 2    |
| >EGFR-V769I YVMASVDNP  | 4    | >EGFR-V769I YVMASLDNP  | 4   | 0    |
| >EGFR-V769I YVMASVDNP  | 3    | >EGFR-V769I YVMASLDNP  | 3   | 0    |
| >EGFR-V769I YVMASVDNP  | 397  | >EGFR-V769I YVMASLDNP  | 261 | 136  |
| >EGFR-V769I YVMASVDNP  | 457  | >EGFR-V769I YVMASLDNP  | 325 | 132  |
| >EGFR-V769I YVMASVDNP  | 17   | >EGFR-V769I YVMASLDNP  | 19  | 2    |
| >EGFR-V769I YVMASVDNP  | 7    | >EGFR-V769I YVMASLDNP  | 7   | 0    |
| >EGFR-V769I YVMASVDNP  | 424  | >EGFR-V769I YVMASLDNP  | 563 | 139  |
| >EGFR-V769I EAYVMASV   | 1698 | >EGFR-V769I EAYVMASL   | 359 | 1339 |
| >EGFR-V769I EAYVMASV   | 18   | >EGFR-V769I EAYVMASL   | 94  | 76   |
| >EGFR-V769I EAYVMASV   | 8    | >EGFR-V769I EAYVMASL   | 43  | 35   |
| >EGFR-V769I EAYVMASV   | 1629 | >EGFR-V769I EAYVMASL   | 34  | 1595 |
| >EGFR-V769I DEAYVMASV  | 25   | >EGFR-V769I DEAYVMASL  | 49  | 24   |

|                        |       |                        |      |       |
|------------------------|-------|------------------------|------|-------|
| >EGFR-V769I DEAYVMASV  | 64    | >EGFR-V769I DEAYVMASL  | 625  | 561   |
| >EGFR-V769I DEAYVMASV  | 43    | >EGFR-V769I DEAYVMASL  | 17   | 26    |
| >EGFR-V769I DEAYVMASV  | 1670  | >EGFR-V769I DEAYVMASL  | 216  | 1454  |
| >EGFR-V769I DEAYVMASV  | 423   | >EGFR-V769I DEAYVMASL  | 893  | 470   |
| >EGFR-V769I LDEAYVMASV | 144   | >EGFR-V769I LDEAYVMASL | 662  | 518   |
| >EGFR-V769I VDNPHVCR   | 3291  | >EGFR-V769I MDNPHVCR   | 468  | 2823  |
| >EGFR-V769I SVDNPHVCRI | 7530  | >EGFR-V769I SMDNPHVCR  | 422  | 7108  |
| >EGFR-V769I SVDNPHVCRI | 1829  | >EGFR-V769I SMDNPHVCR  | 104  | 1725  |
| >EGFR-V769I SVDNPHVCRI | 3632  | >EGFR-V769I SMDNPHVCR  | 443  | 3189  |
| >EGFR-V769I SVDNPHVC   | 1522  | >EGFR-V769I SMDNPHVC   | 12   | 1510  |
| >EGFR-V769I SVDNPHVCRI | 75    | >EGFR-V769I SMDNPHVCR  | 3    | 72    |
| >EGFR-V769I SVDNPHVCRI | 1156  | >EGFR-V769I SMDNPHVCR  | 13   | 1143  |
| >EGFR-V769I SVDNPHVC   | 9023  | >EGFR-V769I SMDNPHVC   | 185  | 8838  |
| >EGFR-V769I SVDNPHVCRI | 3255  | >EGFR-V769I SMDNPHVCR  | 25   | 3230  |
| >EGFR-V769I SVDNPHVCRI | 9067  | >EGFR-V769I SMDNPHVCR  | 224  | 8843  |
| >EGFR-V769I SVDNPHVC   | 10928 | >EGFR-V769I SMDNPHVC   | 374  | 10554 |
| >EGFR-V769I SVDNPHVCRI | 449   | >EGFR-V769I SMDNPHVCR  | 11   | 438   |
| >EGFR-V769I SVDNPHVCRI | 2975  | >EGFR-V769I SMDNPHVCR  | 38   | 2937  |
| >EGFR-V769I SVDNPHVCRI | 7476  | >EGFR-V769I SMDNPHVCR  | 152  | 7324  |
| >EGFR-V769I SVDNPHVC   | 8666  | >EGFR-V769I SMDNPHVC   | 141  | 8525  |
| >EGFR-V769I SVDNPHVCRI | 204   | >EGFR-V769I SMDNPHVCR  | 6    | 198   |
| >EGFR-V769I SVDNPHVCRI | 3469  | >EGFR-V769I SMDNPHVCR  | 111  | 3358  |
| >EGFR-V769I SVDNPHVCR  | 184   | >EGFR-V769I SMDNPHVCR  | 441  | 257   |
| >EGFR-V769I SVDNPHVCR  | 237   | >EGFR-V769I SMDNPHVCR  | 99   | 138   |
| >EGFR-V769I SVDNPHVCR  | 118   | >EGFR-V769I SMDNPHVCR  | 547  | 429   |
| >EGFR-V769I ILDEAYVMAS | 11    | >EGFR-V769I ILDEAYVMAS | 43   | 32    |
| >EGFR-V769I ILDEAYVMAS | 5     | >EGFR-V769I ILDEAYVMAS | 58   | 53    |
| >EGFR-V769I ILDEAYVMAS | 10    | >EGFR-V769I ILDEAYVMAS | 322  | 312   |
| >EGFR-V769I ILDEAYVMAS | 8     | >EGFR-V769I ILDEAYVMAS | 92   | 84    |
| >EGFR-V769I ILDEAYVMAS | 2     | >EGFR-V769I ILDEAYVMAS | 10   | 8     |
| >EGFR-V769I ILDEAYVMAS | 3     | >EGFR-V769I ILDEAYVMAS | 45   | 42    |
| >EGFR-V769I ILDEAYVMAS | 5     | >EGFR-V769I ILDEAYVMAS | 60   | 55    |
| >EGFR-V769I ILDEAYVMAS | 3     | >EGFR-V769I ILDEAYVMAS | 44   | 41    |
| >EGFR-V769I ILDEAYVMAS | 2     | >EGFR-V769I ILDEAYVMAS | 30   | 28    |
| >EGFR-V769I ILDEAYVMAS | 82    | >EGFR-V769I ILDEAYVMAS | 1119 | 1037  |
| >EGFR-V769I ASVDNPHV   | 4666  | >EGFR-V769I ASMDNPHV   | 312  | 4354  |
| >EGFR-V769I ASVDNPHVCI | 2505  | >EGFR-V769I ASMDNPHVC  | 438  | 2067  |
| >EGFR-V769I ASVDNPHV   | 291   | >EGFR-V769I ASMDNPHV   | 117  | 174   |
| >EGFR-V769I ASVDNPHV   | 918   | >EGFR-V769I ASMDNPHV   | 312  | 606   |
| >EGFR-V769I ASVDNPHV   | 767   | >EGFR-V769I ASMDNPHV   | 321  | 446   |
| >EGFR-V769I ASVDNPHVCI | 3309  | >EGFR-V769I ASMDNPHVC  | 456  | 2853  |
| >EGFR-V769I ASVDNPHVCI | 300   | >EGFR-V769I ASMDNPHVC  | 34   | 266   |
| >EGFR-V769I ASVDNPHVCI | 389   | >EGFR-V769I ASMDNPHVC  | 1232 | 843   |

|                        |      |                       |     |     |
|------------------------|------|-----------------------|-----|-----|
| >EGFR-V769I ASVDNPHVCI | 113  | >EGFR-V769I ASMDNPHVC | 24  | 89  |
| >EGFR-V769I ASVDNPHVCI | 979  | >EGFR-V769I ASMDNPHVC | 189 | 790 |
| >EGFR-V769I ASVDNPHVCI | 423  | >EGFR-V769I ASMDNPHVC | 143 | 280 |
| >EGFR-V769I ASVDNPHV   | 1074 | >EGFR-V769I ASMDNPHV  | 231 | 843 |
| >EGFR-V769I ASVDNPHV   | 496  | >EGFR-V769I ASMDNPHV  | 576 | 80  |
| >EGFR-V769I ASVDNPHVCI | 6    | >EGFR-V769I ASMDNPHVC | 6   | 0   |
| >EGFR-V769I ASVDNPHVCI | 154  | >EGFR-V769I ASMDNPHVC | 81  | 73  |
| >EGFR-V769I MASVDNPHV  | 162  | >EGFR-V769I MASMDNPH' | 134 | 28  |
| >EGFR-V769I MASVDNPHV  | 162  | >EGFR-V769I MASMDNPH' | 75  | 87  |
| >EGFR-V769I MASVDNPHV  | 74   | >EGFR-V769I MASMDNPH' | 73  | 1   |
| >EGFR-V769I MASVDNPHV  | 268  | >EGFR-V769I MASMDNPH' | 190 | 78  |
| >EGFR-V769I MASVDNPHV  | 9    | >EGFR-V769I MASMDNPH' | 7   | 2   |
| >EGFR-V769I MASVDNPHV  | 258  | >EGFR-V769I MASMDNPH' | 276 | 18  |
| >EGFR-V769I MASVDNPHV  | 161  | >EGFR-V769I MASMDNPH' | 239 | 78  |
| >EGFR-V769I MASVDNPH   | 55   | >EGFR-V769I MASMDNPH  | 43  | 12  |
| >EGFR-V769I VMASVDNPT  | 148  | >EGFR-V769I VMASMDNPI | 93  | 55  |
| >EGFR-V769I VMASVDNPT  | 84   | >EGFR-V769I VMASMDNPI | 99  | 15  |
| >EGFR-V769I VMASVDNPT  | 209  | >EGFR-V769I VMASMDNPI | 175 | 34  |
| >EGFR-V769I VMASVDNPT  | 303  | >EGFR-V769I VMASMDNPI | 286 | 17  |
| >EGFR-V769I VMASVDNPT  | 3    | >EGFR-V769I VMASMDNPI | 6   | 3   |
| >EGFR-V769I VMASVDNPT  | 37   | >EGFR-V769I VMASMDNPI | 143 | 106 |
| >EGFR-V769I VMASVDNPT  | 7    | >EGFR-V769I VMASMDNPI | 10  | 3   |
| >EGFR-V769I VMASVDNPT  | 258  | >EGFR-V769I VMASMDNPI | 342 | 84  |
| >EGFR-V769I VMASVDNPT  | 5    | >EGFR-V769I VMASMDNPI | 6   | 1   |
| >EGFR-V769I VMASVDNPT  | 6    | >EGFR-V769I VMASMDNPI | 6   | 0   |
| >EGFR-V769I VMASVDNPT  | 233  | >EGFR-V769I VMASMDNPI | 278 | 45  |
| >EGFR-V769I VMASVDNPT  | 3    | >EGFR-V769I VMASMDNPI | 3   | 0   |
| >EGFR-V769I VMASVDNPT  | 75   | >EGFR-V769I VMASMDNPI | 46  | 29  |
| >EGFR-V769I VMASVDNPT  | 655  | >EGFR-V769I VMASMDNPI | 499 | 156 |
| >EGFR-V769I YVMASVDNP  | 10   | >EGFR-V769I YVMASMDNI | 10  | 0   |
| >EGFR-V769I YVMASVDNP  | 13   | >EGFR-V769I YVMASMDNI | 13  | 0   |
| >EGFR-V769I YVMASVDNP  | 8    | >EGFR-V769I YVMASMDNI | 8   | 0   |
| >EGFR-V769I YVMASVDNP  | 4    | >EGFR-V769I YVMASMDNI | 4   | 0   |
| >EGFR-V769I YVMASVDNP  | 8    | >EGFR-V769I YVMASMDNI | 12  | 4   |
| >EGFR-V769I YVMASVDNP  | 7    | >EGFR-V769I YVMASMDNI | 9   | 2   |
| >EGFR-V769I YVMASVDNP  | 10   | >EGFR-V769I YVMASMDNI | 14  | 4   |
| >EGFR-V769I YVMASVDNP  | 4    | >EGFR-V769I YVMASMDNI | 7   | 3   |
| >EGFR-V769I YVMASVDNP  | 3    | >EGFR-V769I YVMASMDNI | 4   | 1   |
| >EGFR-V769I YVMASVDNP  | 397  | >EGFR-V769I YVMASMDNI | 162 | 235 |
| >EGFR-V769I YVMASVDNP  | 457  | >EGFR-V769I YVMASMDNI | 186 | 271 |
| >EGFR-V769I YVMASVDNP  | 662  | >EGFR-V769I YVMASMDNI | 471 | 191 |
| >EGFR-V769I YVMASVDNP  | 17   | >EGFR-V769I YVMASMDNI | 16  | 1   |
| >EGFR-V769I YVMASVDNP  | 7    | >EGFR-V769I YVMASMDNI | 6   | 1   |



|                        |       |                        |      |       |
|------------------------|-------|------------------------|------|-------|
| >EGFR-V769I YVMASVDNP  | 424   | >EGFR-V769I YVMASMDNI  | 547  | 123   |
| >EGFR-V769I EAYVMASV   | 4845  | >EGFR-V769I EAYVMASM   | 304  | 4541  |
| >EGFR-V769I EAYVMASV   | 6915  | >EGFR-V769I EAYVMASM   | 221  | 6694  |
| >EGFR-V769I EAYVMASV   | 18    | >EGFR-V769I EAYVMASM   | 646  | 628   |
| >EGFR-V769I EAYVMASV   | 8     | >EGFR-V769I EAYVMASM   | 61   | 53    |
| >EGFR-V769I EAYVMASV   | 1629  | >EGFR-V769I EAYVMASM   | 24   | 1605  |
| >EGFR-V769I EAYVMASV   | 5146  | >EGFR-V769I EAYVMASM   | 47   | 5099  |
| >EGFR-V769I DEAYVMASV  | 25    | >EGFR-V769I DEAYVMASN  | 56   | 31    |
| >EGFR-V769I DEAYVMASV  | 16013 | >EGFR-V769I DEAYVMASN  | 448  | 15565 |
| >EGFR-V769I DEAYVMASV  | 64    | >EGFR-V769I DEAYVMASN  | 4457 | 4393  |
| >EGFR-V769I DEAYVMASV  | 43    | >EGFR-V769I DEAYVMASN  | 14   | 29    |
| >EGFR-V769I DEAYVMASV  | 423   | >EGFR-V769I DEAYVMASN  | 1663 | 1240  |
| >EGFR-V769I LDEAYVMASV | 144   | >EGFR-V769I LDEAYMASI  | 1635 | 1491  |
| >EGFR-V774I HVCRLGI    | 5622  | >EGFR-V774I HLCRLGI    | 356  | 5266  |
| >EGFR-V774I HVCRLGI    | 1625  | >EGFR-V774I HLCRLGI    | 134  | 1491  |
| >EGFR-V774I HVCRLGI    | 5296  | >EGFR-V774I HLCRLGI    | 68   | 5228  |
| >EGFR-V774I HVCRLGI    | 8676  | >EGFR-V774I HLCRLGI    | 85   | 8591  |
| >EGFR-V774I HVCRLGICL  | 10530 | >EGFR-V774I HLCRLGICL  | 184  | 10346 |
| >EGFR-V774I HVCRLGICLT | 15055 | >EGFR-V774I HLCRLGICLT | 350  | 14705 |
| >EGFR-V774I YVMASVDNP  | 10    | >EGFR-V774I YVMASVDNP  | 17   | 7     |
| >EGFR-V774I YVMASVDNP  | 13    | >EGFR-V774I YVMASVDNP  | 13   | 0     |
| >EGFR-V774I YVMASVDNP  | 8     | >EGFR-V774I YVMASVDNP  | 46   | 38    |
| >EGFR-V774I YVMASVDNP  | 4     | >EGFR-V774I YVMASVDNP  | 7    | 3     |
| >EGFR-V774I YVMASVDNP  | 8     | >EGFR-V774I YVMASVDNP  | 78   | 70    |
| >EGFR-V774I YVMASVDNP  | 7     | >EGFR-V774I YVMASVDNP  | 41   | 34    |
| >EGFR-V774I YVMASVDNP  | 10    | >EGFR-V774I YVMASVDNP  | 75   | 65    |
| >EGFR-V774I YVMASVDNP  | 4     | >EGFR-V774I YVMASVDNP  | 19   | 15    |
| >EGFR-V774I YVMASVDNP  | 3     | >EGFR-V774I YVMASVDNP  | 19   | 16    |
| >EGFR-V774I YVMASVDNP  | 457   | >EGFR-V774I YVMASVDNP  | 48   | 409   |
| >EGFR-V774I YVMASVDNP  | 17    | >EGFR-V774I YVMASVDNP  | 79   | 62    |
| >EGFR-V774I YVMASVDNP  | 7     | >EGFR-V774I YVMASVDNP  | 31   | 24    |
| >EGFR-V774I YVMASVDNP  | 560   | >EGFR-V774I YVMASVDNP  | 217  | 343   |
| >EGFR-V774I YVMASVDNP  | 5286  | >EGFR-V774I YVMASVDNP  | 261  | 5025  |
| >EGFR-V774I YVMASVDNP  | 5772  | >EGFR-V774I YVMASVDNP  | 433  | 5339  |
| >EGFR-V774I NPHVCRL    | 65    | >EGFR-V774I NPHLCRL    | 60   | 5     |
| >EGFR-V774I SVDNPHVCRI | 75    | >EGFR-V774I SVDNPHLCRL | 113  | 38    |
| >EGFR-V774I SVDNPHVCRI | 449   | >EGFR-V774I SVDNPHLCRL | 684  | 235   |
| >EGFR-V774I SVDNPHVCRI | 204   | >EGFR-V774I SVDNPHLCRL | 262  | 58    |
| >EGFR-V774I SVDNPHVCR  | 184   | >EGFR-V774I SVDNPHLCR  | 83   | 101   |
| >EGFR-V774I SVDNPHVCR  | 237   | >EGFR-V774I SVDNPHLCR  | 962  | 725   |
| >EGFR-V774I SVDNPHVCR  | 118   | >EGFR-V774I SVDNPHLCR  | 232  | 114   |
| >EGFR-V774I ASVDNPHV   | 291   | >EGFR-V774I ASVDNPHL   | 1196 | 905   |
| >EGFR-V774I ASVDNPHVCI | 300   | >EGFR-V774I ASVDNPHLCF | 117  | 183   |

|                        |       |                        |      |       |
|------------------------|-------|------------------------|------|-------|
| >EGFR-V774I ASVDNPHV   | 2346  | >EGFR-V774I ASVDNPHL   | 248  | 2098  |
| >EGFR-V774I ASVDNPHVCI | 389   | >EGFR-V774I ASVDNPHLCF | 366  | 23    |
| >EGFR-V774I ASVDNPHVCI | 113   | >EGFR-V774I ASVDNPHLCF | 156  | 43    |
| >EGFR-V774I ASVDNPHVCI | 423   | >EGFR-V774I ASVDNPHLCF | 756  | 333   |
| >EGFR-V774I ASVDNPHV   | 496   | >EGFR-V774I ASVDNPHL   | 19   | 477   |
| >EGFR-V774I ASVDNPHVCI | 6     | >EGFR-V774I ASVDNPHLCF | 7    | 1     |
| >EGFR-V774I ASVDNPHVCI | 154   | >EGFR-V774I ASVDNPHLCF | 121  | 33    |
| >EGFR-V774I MASVDNPHV  | 162   | >EGFR-V774I MASVDNPHL  | 1002 | 840   |
| >EGFR-V774I MASVDNPHV  | 162   | >EGFR-V774I MASVDNPHL  | 4860 | 4698  |
| >EGFR-V774I MASVDNPHV  | 74    | >EGFR-V774I MASVDNPHL  | 161  | 87    |
| >EGFR-V774I MASVDNPHV  | 268   | >EGFR-V774I MASVDNPHL  | 502  | 234   |
| >EGFR-V774I MASVDNPHV  | 9     | >EGFR-V774I MASVDNPHL  | 15   | 6     |
| >EGFR-V774I MASVDNPHV  | 258   | >EGFR-V774I MASVDNPHL  | 2512 | 2254  |
| >EGFR-V774I MASVDNPHV  | 161   | >EGFR-V774I MASVDNPHL  | 2222 | 2061  |
| >EGFR-V774I MASVDNPHV  | 1914  | >EGFR-V774I MASVDNPHL  | 441  | 1473  |
| >EGFR-V774I MASVDNPHV  | 7013  | >EGFR-V774I MASVDNPHL  | 471  | 6542  |
| >EGFR-V774I VMASVDNPH  | 148   | >EGFR-V774I VMASVDNPH  | 593  | 445   |
| >EGFR-V774I VMASVDNPH  | 84    | >EGFR-V774I VMASVDNPH  | 85   | 1     |
| >EGFR-V774I VMASVDNPH  | 209   | >EGFR-V774I VMASVDNPH  | 1058 | 849   |
| >EGFR-V774I VMASVDNPH  | 303   | >EGFR-V774I VMASVDNPH  | 1318 | 1015  |
| >EGFR-V774I VMASVDNPH  | 3     | >EGFR-V774I VMASVDNPH  | 18   | 15    |
| >EGFR-V774I VMASVDNPH  | 37    | >EGFR-V774I VMASVDNPH  | 36   | 1     |
| >EGFR-V774I VMASVDNPH  | 7     | >EGFR-V774I VMASVDNPH  | 35   | 28    |
| >EGFR-V774I VMASVDNPH  | 258   | >EGFR-V774I VMASVDNPH  | 386  | 128   |
| >EGFR-V774I VMASVDNPH  | 5     | >EGFR-V774I VMASVDNPH  | 10   | 5     |
| >EGFR-V774I VMASVDNPH  | 516   | >EGFR-V774I VMASVDNPH  | 356  | 160   |
| >EGFR-V774I VMASVDNPH  | 6     | >EGFR-V774I VMASVDNPH  | 43   | 37    |
| >EGFR-V774I VMASVDNPH  | 233   | >EGFR-V774I VMASVDNPH  | 288  | 55    |
| >EGFR-V774I VMASVDNPH  | 3     | >EGFR-V774I VMASVDNPH  | 10   | 7     |
| >EGFR-V774I VMASVDNPH  | 75    | >EGFR-V774I VMASVDNPH  | 54   | 21    |
| >EGFR-V774I VMASVDNPH  | 873   | >EGFR-V774I VMASVDNPH  | 295  | 578   |
| >EGFR-V774I VMASVDNPH  | 649   | >EGFR-V774I VMASVDNPH  | 311  | 338   |
| >EGFR-V774I HVCRLG     | 5622  | >EGFR-V774I HMCRLG     | 377  | 5245  |
| >EGFR-V774I HVCRLG     | 1625  | >EGFR-V774I HMCRLG     | 84   | 1541  |
| >EGFR-V774I HVCRLG     | 720   | >EGFR-V774I HMCRLG     | 338  | 382   |
| >EGFR-V774I HVCRLG     | 5296  | >EGFR-V774I HMCRLG     | 43   | 5253  |
| >EGFR-V774I HVCRLGICL  | 13495 | >EGFR-V774I HMCRLGICL  | 388  | 13107 |
| >EGFR-V774I HVCRLG     | 8676  | >EGFR-V774I HMCRLG     | 161  | 8515  |
| >EGFR-V774I HVCRLGICL  | 10530 | >EGFR-V774I HMCRLGICL  | 357  | 10173 |
| >EGFR-V774I YVMASVDNP  | 10    | >EGFR-V774I YVMASVDNP  | 57   | 47    |
| >EGFR-V774I YVMASVDNP  | 13    | >EGFR-V774I YVMASVDNP  | 131  | 118   |
| >EGFR-V774I YVMASVDNP  | 8     | >EGFR-V774I YVMASVDNP  | 346  | 338   |
| >EGFR-V774I YVMASVDNP  | 4     | >EGFR-V774I YVMASVDNP  | 16   | 12    |

|                       |       |                      |       |       |
|-----------------------|-------|----------------------|-------|-------|
| >EGFR-V774IYVMASVDNP  | 8     | >EGFR-V774IYVMASVDNP | 640   | 632   |
| >EGFR-V774IYVMASVDNP  | 7     | >EGFR-V774IYVMASVDNP | 527   | 520   |
| >EGFR-V774IYVMASVDNP  | 10    | >EGFR-V774IYVMASVDNP | 910   | 900   |
| >EGFR-V774IYVMASVDNP  | 4     | >EGFR-V774IYVMASVDNP | 97    | 93    |
| >EGFR-V774IYVMASVDNP  | 3     | >EGFR-V774IYVMASVDNP | 816   | 813   |
| >EGFR-V774IYVMASVDNP  | 457   | >EGFR-V774IYVMASVDNP | 7     | 450   |
| >EGFR-V774IYVMASVDNP  | 17    | >EGFR-V774IYVMASVDNP | 621   | 604   |
| >EGFR-V774IYVMASVDNP  | 7     | >EGFR-V774IYVMASVDNP | 39    | 32    |
| >EGFR-V774IYVMASVDNP  | 560   | >EGFR-V774IYVMASVDNP | 71    | 489   |
| >EGFR-V774IYVMASVDNP  | 1501  | >EGFR-V774IYVMASVDNP | 391   | 1110  |
| >EGFR-V774IYVMASVDNP  | 5286  | >EGFR-V774IYVMASVDNP | 152   | 5134  |
| >EGFR-V774IYVMASVDNP  | 10448 | >EGFR-V774IYVMASVDNP | 238   | 10210 |
| >EGFR-V774IYVMASVDNP  | 9899  | >EGFR-V774IYVMASVDNP | 454   | 9445  |
| >EGFR-V774INPHVCRL    | 65    | >EGFR-V774INPHMCRL   | 32    | 33    |
| >EGFR-V774IVDNPHVCRL  | 538   | >EGFR-V774IVDNPHMCRL | 495   | 43    |
| >EGFR-V774ISVDNPHVCRI | 75    | >EGFR-V774ISVDNPHMCR | 164   | 89    |
| >EGFR-V774ISVDNPHVCRI | 449   | >EGFR-V774ISVDNPHMCR | 913   | 464   |
| >EGFR-V774ISVDNPHVCRI | 204   | >EGFR-V774ISVDNPHMCR | 330   | 126   |
| >EGFR-V774ISVDNPHVCR  | 184   | >EGFR-V774ISVDNPHMCR | 62    | 122   |
| >EGFR-V774ISVDNPHVCR  | 237   | >EGFR-V774ISVDNPHMCR | 427   | 190   |
| >EGFR-V774ISVDNPHVCR  | 118   | >EGFR-V774ISVDNPHMCR | 99    | 19    |
| >EGFR-V774ISVDNPHVCRI | 627   | >EGFR-V774ISVDNPHMCR | 326   | 301   |
| >EGFR-V774IASVDNPHV   | 291   | >EGFR-V774IASVDNPHM  | 4022  | 3731  |
| >EGFR-V774IASVDNPHVCI | 300   | >EGFR-V774IASVDNPHMC | 81    | 219   |
| >EGFR-V774IASVDNPHV   | 2346  | >EGFR-V774IASVDNPHM  | 26    | 2320  |
| >EGFR-V774IASVDNPHVCI | 389   | >EGFR-V774IASVDNPHMC | 199   | 190   |
| >EGFR-V774IASVDNPHVCI | 113   | >EGFR-V774IASVDNPHMC | 92    | 21    |
| >EGFR-V774IASVDNPHVCI | 423   | >EGFR-V774IASVDNPHMC | 455   | 32    |
| >EGFR-V774IASVDNPHV   | 496   | >EGFR-V774IASVDNPHM  | 13    | 483   |
| >EGFR-V774IASVDNPHVCI | 6     | >EGFR-V774IASVDNPHMC | 5     | 1     |
| >EGFR-V774IASVDNPHVCI | 154   | >EGFR-V774IASVDNPHMC | 122   | 32    |
| >EGFR-V774IMASVDNPHV  | 162   | >EGFR-V774IMASVDNPHM | 4262  | 4100  |
| >EGFR-V774IMASVDNPHV  | 162   | >EGFR-V774IMASVDNPHM | 22687 | 22525 |
| >EGFR-V774IMASVDNPHV  | 74    | >EGFR-V774IMASVDNPHM | 101   | 27    |
| >EGFR-V774IMASVDNPHV  | 268   | >EGFR-V774IMASVDNPHM | 248   | 20    |
| >EGFR-V774IMASVDNPHV  | 9     | >EGFR-V774IMASVDNPHM | 9     | 0     |
| >EGFR-V774IMASVDNPHV  | 258   | >EGFR-V774IMASVDNPHM | 10238 | 9980  |
| >EGFR-V774IMASVDNPHV  | 161   | >EGFR-V774IMASVDNPHM | 3016  | 2855  |
| >EGFR-V774IMASVDNPHV  | 10347 | >EGFR-V774IMASVDNPHM | 358   | 9989  |
| >EGFR-V774IMASVDNPHV  | 4768  | >EGFR-V774IMASVDNPHM | 78    | 4690  |
| >EGFR-V774IMASVDNPHV  | 1914  | >EGFR-V774IMASVDNPHM | 282   | 1632  |
| >EGFR-V774IMASVDNPHV  | 7013  | >EGFR-V774IMASVDNPHM | 137   | 6876  |
| >EGFR-V774IVMASVDNPH  | 148   | >EGFR-V774IVMASVDNPH | 2239  | 2091  |

|                         |       |                         |      |       |
|-------------------------|-------|-------------------------|------|-------|
| >EGFR-V774I VMASVDNPF   | 84    | >EGFR-V774I VMASVDNPF   | 413  | 329   |
| >EGFR-V774I VMASVDNPF   | 209   | >EGFR-V774I VMASVDNPF   | 3975 | 3766  |
| >EGFR-V774I VMASVDNPF   | 303   | >EGFR-V774I VMASVDNPF   | 4073 | 3770  |
| >EGFR-V774I VMASVDNPF   | 3     | >EGFR-V774I VMASVDNPF   | 123  | 120   |
| >EGFR-V774I VMASVDNPF   | 37    | >EGFR-V774I VMASVDNPF   | 22   | 15    |
| >EGFR-V774I VMASVDNPF   | 7     | >EGFR-V774I VMASVDNPF   | 468  | 461   |
| >EGFR-V774I VMASVDNPF   | 258   | >EGFR-V774I VMASVDNPF   | 393  | 135   |
| >EGFR-V774I VMASVDNPF   | 5     | >EGFR-V774I VMASVDNPF   | 43   | 38    |
| >EGFR-V774I VMASVDNPF   | 516   | >EGFR-V774I VMASVDNPF   | 239  | 277   |
| >EGFR-V774I VMASVDNPF   | 6     | >EGFR-V774I VMASVDNPF   | 306  | 300   |
| >EGFR-V774I VMASVDNPF   | 233   | >EGFR-V774I VMASVDNPF   | 212  | 21    |
| >EGFR-V774I VMASVDNPF   | 3     | >EGFR-V774I VMASVDNPF   | 181  | 178   |
| >EGFR-V774I VMASVDNPF   | 75    | >EGFR-V774I VMASVDNPF   | 62   | 13    |
| >EGFR-V774I VMASVDNPF   | 873   | >EGFR-V774I VMASVDNPF   | 76   | 797   |
| >EGFR-V774I VMASVDNPF   | 649   | >EGFR-V774I VMASVDNPF   | 148  | 501   |
| >EGFR-V786I VQLITQLM    | 332   | >EGFR-V786I MQLITQLM    | 73   | 259   |
| >EGFR-V786I VQLITQLMPF  | 2268  | >EGFR-V786I MQLITQLMP   | 485  | 1783  |
| >EGFR-V786I VQLITQLMPF  | 75    | >EGFR-V786I MQLITQLMP   | 46   | 29    |
| >EGFR-V786I VQLITQLMPF  | 729   | >EGFR-V786I MQLITQLMP   | 420  | 309   |
| >EGFR-V786I VQLITQLM    | 58    | >EGFR-V786I MQLITQLM    | 18   | 40    |
| >EGFR-V786I VQLITQLMPF  | 3     | >EGFR-V786I MQLITQLMP   | 2    | 1     |
| >EGFR-V786I VQLITQLM    | 4382  | >EGFR-V786I MQLITQLM    | 299  | 4083  |
| >EGFR-V786I TVQLITQL    | 6742  | >EGFR-V786I TMQLITQL    | 316  | 6426  |
| >EGFR-V786I TVQLITQL    | 1348  | >EGFR-V786I TMQLITQL    | 41   | 1307  |
| >EGFR-V786I TVQLITQLM   | 4087  | >EGFR-V786I TMQLITQLM   | 253  | 3834  |
| >EGFR-V786I TVQLITQL    | 2492  | >EGFR-V786I TMQLITQL    | 122  | 2370  |
| >EGFR-V786I TVQLITQL    | 8982  | >EGFR-V786I TMQLITQL    | 169  | 8813  |
| >EGFR-V786I TVQLITQL    | 14274 | >EGFR-V786I TMQLITQL    | 277  | 13997 |
| >EGFR-V786I TVQLITQL    | 7510  | >EGFR-V786I TMQLITQL    | 108  | 7402  |
| >EGFR-V786I TVQLITQL    | 2592  | >EGFR-V786I TMQLITQL    | 16   | 2576  |
| >EGFR-V786I TVQLITQLMP  | 469   | >EGFR-V786I TMQLITQLM   | 7585 | 7116  |
| >EGFR-V786I TVQLITQLMP  | 188   | >EGFR-V786I TMQLITQLM   | 117  | 71    |
| >EGFR-V786I TVQLITQL    | 217   | >EGFR-V786I TMQLITQL    | 5473 | 5256  |
| >EGFR-V786I TVQLITQLMP  | 651   | >EGFR-V786I TMQLITQLM   | 78   | 573   |
| >EGFR-V786I TVQLITQLMP  | 3234  | >EGFR-V786I TMQLITQLM   | 315  | 2919  |
| >EGFR-V786I TVQLITQLMP  | 2354  | >EGFR-V786I TMQLITQLM   | 48   | 2306  |
| >EGFR-V786I TVQLITQLM   | 410   | >EGFR-V786I TMQLITQLM   | 3552 | 3142  |
| >EGFR-V786I RLLGICLTSTV | 15    | >EGFR-V786I RLLGICLTSTM | 144  | 129   |
| >EGFR-V786I RLLGICLTSTV | 29    | >EGFR-V786I RLLGICLTSTM | 412  | 383   |
| >EGFR-V786I RLLGICLTSTV | 13    | >EGFR-V786I RLLGICLTSTM | 322  | 309   |
| >EGFR-V786I RLLGICLTSTV | 19    | >EGFR-V786I RLLGICLTSTM | 724  | 705   |
| >EGFR-V786I RLLGICLTSTV | 2     | >EGFR-V786I RLLGICLTSTM | 14   | 12    |
| >EGFR-V786I RLLGICLTSTV | 5     | >EGFR-V786I RLLGICLTSTM | 99   | 94    |

|                         |      |                         |      |      |
|-------------------------|------|-------------------------|------|------|
| >EGFR-V786I RLLGICLTSTV | 5    | >EGFR-V786I RLLGICLTSTM | 71   | 66   |
| >EGFR-V786I RLLGICLTSTV | 2    | >EGFR-V786I RLLGICLTSTM | 32   | 30   |
| >EGFR-V786I RLLGICLTSTV | 2    | >EGFR-V786I RLLGICLTSTM | 32   | 30   |
| >EGFR-V786I RLLGICLTSTV | 23   | >EGFR-V786I RLLGICLTSTM | 14   | 9    |
| >EGFR-V786I RLLGICLTSTV | 3419 | >EGFR-V786I RLLGICLTSTM | 256  | 3163 |
| >EGFR-V786I RLLGICLTSTV | 1293 | >EGFR-V786I RLLGICLTSTM | 286  | 1007 |
| >EGFR-V786I RLLGICLTSTV | 6546 | >EGFR-V786I RLLGICLTSTM | 187  | 6359 |
| >EGFR-V786I RLLGICLTSTV | 241  | >EGFR-V786I RLLGICLTSTM | 16   | 225  |
| >EGFR-V786I STVQLITQL   | 788  | >EGFR-V786I STMQLITQL   | 171  | 617  |
| >EGFR-V786I STVQLITQL   | 5704 | >EGFR-V786I STMQLITQL   | 291  | 5413 |
| >EGFR-V786I STVQLITQL   | 339  | >EGFR-V786I STMQLITQL   | 36   | 303  |
| >EGFR-V786I STVQLITQLM  | 1715 | >EGFR-V786I STMQLITQLM  | 357  | 1358 |
| >EGFR-V786I STVQLITQL   | 907  | >EGFR-V786I STMQLITQL   | 170  | 737  |
| >EGFR-V786I STVQLITQLM  | 2180 | >EGFR-V786I STMQLITQLM  | 455  | 1725 |
| >EGFR-V786I STVQLITQL   | 408  | >EGFR-V786I STMQLITQL   | 115  | 293  |
| >EGFR-V786I STVQLITQL   | 706  | >EGFR-V786I STMQLITQL   | 207  | 499  |
| >EGFR-V786I STVQLITQL   | 1041 | >EGFR-V786I STMQLITQL   | 440  | 601  |
| >EGFR-V786I STVQLITQ    | 371  | >EGFR-V786I STMQLITQ    | 1289 | 918  |
| >EGFR-V786I STVQLITQL   | 64   | >EGFR-V786I STMQLITQL   | 191  | 127  |
| >EGFR-V786I STVQLITQLM  | 18   | >EGFR-V786I STMQLITQLM  | 57   | 39   |
| >EGFR-V786I STVQLITQLM  | 139  | >EGFR-V786I STMQLITQLM  | 251  | 112  |
| >EGFR-V786I STVQLITQL   | 572  | >EGFR-V786I STMQLITQL   | 51   | 521  |
| >EGFR-V786I STVQLITQLM  | 2556 | >EGFR-V786I STMQLITQLM  | 358  | 2198 |
| >EGFR-V786I STVQLITQL   | 116  | >EGFR-V786I STMQLITQL   | 34   | 82   |
| >EGFR-V786I STVQLITQLM  | 296  | >EGFR-V786I STMQLITQLM  | 218  | 78   |
| >EGFR-V786I STVQLITQL   | 222  | >EGFR-V786I STMQLITQL   | 47   | 175  |
| >EGFR-V786I STVQLITQLM  | 528  | >EGFR-V786I STMQLITQLM  | 118  | 410  |
| >EGFR-V786I STVQLITQL   | 7    | >EGFR-V786I STMQLITQL   | 8    | 1    |
| >EGFR-V786I STVQLITQLM  | 18   | >EGFR-V786I STMQLITQLM  | 21   | 3    |
| >EGFR-V786I STVQLITQL   | 170  | >EGFR-V786I STMQLITQL   | 360  | 190  |
| >EGFR-V786I STVQLITQLM  | 72   | >EGFR-V786I STMQLITQLM  | 154  | 82   |
| >EGFR-V786I STVQLITQL   | 17   | >EGFR-V786I STMQLITQL   | 12   | 5    |
| >EGFR-V786I STVQLITQLM  | 24   | >EGFR-V786I STMQLITQLM  | 18   | 6    |
| >EGFR-V786I STVQLITQL   | 249  | >EGFR-V786I STMQLITQL   | 76   | 173  |
| >EGFR-V786I TSTVQLITQL  | 59   | >EGFR-V786I TSTMQLITQL  | 46   | 13   |
| >EGFR-V786I TSTVQLITQLM | 239  | >EGFR-V786I TSTMQLITQL  | 175  | 64   |
| >EGFR-V786I TSTVQLITQL  | 474  | >EGFR-V786I TSTMQLITQL  | 230  | 244  |
| >EGFR-V786I TSTVQLITQLM | 203  | >EGFR-V786I TSTMQLITQL  | 94   | 109  |
| >EGFR-V786I TSTVQLITQL  | 253  | >EGFR-V786I TSTMQLITQL  | 503  | 250  |
| >EGFR-V786I TSTVQLITQLM | 171  | >EGFR-V786I TSTMQLITQL  | 121  | 50   |
| >EGFR-V786I LTSTVQLI    | 302  | >EGFR-V786I LTSTMQLI    | 487  | 185  |
| >EGFR-V786I LTSTVQLITQL | 119  | >EGFR-V786I LTSTMQLITQ  | 188  | 69   |
| >EGFR-V786I LTSTVQLI    | 123  | >EGFR-V786I LTSTMQLI    | 254  | 131  |

|                         |      |                        |       |       |
|-------------------------|------|------------------------|-------|-------|
| >EGFR-V786I LTSTVQLITQL | 223  | >EGFR-V786I LTSTMQLITQ | 599   | 376   |
| >EGFR-V786I LTSTVQLI    | 715  | >EGFR-V786I LTSTMQLI   | 193   | 522   |
| >EGFR-V786I LTSTVQLITQL | 49   | >EGFR-V786I LTSTMQLITQ | 17    | 32    |
| >EGFR-V786I LTSTVQLI    | 80   | >EGFR-V786I LTSTMQLI   | 297   | 217   |
| >EGFR-V786I LTSTVQLITQL | 78   | >EGFR-V786I LTSTMQLITQ | 173   | 95    |
| >EGFR-V786I LTSTVQLITQL | 117  | >EGFR-V786I LTSTMQLITQ | 119   | 2     |
| >EGFR-V786I LTSTVQLITQ  | 785  | >EGFR-V786I LTSTMQLITQ | 350   | 435   |
| >EGFR-V786I LTSTVQLITQL | 30   | >EGFR-V786I LTSTMQLITQ | 33    | 3     |
| >EGFR-V786I LTSTVQLI    | 32   | >EGFR-V786I LTSTMQLI   | 36    | 4     |
| >EGFR-V786I LTSTVQLITQL | 298  | >EGFR-V786I LTSTMQLITQ | 395   | 97    |
| >EGFR-V786I CLTSTVQL    | 75   | >EGFR-V786I CLTSTMQL   | 86    | 11    |
| >EGFR-V786I CLTSTVQLI   | 187  | >EGFR-V786I CLTSTMQLI  | 156   | 31    |
| >EGFR-V786I CLTSTVQL    | 312  | >EGFR-V786I CLTSTMQL   | 194   | 118   |
| >EGFR-V786I CLTSTVQLI   | 73   | >EGFR-V786I CLTSTMQLI  | 126   | 53    |
| >EGFR-V786I CLTSTVQL    | 143  | >EGFR-V786I CLTSTMQL   | 298   | 155   |
| >EGFR-V786I CLTSTVQLI   | 103  | >EGFR-V786I CLTSTMQLI  | 428   | 325   |
| >EGFR-V786I CLTSTVQL    | 364  | >EGFR-V786I CLTSTMQL   | 506   | 142   |
| >EGFR-V786I CLTSTVQLI   | 316  | >EGFR-V786I CLTSTMQLI  | 776   | 460   |
| >EGFR-V786I CLTSTVQL    | 227  | >EGFR-V786I CLTSTMQL   | 534   | 307   |
| >EGFR-V786I CLTSTVQLI   | 272  | >EGFR-V786I CLTSTMQLI  | 1237  | 965   |
| >EGFR-V786I CLTSTVQL    | 77   | >EGFR-V786I CLTSTMQL   | 237   | 160   |
| >EGFR-V786I CLTSTVQLI   | 301  | >EGFR-V786I CLTSTMQLI  | 2559  | 2258  |
| >EGFR-V786I CLTSTVQL    | 7    | >EGFR-V786I CLTSTMQL   | 8     | 1     |
| >EGFR-V786I CLTSTVQLI   | 25   | >EGFR-V786I CLTSTMQLI  | 68    | 43    |
| >EGFR-V786I GICLTSTV    | 138  | >EGFR-V786I GICLTSTM   | 4948  | 4810  |
| >EGFR-V786I GICLTSTV    | 122  | >EGFR-V786I GICLTSTM   | 8940  | 8818  |
| >EGFR-V786I GICLTSTV    | 314  | >EGFR-V786I GICLTSTM   | 15040 | 14726 |
| >EGFR-V786I GICLTSTV    | 38   | >EGFR-V786I GICLTSTM   | 14131 | 14093 |
| >EGFR-V786I LGICLTSTV   | 3213 | >EGFR-V786I LGICLTSTM  | 192   | 3021  |
| >EGFR-V786I LGICLTSTV   | 4946 | >EGFR-V786I LGICLTSTM  | 59    | 4887  |
| >EGFR-V786I LGICLTSTV   | 256  | >EGFR-V786I LGICLTSTM  | 17    | 239   |
| >EGFR-V786I LLGICLTSTV  | 63   | >EGFR-V786I LLGICLTSTM | 659   | 596   |
| >EGFR-V786I LLGICLTSTV  | 17   | >EGFR-V786I LLGICLTSTM | 43    | 26    |
| >EGFR-V786I LLGICLTSTV  | 14   | >EGFR-V786I LLGICLTSTM | 169   | 155   |
| >EGFR-V786I LLGICLTSTV  | 98   | >EGFR-V786I LLGICLTSTM | 1204  | 1106  |
| >EGFR-V786I LLGICLTSTV  | 4    | >EGFR-V786I LLGICLTSTM | 212   | 208   |
| >EGFR-V786I LLGICLTSTV  | 5    | >EGFR-V786I LLGICLTSTM | 276   | 271   |
| >EGFR-V786I LLGICLTSTV  | 9    | >EGFR-V786I LLGICLTSTM | 1090  | 1081  |
| >EGFR-V786I LLGICLTSTV  | 6    | >EGFR-V786I LLGICLTSTM | 590   | 584   |
| >EGFR-V786I LLGICLTSTV  | 2    | >EGFR-V786I LLGICLTSTM | 28    | 26    |
| >EGFR-V786I LLGICLTSTVQ | 272  | >EGFR-V786I LLGICLTSTM | 201   | 71    |
| >EGFR-V786I LLGICLTSTV  | 2599 | >EGFR-V786I LLGICLTSTM | 174   | 2425  |
| >EGFR-V786I LLGICLTSTV  | 8389 | >EGFR-V786I LLGICLTSTM | 311   | 8078  |

|                       |       |                       |       |       |
|-----------------------|-------|-----------------------|-------|-------|
| >EGFR-V802FLMPFGCLLDY | 24    | >EGFR-V802FLMPFGCLLDY | 8713  | 8689  |
| >EGFR-V802FLMPFGCLLDY | 12    | >EGFR-V802FLMPFGCLLDY | 1453  | 1441  |
| >EGFR-V802FLMPFGCLLDY | 8     | >EGFR-V802FLMPFGCLLDY | 3963  | 3955  |
| >EGFR-V802FLMPFGCLLDY | 12    | >EGFR-V802FLMPFGCLLDY | 736   | 724   |
| >EGFR-V802FLMPFGCLLDY | 3     | >EGFR-V802FLMPFGCLLDY | 986   | 983   |
| >EGFR-V802FLMPFGCLLDY | 14    | >EGFR-V802FLMPFGCLLDY | 8749  | 8735  |
| >EGFR-V802FLMPFGCLLDY | 8     | >EGFR-V802FLMPFGCLLDY | 12489 | 12481 |
| >EGFR-V802FLMPFGCLLDY | 6     | >EGFR-V802FLMPFGCLLDY | 11345 | 11339 |
| >EGFR-V802FLMPFGCLLDY | 3     | >EGFR-V802FLMPFGCLLDY | 8780  | 8777  |
| >EGFR-V802FLMPFGCLLDY | 8863  | >EGFR-V802FLMPFGCLLDY | 41    | 8822  |
| >EGFR-V802FLMPFGCLLDY | 4050  | >EGFR-V802FLMPFGCLLDY | 305   | 3745  |
| >EGFR-V802FLMPFGCLLDY | 6575  | >EGFR-V802FLMPFGCLLDY | 135   | 6440  |
| >EGFR-V802FLMPFGCLLDY | 7730  | >EGFR-V802FLMPFGCLLDY | 313   | 7417  |
| >EGFR-V802FLMPFGCLLDY | 509   | >EGFR-V802FLMPFGCLLDY | 100   | 409   |
| >EGFR-V802FDYVREHKDNI | 1402  | >EGFR-V802FDYFREHKDNI | 434   | 968   |
| >EGFR-V802FLDYVREHKDN | 101   | >EGFR-V802FLDYFREHKDN | 163   | 62    |
| >EGFR-V802FLDYVREHKDN | 286   | >EGFR-V802FLDYFREHKDN | 647   | 361   |
| >EGFR-V802FLDYVREHKDN | 387   | >EGFR-V802FLDYFREHKDN | 626   | 239   |
| >EGFR-V802FLDYVREHKDN | 62    | >EGFR-V802FLDYFREHKDN | 226   | 164   |
| >EGFR-V802FCLLDYVREHK | 74    | >EGFR-V802FCLLDYFREHK | 88    | 14    |
| >EGFR-V802FCLLDYVREHK | 144   | >EGFR-V802FCLLDYFREHK | 144   | 0     |
| >EGFR-V802FCLLDYVREHK | 570   | >EGFR-V802FCLLDYFREHK | 300   | 270   |
| >EGFR-V802FCLLDYVREHK | 2254  | >EGFR-V802FCLLDYFREHK | 486   | 1768  |
| >EGFR-V802FGCLLDYVR   | 1847  | >EGFR-V802FGCLLDYFR   | 224   | 1623  |
| >EGFR-V802FGCLLDYVR   | 361   | >EGFR-V802FGCLLDYFR   | 151   | 210   |
| >EGFR-V802FGCLLDYV    | 218   | >EGFR-V802FGCLLDYF    | 3842  | 3624  |
| >EGFR-V802FGCLLDYV    | 151   | >EGFR-V802FGCLLDYF    | 4526  | 4375  |
| >EGFR-V802FGCLLDYVR   | 1663  | >EGFR-V802FGCLLDYFR   | 307   | 1356  |
| >EGFR-V802FGCLLDYVR   | 2597  | >EGFR-V802FGCLLDYFR   | 364   | 2233  |
| >EGFR-V802FGCLLDYVR   | 542   | >EGFR-V802FGCLLDYFR   | 66    | 476   |
| >EGFR-V802FGCLLDYVR   | 78    | >EGFR-V802FGCLLDYFR   | 28    | 50    |
| >EGFR-V802FPFGCLLDYV  | 13065 | >EGFR-V802FPFGCLLDYF  | 209   | 12856 |
| >EGFR-V802FPFGCLLDYV  | 8076  | >EGFR-V802FPFGCLLDYF  | 45    | 8031  |
| >EGFR-V802FPFGCLLDYVR | 1752  | >EGFR-V802FPFGCLLDYFR | 237   | 1515  |
| >EGFR-V802FPFGCLLDYVR | 3763  | >EGFR-V802FPFGCLLDYFR | 219   | 3544  |
| >EGFR-V802FPFGCLLDYVR | 1649  | >EGFR-V802FPFGCLLDYFR | 309   | 1340  |
| >EGFR-V802FPFGCLLDYVR | 35    | >EGFR-V802FPFGCLLDYFR | 23    | 12    |
| >EGFR-V802FMPFGCLLDY\ | 8     | >EGFR-V802FMPFGCLLDYF | 4     | 4     |
| >EGFR-V802FMPFGCLLDY\ | 203   | >EGFR-V802FMPFGCLLDYF | 14424 | 14221 |
| >EGFR-V802FMPFGCLLDY\ | 131   | >EGFR-V802FMPFGCLLDYF | 15492 | 15361 |
| >EGFR-V802FMPFGCLLDY\ | 399   | >EGFR-V802FMPFGCLLDYF | 20600 | 20201 |
| >EGFR-V802FMPFGCLLDY\ | 498   | >EGFR-V802FMPFGCLLDYF | 101   | 397   |
| >EGFR-V802FMPFGCLLDY\ | 425   | >EGFR-V802FMPFGCLLDYF | 65    | 360   |

|                       |      |                       |       |       |
|-----------------------|------|-----------------------|-------|-------|
| >EGFR-V802FMPFGCLLDY\ | 63   | >EGFR-V802FMPFGCLLDYF | 14    | 49    |
| >EGFR-V802FMPFGCLLDY\ | 282  | >EGFR-V802FMPFGCLLDYF | 10851 | 10569 |
| >EGFR-V802FMPFGCLLDY\ | 5464 | >EGFR-V802FMPFGCLLDYF | 246   | 5218  |
| >EGFR-V802FMPFGCLLDY\ | 3699 | >EGFR-V802FMPFGCLLDYF | 129   | 3570  |
| >EGFR-V802FMPFGCLLDY\ | 80   | >EGFR-V802FMPFGCLLDYF | 312   | 232   |
| >EGFR-V802FMPFGCLLDY\ | 1655 | >EGFR-V802FMPFGCLLDYF | 243   | 1412  |
| >EGFR-V802FMPFGCLLDY\ | 25   | >EGFR-V802FMPFGCLLDYF | 582   | 557   |
| >EGFR-V802FMPFGCLLDY\ | 43   | >EGFR-V802FMPFGCLLDYF | 106   | 63    |
| >EGFR-V802FMPFGCLLDY\ | 2336 | >EGFR-V802FMPFGCLLDYF | 36    | 2300  |
| >EGFR-V802FMPFGCLLDY\ | 2818 | >EGFR-V802FMPFGCLLDYF | 337   | 2481  |
| >EGFR-V802FMPFGCLLDY\ | 32   | >EGFR-V802FMPFGCLLDYF | 21    | 11    |
| >EGFR-V802IYVREHKDNI  | 519  | >EGFR-V802IYIREHKDNI  | 176   | 343   |
| >EGFR-V802ILMPFGCLLDY | 24   | >EGFR-V802ILMPFGCLLDY | 75    | 51    |
| >EGFR-V802ILMPFGCLLDY | 12   | >EGFR-V802ILMPFGCLLDY | 41    | 29    |
| >EGFR-V802ILMPFGCLLDY | 8    | >EGFR-V802ILMPFGCLLDY | 25    | 17    |
| >EGFR-V802ILMPFGCLLDY | 12   | >EGFR-V802ILMPFGCLLDY | 64    | 52    |
| >EGFR-V802ILMPFGCLLDY | 3    | >EGFR-V802ILMPFGCLLDY | 15    | 12    |
| >EGFR-V802ILMPFGCLLDY | 14   | >EGFR-V802ILMPFGCLLDY | 105   | 91    |
| >EGFR-V802ILMPFGCLLDY | 8    | >EGFR-V802ILMPFGCLLDY | 71    | 63    |
| >EGFR-V802ILMPFGCLLDY | 6    | >EGFR-V802ILMPFGCLLDY | 91    | 85    |
| >EGFR-V802ILMPFGCLLDY | 3    | >EGFR-V802ILMPFGCLLDY | 53    | 50    |
| >EGFR-V802ILMPFGCLLDY | 509  | >EGFR-V802ILMPFGCLLDY | 219   | 290   |
| >EGFR-V802ILDYVREHKDN | 101  | >EGFR-V802ILDYIREHKDN | 67    | 34    |
| >EGFR-V802ILDYVREHKDN | 286  | >EGFR-V802ILDYIREHKDN | 362   | 76    |
| >EGFR-V802ILDYVREHKDN | 387  | >EGFR-V802ILDYIREHKDN | 194   | 193   |
| >EGFR-V802ILDYVREHKDN | 62   | >EGFR-V802ILDYIREHKDN | 66    | 4     |
| >EGFR-V802ICLLDYVREHK | 74   | >EGFR-V802ICLLDYIREHK | 58    | 16    |
| >EGFR-V802ICLLDYVREHK | 144  | >EGFR-V802ICLLDYIREHK | 174   | 30    |
| >EGFR-V802ICLLDYVREHK | 570  | >EGFR-V802ICLLDYIREHK | 414   | 156   |
| >EGFR-V802IGCLLDYVR   | 361  | >EGFR-V802IGCLLDYIR   | 413   | 52    |
| >EGFR-V802IFGCLLDYV   | 218  | >EGFR-V802IFGCLLDYI   | 480   | 262   |
| >EGFR-V802IFGCLLDYV   | 151  | >EGFR-V802IFGCLLDYI   | 840   | 689   |
| >EGFR-V802IFGCLLDYVR  | 78   | >EGFR-V802IFGCLLDYIR  | 75    | 3     |
| >EGFR-V802IPFGCLLDYVR | 35   | >EGFR-V802IPFGCLLDYIR | 38    | 3     |
| >EGFR-V802IMPFGLLDY\  | 8    | >EGFR-V802IMPFGLLDYI  | 6     | 2     |
| >EGFR-V802IMPFGLLDY\  | 203  | >EGFR-V802IMPFGLLDYI  | 460   | 257   |
| >EGFR-V802IMPFGLLDY\  | 131  | >EGFR-V802IMPFGLLDYI  | 460   | 329   |
| >EGFR-V802IMPFGLLDY\  | 399  | >EGFR-V802IMPFGLLDYI  | 2985  | 2586  |
| >EGFR-V802IMPFGLLDY\  | 498  | >EGFR-V802IMPFGLLDYI  | 600   | 102   |
| >EGFR-V802IMPFGLLDY\  | 425  | >EGFR-V802IMPFGLLDYI  | 594   | 169   |
| >EGFR-V802IMPFGLLDY\  | 63   | >EGFR-V802IMPFGLLDYI  | 61    | 2     |
| >EGFR-V802IMPFGLLDY\  | 282  | >EGFR-V802IMPFGLLDYI  | 890   | 608   |
| >EGFR-V802IMPFGLLDY\  | 80   | >EGFR-V802IMPFGLLDYI  | 114   | 34    |



|                        |      |                        |      |      |
|------------------------|------|------------------------|------|------|
| >EGFR-V802I MPFGCLLDYI | 25   | >EGFR-V802I MPFGCLLDYI | 113  | 88   |
| >EGFR-V802I MPFGCLLDYI | 43   | >EGFR-V802I MPFGCLLDYI | 45   | 2    |
| >EGFR-V802I MPFGCLLDYI | 32   | >EGFR-V802I MPFGCLLDYI | 34   | 2    |
| >EGFR-V819/VQIAKGMNY   | 300  | >EGFR-V819/AQIAKGMNY   | 134  | 166  |
| >EGFR-V819/VQIAKGMNY   | 332  | >EGFR-V819/AQIAKGMNY   | 152  | 180  |
| >EGFR-V819/VQIAKGMNY   | 544  | >EGFR-V819/AQIAKGMNY   | 467  | 77   |
| >EGFR-V819/VQIAKGMNY   | 327  | >EGFR-V819/AQIAKGMNY   | 619  | 292  |
| >EGFR-V819/VQIAKGMNY   | 22   | >EGFR-V819/AQIAKGMNY   | 59   | 37   |
| >EGFR-V819/VQIAKGMNY   | 63   | >EGFR-V819/AQIAKGMNY   | 58   | 5    |
| >EGFR-V819/VQIAKGMNY   | 344  | >EGFR-V819/AQIAKGMNY   | 226  | 118  |
| >EGFR-V819/VQIAKGMNY   | 192  | >EGFR-V819/AQIAKGMNY   | 240  | 48   |
| >EGFR-V819/VQIAKGMNY   | 8    | >EGFR-V819/AQIAKGMNY   | 6    | 2    |
| >EGFR-V819/VQIAKGMNY   | 73   | >EGFR-V819/AQIAKGMNY   | 41   | 32   |
| >EGFR-V819/VQIAKGMNY   | 1158 | >EGFR-V819/AQIAKGMNY   | 389  | 769  |
| >EGFR-V819/CVQIAKGMN   | 329  | >EGFR-V819/CAQIAKGMN   | 401  | 72   |
| >EGFR-V819/CVQIAKGMN   | 301  | >EGFR-V819/CAQIAKGMN   | 2996 | 2695 |
| >EGFR-V819/CVQIAKGMN   | 3025 | >EGFR-V819/CAQIAKGMN   | 469  | 2556 |
| >EGFR-V819/WCVQIAKGM   | 249  | >EGFR-V819/WCAQIAKGM   | 1671 | 1422 |
| >EGFR-V819/WCVQIAKGM   | 610  | >EGFR-V819/WCAQIAKGM   | 384  | 226  |
| >EGFR-V819/WCVQIAKGM   | 454  | >EGFR-V819/WCAQIAKGM   | 259  | 195  |
| >EGFR-V819/WCVQIAKGM   | 176  | >EGFR-V819/WCAQIAKGM   | 150  | 26   |
| >EGFR-V819/WCVQIAKGM   | 127  | >EGFR-V819/WCAQIAKGM   | 110  | 17   |
| >EGFR-V819/NWCVQIAK    | 292  | >EGFR-V819/NWCAQIAK    | 87   | 205  |
| >EGFR-V819/LLNWCVQI    | 39   | >EGFR-V819/LLNWCAQI    | 68   | 29   |
| >EGFR-V819/LLNWCVQIA   | 168  | >EGFR-V819/LLNWCAQIA   | 1236 | 1068 |
| >EGFR-V819/LLNWCVQI    | 20   | >EGFR-V819/LLNWCAQI    | 26   | 6    |
| >EGFR-V819/LLNWCVQIA   | 58   | >EGFR-V819/LLNWCAQIA   | 240  | 182  |
| >EGFR-V819/LLNWCVQI    | 12   | >EGFR-V819/LLNWCAQI    | 11   | 1    |
| >EGFR-V819/LLNWCVQIA   | 7    | >EGFR-V819/LLNWCAQIA   | 31   | 24   |
| >EGFR-V819/LLNWCVQI    | 6    | >EGFR-V819/LLNWCAQI    | 8    | 2    |
| >EGFR-V819/LLNWCVQIA   | 40   | >EGFR-V819/LLNWCAQIA   | 205  | 165  |
| >EGFR-V819/LLNWCVQI    | 100  | >EGFR-V819/LLNWCAQI    | 107  | 7    |
| >EGFR-V819/LLNWCVQIA   | 231  | >EGFR-V819/LLNWCAQIA   | 661  | 430  |
| >EGFR-V819/LLNWCVQI    | 28   | >EGFR-V819/LLNWCAQI    | 43   | 15   |
| >EGFR-V819/LLNWCVQIA   | 98   | >EGFR-V819/LLNWCAQIA   | 322  | 224  |
| >EGFR-V819/LLNWCVQI    | 14   | >EGFR-V819/LLNWCAQI    | 14   | 0    |
| >EGFR-V819/LLNWCVQIA   | 68   | >EGFR-V819/LLNWCAQIA   | 441  | 373  |
| >EGFR-V819/LLNWCVQI    | 3    | >EGFR-V819/LLNWCAQI    | 4    | 1    |
| >EGFR-V819/LLNWCVQIA   | 4    | >EGFR-V819/LLNWCAQIA   | 8    | 4    |
| >EGFR-V819/LLNWCVQIA†  | 494  | >EGFR-V819/LLNWCAQIA†  | 766  | 272  |
| >EGFR-V819/LLNWCVQIA†  | 42   | >EGFR-V819/LLNWCAQIA†  | 45   | 3    |
| >EGFR-V819/LLNWCVQIA†  | 100  | >EGFR-V819/LLNWCAQIA†  | 177  | 77   |
| >EGFR-V819/LLNWCVQIA†  | 223  | >EGFR-V819/LLNWCAQIA†  | 492  | 269  |

|                        |     |                         |      |      |
|------------------------|-----|-------------------------|------|------|
| >EGFR-V819/LLNWCVQIAI  | 720 | >EGFR-V819/LLNWCQAQIAI  | 238  | 482  |
| >EGFR-V819/YLLNWCVQI   | 7   | >EGFR-V819/YLLNWCQAQI   | 8    | 1    |
| >EGFR-V819/YLLNWCVQIAI | 19  | >EGFR-V819/YLLNWCQAQIAI | 29   | 10   |
| >EGFR-V819/YLLNWCVQI   | 32  | >EGFR-V819/YLLNWCQAQI   | 28   | 4    |
| >EGFR-V819/YLLNWCVQIAI | 51  | >EGFR-V819/YLLNWCQAQIAI | 54   | 3    |
| >EGFR-V819/YLLNWCVQI   | 21  | >EGFR-V819/YLLNWCQAQI   | 8    | 13   |
| >EGFR-V819/YLLNWCVQIAI | 23  | >EGFR-V819/YLLNWCQAQIAI | 36   | 13   |
| >EGFR-V819/YLLNWCVQ    | 540 | >EGFR-V819/YLLNWCQAQ    | 157  | 383  |
| >EGFR-V819/YLLNWCVQI   | 12  | >EGFR-V819/YLLNWCQAQI   | 13   | 1    |
| >EGFR-V819/YLLNWCVQIAI | 57  | >EGFR-V819/YLLNWCQAQIAI | 79   | 22   |
| >EGFR-V819/YLLNWCVQ    | 16  | >EGFR-V819/YLLNWCQAQ    | 9    | 7    |
| >EGFR-V819/YLLNWCVQI   | 1   | >EGFR-V819/YLLNWCQAQI   | 1    | 0    |
| >EGFR-V819/YLLNWCVQIAI | 3   | >EGFR-V819/YLLNWCQAQIAI | 5    | 2    |
| >EGFR-V819/YLLNWCVQIAI | 30  | >EGFR-V819/YLLNWCQAQIAI | 50   | 20   |
| >EGFR-V819/YLLNWCVQ    | 200 | >EGFR-V819/YLLNWCQAQ    | 85   | 115  |
| >EGFR-V819/YLLNWCVQI   | 4   | >EGFR-V819/YLLNWCQAQI   | 3    | 1    |
| >EGFR-V819/YLLNWCVQIAI | 6   | >EGFR-V819/YLLNWCQAQIAI | 6    | 0    |
| >EGFR-V819/YLLNWCVQ    | 24  | >EGFR-V819/YLLNWCQAQ    | 25   | 1    |
| >EGFR-V819/YLLNWCVQI   | 4   | >EGFR-V819/YLLNWCQAQI   | 4    | 0    |
| >EGFR-V819/YLLNWCVQIAI | 6   | >EGFR-V819/YLLNWCQAQIAI | 7    | 1    |
| >EGFR-V819/YLLNWCVQ    | 448 | >EGFR-V819/YLLNWCQAQ    | 305  | 143  |
| >EGFR-V819/YLLNWCVQI   | 2   | >EGFR-V819/YLLNWCQAQI   | 2    | 0    |
| >EGFR-V819/YLLNWCVQIAI | 5   | >EGFR-V819/YLLNWCQAQIAI | 6    | 1    |
| >EGFR-V819/YLLNWCVQ    | 6   | >EGFR-V819/YLLNWCQAQ    | 5    | 1    |
| >EGFR-V819/YLLNWCVQI   | 2   | >EGFR-V819/YLLNWCQAQI   | 2    | 0    |
| >EGFR-V819/YLLNWCVQIAI | 2   | >EGFR-V819/YLLNWCQAQIAI | 3    | 1    |
| >EGFR-V819/YLLNWCVQIAI | 52  | >EGFR-V819/YLLNWCQAQIAI | 45   | 7    |
| >EGFR-V819/YLLNWCVQIAI | 79  | >EGFR-V819/YLLNWCQAQIAI | 88   | 9    |
| >EGFR-V819/YLLNWCVQIAI | 83  | >EGFR-V819/YLLNWCQAQIAI | 126  | 43   |
| >EGFR-V819/YLLNWCVQI   | 46  | >EGFR-V819/YLLNWCQAQI   | 69   | 23   |
| >EGFR-V819/YLLNWCVQI   | 65  | >EGFR-V819/YLLNWCQAQI   | 407  | 342  |
| >EGFR-V819/YLLNWCVQIAI | 417 | >EGFR-V819/YLLNWCQAQIAI | 566  | 149  |
| >EGFR-V819/YLLNWCVQI   | 22  | >EGFR-V819/YLLNWCQAQI   | 13   | 9    |
| >EGFR-V819/YLLNWCVQI   | 288 | >EGFR-V819/YLLNWCQAQI   | 549  | 261  |
| >EGFR-V819/YLLNWCVQI   | 863 | >EGFR-V819/YLLNWCQAQI   | 365  | 498  |
| >EGFR-V819/QYLLNWCVQ   | 106 | >EGFR-V819/QYLLNWCQAQ   | 139  | 33   |
| >EGFR-V819/QYLLNWCVQ   | 640 | >EGFR-V819/QYLLNWCQAQ   | 465  | 175  |
| >EGFR-V819/QYLLNWCV    | 368 | >EGFR-V819/QYLLNWCQA    | 1935 | 1567 |
| >EGFR-V819/QYLLNWCVQ   | 11  | >EGFR-V819/QYLLNWCQAQ   | 14   | 3    |
| >EGFR-V819/QYLLNWCVQ   | 302 | >EGFR-V819/QYLLNWCQAQ   | 407  | 105  |
| >EGFR-V819/SQYLLNWCV   | 52  | >EGFR-V819/SQYLLNWCQA   | 37   | 15   |
| >EGFR-V819/SQYLLNWCV   | 19  | >EGFR-V819/SQYLLNWCQA   | 255  | 236  |
| >EGFR-V819/SQYLLNWCV   | 221 | >EGFR-V819/SQYLLNWCQA   | 227  | 6    |

|                       |      |                       |       |       |
|-----------------------|------|-----------------------|-------|-------|
| >EGFR-V819/SQYLLNWCV  | 85   | >EGFR-V819/SQYLLNWCA  | 664   | 579   |
| >EGFR-V819/SQYLLNWCV  | 601  | >EGFR-V819/SQYLLNWCA  | 434   | 167   |
| >EGFR-V819/SQYLLNWCV  | 570  | >EGFR-V819/SQYLLNWCA  | 231   | 339   |
| >EGFR-V819/SQYLLNWCV  | 6    | >EGFR-V819/SQYLLNWCA  | 38    | 32    |
| >EGFR-V819/SQYLLNWCV  | 51   | >EGFR-V819/SQYLLNWCA  | 53    | 2     |
| >EGFR-V819/SQYLLNWCV  | 30   | >EGFR-V819/SQYLLNWCA  | 1754  | 1724  |
| >EGFR-V819/SQYLLNWCV  | 264  | >EGFR-V819/SQYLLNWCA  | 226   | 38    |
| >EGFR-V819/SQYLLNWCV  | 21   | >EGFR-V819/SQYLLNWCA  | 1233  | 1212  |
| >EGFR-V819/SQYLLNWCV  | 10   | >EGFR-V819/SQYLLNWCA  | 223   | 213   |
| >EGFR-V819/SQYLLNWCV  | 254  | >EGFR-V819/SQYLLNWCA  | 375   | 121   |
| >EGFR-V819/SQYLLNWCV  | 375  | >EGFR-V819/SQYLLNWCA  | 18906 | 18531 |
| >EGFR-V819/SQYLLNWCV  | 165  | >EGFR-V819/SQYLLNWCA  | 464   | 299   |
| >EGFR-V819/SQYLLNWCV  | 458  | >EGFR-V819/SQYLLNWCA  | 2745  | 2287  |
| >EGFR-V819/SQYLLNWCV  | 161  | >EGFR-V819/SQYLLNWCA  | 301   | 140   |
| >EGFR-V819/SQYLLNWCV  | 297  | >EGFR-V819/SQYLLNWCA  | 8098  | 7801  |
| >EGFR-V819/SQYLLNWCV  | 1093 | >EGFR-V819/SQYLLNWCA  | 260   | 833   |
| >EGFR-V819/SQYLLNWCV  | 185  | >EGFR-V819/SQYLLNWCA  | 218   | 33    |
| >EGFR-V819/SQYLLNWCV  | 502  | >EGFR-V819/SQYLLNWCA  | 412   | 90    |
| >EGFR-V834/VHRDLAARN  | 471  | >EGFR-V834/AHRDLAARN  | 167   | 304   |
| >EGFR-V834/LVHRDLAARN | 138  | >EGFR-V834/LAHRDLAARN | 995   | 857   |
| >EGFR-V834/LVHRDLAARN | 72   | >EGFR-V834/LAHRDLAARN | 819   | 747   |
| >EGFR-V834/LVHRDLAA   | 291  | >EGFR-V834/LAHRDLAA   | 1037  | 746   |
| >EGFR-V834/LVHRDLAARN | 474  | >EGFR-V834/LAHRDLAARN | 1536  | 1062  |
| >EGFR-V834/LVHRDLAAR  | 34   | >EGFR-V834/LAHRDLAAR  | 60    | 26    |
| >EGFR-V834/LVHRDLAAR  | 174  | >EGFR-V834/LAHRDLAAR  | 302   | 128   |
| >EGFR-V834/GMNYLED RR | 54   | >EGFR-V834/GMNYLED RR | 878   | 824   |
| >EGFR-V834/GMNYLED RR | 42   | >EGFR-V834/GMNYLED RR | 450   | 408   |
| >EGFR-V834/GMNYLED RR | 61   | >EGFR-V834/GMNYLED RR | 2709  | 2648  |
| >EGFR-V834/GMNYLED RR | 95   | >EGFR-V834/GMNYLED RR | 3212  | 3117  |
| >EGFR-V834/GMNYLED RR | 75   | >EGFR-V834/GMNYLED RR | 3143  | 3068  |
| >EGFR-V834/GMNYLED RR | 39   | >EGFR-V834/GMNYLED RR | 3044  | 3005  |
| >EGFR-V834/RLVHRDLA   | 778  | >EGFR-V834/RLAHRDLA   | 122   | 656   |
| >EGFR-V834/RLVHRDLAA  | 2763 | >EGFR-V834/RLAHRDLAA  | 473   | 2290  |
| >EGFR-V834/RLVHRDLA   | 174  | >EGFR-V834/RLAHRDLA   | 51    | 123   |
| >EGFR-V834/RLVHRDLAA  | 166  | >EGFR-V834/RLAHRDLAA  | 47    | 119   |
| >EGFR-V834/RLVHRDLAA  | 344  | >EGFR-V834/RLAHRDLAA  | 336   | 8     |
| >EGFR-V834/RLVHRDLA   | 452  | >EGFR-V834/RLAHRDLA   | 230   | 222   |
| >EGFR-V834/RLVHRDLAA  | 796  | >EGFR-V834/RLAHRDLAA  | 348   | 448   |
| >EGFR-V834/RLVHRDLAAF | 26   | >EGFR-V834/RLAHRDLAAF | 31    | 5     |
| >EGFR-V834/RLVHRDLAAF | 136  | >EGFR-V834/RLAHRDLAAF | 107   | 29    |
| >EGFR-V834/RLVHRDLAAF | 132  | >EGFR-V834/RLAHRDLAAF | 178   | 46    |
| >EGFR-V834/RRLVHRDL   | 220  | >EGFR-V834/RRLAHRDL   | 178   | 42    |
| >EGFR-V834/RRLVHRDL   | 45   | >EGFR-V834/RRLAHRDL   | 47    | 2     |

|                       |       |                       |      |       |
|-----------------------|-------|-----------------------|------|-------|
| >EGFR-V834/RRLVHRDLA  | 102   | >EGFR-V834/RRLAHRDLA  | 97   | 5     |
| >EGFR-V834/RRLVHRDLAA | 34    | >EGFR-V834/RRLAHRDLAA | 26   | 8     |
| >EGFR-V834/RRLVHRDLAA | 29    | >EGFR-V834/RRLAHRDLAA | 32   | 3     |
| >EGFR-V834/RRLVHRDL   | 15    | >EGFR-V834/RRLAHRDL   | 21   | 6     |
| >EGFR-V834/RRLVHRDLA  | 91    | >EGFR-V834/RRLAHRDLA  | 99   | 8     |
| >EGFR-V834/RRLVHRDLAA | 38    | >EGFR-V834/RRLAHRDLAA | 37   | 1     |
| >EGFR-V834/RRLVHRDLAA | 224   | >EGFR-V834/RRLAHRDLAA | 247  | 23    |
| >EGFR-V834/RRLVHRDL   | 34    | >EGFR-V834/RRLAHRDL   | 44   | 10    |
| >EGFR-V834/RRLVHRDLA  | 57    | >EGFR-V834/RRLAHRDLA  | 74   | 17    |
| >EGFR-V834/RRLVHRDLAA | 72    | >EGFR-V834/RRLAHRDLAA | 65   | 7     |
| >EGFR-V834/RRLVHRDLAA | 121   | >EGFR-V834/RRLAHRDLAA | 154  | 33    |
| >EGFR-V834/RRLVHRDLAA | 625   | >EGFR-V834/RRLAHRDLAA | 238  | 387   |
| >EGFR-V834/LEDRLVHRC  | 355   | >EGFR-V834/LEDRRLAHR  | 408  | 53    |
| >EGFR-V834/LEDRLVHRC  | 275   | >EGFR-V834/LEDRRLAHR  | 373  | 98    |
| >EGFR-V834/YLEDRLV    | 188   | >EGFR-V834/YLEDRRLA   | 1516 | 1328  |
| >EGFR-V834/YLEDRLV    | 44    | >EGFR-V834/YLEDRRLA   | 343  | 299   |
| >EGFR-V834/YLEDRLV    | 32    | >EGFR-V834/YLEDRRLA   | 330  | 298   |
| >EGFR-V834/YLEDRLV    | 198   | >EGFR-V834/YLEDRRLA   | 2006 | 1808  |
| >EGFR-V834/YLEDRLV    | 17    | >EGFR-V834/YLEDRRLA   | 625  | 608   |
| >EGFR-V834/YLEDRLV    | 47    | >EGFR-V834/YLEDRRLA   | 2025 | 1978  |
| >EGFR-V834/YLEDRLV    | 62    | >EGFR-V834/YLEDRRLA   | 2885 | 2823  |
| >EGFR-V834/YLEDRLV    | 2     | >EGFR-V834/YLEDRRLA   | 8    | 6     |
| >EGFR-V834/YLEDRLVHR  | 418   | >EGFR-V834/YLEDRRLAHR | 332  | 86    |
| >EGFR-V834/YLEDRLVHR  | 253   | >EGFR-V834/YLEDRRLAHR | 404  | 151   |
| >EGFR-V834/YLEDRLVHR  | 229   | >EGFR-V834/YLEDRRLAHR | 174  | 55    |
| >EGFR-V834/YLEDRLVHR  | 420   | >EGFR-V834/YLEDRRLAHR | 410  | 10    |
| >EGFR-V834/YLEDRLVHR  | 93    | >EGFR-V834/YLEDRRLAHR | 102  | 9     |
| >EGFR-V834/YLEDRLVHR  | 162   | >EGFR-V834/YLEDRRLAHR | 296  | 134   |
| >EGFR-V834/NYLEDRLVH  | 159   | >EGFR-V834/NYLEDRLAH  | 140  | 19    |
| >EGFR-V834/NYLEDRLVH  | 17    | >EGFR-V834/NYLEDRLAH  | 15   | 2     |
| >EGFR-V834/NYLEDRLVH  | 26    | >EGFR-V834/NYLEDRLAH  | 37   | 11    |
| >EGFR-V834LVHRDLAARN  | 471   | >EGFR-V834LVHRDLAARN  | 361  | 110   |
| >EGFR-V834LVHRDLAARN  | 2196  | >EGFR-V834LVHRDLAARN  | 134  | 2062  |
| >EGFR-V834LVHRDLAA    | 1116  | >EGFR-V834LVHRDLAA    | 54   | 1062  |
| >EGFR-V834LVHRDLAARN  | 138   | >EGFR-V834LVHRDLAARN  | 12   | 126   |
| >EGFR-V834LVHRDLAA    | 6371  | >EGFR-V834LVHRDLAA    | 112  | 6259  |
| >EGFR-V834LVHRDLAARN  | 542   | >EGFR-V834LVHRDLAARN  | 9    | 533   |
| >EGFR-V834LVHRDLAA    | 12487 | >EGFR-V834LVHRDLAA    | 315  | 12172 |
| >EGFR-V834LVHRDLAARN  | 2053  | >EGFR-V834LVHRDLAARN  | 37   | 2016  |
| >EGFR-V834LVHRDLAARN  | 5141  | >EGFR-V834LVHRDLAARN  | 65   | 5076  |
| >EGFR-V834LVHRDLAARN  | 5771  | >EGFR-V834LVHRDLAARN  | 131  | 5640  |
| >EGFR-V834LVHRDLAA    | 2973  | >EGFR-V834LVHRDLAA    | 17   | 2956  |
| >EGFR-V834LVHRDLAARN  | 72    | >EGFR-V834LVHRDLAARN  | 4    | 68    |

|                        |      |                        |      |      |
|------------------------|------|------------------------|------|------|
| >EGFR-V834I LVHRDLAA   | 291  | >EGFR-V834I LLHRDLAA   | 2296 | 2005 |
| >EGFR-V834I LVHRDLAARN | 474  | >EGFR-V834I LLHRDLAARN | 3059 | 2585 |
| >EGFR-V834I LVHRDLAAR  | 34   | >EGFR-V834I LLHRDLAAR  | 52   | 18   |
| >EGFR-V834I LVHRDLAAR  | 174  | >EGFR-V834I LLHRDLAAR  | 1145 | 971  |
| >EGFR-V834I GMNYLED RR | 54   | >EGFR-V834I GMNYLED RR | 72   | 18   |
| >EGFR-V834I GMNYLED RR | 42   | >EGFR-V834I GMNYLED RR | 533  | 491  |
| >EGFR-V834I GMNYLED RR | 61   | >EGFR-V834I GMNYLED RR | 897  | 836  |
| >EGFR-V834I GMNYLED RR | 95   | >EGFR-V834I GMNYLED RR | 855  | 760  |
| >EGFR-V834I GMNYLED RR | 75   | >EGFR-V834I GMNYLED RR | 1140 | 1065 |
| >EGFR-V834I GMNYLED RR | 39   | >EGFR-V834I GMNYLED RR | 691  | 652  |
| >EGFR-V834I RLVHRDLA   | 174  | >EGFR-V834I RLLHRDLA   | 612  | 438  |
| >EGFR-V834I RLVHRDLAA  | 166  | >EGFR-V834I RLLHRDLAA  | 587  | 421  |
| >EGFR-V834I RLVHRDLAA  | 344  | >EGFR-V834I RLLHRDLAA  | 145  | 199  |
| >EGFR-V834I RLVHRDLA   | 2266 | >EGFR-V834I RLLHRDLA   | 330  | 1936 |
| >EGFR-V834I RLVHRDLAA  | 1372 | >EGFR-V834I RLLHRDLAA  | 185  | 1187 |
| >EGFR-V834I RLVHRDLAA  | 785  | >EGFR-V834I RLLHRDLAA  | 129  | 656  |
| >EGFR-V834I RLVHRDLA   | 3630 | >EGFR-V834I RLLHRDLA   | 340  | 3290 |
| >EGFR-V834I RLVHRDLAA  | 3192 | >EGFR-V834I RLLHRDLAA  | 303  | 2889 |
| >EGFR-V834I RLVHRDLA   | 452  | >EGFR-V834I RLLHRDLA   | 226  | 226  |
| >EGFR-V834I RLVHRDLAA  | 796  | >EGFR-V834I RLLHRDLAA  | 370  | 426  |
| >EGFR-V834I RLVHRDLAAF | 904  | >EGFR-V834I RLLHRDLAAR | 307  | 597  |
| >EGFR-V834I RLVHRDLAAF | 26   | >EGFR-V834I RLLHRDLAAR | 14   | 12   |
| >EGFR-V834I RLVHRDLAA  | 1381 | >EGFR-V834I RLLHRDLAA  | 234  | 1147 |
| >EGFR-V834I RLVHRDLAAF | 136  | >EGFR-V834I RLLHRDLAAR | 132  | 4    |
| >EGFR-V834I RLVHRDLAAF | 132  | >EGFR-V834I RLLHRDLAAR | 101  | 31   |
| >EGFR-V834I RRLVHRDL   | 220  | >EGFR-V834I RRLVHRDL   | 490  | 270  |
| >EGFR-V834I RRLVHRDL   | 45   | >EGFR-V834I RRLVHRDL   | 43   | 2    |
| >EGFR-V834I RRLVHRDLA  | 102  | >EGFR-V834I RRLVHRDLA  | 103  | 1    |
| >EGFR-V834I RRLVHRDLAA | 34   | >EGFR-V834I RRLVHRDLAA | 25   | 9    |
| >EGFR-V834I RRLVHRDLAA | 29   | >EGFR-V834I RRLVHRDLAA | 33   | 4    |
| >EGFR-V834I RRLVHRDL   | 15   | >EGFR-V834I RRLVHRDL   | 21   | 6    |
| >EGFR-V834I RRLVHRDLA  | 91   | >EGFR-V834I RRLVHRDLA  | 133  | 42   |
| >EGFR-V834I RRLVHRDLAA | 38   | >EGFR-V834I RRLVHRDLAA | 38   | 0    |
| >EGFR-V834I RRLVHRDLAA | 224  | >EGFR-V834I RRLVHRDLAA | 320  | 96   |
| >EGFR-V834I RRLVHRDL   | 34   | >EGFR-V834I RRLVHRDL   | 40   | 6    |
| >EGFR-V834I RRLVHRDLA  | 57   | >EGFR-V834I RRLVHRDLA  | 64   | 7    |
| >EGFR-V834I RRLVHRDLAA | 72   | >EGFR-V834I RRLVHRDLAA | 60   | 12   |
| >EGFR-V834I RRLVHRDLAA | 121  | >EGFR-V834I RRLVHRDLAA | 140  | 19   |
| >EGFR-V834I RRLVHRDLAA | 625  | >EGFR-V834I RRLVHRDLAA | 331  | 294  |
| >EGFR-V834I DRRLVHRDL  | 505  | >EGFR-V834I DRRLVHRDL  | 239  | 266  |
| >EGFR-V834I LEDRRLVHRD | 355  | >EGFR-V834I LEDRRLVHRD | 339  | 16   |
| >EGFR-V834I LEDRRLVHRD | 275  | >EGFR-V834I LEDRRLVHRD | 399  | 124  |
| >EGFR-V834I YLED RRLV  | 188  | >EGFR-V834I YLED RRLV  | 549  | 361  |

|                        |       |                        |      |       |
|------------------------|-------|------------------------|------|-------|
| >EGFR-V834I YLEDRRLV   | 44    | >EGFR-V834I YLEDRRLL   | 41   | 3     |
| >EGFR-V834I YLEDRRLV   | 32    | >EGFR-V834I YLEDRRLL   | 416  | 384   |
| >EGFR-V834I YLEDRRLV   | 198   | >EGFR-V834I YLEDRRLL   | 1322 | 1124  |
| >EGFR-V834I YLEDRRLV   | 17    | >EGFR-V834I YLEDRRLL   | 193  | 176   |
| >EGFR-V834I YLEDRRLV   | 47    | >EGFR-V834I YLEDRRLL   | 413  | 366   |
| >EGFR-V834I YLEDRRLV   | 62    | >EGFR-V834I YLEDRRLL   | 1323 | 1261  |
| >EGFR-V834I YLEDRRLV   | 2     | >EGFR-V834I YLEDRRLL   | 4    | 2     |
| >EGFR-V834I YLEDRRLVHR | 418   | >EGFR-V834I YLEDRRLLHR | 530  | 112   |
| >EGFR-V834I YLEDRRLVHR | 253   | >EGFR-V834I YLEDRRLLHR | 233  | 20    |
| >EGFR-V834I YLEDRRLVHR | 229   | >EGFR-V834I YLEDRRLLHR | 300  | 71    |
| >EGFR-V834I YLEDRRLVHR | 420   | >EGFR-V834I YLEDRRLLHR | 482  | 62    |
| >EGFR-V834I YLEDRRLVHR | 93    | >EGFR-V834I YLEDRRLLHR | 53   | 40    |
| >EGFR-V834I YLEDRRLVHR | 162   | >EGFR-V834I YLEDRRLLHR | 144  | 18    |
| >EGFR-V834I NYLEDRRLV  | 2247  | >EGFR-V834I NYLEDRRLL  | 80   | 2167  |
| >EGFR-V834I NYLEDRRLVH | 159   | >EGFR-V834I NYLEDRRLLH | 360  | 201   |
| >EGFR-V834I NYLEDRRLVH | 17    | >EGFR-V834I NYLEDRRLLH | 23   | 6     |
| >EGFR-V834I NYLEDRRLVH | 26    | >EGFR-V834I NYLEDRRLLH | 25   | 1     |
| >EGFR-V834I VHRDLAAR   | 2598  | >EGFR-V834I MHRDLAAR   | 375  | 2223  |
| >EGFR-V834I VHRDLAARN' | 957   | >EGFR-V834I MHRDLAARN  | 343  | 614   |
| >EGFR-V834I VHRDLAARN' | 471   | >EGFR-V834I MHRDLAARN  | 43   | 428   |
| >EGFR-V834I VHRDLAARN' | 9720  | >EGFR-V834I MHRDLAARN  | 368  | 9352  |
| >EGFR-V834I LVHRDLAARN | 2196  | >EGFR-V834I LMHRDLAAR  | 135  | 2061  |
| >EGFR-V834I LVHRDLAA   | 1116  | >EGFR-V834I LMHRDLAA   | 42   | 1074  |
| >EGFR-V834I LVHRDLAARN | 138   | >EGFR-V834I LMHRDLAAR  | 10   | 128   |
| >EGFR-V834I LVHRDLAA   | 1073  | >EGFR-V834I LMHRDLAA   | 493  | 580   |
| >EGFR-V834I LVHRDLAARN | 787   | >EGFR-V834I LMHRDLAAR  | 450  | 337   |
| >EGFR-V834I LVHRDLAA   | 6371  | >EGFR-V834I LMHRDLAA   | 64   | 6307  |
| >EGFR-V834I LVHRDLAARN | 542   | >EGFR-V834I LMHRDLAAR  | 7    | 535   |
| >EGFR-V834I LVHRDLAA   | 12487 | >EGFR-V834I LMHRDLAA   | 204  | 12283 |
| >EGFR-V834I LVHRDLAARN | 2053  | >EGFR-V834I LMHRDLAAR  | 25   | 2028  |
| >EGFR-V834I LVHRDLAARN | 5141  | >EGFR-V834I LMHRDLAAR  | 58   | 5083  |
| >EGFR-V834I LVHRDLAARN | 5771  | >EGFR-V834I LMHRDLAAR  | 98   | 5673  |
| >EGFR-V834I LVHRDLAA   | 2973  | >EGFR-V834I LMHRDLAA   | 26   | 2947  |
| >EGFR-V834I LVHRDLAARN | 72    | >EGFR-V834I LMHRDLAAR  | 4    | 68    |
| >EGFR-V834I LVHRDLAA   | 291   | >EGFR-V834I LMHRDLAA   | 1302 | 1011  |
| >EGFR-V834I LVHRDLAARN | 474   | >EGFR-V834I LMHRDLAAR  | 1860 | 1386  |
| >EGFR-V834I LVHRDLAAR  | 34    | >EGFR-V834I LMHRDLAAR  | 15   | 19    |
| >EGFR-V834I LVHRDLAAR  | 867   | >EGFR-V834I LMHRDLAAR  | 440  | 427   |
| >EGFR-V834I LVHRDLAAR  | 174   | >EGFR-V834I LMHRDLAAR  | 820  | 646   |
| >EGFR-V834I LVHRDLAA   | 4918  | >EGFR-V834I LMHRDLAA   | 418  | 4500  |
| >EGFR-V834I LVHRDLAARN | 8890  | >EGFR-V834I LMHRDLAAR  | 325  | 8565  |
| >EGFR-V834I GMNYLED RR | 54    | >EGFR-V834I GMNYLED RR | 1278 | 1224  |
| >EGFR-V834I GMNYLED RR | 42    | >EGFR-V834I GMNYLED RR | 3359 | 3317  |

|                        |      |                        |      |      |
|------------------------|------|------------------------|------|------|
| >EGFR-V834I GMNYLED RR | 61   | >EGFR-V834I GMNYLED RR | 4253 | 4192 |
| >EGFR-V834I GMNYLED RR | 95   | >EGFR-V834I GMNYLED RR | 5378 | 5283 |
| >EGFR-V834I GMNYLED RR | 75   | >EGFR-V834I GMNYLED RR | 7658 | 7583 |
| >EGFR-V834I GMNYLED RR | 39   | >EGFR-V834I GMNYLED RR | 8336 | 8297 |
| >EGFR-V834I RLVHRDLA   | 4414 | >EGFR-V834I RLMHRDLA   | 222  | 4192 |
| >EGFR-V834I RLVHRDLAA  | 3121 | >EGFR-V834I RLMHRDLAA  | 122  | 2999 |
| >EGFR-V834I RLVHRDLA   | 778  | >EGFR-V834I RLMHRDLA   | 92   | 686  |
| >EGFR-V834I RLVHRDLAA  | 2763 | >EGFR-V834I RLMHRDLAA  | 371  | 2392 |
| >EGFR-V834I RLVHRDLA   | 174  | >EGFR-V834I RLMHRDLA   | 34   | 140  |
| >EGFR-V834I RLVHRDLAA  | 166  | >EGFR-V834I RLMHRDLAA  | 32   | 134  |
| >EGFR-V834I RLVHRDLA   | 1150 | >EGFR-V834I RLMHRDLA   | 322  | 828  |
| >EGFR-V834I RLVHRDLAA  | 344  | >EGFR-V834I RLMHRDLAA  | 96   | 248  |
| >EGFR-V834I RLVHRDLAA  | 1372 | >EGFR-V834I RLMHRDLAA  | 433  | 939  |
| >EGFR-V834I RLVHRDLAA  | 785  | >EGFR-V834I RLMHRDLAA  | 99   | 686  |
| >EGFR-V834I RLVHRDLA   | 452  | >EGFR-V834I RLMHRDLA   | 214  | 238  |
| >EGFR-V834I RLVHRDLAA  | 796  | >EGFR-V834I RLMHRDLAA  | 354  | 442  |
| >EGFR-V834I RLVHRDLAAF | 904  | >EGFR-V834I RLMHRDLAA  | 112  | 792  |
| >EGFR-V834I RLVHRDLAAF | 26   | >EGFR-V834I RLMHRDLAA  | 8    | 18   |
| >EGFR-V834I RLVHRDLAAF | 1562 | >EGFR-V834I RLMHRDLAA  | 304  | 1258 |
| >EGFR-V834I RLVHRDLAA  | 1381 | >EGFR-V834I RLMHRDLAA  | 71   | 1310 |
| >EGFR-V834I RLVHRDLAA  | 814  | >EGFR-V834I RLMHRDLAA  | 265  | 549  |
| >EGFR-V834I RLVHRDLAAF | 136  | >EGFR-V834I RLMHRDLAA  | 74   | 62   |
| >EGFR-V834I RLVHRDLAAF | 132  | >EGFR-V834I RLMHRDLAA  | 123  | 9    |
| >EGFR-V834I RRLVHRDL   | 220  | >EGFR-V834I RRLMHRDL   | 164  | 56   |
| >EGFR-V834I RRLVHRDL   | 45   | >EGFR-V834I RRLMHRDL   | 47   | 2    |
| >EGFR-V834I RRLVHRDLA  | 102  | >EGFR-V834I RRLMHRDLA  | 94   | 8    |
| >EGFR-V834I RRLVHRDLAA | 34   | >EGFR-V834I RRLMHRDLA  | 26   | 8    |
| >EGFR-V834I RRLVHRDLAA | 29   | >EGFR-V834I RRLMHRDLA  | 31   | 2    |
| >EGFR-V834I RRLVHRDL   | 15   | >EGFR-V834I RRLMHRDL   | 20   | 5    |
| >EGFR-V834I RRLVHRDLA  | 91   | >EGFR-V834I RRLMHRDLA  | 121  | 30   |
| >EGFR-V834I RRLVHRDLAA | 38   | >EGFR-V834I RRLMHRDLA  | 52   | 14   |
| >EGFR-V834I RRLVHRDLAA | 224  | >EGFR-V834I RRLMHRDLA  | 299  | 75   |
| >EGFR-V834I RRLVHRDL   | 34   | >EGFR-V834I RRLMHRDL   | 45   | 11   |
| >EGFR-V834I RRLVHRDLA  | 57   | >EGFR-V834I RRLMHRDLA  | 195  | 138  |
| >EGFR-V834I RRLVHRDLAA | 72   | >EGFR-V834I RRLMHRDLA  | 68   | 4    |
| >EGFR-V834I RRLVHRDLAA | 121  | >EGFR-V834I RRLMHRDLA  | 389  | 268  |
| >EGFR-V834I RRLVHRDLAA | 625  | >EGFR-V834I RRLMHRDLA  | 338  | 287  |
| >EGFR-V834I DRRLVHRDL  | 505  | >EGFR-V834I DRRLMHRDL  | 202  | 303  |
| >EGFR-V834I LEDRRLVHRC | 355  | >EGFR-V834I LEDRRLMHRI | 363  | 8    |
| >EGFR-V834I LEDRRLVHRC | 275  | >EGFR-V834I LEDRRLMHRI | 379  | 104  |
| >EGFR-V834I YLED RRLV  | 188  | >EGFR-V834I YLED RRLM  | 2452 | 2264 |
| >EGFR-V834I YLED RRLV  | 44   | >EGFR-V834I YLED RRLM  | 536  | 492  |
| >EGFR-V834I YLED RRLV  | 32   | >EGFR-V834I YLED RRLM  | 3335 | 3303 |

|                         |      |                         |      |      |
|-------------------------|------|-------------------------|------|------|
| >EGFR-V834I YLED RRLV   | 198  | >EGFR-V834I YLED RRLM   | 5003 | 4805 |
| >EGFR-V834I YLED RRLV   | 17   | >EGFR-V834I YLED RRLM   | 1168 | 1151 |
| >EGFR-V834I YLED RRLV   | 47   | >EGFR-V834I YLED RRLM   | 3530 | 3483 |
| >EGFR-V834I YLED RRLV   | 62   | >EGFR-V834I YLED RRLM   | 7554 | 7492 |
| >EGFR-V834I YLED RRLV   | 2    | >EGFR-V834I YLED RRLM   | 22   | 20   |
| >EGFR-V834I YLED RRLVHR | 418  | >EGFR-V834I YLED RRLMHF | 334  | 84   |
| >EGFR-V834I YLED RRLVHR | 253  | >EGFR-V834I YLED RRLMHF | 389  | 136  |
| >EGFR-V834I YLED RRLVHR | 229  | >EGFR-V834I YLED RRLMHF | 153  | 76   |
| >EGFR-V834I YLED RRLVHR | 420  | >EGFR-V834I YLED RRLMHF | 433  | 13   |
| >EGFR-V834I YLED RRLVHR | 93   | >EGFR-V834I YLED RRLMHF | 66   | 27   |
| >EGFR-V834I YLED RRLVHR | 162  | >EGFR-V834I YLED RRLMHF | 220  | 58   |
| >EGFR-V834I NYLED RRLVH | 159  | >EGFR-V834I NYLED RRLMH | 217  | 58   |
| >EGFR-V834I NYLED RRLVH | 17   | >EGFR-V834I NYLED RRLMH | 15   | 2    |
| >EGFR-V834I NYLED RRLVH | 26   | >EGFR-V834I NYLED RRLMH | 29   | 3    |
| >EGFR-V843I VLVKTPQH V  | 476  | >EGFR-V843I ILVKTPQH V  | 299  | 177  |
| >EGFR-V843I VLVKTPQH V  | 215  | >EGFR-V843I ILVKTPQH V  | 116  | 99   |
| >EGFR-V843I VLVKTPQH V  | 703  | >EGFR-V843I ILVKTPQH V  | 340  | 363  |
| >EGFR-V843I VLVKTPQH V  | 22   | >EGFR-V843I ILVKTPQH V  | 16   | 6    |
| >EGFR-V843I VLVKTPQH V  | 269  | >EGFR-V843I ILVKTPQH V  | 195  | 74   |
| >EGFR-V843I VLVKTPQH V  | 248  | >EGFR-V843I ILVKTPQH V  | 181  | 67   |
| >EGFR-V843I VLVKTPQH V  | 3    | >EGFR-V843I ILVKTPQH V  | 4    | 1    |
| >EGFR-V843I VLVKTPQH V  | 25   | >EGFR-V843I ILVKTPQH V  | 30   | 5    |
| >EGFR-V843I VLVKTPQH V  | 6    | >EGFR-V843I ILVKTPQH V  | 8    | 2    |
| >EGFR-V843I VLVKTPQH V  | 241  | >EGFR-V843I ILVKTPQH V  | 350  | 109  |
| >EGFR-V843I VLVKTPQH V  | 7    | >EGFR-V843I ILVKTPQH V  | 8    | 1    |
| >EGFR-V843I VLVKTPQH V  | 97   | >EGFR-V843I ILVKTPQH V  | 200  | 103  |
| >EGFR-V843I VLVKTPQH V  | 30   | >EGFR-V843I ILVKTPQH V  | 27   | 3    |
| >EGFR-V843I VLVKTPQH V  | 3    | >EGFR-V843I ILVKTPQH V  | 4    | 1    |
| >EGFR-V843I VLVKTPQH V  | 26   | >EGFR-V843I ILVKTPQH V  | 34   | 8    |
| >EGFR-V843I VLVKTPQH V  | 415  | >EGFR-V843I ILVKTPQH V  | 198  | 217  |
| >EGFR-V843I VLVKTPQH V  | 623  | >EGFR-V843I ILVKTPQH V  | 249  | 374  |
| >EGFR-V843I VLVKTPQH V  | 1023 | >EGFR-V843I ILVKTPQH V  | 427  | 596  |
| >EGFR-V843I NVLVKTPQH V | 521  | >EGFR-V843I NILVKTPQH V | 297  | 224  |
| >EGFR-V843I NVLVKTPQH V | 424  | >EGFR-V843I NILVKTPQH V | 124  | 300  |
| >EGFR-V843I NVLVKTPQH V | 539  | >EGFR-V843I NILVKTPQH V | 255  | 284  |
| >EGFR-V843I NVLVKTPQH V | 178  | >EGFR-V843I NILVKTPQH V | 60   | 118  |
| >EGFR-V843I NVLVKTPQH V | 179  | >EGFR-V843I NILVKTPQH V | 77   | 102  |
| >EGFR-V843I NVLVKTPQH V | 269  | >EGFR-V843I NILVKTPQH V | 92   | 177  |
| >EGFR-V843I NVLVKTPQH V | 225  | >EGFR-V843I NILVKTPQH V | 415  | 190  |
| >EGFR-V843I NVLVKTPQH V | 318  | >EGFR-V843I NILVKTPQH V | 684  | 366  |
| >EGFR-V843I NVLVKTPQH V | 29   | >EGFR-V843I NILVKTPQH V | 51   | 22   |
| >EGFR-V843I LVHRDLAARN  | 138  | >EGFR-V843I LVHRDLAARN  | 778  | 640  |
| >EGFR-V843I LVHRDLAARN  | 72   | >EGFR-V843I LVHRDLAARN  | 4884 | 4812 |



|                        |     |                        |      |      |
|------------------------|-----|------------------------|------|------|
| >EGFR-V843I LVHRDLAARN | 474 | >EGFR-V843I LVHRDLAARN | 270  | 204  |
| >EGFR-V843I AARNVLVK   | 338 | >EGFR-V843I AARNILVK   | 409  | 71   |
| >EGFR-V843I AARNVLVK   | 5   | >EGFR-V843I AARNILVK   | 5    | 0    |
| >EGFR-V843I AARNVLVKTF | 404 | >EGFR-V843I AARNILVKTF | 367  | 37   |
| >EGFR-V843I LAARNVLV   | 312 | >EGFR-V843I LAARNILV   | 477  | 165  |
| >EGFR-V843I LAARNVLV   | 497 | >EGFR-V843I LAARNILV   | 621  | 124  |
| >EGFR-V843I LAARNVLV   | 337 | >EGFR-V843I LAARNILV   | 233  | 104  |
| >EGFR-V843I LAARNVLV   | 54  | >EGFR-V843I LAARNILV   | 56   | 2    |
| >EGFR-V843I LAARNVLVK  | 458 | >EGFR-V843I LAARNILVK  | 337  | 121  |
| >EGFR-V843I LAARNVLVK  | 230 | >EGFR-V843I LAARNILVK  | 158  | 72   |
| >EGFR-V843I LAARNVLVK  | 398 | >EGFR-V843I LAARNILVK  | 357  | 41   |
| >EGFR-V843I LAARNVLVK  | 267 | >EGFR-V843I LAARNILVK  | 229  | 38   |
| >EGFR-V843I LAARNVLV   | 119 | >EGFR-V843I LAARNILV   | 170  | 51   |
| >EGFR-V843I DLAARNVLV  | 88  | >EGFR-V843I DLAARNILV  | 181  | 93   |
| >EGFR-V843I DLAARNVLV  | 340 | >EGFR-V843I DLAARNILV  | 268  | 72   |
| >EGFR-V843I DLAARNVLV  | 65  | >EGFR-V843I DLAARNILV  | 63   | 2    |
| >EGFR-V843I DLAARNVLV  | 158 | >EGFR-V843I DLAARNILV  | 186  | 28   |
| >EGFR-V843I DLAARNVL   | 326 | >EGFR-V843I DLAARNIL   | 478  | 152  |
| >EGFR-V843I DLAARNVLV  | 17  | >EGFR-V843I DLAARNILV  | 19   | 2    |
| >EGFR-V843I DLAARNVLVK | 382 | >EGFR-V843I DLAARNILVK | 345  | 37   |
| >EGFR-V843I DLAARNVLV  | 64  | >EGFR-V843I DLAARNILV  | 142  | 78   |
| >EGFR-V843I DLAARNVLV  | 334 | >EGFR-V843I DLAARNILV  | 251  | 83   |
| >EGFR-V843I RDLAARNVL  | 377 | >EGFR-V843I RDLAARNILV | 351  | 26   |
| >EGFR-V843I RDLAARNVL  | 97  | >EGFR-V843I RDLAARNIL  | 162  | 65   |
| >EGFR-V843I RDLAARNV   | 187 | >EGFR-V843I RDLAARNI   | 23   | 164  |
| >EGFR-V843I RDLAARNV   | 210 | >EGFR-V843I RDLAARNI   | 102  | 108  |
| >EGFR-V843I RDLAARNVL  | 96  | >EGFR-V843I RDLAARNILV | 104  | 8    |
| >EGFR-V843I HRDLAARNVL | 62  | >EGFR-V843I HRDLAARNIL | 51   | 11   |
| >EGFR-V843I HRDLAARNVL | 21  | >EGFR-V843I HRDLAARNIL | 30   | 9    |
| >EGFR-V843I HRDLAARNVL | 347 | >EGFR-V843I HRDLAARNIL | 272  | 75   |
| >EGFR-V843I VHRDLAARNV | 471 | >EGFR-V843I VHRDLAARNI | 1090 | 619  |
| >EGFR-V845/VKTPQHVKI   | 395 | >EGFR-V845/AKTPQHVKI   | 247  | 148  |
| >EGFR-V845/LVKTPQHV    | 262 | >EGFR-V845/LAKTPQHV    | 2168 | 1906 |
| >EGFR-V845/LVKTPQHV    | 42  | >EGFR-V845/LAKTPQHV    | 654  | 612  |
| >EGFR-V845/LVKTPQHVK   | 322 | >EGFR-V845/LAKTPQHVK   | 3112 | 2790 |
| >EGFR-V845/LVKTPQHVK   | 207 | >EGFR-V845/LAKTPQHVK   | 1275 | 1068 |
| >EGFR-V845/LVKTPQHV    | 173 | >EGFR-V845/LAKTPQHV    | 672  | 499  |
| >EGFR-V845/LVKTPQHVK   | 15  | >EGFR-V845/LAKTPQHVK   | 39   | 24   |
| >EGFR-V845/LVKTPQHVKI  | 126 | >EGFR-V845/LAKTPQHVKI  | 417  | 291  |
| >EGFR-V845/LVKTPQHVK   | 399 | >EGFR-V845/LAKTPQHVK   | 1073 | 674  |
| >EGFR-V845/LVKTPQHVK   | 357 | >EGFR-V845/LAKTPQHVK   | 766  | 409  |
| >EGFR-V845/VLVKTPQHV   | 476 | >EGFR-V845/VLAKTPQHV   | 115  | 361  |
| >EGFR-V845/VLVKTPQHV   | 215 | >EGFR-V845/VLAKTPQHV   | 28   | 187  |

|                       |      |                       |      |      |
|-----------------------|------|-----------------------|------|------|
| >EGFR-V845/VLVKTPQHVK | 703  | >EGFR-V845/VLAKTPQHVK | 115  | 588  |
| >EGFR-V845/VLVKTPQHV  | 22   | >EGFR-V845/VLAKTPQHV  | 10   | 12   |
| >EGFR-V845/VLVKTPQHVK | 269  | >EGFR-V845/VLAKTPQHVK | 81   | 188  |
| >EGFR-V845/VLVKTPQHV  | 248  | >EGFR-V845/VLAKTPQHV  | 269  | 21   |
| >EGFR-V845/VLVKTPQHV  | 3    | >EGFR-V845/VLAKTPQHV  | 3    | 0    |
| >EGFR-V845/VLVKTPQHVK | 25   | >EGFR-V845/VLAKTPQHVK | 22   | 3    |
| >EGFR-V845/VLVKTPQHV  | 6    | >EGFR-V845/VLAKTPQHV  | 6    | 0    |
| >EGFR-V845/VLVKTPQHVK | 241  | >EGFR-V845/VLAKTPQHVK | 233  | 8    |
| >EGFR-V845/VLVKTPQHV  | 7    | >EGFR-V845/VLAKTPQHV  | 5    | 2    |
| >EGFR-V845/VLVKTPQHVK | 97   | >EGFR-V845/VLAKTPQHVK | 25   | 72   |
| >EGFR-V845/VLVKTPQHV  | 30   | >EGFR-V845/VLAKTPQHV  | 5    | 25   |
| >EGFR-V845/VLVKTPQHVK | 2278 | >EGFR-V845/VLAKTPQHVK | 225  | 2053 |
| >EGFR-V845/VLVKTPQHV  | 3    | >EGFR-V845/VLAKTPQHV  | 2    | 1    |
| >EGFR-V845/VLVKTPQHVK | 26   | >EGFR-V845/VLAKTPQHVK | 12   | 14   |
| >EGFR-V845/VLVKTPQHVK | 415  | >EGFR-V845/VLAKTPQHVK | 400  | 15   |
| >EGFR-V845/NVLVKTQHN  | 521  | >EGFR-V845/NVLAKTPQHN | 243  | 278  |
| >EGFR-V845/NVLVKTQHN  | 424  | >EGFR-V845/NVLAKTPQHN | 117  | 307  |
| >EGFR-V845/NVLVKTQHN  | 539  | >EGFR-V845/NVLAKTPQHN | 293  | 246  |
| >EGFR-V845/NVLVKTQHN  | 178  | >EGFR-V845/NVLAKTPQHN | 97   | 81   |
| >EGFR-V845/NVLVKTQHN  | 179  | >EGFR-V845/NVLAKTPQHN | 121  | 58   |
| >EGFR-V845/NVLVKTQHN  | 269  | >EGFR-V845/NVLAKTPQHN | 112  | 157  |
| >EGFR-V845/NVLVKTQHN  | 225  | >EGFR-V845/NVLAKTPQHN | 108  | 117  |
| >EGFR-V845/NVLVKTQHN  | 318  | >EGFR-V845/NVLAKTPQHN | 232  | 86   |
| >EGFR-V845/NVLVKTQHN  | 29   | >EGFR-V845/NVLAKTPQHN | 15   | 14   |
| >EGFR-V845/AARNVLVK   | 338  | >EGFR-V845/AARNVLAK   | 271  | 67   |
| >EGFR-V845/AARNVLVK   | 576  | >EGFR-V845/AARNVLAK   | 493  | 83   |
| >EGFR-V845/AARNVLVK   | 5    | >EGFR-V845/AARNVLAK   | 4    | 1    |
| >EGFR-V845/AARNVLVKTF | 404  | >EGFR-V845/AARNVLAKTF | 229  | 175  |
| >EGFR-V845/LAARNVLV   | 312  | >EGFR-V845/LAARNVLA   | 2743 | 2431 |
| >EGFR-V845/LAARNVLV   | 497  | >EGFR-V845/LAARNVLA   | 3373 | 2876 |
| >EGFR-V845/LAARNVLV   | 337  | >EGFR-V845/LAARNVLA   | 3631 | 3294 |
| >EGFR-V845/LAARNVLV   | 54   | >EGFR-V845/LAARNVLA   | 8406 | 8352 |
| >EGFR-V845/LAARNVLVK  | 458  | >EGFR-V845/LAARNVLAK  | 319  | 139  |
| >EGFR-V845/LAARNVLVK  | 230  | >EGFR-V845/LAARNVLAK  | 158  | 72   |
| >EGFR-V845/LAARNVLVK  | 398  | >EGFR-V845/LAARNVLAK  | 252  | 146  |
| >EGFR-V845/LAARNVLVK  | 267  | >EGFR-V845/LAARNVLAK  | 208  | 59   |
| >EGFR-V845/LAARNVLV   | 119  | >EGFR-V845/LAARNVLA   | 1545 | 1426 |
| >EGFR-V845/DLAARNVLV  | 88   | >EGFR-V845/DLAARNVLA  | 958  | 870  |
| >EGFR-V845/DLAARNVLV  | 340  | >EGFR-V845/DLAARNVLA  | 8768 | 8428 |
| >EGFR-V845/DLAARNVLV  | 65   | >EGFR-V845/DLAARNVLA  | 5359 | 5294 |
| >EGFR-V845/DLAARNVLV  | 158  | >EGFR-V845/DLAARNVLA  | 9002 | 8844 |
| >EGFR-V845/DLAARNVLV  | 17   | >EGFR-V845/DLAARNVLA  | 563  | 546  |
| >EGFR-V845/DLAARNVLVK | 382  | >EGFR-V845/DLAARNVLAK | 264  | 118  |

|                        |       |                       |      |       |
|------------------------|-------|-----------------------|------|-------|
| >EGFR-V845/DLAARNVLV   | 745   | >EGFR-V845/DLAARNVLA  | 426  | 319   |
| >EGFR-V845/DLAARNVLV   | 64    | >EGFR-V845/DLAARNVLA  | 647  | 583   |
| >EGFR-V845/DLAARNVLV   | 334   | >EGFR-V845/DLAARNVLA  | 6393 | 6059  |
| >EGFR-V845/RDLAARNVL   | 377   | >EGFR-V845/RDLAARNVL  | 248  | 129   |
| >EGFR-V845/RDLAARNVL   | 96    | >EGFR-V845/RDLAARNVL  | 3183 | 3087  |
| >EGFR-V845I VKTPQHVKI  | 395   | >EGFR-V845I MKTPQHVKI | 113  | 282   |
| >EGFR-V845I LVKTPQHV   | 6469  | >EGFR-V845I LMKTPQHV  | 291  | 6178  |
| >EGFR-V845I LVKTPQHV   | 262   | >EGFR-V845I LMKTPQHV  | 10   | 252   |
| >EGFR-V845I LVKTPQHV   | 2108  | >EGFR-V845I LMKTPQHV  | 14   | 2094  |
| >EGFR-V845I LVKTPQHVKI | 13132 | >EGFR-V845I LMKTPQHVK | 348  | 12784 |
| >EGFR-V845I LVKTPQHV   | 4625  | >EGFR-V845I LMKTPQHV  | 31   | 4594  |
| >EGFR-V845I LVKTPQHV   | 8329  | >EGFR-V845I LMKTPQHV  | 110  | 8219  |
| >EGFR-V845I LVKTPQHV   | 11242 | >EGFR-V845I LMKTPQHV  | 296  | 10946 |
| >EGFR-V845I LVKTPQHV   | 42    | >EGFR-V845I LMKTPQHV  | 3    | 39    |
| >EGFR-V845I LVKTPQHVKI | 4723  | >EGFR-V845I LMKTPQHVK | 37   | 4686  |
| >EGFR-V845I LVKTPQHVK  | 322   | >EGFR-V845I LMKTPQHVK | 99   | 223   |
| >EGFR-V845I LVKTPQHVK  | 207   | >EGFR-V845I LMKTPQHVK | 396  | 189   |
| >EGFR-V845I LVKTPQHV   | 173   | >EGFR-V845I LMKTPQHV  | 875  | 702   |
| >EGFR-V845I LVKTPQHVK  | 15    | >EGFR-V845I LMKTPQHVK | 49   | 34    |
| >EGFR-V845I LVKTPQHVKI | 126   | >EGFR-V845I LMKTPQHVK | 542  | 416   |
| >EGFR-V845I LVKTPQHVK  | 399   | >EGFR-V845I LMKTPQHVK | 139  | 260   |
| >EGFR-V845I LVKTPQHVK  | 357   | >EGFR-V845I LMKTPQHVK | 1748 | 1391  |
| >EGFR-V845I LVKTPQHV   | 5420  | >EGFR-V845I LMKTPQHV  | 113  | 5307  |
| >EGFR-V845I LVKTPQHVKI | 5256  | >EGFR-V845I LMKTPQHVK | 108  | 5148  |
| >EGFR-V845I HRDLAARNV  | 1037  | >EGFR-V845I HRDLAARNV | 240  | 797   |
| >EGFR-V845I HRDLAARNV  | 574   | >EGFR-V845I HRDLAARNV | 161  | 413   |
| >EGFR-V845I VLVKTPQHV  | 476   | >EGFR-V845I VLMKTPQHV | 24   | 452   |
| >EGFR-V845I VLVKTPQHV  | 3159  | >EGFR-V845I VLMKTPQHV | 148  | 3011  |
| >EGFR-V845I VLVKTPQHV  | 215   | >EGFR-V845I VLMKTPQHV | 25   | 190   |
| >EGFR-V845I VLVKTPQHV  | 703   | >EGFR-V845I VLMKTPQHV | 94   | 609   |
| >EGFR-V845I VLVKTPQHV  | 22    | >EGFR-V845I VLMKTPQHV | 7    | 15    |
| >EGFR-V845I VLVKTPQHV  | 269   | >EGFR-V845I VLMKTPQHV | 53   | 216   |
| >EGFR-V845I VLVKTPQHV  | 248   | >EGFR-V845I VLMKTPQHV | 74   | 174   |
| >EGFR-V845I VLVKTPQHV  | 3     | >EGFR-V845I VLMKTPQHV | 2    | 1     |
| >EGFR-V845I VLVKTPQHV  | 25    | >EGFR-V845I VLMKTPQHV | 10   | 15    |
| >EGFR-V845I VLVKTPQHV  | 6     | >EGFR-V845I VLMKTPQHV | 3    | 3     |
| >EGFR-V845I VLVKTPQHV  | 241   | >EGFR-V845I VLMKTPQHV | 26   | 215   |
| >EGFR-V845I VLVKTPQHV  | 7     | >EGFR-V845I VLMKTPQHV | 5    | 2     |
| >EGFR-V845I VLVKTPQHV  | 97    | >EGFR-V845I VLMKTPQHV | 38   | 59    |
| >EGFR-V845I VLVKTPQHV  | 30    | >EGFR-V845I VLMKTPQHV | 2    | 28    |
| >EGFR-V845I VLVKTPQHV  | 2278  | >EGFR-V845I VLMKTPQHV | 41   | 2237  |
| >EGFR-V845I VLVKTPQHV  | 3     | >EGFR-V845I VLMKTPQHV | 3    | 0     |
| >EGFR-V845I VLVKTPQHV  | 26    | >EGFR-V845I VLMKTPQHV | 13   | 13    |

|                        |       |                        |       |       |
|------------------------|-------|------------------------|-------|-------|
| >EGFR-V845I VLVKTPQHVK | 415   | >EGFR-V845I VLMKTPQHV  | 59    | 356   |
| >EGFR-V845I VLVKTPQHVK | 663   | >EGFR-V845I VLMKTPQHV  | 101   | 562   |
| >EGFR-V845I VLVKTPQHVK | 1938  | >EGFR-V845I VLMKTPQHV  | 248   | 1690  |
| >EGFR-V845I VLVKTPQHV  | 623   | >EGFR-V845I VLMKTPQHV  | 247   | 376   |
| >EGFR-V845I VLVKTPQHVK | 1023  | >EGFR-V845I VLMKTPQHV  | 421   | 602   |
| >EGFR-V845I NVLVKTPQH  | 521   | >EGFR-V845I NVLMKTPQH  | 421   | 100   |
| >EGFR-V845I NVLVKTPQH  | 424   | >EGFR-V845I NVLMKTPQH  | 192   | 232   |
| >EGFR-V845I NVLVKTPQH  | 178   | >EGFR-V845I NVLMKTPQH  | 133   | 45    |
| >EGFR-V845I NVLVKTPQH  | 179   | >EGFR-V845I NVLMKTPQH  | 235   | 56    |
| >EGFR-V845I NVLVKTPQH  | 269   | >EGFR-V845I NVLMKTPQH  | 142   | 127   |
| >EGFR-V845I NVLVKTPQH  | 225   | >EGFR-V845I NVLMKTPQH  | 139   | 86    |
| >EGFR-V845I NVLVKTPQH  | 318   | >EGFR-V845I NVLMKTPQH  | 241   | 77    |
| >EGFR-V845I NVLVKTPQH  | 29    | >EGFR-V845I NVLMKTPQH  | 37    | 8     |
| >EGFR-V845I AARNVLVK   | 338   | >EGFR-V845I AARNVLMK   | 196   | 142   |
| >EGFR-V845I AARNVLVK   | 576   | >EGFR-V845I AARNVLMK   | 277   | 299   |
| >EGFR-V845I AARNVLVK   | 5     | >EGFR-V845I AARNVLMK   | 5     | 0     |
| >EGFR-V845I AARNVLVKT  | 1277  | >EGFR-V845I AARNVLMKT  | 324   | 953   |
| >EGFR-V845I AARNVLVKTF | 404   | >EGFR-V845I AARNVLMKT  | 236   | 168   |
| >EGFR-V845I LAARNVLV   | 312   | >EGFR-V845I LAARNVLM   | 3594  | 3282  |
| >EGFR-V845I LAARNVLV   | 497   | >EGFR-V845I LAARNVLM   | 11167 | 10670 |
| >EGFR-V845I LAARNVLV   | 337   | >EGFR-V845I LAARNVLM   | 8059  | 7722  |
| >EGFR-V845I LAARNVLV   | 54    | >EGFR-V845I LAARNVLM   | 17306 | 17252 |
| >EGFR-V845I LAARNVLVK  | 458   | >EGFR-V845I LAARNVLMK  | 282   | 176   |
| >EGFR-V845I LAARNVLVK  | 230   | >EGFR-V845I LAARNVLMK  | 119   | 111   |
| >EGFR-V845I LAARNVLVK  | 398   | >EGFR-V845I LAARNVLMK  | 478   | 80    |
| >EGFR-V845I LAARNVLVK  | 267   | >EGFR-V845I LAARNVLMK  | 101   | 166   |
| >EGFR-V845I LAARNVLV   | 119   | >EGFR-V845I LAARNVLM   | 5866  | 5747  |
| >EGFR-V845I LAARNVLV   | 10894 | >EGFR-V845I LAARNVLM   | 220   | 10674 |
| >EGFR-V845I LAARNVLV   | 4784  | >EGFR-V845I LAARNVLM   | 187   | 4597  |
| >EGFR-V845I DLAARNVLV  | 88    | >EGFR-V845I DLAARNVLM  | 1317  | 1229  |
| >EGFR-V845I DLAARNVLV  | 340   | >EGFR-V845I DLAARNVLM  | 11322 | 10982 |
| >EGFR-V845I DLAARNVLV  | 65    | >EGFR-V845I DLAARNVLM  | 11029 | 10964 |
| >EGFR-V845I DLAARNVLV  | 158   | >EGFR-V845I DLAARNVLM  | 10026 | 9868  |
| >EGFR-V845I DLAARNVLV  | 17    | >EGFR-V845I DLAARNVLM  | 2696  | 2679  |
| >EGFR-V845I DLAARNVLVK | 382   | >EGFR-V845I DLAARNVLM  | 167   | 215   |
| >EGFR-V845I DLAARNVLVK | 751   | >EGFR-V845I DLAARNVLM  | 397   | 354   |
| >EGFR-V845I DLAARNVLVK | 745   | >EGFR-V845I DLAARNVLM  | 265   | 480   |
| >EGFR-V845I DLAARNVLV  | 64    | >EGFR-V845I DLAARNVLM  | 3710  | 3646  |
| >EGFR-V845I DLAARNVLV  | 334   | >EGFR-V845I DLAARNVLM  | 4482  | 4148  |
| >EGFR-V845I RDLAARNVLI | 377   | >EGFR-V845I RDLAARNVLI | 428   | 51    |
| >EGFR-V845I RDLAARNVLI | 96    | >EGFR-V845I RDLAARNVLI | 1411  | 1315  |
| >EGFR-V851I VKITDFGL   | 279   | >EGFR-V851I AKITDFGL   | 153   | 126   |
| >EGFR-V851I VKITDFGLAK | 252   | >EGFR-V851I AKITDFGLAK | 171   | 81    |

|                        |     |                        |      |      |
|------------------------|-----|------------------------|------|------|
| >EGFR-V851/VKITDFGLAKI | 295 | >EGFR-V851/AKITDFGLAKI | 161  | 134  |
| >EGFR-V851/HVKITDFGLA  | 276 | >EGFR-V851/HAKITDFGLA  | 1266 | 990  |
| >EGFR-V851/HVKITDFG    | 229 | >EGFR-V851/HAKITDFG    | 846  | 617  |
| >EGFR-V851/HVKITDFGL   | 168 | >EGFR-V851/HAKITDFGL   | 693  | 525  |
| >EGFR-V851/HVKITDFGLA  | 33  | >EGFR-V851/HAKITDFGLA  | 113  | 80   |
| >EGFR-V851/HVKITDFGLA  | 4   | >EGFR-V851/HAKITDFGLA  | 6    | 2    |
| >EGFR-V851/HVKITDFGLA  | 201 | >EGFR-V851/HAKITDFGLA  | 530  | 329  |
| >EGFR-V851/HVKITDFGLA  | 130 | >EGFR-V851/HAKITDFGLA  | 326  | 196  |
| >EGFR-V851/HVKITDFGL   | 328 | >EGFR-V851/HAKITDFGL   | 24   | 304  |
| >EGFR-V851/QHVKITDF    | 107 | >EGFR-V851/QHAKITDF    | 137  | 30   |
| >EGFR-V851/QHVKITDFGL  | 380 | >EGFR-V851/QHAKITDFGL  | 370  | 10   |
| >EGFR-V851/PQHVKITDF   | 82  | >EGFR-V851/PQHAKITDF   | 51   | 31   |
| >EGFR-V851/TPQHVKITDF  | 80  | >EGFR-V851/TPQHAKITDF  | 11   | 69   |
| >EGFR-V851/TPQHVKITDF  | 125 | >EGFR-V851/TPQHAKITDF  | 106  | 19   |
| >EGFR-V851/TPQHVKITDF  | 234 | >EGFR-V851/TPQHAKITDF  | 356  | 122  |
| >EGFR-V851/KTPQHVKITD  | 461 | >EGFR-V851/KTPQHAKITD  | 1461 | 1000 |
| >EGFR-V851/KTPQHVKI    | 23  | >EGFR-V851/KTPQHAKI    | 48   | 25   |
| >EGFR-V851/KTPQHVKITD  | 41  | >EGFR-V851/KTPQHAKITD  | 38   | 3    |
| >EGFR-V851/KTPQHVKI    | 299 | >EGFR-V851/KTPQHAKI    | 133  | 166  |
| >EGFR-V851/KTPQHVKITD  | 44  | >EGFR-V851/KTPQHAKITD  | 41   | 3    |
| >EGFR-V851/KTPQHVKI    | 33  | >EGFR-V851/KTPQHAKI    | 40   | 7    |
| >EGFR-V851/KTPQHVKIT   | 77  | >EGFR-V851/KTPQHAKIT   | 138  | 61   |
| >EGFR-V851/KTPQHVKITD  | 7   | >EGFR-V851/KTPQHAKITD  | 7    | 0    |
| >EGFR-V851/KTPQHVKI    | 51  | >EGFR-V851/KTPQHAKI    | 42   | 9    |
| >EGFR-V851/VKTPQHVKI   | 395 | >EGFR-V851/VKTPQHAKI   | 919  | 524  |
| >EGFR-V851/LVKTPQHV    | 262 | >EGFR-V851/LVKTPQHA    | 2419 | 2157 |
| >EGFR-V851/LVKTPQHV    | 42  | >EGFR-V851/LVKTPQHA    | 6162 | 6120 |
| >EGFR-V851/LVKTPQHVK   | 322 | >EGFR-V851/LVKTPQHAK   | 234  | 88   |
| >EGFR-V851/LVKTPQHVK   | 207 | >EGFR-V851/LVKTPQHAK   | 161  | 46   |
| >EGFR-V851/LVKTPQHV    | 173 | >EGFR-V851/LVKTPQHA    | 90   | 83   |
| >EGFR-V851/LVKTPQHVK   | 15  | >EGFR-V851/LVKTPQHAK   | 10   | 5    |
| >EGFR-V851/LVKTPQHVKI  | 126 | >EGFR-V851/LVKTPQHAKI  | 82   | 44   |
| >EGFR-V851/LVKTPQHVK   | 399 | >EGFR-V851/LVKTPQHAK   | 178  | 221  |
| >EGFR-V851/LVKTPQHVK   | 357 | >EGFR-V851/LVKTPQHAK   | 233  | 124  |
| >EGFR-V851/VLVKTPQHV   | 476 | >EGFR-V851/VLVKTPQHA   | 5607 | 5131 |
| >EGFR-V851/VLVKTPQHV   | 215 | >EGFR-V851/VLVKTPQHA   | 1980 | 1765 |
| >EGFR-V851/VLVKTPQHV   | 22  | >EGFR-V851/VLVKTPQHA   | 159  | 137  |
| >EGFR-V851/VLVKTPQHVK  | 269 | >EGFR-V851/VLVKTPQHAK  | 102  | 167  |
| >EGFR-V851/VLVKTPQHV   | 248 | >EGFR-V851/VLVKTPQHA   | 3748 | 3500 |
| >EGFR-V851/VLVKTPQHV   | 3   | >EGFR-V851/VLVKTPQHA   | 61   | 58   |
| >EGFR-V851/VLVKTPQHVK  | 25  | >EGFR-V851/VLVKTPQHAK  | 22   | 3    |
| >EGFR-V851/VLVKTPQHV   | 6   | >EGFR-V851/VLVKTPQHA   | 302  | 296  |
| >EGFR-V851/VLVKTPQHVK  | 241 | >EGFR-V851/VLVKTPQHAK  | 162  | 79   |

|                         |     |                         |       |       |
|-------------------------|-----|-------------------------|-------|-------|
| >EGFR-V851I/VLVKTPQHV   | 7   | >EGFR-V851I/VLVKTPQHA   | 80    | 73    |
| >EGFR-V851I/VLVKTPQHVK  | 97  | >EGFR-V851I/VLVKTPQHAV  | 150   | 53    |
| >EGFR-V851I/VLVKTPQHV   | 30  | >EGFR-V851I/VLVKTPQHA   | 5089  | 5059  |
| >EGFR-V851I/VLVKTPQHV   | 3   | >EGFR-V851I/VLVKTPQHA   | 41    | 38    |
| >EGFR-V851I/VLVKTPQHVK  | 26  | >EGFR-V851I/VLVKTPQHAV  | 23    | 3     |
| >EGFR-V851I/VLVKTPQHVK  | 415 | >EGFR-V851I/VLVKTPQHAV  | 296   | 119   |
| >EGFR-V851I/NVLVKTQHV   | 424 | >EGFR-V851I/NVLVKTQHV   | 9218  | 8794  |
| >EGFR-V851I/NVLVKTQHV   | 178 | >EGFR-V851I/NVLVKTQHV   | 7810  | 7632  |
| >EGFR-V851I/NVLVKTQHV   | 179 | >EGFR-V851I/NVLVKTQHV   | 7132  | 6953  |
| >EGFR-V851I/NVLVKTQHV   | 269 | >EGFR-V851I/NVLVKTQHV   | 14406 | 14137 |
| >EGFR-V851I/NVLVKTQHV   | 225 | >EGFR-V851I/NVLVKTQHV   | 180   | 45    |
| >EGFR-V851I/NVLVKTQHV   | 318 | >EGFR-V851I/NVLVKTQHV   | 217   | 101   |
| >EGFR-V851I/NVLVKTQHV   | 29  | >EGFR-V851I/NVLVKTQHV   | 781   | 752   |
| >EGFR-V851I/VKITDFGL    | 279 | >EGFR-V851I/VKITDFGL    | 100   | 179   |
| >EGFR-V851I/VKITDFGLAK  | 252 | >EGFR-V851I/VKITDFGLAK  | 108   | 144   |
| >EGFR-V851I/VKITDFGLAKI | 295 | >EGFR-V851I/VKITDFGLAKL | 115   | 180   |
| >EGFR-V851I/HVKITDFGLA  | 520 | >EGFR-V851I/HVKITDFGLA  | 462   | 58    |
| >EGFR-V851I/HVKITDFGLA  | 276 | >EGFR-V851I/HVKITDFGLA  | 508   | 232   |
| >EGFR-V851I/HVKITDFG    | 229 | >EGFR-V851I/HVKITDFG    | 754   | 525   |
| >EGFR-V851I/HVKITDFGL   | 168 | >EGFR-V851I/HVKITDFGL   | 628   | 460   |
| >EGFR-V851I/HVKITDFGLA  | 33  | >EGFR-V851I/HVKITDFGLA  | 105   | 72    |
| >EGFR-V851I/HVKITDFGLA  | 4   | >EGFR-V851I/HVKITDFGLAK | 6     | 2     |
| >EGFR-V851I/HVKITDFGLA  | 201 | >EGFR-V851I/HVKITDFGLAK | 438   | 237   |
| >EGFR-V851I/HVKITDFGLA  | 130 | >EGFR-V851I/HVKITDFGLAK | 314   | 184   |
| >EGFR-V851I/HVKITDFGL   | 328 | >EGFR-V851I/HVKITDFGL   | 1526  | 1198  |
| >EGFR-V851I/QHVKITDF    | 107 | >EGFR-V851I/QHVKITDF    | 80    | 27    |
| >EGFR-V851I/QHVKITDFGL  | 380 | >EGFR-V851I/QHVKITDFGL  | 252   | 128   |
| >EGFR-V851I/PQHVKITDF   | 82  | >EGFR-V851I/PQHVKITDF   | 150   | 68    |
| >EGFR-V851I/TPQHVKITDF  | 80  | >EGFR-V851I/TPQHVKITDF  | 120   | 40    |
| >EGFR-V851I/TPQHVKITDF  | 125 | >EGFR-V851I/TPQHVKITDF  | 103   | 22    |
| >EGFR-V851I/TPQHVKITDF  | 234 | >EGFR-V851I/TPQHVKITDF  | 212   | 22    |
| >EGFR-V851I/KTPQHVKITD  | 461 | >EGFR-V851I/KTPQHVKITD  | 511   | 50    |
| >EGFR-V851I/KTPQHVKI    | 23  | >EGFR-V851I/KTPQHVKI    | 44    | 21    |
| >EGFR-V851I/KTPQHVKITD  | 41  | >EGFR-V851I/KTPQHVKITD  | 57    | 16    |
| >EGFR-V851I/KTPQHVKI    | 299 | >EGFR-V851I/KTPQHVKI    | 392   | 93    |
| >EGFR-V851I/KTPQHVKITD  | 44  | >EGFR-V851I/KTPQHVKITD  | 51    | 7     |
| >EGFR-V851I/KTPQHVKI    | 33  | >EGFR-V851I/KTPQHVKI    | 52    | 19    |
| >EGFR-V851I/KTPQHVKIT   | 77  | >EGFR-V851I/KTPQHVKIT   | 35    | 42    |
| >EGFR-V851I/KTPQHVKITD  | 7   | >EGFR-V851I/KTPQHVKITD  | 6     | 1     |
| >EGFR-V851I/KTPQHVKI    | 51  | >EGFR-V851I/KTPQHVKI    | 47    | 4     |
| >EGFR-V851I/VKTPQHVKI   | 395 | >EGFR-V851I/VKTPQHVKI   | 844   | 449   |
| >EGFR-V851I/LVKTPQHV    | 262 | >EGFR-V851I/LVKTPQHI    | 1898  | 1636  |
| >EGFR-V851I/LVKTPQHV    | 42  | >EGFR-V851I/LVKTPQHI    | 5435  | 5393  |

|                        |     |                        |       |       |
|------------------------|-----|------------------------|-------|-------|
| >EGFR-V851I LVKTPQHVK  | 322 | >EGFR-V851I LVKTPQHIK  | 383   | 61    |
| >EGFR-V851I LVKTPQHVK  | 207 | >EGFR-V851I LVKTPQHIK  | 220   | 13    |
| >EGFR-V851I LVKTPQHV   | 173 | >EGFR-V851I LVKTPQHI   | 98    | 75    |
| >EGFR-V851I LVKTPQHVK  | 15  | >EGFR-V851I LVKTPQHIK  | 13    | 2     |
| >EGFR-V851I LVKTPQHVKI | 126 | >EGFR-V851I LVKTPQHIKI | 70    | 56    |
| >EGFR-V851I LVKTPQHVK  | 399 | >EGFR-V851I LVKTPQHIK  | 487   | 88    |
| >EGFR-V851I LVKTPQHVK  | 357 | >EGFR-V851I LVKTPQHIK  | 360   | 3     |
| >EGFR-V851I VLVKTPQHV  | 476 | >EGFR-V851I VLVKTPQHI  | 2744  | 2268  |
| >EGFR-V851I VLVKTPQHV  | 215 | >EGFR-V851I VLVKTPQHI  | 1001  | 786   |
| >EGFR-V851I VLVKTPQHV  | 22  | >EGFR-V851I VLVKTPQHI  | 123   | 101   |
| >EGFR-V851I VLVKTPQHVK | 269 | >EGFR-V851I VLVKTPQHIK | 307   | 38    |
| >EGFR-V851I VLVKTPQHV  | 248 | >EGFR-V851I VLVKTPQHI  | 2247  | 1999  |
| >EGFR-V851I VLVKTPQHV  | 3   | >EGFR-V851I VLVKTPQHI  | 17    | 14    |
| >EGFR-V851I VLVKTPQHVK | 25  | >EGFR-V851I VLVKTPQHIK | 22    | 3     |
| >EGFR-V851I VLVKTPQHV  | 6   | >EGFR-V851I VLVKTPQHI  | 41    | 35    |
| >EGFR-V851I VLVKTPQHVK | 241 | >EGFR-V851I VLVKTPQHIK | 242   | 1     |
| >EGFR-V851I VLVKTPQHV  | 7   | >EGFR-V851I VLVKTPQHI  | 37    | 30    |
| >EGFR-V851I VLVKTPQHVK | 97  | >EGFR-V851I VLVKTPQHIK | 93    | 4     |
| >EGFR-V851I VLVKTPQHV  | 30  | >EGFR-V851I VLVKTPQHI  | 1639  | 1609  |
| >EGFR-V851I VLVKTPQHV  | 3   | >EGFR-V851I VLVKTPQHI  | 38    | 35    |
| >EGFR-V851I VLVKTPQHVK | 26  | >EGFR-V851I VLVKTPQHIK | 30    | 4     |
| >EGFR-V851I VLVKTPQHVK | 415 | >EGFR-V851I VLVKTPQHIK | 380   | 35    |
| >EGFR-V851I VLVKTPQHV  | 623 | >EGFR-V851I VLVKTPQHI  | 496   | 127   |
| >EGFR-V851I NVLVKTPQH  | 424 | >EGFR-V851I NVLVKTPQHI | 4267  | 3843  |
| >EGFR-V851I NVLVKTPQH  | 178 | >EGFR-V851I NVLVKTPQHI | 4468  | 4290  |
| >EGFR-V851I NVLVKTPQH  | 179 | >EGFR-V851I NVLVKTPQHI | 3535  | 3356  |
| >EGFR-V851I NVLVKTPQH  | 269 | >EGFR-V851I NVLVKTPQHI | 12722 | 12453 |
| >EGFR-V851I NVLVKTPQH  | 225 | >EGFR-V851I NVLVKTPQHI | 246   | 21    |
| >EGFR-V851I NVLVKTPQH  | 318 | >EGFR-V851I NVLVKTPQHI | 308   | 10    |
| >EGFR-V851I NVLVKTPQH  | 29  | >EGFR-V851I NVLVKTPQHI | 152   | 123   |
| >EGFR-V897I VWSYGVTV   | 633 | >EGFR-V897I IWSYGVTV   | 342   | 291   |
| >EGFR-V897I VWSYGVTV   | 604 | >EGFR-V897I IWSYGVTV   | 337   | 267   |
| >EGFR-V897I VWSYGVTV   | 94  | >EGFR-V897I IWSYGVTV   | 118   | 24    |
| >EGFR-V897I VWSYGVTV   | 655 | >EGFR-V897I IWSYGVTV   | 375   | 280   |
| >EGFR-V897I VWSYGVTV   | 224 | >EGFR-V897I IWSYGVTV   | 261   | 37    |
| >EGFR-V897I VWSYGVTV   | 410 | >EGFR-V897I IWSYGVTV   | 451   | 41    |
| >EGFR-V897I VWSYGVTV   | 114 | >EGFR-V897I IWSYGVTV   | 132   | 18    |
| >EGFR-V897I DVWSYGVTV  | 50  | >EGFR-V897I DIWSYGVTV  | 15    | 35    |
| >EGFR-V897I DVWSYGVTV  | 124 | >EGFR-V897I DIWSYGVTV  | 44    | 80    |
| >EGFR-V897I DVWSYGVTV  | 362 | >EGFR-V897I DIWSYGVTV  | 147   | 215   |
| >EGFR-V897I DVWSYGVTV  | 107 | >EGFR-V897I DIWSYGVTV  | 41    | 66    |
| >EGFR-V897I DVWSYGVTV  | 82  | >EGFR-V897I DIWSYGVTV  | 420   | 338   |
| >EGFR-V897I DVWSYGVTV  | 8   | >EGFR-V897I DIWSYGVTV  | 12    | 4     |

|                        |     |                         |     |     |
|------------------------|-----|-------------------------|-----|-----|
| >EGFR-V897I LHRIYTHQSD | 739 | >EGFR-V897I LHRIYTHQSD  | 498 | 241 |
| >EGFR-V897I SDVWSYGV   | 774 | >EGFR-V897I SDIWSYGV    | 404 | 370 |
| >EGFR-V897I SDVWSYGV   | 163 | >EGFR-V897I SDIWSYGV    | 112 | 51  |
| >EGFR-V897I SDVWSYGVTV | 130 | >EGFR-V897I SDIWSYGVTV  | 92  | 38  |
| >EGFR-V897I QSDVWSYGV  | 247 | >EGFR-V897I QSDIWSYGV   | 323 | 76  |
| >EGFR-V897I QSDVWSYGV  | 433 | >EGFR-V897I QSDIWSYGV   | 550 | 117 |
| >EGFR-V897I QSDVWSYGV  | 747 | >EGFR-V897I QSDIWSYGV   | 288 | 459 |
| >EGFR-V897I QSDVWSYGV  | 224 | >EGFR-V897I QSDIWSYGV   | 235 | 11  |
| >EGFR-V897I QSDVWSYGV  | 16  | >EGFR-V897I QSDIWSYGV   | 13  | 3   |
| >EGFR-V897I QSDVWSYGV  | 89  | >EGFR-V897I QSDIWSYGV   | 78  | 11  |
| >EGFR-V897I HQSDVWSYCV | 343 | >EGFR-V897I HQSDIWSYCV  | 240 | 103 |
| >EGFR-V897I HQSDVWSYCV | 114 | >EGFR-V897I HQSDIWSYCV  | 100 | 14  |
| >EGFR-V897I HQSDVWSYCV | 683 | >EGFR-V897I HQSDIWSYCV  | 479 | 204 |
| >EGFR-V897I HQSDVWSY   | 395 | >EGFR-V897I HQSDIWSY    | 303 | 92  |
| >EGFR-V897I HQSDVWSYCV | 384 | >EGFR-V897I HQSDIWSYCV  | 511 | 127 |
| >EGFR-V897I HQSDVWSYCV | 76  | >EGFR-V897I HQSDIWSYCV  | 58  | 18  |
| >EGFR-V897I HQSDVWSYCV | 26  | >EGFR-V897I HQSDIWSYCV  | 40  | 14  |
| >EGFR-V897I HQSDVWSYCV | 28  | >EGFR-V897I HQSDIWSYCV  | 29  | 1   |
| >EGFR-V897I HQSDVWSYCV | 51  | >EGFR-V897I HQSDIWSYCV  | 77  | 26  |
| >EGFR-V897I HQSDVWSYCV | 132 | >EGFR-V897I HQSDIWSYCV  | 78  | 54  |
| >EGFR-V897I HQSDVWSYCV | 200 | >EGFR-V897I HQSDIWSYCV  | 127 | 73  |
| >EGFR-V897I HQSDVWSY   | 478 | >EGFR-V897I HQSDIWSY    | 260 | 218 |
| >EGFR-V897I HQSDVWSY   | 37  | >EGFR-V897I HQSDIWSY    | 26  | 11  |
| >EGFR-V897I HQSDVWSY   | 574 | >EGFR-V897I HQSDIWSY    | 474 | 100 |
| >EGFR-V897I HQSDVWSY   | 52  | >EGFR-V897I HQSDIWSY    | 59  | 7   |
| >EGFR-V897I HQSDVWSY   | 215 | >EGFR-V897I HQSDIWSY    | 253 | 38  |
| >EGFR-V897I HQSDVWSY   | 21  | >EGFR-V897I HQSDIWSY    | 24  | 3   |
| >EGFR-V897I HQSDVWSY   | 229 | >EGFR-V897I HQSDIWSY    | 241 | 12  |
| >EGFR-V897I HQSDVWSY   | 267 | >EGFR-V897I HQSDIWSY    | 238 | 29  |
| >EGFR-V897I HQSDVWSYCV | 224 | >EGFR-V897I HQSDIWSYCV  | 310 | 86  |
| >EGFR-V897I HQSDVWSY   | 480 | >EGFR-V897I HQSDIWSY    | 817 | 337 |
| >EGFR-V897I THQSDVWSY  | 55  | >EGFR-V897I THQSDIWSY   | 40  | 15  |
| >EGFR-V897I THQSDVWSY  | 462 | >EGFR-V897I THQSDIWSY   | 598 | 136 |
| >EGFR-V897I THQSDVWSY  | 253 | >EGFR-V897I THQSDIWSYCV | 389 | 136 |
| >EGFR-V897I YTHQSDVWS  | 342 | >EGFR-V897I YTHQSDIWSY  | 302 | 40  |
| >EGFR-V897I YTHQSDVWS  | 53  | >EGFR-V897I YTHQSDIWSY  | 52  | 1   |
| >EGFR-V897I YTHQSDVWS  | 8   | >EGFR-V897I YTHQSDIWSY  | 7   | 1   |
| >EGFR-V897I YTHQSDVWS  | 22  | >EGFR-V897I YTHQSDIWSY  | 20  | 2   |
| >EGFR-V897I YTHQSDVWS  | 123 | >EGFR-V897I YTHQSDIWSY  | 138 | 15  |
| >EGFR-V897I YTHQSDVWS  | 246 | >EGFR-V897I YTHQSDIWSY  | 208 | 38  |
| >EGFR-V897I YTHQSDVWS  | 67  | >EGFR-V897I YTHQSDIWSY  | 59  | 8   |
| >EGFR-V897I YTHQSDVWS  | 60  | >EGFR-V897I YTHQSDIWSY  | 74  | 14  |
| >EGFR-V897I YTHQSDVWS  | 243 | >EGFR-V897I YTHQSDIWSY  | 249 | 6   |



|                        |       |                         |      |       |
|------------------------|-------|-------------------------|------|-------|
| >EGFR-V897I YTHQSDVWS  | 55    | >EGFR-V897I YTHQSDIWSY  | 88   | 33    |
| >EGFR-V897I YTHQSDVW   | 4     | >EGFR-V897I YTHQSDIW    | 5    | 1     |
| >EGFR-V897I YTHQSDVWS  | 4     | >EGFR-V897I YTHQSDIWSY  | 4    | 0     |
| >EGFR-V897I YTHQSDVW   | 71    | >EGFR-V897I YTHQSDIW    | 72   | 1     |
| >EGFR-V897I YTHQSDVWS  | 357   | >EGFR-V897I YTHQSDIWSY  | 386  | 29    |
| >EGFR-V897I YTHQSDVW   | 22    | >EGFR-V897I YTHQSDIW    | 24   | 2     |
| >EGFR-V897I YTHQSDVWS  | 333   | >EGFR-V897I YTHQSDIWSY  | 508  | 175   |
| >EGFR-V897I YTHQSDVW   | 224   | >EGFR-V897I YTHQSDIW    | 422  | 198   |
| >EGFR-V897I YTHQSDVWS  | 53    | >EGFR-V897I YTHQSDIWSY  | 38   | 15    |
| >EGFR-V897I YTHQSDVW   | 340   | >EGFR-V897I YTHQSDIW    | 535  | 195   |
| >EGFR-V897I IYTHQSDV   | 2288  | >EGFR-V897I IYTHQSDI    | 156  | 2132  |
| >EGFR-V897I IYTHQSDV   | 3350  | >EGFR-V897I IYTHQSDI    | 362  | 2988  |
| >EGFR-V897I IYTHQSDVW  | 403   | >EGFR-V897I IYTHQSDIW   | 523  | 120   |
| >EGFR-V897I IYTHQSDV   | 2124  | >EGFR-V897I IYTHQSDI    | 73   | 2051  |
| >EGFR-V897I IYTHQSDVW  | 26    | >EGFR-V897I IYTHQSDIW   | 63   | 37    |
| >EGFR-V897I IYTHQSDVW! | 271   | >EGFR-V897I IYTHQSDIWS  | 306  | 35    |
| >EGFR-V897I IYTHQSDVW! | 72    | >EGFR-V897I IYTHQSDIWS  | 68   | 4     |
| >EGFR-V897I IYTHQSDVW! | 26    | >EGFR-V897I IYTHQSDIWS  | 24   | 2     |
| >EGFR-V897I IYTHQSDVW! | 53    | >EGFR-V897I IYTHQSDIWS  | 54   | 1     |
| >EGFR-V897I IYTHQSDVW  | 436   | >EGFR-V897I IYTHQSDIW   | 646  | 210   |
| >EGFR-V897I IYTHQSDVW  | 155   | >EGFR-V897I IYTHQSDIW   | 126  | 29    |
| >EGFR-V897I IYTHQSDVW! | 279   | >EGFR-V897I IYTHQSDIWS  | 333  | 54    |
| >EGFR-V897I RIYTHQSDV  | 11    | >EGFR-V897I RIYTHQSDI   | 50   | 39    |
| >EGFR-V897I RIYTHQSDV  | 83    | >EGFR-V897I RIYTHQSDI   | 1549 | 1466  |
| >EGFR-V897I RIYTHQSDV  | 441   | >EGFR-V897I RIYTHQSDI   | 7032 | 6591  |
| >EGFR-V897I RIYTHQSDV  | 25    | >EGFR-V897I RIYTHQSDI   | 2204 | 2179  |
| >EGFR-V897I RIYTHQSDV  | 1429  | >EGFR-V897I RIYTHQSDI   | 97   | 1332  |
| >EGFR-V897I RIYTHQSDVW | 57    | >EGFR-V897I RIYTHQSDIW  | 80   | 23    |
| >EGFR-V897I RIYTHQSDV  | 384   | >EGFR-V897I RIYTHQSDI   | 277  | 107   |
| >EGFR-V897I RIYTHQSDVW | 34    | >EGFR-V897I RIYTHQSDIW  | 61   | 27    |
| >EGFR-V897I RIYTHQSDVW | 188   | >EGFR-V897I RIYTHQSDIW  | 190  | 2     |
| >EGFR-V897I RIYTHQSDVW | 13    | >EGFR-V897I RIYTHQSDIW  | 14   | 1     |
| >EGFR-V897I RIYTHQSDVW | 331   | >EGFR-V897I RIYTHQSDIW  | 281  | 50    |
| >EGFR-V897I RIYTHQSDV  | 13453 | >EGFR-V897I RIYTHQSDI   | 455  | 12998 |
| >EGFR-V897I HRIYTHQSDV | 159   | >EGFR-V897I HRIYTHQSDI  | 125  | 34    |
| >EGFR-V897I HRIYTHQSDV | 376   | >EGFR-V897I HRIYTHQSDI\ | 459  | 83    |
| >EGFR-V897I HRIYTHQSDV | 64    | >EGFR-V897I HRIYTHQSDI  | 27   | 37    |
| >EGFR-V897I HRIYTHQSDV | 32    | >EGFR-V897I HRIYTHQSDI\ | 28   | 4     |
| >EGFR-W731 WIPEGEKV    | 298   | >EGFR-W731 LIPEGEKV     | 298  | 0     |
| >EGFR-W731 WIPEGEKV    | 191   | >EGFR-W731 LIPEGEKV     | 362  | 171   |
| >EGFR-W731 WIPEGEKV    | 25    | >EGFR-W731 LIPEGEKV     | 32   | 7     |
| >EGFR-W731 WIPEGEKV    | 69    | >EGFR-W731 LIPEGEKV     | 131  | 62    |
| >EGFR-W731 WIPEGEKV    | 284   | >EGFR-W731 LIPEGEKV     | 1039 | 755   |

|                       |       |                        |       |       |
|-----------------------|-------|------------------------|-------|-------|
| >EGFR-W731 WIPEGEKV   | 10    | >EGFR-W731 LIPEGEKV    | 8     | 2     |
| >EGFR-W731 WIPEGEKVKI | 453   | >EGFR-W731 LIPEGEKVKI  | 405   | 48    |
| >EGFR-W731 WIPEGEKV   | 381   | >EGFR-W731 LIPEGEKV    | 1735  | 1354  |
| >EGFR-W731 LWIPEGEKV  | 19285 | >EGFR-W731 LLIPEGEKV   | 180   | 19105 |
| >EGFR-W731 LWIPEGEKV  | 1600  | >EGFR-W731 LLIPEGEKV   | 14    | 1586  |
| >EGFR-W731 LWIPEGEKVK | 7617  | >EGFR-W731 LLIPEGEKVKI | 70    | 7547  |
| >EGFR-W731 LWIPEGEKV  | 16649 | >EGFR-W731 LLIPEGEKV   | 14    | 16635 |
| >EGFR-W731 LWIPEGEKVK | 21272 | >EGFR-W731 LLIPEGEKVKI | 175   | 21097 |
| >EGFR-W731 LWIPEGEKV  | 1563  | >EGFR-W731 LLIPEGEKV   | 51    | 1512  |
| >EGFR-W731 LWIPEGEKVK | 9133  | >EGFR-W731 LLIPEGEKVKI | 410   | 8723  |
| >EGFR-W731 LWIPEGEKV  | 8893  | >EGFR-W731 LLIPEGEKV   | 5     | 8888  |
| >EGFR-W731 LWIPEGEKVK | 21167 | >EGFR-W731 LLIPEGEKVKI | 43    | 21124 |
| >EGFR-W731 LWIPEGEKV  | 17361 | >EGFR-W731 LLIPEGEKV   | 9     | 17352 |
| >EGFR-W731 LWIPEGEKVK | 22856 | >EGFR-W731 LLIPEGEKVKI | 97    | 22759 |
| >EGFR-W731 LWIPEGEKV  | 15027 | >EGFR-W731 LLIPEGEKV   | 15    | 15012 |
| >EGFR-W731 LWIPEGEKVK | 23113 | >EGFR-W731 LLIPEGEKVKI | 311   | 22802 |
| >EGFR-W731 LWIPEGEKV  | 24457 | >EGFR-W731 LLIPEGEKV   | 60    | 24397 |
| >EGFR-W731 LWIPEGEKV  | 6062  | >EGFR-W731 LLIPEGEKV   | 3     | 6059  |
| >EGFR-W731 LWIPEGEKVK | 25963 | >EGFR-W731 LLIPEGEKVKI | 11    | 25952 |
| >EGFR-W731 LWIPEGEKVK | 158   | >EGFR-W731 LLIPEGEKVKI | 5246  | 5088  |
| >EGFR-W731 LWIPEGEKVK | 37    | >EGFR-W731 LLIPEGEKVKI | 9503  | 9466  |
| >EGFR-W731 LWIPEGEKV  | 270   | >EGFR-W731 LLIPEGEKV   | 27083 | 26813 |
| >EGFR-W731 LWIPEGEKVK | 270   | >EGFR-W731 LLIPEGEKVKI | 28028 | 27758 |
| >EGFR-W731 GAFGTVYKGL | 38    | >EGFR-W731 GAFGTVYKGL  | 468   | 430   |
| >EGFR-W731 GAFGTVYKGL | 456   | >EGFR-W731 GAFGTVYKGL  | 12062 | 11606 |
| >EGFR-W731 GAFGTVYKGL | 46    | >EGFR-W731 GAFGTVYKGL  | 7380  | 7334  |
| >EGFR-W731 GAFGTVYKGL | 34    | >EGFR-W731 GAFGTVYKGL  | 7603  | 7569  |
| >EGFR-W731 GAFGTVYKGL | 279   | >EGFR-W731 GAFGTVYKGL  | 151   | 128   |
| >EGFR-W731 GAFGTVYKGL | 33    | >EGFR-W731 GAFGTVYKGL  | 5675  | 5642  |
| >EGFR-W731 GLWIPEGEKV | 1248  | >EGFR-W731 GLLIPEGEKV  | 480   | 768   |
| >EGFR-W731 GLWIPEGEKV | 251   | >EGFR-W731 GLLIPEGEKV  | 209   | 42    |
| >EGFR-W731 GLWIPEGEKV | 329   | >EGFR-W731 GLLIPEGEKV  | 260   | 69    |
| >EGFR-W731 GLWIPEGEKV | 790   | >EGFR-W731 GLLIPEGEKV  | 332   | 458   |
| >EGFR-W731 GLWIPEGEKV | 3     | >EGFR-W731 GLLIPEGEKV  | 4     | 1     |
| >EGFR-W731 GLWIPEGEKV | 28    | >EGFR-W731 GLLIPEGEKV  | 31    | 3     |
| >EGFR-W731 GLWIPEGEKV | 6     | >EGFR-W731 GLLIPEGEKV  | 8     | 2     |
| >EGFR-W731 GLWIPEGEKV | 87    | >EGFR-W731 GLLIPEGEKV  | 136   | 49    |
| >EGFR-W731 GLWIPEGEKV | 7     | >EGFR-W731 GLLIPEGEKV  | 9     | 2     |
| >EGFR-W731 GLWIPEGEK  | 421   | >EGFR-W731 GLLIPEGEK   | 664   | 243   |
| >EGFR-W731 KGLWIPEGEK | 229   | >EGFR-W731 KGLLIPEGEK\ | 3530  | 3301  |
| >EGFR-W731 KGLWIPEGEK | 499   | >EGFR-W731 KGLLIPEGEK\ | 3418  | 2919  |
| >EGFR-W731 TVYKGLWI   | 153   | >EGFR-W731 TVYKGLLI    | 190   | 37    |
| >EGFR-W731 TVYKGLWI   | 168   | >EGFR-W731 TVYKGLLI    | 233   | 65    |

|                      |       |                       |       |       |
|----------------------|-------|-----------------------|-------|-------|
| >EGFR-W731TVYKGLWI   | 444   | >EGFR-W731TVYKGLLI    | 1297  | 853   |
| >EGFR-W731TVYKGLWI   | 463   | >EGFR-W731TVYKGLLI    | 367   | 96    |
| >EGFR-W731TVYKGLWI   | 191   | >EGFR-W731TVYKGLLI    | 213   | 22    |
| >EGFR-W731TVYKGLWI   | 265   | >EGFR-W731TVYKGLLI    | 188   | 77    |
| >EGFR-W731GTVYKGLW   | 14    | >EGFR-W731GTVYKGLL    | 93    | 79    |
| >EGFR-W731GTVYKGLWI  | 24    | >EGFR-W731GTVYKGLLI   | 66    | 42    |
| >EGFR-W731GTVYKGLW   | 199   | >EGFR-W731GTVYKGLL    | 20841 | 20642 |
| >EGFR-W731GTVYKGLW   | 230   | >EGFR-W731GTVYKGLL    | 17571 | 17341 |
| >EGFR-W731GTVYKGLWI  | 118   | >EGFR-W731GTVYKGLLI   | 95    | 23    |
| >EGFR-W731GTVYKGLWI  | 166   | >EGFR-W731GTVYKGLLI   | 190   | 24    |
| >EGFR-W731FGTVYKGLW  | 393   | >EGFR-W731FGTVYKGLL   | 20022 | 19629 |
| >EGFR-W731FGTVYKGLW  | 29    | >EGFR-W731FGTVYKGLL   | 10701 | 10672 |
| >EGFR-W731AFGTVYKGLV | 591   | >EGFR-W731AFGTVYKGLL  | 483   | 108   |
| >EGFR-W731AFGTVYKGLV | 249   | >EGFR-W731AFGTVYKGLL  | 419   | 170   |
| >EGFR-W731WIPEGEKV   | 298   | >EGFR-W731RIPEGEKV    | 390   | 92    |
| >EGFR-W731WIPEGEKV   | 191   | >EGFR-W731RIPEGEKV    | 347   | 156   |
| >EGFR-W731WIPEGEKV   | 25    | >EGFR-W731RIPEGEKV    | 33    | 8     |
| >EGFR-W731WIPEGEKV   | 69    | >EGFR-W731RIPEGEKV    | 122   | 53    |
| >EGFR-W731WIPEGEKV   | 284   | >EGFR-W731RIPEGEKV    | 2403  | 2119  |
| >EGFR-W731WIPEGEKV   | 10    | >EGFR-W731RIPEGEKV    | 24    | 14    |
| >EGFR-W731WIPEGEKVKI | 453   | >EGFR-W731RIPEGEKVKI  | 2375  | 1922  |
| >EGFR-W731WIPEGEKVKI | 17337 | >EGFR-W731RIPEGEKVKI  | 325   | 17012 |
| >EGFR-W731WIPEGEKV   | 381   | >EGFR-W731RIPEGEKV    | 5773  | 5392  |
| >EGFR-W731LWIPEGEKVK | 158   | >EGFR-W731LRIPEGEKVKI | 14007 | 13849 |
| >EGFR-W731LWIPEGEKVK | 37    | >EGFR-W731LRIPEGEKVKI | 18483 | 18446 |
| >EGFR-W731LWIPEGEKV  | 270   | >EGFR-W731LRIPEGEKV   | 33756 | 33486 |
| >EGFR-W731LWIPEGEKVK | 270   | >EGFR-W731LRIPEGEKVKI | 34465 | 34195 |
| >EGFR-W731GAFGTVYKGL | 23546 | >EGFR-W731GAFGTVYKGL  | 451   | 23095 |
| >EGFR-W731GAFGTVYKGL | 16896 | >EGFR-W731GAFGTVYKGL  | 35    | 16861 |
| >EGFR-W731GAFGTVYKGL | 18070 | >EGFR-W731GAFGTVYKGL  | 28    | 18042 |
| >EGFR-W731GAFGTVYKGL | 38    | >EGFR-W731GAFGTVYKGL  | 18321 | 18283 |
| >EGFR-W731GAFGTVYKGL | 456   | >EGFR-W731GAFGTVYKGL  | 33923 | 33467 |
| >EGFR-W731GAFGTVYKGL | 46    | >EGFR-W731GAFGTVYKGL  | 20978 | 20932 |
| >EGFR-W731GAFGTVYKGL | 34    | >EGFR-W731GAFGTVYKGL  | 22362 | 22328 |
| >EGFR-W731GAFGTVYKGL | 279   | >EGFR-W731GAFGTVYKGL  | 4696  | 4417  |
| >EGFR-W731GAFGTVYKGL | 33    | >EGFR-W731GAFGTVYKGL  | 18168 | 18135 |
| >EGFR-W731GAFGTVYKGL | 11217 | >EGFR-W731GAFGTVYKGL  | 478   | 10739 |
| >EGFR-W731GLWIPEGEKV | 251   | >EGFR-W731GLRIPEGEKV  | 999   | 748   |
| >EGFR-W731GLWIPEGEKV | 329   | >EGFR-W731GLRIPEGEKV  | 989   | 660   |
| >EGFR-W731GLWIPEGEKV | 3     | >EGFR-W731GLRIPEGEKV  | 76    | 73    |
| >EGFR-W731GLWIPEGEKV | 28    | >EGFR-W731GLRIPEGEKV  | 1268  | 1240  |
| >EGFR-W731GLWIPEGEKV | 6     | >EGFR-W731GLRIPEGEKV  | 210   | 204   |
| >EGFR-W731GLWIPEGEKV | 87    | >EGFR-W731GLRIPEGEKV  | 11331 | 11244 |

|                       |       |                        |       |       |
|-----------------------|-------|------------------------|-------|-------|
| >EGFR-W731 GLWIPEGEKV | 7     | >EGFR-W731 GLRIPEGEKV  | 14    | 7     |
| >EGFR-W731 GLWIPEGEK  | 421   | >EGFR-W731 GLRIPEGEK   | 455   | 34    |
| >EGFR-W731 GLWIPEGEK  | 14610 | >EGFR-W731 GLRIPEGEK   | 465   | 14145 |
| >EGFR-W731 GLWIPEGEKV | 14886 | >EGFR-W731 GLRIPEGEKVI | 499   | 14387 |
| >EGFR-W731 KGLWIPEGEK | 229   | >EGFR-W731 KGLRIPEGEK\ | 1545  | 1316  |
| >EGFR-W731 KGLWIPEGEK | 499   | >EGFR-W731 KGLRIPEGEK\ | 2700  | 2201  |
| >EGFR-W731 TVYKGLWI   | 153   | >EGFR-W731 TVYKGLRI    | 391   | 238   |
| >EGFR-W731 TVYKGLWI   | 168   | >EGFR-W731 TVYKGLRI    | 850   | 682   |
| >EGFR-W731 TVYKGLWI   | 444   | >EGFR-W731 TVYKGLRI    | 1207  | 763   |
| >EGFR-W731 TVYKGLWI   | 463   | >EGFR-W731 TVYKGLRI    | 679   | 216   |
| >EGFR-W731 TVYKGLWI   | 191   | >EGFR-W731 TVYKGLRI    | 412   | 221   |
| >EGFR-W731 TVYKGLWI   | 265   | >EGFR-W731 TVYKGLRI    | 326   | 61    |
| >EGFR-W731 GTVYKGLW   | 19469 | >EGFR-W731 GTVYKGLR    | 84    | 19385 |
| >EGFR-W731 GTVYKGLW   | 26362 | >EGFR-W731 GTVYKGLR    | 81    | 26281 |
| >EGFR-W731 GTVYKGLW   | 14    | >EGFR-W731 GTVYKGLR    | 16162 | 16148 |
| >EGFR-W731 GTVYKGLWI  | 24    | >EGFR-W731 GTVYKGLRI   | 17    | 7     |
| >EGFR-W731 GTVYKGLW   | 199   | >EGFR-W731 GTVYKGLR    | 25334 | 25135 |
| >EGFR-W731 GTVYKGLW   | 230   | >EGFR-W731 GTVYKGLR    | 22344 | 22114 |
| >EGFR-W731 GTVYKGLWI  | 118   | >EGFR-W731 GTVYKGLRI   | 199   | 81    |
| >EGFR-W731 GTVYKGLW   | 11612 | >EGFR-W731 GTVYKGLR    | 432   | 11180 |
| >EGFR-W731 GTVYKGLWI  | 166   | >EGFR-W731 GTVYKGLRI   | 347   | 181   |
| >EGFR-W731 FGTVYKGLW  | 32084 | >EGFR-W731 FGTVYKGLR   | 238   | 31846 |
| >EGFR-W731 FGTVYKGLW  | 393   | >EGFR-W731 FGTVYKGLR   | 22565 | 22172 |
| >EGFR-W731 FGTVYKGLW  | 29    | >EGFR-W731 FGTVYKGLR   | 24415 | 24386 |
| >EGFR-W731 AFGTVYKGLV | 249   | >EGFR-W731 AFGTVYKGLR  | 516   | 267   |
| >EGFR-W731 AFGTVYKGLV | 24871 | >EGFR-W731 AFGTVYKGLR  | 92    | 24779 |
| >EGFR-W731 AFGTVYKGLV | 28975 | >EGFR-W731 AFGTVYKGLR  | 444   | 28531 |
| >EGFR-W731 AFGTVYKGLV | 31971 | >EGFR-W731 AFGTVYKGLR  | 397   | 31574 |
| >EGFR-Y727(VLGSGAFGTV | 5237  | >EGFR-Y727(VLGSGAFGTV  | 175   | 5062  |
| >EGFR-Y727(VLGSGAFGTV | 2462  | >EGFR-Y727(VLGSGAFGTV  | 46    | 2416  |
| >EGFR-Y727(VLGSGAFGTV | 64    | >EGFR-Y727(VLGSGAFGTV  | 21378 | 21314 |
| >EGFR-Y727(VLGSGAFGTV | 54    | >EGFR-Y727(VLGSGAFGTV  | 20213 | 20159 |
| >EGFR-Y727(VLGSGAFGTV | 26    | >EGFR-Y727(VLGSGAFGTV  | 24643 | 24617 |
| >EGFR-Y727(VLGSGAFGTV | 73    | >EGFR-Y727(VLGSGAFGTV  | 12311 | 12238 |
| >EGFR-Y727(VLGSGAFGTV | 87    | >EGFR-Y727(VLGSGAFGTV  | 16931 | 16844 |
| >EGFR-Y727(VLGSGAFGTV | 421   | >EGFR-Y727(VLGSGAFGTV  | 13848 | 13427 |
| >EGFR-Y727(VLGSGAFGTV | 227   | >EGFR-Y727(VLGSGAFGTV  | 18847 | 18620 |
| >EGFR-Y727(TVYKGLWI   | 153   | >EGFR-Y727(TVCKGLWI    | 2808  | 2655  |
| >EGFR-Y727(TVYKGLWI   | 168   | >EGFR-Y727(TVCKGLWI    | 943   | 775   |
| >EGFR-Y727(TVYKGLWI   | 444   | >EGFR-Y727(TVCKGLWI    | 4674  | 4230  |
| >EGFR-Y727(TVYKGLWI   | 463   | >EGFR-Y727(TVCKGLWI    | 2619  | 2156  |
| >EGFR-Y727(TVYKGLWI   | 191   | >EGFR-Y727(TVCKGLWI    | 4320  | 4129  |
| >EGFR-Y727(TVYKGLWI   | 265   | >EGFR-Y727(TVCKGLWI    | 758   | 493   |

|                       |      |                       |       |       |
|-----------------------|------|-----------------------|-------|-------|
| >EGFR-Y727(GTVYKGLW   | 14   | >EGFR-Y727(GTVCKGLW   | 14    | 0     |
| >EGFR-Y727(GTVYKGLWI  | 24   | >EGFR-Y727(GTVCKGLWI  | 31    | 7     |
| >EGFR-Y727(GTVYKGLW   | 199  | >EGFR-Y727(GTVCKGLW   | 390   | 191   |
| >EGFR-Y727(GTVYKGLW   | 230  | >EGFR-Y727(GTVCKGLW   | 496   | 266   |
| >EGFR-Y727(GTVYKGLWI  | 118  | >EGFR-Y727(GTVCKGLWI  | 147   | 29    |
| >EGFR-Y727(GTVYKGLWI  | 166  | >EGFR-Y727(GTVCKGLWI  | 225   | 59    |
| >EGFR-Y727(FGTVYKGL   | 354  | >EGFR-Y727(FGTVCKGL   | 15435 | 15081 |
| >EGFR-Y727(FGTVYKGLW  | 1595 | >EGFR-Y727(FGTVCKGLW  | 441   | 1154  |
| >EGFR-Y727(FGTVYKGLW  | 393  | >EGFR-Y727(FGTVCKGLW  | 607   | 214   |
| >EGFR-Y727(FGTVYKGLW  | 29   | >EGFR-Y727(FGTVCKGLW  | 61    | 32    |
| >EGFR-Y727(AFGTVYKGL  | 152  | >EGFR-Y727(AFGTVCKGL  | 1663  | 1511  |
| >EGFR-Y727(AFGTVYKGLV | 249  | >EGFR-Y727(AFGTVCKGLV | 817   | 568   |
| >EGFR-Y727(GAFGTVYKGI | 372  | >EGFR-Y727(GAFGTVCKGI | 823   | 451   |
| >EGFR-Y727(GAFGTVYK   | 122  | >EGFR-Y727(GAFGTVCK   | 605   | 483   |
| >EGFR-Y727(GAFGTVYK   | 9    | >EGFR-Y727(GAFGTVCK   | 26    | 17    |
| >EGFR-Y727(GAFGTVYK   | 98   | >EGFR-Y727(GAFGTVCK   | 771   | 673   |
| >EGFR-Y727(GAFGTVYK   | 222  | >EGFR-Y727(GAFGTVCK   | 2187  | 1965  |
| >EGFR-Y727(GAFGTVYK   | 23   | >EGFR-Y727(GAFGTVCK   | 87    | 64    |
| >EGFR-Y727(GAFGTVYKGI | 158  | >EGFR-Y727(GAFGTVCKGI | 137   | 21    |
| >EGFR-Y727(GAFGTVYKGI | 38   | >EGFR-Y727(GAFGTVCKGI | 55    | 17    |
| >EGFR-Y727(GAFGTVYKGI | 456  | >EGFR-Y727(GAFGTVCKGI | 382   | 74    |
| >EGFR-Y727(GAFGTVYKGI | 46   | >EGFR-Y727(GAFGTVCKGI | 46    | 0     |
| >EGFR-Y727(GAFGTVYKGI | 34   | >EGFR-Y727(GAFGTVCKGI | 42    | 8     |
| >EGFR-Y727(GAFGTVYKGI | 279  | >EGFR-Y727(GAFGTVCKGI | 284   | 5     |
| >EGFR-Y727(GAFGTVYKGI | 33   | >EGFR-Y727(GAFGTVCKGI | 39    | 6     |
| >EGFR-Y727(GAFGTVYK   | 150  | >EGFR-Y727(GAFGTVCK   | 306   | 156   |
| >EGFR-Y727(SGAFGTVYK  | 49   | >EGFR-Y727(SGAFGTVCK  | 225   | 176   |
| >EGFR-Y727(SGAFGTVY   | 87   | >EGFR-Y727(SGAFGTVC   | 26719 | 26632 |
| >EGFR-Y727(SGAFGTVYK  | 178  | >EGFR-Y727(SGAFGTVCK  | 498   | 320   |
| >EGFR-Y727(SGAFGTVY   | 188  | >EGFR-Y727(SGAFGTVC   | 18204 | 18016 |
| >EGFR-Y727(SGAFGTVY   | 460  | >EGFR-Y727(SGAFGTVC   | 29449 | 28989 |
| >EGFR-Y727(SGAFGTVYK  | 342  | >EGFR-Y727(SGAFGTVCK  | 538   | 196   |
| >EGFR-Y727(GSGAFGTVYK | 46   | >EGFR-Y727(GSGAFGTVC  | 157   | 111   |
| >EGFR-Y727(GSGAFGTVYK | 29   | >EGFR-Y727(GSGAFGTVC  | 142   | 113   |
| >EGFR-Y727(GSGAFGTVY  | 432  | >EGFR-Y727(GSGAFGTVC  | 31637 | 31205 |
| >EGFR-Y727(GSGAFGTVYK | 224  | >EGFR-Y727(GSGAFGTVC  | 2854  | 2630  |
| >EGFR-Y727(GSGAFGTVY  | 78   | >EGFR-Y727(GSGAFGTVC  | 14465 | 14387 |
| >EGFR-Y727(GSGAFGTVY  | 349  | >EGFR-Y727(GSGAFGTVC  | 13320 | 12971 |
| >EGFR-Y727(GSGAFGTVY  | 62   | >EGFR-Y727(GSGAFGTVC  | 22757 | 22695 |
| >EGFR-Y727(GSGAFGTVY  | 11   | >EGFR-Y727(GSGAFGTVC  | 3548  | 3537  |
| >EGFR-Y727(GSGAFGTVYK | 337  | >EGFR-Y727(GSGAFGTVC  | 534   | 197   |
| >EGFR-Y727(LGSGAFGTVY | 125  | >EGFR-Y727(LGSGAFGTVC | 27815 | 27690 |
| >EGFR-Y727(LGSGAFGTVY | 478  | >EGFR-Y727(LGSGAFGTVC | 33225 | 32747 |

|                       |     |                       |       |       |
|-----------------------|-----|-----------------------|-------|-------|
| >EGFR-Y727(LGSGAFGTVY | 93  | >EGFR-Y727(LGSGAFGTVC | 15405 | 15312 |
| >EGFR-Y727(LGSGAFGTVY | 94  | >EGFR-Y727(LGSGAFGTVC | 19696 | 19602 |
| >EGFR-Y727(VLGSGAFGTV | 64  | >EGFR-Y727(VLGSGAFGTV | 7373  | 7309  |
| >EGFR-Y727(VLGSGAFGTV | 54  | >EGFR-Y727(VLGSGAFGTV | 7120  | 7066  |
| >EGFR-Y727(VLGSGAFGTV | 26  | >EGFR-Y727(VLGSGAFGTV | 8748  | 8722  |
| >EGFR-Y727(VLGSGAFGTV | 73  | >EGFR-Y727(VLGSGAFGTV | 3205  | 3132  |
| >EGFR-Y727(VLGSGAFGTV | 87  | >EGFR-Y727(VLGSGAFGTV | 3823  | 3736  |
| >EGFR-Y727(VLGSGAFGTV | 421 | >EGFR-Y727(VLGSGAFGTV | 8851  | 8430  |
| >EGFR-Y727(VLGSGAFGTV | 227 | >EGFR-Y727(VLGSGAFGTV | 4225  | 3998  |
| >EGFR-Y727(TVYKGLWI   | 153 | >EGFR-Y727(TVHKGLWI   | 1013  | 860   |
| >EGFR-Y727(TVYKGLWI   | 168 | >EGFR-Y727(TVHKGLWI   | 1302  | 1134  |
| >EGFR-Y727(TVYKGLWI   | 444 | >EGFR-Y727(TVHKGLWI   | 3427  | 2983  |
| >EGFR-Y727(TVYKGLWI   | 463 | >EGFR-Y727(TVHKGLWI   | 879   | 416   |
| >EGFR-Y727(TVYKGLWI   | 191 | >EGFR-Y727(TVHKGLWI   | 3310  | 3119  |
| >EGFR-Y727(TVYKGLWI   | 265 | >EGFR-Y727(TVHKGLWI   | 1309  | 1044  |
| >EGFR-Y727(GTVYKGLW   | 14  | >EGFR-Y727(GTVHKGLW   | 10    | 4     |
| >EGFR-Y727(GTVYKGLWI  | 24  | >EGFR-Y727(GTVHKGLWI  | 20    | 4     |
| >EGFR-Y727(GTVYKGLW   | 199 | >EGFR-Y727(GTVHKGLW   | 214   | 15    |
| >EGFR-Y727(GTVYKGLW   | 230 | >EGFR-Y727(GTVHKGLW   | 153   | 77    |
| >EGFR-Y727(GTVYKGLWI  | 118 | >EGFR-Y727(GTVHKGLWI  | 200   | 82    |
| >EGFR-Y727(GTVYKGLWI  | 166 | >EGFR-Y727(GTVHKGLWI  | 207   | 41    |
| >EGFR-Y727(FGTVYKGL   | 354 | >EGFR-Y727(FGTVHKGL   | 6246  | 5892  |
| >EGFR-Y727(FGTVYKGLW  | 393 | >EGFR-Y727(FGTVHKGLW  | 716   | 323   |
| >EGFR-Y727(FGTVYKGLW  | 29  | >EGFR-Y727(FGTVHKGLW  | 91    | 62    |
| >EGFR-Y727(AFGTVYKGL  | 152 | >EGFR-Y727(AFGTVHKGL  | 1438  | 1286  |
| >EGFR-Y727(AFGTVYKGLV | 249 | >EGFR-Y727(AFGTVHKGLV | 698   | 449   |
| >EGFR-Y727(GAFGTVYKGL | 372 | >EGFR-Y727(GAFGTVHKGL | 391   | 19    |
| >EGFR-Y727(GAFGTVYK   | 122 | >EGFR-Y727(GAFGTVHK   | 233   | 111   |
| >EGFR-Y727(GAFGTVYK   | 9   | >EGFR-Y727(GAFGTVHK   | 26    | 17    |
| >EGFR-Y727(GAFGTVYK   | 98  | >EGFR-Y727(GAFGTVHK   | 195   | 97    |
| >EGFR-Y727(GAFGTVYK   | 222 | >EGFR-Y727(GAFGTVHK   | 940   | 718   |
| >EGFR-Y727(GAFGTVYK   | 23  | >EGFR-Y727(GAFGTVHK   | 77    | 54    |
| >EGFR-Y727(GAFGTVYKGL | 158 | >EGFR-Y727(GAFGTVHKGL | 87    | 71    |
| >EGFR-Y727(GAFGTVYKGL | 38  | >EGFR-Y727(GAFGTVHKGL | 37    | 1     |
| >EGFR-Y727(GAFGTVYKGL | 456 | >EGFR-Y727(GAFGTVHKGL | 628   | 172   |
| >EGFR-Y727(GAFGTVYKGL | 46  | >EGFR-Y727(GAFGTVHKGL | 55    | 9     |
| >EGFR-Y727(GAFGTVYKGL | 34  | >EGFR-Y727(GAFGTVHKGL | 42    | 8     |
| >EGFR-Y727(GAFGTVYKGL | 279 | >EGFR-Y727(GAFGTVHKGL | 485   | 206   |
| >EGFR-Y727(GAFGTVYKGL | 603 | >EGFR-Y727(GAFGTVHKGL | 479   | 124   |
| >EGFR-Y727(GAFGTVYKGL | 33  | >EGFR-Y727(GAFGTVHKGL | 60    | 27    |
| >EGFR-Y727(GAFGTVYK   | 150 | >EGFR-Y727(GAFGTVHK   | 158   | 8     |
| >EGFR-Y727(SGAFGTVYK  | 49  | >EGFR-Y727(SGAFGTVHK  | 534   | 485   |
| >EGFR-Y727(SGAFGTVY   | 87  | >EGFR-Y727(SGAFGTVH   | 12415 | 12328 |

|                        |      |                        |       |       |
|------------------------|------|------------------------|-------|-------|
| >EGFR-Y727F SGAFGTVYK  | 178  | >EGFR-Y727F SGAFGTVHK  | 878   | 700   |
| >EGFR-Y727F SGAFGTVY   | 188  | >EGFR-Y727F SGAFGTVH   | 10967 | 10779 |
| >EGFR-Y727F SGAFGTVY   | 460  | >EGFR-Y727F SGAFGTVH   | 13591 | 13131 |
| >EGFR-Y727F SGAFGTVYK  | 342  | >EGFR-Y727F SGAFGTVHK  | 357   | 15    |
| >EGFR-Y727F GSGAFGTVYK | 46   | >EGFR-Y727F GSGAFGTVHI | 110   | 64    |
| >EGFR-Y727F GSGAFGTVYK | 29   | >EGFR-Y727F GSGAFGTVHI | 67    | 38    |
| >EGFR-Y727F GSGAFGTVY  | 432  | >EGFR-Y727F GSGAFGTVH  | 18648 | 18216 |
| >EGFR-Y727F GSGAFGTVYK | 224  | >EGFR-Y727F GSGAFGTVHI | 1679  | 1455  |
| >EGFR-Y727F GSGAFGTVY  | 78   | >EGFR-Y727F GSGAFGTVH  | 5259  | 5181  |
| >EGFR-Y727F GSGAFGTVY  | 349  | >EGFR-Y727F GSGAFGTVH  | 10551 | 10202 |
| >EGFR-Y727F GSGAFGTVY  | 62   | >EGFR-Y727F GSGAFGTVH  | 15110 | 15048 |
| >EGFR-Y727F GSGAFGTVY  | 11   | >EGFR-Y727F GSGAFGTVH  | 172   | 161   |
| >EGFR-Y727F GSGAFGTVYK | 337  | >EGFR-Y727F GSGAFGTVHI | 369   | 32    |
| >EGFR-Y727F LGSGAFGTVY | 125  | >EGFR-Y727F LGSGAFGTVF | 19135 | 19010 |
| >EGFR-Y727F LGSGAFGTVY | 478  | >EGFR-Y727F LGSGAFGTVF | 27550 | 27072 |
| >EGFR-Y727F LGSGAFGTVY | 93   | >EGFR-Y727F LGSGAFGTVF | 5405  | 5312  |
| >EGFR-Y727F LGSGAFGTVY | 94   | >EGFR-Y727F LGSGAFGTVF | 13830 | 13736 |
| >EGFR-Y801F YVREHKDNI  | 1535 | >EGFR-Y801F HVREHKDNI  | 68    | 1467  |
| >EGFR-Y801F YVREHKDNI  | 3764 | >EGFR-Y801F HVREHKDNI  | 273   | 3491  |
| >EGFR-Y801F YVREHKDNI  | 2689 | >EGFR-Y801F HVREHKDNI  | 188   | 2501  |
| >EGFR-Y801F QLMPFGCLLI | 15   | >EGFR-Y801F QLMPFGCLLI | 1995  | 1980  |
| >EGFR-Y801F QLMPFGCLLI | 328  | >EGFR-Y801F QLMPFGCLLI | 16452 | 16124 |
| >EGFR-Y801F QLMPFGCLLI | 23   | >EGFR-Y801F QLMPFGCLLI | 6924  | 6901  |
| >EGFR-Y801F QLMPFGCLLI | 111  | >EGFR-Y801F QLMPFGCLLI | 7133  | 7022  |
| >EGFR-Y801F QLMPFGCLLI | 92   | >EGFR-Y801F QLMPFGCLLI | 3181  | 3089  |
| >EGFR-Y801F QLMPFGCLLI | 124  | >EGFR-Y801F QLMPFGCLLI | 3478  | 3354  |
| >EGFR-Y801F LDYVREHKDI | 101  | >EGFR-Y801F LDHVREHKDI | 728   | 627   |
| >EGFR-Y801F LDYVREHKDI | 286  | >EGFR-Y801F LDHVREHKDI | 949   | 663   |
| >EGFR-Y801F LDYVREHKDI | 387  | >EGFR-Y801F LDHVREHKDI | 958   | 571   |
| >EGFR-Y801F LDYVREHKDI | 62   | >EGFR-Y801F LDHVREHKDI | 135   | 73    |
| >EGFR-Y801F CLLDYVREHK | 74   | >EGFR-Y801F CLLDHVREHK | 74    | 0     |
| >EGFR-Y801F CLLDYVREHK | 144  | >EGFR-Y801F CLLDHVREHK | 176   | 32    |
| >EGFR-Y801F GCLLDYVR   | 361  | >EGFR-Y801F GCLLDHVR   | 735   | 374   |
| >EGFR-Y801F FGCLLDYV   | 218  | >EGFR-Y801F FGCLLDHV   | 929   | 711   |
| >EGFR-Y801F FGCLLDYV   | 151  | >EGFR-Y801F FGCLLDHV   | 411   | 260   |
| >EGFR-Y801F FGCLLDYVR  | 78   | >EGFR-Y801F FGCLLDHVR  | 201   | 123   |
| >EGFR-Y801F PFGCLLDY   | 31   | >EGFR-Y801F PFGCLLDH   | 4782  | 4751  |
| >EGFR-Y801F PFGCLLDY   | 341  | >EGFR-Y801F PFGCLLDH   | 18507 | 18166 |
| >EGFR-Y801F PFGCLLDYVR | 35   | >EGFR-Y801F PFGCLLDHVR | 57    | 22    |
| >EGFR-Y801F MPFGCLLDY  | 79   | >EGFR-Y801F MPFGCLLDH  | 962   | 883   |
| >EGFR-Y801F MPFGCLLDY\ | 8    | >EGFR-Y801F MPFGCLLDH\ | 30    | 22    |
| >EGFR-Y801F MPFGCLLDY\ | 203  | >EGFR-Y801F MPFGCLLDH\ | 1495  | 1292  |
| >EGFR-Y801F MPFGCLLDY\ | 131  | >EGFR-Y801F MPFGCLLDH\ | 425   | 294   |

|                        |     |                        |       |       |
|------------------------|-----|------------------------|-------|-------|
| >EGFR-Y801F MPFGCLLDY\ | 399 | >EGFR-Y801F MPFGCLLDH\ | 2497  | 2098  |
| >EGFR-Y801F MPFGCLLDY  | 17  | >EGFR-Y801F MPFGCLLDH  | 2635  | 2618  |
| >EGFR-Y801F MPFGCLLDY\ | 498 | >EGFR-Y801F MPFGCLLDH\ | 934   | 436   |
| >EGFR-Y801F MPFGCLLDY\ | 425 | >EGFR-Y801F MPFGCLLDH\ | 707   | 282   |
| >EGFR-Y801F MPFGCLLDY\ | 63  | >EGFR-Y801F MPFGCLLDH\ | 66    | 3     |
| >EGFR-Y801F MPFGCLLDY\ | 282 | >EGFR-Y801F MPFGCLLDH\ | 839   | 557   |
| >EGFR-Y801F MPFGCLLDY  | 359 | >EGFR-Y801F MPFGCLLDH  | 20254 | 19895 |
| >EGFR-Y801F MPFGCLLDY  | 480 | >EGFR-Y801F MPFGCLLDH  | 8701  | 8221  |
| >EGFR-Y801F MPFGCLLDY  | 297 | >EGFR-Y801F MPFGCLLDH  | 9707  | 9410  |
| >EGFR-Y801F MPFGCLLDY  | 8   | >EGFR-Y801F MPFGCLLDH  | 57    | 49    |
| >EGFR-Y801F MPFGCLLDY\ | 80  | >EGFR-Y801F MPFGCLLDH\ | 139   | 59    |
| >EGFR-Y801F MPFGCLLDY  | 13  | >EGFR-Y801F MPFGCLLDH  | 1783  | 1770  |
| >EGFR-Y801F MPFGCLLDY  | 254 | >EGFR-Y801F MPFGCLLDH  | 689   | 435   |
| >EGFR-Y801F MPFGCLLDY\ | 25  | >EGFR-Y801F MPFGCLLDH\ | 20    | 5     |
| >EGFR-Y801F MPFGCLLDY\ | 43  | >EGFR-Y801F MPFGCLLDH\ | 54    | 11    |
| >EGFR-Y801F MPFGCLLDY  | 95  | >EGFR-Y801F MPFGCLLDH  | 7145  | 7050  |
| >EGFR-Y801F MPFGCLLDY  | 101 | >EGFR-Y801F MPFGCLLDH  | 6933  | 6832  |
| >EGFR-Y801F MPFGCLLDY  | 494 | >EGFR-Y801F MPFGCLLDH  | 23803 | 23309 |
| >EGFR-Y801F MPFGCLLDY\ | 32  | >EGFR-Y801F MPFGCLLDH\ | 43    | 11    |
| >EGFR-Y801F LMPFGCLLDY | 24  | >EGFR-Y801F LMPFGCLLDH | 84    | 60    |
| >EGFR-Y801F LMPFGCLLDY | 12  | >EGFR-Y801F LMPFGCLLDH | 36    | 24    |
| >EGFR-Y801F LMPFGCLLDY | 8   | >EGFR-Y801F LMPFGCLLDH | 11    | 3     |
| >EGFR-Y801F LMPFGCLLDY | 12  | >EGFR-Y801F LMPFGCLLDH | 16    | 4     |
| >EGFR-Y801F LMPFGCLLDY | 3   | >EGFR-Y801F LMPFGCLLDH | 8     | 5     |
| >EGFR-Y801F LMPFGCLLDY | 14  | >EGFR-Y801F LMPFGCLLDH | 26    | 12    |
| >EGFR-Y801F LMPFGCLLDY | 8   | >EGFR-Y801F LMPFGCLLDH | 10    | 2     |
| >EGFR-Y801F LMPFGCLLDY | 6   | >EGFR-Y801F LMPFGCLLDH | 29    | 23    |
| >EGFR-Y801F LMPFGCLLDY | 3   | >EGFR-Y801F LMPFGCLLDH | 4     | 1     |
| >EGFR-Y801F LMPFGCLLDY | 254 | >EGFR-Y801F LMPFGCLLDH | 3684  | 3430  |
| >EGFR-Y801F LMPFGCLLDY | 326 | >EGFR-Y801F LMPFGCLLDH | 22749 | 22423 |
| >EGFR-Y801F LMPFGCLLDY | 259 | >EGFR-Y801F LMPFGCLLDH | 24556 | 24297 |
| >EGFR-Y801F LMPFGCLLDY | 97  | >EGFR-Y801F LMPFGCLLDH | 16509 | 16412 |
| >EGFR-Y801F LMPFGCLLDY | 117 | >EGFR-Y801F LMPFGCLLDH | 7595  | 7478  |
| >EGFR-Y801F LMPFGCLLDY | 344 | >EGFR-Y801F LMPFGCLLDH | 20278 | 19934 |
| >EGFR-Y813C YLLNWCVQI  | 7   | >EGFR-Y813C CLLNWCVQI  | 29    | 22    |
| >EGFR-Y813C YLLNWCVQI/ | 19  | >EGFR-Y813C CLLNWCVQI/ | 320   | 301   |
| >EGFR-Y813C YLLNWCVQI  | 32  | >EGFR-Y813C CLLNWCVQI  | 578   | 546   |
| >EGFR-Y813C YLLNWCVQI/ | 51  | >EGFR-Y813C CLLNWCVQI/ | 443   | 392   |
| >EGFR-Y813C YLLNWCVQI  | 21  | >EGFR-Y813C CLLNWCVQI  | 618   | 597   |
| >EGFR-Y813C YLLNWCVQI/ | 23  | >EGFR-Y813C CLLNWCVQI/ | 233   | 210   |
| >EGFR-Y813C YLLNWCVQI  | 12  | >EGFR-Y813C CLLNWCVQI  | 304   | 292   |
| >EGFR-Y813C YLLNWCVQI/ | 57  | >EGFR-Y813C CLLNWCVQI/ | 636   | 579   |
| >EGFR-Y813C YLLNWCVQ   | 16  | >EGFR-Y813C CLLNWCVQ   | 1205  | 1189  |



|                       |      |                       |       |       |
|-----------------------|------|-----------------------|-------|-------|
| >EGFR-Y813(YLLNWCVQI  | 1    | >EGFR-Y813(CLLNWCVQI  | 6     | 5     |
| >EGFR-Y813(YLLNWCVQI/ | 3    | >EGFR-Y813(CLLNWCVQI/ | 66    | 63    |
| >EGFR-Y813(YLLNWCVQI/ | 30   | >EGFR-Y813(CLLNWCVQI/ | 2737  | 2707  |
| >EGFR-Y813(YLLNWCVQ   | 200  | >EGFR-Y813(CLLNWCVQ   | 7087  | 6887  |
| >EGFR-Y813(YLLNWCVQI  | 4    | >EGFR-Y813(CLLNWCVQI  | 34    | 30    |
| >EGFR-Y813(YLLNWCVQI/ | 6    | >EGFR-Y813(CLLNWCVQI/ | 135   | 129   |
| >EGFR-Y813(YLLNWCVQ   | 24   | >EGFR-Y813(CLLNWCVQ   | 3400  | 3376  |
| >EGFR-Y813(YLLNWCVQI  | 4    | >EGFR-Y813(CLLNWCVQI  | 24    | 20    |
| >EGFR-Y813(YLLNWCVQI/ | 6    | >EGFR-Y813(CLLNWCVQI/ | 126   | 120   |
| >EGFR-Y813(YLLNWCVQ   | 448  | >EGFR-Y813(CLLNWCVQ   | 4910  | 4462  |
| >EGFR-Y813(YLLNWCVQI  | 2    | >EGFR-Y813(CLLNWCVQI  | 7     | 5     |
| >EGFR-Y813(YLLNWCVQI/ | 5    | >EGFR-Y813(CLLNWCVQI/ | 61    | 56    |
| >EGFR-Y813(YLLNWCVQ   | 6    | >EGFR-Y813(CLLNWCVQ   | 343   | 337   |
| >EGFR-Y813(YLLNWCVQI  | 2    | >EGFR-Y813(CLLNWCVQI  | 8     | 6     |
| >EGFR-Y813(YLLNWCVQI/ | 2    | >EGFR-Y813(CLLNWCVQI/ | 25    | 23    |
| >EGFR-Y813(YLLNWCVQI/ | 52   | >EGFR-Y813(CLLNWCVQI/ | 5468  | 5416  |
| >EGFR-Y813(YLLNWCVQI/ | 79   | >EGFR-Y813(CLLNWCVQI/ | 75    | 4     |
| >EGFR-Y813(YLLNWCVQI/ | 83   | >EGFR-Y813(CLLNWCVQI/ | 87    | 4     |
| >EGFR-Y813(YLLNWCVQI  | 46   | >EGFR-Y813(CLLNWCVQI  | 137   | 91    |
| >EGFR-Y813(YLLNWCVQI  | 65   | >EGFR-Y813(CLLNWCVQI  | 354   | 289   |
| >EGFR-Y813(YLLNWCVQI/ | 417  | >EGFR-Y813(CLLNWCVQI/ | 1440  | 1023  |
| >EGFR-Y813(YLLNWCVQI  | 22   | >EGFR-Y813(CLLNWCVQI  | 740   | 718   |
| >EGFR-Y813(YLLNWCVQI  | 288  | >EGFR-Y813(CLLNWCVQI  | 1771  | 1483  |
| >EGFR-Y813(YLLNWCVQI  | 1433 | >EGFR-Y813(CLLNWCVQI  | 280   | 1153  |
| >EGFR-Y813(QYLLNWCVQ  | 106  | >EGFR-Y813(QCLLNWCVQ  | 26219 | 26113 |
| >EGFR-Y813(QYLLNWCV   | 368  | >EGFR-Y813(QCLLNWCV   | 25370 | 25002 |
| >EGFR-Y813(QYLLNWCVQ  | 11   | >EGFR-Y813(QCLLNWCVQ  | 14179 | 14168 |
| >EGFR-Y813(QYLLNWCVQ  | 302  | >EGFR-Y813(QCLLNWCVQ  | 7335  | 7033  |
| >EGFR-Y813(REHKDNIGSC | 364  | >EGFR-Y813(REHKDNIGSC | 19840 | 19476 |
| >EGFR-Y813(REHKDNIGSC | 104  | >EGFR-Y813(REHKDNIGSC | 11473 | 11369 |
| >EGFR-Y813(REHKDNIGSC | 360  | >EGFR-Y813(REHKDNIGSC | 9983  | 9623  |
| >EGFR-Y813(REHKDNIGSC | 362  | >EGFR-Y813(REHKDNIGSC | 17306 | 16944 |
| >EGFR-Y813(REHKDNIGSC | 1211 | >EGFR-Y813(REHKDNIGSC | 250   | 961   |
| >EGFR-Y813(SQYLLNWCV/ | 52   | >EGFR-Y813(SQCLLNWCV/ | 521   | 469   |
| >EGFR-Y813(SQYLLNWCV  | 19   | >EGFR-Y813(SQCLLNWCV  | 181   | 162   |
| >EGFR-Y813(SQYLLNWCV/ | 221  | >EGFR-Y813(SQCLLNWCV/ | 2051  | 1830  |
| >EGFR-Y813(SQYLLNWCV  | 85   | >EGFR-Y813(SQCLLNWCV  | 610   | 525   |
| >EGFR-Y813(SQYLLNWC   | 418  | >EGFR-Y813(SQCLLNWC   | 2207  | 1789  |
| >EGFR-Y813(SQYLLNWCV  | 6    | >EGFR-Y813(SQCLLNWCV  | 17    | 11    |
| >EGFR-Y813(SQYLLNWCV/ | 51   | >EGFR-Y813(SQCLLNWCV/ | 221   | 170   |
| >EGFR-Y813(SQYLLNWCV  | 30   | >EGFR-Y813(SQCLLNWCV  | 412   | 382   |
| >EGFR-Y813(SQYLLNWCV/ | 264  | >EGFR-Y813(SQCLLNWCV/ | 2638  | 2374  |
| >EGFR-Y813(SQYLLNWCV  | 21   | >EGFR-Y813(SQCLLNWCV  | 663   | 642   |

|                       |      |                       |       |       |
|-----------------------|------|-----------------------|-------|-------|
| >EGFR-Y813(SQYLLNWCV  | 10   | >EGFR-Y813(SQCLLNWCV  | 148   | 138   |
| >EGFR-Y813(SQYLLNWCV  | 254  | >EGFR-Y813(SQCLLNWCV  | 6336  | 6082  |
| >EGFR-Y813(SQYLLNWCV  | 375  | >EGFR-Y813(SQCLLNWCV  | 4209  | 3834  |
| >EGFR-Y813(SQYLLNWCV  | 165  | >EGFR-Y813(SQCLLNWCV  | 1068  | 903   |
| >EGFR-Y813(SQYLLNWCV  | 458  | >EGFR-Y813(SQCLLNWCV  | 4248  | 3790  |
| >EGFR-Y813(SQYLLNWCV  | 161  | >EGFR-Y813(SQCLLNWCV  | 1975  | 1814  |
| >EGFR-Y813(SQYLLNWCV  | 297  | >EGFR-Y813(SQCLLNWCV  | 798   | 501   |
| >EGFR-Y813(SQYLLNWCV  | 185  | >EGFR-Y813(SQCLLNWCV  | 1911  | 1726  |
| >EGFR-Y813(GSQYLLNW   | 29   | >EGFR-Y813(GSQCLLNW   | 33    | 4     |
| >EGFR-Y813(GSQYLLNW   | 328  | >EGFR-Y813(GSQCLLNW   | 710   | 382   |
| >EGFR-Y813(GSQYLLNW   | 47   | >EGFR-Y813(GSQCLLNW   | 72    | 25    |
| >EGFR-Y813(IGSQYLLNW  | 58   | >EGFR-Y813(IGSQCLLNW  | 135   | 77    |
| >EGFR-Y813(IGSQYLLNW  | 596  | >EGFR-Y813(IGSQCLLNW  | 194   | 402   |
| >EGFR-Y813(IGSQYLLNW  | 523  | >EGFR-Y813(IGSQCLLNW  | 293   | 230   |
| >EGFR-Y813(IGSQYLLNW  | 35   | >EGFR-Y813(IGSQCLLNW  | 43    | 8     |
| >EGFR-Y813(NIGSQYLL   | 248  | >EGFR-Y813(NIGSQCLL   | 1193  | 945   |
| >EGFR-Y813(KDNIGSQYLL | 329  | >EGFR-Y813(KDNIGSQCLL | 522   | 193   |
| >EGFR-Y813(HKDNIGSQY  | 198  | >EGFR-Y813(HKDNIGSQC  | 10778 | 10580 |
| >EGFR-Y813(HKDNIGSQYL | 372  | >EGFR-Y813(HKDNIGSQCL | 74    | 298   |
| >EGFR-Y813(HKDNIGSQYL | 71   | >EGFR-Y813(HKDNIGSQCL | 195   | 124   |
| >EGFR-Y813(HKDNIGSQY  | 125  | >EGFR-Y813(HKDNIGSQC  | 17026 | 16901 |
| >EGFR-Y869(YHAEGGKVPI | 486  | >EGFR-Y869(CHAEGGKVPI | 3128  | 2642  |
| >EGFR-Y869(YHAEGGKVPI | 306  | >EGFR-Y869(CHAEGGKVPI | 1347  | 1041  |
| >EGFR-Y869(YHAEGGKVPI | 22   | >EGFR-Y869(CHAEGGKVPI | 269   | 247   |
| >EGFR-Y869(EYHAEGGKVI | 173  | >EGFR-Y869(ECHAEGGKVI | 25292 | 25119 |
| >EGFR-Y869(EYHAEGGKVI | 270  | >EGFR-Y869(ECHAEGGKVI | 23732 | 23462 |
| >EGFR-Y869(AKLLGAEKE  | 23   | >EGFR-Y869(AKLLGAEKE  | 4917  | 4894  |
| >EGFR-Y869(KEYHAEGGK  | 130  | >EGFR-Y869(KECHAEGGK  | 1466  | 1336  |
| >EGFR-Y869(KEYHAEGGK  | 65   | >EGFR-Y869(KECHAEGGK  | 83    | 18    |
| >EGFR-Y869(EEKEYHAE   | 180  | >EGFR-Y869(EEKECHAE   | 718   | 538   |
| >EGFR-Y869(EEKEYHAE   | 142  | >EGFR-Y869(EEKECHAE   | 1325  | 1183  |
| >EGFR-Y869(AEEKEYHAE  | 412  | >EGFR-Y869(AEEKECHAE  | 215   | 197   |
| >EGFR-Y869(AEEKEYHA   | 15   | >EGFR-Y869(AEEKECHA   | 68    | 53    |
| >EGFR-Y869(AEEKEYHAE  | 159  | >EGFR-Y869(AEEKECHAE  | 286   | 127   |
| >EGFR-Y869(AEEKEYHAE  | 75   | >EGFR-Y869(AEEKECHAE  | 50    | 25    |
| >EGFR-Y869(LGAEKEY    | 425  | >EGFR-Y869(LGAEKEC    | 22041 | 21616 |
| >EGFR-Y869(LLGAEKEYH  | 248  | >EGFR-Y869(LLGAEKECH  | 1127  | 879   |
| >EGFR-Y869(LLGAEKEYH  | 181  | >EGFR-Y869(LLGAEKECH  | 226   | 45    |
| >EGFR-Y869(LLGAEKEYH  | 186  | >EGFR-Y869(LLGAEKECH  | 628   | 442   |
| >EGFR-Y869(LLGAEKEYH  | 194  | >EGFR-Y869(LLGAEKECH  | 148   | 46    |
| >EGFR-Y869(LLGAEKEY   | 8834 | >EGFR-Y869(LLGAEKEC   | 296   | 8538  |
| >EGFR-Y869(LLGAEKEYH  | 24   | >EGFR-Y869(LLGAEKECH  | 17    | 7     |
| >EGFR-Y869(KLLGAEKEY  | 4247 | >EGFR-Y869(KLLGAEKEC  | 127   | 4120  |

|                        |       |                       |     |       |
|------------------------|-------|-----------------------|-----|-------|
| >EGFR-Y869C KLLGAEKEY  | 4751  | >EGFR-Y869C KLLGAEKEC | 137 | 4614  |
| >EIF4A2-G3V SGGGSADYNR | 14849 | >EIF4A2-G3V SVGSADYNR | 256 | 14593 |
| >EIF4A2-G3V SGGGSADYNR | 836   | >EIF4A2-G3V SVGSADYNR | 67  | 769   |
| >EIF4A2-G3V SGGGSADYNR | 2240  | >EIF4A2-G3V SVGSADYNR | 54  | 2186  |
| >EIF4A2-G3V SGGGSADYNR | 106   | >EIF4A2-G3V SVGSADYNR | 72  | 34    |
| >EIF4A2-G3V MSGGSADYN  | 843   | >EIF4A2-G3V MSVGSADYN | 251 | 592   |
| >EIF4A2-G3V MSGGSADY   | 2274  | >EIF4A2-G3V MSVGSADY  | 62  | 2212  |
| >EIF4A2-G3V MSGGSADY   | 61    | >EIF4A2-G3V MSVGSADY  | 39  | 22    |
| >EIF4A2-G3V MSGGSADY   | 103   | >EIF4A2-G3V MSVGSADY  | 108 | 5     |
| >EIF4A2-G3V MSGGSADYN  | 82    | >EIF4A2-G3V MSVGSADYN | 40  | 42    |
| >EIF4A2-G3V MSGGSADY   | 2510  | >EIF4A2-G3V MSVGSADY  | 414 | 2096  |
| >EIF4A2-G3V MSGGSADYN  | 26    | >EIF4A2-G3V MSVGSADYN | 7   | 19    |
| >EIF4A2-G3V MSGGSADY   | 218   | >EIF4A2-G3V MSVGSADY  | 168 | 50    |
| >EIF4A2-G3V MSGGSADY   | 1386  | >EIF4A2-G3V MSVGSADY  | 210 | 1176  |
| >EIF4A2-G3V MSGGSADY   | 8     | >EIF4A2-G3V MSVGSADY  | 3   | 5     |
| >EIF4A2-G3V MSGGSADY   | 198   | >EIF4A2-G3V MSVGSADY  | 37  | 161   |
| >EIF4A2-G3V MSGGSADY   | 1898  | >EIF4A2-G3V MSVGSADY  | 495 | 1403  |
| >EIF4A2-G3V MSGGSADY   | 1071  | >EIF4A2-G3V MSVGSADY  | 167 | 904   |
| >EIF4A2-G3V MSGGSADY   | 445   | >EIF4A2-G3V MSVGSADY  | 235 | 210   |
| >EIF4A2-G3V MSGGSADY   | 3073  | >EIF4A2-G3V MSVGSADY  | 288 | 2785  |
| >EIF4A2-G3V MSGGSADYN  | 184   | >EIF4A2-G3V MSVGSADYN | 203 | 19    |
| >EIF4A2-M31IMREFRSGSS  | 204   | >EIF4A2-M31IREFRSGSSR | 662 | 458   |
| >EIF4A2-M31IMREFRSGSS  | 433   | >EIF4A2-M31IREFRSGSS  | 287 | 146   |
| >EIF4A2-M31IMREFRSGSS  | 201   | >EIF4A2-M31IREFRSGSSR | 138 | 63    |
| >EIF4A2-M31IMREFRSGSS  | 16    | >EIF4A2-M31IREFRSGSSR | 59  | 43    |
| >EIF4A2-M31IMREFRSGSS  | 35    | >EIF4A2-M31IREFRSGSSR | 60  | 25    |
| >EIF4A2-M31IMREFRSGSS  | 542   | >EIF4A2-M31IREFRSGSSR | 262 | 280   |
| >EIF4A2-M31IMREFRSGSS  | 34    | >EIF4A2-M31IREFRSGSSR | 992 | 958   |
| >EIF4A2-M31DVIMREFR    | 195   | >EIF4A2-M31DVIREFR    | 251 | 56    |
| >EIF4A2-M31DVIMREFR    | 8     | >EIF4A2-M31DVIREFR    | 9   | 1     |
| >EIF4A2-M31DVIMREFR    | 3     | >EIF4A2-M31DVIREFR    | 4   | 1     |
| >EIF4A2-M31RDVIMREFR   | 268   | >EIF4A2-M31RDVIREFR   | 242 | 26    |
| >EIF4A2-M31RDVIMREF    | 348   | >EIF4A2-M31RDVIREF    | 649 | 301   |
| >EIF4A2-M31RDVIMREFR   | 295   | >EIF4A2-M31RDVIREFR   | 165 | 130   |
| >EIF4A2-M31ERDVIMREFR  | 386   | >EIF4A2-M31ERDVIREFR  | 395 | 9     |
| >EIF4A2-M31KERDVIMREF  | 81    | >EIF4A2-M31KERDVIREFR | 80  | 1     |
| >EIF4A2-M31KERDVIMREF  | 86    | >EIF4A2-M31KERDVIREF  | 96  | 10    |
| >EIF4A2-M31KERDVIMREF  | 91    | >EIF4A2-M31KERDVIREF  | 73  | 18    |
| >EIF4A2-M31KERDVIMREF  | 415   | >EIF4A2-M31KERDVIREF  | 459 | 44    |
| >EIF4A2-M31KERDVIMRE   | 291   | >EIF4A2-M31KERDVIIRE  | 366 | 75    |
| >EIF4A2-M31KERDVIMREF  | 123   | >EIF4A2-M31KERDVIREF  | 97  | 26    |
| >EIF4A2-M31KERDVIMREF  | 426   | >EIF4A2-M31KERDVIREFR | 548 | 122   |
| >EIF4A2-M31KERDVIMR    | 188   | >EIF4A2-M31KERDVIIR   | 147 | 41    |

|                        |       |                        |     |       |
|------------------------|-------|------------------------|-----|-------|
| >EIF4A2-M31KERDVIMREF  | 116   | >EIF4A2-M31KERDVIREFR  | 104 | 12    |
| >EIF4A2-M31QKERDVIMRI  | 110   | >EIF4A2-M31QKERDVIREF  | 82  | 28    |
| >EIF4A2-M31MDQKERDVI   | 5811  | >EIF4A2-M31MDQKERDVI   | 222 | 5589  |
| >EIF4A2-V18 VLDEADEM   | 504   | >EIF4A2-V18 LLDEADEM   | 344 | 160   |
| >EIF4A2-V18 VLDEADEML  | 91    | >EIF4A2-V18 LLDEADEML  | 66  | 25    |
| >EIF4A2-V18 VLDEADEM   | 467   | >EIF4A2-V18 LLDEADEM   | 152 | 315   |
| >EIF4A2-V18 VLDEADEML  | 33    | >EIF4A2-V18 LLDEADEML  | 17  | 16    |
| >EIF4A2-V18 VLDEADEM   | 530   | >EIF4A2-V18 LLDEADEM   | 296 | 234   |
| >EIF4A2-V18 VLDEADEML  | 117   | >EIF4A2-V18 LLDEADEML  | 77  | 40    |
| >EIF4A2-V18 VLDEADEM   | 28    | >EIF4A2-V18 LLDEADEM   | 33  | 5     |
| >EIF4A2-V18 VLDEADEML  | 5     | >EIF4A2-V18 LLDEADEML  | 5   | 0     |
| >EIF4A2-V18 VLDEADEM   | 84    | >EIF4A2-V18 LLDEADEM   | 69  | 15    |
| >EIF4A2-V18 VLDEADEML  | 19    | >EIF4A2-V18 LLDEADEML  | 15  | 4     |
| >EIF4A2-V18 VLDEADEM   | 48    | >EIF4A2-V18 LLDEADEM   | 65  | 17    |
| >EIF4A2-V18 VLDEADEML  | 8     | >EIF4A2-V18 LLDEADEML  | 9   | 1     |
| >EIF4A2-V18 VLDEADEM   | 98    | >EIF4A2-V18 LLDEADEM   | 128 | 30    |
| >EIF4A2-V18 VLDEADEML  | 15    | >EIF4A2-V18 LLDEADEML  | 19  | 4     |
| >EIF4A2-V18 VLDEADEM   | 103   | >EIF4A2-V18 LLDEADEM   | 68  | 35    |
| >EIF4A2-V18 VLDEADEML  | 12    | >EIF4A2-V18 LLDEADEML  | 10  | 2     |
| >EIF4A2-V18 FVLDEADEM  | 288   | >EIF4A2-V18 FLLDEADEM  | 17  | 271   |
| >EIF4A2-V18 FVLDEADEMI | 68    | >EIF4A2-V18 FLLDEADEML | 9   | 59    |
| >EIF4A2-V18 FVLDEADEMI | 4989  | >EIF4A2-V18 FLLDEADEML | 176 | 4813  |
| >EIF4A2-V18 FVLDEADEM  | 131   | >EIF4A2-V18 FLLDEADEM  | 8   | 123   |
| >EIF4A2-V18 FVLDEADEMI | 28    | >EIF4A2-V18 FLLDEADEML | 7   | 21    |
| >EIF4A2-V18 FVLDEADEMI | 4229  | >EIF4A2-V18 FLLDEADEML | 97  | 4132  |
| >EIF4A2-V18 FVLDEADEM  | 5832  | >EIF4A2-V18 FLLDEADEM  | 266 | 5566  |
| >EIF4A2-V18 FVLDEADEMI | 662   | >EIF4A2-V18 FLLDEADEML | 76  | 586   |
| >EIF4A2-V18 FVLDEADEM  | 18    | >EIF4A2-V18 FLLDEADEM  | 11  | 7     |
| >EIF4A2-V18 FVLDEADEMI | 49    | >EIF4A2-V18 FLLDEADEML | 45  | 4     |
| >EIF4A2-V18 FVLDEADEMI | 272   | >EIF4A2-V18 FLLDEADEML | 106 | 166   |
| >EIF4A2-V18 FVLDEADEM  | 219   | >EIF4A2-V18 FLLDEADEM  | 4   | 215   |
| >EIF4A2-V18 FVLDEADEMI | 24    | >EIF4A2-V18 FLLDEADEML | 2   | 22    |
| >EIF4A2-V18 FVLDEADEMI | 5032  | >EIF4A2-V18 FLLDEADEML | 91  | 4941  |
| >EIF4A2-V18 FVLDEADEM  | 463   | >EIF4A2-V18 FLLDEADEM  | 6   | 457   |
| >EIF4A2-V18 FVLDEADEMI | 84    | >EIF4A2-V18 FLLDEADEML | 4   | 80    |
| >EIF4A2-V18 FVLDEADEMI | 13456 | >EIF4A2-V18 FLLDEADEML | 425 | 13031 |
| >EIF4A2-V18 FVLDEADEM  | 802   | >EIF4A2-V18 FLLDEADEM  | 10  | 792   |
| >EIF4A2-V18 FVLDEADEMI | 46    | >EIF4A2-V18 FLLDEADEML | 5   | 41    |
| >EIF4A2-V18 FVLDEADEMI | 9056  | >EIF4A2-V18 FLLDEADEML | 267 | 8789  |
| >EIF4A2-V18 FVLDEADEM  | 300   | >EIF4A2-V18 FLLDEADEM  | 6   | 294   |
| >EIF4A2-V18 FVLDEADEMI | 74    | >EIF4A2-V18 FLLDEADEML | 3   | 71    |
| >EIF4A2-V18 FVLDEADE   | 17493 | >EIF4A2-V18 FLLDEADE   | 375 | 17118 |
| >EIF4A2-V18 FVLDEADEM  | 532   | >EIF4A2-V18 FLLDEADEM  | 5   | 527   |

|                        |      |                         |      |      |
|------------------------|------|-------------------------|------|------|
| >EIF4A2-V18 FVLDEADEMI | 18   | >EIF4A2-V18 FLLDEADEML  | 2    | 16   |
| >EIF4A2-V18 FVLDEADEMI | 5454 | >EIF4A2-V18 FLLDEADEML  | 22   | 5432 |
| >EIF4A2-V18 FVLDEADEM  | 348  | >EIF4A2-V18 FLLDEADEM   | 5866 | 5518 |
| >EIF4A2-V18 FVLDEADEM  | 86   | >EIF4A2-V18 FLLDEADEM   | 516  | 430  |
| >EIF4A2-V18 FVLDEADEMI | 64   | >EIF4A2-V18 FLLDEADEML  | 381  | 317  |
| >EIF4A2-V18 FVLDEADEM  | 56   | >EIF4A2-V18 FLLDEADEM   | 259  | 203  |
| >EIF4A2-V18 YLSPKWIKMF | 9    | >EIF4A2-V18 YLSPKWIKMF  | 14   | 5    |
| >EIF4A2-V18 YLSPKWIKMF | 4    | >EIF4A2-V18 YLSPKWIKMF  | 4    | 0    |
| >EIF4A2-V18 YLSPKWIKMF | 3    | >EIF4A2-V18 YLSPKWIKMF  | 7    | 4    |
| >EIF4A2-V18 YLSPKWIKMF | 7    | >EIF4A2-V18 YLSPKWIKMF  | 19   | 12   |
| >EIF4A2-V18 YLSPKWIKMF | 2    | >EIF4A2-V18 YLSPKWIKMF  | 5    | 3    |
| >EIF4A2-V18 YLSPKWIKMF | 4    | >EIF4A2-V18 YLSPKWIKMF  | 11   | 7    |
| >EIF4A2-V18 YLSPKWIKMF | 4    | >EIF4A2-V18 YLSPKWIKMF  | 6    | 2    |
| >EIF4A2-V18 YLSPKWIKMF | 3    | >EIF4A2-V18 YLSPKWIKMF  | 8    | 5    |
| >EIF4A2-V18 YLSPKWIKMF | 1    | >EIF4A2-V18 YLSPKWIKMF  | 2    | 1    |
| >EIF4A2-V18 YLSPKWIKMF | 71   | >EIF4A2-V18 YLSPKWIKMF  | 460  | 389  |
| >EIF4A2-V18 YLSPKWIKMF | 249  | >EIF4A2-V18 YLSPKWIKMF  | 2217 | 1968 |
| >EIF4A2-V18 MFVLDEADEI | 2649 | >EIF4A2-V18 MFLLDEADEI  | 498  | 2151 |
| >EIF4A2-V18 MFVLDEADEI | 331  | >EIF4A2-V18 MFLLDEADEI  | 50   | 281  |
| >EIF4A2-V18 KMFVLDEADI | 454  | >EIF4A2-V18 KMFLLDEADEI | 508  | 54   |
| >EIF4A2-V18 KMFVLDEA   | 40   | >EIF4A2-V18 KMFLLDEA    | 39   | 1    |
| >EIF4A2-V18 KMFVLDEADI | 169  | >EIF4A2-V18 KMFLLDEADEI | 165  | 4    |
| >EIF4A2-V18 KMFVLDEA   | 24   | >EIF4A2-V18 KMFLLDEA    | 25   | 1    |
| >EIF4A2-V18 KMFVLDEADI | 62   | >EIF4A2-V18 KMFLLDEADEI | 64   | 2    |
| >EIF4A2-V18 KMFVLDEA   | 69   | >EIF4A2-V18 KMFLLDEA    | 68   | 1    |
| >EIF4A2-V18 KMFVLDEA   | 96   | >EIF4A2-V18 KMFLLDEA    | 137  | 41   |
| >EIF4A2-V18 KMFVLDEADI | 367  | >EIF4A2-V18 KMFLLDEADEI | 457  | 90   |
| >EIF4A2-V18 KMFVLDEA   | 16   | >EIF4A2-V18 KMFLLDEA    | 21   | 5    |
| >EIF4A2-V18 KMFVLDEADI | 57   | >EIF4A2-V18 KMFLLDEADEI | 74   | 17   |
| >EIF4A2-V18 KMFVLDEA   | 66   | >EIF4A2-V18 KMFLLDEA    | 82   | 16   |
| >EIF4A2-V18 KMFVLDEADI | 173  | >EIF4A2-V18 KMFLLDEADEI | 186  | 13   |
| >EIF4A2-V18 KMFVLDEA   | 23   | >EIF4A2-V18 KMFLLDEA    | 29   | 6    |
| >EIF4A2-V18 KMFVLDEADI | 118  | >EIF4A2-V18 KMFLLDEADEI | 163  | 45   |
| >EIF4A2-V18 KMFVLDEA   | 119  | >EIF4A2-V18 KMFLLDEA    | 168  | 49   |
| >EIF4A2-V18 KMFVLDEAD  | 502  | >EIF4A2-V18 KMFLLDEAD   | 407  | 95   |
| >EIF4A2-V18 KMFVLDEADI | 87   | >EIF4A2-V18 KMFLLDEADEI | 71   | 16   |
| >EIF4A2-V18 KMFVLDEADI | 175  | >EIF4A2-V18 KMFLLDEADEI | 284  | 109  |
| >EIF4A2-V18 KMFVLDEADI | 46   | >EIF4A2-V18 KMFLLDEADEI | 105  | 59   |
| >EIF4A2-V18 KMFVLDEADI | 287  | >EIF4A2-V18 KMFLLDEADEI | 771  | 484  |
| >EIF4A2-V18 WIKMFVLDE/ | 335  | >EIF4A2-V18 WIKMFLLDE/  | 312  | 23   |
| >EIF4A2-V18 WIKMFVLDE/ | 800  | >EIF4A2-V18 WIKMFLLDE/  | 464  | 336  |
| >EIF4A2-V18 KWIKMFVL   | 1133 | >EIF4A2-V18 KWIKMFLL    | 462  | 671  |
| >EIF4A2-V18 KWIKMFVL   | 57   | >EIF4A2-V18 KWIKMFLL    | 38   | 19   |

|                         |       |                         |       |       |
|-------------------------|-------|-------------------------|-------|-------|
| >EIF4A2-V18 KWIKMFVL    | 91    | >EIF4A2-V18 KWIKMFLL    | 45    | 46    |
| >EIF4A2-V18 KWIKMFVL    | 31    | >EIF4A2-V18 KWIKMFLL    | 53    | 22    |
| >EIF4A2-V18 KWIKMFVL    | 485   | >EIF4A2-V18 KWIKMFLL    | 353   | 132   |
| >EIF4A2-V18 KWIKMFVLD   | 301   | >EIF4A2-V18 KWIKMFLLD   | 312   | 11    |
| >EIF4A2-V18 KWIKMFVLDI  | 322   | >EIF4A2-V18 KWIKMFLLDE  | 368   | 46    |
| >EIF4A2-V18 KWIKMFVL    | 590   | >EIF4A2-V18 KWIKMFLL    | 336   | 254   |
| >EIF4A2-V18 KWIKMFVL    | 49    | >EIF4A2-V18 KWIKMFLL    | 42    | 7     |
| >EIF4A2-V18 KWIKMFVLD   | 230   | >EIF4A2-V18 KWIKMFLLD   | 238   | 8     |
| >EIF4A2-V18 KWIKMFVLDI  | 57    | >EIF4A2-V18 KWIKMFLLDE  | 53    | 4     |
| >EIF4A2-V18 SPKWIKMFV   | 1225  | >EIF4A2-V18 SPKWIKMFL   | 298   | 927   |
| >EIF4A2-V18 SPKWIKMFV   | 559   | >EIF4A2-V18 SPKWIKMFL   | 97    | 462   |
| >EIF4A2-V18 SPKWIKMFVI  | 52    | >EIF4A2-V18 SPKWIKMFLL  | 115   | 63    |
| >EIF4A2-V18 SPKWIKMFV   | 1159  | >EIF4A2-V18 SPKWIKMFL   | 223   | 936   |
| >EIF4A2-V18 LSPKWIKMFV  | 427   | >EIF4A2-V18 LSPKWIKMFL  | 728   | 301   |
| >EIF4A2-V18 LSPKWIKMFV  | 78    | >EIF4A2-V18 LSPKWIKMFL  | 645   | 567   |
| >EIF4A2-V18 LSPKWIKMFV  | 8     | >EIF4A2-V18 LSPKWIKMFL  | 3     | 5     |
| >EIF4A2-V18 LSPKWIKMFV  | 2     | >EIF4A2-V18 LSPKWIKMFL  | 2     | 0     |
| >EIF4A2-V18 LSPKWIKMFV  | 617   | >EIF4A2-V18 LSPKWIKMFL  | 320   | 297   |
| >ELF4-P360S PSASLELGPSL | 5494  | >ELF4-P360S SSASLELGPSL | 68    | 5426  |
| >ELF4-P360S PSASLELGPSL | 2832  | >ELF4-P360S SSASLELGPSL | 227   | 2605  |
| >ELF4-P360S PSASLELGPSL | 8469  | >ELF4-P360S SSASLELGPSL | 124   | 8345  |
| >ELF4-P360S PSASLELGPSL | 4566  | >ELF4-P360S SSASLELGPSL | 221   | 4345  |
| >ELF4-P360S QPSASLEL    | 227   | >ELF4-P360S QSSASLEL    | 33056 | 32829 |
| >ELF4-P360S QPSASLEL    | 182   | >ELF4-P360S QSSASLEL    | 19868 | 19686 |
| >ELF4-P360S QPSASLEL    | 16373 | >ELF4-P360S QSSASLEL    | 13    | 16360 |
| >ELF4-P360S QPSASLEL    | 199   | >ELF4-P360S QSSASLEL    | 4971  | 4772  |
| >ELF4-P360S QPSASLEL    | 17013 | >ELF4-P360S QSSASLEL    | 314   | 16699 |
| >ELF4-P360S QPSASLEL    | 281   | >ELF4-P360S QSSASLEL    | 19124 | 18843 |
| >ELF4-P360S LQPSASLEL   | 219   | >ELF4-P360S LQSSASLEL   | 1744  | 1525  |
| >ELF4-P360S LQPSASLEL   | 1260  | >ELF4-P360S LQSSASLEL   | 384   | 876   |
| >ELF4-P360S LQPSASLEL   | 413   | >ELF4-P360S LQSSASLEL   | 50    | 363   |
| >ELF4-P360S LQPSASLEL   | 42    | >ELF4-P360S LQSSASLEL   | 36    | 6     |
| >ELF4-P360S LQPSASLEL   | 159   | >ELF4-P360S LQSSASLEL   | 56    | 103   |
| >ELF4-P360S LQPSASLEL   | 58    | >ELF4-P360S LQSSASLEL   | 11    | 47    |
| >ELF4-P360S LQPSASLEL   | 2482  | >ELF4-P360S LQSSASLEL   | 124   | 2358  |
| >ELF4-P360S GLQPSASL    | 270   | >ELF4-P360S GLQSSASL    | 222   | 48    |
| >ELF4-P360S GLQPSASL    | 40    | >ELF4-P360S GLQSSASL    | 28    | 12    |
| >ELF4-P360S GLQPSASLEL  | 101   | >ELF4-P360S GLQSSASLEL  | 40    | 61    |
| >ELF4-P360S GLQPSASL    | 59    | >ELF4-P360S GLQSSASL    | 47    | 12    |
| >ELF4-P360S GLQPSASLEL  | 394   | >ELF4-P360S GLQSSASLEL  | 220   | 174   |
| >ELF4-P360S GLQPSASL    | 51    | >ELF4-P360S GLQSSASL    | 73    | 22    |
| >ELF4-P360S GLQPSASLEL  | 106   | >ELF4-P360S GLQSSASLEL  | 119   | 13    |
| >ELF4-P360S GLQPSASL    | 8     | >ELF4-P360S GLQSSASL    | 10    | 2     |

|                        |      |                        |      |      |
|------------------------|------|------------------------|------|------|
| >ELF4-P360S GLQPSASLEL | 18   | >ELF4-P360S GLQSSASLEL | 25   | 7    |
| >ELF4-P360S GLQPSASL   | 156  | >ELF4-P360S GLQSSASL   | 213  | 57   |
| >ELF4-P360S GLQPSASLEL | 66   | >ELF4-P360S GLQSSASLEL | 95   | 29   |
| >ELF4-P360S GLQPSASL   | 286  | >ELF4-P360S GLQSSASL   | 333  | 47   |
| >ELF4-P360S GLQPSASL   | 5    | >ELF4-P360S GLQSSASL   | 6    | 1    |
| >ELF4-P360S GLQPSASLEL | 5    | >ELF4-P360S GLQSSASLEL | 8    | 3    |
| >ELF4-P360S GLQPSASL   | 569  | >ELF4-P360S GLQSSASL   | 487  | 82   |
| >ELF4-P360S VGLQPSASL  | 219  | >ELF4-P360S VGLQSSASL  | 52   | 167  |
| >ELF4-P360S VGLQPSASLE | 461  | >ELF4-P360S VGLQSSASLE | 185  | 276  |
| >ELF4-P360S QHVGLQPSA' | 22   | >ELF4-P360S QHVGLQSSA' | 16   | 6    |
| >ELF4-P360S IQHVGLQPSA | 511  | >ELF4-P360S IQHVGLQSSA | 350  | 161  |
| >ELF4-P360S IQHVGLQPSA | 414  | >ELF4-P360S IQHVGLQSSA | 199  | 215  |
| >ELF4-P360S KIQHVGLQPS | 254  | >ELF4-P360S KIQHVGLQSS | 799  | 545  |
| >ELN-A418T- AGVPGVGGV  | 460  | >ELN-A418T- TGVPGVGGV  | 1090 | 630  |
| >ELN-A418T- AGVPGVGGV  | 6080 | >ELN-A418T- TGVPGVGGV  | 215  | 5865 |
| >ELN-A418T- VAGVPGVGG  | 630  | >ELN-A418T- VTGVPGVGG  | 150  | 480  |
| >ELN-A418T- GVAGVPGV   | 191  | >ELN-A418T- GVTGVPGV   | 912  | 721  |
| >ELN-A418T- GVAGVPGV   | 114  | >ELN-A418T- GVTGVPGV   | 1266 | 1152 |
| >ELN-A418T- GVAGVPGV   | 219  | >ELN-A418T- GVTGVPGV   | 1879 | 1660 |
| >ELN-A418T- GVAGVPGV   | 19   | >ELN-A418T- GVTGVPGV   | 152  | 133  |
| >ELN-A418T- GVAGVPGV   | 14   | >ELN-A418T- GVTGVPGV   | 80   | 66   |
| >ELN-A418T- GVAGVPGV   | 54   | >ELN-A418T- GVTGVPGV   | 116  | 62   |
| >ELN-A418T- GVAGVPGV   | 278  | >ELN-A418T- GVTGVPGV   | 642  | 364  |
| >ELN-A418T- GVAGVPGV   | 13   | >ELN-A418T- GVTGVPGV   | 32   | 19   |
| >ELN-A418T- GVAGVPGV   | 28   | >ELN-A418T- GVTGVPGV   | 76   | 48   |
| >ELN-A418T- GVAGVPGV   | 291  | >ELN-A418T- GVTGVPGV   | 454  | 163  |
| >ELN-A418T- GVAGVPGV   | 12   | >ELN-A418T- GVTGVPGV   | 19   | 7    |
| >ELN-A418T- GVAGVPGV   | 41   | >ELN-A418T- GVTGVPGV   | 88   | 47   |
| >ELN-A418T- GVAGVPGV   | 85   | >ELN-A418T- GVTGVPGV   | 677  | 592  |
| >ELN-A418T- GVAGVPGV   | 9    | >ELN-A418T- GVTGVPGV   | 10   | 1    |
| >ELN-A418T- GVAGVPGV   | 35   | >ELN-A418T- GVTGVPGV   | 38   | 3    |
| >ELN-A418T- GVAGVPGV   | 248  | >ELN-A418T- GVTGVPGV   | 1434 | 1186 |
| >ELN-A418T- GVAGVPGV   | 76   | >ELN-A418T- GVTGVPGV   | 522  | 446  |
| >ELN-A418T- GVAGVPGV   | 498  | >ELN-A418T- GVTGVPGV   | 2648 | 2150 |
| >ELN-A418T- IPGVAGVPGV | 293  | >ELN-A418T- IPGVTGVPGV | 4125 | 3832 |
| >ELN-A418T- IPGVAGVPG  | 420  | >ELN-A418T- IPGVTGVPG  | 381  | 39   |
| >ELN-A418T- GIPGVAGV   | 263  | >ELN-A418T- GIPGVTGV   | 175  | 88   |
| >ELN-A418T- GIPGVAGV   | 28   | >ELN-A418T- GIPGVTGV   | 16   | 12   |
| >ELN-A418T- GIPGVAGVPC | 52   | >ELN-A418T- GIPGVTGVPC | 30   | 22   |
| >ELN-A418T- GIPGVAGV   | 96   | >ELN-A418T- GIPGVTGV   | 89   | 7    |
| >ELN-A418T- GIPGVAGVPC | 88   | >ELN-A418T- GIPGVTGVPC | 81   | 7    |
| >ELN-A418T- GIPGVAGV   | 14   | >ELN-A418T- GIPGVTGV   | 16   | 2    |
| >ELN-A418T- GIPGVAGVPC | 13   | >ELN-A418T- GIPGVTGVPC | 12   | 1    |

|                        |      |                        |      |      |
|------------------------|------|------------------------|------|------|
| >ELN-A418T- GIPGVAGV   | 342  | >ELN-A418T- GIPGVTGV   | 675  | 333  |
| >ELN-A418T- GIPGVAGVPC | 582  | >ELN-A418T- GIPGVTGVPC | 413  | 169  |
| >ELN-A418T- GIPGVAGV   | 25   | >ELN-A418T- GIPGVTGV   | 21   | 4    |
| >ELN-A418T- GIPGVAGVPC | 19   | >ELN-A418T- GIPGVTGVPC | 15   | 4    |
| >ELN-A418T- GIPGVAGVPC | 368  | >ELN-A418T- GIPGVTGVPC | 259  | 109  |
| >ELN-A418T- GIPGVAGV   | 8    | >ELN-A418T- GIPGVTGV   | 7    | 1    |
| >ELN-A418T- GIPGVAGVPC | 11   | >ELN-A418T- GIPGVTGVPC | 8    | 3    |
| >ELN-A418T- GGIPGVAGV  | 160  | >ELN-A418T- GGIPGVTGV  | 197  | 37   |
| >ELN-A418T- GVGGIPGVAC | 395  | >ELN-A418T- GVGGIPGVTC | 461  | 66   |
| >ELN-A418T- GVGGIPGVAC | 74   | >ELN-A418T- GVGGIPGVTC | 75   | 1    |
| >ELN-A418T- GVGGIPGVAC | 29   | >ELN-A418T- GVGGIPGVTC | 47   | 18   |
| >ELN-A418T- GVGGIPGVAC | 172  | >ELN-A418T- GVGGIPGVTC | 556  | 384  |
| >ELN-A418T- GVGGIPGVAC | 68   | >ELN-A418T- GVGGIPGVTC | 69   | 1    |
| >ELN-A418T- GVGGIPGVAC | 128  | >ELN-A418T- GVGGIPGVTC | 422  | 294  |
| >ELN-A418T- GVGGIPGVAC | 18   | >ELN-A418T- GVGGIPGVTC | 20   | 2    |
| >ELN-A461S- AAKAAAKA   | 69   | >ELN-A461S- SAKAAAKA   | 114  | 45   |
| >ELN-A461S- AAKAAAKAA  | 54   | >ELN-A461S- SAKAAAKAA  | 91   | 37   |
| >ELN-A461S- AAKAAAKAAI | 403  | >ELN-A461S- SAKAAAKAAI | 662  | 259  |
| >ELN-A461S- AAKAAAKAAI | 181  | >ELN-A461S- SAKAAAKAAI | 191  | 10   |
| >ELN-A461S- AAKAAAKAAI | 102  | >ELN-A461S- SAKAAAKAAI | 187  | 85   |
| >ELN-A461S- AAKAAAKAAI | 5    | >ELN-A461S- SAKAAAKAAI | 9    | 4    |
| >ELN-A461S- AAKAAAKAAI | 1040 | >ELN-A461S- SAKAAAKAAI | 449  | 591  |
| >ELN-A461S- AAKAAAK    | 693  | >ELN-A461S- ASAKAAAK   | 222  | 471  |
| >ELN-A461S- AAKAAAK    | 177  | >ELN-A461S- ASAKAAAK   | 44   | 133  |
| >ELN-A461S- AAKAAAK    | 230  | >ELN-A461S- ASAKAAAK   | 76   | 154  |
| >ELN-A461S- AAKAAAK    | 321  | >ELN-A461S- ASAKAAAK   | 336  | 15   |
| >ELN-A461S- AAKAAAK    | 1340 | >ELN-A461S- ASAKAAAK   | 317  | 1023 |
| >ELN-A461S- AAAAKAAAK  | 399  | >ELN-A461S- AASAKAAAK  | 422  | 23   |
| >ELN-A461S- AAAAKAAAK  | 155  | >ELN-A461S- AASAKAAAK  | 106  | 49   |
| >ELN-A461S- AAAAKAAAK  | 249  | >ELN-A461S- AASAKAAAK  | 96   | 153  |
| >ELN-A461S- AAAAKAAA   | 306  | >ELN-A461S- AAASAKAAAI | 354  | 48   |
| >ELN-A461S- AAAAKAAA   | 203  | >ELN-A461S- AAASAKAAAI | 168  | 35   |
| >ELN-A461S- AAAAKAAA   | 125  | >ELN-A461S- AAASAKAAAI | 222  | 97   |
| >ELN-A461S- AAAAKAAA   | 90   | >ELN-A461S- AAASAKAAAI | 109  | 19   |
| >ELN-A461S- AAAAKAAA   | 423  | >ELN-A461S- AAASAKAAA  | 1016 | 593  |
| >ELN-A461S- TPAAAAAK   | 396  | >ELN-A461S- TPAAASAK   | 461  | 65   |
| >ELN-A461S- TPAAAAAKA/ | 66   | >ELN-A461S- TPAAASAKA/ | 61   | 5    |
| >ELN-A461S- TPAAAAAK   | 446  | >ELN-A461S- TPAAASAK   | 357  | 89   |
| >ELN-A461S- TPAAAAAKA/ | 176  | >ELN-A461S- TPAAASAKA/ | 145  | 31   |
| >ELN-A461S- TPAAAAAKA  | 249  | >ELN-A461S- TPAAASAKA  | 172  | 77   |
| >ELN-A461S- TPAAAAAKA/ | 347  | >ELN-A461S- TPAAASAKA/ | 814  | 467  |
| >ELN-A461S- TPAAAAAKA/ | 35   | >ELN-A461S- TPAAASAKA/ | 32   | 3    |
| >ELN-A461S- TPAAAAAKA/ | 791  | >ELN-A461S- TPAAASAKA/ | 377  | 414  |



|                         |      |                        |     |      |
|-------------------------|------|------------------------|-----|------|
| >ELN-A461S- GTPAAAAAK   | 147  | >ELN-A461S- GTPAAASAK  | 115 | 32   |
| >ELN-A461S- GTPAAAAAK/  | 320  | >ELN-A461S- GTPAAASAK/ | 481 | 161  |
| >ELN-A461S- GTPAAAAAK   | 179  | >ELN-A461S- GTPAAASAK  | 755 | 576  |
| >ELN-A461S- GTPAAAAAK/  | 30   | >ELN-A461S- GTPAAASAK/ | 53  | 23   |
| >ELN-A461S- GTPAAAAAK/  | 147  | >ELN-A461S- GTPAAASAK/ | 267 | 120  |
| >ELN-A461S- GVGTPAAAA.  | 284  | >ELN-A461S- GVGTPAAAS/ | 214 | 70   |
| >ELN-A461S- GVGTPAAAA.  | 69   | >ELN-A461S- GVGTPAAAS/ | 59  | 10   |
| >ELN-G157E- GARFPGVGV   | 9846 | >ELN-G157E- EARFPGVGV  | 129 | 9717 |
| >ELN-G157E- GARFPGVGV   | 8907 | >ELN-G157E- EARFPGVGV  | 111 | 8796 |
| >ELN-G157E- GARFPGVGV/  | 147  | >ELN-G157E- EARFPGVGV/ | 378 | 231  |
| >ELN-G157E- LPGARFPGV   | 214  | >ELN-G157E- LPEARFPGV  | 240 | 26   |
| >ELN-G157E- LPGARFPGV/  | 331  | >ELN-G157E- LPEARFPGV/ | 346 | 15   |
| >ELN-G157E- LPGARFPGV   | 311  | >ELN-G157E- LPEARFPGV  | 427 | 116  |
| >ELN-G157E- LPGARFPG    | 213  | >ELN-G157E- LPEARFPG   | 175 | 38   |
| >ELN-G157E- LPGARFPGV   | 34   | >ELN-G157E- LPEARFPGV  | 31  | 3    |
| >ELN-G157E- LPGARFPGV/  | 81   | >ELN-G157E- LPEARFPGV/ | 68  | 13   |
| >ELN-G157E- VLPGARFPGV  | 92   | >ELN-G157E- VLPEARFPGV | 69  | 23   |
| >ELN-G157E- VLPGARFPGV  | 250  | >ELN-G157E- VLPEARFPGV | 244 | 6    |
| >ELN-G157E- VLPGARFPGV  | 88   | >ELN-G157E- VLPEARFPGV | 94  | 6    |
| >ELN-G157E- VLPGARFPGV  | 77   | >ELN-G157E- VLPEARFPGV | 73  | 4    |
| >ELN-G157E- VLPGARFPGV  | 4    | >ELN-G157E- VLPEARFPGV | 2   | 2    |
| >ELN-G157E- VLPGARFPGV  | 52   | >ELN-G157E- VLPEARFPGV | 13  | 39   |
| >ELN-G157E- VLPGARFPGV  | 5    | >ELN-G157E- VLPEARFPGV | 4   | 1    |
| >ELN-G157E- VLPGARFPGV  | 6    | >ELN-G157E- VLPEARFPGV | 4   | 2    |
| >ELN-G157E- VLPGARFPGV  | 2    | >ELN-G157E- VLPEARFPGV | 2   | 0    |
| >ELN-G157E- VLPGARFPGV  | 258  | >ELN-G157E- VLPEARFPGV | 301 | 43   |
| >ELN-G157E- GVLPGARFPG  | 300  | >ELN-G157E- GVLPEARFPG | 384 | 84   |
| >ELN-G157E- GVLPGARFPG  | 362  | >ELN-G157E- GVLPEARFPG | 602 | 240  |
| >ELN-G157E- GVLPGARFPG  | 12   | >ELN-G157E- GVLPEARFPG | 21  | 9    |
| >ELN-G157E- GVLPGARFPG  | 24   | >ELN-G157E- GVLPEARFPG | 42  | 18   |
| >ELN-G157E- GVLPGARFPG  | 67   | >ELN-G157E- GVLPEARFPG | 96  | 29   |
| >ELN-G157E- GVLPGARFPG  | 16   | >ELN-G157E- GVLPEARFPG | 26  | 10   |
| >ELN-G157E- GVLPGARFPG  | 147  | >ELN-G157E- GVLPEARFPG | 301 | 154  |
| >ELN-G157E- GVLPGARFPG  | 12   | >ELN-G157E- GVLPEARFPG | 23  | 11   |
| >ELN-G157E- GVLPGARFPG  | 130  | >ELN-G157E- GVLPEARFPG | 303 | 173  |
| >ELN-G157E- GVLPGARF    | 13   | >ELN-G157E- GVLPEARF   | 29  | 16   |
| >ELN-G157E- GGVLPGARF   | 132  | >ELN-G157E- GGVLPEARF  | 517 | 385  |
| >ELN-G157E- GGVLPGARF   | 172  | >ELN-G157E- GGVLPEARF  | 635 | 463  |
| >ELN-G157E- YPGGVLPGAR  | 251  | >ELN-G157E- YPGGVLPEAR | 754 | 503  |
| >ELN-G157E- YPGGVLPGAR  | 45   | >ELN-G157E- YPGGVLPEAR | 30  | 15   |
| >ELN-G157E- YPGGVLPGAR  | 631  | >ELN-G157E- YPGGVLPEAR | 376 | 255  |
| >ELN-G157E- YPGGVLPGA   | 36   | >ELN-G157E- YPGGVLPEA  | 21  | 15   |
| >ELN-G157E- VYPGGVLPGAR | 556  | >ELN-G157E- VYPGGVLPEA | 149 | 407  |

|                        |       |                        |      |       |
|------------------------|-------|------------------------|------|-------|
| >ELN-G157E- VYPGGVLPG/ | 126   | >ELN-G157E- VYPGGVLPEA | 111  | 15    |
| >ELN-G157E- VYPGGVLPG/ | 435   | >ELN-G157E- VYPGGVLPEA | 789  | 354   |
| >ELN-G157E- GVYPGGVLP( | 79    | >ELN-G157E- GVYPGGVLP( | 111  | 32    |
| >ELN-G157E- GVYPGGVLP( | 24    | >ELN-G157E- GVYPGGVLP( | 34   | 10    |
| >ELN-G157E- GVYPGGVLP( | 119   | >ELN-G157E- GVYPGGVLP( | 125  | 6     |
| >ELN-G157E- GVYPGGVLP( | 96    | >ELN-G157E- GVYPGGVLP( | 86   | 10    |
| >ELN-G157E- GVYPGGVLP( | 86    | >ELN-G157E- GVYPGGVLP( | 66   | 20    |
| >ELN-G384R- GARPGVGV   | 373   | >ELN-G384R- RARPGVGV   | 523  | 150   |
| >ELN-G384R- GARPGVGV   | 811   | >ELN-G384R- RARPGVGV   | 13   | 798   |
| >ELN-G384R- GARPGVGVG  | 3479  | >ELN-G384R- RARPGVGVG  | 40   | 3439  |
| >ELN-G384R- GARPGVGVG  | 4264  | >ELN-G384R- RARPGVGVG  | 70   | 4194  |
| >ELN-G384R- GARPGVGVG  | 532   | >ELN-G384R- RARPGVGVG  | 10   | 522   |
| >ELN-G384R- GARPGVGV   | 6236  | >ELN-G384R- RARPGVGV   | 149  | 6087  |
| >ELN-G384R- GARPGVGVG  | 8249  | >ELN-G384R- RARPGVGVG  | 238  | 8011  |
| >ELN-G384R- GARPGVGV   | 728   | >ELN-G384R- RARPGVGV   | 22   | 706   |
| >ELN-G384R- GARPGVGVG  | 91    | >ELN-G384R- RARPGVGVG  | 6    | 85    |
| >ELN-G384R- GARPGVGVG  | 261   | >ELN-G384R- RARPGVGVG  | 34   | 227   |
| >ELN-G384R- YGARPGVGV  | 402   | >ELN-G384R- YRARPGVGV  | 1249 | 847   |
| >ELN-G384R- YGARPGVGV  | 366   | >ELN-G384R- YRARPGVGV  | 2724 | 2358  |
| >ELN-G384R- YGARPGVGV  | 5041  | >ELN-G384R- YRARPGVGV  | 120  | 4921  |
| >ELN-G384R- YGARPGVGV  | 21296 | >ELN-G384R- YRARPGVGV  | 130  | 21166 |
| >ELN-G384R- KYGARPGV   | 793   | >ELN-G384R- KYRARPGV   | 4    | 789   |
| >ELN-G384R- KYGARPGVG  | 7290  | >ELN-G384R- KYRARPGVG  | 11   | 7279  |
| >ELN-G384R- KYGARPGVG\ | 2917  | >ELN-G384R- KYRARPGVG\ | 6    | 2911  |
| >ELN-G384R- KYGARPGVG\ | 8199  | >ELN-G384R- KYRARPGVG\ | 13   | 8186  |
| >ELN-G384R- KYGARPGV   | 778   | >ELN-G384R- KYRARPGV   | 291  | 487   |
| >ELN-G384R- AKYGARPGV  | 147   | >ELN-G384R- AKYRARPGV  | 502  | 355   |
| >ELN-G384R- AKYGARPGV( | 315   | >ELN-G384R- AKYRARPGV( | 1002 | 687   |
| >ELN-G384R- AKYGARPGV  | 208   | >ELN-G384R- AKYRARPGV  | 53   | 155   |
| >ELN-G384R- AKYGARPGV( | 62    | >ELN-G384R- AKYRARPGV( | 20   | 42    |
| >ELN-G384R- AAKYGARPG  | 769   | >ELN-G384R- AAKYRARPG  | 417  | 352   |
| >ELN-G384R- AAKYGARPG\ | 75    | >ELN-G384R- AAKYRARPG\ | 43   | 32    |
| >ELN-G384R- KAAKYGARPC | 147   | >ELN-G384R- KAAKYRARPC | 297  | 150   |
| >ELN-G384R- KAAKYGARPC | 279   | >ELN-G384R- KAAKYRARPC | 308  | 29    |
| >ELN-G384R- KAAKYGARPC | 995   | >ELN-G384R- KAAKYRARPC | 383  | 612   |
| >ELN-G384R- KAAKYGAR   | 16    | >ELN-G384R- KAAKYRAR   | 12   | 4     |
| >ELN-G384R- KAAKYGAR   | 218   | >ELN-G384R- KAAKYRAR   | 194  | 24    |
| >ELN-G384R- AAKAAKYG   | 441   | >ELN-G384R- AAKAAKYR   | 148  | 293   |
| >ELN-G384R- AAKAAKYGA  | 147   | >ELN-G384R- AAKAAKYRA  | 121  | 26    |
| >ELN-G384R- AAKAAKYGAI | 212   | >ELN-G384R- AAKAAKYRAF | 158  | 54    |
| >ELN-G384R- AAKAAKYG   | 17423 | >ELN-G384R- AAKAAKYR   | 20   | 17403 |
| >ELN-G384R- AAKAAKYGAI | 165   | >ELN-G384R- AAKAAKYRAF | 44   | 121   |
| >ELN-G384R- AAKAAKYG   | 41158 | >ELN-G384R- AAKAAKYR   | 425  | 40733 |

|                       |       |                       |      |       |
|-----------------------|-------|-----------------------|------|-------|
| >ELN-G384R- AAKAAKYG  | 24190 | >ELN-G384R- AAKAAKYR  | 454  | 23736 |
| >ELN-G384R- AAKAAKYG/ | 443   | >ELN-G384R- AAKAAKYR/ | 377  | 66    |
| >ELN-G384R- AAKAAKYG  | 35357 | >ELN-G384R- AAKAAKYR  | 62   | 35295 |
| >ELN-G384R- AAKAAKYG/ | 294   | >ELN-G384R- AAKAAKYR/ | 470  | 176   |
| >ELN-G384R- KAAAKAAYC | 27457 | >ELN-G384R- KAAAKAAYF | 79   | 27378 |
| >ELN-G384R- KAAAKAAYC | 37847 | >ELN-G384R- KAAAKAAYF | 321  | 37526 |
| >ELN-G384R- KAAAKAAYC | 31878 | >ELN-G384R- KAAAKAAYF | 457  | 31421 |
| >ELN-G384R- KAAAKAAYC | 24024 | >ELN-G384R- KAAAKAAYF | 37   | 23987 |
| >EML4-V782 VWPEGSDGT  | 483   | >EML4-V782 LWPEGSDGT  | 172  | 311   |
| >EML4-V782 GVWPEGSDC  | 4609  | >EML4-V782 GLWPEGSDG  | 87   | 4522  |
| >EML4-V782 GVWPEGSDC  | 11096 | >EML4-V782 GLWPEGSDG  | 236  | 10860 |
| >EML4-V782 GVWPEGSDC  | 3776  | >EML4-V782 GLWPEGSDG  | 72   | 3704  |
| >EML4-V782 GVWPEGSDC  | 9235  | >EML4-V782 GLWPEGSDG  | 81   | 9154  |
| >EML4-V782 TCVLGFQVFC | 168   | >EML4-V782 TCVLGFQVFC | 1157 | 989   |
| >EML4-V782 TCVLGFQVFC | 236   | >EML4-V782 TCVLGFQVFC | 2085 | 1849  |
| >EML4-V782 FQVFGVWP   | 411   | >EML4-V782 FQVFGVWP   | 302  | 109   |
| >EML4-V782 FQVFGVWPE  | 46    | >EML4-V782 FQVFGVWPE  | 21   | 25    |
| >EML4-V782 FQVFGVWPE  | 58    | >EML4-V782 FQVFGVWPE  | 47   | 11    |
| >EML4-V782 GFQVFGVW   | 165   | >EML4-V782 GFQVFGVW   | 274  | 109   |
| >EML4-V782 LGFQVFGV   | 1961  | >EML4-V782 LGFQVFGV   | 363  | 1598  |
| >EML4-V782 LGFQVFGV   | 461   | >EML4-V782 LGFQVFGV   | 650  | 189   |
| >EML4-V782 LGFQVFGV   | 92    | >EML4-V782 LGFQVFGV   | 687  | 595   |
| >EML4-V782 LGFQVFGV   | 94    | >EML4-V782 LGFQVFGV   | 1537 | 1443  |
| >EML4-V782 LGFQVFGV   | 215   | >EML4-V782 LGFQVFGV   | 3938 | 3723  |
| >EML4-V782 LGFQVFGV   | 410   | >EML4-V782 LGFQVFGV   | 2988 | 2578  |
| >EML4-V782 LGFQVFGVW  | 159   | >EML4-V782 LGFQVFGVW  | 116  | 43    |
| >EML4-V782 LGFQVFGVW  | 23    | >EML4-V782 LGFQVFGVW  | 27   | 4     |
| >EML4-V782 LGFQVFGVW  | 166   | >EML4-V782 LGFQVFGVW  | 94   | 72    |
| >EML4-V782 LGFQVFGVW  | 80    | >EML4-V782 LGFQVFGVW  | 100  | 20    |
| >EML4-V782 LGFQVFGVW  | 25    | >EML4-V782 LGFQVFGVW  | 17   | 8     |
| >EML4-V782 VLGQVFGV   | 22    | >EML4-V782 VLGQVFGV   | 55   | 33    |
| >EML4-V782 VLGQVFGV   | 17    | >EML4-V782 VLGQVFGV   | 29   | 12    |
| >EML4-V782 VLGQVFGV   | 15    | >EML4-V782 VLGQVFGV   | 137  | 122   |
| >EML4-V782 VLGQVFGV   | 46    | >EML4-V782 VLGQVFGV   | 399  | 353   |
| >EML4-V782 VLGQVFGV   | 2     | >EML4-V782 VLGQVFGV   | 4    | 2     |
| >EML4-V782 VLGQVFGV   | 3     | >EML4-V782 VLGQVFGV   | 7    | 4     |
| >EML4-V782 VLGQVFGV   | 4     | >EML4-V782 VLGQVFGV   | 9    | 5     |
| >EML4-V782 VLGQVFGV   | 2     | >EML4-V782 VLGQVFGV   | 4    | 2     |
| >EML4-V782 VLGQVFGV   | 2     | >EML4-V782 VLGQVFGV   | 4    | 2     |
| >EML4-V782 VLGQVFGV\  | 489   | >EML4-V782 VLGQVFGV\  | 176  | 313   |
| >EML4-V782 CVLGFQVFG\ | 77    | >EML4-V782 CVLGFQVFG\ | 264  | 187   |
| >EML4-V782 CVLGFQVFG\ | 220   | >EML4-V782 CVLGFQVFG\ | 205  | 15    |
| >EML4-V782 CVLGFQVFG\ | 196   | >EML4-V782 CVLGFQVFG\ | 1005 | 809   |

|                       |       |                       |       |       |
|-----------------------|-------|-----------------------|-------|-------|
| >EML4-V782 CVLGFQVFG\ | 54    | >EML4-V782 CVLGFQVFGI | 142   | 88    |
| >EML4-V782 CVLGFQVFG\ | 11    | >EML4-V782 CVLGFQVFGI | 148   | 137   |
| >EML4-V782 CVLGFQVFG\ | 116   | >EML4-V782 CVLGFQVFGI | 1156  | 1040  |
| >EML4-V782 CVLGFQVFG\ | 41    | >EML4-V782 CVLGFQVFGI | 971   | 930   |
| >EML4-V782 CVLGFQVFG\ | 8     | >EML4-V782 CVLGFQVFGI | 70    | 62    |
| >EML4-V782 CVLGFQVFG\ | 12    | >EML4-V782 CVLGFQVFGI | 307   | 295   |
| >EML4-V782 CVLGFQVFG\ | 361   | >EML4-V782 CVLGFQVFGI | 1753  | 1392  |
| >EML4-V782 CVLGFQVFG\ | 19    | >EML4-V782 CVLGFQVFGI | 213   | 194   |
| >EML4-V782 CVLGFQVFG\ | 618   | >EML4-V782 CVLGFQVFGI | 432   | 186   |
| >EML4-V782 CVLGFQVFG\ | 332   | >EML4-V782 CVLGFQVFGI | 264   | 68    |
| >EML4-V782 CVLGFQVFG\ | 28    | >EML4-V782 CVLGFQVFGI | 31    | 3     |
| >EML4-V782 CVLGFQVFG\ | 244   | >EML4-V782 CVLGFQVFGI | 290   | 46    |
| >EML4-V782 CVLGFQVFG\ | 149   | >EML4-V782 CVLGFQVFGI | 85    | 64    |
| >EP300-A214VQRAGLPQ   | 229   | >EP300-A214VQRTGLPQ   | 582   | 353   |
| >EP300-A214MQAGVQRA   | 120   | >EP300-A214MQAGVQRT   | 1168  | 1048  |
| >EP300-A214MQAGVQRA\  | 235   | >EP300-A214MQAGVQRT\  | 259   | 24    |
| >EP300-A214MQAGVQRA   | 135   | >EP300-A214MQAGVQRT   | 1627  | 1492  |
| >EP300-A214MQAGVQRA   | 56    | >EP300-A214MQAGVQRT   | 536   | 480   |
| >EP300-A214MQAGVQRA\  | 415   | >EP300-A214MQAGVQRT\  | 620   | 205   |
| >EP300-A214MQAGVQRA\  | 421   | >EP300-A214MQAGVQRT\  | 278   | 143   |
| >EP300-A214MQAGVQRA\  | 44    | >EP300-A214MQAGVQRT\  | 97    | 53    |
| >EP300-A214MQAGVQRA\  | 240   | >EP300-A214MQAGVQRT\  | 323   | 83    |
| >EP300-A214PMQAGVQR\  | 332   | >EP300-A214PMQAGVQR\  | 2356  | 2024  |
| >EP300-A214PMQAGVQR\  | 424   | >EP300-A214PMQAGVQR\  | 654   | 230   |
| >EP300-A214PMQAGVQR\  | 55    | >EP300-A214PMQAGVQR\  | 834   | 779   |
| >EP300-A214PMQAGVQR\  | 36    | >EP300-A214PMQAGVQR\  | 45    | 9     |
| >EP300-A214NPMQAGVQ   | 457   | >EP300-A214NPMQAGVQ   | 1032  | 575   |
| >EP300-A214NPMQAGVQ   | 39    | >EP300-A214NPMQAGVQ   | 1291  | 1252  |
| >EP300-P133KPGMKARF   | 132   | >EP300-P133KSGMKARF   | 21819 | 21687 |
| >EP300-P133KPGMKARFV  | 112   | >EP300-P133KSGMKARFV  | 24980 | 24868 |
| >EP300-P133KPGMKARF   | 7912  | >EP300-P133KSGMKARF   | 8     | 7904  |
| >EP300-P133KPGMKARF   | 19716 | >EP300-P133KSGMKARF   | 139   | 19577 |
| >EP300-P133VKPGMKARF  | 1928  | >EP300-P133VKSGMKARF  | 428   | 1500  |
| >EP300-P133EVKPGMKAR  | 293   | >EP300-P133EVKSGMKAR  | 436   | 143   |
| >EP300-P133EVKPGMKAR  | 22    | >EP300-P133EVKSGMKAR  | 13    | 9     |
| >EP300-P133EVKPGMKAR  | 796   | >EP300-P133EVKSGMKAR  | 353   | 443   |
| >EP300-P133EVKPGMKAR  | 415   | >EP300-P133EVKSGMKAR  | 358   | 57    |
| >EP300-P133EVKPGMKAR  | 71    | >EP300-P133EVKSGMKAR  | 56    | 15    |
| >EP300-P133EVKPGMKAR  | 73    | >EP300-P133EVKSGMKAR  | 35    | 38    |
| >EP300-P133EVKPGMKAR  | 100   | >EP300-P133EVKSGMKAR  | 156   | 56    |
| >EP300-P133EVKPGMKAR  | 479   | >EP300-P133EVKSGMKAR  | 375   | 104   |
| >EP300-P133EVKPGMKAR  | 115   | >EP300-P133EVKSGMKAR  | 837   | 722   |
| >EP300-P133VEVKPGMKA  | 291   | >EP300-P133VEVKSGMKA  | 179   | 112   |

|                        |       |                        |       |       |
|------------------------|-------|------------------------|-------|-------|
| >EP300-P133 VEVKPGMKA  | 231   | >EP300-P133 VEVKSGMKA  | 139   | 92    |
| >EP300-P133 VEVKPGMKA  | 374   | >EP300-P133 VEVKSGMKA  | 174   | 200   |
| >EP300-P133 VEVKPGMKA  | 895   | >EP300-P133 VEVKSGMKA  | 476   | 419   |
| >EP300-P133 TVEVKPGMK  | 504   | >EP300-P133 TVEVKSGMK  | 380   | 124   |
| >EP300-P133 TVEVKPGMK  | 785   | >EP300-P133 TVEVKSGMK  | 334   | 451   |
| >EP300-P133 TVEVKPGMK  | 463   | >EP300-P133 TVEVKSGMK  | 268   | 195   |
| >EP300-P133 KTVEVKPGM  | 387   | >EP300-P133 KTVEVKSGM  | 1134  | 747   |
| >EP300-P133 KTVEVKPGM  | 266   | >EP300-P133 KTVEVKSGMI | 116   | 150   |
| >EP300-P133 KTVEVKPGM  | 164   | >EP300-P133 KTVEVKSGMI | 113   | 51    |
| >EP300-P133 KTVEVKPGM  | 185   | >EP300-P133 KTVEVKSGM  | 196   | 11    |
| >EP300-P133 KTVEVKPGM  | 576   | >EP300-P133 KTVEVKSGM  | 121   | 455   |
| >EP300-P133 KTVEVKPGM  | 52    | >EP300-P133 KTVEVKSGMI | 60    | 8     |
| >EP300-P133 KTVEVKPGM  | 259   | >EP300-P133 KTVEVKSGM  | 1287  | 1028  |
| >EP300-P133 KTVEVKPGM  | 11    | >EP300-P133 KTVEVKSGM  | 8     | 3     |
| >EP300-P133 KTVEVKPGM  | 67    | >EP300-P133 KTVEVKSGM  | 172   | 105   |
| >EP300-P133 KTVEVKPGM  | 331   | >EP300-P133 KTVEVKSGM  | 12    | 319   |
| >EP300-P145 HPPDQKIPK  | 18671 | >EP300-P145 HLPDQKIPK  | 316   | 18355 |
| >EP300-P145 HPPDQKIPK  | 14684 | >EP300-P145 HLPDQKIPK  | 445   | 14239 |
| >EP300-P145 HPPDQKIPK  | 597   | >EP300-P145 HLPDQKIPK  | 160   | 437   |
| >EP300-P145 HPPDQKIPKP | 861   | >EP300-P145 HLPDQKIPKP | 258   | 603   |
| >EP300-P145 HCHPPDQK   | 194   | >EP300-P145 HCHLPDQK   | 412   | 218   |
| >EP300-P145 HCHPPDQKIF | 16    | >EP300-P145 HCHLPDQKIP | 24    | 8     |
| >EP300-P145 HCHPPDQKI  | 218   | >EP300-P145 HCHLPDQKI  | 1215  | 997   |
| >EP300-P145 IFHCHPPDQK | 199   | >EP300-P145 IFHCHLPDQK | 192   | 7     |
| >EP300-P145 IFHCHPPDQK | 434   | >EP300-P145 IFHCHLPDQK | 1741  | 1307  |
| >EP300-P145 YIFHCHPPDQ | 164   | >EP300-P145 YIFHCHLPDQ | 176   | 12    |
| >EP300-P145 YIFHCHPPDQ | 49    | >EP300-P145 YIFHCHLPDQ | 38    | 11    |
| >EP300-P145 YIFHCHPPDQ | 26    | >EP300-P145 YIFHCHLPDQ | 19    | 7     |
| >EP300-P145 YIFHCHPPDQ | 640   | >EP300-P145 YIFHCHLPDQ | 331   | 309   |
| >EP300-P145 DYIFHCHP   | 14432 | >EP300-P145 DYIFHCHL   | 370   | 14062 |
| >EP300-P145 DYIFHCHP   | 16571 | >EP300-P145 DYIFHCHL   | 454   | 16117 |
| >EP300-P145 DYIFHCHP   | 10361 | >EP300-P145 DYIFHCHL   | 315   | 10046 |
| >EP300-P188 PNSMPPYLPF | 4349  | >EP300-P188 SNSMPPYLPF | 468   | 3881  |
| >EP300-P188 PNSMPPYLPF | 906   | >EP300-P188 SNSMPPYLPF | 207   | 699   |
| >EP300-P188 PPNSMPPYL  | 6     | >EP300-P188 PSNSMPPYL  | 1483  | 1477  |
| >EP300-P188 PPNSMPPY   | 22054 | >EP300-P188 PSNSMPPY   | 269   | 21785 |
| >EP300-P188 PPNSMPPY   | 3194  | >EP300-P188 PSNSMPPY   | 338   | 2856  |
| >EP300-P188 PPNSMPPY   | 2833  | >EP300-P188 PSNSMPPY   | 384   | 2449  |
| >EP300-P188 PPNSMPPY   | 1761  | >EP300-P188 PSNSMPPY   | 73    | 1688  |
| >EP300-P188 PPNSMPPYLF | 7169  | >EP300-P188 PSNSMPPYLF | 228   | 6941  |
| >EP300-P188 PPNSMPPY   | 23857 | >EP300-P188 PSNSMPPY   | 465   | 23392 |
| >EP300-P188 PPNSMPPY   | 37    | >EP300-P188 PSNSMPPY   | 2167  | 2130  |
| >EP300-P188 PPNSMPPY   | 180   | >EP300-P188 PSNSMPPY   | 12123 | 11943 |

|                       |       |                       |       |       |
|-----------------------|-------|-----------------------|-------|-------|
| >EP300-P188PPNSMPPYL  | 146   | >EP300-P188PSNSMPPYL  | 15386 | 15240 |
| >EP300-P188PPNSMPPY   | 436   | >EP300-P188PSNSMPPY   | 16201 | 15765 |
| >EP300-P188TPPNSMPPYL | 8     | >EP300-P188TPSNSMPPYL | 16    | 8     |
| >EP300-P188TPPNSMPPY  | 113   | >EP300-P188TPSNSMPPY  | 303   | 190   |
| >EP300-P188TPPNSMPPY  | 2740  | >EP300-P188TPSNSMPPY  | 451   | 2289  |
| >EP300-P188TPPNSMPPYL | 279   | >EP300-P188TPSNSMPPYL | 301   | 22    |
| >EP300-P188TPPNSMPPY  | 49    | >EP300-P188TPSNSMPPY  | 12    | 37    |
| >EP300-P188TPPNSMPPYL | 3806  | >EP300-P188TPSNSMPPYL | 353   | 3453  |
| >EP300-P188TPPNSMPPY  | 2542  | >EP300-P188TPSNSMPPY  | 332   | 2210  |
| >EP300-P188TPPNSMPPYL | 37    | >EP300-P188TPSNSMPPYL | 4168  | 4131  |
| >EP300-P188TPPNSMPPY  | 1408  | >EP300-P188TPSNSMPPY  | 28    | 1380  |
| >EP300-P188PTPPNSMPP\ | 325   | >EP300-P188PTPSNSMPP\ | 147   | 178   |
| >EP300-P188PTPPNSMPP\ | 85    | >EP300-P188PTPSNSMPP\ | 38    | 47    |
| >EP300-P188PTPPNSMPP\ | 443   | >EP300-P188PTPSNSMPP\ | 1667  | 1224  |
| >EP300-P188PTPPNSMPP\ | 198   | >EP300-P188PTPSNSMPP\ | 258   | 60    |
| >EP300-P188PTPPNSMPP\ | 4     | >EP300-P188PTPSNSMPP\ | 4     | 0     |
| >EP300-P188QTPPPNSMP  | 496   | >EP300-P188QTPPSNSMP  | 783   | 287   |
| >EP300-P188QTPPPNSM   | 84    | >EP300-P188QTPPSNSM   | 67    | 17    |
| >EP300-P188QTPPPNSMP  | 324   | >EP300-P188QTPPSNSMP  | 404   | 80    |
| >EP300-P188QTPPPNSM   | 71    | >EP300-P188QTPPSNSM   | 39    | 32    |
| >EP300-P188QTPPPNSMP  | 17    | >EP300-P188QTPPSNSMP  | 14    | 3     |
| >EP300-P188QTPPPNSMP  | 86    | >EP300-P188QTPPSNSMP  | 55    | 31    |
| >EP300-P188QPQTPPNSI  | 392   | >EP300-P188QPQTPSNSI  | 266   | 126   |
| >EP300-P188SQPQTPPNS  | 192   | >EP300-P188SQPQTPSNS  | 308   | 116   |
| >EP300-P188SQPQTPPNS  | 487   | >EP300-P188SQPQTPSNS  | 180   | 307   |
| >EP300-P188SQPQTPPNS  | 717   | >EP300-P188SQPQTPSNS  | 468   | 249   |
| >EP300-P188SQPQTPPNS  | 150   | >EP300-P188SQPQTPSNS  | 131   | 19    |
| >EP300-R195RPIQHQMPP  | 331   | >EP300-R195SPIQHQMPP  | 118   | 213   |
| >EP300-R195RPIQHQMPP  | 193   | >EP300-R195SPIQHQMPP  | 42    | 151   |
| >EP300-R195RPIQHQMPP  | 49    | >EP300-R195SPIQHQMPP  | 67    | 18    |
| >EP300-R195RPIQHQMPP  | 329   | >EP300-R195SPIQHQMPP  | 110   | 219   |
| >EP300-R195RPIQHQMPP  | 365   | >EP300-R195SPIQHQMPP  | 205   | 160   |
| >EP300-R195RPIQHQMPP  | 237   | >EP300-R195SPIQHQMPP  | 435   | 198   |
| >EP300-R195QRPIQHQMP  | 6244  | >EP300-R195QSPIQHQMP  | 384   | 5860  |
| >EP300-R195QRPIQHQMP  | 12843 | >EP300-R195QSPIQHQMP  | 397   | 12446 |
| >EP300-R195QRPIQHQMP  | 25805 | >EP300-R195QSPIQHQMP  | 128   | 25677 |
| >EP300-R195QRPIQHQM   | 18322 | >EP300-R195QSPIQHQM   | 30    | 18292 |
| >EP300-R195QRPIQHQMP  | 14195 | >EP300-R195QSPIQHQMP  | 15    | 14180 |
| >EP300-R195RQMAHVQIF  | 2120  | >EP300-R195RQMAHVQIF  | 100   | 2020  |
| >EP300-R195RQMAHVQIF  | 293   | >EP300-R195RQMAHVQIF  | 14786 | 14493 |
| >EP300-R195RQMAHVQIF  | 79    | >EP300-R195RQMAHVQIF  | 7769  | 7690  |
| >EP300-R195RQMAHVQIF  | 6     | >EP300-R195RQMAHVQIF  | 1936  | 1930  |
| >EP300-R195RQMAHVQIF  | 84    | >EP300-R195RQMAHVQIF  | 536   | 452   |

|                        |      |                        |       |       |
|------------------------|------|------------------------|-------|-------|
| >EP300-R195 RQMAHVQIF  | 45   | >EP300-R195 RQMAHVQIF  | 361   | 316   |
| >EP300-R195 RQMAHVQIF  | 70   | >EP300-R195 RQMAHVQIF  | 20016 | 19946 |
| >EP300-R195 FQRPIQHQM  | 6002 | >EP300-R195 FQSPIQHQM  | 255   | 5747  |
| >EP300-R195 FQRPIQHQM  | 307  | >EP300-R195 FQSPIQHQM  | 10    | 297   |
| >EP300-R195 FQRPIQHQ   | 2341 | >EP300-R195 FQSPIQHQ   | 358   | 1983  |
| >EP300-R195 FQRPIQHQM  | 241  | >EP300-R195 FQSPIQHQM  | 29    | 212   |
| >EP300-R195 FQRPIQHQM  | 3668 | >EP300-R195 FQSPIQHQM  | 465   | 3203  |
| >EP300-R195 FQRPIQHQM  | 8558 | >EP300-R195 FQSPIQHQM  | 427   | 8131  |
| >EP300-R195 FQRPIQHQM  | 109  | >EP300-R195 FQSPIQHQM  | 194   | 85    |
| >EP300-R195 FQRPIQHQM  | 30   | >EP300-R195 FQSPIQHQM  | 83    | 53    |
| >EP300-R195 FQRPIQHQM  | 339  | >EP300-R195 FQSPIQHQM  | 797   | 458   |
| >EP300-R195 FQRPIQHQM  | 1077 | >EP300-R195 FQSPIQHQM  | 39    | 1038  |
| >EP300-R195 QIFQRPIQHQ | 439  | >EP300-R195 QIFQSPIQHQ | 1717  | 1278  |
| >EP300-R195 QIFQRPIQHQ | 578  | >EP300-R195 QIFQSPIQHQ | 197   | 381   |
| >EP300-R195 QIFQRPIQHQ | 712  | >EP300-R195 QIFQSPIQHQ | 264   | 448   |
| >EP300-R195 VQIFQRPI   | 1019 | >EP300-R195 VQIFQSPI   | 148   | 871   |
| >EP300-R195 VQIFQRPI   | 180  | >EP300-R195 VQIFQSPI   | 28    | 152   |
| >EP300-R195 VQIFQRPI   | 733  | >EP300-R195 VQIFQSPI   | 193   | 540   |
| >EP300-R195 VQIFQRPI   | 124  | >EP300-R195 VQIFQSPI   | 43    | 81    |
| >EP300-R195 VQIFQRPI   | 115  | >EP300-R195 VQIFQSPI   | 238   | 123   |
| >EP300-R195 HVQIFQRPI  | 229  | >EP300-R195 HVQIFQSPI  | 233   | 4     |
| >EP300-R195 HVQIFQRPI  | 494  | >EP300-R195 HVQIFQSPI  | 806   | 312   |
| >EP300-R195 HVQIFQRPI  | 474  | >EP300-R195 HVQIFQSPI  | 64    | 410   |
| >EP300-R195 HVQIFQRPI  | 1800 | >EP300-R195 HVQIFQSPI  | 452   | 1348  |
| >EP300-R195 HVQIFQRPI  | 277  | >EP300-R195 HVQIFQSPI  | 103   | 174   |
| >EP300-R195 AHVQIFQRPI | 1039 | >EP300-R195 AHVQIFQSPI | 362   | 677   |
| >EP300-R195 AHVQIFQRPI | 1401 | >EP300-R195 AHVQIFQSPI | 313   | 1088  |
| >EP300-R195 MAHVQIFQR  | 285  | >EP300-R195 MAHVQIFQS  | 18984 | 18699 |
| >EP300-R195 MAHVQIFQR  | 288  | >EP300-R195 MAHVQIFQS  | 870   | 582   |
| >EP300-R195 MAHVQIFQR  | 25   | >EP300-R195 MAHVQIFQS  | 26    | 1     |
| >EP300-R195 MAHVQIFQR  | 6    | >EP300-R195 MAHVQIFQS  | 5320  | 5314  |
| >EP300-R195 MAHVQIFQR  | 56   | >EP300-R195 MAHVQIFQS  | 21437 | 21381 |
| >EP300-R195 MAHVQIFQR  | 5    | >EP300-R195 MAHVQIFQS  | 4788  | 4783  |
| >EP300-R195 MAHVQIFQR  | 89   | >EP300-R195 MAHVQIFQS  | 29    | 60    |
| >EP300-R195 MAHVQIFQR  | 1021 | >EP300-R195 MAHVQIFQS  | 441   | 580   |
| >EP300-R195 MAHVQIFQR  | 293  | >EP300-R195 MAHVQIFQS  | 103   | 190   |
| >EP300-R195 MAHVQIFQR  | 2059 | >EP300-R195 MAHVQIFQS  | 325   | 1734  |
| >EP300-R195 MAHVQIFQR  | 87   | >EP300-R195 MAHVQIFQS  | 53    | 34    |
| >EP300-R195 QMAHVQIFQ  | 100  | >EP300-R195 QMAHVQIFQ  | 21224 | 21124 |
| >EP300-R195 QMAHVQIFQ  | 279  | >EP300-R195 QMAHVQIFQ  | 23062 | 22783 |
| >EP300-R195 QMAHVQIFQ  | 55   | >EP300-R195 QMAHVQIFQ  | 28671 | 28616 |
| >EP300-R195 QMAHVQIFQ  | 94   | >EP300-R195 QMAHVQIFQ  | 13579 | 13485 |
| >EP300-R195 QMAHVQIFQ  | 162  | >EP300-R195 QMAHVQIFQ  | 27472 | 27310 |

|                       |       |                       |      |       |
|-----------------------|-------|-----------------------|------|-------|
| >ERBB2-C311CTLVCPLH   | 10511 | >ERBB2-C311RTLVCPLH   | 207  | 10304 |
| >ERBB2-C311CTLVCPLHNC | 11389 | >ERBB2-C311RTLVCPLHNC | 464  | 10925 |
| >ERBB2-C311CTLVCPLH   | 5896  | >ERBB2-C311RTLVCPLH   | 463  | 5433  |
| >ERBB2-C311SCTLVCPL   | 24042 | >ERBB2-C311SRTLVCPL   | 398  | 23644 |
| >ERBB2-C311YNYLSTDVGS | 34476 | >ERBB2-C311YNYLSTDVGS | 128  | 34348 |
| >ERBB2-C311GSCTLVCPL  | 6893  | >ERBB2-C311GSRTLVCPL  | 35   | 6858  |
| >ERBB2-C311GSCTLVCPL  | 70    | >ERBB2-C311GSRTLVCPL  | 12   | 58    |
| >ERBB2-C311DVGSTLV    | 173   | >ERBB2-C311DVGSRTLV   | 327  | 154   |
| >ERBB2-C311DVGSTLVCP  | 452   | >ERBB2-C311DVGSRTLVCP | 1363 | 911   |
| >ERBB2-C311DVGSTLV    | 314   | >ERBB2-C311DVGSRTLV   | 412  | 98    |
| >ERBB2-C311DVGSTLVCP  | 405   | >ERBB2-C311DVGSRTLVCP | 514  | 109   |
| >ERBB2-C311TDVGSCTL   | 476   | >ERBB2-C311TDVGSRTL   | 2076 | 1600  |
| >ERBB2-C311TDVGSCTLV  | 74    | >ERBB2-C311TDVGSRTL   | 234  | 160   |
| >ERBB2-C311STDVGSCTLV | 404   | >ERBB2-C311STDVGSRTL  | 943  | 539   |
| >ERBB2-C311STDVGSCTLV | 401   | >ERBB2-C311STDVGSRTL  | 1075 | 674   |
| >ERBB2-C311STDVGSCTLV | 314   | >ERBB2-C311STDVGSRTL  | 892  | 578   |
| >ERBB2-C311STDVGSCTL  | 184   | >ERBB2-C311STDVGSRTL  | 4975 | 4791  |
| >ERBB2-C311STDVGSCTLV | 80    | >ERBB2-C311STDVGSRTL  | 436  | 356   |
| >ERBB2-C311STDVGSCTLV | 215   | >ERBB2-C311STDVGSRTL  | 662  | 447   |
| >ERBB2-C311STDVGSCTLV | 138   | >ERBB2-C311STDVGSRTL  | 181  | 43    |
| >ERBB2-C311STDVGSCTL  | 250   | >ERBB2-C311STDVGSRTL  | 1346 | 1096  |
| >ERBB2-C311STDVGSCTLV | 56    | >ERBB2-C311STDVGSRTL  | 124  | 68    |
| >ERBB2-C311STDVGSCTL  | 9     | >ERBB2-C311STDVGSRTL  | 18   | 9     |
| >ERBB2-C311STDVGSCTL  | 400   | >ERBB2-C311STDVGSRTL  | 216  | 184   |
| >ERBB2-C311STDVGSCTLV | 1013  | >ERBB2-C311STDVGSRTL  | 406  | 607   |
| >ERBB2-C311STDVGSCTL  | 539   | >ERBB2-C311STDVGSRTL  | 262  | 277   |
| >ERBB2-C311LSTDVGS    | 34177 | >ERBB2-C311LSTDVGS    | 55   | 34122 |
| >ERBB2-C311LSTDVGSCTL | 289   | >ERBB2-C311LSTDVGSRTL | 142  | 147   |
| >ERBB2-C311LSTDVGSCTL | 17    | >ERBB2-C311LSTDVGSRTL | 15   | 2     |
| >ERBB2-C311LSTDVGSCTL | 430   | >ERBB2-C311LSTDVGSRTL | 3171 | 2741  |
| >ERBB2-C311LSTDVGSCTL | 179   | >ERBB2-C311LSTDVGSRTL | 109  | 70    |
| >ERBB2-C311LSTDVGSCTL | 132   | >ERBB2-C311LSTDVGSRTL | 152  | 20    |
| >ERBB2-C311LSTDVGSCT  | 569   | >ERBB2-C311LSTDVGSRT  | 77   | 492   |
| >ERBB2-C311LSTDVGSCTL | 51    | >ERBB2-C311LSTDVGSRTL | 78   | 27    |
| >ERBB2-C311LSTDVGSCTL | 35    | >ERBB2-C311LSTDVGSRTL | 38   | 3     |
| >ERBB2-C311YLSTDVGSCT | 25    | >ERBB2-C311YLSTDVGSRT | 94   | 69    |
| >ERBB2-C311YLSTDVGSCT | 92    | >ERBB2-C311YLSTDVGSRT | 69   | 23    |
| >ERBB2-C311YLSTDVGSCT | 5     | >ERBB2-C311YLSTDVGSRT | 9    | 4     |
| >ERBB2-C311YLSTDVGS   | 41    | >ERBB2-C311YLSTDVGS   | 2428 | 2387  |
| >ERBB2-C311YLSTDVGSCT | 170   | >ERBB2-C311YLSTDVGSRT | 140  | 30    |
| >ERBB2-C311YLSTDVGSCT | 6     | >ERBB2-C311YLSTDVGSRT | 7    | 1     |
| >ERBB2-C311YLSTDVGSCT | 62    | >ERBB2-C311YLSTDVGSRT | 378  | 316   |
| >ERBB2-C311YLSTDVGS   | 70    | >ERBB2-C311YLSTDVGS   | 7924 | 7854  |



|                        |       |                        |       |       |
|------------------------|-------|------------------------|-------|-------|
| >ERBB2-C311YLSTDVGSCT  | 297   | >ERBB2-C311YLSTDVGSRT  | 91    | 206   |
| >ERBB2-C311YLSTDVGSCT  | 4     | >ERBB2-C311YLSTDVGSRT  | 9     | 5     |
| >ERBB2-C311YLSTDVGSCT  | 210   | >ERBB2-C311YLSTDVGSRT  | 16920 | 16710 |
| >ERBB2-C311YLSTDVGSCT  | 4     | >ERBB2-C311YLSTDVGSRT  | 7     | 3     |
| >ERBB2-C311YLSTDVGSCT  | 238   | >ERBB2-C311YLSTDVGSRT  | 488   | 250   |
| >ERBB2-C311YLSTDVGSCT  | 9     | >ERBB2-C311YLSTDVGSRT  | 25    | 16    |
| >ERBB2-C311YLSTDVGSCT  | 248   | >ERBB2-C311YLSTDVGSRT  | 20354 | 20106 |
| >ERBB2-C311YLSTDVGSCT  | 361   | >ERBB2-C311YLSTDVGSRT  | 573   | 212   |
| >ERBB2-C311YLSTDVGSCT  | 5     | >ERBB2-C311YLSTDVGSRT  | 15    | 10    |
| >ERBB2-C311YLSTDVGSCT  | 21    | >ERBB2-C311YLSTDVGSRT  | 2526  | 2505  |
| >ERBB2-C311YLSTDVGSCT  | 40    | >ERBB2-C311YLSTDVGSRT  | 12    | 28    |
| >ERBB2-C311YLSTDVGSCT  | 2     | >ERBB2-C311YLSTDVGSRT  | 3     | 1     |
| >ERBB2-C311YLSTDVGSCT  | 39572 | >ERBB2-C311YLSTDVGSRT  | 115   | 39457 |
| >ERBB2-C311YLSTDVGSCT  | 263   | >ERBB2-C311YLSTDVGSRT  | 673   | 410   |
| >ERBB2-C311YLSTDVGSCT  | 438   | >ERBB2-C311YLSTDVGSRT  | 816   | 378   |
| >ERBB2-C311YLSTDVGSCT  | 326   | >ERBB2-C311YLSTDVGSRT  | 758   | 432   |
| >ERBB2-C311NYLSTDVGSCT | 31898 | >ERBB2-C311NYLSTDVGSRT | 62    | 31836 |
| >ERBB2-C334CSKPCARVCY  | 503   | >ERBB2-C334SSKPCARVCY  | 342   | 161   |
| >ERBB2-C334CSKPCARVCY  | 1374  | >ERBB2-C334SSKPCARVCY  | 254   | 1120  |
| >ERBB2-C334CSKPCARVCY  | 970   | >ERBB2-C334SSKPCARVCY  | 176   | 794   |
| >ERBB2-C334CSKPCARVCY  | 170   | >ERBB2-C334SSKPCARVCY  | 83    | 87    |
| >ERBB2-C334CSKPCARV    | 1792  | >ERBB2-C334SSKPCARV    | 303   | 1489  |
| >ERBB2-C334CSKPCARVCY  | 150   | >ERBB2-C334SSKPCARVCY  | 36    | 114   |
| >ERBB2-C334CSKPCARVCY  | 1241  | >ERBB2-C334SSKPCARVCY  | 192   | 1049  |
| >ERBB2-C334CSKPCARV    | 491   | >ERBB2-C334SSKPCARV    | 1453  | 962   |
| >ERBB2-C334KCSKPCARVC  | 982   | >ERBB2-C334KSSKPCARVC  | 82    | 900   |
| >ERBB2-C334KCSKPCAR    | 370   | >ERBB2-C334KSSKPCAR    | 29    | 341   |
| >ERBB2-C334KCSKPCARVC  | 11467 | >ERBB2-C334KSSKPCARVC  | 402   | 11065 |
| >ERBB2-C334KCSKPCARVC  | 633   | >ERBB2-C334KSSKPCARVC  | 48    | 585   |
| >ERBB2-C334KCSKPCARV   | 18704 | >ERBB2-C334KSSKPCARV   | 151   | 18553 |
| >ERBB2-C334KCSKPCARVC  | 11407 | >ERBB2-C334KSSKPCARVC  | 29    | 11378 |
| >ERBB2-C334KCSKPCARV   | 745   | >ERBB2-C334KSSKPCARV   | 121   | 624   |
| >ERBB2-C334KCSKPCARVC  | 448   | >ERBB2-C334KSSKPCARVC  | 83    | 365   |
| >ERBB2-C334KCSKPCAR    | 49    | >ERBB2-C334KSSKPCAR    | 183   | 134   |
| >ERBB2-C334CEKCSKPCA   | 21    | >ERBB2-C334CEKSSKPCA   | 26    | 5     |
| >ERBB2-C334CEKCSKPCAR  | 149   | >ERBB2-C334CEKSSKPCAR  | 219   | 70    |
| >ERBB2-C334CEKCSKPCAR  | 215   | >ERBB2-C334CEKSSKPCAR  | 187   | 28    |
| >ERBB2-C334RCEKCSKPCA  | 30    | >ERBB2-C334RCEKSSKPCA  | 70    | 40    |
| >ERBB2-C334TQRCEKCSK   | 59    | >ERBB2-C334TQRCEKSSK   | 157   | 98    |
| >ERBB2-C334GTQRCEKCSK  | 386   | >ERBB2-C334GTQRCEKSSK  | 346   | 40    |
| >ERBB2-D32(AEDGTQRC    | 664   | >ERBB2-D32(AEGGTQRC    | 77    | 587   |
| >ERBB2-D32(AEDGTQRCE   | 1400  | >ERBB2-D32(AEGGTQRCE   | 153   | 1247  |
| >ERBB2-D32(AEDGTQRCEI  | 1213  | >ERBB2-D32(AEGGTQRCEI  | 146   | 1067  |

|                        |      |                        |       |       |
|------------------------|------|------------------------|-------|-------|
| >ERBB2-D32(TAEDGTQR    | 64   | >ERBB2-D32(TAEGGTQR    | 87    | 23    |
| >ERBB2-D32(TAEDGTQRCI  | 243  | >ERBB2-D32(TAEGGTQRCI  | 321   | 78    |
| >ERBB2-D32(VTAEDGTQR   | 1526 | >ERBB2-D32(VTAEGGTQR   | 441   | 1085  |
| >ERBB2-D32(VTAEDGTQR   | 65   | >ERBB2-D32(VTAEGGTQR   | 78    | 13    |
| >ERBB2-D32(EVTAEDGTQI  | 20   | >ERBB2-D32(EVTAEGGTQI  | 32    | 12    |
| >ERBB2-D76( DEAYVMAGV  | 33   | >ERBB2-D76( HEAYVMAGV  | 16    | 17    |
| >ERBB2-D76( DEAYVMAGV  | 39   | >ERBB2-D76( HEAYVMAGV  | 19    | 20    |
| >ERBB2-D76( DEAYVMAGV  | 158  | >ERBB2-D76( HEAYVMAGV  | 2090  | 1932  |
| >ERBB2-D76( DEAYVMAGV  | 472  | >ERBB2-D76( HEAYVMAGV  | 4604  | 4132  |
| >ERBB2-D76( DEAYVMAGV  | 1561 | >ERBB2-D76( HEAYVMAGV  | 25    | 1536  |
| >ERBB2-D76( DEAYVMAGV  | 1238 | >ERBB2-D76( HEAYVMAGV  | 96    | 1142  |
| >ERBB2-D76( DEAYVMAGV  | 411  | >ERBB2-D76( HEAYVMAGV  | 6     | 405   |
| >ERBB2-D76( LDEAYVMAG  | 139  | >ERBB2-D76( LHEAYVMAG  | 14513 | 14374 |
| >ERBB2-D76( ILDEAYVM   | 111  | >ERBB2-D76( ILHEAYVM   | 311   | 200   |
| >ERBB2-D76( ILDEAYVMA  | 38   | >ERBB2-D76( ILHEAYVMA  | 89    | 51    |
| >ERBB2-D76( ILDEAYVMAC | 11   | >ERBB2-D76( ILHEAYVMAC | 17    | 6     |
| >ERBB2-D76( ILDEAYVM   | 192  | >ERBB2-D76( ILHEAYVM   | 179   | 13    |
| >ERBB2-D76( ILDEAYVMA  | 44   | >ERBB2-D76( ILHEAYVMA  | 37    | 7     |
| >ERBB2-D76( ILDEAYVMAC | 6    | >ERBB2-D76( ILHEAYVMAC | 5     | 1     |
| >ERBB2-D76( ILDEAYVM   | 3472 | >ERBB2-D76( ILHEAYVM   | 463   | 3009  |
| >ERBB2-D76( ILDEAYVMA  | 172  | >ERBB2-D76( ILHEAYVMA  | 14    | 158   |
| >ERBB2-D76( ILDEAYVMAC | 11   | >ERBB2-D76( ILHEAYVMAC | 3     | 8     |
| >ERBB2-D76( ILDEAYVM   | 334  | >ERBB2-D76( ILHEAYVM   | 1399  | 1065  |
| >ERBB2-D76( ILDEAYVMA  | 44   | >ERBB2-D76( ILHEAYVMA  | 175   | 131   |
| >ERBB2-D76( ILDEAYVMAC | 7    | >ERBB2-D76( ILHEAYVMAC | 14    | 7     |
| >ERBB2-D76( ILDEAYVM   | 17   | >ERBB2-D76( ILHEAYVM   | 26    | 9     |
| >ERBB2-D76( ILDEAYVMA  | 6    | >ERBB2-D76( ILHEAYVMA  | 7     | 1     |
| >ERBB2-D76( ILDEAYVMAC | 137  | >ERBB2-D76( ILHEAYVMAC | 274   | 137   |
| >ERBB2-D76( ILDEAYVMAC | 2    | >ERBB2-D76( ILHEAYVMAC | 2     | 0     |
| >ERBB2-D76( ILDEAYVM   | 31   | >ERBB2-D76( ILHEAYVM   | 119   | 88    |
| >ERBB2-D76( ILDEAYVMA  | 63   | >ERBB2-D76( ILHEAYVMA  | 313   | 250   |
| >ERBB2-D76( ILDEAYVMAC | 3    | >ERBB2-D76( ILHEAYVMAC | 5     | 2     |
| >ERBB2-D76( ILDEAYVM   | 76   | >ERBB2-D76( ILHEAYVM   | 554   | 478   |
| >ERBB2-D76( ILDEAYVMA  | 11   | >ERBB2-D76( ILHEAYVMA  | 46    | 35    |
| >ERBB2-D76( ILDEAYVMAC | 4    | >ERBB2-D76( ILHEAYVMAC | 6     | 2     |
| >ERBB2-D76( ILDEAYVM   | 31   | >ERBB2-D76( ILHEAYVM   | 565   | 534   |
| >ERBB2-D76( ILDEAYVMA  | 43   | >ERBB2-D76( ILHEAYVMA  | 969   | 926   |
| >ERBB2-D76( ILDEAYVMAC | 3    | >ERBB2-D76( ILHEAYVMAC | 5     | 2     |
| >ERBB2-D76( ILDEAYVM   | 77   | >ERBB2-D76( ILHEAYVM   | 42    | 35    |
| >ERBB2-D76( ILDEAYVMA  | 8    | >ERBB2-D76( ILHEAYVMA  | 6     | 2     |
| >ERBB2-D76( ILDEAYVMAC | 2    | >ERBB2-D76( ILHEAYVMAC | 2     | 0     |
| >ERBB2-D76( ILDEAYVMAC | 2104 | >ERBB2-D76( ILHEAYVMAC | 245   | 1859  |
| >ERBB2-D76( ILDEAYVMAC | 45   | >ERBB2-D76( ILHEAYVMAC | 442   | 397   |

|                        |      |                        |      |      |
|------------------------|------|------------------------|------|------|
| >ERBB2-D76!ILDEAYVM    | 5343 | >ERBB2-D76!ILHEAYVM    | 221  | 5122 |
| >ERBB2-D76!ILDEAYVM    | 5816 | >ERBB2-D76!ILHEAYVM    | 260  | 5556 |
| >ERBB2-D76!EILDEAYV    | 471  | >ERBB2-D76!EILHEAYV    | 1176 | 705  |
| >ERBB2-D76!EILDEAYV    | 100  | >ERBB2-D76!EILHEAYV    | 249  | 149  |
| >ERBB2-D76!EILDEAYV    | 11   | >ERBB2-D76!EILHEAYV    | 40   | 29   |
| >ERBB2-D76!EILDEAYV    | 83   | >ERBB2-D76!EILHEAYV    | 239  | 156  |
| >ERBB2-D76!EILDEAYV    | 24   | >ERBB2-D76!EILHEAYV    | 100  | 76   |
| >ERBB2-D76!EILDEAYV    | 5    | >ERBB2-D76!EILHEAYV    | 24   | 19   |
| >ERBB2-D76!EILDEAYVM   | 362  | >ERBB2-D76!EILHEAYVM   | 4175 | 3813 |
| >ERBB2-D76!EILDEAYV    | 11   | >ERBB2-D76!EILHEAYV    | 96   | 85   |
| >ERBB2-D76!EILDEAYVM   | 39   | >ERBB2-D76!EILHEAYVM   | 63   | 24   |
| >ERBB2-D76!EILDEAYV    | 34   | >ERBB2-D76!EILHEAYV    | 45   | 11   |
| >ERBB2-D76!EILDEAYV    | 5    | >ERBB2-D76!EILHEAYV    | 6    | 1    |
| >ERBB2-D76!EILDEAYVM   | 33   | >ERBB2-D76!EILHEAYVM   | 241  | 208  |
| >ERBB2-D76!EILDEAYVMA  | 16   | >ERBB2-D76!EILHEAYVMA  | 62   | 46   |
| >ERBB2-D76!KEILDEAY    | 1004 | >ERBB2-D76!KEILHEAY    | 366  | 638  |
| >ERBB2-D76!KEILDEAY    | 256  | >ERBB2-D76!KEILHEAY    | 77   | 179  |
| >ERBB2-D76!KEILDEAYV   | 310  | >ERBB2-D76!KEILHEAYV   | 492  | 182  |
| >ERBB2-D76!KEILDEAYVM  | 163  | >ERBB2-D76!KEILHEAYVM  | 247  | 84   |
| >ERBB2-D76!KEILDEAYVM  | 289  | >ERBB2-D76!KEILHEAYVM  | 141  | 148  |
| >ERBB2-D76!KEILDEAY    | 363  | >ERBB2-D76!KEILHEAY    | 452  | 89   |
| >ERBB2-D76!KEILDEAY    | 273  | >ERBB2-D76!KEILHEAY    | 245  | 28   |
| >ERBB2-D76!KEILDEAYV   | 536  | >ERBB2-D76!KEILHEAYV   | 225  | 311  |
| >ERBB2-D76!KEILDEAYVM  | 50   | >ERBB2-D76!KEILHEAYVM  | 25   | 25   |
| >ERBB2-D76!KEILDEAYV   | 32   | >ERBB2-D76!KEILHEAYV   | 12   | 20   |
| >ERBB2-D76!KEILDEAYVM  | 15   | >ERBB2-D76!KEILHEAYVM  | 10   | 5    |
| >ERBB2-D76!KEILDEAYVM  | 468  | >ERBB2-D76!KEILHEAYVM  | 151  | 317  |
| >ERBB2-D76!NKEILDEAYVI | 676  | >ERBB2-D76!NKEILHEAYVI | 401  | 275  |
| >ERBB2-D76!KANKEILDEA' | 126  | >ERBB2-D76!KANKEILHEA' | 139  | 13   |
| >ERBB2-D76!KANKEILDEA' | 385  | >ERBB2-D76!KANKEILHEA' | 166  | 219  |
| >ERBB2-D76!KANKEILDEA' | 255  | >ERBB2-D76!KANKEILHEA' | 142  | 113  |
| >ERBB2-D76!KANKEILDEA' | 293  | >ERBB2-D76!KANKEILHEA' | 113  | 180  |
| >ERBB2-D76!KANKEILDEA' | 140  | >ERBB2-D76!KANKEILHEA' | 88   | 52   |
| >ERBB2-D76!KANKEILDEA' | 200  | >ERBB2-D76!KANKEILHEA' | 438  | 238  |
| >ERBB2-D76!KANKEILDEA' | 86   | >ERBB2-D76!KANKEILHEA' | 70   | 16   |
| >ERBB2-D76!KANKEILDEA' | 473  | >ERBB2-D76!KANKEILHEA' | 558  | 85   |
| >ERBB2-E321EVTAEDGTQI  | 20   | >ERBB2-E321GVTAEDGTQ   | 306  | 286  |
| >ERBB2-E321PLHNQEVTA   | 149  | >ERBB2-E321PLHNQGVTA   | 160  | 11   |
| >ERBB2-E321CPLHNQEV    | 469  | >ERBB2-E321CPLHNQGV    | 985  | 516  |
| >ERBB2-E321CPLHNQEV    | 289  | >ERBB2-E321CPLHNQGV    | 371  | 82   |
| >ERBB2-E321CPLHNQEVT   | 1046 | >ERBB2-E321CPLHNQGV    | 218  | 828  |
| >ERBB2-E321CPLHNQEVTA  | 106  | >ERBB2-E321CPLHNQGVTA  | 54   | 52   |
| >ERBB2-E321LVCPLHNQEV  | 459  | >ERBB2-E321LVCPLHNQGV  | 353  | 106  |

|                        |      |                        |       |       |
|------------------------|------|------------------------|-------|-------|
| >ERBB2-E321LVCPLHNQEV  | 139  | >ERBB2-E321LVCPLHNQGV  | 130   | 9     |
| >ERBB2-E321LVCPLHNQEV  | 11   | >ERBB2-E321LVCPLHNQGV  | 13    | 2     |
| >ERBB2-E321TLVCPLHNQE  | 57   | >ERBB2-E321TLVCPLHNQCC | 110   | 53    |
| >ERBB2-E321TLVCPLHNQE  | 24   | >ERBB2-E321TLVCPLHNQCC | 36    | 12    |
| >ERBB2-E321TLVCPLHNQE  | 13   | >ERBB2-E321TLVCPLHNQCC | 10    | 3     |
| >ERBB2-E321TLVCPLHNQE  | 50   | >ERBB2-E321TLVCPLHNQCC | 33    | 17    |
| >ERBB2-E321TLVCPLHNQE  | 6    | >ERBB2-E321TLVCPLHNQCC | 5     | 1     |
| >ERBB2-E321TLVCPLHNQE  | 9    | >ERBB2-E321TLVCPLHNQCC | 7     | 2     |
| >ERBB2-E321TLVCPLHNQE  | 38   | >ERBB2-E321TLVCPLHNQCC | 40    | 2     |
| >ERBB2-E321TLVCPLHNQE  | 59   | >ERBB2-E321TLVCPLHNQCC | 28    | 31    |
| >ERBB2-E321TLVCPLHNQE  | 4    | >ERBB2-E321TLVCPLHNQCC | 4     | 0     |
| >ERBB2-E321TLVCPLHNQE  | 58   | >ERBB2-E321TLVCPLHNQCC | 65    | 7     |
| >ERBB2-E321TLVCPLHNQE  | 42   | >ERBB2-E321TLVCPLHNQCC | 24    | 18    |
| >ERBB2-E744ENVKIPVAI   | 144  | >ERBB2-E744GNVKIPVAI   | 12865 | 12721 |
| >ERBB2-E744ENVKIPVAIK\ | 90   | >ERBB2-E744GNVKIPVAIK\ | 9879  | 9789  |
| >ERBB2-E744GENVKIPVAI  | 279  | >ERBB2-E744GGNVKIPVAI  | 20575 | 20296 |
| >ERBB2-E744GENVKIPV    | 246  | >ERBB2-E744GGNVKIPV    | 23955 | 23709 |
| >ERBB2-E744GENVKIPV    | 89   | >ERBB2-E744GGNVKIPV    | 34073 | 33984 |
| >ERBB2-E744GENVKIPVA   | 120  | >ERBB2-E744GGNVKIPVA   | 31556 | 31436 |
| >ERBB2-E744GENVKIPVAI  | 160  | >ERBB2-E744GGNVKIPVAI  | 34451 | 34291 |
| >ERBB2-E744GENVKIPV    | 106  | >ERBB2-E744GGNVKIPV    | 37281 | 37175 |
| >ERBB2-E744GENVKIPVA   | 24   | >ERBB2-E744GGNVKIPVA   | 29183 | 29159 |
| >ERBB2-E744GENVKIPVA   | 372  | >ERBB2-E744GGNVKIPVA   | 39116 | 38744 |
| >ERBB2-E744GENVKIPVAI  | 23   | >ERBB2-E744GGNVKIPVAI  | 24216 | 24193 |
| >ERBB2-E744PDGENVKI    | 273  | >ERBB2-E744PDGGNVKI    | 703   | 430   |
| >ERBB2-E744IPDGENVKI   | 3274 | >ERBB2-E744IPDGGNVKI   | 203   | 3071  |
| >ERBB2-E744IPDGENVKIP\ | 314  | >ERBB2-E744IPDGGNVKIP' | 86    | 228   |
| >ERBB2-E744IPDGENVKI   | 67   | >ERBB2-E744IPDGGNVKI   | 139   | 72    |
| >ERBB2-E744IPDGENVKIP\ | 279  | >ERBB2-E744IPDGGNVKIP' | 96    | 183   |
| >ERBB2-E744WIPDGENV    | 333  | >ERBB2-E744WIPDGGNV    | 863   | 530   |
| >ERBB2-E744WIPDGENV    | 110  | >ERBB2-E744WIPDGGNV    | 41    | 69    |
| >ERBB2-E744WIPDGENV    | 117  | >ERBB2-E744WIPDGGNV    | 168   | 51    |
| >ERBB2-E744WIPDGENV    | 32   | >ERBB2-E744WIPDGGNV    | 46    | 14    |
| >ERBB2-E744WIPDGENVKI  | 864  | >ERBB2-E744WIPDGGNVK   | 454   | 410   |
| >ERBB2-E744WIPDGENV    | 57   | >ERBB2-E744WIPDGGNV    | 136   | 79    |
| >ERBB2-E744WIPDGENV    | 136  | >ERBB2-E744WIPDGGNV    | 796   | 660   |
| >ERBB2-E744WIPDGENV    | 6    | >ERBB2-E744WIPDGGNV    | 9     | 3     |
| >ERBB2-E744WIPDGENVKI  | 140  | >ERBB2-E744WIPDGGNVK   | 102   | 38    |
| >ERBB2-E744WIPDGENV    | 95   | >ERBB2-E744WIPDGGNV    | 158   | 63    |
| >ERBB2-E744IWIPDGENVK  | 95   | >ERBB2-E744IWIPDGGNV\  | 170   | 75    |
| >ERBB2-E744IWIPDGENVK  | 338  | >ERBB2-E744IWIPDGGNV\  | 504   | 166   |
| >ERBB2-E744IWIPDGENVK  | 135  | >ERBB2-E744IWIPDGGNV\  | 152   | 17    |
| >ERBB2-E744IWIPDGENVK  | 521  | >ERBB2-E744IWIPDGGNV\  | 449   | 72    |

|                       |       |                       |       |       |
|-----------------------|-------|-----------------------|-------|-------|
| >ERBB2-E744GIWIPDGEN\ | 21    | >ERBB2-E744GIWIPDGGN\ | 38    | 17    |
| >ERBB2-E744GIWIPDGEN\ | 27    | >ERBB2-E744GIWIPDGGN\ | 61    | 34    |
| >ERBB2-E744GIWIPDGEN\ | 50    | >ERBB2-E744GIWIPDGGN\ | 87    | 37    |
| >ERBB2-E744GIWIPDGEN\ | 538   | >ERBB2-E744GIWIPDGGN\ | 447   | 91    |
| >ERBB2-E914ELMTFGAK   | 167   | >ERBB2-E914KLMTFGAK   | 27    | 140   |
| >ERBB2-E914ELMTFGAKP\ | 663   | >ERBB2-E914KLMTFGAKP\ | 49    | 614   |
| >ERBB2-E914ELMTFGAK   | 237   | >ERBB2-E914KLMTFGAK   | 16    | 221   |
| >ERBB2-E914ELMTFGAKP\ | 70    | >ERBB2-E914KLMTFGAKP\ | 3679  | 3609  |
| >ERBB2-E914ELMTFGAKP\ | 357   | >ERBB2-E914KLMTFGAKP\ | 8679  | 8322  |
| >ERBB2-E914ELMTFGAKP\ | 236   | >ERBB2-E914KLMTFGAKP\ | 252   | 16    |
| >ERBB2-E914ELMTFGAK   | 10764 | >ERBB2-E914KLMTFGAK   | 25    | 10739 |
| >ERBB2-E914ELMTFGAKP\ | 473   | >ERBB2-E914KLMTFGAKP\ | 144   | 329   |
| >ERBB2-E914ELMTFGAK   | 7753  | >ERBB2-E914KLMTFGAK   | 101   | 7652  |
| >ERBB2-E914ELMTFGAKP\ | 3710  | >ERBB2-E914KLMTFGAKP\ | 89    | 3621  |
| >ERBB2-E914ELMTFGAK   | 39    | >ERBB2-E914KLMTFGAK   | 4296  | 4257  |
| >ERBB2-E914ELMTFGAKP\ | 3378  | >ERBB2-E914KLMTFGAKP\ | 99    | 3279  |
| >ERBB2-E914ELMTFGAKP\ | 206   | >ERBB2-E914KLMTFGAKP\ | 81    | 125   |
| >ERBB2-E914ELMTFGAKP\ | 48    | >ERBB2-E914KLMTFGAKP\ | 71    | 23    |
| >ERBB2-E914ELMTFGAKP\ | 100   | >ERBB2-E914KLMTFGAKP\ | 15    | 85    |
| >ERBB2-E914ELMTFGAKP\ | 2192  | >ERBB2-E914KLMTFGAKP\ | 58    | 2134  |
| >ERBB2-E914ELMTFGAK   | 2917  | >ERBB2-E914KLMTFGAK   | 178   | 2739  |
| >ERBB2-E914WELMTFGA   | 211   | >ERBB2-E914WKLMTFGA   | 27704 | 27493 |
| >ERBB2-E914WELMTFGAK  | 67    | >ERBB2-E914WKLMTFGAK  | 3636  | 3569  |
| >ERBB2-E914WELMTFGAK  | 336   | >ERBB2-E914WKLMTFGAK  | 2770  | 2434  |
| >ERBB2-E914WELMTFGAK  | 293   | >ERBB2-E914WKLMTFGAK  | 494   | 201   |
| >ERBB2-E914WELMTFGAK  | 4697  | >ERBB2-E914WKLMTFGAK  | 187   | 4510  |
| >ERBB2-E914WELMTFGAK  | 66    | >ERBB2-E914WKLMTFGAK  | 5     | 61    |
| >ERBB2-E914WELMTFGA   | 154   | >ERBB2-E914WKLMTFGA   | 19681 | 19527 |
| >ERBB2-E914WELMTFGAK  | 92    | >ERBB2-E914WKLMTFGAK  | 17090 | 16998 |
| >ERBB2-E914WELMTFGAK  | 4     | >ERBB2-E914WKLMTFGAK  | 541   | 537   |
| >ERBB2-E914WELMTFGA   | 69    | >ERBB2-E914WKLMTFGA   | 17647 | 17578 |
| >ERBB2-E914WELMTFGAK  | 292   | >ERBB2-E914WKLMTFGAK  | 22868 | 22576 |
| >ERBB2-E914WELMTFGA   | 106   | >ERBB2-E914WKLMTFGA   | 25458 | 25352 |
| >ERBB2-E914DVWSYGVTV  | 4562  | >ERBB2-E914DVWSYGVTV  | 121   | 4441  |
| >ERBB2-E914DVWSYGVTV  | 6289  | >ERBB2-E914DVWSYGVTV  | 28    | 6261  |
| >ERBB2-E914VWELMTFGA  | 9392  | >ERBB2-E914VWKLMTFGA  | 230   | 9162  |
| >ERBB2-E914VWELMTFGA  | 549   | >ERBB2-E914VWKLMTFGA  | 381   | 168   |
| >ERBB2-E914VWELMTFG   | 204   | >ERBB2-E914VWKLMTFG   | 302   | 98    |
| >ERBB2-E914TVWELMTFG  | 427   | >ERBB2-E914TVWKLMTFG  | 661   | 234   |
| >ERBB2-E914TVWELMTFG  | 112   | >ERBB2-E914TVWKLMTFG  | 379   | 267   |
| >ERBB2-E914TVWELMTFG  | 164   | >ERBB2-E914TVWKLMTFG  | 1554  | 1390  |
| >ERBB2-E914TVWELMTFG  | 136   | >ERBB2-E914TVWKLMTFG  | 685   | 549   |
| >ERBB2-E914TVWELMTFG  | 497   | >ERBB2-E914TVWKLMTFG  | 3146  | 2649  |

|                      |      |                      |      |      |
|----------------------|------|----------------------|------|------|
| >ERBB2-E914TVWELMTFG | 449  | >ERBB2-E914TVWKLMTFG | 2693 | 2244 |
| >ERBB2-E914TVWELMTFG | 116  | >ERBB2-E914TVWKLMTFG | 91   | 25   |
| >ERBB2-E914TVWELMTFG | 15   | >ERBB2-E914TVWKLMTFG | 17   | 2    |
| >ERBB2-E914TVWELMTF  | 318  | >ERBB2-E914TVWKLMTF  | 214  | 104  |
| >ERBB2-E914TVWELMTF  | 640  | >ERBB2-E914TVWKLMTF  | 468  | 172  |
| >ERBB2-E914TVWELMTF  | 118  | >ERBB2-E914TVWKLMTF  | 244  | 126  |
| >ERBB2-E914TVWELMTF  | 403  | >ERBB2-E914TVWKLMTF  | 797  | 394  |
| >ERBB2-E914TVWELMTFG | 110  | >ERBB2-E914TVWKLMTFG | 77   | 33   |
| >ERBB2-E914TVWELMTF  | 35   | >ERBB2-E914TVWKLMTF  | 46   | 11   |
| >ERBB2-E914TVWELMTFG | 318  | >ERBB2-E914TVWKLMTFG | 565  | 247  |
| >ERBB2-E914TVWELMTFG | 84   | >ERBB2-E914TVWKLMTFG | 102  | 18   |
| >ERBB2-E914TVWELMTFG | 246  | >ERBB2-E914TVWKLMTFG | 1255 | 1009 |
| >ERBB2-E914TVWELMTFG | 9    | >ERBB2-E914TVWKLMTFG | 30   | 21   |
| >ERBB2-E914TVWELMTF  | 384  | >ERBB2-E914TVWKLMTF  | 272  | 112  |
| >ERBB2-E914TVWELMTF  | 41   | >ERBB2-E914TVWKLMTF  | 78   | 37   |
| >ERBB2-E914TVWELMTF  | 64   | >ERBB2-E914TVWKLMTF  | 214  | 150  |
| >ERBB2-E914VTVWELMTF | 1232 | >ERBB2-E914VTVWKLMTF | 149  | 1083 |
| >ERBB2-E914VTVWELMTF | 51   | >ERBB2-E914VTVWKLMTF | 80   | 29   |
| >ERBB2-E914VTVWELMTF | 155  | >ERBB2-E914VTVWKLMTF | 392  | 237  |
| >ERBB2-E914VTVWELMTF | 452  | >ERBB2-E914VTVWKLMTF | 562  | 110  |
| >ERBB2-E914VTVWELMTF | 333  | >ERBB2-E914VTVWKLMTF | 851  | 518  |
| >ERBB2-E914VTVWELMTF | 19   | >ERBB2-E914VTVWKLMTF | 33   | 14   |
| >ERBB2-E914VTVWELMTF | 65   | >ERBB2-E914VTVWKLMTF | 52   | 13   |
| >ERBB2-E914VTVWELMTF | 595  | >ERBB2-E914VTVWKLMTF | 391  | 204  |
| >ERBB2-E914VTVWELMTF | 255  | >ERBB2-E914VTVWKLMTF | 623  | 368  |
| >ERBB2-E914VTVWELMTF | 4    | >ERBB2-E914VTVWKLMTF | 3    | 1    |
| >ERBB2-E914VTVWELMTF | 28   | >ERBB2-E914VTVWKLMTF | 45   | 17   |
| >ERBB2-E914VTVWELMTF | 309  | >ERBB2-E914VTVWKLMTF | 776  | 467  |
| >ERBB2-E914VTVWELMTF | 20   | >ERBB2-E914VTVWKLMTF | 20   | 0    |
| >ERBB2-E914GVTWELMT  | 231  | >ERBB2-E914GVTWKLMT  | 447  | 216  |
| >ERBB2-E914YGVTVWEL  | 424  | >ERBB2-E914YGVTVWKL  | 1704 | 1280 |
| >ERBB2-E914YGVTVWEL  | 90   | >ERBB2-E914YGVTVWKL  | 604  | 514  |
| >ERBB2-E914YGVTVWELM | 464  | >ERBB2-E914YGVTVWKLM | 813  | 349  |
| >ERBB2-E914YGVTVWELM | 175  | >ERBB2-E914YGVTVWKLM | 188  | 13   |
| >ERBB2-E914YGVTVWELM | 378  | >ERBB2-E914YGVTVWKLM | 196  | 182  |
| >ERBB2-E914YGVTVWELM | 142  | >ERBB2-E914YGVTVWKLM | 259  | 117  |
| >ERBB2-E914YGVTVWELM | 48   | >ERBB2-E914YGVTVWKLM | 75   | 27   |
| >ERBB2-E914YGVTVWELM | 101  | >ERBB2-E914YGVTVWKLM | 117  | 16   |
| >ERBB2-E914YGVTVWELM | 528  | >ERBB2-E914YGVTVWKLM | 389  | 139  |
| >ERBB2-E914SYGVTWEL  | 23   | >ERBB2-E914SYGVTWKL  | 58   | 35   |
| >ERBB2-E914SYGVTWELI | 186  | >ERBB2-E914SYGVTWKLI | 521  | 335  |
| >ERBB2-E914SYGVTWEL  | 236  | >ERBB2-E914SYGVTWKL  | 244  | 8    |
| >ERBB2-E914SYGVTWEL  | 94   | >ERBB2-E914SYGVTWKL  | 75   | 19   |

|                       |       |                       |      |       |
|-----------------------|-------|-----------------------|------|-------|
| >ERBB2-E914SYGVTWEL   | 5     | >ERBB2-E914SYGVTWKL   | 7    | 2     |
| >ERBB2-E914SYGVTWELI  | 107   | >ERBB2-E914SYGVTWKLI  | 203  | 96    |
| >ERBB2-E914SYGVTWWE   | 13474 | >ERBB2-E914SYGVTWVK   | 159  | 13315 |
| >ERBB2-E914SYGVTWEL   | 152   | >ERBB2-E914SYGVTWKL   | 154  | 2     |
| >ERBB2-E914SYGVTWELI  | 26    | >ERBB2-E914SYGVTWKLI  | 40   | 14    |
| >ERBB2-E914SYGVTWEL   | 159   | >ERBB2-E914SYGVTWKL   | 210  | 51    |
| >ERBB2-E914SYGVTWELI  | 461   | >ERBB2-E914SYGVTWKLI  | 802  | 341   |
| >ERBB2-E914WSYGVTWWE  | 251   | >ERBB2-E914WSYGVTW    | 219  | 32    |
| >ERBB2-E914WSYGVTWWE  | 311   | >ERBB2-E914WSYGVTW    | 486  | 175   |
| >ERBB2-E914WSYGVTWWE  | 262   | >ERBB2-E914WSYGVTW    | 693  | 431   |
| >ERBB2-E914WSYGVTWWE  | 56    | >ERBB2-E914WSYGVTW    | 113  | 57    |
| >ERBB2-E914WSYGVTWWE  | 343   | >ERBB2-E914WSYGVTW    | 601  | 258   |
| >ERBB2-E914WSYGVTWWE  | 18428 | >ERBB2-E914WSYGVTW    | 105  | 18323 |
| >ERBB2-E914WSYGVTWWE  | 24030 | >ERBB2-E914WSYGVTW    | 62   | 23968 |
| >ERBB2-E914WSYGVTWWE  | 2015  | >ERBB2-E914WSYGVTW    | 8    | 2007  |
| >ERBB2-E914WSYGVTWWE  | 119   | >ERBB2-E914WSYGVTW    | 222  | 103   |
| >ERBB2-E914WSYGVTWWE  | 206   | >ERBB2-E914WSYGVTW    | 1669 | 1463  |
| >ERBB2-E914WSYGVTWWE  | 160   | >ERBB2-E914WSYGVTW    | 249  | 89    |
| >ERBB2-E914WSYGVTWWE  | 404   | >ERBB2-E914WSYGVTW    | 793  | 389   |
| >ERBB2-E914WSYGVTWWE  | 21    | >ERBB2-E914WSYGVTW    | 19   | 2     |
| >ERBB2-E914WSYGVTWWE  | 77    | >ERBB2-E914WSYGVTW    | 42   | 35    |
| >ERBB2-E914WSYGVTWWE  | 273   | >ERBB2-E914WSYGVTW    | 416  | 143   |
| >ERBB2-E914WSYGVTWWE  | 86    | >ERBB2-E914WSYGVTW    | 271  | 185   |
| >ERBB2-E914WSYGVTWWE  | 499   | >ERBB2-E914WSYGVTW    | 409  | 90    |
| >ERBB2-E914WSYGVTWWE  | 104   | >ERBB2-E914WSYGVTW    | 110  | 6     |
| >ERBB2-E914WSYGVTWWE  | 84    | >ERBB2-E914WSYGVTW    | 475  | 391   |
| >ERBB2-E914WSYGVTWWE  | 735   | >ERBB2-E914WSYGVTW    | 397  | 338   |
| >ERBB2-E914WSYGVTWWE  | 165   | >ERBB2-E914WSYGVTW    | 114  | 51    |
| >ERBB2-E914WSYGVTWWE  | 8     | >ERBB2-E914WSYGVTW    | 9    | 1     |
| >ERBB2-E914WSYGVTWWE  | 319   | >ERBB2-E914WSYGVTW    | 343  | 24    |
| >ERBB2-E914VWSYGVTVM  | 19800 | >ERBB2-E914VWSYGVTVM  | 141  | 19659 |
| >ERBB2-E914VWSYGVTVM  | 33382 | >ERBB2-E914VWSYGVTVM  | 201  | 33181 |
| >ERBB2-E914VWSYGVTVM  | 94    | >ERBB2-E914VWSYGVTVM  | 196  | 102   |
| >ERBB2-E914VWSYGVTVM  | 114   | >ERBB2-E914VWSYGVTVM  | 129  | 15    |
| >ERBB2-G77(GVGSPYVSRL | 478   | >ERBB2-G77(SVGSPYVSRL | 311  | 167   |
| >ERBB2-G77(GVGSPYVSRL | 888   | >ERBB2-G77(SVGSPYVSRL | 359  | 529   |
| >ERBB2-G77(GVGSPYVSRL | 504   | >ERBB2-G77(SVGSPYVSRL | 208  | 296   |
| >ERBB2-G77(GVGSPYVSR  | 324   | >ERBB2-G77(SVGSPYVSR  | 116  | 208   |
| >ERBB2-G77(GVGSPYVSR  | 82    | >ERBB2-G77(SVGSPYVSR  | 51   | 31    |
| >ERBB2-G77(GVGSPYVSR  | 1263  | >ERBB2-G77(SVGSPYVSR  | 252  | 1011  |
| >ERBB2-G77(GVGSPYVSR  | 2291  | >ERBB2-G77(SVGSPYVSR  | 418  | 1873  |
| >ERBB2-G77(AGVGSPYV   | 354   | >ERBB2-G77(ASVGSPYV   | 142  | 212   |
| >ERBB2-G77(AGVGSPYV   | 586   | >ERBB2-G77(ASVGSPYV   | 273  | 313   |

|                       |       |                       |     |       |
|-----------------------|-------|-----------------------|-----|-------|
| >ERBB2-G77(AGVGSPYVSF | 17209 | >ERBB2-G77(ASVGSPYVSR | 71  | 17138 |
| >ERBB2-G77(AGVGSPYVSF | 16494 | >ERBB2-G77(ASVGSPYVSR | 122 | 16372 |
| >ERBB2-G77(AGVGSPYVSF | 2085  | >ERBB2-G77(ASVGSPYVSR | 189 | 1896  |
| >ERBB2-G77(AGVGSPYVSF | 11586 | >ERBB2-G77(ASVGSPYVSR | 57  | 11529 |
| >ERBB2-G77(AGVGSPYV   | 12679 | >ERBB2-G77(ASVGSPYV   | 78  | 12601 |
| >ERBB2-G77(AGVGSPYVSF | 254   | >ERBB2-G77(ASVGSPYVSR | 4   | 250   |
| >ERBB2-G77(AGVGSPYVSF | 8773  | >ERBB2-G77(ASVGSPYVSR | 439 | 8334  |
| >ERBB2-G77(AGVGSPYVSF | 1374  | >ERBB2-G77(ASVGSPYVSR | 122 | 1252  |
| >ERBB2-G77(AGVGSPYVSF | 1248  | >ERBB2-G77(ASVGSPYVSR | 163 | 1085  |
| >ERBB2-G77(MAGVGSPYV  | 724   | >ERBB2-G77(MASVGSPYV  | 258 | 466   |
| >ERBB2-G77(MAGVGSPYV  | 1158  | >ERBB2-G77(MASVGSPYV  | 164 | 994   |
| >ERBB2-G77(MAGVGSPYV  | 2032  | >ERBB2-G77(MASVGSPYV  | 234 | 1798  |
| >ERBB2-G77(MAGVGSPYV  | 34    | >ERBB2-G77(MASVGSPYV  | 12  | 22    |
| >ERBB2-G77(MAGVGSPYV  | 53    | >ERBB2-G77(MASVGSPYV  | 90  | 37    |
| >ERBB2-G77(MAGVGSPYV  | 48    | >ERBB2-G77(MASVGSPYV  | 63  | 15    |
| >ERBB2-G77(MAGVGSPYV  | 49    | >ERBB2-G77(MASVGSPYV  | 39  | 10    |
| >ERBB2-G77(MAGVGSPYV  | 31    | >ERBB2-G77(MASVGSPYV  | 22  | 9     |
| >ERBB2-G77(MAGVGSPY   | 121   | >ERBB2-G77(MASVGSPY   | 86  | 35    |
| >ERBB2-G77(MAGVGSPYV  | 904   | >ERBB2-G77(MASVGSPYV  | 156 | 748   |
| >ERBB2-G77(MAGVGSPY   | 176   | >ERBB2-G77(MASVGSPY   | 66  | 110   |
| >ERBB2-G77(MAGVGSPYV  | 51    | >ERBB2-G77(MASVGSPYV  | 32  | 19    |
| >ERBB2-G77(MAGVGSPYV  | 374   | >ERBB2-G77(MASVGSPYV  | 167 | 207   |
| >ERBB2-G77(MAGVGSPY   | 2253  | >ERBB2-G77(MASVGSPY   | 330 | 1923  |
| >ERBB2-G77(MAGVGSPYV  | 61    | >ERBB2-G77(MASVGSPYV  | 10  | 51    |
| >ERBB2-G77(MAGVGSPYV  | 490   | >ERBB2-G77(MASVGSPYV  | 45  | 445   |
| >ERBB2-G77(MAGVGSPYV  | 15    | >ERBB2-G77(MASVGSPYV  | 14  | 1     |
| >ERBB2-G77(MAGVGSPY   | 76    | >ERBB2-G77(MASVGSPY   | 64  | 12    |
| >ERBB2-G77(MAGVGSPY   | 461   | >ERBB2-G77(MASVGSPY   | 271 | 190   |
| >ERBB2-G77(MAGVGSPY   | 318   | >ERBB2-G77(MASVGSPY   | 56  | 262   |
| >ERBB2-G77(MAGVGSPY   | 26    | >ERBB2-G77(MASVGSPY   | 7   | 19    |
| >ERBB2-G77(MAGVGSPY   | 13    | >ERBB2-G77(MASVGSPY   | 8   | 5     |
| >ERBB2-G77(MAGVGSPY   | 2093  | >ERBB2-G77(MASVGSPY   | 367 | 1726  |
| >ERBB2-G77(MAGVGSPY   | 3604  | >ERBB2-G77(MASVGSPY   | 349 | 3255  |
| >ERBB2-G77(MAGVGSPY   | 2268  | >ERBB2-G77(MASVGSPY   | 129 | 2139  |
| >ERBB2-G77(MMAGVGSPY  | 36    | >ERBB2-G77(MMASVGSPY  | 38  | 2     |
| >ERBB2-G77(MMAGVGSPY  | 36    | >ERBB2-G77(MMASVGSPY  | 25  | 11    |
| >ERBB2-G77(MMAGVGSPY  | 25    | >ERBB2-G77(MMASVGSPY  | 22  | 3     |
| >ERBB2-G77(MMAGVGSPY  | 88    | >ERBB2-G77(MMASVGSPY  | 115 | 27    |
| >ERBB2-G77(MMAGVGSPY  | 1     | >ERBB2-G77(MMASVGSPY  | 1   | 0     |
| >ERBB2-G77(MMAGVGSPY  | 128   | >ERBB2-G77(MMASVGSPY  | 238 | 110   |
| >ERBB2-G77(MMAGVGSPY  | 4     | >ERBB2-G77(MMASVGSPY  | 4   | 0     |
| >ERBB2-G77(MMAGVGSPY  | 4     | >ERBB2-G77(MMASVGSPY  | 4   | 0     |
| >ERBB2-G77(MMAGVGSPY  | 2     | >ERBB2-G77(MMASVGSPY  | 2   | 0     |



|                      |      |                       |     |     |
|----------------------|------|-----------------------|-----|-----|
| >ERBB2-G77(VMAGVGSPY | 2    | >ERBB2-G77(VMASVGSPY' | 2   | 0   |
| >ERBB2-G77(VMAGVGSPY | 183  | >ERBB2-G77(VMASVGSPY  | 140 | 43  |
| >ERBB2-G77(VMAGVGSPY | 876  | >ERBB2-G77(VMASVGSPY  | 480 | 396 |
| >ERBB2-G77(VMAGVGSPY | 16   | >ERBB2-G77(VMASVGSPY  | 18  | 2   |
| >ERBB2-G77(VMAGVGSPY | 16   | >ERBB2-G77(VMASVGSPY  | 9   | 7   |
| >ERBB2-G77(VMAGVGSPY | 292  | >ERBB2-G77(VMASVGSPY' | 167 | 125 |
| >ERBB2-G77(VMAGVGSPY | 166  | >ERBB2-G77(VMASVGSPY  | 68  | 98  |
| >ERBB2-G77(VMAGVGSPY | 29   | >ERBB2-G77(VMASVGSPY  | 26  | 3   |
| >ERBB2-G77(VMAGVGSPY | 694  | >ERBB2-G77(VMASVGSPY' | 499 | 195 |
| >ERBB2-G77(VMAGVGSPY | 12   | >ERBB2-G77(VMASVGSPY  | 13  | 1   |
| >ERBB2-G77(VMAGVGSPY | 19   | >ERBB2-G77(VMASVGSPY  | 4   | 15  |
| >ERBB2-G77(VMAGVGSPY | 1075 | >ERBB2-G77(VMASVGSPY' | 166 | 909 |
| >ERBB2-G77(VMAGVGSPY | 479  | >ERBB2-G77(VMASVGSPY  | 531 | 52  |
| >ERBB2-G77(VMAGVGSPY | 81   | >ERBB2-G77(VMASVGSPY  | 83  | 2   |
| >ERBB2-G77(VMAGVGSPY | 88   | >ERBB2-G77(VMASVGSPY  | 36  | 52  |
| >ERBB2-G77(VMAGVGSPY | 698  | >ERBB2-G77(VMASVGSPY  | 175 | 523 |
| >ERBB2-G77(VMAGVGSPY | 475  | >ERBB2-G77(VMASVGSPY  | 817 | 342 |
| >ERBB2-G77(YVMAGVGSP | 7    | >ERBB2-G77(YVMASVGSP' | 8   | 1   |
| >ERBB2-G77(YVMAGVGSP | 6    | >ERBB2-G77(YVMASVGSP' | 5   | 1   |
| >ERBB2-G77(YVMAGVGSP | 3    | >ERBB2-G77(YVMASVGSP' | 3   | 0   |
| >ERBB2-G77(YVMAGVGS  | 89   | >ERBB2-G77(YVMASVGS   | 81  | 8   |
| >ERBB2-G77(YVMAGVGSP | 3    | >ERBB2-G77(YVMASVGSP' | 3   | 0   |
| >ERBB2-G77(YVMAGVGSP | 2    | >ERBB2-G77(YVMASVGSP' | 2   | 0   |
| >ERBB2-G77(YVMAGVGSP | 5    | >ERBB2-G77(YVMASVGSP' | 5   | 0   |
| >ERBB2-G77(YVMAGVGSP | 7    | >ERBB2-G77(YVMASVGSP' | 9   | 2   |
| >ERBB2-G77(YVMAGVGSP | 2    | >ERBB2-G77(YVMASVGSP' | 2   | 0   |
| >ERBB2-G77(YVMAGVGSP | 2    | >ERBB2-G77(YVMASVGSP' | 2   | 0   |
| >ERBB2-G77(YVMAGVGSP | 71   | >ERBB2-G77(YVMASVGSP' | 109 | 38  |
| >ERBB2-G77(YVMAGVGSP | 137  | >ERBB2-G77(YVMASVGSP' | 127 | 10  |
| >ERBB2-G77(YVMAGVGSP | 86   | >ERBB2-G77(YVMASVGSP' | 126 | 40  |
| >ERBB2-G77(YVMAGVGSP | 401  | >ERBB2-G77(YVMASVGSP' | 301 | 100 |
| >ERBB2-G77(YVMAGVGSP | 6    | >ERBB2-G77(YVMASVGSP' | 6   | 0   |
| >ERBB2-G77(YVMAGVGSP | 143  | >ERBB2-G77(YVMASVGSP' | 164 | 21  |
| >ERBB2-G77(YVMAGVGSP | 222  | >ERBB2-G77(YVMASVGSP' | 88  | 134 |
| >ERBB2-G77(YVMAGVGSP | 77   | >ERBB2-G77(YVMASVGSP' | 71  | 6   |
| >ERBB2-G77(YVMAGVGSP | 28   | >ERBB2-G77(YVMASVGSP' | 28  | 0   |
| >ERBB2-G77(YVMAGVGS  | 352  | >ERBB2-G77(YVMASVGS   | 148 | 204 |
| >ERBB2-G77(YVMAGVGSP | 10   | >ERBB2-G77(YVMASVGSP' | 9   | 1   |
| >ERBB2-G77(YVMAGVGSP | 4    | >ERBB2-G77(YVMASVGSP' | 4   | 0   |
| >ERBB2-G77(YVMAGVGSP | 22   | >ERBB2-G77(YVMASVGSP' | 26  | 4   |
| >ERBB2-G77(YVMAGVGSP | 32   | >ERBB2-G77(YVMASVGSP' | 28  | 4   |
| >ERBB2-G77(YVMAGVGSP | 410  | >ERBB2-G77(YVMASVGSP' | 348 | 62  |
| >ERBB2-G77(YVMAGVGSP | 10   | >ERBB2-G77(YVMASVGSP' | 12  | 2   |

|                       |       |                       |      |       |
|-----------------------|-------|-----------------------|------|-------|
| >ERBB2-G77(YVMAGVGSP  | 76    | >ERBB2-G77(YVMASVGSP' | 20   | 56    |
| >ERBB2-G77(YVMAGVGSP  | 18    | >ERBB2-G77(YVMASVGSP' | 13   | 5     |
| >ERBB2-G77(YVMAGVGSP  | 504   | >ERBB2-G77(YVMASVGSP' | 423  | 81    |
| >ERBB2-G77(YVMAGVGSP  | 261   | >ERBB2-G77(YVMASVGSP' | 177  | 84    |
| >ERBB2-G77(YVMAGVGSP  | 79    | >ERBB2-G77(YVMASVGSP' | 32   | 47    |
| >ERBB2-G77(AYVMAGVGS  | 450   | >ERBB2-G77(AYVMASVGS  | 511  | 61    |
| >ERBB2-G77(AYVMAGVGS  | 149   | >ERBB2-G77(AYVMASVGS  | 151  | 2     |
| >ERBB2-G77(AYVMAGVGS  | 390   | >ERBB2-G77(AYVMASVGS  | 267  | 123   |
| >ERBB2-G77(AYVMAGVGS  | 395   | >ERBB2-G77(AYVMASVGS  | 300  | 95    |
| >ERBB2-G77(AYVMAGVGS  | 457   | >ERBB2-G77(AYVMASVGS  | 259  | 198   |
| >ERBB2-G77(EAYVMAGV   | 14    | >ERBB2-G77(EAYVMASV   | 18   | 4     |
| >ERBB2-G77(EAYVMAGV   | 6     | >ERBB2-G77(EAYVMASV   | 8    | 2     |
| >ERBB2-G77(DEAYVMAGV  | 33    | >ERBB2-G77(DEAYVMASV  | 25   | 8     |
| >ERBB2-G77(DEAYVMAGV  | 39    | >ERBB2-G77(DEAYVMASV  | 64   | 25    |
| >ERBB2-G77(DEAYVMAG   | 908   | >ERBB2-G77(DEAYVMAS   | 98   | 810   |
| >ERBB2-G77(DEAYVMAGV  | 158   | >ERBB2-G77(DEAYVMASV  | 43   | 115   |
| >ERBB2-G77(DEAYVMAGV  | 472   | >ERBB2-G77(DEAYVMASV  | 442  | 30    |
| >ERBB2-G77(DEAYVMAGV  | 411   | >ERBB2-G77(DEAYVMASV  | 423  | 12    |
| >ERBB2-G77(LDEAYVMAG  | 139   | >ERBB2-G77(LDEAYVMAS\ | 144  | 5     |
| >ERBB2-G77(ILDEAYVMAC | 11    | >ERBB2-G77(ILDEAYVMAS | 11   | 0     |
| >ERBB2-G77(ILDEAYVMAC | 6     | >ERBB2-G77(ILDEAYVMAS | 5    | 1     |
| >ERBB2-G77(ILDEAYVMAC | 11    | >ERBB2-G77(ILDEAYVMAS | 10   | 1     |
| >ERBB2-G77(ILDEAYVMAC | 7     | >ERBB2-G77(ILDEAYVMAS | 8    | 1     |
| >ERBB2-G77(ILDEAYVMAC | 137   | >ERBB2-G77(ILDEAYVMAS | 56   | 81    |
| >ERBB2-G77(ILDEAYVMAC | 2     | >ERBB2-G77(ILDEAYVMAS | 2    | 0     |
| >ERBB2-G77(ILDEAYVMAC | 3     | >ERBB2-G77(ILDEAYVMAS | 3    | 0     |
| >ERBB2-G77(ILDEAYVMAC | 4     | >ERBB2-G77(ILDEAYVMAS | 5    | 1     |
| >ERBB2-G77(ILDEAYVMAC | 3     | >ERBB2-G77(ILDEAYVMAS | 3    | 0     |
| >ERBB2-G77(ILDEAYVMAC | 2     | >ERBB2-G77(ILDEAYVMAS | 2    | 0     |
| >ERBB2-G77(ILDEAYVMAC | 45    | >ERBB2-G77(ILDEAYVMAS | 82   | 37    |
| >ERBB2-G77(GVGSPYVSRL | 478   | >ERBB2-G77(VVGSPYVSRL | 1029 | 551   |
| >ERBB2-G77(GVGSPYVSRL | 888   | >ERBB2-G77(VVGSPYVSRL | 358  | 530   |
| >ERBB2-G77(GVGSPYVSRL | 504   | >ERBB2-G77(VVGSPYVSRL | 175  | 329   |
| >ERBB2-G77(GVGSPYVSR  | 324   | >ERBB2-G77(VVGSPYVSR  | 347  | 23    |
| >ERBB2-G77(GVGSPYVSR  | 82    | >ERBB2-G77(VVGSPYVSR  | 70   | 12    |
| >ERBB2-G77(AGVGSPYV   | 8797  | >ERBB2-G77(AVVGSPYV   | 111  | 8686  |
| >ERBB2-G77(AGVGSPYV   | 2182  | >ERBB2-G77(AVVGSPYV   | 93   | 2089  |
| >ERBB2-G77(AGVGSPYVSF | 3346  | >ERBB2-G77(AVVGSPYVSF | 209  | 3137  |
| >ERBB2-G77(AGVGSPYV   | 8467  | >ERBB2-G77(AVVGSPYV   | 40   | 8427  |
| >ERBB2-G77(AGVGSPYVSF | 12824 | >ERBB2-G77(AVVGSPYVSF | 239  | 12585 |
| >ERBB2-G77(AGVGSPYV   | 354   | >ERBB2-G77(AVVGSPYV   | 11   | 343   |
| >ERBB2-G77(AGVGSPYV   | 586   | >ERBB2-G77(AVVGSPYV   | 9    | 577   |
| >ERBB2-G77(AGVGSPYVSF | 9537  | >ERBB2-G77(AVVGSPYVSF | 332  | 9205  |

|                       |       |                       |     |       |
|-----------------------|-------|-----------------------|-----|-------|
| >ERBB2-G77(AGVGSPYV   | 12520 | >ERBB2-G77(AVVGSPYV   | 162 | 12358 |
| >ERBB2-G77(AGVGSPYV   | 899   | >ERBB2-G77(AVVGSPYV   | 24  | 875   |
| >ERBB2-G77(AGVGSPYV   | 11000 | >ERBB2-G77(AVVGSPYV   | 72  | 10928 |
| >ERBB2-G77(AGVGSPYV   | 767   | >ERBB2-G77(AVVGSPYV   | 5   | 762   |
| >ERBB2-G77(AGVGSPYVSF | 10939 | >ERBB2-G77(AVVGSPYVSF | 51  | 10888 |
| >ERBB2-G77(AGVGSPYVSF | 17209 | >ERBB2-G77(AVVGSPYVSF | 104 | 17105 |
| >ERBB2-G77(AGVGSPYVSF | 16494 | >ERBB2-G77(AVVGSPYVSF | 33  | 16461 |
| >ERBB2-G77(AGVGSPYVSF | 2085  | >ERBB2-G77(AVVGSPYVSF | 204 | 1881  |
| >ERBB2-G77(AGVGSPYVSF | 11586 | >ERBB2-G77(AVVGSPYVSF | 39  | 11547 |
| >ERBB2-G77(AGVGSPYV   | 7688  | >ERBB2-G77(AVVGSPYV   | 123 | 7565  |
| >ERBB2-G77(AGVGSPYV   | 7191  | >ERBB2-G77(AVVGSPYV   | 96  | 7095  |
| >ERBB2-G77(AGVGSPYVSF | 254   | >ERBB2-G77(AVVGSPYVSF | 52  | 202   |
| >ERBB2-G77(AGVGSPYVSF | 1374  | >ERBB2-G77(AVVGSPYVSF | 467 | 907   |
| >ERBB2-G77(AGVGSPYVSF | 8846  | >ERBB2-G77(AVVGSPYVSF | 423 | 8423  |
| >ERBB2-G77(EILDEAYVMA | 23075 | >ERBB2-G77(EILDEAYVMA | 469 | 22606 |
| >ERBB2-G77(EILDEAYVMA | 15421 | >ERBB2-G77(EILDEAYVMA | 60  | 15361 |
| >ERBB2-G77(EILDEAYVMA | 11824 | >ERBB2-G77(EILDEAYVMA | 11  | 11813 |
| >ERBB2-G77(EILDEAYVMA | 17820 | >ERBB2-G77(EILDEAYVMA | 60  | 17760 |
| >ERBB2-G77(EILDEAYVMA | 22630 | >ERBB2-G77(EILDEAYVMA | 61  | 22569 |
| >ERBB2-G77(EILDEAYVMA | 17314 | >ERBB2-G77(EILDEAYVMA | 8   | 17306 |
| >ERBB2-G77(EILDEAYVMA | 25174 | >ERBB2-G77(EILDEAYVMA | 12  | 25162 |
| >ERBB2-G77(EILDEAYVMA | 10482 | >ERBB2-G77(EILDEAYVMA | 29  | 10453 |
| >ERBB2-G77(EILDEAYVMA | 2231  | >ERBB2-G77(EILDEAYVMA | 4   | 2227  |
| >ERBB2-G77(MAGVGSPYV  | 724   | >ERBB2-G77(MAVVGSPYV  | 357 | 367   |
| >ERBB2-G77(MAGVGSPYV  | 1158  | >ERBB2-G77(MAVVGSPYV  | 370 | 788   |
| >ERBB2-G77(MAGVGSPYV  | 2032  | >ERBB2-G77(MAVVGSPYV  | 389 | 1643  |
| >ERBB2-G77(MAGVGSPYV  | 34    | >ERBB2-G77(MAVVGSPYV  | 6   | 28    |
| >ERBB2-G77(MAGVGSPYV  | 53    | >ERBB2-G77(MAVVGSPYV  | 57  | 4     |
| >ERBB2-G77(MAGVGSPYV  | 48    | >ERBB2-G77(MAVVGSPYV  | 82  | 34    |
| >ERBB2-G77(MAGVGSPYV  | 49    | >ERBB2-G77(MAVVGSPYV  | 149 | 100   |
| >ERBB2-G77(MAGVGSPYV  | 31    | >ERBB2-G77(MAVVGSPYV  | 30  | 1     |
| >ERBB2-G77(MAGVGSPY   | 121   | >ERBB2-G77(MAVVGSPY   | 77  | 44    |
| >ERBB2-G77(MAGVGSPYV  | 904   | >ERBB2-G77(MAVVGSPYV  | 356 | 548   |
| >ERBB2-G77(MAGVGSPY   | 176   | >ERBB2-G77(MAVVGSPY   | 188 | 12    |
| >ERBB2-G77(MAGVGSPYV  | 51    | >ERBB2-G77(MAVVGSPYV  | 33  | 18    |
| >ERBB2-G77(MAGVGSPYV  | 374   | >ERBB2-G77(MAVVGSPYV  | 168 | 206   |
| >ERBB2-G77(MAGVGSPY   | 2253  | >ERBB2-G77(MAVVGSPY   | 364 | 1889  |
| >ERBB2-G77(MAGVGSPYV  | 61    | >ERBB2-G77(MAVVGSPYV  | 10  | 51    |
| >ERBB2-G77(MAGVGSPYV  | 490   | >ERBB2-G77(MAVVGSPYV  | 41  | 449   |
| >ERBB2-G77(MAGVGSPYV  | 15    | >ERBB2-G77(MAVVGSPYV  | 9   | 6     |
| >ERBB2-G77(MAGVGSPY   | 76    | >ERBB2-G77(MAVVGSPY   | 64  | 12    |
| >ERBB2-G77(MAGVGSPY   | 461   | >ERBB2-G77(MAVVGSPY   | 246 | 215   |
| >ERBB2-G77(MAGVGSPY   | 318   | >ERBB2-G77(MAVVGSPY   | 49  | 269   |

|                      |      |                      |     |      |
|----------------------|------|----------------------|-----|------|
| >ERBB2-G77(MAGVGSPY  | 26   | >ERBB2-G77(MAVVGSPY  | 5   | 21   |
| >ERBB2-G77(MAGVGSPYV | 4990 | >ERBB2-G77(MAVVGSPYV | 235 | 4755 |
| >ERBB2-G77(MAGVGSPY  | 13   | >ERBB2-G77(MAVVGSPY  | 7   | 6    |
| >ERBB2-G77(MAGVGSPY  | 1613 | >ERBB2-G77(MAVVGSPY  | 433 | 1180 |
| >ERBB2-G77(MAGVGSPY  | 2093 | >ERBB2-G77(MAVVGSPY  | 387 | 1706 |
| >ERBB2-G77(MAGVGSPY  | 3604 | >ERBB2-G77(MAVVGSPY  | 315 | 3289 |
| >ERBB2-G77(MAGVGSPY  | 2268 | >ERBB2-G77(MAVVGSPY  | 226 | 2042 |
| >ERBB2-G77(MMAGVGSPY | 36   | >ERBB2-G77(MMAVVGSPY | 60  | 24   |
| >ERBB2-G77(MMAGVGSPY | 36   | >ERBB2-G77(MMAVVGSPY | 65  | 29   |
| >ERBB2-G77(MMAGVGSPY | 25   | >ERBB2-G77(MMAVVGSPY | 40  | 15   |
| >ERBB2-G77(MMAGVGSPY | 88   | >ERBB2-G77(MMAVVGSPY | 112 | 24   |
| >ERBB2-G77(MMAGVGSPY | 1    | >ERBB2-G77(MMAVVGSPY | 2   | 1    |
| >ERBB2-G77(MMAGVGSPY | 128  | >ERBB2-G77(MMAVVGSPY | 842 | 714  |
| >ERBB2-G77(MMAGVGSPY | 4    | >ERBB2-G77(MMAVVGSPY | 5   | 1    |
| >ERBB2-G77(MMAGVGSPY | 4    | >ERBB2-G77(MMAVVGSPY | 4   | 0    |
| >ERBB2-G77(MMAGVGSPY | 2    | >ERBB2-G77(MMAVVGSPY | 3   | 1    |
| >ERBB2-G77(MMAGVGSPY | 2    | >ERBB2-G77(MMAVVGSPY | 2   | 0    |
| >ERBB2-G77(MMAGVGSPY | 183  | >ERBB2-G77(MMAVVGSPY | 277 | 94   |
| >ERBB2-G77(MMAGVGSPY | 16   | >ERBB2-G77(MMAVVGSPY | 24  | 8    |
| >ERBB2-G77(MMAGVGSPY | 16   | >ERBB2-G77(MMAVVGSPY | 13  | 3    |
| >ERBB2-G77(MMAGVGSPY | 292  | >ERBB2-G77(MMAVVGSPY | 354 | 62   |
| >ERBB2-G77(MMAGVGSPY | 166  | >ERBB2-G77(MMAVVGSPY | 120 | 46   |
| >ERBB2-G77(MMAGVGSPY | 29   | >ERBB2-G77(MMAVVGSPY | 34  | 5    |
| >ERBB2-G77(MMAGVGSPY | 12   | >ERBB2-G77(MMAVVGSPY | 16  | 4    |
| >ERBB2-G77(MMAGVGSPY | 19   | >ERBB2-G77(MMAVVGSPY | 7   | 12   |
| >ERBB2-G77(MMAGVGSPY | 1075 | >ERBB2-G77(MMAVVGSPY | 394 | 681  |
| >ERBB2-G77(MMAGVGSPY | 479  | >ERBB2-G77(MMAVVGSPY | 430 | 49   |
| >ERBB2-G77(MMAGVGSPY | 81   | >ERBB2-G77(MMAVVGSPY | 151 | 70   |
| >ERBB2-G77(MMAGVGSPY | 88   | >ERBB2-G77(MMAVVGSPY | 171 | 83   |
| >ERBB2-G77(MMAGVGSPY | 698  | >ERBB2-G77(MMAVVGSPY | 399 | 299  |
| >ERBB2-G77(MMAGVGSPY | 475  | >ERBB2-G77(MMAVVGSPY | 757 | 282  |
| >ERBB2-G77(YVMAGVGSP | 7    | >ERBB2-G77(YVMAVVGSP | 7   | 0    |
| >ERBB2-G77(YVMAGVGS  | 2081 | >ERBB2-G77(YVMAVVGSP | 475 | 1606 |
| >ERBB2-G77(YVMAGVGSP | 6    | >ERBB2-G77(YVMAVVGSP | 5   | 1    |
| >ERBB2-G77(YVMAGVGS  | 650  | >ERBB2-G77(YVMAVVGSP | 322 | 328  |
| >ERBB2-G77(YVMAGVGSP | 3    | >ERBB2-G77(YVMAVVGSP | 3   | 0    |
| >ERBB2-G77(YVMAGVGS  | 89   | >ERBB2-G77(YVMAVVGSP | 80  | 9    |
| >ERBB2-G77(YVMAGVGSP | 3    | >ERBB2-G77(YVMAVVGSP | 3   | 0    |
| >ERBB2-G77(YVMAGVGSP | 2    | >ERBB2-G77(YVMAVVGSP | 2   | 0    |
| >ERBB2-G77(YVMAGVGSP | 5    | >ERBB2-G77(YVMAVVGSP | 5   | 0    |
| >ERBB2-G77(YVMAGVGSP | 7    | >ERBB2-G77(YVMAVVGSP | 7   | 0    |
| >ERBB2-G77(YVMAGVGSP | 2    | >ERBB2-G77(YVMAVVGSP | 2   | 0    |
| >ERBB2-G77(YVMAGVGSP | 2    | >ERBB2-G77(YVMAVVGSP | 3   | 1    |

|                       |       |                       |     |       |
|-----------------------|-------|-----------------------|-----|-------|
| >ERBB2-G77(YVMAGVGSP  | 71    | >ERBB2-G77(YVMAVVGSP  | 72  | 1     |
| >ERBB2-G77(YVMAGVGSP  | 137   | >ERBB2-G77(YVMAVVGSP  | 142 | 5     |
| >ERBB2-G77(YVMAGVGSP  | 86    | >ERBB2-G77(YVMAVVGSP  | 126 | 40    |
| >ERBB2-G77(YVMAGVGSP  | 401   | >ERBB2-G77(YVMAVVGSP  | 311 | 90    |
| >ERBB2-G77(YVMAGVGSP  | 610   | >ERBB2-G77(YVMAVVGSP  | 457 | 153   |
| >ERBB2-G77(YVMAGVGSP  | 6     | >ERBB2-G77(YVMAVVGSP  | 11  | 5     |
| >ERBB2-G77(YVMAGVGSP  | 143   | >ERBB2-G77(YVMAVVGSP  | 411 | 268   |
| >ERBB2-G77(YVMAGVGSP  | 222   | >ERBB2-G77(YVMAVVGSP  | 54  | 168   |
| >ERBB2-G77(YVMAGVGSP  | 77    | >ERBB2-G77(YVMAVVGSP  | 65  | 12    |
| >ERBB2-G77(YVMAGVGSP  | 28    | >ERBB2-G77(YVMAVVGSP  | 16  | 12    |
| >ERBB2-G77(YVMAGVGS   | 352   | >ERBB2-G77(YVMAVVGSP  | 63  | 289   |
| >ERBB2-G77(YVMAGVGSP  | 10    | >ERBB2-G77(YVMAVVGSP  | 8   | 2     |
| >ERBB2-G77(YVMAGVGSP  | 4     | >ERBB2-G77(YVMAVVGSP  | 4   | 0     |
| >ERBB2-G77(YVMAGVGSP  | 22    | >ERBB2-G77(YVMAVVGSP  | 17  | 5     |
| >ERBB2-G77(YVMAGVGSP  | 32    | >ERBB2-G77(YVMAVVGSP  | 34  | 2     |
| >ERBB2-G77(YVMAGVGSP  | 410   | >ERBB2-G77(YVMAVVGSP  | 590 | 180   |
| >ERBB2-G77(YVMAGVGSP  | 10    | >ERBB2-G77(YVMAVVGSP  | 18  | 8     |
| >ERBB2-G77(YVMAGVGSP  | 76    | >ERBB2-G77(YVMAVVGSP  | 69  | 7     |
| >ERBB2-G77(YVMAGVGSP  | 18    | >ERBB2-G77(YVMAVVGSP  | 45  | 27    |
| >ERBB2-G77(YVMAGVGSP  | 504   | >ERBB2-G77(YVMAVVGSP  | 331 | 173   |
| >ERBB2-G77(YVMAGVGSP  | 261   | >ERBB2-G77(YVMAVVGSP  | 289 | 28    |
| >ERBB2-G77(YVMAGVGSP  | 79    | >ERBB2-G77(YVMAVVGSP  | 23  | 56    |
| >ERBB2-G77(AYVMAGVGS  | 450   | >ERBB2-G77(AYVMAVVGSP | 161 | 289   |
| >ERBB2-G77(AYVMAGVGS  | 149   | >ERBB2-G77(AYVMAVVGSP | 236 | 87    |
| >ERBB2-G77(AYVMAGVGS  | 390   | >ERBB2-G77(AYVMAVVGSP | 423 | 33    |
| >ERBB2-G77(AYVMAGVGS  | 395   | >ERBB2-G77(AYVMAVVGSP | 344 | 51    |
| >ERBB2-G77(AYVMAGVGS  | 457   | >ERBB2-G77(AYVMAVVGSP | 342 | 115   |
| >ERBB2-G77(EAYVMAGV   | 14    | >ERBB2-G77(EAYVMAV    | 25  | 11    |
| >ERBB2-G77(EAYVMAGV   | 6     | >ERBB2-G77(EAYVMAV    | 14  | 8     |
| >ERBB2-G77(DEAYVMAG   | 2719  | >ERBB2-G77(DEAYVMAV   | 40  | 2679  |
| >ERBB2-G77(DEAYVMAGV  | 33    | >ERBB2-G77(DEAYVMAV   | 33  | 0     |
| >ERBB2-G77(DEAYVMAG   | 19377 | >ERBB2-G77(DEAYVMAV   | 246 | 19131 |
| >ERBB2-G77(DEAYVMAGV  | 39    | >ERBB2-G77(DEAYVMAV   | 167 | 128   |
| >ERBB2-G77(DEAYVMAG   | 908   | >ERBB2-G77(DEAYVMAV   | 34  | 874   |
| >ERBB2-G77(DEAYVMAGV  | 158   | >ERBB2-G77(DEAYVMAV   | 76  | 82    |
| >ERBB2-G77(DEAYVMAGV  | 472   | >ERBB2-G77(DEAYVMAV   | 326 | 146   |
| >ERBB2-G77(DEAYVMAG   | 7725  | >ERBB2-G77(DEAYVMAV   | 493 | 7232  |
| >ERBB2-G77(DEAYVMAGV  | 411   | >ERBB2-G77(DEAYVMAV   | 605 | 194   |
| >ERBB2-G77(LDEAYVMAG  | 14735 | >ERBB2-G77(LDEAYVMAV  | 64  | 14671 |
| >ERBB2-G77(LDEAYVMAG  | 139   | >ERBB2-G77(LDEAYVMAV  | 95  | 44    |
| >ERBB2-G77(ILDEAYVMAC | 1544  | >ERBB2-G77(ILDEAYVMAV | 16  | 1528  |
| >ERBB2-G77(ILDEAYVMAC | 11    | >ERBB2-G77(ILDEAYVMAV | 16  | 5     |
| >ERBB2-G77(ILDEAYVMAC | 2430  | >ERBB2-G77(ILDEAYVMAV | 13  | 2417  |

|                       |       |                        |     |       |
|-----------------------|-------|------------------------|-----|-------|
| >ERBB2-G77\ILDEAYVMAC | 6     | >ERBB2-G77\ILDEAYVMAV  | 11  | 5     |
| >ERBB2-G77\ILDEAYVMAC | 7223  | >ERBB2-G77\ILDEAYVMAV  | 19  | 7204  |
| >ERBB2-G77\ILDEAYVMAC | 11    | >ERBB2-G77\ILDEAYVMAV  | 18  | 7     |
| >ERBB2-G77\ILDEAYVMAC | 9511  | >ERBB2-G77\ILDEAYVMAV  | 59  | 9452  |
| >ERBB2-G77\ILDEAYVMAC | 7     | >ERBB2-G77\ILDEAYVMAV  | 12  | 5     |
| >ERBB2-G77\ILDEAYVMAC | 137   | >ERBB2-G77\ILDEAYVMAV  | 1   | 136   |
| >ERBB2-G77\ILDEAYVMAC | 2     | >ERBB2-G77\ILDEAYVMAV  | 2   | 0     |
| >ERBB2-G77\ILDEAYVMAC | 2714  | >ERBB2-G77\ILDEAYVMAV  | 3   | 2711  |
| >ERBB2-G77\ILDEAYVMAC | 3     | >ERBB2-G77\ILDEAYVMAV  | 4   | 1     |
| >ERBB2-G77\ILDEAYVMAC | 3760  | >ERBB2-G77\ILDEAYVMAV  | 4   | 3756  |
| >ERBB2-G77\ILDEAYVMAC | 4     | >ERBB2-G77\ILDEAYVMAV  | 5   | 1     |
| >ERBB2-G77\ILDEAYVMAC | 14549 | >ERBB2-G77\ILDEAYVMAV  | 2   | 14547 |
| >ERBB2-G77\ILDEAYVMAC | 3     | >ERBB2-G77\ILDEAYVMAV  | 3   | 0     |
| >ERBB2-G77\ILDEAYVMAC | 3928  | >ERBB2-G77\ILDEAYVMAV  | 2   | 3926  |
| >ERBB2-G77\ILDEAYVMAC | 2     | >ERBB2-G77\ILDEAYVMAV  | 2   | 0     |
| >ERBB2-G77\ILDEAYVMAC | 18031 | >ERBB2-G77\ILDEAYVMAV  | 72  | 17959 |
| >ERBB2-G77\ILDEAYVMAC | 45    | >ERBB2-G77\ILDEAYVMAV  | 299 | 254   |
| >ERBB2-G80\GCLLDHVR   | 735   | >ERBB2-G80\SCLLDHVR    | 124 | 611   |
| >ERBB2-G80\GCLLDHVREN | 2360  | >ERBB2-G80\SCLLDHVREN  | 430 | 1930  |
| >ERBB2-G80\YGCLLDHV   | 894   | >ERBB2-G80\YSCLLDHV    | 331 | 563   |
| >ERBB2-G80\YGCLLDHVR  | 1490  | >ERBB2-G80\YSCLLDHVR   | 127 | 1363  |
| >ERBB2-G80\YGCLLDHVR  | 4770  | >ERBB2-G80\YSCLLDHVR   | 131 | 4639  |
| >ERBB2-G80\YGCLLDHVR  | 659   | >ERBB2-G80\YSCLLDHVR   | 31  | 628   |
| >ERBB2-G80\YGCLLDHVR  | 91    | >ERBB2-G80\YSCLLDHVR   | 183 | 92    |
| >ERBB2-G80\PYGCLLDHVR | 27    | >ERBB2-G80\PYSCCLLDHVR | 39  | 12    |
| >ERBB2-G80\MPYGCLLDH\ | 59    | >ERBB2-G80\MPYSCCLLDH\ | 33  | 26    |
| >ERBB2-G80\MPYGCLLDH\ | 365   | >ERBB2-G80\MPYSCCLLDH\ | 530 | 165   |
| >ERBB2-G80\MPYGCLLDH\ | 1226  | >ERBB2-G80\MPYSCCLLDH\ | 471 | 755   |
| >ERBB2-G80\MPYGCLLDH\ | 126   | >ERBB2-G80\MPYSCCLLDH\ | 92  | 34    |
| >ERBB2-G80\MPYGCLLDH\ | 502   | >ERBB2-G80\MPYSCCLLDH\ | 299 | 203   |
| >ERBB2-G80\MPYGCLLDH  | 41    | >ERBB2-G80\MPYSCCLLDH  | 34  | 7     |
| >ERBB2-G80\MPYGCLLDH\ | 88    | >ERBB2-G80\MPYSCCLLDH\ | 83  | 5     |
| >ERBB2-G80\MPYGCLLDH  | 769   | >ERBB2-G80\MPYSCCLLDH  | 470 | 299   |
| >ERBB2-G80\MPYGCLLD   | 38    | >ERBB2-G80\MPYSCCLLD   | 51  | 13    |
| >ERBB2-G80\MPYGCLLDH  | 398   | >ERBB2-G80\MPYSCCLLDH  | 585 | 187   |
| >ERBB2-G80\MPYGCLLDH\ | 15    | >ERBB2-G80\MPYSCCLLDH\ | 11  | 4     |
| >ERBB2-G80\MPYGCLLDH\ | 29    | >ERBB2-G80\MPYSCCLLDH\ | 39  | 10    |
| >ERBB2-G80\MPYGCLLDH\ | 48    | >ERBB2-G80\MPYSCCLLDH\ | 60  | 12    |
| >ERBB2-G80\LMPYGCLL   | 206   | >ERBB2-G80\LMPYSCLL    | 120 | 86    |
| >ERBB2-G80\LMPYGCLLDH | 63    | >ERBB2-G80\LMPYSCLLDH  | 66  | 3     |
| >ERBB2-G80\LMPYGCLL   | 61    | >ERBB2-G80\LMPYSCLL    | 27  | 34    |
| >ERBB2-G80\LMPYGCLLDH | 36    | >ERBB2-G80\LMPYSCLLDH  | 23  | 13    |
| >ERBB2-G80\LMPYGCLL   | 109   | >ERBB2-G80\LMPYSCLL    | 81  | 28    |

|                       |      |                       |     |     |
|-----------------------|------|-----------------------|-----|-----|
| >ERBB2-G80·LMPYGCLLD† | 14   | >ERBB2-G80·LMPYSCLLDH | 15  | 1   |
| >ERBB2-G80·LMPYGCLL   | 201  | >ERBB2-G80·LMPYSCLL   | 218 | 17  |
| >ERBB2-G80·LMPYGCLLD† | 14   | >ERBB2-G80·LMPYSCLLDH | 19  | 5   |
| >ERBB2-G80·LMPYGCLL   | 80   | >ERBB2-G80·LMPYSCLL   | 104 | 24  |
| >ERBB2-G80·LMPYGCLLD† | 16   | >ERBB2-G80·LMPYSCLLDH | 23  | 7   |
| >ERBB2-G80·LMPYGCLL   | 448  | >ERBB2-G80·LMPYSCLL   | 331 | 117 |
| >ERBB2-G80·LMPYGCLLD† | 25   | >ERBB2-G80·LMPYSCLLDH | 26  | 1   |
| >ERBB2-G80·LMPYGCLL   | 136  | >ERBB2-G80·LMPYSCLL   | 182 | 46  |
| >ERBB2-G80·LMPYGCLLD† | 13   | >ERBB2-G80·LMPYSCLLDH | 18  | 5   |
| >ERBB2-G80·LMPYGCLLD† | 81   | >ERBB2-G80·LMPYSCLLDH | 92  | 11  |
| >ERBB2-G80·LMPYGCLL   | 13   | >ERBB2-G80·LMPYSCLL   | 16  | 3   |
| >ERBB2-G80·LMPYGCLLD† | 6    | >ERBB2-G80·LMPYSCLLDH | 8   | 2   |
| >ERBB2-G80·LMPYGCLL   | 1038 | >ERBB2-G80·LMPYSCLL   | 408 | 630 |
| >ERBB2-G80·LMPYGCLL   | 10   | >ERBB2-G80·LMPYSCLL   | 10  | 0   |
| >ERBB2-G80·QLMPYGCL   | 210  | >ERBB2-G80·QLMPYSCL   | 51  | 159 |
| >ERBB2-G80·QLMPYGCLL  | 24   | >ERBB2-G80·QLMPYSCLL  | 11  | 13  |
| >ERBB2-G80·QLMPYGCL   | 26   | >ERBB2-G80·QLMPYSCL   | 9   | 17  |
| >ERBB2-G80·QLMPYGCLL  | 6    | >ERBB2-G80·QLMPYSCLL  | 3   | 3   |
| >ERBB2-G80·QLMPYGCL   | 171  | >ERBB2-G80·QLMPYSCL   | 64  | 107 |
| >ERBB2-G80·QLMPYGCLL  | 35   | >ERBB2-G80·QLMPYSCLL  | 20  | 15  |
| >ERBB2-G80·QLMPYGCL   | 460  | >ERBB2-G80·QLMPYSCL   | 137 | 323 |
| >ERBB2-G80·QLMPYGCLL  | 36   | >ERBB2-G80·QLMPYSCLL  | 19  | 17  |
| >ERBB2-G80·QLMPYGCL   | 118  | >ERBB2-G80·QLMPYSCL   | 62  | 56  |
| >ERBB2-G80·QLMPYGCLL  | 16   | >ERBB2-G80·QLMPYSCLL  | 13  | 3   |
| >ERBB2-G80·QLMPYGCL   | 120  | >ERBB2-G80·QLMPYSCL   | 31  | 89  |
| >ERBB2-G80·QLMPYGCLL  | 32   | >ERBB2-G80·QLMPYSCLL  | 14  | 18  |
| >ERBB2-G80·QLMPYGCL   | 546  | >ERBB2-G80·QLMPYSCL   | 218 | 328 |
| >ERBB2-G80·QLMPYGCLL  | 120  | >ERBB2-G80·QLMPYSCLL  | 71  | 49  |
| >ERBB2-G80·QLMPYGCL   | 81   | >ERBB2-G80·QLMPYSCL   | 13  | 68  |
| >ERBB2-G80·QLMPYGCLL  | 36   | >ERBB2-G80·QLMPYSCLL  | 8   | 28  |
| >ERBB2-G80·QLMPYGCL   | 36   | >ERBB2-G80·QLMPYSCL   | 11  | 25  |
| >ERBB2-G80·QLMPYGCLL  | 4    | >ERBB2-G80·QLMPYSCLL  | 3   | 1   |
| >ERBB2-G80·QLMPYGCLL  | 1173 | >ERBB2-G80·QLMPYSCLL  | 260 | 913 |
| >ERBB2-G80·QLMPYGCL   | 1090 | >ERBB2-G80·QLMPYSCL   | 228 | 862 |
| >ERBB2-G80·QLMPYGCLL  | 665  | >ERBB2-G80·QLMPYSCLL  | 401 | 264 |
| >ERBB2-G80·QLMPYGCL   | 1032 | >ERBB2-G80·QLMPYSCL   | 219 | 813 |
| >ERBB2-G80·TQLMPYGCLI | 521  | >ERBB2-G80·TQLMPYSCLL | 335 | 186 |
| >ERBB2-G80·TQLMPYGCLI | 241  | >ERBB2-G80·TQLMPYSCLL | 240 | 1   |
| >ERBB2-G80·TQLMPYGCL  | 601  | >ERBB2-G80·TQLMPYSCL  | 28  | 573 |
| >ERBB2-G80·TQLMPYGCLI | 267  | >ERBB2-G80·TQLMPYSCLL | 94  | 173 |
| >ERBB2-G80·TQLMPYGCL  | 618  | >ERBB2-G80·TQLMPYSCL  | 116 | 502 |
| >ERBB2-G80·TQLMPYGCLI | 340  | >ERBB2-G80·TQLMPYSCLL | 106 | 234 |
| >ERBB2-G80·TQLMPYGCL  | 1166 | >ERBB2-G80·TQLMPYSCL  | 456 | 710 |

|                        |       |                        |      |       |
|------------------------|-------|------------------------|------|-------|
| >ERBB2-G80:VTQLMPYGC   | 692   | >ERBB2-G80:VTQLMPYSCI  | 245  | 447   |
| >ERBB2-G80:VTQLMPYGC   | 32    | >ERBB2-G80:VTQLMPYSCI  | 27   | 5     |
| >ERBB2-G80:VTQLMPYGC   | 144   | >ERBB2-G80:VTQLMPYSCI  | 90   | 54    |
| >ERBB2-G80:VTQLMPYGC   | 92    | >ERBB2-G80:VTQLMPYSCI  | 119  | 27    |
| >ERBB2-G80:VTQLMPYGC   | 351   | >ERBB2-G80:VTQLMPYSCI  | 286  | 65    |
| >ERBB2-G80:VTQLMPYGC   | 1092  | >ERBB2-G80:VTQLMPYSCI  | 258  | 834   |
| >ERBB2-G80:LVTQLMPYGC  | 1634  | >ERBB2-G80:LVTQLMPYSCI | 460  | 1174  |
| >ERBB2-G80:LVTQLMPYGC  | 1492  | >ERBB2-G80:LVTQLMPYSCI | 241  | 1251  |
| >ERBB2-H87:HADGGKVPI   | 3825  | >ERBB2-H87:HADGGKVPI   | 171  | 3654  |
| >ERBB2-H87:HADGGKVPI   | 5564  | >ERBB2-H87:HADGGKVPI   | 190  | 5374  |
| >ERBB2-H87:HADGGKVPI   | 349   | >ERBB2-H87:HADGGKVPI   | 157  | 192   |
| >ERBB2-H87:HADGGKVPI   | 351   | >ERBB2-H87:HADGGKVPI   | 116  | 235   |
| >ERBB2-H87:HADGGKVPI   | 473   | >ERBB2-H87:HADGGKVPI   | 337  | 136   |
| >ERBB2-H87:HADGGKVPI   | 144   | >ERBB2-H87:HADGGKVPI   | 112  | 32    |
| >ERBB2-H87:HADGGKVPI   | 121   | >ERBB2-H87:HADGGKVPI   | 324  | 203   |
| >ERBB2-H87:HADGGKVPI   | 44    | >ERBB2-H87:HADGGKVPI   | 40   | 4     |
| >ERBB2-H87:YHADGGKVP   | 12675 | >ERBB2-H87:YHADGGKVP   | 83   | 12592 |
| >ERBB2-H87:YHADGGKV    | 2290  | >ERBB2-H87:YHADGGKV    | 328  | 1962  |
| >ERBB2-H87:YHADGGKV    | 3015  | >ERBB2-H87:YHADGGKV    | 348  | 2667  |
| >ERBB2-H87:YHADGGKV    | 702   | >ERBB2-H87:YHADGGKV    | 31   | 671   |
| >ERBB2-H87:YHADGGKV    | 20002 | >ERBB2-H87:YHADGGKV    | 225  | 19777 |
| >ERBB2-H87:YHADGGKVP   | 15851 | >ERBB2-H87:YHADGGKVP   | 24   | 15827 |
| >ERBB2-H87:YHADGGKVP   | 239   | >ERBB2-H87:YHADGGKVP   | 6892 | 6653  |
| >ERBB2-H87:YHADGGKVP   | 30    | >ERBB2-H87:YHADGGKVP   | 1308 | 1278  |
| >ERBB2-H87:RLLDIDETEYH | 1021  | >ERBB2-H87:RLLDIDETEYH | 84   | 937   |
| >ERBB2-H87:RLLDIDETEYH | 4755  | >ERBB2-H87:RLLDIDETEYH | 27   | 4728  |
| >ERBB2-H87:RLLDIDETEYH | 10139 | >ERBB2-H87:RLLDIDETEYH | 91   | 10048 |
| >ERBB2-H87:RLLDIDETEYH | 2228  | >ERBB2-H87:RLLDIDETEYH | 228  | 2000  |
| >ERBB2-H87:RLLDIDETEYH | 8787  | >ERBB2-H87:RLLDIDETEYH | 15   | 8772  |
| >ERBB2-H87:RLLDIDETEYH | 8071  | >ERBB2-H87:RLLDIDETEYH | 129  | 7942  |
| >ERBB2-H87:RLLDIDETEYH | 9241  | >ERBB2-H87:RLLDIDETEYH | 489  | 8752  |
| >ERBB2-H87:RLLDIDETEYH | 18968 | >ERBB2-H87:RLLDIDETEYH | 210  | 18758 |
| >ERBB2-H87:EYHADGGKV   | 71    | >ERBB2-H87:EYHADGGKV   | 139  | 68    |
| >ERBB2-H87:EYHADGGKV   | 419   | >ERBB2-H87:EYHADGGKV   | 412  | 7     |
| >ERBB2-H87:EYHADGGK    | 723   | >ERBB2-H87:EYHADGGK    | 225  | 498   |
| >ERBB2-H87:TEYHADGGK   | 44    | >ERBB2-H87:TEYHADGGK   | 46   | 2     |
| >ERBB2-H87:TEYHADGGK   | 840   | >ERBB2-H87:TEYHADGGK   | 390  | 450   |
| >ERBB2-H87:TEYHADGGK   | 448   | >ERBB2-H87:TEYHADGGK   | 107  | 341   |
| >ERBB2-H87:ETEYHADGGI  | 132   | >ERBB2-H87:ETEYHADGGI  | 88   | 44    |
| >ERBB2-H87:ETEYHADGGI  | 135   | >ERBB2-H87:ETEYHADGGI  | 84   | 51    |
| >ERBB2-H87:DETEYHAD    | 20    | >ERBB2-H87:DETEYHAD    | 24   | 4     |
| >ERBB2-H87:DIDETEYH    | 18099 | >ERBB2-H87:DIDETEYH    | 81   | 18018 |
| >ERBB2-H87:DIDETEYHA   | 4020  | >ERBB2-H87:DIDETEYHA   | 378  | 3642  |



|                         |       |                         |     |       |
|-------------------------|-------|-------------------------|-----|-------|
| >ERBB2-H87: DIDETEYHA   | 1119  | >ERBB2-H87: DIDETEYHA   | 248 | 871   |
| >ERBB2-H87: DIDETEYH    | 18134 | >ERBB2-H87: DIDETEYH    | 413 | 17721 |
| >ERBB2-H87: LDIDETEYH   | 13967 | >ERBB2-H87: LDIDETEYH   | 183 | 13784 |
| >ERBB2-H87: LLDIDETEYH  | 9921  | >ERBB2-H87: LLDIDETEYH  | 41  | 9880  |
| >ERBB2-H87: LLDIDETEYHA | 489   | >ERBB2-H87: LLDIDETEYHA | 104 | 385   |
| >ERBB2-H87: LLDIDETEYHA | 388   | >ERBB2-H87: LLDIDETEYHA | 86  | 302   |
| >ERBB2-H87: LLDIDETEYHA | 698   | >ERBB2-H87: LLDIDETEYHA | 485 | 213   |
| >ERBB2-H87: LLDIDETEYHA | 60    | >ERBB2-H87: LLDIDETEYHA | 14  | 46    |
| >ERBB2-H87: LLDIDETEYHA | 82    | >ERBB2-H87: LLDIDETEYHA | 37  | 45    |
| >ERBB2-H87: LLDIDETEYHA | 29    | >ERBB2-H87: LLDIDETEYHA | 21  | 8     |
| >ERBB2-H87: LLDIDETEYHA | 1370  | >ERBB2-H87: LLDIDETEYHA | 120 | 1250  |
| >ERBB2-H87: LLDIDETEYHA | 23    | >ERBB2-H87: LLDIDETEYHA | 13  | 10    |
| >ERBB2-I767 ILDEAYVM    | 111   | >ERBB2-I767 MLDEAYVM    | 36  | 75    |
| >ERBB2-I767 ILDEAYVMA   | 38    | >ERBB2-I767 MLDEAYVMA   | 16  | 22    |
| >ERBB2-I767 ILDEAYVMAC  | 11    | >ERBB2-I767 MLDEAYVMAC  | 8   | 3     |
| >ERBB2-I767 ILDEAYVM    | 192   | >ERBB2-I767 MLDEAYVM    | 39  | 153   |
| >ERBB2-I767 ILDEAYVMA   | 44    | >ERBB2-I767 MLDEAYVMA   | 10  | 34    |
| >ERBB2-I767 ILDEAYVMAC  | 6     | >ERBB2-I767 MLDEAYVMAC  | 3   | 3     |
| >ERBB2-I767 ILDEAYVMA   | 172   | >ERBB2-I767 MLDEAYVMA   | 43  | 129   |
| >ERBB2-I767 ILDEAYVMAC  | 11    | >ERBB2-I767 MLDEAYVMAC  | 6   | 5     |
| >ERBB2-I767 ILDEAYVM    | 334   | >ERBB2-I767 MLDEAYVM    | 101 | 233   |
| >ERBB2-I767 ILDEAYVMA   | 44    | >ERBB2-I767 MLDEAYVMA   | 16  | 28    |
| >ERBB2-I767 ILDEAYVMAC  | 7     | >ERBB2-I767 MLDEAYVMAC  | 4   | 3     |
| >ERBB2-I767 ILDEAYVM    | 17    | >ERBB2-I767 MLDEAYVM    | 9   | 8     |
| >ERBB2-I767 ILDEAYVMA   | 6     | >ERBB2-I767 MLDEAYVMA   | 4   | 2     |
| >ERBB2-I767 ILDEAYVMAC  | 137   | >ERBB2-I767 MLDEAYVMAC  | 58  | 79    |
| >ERBB2-I767 ILDEAYVMAC  | 2     | >ERBB2-I767 MLDEAYVMAC  | 1   | 1     |
| >ERBB2-I767 ILDEAYVM    | 31    | >ERBB2-I767 MLDEAYVM    | 14  | 17    |
| >ERBB2-I767 ILDEAYVMA   | 63    | >ERBB2-I767 MLDEAYVMA   | 26  | 37    |
| >ERBB2-I767 ILDEAYVMAC  | 3     | >ERBB2-I767 MLDEAYVMAC  | 3   | 0     |
| >ERBB2-I767 ILDEAYVM    | 76    | >ERBB2-I767 MLDEAYVM    | 41  | 35    |
| >ERBB2-I767 ILDEAYVMA   | 11    | >ERBB2-I767 MLDEAYVMA   | 8   | 3     |
| >ERBB2-I767 ILDEAYVMAC  | 4     | >ERBB2-I767 MLDEAYVMAC  | 4   | 0     |
| >ERBB2-I767 ILDEAYVM    | 31    | >ERBB2-I767 MLDEAYVM    | 24  | 7     |
| >ERBB2-I767 ILDEAYVMA   | 43    | >ERBB2-I767 MLDEAYVMA   | 25  | 18    |
| >ERBB2-I767 ILDEAYVMAC  | 3     | >ERBB2-I767 MLDEAYVMAC  | 2   | 1     |
| >ERBB2-I767 ILDEAYVM    | 77    | >ERBB2-I767 MLDEAYVM    | 23  | 54    |
| >ERBB2-I767 ILDEAYVMA   | 8     | >ERBB2-I767 MLDEAYVMA   | 4   | 4     |
| >ERBB2-I767 ILDEAYVMAC  | 2     | >ERBB2-I767 MLDEAYVMAC  | 2   | 0     |
| >ERBB2-I767 ILDEAYVMAC  | 2104  | >ERBB2-I767 MLDEAYVMAC  | 68  | 2036  |
| >ERBB2-I767 ILDEAYVM    | 5244  | >ERBB2-I767 MLDEAYVM    | 457 | 4787  |
| >ERBB2-I767 ILDEAYVMA   | 1743  | >ERBB2-I767 MLDEAYVMA   | 73  | 1670  |
| >ERBB2-I767 ILDEAYVMAC  | 45    | >ERBB2-I767 MLDEAYVMAC  | 6   | 39    |

|                         |      |                        |     |      |
|-------------------------|------|------------------------|-----|------|
| >ERBB2-I767 ILDEAYVM    | 1677 | >ERBB2-I767 MLDEAYVM   | 150 | 1527 |
| >ERBB2-I767 ILDEAYVM    | 4425 | >ERBB2-I767 MLDEAYVM   | 299 | 4126 |
| >ERBB2-I767 EILDEAYV    | 659  | >ERBB2-I767 EMLDEAYV   | 40  | 619  |
| >ERBB2-I767 EILDEAYVMA  | 2907 | >ERBB2-I767 EMLDEAYVM  | 384 | 2523 |
| >ERBB2-I767 EILDEAYV    | 471  | >ERBB2-I767 EMLDEAYV   | 50  | 421  |
| >ERBB2-I767 EILDEAYV    | 2587 | >ERBB2-I767 EMLDEAYV   | 298 | 2289 |
| >ERBB2-I767 EILDEAYV    | 100  | >ERBB2-I767 EMLDEAYV   | 38  | 62   |
| >ERBB2-I767 EILDEAYV    | 11   | >ERBB2-I767 EMLDEAYV   | 2   | 9    |
| >ERBB2-I767 EILDEAYVM   | 3049 | >ERBB2-I767 EMLDEAYVM  | 61  | 2988 |
| >ERBB2-I767 EILDEAYVMA  | 994  | >ERBB2-I767 EMLDEAYVM  | 18  | 976  |
| >ERBB2-I767 EILDEAYV    | 83   | >ERBB2-I767 EMLDEAYV   | 4   | 79   |
| >ERBB2-I767 EILDEAYVM   | 5039 | >ERBB2-I767 EMLDEAYVM  | 46  | 4993 |
| >ERBB2-I767 EILDEAYVMA  | 7812 | >ERBB2-I767 EMLDEAYVM  | 168 | 7644 |
| >ERBB2-I767 EILDEAYV    | 24   | >ERBB2-I767 EMLDEAYV   | 5   | 19   |
| >ERBB2-I767 EILDEAYVMA  | 2004 | >ERBB2-I767 EMLDEAYVM  | 52  | 1952 |
| >ERBB2-I767 EILDEAYV    | 5    | >ERBB2-I767 EMLDEAYV   | 2   | 3    |
| >ERBB2-I767 EILDEAYVM   | 362  | >ERBB2-I767 EMLDEAYVM  | 13  | 349  |
| >ERBB2-I767 EILDEAYVMA  | 635  | >ERBB2-I767 EMLDEAYVM  | 21  | 614  |
| >ERBB2-I767 EILDEAYV    | 11   | >ERBB2-I767 EMLDEAYV   | 3   | 8    |
| >ERBB2-I767 EILDEAYVMA  | 2189 | >ERBB2-I767 EMLDEAYVM  | 53  | 2136 |
| >ERBB2-I767 EILDEAYVM   | 39   | >ERBB2-I767 EMLDEAYVM  | 363 | 324  |
| >ERBB2-I767 EILDEAYV    | 34   | >ERBB2-I767 EMLDEAYV   | 287 | 253  |
| >ERBB2-I767 EILDEAYV    | 5    | >ERBB2-I767 EMLDEAYV   | 7   | 2    |
| >ERBB2-I767 EILDEAYVM   | 33   | >ERBB2-I767 EMLDEAYVM  | 73  | 40   |
| >ERBB2-I767 EILDEAYVMA  | 16   | >ERBB2-I767 EMLDEAYVM  | 30  | 14   |
| >ERBB2-I767 EILDEAYVM   | 550  | >ERBB2-I767 EMLDEAYVM  | 265 | 285  |
| >ERBB2-I767 EILDEAYVM   | 1323 | >ERBB2-I767 EMLDEAYVM  | 98  | 1225 |
| >ERBB2-I767 KEILDEAYV   | 1524 | >ERBB2-I767 KEMLDEAYV  | 424 | 1100 |
| >ERBB2-I767 KEILDEAYV   | 841  | >ERBB2-I767 KEMLDEAYV  | 393 | 448  |
| >ERBB2-I767 KEILDEAY    | 256  | >ERBB2-I767 KEMLDEAY   | 229 | 27   |
| >ERBB2-I767 KEILDEAYV   | 310  | >ERBB2-I767 KEMLDEAYV  | 534 | 224  |
| >ERBB2-I767 KEILDEAYVM  | 163  | >ERBB2-I767 KEMLDEAYVI | 215 | 52   |
| >ERBB2-I767 KEILDEAYVM  | 289  | >ERBB2-I767 KEMLDEAYVI | 161 | 128  |
| >ERBB2-I767 KEILDEAY    | 363  | >ERBB2-I767 KEMLDEAY   | 177 | 186  |
| >ERBB2-I767 KEILDEAY    | 273  | >ERBB2-I767 KEMLDEAY   | 278 | 5    |
| >ERBB2-I767 KEILDEAYV   | 536  | >ERBB2-I767 KEMLDEAYV  | 160 | 376  |
| >ERBB2-I767 KEILDEAYVM  | 50   | >ERBB2-I767 KEMLDEAYVI | 20  | 30   |
| >ERBB2-I767 KEILDEAYV   | 32   | >ERBB2-I767 KEMLDEAYV  | 17  | 15   |
| >ERBB2-I767 KEILDEAYVM  | 15   | >ERBB2-I767 KEMLDEAYVI | 15  | 0    |
| >ERBB2-I767 KEILDEAYVM  | 468  | >ERBB2-I767 KEMLDEAYVI | 121 | 347  |
| >ERBB2-I767 NKEILDEAYVI | 676  | >ERBB2-I767 NKEMLDEAY' | 466 | 210  |
| >ERBB2-I767 KANKEILDEA' | 126  | >ERBB2-I767 KANKEMLDE  | 98  | 28   |
| >ERBB2-I767 KANKEILDEA' | 385  | >ERBB2-I767 KANKEMLDE  | 204 | 181  |

|                         |       |                        |      |       |
|-------------------------|-------|------------------------|------|-------|
| >ERBB2-I767 KANKEILDEA' | 255   | >ERBB2-I767 KANKEMLDE, | 252  | 3     |
| >ERBB2-I767 KANKEILDEA' | 293   | >ERBB2-I767 KANKEMLDE, | 315  | 22    |
| >ERBB2-I767 KANKEILDEA' | 140   | >ERBB2-I767 KANKEMLDE, | 96   | 44    |
| >ERBB2-I767 KANKEILDEA' | 200   | >ERBB2-I767 KANKEMLDE, | 222  | 22    |
| >ERBB2-I767 KANKEILDEA' | 86    | >ERBB2-I767 KANKEMLDE, | 121  | 35    |
| >ERBB2-I767 KANKEILDEA' | 473   | >ERBB2-I767 KANKEMLDE, | 577  | 104   |
| >ERBB2-I767 SPKANKEI    | 133   | >ERBB2-I767 SPKANKEM   | 30   | 103   |
| >ERBB2-I767 SPKANKEIL   | 187   | >ERBB2-I767 SPKANKEML  | 113  | 74    |
| >ERBB2-I767 SPKANKEI    | 741   | >ERBB2-I767 SPKANKEM   | 138  | 603   |
| >ERBB2-I767 SPKANKEIL   | 193   | >ERBB2-I767 SPKANKEML  | 238  | 45    |
| >ERBB2-I767 TSPKANKEI   | 54    | >ERBB2-I767 TSPKANKEM  | 24   | 30    |
| >ERBB2-I767 TSPKANKEIL  | 9     | >ERBB2-I767 TSPKANKEMI | 10   | 1     |
| >ERBB2-I767 TSPKANKEI   | 159   | >ERBB2-I767 TSPKANKEM  | 3710 | 3551  |
| >ERBB2-I767 NTSPKANKEI  | 171   | >ERBB2-I767 NTSPKANKEN | 69   | 102   |
| >ERBB2-I767 NTSPKANKEI  | 994   | >ERBB2-I767 NTSPKANKEN | 125  | 869   |
| >ERBB2-I767 NTSPKANKEI  | 2148  | >ERBB2-I767 NTSPKANKEN | 76   | 2072  |
| >ERBB2-I829 IAKGMSYL    | 44    | >ERBB2-I829 TAKGMSYL   | 367  | 323   |
| >ERBB2-I829 QIAKGMSY    | 6943  | >ERBB2-I829 QTAKGMSY   | 132  | 6811  |
| >ERBB2-I829 QIAKGMSYL   | 27    | >ERBB2-I829 QTAKGMSYL  | 111  | 84    |
| >ERBB2-I829 QIAKGMSYL   | 49    | >ERBB2-I829 QTAKGMSYL  | 381  | 332   |
| >ERBB2-I829 QIAKGMSYL   | 96    | >ERBB2-I829 QTAKGMSYL  | 350  | 254   |
| >ERBB2-I829 QIAKGMSY    | 138   | >ERBB2-I829 QTAKGMSY   | 36   | 102   |
| >ERBB2-I829 QIAKGMSYL   | 703   | >ERBB2-I829 QTAKGMSYL  | 150  | 553   |
| >ERBB2-I829 QIAKGMSY    | 188   | >ERBB2-I829 QTAKGMSY   | 28   | 160   |
| >ERBB2-I829 QIAKGMSYL   | 540   | >ERBB2-I829 QTAKGMSYL  | 67   | 473   |
| >ERBB2-I829 QIAKGMSY    | 141   | >ERBB2-I829 QTAKGMSY   | 30   | 111   |
| >ERBB2-I829 QIAKGMSYL   | 54    | >ERBB2-I829 QTAKGMSYL  | 9    | 45    |
| >ERBB2-I829 QIAKGMSY    | 2283  | >ERBB2-I829 QTAKGMSY   | 243  | 2040  |
| >ERBB2-I829 QIAKGMSY    | 86    | >ERBB2-I829 QTAKGMSY   | 47   | 39    |
| >ERBB2-I829 QIAKGMSY    | 126   | >ERBB2-I829 QTAKGMSY   | 65   | 61    |
| >ERBB2-I829 QIAKGMSY    | 2979  | >ERBB2-I829 QTAKGMSY   | 464  | 2515  |
| >ERBB2-I829 QIAKGMSYL   | 68    | >ERBB2-I829 QTAKGMSYL  | 17   | 51    |
| >ERBB2-I829 QIAKGMSYL   | 166   | >ERBB2-I829 QTAKGMSYL  | 53   | 113   |
| >ERBB2-I829 QIAKGMSY    | 41    | >ERBB2-I829 QTAKGMSY   | 26   | 15    |
| >ERBB2-I829 QIAKGMSY    | 125   | >ERBB2-I829 QTAKGMSY   | 142  | 17    |
| >ERBB2-I829 QIAKGMSY    | 126   | >ERBB2-I829 QTAKGMSY   | 509  | 383   |
| >ERBB2-I829 QIAKGMSY    | 785   | >ERBB2-I829 QTAKGMSY   | 365  | 420   |
| >ERBB2-I829 QIAKGMSY    | 1362  | >ERBB2-I829 QTAKGMSY   | 7    | 1355  |
| >ERBB2-I829 QIAKGMSYL   | 3297  | >ERBB2-I829 QTAKGMSYL  | 10   | 3287  |
| >ERBB2-I829 QIAKGMSYL   | 10741 | >ERBB2-I829 QTAKGMSYL  | 99   | 10642 |
| >ERBB2-I829 QIAKGMSY    | 985   | >ERBB2-I829 QTAKGMSY   | 40   | 945   |
| >ERBB2-I829 QIAKGMSYL   | 221   | >ERBB2-I829 QTAKGMSYL  | 8    | 213   |
| >ERBB2-I829 QIAKGMSY    | 399   | >ERBB2-I829 QTAKGMSY   | 1093 | 694   |

|                       |       |                       |      |       |
|-----------------------|-------|-----------------------|------|-------|
| >ERBB2-I829 QIAKGMSYL | 11675 | >ERBB2-I829 QTAKGMSYL | 314  | 11361 |
| >ERBB2-I829 SQDLLNWCM | 99    | >ERBB2-I829 SQDLLNWCM | 1115 | 1016  |
| >ERBB2-I829 MQIAKGMSY | 41    | >ERBB2-I829 MQTAKGMS' | 97   | 56    |
| >ERBB2-I829 MQIAKGMSY | 34    | >ERBB2-I829 MQTAKGMS' | 85   | 51    |
| >ERBB2-I829 MQIAKGMSY | 145   | >ERBB2-I829 MQTAKGMS' | 884  | 739   |
| >ERBB2-I829 MQIAKGMSY | 336   | >ERBB2-I829 MQTAKGMS' | 1105 | 769   |
| >ERBB2-I829 MQIAKGMSY | 76    | >ERBB2-I829 MQTAKGMS' | 275  | 199   |
| >ERBB2-I829 MQIAKGMSY | 380   | >ERBB2-I829 MQTAKGMS' | 465  | 85    |
| >ERBB2-I829 MQIAKGMSY | 89    | >ERBB2-I829 MQTAKGMS' | 109  | 20    |
| >ERBB2-I829 MQIAKGMSY | 35    | >ERBB2-I829 MQTAKGMS' | 59   | 24    |
| >ERBB2-I829 MQIAKGMSY | 81    | >ERBB2-I829 MQTAKGMS' | 1024 | 943   |
| >ERBB2-I829 MQIAKGMSY | 62    | >ERBB2-I829 MQTAKGMS' | 65   | 3     |
| >ERBB2-I829 MQIAKGMSY | 3     | >ERBB2-I829 MQTAKGMS' | 5    | 2     |
| >ERBB2-I829 MQIAKGMSY | 12    | >ERBB2-I829 MQTAKGMS' | 46   | 34    |
| >ERBB2-I829 MQIAKGMSY | 62    | >ERBB2-I829 MQTAKGMS' | 482  | 420   |
| >ERBB2-I829 MQIAKGMSY | 183   | >ERBB2-I829 MQTAKGMS' | 432  | 249   |
| >ERBB2-I829 MQIAKGMSY | 1062  | >ERBB2-I829 MQTAKGMS' | 149  | 913   |
| >ERBB2-I829 CMQIAKGMS | 370   | >ERBB2-I829 CMQTAKGM! | 218  | 152   |
| >ERBB2-I829 CMQIAKGMS | 508   | >ERBB2-I829 CMQTAKGM! | 283  | 225   |
| >ERBB2-I829 CMQIAKGMS | 205   | >ERBB2-I829 CMQTAKGM! | 295  | 90    |
| >ERBB2-I829 CMQIAKGMS | 419   | >ERBB2-I829 CMQTAKGM! | 222  | 197   |
| >ERBB2-I829 CMQIAKGMS | 153   | >ERBB2-I829 CMQTAKGM! | 156  | 3     |
| >ERBB2-I829 CMQIAKGMS | 322   | >ERBB2-I829 CMQTAKGM! | 223  | 99    |
| >ERBB2-I829 CMQIAKGMS | 581   | >ERBB2-I829 CMQTAKGM! | 488  | 93    |
| >ERBB2-I829 CMQIAKGMS | 189   | >ERBB2-I829 CMQTAKGM! | 269  | 80    |
| >ERBB2-I829 CMQIAKGMS | 132   | >ERBB2-I829 CMQTAKGM! | 128  | 4     |
| >ERBB2-I829 CMQIAKGMS | 247   | >ERBB2-I829 CMQTAKGM! | 217  | 30    |
| >ERBB2-I829 CMQIAKGMS | 221   | >ERBB2-I829 CMQTAKGM! | 98   | 123   |
| >ERBB2-I829 WCMQIAKGM | 585   | >ERBB2-I829 WCMQTAKG  | 395  | 190   |
| >ERBB2-I829 WCMQIAKGM | 247   | >ERBB2-I829 WCMQTAKG  | 114  | 133   |
| >ERBB2-I829 WCMQIAKGM | 398   | >ERBB2-I829 WCMQTAKG  | 507  | 109   |
| >ERBB2-I829 WCMQIAKGM | 104   | >ERBB2-I829 WCMQTAKG  | 132  | 28    |
| >ERBB2-I829 WCMQIAKGM | 38    | >ERBB2-I829 WCMQTAKG  | 41   | 3     |
| >ERBB2-I829 NWCMQIAK  | 117   | >ERBB2-I829 NWCMQTAK  | 185  | 68    |
| >ERBB2-I829 LLNWCMQI  | 39    | >ERBB2-I829 LLNWCMQT  | 827  | 788   |
| >ERBB2-I829 LLNWCMQIA | 274   | >ERBB2-I829 LLNWCMQT/ | 85   | 189   |
| >ERBB2-I829 LLNWCMQI  | 23    | >ERBB2-I829 LLNWCMQT  | 413  | 390   |
| >ERBB2-I829 LLNWCMQIA | 59    | >ERBB2-I829 LLNWCMQT/ | 40   | 19    |
| >ERBB2-I829 LLNWCMQI  | 8     | >ERBB2-I829 LLNWCMQT  | 72   | 64    |
| >ERBB2-I829 LLNWCMQIA | 10    | >ERBB2-I829 LLNWCMQT/ | 8    | 2     |
| >ERBB2-I829 LLNWCMQI  | 9     | >ERBB2-I829 LLNWCMQT  | 153  | 144   |
| >ERBB2-I829 LLNWCMQIA | 154   | >ERBB2-I829 LLNWCMQT/ | 17   | 137   |
| >ERBB2-I829 LLNWCMQI  | 145   | >ERBB2-I829 LLNWCMQT  | 7956 | 7811  |

|                        |      |                        |       |       |
|------------------------|------|------------------------|-------|-------|
| >ERBB2-I829 LLNWCMQIA  | 583  | >ERBB2-I829 LLNWCMQT/  | 90    | 493   |
| >ERBB2-I829 LLNWCMQI   | 39   | >ERBB2-I829 LLNWCMQT   | 1131  | 1092  |
| >ERBB2-I829 LLNWCMQIA  | 387  | >ERBB2-I829 LLNWCMQT/  | 82    | 305   |
| >ERBB2-I829 LLNWCMQI   | 29   | >ERBB2-I829 LLNWCMQT   | 1128  | 1099  |
| >ERBB2-I829 LLNWCMQIA  | 1206 | >ERBB2-I829 LLNWCMQT/  | 214   | 992   |
| >ERBB2-I829 LLNWCMQI   | 4    | >ERBB2-I829 LLNWCMQT   | 10    | 6     |
| >ERBB2-I829 LLNWCMQIA  | 7    | >ERBB2-I829 LLNWCMQT/  | 4     | 3     |
| >ERBB2-I829 LLNWCMQIA  | 660  | >ERBB2-I829 LLNWCMQT/  | 410   | 250   |
| >ERBB2-I829 LLNWCMQIA  | 33   | >ERBB2-I829 LLNWCMQT/  | 38    | 5     |
| >ERBB2-I829 LLNWCMQIA  | 128  | >ERBB2-I829 LLNWCMQT/  | 260   | 132   |
| >ERBB2-I829 LLNWCMQIA  | 238  | >ERBB2-I829 LLNWCMQT/  | 387   | 149   |
| >ERBB2-I829 DLLNWCMQI  | 842  | >ERBB2-I829 DLLNWCMQ   | 237   | 605   |
| >ERBB2-I829 DLLNWCMQI  | 1048 | >ERBB2-I829 DLLNWCMQ   | 465   | 583   |
| >ERBB2-I829 DLLNWCMQI  | 534  | >ERBB2-I829 DLLNWCMQ   | 174   | 360   |
| >ERBB2-I829 DLLNWCMQI  | 27   | >ERBB2-I829 DLLNWCMQ   | 962   | 935   |
| >ERBB2-I829 DLLNWCMQI  | 791  | >ERBB2-I829 DLLNWCMQ   | 106   | 685   |
| >ERBB2-I829 DLLNWCMQI  | 462  | >ERBB2-I829 DLLNWCMQ   | 9376  | 8914  |
| >ERBB2-I829 DLLNWCMQI  | 2206 | >ERBB2-I829 DLLNWCMQ   | 413   | 1793  |
| >ERBB2-I829 DLLNWCMQI  | 43   | >ERBB2-I829 DLLNWCMQ   | 1510  | 1467  |
| >ERBB2-I829 DLLNWCMQI  | 413  | >ERBB2-I829 DLLNWCMQ   | 124   | 289   |
| >ERBB2-I829 DLLNWCMQI  | 19   | >ERBB2-I829 DLLNWCMQ   | 394   | 375   |
| >ERBB2-I829 DLLNWCMQI  | 467  | >ERBB2-I829 DLLNWCMQ   | 134   | 333   |
| >ERBB2-I829 DLLNWCMQI  | 25   | >ERBB2-I829 DLLNWCMQ   | 376   | 351   |
| >ERBB2-I829 DLLNWCMQI  | 191  | >ERBB2-I829 DLLNWCMQ   | 42    | 149   |
| >ERBB2-I829 DLLNWCMQI  | 125  | >ERBB2-I829 DLLNWCMQ   | 109   | 16    |
| >ERBB2-I829 DLLNWCMQI  | 24   | >ERBB2-I829 DLLNWCMQ   | 637   | 613   |
| >ERBB2-I829 DLLNWCMQI  | 1014 | >ERBB2-I829 DLLNWCMQ   | 328   | 686   |
| >ERBB2-I829 QDLLNWCMQ  | 53   | >ERBB2-I829 QDLLNWCMQ  | 11488 | 11435 |
| >ERBB2-I829 QDLLNWCMQ  | 60   | >ERBB2-I829 QDLLNWCMQ  | 5077  | 5017  |
| >ERBB2-K724 KVLGSGAFGT | 294  | >ERBB2-K724 NVLGSGAFGT | 2643  | 2349  |
| >ERBB2-K724 KVLGSGAFGT | 123  | >ERBB2-K724 NVLGSGAFGT | 330   | 207   |
| >ERBB2-K724 KVLGSGAFGT | 9    | >ERBB2-K724 NVLGSGAFGT | 33    | 24    |
| >ERBB2-K724 KVLGSGAFGT | 12   | >ERBB2-K724 NVLGSGAFGT | 87    | 75    |
| >ERBB2-K724 KVLGSGAFGT | 78   | >ERBB2-K724 NVLGSGAFGT | 472   | 394   |
| >ERBB2-K724 KVLGSGAFGT | 28   | >ERBB2-K724 NVLGSGAFGT | 269   | 241   |
| >ERBB2-K724 KVLGSGAFGT | 176  | >ERBB2-K724 NVLGSGAFGT | 245   | 69    |
| >ERBB2-K724 KVLGSGAFGT | 15   | >ERBB2-K724 NVLGSGAFGT | 80    | 65    |
| >ERBB2-K724 KVLGSGAF   | 540  | >ERBB2-K724 NVLGSGAF   | 183   | 357   |
| >ERBB2-K724 KVLGSGAFG  | 103  | >ERBB2-K724 NVLGSGAFG  | 9898  | 9795  |
| >ERBB2-K724 KVLGSGAFGT | 76   | >ERBB2-K724 NVLGSGAFGT | 8421  | 8345  |
| >ERBB2-K724 KVLGSGAF   | 32   | >ERBB2-K724 NVLGSGAF   | 3519  | 3487  |
| >ERBB2-K724 KVLGSGAFGT | 3297 | >ERBB2-K724 NVLGSGAFGT | 46    | 3251  |
| >ERBB2-K724 KVLGSGAFGT | 4491 | >ERBB2-K724 NVLGSGAFGT | 250   | 4241  |

|                        |      |                        |       |       |
|------------------------|------|------------------------|-------|-------|
| >ERBB2-K724KVLGSGAFGT  | 324  | >ERBB2-K724NVLGSGAF    | 12    | 312   |
| >ERBB2-K724KVLGSGAF    | 172  | >ERBB2-K724NVLGSGAF    | 575   | 403   |
| >ERBB2-K724KVLGSGAF    | 345  | >ERBB2-K724NVLGSGAF    | 69    | 276   |
| >ERBB2-K724KVLGSGAF    | 165  | >ERBB2-K724NVLGSGAF    | 1910  | 1745  |
| >ERBB2-K724KVLGSGAF    | 16   | >ERBB2-K724NVLGSGAF    | 1038  | 1022  |
| >ERBB2-K724KVLGSGAF    | 763  | >ERBB2-K724NVLGSGAF    | 102   | 661   |
| >ERBB2-K724KVLGSGAF    | 476  | >ERBB2-K724NVLGSGAF    | 17838 | 17362 |
| >ERBB2-K724VKVLGSGAF   | 16   | >ERBB2-K724VNVLGSGAF   | 2067  | 2051  |
| >ERBB2-K724ILKETELRKVK | 368  | >ERBB2-K724ILKETELRKVN | 21375 | 21007 |
| >ERBB2-K724ILKETELRKVK | 114  | >ERBB2-K724ILKETELRKVN | 12109 | 11995 |
| >ERBB2-K724KVKVLGSGA   | 898  | >ERBB2-K724KVNVLGSGA   | 488   | 410   |
| >ERBB2-K724KVKVLGSG    | 79   | >ERBB2-K724KVNVLGSG    | 2298  | 2219  |
| >ERBB2-K724KVKVLGSGA   | 23   | >ERBB2-K724KVNVLGSGA   | 702   | 679   |
| >ERBB2-K724KVKVLGSGAF  | 258  | >ERBB2-K724KVNVLGSGAF  | 4809  | 4551  |
| >ERBB2-K724KVKVLGSGAF  | 20   | >ERBB2-K724KVNVLGSGAF  | 361   | 341   |
| >ERBB2-K724KVKVLGSGAF  | 1062 | >ERBB2-K724KVNVLGSGAF  | 155   | 907   |
| >ERBB2-K724KVKVLGSGAF  | 67   | >ERBB2-K724KVNVLGSGAF  | 86    | 19    |
| >ERBB2-K724KVKVLGSGAF  | 305  | >ERBB2-K724KVNVLGSGAF  | 387   | 82    |
| >ERBB2-K724KVKVLGSGAF  | 127  | >ERBB2-K724KVNVLGSGAF  | 135   | 8     |
| >ERBB2-K724KVKVLGSGAF  | 8930 | >ERBB2-K724KVNVLGSGAF  | 450   | 8480  |
| >ERBB2-K724KVKVLGSGAF  | 389  | >ERBB2-K724KVNVLGSGAF  | 578   | 189   |
| >ERBB2-K724RKVKVLGSGA  | 6    | >ERBB2-K724RKNVLGSGA   | 5     | 1     |
| >ERBB2-K724ELRKVKVL    | 97   | >ERBB2-K724ELRKVNVL    | 184   | 87    |
| >ERBB2-K724TELRKVKVL   | 19   | >ERBB2-K724TELRKVNVL   | 48    | 29    |
| >ERBB2-K724TELRKVKVL   | 209  | >ERBB2-K724TELRKVNVL   | 105   | 104   |
| >ERBB2-K724TELRKVKVL   | 302  | >ERBB2-K724TELRKVNVL   | 152   | 150   |
| >ERBB2-K724EELRKVK     | 74   | >ERBB2-K724EELRKVN     | 15298 | 15224 |
| >ERBB2-K724EELRKVKV    | 690  | >ERBB2-K724EELRKVNV    | 358   | 332   |
| >ERBB2-K724KETELRKVKV  | 170  | >ERBB2-K724KETELRKVNV  | 145   | 25    |
| >ERBB2-K724KETELRKVKV  | 105  | >ERBB2-K724KETELRKVNV  | 286   | 181   |
| >ERBB2-K724KETELRKVKV  | 93   | >ERBB2-K724KETELRKVNV  | 56    | 37    |
| >ERBB2-K724KETELRKVKV  | 439  | >ERBB2-K724KETELRKVNV  | 397   | 42    |
| >ERBB2-K724KETELRKVKV  | 58   | >ERBB2-K724KETELRKVNV  | 38    | 20    |
| >ERBB2-K724KETELRKVKV  | 86   | >ERBB2-K724KETELRKVNV  | 57    | 29    |
| >ERBB2-L49F LYQGCQVV   | 326  | >ERBB2-L49F HYQGCQVV   | 235   | 91    |
| >ERBB2-L49F LYQGCQVV   | 148  | >ERBB2-L49F HYQGCQVV   | 1110  | 962   |
| >ERBB2-L49F LYQGCQVV   | 63   | >ERBB2-L49F HYQGCQVV   | 67    | 4     |
| >ERBB2-L49F LYQGCQVVQ  | 488  | >ERBB2-L49F HYQGCQVVC  | 524   | 36    |
| >ERBB2-L49F LYQGCQVVQ  | 2391 | >ERBB2-L49F HYQGCQVVC  | 275   | 2116  |
| >ERBB2-L49F HLYQGCQV   | 85   | >ERBB2-L49F HHYQGCQV   | 22025 | 21940 |
| >ERBB2-L49F HLYQGCQVV  | 191  | >ERBB2-L49F HHYQGCQVV  | 21089 | 20898 |
| >ERBB2-L49F HLYQGCQV   | 31   | >ERBB2-L49F HHYQGCQV   | 13797 | 13766 |
| >ERBB2-L49F HLYQGCQVV  | 117  | >ERBB2-L49F HHYQGCQVV  | 16770 | 16653 |

|                        |       |                       |       |       |
|------------------------|-------|-----------------------|-------|-------|
| >ERBB2-L49F HLYQGCQV   | 9     | >ERBB2-L49F HHYQGCQV  | 15228 | 15219 |
| >ERBB2-L49F HLYQGCQVV  | 10    | >ERBB2-L49F HHYQGCQVV | 16708 | 16698 |
| >ERBB2-L49F HLYQGCQV   | 99    | >ERBB2-L49F HHYQGCQV  | 14903 | 14804 |
| >ERBB2-L49F HLYQGCQVV  | 161   | >ERBB2-L49F HHYQGCQVV | 12810 | 12649 |
| >ERBB2-L49F HLYQGCQV   | 2     | >ERBB2-L49F HHYQGCQV  | 3914  | 3912  |
| >ERBB2-L49F HLYQGCQVV  | 5     | >ERBB2-L49F HHYQGCQVV | 9249  | 9244  |
| >ERBB2-L49F HLYQGCQV   | 14    | >ERBB2-L49F HHYQGCQV  | 18449 | 18435 |
| >ERBB2-L49F HLYQGCQVV  | 19    | >ERBB2-L49F HHYQGCQVV | 19022 | 19003 |
| >ERBB2-L49F HLYQGCQV   | 5     | >ERBB2-L49F HHYQGCQV  | 4882  | 4877  |
| >ERBB2-L49F HLYQGCQVV  | 7     | >ERBB2-L49F HHYQGCQVV | 10413 | 10406 |
| >ERBB2-L49F HLYQGCQV   | 12    | >ERBB2-L49F HHYQGCQV  | 20910 | 20898 |
| >ERBB2-L49F HLYQGCQVV  | 29    | >ERBB2-L49F HHYQGCQVV | 20350 | 20321 |
| >ERBB2-L49F HLYQGCQV   | 2     | >ERBB2-L49F HHYQGCQV  | 2134  | 2132  |
| >ERBB2-L49F HLYQGCQVV  | 2     | >ERBB2-L49F HHYQGCQVV | 4995  | 4993  |
| >ERBB2-L49F HLYQGCQVV  | 55    | >ERBB2-L49F HHYQGCQVV | 33662 | 33607 |
| >ERBB2-L49F HLYQGCQV   | 88    | >ERBB2-L49F HHYQGCQV  | 13287 | 13199 |
| >ERBB2-L49F HLYQGCQVV  | 381   | >ERBB2-L49F HHYQGCQVV | 17495 | 17114 |
| >ERBB2-L49F HLYQGCQV   | 442   | >ERBB2-L49F HHYQGCQV  | 8799  | 8357  |
| >ERBB2-L49F HLYQGCQVV  | 231   | >ERBB2-L49F HHYQGCQVV | 5077  | 4846  |
| >ERBB2-L49F HLYQGCQVV  | 442   | >ERBB2-L49F HHYQGCQVV | 318   | 124   |
| >ERBB2-L49F HLYQGCQV   | 6987  | >ERBB2-L49F HHYQGCQV  | 89    | 6898  |
| >ERBB2-L49F HLYQGCQVV  | 5331  | >ERBB2-L49F HHYQGCQVV | 63    | 5268  |
| >ERBB2-L49F HLYQGCQVV  | 8575  | >ERBB2-L49F HHYQGCQVV | 116   | 8459  |
| >ERBB2-L49F HLYQGCQV   | 11595 | >ERBB2-L49F HHYQGCQV  | 396   | 11199 |
| >ERBB2-L49F HLYQGCQVV  | 3246  | >ERBB2-L49F HHYQGCQVV | 68    | 3178  |
| >ERBB2-L49F RHLYQGCQV  | 272   | >ERBB2-L49F RHHYQGCQV | 282   | 10    |
| >ERBB2-L49F RHLYQGCQV  | 145   | >ERBB2-L49F RHHYQGCQV | 155   | 10    |
| >ERBB2-L49F LRHLYQGCQV | 1271  | >ERBB2-L49F LRHHYQGCQ | 332   | 939   |
| >ERBB2-L49F LRHLYQGCQV | 740   | >ERBB2-L49F LRHHYQGCQ | 177   | 563   |
| >ERBB2-L49F MLRHLYQGC  | 61    | >ERBB2-L49F MLRHHYQGC | 40    | 21    |
| >ERBB2-L49F MLRHLYQGC  | 1140  | >ERBB2-L49F MLRHHYQGC | 240   | 900   |
| >ERBB2-L49F MLRHLYQGC  | 8     | >ERBB2-L49F MLRHHYQGC | 5     | 3     |
| >ERBB2-L49F MLRHLYQGC  | 7     | >ERBB2-L49F MLRHHYQGC | 7     | 0     |
| >ERBB2-L49F MLRHLYQGC  | 83    | >ERBB2-L49F MLRHHYQGC | 79    | 4     |
| >ERBB2-L49F MLRHLYQGC  | 25    | >ERBB2-L49F MLRHHYQGC | 54    | 29    |
| >ERBB2-L49F MLRHLYQGC  | 474   | >ERBB2-L49F MLRHHYQGC | 822   | 348   |
| >ERBB2-L49F MLRHLYQGC  | 124   | >ERBB2-L49F MLRHHYQGC | 81    | 43    |
| >ERBB2-L49F MLRHLYQGC  | 2     | >ERBB2-L49F MLRHHYQGC | 2     | 0     |
| >ERBB2-L49F MLRHLYQGC  | 388   | >ERBB2-L49F MLRHHYQGC | 137   | 251   |
| >ERBB2-L49F MLRHLYQGC  | 28    | >ERBB2-L49F MLRHHYQGC | 20    | 8     |
| >ERBB2-L49F MLRHLYQGC  | 814   | >ERBB2-L49F MLRHHYQGC | 109   | 705   |
| >ERBB2-L49F MLRHLYQGC  | 3327  | >ERBB2-L49F MLRHHYQGC | 275   | 3052  |
| >ERBB2-L49F MLRHLYQGC  | 153   | >ERBB2-L49F MLRHHYQGC | 40    | 113   |

|                         |       |                         |       |       |
|-------------------------|-------|-------------------------|-------|-------|
| >ERBB2-L49F MLRHLYQGC   | 296   | >ERBB2-L49F MLRHLYQGC   | 175   | 121   |
| >ERBB2-L49F DMLRHLYQG   | 489   | >ERBB2-L49F DMLRHLYQG   | 657   | 168   |
| >ERBB2-L49F LDMLRHLY    | 284   | >ERBB2-L49F LDMLRHLY    | 1029  | 745   |
| >ERBB2-L49F HLDMLRHLY   | 10    | >ERBB2-L49F HLDMLRHLY   | 19    | 9     |
| >ERBB2-L49F HLDMLRHL    | 399   | >ERBB2-L49F HLDMLRHL    | 23952 | 23553 |
| >ERBB2-L49F HLDMLRHL    | 234   | >ERBB2-L49F HLDMLRHL    | 24541 | 24307 |
| >ERBB2-L49F HLDMLRHL    | 321   | >ERBB2-L49F HLDMLRHL    | 24131 | 23810 |
| >ERBB2-L49F HLDMLRHL    | 175   | >ERBB2-L49F HLDMLRHL    | 24037 | 23862 |
| >ERBB2-L49F HLDMLRHL    | 55    | >ERBB2-L49F HLDMLRHL    | 23526 | 23471 |
| >ERBB2-L49F HLDMLRHLYC  | 857   | >ERBB2-L49F HLDMLRHLYC  | 197   | 660   |
| >ERBB2-L49F HLDMLRHLY   | 143   | >ERBB2-L49F HLDMLRHLY   | 568   | 425   |
| >ERBB2-L49F HLDMLRHLY   | 46    | >ERBB2-L49F HLDMLRHLY   | 47    | 1     |
| >ERBB2-L49F HLDMLRHLY   | 19    | >ERBB2-L49F HLDMLRHLY   | 27    | 8     |
| >ERBB2-L49F HLDMLRHLY   | 33    | >ERBB2-L49F HLDMLRHLY   | 58    | 25    |
| >ERBB2-L49F ETHLDMLRHI  | 90    | >ERBB2-L49F ETHLDMLRHI  | 269   | 179   |
| >ERBB2-L49F ETHLDMLRHI  | 288   | >ERBB2-L49F ETHLDMLRHI  | 269   | 19    |
| >ERBB2-L49F ETHLDMLRHI  | 50    | >ERBB2-L49F ETHLDMLRHI  | 87    | 37    |
| >ERBB2-L49F ETHLDMLRHI  | 7     | >ERBB2-L49F ETHLDMLRHI  | 20    | 13    |
| >ERBB2-L49F ETHLDMLRHI  | 7     | >ERBB2-L49F ETHLDMLRHI  | 3     | 4     |
| >ERBB2-L49F ETHLDMLRHI  | 378   | >ERBB2-L49F ETHLDMLRHI  | 1572  | 1194  |
| >ERBB2-L49F ETHLDMLRHI  | 27    | >ERBB2-L49F ETHLDMLRHI  | 25    | 2     |
| >ERBB2-L49F ETHLDMLRHI  | 69    | >ERBB2-L49F ETHLDMLRHI  | 198   | 129   |
| >ERBB2-L49F ETHLDMLRHI  | 171   | >ERBB2-L49F ETHLDMLRHI  | 168   | 3     |
| >ERBB2-L49F ETHLDMLRHI  | 56    | >ERBB2-L49F ETHLDMLRHI  | 113   | 57    |
| >ERBB2-L49F ETHLDMLRHI  | 243   | >ERBB2-L49F ETHLDMLRHI  | 418   | 175   |
| >ERBB2-L49F ETHLDMLRHI  | 253   | >ERBB2-L49F ETHLDMLRHI  | 9105  | 8852  |
| >ERBB2-L49F ETHLDMLRHI  | 65    | >ERBB2-L49F ETHLDMLRHI  | 50    | 15    |
| >ERBB2-L49F ETHLDMLRHI  | 341   | >ERBB2-L49F ETHLDMLRHI  | 2130  | 1789  |
| >ERBB2-L755 VLRENTSPKA  | 61    | >ERBB2-L755 VLRENTSPKA  | 24152 | 24091 |
| >ERBB2-L755 VLRENTSPKA  | 249   | >ERBB2-L755 VLRENTSPKA  | 24476 | 24227 |
| >ERBB2-L755 VLRENTSPKA  | 206   | >ERBB2-L755 VLRENTSPKA  | 25422 | 25216 |
| >ERBB2-L755 VLRENTSPKA  | 7     | >ERBB2-L755 VLRENTSPKA  | 30998 | 30991 |
| >ERBB2-L755 VLRENTSPK   | 42    | >ERBB2-L755 VLRENTSPK   | 10733 | 10691 |
| >ERBB2-L755 VLRENTSPK   | 11    | >ERBB2-L755 VLRENTSPK   | 3069  | 3058  |
| >ERBB2-L755 VLRENTSPKA  | 142   | >ERBB2-L755 VLRENTSPKA  | 11674 | 11532 |
| >ERBB2-L755 VLRENTSPK   | 12187 | >ERBB2-L755 VLRENTSPK   | 67    | 12120 |
| >ERBB2-L755 VLRENTSPKA  | 31002 | >ERBB2-L755 VLRENTSPKA  | 293   | 30709 |
| >ERBB2-L755 KVLRENTSPK  | 450   | >ERBB2-L755 KVLRENTSPK  | 2176  | 1726  |
| >ERBB2-L755 KVLRENTSPK  | 30    | >ERBB2-L755 KVLRENTSPK  | 135   | 105   |
| >ERBB2-L755 KVLRENTSPK  | 113   | >ERBB2-L755 KVLRENTSPK  | 276   | 163   |
| >ERBB2-L755 KVLRENTSPK  | 6     | >ERBB2-L755 KVLRENTSPK  | 36    | 30    |
| >ERBB2-L755 KVLRENTSPK  | 42    | >ERBB2-L755 KVLRENTSPK  | 707   | 665   |
| >ERBB2-L755 IKVLRENTSPK | 421   | >ERBB2-L755 IKVLRENTSPK | 136   | 285   |



|                         |      |                         |       |       |
|-------------------------|------|-------------------------|-------|-------|
| >ERBB2-L755 PVAIKVLR    | 316  | >ERBB2-L755 PVAIKVPR    | 650   | 334   |
| >ERBB2-L755 PVAIKVLR    | 719  | >ERBB2-L755 PVAIKVPR    | 465   | 254   |
| >ERBB2-L755 IPVAIKVL    | 54   | >ERBB2-L755 IPVAIKVP    | 37240 | 37186 |
| >ERBB2-L755 IPVAIKVLR   | 125  | >ERBB2-L755 IPVAIKVPR   | 402   | 277   |
| >ERBB2-L755 IPVAIKVL    | 70   | >ERBB2-L755 IPVAIKVP    | 21792 | 21722 |
| >ERBB2-L755 IPVAIKVL    | 399  | >ERBB2-L755 IPVAIKVP    | 10656 | 10257 |
| >ERBB2-L755 IPVAIKVL    | 293  | >ERBB2-L755 IPVAIKVP    | 10181 | 9888  |
| >ERBB2-L755 IPVAIKVL    | 2098 | >ERBB2-L755 IPVAIKVP    | 257   | 1841  |
| >ERBB2-L755 IPVAIKVLR   | 232  | >ERBB2-L755 IPVAIKVPR   | 115   | 117   |
| >ERBB2-L755 IPVAIKVL    | 245  | >ERBB2-L755 IPVAIKVP    | 16044 | 15799 |
| >ERBB2-L755 IPVAIKVLR   | 109  | >ERBB2-L755 IPVAIKVPR   | 41    | 68    |
| >ERBB2-L755 KIPVAIKVLR  | 31   | >ERBB2-L755 KIPVAIKVPR  | 27    | 4     |
| >ERBB2-L755 KIPVAIKVLR  | 64   | >ERBB2-L755 KIPVAIKVPR  | 95    | 31    |
| >ERBB2-L755 KIPVAIKVL   | 82   | >ERBB2-L755 KIPVAIKVP   | 9841  | 9759  |
| >ERBB2-L755 KIPVAIKVLR  | 440  | >ERBB2-L755 KIPVAIKVPR  | 1257  | 817   |
| >ERBB2-L755 KIPVAIKVLR  | 32   | >ERBB2-L755 KIPVAIKVPR  | 20    | 12    |
| >ERBB2-L755 VKIPVAIKVL  | 67   | >ERBB2-L755 VKIPVAIKVP  | 2344  | 2277  |
| >ERBB2-L755 VKIPVAIKVLR | 1945 | >ERBB2-L755 VKIPVAIKVPR | 448   | 1497  |
| >ERBB2-L755 VLRENTSPKA  | 61   | >ERBB2-L755 VSRENTSPKA  | 16955 | 16894 |
| >ERBB2-L755 VLRENTSPKA  | 249  | >ERBB2-L755 VSRENTSPKA  | 22621 | 22372 |
| >ERBB2-L755 VLRENTSPKA  | 206  | >ERBB2-L755 VSRENTSPKA  | 22165 | 21959 |
| >ERBB2-L755 VLRENTSPKA  | 7    | >ERBB2-L755 VSRENTSPKA  | 25836 | 25829 |
| >ERBB2-L755 VLRENTSPK   | 42   | >ERBB2-L755 VSRENTSPK   | 134   | 92    |
| >ERBB2-L755 VLRENTSPK   | 1206 | >ERBB2-L755 VSRENTSPK   | 282   | 924   |
| >ERBB2-L755 VLRENTSPK   | 11   | >ERBB2-L755 VSRENTSPK   | 5     | 6     |
| >ERBB2-L755 VLRENTSPKA  | 142  | >ERBB2-L755 VSRENTSPKA  | 27    | 115   |
| >ERBB2-L755 KVLRENTSPK  | 450  | >ERBB2-L755 KVSRENTSPK  | 2508  | 2058  |
| >ERBB2-L755 KVLRENTSPK  | 30   | >ERBB2-L755 KVSRENTSPK  | 43    | 13    |
| >ERBB2-L755 KVLRENTSPK  | 113  | >ERBB2-L755 KVSRENTSPK  | 81    | 32    |
| >ERBB2-L755 KVLRENTSPK  | 6    | >ERBB2-L755 KVSRENTSPK  | 8     | 2     |
| >ERBB2-L755 KVLRENTSPK  | 42   | >ERBB2-L755 KVSRENTSPK  | 92    | 50    |
| >ERBB2-L755 IKVLRENTSP  | 1539 | >ERBB2-L755 IKVSRENTSP  | 333   | 1206  |
| >ERBB2-L755 IKVLRENTSPK | 421  | >ERBB2-L755 IKVSRENTSPK | 93    | 328   |
| >ERBB2-L755 PVAIKVLR    | 316  | >ERBB2-L755 PVAIKVSR    | 613   | 297   |
| >ERBB2-L755 IPVAIKVL    | 54   | >ERBB2-L755 IPVAIKVS    | 29869 | 29815 |
| >ERBB2-L755 IPVAIKVLR   | 125  | >ERBB2-L755 IPVAIKVSR   | 382   | 257   |
| >ERBB2-L755 IPVAIKVL    | 70   | >ERBB2-L755 IPVAIKVS    | 15793 | 15723 |
| >ERBB2-L755 IPVAIKVL    | 399  | >ERBB2-L755 IPVAIKVS    | 2642  | 2243  |
| >ERBB2-L755 IPVAIKVL    | 293  | >ERBB2-L755 IPVAIKVS    | 14170 | 13877 |
| >ERBB2-L755 IPVAIKVL    | 2098 | >ERBB2-L755 IPVAIKVS    | 145   | 1953  |
| >ERBB2-L755 IPVAIKVLR   | 232  | >ERBB2-L755 IPVAIKVSR   | 700   | 468   |
| >ERBB2-L755 IPVAIKVL    | 245  | >ERBB2-L755 IPVAIKVS    | 5143  | 4898  |
| >ERBB2-L755 IPVAIKVLR   | 109  | >ERBB2-L755 IPVAIKVSR   | 248   | 139   |

|                         |     |                         |       |       |
|-------------------------|-----|-------------------------|-------|-------|
| >ERBB2-L755 KIPVAIKVLR  | 31  | >ERBB2-L755 KIPVAIKVSR  | 44    | 13    |
| >ERBB2-L755 KIPVAIKVLR  | 64  | >ERBB2-L755 KIPVAIKVSR  | 239   | 175   |
| >ERBB2-L755 KIPVAIKVL   | 82  | >ERBB2-L755 KIPVAIKVS   | 6627  | 6545  |
| >ERBB2-L755 KIPVAIKVLR  | 440 | >ERBB2-L755 KIPVAIKVSR  | 1281  | 841   |
| >ERBB2-L755 KIPVAIKVLR  | 32  | >ERBB2-L755 KIPVAIKVSR  | 33    | 1     |
| >ERBB2-L755 VKIPVAIKVL  | 67  | >ERBB2-L755 VKIPVAIKVS  | 2541  | 2474  |
| >ERBB2-L869 LLDIDETEY   | 115 | >ERBB2-L869 QLDIDETEY   | 580   | 465   |
| >ERBB2-L869 LLDIDETEYHA | 489 | >ERBB2-L869 QLDIDETEYH  | 2490  | 2001  |
| >ERBB2-L869 LLDIDETEYHA | 388 | >ERBB2-L869 QLDIDETEYH  | 1471  | 1083  |
| >ERBB2-L869 LLDIDETEYHA | 60  | >ERBB2-L869 QLDIDETEYH  | 444   | 384   |
| >ERBB2-L869 LLDIDETEYHA | 82  | >ERBB2-L869 QLDIDETEYH  | 424   | 342   |
| >ERBB2-L869 LLDIDETEYHA | 29  | >ERBB2-L869 QLDIDETEYH  | 246   | 217   |
| >ERBB2-L869 LLDIDETEYHA | 23  | >ERBB2-L869 QLDIDETEYH  | 372   | 349   |
| >ERBB2-L869 LLDIDETEY   | 509 | >ERBB2-L869 QLDIDETEY   | 485   | 24    |
| >ERBB2-L869 RLLDIDET    | 170 | >ERBB2-L869 RQLDIDET    | 3676  | 3506  |
| >ERBB2-L869 RLLDIDET    | 260 | >ERBB2-L869 RQLDIDET    | 7625  | 7365  |
| >ERBB2-L869 RLLDIDET    | 131 | >ERBB2-L869 RQLDIDET    | 45    | 86    |
| >ERBB2-L869 RLLDIDET    | 19  | >ERBB2-L869 RQLDIDET    | 2288  | 2269  |
| >ERBB2-L869 RLLDIDET    | 200 | >ERBB2-L869 RQLDIDET    | 5593  | 5393  |
| >ERBB2-L869 RLLDIDET    | 79  | >ERBB2-L869 RQLDIDET    | 7734  | 7655  |
| >ERBB2-L869 RLLDIDET    | 207 | >ERBB2-L869 RQLDIDET    | 13459 | 13252 |
| >ERBB2-L869 RLLDIDET    | 54  | >ERBB2-L869 RQLDIDET    | 26562 | 26508 |
| >ERBB2-L869 RLLDIDETEY  | 234 | >ERBB2-L869 RQLDIDETEY  | 162   | 72    |
| >ERBB2-L869 RLLDIDETE   | 454 | >ERBB2-L869 RQLDIDETE   | 1398  | 944   |
| >ERBB2-L869 RLLDIDETEY  | 322 | >ERBB2-L869 RQLDIDETEY  | 1009  | 687   |
| >ERBB2-L869 RLLDIDETEY  | 71  | >ERBB2-L869 RQLDIDETEY  | 975   | 904   |
| >ERBB2-L869 RLLDIDETEY  | 301 | >ERBB2-L869 RQLDIDETEY  | 108   | 193   |
| >ERBB2-L869 RLLDIDETEY  | 297 | >ERBB2-L869 RQLDIDETEY  | 13    | 284   |
| >ERBB2-L869 RLLDIDETEY  | 161 | >ERBB2-L869 RQLDIDETEY  | 1669  | 1508  |
| >ERBB2-L869 VKITDFGLARI | 450 | >ERBB2-L869 VKITDFGLARI | 8883  | 8433  |
| >ERBB2-L869 ARLLDIDETEY | 265 | >ERBB2-L869 ARQLDIDETE  | 791   | 526   |
| >ERBB2-L869 GLARLLDI    | 392 | >ERBB2-L869 GLARQLDI    | 1359  | 967   |
| >ERBB2-L869 GLARLLDI    | 71  | >ERBB2-L869 GLARQLDI    | 179   | 108   |
| >ERBB2-L869 GLARLLDIDE  | 84  | >ERBB2-L869 GLARQLDIDE  | 159   | 75    |
| >ERBB2-L869 GLARLLDI    | 32  | >ERBB2-L869 GLARQLDI    | 84    | 52    |
| >ERBB2-L869 GLARLLDIDE  | 418 | >ERBB2-L869 GLARQLDIDE  | 543   | 125   |
| >ERBB2-L869 GLARLLDI    | 252 | >ERBB2-L869 GLARQLDI    | 554   | 302   |
| >ERBB2-L869 GLARLLDI    | 149 | >ERBB2-L869 GLARQLDI    | 241   | 92    |
| >ERBB2-L869 GLARLLDI    | 49  | >ERBB2-L869 GLARQLDI    | 83    | 34    |
| >ERBB2-L869 GLARLLDIDE  | 492 | >ERBB2-L869 GLARQLDIDE  | 843   | 351   |
| >ERBB2-L869 GLARLLDI    | 39  | >ERBB2-L869 GLARQLDI    | 42    | 3     |
| >ERBB2-L869 GLARLLDIDE  | 399 | >ERBB2-L869 GLARQLDIDE  | 274   | 125   |
| >ERBB2-L869 FGLARLLDI   | 464 | >ERBB2-L869 FGLARQLDI   | 616   | 152   |

|                        |     |                       |       |       |
|------------------------|-----|-----------------------|-------|-------|
| >ERBB2-L869TDFGLARLL   | 323 | >ERBB2-L869TDFGLARQL  | 869   | 546   |
| >ERBB2-L869TDFGLARLLD  | 122 | >ERBB2-L869TDFGLARQLL | 280   | 158   |
| >ERBB2-L869TDFGLARLL   | 253 | >ERBB2-L869TDFGLARQL  | 216   | 37    |
| >ERBB2-L869TDFGLARLLD  | 487 | >ERBB2-L869TDFGLARQLL | 565   | 78    |
| >ERBB2-L869TDFGLARLLD  | 389 | >ERBB2-L869TDFGLARQLL | 1015  | 626   |
| >ERBB2-L869TDFGLARLL   | 361 | >ERBB2-L869TDFGLARQL  | 1442  | 1081  |
| >ERBB2-L869TDFGLARLLD  | 85  | >ERBB2-L869TDFGLARQLL | 73    | 12    |
| >ERBB2-L869ITDFGLARL   | 5   | >ERBB2-L869ITDFGLARQ  | 640   | 635   |
| >ERBB2-L869ITDFGLARLL  | 21  | >ERBB2-L869ITDFGLARQL | 8     | 13    |
| >ERBB2-L869ITDFGLARLL  | 222 | >ERBB2-L869ITDFGLARQL | 1013  | 791   |
| >ERBB2-L869ITDFGLARL   | 56  | >ERBB2-L869ITDFGLARQ  | 1112  | 1056  |
| >ERBB2-L869ITDFGLARLL  | 374 | >ERBB2-L869ITDFGLARQL | 2052  | 1678  |
| >ERBB2-L869KITDFGLARL  | 89  | >ERBB2-L869KITDFGLARQ | 13576 | 13487 |
| >ERBB2-L869KITDFGLARLL | 207 | >ERBB2-L869KITDFGLARQ | 310   | 103   |
| >ERBB2-L869KITDFGLARL  | 106 | >ERBB2-L869KITDFGLARQ | 13625 | 13519 |
| >ERBB2-L869KITDFGLARL  | 486 | >ERBB2-L869KITDFGLARQ | 18182 | 17696 |
| >ERBB2-L869KITDFGLARLL | 427 | >ERBB2-L869KITDFGLARQ | 791   | 364   |
| >ERBB2-L869KITDFGLARL  | 118 | >ERBB2-L869KITDFGLARQ | 9786  | 9668  |
| >ERBB2-L869KITDFGLARLL | 667 | >ERBB2-L869KITDFGLARQ | 387   | 280   |
| >ERBB2-L869KITDFGLARL  | 18  | >ERBB2-L869KITDFGLARQ | 1539  | 1521  |
| >ERBB2-L869KITDFGLARLL | 292 | >ERBB2-L869KITDFGLARQ | 135   | 157   |
| >ERBB2-L869KITDFGLARLL | 543 | >ERBB2-L869KITDFGLARQ | 273   | 270   |
| >ERBB2-L869KITDFGLARL  | 441 | >ERBB2-L869KITDFGLARQ | 16200 | 15759 |
| >ERBB2-N31!PLHNQEVTA   | 149 | >ERBB2-N31!PLHDQEVTA  | 27    | 122   |
| >ERBB2-N31!CPLHNQEV    | 469 | >ERBB2-N31!CPLHDQEV   | 602   | 133   |
| >ERBB2-N31!CPLHNQEV    | 289 | >ERBB2-N31!CPLHDQEV   | 737   | 448   |
| >ERBB2-N31!CPLHNQEVTA  | 106 | >ERBB2-N31!CPLHDQEVTA | 89    | 17    |
| >ERBB2-N31!LVCPLHNQEV  | 459 | >ERBB2-N31!LVCPLHDQEV | 542   | 83    |
| >ERBB2-N31!LVCPLHNQEV  | 139 | >ERBB2-N31!LVCPLHDQEV | 170   | 31    |
| >ERBB2-N31!LVCPLHNQEV  | 11  | >ERBB2-N31!LVCPLHDQEV | 17    | 6     |
| >ERBB2-N31!TLVCPLHNQE  | 57  | >ERBB2-N31!TLVCPLHDQE | 121   | 64    |
| >ERBB2-N31!TLVCPLHNQE  | 24  | >ERBB2-N31!TLVCPLHDQE | 50    | 26    |
| >ERBB2-N31!TLVCPLHNQE  | 13  | >ERBB2-N31!TLVCPLHDQE | 22    | 9     |
| >ERBB2-N31!TLVCPLHNQE  | 50  | >ERBB2-N31!TLVCPLHDQE | 68    | 18    |
| >ERBB2-N31!TLVCPLHNQE  | 6   | >ERBB2-N31!TLVCPLHDQE | 9     | 3     |
| >ERBB2-N31!TLVCPLHNQE  | 9   | >ERBB2-N31!TLVCPLHDQE | 9     | 0     |
| >ERBB2-N31!TLVCPLHNQE  | 38  | >ERBB2-N31!TLVCPLHDQE | 34    | 4     |
| >ERBB2-N31!TLVCPLHNQE  | 59  | >ERBB2-N31!TLVCPLHDQE | 189   | 130   |
| >ERBB2-N31!TLVCPLHNQE  | 4   | >ERBB2-N31!TLVCPLHDQE | 4     | 0     |
| >ERBB2-N31!TLVCPLHNQE  | 58  | >ERBB2-N31!TLVCPLHDQE | 89    | 31    |
| >ERBB2-N31!TLVCPLHNQE  | 42  | >ERBB2-N31!TLVCPLHDQE | 165   | 123   |
| >ERBB2-N74!NVKIPVAIK   | 129 | >ERBB2-N74!DVKIPVAIK  | 787   | 658   |
| >ERBB2-N74!NVKIPVAIK   | 172 | >ERBB2-N74!DVKIPVAIK  | 140   | 32    |

|                        |     |                        |      |      |
|------------------------|-----|------------------------|------|------|
| >ERBB2-N74!NVKIPVAI    | 253 | >ERBB2-N74!DVKIPVAI    | 579  | 326  |
| >ERBB2-N74!NVKIPVAIKV  | 115 | >ERBB2-N74!DVKIPVAIKV  | 314  | 199  |
| >ERBB2-N74!NVKIPVAIKV  | 407 | >ERBB2-N74!DVKIPVAIKV  | 453  | 46   |
| >ERBB2-N74!ENVKIPVAI   | 144 | >ERBB2-N74!EDVKIPVAI   | 1056 | 912  |
| >ERBB2-N74!ENVKIPVAIKV | 90  | >ERBB2-N74!EDVKIPVAIKV | 591  | 501  |
| >ERBB2-N74!GENVKIPVAI  | 279 | >ERBB2-N74!GEDVKIPVAI  | 784  | 505  |
| >ERBB2-N74!GENVKIPV    | 246 | >ERBB2-N74!GEDVKIPV    | 140  | 106  |
| >ERBB2-N74!GENVKIPV    | 89  | >ERBB2-N74!GEDVKIPV    | 664  | 575  |
| >ERBB2-N74!GENVKIPVA   | 120 | >ERBB2-N74!GEDVKIPVA   | 741  | 621  |
| >ERBB2-N74!GENVKIPVAI  | 160 | >ERBB2-N74!GEDVKIPVAI  | 191  | 31   |
| >ERBB2-N74!GENVKIPV    | 106 | >ERBB2-N74!GEDVKIPV    | 1165 | 1059 |
| >ERBB2-N74!GENVKIPVA   | 24  | >ERBB2-N74!GEDVKIPVA   | 151  | 127  |
| >ERBB2-N74!GENVKIPVA   | 372 | >ERBB2-N74!GEDVKIPVA   | 1277 | 905  |
| >ERBB2-N74!GENVKIPVAI  | 23  | >ERBB2-N74!GEDVKIPVAI  | 18   | 5    |
| >ERBB2-N74!PDGENVKI    | 273 | >ERBB2-N74!PDGEDVKI    | 330  | 57   |
| >ERBB2-N74!IPDGENVKIPV | 314 | >ERBB2-N74!IPDGEDVKIPV | 524  | 210  |
| >ERBB2-N74!IPDGENVKI   | 67  | >ERBB2-N74!IPDGEDVKI   | 46   | 21   |
| >ERBB2-N74!IPDGENVKIPV | 279 | >ERBB2-N74!IPDGEDVKIPV | 328  | 49   |
| >ERBB2-N74!WIPDGENV    | 333 | >ERBB2-N74!WIPDGEDV    | 1610 | 1277 |
| >ERBB2-N74!WIPDGENV    | 110 | >ERBB2-N74!WIPDGEDV    | 466  | 356  |
| >ERBB2-N74!WIPDGENV    | 117 | >ERBB2-N74!WIPDGEDV    | 275  | 158  |
| >ERBB2-N74!WIPDGENV    | 32  | >ERBB2-N74!WIPDGEDV    | 106  | 74   |
| >ERBB2-N74!WIPDGENV    | 57  | >ERBB2-N74!WIPDGEDV    | 119  | 62   |
| >ERBB2-N74!WIPDGENV    | 136 | >ERBB2-N74!WIPDGEDV    | 797  | 661  |
| >ERBB2-N74!WIPDGENV    | 6   | >ERBB2-N74!WIPDGEDV    | 8    | 2    |
| >ERBB2-N74!WIPDGENVKI  | 140 | >ERBB2-N74!WIPDGEDVKI  | 226  | 86   |
| >ERBB2-N74!WIPDGENV    | 95  | >ERBB2-N74!WIPDGEDV    | 537  | 442  |
| >ERBB2-N74!IWIPDGENVK  | 95  | >ERBB2-N74!IWIPDGEDVK  | 132  | 37   |
| >ERBB2-N74!IWIPDGENVK  | 338 | >ERBB2-N74!IWIPDGEDVK  | 560  | 222  |
| >ERBB2-N74!IWIPDGENVK  | 135 | >ERBB2-N74!IWIPDGEDVK  | 176  | 41   |
| >ERBB2-N74!GIWIPDGENV  | 21  | >ERBB2-N74!GIWIPDGEDV  | 65   | 44   |
| >ERBB2-N74!GIWIPDGENV  | 27  | >ERBB2-N74!GIWIPDGEDV  | 49   | 22   |
| >ERBB2-N74!GIWIPDGENV  | 50  | >ERBB2-N74!GIWIPDGEDV  | 69   | 19   |
| >ERBB2-N85!NHVKITDF    | 388 | >ERBB2-N85!SHVKITDF    | 117  | 271  |
| >ERBB2-N85!NHVKITDFGL  | 86  | >ERBB2-N85!SHVKITDFGL  | 216  | 130  |
| >ERBB2-N85!AARNVLVKSF  | 835 | >ERBB2-N85!AARNVLVKSF  | 196  | 639  |
| >ERBB2-N85!SPNHVKITDF  | 80  | >ERBB2-N85!SPSHVKITDF  | 138  | 58   |
| >ERBB2-N85!SPNHVKITDF  | 104 | >ERBB2-N85!SPSHVKITDF  | 114  | 10   |
| >ERBB2-N85!SPNHVKITDF  | 365 | >ERBB2-N85!SPSHVKITDF  | 308  | 57   |
| >ERBB2-N85!SPNHVKITDF  | 199 | >ERBB2-N85!SPSHVKITDF  | 282  | 83   |
| >ERBB2-N85!KSPNHVKI    | 43  | >ERBB2-N85!KSPSHVKI    | 80   | 37   |
| >ERBB2-N85!KSPNHVKITD  | 90  | >ERBB2-N85!KSPSHVKITDf | 165  | 75   |
| >ERBB2-N85!KSPNHVKITD  | 100 | >ERBB2-N85!KSPSHVKITDf | 75   | 25   |

|                       |      |                        |     |     |
|-----------------------|------|------------------------|-----|-----|
| >ERBB2-N85`KSPNHVKITD | 111  | >ERBB2-N85`KSPSHVKITDI | 81  | 30  |
| >ERBB2-N85`KSPNHVKI   | 73   | >ERBB2-N85`KSPSHVKI    | 56  | 17  |
| >ERBB2-N85`KSPNHVKIT  | 518  | >ERBB2-N85`KSPSHVKIT   | 105 | 413 |
| >ERBB2-N85`KSPNHVKITD | 23   | >ERBB2-N85`KSPSHVKITDI | 10  | 13  |
| >ERBB2-N85`KSPNHVKI   | 68   | >ERBB2-N85`KSPSHVKI    | 54  | 14  |
| >ERBB2-N85`VKSPNHVK   | 636  | >ERBB2-N85`VKSPSHVK    | 259 | 377 |
| >ERBB2-N85`VKSPNHVKI  | 102  | >ERBB2-N85`VKSPSHVKI   | 35  | 67  |
| >ERBB2-N85`LVKSPNHV   | 131  | >ERBB2-N85`LVKSPSHV    | 45  | 86  |
| >ERBB2-N85`LVKSPNHV   | 85   | >ERBB2-N85`LVKSPSHV    | 37  | 48  |
| >ERBB2-N85`LVKSPNHVK  | 649  | >ERBB2-N85`LVKSPSHVK   | 218 | 431 |
| >ERBB2-N85`LVKSPNHVK  | 138  | >ERBB2-N85`LVKSPSHVK   | 98  | 40  |
| >ERBB2-N85`LVKSPNHV   | 193  | >ERBB2-N85`LVKSPSHV    | 181 | 12  |
| >ERBB2-N85`LVKSPNHVK  | 14   | >ERBB2-N85`LVKSPSHVK   | 10  | 4   |
| >ERBB2-N85`LVKSPNHVKI | 139  | >ERBB2-N85`LVKSPSHVKI  | 89  | 50  |
| >ERBB2-N85`LVKSPNHVK  | 224  | >ERBB2-N85`LVKSPSHVK   | 252 | 28  |
| >ERBB2-N85`LVKSPNHVK  | 158  | >ERBB2-N85`LVKSPSHVK   | 222 | 64  |
| >ERBB2-N85`LVKSPNHV   | 379  | >ERBB2-N85`LVKSPSHV    | 474 | 95  |
| >ERBB2-N85`VLVKSPNHV  | 443  | >ERBB2-N85`VLVKSPSHV   | 436 | 7   |
| >ERBB2-N85`VLVKSPNHV  | 52   | >ERBB2-N85`VLVKSPSHV   | 98  | 46  |
| >ERBB2-N85`VLVKSPNHVK | 410  | >ERBB2-N85`VLVKSPSHVK  | 451 | 41  |
| >ERBB2-N85`VLVKSPNHV  | 10   | >ERBB2-N85`VLVKSPSHV   | 6   | 4   |
| >ERBB2-N85`VLVKSPNHVK | 170  | >ERBB2-N85`VLVKSPSHVK  | 102 | 68  |
| >ERBB2-N85`VLVKSPNHV  | 184  | >ERBB2-N85`VLVKSPSHV   | 216 | 32  |
| >ERBB2-N85`VLVKSPNHV  | 8    | >ERBB2-N85`VLVKSPSHV   | 5   | 3   |
| >ERBB2-N85`VLVKSPNHVK | 39   | >ERBB2-N85`VLVKSPSHVK  | 37  | 2   |
| >ERBB2-N85`VLVKSPNHV  | 9    | >ERBB2-N85`VLVKSPSHV   | 10  | 1   |
| >ERBB2-N85`VLVKSPNHVK | 207  | >ERBB2-N85`VLVKSPSHVK  | 345 | 138 |
| >ERBB2-N85`VLVKSPNHV  | 12   | >ERBB2-N85`VLVKSPSHV   | 9   | 3   |
| >ERBB2-N85`VLVKSPNHVK | 223  | >ERBB2-N85`VLVKSPSHVK  | 169 | 54  |
| >ERBB2-N85`VLVKSPNHV  | 104  | >ERBB2-N85`VLVKSPSHV   | 58  | 46  |
| >ERBB2-N85`VLVKSPNHV  | 6    | >ERBB2-N85`VLVKSPSHV   | 4   | 2   |
| >ERBB2-N85`VLVKSPNHVK | 34   | >ERBB2-N85`VLVKSPSHVK  | 26  | 8   |
| >ERBB2-N85`VLVKSPNHVK | 422  | >ERBB2-N85`VLVKSPSHVK  | 200 | 222 |
| >ERBB2-N85`VLVKSPNHVK | 403  | >ERBB2-N85`VLVKSPSHVK  | 305 | 98  |
| >ERBB2-N85`VLVKSPNHV  | 618  | >ERBB2-N85`VLVKSPSHV   | 359 | 259 |
| >ERBB2-N85`VLVKSPNHVK | 770  | >ERBB2-N85`VLVKSPSHVK  | 479 | 291 |
| >ERBB2-N85`NVLVKSPNH  | 368  | >ERBB2-N85`NVLVKSPSHV  | 135 | 233 |
| >ERBB2-N85`NVLVKSPNH  | 483  | >ERBB2-N85`NVLVKSPSHV  | 364 | 119 |
| >ERBB2-N85`NVLVKSPNH  | 546  | >ERBB2-N85`NVLVKSPSHV  | 362 | 184 |
| >ERBB2-N85`NVLVKSPNH  | 1034 | >ERBB2-N85`NVLVKSPSHV  | 457 | 577 |
| >ERBB2-N85`NVLVKSPNH  | 229  | >ERBB2-N85`NVLVKSPSHV  | 188 | 41  |
| >ERBB2-N85`NVLVKSPNH  | 336  | >ERBB2-N85`NVLVKSPSHV  | 413 | 77  |
| >ERBB2-N85`NVLVKSPNH  | 34   | >ERBB2-N85`NVLVKSPSHV  | 38  | 4   |

|                         |       |                         |       |       |
|-------------------------|-------|-------------------------|-------|-------|
| >ERBB2-N85: ARNVLVKSPN  | 496   | >ERBB2-N85: ARNVLVKSPS  | 436   | 60    |
| >ERBB2-Q79: QLMPYGCL    | 210   | >ERBB2-Q79: PLMPYGCL    | 2689  | 2479  |
| >ERBB2-Q79: QLMPYGCLL   | 24    | >ERBB2-Q79: PLMPYGCLL   | 429   | 405   |
| >ERBB2-Q79: QLMPYGCL    | 26    | >ERBB2-Q79: PLMPYGCL    | 245   | 219   |
| >ERBB2-Q79: QLMPYGCLL   | 6     | >ERBB2-Q79: PLMPYGCLL   | 31    | 25    |
| >ERBB2-Q79: QLMPYGCL    | 171   | >ERBB2-Q79: PLMPYGCL    | 2098  | 1927  |
| >ERBB2-Q79: QLMPYGCLL   | 35    | >ERBB2-Q79: PLMPYGCLL   | 813   | 778   |
| >ERBB2-Q79: QLMPYGCL    | 460   | >ERBB2-Q79: PLMPYGCL    | 7694  | 7234  |
| >ERBB2-Q79: QLMPYGCLL   | 36    | >ERBB2-Q79: PLMPYGCLL   | 1760  | 1724  |
| >ERBB2-Q79: QLMPYGCL    | 118   | >ERBB2-Q79: PLMPYGCL    | 349   | 231   |
| >ERBB2-Q79: QLMPYGCLL   | 16    | >ERBB2-Q79: PLMPYGCLL   | 38    | 22    |
| >ERBB2-Q79: QLMPYGCL    | 120   | >ERBB2-Q79: PLMPYGCL    | 1695  | 1575  |
| >ERBB2-Q79: QLMPYGCLL   | 32    | >ERBB2-Q79: PLMPYGCLL   | 549   | 517   |
| >ERBB2-Q79: QLMPYGCLL   | 120   | >ERBB2-Q79: PLMPYGCLL   | 164   | 44    |
| >ERBB2-Q79: QLMPYGCL    | 81    | >ERBB2-Q79: PLMPYGCL    | 174   | 93    |
| >ERBB2-Q79: QLMPYGCLL   | 36    | >ERBB2-Q79: PLMPYGCLL   | 69    | 33    |
| >ERBB2-Q79: QLMPYGCL    | 36    | >ERBB2-Q79: PLMPYGCL    | 100   | 64    |
| >ERBB2-Q79: QLMPYGCLL   | 4     | >ERBB2-Q79: PLMPYGCLL   | 11    | 7     |
| >ERBB2-Q79: TQLMPYGCLI  | 241   | >ERBB2-Q79: TPLMPYGCLL  | 9727  | 9486  |
| >ERBB2-Q79: TQLMPYGCL   | 24266 | >ERBB2-Q79: TPLMPYGCL   | 434   | 23832 |
| >ERBB2-Q79: TQLMPYGCLI  | 16523 | >ERBB2-Q79: TPLMPYGCLL  | 89    | 16434 |
| >ERBB2-Q79: TQLMPYGCLI  | 267   | >ERBB2-Q79: TPLMPYGCLL  | 8904  | 8637  |
| >ERBB2-Q79: TQLMPYGCLI  | 35030 | >ERBB2-Q79: TPLMPYGCLL  | 219   | 34811 |
| >ERBB2-Q79: TQLMPYGCLI  | 340   | >ERBB2-Q79: TPLMPYGCLL  | 870   | 530   |
| >ERBB2-Q79: TQLMPYGCLI  | 21309 | >ERBB2-Q79: TPLMPYGCLL  | 360   | 20949 |
| >ERBB2-Q79: TQLMPYGCL   | 21669 | >ERBB2-Q79: TPLMPYGCL   | 385   | 21284 |
| >ERBB2-Q79: CLTSTVQLVTI | 417   | >ERBB2-Q79: CLTSTVQLVTI | 11705 | 11288 |
| >ERBB2-Q79: VTQLMPYGC   | 1050  | >ERBB2-Q79: VTPLMPYGC   | 471   | 579   |
| >ERBB2-Q79: VTQLMPYGC   | 32    | >ERBB2-Q79: VTPLMPYGC   | 467   | 435   |
| >ERBB2-Q79: VTQLMPYGC   | 9173  | >ERBB2-Q79: VTPLMPYGC   | 52    | 9121  |
| >ERBB2-Q79: VTQLMPYGC   | 1404  | >ERBB2-Q79: VTPLMPYGC   | 4     | 1400  |
| >ERBB2-Q79: VTQLMPYGC   | 144   | >ERBB2-Q79: VTPLMPYGC   | 2     | 142   |
| >ERBB2-Q79: VTQLMPYGC   | 92    | >ERBB2-Q79: VTPLMPYGC   | 238   | 146   |
| >ERBB2-Q79: VTQLMPYGC   | 351   | >ERBB2-Q79: VTPLMPYGC   | 3454  | 3103  |
| >ERBB2-Q79: VTQLMPYGC   | 1092  | >ERBB2-Q79: VTPLMPYGC   | 484   | 608   |
| >ERBB2-Q79: LVTQLMPY    | 1447  | >ERBB2-Q79: LVTPLMPY    | 444   | 1003  |
| >ERBB2-Q79: LVTQLMPY    | 33    | >ERBB2-Q79: LVTPLMPY    | 58    | 25    |
| >ERBB2-Q79: LVTQLMPY    | 30    | >ERBB2-Q79: LVTPLMPY    | 19    | 11    |
| >ERBB2-Q79: LVTQLMPY    | 244   | >ERBB2-Q79: LVTPLMPY    | 216   | 28    |
| >ERBB2-Q79: LVTQLMPY    | 42    | >ERBB2-Q79: LVTPLMPY    | 59    | 17    |
| >ERBB2-Q79: LVTQLMPY    | 228   | >ERBB2-Q79: LVTPLMPY    | 217   | 11    |
| >ERBB2-Q79: LVTQLMPY    | 148   | >ERBB2-Q79: LVTPLMPY    | 42    | 106   |
| >ERBB2-Q79: LVTQLMPY    | 84    | >ERBB2-Q79: LVTPLMPY    | 81    | 3     |

|                       |      |                       |      |      |
|-----------------------|------|-----------------------|------|------|
| >ERBB2-Q79:LVTQLMPY   | 444  | >ERBB2-Q79:LVTPLMPY   | 590  | 146  |
| >ERBB2-Q79:QLVTQLMPY  | 449  | >ERBB2-Q79:QLVTPLMPY  | 1104 | 655  |
| >ERBB2-Q79:QLVTQLMPY  | 23   | >ERBB2-Q79:QLVTPLMPY  | 16   | 7    |
| >ERBB2-Q79:QLVTQLMPY  | 1197 | >ERBB2-Q79:QLVTPLMPY  | 231  | 966  |
| >ERBB2-Q79:QLVTQLMPY  | 45   | >ERBB2-Q79:QLVTPLMPY  | 55   | 10   |
| >ERBB2-Q79:QLVTQLMPY  | 26   | >ERBB2-Q79:QLVTPLMPY  | 101  | 75   |
| >ERBB2-Q79:QLVTQLMPY  | 117  | >ERBB2-Q79:QLVTPLMPY  | 134  | 17   |
| >ERBB2-Q79:QLVTQLMPY  | 268  | >ERBB2-Q79:QLVTPLMPY  | 87   | 181  |
| >ERBB2-Q79:QLVTQLMPY  | 90   | >ERBB2-Q79:QLVTPLMPY  | 54   | 36   |
| >ERBB2-Q79:VQLVTQLM   | 275  | >ERBB2-Q79:VQLVTPLM   | 162  | 113  |
| >ERBB2-Q79:VQLVTQLMP  | 709  | >ERBB2-Q79:VQLVTPLMP  | 418  | 291  |
| >ERBB2-Q79:VQLVTQLMP  | 71   | >ERBB2-Q79:VQLVTPLMP  | 87   | 16   |
| >ERBB2-Q79:VQLVTQLMP  | 67   | >ERBB2-Q79:VQLVTPLMP  | 83   | 16   |
| >ERBB2-Q79:VQLVTQLMP  | 216  | >ERBB2-Q79:VQLVTPLMP  | 143  | 73   |
| >ERBB2-Q79:VQLVTQLM   | 35   | >ERBB2-Q79:VQLVTPLM   | 47   | 12   |
| >ERBB2-Q79:VQLVTQLMP  | 4    | >ERBB2-Q79:VQLVTPLMP  | 4    | 0    |
| >ERBB2-Q79:TVQLVTQLM  | 57   | >ERBB2-Q79:TVQLVTPLM  | 33   | 24   |
| >ERBB2-Q79:TVQLVTQLM  | 145  | >ERBB2-Q79:TVQLVTPLM  | 86   | 59   |
| >ERBB2-Q79:TVQLVTQLM  | 88   | >ERBB2-Q79:TVQLVTPLM  | 72   | 16   |
| >ERBB2-Q79:TVQLVTQL   | 403  | >ERBB2-Q79:TVQLVTPL   | 99   | 304  |
| >ERBB2-Q79:TVQLVTQLM  | 48   | >ERBB2-Q79:TVQLVTPLM  | 92   | 44   |
| >ERBB2-Q79:TVQLVTQLM  | 364  | >ERBB2-Q79:TVQLVTPLM  | 391  | 27   |
| >ERBB2-Q79:TVQLVTQLM  | 485  | >ERBB2-Q79:TVQLVTPLM  | 527  | 42   |
| >ERBB2-Q79:STVQLVTQL  | 869  | >ERBB2-Q79:STVQLVTPL  | 43   | 826  |
| >ERBB2-Q79:STVQLVTQL  | 1080 | >ERBB2-Q79:STVQLVTPL  | 417  | 663  |
| >ERBB2-Q79:STVQLVTQL  | 335  | >ERBB2-Q79:STVQLVTPL  | 174  | 161  |
| >ERBB2-Q79:STVQLVTQL  | 713  | >ERBB2-Q79:STVQLVTPL  | 199  | 514  |
| >ERBB2-Q79:STVQLVTQL  | 846  | >ERBB2-Q79:STVQLVTPL  | 120  | 726  |
| >ERBB2-Q79:STVQLVTQ   | 455  | >ERBB2-Q79:STVQLVTP   | 8705 | 8250 |
| >ERBB2-Q79:STVQLVTQL  | 49   | >ERBB2-Q79:STVQLVTPL  | 29   | 20   |
| >ERBB2-Q79:STVQLVTQLM | 18   | >ERBB2-Q79:STVQLVTPLM | 11   | 7    |
| >ERBB2-Q79:STVQLVTQL  | 2048 | >ERBB2-Q79:STVQLVTPL  | 363  | 1685 |
| >ERBB2-Q79:STVQLVTQLM | 109  | >ERBB2-Q79:STVQLVTPLM | 162  | 53   |
| >ERBB2-Q79:STVQLVTQL  | 235  | >ERBB2-Q79:STVQLVTPL  | 64   | 171  |
| >ERBB2-Q79:STVQLVTQL  | 195  | >ERBB2-Q79:STVQLVTPL  | 30   | 165  |
| >ERBB2-Q79:STVQLVTQLM | 430  | >ERBB2-Q79:STVQLVTPLM | 940  | 510  |
| >ERBB2-Q79:STVQLVTQL  | 239  | >ERBB2-Q79:STVQLVTPL  | 70   | 169  |
| >ERBB2-Q79:STVQLVTQLM | 558  | >ERBB2-Q79:STVQLVTPLM | 134  | 424  |
| >ERBB2-Q79:STVQLVTQL  | 5    | >ERBB2-Q79:STVQLVTPL  | 6    | 1    |
| >ERBB2-Q79:STVQLVTQLM | 17   | >ERBB2-Q79:STVQLVTPLM | 15   | 2    |
| >ERBB2-Q79:STVQLVTQLM | 530  | >ERBB2-Q79:STVQLVTPLM | 395  | 135  |
| >ERBB2-Q79:STVQLVTQL  | 227  | >ERBB2-Q79:STVQLVTPL  | 176  | 51   |
| >ERBB2-Q79:STVQLVTQLM | 82   | >ERBB2-Q79:STVQLVTPLM | 43   | 39   |

|                        |     |                        |       |       |
|------------------------|-----|------------------------|-------|-------|
| >ERBB2-Q79!STVQLVTQL   | 16  | >ERBB2-Q79!STVQLVTPL   | 89    | 73    |
| >ERBB2-Q79!STVQLVTQLM  | 28  | >ERBB2-Q79!STVQLVTPLM  | 25    | 3     |
| >ERBB2-Q79!STVQLVTQL   | 408 | >ERBB2-Q79!STVQLVTPL   | 1006  | 598   |
| >ERBB2-Q79!TSTVQLVTQL  | 46  | >ERBB2-Q79!TSTVQLVTPL  | 53    | 7     |
| >ERBB2-Q79!TSTVQLVTQL  | 267 | >ERBB2-Q79!TSTVQLVTPLI | 212   | 55    |
| >ERBB2-Q79!TSTVQLVTQL  | 236 | >ERBB2-Q79!TSTVQLVTPLI | 114   | 122   |
| >ERBB2-Q79!TSTVQLVTQL  | 453 | >ERBB2-Q79!TSTVQLVTPL  | 942   | 489   |
| >ERBB2-Q79!TSTVQLVTQL  | 192 | >ERBB2-Q79!TSTVQLVTPLI | 240   | 48    |
| >ERBB2-Q79!LTSTVQLVTQ  | 123 | >ERBB2-Q79!LTSTVQLVTPI | 79    | 44    |
| >ERBB2-Q79!LTSTVQLVTQ  | 821 | >ERBB2-Q79!LTSTVQLVTPI | 330   | 491   |
| >ERBB2-Q79!LTSTVQLVTQ  | 268 | >ERBB2-Q79!LTSTVQLVTPI | 54    | 214   |
| >ERBB2-Q79!LTSTVQLVTQ  | 35  | >ERBB2-Q79!LTSTVQLVTPI | 39    | 4     |
| >ERBB2-Q79!LTSTVQLVTQ  | 49  | >ERBB2-Q79!LTSTVQLVTPI | 173   | 124   |
| >ERBB2-Q79!LTSTVQLVTQ  | 157 | >ERBB2-Q79!LTSTVQLVTPI | 118   | 39    |
| >ERBB2-Q79!LTSTVQLVTQ  | 29  | >ERBB2-Q79!LTSTVQLVTPI | 113   | 84    |
| >ERBB2-Q79!LTSTVQLVTQ  | 367 | >ERBB2-Q79!LTSTVQLVTPI | 664   | 297   |
| >ERBB2-R78!RLLGICLT    | 229 | >ERBB2-R78!CLLGICLT    | 886   | 657   |
| >ERBB2-R78!RLLGICLTST  | 73  | >ERBB2-R78!CLLGICLTST  | 209   | 136   |
| >ERBB2-R78!RLLGICLTSTV | 15  | >ERBB2-R78!CLLGICLTSTV | 29    | 14    |
| >ERBB2-R78!RLLGICLTST  | 207 | >ERBB2-R78!CLLGICLTST  | 391   | 184   |
| >ERBB2-R78!RLLGICLTSTV | 29  | >ERBB2-R78!CLLGICLTSTV | 96    | 67    |
| >ERBB2-R78!RLLGICLTST  | 52  | >ERBB2-R78!CLLGICLTST  | 124   | 72    |
| >ERBB2-R78!RLLGICLTSTV | 13  | >ERBB2-R78!CLLGICLTSTV | 68    | 55    |
| >ERBB2-R78!RLLGICLT    | 310 | >ERBB2-R78!CLLGICLT    | 2317  | 2007  |
| >ERBB2-R78!RLLGICLTST  | 87  | >ERBB2-R78!CLLGICLTST  | 205   | 118   |
| >ERBB2-R78!RLLGICLTSTV | 19  | >ERBB2-R78!CLLGICLTSTV | 111   | 92    |
| >ERBB2-R78!RLLGICLT    | 35  | >ERBB2-R78!CLLGICLT    | 281   | 246   |
| >ERBB2-R78!RLLGICLTST  | 95  | >ERBB2-R78!CLLGICLTST  | 977   | 882   |
| >ERBB2-R78!RLLGICLTSTV | 2   | >ERBB2-R78!CLLGICLTSTV | 4     | 2     |
| >ERBB2-R78!RLLGICLTSTV | 5   | >ERBB2-R78!CLLGICLTSTV | 9     | 4     |
| >ERBB2-R78!RLLGICLT    | 112 | >ERBB2-R78!CLLGICLT    | 1155  | 1043  |
| >ERBB2-R78!RLLGICLTST  | 401 | >ERBB2-R78!CLLGICLTST  | 3960  | 3559  |
| >ERBB2-R78!RLLGICLTSTV | 5   | >ERBB2-R78!CLLGICLTSTV | 10    | 5     |
| >ERBB2-R78!RLLGICLTSTV | 2   | >ERBB2-R78!CLLGICLTSTV | 2     | 0     |
| >ERBB2-R78!RLLGICLT    | 30  | >ERBB2-R78!CLLGICLT    | 96    | 66    |
| >ERBB2-R78!RLLGICLTST  | 34  | >ERBB2-R78!CLLGICLTST  | 157   | 123   |
| >ERBB2-R78!RLLGICLTSTV | 2   | >ERBB2-R78!CLLGICLTSTV | 3     | 1     |
| >ERBB2-R78!RLLGICLTS   | 163 | >ERBB2-R78!CLLGICLTS   | 10290 | 10127 |
| >ERBB2-R78!RLLGICLTST  | 360 | >ERBB2-R78!CLLGICLTST  | 13741 | 13381 |
| >ERBB2-R78!RLLGICLTSTV | 23  | >ERBB2-R78!CLLGICLTSTV | 1454  | 1431  |
| >ERBB2-R78!RLLGICLTSTV | 241 | >ERBB2-R78!CLLGICLTSTV | 3167  | 2926  |
| >ERBB2-R78!SRLLGICL    | 123 | >ERBB2-R78!SCLLGICL    | 22703 | 22580 |
| >ERBB2-R78!SRLLGICL    | 132 | >ERBB2-R78!SCLLGICL    | 9572  | 9440  |



|                        |      |                        |       |       |
|------------------------|------|------------------------|-------|-------|
| >ERBB2-R78^MAGVGSPYV   | 51   | >ERBB2-R78^MAGVGSPYV   | 21329 | 21278 |
| >ERBB2-R78^MAGVGSPYV   | 374  | >ERBB2-R78^MAGVGSPYV   | 36707 | 36333 |
| >ERBB2-R78^MAGVGSPYV   | 61   | >ERBB2-R78^MAGVGSPYV   | 31549 | 31488 |
| >ERBB2-R78^VSRLLGICL   | 67   | >ERBB2-R78^VSCLLGICL   | 524   | 457   |
| >ERBB2-R78^YVSRLLGI    | 264  | >ERBB2-R78^YVSCLLGI    | 67    | 197   |
| >ERBB2-R78^YVSRLLGI    | 139  | >ERBB2-R78^YVSCLLGI    | 41    | 98    |
| >ERBB2-R78^YVSRLLGICL  | 335  | >ERBB2-R78^YVSCLLGICL  | 177   | 158   |
| >ERBB2-R78^YVSRLLGI    | 27   | >ERBB2-R78^YVSCLLGI    | 16    | 11    |
| >ERBB2-R78^YVSRLLGICLT | 614  | >ERBB2-R78^YVSCLLGICLT | 230   | 384   |
| >ERBB2-R78^YVSRLLGI    | 23   | >ERBB2-R78^YVSCLLGI    | 17    | 6     |
| >ERBB2-R78^YVSRLLGICL  | 220  | >ERBB2-R78^YVSCLLGICL  | 117   | 103   |
| >ERBB2-R78^YVSRLLGICLT | 651  | >ERBB2-R78^YVSCLLGICLT | 318   | 333   |
| >ERBB2-R78^YVSRLLGI    | 241  | >ERBB2-R78^YVSCLLGI    | 136   | 105   |
| >ERBB2-R78^YVSRLLGI    | 908  | >ERBB2-R78^YVSCLLGI    | 137   | 771   |
| >ERBB2-R78^YVSRLLGICL  | 2478 | >ERBB2-R78^YVSCLLGICL  | 420   | 2058  |
| >ERBB2-R78^YVSRLLGI    | 196  | >ERBB2-R78^YVSCLLGI    | 639   | 443   |
| >ERBB2-R78^YVSRLLGI    | 202  | >ERBB2-R78^YVSCLLGI    | 36    | 166   |
| >ERBB2-R78^YVSRLLGICL  | 569  | >ERBB2-R78^YVSCLLGICL  | 418   | 151   |
| >ERBB2-R78^YVSRLLGI    | 395  | >ERBB2-R78^YVSCLLGI    | 132   | 263   |
| >ERBB2-R78^YVSRLLGICL  | 2913 | >ERBB2-R78^YVSCLLGICL  | 318   | 2595  |
| >ERBB2-R78^PYVSRLLGI   | 447  | >ERBB2-R78^PYVSCLLGI   | 61    | 386   |
| >ERBB2-R78^PYVSRLLGICL | 1106 | >ERBB2-R78^PYVSCLLGICL | 304   | 802   |
| >ERBB2-R78^PYVSRLLGI   | 648  | >ERBB2-R78^PYVSCLLGI   | 493   | 155   |
| >ERBB2-R78^PYVSRLLGI   | 269  | >ERBB2-R78^PYVSCLLGI   | 213   | 56    |
| >ERBB2-R78^SPYVSRL     | 224  | >ERBB2-R78^SPYVSCLL    | 2141  | 1917  |
| >ERBB2-R78^SPYVSRL     | 313  | >ERBB2-R78^SPYVSCLL    | 249   | 64    |
| >ERBB2-R78^SPYVSRLLGI  | 205  | >ERBB2-R78^SPYVSCLLGI  | 203   | 2     |
| >ERBB2-R78^SPYVSRL     | 26   | >ERBB2-R78^SPYVSCLL    | 132   | 106   |
| >ERBB2-R78^SPYVSRLLGI  | 48   | >ERBB2-R78^SPYVSCLLGI  | 120   | 72    |
| >ERBB2-R78^SPYVSRL     | 561  | >ERBB2-R78^SPYVSCLL    | 484   | 77    |
| >ERBB2-R78^SPYVSRL     | 1790 | >ERBB2-R78^SPYVSCLL    | 392   | 1398  |
| >ERBB2-R78^GSPYVSRL    | 350  | >ERBB2-R78^GSPYVSCLL   | 1063  | 713   |
| >ERBB2-R78^GSPYVSRLLG  | 138  | >ERBB2-R78^GSPYVSCLLGI | 222   | 84    |
| >ERBB2-R78^GSPYVSRL    | 140  | >ERBB2-R78^GSPYVSCL    | 116   | 24    |
| >ERBB2-R78^GSPYVSRL    | 4    | >ERBB2-R78^GSPYVSCLL   | 6     | 2     |
| >ERBB2-R78^GSPYVSRLLG  | 436  | >ERBB2-R78^GSPYVSCLLG  | 326   | 110   |
| >ERBB2-R78^GSPYVSRLLG  | 37   | >ERBB2-R78^GSPYVSCLLGI | 30    | 7     |
| >ERBB2-R78^GSPYVSRLLG  | 277  | >ERBB2-R78^GSPYVSCLLGI | 267   | 10    |
| >ERBB2-R78^VGSPYVSRL   | 207  | >ERBB2-R78^VGSPYVSCL   | 4772  | 4565  |
| >ERBB2-R78^VGSPYVSRL   | 195  | >ERBB2-R78^VGSPYVSCL   | 1461  | 1266  |
| >ERBB2-R78^GVGSPYVSRL  | 478  | >ERBB2-R78^GVGSPYVSCL  | 651   | 173   |
| >ERBB2-R78^GVGSPYVSR   | 324  | >ERBB2-R78^GVGSPYVSC   | 26123 | 25799 |
| >ERBB2-R78^GVGSPYVSR   | 82   | >ERBB2-R78^GVGSPYVSC   | 22909 | 22827 |

|                        |      |                        |       |       |
|------------------------|------|------------------------|-------|-------|
| >ERBB2-R784AGVGSPYVSF  | 254  | >ERBB2-R784AGVGSPYVSC  | 2837  | 2583  |
| >ERBB2-R89€RRRFTHQS    | 344  | >ERBB2-R89€CRRFTHQS    | 8591  | 8247  |
| >ERBB2-R89€RRRFTHQSD   | 356  | >ERBB2-R89€CRRFTHQSD   | 5333  | 4977  |
| >ERBB2-R89€RRRFTHQSD\  | 134  | >ERBB2-R89€CRRFTHQSD\  | 4564  | 4430  |
| >ERBB2-R89€RRRFTHQSD\  | 61   | >ERBB2-R89€CRRFTHQSD\  | 496   | 435   |
| >ERBB2-R89€RRRFTHQSD\  | 167  | >ERBB2-R89€CRRFTHQSD\  | 1143  | 976   |
| >ERBB2-R89€RRRFTHQSD\  | 108  | >ERBB2-R89€CRRFTHQSD\  | 1986  | 1878  |
| >ERBB2-R89€RRRFTHQS    | 127  | >ERBB2-R89€CRRFTHQS    | 2841  | 2714  |
| >ERBB2-R89€RRRFTHQSD   | 359  | >ERBB2-R89€CRRFTHQSD   | 18425 | 18066 |
| >ERBB2-R89€RRRFTHQSD\  | 156  | >ERBB2-R89€CRRFTHQSD\  | 3396  | 3240  |
| >ERBB2-R89€RRRFTHQSD\  | 113  | >ERBB2-R89€CRRFTHQSD\  | 8371  | 8258  |
| >ERBB2-R89€RRRFTHQSD\  | 147  | >ERBB2-R89€CRRFTHQSD\  | 1710  | 1563  |
| >ERBB2-R89€RRRFTHQSD\  | 36   | >ERBB2-R89€CRRFTHQSD\  | 39    | 3     |
| >ERBB2-R89€LRRRFTHQSD  | 185  | >ERBB2-R89€LCRRFTHQSD  | 2582  | 2397  |
| >ERBB2-R89€LRRRFTHQ    | 299  | >ERBB2-R89€LCRRFTHQ    | 24028 | 23729 |
| >ERBB2-R89€IKWMALESIL  | 290  | >ERBB2-R89€IKWMALESIL  | 1372  | 1082  |
| >ERBB2-R89€IKWMALESIL  | 190  | >ERBB2-R89€IKWMALESIL  | 34647 | 34457 |
| >ERBB2-R89€ILRRRFTHQ   | 569  | >ERBB2-R89€ILCRRFTHQ   | 384   | 185   |
| >ERBB2-R89€ILRRRFTHQS  | 543  | >ERBB2-R89€ILCRRFTHQS  | 405   | 138   |
| >ERBB2-R89€ILRRRFTH    | 359  | >ERBB2-R89€ILCRRFTH    | 894   | 535   |
| >ERBB2-R89€ILRRRFTHQ   | 109  | >ERBB2-R89€ILCRRFTHQ   | 2338  | 2229  |
| >ERBB2-R89€SILRRRFTH   | 308  | >ERBB2-R89€SILCRRFTH   | 389   | 81    |
| >ERBB2-R89€ESILRRRF    | 57   | >ERBB2-R89€ESILCRRF    | 42    | 15    |
| >ERBB2-R89€ESILRRRF    | 27   | >ERBB2-R89€ESILCRRF    | 32    | 5     |
| >ERBB2-R89€ESILRRRF    | 1647 | >ERBB2-R89€ESILCRRF    | 458   | 1189  |
| >ERBB2-R89€LESILRRRF   | 754  | >ERBB2-R89€LESILCRRF   | 232   | 522   |
| >ERBB2-R89€LESILRRRFTH | 170  | >ERBB2-R89€LESILCRRFTH | 155   | 15    |
| >ERBB2-R89€LESILRRRF   | 65   | >ERBB2-R89€LESILCRRF   | 128   | 63    |
| >ERBB2-R89€LESILRRRFTH | 339  | >ERBB2-R89€LESILCRRFTH | 449   | 110   |
| >ERBB2-R89€LESILRRRF   | 852  | >ERBB2-R89€LESILCRRF   | 460   | 392   |
| >ERBB2-R89€ALESILRR    | 291  | >ERBB2-R89€ALESILCR    | 369   | 78    |
| >ERBB2-R89€ALESILRRR   | 223  | >ERBB2-R89€ALESILCRR   | 81    | 142   |
| >ERBB2-R89€MALESILR    | 195  | >ERBB2-R89€MALESILC    | 22631 | 22436 |
| >ERBB2-R89€MALESILRR   | 204  | >ERBB2-R89€MALESILCR   | 147   | 57    |
| >ERBB2-R89€MALESILR    | 34   | >ERBB2-R89€MALESILC    | 19281 | 19247 |
| >ERBB2-R89€MALESILRR   | 45   | >ERBB2-R89€MALESILCR   | 78    | 33    |
| >ERBB2-R89€MALESILRRR  | 27   | >ERBB2-R89€MALESILCRR  | 23    | 4     |
| >ERBB2-R89€MALESILR    | 74   | >ERBB2-R89€MALESILC    | 29274 | 29200 |
| >ERBB2-R89€MALESILRR   | 166  | >ERBB2-R89€MALESILCR   | 134   | 32    |
| >ERBB2-R89€MALESILRRR  | 1486 | >ERBB2-R89€MALESILCRR  | 472   | 1014  |
| >ERBB2-R89€MALESILR    | 11   | >ERBB2-R89€MALESILC    | 24342 | 24331 |
| >ERBB2-R89€MALESILRR   | 17   | >ERBB2-R89€MALESILCR   | 25    | 8     |
| >ERBB2-R89€MALESILRRR  | 108  | >ERBB2-R89€MALESILCRR  | 20    | 88    |

|                         |       |                          |       |       |
|-------------------------|-------|--------------------------|-------|-------|
| >ERBB2-R89€ MALESILRRRI | 56    | >ERBB2-R89€ MALESILCRRRI | 54    | 2     |
| >ERBB2-R89€ MALESILRRRI | 5     | >ERBB2-R89€ MALESILCRRRI | 5     | 0     |
| >ERBB2-R89€ MALESILRRRI | 97    | >ERBB2-R89€ MALESILCRRRI | 64    | 33    |
| >ERBB2-R89€ MALESILRRRI | 184   | >ERBB2-R89€ MALESILCRRRI | 445   | 261   |
| >ERBB2-R89€ MALESILRRRI | 237   | >ERBB2-R89€ MALESILCRRRI | 338   | 101   |
| >ERBB2-R89€ MALESILR    | 222   | >ERBB2-R89€ MALESILC     | 35244 | 35022 |
| >ERBB2-R89€ MALESILRR   | 247   | >ERBB2-R89€ MALESILCR    | 387   | 140   |
| >ERBB2-R89€ MALESILRRR  | 819   | >ERBB2-R89€ MALESILCRR   | 273   | 546   |
| >ERBB2-R89€ WMALESILR   | 20001 | >ERBB2-R89€ WMALESILC    | 398   | 19603 |
| >ERBB2-R89€ WMALESILRF  | 1009  | >ERBB2-R89€ WMALESILCF   | 465   | 544   |
| >ERBB2-R89€ WMALESILRF  | 1144  | >ERBB2-R89€ WMALESILCF   | 226   | 918   |
| >ERBB2-R89€ WMALESILR   | 111   | >ERBB2-R89€ WMALESILC    | 36849 | 36738 |
| >ERBB2-R89€ WMALESILRF  | 159   | >ERBB2-R89€ WMALESILCF   | 259   | 100   |
| >ERBB2-R89€ WMALESILRF  | 395   | >ERBB2-R89€ WMALESILCF   | 139   | 256   |
| >ERBB2-R89€ WMALESILRF  | 66    | >ERBB2-R89€ WMALESILCF   | 42    | 24    |
| >ERBB2-R89€ WMALESILR   | 62    | >ERBB2-R89€ WMALESILC    | 34384 | 34322 |
| >ERBB2-R89€ WMALESILRF  | 66    | >ERBB2-R89€ WMALESILCF   | 113   | 47    |
| >ERBB2-R89€ WMALESILRF  | 237   | >ERBB2-R89€ WMALESILCF   | 68    | 169   |
| >ERBB2-R89€ KWMALESILF  | 21    | >ERBB2-R89€ KWMALESILC   | 14845 | 14824 |
| >ERBB2-R89€ KWMALESILF  | 50    | >ERBB2-R89€ KWMALESILC   | 57    | 7     |
| >ERBB2-R89€ KWMALESILF  | 497   | >ERBB2-R89€ KWMALESILC   | 28077 | 27580 |
| >ERBB2-R89€ KWMALESILF  | 9     | >ERBB2-R89€ KWMALESILC   | 5290  | 5281  |
| >ERBB2-R89€ KWMALESILF  | 8     | >ERBB2-R89€ KWMALESILC   | 12    | 4     |
| >ERBB2-R89€ KWMALESILF  | 128   | >ERBB2-R89€ KWMALESILC   | 109   | 19    |
| >ERBB2-S31C GSCTLVCP    | 70    | >ERBB2-S31C GFCTLVCP     | 25896 | 25826 |
| >ERBB2-S31C PYNYLSTDVG  | 15167 | >ERBB2-S31C PYNYLSTDVG   | 132   | 15035 |
| >ERBB2-S31C VGSCTLVCP   | 2292  | >ERBB2-S31C VGFCTLVCP    | 379   | 1913  |
| >ERBB2-S31C DVGSTLV     | 173   | >ERBB2-S31C DVGFCTLV     | 76    | 97    |
| >ERBB2-S31C DVGSTLVCP   | 452   | >ERBB2-S31C DVGFCTLVCP   | 199   | 253   |
| >ERBB2-S31C DVGSTLV     | 314   | >ERBB2-S31C DVGFCTLV     | 267   | 47    |
| >ERBB2-S31C DVGSTLVCP   | 405   | >ERBB2-S31C DVGFCTLVCP   | 525   | 120   |
| >ERBB2-S31C TDVGSCTL    | 476   | >ERBB2-S31C TDVGFCTL     | 575   | 99    |
| >ERBB2-S31C TDVGSCTLV   | 74    | >ERBB2-S31C TDVGFCTLV    | 142   | 68    |
| >ERBB2-S31C STDVGSCTLV  | 404   | >ERBB2-S31C STDVGFCTLV   | 429   | 25    |
| >ERBB2-S31C STDVGSCTL   | 763   | >ERBB2-S31C STDVGFCTL    | 84    | 679   |
| >ERBB2-S31C STDVGSCTLV  | 401   | >ERBB2-S31C STDVGFCTLV   | 155   | 246   |
| >ERBB2-S31C STDVGSCTL   | 570   | >ERBB2-S31C STDVGFCTL    | 471   | 99    |
| >ERBB2-S31C STDVGSCTLV  | 314   | >ERBB2-S31C STDVGFCTLV   | 190   | 124   |
| >ERBB2-S31C STDVGSCTL   | 184   | >ERBB2-S31C STDVGFCTL    | 257   | 73    |
| >ERBB2-S31C STDVGSCTLV  | 80    | >ERBB2-S31C STDVGFCTLV   | 72    | 8     |
| >ERBB2-S31C STDVGSCTLV  | 215   | >ERBB2-S31C STDVGFCTLV   | 189   | 26    |
| >ERBB2-S31C STDVGSCTLV  | 138   | >ERBB2-S31C STDVGFCTLV   | 122   | 16    |
| >ERBB2-S31C STDVGSCTL   | 250   | >ERBB2-S31C STDVGFCTL    | 167   | 83    |

|                         |       |                         |     |       |
|-------------------------|-------|-------------------------|-----|-------|
| >ERBB2-S31C STDVGSCTLV  | 56    | >ERBB2-S31C STDVGFCTLV  | 30  | 26    |
| >ERBB2-S31C STDVGSCTL   | 9     | >ERBB2-S31C STDVGFCTL   | 35  | 26    |
| >ERBB2-S31C STDVGSCTL   | 400   | >ERBB2-S31C STDVGFCTL   | 348 | 52    |
| >ERBB2-S31C LSTDVGSCTL\ | 678   | >ERBB2-S31C LSTDVGFCTL\ | 282 | 396   |
| >ERBB2-S31C LSTDVGSCTL\ | 736   | >ERBB2-S31C LSTDVGFCTL\ | 284 | 452   |
| >ERBB2-S31C LSTDVGSCTL\ | 289   | >ERBB2-S31C LSTDVGFCTL\ | 134 | 155   |
| >ERBB2-S31C LSTDVGSCTL  | 17    | >ERBB2-S31C LSTDVGFCTL  | 33  | 16    |
| >ERBB2-S31C LSTDVGSCTL  | 430   | >ERBB2-S31C LSTDVGFCTL  | 252 | 178   |
| >ERBB2-S31C LSTDVGSCTL  | 179   | >ERBB2-S31C LSTDVGFCTL  | 61  | 118   |
| >ERBB2-S31C LSTDVGSCTL\ | 132   | >ERBB2-S31C LSTDVGFCTL\ | 79  | 53    |
| >ERBB2-S31C LSTDVGSCTL  | 51    | >ERBB2-S31C LSTDVGFCTL  | 161 | 110   |
| >ERBB2-S31C LSTDVGSCTL\ | 35    | >ERBB2-S31C LSTDVGFCTL\ | 78  | 43    |
| >ERBB2-S31C YLSTDVGSCT  | 929   | >ERBB2-S31C YLSTDVGFCT  | 105 | 824   |
| >ERBB2-S31C YLSTDVGSCT  | 25    | >ERBB2-S31C YLSTDVGFCT  | 19  | 6     |
| >ERBB2-S31C YLSTDVGS    | 252   | >ERBB2-S31C YLSTDVGF    | 144 | 108   |
| >ERBB2-S31C YLSTDVGS    | 734   | >ERBB2-S31C YLSTDVGF    | 171 | 563   |
| >ERBB2-S31C YLSTDVGSCT  | 92    | >ERBB2-S31C YLSTDVGFCT  | 51  | 41    |
| >ERBB2-S31C YLSTDVGSCT  | 5     | >ERBB2-S31C YLSTDVGFCT  | 4   | 1     |
| >ERBB2-S31C YLSTDVGS    | 324   | >ERBB2-S31C YLSTDVGF    | 682 | 358   |
| >ERBB2-S31C YLSTDVGS    | 41    | >ERBB2-S31C YLSTDVGF    | 50  | 9     |
| >ERBB2-S31C YLSTDVGSCT  | 170   | >ERBB2-S31C YLSTDVGFCT  | 471 | 301   |
| >ERBB2-S31C YLSTDVGSCT  | 6     | >ERBB2-S31C YLSTDVGFCT  | 5   | 1     |
| >ERBB2-S31C YLSTDVGS    | 1657  | >ERBB2-S31C YLSTDVGF    | 428 | 1229  |
| >ERBB2-S31C YLSTDVGSCT  | 717   | >ERBB2-S31C YLSTDVGFCT  | 259 | 458   |
| >ERBB2-S31C YLSTDVGSCT  | 62    | >ERBB2-S31C YLSTDVGFCT  | 27  | 35    |
| >ERBB2-S31C YLSTDVGS    | 70    | >ERBB2-S31C YLSTDVGF    | 38  | 32    |
| >ERBB2-S31C YLSTDVGSCT  | 297   | >ERBB2-S31C YLSTDVGFCT  | 97  | 200   |
| >ERBB2-S31C YLSTDVGSCT  | 4     | >ERBB2-S31C YLSTDVGFCT  | 4   | 0     |
| >ERBB2-S31C YLSTDVGS    | 210   | >ERBB2-S31C YLSTDVGF    | 146 | 64    |
| >ERBB2-S31C YLSTDVGSCT  | 534   | >ERBB2-S31C YLSTDVGFCT  | 128 | 406   |
| >ERBB2-S31C YLSTDVGSCT  | 4     | >ERBB2-S31C YLSTDVGFCT  | 5   | 1     |
| >ERBB2-S31C YLSTDVGS    | 1494  | >ERBB2-S31C YLSTDVGF    | 331 | 1163  |
| >ERBB2-S31C YLSTDVGSCT  | 238   | >ERBB2-S31C YLSTDVGFCT  | 58  | 180   |
| >ERBB2-S31C YLSTDVGSCT  | 9     | >ERBB2-S31C YLSTDVGFCT  | 8   | 1     |
| >ERBB2-S31C YLSTDVGS    | 248   | >ERBB2-S31C YLSTDVGF    | 111 | 137   |
| >ERBB2-S31C YLSTDVGSCT  | 361   | >ERBB2-S31C YLSTDVGFCT  | 76  | 285   |
| >ERBB2-S31C YLSTDVGSCT  | 5     | >ERBB2-S31C YLSTDVGFCT  | 5   | 0     |
| >ERBB2-S31C YLSTDVGS    | 143   | >ERBB2-S31C YLSTDVGF    | 330 | 187   |
| >ERBB2-S31C YLSTDVGS    | 21    | >ERBB2-S31C YLSTDVGF    | 24  | 3     |
| >ERBB2-S31C YLSTDVGSCT  | 40    | >ERBB2-S31C YLSTDVGFCT  | 25  | 15    |
| >ERBB2-S31C YLSTDVGSCT  | 2     | >ERBB2-S31C YLSTDVGFCT  | 2   | 0     |
| >ERBB2-S31C YLSTDVGS    | 13591 | >ERBB2-S31C YLSTDVGF    | 86  | 13505 |
| >ERBB2-S31C YLSTDVGSCT  | 263   | >ERBB2-S31C YLSTDVGFCT  | 386 | 123   |

|                         |       |                         |       |       |
|-------------------------|-------|-------------------------|-------|-------|
| >ERBB2-S31C YLSTDVGS    | 16619 | >ERBB2-S31C YLSTDVGF    | 168   | 16451 |
| >ERBB2-S31C YLSTDVGS    | 15207 | >ERBB2-S31C YLSTDVGF    | 46    | 15161 |
| >ERBB2-S31C YLSTDVGSCT  | 438   | >ERBB2-S31C YLSTDVGFCT  | 473   | 35    |
| >ERBB2-S31C YLSTDVGS    | 13927 | >ERBB2-S31C YLSTDVGF    | 395   | 13532 |
| >ERBB2-S31C YLSTDVGSCT  | 326   | >ERBB2-S31C YLSTDVGFCT  | 687   | 361   |
| >ERBB2-S31C NYLSTDVGS   | 15628 | >ERBB2-S31C NYLSTDVGF   | 61    | 15567 |
| >ERBB2-S31C NYLSTDVGS   | 2865  | >ERBB2-S31C NYLSTDVGF   | 8     | 2857  |
| >ERBB2-S31C YNYLSTDVGS  | 17027 | >ERBB2-S31C YNYLSTDVGF  | 363   | 16664 |
| >ERBB2-S31C YNYLSTDVGS  | 17323 | >ERBB2-S31C YNYLSTDVGF  | 226   | 17097 |
| >ERBB2-S31C YNYLSTDVGS  | 11116 | >ERBB2-S31C YNYLSTDVGF  | 32    | 11084 |
| >ERBB2-S31C YNYLSTDVGS  | 22848 | >ERBB2-S31C YNYLSTDVGF  | 347   | 22501 |
| >ERBB2-S76C SPKANKEI    | 133   | >ERBB2-S76C FPKANKEI    | 137   | 4     |
| >ERBB2-S76C SPKANKEIL   | 187   | >ERBB2-S76C FPKANKEIL   | 181   | 6     |
| >ERBB2-S76C SPKANKEIL   | 193   | >ERBB2-S76C FPKANKEIL   | 159   | 34    |
| >ERBB2-S76C SPKANKEI    | 1303  | >ERBB2-S76C FPKANKEI    | 434   | 869   |
| >ERBB2-S76C SPKANKEIL   | 515   | >ERBB2-S76C FPKANKEIL   | 158   | 357   |
| >ERBB2-S76C SPKANKEI    | 17622 | >ERBB2-S76C FPKANKEI    | 277   | 17345 |
| >ERBB2-S76C TSPKANKEI   | 11898 | >ERBB2-S76C TFPKANKEI   | 69    | 11829 |
| >ERBB2-S76C TSPKANKEIL  | 15598 | >ERBB2-S76C TFPKANKEIL  | 165   | 15433 |
| >ERBB2-S76C TSPKANKEI   | 54    | >ERBB2-S76C TFPKANKEI   | 9184  | 9130  |
| >ERBB2-S76C TSPKANKEIL  | 9     | >ERBB2-S76C TFPKANKEIL  | 1778  | 1769  |
| >ERBB2-S76C TSPKANKEI   | 159   | >ERBB2-S76C TFPKANKEI   | 11885 | 11726 |
| >ERBB2-S76C VAIKVLRENT! | 20573 | >ERBB2-S76C VAIKVLRENTI | 123   | 20450 |
| >ERBB2-S76C VAIKVLRENT! | 21440 | >ERBB2-S76C VAIKVLRENTI | 45    | 21395 |
| >ERBB2-S76C VAIKVLRENT! | 14853 | >ERBB2-S76C VAIKVLRENTI | 391   | 14462 |
| >ERBB2-S76C VAIKVLRENT! | 20654 | >ERBB2-S76C VAIKVLRENTI | 289   | 20365 |
| >ERBB2-S76C VAIKVLRENT! | 17546 | >ERBB2-S76C VAIKVLRENTI | 359   | 17187 |
| >ERBB2-S76C NTSPKANKEI  | 1700  | >ERBB2-S76C NTFPKANKEI  | 450   | 1250  |
| >ERBB2-S76C NTSPKANK    | 1258  | >ERBB2-S76C NTFPKANK    | 240   | 1018  |
| >ERBB2-S76C NTSPKANK    | 173   | >ERBB2-S76C NTFPKANK    | 51    | 122   |
| >ERBB2-S76C NTSPKANK    | 2370  | >ERBB2-S76C NTFPKANK    | 383   | 1987  |
| >ERBB2-S76C NTSPKANK    | 36    | >ERBB2-S76C NTFPKANK    | 8     | 28    |
| >ERBB2-S76C NTSPKANKEI  | 171   | >ERBB2-S76C NTFPKANKEI  | 39    | 132   |
| >ERBB2-S76C NTSPKANKEI  | 2339  | >ERBB2-S76C NTFPKANKEI  | 408   | 1931  |
| >ERBB2-S76C NTSPKANKEI  | 994   | >ERBB2-S76C NTFPKANKEI  | 158   | 836   |
| >ERBB2-S76C NTSPKANKEI  | 1305  | >ERBB2-S76C NTFPKANKEI  | 222   | 1083  |
| >ERBB2-S76C NTSPKANKEI  | 1401  | >ERBB2-S76C NTFPKANKEI  | 272   | 1129  |
| >ERBB2-S76C NTSPKANK    | 1630  | >ERBB2-S76C NTFPKANK    | 480   | 1150  |
| >ERBB2-S76C NTSPKANKEI  | 2515  | >ERBB2-S76C NTFPKANKEI  | 428   | 2087  |
| >ERBB2-S76C ENTSPKANK   | 289   | >ERBB2-S76C ENTFPKANK   | 197   | 92    |
| >ERBB2-S76C RENTSPKA    | 615   | >ERBB2-S76C RENTFPKA    | 232   | 383   |
| >ERBB2-S76C RENTSPKA    | 45    | >ERBB2-S76C RENTFPKA    | 20    | 25    |
| >ERBB2-S76C VLRENTSPKA  | 61    | >ERBB2-S76C VLRENTFPKA  | 36    | 25    |

|                         |       |                         |      |       |
|-------------------------|-------|-------------------------|------|-------|
| >ERBB2-S76C VLRENTSPKA  | 249   | >ERBB2-S76C VLRENTFPKA  | 158  | 91    |
| >ERBB2-S76C VLRENTSPKA  | 206   | >ERBB2-S76C VLRENTFPKA  | 107  | 99    |
| >ERBB2-S76C VLRENTSPK   | 881   | >ERBB2-S76C VLRENTFPK   | 263  | 618   |
| >ERBB2-S76C VLRENTSPKA  | 7     | >ERBB2-S76C VLRENTFPKA  | 6    | 1     |
| >ERBB2-S76C VLRENTSPK   | 42    | >ERBB2-S76C VLRENTFPK   | 41   | 1     |
| >ERBB2-S76C VLRENTSPK   | 1206  | >ERBB2-S76C VLRENTFPK   | 126  | 1080  |
| >ERBB2-S76C VLRENTSPK   | 11    | >ERBB2-S76C VLRENTFPK   | 9    | 2     |
| >ERBB2-S76C VLRENTSPKA  | 142   | >ERBB2-S76C VLRENTFPKA  | 178  | 36    |
| >ERBB2-S76C VLRENTSPK   | 2238  | >ERBB2-S76C VLRENTFPK   | 188  | 2050  |
| >ERBB2-S76C KVLRENTSPK  | 450   | >ERBB2-S76C KVLRENTFPK  | 124  | 326   |
| >ERBB2-S76C KVLRENTSPK  | 30    | >ERBB2-S76C KVLRENTFPK  | 38   | 8     |
| >ERBB2-S76C KVLRENTSPK  | 113   | >ERBB2-S76C KVLRENTFPK  | 34   | 79    |
| >ERBB2-S76C KVLRENTSPK  | 6     | >ERBB2-S76C KVLRENTFPK  | 5    | 1     |
| >ERBB2-S76C KVLRENTSPK  | 42    | >ERBB2-S76C KVLRENTFPK  | 40   | 2     |
| >ERBB2-S76C KVLRENTSPK  | 1496  | >ERBB2-S76C KVLRENTFPK  | 347  | 1149  |
| >ERBB2-S76C KVLRENTS    | 2396  | >ERBB2-S76C KVLRENTF    | 13   | 2383  |
| >ERBB2-S76C KVLRENTS    | 20107 | >ERBB2-S76C KVLRENTF    | 82   | 20025 |
| >ERBB2-S76C KVLRENTS    | 20128 | >ERBB2-S76C KVLRENTF    | 165  | 19963 |
| >ERBB2-S76C KVLRENTS    | 20083 | >ERBB2-S76C KVLRENTF    | 122  | 19961 |
| >ERBB2-S76C KVLRENTSPK  | 536   | >ERBB2-S76C KVLRENTFPK  | 119  | 417   |
| >ERBB2-S76C IKVLRENTS   | 6556  | >ERBB2-S76C IKVLRENTF   | 10   | 6546  |
| >ERBB2-S76C IKVLRENTSPK | 421   | >ERBB2-S76C IKVLRENTFPK | 1035 | 614   |
| >ERBB2-S76C AIKVLRENTS  | 18727 | >ERBB2-S76C AIKVLRENTF  | 383  | 18344 |
| >ERBB2-T21€ TRTVCAGGC/  | 1614  | >ERBB2-T21€ SRTVCAGGC/  | 393  | 1221  |
| >ERBB2-T21€ LTRTVCAG    | 156   | >ERBB2-T21€ LSRTVCAG    | 341  | 185   |
| >ERBB2-T21€ LTRTVCAGGC  | 89    | >ERBB2-T21€ LSRTVCAGGC  | 191  | 102   |
| >ERBB2-T21€ GESSEDCQSL  | 458   | >ERBB2-T21€ GESSEDCQSL  | 2342 | 1884  |
| >ERBB2-T21€ SLTRTVCA    | 598   | >ERBB2-T21€ SLSRTVCA    | 110  | 488   |
| >ERBB2-T21€ SLTRTVCA    | 602   | >ERBB2-T21€ SLSRTVCA    | 144  | 458   |
| >ERBB2-T21€ SLTRTVCA    | 285   | >ERBB2-T21€ SLSRTVCA    | 206  | 79    |
| >ERBB2-T21€ SLTRTVCAGG  | 470   | >ERBB2-T21€ SLSRTVCAGG  | 366  | 104   |
| >ERBB2-T21€ SLTRTVCA    | 381   | >ERBB2-T21€ SLSRTVCA    | 281  | 100   |
| >ERBB2-T21€ SLTRTVCA    | 34    | >ERBB2-T21€ SLSRTVCA    | 37   | 3     |
| >ERBB2-T21€ SLTRTVCA    | 15    | >ERBB2-T21€ SLSRTVCA    | 17   | 2     |
| >ERBB2-T21€ SLTRTVCAGG  | 118   | >ERBB2-T21€ SLSRTVCAGG  | 155  | 37    |
| >ERBB2-T21€ EDCQSLTR    | 494   | >ERBB2-T21€ EDCQSLSR    | 551  | 57    |
| >ERBB2-T21€ SEDCQSLT    | 483   | >ERBB2-T21€ SEDCQSLS    | 734  | 251   |
| >ERBB2-T21€ SEDCQSLTRT  | 171   | >ERBB2-T21€ SEDCQSLSRT  | 209  | 38    |
| >ERBB2-T21€ SSEDQCQLTR  | 184   | >ERBB2-T21€ SSEDQCQLSR  | 277  | 93    |
| >ERBB2-T21€ SSEDQCQLTR  | 122   | >ERBB2-T21€ SSEDQCQLSR  | 315  | 193   |
| >ERBB2-T21€ SSEDQCQLT   | 164   | >ERBB2-T21€ SSEDQCQLS   | 257  | 93    |
| >ERBB2-T21€ SSEDQCQLTR  | 691   | >ERBB2-T21€ SSEDQCQLSR  | 224  | 467   |
| >ERBB2-T21€ SSEDQCQLTR  | 474   | >ERBB2-T21€ SSEDQCQLSR  | 507  | 33    |

|                        |      |                        |       |       |
|------------------------|------|------------------------|-------|-------|
| >ERBB2-T21€ESSEDCQSLTI | 16   | >ERBB2-T21€ESSEDCQSLSI | 18    | 2     |
| >ERBB2-T73€TVYKGIWI    | 935  | >ERBB2-T73€IVYKGIWI    | 383   | 552   |
| >ERBB2-T73€TVYKGIWI    | 215  | >ERBB2-T73€IVYKGIWI    | 119   | 96    |
| >ERBB2-T73€TVYKGIWI    | 192  | >ERBB2-T73€IVYKGIWI    | 94    | 98    |
| >ERBB2-T73€TVYKGIWI    | 214  | >ERBB2-T73€IVYKGIWI    | 50    | 164   |
| >ERBB2-T73€TVYKGIWI    | 657  | >ERBB2-T73€IVYKGIWI    | 291   | 366   |
| >ERBB2-T73€TVYKGIWI    | 572  | >ERBB2-T73€IVYKGIWI    | 168   | 404   |
| >ERBB2-T73€TVYKGIWI    | 148  | >ERBB2-T73€IVYKGIWI    | 2049  | 1901  |
| >ERBB2-T73€TVYKGIWI    | 161  | >ERBB2-T73€IVYKGIWI    | 1560  | 1399  |
| >ERBB2-T73€TVYKGIWI    | 3388 | >ERBB2-T73€IVYKGIWI    | 461   | 2927  |
| >ERBB2-T73€TVYKGIWI    | 316  | >ERBB2-T73€IVYKGIWI    | 185   | 131   |
| >ERBB2-T73€GTVYKGIW    | 21   | >ERBB2-T73€GIVYKGIW    | 2234  | 2213  |
| >ERBB2-T73€GTVYKGIWI   | 66   | >ERBB2-T73€GIVYKGIWI   | 13607 | 13541 |
| >ERBB2-T73€GTVYKGIW    | 289  | >ERBB2-T73€GIVYKGIW    | 8023  | 7734  |
| >ERBB2-T73€GTVYKGIW    | 340  | >ERBB2-T73€GIVYKGIW    | 3494  | 3154  |
| >ERBB2-T73€GTVYKGIWI   | 180  | >ERBB2-T73€GIVYKGIWI   | 4349  | 4169  |
| >ERBB2-T73€GTVYKGIWI   | 192  | >ERBB2-T73€GIVYKGIWI   | 10840 | 10648 |
| >ERBB2-T73€FGTVYKGI    | 3361 | >ERBB2-T73€FGIVYKGI    | 359   | 3002  |
| >ERBB2-T73€FGTVYKGIW   | 465  | >ERBB2-T73€FGIVYKGIW   | 185   | 280   |
| >ERBB2-T73€FGTVYKGIW   | 44   | >ERBB2-T73€FGIVYKGIW   | 200   | 156   |
| >ERBB2-T73€AFGTVYKGI   | 187  | >ERBB2-T73€AFGIVYKGI   | 155   | 32    |
| >ERBB2-T73€AFGTVYKGIW  | 324  | >ERBB2-T73€AFGIVYKGIW  | 254   | 70    |
| >ERBB2-T73€GAFGTVYKGI  | 322  | >ERBB2-T73€GAFGIVYKGI  | 317   | 5     |
| >ERBB2-T73€GAFGTVYK    | 122  | >ERBB2-T73€GAFGIVYK    | 105   | 17    |
| >ERBB2-T73€GAFGTVYK    | 9    | >ERBB2-T73€GAFGIVYK    | 8     | 1     |
| >ERBB2-T73€GAFGTVYK    | 98   | >ERBB2-T73€GAFGIVYK    | 273   | 175   |
| >ERBB2-T73€GAFGTVYK    | 222  | >ERBB2-T73€GAFGIVYK    | 99    | 123   |
| >ERBB2-T73€GAFGTVYK    | 23   | >ERBB2-T73€GAFGIVYK    | 14    | 9     |
| >ERBB2-T73€GAFGTVYKGI  | 57   | >ERBB2-T73€GAFGIVYKGI  | 140   | 83    |
| >ERBB2-T73€GAFGTVYKGI  | 58   | >ERBB2-T73€GAFGIVYKGI  | 57    | 1     |
| >ERBB2-T73€GAFGTVYKGI  | 37   | >ERBB2-T73€GAFGIVYKGI  | 47    | 10    |
| >ERBB2-T73€GAFGTVYKGI  | 408  | >ERBB2-T73€GAFGIVYKGI  | 310   | 98    |
| >ERBB2-T73€GAFGTVYKGI  | 47   | >ERBB2-T73€GAFGIVYKGI  | 36    | 11    |
| >ERBB2-T73€GAFGTVYK    | 150  | >ERBB2-T73€GAFGIVYK    | 176   | 26    |
| >ERBB2-T73€SGAFGTVYK   | 49   | >ERBB2-T73€SGAFGIVYK   | 51    | 2     |
| >ERBB2-T73€SGAFGTVY    | 87   | >ERBB2-T73€SGAFGIVY    | 95    | 8     |
| >ERBB2-T73€SGAFGTVYK   | 178  | >ERBB2-T73€SGAFGIVYK   | 181   | 3     |
| >ERBB2-T73€SGAFGTVY    | 188  | >ERBB2-T73€SGAFGIVY    | 328   | 140   |
| >ERBB2-T73€SGAFGTVY    | 460  | >ERBB2-T73€SGAFGIVY    | 819   | 359   |
| >ERBB2-T73€SGAFGTVYK   | 342  | >ERBB2-T73€SGAFGIVYK   | 216   | 126   |
| >ERBB2-T73€SGAFGTVYK   | 422  | >ERBB2-T73€SGAFGIVYK   | 474   | 52    |
| >ERBB2-T73€GSGAFGTVYK  | 46   | >ERBB2-T73€GSGAFGIVYK  | 63    | 17    |
| >ERBB2-T73€GSGAFGTVYK  | 29   | >ERBB2-T73€GSGAFGIVYK  | 35    | 6     |

|                       |      |                       |     |      |
|-----------------------|------|-----------------------|-----|------|
| >ERBB2-T73EGSGAFGTVY  | 827  | >ERBB2-T73EGSGAFGIVY  | 472 | 355  |
| >ERBB2-T73EGSGAFGTVY  | 432  | >ERBB2-T73EGSGAFGIVY  | 480 | 48   |
| >ERBB2-T73EGSGAFGTVYK | 224  | >ERBB2-T73EGSGAFGIVYK | 290 | 66   |
| >ERBB2-T73EGSGAFGTVY  | 78   | >ERBB2-T73EGSGAFGIVY  | 127 | 49   |
| >ERBB2-T73EGSGAFGTVY  | 349  | >ERBB2-T73EGSGAFGIVY  | 725 | 376  |
| >ERBB2-T73EGSGAFGTVY  | 62   | >ERBB2-T73EGSGAFGIVY  | 91  | 29   |
| >ERBB2-T73EGSGAFGTVY  | 11   | >ERBB2-T73EGSGAFGIVY  | 53  | 42   |
| >ERBB2-T73EGSGAFGTVYK | 337  | >ERBB2-T73EGSGAFGIVYK | 247 | 90   |
| >ERBB2-T73ELGSGAFGTVY | 125  | >ERBB2-T73ELGSGAFGIVY | 157 | 32   |
| >ERBB2-T73ELGSGAFGTVY | 478  | >ERBB2-T73ELGSGAFGIVY | 836 | 358  |
| >ERBB2-T73ELGSGAFGTVY | 93   | >ERBB2-T73ELGSGAFGIVY | 142 | 49   |
| >ERBB2-T73ELGSGAFGTVY | 94   | >ERBB2-T73ELGSGAFGIVY | 58  | 36   |
| >ERBB2-T73VLGSGAFGT   | 2098 | >ERBB2-T73VLGSGAFGI   | 107 | 1991 |
| >ERBB2-T73VLGSGAFGT   | 73   | >ERBB2-T73VLGSGAFGIV  | 318 | 245  |
| >ERBB2-T73VLGSGAFGT   | 3530 | >ERBB2-T73VLGSGAFGI   | 201 | 3329 |
| >ERBB2-T73VLGSGAFGT   | 41   | >ERBB2-T73VLGSGAFGIV  | 115 | 74   |
| >ERBB2-T73VLGSGAFGT   | 1992 | >ERBB2-T73VLGSGAFGI   | 101 | 1891 |
| >ERBB2-T73VLGSGAFGT   | 21   | >ERBB2-T73VLGSGAFGIV  | 47  | 26   |
| >ERBB2-T73VLGSGAFGT   | 827  | >ERBB2-T73VLGSGAFGI   | 68  | 759  |
| >ERBB2-T73VLGSGAFGT   | 68   | >ERBB2-T73VLGSGAFGI   | 5   | 63   |
| >ERBB2-T73VLGSGAFGT   | 3    | >ERBB2-T73VLGSGAFGIV  | 9   | 6    |
| >ERBB2-T73VLGSGAFGT   | 505  | >ERBB2-T73VLGSGAFGI   | 8   | 497  |
| >ERBB2-T73VLGSGAFGT   | 7    | >ERBB2-T73VLGSGAFGIV  | 19  | 12   |
| >ERBB2-T73VLGSGAFGT   | 103  | >ERBB2-T73VLGSGAFGI   | 8   | 95   |
| >ERBB2-T73VLGSGAFGT   | 7    | >ERBB2-T73VLGSGAFGIV  | 12  | 5    |
| >ERBB2-T73VLGSGAFGT   | 75   | >ERBB2-T73VLGSGAFGI   | 4   | 71   |
| >ERBB2-T73VLGSGAFGT   | 5    | >ERBB2-T73VLGSGAFGIV  | 15  | 10   |
| >ERBB2-T73VLGSGAFGT   | 14   | >ERBB2-T73VLGSGAFGI   | 4   | 10   |
| >ERBB2-T73VLGSGAFGT   | 2    | >ERBB2-T73VLGSGAFGIV  | 3   | 1    |
| >ERBB2-T73VLGSGAFGT   | 64   | >ERBB2-T73VLGSGAFGIV  | 49  | 15   |
| >ERBB2-T73VLGSGAFGT   | 54   | >ERBB2-T73VLGSGAFGIV  | 55  | 1    |
| >ERBB2-T73VLGSGAFGT   | 26   | >ERBB2-T73VLGSGAFGIV  | 18  | 8    |
| >ERBB2-T73VLGSGAFGT   | 73   | >ERBB2-T73VLGSGAFGIV  | 93  | 20   |
| >ERBB2-T73VLGSGAFGT   | 87   | >ERBB2-T73VLGSGAFGIV  | 110 | 23   |
| >ERBB2-T73VLGSGAFGT   | 421  | >ERBB2-T73VLGSGAFGIV  | 659 | 238  |
| >ERBB2-T73VLGSGAFGT   | 227  | >ERBB2-T73VLGSGAFGIV  | 729 | 502  |
| >ERBB2-T73KVLGSGAFGT  | 294  | >ERBB2-T73KVLGSGAFGI' | 844 | 550  |
| >ERBB2-T73KVLGSGAFGT  | 3465 | >ERBB2-T73KVLGSGAFGI  | 449 | 3016 |
| >ERBB2-T73KVLGSGAFGT  | 123  | >ERBB2-T73KVLGSGAFGI' | 245 | 122  |
| >ERBB2-T73KVLGSGAFGT  | 602  | >ERBB2-T73KVLGSGAFGI  | 138 | 464  |
| >ERBB2-T73KVLGSGAFGT  | 9    | >ERBB2-T73KVLGSGAFGI' | 25  | 16   |
| >ERBB2-T73KVLGSGAFGT  | 1193 | >ERBB2-T73KVLGSGAFGI  | 35  | 1158 |
| >ERBB2-T73KVLGSGAFGT  | 12   | >ERBB2-T73KVLGSGAFGI' | 87  | 75   |



|                       |       |                        |       |       |
|-----------------------|-------|------------------------|-------|-------|
| >ERBB2-T73EKVLGSGAFGT | 6088  | >ERBB2-T73EKVLGSGAFGI  | 129   | 5959  |
| >ERBB2-T73EKVLGSGAFGT | 78    | >ERBB2-T73EKVLGSGAFGI' | 397   | 319   |
| >ERBB2-T73EKVLGSGAFGT | 2425  | >ERBB2-T73EKVLGSGAFGI  | 114   | 2311  |
| >ERBB2-T73EKVLGSGAFGT | 28    | >ERBB2-T73EKVLGSGAFGI' | 77    | 49    |
| >ERBB2-T73EKVLGSGAFGT | 2780  | >ERBB2-T73EKVLGSGAFGI  | 132   | 2648  |
| >ERBB2-T73EKVLGSGAFGT | 176   | >ERBB2-T73EKVLGSGAFGI' | 571   | 395   |
| >ERBB2-T73EKVLGSGAFGT | 4594  | >ERBB2-T73EKVLGSGAFGI  | 421   | 4173  |
| >ERBB2-T73EKVLGSGAFGT | 15    | >ERBB2-T73EKVLGSGAFGI' | 59    | 44    |
| >ERBB2-T73EKVLGSGAFGT | 2433  | >ERBB2-T73EKVLGSGAFGI  | 140   | 2293  |
| >ERBB2-T73EKVLGSGAFGT | 76    | >ERBB2-T73EKVLGSGAFGI' | 107   | 31    |
| >ERBB2-T73EKVLGSGAFGT | 4396  | >ERBB2-T73EKVLGSGAFGI  | 42    | 4354  |
| >ERBB2-T73EKVLGSGAFGT | 4491  | >ERBB2-T73EKVLGSGAFGI  | 228   | 4263  |
| >ERBB2-T73EKVLGSGAFGT | 324   | >ERBB2-T73EKVLGSGAFGI' | 1039  | 715   |
| >ERBB2-T73EKVLGSGAFGT | 3039  | >ERBB2-T73EKVLGSGAFGI  | 40    | 2999  |
| >ERBB2-T73EKVLGSGAFGT | 16776 | >ERBB2-T73EKVLGSGAFGI  | 407   | 16369 |
| >ERBB2-T791TSTVQLVTQL | 46    | >ERBB2-T791ISTVQLVTQL  | 10    | 36    |
| >ERBB2-T791TSTVQLVTQL | 267   | >ERBB2-T791ISTVQLVTQLI | 38    | 229   |
| >ERBB2-T791TSTVQLVTQL | 1897  | >ERBB2-T791ISTVQLVTQL  | 256   | 1641  |
| >ERBB2-T791TSTVQLVTQL | 1042  | >ERBB2-T791ISTVQLVTQLI | 141   | 901   |
| >ERBB2-T791TSTVQLVTQL | 236   | >ERBB2-T791ISTVQLVTQLI | 160   | 76    |
| >ERBB2-T791TSTVQLVTQL | 453   | >ERBB2-T791ISTVQLVTQL  | 730   | 277   |
| >ERBB2-T791TSTVQLVTQL | 192   | >ERBB2-T791ISTVQLVTQLI | 47    | 145   |
| >ERBB2-T791LTSTVQLV   | 1215  | >ERBB2-T791LISTVQLV    | 195   | 1020  |
| >ERBB2-T791LTSTVQLV   | 83    | >ERBB2-T791LISTVQLV    | 22    | 61    |
| >ERBB2-T791LTSTVQLVTQ | 123   | >ERBB2-T791LISTVQLVTQI | 32    | 91    |
| >ERBB2-T791LTSTVQLV   | 129   | >ERBB2-T791LISTVQLV    | 22    | 107   |
| >ERBB2-T791LTSTVQLVTQ | 821   | >ERBB2-T791LISTVQLVTQI | 122   | 699   |
| >ERBB2-T791LTSTVQLV   | 374   | >ERBB2-T791LISTVQLV    | 106   | 268   |
| >ERBB2-T791LTSTVQLV   | 205   | >ERBB2-T791LISTVQLV    | 42    | 163   |
| >ERBB2-T791LTSTVQLV   | 451   | >ERBB2-T791LISTVQLV    | 69    | 382   |
| >ERBB2-T791LTSTVQLV   | 3783  | >ERBB2-T791LISTVQLV    | 143   | 3640  |
| >ERBB2-T791LTSTVQLV   | 83    | >ERBB2-T791LISTVQLV    | 5     | 78    |
| >ERBB2-T791LTSTVQLVTQ | 2468  | >ERBB2-T791LISTVQLVTQI | 56    | 2412  |
| >ERBB2-T791LTSTVQLV   | 34    | >ERBB2-T791LISTVQLV    | 216   | 182   |
| >ERBB2-T791LTSTVQLVTQ | 268   | >ERBB2-T791LISTVQLVTQI | 1916  | 1648  |
| >ERBB2-T791LTSTVQLVTQ | 35    | >ERBB2-T791LISTVQLVTQI | 7582  | 7547  |
| >ERBB2-T791LTSTVQLVTQ | 49    | >ERBB2-T791LISTVQLVTQI | 848   | 799   |
| >ERBB2-T791LTSTVQLVTQ | 157   | >ERBB2-T791LISTVQLVTQI | 13358 | 13201 |
| >ERBB2-T791LTSTVQLVTQ | 29    | >ERBB2-T791LISTVQLVTQI | 1086  | 1057  |
| >ERBB2-T791LTSTVQLVTQ | 367   | >ERBB2-T791LISTVQLVTQI | 17394 | 17027 |
| >ERBB2-T791YVSRLGICLT | 5036  | >ERBB2-T791YVSRLGICLI  | 316   | 4720  |
| >ERBB2-T791YVSRLGICLT | 1806  | >ERBB2-T791YVSRLGICLI  | 82    | 1724  |
| >ERBB2-T791YVSRLGICLT | 614   | >ERBB2-T791YVSRLGICLI  | 29    | 585   |

|                        |      |                        |      |      |
|------------------------|------|------------------------|------|------|
| >ERBB2-T791YVSRLGICLT  | 651  | >ERBB2-T791YVSRLGICLI  | 42   | 609  |
| >ERBB2-T791YVSRLGICLT  | 3715 | >ERBB2-T791YVSRLGICLI  | 206  | 3509 |
| >ERBB2-T791YVSRLGICLT  | 5685 | >ERBB2-T791YVSRLGICLI  | 422  | 5263 |
| >ERBB2-T791YVSRLGICLT  | 751  | >ERBB2-T791YVSRLGICLI  | 83   | 668  |
| >ERBB2-T791YVSRLGICLT  | 3287 | >ERBB2-T791YVSRLGICLI  | 103  | 3184 |
| >ERBB2-T791CLTSTVQL    | 835  | >ERBB2-T791CLISTVQL    | 115  | 720  |
| >ERBB2-T791CLTSTVQLV   | 112  | >ERBB2-T791CLISTVQLV   | 27   | 85   |
| >ERBB2-T791CLTSTVQL    | 75   | >ERBB2-T791CLISTVQL    | 40   | 35   |
| >ERBB2-T791CLTSTVQLV   | 46   | >ERBB2-T791CLISTVQLV   | 27   | 19   |
| >ERBB2-T791CLTSTVQL    | 312  | >ERBB2-T791CLISTVQL    | 64   | 248  |
| >ERBB2-T791CLTSTVQLV   | 16   | >ERBB2-T791CLISTVQLV   | 6    | 10   |
| >ERBB2-T791CLTSTVQLV   | 780  | >ERBB2-T791CLISTVQLV   | 130  | 650  |
| >ERBB2-T791CLTSTVQL    | 143  | >ERBB2-T791CLISTVQL    | 45   | 98   |
| >ERBB2-T791CLTSTVQLV   | 10   | >ERBB2-T791CLISTVQLV   | 4    | 6    |
| >ERBB2-T791CLTSTVQL    | 364  | >ERBB2-T791CLISTVQL    | 68   | 296  |
| >ERBB2-T791CLTSTVQLV   | 25   | >ERBB2-T791CLISTVQLV   | 8    | 17   |
| >ERBB2-T791CLTSTVQL    | 227  | >ERBB2-T791CLISTVQL    | 333  | 106  |
| >ERBB2-T791CLTSTVQLV   | 13   | >ERBB2-T791CLISTVQLV   | 17   | 4    |
| >ERBB2-T791CLTSTVQL    | 77   | >ERBB2-T791CLISTVQL    | 110  | 33   |
| >ERBB2-T791CLTSTVQLV   | 10   | >ERBB2-T791CLISTVQLV   | 11   | 1    |
| >ERBB2-T791CLTSTVQL    | 7    | >ERBB2-T791CLISTVQL    | 11   | 4    |
| >ERBB2-T791CLTSTVQLV   | 2    | >ERBB2-T791CLISTVQLV   | 3    | 1    |
| >ERBB2-T791CLTSTVQLVTC | 417  | >ERBB2-T791CLISTVQLVTC | 601  | 184  |
| >ERBB2-T791ICLTSTVQLV  | 463  | >ERBB2-T791ICLISTVQLV  | 313  | 150  |
| >ERBB2-T791ICLTSTVQLV  | 466  | >ERBB2-T791ICLISTVQLV  | 447  | 19   |
| >ERBB2-T791GICLTSTV    | 1157 | >ERBB2-T791GICLISTV    | 478  | 679  |
| >ERBB2-T791GICLTSTVQLV | 766  | >ERBB2-T791GICLISTVQLV | 213  | 553  |
| >ERBB2-T791GICLTSTV    | 138  | >ERBB2-T791GICLISTV    | 97   | 41   |
| >ERBB2-T791GICLTSTVQLV | 200  | >ERBB2-T791GICLISTVQLV | 155  | 45   |
| >ERBB2-T791GICLTSTV    | 858  | >ERBB2-T791GICLISTV    | 454  | 404  |
| >ERBB2-T791GICLTSTV    | 122  | >ERBB2-T791GICLISTV    | 72   | 50   |
| >ERBB2-T791GICLTSTVQLV | 165  | >ERBB2-T791GICLISTVQLV | 171  | 6    |
| >ERBB2-T791GICLTSTV    | 314  | >ERBB2-T791GICLISTV    | 267  | 47   |
| >ERBB2-T791GICLTSTVQLV | 289  | >ERBB2-T791GICLISTVQLV | 349  | 60   |
| >ERBB2-T791GICLTSTV    | 38   | >ERBB2-T791GICLISTV    | 30   | 8    |
| >ERBB2-T791GICLTSTVQLV | 47   | >ERBB2-T791GICLISTVQLV | 49   | 2    |
| >ERBB2-T791LGICLTSTV   | 518  | >ERBB2-T791LGICLISTV   | 153  | 365  |
| >ERBB2-T791LGICLTSTV   | 256  | >ERBB2-T791LGICLISTV   | 284  | 28   |
| >ERBB2-T791LLGICLTSTV  | 63   | >ERBB2-T791LLGICLISTV  | 42   | 21   |
| >ERBB2-T791LLGICLTST   | 415  | >ERBB2-T791LLGICLIST   | 1213 | 798  |
| >ERBB2-T791LLGICLTSTV  | 17   | >ERBB2-T791LLGICLISTV  | 20   | 3    |
| >ERBB2-T791LLGICLTST   | 295  | >ERBB2-T791LLGICLIST   | 1654 | 1359 |
| >ERBB2-T791LLGICLTSTV  | 14   | >ERBB2-T791LLGICLISTV  | 16   | 2    |

|                        |       |                        |      |       |
|------------------------|-------|------------------------|------|-------|
| >ERBB2-T791LLGICLTSTV  | 98    | >ERBB2-T791LLGICLISTV  | 70   | 28    |
| >ERBB2-T791LLGICLTSTV  | 4     | >ERBB2-T791LLGICLISTV  | 3    | 1     |
| >ERBB2-T791LLGICLTSTV  | 5     | >ERBB2-T791LLGICLISTV  | 4    | 1     |
| >ERBB2-T791LLGICLTSTV  | 9     | >ERBB2-T791LLGICLISTV  | 8    | 1     |
| >ERBB2-T791LLGICLTSTV  | 6     | >ERBB2-T791LLGICLISTV  | 5    | 1     |
| >ERBB2-T791LLGICLTST   | 30    | >ERBB2-T791LLGICLIST   | 37   | 7     |
| >ERBB2-T791LLGICLTSTV  | 2     | >ERBB2-T791LLGICLISTV  | 2    | 0     |
| >ERBB2-T791LLGICLTSTVQ | 272   | >ERBB2-T791LLGICLISTVQ | 299  | 27    |
| >ERBB2-T791RLLGICLT    | 229   | >ERBB2-T791RLLGICLI    | 21   | 208   |
| >ERBB2-T791RLLGICLTST  | 73    | >ERBB2-T791RLLGICLIST  | 47   | 26    |
| >ERBB2-T791RLLGICLTSTV | 15    | >ERBB2-T791RLLGICLISTV | 14   | 1     |
| >ERBB2-T791RLLGICLT    | 582   | >ERBB2-T791RLLGICLI    | 58   | 524   |
| >ERBB2-T791RLLGICLTST  | 207   | >ERBB2-T791RLLGICLIST  | 204  | 3     |
| >ERBB2-T791RLLGICLTSTV | 29    | >ERBB2-T791RLLGICLISTV | 39   | 10    |
| >ERBB2-T791RLLGICLT    | 800   | >ERBB2-T791RLLGICLI    | 61   | 739   |
| >ERBB2-T791RLLGICLTST  | 52    | >ERBB2-T791RLLGICLIST  | 89   | 37    |
| >ERBB2-T791RLLGICLTSTV | 13    | >ERBB2-T791RLLGICLISTV | 13   | 0     |
| >ERBB2-T791RLLGICLT    | 310   | >ERBB2-T791RLLGICLI    | 37   | 273   |
| >ERBB2-T791RLLGICLTST  | 87    | >ERBB2-T791RLLGICLIST  | 66   | 21    |
| >ERBB2-T791RLLGICLTSTV | 19    | >ERBB2-T791RLLGICLISTV | 15   | 4     |
| >ERBB2-T791RLLGICLT    | 35    | >ERBB2-T791RLLGICLI    | 4    | 31    |
| >ERBB2-T791RLLGICLTST  | 95    | >ERBB2-T791RLLGICLIST  | 82   | 13    |
| >ERBB2-T791RLLGICLTSTV | 2     | >ERBB2-T791RLLGICLISTV | 2    | 0     |
| >ERBB2-T791RLLGICLT    | 2159  | >ERBB2-T791RLLGICLI    | 37   | 2122  |
| >ERBB2-T791RLLGICLTSTV | 5     | >ERBB2-T791RLLGICLISTV | 5    | 0     |
| >ERBB2-T791RLLGICLT    | 112   | >ERBB2-T791RLLGICLI    | 11   | 101   |
| >ERBB2-T791RLLGICLTST  | 401   | >ERBB2-T791RLLGICLIST  | 323  | 78    |
| >ERBB2-T791RLLGICLTSTV | 5     | >ERBB2-T791RLLGICLISTV | 5    | 0     |
| >ERBB2-T791RLLGICLT    | 541   | >ERBB2-T791RLLGICLI    | 13   | 528   |
| >ERBB2-T791RLLGICLTSTV | 2     | >ERBB2-T791RLLGICLISTV | 3    | 1     |
| >ERBB2-T791RLLGICLT    | 30    | >ERBB2-T791RLLGICLI    | 7    | 23    |
| >ERBB2-T791RLLGICLTST  | 34    | >ERBB2-T791RLLGICLIST  | 55   | 21    |
| >ERBB2-T791RLLGICLTSTV | 2     | >ERBB2-T791RLLGICLISTV | 2    | 0     |
| >ERBB2-T791RLLGICLT    | 2775  | >ERBB2-T791RLLGICLI    | 26   | 2749  |
| >ERBB2-T791RLLGICLTS   | 163   | >ERBB2-T791RLLGICLIS   | 1764 | 1601  |
| >ERBB2-T791RLLGICLTST  | 360   | >ERBB2-T791RLLGICLIST  | 573  | 213   |
| >ERBB2-T791RLLGICLTSTV | 23    | >ERBB2-T791RLLGICLISTV | 61   | 38    |
| >ERBB2-T791RLLGICLTSTV | 241   | >ERBB2-T791RLLGICLISTV | 261  | 20    |
| >ERBB2-T791SRLLGICLT   | 14965 | >ERBB2-T791SRLLGICLI   | 117  | 14848 |
| >ERBB2-T791SRLLGICLT   | 1325  | >ERBB2-T791SRLLGICLI   | 110  | 1215  |
| >ERBB2-T791SRLLGICLT   | 1261  | >ERBB2-T791SRLLGICLI   | 233  | 1028  |
| >ERBB2-T791SRLLGICLT   | 2193  | >ERBB2-T791SRLLGICLI   | 54   | 2139  |
| >ERBB2-T791VSRLGICLT   | 1786  | >ERBB2-T791VSRLGICLI   | 87   | 1699  |

|                        |       |                        |       |       |
|------------------------|-------|------------------------|-------|-------|
| >ERBB2-T791VSRLGICLT   | 2652  | >ERBB2-T791VSRLGICLI   | 47    | 2605  |
| >ERBB2-T791VSRLGICLT   | 4443  | >ERBB2-T791VSRLGICLI   | 458   | 3985  |
| >ERBB2-T791VSRLGICLT   | 24104 | >ERBB2-T791VSRLGICLI   | 107   | 23997 |
| >ERBB2-V75(PVAIKVLR    | 316   | >ERBB2-V75(PEAIKVLR    | 11061 | 10745 |
| >ERBB2-V75(IPDGENVKIP\ | 314   | >ERBB2-V75(IPDGENVKIP{ | 17681 | 17367 |
| >ERBB2-V75(IPDGENVKIP\ | 279   | >ERBB2-V75(IPDGENVKIP{ | 5850  | 5571  |
| >ERBB2-V75(IPVAIKVL    | 54    | >ERBB2-V75(IPEAIKVL    | 176   | 122   |
| >ERBB2-V75(IPVAIKVLR   | 125   | >ERBB2-V75(IPEAIKVLR   | 500   | 375   |
| >ERBB2-V75(IPVAIKVL    | 70    | >ERBB2-V75(IPEAIKVL    | 146   | 76    |
| >ERBB2-V75(IPVAIKVL    | 399   | >ERBB2-V75(IPEAIKVL    | 1329  | 930   |
| >ERBB2-V75(IPVAIKVL    | 293   | >ERBB2-V75(IPEAIKVL    | 678   | 385   |
| >ERBB2-V75(IPVAIKVLR   | 232   | >ERBB2-V75(IPEAIKVLR   | 2997  | 2765  |
| >ERBB2-V75(IPVAIKVL    | 245   | >ERBB2-V75(IPEAIKVL    | 1523  | 1278  |
| >ERBB2-V75(IPVAIKVL    | 531   | >ERBB2-V75(IPEAIKVL    | 440   | 91    |
| >ERBB2-V75(IPVAIKVLR   | 109   | >ERBB2-V75(IPEAIKVLR   | 308   | 199   |
| >ERBB2-V75(KIPVAIKV    | 1695  | >ERBB2-V75(KIPEAIKV    | 293   | 1402  |
| >ERBB2-V75(KIPVAIKV    | 376   | >ERBB2-V75(KIPEAIKV    | 79    | 297   |
| >ERBB2-V75(KIPVAIKV    | 128   | >ERBB2-V75(KIPEAIKV    | 45    | 83    |
| >ERBB2-V75(KIPVAIKV    | 132   | >ERBB2-V75(KIPEAIKV    | 19    | 113   |
| >ERBB2-V75(KIPVAIKVL   | 4448  | >ERBB2-V75(KIPEAIKVL   | 199   | 4249  |
| >ERBB2-V75(KIPVAIKV    | 1943  | >ERBB2-V75(KIPEAIKV    | 343   | 1600  |
| >ERBB2-V75(KIPVAIKV    | 105   | >ERBB2-V75(KIPEAIKV    | 30    | 75    |
| >ERBB2-V75(KIPVAIKV    | 2629  | >ERBB2-V75(KIPEAIKV    | 435   | 2194  |
| >ERBB2-V75(KIPVAIKV    | 64    | >ERBB2-V75(KIPEAIKV    | 14    | 50    |
| >ERBB2-V75(KIPVAIKVLR  | 31    | >ERBB2-V75(KIPEAIKVLR  | 31    | 0     |
| >ERBB2-V75(KIPVAIKVLR  | 64    | >ERBB2-V75(KIPEAIKVLR  | 63    | 1     |
| >ERBB2-V75(KIPVAIKVL   | 82    | >ERBB2-V75(KIPEAIKVL   | 45    | 37    |
| >ERBB2-V75(KIPVAIKVLR  | 440   | >ERBB2-V75(KIPEAIKVLR  | 473   | 33    |
| >ERBB2-V75(KIPVAIKVLR  | 32    | >ERBB2-V75(KIPEAIKVLR  | 34    | 2     |
| >ERBB2-V75(VKIPVAIKV   | 569   | >ERBB2-V75(VKIPEAIKV   | 368   | 201   |
| >ERBB2-V75(VKIPVAIKVL  | 67    | >ERBB2-V75(VKIPEAIKVL  | 47    | 20    |
| >ERBB2-V75(NVKIPVAIK   | 129   | >ERBB2-V75(NVKIPEAIK   | 675   | 546   |
| >ERBB2-V75(NVKIPVAIK   | 172   | >ERBB2-V75(NVKIPEAIK   | 197   | 25    |
| >ERBB2-V75(NVKIPVAI    | 253   | >ERBB2-V75(NVKIPEAI    | 579   | 326   |
| >ERBB2-V75(NVKIPVAIKV  | 115   | >ERBB2-V75(NVKIPEAIKV  | 447   | 332   |
| >ERBB2-V75(NVKIPVAIKV  | 407   | >ERBB2-V75(NVKIPEAIKV  | 1408  | 1001  |
| >ERBB2-V75(ENVKIPVAI   | 144   | >ERBB2-V75(ENVKIPEAI   | 128   | 16    |
| >ERBB2-V75(ENVKIPVAIK\ | 90    | >ERBB2-V75(ENVKIPEAIK\ | 246   | 156   |
| >ERBB2-V75(GENVKIPVAI  | 279   | >ERBB2-V75(GENVKIPEAI  | 154   | 125   |
| >ERBB2-V75(GENVKIPV    | 246   | >ERBB2-V75(GENVKIPE    | 8697  | 8451  |
| >ERBB2-V75(GENVKIPV    | 89    | >ERBB2-V75(GENVKIPE    | 2640  | 2551  |
| >ERBB2-V75(GENVKIPVA   | 120   | >ERBB2-V75(GENVKIPEA   | 95    | 25    |
| >ERBB2-V75(GENVKIPVAI  | 160   | >ERBB2-V75(GENVKIPEAI  | 255   | 95    |

|                       |      |                       |      |      |
|-----------------------|------|-----------------------|------|------|
| >ERBB2-V75(GENVKIPV   | 106  | >ERBB2-V75(GENVKIPE   | 3098 | 2992 |
| >ERBB2-V75(GENVKIPVA  | 24   | >ERBB2-V75(GENVKIPEA  | 23   | 1    |
| >ERBB2-V75(GENVKIPVA  | 372  | >ERBB2-V75(GENVKIPEA  | 283  | 89   |
| >ERBB2-V75(GENVKIPVAI | 23   | >ERBB2-V75(GENVKIPEAI | 28   | 5    |
| >ERBB2-V77:VMAGVGSPY  | 36   | >ERBB2-V77:AMAGVGSPY  | 31   | 5    |
| >ERBB2-V77:VMAGVGSPY  | 36   | >ERBB2-V77:AMAGVGSPY  | 21   | 15   |
| >ERBB2-V77:VMAGVGSPY  | 947  | >ERBB2-V77:AMAGVGSPY  | 450  | 497  |
| >ERBB2-V77:VMAGVGSPY  | 25   | >ERBB2-V77:AMAGVGSPY  | 16   | 9    |
| >ERBB2-V77:VMAGVGSPY  | 88   | >ERBB2-V77:AMAGVGSPY  | 76   | 12   |
| >ERBB2-V77:VMAGVGSPY  | 1    | >ERBB2-V77:AMAGVGSPY  | 1    | 0    |
| >ERBB2-V77:VMAGVGSPY  | 128  | >ERBB2-V77:AMAGVGSPY  | 178  | 50   |
| >ERBB2-V77:VMAGVGSPY  | 4    | >ERBB2-V77:AMAGVGSPY  | 4    | 0    |
| >ERBB2-V77:VMAGVGSPY  | 4    | >ERBB2-V77:AMAGVGSPY  | 4    | 0    |
| >ERBB2-V77:VMAGVGSPY  | 2    | >ERBB2-V77:AMAGVGSPY  | 3    | 1    |
| >ERBB2-V77:VMAGVGSPY  | 2    | >ERBB2-V77:AMAGVGSPY  | 2    | 0    |
| >ERBB2-V77:VMAGVGSPY  | 183  | >ERBB2-V77:AMAGVGSPY  | 166  | 17   |
| >ERBB2-V77:VMAGVGSPY  | 876  | >ERBB2-V77:AMAGVGSPY  | 246  | 630  |
| >ERBB2-V77:VMAGVGSPY  | 16   | >ERBB2-V77:AMAGVGSPY  | 19   | 3    |
| >ERBB2-V77:VMAGVGSPY  | 16   | >ERBB2-V77:AMAGVGSPY  | 21   | 5    |
| >ERBB2-V77:VMAGVGSPY  | 292  | >ERBB2-V77:AMAGVGSPY  | 236  | 56   |
| >ERBB2-V77:VMAGVGSPY  | 166  | >ERBB2-V77:AMAGVGSPY  | 486  | 320  |
| >ERBB2-V77:VMAGVGSPY  | 29   | >ERBB2-V77:AMAGVGSPY  | 26   | 3    |
| >ERBB2-V77:VMAGVGSPY  | 694  | >ERBB2-V77:AMAGVGSPY  | 435  | 259  |
| >ERBB2-V77:VMAGVGSPY  | 12   | >ERBB2-V77:AMAGVGSPY  | 13   | 1    |
| >ERBB2-V77:VMAGVGSPY  | 19   | >ERBB2-V77:AMAGVGSPY  | 16   | 3    |
| >ERBB2-V77:VMAGVGSPY  | 479  | >ERBB2-V77:AMAGVGSPY  | 328  | 151  |
| >ERBB2-V77:VMAGVGSPY  | 81   | >ERBB2-V77:AMAGVGSPY  | 211  | 130  |
| >ERBB2-V77:VMAGVGSPY  | 88   | >ERBB2-V77:AMAGVGSPY  | 144  | 56   |
| >ERBB2-V77:VMAGVGSPY  | 698  | >ERBB2-V77:AMAGVGSPY  | 183  | 515  |
| >ERBB2-V77:VMAGVGSPY  | 475  | >ERBB2-V77:AMAGVGSPY  | 431  | 44   |
| >ERBB2-V77:YVMAGVGSP  | 2061 | >ERBB2-V77:YAMAGVGSP  | 330  | 1731 |
| >ERBB2-V77:YVMAGVGSP  | 7    | >ERBB2-V77:YAMAGVGSP  | 13   | 6    |
| >ERBB2-V77:YVMAGVGSP  | 6    | >ERBB2-V77:YAMAGVGSP  | 17   | 11   |
| >ERBB2-V77:YVMAGVGSP  | 3    | >ERBB2-V77:YAMAGVGSP  | 7    | 4    |
| >ERBB2-V77:YVMAGVGS   | 89   | >ERBB2-V77:YAMAGVGS   | 474  | 385  |
| >ERBB2-V77:YVMAGVGSP  | 3    | >ERBB2-V77:YAMAGVGSP  | 4    | 1    |
| >ERBB2-V77:YVMAGVGSP  | 2    | >ERBB2-V77:YAMAGVGSP  | 4    | 2    |
| >ERBB2-V77:YVMAGVGSP  | 5    | >ERBB2-V77:YAMAGVGSP  | 21   | 16   |
| >ERBB2-V77:YVMAGVGSP  | 7    | >ERBB2-V77:YAMAGVGSP  | 18   | 11   |
| >ERBB2-V77:YVMAGVGSP  | 2    | >ERBB2-V77:YAMAGVGSP  | 4    | 2    |
| >ERBB2-V77:YVMAGVGSP  | 2    | >ERBB2-V77:YAMAGVGSP  | 5    | 3    |
| >ERBB2-V77:YVMAGVGSP  | 71   | >ERBB2-V77:YAMAGVGSP  | 260  | 189  |
| >ERBB2-V77:YVMAGVGSP  | 137  | >ERBB2-V77:YAMAGVGSP  | 467  | 330  |

|                       |      |                       |      |      |
|-----------------------|------|-----------------------|------|------|
| >ERBB2-V77:YVMAGVGSP  | 86   | >ERBB2-V77:YAMAGVGSP  | 1171 | 1085 |
| >ERBB2-V77:YVMAGVGSP  | 401  | >ERBB2-V77:YAMAGVGSP  | 1619 | 1218 |
| >ERBB2-V77:YVMAGVGSP  | 6    | >ERBB2-V77:YAMAGVGSP  | 85   | 79   |
| >ERBB2-V77:YVMAGVGSP  | 143  | >ERBB2-V77:YAMAGVGSP  | 1547 | 1404 |
| >ERBB2-V77:YVMAGVGSP  | 222  | >ERBB2-V77:YAMAGVGSP  | 337  | 115  |
| >ERBB2-V77:YVMAGVGSP  | 77   | >ERBB2-V77:YAMAGVGSP  | 81   | 4    |
| >ERBB2-V77:YVMAGVGSP  | 28   | >ERBB2-V77:YAMAGVGSP  | 42   | 14   |
| >ERBB2-V77:YVMAGVGS   | 352  | >ERBB2-V77:YAMAGVGS   | 1749 | 1397 |
| >ERBB2-V77:YVMAGVGSP  | 10   | >ERBB2-V77:YAMAGVGSP  | 23   | 13   |
| >ERBB2-V77:YVMAGVGSP  | 4    | >ERBB2-V77:YAMAGVGSP  | 6    | 2    |
| >ERBB2-V77:YVMAGVGSP  | 22   | >ERBB2-V77:YAMAGVGSP  | 268  | 246  |
| >ERBB2-V77:YVMAGVGSP  | 32   | >ERBB2-V77:YAMAGVGSP  | 35   | 3    |
| >ERBB2-V77:YVMAGVGSP  | 410  | >ERBB2-V77:YAMAGVGSP  | 707  | 297  |
| >ERBB2-V77:YVMAGVGSP  | 10   | >ERBB2-V77:YAMAGVGSP  | 15   | 5    |
| >ERBB2-V77:YVMAGVGSP  | 76   | >ERBB2-V77:YAMAGVGSP  | 21   | 55   |
| >ERBB2-V77:YVMAGVGSP  | 18   | >ERBB2-V77:YAMAGVGSP  | 6    | 12   |
| >ERBB2-V77:YVMAGVGSP  | 2376 | >ERBB2-V77:YAMAGVGSP  | 240  | 2136 |
| >ERBB2-V77:YVMAGVGSP  | 504  | >ERBB2-V77:YAMAGVGSP  | 60   | 444  |
| >ERBB2-V77:YVMAGVGSP  | 2679 | >ERBB2-V77:YAMAGVGSP  | 403  | 2276 |
| >ERBB2-V77:YVMAGVGSP  | 261  | >ERBB2-V77:YAMAGVGSP  | 410  | 149  |
| >ERBB2-V77:YVMAGVGSP  | 79   | >ERBB2-V77:YAMAGVGSP  | 157  | 78   |
| >ERBB2-V77:AYVMAGVGS  | 450  | >ERBB2-V77:AYAMAGVGS  | 1221 | 771  |
| >ERBB2-V77:AYVMAGVGS  | 149  | >ERBB2-V77:AYAMAGVGS  | 109  | 40   |
| >ERBB2-V77:AYVMAGVGS  | 390  | >ERBB2-V77:AYAMAGVGS  | 109  | 281  |
| >ERBB2-V77:AYVMAGVGS  | 532  | >ERBB2-V77:AYAMAGVGS  | 305  | 227  |
| >ERBB2-V77:AYVMAGVGS  | 395  | >ERBB2-V77:AYAMAGVGS  | 443  | 48   |
| >ERBB2-V77:AYVMAGVGS  | 457  | >ERBB2-V77:AYAMAGVGS  | 301  | 156  |
| >ERBB2-V77:AYVMAGVGS  | 1696 | >ERBB2-V77:AYAMAGVGS  | 411  | 1285 |
| >ERBB2-V77:EAYVMAGV   | 14   | >ERBB2-V77:EAYAMAGV   | 7    | 7    |
| >ERBB2-V77:EAYVMAGV   | 6    | >ERBB2-V77:EAYAMAGV   | 5    | 1    |
| >ERBB2-V77:DEAYVMAGV  | 33   | >ERBB2-V77:DEAYAMAGV  | 84   | 51   |
| >ERBB2-V77:DEAYVMAGV  | 39   | >ERBB2-V77:DEAYAMAGV  | 102  | 63   |
| >ERBB2-V77:DEAYVMAGV  | 158  | >ERBB2-V77:DEAYAMAGV  | 92   | 66   |
| >ERBB2-V77:DEAYVMAGV  | 472  | >ERBB2-V77:DEAYAMAGV  | 325  | 147  |
| >ERBB2-V77:DEAYVMAGV  | 411  | >ERBB2-V77:DEAYAMAGV  | 905  | 494  |
| >ERBB2-V77:LDEAYVMAG  | 139  | >ERBB2-V77:LDEAYAMAG  | 88   | 51   |
| >ERBB2-V77:ILDEAYVM   | 111  | >ERBB2-V77:ILDEAYAM   | 51   | 60   |
| >ERBB2-V77:ILDEAYVMA  | 38   | >ERBB2-V77:ILDEAYAMA  | 34   | 4    |
| >ERBB2-V77:ILDEAYVMAC | 11   | >ERBB2-V77:ILDEAYAMAC | 11   | 0    |
| >ERBB2-V77:ILDEAYVM   | 192  | >ERBB2-V77:ILDEAYAM   | 66   | 126  |
| >ERBB2-V77:ILDEAYVMA  | 44   | >ERBB2-V77:ILDEAYAMA  | 34   | 10   |
| >ERBB2-V77:ILDEAYVMAC | 6    | >ERBB2-V77:ILDEAYAMAC | 5    | 1    |
| >ERBB2-V77:ILDEAYVMA  | 172  | >ERBB2-V77:ILDEAYAMA  | 31   | 141  |

|                       |      |                       |      |      |
|-----------------------|------|-----------------------|------|------|
| >ERBB2-V77:ILDEAYVMAC | 11   | >ERBB2-V77:ILDEAYAMAC | 8    | 3    |
| >ERBB2-V77:ILDEAYVM   | 334  | >ERBB2-V77:ILDEAYAM   | 91   | 243  |
| >ERBB2-V77:ILDEAYVMA  | 44   | >ERBB2-V77:ILDEAYAMA  | 37   | 7    |
| >ERBB2-V77:ILDEAYVMAC | 7    | >ERBB2-V77:ILDEAYAMAC | 7    | 0    |
| >ERBB2-V77:ILDEAYVM   | 17   | >ERBB2-V77:ILDEAYAM   | 10   | 7    |
| >ERBB2-V77:ILDEAYVMA  | 6    | >ERBB2-V77:ILDEAYAMA  | 5    | 1    |
| >ERBB2-V77:ILDEAYVMAC | 137  | >ERBB2-V77:ILDEAYAMAC | 304  | 167  |
| >ERBB2-V77:ILDEAYVMAC | 2    | >ERBB2-V77:ILDEAYAMAC | 2    | 0    |
| >ERBB2-V77:ILDEAYVM   | 31   | >ERBB2-V77:ILDEAYAM   | 15   | 16   |
| >ERBB2-V77:ILDEAYVMA  | 63   | >ERBB2-V77:ILDEAYAMA  | 35   | 28   |
| >ERBB2-V77:ILDEAYVMAC | 3    | >ERBB2-V77:ILDEAYAMAC | 3    | 0    |
| >ERBB2-V77:ILDEAYVM   | 76   | >ERBB2-V77:ILDEAYAM   | 85   | 9    |
| >ERBB2-V77:ILDEAYVMA  | 11   | >ERBB2-V77:ILDEAYAMA  | 15   | 4    |
| >ERBB2-V77:ILDEAYVMAC | 4    | >ERBB2-V77:ILDEAYAMAC | 4    | 0    |
| >ERBB2-V77:ILDEAYVM   | 31   | >ERBB2-V77:ILDEAYAM   | 22   | 9    |
| >ERBB2-V77:ILDEAYVMA  | 43   | >ERBB2-V77:ILDEAYAMA  | 14   | 29   |
| >ERBB2-V77:ILDEAYVMAC | 3    | >ERBB2-V77:ILDEAYAMAC | 2    | 1    |
| >ERBB2-V77:ILDEAYVM   | 77   | >ERBB2-V77:ILDEAYAM   | 60   | 17   |
| >ERBB2-V77:ILDEAYVMA  | 8    | >ERBB2-V77:ILDEAYAMA  | 7    | 1    |
| >ERBB2-V77:ILDEAYVMAC | 2    | >ERBB2-V77:ILDEAYAMAC | 2    | 0    |
| >ERBB2-V77:ILDEAYVMAC | 45   | >ERBB2-V77:ILDEAYAMAC | 33   | 12   |
| >ERBB2-V77:ILDEAYVM   | 1677 | >ERBB2-V77:ILDEAYAM   | 380  | 1297 |
| >ERBB2-V77:EILDEAYV   | 471  | >ERBB2-V77:EILDEAYA   | 4164 | 3693 |
| >ERBB2-V77:EILDEAYV   | 100  | >ERBB2-V77:EILDEAYA   | 903  | 803  |
| >ERBB2-V77:EILDEAYV   | 11   | >ERBB2-V77:EILDEAYA   | 477  | 466  |
| >ERBB2-V77:EILDEAYV   | 83   | >ERBB2-V77:EILDEAYA   | 3760 | 3677 |
| >ERBB2-V77:EILDEAYV   | 24   | >ERBB2-V77:EILDEAYA   | 2182 | 2158 |
| >ERBB2-V77:EILDEAYV   | 5    | >ERBB2-V77:EILDEAYA   | 167  | 162  |
| >ERBB2-V77:EILDEAYVM  | 362  | >ERBB2-V77:EILDEAYAM  | 207  | 155  |
| >ERBB2-V77:EILDEAYVMA | 635  | >ERBB2-V77:EILDEAYAMA | 340  | 295  |
| >ERBB2-V77:EILDEAYV   | 11   | >ERBB2-V77:EILDEAYA   | 1094 | 1083 |
| >ERBB2-V77:EILDEAYVM  | 1229 | >ERBB2-V77:EILDEAYAM  | 277  | 952  |
| >ERBB2-V77:EILDEAYVM  | 39   | >ERBB2-V77:EILDEAYAM  | 16   | 23   |
| >ERBB2-V77:EILDEAYV   | 34   | >ERBB2-V77:EILDEAYA   | 476  | 442  |
| >ERBB2-V77:EILDEAYV   | 5    | >ERBB2-V77:EILDEAYA   | 34   | 29   |
| >ERBB2-V77:EILDEAYVM  | 33   | >ERBB2-V77:EILDEAYAM  | 9    | 24   |
| >ERBB2-V77:EILDEAYVMA | 16   | >ERBB2-V77:EILDEAYAMA | 10   | 6    |
| >ERBB2-V77:EILDEAYVM  | 550  | >ERBB2-V77:EILDEAYAM  | 74   | 476  |
| >ERBB2-V77:KEILDEAYV  | 310  | >ERBB2-V77:KEILDEAYA  | 6851 | 6541 |
| >ERBB2-V77:KEILDEAYVM | 163  | >ERBB2-V77:KEILDEAYAM | 91   | 72   |
| >ERBB2-V77:KEILDEAYVM | 289  | >ERBB2-V77:KEILDEAYAM | 645  | 356  |
| >ERBB2-V77:KEILDEAYV  | 536  | >ERBB2-V77:KEILDEAYA  | 107  | 429  |
| >ERBB2-V77:KEILDEAYVM | 50   | >ERBB2-V77:KEILDEAYAM | 52   | 2    |

|                        |      |                        |      |      |
|------------------------|------|------------------------|------|------|
| >ERBB2-V77; KEILDEAYV  | 32   | >ERBB2-V77; KEILDEAYA  | 1595 | 1563 |
| >ERBB2-V77; KEILDEAYVM | 15   | >ERBB2-V77; KEILDEAYAM | 12   | 3    |
| >ERBB2-V77; KEILDEAYVM | 468  | >ERBB2-V77; KEILDEAYAM | 623  | 155  |
| >ERBB2-V77; VGSPYVSR   | 709  | >ERBB2-V77; AGSPYVSR   | 453  | 256  |
| >ERBB2-V77; VGSPYVSRL  | 207  | >ERBB2-V77; AGSPYVSRL  | 219  | 12   |
| >ERBB2-V77; VGSPYVSRL  | 195  | >ERBB2-V77; AGSPYVSRL  | 351  | 156  |
| >ERBB2-V77; GVGSPYVSRL | 478  | >ERBB2-V77; GAGSPYVSRL | 1596 | 1118 |
| >ERBB2-V77; GVGSPYVSR  | 324  | >ERBB2-V77; GAGSPYVSR  | 3398 | 3074 |
| >ERBB2-V77; GVGSPYVSR  | 82   | >ERBB2-V77; GAGSPYVSR  | 146  | 64   |
| >ERBB2-V77; ILDEAYVMAC | 11   | >ERBB2-V77; ILDEAYVMAC | 39   | 28   |
| >ERBB2-V77; ILDEAYVMAC | 6    | >ERBB2-V77; ILDEAYVMAC | 35   | 29   |
| >ERBB2-V77; ILDEAYVMAC | 11   | >ERBB2-V77; ILDEAYVMAC | 36   | 25   |
| >ERBB2-V77; ILDEAYVMAC | 7    | >ERBB2-V77; ILDEAYVMAC | 27   | 20   |
| >ERBB2-V77; ILDEAYVMAC | 2    | >ERBB2-V77; ILDEAYVMAC | 6    | 4    |
| >ERBB2-V77; ILDEAYVMAC | 3    | >ERBB2-V77; ILDEAYVMAC | 22   | 19   |
| >ERBB2-V77; ILDEAYVMAC | 4    | >ERBB2-V77; ILDEAYVMAC | 15   | 11   |
| >ERBB2-V77; ILDEAYVMAC | 3    | >ERBB2-V77; ILDEAYVMAC | 28   | 25   |
| >ERBB2-V77; ILDEAYVMAC | 2    | >ERBB2-V77; ILDEAYVMAC | 10   | 8    |
| >ERBB2-V77; ILDEAYVMAC | 45   | >ERBB2-V77; ILDEAYVMAC | 1481 | 1436 |
| >ERBB2-V77; AGVGSPYV   | 354  | >ERBB2-V77; AGAGSPYV   | 512  | 158  |
| >ERBB2-V77; AGVGSPYV   | 586  | >ERBB2-V77; AGAGSPYV   | 459  | 127  |
| >ERBB2-V77; AGVGSPYV   | 899  | >ERBB2-V77; AGAGSPYV   | 201  | 698  |
| >ERBB2-V77; AGVGSPYV   | 767  | >ERBB2-V77; AGAGSPYV   | 343  | 424  |
| >ERBB2-V77; AGVGSPYVSF | 254  | >ERBB2-V77; AGAGSPYVSF | 777  | 523  |
| >ERBB2-V77; MAGVGSPYV  | 724  | >ERBB2-V77; MAGAGSPYV  | 130  | 594  |
| >ERBB2-V77; MAGVGSPYV  | 1158 | >ERBB2-V77; MAGAGSPYV  | 189  | 969  |
| >ERBB2-V77; MAGVGSPYV  | 2032 | >ERBB2-V77; MAGAGSPYV  | 414  | 1618 |
| >ERBB2-V77; MAGVGSPYV  | 34   | >ERBB2-V77; MAGAGSPYV  | 18   | 16   |
| >ERBB2-V77; MAGVGSPYV  | 53   | >ERBB2-V77; MAGAGSPYV  | 14   | 39   |
| >ERBB2-V77; MAGVGSPYV  | 48   | >ERBB2-V77; MAGAGSPYV  | 27   | 21   |
| >ERBB2-V77; MAGVGSPYV  | 49   | >ERBB2-V77; MAGAGSPYV  | 42   | 7    |
| >ERBB2-V77; MAGVGSPYV  | 31   | >ERBB2-V77; MAGAGSPYV  | 11   | 20   |
| >ERBB2-V77; MAGVGSPY   | 121  | >ERBB2-V77; MAGAGSPY   | 93   | 28   |
| >ERBB2-V77; MAGVGSPY   | 176  | >ERBB2-V77; MAGAGSPY   | 190  | 14   |
| >ERBB2-V77; MAGVGSPYV  | 51   | >ERBB2-V77; MAGAGSPYV  | 53   | 2    |
| >ERBB2-V77; MAGVGSPYV  | 374  | >ERBB2-V77; MAGAGSPYV  | 473  | 99   |
| >ERBB2-V77; MAGVGSPYV  | 61   | >ERBB2-V77; MAGAGSPYV  | 42   | 19   |
| >ERBB2-V77; MAGVGSPYV  | 490  | >ERBB2-V77; MAGAGSPYV  | 114  | 376  |
| >ERBB2-V77; MAGVGSPYV  | 15   | >ERBB2-V77; MAGAGSPYV  | 8    | 7    |
| >ERBB2-V77; MAGVGSPY   | 76   | >ERBB2-V77; MAGAGSPY   | 53   | 23   |
| >ERBB2-V77; MAGVGSPY   | 461  | >ERBB2-V77; MAGAGSPY   | 219  | 242  |
| >ERBB2-V77; MAGVGSPY   | 318  | >ERBB2-V77; MAGAGSPY   | 199  | 119  |
| >ERBB2-V77; MAGVGSPY   | 26   | >ERBB2-V77; MAGAGSPY   | 20   | 6    |



|                      |      |                      |     |     |
|----------------------|------|----------------------|-----|-----|
| >ERBB2-V77;MAGVGSPY  | 13   | >ERBB2-V77;MAGAGSPY  | 10  | 3   |
| >ERBB2-V77;MAGVGSPYV | 1305 | >ERBB2-V77;MAGAGSPYV | 498 | 807 |
| >ERBB2-V77;VMAGVGSPY | 36   | >ERBB2-V77;VMAGAGSPY | 33  | 3   |
| >ERBB2-V77;VMAGVGSPY | 36   | >ERBB2-V77;VMAGAGSPY | 29  | 7   |
| >ERBB2-V77;VMAGVGSPY | 25   | >ERBB2-V77;VMAGAGSPY | 24  | 1   |
| >ERBB2-V77;VMAGVGSPY | 88   | >ERBB2-V77;VMAGAGSPY | 105 | 17  |
| >ERBB2-V77;VMAGVGSPY | 1    | >ERBB2-V77;VMAGAGSPY | 2   | 1   |
| >ERBB2-V77;VMAGVGSPY | 128  | >ERBB2-V77;VMAGAGSPY | 423 | 295 |
| >ERBB2-V77;VMAGVGSPY | 4    | >ERBB2-V77;VMAGAGSPY | 4   | 0   |
| >ERBB2-V77;VMAGVGSPY | 4    | >ERBB2-V77;VMAGAGSPY | 4   | 0   |
| >ERBB2-V77;VMAGVGSPY | 2    | >ERBB2-V77;VMAGAGSPY | 2   | 0   |
| >ERBB2-V77;VMAGVGSPY | 2    | >ERBB2-V77;VMAGAGSPY | 2   | 0   |
| >ERBB2-V77;VMAGVGSPY | 183  | >ERBB2-V77;VMAGAGSPY | 366 | 183 |
| >ERBB2-V77;VMAGVGSPY | 16   | >ERBB2-V77;VMAGAGSPY | 18  | 2   |
| >ERBB2-V77;VMAGVGSPY | 16   | >ERBB2-V77;VMAGAGSPY | 16  | 0   |
| >ERBB2-V77;VMAGVGSPY | 292  | >ERBB2-V77;VMAGAGSPY | 181 | 111 |
| >ERBB2-V77;VMAGVGSPY | 166  | >ERBB2-V77;VMAGAGSPY | 741 | 575 |
| >ERBB2-V77;VMAGVGSPY | 29   | >ERBB2-V77;VMAGAGSPY | 25  | 4   |
| >ERBB2-V77;VMAGVGSPY | 694  | >ERBB2-V77;VMAGAGSPY | 373 | 321 |
| >ERBB2-V77;VMAGVGSPY | 12   | >ERBB2-V77;VMAGAGSPY | 10  | 2   |
| >ERBB2-V77;VMAGVGSPY | 19   | >ERBB2-V77;VMAGAGSPY | 10  | 9   |
| >ERBB2-V77;VMAGVGSPY | 479  | >ERBB2-V77;VMAGAGSPY | 114 | 365 |
| >ERBB2-V77;VMAGVGSPY | 81   | >ERBB2-V77;VMAGAGSPY | 44  | 37  |
| >ERBB2-V77;VMAGVGSPY | 88   | >ERBB2-V77;VMAGAGSPY | 270 | 182 |
| >ERBB2-V77;VMAGVGSPY | 475  | >ERBB2-V77;VMAGAGSPY | 479 | 4   |
| >ERBB2-V77;YVMAGVGSP | 7    | >ERBB2-V77;YVMAGAGSP | 11  | 4   |
| >ERBB2-V77;YVMAGVGSP | 6    | >ERBB2-V77;YVMAGAGSP | 8   | 2   |
| >ERBB2-V77;YVMAGVGSP | 3    | >ERBB2-V77;YVMAGAGSP | 3   | 0   |
| >ERBB2-V77;YVMAGVGS  | 89   | >ERBB2-V77;YVMAGAGS  | 101 | 12  |
| >ERBB2-V77;YVMAGVGSP | 3    | >ERBB2-V77;YVMAGAGSP | 3   | 0   |
| >ERBB2-V77;YVMAGVGSP | 2    | >ERBB2-V77;YVMAGAGSP | 3   | 1   |
| >ERBB2-V77;YVMAGVGSP | 5    | >ERBB2-V77;YVMAGAGSP | 6   | 1   |
| >ERBB2-V77;YVMAGVGSP | 7    | >ERBB2-V77;YVMAGAGSP | 10  | 3   |
| >ERBB2-V77;YVMAGVGSP | 2    | >ERBB2-V77;YVMAGAGSP | 3   | 1   |
| >ERBB2-V77;YVMAGVGSP | 2    | >ERBB2-V77;YVMAGAGSP | 2   | 0   |
| >ERBB2-V77;YVMAGVGSP | 71   | >ERBB2-V77;YVMAGAGSP | 77  | 6   |
| >ERBB2-V77;YVMAGVGSP | 137  | >ERBB2-V77;YVMAGAGSP | 225 | 88  |
| >ERBB2-V77;YVMAGVGSP | 86   | >ERBB2-V77;YVMAGAGSP | 217 | 131 |
| >ERBB2-V77;YVMAGVGSP | 401  | >ERBB2-V77;YVMAGAGSP | 538 | 137 |
| >ERBB2-V77;YVMAGVGSP | 6    | >ERBB2-V77;YVMAGAGSP | 8   | 2   |
| >ERBB2-V77;YVMAGVGSP | 143  | >ERBB2-V77;YVMAGAGSP | 169 | 26  |
| >ERBB2-V77;YVMAGVGSP | 222  | >ERBB2-V77;YVMAGAGSP | 263 | 41  |
| >ERBB2-V77;YVMAGVGSP | 77   | >ERBB2-V77;YVMAGAGSP | 98  | 21  |

|                       |       |                       |      |       |
|-----------------------|-------|-----------------------|------|-------|
| >ERBB2-V77;YVMAGVGSP  | 28    | >ERBB2-V77;YVMAGAGSP  | 42   | 14    |
| >ERBB2-V77;YVMAGVGS   | 352   | >ERBB2-V77;YVMAGAGS   | 455  | 103   |
| >ERBB2-V77;YVMAGVGSP  | 10    | >ERBB2-V77;YVMAGAGSP  | 9    | 1     |
| >ERBB2-V77;YVMAGVGSP  | 4     | >ERBB2-V77;YVMAGAGSP  | 4    | 0     |
| >ERBB2-V77;YVMAGVGSP  | 22    | >ERBB2-V77;YVMAGAGSP  | 28   | 6     |
| >ERBB2-V77;YVMAGVGSP  | 32    | >ERBB2-V77;YVMAGAGSP  | 35   | 3     |
| >ERBB2-V77;YVMAGVGSP  | 410   | >ERBB2-V77;YVMAGAGSP  | 548  | 138   |
| >ERBB2-V77;YVMAGVGSP  | 10    | >ERBB2-V77;YVMAGAGSP  | 9    | 1     |
| >ERBB2-V77;YVMAGVGSP  | 76    | >ERBB2-V77;YVMAGAGSP  | 81   | 5     |
| >ERBB2-V77;YVMAGVGSP  | 18    | >ERBB2-V77;YVMAGAGSP  | 12   | 6     |
| >ERBB2-V77;YVMAGVGSP  | 261   | >ERBB2-V77;YVMAGAGSP  | 197  | 64    |
| >ERBB2-V77;YVMAGVGSP  | 79    | >ERBB2-V77;YVMAGAGSP  | 168  | 89    |
| >ERBB2-V77;AYVMAGVGS  | 450   | >ERBB2-V77;AYVMAGAGS  | 225  | 225   |
| >ERBB2-V77;AYVMAGVGS  | 149   | >ERBB2-V77;AYVMAGAGS  | 133  | 16    |
| >ERBB2-V77;AYVMAGVGS  | 390   | >ERBB2-V77;AYVMAGAGS  | 236  | 154   |
| >ERBB2-V77;AYVMAGVGS  | 700   | >ERBB2-V77;AYVMAGAGS  | 471  | 229   |
| >ERBB2-V77;AYVMAGVGS  | 532   | >ERBB2-V77;AYVMAGAGS  | 382  | 150   |
| >ERBB2-V77;AYVMAGVGS  | 395   | >ERBB2-V77;AYVMAGAGS  | 445  | 50    |
| >ERBB2-V77;AYVMAGVGS  | 457   | >ERBB2-V77;AYVMAGAGS  | 472  | 15    |
| >ERBB2-V77;EAYVMAGV   | 14    | >ERBB2-V77;EAYVMAGA   | 92   | 78    |
| >ERBB2-V77;EAYVMAGV   | 6     | >ERBB2-V77;EAYVMAGA   | 83   | 77    |
| >ERBB2-V77;DEAYVMAGV  | 33    | >ERBB2-V77;DEAYVMAGA  | 1225 | 1192  |
| >ERBB2-V77;DEAYVMAGV  | 39    | >ERBB2-V77;DEAYVMAGA  | 597  | 558   |
| >ERBB2-V77;DEAYVMAGV  | 158   | >ERBB2-V77;DEAYVMAGA  | 389  | 231   |
| >ERBB2-V77;DEAYVMAGV  | 472   | >ERBB2-V77;DEAYVMAGA  | 484  | 12    |
| >ERBB2-V77;DEAYVMAGV  | 1238  | >ERBB2-V77;DEAYVMAGA  | 236  | 1002  |
| >ERBB2-V77;DEAYVMAGV  | 411   | >ERBB2-V77;DEAYVMAGA  | 7830 | 7419  |
| >ERBB2-V77;LDEAYVMAG  | 139   | >ERBB2-V77;LDEAYVMAG  | 3106 | 2967  |
| >ERBB2-V77;VGSPYVSRL  | 1312  | >ERBB2-V77;LGSPYVSRL  | 398  | 914   |
| >ERBB2-V77;VGSPYVSRL  | 207   | >ERBB2-V77;LGSPYVSRL  | 228  | 21    |
| >ERBB2-V77;VGSPYVSRL  | 195   | >ERBB2-V77;LGSPYVSRL  | 144  | 51    |
| >ERBB2-V77;GVGSPYVSRL | 478   | >ERBB2-V77;GLGSPYVSRL | 28   | 450   |
| >ERBB2-V77;GVGSPYVSRL | 3409  | >ERBB2-V77;GLGSPYVSRL | 140  | 3269  |
| >ERBB2-V77;GVGSPYVSRL | 2308  | >ERBB2-V77;GLGSPYVSRL | 239  | 2069  |
| >ERBB2-V77;GVGSPYVSRL | 888   | >ERBB2-V77;GLGSPYVSRL | 9    | 879   |
| >ERBB2-V77;GVGSPYVSRL | 3993  | >ERBB2-V77;GLGSPYVSRL | 55   | 3938  |
| >ERBB2-V77;GVGSPYVSRL | 5394  | >ERBB2-V77;GLGSPYVSRL | 52   | 5342  |
| >ERBB2-V77;GVGSPYVSRL | 6842  | >ERBB2-V77;GLGSPYVSRL | 244  | 6598  |
| >ERBB2-V77;GVGSPYVSRL | 4309  | >ERBB2-V77;GLGSPYVSRL | 54   | 4255  |
| >ERBB2-V77;GVGSPYVSRL | 6744  | >ERBB2-V77;GLGSPYVSRL | 160  | 6584  |
| >ERBB2-V77;GVGSPYVSRL | 11514 | >ERBB2-V77;GLGSPYVSRL | 308  | 11206 |
| >ERBB2-V77;GVGSPYVSRL | 504   | >ERBB2-V77;GLGSPYVSRL | 5    | 499   |
| >ERBB2-V77;GVGSPYVSRL | 4859  | >ERBB2-V77;GLGSPYVSRL | 68   | 4791  |

|                       |     |                       |      |      |
|-----------------------|-----|-----------------------|------|------|
| >ERBB2-V77;GVGSPYVSR  | 324 | >ERBB2-V77;GLGSPYVSR  | 3003 | 2679 |
| >ERBB2-V77;GVGSPYVSR  | 82  | >ERBB2-V77;GLGSPYVSR  | 115  | 33   |
| >ERBB2-V77;ILDEAYVMAC | 11  | >ERBB2-V77;ILDEAYVMAC | 19   | 8    |
| >ERBB2-V77;ILDEAYVMAC | 6   | >ERBB2-V77;ILDEAYVMAC | 8    | 2    |
| >ERBB2-V77;ILDEAYVMAC | 11  | >ERBB2-V77;ILDEAYVMAC | 62   | 51   |
| >ERBB2-V77;ILDEAYVMAC | 7   | >ERBB2-V77;ILDEAYVMAC | 22   | 15   |
| >ERBB2-V77;ILDEAYVMAC | 2   | >ERBB2-V77;ILDEAYVMAC | 3    | 1    |
| >ERBB2-V77;ILDEAYVMAC | 3   | >ERBB2-V77;ILDEAYVMAC | 7    | 4    |
| >ERBB2-V77;ILDEAYVMAC | 4   | >ERBB2-V77;ILDEAYVMAC | 8    | 4    |
| >ERBB2-V77;ILDEAYVMAC | 3   | >ERBB2-V77;ILDEAYVMAC | 7    | 4    |
| >ERBB2-V77;ILDEAYVMAC | 2   | >ERBB2-V77;ILDEAYVMAC | 4    | 2    |
| >ERBB2-V77;ILDEAYVMAC | 45  | >ERBB2-V77;ILDEAYVMAC | 535  | 490  |
| >ERBB2-V77;AGVGSPYV   | 354 | >ERBB2-V77;AGLGSPYV   | 270  | 84   |
| >ERBB2-V77;AGVGSPYV   | 586 | >ERBB2-V77;AGLGSPYV   | 79   | 507  |
| >ERBB2-V77;AGVGSPYV   | 899 | >ERBB2-V77;AGLGSPYV   | 72   | 827  |
| >ERBB2-V77;AGVGSPYV   | 767 | >ERBB2-V77;AGLGSPYV   | 350  | 417  |
| >ERBB2-V77;AGVGSPYVSF | 254 | >ERBB2-V77;AGLGSPYVSR | 346  | 92   |
| >ERBB2-V77;MAGVGSPYV  | 34  | >ERBB2-V77;MAGLGSPYV  | 41   | 7    |
| >ERBB2-V77;MAGVGSPYV  | 53  | >ERBB2-V77;MAGLGSPYV  | 73   | 20   |
| >ERBB2-V77;MAGVGSPYV  | 48  | >ERBB2-V77;MAGLGSPYV  | 67   | 19   |
| >ERBB2-V77;MAGVGSPYV  | 49  | >ERBB2-V77;MAGLGSPYV  | 73   | 24   |
| >ERBB2-V77;MAGVGSPYV  | 31  | >ERBB2-V77;MAGLGSPYV  | 50   | 19   |
| >ERBB2-V77;MAGVGSPY   | 121 | >ERBB2-V77;MAGLGSPY   | 101  | 20   |
| >ERBB2-V77;MAGVGSPY   | 176 | >ERBB2-V77;MAGLGSPY   | 375  | 199  |
| >ERBB2-V77;MAGVGSPYV  | 51  | >ERBB2-V77;MAGLGSPYV: | 81   | 30   |
| >ERBB2-V77;MAGVGSPYV  | 374 | >ERBB2-V77;MAGLGSPYV: | 307  | 67   |
| >ERBB2-V77;MAGVGSPYV  | 61  | >ERBB2-V77;MAGLGSPYV: | 77   | 16   |
| >ERBB2-V77;MAGVGSPYV  | 490 | >ERBB2-V77;MAGLGSPYV  | 538  | 48   |
| >ERBB2-V77;MAGVGSPYV  | 15  | >ERBB2-V77;MAGLGSPYV  | 18   | 3    |
| >ERBB2-V77;MAGVGSPY   | 76  | >ERBB2-V77;MAGLGSPY   | 96   | 20   |
| >ERBB2-V77;MAGVGSPY   | 461 | >ERBB2-V77;MAGLGSPY   | 929  | 468  |
| >ERBB2-V77;MAGVGSPY   | 318 | >ERBB2-V77;MAGLGSPY   | 630  | 312  |
| >ERBB2-V77;MAGVGSPY   | 26  | >ERBB2-V77;MAGLGSPY   | 28   | 2    |
| >ERBB2-V77;MAGVGSPY   | 13  | >ERBB2-V77;MAGLGSPY   | 12   | 1    |
| >ERBB2-V77;VMAGVGSPY  | 36  | >ERBB2-V77;VMAGLGSPY' | 22   | 14   |
| >ERBB2-V77;VMAGVGSPY  | 36  | >ERBB2-V77;VMAGLGSPY' | 28   | 8    |
| >ERBB2-V77;VMAGVGSPY  | 25  | >ERBB2-V77;VMAGLGSPY' | 18   | 7    |
| >ERBB2-V77;VMAGVGSPY  | 88  | >ERBB2-V77;VMAGLGSPY' | 60   | 28   |
| >ERBB2-V77;VMAGVGSPY  | 1   | >ERBB2-V77;VMAGLGSPY' | 2    | 1    |
| >ERBB2-V77;VMAGVGSPY  | 128 | >ERBB2-V77;VMAGLGSPY' | 314  | 186  |
| >ERBB2-V77;VMAGVGSPY  | 4   | >ERBB2-V77;VMAGLGSPY' | 5    | 1    |
| >ERBB2-V77;VMAGVGSPY  | 4   | >ERBB2-V77;VMAGLGSPY' | 4    | 0    |
| >ERBB2-V77;VMAGVGSPY  | 2   | >ERBB2-V77;VMAGLGSPY' | 2    | 0    |

|                      |     |                      |      |      |
|----------------------|-----|----------------------|------|------|
| >ERBB2-V77;VMAGVGSPY | 2   | >ERBB2-V77;VMAGLGSPY | 2    | 0    |
| >ERBB2-V77;VMAGVGSPY | 183 | >ERBB2-V77;VMAGLGSPY | 370  | 187  |
| >ERBB2-V77;VMAGVGSPY | 16  | >ERBB2-V77;VMAGLGSPY | 12   | 4    |
| >ERBB2-V77;VMAGVGSPY | 16  | >ERBB2-V77;VMAGLGSPY | 17   | 1    |
| >ERBB2-V77;VMAGVGSPY | 292 | >ERBB2-V77;VMAGLGSPY | 292  | 0    |
| >ERBB2-V77;VMAGVGSPY | 166 | >ERBB2-V77;VMAGLGSPY | 103  | 63   |
| >ERBB2-V77;VMAGVGSPY | 29  | >ERBB2-V77;VMAGLGSPY | 27   | 2    |
| >ERBB2-V77;VMAGVGSPY | 12  | >ERBB2-V77;VMAGLGSPY | 14   | 2    |
| >ERBB2-V77;VMAGVGSPY | 19  | >ERBB2-V77;VMAGLGSPY | 18   | 1    |
| >ERBB2-V77;VMAGVGSPY | 479 | >ERBB2-V77;VMAGLGSPY | 195  | 284  |
| >ERBB2-V77;VMAGVGSPY | 81  | >ERBB2-V77;VMAGLGSPY | 63   | 18   |
| >ERBB2-V77;VMAGVGSPY | 88  | >ERBB2-V77;VMAGLGSPY | 84   | 4    |
| >ERBB2-V77;VMAGVGSPY | 475 | >ERBB2-V77;VMAGLGSPY | 592  | 117  |
| >ERBB2-V77;YVMAGVGSP | 7   | >ERBB2-V77;YVMAGLGSP | 7    | 0    |
| >ERBB2-V77;YVMAGVGSP | 6   | >ERBB2-V77;YVMAGLGSP | 5    | 1    |
| >ERBB2-V77;YVMAGVGSP | 3   | >ERBB2-V77;YVMAGLGSP | 3    | 0    |
| >ERBB2-V77;YVMAGVGS  | 89  | >ERBB2-V77;YVMAGLGS  | 66   | 23   |
| >ERBB2-V77;YVMAGVGSP | 911 | >ERBB2-V77;YVMAGLGSP | 221  | 690  |
| >ERBB2-V77;YVMAGVGSP | 3   | >ERBB2-V77;YVMAGLGSP | 2    | 1    |
| >ERBB2-V77;YVMAGVGSP | 2   | >ERBB2-V77;YVMAGLGSP | 2    | 0    |
| >ERBB2-V77;YVMAGVGSP | 5   | >ERBB2-V77;YVMAGLGSP | 4    | 1    |
| >ERBB2-V77;YVMAGVGSP | 7   | >ERBB2-V77;YVMAGLGSP | 8    | 1    |
| >ERBB2-V77;YVMAGVGSP | 2   | >ERBB2-V77;YVMAGLGSP | 2    | 0    |
| >ERBB2-V77;YVMAGVGSP | 2   | >ERBB2-V77;YVMAGLGSP | 2    | 0    |
| >ERBB2-V77;YVMAGVGSP | 71  | >ERBB2-V77;YVMAGLGSP | 89   | 18   |
| >ERBB2-V77;YVMAGVGSP | 137 | >ERBB2-V77;YVMAGLGSP | 181  | 44   |
| >ERBB2-V77;YVMAGVGSP | 86  | >ERBB2-V77;YVMAGLGSP | 74   | 12   |
| >ERBB2-V77;YVMAGVGSP | 401 | >ERBB2-V77;YVMAGLGSP | 359  | 42   |
| >ERBB2-V77;YVMAGVGSP | 6   | >ERBB2-V77;YVMAGLGSP | 5    | 1    |
| >ERBB2-V77;YVMAGVGSP | 599 | >ERBB2-V77;YVMAGLGSP | 445  | 154  |
| >ERBB2-V77;YVMAGVGSP | 143 | >ERBB2-V77;YVMAGLGSP | 108  | 35   |
| >ERBB2-V77;YVMAGVGSP | 222 | >ERBB2-V77;YVMAGLGSP | 364  | 142  |
| >ERBB2-V77;YVMAGVGSP | 77  | >ERBB2-V77;YVMAGLGSP | 126  | 49   |
| >ERBB2-V77;YVMAGVGSP | 28  | >ERBB2-V77;YVMAGLGSP | 52   | 24   |
| >ERBB2-V77;YVMAGVGS  | 352 | >ERBB2-V77;YVMAGLGS  | 1575 | 1223 |
| >ERBB2-V77;YVMAGVGSP | 10  | >ERBB2-V77;YVMAGLGSP | 11   | 1    |
| >ERBB2-V77;YVMAGVGSP | 4   | >ERBB2-V77;YVMAGLGSP | 4    | 0    |
| >ERBB2-V77;YVMAGVGSP | 22  | >ERBB2-V77;YVMAGLGSP | 18   | 4    |
| >ERBB2-V77;YVMAGVGSP | 32  | >ERBB2-V77;YVMAGLGSP | 35   | 3    |
| >ERBB2-V77;YVMAGVGSP | 410 | >ERBB2-V77;YVMAGLGSP | 667  | 257  |
| >ERBB2-V77;YVMAGVGSP | 10  | >ERBB2-V77;YVMAGLGSP | 12   | 2    |
| >ERBB2-V77;YVMAGVGSP | 76  | >ERBB2-V77;YVMAGLGSP | 111  | 35   |
| >ERBB2-V77;YVMAGVGSP | 18  | >ERBB2-V77;YVMAGLGSP | 17   | 1    |

|                       |       |                       |      |       |
|-----------------------|-------|-----------------------|------|-------|
| >ERBB2-V77;YVMAGVGSP  | 504   | >ERBB2-V77;YVMAGLGSP' | 446  | 58    |
| >ERBB2-V77;YVMAGVGSP  | 261   | >ERBB2-V77;YVMAGLGSP' | 290  | 29    |
| >ERBB2-V77;YVMAGVGSP  | 79    | >ERBB2-V77;YVMAGLGSP' | 132  | 53    |
| >ERBB2-V77;AYVMAGVGS  | 450   | >ERBB2-V77;AYVMAGLGS  | 481  | 31    |
| >ERBB2-V77;AYVMAGVGS  | 149   | >ERBB2-V77;AYVMAGLGS  | 66   | 83    |
| >ERBB2-V77;AYVMAGVGS  | 390   | >ERBB2-V77;AYVMAGLGS  | 408  | 18    |
| >ERBB2-V77;AYVMAGVGS  | 395   | >ERBB2-V77;AYVMAGLGS  | 470  | 75    |
| >ERBB2-V77;AYVMAGVGS  | 457   | >ERBB2-V77;AYVMAGLGS  | 789  | 332   |
| >ERBB2-V77;EAYVMAGV   | 1973  | >ERBB2-V77;EAYVMAGL   | 367  | 1606  |
| >ERBB2-V77;EAYVMAGV   | 14    | >ERBB2-V77;EAYVMAGL   | 70   | 56    |
| >ERBB2-V77;EAYVMAGV   | 6     | >ERBB2-V77;EAYVMAGL   | 30   | 24    |
| >ERBB2-V77;EAYVMAGV   | 1830  | >ERBB2-V77;EAYVMAGL   | 44   | 1786  |
| >ERBB2-V77;DEAYVMAGV  | 33    | >ERBB2-V77;DEAYVMAGL  | 71   | 38    |
| >ERBB2-V77;DEAYVMAGV  | 39    | >ERBB2-V77;DEAYVMAGL  | 432  | 393   |
| >ERBB2-V77;DEAYVMAGV  | 158   | >ERBB2-V77;DEAYVMAGL  | 48   | 110   |
| >ERBB2-V77;DEAYVMAGV  | 472   | >ERBB2-V77;DEAYVMAGL  | 408  | 64    |
| >ERBB2-V77;DEAYVMAGV  | 1561  | >ERBB2-V77;DEAYVMAGL  | 206  | 1355  |
| >ERBB2-V77;DEAYVMAGV  | 411   | >ERBB2-V77;DEAYVMAGL  | 779  | 368   |
| >ERBB2-V77;LDEAYVMAG  | 139   | >ERBB2-V77;LDEAYVMAG  | 608  | 469   |
| >ERBB2-V77;VGSPYVSRL  | 1312  | >ERBB2-V77;MGSPYVSRL  | 119  | 1193  |
| >ERBB2-V77;VGSPYVSR   | 709   | >ERBB2-V77;MGSPYVSR   | 82   | 627   |
| >ERBB2-V77;VGSPYVSR   | 1891  | >ERBB2-V77;MGSPYVSR   | 106  | 1785  |
| >ERBB2-V77;VGSPYVSRL  | 207   | >ERBB2-V77;MGSPYVSRL  | 87   | 120   |
| >ERBB2-V77;VGSPYVSRL  | 195   | >ERBB2-V77;MGSPYVSRL  | 136  | 59    |
| >ERBB2-V77;VGSPYVSR   | 1773  | >ERBB2-V77;MGSPYVSR   | 421  | 1352  |
| >ERBB2-V77;GVGSPYVSRL | 478   | >ERBB2-V77;GMGSPYVSR  | 32   | 446   |
| >ERBB2-V77;GVGSPYVSRL | 3409  | >ERBB2-V77;GMGSPYVSR  | 147  | 3262  |
| >ERBB2-V77;GVGSPYVSRL | 2308  | >ERBB2-V77;GMGSPYVSR  | 247  | 2061  |
| >ERBB2-V77;GVGSPYVSRL | 888   | >ERBB2-V77;GMGSPYVSR  | 7    | 881   |
| >ERBB2-V77;GVGSPYVSRL | 3993  | >ERBB2-V77;GMGSPYVSR  | 33   | 3960  |
| >ERBB2-V77;GVGSPYVSRL | 5394  | >ERBB2-V77;GMGSPYVSR  | 34   | 5360  |
| >ERBB2-V77;GVGSPYVSRL | 6842  | >ERBB2-V77;GMGSPYVSR  | 133  | 6709  |
| >ERBB2-V77;GVGSPYVSRL | 4309  | >ERBB2-V77;GMGSPYVSR  | 49   | 4260  |
| >ERBB2-V77;GVGSPYVSRL | 6744  | >ERBB2-V77;GMGSPYVSR  | 126  | 6618  |
| >ERBB2-V77;GVGSPYVSRL | 11514 | >ERBB2-V77;GMGSPYVSR  | 218  | 11296 |
| >ERBB2-V77;GVGSPYVSRL | 504   | >ERBB2-V77;GMGSPYVSR  | 7    | 497   |
| >ERBB2-V77;GVGSPYVSRL | 4859  | >ERBB2-V77;GMGSPYVSR  | 125  | 4734  |
| >ERBB2-V77;GVGSPYVSR  | 324   | >ERBB2-V77;GMGSPYVSR  | 1135 | 811   |
| >ERBB2-V77;GVGSPYVSR  | 82    | >ERBB2-V77;GMGSPYVSR  | 27   | 55    |
| >ERBB2-V77;ILDEAYVMAC | 11    | >ERBB2-V77;ILDEAYVMAC | 53   | 42    |
| >ERBB2-V77;ILDEAYVMAC | 6     | >ERBB2-V77;ILDEAYVMAC | 70   | 64    |
| >ERBB2-V77;ILDEAYVMAC | 11    | >ERBB2-V77;ILDEAYVMAC | 372  | 361   |
| >ERBB2-V77;ILDEAYVMAC | 7     | >ERBB2-V77;ILDEAYVMAC | 76   | 69    |

|                       |      |                       |     |      |
|-----------------------|------|-----------------------|-----|------|
| >ERBB2-V77;ILDEAYVMAC | 2    | >ERBB2-V77;ILDEAYVMAC | 10  | 8    |
| >ERBB2-V77;ILDEAYVMAC | 3    | >ERBB2-V77;ILDEAYVMAC | 37  | 34   |
| >ERBB2-V77;ILDEAYVMAC | 4    | >ERBB2-V77;ILDEAYVMAC | 45  | 41   |
| >ERBB2-V77;ILDEAYVMAC | 3    | >ERBB2-V77;ILDEAYVMAC | 32  | 29   |
| >ERBB2-V77;ILDEAYVMAC | 2    | >ERBB2-V77;ILDEAYVMAC | 38  | 36   |
| >ERBB2-V77;ILDEAYVMAC | 45   | >ERBB2-V77;ILDEAYVMAC | 647 | 602  |
| >ERBB2-V77;AGVGSPYV   | 2182 | >ERBB2-V77;AGMGSPYV   | 395 | 1787 |
| >ERBB2-V77;AGVGSPYV   | 354  | >ERBB2-V77;AGMGSPYV   | 134 | 220  |
| >ERBB2-V77;AGVGSPYV   | 586  | >ERBB2-V77;AGMGSPYV   | 177 | 409  |
| >ERBB2-V77;AGVGSPYV   | 899  | >ERBB2-V77;AGMGSPYV   | 319 | 580  |
| >ERBB2-V77;AGVGSPYV   | 767  | >ERBB2-V77;AGMGSPYV   | 344 | 423  |
| >ERBB2-V77;AGVGSPYVSF | 2085 | >ERBB2-V77;AGMGSPYVS  | 397 | 1688 |
| >ERBB2-V77;AGVGSPYVSF | 254  | >ERBB2-V77;AGMGSPYVS  | 264 | 10   |
| >ERBB2-V77;MAGVGSPYV  | 724  | >ERBB2-V77;MAGMGSPY\  | 389 | 335  |
| >ERBB2-V77;MAGVGSPYV  | 34   | >ERBB2-V77;MAGMGSPY\  | 31  | 3    |
| >ERBB2-V77;MAGVGSPYV  | 53   | >ERBB2-V77;MAGMGSPY\  | 25  | 28   |
| >ERBB2-V77;MAGVGSPYV  | 48   | >ERBB2-V77;MAGMGSPY\  | 36  | 12   |
| >ERBB2-V77;MAGVGSPYV  | 49   | >ERBB2-V77;MAGMGSPY\  | 86  | 37   |
| >ERBB2-V77;MAGVGSPYV  | 31   | >ERBB2-V77;MAGMGSPY\  | 17  | 14   |
| >ERBB2-V77;MAGVGSPY   | 121  | >ERBB2-V77;MAGMGSPY   | 105 | 16   |
| >ERBB2-V77;MAGVGSPY   | 176  | >ERBB2-V77;MAGMGSPY   | 167 | 9    |
| >ERBB2-V77;MAGVGSPYV  | 51   | >ERBB2-V77;MAGMGSPY\  | 52  | 1    |
| >ERBB2-V77;MAGVGSPYV  | 374  | >ERBB2-V77;MAGMGSPY\  | 260 | 114  |
| >ERBB2-V77;MAGVGSPYV  | 61   | >ERBB2-V77;MAGMGSPY\  | 51  | 10   |
| >ERBB2-V77;MAGVGSPYV  | 490  | >ERBB2-V77;MAGMGSPY\  | 552 | 62   |
| >ERBB2-V77;MAGVGSPYV  | 15   | >ERBB2-V77;MAGMGSPY\  | 19  | 4    |
| >ERBB2-V77;MAGVGSPY   | 76   | >ERBB2-V77;MAGMGSPY   | 56  | 20   |
| >ERBB2-V77;MAGVGSPY   | 461  | >ERBB2-V77;MAGMGSPY   | 603 | 142  |
| >ERBB2-V77;MAGVGSPY   | 318  | >ERBB2-V77;MAGMGSPY   | 220 | 98   |
| >ERBB2-V77;MAGVGSPY   | 26   | >ERBB2-V77;MAGMGSPY   | 20  | 6    |
| >ERBB2-V77;MAGVGSPY   | 13   | >ERBB2-V77;MAGMGSPY   | 11  | 2    |
| >ERBB2-V77;VMAGVGSPY  | 36   | >ERBB2-V77;VMAGMGSP'  | 24  | 12   |
| >ERBB2-V77;VMAGVGSPY  | 36   | >ERBB2-V77;VMAGMGSP'  | 38  | 2    |
| >ERBB2-V77;VMAGVGSPY  | 25   | >ERBB2-V77;VMAGMGSP'  | 21  | 4    |
| >ERBB2-V77;VMAGVGSPY  | 88   | >ERBB2-V77;VMAGMGSP'  | 84  | 4    |
| >ERBB2-V77;VMAGVGSPY  | 1    | >ERBB2-V77;VMAGMGSP'  | 2   | 1    |
| >ERBB2-V77;VMAGVGSPY  | 128  | >ERBB2-V77;VMAGMGSP'  | 546 | 418  |
| >ERBB2-V77;VMAGVGSPY  | 4    | >ERBB2-V77;VMAGMGSP'  | 6   | 2    |
| >ERBB2-V77;VMAGVGSPY  | 4    | >ERBB2-V77;VMAGMGSP'  | 4   | 0    |
| >ERBB2-V77;VMAGVGSPY  | 2    | >ERBB2-V77;VMAGMGSP'  | 2   | 0    |
| >ERBB2-V77;VMAGVGSPY  | 2    | >ERBB2-V77;VMAGMGSP'  | 2   | 0    |
| >ERBB2-V77;VMAGVGSPY  | 183  | >ERBB2-V77;VMAGMGSP'  | 310 | 127  |
| >ERBB2-V77;VMAGVGSPY  | 16   | >ERBB2-V77;VMAGMGSP'  | 11  | 5    |

|                      |     |                      |     |     |
|----------------------|-----|----------------------|-----|-----|
| >ERBB2-V77;VMAGVGSPY | 16  | >ERBB2-V77;VMAGMGSP' | 15  | 1   |
| >ERBB2-V77;VMAGVGSPY | 292 | >ERBB2-V77;VMAGMGSP' | 455 | 163 |
| >ERBB2-V77;VMAGVGSPY | 166 | >ERBB2-V77;VMAGMGSP' | 174 | 8   |
| >ERBB2-V77;VMAGVGSPY | 29  | >ERBB2-V77;VMAGMGSP' | 27  | 2   |
| >ERBB2-V77;VMAGVGSPY | 12  | >ERBB2-V77;VMAGMGSP' | 13  | 1   |
| >ERBB2-V77;VMAGVGSPY | 19  | >ERBB2-V77;VMAGMGSP' | 21  | 2   |
| >ERBB2-V77;VMAGVGSPY | 479 | >ERBB2-V77;VMAGMGSP' | 159 | 320 |
| >ERBB2-V77;VMAGVGSPY | 81  | >ERBB2-V77;VMAGMGSP' | 59  | 22  |
| >ERBB2-V77;VMAGVGSPY | 88  | >ERBB2-V77;VMAGMGSP' | 100 | 12  |
| >ERBB2-V77;VMAGVGSPY | 475 | >ERBB2-V77;VMAGMGSP' | 670 | 195 |
| >ERBB2-V77;YVMAGVGSP | 7   | >ERBB2-V77;YVMAGMGSI | 8   | 1   |
| >ERBB2-V77;YVMAGVGSP | 6   | >ERBB2-V77;YVMAGMGSI | 6   | 0   |
| >ERBB2-V77;YVMAGVGS  | 650 | >ERBB2-V77;YVMAGMGS  | 452 | 198 |
| >ERBB2-V77;YVMAGVGSP | 3   | >ERBB2-V77;YVMAGMGSI | 3   | 0   |
| >ERBB2-V77;YVMAGVGS  | 89  | >ERBB2-V77;YVMAGMGS  | 89  | 0   |
| >ERBB2-V77;YVMAGVGSP | 3   | >ERBB2-V77;YVMAGMGSI | 3   | 0   |
| >ERBB2-V77;YVMAGVGSP | 2   | >ERBB2-V77;YVMAGMGSI | 3   | 1   |
| >ERBB2-V77;YVMAGVGSP | 5   | >ERBB2-V77;YVMAGMGSI | 6   | 1   |
| >ERBB2-V77;YVMAGVGSP | 7   | >ERBB2-V77;YVMAGMGSI | 10  | 3   |
| >ERBB2-V77;YVMAGVGSP | 2   | >ERBB2-V77;YVMAGMGSI | 3   | 1   |
| >ERBB2-V77;YVMAGVGSP | 2   | >ERBB2-V77;YVMAGMGSI | 2   | 0   |
| >ERBB2-V77;YVMAGVGSP | 71  | >ERBB2-V77;YVMAGMGSI | 54  | 17  |
| >ERBB2-V77;YVMAGVGSP | 137 | >ERBB2-V77;YVMAGMGSI | 185 | 48  |
| >ERBB2-V77;YVMAGVGSP | 86  | >ERBB2-V77;YVMAGMGSI | 61  | 25  |
| >ERBB2-V77;YVMAGVGSP | 401 | >ERBB2-V77;YVMAGMGSI | 263 | 138 |
| >ERBB2-V77;YVMAGVGSP | 610 | >ERBB2-V77;YVMAGMGSI | 253 | 357 |
| >ERBB2-V77;YVMAGVGSP | 6   | >ERBB2-V77;YVMAGMGSI | 4   | 2   |
| >ERBB2-V77;YVMAGVGSP | 599 | >ERBB2-V77;YVMAGMGSI | 278 | 321 |
| >ERBB2-V77;YVMAGVGSP | 143 | >ERBB2-V77;YVMAGMGSI | 120 | 23  |
| >ERBB2-V77;YVMAGVGSP | 222 | >ERBB2-V77;YVMAGMGSI | 112 | 110 |
| >ERBB2-V77;YVMAGVGSP | 77  | >ERBB2-V77;YVMAGMGSI | 118 | 41  |
| >ERBB2-V77;YVMAGVGSP | 28  | >ERBB2-V77;YVMAGMGSI | 24  | 4   |
| >ERBB2-V77;YVMAGVGS  | 352 | >ERBB2-V77;YVMAGMGS  | 225 | 127 |
| >ERBB2-V77;YVMAGVGSP | 10  | >ERBB2-V77;YVMAGMGSI | 9   | 1   |
| >ERBB2-V77;YVMAGVGSP | 4   | >ERBB2-V77;YVMAGMGSI | 4   | 0   |
| >ERBB2-V77;YVMAGVGSP | 22  | >ERBB2-V77;YVMAGMGSI | 16  | 6   |
| >ERBB2-V77;YVMAGVGSP | 32  | >ERBB2-V77;YVMAGMGSI | 33  | 1   |
| >ERBB2-V77;YVMAGVGSP | 410 | >ERBB2-V77;YVMAGMGSI | 504 | 94  |
| >ERBB2-V77;YVMAGVGSP | 10  | >ERBB2-V77;YVMAGMGSI | 10  | 0   |
| >ERBB2-V77;YVMAGVGSP | 76  | >ERBB2-V77;YVMAGMGSI | 116 | 40  |
| >ERBB2-V77;YVMAGVGSP | 18  | >ERBB2-V77;YVMAGMGSI | 12  | 6   |
| >ERBB2-V77;YVMAGVGSP | 504 | >ERBB2-V77;YVMAGMGSI | 355 | 149 |
| >ERBB2-V77;YVMAGVGSP | 261 | >ERBB2-V77;YVMAGMGSI | 141 | 120 |

|                       |       |                       |      |       |
|-----------------------|-------|-----------------------|------|-------|
| >ERBB2-V77;YVMAGVGSP  | 79    | >ERBB2-V77;YVMAGMGS   | 132  | 53    |
| >ERBB2-V77;AYVMAGVGS  | 450   | >ERBB2-V77;AYVMAGMG   | 447  | 3     |
| >ERBB2-V77;AYVMAGVGS  | 149   | >ERBB2-V77;AYVMAGMG   | 94   | 55    |
| >ERBB2-V77;AYVMAGVGS  | 390   | >ERBB2-V77;AYVMAGMG   | 395  | 5     |
| >ERBB2-V77;AYVMAGVGS  | 395   | >ERBB2-V77;AYVMAGMG   | 404  | 9     |
| >ERBB2-V77;AYVMAGVGS  | 457   | >ERBB2-V77;AYVMAGMG   | 695  | 238   |
| >ERBB2-V77;EAYVMAGV   | 2589  | >ERBB2-V77;EAYVMAGM   | 132  | 2457  |
| >ERBB2-V77;EAYVMAGV   | 6695  | >ERBB2-V77;EAYVMAGM   | 210  | 6485  |
| >ERBB2-V77;EAYVMAGV   | 14    | >ERBB2-V77;EAYVMAGM   | 492  | 478   |
| >ERBB2-V77;EAYVMAGV   | 6     | >ERBB2-V77;EAYVMAGM   | 43   | 37    |
| >ERBB2-V77;EAYVMAGV   | 1830  | >ERBB2-V77;EAYVMAGM   | 29   | 1801  |
| >ERBB2-V77;EAYVMAGV   | 7153  | >ERBB2-V77;EAYVMAGM   | 112  | 7041  |
| >ERBB2-V77;DEAYVMAGV  | 33    | >ERBB2-V77;DEAYVMAGN  | 83   | 50    |
| >ERBB2-V77;DEAYVMAGV  | 16964 | >ERBB2-V77;DEAYVMAGN  | 333  | 16631 |
| >ERBB2-V77;DEAYVMAGV  | 39    | >ERBB2-V77;DEAYVMAGN  | 4142 | 4103  |
| >ERBB2-V77;DEAYVMAGV  | 158   | >ERBB2-V77;DEAYVMAGN  | 35   | 123   |
| >ERBB2-V77;DEAYVMAGV  | 472   | >ERBB2-V77;DEAYVMAGN  | 370  | 102   |
| >ERBB2-V77;DEAYVMAGV  | 411   | >ERBB2-V77;DEAYVMAGN  | 1711 | 1300  |
| >ERBB2-V77;LDEAYVMAG  | 139   | >ERBB2-V77;LDEAYVMAG  | 1488 | 1349  |
| >ERBB2-V84;VHRDLAARN' | 957   | >ERBB2-V84;IHRDLAARNV | 413  | 544   |
| >ERBB2-V84;VHRDLAARN' | 471   | >ERBB2-V84;IHRDLAARNV | 588  | 117   |
| >ERBB2-V84;LVHRDLAARN | 138   | >ERBB2-V84;LIHRDLAARN | 60   | 78    |
| >ERBB2-V84;LVHRDLAARN | 542   | >ERBB2-V84;LIHRDLAARN | 166  | 376   |
| >ERBB2-V84;LVHRDLAARN | 72    | >ERBB2-V84;LIHRDLAARN | 29   | 43    |
| >ERBB2-V84;LVHRDLAA   | 291   | >ERBB2-V84;LIHRDLAA   | 917  | 626   |
| >ERBB2-V84;LVHRDLAARN | 474   | >ERBB2-V84;LIHRDLAARN | 1373 | 899   |
| >ERBB2-V84;LVHRDLAAR  | 34    | >ERBB2-V84;LIHRDLAAR  | 55   | 21    |
| >ERBB2-V84;LVHRDLAAR  | 174   | >ERBB2-V84;LIHRDLAAR  | 354  | 180   |
| >ERBB2-V84;GMSYLEDVRI | 185   | >ERBB2-V84;GMSYLEDVRI | 871  | 686   |
| >ERBB2-V84;GMSYLEDVRI | 11    | >ERBB2-V84;GMSYLEDVRI | 43   | 32    |
| >ERBB2-V84;GMSYLEDVRI | 23    | >ERBB2-V84;GMSYLEDVRI | 98   | 75    |
| >ERBB2-V84;GMSYLEDVRI | 31    | >ERBB2-V84;GMSYLEDVRI | 353  | 322   |
| >ERBB2-V84;GMSYLEDVRI | 23    | >ERBB2-V84;GMSYLEDVRI | 222  | 199   |
| >ERBB2-V84;GMSYLEDVRI | 26    | >ERBB2-V84;GMSYLEDVRI | 461  | 435   |
| >ERBB2-V84;GMSYLEDVRI | 371   | >ERBB2-V84;GMSYLEDVRI | 6163 | 5792  |
| >ERBB2-V84;GMSYLEDVRI | 22    | >ERBB2-V84;GMSYLEDVRI | 1941 | 1919  |
| >ERBB2-V84;RLVHRDLA   | 778   | >ERBB2-V84;RLIHRDLA   | 406  | 372   |
| >ERBB2-V84;RLVHRDLA   | 174   | >ERBB2-V84;RLIHRDLA   | 76   | 98    |
| >ERBB2-V84;RLVHRDLAA  | 166   | >ERBB2-V84;RLIHRDLAA  | 74   | 92    |
| >ERBB2-V84;RLVHRDLAA  | 344   | >ERBB2-V84;RLIHRDLAA  | 216  | 128   |
| >ERBB2-V84;RLVHRDLAA  | 785   | >ERBB2-V84;RLIHRDLAA  | 247  | 538   |
| >ERBB2-V84;RLVHRDLA   | 452   | >ERBB2-V84;RLIHRDLA   | 349  | 103   |
| >ERBB2-V84;RLVHRDLAAF | 904   | >ERBB2-V84;RLIHRDLAAR | 451  | 453   |



|                        |      |                        |      |      |
|------------------------|------|------------------------|------|------|
| >ERBB2-V84:RLVHRDLAAF  | 26   | >ERBB2-V84:RLIHRDLAAR  | 15   | 11   |
| >ERBB2-V84:RLVHRDLAA   | 1381 | >ERBB2-V84:RLIHRDLAA   | 436  | 945  |
| >ERBB2-V84:RLVHRDLAA   | 814  | >ERBB2-V84:RLIHRDLAA   | 361  | 453  |
| >ERBB2-V84:RLVHRDLAAF  | 136  | >ERBB2-V84:RLIHRDLAAR  | 169  | 33   |
| >ERBB2-V84:RLVHRDLAAF  | 132  | >ERBB2-V84:RLIHRDLAAR  | 159  | 27   |
| >ERBB2-V84:VRLVHRDLAA  | 350  | >ERBB2-V84:VRLIHRDLAA  | 480  | 130  |
| >ERBB2-V84:VRLVHRDL    | 457  | >ERBB2-V84:VRLIHRDL    | 623  | 166  |
| >ERBB2-V84:EDVRLVHR    | 185  | >ERBB2-V84:EDVRLIHR    | 214  | 29   |
| >ERBB2-V84:LEDVRLVHRC  | 289  | >ERBB2-V84:LEDVRLIHRDI | 248  | 41   |
| >ERBB2-V84:YLEDVRLV    | 38   | >ERBB2-V84:YLEDVRLI    | 105  | 67   |
| >ERBB2-V84:YLEDVRLV    | 12   | >ERBB2-V84:YLEDVRLI    | 36   | 24   |
| >ERBB2-V84:YLEDVRLV    | 10   | >ERBB2-V84:YLEDVRLI    | 45   | 35   |
| >ERBB2-V84:YLEDVRLV    | 45   | >ERBB2-V84:YLEDVRLI    | 359  | 314  |
| >ERBB2-V84:YLEDVRLV    | 3    | >ERBB2-V84:YLEDVRLI    | 14   | 11   |
| >ERBB2-V84:YLEDVRLV    | 8    | >ERBB2-V84:YLEDVRLI    | 44   | 36   |
| >ERBB2-V84:YLEDVRLV    | 13   | >ERBB2-V84:YLEDVRLI    | 140  | 127  |
| >ERBB2-V84:YLEDVRLV    | 39   | >ERBB2-V84:YLEDVRLI    | 1456 | 1417 |
| >ERBB2-V84:YLEDVRLV    | 2    | >ERBB2-V84:YLEDVRLI    | 5    | 3    |
| >ERBB2-V84:YLEDVRLVHR  | 285  | >ERBB2-V84:YLEDVRLIHR  | 221  | 64   |
| >ERBB2-V84:YLEDVRLVHR  | 351  | >ERBB2-V84:YLEDVRLIHR  | 429  | 78   |
| >ERBB2-V84:YLEDVRLVHR  | 431  | >ERBB2-V84:YLEDVRLIHR  | 425  | 6    |
| >ERBB2-V84:YLEDVRLVHR  | 347  | >ERBB2-V84:YLEDVRLIHR  | 343  | 4    |
| >ERBB2-V84:YLEDVRLVHR  | 102  | >ERBB2-V84:YLEDVRLIHR  | 82   | 20   |
| >ERBB2-V84:YLEDVRLVHR  | 271  | >ERBB2-V84:YLEDVRLIHR  | 311  | 40   |
| >ERBB2-V84:SYLEDVRLV   | 2151 | >ERBB2-V84:SYLEDVRLI   | 186  | 1965 |
| >ERBB2-V84:SYLEDVRLV   | 112  | >ERBB2-V84:SYLEDVRLI   | 1390 | 1278 |
| >ERBB2-V84:SYLEDVRLV   | 220  | >ERBB2-V84:SYLEDVRLI   | 4749 | 4529 |
| >ERBB2-V84:SYLEDVRLV   | 3293 | >ERBB2-V84:SYLEDVRLI   | 270  | 3023 |
| >ERBB2-V84:SYLEDVRLV   | 458  | >ERBB2-V84:SYLEDVRLI   | 18   | 440  |
| >ERBB2-V84:SYLEDVRLVH  | 61   | >ERBB2-V84:SYLEDVRLIHF | 84   | 23   |
| >ERBB2-V84:SYLEDVRLVH  | 105  | >ERBB2-V84:SYLEDVRLIHF | 109  | 4    |
| >ERBB2-V84:SYLEDVRLVH  | 30   | >ERBB2-V84:SYLEDVRLIHF | 31   | 1    |
| >ERBB2-V84:MSYLEDVRLV  | 2998 | >ERBB2-V84:MSYLEDVRLI  | 496  | 2502 |
| >ERBB2-V84:MSYLEDVRLV  | 249  | >ERBB2-V84:MSYLEDVRLI  | 49   | 200  |
| >ERBB2-V84:MSYLEDVRLV  | 364  | >ERBB2-V84:MSYLEDVRLI  | 666  | 302  |
| >ERBB2-V84:MSYLEDVRLV  | 3707 | >ERBB2-V84:MSYLEDVRLI  | 74   | 3633 |
| >ERC1-L583I-ENLQEQLR   | 488  | >ERC1-L583I-ENIQEQLR   | 71   | 417  |
| >ERC1-L583I-ENLQEQLR   | 493  | >ERC1-L583I-ENIQEQLR   | 963  | 470  |
| >ERC1-L583I-IENLQEQL   | 366  | >ERC1-L583I-IENIQEQL   | 1996 | 1630 |
| >ERC1-L583I-IENLQEQL   | 521  | >ERC1-L583I-IENIQEQL   | 498  | 23   |
| >ERC1-L583I-IENLQEQL   | 370  | >ERC1-L583I-IENIQEQL   | 480  | 110  |
| >ERC1-L583I-KIENLQEQL  | 573  | >ERC1-L583I-KIENIQEQL  | 154  | 419  |
| >ERC1-L583I-KIENLQEQLR | 514  | >ERC1-L583I-KIENIQEQLR | 398  | 116  |

|                         |      |                         |     |      |
|-------------------------|------|-------------------------|-----|------|
| >ERC1-L583I-KIENLQEQ    | 192  | >ERC1-L583I-KIENIQEQL   | 75  | 117  |
| >ERC1-L583I-KIENLQEQLR  | 290  | >ERC1-L583I-KIENIQEQLR  | 247 | 43   |
| >ERC1-L583I-KIENLQEQLR  | 146  | >ERC1-L583I-KIENIQEQLR  | 146 | 0    |
| >ERC1-L583I-KKIENLQEQ   | 83   | >ERC1-L583I-KKIENIQEQL  | 65  | 18   |
| >ERC1-L583I-KKIENLQEQLI | 448  | >ERC1-L583I-KKIENIQEQLF | 254 | 194  |
| >ERC1-L583I-LQKKIENL    | 131  | >ERC1-L583I-LQKKIENI    | 213 | 82   |
| >ERC1-L583I-LQKKIENL    | 9877 | >ERC1-L583I-LQKKIENI    | 485 | 9392 |
| >ERC1-L583I-VLQKKIENL   | 449  | >ERC1-L583I-VLQKKIENI   | 610 | 161  |
| >ERC1-L583I-VLQKKIENL   | 39   | >ERC1-L583I-VLQKKIENI   | 150 | 111  |
| >ERC1-L583I-VLQKKIENL   | 321  | >ERC1-L583I-VLQKKIENI   | 141 | 180  |
| >ERC1-L583I-VLQKKIENL   | 31   | >ERC1-L583I-VLQKKIENI   | 28  | 3    |
| >ERC1-L583I-VLQKKIENL   | 57   | >ERC1-L583I-VLQKKIENI   | 61  | 4    |
| >ERC1-L583I-VLQKKIENL   | 208  | >ERC1-L583I-VLQKKIENI   | 313 | 105  |
| >ERC1-L583I-VLQKKIENL   | 107  | >ERC1-L583I-VLQKKIENI   | 181 | 74   |
| >ERC1-L583I-VLQKKIENL   | 11   | >ERC1-L583I-VLQKKIENI   | 31  | 20   |
| >ERC1-L583I-NVLQKKIENL  | 731  | >ERC1-L583I-NVLQKKIENI  | 409 | 322  |
| >ERCC2-V61E VIMFGVPYV   | 8    | >ERCC2-V61E IIMFGVPYV   | 7   | 1    |
| >ERCC2-V61E VIMFGVPYVY  | 581  | >ERCC2-V61E IIMFGVPYVY  | 347 | 234  |
| >ERCC2-V61E VIMFGVPYV   | 14   | >ERCC2-V61E IIMFGVPYV   | 9   | 5    |
| >ERCC2-V61E VIMFGVPYV   | 4    | >ERCC2-V61E IIMFGVPYV   | 4   | 0    |
| >ERCC2-V61E VIMFGVPYVY  | 579  | >ERCC2-V61E IIMFGVPYVY  | 401 | 178  |
| >ERCC2-V61E VIMFGVPYV   | 5    | >ERCC2-V61E IIMFGVPYV   | 4   | 1    |
| >ERCC2-V61E VIMFGVPYVY  | 478  | >ERCC2-V61E IIMFGVPYVY  | 294 | 184  |
| >ERCC2-V61E VIMFGVPYV   | 2    | >ERCC2-V61E IIMFGVPYV   | 2   | 0    |
| >ERCC2-V61E VIMFGVPYVY  | 307  | >ERCC2-V61E IIMFGVPYVY  | 360 | 53   |
| >ERCC2-V61E VIMFGVPYV   | 10   | >ERCC2-V61E IIMFGVPYV   | 13  | 3    |
| >ERCC2-V61E VIMFGVPYV   | 6    | >ERCC2-V61E IIMFGVPYV   | 7   | 1    |
| >ERCC2-V61E VIMFGVPYV   | 2    | >ERCC2-V61E IIMFGVPYV   | 2   | 0    |
| >ERCC2-V61E VIMFGVPYVY  | 288  | >ERCC2-V61E IIMFGVPYVY  | 318 | 30   |
| >ERCC2-V61E VIMFGVPYV   | 3    | >ERCC2-V61E IIMFGVPYV   | 3   | 0    |
| >ERCC2-V61E VIMFGVPY    | 509  | >ERCC2-V61E IIMFGVPY    | 310 | 199  |
| >ERCC2-V61E VIMFGVPYVY  | 104  | >ERCC2-V61E IIMFGVPYVY  | 62  | 42   |
| >ERCC2-V61E VIMFGVPY    | 73   | >ERCC2-V61E IIMFGVPY    | 81  | 8    |
| >ERCC2-V61E VIMFGVPYVY  | 42   | >ERCC2-V61E IIMFGVPYVY  | 45  | 3    |
| >ERCC2-V61E VIMFGVPY    | 248  | >ERCC2-V61E IIMFGVPY    | 330 | 82   |
| >ERCC2-V61E VIMFGVPYVY  | 173  | >ERCC2-V61E IIMFGVPYVY  | 225 | 52   |
| >ERCC2-V61E VIMFGVPY    | 43   | >ERCC2-V61E IIMFGVPY    | 31  | 12   |
| >ERCC2-V61E VIMFGVPYVY  | 96   | >ERCC2-V61E IIMFGVPYVY  | 63  | 33   |
| >ERCC2-V61E VIMFGVPY    | 85   | >ERCC2-V61E IIMFGVPY    | 88  | 3    |
| >ERCC2-V61E VIMFGVPYVY  | 42   | >ERCC2-V61E IIMFGVPYVY  | 37  | 5    |
| >ERCC2-V61E VIMFGVPY    | 702  | >ERCC2-V61E IIMFGVPY    | 487 | 215  |
| >ERCC2-V61E VIMFGVPYVY  | 463  | >ERCC2-V61E IIMFGVPYVY  | 324 | 139  |
| >ERCC2-V61E VIMFGVPYVY  | 649  | >ERCC2-V61E IIMFGVPYVY  | 290 | 359  |

|                        |     |                        |      |     |
|------------------------|-----|------------------------|------|-----|
| >ERCC2-V61\xVIMFGVPYV  | 168 | >ERCC2-V61\xIIMFGVPYV  | 105  | 63  |
| >ERCC2-V61\xVIMFGVPYV  | 18  | >ERCC2-V61\xIIMFGVPYV  | 15   | 3   |
| >ERCC2-V61\xVIMFGVPY   | 231 | >ERCC2-V61\xIIMFGVPY   | 422  | 191 |
| >ERCC2-V61\xVIMFGVPYVY | 71  | >ERCC2-V61\xIIMFGVPYVY | 120  | 49  |
| >ERCC2-V61\xVIMFGVPY   | 70  | >ERCC2-V61\xIIMFGVPY   | 67   | 3   |
| >ERCC2-V61\xVIMFGVPYVY | 106 | >ERCC2-V61\xIIMFGVPYVY | 100  | 6   |
| >ERCC2-V61\xVIMFGVPY   | 183 | >ERCC2-V61\xIIMFGVPY   | 169  | 14  |
| >ERCC2-V61\xVIMFGVPY   | 201 | >ERCC2-V61\xIIMFGVPY   | 99   | 102 |
| >ERCC2-V61\xVIMFGVPYVY | 842 | >ERCC2-V61\xIIMFGVPYVY | 408  | 434 |
| >ERCC2-V61\xVIMFGVPY   | 228 | >ERCC2-V61\xIIMFGVPY   | 131  | 97  |
| >ERCC2-V61\xVIMFGVPY   | 292 | >ERCC2-V61\xIIMFGVPY   | 180  | 112 |
| >ERCC2-V61\xVIMFGVPYVY | 590 | >ERCC2-V61\xIIMFGVPYVY | 264  | 326 |
| >ERCC2-V61\xVIMFGVPYVY | 347 | >ERCC2-V61\xIIMFGVPYVY | 703  | 356 |
| >ERCC2-V61\xAVIMFGVPY\ | 43  | >ERCC2-V61\xAIIMFGVPYV | 25   | 18  |
| >ERCC2-V61\xAVIMFGVPY\ | 89  | >ERCC2-V61\xAIIMFGVPYV | 66   | 23  |
| >ERCC2-V61\xAVIMFGVPY\ | 27  | >ERCC2-V61\xAIIMFGVPYV | 20   | 7   |
| >ERCC2-V61\xAVIMFGVPY\ | 33  | >ERCC2-V61\xAIIMFGVPYV | 34   | 1   |
| >ERCC2-V61\xAVIMFGVPY\ | 7   | >ERCC2-V61\xAIIMFGVPYV | 4    | 3   |
| >ERCC2-V61\xAVIMFGVPY\ | 99  | >ERCC2-V61\xAIIMFGVPYV | 52   | 47  |
| >ERCC2-V61\xAVIMFGVPY\ | 28  | >ERCC2-V61\xAIIMFGVPYV | 16   | 12  |
| >ERCC2-V61\xAVIMFGVPY\ | 300 | >ERCC2-V61\xAIIMFGVPYV | 146  | 154 |
| >ERCC2-V61\xAVIMFGVPY\ | 7   | >ERCC2-V61\xAIIMFGVPYV | 4    | 3   |
| >ERCC2-V61\xAVIMFGVPY  | 29  | >ERCC2-V61\xAIIMFGVPY  | 40   | 11  |
| >ERCC2-V61\xAVIMFGVPY\ | 41  | >ERCC2-V61\xAIIMFGVPYV | 65   | 24  |
| >ERCC2-V61\xAVIMFGVPY  | 30  | >ERCC2-V61\xAIIMFGVPY  | 93   | 63  |
| >ERCC2-V61\xAVIMFGVPY\ | 405 | >ERCC2-V61\xAIIMFGVPYV | 1382 | 977 |
| >ERCC2-V61\xAVIMFGVPY\ | 30  | >ERCC2-V61\xAIIMFGVPYV | 81   | 51  |
| >ERCC2-V61\xAVIMFGVPY  | 148 | >ERCC2-V61\xAIIMFGVPY  | 568  | 420 |
| >ERCC2-V61\xAVIMFGVPY  | 41  | >ERCC2-V61\xAIIMFGVPY  | 74   | 33  |
| >ERCC2-V61\xAVIMFGVPY\ | 20  | >ERCC2-V61\xAIIMFGVPYV | 35   | 15  |
| >ERCC2-V61\xAVIMFGVPY\ | 292 | >ERCC2-V61\xAIIMFGVPYV | 975  | 683 |
| >ERCC2-V61\xAVIMFGVPY  | 402 | >ERCC2-V61\xAIIMFGVPY  | 498  | 96  |
| >ERCC2-V61\xAVIMFGVPY\ | 63  | >ERCC2-V61\xAIIMFGVPYV | 73   | 10  |
| >ERCC2-V61\xAVIMFGVPY  | 231 | >ERCC2-V61\xAIIMFGVPY  | 283  | 52  |
| >ERCC2-V61\xAVIMFGVPY\ | 182 | >ERCC2-V61\xAIIMFGVPYV | 218  | 36  |
| >ERCC2-V61\xAVIMFGVPY\ | 199 | >ERCC2-V61\xAIIMFGVPYV | 482  | 283 |
| >ERCC2-V61\xAVIMFGVPY\ | 46  | >ERCC2-V61\xAIIMFGVPYV | 92   | 46  |
| >ERCC2-V61\xAVIMFGVPY  | 357 | >ERCC2-V61\xAIIMFGVPY  | 987  | 630 |
| >ERCC2-V61\xAVIMFGVPY\ | 96  | >ERCC2-V61\xAIIMFGVPYV | 254  | 158 |
| >ERCC2-V61\xAVIMFGVPY  | 64  | >ERCC2-V61\xAIIMFGVPY  | 60   | 4   |
| >ERCC2-V61\xAVIMFGVPY\ | 103 | >ERCC2-V61\xAIIMFGVPYV | 100  | 3   |
| >ERCC2-V61\xAVIMFGVPY  | 295 | >ERCC2-V61\xAIIMFGVPY  | 245  | 50  |
| >ERCC2-V61\xAVIMFGVPY  | 31  | >ERCC2-V61\xAIIMFGVPY  | 26   | 5   |

|                       |      |                        |      |      |
|-----------------------|------|------------------------|------|------|
| >ERCC2-V61ξAVIMFGVPY\ | 201  | >ERCC2-V61ξAIIMFGVPYV  | 163  | 38   |
| >ERCC2-V61ξAVIMFGVPY  | 43   | >ERCC2-V61ξAIIMFGVPY   | 130  | 87   |
| >ERCC2-V61ξAVIMFGVPY\ | 219  | >ERCC2-V61ξAIIMFGVPYV  | 787  | 568  |
| >ERCC2-V61ξAVIMFGVPY  | 125  | >ERCC2-V61ξAIIMFGVPY   | 371  | 246  |
| >ERCC2-V61ξAVIMFGVPY\ | 299  | >ERCC2-V61ξAIIMFGVPYV  | 949  | 650  |
| >ERCC2-V61ξAVIMFGVPY\ | 416  | >ERCC2-V61ξAIIMFGVPYV  | 1362 | 946  |
| >ERCC2-V61ξAVIMFGVPY  | 46   | >ERCC2-V61ξAIIMFGVPY   | 46   | 0    |
| >ERCC2-V61ξAVIMFGVPY\ | 212  | >ERCC2-V61ξAIIMFGVPYV  | 194  | 18   |
| >ERCC2-V61ξIDFVHHYGRA | 551  | >ERCC2-V61ξIDFVHHYGRA  | 411  | 140  |
| >ERCC2-V61ξIDFVHHYGRA | 1005 | >ERCC2-V61ξIDFVHHYGRA  | 276  | 729  |
| >ERCC2-V61ξIDFVHHYGRA | 321  | >ERCC2-V61ξIDFVHHYGRA  | 153  | 168  |
| >ERCC2-V61ξRAVIMFGVP\ | 1587 | >ERCC2-V61ξRAIIMFGVPY' | 420  | 1167 |
| >ERCC2-V61ξRAVIMFGV   | 597  | >ERCC2-V61ξRAIIMFGV    | 332  | 265  |
| >ERCC2-V61ξRAVIMFGVP\ | 403  | >ERCC2-V61ξRAIIMFGVPY' | 207  | 196  |
| >ERCC2-V61ξRAVIMFGV   | 22   | >ERCC2-V61ξRAIIMFGV    | 15   | 7    |
| >ERCC2-V61ξRAVIMFGVP\ | 27   | >ERCC2-V61ξRAIIMFGVPY' | 18   | 9    |
| >ERCC2-V61ξRAVIMFGV   | 494  | >ERCC2-V61ξRAIIMFGV    | 325  | 169  |
| >ERCC2-V61ξRAVIMFGVP\ | 131  | >ERCC2-V61ξRAIIMFGVPY' | 94   | 37   |
| >ERCC2-V61ξRAVIMFGVP\ | 601  | >ERCC2-V61ξRAIIMFGVPY' | 490  | 111  |
| >ERCC2-V61ξRAVIMFGVP\ | 409  | >ERCC2-V61ξRAIIMFGVPY' | 309  | 100  |
| >ERCC2-V61ξRAVIMFGVP\ | 783  | >ERCC2-V61ξRAIIMFGVPY  | 253  | 530  |
| >ERCC2-V61ξRAVIMFGVP\ | 191  | >ERCC2-V61ξRAIIMFGVPY  | 121  | 70   |
| >ERCC2-V61ξRAVIMFGVP\ | 468  | >ERCC2-V61ξRAIIMFGVPY' | 283  | 185  |
| >ERCC2-V61ξRAVIMFGVP\ | 143  | >ERCC2-V61ξRAIIMFGVPY  | 78   | 65   |
| >ERCC2-V61ξRAVIMFGVP\ | 413  | >ERCC2-V61ξRAIIMFGVPY  | 222  | 191  |
| >ERCC2-V61ξRAVIMFGV   | 349  | >ERCC2-V61ξRAIIMFGV    | 218  | 131  |
| >ERCC2-V61ξRAVIMFGV   | 323  | >ERCC2-V61ξRAIIMFGV    | 269  | 54   |
| >ERCC2-V61ξRAVIMFGVP\ | 422  | >ERCC2-V61ξRAIIMFGVPY' | 326  | 96   |
| >ERCC2-V61ξRAVIMFGVP\ | 755  | >ERCC2-V61ξRAIIMFGVPY  | 463  | 292  |
| >ERCC2-V61ξRAVIMFGVP\ | 77   | >ERCC2-V61ξRAIIMFGVPY  | 57   | 20   |
| >ERCC2-V61ξRAVIMFGVP\ | 82   | >ERCC2-V61ξRAIIMFGVPY  | 59   | 23   |
| >ERCC2-V61ξRAVIMFGV   | 126  | >ERCC2-V61ξRAIIMFGV    | 128  | 2    |
| >ERCC2-V61ξRAVIMFGVP\ | 5    | >ERCC2-V61ξRAIIMFGVPY  | 5    | 0    |
| >ERCC2-V61ξRAVIMFGVP\ | 238  | >ERCC2-V61ξRAIIMFGVPY' | 256  | 18   |
| >ERCC2-V61ξRAVIMFGVP\ | 872  | >ERCC2-V61ξRAIIMFGVPY  | 416  | 456  |
| >ERCC2-V61ξRAVIMFGVP\ | 241  | >ERCC2-V61ξRAIIMFGVPY  | 159  | 82   |
| >ERCC2-V61ξRAVIMFGVP\ | 167  | >ERCC2-V61ξRAIIMFGVPY  | 147  | 20   |
| >ERCC2-V61ξGRAVIMFGVI | 508  | >ERCC2-V61ξGRAIIMFGVP  | 395  | 113  |
| >ERCC2-V61ξGRAVIMFGVI | 138  | >ERCC2-V61ξGRAIIMFGVP  | 199  | 61   |
| >ERCC2-V61ξGRAVIMFGV  | 83   | >ERCC2-V61ξGRAIIMFGV   | 101  | 18   |
| >ERCC2-V61ξGRAVIMFGVI | 56   | >ERCC2-V61ξGRAIIMFGVP  | 74   | 18   |
| >ERCC2-V61ξGRAVIMFGV  | 94   | >ERCC2-V61ξGRAIIMFGV   | 119  | 25   |
| >ERCC2-V61ξGRAVIMFGVI | 336  | >ERCC2-V61ξGRAIIMFGVP  | 418  | 82   |

|                        |      |                        |      |      |
|------------------------|------|------------------------|------|------|
| >ERCC2-V61FYGRAVIMFGV  | 334  | >ERCC2-V61FYGRAIIMFGV  | 600  | 266  |
| >ERCC2-V61FYGRAVIMFGV  | 462  | >ERCC2-V61FYGRAIIMFGV  | 308  | 154  |
| >ERCC2-V61FYGRAVIMF    | 165  | >ERCC2-V61FYGRAIIMF    | 242  | 77   |
| >ERCC2-V61FYGRAVIMF    | 72   | >ERCC2-V61FYGRAIIMF    | 83   | 11   |
| >ERCC2-V61FYGRAVIMF    | 130  | >ERCC2-V61FYGRAIIMF    | 112  | 18   |
| >ERCC2-V61FYHYGRAVIMF  | 101  | >ERCC2-V61FYHYGRAIIMF  | 61   | 40   |
| >ERCC2-V61FYHYGRAVIMF  | 62   | >ERCC2-V61FYHYGRAIIMF  | 109  | 47   |
| >ERCC2-V61FYHYGRAVIM   | 67   | >ERCC2-V61FYHYGRAIIM   | 102  | 35   |
| >ERCC2-V61FYHYGRAVIMF  | 3    | >ERCC2-V61FYHYGRAIIMF  | 3    | 0    |
| >ERCC2-V61FYHYGRAVIMFG | 415  | >ERCC2-V61FYHYGRAIIMFG | 434  | 19   |
| >ERCC2-V61FYHYGRAVIMFG | 62   | >ERCC2-V61FYHYGRAIIMFG | 58   | 4    |
| >ERCC2-V61FYHHYGRAVIM  | 434  | >ERCC2-V61FYHHYGRAIIM  | 414  | 20   |
| >ERCC2-V61FYHHYGRAVIM  | 405  | >ERCC2-V61FYHHYGRAIIMF | 480  | 75   |
| >ERCC2-V61FYHHYGRAVIM  | 340  | >ERCC2-V61FYHHYGRAIIM  | 752  | 412  |
| >ERCC2-V61FYHHYGRAVIM  | 26   | >ERCC2-V61FYHHYGRAIIMF | 41   | 15   |
| >ERCC2-V61FYHHYGRAVI   | 82   | >ERCC2-V61FYHHYGRAII   | 91   | 9    |
| >ERCC2-V61FYHHYGRAVIM  | 72   | >ERCC2-V61FYHHYGRAIIM  | 87   | 15   |
| >ERCC2-V61FYHHYGRAVIM  | 395  | >ERCC2-V61FYHHYGRAIIMF | 381  | 14   |
| >ERCC2-V61FYHHYGRAVI   | 20   | >ERCC2-V61FYHHYGRAII   | 32   | 12   |
| >ERCC2-V61FYHHYGRAVIM  | 9    | >ERCC2-V61FYHHYGRAIIM  | 9    | 0    |
| >ERCC2-V61FYHHYGRAVIM  | 76   | >ERCC2-V61FYHHYGRAIIMF | 98   | 22   |
| >ERCC2-V61FYHHYGRAVI   | 399  | >ERCC2-V61FYHHYGRAII   | 422  | 23   |
| >ERCC2-V61FYVHHYGRAVIM | 299  | >ERCC2-V61FYVHHYGRAIIM | 504  | 205  |
| >ERCC2-V61FYVHHYGRAVIM | 19   | >ERCC2-V61FYVHHYGRAIIM | 24   | 5    |
| >ERCC2-V61FYVHHYGRAVI  | 473  | >ERCC2-V61FYVHHYGRAII  | 1368 | 895  |
| >ERCC2-V61FYVHHYGRAVIM | 208  | >ERCC2-V61FYVHHYGRAIIM | 268  | 60   |
| >ERCC2-V61FYVHHYGRAV   | 169  | >ERCC2-V61FYVHHYGRAI   | 841  | 672  |
| >ERCC2-V61FYVHHYGRAV   | 9    | >ERCC2-V61FYVHHYGRAI   | 46   | 37   |
| >ERCC2-V61FYVHHYGRAVI  | 339  | >ERCC2-V61FYVHHYGRAII  | 381  | 42   |
| >ERCC2-V61FYVHHYGRAV   | 45   | >ERCC2-V61FYVHHYGRAI   | 371  | 326  |
| >ERCC2-V61FYVHHYGRAV   | 17   | >ERCC2-V61FYVHHYGRAI   | 242  | 225  |
| >ERCC2-V61FYVHHYGRAV   | 437  | >ERCC2-V61FYVHHYGRAI   | 3608 | 3171 |
| >ERCC2-V61FYVHHYGRAV   | 71   | >ERCC2-V61FYVHHYGRAI   | 6577 | 6506 |
| >ERCC2-V61FYVHHYGRAV   | 199  | >ERCC2-V61FYVHHYGRAI   | 975  | 776  |
| >ERCC2-V61FYVHHYGRAV   | 273  | >ERCC2-V61FYVHHYGRAI   | 280  | 7    |
| >ERCC2-V61FYVHHYGRAV   | 387  | >ERCC2-V61FYVHHYGRAI   | 282  | 105  |
| >ERCC2-V61FYVHHYGRAVI  | 259  | >ERCC2-V61FYVHHYGRAIIM | 424  | 165  |
| >ERCC2-V61FYVHHYGRAVI  | 283  | >ERCC2-V61FYVHHYGRAIIM | 222  | 61   |
| >ERCC2-V61FYVHHYGRAVI  | 536  | >ERCC2-V61FYVHHYGRAIIM | 472  | 64   |
| >ERCC2-V61FYVHHYGRAVI  | 376  | >ERCC2-V61FYVHHYGRAII  | 397  | 21   |
| >ERCC3-E517EFYREYVAI   | 1786 | >ERCC3-E517AFYREYVAI   | 363  | 1423 |
| >ERCC3-E517EFYREYVAIK  | 4645 | >ERCC3-E517AFYREYVAIK  | 395  | 4250 |
| >ERCC3-E517EFYREYVAI   | 108  | >ERCC3-E517AFYREYVAI   | 81   | 27   |

|                        |       |                        |       |       |
|------------------------|-------|------------------------|-------|-------|
| >ERCC3-E517EFYREYVAI   | 130   | >ERCC3-E517AFYREYVAI   | 20    | 110   |
| >ERCC3-E517EFYREYVAIK  | 7561  | >ERCC3-E517AFYREYVAIK  | 54    | 7507  |
| >ERCC3-E517EFYREYVAIK  | 250   | >ERCC3-E517AFYREYVAIK  | 1645  | 1395  |
| >ERCC3-E517PEFYREYVAI  | 98    | >ERCC3-E517PAFYREYVAI  | 15204 | 15106 |
| >ERCC3-E517PEFYREYVAIK | 13164 | >ERCC3-E517PAFYREYVAIK | 452   | 12712 |
| >ERCC3-E517PEFYREYV    | 14383 | >ERCC3-E517PAFYREYV    | 430   | 13953 |
| >ERCC3-E517PEFYREYVAI  | 121   | >ERCC3-E517PAFYREYVAI  | 28623 | 28502 |
| >ERCC3-E517PEFYREYVAI  | 55    | >ERCC3-E517PAFYREYVAI  | 26313 | 26258 |
| >ERCC3-E517SPEFYREYV   | 3872  | >ERCC3-E517SPAFYREYV   | 49    | 3823  |
| >ERCC3-E517SPEFYREYV   | 3606  | >ERCC3-E517SPAFYREYV   | 222   | 3384  |
| >ERCC3-E517SPEFYREYV   | 1431  | >ERCC3-E517SPAFYREYV   | 137   | 1294  |
| >ERCC3-E517SPEFYREYVA  | 167   | >ERCC3-E517SPAFYREYVA  | 101   | 66    |
| >ERCC3-E517SPEFYREYVAI | 234   | >ERCC3-E517SPAFYREYVA  | 35    | 199   |
| >ERCC3-E517SPEFYREY    | 76    | >ERCC3-E517SPAFYREY    | 33    | 43    |
| >ERCC3-E517SPEFYREYVA  | 32    | >ERCC3-E517SPAFYREYVA  | 31    | 1     |
| >ERCC3-E517SPEFYREY    | 70    | >ERCC3-E517SPAFYREY    | 12    | 58    |
| >ERCC3-E517SPEFYREYVAI | 2964  | >ERCC3-E517SPAFYREYVA  | 365   | 2599  |
| >ERCC3-E517SPEFYREY    | 394   | >ERCC3-E517SPAFYREY    | 568   | 174   |
| >ERCC3-E517MSPEFYREYV  | 161   | >ERCC3-E517MSPAFYREYV  | 168   | 7     |
| >ERCC3-E517MSPEFYREYV  | 246   | >ERCC3-E517MSPAFYREYV  | 386   | 140   |
| >ERCC3-E517MSPEFYREYV  | 113   | >ERCC3-E517MSPAFYREYV  | 463   | 350   |
| >ERCC3-E517MSPEFYREY   | 702   | >ERCC3-E517MSPAFYREY   | 459   | 243   |
| >ERCC3-E517MSPEFYREYV  | 11    | >ERCC3-E517MSPAFYREYV  | 9     | 2     |
| >ERCC3-E517MSPEFYREYV  | 133   | >ERCC3-E517MSPAFYREYV  | 115   | 18    |
| >ERCC3-E517MSPEFYREYV  | 161   | >ERCC3-E517MSPAFYREYV  | 517   | 356   |
| >ERCC3-E517MSPEFYREY   | 157   | >ERCC3-E517MSPAFYREY   | 85    | 72    |
| >ERCC3-E517MSPEFYREY   | 193   | >ERCC3-E517MSPAFYREY   | 141   | 52    |
| >ERCC3-E517MSPEFYREY   | 168   | >ERCC3-E517MSPAFYREY   | 296   | 128   |
| >ERCC3-E517MSPEFYRE    | 498   | >ERCC3-E517MSPAFYRE    | 913   | 415   |
| >ERCC3-E517MSPEFYREY   | 137   | >ERCC3-E517MSPAFYREY   | 77    | 60    |
| >ERCC3-E517MSPEFYREYV  | 5     | >ERCC3-E517MSPAFYREYV  | 4     | 1     |
| >ERCC3-E517MSPEFYREYV  | 239   | >ERCC3-E517MSPAFYREYV  | 153   | 86    |
| >ERCC3-E517PMSPEFYREY  | 557   | >ERCC3-E517PMSPAFYREY  | 341   | 216   |
| >ERCC3-E517PMSPEFYREY  | 19    | >ERCC3-E517PMSPAFYREY  | 18    | 1     |
| >ERCC3-E517PMSPEFYREY  | 381   | >ERCC3-E517PMSPAFYREY  | 247   | 134   |
| >ERCC3-E517PMSPEFYREY  | 493   | >ERCC3-E517PMSPAFYREY  | 273   | 220   |
| >ERCC3-E517PMSPEFYREY  | 16    | >ERCC3-E517PMSPAFYREY  | 15    | 1     |
| >ERCC3-E517PMSPEFYREY  | 257   | >ERCC3-E517PMSPAFYREY  | 241   | 16    |
| >ERCC3-E517PMSPEFYREY  | 44    | >ERCC3-E517PMSPAFYREY  | 31    | 13    |
| >ERCC3-E517PMSPEFYREY  | 18    | >ERCC3-E517PMSPAFYREY  | 13    | 5     |
| >ERCC3-E517PMSPEFYREY  | 8     | >ERCC3-E517PMSPAFYREY  | 7     | 1     |
| >ERCC3-E517PMSPEFYREY  | 138   | >ERCC3-E517PMSPAFYREY  | 88    | 50    |
| >ERCC3-E517PMSPEFYREY  | 619   | >ERCC3-E517PMSPAFYREY  | 298   | 321   |

|                       |      |                       |     |      |
|-----------------------|------|-----------------------|-----|------|
| >ERCC3-E517PMSPEFYR   | 89   | >ERCC3-E517PMSPAFYR   | 40  | 49   |
| >ERCC3-E517PMSPEFYR   | 329  | >ERCC3-E517PMSPAFYR   | 335 | 6    |
| >ERCC3-E517PMSPEFYREY | 192  | >ERCC3-E517PMSPAFYREY | 131 | 61   |
| >ERCC3-E517PMSPEFYR   | 33   | >ERCC3-E517PMSPAFYR   | 29  | 4    |
| >ERCC3-E517CPMSPEFY   | 1177 | >ERCC3-E517CPMSPAFY   | 416 | 761  |
| >ERCC3-E517CPMSPEFYR  | 365  | >ERCC3-E517CPMSPAFYR  | 278 | 87   |
| >ERCC3-E517CPMSPEFYR  | 283  | >ERCC3-E517CPMSPAFYR  | 666 | 383  |
| >ERCC3-E517CPMSPEFYR  | 121  | >ERCC3-E517CPMSPAFYR  | 60  | 61   |
| >ERCC3-E517CPMSPEFY   | 42   | >ERCC3-E517CPMSPAFY   | 24  | 18   |
| >ERCC3-E517CPMSPEFYRE | 15   | >ERCC3-E517CPMSPAFYRE | 15  | 0    |
| >ERCC3-E517CPMSPEFY   | 37   | >ERCC3-E517CPMSPAFY   | 39  | 2    |
| >ERCC3-E517CPMSPEFYRE | 46   | >ERCC3-E517CPMSPAFYRE | 46  | 0    |
| >ERCC3-E517CPMSPEFY   | 1039 | >ERCC3-E517CPMSPAFY   | 358 | 681  |
| >ERCC3-E517CPMSPEFYRE | 32   | >ERCC3-E517CPMSPAFYRE | 27  | 5    |
| >ERCC3-E517CPMSPEFYRE | 97   | >ERCC3-E517CPMSPAFYRE | 75  | 22   |
| >ERCC3-E517CPMSPEFYR  | 121  | >ERCC3-E517CPMSPAFYR  | 63  | 58   |
| >ERCC3-E517WCPMSPEFY  | 709  | >ERCC3-E517WCPMSPAFY  | 347 | 362  |
| >ERCC3-E517WCPMSPEF   | 1749 | >ERCC3-E517WCPMSPAF   | 432 | 1317 |
| >ERCC3-E517WCPMSPEFY  | 80   | >ERCC3-E517WCPMSPAFY  | 39  | 41   |
| >ERCC3-E517WCPMSPEFY  | 102  | >ERCC3-E517WCPMSPAFY  | 69  | 33   |
| >ERCC3-E517VWCPMSPEF  | 41   | >ERCC3-E517VWCPMSPAF  | 90  | 49   |
| >ERCC3-E517VWCPMSPEF  | 150  | >ERCC3-E517VWCPMSPAF  | 296 | 146  |
| >ERCC3-E517VWCPMSPEF  | 722  | >ERCC3-E517VWCPMSPAF  | 370 | 352  |
| >ERCC3-E517VWCPMSPEF  | 9    | >ERCC3-E517VWCPMSPAF  | 18  | 9    |
| >ERCC3-E517VWCPMSPEF  | 60   | >ERCC3-E517VWCPMSPAF  | 39  | 21   |
| >ERCC3-E517VWCPMSPEF  | 569  | >ERCC3-E517VWCPMSPAF  | 161 | 408  |
| >ERCC3-E517VWCPMSPEF  | 35   | >ERCC3-E517VWCPMSPAF  | 31  | 4    |
| >ERCC3-E517VWCPMSPEF  | 303  | >ERCC3-E517VWCPMSPAF  | 413 | 110  |
| >ERCC3-E517VWCPMSPEF  | 257  | >ERCC3-E517VWCPMSPAF  | 349 | 92   |
| >ERCC3-E517VWCPMSPEF  | 27   | >ERCC3-E517VWCPMSPAF  | 22  | 5    |
| >ERCC3-E517VWCPMSPE   | 610  | >ERCC3-E517VWCPMSPA   | 218 | 392  |
| >ERCC3-E517VWCPMSPEF  | 459  | >ERCC3-E517VWCPMSPAF  | 148 | 311  |
| >ERCC3-E517VWCPMSPEF  | 383  | >ERCC3-E517VWCPMSPAF  | 287 | 96   |
| >ERCC3-E517EVWCPMSPE  | 229  | >ERCC3-E517EVWCPMSPA  | 86  | 143  |
| >ERCC3-E517EVWCPMSPE  | 155  | >ERCC3-E517EVWCPMSPA  | 149 | 6    |
| >ERCC3-E517EVWCPMSPE  | 18   | >ERCC3-E517EVWCPMSPA  | 11  | 7    |
| >ERCC3-E517EVWCPMSPE  | 5    | >ERCC3-E517EVWCPMSPA  | 4   | 1    |
| >ERCC3-E517EVWCPMSPE  | 593  | >ERCC3-E517EVWCPMSPA  | 151 | 442  |
| >ERCC3-E517EVWCPMSPE  | 11   | >ERCC3-E517EVWCPMSPA  | 7   | 4    |
| >ERCC3-E517EVWCPMSPE  | 34   | >ERCC3-E517EVWCPMSPA  | 27  | 7    |
| >ERCC3-E517EVWCPMSPE  | 1041 | >ERCC3-E517EVWCPMSPA  | 327 | 714  |
| >ERCC3-E517EVWCPMSPE  | 680  | >ERCC3-E517EVWCPMSPA  | 262 | 418  |
| >ERCC3-E517EVWCPMSPE  | 163  | >ERCC3-E517EVWCPMSPA  | 137 | 26   |

|                       |       |                       |       |       |
|-----------------------|-------|-----------------------|-------|-------|
| >ERCC3-E517EVWCPMSPE  | 1267  | >ERCC3-E517EVWCPMSPA  | 6     | 1261  |
| >ERCC3-E517EVWCPMSPE  | 427   | >ERCC3-E517EVWCPMSPA  | 5     | 422   |
| >ERCC3-E517EVWCPMSPE  | 150   | >ERCC3-E517EVWCPMSPA  | 120   | 30    |
| >ERCC3-E517EVWCPMSPE  | 573   | >ERCC3-E517EVWCPMSPA  | 321   | 252   |
| >ERCC3-E517EVWCPMSPE  | 333   | >ERCC3-E517EVWCPMSPA  | 393   | 60    |
| >ERCC3-E517EVWCPMSPE  | 1349  | >ERCC3-E517EVWCPMSPA  | 435   | 914   |
| >ERCC3-E517EVWCPMSPE  | 245   | >ERCC3-E517EVWCPMSPA  | 135   | 110   |
| >ERCC3-E517EVWCPMSPE  | 581   | >ERCC3-E517EVWCPMSPA  | 497   | 84    |
| >ERCC3-E517EVWCPMSPE  | 119   | >ERCC3-E517EVWCPMSPA  | 157   | 38    |
| >ERCC3-E517EVWCPMSPE  | 891   | >ERCC3-E517EVWCPMSPA  | 196   | 695   |
| >ERCC3-E517EVWCPMSPE  | 124   | >ERCC3-E517EVWCPMSPA  | 60    | 64    |
| >ERCC3-E517EVWCPMSPE  | 387   | >ERCC3-E517EVWCPMSPA  | 338   | 49    |
| >ERCC3-E517AEVWCPMSF  | 132   | >ERCC3-E517AEVWCPMSF  | 60    | 72    |
| >ERCC3-E517AEVWCPMSF  | 72    | >ERCC3-E517AEVWCPMSF  | 32    | 40    |
| >ERCC3-E517AEVWCPMSF  | 32    | >ERCC3-E517AEVWCPMSF  | 17    | 15    |
| >ERCC3-E517AEVWCPMSF  | 262   | >ERCC3-E517AEVWCPMSF  | 107   | 155   |
| >ERCC3-E517AEVWCPMSF  | 49    | >ERCC3-E517AEVWCPMSF  | 46    | 3     |
| >ERCC3-E517AEVWCPMSF  | 108   | >ERCC3-E517AEVWCPMSF  | 108   | 0     |
| >ERCC3-E517AEVWCPMSF  | 19    | >ERCC3-E517AEVWCPMSF  | 19    | 0     |
| >ERCC3-E517AEVWCPMSF  | 501   | >ERCC3-E517AEVWCPMSF  | 38    | 463   |
| >ERCC3-E517AEVWCPMSF  | 242   | >ERCC3-E517AEVWCPMSF  | 137   | 105   |
| >ERCC3-E517AEVWCPMSF  | 20    | >ERCC3-E517AEVWCPMSF  | 20    | 0     |
| >ERCC3-K41&KRSWEAERV  | 236   | >ERCC3-K41&QRSWEAERV  | 1204  | 968   |
| >ERCC3-K41&KRSWEAERV  | 142   | >ERCC3-K41&QRSWEAERV  | 1198  | 1056  |
| >ERCC3-K41&KRSWEAERV  | 219   | >ERCC3-K41&QRSWEAERV  | 899   | 680   |
| >ERCC3-K41&KRSWEAER   | 141   | >ERCC3-K41&QRSWEAER   | 1067  | 926   |
| >ERCC3-K41&TKRSWEAER  | 2666  | >ERCC3-K41&TQRSWEAER  | 22    | 2644  |
| >ERCC3-K41&TKRSWEAER  | 896   | >ERCC3-K41&TQRSWEAER  | 176   | 720   |
| >ERCC3-K41&TKRSWEAER\ | 14920 | >ERCC3-K41&TQRSWEAER' | 106   | 14814 |
| >ERCC3-K41&TKRSWEAER\ | 58    | >ERCC3-K41&TQRSWEAER' | 65    | 7     |
| >ERCC3-K41&STYSMLGHTT | 39    | >ERCC3-K41&STYSMLGHTT | 13853 | 13814 |
| >ERCC3-K41&STYSMLGHTT | 9     | >ERCC3-K41&STYSMLGHTT | 10500 | 10491 |
| >ERCC3-K41&STYSMLGHTT | 35    | >ERCC3-K41&STYSMLGHTT | 4591  | 4556  |
| >ERCC3-K41&STYSMLGHTT | 42    | >ERCC3-K41&STYSMLGHTT | 4071  | 4029  |
| >ERCC3-K41&STYSMLGHTT | 9     | >ERCC3-K41&STYSMLGHTT | 351   | 342   |
| >ERCC3-K41&STYSMLGHTT | 102   | >ERCC3-K41&STYSMLGHTT | 34    | 68    |
| >ERCC3-K41&STYSMLGHTT | 95    | >ERCC3-K41&STYSMLGHTT | 1581  | 1486  |
| >ERCC3-K41&TTKRSWEA   | 60    | >ERCC3-K41&TTQRSWEA   | 3637  | 3577  |
| >ERCC3-K41&TTKRSWEAEF | 477   | >ERCC3-K41&TTQRSWEAEI | 7607  | 7130  |
| >ERCC3-K41&TTKRSWEAEF | 123   | >ERCC3-K41&TTQRSWEAEI | 198   | 75    |
| >ERCC3-K41&TTKRSWEAEF | 74    | >ERCC3-K41&TTQRSWEAEI | 97    | 23    |
| >ERCC3-K41&TTKRSWEA   | 463   | >ERCC3-K41&TTQRSWEA   | 231   | 232   |
| >ERCC3-K41&TTKRSWEAEF | 80    | >ERCC3-K41&TTQRSWEAEI | 48    | 32    |



|                       |      |                       |       |       |
|-----------------------|------|-----------------------|-------|-------|
| >ERCC3-K41&HTTKRSWEAI | 22   | >ERCC3-K41&HTTQRSWEA  | 43    | 21    |
| >ERCC3-K41&HTTKRSWEAI | 19   | >ERCC3-K41&HTTQRSWEA  | 19    | 0     |
| >ERCC3-K41&HTTKRSWEAI | 7    | >ERCC3-K41&HTTQRSWEA  | 7     | 0     |
| >ERCC3-K41&HTTKRSWEA  | 83   | >ERCC3-K41&HTTQRSWEA  | 93    | 10    |
| >ERCC3-K41&HTTKRSWEAI | 255  | >ERCC3-K41&HTTQRSWEA  | 217   | 38    |
| >ERCC3-K41&GHHTTKRSW  | 868  | >ERCC3-K41&GHHTTQRSW  | 284   | 584   |
| >ERCC3-K41&LGHTTKRSW  | 309  | >ERCC3-K41&LGHTTQRSW  | 226   | 83    |
| >ERCC3-K41&LGHTTKRSW  | 2893 | >ERCC3-K41&LGHTTQRSW  | 289   | 2604  |
| >ERCC3-K41&MLGHTTKRS  | 4372 | >ERCC3-K41&MLGHTTQRS  | 391   | 3981  |
| >ERCC3-K41&MLGHTTKR   | 412  | >ERCC3-K41&MLGHTTQR   | 402   | 10    |
| >ERCC3-K41&MLGHTTKR   | 78   | >ERCC3-K41&MLGHTTQR   | 60    | 18    |
| >ERCC3-K41&MLGHTTKR   | 161  | >ERCC3-K41&MLGHTTQR   | 103   | 58    |
| >ERCC3-K41&MLGHTTKRS\ | 616  | >ERCC3-K41&MLGHTTQRS\ | 431   | 185   |
| >ERCC3-K41&MLGHTTKRS\ | 690  | >ERCC3-K41&MLGHTTQRS\ | 119   | 571   |
| >ERCC3-K41&MLGHTTKR   | 122  | >ERCC3-K41&MLGHTTQR   | 179   | 57    |
| >ERCC3-K41&SMLGHTTK   | 554  | >ERCC3-K41&SMLGHTTQ   | 147   | 407   |
| >ERCC3-K41&SMLGHTTKR\ | 390  | >ERCC3-K41&SMLGHTTQR\ | 108   | 282   |
| >ERCC3-K41&SMLGHTTK   | 3836 | >ERCC3-K41&SMLGHTTQ   | 360   | 3476  |
| >ERCC3-K41&SMLGHTTK   | 346  | >ERCC3-K41&SMLGHTTQ   | 27    | 319   |
| >ERCC3-K41&SMLGHTTKR\ | 1260 | >ERCC3-K41&SMLGHTTQR\ | 186   | 1074  |
| >ERCC3-K41&SMLGHTTK   | 52   | >ERCC3-K41&SMLGHTTQ   | 15642 | 15590 |
| >ERCC3-K41&SMLGHTTKR  | 140  | >ERCC3-K41&SMLGHTTQR  | 153   | 13    |
| >ERCC3-K41&SMLGHTTK   | 25   | >ERCC3-K41&SMLGHTTQ   | 19855 | 19830 |
| >ERCC3-K41&SMLGHTTKR  | 462  | >ERCC3-K41&SMLGHTTQR  | 314   | 148   |
| >ERCC3-K41&SMLGHTTK   | 281  | >ERCC3-K41&SMLGHTTQ   | 10233 | 9952  |
| >ERCC3-K41&SMLGHTTK   | 162  | >ERCC3-K41&SMLGHTTQ   | 9278  | 9116  |
| >ERCC3-K41&SMLGHTTKR  | 16   | >ERCC3-K41&SMLGHTTQR  | 14    | 2     |
| >ERCC3-K41&SMLGHTTKR\ | 90   | >ERCC3-K41&SMLGHTTQR\ | 53    | 37    |
| >ERCC3-K41&SMLGHTTKR  | 603  | >ERCC3-K41&SMLGHTTQR  | 357   | 246   |
| >ERCC3-K41&SMLGHTTKR\ | 310  | >ERCC3-K41&SMLGHTTQR\ | 203   | 107   |
| >ERCC3-K41&SMLGHTTKR\ | 464  | >ERCC3-K41&SMLGHTTQR\ | 356   | 108   |
| >ERCC3-K41&SMLGHTTKR\ | 493  | >ERCC3-K41&SMLGHTTQR\ | 110   | 383   |
| >ERCC3-K41&SMLGHTTKR  | 45   | >ERCC3-K41&SMLGHTTQR  | 60    | 15    |
| >ERCC3-K41&YSMLGHTTK  | 54   | >ERCC3-K41&YSMLGHTTQ  | 23487 | 23433 |
| >ERCC3-K41&YSMLGHTTKF | 210  | >ERCC3-K41&YSMLGHTTQ  | 216   | 6     |
| >ERCC3-K41&YSMLGHTTKF | 119  | >ERCC3-K41&YSMLGHTTQ  | 140   | 21    |
| >ERCC3-K41&YSMLGHTTK  | 34   | >ERCC3-K41&YSMLGHTTQ  | 2085  | 2051  |
| >ERCC3-K41&YSMLGHTTKF | 11   | >ERCC3-K41&YSMLGHTTQ  | 13    | 2     |
| >ERCC3-K41&YSMLGHTTK  | 1785 | >ERCC3-K41&YSMLGHTTQ  | 257   | 1528  |
| >ERCC3-K41&YSMLGHTTK  | 358  | >ERCC3-K41&YSMLGHTTQ  | 117   | 241   |
| >ERCC3-K41&TYSMLGHTTK | 47   | >ERCC3-K41&TYSMLGHTTC | 41    | 6     |
| >ERCC3-K41&TYSMLGHTTK | 129  | >ERCC3-K41&TYSMLGHTTC | 94    | 35    |
| >ERCC3-K41&TYSMLGHTTK | 172  | >ERCC3-K41&TYSMLGHTTC | 117   | 55    |

|                        |      |                        |      |      |
|------------------------|------|------------------------|------|------|
| >ERCC3-K41&TYSMLGHTTK  | 36   | >ERCC3-K41&TYSMLGHTTK  | 45   | 9    |
| >ERCC4-A58&AELTFVRQL   | 29   | >ERCC4-A58&TELTFVRQL   | 11   | 18   |
| >ERCC4-A58&AELTFVRQLEI | 11   | >ERCC4-A58&TELTFVRQLEI | 6    | 5    |
| >ERCC4-A58&AELTFVRQL   | 1316 | >ERCC4-A58&TELTFVRQL   | 81   | 1235 |
| >ERCC4-A58&AELTFVRQL   | 124  | >ERCC4-A58&TELTFVRQL   | 399  | 275  |
| >ERCC4-A58&AELTFVRQLEI | 353  | >ERCC4-A58&TELTFVRQLEI | 883  | 530  |
| >ERCC4-A58&AELTFVRQL   | 37   | >ERCC4-A58&TELTFVRQL   | 72   | 35   |
| >ERCC4-A58&AELTFVRQLEI | 40   | >ERCC4-A58&TELTFVRQLEI | 78   | 38   |
| >ERCC4-A58&AELTFVRQL   | 168  | >ERCC4-A58&TELTFVRQL   | 320  | 152  |
| >ERCC4-A58&AELTFVRQLEI | 155  | >ERCC4-A58&TELTFVRQLEI | 291  | 136  |
| >ERCC4-A58&AELTFVRQ    | 364  | >ERCC4-A58&TELTFVRQ    | 1817 | 1453 |
| >ERCC4-A58&AELTFVRQL   | 101  | >ERCC4-A58&TELTFVRQL   | 433  | 332  |
| >ERCC4-A58&AELTFVRQLEI | 185  | >ERCC4-A58&TELTFVRQLEI | 862  | 677  |
| >ERCC4-A58&AELTFVRQ    | 167  | >ERCC4-A58&TELTFVRQ    | 1654 | 1487 |
| >ERCC4-A58&AELTFVRQL   | 274  | >ERCC4-A58&TELTFVRQL   | 3011 | 2737 |
| >ERCC4-A58&AELTFVRQLEI | 59   | >ERCC4-A58&TELTFVRQLEI | 633  | 574  |
| >ERCC4-A58&AELTFVRQL   | 4    | >ERCC4-A58&TELTFVRQL   | 9    | 5    |
| >ERCC4-A58&AELTFVRQLEI | 4    | >ERCC4-A58&TELTFVRQLEI | 9    | 5    |
| >ERCC4-A58&DAELTFVR    | 48   | >ERCC4-A58&DTELTFVR    | 22   | 26   |
| >ERCC4-A58&DAELTFVR    | 33   | >ERCC4-A58&DTELTFVR    | 12   | 21   |
| >ERCC4-A58&YDAELTFVRQ  | 350  | >ERCC4-A58&YDTELTFVRQ  | 639  | 289  |
| >ERCC4-A58&YDAELTFV    | 63   | >ERCC4-A58&YDTELTFV    | 607  | 544  |
| >ERCC4-A58&YDAELTFV    | 490  | >ERCC4-A58&YDTELTFV    | 2843 | 2353 |
| >ERCC4-A58&YDAELTFV    | 88   | >ERCC4-A58&YDTELTFV    | 178  | 90   |
| >ERCC4-A58&YDAELTFV    | 445  | >ERCC4-A58&YDTELTFV    | 1024 | 579  |
| >ERCC4-A58&YDAELTFV    | 172  | >ERCC4-A58&YDTELTFV    | 398  | 226  |
| >ERCC4-A58&YDAELTFVR   | 59   | >ERCC4-A58&YDTELTFVR   | 145  | 86   |
| >ERCC4-A58&YDAELTFV    | 244  | >ERCC4-A58&YDTELTFV    | 1203 | 959  |
| >ERCC4-A58&YDAELTFV    | 343  | >ERCC4-A58&YDTELTFV    | 1871 | 1528 |
| >ERCC4-A58&YDAELTFVRQ  | 767  | >ERCC4-A58&YDTELTFVRQ  | 379  | 388  |
| >ERCC4-A58&YDAELTFV    | 117  | >ERCC4-A58&YDTELTFV    | 82   | 35   |
| >ERCC4-A58&YDAELTFVRQ  | 104  | >ERCC4-A58&YDTELTFVRQ  | 161  | 57   |
| >ERCC4-A58&YDAELTFV    | 96   | >ERCC4-A58&YDTELTFV    | 68   | 28   |
| >ERCC4-A58&LYDAELTFV   | 75   | >ERCC4-A58&LYDTELTFV   | 275  | 200  |
| >ERCC4-A58&LYDAELTFV   | 62   | >ERCC4-A58&LYDTELTFV   | 170  | 108  |
| >ERCC4-A58&LYDAELTFV   | 298  | >ERCC4-A58&LYDTELTFV   | 639  | 341  |
| >ERCC4-A58&LYDAELTF    | 172  | >ERCC4-A58&LYDTELTF    | 274  | 102  |
| >ERCC4-A58&LYDAELTF    | 255  | >ERCC4-A58&LYDTELTF    | 227  | 28   |
| >ERCC4-A58&LYDAELTF    | 8    | >ERCC4-A58&LYDTELTF    | 11   | 3    |
| >ERCC4-A58&LYDAELTFVR  | 78   | >ERCC4-A58&LYDTELTFVR  | 77   | 1    |
| >ERCC4-A58&VLYDAELTF   | 453  | >ERCC4-A58&VLYDTELTF   | 553  | 100  |
| >ERCC4-A58&VLYDAELT    | 362  | >ERCC4-A58&VLYDTELT    | 275  | 87   |
| >ERCC4-A58&VLYDAELTFV  | 6    | >ERCC4-A58&VLYDTELTFV  | 6    | 0    |

|                        |      |                        |     |     |
|------------------------|------|------------------------|-----|-----|
| >ERCC4-A58:VLYDAELT    | 276  | >ERCC4-A58:VLYDTELT    | 228 | 48  |
| >ERCC4-A58:VLYDAELTFV  | 9    | >ERCC4-A58:VLYDTELTFV  | 11  | 2   |
| >ERCC4-A58:VLYDAELT    | 157  | >ERCC4-A58:VLYDTELT    | 115 | 42  |
| >ERCC4-A58:VLYDAELTFV  | 10   | >ERCC4-A58:VLYDTELTFV  | 9   | 1   |
| >ERCC4-A58:VLYDAELT    | 392  | >ERCC4-A58:VLYDTELT    | 554 | 162 |
| >ERCC4-A58:VLYDAELTFV  | 40   | >ERCC4-A58:VLYDTELTFV  | 31  | 9   |
| >ERCC4-A58:VLYDAELT    | 23   | >ERCC4-A58:VLYDTELT    | 13  | 10  |
| >ERCC4-A58:VLYDAELTF   | 55   | >ERCC4-A58:VLYDTELTF   | 25  | 30  |
| >ERCC4-A58:VLYDAELTFV  | 1    | >ERCC4-A58:VLYDTELTFV  | 1   | 0   |
| >ERCC4-A58:VLYDAELTFVI | 585  | >ERCC4-A58:VLYDTELTFVI | 369 | 216 |
| >ERCC4-A58:VLYDAELTFV  | 3    | >ERCC4-A58:VLYDTELTFV  | 3   | 0   |
| >ERCC4-A58:VLYDAELT    | 79   | >ERCC4-A58:VLYDTELT    | 62  | 17  |
| >ERCC4-A58:VLYDAELTFV  | 3    | >ERCC4-A58:VLYDTELTFV  | 3   | 0   |
| >ERCC4-A58:VLYDAELTFV  | 2    | >ERCC4-A58:VLYDTELTFV  | 2   | 0   |
| >ERCC4-A58:VLYDAELT    | 13   | >ERCC4-A58:VLYDTELT    | 9   | 4   |
| >ERCC4-A58:VLYDAELTF   | 35   | >ERCC4-A58:VLYDTELTF   | 30  | 5   |
| >ERCC4-A58:VLYDAELTFV  | 1    | >ERCC4-A58:VLYDTELTFV  | 1   | 0   |
| >ERCC4-A58:VLYDAELTFVI | 167  | >ERCC4-A58:VLYDTELTFVI | 161 | 6   |
| >ERCC4-A58:VLYDAELTFVI | 148  | >ERCC4-A58:VLYDTELTFVI | 157 | 9   |
| >ERCC4-A58:VLYDAELTFVI | 249  | >ERCC4-A58:VLYDTELTFVI | 219 | 30  |
| >ERCC4-A58:VLYDAELTF   | 146  | >ERCC4-A58:VLYDTELTF   | 138 | 8   |
| >ERCC4-A58:VLYDAELTF   | 464  | >ERCC4-A58:VLYDTELTF   | 344 | 120 |
| >ERCC4-A58:VLYDAELTFVI | 107  | >ERCC4-A58:VLYDTELTFVI | 75  | 32  |
| >ERCC4-A58:VLYDAELTF   | 114  | >ERCC4-A58:VLYDTELTF   | 60  | 54  |
| >ERCC4-A58:VLYDAELTFVI | 407  | >ERCC4-A58:VLYDTELTFVI | 374 | 33  |
| >ERCC4-A58:VLYDAELTFVI | 68   | >ERCC4-A58:VLYDTELTFVI | 67  | 1   |
| >ERCC4-A58:VLYDAELTF   | 59   | >ERCC4-A58:VLYDTELTF   | 65  | 6   |
| >ERCC4-A58:VLYDAELTF   | 163  | >ERCC4-A58:VLYDTELTF   | 134 | 29  |
| >ERCC4-A58:VLYDAELTF   | 20   | >ERCC4-A58:VLYDTELTF   | 12  | 8   |
| >ERCC4-A58:VLYDAELTF   | 15   | >ERCC4-A58:VLYDTELTF   | 13  | 2   |
| >ERCC4-A58:VLYDAELTF   | 134  | >ERCC4-A58:VLYDTELTF   | 363 | 229 |
| >ERCC4-A58:VLYDAELTF   | 1196 | >ERCC4-A58:VLYDTELTF   | 497 | 699 |
| >ERCC4-A58:VLYDAELTFVI | 141  | >ERCC4-A58:VLYDTELTFVI | 128 | 13  |
| >ERCC4-A58:VLYDAELTFV  | 642  | >ERCC4-A58:VLYDTELTFV  | 371 | 271 |
| >ERCC4-A58:VVLYDAELTF\ | 97   | >ERCC4-A58:VVLYDTELTF\ | 49  | 48  |
| >ERCC4-A58:VVLYDAELTF\ | 155  | >ERCC4-A58:VVLYDTELTF\ | 105 | 50  |
| >ERCC4-A58:VVLYDAELTF\ | 190  | >ERCC4-A58:VVLYDTELTF\ | 146 | 44  |
| >ERCC4-A58:VVLYDAEL    | 202  | >ERCC4-A58:VVLYDTEL    | 178 | 24  |
| >ERCC4-A58:VVLYDAELTF\ | 7    | >ERCC4-A58:VVLYDTELTF\ | 7   | 0   |
| >ERCC4-A58:VVLYDAELTF\ | 53   | >ERCC4-A58:VVLYDTELTF\ | 48  | 5   |
| >ERCC4-A58:VVLYDAELTF\ | 101  | >ERCC4-A58:VVLYDTELTF\ | 66  | 35  |
| >ERCC4-A58:VVLYDAELTF\ | 41   | >ERCC4-A58:VVLYDTELTF\ | 33  | 8   |
| >ERCC4-A58:VVLYDAELTF\ | 28   | >ERCC4-A58:VVLYDTELTF\ | 16  | 12  |

|                        |      |                        |      |     |
|------------------------|------|------------------------|------|-----|
| >ERCC4-A58:VVLYDAELTF\ | 41   | >ERCC4-A58:VVLYDTELTF\ | 35   | 6   |
| >ERCC4-A58:VVLYDAELTF  | 88   | >ERCC4-A58:VVLYDTELTF  | 44   | 44  |
| >ERCC4-A58:VVLYDAELTF\ | 391  | >ERCC4-A58:VVLYDTELTF\ | 241  | 150 |
| >ERCC4-A58:VVLYDAELTF\ | 176  | >ERCC4-A58:VVLYDTELTF\ | 176  | 0   |
| >ERCC4-A58:VVLYDAELTF  | 245  | >ERCC4-A58:VVLYDTELTF  | 166  | 79  |
| >ERCC4-A58:VVLYDAELTF  | 94   | >ERCC4-A58:VVLYDTELTF  | 134  | 40  |
| >ERCC4-A58:VVLYDAELTF  | 728  | >ERCC4-A58:VVLYDTELTF  | 380  | 348 |
| >ERCC4-A58:YVVLYDAEL   | 420  | >ERCC4-A58:YVVLYDTEL   | 633  | 213 |
| >ERCC4-A58:YVVLYDAEL   | 104  | >ERCC4-A58:YVVLYDTEL   | 218  | 114 |
| >ERCC4-A58:YVVLYDAEL   | 40   | >ERCC4-A58:YVVLYDTEL   | 40   | 0   |
| >ERCC4-A58:YVVLYDAEL   | 321  | >ERCC4-A58:YVVLYDTEL   | 331  | 10  |
| >ERCC4-A58:YVVLYDAEL   | 34   | >ERCC4-A58:YVVLYDTEL   | 29   | 5   |
| >ERCC4-A58:YVVLYDAELT  | 1017 | >ERCC4-A58:YVVLYDEL    | 462  | 555 |
| >ERCC4-A58:YVVLYDAEL   | 72   | >ERCC4-A58:YVVLYDTEL   | 112  | 40  |
| >ERCC4-A58:YVVLYDAELTI | 370  | >ERCC4-A58:YVVLYDELTI  | 387  | 17  |
| >ERCC4-A58:YVVLYDAEL   | 152  | >ERCC4-A58:YVVLYDTEL   | 1117 | 965 |
| >ERCC4-A58:YVVLYDAELTI | 52   | >ERCC4-A58:YVVLYDELTI  | 105  | 53  |
| >ERCC4-A58:YVVLYDAELTI | 185  | >ERCC4-A58:YVVLYDELTI  | 217  | 32  |
| >ERCC4-A58:YVVLYDAEL   | 91   | >ERCC4-A58:YVVLYDTEL   | 187  | 96  |
| >ERCC4-A58:YVVLYDAELTI | 159  | >ERCC4-A58:YVVLYDELTI  | 188  | 29  |
| >ERCC4-A58:YVVLYDAELTI | 222  | >ERCC4-A58:YVVLYDELTI  | 133  | 89  |
| >ERCC4-A58:YVVLYDAEL   | 74   | >ERCC4-A58:YVVLYDTEL   | 192  | 118 |
| >ERCC4-A58:YVVLYDAELTI | 9    | >ERCC4-A58:YVVLYDELTI  | 10   | 1   |
| >ERCC4-A58:YVVLYDAEL   | 101  | >ERCC4-A58:YVVLYDTEL   | 121  | 20  |
| >ERCC4-A58:YVVLYDAELTI | 16   | >ERCC4-A58:YVVLYDELTI  | 21   | 5   |
| >ERCC4-A58:YVVLYDAELTI | 566  | >ERCC4-A58:YVVLYDELTI  | 491  | 75  |
| >ERCC4-A58:YVVLYDAELTI | 233  | >ERCC4-A58:YVVLYDELTI  | 131  | 102 |
| >ERCC4-A58:YVVLYDAELTI | 150  | >ERCC4-A58:YVVLYDELTI  | 250  | 100 |
| >ERCC4-A58:RYVVLYDAEL  | 523  | >ERCC4-A58:RYVVLYDTEL  | 78   | 445 |
| >ERCC4-A58:RYVVLYDAEL  | 593  | >ERCC4-A58:RYVVLYDTEL  | 392  | 201 |
| >ERCC4-A58:RYVVLYDAEL  | 325  | >ERCC4-A58:RYVVLYDTEL  | 236  | 89  |
| >ERCC4-A58:RYVVLYDA    | 413  | >ERCC4-A58:RYVVLYDT    | 412  | 1   |
| >ERCC4-A58:RYVVLYDAE   | 500  | >ERCC4-A58:RYVVLYDTE   | 295  | 205 |
| >ERCC4-A58:RYVVLYDAEL  | 8    | >ERCC4-A58:RYVVLYDTEL  | 10   | 2   |
| >ERCC4-A58:RYVVLYDAEL  | 589  | >ERCC4-A58:RYVVLYDEL   | 339  | 250 |
| >ERCC4-A58:RYVVLYDA    | 261  | >ERCC4-A58:RYVVLYDT    | 862  | 601 |
| >ERCC4-A58:RYVVLYDAE   | 248  | >ERCC4-A58:RYVVLYDTE   | 276  | 28  |
| >ERCC4-A58:RYVVLYDAEL  | 432  | >ERCC4-A58:RYVVLYDTEL  | 408  | 24  |
| >ERCC4-A58:PRYVVLYDA   | 440  | >ERCC4-A58:PRYVVLYDT   | 973  | 533 |
| >ERCC4-A58:PRYVVLYDAE  | 363  | >ERCC4-A58:PRYVVLYDTE  | 285  | 78  |
| >ERCC4-A58:PRYVVLYDAE  | 139  | >ERCC4-A58:PRYVVLYDTE  | 146  | 7   |
| >ERCC4-A58:EPYVVLYDA   | 16   | >ERCC4-A58:EPYVVLYDT   | 283  | 267 |
| >ERCC4-R64( REGRDETNL  | 134  | >ERCC4-R64( TEGRDETNL  | 1046 | 912 |

|                       |       |                       |       |       |
|-----------------------|-------|-----------------------|-------|-------|
| >ERCC4-R64:REGRDETNL  | 75    | >ERCC4-R64:TEGRDETNL  | 572   | 497   |
| >ERCC4-R64:REGRDETNL  | 373   | >ERCC4-R64:TEGRDETNL  | 1164  | 791   |
| >ERCC4-R64:EKASMVVPEI | 40    | >ERCC4-R64:EKASMVVPEI | 22061 | 22021 |
| >ERCC4-R64:EEREGRDE   | 284   | >ERCC4-R64:EETEGRDE   | 750   | 466   |
| >ERCC4-R64:EEREGRDET  | 1602  | >ERCC4-R64:EETEGRDET  | 130   | 1472  |
| >ERCC4-R64:EEREGRDET  | 389   | >ERCC4-R64:EETEGRDET  | 659   | 270   |
| >ERCC4-R64:EEREGRDET  | 177   | >ERCC4-R64:EETEGRDET  | 137   | 40    |
| >ERCC4-R64:MOVVPEEREG | 394   | >ERCC4-R64:MOVVPEETEG | 1142  | 748   |
| >ERCC4-R64:MOVVPEEREG | 21    | >ERCC4-R64:MOVVPEETEG | 12    | 9     |
| >ERCC4-R64:MOVVPEEREG | 762   | >ERCC4-R64:MOVVPEETEG | 433   | 329   |
| >ERCC4-R64:SMVVPEER   | 9112  | >ERCC4-R64:SMVVPEET   | 293   | 8819  |
| >ERCC4-R64:SMVVPEER   | 123   | >ERCC4-R64:SMVVPEET   | 21193 | 21070 |
| >ERCC4-R64:SMVVPEERE  | 381   | >ERCC4-R64:SMVVPEETE  | 623   | 242   |
| >ERCC4-R64:SMVVPEER   | 244   | >ERCC4-R64:SMVVPEET   | 31785 | 31541 |
| >ERCC4-R64:SMVVPEERE  | 323   | >ERCC4-R64:SMVVPEETE  | 263   | 60    |
| >ERCC4-R64:ASMVVPEER  | 100   | >ERCC4-R64:ASMVVPEET  | 19421 | 19321 |
| >ERCC4-R64:ASMVVPEER  | 61    | >ERCC4-R64:ASMVVPEET  | 19568 | 19507 |
| >ERCC4-R64:ASMVVPEER  | 96    | >ERCC4-R64:ASMVVPEET  | 30256 | 30160 |
| >ERCC4-R64:ASMVVPEER  | 115   | >ERCC4-R64:ASMVVPEET  | 3226  | 3111  |
| >ERCC4-R64:KASMVVPEEI | 356   | >ERCC4-R64:KASMVVPEET | 32505 | 32149 |
| >ERCC4-R64:KASMVVPEEI | 40    | >ERCC4-R64:KASMVVPEET | 17460 | 17420 |
| >ERCC4-R64:KASMVVPEEI | 49    | >ERCC4-R64:KASMVVPEET | 34501 | 34452 |
| >ERCC5-D94:DSKGSFLWGI | 2536  | >ERCC5-D94:YSKGSFLWGH | 344   | 2192  |
| >ERCC5-D94:DSKGSFLWGI | 374   | >ERCC5-D94:YSKGSFLWGH | 75    | 299   |
| >ERCC5-D94:DSKGSFLWGI | 1153  | >ERCC5-D94:YSKGSFLWGH | 40    | 1113  |
| >ERCC5-D94:DSKGSFLWGI | 424   | >ERCC5-D94:YSKGSFLWGH | 125   | 299   |
| >ERCC5-D94:DSKGSFLWGI | 116   | >ERCC5-D94:YSKGSFLWGH | 57    | 59    |
| >ERCC5-D94:DSKGSFLW   | 119   | >ERCC5-D94:YSKGSFLW   | 4     | 115   |
| >ERCC5-D94:DSKGSFLW   | 109   | >ERCC5-D94:YSKGSFLW   | 38    | 71    |
| >ERCC5-D94:DSKGSFLW   | 839   | >ERCC5-D94:YSKGSFLW   | 15    | 824   |
| >ERCC5-D94:DSKGSFLW   | 3210  | >ERCC5-D94:YSKGSFLW   | 103   | 3107  |
| >ERCC5-D94:DSKGSFLW   | 7442  | >ERCC5-D94:YSKGSFLW   | 413   | 7029  |
| >ERCC5-D94:DSKGSFLWGI | 739   | >ERCC5-D94:YSKGSFLWGH | 460   | 279   |
| >ERCC5-D94:DDSKGSFL   | 30925 | >ERCC5-D94:DYSKGSFL   | 355   | 30570 |
| >ERCC5-D94:DDSKGSFLW  | 15906 | >ERCC5-D94:DYSKGSFLW  | 86    | 15820 |
| >ERCC5-D94:DDSKGSFL   | 26743 | >ERCC5-D94:DYSKGSFL   | 300   | 26443 |
| >ERCC5-D94:DDSKGSFLW  | 26488 | >ERCC5-D94:DYSKGSFLW  | 131   | 26357 |
| >ERCC5-D94:DDSKGSFLW  | 17039 | >ERCC5-D94:DYSKGSFLWC | 98    | 16941 |
| >ERCC5-D94:DDSKGSFLW  | 2354  | >ERCC5-D94:DYSKGSFLWC | 356   | 1998  |
| >ERCC5-D94:AEAYLKPVVD | 23997 | >ERCC5-D94:AEAYLKPVVD | 378   | 23619 |
| >ERCC5-D94:AEAYLKPVVD | 3932  | >ERCC5-D94:AEAYLKPVVD | 265   | 3667  |
| >ERCC5-D94:AEAYLKPVVD | 1490  | >ERCC5-D94:AEAYLKPVVD | 75    | 1415  |
| >ERCC5-D94:AEAYLKPVVD | 747   | >ERCC5-D94:AEAYLKPVVD | 216   | 531   |

|                       |       |                        |      |       |
|-----------------------|-------|------------------------|------|-------|
| >ERCC5-D94:VDDSKGSF   | 8514  | >ERCC5-D94:VDYSKGSF    | 343  | 8171  |
| >ERCC5-D94:VDDSKGSFL  | 1606  | >ERCC5-D94:VDYSKGSFL   | 188  | 1418  |
| >ERCC5-D94:VVDDSKGSFL | 345   | >ERCC5-D94:VVDYSKGSFL  | 3284 | 2939  |
| >ERCC5-D94:VVDDSKGSFL | 314   | >ERCC5-D94:VVDYSKGSFL  | 5602 | 5288  |
| >ERCC5-D94:VVDDSKGSFL | 287   | >ERCC5-D94:VVDYSKGSFL  | 660  | 373   |
| >ERCC5-D94:VVDDSKGSFL | 55    | >ERCC5-D94:VVDYSKGSFL  | 52   | 3     |
| >ERCC5-D94:VVDDSKGSF  | 760   | >ERCC5-D94:VVDYSKGSF   | 454  | 306   |
| >ERCC5-D94:PVVDDSKGSF | 203   | >ERCC5-D94:PVVDYSKGSF  | 295  | 92    |
| >ERCC5-D94:PVVDDSKGSF | 266   | >ERCC5-D94:PVVDYSKGSF  | 392  | 126   |
| >ERCC5-D94:KPVVDDSKGS | 90    | >ERCC5-D94:KPVVDYSKGS  | 63   | 27    |
| >ERCC5-D94:KPVVDDSKGS | 1039  | >ERCC5-D94:KPVVDYSKGS  | 356  | 683   |
| >ERCC5-D94:KPVVDDSKGS | 174   | >ERCC5-D94:KPVVDYSKGS  | 330  | 156   |
| >ERCC5-D94:KPVVDDSKGS | 353   | >ERCC5-D94:KPVVDYSKGS  | 427  | 74    |
| >ERCC5-D94:KPVVDDSKGS | 488   | >ERCC5-D94:KPVVDYSKGS  | 401  | 87    |
| >ERCC5-D94:KPVVDDSKGS | 558   | >ERCC5-D94:KPVVDYSKGS  | 333  | 225   |
| >ERCC5-D94:YLPVVDDS   | 1206  | >ERCC5-D94:YLPVVVDYS   | 42   | 1164  |
| >ERCC5-D94:YLPVVDDS   | 309   | >ERCC5-D94:YLPVVVDYS   | 40   | 269   |
| >ERCC5-D94:YLPVVDDSK  | 1428  | >ERCC5-D94:YLPVVVDYSK  | 459  | 969   |
| >ERCC5-D94:YLPVVDDS   | 3979  | >ERCC5-D94:YLPVVVDYS   | 59   | 3920  |
| >ERCC5-D94:YLPVVDDS   | 1247  | >ERCC5-D94:YLPVVVDYS   | 207  | 1040  |
| >ERCC5-D94:YLPVVDDSK  | 1785  | >ERCC5-D94:YLPVVVDYSK  | 432  | 1353  |
| >ERCC5-D94:YLPVVDDSK  | 1427  | >ERCC5-D94:YLPVVVDYSK  | 234  | 1193  |
| >ERCC5-D94:YLPVVDDSK  | 2697  | >ERCC5-D94:YLPVVVDYSK  | 227  | 2470  |
| >ERCC5-D94:YLPVVDD    | 24502 | >ERCC5-D94:YLPVVVDY    | 101  | 24401 |
| >ERCC5-D94:YLPVVDDSK  | 2114  | >ERCC5-D94:YLPVVVDYSK  | 367  | 1747  |
| >ERCC5-D94:YLPVVDDSK  | 871   | >ERCC5-D94:YLPVVVDYSK  | 140  | 731   |
| >ERCC5-D94:YLPVVDD    | 26493 | >ERCC5-D94:YLPVVVDY    | 223  | 26270 |
| >ERCC5-D94:YLPVVDD    | 16658 | >ERCC5-D94:YLPVVVDY    | 52   | 16606 |
| >ERCC5-D94:YLPVVDD    | 24123 | >ERCC5-D94:YLPVVVDY    | 64   | 24059 |
| >ERCC5-D94:YLPVVDD    | 17144 | >ERCC5-D94:YLPVVVDY    | 62   | 17082 |
| >ERCC5-D94:AYLKPVVDD  | 1117  | >ERCC5-D94:AYLKPVVVDY  | 89   | 1028  |
| >ERCC5-D94:AYLKPVVDDS | 735   | >ERCC5-D94:AYLKPVVVDYS | 319  | 416   |
| >ERCC5-D94:AYLKPVVDDS | 597   | >ERCC5-D94:AYLKPVVVDYS | 430  | 167   |
| >ERCC5-D94:AYLKPVVDD  | 25207 | >ERCC5-D94:AYLKPVVVDY  | 363  | 24844 |
| >ERCC5-D94:AYLKPVVDDS | 440   | >ERCC5-D94:AYLKPVVVDYS | 91   | 349   |
| >ERCC5-D94:AYLKPVVDD  | 21763 | >ERCC5-D94:AYLKPVVVDY  | 388  | 21375 |
| >ERCC5-D94:EAYLKPVVDD | 30084 | >ERCC5-D94:EAYLKPVVVDY | 344  | 29740 |
| >ERCC5-D94:EAYLKPVVDD | 22239 | >ERCC5-D94:EAYLKPVVVDY | 69   | 22170 |
| >ERCC5-G78\DGDAPLLK   | 9715  | >ERCC5-G78\DVDAPLLK    | 398  | 9317  |
| >ERCC5-G78\DGDAPLLK   | 10888 | >ERCC5-G78\DVDAPLLK    | 401  | 10487 |
| >ERCC5-G78\FRIRPIVFDG | 6276  | >ERCC5-G78\FRIRPIVFDV  | 241  | 6035  |
| >ERCC5-G78\FRIRPIVFDG | 2816  | >ERCC5-G78\FRIRPIVFDV  | 170  | 2646  |
| >ERCC5-G78\FRIRPIVFDG | 2296  | >ERCC5-G78\FRIRPIVFDV  | 350  | 1946  |

|                       |       |                       |     |       |
|-----------------------|-------|-----------------------|-----|-------|
| >ERCC5-G78\FDGDAPLL   | 2325  | >ERCC5-G78\FDVDAPLL   | 476 | 1849  |
| >ERCC5-G78\FDGDAPLL   | 1403  | >ERCC5-G78\FDVDAPLL   | 405 | 998   |
| >ERCC5-G78\FVDGDAPLLK | 401   | >ERCC5-G78\FVDVDAPLLK | 501 | 100   |
| >ERCC5-G78\FVFDGDAPL  | 554   | >ERCC5-G78\FVFDVDAPL  | 454 | 100   |
| >ERCC5-G78\FVFDGDAPL  | 10    | >ERCC5-G78\FVFDVDAPL  | 10  | 0     |
| >ERCC5-G78\FVFDGDAPLL | 89    | >ERCC5-G78\FVFDVDAPLL | 112 | 23    |
| >ERCC5-G78\FVFDGDAP   | 2083  | >ERCC5-G78\FVFDVDAP   | 485 | 1598  |
| >ERCC5-G78\FVFDGDAPL  | 5     | >ERCC5-G78\FVFDVDAPL  | 4   | 1     |
| >ERCC5-G78\FVFDGDAPLL | 16    | >ERCC5-G78\FVFDVDAPLL | 21  | 5     |
| >ERCC5-G78\FVFDGDAPL  | 12    | >ERCC5-G78\FVFDVDAPL  | 13  | 1     |
| >ERCC5-G78\FVFDGDAPLL | 172   | >ERCC5-G78\FVFDVDAPLL | 197 | 25    |
| >ERCC5-G78\FVFDGDAP   | 302   | >ERCC5-G78\FVFDVDAP   | 230 | 72    |
| >ERCC5-G78\FVFDGDAPL  | 3     | >ERCC5-G78\FVFDVDAPL  | 4   | 1     |
| >ERCC5-G78\FVFDGDAPLL | 59    | >ERCC5-G78\FVFDVDAPLL | 50  | 9     |
| >ERCC5-G78\FVFDGDAPL  | 10    | >ERCC5-G78\FVFDVDAPL  | 5   | 5     |
| >ERCC5-G78\FVFDGDAPLL | 14    | >ERCC5-G78\FVFDVDAPLL | 11  | 3     |
| >ERCC5-G78\FVFDGDAPL  | 9     | >ERCC5-G78\FVFDVDAPL  | 8   | 1     |
| >ERCC5-G78\FVFDGDAPLL | 58    | >ERCC5-G78\FVFDVDAPLL | 60  | 2     |
| >ERCC5-G78\FVFDGDAPL  | 21    | >ERCC5-G78\FVFDVDAPL  | 12  | 9     |
| >ERCC5-G78\FVFDGDAPLL | 14    | >ERCC5-G78\FVFDVDAPLL | 14  | 0     |
| >ERCC5-G78\FVFDGDAPL  | 429   | >ERCC5-G78\FVFDVDAPL  | 687 | 258   |
| >ERCC5-G78\FVFDGDAPLL | 183   | >ERCC5-G78\FVFDVDAPLL | 313 | 130   |
| >ERCC5-G78\FVFDGDAPL  | 4     | >ERCC5-G78\FVFDVDAPL  | 6   | 2     |
| >ERCC5-G78\FVFDGDAPLL | 4     | >ERCC5-G78\FVFDVDAPLL | 6   | 2     |
| >ERCC5-G78\FVFDGDAPLL | 205   | >ERCC5-G78\FVFDVDAPLL | 155 | 50    |
| >ERCC5-G78\FVFDGDAPLL | 20    | >ERCC5-G78\FVFDVDAPLL | 15  | 5     |
| >ERCC5-G78\FVFDGDAPL  | 207   | >ERCC5-G78\FVFDVDAPL  | 144 | 63    |
| >ERCC5-G78\FVFDGDAPLL | 205   | >ERCC5-G78\FVFDVDAPLL | 372 | 167   |
| >ERCC5-G78\FVFDGDAPLL | 5     | >ERCC5-G78\FVFDVDAPLL | 3   | 2     |
| >ERCC5-G78\FVFDGDAPL  | 6     | >ERCC5-G78\FVFDVDAPL  | 5   | 1     |
| >ERCC5-G78\FVFDGDAPLL | 297   | >ERCC5-G78\FVFDVDAPLL | 317 | 20    |
| >ERCC5-G78\FVFDGDAPL  | 44    | >ERCC5-G78\FVFDVDAPL  | 42  | 2     |
| >ERCC5-G78\FVFDGDAPLL | 42    | >ERCC5-G78\FVFDVDAPLL | 43  | 1     |
| >ERCC5-G78\FVFDGDAPL  | 96    | >ERCC5-G78\FVFDVDAPL  | 142 | 46    |
| >ERCC5-G78\FVFDGDAPL  | 181   | >ERCC5-G78\FVFDVDAPL  | 936 | 755   |
| >ERCC5-G78\FVFDGDAPL  | 32    | >ERCC5-G78\FVFDVDAPL  | 307 | 275   |
| >ERCC5-G78\FVFDGDAPLL | 214   | >ERCC5-G78\FVFDVDAPLL | 977 | 763   |
| >ERCC5-G78\FVFDGDAPL  | 30    | >ERCC5-G78\FVFDVDAPL  | 35  | 5     |
| >ERCC5-G78\FVFDGDAPL  | 111   | >ERCC5-G78\FVFDVDAPL  | 160 | 49    |
| >ERCC5-G78\FVFDGDAPLL | 239   | >ERCC5-G78\FVFDVDAPLL | 383 | 144   |
| >ERCC5-G78\FVFDGDAPL  | 391   | >ERCC5-G78\FVFDVDAPL  | 277 | 114   |
| >ERCC5-G78\PIFVFDGDAP | 332   | >ERCC5-G78\PIFVFDVDAP | 264 | 68    |
| >ERCC5-G78\RPIFVFDG   | 16826 | >ERCC5-G78\RPIFVFDV   | 51  | 16775 |

|                          |       |                          |       |       |
|--------------------------|-------|--------------------------|-------|-------|
| >ERCC5-G78\ RPIFVFDG     | 21831 | >ERCC5-G78\ RPIFVFDV     | 409   | 21422 |
| >ERCC5-G78\ RPIFVFDGDA   | 157   | >ERCC5-G78\ RPIFVFDVDA   | 110   | 47    |
| >ERCC5-G78\ RIRPIFVFDG   | 23304 | >ERCC5-G78\ RIRPIFVFDV   | 149   | 23155 |
| >ERCC5-G78\ RIRPIFVFDG   | 25000 | >ERCC5-G78\ RIRPIFVFDV   | 342   | 24658 |
| >ERCC5-G78\ RIRPIFVFDG   | 26119 | >ERCC5-G78\ RIRPIFVFDV   | 13    | 26106 |
| >ERCC5-G78\ RIRPIFVFDG   | 42    | >ERCC5-G78\ RIRPIFVFDV   | 10    | 32    |
| >ERCC5-I186\ IDIESEDFSSL | 937   | >ERCC5-I186\ TDIESEDFSSL | 484   | 453   |
| >ERCC5-I186\ IDIESEDFSSL | 399   | >ERCC5-I186\ TDIESEDFSSL | 239   | 160   |
| >ERCC5-I186\ AIDIESEDF   | 5580  | >ERCC5-I186\ ATDIESEDF   | 32    | 5548  |
| >ERCC5-I186\ QEEFFHNPQ/  | 100   | >ERCC5-I186\ QEEFFHNPQ/  | 16310 | 16210 |
| >ERCC5-I186\ QEEFFHNPQ/  | 48    | >ERCC5-I186\ QEEFFHNPQ/  | 4522  | 4474  |
| >ERCC5-I186\ QEEFFHNPQ/  | 111   | >ERCC5-I186\ QEEFFHNPQ/  | 53    | 58    |
| >ERCC5-I186\ QEEFFHNPQ/  | 170   | >ERCC5-I186\ QEEFFHNPQ/  | 8546  | 8376  |
| >ERCC5-I186\ QAIDIESEDF  | 361   | >ERCC5-I186\ QATDIESEDF  | 1185  | 824   |
| >ERCC5-I186\ QAIDIESEDF  | 144   | >ERCC5-I186\ QATDIESEDF  | 822   | 678   |
| >ERCC5-I186\ PQAIDIESEDF | 238   | >ERCC5-I186\ PQATDIESED  | 98    | 140   |
| >ERCC5-I186\ NPQAIDIES   | 209   | >ERCC5-I186\ NPQATDIES   | 331   | 122   |
| >ERCC5-I186\ FHNPAIDI    | 421   | >ERCC5-I186\ FHNPAIDI    | 1394  | 973   |
| >ERCC5-I186\ FFHNPQAI    | 100   | >ERCC5-I186\ FFHNPQAT    | 9076  | 8976  |
| >ERCC5-I186\ FFHNPQAIDI  | 149   | >ERCC5-I186\ FFHNPQATDI  | 203   | 54    |
| >ERCC5-I186\ EFFHNPQAI   | 493   | >ERCC5-I186\ EFFHNPQAT   | 20966 | 20473 |
| >ERCC5-I186\ EEFFHNPQAI  | 108   | >ERCC5-I186\ EEFFHNPQAT  | 15185 | 15077 |
| >ERCC5-I186\ EEFFHNPQAI  | 252   | >ERCC5-I186\ EEFFHNPQAT  | 1029  | 777   |
| >ERCC5-I186\ EEFFHNPQAI  | 371   | >ERCC5-I186\ EEFFHNPQAT  | 1365  | 994   |
| >ERCC5-I186\ EEFFHNPQAI  | 10    | >ERCC5-I186\ EEFFHNPQAT  | 530   | 520   |
| >ERCC5-Q62\ QQTTESAGQ    | 167   | >ERCC5-Q62\ EQTTESAGQI   | 780   | 613   |
| >ERCC5-Q62\ EQQTTESA     | 2640  | >ERCC5-Q62\ EEQTTESA     | 17    | 2623  |
| >ERCC5-Q62\ QEQQTTES     | 435   | >ERCC5-Q62\ QEEQTTES     | 939   | 504   |
| >ERCC5-Q62\ QEQQTTESA    | 21    | >ERCC5-Q62\ QEEQTTESA    | 37    | 16    |
| >ERCC5-Q62\ QEQQTTESA(   | 156   | >ERCC5-Q62\ QEEQTTESAC   | 173   | 17    |
| >ERCC5-Q62\ ETIQEQQTTE   | 381   | >ERCC5-Q62\ ETIQEEQTTE   | 720   | 339   |
| >ERCC5-Q62\ ETIQEQQT     | 169   | >ERCC5-Q62\ ETIQEEQT     | 185   | 16    |
| >ERCC5-Q62\ ETIQEQQTT    | 105   | >ERCC5-Q62\ ETIQEEQTT    | 205   | 100   |
| >ERCC5-Q62\ ETIQEQQTTE   | 200   | >ERCC5-Q62\ ETIQEEQTTE   | 273   | 73    |
| >ERCC5-Q62\ ETIQEQQTTE   | 271   | >ERCC5-Q62\ ETIQEEQTTE:  | 357   | 86    |
| >ERCC5-Q62\ FLETIQEQ     | 128   | >ERCC5-Q62\ FLETIQEE     | 992   | 864   |
| >ERCC5-Q62\ FLETIQEQQ    | 91    | >ERCC5-Q62\ FLETIQEEQ    | 51    | 40    |
| >ERCC5-Q62\ FLETIQEQQT   | 119   | >ERCC5-Q62\ FLETIQEEQTTI | 167   | 48    |
| >ERCC5-Q62\ FLETIQEQ     | 20    | >ERCC5-Q62\ FLETIQEE     | 1399  | 1379  |
| >ERCC5-Q62\ FLETIQEQQ    | 60    | >ERCC5-Q62\ FLETIQEEQ    | 61    | 1     |
| >ERCC5-Q62\ FLETIQEQQT   | 28    | >ERCC5-Q62\ FLETIQEEQT   | 60    | 32    |
| >ERCC5-Q62\ FLETIQEQQT   | 20    | >ERCC5-Q62\ FLETIQEEQTTI | 26    | 6     |
| >ERG-Q293K\ QIQLWQFL     | 2949  | >ERG-Q293K\ KIQLWQFL     | 266   | 2683  |



|                       |       |                       |       |       |
|-----------------------|-------|-----------------------|-------|-------|
| >ERG-Q293K QIQLWQFLL  | 370   | >ERG-Q293K KIQLWQFLL  | 40    | 330   |
| >ERG-Q293K QIQLWQFLL  | 661   | >ERG-Q293K KIQLWQFLL  | 64    | 597   |
| >ERG-Q293K QIQLWQFL   | 1359  | >ERG-Q293K KIQLWQFL   | 477   | 882   |
| >ERG-Q293K QIQLWQFLL  | 881   | >ERG-Q293K KIQLWQFLL  | 268   | 613   |
| >ERG-Q293K QIQLWQFL   | 1152  | >ERG-Q293K KIQLWQFL   | 227   | 925   |
| >ERG-Q293K QIQLWQFLL  | 1396  | >ERG-Q293K KIQLWQFLL  | 252   | 1144  |
| >ERG-Q293K QIQLWQFLL  | 1262  | >ERG-Q293K KIQLWQFLL  | 280   | 982   |
| >ERG-Q293K QIQLWQFL   | 2342  | >ERG-Q293K KIQLWQFL   | 278   | 2064  |
| >ERG-Q293K QIQLWQFLL  | 2200  | >ERG-Q293K KIQLWQFLL  | 227   | 1973  |
| >ERG-Q293K QIQLWQFLL  | 2268  | >ERG-Q293K KIQLWQFLL  | 240   | 2028  |
| >ERG-Q293K QIQLWQFLL  | 3158  | >ERG-Q293K KIQLWQFLL  | 313   | 2845  |
| >ERG-Q293K QIQLWQFL   | 5216  | >ERG-Q293K KIQLWQFL   | 469   | 4747  |
| >ERG-Q293K QIQLWQFLL  | 4939  | >ERG-Q293K KIQLWQFLL  | 384   | 4555  |
| >ERG-Q293K QIQLWQFLL  | 1082  | >ERG-Q293K KIQLWQFLL  | 464   | 618   |
| >ERG-Q293K QIQLWQFL   | 1119  | >ERG-Q293K KIQLWQFL   | 287   | 832   |
| >ERG-Q293K QIQLWQFLL  | 372   | >ERG-Q293K KIQLWQFLL  | 82    | 290   |
| >ERG-Q293K QIQLWQFLL  | 515   | >ERG-Q293K KIQLWQFLL  | 124   | 391   |
| >ERG-Q293K QIQLWQFLL  | 7676  | >ERG-Q293K KIQLWQFLL  | 474   | 7202  |
| >ERG-Q293K QIQLWQFLL  | 2184  | >ERG-Q293K KIQLWQFLL  | 236   | 1948  |
| >ERG-Q293K QIQLWQFLL  | 1574  | >ERG-Q293K KIQLWQFLL  | 141   | 1433  |
| >ERG-Q293K QIQLWQFLL  | 11187 | >ERG-Q293K KIQLWQFLL  | 276   | 10911 |
| >ERG-Q293K QIQLWQFLL  | 472   | >ERG-Q293K KIQLWQFLL  | 696   | 224   |
| >ERG-Q293K GQIQLWQFL  | 239   | >ERG-Q293K GKIQLWQFL  | 6461  | 6222  |
| >ERG-Q293K GQIQLWQFL  | 240   | >ERG-Q293K GKIQLWQFL  | 5972  | 5732  |
| >ERG-Q293K GQIQLWQF   | 80    | >ERG-Q293K GKIQLWQF   | 11238 | 11158 |
| >ERG-Q293K GQIQLWQFL  | 8     | >ERG-Q293K GKIQLWQFL  | 2770  | 2762  |
| >ERG-Q293K GQIQLWQFL  | 475   | >ERG-Q293K GKIQLWQFL  | 6733  | 6258  |
| >ERG-Q293K GQIQLWQF   | 265   | >ERG-Q293K GKIQLWQF   | 2128  | 1863  |
| >ERG-Q293K GQIQLWQF   | 79    | >ERG-Q293K GKIQLWQF   | 10550 | 10471 |
| >ERG-Q293K GQIQLWQFL  | 482   | >ERG-Q293K GKIQLWQFL  | 17696 | 17214 |
| >ERG-Q293K GQIQLWQF   | 55    | >ERG-Q293K GKIQLWQF   | 60    | 5     |
| >ERG-Q293K GQIQLWQFL  | 185   | >ERG-Q293K GKIQLWQFL  | 227   | 42    |
| >ERG-Q293K GQIQLWQFL  | 227   | >ERG-Q293K GKIQLWQFL  | 803   | 576   |
| >ERG-Q293K GQIQLWQFL  | 306   | >ERG-Q293K GKIQLWQFL  | 8643  | 8337  |
| >ERG-Q293K GQIQLWQFL  | 224   | >ERG-Q293K GKIQLWQFL  | 3422  | 3198  |
| >ERG-Q293K GQIQLWQFL  | 203   | >ERG-Q293K GKIQLWQFL  | 1437  | 1234  |
| >ERG-Q293K GQIQLWQF   | 478   | >ERG-Q293K GKIQLWQF   | 2376  | 1898  |
| >ERG-Q293K GQIQLWQFL  | 61    | >ERG-Q293K GKIQLWQFL  | 161   | 100   |
| >ERG-Q293K SSRLANPGSG | 27499 | >ERG-Q293K SSRLANPGSG | 395   | 27104 |
| >ERG-Q293K SSRLANPGSG | 218   | >ERG-Q293K SSRLANPGSG | 5     | 213   |
| >ERG-Q293K GSGQIQLW   | 52    | >ERG-Q293K GSGQIQLW   | 112   | 60    |
| >ERG-Q293K GSGQIQLWQ  | 54    | >ERG-Q293K GSGQIQLWQ  | 121   | 67    |
| >ERG-Q293K GSGQIQLW   | 94    | >ERG-Q293K GSGQIQLW   | 100   | 6     |

|                       |       |                       |      |       |
|-----------------------|-------|-----------------------|------|-------|
| >ERG-Q293K GSGQIQLW   | 30    | >ERG-Q293K GSGKIQLW   | 49   | 19    |
| >ERG-Q293K GSGQIQLWQ  | 124   | >ERG-Q293K GSGKIQLWQ  | 221  | 97    |
| >ERG-Q293K GSGQIQLWQ  | 465   | >ERG-Q293K GSGKIQLWQ  | 454  | 11    |
| >ERG-Q293K NPGSGQIQL  | 16    | >ERG-Q293K NPGSGKIQL  | 40   | 24    |
| >ERG-Q293K NPGSGQIQL  | 573   | >ERG-Q293K NPGSGKIQL  | 180  | 393   |
| >ERG-Q293K NPGSGQIQLV | 43    | >ERG-Q293K NPGSGKIQLV | 59   | 16    |
| >ERG-Q293K LANPGSGQ   | 27116 | >ERG-Q293K LANPGSGK   | 421  | 26695 |
| >ERG-Q293K LANPGSGQI  | 60    | >ERG-Q293K LANPGSGKI  | 119  | 59    |
| >ERG-Q293K LANPGSGQIC | 28    | >ERG-Q293K LANPGSGKIQ | 44   | 16    |
| >ERG-Q293K LANPGSGQI  | 214   | >ERG-Q293K LANPGSGKI  | 928  | 714   |
| >ERG-Q293K LANPGSGQIC | 171   | >ERG-Q293K LANPGSGKIQ | 904  | 733   |
| >ERG-Q293K LANPGSGQI  | 1760  | >ERG-Q293K LANPGSGKI  | 491  | 1269  |
| >ERG-Q293K LANPGSGQI  | 23    | >ERG-Q293K LANPGSGKI  | 32   | 9     |
| >ERG-Q293K LANPGSGQIC | 484   | >ERG-Q293K LANPGSGKIQ | 730  | 246   |
| >ERG-Q293K RLANPGSGQI | 342   | >ERG-Q293K RLANPGSGKI | 298  | 44    |
| >ERG-Q293K RLANPGSGQI | 120   | >ERG-Q293K RLANPGSGKI | 101  | 19    |
| >ERG-Q293K RLANPGSGQI | 12    | >ERG-Q293K RLANPGSGKI | 20   | 8     |
| >ERG-Q293K RLANPGSGQI | 262   | >ERG-Q293K RLANPGSGKI | 274  | 12    |
| >ERG-Q293K RLANPGSGQI | 86    | >ERG-Q293K RLANPGSGKI | 114  | 28    |
| >ERG-Q293K RLANPGSGQI | 469   | >ERG-Q293K RLANPGSGKI | 1215 | 746   |
| >ERG-Q293K RLANPGSGQI | 33    | >ERG-Q293K RLANPGSGKI | 72   | 39    |
| >ERG-Q293K RLANPGSGQ  | 9316  | >ERG-Q293K RLANPGSGK  | 29   | 9287  |
| >ERG-Q293K RLANPGSGQ  | 24019 | >ERG-Q293K RLANPGSGK  | 97   | 23922 |
| >ERG-Q293K SRLANPGSGC | 1237  | >ERG-Q293K SRLANPGSGK | 180  | 1057  |
| >ERG-Q293K SRLANPGSGC | 252   | >ERG-Q293K SRLANPGSGK | 191  | 61    |
| >ERG-R353L-RYYYDKNIMT | 387   | >ERG-R353L-LYYYDKNIMT | 1738 | 1351  |
| >ERG-R353L-RYYYDKNIMT | 368   | >ERG-R353L-LYYYDKNIMT | 1514 | 1146  |
| >ERG-R353L-RYYYDKNI   | 49    | >ERG-R353L-LYYYDKNI   | 76   | 27    |
| >ERG-R353L-RYYYDKNIMT | 148   | >ERG-R353L-LYYYDKNIMT | 220  | 72    |
| >ERG-R353L-RYYYDKNI   | 476   | >ERG-R353L-LYYYDKNI   | 1015 | 539   |
| >ERG-R353L-RYYYDKNI   | 14    | >ERG-R353L-LYYYDKNI   | 39   | 25    |
| >ERG-R353L-RYYYDKNIM  | 212   | >ERG-R353L-LYYYDKNIM  | 793  | 581   |
| >ERG-R353L-RYYYDKNIMT | 233   | >ERG-R353L-LYYYDKNIMT | 650  | 417   |
| >ERG-R353L-RYYYDKNIMT | 13    | >ERG-R353L-LYYYDKNIMT | 219  | 206   |
| >ERG-R353L-RYYYDKNIMT | 62    | >ERG-R353L-LYYYDKNIMT | 956  | 894   |
| >ERG-R353L-RYYYDKNI   | 291   | >ERG-R353L-LYYYDKNI   | 7646 | 7355  |
| >ERG-R353L-RYYYDKNIMT | 1962  | >ERG-R353L-LYYYDKNIMT | 480  | 1482  |
| >ERG-R353L-RYYYDKNIM  | 449   | >ERG-R353L-LYYYDKNIM  | 1017 | 568   |
| >ERG-R353L-RYYYDKNIMT | 62    | >ERG-R353L-LYYYDKNIMT | 426  | 364   |
| >ERG-R353L-LRYYYDKNI  | 119   | >ERG-R353L-LLYYYDKNI  | 1176 | 1057  |
| >ERG-R353L-LRYYYDKNI  | 23022 | >ERG-R353L-LLYYYDKNI  | 255  | 22767 |
| >ERG-R353L-LRYYYDKNIM | 22864 | >ERG-R353L-LLYYYDKNIM | 467  | 22397 |
| >ERG-R353L-LRYYYDKNI  | 19393 | >ERG-R353L-LLYYYDKNI  | 123  | 19270 |

|                         |       |                        |       |       |
|-------------------------|-------|------------------------|-------|-------|
| >ERG-R353L- LRYYYDKNIM  | 18198 | >ERG-R353L- LLYYYDKNIM | 222   | 17976 |
| >ERG-R353L- LRYYYDKNI   | 17541 | >ERG-R353L- LLYYYDKNI  | 47    | 17494 |
| >ERG-R353L- LRYYYDKNIM  | 21278 | >ERG-R353L- LLYYYDKNIM | 450   | 20828 |
| >ERG-R353L- LRYYYDKNI   | 23896 | >ERG-R353L- LLYYYDKNI  | 58    | 23838 |
| >ERG-R353L- LRYYYDKNIM  | 24434 | >ERG-R353L- LLYYYDKNIM | 161   | 24273 |
| >ERG-R353L- LRYYYDKNI   | 22894 | >ERG-R353L- LLYYYDKNI  | 179   | 22715 |
| >ERG-R353L- LRYYYDKNI   | 26137 | >ERG-R353L- LLYYYDKNI  | 477   | 25660 |
| >ERG-R353L- LRYYYDKNI   | 35675 | >ERG-R353L- LLYYYDKNI  | 110   | 35565 |
| >ERG-R353L- LRYYYDKNIM  | 35071 | >ERG-R353L- LLYYYDKNIM | 205   | 34866 |
| >ERG-R353L- LRYYYDKNIM  | 15108 | >ERG-R353L- LLYYYDKNIM | 337   | 14771 |
| >ERG-R353L- LRYYYDKNI   | 102   | >ERG-R353L- LLYYYDKNI  | 234   | 132   |
| >ERG-R353L- LRYYYDKNIM  | 59    | >ERG-R353L- LLYYYDKNIM | 100   | 41    |
| >ERG-R353L- LRYYYDKNI   | 188   | >ERG-R353L- LLYYYDKNI  | 21627 | 21439 |
| >ERG-R353L- LRYYYDKNIM  | 159   | >ERG-R353L- LLYYYDKNIM | 27794 | 27635 |
| >ERG-R353L- LRYYYDKNIM  | 895   | >ERG-R353L- LLYYYDKNIM | 136   | 759   |
| >ERG-R353L- MNYDKLSRAI  | 3935  | >ERG-R353L- MNYDKLSRAI | 24    | 3911  |
| >ERG-R353L- MNYDKLSRAI  | 26    | >ERG-R353L- MNYDKLSRAI | 11489 | 11463 |
| >ERG-R353L- MNYDKLSRAI  | 379   | >ERG-R353L- MNYDKLSRAI | 19122 | 18743 |
| >ERG-R353L- MNYDKLSRAI  | 16    | >ERG-R353L- MNYDKLSRAI | 10163 | 10147 |
| >ERG-R353L- MNYDKLSRAI  | 261   | >ERG-R353L- MNYDKLSRAI | 28467 | 28206 |
| >ERG-R353L- ALRYYYDKNI  | 8134  | >ERG-R353L- ALLYYDKNI  | 372   | 7762  |
| >ERG-R353L- ALRYYYDKNI  | 642   | >ERG-R353L- ALLYYDKNI  | 136   | 506   |
| >ERG-R353L- ALRYYYDKNI  | 788   | >ERG-R353L- ALLYYDKNI  | 216   | 572   |
| >ERG-R353L- ALRYYYDKNI  | 2385  | >ERG-R353L- ALLYYDKNI  | 61    | 2324  |
| >ERG-R353L- ALRYYYDKNI  | 4738  | >ERG-R353L- ALLYYDKNI  | 131   | 4607  |
| >ERG-R353L- ALRYYYDKNI  | 9336  | >ERG-R353L- ALLYYDKNI  | 211   | 9125  |
| >ERG-R353L- ALRYYYDKNI  | 1211  | >ERG-R353L- ALLYYDKNI  | 225   | 986   |
| >ERG-R353L- ALRYYYDK    | 185   | >ERG-R353L- ALLYYDK    | 257   | 72    |
| >ERG-R353L- ALRYYYDK    | 994   | >ERG-R353L- ALLYYDK    | 44    | 950   |
| >ERG-R353L- ALRYYYDK    | 10    | >ERG-R353L- ALLYYDK    | 763   | 753   |
| >ERG-R353L- ALRYYYDKNI  | 181   | >ERG-R353L- ALLYYDKNI  | 7013  | 6832  |
| >ERG-R353L- ALRYYYDKNII | 476   | >ERG-R353L- ALLYYDKNII | 9620  | 9144  |
| >ERG-R353L- ALRYYYDK    | 405   | >ERG-R353L- ALLYYDK    | 630   | 225   |
| >ERG-R353L- ALRYYYDKNI  | 348   | >ERG-R353L- ALLYYDKNI  | 507   | 159   |
| >ERG-R353L- ALRYYYDKNII | 165   | >ERG-R353L- ALLYYDKNII | 279   | 114   |
| >ERG-R353L- ALRYYYDKNII | 399   | >ERG-R353L- ALLYYDKNII | 1104  | 705   |
| >ERG-R353L- ALRYYYDK    | 1190  | >ERG-R353L- ALLYYDK    | 346   | 844   |
| >ERG-R353L- RALRYYYDK   | 19    | >ERG-R353L- RALLYYYDK  | 19    | 0     |
| >ERG-R353L- RALRYYYDK   | 13    | >ERG-R353L- RALLYYYDK  | 35    | 22    |
| >ERG-R353L- RALRYYYDKN  | 255   | >ERG-R353L- RALLYYYDKN | 847   | 592   |
| >ERG-R353L- RALRYYYDK   | 18    | >ERG-R353L- RALLYYYDK  | 34    | 16    |
| >ERG-R353L- RALRYYYDKN  | 332   | >ERG-R353L- RALLYYYDKN | 881   | 549   |
| >ERG-R353L- RALRYYYDKN  | 184   | >ERG-R353L- RALLYYYDKN | 67    | 117   |

|                         |      |                         |      |      |
|-------------------------|------|-------------------------|------|------|
| >ERG-R353L- RALRYYYDKN  | 471  | >ERG-R353L- RALLYYYDKN  | 1984 | 1513 |
| >ERG-R353L- RALRYYYDK   | 348  | >ERG-R353L- RALLYYYDK   | 456  | 108  |
| >ERG-R353L- RALRYYYDK   | 820  | >ERG-R353L- RALLYYYDK   | 468  | 352  |
| >ERG-R353L- RALRYYYDKN  | 79   | >ERG-R353L- RALLYYYDKN  | 120  | 41   |
| >ERG-R353L- SRALRYYYDK  | 416  | >ERG-R353L- SRALLYYYDK  | 387  | 29   |
| >ERG-R353L- SRALRYYY    | 150  | >ERG-R353L- SRALLYYY    | 62   | 88   |
| >ERG-R353L- SRALRYYY    | 184  | >ERG-R353L- SRALLYYY    | 131  | 53   |
| >ERG-R353L- SRALRYYY    | 1670 | >ERG-R353L- SRALLYYY    | 479  | 1191 |
| >ERG-R353L- SRALRYYY    | 246  | >ERG-R353L- SRALLYYY    | 188  | 58   |
| >ERG-R353L- SRALRYYYDK  | 164  | >ERG-R353L- SRALLYYYDK  | 116  | 48   |
| >ERG-R353L- LSRALRYYYDI | 375  | >ERG-R353L- LSRALLYYYDK | 332  | 43   |
| >ERG-R353L- LSRALRYYY   | 4291 | >ERG-R353L- LSRALLYYY   | 135  | 4156 |
| >ERG-R353L- LSRALRY     | 264  | >ERG-R353L- LSRALLY     | 31   | 233  |
| >ERG-R353L- LSRALRYYY   | 24   | >ERG-R353L- LSRALLYYY   | 17   | 7    |
| >ERG-R353L- LSRALRY     | 26   | >ERG-R353L- LSRALLY     | 26   | 0    |
| >ERG-R353L- LSRALRYYY   | 15   | >ERG-R353L- LSRALLYYY   | 34   | 19   |
| >ERG-R353L- LSRALRYYYD  | 340  | >ERG-R353L- LSRALLYYYD  | 582  | 242  |
| >ERG-R353L- LSRALRYYYDI | 5    | >ERG-R353L- LSRALLYYYDK | 7    | 2    |
| >ERG-R353L- LSRALRY     | 87   | >ERG-R353L- LSRALLY     | 86   | 1    |
| >ERG-R353L- LSRALRYYY   | 14   | >ERG-R353L- LSRALLYYY   | 19   | 5    |
| >ERG-R353L- LSRALRYYY   | 112  | >ERG-R353L- LSRALLYYY   | 237  | 125  |
| >ERG-R353L- LSRALRYYYDI | 65   | >ERG-R353L- LSRALLYYYDK | 99   | 34   |
| >ERG-R353L- LSRALRY     | 5116 | >ERG-R353L- LSRALLY     | 179  | 4937 |
| >ERG-R353L- LSRALRYYY   | 1649 | >ERG-R353L- LSRALLYYY   | 220  | 1429 |
| >ERG-R353L- LSRALRY     | 99   | >ERG-R353L- LSRALLY     | 64   | 35   |
| >ERG-R353L- LSRALRYYY   | 88   | >ERG-R353L- LSRALLYYY   | 81   | 7    |
| >ERG-R353L- LSRALRY     | 135  | >ERG-R353L- LSRALLY     | 102  | 33   |
| >ERG-R353L- LSRALRYYY   | 82   | >ERG-R353L- LSRALLYYY   | 175  | 93   |
| >ERG-R353L- LSRALRY     | 6    | >ERG-R353L- LSRALLY     | 4    | 2    |
| >ERG-R353L- LSRALRYYY   | 8    | >ERG-R353L- LSRALLYYY   | 5    | 3    |
| >ERG-R353L- LSRALRY     | 95   | >ERG-R353L- LSRALLY     | 132  | 37   |
| >ERG-R353L- LSRALRYYY   | 59   | >ERG-R353L- LSRALLYYY   | 71   | 12   |
| >ERG-R353L- LSRALRY     | 2641 | >ERG-R353L- LSRALLY     | 159  | 2482 |
| >ERG-R353L- LSRALRYYY   | 214  | >ERG-R353L- LSRALLYYY   | 86   | 128  |
| >ERG-R353L- LSRALRY     | 367  | >ERG-R353L- LSRALLY     | 341  | 26   |
| >ERG-R353L- LSRALRYYY   | 19   | >ERG-R353L- LSRALLYYY   | 14   | 5    |
| >ERG-R353L- LSRALRY     | 1280 | >ERG-R353L- LSRALLY     | 428  | 852  |
| >ERG-R353L- LSRALRYYY   | 153  | >ERG-R353L- LSRALLYYY   | 151  | 2    |
| >ERG-R353L- KLSRALRYYY  | 1968 | >ERG-R353L- KLSRALRYYY  | 222  | 1746 |
| >ERG-R353L- KLSRALRYYY  | 766  | >ERG-R353L- KLSRALRYYY  | 161  | 605  |
| >ERG-R353L- KLSRALRY    | 80   | >ERG-R353L- KLSRALRY    | 44   | 36   |
| >ERG-R353L- KLSRALRY    | 77   | >ERG-R353L- KLSRALRY    | 34   | 43   |
| >ERG-R353L- KLSRALRYYY  | 53   | >ERG-R353L- KLSRALRYYY  | 38   | 15   |

|                         |       |                         |       |       |
|-------------------------|-------|-------------------------|-------|-------|
| >ERG-R353L- KLSRALRY    | 1977  | >ERG-R353L- KLSRALLY    | 322   | 1655  |
| >ERG-R353L- KLSRALRYY   | 1853  | >ERG-R353L- KLSRALLYY   | 85    | 1768  |
| >ERG-R353L- KLSRALRYYY  | 182   | >ERG-R353L- KLSRALLYYY  | 98    | 84    |
| >ERG-R353L- KLSRALRY    | 161   | >ERG-R353L- KLSRALLY    | 28    | 133   |
| >ERG-R353L- KLSRALRYY   | 494   | >ERG-R353L- KLSRALLYY   | 23    | 471   |
| >ERG-R353L- KLSRALRYYY  | 108   | >ERG-R353L- KLSRALLYYY  | 118   | 10    |
| >ERG-R353L- KLSRALRYY   | 384   | >ERG-R353L- KLSRALLYY   | 132   | 252   |
| >ERG-R353L- KLSRALRYYY  | 382   | >ERG-R353L- KLSRALLYYY  | 476   | 94    |
| >ERG-R353L- KLSRALRY    | 82    | >ERG-R353L- KLSRALLY    | 70    | 12    |
| >ERG-R353L- KLSRALRYY   | 39    | >ERG-R353L- KLSRALLYY   | 30    | 9     |
| >ERG-R353L- KLSRALRYYY  | 34    | >ERG-R353L- KLSRALLYYY  | 26    | 8     |
| >ERG-R353L- KLSRALRYYY  | 88    | >ERG-R353L- KLSRALLYYY  | 293   | 205   |
| >ERG-R353L- KLSRALRY    | 17    | >ERG-R353L- KLSRALLY    | 5     | 12    |
| >ERG-R353L- KLSRALRYY   | 110   | >ERG-R353L- KLSRALLYY   | 5     | 105   |
| >ERG-R353L- KLSRALRYYY  | 30    | >ERG-R353L- KLSRALLYYY  | 7     | 23    |
| >ERG-R353L- KLSRALRY    | 192   | >ERG-R353L- KLSRALLY    | 200   | 8     |
| >ERG-R353L- KLSRALRYY   | 198   | >ERG-R353L- KLSRALLYY   | 90    | 108   |
| >ERG-R353L- KLSRALRYYY  | 164   | >ERG-R353L- KLSRALLYYY  | 120   | 44    |
| >ERG-R353L- KLSRALRY    | 667   | >ERG-R353L- KLSRALLY    | 398   | 269   |
| >ERG-R353L- KLSRALRYY   | 434   | >ERG-R353L- KLSRALLYY   | 174   | 260   |
| >ERG-R353L- KLSRALRYYY  | 290   | >ERG-R353L- KLSRALLYYY  | 277   | 13    |
| >ERG-R353L- KLSRALRY    | 332   | >ERG-R353L- KLSRALLY    | 853   | 521   |
| >ERG-R353L- KLSRALRY    | 1203  | >ERG-R353L- KLSRALLY    | 374   | 829   |
| >ERG-R353L- KLSRALRYY   | 3763  | >ERG-R353L- KLSRALLYY   | 84    | 3679  |
| >ERG-R353L- KLSRALRYYY  | 472   | >ERG-R353L- KLSRALLYYY  | 99    | 373   |
| >ERG-R353L- KLSRALRYYY  | 281   | >ERG-R353L- KLSRALLYYY  | 156   | 125   |
| >ERG-R353L- KLSRALRYY   | 446   | >ERG-R353L- KLSRALLYY   | 1372  | 926   |
| >ERG-R353L- KLSRALRYYY  | 262   | >ERG-R353L- KLSRALLYYY  | 432   | 170   |
| >ERG-R353L- KLSRALRY    | 116   | >ERG-R353L- KLSRALLY    | 87    | 29    |
| >ERG-R353L- KLSRALRYY   | 368   | >ERG-R353L- KLSRALLYY   | 73    | 295   |
| >ERG-R353L- DKLSRALRY   | 1039  | >ERG-R353L- DKLSRALLY   | 214   | 825   |
| >ERG-R353L- DKLSRALRYY' | 363   | >ERG-R353L- DKLSRALLYYY | 193   | 170   |
| >ERG-R353L- DKLSRALR    | 188   | >ERG-R353L- DKLSRALL    | 20330 | 20142 |
| >ERG-R353L- DKLSRALRY   | 390   | >ERG-R353L- DKLSRALLY   | 240   | 150   |
| >ERG-R353L- DKLSRALRYY  | 236   | >ERG-R353L- DKLSRALLYY  | 158   | 78    |
| >ERG-R353L- DKLSRALRYY' | 200   | >ERG-R353L- DKLSRALLYYY | 219   | 19    |
| >ERG-R353L- YDKLSRALRY  | 855   | >ERG-R353L- YDKLSRALLY  | 470   | 385   |
| >ERG-R353L- YDKLSRALRY' | 2259  | >ERG-R353L- YDKLSRALLY  | 247   | 2012  |
| >ERG-R353L- YDKLSRALR   | 16202 | >ERG-R353L- YDKLSRALL   | 253   | 15949 |
| >ERG-R353L- NYDKLSRALR  | 1079  | >ERG-R353L- NYDKLSRALL' | 470   | 609   |
| >ERG-R353L- NYDKLSRALR  | 10537 | >ERG-R353L- NYDKLSRALL  | 348   | 10189 |
| >ERG-R353L- NYDKLSRALR  | 374   | >ERG-R353L- NYDKLSRALL' | 118   | 256   |
| >ERG-R353L- NYDKLSRALR  | 88    | >ERG-R353L- NYDKLSRALL  | 15580 | 15492 |

|                         |       |                         |       |       |
|-------------------------|-------|-------------------------|-------|-------|
| >ERG-R353L- NYDKLSRALR  | 121   | >ERG-R353L- NYDKLSRALL  | 17516 | 17395 |
| >ERG-R353L- NYDKLSRALR  | 41    | >ERG-R353L- NYDKLSRALL' | 20    | 21    |
| >ERG-R353L- NYDKLSRALR  | 85    | >ERG-R353L- NYDKLSRALL' | 91    | 6     |
| >ERG-R353L- NYDKLSRALR  | 81    | >ERG-R353L- NYDKLSRALL  | 29265 | 29184 |
| >ERG-R353L- NYDKLSRALR  | 10846 | >ERG-R353L- NYDKLSRALL  | 325   | 10521 |
| >ERG-S305L- SDSSNSSCITV | 2192  | >ERG-S305L- LDSSNSSCITV | 330   | 1862  |
| >ERG-S305L- SDSSNSSCI   | 142   | >ERG-S305L- LDSSNSSCI   | 203   | 61    |
| >ERG-S305L- LSDSSNSSCI  | 6375  | >ERG-S305L- LLDSSNSSCI  | 79    | 6296  |
| >ERG-S305L- LSDSSNSSCI  | 10573 | >ERG-S305L- LLDSSNSSCI  | 202   | 10371 |
| >ERG-S305L- LSDSSNSSC   | 20158 | >ERG-S305L- LLDSSNSSC   | 182   | 19976 |
| >ERG-S305L- LSDSSNSSCI  | 14073 | >ERG-S305L- LLDSSNSSCI  | 35    | 14038 |
| >ERG-S305L- LSDSSNSSCI  | 18000 | >ERG-S305L- LLDSSNSSCI  | 17    | 17983 |
| >ERG-S305L- LSDSSNSSCI  | 19690 | >ERG-S305L- LLDSSNSSCI  | 49    | 19641 |
| >ERG-S305L- LSDSSNSSCI  | 19778 | >ERG-S305L- LLDSSNSSCI  | 32    | 19746 |
| >ERG-S305L- LSDSSNSSC   | 32406 | >ERG-S305L- LLDSSNSSC   | 36    | 32370 |
| >ERG-S305L- LSDSSNSSCI  | 29239 | >ERG-S305L- LLDSSNSSCI  | 25    | 29214 |
| >ERG-S305L- LSDSSNSSCIT | 32944 | >ERG-S305L- LLDSSNSSCIT | 93    | 32851 |
| >ERG-S305L- LSDSSNSSCI  | 468   | >ERG-S305L- LLDSSNSSCI  | 15554 | 15086 |
| >ERG-S305L- LSDSSNSSCI  | 30    | >ERG-S305L- LLDSSNSSCI  | 1364  | 1334  |
| >ERG-S305L- QLWQFLELL   | 1891  | >ERG-S305L- QLWQFLELL   | 32    | 1859  |
| >ERG-S305L- QLWQFLELL   | 2771  | >ERG-S305L- QLWQFLELL   | 135   | 2636  |
| >ERG-S305L- QLWQFLELL   | 5495  | >ERG-S305L- QLWQFLELL   | 402   | 5093  |
| >ERG-S305L- QLWQFLELL   | 1344  | >ERG-S305L- QLWQFLELL   | 19    | 1325  |
| >ERG-S305L- QLWQFLELL   | 15616 | >ERG-S305L- QLWQFLELL   | 359   | 15257 |
| >ERG-S305L- QLWQFLELL   | 4733  | >ERG-S305L- QLWQFLELL   | 43    | 4690  |
| >ERG-S305L- QLWQFLELL   | 16801 | >ERG-S305L- QLWQFLELL   | 221   | 16580 |
| >ERG-S305L- QLWQFLELL   | 2646  | >ERG-S305L- QLWQFLELL   | 10    | 2636  |
| >ERG-S305L- QLWQFLELL   | 11637 | >ERG-S305L- QLWQFLELL   | 290   | 11347 |
| >ERG-S305L- QLWQFLELL   | 14883 | >ERG-S305L- QLWQFLELL   | 359   | 14524 |
| >ERG-S305L- LLDSSNSSCI  | 151   | >ERG-S305L- LLDSSNSSCI  | 40    | 111   |
| >ERG-S305L- LLDSSNS     | 141   | >ERG-S305L- LLDSSNS     | 941   | 800   |
| >ERG-S305L- LLDSSNSS    | 48    | >ERG-S305L- LLDSSNSS    | 328   | 280   |
| >ERG-S305L- LLDSSNSSC   | 303   | >ERG-S305L- LLDSSNSSC   | 351   | 48    |
| >ERG-S305L- LLDSSNSSCI  | 9     | >ERG-S305L- LLDSSNSSCI  | 55    | 46    |
| >ERG-S305L- LLDSSNS     | 281   | >ERG-S305L- LLDSSNS     | 1598  | 1317  |
| >ERG-S305L- LLDSSNSS    | 166   | >ERG-S305L- LLDSSNSS    | 1068  | 902   |
| >ERG-S305L- LLDSSNSSCI  | 12    | >ERG-S305L- LLDSSNSSCI  | 49    | 37    |
| >ERG-S305L- LLDSSNSS    | 2179  | >ERG-S305L- LLDSSNSS    | 286   | 1893  |
| >ERG-S305L- LLDSSNSSCI  | 466   | >ERG-S305L- LLDSSNSSCI  | 82    | 384   |
| >ERG-S305L- LLDSSNS     | 3638  | >ERG-S305L- LLDSSNS     | 427   | 3211  |
| >ERG-S305L- LLDSSNSS    | 3055  | >ERG-S305L- LLDSSNSS    | 369   | 2686  |
| >ERG-S305L- LLDSSNSSC   | 252   | >ERG-S305L- LLDSSNSSC   | 24    | 228   |
| >ERG-S305L- LLDSSNSSCI  | 46    | >ERG-S305L- LLDSSNSSCI  | 7     | 39    |

|                         |       |                         |      |       |
|-------------------------|-------|-------------------------|------|-------|
| >ERG-S305L- LLDSSNSSC   | 269   | >ERG-S305L- LLLDSSNSSC  | 50   | 219   |
| >ERG-S305L- LLDSSNSSCI  | 8     | >ERG-S305L- LLLDSSNSSCI | 4    | 4     |
| >ERG-S305L- LLDSSNSSCI  | 47    | >ERG-S305L- LLLDSSNSSCI | 11   | 36    |
| >ERG-S305L- LLDSSNSSC   | 264   | >ERG-S305L- LLLDSSNSSC  | 57   | 207   |
| >ERG-S305L- LLDSSNSSCI  | 11    | >ERG-S305L- LLLDSSNSSCI | 4    | 7     |
| >ERG-S305L- LLDSSNS     | 116   | >ERG-S305L- LLLDSSNS    | 86   | 30    |
| >ERG-S305L- LLDSSNSS    | 83    | >ERG-S305L- LLLDSSNSS   | 56   | 27    |
| >ERG-S305L- LLDSSNSSC   | 7     | >ERG-S305L- LLLDSSNSSC  | 6    | 1     |
| >ERG-S305L- LLDSSNSSCI  | 5     | >ERG-S305L- LLLDSSNSSCI | 5    | 0     |
| >ERG-S305L- LLDSSNSSCI  | 498   | >ERG-S305L- LLLDSSNSSCI | 1535 | 1037  |
| >ERG-S305L- LLDSSNSSCI  | 453   | >ERG-S305L- LLLDSSNSSCI | 260  | 193   |
| >ERG-S305L- ELLDSSNSSC  | 451   | >ERG-S305L- ELLDSSNSSC  | 1216 | 765   |
| >ERG-S305L- LELLSDSS    | 839   | >ERG-S305L- LELLSDSS    | 389  | 450   |
| >ERG-S305L- LELLSDSSNS  | 833   | >ERG-S305L- LELLSDSSNS  | 444  | 389   |
| >ERG-S305L- FLLELLSDS   | 192   | >ERG-S305L- FLLELLSDS   | 75   | 117   |
| >ERG-S305L- FLLELLSDSS  | 200   | >ERG-S305L- FLLELLSDSS  | 72   | 128   |
| >ERG-S305L- FLLELLSD    | 444   | >ERG-S305L- FLLELLSD    | 395  | 49    |
| >ERG-S305L- FLLELLSDS   | 158   | >ERG-S305L- FLLELLSDS   | 401  | 243   |
| >ERG-S305L- FLLELLSDSS  | 180   | >ERG-S305L- FLLELLSDSS  | 97   | 83    |
| >ERG-S305L- FLLELLSDS   | 67    | >ERG-S305L- FLLELLSDS   | 404  | 337   |
| >ERG-S305L- FLLELLSDSS  | 409   | >ERG-S305L- FLLELLSDSS  | 238  | 171   |
| >ERG-S305L- FLLELLSDS   | 53    | >ERG-S305L- FLLELLSDS   | 51   | 2     |
| >ERG-S305L- FLLELLSDSS  | 164   | >ERG-S305L- FLLELLSDSS  | 87   | 77    |
| >ERG-S305L- FLLELLSD    | 112   | >ERG-S305L- FLLELLSD    | 191  | 79    |
| >ERG-S305L- FLLELLSDS   | 38    | >ERG-S305L- FLLELLSDS   | 42   | 4     |
| >ERG-S305L- FLLELLSDSS  | 22    | >ERG-S305L- FLLELLSDSS  | 17   | 5     |
| >ERG-S305L- FLLELLSDSSN | 136   | >ERG-S305L- FLLELLSDSSN | 131  | 5     |
| >ERG-S305L- FLLELLSDS   | 148   | >ERG-S305L- FLLELLSDS   | 301  | 153   |
| >ERG-S305L- FLLELLSDSS  | 98    | >ERG-S305L- FLLELLSDSS  | 112  | 14    |
| >ERG-S305L- FLLELLSDS   | 96    | >ERG-S305L- FLLELLSDS   | 83   | 13    |
| >ERG-S305L- FLLELLSDSS  | 95    | >ERG-S305L- FLLELLSDSS  | 90   | 5     |
| >ERG-S305L- FLLELLSD    | 424   | >ERG-S305L- FLLELLSD    | 772  | 348   |
| >ERG-S305L- FLLELLSDS   | 40    | >ERG-S305L- FLLELLSDS   | 64   | 24    |
| >ERG-S305L- FLLELLSDSS  | 95    | >ERG-S305L- FLLELLSDSS  | 75   | 20    |
| >ERG-S305L- FLLELLSDSSN | 360   | >ERG-S305L- FLLELLSDSSN | 493  | 133   |
| >ERG-S305L- QFLELLS     | 13507 | >ERG-S305L- QFLELLS     | 162  | 13345 |
| >ERG-S305L- QFLELLS     | 8979  | >ERG-S305L- QFLELLS     | 204  | 8775  |
| >ERG-S305L- WQFLELLS    | 7758  | >ERG-S305L- WQFLELLS    | 449  | 7309  |
| >ERG-S305L- WQFLELLS    | 2536  | >ERG-S305L- WQFLELLS    | 62   | 2474  |
| >ERG-S305L- WQFLELLS    | 5307  | >ERG-S305L- WQFLELLS    | 100  | 5207  |
| >ERG-S305L- WQFLELLS    | 1589  | >ERG-S305L- WQFLELLS    | 282  | 1307  |
| >ERG-S305L- WQFLELLS    | 15554 | >ERG-S305L- WQFLELLS    | 41   | 15513 |
| >ERG-S305L- WQFLELLS    | 17100 | >ERG-S305L- WQFLELLS    | 371  | 16729 |

|                        |       |                        |      |       |
|------------------------|-------|------------------------|------|-------|
| >ERG-S305L- WQFLELLS   | 3875  | >ERG-S305L- WQFLELLL   | 151  | 3724  |
| >ERG-S305L- WQFLELLS   | 6296  | >ERG-S305L- WQFLELLL   | 53   | 6243  |
| >ERG-S305L- WQFLELLS   | 10672 | >ERG-S305L- WQFLELLL   | 485  | 10187 |
| >ERG-S305L- WQFLELLS   | 6165  | >ERG-S305L- WQFLELLL   | 67   | 6098  |
| >ERG-S305L- LWQFLELLS  | 10432 | >ERG-S305L- LWQFLELLL  | 143  | 10289 |
| >ERG-S305L- LWQFLELLS  | 6585  | >ERG-S305L- LWQFLELLL  | 182  | 6403  |
| >ERG-S305L- LWQFLELLSI | 369   | >ERG-S305L- LWQFLELLLI | 479  | 110   |
| >ETV1-F222L FPPQGFKQEY | 342   | >ETV1-F222L LPPQGFKQEY | 2291 | 1949  |
| >ETV1-F222L FPPQGFKQEY | 82    | >ETV1-F222L LPPQGFKQEY | 707  | 625   |
| >ETV1-F222L FPPQGFKQEY | 158   | >ETV1-F222L LPPQGFKQEY | 752  | 594   |
| >ETV1-F222L FPPQGFKQE  | 118   | >ETV1-F222L LPPQGFKQE  | 768  | 650   |
| >ETV1-F222L FPPQGFKQEY | 278   | >ETV1-F222L LPPQGFKQEY | 963  | 685   |
| >ETV1-F222L PFPPQGFKQE | 184   | >ETV1-F222L PLPPQGFKQE | 555  | 371   |
| >ETV1-F222L QRQMSEPNII | 17    | >ETV1-F222L QRQMSEPNII | 254  | 237   |
| >ETV1-F222L QRQMSEPNII | 6039  | >ETV1-F222L QRQMSEPNII | 358  | 5681  |
| >ETV1-F222L QRQMSEPNII | 480   | >ETV1-F222L QRQMSEPNII | 138  | 342   |
| >ETV1-F222L QRQMSEPNII | 604   | >ETV1-F222L QRQMSEPNII | 201  | 403   |
| >ETV1-F222L IPFPPQGF   | 48    | >ETV1-F222L IPLPPQGF   | 306  | 258   |
| >ETV1-F222L IPFPPQGF   | 42    | >ETV1-F222L IPLPPQGF   | 185  | 143   |
| >ETV1-F222L IPFPPQGF   | 57    | >ETV1-F222L IPLPPQGF   | 122  | 65    |
| >ETV1-F222L NIPFPPQGFK | 89    | >ETV1-F222L NIPLPPQGFK | 310  | 221   |
| >ETV1-F222L NIPFPPQGFK | 155   | >ETV1-F222L NIPLPPQGFK | 314  | 159   |
| >ETV1-F222L NIPFPPQGFK | 21    | >ETV1-F222L NIPLPPQGFK | 115  | 94    |
| >ETV1-F222L EPNIPFPPQG | 77    | >ETV1-F222L EPNIPLPPQG | 96   | 19    |
| >ETV1-F222L EPNIPFPP   | 249   | >ETV1-F222L EPNIPLPP   | 1635 | 1386  |
| >ETV1-F222L EPNIPFPPQ  | 70    | >ETV1-F222L EPNIPLPPQ  | 317  | 247   |
| >ETV1-F222L MSEPNIPIF  | 120   | >ETV1-F222L MSEPNIPL   | 2554 | 2434  |
| >ETV1-F222L MSEPNIPIF  | 4     | >ETV1-F222L MSEPNIPL   | 19   | 15    |
| >ETV1-F222L MSEPNIPIF  | 43    | >ETV1-F222L MSEPNIPL   | 633  | 590   |
| >ETV1-F222L MSEPNIPIF  | 5731  | >ETV1-F222L MSEPNIPL   | 427  | 5304  |
| >ETV1-F222L QMSEPNIPIF | 8620  | >ETV1-F222L QMSEPNIPL  | 57   | 8563  |
| >ETV1-F222L QMSEPNIPIF | 3428  | >ETV1-F222L QMSEPNIPL  | 29   | 3399  |
| >ETV1-F222L QMSEPNIPIF | 9453  | >ETV1-F222L QMSEPNIPL  | 192  | 9261  |
| >ETV1-F222L QMSEPNIPIF | 571   | >ETV1-F222L QMSEPNIPL  | 79   | 492   |
| >ETV1-F222L QMSEPNIPIF | 1164  | >ETV1-F222L QMSEPNIPL  | 11   | 1153  |
| >ETV1-F222L QMSEPNIPIF | 5788  | >ETV1-F222L QMSEPNIPL  | 32   | 5756  |
| >ETV1-F222L QMSEPNIPIF | 16100 | >ETV1-F222L QMSEPNIPL  | 176  | 15924 |
| >ETV1-F222L QMSEPNIPIF | 13620 | >ETV1-F222L QMSEPNIPL  | 121  | 13499 |
| >ETV1-F222L QMSEPNIPIF | 10497 | >ETV1-F222L QMSEPNIPL  | 25   | 10472 |
| >ETV1-F222L QMSEPNIPIF | 66    | >ETV1-F222L QMSEPNIPL  | 274  | 208   |
| >ETV1-F222L QMSEPNIPIF | 15197 | >ETV1-F222L QMSEPNIPL  | 293  | 14904 |
| >ETV1-F222L QMSEPNIPIF | 5728  | >ETV1-F222L QMSEPNIPL  | 43   | 5685  |
| >ETV1-F222L QMSEPNIPIF | 51    | >ETV1-F222L QMSEPNIPL  | 613  | 562   |



|                        |       |                        |      |       |
|------------------------|-------|------------------------|------|-------|
| >ETV1-F222L QMSEPNIFF  | 28    | >ETV1-F222L QMSEPNIPL  | 355  | 327   |
| >ETV1-F222L QMSEPNIFF  | 7     | >ETV1-F222L QMSEPNIPL  | 108  | 101   |
| >ETV1-F222L QMSEPNIFF  | 477   | >ETV1-F222L QMSEPNIPL  | 4343 | 3866  |
| >ETV1-F222L QMSEPNIFF  | 70    | >ETV1-F222L QMSEPNIPL  | 1071 | 1001  |
| >ETV1-F222L QMSEPNIFF  | 3278  | >ETV1-F222L QMSEPNIPL  | 93   | 3185  |
| >ETV1-F222L RQMSEPNIFF | 3820  | >ETV1-F222L RQMSEPNIPL | 54   | 3766  |
| >ETV1-F222L RQMSEPNIFF | 2026  | >ETV1-F222L RQMSEPNIPL | 17   | 2009  |
| >ETV1-F222L RQMSEPNIFF | 11778 | >ETV1-F222L RQMSEPNIPL | 178  | 11600 |
| >ETV1-F222L RQMSEPNIFF | 5941  | >ETV1-F222L RQMSEPNIPL | 105  | 5836  |
| >ETV1-F222L RQMSEPNIFF | 9379  | >ETV1-F222L RQMSEPNIPL | 402  | 8977  |
| >ETV1-F222L RQMSEPNIFF | 16    | >ETV1-F222L RQMSEPNIPL | 52   | 36    |
| >ETV1-F222L RQMSEPNIFF | 33    | >ETV1-F222L RQMSEPNIPL | 114  | 81    |
| >ETV1-F222L RQMSEPNIFF | 452   | >ETV1-F222L RQMSEPNIPL | 3692 | 3240  |
| >ETV1-F222L RQMSEPNIFF | 2     | >ETV1-F222L RQMSEPNIPL | 4    | 2     |
| >ETV1-F222L RQMSEPNIFF | 238   | >ETV1-F222L RQMSEPNIPL | 394  | 156   |
| >ETV1-F222L RQMSEPNIFF | 662   | >ETV1-F222L RQMSEPNIPL | 377  | 285   |
| >ETV1-F222L RQMSEPNIFF | 182   | >ETV1-F222L RQMSEPNIPL | 14   | 168   |
| >ETV1-F222L RQMSEPNIFF | 228   | >ETV1-F222L RQMSEPNIPL | 42   | 186   |
| >ETV1-L79M·LAFHGLPL    | 1001  | >ETV1-L79M·MAFHGLPL    | 191  | 810   |
| >ETV1-L79M·LAFHGLPL    | 488   | >ETV1-L79M·MAFHGLPL    | 138  | 350   |
| >ETV1-L79M·LAFHGLPLKI  | 665   | >ETV1-L79M·MAFHGLPLKI  | 463  | 202   |
| >ETV1-L79M·LAFHGLPL    | 718   | >ETV1-L79M·MAFHGLPL    | 232  | 486   |
| >ETV1-L79M·LAFHGLPLKI  | 365   | >ETV1-L79M·MAFHGLPLKI  | 224  | 141   |
| >ETV1-L79M·LAFHGLPL    | 90    | >ETV1-L79M·MAFHGLPL    | 30   | 60    |
| >ETV1-L79M·LAFHGLPLKI  | 780   | >ETV1-L79M·MAFHGLPLKI  | 490  | 290   |
| >ETV1-L79M·LAFHGLPL    | 981   | >ETV1-L79M·MAFHGLPL    | 408  | 573   |
| >ETV1-L79M·LAFHGLPLKI  | 916   | >ETV1-L79M·MAFHGLPLKI  | 382  | 534   |
| >ETV1-L79M·LAFHGLPLK   | 87    | >ETV1-L79M·MAFHGLPLK   | 44   | 43    |
| >ETV1-L79M·LAFHGLPLKIK | 763   | >ETV1-L79M·MAFHGLPLKI  | 201  | 562   |
| >ETV1-L79M·LAFHGLPLK   | 38    | >ETV1-L79M·MAFHGLPLK   | 15   | 23    |
| >ETV1-L79M·LAFHGLPLKIK | 414   | >ETV1-L79M·MAFHGLPLKI  | 77   | 337   |
| >ETV1-L79M·LAFHGLPL    | 2372  | >ETV1-L79M·MAFHGLPL    | 360  | 2012  |
| >ETV1-L79M·LAFHGLPLK   | 27    | >ETV1-L79M·MAFHGLPLK   | 8    | 19    |
| >ETV1-L79M·LAFHGLPLKI  | 2437  | >ETV1-L79M·MAFHGLPLKI  | 397  | 2040  |
| >ETV1-L79M·LAFHGLPLKIK | 222   | >ETV1-L79M·MAFHGLPLKI  | 37   | 185   |
| >ETV1-L79M·LAFHGLPLK   | 1055  | >ETV1-L79M·MAFHGLPLK   | 167  | 888   |
| >ETV1-L79M·LAFHGLPLK   | 79    | >ETV1-L79M·MAFHGLPLK   | 8    | 71    |
| >ETV1-L79M·LAFHGLPLKIK | 565   | >ETV1-L79M·MAFHGLPLKI  | 38   | 527   |
| >ETV1-L79M·LAFHGLPL    | 1477  | >ETV1-L79M·MAFHGLPL    | 44   | 1433  |
| >ETV1-L79M·LAFHGLPL    | 1056  | >ETV1-L79M·MAFHGLPL    | 165  | 891   |
| >ETV1-L79M·LAFHGLPLKI  | 1995  | >ETV1-L79M·MAFHGLPLKI  | 317  | 1678  |
| >ETV1-L79M·LAFHGLPL    | 1155  | >ETV1-L79M·MAFHGLPL    | 458  | 697   |
| >ETV1-L79M·LAFHGLPL    | 202   | >ETV1-L79M·MAFHGLPL    | 258  | 56    |

|                        |      |                        |      |      |
|------------------------|------|------------------------|------|------|
| >ETV1-L79M·LAFHGLPL    | 54   | >ETV1-L79M·MAFHGLPL    | 31   | 23   |
| >ETV1-L79M·LAFHGLPLKI  | 716  | >ETV1-L79M·MAFHGLPLKI  | 410  | 306  |
| >ETV1-L79M·LAFHGLPL    | 10   | >ETV1-L79M·MAFHGLPL    | 7    | 3    |
| >ETV1-L79M·LAFHGLPLKI  | 49   | >ETV1-L79M·MAFHGLPLKI  | 22   | 27   |
| >ETV1-L79M·LAFHGLPL    | 186  | >ETV1-L79M·MAFHGLPL    | 46   | 140  |
| >ETV1-L79M·LAFHGLPL    | 2680 | >ETV1-L79M·MAFHGLPL    | 295  | 2385 |
| >ETV1-L79M·LAFHGLPLKI  | 139  | >ETV1-L79M·MAFHGLPLKI  | 61   | 78   |
| >ETV1-L79M·LAFHGLPL    | 1531 | >ETV1-L79M·MAFHGLPL    | 217  | 1314 |
| >ETV1-L79M·LAFHGLPLK   | 472  | >ETV1-L79M·MAFHGLPLK   | 510  | 38   |
| >ETV1-L79M·LAFHGLPL    | 273  | >ETV1-L79M·MAFHGLPL    | 343  | 70   |
| >ETV1-L79M·LAFHGLPLKI  | 223  | >ETV1-L79M·MAFHGLPLKI  | 514  | 291  |
| >ETV1-L79M·SLAFHGLPL   | 2628 | >ETV1-L79M·SMAFHGLPL   | 252  | 2376 |
| >ETV1-L79M·SLAFHGLPL   | 46   | >ETV1-L79M·SMAFHGLPL   | 35   | 11   |
| >ETV1-L79M·SLAFHGLPLKI | 131  | >ETV1-L79M·SMAFHGLPLKI | 97   | 34   |
| >ETV1-L79M·SLAFHGLPL   | 8    | >ETV1-L79M·SMAFHGLPL   | 8    | 0    |
| >ETV1-L79M·SLAFHGLPLKI | 37   | >ETV1-L79M·SMAFHGLPLKI | 42   | 5    |
| >ETV1-L79M·SLAFHGLPL   | 8    | >ETV1-L79M·SMAFHGLPL   | 7    | 1    |
| >ETV1-L79M·SLAFHGLPLKI | 15   | >ETV1-L79M·SMAFHGLPLKI | 14   | 1    |
| >ETV1-L79M·SLAFHGLPL   | 223  | >ETV1-L79M·SMAFHGLPL   | 123  | 100  |
| >ETV1-L79M·SLAFHGLPL   | 28   | >ETV1-L79M·SMAFHGLPL   | 17   | 11   |
| >ETV1-L79M·SLAFHGLPLKI | 27   | >ETV1-L79M·SMAFHGLPLKI | 17   | 10   |
| >ETV1-L79M·SLAFHGLPL   | 153  | >ETV1-L79M·SMAFHGLPL   | 72   | 81   |
| >ETV1-L79M·SLAFHGLPLKI | 469  | >ETV1-L79M·SMAFHGLPLKI | 248  | 221  |
| >ETV1-L79M·SLAFHGLPL   | 32   | >ETV1-L79M·SMAFHGLPL   | 30   | 2    |
| >ETV1-L79M·SLAFHGLPLKI | 37   | >ETV1-L79M·SMAFHGLPLKI | 35   | 2    |
| >ETV1-L79M·SLAFHGLPL   | 16   | >ETV1-L79M·SMAFHGLPL   | 30   | 14   |
| >ETV1-L79M·SLAFHGLPLKI | 52   | >ETV1-L79M·SMAFHGLPLKI | 106  | 54   |
| >ETV1-L79M·SLAFHGLPLK  | 15   | >ETV1-L79M·SMAFHGLPLK  | 13   | 2    |
| >ETV1-L79M·SLAFHGLPLK  | 17   | >ETV1-L79M·SMAFHGLPLK  | 12   | 5    |
| >ETV1-L79M·SLAFHGLPLKI | 2096 | >ETV1-L79M·SMAFHGLPLKI | 382  | 1714 |
| >ETV1-L79M·SLAFHGLPLK  | 351  | >ETV1-L79M·SMAFHGLPLK  | 166  | 185  |
| >ETV1-L79M·SLAFHGLPL   | 1046 | >ETV1-L79M·SMAFHGLPL   | 426  | 620  |
| >ETV1-L79M·SLAFHGLPLKI | 286  | >ETV1-L79M·SMAFHGLPLKI | 145  | 141  |
| >ETV1-L79M·SLAFHGLPLK  | 52   | >ETV1-L79M·SMAFHGLPLK  | 24   | 28   |
| >ETV1-L79M·SLAFHGLPL   | 346  | >ETV1-L79M·SMAFHGLPL   | 312  | 34   |
| >ETV1-L79M·SLAFHGLPL   | 181  | >ETV1-L79M·SMAFHGLPL   | 160  | 21   |
| >ETV1-L79M·SLAFHGLPL   | 100  | >ETV1-L79M·SMAFHGLPL   | 45   | 55   |
| >ETV1-L79M·SLAFHGLPL   | 582  | >ETV1-L79M·SMAFHGLPL   | 346  | 236  |
| >ETV1-L79M·SLAFHGLPL   | 1207 | >ETV1-L79M·SMAFHGLPL   | 73   | 1134 |
| >ETV1-L79M·SLAFHGLPL   | 2728 | >ETV1-L79M·SMAFHGLPL   | 344  | 2384 |
| >ETV1-L79M·SLAFHGLPLK  | 136  | >ETV1-L79M·SMAFHGLPLK  | 102  | 34   |
| >ETV1-L79M·SLAFHGLPLK  | 651  | >ETV1-L79M·SMAFHGLPLK  | 309  | 342  |
| >ETV1-L79M·QFVPDYQAE!  | 116  | >ETV1-L79M·QFVPDYQAE!  | 1616 | 1500 |

|                        |      |                       |     |     |
|------------------------|------|-----------------------|-----|-----|
| >ETV1-L79M·QFVPDYQAE!  | 200  | >ETV1-L79M·QFVPDYQAE! | 291 | 91  |
| >ETV1-L79M·ESLAFHGL    | 355  | >ETV1-L79M·ESMAFHGL   | 437 | 82  |
| >ETV1-L79M·ESLAFHGLPLI | 1348 | >ETV1-L79M·ESMAFHGLPI | 352 | 996 |
| >ETV1-L79M·ESLAFHGLPLI | 86   | >ETV1-L79M·ESMAFHGLPI | 26  | 60  |
| >ETV1-L79M·ESLAFHGL    | 359  | >ETV1-L79M·ESMAFHGL   | 95  | 264 |
| >ETV1-L79M·ESLAFHGLPL  | 1042 | >ETV1-L79M·ESMAFHGLPI | 326 | 716 |
| >ETV1-L79M·ESLAFHGL    | 185  | >ETV1-L79M·ESMAFHGL   | 189 | 4   |
| >ETV1-L79M·ESLAFHGLPLI | 22   | >ETV1-L79M·ESMAFHGLPI | 6   | 16  |
| >ETV1-L79M·ESLAFHGL    | 74   | >ETV1-L79M·ESMAFHGL   | 9   | 65  |
| >ETV1-L79M·ESLAFHGLPL  | 172  | >ETV1-L79M·ESMAFHGLPI | 35  | 137 |
| >ETV1-L79M·ESLAFHGL    | 14   | >ETV1-L79M·ESMAFHGL   | 14  | 0   |
| >ETV1-L79M·ESLAFHGLPL  | 30   | >ETV1-L79M·ESMAFHGLPI | 30  | 0   |
| >ETV1-L79M·ESLAFHGL    | 161  | >ETV1-L79M·ESMAFHGL   | 123 | 38  |
| >ETV1-L79M·ESLAFHGLPL  | 55   | >ETV1-L79M·ESMAFHGLPI | 43  | 12  |
| >ETV1-L79M·ESLAFHGLPL  | 1270 | >ETV1-L79M·ESMAFHGLPI | 302 | 968 |
| >ETV1-L79M·ESLAFHGLPLI | 469  | >ETV1-L79M·ESMAFHGLPI | 356 | 113 |
| >ETV1-L79M·ESLAFHGLPL  | 145  | >ETV1-L79M·ESMAFHGLPI | 98  | 47  |
| >ETV1-L79M·AESLAFHGL   | 195  | >ETV1-L79M·AESMAFHGL  | 161 | 34  |
| >ETV1-L79M·AESLAFHGL   | 497  | >ETV1-L79M·AESMAFHGL  | 685 | 188 |
| >ETV1-L79M·AESLAFHGLP  | 443  | >ETV1-L79M·AESMAFHGLI | 571 | 128 |
| >ETV1-L79M·AESLAFHGL   | 6    | >ETV1-L79M·AESMAFHGL  | 5   | 1   |
| >ETV1-L79M·AESLAFHGLP  | 7    | >ETV1-L79M·AESMAFHGLI | 5   | 2   |
| >ETV1-L79M·AESLAFHGL   | 40   | >ETV1-L79M·AESMAFHGL  | 37  | 3   |
| >ETV1-L79M·AESLAFHGLP  | 17   | >ETV1-L79M·AESMAFHGLI | 15  | 2   |
| >ETV1-L79M·AESLAFHGL   | 446  | >ETV1-L79M·AESMAFHGL  | 766 | 320 |
| >ETV1-L79M·AESLAFHGL   | 200  | >ETV1-L79M·AESMAFHGL  | 170 | 30  |
| >ETV1-L79M·AESLAFHGLP  | 274  | >ETV1-L79M·AESMAFHGLI | 234 | 40  |
| >ETV1-L79M·AESLAFHG    | 137  | >ETV1-L79M·AESMAFHG   | 108 | 29  |
| >ETV1-L79M·AESLAFHGL   | 35   | >ETV1-L79M·AESMAFHGL  | 30  | 5   |
| >ETV1-L79M·AESLAFHGLP  | 144  | >ETV1-L79M·AESMAFHGLI | 160 | 16  |
| >ETV1-L79M·AESLAFHGLP  | 65   | >ETV1-L79M·AESMAFHGLI | 58  | 7   |
| >ETV1-L79M·AESLAFHGL   | 17   | >ETV1-L79M·AESMAFHGL  | 23  | 6   |
| >ETV1-L79M·AESLAFHGLP  | 17   | >ETV1-L79M·AESMAFHGLI | 22  | 5   |
| >ETV1-L79M·YQAESLAFHC  | 15   | >ETV1-L79M·YQAESMAFH  | 15  | 0   |
| >ETV1-L79M·YQAESLAFHC  | 4    | >ETV1-L79M·YQAESMAFH  | 4   | 0   |
| >ETV1-L79M·YQAESLAFHC  | 8    | >ETV1-L79M·YQAESMAFH  | 8   | 0   |
| >ETV1-L79M·YQAESLAF    | 7    | >ETV1-L79M·YQAESMAF   | 8   | 1   |
| >ETV1-L79M·YQAESLAFH   | 52   | >ETV1-L79M·YQAESMAFH  | 102 | 50  |
| >ETV1-L79M·YQAESLAFHC  | 3    | >ETV1-L79M·YQAESMAFH  | 3   | 0   |
| >ETV1-L79M·YQAESLAFHC  | 26   | >ETV1-L79M·YQAESMAFH  | 29  | 3   |
| >ETV1-L79M·YQAESLAFHC  | 12   | >ETV1-L79M·YQAESMAFH  | 15  | 3   |
| >ETV1-L79M·YQAESLAFHC  | 42   | >ETV1-L79M·YQAESMAFH  | 48  | 6   |
| >ETV1-L79M·YQAESLAFHC  | 38   | >ETV1-L79M·YQAESMAFH  | 74  | 36  |

|                       |      |                       |      |      |
|-----------------------|------|-----------------------|------|------|
| >ETV1-L79M·YQAESLAFHC | 34   | >ETV1-L79M·YQAESMAFH  | 44   | 10   |
| >ETV1-L79M·YQAESLAFH  | 1203 | >ETV1-L79M·YQAESMAFH  | 419  | 784  |
| >ETV1-L79M·YQAESLAFHC | 291  | >ETV1-L79M·YQAESMAFH  | 218  | 73   |
| >ETV1-L79M·YQAESLAF   | 23   | >ETV1-L79M·YQAESMAF   | 25   | 2    |
| >ETV1-L79M·YQAESLAFH  | 256  | >ETV1-L79M·YQAESMAFH  | 234  | 22   |
| >ETV1-L79M·YQAESLAFHC | 285  | >ETV1-L79M·YQAESMAFH  | 283  | 2    |
| >ETV1-L79M·YQAESLAFHC | 106  | >ETV1-L79M·YQAESMAFH  | 91   | 15   |
| >ETV1-L79M·YQAESLAF   | 31   | >ETV1-L79M·YQAESMAF   | 27   | 4    |
| >ETV1-L79M·YQAESLAFHC | 549  | >ETV1-L79M·YQAESMAFH  | 418  | 131  |
| >ETV1-L79M·YQAESLAF   | 2    | >ETV1-L79M·YQAESMAF   | 2    | 0    |
| >ETV1-L79M·YQAESLAFH  | 235  | >ETV1-L79M·YQAESMAFH  | 238  | 3    |
| >ETV1-L79M·YQAESLAFHC | 38   | >ETV1-L79M·YQAESMAFH  | 29   | 9    |
| >ETV1-L79M·YQAESLAF   | 203  | >ETV1-L79M·YQAESMAF   | 219  | 16   |
| >ETV1-L79M·YQAESLAF   | 57   | >ETV1-L79M·YQAESMAF   | 69   | 12   |
| >ETV1-L79M·YQAESLAF   | 46   | >ETV1-L79M·YQAESMAF   | 29   | 17   |
| >ETV1-L79M·YQAESLAFHC | 15   | >ETV1-L79M·YQAESMAFH  | 12   | 3    |
| >ETV1-L79M·YQAESLAFHC | 292  | >ETV1-L79M·YQAESMAFH  | 294  | 2    |
| >ETV1-L79M·YQAESLAF   | 339  | >ETV1-L79M·YQAESMAF   | 271  | 68   |
| >ETV1-L79M·DYQAESLAF  | 219  | >ETV1-L79M·DYQAESMAF  | 116  | 103  |
| >ETV1-L79M·DYQAESLAF  | 492  | >ETV1-L79M·DYQAESMAF  | 490  | 2    |
| >ETV1-L79M·DYQAESLAF  | 20   | >ETV1-L79M·DYQAESMAF  | 10   | 10   |
| >ETV1-L79M·VPDYQAESL  | 534  | >ETV1-L79M·VPDYQAESM  | 411  | 123  |
| >ETV1-L79M·VPDYQAESLA | 223  | >ETV1-L79M·VPDYQAESM  | 316  | 93   |
| >ETV1-L79M·VPDYQAESL  | 1463 | >ETV1-L79M·VPDYQAESM  | 82   | 1381 |
| >ETV1-L79M·VPDYQAESLA | 17   | >ETV1-L79M·VPDYQAESM  | 19   | 2    |
| >ETV1-L79M·VPDYQAESL  | 397  | >ETV1-L79M·VPDYQAESM  | 243  | 154  |
| >ETV1-L79M·VPDYQAESLA | 80   | >ETV1-L79M·VPDYQAESM  | 113  | 33   |
| >ETV1-L79M·VPDYQAESLA | 127  | >ETV1-L79M·VPDYQAESM  | 146  | 19   |
| >ETV1-L79M·VPDYQAESLA | 307  | >ETV1-L79M·VPDYQAESM  | 236  | 71   |
| >ETV1-L79M·VPDYQAESLA | 96   | >ETV1-L79M·VPDYQAESM  | 82   | 14   |
| >ETV1-L79M·FVPDYQAESL | 233  | >ETV1-L79M·FVPDYQAESM | 358  | 125  |
| >ETV1-L79M·FVPDYQAESL | 75   | >ETV1-L79M·FVPDYQAESM | 416  | 341  |
| >ETV1-L79M·FVPDYQAESL | 63   | >ETV1-L79M·FVPDYQAESM | 142  | 79   |
| >ETV1-L79M·FVPDYQAESL | 48   | >ETV1-L79M·FVPDYQAESM | 66   | 18   |
| >ETV1-L79M·FVPDYQAESL | 315  | >ETV1-L79M·FVPDYQAESM | 993  | 678  |
| >ETV1-L79M·FVPDYQAESL | 28   | >ETV1-L79M·FVPDYQAESM | 45   | 17   |
| >ETV1-L79M·FVPDYQAESL | 67   | >ETV1-L79M·FVPDYQAESM | 433  | 366  |
| >ETV1-L79M·FVPDYQAESL | 431  | >ETV1-L79M·FVPDYQAESM | 222  | 209  |
| >ETV1-L79M·FVPDYQAESL | 11   | >ETV1-L79M·FVPDYQAESM | 167  | 156  |
| >ETV1-L79M·FVPDYQAESL | 28   | >ETV1-L79M·FVPDYQAESM | 33   | 5    |
| >ETV1-L79M·FVPDYQAESL | 2742 | >ETV1-L79M·FVPDYQAESM | 301  | 2441 |
| >ETV1-L79M·FVPDYQAESL | 198  | >ETV1-L79M·FVPDYQAESM | 1701 | 1503 |
| >ETV1-L79M·FVPDYQAESL | 50   | >ETV1-L79M·FVPDYQAESM | 84   | 34   |

|                        |      |                        |      |      |
|------------------------|------|------------------------|------|------|
| >ETV1-L79M·FVPDYQAESL  | 111  | >ETV1-L79M·FVPDYQAESM  | 189  | 78   |
| >ETV1-P234S·PVYEHNTM   | 7391 | >ETV1-P234S·SVYEHNTM   | 124  | 7267 |
| >ETV1-P234S·PVYEHNTMV  | 2341 | >ETV1-P234S·SVYEHNTMV  | 205  | 2136 |
| >ETV1-P234S·PVYEHNTMV  | 2573 | >ETV1-P234S·SVYEHNTMV  | 22   | 2551 |
| >ETV1-P234S·PVYEHNTMV  | 1017 | >ETV1-P234S·SVYEHNTMV  | 32   | 985  |
| >ETV1-P234S·PVYEHNTM   | 8738 | >ETV1-P234S·SVYEHNTM   | 417  | 8321 |
| >ETV1-P234S·PVYEHNTMV  | 140  | >ETV1-P234S·SVYEHNTMV  | 7    | 133  |
| >ETV1-P234S·PVYEHNTM   | 9710 | >ETV1-P234S·SVYEHNTM   | 303  | 9407 |
| >ETV1-P234S·PVYEHNTMV  | 684  | >ETV1-P234S·SVYEHNTMV  | 12   | 672  |
| >ETV1-P234S·PVYEHNTM   | 4743 | >ETV1-P234S·SVYEHNTM   | 237  | 4506 |
| >ETV1-P234S·PVYEHNTMV  | 58   | >ETV1-P234S·SVYEHNTMV  | 4    | 54   |
| >ETV1-P234S·PVYEHNTMV  | 6144 | >ETV1-P234S·SVYEHNTMV  | 211  | 5933 |
| >ETV1-P234S·PVYEHNTMV  | 420  | >ETV1-P234S·SVYEHNTMV  | 14   | 406  |
| >ETV1-P234S·PVYEHNTMV  | 77   | >ETV1-P234S·SVYEHNTMV  | 6    | 71   |
| >ETV1-P234S·PVYEHNTM   | 176  | >ETV1-P234S·SVYEHNTM   | 38   | 138  |
| >ETV1-P234S·PVYEHNTM   | 3825 | >ETV1-P234S·SVYEHNTM   | 290  | 3535 |
| >ETV1-P234S·PVYEHNTMV  | 2529 | >ETV1-P234S·SVYEHNTMV  | 26   | 2503 |
| >ETV1-P234S·PVYEHNTM   | 2260 | >ETV1-P234S·SVYEHNTM   | 76   | 2184 |
| >ETV1-P234S·PVYEHNTMV  | 46   | >ETV1-P234S·SVYEHNTMV  | 4    | 42   |
| >ETV1-P234S·PVYEHNTM   | 9068 | >ETV1-P234S·SVYEHNTM   | 375  | 8693 |
| >ETV1-P234S·PVYEHNTM   | 9958 | >ETV1-P234S·SVYEHNTM   | 346  | 9612 |
| >ETV1-P234S·PVYEHNTM   | 1321 | >ETV1-P234S·SVYEHNTM   | 124  | 1197 |
| >ETV1-P234S·DPVYEHNTM  | 480  | >ETV1-P234S·DSVYEHNTM  | 16   | 464  |
| >ETV1-P234S·DPVYEHNTM  | 551  | >ETV1-P234S·DSVYEHNTM  | 373  | 178  |
| >ETV1-P234S·DPVYEHNTM  | 22   | >ETV1-P234S·DSVYEHNTM  | 1026 | 1004 |
| >ETV1-P234S·HDPVYEHNTI | 243  | >ETV1-P234S·HDSVYEHNTI | 63   | 180  |
| >ETV1-P234S·YHDPVYEHNT | 137  | >ETV1-P234S·YHDSVYEHNT | 138  | 1    |
| >ETV1-P234S·YHDPVYEHNT | 38   | >ETV1-P234S·YHDSVYEHNT | 29   | 9    |
| >ETV1-P234S·QEYHDPVY   | 403  | >ETV1-P234S·QEYHDSVY   | 128  | 275  |
| >ETV1-P234S·QEYHDPVY   | 1003 | >ETV1-P234S·QEYHDSVY   | 196  | 807  |
| >ETV1-P234S·QEYHDPVY   | 94   | >ETV1-P234S·QEYHDSVY   | 55   | 39   |
| >ETV1-P234S·QEYHDPVY   | 143  | >ETV1-P234S·QEYHDSVY   | 137  | 6    |
| >ETV1-P234S·QEYHDPVYEH | 476  | >ETV1-P234S·QEYHDSVYEH | 413  | 63   |
| >ETV1-P234S·QEYHDPVY   | 183  | >ETV1-P234S·QEYHDSVY   | 206  | 23   |
| >ETV1-P234S·KQEYHDPV   | 40   | >ETV1-P234S·KQEYHDSV   | 65   | 25   |
| >ETV1-P234S·KQEYHDPVY  | 49   | >ETV1-P234S·KQEYHDSVY  | 78   | 29   |
| >ETV1-P234S·KQEYHDPVY  | 93   | >ETV1-P234S·KQEYHDSVY  | 65   | 28   |
| >ETV1-P234S·KQEYHDPVY  | 2207 | >ETV1-P234S·KQEYHDSVY  | 311  | 1896 |
| >ETV1-P234S·KQEYHDPVY  | 87   | >ETV1-P234S·KQEYHDSVY  | 37   | 50   |
| >ETV1-P234S·FKQEYHDPV  | 483  | >ETV1-P234S·FKQEYHDSV  | 529  | 46   |
| >ETV1-P234S·FKQEYHDPV  | 108  | >ETV1-P234S·FKQEYHDSV  | 188  | 80   |
| >ETV1-P234S·FKQEYHDPV  | 112  | >ETV1-P234S·FKQEYHDSV  | 118  | 6    |
| >ETV1-P234S·FKQEYHDPVY | 1152 | >ETV1-P234S·FKQEYHDSVY | 454  | 698  |

|                       |      |                       |      |      |
|-----------------------|------|-----------------------|------|------|
| >ETV1-P234SFKQEYHDPV\ | 867  | >ETV1-P234SFKQEYHDSVY | 227  | 640  |
| >ETV1-P234SFKQEYHDPV  | 112  | >ETV1-P234SFKQEYHDSV  | 129  | 17   |
| >ETV1-P234SFKQEYHDPV\ | 13   | >ETV1-P234SFKQEYHDSVY | 8    | 5    |
| >ETV1-P234SFKQEYHDPV  | 447  | >ETV1-P234SFKQEYHDSV  | 792  | 345  |
| >ETV1-P234SGFKQEYHDP\ | 104  | >ETV1-P234SGFKQEYHDS\ | 164  | 60   |
| >ETV1-P234SGFKQEYHDP\ | 217  | >ETV1-P234SGFKQEYHDS\ | 298  | 81   |
| >ETV1-P234SQGFKQEYHD  | 389  | >ETV1-P234SQGFKQEYHD  | 1124 | 735  |
| >ETV5-D452\DALFSMAF   | 7661 | >ETV5-D452\HALFSMAF   | 360  | 7301 |
| >ETV5-D452\DALFSMAF   | 252  | >ETV5-D452\HALFSMAF   | 15   | 237  |
| >ETV5-D452\DALFSMAF   | 261  | >ETV5-D452\HALFSMAF   | 7    | 254  |
| >ETV5-D452\DALFSMAF   | 131  | >ETV5-D452\HALFSMAF   | 28   | 103  |
| >ETV5-D452\PDALFSMAF  | 1698 | >ETV5-D452\PHALFSMAF  | 71   | 1627 |
| >ETV5-D452\DPDALFSM   | 436  | >ETV5-D452\DPHALFSM   | 30   | 406  |
| >ETV5-D452\DPDALFSM   | 55   | >ETV5-D452\DPHALFSM   | 53   | 2    |
| >ETV5-D452\DPDALFSM   | 467  | >ETV5-D452\DPHALFSM   | 835  | 368  |
| >ETV5-D452\DPDALFSMA  | 197  | >ETV5-D452\DPHALFSMA  | 56   | 141  |
| >ETV5-D452\DPDALFSMA\ | 251  | >ETV5-D452\DPHALFSMA\ | 253  | 2    |
| >ETV5-D452\DPDALFSMA\ | 67   | >ETV5-D452\DPHALFSMA\ | 59   | 8    |
| >ETV5-D452\FVCDPDAL   | 509  | >ETV5-D452\FVCDPHAL   | 189  | 320  |
| >ETV5-D452\FVCDPDALFS | 143  | >ETV5-D452\FVCDPHALFS | 206  | 63   |
| >ETV5-D452\FVCDPDAL   | 83   | >ETV5-D452\FVCDPHAL   | 52   | 31   |
| >ETV5-D452\FVCDPDALFS | 144  | >ETV5-D452\FVCDPHALFS | 156  | 12   |
| >ETV5-D452\FVCDPDAL   | 642  | >ETV5-D452\FVCDPHAL   | 176  | 466  |
| >ETV5-D452\FVCDPDAL   | 37   | >ETV5-D452\FVCDPHAL   | 22   | 15   |
| >ETV5-D452\FVCDPDALF  | 195  | >ETV5-D452\FVCDPHALF  | 299  | 104  |
| >ETV5-D452\FVCDPDALFS | 16   | >ETV5-D452\FVCDPHALFS | 19   | 3    |
| >ETV5-D452\FVCDPDAL   | 58   | >ETV5-D452\FVCDPHAL   | 15   | 43   |
| >ETV5-D452\FVCDPDALFS | 123  | >ETV5-D452\FVCDPHALFS | 83   | 40   |
| >ETV5-D452\FVCDPDAL   | 94   | >ETV5-D452\FVCDPHAL   | 10   | 84   |
| >ETV5-D452\FVCDPDALFS | 105  | >ETV5-D452\FVCDPHALFS | 119  | 14   |
| >ETV5-D452\FVCDPDALFS | 356  | >ETV5-D452\FVCDPHALFS | 530  | 174  |
| >ETV5-D452\FVCDPDAL   | 485  | >ETV5-D452\FVCDPHAL   | 287  | 198  |
| >ETV5-D452\FVCDPDALF  | 175  | >ETV5-D452\FVCDPHALF  | 81   | 94   |
| >ETV5-D452\FVCDPDALFS | 60   | >ETV5-D452\FVCDPHALFS | 47   | 13   |
| >ETV5-D452\FVCDPDALF  | 103  | >ETV5-D452\FVCDPHALF  | 45   | 58   |
| >ETV5-D452\FVCDPDAL   | 156  | >ETV5-D452\FVCDPHAL   | 82   | 74   |
| >ETV5-D452\FVCDPDALFS | 278  | >ETV5-D452\FVCDPHALFS | 293  | 15   |
| >ETV5-D452\FVCDPDAL   | 2648 | >ETV5-D452\FVCDPHAL   | 177  | 2471 |
| >ETV5-D452\FVCDPDALFS | 268  | >ETV5-D452\FVCDPHALFS | 90   | 178  |
| >ETV5-D452\FVCDPDALF  | 331  | >ETV5-D452\FVCDPHALF  | 207  | 124  |
| >ETV5-D452\FVCDPDALFS | 410  | >ETV5-D452\FVCDPHALFS | 325  | 85   |
| >ETV5-D452\FVCDPDALF  | 344  | >ETV5-D452\FVCDPHALF  | 512  | 168  |
| >ETV5-D452\FVCDPDALF  | 78   | >ETV5-D452\FVCDPHALF  | 59   | 19   |

|                        |      |                        |     |      |
|------------------------|------|------------------------|-----|------|
| >ETV5-D452F FVCDPDALFS | 431  | >ETV5-D452F FVCDPHALFS | 330 | 101  |
| >ETV5-D452F FVCDPDAL   | 474  | >ETV5-D452F FVCDPHAL   | 869 | 395  |
| >ETV5-D452F FVCDPDALF  | 118  | >ETV5-D452F FVCDPHALF  | 536 | 418  |
| >ETV5-D452F FVCDPDALFS | 94   | >ETV5-D452F FVCDPHALFS | 201 | 107  |
| >ETV5-D452F FVCDPDAL   | 1606 | >ETV5-D452F FVCDPHAL   | 186 | 1420 |
| >ETV5-D452F FVCDPDALF  | 4979 | >ETV5-D452F FVCDPHALF  | 377 | 4602 |
| >ETV5-D452F FVCDPDALF  | 157  | >ETV5-D452F FVCDPHALF  | 39  | 118  |
| >ETV5-D452F FVCDPDALFS | 396  | >ETV5-D452F FVCDPHALFS | 184 | 212  |
| >ETV5-D452F KFVCDPDAL  | 1456 | >ETV5-D452F KFVCDPHAL  | 132 | 1324 |
| >ETV5-D452F KFVCDPDALF | 410  | >ETV5-D452F KFVCDPHALF | 284 | 126  |
| >ETV5-D452F KFVCDPDALF | 253  | >ETV5-D452F KFVCDPHALF | 118 | 135  |
| >ETV5-D452F KFVCDPDALF | 1816 | >ETV5-D452F KFVCDPHALF | 412 | 1404 |
| >ETV5-D452F KFVCDPDAL  | 147  | >ETV5-D452F KFVCDPHAL  | 121 | 26   |
| >ETV5-D452F YKFVCDPD   | 3641 | >ETV5-D452F YKFVCDPH   | 64  | 3577 |
| >ETV5-D452F YKFVCDPDA  | 206  | >ETV5-D452F YKFVCDPHA  | 144 | 62   |
| >ETV5-D452F YKFVCDPDAL | 9    | >ETV5-D452F YKFVCDPHAL | 6   | 3    |
| >ETV5-D452F YKFVCDPDAL | 3    | >ETV5-D452F YKFVCDPHAL | 3   | 0    |
| >ETV5-D452F YKFVCDPDAL | 47   | >ETV5-D452F YKFVCDPHAL | 21  | 26   |
| >ETV5-D452F YKFVCDPDAL | 299  | >ETV5-D452F YKFVCDPHAL | 146 | 153  |
| >ETV5-D452F VYKFVCDPDA | 299  | >ETV5-D452F VYKFVCDPHA | 435 | 136  |
| >ETV5-D452F VYKFVCDPDA | 367  | >ETV5-D452F VYKFVCDPHA | 101 | 266  |
| >ETV5-D452F VYKFVCDPDA | 1009 | >ETV5-D452F VYKFVCDPHA | 451 | 558  |
| >ETV5-D452F VYKFVCDPDA | 96   | >ETV5-D452F VYKFVCDPHA | 70  | 26   |
| >ETV5-D452F VYKFVCDPDA | 465  | >ETV5-D452F VYKFVCDPHA | 412 | 53   |
| >ETV5-D452F VYKFVCDPDA | 307  | >ETV5-D452F VYKFVCDPHA | 85  | 222  |
| >ETV5-D452F VYKFVCDPD  | 209  | >ETV5-D452F VYKFVCDPH  | 89  | 120  |
| >ETV5-D452F VYKFVCDPD  | 122  | >ETV5-D452F VYKFVCDPH  | 23  | 99   |
| >ETV5-D452F VYKFVCDPD  | 267  | >ETV5-D452F VYKFVCDPH  | 79  | 188  |
| >ETV5-D452F VYKFVCDPD  | 91   | >ETV5-D452F VYKFVCDPH  | 32  | 59   |
| >ETV5-D452F VYKFVCDPD  | 100  | >ETV5-D452F VYKFVCDPH  | 52  | 48   |
| >ETV5-D452F VYKFVCDPD  | 1027 | >ETV5-D452F VYKFVCDPH  | 316 | 711  |
| >ETV5-N77H·NLVLHAPPPT  | 810  | >ETV5-N77H·HLVLHAPPPT  | 87  | 723  |
| >ETV5-N77H·NLVLHAPPPT  | 7494 | >ETV5-N77H·HLVLHAPPPT  | 141 | 7353 |
| >ETV5-N77H·QSDNLVLHA   | 478  | >ETV5-N77H·QSDHLVLHA   | 518 | 40   |
| >ETV5-N77H·FQSDNLVL    | 53   | >ETV5-N77H·FQSDHLVL    | 67  | 14   |
| >ETV5-N77H·FQSDNLVLHA  | 298  | >ETV5-N77H·FQSDHLVLHA  | 307 | 9    |
| >ETV5-N77H·FQSDNLVL    | 17   | >ETV5-N77H·FQSDHLVL    | 18  | 1    |
| >ETV5-N77H·FQSDNLVLHA  | 105  | >ETV5-N77H·FQSDHLVLHA  | 99  | 6    |
| >ETV5-N77H·FQSDNLVLHA  | 330  | >ETV5-N77H·FQSDHLVLHA  | 229 | 101  |
| >ETV5-N77H·FQSDNLVL    | 81   | >ETV5-N77H·FQSDHLVL    | 44  | 37   |
| >ETV5-N77H·FQSDNLVLHA  | 90   | >ETV5-N77H·FQSDHLVLHA  | 102 | 12   |
| >ETV5-N77H·FQSDNLVL    | 10   | >ETV5-N77H·FQSDHLVL    | 10  | 0    |
| >ETV5-N77H·FQSDNLVLH   | 361  | >ETV5-N77H·FQSDHLVLH   | 238 | 123  |

|                        |      |                        |      |      |
|------------------------|------|------------------------|------|------|
| >ETV5-N77H·FQSDNLVLHA  | 58   | >ETV5-N77H·FQSDHLVLHA  | 65   | 7    |
| >ETV5-N77H·FQSDNLVLHA  | 48   | >ETV5-N77H·FQSDHLVLHA  | 40   | 8    |
| >ETV5-N77H·FQSDNLVL    | 259  | >ETV5-N77H·FQSDHLVL    | 243  | 16   |
| >ETV5-N77H·FQSDNLVLHA  | 271  | >ETV5-N77H·FQSDHLVLHA  | 430  | 159  |
| >ETV5-N77H·FQSDNLVL    | 121  | >ETV5-N77H·FQSDHLVL    | 403  | 282  |
| >ETV5-N77H·FQSDNLVLHA  | 185  | >ETV5-N77H·FQSDHLVLHA  | 625  | 440  |
| >ETV5-N77H·FQSDNLVLHA  | 487  | >ETV5-N77H·FQSDHLVLHA  | 1003 | 516  |
| >ETV5-N77H·FQSDNLVL    | 301  | >ETV5-N77H·FQSDHLVL    | 447  | 146  |
| >ETV5-N77H·FQSDNLVL    | 113  | >ETV5-N77H·FQSDHLVL    | 83   | 30   |
| >ETV5-N77H·FQSDNLVLHA  | 213  | >ETV5-N77H·FQSDHLVLHA  | 144  | 69   |
| >ETV5-N77H·FQSDNLVL    | 32   | >ETV5-N77H·FQSDHLVL    | 28   | 4    |
| >ETV5-N77H·FQSDNLVL    | 11   | >ETV5-N77H·FQSDHLVL    | 11   | 0    |
| >ETV5-N77H·FQSDNLVL    | 1040 | >ETV5-N77H·FQSDHLVL    | 481  | 559  |
| >ETV5-N77H·PDFQSDNLV   | 77   | >ETV5-N77H·PDFQSDHLV   | 57   | 20   |
| >ETV5-N77H·VPDFQSDNL\  | 296  | >ETV5-N77H·VPDFQSDHL\  | 187  | 109  |
| >ETV5-N77H·VPDFQSDNL\  | 353  | >ETV5-N77H·VPDFQSDHL\  | 761  | 408  |
| >ETV5-N77H·FVPDFQSDNI  | 75   | >ETV5-N77H·FVPDFQSDHL  | 35   | 40   |
| >ETV5-N77H·FVPDFQSDNI  | 67   | >ETV5-N77H·FVPDFQSDHL  | 88   | 21   |
| >ETV5-N77H·FVPDFQSDNI  | 13   | >ETV5-N77H·FVPDFQSDHL  | 11   | 2    |
| >ETV5-N77H·FVPDFQSDNI  | 441  | >ETV5-N77H·FVPDFQSDHL  | 732  | 291  |
| >ETV5-N77H·FVPDFQSDNI  | 17   | >ETV5-N77H·FVPDFQSDHL  | 15   | 2    |
| >ETV5-N77H·FVPDFQSDNI  | 94   | >ETV5-N77H·FVPDFQSDHL  | 116  | 22   |
| >ETV5-N77H·FVPDFQSDNI  | 12   | >ETV5-N77H·FVPDFQSDHL  | 9    | 3    |
| >ETV5-N77H·FVPDFQSDNI  | 287  | >ETV5-N77H·FVPDFQSDHL  | 241  | 46   |
| >ETV5-N77H·FVPDFQSDNI  | 39   | >ETV5-N77H·FVPDFQSDHL  | 13   | 26   |
| >ETV5-N77H·FVPDFQSDNI  | 290  | >ETV5-N77H·FVPDFQSDHL  | 89   | 201  |
| >ETV5-N77H·FVPDFQSDNI  | 962  | >ETV5-N77H·FVPDFQSDHL  | 476  | 486  |
| >ETV5-N77H·FVPDFQSDNI  | 52   | >ETV5-N77H·FVPDFQSDHL  | 21   | 31   |
| >ETV5-N77H·FVPDFQSDNI  | 763  | >ETV5-N77H·FVPDFQSDHL  | 137  | 626  |
| >ETV5-N77H·FVPDFQSDNI  | 40   | >ETV5-N77H·FVPDFQSDHL  | 34   | 6    |
| >ETV5-N77H·FVPDFQSDNI  | 4    | >ETV5-N77H·FVPDFQSDHL  | 2    | 2    |
| >ETV5-N77H·FVPDFQSDNI  | 165  | >ETV5-N77H·FVPDFQSDHL  | 138  | 27   |
| >ETV5-N77H·FVPDFQSDNI  | 10   | >ETV5-N77H·FVPDFQSDHL  | 9    | 1    |
| >ETV5-N77H·FVPDFQSDNI  | 392  | >ETV5-N77H·FVPDFQSDHL  | 106  | 286  |
| >ETV5-N77H·FVPDFQSDNI  | 109  | >ETV5-N77H·FVPDFQSDHL  | 107  | 2    |
| >ETV5-N77H·FVPDFQSDNI  | 64   | >ETV5-N77H·FVPDFQSDHL  | 43   | 21   |
| >ETV5-N77H·QFVPDFQSDI  | 150  | >ETV5-N77H·QFVPDFQSDI  | 119  | 31   |
| >ETV5-N77H·QFVPDFQSDI  | 735  | >ETV5-N77H·QFVPDFQSDI  | 449  | 286  |
| >ETV5-N77H·QFVPDFQSDI  | 435  | >ETV5-N77H·QFVPDFQSDI  | 488  | 53   |
| >ETV5-Y445C YKFVCDPDA  | 206  | >ETV5-Y445C CKFVCDPDA  | 1242 | 1036 |
| >ETV5-Y445C YKFVCDPDAL | 9    | >ETV5-Y445C CKFVCDPDAL | 69   | 60   |
| >ETV5-Y445C YKFVCDPDAL | 3    | >ETV5-Y445C CKFVCDPDAL | 14   | 11   |
| >ETV5-Y445C YKFVCDPDAL | 47   | >ETV5-Y445C CKFVCDPDAL | 898  | 851  |



|                       |      |                        |       |       |
|-----------------------|------|------------------------|-------|-------|
| >ETV5-Y445CYKFVCDPDAL | 299  | >ETV5-Y445CCKFVCDPDAL  | 4289  | 3990  |
| >ETV5-Y445CYKFVCDPDAL | 1249 | >ETV5-Y445CCKFVCDPDAL  | 373   | 876   |
| >ETV5-Y445CVYKFVCDPDA | 299  | >ETV5-Y445CVCKFVCDPDA  | 25641 | 25342 |
| >ETV5-Y445CVYKFVCDPDA | 367  | >ETV5-Y445CVCKFVCDPDA  | 22307 | 21940 |
| >ETV5-Y445CVYKFVCDPDA | 96   | >ETV5-Y445CVCKFVCDPDA  | 23793 | 23697 |
| >ETV5-Y445CVYKFVCDPDA | 465  | >ETV5-Y445CVCKFVCDPDA  | 30284 | 29819 |
| >ETV5-Y445CMQKVAGERY  | 83   | >ETV5-Y445CMQKVAGERY   | 26208 | 26125 |
| >ETV5-Y445CMQKVAGERY  | 40   | >ETV5-Y445CMQKVAGERY   | 2525  | 2485  |
| >ETV5-Y445CMQKVAGERY  | 234  | >ETV5-Y445CMQKVAGERY   | 21654 | 21420 |
| >ETV5-Y445CMQKVAGERY  | 7    | >ETV5-Y445CMQKVAGERY   | 1404  | 1397  |
| >ETV5-Y445CVYKFVCDPD  | 307  | >ETV5-Y445CVYVCKFVCDPC | 3330  | 3023  |
| >ETV5-Y445CVYKFVCDPD  | 209  | >ETV5-Y445CVYVCKFVCDPC | 2794  | 2585  |
| >ETV5-Y445CVYKFVCDPD  | 122  | >ETV5-Y445CVYVCKFVCDPC | 1100  | 978   |
| >ETV5-Y445CVYKFVCDPD  | 267  | >ETV5-Y445CVYVCKFVCDPC | 2446  | 2179  |
| >ETV5-Y445CVYKFVCDPD  | 91   | >ETV5-Y445CVYVCKFVCDPC | 3947  | 3856  |
| >ETV5-Y445CVYKFVCDPD  | 100  | >ETV5-Y445CVYVCKFVCDPC | 940   | 840   |
| >ETV5-Y445CERYVYKFVC  | 319  | >ETV5-Y445CERYVCKFVC   | 299   | 20    |
| >ETV5-Y445CGERYVYKFV  | 8    | >ETV5-Y445CGERYVCKFV   | 9     | 1     |
| >ETV5-Y445CGERYVYKF   | 223  | >ETV5-Y445CGERYVCKF    | 300   | 77    |
| >ETV5-Y445CGERYVYKF   | 313  | >ETV5-Y445CGERYVCKF    | 1916  | 1603  |
| >ETV5-Y445CGERYVYKF   | 151  | >ETV5-Y445CGERYVCKF    | 328   | 177   |
| >ETV5-Y445CGERYVYKFV  | 292  | >ETV5-Y445CGERYVCKFV   | 550   | 258   |
| >ETV5-Y445CGERYVYKFVC | 287  | >ETV5-Y445CGERYVCKFVC  | 478   | 191   |
| >ETV5-Y445CGERYVYKF   | 155  | >ETV5-Y445CGERYVCKF    | 380   | 225   |
| >ETV5-Y445CGERYVYKFV  | 172  | >ETV5-Y445CGERYVCKFV   | 336   | 164   |
| >ETV5-Y445CGERYVYKF   | 226  | >ETV5-Y445CGERYVCKF    | 573   | 347   |
| >ETV5-Y445CGERYVYKFV  | 22   | >ETV5-Y445CGERYVCKFV   | 20    | 2     |
| >ETV5-Y445CAGERYVYK   | 468  | >ETV5-Y445CAGERYVCK    | 2747  | 2279  |
| >ETV5-Y445CVAGERYVYKF | 492  | >ETV5-Y445CVAGERYVCKF  | 1608  | 1116  |
| >ETV5-Y445CVAGERYVYKF | 458  | >ETV5-Y445CVAGERYVCKF  | 885   | 427   |
| >ETV5-Y445CVAGERYVYKF | 119  | >ETV5-Y445CVAGERYVCKF  | 434   | 315   |
| >ETV5-Y445CVAGERYVYKF | 384  | >ETV5-Y445CVAGERYVCKF  | 689   | 305   |
| >ETV5-Y445CVAGERYVYK  | 231  | >ETV5-Y445CVAGERYVCK   | 2483  | 2252  |
| >ETV5-Y445CVAGERYVYK  | 37   | >ETV5-Y445CVAGERYVCK   | 272   | 235   |
| >ETV5-Y445CVAGERYVY   | 222  | >ETV5-Y445CVAGERYVC    | 29288 | 29066 |
| >ETV5-Y445CVAGERYVYK  | 172  | >ETV5-Y445CVAGERYVCK   | 2526  | 2354  |
| >ETV5-Y445CVAGERYVYKF | 137  | >ETV5-Y445CVAGERYVCKF  | 149   | 12    |
| >ETV5-Y445CVAGERYVY   | 441  | >ETV5-Y445CVAGERYVC    | 21256 | 20815 |
| >ETV5-Y445CKVAGERYVYK | 20   | >ETV5-Y445CKVAGERYVCK  | 55    | 35    |
| >ETV5-Y445CKVAGERYVY  | 437  | >ETV5-Y445CKVAGERYVC   | 22517 | 22080 |
| >ETV5-Y445CKVAGERYVYK | 20   | >ETV5-Y445CKVAGERYVCK  | 74    | 54    |
| >ETV5-Y445CKVAGERYVYK | 424  | >ETV5-Y445CKVAGERYVCK  | 2805  | 2381  |
| >ETV5-Y445CKVAGERYVY  | 125  | >ETV5-Y445CKVAGERYVC   | 30094 | 29969 |

|                        |       |                         |       |       |
|------------------------|-------|-------------------------|-------|-------|
| >ETV5-Y445C KVAGERYVYK | 241   | >ETV5-Y445C KVAGERYVCK  | 691   | 450   |
| >ETV5-Y445C KVAGERYVY  | 40    | >ETV5-Y445C KVAGERYVC   | 22752 | 22712 |
| >ETV5-Y445C KVAGERYVYK | 13    | >ETV5-Y445C KVAGERYVCK  | 69    | 56    |
| >ETV5-Y445C KVAGERYVY  | 9     | >ETV5-Y445C KVAGERYVC   | 12172 | 12163 |
| >ETV5-Y445C KVAGERYVYK | 122   | >ETV5-Y445C KVAGERYVCK  | 250   | 128   |
| >ETV5-Y445C KVAGERYVY  | 134   | >ETV5-Y445C KVAGERYVC   | 1360  | 1226  |
| >ETV5-Y445C KVAGERYVYK | 18    | >ETV5-Y445C KVAGERYVCK  | 47    | 29    |
| >ETV5-Y445C KVAGERYVYK | 64    | >ETV5-Y445C KVAGERYVCK  | 1324  | 1260  |
| >ETV5-Y445C KVAGERYVY  | 181   | >ETV5-Y445C KVAGERYVC   | 26400 | 26219 |
| >ETV5-Y445C KVAGERYVY  | 281   | >ETV5-Y445C KVAGERYVC   | 16881 | 16600 |
| >ETV5-Y445C KVAGERYVYK | 323   | >ETV5-Y445C KVAGERYVCK  | 234   | 89    |
| >ETV5-Y445C KVAGERYVYK | 339   | >ETV5-Y445C KVAGERYVCK  | 870   | 531   |
| >ETV5-Y445C KVAGERYVY  | 150   | >ETV5-Y445C KVAGERYVC   | 10738 | 10588 |
| >ETV5-Y445C KVAGERYVYK | 43    | >ETV5-Y445C KVAGERYVCK  | 44    | 1     |
| >ETV5-Y445C KVAGERYVY  | 123   | >ETV5-Y445C KVAGERYVC   | 32308 | 32185 |
| >ETV5-Y445C KVAGERYVY  | 47    | >ETV5-Y445C KVAGERYVC   | 32044 | 31997 |
| >ETV5-Y445C KVAGERYVYK | 111   | >ETV5-Y445C KVAGERYVCK  | 435   | 324   |
| >ETV5-Y445C KVAGERYVYK | 72    | >ETV5-Y445C KVAGERYVCK  | 797   | 725   |
| >ETV5-Y445C QKVAGERYV' | 29    | >ETV5-Y445C QKVAGERYV'  | 5362  | 5333  |
| >ETV6-G375F GLARLWGNH  | 2655  | >ETV6-G375F RLARLWGNH   | 322   | 2333  |
| >ETV6-G375F GLARLWGNH  | 383   | >ETV6-G375F RLARLWGNH   | 75    | 308   |
| >ETV6-G375F GLARLWGNH  | 653   | >ETV6-G375F RLARLWGNH   | 350   | 303   |
| >ETV6-G375F GLARLWGNH  | 2626  | >ETV6-G375F RLARLWGNH   | 54    | 2572  |
| >ETV6-G375F GLARLWGNH  | 1054  | >ETV6-G375F RLARLWGNH   | 116   | 938   |
| >ETV6-G375F NGLARLWGN  | 30741 | >ETV6-G375F NRLARLWGN   | 443   | 30298 |
| >ETV6-G375F NGLARLWGN  | 22050 | >ETV6-G375F NRLARLWGN   | 139   | 21911 |
| >ETV6-G375F DPNGLARLW  | 174   | >ETV6-G375F DPNRLARLW   | 384   | 210   |
| >ETV6-G375F DPNGLARLW  | 17    | >ETV6-G375F DPNRLARLW   | 14    | 3     |
| >ETV6-G375F IVDPNGLARL | 216   | >ETV6-G375F IVDPNRLARL  | 825   | 609   |
| >ETV6-G375F IVDPNGLARL | 117   | >ETV6-G375F IVDPNRLARL  | 156   | 39    |
| >ETV6-G375F IVDPNGLAR  | 1962  | >ETV6-G375F IVDPNRLAR   | 492   | 1470  |
| >ETV6-G375F IVDPNGLARL | 111   | >ETV6-G375F IVDPNRLARL  | 316   | 205   |
| >ETV6-G375F IVDPNGLARL | 73    | >ETV6-G375F IVDPNRLARL' | 152   | 79    |
| >ETV6-G375F IVDPNGLARL | 170   | >ETV6-G375F IVDPNRLARL' | 155   | 15    |
| >ETV6-G375F IVDPNGLARL | 81    | >ETV6-G375F IVDPNRLARL' | 65    | 16    |
| >ETV6-G375F RIVDPNGL   | 482   | >ETV6-G375F RIVDPNRL    | 769   | 287   |
| >ETV6-G375F RIVDPNGLAR | 423   | >ETV6-G375F RIVDPNRLAR  | 490   | 67    |
| >ETV6-G375F RIVDPNGL   | 458   | >ETV6-G375F RIVDPNRL    | 1256  | 798   |
| >ETV6-G375F RIVDPNGLAR | 221   | >ETV6-G375F RIVDPNRLAR  | 326   | 105   |
| >ETV6-G375F RIVDPNGL   | 249   | >ETV6-G375F RIVDPNRL    | 1208  | 959   |
| >ETV6-G375F RIVDPNGLAR | 136   | >ETV6-G375F RIVDPNRLAR  | 201   | 65    |
| >ETV6-G375F RIVDPNGL   | 214   | >ETV6-G375F RIVDPNRL    | 323   | 109   |
| >ETV6-G375F RIVDPNGLAR | 114   | >ETV6-G375F RIVDPNRLAR  | 171   | 57    |

|                         |       |                         |      |       |
|-------------------------|-------|-------------------------|------|-------|
| >ETV6-G375F RIVDPNGL    | 365   | >ETV6-G375F RIVDPNRL    | 344  | 21    |
| >ETV6-G375F RIVDPNGLAR  | 68    | >ETV6-G375F RIVDPNRLAR  | 111  | 43    |
| >ETV6-G375F RIVDPNGLAR  | 317   | >ETV6-G375F RIVDPNRLAR  | 541  | 224   |
| >ETV6-G375F RIVDPNGLAR  | 301   | >ETV6-G375F RIVDPNRLAR  | 623  | 322   |
| >ETV6-G375F RIVDPNGLAR  | 432   | >ETV6-G375F RIVDPNRLAR  | 976  | 544   |
| >ETV6-G375F RIVDPNGLAR  | 57    | >ETV6-G375F RIVDPNRLAR  | 16   | 41    |
| >ETV6-G375F RIVDPNGLAR  | 65    | >ETV6-G375F RIVDPNRLAR  | 114  | 49    |
| >ETV6-G375F RIVDPNGLAR  | 59    | >ETV6-G375F RIVDPNRLAR  | 66   | 7     |
| >ETV6-G375F RIVDPNGLAR  | 52    | >ETV6-G375F RIVDPNRLAR  | 44   | 8     |
| >ETV6-G375F FRIVDPNGL   | 374   | >ETV6-G375F FRIVDPNRL   | 570  | 196   |
| >ETV6-G375F FRIVDPNGLA  | 373   | >ETV6-G375F FRIVDPNRLA  | 547  | 174   |
| >ETV6-G375F FRIVDPNG    | 6759  | >ETV6-G375F FRIVDPNR    | 245  | 6514  |
| >ETV6-G375F FRIVDPNGL   | 179   | >ETV6-G375F FRIVDPNRL   | 261  | 82    |
| >ETV6-G375F FRIVDPNGLA  | 124   | >ETV6-G375F FRIVDPNRLA  | 112  | 12    |
| >ETV6-G375F FRIVDPNGL   | 27    | >ETV6-G375F FRIVDPNRL   | 40   | 13    |
| >ETV6-G375F FRIVDPNGL   | 97    | >ETV6-G375F FRIVDPNRL   | 204  | 107   |
| >ETV6-G375F FRIVDPNGLA  | 204   | >ETV6-G375F FRIVDPNRLA  | 160  | 44    |
| >ETV6-G375F FRIVDPNG    | 20330 | >ETV6-G375F FRIVDPNR    | 27   | 20303 |
| >ETV6-G375F FRIVDPNG    | 27548 | >ETV6-G375F FRIVDPNR    | 44   | 27504 |
| >ETV6-G375F FRIVDPNG    | 35035 | >ETV6-G375F FRIVDPNR    | 325  | 34710 |
| >ETV6-G375F KIFRIVDPNGI | 192   | >ETV6-G375F KIFRIVDPNRL | 268  | 76    |
| >ETV6-G375F KIFRIVDPNGI | 30    | >ETV6-G375F KIFRIVDPNRL | 43   | 13    |
| >ETV6-G375F KIFRIVDPNGI | 100   | >ETV6-G375F KIFRIVDPNRL | 240  | 140   |
| >ETV6-G375F KIFRIVDPNGI | 149   | >ETV6-G375F KIFRIVDPNRL | 599  | 450   |
| >ETV6-G375F KIFRIVDPNGI | 43    | >ETV6-G375F KIFRIVDPNRL | 64   | 21    |
| >ETV6-G375F KIFRIVDPNGI | 328   | >ETV6-G375F KIFRIVDPNRL | 1221 | 893   |
| >ETV6-G375F KIFRIVDPNGI | 258   | >ETV6-G375F KIFRIVDPNRL | 571  | 313   |
| >ETV6-G375F KIFRIVDPNGI | 367   | >ETV6-G375F KIFRIVDPNRL | 291  | 76    |
| >ETV6-G375F KIFRIVDPNG  | 20670 | >ETV6-G375F KIFRIVDPNR  | 25   | 20645 |
| >ETV6-G375F KIFRIVDPNGI | 15    | >ETV6-G375F KIFRIVDPNRL | 18   | 3     |
| >ETV6-G375F KIFRIVDPNG  | 39039 | >ETV6-G375F KIFRIVDPNR  | 365  | 38674 |
| >ETV6-G375F KIFRIVDPNG  | 29635 | >ETV6-G375F KIFRIVDPNR  | 267  | 29368 |
| >ETV6-G375F KIFRIVDPNG  | 20768 | >ETV6-G375F KIFRIVDPNR  | 25   | 20743 |
| >EWSR1-T41 TVSYEDPPTA   | 39    | >EWSR1-T41 AVSYEDPPTA   | 47   | 8     |
| >EWSR1-T41 TVSYEDPPTA   | 2558  | >EWSR1-T41 AVSYEDPPTA   | 364  | 2194  |
| >EWSR1-T41 TVSYEDPPTA   | 28    | >EWSR1-T41 AVSYEDPPTA   | 515  | 487   |
| >EWSR1-T41 KETGKPKGDA   | 722   | >EWSR1-T41 KETGKPKGDA   | 96   | 626   |
| >EWSR1-T41 KGDATVSY     | 281   | >EWSR1-T41 KGDAAVSY     | 323  | 42    |
| >EWSR1-T41 PKGDATVSY    | 219   | >EWSR1-T41 PKGDAAVSY    | 281  | 62    |
| >EWSR1-T41 KPKGDATV     | 282   | >EWSR1-T41 KPKGDAAV     | 61   | 221   |
| >EWSR1-T41 KPKGDATVSY   | 433   | >EWSR1-T41 KPKGDAAVSY   | 406  | 27    |
| >EWSR1-T41 KPKGDATVSY   | 267   | >EWSR1-T41 KPKGDAAVSY   | 418  | 151   |
| >EWSR1-T41 GKPKGDATV    | 184   | >EWSR1-T41 GKPKGDAAV    | 191  | 7     |

|                        |      |                        |      |      |
|------------------------|------|------------------------|------|------|
| >EWSR1-T41.ETGKPKGDA1  | 44   | >EWSR1-T41.ETGKPKGDA/  | 33   | 11   |
| >EWSR1-T41.ETGKPKGDA1  | 39   | >EWSR1-T41.ETGKPKGDA/  | 34   | 5    |
| >EZH2-A2551ALPPECTPNI  | 335  | >EZH2-A2551TLPPECTPNI  | 348  | 13   |
| >EZH2-A2551ALPPECTPNI  | 346  | >EZH2-A2551TLPPECTPNI  | 524  | 178  |
| >EZH2-A2551ALPPECTPNI  | 253  | >EZH2-A2551TLPPECTPNI  | 248  | 5    |
| >EZH2-A2551ALPPECTPNI  | 245  | >EZH2-A2551TLPPECTPNI  | 213  | 32   |
| >EZH2-A2551ALPPECTPNI  | 92   | >EZH2-A2551TLPPECTPNI  | 374  | 282  |
| >EZH2-A2551ALPPECTPNI  | 315  | >EZH2-A2551TLPPECTPNI  | 859  | 544  |
| >EZH2-A2551ALPPECTPNI  | 52   | >EZH2-A2551TLPPECTPNI  | 133  | 81   |
| >EZH2-A2551ALPPECTPNI  | 206  | >EZH2-A2551TLPPECTPNI  | 330  | 124  |
| >EZH2-A2551ALPPECTPNI  | 10   | >EZH2-A2551TLPPECTPNI  | 26   | 16   |
| >EZH2-A2551ALPPECTPNI  | 435  | >EZH2-A2551TLPPECTPNI  | 276  | 159  |
| >EZH2-A2551GALPPECTPN  | 1457 | >EZH2-A2551GTLPPECTPN  | 371  | 1086 |
| >EZH2-A2551GALPPECTPN  | 1551 | >EZH2-A2551GTLPPECTPN  | 347  | 1204 |
| >EZH2-A2551GALPPECTPN  | 386  | >EZH2-A2551GTLPPECTPN  | 44   | 342  |
| >EZH2-A2551GALPPECTPN  | 164  | >EZH2-A2551GTLPPECTPN  | 37   | 127  |
| >EZH2-A2551KELTEQQLPG  | 416  | >EZH2-A2551KELTEQQLPG  | 615  | 199  |
| >EZH2-A2551KELTEQQLPG  | 57   | >EZH2-A2551KELTEQQLPG  | 515  | 458  |
| >EZH2-A2551KELTEQQLPG  | 64   | >EZH2-A2551KELTEQQLPG  | 55   | 9    |
| >EZH2-A2551QLPGALPPEC  | 366  | >EZH2-A2551QLPGTLPPEC  | 242  | 124  |
| >EZH2-A2551QLPGALPPEC  | 69   | >EZH2-A2551QLPGTLPPEC  | 75   | 6    |
| >EZH2-A2551QQLPGALPP   | 715  | >EZH2-A2551QQLPGTLPP   | 482  | 233  |
| >EZH2-A2551QQLPGALPPE  | 259  | >EZH2-A2551QQLPGTLPPE  | 257  | 2    |
| >EZH2-A2551TEQQLPGAL   | 386  | >EZH2-A2551TEQQLPGTL   | 1138 | 752  |
| >EZH2-A2551TEQQLPGAL   | 261  | >EZH2-A2551TEQQLPGTL   | 330  | 69   |
| >EZH2-A2551TEQQLPGAL   | 121  | >EZH2-A2551TEQQLPGTL   | 362  | 241  |
| >EZH2-A2551TEQQLPGA    | 40   | >EZH2-A2551TEQQLPGT    | 293  | 253  |
| >EZH2-A2551TEQQLPGAL   | 249  | >EZH2-A2551TEQQLPGTL   | 247  | 2    |
| >EZH2-A2551LTEQQLPGAL  | 104  | >EZH2-A2551LTEQQLPGTL  | 36   | 68   |
| >EZH2-A2551LTEQQLPGAL  | 133  | >EZH2-A2551LTEQQLPGTL  | 54   | 79   |
| >EZH2-A2551ELTEQQLPGA  | 353  | >EZH2-A2551ELTEQQLPGT  | 2006 | 1653 |
| >EZH2-A2551ELTEQQLPGA  | 260  | >EZH2-A2551ELTEQQLPGT  | 192  | 68   |
| >EZH2-A2551ELTEQQLPGA  | 116  | >EZH2-A2551ELTEQQLPGT  | 1723 | 1607 |
| >EZH2-A2551ELTEQQLPGA  | 705  | >EZH2-A2551ELTEQQLPGT  | 275  | 430  |
| >EZH2-A2551ELTEQQLPGA  | 22   | >EZH2-A2551ELTEQQLPGT  | 185  | 163  |
| >EZH2-A2551ELTEQQLPGA  | 95   | >EZH2-A2551ELTEQQLPGT  | 36   | 59   |
| >EZH2-A2551ELTEQQLPGA  | 242  | >EZH2-A2551ELTEQQLPGT  | 1658 | 1416 |
| >EZH2-A3451AERIKTPPK   | 17   | >EZH2-A3451TERIKTPPK   | 114  | 97   |
| >EZH2-A3451AERIKTPPK   | 417  | >EZH2-A3451TERIKTPPK   | 3774 | 3357 |
| >EZH2-A3451TAERIKTPPK  | 949  | >EZH2-A3451TTERIKTPPK  | 133  | 816  |
| >EZH2-A3451TAERIKTPPK  | 1075 | >EZH2-A3451TTERIKTPPK  | 204  | 871  |
| >EZH2-A3451TAERIKTPPKF | 343  | >EZH2-A3451TTERIKTPPKR | 125  | 218  |
| >EZH2-A3451TAERIKTPPKF | 58   | >EZH2-A3451TTERIKTPPKR | 21   | 37   |

|                        |      |                        |      |      |
|------------------------|------|------------------------|------|------|
| >EZH2-A3451GAKEFAAALT  | 425  | >EZH2-A3451GAKEFAAALT  | 5256 | 4831 |
| >EZH2-A3451LTAERIKTPPK | 161  | >EZH2-A3451LTTERIKTPPK | 533  | 372  |
| >EZH2-A3451LTAERIKTPPK | 39   | >EZH2-A3451LTTERIKTPPK | 75   | 36   |
| >EZH2-A3451LTAERIKTPPK | 68   | >EZH2-A3451LTTERIKTPPK | 54   | 14   |
| >EZH2-A3451LTAERIKTPPK | 47   | >EZH2-A3451LTTERIKTPPK | 128  | 81   |
| >EZH2-A3451LTAERIKTPPK | 325  | >EZH2-A3451LTTERIKTPPK | 853  | 528  |
| >EZH2-A3451ALTAERIKT   | 125  | >EZH2-A3451ALTTERIKT   | 282  | 157  |
| >EZH2-A3451AALTAERIK   | 182  | >EZH2-A3451AALTTERIK   | 185  | 3    |
| >EZH2-A3451AALTAERI    | 426  | >EZH2-A3451AALTTERI    | 338  | 88   |
| >EZH2-A3451AAALTAERIK  | 405  | >EZH2-A3451AAALTTERIK  | 238  | 167  |
| >EZH2-A3451AAALTAER    | 243  | >EZH2-A3451AAALTTER    | 180  | 63   |
| >EZH2-A3451AAALTAER    | 51   | >EZH2-A3451AAALTTER    | 60   | 9    |
| >EZH2-A3451AAALTAERI   | 418  | >EZH2-A3451AAALTTERI   | 1151 | 733  |
| >EZH2-A3451AAALTAERI   | 378  | >EZH2-A3451AAALTTERI   | 240  | 138  |
| >EZH2-A3451FAAALTAERI  | 296  | >EZH2-A3451FAAALTTERI  | 161  | 135  |
| >EZH2-A3451FAAALTAERI  | 898  | >EZH2-A3451FAAALTTERI  | 283  | 615  |
| >EZH2-A3451FAAALTAERI  | 700  | >EZH2-A3451FAAALTTERI  | 321  | 379  |
| >EZH2-A3451FAAALTAER   | 274  | >EZH2-A3451FAAALTTER   | 442  | 168  |
| >EZH2-A3451FAAALTAER   | 406  | >EZH2-A3451FAAALTTER   | 735  | 329  |
| >EZH2-A3451FAAALTAER   | 3    | >EZH2-A3451FAAALTTER   | 4    | 1    |
| >EZH2-A3451FAAALTAERIK | 40   | >EZH2-A3451FAAALTTERIK | 44   | 4    |
| >EZH2-A3451FAAALTAERI  | 40   | >EZH2-A3451FAAALTTERI  | 45   | 5    |
| >EZH2-A3451FAAALTAERI  | 139  | >EZH2-A3451FAAALTTERI  | 154  | 15   |
| >EZH2-A3451FAAALTAERI  | 134  | >EZH2-A3451FAAALTTERI  | 111  | 23   |
| >EZH2-A3451FAAALTAERI  | 271  | >EZH2-A3451FAAALTTERI  | 230  | 41   |
| >EZH2-A3451EFAAALTAER  | 438  | >EZH2-A3451EFAAALTTER  | 984  | 546  |
| >EZH2-A3451EFAAALTAER  | 247  | >EZH2-A3451EFAAALTTER  | 425  | 178  |
| >EZH2-A3451EFAAALTAER  | 9    | >EZH2-A3451EFAAALTTER  | 14   | 5    |
| >EZH2-A3451EFAAALTAER  | 133  | >EZH2-A3451EFAAALTTER  | 128  | 5    |
| >EZH2-A3451KEFAAALTAE  | 286  | >EZH2-A3451KEFAAALTTEI | 381  | 95   |
| >EZH2-A3451KEFAAALTA   | 80   | >EZH2-A3451KEFAAALT    | 115  | 35   |
| >EZH2-A3451KEFAAALTA   | 23   | >EZH2-A3451KEFAAALT    | 28   | 5    |
| >EZH2-A3451KEFAAALTAE  | 375  | >EZH2-A3451KEFAAALTTE  | 323  | 52   |
| >EZH2-A3451KEFAAALTAE  | 574  | >EZH2-A3451KEFAAALTTEI | 238  | 336  |
| >EZH2-A3451KEFAAALTA   | 251  | >EZH2-A3451KEFAAALT    | 399  | 148  |
| >EZH2-A3451KEFAAALTA   | 26   | >EZH2-A3451KEFAAALT    | 134  | 108  |
| >EZH2-A3451KEFAAALTA   | 194  | >EZH2-A3451KEFAAALT    | 147  | 47   |
| >EZH2-A3451KEFAAALTAE  | 480  | >EZH2-A3451KEFAAALTTEI | 493  | 13   |
| >EZH2-A3451KEFAAALTAE  | 28   | >EZH2-A3451KEFAAALTTEI | 28   | 0    |
| >EZH2-A3451AKEFAAALTA  | 386  | >EZH2-A3451AKEFAAALT   | 1967 | 1581 |
| >EZH2-A656\EADRRGKV    | 544  | >EZH2-A656\EVDRRGKV    | 175  | 369  |
| >EZH2-A656\YCGEIIQDEA  | 1010 | >EZH2-A656\YCGEIIQDEV  | 178  | 832  |
| >EZH2-A656\YCGEIIQDEA  | 1002 | >EZH2-A656\YCGEIIQDEV  | 29   | 973  |

|                         |       |                         |     |       |
|-------------------------|-------|-------------------------|-----|-------|
| >EZH2-A656\YCGEIIISQDEA | 6645  | >EZH2-A656\YCGEIIISQDEV | 253 | 6392  |
| >EZH2-A656\YCGEIIISQDEA | 2933  | >EZH2-A656\YCGEIIISQDEV | 64  | 2869  |
| >EZH2-A656\YCGEIIISQDEA | 8856  | >EZH2-A656\YCGEIIISQDEV | 274 | 8582  |
| >EZH2-A656\YCGEIIISQDEA | 3415  | >EZH2-A656\YCGEIIISQDEV | 35  | 3380  |
| >EZH2-A656\YCGEIIISQDEA | 7093  | >EZH2-A656\YCGEIIISQDEV | 492 | 6601  |
| >EZH2-A656\DEADRRGKV    | 212   | >EZH2-A656\DEVDRRGKV    | 637 | 425   |
| >EZH2-A656\SQDEADRRG    | 183   | >EZH2-A656\SQDEVDRRG    | 176 | 7     |
| >EZH2-A656\SQDEADRRG    | 421   | >EZH2-A656\SQDEVDRRG    | 137 | 284   |
| >EZH2-A656\SQDEADRRG    | 297   | >EZH2-A656\SQDEVDRRG    | 172 | 125   |
| >EZH2-A656\ISQDEADRRG   | 544   | >EZH2-A656\ISQDEVDRRG   | 493 | 51    |
| >EZH2-A656\ISQDEADR     | 422   | >EZH2-A656\ISQDEVDR     | 464 | 42    |
| >EZH2-A656\ISQDEADRR    | 236   | >EZH2-A656\ISQDEVDRR    | 245 | 9     |
| >EZH2-A656\IISQDEADR    | 147   | >EZH2-A656\IISQDEVDR    | 208 | 61    |
| >EZH2-A656\IISQDEADRR   | 481   | >EZH2-A656\IISQDEVDRR   | 600 | 119   |
| >EZH2-A656\EIISQDEA     | 14246 | >EZH2-A656\EIISQDEV     | 207 | 14039 |
| >EZH2-A656\EIISQDEA     | 937   | >EZH2-A656\EIISQDEV     | 177 | 760   |
| >EZH2-A656\EIISQDEADRF  | 885   | >EZH2-A656\EIISQDEVDRF  | 320 | 565   |
| >EZH2-A656\EIISQDEADR   | 21    | >EZH2-A656\EIISQDEVDR   | 22  | 1     |
| >EZH2-A656\EIISQDEADRF  | 8     | >EZH2-A656\EIISQDEVDRF  | 8   | 0     |
| >EZH2-A656\EIISQDEA     | 58    | >EZH2-A656\EIISQDEV     | 11  | 47    |
| >EZH2-A656\EIISQDEA     | 2290  | >EZH2-A656\EIISQDEV     | 69  | 2221  |
| >EZH2-A656\GEIISQDEA    | 10816 | >EZH2-A656\GEIISQDEV    | 332 | 10484 |
| >EZH2-A656\GEIISQDEA    | 6342  | >EZH2-A656\GEIISQDEV    | 209 | 6133  |
| >EZH2-A656\GEIISQDEA    | 90    | >EZH2-A656\GEIISQDEV    | 79  | 11    |
| >EZH2-A656\GEIISQDEA    | 747   | >EZH2-A656\GEIISQDEV    | 448 | 299   |
| >EZH2-A656\GEIISQDEA    | 36    | >EZH2-A656\GEIISQDEV    | 132 | 96    |
| >EZH2-A656\GEIISQDEA    | 217   | >EZH2-A656\GEIISQDEV    | 11  | 206   |
| >EZH2-C571\YCN TKQCPCY  | 3712  | >EZH2-C571\YNTKQCPCY    | 409 | 3303  |
| >EZH2-C571\YQCNTKQCPC'  | 26402 | >EZH2-C571\YQYNTKQCPC'  | 330 | 26072 |
| >EZH2-C571\YQCNTKQCPC'  | 25230 | >EZH2-C571\YQYNTKQCPC'  | 333 | 24897 |
| >EZH2-C571\YQCNTKQCPC'  | 4476  | >EZH2-C571\YQYNTKQCPC'  | 381 | 4095  |
| >EZH2-C571\YQCNTKQCPC'  | 1003  | >EZH2-C571\YQYNTKQCPC'  | 187 | 816   |
| >EZH2-C571\YRFPGCRCCKAC | 37715 | >EZH2-C571\YRFPGCRCCKAC | 323 | 37392 |
| >EZH2-C571\YACQNTKQCP   | 322   | >EZH2-C571\YAQYNTKQCP   | 176 | 146   |
| >EZH2-C571\YACQNTKQCP   | 65    | >EZH2-C571\YAQYNTKQCP   | 35  | 30    |
| >EZH2-C571\YACQNTKQCP   | 3013  | >EZH2-C571\YAQYNTKQCP   | 261 | 2752  |
| >EZH2-C571\YACQNTKQC    | 3304  | >EZH2-C571\YAQYNTKQC    | 405 | 2899  |
| >EZH2-C571\YACQNTKQCP   | 2125  | >EZH2-C571\YAQYNTKQCP   | 201 | 1924  |
| >EZH2-C571\YACQNTKQCP   | 1802  | >EZH2-C571\YAQYNTKQCP   | 210 | 1592  |
| >EZH2-C571\YACQNTKQCP   | 21    | >EZH2-C571\YAQYNTKQCP   | 3   | 18    |
| >EZH2-C571\YRCKAQCN TK  | 7     | >EZH2-C571\YRCKAQYNTK   | 4   | 3     |
| >EZH2-C571\YRCKAQCN TK  | 1916  | >EZH2-C571\YRCKAQYNTK   | 303 | 1613  |
| >EZH2-C571\YGCRCCKAQCN  | 57    | >EZH2-C571\YGCRCCKAQYN  | 16  | 41    |

|                       |       |                       |      |       |
|-----------------------|-------|-----------------------|------|-------|
| >EZH2-C571\FPGCRCKAQ  | 2796  | >EZH2-C571\FPGCRCKAQ  | 20   | 2776  |
| >EZH2-C571\FPGCRCKAQ  | 7601  | >EZH2-C571\FPGCRCKAQ  | 182  | 7419  |
| >EZH2-C576\QCPCYLAVR  | 238   | >EZH2-C576\QWPCYLAVR  | 24   | 214   |
| >EZH2-C576\QCPCYLAV   | 35333 | >EZH2-C576\QWPCYLAV   | 146  | 35187 |
| >EZH2-C576\RCKAQCNTK  | 25787 | >EZH2-C576\RCKAQCNTK  | 433  | 25354 |
| >EZH2-C576\KQCPCYLA   | 650   | >EZH2-C576\KQWPCYLA   | 21   | 629   |
| >EZH2-C576\KQCPCYLAV  | 77    | >EZH2-C576\KQWPCYLAV  | 9    | 68    |
| >EZH2-C576\KQCPCYLAV  | 569   | >EZH2-C576\KQWPCYLAV  | 260  | 309   |
| >EZH2-C576\KQCPCYLAV  | 97    | >EZH2-C576\KQWPCYLAV  | 96   | 1     |
| >EZH2-C576\KQCPCYLA   | 50    | >EZH2-C576\KQWPCYLA   | 13   | 37    |
| >EZH2-C576\KQCPCYLAV  | 6     | >EZH2-C576\KQWPCYLAV  | 3    | 3     |
| >EZH2-C576\KQCPCYLAV  | 322   | >EZH2-C576\KQWPCYLAV  | 25   | 297   |
| >EZH2-C576\KQCPCYLAV  | 920   | >EZH2-C576\KQWPCYLAV  | 19   | 901   |
| >EZH2-C576\KQCPCYLAV  | 2601  | >EZH2-C576\KQWPCYLAV  | 25   | 2576  |
| >EZH2-C576\KQCPCYLAV  | 2897  | >EZH2-C576\KQWPCYLAV  | 212  | 2685  |
| >EZH2-C576\KQCPCYLAV  | 1801  | >EZH2-C576\KQWPCYLAV  | 372  | 1429  |
| >EZH2-C576\KQCPCYLAVR | 9     | >EZH2-C576\KQWPCYLAV  | 19   | 10    |
| >EZH2-C576\KQCPCYLAV  | 367   | >EZH2-C576\KQWPCYLAV  | 643  | 276   |
| >EZH2-C576\KQCPCYLA   | 1665  | >EZH2-C576\KQWPCYLA   | 215  | 1450  |
| >EZH2-C576\KQCPCYLAV  | 40    | >EZH2-C576\KQWPCYLAV  | 6    | 34    |
| >EZH2-C576\KQCPCYLAVR | 293   | >EZH2-C576\KQWPCYLAV  | 37   | 256   |
| >EZH2-C576\KQCPCYLAV  | 4582  | >EZH2-C576\KQWPCYLAV  | 243  | 4339  |
| >EZH2-C576\KQCPCYLAV  | 2306  | >EZH2-C576\KQWPCYLAV  | 169  | 2137  |
| >EZH2-C576\KQCPCYLAV  | 1100  | >EZH2-C576\KQWPCYLAV  | 117  | 983   |
| >EZH2-C576\KQCPCYLAVR | 27    | >EZH2-C576\KQWPCYLAV  | 15   | 12    |
| >EZH2-C576\TKQCPCYL   | 357   | >EZH2-C576\TKQWPCYL   | 1911 | 1554  |
| >EZH2-C576\TKQCPCYLAV | 233   | >EZH2-C576\TKQWPCYLA' | 1194 | 961   |
| >EZH2-C576\NTKQCPCYLA | 599   | >EZH2-C576\NTKQWPCYL  | 341  | 258   |
| >EZH2-C576\NTKQCPCY   | 417   | >EZH2-C576\NTKQWPCY   | 113  | 304   |
| >EZH2-C576\NTKQCPCY   | 1302  | >EZH2-C576\NTKQWPCY   | 323  | 979   |
| >EZH2-C576\NTKQCPCY   | 261   | >EZH2-C576\NTKQWPCY   | 332  | 71    |
| >EZH2-C576\NTKQCPCYLA | 354   | >EZH2-C576\NTKQWPCYL  | 138  | 216   |
| >EZH2-C576\NTKQCPCYLA | 184   | >EZH2-C576\NTKQWPCYL  | 179  | 5     |
| >EZH2-C576\NTKQCPCYL  | 3234  | >EZH2-C576\NTKQWPCYL  | 105  | 3129  |
| >EZH2-C576\NTKQCPCYLA | 637   | >EZH2-C576\NTKQWPCYL  | 67   | 570   |
| >EZH2-C576\NTKQCPCY   | 473   | >EZH2-C576\NTKQWPCY   | 1806 | 1333  |
| >EZH2-C576\AQCNTKQCP  | 322   | >EZH2-C576\AQCNTKQWF  | 386  | 64    |
| >EZH2-C576\AQCNTKQCP  | 65    | >EZH2-C576\AQCNTKQWF  | 79   | 14    |
| >EZH2-C576\AQCNTKQC   | 3304  | >EZH2-C576\AQCNTKQW   | 460  | 2844  |
| >EZH2-C576\AQCNTKQCP  | 21    | >EZH2-C576\AQCNTKQWF  | 25   | 4     |
| >EZH2-C576\KAQCNTKQC  | 8486  | >EZH2-C576\KAQCNTKQW  | 27   | 8459  |
| >EZH2-C576\KAQCNTKQC  | 21314 | >EZH2-C576\KAQCNTKQW  | 51   | 21263 |
| >EZH2-C576\KAQCNTKQC  | 18339 | >EZH2-C576\KAQCNTKQW  | 19   | 18320 |

|                       |       |                       |     |       |
|-----------------------|-------|-----------------------|-----|-------|
| >EZH2-C576\KAQCNTKQC  | 31751 | >EZH2-C576\KAQCNTKQM  | 495 | 31256 |
| >EZH2-D664\DKYMCSFL   | 305   | >EZH2-D664\EKYMCSFL   | 66  | 239   |
| >EZH2-D664\DKYMCSFLF  | 44    | >EZH2-D664\EKYMCSFLF  | 10  | 34    |
| >EZH2-D664\DKYMCSFLFN | 304   | >EZH2-D664\EKYMCSFLFN | 83  | 221   |
| >EZH2-D664\YDKYMCSF   | 6064  | >EZH2-D664\YEKYMCSF   | 128 | 5936  |
| >EZH2-D664\YDKYMCSFL  | 183   | >EZH2-D664\YEKYMCSFL  | 14  | 169   |
| >EZH2-D664\YDKYMCSFLF | 1258  | >EZH2-D664\YEKYMCSFLF | 63  | 1195  |
| >EZH2-D664\YDKYMCSF   | 355   | >EZH2-D664\YEKYMCSF   | 53  | 302   |
| >EZH2-D664\YDKYMCSFLF | 2577  | >EZH2-D664\YEKYMCSFLF | 208 | 2369  |
| >EZH2-D664\YDKYMCSF   | 100   | >EZH2-D664\YEKYMCSF   | 16  | 84    |
| >EZH2-D664\YDKYMCSFLF | 442   | >EZH2-D664\YEKYMCSFLF | 48  | 394   |
| >EZH2-D664\YDKYMCSF   | 4789  | >EZH2-D664\YEKYMCSF   | 32  | 4757  |
| >EZH2-D664\YDKYMCSFLF | 9285  | >EZH2-D664\YEKYMCSFLF | 132 | 9153  |
| >EZH2-D664\YDKYMCSFL  | 14062 | >EZH2-D664\YEKYMCSFL  | 78  | 13984 |
| >EZH2-D664\YDKYMCSFLF | 12167 | >EZH2-D664\YEKYMCSFLF | 474 | 11693 |
| >EZH2-D664\YDKYMCSF   | 489   | >EZH2-D664\YEKYMCSF   | 96  | 393   |
| >EZH2-D664\YDKYMCSFL  | 433   | >EZH2-D664\YEKYMCSFL  | 63  | 370   |
| >EZH2-D664\YDKYMCSFLF | 11272 | >EZH2-D664\YEKYMCSFLF | 54  | 11218 |
| >EZH2-D664\YDKYMCSFLF | 715   | >EZH2-D664\YEKYMCSFLF | 19  | 696   |
| >EZH2-D664\YDKYMCSFLF | 4801  | >EZH2-D664\YEKYMCSFLF | 72  | 4729  |
| >EZH2-D664\YDKYMCSFLF | 7966  | >EZH2-D664\YEKYMCSFLF | 468 | 7498  |
| >EZH2-D664\YDKYMCSFL  | 39    | >EZH2-D664\YEKYMCSFL  | 94  | 55    |
| >EZH2-D664\YDKYMCSFLF | 173   | >EZH2-D664\YEKYMCSFLF | 124 | 49    |
| >EZH2-D664\YDKYMCSF   | 2430  | >EZH2-D664\YEKYMCSF   | 298 | 2132  |
| >EZH2-D664\YDKYMCSFL  | 349   | >EZH2-D664\YEKYMCSFL  | 11  | 338   |
| >EZH2-D664\YVDKYMCSFL | 1155  | >EZH2-D664\VYEKYMCSFL | 342 | 813   |
| >EZH2-D664\YVDKYMCSF  | 837   | >EZH2-D664\VYEKYMCSF  | 351 | 486   |
| >EZH2-D664\YVDKYMCSFL | 63    | >EZH2-D664\VYEKYMCSFL | 64  | 1     |
| >EZH2-D664\YVDKYMCSFL | 114   | >EZH2-D664\VYEKYMCSFL | 54  | 60    |
| >EZH2-D664\YVDKYMCSF  | 466   | >EZH2-D664\VYEKYMCSF  | 372 | 94    |
| >EZH2-D664\YVDKYMCSFL | 82    | >EZH2-D664\VYEKYMCSFL | 130 | 48    |
| >EZH2-D664\YVDKYMCSFL | 63    | >EZH2-D664\VYEKYMCSFL | 47  | 16    |
| >EZH2-D664\YVDKYMCSF  | 17    | >EZH2-D664\VYEKYMCSF  | 15  | 2     |
| >EZH2-D664\YVDKYMCSFL | 84    | >EZH2-D664\VYEKYMCSFL | 59  | 25    |
| >EZH2-D664\YVDKYMCSFL | 15    | >EZH2-D664\VYEKYMCSFL | 13  | 2     |
| >EZH2-D664\YVDKYMCSFL | 338   | >EZH2-D664\VYEKYMCSFL | 367 | 29    |
| >EZH2-D664\KVYDKYMCSI | 410   | >EZH2-D664\KVYEKYMCSF | 399 | 11    |
| >EZH2-D664\KVYDKYMCSI | 44    | >EZH2-D664\KVYEKYMCSF | 46  | 2     |
| >EZH2-D664\KVYDKYMCSI | 61    | >EZH2-D664\KVYEKYMCSF | 63  | 2     |
| >EZH2-D664\KVYDKYMCSI | 33    | >EZH2-D664\KVYEKYMCSF | 43  | 10    |
| >EZH2-D664\KVYDKYMCSI | 26    | >EZH2-D664\KVYEKYMCSF | 27  | 1     |
| >EZH2-D664\KVYDKYMCSI | 26    | >EZH2-D664\KVYEKYMCSF | 23  | 3     |
| >EZH2-D664\KVYDKYMC   | 271   | >EZH2-D664\KVYEKYMC   | 182 | 89    |



|                       |       |                       |      |       |
|-----------------------|-------|-----------------------|------|-------|
| >EZH2-D664IKVYDKYMCSI | 112   | >EZH2-D664IKVYEKYMCSF | 75   | 37    |
| >EZH2-D664IKVYDKYMCSI | 611   | >EZH2-D664IKVYEKYMCSF | 405  | 206   |
| >EZH2-D664IKVYDKYMCSI | 139   | >EZH2-D664IKVYEKYMCSF | 106  | 33    |
| >EZH2-D664IKVYDKYMCSI | 63    | >EZH2-D664IKVYEKYMCSF | 156  | 93    |
| >EZH2-D664IKVYDKYMCSI | 85    | >EZH2-D664IKVYEKYMCSF | 103  | 18    |
| >EZH2-D664IKVYDKYMCSI | 296   | >EZH2-D664IKVYEKYMCSF | 324  | 28    |
| >EZH2-D664IKVYDKYMCSI | 22    | >EZH2-D664IKVYEKYMCSF | 17   | 5     |
| >EZH2-D664IKVYDKYMCSI | 80    | >EZH2-D664IKVYEKYMCSF | 95   | 15    |
| >EZH2-D664IKVYDKYMCSI | 34    | >EZH2-D664IKVYEKYMCSF | 27   | 7     |
| >EZH2-D664IKVYDKYMCSI | 8     | >EZH2-D664IKVYEKYMCSF | 7    | 1     |
| >EZH2-D664IKVYDKYMCSI | 60    | >EZH2-D664IKVYEKYMCSF | 68   | 8     |
| >EZH2-D664IKVYDKYMCSI | 73    | >EZH2-D664IKVYEKYMCSF | 62   | 11    |
| >EZH2-D664IKVYDKYMCSI | 217   | >EZH2-D664IKVYEKYMCSF | 277  | 60    |
| >EZH2-D664IKVYDKYMCSI | 138   | >EZH2-D664IKVYEKYMCSF | 301  | 163   |
| >EZH2-D664IGKVYDKYM   | 310   | >EZH2-D664IGKVYEKYM   | 213  | 97    |
| >EZH2-D664IGKVYDKYMC  | 11    | >EZH2-D664IGKVYEKYM   | 10   | 1     |
| >EZH2-D664IRGKVYDKY   | 467   | >EZH2-D664IRGKVYEKY   | 692  | 225   |
| >EZH2-D664IRRGKVYDKY  | 676   | >EZH2-D664IRRGKVYEKY  | 334  | 342   |
| >EZH2-D664IRRGKVYDKYM | 752   | >EZH2-D664IRRGKVYEKYM | 495  | 257   |
| >EZH2-D664IRRGKVYDK   | 217   | >EZH2-D664IRRGKVYEK   | 95   | 122   |
| >EZH2-D664IRRGKVYDKY  | 197   | >EZH2-D664IRRGKVYEKY  | 111  | 86    |
| >EZH2-D664IRRGKVYDKYM | 46    | >EZH2-D664IRRGKVYEKYM | 53   | 7     |
| >EZH2-D664IRRGKVYDK   | 78    | >EZH2-D664IRRGKVYEK   | 77   | 1     |
| >EZH2-D664IRRGKVYDKY  | 348   | >EZH2-D664IRRGKVYEKY  | 328  | 20    |
| >EZH2-D664IRRGKVYDKYM | 83    | >EZH2-D664IRRGKVYEKYM | 92   | 9     |
| >EZH2-D664IRRGKVYDKYM | 373   | >EZH2-D664IRRGKVYEKYM | 429  | 56    |
| >EZH2-D664IRRGKVYDKYM | 59    | >EZH2-D664IRRGKVYEKYM | 63   | 4     |
| >EZH2-D664IDRRGKVYDK  | 622   | >EZH2-D664IDRRGKVYEKY | 441  | 181   |
| >EZH2-D664IDRRGKVYDI  | 664   | >EZH2-D664IDRRGKVYEI  | 238  | 426   |
| >EZH2-D664IEADRRGKVYI | 1204  | >EZH2-D664IEADRRGKVYE | 499  | 705   |
| >EZH2-D664\DKYMCSFL   | 7201  | >EZH2-D664\VKYMCSFL   | 145  | 7056  |
| >EZH2-D664\DKYMCSFLF  | 3395  | >EZH2-D664\VKYMCSFLF  | 150  | 3245  |
| >EZH2-D664\DKYMCSFLFM | 1530  | >EZH2-D664\VKYMCSFLFM | 65   | 1465  |
| >EZH2-D664\DKYMCSFLF  | 2948  | >EZH2-D664\VKYMCSFLF  | 276  | 2672  |
| >EZH2-D664\DKYMCSFL   | 305   | >EZH2-D664\VKYMCSFL   | 14   | 291   |
| >EZH2-D664\DKYMCSFLF  | 44    | >EZH2-D664\VKYMCSFLF  | 4    | 40    |
| >EZH2-D664\DKYMCSFLFM | 304   | >EZH2-D664\VKYMCSFLFM | 20   | 284   |
| >EZH2-D664\DKYMCSFLF  | 4608  | >EZH2-D664\VKYMCSFLF  | 345  | 4263  |
| >EZH2-D664\YDKYMCSFL  | 183   | >EZH2-D664\YVKYMCSFL  | 3519 | 3336  |
| >EZH2-D664\YDKYMCSFL  | 6724  | >EZH2-D664\YVKYMCSFL  | 97   | 6627  |
| >EZH2-D664\YDKYMCSFL  | 8126  | >EZH2-D664\YVKYMCSFL  | 47   | 8079  |
| >EZH2-D664\YDKYMCSFL  | 15728 | >EZH2-D664\YVKYMCSFL  | 449  | 15279 |
| >EZH2-D664\YDKYMCSF   | 6017  | >EZH2-D664\YVKYMCSF   | 125  | 5892  |

|                       |       |                       |       |       |
|-----------------------|-------|-----------------------|-------|-------|
| >EZH2-D664\YDKYMCSF   | 17846 | >EZH2-D664\YVKYMCSF   | 342   | 17504 |
| >EZH2-D664\YDKYMCSF   | 20519 | >EZH2-D664\YVKYMCSF   | 309   | 20210 |
| >EZH2-D664\YDKYMCSFLF | 2419  | >EZH2-D664\YVKYMCSFLF | 321   | 2098  |
| >EZH2-D664\YDKYMCSFL  | 11739 | >EZH2-D664\YVKYMCSFL  | 417   | 11322 |
| >EZH2-D664\YDKYMCSF   | 1451  | >EZH2-D664\YVKYMCSF   | 210   | 1241  |
| >EZH2-D664\YDKYMCSFL  | 2146  | >EZH2-D664\YVKYMCSFL  | 308   | 1838  |
| >EZH2-D664\YDKYMCSF   | 355   | >EZH2-D664\YVKYMCSF   | 31    | 324   |
| >EZH2-D664\YDKYMCSFLF | 2577  | >EZH2-D664\YVKYMCSFLF | 81    | 2496  |
| >EZH2-D664\YDKYMCSF   | 100   | >EZH2-D664\YVKYMCSF   | 33    | 67    |
| >EZH2-D664\YDKYMCSFLF | 442   | >EZH2-D664\YVKYMCSFLF | 122   | 320   |
| >EZH2-D664\YDKYMCSF   | 11622 | >EZH2-D664\YVKYMCSF   | 93    | 11529 |
| >EZH2-D664\YDKYMCSFLF | 14389 | >EZH2-D664\YVKYMCSFLF | 187   | 14202 |
| >EZH2-D664\YDKYMCSF   | 489   | >EZH2-D664\YVKYMCSF   | 19640 | 19151 |
| >EZH2-D664\YDKYMCSFL  | 433   | >EZH2-D664\YVKYMCSFL  | 24354 | 23921 |
| >EZH2-D664\YDKYMCSFL  | 39    | >EZH2-D664\YVKYMCSFL  | 7     | 32    |
| >EZH2-D664\YDKYMCSFLF | 173   | >EZH2-D664\YVKYMCSFLF | 35    | 138   |
| >EZH2-D664\YDKYMCSFL  | 349   | >EZH2-D664\YVKYMCSFL  | 14450 | 14101 |
| >EZH2-D664\DEADRRGKV' | 16778 | >EZH2-D664\DEADRRGKV' | 102   | 16676 |
| >EZH2-D664\DEADRRGKV' | 1327  | >EZH2-D664\DEADRRGKV' | 421   | 906   |
| >EZH2-D664\VYDKYMCSF  | 2369  | >EZH2-D664\VYVKYMCSF  | 299   | 2070  |
| >EZH2-D664\VYDKYMCSFL | 2017  | >EZH2-D664\VYVKYMCSFL | 308   | 1709  |
| >EZH2-D664\VYDKYMCSFL | 1155  | >EZH2-D664\VYVKYMCSFL | 118   | 1037  |
| >EZH2-D664\VYDKYMCSF  | 837   | >EZH2-D664\VYVKYMCSF  | 96    | 741   |
| >EZH2-D664\VYDKYMCSFL | 63    | >EZH2-D664\VYVKYMCSFL | 23    | 40    |
| >EZH2-D664\VYDKYMCSFL | 114   | >EZH2-D664\VYVKYMCSFL | 24    | 90    |
| >EZH2-D664\VYDKYMCSF  | 466   | >EZH2-D664\VYVKYMCSF  | 158   | 308   |
| >EZH2-D664\VYDKYMCSFL | 82    | >EZH2-D664\VYVKYMCSFL | 49    | 33    |
| >EZH2-D664\VYDKYMCSFL | 63    | >EZH2-D664\VYVKYMCSFL | 27    | 36    |
| >EZH2-D664\VYDKYMCSF  | 17    | >EZH2-D664\VYVKYMCSF  | 10    | 7     |
| >EZH2-D664\VYDKYMCSFL | 84    | >EZH2-D664\VYVKYMCSFL | 29    | 55    |
| >EZH2-D664\VYDKYMCSFL | 15    | >EZH2-D664\VYVKYMCSFL | 9     | 6     |
| >EZH2-D664\VYDKYMCSF  | 23589 | >EZH2-D664\VYVKYMCSF  | 390   | 23199 |
| >EZH2-D664\VYDKYMCSFL | 338   | >EZH2-D664\VYVKYMCSFL | 340   | 2     |
| >EZH2-D664\VYDKYMCSFL | 2123  | >EZH2-D664\VYVKYMCSFL | 438   | 1685  |
| >EZH2-D664\VYDKYMCSF  | 2246  | >EZH2-D664\VYVKYMCSF  | 157   | 2089  |
| >EZH2-D664\VYDKYMCSFL | 531   | >EZH2-D664\VYVKYMCSFL | 338   | 193   |
| >EZH2-D664\KVYDKYMCSI | 410   | >EZH2-D664\KVYVKYMCSF | 1664  | 1254  |
| >EZH2-D664\KVYDKYMCSI | 44    | >EZH2-D664\KVYVKYMCSF | 36    | 8     |
| >EZH2-D664\KVYDKYMCSI | 61    | >EZH2-D664\KVYVKYMCSF | 620   | 559   |
| >EZH2-D664\KVYDKYMCSI | 33    | >EZH2-D664\KVYVKYMCSF | 174   | 141   |
| >EZH2-D664\KVYDKYMCSI | 26    | >EZH2-D664\KVYVKYMCSF | 133   | 107   |
| >EZH2-D664\KVYDKYMCSI | 26    | >EZH2-D664\KVYVKYMCSF | 109   | 83    |
| >EZH2-D664\KVYDKYMC   | 271   | >EZH2-D664\KVYVKYMC   | 1719  | 1448  |

|                       |       |                       |       |       |
|-----------------------|-------|-----------------------|-------|-------|
| >EZH2-D664\KVYDKYMCSI | 112   | >EZH2-D664\KVYVKYMCSF | 1169  | 1057  |
| >EZH2-D664\KVYDKYMCSI | 139   | >EZH2-D664\KVYVKYMCSF | 808   | 669   |
| >EZH2-D664\KVYDKYMCSI | 63    | >EZH2-D664\KVYVKYMCSF | 1009  | 946   |
| >EZH2-D664\KVYDKYMCS  | 625   | >EZH2-D664\KVYVKYMCS  | 400   | 225   |
| >EZH2-D664\KVYDKYMCSI | 85    | >EZH2-D664\KVYVKYMCSF | 62    | 23    |
| >EZH2-D664\KVYDKYMCSI | 296   | >EZH2-D664\KVYVKYMCSF | 198   | 98    |
| >EZH2-D664\KVYDKYMCSI | 22    | >EZH2-D664\KVYVKYMCSF | 29    | 7     |
| >EZH2-D664\KVYDKYMCSI | 80    | >EZH2-D664\KVYVKYMCSF | 102   | 22    |
| >EZH2-D664\KVYDKYMCSI | 34    | >EZH2-D664\KVYVKYMCSF | 25    | 9     |
| >EZH2-D664\KVYDKYMCSI | 8     | >EZH2-D664\KVYVKYMCSF | 10    | 2     |
| >EZH2-D664\KVYDKYMCSI | 60    | >EZH2-D664\KVYVKYMCSF | 114   | 54    |
| >EZH2-D664\KVYDKYMCSI | 73    | >EZH2-D664\KVYVKYMCSF | 49    | 24    |
| >EZH2-D664\KVYDKYMCSI | 217   | >EZH2-D664\KVYVKYMCSF | 185   | 32    |
| >EZH2-D664\KVYDKYMCSI | 138   | >EZH2-D664\KVYVKYMCSF | 156   | 18    |
| >EZH2-D664\GKVYDKYM   | 310   | >EZH2-D664\GKVYVKYM   | 153   | 157   |
| >EZH2-D664\GKVYDKYMC  | 11    | >EZH2-D664\GKVYVKYMC  | 13    | 2     |
| >EZH2-D664\RGKVYDKYM  | 565   | >EZH2-D664\RGKVYVKYM  | 123   | 442   |
| >EZH2-D664\RGKVYDKY   | 467   | >EZH2-D664\RGKVYVKY   | 684   | 217   |
| >EZH2-D664\RGKVYDKY   | 1049  | >EZH2-D664\RGKVYVKY   | 270   | 779   |
| >EZH2-D664\RRGKVYDKY  | 676   | >EZH2-D664\RRGKVYVKY  | 101   | 575   |
| >EZH2-D664\RRGKVYDKY\ | 752   | >EZH2-D664\RRGKVYVKY\ | 209   | 543   |
| >EZH2-D664\RRGKVYDK   | 217   | >EZH2-D664\RRGKVYVK   | 77    | 140   |
| >EZH2-D664\RRGKVYDKY  | 197   | >EZH2-D664\RRGKVYVKY  | 62    | 135   |
| >EZH2-D664\RRGKVYDKY\ | 46    | >EZH2-D664\RRGKVYVKY\ | 46    | 0     |
| >EZH2-D664\RRGKVYDK   | 78    | >EZH2-D664\RRGKVYVK   | 158   | 80    |
| >EZH2-D664\RRGKVYDKY  | 348   | >EZH2-D664\RRGKVYVKY  | 203   | 145   |
| >EZH2-D664\RRGKVYDKY\ | 83    | >EZH2-D664\RRGKVYVKY\ | 86    | 3     |
| >EZH2-D664\RRGKVYDKY\ | 373   | >EZH2-D664\RRGKVYVKY\ | 212   | 161   |
| >EZH2-D664\RRGKVYDKY  | 977   | >EZH2-D664\RRGKVYVKY  | 391   | 586   |
| >EZH2-D664\RRGKVYDKY\ | 59    | >EZH2-D664\RRGKVYVKY\ | 54    | 5     |
| >EZH2-D664\RRGKVYDKY\ | 817   | >EZH2-D664\RRGKVYVKY\ | 450   | 367   |
| >EZH2-D664\DRRGKVYDK\ | 622   | >EZH2-D664\DRRGKVYVK\ | 279   | 343   |
| >EZH2-D664\ADRRGKVYDI | 664   | >EZH2-D664\ADRRGKVYVI | 238   | 426   |
| >EZH2-D664\EADRRGKVYI | 19905 | >EZH2-D664\EADRRGKVY\ | 126   | 19779 |
| >EZH2-E249\KQQLPGAL   | 3235  | >EZH2-E249\KQQLPGAL   | 216   | 3019  |
| >EZH2-E249\KQQLPGAL   | 1281  | >EZH2-E249\KQQLPGAL   | 212   | 1069  |
| >EZH2-E249\KTEQQLPGAL | 386   | >EZH2-E249\KTKQQLPGAL | 132   | 254   |
| >EZH2-E249\KTEQQLPGAL | 261   | >EZH2-E249\KTKQQLPGAL | 19936 | 19675 |
| >EZH2-E249\KTEQQLPGAL | 121   | >EZH2-E249\KTKQQLPGAL | 28894 | 28773 |
| >EZH2-E249\KTEQQLPGA  | 40    | >EZH2-E249\KTKQQLPGA  | 18523 | 18483 |
| >EZH2-E249\KTEQQLPGAL | 249   | >EZH2-E249\KTKQQLPGAL | 19132 | 18883 |
| >EZH2-E249\KLTEQQLPG  | 12671 | >EZH2-E249\KLTQQLPG   | 377   | 12294 |
| >EZH2-E249\KLTEQQLPGA | 9859  | >EZH2-E249\KLTQQLPGA  | 85    | 9774  |

|                          |       |                          |      |       |
|--------------------------|-------|--------------------------|------|-------|
| >EZH2-E249K LTEQQLP GAL  | 104   | >EZH2-E249K LTKQQLP GAL  | 42   | 62    |
| >EZH2-E249K LTEQQLP GAL  | 133   | >EZH2-E249K LTKQQLP GAL  | 103  | 30    |
| >EZH2-E249K ELTEQQLP GA  | 353   | >EZH2-E249K ELTKQQLP GA  | 2543 | 2190  |
| >EZH2-E249K ELTEQQLP GA  | 260   | >EZH2-E249K ELTKQQLP GA  | 2055 | 1795  |
| >EZH2-E249K ELTEQQLP GA  | 116   | >EZH2-E249K ELTKQQLP GA  | 604  | 488   |
| >EZH2-E249K ELTEQQLP GA  | 22    | >EZH2-E249K ELTKQQLP GA  | 101  | 79    |
| >EZH2-E249K ELTEQQLP GA  | 95    | >EZH2-E249K ELTKQQLP GA  | 510  | 415   |
| >EZH2-E249K ELTEQQLP GA  | 242   | >EZH2-E249K ELTKQQLP GA  | 1389 | 1147  |
| >EZH2-E249K KELTEQQ L    | 163   | >EZH2-E249K KELTKQQ L    | 164  | 1     |
| >EZH2-E249K KELTEQQ L    | 133   | >EZH2-E249K KELTKQQ L    | 136  | 3     |
| >EZH2-E249K KELTEQQ L PG | 416   | >EZH2-E249K KELTKQQ L PG | 405  | 11    |
| >EZH2-E249K KELTEQQ L PG | 57    | >EZH2-E249K KELTKQQ L PG | 60   | 3     |
| >EZH2-E249K KELTEQQ L PG | 64    | >EZH2-E249K KELTKQQ L PG | 92   | 28    |
| >EZH2-E249K KELTEQQ L    | 1222  | >EZH2-E249K KELTKQQ L    | 329  | 893   |
| >EZH2-E249K YKELTEQQ L   | 359   | >EZH2-E249K YKELTKQQ L   | 225  | 134   |
| >EZH2-E249K KYKELTEQQ L  | 33    | >EZH2-E249K KYKELTKQQ L  | 45   | 12    |
| >EZH2-E249K KYKELTEQQ L  | 16    | >EZH2-E249K KYKELTKQQ L  | 23   | 7     |
| >EZH2-E249K KYKELTEQQ    | 1475  | >EZH2-E249K KYKELTKQQ    | 312  | 1163  |
| >EZH2-E249K KYKELTEQQ L  | 123   | >EZH2-E249K KYKELTKQQ L  | 42   | 81    |
| >EZH2-E249K KYKELTEQQ L  | 768   | >EZH2-E249K KYKELTKQQ L  | 322  | 446   |
| >EZH2-E249K EKYKELTEQQ   | 122   | >EZH2-E249K EKYKELTKQQ   | 172  | 50    |
| >EZH2-E249K KEKYKELTE    | 13917 | >EZH2-E249K KEKYKELTK    | 323  | 13594 |
| >EZH2-F145C TFIEELIK NY  | 30    | >EZH2-F145C TCIEELIK NY  | 11   | 19    |
| >EZH2-F145C TFIEELIK NY  | 420   | >EZH2-F145C TCIEELIK NY  | 292  | 128   |
| >EZH2-F145C TFIEELIK NY  | 390   | >EZH2-F145C TCIEELIK NY  | 2773 | 2383  |
| >EZH2-F145C GTFIEELIK    | 23    | >EZH2-F145C GTCIEELIK    | 58   | 35    |
| >EZH2-F145C GTFIEELIK NY | 101   | >EZH2-F145C GTCIEELIK NY | 593  | 492   |
| >EZH2-F145C GTFIEELIK NY | 353   | >EZH2-F145C GTCIEELIK NY | 772  | 419   |
| >EZH2-F145C GTFIEELIK    | 274   | >EZH2-F145C GTCIEELIK    | 2589 | 2315  |
| >EZH2-F145C GTFIEELIK NY | 6     | >EZH2-F145C GTCIEELIK NY | 16   | 10    |
| >EZH2-F145C GTFIEELIK NY | 43    | >EZH2-F145C GTCIEELIK NY | 408  | 365   |
| >EZH2-F145C GTFIEELIK NY | 424   | >EZH2-F145C GTCIEELIK NY | 1173 | 749   |
| >EZH2-F145C GTFIEELIK    | 69    | >EZH2-F145C GTCIEELIK    | 347  | 278   |
| >EZH2-F145C GTFIEELIK NY | 294   | >EZH2-F145C GTCIEELIK NY | 2039 | 1745  |
| >EZH2-F145C GTFIEELI     | 46    | >EZH2-F145C GTCIEELI     | 143  | 97    |
| >EZH2-F145C QDGT FIEELI  | 258   | >EZH2-F145C QDGT CIEELI  | 618  | 360   |
| >EZH2-F145C QDGT FIEELI  | 162   | >EZH2-F145C QDGT CIEELI  | 280  | 118   |
| >EZH2-F145C LDQDGT FI    | 344   | >EZH2-F145C LDQDGT CI    | 1203 | 859   |
| >EZH2-F145C LDQDGT FI    | 161   | >EZH2-F145C LDQDGT CI    | 609  | 448   |
| >EZH2-F145C VLDQDGT FI   | 435   | >EZH2-F145C VLDQDGT CI   | 2545 | 2110  |
| >EZH2-F145C VLDQDGT FI   | 146   | >EZH2-F145C VLDQDGT CI   | 1382 | 1236  |
| >EZH2-F145C VLDQDGT FI   | 281   | >EZH2-F145C VLDQDGT CI   | 3276 | 2995  |
| >EZH2-F145C VLDQDGT F    | 2412  | >EZH2-F145C VLDQDGT C    | 202  | 2210  |

|                         |       |                         |       |       |
|-------------------------|-------|-------------------------|-------|-------|
| >EZH2-F145C VLDQDGTFI   | 9     | >EZH2-F145C VLDQDGTCT   | 65    | 56    |
| >EZH2-F145C VLDQDGTFI   | 35    | >EZH2-F145C VLDQDGTCT   | 98    | 63    |
| >EZH2-F145C VLDQDGTFI   | 10    | >EZH2-F145C VLDQDGTCT   | 26    | 16    |
| >EZH2-F145C VLDQDGTFI   | 142   | >EZH2-F145C VLDQDGTCT   | 389   | 247   |
| >EZH2-F145C VLDQDGTG    | 6556  | >EZH2-F145C VLDQDGTCT   | 296   | 6260  |
| >EZH2-F145C VLDQDGTFI   | 19    | >EZH2-F145C VLDQDGTCT   | 51    | 32    |
| >EZH2-F145C EVLDQDGTG   | 319   | >EZH2-F145C EVLDQDGTCT  | 9596  | 9277  |
| >EZH2-F145C EVLDQDGTG   | 74    | >EZH2-F145C EVLDQDGTCT  | 6320  | 6246  |
| >EZH2-F145C EVLDQDGTG   | 16    | >EZH2-F145C EVLDQDGTCT  | 10854 | 10838 |
| >EZH2-F145C EVLDQDGTFI  | 412   | >EZH2-F145C EVLDQDGTCT  | 1382  | 970   |
| >EZH2-F145C EVLDQDGTFI  | 25    | >EZH2-F145C EVLDQDGTCT  | 276   | 251   |
| >EZH2-F145C EVLDQDGTG   | 404   | >EZH2-F145C EVLDQDGTCT  | 25991 | 25587 |
| >EZH2-F145C EVLDQDGTG   | 49    | >EZH2-F145C EVLDQDGTCT  | 9343  | 9294  |
| >EZH2-F145C DEVLDQDGTI  | 20    | >EZH2-F145C DEVLDQDGTCT | 57    | 37    |
| >EZH2-G660I GKVYDKYM    | 310   | >EZH2-G660I RRVYDKYM    | 16    | 294   |
| >EZH2-G660I GKVYDKYMC   | 11    | >EZH2-G660I RRVYDKYMC   | 3     | 8     |
| >EZH2-G660I RGKVYDKY    | 467   | >EZH2-G660I RRVYDKY     | 1494  | 1027  |
| >EZH2-G660I RGKVYDKY    | 3461  | >EZH2-G660I RRVYDKY     | 122   | 3339  |
| >EZH2-G660I RGKVYDKYM   | 4406  | >EZH2-G660I RRVYDKYM    | 112   | 4294  |
| >EZH2-G660I RGKVYDKY    | 19123 | >EZH2-G660I RRVYDKY     | 95    | 19028 |
| >EZH2-G660I RGKVYDKYM   | 17740 | >EZH2-G660I RRVYDKYM    | 62    | 17678 |
| >EZH2-G660I RGKVYDKYM   | 30082 | >EZH2-G660I RRVYDKYM    | 364   | 29718 |
| >EZH2-G660I RGKVYDKY    | 27793 | >EZH2-G660I RRVYDKY     | 273   | 27520 |
| >EZH2-G660I RGKVYDKYM   | 14354 | >EZH2-G660I RRVYDKYM    | 182   | 14172 |
| >EZH2-G660I RGKVYDKYM   | 22775 | >EZH2-G660I RRVYDKYM    | 478   | 22297 |
| >EZH2-G660I RGKVYDKYM   | 25406 | >EZH2-G660I RRVYDKYM    | 236   | 25170 |
| >EZH2-G660I IISQDEADRRF | 39451 | >EZH2-G660I IISQDEADRRF | 244   | 39207 |
| >EZH2-G660I RRGKVYDK    | 9573  | >EZH2-G660I RRRKVYDK    | 29    | 9544  |
| >EZH2-G660I RRGKVYDKY   | 676   | >EZH2-G660I RRRKVYDKY   | 89    | 587   |
| >EZH2-G660I RRGKVYDKYM  | 752   | >EZH2-G660I RRRKVYDKYM  | 83    | 669   |
| >EZH2-G660I RRGKVYDK    | 217   | >EZH2-G660I RRRKVYDK    | 91    | 126   |
| >EZH2-G660I RRGKVYDKY   | 197   | >EZH2-G660I RRRKVYDKY   | 96    | 101   |
| >EZH2-G660I RRGKVYDKYM  | 46    | >EZH2-G660I RRRKVYDKYM  | 21    | 25    |
| >EZH2-G660I RRGKVYDKY   | 4138  | >EZH2-G660I RRRKVYDKY   | 327   | 3811  |
| >EZH2-G660I RRGKVYDK    | 78    | >EZH2-G660I RRRKVYDK    | 38    | 40    |
| >EZH2-G660I RRGKVYDKY   | 348   | >EZH2-G660I RRRKVYDKY   | 92    | 256   |
| >EZH2-G660I RRGKVYDKYM  | 83    | >EZH2-G660I RRRKVYDKYM  | 28    | 55    |
| >EZH2-G660I RRGKVYDKYM  | 373   | >EZH2-G660I RRRKVYDKYM  | 71    | 302   |
| >EZH2-G660I RRGKVYDKY   | 977   | >EZH2-G660I RRRKVYDKY   | 361   | 616   |
| >EZH2-G660I RRGKVYDKYM  | 59    | >EZH2-G660I RRRKVYDKYM  | 28    | 31    |
| >EZH2-G660I RRGKVYDKYM  | 817   | >EZH2-G660I RRRKVYDKYM  | 289   | 528   |
| >EZH2-G660I ADRRGKVYDI  | 664   | >EZH2-G660I ADRRRKVYDI  | 384   | 280   |
| >EZH2-G660I DEADRRGKV   | 212   | >EZH2-G660I DEADRRRKV   | 146   | 66    |

|                        |       |                        |      |       |
|------------------------|-------|------------------------|------|-------|
| >EZH2-G660ISQDEADRRG   | 183   | >EZH2-G660ISQDEADRRRI  | 261  | 78    |
| >EZH2-G660ISQDEADRRG   | 421   | >EZH2-G660ISQDEADRRRI  | 434  | 13    |
| >EZH2-G660ISQDEADRRG   | 297   | >EZH2-G660ISQDEADRRRI  | 470  | 173   |
| >EZH2-G660ISQDEADRRG   | 544   | >EZH2-G660ISQDEADRRR   | 488  | 56    |
| >EZH2-H297IHRKCNYSFHA  | 316   | >EZH2-H297IRRKCNYSFHA  | 85   | 231   |
| >EZH2-H297IHRKCNYSF    | 11    | >EZH2-H297IRRKCNYSF    | 4    | 7     |
| >EZH2-H297IHRKCNYSFH   | 622   | >EZH2-H297IRRKCNYSFH   | 131  | 491   |
| >EZH2-H297IHRKCNYSFHA  | 1255  | >EZH2-H297IRRKCNYSFHA  | 251  | 1004  |
| >EZH2-H297IHRKCNYSFHA  | 1147  | >EZH2-H297IRRKCNYSFHA  | 231  | 916   |
| >EZH2-H297IHRKCNYSF    | 230   | >EZH2-H297IRRKCNYSF    | 74   | 156   |
| >EZH2-H297IHRKCNYSFH   | 903   | >EZH2-H297IRRKCNYSFH   | 275  | 628   |
| >EZH2-H297IHRKCNYSFHA  | 912   | >EZH2-H297IRRKCNYSFHA  | 334  | 578   |
| >EZH2-H297IHRKCNYSFHA  | 1782  | >EZH2-H297IRRKCNYSFHA  | 409  | 1373  |
| >EZH2-H297IHRKCNYSF    | 3888  | >EZH2-H297IRRKCNYSF    | 75   | 3813  |
| >EZH2-H297IHRKCNYSFH   | 3888  | >EZH2-H297IRRKCNYSFH   | 109  | 3779  |
| >EZH2-H297IHRKCNYSFHA  | 1595  | >EZH2-H297IRRKCNYSFHA  | 97   | 1498  |
| >EZH2-H297IHRKCNYSFHA  | 6556  | >EZH2-H297IRRKCNYSFHA  | 194  | 6362  |
| >EZH2-H297IHRKCNYSFH   | 2639  | >EZH2-H297IRRKCNYSFH   | 418  | 2221  |
| >EZH2-H297IHRKCNYSFHA  | 2891  | >EZH2-H297IRRKCNYSFHA  | 149  | 2742  |
| >EZH2-H297ILHRKCNYSF   | 363   | >EZH2-H297ILRRKCNYSF   | 1435 | 1072  |
| >EZH2-H297ILHRKCNYSF   | 7     | >EZH2-H297ILRRKCNYSF   | 10   | 3     |
| >EZH2-H297ILHRKCNYSFH  | 712   | >EZH2-H297ILRRKCNYSFH  | 449  | 263   |
| >EZH2-H297ILHRKCNYSFH  | 13872 | >EZH2-H297ILRRKCNYSFH  | 228  | 13644 |
| >EZH2-H297ILHRKCNYSF   | 217   | >EZH2-H297ILRRKCNYSF   | 798  | 581   |
| >EZH2-H297IRRCFKYDCFLI | 283   | >EZH2-H297IRRCFKYDCFLI | 447  | 164   |
| >EZH2-H297IRRCFKYDCFLI | 264   | >EZH2-H297IRRCFKYDCFLI | 225  | 39    |
| >EZH2-H297IRRCFKYDCFLI | 27848 | >EZH2-H297IRRCFKYDCFLI | 193  | 27655 |
| >EZH2-H297IFLHRKCNYS   | 194   | >EZH2-H297IFLRRKCNYS   | 985  | 791   |
| >EZH2-H297IFLHRKCNYS   | 315   | >EZH2-H297IFLRRKCNYS   | 695  | 380   |
| >EZH2-H297IFLHRKCNYS   | 386   | >EZH2-H297IFLRRKCNYS   | 1077 | 691   |
| >EZH2-H297IFLHRKCNYS   | 419   | >EZH2-H297IFLRRKCNYS   | 1023 | 604   |
| >EZH2-H297IFLHRKCNYS   | 345   | >EZH2-H297IFLRRKCNYS   | 788  | 443   |
| >EZH2-H297IFLHRKCNYS   | 1175  | >EZH2-H297IFLRRKCNYS   | 401  | 774   |
| >EZH2-H297IFLHRKCNYS   | 878   | >EZH2-H297IFLRRKCNYS   | 325  | 553   |
| >EZH2-H297IFLHRKCNYS   | 167   | >EZH2-H297IFLRRKCNYS   | 107  | 60    |
| >EZH2-H297IFLHRKCNYSF  | 67    | >EZH2-H297IFLRRKCNYSF  | 49   | 18    |
| >EZH2-H297IFLHRKCNYS   | 113   | >EZH2-H297IFLRRKCNYS   | 93   | 20    |
| >EZH2-H297IFLHRKCNYSF  | 211   | >EZH2-H297IFLRRKCNYSF  | 167  | 44    |
| >EZH2-H297IFLHRKCNYS   | 170   | >EZH2-H297IFLRRKCNYS   | 99   | 71    |
| >EZH2-H297IFLHRKCNYSF  | 18    | >EZH2-H297IFLRRKCNYSF  | 11   | 7     |
| >EZH2-H297IFLHRKCNYSF  | 542   | >EZH2-H297IFLRRKCNYSF  | 270  | 272   |
| >EZH2-H297IFLHRKCNYS   | 88    | >EZH2-H297IFLRRKCNYS   | 81   | 7     |
| >EZH2-H297IFLHRKCNYS   | 513   | >EZH2-H297IFLRRKCNYS   | 325  | 188   |

|                         |       |                         |       |       |
|-------------------------|-------|-------------------------|-------|-------|
| >EZH2-H297I CFLHRKCNYS  | 9     | >EZH2-H297I CFLRRKCNYS  | 7     | 2     |
| >EZH2-H297I DCFLHRKCNYS | 635   | >EZH2-H297I DCFLRRKCNYS | 430   | 205   |
| >EZH2-H297I KYDCFLHRK   | 328   | >EZH2-H297I KYDCFLRRK   | 3215  | 2887  |
| >EZH2-H297I KYDCFLHRK   | 426   | >EZH2-H297I KYDCFLRRK   | 7905  | 7479  |
| >EZH2-H297I KYDCFLHR    | 27    | >EZH2-H297I KYDCFLRR    | 73    | 46    |
| >EZH2-H297I KYDCFLHRK   | 306   | >EZH2-H297I KYDCFLRRK   | 1984  | 1678  |
| >EZH2-H297I KYDCFLHRK   | 426   | >EZH2-H297I KYDCFLRRK   | 1436  | 1010  |
| >EZH2-H297I KYDCFLHR    | 8     | >EZH2-H297I KYDCFLRR    | 10    | 2     |
| >EZH2-H297I KYDCFLHRK   | 30    | >EZH2-H297I KYDCFLRRK   | 160   | 130   |
| >EZH2-H297I FKYDCFLH    | 8617  | >EZH2-H297I FKYDCFLR    | 56    | 8561  |
| >EZH2-H297I FKYDCFLHR   | 214   | >EZH2-H297I FKYDCFLRR   | 257   | 43    |
| >EZH2-H297I FKYDCFLH    | 139   | >EZH2-H297I FKYDCFLR    | 187   | 48    |
| >EZH2-H297I FKYDCFLHR   | 29    | >EZH2-H297I FKYDCFLRR   | 100   | 71    |
| >EZH2-H297I FKYDCFLHRK  | 185   | >EZH2-H297I FKYDCFLRRK  | 277   | 92    |
| >EZH2-H297I FKYDCFLH    | 17389 | >EZH2-H297I FKYDCFLR    | 88    | 17301 |
| >EZH2-H297I FKYDCFLHR   | 14    | >EZH2-H297I FKYDCFLRR   | 22    | 8     |
| >EZH2-H297I FKYDCFLHRK  | 384   | >EZH2-H297I FKYDCFLRRK  | 1570  | 1186  |
| >EZH2-H297I CFKYDCFLHR  | 347   | >EZH2-H297I CFKYDCFLRR  | 391   | 44    |
| >EZH2-H297I CFKYDCFLH   | 2241  | >EZH2-H297I CFKYDCFLR   | 11    | 2230  |
| >EZH2-H297I CFKYDCFLHR  | 18    | >EZH2-H297I CFKYDCFLRR  | 19    | 1     |
| >EZH2-H297I CFKYDCFLHR  | 160   | >EZH2-H297I CFKYDCFLRR  | 547   | 387   |
| >EZH2-H297I CFKYDCFLH   | 3582  | >EZH2-H297I CFKYDCFLR   | 15    | 3567  |
| >EZH2-H297I CFKYDCFLHR  | 59    | >EZH2-H297I CFKYDCFLRR  | 60    | 1     |
| >EZH2-H297I CFKYDCFLH   | 14292 | >EZH2-H297I CFKYDCFLR   | 91    | 14201 |
| >EZH2-H297I CFKYDCFLHR  | 53    | >EZH2-H297I CFKYDCFLRR  | 209   | 156   |
| >EZH2-H297I CFKYDCFLH   | 22466 | >EZH2-H297I CFKYDCFLR   | 121   | 22345 |
| >EZH2-H297I CFKYDCFLHR  | 36    | >EZH2-H297I CFKYDCFLRR  | 52    | 16    |
| >EZH2-H297I RCFKYDCFLH  | 3497  | >EZH2-H297I RCFKYDCFLR  | 22    | 3475  |
| >EZH2-H297I RCFKYDCFLH  | 18    | >EZH2-H297I RCFKYDCFLR  | 28    | 10    |
| >EZH2-H297I RCFKYDCFLH  | 16896 | >EZH2-H297I RCFKYDCFLR  | 130   | 16766 |
| >EZH2-H297I RCFKYDCFLH  | 2442  | >EZH2-H297I RCFKYDCFLR  | 21    | 2421  |
| >EZH2-H297I RCFKYDCFLH  | 10    | >EZH2-H297I RCFKYDCFLR  | 12    | 2     |
| >EZH2-I713T RIGIFAKR    | 1402  | >EZH2-I713T RTGIFAKR    | 433   | 969   |
| >EZH2-I713T RIGIFAKR    | 25    | >EZH2-I713T RTGIFAKR    | 14    | 11    |
| >EZH2-I713T RIGIFAKRAI  | 181   | >EZH2-I713T RTGIFAKRAI  | 71    | 110   |
| >EZH2-I713T RIGIFAKR    | 1141  | >EZH2-I713T RTGIFAKR    | 250   | 891   |
| >EZH2-I713T RIGIFAKRAI  | 7978  | >EZH2-I713T RTGIFAKRAI  | 71    | 7907  |
| >EZH2-I713T RIGIFAKRAI  | 13857 | >EZH2-I713T RTGIFAKRAI  | 388   | 13469 |
| >EZH2-I713T RIGIFAKR    | 19    | >EZH2-I713T RTGIFAKR    | 35    | 16    |
| >EZH2-I713T KVMMVNGD    | 496   | >EZH2-I713T KVMMVNGD    | 6197  | 5701  |
| >EZH2-I713T KVMMVNGD    | 209   | >EZH2-I713T KVMMVNGD    | 2423  | 2214  |
| >EZH2-I713T KVMMVNGD    | 43    | >EZH2-I713T KVMMVNGD    | 3994  | 3951  |
| >EZH2-I713T KVMMVNGD    | 170   | >EZH2-I713T KVMMVNGD    | 13625 | 13455 |

|                         |     |                        |       |       |
|-------------------------|-----|------------------------|-------|-------|
| >EZH2-I713T·KVMVMVNGD   | 323 | >EZH2-I713T·KVMVMVNGD  | 39286 | 38963 |
| >EZH2-I713T·HRIGIFAKR   | 142 | >EZH2-I713T·HRTGIFAKR  | 402   | 260   |
| >EZH2-I713T·HRIGIFAK    | 23  | >EZH2-I713T·HRTGIFAK   | 25    | 2     |
| >EZH2-I713T·HRIGIFAKR   | 27  | >EZH2-I713T·HRTGIFAKR  | 28    | 1     |
| >EZH2-I713T·HRIGIFAKRA  | 76  | >EZH2-I713T·HRTGIFAKRA | 255   | 179   |
| >EZH2-I713T·HRIGIFAKRAI | 51  | >EZH2-I713T·HRTGIFAKRA | 63    | 12    |
| >EZH2-I713T·HRIGIFAKRAI | 148 | >EZH2-I713T·HRTGIFAKRA | 850   | 702   |
| >EZH2-I713T·HRIGIFAKRAI | 149 | >EZH2-I713T·HRTGIFAKRA | 249   | 100   |
| >EZH2-I713T·HRIGIFAKR   | 28  | >EZH2-I713T·HRTGIFAKR  | 43    | 15    |
| >EZH2-I713T·MVNGDHRI    | 461 | >EZH2-I713T·MVNGDHRT   | 6650  | 6189  |
| >EZH2-I713T·MVNGDHRI    | 355 | >EZH2-I713T·MVNGDHRT   | 6360  | 6005  |
| >EZH2-I713T·MVNGDHRI    | 112 | >EZH2-I713T·MVNGDHRT   | 1271  | 1159  |
| >EZH2-I713T·MVNGDHRIG   | 534 | >EZH2-I713T·MVNGDHRTC  | 356   | 178   |
| >EZH2-I713T·MVNGDHRIG   | 371 | >EZH2-I713T·MVNGDHRTC  | 610   | 239   |
| >EZH2-I713T·MVNGDHRIG   | 654 | >EZH2-I713T·MVNGDHRTC  | 390   | 264   |
| >EZH2-I713T·MVNGDHRI    | 31  | >EZH2-I713T·MVNGDHRT   | 922   | 891   |
| >EZH2-I713T·MVNGDHRIG   | 261 | >EZH2-I713T·MVNGDHRTC  | 680   | 419   |
| >EZH2-I713T·MVNGDHRIG   | 573 | >EZH2-I713T·MVNGDHRTC  | 412   | 161   |
| >EZH2-I713T·MVNGDHRIG   | 215 | >EZH2-I713T·MVNGDHRTC  | 99    | 116   |
| >EZH2-I713T·MVNGDHRIG   | 364 | >EZH2-I713T·MVNGDHRTC  | 339   | 25    |
| >EZH2-I713T·MMVNGDHR    | 65  | >EZH2-I713T·MMVNGDHR   | 1495  | 1430  |
| >EZH2-I713T·MMVNGDHR    | 58  | >EZH2-I713T·MMVNGDHR   | 105   | 47    |
| >EZH2-I713T·MMVNGDHR    | 54  | >EZH2-I713T·MMVNGDHR   | 1511  | 1457  |
| >EZH2-I713T·MMVNGDHR    | 72  | >EZH2-I713T·MMVNGDHR   | 43    | 29    |
| >EZH2-I713T·MMVNGDHR    | 29  | >EZH2-I713T·MMVNGDHR   | 552   | 523   |
| >EZH2-I713T·MMVNGDHR    | 17  | >EZH2-I713T·MMVNGDHR   | 9     | 8     |
| >EZH2-I713T·MMVNGDHR    | 41  | >EZH2-I713T·MMVNGDHR   | 554   | 513   |
| >EZH2-I713T·MMVNGDHR    | 23  | >EZH2-I713T·MMVNGDHR   | 23    | 0     |
| >EZH2-I713T·MMVNGDHR    | 6   | >EZH2-I713T·MMVNGDHR   | 88    | 82    |
| >EZH2-I713T·MMVNGDHR    | 8   | >EZH2-I713T·MMVNGDHR   | 12    | 4     |
| >EZH2-I713T·MMVNGDHR    | 8   | >EZH2-I713T·MMVNGDHR   | 511   | 503   |
| >EZH2-I713T·MMVNGDHR    | 18  | >EZH2-I713T·MMVNGDHR   | 35    | 17    |
| >EZH2-I713T·MMVNGDHR    | 22  | >EZH2-I713T·MMVNGDHR   | 733   | 711   |
| >EZH2-I713T·MMVNGDHR    | 55  | >EZH2-I713T·MMVNGDHR   | 85    | 30    |
| >EZH2-I713T·MMVNGDHR    | 88  | >EZH2-I713T·MMVNGDHR   | 3968  | 3880  |
| >EZH2-I713T·MMVNGDHR    | 328 | >EZH2-I713T·MMVNGDHR   | 494   | 166   |
| >EZH2-I713T·MMVNGDHR    | 4   | >EZH2-I713T·MMVNGDHR   | 11    | 7     |
| >EZH2-I713T·MMVNGDHR    | 6   | >EZH2-I713T·MMVNGDHR   | 6     | 0     |
| >EZH2-I713T·MMVNGDHR    | 189 | >EZH2-I713T·MMVNGDHR   | 21463 | 21274 |
| >EZH2-I713T·MMVNGDHR    | 439 | >EZH2-I713T·MMVNGDHR   | 7404  | 6965  |
| >EZH2-I713T·MMVNGDHR    | 343 | >EZH2-I713T·MMVNGDHR   | 329   | 14    |
| >EZH2-I713T·MMVNGDHR    | 468 | >EZH2-I713T·MMVNGDHR   | 289   | 179   |
| >EZH2-I713T·VMMVNGDH    | 146 | >EZH2-I713T·VMMVNGDH   | 1287  | 1141  |



|                         |      |                         |       |       |
|-------------------------|------|-------------------------|-------|-------|
| >EZH2-I713T·VMMVNGDH    | 198  | >EZH2-I713T·VMMVNGDH    | 950   | 752   |
| >EZH2-I713T·VMMVNGDH    | 11   | >EZH2-I713T·VMMVNGDH    | 230   | 219   |
| >EZH2-I713T·VMMVNGDH    | 8    | >EZH2-I713T·VMMVNGDH    | 311   | 303   |
| >EZH2-I713T·VMMVNGDH    | 69   | >EZH2-I713T·VMMVNGDH    | 1673  | 1604  |
| >EZH2-I713T·VMMVNGDH    | 11   | >EZH2-I713T·VMMVNGDH    | 249   | 238   |
| >EZH2-I713T·VMMVNGDH    | 20   | >EZH2-I713T·VMMVNGDH    | 119   | 99    |
| >EZH2-K243C·KYKELTEQQ   | 33   | >EZH2-K243C·QYKELTEQQ   | 135   | 102   |
| >EZH2-K243C·KYKELTEQQ   | 16   | >EZH2-K243C·QYKELTEQQ   | 23    | 7     |
| >EZH2-K243C·KYKELTEQQ   | 123  | >EZH2-K243C·QYKELTEQQ   | 3970  | 3847  |
| >EZH2-K243C·EKYKELTEQQ  | 122  | >EZH2-K243C·EQYKELTEQC  | 130   | 8     |
| >EZH2-K243C·ELKEKYKEL   | 220  | >EZH2-K243C·ELKEQYKEL   | 127   | 93    |
| >EZH2-K243C·ELKEKYKEL   | 25   | >EZH2-K243C·ELKEQYKEL   | 117   | 92    |
| >EZH2-K243C·EELKEKYKEL  | 86   | >EZH2-K243C·EELKEQYKEL  | 131   | 45    |
| >EZH2-K243C·EELKEKYKEL  | 424  | >EZH2-K243C·EELKEQYKEL  | 326   | 98    |
| >EZH2-K243C·EELKEKYKELT | 411  | >EZH2-K243C·EELKEQYKELT | 215   | 196   |
| >EZH2-K243C·AEELKEKYKEL | 166  | >EZH2-K243C·AEELKEQYKE  | 291   | 125   |
| >EZH2-K243C·AEELKEKYKEL | 319  | >EZH2-K243C·AEELKEQYKE  | 171   | 148   |
| >EZH2-K243C·AEELKEKYKEL | 618  | >EZH2-K243C·AEELKEQYKE  | 383   | 235   |
| >EZH2-K243C·AEELKEKY    | 1434 | >EZH2-K243C·AEELKEQY    | 417   | 1017  |
| >EZH2-K243C·GTAEELKEKY  | 601  | >EZH2-K243C·GTAEELKEQY  | 447   | 154   |
| >EZH2-K243C·GTAEELKEK   | 162  | >EZH2-K243C·GTAEELKEQ   | 27869 | 27707 |
| >EZH2-K243C·GTAEELKEKYI | 68   | >EZH2-K243C·GTAEELKEQY  | 48    | 20    |
| >EZH2-K243C·GTAEELKEKY  | 231  | >EZH2-K243C·GTAEELKEQY  | 170   | 61    |
| >EZH2-K243C·GTAEELKEKYI | 290  | >EZH2-K243C·GTAEELKEQY  | 184   | 106   |
| >EZH2-K243C·GTAEELKEKY  | 49   | >EZH2-K243C·GTAEELKEQY  | 32    | 17    |
| >EZH2-K243C·GTAEELKEKY  | 94   | >EZH2-K243C·GTAEELKEQY  | 129   | 35    |
| >EZH2-K243C·GTAEELKEK   | 183  | >EZH2-K243C·GTAEELKEQ   | 3464  | 3281  |
| >EZH2-K243C·GTAEELKEKYI | 238  | >EZH2-K243C·GTAEELKEQY  | 370   | 132   |
| >EZH2-K243C·KGTAELKEK'  | 456  | >EZH2-K243C·KGTAELKEQ   | 936   | 480   |
| >EZH2-K243C·KGTAELKEK'  | 1299 | >EZH2-K243C·KGTAELKEQ   | 458   | 841   |
| >EZH2-L252V·QLPGALPPEC  | 366  | >EZH2-L252V·QVPGALPPEC  | 11060 | 10694 |
| >EZH2-L252V·QLPGALPPEC  | 69   | >EZH2-L252V·QVPGALPPEC  | 9769  | 9700  |
| >EZH2-L252V·EKYKELTEQQ  | 122  | >EZH2-L252V·EKYKELTEQQ  | 271   | 149   |
| >EZH2-L252V·QQLPGALPPE  | 259  | >EZH2-L252V·QQVPGALPPI  | 387   | 128   |
| >EZH2-L252V·EQQLPGAL    | 659  | >EZH2-L252V·EQQVPGAL    | 464   | 195   |
| >EZH2-L252V·TEQQLPGAL   | 584  | >EZH2-L252V·TEQQVPGAL   | 435   | 149   |
| >EZH2-L252V·TEQQLPGAL   | 386  | >EZH2-L252V·TEQQVPGAL   | 290   | 96    |
| >EZH2-L252V·TEQQLPGAL   | 261  | >EZH2-L252V·TEQQVPGAL   | 135   | 126   |
| >EZH2-L252V·TEQQLPGAL   | 121  | >EZH2-L252V·TEQQVPGAL   | 405   | 284   |
| >EZH2-L252V·TEQQLPGA    | 40   | >EZH2-L252V·TEQQVPGA    | 40    | 0     |
| >EZH2-L252V·TEQQLPGAL   | 249  | >EZH2-L252V·TEQQVPGAL   | 240   | 9     |
| >EZH2-L252V·LTEQQLPGAL  | 104  | >EZH2-L252V·LTEQQVPGAI  | 115   | 11    |
| >EZH2-L252V·LTEQQLPGAL  | 133  | >EZH2-L252V·LTEQQVPGAI  | 112   | 21    |

|                         |      |                        |      |      |
|-------------------------|------|------------------------|------|------|
| >EZH2-L252V ELTEQQQLPGA | 353  | >EZH2-L252V ELTEQQVPG/ | 223  | 130  |
| >EZH2-L252V ELTEQQQLPGA | 260  | >EZH2-L252V ELTEQQVPG/ | 138  | 122  |
| >EZH2-L252V ELTEQQQLPGA | 116  | >EZH2-L252V ELTEQQVPG/ | 78   | 38   |
| >EZH2-L252V ELTEQQQLPGA | 510  | >EZH2-L252V ELTEQQVPG/ | 312  | 198  |
| >EZH2-L252V ELTEQQQLPGA | 22   | >EZH2-L252V ELTEQQVPG/ | 19   | 3    |
| >EZH2-L252V ELTEQQQLPGA | 95   | >EZH2-L252V ELTEQQVPG/ | 86   | 9    |
| >EZH2-L252V ELTEQQQLPGA | 242  | >EZH2-L252V ELTEQQVPG/ | 244  | 2    |
| >EZH2-L252V KELTEQQQL   | 163  | >EZH2-L252V KELTEQQV   | 1455 | 1292 |
| >EZH2-L252V KELTEQQQL   | 133  | >EZH2-L252V KELTEQQV   | 430  | 297  |
| >EZH2-L252V KELTEQQQLPG | 416  | >EZH2-L252V KELTEQQVPC | 338  | 78   |
| >EZH2-L252V KELTEQQQLPG | 57   | >EZH2-L252V KELTEQQVPC | 44   | 13   |
| >EZH2-L252V KELTEQQQLPG | 64   | >EZH2-L252V KELTEQQVPC | 85   | 21   |
| >EZH2-L252V YKELTEQQQL  | 359  | >EZH2-L252V YKELTEQQV  | 5214 | 4855 |
| >EZH2-L252V KYKELTEQQQL | 33   | >EZH2-L252V KYKELTEQQV | 140  | 107  |
| >EZH2-L252V KYKELTEQQQL | 16   | >EZH2-L252V KYKELTEQQV | 339  | 323  |
| >EZH2-L252V KYKELTEQQQL | 123  | >EZH2-L252V KYKELTEQQV | 77   | 46   |
| >EZH2-L674V LNNDFFVDA   | 148  | >EZH2-L674V VNNDFFVDA  | 359  | 211  |
| >EZH2-L674V NLNNDFFV    | 128  | >EZH2-L674V NVNNDFFV   | 3122 | 2994 |
| >EZH2-L674V NLNNDFFV    | 35   | >EZH2-L674V NVNNDFFV   | 1549 | 1514 |
| >EZH2-L674V NLNNDFFV    | 23   | >EZH2-L674V NVNNDFFV   | 517  | 494  |
| >EZH2-L674V NLNNDFFV    | 373  | >EZH2-L674V NVNNDFFV   | 4880 | 4507 |
| >EZH2-L674V NLNNDFFV    | 74   | >EZH2-L674V NVNNDFFV   | 118  | 44   |
| >EZH2-L674V NLNNDFFV    | 9    | >EZH2-L674V NVNNDFFV   | 502  | 493  |
| >EZH2-L674V NLNNDFFV    | 4    | >EZH2-L674V NVNNDFFV   | 259  | 255  |
| >EZH2-L674V NLNNDFFV    | 13   | >EZH2-L674V NVNNDFFV   | 727  | 714  |
| >EZH2-L674V NLNNDFFV    | 7    | >EZH2-L674V NVNNDFFV   | 349  | 342  |
| >EZH2-L674V NLNNDFFV    | 6    | >EZH2-L674V NVNNDFFV   | 248  | 242  |
| >EZH2-L674V NLNNDFFV    | 127  | >EZH2-L674V NVNNDFFV   | 9583 | 9456 |
| >EZH2-L674V NLNNDFFV    | 387  | >EZH2-L674V NVNNDFFV   | 26   | 361  |
| >EZH2-L674V NLNNDFFV    | 654  | >EZH2-L674V NVNNDFFV   | 149  | 505  |
| >EZH2-L674V DKYMCSFLFM  | 304  | >EZH2-L674V DKYMCSFLFM | 569  | 265  |
| >EZH2-L674V FNLNNDFFV   | 271  | >EZH2-L674V FNVNNDFFV  | 434  | 163  |
| >EZH2-L674V FNLNNDFFV   | 469  | >EZH2-L674V FNVNNDFFV  | 757  | 288  |
| >EZH2-L674V FNLNNDFFV   | 295  | >EZH2-L674V FNVNNDFFV  | 389  | 94   |
| >EZH2-L674V FNLNNDFFV   | 358  | >EZH2-L674V FNVNNDFFV  | 2141 | 1783 |
| >EZH2-L674V FNLNNDFFV   | 442  | >EZH2-L674V FNVNNDFFV  | 2363 | 1921 |
| >EZH2-L674V FNLNNDFFV   | 440  | >EZH2-L674V FNVNNDFFV  | 2363 | 1923 |
| >EZH2-L674V FNLNNDFFV   | 392  | >EZH2-L674V FNVNNDFFV  | 4095 | 3703 |
| >EZH2-L674V FNLNNDFFV   | 435  | >EZH2-L674V FNVNNDFFV  | 4873 | 4438 |
| >EZH2-L674V FNLNNDFFV   | 1395 | >EZH2-L674V FNVNNDFFV  | 163  | 1232 |
| >EZH2-L674V FNLNNDFFV   | 3060 | >EZH2-L674V FNVNNDFFV  | 469  | 2591 |
| >EZH2-L674V LFNLNNDFFV  | 234  | >EZH2-L674V LFNVNNDFFV | 262  | 28   |
| >EZH2-L674V LFNLNNDFFV  | 807  | >EZH2-L674V LFNVNNDFFV | 303  | 504  |

|                         |      |                         |     |     |
|-------------------------|------|-------------------------|-----|-----|
| >EZH2-L674V LFNLNNDNF   | 106  | >EZH2-L674V LFNVNNDNF   | 83  | 23  |
| >EZH2-L674V LFNLNNDNFV  | 487  | >EZH2-L674V LFNVNNDNFV  | 431 | 56  |
| >EZH2-L674V FLFNLNNDNFV | 6    | >EZH2-L674V FLFNVNNDNFV | 7   | 1   |
| >EZH2-L674V FLFNLNNDNFV | 7    | >EZH2-L674V FLFNVNNDNFV | 7   | 0   |
| >EZH2-L674V FLFNLNND    | 71   | >EZH2-L674V FLFNVNND    | 91  | 20  |
| >EZH2-L674V FLFNLNNDNF  | 81   | >EZH2-L674V FLFNVNNDNF  | 84  | 3   |
| >EZH2-L674V FLFNLNNDNFV | 5    | >EZH2-L674V FLFNVNNDNFV | 5   | 0   |
| >EZH2-L674V FLFNLNNDNFV | 3    | >EZH2-L674V FLFNVNNDNFV | 3   | 0   |
| >EZH2-L674V FLFNLNNDNFV | 9    | >EZH2-L674V FLFNVNNDNFV | 11  | 2   |
| >EZH2-L674V FLFNLNNDNFV | 5    | >EZH2-L674V FLFNVNNDNFV | 4   | 1   |
| >EZH2-L674V FLFNLNNDNF  | 362  | >EZH2-L674V FLFNVNNDNF  | 271 | 91  |
| >EZH2-L674V FLFNLNNDNFV | 25   | >EZH2-L674V FLFNVNNDNFV | 29  | 4   |
| >EZH2-L674V FLFNLNNDNFV | 5    | >EZH2-L674V FLFNVNNDNFV | 5   | 0   |
| >EZH2-L674V FLFNLNND    | 1144 | >EZH2-L674V FLFNVNND    | 399 | 745 |
| >EZH2-L674V FLFNLNNDNF  | 878  | >EZH2-L674V FLFNVNNDNF  | 216 | 662 |
| >EZH2-L674V FLFNLNNDNFV | 1    | >EZH2-L674V FLFNVNNDNFV | 1   | 0   |
| >EZH2-L674V FLFNLNNDNFV | 1    | >EZH2-L674V FLFNVNNDNFV | 1   | 0   |
| >EZH2-L674V FLFNLNNDNFV | 3    | >EZH2-L674V FLFNVNNDNFV | 2   | 1   |
| >EZH2-L674V FLFNLNNDNFV | 2    | >EZH2-L674V FLFNVNNDNFV | 2   | 0   |
| >EZH2-L674V FLFNLNNDNFV | 4    | >EZH2-L674V FLFNVNNDNFV | 4   | 0   |
| >EZH2-L674V FLFNLNNDNFV | 4    | >EZH2-L674V FLFNVNNDNFV | 4   | 0   |
| >EZH2-L674V FLFNLNNDNFV | 3    | >EZH2-L674V FLFNVNNDNFV | 3   | 0   |
| >EZH2-L674V FLFNLNNDNFV | 3    | >EZH2-L674V FLFNVNNDNFV | 3   | 0   |
| >EZH2-L674V FLFNLNNDNFV | 2    | >EZH2-L674V FLFNVNNDNFV | 2   | 0   |
| >EZH2-L674V FLFNLNNDNFV | 2    | >EZH2-L674V FLFNVNNDNFV | 2   | 0   |
| >EZH2-L674V FLFNLNNDNF  | 895  | >EZH2-L674V FLFNVNNDNF  | 422 | 473 |
| >EZH2-L674V FLFNLNNDNF  | 476  | >EZH2-L674V FLFNVNNDNF  | 818 | 342 |
| >EZH2-L674V FLFNLNNDNF  | 92   | >EZH2-L674V FLFNVNNDNF  | 76  | 16  |
| >EZH2-L674V FLFNLNNDNFV | 89   | >EZH2-L674V FLFNVNNDNFV | 82  | 7   |
| >EZH2-L674V FLFNLNNDNFV | 77   | >EZH2-L674V FLFNVNNDNFV | 52  | 25  |
| >EZH2-L674V FLFNLNNDNFV | 79   | >EZH2-L674V FLFNVNNDNFV | 75  | 4   |
| >EZH2-L674V FLFNLNNDNFV | 260  | >EZH2-L674V FLFNVNNDNFV | 263 | 3   |
| >EZH2-L674V FLFNLNNDNF  | 73   | >EZH2-L674V FLFNVNNDNF  | 81  | 8   |
| >EZH2-L674V FLFNLNNDNF  | 30   | >EZH2-L674V FLFNVNNDNF  | 22  | 8   |
| >EZH2-L674V FLFNLNNDNFV | 552  | >EZH2-L674V FLFNVNNDNFV | 404 | 148 |
| >EZH2-L674V FLFNLNNDNF  | 8    | >EZH2-L674V FLFNVNNDNF  | 7   | 1   |
| >EZH2-L674V FLFNLNNDNFV | 215  | >EZH2-L674V FLFNVNNDNFV | 207 | 8   |
| >EZH2-L674V FLFNLNNDNF  | 215  | >EZH2-L674V FLFNVNNDNF  | 219 | 4   |
| >EZH2-L674V SFLFNLNNDNF | 410  | >EZH2-L674V SFLFNVNNDNF | 464 | 54  |
| >EZH2-L674V SFLFNLNNDNF | 534  | >EZH2-L674V SFLFNVNNDNF | 384 | 150 |
| >EZH2-L674V SFLFNLNNDNF | 275  | >EZH2-L674V SFLFNVNNDNF | 192 | 83  |
| >EZH2-L674V SFLFNLNNDNF | 362  | >EZH2-L674V SFLFNVNNDNF | 395 | 33  |
| >EZH2-L674V SFLFNLNNDNF | 14   | >EZH2-L674V SFLFNVNNDNF | 12  | 2   |

|                       |      |                       |      |      |
|-----------------------|------|-----------------------|------|------|
| >EZH2-L674vSFLFNLNND  | 324  | >EZH2-L674vSFLFNVNND  | 494  | 170  |
| >EZH2-L674vSFLFNLNND  | 115  | >EZH2-L674vSFLFNVNND  | 106  | 9    |
| >EZH2-L674vCSFLFNLNND | 241  | >EZH2-L674vCSFLFNVNND | 318  | 77   |
| >EZH2-L674vCSFLFNLNND | 394  | >EZH2-L674vCSFLFNVNND | 267  | 127  |
| >EZH2-L674vCSFLFNLNND | 39   | >EZH2-L674vCSFLFNVNND | 32   | 7    |
| >EZH2-L674vCSFLFNLNND | 61   | >EZH2-L674vCSFLFNVNND | 112  | 51   |
| >EZH2-L674vCSFLFNLNND | 329  | >EZH2-L674vCSFLFNVNND | 402  | 73   |
| >EZH2-L674vMCSFLFNL   | 67   | >EZH2-L674vMCSFLFNV   | 49   | 18   |
| >EZH2-L674vMCSFLFNL   | 92   | >EZH2-L674vMCSFLFNV   | 17   | 75   |
| >EZH2-L674vMCSFLFNL   | 1767 | >EZH2-L674vMCSFLFNV   | 210  | 1557 |
| >EZH2-L674vYMCSFLFNL  | 439  | >EZH2-L674vYMCSFLFNV  | 1234 | 795  |
| >EZH2-L674vYMCSFLFNL  | 6    | >EZH2-L674vYMCSFLFNV  | 6    | 0    |
| >EZH2-L674vYMCSFLFNL  | 2    | >EZH2-L674vYMCSFLFNV  | 2    | 0    |
| >EZH2-L674vYMCSFLFNLN | 731  | >EZH2-L674vYMCSFLFNV  | 431  | 300  |
| >EZH2-L674vYMCSFLFNL  | 5    | >EZH2-L674vYMCSFLFNV  | 2    | 3    |
| >EZH2-L674vYMCSFLFNL  | 5    | >EZH2-L674vYMCSFLFNV  | 3    | 2    |
| >EZH2-L674vYMCSFLFNL  | 2    | >EZH2-L674vYMCSFLFNV  | 1    | 1    |
| >EZH2-L674vYMCSFLFNLN | 497  | >EZH2-L674vYMCSFLFNV  | 504  | 7    |
| >EZH2-L674vYMCSFLFNLN | 379  | >EZH2-L674vYMCSFLFNV  | 293  | 86   |
| >EZH2-L674vYMCSFLFNL  | 7    | >EZH2-L674vYMCSFLFNV  | 3    | 4    |
| >EZH2-L674vYMCSFLFNL  | 8    | >EZH2-L674vYMCSFLFNV  | 4    | 4    |
| >EZH2-L674vYMCSFLFNL  | 2    | >EZH2-L674vYMCSFLFNV  | 2    | 0    |
| >EZH2-L674vYMCSFLFNL  | 2    | >EZH2-L674vYMCSFLFNV  | 1    | 1    |
| >EZH2-L674vYMCSFLFNL  | 413  | >EZH2-L674vYMCSFLFNV  | 6360 | 5947 |
| >EZH2-L674vYMCSFLFNL  | 165  | >EZH2-L674vYMCSFLFNV  | 18   | 147  |
| >EZH2-L674vYMCSFLFNL  | 74   | >EZH2-L674vYMCSFLFNV  | 159  | 85   |
| >EZH2-L674vYMCSFLFNL  | 298  | >EZH2-L674vYMCSFLFNV  | 4480 | 4182 |
| >EZH2-L674vYMCSFLFNL  | 265  | >EZH2-L674vYMCSFLFNV  | 404  | 139  |
| >EZH2-L674vKYMCSFLFNL | 42   | >EZH2-L674vKYMCSFLFNV | 141  | 99   |
| >EZH2-L674vKYMCSFLFNL | 490  | >EZH2-L674vKYMCSFLFNV | 124  | 366  |
| >EZH2-L674vKYMCSFLFNL | 364  | >EZH2-L674vKYMCSFLFNV | 339  | 25   |
| >EZH2-L674vKYMCSFLFNL | 258  | >EZH2-L674vKYMCSFLFNV | 73   | 185  |
| >EZH2-L674vKYMCSFLFNL | 3482 | >EZH2-L674vKYMCSFLFNV | 270  | 3212 |
| >EZH2-L674vKYMCSFLFNL | 1263 | >EZH2-L674vKYMCSFLFNV | 135  | 1128 |
| >EZH2-L674vKYMCSFLFNL | 30   | >EZH2-L674vKYMCSFLFNV | 328  | 298  |
| >EZH2-L674vKYMCSFLFNL | 80   | >EZH2-L674vKYMCSFLFNV | 441  | 361  |
| >EZH2-L674vKYMCSFLFNL | 5    | >EZH2-L674vKYMCSFLFNV | 21   | 16   |
| >EZH2-L674vKYMCSFLFNL | 496  | >EZH2-L674vKYMCSFLFNV | 301  | 195  |
| >EZH2-L674vKYMCSFLFNL | 291  | >EZH2-L674vKYMCSFLFNV | 2581 | 2290 |
| >EZH2-L674vKYMCSFLFNL | 72   | >EZH2-L674vKYMCSFLFNV | 46   | 26   |
| >EZH2-L674vKYMCSFLFNL | 266  | >EZH2-L674vKYMCSFLFNV | 522  | 256  |
| >EZH2-L674vKYMCSFLFNL | 263  | >EZH2-L674vKYMCSFLFNV | 1059 | 796  |
| >EZH2-L674vKYMCSFLFNL | 388  | >EZH2-L674vKYMCSFLFNV | 918  | 530  |

|                        |       |                         |      |       |
|------------------------|-------|-------------------------|------|-------|
| >EZH2-L674VKYMCSFLFNL  | 281   | >EZH2-L674VKYMCSFLFNV   | 390  | 109   |
| >EZH2-L674VKYMCSFLFNL  | 50    | >EZH2-L674VKYMCSFLFNV   | 57   | 7     |
| >EZH2-L674VKYMCSFLFNL  | 54    | >EZH2-L674VKYMCSFLFNV   | 67   | 13    |
| >EZH2-L674VKYMCSFLFNL  | 411   | >EZH2-L674VKYMCSFLFNV   | 614  | 203   |
| >EZH2-N322!NKPCGPQCY   | 160   | >EZH2-N322!SKPCGPQCY    | 43   | 117   |
| >EZH2-N322!DNKPCGPQC   | 10321 | >EZH2-N322!DSKPCGPQC\   | 491  | 9830  |
| >EZH2-N322!DNKPCGPQC   | 1083  | >EZH2-N322!DSKPCGPQC\   | 314  | 769   |
| >EZH2-N322!KRKNTETALD  | 490   | >EZH2-N322!KRKNTETALD   | 879  | 389   |
| >EZH2-N322!ALDNKPCGPC  | 36    | >EZH2-N322!ALDSKPCGPC   | 44   | 8     |
| >EZH2-N322!ALDNKPCGPC  | 318   | >EZH2-N322!ALDSKPCGPC   | 415  | 97    |
| >EZH2-N322!ALDNKPCGPC  | 30    | >EZH2-N322!ALDSKPCGPC   | 33   | 3     |
| >EZH2-N322!NTETALDNK   | 85    | >EZH2-N322!NTETALDSK    | 73   | 12    |
| >EZH2-N640INEFISEYCGEI | 5     | >EZH2-N640I KEFISEYCGEI | 9    | 4     |
| >EZH2-N640INEFISEYCGEI | 392   | >EZH2-N640I KEFISEYCGEI | 7312 | 6920  |
| >EZH2-N640INEFISEYCGEI | 853   | >EZH2-N640I KEFISEYCGEI | 98   | 755   |
| >EZH2-N640INEFISEYC    | 3447  | >EZH2-N640I KEFISEYC    | 383  | 3064  |
| >EZH2-N640INEFISEYCGEI | 228   | >EZH2-N640I KEFISEYCGEI | 32   | 196   |
| >EZH2-N640INEFISEYCGEI | 589   | >EZH2-N640I KEFISEYCGEI | 486  | 103   |
| >EZH2-N640INEFISEYCGEI | 20    | >EZH2-N640I KEFISEYCGEI | 6    | 14    |
| >EZH2-N640IKNEFISEY    | 252   | >EZH2-N640I KKEFISEY    | 248  | 4     |
| >EZH2-N640IKNEFISEY    | 5446  | >EZH2-N640I KKEFISEY    | 111  | 5335  |
| >EZH2-N640IGIFIKDPVQKI | 20447 | >EZH2-N640I GIFIKDPVQKI | 324  | 20123 |
| >EZH2-N640IGIFIKDPVQKI | 24101 | >EZH2-N640I GIFIKDPVQKI | 81   | 24020 |
| >EZH2-N640IQKNEFISEY   | 5     | >EZH2-N640I QKKEFISEY   | 5    | 0     |
| >EZH2-N640IQKNEFISEY   | 387   | >EZH2-N640I QKKEFISEY   | 2627 | 2240  |
| >EZH2-N640IVQKNEFISEY  | 191   | >EZH2-N640I VQKKEFISEY  | 170  | 21    |
| >EZH2-N640IVQKNEFISEY  | 37    | >EZH2-N640I VQKKEFISEY  | 38   | 1     |
| >EZH2-N640IVQKNEFISEY  | 329   | >EZH2-N640I VQKKEFISEY  | 414  | 85    |
| >EZH2-N640IVQKNEFISEY  | 4     | >EZH2-N640I VQKKEFISEY  | 5    | 1     |
| >EZH2-N640IPVQKNEFISEY | 372   | >EZH2-N640I PVQKKEFISEY | 575  | 203   |
| >EZH2-N640IDPVQKNEF    | 81    | >EZH2-N640I DPVQKKEF    | 229  | 148   |
| >EZH2-N640IDPVQKNEF    | 292   | >EZH2-N640I DPVQKKEF    | 544  | 252   |
| >EZH2-N640IDPVQKNEF    | 464   | >EZH2-N640I DPVQKKEF    | 792  | 328   |
| >EZH2-N640IKDPVQKNEFI  | 518   | >EZH2-N640I KDPVQKKEFI  | 191  | 327   |
| >EZH2-N640IKDPVQKNEFI  | 181   | >EZH2-N640I KDPVQKKEFI  | 219  | 38    |
| >EZH2-N640IIKDPVQKNEF  | 332   | >EZH2-N640I IKDPVQKKEFI | 185  | 147   |
| >EZH2-N640IIKDPVQKNEF  | 124   | >EZH2-N640I IKDPVQKKEF  | 134  | 10    |
| >EZH2-N640IFIKDPVQKN   | 22699 | >EZH2-N640I FIKDPVQKK   | 331  | 22368 |
| >EZH2-N640IFIKDPVQKNE  | 178   | >EZH2-N640I FIKDPVQKKEI | 289  | 111   |
| >EZH2-N640IFIKDPVQKNE  | 311   | >EZH2-N640I FIKDPVQKKEI | 322  | 11    |
| >EZH2-N640IFIKDPVQKNE  | 106   | >EZH2-N640I FIKDPVQKKEI | 98   | 8     |
| >EZH2-N675I NNDFVVDAT  | 198   | >EZH2-N675I KNDFVVDATI  | 3673 | 3475  |
| >EZH2-N675I LNDFVVDAT  | 148   | >EZH2-N675I LKNDFVVDATI | 584  | 436   |

|                       |       |                       |      |       |
|-----------------------|-------|-----------------------|------|-------|
| >EZH2-N675ILNNDFFVDA  | 6902  | >EZH2-N675ILKNDFFVDA  | 236  | 6666  |
| >EZH2-N675IKYMCSFLFNL | 16399 | >EZH2-N675IKYMCSFLFNL | 180  | 16219 |
| >EZH2-N675IKYMCSFLFNL | 16084 | >EZH2-N675IKYMCSFLFNL | 28   | 16056 |
| >EZH2-N675IKYMCSFLFNL | 1175  | >EZH2-N675IKYMCSFLFNL | 32   | 1143  |
| >EZH2-N675IKYMCSFLFNL | 688   | >EZH2-N675IKYMCSFLFNL | 174  | 514   |
| >EZH2-N675IKYMCSFLFNL | 496   | >EZH2-N675IKYMCSFLFNL | 211  | 285   |
| >EZH2-N675IKYMCSFLFNL | 1178  | >EZH2-N675IKYMCSFLFNL | 5    | 1173  |
| >EZH2-N675IKYMCSFLFNL | 3156  | >EZH2-N675IKYMCSFLFNL | 35   | 3121  |
| >EZH2-N675IKYMCSFLFNL | 6704  | >EZH2-N675IKYMCSFLFNL | 165  | 6539  |
| >EZH2-N675IKYMCSFLFNL | 281   | >EZH2-N675IKYMCSFLFNL | 15   | 266   |
| >EZH2-N675IKYMCSFLFNL | 411   | >EZH2-N675IKYMCSFLFNL | 290  | 121   |
| >EZH2-N675INLNDFV     | 128   | >EZH2-N675INLNDFV     | 1555 | 1427  |
| >EZH2-N675INLNDFV     | 35    | >EZH2-N675INLNDFV     | 322  | 287   |
| >EZH2-N675INLNDFV     | 23    | >EZH2-N675INLNDFV     | 46   | 23    |
| >EZH2-N675INLNDFVD    | 373   | >EZH2-N675INLNDFVD    | 713  | 340   |
| >EZH2-N675INLNDFV     | 74    | >EZH2-N675INLNDFV     | 474  | 400   |
| >EZH2-N675INLNDFV     | 9     | >EZH2-N675INLNDFV     | 161  | 152   |
| >EZH2-N675INLNDFV     | 4     | >EZH2-N675INLNDFV     | 20   | 16    |
| >EZH2-N675INLNDFV     | 13    | >EZH2-N675INLNDFV     | 331  | 318   |
| >EZH2-N675INLNDFV     | 7     | >EZH2-N675INLNDFV     | 355  | 348   |
| >EZH2-N675INLNDFV     | 6     | >EZH2-N675INLNDFV     | 12   | 6     |
| >EZH2-N675INLNDFVD    | 127   | >EZH2-N675INLNDFVD    | 456  | 329   |
| >EZH2-N675INLNDFV     | 387   | >EZH2-N675INLNDFV     | 2779 | 2392  |
| >EZH2-N675IFNLNDFV    | 271   | >EZH2-N675IFNLNDFV    | 581  | 310   |
| >EZH2-N675IFNLNDFV    | 469   | >EZH2-N675IFNLNDFV    | 236  | 233   |
| >EZH2-N675IFNLNDFV    | 295   | >EZH2-N675IFNLNDFV    | 552  | 257   |
| >EZH2-N675IFNLNDFV    | 358   | >EZH2-N675IFNLNDFV    | 1020 | 662   |
| >EZH2-N675IFNLNDFV    | 442   | >EZH2-N675IFNLNDFV    | 1123 | 681   |
| >EZH2-N675IFNLNDFV    | 440   | >EZH2-N675IFNLNDFV    | 1508 | 1068  |
| >EZH2-N675IFNLNDFV    | 392   | >EZH2-N675IFNLNDFV    | 758  | 366   |
| >EZH2-N675IFNLNDFV    | 435   | >EZH2-N675IFNLNDFV    | 910  | 475   |
| >EZH2-N675IFNLNDFV    | 234   | >EZH2-N675IFNLNDFV    | 335  | 101   |
| >EZH2-N675IFNLNDF     | 106   | >EZH2-N675IFNLNDF     | 289  | 183   |
| >EZH2-N675IFNLNDFV    | 487   | >EZH2-N675IFNLNDFV    | 810  | 323   |
| >EZH2-N675IFLNLNDFV   | 6     | >EZH2-N675IFLNLNDFV   | 6    | 0     |
| >EZH2-N675IFLNLNDFV   | 7     | >EZH2-N675IFLNLNDFV   | 9    | 2     |
| >EZH2-N675IFLNLNND    | 71    | >EZH2-N675IFLNLNND    | 899  | 828   |
| >EZH2-N675IFLNLNDF    | 81    | >EZH2-N675IFLNLNDF    | 539  | 458   |
| >EZH2-N675IFLNLNDFV   | 5     | >EZH2-N675IFLNLNDFV   | 6    | 1     |
| >EZH2-N675IFLNLNDFV   | 3     | >EZH2-N675IFLNLNDFV   | 4    | 1     |
| >EZH2-N675IFLNLNDFV   | 9     | >EZH2-N675IFLNLNDFV   | 11   | 2     |
| >EZH2-N675IFLNLNDFV   | 5     | >EZH2-N675IFLNLNDFV   | 6    | 1     |
| >EZH2-N675IFLNLNDF    | 362   | >EZH2-N675IFLNLNDF    | 978  | 616   |

|                        |       |                        |      |       |
|------------------------|-------|------------------------|------|-------|
| >EZH2-N675I FLFNLNNDV  | 25    | >EZH2-N675I FLFNLKNDV  | 28   | 3     |
| >EZH2-N675I FLFNLNNDV  | 5     | >EZH2-N675I FLFNLKNDV  | 8    | 3     |
| >EZH2-N675I FLFNLNNDV  | 1     | >EZH2-N675I FLFNLKNDV  | 2    | 1     |
| >EZH2-N675I FLFNLNNDV  | 1     | >EZH2-N675I FLFNLKNDV  | 1    | 0     |
| >EZH2-N675I FLFNLNNDV  | 3     | >EZH2-N675I FLFNLKNDV  | 3    | 0     |
| >EZH2-N675I FLFNLNNDV  | 2     | >EZH2-N675I FLFNLKNDV  | 3    | 1     |
| >EZH2-N675I FLFNLNNDV  | 4     | >EZH2-N675I FLFNLKNDV  | 4    | 0     |
| >EZH2-N675I FLFNLNNDV  | 4     | >EZH2-N675I FLFNLKNDV  | 4    | 0     |
| >EZH2-N675I FLFNLNNDV  | 3     | >EZH2-N675I FLFNLKNDV  | 6    | 3     |
| >EZH2-N675I FLFNLNNDV  | 3     | >EZH2-N675I FLFNLKNDV  | 6    | 3     |
| >EZH2-N675I FLFNLNNDV  | 2     | >EZH2-N675I FLFNLKNDV  | 2    | 0     |
| >EZH2-N675I FLFNLNNDV  | 2     | >EZH2-N675I FLFNLKNDV  | 2    | 0     |
| >EZH2-N675I FLFNLNND   | 476   | >EZH2-N675I FLFNLKND   | 1029 | 553   |
| >EZH2-N675I FLFNLNND   | 92    | >EZH2-N675I FLFNLKND   | 579  | 487   |
| >EZH2-N675I FLFNLNNDV  | 89    | >EZH2-N675I FLFNLKNDV  | 137  | 48    |
| >EZH2-N675I FLFNLNNDV  | 77    | >EZH2-N675I FLFNLKNDV  | 128  | 51    |
| >EZH2-N675I FLFNLNNDV  | 79    | >EZH2-N675I FLFNLKNDV  | 255  | 176   |
| >EZH2-N675I FLFNLNNDV  | 260   | >EZH2-N675I FLFNLKNDV  | 468  | 208   |
| >EZH2-N675I FLFNLNND   | 73    | >EZH2-N675I FLFNLKND   | 166  | 93    |
| >EZH2-N675I FLFNLNND   | 30    | >EZH2-N675I FLFNLKND   | 77   | 47    |
| >EZH2-N675I FLFNLNND   | 8     | >EZH2-N675I FLFNLKND   | 14   | 6     |
| >EZH2-N675I FLFNLNNDV  | 215   | >EZH2-N675I FLFNLKNDV  | 384  | 169   |
| >EZH2-N675I FLFNLNND   | 215   | >EZH2-N675I FLFNLKND   | 316  | 101   |
| >EZH2-N675I SFLFNLNND  | 410   | >EZH2-N675I SFLFNLKND' | 1006 | 596   |
| >EZH2-N675I SFLFNLNND  | 275   | >EZH2-N675I SFLFNLKND' | 475  | 200   |
| >EZH2-N675I SFLFNLNND  | 362   | >EZH2-N675I SFLFNLKND  | 326  | 36    |
| >EZH2-N675I SFLFNLNND  | 14    | >EZH2-N675I SFLFNLKND  | 21   | 7     |
| >EZH2-N675I SFLFNLNND  | 324   | >EZH2-N675I SFLFNLKND' | 363  | 39    |
| >EZH2-N675I SFLFNLNND  | 115   | >EZH2-N675I SFLFNLKND' | 151  | 36    |
| >EZH2-N675I CSFLFNLND  | 241   | >EZH2-N675I CSFLFNLKND | 154  | 87    |
| >EZH2-N675I CSFLFNLN   | 18762 | >EZH2-N675I CSFLFNLK   | 131  | 18631 |
| >EZH2-N675I CSFLFNLN   | 14049 | >EZH2-N675I CSFLFNLK   | 10   | 14039 |
| >EZH2-N675I CSFLFNLN   | 12418 | >EZH2-N675I CSFLFNLK   | 87   | 12331 |
| >EZH2-N675I CSFLFNLN   | 14115 | >EZH2-N675I CSFLFNLK   | 423  | 13692 |
| >EZH2-N675I CSFLFNLND  | 394   | >EZH2-N675I CSFLFNLKND | 937  | 543   |
| >EZH2-N675I CSFLFNLN   | 4968  | >EZH2-N675I CSFLFNLK   | 16   | 4952  |
| >EZH2-N675I CSFLFNLND  | 39    | >EZH2-N675I CSFLFNLKND | 70   | 31    |
| >EZH2-N675I CSFLFNLND  | 61    | >EZH2-N675I CSFLFNLKND | 120  | 59    |
| >EZH2-N675I CSFLFNLND  | 329   | >EZH2-N675I CSFLFNLKND | 342  | 13    |
| >EZH2-N675I CSFLFNLN   | 7947  | >EZH2-N675I CSFLFNLK   | 180  | 7767  |
| >EZH2-N675I MCSFLFNLN  | 14683 | >EZH2-N675I MCSFLFNLK  | 309  | 14374 |
| >EZH2-N675I MCSFLFNLN  | 14953 | >EZH2-N675I MCSFLFNLK  | 106  | 14847 |
| >EZH2-N675I YMCSFLFNLN | 1102  | >EZH2-N675I YMCSFLFNLK | 385  | 717   |

|                        |       |                         |     |       |
|------------------------|-------|-------------------------|-----|-------|
| >EZH2-N675IYMCSFLFNLN  | 497   | >EZH2-N675IYMCSFLFNLK   | 617 | 120   |
| >EZH2-N675IYMCSFLFNLN  | 379   | >EZH2-N675IYMCSFLFNLK   | 371 | 8     |
| >EZH2-N675IYMCSFLFNLN  | 12192 | >EZH2-N675IYMCSFLFNLK   | 37  | 12155 |
| >EZH2-N675IYMCSFLFNLN  | 28699 | >EZH2-N675IYMCSFLFNLK   | 38  | 28661 |
| >EZH2-N675IYMCSFLFNLN  | 5951  | >EZH2-N675IYMCSFLFNLK   | 178 | 5773  |
| >EZH2-N675IYMCSFLFNLN  | 4399  | >EZH2-N675IYMCSFLFNLK   | 481 | 3918  |
| >EZH2-N675IYMCSFLFNLN  | 18417 | >EZH2-N675IYMCSFLFNLK   | 49  | 18368 |
| >EZH2-N675IYMCSFLFNLN  | 9447  | >EZH2-N675IYMCSFLFNLK   | 118 | 9329  |
| >EZH2-N675IYMCSFLFNLN  | 10391 | >EZH2-N675IYMCSFLFNLK   | 278 | 10113 |
| >EZH2-N693I NHSVNPNCY  | 2053  | >EZH2-N693I IHSVNPNCY   | 447 | 1606  |
| >EZH2-N693I NHSVNPNCY  | 1103  | >EZH2-N693I IHSVNPNCY   | 129 | 974   |
| >EZH2-N693I ANHSVNPNC  | 11269 | >EZH2-N693I AIHSVNPNCY  | 73  | 11196 |
| >EZH2-N693I ANHSVNPNC  | 28603 | >EZH2-N693I AIHSVNPNCY  | 266 | 28337 |
| >EZH2-N693I ANHSVNPNC  | 7066  | >EZH2-N693I AIHSVNPNCY  | 306 | 6760  |
| >EZH2-N693I ANHSVNPNC  | 392   | >EZH2-N693I AIHSVNPNCY  | 26  | 366   |
| >EZH2-N693I ANHSVNPNC  | 362   | >EZH2-N693I AIHSVNPNCY  | 412 | 50    |
| >EZH2-N693I TRKGNKIRFA | 5136  | >EZH2-N693I TRKGNKIRFA  | 442 | 4694  |
| >EZH2-N693I FANHSVNPNC | 2163  | >EZH2-N693I FAIHSVNPNC  | 66  | 2097  |
| >EZH2-N693I FANHSVNPNC | 581   | >EZH2-N693I FAIHSVNPNC  | 96  | 485   |
| >EZH2-N693I FANHSVNPNC | 278   | >EZH2-N693I FAIHSVNPNC  | 190 | 88    |
| >EZH2-N693I FANHSVNPNC | 32    | >EZH2-N693I FAIHSVNPNC  | 24  | 8     |
| >EZH2-N693I FANHSVNPNC | 387   | >EZH2-N693I FAIHSVNPNC  | 95  | 292   |
| >EZH2-N693I FANHSVNPNC | 23    | >EZH2-N693I FAIHSVNPNC  | 18  | 5     |
| >EZH2-N693I FANHSVNPNC | 409   | >EZH2-N693I FAIHSVNPNC  | 283 | 126   |
| >EZH2-N693I FANHSVNPNC | 364   | >EZH2-N693I FAIHSVNPNC  | 303 | 61    |
| >EZH2-N693I IRFANHSV   | 39    | >EZH2-N693I IRFAIHSV    | 60  | 21    |
| >EZH2-N693I IRFANHSVNP | 229   | >EZH2-N693I IRFAIHSVNP  | 450 | 221   |
| >EZH2-N693I IRFANHSVNP | 453   | >EZH2-N693I IRFAIHSVNP  | 658 | 205   |
| >EZH2-N693I IRFANHSV   | 154   | >EZH2-N693I IRFAIHSV    | 74  | 80    |
| >EZH2-N693I IRFANHSV   | 607   | >EZH2-N693I IRFAIHSV    | 365 | 242   |
| >EZH2-N693I KIRFANHSV  | 469   | >EZH2-N693I KIRFAIHSV   | 284 | 185   |
| >EZH2-N693I KIRFANHSV  | 41    | >EZH2-N693I KIRFAIHSV   | 9   | 32    |
| >EZH2-N693I KIRFANHSV  | 319   | >EZH2-N693I KIRFAIHSV   | 50  | 269   |
| >EZH2-N693I KIRFANHSV  | 500   | >EZH2-N693I KIRFAIHSV   | 40  | 460   |
| >EZH2-N693I KIRFANHSV  | 974   | >EZH2-N693I KIRFAIHSV   | 367 | 607   |
| >EZH2-N693I KIRFANHSV  | 1609  | >EZH2-N693I KIRFAIHSV   | 226 | 1383  |
| >EZH2-N693I KIRFANHSV  | 1954  | >EZH2-N693I KIRFAIHSV   | 302 | 1652  |
| >EZH2-N693I KIRFANHSV  | 18    | >EZH2-N693I KIRFAIHSV   | 5   | 13    |
| >EZH2-N693I KIRFANHS   | 12    | >EZH2-N693I KIRFAIHS    | 9   | 3     |
| >EZH2-N693I KIRFANHSV  | 4     | >EZH2-N693I KIRFAIHSV   | 5   | 1     |
| >EZH2-N693I KIRFANHSV  | 25    | >EZH2-N693I KIRFAIHSV   | 32  | 7     |
| >EZH2-N693I KIRFANHSV  | 17    | >EZH2-N693I KIRFAIHSVNF | 20  | 3     |
| >EZH2-N693I NKIRFANHSV | 277   | >EZH2-N693I NKIRFAIHSV  | 255 | 22    |



|                        |       |                       |      |       |
|------------------------|-------|-----------------------|------|-------|
| >EZH2-N693IGNKIRFANHS  | 513   | >EZH2-N693IGNKIRFAIHS | 375  | 138   |
| >EZH2-N693IKGNKIRFAN   | 18655 | >EZH2-N693IKGNKIRFAI  | 409  | 18246 |
| >EZH2-N693IRKGNKIRFAN  | 7522  | >EZH2-N693IRKGNKIRFAI | 226  | 7296  |
| >EZH2-N693INHVSVPNCY   | 2053  | >EZH2-N693IKHSVNPNCY  | 218  | 1835  |
| >EZH2-N693INHVSVPNCY   | 1103  | >EZH2-N693IKHSVNPNCY  | 91   | 1012  |
| >EZH2-N693IANHSVNPNC   | 392   | >EZH2-N693IAKHSVNPNC  | 1320 | 928   |
| >EZH2-N693IANHSVNPNC   | 362   | >EZH2-N693IAKHSVNPNC  | 6    | 356   |
| >EZH2-N693IANHSVNPNC   | 6932  | >EZH2-N693IAKHSVNPNC  | 238  | 6694  |
| >EZH2-N693ITRKGNKIRFA  | 5136  | >EZH2-N693ITRKGNKIRFA | 254  | 4882  |
| >EZH2-N693IFANHSVNPNC  | 278   | >EZH2-N693IFAKHSVNPNC | 195  | 83    |
| >EZH2-N693IFANHSVNPNC  | 32    | >EZH2-N693IFAKHSVNPNC | 29   | 3     |
| >EZH2-N693IFANHSVNPNC  | 387   | >EZH2-N693IFAKHSVNPNC | 334  | 53    |
| >EZH2-N693IFANHSVNPNC  | 23    | >EZH2-N693IFAKHSVNPNC | 96   | 73    |
| >EZH2-N693IFANHSVNPNC  | 409   | >EZH2-N693IFAKHSVNPNC | 401  | 8     |
| >EZH2-N693IFANHSVNPNC  | 364   | >EZH2-N693IFAKHSVNPNC | 4782 | 4418  |
| >EZH2-N693IRFANHSV     | 39    | >EZH2-N693IRFAKHSV    | 109  | 70    |
| >EZH2-N693IRFANHSVNP   | 229   | >EZH2-N693IRFAKHSVNP  | 535  | 306   |
| >EZH2-N693IRFANHSVNP   | 453   | >EZH2-N693IRFAKHSVNP  | 862  | 409   |
| >EZH2-N693IRFANHSV     | 154   | >EZH2-N693IRFAKHSV    | 184  | 30    |
| >EZH2-N693KIRFANHSV    | 469   | >EZH2-N693KIRFAKHSV   | 3049 | 2580  |
| >EZH2-N693KIRFANHSV    | 41    | >EZH2-N693KIRFAKHSV   | 185  | 144   |
| >EZH2-N693KIRFANHSV    | 319   | >EZH2-N693KIRFAKHSV   | 1359 | 1040  |
| >EZH2-N693KIRFANHSV    | 18    | >EZH2-N693KIRFAKHSV   | 19   | 1     |
| >EZH2-N693KIRFANHS     | 12    | >EZH2-N693KIRFAKHS    | 23   | 11    |
| >EZH2-N693KIRFANHSV    | 4     | >EZH2-N693KIRFAKHSV   | 5    | 1     |
| >EZH2-N693KIRFANHSVN   | 25    | >EZH2-N693KIRFAKHSVN  | 43   | 18    |
| >EZH2-N693KIRFANHSVN   | 17    | >EZH2-N693KIRFAKHSVN  | 25   | 8     |
| >EZH2-N693NKIRFANHSV   | 277   | >EZH2-N693NKIRFAKHSV  | 425  | 148   |
| >EZH2-N693IGNKIRFAN    | 14432 | >EZH2-N693IGNKIRFAK   | 268  | 14164 |
| >EZH2-N693IGNKIRFANHS  | 513   | >EZH2-N693IGNKIRFAKHS | 383  | 130   |
| >EZH2-N693IKGNKIRFAN   | 21085 | >EZH2-N693IKGNKIRFAK  | 227  | 20858 |
| >EZH2-N693IKGNKIRFAN   | 20244 | >EZH2-N693IKGNKIRFAK  | 112  | 20132 |
| >EZH2-N693IKGNKIRFAN   | 8486  | >EZH2-N693IKGNKIRFAK  | 30   | 8456  |
| >EZH2-N693IKGNKIRFAN   | 3862  | >EZH2-N693IKGNKIRFAK  | 22   | 3840  |
| >EZH2-N693IRKGNKIRFAN  | 14647 | >EZH2-N693IRKGNKIRFAK | 470  | 14177 |
| >EZH2-R288(RCFKYDCFL   | 491   | >EZH2-R288(QCFKYDCFL  | 7452 | 6961  |
| >EZH2-R288(RCFKYDCFLH  | 18    | >EZH2-R288(QCFKYDCFLH | 246  | 228   |
| >EZH2-R288(RCFKYDCFLH  | 1232  | >EZH2-R288(QCFKYDCFLH | 447  | 785   |
| >EZH2-R288(RCFKYDCF    | 48    | >EZH2-R288(QCFKYDCF   | 209  | 161   |
| >EZH2-R288(RCFKYDCFLH  | 10    | >EZH2-R288(QCFKYDCFLH | 13   | 3     |
| >EZH2-R288(RRCFKYDCFLI | 13180 | >EZH2-R288(RQCFKYDCFL | 424  | 12756 |
| >EZH2-R288(RRCFKYDCF   | 16561 | >EZH2-R288(RQCFKYDCF  | 145  | 16416 |
| >EZH2-R288(RRCFKYDCF   | 171   | >EZH2-R288(RQCFKYDCF  | 23   | 148   |

|                        |      |                        |       |       |
|------------------------|------|------------------------|-------|-------|
| >EZH2-R288(RRCFKYDCFL  | 1361 | >EZH2-R288(RQCFKYDCFL  | 483   | 878   |
| >EZH2-R288(RRCFKYDCFL  | 30   | >EZH2-R288(RQCFKYDCFL  | 1758  | 1728  |
| >EZH2-R288(RRCFKYDC    | 57   | >EZH2-R288(RQCFKYDC    | 1127  | 1070  |
| >EZH2-R288(RRCFKYDCF   | 214  | >EZH2-R288(RQCFKYDCF   | 3695  | 3481  |
| >EZH2-R288(RRCFKYDCFL  | 27   | >EZH2-R288(RQCFKYDCFL  | 400   | 373   |
| >EZH2-R288(RRCFKYDCFLI | 283  | >EZH2-R288(RQCFKYDCFL  | 5500  | 5217  |
| >EZH2-R288(RRCFKYDCF   | 51   | >EZH2-R288(RQCFKYDCF   | 1055  | 1004  |
| >EZH2-R288(RRCFKYDCFL  | 27   | >EZH2-R288(RQCFKYDCFL  | 331   | 304   |
| >EZH2-R288(RRCFKYDCFLI | 264  | >EZH2-R288(RQCFKYDCFL  | 2927  | 2663  |
| >EZH2-R288(LHSFHTLFCRI | 283  | >EZH2-R288(LHSFHTLFCR( | 17296 | 17013 |
| >EZH2-R288(CRRCFKYDCF  | 60   | >EZH2-R288(CRQCFKYDCF  | 217   | 157   |
| >EZH2-R288(CRRCFKYDCF  | 295  | >EZH2-R288(CRQCFKYDCF  | 378   | 83    |
| >EZH2-R288(CRRCFKYDCF  | 499  | >EZH2-R288(CRQCFKYDCF  | 385   | 114   |
| >EZH2-R288(CRRCFKYDCF  | 246  | >EZH2-R288(CRQCFKYDCF  | 93    | 153   |
| >EZH2-R288(FCRRCFKY    | 404  | >EZH2-R288(FCRQCFKY    | 217   | 187   |
| >EZH2-R288(FCRRCFKYDC  | 477  | >EZH2-R288(FCRQCFKYDC  | 748   | 271   |
| >EZH2-R288(FCRRCFKY    | 416  | >EZH2-R288(FCRQCFKY    | 554   | 138   |
| >EZH2-R288(FCRRCFKYDC  | 102  | >EZH2-R288(FCRQCFKYDC  | 132   | 30    |
| >EZH2-R288(FCRRCFKYDC  | 343  | >EZH2-R288(FCRQCFKYDC  | 299   | 44    |
| >EZH2-R288(LFCRRCFKY   | 22   | >EZH2-R288(LFCRQCFKY   | 15    | 7     |
| >EZH2-R288(LFCRRCFK    | 79   | >EZH2-R288(LFCRQCFK    | 107   | 28    |
| >EZH2-R288(LFCRRCFKY   | 641  | >EZH2-R288(LFCRQCFKY   | 380   | 261   |
| >EZH2-R288(LFCRRCFK    | 33   | >EZH2-R288(LFCRQCFK    | 85    | 52    |
| >EZH2-R288(LFCRRCFK    | 54   | >EZH2-R288(LFCRQCFK    | 203   | 149   |
| >EZH2-R288(LFCRRCFKY   | 121  | >EZH2-R288(LFCRQCFKY   | 210   | 89    |
| >EZH2-R288(TLFCRRCFK   | 27   | >EZH2-R288(TLFCRQCFK   | 27    | 0     |
| >EZH2-R288(TLFCRRCFKY  | 168  | >EZH2-R288(TLFCRQCFKY  | 283   | 115   |
| >EZH2-R288(TLFCRRCFK   | 14   | >EZH2-R288(TLFCRQCFK   | 18    | 4     |
| >EZH2-R288(TLFCRRCFKY  | 387  | >EZH2-R288(TLFCRQCFKY  | 504   | 117   |
| >EZH2-R288(TLFCRRCFKY  | 131  | >EZH2-R288(TLFCRQCFKY  | 110   | 21    |
| >EZH2-R288(TLFCRRCFK   | 21   | >EZH2-R288(TLFCRQCFK   | 40    | 19    |
| >EZH2-R288(TLFCRRCFKY  | 42   | >EZH2-R288(TLFCRQCFKY  | 41    | 1     |
| >EZH2-R288(TLFCRRCFK   | 26   | >EZH2-R288(TLFCRQCFK   | 53    | 27    |
| >EZH2-R288(TLFCRRCFK   | 44   | >EZH2-R288(TLFCRQCFK   | 127   | 83    |
| >EZH2-R288(TLFCRRCFK   | 12   | >EZH2-R288(TLFCRQCFK   | 18    | 6     |
| >EZH2-R288(TLFCRRCFKY  | 366  | >EZH2-R288(TLFCRQCFKY  | 160   | 206   |
| >EZH2-R288(TLFCRRCF    | 267  | >EZH2-R288(TLFCRQCF    | 366   | 99    |
| >EZH2-R288(TLFCRRCF    | 264  | >EZH2-R288(TLFCRQCF    | 161   | 103   |
| >EZH2-R288(TLFCRRCFKY  | 388  | >EZH2-R288(TLFCRQCFKY  | 392   | 4     |
| >EZH2-R288(TLFCRRCF    | 736  | >EZH2-R288(TLFCRQCF    | 442   | 294   |
| >EZH2-R288(TLFCRRCFKY  | 244  | >EZH2-R288(TLFCRQCFKY  | 213   | 31    |
| >EZH2-R288(TLFCRRCF    | 33   | >EZH2-R288(TLFCRQCF    | 22    | 11    |
| >EZH2-R288(TLFCRRCFKY  | 321  | >EZH2-R288(TLFCRQCFKY  | 307   | 14    |

|                        |      |                       |       |       |
|------------------------|------|-----------------------|-------|-------|
| >EZH2-R288(TLFCRRCFK   | 117  | >EZH2-R288(TLFCRQCFK  | 169   | 52    |
| >EZH2-R288(HTLFCRRCFK  | 12   | >EZH2-R288(HTLFCRQCFK | 13    | 1     |
| >EZH2-R288(HTLFCRRCFK  | 16   | >EZH2-R288(HTLFCRQCFK | 15    | 1     |
| >EZH2-R288(HTLFCRRCFK' | 438  | >EZH2-R288(HTLFCRQCFK | 428   | 10    |
| >EZH2-R288(HTLFCRRCFK' | 39   | >EZH2-R288(HTLFCRQCFK | 29    | 10    |
| >EZH2-R288(HTLFCRRCFK  | 6    | >EZH2-R288(HTLFCRQCFK | 6     | 0     |
| >EZH2-R288(HTLFCRRCFK' | 51   | >EZH2-R288(HTLFCRQCFK | 48    | 3     |
| >EZH2-R288(HTLFCRRCFK  | 8    | >EZH2-R288(HTLFCRQCFK | 21    | 13    |
| >EZH2-R288(HTLFCRRCFK  | 309  | >EZH2-R288(HTLFCRQCFK | 694   | 385   |
| >EZH2-R288(HTLFCRRCFK  | 9    | >EZH2-R288(HTLFCRQCFK | 9     | 0     |
| >EZH2-R288(HTLFCRRCFK' | 402  | >EZH2-R288(HTLFCRQCFK | 349   | 53    |
| >EZH2-R288(HTLFCRRCFK' | 288  | >EZH2-R288(HTLFCRQCFK | 191   | 97    |
| >EZH2-R288(HTLFCRRCF   | 201  | >EZH2-R288(HTLFCRQCF  | 74    | 127   |
| >EZH2-R288(HTLFCRRCF   | 65   | >EZH2-R288(HTLFCRQCF  | 28    | 37    |
| >EZH2-R288(HTLFCRRCFK' | 10   | >EZH2-R288(HTLFCRQCFK | 8     | 2     |
| >EZH2-R288(HTLFCRRCF   | 127  | >EZH2-R288(HTLFCRQCF  | 92    | 35    |
| >EZH2-R288(HTLFCRRCFK' | 32   | >EZH2-R288(HTLFCRQCFK | 33    | 1     |
| >EZH2-R288(HTLFCRRCFK' | 109  | >EZH2-R288(HTLFCRQCFK | 95    | 14    |
| >EZH2-R288(HTLFCRRCFK  | 257  | >EZH2-R288(HTLFCRQCFK | 264   | 7     |
| >EZH2-R288(FHTLFCRRCFI | 471  | >EZH2-R288(FHTLFCRQCF | 527   | 56    |
| >EZH2-R288(FHTLFCRRCF  | 118  | >EZH2-R288(FHTLFCRQCF | 60    | 58    |
| >EZH2-R288(FHTLFCRR    | 370  | >EZH2-R288(FHTLFCRQ   | 21431 | 21061 |
| >EZH2-R288(SFHTLFCRRCI | 183  | >EZH2-R288(SFHTLFCRQC | 78    | 105   |
| >EZH2-R288(SFHTLFCRR   | 10   | >EZH2-R288(SFHTLFCRQ  | 6097  | 6087  |
| >EZH2-R288(SFHTLFCRR   | 125  | >EZH2-R288(SFHTLFCRQ  | 22063 | 21938 |
| >EZH2-R288(SFHTLFCRR   | 448  | >EZH2-R288(SFHTLFCRQ  | 22836 | 22388 |
| >EZH2-R288(SFHTLFCRR   | 11   | >EZH2-R288(SFHTLFCRQ  | 416   | 405   |
| >EZH2-R288(HSFHTLFCRR  | 372  | >EZH2-R288(HSFHTLFCRQ | 998   | 626   |
| >EZH2-R288(HSFHTLFCRR  | 14   | >EZH2-R288(HSFHTLFCRQ | 7503  | 7489  |
| >EZH2-R288(HSFHTLFCRR  | 25   | >EZH2-R288(HSFHTLFCRQ | 21436 | 21411 |
| >EZH2-R288(HSFHTLFCRR  | 177  | >EZH2-R288(HSFHTLFCRQ | 1431  | 1254  |
| >EZH2-R288(HSFHTLFCRR  | 41   | >EZH2-R288(HSFHTLFCRQ | 2989  | 2948  |
| >EZH2-R509(CRKIQLKK    | 342  | >EZH2-R509(CGKIQLKK   | 24489 | 24147 |
| >EZH2-R509(RKHRLWAAH   | 431  | >EZH2-R509(RKHRLWAAH  | 21419 | 20988 |
| >EZH2-R509(RKHRLWAAH   | 286  | >EZH2-R509(RKHRLWAAH  | 4079  | 3793  |
| >EZH2-R509(RKHRLWAAH   | 372  | >EZH2-R509(RKHRLWAAH  | 6683  | 6311  |
| >EZH2-R509(RKHRLWAAH   | 212  | >EZH2-R509(RKHRLWAAH  | 33683 | 33471 |
| >EZH2-R509(HCRKIQLK    | 5    | >EZH2-R509(HCGKIQLK   | 1908  | 1903  |
| >EZH2-R509(HCRKIQLK    | 5    | >EZH2-R509(HCGKIQLK   | 2190  | 2185  |
| >EZH2-R509(AHCRKIQL    | 1402 | >EZH2-R509(AHCGKIQL   | 276   | 1126  |
| >EZH2-R509(AAHCRIQLK   | 185  | >EZH2-R509(AAHCRIQLK  | 229   | 44    |
| >EZH2-R509(AAHCRIQLK   | 254  | >EZH2-R509(AAHCRIQLK  | 414   | 160   |
| >EZH2-R509(AAHCRIQLK   | 212  | >EZH2-R509(AAHCRIQLK  | 188   | 24    |

|                        |      |                         |       |       |
|------------------------|------|-------------------------|-------|-------|
| >EZH2-R509(AAHC RKIQLK | 123  | >EZH2-R509(AAHC GK IQLK | 154   | 31    |
| >EZH2-R509(AAHC RKIQL  | 376  | >EZH2-R509(AAHC GK IQL  | 730   | 354   |
| >EZH2-R509(AAHC RKIQLK | 8    | >EZH2-R509(AAHC GK IQLK | 10    | 2     |
| >EZH2-R509(AAHC RKIQLK | 10   | >EZH2-R509(AAHC GK IQLK | 12    | 2     |
| >EZH2-R509(AAHC RKIQL  | 199  | >EZH2-R509(AAHC GK IQL  | 12844 | 12645 |
| >EZH2-R509(AAHC RKIQL  | 479  | >EZH2-R509(AAHC GK IQL  | 318   | 161   |
| >EZH2-R509(WAAHC RKIQ  | 275  | >EZH2-R509(WAAHC GK IQ  | 435   | 160   |
| >EZH2-R509(WAAHC RKI   | 433  | >EZH2-R509(WAAHC GK I   | 331   | 102   |
| >EZH2-R509(WAAHC RKIQ  | 1072 | >EZH2-R509(WAAHC GK IQ  | 352   | 720   |
| >EZH2-R509(WAAHC RKI   | 132  | >EZH2-R509(WAAHC GK I   | 75    | 57    |
| >EZH2-R509(LWAAHC RKI  | 890  | >EZH2-R509(LWAAHC GK I  | 321   | 569   |
| >EZH2-R509(LWAAHC RKI  | 419  | >EZH2-R509(LWAAHC GK I  | 229   | 190   |
| >EZH2-R509(LWAAHC RK   | 158  | >EZH2-R509(LWAAHC GK    | 168   | 10    |
| >EZH2-R509(LWAAHC RK   | 692  | >EZH2-R509(LWAAHC GK    | 466   | 226   |
| >EZH2-R509(LWAAHC RKI  | 153  | >EZH2-R509(LWAAHC GK I  | 113   | 40    |
| >EZH2-R509(LWAAHC RKI  | 254  | >EZH2-R509(LWAAHC GK I  | 223   | 31    |
| >EZH2-R509(RLWAAHC RK  | 577  | >EZH2-R509(RLWAAHC GK   | 432   | 145   |
| >EZH2-R509(RLWAAHC RK  | 251  | >EZH2-R509(RLWAAHC GK   | 128   | 123   |
| >EZH2-R509(RLWAAHC RK  | 410  | >EZH2-R509(RLWAAHC GK   | 246   | 164   |
| >EZH2-R509(RLWAAHC RK  | 10   | >EZH2-R509(RLWAAHC GK   | 9     | 1     |
| >EZH2-R509(RLWAAHC RK  | 511  | >EZH2-R509(RLWAAHC GK   | 340   | 171   |
| >EZH2-R509(RLWAAHC RK  | 77   | >EZH2-R509(RLWAAHC GK   | 45    | 32    |
| >EZH2-R509(RLWAAHC RK  | 305  | >EZH2-R509(RLWAAHC GK   | 278   | 27    |
| >EZH2-R509(RLWAAHC RK  | 245  | >EZH2-R509(RLWAAHC GK   | 275   | 30    |
| >EZH2-R509(RLWAAHC RK  | 53   | >EZH2-R509(RLWAAHC GK   | 39    | 14    |
| >EZH2-R509(RLWAAHC R   | 319  | >EZH2-R509(RLWAAHC G    | 17944 | 17625 |
| >EZH2-R509(RLWAAHC RK  | 38   | >EZH2-R509(RLWAAHC GK   | 45    | 7     |
| >EZH2-R509(RLWAAHC RK  | 74   | >EZH2-R509(RLWAAHC GK   | 87    | 13    |
| >EZH2-R509(RLWAAHC RK  | 11   | >EZH2-R509(RLWAAHC GK   | 12    | 1     |
| >EZH2-R509(RLWAAHC R   | 9    | >EZH2-R509(RLWAAHC G    | 8211  | 8202  |
| >EZH2-R509(RLWAAHC RK  | 29   | >EZH2-R509(RLWAAHC GK   | 46    | 17    |
| >EZH2-R509(RLWAAHC RK  | 32   | >EZH2-R509(RLWAAHC GK   | 98    | 66    |
| >EZH2-R509(RLWAAHC R   | 23   | >EZH2-R509(RLWAAHC G    | 15354 | 15331 |
| >EZH2-R509(RLWAAHC RK  | 48   | >EZH2-R509(RLWAAHC GK   | 58    | 10    |
| >EZH2-R509(HRLWAAHC R  | 32   | >EZH2-R509(HRLWAAHC C   | 639   | 607   |
| >EZH2-R509(HRLWAAHC R  | 27   | >EZH2-R509(HRLWAAHC C   | 31    | 4     |
| >EZH2-R509(HRLWAAHC R  | 69   | >EZH2-R509(HRLWAAHC C   | 81    | 12    |
| >EZH2-R509(HRLWAAHC R  | 448  | >EZH2-R509(HRLWAAHC C   | 307   | 141   |
| >EZH2-R509(HRLWAAHC R  | 168  | >EZH2-R509(HRLWAAHC C   | 309   | 141   |
| >EZH2-R509(HRLWAAHC R  | 64   | >EZH2-R509(HRLWAAHC C   | 30423 | 30359 |
| >EZH2-R509(KHRLWAAHC   | 14   | >EZH2-R509(KHRLWAAHC    | 15    | 1     |
| >EZH2-R509(KHRLWAAHC   | 63   | >EZH2-R509(KHRLWAAHC    | 21565 | 21502 |
| >EZH2-R509(KHRLWAAHC   | 120  | >EZH2-R509(KHRLWAAHC    | 30134 | 30014 |

|                       |      |                       |       |       |
|-----------------------|------|-----------------------|-------|-------|
| >EZH2-R684(RKGNKIRF   | 25   | >EZH2-R684(CKGNKIRF   | 337   | 312   |
| >EZH2-R684(RKGNKIRF   | 460  | >EZH2-R684(CKGNKIRF   | 1859  | 1399  |
| >EZH2-R684(LNNDFVVDA  | 148  | >EZH2-R684(LNNDFVVDA  | 38000 | 37852 |
| >EZH2-R684(ATRKGNKIRF | 910  | >EZH2-R684(ATCKGNKIRF | 243   | 667   |
| >EZH2-R684(ATRKGNKI   | 11   | >EZH2-R684(ATCKGNKI   | 2376  | 2365  |
| >EZH2-R684(ATRKGNKIR  | 23   | >EZH2-R684(ATCKGNKIR  | 5269  | 5246  |
| >EZH2-R684(ATRKGNKIRF | 151  | >EZH2-R684(ATCKGNKIRF | 9345  | 9194  |
| >EZH2-R684(ATRKGNKIRF | 5    | >EZH2-R684(ATCKGNKIRF | 322   | 317   |
| >EZH2-R684(ATRKGNKIR  | 226  | >EZH2-R684(ATCKGNKIR  | 392   | 166   |
| >EZH2-R684(ATRKGNKIRF | 221  | >EZH2-R684(ATCKGNKIRF | 1235  | 1014  |
| >EZH2-R684(ATRKGNKI   | 61   | >EZH2-R684(ATCKGNKI   | 404   | 343   |
| >EZH2-R684(ATRKGNKIRF | 4    | >EZH2-R684(ATCKGNKIRF | 6     | 2     |
| >EZH2-R684(ATRKGNKI   | 361  | >EZH2-R684(ATCKGNKI   | 729   | 368   |
| >EZH2-R684(ATRKGNKIRF | 69   | >EZH2-R684(ATCKGNKIRF | 165   | 96    |
| >EZH2-R684(ATRKGNKI   | 121  | >EZH2-R684(ATCKGNKI   | 42    | 79    |
| >EZH2-R684(DATRKGNK   | 463  | >EZH2-R684(DATCKGNK   | 338   | 125   |
| >EZH2-R684(VDATRKGNKI | 204  | >EZH2-R684(VDATCKGNKI | 359   | 155   |
| >EZH2-R684(FVVDATRK   | 411  | >EZH2-R684(FVVDATCK   | 320   | 91    |
| >EZH2-R684(FVVDATRKGI | 657  | >EZH2-R684(FVVDATCKGI | 418   | 239   |
| >EZH2-R684(FVVDATRK   | 17   | >EZH2-R684(FVVDATCK   | 12    | 5     |
| >EZH2-R684(FVVDATRKGI | 34   | >EZH2-R684(FVVDATCKGI | 24    | 10    |
| >EZH2-R684(DFVVDATR   | 25   | >EZH2-R684(DFVVDATC   | 23821 | 23796 |
| >EZH2-R684(DFVVDATR   | 104  | >EZH2-R684(DFVVDATC   | 37322 | 37218 |
| >EZH2-R684(NDFVVDATR  | 100  | >EZH2-R684(NDFVVDATC  | 35132 | 35032 |
| >EZH2-R684(NNDFVVDAT  | 198  | >EZH2-R684(NNDFVVDAT  | 36206 | 36008 |
| >EZH2-R690(IRFANHSV   | 2832 | >EZH2-R690(ICFANHSV   | 281   | 2551  |
| >EZH2-R690(IRFANHSV   | 1323 | >EZH2-R690(ICFANHSV   | 73    | 1250  |
| >EZH2-R690(IRFANHSV   | 1092 | >EZH2-R690(ICFANHSV   | 70    | 1022  |
| >EZH2-R690(IRFANHSV   | 5264 | >EZH2-R690(ICFANHSV   | 325   | 4939  |
| >EZH2-R690(IRFANHSV   | 39   | >EZH2-R690(ICFANHSV   | 683   | 644   |
| >EZH2-R690(IRFANHSVNP | 229  | >EZH2-R690(ICFANHSVNP | 4859  | 4630  |
| >EZH2-R690(IRFANHSVNP | 453  | >EZH2-R690(ICFANHSVNP | 4808  | 4355  |
| >EZH2-R690(IRFANHSV   | 154  | >EZH2-R690(ICFANHSV   | 26040 | 25886 |
| >EZH2-R690(KIRFANHSV  | 2767 | >EZH2-R690(KICFANHSV  | 195   | 2572  |
| >EZH2-R690(KIRFANHSV  | 469  | >EZH2-R690(KICFANHSV  | 64    | 405   |
| >EZH2-R690(KIRFANHSV  | 41   | >EZH2-R690(KICFANHSV  | 69    | 28    |
| >EZH2-R690(KIRFANHSV  | 319  | >EZH2-R690(KICFANHSV  | 42    | 277   |
| >EZH2-R690(KIRFANHSV  | 500  | >EZH2-R690(KICFANHSV  | 41    | 459   |
| >EZH2-R690(KIRFANHSV  | 1609 | >EZH2-R690(KICFANHSV  | 388   | 1221  |
| >EZH2-R690(KIRFANHSV  | 1954 | >EZH2-R690(KICFANHSV  | 236   | 1718  |
| >EZH2-R690(KIRFANHSV  | 18   | >EZH2-R690(KICFANHSV  | 16    | 2     |
| >EZH2-R690(KIRFANHS   | 12   | >EZH2-R690(KICFANHS   | 2441  | 2429  |
| >EZH2-R690(KIRFANHSV  | 4    | >EZH2-R690(KICFANHSV  | 156   | 152   |

|                         |      |                         |       |       |
|-------------------------|------|-------------------------|-------|-------|
| >EZH2-R690C KIRFANHSVN  | 25   | >EZH2-R690C KICFANHSVN  | 4022  | 3997  |
| >EZH2-R690C KIRFANHSVN  | 17   | >EZH2-R690C KICFANHSVN  | 2865  | 2848  |
| >EZH2-R690C KIRFANHSV   | 670  | >EZH2-R690C KICFANHSV   | 255   | 415   |
| >EZH2-R690C NKIRFANHSV  | 277  | >EZH2-R690C NKICFANHSV  | 133   | 144   |
| >EZH2-R690C RKG NKIRF   | 25   | >EZH2-R690C RKG NKICF   | 10    | 15    |
| >EZH2-R690C RKG NKIRF   | 460  | >EZH2-R690C RKG NKICF   | 3381  | 2921  |
| >EZH2-R690C ATRKGNKIR   | 23   | >EZH2-R690C ATRKGNKIC   | 359   | 336   |
| >EZH2-R690C ATRKGNKIRF  | 151  | >EZH2-R690C ATRKGNKICF  | 252   | 101   |
| >EZH2-R690C ATRKGNKIRF. | 5    | >EZH2-R690C ATRKGNKICF. | 4     | 1     |
| >EZH2-R690C ATRKGNKIR   | 226  | >EZH2-R690C ATRKGNKIC   | 22886 | 22660 |
| >EZH2-R690C ATRKGNKIRF  | 221  | >EZH2-R690C ATRKGNKICF  | 75    | 146   |
| >EZH2-R690C ATRKGNKIRF  | 4    | >EZH2-R690C ATRKGNKICF  | 9     | 5     |
| >EZH2-R690C ATRKGNKIRF  | 69   | >EZH2-R690C ATRKGNKICF  | 88    | 19    |
| >EZH2-R690F IRFANHSV    | 39   | >EZH2-R690F IHFANHSV    | 62    | 23    |
| >EZH2-R690F IRFANHSVNP  | 229  | >EZH2-R690F IHFANHSVNF  | 704   | 475   |
| >EZH2-R690F IRFANHSVNP  | 453  | >EZH2-R690F IHFANHSVNF  | 1071  | 618   |
| >EZH2-R690F IRFANHSV    | 154  | >EZH2-R690F IHFANHSV    | 20577 | 20423 |
| >EZH2-R690F IRFANHSV    | 568  | >EZH2-R690F IHFANHSV    | 252   | 316   |
| >EZH2-R690F KIRFANHSV   | 2767 | >EZH2-R690F KIHFANHSV   | 168   | 2599  |
| >EZH2-R690F KIRFANHSV   | 469  | >EZH2-R690F KIHFANHSV   | 60    | 409   |
| >EZH2-R690F KIRFANHSV   | 41   | >EZH2-R690F KIHFANHSV   | 21    | 20    |
| >EZH2-R690F KIRFANHSV   | 319  | >EZH2-R690F KIHFANHSV   | 74    | 245   |
| >EZH2-R690F KIRFANHSV   | 500  | >EZH2-R690F KIHFANHSV   | 28    | 472   |
| >EZH2-R690F KIRFANHSV   | 974  | >EZH2-R690F KIHFANHSV   | 144   | 830   |
| >EZH2-R690F KIRFANHSV   | 1609 | >EZH2-R690F KIHFANHSV   | 119   | 1490  |
| >EZH2-R690F KIRFANHSV   | 1954 | >EZH2-R690F KIHFANHSV   | 284   | 1670  |
| >EZH2-R690F KIRFANHSV   | 18   | >EZH2-R690F KIHFANHSV   | 10    | 8     |
| >EZH2-R690F KIRFANHS    | 12   | >EZH2-R690F KIHFANHS    | 74    | 62    |
| >EZH2-R690F KIRFANHSV   | 4    | >EZH2-R690F KIHFANHSV   | 8     | 4     |
| >EZH2-R690F KIRFANHSVN  | 25   | >EZH2-R690F KIHFANHSVN  | 209   | 184   |
| >EZH2-R690F KIRFANHSVN  | 17   | >EZH2-R690F KIHFANHSVN  | 116   | 99    |
| >EZH2-R690F KIRFANHSV   | 670  | >EZH2-R690F KIHFANHSV   | 196   | 474   |
| >EZH2-R690F KIRFANHSV   | 4335 | >EZH2-R690F KIHFANHSV   | 373   | 3962  |
| >EZH2-R690F NKIRFANH    | 1166 | >EZH2-R690F NKIHFANH    | 486   | 680   |
| >EZH2-R690F NKIRFANHSV  | 277  | >EZH2-R690F NKIHFANHSV  | 132   | 145   |
| >EZH2-R690F NKIRFANHSV  | 556  | >EZH2-R690F NKIHFANHSV  | 319   | 237   |
| >EZH2-R690F KGNKIRFA    | 517  | >EZH2-R690F KGNKIHFA    | 396   | 121   |
| >EZH2-R690F RKG NKIRF   | 25   | >EZH2-R690F RKG NKIHF   | 11    | 14    |
| >EZH2-R690F RKG NKIRF   | 460  | >EZH2-R690F RKG NKIHF   | 641   | 181   |
| >EZH2-R690F ATRKGNKIRF  | 910  | >EZH2-R690F ATRKGNKIHF  | 359   | 551   |
| >EZH2-R690F ATRKGNKIR   | 23   | >EZH2-R690F ATRKGNKIH   | 250   | 227   |
| >EZH2-R690F ATRKGNKIRF  | 151  | >EZH2-R690F ATRKGNKIHF  | 54    | 97    |
| >EZH2-R690F ATRKGNKIRF. | 5    | >EZH2-R690F ATRKGNKIHF  | 5     | 0     |

|                          |      |                          |       |       |
|--------------------------|------|--------------------------|-------|-------|
| >EZH2-R690F ATRKGNKIR    | 226  | >EZH2-R690F ATRKGNKIH    | 14266 | 14040 |
| >EZH2-R690F ATRKGNKIRF   | 827  | >EZH2-R690F ATRKGNKIHF   | 187   | 640   |
| >EZH2-R690F ATRKGNKIRF   | 221  | >EZH2-R690F ATRKGNKIHF   | 85    | 136   |
| >EZH2-R690F ATRKGNKIRF   | 4    | >EZH2-R690F ATRKGNKIHF   | 4     | 0     |
| >EZH2-R690F ATRKGNKIR    | 1459 | >EZH2-R690F ATRKGNKIH    | 86    | 1373  |
| >EZH2-R690F ATRKGNKIRF   | 69   | >EZH2-R690F ATRKGNKIHF   | 92    | 23    |
| >EZH2-Y244C YKELTEQQL    | 359  | >EZH2-Y244C DKELTEQQL    | 8805  | 8446  |
| >EZH2-Y244C KYKELTEQQL   | 33   | >EZH2-Y244C KDKELTEQQL   | 24615 | 24582 |
| >EZH2-Y244C KYKELTEQQL   | 16   | >EZH2-Y244C KDKELTEQQL   | 23619 | 23603 |
| >EZH2-Y244C KYKELTEQQL   | 123  | >EZH2-Y244C KDKELTEQQL   | 10807 | 10684 |
| >EZH2-Y244C KGTAEEELKEK  | 456  | >EZH2-Y244C KGTAEEELKEK  | 34569 | 34113 |
| >EZH2-Y244C EKYKELTEQQ   | 122  | >EZH2-Y244C EKDKELTEQQ   | 7309  | 7187  |
| >EZH2-Y244C ELKEKYKEL    | 220  | >EZH2-Y244C ELKEKDKEK    | 621   | 401   |
| >EZH2-Y244C ELKEKYKEL    | 25   | >EZH2-Y244C ELKEKDKEK    | 79    | 54    |
| >EZH2-Y244C EELKEKYKEL   | 86   | >EZH2-Y244C EELKEKDKEK   | 241   | 155   |
| >EZH2-Y244C EELKEKYKEL   | 424  | >EZH2-Y244C EELKEKDKEK   | 1408  | 984   |
| >EZH2-Y244C EELKEKYKELT  | 411  | >EZH2-Y244C EELKEKDKELT  | 1210  | 799   |
| >EZH2-Y244C AEELKEKYKEL  | 166  | >EZH2-Y244C AEELKEKDKE   | 632   | 466   |
| >EZH2-Y244C AEELKEKYKEL  | 319  | >EZH2-Y244C AEELKEKDKE   | 719   | 400   |
| >EZH2-Y244C GTAEEELKEKY  | 68   | >EZH2-Y244C GTAEEELKEKD  | 1128  | 1060  |
| >EZH2-Y244C GTAEEELKEKY  | 231  | >EZH2-Y244C GTAEEELKEKD  | 33486 | 33255 |
| >EZH2-Y244C GTAEEELKEKY  | 290  | >EZH2-Y244C GTAEEELKEKD  | 1969  | 1679  |
| >EZH2-Y244C GTAEEELKEKY  | 49   | >EZH2-Y244C GTAEEELKEKD  | 21683 | 21634 |
| >EZH2-Y244C GTAEEELKEKY  | 94   | >EZH2-Y244C GTAEEELKEKD  | 22476 | 22382 |
| >EZH2-Y244C GTAEEELKEKY  | 238  | >EZH2-Y244C GTAEEELKEKD  | 358   | 120   |
| >EZH2-Y646C PVQKNEFISE   | 372  | >EZH2-Y646C PVQKNEFISE   | 31732 | 31360 |
| >EZH2-Y646C SEYCGEII     | 5    | >EZH2-Y646C SECCGEII     | 10    | 5     |
| >EZH2-Y646C SEYCGEII     | 30   | >EZH2-Y646C SECCGEII     | 54    | 24    |
| >EZH2-Y646C SEYCGEII     | 483  | >EZH2-Y646C SECCGEII     | 4757  | 4274  |
| >EZH2-Y646C SEYCGEII     | 287  | >EZH2-Y646C SECCGEII     | 609   | 322   |
| >EZH2-Y646C SEYCGEIIIS   | 149  | >EZH2-Y646C SECCGEIIS    | 415   | 266   |
| >EZH2-Y646C SEYCGEII     | 84   | >EZH2-Y646C SECCGEII     | 600   | 516   |
| >EZH2-Y646C SEYCGEIIISQD | 457  | >EZH2-Y646C SECCGEIIISQD | 3121  | 2664  |
| >EZH2-Y646C ISEYCGEII    | 70   | >EZH2-Y646C ISECCGEII    | 79    | 9     |
| >EZH2-Y646C ISEYCGEI     | 54   | >EZH2-Y646C ISECCGEI     | 80    | 26    |
| >EZH2-Y646C ISEYCGEII    | 38   | >EZH2-Y646C ISECCGEII    | 86    | 48    |
| >EZH2-Y646C FISEYCGEI    | 29   | >EZH2-Y646C FISECCGEI    | 40    | 11    |
| >EZH2-Y646C FISEYCGEII   | 309  | >EZH2-Y646C FISECCGEII   | 462   | 153   |
| >EZH2-Y646C FISEYCGEI    | 5    | >EZH2-Y646C FISECCGEI    | 6     | 1     |
| >EZH2-Y646C FISEYCGEII   | 108  | >EZH2-Y646C FISECCGEII   | 79    | 29    |
| >EZH2-Y646C FISEYCGEI    | 5    | >EZH2-Y646C FISECCGEI    | 7     | 2     |
| >EZH2-Y646C FISEYCGEII   | 186  | >EZH2-Y646C FISECCGEII   | 231   | 45    |
| >EZH2-Y646C FISEYCGEI    | 13   | >EZH2-Y646C FISECCGEI    | 20    | 7     |

|                          |      |                          |       |       |
|--------------------------|------|--------------------------|-------|-------|
| >EZH2-Y646C FISEYCGEII   | 93   | >EZH2-Y646C FISECCGEII   | 99    | 6     |
| >EZH2-Y646C FISEYCGEI    | 31   | >EZH2-Y646C FISECCGEI    | 328   | 297   |
| >EZH2-Y646C FISEYCGEII   | 164  | >EZH2-Y646C FISECCGEII   | 549   | 385   |
| >EZH2-Y646C FISEYCGEI    | 57   | >EZH2-Y646C FISECCGEI    | 102   | 45    |
| >EZH2-Y646C FISEYCGEII   | 199  | >EZH2-Y646C FISECCGEII   | 326   | 127   |
| >EZH2-Y646C FISEYCGEI    | 105  | >EZH2-Y646C FISECCGEI    | 63    | 42    |
| >EZH2-Y646C FISEYCGEII   | 382  | >EZH2-Y646C FISECCGEII   | 810   | 428   |
| >EZH2-Y646C FISEYCGEI    | 201  | >EZH2-Y646C FISECCGEI    | 1830  | 1629  |
| >EZH2-Y646C EFISEYCGEII  | 424  | >EZH2-Y646C EFISECCGEII  | 571   | 147   |
| >EZH2-Y646C EFISEYCGEI   | 420  | >EZH2-Y646C EFISECCGEI   | 1067  | 647   |
| >EZH2-Y646C NEFISEYCGEII | 5    | >EZH2-Y646C NEFISECCGEII | 5     | 0     |
| >EZH2-Y646C NEFISEYCGEI  | 392  | >EZH2-Y646C NEFISECCGEI  | 965   | 573   |
| >EZH2-Y646C NEFISEYCGEII | 228  | >EZH2-Y646C NEFISECCGEII | 249   | 21    |
| >EZH2-Y646C NEFISEYCGEI  | 20   | >EZH2-Y646C NEFISECCGEI  | 19    | 1     |
| >EZH2-Y646C KNEFISEY     | 252  | >EZH2-Y646C KNEFISEC     | 28657 | 28405 |
| >EZH2-Y646C QKNEFISEY    | 5    | >EZH2-Y646C QKNEFISEC    | 1201  | 1196  |
| >EZH2-Y646C QKNEFISEY    | 387  | >EZH2-Y646C QKNEFISEC    | 35045 | 34658 |
| >EZH2-Y646C VQKNEFISEY   | 191  | >EZH2-Y646C VQKNEFISEC   | 29106 | 28915 |
| >EZH2-Y646C VQKNEFISEY   | 37   | >EZH2-Y646C VQKNEFISEC   | 6386  | 6349  |
| >EZH2-Y646C VQKNEFISEY   | 329  | >EZH2-Y646C VQKNEFISEC   | 23249 | 22920 |
| >EZH2-Y646C VQKNEFISEY   | 4    | >EZH2-Y646C VQKNEFISEC   | 723   | 719   |
| >EZH2-Y646F YCGEII SQDEA | 1010 | >EZH2-Y646F FCGEII SQDEA | 308   | 702   |
| >EZH2-Y646F PVQKNEFISEI  | 372  | >EZH2-Y646F PVQKNEFISEI  | 14631 | 14259 |
| >EZH2-Y646F SEYCGEII     | 5    | >EZH2-Y646F SEFCGEII     | 7     | 2     |
| >EZH2-Y646F SEYCGEII     | 30   | >EZH2-Y646F SEFCGEII     | 23    | 7     |
| >EZH2-Y646F SEYCGEII     | 483  | >EZH2-Y646F SEFCGEII     | 239   | 244   |
| >EZH2-Y646F SEYCGEII     | 1183 | >EZH2-Y646F SEFCGEII     | 378   | 805   |
| >EZH2-Y646F SEYCGEII     | 287  | >EZH2-Y646F SEFCGEII     | 871   | 584   |
| >EZH2-Y646F SEYCGEII S   | 149  | >EZH2-Y646F SEFCGEII S   | 437   | 288   |
| >EZH2-Y646F SEYCGEII     | 84   | >EZH2-Y646F SEFCGEII     | 84    | 0     |
| >EZH2-Y646F SEYCGEII SQD | 457  | >EZH2-Y646F SEFCGEII SQD | 585   | 128   |
| >EZH2-Y646F ISEYCGEII    | 70   | >EZH2-Y646F ISEFCGEII    | 74    | 4     |
| >EZH2-Y646F ISEYCGEI     | 54   | >EZH2-Y646F ISEFCGEI     | 82    | 28    |
| >EZH2-Y646F ISEYCGEII    | 38   | >EZH2-Y646F ISEFCGEII    | 98    | 60    |
| >EZH2-Y646F FISEYCGEI    | 29   | >EZH2-Y646F FISEFCGEI    | 43    | 14    |
| >EZH2-Y646F FISEYCGEII   | 309  | >EZH2-Y646F FISEFCGEII   | 173   | 136   |
| >EZH2-Y646F FISEYCGEI    | 5    | >EZH2-Y646F FISEFCGEI    | 5     | 0     |
| >EZH2-Y646F FISEYCGEII   | 108  | >EZH2-Y646F FISEFCGEII   | 61    | 47    |
| >EZH2-Y646F FISEYCGEI    | 5    | >EZH2-Y646F FISEFCGEI    | 7     | 2     |
| >EZH2-Y646F FISEYCGEII   | 186  | >EZH2-Y646F FISEFCGEII   | 103   | 83    |
| >EZH2-Y646F FISEYCGEI    | 13   | >EZH2-Y646F FISEFCGEI    | 17    | 4     |
| >EZH2-Y646F FISEYCGEII   | 93   | >EZH2-Y646F FISEFCGEII   | 64    | 29    |
| >EZH2-Y646F FISEYCGEI    | 31   | >EZH2-Y646F FISEFCGEI    | 32    | 1     |



|                          |     |                          |       |       |
|--------------------------|-----|--------------------------|-------|-------|
| >EZH2-Y646F FISEYCGEII   | 164 | >EZH2-Y646F FISEFCGEII   | 151   | 13    |
| >EZH2-Y646F FISEYCGEI    | 57  | >EZH2-Y646F FISEFCGEI    | 93    | 36    |
| >EZH2-Y646F FISEYCGEII   | 199 | >EZH2-Y646F FISEFCGEII   | 227   | 28    |
| >EZH2-Y646F FISEYCGEI    | 105 | >EZH2-Y646F FISEFCGEI    | 53    | 52    |
| >EZH2-Y646F FISEYCGEII   | 382 | >EZH2-Y646F FISEFCGEII   | 250   | 132   |
| >EZH2-Y646F FISEYCGEI    | 201 | >EZH2-Y646F FISEFCGEI    | 96    | 105   |
| >EZH2-Y646F EFISEYCGEII  | 424 | >EZH2-Y646F EFISEFCGEII  | 344   | 80    |
| >EZH2-Y646F EFISEYCGEI   | 420 | >EZH2-Y646F EFISEFCGEI   | 382   | 38    |
| >EZH2-Y646F NEFISEYCGEI  | 5   | >EZH2-Y646F NEFISEFCGEI  | 5     | 0     |
| >EZH2-Y646F NEFISEYCGEII | 392 | >EZH2-Y646F NEFISEFCGEII | 387   | 5     |
| >EZH2-Y646F NEFISEYCGEI  | 228 | >EZH2-Y646F NEFISEFCGEI  | 230   | 2     |
| >EZH2-Y646F NEFISEYCGEII | 589 | >EZH2-Y646F NEFISEFCGEII | 452   | 137   |
| >EZH2-Y646F NEFISEYCGEI  | 20  | >EZH2-Y646F NEFISEFCGEI  | 17    | 3     |
| >EZH2-Y646F KNEFISEY     | 252 | >EZH2-Y646F KNEFISEF     | 11882 | 11630 |
| >EZH2-Y646F QKNEFISEY    | 5   | >EZH2-Y646F QKNEFISEF    | 3     | 2     |
| >EZH2-Y646F QKNEFISEY    | 387 | >EZH2-Y646F QKNEFISEF    | 1645  | 1258  |
| >EZH2-Y646F VQKNEFISEY   | 191 | >EZH2-Y646F VQKNEFISEF   | 7428  | 7237  |
| >EZH2-Y646F VQKNEFISEY   | 37  | >EZH2-Y646F VQKNEFISEF   | 31    | 6     |
| >EZH2-Y646F VQKNEFISEY   | 329 | >EZH2-Y646F VQKNEFISEF   | 724   | 395   |
| >EZH2-Y646F VQKNEFISEY   | 4   | >EZH2-Y646F VQKNEFISEF   | 3     | 1     |
| >EZH2-Y646F PVQKNEFISEY  | 372 | >EZH2-Y646F PVQKNEFISEF  | 18511 | 18139 |
| >EZH2-Y646F SEYCGEII     | 5   | >EZH2-Y646F SEHCGEII     | 7     | 2     |
| >EZH2-Y646F SEYCGEI      | 30  | >EZH2-Y646F SEHCGEI      | 48    | 18    |
| >EZH2-Y646F SEYCGEII     | 483 | >EZH2-Y646F SEHCGEII     | 491   | 8     |
| >EZH2-Y646F SEYCGEI      | 287 | >EZH2-Y646F SEHCGEI      | 134   | 153   |
| >EZH2-Y646F SEYCGEIIIS   | 149 | >EZH2-Y646F SEHCGEIIIS   | 75    | 74    |
| >EZH2-Y646F SEYCGEI      | 84  | >EZH2-Y646F SEHCGEI      | 126   | 42    |
| >EZH2-Y646F SEYCGEIIISQD | 457 | >EZH2-Y646F SEHCGEIIISQD | 1389  | 932   |
| >EZH2-Y646F ISEYCGEII    | 70  | >EZH2-Y646F ISEHCGEII    | 137   | 67    |
| >EZH2-Y646F ISEYCGEI     | 54  | >EZH2-Y646F ISEHCGEI     | 61    | 7     |
| >EZH2-Y646F ISEYCGEII    | 38  | >EZH2-Y646F ISEHCGEII    | 38    | 0     |
| >EZH2-Y646F FISEYCGEI    | 29  | >EZH2-Y646F FISEHCGEI    | 84    | 55    |
| >EZH2-Y646F FISEYCGEII   | 309 | >EZH2-Y646F FISEHCGEII   | 738   | 429   |
| >EZH2-Y646F FISEYCGEI    | 5   | >EZH2-Y646F FISEHCGEI    | 10    | 5     |
| >EZH2-Y646F FISEYCGEII   | 108 | >EZH2-Y646F FISEHCGEII   | 185   | 77    |
| >EZH2-Y646F FISEYCGEI    | 5   | >EZH2-Y646F FISEHCGEI    | 5     | 0     |
| >EZH2-Y646F FISEYCGEII   | 186 | >EZH2-Y646F FISEHCGEII   | 261   | 75    |
| >EZH2-Y646F FISEYCGEI    | 13  | >EZH2-Y646F FISEHCGEI    | 29    | 16    |
| >EZH2-Y646F FISEYCGEII   | 93  | >EZH2-Y646F FISEHCGEII   | 141   | 48    |
| >EZH2-Y646F FISEYCGEI    | 31  | >EZH2-Y646F FISEHCGEI    | 105   | 74    |
| >EZH2-Y646F FISEYCGEII   | 164 | >EZH2-Y646F FISEHCGEII   | 318   | 154   |
| >EZH2-Y646F FISEYCGEI    | 57  | >EZH2-Y646F FISEHCGEI    | 129   | 72    |
| >EZH2-Y646F FISEYCGEII   | 199 | >EZH2-Y646F FISEHCGEII   | 338   | 139   |

|                          |     |                          |       |       |
|--------------------------|-----|--------------------------|-------|-------|
| >EZH2-Y646F FISEYCGEI    | 105 | >EZH2-Y646F FISEHCGEI    | 229   | 124   |
| >EZH2-Y646F FISEYCGEII   | 382 | >EZH2-Y646F FISEHCGEII   | 963   | 581   |
| >EZH2-Y646F FISEYCGEI    | 201 | >EZH2-Y646F FISEHCGEI    | 427   | 226   |
| >EZH2-Y646F EFISEYCGEII  | 424 | >EZH2-Y646F EFISEHCGEII  | 691   | 267   |
| >EZH2-Y646F EFISEYCGEI   | 420 | >EZH2-Y646F EFISEHCGEI   | 998   | 578   |
| >EZH2-Y646F NEFISEYCGEI  | 5   | >EZH2-Y646F NEFISEHCGEI  | 5     | 0     |
| >EZH2-Y646F NEFISEYCGEII | 392 | >EZH2-Y646F NEFISEHCGEII | 429   | 37    |
| >EZH2-Y646F NEFISEYCGEI  | 228 | >EZH2-Y646F NEFISEHCGEI  | 453   | 225   |
| >EZH2-Y646F NEFISEYCGEII | 20  | >EZH2-Y646F NEFISEHCGEII | 25    | 5     |
| >EZH2-Y646F KNEFISEY     | 252 | >EZH2-Y646F KNEFISEH     | 14670 | 14418 |
| >EZH2-Y646F QKNEFISEY    | 5   | >EZH2-Y646F QKNEFISEH    | 183   | 178   |
| >EZH2-Y646F QKNEFISEY    | 387 | >EZH2-Y646F QKNEFISEH    | 30622 | 30235 |
| >EZH2-Y646F VQKNEFISEY   | 191 | >EZH2-Y646F VQKNEFISEH   | 20137 | 19946 |
| >EZH2-Y646F VQKNEFISEY   | 37  | >EZH2-Y646F VQKNEFISEH   | 665   | 628   |
| >EZH2-Y646F VQKNEFISEY   | 329 | >EZH2-Y646F VQKNEFISEH   | 7722  | 7393  |
| >EZH2-Y646F VQKNEFISEY   | 4   | >EZH2-Y646F VQKNEFISEH   | 130   | 126   |
| >EZH2-Y646M PVQKNEFISEI  | 372 | >EZH2-Y646M PVQKNEFISEI  | 28905 | 28533 |
| >EZH2-Y646M SEYCGEII     | 5   | >EZH2-Y646M SENCGEII     | 7     | 2     |
| >EZH2-Y646M SEYCGEII     | 30  | >EZH2-Y646M SENCGEII     | 87    | 57    |
| >EZH2-Y646M SEYCGEII     | 483 | >EZH2-Y646M SENCGEII     | 1167  | 684   |
| >EZH2-Y646M SEYCGEII     | 287 | >EZH2-Y646M SENCGEII     | 336   | 49    |
| >EZH2-Y646M SEYCGEIIIS   | 149 | >EZH2-Y646M SENCGEIIIS   | 198   | 49    |
| >EZH2-Y646M SEYCGEII     | 84  | >EZH2-Y646M SENCGEII     | 330   | 246   |
| >EZH2-Y646M SEYCGEIIISQD | 457 | >EZH2-Y646M SENCGEIIISQD | 3601  | 3144  |
| >EZH2-Y646M ISEYCGEII    | 70  | >EZH2-Y646M ISENCGEII    | 61    | 9     |
| >EZH2-Y646M ISEYCGEI     | 54  | >EZH2-Y646M ISENCGEI     | 83    | 29    |
| >EZH2-Y646M ISEYCGEII    | 38  | >EZH2-Y646M ISENCGEII    | 42    | 4     |
| >EZH2-Y646M FISEYCGEI    | 29  | >EZH2-Y646M FISENCGEI    | 211   | 182   |
| >EZH2-Y646M FISEYCGEII   | 309 | >EZH2-Y646M FISENCGEII   | 636   | 327   |
| >EZH2-Y646M FISEYCGEI    | 5   | >EZH2-Y646M FISENCGEI    | 17    | 12    |
| >EZH2-Y646M FISEYCGEII   | 108 | >EZH2-Y646M FISENCGEII   | 174   | 66    |
| >EZH2-Y646M FISEYCGEI    | 5   | >EZH2-Y646M FISENCGEI    | 10    | 5     |
| >EZH2-Y646M FISEYCGEII   | 186 | >EZH2-Y646M FISENCGEII   | 229   | 43    |
| >EZH2-Y646M FISEYCGEI    | 13  | >EZH2-Y646M FISENCGEI    | 54    | 41    |
| >EZH2-Y646M FISEYCGEII   | 93  | >EZH2-Y646M FISENCGEII   | 126   | 33    |
| >EZH2-Y646M FISEYCGEI    | 31  | >EZH2-Y646M FISENCGEI    | 68    | 37    |
| >EZH2-Y646M FISEYCGEII   | 164 | >EZH2-Y646M FISENCGEII   | 199   | 35    |
| >EZH2-Y646M FISEYCGEII   | 693 | >EZH2-Y646M FISENCGEII   | 307   | 386   |
| >EZH2-Y646M FISEYCGEI    | 57  | >EZH2-Y646M FISENCGEI    | 58    | 1     |
| >EZH2-Y646M FISEYCGEII   | 199 | >EZH2-Y646M FISENCGEII   | 158   | 41    |
| >EZH2-Y646M FISEYCGEI    | 105 | >EZH2-Y646M FISENCGEI    | 113   | 8     |
| >EZH2-Y646M FISEYCGEII   | 382 | >EZH2-Y646M FISENCGEII   | 853   | 471   |
| >EZH2-Y646M FISEYCGEI    | 201 | >EZH2-Y646M FISENCGEI    | 510   | 309   |

|                          |      |                          |       |       |
|--------------------------|------|--------------------------|-------|-------|
| >EZH2-Y646M EFISEYCGEII  | 424  | >EZH2-Y646M EFISENCGEII  | 860   | 436   |
| >EZH2-Y646M EFISEYCGEI   | 420  | >EZH2-Y646M EFISENCGEI   | 968   | 548   |
| >EZH2-Y646M NEFISEYCGEI  | 5    | >EZH2-Y646M NEFISENCGEI  | 5     | 0     |
| >EZH2-Y646M NEFISEYCGEI  | 392  | >EZH2-Y646M NEFISENCGEI  | 1033  | 641   |
| >EZH2-Y646M NEFISEYCGEI  | 228  | >EZH2-Y646M NEFISENCGEI  | 418   | 190   |
| >EZH2-Y646M NEFISEYCGEI  | 20   | >EZH2-Y646M NEFISENCGEI  | 26    | 6     |
| >EZH2-Y646M KNEFISEY     | 252  | >EZH2-Y646M KNEFISEN     | 25694 | 25442 |
| >EZH2-Y646M QKNEFISEY    | 5    | >EZH2-Y646M QKNEFISEN    | 2058  | 2053  |
| >EZH2-Y646M QKNEFISEY    | 387  | >EZH2-Y646M QKNEFISEN    | 36218 | 35831 |
| >EZH2-Y646M VQKNEFISEY   | 191  | >EZH2-Y646M VQKNEFISEN   | 27385 | 27194 |
| >EZH2-Y646M VQKNEFISEY   | 37   | >EZH2-Y646M VQKNEFISEN   | 7006  | 6969  |
| >EZH2-Y646M VQKNEFISEY   | 329  | >EZH2-Y646M VQKNEFISEN   | 22570 | 22241 |
| >EZH2-Y646M VQKNEFISEY   | 4    | >EZH2-Y646M VQKNEFISEN   | 1931  | 1927  |
| >EZH2-Y646S EYCGEIIISQ   | 1449 | >EZH2-Y646S ESCGEIIISQ   | 393   | 1056  |
| >EZH2-Y646S PVQKNEFISE'  | 372  | >EZH2-Y646S PVQKNEFISE'  | 27986 | 27614 |
| >EZH2-Y646S SEYCGEII     | 5    | >EZH2-Y646S SESCGEII     | 7     | 2     |
| >EZH2-Y646S SEYCGEII     | 30   | >EZH2-Y646S SESCGEII     | 38    | 8     |
| >EZH2-Y646S SEYCGEII     | 483  | >EZH2-Y646S SESCGEII     | 2321  | 1838  |
| >EZH2-Y646S SEYCGEII     | 287  | >EZH2-Y646S SESCGEII     | 325   | 38    |
| >EZH2-Y646S SEYCGEIIS    | 149  | >EZH2-Y646S SESCGEIIS    | 200   | 51    |
| >EZH2-Y646S SEYCGEII     | 84   | >EZH2-Y646S SESCGEII     | 436   | 352   |
| >EZH2-Y646S SEYCGEIIISQD | 457  | >EZH2-Y646S SESCGEIIISQD | 2266  | 1809  |
| >EZH2-Y646S ISEYCGEII    | 70   | >EZH2-Y646S ISESCGEII    | 41    | 29    |
| >EZH2-Y646S ISEYCGEI     | 54   | >EZH2-Y646S ISESCGEI     | 61    | 7     |
| >EZH2-Y646S ISEYCGEII    | 38   | >EZH2-Y646S ISESCGEII    | 41    | 3     |
| >EZH2-Y646S FISEYCGEI    | 29   | >EZH2-Y646S FISESCGEI    | 149   | 120   |
| >EZH2-Y646S FISEYCGEII   | 309  | >EZH2-Y646S FISESCGEII   | 610   | 301   |
| >EZH2-Y646S FISEYCGEI    | 5    | >EZH2-Y646S FISESCGEI    | 12    | 7     |
| >EZH2-Y646S FISEYCGEII   | 108  | >EZH2-Y646S FISESCGEII   | 123   | 15    |
| >EZH2-Y646S FISEYCGEI    | 5    | >EZH2-Y646S FISESCGEI    | 7     | 2     |
| >EZH2-Y646S FISEYCGEII   | 186  | >EZH2-Y646S FISESCGEII   | 214   | 28    |
| >EZH2-Y646S FISEYCGEI    | 13   | >EZH2-Y646S FISESCGEI    | 31    | 18    |
| >EZH2-Y646S FISEYCGEII   | 93   | >EZH2-Y646S FISESCGEII   | 98    | 5     |
| >EZH2-Y646S FISEYCGEI    | 31   | >EZH2-Y646S FISESCGEI    | 147   | 116   |
| >EZH2-Y646S FISEYCGEII   | 164  | >EZH2-Y646S FISESCGEII   | 354   | 190   |
| >EZH2-Y646S FISEYCGEI    | 57   | >EZH2-Y646S FISESCGEI    | 75    | 18    |
| >EZH2-Y646S FISEYCGEII   | 199  | >EZH2-Y646S FISESCGEII   | 201   | 2     |
| >EZH2-Y646S FISEYCGEI    | 105  | >EZH2-Y646S FISESCGEI    | 119   | 14    |
| >EZH2-Y646S FISEYCGEII   | 382  | >EZH2-Y646S FISESCGEII   | 523   | 141   |
| >EZH2-Y646S FISEYCGEI    | 201  | >EZH2-Y646S FISESCGEI    | 569   | 368   |
| >EZH2-Y646S EFISEYCGEII  | 424  | >EZH2-Y646S EFISESCGEII  | 918   | 494   |
| >EZH2-Y646S EFISEYCGEI   | 420  | >EZH2-Y646S EFISESCGEI   | 1055  | 635   |
| >EZH2-Y646S NEFISEYCGEI  | 5    | >EZH2-Y646S NEFISESCGEI  | 5     | 0     |

|                         |     |                         |       |       |
|-------------------------|-----|-------------------------|-------|-------|
| >EZH2-Y646S NEFISEYCGEI | 392 | >EZH2-Y646S NEFISESCGEI | 1113  | 721   |
| >EZH2-Y646S NEFISEYCGEI | 228 | >EZH2-Y646S NEFISESCGEI | 398   | 170   |
| >EZH2-Y646S NEFISEYCGEI | 20  | >EZH2-Y646S NEFISESCGEI | 22    | 2     |
| >EZH2-Y646S KNEFISEY    | 252 | >EZH2-Y646S KNEFISES    | 24670 | 24418 |
| >EZH2-Y646S QKNEFISEY   | 5   | >EZH2-Y646S QKNEFISES   | 1049  | 1044  |
| >EZH2-Y646S QKNEFISEY   | 387 | >EZH2-Y646S QKNEFISES   | 31816 | 31429 |
| >EZH2-Y646S VQKNEFISEY  | 191 | >EZH2-Y646S VQKNEFISES  | 25842 | 25651 |
| >EZH2-Y646S VQKNEFISEY  | 37  | >EZH2-Y646S VQKNEFISES  | 4382  | 4345  |
| >EZH2-Y646S VQKNEFISEY  | 329 | >EZH2-Y646S VQKNEFISES  | 21845 | 21516 |
| >EZH2-Y646S VQKNEFISEY  | 4   | >EZH2-Y646S VQKNEFISES  | 866   | 862   |
| >EZH2-Y731[ YRYSQADALK  | 33  | >EZH2-Y731[ DRYSQADALH  | 637   | 604   |
| >EZH2-Y731[ YRYSQADALK  | 98  | >EZH2-Y731[ DRYSQADALH  | 4539  | 4441  |
| >EZH2-Y731[ YRYSQADALK  | 266 | >EZH2-Y731[ DRYSQADALH  | 4287  | 4021  |
| >EZH2-Y731[ YRYSQADA    | 482 | >EZH2-Y731[ DRYSQADA    | 6789  | 6307  |
| >EZH2-Y731[ YRYSQADAL   | 29  | >EZH2-Y731[ DRYSQADAL   | 1495  | 1466  |
| >EZH2-Y731[ YRYSQADALK  | 15  | >EZH2-Y731[ DRYSQADALH  | 520   | 505   |
| >EZH2-Y731[ YRYSQADAL   | 77  | >EZH2-Y731[ DRYSQADAL   | 2386  | 2309  |
| >EZH2-Y731[ YRYSQADALK  | 96  | >EZH2-Y731[ DRYSQADALH  | 815   | 719   |
| >EZH2-Y731[ YRYSQADALK  | 38  | >EZH2-Y731[ DRYSQADALH  | 816   | 778   |
| >EZH2-Y731[ YRYSQADAL   | 8   | >EZH2-Y731[ DRYSQADAL   | 84    | 76    |
| >EZH2-Y731[ YRYSQADA    | 385 | >EZH2-Y731[ DRYSQADA    | 631   | 246   |
| >EZH2-Y731[ YRYSQADAL   | 377 | >EZH2-Y731[ DRYSQADAL   | 1668  | 1291  |
| >EZH2-Y731[ YRYSQADAL   | 351 | >EZH2-Y731[ DRYSQADAL   | 1726  | 1375  |
| >EZH2-Y731[ DRYYSQADAI  | 85  | >EZH2-Y731[ DDRYSQADA   | 4939  | 4854  |
| >EZH2-Y731[ DRYYSQADAI  | 36  | >EZH2-Y731[ DDRYSQADA   | 9949  | 9913  |
| >EZH2-Y731[ IQTGEELFFD\ | 105 | >EZH2-Y731[ IQTGEELFFDI | 24813 | 24708 |
| >EZH2-Y731[ IQTGEELFFD\ | 142 | >EZH2-Y731[ IQTGEELFFDI | 31019 | 30877 |
| >EZH2-Y731[ IQTGEELFFD\ | 193 | >EZH2-Y731[ IQTGEELFFDI | 23626 | 23433 |
| >EZH2-Y731[ IQTGEELFFD\ | 136 | >EZH2-Y731[ IQTGEELFFDI | 21548 | 21412 |
| >EZH2-Y731[ FDYRYSQA    | 399 | >EZH2-Y731[ FDDRYYSQA   | 20917 | 20518 |
| >EZH2-Y731[ FDYRYSQAD/  | 228 | >EZH2-Y731[ FDDRYYSQAD/ | 3851  | 3623  |
| >EZH2-Y731[ FDYRYSQAD/  | 191 | >EZH2-Y731[ FDDRYYSQAD/ | 275   | 84    |
| >EZH2-Y731[ FDYRYSQAD/  | 147 | >EZH2-Y731[ FDDRYYSQAD/ | 2169  | 2022  |
| >EZH2-Y731[ FDYRYSQAD/  | 492 | >EZH2-Y731[ FDDRYYSQAD/ | 8122  | 7630  |
| >EZH2-Y731[ FDYRYSQAD/  | 219 | >EZH2-Y731[ FDDRYYSQAD/ | 376   | 157   |
| >EZH2-Y731[ LFFDYRYSQ   | 489 | >EZH2-Y731[ LFFDDRYYSQ  | 1016  | 527   |
| >EZH2-Y731[ ELFFDYRYSQ, | 279 | >EZH2-Y731[ ELFFDDRYYSQ | 585   | 306   |
| >EZH2-Y731[ ELFFDYRYSQ, | 326 | >EZH2-Y731[ ELFFDDRYYSQ | 388   | 62    |
| >EZH2-Y731[ ELFFDYRYSQ, | 240 | >EZH2-Y731[ ELFFDDRYYSQ | 204   | 36    |
| >EZH2-Y731[ ELFFDYRY    | 31  | >EZH2-Y731[ ELFFDDRY    | 247   | 216   |
| >EZH2-Y731[ ELFFDYRY    | 142 | >EZH2-Y731[ ELFFDDRY    | 335   | 193   |
| >EZH2-Y731[ ELFFDYRY    | 106 | >EZH2-Y731[ ELFFDDRY    | 215   | 109   |
| >EZH2-Y731[ ELFFDYRYSQ, | 266 | >EZH2-Y731[ ELFFDDRYYSQ | 359   | 93    |

|                         |      |                         |       |       |
|-------------------------|------|-------------------------|-------|-------|
| >EZH2-Y731[ ELFFDYRY    | 425  | >EZH2-Y731[ ELFFDDRY    | 282   | 143   |
| >EZH2-Y731[ ELFFDYRY    | 81   | >EZH2-Y731[ ELFFDDRY    | 283   | 202   |
| >EZH2-Y731[ EELFFDYRY   | 327  | >EZH2-Y731[ EELFFDDRY   | 5751  | 5424  |
| >EZH2-Y731[ EELFFDYR    | 53   | >EZH2-Y731[ EELFFDDR    | 474   | 421   |
| >EZH2-Y731[ EELFFDYRY   | 29   | >EZH2-Y731[ EELFFDDRY   | 425   | 396   |
| >EZH2-Y731[ EELFFDYRYS( | 167  | >EZH2-Y731[ EELFFDDRYS( | 634   | 467   |
| >EZH2-Y731[ EELFFDYRYS  | 413  | >EZH2-Y731[ EELFFDDRYS  | 1099  | 686   |
| >EZH2-Y731[ EELFFDYR    | 495  | >EZH2-Y731[ EELFFDDR    | 965   | 470   |
| >EZH2-Y731[ EELFFDYRY   | 32   | >EZH2-Y731[ EELFFDDRY   | 54    | 22    |
| >EZH2-Y731[ EELFFDYRYS  | 293  | >EZH2-Y731[ EELFFDDRYS  | 633   | 340   |
| >EZH2-Y731[ EELFFDYRY   | 232  | >EZH2-Y731[ EELFFDDRY   | 857   | 625   |
| >EZH2-Y731[ EELFFDYRYS( | 255  | >EZH2-Y731[ EELFFDDRYS( | 636   | 381   |
| >EZH2-Y731[ EELFFDYR    | 30   | >EZH2-Y731[ EELFFDDR    | 359   | 329   |
| >EZH2-Y731[ GEELFFDYRY  | 156  | >EZH2-Y731[ GEELFFDDRY  | 1776  | 1620  |
| >EZH2-Y731[ GEELFFDYRY  | 174  | >EZH2-Y731[ GEELFFDDRY  | 1626  | 1452  |
| >EZH2-Y731[ GEELFFDYRY  | 156  | >EZH2-Y731[ GEELFFDDRY  | 757   | 601   |
| >EZH2-Y731[ GEELFFDY    | 140  | >EZH2-Y731[ GEELFFDD    | 3975  | 3835  |
| >EZH2-Y731[ GEELFFDYRY  | 49   | >EZH2-Y731[ GEELFFDDRY  | 167   | 118   |
| >EZH2-Y731[ GEELFFDYRY! | 321  | >EZH2-Y731[ GEELFFDDRY  | 880   | 559   |
| >EZH2-Y731[ GEELFFDYR   | 269  | >EZH2-Y731[ GEELFFDDR   | 2346  | 2077  |
| >EZH2-Y731[ TGEELFFDY   | 434  | >EZH2-Y731[ TGEELFFDD   | 25889 | 25455 |
| >EZH2-Y731[ TGEELFFDYR' | 251  | >EZH2-Y731[ TGEELFFDDR  | 828   | 577   |
| >EZH2-Y731[ TGEELFFDYR  | 77   | >EZH2-Y731[ TGEELFFDDR  | 809   | 732   |
| >EZH2-Y731[ QTGEELFFDY  | 388  | >EZH2-Y731[ QTGEELFFDD  | 33329 | 32941 |
| >EZH2-Y731[ QTGEELFFDY  | 269  | >EZH2-Y731[ QTGEELFFDD  | 2911  | 2642  |
| >EZH2-Y731[ QTGEELFFDY  | 73   | >EZH2-Y731[ QTGEELFFDD  | 26115 | 26042 |
| >EZH2-Y731[ QTGEELFFDY  | 72   | >EZH2-Y731[ QTGEELFFDD  | 29043 | 28971 |
| >EZH2-Y731[ QTGEELFFDY  | 494  | >EZH2-Y731[ QTGEELFFDD  | 31089 | 30595 |
| >EZH2-Y731[ QTGEELFFDY  | 127  | >EZH2-Y731[ QTGEELFFDD  | 2339  | 2212  |
| >EZH2-Y731[ QTGEELFFDY  | 221  | >EZH2-Y731[ QTGEELFFDD  | 1544  | 1323  |
| >EZH2-Y731[ QTGEELFFDY  | 16   | >EZH2-Y731[ QTGEELFFDD  | 87    | 71    |
| >EZH2-Y731[ QTGEELFFDY  | 11   | >EZH2-Y731[ QTGEELFFDD  | 21434 | 21423 |
| >EZH2-Y731[ QTGEELFFDY  | 225  | >EZH2-Y731[ QTGEELFFDD  | 25351 | 25126 |
| >EZH2-Y731[ QTGEELFFDY  | 326  | >EZH2-Y731[ QTGEELFFDD  | 27056 | 26730 |
| >EZH2-Y731[ QTGEELFFDY  | 269  | >EZH2-Y731[ QTGEELFFDD  | 323   | 54    |
| >EZH2-Y731[ QTGEELFFDY  | 74   | >EZH2-Y731[ QTGEELFFDD  | 582   | 508   |
| >FAM123B-AGAKNKAAEA     | 1401 | >FAM123B-AGTKNKAAEA     | 210   | 1191  |
| >FAM123B-ASTREQTAEKG    | 27   | >FAM123B-ASTREQTAEKG    | 511   | 484   |
| >FAM123B-AAEKGAKNKA     | 31   | >FAM123B-AAEKGTKNKA     | 24    | 7     |
| >FAM123B-AAEKGAKNKA/    | 126  | >FAM123B-AAEKGTKNKA/    | 112   | 14    |
| >FAM123B-AQTAEKGAK      | 357  | >FAM123B-AQTAEKGTK      | 449   | 92    |
| >FAM123B-AQTAEKGAK      | 61   | >FAM123B-AQTAEKGTK      | 59    | 2     |
| >FAM123B-AQTAEKGAKNI    | 104  | >FAM123B-AQTAEKGTKNI    | 204   | 100   |

|                       |       |                       |      |       |
|-----------------------|-------|-----------------------|------|-------|
| >FAM123B-A QTAEKGAKNI | 470   | >FAM123B-A QTAEKGTKNI | 328  | 142   |
| >FAM123B-A REQTAEKGA  | 106   | >FAM123B-A REQTAEKGT  | 759  | 653   |
| >FAM123B-A VTYQGGGEEI | 474   | >FAM123B-A VTYQGGGEEI | 425  | 49    |
| >FAM123B-A GEEMALPDD  | 485   | >FAM123B-A GEEMTLPDD  | 730  | 245   |
| >FAM123B-A YQGGGEEMA  | 302   | >FAM123B-A YQGGGEEMT  | 216  | 86    |
| >FAM123B-A YQGGGEEMA  | 45    | >FAM123B-A YQGGGEEMT  | 34   | 11    |
| >FAM123B-A YQGGGEEMA  | 160   | >FAM123B-A YQGGGEEMT  | 1475 | 1315  |
| >FAM123B-A YQGGGEEMA  | 206   | >FAM123B-A YQGGGEEMT  | 247  | 41    |
| >FAM123B-A YQGGGEEMA  | 473   | >FAM123B-A YQGGGEEMT  | 2702 | 2229  |
| >FAM123B-A YQGGGEEMA  | 235   | >FAM123B-A YQGGGEEMT  | 168  | 67    |
| >FAM123B-A YQGGGEEMA  | 722   | >FAM123B-A YQGGGEEMT  | 365  | 357   |
| >FAM123B-A YQGGGEEMA  | 1352  | >FAM123B-A YQGGGEEMT  | 383  | 969   |
| >FAM123B-A YQGGGEEMA  | 782   | >FAM123B-A YQGGGEEMT  | 239  | 543   |
| >FAM123B-A YQGGGEEMA  | 377   | >FAM123B-A YQGGGEEMT  | 671  | 294   |
| >FAM123B-A YQGGGEEMA  | 381   | >FAM123B-A YQGGGEEMT  | 658  | 277   |
| >FAM123B-A YQGGGEEMA  | 69    | >FAM123B-A YQGGGEEMT  | 148  | 79    |
| >FAM123B-A YQGGGEEMA  | 256   | >FAM123B-A YQGGGEEMT  | 663  | 407   |
| >FAM123B-A TYQGGGEEM  | 71    | >FAM123B-A TYQGGGEEM  | 27   | 44    |
| >FAM123B-A TYQGGGEEM  | 593   | >FAM123B-A TYQGGGEEM  | 171  | 422   |
| >FAM123B-A TYQGGGEEM  | 1554  | >FAM123B-A TYQGGGEEM  | 321  | 1233  |
| >FAM123B-A TYQGGGEEM  | 7     | >FAM123B-A TYQGGGEEM  | 6    | 1     |
| >FAM123B-K EKVVAGEV   | 1898  | >FAM123B-K ENVVAGEV   | 222  | 1676  |
| >FAM123B-K GEKVVAGEV  | 50    | >FAM123B-K GENVVAGEV  | 31   | 19    |
| >FAM123B-K GEKVVAGEV  | 451   | >FAM123B-K GENVVAGEV  | 176  | 275   |
| >FAM123B-K GEKVVAGEV  | 321   | >FAM123B-K GENVVAGEV  | 147  | 174   |
| >FAM123B-K GEKVVAGEV  | 13    | >FAM123B-K GENVVAGEV  | 30   | 17    |
| >FAM123B-K ETGEKVVAGE | 376   | >FAM123B-K ETGENVVAGI | 188  | 188   |
| >FAM123B-K ETGEKVVAGE | 480   | >FAM123B-K ETGENVVAGI | 1003 | 523   |
| >FAM123B-K ETGEKVVA   | 547   | >FAM123B-K ETGENVVA   | 188  | 359   |
| >FAM123B-K ETGEKVVAGE | 13    | >FAM123B-K ETGENVVAGI | 10   | 3     |
| >FAM123B-K ETGEKVVA   | 1285  | >FAM123B-K ETGENVVA   | 282  | 1003  |
| >FAM123B-K ETGEKVVAGE | 9     | >FAM123B-K ETGENVVAGI | 6    | 3     |
| >FAM123B-K SPETGEKV   | 1963  | >FAM123B-K SPETGENV   | 296  | 1667  |
| >FAM123B-K SPETGEKVVA | 491   | >FAM123B-K SPETGENVVA | 1090 | 599   |
| >FAM123B-K HSPETGEKV  | 294   | >FAM123B-K HSPETGENV  | 140  | 154   |
| >FAM123B-K HSPETGEKV  | 201   | >FAM123B-K HSPETGENV  | 187  | 14    |
| >FAM123B-K HSPETGEKV  | 666   | >FAM123B-K HSPETGENV  | 256  | 410   |
| >FAM123B-S SSGPGRLLK  | 229   | >FAM123B-S LSGPGRLLK  | 267  | 38    |
| >FAM123B-S SSGPGRLLK  | 45    | >FAM123B-S LSGPGRLLK  | 245  | 200   |
| >FAM123B-S SSGPGRLLK  | 24    | >FAM123B-S LSGPGRLLK  | 119  | 95    |
| >FAM123B-S SSGPGRLLK  | 397   | >FAM123B-S LSGPGRLLK  | 1064 | 667   |
| >FAM123B-S SSGPGRLLK  | 142   | >FAM123B-S LSGPGRLLK  | 421  | 279   |
| >FAM123B-S SSSPGRLL   | 11128 | >FAM123B-S SLSPGRLL   | 88   | 11040 |

|                        |       |                        |       |       |
|------------------------|-------|------------------------|-------|-------|
| >FAM123B-S SSSGPGRL    | 15050 | >FAM123B-S SLSGPGRL    | 123   | 14927 |
| >FAM123B-S SSSGPGRL    | 13521 | >FAM123B-S SLSGPGRL    | 18    | 13503 |
| >FAM123B-S SSSGPGRL    | 20742 | >FAM123B-S SLSGPGRL    | 118   | 20624 |
| >FAM123B-S SSSGPGRL    | 21428 | >FAM123B-S SLSGPGRL    | 7     | 21421 |
| >FAM123B-S SSSGPGRLKK  | 34727 | >FAM123B-S SLSGPGRLKK  | 282   | 34445 |
| >FAM123B-S SSSGPGRLK   | 290   | >FAM123B-S SLSGPGRLK   | 65    | 225   |
| >FAM123B-S SSSGPGRLKK  | 82    | >FAM123B-S SLSGPGRLKK  | 25    | 57    |
| >FAM123B-S SSSGPGRLK   | 37    | >FAM123B-S SLSGPGRLK   | 87    | 50    |
| >FAM123B-S SSSGPGRLKK  | 14    | >FAM123B-S SLSGPGRLKK  | 30    | 16    |
| >FAM123B-S SSSGPGRLKK  | 215   | >FAM123B-S SLSGPGRLKK  | 1404  | 1189  |
| >FAM123B-S SSSGPGRLKK  | 319   | >FAM123B-S SLSGPGRLKK  | 438   | 119   |
| >FAM123B-S SSSGPGRLKK  | 128   | >FAM123B-S SLSGPGRLKK  | 876   | 748   |
| >FAM123B-S SSSGPGRL    | 42    | >FAM123B-S SLSGPGRL    | 7771  | 7729  |
| >FAM123B-S SSSGPGRLKK  | 6612  | >FAM123B-S SLSGPGRLKK  | 359   | 6253  |
| >FAM123B-S SSSGPGRL    | 432   | >FAM123B-S SLSGPGRL    | 14857 | 14425 |
| >FAM123B-S ATEGPTSEPSI | 6924  | >FAM123B-S ATEGPTSEPSI | 19    | 6905  |
| >FAM123B-S ATEGPTSEPSI | 14375 | >FAM123B-S ATEGPTSEPSI | 249   | 14126 |
| >FAM123B-S ATEGPTSEPSI | 3583  | >FAM123B-S ATEGPTSEPSI | 251   | 3332  |
| >FAM123B-S PSSSGPGRK   | 300   | >FAM123B-S PSLSGPGRK   | 396   | 96    |
| >FAM123B-S EPSSSGPGR   | 148   | >FAM123B-S EPSLSGPGR   | 413   | 265   |
| >FAM123B-S SEPSSSGPGR  | 454   | >FAM123B-S SEPSLSGPGR  | 270   | 184   |
| >FAM123B-S TSEPSSSGPGI | 117   | >FAM123B-S TSEPSLSGPGI | 149   | 32    |
| >FAM123B-S EGPTSEPSS   | 3154  | >FAM123B-S EGPTSEPSSL  | 153   | 3001  |
| >FAM123B-S TEGPTSEPSS  | 13843 | >FAM123B-S TEGPTSEPSSL | 384   | 13459 |
| >FAM123B-S TEGPTSEPSS  | 8208  | >FAM123B-S TEGPTSEPSSL | 492   | 7716  |
| >FAM123B-S TEGPTSEPSS  | 14889 | >FAM123B-S TEGPTSEPSSL | 114   | 14775 |
| >FAM123B-T TSPGHHGYM   | 499   | >FAM123B-T ISPGHHGYM   | 179   | 320   |
| >FAM123B-T TSPGHHGYM   | 221   | >FAM123B-T ISPGHHGYMI  | 88    | 133   |
| >FAM123B-T TSPGHHGY    | 31    | >FAM123B-T ISPGHHGY    | 212   | 181   |
| >FAM123B-T TSPGHHGYM   | 30    | >FAM123B-T ISPGHHGYM   | 161   | 131   |
| >FAM123B-T TSPGHHGY    | 227   | >FAM123B-T ISPGHHGY    | 807   | 580   |
| >FAM123B-T TSPGHHGY    | 167   | >FAM123B-T ISPGHHGY    | 123   | 44    |
| >FAM123B-T TSPGHHGY    | 224   | >FAM123B-T ISPGHHGY    | 102   | 122   |
| >FAM123B-T TSPGHHGYM   | 154   | >FAM123B-T ISPGHHGYMI  | 2427  | 2273  |
| >FAM123B-T TSPGHHGY    | 241   | >FAM123B-T ISPGHHGY    | 35    | 206   |
| >FAM123B-T TSPGHHGYM   | 2300  | >FAM123B-T ISPGHHGYM   | 336   | 1964  |
| >FAM123B-T TSPGHHGYM   | 2356  | >FAM123B-T ISPGHHGYMI  | 420   | 1936  |
| >FAM123B-T TSPGHHGY    | 371   | >FAM123B-T ISPGHHGY    | 287   | 84    |
| >FAM123B-T TSPGHHGYM   | 2     | >FAM123B-T ISPGHHGYM   | 2     | 0     |
| >FAM123B-T TSPGHHGYM   | 2     | >FAM123B-T ISPGHHGYMI  | 2     | 0     |
| >FAM123B-T TSPGHHGYM   | 2     | >FAM123B-T ISPGHHGYMI  | 2     | 0     |
| >FAM123B-T TSPGHHGYM   | 200   | >FAM123B-T ISPGHHGYMI  | 98    | 102   |
| >FAM123B-T TTSPGHHGY   | 54    | >FAM123B-T TISPGHHGY   | 2970  | 2916  |

|                       |      |                       |       |       |
|-----------------------|------|-----------------------|-------|-------|
| >FAM123B-T TTSPGHHGYM | 484  | >FAM123B-T TISPGHHGYM | 92    | 392   |
| >FAM123B-T TTSPGHHGYM | 2727 | >FAM123B-T TISPGHHGYM | 131   | 2596  |
| >FAM123B-T TTSPGHHGY  | 123  | >FAM123B-T TISPGHHGY  | 373   | 250   |
| >FAM123B-T TTSPGHHGY  | 436  | >FAM123B-T TISPGHHGY  | 2292  | 1856  |
| >FAM123B-T TTSPGHHGY  | 235  | >FAM123B-T TISPGHHGY  | 1795  | 1560  |
| >FAM123B-T TTSPGHHGY  | 52   | >FAM123B-T TISPGHHGY  | 416   | 364   |
| >FAM123B-T TTSPGHHGYM | 60   | >FAM123B-T TISPGHHGYM | 439   | 379   |
| >FAM123B-T TTSPGHHGY  | 318  | >FAM123B-T TISPGHHGY  | 2524  | 2206  |
| >FAM123B-T TTSPGHHGY  | 14   | >FAM123B-T TISPGHHGY  | 20    | 6     |
| >FAM123B-T TTSPGHHGY  | 9    | >FAM123B-T TISPGHHGY  | 13    | 4     |
| >FAM123B-T TTSPGHHGY  | 82   | >FAM123B-T TISPGHHGY  | 580   | 498   |
| >FAM123B-T TTSPGHHGYM | 227  | >FAM123B-T TISPGHHGYM | 2071  | 1844  |
| >FAM123B-T TTSPGHHGYM | 24   | >FAM123B-T TISPGHHGYM | 129   | 105   |
| >FAM123B-T TTSPGHHGYM | 137  | >FAM123B-T TISPGHHGYM | 495   | 358   |
| >FAM123B-T TTSPGHHGYM | 137  | >FAM123B-T TISPGHHGYM | 469   | 332   |
| >FAM123B-T TTSPGHHGY  | 165  | >FAM123B-T TISPGHHGY  | 215   | 50    |
| >FAM123B-T TTSPGHHGY  | 305  | >FAM123B-T TISPGHHGY  | 226   | 79    |
| >FAM123B-T TTSPGHHGY  | 533  | >FAM123B-T TISPGHHGY  | 140   | 393   |
| >FAM123B-T TTSPGHHGY  | 3    | >FAM123B-T TISPGHHGY  | 92    | 89    |
| >FAM123B-T TTSPGHHGYM | 15   | >FAM123B-T TISPGHHGYM | 3546  | 3531  |
| >FAM123B-T TTSPGHHGYM | 13   | >FAM123B-T TISPGHHGYM | 3850  | 3837  |
| >FAM123B-T TTSPGHHGY  | 307  | >FAM123B-T TISPGHHGY  | 9085  | 8778  |
| >FAM123B-T TTSPGHHGY  | 332  | >FAM123B-T TISPGHHGY  | 7060  | 6728  |
| >FAM123B-T TTSPGHHGYM | 37   | >FAM123B-T TISPGHHGYM | 5281  | 5244  |
| >FAM123B-T TTSPGHHGYM | 21   | >FAM123B-T TISPGHHGYM | 2730  | 2709  |
| >FAM123B-T TTSPGHHGY  | 53   | >FAM123B-T TISPGHHGY  | 2637  | 2584  |
| >FAM123B-T TTSPGHHGYM | 23   | >FAM123B-T TISPGHHGYM | 174   | 151   |
| >FAM123B-T TTSPGHHGYM | 139  | >FAM123B-T TISPGHHGYM | 5243  | 5104  |
| >FAM123B-T TTSPGHHGYM | 477  | >FAM123B-T TISPGHHGYM | 14779 | 14302 |
| >FAM123B-T PTTSPGHHG\ | 277  | >FAM123B-T PTISPGHHGY | 308   | 31    |
| >FAM123B-T PTTSPGHH   | 5076 | >FAM123B-T PTISPGHH   | 288   | 4788  |
| >FAM123B-T PTTSPGHHG\ | 37   | >FAM123B-T PTISPGHHGY | 5     | 32    |
| >FAM123B-T PTTSPGHHG\ | 35   | >FAM123B-T PTISPGHHGY | 4     | 31    |
| >FAM123B-T PTTSPGHHG\ | 130  | >FAM123B-T PTISPGHHGY | 12    | 118   |
| >FAM123B-T PTTSPGHHG\ | 2758 | >FAM123B-T PTISPGHHGY | 337   | 2421  |
| >FAM123B-T PTTSPGHHG\ | 505  | >FAM123B-T PTISPGHHGY | 136   | 369   |
| >FAM123B-T PTTSPGHHG\ | 200  | >FAM123B-T PTISPGHHGY | 49    | 151   |
| >FAM123B-T PTTSPGHHG\ | 65   | >FAM123B-T PTISPGHHGY | 598   | 533   |
| >FAM123B-T PTTSPGHHG\ | 415  | >FAM123B-T PTISPGHHGY | 786   | 371   |
| >FAM123B-T HPTTSPGHHG | 391  | >FAM123B-T HPTISPGHHG | 455   | 64    |
| >FAM123B-T HPTTSPGH   | 192  | >FAM123B-T HPTISPGH   | 220   | 28    |
| >FAM123B-T HPTTSPGHHG | 24   | >FAM123B-T HPTISPGHHG | 27    | 3     |
| >FAM123B-T HPTTSPGHHG | 355  | >FAM123B-T HPTISPGHHG | 333   | 22    |



|                       |       |                       |       |       |
|-----------------------|-------|-----------------------|-------|-------|
| >FAM123B-T GYHPTTSPG  | 353   | >FAM123B-T GYHPTISPG  | 636   | 283   |
| >FAM123B-T NLGYHPTT   | 2925  | >FAM123B-T NLGYHPTI   | 238   | 2687  |
| >FAM123B-T NLGYHPTT   | 2924  | >FAM123B-T NLGYHPTI   | 146   | 2778  |
| >FAM123B-T NLGYHPTT   | 3855  | >FAM123B-T NLGYHPTI   | 119   | 3736  |
| >FAM123B-T NLGYHPTT   | 3308  | >FAM123B-T NLGYHPTI   | 427   | 2881  |
| >FAM123B-T MNLGYHPTT  | 2602  | >FAM123B-T MNLGYHPTI  | 325   | 2277  |
| >FAM123B-T MNLGYHPTT  | 35063 | >FAM123B-T MNLGYHPTI  | 450   | 34613 |
| >FAM123B-T NMNLGYHPT  | 1971  | >FAM123B-T NMNLGYHPT  | 180   | 1791  |
| >FAM123B-T NMNLGYHPT  | 1861  | >FAM123B-T NMNLGYHPT  | 418   | 1443  |
| >FAM123B-T NMNLGYHPT  | 855   | >FAM123B-T NMNLGYHPT  | 32    | 823   |
| >FAM123B-T NMNLGYHPT  | 3024  | >FAM123B-T NMNLGYHPT  | 56    | 2968  |
| >FAM123B-T NMNLGYHPT  | 3914  | >FAM123B-T NMNLGYHPT  | 165   | 3749  |
| >FAM123B-T NMNLGYHPT  | 1939  | >FAM123B-T NMNLGYHPT  | 87    | 1852  |
| >FAM123B-T NMNLGYHPT  | 954   | >FAM123B-T NMNLGYHPT  | 86    | 868   |
| >FAM123B-T NMNLGYHPT  | 5647  | >FAM123B-T NMNLGYHPT  | 284   | 5363  |
| >FAM123B-Y YAREAHTWE  | 201   | >FAM123B-Y FAREAHTWE  | 257   | 56    |
| >FAM123B-Y YAREAHTWE  | 205   | >FAM123B-Y FAREAHTWE  | 1531  | 1326  |
| >FAM123B-Y YAREAHTW   | 4     | >FAM123B-Y FAREAHTW   | 5     | 1     |
| >FAM123B-Y YAREAHTW   | 425   | >FAM123B-Y FAREAHTW   | 476   | 51    |
| >FAM123B-Y YAREAHTWE  | 236   | >FAM123B-Y FAREAHTWE  | 300   | 64    |
| >FAM123B-Y YAREAHTW   | 362   | >FAM123B-Y FAREAHTW   | 97    | 265   |
| >FAM123B-Y YAREAHTW   | 31    | >FAM123B-Y FAREAHTW   | 33    | 2     |
| >FAM123B-Y YAREAHTW   | 39    | >FAM123B-Y FAREAHTW   | 33    | 6     |
| >FAM123B-Y YAREAHTW   | 257   | >FAM123B-Y FAREAHTW   | 60    | 197   |
| >FAM123B-Y YAREAHTW   | 1371  | >FAM123B-Y FAREAHTW   | 421   | 950   |
| >FAM123B-Y AYAREAHTW  | 113   | >FAM123B-Y AFAREAHTW  | 477   | 364   |
| >FAM123B-Y AYAREAHTW  | 46    | >FAM123B-Y AFAREAHTW  | 198   | 152   |
| >FAM123B-Y AYAREAHTW  | 6     | >FAM123B-Y AFAREAHTW  | 56    | 50    |
| >FAM123B-Y AYAREAHTW  | 103   | >FAM123B-Y AFAREAHTW  | 2346  | 2243  |
| >FAM123B-Y AYAREAHTW  | 536   | >FAM123B-Y AFAREAHTW  | 116   | 420   |
| >FAM123B-Y YTREAYGREA | 24    | >FAM123B-Y YTREAYGREA | 125   | 101   |
| >FAM123B-Y YTREAYGREA | 24    | >FAM123B-Y YTREAYGREA | 132   | 108   |
| >FAM123B-Y YTREAYGREA | 13    | >FAM123B-Y YTREAYGREA | 34    | 21    |
| >FAM123B-Y YTREAYGREA | 121   | >FAM123B-Y YTREAYGREA | 804   | 683   |
| >FAM123B-Y YTREAYGREA | 48    | >FAM123B-Y YTREAYGREA | 2801  | 2753  |
| >FAM123B-Y YTREAYGREA | 322   | >FAM123B-Y YTREAYGREA | 1992  | 1670  |
| >FAM123B-Y YTREAYGREA | 315   | >FAM123B-Y YTREAYGREA | 12608 | 12293 |
| >FAM123B-Y YTREAYGREA | 48    | >FAM123B-Y YTREAYGREA | 43    | 5     |
| >FAM123B-Y YTREAYGREA | 115   | >FAM123B-Y YTREAYGREA | 304   | 189   |
| >FAM123B-Y YTREAYGREA | 80    | >FAM123B-Y YTREAYGREA | 23    | 57    |
| >FAM123B-Y YTREAYGREA | 9     | >FAM123B-Y YTREAYGREA | 6     | 3     |
| >FAM123B-Y YTREAYGREA | 189   | >FAM123B-Y YTREAYGREA | 504   | 315   |
| >FAM123B-Y YTREAYGREA | 10    | >FAM123B-Y YTREAYGREA | 13    | 3     |

|                        |      |                       |       |       |
|------------------------|------|-----------------------|-------|-------|
| >FAM123B-Y YTREAYGRE   | 393  | >FAM123B-Y YTREAYGRE  | 1519  | 1126  |
| >FAM123B-Y EAYAREHTV   | 822  | >FAM123B-Y EAFAREHTV  | 472   | 350   |
| >FAM123B-Y EAYAREHTV   | 10   | >FAM123B-Y EAFAREHTV  | 17    | 7     |
| >FAM123B-Y EAYAREHTV   | 48   | >FAM123B-Y EAFAREHTV  | 43    | 5     |
| >FAM123B-Y EAYAREHTV   | 21   | >FAM123B-Y EAFAREHTV  | 25    | 4     |
| >FAM123B-Y EAYAREHTV   | 78   | >FAM123B-Y EAFAREHTV  | 109   | 31    |
| >FAM123B-Y REAYAREHT   | 219  | >FAM123B-Y REAFAREHT  | 147   | 72    |
| >FAM123B-Y REAYAREAH   | 404  | >FAM123B-Y REAFAREAH  | 654   | 250   |
| >FAM123B-Y REAYAREHT   | 253  | >FAM123B-Y REAFAREHT  | 404   | 151   |
| >FAM123B-Y REAYAREA    | 590  | >FAM123B-Y REAFAREA   | 443   | 147   |
| >FAM123B-Y REAYAREHT   | 230  | >FAM123B-Y REAFAREHT  | 333   | 103   |
| >FAM123B-Y REAYAREHT   | 176  | >FAM123B-Y REAFAREHT  | 204   | 28    |
| >FAM123B-Y REAYAREHT   | 55   | >FAM123B-Y REAFAREHT  | 65    | 10    |
| >FAM123B-Y REAYAREA    | 25   | >FAM123B-Y REAFAREA   | 27    | 2     |
| >FAM123B-Y REAYAREHT   | 300  | >FAM123B-Y REAFAREHT  | 623   | 323   |
| >FAM123B-Y REAYAREHT   | 378  | >FAM123B-Y REAFAREHT  | 518   | 140   |
| >FAM123B-Y REAYAREHT   | 164  | >FAM123B-Y REAFAREHT  | 235   | 71    |
| >FAM123B-Y REAYAREHT   | 235  | >FAM123B-Y REAFAREHT  | 407   | 172   |
| >FAM123B-Y AYGREAYAR   | 190  | >FAM123B-Y AYGREAFAR  | 117   | 73    |
| >FAM123B-Y AYGREAYAR   | 46   | >FAM123B-Y AYGREAFAR  | 141   | 95    |
| >FAM123B-Y EAYGREAY    | 114  | >FAM123B-Y EAYGREAF   | 1393  | 1279  |
| >FAM123B-Y EAYGREAY    | 47   | >FAM123B-Y EAYGREAF   | 200   | 153   |
| >FAM123B-Y EAYGREAY    | 207  | >FAM123B-Y EAYGREAF   | 1791  | 1584  |
| >FAM123B-Y EAYGREAYAF  | 115  | >FAM123B-Y EAYGREAFAR | 101   | 14    |
| >FAM123B-Y EAYGREAYAF  | 86   | >FAM123B-Y EAYGREAFAR | 49    | 37    |
| >FAM123B-Y EAYGREAY    | 125  | >FAM123B-Y EAYGREAF   | 2325  | 2200  |
| >FAM123B-Y EAYGREAYAF  | 5    | >FAM123B-Y EAYGREAFAR | 6     | 1     |
| >FAM123B-Y EAYGREAYA   | 138  | >FAM123B-Y EAYGREAF   | 169   | 31    |
| >FAM123B-Y EAYGREAY    | 1622 | >FAM123B-Y EAYGREAF   | 360   | 1262  |
| >FAM123B-Y EAYGREAY    | 102  | >FAM123B-Y EAYGREAF   | 69    | 33    |
| >FAM123B-Y EAYGREAY    | 23   | >FAM123B-Y EAYGREAF   | 44    | 21    |
| >FAM123B-Y EAYGREAYAF  | 165  | >FAM123B-Y EAYGREAFAR | 446   | 281   |
| >FAM123B-Y REAYGREAY   | 218  | >FAM123B-Y REAYGREAF  | 15558 | 15340 |
| >FAM123B-Y REAYGREAY   | 97   | >FAM123B-Y REAYGREAF  | 101   | 4     |
| >FAM123B-Y REAYGREAY   | 68   | >FAM123B-Y REAYGREAF  | 14    | 54    |
| >FAM123B-Y REAYGREAY   | 77   | >FAM123B-Y REAYGREAF  | 88    | 11    |
| >FAM123B-Y REAYGREAY   | 144  | >FAM123B-Y REAYGREAF  | 10    | 134   |
| >FAM123B-Y REAYGREAY   | 3322 | >FAM123B-Y REAYGREAF  | 209   | 3113  |
| >FAM123B-Y REAYGREAYAF | 141  | >FAM123B-Y REAYGREAF  | 217   | 76    |
| >FAM123B-Y REAYGREAYAF | 51   | >FAM123B-Y REAYGREAF  | 55    | 4     |
| >FAM123B-Y REAYGREAY   | 930  | >FAM123B-Y REAYGREAF  | 41    | 889   |
| >FAM123B-Y REAYGREAYAF | 306  | >FAM123B-Y REAYGREAF  | 616   | 310   |
| >FAM123B-Y TREAYGREAY  | 1043 | >FAM123B-Y TREAYGREAF | 350   | 693   |

|                        |       |                        |       |       |
|------------------------|-------|------------------------|-------|-------|
| >FANCA-P50\PSKYRSL     | 1024  | >FANCA-P50\ASKYRSL     | 27    | 997   |
| >FANCA-P50\PSKYRSLT    | 2231  | >FANCA-P50\ASKYRSLT    | 67    | 2164  |
| >FANCA-P50\PSKYRSLTD   | 4814  | >FANCA-P50\ASKYRSLTD   | 402   | 4412  |
| >FANCA-P50\PSKYRSLTDY  | 816   | >FANCA-P50\ASKYRSLTDY  | 150   | 666   |
| >FANCA-P50\PSKYRSLTDY  | 3890  | >FANCA-P50\ASKYRSLTDY  | 143   | 3747  |
| >FANCA-P50\PSKYRSLTDY  | 1444  | >FANCA-P50\ASKYRSLTDY  | 121   | 1323  |
| >FANCA-P50\PSKYRSL     | 6793  | >FANCA-P50\ASKYRSL     | 42    | 6751  |
| >FANCA-P50\PSKYRSLTDY  | 2303  | >FANCA-P50\ASKYRSLTDY  | 13    | 2290  |
| >FANCA-P50\PSKYRSLTDY  | 2330  | >FANCA-P50\ASKYRSLTDY  | 62    | 2268  |
| >FANCA-P50\VPSKYRSL    | 464   | >FANCA-P50\VASKYRSL    | 34    | 430   |
| >FANCA-P50\VPSKYRSL    | 4696  | >FANCA-P50\VASKYRSL    | 201   | 4495  |
| >FANCA-P50\VPSKYRSL    | 11    | >FANCA-P50\VASKYRSL    | 1234  | 1223  |
| >FANCA-P50\VPSKYRSL    | 18    | >FANCA-P50\VASKYRSL    | 4217  | 4199  |
| >FANCA-P50\VPSKYRSL    | 156   | >FANCA-P50\VASKYRSL    | 530   | 374   |
| >FANCA-P50\VPSKYRSL    | 5765  | >FANCA-P50\VASKYRSL    | 479   | 5286  |
| >FANCA-P50\VPSKYRSL    | 184   | >FANCA-P50\VASKYRSL    | 43    | 141   |
| >FANCA-P50\VPSKYRSL    | 308   | >FANCA-P50\VASKYRSL    | 7281  | 6973  |
| >FANCA-P50\QVHILHPPLV  | 2949  | >FANCA-P50\QVHILHPPLV  | 111   | 2838  |
| >FANCA-P50\LVPSKYRSL   | 192   | >FANCA-P50\LVASKYRSL   | 374   | 182   |
| >FANCA-P50\LVPSKYRSL   | 4519  | >FANCA-P50\LVASKYRSL   | 315   | 4204  |
| >FANCA-P50\LVPSKYRSL   | 310   | >FANCA-P50\LVASKYRSL   | 92    | 218   |
| >FANCA-P50\LVPSKYRSL   | 1334  | >FANCA-P50\LVASKYRSL   | 215   | 1119  |
| >FANCA-P50\LVPSKYRSL   | 4288  | >FANCA-P50\LVASKYRSL   | 138   | 4150  |
| >FANCA-P50\LVPSKYRSL   | 357   | >FANCA-P50\LVASKYRSL   | 99    | 258   |
| >FANCA-P50\LVPSKYRSL   | 151   | >FANCA-P50\LVASKYRSL   | 10415 | 10264 |
| >FANCA-P50\LVPSKYRSL   | 16    | >FANCA-P50\LVASKYRSL   | 1955  | 1939  |
| >FANCA-P50\LVPSKYRSL   | 231   | >FANCA-P50\LVASKYRSL   | 140   | 91    |
| >FANCA-P50\PLVPSKYRSL  | 140   | >FANCA-P50\PLVASKYRSL  | 291   | 151   |
| >FANCA-P50\PLVPSKYRSL  | 42    | >FANCA-P50\PLVASKYRSL  | 77    | 35    |
| >FANCA-P50\PLVPSKYR    | 103   | >FANCA-P50\PLVASKYR    | 79    | 24    |
| >FANCA-P50\PPLVPSKYRSI | 4775  | >FANCA-P50\PPLVASKYRSI | 243   | 4532  |
| >FANCA-P50\PPLVPSKYRSI | 448   | >FANCA-P50\PPLVASKYRSI | 607   | 159   |
| >FANCA-P50\PPLVPSKY    | 774   | >FANCA-P50\PPLVASKY    | 318   | 456   |
| >FANCA-P50\PPLVPSKY    | 497   | >FANCA-P50\PPLVASKY    | 470   | 27    |
| >FANCA-P50\HPPLVPSKYR  | 231   | >FANCA-P50\HPPLVASKYR  | 218   | 13    |
| >FANCA-P50\HPPLVPSKY   | 97    | >FANCA-P50\HPPLVASKY   | 54    | 43    |
| >FANCA-P50\HPPLVPSKYR  | 115   | >FANCA-P50\HPPLVASKYR  | 105   | 10    |
| >FANCA-P50\LHPPLVPSKYI | 261   | >FANCA-P50\LHPPLVASKYI | 224   | 37    |
| >FANCA-P50\ILHPPLVP    | 13118 | >FANCA-P50\ILHPPLVA    | 61    | 13057 |
| >FANCA-P50\ILHPPLVP    | 4814  | >FANCA-P50\ILHPPLVA    | 21    | 4793  |
| >FANCA-P50\ILHPPLVPS   | 233   | >FANCA-P50\ILHPPLVAS   | 214   | 19    |
| >FANCA-P50\ILHPPLVP    | 6247  | >FANCA-P50\ILHPPLVA    | 16    | 6231  |
| >FANCA-P50\ILHPPLVPS   | 363   | >FANCA-P50\ILHPPLVAS   | 413   | 50    |

|                        |     |                        |       |       |
|------------------------|-----|------------------------|-------|-------|
| >FANCA-P50!ILHPPLVPSK  | 197 | >FANCA-P50!ILHPPLVASK  | 223   | 26    |
| >FANCA-P50!ILHPPLVPSK  | 69  | >FANCA-P50!ILHPPLVASK  | 46    | 23    |
| >FANCA-P50!ILHPPLVPSKY | 140 | >FANCA-P50!ILHPPLVASKY | 144   | 4     |
| >FANCA-P50!ILHPPLVPSK  | 388 | >FANCA-P50!ILHPPLVASK  | 762   | 374   |
| >FANCA-P50!ILHPPLVPSKY | 55  | >FANCA-P50!ILHPPLVASKY | 57    | 2     |
| >FANCA-P50!ILHPPLVPSK  | 19  | >FANCA-P50!ILHPPLVASK  | 30    | 11    |
| >FANCA-P50!ILHPPLVPSKY | 108 | >FANCA-P50!ILHPPLVASKY | 80    | 28    |
| >FANCA-P50!ILHPPLVPSKY | 370 | >FANCA-P50!ILHPPLVASKY | 261   | 109   |
| >FANCA-P50!ILHPPLVPSKY | 77  | >FANCA-P50!ILHPPLVASKY | 69    | 8     |
| >FANCA-P50!ILHPPLVPSKY | 66  | >FANCA-P50!ILHPPLVASKY | 79    | 13    |
| >FANCA-P50!ILHPPLVPSKY | 68  | >FANCA-P50!ILHPPLVASKY | 43    | 25    |
| >FANCA-P50!ILHPPLVPSKY | 164 | >FANCA-P50!ILHPPLVASKY | 85    | 79    |
| >FANCA-P50!HILHPPLVPSK | 59  | >FANCA-P50!HILHPPLVASK | 53    | 6     |
| >FANCA-P50!HILHPPLVPSK | 77  | >FANCA-P50!HILHPPLVASK | 86    | 9     |
| >FANCA-P50!HILHPPLVPSK | 13  | >FANCA-P50!HILHPPLVASK | 17    | 4     |
| >FANCA-S10!SFQAEQPI    | 71  | >FANCA-S10!GFQAEQPI    | 1406  | 1335  |
| >FANCA-S10!SFQAEQPITA  | 67  | >FANCA-S10!GFQAEQPITA  | 122   | 55    |
| >FANCA-S10!SFQAEQPITA  | 199 | >FANCA-S10!GFQAEQPITA  | 1357  | 1158  |
| >FANCA-S10!SSFQAEQPI   | 189 | >FANCA-S10!SGFQAEQPI   | 870   | 681   |
| >FANCA-S10!SSFQAEQPI   | 180 | >FANCA-S10!SGFQAEQPI   | 11351 | 11171 |
| >FANCA-S10!SSFQAEQPI   | 231 | >FANCA-S10!SGFQAEQPI   | 3190  | 2959  |
| >FANCA-S10!SSFQAEQPI   | 45  | >FANCA-S10!SGFQAEQPI   | 9505  | 9460  |
| >FANCA-S10!SSFQAEQPI   | 21  | >FANCA-S10!SGFQAEQPI   | 252   | 231   |
| >FANCA-S10!CGSSFQAEQF  | 172 | >FANCA-S10!CGSGFQAEQF  | 325   | 153   |
| >FANCA-S10!VLCGSSFQA   | 152 | >FANCA-S10!VLCGSGFQA   | 805   | 653   |
| >FANCA-S10!VLCGSSFQA   | 40  | >FANCA-S10!VLCGSGFQA   | 158   | 118   |
| >FANCA-S10!VLCGSSFQA   | 107 | >FANCA-S10!VLCGSGFQA   | 245   | 138   |
| >FANCA-S10!VLCGSSFQA   | 475 | >FANCA-S10!VLCGSGFQA   | 1053  | 578   |
| >FANCA-S10!VLCGSSFQA   | 9   | >FANCA-S10!VLCGSGFQA   | 11    | 2     |
| >FANCA-S10!VLCGSSFQA   | 38  | >FANCA-S10!VLCGSGFQA   | 60    | 22    |
| >FANCA-S10!VLCGSSFQA   | 31  | >FANCA-S10!VLCGSGFQA   | 340   | 309   |
| >FANCA-S10!VLCGSSFQ    | 41  | >FANCA-S10!VLCGSGFQ    | 222   | 181   |
| >FANCA-S10!VLCGSSFQA   | 3   | >FANCA-S10!VLCGSGFQA   | 4     | 1     |
| >FANCA-S10!VLCGSSFQAE  | 16  | >FANCA-S10!VLCGSGFQAE  | 17    | 1     |
| >FANCA-S10!SVLCGSSFQA  | 166 | >FANCA-S10!SVLCGSGFQA  | 167   | 1     |
| >FANCA-S10!SVLCGSSFQA  | 225 | >FANCA-S10!SVLCGSGFQA  | 322   | 97    |
| >FANCA-S10!SVLCGSSFQA  | 163 | >FANCA-S10!SVLCGSGFQA  | 339   | 176   |
| >FANCA-S10!SVLCGSSF    | 362 | >FANCA-S10!SVLCGSGF    | 341   | 21    |
| >FANCA-S10!SVLCGSSFQA  | 337 | >FANCA-S10!SVLCGSGFQA  | 794   | 457   |
| >FANCA-S10!SVLCGSSF    | 416 | >FANCA-S10!SVLCGSGF    | 1626  | 1210  |
| >FANCA-S10!SVLCGSSFQA  | 37  | >FANCA-S10!SVLCGSGFQA  | 77    | 40    |
| >FANCA-S10!SVLCGSSF    | 81  | >FANCA-S10!SVLCGSGF    | 234   | 153   |
| >FANCA-S10!SVLCGSSF    | 135 | >FANCA-S10!SVLCGSGF    | 160   | 25    |

|                        |       |                        |      |       |
|------------------------|-------|------------------------|------|-------|
| >FANCA-S10!SVLCGSSF    | 50    | >FANCA-S10!SVLCGSGF    | 400  | 350   |
| >FANCA-S10!SVLCGSSF    | 115   | >FANCA-S10!SVLCGSGF    | 135  | 20    |
| >FANCA-S10!SVLCGSSF    | 307   | >FANCA-S10!SVLCGSGF    | 846  | 539   |
| >FANCA-S10!SVLCGSSFQ   | 249   | >FANCA-S10!SVLCGSGFQ   | 3255 | 3006  |
| >FANCA-S10!SSVLCGSSF   | 504   | >FANCA-S10!SSVLCGSGF   | 393  | 111   |
| >FANCA-S10!SSVLCGSSF   | 85    | >FANCA-S10!SSVLCGSGF   | 315  | 230   |
| >FANCA-S10!SSVLCGSSF   | 28    | >FANCA-S10!SSVLCGSGF   | 109  | 81    |
| >FANCA-S10!SSVLCGSSF   | 4     | >FANCA-S10!SSVLCGSGF   | 4    | 0     |
| >FANCA-S10!SSVLCGSSF   | 3     | >FANCA-S10!SSVLCGSGF   | 6    | 3     |
| >FANCA-S10!PSSVLCGSSF  | 333   | >FANCA-S10!PSSVLCGSGF  | 1002 | 669   |
| >FANCA-S10!PSSVLCGSSF  | 68    | >FANCA-S10!PSSVLCGSGF  | 114  | 46    |
| >FANCA-S10!LPSSVLCGSSF | 193   | >FANCA-S10!LPSSVLCGSGI | 942  | 749   |
| >FANCA-S10!LPSSVLCGSSF | 67    | >FANCA-S10!LPSSVLCGSGI | 277  | 210   |
| >FANCA-S10!LPSSVLCGSSF | 101   | >FANCA-S10!LPSSVLCGSGI | 327  | 226   |
| >FANCA-S10!LPSSVLCGSSF | 16    | >FANCA-S10!LPSSVLCGSGI | 20   | 4     |
| >FANCA-S10!LPSSVLCGSSF | 41    | >FANCA-S10!LPSSVLCGSGI | 108  | 67    |
| >FANCA-S10!LPSSVLCGSSF | 69    | >FANCA-S10!LPSSVLCGSGI | 148  | 79    |
| >FANCA-S10!LPSSVLCGSSF | 123   | >FANCA-S10!LPSSVLCGSGI | 3112 | 2989  |
| >FANCA-S10!LPSSVLCGSSF | 59    | >FANCA-S10!LPSSVLCGSGI | 266  | 207   |
| >FANCA-W9!WLHLELEI     | 420   | >FANCA-W9!LLHLELEI     | 400  | 20    |
| >FANCA-W9!WLHLELEI     | 185   | >FANCA-W9!LLHLELEI     | 236  | 51    |
| >FANCA-W9!WLHLELEI     | 161   | >FANCA-W9!LLHLELEI     | 205  | 44    |
| >FANCA-W9!WLHLELEI     | 46    | >FANCA-W9!LLHLELEI     | 52   | 6     |
| >FANCA-W9!WLHLELEI     | 355   | >FANCA-W9!LLHLELEI     | 358  | 3     |
| >FANCA-W9!WLHLELEI     | 286   | >FANCA-W9!LLHLELEI     | 484  | 198   |
| >FANCA-W9!WLHLELEI     | 33    | >FANCA-W9!LLHLELEI     | 23   | 10    |
| >FANCA-W9!DWLHLELEI    | 22696 | >FANCA-W9!DLLHLELEI    | 277  | 22419 |
| >FANCA-W9!EEDVHLTYQI   | 15363 | >FANCA-W9!EEDVHLTYQI   | 342  | 15021 |
| >FANCA-W9!EEDVHLTYQI   | 121   | >FANCA-W9!EEDVHLTYQI   | 2386 | 2265  |
| >FANCA-W9!EEDVHLTYQI   | 81    | >FANCA-W9!EEDVHLTYQI   | 1518 | 1437  |
| >FANCA-W9!QDWLHLELEI   | 106   | >FANCA-W9!QDLLHLELEI   | 154  | 48    |
| >FANCA-W9!QDWLHLELEI   | 675   | >FANCA-W9!QDLLHLELEI   | 454  | 221   |
| >FANCA-W9!QDWLHLELEI   | 63    | >FANCA-W9!QDLLHLELEI   | 44   | 19    |
| >FANCA-W9!YQDWLHLELEI  | 48    | >FANCA-W9!YQDLLHLELEI  | 231  | 183   |
| >FANCA-W9!YQDWLHLELEI  | 50    | >FANCA-W9!YQDLLHLELEI  | 197  | 147   |
| >FANCA-W9!YQDWLHLELEI  | 417   | >FANCA-W9!YQDLLHLELEI  | 531  | 114   |
| >FANCA-W9!YQDWLHLELEI  | 11    | >FANCA-W9!YQDLLHLELEI  | 39   | 28    |
| >FANCA-W9!YQDWLHLELEI  | 14    | >FANCA-W9!YQDLLHLELEI  | 45   | 31    |
| >FANCA-W9!YQDWLHLELEI  | 16    | >FANCA-W9!YQDLLHLELEI  | 378  | 362   |
| >FANCA-W9!YQDWLHLELEI  | 33    | >FANCA-W9!YQDLLHLELEI  | 479  | 446   |
| >FANCA-W9!YQDWLHLELEI  | 74    | >FANCA-W9!YQDLLHLELEI  | 1064 | 990   |
| >FANCA-W9!YQDWLHLELEI  | 122   | >FANCA-W9!YQDLLHLELEI  | 1040 | 918   |
| >FANCA-W9!YQDWLHLELEI  | 16    | >FANCA-W9!YQDLLHLELEI  | 35   | 19    |

|                      |      |                       |      |      |
|----------------------|------|-----------------------|------|------|
| >FANCA-W9:YQDWLHLELI | 204  | >FANCA-W9:YQDLLHLELEI | 531  | 327  |
| >FANCA-W9:YQDWLHLEL  | 41   | >FANCA-W9:YQDLLHLEL   | 484  | 443  |
| >FANCA-W9:YQDWLHLELI | 486  | >FANCA-W9:YQDLLHLELEI | 3308 | 2822 |
| >FANCA-W9:TYQDWLHL   | 3532 | >FANCA-W9:TYQDLLHL    | 280  | 3252 |
| >FANCA-W9:TYQDWLHL   | 24   | >FANCA-W9:TYQDLLHL    | 55   | 31   |
| >FANCA-W9:TYQDWLHLE  | 303  | >FANCA-W9:TYQDLLHLE   | 3132 | 2829 |
| >FANCA-W9:TYQDWLHL   | 113  | >FANCA-W9:TYQDLLHL    | 380  | 267  |
| >FANCA-W9:TYQDWLHL   | 15   | >FANCA-W9:TYQDLLHL    | 10   | 5    |
| >FANCA-W9:TYQDWLHLEI | 8    | >FANCA-W9:TYQDLLHLEL  | 7    | 1    |
| >FANCA-W9:TYQDWLHL   | 145  | >FANCA-W9:TYQDLLHL    | 171  | 26   |
| >FANCA-W9:TYQDWLHLEI | 34   | >FANCA-W9:TYQDLLHLEL  | 40   | 6    |
| >FANCA-W9:TYQDWLHLEI | 352  | >FANCA-W9:TYQDLLHLEL  | 494  | 142  |
| >FANCA-W9:LTYQDWLHL  | 181  | >FANCA-W9:LTYQDLLHL   | 486  | 305  |
| >FANCA-W9:LTYQDWLHLI | 266  | >FANCA-W9:LTYQDLLHLEI | 519  | 253  |
| >FANCA-W9:LTYQDWLHL  | 77   | >FANCA-W9:LTYQDLLHL   | 60   | 17   |
| >FANCA-W9:LTYQDWLHLI | 227  | >FANCA-W9:LTYQDLLHLEI | 240  | 13   |
| >FANCA-W9:LTYQDWLHL  | 344  | >FANCA-W9:LTYQDLLHL   | 255  | 89   |
| >FANCA-W9:LTYQDWLHLI | 113  | >FANCA-W9:LTYQDLLHLEI | 173  | 60   |
| >FANCA-W9:LTYQDWLHL  | 379  | >FANCA-W9:LTYQDLLHL   | 598  | 219  |
| >FANCA-W9:LTYQDWLHL  | 1137 | >FANCA-W9:LTYQDLLHL   | 377  | 760  |
| >FANCA-W9:LTYQDWLHLI | 476  | >FANCA-W9:LTYQDLLHLEI | 420  | 56   |
| >FANCA-W9:LTYQDWLHL  | 935  | >FANCA-W9:LTYQDLLHL   | 69   | 866  |
| >FANCA-W9:LTYQDWLH   | 424  | >FANCA-W9:LTYQDLLH    | 408  | 16   |
| >FANCA-W9:LTYQDWLHLI | 471  | >FANCA-W9:LTYQDLLHLEI | 473  | 2    |
| >FANCA-W9:LTYQDWLHL  | 346  | >FANCA-W9:LTYQDLLHL   | 405  | 59   |
| >FANCA-W9:LTYQDWLH   | 643  | >FANCA-W9:LTYQDLLH    | 294  | 349  |
| >FANCA-W9:LTYQDWLHL  | 11   | >FANCA-W9:LTYQDLLHL   | 12   | 1    |
| >FANCA-W9:LTYQDWLHLI | 6    | >FANCA-W9:LTYQDLLHLEI | 6    | 0    |
| >FANCA-W9:LTYQDWLHL  | 135  | >FANCA-W9:LTYQDLLHL   | 85   | 50   |
| >FANCA-W9:LTYQDWLHLI | 199  | >FANCA-W9:LTYQDLLHLEI | 191  | 8    |
| >FANCA-W9:LTYQDWLHL  | 547  | >FANCA-W9:LTYQDLLHL   | 395  | 152  |
| >FANCA-W9:LTYQDWLHLI | 119  | >FANCA-W9:LTYQDLLHLEI | 110  | 9    |
| >FANCA-W9:LTYQDWLHL  | 37   | >FANCA-W9:LTYQDLLHL   | 28   | 9    |
| >FANCA-W9:LTYQDWLHLI | 91   | >FANCA-W9:LTYQDLLHLEI | 97   | 6    |
| >FANCA-W9:HLTYQDWLH  | 1758 | >FANCA-W9:HLTYQDLLHL  | 411  | 1347 |
| >FANCA-W9:HLTYQDWL   | 20   | >FANCA-W9:HLTYQDLL    | 30   | 10   |
| >FANCA-W9:HLTYQDWLH  | 536  | >FANCA-W9:HLTYQDLLHL  | 209  | 327  |
| >FANCA-W9:HLTYQDWLH  | 1456 | >FANCA-W9:HLTYQDLLHL  | 411  | 1045 |
| >FANCA-W9:HLTYQDWL   | 444  | >FANCA-W9:HLTYQDLL    | 684  | 240  |
| >FANCA-W9:HLTYQDWLH  | 232  | >FANCA-W9:HLTYQDLLHL  | 246  | 14   |
| >FANCA-W9:HLTYQDWL   | 276  | >FANCA-W9:HLTYQDLL    | 710  | 434  |
| >FANCA-W9:HLTYQDWLH  | 89   | >FANCA-W9:HLTYQDLLHL  | 221  | 132  |
| >FANCA-W9:HLTYQDWL   | 31   | >FANCA-W9:HLTYQDLL    | 80   | 49   |

|                        |       |                        |      |       |
|------------------------|-------|------------------------|------|-------|
| >FANCA-W9:HLTYQDWLH    | 42    | >FANCA-W9:HLTYQDLLHL   | 42   | 0     |
| >FANCA-W9:HLTYQDWLH    | 405   | >FANCA-W9:HLTYQDLLHL   | 2287 | 1882  |
| >FANCA-W9:VHLTYQDW     | 5074  | >FANCA-W9:VHLTYQDL     | 164  | 4910  |
| >FANCA-W9:VHLTYQDWL    | 735   | >FANCA-W9:VHLTYQDLL    | 234  | 501   |
| >FANCA-W9:VHLTYQDWL    | 208   | >FANCA-W9:VHLTYQDLLH   | 321  | 113   |
| >FANCA-W9:VHLTYQDW     | 1633  | >FANCA-W9:VHLTYQDL     | 421  | 1212  |
| >FANCA-W9:VHLTYQDWL    | 1297  | >FANCA-W9:VHLTYQDLL    | 334  | 963   |
| >FANCA-W9:VHLTYQDW     | 29    | >FANCA-W9:VHLTYQDL     | 5250 | 5221  |
| >FANCA-W9:VHLTYQDWL    | 105   | >FANCA-W9:VHLTYQDLL    | 146  | 41    |
| >FANCA-W9:DVHLTYQDW    | 453   | >FANCA-W9:DVHLTYQDLL   | 4060 | 3607  |
| >FANCA-W9:EDVHLTYQD\   | 498   | >FANCA-W9:EDVHLTYQDL   | 8421 | 7923  |
| >FANCA-W9:EDVHLTYQD\   | 613   | >FANCA-W9:EDVHLTYQDL   | 155  | 458   |
| >FANCE-H23:EHKSLESL    | 13090 | >FANCE-H23:EYKSLESL    | 119  | 12971 |
| >FANCE-H23:EHKSLESL    | 21963 | >FANCE-H23:EYKSLESL    | 174  | 21789 |
| >FANCE-H23:EHKSLESL    | 2390  | >FANCE-H23:EYKSLESL    | 207  | 2183  |
| >FANCE-H23:PEHKSLESL   | 2205  | >FANCE-H23:PEYKSLESL   | 197  | 2008  |
| >FANCE-H23:PEHKSLESL   | 219   | >FANCE-H23:PEYKSLESL   | 130  | 89    |
| >FANCE-H23:PEHKSLES\A  | 1034  | >FANCE-H23:PEYKSLES\A  | 260  | 774   |
| >FANCE-H23:PEHKSLESL   | 149   | >FANCE-H23:PEYKSLESL   | 60   | 89    |
| >FANCE-H23:RPEHKSLESL  | 31    | >FANCE-H23:RPEYKSLESL  | 48   | 17    |
| >FANCE-H23:RPEHKSLES\A | 422   | >FANCE-H23:RPEYKSLES\A | 566  | 144   |
| >FANCE-H23:KERPEHKS\   | 3696  | >FANCE-H23:KERPEYKSL   | 495  | 3201  |
| >FANCE-H23:KERPEHKS\   | 190   | >FANCE-H23:KERPEYKSL   | 125  | 65    |
| >FANCE-H23:KERPEHKS\   | 101   | >FANCE-H23:KERPEYKSL   | 117  | 16    |
| >FANCE-H23:KERPEHKS\   | 940   | >FANCE-H23:KERPEYKSL   | 313  | 627   |
| >FANCE-H23:HEKERPEHKS  | 315   | >FANCE-H23:HEKERPEYKS\ | 99   | 216   |
| >FANCE-H23:HEKERPEH    | 4457  | >FANCE-H23:HEKERPEY    | 90   | 4367  |
| >FANCE-H23:HEKERPEHKS  | 437   | >FANCE-H23:HEKERPEYKS\ | 339  | 98    |
| >FANCE-H23:HEKERPEHKS  | 124   | >FANCE-H23:HEKERPEYKS\ | 121  | 3     |
| >FANCE-H23:HEKERPEHKS  | 138   | >FANCE-H23:HEKERPEYKS\ | 83   | 55    |
| >FANCF-P18:PARFLSSL    | 951   | >FANCF-P18:LARFLSSL    | 114  | 837   |
| >FANCF-P18:PARFLSSLWE  | 2657  | >FANCF-P18:LARFLSSLWE\ | 373  | 2284  |
| >FANCF-P18:PARFLSSLWE  | 493   | >FANCF-P18:LARFLSSLWE\ | 22   | 471   |
| >FANCF-P18:PARFLSSLWE  | 356   | >FANCF-P18:LARFLSSLWE\ | 71   | 285   |
| >FANCF-P18:PARFLSSLWE  | 3157  | >FANCF-P18:LARFLSSLWE\ | 143  | 3014  |
| >FANCF-P18:PARFLSSL    | 3404  | >FANCF-P18:LARFLSSL    | 161  | 3243  |
| >FANCF-P18:PARFLSSL    | 2808  | >FANCF-P18:LARFLSSL    | 220  | 2588  |
| >FANCF-P18:PARFLSSL    | 4524  | >FANCF-P18:LARFLSSL    | 344  | 4180  |
| >FANCF-P18:PARFLSSL    | 2453  | >FANCF-P18:LARFLSSL    | 23   | 2430  |
| >FANCF-P18:PARFLSSLW   | 787   | >FANCF-P18:LARFLSSLW   | 8    | 779   |
| >FANCF-P18:PARFLSSLW   | 2012  | >FANCF-P18:LARFLSSLW   | 219  | 1793  |
| >FANCF-P18:PARFLSSLW   | 887   | >FANCF-P18:LARFLSSLW   | 50   | 837   |
| >FANCF-P18:PARFLSSLW   | 6738  | >FANCF-P18:LARFLSSLW   | 40   | 6698  |

|                         |       |                         |       |       |
|-------------------------|-------|-------------------------|-------|-------|
| >FANCF-P18! PARFLSSLW   | 545   | >FANCF-P18! LARFLSSLW   | 8     | 537   |
| >FANCF-P18! PARFLSSLW   | 3060  | >FANCF-P18! LARFLSSLW   | 71    | 2989  |
| >FANCF-P18! RPARFLSSL   | 22304 | >FANCF-P18! RLARFLSSL   | 38    | 22266 |
| >FANCF-P18! RPARFLSSL   | 12699 | >FANCF-P18! RLARFLSSL   | 4     | 12695 |
| >FANCF-P18! RPARFLSS    | 22906 | >FANCF-P18! RLARFLSS    | 363   | 22543 |
| >FANCF-P18! RPARFLSSL   | 13818 | >FANCF-P18! RLARFLSSL   | 3     | 13815 |
| >FANCF-P18! RPARFLSSL   | 9879  | >FANCF-P18! RLARFLSSL   | 50    | 9829  |
| >FANCF-P18! RPARFLSSL   | 18650 | >FANCF-P18! RLARFLSSL   | 7     | 18643 |
| >FANCF-P18! RPARFLSSL   | 22673 | >FANCF-P18! RLARFLSSL   | 21    | 22652 |
| >FANCF-P18! RPARFLSSL   | 24632 | >FANCF-P18! RLARFLSSL   | 48    | 24584 |
| >FANCF-P18! RPARFLSSL   | 24187 | >FANCF-P18! RLARFLSSL   | 63    | 24124 |
| >FANCF-P18! RPARFLSSL   | 25526 | >FANCF-P18! RLARFLSSL   | 3     | 25523 |
| >FANCF-P18! RPARFLSSL   | 10548 | >FANCF-P18! RLARFLSSL   | 93    | 10455 |
| >FANCF-P18! RPARFLSSLW  | 15691 | >FANCF-P18! RLARFLSSLW  | 214   | 15477 |
| >FANCF-P18! RPARFLSS    | 310   | >FANCF-P18! RLARFLSS    | 19895 | 19585 |
| >FANCF-P18! RPARFLSSL   | 8     | >FANCF-P18! RLARFLSSL   | 265   | 257   |
| >FANCF-P18! RPARFLSSL   | 167   | >FANCF-P18! RLARFLSSL   | 182   | 15    |
| >FANCF-P18! RPARFLSSL   | 15554 | >FANCF-P18! RLARFLSSL   | 258   | 15296 |
| >FANCF-P18! RPARFLSSL   | 562   | >FANCF-P18! RLARFLSSL   | 90    | 472   |
| >FANCF-P18! RPARFLSSLW  | 3914  | >FANCF-P18! RLARFLSSLW  | 178   | 3736  |
| >FANCF-P18! RPARFLSSLW  | 368   | >FANCF-P18! RLARFLSSLW  | 95    | 273   |
| >FANCF-P18! RPARFLSSLW  | 104   | >FANCF-P18! RLARFLSSLW  | 16    | 88    |
| >FANCF-P18! RPARFLSSL   | 120   | >FANCF-P18! RLARFLSSL   | 85    | 35    |
| >FANCF-P18! RPARFLSSL   | 50    | >FANCF-P18! RLARFLSSL   | 5785  | 5735  |
| >FANCF-P18! RPARFLSSLW  | 15    | >FANCF-P18! RLARFLSSLW  | 4331  | 4316  |
| >FANCF-P18! RPARFLSSL   | 909   | >FANCF-P18! RLARFLSSL   | 230   | 679   |
| >FANCF-P18! RPARFLSSLW  | 413   | >FANCF-P18! RLARFLSSLW  | 555   | 142   |
| >FANCF-P18! QEVGKAEAEI  | 5436  | >FANCF-P18! QEVGKAEAEI  | 25    | 5411  |
| >FANCF-P18! ERPARFLSSL  | 2038  | >FANCF-P18! ERLARFLSSL  | 475   | 1563  |
| >FANCF-P18! ERPARFLSSL  | 781   | >FANCF-P18! ERLARFLSSL  | 53    | 728   |
| >FANCF-P18! ERPARFLSSL  | 2250  | >FANCF-P18! ERLARFLSSL  | 134   | 2116  |
| >FANCF-P18! ERPARFLSSL  | 714   | >FANCF-P18! ERLARFLSSL  | 276   | 438   |
| >FANCF-P18! ERPARFLSSL  | 348   | >FANCF-P18! ERLARFLSSL  | 112   | 236   |
| >FANCF-P18! AERPARFL    | 28    | >FANCF-P18! AERLARFL    | 4     | 24    |
| >FANCF-P18! AERPARFLSSI | 477   | >FANCF-P18! AERLARFLSSI | 334   | 143   |
| >FANCF-P18! AERPARFLSSI | 356   | >FANCF-P18! AERLARFLSSI | 854   | 498   |
| >FANCF-P18! AERPARFL    | 339   | >FANCF-P18! AERLARFL    | 288   | 51    |
| >FANCF-P18! AERPARFLSSI | 180   | >FANCF-P18! AERLARFLSSI | 180   | 0     |
| >FANCF-P18! AERPARFL    | 99    | >FANCF-P18! AERLARFL    | 32    | 67    |
| >FANCF-P18! AERPARFLS   | 1170  | >FANCF-P18! AERLARFLS   | 381   | 789   |
| >FANCF-P18! AERPARFLSS  | 760   | >FANCF-P18! AERLARFLSS  | 422   | 338   |
| >FANCF-P18! AERPARFLSSI | 19    | >FANCF-P18! AERLARFLSSI | 13    | 6     |
| >FANCF-P18! AERPARFL    | 345   | >FANCF-P18! AERLARFL    | 356   | 11    |



|                         |     |                         |     |     |
|-------------------------|-----|-------------------------|-----|-----|
| >FANCF-P18! AERPARFL    | 512 | >FANCF-P18! AERLARFL    | 343 | 169 |
| >FANCF-P18! AERPARFLS   | 198 | >FANCF-P18! AERLARFLS   | 107 | 91  |
| >FANCF-P18! AERPARFLSS  | 114 | >FANCF-P18! AERLARFLSS  | 88  | 26  |
| >FANCF-P18! AERPARFLSSI | 479 | >FANCF-P18! AERLARFLSSI | 343 | 136 |
| >FANCF-P18! AERPARFL    | 34  | >FANCF-P18! AERLARFL    | 20  | 14  |
| >FANCF-P18! AERPARFLS   | 296 | >FANCF-P18! AERLARFLS   | 152 | 144 |
| >FANCF-P18! AERPARFLSSI | 12  | >FANCF-P18! AERLARFLSSI | 7   | 5   |
| >FANCF-P18! AEAERPARFL  | 90  | >FANCF-P18! AEAERLARFL  | 20  | 70  |
| >FANCF-P18! AEAERPARFL  | 273 | >FANCF-P18! AEAERLARFL  | 259 | 14  |
| >FANCF-P18! AEAERPARF   | 470 | >FANCF-P18! AEAERLARF   | 441 | 29  |
| >FANCF-P18! AEAERPARFL  | 53  | >FANCF-P18! AEAERLARFL  | 40  | 13  |
| >FANCF-P18! AEAERPARF   | 117 | >FANCF-P18! AEAERLARF   | 110 | 7   |
| >FANCF-P18! AEAERPARFL  | 402 | >FANCF-P18! AEAERLARFL  | 154 | 248 |
| >FANCF-P18! AEAERPARFL  | 511 | >FANCF-P18! AEAERLARFL  | 281 | 230 |
| >FANCF-P18! AEAERPARFL  | 115 | >FANCF-P18! AEAERLARFL! | 74  | 41  |
| >FANCF-P18! AEAERPARF   | 32  | >FANCF-P18! AEAERLARF   | 10  | 22  |
| >FANCF-P18! AEAERPARFL  | 20  | >FANCF-P18! AEAERLARFL  | 22  | 2   |
| >FANCF-P18! AEAERPARFL  | 291 | >FANCF-P18! AEAERLARFL! | 116 | 175 |
| >FANCF-P18! KAEAERPAR   | 105 | >FANCF-P18! KAEAERLAR   | 195 | 90  |
| >FANCF-P18! KAEAERPARF  | 24  | >FANCF-P18! KAEAERLARF  | 18  | 6   |
| >FANCF-P18! KAEAERPAR   | 372 | >FANCF-P18! KAEAERLAR   | 92  | 280 |
| >FANCF-P18! GKAEAERPAF  | 69  | >FANCF-P18! GKAEAERLAR  | 150 | 81  |
| >FANCG-A60 AFLEEFRTSL   | 93  | >FANCG-A60 TFLEEFRTSL   | 113 | 20  |
| >FANCG-A60 DAFLEEFR     | 12  | >FANCG-A60 DTFLEEFR     | 8   | 4   |
| >FANCG-A60 DAFLEEFR     | 4   | >FANCG-A60 DTFLEEFR     | 2   | 2   |
| >FANCG-A60 DAFLEEFRTSL  | 820 | >FANCG-A60 DTFLEEFRTSL  | 123 | 697 |
| >FANCG-A60 DRDAFLEEFR   | 479 | >FANCG-A60 DRDTFLEEFR   | 483 | 4   |
| >FANCG-A60 SDRDAFLEEF   | 816 | >FANCG-A60 SDRDTFLEEF   | 447 | 369 |
| >FANCG-A60 RPSDRDAF     | 16  | >FANCG-A60 RPSDRDTF     | 27  | 11  |
| >FANCG-A60 RPSDRDAFL    | 27  | >FANCG-A60 RPSDRDTFL    | 22  | 5   |
| >FANCG-A60 RPSDRDAF     | 33  | >FANCG-A60 RPSDRDTF     | 50  | 17  |
| >FANCG-A60 RPSDRDAF     | 59  | >FANCG-A60 RPSDRDTF     | 76  | 17  |
| >FANCG-A60 IRPSDRDAF    | 100 | >FANCG-A60 IRPSDRDTF    | 142 | 42  |
| >FANCG-A60 IRPSDRDAFL   | 519 | >FANCG-A60 IRPSDRDTFL   | 370 | 149 |
| >FANCG-A60 IRPSDRDAFL   | 584 | >FANCG-A60 IRPSDRDTFL   | 297 | 287 |
| >FANCG-A60 IRPSDRDAFL   | 213 | >FANCG-A60 IRPSDRDTFL   | 161 | 52  |
| >FANCG-A60 WIRPSDRDAI   | 273 | >FANCG-A60 WIRPSDRDTF   | 357 | 84  |
| >FANCG-A60 WIRPSDRDAI   | 100 | >FANCG-A60 WIRPSDRDTF   | 151 | 51  |
| >FANCG-A60 WIRPSDRDAI   | 196 | >FANCG-A60 WIRPSDRDTF   | 288 | 92  |
| >FANCG-A60 WIRPSDRDAI   | 51  | >FANCG-A60 WIRPSDRDTF   | 84  | 33  |
| >FANCG-A60 WIRPSDRDAI   | 261 | >FANCG-A60 WIRPSDRDTF   | 102 | 159 |
| >FANCG-A60 WIRPSDRDAI   | 191 | >FANCG-A60 WIRPSDRDTF   | 347 | 156 |
| >FANCG-A60 SWIRPSDRDA   | 493 | >FANCG-A60 SWIRPSDRDT   | 157 | 336 |

|                        |       |                        |       |       |
|------------------------|-------|------------------------|-------|-------|
| >FANCG-A60 SWIRPSDRDA  | 1676  | >FANCG-A60 SWIRPSDRDT  | 321   | 1355  |
| >FANCG-A60 SWIRPSDRDA  | 18    | >FANCG-A60 SWIRPSDRDT  | 12    | 6     |
| >FANCG-A60 SWIRPSDRDA  | 134   | >FANCG-A60 SWIRPSDRDT  | 201   | 67    |
| >FANCG-V47 VAISEFSRCL  | 5051  | >FANCG-V47 EAISEFSRCL  | 125   | 4926  |
| >FANCG-V47 VAISEFSR    | 119   | >FANCG-V47 EAISEFSR    | 1612  | 1493  |
| >FANCG-V47 VAISEFSR    | 297   | >FANCG-V47 EAISEFSR    | 48    | 249   |
| >FANCG-V47 VAISEFSR    | 27    | >FANCG-V47 EAISEFSR    | 3     | 24    |
| >FANCG-V47 KVAISEFSRCL | 21269 | >FANCG-V47 KEAISEFSRCL | 184   | 21085 |
| >FANCG-V47 KVAISEFSRCL | 448   | >FANCG-V47 KEAISEFSRCL | 11108 | 10660 |
| >FANCG-V47 KVAISEFSR   | 101   | >FANCG-V47 KEAISEFSR   | 18687 | 18586 |
| >FANCG-V47 KVAISEFSR   | 14    | >FANCG-V47 KEAISEFSR   | 1109  | 1095  |
| >FANCG-V47 KVAISEFSR   | 43    | >FANCG-V47 KEAISEFSR   | 4201  | 4158  |
| >FANCG-V47 KVAISEFSRCL | 21279 | >FANCG-V47 KEAISEFSRCL | 113   | 21166 |
| >FANCG-V47 KVAISEFSRCL | 36388 | >FANCG-V47 KEAISEFSRCL | 121   | 36267 |
| >FANCG-V47 KVAISEFS    | 39993 | >FANCG-V47 KEAISEFS    | 455   | 39538 |
| >FANCG-V47 KVAISEFSRCL | 37732 | >FANCG-V47 KEAISEFSRCL | 257   | 37475 |
| >FANCG-V47 KVAISEFSRCL | 26292 | >FANCG-V47 KEAISEFSRCL | 59    | 26233 |
| >FANCG-V47 KVAISEFSR   | 124   | >FANCG-V47 KEAISEFSR   | 273   | 149   |
| >FANCG-V47 QAWVQLGAC   | 107   | >FANCG-V47 QAWVQLGAC   | 20101 | 19994 |
| >FANCG-V47 QKVAISEF    | 5     | >FANCG-V47 QKEAISEF    | 48    | 43    |
| >FANCG-V47 AQKVAISEF   | 2274  | >FANCG-V47 AQKEAISEF   | 168   | 2106  |
| >FANCG-V47 AQKVAISEFSI | 19    | >FANCG-V47 AQKEAISEFSI | 33    | 14    |
| >FANCG-V47 AQKVAISEF   | 30    | >FANCG-V47 AQKEAISEF   | 26    | 4     |
| >FANCG-V47 AQKVAISEF   | 497   | >FANCG-V47 AQKEAISEF   | 297   | 200   |
| >FANCG-V47 AQKVAISEF   | 3     | >FANCG-V47 AQKEAISEF   | 3     | 0     |
| >FANCG-V47 AQKVAISEFSI | 307   | >FANCG-V47 AQKEAISEFSI | 362   | 55    |
| >FANCG-V47 GAQKVAISEF  | 507   | >FANCG-V47 GAQKEAISEF  | 462   | 45    |
| >FANCG-V47 GAQKVAISEF  | 218   | >FANCG-V47 GAQKEAISEF  | 116   | 102   |
| >FANCG-V47 LGAQKVAISE  | 234   | >FANCG-V47 LGAQKEAISEI | 637   | 403   |
| >FANCG-V47 LGAQKVAISE  | 204   | >FANCG-V47 LGAQKEAISEI | 427   | 223   |
| >FANCG-V47 LGAQKVAISE  | 599   | >FANCG-V47 LGAQKEAISEI | 421   | 178   |
| >FANCG-V47 LGAQKVAISE  | 344   | >FANCG-V47 LGAQKEAISEI | 472   | 128   |
| >FANCG-V47 QLGAQKVAI   | 399   | >FANCG-V47 QLGAQKEAI   | 410   | 11    |
| >FANCG-V47 QLGAQKVA    | 666   | >FANCG-V47 QLGAQKEA    | 266   | 400   |
| >FANCG-V47 QLGAQKVAI   | 256   | >FANCG-V47 QLGAQKEAI   | 618   | 362   |
| >FANCG-V47 QLGAQKVAI   | 308   | >FANCG-V47 QLGAQKEAI   | 1022  | 714   |
| >FANCG-V47 VQLGAQKV    | 33    | >FANCG-V47 VQLGAQKE    | 16157 | 16124 |
| >FANCG-V47 VQLGAQKV    | 46    | >FANCG-V47 VQLGAQKE    | 25749 | 25703 |
| >FANCG-V47 VQLGAQKV    | 65    | >FANCG-V47 VQLGAQKE    | 18640 | 18575 |
| >FANCG-V47 VQLGAQKV    | 207   | >FANCG-V47 VQLGAQKE    | 23463 | 23256 |
| >FANCG-V47 VQLGAQKV    | 100   | >FANCG-V47 VQLGAQKE    | 36124 | 36024 |
| >FANCG-V47 VQLGAQKVA   | 130   | >FANCG-V47 VQLGAQKEA   | 365   | 235   |
| >FANCG-V47 VQLGAQKVA   | 424   | >FANCG-V47 VQLGAQKEA   | 1435  | 1011  |

|                       |      |                       |       |       |
|-----------------------|------|-----------------------|-------|-------|
| >FANCG-V47 WVQLGAQK\  | 318  | >FANCG-V47 WVQLGAQKE  | 25773 | 25455 |
| >FANCG-V47 WVQLGAQK\  | 38   | >FANCG-V47 WVQLGAQKE  | 32694 | 32656 |
| >FANCG-V47 AWVQLGAQ\  | 274  | >FANCG-V47 AWVQLGAQ\  | 285   | 11    |
| >FAS-D269N-DTAEQKVQLI | 436  | >FAS-D269N-NTAEQKVQLI | 2357  | 1921  |
| >FAS-D269N-DTAEQKVQLI | 2246 | >FAS-D269N-NTAEQKVQLI | 493   | 1753  |
| >FAS-D269N-DTAEQKVQLI | 28   | >FAS-D269N-NTAEQKVQLI | 130   | 102   |
| >FAS-D269N-DTAEQKVQLI | 4    | >FAS-D269N-NTAEQKVQLI | 5     | 1     |
| >FAS-D269N-DTAEQKVQL  | 59   | >FAS-D269N-NTAEQKVQL  | 32    | 27    |
| >FAS-D269N-DTAEQKVQLI | 514  | >FAS-D269N-NTAEQKVQLI | 201   | 313   |
| >FAS-D269N-DTAEQKVQL  | 41   | >FAS-D269N-NTAEQKVQL  | 37    | 4     |
| >FAS-D269N-DTAEQKVQLI | 122  | >FAS-D269N-NTAEQKVQLI | 111   | 11    |
| >FAS-D269N-QDTAEQKV   | 193  | >FAS-D269N-QNTAEQKV   | 9154  | 8961  |
| >FAS-D269N-QDTAEQKVQ  | 384  | >FAS-D269N-QNTAEQKVQ  | 12722 | 12338 |
| >FAS-D269N-VQDTAEQKV  | 363  | >FAS-D269N-VQNTAEQKV  | 1133  | 770   |
| >FAS-D269N-VQDTAEQK   | 1132 | >FAS-D269N-VQNTAEQK   | 308   | 824   |
| >FAS-D269N-VQDTAEQKV  | 4491 | >FAS-D269N-VQNTAEQKV  | 344   | 4147  |
| >FAS-D269N-VQDTAEQKV  | 2872 | >FAS-D269N-VQNTAEQKV  | 208   | 2664  |
| >FAS-D269N-NVQDTAEQK  | 80   | >FAS-D269N-NVQNTAEQK  | 685   | 605   |
| >FAS-D269N-NVQDTAEQK  | 299  | >FAS-D269N-NVQNTAEQK  | 337   | 38    |
| >FAS-D269N-NVQDTAEQK  | 47   | >FAS-D269N-NVQNTAEQK  | 65    | 18    |
| >FAS-D269N-NVQDTAEQK  | 264  | >FAS-D269N-NVQNTAEQK  | 674   | 410   |
| >FAS-D269N-IKNDNVQDT\ | 977  | >FAS-D269N-IKNDNVQNT\ | 362   | 615   |
| >FBXW7-A31AEDNLLWRE\  | 100  | >FBXW7-A31TEDNLLWRE\  | 718   | 618   |
| >FBXW7-A31AEDNLLWRE\  | 416  | >FBXW7-A31TEDNLLWRE\  | 3119  | 2703  |
| >FBXW7-A31AEDNLLWRE\  | 184  | >FBXW7-A31TEDNLLWRE\  | 1572  | 1388  |
| >FBXW7-A31LAEDNLLW    | 8878 | >FBXW7-A31LTEDNLLW    | 403   | 8475  |
| >FBXW7-A31LAEDNLLWR   | 320  | >FBXW7-A31LTEDNLLWR   | 96    | 224   |
| >FBXW7-A31LAEDNLLW    | 41   | >FBXW7-A31LTEDNLLW    | 7     | 34    |
| >FBXW7-A31LAEDNLLW    | 32   | >FBXW7-A31LTEDNLLW    | 538   | 506   |
| >FBXW7-A31LAEDNLLW    | 387  | >FBXW7-A31LTEDNLLW    | 233   | 154   |
| >FBXW7-A31LAEDNLLW    | 64   | >FBXW7-A31LTEDNLLW    | 52    | 12    |
| >FBXW7-A31LAEDNLLW    | 26   | >FBXW7-A31LTEDNLLW    | 90    | 64    |
| >FBXW7-A31LAEDNLLW    | 85   | >FBXW7-A31LTEDNLLW    | 1412  | 1327  |
| >FBXW7-A31LAEDNLLWR   | 2263 | >FBXW7-A31LTEDNLLWR   | 326   | 1937  |
| >FBXW7-A31LAEDNLLWRE\ | 2134 | >FBXW7-A31LTEDNLLWRE\ | 379   | 1755  |
| >FBXW7-A31AQTCRYWRIL  | 102  | >FBXW7-A31AQTCRYWRIL  | 748   | 646   |
| >FBXW7-A31ILAEDNLL    | 34   | >FBXW7-A31ILTEDNLL    | 110   | 76    |
| >FBXW7-A31ILAEDNLL    | 3    | >FBXW7-A31ILTEDNLL    | 9     | 6     |
| >FBXW7-A31ILAEDNLL    | 23   | >FBXW7-A31ILTEDNLL    | 205   | 182   |
| >FBXW7-A31ILAEDNLL    | 71   | >FBXW7-A31ILTEDNLL    | 219   | 148   |
| >FBXW7-A31ILAEDNLL    | 34   | >FBXW7-A31ILTEDNLL    | 78    | 44    |
| >FBXW7-A31ILAEDNLL    | 40   | >FBXW7-A31ILTEDNLL    | 58    | 18    |
| >FBXW7-A31ILAEDNLL    | 27   | >FBXW7-A31ILTEDNLL    | 52    | 25    |

|                       |     |                       |      |      |
|-----------------------|-----|-----------------------|------|------|
| >FBXW7-A31 ILAEDNLL   | 43  | >FBXW7-A31 ILTEDNLL   | 324  | 281  |
| >FBXW7-A31 ILAEDNLL   | 5   | >FBXW7-A31 ILTEDNLL   | 6    | 1    |
| >FBXW7-A31 ILAEDNLLWR | 355 | >FBXW7-A31 ILTEDNLLWR | 409  | 54   |
| >FBXW7-A31 ILAEDNLLWR | 166 | >FBXW7-A31 ILTEDNLLWR | 601  | 435  |
| >FBXW7-A31 ILAEDNLLW  | 472 | >FBXW7-A31 ILTEDNLLW  | 826  | 354  |
| >FBXW7-A31 ILAEDNLLW  | 32  | >FBXW7-A31 ILTEDNLLW  | 52   | 20   |
| >FBXW7-A31 ILAEDNLLW  | 713 | >FBXW7-A31 ILTEDNLLW  | 414  | 299  |
| >FBXW7-A31 ILAEDNLLWR | 196 | >FBXW7-A31 ILTEDNLLWR | 239  | 43   |
| >FBXW7-A31 RILAEDNLL  | 295 | >FBXW7-A31 RILTEDNLL  | 888  | 593  |
| >FBXW7-A31 RILAEDNLL  | 396 | >FBXW7-A31 RILTEDNLL  | 1099 | 703  |
| >FBXW7-A31 RILAEDNLLW | 61  | >FBXW7-A31 RILTEDNLLW | 86   | 25   |
| >FBXW7-A31 RILAEDNLLW | 290 | >FBXW7-A31 RILTEDNLLW | 406  | 116  |
| >FBXW7-A31 RILAEDNLLW | 104 | >FBXW7-A31 RILTEDNLLW | 194  | 90   |
| >FBXW7-A31 RILAEDNLLW | 116 | >FBXW7-A31 RILTEDNLLW | 184  | 68   |
| >FBXW7-A31 RILAEDNLLW | 11  | >FBXW7-A31 RILTEDNLLW | 14   | 3    |
| >FBXW7-A31 RILAEDNLLW | 27  | >FBXW7-A31 RILTEDNLLW | 27   | 0    |
| >FBXW7-A31 WRILAEDNLL | 20  | >FBXW7-A31 WRILTEDNLL | 24   | 4    |
| >FBXW7-A31 WRILAEDNL  | 920 | >FBXW7-A31 WRILTEDNL  | 375  | 545  |
| >FBXW7-A31 WRILAEDNLL | 152 | >FBXW7-A31 WRILTEDNLL | 93   | 59   |
| >FBXW7-A31 WRILAEDNLL | 105 | >FBXW7-A31 WRILTEDNLL | 84   | 21   |
| >FBXW7-A31 WRILAEDNL  | 620 | >FBXW7-A31 WRILTEDNL  | 468  | 152  |
| >FBXW7-A31 WRILAEDNLL | 114 | >FBXW7-A31 WRILTEDNLL | 113  | 1    |
| >FBXW7-A31 WRILAEDNLL | 77  | >FBXW7-A31 WRILTEDNLL | 77   | 0    |
| >FBXW7-A31 YWRILAEDNL | 361 | >FBXW7-A31 YWRILTEDNL | 259  | 102  |
| >FBXW7-A31 YWRILAEDNL | 488 | >FBXW7-A31 YWRILTEDNL | 334  | 154  |
| >FBXW7-A31 YWRILAEDNL | 468 | >FBXW7-A31 YWRILTEDNL | 415  | 53   |
| >FBXW7-A31 YWRILAEDNL | 268 | >FBXW7-A31 YWRILTEDNL | 287  | 19   |
| >FBXW7-A31 RYWRILAEDN | 407 | >FBXW7-A31 RYWRILTEDN | 93   | 314  |
| >FBXW7-A31 RYWRILAEDN | 61  | >FBXW7-A31 RYWRILTEDN | 67   | 6    |
| >FBXW7-A31 RYWRILAEDN | 247 | >FBXW7-A31 RYWRILTEDN | 288  | 41   |
| >FBXW7-A31 RYWRILAED  | 383 | >FBXW7-A31 RYWRILTED  | 640  | 257  |
| >FBXW7-A31 RYWRILAEDN | 6   | >FBXW7-A31 RYWRILTEDN | 7    | 1    |
| >FBXW7-A31 RYWRILAEDN | 324 | >FBXW7-A31 RYWRILTEDN | 233  | 91   |
| >FBXW7-A31 RYWRILAEDN | 362 | >FBXW7-A31 RYWRILTEDN | 244  | 118  |
| >FBXW7-A31 CRYWRILA   | 270 | >FBXW7-A31 CRYWRILT   | 578  | 308  |
| >FBXW7-A31 CRYWRILAED | 472 | >FBXW7-A31 CRYWRILTED | 335  | 137  |
| >FBXW7-A31 CRYWRILA   | 372 | >FBXW7-A31 CRYWRILT   | 843  | 471  |
| >FBXW7-A31 CRYWRILA   | 360 | >FBXW7-A31 CRYWRILT   | 234  | 126  |
| >FBXW7-A31 CRYWRILAED | 449 | >FBXW7-A31 CRYWRILTED | 253  | 196  |
| >FBXW7-A31 CRYWRILAE  | 305 | >FBXW7-A31 CRYWRILTE  | 199  | 106  |
| >FBXW7-A31 CRYWRILAED | 554 | >FBXW7-A31 CRYWRILTED | 431  | 123  |
| >FBXW7-A31 TCRYWRILA  | 83  | >FBXW7-A31 TCRYWRILT  | 2242 | 2159 |
| >FBXW7-A31 QTCRYWRILA | 395 | >FBXW7-A31 QTCRYWRILT | 5268 | 4873 |

|                       |       |                       |      |       |
|-----------------------|-------|-----------------------|------|-------|
| >FBXW7-C38 CLQFCGNRI  | 999   | >FBXW7-C38 WLQFCGNRI  | 162  | 837   |
| >FBXW7-C38 CLQFCGNRI  | 1037  | >FBXW7-C38 WLQFCGNRI  | 217  | 820   |
| >FBXW7-C38 CLQFCGNRIV | 1200  | >FBXW7-C38 WLQFCGNRI  | 305  | 895   |
| >FBXW7-C38 CLQFCGNRI  | 4571  | >FBXW7-C38 WLQFCGNRI  | 482  | 4089  |
| >FBXW7-C38 CLQFCGNRIV | 1216  | >FBXW7-C38 WLQFCGNRI  | 98   | 1118  |
| >FBXW7-C38 CLQFCGNRI  | 919   | >FBXW7-C38 WLQFCGNRI  | 160  | 759   |
| >FBXW7-C38 CLQFCGNRIV | 161   | >FBXW7-C38 WLQFCGNRI  | 35   | 126   |
| >FBXW7-C38 CLQFCGNRIV | 4085  | >FBXW7-C38 WLQFCGNRI  | 377  | 3708  |
| >FBXW7-C38 CLQFCGNRI  | 3752  | >FBXW7-C38 WLQFCGNRI  | 415  | 3337  |
| >FBXW7-C38 CLQFCGNRIV | 617   | >FBXW7-C38 WLQFCGNRI  | 55   | 562   |
| >FBXW7-C38 CLQFCGNRI  | 2272  | >FBXW7-C38 WLQFCGNRI  | 96   | 2176  |
| >FBXW7-C38 CLQFCGNRIV | 107   | >FBXW7-C38 WLQFCGNRI  | 12   | 95    |
| >FBXW7-C38 CLQFCGNR   | 345   | >FBXW7-C38 WLQFCGNR   | 1913 | 1568  |
| >FBXW7-C38 CLQFCGNR   | 357   | >FBXW7-C38 WLQFCGNR   | 425  | 68    |
| >FBXW7-C38 TCLQFCGNRI | 17988 | >FBXW7-C38 TWLQFCGNR  | 155  | 17833 |
| >FBXW7-C38 TCLQFCGNR  | 1014  | >FBXW7-C38 TWLQFCGNR  | 461  | 553   |
| >FBXW7-C38 TCLQFCGNR  | 60    | >FBXW7-C38 TWLQFCGNR  | 13   | 47    |
| >FBXW7-C38 TCLQFCGN   | 35010 | >FBXW7-C38 TWLQFCGN   | 223  | 34787 |
| >FBXW7-C38 TCLQFCGNR  | 32969 | >FBXW7-C38 TWLQFCGNR  | 96   | 32873 |
| >FBXW7-C38 TCLQFCGNRI | 27070 | >FBXW7-C38 TWLQFCGNR  | 182  | 26888 |
| >FBXW7-C38 TCLQFCGNRI | 28201 | >FBXW7-C38 TWLQFCGNR  | 81   | 28120 |
| >FBXW7-C38 LKGHDDHVIT | 26306 | >FBXW7-C38 LKGHDDHVIT | 59   | 26247 |
| >FBXW7-C38 ITCLQFCGNR | 38    | >FBXW7-C38 ITWLQFCGNR | 81   | 43    |
| >FBXW7-C38 ITCLQFCGNR | 194   | >FBXW7-C38 ITWLQFCGNR | 456  | 262   |
| >FBXW7-C38 ITCLQFCGNR | 163   | >FBXW7-C38 ITWLQFCGNR | 33   | 130   |
| >FBXW7-C38 ITCLQFCGNR | 580   | >FBXW7-C38 ITWLQFCGNR | 340  | 240   |
| >FBXW7-C38 ITCLQFCGNR | 241   | >FBXW7-C38 ITWLQFCGNR | 74   | 167   |
| >FBXW7-C38 ITCLQFCGNR | 132   | >FBXW7-C38 ITWLQFCGNR | 46   | 86    |
| >FBXW7-C38 VITCLQFC   | 3412  | >FBXW7-C38 VITWLQFC   | 297  | 3115  |
| >FBXW7-C38 VITCLQFCGN | 414   | >FBXW7-C38 VITWLQFCGN | 215  | 199   |
| >FBXW7-C38 VITCLQFCGN | 387   | >FBXW7-C38 VITWLQFCGN | 269  | 118   |
| >FBXW7-C38 VITCLQFCGN | 124   | >FBXW7-C38 VITWLQFCGN | 66   | 58    |
| >FBXW7-C38 VITCLQFCGN | 328   | >FBXW7-C38 VITWLQFCGN | 192  | 136   |
| >FBXW7-C38 HVITCLQFC  | 604   | >FBXW7-C38 HVITWLQFC  | 384  | 220   |
| >FBXW7-C38 HVITCLQF   | 315   | >FBXW7-C38 HVITWLQF   | 180  | 135   |
| >FBXW7-C38 HVITCLQF   | 850   | >FBXW7-C38 HVITWLQF   | 63   | 787   |
| >FBXW7-C38 HVITCLQF   | 22    | >FBXW7-C38 HVITWLQF   | 8    | 14    |
| >FBXW7-C38 HVITCLQFC  | 360   | >FBXW7-C38 HVITWLQFC  | 95   | 265   |
| >FBXW7-C38 HVITCLQF   | 356   | >FBXW7-C38 HVITWLQF   | 95   | 261   |
| >FBXW7-C38 HVITCLQF   | 375   | >FBXW7-C38 HVITWLQF   | 244  | 131   |
| >FBXW7-C38 HVITCLQF   | 353   | >FBXW7-C38 HVITWLQF   | 549  | 196   |
| >FBXW7-C38 HVITCLQF   | 44    | >FBXW7-C38 HVITWLQF   | 32   | 12    |
| >FBXW7-C38 HVITCLQF   | 264   | >FBXW7-C38 HVITWLQF   | 187  | 77    |

|                        |       |                        |      |       |
|------------------------|-------|------------------------|------|-------|
| >FBXW7-C38 HVITCLQF    | 472   | >FBXW7-C38 HVITWLQF    | 218  | 254   |
| >FBXW7-C38 GHDDHVITCL  | 123   | >FBXW7-C38 GHDDHVITW   | 887  | 764   |
| >FBXW7-C38 GHDDHVITC   | 30761 | >FBXW7-C38 GHDDHVITV   | 385  | 30376 |
| >FBXW7-C38 KGHDDHVITC  | 22380 | >FBXW7-C38 KGHDDHVIT\  | 140  | 22240 |
| >FBXW7-C38 KGHDDHVITC  | 23169 | >FBXW7-C38 KGHDDHVIT\  | 140  | 23029 |
| >FBXW7-C38 KGHDDHVITC  | 20601 | >FBXW7-C38 KGHDDHVIT\  | 73   | 20528 |
| >FBXW7-D44 STDRTLKV    | 445   | >FBXW7-D44 STNRTLKV    | 9696 | 9251  |
| >FBXW7-D44 STDRTLKV    | 4363  | >FBXW7-D44 STNRTLKV    | 277  | 4086  |
| >FBXW7-D44 STDRTLKV    | 101   | >FBXW7-D44 STNRTLKV    | 204  | 103   |
| >FBXW7-D44 STDRTLKV    | 100   | >FBXW7-D44 STNRTLKV    | 314  | 214   |
| >FBXW7-D44 STDRTLKV    | 544   | >FBXW7-D44 STNRTLKV    | 356  | 188   |
| >FBXW7-D44 STDRTLKV    | 10395 | >FBXW7-D44 STNRTLKV    | 450  | 9945  |
| >FBXW7-D44 STDRTLKVWI  | 9863  | >FBXW7-D44 STNRTLKVWI  | 436  | 9427  |
| >FBXW7-D44 STDRTLKV    | 3892  | >FBXW7-D44 STNRTLKV    | 313  | 3579  |
| >FBXW7-D44 STDRTLKV    | 61    | >FBXW7-D44 STNRTLKV    | 136  | 75    |
| >FBXW7-D44 STDRTLKVW   | 32    | >FBXW7-D44 STNRTLKVW   | 14   | 18    |
| >FBXW7-D44 STDRTLKVW   | 108   | >FBXW7-D44 STNRTLKVW   | 47   | 61    |
| >FBXW7-D44 STDRTLKVW   | 38    | >FBXW7-D44 STNRTLKVW   | 21   | 17    |
| >FBXW7-D44 STDRTLKVW   | 285   | >FBXW7-D44 STNRTLKVW   | 129  | 156   |
| >FBXW7-D44 GSTDRTLK    | 599   | >FBXW7-D44 GSTNRTLK    | 217  | 382   |
| >FBXW7-D44 GSTDRTLK    | 34    | >FBXW7-D44 GSTNRTLK    | 29   | 5     |
| >FBXW7-D44 GSTDRTLKV   | 11    | >FBXW7-D44 GSTNRTLKV   | 14   | 3     |
| >FBXW7-D44 GSTDRTLKV   | 168   | >FBXW7-D44 GSTNRTLKV   | 132  | 36    |
| >FBXW7-D44 GSTDRTLKV   | 47    | >FBXW7-D44 GSTNRTLKV   | 55   | 8     |
| >FBXW7-D44 GSTDRTLK    | 490   | >FBXW7-D44 GSTNRTLK    | 370  | 120   |
| >FBXW7-D44 SGSTDRTLK   | 752   | >FBXW7-D44 SGSTNRTLK   | 409  | 343   |
| >FBXW7-D44 ISGSTDRTLK  | 1173  | >FBXW7-D44 ISGSTNRTLK  | 212  | 961   |
| >FBXW7-D44 ISGSTDRTLK  | 220   | >FBXW7-D44 ISGSTNRTLK  | 141  | 79    |
| >FBXW7-D44 ISGSTDRTLK  | 471   | >FBXW7-D44 ISGSTNRTLK  | 454  | 17    |
| >FBXW7-D44 ISGSTDRTL   | 55    | >FBXW7-D44 ISGSTNRTL   | 56   | 1     |
| >FBXW7-D44 ISGSTDRTL   | 397   | >FBXW7-D44 ISGSTNRTL   | 112  | 285   |
| >FBXW7-D44 ISGSTDRTL   | 471   | >FBXW7-D44 ISGSTNRTL   | 561  | 90    |
| >FBXW7-D44 IISGSTDRTL  | 133   | >FBXW7-D44 IISGSTNRTL  | 150  | 17    |
| >FBXW7-D44 IISGSTDRTL  | 378   | >FBXW7-D44 IISGSTNRTL  | 218  | 160   |
| >FBXW7-D44 IISGSTDRTL  | 234   | >FBXW7-D44 IISGSTNRTL  | 144  | 90    |
| >FBXW7-D44 IISGSTDR    | 2330  | >FBXW7-D44 IISGSTNR    | 467  | 1863  |
| >FBXW7-D44 IISGSTDRTLK | 70    | >FBXW7-D44 IISGSTNRTLK | 44   | 26    |
| >FBXW7-D44 IISGSTDRTLK | 33    | >FBXW7-D44 IISGSTNRTLK | 26   | 7     |
| >FBXW7-D44 IISGSTDR    | 2958  | >FBXW7-D44 IISGSTNR    | 292  | 2666  |
| >FBXW7-D44 IISGSTDR    | 76    | >FBXW7-D44 IISGSTNR    | 41   | 35    |
| >FBXW7-D44 IISGSTDRTLK | 58    | >FBXW7-D44 IISGSTNRTLK | 45   | 13    |
| >FBXW7-D44 IISGSTDR    | 658   | >FBXW7-D44 IISGSTNR    | 241  | 417   |
| >FBXW7-D44 IISGSTDRTL  | 938   | >FBXW7-D44 IISGSTNRTL  | 470  | 468   |

|                         |       |                        |       |       |
|-------------------------|-------|------------------------|-------|-------|
| >FBXW7-D44 IIISGSTDRTL  | 397   | >FBXW7-D44 IIISGSTNRTL | 194   | 203   |
| >FBXW7-D44 IIISGSTDRTL  | 483   | >FBXW7-D44 IIISGSTNRTL | 352   | 131   |
| >FBXW7-D44 IIISGSTDRT   | 1073  | >FBXW7-D44 IIISGSTNR   | 67    | 1006  |
| >FBXW7-D44 IIISGSTDRT   | 902   | >FBXW7-D44 IIISGSTNR   | 293   | 609   |
| >FBXW7-D44 IIISGSTDRT   | 76    | >FBXW7-D44 IIISGSTNR   | 38    | 38    |
| >FBXW7-D44 IIISGSTDRTL  | 580   | >FBXW7-D44 IIISGSTNRTL | 465   | 115   |
| >FBXW7-D44 NIIISGSTDRT  | 1209  | >FBXW7-D44 NIIISGSTNR  | 434   | 775   |
| >FBXW7-D44 NIIISGSTDRT  | 1243  | >FBXW7-D44 NIIISGSTNR  | 461   | 782   |
| >FBXW7-D44 NIIISGSTDRT  | 19    | >FBXW7-D44 NIIISGSTNR  | 12    | 7     |
| >FBXW7-D44 DNIIISGSTDRT | 208   | >FBXW7-D44 DNIIISGSTNR | 97    | 111   |
| >FBXW7-D48 DATLRVWDI    | 21047 | >FBXW7-D48 YATLRVWDI   | 309   | 20738 |
| >FBXW7-D48 DATLRVWDI    | 3715  | >FBXW7-D48 YATLRVWDI   | 414   | 3301  |
| >FBXW7-D48 RDATLRVWD    | 12919 | >FBXW7-D48 RYATLRVWDI  | 15    | 12904 |
| >FBXW7-D48 RDATLRVWD    | 29361 | >FBXW7-D48 RYATLRVWDI  | 153   | 29208 |
| >FBXW7-D48 RDATLRVW     | 21464 | >FBXW7-D48 RYATLRVW    | 110   | 21354 |
| >FBXW7-D48 RDATLRVWD    | 31421 | >FBXW7-D48 RYATLRVWDI  | 384   | 31037 |
| >FBXW7-D48 RDATLRVW     | 22579 | >FBXW7-D48 RYATLRVW    | 11    | 22568 |
| >FBXW7-D48 RDATLRVWD    | 20292 | >FBXW7-D48 RYATLRVWDI  | 7     | 20285 |
| >FBXW7-D48 RDATLRVWD    | 6833  | >FBXW7-D48 RYATLRVWDI  | 432   | 6401  |
| >FBXW7-D48 RDATLRVW     | 3198  | >FBXW7-D48 RYATLRVW    | 485   | 2713  |
| >FBXW7-D48 RDATLRVWD    | 56    | >FBXW7-D48 RYATLRVWDI  | 2824  | 2768  |
| >FBXW7-D48 RDATLRVWD    | 94    | >FBXW7-D48 RYATLRVWDI  | 13206 | 13112 |
| >FBXW7-D48 HEKRVVSGSF   | 22728 | >FBXW7-D48 HEKRVVSGSF  | 331   | 22397 |
| >FBXW7-D48 HEKRVVSGSF   | 26064 | >FBXW7-D48 HEKRVVSGSF  | 413   | 25651 |
| >FBXW7-D48 HEKRVVSGSF   | 7587  | >FBXW7-D48 HEKRVVSGSF  | 386   | 7201  |
| >FBXW7-D48 HEKRVVSGSF   | 25328 | >FBXW7-D48 HEKRVVSGSF  | 277   | 25051 |
| >FBXW7-D48 SRDATLRVWI   | 4659  | >FBXW7-D48 SRYATLRVWI  | 410   | 4249  |
| >FBXW7-D48 SRDATLRVW    | 5404  | >FBXW7-D48 SRYATLRVW   | 330   | 5074  |
| >FBXW7-D48 SRDATLRVWI   | 6132  | >FBXW7-D48 SRYATLRVWI  | 375   | 5757  |
| >FBXW7-D48 SRDATLRV     | 4678  | >FBXW7-D48 SRYATLRV    | 130   | 4548  |
| >FBXW7-D48 SRDATLRVWI   | 3796  | >FBXW7-D48 SRYATLRVWI  | 129   | 3667  |
| >FBXW7-D48 SRDATLRVW    | 3526  | >FBXW7-D48 SRYATLRVW   | 280   | 3246  |
| >FBXW7-D48 SRDATLRVWI   | 2120  | >FBXW7-D48 SRYATLRVWI  | 167   | 1953  |
| >FBXW7-D48 SRDATLRVWI   | 2967  | >FBXW7-D48 SRYATLRVWI  | 169   | 2798  |
| >FBXW7-D48 GSRDATLR     | 394   | >FBXW7-D48 GSRDATLR    | 202   | 192   |
| >FBXW7-D48 GSRDATLRV    | 29    | >FBXW7-D48 GSRDATLRV   | 22    | 7     |
| >FBXW7-D48 GSRDATLR     | 148   | >FBXW7-D48 GSRDATLR    | 46    | 102   |
| >FBXW7-D48 GSRDATLRV    | 91    | >FBXW7-D48 GSRDATLRV   | 146   | 55    |
| >FBXW7-D48 GSRDATLRVV   | 7     | >FBXW7-D48 GSRDATLRVV  | 11    | 4     |
| >FBXW7-D48 GSRDATLRVV   | 52    | >FBXW7-D48 GSRDATLRVV  | 43    | 9     |
| >FBXW7-D48 GSRDATLRVV   | 394   | >FBXW7-D48 GSRDATLRVV  | 354   | 40    |
| >FBXW7-D48 GSRDATLRV    | 424   | >FBXW7-D48 GSRDATLRV   | 235   | 189   |
| >FBXW7-D48 SGSRDATL     | 8909  | >FBXW7-D48 SGSRDATL    | 15    | 8894  |

|                      |       |                      |      |       |
|----------------------|-------|----------------------|------|-------|
| >FBXW7-D48SGSRDATLR  | 4660  | >FBXW7-D48SGSRYATLR  | 388  | 4272  |
| >FBXW7-D48SGSRDATLR  | 984   | >FBXW7-D48SGSRYATLR  | 272  | 712   |
| >FBXW7-D48SGSRDATLRV | 633   | >FBXW7-D48SGSRYATLRV | 340  | 293   |
| >FBXW7-D48VSGSRDATL  | 317   | >FBXW7-D48VSGSRYATL  | 1116 | 799   |
| >FBXW7-D48VSGSRDATL  | 303   | >FBXW7-D48VSGSRYATL  | 14   | 289   |
| >FBXW7-D48VSGSRDATLR | 815   | >FBXW7-D48VSGSRYATLR | 150  | 665   |
| >FBXW7-D48VSGSRDATLR | 1229  | >FBXW7-D48VSGSRYATLR | 155  | 1074  |
| >FBXW7-D48VSGSRDATLR | 291   | >FBXW7-D48VSGSRYATLR | 196  | 95    |
| >FBXW7-D48VSGSRDATL  | 28    | >FBXW7-D48VSGSRYATL  | 35   | 7     |
| >FBXW7-D48VSGSRDATL  | 4357  | >FBXW7-D48VSGSRYATL  | 378  | 3979  |
| >FBXW7-D48VSGSRDATL  | 941   | >FBXW7-D48VSGSRYATL  | 378  | 563   |
| >FBXW7-D48VSGSRDATL  | 732   | >FBXW7-D48VSGSRYATL  | 444  | 288   |
| >FBXW7-D48VVSISRDATL | 397   | >FBXW7-D48VVSISRATL  | 353  | 44    |
| >FBXW7-D48VVSISRDATL | 1452  | >FBXW7-D48VVSISRATL  | 473  | 979   |
| >FBXW7-D48VVSISRDATL | 134   | >FBXW7-D48VVSISRATL  | 39   | 95    |
| >FBXW7-D48VVSISRDATL | 287   | >FBXW7-D48VVSISRATL  | 86   | 201   |
| >FBXW7-D48VVSISRDATL | 474   | >FBXW7-D48VVSISRATL  | 57   | 417   |
| >FBXW7-D48VVSISRDATL | 1463  | >FBXW7-D48VVSISRATL  | 397  | 1066  |
| >FBXW7-D48VVSISRDATL | 37    | >FBXW7-D48VVSISRATL  | 23   | 14    |
| >FBXW7-D48VVSISRDATL | 365   | >FBXW7-D48VVSISRATL  | 395  | 30    |
| >FBXW7-D48RVVSGSRDA  | 2918  | >FBXW7-D48RVVSGSRYA  | 450  | 2468  |
| >FBXW7-D48RVVSGSRDA1 | 999   | >FBXW7-D48RVVSGSRYAT | 198  | 801   |
| >FBXW7-D48RVVSGSRDA  | 6576  | >FBXW7-D48RVVSGSRYA  | 372  | 6204  |
| >FBXW7-D48RVVSGSRDA1 | 434   | >FBXW7-D48RVVSGSRYAT | 139  | 295   |
| >FBXW7-D48RVVSGSRD   | 26767 | >FBXW7-D48RVVSGSRY   | 30   | 26737 |
| >FBXW7-D48RVVSGSRD   | 24835 | >FBXW7-D48RVVSGSRY   | 91   | 24744 |
| >FBXW7-D48RVVSGSRDA  | 1541  | >FBXW7-D48RVVSGSRYA  | 54   | 1487  |
| >FBXW7-D48RVVSGSRDA1 | 1281  | >FBXW7-D48RVVSGSRYAT | 219  | 1062  |
| >FBXW7-D48RVVSGSRD   | 21457 | >FBXW7-D48RVVSGSRY   | 48   | 21409 |
| >FBXW7-D48RVVSGSRDA1 | 127   | >FBXW7-D48RVVSGSRYAT | 165  | 38    |
| >FBXW7-D48RVVSGSRD   | 25262 | >FBXW7-D48RVVSGSRY   | 45   | 25217 |
| >FBXW7-D48RVVSGSRDA1 | 472   | >FBXW7-D48RVVSGSRYAT | 386  | 86    |
| >FBXW7-D48RVVSGSRD   | 18507 | >FBXW7-D48RVVSGSRY   | 79   | 18428 |
| >FBXW7-D48RVVSGSRD   | 24021 | >FBXW7-D48RVVSGSRY   | 420  | 23601 |
| >FBXW7-D48RVVSGSRD   | 7576  | >FBXW7-D48RVVSGSRY   | 5    | 7571  |
| >FBXW7-D48RVVSGSRDA1 | 15    | >FBXW7-D48RVVSGSRYAT | 15   | 0     |
| >FBXW7-D48RVVSGSRD   | 23627 | >FBXW7-D48RVVSGSRY   | 239  | 23388 |
| >FBXW7-D48RVVSGSRDA1 | 281   | >FBXW7-D48RVVSGSRYAT | 123  | 158   |
| >FBXW7-D48KRVSISRDA  | 32772 | >FBXW7-D48KRVSISRAT  | 479  | 32293 |
| >FBXW7-D48KRVSISRDA  | 8752  | >FBXW7-D48KRVSISRAT  | 12   | 8740  |
| >FBXW7-D48KRVSISRDA  | 8728  | >FBXW7-D48KRVSISRAT  | 457  | 8271  |
| >FBXW7-D48KRVSISRDA  | 20755 | >FBXW7-D48KRVSISRAT  | 77   | 20678 |
| >FBXW7-D48KRVSISRDA  | 897   | >FBXW7-D48KRVSISRAT  | 465  | 432   |



|                       |       |                       |      |       |
|-----------------------|-------|-----------------------|------|-------|
| >FBXW7-D48 EKRVS SGRD | 14905 | >FBXW7-D48 EKRVS SGRY | 57   | 14848 |
| >FBXW7-D52 YDFMV KVV  | 324   | >FBXW7-D52 YNFMV KVV  | 9014 | 8690  |
| >FBXW7-D52 YDFMV KVV  | 299   | >FBXW7-D52 YNFMV KVV  | 134  | 165   |
| >FBXW7-D52 AYDFMVKV   | 152   | >FBXW7-D52 AYNFMVKV   | 76   | 76    |
| >FBXW7-D52 AYDFMVKV   | 227   | >FBXW7-D52 AYNFMVKV   | 138  | 89    |
| >FBXW7-D52 GAYDFMVKV  | 92    | >FBXW7-D52 GAYNFMVKV  | 89   | 3     |
| >FBXW7-D52 GAYDFMVKV  | 85    | >FBXW7-D52 GAYNFMVKV  | 475  | 390   |
| >FBXW7-D52 GAYDFMVKV  | 73    | >FBXW7-D52 GAYNFMVKV  | 292  | 219   |
| >FBXW7-D52 GAYDFMVKV  | 64    | >FBXW7-D52 GAYNFMVKV  | 146  | 82    |
| >FBXW7-D52 GAYDFMVKV  | 42    | >FBXW7-D52 GAYNFMVKV  | 148  | 106   |
| >FBXW7-D52 GAYDFMVKV  | 17    | >FBXW7-D52 GAYNFMVKV  | 34   | 17    |
| >FBXW7-D52 GAYDFMVKV  | 55    | >FBXW7-D52 GAYNFMVKV  | 99   | 44    |
| >FBXW7-D52 GAYDFMVKV  | 11    | >FBXW7-D52 GAYNFMVKV  | 78   | 67    |
| >FBXW7-D52 GAYDFMVK   | 104   | >FBXW7-D52 GAYNFMVK   | 55   | 49    |
| >FBXW7-D52 GAYDFMVK   | 10    | >FBXW7-D52 GAYNFMVK   | 9    | 1     |
| >FBXW7-D52 GAYDFMVK   | 790   | >FBXW7-D52 GAYNFMVK   | 359  | 431   |
| >FBXW7-D52 GAYDFMVK   | 98    | >FBXW7-D52 GAYNFMVK   | 128  | 30    |
| >FBXW7-D52 GAYDFMVKV  | 319   | >FBXW7-D52 GAYNFMVKV  | 971  | 652   |
| >FBXW7-D52 GAYDFMVKV  | 76    | >FBXW7-D52 GAYNFMVKV  | 325  | 249   |
| >FBXW7-D52 GAYDFMVKV  | 425   | >FBXW7-D52 GAYNFMVKV  | 1148 | 723   |
| >FBXW7-D52 GAYDFMVKV  | 5     | >FBXW7-D52 GAYNFMVKV  | 7    | 2     |
| >FBXW7-D52 GAYDFMVKV  | 58    | >FBXW7-D52 GAYNFMVKV  | 53   | 5     |
| >FBXW7-D52 GAYDFMVKV  | 45    | >FBXW7-D52 GAYNFMVKV  | 52   | 7     |
| >FBXW7-D52 GAYDFMVKV  | 33    | >FBXW7-D52 GAYNFMVKV  | 47   | 14    |
| >FBXW7-D52 GAYDFMVK   | 112   | >FBXW7-D52 GAYNFMVK   | 94   | 18    |
| >FBXW7-D52 SGAYDFMVK  | 208   | >FBXW7-D52 SGAYNFMVK  | 119  | 89    |
| >FBXW7-D52 SGAYDFMV   | 167   | >FBXW7-D52 SGAYNFMV   | 84   | 83    |
| >FBXW7-D52 SGAYDFMVK  | 563   | >FBXW7-D52 SGAYNFMVK  | 416  | 147   |
| >FBXW7-D52 SGAYDFMVK  | 876   | >FBXW7-D52 SGAYNFMVK  | 430  | 446   |
| >FBXW7-D52 SGAYDFMVK  | 137   | >FBXW7-D52 SGAYNFMVK  | 118  | 19    |
| >FBXW7-D52 VSGAYDFM   | 2526  | >FBXW7-D52 VSGAYNFM   | 366  | 2160  |
| >FBXW7-D52 VSGAYDFMV  | 577   | >FBXW7-D52 VSGAYNFMV  | 287  | 290   |
| >FBXW7-D52 VSGAYDFMV  | 348   | >FBXW7-D52 VSGAYNFMV  | 97   | 251   |
| >FBXW7-D52 VSGAYDFMV  | 50    | >FBXW7-D52 VSGAYNFMV  | 38   | 12    |
| >FBXW7-D52 VSGAYDFMV  | 4421  | >FBXW7-D52 VSGAYNFMV  | 377  | 4044  |
| >FBXW7-D52 VSGAYDFM   | 415   | >FBXW7-D52 VSGAYNFM   | 399  | 16    |
| >FBXW7-D52 VSGAYDFMV  | 1406  | >FBXW7-D52 VSGAYNFMV  | 314  | 1092  |
| >FBXW7-D52 VSGAYDFM   | 2521  | >FBXW7-D52 VSGAYNFM   | 351  | 2170  |
| >FBXW7-D52 VVSGAYDFM  | 1999  | >FBXW7-D52 VVSGAYNFM  | 497  | 1502  |
| >FBXW7-D52 VVSGAYDFM  | 374   | >FBXW7-D52 VVSGAYNFM  | 397  | 23    |
| >FBXW7-D52 VVSGAYDFM  | 287   | >FBXW7-D52 VVSGAYNFM  | 181  | 106   |
| >FBXW7-D52 VVSGAYDFM  | 72    | >FBXW7-D52 VVSGAYNFM  | 90   | 18    |
| >FBXW7-D52 VVSGAYDFM  | 233   | >FBXW7-D52 VVSGAYNFM  | 199  | 34    |

|                       |      |                       |     |      |
|-----------------------|------|-----------------------|-----|------|
| >FBXW7-D52 VVSGAYDFM  | 39   | >FBXW7-D52 VVSGAYNFM  | 33  | 6    |
| >FBXW7-D52 VVSGAYDFM  | 33   | >FBXW7-D52 VVSGAYNFM  | 45  | 12   |
| >FBXW7-D52 VVSGAYDFM  | 45   | >FBXW7-D52 VVSGAYNFM  | 29  | 16   |
| >FBXW7-D52 VVSGAYDFM  | 8    | >FBXW7-D52 VVSGAYNFM  | 6   | 2    |
| >FBXW7-D52 VVSGAYDFM  | 162  | >FBXW7-D52 VVSGAYNFM  | 79  | 83   |
| >FBXW7-D52 VVSGAYDFM  | 17   | >FBXW7-D52 VVSGAYNFM  | 14  | 3    |
| >FBXW7-D52 VVSGAYDFM  | 177  | >FBXW7-D52 VVSGAYNFM  | 185 | 8    |
| >FBXW7-D52 VVSGAYDFM  | 442  | >FBXW7-D52 VVSGAYNFM  | 87  | 355  |
| >FBXW7-D52 VVSGAYDFM  | 254  | >FBXW7-D52 VVSGAYNFM  | 200 | 54   |
| >FBXW7-D52 VVSGAYDFM  | 800  | >FBXW7-D52 VVSGAYNFM  | 192 | 608  |
| >FBXW7-D52 VVSGAYDFM  | 716  | >FBXW7-D52 VVSGAYNFM  | 148 | 568  |
| >FBXW7-D52 VVSGAYDF   | 935  | >FBXW7-D52 VVSGAYNF   | 237 | 698  |
| >FBXW7-D52 VVSGAYDFM  | 1409 | >FBXW7-D52 VVSGAYNFM  | 456 | 953  |
| >FBXW7-D52 VVSGAYDFM  | 353  | >FBXW7-D52 VVSGAYNFM  | 148 | 205  |
| >FBXW7-D52 RVVSGAYDFM | 167  | >FBXW7-D52 RVVSGAYNFM | 90  | 77   |
| >FBXW7-D52 RVVSGAYDFM | 495  | >FBXW7-D52 RVVSGAYNFM | 453 | 42   |
| >FBXW7-D52 RVVSGAYDFM | 353  | >FBXW7-D52 RVVSGAYNFM | 160 | 193  |
| >FBXW7-D52 RVVSGAYDFM | 210  | >FBXW7-D52 RVVSGAYNFM | 96  | 114  |
| >FBXW7-D52 RVVSGAYDFM | 12   | >FBXW7-D52 RVVSGAYNFM | 9   | 3    |
| >FBXW7-D52 RVVSGAYDFM | 43   | >FBXW7-D52 RVVSGAYNFM | 23  | 20   |
| >FBXW7-D52 RVVSGAYDFM | 319  | >FBXW7-D52 RVVSGAYNFM | 273 | 46   |
| >FBXW7-D52 RVVSGAYDFM | 99   | >FBXW7-D52 RVVSGAYNFM | 102 | 3    |
| >FBXW7-D52 RVVSGAYDFM | 824  | >FBXW7-D52 RVVSGAYNFM | 342 | 482  |
| >FBXW7-D52 RVVSGAYDFM | 38   | >FBXW7-D52 RVVSGAYNFM | 26  | 12   |
| >FBXW7-D52 RVVSGAYDF  | 233  | >FBXW7-D52 RVVSGAYNF  | 97  | 136  |
| >FBXW7-D52 RVVSGAYDF  | 589  | >FBXW7-D52 RVVSGAYNF  | 321 | 268  |
| >FBXW7-D52 RVVSGAYDF  | 117  | >FBXW7-D52 RVVSGAYNF  | 42  | 75   |
| >FBXW7-D52 RVVSGAYDFM | 19   | >FBXW7-D52 RVVSGAYNFM | 15  | 4    |
| >FBXW7-D52 RVVSGAYDF  | 194  | >FBXW7-D52 RVVSGAYNF  | 276 | 82   |
| >FBXW7-D52 RVVSGAYDFM | 1250 | >FBXW7-D52 RVVSGAYNFM | 161 | 1089 |
| >FBXW7-D52 RVVSGAYDF  | 21   | >FBXW7-D52 RVVSGAYNF  | 17  | 4    |
| >FBXW7-D52 RVVSGAYDFM | 177  | >FBXW7-D52 RVVSGAYNFM | 102 | 75   |
| >FBXW7-D52 RVVSGAYDFM | 204  | >FBXW7-D52 RVVSGAYNFM | 33  | 171  |
| >FBXW7-D52 RVVSGAYDF  | 316  | >FBXW7-D52 RVVSGAYNF  | 235 | 81   |
| >FBXW7-D52 RVVSGAYDF  | 119  | >FBXW7-D52 RVVSGAYNF  | 73  | 46   |
| >FBXW7-D52 RVVSGAYDF  | 15   | >FBXW7-D52 RVVSGAYNF  | 6   | 9    |
| >FBXW7-D52 RVVSGAYDFM | 269  | >FBXW7-D52 RVVSGAYNFM | 172 | 97   |
| >FBXW7-D52 RVVSGAYDF  | 378  | >FBXW7-D52 RVVSGAYNF  | 68  | 310  |
| >FBXW7-D52 RVVSGAYDF  | 202  | >FBXW7-D52 RVVSGAYNF  | 84  | 118  |
| >FBXW7-D52 RVVSGAYDFM | 474  | >FBXW7-D52 RVVSGAYNFM | 89  | 385  |
| >FBXW7-D52 RVVSGAYDFM | 870  | >FBXW7-D52 RVVSGAYNFM | 431 | 439  |
| >FBXW7-D52 RRVSGAYDF  | 1186 | >FBXW7-D52 RRVSGAYNF  | 496 | 690  |
| >FBXW7-D52 RRVSGAYDF  | 6    | >FBXW7-D52 RRVSGAYNF  | 5   | 1    |

|                        |       |                        |      |       |
|------------------------|-------|------------------------|------|-------|
| >FBXW7-D52 RRVVSGAYDF  | 89    | >FBXW7-D52 RRVVSGAYNF  | 35   | 54    |
| >FBXW7-D52 RRVVSGAYDF  | 18    | >FBXW7-D52 RRVVSGAYNF  | 16   | 2     |
| >FBXW7-D52 RRVVSGAYDF  | 48    | >FBXW7-D52 RRVVSGAYNF  | 48   | 0     |
| >FBXW7-D52 RRVVSGAYDF  | 322   | >FBXW7-D52 RRVVSGAYNF  | 351  | 29    |
| >FBXW7-D52 RRVVSGAYDF  | 153   | >FBXW7-D52 RRVVSGAYNF  | 131  | 22    |
| >FBXW7-D52 RRVVSGAYDF  | 136   | >FBXW7-D52 RRVVSGAYNF  | 132  | 4     |
| >FBXW7-D52 RRVVSGAYDF  | 137   | >FBXW7-D52 RRVVSGAYNF  | 73   | 64    |
| >FBXW7-D52 GRRVVSAGAYI | 123   | >FBXW7-D52 GRRVVSAGAYI | 81   | 42    |
| >FBXW7-D52 GRRVVSAGAYI | 1084  | >FBXW7-D52 GRRVVSAGAYI | 308  | 776   |
| >FBXW7-D52 GRRVVSAGAYI | 429   | >FBXW7-D52 GRRVVSAGAYI | 573  | 144   |
| >FBXW7-D52 GRRVVSAGAYI | 180   | >FBXW7-D52 GRRVVSAGAYI | 113  | 67    |
| >FBXW7-D52 DPETETCLHT  | 730   | >FBXW7-D52 GPETETCLHT  | 365  | 365   |
| >FBXW7-D52 WDPETETCL   | 5612  | >FBXW7-D52 WGPETETCL   | 232  | 5380  |
| >FBXW7-D52 KVWDPETETC  | 105   | >FBXW7-D52 KVWGPETETC  | 355  | 250   |
| >FBXW7-D52 KVWDPETETC  | 177   | >FBXW7-D52 KVWGPETETC  | 323  | 146   |
| >FBXW7-D52 KVWDPETETC  | 145   | >FBXW7-D52 KVWGPETETC  | 276  | 131   |
| >FBXW7-D52 KVWDPETETC  | 76    | >FBXW7-D52 KVWGPETETC  | 136  | 60    |
| >FBXW7-D52 KVWDPETETC  | 111   | >FBXW7-D52 KVWGPETETC  | 234  | 123   |
| >FBXW7-D52 KVWDPETE    | 660   | >FBXW7-D52 KVWGPETE    | 248  | 412   |
| >FBXW7-D52 KVWDPETETC  | 168   | >FBXW7-D52 KVWGPETETC  | 79   | 89    |
| >FBXW7-D52 KVWDPETETC  | 354   | >FBXW7-D52 KVWGPETETC  | 126  | 228   |
| >FBXW7-D52 FMVKVWDP    | 439   | >FBXW7-D52 FMVKVWGP    | 801  | 362   |
| >FBXW7-D52 FMVKVWDP    | 670   | >FBXW7-D52 FMVKVWGP    | 226  | 444   |
| >FBXW7-D52 FMVKVWDP    | 902   | >FBXW7-D52 FMVKVWGP    | 267  | 635   |
| >FBXW7-D52 FMVKVWDP    | 142   | >FBXW7-D52 FMVKVWGP    | 121  | 21    |
| >FBXW7-D52 FMVKVWDP    | 1153  | >FBXW7-D52 FMVKVWGP    | 145  | 1008  |
| >FBXW7-D52 FMVKVWDP    | 18    | >FBXW7-D52 FMVKVWGP    | 13   | 5     |
| >FBXW7-D52 FMVKVWDP    | 34    | >FBXW7-D52 FMVKVWGP    | 47   | 13    |
| >FBXW7-D52 FMVKVWDP    | 76    | >FBXW7-D52 FMVKVWGP    | 69   | 7     |
| >FBXW7-E12 EEMDQESDD   | 771   | >FBXW7-E12 EEMDQYSDD   | 235  | 536   |
| >FBXW7-E12 EEMDQESDD   | 1034  | >FBXW7-E12 EEMDQYSDD   | 197  | 837   |
| >FBXW7-E12 EEEMDQESD   | 628   | >FBXW7-E12 EEEMDQYS    | 329  | 299   |
| >FBXW7-E12 EEEMDQES    | 548   | >FBXW7-E12 EEEMDQYS    | 458  | 90    |
| >FBXW7-E12 EEEEEMDQE   | 17416 | >FBXW7-E12 EEEEEMDQY   | 376  | 17040 |
| >FBXW7-E12 EEEEEMDQE   | 8088  | >FBXW7-E12 EEEEEMDQY   | 197  | 7891  |
| >FBXW7-E12 EEEEEEMDQE  | 13220 | >FBXW7-E12 EEEEEEMDQY  | 465  | 12755 |
| >FBXW7-E12 DEEEEEEMDQ  | 27389 | >FBXW7-E12 DEEEEEEMDQ  | 487  | 26902 |
| >FBXW7-E69 EETKLLVL    | 50    | >FBXW7-E69 KETKLLVL    | 107  | 57    |
| >FBXW7-E69 EETKLLVLDF  | 2140  | >FBXW7-E69 KETKLLVLDF  | 237  | 1903  |
| >FBXW7-E69 EETKLLVLDF  | 349   | >FBXW7-E69 KETKLLVLDF  | 1563 | 1214  |
| >FBXW7-E69 EETKLLVL    | 101   | >FBXW7-E69 KETKLLVL    | 19   | 82    |
| >FBXW7-E69 EETKLLVL    | 132   | >FBXW7-E69 KETKLLVL    | 25   | 107   |
| >FBXW7-E69 EETKLLVLDF  | 873   | >FBXW7-E69 KETKLLVLDF  | 445  | 428   |

|                        |       |                       |       |       |
|------------------------|-------|-----------------------|-------|-------|
| >FBXW7-E69 EETKLLVDF   | 80    | >FBXW7-E69 KETKLLVDF  | 146   | 66    |
| >FBXW7-E69 EETKLLVL    | 431   | >FBXW7-E69 KETKLLVL   | 1059  | 628   |
| >FBXW7-E69 EETKLLVDF   | 64    | >FBXW7-E69 KETKLLVDF  | 117   | 53    |
| >FBXW7-E69 EETKLLVL    | 1697  | >FBXW7-E69 KETKLLVL   | 342   | 1355  |
| >FBXW7-E69 EETKLLVLD   | 4133  | >FBXW7-E69 KETKLLVLD  | 199   | 3934  |
| >FBXW7-E69 EETKLLVDFL  | 5933  | >FBXW7-E69 KETKLLVDFL | 404   | 5529  |
| >FBXW7-E69 EETKLLVL    | 13561 | >FBXW7-E69 KETKLLVL   | 463   | 13098 |
| >FBXW7-E69 TEETKLLV    | 55    | >FBXW7-E69 TKETKLLV   | 14380 | 14325 |
| >FBXW7-E69 TEETKLLVL   | 292   | >FBXW7-E69 TKETKLLVL  | 14493 | 14201 |
| >FBXW7-E69 TEETKLLVDF  | 390   | >FBXW7-E69 TKETKLLVDF | 19402 | 19012 |
| >FBXW7-E69 TEETKLLVL   | 1171  | >FBXW7-E69 TKETKLLVL  | 383   | 788   |
| >FBXW7-E69 TEETKLLVL   | 86    | >FBXW7-E69 TKETKLLVL  | 18806 | 18720 |
| >FBXW7-E69 TEETKLLVDF  | 446   | >FBXW7-E69 TKETKLLVDF | 24428 | 23982 |
| >FBXW7-E69 TEETKLLVL   | 223   | >FBXW7-E69 TKETKLLVL  | 20540 | 20317 |
| >FBXW7-E69 GTEETKLLV   | 9055  | >FBXW7-E69 GTKETKLLV  | 129   | 8926  |
| >FBXW7-E69 GTEETKLLVL  | 12454 | >FBXW7-E69 GTKETKLLVL | 360   | 12094 |
| >FBXW7-E69 GTEETKLL    | 567   | >FBXW7-E69 GTKETKLL   | 224   | 343   |
| >FBXW7-E69 GTEETKLLVL  | 191   | >FBXW7-E69 GTKETKLLVL | 82    | 109   |
| >FBXW7-E69 GTEETKLLV   | 413   | >FBXW7-E69 GTKETKLLV  | 243   | 170   |
| >FBXW7-E69 SRNGTEETK   | 732   | >FBXW7-E69 SRNGTKETK  | 349   | 383   |
| >FBXW7-E69 SRNGTEETKL  | 159   | >FBXW7-E69 SRNGTKETKL | 142   | 17    |
| >FBXW7-E69 SRNGTEETKL  | 721   | >FBXW7-E69 SRNGTKETKL | 485   | 236   |
| >FBXW7-E69 GSRNGTEETK  | 419   | >FBXW7-E69 GSRNGTKETK | 345   | 74    |
| >FBXW7-E69 GSRNGTEETK  | 43    | >FBXW7-E69 GSRNGTKETK | 20    | 23    |
| >FBXW7-E69 GSRNGTEETK  | 55    | >FBXW7-E69 GSRNGTKETK | 29    | 26    |
| >FBXW7-E69 GSRNGTEETK  | 61    | >FBXW7-E69 GSRNGTKETK | 69    | 8     |
| >FBXW7-E69 AVGSRNGTE   | 20506 | >FBXW7-E69 AVGSRNGTK  | 223   | 20283 |
| >FBXW7-E69 AVGSRNGTE   | 26868 | >FBXW7-E69 AVGSRNGTK  | 243   | 26625 |
| >FBXW7-E69 AVGSRNGTE   | 14609 | >FBXW7-E69 AVGSRNGTK  | 233   | 14376 |
| >FBXW7-G39 GSDDNTLKV   | 369   | >FBXW7-G39 DSDDNTLKV  | 258   | 111   |
| >FBXW7-G39 GSDDNTLK    | 45    | >FBXW7-G39 DSDDNTLK   | 3008  | 2963  |
| >FBXW7-G39 GSDDNTLK    | 3904  | >FBXW7-G39 DSDDNTLK   | 335   | 3569  |
| >FBXW7-G39 GSDDNTLKV   | 2831  | >FBXW7-G39 DSDDNTLKV  | 60    | 2771  |
| >FBXW7-G39 GSDDNTLKV\  | 23    | >FBXW7-G39 DSDDNTLKV\ | 483   | 460   |
| >FBXW7-G39 GSDDNTLKV\  | 64    | >FBXW7-G39 DSDDNTLKV\ | 1167  | 1103  |
| >FBXW7-G39 SGSDDDNTLKV | 14782 | >FBXW7-G39 SDSDDNTLKV | 115   | 14667 |
| >FBXW7-G39 LQFCGNRIVS  | 125   | >FBXW7-G39 LQFCGNRIVS | 2201  | 2076  |
| >FBXW7-G39 LQFCGNRIVS  | 294   | >FBXW7-G39 LQFCGNRIVS | 1017  | 723   |
| >FBXW7-G39 VSGSDDNTLk  | 13330 | >FBXW7-G39 VSDSDDNTLk | 334   | 12996 |
| >FBXW7-G39 VSGSDDNTLk  | 175   | >FBXW7-G39 VSDSDDNTLk | 115   | 60    |
| >FBXW7-G39 IVSGSDDNTL  | 174   | >FBXW7-G39 IVSDSDDNTL | 130   | 44    |
| >FBXW7-G39 IVSGSDDNTL  | 783   | >FBXW7-G39 IVSDSDDNTL | 304   | 479   |
| >FBXW7-G39 IVSGSDDNTL  | 281   | >FBXW7-G39 IVSDSDDNTL | 453   | 172   |

|                       |       |                       |      |       |
|-----------------------|-------|-----------------------|------|-------|
| >FBXW7-G39 IVSGSDDNTL | 45    | >FBXW7-G39 IVSDSDDNTL | 36   | 9     |
| >FBXW7-G39 IVSGSDDNTL | 27    | >FBXW7-G39 IVSDSDDNTL | 24   | 3     |
| >FBXW7-G39 RIVSGSDDNT | 395   | >FBXW7-G39 RIVSDSDDNT | 751  | 356   |
| >FBXW7-G39 RIVSGSDDNT | 183   | >FBXW7-G39 RIVSDSDDNT | 236  | 53    |
| >FBXW7-G42 GVWSSQMR   | 308   | >FBXW7-G42 VVWSSQMR   | 320  | 12    |
| >FBXW7-G42 GVWSSQMR   | 39    | >FBXW7-G42 VVWSSQMR   | 33   | 6     |
| >FBXW7-G42 GVWSSQMR   | 1549  | >FBXW7-G42 VVWSSQMR   | 356  | 1193  |
| >FBXW7-G42 GVWSSQMR   | 305   | >FBXW7-G42 VVWSSQMR   | 175  | 130   |
| >FBXW7-G42 GGVWSSQM   | 14216 | >FBXW7-G42 GVVWSSQMI  | 272  | 13944 |
| >FBXW7-G42 GGVWSSQM   | 4992  | >FBXW7-G42 GVVWSSQMI  | 486  | 4506  |
| >FBXW7-G42 GGVWSSQM   | 2290  | >FBXW7-G42 GVVWSSQMI  | 81   | 2209  |
| >FBXW7-G42 GGVWSSQM   | 538   | >FBXW7-G42 GVVWSSQM   | 98   | 440   |
| >FBXW7-G42 CLRTLVGHTG | 7582  | >FBXW7-G42 CLRTLVGHTG | 26   | 7556  |
| >FBXW7-G42 CLRTLVGHTG | 24467 | >FBXW7-G42 CLRTLVGHTG | 186  | 24281 |
| >FBXW7-G42 CLRTLVGHTG | 25833 | >FBXW7-G42 CLRTLVGHTG | 8    | 25825 |
| >FBXW7-G42 TGGVWSSQM  | 897   | >FBXW7-G42 TGVVWSSQM  | 360  | 537   |
| >FBXW7-G42 TGGVWSSQM  | 199   | >FBXW7-G42 TGVVWSSQM  | 48   | 151   |
| >FBXW7-G42 HTGGVWSSC  | 229   | >FBXW7-G42 HTGVVWSSC  | 1308 | 1079  |
| >FBXW7-G42 HTGGVWSSC  | 330   | >FBXW7-G42 HTGVVWSSC  | 1482 | 1152  |
| >FBXW7-G42 HTGGVWSSC  | 107   | >FBXW7-G42 HTGVVWSSC  | 56   | 51    |
| >FBXW7-G42 HTGGVWSSC  | 85    | >FBXW7-G42 HTGVVWSSC  | 76   | 9     |
| >FBXW7-G42 HTGGVWSSC  | 21    | >FBXW7-G42 HTGVVWSSC  | 27   | 6     |
| >FBXW7-G42 HTGGVWSSC  | 450   | >FBXW7-G42 HTGVVWSSC  | 621  | 171   |
| >FBXW7-G42 HTGGVWSSC  | 41    | >FBXW7-G42 HTGVVWSSC  | 41   | 0     |
| >FBXW7-G42 HTGGVWSSC  | 64    | >FBXW7-G42 HTGVVWSSC  | 48   | 16    |
| >FBXW7-G42 GHTGGVWSS  | 488   | >FBXW7-G42 GHTGVVWSS  | 390  | 98    |
| >FBXW7-G42 VGHTGGVW   | 680   | >FBXW7-G42 VGHTGVVW   | 348  | 332   |
| >FBXW7-G42 VGHTGGVW   | 1354  | >FBXW7-G42 VGHTGVVW   | 418  | 936   |
| >FBXW7-G42 LVGHTGGV   | 183   | >FBXW7-G42 LVGHTGVV   | 508  | 325   |
| >FBXW7-G42 LVGHTGGV   | 275   | >FBXW7-G42 LVGHTGVV   | 512  | 237   |
| >FBXW7-G42 LVGHTGGV   | 98    | >FBXW7-G42 LVGHTGVV   | 151  | 53    |
| >FBXW7-G42 LVGHTGGVM  | 667   | >FBXW7-G42 LVGHTGVVW  | 230  | 437   |
| >FBXW7-G42 LVGHTGGVM  | 100   | >FBXW7-G42 LVGHTGVVW  | 48   | 52    |
| >FBXW7-G42 TLVGHTGG   | 22218 | >FBXW7-G42 TLVGHTGV   | 212  | 22006 |
| >FBXW7-G42 TLVGHTGG   | 4187  | >FBXW7-G42 TLVGHTGV   | 15   | 4172  |
| >FBXW7-G42 TLVGHTGGV  | 17    | >FBXW7-G42 TLVGHTGVV  | 72   | 55    |
| >FBXW7-G42 TLVGHTGG   | 3355  | >FBXW7-G42 TLVGHTGV   | 5    | 3350  |
| >FBXW7-G42 TLVGHTGGV  | 4     | >FBXW7-G42 TLVGHTGVV  | 5    | 1     |
| >FBXW7-G42 TLVGHTGG   | 11614 | >FBXW7-G42 TLVGHTGV   | 40   | 11574 |
| >FBXW7-G42 TLVGHTGGV  | 104   | >FBXW7-G42 TLVGHTGVV  | 606  | 502   |
| >FBXW7-G42 TLVGHTGG   | 9068  | >FBXW7-G42 TLVGHTGV   | 6    | 9062  |
| >FBXW7-G42 TLVGHTGGV  | 7     | >FBXW7-G42 TLVGHTGVV  | 14   | 7     |
| >FBXW7-G42 TLVGHTGG   | 18056 | >FBXW7-G42 TLVGHTGV   | 52   | 18004 |

|                       |       |                       |      |       |
|-----------------------|-------|-----------------------|------|-------|
| >FBXW7-G42TLVGHTGGV   | 44    | >FBXW7-G42TLVGHTGVV   | 94   | 50    |
| >FBXW7-G42TLVGHTGG    | 17739 | >FBXW7-G42TLVGHTGV    | 20   | 17719 |
| >FBXW7-G42TLVGHTGGV   | 51    | >FBXW7-G42TLVGHTGVV   | 124  | 73    |
| >FBXW7-G42TLVGHTGG    | 23297 | >FBXW7-G42TLVGHTGV    | 60   | 23237 |
| >FBXW7-G42TLVGHTGGV   | 110   | >FBXW7-G42TLVGHTGVV   | 343  | 233   |
| >FBXW7-G42TLVGHTGG    | 9136  | >FBXW7-G42TLVGHTGV    | 2    | 9134  |
| >FBXW7-G42TLVGHTGGV   | 3     | >FBXW7-G42TLVGHTGVV   | 4    | 1     |
| >FBXW7-G42TLVGHTGG    | 14256 | >FBXW7-G42TLVGHTGV    | 133  | 14123 |
| >FBXW7-G42TLVGHTGGV   | 87    | >FBXW7-G42TLVGHTGVV   | 314  | 227   |
| >FBXW7-G42TLVGHTGG    | 19137 | >FBXW7-G42TLVGHTGV    | 118  | 19019 |
| >FBXW7-G42TLVGHTGGV   | 60    | >FBXW7-G42TLVGHTGVV   | 744  | 684   |
| >FBXW7-G42RTLVGHTGG\  | 131   | >FBXW7-G42RTLVGHTGV\  | 279  | 148   |
| >FBXW7-G42RTLVGHTGG   | 15724 | >FBXW7-G42RTLVGHTGV   | 58   | 15666 |
| >FBXW7-G42RTLVGHTGG\  | 338   | >FBXW7-G42RTLVGHTGV\  | 790  | 452   |
| >FBXW7-G42RTLVGHTGG   | 23138 | >FBXW7-G42RTLVGHTGV   | 58   | 23080 |
| >FBXW7-G42RTLVGHTGG\  | 71    | >FBXW7-G42RTLVGHTGV\  | 175  | 104   |
| >FBXW7-G42RTLVGHTGG   | 18839 | >FBXW7-G42RTLVGHTGV   | 176  | 18663 |
| >FBXW7-G42RTLVGHTGG\  | 435   | >FBXW7-G42RTLVGHTGV\  | 1044 | 609   |
| >FBXW7-G42RTLVGHTGG   | 36531 | >FBXW7-G42RTLVGHTGV   | 306  | 36225 |
| >FBXW7-G42RTLVGHTGG   | 1335  | >FBXW7-G42RTLVGHTGV   | 157  | 1178  |
| >FBXW7-G42RTLVGHTGG\  | 147   | >FBXW7-G42RTLVGHTGV\  | 86   | 61    |
| >FBXW7-G42RTLVGHTGG   | 4977  | >FBXW7-G42RTLVGHTGV   | 489  | 4488  |
| >FBXW7-G42RTLVGHTGG\  | 377   | >FBXW7-G42RTLVGHTGV\  | 29   | 348   |
| >FBXW7-G42RTLVGHTGG\  | 465   | >FBXW7-G42RTLVGHTGV\  | 735  | 270   |
| >FBXW7-G42RTLVGHTGG   | 17561 | >FBXW7-G42RTLVGHTGV   | 62   | 17499 |
| >FBXW7-G42RTLVGHTGG\  | 52    | >FBXW7-G42RTLVGHTGV\  | 362  | 310   |
| >FBXW7-G42RTLVGHTGG   | 220   | >FBXW7-G42RTLVGHTGV   | 8    | 212   |
| >FBXW7-G42RTLVGHTGG\  | 19    | >FBXW7-G42RTLVGHTGV\  | 31   | 12    |
| >FBXW7-G42RTLVGHTGG\  | 3     | >FBXW7-G42RTLVGHTGV\  | 3    | 0     |
| >FBXW7-G42RTLVGHTGG\  | 44    | >FBXW7-G42RTLVGHTGV\  | 38   | 6     |
| >FBXW7-G42RTLVGHTGG\  | 9     | >FBXW7-G42RTLVGHTGV\  | 9    | 0     |
| >FBXW7-G42RTLVGHTGG   | 3045  | >FBXW7-G42RTLVGHTGV   | 131  | 2914  |
| >FBXW7-G42RTLVGHTGG\  | 67    | >FBXW7-G42RTLVGHTGV\  | 59   | 8     |
| >FBXW7-G42RTLVGHTGG\  | 24    | >FBXW7-G42RTLVGHTGV\  | 48   | 24    |
| >FBXW7-G42RTLVGHTGG\  | 270   | >FBXW7-G42RTLVGHTGV\  | 1467 | 1197  |
| >FBXW7-G42LRTLVGHTGC  | 351   | >FBXW7-G42LRTLVGHTGV  | 643  | 292   |
| >FBXW7-H37GHDDHVITCL  | 7287  | >FBXW7-H37GRDDHVITCL  | 87   | 7200  |
| >FBXW7-H37GHDDHVITCL  | 123   | >FBXW7-H37GRDDHVITCL  | 334  | 211   |
| >FBXW7-H37ELKSPKVLKGI | 24403 | >FBXW7-H37ELKSPKVLKGI | 138  | 24265 |
| >FBXW7-H37ELKSPKVLKGI | 16736 | >FBXW7-H37ELKSPKVLKGI | 107  | 16629 |
| >FBXW7-H37KGHDDHVI    | 1665  | >FBXW7-H37KGRDDHVI    | 168  | 1497  |
| >FBXW7-H37KGHDDHVI    | 486   | >FBXW7-H37KGRDDHVI    | 1142 | 656   |
| >FBXW7-H37VLKGHDDHV   | 127   | >FBXW7-H37VLKGRDDHV   | 363  | 236   |

|                      |       |                      |      |       |
|----------------------|-------|----------------------|------|-------|
| >FBXW7-H37VLKGHDDHV  | 25    | >FBXW7-H37VLKGRDDHV  | 101  | 76    |
| >FBXW7-H37VLKGHDDHV  | 89    | >FBXW7-H37VLKGRDDHV  | 221  | 132   |
| >FBXW7-H37VLKGHDDHV  | 152   | >FBXW7-H37VLKGRDDHV  | 299  | 147   |
| >FBXW7-H37VLKGHDDHV  | 452   | >FBXW7-H37VLKGRDDHV  | 671  | 219   |
| >FBXW7-H37VLKGHDDHV  | 105   | >FBXW7-H37VLKGRDDHV  | 100  | 5     |
| >FBXW7-H37VLKGHDDHV  | 7     | >FBXW7-H37VLKGRDDHV  | 6    | 1     |
| >FBXW7-H37VLKGHDDHV  | 42    | >FBXW7-H37VLKGRDDHV  | 35   | 7     |
| >FBXW7-H37KVLKGHDDH' | 486   | >FBXW7-H37KVLKGRDDH' | 806  | 320   |
| >FBXW7-H37KVLKGHDDH' | 164   | >FBXW7-H37KVLKGRDDH' | 744  | 580   |
| >FBXW7-H37KVLKGHDDH' | 426   | >FBXW7-H37KVLKGRDDH' | 1005 | 579   |
| >FBXW7-H37KVLKGHDDH' | 37    | >FBXW7-H37KVLKGRDDH' | 62   | 25    |
| >FBXW7-H37KVLKGHDDH' | 287   | >FBXW7-H37KVLKGRDDH' | 318  | 31    |
| >FBXW7-H37KVLKGHDDH' | 94    | >FBXW7-H37KVLKGRDDH' | 128  | 34    |
| >FBXW7-H37KVLKGHDDH' | 435   | >FBXW7-H37KVLKGRDDH' | 542  | 107   |
| >FBXW7-H37KVLKGHDDH' | 377   | >FBXW7-H37KVLKGRDDH' | 447  | 70    |
| >FBXW7-H37KSPKVLKGH  | 12355 | >FBXW7-H37KSPKVLKGR  | 405  | 11950 |
| >FBXW7-H37KSPKVLKGH  | 29752 | >FBXW7-H37KSPKVLKGR  | 307  | 29445 |
| >FBXW7-H42HTGGVWSSC  | 5162  | >FBXW7-H42YTGGVWSSQ  | 160  | 5002  |
| >FBXW7-H42HTGGVWSSC  | 229   | >FBXW7-H42YTGGVWSSQ  | 99   | 130   |
| >FBXW7-H42HTGGVWSSC  | 330   | >FBXW7-H42YTGGVWSSQ  | 1163 | 833   |
| >FBXW7-H42HTGGVWSSC  | 107   | >FBXW7-H42YTGGVWSSQ  | 506  | 399   |
| >FBXW7-H42HTGGVWSSC  | 85    | >FBXW7-H42YTGGVWSSQ  | 168  | 83    |
| >FBXW7-H42HTGGVWSSC  | 21    | >FBXW7-H42YTGGVWSSQ  | 12   | 9     |
| >FBXW7-H42HTGGVWSSC  | 450   | >FBXW7-H42YTGGVWSSQ  | 243  | 207   |
| >FBXW7-H42HTGGVWSSC  | 1330  | >FBXW7-H42YTGGVWSSQ  | 314  | 1016  |
| >FBXW7-H42HTGGVWSSC  | 41    | >FBXW7-H42YTGGVWSSQ  | 18   | 23    |
| >FBXW7-H42HTGGVWSSC  | 5310  | >FBXW7-H42YTGGVWSSQ  | 239  | 5071  |
| >FBXW7-H42HTGGVWSSC  | 596   | >FBXW7-H42YTGGVWSSQ  | 80   | 516   |
| >FBXW7-H42HTGGVWSSC  | 64    | >FBXW7-H42YTGGVWSSQ  | 21   | 43    |
| >FBXW7-H42GHTGGVWSS  | 17765 | >FBXW7-H42GYTGGVWSS  | 467  | 17298 |
| >FBXW7-H42GHTGGVWSS  | 17012 | >FBXW7-H42GYTGGVWSS  | 71   | 16941 |
| >FBXW7-H42GHTGGVWSS  | 488   | >FBXW7-H42GYTGGVWSS  | 297  | 191   |
| >FBXW7-H42VGHTGGVW   | 680   | >FBXW7-H42VGYTGGVW   | 68   | 612   |
| >FBXW7-H42VGHTGGVW   | 1354  | >FBXW7-H42VGYTGGVW   | 121  | 1233  |
| >FBXW7-H42VGHTGGVW   | 1113  | >FBXW7-H42VGYTGGVW   | 372  | 741   |
| >FBXW7-H42LVGHTGGV   | 183   | >FBXW7-H42LVGYTGGV   | 296  | 113   |
| >FBXW7-H42LVGHTGGV   | 275   | >FBXW7-H42LVGYTGGV   | 490  | 215   |
| >FBXW7-H42LVGHTGGV   | 98    | >FBXW7-H42LVGYTGGV   | 223  | 125   |
| >FBXW7-H42LVGHTGGV   | 773   | >FBXW7-H42LVGYTGGV   | 496  | 277   |
| >FBXW7-H42LVGHTGGVW  | 100   | >FBXW7-H42LVGYTGGVW  | 167  | 67    |
| >FBXW7-H42TLVGHTGGV  | 616   | >FBXW7-H42TLVGYTGGV  | 156  | 460   |
| >FBXW7-H42TLVGHTGGV  | 17    | >FBXW7-H42TLVGYTGGV  | 10   | 7     |
| >FBXW7-H42TLVGHTGGV  | 4     | >FBXW7-H42TLVGYTGGV  | 5    | 1     |

|                        |       |                        |      |       |
|------------------------|-------|------------------------|------|-------|
| >FBXW7-H42 TLVGHTGGV   | 104   | >FBXW7-H42 TLVGYTGGV   | 55   | 49    |
| >FBXW7-H42 TLVGHTGGV   | 7     | >FBXW7-H42 TLVGYTGGV   | 4    | 3     |
| >FBXW7-H42 TLVGHTGGV   | 44    | >FBXW7-H42 TLVGYTGGV   | 24   | 20    |
| >FBXW7-H42 TLVGHTGGV   | 51    | >FBXW7-H42 TLVGYTGGV   | 25   | 26    |
| >FBXW7-H42 TLVGHTGGV   | 110   | >FBXW7-H42 TLVGYTGGV   | 19   | 91    |
| >FBXW7-H42 TLVGHTGGV   | 3     | >FBXW7-H42 TLVGYTGGV   | 3    | 0     |
| >FBXW7-H42 TLVGHTGGV   | 87    | >FBXW7-H42 TLVGYTGGV   | 55   | 32    |
| >FBXW7-H42 TLVGHTGGV   | 60    | >FBXW7-H42 TLVGYTGGV   | 28   | 32    |
| >FBXW7-H42 TLVGHTGGV\  | 661   | >FBXW7-H42 TLVGYTGGV\  | 385  | 276   |
| >FBXW7-H42 RTLVGHTGG\  | 131   | >FBXW7-H42 RTLVGYTGG\  | 86   | 45    |
| >FBXW7-H42 RTLVGHTGG\  | 338   | >FBXW7-H42 RTLVGYTGG\  | 137  | 201   |
| >FBXW7-H42 RTLVGHTGG\  | 71    | >FBXW7-H42 RTLVGYTGG\  | 53   | 18    |
| >FBXW7-H42 RTLVGHTGG\  | 435   | >FBXW7-H42 RTLVGYTGG\  | 207  | 228   |
| >FBXW7-H42 RTLVGHTGG\  | 147   | >FBXW7-H42 RTLVGYTGG\  | 200  | 53    |
| >FBXW7-H42 RTLVGHTGG\  | 377   | >FBXW7-H42 RTLVGYTGG\  | 553  | 176   |
| >FBXW7-H42 RTLVGHTGG\  | 465   | >FBXW7-H42 RTLVGYTGG\  | 182  | 283   |
| >FBXW7-H42 RTLVGHTGG\  | 52    | >FBXW7-H42 RTLVGYTGG\  | 35   | 17    |
| >FBXW7-H42 RTLVGHTG    | 437   | >FBXW7-H42 RTLVGYTG    | 914  | 477   |
| >FBXW7-H42 RTLVGHTGG   | 220   | >FBXW7-H42 RTLVGYTGG   | 949  | 729   |
| >FBXW7-H42 RTLVGHTGG\  | 19    | >FBXW7-H42 RTLVGYTGG\  | 28   | 9     |
| >FBXW7-H42 RTLVGHTGG\  | 3     | >FBXW7-H42 RTLVGYTGG\  | 4    | 1     |
| >FBXW7-H42 RTLVGHTGG\  | 44    | >FBXW7-H42 RTLVGYTGG\  | 48   | 4     |
| >FBXW7-H42 RTLVGHTGG\  | 9     | >FBXW7-H42 RTLVGYTGG\  | 10   | 1     |
| >FBXW7-H42 RTLVGHTGG\  | 67    | >FBXW7-H42 RTLVGYTGG\  | 86   | 19    |
| >FBXW7-H42 RTLVGHTGG\  | 24    | >FBXW7-H42 RTLVGYTGG\  | 30   | 6     |
| >FBXW7-H42 RTLVGHTGG\  | 270   | >FBXW7-H42 RTLVGYTGG\  | 309  | 39    |
| >FBXW7-H42 LRRTLVGHTGC | 351   | >FBXW7-H42 LRRTLVGYTGG | 272  | 79    |
| >FBXW7-H42 CLRTLUGH    | 18398 | >FBXW7-H42 CLRTLUGH    | 393  | 18005 |
| >FBXW7-H42 CLRTLUGH    | 11560 | >FBXW7-H42 CLRTLUGH    | 404  | 11156 |
| >FBXW7-H42 CLRTLUGH    | 22515 | >FBXW7-H42 CLRTLUGH    | 483  | 22032 |
| >FBXW7-H42 KCLRTLUGH   | 16408 | >FBXW7-H42 KCLRTLUGH   | 228  | 16180 |
| >FBXW7-H42 KCLRTLUGH   | 9315  | >FBXW7-H42 KCLRTLUGH   | 472  | 8843  |
| >FBXW7-H42 GKCLRTLUGH  | 8915  | >FBXW7-H42 GKCLRTLUGH  | 467  | 8448  |
| >FBXW7-H46 HTSTVRCMH   | 1298  | >FBXW7-H46 RTSTVRCMHI  | 495  | 803   |
| >FBXW7-H46 HTSTVRCMH   | 946   | >FBXW7-H46 RTSTVRCMHI  | 139  | 807   |
| >FBXW7-H46 HTSTVRCMH   | 268   | >FBXW7-H46 RTSTVRCMHI  | 76   | 192   |
| >FBXW7-H46 HTSTVRCMH   | 1017  | >FBXW7-H46 RTSTVRCMHI  | 223  | 794   |
| >FBXW7-H46 HTSTVRCMH   | 209   | >FBXW7-H46 RTSTVRCMHI  | 3887 | 3678  |
| >FBXW7-H46 HTSTVRCMH   | 178   | >FBXW7-H46 RTSTVRCMHI  | 2892 | 2714  |
| >FBXW7-H46 HTSTVRCMH   | 73    | >FBXW7-H46 RTSTVRCMHI  | 64   | 9     |
| >FBXW7-H46 HTSTVRCM    | 491   | >FBXW7-H46 RTSTVRCM    | 63   | 428   |
| >FBXW7-H46 HTSTVRCMH   | 240   | >FBXW7-H46 RTSTVRCMHI  | 28   | 212   |
| >FBXW7-H46 HTSTVRCMH   | 1394  | >FBXW7-H46 RTSTVRCMHI  | 104  | 1290  |



|                        |       |                        |      |       |
|------------------------|-------|------------------------|------|-------|
| >FBXW7-H46 HTSTVRCM    | 55    | >FBXW7-H46 RTSTVRCM    | 12   | 43    |
| >FBXW7-H46 HTSTVRCMH   | 513   | >FBXW7-H46 RTSTVRCMH   | 95   | 418   |
| >FBXW7-H46 HTSTVRCMH   | 2422  | >FBXW7-H46 RTSTVRCMH   | 219  | 2203  |
| >FBXW7-H46 HTSTVRCMH   | 193   | >FBXW7-H46 RTSTVRCMH   | 39   | 154   |
| >FBXW7-H46 GHTSTVRCM   | 13134 | >FBXW7-H46 GRTSTVRCM   | 99   | 13035 |
| >FBXW7-H46 GHTSTVRCM   | 18014 | >FBXW7-H46 GRTSTVRCM   | 247  | 17767 |
| >FBXW7-H46 GHTSTVRCM   | 12777 | >FBXW7-H46 GRTSTVRCM   | 262  | 12515 |
| >FBXW7-H46 GHTSTVRCM   | 15402 | >FBXW7-H46 GRTSTVRCM   | 219  | 15183 |
| >FBXW7-H46 GHTSTVRCM   | 5968  | >FBXW7-H46 GRTSTVRCM   | 28   | 5940  |
| >FBXW7-H46 TGECIHTLYGI | 23789 | >FBXW7-H46 TGECIHTLYGI | 294  | 23495 |
| >FBXW7-H46 TGECIHTLYGI | 25790 | >FBXW7-H46 TGECIHTLYGI | 291  | 25499 |
| >FBXW7-H46 YGHTSTVR    | 272   | >FBXW7-H46 YGRTSTVR    | 1512 | 1240  |
| >FBXW7-H46 YGHTSTVRCM  | 464   | >FBXW7-H46 YGRTSTVRCM  | 261  | 203   |
| >FBXW7-H46 YGHTSTVR    | 360   | >FBXW7-H46 YGRTSTVR    | 956  | 596   |
| >FBXW7-H46 LYGHTSTV    | 393   | >FBXW7-H46 LYGRTSTV    | 66   | 327   |
| >FBXW7-H46 LYGHTSTV    | 570   | >FBXW7-H46 LYGRTSTV    | 259  | 311   |
| >FBXW7-H46 LYGHTSTV    | 631   | >FBXW7-H46 LYGRTSTV    | 441  | 190   |
| >FBXW7-H46 LYGHTSTV    | 131   | >FBXW7-H46 LYGRTSTV    | 105  | 26    |
| >FBXW7-H46 LYGHTSTVR   | 412   | >FBXW7-H46 LYGRTSTVR   | 231  | 181   |
| >FBXW7-H46 LYGHTSTVR   | 69    | >FBXW7-H46 LYGRTSTVR   | 102  | 33    |
| >FBXW7-H46 TLYGHTSTV   | 455   | >FBXW7-H46 TLYGRTSTV   | 312  | 143   |
| >FBXW7-H46 TLYGHTSTV   | 17    | >FBXW7-H46 TLYGRTSTV   | 27   | 10    |
| >FBXW7-H46 TLYGHTST    | 282   | >FBXW7-H46 TLYGRTST    | 921  | 639   |
| >FBXW7-H46 TLYGHTSTV   | 8     | >FBXW7-H46 TLYGRTSTV   | 15   | 7     |
| >FBXW7-H46 TLYGHTST    | 18    | >FBXW7-H46 TLYGRTST    | 44   | 26    |
| >FBXW7-H46 TLYGHTSTV   | 2     | >FBXW7-H46 TLYGRTSTV   | 3    | 1     |
| >FBXW7-H46 TLYGHTSTVR  | 403   | >FBXW7-H46 TLYGRTSTVR  | 965  | 562   |
| >FBXW7-H46 TLYGHTSTV   | 53    | >FBXW7-H46 TLYGRTSTV   | 91   | 38    |
| >FBXW7-H46 TLYGHTST    | 82    | >FBXW7-H46 TLYGRTST    | 406  | 324   |
| >FBXW7-H46 TLYGHTSTV   | 2     | >FBXW7-H46 TLYGRTSTV   | 2    | 0     |
| >FBXW7-H46 TLYGHTSTVR  | 33    | >FBXW7-H46 TLYGRTSTVR  | 57   | 24    |
| >FBXW7-H46 TLYGHTSTV   | 4     | >FBXW7-H46 TLYGRTSTV   | 6    | 2     |
| >FBXW7-H46 TLYGHTSTV   | 6     | >FBXW7-H46 TLYGRTSTV   | 6    | 0     |
| >FBXW7-H46 TLYGHTSTV   | 5     | >FBXW7-H46 TLYGRTSTV   | 6    | 1     |
| >FBXW7-H46 TLYGHTST    | 15    | >FBXW7-H46 TLYGRTST    | 19   | 4     |
| >FBXW7-H46 TLYGHTSTV   | 2     | >FBXW7-H46 TLYGRTSTV   | 2    | 0     |
| >FBXW7-H46 TLYGHTSTVR  | 10    | >FBXW7-H46 TLYGRTSTVR  | 10   | 0     |
| >FBXW7-H46 TLYGHTSTVR  | 66    | >FBXW7-H46 TLYGRTSTVR  | 72   | 6     |
| >FBXW7-H46 TLYGHTSTVR  | 259   | >FBXW7-H46 TLYGRTSTVR  | 358  | 99    |
| >FBXW7-H46 TLYGHTSTVR  | 82    | >FBXW7-H46 TLYGRTSTVR  | 67   | 15    |
| >FBXW7-H46 TLYGHTSTV   | 182   | >FBXW7-H46 TLYGRTSTV   | 266  | 84    |
| >FBXW7-H46 TLYGHTSTVR  | 1529  | >FBXW7-H46 TLYGRTSTVR  | 412  | 1117  |
| >FBXW7-H46 TLYGHTSTVR  | 19    | >FBXW7-H46 TLYGRTSTVR  | 42   | 23    |

|                       |       |                       |      |       |
|-----------------------|-------|-----------------------|------|-------|
| >FBXW7-H46 TLYGHTSTV  | 210   | >FBXW7-H46 TLYGRTSTV  | 349  | 139   |
| >FBXW7-H46 TLYGHTSTV  | 36    | >FBXW7-H46 TLYGRTSTV  | 194  | 158   |
| >FBXW7-H46 TLYGHTSTV  | 887   | >FBXW7-H46 TLYGRTSTV  | 294  | 593   |
| >FBXW7-H46 TLYGHTSTV  | 178   | >FBXW7-H46 TLYGRTSTV  | 211  | 33    |
| >FBXW7-H46 TLYGHTSTVR | 139   | >FBXW7-H46 TLYGRTSTVR | 147  | 8     |
| >FBXW7-H46 HTLYGHTSTV | 281   | >FBXW7-H46 HTLYGRTSTV | 464  | 183   |
| >FBXW7-H46 HTLYGHTSTV | 106   | >FBXW7-H46 HTLYGRTSTV | 118  | 12    |
| >FBXW7-H46 HTLYGHTSTV | 319   | >FBXW7-H46 HTLYGRTSTV | 299  | 20    |
| >FBXW7-H46 HTLYGHTSTV | 222   | >FBXW7-H46 HTLYGRTSTV | 842  | 620   |
| >FBXW7-H46 HTLYGHTSTV | 260   | >FBXW7-H46 HTLYGRTSTV | 554  | 294   |
| >FBXW7-H46 HTLYGHTSTV | 395   | >FBXW7-H46 HTLYGRTSTV | 465  | 70    |
| >FBXW7-H46 HTLYGHTSTV | 127   | >FBXW7-H46 HTLYGRTSTV | 144  | 17    |
| >FBXW7-H46 HTLYGHTSTV | 14    | >FBXW7-H46 HTLYGRTSTV | 14   | 0     |
| >FBXW7-H46 HTLYGHTSTV | 108   | >FBXW7-H46 HTLYGRTSTV | 184  | 76    |
| >FBXW7-H46 HTLYGHTSTV | 29    | >FBXW7-H46 HTLYGRTSTV | 30   | 1     |
| >FBXW7-H46 HTLYGHTSTV | 19    | >FBXW7-H46 HTLYGRTSTV | 20   | 1     |
| >FBXW7-H46 HTLYGHTSTV | 89    | >FBXW7-H46 HTLYGRTSTV | 99   | 10    |
| >FBXW7-H46 HTLYGHTSTV | 12    | >FBXW7-H46 HTLYGRTSTV | 26   | 14    |
| >FBXW7-H46 HTLYGHTSTV | 26    | >FBXW7-H46 HTLYGRTSTV | 58   | 32    |
| >FBXW7-H46 HTLYGHTSTV | 268   | >FBXW7-H46 HTLYGRTSTV | 411  | 143   |
| >FBXW7-H46 HTLYGHTSTV | 344   | >FBXW7-H46 HTLYGRTSTV | 407  | 63    |
| >FBXW7-H46 CIHTLYGH   | 9598  | >FBXW7-H46 CIHTLYGR   | 88   | 9510  |
| >FBXW7-H46 CIHTLYGH   | 15823 | >FBXW7-H46 CIHTLYGR   | 115  | 15708 |
| >FBXW7-H46 CIHTLYGH   | 13973 | >FBXW7-H46 CIHTLYGR   | 43   | 13930 |
| >FBXW7-H46 ECIHTLYGH  | 105   | >FBXW7-H46 ECIHTLYGR  | 1830 | 1725  |
| >FBXW7-H46 ECIHTLYGH  | 27083 | >FBXW7-H46 ECIHTLYGR  | 349  | 26734 |
| >FBXW7-H46 ECIHTLYGH  | 18111 | >FBXW7-H46 ECIHTLYGR  | 92   | 18019 |
| >FBXW7-H46 ECIHTLYGH  | 22149 | >FBXW7-H46 ECIHTLYGR  | 134  | 22015 |
| >FBXW7-H46 GECIHTLYGH | 16773 | >FBXW7-H46 GECIHTLYGR | 476  | 16297 |
| >FBXW7-H46 GECIHTLYGH | 256   | >FBXW7-H46 GECIHTLYGR | 250  | 6     |
| >FBXW7-H47 HTSTVR CMH | 178   | >FBXW7-H47 HTSTVR CMH | 4167 | 3989  |
| >FBXW7-H47 HTSTVR CMH | 193   | >FBXW7-H47 HTSTVR CMH | 6931 | 6738  |
| >FBXW7-H47 HLHEKR VV  | 84    | >FBXW7-H47 HLPEKR VV  | 176  | 92    |
| >FBXW7-H47 HLHEKR VV  | 15    | >FBXW7-H47 HLPEKR VV  | 32   | 17    |
| >FBXW7-H47 HLHEKR VV  | 82    | >FBXW7-H47 HLPEKR VV  | 167  | 85    |
| >FBXW7-H47 HLHEKR VV  | 130   | >FBXW7-H47 HLPEKR VV  | 99   | 31    |
| >FBXW7-H47 HLHEKR VV  | 7     | >FBXW7-H47 HLPEKR VV  | 9    | 2     |
| >FBXW7-H47 CMHLHEKR V | 427   | >FBXW7-H47 CMHLPEKR V | 2302 | 1875  |
| >FBXW7-H47 CMHLHEKR V | 260   | >FBXW7-H47 CMHLPEKR V | 120  | 140   |
| >FBXW7-H47 CMHLHEKR V | 348   | >FBXW7-H47 CMHLPEKR V | 183  | 165   |
| >FBXW7-H47 CMHLHEKR V | 70    | >FBXW7-H47 CMHLPEKR V | 63   | 7     |
| >FBXW7-H47 CMHLHEKR V | 179   | >FBXW7-H47 CMHLPEKR V | 121  | 58    |
| >FBXW7-H47 CMHLHEKR   | 87    | >FBXW7-H47 CMHLPEKR   | 289  | 202   |

|                      |      |                       |       |       |
|----------------------|------|-----------------------|-------|-------|
| >FBXW7-H47CMHLHEKR   | 101  | >FBXW7-H47CMHLPEKR    | 174   | 73    |
| >FBXW7-H47RCMHLHEK   | 71   | >FBXW7-H47RCMHLPEK    | 61    | 10    |
| >FBXW7-H47RCMHLHEK   | 369  | >FBXW7-H47RCMHLPEK    | 1745  | 1376  |
| >FBXW7-H47RCMHLHEKR  | 40   | >FBXW7-H47RCMHLPEKR   | 229   | 189   |
| >FBXW7-H47RCMHLHEKR  | 46   | >FBXW7-H47RCMHLPEKR   | 43    | 3     |
| >FBXW7-H47VRCMHLHEK  | 418  | >FBXW7-H47VRCMHLPEKI  | 1006  | 588   |
| >FBXW7-H47VRCMHLHEK  | 677  | >FBXW7-H47VRCMHLPEKI  | 412   | 265   |
| >FBXW7-H47TVRCMHLHE  | 127  | >FBXW7-H47TVRCMHLPEI  | 146   | 19    |
| >FBXW7-H47TVRCMHLHE  | 113  | >FBXW7-H47TVRCMHLPEI  | 87    | 26    |
| >FBXW7-H47TVRCMHLHE  | 333  | >FBXW7-H47TVRCMHLPE   | 146   | 187   |
| >FBXW7-H47TVRCMHLHE  | 5    | >FBXW7-H47TVRCMHLPEI  | 4     | 1     |
| >FBXW7-H47TVRCMHLHE  | 377  | >FBXW7-H47TVRCMHLPEI  | 568   | 191   |
| >FBXW7-H47TVRCMHLHE  | 476  | >FBXW7-H47TVRCMHLPEI  | 2165  | 1689  |
| >FBXW7-H47TVRCMHLHE  | 21   | >FBXW7-H47TVRCMHLPEI  | 54    | 33    |
| >FBXW7-H47TVRCMHLHE  | 95   | >FBXW7-H47TVRCMHLPEI  | 190   | 95    |
| >FBXW7-H47TVRCMHLHE  | 165  | >FBXW7-H47TVRCMHLPEI  | 215   | 50    |
| >FBXW7-H47TVRCMHLHE  | 48   | >FBXW7-H47TVRCMHLPEI  | 81    | 33    |
| >FBXW7-H47STVRCMHLHI | 469  | >FBXW7-H47STVRCMHLPEI | 373   | 96    |
| >FBXW7-H47STVRCMHLH  | 216  | >FBXW7-H47STVRCMHLP   | 12683 | 12467 |
| >FBXW7-H47STVRCMHLHI | 12   | >FBXW7-H47STVRCMHLPEI | 14    | 2     |
| >FBXW7-H47STVRCMHLH  | 24   | >FBXW7-H47STVRCMHLP   | 2129  | 2105  |
| >FBXW7-H47STVRCMHLHI | 311  | >FBXW7-H47STVRCMHLPEI | 343   | 32    |
| >FBXW7-H47STVRCMHLHI | 123  | >FBXW7-H47STVRCMHLPEI | 54    | 69    |
| >FBXW7-H47STVRCMHLHI | 78   | >FBXW7-H47STVRCMHLPEI | 228   | 150   |
| >FBXW7-H47STVRCMHLHI | 22   | >FBXW7-H47STVRCMHLPEI | 41    | 19    |
| >FBXW7-H47STVRCMHLH  | 32   | >FBXW7-H47STVRCMHLP   | 1800  | 1768  |
| >FBXW7-H47STVRCMHLH  | 109  | >FBXW7-H47STVRCMHLP   | 1107  | 998   |
| >FBXW7-H47STVRCMHLHI | 53   | >FBXW7-H47STVRCMHLPEI | 67    | 14    |
| >FBXW7-H54HTNRVYSL   | 7181 | >FBXW7-H54YTNRVYSL    | 312   | 6869  |
| >FBXW7-H54HTNRVYSL   | 320  | >FBXW7-H54YTNRVYSL    | 32    | 288   |
| >FBXW7-H54HTNRVYSL   | 1461 | >FBXW7-H54YTNRVYSL    | 80    | 1381  |
| >FBXW7-H54HTNRVYSL   | 3881 | >FBXW7-H54YTNRVYSL    | 146   | 3735  |
| >FBXW7-H54HTNRVYSL   | 1640 | >FBXW7-H54YTNRVYSL    | 32    | 1608  |
| >FBXW7-H54HTNRVYSL   | 4513 | >FBXW7-H54YTNRVYSL    | 492   | 4021  |
| >FBXW7-H54HTNRVYSL   | 6385 | >FBXW7-H54YTNRVYSL    | 295   | 6090  |
| >FBXW7-H54HTNRVYSLQF | 596  | >FBXW7-H54YTNRVYSLQF  | 151   | 445   |
| >FBXW7-H54HTNRVYSLQF | 518  | >FBXW7-H54YTNRVYSLQF  | 219   | 299   |
| >FBXW7-H54HTNRVYSL   | 208  | >FBXW7-H54YTNRVYSL    | 3530  | 3322  |
| >FBXW7-H54HTNRVYSLQ  | 439  | >FBXW7-H54YTNRVYSLQ   | 4113  | 3674  |
| >FBXW7-H54HTNRVYSL   | 105  | >FBXW7-H54YTNRVYSL    | 246   | 141   |
| >FBXW7-H54HTNRVYSLQF | 199  | >FBXW7-H54YTNRVYSLQF  | 538   | 339   |
| >FBXW7-H54HTNRVYSLQ  | 114  | >FBXW7-H54YTNRVYSLQ   | 76    | 38    |
| >FBXW7-H54HTNRVYSL   | 16   | >FBXW7-H54YTNRVYSL    | 28    | 12    |

|                      |       |                      |       |       |
|----------------------|-------|----------------------|-------|-------|
| >FBXW7-H54HTNRVYSL   | 361   | >FBXW7-H54YTNRVYSL   | 164   | 197   |
| >FBXW7-H54HTNRVYSLQF | 257   | >FBXW7-H54YTNRVYSLQF | 80    | 177   |
| >FBXW7-H54HTNRVYSLQF | 159   | >FBXW7-H54YTNRVYSLQF | 35    | 124   |
| >FBXW7-H54HTNRVYSL   | 173   | >FBXW7-H54YTNRVYSL   | 65    | 108   |
| >FBXW7-H54HTNRVYSLQF | 10    | >FBXW7-H54YTNRVYSLQF | 5     | 5     |
| >FBXW7-H54HTNRVYSLQF | 166   | >FBXW7-H54YTNRVYSLQF | 602   | 436   |
| >FBXW7-H54HTNRVYSL   | 276   | >FBXW7-H54YTNRVYSL   | 196   | 80    |
| >FBXW7-H54HTNRVYSLQF | 14    | >FBXW7-H54YTNRVYSLQF | 14    | 0     |
| >FBXW7-H54HTNRVYSLQF | 2940  | >FBXW7-H54YTNRVYSLQF | 215   | 2725  |
| >FBXW7-H54HTNRVYSLQ  | 140   | >FBXW7-H54YTNRVYSLQ  | 18    | 122   |
| >FBXW7-H54HTNRVYSLQF | 74    | >FBXW7-H54YTNRVYSLQF | 21    | 53    |
| >FBXW7-H54HTNRVYSLQF | 328   | >FBXW7-H54YTNRVYSLQF | 229   | 99    |
| >FBXW7-H54GHTNRVYSLC | 4458  | >FBXW7-H54GYTNRVYSLC | 69    | 4389  |
| >FBXW7-H54GHTNRVYSLC | 6837  | >FBXW7-H54GYTNRVYSLC | 213   | 6624  |
| >FBXW7-H54GHTNRVYSL  | 15654 | >FBXW7-H54GYTNRVYSL  | 17    | 15637 |
| >FBXW7-H54GHTNRVYSLC | 3374  | >FBXW7-H54GYTNRVYSLC | 7     | 3367  |
| >FBXW7-H54GHTNRVYSLC | 400   | >FBXW7-H54GYTNRVYSLC | 3060  | 2660  |
| >FBXW7-H54GHTNRVYSL  | 381   | >FBXW7-H54GYTNRVYSL  | 10882 | 10501 |
| >FBXW7-H54TETCLHTLQG | 2149  | >FBXW7-H54TETCLHTLQG | 58    | 2091  |
| >FBXW7-H54TETCLHTLQG | 1258  | >FBXW7-H54TETCLHTLQG | 108   | 1150  |
| >FBXW7-H54TETCLHTLQG | 2883  | >FBXW7-H54TETCLHTLQG | 133   | 2750  |
| >FBXW7-H54QGHTNRVY   | 731   | >FBXW7-H54QGYTNRVY   | 476   | 255   |
| >FBXW7-H54QGHTNRVY   | 1550  | >FBXW7-H54QGYTNRVY   | 492   | 1058  |
| >FBXW7-H54QGHTNRVY   | 1748  | >FBXW7-H54QGYTNRVY   | 463   | 1285  |
| >FBXW7-H54LQGHTNRVY: | 430   | >FBXW7-H54LQGYTNRVY: | 413   | 17    |
| >FBXW7-H54LQGHTNRV   | 290   | >FBXW7-H54LQGYTNRV   | 279   | 11    |
| >FBXW7-H54LQGHTNRVY: | 309   | >FBXW7-H54LQGYTNRVY: | 382   | 73    |
| >FBXW7-H54LQGHTNRVY  | 299   | >FBXW7-H54LQGYTNRVY  | 195   | 104   |
| >FBXW7-H54LQGHTNRVY  | 36    | >FBXW7-H54LQGYTNRVY  | 36    | 0     |
| >FBXW7-H54LQGHTNRVY: | 88    | >FBXW7-H54LQGYTNRVY: | 84    | 4     |
| >FBXW7-H54LQGHTNRVY  | 238   | >FBXW7-H54LQGYTNRVY  | 267   | 29    |
| >FBXW7-H54LQGHTNRVY  | 15    | >FBXW7-H54LQGYTNRVY  | 14    | 1     |
| >FBXW7-H54LQGHTNRVY: | 41    | >FBXW7-H54LQGYTNRVY: | 50    | 9     |
| >FBXW7-H54TLQGHTNRV  | 96    | >FBXW7-H54TLQGYTNRV  | 28    | 68    |
| >FBXW7-H54TLQGHTNRV  | 12    | >FBXW7-H54TLQGYTNRV  | 7     | 5     |
| >FBXW7-H54TLQGHTNRV  | 10    | >FBXW7-H54TLQGYTNRV  | 14    | 4     |
| >FBXW7-H54TLQGHTNRV  | 12    | >FBXW7-H54TLQGYTNRV  | 6     | 6     |
| >FBXW7-H54TLQGHTNRV  | 24    | >FBXW7-H54TLQGYTNRV  | 13    | 11    |
| >FBXW7-H54TLQGHTNRV  | 138   | >FBXW7-H54TLQGYTNRV  | 50    | 88    |
| >FBXW7-H54TLQGHTNRV  | 32    | >FBXW7-H54TLQGYTNRV  | 10    | 22    |
| >FBXW7-H54TLQGHTNRV  | 2     | >FBXW7-H54TLQGYTNRV  | 2     | 0     |
| >FBXW7-H54TLQGHTNRV' | 1055  | >FBXW7-H54TLQGYTNRV' | 141   | 914   |
| >FBXW7-H54TLQGHTNRV' | 212   | >FBXW7-H54TLQGYTNRV' | 74    | 138   |

|                      |       |                      |       |       |
|----------------------|-------|----------------------|-------|-------|
| >FBXW7-H54TLQGHTNR   | 67    | >FBXW7-H54TLQGYTNR   | 53    | 14    |
| >FBXW7-H54TLQGHTNR   | 369   | >FBXW7-H54TLQGYTNR   | 232   | 137   |
| >FBXW7-H54TLQGHTNR   | 275   | >FBXW7-H54TLQGYTNR   | 207   | 68    |
| >FBXW7-H54TLQGHTNRV  | 647   | >FBXW7-H54TLQGYTNRV  | 257   | 390   |
| >FBXW7-H54TLQGHTNRV\ | 94    | >FBXW7-H54TLQGYTNRV\ | 104   | 10    |
| >FBXW7-H54TLQGHTNRV\ | 40    | >FBXW7-H54TLQGYTNRV\ | 50    | 10    |
| >FBXW7-H54TLQGHTNR   | 458   | >FBXW7-H54TLQGYTNR   | 425   | 33    |
| >FBXW7-H54HTLQGHTNR\ | 202   | >FBXW7-H54HTLQGYTNR\ | 137   | 65    |
| >FBXW7-H54HTLQGHTNR\ | 924   | >FBXW7-H54HTLQGYTNR\ | 380   | 544   |
| >FBXW7-H54HTLQGHTNR\ | 151   | >FBXW7-H54HTLQGYTNR\ | 98    | 53    |
| >FBXW7-H54HTLQGHTNR\ | 200   | >FBXW7-H54HTLQGYTNR\ | 122   | 78    |
| >FBXW7-H54HTLQGHTNR\ | 84    | >FBXW7-H54HTLQGYTNR\ | 89    | 5     |
| >FBXW7-H54HTLQGHTNR\ | 20    | >FBXW7-H54HTLQGYTNR\ | 28    | 8     |
| >FBXW7-H54HTLQGHTNR\ | 162   | >FBXW7-H54HTLQGYTNR\ | 200   | 38    |
| >FBXW7-H54HTLQGHTNR\ | 158   | >FBXW7-H54HTLQGYTNR\ | 169   | 11    |
| >FBXW7-H54HTLQGHTNR  | 15    | >FBXW7-H54HTLQGYTNR  | 16    | 1     |
| >FBXW7-H54HTLQGHTNR  | 21    | >FBXW7-H54HTLQGYTNR  | 26    | 5     |
| >FBXW7-H54HTLQGHTNR  | 26    | >FBXW7-H54HTLQGYTNR  | 38    | 12    |
| >FBXW7-H54HTLQGHTNR\ | 1090  | >FBXW7-H54HTLQGYTNR\ | 390   | 700   |
| >FBXW7-H54HTLQGHTNR\ | 10    | >FBXW7-H54HTLQGYTNR\ | 9     | 1     |
| >FBXW7-H54HTLQGHTNR\ | 226   | >FBXW7-H54HTLQGYTNR\ | 277   | 51    |
| >FBXW7-H54HTLQGHTNR\ | 209   | >FBXW7-H54HTLQGYTNR\ | 275   | 66    |
| >FBXW7-H54HTLQGHTNR\ | 276   | >FBXW7-H54HTLQGYTNR\ | 227   | 49    |
| >FBXW7-H54HTLQGHTNR\ | 173   | >FBXW7-H54HTLQGYTNR\ | 251   | 78    |
| >FBXW7-H54HTLQGHTNR\ | 5     | >FBXW7-H54HTLQGYTNR\ | 6     | 1     |
| >FBXW7-H54HTLQGHTNR\ | 483   | >FBXW7-H54HTLQGYTNR\ | 471   | 12    |
| >FBXW7-H54HTLQGHTNR\ | 12    | >FBXW7-H54HTLQGYTNR\ | 14    | 2     |
| >FBXW7-H54HTLQGHTNR  | 94    | >FBXW7-H54HTLQGYTNR  | 91    | 3     |
| >FBXW7-H54CLHTLQGH   | 14889 | >FBXW7-H54CLHTLQGY   | 341   | 14548 |
| >FBXW7-H54CLHTLQGH   | 12761 | >FBXW7-H54CLHTLQGY   | 176   | 12585 |
| >FBXW7-H54CLHTLQGH\  | 99    | >FBXW7-H54CLHTLQGY\  | 85    | 14    |
| >FBXW7-H54CLHTLQGH   | 16905 | >FBXW7-H54CLHTLQGY   | 242   | 16663 |
| >FBXW7-H54CLHTLQGH   | 20687 | >FBXW7-H54CLHTLQGY   | 468   | 20219 |
| >FBXW7-H54CLHTLQGH\  | 120   | >FBXW7-H54CLHTLQGY\  | 96    | 24    |
| >FBXW7-H54TCLHTLQGH  | 15067 | >FBXW7-H54TCLHTLQGY  | 257   | 14810 |
| >FBXW7-H54ETCLHTLQGH | 20653 | >FBXW7-H54ETCLHTLQGY | 171   | 20482 |
| >FBXW7-H54ETCLHTLQGH | 1470  | >FBXW7-H54ETCLHTLQGY | 73    | 1397  |
| >FBXW7-H54ETCLHTLQGH | 10189 | >FBXW7-H54ETCLHTLQGY | 450   | 9739  |
| >FBXW7-H54ETCLHTLQGH | 84    | >FBXW7-H54ETCLHTLQGY | 4     | 80    |
| >FBXW7-H54ETCLHTLQGH | 567   | >FBXW7-H54ETCLHTLQGY | 13    | 554   |
| >FBXW7-H54ETCLHTLQGH | 4437  | >FBXW7-H54ETCLHTLQGY | 18    | 4419  |
| >FBXW7-I56:HVVSGLDTS | 393   | >FBXW7-I56:HVVSGLDTS | 4526  | 4133  |
| >FBXW7-I56:HVVSGLDTS | 351   | >FBXW7-I56:HVVSGLDTS | 16746 | 16395 |

|                        |      |                         |       |       |
|------------------------|------|-------------------------|-------|-------|
| >FBXW7-I56:HVVSGSLDTS  | 84   | >FBXW7-I56:HVVSGSLDTS   | 2314  | 2230  |
| >FBXW7-I56:TSIRVWDV    | 42   | >FBXW7-I56:TSTRVWDV     | 115   | 73    |
| >FBXW7-I56:DTSIRVWDV   | 169  | >FBXW7-I56:DTSTRVWDV    | 84    | 85    |
| >FBXW7-I56:DTSIRVWDV   | 296  | >FBXW7-I56:DTSTRVWDV    | 366   | 70    |
| >FBXW7-I56:LDSIRVW     | 433  | >FBXW7-I56:LDTSTRVW     | 609   | 176   |
| >FBXW7-I56:LDSIRVWDV   | 176  | >FBXW7-I56:LDTSTRVWDV   | 94    | 82    |
| >FBXW7-I56:SLDTSIRV    | 23   | >FBXW7-I56:SLDTSTRV     | 44    | 21    |
| >FBXW7-I56:SLDTSIRVWD  | 36   | >FBXW7-I56:SLDTSTRVWI   | 49    | 13    |
| >FBXW7-I56:SLDTSIRV    | 81   | >FBXW7-I56:SLDTSTRV     | 43    | 38    |
| >FBXW7-I56:SLDTSIRVWD  | 75   | >FBXW7-I56:SLDTSTRVWI   | 76    | 1     |
| >FBXW7-I56:SLDTSIRV    | 95   | >FBXW7-I56:SLDTSTRV     | 42    | 53    |
| >FBXW7-I56:SLDTSIRVWD  | 63   | >FBXW7-I56:SLDTSTRVWI   | 73    | 10    |
| >FBXW7-I56:SLDTSIRV    | 213  | >FBXW7-I56:SLDTSTRV     | 334   | 121   |
| >FBXW7-I56:SLDTSIRVWD  | 73   | >FBXW7-I56:SLDTSTRVWI   | 109   | 36    |
| >FBXW7-I56:SLDTSIRV    | 3    | >FBXW7-I56:SLDTSTRV     | 4     | 1     |
| >FBXW7-I56:SLDTSIRVWD  | 3    | >FBXW7-I56:SLDTSTRVWI   | 4     | 1     |
| >FBXW7-I56:SLDTSIRV    | 6    | >FBXW7-I56:SLDTSTRV     | 10    | 4     |
| >FBXW7-I56:SLDTSIRVWD  | 6    | >FBXW7-I56:SLDTSTRVWI   | 7     | 1     |
| >FBXW7-I56:SLDTSIRV    | 5    | >FBXW7-I56:SLDTSTRV     | 6     | 1     |
| >FBXW7-I56:SLDTSIRVWD  | 5    | >FBXW7-I56:SLDTSTRVWI   | 6     | 1     |
| >FBXW7-I56:SLDTSIRV    | 17   | >FBXW7-I56:SLDTSTRV     | 22    | 5     |
| >FBXW7-I56:SLDTSIRVWD  | 22   | >FBXW7-I56:SLDTSTRVWI   | 21    | 1     |
| >FBXW7-I56:SLDTSIRV    | 2    | >FBXW7-I56:SLDTSTRV     | 3     | 1     |
| >FBXW7-I56:SLDTSIRVWD  | 2    | >FBXW7-I56:SLDTSTRVWI   | 3     | 1     |
| >FBXW7-I56:GSLDTSIRV   | 179  | >FBXW7-I56:GSLDTSTRV    | 439   | 260   |
| >FBXW7-I56:GSLDTSIRV   | 302  | >FBXW7-I56:GSLDTSTRV    | 795   | 493   |
| >FBXW7-I56:GSLDTSIR    | 277  | >FBXW7-I56:GSLDTSTR     | 157   | 120   |
| >FBXW7-I56:GSLDTSIR    | 906  | >FBXW7-I56:GSLDTSTR     | 499   | 407   |
| >FBXW7-I56:GSLDTSIRV   | 304  | >FBXW7-I56:GSLDTSTRV    | 189   | 115   |
| >FBXW7-I56:GSLDTSIRVW  | 5    | >FBXW7-I56:GSLDTSTRVW   | 5     | 0     |
| >FBXW7-I56:GSLDTSIRVW  | 89   | >FBXW7-I56:GSLDTSTRVW   | 87    | 2     |
| >FBXW7-I56:GSLDTSIRVW  | 30   | >FBXW7-I56:GSLDTSTRVW   | 25    | 5     |
| >FBXW7-I56:GSLDTSIRV   | 378  | >FBXW7-I56:GSLDTSTRV    | 70    | 308   |
| >FBXW7-I56:GSLDTSIR    | 385  | >FBXW7-I56:GSLDTSTR     | 440   | 55    |
| >FBXW7-I56:SGSLDTSI    | 348  | >FBXW7-I56:SGSLDTST     | 33128 | 32780 |
| >FBXW7-I56:VSGSLDTSIR  | 355  | >FBXW7-I56:VSGSLDTSTR   | 178   | 177   |
| >FBXW7-I56:VSGSLDTSI   | 493  | >FBXW7-I56:VSGSLDTST    | 3923  | 3430  |
| >FBXW7-I56:VSGSLDTSIRV | 1335 | >FBXW7-I56:VSGSLDTSTRV  | 396   | 939   |
| >FBXW7-I56:VSGSLDTSI   | 44   | >FBXW7-I56:VSGSLDTST    | 28879 | 28835 |
| >FBXW7-I56:VVSGSLDTSI  | 322  | >FBXW7-I56:VVSGSLDTST   | 2674  | 2352  |
| >FBXW7-I56:VVSGSLDTSIF | 127  | >FBXW7-I56:VVSGSLDTSTIF | 83    | 44    |
| >FBXW7-I56:VVSGSLDTSI  | 355  | >FBXW7-I56:VVSGSLDTST   | 31450 | 31095 |
| >FBXW7-K11 KRRRTGGSL   | 63   | >FBXW7-K11 RRRRTGGSL    | 57    | 6     |

|                        |      |                        |      |      |
|------------------------|------|------------------------|------|------|
| >FBXW7-K11 KRRRTGGSLR  | 172  | >FBXW7-K11 RRRRTGGSLR  | 155  | 17   |
| >FBXW7-K11 KRRRTGGSLR  | 338  | >FBXW7-K11 RRRRTGGSLR  | 303  | 35   |
| >FBXW7-K11 KRRRTGGSLR  | 356  | >FBXW7-K11 RRRRTGGSLR  | 308  | 48   |
| >FBXW7-K11 KRRRTGGSL   | 177  | >FBXW7-K11 RRRRTGGSL   | 59   | 118  |
| >FBXW7-K11 KRRRTGGSL   | 89   | >FBXW7-K11 RRRRTGGSL   | 55   | 34   |
| >FBXW7-K11 KRRRTGGSLR  | 575  | >FBXW7-K11 RRRRTGGSLR  | 319  | 256  |
| >FBXW7-K11 KRRRTGGS    | 2198 | >FBXW7-K11 RRRRTGGS    | 436  | 1762 |
| >FBXW7-K11 KRRRTGGSL   | 199  | >FBXW7-K11 RRRRTGGSL   | 51   | 148  |
| >FBXW7-K11 KRRRTGGSLR  | 57   | >FBXW7-K11 RRRRTGGSLR  | 18   | 39   |
| >FBXW7-K11 KRRRTGGS    | 1477 | >FBXW7-K11 RRRRTGGS    | 380  | 1097 |
| >FBXW7-K11 KRRRTGGSL   | 38   | >FBXW7-K11 RRRRTGGSL   | 26   | 12   |
| >FBXW7-K11 KRRRTGGSLR  | 50   | >FBXW7-K11 RRRRTGGSLR  | 23   | 27   |
| >FBXW7-K11 KRRRTGGSLR  | 310  | >FBXW7-K11 RRRRTGGSLR  | 137  | 173  |
| >FBXW7-K11 KRRRTGGSL   | 91   | >FBXW7-K11 RRRRTGGSL   | 39   | 52   |
| >FBXW7-K11 KRRRTGGSLR  | 165  | >FBXW7-K11 RRRRTGGSLR  | 48   | 117  |
| >FBXW7-K11 SKRRRTGGSL  | 110  | >FBXW7-K11 SRRRTGGSL   | 761  | 651  |
| >FBXW7-K11 SKRRRTGGSL  | 3248 | >FBXW7-K11 SRRRTGGSL   | 38   | 3210 |
| >FBXW7-K11 SKRRRTGGSL  | 1435 | >FBXW7-K11 SRRRTGGSL   | 69   | 1366 |
| >FBXW7-K11 SKRRRTGGSL  | 1865 | >FBXW7-K11 SRRRTGGSL   | 48   | 1817 |
| >FBXW7-K11 SKRRRTGGSL  | 3184 | >FBXW7-K11 SRRRTGGSL   | 394  | 2790 |
| >FBXW7-K11 MNQELLSVG   | 1385 | >FBXW7-K11 MNQELLSVG   | 354  | 1031 |
| >FBXW7-K11 GSKRRRTG    | 967  | >FBXW7-K11 GSRRRTG     | 132  | 835  |
| >FBXW7-K11 GSKRRRTGG   | 2197 | >FBXW7-K11 GSRRRTGG    | 382  | 1815 |
| >FBXW7-K11 GSKRRRTGG   | 227  | >FBXW7-K11 GSRRRTGG    | 36   | 191  |
| >FBXW7-K11 GSKRRRTGG   | 4691 | >FBXW7-K11 GSRRRTGG    | 160  | 4531 |
| >FBXW7-K11 GSKRRRTGG   | 933  | >FBXW7-K11 GSRRRTGG    | 106  | 827  |
| >FBXW7-K11 GSKRRRTGG   | 184  | >FBXW7-K11 GSRRRTGG    | 55   | 129  |
| >FBXW7-K11 SVGSKRRR    | 124  | >FBXW7-K11 SVGSRRR     | 82   | 42   |
| >FBXW7-K11 SVGSKRRR    | 750  | >FBXW7-K11 SVGSRRR     | 433  | 317  |
| >FBXW7-K11 LSVGSKRRR   | 461  | >FBXW7-K11 LSVGSR      | 278  | 183  |
| >FBXW7-K11 LSVGSKRR    | 240  | >FBXW7-K11 LSVGSR      | 175  | 65   |
| >FBXW7-K11 LSVGSKRRR   | 343  | >FBXW7-K11 LSVGSR      | 162  | 181  |
| >FBXW7-K11 LLSVGSKR    | 525  | >FBXW7-K11 LLSVGSRR    | 455  | 70   |
| >FBXW7-K11 LLSVGSKRRR  | 76   | >FBXW7-K11 LLSVGSRRR   | 35   | 41   |
| >FBXW7-K11 ELLSVGSK    | 364  | >FBXW7-K11 ELLSVGSR    | 7472 | 7108 |
| >FBXW7-K11 ELLSVGSK    | 2049 | >FBXW7-K11 ELLSVGSR    | 66   | 1983 |
| >FBXW7-K11 ELLSVGSKR   | 87   | >FBXW7-K11 ELLSVGSRR   | 69   | 18   |
| >FBXW7-K11 ELLSVGSKRRI | 184  | >FBXW7-K11 ELLSVGSRRRI | 99   | 85   |
| >FBXW7-K11 ELLSVGSK    | 137  | >FBXW7-K11 ELLSVGSR    | 40   | 97   |
| >FBXW7-K11 ELLSVGSKR   | 27   | >FBXW7-K11 ELLSVGSRR   | 27   | 0    |
| >FBXW7-K11 ELLSVGSKRRI | 92   | >FBXW7-K11 ELLSVGSRRRI | 64   | 28   |
| >FBXW7-L59·LVSGNADSTV  | 1532 | >FBXW7-L59·FVSGNADSTV  | 160  | 1372 |
| >FBXW7-L59·LVSGNADSTV  | 93   | >FBXW7-L59·FVSGNADSTV  | 26   | 67   |

|                        |      |                        |       |       |
|------------------------|------|------------------------|-------|-------|
| >FBXW7-L59.LVSGNADSTV  | 70   | >FBXW7-L59.FVSGNADSTV  | 22    | 48    |
| >FBXW7-L59.LVSGNADSTV  | 263  | >FBXW7-L59.FVSGNADSTV  | 55    | 208   |
| >FBXW7-L59.LVSGNADSTV  | 147  | >FBXW7-L59.FVSGNADSTV  | 19    | 128   |
| >FBXW7-L59.LVSGNADSTV  | 338  | >FBXW7-L59.FVSGNADSTV  | 24    | 314   |
| >FBXW7-L59.LVSGNADSTV  | 307  | >FBXW7-L59.FVSGNADSTV  | 31    | 276   |
| >FBXW7-L59.LVSGNADSTV  | 261  | >FBXW7-L59.FVSGNADSTV  | 39    | 222   |
| >FBXW7-L59.LVSGNADSTV  | 6    | >FBXW7-L59.FVSGNADSTV  | 3     | 3     |
| >FBXW7-L59.LVSGNADSTV  | 166  | >FBXW7-L59.FVSGNADSTV  | 295   | 129   |
| >FBXW7-L59.LVSGNADSTV  | 147  | >FBXW7-L59.FVSGNADSTV  | 34    | 113   |
| >FBXW7-L59.LVSGNADSTV  | 692  | >FBXW7-L59.FVSGNADSTV  | 196   | 496   |
| >FBXW7-L59.LVSGNADSTV  | 2785 | >FBXW7-L59.FVSGNADSTV  | 315   | 2470  |
| >FBXW7-L59.ILVSGNADSTV | 93   | >FBXW7-L59.IFVSGNADSTV | 14575 | 14482 |
| >FBXW7-L59.ILVSGNADSTV | 276  | >FBXW7-L59.IFVSGNADSTV | 16985 | 16709 |
| >FBXW7-L59.ILVSGNADSTV | 34   | >FBXW7-L59.IFVSGNADSTV | 2467  | 2433  |
| >FBXW7-L59.ILVSGNADSTV | 7    | >FBXW7-L59.IFVSGNADSTV | 5989  | 5982  |
| >FBXW7-L59.ILVSGNADSTV | 40   | >FBXW7-L59.IFVSGNADSTV | 4131  | 4091  |
| >FBXW7-L59.ILVSGNADSTV | 5    | >FBXW7-L59.IFVSGNADSTV | 3386  | 3381  |
| >FBXW7-L59.ILVSGNADSTV | 8    | >FBXW7-L59.IFVSGNADSTV | 8609  | 8601  |
| >FBXW7-L59.ILVSGNADSTV | 11   | >FBXW7-L59.IFVSGNADSTV | 6017  | 6006  |
| >FBXW7-L59.ILVSGNADSTV | 11   | >FBXW7-L59.IFVSGNADSTV | 10995 | 10984 |
| >FBXW7-L59.ILVSGNADSTV | 190  | >FBXW7-L59.IFVSGNADSTV | 30117 | 29927 |
| >FBXW7-L59.ILVSGNADSTV | 2    | >FBXW7-L59.IFVSGNADSTV | 894   | 892   |
| >FBXW7-L59.NILVSGNA    | 5820 | >FBXW7-L59.NIFVSGNA    | 308   | 5512  |
| >FBXW7-L59.ELKDNILV    | 394  | >FBXW7-L59.ELKDNIFV    | 145   | 249   |
| >FBXW7-L59.ELKDNILV    | 104  | >FBXW7-L59.ELKDNIFV    | 78    | 26    |
| >FBXW7-L59.ELKDNILV    | 74   | >FBXW7-L59.ELKDNIFV    | 24    | 50    |
| >FBXW7-L59.ELKDNILV    | 132  | >FBXW7-L59.ELKDNIFV    | 30    | 102   |
| >FBXW7-L59.ELKDNILV    | 440  | >FBXW7-L59.ELKDNIFV    | 77    | 363   |
| >FBXW7-L59.ELKDNILV    | 152  | >FBXW7-L59.ELKDNIFV    | 21    | 131   |
| >FBXW7-L59.ELKDNILV    | 5    | >FBXW7-L59.ELKDNIFV    | 4     | 1     |
| >FBXW7-L59.ELKDNILV    | 548  | >FBXW7-L59.ELKDNIFV    | 132   | 416   |
| >FBXW7-L59.ELKDNILV    | 304  | >FBXW7-L59.ELKDNIFV    | 120   | 184   |
| >FBXW7-L59.MELKDNIL    | 21   | >FBXW7-L59.MELKDNIF    | 103   | 82    |
| >FBXW7-L59.MELKDNILV   | 408  | >FBXW7-L59.MELKDNIFV   | 131   | 277   |
| >FBXW7-L59.MELKDNILV   | 797  | >FBXW7-L59.MELKDNIFV   | 213   | 584   |
| >FBXW7-L59.MELKDNIL    | 1422 | >FBXW7-L59.MELKDNIF    | 57    | 1365  |
| >FBXW7-L59.MELKDNIL    | 583  | >FBXW7-L59.MELKDNIF    | 45    | 538   |
| >FBXW7-L59.MELKDNIL    | 23   | >FBXW7-L59.MELKDNIF    | 249   | 226   |
| >FBXW7-L59.MELKDNILV   | 62   | >FBXW7-L59.MELKDNIFV   | 60    | 2     |
| >FBXW7-L59.MELKDNIL    | 152  | >FBXW7-L59.MELKDNIF    | 497   | 345   |
| >FBXW7-L59.MELKDNILV   | 708  | >FBXW7-L59.MELKDNIFV   | 301   | 407   |
| >FBXW7-L59.MELKDNIL    | 496  | >FBXW7-L59.MELKDNIF    | 77    | 419   |
| >FBXW7-L59.MELKDNILV   | 527  | >FBXW7-L59.MELKDNIFV   | 314   | 213   |



|                        |       |                        |       |       |
|------------------------|-------|------------------------|-------|-------|
| >FBXW7-L59.MELKDNILV   | 136   | >FBXW7-L59.MELKDNIFV   | 67    | 69    |
| >FBXW7-L59.MELKDNILVS  | 1073  | >FBXW7-L59.MELKDNIFVS  | 442   | 631   |
| >FBXW7-L59.MELKDNIL    | 312   | >FBXW7-L59.MELKDNIF    | 1318  | 1006  |
| >FBXW7-L59.MELKDNILV   | 21    | >FBXW7-L59.MELKDNIFV   | 54    | 33    |
| >FBXW7-L59.GMELKDNILV  | 507   | >FBXW7-L59.GMELKDNIFV  | 176   | 331   |
| >FBXW7-L59.GMELKDNILV  | 387   | >FBXW7-L59.GMELKDNIFV  | 258   | 129   |
| >FBXW7-L59.GMELKDNILV  | 498   | >FBXW7-L59.GMELKDNIFV  | 176   | 322   |
| >FBXW7-L59.GMELKDNILV  | 44    | >FBXW7-L59.GMELKDNIFV  | 16    | 28    |
| >FBXW7-L59.GMELKDNILV  | 255   | >FBXW7-L59.GMELKDNIFV  | 68    | 187   |
| >FBXW7-L59.GMELKDNILV  | 35    | >FBXW7-L59.GMELKDNIFV  | 32    | 3     |
| >FBXW7-L59.SGMELKDNIL  | 453   | >FBXW7-L59.SGMELKDNIF  | 141   | 312   |
| >FBXW7-L59.SGMELKDNIL  | 1106  | >FBXW7-L59.SGMELKDNIF  | 246   | 860   |
| >FBXW7-L59.SGMELKDNIL  | 600   | >FBXW7-L59.SGMELKDNIF  | 259   | 341   |
| >FBXW7-L59.SGMELKDNIL  | 1128  | >FBXW7-L59.SGMELKDNIF  | 488   | 640   |
| >FBXW7-P29.EPKDLLQAA   | 184   | >FBXW7-P29.ERKDLLQAA   | 30560 | 30376 |
| >FBXW7-P29.LALYVLSFLEP | 20053 | >FBXW7-P29.LALYVLSFLER | 33    | 20020 |
| >FBXW7-P29.LALYVLSFLEP | 30093 | >FBXW7-P29.LALYVLSFLER | 104   | 29989 |
| >FBXW7-P29.LALYVLSFLEP | 27623 | >FBXW7-P29.LALYVLSFLER | 44    | 27579 |
| >FBXW7-P29.LEPKDLLQA   | 606   | >FBXW7-P29.LERKDLLQA   | 223   | 383   |
| >FBXW7-P29.FLEPKDLL    | 443   | >FBXW7-P29.FLERKDLL    | 1224  | 781   |
| >FBXW7-P29.FLEPKDLLQA  | 193   | >FBXW7-P29.FLERKDLLQA  | 496   | 303   |
| >FBXW7-P29.FLEPKDLLQA, | 280   | >FBXW7-P29.FLERKDLLQA, | 824   | 544   |
| >FBXW7-P29.FLEPKDLL    | 11    | >FBXW7-P29.FLERKDLL    | 19    | 8     |
| >FBXW7-P29.FLEPKDLLQA  | 277   | >FBXW7-P29.FLERKDLLQA  | 489   | 212   |
| >FBXW7-P29.FLEPKDLLQA, | 26    | >FBXW7-P29.FLERKDLLQA, | 71    | 45    |
| >FBXW7-P29.FLEPKDLLQA  | 164   | >FBXW7-P29.FLERKDLLQA  | 173   | 9     |
| >FBXW7-P29.FLEPKDLLQA, | 49    | >FBXW7-P29.FLERKDLLQA, | 115   | 66    |
| >FBXW7-P29.FLEPKDLL    | 422   | >FBXW7-P29.FLERKDLL    | 1733  | 1311  |
| >FBXW7-P29.FLEPKDLLQA  | 141   | >FBXW7-P29.FLERKDLLQA  | 407   | 266   |
| >FBXW7-P29.FLEPKDLLQA, | 75    | >FBXW7-P29.FLERKDLLQA, | 323   | 248   |
| >FBXW7-P29.FLEPKDLL    | 125   | >FBXW7-P29.FLERKDLL    | 308   | 183   |
| >FBXW7-P29.FLEPKDLLQA  | 197   | >FBXW7-P29.FLERKDLLQA  | 355   | 158   |
| >FBXW7-P29.FLEPKDLLQA, | 91    | >FBXW7-P29.FLERKDLLQA, | 160   | 69    |
| >FBXW7-P29.FLEPKDLL    | 88    | >FBXW7-P29.FLERKDLL    | 190   | 102   |
| >FBXW7-P29.FLEPKDLLQA  | 397   | >FBXW7-P29.FLERKDLLQA  | 793   | 396   |
| >FBXW7-P29.FLEPKDLLQA, | 55    | >FBXW7-P29.FLERKDLLQA, | 107   | 52    |
| >FBXW7-P29.FLEPKDLL    | 314   | >FBXW7-P29.FLERKDLL    | 804   | 490   |
| >FBXW7-P29.FLEPKDLLQA  | 299   | >FBXW7-P29.FLERKDLLQA  | 783   | 484   |
| >FBXW7-P29.FLEPKDLLQA, | 396   | >FBXW7-P29.FLERKDLLQA, | 1006  | 610   |
| >FBXW7-P29.FLEPKDLL    | 7     | >FBXW7-P29.FLERKDLL    | 12    | 5     |
| >FBXW7-P29.FLEPKDLLQ   | 77    | >FBXW7-P29.FLERKDLLQ   | 262   | 185   |
| >FBXW7-P29.FLEPKDLLQA  | 5     | >FBXW7-P29.FLERKDLLQA  | 10    | 5     |
| >FBXW7-P29.FLEPKDLLQA, | 6     | >FBXW7-P29.FLERKDLLQA, | 11    | 5     |

|                        |       |                        |      |       |
|------------------------|-------|------------------------|------|-------|
| >FBXW7-P29 SFLEPKDL    | 489   | >FBXW7-P29 SFLEPKDL    | 547  | 58    |
| >FBXW7-P29 SFLEPKDLL   | 163   | >FBXW7-P29 SFLEPKDLL   | 296  | 133   |
| >FBXW7-P29 LSFLEPKDL   | 56    | >FBXW7-P29 LSFLEPKDL   | 157  | 101   |
| >FBXW7-P29 LSFLEPKDLL  | 139   | >FBXW7-P29 LSFLEPKDLL  | 273  | 134   |
| >FBXW7-P29 VLSFLEPKDL  | 25    | >FBXW7-P29 VLSFLEPKDL  | 33   | 8     |
| >FBXW7-P29 VLSFLEPKDLL | 127   | >FBXW7-P29 VLSFLEPKDLL | 399  | 272   |
| >FBXW7-P29 VLSFLEPKDLL | 106   | >FBXW7-P29 VLSFLEPKDLL | 465  | 359   |
| >FBXW7-P29 VLSFLEPKDLL | 469   | >FBXW7-P29 VLSFLEPKDLL | 2278 | 1809  |
| >FBXW7-P29 VLSFLEPKDL  | 89    | >FBXW7-P29 VLSFLEPKDL  | 188  | 99    |
| >FBXW7-P29 VLSFLEPKDLL | 28    | >FBXW7-P29 VLSFLEPKDLL | 65   | 37    |
| >FBXW7-P29 VLSFLEPK    | 160   | >FBXW7-P29 VLSFLEPK    | 185  | 25    |
| >FBXW7-P29 VLSFLEPK    | 54    | >FBXW7-P29 VLSFLEPK    | 178  | 124   |
| >FBXW7-P29 YVLSFLEPKDL | 465   | >FBXW7-P29 YVLSFLEPKDL | 805  | 340   |
| >FBXW7-P29 YVLSFLEPK   | 484   | >FBXW7-P29 YVLSFLEPK   | 5005 | 4521  |
| >FBXW7-P29 YVLSFLEPKDL | 425   | >FBXW7-P29 YVLSFLEPKDL | 489  | 64    |
| >FBXW7-P29 YVLSFLEPKDL | 182   | >FBXW7-P29 YVLSFLEPKDL | 505  | 323   |
| >FBXW7-P29 YVLSFLEPKDL | 242   | >FBXW7-P29 YVLSFLEPKDL | 194  | 48    |
| >FBXW7-P29 YVLSFLEPK   | 21137 | >FBXW7-P29 YVLSFLEPK   | 107  | 21030 |
| >FBXW7-P29 YVLSFLEPK   | 20    | >FBXW7-P29 YVLSFLEPK   | 32   | 12    |
| >FBXW7-P29 YVLSFLEPK   | 20403 | >FBXW7-P29 YVLSFLEPK   | 38   | 20365 |
| >FBXW7-P29 YVLSFLEPK   | 272   | >FBXW7-P29 YVLSFLEPK   | 1000 | 728   |
| >FBXW7-P29 YVLSFLEPK   | 30162 | >FBXW7-P29 YVLSFLEPK   | 109  | 30053 |
| >FBXW7-P29 YVLSFLEPK   | 22791 | >FBXW7-P29 YVLSFLEPK   | 15   | 22776 |
| >FBXW7-P29 YVLSFLEPK   | 27    | >FBXW7-P29 YVLSFLEPK   | 21   | 6     |
| >FBXW7-P29 YVLSFLEPKDL | 461   | >FBXW7-P29 YVLSFLEPKDL | 664  | 203   |
| >FBXW7-P29 YVLSFLEPK   | 33144 | >FBXW7-P29 YVLSFLEPK   | 116  | 33028 |
| >FBXW7-P29 LYVLSFLEPK  | 20417 | >FBXW7-P29 LYVLSFLEPK  | 146  | 20271 |
| >FBXW7-P29 LYVLSFLEPK  | 33504 | >FBXW7-P29 LYVLSFLEPK  | 163  | 33341 |
| >FBXW7-P29 LYVLSFLEPK  | 25353 | >FBXW7-P29 LYVLSFLEPK  | 22   | 25331 |
| >FBXW7-P29 LYVLSFLEPK  | 217   | >FBXW7-P29 LYVLSFLEPK  | 561  | 344   |
| >FBXW7-P29 ALYVLSFLEPK | 981   | >FBXW7-P29 ALYVLSFLEPK | 483  | 498   |
| >FBXW7-P29 ALYVLSFLEPK | 3312  | >FBXW7-P29 ALYVLSFLEPK | 69   | 3243  |
| >FBXW7-P29 ALYVLSFLEPK | 38    | >FBXW7-P29 ALYVLSFLEPK | 37   | 1     |
| >FBXW7-P29 ALYVLSFLEPK | 23759 | >FBXW7-P29 ALYVLSFLEPK | 55   | 23704 |
| >FBXW7-P29 ALYVLSFLEPK | 14    | >FBXW7-P29 ALYVLSFLEPK | 22   | 8     |
| >FBXW7-P29 ALYVLSFLEPK | 278   | >FBXW7-P29 ALYVLSFLEPK | 1086 | 808   |
| >FBXW7-P29 ALYVLSFLEPK | 14714 | >FBXW7-P29 ALYVLSFLEPK | 20   | 14694 |
| >FBXW7-P29 ALYVLSFLEPK | 111   | >FBXW7-P29 ALYVLSFLEPK | 282  | 171   |
| >FBXW7-P29 ALYVLSFLEPK | 23029 | >FBXW7-P29 ALYVLSFLEPK | 135  | 22894 |
| >FBXW7-P29 ALYVLSFLEPK | 33557 | >FBXW7-P29 ALYVLSFLEPK | 66   | 33491 |
| >FBXW7-P29 ALYVLSFLEPK | 29129 | >FBXW7-P29 ALYVLSFLEPK | 302  | 28827 |
| >FBXW7-P29 ALYVLSFLEPK | 12180 | >FBXW7-P29 ALYVLSFLEPK | 347  | 11833 |
| >FBXW7-P29 ALYVLSFLEPK | 34544 | >FBXW7-P29 ALYVLSFLEPK | 356  | 34188 |

|                        |     |                        |       |       |
|------------------------|-----|------------------------|-------|-------|
| >FBXW7-P29 EPKDLLQAA   | 184 | >FBXW7-P29 ESKDLLQAA   | 27692 | 27508 |
| >FBXW7-P29 LEPKDLLQA   | 606 | >FBXW7-P29 LESKDLLQA   | 494   | 112   |
| >FBXW7-P29 FLEPKDLL    | 443 | >FBXW7-P29 FLESKDLL    | 345   | 98    |
| >FBXW7-P29 FLEPKDLLQA  | 193 | >FBXW7-P29 FLESKDLLQA  | 214   | 21    |
| >FBXW7-P29 FLEPKDLLQA, | 280 | >FBXW7-P29 FLESKDLLQA, | 254   | 26    |
| >FBXW7-P29 FLEPKDLL    | 11  | >FBXW7-P29 FLESKDLL    | 8     | 3     |
| >FBXW7-P29 FLEPKDLLQA  | 277 | >FBXW7-P29 FLESKDLLQA  | 96    | 181   |
| >FBXW7-P29 FLEPKDLLQA, | 26  | >FBXW7-P29 FLESKDLLQA, | 23    | 3     |
| >FBXW7-P29 FLEPKDLLQA  | 164 | >FBXW7-P29 FLESKDLLQA  | 98    | 66    |
| >FBXW7-P29 FLEPKDLLQA, | 49  | >FBXW7-P29 FLESKDLLQA, | 47    | 2     |
| >FBXW7-P29 FLEPKDLL    | 422 | >FBXW7-P29 FLESKDLL    | 978   | 556   |
| >FBXW7-P29 FLEPKDLLQA  | 141 | >FBXW7-P29 FLESKDLLQA  | 201   | 60    |
| >FBXW7-P29 FLEPKDLLQA, | 75  | >FBXW7-P29 FLESKDLLQA, | 185   | 110   |
| >FBXW7-P29 FLEPKDLL    | 125 | >FBXW7-P29 FLESKDLL    | 178   | 53    |
| >FBXW7-P29 FLEPKDLLQA  | 197 | >FBXW7-P29 FLESKDLLQA  | 231   | 34    |
| >FBXW7-P29 FLEPKDLLQA, | 91  | >FBXW7-P29 FLESKDLLQA, | 103   | 12    |
| >FBXW7-P29 FLEPKDLL    | 88  | >FBXW7-P29 FLESKDLL    | 135   | 47    |
| >FBXW7-P29 FLEPKDLLQA  | 397 | >FBXW7-P29 FLESKDLLQA  | 636   | 239   |
| >FBXW7-P29 FLEPKDLLQA, | 55  | >FBXW7-P29 FLESKDLLQA, | 87    | 32    |
| >FBXW7-P29 FLEPKDLL    | 314 | >FBXW7-P29 FLESKDLL    | 405   | 91    |
| >FBXW7-P29 FLEPKDLLQA  | 299 | >FBXW7-P29 FLESKDLLQA  | 443   | 144   |
| >FBXW7-P29 FLEPKDLLQA, | 396 | >FBXW7-P29 FLESKDLLQA, | 574   | 178   |
| >FBXW7-P29 FLEPKDLL    | 7   | >FBXW7-P29 FLESKDLL    | 10    | 3     |
| >FBXW7-P29 FLEPKDLLQ   | 77  | >FBXW7-P29 FLESKDLLQ   | 264   | 187   |
| >FBXW7-P29 FLEPKDLLQA  | 5   | >FBXW7-P29 FLESKDLLQA  | 9     | 4     |
| >FBXW7-P29 FLEPKDLLQA, | 6   | >FBXW7-P29 FLESKDLLQA, | 10    | 4     |
| >FBXW7-P29 SFLEPKDL    | 489 | >FBXW7-P29 SFLESKDL    | 474   | 15    |
| >FBXW7-P29 SFLEPKDLL   | 163 | >FBXW7-P29 SFLESKDLL   | 125   | 38    |
| >FBXW7-P29 LSFLEPKDL   | 56  | >FBXW7-P29 LSFLESKDL   | 28    | 28    |
| >FBXW7-P29 LSFLEPKDLL  | 139 | >FBXW7-P29 LSFLESKDLL  | 63    | 76    |
| >FBXW7-P29 VLSFLEPKDLL | 25  | >FBXW7-P29 VLSFLESKDLL | 13    | 12    |
| >FBXW7-P29 VLSFLEPKDLL | 825 | >FBXW7-P29 VLSFLESKDLL | 313   | 512   |
| >FBXW7-P29 VLSFLEPKDLL | 127 | >FBXW7-P29 VLSFLESKDLL | 236   | 109   |
| >FBXW7-P29 VLSFLEPKDLL | 106 | >FBXW7-P29 VLSFLESKDLL | 181   | 75    |
| >FBXW7-P29 VLSFLEPKDLL | 469 | >FBXW7-P29 VLSFLESKDLL | 736   | 267   |
| >FBXW7-P29 VLSFLEPKDL  | 89  | >FBXW7-P29 VLSFLESKDL  | 79    | 10    |
| >FBXW7-P29 VLSFLEPKDLL | 28  | >FBXW7-P29 VLSFLESKDLL | 29    | 1     |
| >FBXW7-P29 VLSFLEPK    | 160 | >FBXW7-P29 VLSFLESK    | 141   | 19    |
| >FBXW7-P29 VLSFLEPK    | 54  | >FBXW7-P29 VLSFLESK    | 97    | 43    |
| >FBXW7-P29 YVLSFLEPKDL | 465 | >FBXW7-P29 YVLSFLESKDL | 473   | 8     |
| >FBXW7-P29 YVLSFLEP    | 684 | >FBXW7-P29 YVLSFLES    | 112   | 572   |
| >FBXW7-P29 YVLSFLEPK   | 484 | >FBXW7-P29 YVLSFLESK   | 961   | 477   |
| >FBXW7-P29 YVLSFLEPKDL | 425 | >FBXW7-P29 YVLSFLESKDL | 232   | 193   |

|                        |       |                        |       |       |
|------------------------|-------|------------------------|-------|-------|
| >FBXW7-P29 YVLSFLEPKDL | 182   | >FBXW7-P29 YVLSFLESKDL | 253   | 71    |
| >FBXW7-P29 YVLSFLEPKDL | 242   | >FBXW7-P29 YVLSFLESKDL | 162   | 80    |
| >FBXW7-P29 YVLSFLEPK   | 20    | >FBXW7-P29 YVLSFLESK   | 29    | 9     |
| >FBXW7-P29 YVLSFLEPK   | 272   | >FBXW7-P29 YVLSFLESK   | 1232  | 960   |
| >FBXW7-P29 YVLSFLEPK   | 27    | >FBXW7-P29 YVLSFLESK   | 22    | 5     |
| >FBXW7-P29 YVLSFLEPKDL | 461   | >FBXW7-P29 YVLSFLESKDL | 379   | 82    |
| >FBXW7-P29 LYVLSFLEPK  | 217   | >FBXW7-P29 LYVLSFLESK  | 726   | 509   |
| >FBXW7-P29 ALYVLSFLEP  | 4165  | >FBXW7-P29 ALYVLSFLES  | 367   | 3798  |
| >FBXW7-P29 ALYVLSFLEPK | 981   | >FBXW7-P29 ALYVLSFLESK | 446   | 535   |
| >FBXW7-P29 ALYVLSFLEPK | 38    | >FBXW7-P29 ALYVLSFLESK | 36    | 2     |
| >FBXW7-P29 ALYVLSFLEPK | 14    | >FBXW7-P29 ALYVLSFLESK | 18    | 4     |
| >FBXW7-P29 ALYVLSFLEPK | 278   | >FBXW7-P29 ALYVLSFLESK | 488   | 210   |
| >FBXW7-P29 ALYVLSFLEPK | 111   | >FBXW7-P29 ALYVLSFLESK | 341   | 230   |
| >FBXW7-Q15 QLSSPFYT    | 110   | >FBXW7-Q15 ELSSPFYT    | 984   | 874   |
| >FBXW7-Q15 QLSSPFYTKT  | 385   | >FBXW7-Q15 ELSSPFYTKT  | 1325  | 940   |
| >FBXW7-Q15 QLSSPFYTKT  | 355   | >FBXW7-Q15 ELSSPFYTKT  | 927   | 572   |
| >FBXW7-Q15 QLSSPFYT    | 216   | >FBXW7-Q15 ELSSPFYT    | 389   | 173   |
| >FBXW7-Q15 QLSSPFYT    | 729   | >FBXW7-Q15 ELSSPFYT    | 436   | 293   |
| >FBXW7-Q15 QLSSPFYT    | 367   | >FBXW7-Q15 ELSSPFYT    | 722   | 355   |
| >FBXW7-Q15 QLSSPFYTK   | 65    | >FBXW7-Q15 ELSSPFYTK   | 251   | 186   |
| >FBXW7-Q15 QLSSPFYTK   | 28    | >FBXW7-Q15 ELSSPFYTK   | 130   | 102   |
| >FBXW7-Q15 QLSSPFYTK   | 366   | >FBXW7-Q15 ELSSPFYTK   | 2513  | 2147  |
| >FBXW7-Q15 QLSSPFYTK   | 3131  | >FBXW7-Q15 ELSSPFYTK   | 281   | 2850  |
| >FBXW7-Q15 QLSSPFYTK   | 188   | >FBXW7-Q15 ELSSPFYTK   | 19    | 169   |
| >FBXW7-Q15 QLSSPFYT    | 2941  | >FBXW7-Q15 ELSSPFYT    | 498   | 2443  |
| >FBXW7-Q15 HQLSSPFYT   | 92    | >FBXW7-Q15 HELSSPFYT   | 11121 | 11029 |
| >FBXW7-Q15 HQLSSPFYTK  | 69    | >FBXW7-Q15 HELSSPFYTK  | 2499  | 2430  |
| >FBXW7-Q15 HQLSSPFYTK  | 32    | >FBXW7-Q15 HELSSPFYTK  | 2885  | 2853  |
| >FBXW7-Q15 HQLSSPFY    | 123   | >FBXW7-Q15 HELSSPFY    | 457   | 334   |
| >FBXW7-Q15 HQLSSPFYTK  | 91    | >FBXW7-Q15 HELSSPFYTK  | 3330  | 3239  |
| >FBXW7-Q15 HQLSSPFY    | 48    | >FBXW7-Q15 HELSSPFY    | 485   | 437   |
| >FBXW7-Q15 HQLSSPFYTK  | 306   | >FBXW7-Q15 HELSSPFYTK  | 3979  | 3673  |
| >FBXW7-Q15 HQLSSPFY    | 158   | >FBXW7-Q15 HELSSPFY    | 437   | 279   |
| >FBXW7-Q15 HQLSSPFY    | 95    | >FBXW7-Q15 HELSSPFY    | 2285  | 2190  |
| >FBXW7-Q15 HQLSSPFY    | 114   | >FBXW7-Q15 HELSSPFY    | 1654  | 1540  |
| >FBXW7-Q15 HQLSSPFY    | 5     | >FBXW7-Q15 HELSSPFY    | 99    | 94    |
| >FBXW7-Q15 HQLSSPFYTK  | 63    | >FBXW7-Q15 HELSSPFYTK  | 1721  | 1658  |
| >FBXW7-Q15 HQLSSPFY    | 2983  | >FBXW7-Q15 HELSSPFY    | 56    | 2927  |
| >FBXW7-Q15 HQLSSPFYT   | 15982 | >FBXW7-Q15 HELSSPFYT   | 193   | 15789 |
| >FBXW7-Q15 HQLSSPFYTK  | 25088 | >FBXW7-Q15 HELSSPFYTK  | 279   | 24809 |
| >FBXW7-Q15 HQLSSPFYTK  | 12946 | >FBXW7-Q15 HELSSPFYTK  | 190   | 12756 |
| >FBXW7-Q15 HQLSSPFY    | 8743  | >FBXW7-Q15 HELSSPFY    | 155   | 8588  |
| >FBXW7-Q15 HQLSSPFY    | 2430  | >FBXW7-Q15 HELSSPFY    | 31    | 2399  |

|                        |       |                        |      |       |
|------------------------|-------|------------------------|------|-------|
| >FBXW7-Q15 HQLSSPFYT   | 14529 | >FBXW7-Q15 HELSSPFYT   | 105  | 14424 |
| >FBXW7-Q15 HQLSSPFYTK' | 15163 | >FBXW7-Q15 HELSSPFYTKT | 205  | 14958 |
| >FBXW7-Q15 HQLSSPFYT   | 16831 | >FBXW7-Q15 HELSSPFYT   | 127  | 16704 |
| >FBXW7-Q15 HQLSSPFYTK' | 12165 | >FBXW7-Q15 HELSSPFYTKT | 85   | 12080 |
| >FBXW7-Q15 HQLSSPFYTK  | 116   | >FBXW7-Q15 HELSSPFYTK  | 262  | 146   |
| >FBXW7-Q15 VHQLSSPFY   | 87    | >FBXW7-Q15 VHELSSPFY   | 289  | 202   |
| >FBXW7-Q15 VHQLSSPF    | 29    | >FBXW7-Q15 VHELSSPF    | 339  | 310   |
| >FBXW7-Q15 VHQLSSPFY   | 460   | >FBXW7-Q15 VHELSSPFY   | 3131 | 2671  |
| >FBXW7-Q15 PVHQLSSPFY  | 111   | >FBXW7-Q15 PVHELSSPFY  | 105  | 6     |
| >FBXW7-Q15 PVHQLSSPFY  | 611   | >FBXW7-Q15 PVHELSSPFY  | 370  | 241   |
| >FBXW7-Q15 PVHQLSSPFY  | 363   | >FBXW7-Q15 PVHELSSPFY  | 344  | 19    |
| >FBXW7-Q15 PVHQLSSPF   | 233   | >FBXW7-Q15 PVHELSSPF   | 430  | 197   |
| >FBXW7-Q15 LPVHQLSSPF' | 307   | >FBXW7-Q15 LPVHELSSPFY | 324  | 17    |
| >FBXW7-Q15 LPVHQLSSPF' | 485   | >FBXW7-Q15 LPVHELSSPFY | 723  | 238   |
| >FBXW7-Q15 LPVHQLSSPF' | 482   | >FBXW7-Q15 LPVHELSSPFY | 478  | 4     |
| >FBXW7-Q15 LPVHQLSSPF  | 217   | >FBXW7-Q15 LPVHELSSPF  | 663  | 446   |
| >FBXW7-Q15 LPVHQLSSPF  | 42    | >FBXW7-Q15 LPVHELSSPF  | 41   | 1     |
| >FBXW7-Q15 LPVHQLSS    | 468   | >FBXW7-Q15 LPVHELSS    | 423  | 45    |
| >FBXW7-Q15 LPVHQLSSPF  | 26    | >FBXW7-Q15 LPVHELSSPF  | 32   | 6     |
| >FBXW7-Q15 LPVHQLSSPF' | 11    | >FBXW7-Q15 LPVHELSSPFY | 12   | 1     |
| >FBXW7-Q15 LPVHQLSSPF  | 85    | >FBXW7-Q15 LPVHELSSPF  | 119  | 34    |
| >FBXW7-Q15 LPVHQLSSPF' | 28    | >FBXW7-Q15 LPVHELSSPFY | 23   | 5     |
| >FBXW7-Q15 LPVHQLSS    | 426   | >FBXW7-Q15 LPVHELSS    | 667  | 241   |
| >FBXW7-Q15 LPVHQLSSP   | 259   | >FBXW7-Q15 LPVHELSSP   | 522  | 263   |
| >FBXW7-Q15 LPVHQLSSPF  | 19    | >FBXW7-Q15 LPVHELSSPF  | 33   | 14    |
| >FBXW7-Q15 LPVHQLSSPF' | 49    | >FBXW7-Q15 LPVHELSSPFY | 89   | 40    |
| >FBXW7-Q15 LPVHQLSSPF  | 14    | >FBXW7-Q15 LPVHELSSPF  | 15   | 1     |
| >FBXW7-Q15 LPVHQLSSPF' | 102   | >FBXW7-Q15 LPVHELSSPFY | 107  | 5     |
| >FBXW7-Q15 IVDLPVHQL   | 1085  | >FBXW7-Q15 IVDLPVHEL   | 470  | 615   |
| >FBXW7-Q15 IVDLPVHQL   | 151   | >FBXW7-Q15 IVDLPVHEL   | 124  | 27    |
| >FBXW7-Q15 IVDLPVHQL   | 268   | >FBXW7-Q15 IVDLPVHEL   | 664  | 396   |
| >FBXW7-Q15 IVDLPVHQL   | 226   | >FBXW7-Q15 IVDLPVHEL   | 251  | 25    |
| >FBXW7-Q15 IVDLPVHQL   | 361   | >FBXW7-Q15 IVDLPVHEL   | 559  | 198   |
| >FBXW7-Q15 SIVDLPVHQL  | 163   | >FBXW7-Q15 SIVDLPVHEL  | 102  | 61    |
| >FBXW7-Q15 SIVDLPVHQL  | 279   | >FBXW7-Q15 SIVDLPVHEL  | 134  | 145   |
| >FBXW7-Q15 SIVDLPVHQL  | 296   | >FBXW7-Q15 SIVDLPVHEL  | 187  | 109   |
| >FBXW7-Q15 SIVDLPVHQL  | 25    | >FBXW7-Q15 SIVDLPVHEL  | 22   | 3     |
| >FBXW7-Q15 SIVDLPVHQL  | 768   | >FBXW7-Q15 SIVDLPVHEL  | 330  | 438   |
| >FBXW7-Q15 SIVDLPVHQL  | 87    | >FBXW7-Q15 SIVDLPVHEL  | 69   | 18    |
| >FBXW7-Q15 SIVDLPVHQL  | 10    | >FBXW7-Q15 SIVDLPVHEL  | 10   | 0     |
| >FBXW7-Q15 SIVDLPVHQL  | 384   | >FBXW7-Q15 SIVDLPVHEL  | 412  | 28    |
| >FBXW7-Q15 SIVDLPVHQL  | 308   | >FBXW7-Q15 SIVDLPVHEL  | 216  | 92    |
| >FBXW7-Q15 SIVDLPVHQL  | 83    | >FBXW7-Q15 SIVDLPVHEL  | 118  | 35    |

|                        |       |                        |       |       |
|------------------------|-------|------------------------|-------|-------|
| >FBXW7-Q15 SSIVDLPVHQ  | 949   | >FBXW7-Q15 SSIVDLPVHEL | 299   | 650   |
| >FBXW7-Q15 SSIVDLPVHQ  | 37    | >FBXW7-Q15 SSIVDLPVHEL | 41    | 4     |
| >FBXW7-Q15 SSIVDLPVHQ  | 19    | >FBXW7-Q15 SSIVDLPVHEL | 32    | 13    |
| >FBXW7-Q2€ QVKHMMQV    | 80    | >FBXW7-Q2€ RVKHMMQV    | 19    | 61    |
| >FBXW7-Q2€ QVKHMMQV    | 1369  | >FBXW7-Q2€ RVKHMMQV    | 375   | 994   |
| >FBXW7-Q2€ QVKHMMQV    | 689   | >FBXW7-Q2€ RVKHMMQV    | 187   | 502   |
| >FBXW7-Q2€ QVKHMMQV    | 148   | >FBXW7-Q2€ RVKHMMQV    | 7     | 141   |
| >FBXW7-Q2€ QVKHMMQV    | 149   | >FBXW7-Q2€ RVKHMMQV    | 7     | 142   |
| >FBXW7-Q2€ QVKHMMQV    | 7077  | >FBXW7-Q2€ RVKHMMQV    | 327   | 6750  |
| >FBXW7-Q2€ QVKHMMQV    | 2774  | >FBXW7-Q2€ RVKHMMQV    | 56    | 2718  |
| >FBXW7-Q2€ QVKHMMQV    | 2207  | >FBXW7-Q2€ RVKHMMQV    | 290   | 1917  |
| >FBXW7-Q2€ QVKHMMQV    | 92    | >FBXW7-Q2€ RVKHMMQV    | 2500  | 2408  |
| >FBXW7-Q2€ QVKHMMQV    | 4928  | >FBXW7-Q2€ RVKHMMQV    | 294   | 4634  |
| >FBXW7-Q2€ QVKHMMQV    | 1808  | >FBXW7-Q2€ RVKHMMQV    | 416   | 1392  |
| >FBXW7-Q2€ TQVKHMMQ    | 21    | >FBXW7-Q2€ TRVKHMMQ'   | 9801  | 9780  |
| >FBXW7-Q2€ TQVKHMMQ    | 15    | >FBXW7-Q2€ TRVKHMMQ'   | 11921 | 11906 |
| >FBXW7-Q2€ TQVKHMMQ    | 489   | >FBXW7-Q2€ TRVKHMMQ'   | 1477  | 988   |
| >FBXW7-Q2€ TQVKHMMQ    | 178   | >FBXW7-Q2€ TRVKHMMQ'   | 789   | 611   |
| >FBXW7-Q2€ TQVKHMMQ    | 233   | >FBXW7-Q2€ TRVKHMMQ'   | 280   | 47    |
| >FBXW7-Q2€ DELIDSCEPTC | 194   | >FBXW7-Q2€ DELIDSCEPTF | 416   | 222   |
| >FBXW7-Q2€ PTQVKHMM    | 11992 | >FBXW7-Q2€ PTRVKHMM    | 323   | 11669 |
| >FBXW7-Q2€ PTQVKHMM    | 10006 | >FBXW7-Q2€ PTRVKHMM    | 123   | 9883  |
| >FBXW7-Q2€ PTQVKHMM    | 5971  | >FBXW7-Q2€ PTRVKHMM    | 30    | 5941  |
| >FBXW7-Q2€ PTQVKHMM    | 6909  | >FBXW7-Q2€ PTRVKHMM    | 44    | 6865  |
| >FBXW7-Q2€ EPTQVKHMM   | 610   | >FBXW7-Q2€ EPTRVKHMM   | 466   | 144   |
| >FBXW7-Q2€ EPTQVKHMM   | 94    | >FBXW7-Q2€ EPTRVKHMM   | 136   | 42    |
| >FBXW7-Q2€ EPTQVKHM    | 278   | >FBXW7-Q2€ EPTRVKHM    | 1031  | 753   |
| >FBXW7-Q2€ EPTQVKHMM   | 101   | >FBXW7-Q2€ EPTRVKHMM   | 366   | 265   |
| >FBXW7-Q2€ EPTQVKHMM   | 245   | >FBXW7-Q2€ EPTRVKHMM   | 457   | 212   |
| >FBXW7-Q2€ CEPTQVKHM   | 237   | >FBXW7-Q2€ CEPTRVKHM   | 145   | 92    |
| >FBXW7-Q2€ CEPTQVKHM   | 130   | >FBXW7-Q2€ CEPTRVKHM   | 92    | 38    |
| >FBXW7-Q2€ CEPTQVKHM   | 394   | >FBXW7-Q2€ CEPTRVKHM   | 369   | 25    |
| >FBXW7-Q2€ SCEPTQVKHM  | 148   | >FBXW7-Q2€ SCEPTRVKHM  | 144   | 4     |
| >FBXW7-Q2€ DSCEPTQVKH  | 21    | >FBXW7-Q2€ DSCEPTRVKH  | 34    | 13    |
| >FBXW7-Q2€ DSCEPTQVKH  | 192   | >FBXW7-Q2€ DSCEPTRVKH  | 134   | 58    |
| >FBXW7-Q2€ DSCEPTQVK   | 413   | >FBXW7-Q2€ DSCEPTRVK   | 781   | 368   |
| >FBXW7-Q2€ DSCEPTQV    | 345   | >FBXW7-Q2€ DSCEPTRV    | 1029  | 684   |
| >FBXW7-Q2€ IDSCEPTQV   | 407   | >FBXW7-Q2€ IDSCEPTRV   | 512   | 105   |
| >FBXW7-Q2€ LIDSCEPTQV  | 174   | >FBXW7-Q2€ LIDSCEPTRV  | 150   | 24    |
| >FBXW7-Q2€ LIDSCEPTQV  | 152   | >FBXW7-Q2€ LIDSCEPTRV  | 163   | 11    |
| >FBXW7-Q2€ LIDSCEPTQV  | 374   | >FBXW7-Q2€ LIDSCEPTRV  | 615   | 241   |
| >FBXW7-Q2€ LIDSCEPTQV  | 29    | >FBXW7-Q2€ LIDSCEPTRV  | 35    | 6     |
| >FBXW7-Q2€ LIDSCEPTQV  | 45    | >FBXW7-Q2€ LIDSCEPTRV  | 97    | 52    |

|                        |       |                        |       |       |
|------------------------|-------|------------------------|-------|-------|
| >FBXW7-Q2€ LIDSCEPTQV  | 48    | >FBXW7-Q2€ LIDSCEPTRV  | 133   | 85    |
| >FBXW7-Q2€ LIDSCEPTQV  | 11    | >FBXW7-Q2€ LIDSCEPTRV  | 14    | 3     |
| >FBXW7-Q2€ ELIDSCEPTQ\ | 299   | >FBXW7-Q2€ ELIDSCEPTRV | 320   | 21    |
| >FBXW7-Q2€ ELIDSCEPTQ\ | 38    | >FBXW7-Q2€ ELIDSCEPTRV | 61    | 23    |
| >FBXW7-Q2€ ELIDSCEPTQ\ | 18    | >FBXW7-Q2€ ELIDSCEPTRV | 26    | 8     |
| >FBXW7-Q2€ ELIDSCEPTQ\ | 402   | >FBXW7-Q2€ ELIDSCEPTRV | 591   | 189   |
| >FBXW7-Q2€ ELIDSCEPTQ\ | 12    | >FBXW7-Q2€ ELIDSCEPTRV | 14    | 2     |
| >FBXW7-Q2€ ELIDSCEPTQ\ | 66    | >FBXW7-Q2€ ELIDSCEPTRV | 72    | 6     |
| >FBXW7-Q2€ ELIDSCEPTQ\ | 31    | >FBXW7-Q2€ ELIDSCEPTRV | 61    | 30    |
| >FBXW7-Q2€ ELIDSCEPTQ\ | 18    | >FBXW7-Q2€ ELIDSCEPTRV | 39    | 21    |
| >FBXW7-Q2€ ELIDSCEPTQ  | 287   | >FBXW7-Q2€ ELIDSCEPTR  | 7727  | 7440  |
| >FBXW7-Q2€ ELIDSCEPTQ\ | 4     | >FBXW7-Q2€ ELIDSCEPTRV | 5     | 1     |
| >FBXW7-Q2€ ELIDSCEPTQ  | 28648 | >FBXW7-Q2€ ELIDSCEPTR  | 157   | 28491 |
| >FBXW7-Q2€ ELIDSCEPTQ\ | 42    | >FBXW7-Q2€ ELIDSCEPTRV | 32    | 10    |
| >FBXW7-Q2€ ELIDSCEPTQ\ | 30    | >FBXW7-Q2€ ELIDSCEPTRV | 64    | 34    |
| >FBXW7-R31 RILAEDNL    | 725   | >FBXW7-R31 SILAEDNL    | 369   | 356   |
| >FBXW7-R31 RILAEDNLL   | 295   | >FBXW7-R31 SILAEDNLL   | 142   | 153   |
| >FBXW7-R31 RILAEDNLL   | 396   | >FBXW7-R31 SILAEDNLL   | 542   | 146   |
| >FBXW7-R31 RILAEDNL    | 920   | >FBXW7-R31 SILAEDNL    | 177   | 743   |
| >FBXW7-R31 RILAEDNLLW  | 733   | >FBXW7-R31 SILAEDNLLW  | 416   | 317   |
| >FBXW7-R31 RILAEDNLLW  | 61    | >FBXW7-R31 SILAEDNLLW  | 570   | 509   |
| >FBXW7-R31 RILAEDNLLW  | 290   | >FBXW7-R31 SILAEDNLLW  | 3083  | 2793  |
| >FBXW7-R31 RILAEDNLLW  | 1548  | >FBXW7-R31 SILAEDNLLW  | 258   | 1290  |
| >FBXW7-R31 RILAEDNLLW  | 104   | >FBXW7-R31 SILAEDNLLW  | 960   | 856   |
| >FBXW7-R31 RILAEDNLLW  | 116   | >FBXW7-R31 SILAEDNLLW  | 905   | 789   |
| >FBXW7-R31 RILAEDNLLW  | 11    | >FBXW7-R31 SILAEDNLLW  | 71    | 60    |
| >FBXW7-R31 RILAEDNLLW  | 27    | >FBXW7-R31 SILAEDNLLW  | 60    | 33    |
| >FBXW7-R31 WRILAEDNL   | 27007 | >FBXW7-R31 WSILAEDNL   | 301   | 26706 |
| >FBXW7-R31 WRILAEDNLL  | 27054 | >FBXW7-R31 WSILAEDNLL  | 492   | 26562 |
| >FBXW7-R31 WRILAEDNLL  | 9002  | >FBXW7-R31 WSILAEDNLL  | 6     | 8996  |
| >FBXW7-R31 WRILAEDNLL  | 20    | >FBXW7-R31 WSILAEDNLL  | 10181 | 10161 |
| >FBXW7-R31 WRILAEDNLL  | 152   | >FBXW7-R31 WSILAEDNLL  | 4210  | 4058  |
| >FBXW7-R31 WRILAEDNLL  | 18836 | >FBXW7-R31 WSILAEDNLL  | 69    | 18767 |
| >FBXW7-R31 WRILAEDNLL  | 9414  | >FBXW7-R31 WSILAEDNLL  | 12    | 9402  |
| >FBXW7-R31 WRILAEDNLL  | 9274  | >FBXW7-R31 WSILAEDNLL  | 111   | 9163  |
| >FBXW7-R31 WRILAEDNLL  | 1778  | >FBXW7-R31 WSILAEDNLL  | 455   | 1323  |
| >FBXW7-R31 WRILAEDNLL  | 105   | >FBXW7-R31 WSILAEDNLL  | 13502 | 13397 |
| >FBXW7-R31 WRILAEDNLL  | 114   | >FBXW7-R31 WSILAEDNLL  | 14374 | 14260 |
| >FBXW7-R31 WRILAEDNLL  | 77    | >FBXW7-R31 WSILAEDNLL  | 808   | 731   |
| >FBXW7-R31 LQAAQTCRY\  | 32    | >FBXW7-R31 LQAAQTCRY\  | 12592 | 12560 |
| >FBXW7-R31 LQAAQTCRY\  | 268   | >FBXW7-R31 LQAAQTCRY\  | 32408 | 32140 |
| >FBXW7-R31 LQAAQTCRY\  | 67    | >FBXW7-R31 LQAAQTCRY\  | 19120 | 19053 |
| >FBXW7-R31 YWRILAEDNL  | 4376  | >FBXW7-R31 YWSILAEDNL  | 256   | 4120  |

|                       |      |                       |       |       |
|-----------------------|------|-----------------------|-------|-------|
| >FBXW7-R31 YWRILAEDNL | 361  | >FBXW7-R31 YWSILAEDNL | 59    | 302   |
| >FBXW7-R31 YWRILAEDNL | 488  | >FBXW7-R31 YWSILAEDNL | 75    | 413   |
| >FBXW7-R31 YWRILAEDNL | 468  | >FBXW7-R31 YWSILAEDNL | 429   | 39    |
| >FBXW7-R31 YWRILAEDNL | 268  | >FBXW7-R31 YWSILAEDNL | 212   | 56    |
| >FBXW7-R31 RYWRILAEDN | 407  | >FBXW7-R31 RYWSILAEDN | 229   | 178   |
| >FBXW7-R31 RYWRILAEDN | 61   | >FBXW7-R31 RYWSILAEDN | 53    | 8     |
| >FBXW7-R31 RYWRILAEDN | 247  | >FBXW7-R31 RYWSILAEDN | 327   | 80    |
| >FBXW7-R31 RYWRILAED  | 383  | >FBXW7-R31 RYWSILAED  | 481   | 98    |
| >FBXW7-R31 RYWRILAEDN | 6    | >FBXW7-R31 RYWSILAEDN | 6     | 0     |
| >FBXW7-R31 RYWRILAEDN | 324  | >FBXW7-R31 RYWSILAEDN | 329   | 5     |
| >FBXW7-R31 RYWRILAEDN | 362  | >FBXW7-R31 RYWSILAEDN | 244   | 118   |
| >FBXW7-R31 CRYWRILA   | 270  | >FBXW7-R31 CRYWSILA   | 585   | 315   |
| >FBXW7-R31 CRYWRILAED | 472  | >FBXW7-R31 CRYWSILAED | 695   | 223   |
| >FBXW7-R31 CRYWRILA   | 372  | >FBXW7-R31 CRYWSILA   | 343   | 29    |
| >FBXW7-R31 CRYWRILA   | 360  | >FBXW7-R31 CRYWSILA   | 1757  | 1397  |
| >FBXW7-R31 CRYWRILAED | 449  | >FBXW7-R31 CRYWSILAED | 1104  | 655   |
| >FBXW7-R31 CRYWRILAE  | 305  | >FBXW7-R31 CRYWSILAE  | 1912  | 1607  |
| >FBXW7-R31 TCRYWRILA  | 83   | >FBXW7-R31 TCRYWSILA  | 98    | 15    |
| >FBXW7-R31 QTCRYWRIL  | 974  | >FBXW7-R31 QTCRYWSIL  | 219   | 755   |
| >FBXW7-R31 QTCRYWRILA | 395  | >FBXW7-R31 QTCRYWSILA | 423   | 28    |
| >FBXW7-R31 QTCRYWRI   | 406  | >FBXW7-R31 QTCRYWSI   | 227   | 179   |
| >FBXW7-R31 QTCRYWRIL  | 852  | >FBXW7-R31 QTCRYWSIL  | 201   | 651   |
| >FBXW7-R31 QTCRYWRIL  | 857  | >FBXW7-R31 QTCRYWSIL  | 33    | 824   |
| >FBXW7-R31 QTCRYWRI   | 111  | >FBXW7-R31 QTCRYWSI   | 48    | 63    |
| >FBXW7-R31 AQTCRYWRI  | 790  | >FBXW7-R31 AQTCRYWSI  | 340   | 450   |
| >FBXW7-R31 AQTCRYWRI  | 1099 | >FBXW7-R31 AQTCRYWSI  | 293   | 806   |
| >FBXW7-R31 AQTCRYWRI  | 19   | >FBXW7-R31 AQTCRYWSI  | 7     | 12    |
| >FBXW7-R31 AQTCRYWRIL | 102  | >FBXW7-R31 AQTCRYWSIL | 35    | 67    |
| >FBXW7-R31 AQTCRYWRI  | 765  | >FBXW7-R31 AQTCRYWSI  | 234   | 531   |
| >FBXW7-R31 AQTCRYWR   | 14   | >FBXW7-R31 AQTCRYWS   | 10400 | 10386 |
| >FBXW7-R31 AQTCRYWRI  | 555  | >FBXW7-R31 AQTCRYWSI  | 46    | 509   |
| >FBXW7-R31 AQTCRYWRIL | 116  | >FBXW7-R31 AQTCRYWSIL | 34    | 82    |
| >FBXW7-R31 AQTCRYWR   | 235  | >FBXW7-R31 AQTCRYWS   | 31428 | 31193 |
| >FBXW7-R31 AAQTCRYWR  | 10   | >FBXW7-R31 AAQTCRYWS  | 9877  | 9867  |
| >FBXW7-R31 AAQTCRYWR  | 364  | >FBXW7-R31 AAQTCRYWS  | 31504 | 31140 |
| >FBXW7-R31 AAQTCRYWR  | 234  | >FBXW7-R31 AAQTCRYWS  | 34655 | 34421 |
| >FBXW7-R31 AAQTCRYWR  | 3719 | >FBXW7-R31 AAQTCRYWS  | 440   | 3279  |
| >FBXW7-R31 AAQTCRYWR  | 241  | >FBXW7-R31 AAQTCRYWS  | 30548 | 30307 |
| >FBXW7-R31 QAAQTCRYW  | 30   | >FBXW7-R31 QAAQTCRYW  | 15318 | 15288 |
| >FBXW7-R31 QAAQTCRYW  | 37   | >FBXW7-R31 QAAQTCRYW  | 28972 | 28935 |
| >FBXW7-R31 QAAQTCRYW  | 461  | >FBXW7-R31 QAAQTCRYW  | 362   | 99    |
| >FBXW7-R31 QAAQTCRYW  | 584  | >FBXW7-R31 QAAQTCRYW  | 295   | 289   |
| >FBXW7-R31 QAAQTCRYW  | 170  | >FBXW7-R31 QAAQTCRYW  | 21821 | 21651 |



|                        |       |                        |       |       |
|------------------------|-------|------------------------|-------|-------|
| >FBXW7-R31 QAAQTCRYW   | 172   | >FBXW7-R31 QAAQTCRYW   | 95    | 77    |
| >FBXW7-R44 RTLKVVNA    | 161   | >FBXW7-R44 WTLKVVNA    | 126   | 35    |
| >FBXW7-R44 RTLKVVNA    | 258   | >FBXW7-R44 WTLKVVNA    | 231   | 27    |
| >FBXW7-R44 RTLKVVNA    | 696   | >FBXW7-R44 WTLKVVNA    | 380   | 316   |
| >FBXW7-R44 RTLKVVNA    | 48    | >FBXW7-R44 WTLKVVNA    | 10428 | 10380 |
| >FBXW7-R44 RTLKVVNAE'  | 480   | >FBXW7-R44 WTLKVVNAE'  | 16536 | 16056 |
| >FBXW7-R44 RTLKVVNA    | 5007  | >FBXW7-R44 WTLKVVNA    | 158   | 4849  |
| >FBXW7-R44 RTLKVVNA    | 1636  | >FBXW7-R44 WTLKVVNA    | 91    | 1545  |
| >FBXW7-R44 RTLKVVNAE'  | 4643  | >FBXW7-R44 WTLKVVNAE'  | 449   | 4194  |
| >FBXW7-R44 DRTLKVVNA   | 37499 | >FBXW7-R44 DWTLKVVNA   | 399   | 37100 |
| >FBXW7-R44 DNIIISGSTDV | 208   | >FBXW7-R44 DNIIISGSTDV | 30048 | 29840 |
| >FBXW7-R44 STDRTLKV    | 445   | >FBXW7-R44 STDWTLKV    | 457   | 12    |
| >FBXW7-R44 STDRTLKV    | 617   | >FBXW7-R44 STDWTLKV    | 130   | 487   |
| >FBXW7-R44 STDRTLKV    | 101   | >FBXW7-R44 STDWTLKV    | 12    | 89    |
| >FBXW7-R44 STDRTLKVWI  | 841   | >FBXW7-R44 STDWTLKVWI  | 156   | 685   |
| >FBXW7-R44 STDRTLKV    | 100   | >FBXW7-R44 STDWTLKV    | 20    | 80    |
| >FBXW7-R44 STDRTLKVWI  | 1175  | >FBXW7-R44 STDWTLKVWI  | 316   | 859   |
| >FBXW7-R44 STDRTLKV    | 544   | >FBXW7-R44 STDWTLKV    | 87    | 457   |
| >FBXW7-R44 STDRTLKV    | 61    | >FBXW7-R44 STDWTLKV    | 9     | 52    |
| >FBXW7-R44 STDRTLKVWI  | 851   | >FBXW7-R44 STDWTLKVWI  | 171   | 680   |
| >FBXW7-R44 STDRTLKVW   | 32    | >FBXW7-R44 STDWTLKVW   | 13    | 19    |
| >FBXW7-R44 STDRTLKVW   | 108   | >FBXW7-R44 STDWTLKVW   | 370   | 262   |
| >FBXW7-R44 STDRTLKVW   | 38    | >FBXW7-R44 STDWTLKVW   | 41    | 3     |
| >FBXW7-R44 STDRTLKV    | 5176  | >FBXW7-R44 STDWTLKV    | 425   | 4751  |
| >FBXW7-R44 STDRTLKVW   | 285   | >FBXW7-R44 STDWTLKVW   | 253   | 32    |
| >FBXW7-R44 GSTDRTLKV   | 2670  | >FBXW7-R44 GSTDWTLKV   | 162   | 2508  |
| >FBXW7-R44 GSTDRTLK    | 34    | >FBXW7-R44 GSTDWTLK    | 24    | 10    |
| >FBXW7-R44 GSTDRTLKVV  | 11    | >FBXW7-R44 GSTDWTLKVV  | 12    | 1     |
| >FBXW7-R44 GSTDRTLKVV  | 168   | >FBXW7-R44 GSTDWTLKVV  | 118   | 50    |
| >FBXW7-R44 GSTDRTLKVV  | 47    | >FBXW7-R44 GSTDWTLKVV  | 24    | 23    |
| >FBXW7-R44 GSTDRTLK    | 490   | >FBXW7-R44 GSTDWTLK    | 158   | 332   |
| >FBXW7-R44 SGSTDRTLK   | 5509  | >FBXW7-R44 SGSTDWTLK   | 387   | 5122  |
| >FBXW7-R44 ISGSTDRTLK  | 220   | >FBXW7-R44 ISGSTDWTLK  | 93    | 127   |
| >FBXW7-R44 ISGSTDRTLK  | 471   | >FBXW7-R44 ISGSTDWTLK  | 347   | 124   |
| >FBXW7-R44 ISGSTDRTL   | 55    | >FBXW7-R44 ISGSTDWTL   | 35    | 20    |
| >FBXW7-R44 ISGSTDRTL   | 2715  | >FBXW7-R44 ISGSTDWTL   | 402   | 2313  |
| >FBXW7-R44 ISGSTDRTL   | 5161  | >FBXW7-R44 ISGSTDWTL   | 61    | 5100  |
| >FBXW7-R44 ISGSTDRTL   | 397   | >FBXW7-R44 ISGSTDWTL   | 1488  | 1091  |
| >FBXW7-R44 ISGSTDRTL   | 471   | >FBXW7-R44 ISGSTDWTL   | 693   | 222   |
| >FBXW7-R44 IISGSTDRTL  | 4507  | >FBXW7-R44 IISGSTDWTL  | 154   | 4353  |
| >FBXW7-R44 IISGSTDRTL  | 133   | >FBXW7-R44 IISGSTDWTL  | 25    | 108   |
| >FBXW7-R44 IISGSTDRTL  | 378   | >FBXW7-R44 IISGSTDWTL  | 332   | 46    |
| >FBXW7-R44 IISGSTDRTL  | 2214  | >FBXW7-R44 IISGSTDWTL  | 165   | 2049  |

|                        |       |                        |       |       |
|------------------------|-------|------------------------|-------|-------|
| >FBXW7-R44 IISGSTDRTL  | 1512  | >FBXW7-R44 IISGSTDWTL  | 122   | 1390  |
| >FBXW7-R44 IISGSTDRTL  | 6183  | >FBXW7-R44 IISGSTDWTL  | 348   | 5835  |
| >FBXW7-R44 IISGSTDRTL  | 5590  | >FBXW7-R44 IISGSTDWTL  | 214   | 5376  |
| >FBXW7-R44 IISGSTDRTL  | 2853  | >FBXW7-R44 IISGSTDWTL  | 142   | 2711  |
| >FBXW7-R44 IISGSTDRTL  | 234   | >FBXW7-R44 IISGSTDWTL  | 12    | 222   |
| >FBXW7-R44 IISGSTDRTLK | 70    | >FBXW7-R44 IISGSTDWTLK | 73    | 3     |
| >FBXW7-R44 IISGSTDRTLK | 33    | >FBXW7-R44 IISGSTDWTLK | 34    | 1     |
| >FBXW7-R44 IISGSTDWR   | 76    | >FBXW7-R44 IISGSTDW    | 26062 | 25986 |
| >FBXW7-R44 IISGSTDRTLK | 58    | >FBXW7-R44 IISGSTDWTLK | 85    | 27    |
| >FBXW7-R44 IISGSTDWR   | 22459 | >FBXW7-R44 IISGSTDW    | 350   | 22109 |
| >FBXW7-R44 IISGSTDWR   | 24323 | >FBXW7-R44 IISGSTDW    | 312   | 24011 |
| >FBXW7-R44 IISGSTDWR   | 22027 | >FBXW7-R44 IISGSTDW    | 81    | 21946 |
| >FBXW7-R44 IIISGSTDRTL | 2869  | >FBXW7-R44 IIISGSTDWTL | 117   | 2752  |
| >FBXW7-R44 IIISGSTDRTL | 938   | >FBXW7-R44 IIISGSTDWTL | 106   | 832   |
| >FBXW7-R44 IIISGSTDRTL | 397   | >FBXW7-R44 IIISGSTDWTL | 181   | 216   |
| >FBXW7-R44 IIISGSTDRTL | 796   | >FBXW7-R44 IIISGSTDWTL | 26    | 770   |
| >FBXW7-R44 IIISGSTDRTL | 1318  | >FBXW7-R44 IIISGSTDWTL | 97    | 1221  |
| >FBXW7-R44 IIISGSTDRTL | 2952  | >FBXW7-R44 IIISGSTDWTL | 101   | 2851  |
| >FBXW7-R44 IIISGSTDRTL | 5842  | >FBXW7-R44 IIISGSTDWTL | 243   | 5599  |
| >FBXW7-R44 IIISGSTDRTL | 483   | >FBXW7-R44 IIISGSTDWTL | 18    | 465   |
| >FBXW7-R44 IIISGSTDWR  | 76    | >FBXW7-R44 IIISGSTDW   | 24289 | 24213 |
| >FBXW7-R44 IIISGSTDWR  | 22132 | >FBXW7-R44 IIISGSTDW   | 73    | 22059 |
| >FBXW7-R44 IIISGSTDWR  | 22092 | >FBXW7-R44 IIISGSTDW   | 76    | 22016 |
| >FBXW7-R44 NIIISGSTDWR | 19    | >FBXW7-R44 NIIISGSTDW  | 21096 | 21077 |
| >FBXW7-R46 RCMHLHEK    | 71    | >FBXW7-R46 CCMHLHEK    | 4251  | 4180  |
| >FBXW7-R46 RCMHLHEK    | 369   | >FBXW7-R46 CCMHLHEK    | 6009  | 5640  |
| >FBXW7-R46 RCMHLHEKR   | 40    | >FBXW7-R46 CCMHLHEKR   | 901   | 861   |
| >FBXW7-R46 RCMHLHEKR   | 46    | >FBXW7-R46 CCMHLHEKR   | 138   | 92    |
| >FBXW7-R46 VRCMHLHEK   | 418   | >FBXW7-R46 VCCMHLHEK   | 265   | 153   |
| >FBXW7-R46 HTLYGHTSTV  | 14    | >FBXW7-R46 HTLYGHTSTV  | 15599 | 15585 |
| >FBXW7-R46 HTLYGHTSTV  | 29    | >FBXW7-R46 HTLYGHTSTV  | 22136 | 22107 |
| >FBXW7-R46 HTLYGHTSTV  | 19    | >FBXW7-R46 HTLYGHTSTV  | 26027 | 26008 |
| >FBXW7-R46 HTLYGHTSTV  | 344   | >FBXW7-R46 HTLYGHTSTV  | 37000 | 36656 |
| >FBXW7-R46 TVRCMHLHE   | 127   | >FBXW7-R46 TVCCMHLHE   | 84    | 43    |
| >FBXW7-R46 TVRCMHLH    | 4594  | >FBXW7-R46 TVCCMHLH    | 358   | 4236  |
| >FBXW7-R46 TVRCMHLHE   | 113   | >FBXW7-R46 TVCCMHLHE   | 22    | 91    |
| >FBXW7-R46 TVRCMHLHE   | 3539  | >FBXW7-R46 TVCCMHLHE   | 252   | 3287  |
| >FBXW7-R46 TVRCMHLHE   | 333   | >FBXW7-R46 TVCCMHLHE   | 11008 | 10675 |
| >FBXW7-R46 TVRCMHLHE   | 5     | >FBXW7-R46 TVCCMHLHE   | 245   | 240   |
| >FBXW7-R46 TVRCMHLHE   | 377   | >FBXW7-R46 TVCCMHLHE   | 10687 | 10310 |
| >FBXW7-R46 TVRCMHLHE   | 476   | >FBXW7-R46 TVCCMHLHE   | 402   | 74    |
| >FBXW7-R46 TVRCMHLHE   | 21    | >FBXW7-R46 TVCCMHLHE   | 63    | 42    |
| >FBXW7-R46 TVRCMHLHE   | 95    | >FBXW7-R46 TVCCMHLHE   | 141   | 46    |

|                       |      |                       |       |       |
|-----------------------|------|-----------------------|-------|-------|
| >FBXW7-R46 TVRCMHLHE  | 165  | >FBXW7-R46 TVCCMHLHE  | 56    | 109   |
| >FBXW7-R46 TVRCMHLHE  | 48   | >FBXW7-R46 TVCCMHLHE  | 12    | 36    |
| >FBXW7-R46 TVRCMHLHE  | 593  | >FBXW7-R46 TVCCMHLHE  | 459   | 134   |
| >FBXW7-R46 TVRCMHLHE  | 646  | >FBXW7-R46 TVCCMHLHE  | 221   | 425   |
| >FBXW7-R46 STVRCMHL   | 147  | >FBXW7-R46 STVCCMHL   | 441   | 294   |
| >FBXW7-R46 STVRCMHL   | 458  | >FBXW7-R46 STVCCMHL   | 194   | 264   |
| >FBXW7-R46 STVRCMHLH  | 469  | >FBXW7-R46 STVCCMHLH  | 821   | 352   |
| >FBXW7-R46 STVRCMHLH  | 216  | >FBXW7-R46 STVCCMHLH  | 202   | 14    |
| >FBXW7-R46 STVRCMHLH  | 12   | >FBXW7-R46 STVCCMHLH  | 12    | 0     |
| >FBXW7-R46 STVRCMHL   | 58   | >FBXW7-R46 STVCCMHL   | 81    | 23    |
| >FBXW7-R46 STVRCMHLH  | 24   | >FBXW7-R46 STVCCMHLH  | 47    | 23    |
| >FBXW7-R46 STVRCMHLH  | 311  | >FBXW7-R46 STVCCMHLH  | 561   | 250   |
| >FBXW7-R46 STVRCMHLH  | 123  | >FBXW7-R46 STVCCMHLH  | 333   | 210   |
| >FBXW7-R46 STVRCMHLH  | 78   | >FBXW7-R46 STVCCMHLH  | 142   | 64    |
| >FBXW7-R46 STVRCMHLH  | 22   | >FBXW7-R46 STVCCMHLH  | 17    | 5     |
| >FBXW7-R46 STVRCMHL   | 55   | >FBXW7-R46 STVCCMHL   | 15    | 40    |
| >FBXW7-R46 STVRCMHL   | 1380 | >FBXW7-R46 STVCCMHL   | 392   | 988   |
| >FBXW7-R46 STVRCMHL   | 54   | >FBXW7-R46 STVCCMHL   | 37    | 17    |
| >FBXW7-R46 STVRCMHLH  | 32   | >FBXW7-R46 STVCCMHLH  | 22    | 10    |
| >FBXW7-R46 STVRCMHLH  | 109  | >FBXW7-R46 STVCCMHLH  | 87    | 22    |
| >FBXW7-R46 STVRCMHLH  | 784  | >FBXW7-R46 STVCCMHLH  | 479   | 305   |
| >FBXW7-R46 STVRCMHLH  | 53   | >FBXW7-R46 STVCCMHLH  | 50    | 3     |
| >FBXW7-R46 TSTVRCMHL  | 134  | >FBXW7-R46 TSTVCCMHL  | 718   | 584   |
| >FBXW7-R46 TSTVRCMHL  | 2322 | >FBXW7-R46 TSTVCCMHL  | 391   | 1931  |
| >FBXW7-R46 TSTVRCMH   | 994  | >FBXW7-R46 TSTVCCMH   | 321   | 673   |
| >FBXW7-R46 HTSTVRCMH  | 268  | >FBXW7-R46 HTSTVCCMH  | 1425  | 1157  |
| >FBXW7-R46 HTSTVRCMH  | 209  | >FBXW7-R46 HTSTVCCMH  | 253   | 44    |
| >FBXW7-R46 HTSTVRCMH  | 178  | >FBXW7-R46 HTSTVCCMH  | 180   | 2     |
| >FBXW7-R46 HTSTVRCMH  | 73   | >FBXW7-R46 HTSTVCCMH  | 53    | 20    |
| >FBXW7-R46 HTSTVRCM   | 491  | >FBXW7-R46 HTSTVCCM   | 226   | 265   |
| >FBXW7-R46 HTSTVRCMH  | 240  | >FBXW7-R46 HTSTVCCMH  | 225   | 15    |
| >FBXW7-R46 HTSTVRCM   | 55   | >FBXW7-R46 HTSTVCCM   | 125   | 70    |
| >FBXW7-R46 HTSTVRCMH  | 513  | >FBXW7-R46 HTSTVCCMH  | 200   | 313   |
| >FBXW7-R46 HTSTVRCMH  | 193  | >FBXW7-R46 HTSTVCCMH  | 113   | 80    |
| >FBXW7-R46 YGHTSTVR   | 272  | >FBXW7-R46 YGHTSTVC   | 41490 | 41218 |
| >FBXW7-R46 YGHTSTVR   | 464  | >FBXW7-R46 YGHTSTVCCM | 264   | 200   |
| >FBXW7-R46 YGHTSTVR   | 360  | >FBXW7-R46 YGHTSTVC   | 35856 | 35496 |
| >FBXW7-R46 LYGHTSTVR  | 412  | >FBXW7-R46 LYGHTSTVC  | 22303 | 21891 |
| >FBXW7-R46 LYGHTSTVR  | 69   | >FBXW7-R46 LYGHTSTVC  | 34692 | 34623 |
| >FBXW7-R46 TLYGHTSTVR | 403  | >FBXW7-R46 TLYGHTSTVC | 1024  | 621   |
| >FBXW7-R46 TLYGHTSTVR | 6921 | >FBXW7-R46 TLYGHTSTVC | 62    | 6859  |
| >FBXW7-R46 TLYGHTSTVR | 33   | >FBXW7-R46 TLYGHTSTVC | 107   | 74    |
| >FBXW7-R46 TLYGHTSTVR | 3439 | >FBXW7-R46 TLYGHTSTVC | 28    | 3411  |

|                       |      |                       |       |       |
|-----------------------|------|-----------------------|-------|-------|
| >FBXW7-R46 TLYGHTSTVR | 10   | >FBXW7-R46 TLYGHTSTVC | 30    | 20    |
| >FBXW7-R46 TLYGHTSTVR | 66   | >FBXW7-R46 TLYGHTSTVC | 14736 | 14670 |
| >FBXW7-R46 TLYGHTSTVR | 259  | >FBXW7-R46 TLYGHTSTVC | 34350 | 34091 |
| >FBXW7-R46 TLYGHTSTVR | 82   | >FBXW7-R46 TLYGHTSTVC | 22951 | 22869 |
| >FBXW7-R46 TLYGHTSTVR | 19   | >FBXW7-R46 TLYGHTSTVC | 30701 | 30682 |
| >FBXW7-R46 TLYGHTSTVR | 139  | >FBXW7-R46 TLYGHTSTVC | 35334 | 35195 |
| >FBXW7-R46 RCMHLHEK   | 71   | >FBXW7-R46 HCMHLHEK   | 282   | 211   |
| >FBXW7-R46 RCMHLHEK   | 369  | >FBXW7-R46 HCMHLHEK   | 1635  | 1266  |
| >FBXW7-R46 RCMHLHEKR  | 40   | >FBXW7-R46 HCMHLHEKR  | 128   | 88    |
| >FBXW7-R46 RCMHLHEKR  | 6958 | >FBXW7-R46 HCMHLHEKR  | 343   | 6615  |
| >FBXW7-R46 RCMHLHEKR  | 46   | >FBXW7-R46 HCMHLHEKR  | 49    | 3     |
| >FBXW7-R46 VRCMHLHEK  | 418  | >FBXW7-R46 VHCMHLHEK  | 1055  | 637   |
| >FBXW7-R46 HTLYGHTSTV | 14   | >FBXW7-R46 HTLYGHTSTV | 2479  | 2465  |
| >FBXW7-R46 HTLYGHTSTV | 29   | >FBXW7-R46 HTLYGHTSTV | 9380  | 9351  |
| >FBXW7-R46 HTLYGHTSTV | 19   | >FBXW7-R46 HTLYGHTSTV | 4520  | 4501  |
| >FBXW7-R46 HTLYGHTSTV | 3790 | >FBXW7-R46 HTLYGHTSTV | 198   | 3592  |
| >FBXW7-R46 HTLYGHTSTV | 700  | >FBXW7-R46 HTLYGHTSTV | 33    | 667   |
| >FBXW7-R46 HTLYGHTSTV | 344  | >FBXW7-R46 HTLYGHTSTV | 31873 | 31529 |
| >FBXW7-R46 TVRCMHLHE  | 127  | >FBXW7-R46 TVHCMHLHE  | 121   | 6     |
| >FBXW7-R46 TVRCMHLHE  | 113  | >FBXW7-R46 TVHCMHLHE  | 67    | 46    |
| >FBXW7-R46 TVRCMHLHE  | 3539 | >FBXW7-R46 TVHCMHLHE  | 422   | 3117  |
| >FBXW7-R46 TVRCMHLHE  | 333  | >FBXW7-R46 TVHCMHLHE  | 2680  | 2347  |
| >FBXW7-R46 TVRCMHLHE  | 5    | >FBXW7-R46 TVHCMHLHE  | 12    | 7     |
| >FBXW7-R46 TVRCMHLHE  | 377  | >FBXW7-R46 TVHCMHLHE  | 2109  | 1732  |
| >FBXW7-R46 TVRCMHLHE  | 476  | >FBXW7-R46 TVHCMHLHE  | 1287  | 811   |
| >FBXW7-R46 TVRCMHLHE  | 21   | >FBXW7-R46 TVHCMHLHE  | 35    | 14    |
| >FBXW7-R46 TVRCMHLHE  | 95   | >FBXW7-R46 TVHCMHLHE  | 324   | 229   |
| >FBXW7-R46 TVRCMHLHE  | 165  | >FBXW7-R46 TVHCMHLHE  | 59    | 106   |
| >FBXW7-R46 TVRCMHLHE  | 48   | >FBXW7-R46 TVHCMHLHE  | 11    | 37    |
| >FBXW7-R46 TVRCMHLHE  | 593  | >FBXW7-R46 TVHCMHLHE  | 459   | 134   |
| >FBXW7-R46 TVRCMHLHE  | 646  | >FBXW7-R46 TVHCMHLHE  | 239   | 407   |
| >FBXW7-R46 STVRCMHL   | 147  | >FBXW7-R46 STVHCMHL   | 623   | 476   |
| >FBXW7-R46 STVRCMHL   | 458  | >FBXW7-R46 STVHCMHL   | 244   | 214   |
| >FBXW7-R46 STVRCMHLH  | 469  | >FBXW7-R46 STVHCMHLH  | 452   | 17    |
| >FBXW7-R46 STVRCMHLH  | 216  | >FBXW7-R46 STVHCMHLH  | 307   | 91    |
| >FBXW7-R46 STVRCMHLH  | 12   | >FBXW7-R46 STVHCMHLH  | 12    | 0     |
| >FBXW7-R46 STVRCMHL   | 58   | >FBXW7-R46 STVHCMHL   | 56    | 2     |
| >FBXW7-R46 STVRCMHLH  | 24   | >FBXW7-R46 STVHCMHLH  | 45    | 21    |
| >FBXW7-R46 STVRCMHLH  | 311  | >FBXW7-R46 STVHCMHLH  | 622   | 311   |
| >FBXW7-R46 STVRCMHLH  | 2366 | >FBXW7-R46 STVHCMHLH  | 483   | 1883  |
| >FBXW7-R46 STVRCMHLH  | 123  | >FBXW7-R46 STVHCMHLH  | 225   | 102   |
| >FBXW7-R46 STVRCMHLH  | 827  | >FBXW7-R46 STVHCMHLH  | 421   | 406   |
| >FBXW7-R46 STVRCMHLH  | 78   | >FBXW7-R46 STVHCMHLH  | 119   | 41    |

|                       |      |                       |       |       |
|-----------------------|------|-----------------------|-------|-------|
| >FBXW7-R46 STVRCMHLH  | 22   | >FBXW7-R46 STVHCMHLH  | 19    | 3     |
| >FBXW7-R46 STVRCMHL   | 55   | >FBXW7-R46 STVHCMHL   | 25    | 30    |
| >FBXW7-R46 STVRCMHL   | 54   | >FBXW7-R46 STVHCMHL   | 21    | 33    |
| >FBXW7-R46 STVRCMHL   | 761  | >FBXW7-R46 STVHCMHL   | 396   | 365   |
| >FBXW7-R46 STVRCMHLH  | 32   | >FBXW7-R46 STVHCMHLH  | 30    | 2     |
| >FBXW7-R46 STVRCMHL   | 890  | >FBXW7-R46 STVHCMHL   | 477   | 413   |
| >FBXW7-R46 STVRCMHLH  | 109  | >FBXW7-R46 STVHCMHLH  | 82    | 27    |
| >FBXW7-R46 STVRCMHLH  | 784  | >FBXW7-R46 STVHCMHLH  | 484   | 300   |
| >FBXW7-R46 STVRCMHLH  | 53   | >FBXW7-R46 STVHCMHLH  | 46    | 7     |
| >FBXW7-R46 TSTVRCMHL  | 134  | >FBXW7-R46 TSTVHCMHL  | 180   | 46    |
| >FBXW7-R46 TSTVRCMHL  | 1611 | >FBXW7-R46 TSTVHCMHL  | 316   | 1295  |
| >FBXW7-R46 HTSTVRCM   | 570  | >FBXW7-R46 HTSTVHCM   | 164   | 406   |
| >FBXW7-R46 HTSTVRCMH  | 268  | >FBXW7-R46 HTSTVHCMH  | 237   | 31    |
| >FBXW7-R46 HTSTVRCMH  | 209  | >FBXW7-R46 HTSTVHCMH  | 208   | 1     |
| >FBXW7-R46 HTSTVRCMH  | 178  | >FBXW7-R46 HTSTVHCMH  | 174   | 4     |
| >FBXW7-R46 HTSTVRCM   | 1101 | >FBXW7-R46 HTSTVHCM   | 239   | 862   |
| >FBXW7-R46 HTSTVRCMH  | 73   | >FBXW7-R46 HTSTVHCMH  | 74    | 1     |
| >FBXW7-R46 HTSTVRCM   | 491  | >FBXW7-R46 HTSTVHCM   | 205   | 286   |
| >FBXW7-R46 HTSTVRCMH  | 240  | >FBXW7-R46 HTSTVHCMH  | 108   | 132   |
| >FBXW7-R46 HTSTVRCM   | 5122 | >FBXW7-R46 HTSTVHCM   | 472   | 4650  |
| >FBXW7-R46 HTSTVRCM   | 5481 | >FBXW7-R46 HTSTVHCM   | 457   | 5024  |
| >FBXW7-R46 HTSTVRCM   | 55   | >FBXW7-R46 HTSTVHCM   | 87    | 32    |
| >FBXW7-R46 HTSTVRCMH  | 513  | >FBXW7-R46 HTSTVHCMH  | 256   | 257   |
| >FBXW7-R46 HTSTVRCMH  | 193  | >FBXW7-R46 HTSTVHCMH  | 132   | 61    |
| >FBXW7-R46 GHTSTVRCM  | 2761 | >FBXW7-R46 GHTSTVHCM  | 165   | 2596  |
| >FBXW7-R46 YGHTSTVR   | 272  | >FBXW7-R46 YGHTSTVH   | 24493 | 24221 |
| >FBXW7-R46 YGHTSTVRCM | 464  | >FBXW7-R46 YGHTSTVHCM | 377   | 87    |
| >FBXW7-R46 YGHTSTVR   | 360  | >FBXW7-R46 YGHTSTVH   | 30443 | 30083 |
| >FBXW7-R46 LYGHTSTVRC | 1184 | >FBXW7-R46 LYGHTSTVHC | 339   | 845   |
| >FBXW7-R46 LYGHTSTVR  | 412  | >FBXW7-R46 LYGHTSTVH  | 12964 | 12552 |
| >FBXW7-R46 LYGHTSTVR  | 69   | >FBXW7-R46 LYGHTSTVH  | 23448 | 23379 |
| >FBXW7-R46 TLYGHTSTVR | 403  | >FBXW7-R46 TLYGHTSTVH | 301   | 102   |
| >FBXW7-R46 TLYGHTSTVR | 33   | >FBXW7-R46 TLYGHTSTVH | 47    | 14    |
| >FBXW7-R46 TLYGHTSTVR | 10   | >FBXW7-R46 TLYGHTSTVH | 14    | 4     |
| >FBXW7-R46 TLYGHTSTVR | 66   | >FBXW7-R46 TLYGHTSTVH | 1433  | 1367  |
| >FBXW7-R46 TLYGHTSTVR | 259  | >FBXW7-R46 TLYGHTSTVH | 12734 | 12475 |
| >FBXW7-R46 TLYGHTSTVR | 82   | >FBXW7-R46 TLYGHTSTVH | 9713  | 9631  |
| >FBXW7-R46 TLYGHTSTVR | 19   | >FBXW7-R46 TLYGHTSTVH | 7199  | 7180  |
| >FBXW7-R46 TLYGHTSTVR | 3197 | >FBXW7-R46 TLYGHTSTVH | 269   | 2928  |
| >FBXW7-R46 TLYGHTSTVR | 139  | >FBXW7-R46 TLYGHTSTVH | 25197 | 25058 |
| >FBXW7-R46 RCMHLHEK   | 71   | >FBXW7-R46 LCMHLHEK   | 2555  | 2484  |
| >FBXW7-R46 RCMHLHEK   | 369  | >FBXW7-R46 LCMHLHEK   | 3871  | 3502  |
| >FBXW7-R46 RCMHLHEKR  | 40   | >FBXW7-R46 LCMHLHEKR  | 426   | 386   |

|                       |       |                       |       |       |
|-----------------------|-------|-----------------------|-------|-------|
| >FBXW7-R46 RCMHLHEKR  | 46    | >FBXW7-R46 LCMHLHEKR  | 412   | 366   |
| >FBXW7-R46 VRCMHLHEK  | 22706 | >FBXW7-R46 VLCMHLHEKI | 310   | 22396 |
| >FBXW7-R46 VRCMHLHEK  | 15061 | >FBXW7-R46 VLCMHLHEKI | 65    | 14996 |
| >FBXW7-R46 VRCMHLHEK  | 11958 | >FBXW7-R46 VLCMHLHEKI | 9     | 11949 |
| >FBXW7-R46 VRCMHLHEK  | 22905 | >FBXW7-R46 VLCMHLHEKI | 271   | 22634 |
| >FBXW7-R46 VRCMHLHEK  | 35891 | >FBXW7-R46 VLCMHLHEK  | 216   | 35675 |
| >FBXW7-R46 VRCMHLHEK  | 10853 | >FBXW7-R46 VLCMHLHEKI | 5     | 10848 |
| >FBXW7-R46 VRCMHLHEK  | 20423 | >FBXW7-R46 VLCMHLHEK  | 115   | 20308 |
| >FBXW7-R46 VRCMHLHEK  | 8053  | >FBXW7-R46 VLCMHLHEK  | 50    | 8003  |
| >FBXW7-R46 VRCMHLHEK  | 418   | >FBXW7-R46 VLCMHLHEKI | 71    | 347   |
| >FBXW7-R46 VRCMHLHEK  | 1177  | >FBXW7-R46 VLCMHLHEKI | 196   | 981   |
| >FBXW7-R46 HTLYGHTSTV | 660   | >FBXW7-R46 HTLYGHTSTV | 399   | 261   |
| >FBXW7-R46 HTLYGHTSTV | 14    | >FBXW7-R46 HTLYGHTSTV | 6183  | 6169  |
| >FBXW7-R46 HTLYGHTSTV | 3475  | >FBXW7-R46 HTLYGHTSTV | 71    | 3404  |
| >FBXW7-R46 HTLYGHTSTV | 29    | >FBXW7-R46 HTLYGHTSTV | 7288  | 7259  |
| >FBXW7-R46 HTLYGHTSTV | 19    | >FBXW7-R46 HTLYGHTSTV | 13927 | 13908 |
| >FBXW7-R46 HTLYGHTSTV | 20991 | >FBXW7-R46 HTLYGHTSTV | 386   | 20605 |
| >FBXW7-R46 HTLYGHTSTV | 9939  | >FBXW7-R46 HTLYGHTSTV | 222   | 9717  |
| >FBXW7-R46 HTLYGHTSTV | 2788  | >FBXW7-R46 HTLYGHTSTV | 298   | 2490  |
| >FBXW7-R46 HTLYGHTSTV | 3790  | >FBXW7-R46 HTLYGHTSTV | 6     | 3784  |
| >FBXW7-R46 HTLYGHTSTV | 19501 | >FBXW7-R46 HTLYGHTSTV | 327   | 19174 |
| >FBXW7-R46 HTLYGHTSTV | 700   | >FBXW7-R46 HTLYGHTSTV | 19    | 681   |
| >FBXW7-R46 HTLYGHTSTV | 344   | >FBXW7-R46 HTLYGHTSTV | 34137 | 33793 |
| >FBXW7-R46 HTLYGHTSTV | 32405 | >FBXW7-R46 HTLYGHTSTV | 168   | 32237 |
| >FBXW7-R46 TVRCMHLHE  | 127   | >FBXW7-R46 TVLCMHLHEI | 60    | 67    |
| >FBXW7-R46 TVRCMHLH   | 4594  | >FBXW7-R46 TVLCMHLH   | 331   | 4263  |
| >FBXW7-R46 TVRCMHLHE  | 113   | >FBXW7-R46 TVLCMHLHEI | 19    | 94    |
| >FBXW7-R46 TVRCMHLHE  | 3539  | >FBXW7-R46 TVLCMHLHEI | 213   | 3326  |
| >FBXW7-R46 TVRCMHLHE  | 333   | >FBXW7-R46 TVLCMHLHE  | 8893  | 8560  |
| >FBXW7-R46 TVRCMHLHE  | 5     | >FBXW7-R46 TVLCMHLHEI | 75    | 70    |
| >FBXW7-R46 TVRCMHLHE  | 377   | >FBXW7-R46 TVLCMHLHEI | 7449  | 7072  |
| >FBXW7-R46 TVRCMHLHE  | 476   | >FBXW7-R46 TVLCMHLHEI | 651   | 175   |
| >FBXW7-R46 TVRCMHLHE  | 21    | >FBXW7-R46 TVLCMHLHEI | 41    | 20    |
| >FBXW7-R46 TVRCMHLHE  | 95    | >FBXW7-R46 TVLCMHLHEI | 180   | 85    |
| >FBXW7-R46 TVRCMHLHE  | 165   | >FBXW7-R46 TVLCMHLHEI | 63    | 102   |
| >FBXW7-R46 TVRCMHLHE  | 48    | >FBXW7-R46 TVLCMHLHEI | 24    | 24    |
| >FBXW7-R46 TVRCMHLHE  | 593   | >FBXW7-R46 TVLCMHLHEI | 218   | 375   |
| >FBXW7-R46 TVRCMHLHE  | 646   | >FBXW7-R46 TVLCMHLHEI | 140   | 506   |
| >FBXW7-R46 STVRCMHL   | 147   | >FBXW7-R46 STVLCMHL   | 302   | 155   |
| >FBXW7-R46 STVRCMHL   | 458   | >FBXW7-R46 STVLCMHL   | 410   | 48    |
| >FBXW7-R46 STVRCMHLH  | 469   | >FBXW7-R46 STVLCMHLHE | 942   | 473   |
| >FBXW7-R46 STVRCMHLH  | 216   | >FBXW7-R46 STVLCMHLH  | 220   | 4     |
| >FBXW7-R46 STVRCMHLH  | 12    | >FBXW7-R46 STVLCMHLHE | 12    | 0     |

|                         |       |                         |       |       |
|-------------------------|-------|-------------------------|-------|-------|
| >FBXW7-R46 STVRCMHL     | 58    | >FBXW7-R46 STVLCMHL     | 117   | 59    |
| >FBXW7-R46 STVRCMHLH    | 24    | >FBXW7-R46 STVLCMHLH    | 95    | 71    |
| >FBXW7-R46 STVRCMHLHI   | 311   | >FBXW7-R46 STVLCMHLHI   | 1027  | 716   |
| >FBXW7-R46 STVRCMHLHII  | 123   | >FBXW7-R46 STVLCMHLHII  | 474   | 351   |
| >FBXW7-R46 STVRCMHLHIII | 78    | >FBXW7-R46 STVLCMHLHIII | 151   | 73    |
| >FBXW7-R46 STVRCMHLHIV  | 22    | >FBXW7-R46 STVLCMHLHIV  | 22    | 0     |
| >FBXW7-R46 STVRCMHL     | 55    | >FBXW7-R46 STVLCMHL     | 42    | 13    |
| >FBXW7-R46 STVRCMHL     | 54    | >FBXW7-R46 STVLCMHL     | 25    | 29    |
| >FBXW7-R46 STVRCMHLH    | 32    | >FBXW7-R46 STVLCMHLH    | 53    | 21    |
| >FBXW7-R46 STVRCMHLH    | 109   | >FBXW7-R46 STVLCMHLH    | 121   | 12    |
| >FBXW7-R46 STVRCMHLHI   | 53    | >FBXW7-R46 STVLCMHLHI   | 60    | 7     |
| >FBXW7-R46 TSTVRCMHL    | 134   | >FBXW7-R46 TSTVLCMHL    | 467   | 333   |
| >FBXW7-R46 TSTVRCMHL    | 2322  | >FBXW7-R46 TSTVLCMHL    | 434   | 1888  |
| >FBXW7-R46 TSTVRCMHL    | 1611  | >FBXW7-R46 TSTVLCMHL    | 407   | 1204  |
| >FBXW7-R46 HTSTVRCM     | 570   | >FBXW7-R46 HTSTVLCM     | 193   | 377   |
| >FBXW7-R46 HTSTVRCMH    | 268   | >FBXW7-R46 HTSTVLCMHI   | 667   | 399   |
| >FBXW7-R46 HTSTVRCMH    | 209   | >FBXW7-R46 HTSTVLCMH    | 464   | 255   |
| >FBXW7-R46 HTSTVRCMH    | 178   | >FBXW7-R46 HTSTVLCMHI   | 271   | 93    |
| >FBXW7-R46 HTSTVRCMH    | 73    | >FBXW7-R46 HTSTVLCMHI   | 90    | 17    |
| >FBXW7-R46 HTSTVRCM     | 491   | >FBXW7-R46 HTSTVLCM     | 139   | 352   |
| >FBXW7-R46 HTSTVRCMH    | 240   | >FBXW7-R46 HTSTVLCMHI   | 141   | 99    |
| >FBXW7-R46 HTSTVRCMH    | 1394  | >FBXW7-R46 HTSTVLCMHI   | 481   | 913   |
| >FBXW7-R46 HTSTVRCM     | 55    | >FBXW7-R46 HTSTVLCM     | 67    | 12    |
| >FBXW7-R46 HTSTVRCMH    | 513   | >FBXW7-R46 HTSTVLCMH    | 323   | 190   |
| >FBXW7-R46 HTSTVRCMH    | 193   | >FBXW7-R46 HTSTVLCMHI   | 165   | 28    |
| >FBXW7-R46 GHTSTVRCM    | 2761  | >FBXW7-R46 GHTSTVLCM    | 392   | 2369  |
| >FBXW7-R46 YGHTSTVR     | 272   | >FBXW7-R46 YGHTSTVL     | 34483 | 34211 |
| >FBXW7-R46 YGHTSTVR     | 3205  | >FBXW7-R46 YGHTSTVL     | 448   | 2757  |
| >FBXW7-R46 YGHTSTVRCM   | 464   | >FBXW7-R46 YGHTSTVLCM   | 305   | 159   |
| >FBXW7-R46 YGHTSTVR     | 20700 | >FBXW7-R46 YGHTSTVL     | 459   | 20241 |
| >FBXW7-R46 YGHTSTVR     | 360   | >FBXW7-R46 YGHTSTVL     | 32183 | 31823 |
| >FBXW7-R46 LYGHTSTVR    | 24789 | >FBXW7-R46 LYGHTSTVL    | 216   | 24573 |
| >FBXW7-R46 LYGHTSTVR    | 7290  | >FBXW7-R46 LYGHTSTVL    | 428   | 6862  |
| >FBXW7-R46 LYGHTSTVR    | 2757  | >FBXW7-R46 LYGHTSTVL    | 14    | 2743  |
| >FBXW7-R46 LYGHTSTVR    | 412   | >FBXW7-R46 LYGHTSTVL    | 15487 | 15075 |
| >FBXW7-R46 LYGHTSTVR    | 69    | >FBXW7-R46 LYGHTSTVL    | 28118 | 28049 |
| >FBXW7-R46 TLYGHTSTVR   | 10902 | >FBXW7-R46 TLYGHTSTVL   | 120   | 10782 |
| >FBXW7-R46 TLYGHTSTVR   | 5126  | >FBXW7-R46 TLYGHTSTVL   | 21    | 5105  |
| >FBXW7-R46 TLYGHTSTVR   | 2719  | >FBXW7-R46 TLYGHTSTVL   | 20    | 2699  |
| >FBXW7-R46 TLYGHTSTVR   | 403   | >FBXW7-R46 TLYGHTSTVL   | 207   | 196   |
| >FBXW7-R46 TLYGHTSTVR   | 6921  | >FBXW7-R46 TLYGHTSTVL   | 9     | 6912  |
| >FBXW7-R46 TLYGHTSTVR   | 33    | >FBXW7-R46 TLYGHTSTVL   | 48    | 15    |
| >FBXW7-R46 TLYGHTSTVR   | 20465 | >FBXW7-R46 TLYGHTSTVL   | 38    | 20427 |

|                       |       |                       |       |       |
|-----------------------|-------|-----------------------|-------|-------|
| >FBXW7-R46 TLYGHTSTVR | 16584 | >FBXW7-R46 TLYGHTSTVL | 24    | 16560 |
| >FBXW7-R46 TLYGHTSTVR | 24000 | >FBXW7-R46 TLYGHTSTVL | 220   | 23780 |
| >FBXW7-R46 TLYGHTSTVR | 3439  | >FBXW7-R46 TLYGHTSTVL | 5     | 3434  |
| >FBXW7-R46 TLYGHTSTVR | 10    | >FBXW7-R46 TLYGHTSTVL | 13    | 3     |
| >FBXW7-R46 TLYGHTSTVR | 66    | >FBXW7-R46 TLYGHTSTVL | 6998  | 6932  |
| >FBXW7-R46 TLYGHTSTVR | 259   | >FBXW7-R46 TLYGHTSTVL | 28967 | 28708 |
| >FBXW7-R46 TLYGHTSTVR | 82    | >FBXW7-R46 TLYGHTSTVL | 14162 | 14080 |
| >FBXW7-R46 TLYGHTSTVR | 5708  | >FBXW7-R46 TLYGHTSTVL | 93    | 5615  |
| >FBXW7-R46 TLYGHTSTVR | 19    | >FBXW7-R46 TLYGHTSTVL | 18683 | 18664 |
| >FBXW7-R46 TLYGHTSTVR | 9782  | >FBXW7-R46 TLYGHTSTVL | 180   | 9602  |
| >FBXW7-R46 TLYGHTSTVR | 3197  | >FBXW7-R46 TLYGHTSTVL | 222   | 2975  |
| >FBXW7-R46 TLYGHTSTVR | 4156  | >FBXW7-R46 TLYGHTSTVL | 483   | 3673  |
| >FBXW7-R46 TLYGHTSTVR | 15417 | >FBXW7-R46 TLYGHTSTVL | 58    | 15359 |
| >FBXW7-R46 TLYGHTSTVR | 139   | >FBXW7-R46 TLYGHTSTVL | 28727 | 28588 |
| >FBXW7-R47 RDATLRVWD  | 56    | >FBXW7-R47 GDATLRVWD  | 180   | 124   |
| >FBXW7-R47 RDATLRVWD  | 94    | >FBXW7-R47 GDATLRVWD  | 113   | 19    |
| >FBXW7-R47 GSRDATLR   | 394   | >FBXW7-R47 GSGDATLR   | 14965 | 14571 |
| >FBXW7-R47 GSRDATLRV  | 29    | >FBXW7-R47 GSGDATLRV  | 9821  | 9792  |
| >FBXW7-R47 GSRDATLR   | 148   | >FBXW7-R47 GSGDATLR   | 1063  | 915   |
| >FBXW7-R47 GSRDATLRV  | 91    | >FBXW7-R47 GSGDATLRV  | 3371  | 3280  |
| >FBXW7-R47 GSRDATLRVV | 7     | >FBXW7-R47 GSGDATLRV  | 31    | 24    |
| >FBXW7-R47 GSRDATLRVV | 52    | >FBXW7-R47 GSGDATLRV  | 152   | 100   |
| >FBXW7-R47 GSRDATLRVV | 394   | >FBXW7-R47 GSGDATLRV  | 96    | 298   |
| >FBXW7-R47 GSRDATLRV  | 424   | >FBXW7-R47 GSGDATLRV  | 5047  | 4623  |
| >FBXW7-R47 VSGSRDATL  | 317   | >FBXW7-R47 VSGSGDATL  | 12395 | 12078 |
| >FBXW7-R47 VSGSRDATL  | 303   | >FBXW7-R47 VSGSGDATL  | 3892  | 3589  |
| >FBXW7-R47 VSGSRDATLR | 291   | >FBXW7-R47 VSGSGDATLR | 196   | 95    |
| >FBXW7-R47 VSGSRDATL  | 28    | >FBXW7-R47 VSGSGDATL  | 17    | 11    |
| >FBXW7-R47 VSGSRDATL  | 941   | >FBXW7-R47 VSGSGDATL  | 374   | 567   |
| >FBXW7-R47 VVSGSRDATL | 397   | >FBXW7-R47 VVSGSGDATL | 276   | 121   |
| >FBXW7-R47 VVSGSRDATL | 134   | >FBXW7-R47 VVSGSGDATL | 102   | 32    |
| >FBXW7-R47 VVSGSRDATL | 287   | >FBXW7-R47 VVSGSGDATL | 361   | 74    |
| >FBXW7-R47 VVSGSRDATL | 474   | >FBXW7-R47 VVSGSGDATL | 1349  | 875   |
| >FBXW7-R47 VVSGSRDATL | 37    | >FBXW7-R47 VVSGSGDATL | 66    | 29    |
| >FBXW7-R47 VVSGSRDATL | 365   | >FBXW7-R47 VVSGSGDATL | 155   | 210   |
| >FBXW7-R47 RVVSGSRDA1 | 434   | >FBXW7-R47 RVVSGSGDA1 | 221   | 213   |
| >FBXW7-R47 RVVSGSRDA1 | 127   | >FBXW7-R47 RVVSGSGDA1 | 233   | 106   |
| >FBXW7-R47 RVVSGSRDA1 | 472   | >FBXW7-R47 RVVSGSGDA1 | 651   | 179   |
| >FBXW7-R47 RVVSGSRDA1 | 15    | >FBXW7-R47 RVVSGSGDA1 | 14    | 1     |
| >FBXW7-R47 RVVSGSRDA1 | 281   | >FBXW7-R47 RVVSGSGDA1 | 152   | 129   |
| >FBXW7-R47 KRVSRSR    | 224   | >FBXW7-R47 KRVSRSR    | 5911  | 5687  |
| >FBXW7-R47 RDATLRVWD  | 820   | >FBXW7-R47 LDATLRVWD  | 288   | 532   |
| >FBXW7-R47 RDATLRVWD  | 56    | >FBXW7-R47 LDATLRVWD  | 225   | 169   |



|                        |       |                        |      |       |
|------------------------|-------|------------------------|------|-------|
| >FBXW7-R47 RDATELRVWD  | 94    | >FBXW7-R47 LDATELRVWD  | 113  | 19    |
| >FBXW7-R47 SRDATELRV   | 20094 | >FBXW7-R47 SLDATELRV   | 20   | 20074 |
| >FBXW7-R47 SRDATELRVWI | 21573 | >FBXW7-R47 SLDATELRVWI | 83   | 21490 |
| >FBXW7-R47 SRDATELRV   | 17892 | >FBXW7-R47 SLDATELRV   | 60   | 17832 |
| >FBXW7-R47 SRDATELRVWI | 23521 | >FBXW7-R47 SLDATELRVWI | 220  | 23301 |
| >FBXW7-R47 SRDATELRV   | 19114 | >FBXW7-R47 SLDATELRV   | 47   | 19067 |
| >FBXW7-R47 SRDATELRVWI | 22776 | >FBXW7-R47 SLDATELRVWI | 326  | 22450 |
| >FBXW7-R47 SRDATELRV   | 11796 | >FBXW7-R47 SLDATELRV   | 94   | 11702 |
| >FBXW7-R47 SRDATELRVWI | 15454 | >FBXW7-R47 SLDATELRVWI | 218  | 15236 |
| >FBXW7-R47 SRDATELRV   | 4410  | >FBXW7-R47 SLDATELRV   | 2    | 4408  |
| >FBXW7-R47 SRDATELRVWI | 12659 | >FBXW7-R47 SLDATELRVWI | 8    | 12651 |
| >FBXW7-R47 SRDATELRV   | 18257 | >FBXW7-R47 SLDATELRV   | 6    | 18251 |
| >FBXW7-R47 SRDATELRVWI | 17707 | >FBXW7-R47 SLDATELRVWI | 17   | 17690 |
| >FBXW7-R47 SRDATELRV   | 7507  | >FBXW7-R47 SLDATELRV   | 5    | 7502  |
| >FBXW7-R47 SRDATELRVWI | 14213 | >FBXW7-R47 SLDATELRVWI | 13   | 14200 |
| >FBXW7-R47 SRDATELRV   | 20976 | >FBXW7-R47 SLDATELRV   | 13   | 20963 |
| >FBXW7-R47 SRDATELRVWI | 21456 | >FBXW7-R47 SLDATELRVWI | 288  | 21168 |
| >FBXW7-R47 SRDATELRV   | 8046  | >FBXW7-R47 SLDATELRV   | 2    | 8044  |
| >FBXW7-R47 SRDATELRVWI | 25733 | >FBXW7-R47 SLDATELRVWI | 20   | 25713 |
| >FBXW7-R47 SRDATELRV   | 12506 | >FBXW7-R47 SLDATELRV   | 229  | 12277 |
| >FBXW7-R47 LHEKRVVSGS  | 23035 | >FBXW7-R47 LHEKRVVSGS  | 381  | 22654 |
| >FBXW7-R47 GSRDATELR   | 6072  | >FBXW7-R47 GSLDATELR   | 272  | 5800  |
| >FBXW7-R47 GSRDATELR   | 394   | >FBXW7-R47 GSLDATELR   | 8816 | 8422  |
| >FBXW7-R47 GSRDATELRV  | 29    | >FBXW7-R47 GSLDATELRV  | 2930 | 2901  |
| >FBXW7-R47 GSRDATELR   | 148   | >FBXW7-R47 GSLDATELR   | 212  | 64    |
| >FBXW7-R47 GSRDATELR   | 848   | >FBXW7-R47 GSLDATELR   | 395  | 453   |
| >FBXW7-R47 GSRDATELRV  | 91    | >FBXW7-R47 GSLDATELRV  | 256  | 165   |
| >FBXW7-R47 GSRDATELRVV | 7     | >FBXW7-R47 GSLDATELRVV | 6    | 1     |
| >FBXW7-R47 GSRDATELRVV | 52    | >FBXW7-R47 GSLDATELRVV | 68   | 16    |
| >FBXW7-R47 GSRDATELRVV | 394   | >FBXW7-R47 GSLDATELRVV | 30   | 364   |
| >FBXW7-R47 GSRDATELRV  | 424   | >FBXW7-R47 GSLDATELRV  | 1231 | 807   |
| >FBXW7-R47 GSRDATELR   | 2018  | >FBXW7-R47 GSLDATELR   | 329  | 1689  |
| >FBXW7-R47 VSGSRDATEL  | 317   | >FBXW7-R47 VSGSLDATEL  | 3921 | 3604  |
| >FBXW7-R47 VSGSRDATEL  | 303   | >FBXW7-R47 VSGSLDATEL  | 719  | 416   |
| >FBXW7-R47 VSGSRDATELR | 291   | >FBXW7-R47 VSGSLDATELR | 115  | 176   |
| >FBXW7-R47 VSGSRDATEL  | 28    | >FBXW7-R47 VSGSLDATEL  | 47   | 19    |
| >FBXW7-R47 VSGSRDATEL  | 941   | >FBXW7-R47 VSGSLDATEL  | 231  | 710   |
| >FBXW7-R47 VVSGSRDATEL | 397   | >FBXW7-R47 VVSGSLDATEL | 146  | 251   |
| >FBXW7-R47 VVSGSRDATEL | 134   | >FBXW7-R47 VVSGSLDATEL | 78   | 56    |
| >FBXW7-R47 VVSGSRDATEL | 287   | >FBXW7-R47 VVSGSLDATEL | 261  | 26    |
| >FBXW7-R47 VVSGSRDATEL | 474   | >FBXW7-R47 VVSGSLDATEL | 786  | 312   |
| >FBXW7-R47 VVSGSRDATEL | 37    | >FBXW7-R47 VVSGSLDATEL | 57   | 20    |
| >FBXW7-R47 VVSGSRDATEL | 365   | >FBXW7-R47 VVSGSLDATEL | 282  | 83    |

|                       |       |                       |       |       |
|-----------------------|-------|-----------------------|-------|-------|
| >FBXW7-R47 RVVSGSRDAT | 434   | >FBXW7-R47 RVVSGSLDAT | 144   | 290   |
| >FBXW7-R47 RVVSGSRDAT | 127   | >FBXW7-R47 RVVSGSLDAT | 75    | 52    |
| >FBXW7-R47 RVVSGSRDAT | 472   | >FBXW7-R47 RVVSGSLDAT | 836   | 364   |
| >FBXW7-R47 RVVSGSRDAT | 15    | >FBXW7-R47 RVVSGSLDAT | 12    | 3     |
| >FBXW7-R47 RVVSGSRDAT | 281   | >FBXW7-R47 RVVSGSLDAT | 151   | 130   |
| >FBXW7-R47 KRVVSGSR   | 1007  | >FBXW7-R47 KRVVSGSL   | 142   | 865   |
| >FBXW7-R47 KRVVSGSR   | 224   | >FBXW7-R47 KRVVSGSL   | 163   | 61    |
| >FBXW7-R47 KRVVSGSRDA | 1406  | >FBXW7-R47 KRVVSGSLDA | 445   | 961   |
| >FBXW7-R47 KRVVSGSR   | 2730  | >FBXW7-R47 KRVVSGSL   | 175   | 2555  |
| >FBXW7-R47 KRVVSGSRDA | 897   | >FBXW7-R47 KRVVSGSLDA | 265   | 632   |
| >FBXW7-R47 KRVVSGSRDA | 1814  | >FBXW7-R47 KRVVSGSLDA | 489   | 1325  |
| >FBXW7-R47 HEKRVVSGSF | 8364  | >FBXW7-R47 HEKRVVSGSL | 39    | 8325  |
| >FBXW7-R47 HEKRVVSGSF | 1516  | >FBXW7-R47 HEKRVVSGSL | 131   | 1385  |
| >FBXW7-R47 RDATLRVWD  | 820   | >FBXW7-R47 QDATLRVWC  | 344   | 476   |
| >FBXW7-R47 RDATLRVWD  | 56    | >FBXW7-R47 QDATLRVWC  | 353   | 297   |
| >FBXW7-R47 RDATLRVWD  | 94    | >FBXW7-R47 QDATLRVWC  | 130   | 36    |
| >FBXW7-R47 SRDATLRV   | 20094 | >FBXW7-R47 SQDATLRV   | 123   | 19971 |
| >FBXW7-R47 SRDATLRV   | 11796 | >FBXW7-R47 SQDATLRV   | 10    | 11786 |
| >FBXW7-R47 SRDATLRVWI | 15454 | >FBXW7-R47 SQDATLRVW  | 43    | 15411 |
| >FBXW7-R47 SRDATLRV   | 4410  | >FBXW7-R47 SQDATLRV   | 48    | 4362  |
| >FBXW7-R47 SRDATLRV   | 18257 | >FBXW7-R47 SQDATLRV   | 458   | 17799 |
| >FBXW7-R47 SRDATLRV   | 7507  | >FBXW7-R47 SQDATLRV   | 60    | 7447  |
| >FBXW7-R47 GSRDATLR   | 6072  | >FBXW7-R47 GSQDATLR   | 314   | 5758  |
| >FBXW7-R47 GSRDATLR   | 394   | >FBXW7-R47 GSQDATLR   | 12237 | 11843 |
| >FBXW7-R47 GSRDATLRV  | 29    | >FBXW7-R47 GSQDATLRV  | 5968  | 5939  |
| >FBXW7-R47 GSRDATLR   | 148   | >FBXW7-R47 GSQDATLR   | 297   | 149   |
| >FBXW7-R47 GSRDATLR   | 848   | >FBXW7-R47 GSQDATLR   | 449   | 399   |
| >FBXW7-R47 GSRDATLRV  | 91    | >FBXW7-R47 GSQDATLRV  | 1005  | 914   |
| >FBXW7-R47 GSRDATLRVV | 7     | >FBXW7-R47 GSQDATLRV  | 15    | 8     |
| >FBXW7-R47 GSRDATLRVV | 52    | >FBXW7-R47 GSQDATLRV  | 105   | 53    |
| >FBXW7-R47 GSRDATLRVV | 394   | >FBXW7-R47 GSQDATLRV  | 60    | 334   |
| >FBXW7-R47 GSRDATLRV  | 424   | >FBXW7-R47 GSQDATLRV  | 1975  | 1551  |
| >FBXW7-R47 VSGSRDATL  | 317   | >FBXW7-R47 VSGSQDATL  | 4833  | 4516  |
| >FBXW7-R47 VSGSRDATL  | 303   | >FBXW7-R47 VSGSQDATL  | 1530  | 1227  |
| >FBXW7-R47 VSGSRDATLR | 291   | >FBXW7-R47 VSGSQDATLF | 398   | 107   |
| >FBXW7-R47 VSGSRDATL  | 28    | >FBXW7-R47 VSGSQDATL  | 32    | 4     |
| >FBXW7-R47 VVSGSRDATL | 397   | >FBXW7-R47 VVSGSQDATI | 324   | 73    |
| >FBXW7-R47 VVSGSRDATL | 134   | >FBXW7-R47 VVSGSQDATI | 91    | 43    |
| >FBXW7-R47 VVSGSRDATL | 287   | >FBXW7-R47 VVSGSQDATI | 455   | 168   |
| >FBXW7-R47 VVSGSRDATL | 474   | >FBXW7-R47 VVSGSQDATI | 1171  | 697   |
| >FBXW7-R47 VVSGSRDATL | 37    | >FBXW7-R47 VVSGSQDATI | 43    | 6     |
| >FBXW7-R47 VVSGSRDATL | 365   | >FBXW7-R47 VVSGSQDATI | 322   | 43    |
| >FBXW7-R47 RVVSGSRDAT | 434   | >FBXW7-R47 RVVSGSQDA  | 247   | 187   |

|                       |       |                       |       |       |
|-----------------------|-------|-----------------------|-------|-------|
| >FBXW7-R47 RVVSGSRDAT | 127   | >FBXW7-R47 RVVSGSQDA` | 122   | 5     |
| >FBXW7-R47 RVVSGSRDAT | 472   | >FBXW7-R47 RVVSGSQDA` | 1145  | 673   |
| >FBXW7-R47 RVVSGSRDAT | 15    | >FBXW7-R47 RVVSGSQDA` | 12    | 3     |
| >FBXW7-R47 RVVSGSRDAT | 281   | >FBXW7-R47 RVVSGSQDA` | 313   | 32    |
| >FBXW7-R47 KRVSRSRDA/ | 1095  | >FBXW7-R47 KRVSRSQD/  | 495   | 600   |
| >FBXW7-R47 KRVSRSR    | 224   | >FBXW7-R47 KRVSRSQ    | 3002  | 2778  |
| >FBXW7-R48 RVWDIETGQ  | 227   | >FBXW7-R48 MVWDIETGC  | 48    | 179   |
| >FBXW7-R48 RVWDIETGQ  | 698   | >FBXW7-R48 MVWDIETGC  | 111   | 587   |
| >FBXW7-R48 RVWDIETGQ  | 374   | >FBXW7-R48 MVWDIETGC  | 130   | 244   |
| >FBXW7-R48 RVWDIETGQ  | 819   | >FBXW7-R48 MVWDIETGC  | 360   | 459   |
| >FBXW7-R48 RVWDIETGQ  | 93    | >FBXW7-R48 MVWDIETGC  | 40    | 53    |
| >FBXW7-R48 RVWDIETGQ  | 694   | >FBXW7-R48 MVWDIETGC  | 294   | 400   |
| >FBXW7-R48 RVWDIETGQ  | 79    | >FBXW7-R48 MVWDIETGC  | 49    | 30    |
| >FBXW7-R48 RVWDIETGQ  | 225   | >FBXW7-R48 MVWDIETGC  | 41    | 184   |
| >FBXW7-R48 RVWDIETGQ  | 3520  | >FBXW7-R48 MVWDIETGC  | 299   | 3221  |
| >FBXW7-R48 RVWDIETGQ  | 2839  | >FBXW7-R48 MVWDIETGC  | 460   | 2379  |
| >FBXW7-R48 RVWDIETGQ  | 83    | >FBXW7-R48 MVWDIETGC  | 14    | 69    |
| >FBXW7-R48 RVWDIETG   | 359   | >FBXW7-R48 MVWDIETG   | 2773  | 2414  |
| >FBXW7-R48 RVWDIETGQ  | 242   | >FBXW7-R48 MVWDIETGC  | 1765  | 1523  |
| >FBXW7-R48 RVWDIETGQ  | 7370  | >FBXW7-R48 MVWDIETGC  | 96    | 7274  |
| >FBXW7-R48 RVWDIETGQ  | 5876  | >FBXW7-R48 MVWDIETGC  | 387   | 5489  |
| >FBXW7-R48 RVWDIETGQ  | 395   | >FBXW7-R48 MVWDIETGC  | 1801  | 1406  |
| >FBXW7-R48 RVWDIETGQ  | 4171  | >FBXW7-R48 MVWDIETGC  | 159   | 4012  |
| >FBXW7-R48 LRVWDIET   | 23645 | >FBXW7-R48 LMVWDIET   | 481   | 23164 |
| >FBXW7-R48 LRVWDIET   | 18865 | >FBXW7-R48 LMVWDIET   | 279   | 18586 |
| >FBXW7-R48 LRVWDIET   | 23029 | >FBXW7-R48 LMVWDIET   | 28    | 23001 |
| >FBXW7-R48 LRVWDIETG  | 26489 | >FBXW7-R48 LMVWDIETG  | 93    | 26396 |
| >FBXW7-R48 LRVWDIETGC | 28536 | >FBXW7-R48 LMVWDIETG  | 346   | 28190 |
| >FBXW7-R48 LRVWDIETGC | 20262 | >FBXW7-R48 LMVWDIETG  | 42    | 20220 |
| >FBXW7-R48 LRVWDIET   | 25017 | >FBXW7-R48 LMVWDIET   | 410   | 24607 |
| >FBXW7-R48 LRVWDIET   | 30713 | >FBXW7-R48 LMVWDIET   | 19    | 30694 |
| >FBXW7-R48 LRVWDIETGC | 31007 | >FBXW7-R48 LMVWDIETG  | 24    | 30983 |
| >FBXW7-R48 LRVWDIETGC | 27784 | >FBXW7-R48 LMVWDIETG  | 54    | 27730 |
| >FBXW7-R48 VVSGSRDATL | 287   | >FBXW7-R48 VVSGSRDATL | 16060 | 15773 |
| >FBXW7-R48 VVSGSRDATL | 474   | >FBXW7-R48 VVSGSRDATL | 20616 | 20142 |
| >FBXW7-R48 VVSGSRDATL | 37    | >FBXW7-R48 VVSGSRDATL | 19092 | 19055 |
| >FBXW7-R48 VVSGSRDATL | 7741  | >FBXW7-R48 VVSGSRDATL | 62    | 7679  |
| >FBXW7-R48 TLRVWDIET  | 13731 | >FBXW7-R48 TLMVWDIET  | 103   | 13628 |
| >FBXW7-R48 TLRVWDIET  | 5831  | >FBXW7-R48 TLMVWDIET  | 443   | 5388  |
| >FBXW7-R48 TLRVWDIET  | 6177  | >FBXW7-R48 TLMVWDIET  | 496   | 5681  |
| >FBXW7-R48 TLRVWDIET  | 722   | >FBXW7-R48 TLMVWDIET  | 116   | 606   |
| >FBXW7-R48 TLRVWDIETG | 1268  | >FBXW7-R48 TLMVWDIETG | 239   | 1029  |
| >FBXW7-R48 ATLRVWDI   | 310   | >FBXW7-R48 ATLMVWDI   | 227   | 83    |

|                       |       |                       |       |       |
|-----------------------|-------|-----------------------|-------|-------|
| >FBXW7-R48 ATRVWDI    | 218   | >FBXW7-R48 ATLMVWDI   | 202   | 16    |
| >FBXW7-R48 ATRVWDI    | 468   | >FBXW7-R48 ATLMVWDI   | 316   | 152   |
| >FBXW7-R48 ATRVWDI    | 122   | >FBXW7-R48 ATLMVWDI   | 143   | 21    |
| >FBXW7-R48 ATRVWDI    | 1342  | >FBXW7-R48 ATLMVWDI   | 395   | 947   |
| >FBXW7-R48 ATRVWDI    | 239   | >FBXW7-R48 ATLMVWDI   | 187   | 52    |
| >FBXW7-R48 ATRVWDI    | 645   | >FBXW7-R48 ATLMVWDI   | 487   | 158   |
| >FBXW7-R48 ATRVWDI    | 148   | >FBXW7-R48 ATLMVWDI   | 147   | 1     |
| >FBXW7-R48 RDATLRVW   | 3198  | >FBXW7-R48 RDATLMVW   | 382   | 2816  |
| >FBXW7-R48 RDATLRVWD  | 56    | >FBXW7-R48 RDATLMVWI  | 23    | 33    |
| >FBXW7-R48 RDATLRVWD  | 94    | >FBXW7-R48 RDATLMVWI  | 42    | 52    |
| >FBXW7-R48 GSRDATLR   | 394   | >FBXW7-R48 GSRDATLM   | 257   | 137   |
| >FBXW7-R48 GSRDATLRV  | 29    | >FBXW7-R48 GSRDATLMV  | 25    | 4     |
| >FBXW7-R48 GSRDATLR   | 148   | >FBXW7-R48 GSRDATLM   | 19694 | 19546 |
| >FBXW7-R48 GSRDATLR   | 10648 | >FBXW7-R48 GSRDATLM   | 15    | 10633 |
| >FBXW7-R48 GSRDATLRV  | 91    | >FBXW7-R48 GSRDATLMV  | 163   | 72    |
| >FBXW7-R48 GSRDATLRVV | 7     | >FBXW7-R48 GSRDATLMV  | 6     | 1     |
| >FBXW7-R48 GSRDATLRVV | 52    | >FBXW7-R48 GSRDATLMV  | 52    | 0     |
| >FBXW7-R48 GSRDATLRVV | 394   | >FBXW7-R48 GSRDATLMV  | 44    | 350   |
| >FBXW7-R48 GSRDATLR   | 12774 | >FBXW7-R48 GSRDATLM   | 183   | 12591 |
| >FBXW7-R48 GSRDATLRV  | 424   | >FBXW7-R48 GSRDATLMV  | 172   | 252   |
| >FBXW7-R48 SGSRDATLRV | 633   | >FBXW7-R48 SGSRDATLM  | 68    | 565   |
| >FBXW7-R48 SGSRDATLR  | 9774  | >FBXW7-R48 SGSRDATLM  | 71    | 9703  |
| >FBXW7-R48 VSGSRDATLR | 291   | >FBXW7-R48 VSGSRDATLM | 35369 | 35078 |
| >FBXW7-R48 VSGSRDATLR | 19063 | >FBXW7-R48 VSGSRDATLM | 178   | 18885 |
| >FBXW7-R48 VSGSRDATLR | 19545 | >FBXW7-R48 VSGSRDATLM | 64    | 19481 |
| >FBXW7-R48 RVWDIETGQ  | 227   | >FBXW7-R48 TVWDIETGQ  | 446   | 219   |
| >FBXW7-R48 RVWDIETGQ  | 374   | >FBXW7-R48 TVWDIETGQ  | 1063  | 689   |
| >FBXW7-R48 RVWDIETGQ  | 93    | >FBXW7-R48 TVWDIETGQ  | 452   | 359   |
| >FBXW7-R48 RVWDIETGQ  | 79    | >FBXW7-R48 TVWDIETGQ  | 180   | 101   |
| >FBXW7-R48 RVWDIETGQ  | 225   | >FBXW7-R48 TVWDIETGQ  | 323   | 98    |
| >FBXW7-R48 RVWDIETGQ  | 83    | >FBXW7-R48 TVWDIETGQ  | 115   | 32    |
| >FBXW7-R48 RVWDIETG   | 359   | >FBXW7-R48 TVWDIETG   | 5985  | 5626  |
| >FBXW7-R48 RVWDIETGQ  | 242   | >FBXW7-R48 TVWDIETGQ  | 3723  | 3481  |
| >FBXW7-R48 RVWDIETGQ  | 7370  | >FBXW7-R48 TVWDIETGQ  | 276   | 7094  |
| >FBXW7-R48 RVWDIETGQ  | 395   | >FBXW7-R48 TVWDIETGQ  | 6729  | 6334  |
| >FBXW7-R48 VVSGSRDATL | 287   | >FBXW7-R48 VVSGSRDATL | 21308 | 21021 |
| >FBXW7-R48 VVSGSRDATL | 474   | >FBXW7-R48 VVSGSRDATL | 23125 | 22651 |
| >FBXW7-R48 VVSGSRDATL | 37    | >FBXW7-R48 VVSGSRDATL | 21365 | 21328 |
| >FBXW7-R48 TLRVWDIET  | 722   | >FBXW7-R48 TLTVWDIET  | 129   | 593   |
| >FBXW7-R48 TLRVWDIETG | 1268  | >FBXW7-R48 TLTVWDIETG | 273   | 995   |
| >FBXW7-R48 ATRVWDI    | 310   | >FBXW7-R48 ATLTVWDI   | 204   | 106   |
| >FBXW7-R48 ATRVWDI    | 218   | >FBXW7-R48 ATLTVWDI   | 234   | 16    |
| >FBXW7-R48 ATRVWDI    | 468   | >FBXW7-R48 ATLTVWDI   | 352   | 116   |

|                       |      |                       |       |       |
|-----------------------|------|-----------------------|-------|-------|
| >FBXW7-R48 ATLRVWDI   | 122  | >FBXW7-R48 ATLTVWDI   | 144   | 22    |
| >FBXW7-R48 ATLRVWDI   | 239  | >FBXW7-R48 ATLTVWDI   | 160   | 79    |
| >FBXW7-R48 ATLRVWDI   | 148  | >FBXW7-R48 ATLTVWDI   | 162   | 14    |
| >FBXW7-R48 RDATLRVWD  | 56   | >FBXW7-R48 RDATLTVWD  | 18    | 38    |
| >FBXW7-R48 RDATLRVWD  | 94   | >FBXW7-R48 RDATLTVWD  | 35    | 59    |
| >FBXW7-R48 SRDATLRV   | 1749 | >FBXW7-R48 SRDATLTV   | 295   | 1454  |
| >FBXW7-R48 GSRDATLR   | 394  | >FBXW7-R48 GSRDATLT   | 1630  | 1236  |
| >FBXW7-R48 GSRDATLRV  | 29   | >FBXW7-R48 GSRDATLTV  | 15    | 14    |
| >FBXW7-R48 GSRDATLR   | 148  | >FBXW7-R48 GSRDATLT   | 21411 | 21263 |
| >FBXW7-R48 GSRDATLRV  | 91   | >FBXW7-R48 GSRDATLTV  | 64    | 27    |
| >FBXW7-R48 GSRDATLRVV | 7    | >FBXW7-R48 GSRDATLTVV | 5     | 2     |
| >FBXW7-R48 GSRDATLRVV | 52   | >FBXW7-R48 GSRDATLTVV | 60    | 8     |
| >FBXW7-R48 GSRDATLRVV | 394  | >FBXW7-R48 GSRDATLTVV | 69    | 325   |
| >FBXW7-R48 GSRDATLRV  | 424  | >FBXW7-R48 GSRDATLTV  | 233   | 191   |
| >FBXW7-R48 SGSRDATLRV | 633  | >FBXW7-R48 SGSRDATLTV | 121   | 512   |
| >FBXW7-R48 VSGSRDATLR | 291  | >FBXW7-R48 VSGSRDATLT | 35047 | 34756 |
| >FBXW7-R50 RCVQYDGR   | 60   | >FBXW7-R50 CCVQYDGR   | 159   | 99    |
| >FBXW7-R50 RCVQYDGRR  | 63   | >FBXW7-R50 CCVQYDGRR  | 228   | 165   |
| >FBXW7-R50 HVLMGHVAA  | 20   | >FBXW7-R50 HVLMGHVAA  | 14812 | 14792 |
| >FBXW7-R50 HVLMGHVAA  | 39   | >FBXW7-R50 HVLMGHVAA  | 22990 | 22951 |
| >FBXW7-R50 HVLMGHVAA  | 35   | >FBXW7-R50 HVLMGHVAA  | 29286 | 29251 |
| >FBXW7-R50 HVLMGHVAA  | 143  | >FBXW7-R50 HVLMGHVAA  | 36212 | 36069 |
| >FBXW7-R50 AVRCVQYD   | 350  | >FBXW7-R50 AVCCVQYD   | 8921  | 8571  |
| >FBXW7-R50 AVRCVQYDG  | 247  | >FBXW7-R50 AVCCVQYDG  | 10697 | 10450 |
| >FBXW7-R50 AVRCVQYDG  | 262  | >FBXW7-R50 AVCCVQYDG  | 10741 | 10479 |
| >FBXW7-R50 AVRCVQYDG  | 158  | >FBXW7-R50 AVCCVQYDG  | 134   | 24    |
| >FBXW7-R50 AVRCVQYDG  | 82   | >FBXW7-R50 AVCCVQYDG  | 198   | 116   |
| >FBXW7-R50 AVRCVQYDG  | 516  | >FBXW7-R50 AVCCVQYDG  | 161   | 355   |
| >FBXW7-R50 AVRCVQYDG  | 684  | >FBXW7-R50 AVCCVQYDG  | 141   | 543   |
| >FBXW7-R50 AAVRCVQY   | 410  | >FBXW7-R50 AAVCCVQY   | 628   | 218   |
| >FBXW7-R50 AAVRCVQYD  | 383  | >FBXW7-R50 AAVCCVQYD  | 718   | 335   |
| >FBXW7-R50 AAVRCVQYD  | 501  | >FBXW7-R50 AAVCCVQYD  | 416   | 85    |
| >FBXW7-R50 AAVRCVQY   | 513  | >FBXW7-R50 AAVCCVQY   | 345   | 168   |
| >FBXW7-R50 AAVRCVQY   | 181  | >FBXW7-R50 AAVCCVQY   | 96    | 85    |
| >FBXW7-R50 AAVRCVQY   | 14   | >FBXW7-R50 AAVCCVQY   | 15    | 1     |
| >FBXW7-R50 AAVRCVQY   | 558  | >FBXW7-R50 AAVCCVQY   | 113   | 445   |
| >FBXW7-R50 VAAVRCVQY  | 451  | >FBXW7-R50 VAAVCCVQY  | 217   | 234   |
| >FBXW7-R50 VAAVRCVQY  | 675  | >FBXW7-R50 VAAVCCVQY  | 108   | 567   |
| >FBXW7-R50 VAAVRCVQY  | 833  | >FBXW7-R50 VAAVCCVQY  | 257   | 576   |
| >FBXW7-R50 VAAVRCVQY  | 29   | >FBXW7-R50 VAAVCCVQY  | 54    | 25    |
| >FBXW7-R50 VAAVRCVQY  | 703  | >FBXW7-R50 VAAVCCVQY  | 86    | 617   |
| >FBXW7-R50 VAAVRCVQY  | 766  | >FBXW7-R50 VAAVCCVQY  | 266   | 500   |
| >FBXW7-R50 HVAAVRCV   | 3903 | >FBXW7-R50 HVAAVCCV   | 495   | 3408  |

|                       |       |                       |       |       |
|-----------------------|-------|-----------------------|-------|-------|
| >FBXW7-R50 HVAAVRCV   | 294   | >FBXW7-R50 HVAAVCCV   | 61    | 233   |
| >FBXW7-R50 HVAAVRCV   | 398   | >FBXW7-R50 HVAAVCCV   | 165   | 233   |
| >FBXW7-R50 HVAAVRCV   | 1076  | >FBXW7-R50 HVAAVCCV   | 102   | 974   |
| >FBXW7-R50 HVAAVRCV   | 1502  | >FBXW7-R50 HVAAVCCV   | 295   | 1207  |
| >FBXW7-R50 HVAAVRCV   | 531   | >FBXW7-R50 HVAAVCCV   | 48    | 483   |
| >FBXW7-R50 HVAAVRCV   | 3068  | >FBXW7-R50 HVAAVCCV   | 178   | 2890  |
| >FBXW7-R50 HVAAVRCV   | 322   | >FBXW7-R50 HVAAVCCV   | 34    | 288   |
| >FBXW7-R50 HVAAVRCVQ  | 451   | >FBXW7-R50 HVAAVCCVQ  | 541   | 90    |
| >FBXW7-R50 HVAAVRCVQ  | 228   | >FBXW7-R50 HVAAVCCVQ  | 189   | 39    |
| >FBXW7-R50 HVAAVRCVQ  | 142   | >FBXW7-R50 HVAAVCCVQ  | 188   | 46    |
| >FBXW7-R50 HVAAVRCVQ  | 294   | >FBXW7-R50 HVAAVCCVQ  | 310   | 16    |
| >FBXW7-R50 HVAAVRCVQ  | 80    | >FBXW7-R50 HVAAVCCVQ  | 140   | 60    |
| >FBXW7-R50 HVAAVRCV   | 9     | >FBXW7-R50 HVAAVCCV   | 7     | 2     |
| >FBXW7-R50 HVAAVRCV   | 320   | >FBXW7-R50 HVAAVCCV   | 97    | 223   |
| >FBXW7-R50 HVAAVRCVQ  | 373   | >FBXW7-R50 HVAAVCCVQ  | 385   | 12    |
| >FBXW7-R50 HVAAVRCVQ  | 192   | >FBXW7-R50 HVAAVCCVQ  | 160   | 32    |
| >FBXW7-R50 HVAAVRCVQ  | 33    | >FBXW7-R50 HVAAVCCVQ  | 35    | 2     |
| >FBXW7-R50 GHVAAVRCV  | 876   | >FBXW7-R50 GHVAAVCCV  | 459   | 417   |
| >FBXW7-R50 MGHVA AVR  | 252   | >FBXW7-R50 MGHVA AVC  | 23674 | 23422 |
| >FBXW7-R50 MGHVA AVR  | 108   | >FBXW7-R50 MGHVA AVC  | 38672 | 38564 |
| >FBXW7-R50 LMGHVA AVR | 348   | >FBXW7-R50 LMGHVA AVC | 81    | 267   |
| >FBXW7-R50 LMGHVA AVR | 129   | >FBXW7-R50 LMGHVA AVC | 46    | 83    |
| >FBXW7-R50 LMGHVA AVR | 48    | >FBXW7-R50 LMGHVA AVC | 34    | 14    |
| >FBXW7-R50 LMGHVA AVR | 805   | >FBXW7-R50 LMGHVA AVC | 159   | 646   |
| >FBXW7-R50 LMGHVA AVR | 10813 | >FBXW7-R50 LMGHVA AVC | 103   | 10710 |
| >FBXW7-R50 LMGHVA AVR | 170   | >FBXW7-R50 LMGHVA AVC | 546   | 376   |
| >FBXW7-R50 LMGHVA AVR | 5     | >FBXW7-R50 LMGHVA AVC | 3     | 2     |
| >FBXW7-R50 LMGHVA AVR | 18665 | >FBXW7-R50 LMGHVA AVC | 419   | 18246 |
| >FBXW7-R50 LMGHVA AVR | 10    | >FBXW7-R50 LMGHVA AVC | 4     | 6     |
| >FBXW7-R50 LMGHVA AVR | 14    | >FBXW7-R50 LMGHVA AVC | 7     | 7     |
| >FBXW7-R50 LMGHVA AVR | 11    | >FBXW7-R50 LMGHVA AVC | 4     | 7     |
| >FBXW7-R50 LMGHVA AVR | 206   | >FBXW7-R50 LMGHVA AVC | 1076  | 870   |
| >FBXW7-R50 LMGHVA AVR | 6     | >FBXW7-R50 LMGHVA AVC | 3     | 3     |
| >FBXW7-R50 LMGHVA AVR | 85    | >FBXW7-R50 LMGHVA AVC | 20993 | 20908 |
| >FBXW7-R50 LMGHVA AVR | 325   | >FBXW7-R50 LMGHVA AVC | 39680 | 39355 |
| >FBXW7-R50 LMGHVA AVR | 980   | >FBXW7-R50 LMGHVA AVC | 358   | 622   |
| >FBXW7-R50 VLMGHVAAV  | 436   | >FBXW7-R50 VLMGHVAAV  | 951   | 515   |
| >FBXW7-R50 VLMGHVAAV  | 2928  | >FBXW7-R50 VLMGHVAAV  | 19    | 2909  |
| >FBXW7-R50 VLMGHVAAV  | 31    | >FBXW7-R50 VLMGHVAAV  | 84    | 53    |
| >FBXW7-R50 VLMGHVAAV  | 13744 | >FBXW7-R50 VLMGHVAAV  | 145   | 13599 |
| >FBXW7-R50 VLMGHVAAV  | 454   | >FBXW7-R50 VLMGHVAAV  | 297   | 157   |
| >FBXW7-R50 VLMGHVAAV  | 9109  | >FBXW7-R50 VLMGHVAAV  | 44    | 9065  |
| >FBXW7-R50 VLMGHVAAV  | 53    | >FBXW7-R50 VLMGHVAAV  | 44    | 9     |

|                       |      |                       |       |       |
|-----------------------|------|-----------------------|-------|-------|
| >FBXW7-R50 VLMGHVAAV  | 2030 | >FBXW7-R50 VLMGHVAAV  | 18    | 2012  |
| >FBXW7-R50 VLMGHVAAV  | 11   | >FBXW7-R50 VLMGHVAAV  | 28    | 17    |
| >FBXW7-R50 VLMGHVAAV  | 195  | >FBXW7-R50 VLMGHVAAV  | 19008 | 18813 |
| >FBXW7-R50 VLMGHVAAV  | 18   | >FBXW7-R50 VLMGHVAAV  | 12788 | 12770 |
| >FBXW7-R50 VLMGHVAAV  | 477  | >FBXW7-R50 VLMGHVAAV  | 29577 | 29100 |
| >FBXW7-R50 VLMGHVAAV  | 70   | >FBXW7-R50 VLMGHVAAV  | 33955 | 33885 |
| >FBXW7-R50 RCVQYDGR   | 60   | >FBXW7-R50 HCVQYDGR   | 60    | 0     |
| >FBXW7-R50 RCVQYDGRR  | 63   | >FBXW7-R50 HCVQYDGRR  | 75    | 12    |
| >FBXW7-R50 HVLMGHVAAV | 20   | >FBXW7-R50 HVLMGHVAAV | 2918  | 2898  |
| >FBXW7-R50 HVLMGHVAAV | 39   | >FBXW7-R50 HVLMGHVAAV | 10219 | 10180 |
| >FBXW7-R50 HVLMGHVAAV | 35   | >FBXW7-R50 HVLMGHVAAV | 6685  | 6650  |
| >FBXW7-R50 HVLMGHVAAV | 143  | >FBXW7-R50 HVLMGHVAAV | 27572 | 27429 |
| >FBXW7-R50 AVRCVQYD   | 350  | >FBXW7-R50 AVHCVQYD   | 2335  | 1985  |
| >FBXW7-R50 AVRCVQYDG  | 247  | >FBXW7-R50 AVHCVQYDG  | 2285  | 2038  |
| >FBXW7-R50 AVRCVQYDG  | 262  | >FBXW7-R50 AVHCVQYDG  | 2123  | 1861  |
| >FBXW7-R50 AVRCVQYDG  | 158  | >FBXW7-R50 AVHCVQYDG  | 452   | 294   |
| >FBXW7-R50 AVRCVQYDG  | 82   | >FBXW7-R50 AVHCVQYDG  | 129   | 47    |
| >FBXW7-R50 AVRCVQYDG  | 516  | >FBXW7-R50 AVHCVQYDG  | 167   | 349   |
| >FBXW7-R50 AVRCVQYDG  | 684  | >FBXW7-R50 AVHCVQYDG  | 127   | 557   |
| >FBXW7-R50 AAVRCVQY   | 410  | >FBXW7-R50 AAVHCVQY   | 397   | 13    |
| >FBXW7-R50 AAVRCVQY   | 1704 | >FBXW7-R50 AAVHCVQY   | 465   | 1239  |
| >FBXW7-R50 AAVRCVQYD  | 383  | >FBXW7-R50 AAVHCVQYD  | 587   | 204   |
| >FBXW7-R50 AAVRCVQYD  | 501  | >FBXW7-R50 AAVHCVQYD  | 478   | 23    |
| >FBXW7-R50 AAVRCVQY   | 513  | >FBXW7-R50 AAVHCVQY   | 288   | 225   |
| >FBXW7-R50 AAVRCVQY   | 181  | >FBXW7-R50 AAVHCVQY   | 84    | 97    |
| >FBXW7-R50 AAVRCVQY   | 14   | >FBXW7-R50 AAVHCVQY   | 7     | 7     |
| >FBXW7-R50 AAVRCVQY   | 558  | >FBXW7-R50 AAVHCVQY   | 166   | 392   |
| >FBXW7-R50 VAAVRCVQY  | 451  | >FBXW7-R50 VAAVHCVQY  | 122   | 329   |
| >FBXW7-R50 VAAVRCVQY  | 1024 | >FBXW7-R50 VAAVHCVQY  | 428   | 596   |
| >FBXW7-R50 VAAVRCVQY  | 833  | >FBXW7-R50 VAAVHCVQY  | 295   | 538   |
| >FBXW7-R50 VAAVRCVQY  | 29   | >FBXW7-R50 VAAVHCVQY  | 39    | 10    |
| >FBXW7-R50 VAAVRCVQY  | 703  | >FBXW7-R50 VAAVHCVQY  | 94    | 609   |
| >FBXW7-R50 VAAVRCVQY  | 1948 | >FBXW7-R50 VAAVHCVQY  | 470   | 1478  |
| >FBXW7-R50 HVAAVRCV   | 3903 | >FBXW7-R50 HVAAVHCV   | 433   | 3470  |
| >FBXW7-R50 HVAAVRCV   | 294  | >FBXW7-R50 HVAAVHCV   | 33    | 261   |
| >FBXW7-R50 HVAAVRCV   | 398  | >FBXW7-R50 HVAAVHCV   | 129   | 269   |
| >FBXW7-R50 HVAAVRCV   | 1076 | >FBXW7-R50 HVAAVHCV   | 82    | 994   |
| >FBXW7-R50 HVAAVRCV   | 1502 | >FBXW7-R50 HVAAVHCV   | 146   | 1356  |
| >FBXW7-R50 HVAAVRCV   | 531  | >FBXW7-R50 HVAAVHCV   | 50    | 481   |
| >FBXW7-R50 HVAAVRCV   | 3068 | >FBXW7-R50 HVAAVHCV   | 138   | 2930  |
| >FBXW7-R50 HVAAVRCV   | 322  | >FBXW7-R50 HVAAVHCV   | 20    | 302   |
| >FBXW7-R50 HVAAVRCVQ  | 451  | >FBXW7-R50 HVAAVHCVQ  | 280   | 171   |
| >FBXW7-R50 HVAAVRCVQ  | 713  | >FBXW7-R50 HVAAVHCVQ  | 158   | 555   |

|                      |       |                      |       |       |
|----------------------|-------|----------------------|-------|-------|
| >FBXW7-R50 HVAAVRCVQ | 228   | >FBXW7-R50 HVAAVHCVQ | 292   | 64    |
| >FBXW7-R50 HVAAVRCVQ | 142   | >FBXW7-R50 HVAAVHCVQ | 204   | 62    |
| >FBXW7-R50 HVAAVRCVQ | 294   | >FBXW7-R50 HVAAVHCVQ | 281   | 13    |
| >FBXW7-R50 HVAAVRCVQ | 80    | >FBXW7-R50 HVAAVHCVQ | 106   | 26    |
| >FBXW7-R50 HVAAVRCV  | 9     | >FBXW7-R50 HVAAVHCV  | 5     | 4     |
| >FBXW7-R50 HVAAVRCV  | 320   | >FBXW7-R50 HVAAVHCV  | 27    | 293   |
| >FBXW7-R50 HVAAVRCVQ | 373   | >FBXW7-R50 HVAAVHCVQ | 224   | 149   |
| >FBXW7-R50 HVAAVRCVQ | 192   | >FBXW7-R50 HVAAVHCVQ | 122   | 70    |
| >FBXW7-R50 HVAAVRCVQ | 711   | >FBXW7-R50 HVAAVHCVQ | 442   | 269   |
| >FBXW7-R50 HVAAVRCVQ | 784   | >FBXW7-R50 HVAAVHCVQ | 419   | 365   |
| >FBXW7-R50 HVAAVRCVQ | 33    | >FBXW7-R50 HVAAVHCVQ | 31    | 2     |
| >FBXW7-R50 GHVAAVRCV | 1362  | >FBXW7-R50 GHVAAVHCV | 404   | 958   |
| >FBXW7-R50 GHVAAVRCV | 2856  | >FBXW7-R50 GHVAAVHCV | 134   | 2722  |
| >FBXW7-R50 MGHVAAVR  | 252   | >FBXW7-R50 MGHVAAVH  | 16044 | 15792 |
| >FBXW7-R50 MGHVAAVR  | 108   | >FBXW7-R50 MGHVAAVH  | 18164 | 18056 |
| >FBXW7-R50 LMGHVAAVR | 348   | >FBXW7-R50 LMGHVAAVF | 49    | 299   |
| >FBXW7-R50 LMGHVAAVR | 129   | >FBXW7-R50 LMGHVAAVF | 21    | 108   |
| >FBXW7-R50 LMGHVAAVR | 48    | >FBXW7-R50 LMGHVAAVF | 22    | 26    |
| >FBXW7-R50 LMGHVAAVR | 805   | >FBXW7-R50 LMGHVAAVF | 105   | 700   |
| >FBXW7-R50 LMGHVAAVR | 170   | >FBXW7-R50 LMGHVAAVF | 229   | 59    |
| >FBXW7-R50 LMGHVAAVR | 5     | >FBXW7-R50 LMGHVAAVF | 3     | 2     |
| >FBXW7-R50 LMGHVAAVR | 10    | >FBXW7-R50 LMGHVAAVF | 3     | 7     |
| >FBXW7-R50 LMGHVAAVR | 14    | >FBXW7-R50 LMGHVAAVF | 6     | 8     |
| >FBXW7-R50 LMGHVAAVR | 11    | >FBXW7-R50 LMGHVAAVF | 3     | 8     |
| >FBXW7-R50 LMGHVAAVR | 206   | >FBXW7-R50 LMGHVAAVF | 347   | 141   |
| >FBXW7-R50 LMGHVAAVR | 6     | >FBXW7-R50 LMGHVAAVF | 2     | 4     |
| >FBXW7-R50 LMGHVAAVR | 85    | >FBXW7-R50 LMGHVAAVF | 9157  | 9072  |
| >FBXW7-R50 LMGHVAAVR | 325   | >FBXW7-R50 LMGHVAAVF | 22080 | 21755 |
| >FBXW7-R50 LMGHVAAVR | 4352  | >FBXW7-R50 LMGHVAAVF | 209   | 4143  |
| >FBXW7-R50 VLMGHVAAV | 436   | >FBXW7-R50 VLMGHVAAV | 360   | 76    |
| >FBXW7-R50 VLMGHVAAV | 1560  | >FBXW7-R50 VLMGHVAAV | 442   | 1118  |
| >FBXW7-R50 VLMGHVAAV | 31    | >FBXW7-R50 VLMGHVAAV | 41    | 10    |
| >FBXW7-R50 VLMGHVAAV | 454   | >FBXW7-R50 VLMGHVAAV | 164   | 290   |
| >FBXW7-R50 VLMGHVAAV | 53    | >FBXW7-R50 VLMGHVAAV | 89    | 36    |
| >FBXW7-R50 VLMGHVAAV | 11    | >FBXW7-R50 VLMGHVAAV | 14    | 3     |
| >FBXW7-R50 VLMGHVAAV | 195   | >FBXW7-R50 VLMGHVAAV | 3917  | 3722  |
| >FBXW7-R50 VLMGHVAAV | 18    | >FBXW7-R50 VLMGHVAAV | 2795  | 2777  |
| >FBXW7-R50 VLMGHVAAV | 477   | >FBXW7-R50 VLMGHVAAV | 16770 | 16293 |
| >FBXW7-R50 VLMGHVAAV | 70    | >FBXW7-R50 VLMGHVAAV | 12477 | 12407 |
| >FBXW7-R50 VLMGHVAAV | 7397  | >FBXW7-R50 VLMGHVAAV | 441   | 6956  |
| >FBXW7-R50 RCVQYDGR  | 60    | >FBXW7-R50 LCVQYDGR  | 455   | 395   |
| >FBXW7-R50 RCVQYDGRR | 63    | >FBXW7-R50 LCVQYDGRR | 498   | 435   |
| >FBXW7-R50 VRCVQYDGR | 20636 | >FBXW7-R50 VLCVQYDGR | 428   | 20208 |



|                      |       |                       |       |       |
|----------------------|-------|-----------------------|-------|-------|
| >FBXW7-R50 VRCVQYDGR | 20683 | >FBXW7-R50 VLCVQYDGRI | 17    | 20666 |
| >FBXW7-R50 VRCVQYDGR | 23466 | >FBXW7-R50 VLCVQYDGR  | 289   | 23177 |
| >FBXW7-R50 VRCVQYDGR | 25870 | >FBXW7-R50 VLCVQYDGR  | 10    | 25860 |
| >FBXW7-R50 HVLMGHVAA | 575   | >FBXW7-R50 HVLMGHVAA  | 365   | 210   |
| >FBXW7-R50 HVLMGHVAA | 20    | >FBXW7-R50 HVLMGHVAA  | 6362  | 6342  |
| >FBXW7-R50 HVLMGHVAA | 39    | >FBXW7-R50 HVLMGHVAA  | 8328  | 8289  |
| >FBXW7-R50 HVLMGHVAA | 35    | >FBXW7-R50 HVLMGHVAA  | 17544 | 17509 |
| >FBXW7-R50 HVLMGHVAA | 13660 | >FBXW7-R50 HVLMGHVAA  | 347   | 13313 |
| >FBXW7-R50 HVLMGHVAA | 15949 | >FBXW7-R50 HVLMGHVAA  | 277   | 15672 |
| >FBXW7-R50 HVLMGHVAA | 14588 | >FBXW7-R50 HVLMGHVAA  | 52    | 14536 |
| >FBXW7-R50 HVLMGHVAA | 143   | >FBXW7-R50 HVLMGHVAA  | 31604 | 31461 |
| >FBXW7-R50 AVRCVQYD  | 350   | >FBXW7-R50 AVLCVQYD   | 6990  | 6640  |
| >FBXW7-R50 AVRCVQYDG | 247   | >FBXW7-R50 AVLCVQYDGI | 8311  | 8064  |
| >FBXW7-R50 AVRCVQYDG | 262   | >FBXW7-R50 AVLCVQYDGI | 8245  | 7983  |
| >FBXW7-R50 AVRCVQYDG | 158   | >FBXW7-R50 AVLCVQYDGI | 208   | 50    |
| >FBXW7-R50 AVRCVQYDG | 82    | >FBXW7-R50 AVLCVQYDGI | 142   | 60    |
| >FBXW7-R50 AVRCVQYDG | 516   | >FBXW7-R50 AVLCVQYDGI | 194   | 322   |
| >FBXW7-R50 AVRCVQYDG | 684   | >FBXW7-R50 AVLCVQYDGI | 353   | 331   |
| >FBXW7-R50 AVRCVQYDG | 1992  | >FBXW7-R50 AVLCVQYDGI | 499   | 1493  |
| >FBXW7-R50 AAVRCVQY  | 410   | >FBXW7-R50 AAVLCVQY   | 983   | 573   |
| >FBXW7-R50 AAVRCVQYD | 383   | >FBXW7-R50 AAVLCVQYD  | 683   | 300   |
| >FBXW7-R50 AAVRCVQY  | 181   | >FBXW7-R50 AAVLCVQY   | 470   | 289   |
| >FBXW7-R50 AAVRCVQY  | 14    | >FBXW7-R50 AAVLCVQY   | 10    | 4     |
| >FBXW7-R50 AAVRCVQY  | 558   | >FBXW7-R50 AAVLCVQY   | 284   | 274   |
| >FBXW7-R50 VAAVRCVQY | 451   | >FBXW7-R50 VAAVLCVQY  | 142   | 309   |
| >FBXW7-R50 VAAVRCVQY | 675   | >FBXW7-R50 VAAVLCVQY  | 335   | 340   |
| >FBXW7-R50 VAAVRCVQY | 29    | >FBXW7-R50 VAAVLCVQY  | 56    | 27    |
| >FBXW7-R50 VAAVRCVQY | 703   | >FBXW7-R50 VAAVLCVQY  | 126   | 577   |
| >FBXW7-R50 VAAVRCVQY | 2589  | >FBXW7-R50 VAAVLCVQY  | 279   | 2310  |
| >FBXW7-R50 VAAVRCVQY | 766   | >FBXW7-R50 VAAVLCVQY  | 307   | 459   |
| >FBXW7-R50 VAAVRCVQY | 1948  | >FBXW7-R50 VAAVLCVQY  | 455   | 1493  |
| >FBXW7-R50 HVAAVRCV  | 3903  | >FBXW7-R50 HVAAVLCV   | 172   | 3731  |
| >FBXW7-R50 HVAAVRCV  | 294   | >FBXW7-R50 HVAAVLCV   | 61    | 233   |
| >FBXW7-R50 HVAAVRCV  | 398   | >FBXW7-R50 HVAAVLCV   | 85    | 313   |
| >FBXW7-R50 HVAAVRCV  | 1076  | >FBXW7-R50 HVAAVLCV   | 35    | 1041  |
| >FBXW7-R50 HVAAVRCV  | 1502  | >FBXW7-R50 HVAAVLCV   | 263   | 1239  |
| >FBXW7-R50 HVAAVRCV  | 531   | >FBXW7-R50 HVAAVLCV   | 53    | 478   |
| >FBXW7-R50 HVAAVRCV  | 3068  | >FBXW7-R50 HVAAVLCV   | 249   | 2819  |
| >FBXW7-R50 HVAAVRCV  | 322   | >FBXW7-R50 HVAAVLCV   | 51    | 271   |
| >FBXW7-R50 HVAAVRCVQ | 451   | >FBXW7-R50 HVAAVLCVQ  | 182   | 269   |
| >FBXW7-R50 HVAAVRCVQ | 713   | >FBXW7-R50 HVAAVLCVQ  | 116   | 597   |
| >FBXW7-R50 HVAAVRCVQ | 228   | >FBXW7-R50 HVAAVLCVQ  | 217   | 11    |
| >FBXW7-R50 HVAAVRCVQ | 142   | >FBXW7-R50 HVAAVLCVQ  | 190   | 48    |

|                       |       |                       |       |       |
|-----------------------|-------|-----------------------|-------|-------|
| >FBXW7-R50 HVAAVRCVQ  | 294   | >FBXW7-R50 HVAAVLCVQ  | 654   | 360   |
| >FBXW7-R50 HVAAVRCVQ  | 80    | >FBXW7-R50 HVAAVLCVQ' | 86    | 6     |
| >FBXW7-R50 HVAAVRCV   | 9     | >FBXW7-R50 HVAAVLCV   | 8     | 1     |
| >FBXW7-R50 HVAAVRCV   | 320   | >FBXW7-R50 HVAAVLCV   | 72    | 248   |
| >FBXW7-R50 HVAAVRCVQ  | 373   | >FBXW7-R50 HVAAVLCVQ' | 103   | 270   |
| >FBXW7-R50 HVAAVRCVQ  | 192   | >FBXW7-R50 HVAAVLCVQ' | 161   | 31    |
| >FBXW7-R50 HVAAVRCVQ  | 969   | >FBXW7-R50 HVAAVLCVQ' | 445   | 524   |
| >FBXW7-R50 HVAAVRCVQ  | 33    | >FBXW7-R50 HVAAVLCVQ' | 23    | 10    |
| >FBXW7-R50 GHVAAVRCV  | 1362  | >FBXW7-R50 GHVAAVLCV  | 317   | 1045  |
| >FBXW7-R50 GHVAAVRCV  | 2856  | >FBXW7-R50 GHVAAVLCV  | 359   | 2497  |
| >FBXW7-R50 MGHVA AVR  | 252   | >FBXW7-R50 MGHVA AVL  | 19175 | 18923 |
| >FBXW7-R50 MGHVA AVR  | 108   | >FBXW7-R50 MGHVA AVL  | 29544 | 29436 |
| >FBXW7-R50 LMGHVA AVR | 348   | >FBXW7-R50 LMGHVA AVL | 60    | 288   |
| >FBXW7-R50 LMGHVA AVR | 13399 | >FBXW7-R50 LMGHVA AVL | 113   | 13286 |
| >FBXW7-R50 LMGHVA AVR | 129   | >FBXW7-R50 LMGHVA AVL | 66    | 63    |
| >FBXW7-R50 LMGHVA AVR | 17872 | >FBXW7-R50 LMGHVA AVL | 142   | 17730 |
| >FBXW7-R50 LMGHVA AVR | 48    | >FBXW7-R50 LMGHVA AVL | 42    | 6     |
| >FBXW7-R50 LMGHVA AVR | 805   | >FBXW7-R50 LMGHVA AVL | 167   | 638   |
| >FBXW7-R50 LMGHVA AVR | 10813 | >FBXW7-R50 LMGHVA AVL | 11    | 10802 |
| >FBXW7-R50 LMGHVA AVR | 170   | >FBXW7-R50 LMGHVA AVL | 241   | 71    |
| >FBXW7-R50 LMGHVA AVR | 5     | >FBXW7-R50 LMGHVA AVL | 4     | 1     |
| >FBXW7-R50 LMGHVA AVR | 18665 | >FBXW7-R50 LMGHVA AVL | 15    | 18650 |
| >FBXW7-R50 LMGHVA AVR | 10    | >FBXW7-R50 LMGHVA AVL | 6     | 4     |
| >FBXW7-R50 LMGHVA AVR | 19440 | >FBXW7-R50 LMGHVA AVL | 61    | 19379 |
| >FBXW7-R50 LMGHVA AVR | 14    | >FBXW7-R50 LMGHVA AVL | 7     | 7     |
| >FBXW7-R50 LMGHVA AVR | 22692 | >FBXW7-R50 LMGHVA AVL | 101   | 22591 |
| >FBXW7-R50 LMGHVA AVR | 11    | >FBXW7-R50 LMGHVA AVL | 6     | 5     |
| >FBXW7-R50 LMGHVA AVR | 18778 | >FBXW7-R50 LMGHVA AVL | 13    | 18765 |
| >FBXW7-R50 LMGHVA AVR | 206   | >FBXW7-R50 LMGHVA AVL | 324   | 118   |
| >FBXW7-R50 LMGHVA AVR | 6     | >FBXW7-R50 LMGHVA AVL | 3     | 3     |
| >FBXW7-R50 LMGHVA AVR | 85    | >FBXW7-R50 LMGHVA AVL | 12847 | 12762 |
| >FBXW7-R50 LMGHVA AVR | 325   | >FBXW7-R50 LMGHVA AVL | 31552 | 31227 |
| >FBXW7-R50 LMGHVA AVR | 4352  | >FBXW7-R50 LMGHVA AVL | 73    | 4279  |
| >FBXW7-R50 LMGHVA AVR | 980   | >FBXW7-R50 LMGHVA AVL | 458   | 522   |
| >FBXW7-R50 LMGHVA AVR | 3936  | >FBXW7-R50 LMGHVA AVL | 394   | 3542  |
| >FBXW7-R50 VLMGHVAAV  | 5720  | >FBXW7-R50 VLMGHVAAV  | 68    | 5652  |
| >FBXW7-R50 VLMGHVAAV  | 5321  | >FBXW7-R50 VLMGHVAAV  | 28    | 5293  |
| >FBXW7-R50 VLMGHVAAV  | 751   | >FBXW7-R50 VLMGHVAAV  | 336   | 415   |
| >FBXW7-R50 VLMGHVAAV  | 4592  | >FBXW7-R50 VLMGHVAAV  | 57    | 4535  |
| >FBXW7-R50 VLMGHVAAV  | 436   | >FBXW7-R50 VLMGHVAAV  | 262   | 174   |
| >FBXW7-R50 VLMGHVAAV  | 2928  | >FBXW7-R50 VLMGHVAAV  | 4     | 2924  |
| >FBXW7-R50 VLMGHVAAV  | 31    | >FBXW7-R50 VLMGHVAAV  | 42    | 11    |
| >FBXW7-R50 VLMGHVAAV  | 13744 | >FBXW7-R50 VLMGHVAAV  | 7     | 13737 |

|                       |       |                       |       |       |
|-----------------------|-------|-----------------------|-------|-------|
| >FBXW7-R50 VLMGHVAAV  | 454   | >FBXW7-R50 VLMGHVAAV  | 419   | 35    |
| >FBXW7-R50 VLMGHVAAV  | 17931 | >FBXW7-R50 VLMGHVAAV  | 35    | 17896 |
| >FBXW7-R50 VLMGHVAAV  | 9109  | >FBXW7-R50 VLMGHVAAV  | 4     | 9105  |
| >FBXW7-R50 VLMGHVAAV  | 53    | >FBXW7-R50 VLMGHVAAV  | 67    | 14    |
| >FBXW7-R50 VLMGHVAAV  | 2030  | >FBXW7-R50 VLMGHVAAV  | 3     | 2027  |
| >FBXW7-R50 VLMGHVAAV  | 11    | >FBXW7-R50 VLMGHVAAV  | 13    | 2     |
| >FBXW7-R50 VLMGHVAAV  | 195   | >FBXW7-R50 VLMGHVAAV  | 10916 | 10721 |
| >FBXW7-R50 VLMGHVAAV  | 18    | >FBXW7-R50 VLMGHVAAV  | 5052  | 5034  |
| >FBXW7-R50 VLMGHVAAV  | 8947  | >FBXW7-R50 VLMGHVAAV  | 232   | 8715  |
| >FBXW7-R50 VLMGHVAAV  | 477   | >FBXW7-R50 VLMGHVAAV  | 24297 | 23820 |
| >FBXW7-R50 VLMGHVAAV  | 70    | >FBXW7-R50 VLMGHVAAV  | 23481 | 23411 |
| >FBXW7-R50 VLMGHVAAV  | 7397  | >FBXW7-R50 VLMGHVAAV  | 137   | 7260  |
| >FBXW7-R50 VLMGHVAAV  | 16432 | >FBXW7-R50 VLMGHVAAV  | 79    | 16353 |
| >FBXW7-R50 RCVQYDGR   | 60    | >FBXW7-R50 PCVQYDGR   | 541   | 481   |
| >FBXW7-R50 RCVQYDGRR  | 63    | >FBXW7-R50 PCVQYDGRR  | 1045  | 982   |
| >FBXW7-R50 HVLMGHVAAV | 20    | >FBXW7-R50 HVLMGHVAAV | 15712 | 15692 |
| >FBXW7-R50 HVLMGHVAAV | 39    | >FBXW7-R50 HVLMGHVAAV | 20760 | 20721 |
| >FBXW7-R50 HVLMGHVAAV | 35    | >FBXW7-R50 HVLMGHVAAV | 23849 | 23814 |
| >FBXW7-R50 HVLMGHVAAV | 143   | >FBXW7-R50 HVLMGHVAAV | 34986 | 34843 |
| >FBXW7-R50 AVRCVQYD   | 350   | >FBXW7-R50 AVPCVQYD   | 14590 | 14240 |
| >FBXW7-R50 AVRCVQYDG  | 247   | >FBXW7-R50 AVPCVQYDG  | 15723 | 15476 |
| >FBXW7-R50 AVRCVQYDG  | 262   | >FBXW7-R50 AVPCVQYDG  | 15915 | 15653 |
| >FBXW7-R50 AVRCVQYDG  | 158   | >FBXW7-R50 AVPCVQYDG  | 743   | 585   |
| >FBXW7-R50 AVRCVQYDG  | 82    | >FBXW7-R50 AVPCVQYDG  | 1204  | 1122  |
| >FBXW7-R50 AVRCVQYDG  | 516   | >FBXW7-R50 AVPCVQYDG  | 74    | 442   |
| >FBXW7-R50 AAVRCVQY   | 410   | >FBXW7-R50 AAVPCVQY   | 547   | 137   |
| >FBXW7-R50 AAVRCVQY   | 1704  | >FBXW7-R50 AAVPCVQY   | 380   | 1324  |
| >FBXW7-R50 AAVRCVQYD  | 383   | >FBXW7-R50 AAVPCVQYD  | 405   | 22    |
| >FBXW7-R50 AAVRCVQYD  | 501   | >FBXW7-R50 AAVPCVQYD  | 423   | 78    |
| >FBXW7-R50 AAVRCVQY   | 513   | >FBXW7-R50 AAVPCVQY   | 305   | 208   |
| >FBXW7-R50 AAVRCVQY   | 181   | >FBXW7-R50 AAVPCVQY   | 180   | 1     |
| >FBXW7-R50 AAVRCVQY   | 14    | >FBXW7-R50 AAVPCVQY   | 4     | 10    |
| >FBXW7-R50 AAVRCVQY   | 558   | >FBXW7-R50 AAVPCVQY   | 190   | 368   |
| >FBXW7-R50 VAAVRCVQY  | 451   | >FBXW7-R50 VAAVPCVQY  | 324   | 127   |
| >FBXW7-R50 VAAVRCVQY  | 833   | >FBXW7-R50 VAAVPCVQY  | 407   | 426   |
| >FBXW7-R50 VAAVRCVQY  | 29    | >FBXW7-R50 VAAVPCVQY  | 28    | 1     |
| >FBXW7-R50 VAAVRCVQY  | 703   | >FBXW7-R50 VAAVPCVQY  | 262   | 441   |
| >FBXW7-R50 VAAVRCVQY  | 766   | >FBXW7-R50 VAAVPCVQY  | 274   | 492   |
| >FBXW7-R50 HVAAVRCV   | 3903  | >FBXW7-R50 HVAAVPCV   | 208   | 3695  |
| >FBXW7-R50 HVAAVRCV   | 294   | >FBXW7-R50 HVAAVPCV   | 104   | 190   |
| >FBXW7-R50 HVAAVRCV   | 398   | >FBXW7-R50 HVAAVPCV   | 145   | 253   |
| >FBXW7-R50 HVAAVRCV   | 1076  | >FBXW7-R50 HVAAVPCV   | 100   | 976   |
| >FBXW7-R50 HVAAVRCV   | 1502  | >FBXW7-R50 HVAAVPCV   | 152   | 1350  |

|                      |      |                      |       |       |
|----------------------|------|----------------------|-------|-------|
| >FBXW7-R50 HVAAVRCV  | 531  | >FBXW7-R50 HVAAVPCV  | 28    | 503   |
| >FBXW7-R50 HVAAVRCV  | 3068 | >FBXW7-R50 HVAAVPCV  | 103   | 2965  |
| >FBXW7-R50 HVAAVRCV  | 322  | >FBXW7-R50 HVAAVPCV  | 44    | 278   |
| >FBXW7-R50 HVAAVRCVQ | 451  | >FBXW7-R50 HVAAVPCVQ | 812   | 361   |
| >FBXW7-R50 HVAAVRCVQ | 713  | >FBXW7-R50 HVAAVPCVQ | 284   | 429   |
| >FBXW7-R50 HVAAVRCVQ | 228  | >FBXW7-R50 HVAAVPCVQ | 115   | 113   |
| >FBXW7-R50 HVAAVRCVQ | 142  | >FBXW7-R50 HVAAVPCVQ | 299   | 157   |
| >FBXW7-R50 HVAAVRCVQ | 294  | >FBXW7-R50 HVAAVPCVQ | 772   | 478   |
| >FBXW7-R50 HVAAVRCVQ | 80   | >FBXW7-R50 HVAAVPCVQ | 69    | 11    |
| >FBXW7-R50 HVAAVRCV  | 9    | >FBXW7-R50 HVAAVPCV  | 12    | 3     |
| >FBXW7-R50 HVAAVRCV  | 320  | >FBXW7-R50 HVAAVPCV  | 35    | 285   |
| >FBXW7-R50 HVAAVRCVQ | 373  | >FBXW7-R50 HVAAVPCVQ | 189   | 184   |
| >FBXW7-R50 HVAAVRCVQ | 192  | >FBXW7-R50 HVAAVPCVQ | 245   | 53    |
| >FBXW7-R50 HVAAVRCVQ | 711  | >FBXW7-R50 HVAAVPCVQ | 400   | 311   |
| >FBXW7-R50 HVAAVRCVQ | 969  | >FBXW7-R50 HVAAVPCVQ | 405   | 564   |
| >FBXW7-R50 HVAAVRCVQ | 33   | >FBXW7-R50 HVAAVPCVQ | 122   | 89    |
| >FBXW7-R50 MGHVAAVR  | 252  | >FBXW7-R50 MGHVAAVP  | 24137 | 23885 |
| >FBXW7-R50 MGHVAAVR  | 108  | >FBXW7-R50 MGHVAAVP  | 35290 | 35182 |
| >FBXW7-R50 LMGHVAAVR | 348  | >FBXW7-R50 LMGHVAAVP | 45    | 303   |
| >FBXW7-R50 LMGHVAAVR | 129  | >FBXW7-R50 LMGHVAAVP | 50    | 79    |
| >FBXW7-R50 LMGHVAAVR | 48   | >FBXW7-R50 LMGHVAAVP | 31    | 17    |
| >FBXW7-R50 LMGHVAAVR | 805  | >FBXW7-R50 LMGHVAAVP | 81    | 724   |
| >FBXW7-R50 LMGHVAAVR | 170  | >FBXW7-R50 LMGHVAAVP | 145   | 25    |
| >FBXW7-R50 LMGHVAAVR | 5    | >FBXW7-R50 LMGHVAAVP | 3     | 2     |
| >FBXW7-R50 LMGHVAAVR | 1318 | >FBXW7-R50 LMGHVAAVP | 328   | 990   |
| >FBXW7-R50 LMGHVAAVR | 10   | >FBXW7-R50 LMGHVAAVP | 5     | 5     |
| >FBXW7-R50 LMGHVAAVR | 14   | >FBXW7-R50 LMGHVAAVP | 6     | 8     |
| >FBXW7-R50 LMGHVAAVR | 11   | >FBXW7-R50 LMGHVAAVP | 3     | 8     |
| >FBXW7-R50 LMGHVAAVR | 206  | >FBXW7-R50 LMGHVAAVP | 419   | 213   |
| >FBXW7-R50 LMGHVAAVR | 6    | >FBXW7-R50 LMGHVAAVP | 3     | 3     |
| >FBXW7-R50 LMGHVAAVR | 85   | >FBXW7-R50 LMGHVAAVP | 21536 | 21451 |
| >FBXW7-R50 LMGHVAAVR | 325  | >FBXW7-R50 LMGHVAAVP | 36227 | 35902 |
| >FBXW7-R50 VLMGHVAAV | 751  | >FBXW7-R50 VLMGHVAAV | 374   | 377   |
| >FBXW7-R50 VLMGHVAAV | 436  | >FBXW7-R50 VLMGHVAAV | 133   | 303   |
| >FBXW7-R50 VLMGHVAAV | 1560 | >FBXW7-R50 VLMGHVAAV | 242   | 1318  |
| >FBXW7-R50 VLMGHVAAV | 31   | >FBXW7-R50 VLMGHVAAV | 27    | 4     |
| >FBXW7-R50 VLMGHVAAV | 454  | >FBXW7-R50 VLMGHVAAV | 96    | 358   |
| >FBXW7-R50 VLMGHVAAV | 53   | >FBXW7-R50 VLMGHVAAV | 57    | 4     |
| >FBXW7-R50 VLMGHVAAV | 11   | >FBXW7-R50 VLMGHVAAV | 16    | 5     |
| >FBXW7-R50 VLMGHVAAV | 195  | >FBXW7-R50 VLMGHVAAV | 15256 | 15061 |
| >FBXW7-R50 VLMGHVAAV | 18   | >FBXW7-R50 VLMGHVAAV | 16726 | 16708 |
| >FBXW7-R50 VLMGHVAAV | 477  | >FBXW7-R50 VLMGHVAAV | 31232 | 30755 |
| >FBXW7-R50 VLMGHVAAV | 70   | >FBXW7-R50 VLMGHVAAV | 30954 | 30884 |

|                      |      |                       |       |       |
|----------------------|------|-----------------------|-------|-------|
| >FBXW7-R50 RCVQYDGR  | 60   | >FBXW7-R50 SCVQYDGR   | 216   | 156   |
| >FBXW7-R50 RCVQYDGRR | 63   | >FBXW7-R50 SCVQYDGRR  | 264   | 201   |
| >FBXW7-R50 HVLMGHVAA | 20   | >FBXW7-R50 HVLMGHVAA  | 10450 | 10430 |
| >FBXW7-R50 HVLMGHVAA | 39   | >FBXW7-R50 HVLMGHVAA  | 15167 | 15128 |
| >FBXW7-R50 HVLMGHVAA | 35   | >FBXW7-R50 HVLMGHVAA  | 15673 | 15638 |
| >FBXW7-R50 HVLMGHVAA | 143  | >FBXW7-R50 HVLMGHVAA  | 31148 | 31005 |
| >FBXW7-R50 AVRCVQYDG | 3847 | >FBXW7-R50 AVSCVQYDGI | 314   | 3533  |
| >FBXW7-R50 AVRCVQYD  | 350  | >FBXW7-R50 AVSCVQYD   | 9490  | 9140  |
| >FBXW7-R50 AVRCVQYDG | 247  | >FBXW7-R50 AVSCVQYDGI | 10928 | 10681 |
| >FBXW7-R50 AVRCVQYDG | 262  | >FBXW7-R50 AVSCVQYDGI | 10961 | 10699 |
| >FBXW7-R50 AVRCVQYDG | 158  | >FBXW7-R50 AVSCVQYDGI | 178   | 20    |
| >FBXW7-R50 AVRCVQYDG | 82   | >FBXW7-R50 AVSCVQYDGI | 259   | 177   |
| >FBXW7-R50 AVRCVQYDG | 516  | >FBXW7-R50 AVSCVQYDGI | 39    | 477   |
| >FBXW7-R50 AVRCVQYDG | 684  | >FBXW7-R50 AVSCVQYDGI | 81    | 603   |
| >FBXW7-R50 AAVRCVQY  | 410  | >FBXW7-R50 AAVSCVQY   | 260   | 150   |
| >FBXW7-R50 AAVRCVQY  | 2017 | >FBXW7-R50 AAVSCVQY   | 489   | 1528  |
| >FBXW7-R50 AAVRCVQYD | 383  | >FBXW7-R50 AAVSCVQYD  | 327   | 56    |
| >FBXW7-R50 AAVRCVQYD | 501  | >FBXW7-R50 AAVSCVQYD  | 242   | 259   |
| >FBXW7-R50 AAVRCVQY  | 513  | >FBXW7-R50 AAVSCVQY   | 283   | 230   |
| >FBXW7-R50 AAVRCVQY  | 181  | >FBXW7-R50 AAVSCVQY   | 72    | 109   |
| >FBXW7-R50 AAVRCVQY  | 14   | >FBXW7-R50 AAVSCVQY   | 7     | 7     |
| >FBXW7-R50 AAVRCVQY  | 558  | >FBXW7-R50 AAVSCVQY   | 177   | 381   |
| >FBXW7-R50 VAAVRCVQY | 451  | >FBXW7-R50 VAAVSCVQY  | 400   | 51    |
| >FBXW7-R50 VAAVRCVQY | 675  | >FBXW7-R50 VAAVSCVQY  | 370   | 305   |
| >FBXW7-R50 VAAVRCVQY | 1024 | >FBXW7-R50 VAAVSCVQY  | 405   | 619   |
| >FBXW7-R50 VAAVRCVQY | 833  | >FBXW7-R50 VAAVSCVQY  | 127   | 706   |
| >FBXW7-R50 VAAVRCVQY | 29   | >FBXW7-R50 VAAVSCVQY  | 11    | 18    |
| >FBXW7-R50 VAAVRCVQY | 703  | >FBXW7-R50 VAAVSCVQY  | 119   | 584   |
| >FBXW7-R50 VAAVRCVQY | 2589 | >FBXW7-R50 VAAVSCVQY  | 289   | 2300  |
| >FBXW7-R50 VAAVRCVQY | 766  | >FBXW7-R50 VAAVSCVQY  | 494   | 272   |
| >FBXW7-R50 VAAVRCVQY | 1948 | >FBXW7-R50 VAAVSCVQY  | 386   | 1562  |
| >FBXW7-R50 HVAAVRCV  | 294  | >FBXW7-R50 HVAAVSCV   | 34    | 260   |
| >FBXW7-R50 HVAAVRCV  | 398  | >FBXW7-R50 HVAAVSCV   | 52    | 346   |
| >FBXW7-R50 HVAAVRCV  | 1076 | >FBXW7-R50 HVAAVSCV   | 99    | 977   |
| >FBXW7-R50 HVAAVRCV  | 1502 | >FBXW7-R50 HVAAVSCV   | 340   | 1162  |
| >FBXW7-R50 HVAAVRCV  | 531  | >FBXW7-R50 HVAAVSCV   | 74    | 457   |
| >FBXW7-R50 HVAAVRCV  | 3068 | >FBXW7-R50 HVAAVSCV   | 234   | 2834  |
| >FBXW7-R50 HVAAVRCV  | 322  | >FBXW7-R50 HVAAVSCV   | 50    | 272   |
| >FBXW7-R50 HVAAVRCVQ | 451  | >FBXW7-R50 HVAAVSCVQ  | 410   | 41    |
| >FBXW7-R50 HVAAVRCVQ | 713  | >FBXW7-R50 HVAAVSCVQ  | 492   | 221   |
| >FBXW7-R50 HVAAVRCVQ | 228  | >FBXW7-R50 HVAAVSCVQ  | 135   | 93    |
| >FBXW7-R50 HVAAVRCVQ | 142  | >FBXW7-R50 HVAAVSCVQ  | 159   | 17    |
| >FBXW7-R50 HVAAVRCVQ | 294  | >FBXW7-R50 HVAAVSCVQ  | 354   | 60    |

|                       |      |                       |       |       |
|-----------------------|------|-----------------------|-------|-------|
| >FBXW7-R50 HVAAVRCVQ  | 80   | >FBXW7-R50 HVAAVSCVQ  | 44    | 36    |
| >FBXW7-R50 HVAAVRCV   | 9    | >FBXW7-R50 HVAAVSCV   | 6     | 3     |
| >FBXW7-R50 HVAAVRCV   | 320  | >FBXW7-R50 HVAAVSCV   | 81    | 239   |
| >FBXW7-R50 HVAAVRCVQ  | 373  | >FBXW7-R50 HVAAVSCVQ  | 172   | 201   |
| >FBXW7-R50 HVAAVRCVQ  | 192  | >FBXW7-R50 HVAAVSCVQ  | 100   | 92    |
| >FBXW7-R50 HVAAVRCVQ  | 711  | >FBXW7-R50 HVAAVSCVQ  | 257   | 454   |
| >FBXW7-R50 HVAAVRCVQ  | 784  | >FBXW7-R50 HVAAVSCVQ  | 150   | 634   |
| >FBXW7-R50 HVAAVRCVQ  | 969  | >FBXW7-R50 HVAAVSCVQ  | 368   | 601   |
| >FBXW7-R50 HVAAVRCVQ  | 33   | >FBXW7-R50 HVAAVSCVQ  | 16    | 17    |
| >FBXW7-R50 GHVAAVRCV  | 876  | >FBXW7-R50 GHVAAVSCVQ | 305   | 571   |
| >FBXW7-R50 GHVAAVRCV  | 2856 | >FBXW7-R50 GHVAAVSCV  | 482   | 2374  |
| >FBXW7-R50 MGHVA AVR  | 252  | >FBXW7-R50 MGHVA AVS  | 22047 | 21795 |
| >FBXW7-R50 MGHVA AVR  | 108  | >FBXW7-R50 MGHVA AVS  | 28702 | 28594 |
| >FBXW7-R50 LMGHVA AVR | 348  | >FBXW7-R50 LMGHVA AVS | 107   | 241   |
| >FBXW7-R50 LMGHVA AVR | 129  | >FBXW7-R50 LMGHVA AVS | 34    | 95    |
| >FBXW7-R50 LMGHVA AVR | 48   | >FBXW7-R50 LMGHVA AVS | 15    | 33    |
| >FBXW7-R50 LMGHVA AVR | 805  | >FBXW7-R50 LMGHVA AVS | 210   | 595   |
| >FBXW7-R50 LMGHVA AVR | 170  | >FBXW7-R50 LMGHVA AVS | 151   | 19    |
| >FBXW7-R50 LMGHVA AVR | 5    | >FBXW7-R50 LMGHVA AVS | 3     | 2     |
| >FBXW7-R50 LMGHVA AVR | 10   | >FBXW7-R50 LMGHVA AVS | 5     | 5     |
| >FBXW7-R50 LMGHVA AVR | 14   | >FBXW7-R50 LMGHVA AVS | 8     | 6     |
| >FBXW7-R50 LMGHVA AVR | 11   | >FBXW7-R50 LMGHVA AVS | 5     | 6     |
| >FBXW7-R50 LMGHVA AVR | 206  | >FBXW7-R50 LMGHVA AVS | 201   | 5     |
| >FBXW7-R50 LMGHVA AVR | 6    | >FBXW7-R50 LMGHVA AVS | 3     | 3     |
| >FBXW7-R50 LMGHVA AVR | 85   | >FBXW7-R50 LMGHVA AVS | 17593 | 17508 |
| >FBXW7-R50 LMGHVA AVR | 325  | >FBXW7-R50 LMGHVA AVS | 31102 | 30777 |
| >FBXW7-R50 LMGHVA AVR | 980  | >FBXW7-R50 LMGHVA AVS | 415   | 565   |
| >FBXW7-R50 VLMGHVAAV  | 751  | >FBXW7-R50 VLMGHVAAV  | 469   | 282   |
| >FBXW7-R50 VLMGHVAAV  | 436  | >FBXW7-R50 VLMGHVAAV  | 187   | 249   |
| >FBXW7-R50 VLMGHVAAV  | 2928 | >FBXW7-R50 VLMGHVAAV  | 193   | 2735  |
| >FBXW7-R50 VLMGHVAAV  | 31   | >FBXW7-R50 VLMGHVAAV  | 29    | 2     |
| >FBXW7-R50 VLMGHVAAV  | 454  | >FBXW7-R50 VLMGHVAAV  | 178   | 276   |
| >FBXW7-R50 VLMGHVAAV  | 53   | >FBXW7-R50 VLMGHVAAV  | 35    | 18    |
| >FBXW7-R50 VLMGHVAAV  | 2030 | >FBXW7-R50 VLMGHVAAV  | 287   | 1743  |
| >FBXW7-R50 VLMGHVAAV  | 11   | >FBXW7-R50 VLMGHVAAV  | 10    | 1     |
| >FBXW7-R50 VLMGHVAAV  | 195  | >FBXW7-R50 VLMGHVAAV  | 14125 | 13930 |
| >FBXW7-R50 VLMGHVAAV  | 18   | >FBXW7-R50 VLMGHVAAV  | 11308 | 11290 |
| >FBXW7-R50 VLMGHVAAV  | 477  | >FBXW7-R50 VLMGHVAAV  | 28160 | 27683 |
| >FBXW7-R50 VLMGHVAAV  | 70   | >FBXW7-R50 VLMGHVAAV  | 28644 | 28574 |
| >FBXW7-R54 RVYSLQFDGI | 173  | >FBXW7-R54 KVYSLQFDGI | 132   | 41    |
| >FBXW7-R54 RVYSLQFDGI | 113  | >FBXW7-R54 KVYSLQFDGI | 111   | 2     |
| >FBXW7-R54 RVYSLQFDGI | 137  | >FBXW7-R54 KVYSLQFDGI | 101   | 36    |
| >FBXW7-R54 RVYSLQFDGI | 162  | >FBXW7-R54 KVYSLQFDGI | 152   | 10    |

|                        |      |                        |      |      |
|------------------------|------|------------------------|------|------|
| >FBXW7-R54 RVYSLQFDGI  | 699  | >FBXW7-R54 KVYSLQFDGI  | 313  | 386  |
| >FBXW7-R54 RVYSLQFDGII | 390  | >FBXW7-R54 KVYSLQFDGII | 375  | 15   |
| >FBXW7-R54 RVYSLQFDGI  | 24   | >FBXW7-R54 KVYSLQFDGI  | 22   | 2    |
| >FBXW7-R54 RVYSLQFDGI  | 84   | >FBXW7-R54 KVYSLQFDGI  | 507  | 423  |
| >FBXW7-R54 RVYSLQFDGI  | 599  | >FBXW7-R54 KVYSLQFDGI  | 445  | 154  |
| >FBXW7-R54 RVYSLQFDGII | 229  | >FBXW7-R54 KVYSLQFDGII | 412  | 183  |
| >FBXW7-R54 NRVYSLQFDC  | 726  | >FBXW7-R54 NKVYSLQFDC  | 495  | 231  |
| >FBXW7-R54 NRVYSLQF    | 45   | >FBXW7-R54 NKVYSLQF    | 8    | 37   |
| >FBXW7-R54 CLHTLQGHTM  | 1449 | >FBXW7-R54 CLHTLQGHTM  | 74   | 1375 |
| >FBXW7-R54 CLHTLQGHTM  | 9262 | >FBXW7-R54 CLHTLQGHTM  | 294  | 8968 |
| >FBXW7-R54 CLHTLQGHTM  | 99   | >FBXW7-R54 CLHTLQGHTM  | 2007 | 1908 |
| >FBXW7-R54 CLHTLQGHTM  | 120  | >FBXW7-R54 CLHTLQGHTM  | 4702 | 4582 |
| >FBXW7-R54 TNRVYSLQF   | 230  | >FBXW7-R54 TNKVYSLQF   | 419  | 189  |
| >FBXW7-R54 HTNRVYSL    | 320  | >FBXW7-R54 HTNKVYSL    | 209  | 111  |
| >FBXW7-R54 HTNRVYSLQF  | 596  | >FBXW7-R54 HTNKVYSLQF  | 491  | 105  |
| >FBXW7-R54 HTNRVYSLQF  | 518  | >FBXW7-R54 HTNKVYSLQF  | 452  | 66   |
| >FBXW7-R54 HTNRVYSL    | 208  | >FBXW7-R54 HTNKVYSL    | 476  | 268  |
| >FBXW7-R54 HTNRVYSLQ   | 439  | >FBXW7-R54 HTNKVYSLQ   | 922  | 483  |
| >FBXW7-R54 HTNRVYSL    | 105  | >FBXW7-R54 HTNKVYSL    | 130  | 25   |
| >FBXW7-R54 HTNRVYSLQF  | 199  | >FBXW7-R54 HTNKVYSLQF  | 243  | 44   |
| >FBXW7-R54 HTNRVYSLQ   | 114  | >FBXW7-R54 HTNKVYSLQ   | 109  | 5    |
| >FBXW7-R54 HTNRVYSL    | 16   | >FBXW7-R54 HTNKVYSL    | 17   | 1    |
| >FBXW7-R54 HTNRVYSL    | 361  | >FBXW7-R54 HTNKVYSL    | 289  | 72   |
| >FBXW7-R54 HTNRVYSLQF  | 257  | >FBXW7-R54 HTNKVYSLQF  | 213  | 44   |
| >FBXW7-R54 HTNRVYSLQF  | 159  | >FBXW7-R54 HTNKVYSLQF  | 158  | 1    |
| >FBXW7-R54 HTNRVYSL    | 173  | >FBXW7-R54 HTNKVYSL    | 107  | 66   |
| >FBXW7-R54 HTNRVYSLQF  | 10   | >FBXW7-R54 HTNKVYSLQF  | 8    | 2    |
| >FBXW7-R54 HTNRVYSLQF  | 166  | >FBXW7-R54 HTNKVYSLQF  | 248  | 82   |
| >FBXW7-R54 HTNRVYSL    | 276  | >FBXW7-R54 HTNKVYSL    | 949  | 673  |
| >FBXW7-R54 HTNRVYSLQF  | 14   | >FBXW7-R54 HTNKVYSLQF  | 18   | 4    |
| >FBXW7-R54 HTNRVYSLQ   | 140  | >FBXW7-R54 HTNKVYSLQ   | 122  | 18   |
| >FBXW7-R54 HTNRVYSLQF  | 74   | >FBXW7-R54 HTNKVYSLQF  | 200  | 126  |
| >FBXW7-R54 HTNRVYSLQF  | 328  | >FBXW7-R54 HTNKVYSLQF  | 294  | 34   |
| >FBXW7-R54 GHTNRVYSLC  | 400  | >FBXW7-R54 GHTNKVYSLC  | 634  | 234  |
| >FBXW7-R54 GHTNRVYSL   | 381  | >FBXW7-R54 GHTNKVYSL   | 1028 | 647  |
| >FBXW7-R54 LQGHTNRVY!  | 430  | >FBXW7-R54 LQGHTNKVY!  | 459  | 29   |
| >FBXW7-R54 LQGHTNRV    | 290  | >FBXW7-R54 LQGHTNKV    | 383  | 93   |
| >FBXW7-R54 LQGHTNRVY!  | 309  | >FBXW7-R54 LQGHTNKVY!  | 444  | 135  |
| >FBXW7-R54 LQGHTNRVY   | 299  | >FBXW7-R54 LQGHTNKVY   | 592  | 293  |
| >FBXW7-R54 LQGHTNRVY   | 36   | >FBXW7-R54 LQGHTNKVY   | 40   | 4    |
| >FBXW7-R54 LQGHTNRVY!  | 88   | >FBXW7-R54 LQGHTNKVY!  | 108  | 20   |
| >FBXW7-R54 LQGHTNRVY   | 238  | >FBXW7-R54 LQGHTNKVY   | 242  | 4    |
| >FBXW7-R54 LQGHTNRV    | 667  | >FBXW7-R54 LQGHTNKV    | 370  | 297  |

|                       |      |                       |      |      |
|-----------------------|------|-----------------------|------|------|
| >FBXW7-R54 LQGHTNRVY  | 15   | >FBXW7-R54 LQGHTNKVY  | 9    | 6    |
| >FBXW7-R54 LQGHTNRVY! | 41   | >FBXW7-R54 LQGHTNKVY! | 44   | 3    |
| >FBXW7-R54 TLQGHTNRV  | 96   | >FBXW7-R54 TLQGHTNKV  | 148  | 52   |
| >FBXW7-R54 TLQGHTNRV  | 12   | >FBXW7-R54 TLQGHTNKV  | 14   | 2    |
| >FBXW7-R54 TLQGHTNRV  | 10   | >FBXW7-R54 TLQGHTNKV  | 10   | 0    |
| >FBXW7-R54 TLQGHTNRV  | 12   | >FBXW7-R54 TLQGHTNKV  | 19   | 7    |
| >FBXW7-R54 TLQGHTNRV  | 24   | >FBXW7-R54 TLQGHTNKV  | 23   | 1    |
| >FBXW7-R54 TLQGHTNRV  | 138  | >FBXW7-R54 TLQGHTNKV  | 92   | 46   |
| >FBXW7-R54 TLQGHTNRV  | 32   | >FBXW7-R54 TLQGHTNKV  | 37   | 5    |
| >FBXW7-R54 TLQGHTNRV  | 2    | >FBXW7-R54 TLQGHTNKV  | 3    | 1    |
| >FBXW7-R54 TLQGHTNR   | 2270 | >FBXW7-R54 TLQGHTNK   | 114  | 2156 |
| >FBXW7-R54 TLQGHTNR   | 2717 | >FBXW7-R54 TLQGHTNK   | 86   | 2631 |
| >FBXW7-R54 TLQGHTNRV^ | 212  | >FBXW7-R54 TLQGHTNKV^ | 289  | 77   |
| >FBXW7-R54 TLQGHTNR   | 67   | >FBXW7-R54 TLQGHTNK   | 1745 | 1678 |
| >FBXW7-R54 TLQGHTNR   | 369  | >FBXW7-R54 TLQGHTNK   | 7627 | 7258 |
| >FBXW7-R54 TLQGHTNR   | 275  | >FBXW7-R54 TLQGHTNK   | 1189 | 914  |
| >FBXW7-R54 TLQGHTNRV^ | 94   | >FBXW7-R54 TLQGHTNKV^ | 126  | 32   |
| >FBXW7-R54 TLQGHTNRV^ | 40   | >FBXW7-R54 TLQGHTNKV^ | 37   | 3    |
| >FBXW7-R54 TLQGHTNR   | 458  | >FBXW7-R54 TLQGHTNK   | 8702 | 8244 |
| >FBXW7-R54 HTLQGHTNR' | 202  | >FBXW7-R54 HTLQGHTNK' | 339  | 137  |
| >FBXW7-R54 HTLQGHTNR' | 151  | >FBXW7-R54 HTLQGHTNK' | 298  | 147  |
| >FBXW7-R54 HTLQGHTNR  | 3454 | >FBXW7-R54 HTLQGHTNK  | 140  | 3314 |
| >FBXW7-R54 HTLQGHTNR  | 2835 | >FBXW7-R54 HTLQGHTNK  | 136  | 2699 |
| >FBXW7-R54 HTLQGHTNR' | 200  | >FBXW7-R54 HTLQGHTNK' | 261  | 61   |
| >FBXW7-R54 HTLQGHTNR' | 84   | >FBXW7-R54 HTLQGHTNK' | 82   | 2    |
| >FBXW7-R54 HTLQGHTNR' | 20   | >FBXW7-R54 HTLQGHTNK' | 34   | 14   |
| >FBXW7-R54 HTLQGHTNR' | 162  | >FBXW7-R54 HTLQGHTNK' | 205  | 43   |
| >FBXW7-R54 HTLQGHTNR  | 2064 | >FBXW7-R54 HTLQGHTNK  | 19   | 2045 |
| >FBXW7-R54 HTLQGHTNR' | 158  | >FBXW7-R54 HTLQGHTNK' | 245  | 87   |
| >FBXW7-R54 HTLQGHTNR  | 15   | >FBXW7-R54 HTLQGHTNK  | 167  | 152  |
| >FBXW7-R54 HTLQGHTNR  | 21   | >FBXW7-R54 HTLQGHTNK  | 365  | 344  |
| >FBXW7-R54 HTLQGHTNR  | 26   | >FBXW7-R54 HTLQGHTNK  | 67   | 41   |
| >FBXW7-R54 HTLQGHTNR' | 10   | >FBXW7-R54 HTLQGHTNK' | 10   | 0    |
| >FBXW7-R54 HTLQGHTNR' | 226  | >FBXW7-R54 HTLQGHTNK' | 278  | 52   |
| >FBXW7-R54 HTLQGHTNR' | 209  | >FBXW7-R54 HTLQGHTNK' | 195  | 14   |
| >FBXW7-R54 HTLQGHTNR' | 276  | >FBXW7-R54 HTLQGHTNK' | 180  | 96   |
| >FBXW7-R54 HTLQGHTNR' | 173  | >FBXW7-R54 HTLQGHTNK' | 240  | 67   |
| >FBXW7-R54 HTLQGHTNR' | 5    | >FBXW7-R54 HTLQGHTNK' | 4    | 1    |
| >FBXW7-R54 HTLQGHTNR' | 483  | >FBXW7-R54 HTLQGHTNK' | 592  | 109  |
| >FBXW7-R54 HTLQGHTNR' | 12   | >FBXW7-R54 HTLQGHTNK' | 11   | 1    |
| >FBXW7-R54 HTLQGHTNR  | 94   | >FBXW7-R54 HTLQGHTNK  | 2532 | 2438 |
| >FBXW7-R67 RIRASNTKLV | 268  | >FBXW7-R67 QIRASNTKLV | 534  | 266  |
| >FBXW7-R67 RIRASNTKLV | 107  | >FBXW7-R67 QIRASNTKLV | 361  | 254  |



|                       |       |                       |       |       |
|-----------------------|-------|-----------------------|-------|-------|
| >FBXW7-R67 RIRASNTK   | 46    | >FBXW7-R67 QIRASNTK   | 219   | 173   |
| >FBXW7-R67 RIRASNTK   | 452   | >FBXW7-R67 QIRASNTK   | 2125  | 1673  |
| >FBXW7-R67 RIRASNTK   | 3     | >FBXW7-R67 QIRASNTK   | 5     | 2     |
| >FBXW7-R67 RIRASNTKL  | 11    | >FBXW7-R67 QIRASNTKL  | 487   | 476   |
| >FBXW7-R67 RIRASNTKLV | 6     | >FBXW7-R67 QIRASNTKLV | 88    | 82    |
| >FBXW7-R67 RIRASNTKLV | 59    | >FBXW7-R67 QIRASNTKLV | 2367  | 2308  |
| >FBXW7-R67 RIRASNTK   | 209   | >FBXW7-R67 QIRASNTK   | 5328  | 5119  |
| >FBXW7-R67 RIRASNTKL  | 108   | >FBXW7-R67 QIRASNTKL  | 4856  | 4748  |
| >FBXW7-R67 RIRASNTKL  | 225   | >FBXW7-R67 QIRASNTKL  | 933   | 708   |
| >FBXW7-R67 RIRASNTKL  | 20    | >FBXW7-R67 QIRASNTKL  | 622   | 602   |
| >FBXW7-R67 RIRASNTKL  | 388   | >FBXW7-R67 QIRASNTKL  | 1910  | 1522  |
| >FBXW7-R67 WRIRASNTKL | 858   | >FBXW7-R67 WQIRASNTKI | 486   | 372   |
| >FBXW7-R67 WRIRASNTKL | 13140 | >FBXW7-R67 WQIRASNTKI | 65    | 13075 |
| >FBXW7-R67 WRIRASNT   | 21788 | >FBXW7-R67 WQIRASNT   | 438   | 21350 |
| >FBXW7-R67 WRIRASNTKL | 4675  | >FBXW7-R67 WQIRASNTKI | 18    | 4657  |
| >FBXW7-R67 WRIRASNTKL | 19027 | >FBXW7-R67 WQIRASNTKI | 292   | 18735 |
| >FBXW7-R67 WRIRASNTK  | 858   | >FBXW7-R67 WQIRASNTK  | 152   | 706   |
| >FBXW7-R67 WRIRASNTKL | 102   | >FBXW7-R67 WQIRASNTKI | 24    | 78    |
| >FBXW7-R67 WRIRASNTKL | 359   | >FBXW7-R67 WQIRASNTKI | 64    | 295   |
| >FBXW7-R67 WRIRASNTK  | 122   | >FBXW7-R67 WQIRASNTK  | 1914  | 1792  |
| >FBXW7-R67 WRIRASNTKL | 17    | >FBXW7-R67 WQIRASNTKI | 609   | 592   |
| >FBXW7-R67 WRIRASNTKL | 257   | >FBXW7-R67 WQIRASNTKI | 3702  | 3445  |
| >FBXW7-R67 WRIRASNTKL | 126   | >FBXW7-R67 WQIRASNTKI | 91    | 35    |
| >FBXW7-R67 WRIRASNTKL | 7640  | >FBXW7-R67 WQIRASNTKI | 336   | 7304  |
| >FBXW7-R67 WRIRASNT   | 449   | >FBXW7-R67 WQIRASNT   | 11265 | 10816 |
| >FBXW7-R67 WRIRASNTKL | 38    | >FBXW7-R67 WQIRASNTKI | 896   | 858   |
| >FBXW7-R67 WRIRASNTK  | 445   | >FBXW7-R67 WQIRASNTK  | 6960  | 6515  |
| >FBXW7-R67 WRIRASNTKL | 71    | >FBXW7-R67 WQIRASNTKI | 1602  | 1531  |
| >FBXW7-R67 WRIRASNTKL | 276   | >FBXW7-R67 WQIRASNTKI | 4690  | 4414  |
| >FBXW7-R67 ESGGSGGVV  | 33    | >FBXW7-R67 ESGGSGGVV  | 4972  | 4939  |
| >FBXW7-R67 VWRIRASNT  | 23    | >FBXW7-R67 VWQIRASNT  | 2890  | 2867  |
| >FBXW7-R67 VWRIRASNT  | 565   | >FBXW7-R67 VWQIRASNT  | 441   | 124   |
| >FBXW7-R67 VVWRIRASN  | 94    | >FBXW7-R67 VVWQIRASN  | 187   | 93    |
| >FBXW7-R67 VVWRIRASN  | 44    | >FBXW7-R67 VVWQIRASN  | 73    | 29    |
| >FBXW7-R67 VVWRIRASN  | 75    | >FBXW7-R67 VVWQIRASN  | 469   | 394   |
| >FBXW7-R67 VVWRIRASN  | 171   | >FBXW7-R67 VVWQIRASN  | 564   | 393   |
| >FBXW7-R67 VVWRIRASN  | 429   | >FBXW7-R67 VVWQIRASN  | 374   | 55    |
| >FBXW7-R67 GSGGVVWRI  | 265   | >FBXW7-R67 GSGGVVWQI  | 193   | 72    |
| >FBXW7-R67 GSGGVVWR   | 312   | >FBXW7-R67 GSGGVVWQ   | 20620 | 20308 |
| >FBXW7-R67 GSGGVVWRI  | 377   | >FBXW7-R67 GSGGVVWQI  | 897   | 520   |
| >FBXW7-R67 GSGGVVWRI  | 313   | >FBXW7-R67 GSGGVVWQI  | 111   | 202   |
| >FBXW7-R67 GSGGVVWRI  | 694   | >FBXW7-R67 GSGGVVWQI  | 410   | 284   |
| >FBXW7-R68 SRNGTEETKL | 159   | >FBXW7-R68 SWNGTEETKI | 13438 | 13279 |

|                       |       |                       |       |       |
|-----------------------|-------|-----------------------|-------|-------|
| >FBXW7-R68 SRNGTEETKL | 26282 | >FBXW7-R68 SWNGTEETKI | 305   | 25977 |
| >FBXW7-R68 NTKLVCAVGS | 196   | >FBXW7-R68 NTKLVCAVGS | 20320 | 20124 |
| >FBXW7-R68 NTKLVCAVGS | 27    | >FBXW7-R68 NTKLVCAVGS | 15831 | 15804 |
| >FBXW7-R68 NTKLVCAVGS | 16    | >FBXW7-R68 NTKLVCAVGS | 15681 | 15665 |
| >FBXW7-R68 NTKLVCAVGS | 25349 | >FBXW7-R68 NTKLVCAVGS | 186   | 25163 |
| >FBXW7-R68 NTKLVCAVGS | 25048 | >FBXW7-R68 NTKLVCAVGS | 385   | 24663 |
| >FBXW7-R68 GSRNGTEETK | 419   | >FBXW7-R68 GSWNGTEET  | 146   | 273   |
| >FBXW7-R68 GSRNGTEETK | 43    | >FBXW7-R68 GSWNGTEET  | 6658  | 6615  |
| >FBXW7-R68 GSRNGTEETK | 55    | >FBXW7-R68 GSWNGTEET  | 77    | 22    |
| >FBXW7-R68 GSRNGTEETK | 61    | >FBXW7-R68 GSWNGTEET  | 273   | 212   |
| >FBXW7-R68 GSRNGTEETK | 4693  | >FBXW7-R68 GSWNGTEET  | 394   | 4299  |
| >FBXW7-R68 LVCAVGSR   | 207   | >FBXW7-R68 LVCAVGSW   | 19329 | 19122 |
| >FBXW7-R68 LVCAVGSR   | 409   | >FBXW7-R68 LVCAVGSW   | 31933 | 31524 |
| >FBXW7-R68 LVCAVGSR   | 78    | >FBXW7-R68 LVCAVGSW   | 23153 | 23075 |
| >FBXW7-R68 LVCAVGSR   | 24782 | >FBXW7-R68 LVCAVGSW   | 158   | 24624 |
| >FBXW7-R68 LVCAVGSR   | 22528 | >FBXW7-R68 LVCAVGSW   | 54    | 22474 |
| >FBXW7-R68 KLVCAVGSR  | 368   | >FBXW7-R68 KLVCAVGSW  | 18266 | 17898 |
| >FBXW7-R68 KLVCAVGSR  | 11690 | >FBXW7-R68 KLVCAVGSW  | 487   | 11203 |
| >FBXW7-R68 KLVCAVGSR  | 21215 | >FBXW7-R68 KLVCAVGSW  | 122   | 21093 |
| >FBXW7-R68 KLVCAVGSR  | 22765 | >FBXW7-R68 KLVCAVGSW  | 55    | 22710 |
| >FBXW7-R68 KLVCAVGSR  | 105   | >FBXW7-R68 KLVCAVGSW  | 29673 | 29568 |
| >FBXW7-R68 TKLVCAVGSR | 32741 | >FBXW7-R68 TKLVCAVGSV | 243   | 32498 |
| >FBXW7-S43 STDRTLKV   | 445   | >FBXW7-S43 FTDRTLKV   | 101   | 344   |
| >FBXW7-S43 STDRTLKV   | 3468  | >FBXW7-S43 FTDRTLKV   | 216   | 3252  |
| >FBXW7-S43 STDRTLKV   | 617   | >FBXW7-S43 FTDRTLKV   | 35    | 582   |
| >FBXW7-S43 STDRTLKVWI | 1677  | >FBXW7-S43 FTDRTLKVWI | 135   | 1542  |
| >FBXW7-S43 STDRTLKV   | 101   | >FBXW7-S43 FTDRTLKV   | 18    | 83    |
| >FBXW7-S43 STDRTLKVWI | 841   | >FBXW7-S43 FTDRTLKVWI | 148   | 693   |
| >FBXW7-S43 STDRTLKV   | 1804  | >FBXW7-S43 FTDRTLKV   | 257   | 1547  |
| >FBXW7-S43 STDRTLKV   | 100   | >FBXW7-S43 FTDRTLKV   | 41    | 59    |
| >FBXW7-S43 STDRTLKV   | 544   | >FBXW7-S43 FTDRTLKV   | 45    | 499   |
| >FBXW7-S43 STDRTLKV   | 61    | >FBXW7-S43 FTDRTLKV   | 26    | 35    |
| >FBXW7-S43 STDRTLKVWI | 851   | >FBXW7-S43 FTDRTLKVWI | 317   | 534   |
| >FBXW7-S43 STDRTLKVW  | 32    | >FBXW7-S43 FTDRTLKVW  | 17    | 15    |
| >FBXW7-S43 STDRTLKVW  | 108   | >FBXW7-S43 FTDRTLKVW  | 124   | 16    |
| >FBXW7-S43 STDRTLKVW  | 38    | >FBXW7-S43 FTDRTLKVW  | 19    | 19    |
| >FBXW7-S43 STDRTLKVW  | 285   | >FBXW7-S43 FTDRTLKVW  | 408   | 123   |
| >FBXW7-S43 STDRTLKVW  | 2711  | >FBXW7-S43 FTDRTLKVW  | 117   | 2594  |
| >FBXW7-S43 GSTDRTLKV  | 2670  | >FBXW7-S43 GFTDRTLKV  | 177   | 2493  |
| >FBXW7-S43 GSTDRTLK   | 34    | >FBXW7-S43 GFTDRTLK   | 1247  | 1213  |
| >FBXW7-S43 GSTDRTLKVW | 11    | >FBXW7-S43 GFTDRTLKVW | 11946 | 11935 |
| >FBXW7-S43 GSTDRTLKVW | 168   | >FBXW7-S43 GFTDRTLKVW | 20495 | 20327 |
| >FBXW7-S43 GSTDRTLKVW | 47    | >FBXW7-S43 GFTDRTLKVW | 6170  | 6123  |

|                         |       |                        |      |       |
|-------------------------|-------|------------------------|------|-------|
| >FBXW7-S43 GSTDRTLK     | 490   | >FBXW7-S43 GFTDRTLK    | 5459 | 4969  |
| >FBXW7-S43 QMRDNIISG    | 9416  | >FBXW7-S43 QMRDNIISG   | 51   | 9365  |
| >FBXW7-S43 QMRDNIISG    | 13070 | >FBXW7-S43 QMRDNIISG   | 98   | 12972 |
| >FBXW7-S43 QMRDNIISG    | 7009  | >FBXW7-S43 QMRDNIISG   | 10   | 6999  |
| >FBXW7-S43 QMRDNIISG    | 19563 | >FBXW7-S43 QMRDNIISG   | 58   | 19505 |
| >FBXW7-S43 SGSTDRTLK    | 752   | >FBXW7-S43 SGFTDRTLK   | 141  | 611   |
| >FBXW7-S43 SGSTDRTLKV   | 1214  | >FBXW7-S43 SGFTDRTLKV  | 268  | 946   |
| >FBXW7-S43 ISGSTDRTLK   | 1173  | >FBXW7-S43 ISGFTDRTLK  | 329  | 844   |
| >FBXW7-S43 ISGSTDRTLK   | 220   | >FBXW7-S43 ISGFTDRTLK  | 155  | 65    |
| >FBXW7-S43 ISGSTDRTLK   | 471   | >FBXW7-S43 ISGFTDRTLK  | 300  | 171   |
| >FBXW7-S43 ISGSTDRTL    | 55    | >FBXW7-S43 ISGFTDRTL   | 37   | 18    |
| >FBXW7-S43 ISGSTDRTL    | 397   | >FBXW7-S43 ISGFTDRTL   | 824  | 427   |
| >FBXW7-S43 ISGSTDRTL    | 471   | >FBXW7-S43 ISGFTDRTL   | 1112 | 641   |
| >FBXW7-S43 IISGSTDRT    | 1882  | >FBXW7-S43 IISGFTDRT   | 395  | 1487  |
| >FBXW7-S43 IISGSTDRTL   | 133   | >FBXW7-S43 IISGFTDRTL  | 51   | 82    |
| >FBXW7-S43 IISGSTDRTL   | 378   | >FBXW7-S43 IISGFTDRTL  | 147  | 231   |
| >FBXW7-S43 IISGSTDRTL   | 234   | >FBXW7-S43 IISGFTDRTL  | 243  | 9     |
| >FBXW7-S43 IISGSTDRTLK  | 70    | >FBXW7-S43 IISGFTDRTLK | 75   | 5     |
| >FBXW7-S43 IISGSTDRTLK  | 33    | >FBXW7-S43 IISGFTDRTLK | 23   | 10    |
| >FBXW7-S43 IISGSTDRTL   | 1208  | >FBXW7-S43 IISGFTDRTL  | 241  | 967   |
| >FBXW7-S43 IISGSTDRT    | 76    | >FBXW7-S43 IISGFTDR    | 50   | 26    |
| >FBXW7-S43 IISGSTDRTLK  | 58    | >FBXW7-S43 IISGFTDRTLK | 40   | 18    |
| >FBXW7-S43 IISGSTDRT    | 658   | >FBXW7-S43 IISGFTDR    | 118  | 540   |
| >FBXW7-S43 IIISGSTDRTL  | 397   | >FBXW7-S43 IIISGFTDRTL | 355  | 42    |
| >FBXW7-S43 IIISGSTDRTL  | 796   | >FBXW7-S43 IIISGFTDRTL | 284  | 512   |
| >FBXW7-S43 IIISGSTDRTL  | 483   | >FBXW7-S43 IIISGFTDRTL | 461  | 22    |
| >FBXW7-S43 IIISGSTDRT   | 1073  | >FBXW7-S43 IIISGFTDR   | 131  | 942   |
| >FBXW7-S43 IIISGSTDRT   | 902   | >FBXW7-S43 IIISGFTDR   | 222  | 680   |
| >FBXW7-S43 IIISGSTDRT   | 76    | >FBXW7-S43 IIISGFTDR   | 55   | 21    |
| >FBXW7-S43 IIISGSTDRT   | 1967  | >FBXW7-S43 IIISGFTDR   | 459  | 1508  |
| >FBXW7-S43 NIIISGSTDRT  | 1209  | >FBXW7-S43 NIIISGFTDR  | 405  | 804   |
| >FBXW7-S43 NIIISGSTDRT  | 1243  | >FBXW7-S43 NIIISGFTDR  | 402  | 841   |
| >FBXW7-S43 NIIISGSTDRT  | 19    | >FBXW7-S43 NIIISGFTDR  | 22   | 3     |
| >FBXW7-S43 DNIIISGSTDRT | 208   | >FBXW7-S43 DNIIISGFTDR | 116  | 92    |
| >FBXW7-S43 MRDNIISGS    | 12938 | >FBXW7-S43 MRDNIISGF   | 224  | 12714 |
| >FBXW7-S43 MRDNIISGS    | 5157  | >FBXW7-S43 MRDNIISGF   | 119  | 5038  |
| >FBXW7-S58 SLTSGMEL     | 98    | >FBXW7-S58 LLTSGMEL    | 119  | 21    |
| >FBXW7-S58 SLTSGMEL     | 20    | >FBXW7-S58 LLTSGMEL    | 17   | 3     |
| >FBXW7-S58 SLTSGMEL     | 46    | >FBXW7-S58 LLTSGMEL    | 40   | 6     |
| >FBXW7-S58 SLTSGMEL     | 384   | >FBXW7-S58 LLTSGMEL    | 188  | 196   |
| >FBXW7-S58 SLTSGMEL     | 29    | >FBXW7-S58 LLTSGMEL    | 32   | 3     |
| >FBXW7-S58 SLTSGMEL     | 91    | >FBXW7-S58 LLTSGMEL    | 72   | 19    |
| >FBXW7-S58 SLTSGMEL     | 12    | >FBXW7-S58 LLTSGMEL    | 30   | 18    |

|                       |       |                       |      |       |
|-----------------------|-------|-----------------------|------|-------|
| >FBXW7-S58 SLTSGMEL   | 1491  | >FBXW7-S58 LLTSGMEL   | 375  | 1116  |
| >FBXW7-S58 SLTSGMEL   | 3     | >FBXW7-S58 LLTSGMEL   | 3    | 0     |
| >FBXW7-S58 SLTSGMELK  | 193   | >FBXW7-S58 LLTSGMELK  | 237  | 44    |
| >FBXW7-S58 SLTSGMELK  | 48    | >FBXW7-S58 LLTSGMELK  | 255  | 207   |
| >FBXW7-S58 SLTSGMELK  | 264   | >FBXW7-S58 LLTSGMELK  | 362  | 98    |
| >FBXW7-S58 QSLTSGMEL  | 17997 | >FBXW7-S58 QLLTSGMEL  | 389  | 17608 |
| >FBXW7-S58 QSLTSGMEL  | 10873 | >FBXW7-S58 QLLTSGMEL  | 217  | 10656 |
| >FBXW7-S58 QSLTSGMEL  | 17724 | >FBXW7-S58 QLLTSGMEL  | 68   | 17656 |
| >FBXW7-S58 QSLTSGMEL  | 19987 | >FBXW7-S58 QLLTSGMEL  | 74   | 19913 |
| >FBXW7-S58 QSLTSGMEL  | 20144 | >FBXW7-S58 QLLTSGMEL  | 124  | 20020 |
| >FBXW7-S58 QSLTSGMEL  | 22436 | >FBXW7-S58 QLLTSGMEL  | 330  | 22106 |
| >FBXW7-S58 QSLTSGMEL  | 25983 | >FBXW7-S58 QLLTSGMEL  | 12   | 25971 |
| >FBXW7-S58 QSLTSGMELK | 120   | >FBXW7-S58 QLLTSGMELK | 48   | 72    |
| >FBXW7-S58 QSLTSGMELK | 45    | >FBXW7-S58 QLLTSGMELK | 157  | 112   |
| >FBXW7-S58 QSLTSGMELK | 404   | >FBXW7-S58 QLLTSGMELK | 1783 | 1379  |
| >FBXW7-S58 QSLTSGMELK | 255   | >FBXW7-S58 QLLTSGMELK | 1136 | 881   |
| >FBXW7-S58 QSLTSGMEL  | 44    | >FBXW7-S58 QLLTSGMEL  | 61   | 17    |
| >FBXW7-S58 QSLTSGMEL  | 13    | >FBXW7-S58 QLLTSGMEL  | 3503 | 3490  |
| >FBXW7-S58 QSLTSGMELK | 157   | >FBXW7-S58 QLLTSGMELK | 3821 | 3664  |
| >FBXW7-S58 HQSLTSGM   | 1775  | >FBXW7-S58 HQLLTSGM   | 415  | 1360  |
| >FBXW7-S58 HQSLTSGMEI | 641   | >FBXW7-S58 HQLLTSGMEI | 169  | 472   |
| >FBXW7-S58 HQSLTSGMEI | 261   | >FBXW7-S58 HQLLTSGMEI | 298  | 37    |
| >FBXW7-S58 HQSLTSGMEI | 1045  | >FBXW7-S58 HQLLTSGMEI | 452  | 593   |
| >FBXW7-S58 HQSLTSGM   | 130   | >FBXW7-S58 HQLLTSGM   | 381  | 251   |
| >FBXW7-S58 HQSLTSGM   | 867   | >FBXW7-S58 HQLLTSGM   | 345  | 522   |
| >FBXW7-S58 HQSLTSGM   | 161   | >FBXW7-S58 HQLLTSGM   | 80   | 81    |
| >FBXW7-S58 HQSLTSGMEI | 68    | >FBXW7-S58 HQLLTSGMEI | 43   | 25    |
| >FBXW7-S58 HQSLTSGM   | 251   | >FBXW7-S58 HQLLTSGM   | 183  | 68    |
| >FBXW7-S58 HQSLTSGMEI | 41    | >FBXW7-S58 HQLLTSGMEI | 36   | 5     |
| >FBXW7-S58 GHQSLTSGM  | 323   | >FBXW7-S58 GHQLLTSGM  | 1485 | 1162  |
| >FBXW7-S58 LTGHQSLTSG | 344   | >FBXW7-S58 LTGHQLLTSG | 260  | 84    |
| >FBXW7-S58 LTGHQSLTSG | 303   | >FBXW7-S58 LTGHQLLTSG | 682  | 379   |
| >FBXW7-S58 LTGHQSLTSG | 16    | >FBXW7-S58 LTGHQLLTSG | 19   | 3     |
| >FBXW7-S58 LTGHQSLTSG | 49    | >FBXW7-S58 LTGHQLLTSG | 61   | 12    |
| >FBXW7-S58 TLTGHQSL   | 38    | >FBXW7-S58 TLTGHQLL   | 30   | 8     |
| >FBXW7-S58 TLTGHQSL   | 149   | >FBXW7-S58 TLTGHQLL   | 282  | 133   |
| >FBXW7-S58 TLTGHQSLT  | 433   | >FBXW7-S58 TLTGHQLLT  | 1530 | 1097  |
| >FBXW7-S58 TLTGHQSL   | 119   | >FBXW7-S58 TLTGHQLL   | 214  | 95    |
| >FBXW7-S58 TLTGHQSL   | 254   | >FBXW7-S58 TLTGHQLL   | 231  | 23    |
| >FBXW7-S58 TLTGHQSL   | 3     | >FBXW7-S58 TLTGHQLL   | 4    | 1     |
| >FBXW7-S58 TLTGHQSLT  | 81    | >FBXW7-S58 TLTGHQLLT  | 118  | 37    |
| >FBXW7-S58 HTLTGHQSL  | 235   | >FBXW7-S58 HTLTGHQLL  | 792  | 557   |
| >FBXW7-S58 HTLTGHQSL  | 1744  | >FBXW7-S58 HTLTGHQLL  | 414  | 1330  |

|                       |       |                       |       |       |
|-----------------------|-------|-----------------------|-------|-------|
| >FBXW7-S58 HTLTGHQSL  | 52    | >FBXW7-S58 HTLTGHQLL  | 62    | 10    |
| >FBXW7-S58 HTLTGHQSLT | 209   | >FBXW7-S58 HTLTGHQLLT | 360   | 151   |
| >FBXW7-S58 HTLTGHQSL  | 315   | >FBXW7-S58 HTLTGHQLL  | 2303  | 1988  |
| >FBXW7-S58 HTLTGHQS   | 2627  | >FBXW7-S58 HTLTGHQL   | 41    | 2586  |
| >FBXW7-S58 HTLTGHQSL  | 116   | >FBXW7-S58 HTLTGHQLL  | 163   | 47    |
| >FBXW7-S58 HTLTGHQS   | 2478  | >FBXW7-S58 HTLTGHQL   | 6     | 2472  |
| >FBXW7-S58 HTLTGHQSL  | 6     | >FBXW7-S58 HTLTGHQLL  | 13    | 7     |
| >FBXW7-S58 HTLTGHQSL  | 388   | >FBXW7-S58 HTLTGHQLL  | 1131  | 743   |
| >FBXW7-S58 HTLTGHQS   | 29331 | >FBXW7-S58 HTLTGHQL   | 68    | 29263 |
| >FBXW7-S58 HTLTGHQSL  | 157   | >FBXW7-S58 HTLTGHQLL  | 70    | 87    |
| >FBXW7-S58 HTLTGHQSL  | 366   | >FBXW7-S58 HTLTGHQLL  | 856   | 490   |
| >FBXW7-S58 IHTLTGHQSL | 528   | >FBXW7-S58 IHTLTGHQLL | 413   | 115   |
| >FBXW7-S58 SLTSGMEL   | 98    | >FBXW7-S58 PLTSGMEL   | 8104  | 8006  |
| >FBXW7-S58 SLTSGMEL   | 20    | >FBXW7-S58 PLTSGMEL   | 688   | 668   |
| >FBXW7-S58 SLTSGMEL   | 46    | >FBXW7-S58 PLTSGMEL   | 3771  | 3725  |
| >FBXW7-S58 SLTSGMEL   | 384   | >FBXW7-S58 PLTSGMEL   | 9415  | 9031  |
| >FBXW7-S58 SLTSGMEL   | 29    | >FBXW7-S58 PLTSGMEL   | 1046  | 1017  |
| >FBXW7-S58 SLTSGMEL   | 91    | >FBXW7-S58 PLTSGMEL   | 4856  | 4765  |
| >FBXW7-S58 SLTSGMEL   | 12    | >FBXW7-S58 PLTSGMEL   | 462   | 450   |
| >FBXW7-S58 SLTSGMEL   | 3     | >FBXW7-S58 PLTSGMEL   | 19    | 16    |
| >FBXW7-S58 SLTSGMELK  | 193   | >FBXW7-S58 PLTSGMELK  | 3926  | 3733  |
| >FBXW7-S58 SLTSGMELK  | 48    | >FBXW7-S58 PLTSGMELK  | 3588  | 3540  |
| >FBXW7-S58 SLTSGMELK  | 264   | >FBXW7-S58 PLTSGMELK  | 6076  | 5812  |
| >FBXW7-S58 QSLTSGMEL  | 24095 | >FBXW7-S58 QPLTSGMEL  | 85    | 24010 |
| >FBXW7-S58 QSLTSGMELK | 120   | >FBXW7-S58 QPLTSGMELK | 4276  | 4156  |
| >FBXW7-S58 QSLTSGMELK | 45    | >FBXW7-S58 QPLTSGMELK | 6457  | 6412  |
| >FBXW7-S58 QSLTSGMELK | 404   | >FBXW7-S58 QPLTSGMELK | 16129 | 15725 |
| >FBXW7-S58 QSLTSGMELK | 255   | >FBXW7-S58 QPLTSGMELK | 7264  | 7009  |
| >FBXW7-S58 QSLTSGMEL  | 18768 | >FBXW7-S58 QPLTSGMEL  | 86    | 18682 |
| >FBXW7-S58 QSLTSGMEL  | 44    | >FBXW7-S58 QPLTSGMEL  | 567   | 523   |
| >FBXW7-S58 QSLTSGMEL  | 13    | >FBXW7-S58 QPLTSGMEL  | 13106 | 13093 |
| >FBXW7-S58 QSLTSGMEL  | 4962  | >FBXW7-S58 QPLTSGMEL  | 367   | 4595  |
| >FBXW7-S58 QSLTSGMELK | 157   | >FBXW7-S58 QPLTSGMELK | 3494  | 3337  |
| >FBXW7-S58 HQSLTSGMEI | 261   | >FBXW7-S58 HQPLTSGMEI | 2783  | 2522  |
| >FBXW7-S58 HQSLTSGM   | 130   | >FBXW7-S58 HQPLTSGM   | 830   | 700   |
| >FBXW7-S58 HQSLTSGM   | 161   | >FBXW7-S58 HQPLTSGM   | 1163  | 1002  |
| >FBXW7-S58 HQSLTSGMEI | 68    | >FBXW7-S58 HQPLTSGMEI | 334   | 266   |
| >FBXW7-S58 HQSLTSGM   | 251   | >FBXW7-S58 HQPLTSGM   | 4098  | 3847  |
| >FBXW7-S58 HQSLTSGMEI | 41    | >FBXW7-S58 HQPLTSGMEI | 740   | 699   |
| >FBXW7-S58 GHQSLTSGM  | 323   | >FBXW7-S58 GHQPLTSGM  | 728   | 405   |
| >FBXW7-S58 TGHQSLTSGM | 508   | >FBXW7-S58 TGHQPLTSGM | 367   | 141   |
| >FBXW7-S58 LTGHQSLTSG | 344   | >FBXW7-S58 LTGHQPLTSG | 273   | 71    |
| >FBXW7-S58 LTGHQSLTSG | 303   | >FBXW7-S58 LTGHQPLTSG | 864   | 561   |

|                       |       |                       |       |       |
|-----------------------|-------|-----------------------|-------|-------|
| >FBXW7-S58 LTGHQSLTSG | 16    | >FBXW7-S58 LTGHQPLTSG | 16    | 0     |
| >FBXW7-S58 LTGHQSLTSG | 49    | >FBXW7-S58 LTGHQPLTSG | 87    | 38    |
| >FBXW7-S58 TLTGHQSL   | 1313  | >FBXW7-S58 TLTGHQPL   | 498   | 815   |
| >FBXW7-S58 TLTGHQSL   | 38    | >FBXW7-S58 TLTGHQPL   | 41    | 3     |
| >FBXW7-S58 TLTGHQSL   | 149   | >FBXW7-S58 TLTGHQPL   | 144   | 5     |
| >FBXW7-S58 TLTGHQSLT  | 433   | >FBXW7-S58 TLTGHQPLT  | 2186  | 1753  |
| >FBXW7-S58 TLTGHQSL   | 119   | >FBXW7-S58 TLTGHQPL   | 88    | 31    |
| >FBXW7-S58 TLTGHQSL   | 882   | >FBXW7-S58 TLTGHQPL   | 462   | 420   |
| >FBXW7-S58 TLTGHQSL   | 254   | >FBXW7-S58 TLTGHQPL   | 121   | 133   |
| >FBXW7-S58 TLTGHQSL   | 3     | >FBXW7-S58 TLTGHQPL   | 4     | 1     |
| >FBXW7-S58 TLTGHQSLT  | 81    | >FBXW7-S58 TLTGHQPLT  | 46    | 35    |
| >FBXW7-S58 HTLTGHQSL  | 564   | >FBXW7-S58 HTLTGHQPL  | 297   | 267   |
| >FBXW7-S58 HTLTGHQSL  | 235   | >FBXW7-S58 HTLTGHQPL  | 345   | 110   |
| >FBXW7-S58 HTLTGHQSL  | 52    | >FBXW7-S58 HTLTGHQPL  | 29    | 23    |
| >FBXW7-S58 HTLTGHQSLT | 1429  | >FBXW7-S58 HTLTGHQPLT | 473   | 956   |
| >FBXW7-S58 HTLTGHQSLT | 209   | >FBXW7-S58 HTLTGHQPLT | 280   | 71    |
| >FBXW7-S58 HTLTGHQSL  | 315   | >FBXW7-S58 HTLTGHQPL  | 329   | 14    |
| >FBXW7-S58 HTLTGHQSL  | 1065  | >FBXW7-S58 HTLTGHQPL  | 246   | 819   |
| >FBXW7-S58 HTLTGHQSL  | 116   | >FBXW7-S58 HTLTGHQPL  | 47    | 69    |
| >FBXW7-S58 HTLTGHQSL  | 501   | >FBXW7-S58 HTLTGHQPL  | 481   | 20    |
| >FBXW7-S58 HTLTGHQSL  | 6     | >FBXW7-S58 HTLTGHQPL  | 6     | 0     |
| >FBXW7-S58 HTLTGHQSL  | 388   | >FBXW7-S58 HTLTGHQPL  | 207   | 181   |
| >FBXW7-S58 HTLTGHQSL  | 157   | >FBXW7-S58 HTLTGHQPL  | 966   | 809   |
| >FBXW7-S58 HTLTGHQSL  | 366   | >FBXW7-S58 HTLTGHQPL  | 1009  | 643   |
| >FBXW7-S58 IHTLTGHQSL | 528   | >FBXW7-S58 IHTLTGHQPL | 374   | 154   |
| >FBXW7-S58 IHTLTGHQSL | 517   | >FBXW7-S58 IHTLTGHQPL | 298   | 219   |
| >FBXW7-S59 SGNADSTV   | 4767  | >FBXW7-S59 FGNADSTV   | 283   | 4484  |
| >FBXW7-S59 SGNADSTV   | 4833  | >FBXW7-S59 FGNADSTV   | 338   | 4495  |
| >FBXW7-S59 SGNADSTVKI | 6250  | >FBXW7-S59 FGNADSTVKI | 429   | 5821  |
| >FBXW7-S59 SGNADSTVKI | 244   | >FBXW7-S59 FGNADSTVKI | 50    | 194   |
| >FBXW7-S59 SGNADSTVKI | 2466  | >FBXW7-S59 FGNADSTVKI | 130   | 2336  |
| >FBXW7-S59 VSGNADSTVI | 195   | >FBXW7-S59 VFGNADSTVI | 1832  | 1637  |
| >FBXW7-S59 VSGNADSTVI | 7717  | >FBXW7-S59 VFGNADSTVI | 146   | 7571  |
| >FBXW7-S59 VSGNADSTVI | 16921 | >FBXW7-S59 VFGNADSTVI | 227   | 16694 |
| >FBXW7-S59 VSGNADSTVI | 452   | >FBXW7-S59 VFGNADSTVI | 27387 | 26935 |
| >FBXW7-S59 VSGNADSTV  | 207   | >FBXW7-S59 VFGNADSTV  | 5969  | 5762  |
| >FBXW7-S59 VSGNADSTVI | 44    | >FBXW7-S59 VFGNADSTVI | 10249 | 10205 |
| >FBXW7-S59 LVSGNADSTV | 1532  | >FBXW7-S59 LVFGNADSTV | 236   | 1296  |
| >FBXW7-S59 LVSGNADSTV | 93    | >FBXW7-S59 LVFGNADSTV | 47    | 46    |
| >FBXW7-S59 LVSGNADSTV | 70    | >FBXW7-S59 LVFGNADSTV | 30    | 40    |
| >FBXW7-S59 LVSGNADSTV | 263   | >FBXW7-S59 LVFGNADSTV | 87    | 176   |
| >FBXW7-S59 LVSGNADSTV | 147   | >FBXW7-S59 LVFGNADSTV | 10    | 137   |
| >FBXW7-S59 LVSGNADSTV | 338   | >FBXW7-S59 LVFGNADSTV | 52    | 286   |

|                        |       |                        |       |       |
|------------------------|-------|------------------------|-------|-------|
| >FBXW7-S59 LVSGNADSTV  | 307   | >FBXW7-S59 LVFGNADSTV  | 39    | 268   |
| >FBXW7-S59 LVSGNADSTV  | 261   | >FBXW7-S59 LVFGNADSTV  | 271   | 10    |
| >FBXW7-S59 LVSGNADSTV  | 6     | >FBXW7-S59 LVFGNADSTV  | 4     | 2     |
| >FBXW7-S59 LVSGNADSTV  | 522   | >FBXW7-S59 LVFGNADSTV  | 145   | 377   |
| >FBXW7-S59 LVSGNADSTV  | 166   | >FBXW7-S59 LVFGNADSTV  | 49    | 117   |
| >FBXW7-S59 LVSGNADSTV  | 147   | >FBXW7-S59 LVFGNADSTV  | 20    | 127   |
| >FBXW7-S59 LVSGNADSTV  | 692   | >FBXW7-S59 LVFGNADSTV  | 259   | 433   |
| >FBXW7-S59 ILVSGNADSTV | 93    | >FBXW7-S59 ILVFGNADSTV | 152   | 59    |
| >FBXW7-S59 ILVSGNADSTV | 276   | >FBXW7-S59 ILVFGNADSTV | 976   | 700   |
| >FBXW7-S59 ILVSGNADSTV | 34    | >FBXW7-S59 ILVFGNADSTV | 47    | 13    |
| >FBXW7-S59 ILVSGNADSTV | 7     | >FBXW7-S59 ILVFGNADSTV | 8     | 1     |
| >FBXW7-S59 ILVSGNADSTV | 40    | >FBXW7-S59 ILVFGNADSTV | 62    | 22    |
| >FBXW7-S59 ILVSGNADSTV | 5     | >FBXW7-S59 ILVFGNADSTV | 8     | 3     |
| >FBXW7-S59 ILVSGNADSTV | 8     | >FBXW7-S59 ILVFGNADSTV | 11    | 3     |
| >FBXW7-S59 ILVSGNADSTV | 11    | >FBXW7-S59 ILVFGNADSTV | 15    | 4     |
| >FBXW7-S59 ILVSGNADSTV | 11    | >FBXW7-S59 ILVFGNADSTV | 12    | 1     |
| >FBXW7-S59 ILVSGNADSTV | 190   | >FBXW7-S59 ILVFGNADSTV | 558   | 368   |
| >FBXW7-S59 ILVSGNADSTV | 2     | >FBXW7-S59 ILVFGNADSTV | 3     | 1     |
| >FBXW7-S59 NILVSGNA    | 1416  | >FBXW7-S59 NILVFGNA    | 468   | 948   |
| >FBXW7-S59 LKDNILVS    | 12503 | >FBXW7-S59 LKDNILVF    | 53    | 12450 |
| >FBXW7-S59 ELKDNILVS   | 12469 | >FBXW7-S59 ELKDNILVF   | 66    | 12403 |
| >FBXW7-S59 ELKDNILVS   | 12673 | >FBXW7-S59 ELKDNILVF   | 70    | 12603 |
| >FBXW7-S59 ELKDNILVS   | 20909 | >FBXW7-S59 ELKDNILVF   | 282   | 20627 |
| >FBXW7-S59 MELKDNILVS  | 11766 | >FBXW7-S59 MELKDNILVF  | 21    | 11745 |
| >FBXW7-S59 MELKDNILVS  | 5760  | >FBXW7-S59 MELKDNILVF  | 319   | 5441  |
| >FBXW7-S59 MELKDNILVS  | 7967  | >FBXW7-S59 MELKDNILVF  | 69    | 7898  |
| >FBXW7-T53 ETCLHTLQGH  | 84    | >FBXW7-T53 ENCLHTLQGH  | 7890  | 7806  |
| >FBXW7-T53 ETCLHTLQ    | 234   | >FBXW7-T53 ENCLHTLQ    | 10573 | 10339 |
| >FBXW7-T53 TETCLHTL    | 69    | >FBXW7-T53 TENCLHTL    | 75    | 6     |
| >FBXW7-T53 TETCLHTL    | 77    | >FBXW7-T53 TENCLHTL    | 55    | 22    |
| >FBXW7-T53 TETCLHTL    | 16    | >FBXW7-T53 TENCLHTL    | 26    | 10    |
| >FBXW7-T53 TETCLHTL    | 160   | >FBXW7-T53 TENCLHTL    | 121   | 39    |
| >FBXW7-T53 TETCLHTL    | 654   | >FBXW7-T53 TENCLHTL    | 471   | 183   |
| >FBXW7-T53 ETETCLHTL   | 273   | >FBXW7-T53 ETENCLHTL   | 169   | 104   |
| >FBXW7-T53 ETETCLHTL   | 65    | >FBXW7-T53 ETENCLHTL   | 197   | 132   |
| >FBXW7-T53 ETETCLHTL   | 84    | >FBXW7-T53 ETENCLHTL   | 134   | 50    |
| >FBXW7-T53 ETETCLHTL   | 354   | >FBXW7-T53 ETENCLHTL   | 230   | 124   |
| >FBXW7-T53 ETETCLHTL   | 487   | >FBXW7-T53 ETENCLHTL   | 963   | 476   |
| >FBXW7-T53 ETETCLHTL   | 524   | >FBXW7-T53 ETENCLHTL   | 253   | 271   |
| >FBXW7-T53 PETETCLHTL  | 275   | >FBXW7-T53 PETENCLHTL  | 212   | 63    |
| >FBXW7-T53 VWDPETETCI  | 555   | >FBXW7-T53 VWDPETENC   | 312   | 243   |
| >FBXW7-T53 KVWDPETETCI | 105   | >FBXW7-T53 KVWDPETEN   | 174   | 69    |
| >FBXW7-T53 KVWDPETETCI | 177   | >FBXW7-T53 KVWDPETEN   | 510   | 333   |

|                       |     |                       |     |     |
|-----------------------|-----|-----------------------|-----|-----|
| >FBXW7-T53 KVWDPETETC | 145 | >FBXW7-T53 KVWDPETEN  | 201 | 56  |
| >FBXW7-T53 KVWDPETETC | 76  | >FBXW7-T53 KVWDPETEN  | 124 | 48  |
| >FBXW7-T53 KVWDPETETC | 111 | >FBXW7-T53 KVWDPETEN  | 245 | 134 |
| >FBXW7-T53 KVWDPETETC | 168 | >FBXW7-T53 KVWDPETEN  | 871 | 703 |
| >FBXW7-T53 KVWDPETETC | 354 | >FBXW7-T53 KVWDPETEN  | 530 | 176 |
| >FBXW7-V50 VRCVQYDGR  | 616 | >FBXW7-V50 IRCVQYDGRF | 291 | 325 |
| >FBXW7-V50 VRCVQYDGR  | 649 | >FBXW7-V50 IRCVQYDGRF | 435 | 214 |
| >FBXW7-V50 AVRCVQYD   | 350 | >FBXW7-V50 AIRCVQYD   | 884 | 534 |
| >FBXW7-V50 AVRCVQYDG  | 247 | >FBXW7-V50 AIRCVQYDGF | 810 | 563 |
| >FBXW7-V50 AVRCVQYDG  | 262 | >FBXW7-V50 AIRCVQYDGF | 823 | 561 |
| >FBXW7-V50 AVRCVQYDG  | 158 | >FBXW7-V50 AIRCVQYDGF | 141 | 17  |
| >FBXW7-V50 AVRCVQYDG  | 82  | >FBXW7-V50 AIRCVQYDGF | 136 | 54  |
| >FBXW7-V50 LHVLMGHVA  | 373 | >FBXW7-V50 LHVLMGHVA  | 310 | 63  |
| >FBXW7-V50 AAVRCVQY   | 410 | >FBXW7-V50 AAIRCVQY   | 191 | 219 |
| >FBXW7-V50 AAVRCVQYD  | 383 | >FBXW7-V50 AAIRCVQYDC | 240 | 143 |
| >FBXW7-V50 AAVRCVQYD  | 501 | >FBXW7-V50 AAIRCVQYDC | 290 | 211 |
| >FBXW7-V50 AAVRCVQY   | 513 | >FBXW7-V50 AAIRCVQY   | 260 | 253 |
| >FBXW7-V50 AAVRCVQY   | 181 | >FBXW7-V50 AAIRCVQY   | 125 | 56  |
| >FBXW7-V50 AAVRCVQY   | 14  | >FBXW7-V50 AAIRCVQY   | 16  | 2   |
| >FBXW7-V50 VAAVRCVQY  | 451 | >FBXW7-V50 VAAIRCVQY  | 346 | 105 |
| >FBXW7-V50 VAAVRCVQY  | 29  | >FBXW7-V50 VAAIRCVQY  | 19  | 10  |
| >FBXW7-V50 HVAAVRCV   | 294 | >FBXW7-V50 HVAAIRCV   | 144 | 150 |
| >FBXW7-V50 HVAAVRCV   | 398 | >FBXW7-V50 HVAAIRCV   | 388 | 10  |
| >FBXW7-V50 HVAAVRCV   | 322 | >FBXW7-V50 HVAAIRCV   | 181 | 141 |
| >FBXW7-V50 HVAAVRCVQ  | 451 | >FBXW7-V50 HVAAIRCVQY | 442 | 9   |
| >FBXW7-V50 HVAAVRCVQ  | 228 | >FBXW7-V50 HVAAIRCVQY | 347 | 119 |
| >FBXW7-V50 HVAAVRCVQ  | 142 | >FBXW7-V50 HVAAIRCVQY | 158 | 16  |
| >FBXW7-V50 HVAAVRCVQ  | 294 | >FBXW7-V50 HVAAIRCVQ  | 222 | 72  |
| >FBXW7-V50 HVAAVRCVQ  | 80  | >FBXW7-V50 HVAAIRCVQY | 120 | 40  |
| >FBXW7-V50 HVAAVRCV   | 9   | >FBXW7-V50 HVAAIRCV   | 8   | 1   |
| >FBXW7-V50 HVAAVRCV   | 320 | >FBXW7-V50 HVAAIRCV   | 269 | 51  |
| >FBXW7-V50 HVAAVRCVQ  | 373 | >FBXW7-V50 HVAAIRCVQY | 207 | 166 |
| >FBXW7-V50 HVAAVRCVQ  | 192 | >FBXW7-V50 HVAAIRCVQY | 260 | 68  |
| >FBXW7-V50 HVAAVRCVQ  | 784 | >FBXW7-V50 HVAAIRCVQY | 482 | 302 |
| >FBXW7-V50 HVAAVRCVQ  | 33  | >FBXW7-V50 HVAAIRCVQY | 42  | 9   |
| >FBXW7-V50 MGHVAAVR   | 252 | >FBXW7-V50 MGHVAAIR   | 347 | 95  |
| >FBXW7-V50 MGHVAAVR   | 108 | >FBXW7-V50 MGHVAAIR   | 122 | 14  |
| >FBXW7-V50 LMGHVAAV   | 40  | >FBXW7-V50 LMGHVAAI   | 152 | 112 |
| >FBXW7-V50 LMGHVAAVR  | 348 | >FBXW7-V50 LMGHVAAIR  | 309 | 39  |
| >FBXW7-V50 LMGHVAAV   | 15  | >FBXW7-V50 LMGHVAAI   | 62  | 47  |
| >FBXW7-V50 LMGHVAAVR  | 129 | >FBXW7-V50 LMGHVAAIR  | 128 | 1   |
| >FBXW7-V50 LMGHVAAV   | 6   | >FBXW7-V50 LMGHVAAI   | 20  | 14  |
| >FBXW7-V50 LMGHVAAVR  | 48  | >FBXW7-V50 LMGHVAAIR  | 55  | 7   |



|                       |     |                        |      |      |
|-----------------------|-----|------------------------|------|------|
| >FBXW7-V50 LMGHVAAV   | 37  | >FBXW7-V50 LMGHVAAI    | 302  | 265  |
| >FBXW7-V50 LMGHVAAV   | 2   | >FBXW7-V50 LMGHVAAI    | 6    | 4    |
| >FBXW7-V50 LMGHVA AVR | 170 | >FBXW7-V50 LMGHVA AIRC | 181  | 11   |
| >FBXW7-V50 LMGHVA AVR | 5   | >FBXW7-V50 LMGHVA AIRC | 5    | 0    |
| >FBXW7-V50 LMGHVA AV  | 3   | >FBXW7-V50 LMGHVA AI   | 9    | 6    |
| >FBXW7-V50 LMGHVA AVR | 10  | >FBXW7-V50 LMGHVA AIRC | 10   | 0    |
| >FBXW7-V50 LMGHVA AV  | 9   | >FBXW7-V50 LMGHVA AI   | 86   | 77   |
| >FBXW7-V50 LMGHVA AVR | 14  | >FBXW7-V50 LMGHVA AIRC | 13   | 1    |
| >FBXW7-V50 LMGHVA AV  | 5   | >FBXW7-V50 LMGHVA AI   | 96   | 91   |
| >FBXW7-V50 LMGHVA AVR | 11  | >FBXW7-V50 LMGHVA AIRC | 13   | 2    |
| >FBXW7-V50 LMGHVA AV  | 2   | >FBXW7-V50 LMGHVA AI   | 27   | 25   |
| >FBXW7-V50 LMGHVA AVR | 206 | >FBXW7-V50 LMGHVA AIRC | 284  | 78   |
| >FBXW7-V50 LMGHVA AVR | 6   | >FBXW7-V50 LMGHVA AIRC | 6    | 0    |
| >FBXW7-V50 LMGHVA AVR | 85  | >FBXW7-V50 LMGHVA AIR  | 106  | 21   |
| >FBXW7-V50 LMGHVA AVR | 325 | >FBXW7-V50 LMGHVA AIR  | 362  | 37   |
| >FBXW7-V50 LMGHVA AV  | 205 | >FBXW7-V50 LMGHVA AI   | 175  | 30   |
| >FBXW7-V50 LMGHVA AV  | 463 | >FBXW7-V50 LMGHVA AI   | 340  | 123  |
| >FBXW7-V50 VLMGHVA AV | 8   | >FBXW7-V50 VLMGHVA AI  | 14   | 6    |
| >FBXW7-V50 VLMGHVA AV | 2   | >FBXW7-V50 VLMGHVA AI  | 4    | 2    |
| >FBXW7-V50 VLMGHVA AV | 2   | >FBXW7-V50 VLMGHVA AI  | 2    | 0    |
| >FBXW7-V50 VLMGHVA AV | 436 | >FBXW7-V50 VLMGHVA AI  | 496  | 60   |
| >FBXW7-V50 VLMGHVA AV | 6   | >FBXW7-V50 VLMGHVA AI  | 23   | 17   |
| >FBXW7-V50 VLMGHVA AV | 1   | >FBXW7-V50 VLMGHVA AI  | 2    | 1    |
| >FBXW7-V50 VLMGHVA AV | 31  | >FBXW7-V50 VLMGHVA AI  | 26   | 5    |
| >FBXW7-V50 VLMGHVA AV | 2   | >FBXW7-V50 VLMGHVA AI  | 5    | 3    |
| >FBXW7-V50 VLMGHVA AV | 454 | >FBXW7-V50 VLMGHVA AI  | 481  | 27   |
| >FBXW7-V50 VLMGHVA AV | 6   | >FBXW7-V50 VLMGHVA AI  | 41   | 35   |
| >FBXW7-V50 VLMGHVA AV | 2   | >FBXW7-V50 VLMGHVA AI  | 3    | 1    |
| >FBXW7-V50 VLMGHVA AV | 53  | >FBXW7-V50 VLMGHVA AI  | 67   | 14   |
| >FBXW7-V50 VLMGHVA AV | 1   | >FBXW7-V50 VLMGHVA AI  | 4    | 3    |
| >FBXW7-V50 VLMGHVA AV | 11  | >FBXW7-V50 VLMGHVA AI  | 12   | 1    |
| >FBXW7-V50 VLMGHVA AV | 195 | >FBXW7-V50 VLMGHVA AI  | 186  | 9    |
| >FBXW7-V50 VLMGHVA AV | 18  | >FBXW7-V50 VLMGHVA AI  | 19   | 1    |
| >FBXW7-V50 VLMGHVA AV | 448 | >FBXW7-V50 VLMGHVA AI  | 32   | 416  |
| >FBXW7-V50 VLMGHVA AV | 477 | >FBXW7-V50 VLMGHVA AI  | 339  | 138  |
| >FBXW7-V50 VLMGHVA AV | 70  | >FBXW7-V50 VLMGHVA AI  | 52   | 18   |
| >FBXW7-V50 VLMGHVA AV | 346 | >FBXW7-V50 VLMGHVA AI  | 2172 | 1826 |
| >FBXW7-V50 VLMGHVA AV | 209 | >FBXW7-V50 VLMGHVA AI  | 135  | 74   |
| >FBXW7-V50 VLMGHVA AV | 201 | >FBXW7-V50 VLMGHVA AI  | 173  | 28   |
| >FBXW7-V50 HVLMGHVA A | 463 | >FBXW7-V50 HVLMGHVA A  | 867  | 404  |
| >FBXW7-V50 HVLMGHVA A | 153 | >FBXW7-V50 HVLMGHVA A  | 597  | 444  |
| >FBXW7-V50 HVLMGHVA A | 201 | >FBXW7-V50 HVLMGHVA A  | 877  | 676  |
| >FBXW7-V50 HVLMGHVA A | 22  | >FBXW7-V50 HVLMGHVA A  | 372  | 350  |

|                       |      |                       |       |       |
|-----------------------|------|-----------------------|-------|-------|
| >FBXW7-V50 HVLMGHVAA  | 112  | >FBXW7-V50 HVLMGHVAA  | 1394  | 1282  |
| >FBXW7-V50 HVLMGHVAA  | 159  | >FBXW7-V50 HVLMGHVAA  | 4604  | 4445  |
| >FBXW7-V50 HVLMGHVAA  | 230  | >FBXW7-V50 HVLMGHVAA  | 3714  | 3484  |
| >FBXW7-V50 HVLMGHVAA  | 13   | >FBXW7-V50 HVLMGHVAA  | 2359  | 2346  |
| >FBXW7-V50 HVLMGHVAA  | 100  | >FBXW7-V50 HVLMGHVAA  | 59    | 41    |
| >FBXW7-V50 HVLMGHVAA  | 20   | >FBXW7-V50 HVLMGHVAA  | 21    | 1     |
| >FBXW7-V50 HVLMGHVAA  | 1106 | >FBXW7-V50 HVLMGHVAA  | 70    | 1036  |
| >FBXW7-V50 HVLMGHVAA  | 39   | >FBXW7-V50 HVLMGHVAA  | 49    | 10    |
| >FBXW7-V50 HVLMGHVAA  | 35   | >FBXW7-V50 HVLMGHVAA  | 37    | 2     |
| >FBXW7-V50 HVLMGHVAA  | 13   | >FBXW7-V50 HVLMGHVAA  | 63    | 50    |
| >FBXW7-V50 HVLMGHVAA  | 143  | >FBXW7-V50 HVLMGHVAA  | 179   | 36    |
| >FBXW7-V62 VTCLQFNKNF | 522  | >FBXW7-V62 ATCLQFNKNF | 418   | 104   |
| >FBXW7-V62 VTCLQFNK   | 258  | >FBXW7-V62 ATCLQFNK   | 273   | 15    |
| >FBXW7-V62 VTCLQFNK   | 13   | >FBXW7-V62 ATCLQFNK   | 12    | 1     |
| >FBXW7-V62 VTCLQFNKNF | 892  | >FBXW7-V62 ATCLQFNKNF | 202   | 690   |
| >FBXW7-V62 VTCLQFNK   | 540  | >FBXW7-V62 ATCLQFNK   | 52    | 488   |
| >FBXW7-V62 VTCLQFNK   | 210  | >FBXW7-V62 ATCLQFNK   | 97    | 113   |
| >FBXW7-V62 VTCLQFNKNF | 1877 | >FBXW7-V62 ATCLQFNKNF | 408   | 1469  |
| >FBXW7-V62 VTCLQFNK   | 288  | >FBXW7-V62 ATCLQFNK   | 347   | 59    |
| >FBXW7-V62 VTCLQFNKNF | 348  | >FBXW7-V62 ATCLQFNKNF | 380   | 32    |
| >FBXW7-V62 VTCLQFNKNF | 711  | >FBXW7-V62 ATCLQFNKNF | 464   | 247   |
| >FBXW7-V62 VTCLQFNKNF | 14   | >FBXW7-V62 ATCLQFNKNF | 13    | 1     |
| >FBXW7-V62 VTCLQFNKNF | 73   | >FBXW7-V62 ATCLQFNKNF | 72    | 1     |
| >FBXW7-V62 VTCLQFNK   | 290  | >FBXW7-V62 ATCLQFNK   | 67    | 223   |
| >FBXW7-V62 AVTCLQFNK  | 163  | >FBXW7-V62 AATCLQFNK  | 1130  | 967   |
| >FBXW7-V62 AVTCLQFNK  | 15   | >FBXW7-V62 AATCLQFNK  | 36    | 21    |
| >FBXW7-V62 AVTCLQFNK  | 114  | >FBXW7-V62 AATCLQFNK  | 446   | 332   |
| >FBXW7-V62 AVTCLQFNK  | 101  | >FBXW7-V62 AATCLQFNK  | 258   | 157   |
| >FBXW7-V62 AVTCLQFNK  | 181  | >FBXW7-V62 AATCLQFNK  | 350   | 169   |
| >FBXW7-V62 AVTCLQFNKN | 523  | >FBXW7-V62 AATCLQFNKN | 141   | 382   |
| >FBXW7-V62 AVTCLQFNKN | 743  | >FBXW7-V62 AATCLQFNKN | 79    | 664   |
| >FBXW7-V62 AVTCLQFNK  | 110  | >FBXW7-V62 AATCLQFNK  | 110   | 0     |
| >FBXW7-V62 LQGPKNKHQS | 433  | >FBXW7-V62 LQGPKNKHQS | 2807  | 2374  |
| >FBXW7-V62 LQGPKNKHQS | 143  | >FBXW7-V62 LQGPKNKHQS | 937   | 794   |
| >FBXW7-V62 LQGPKNKHQS | 166  | >FBXW7-V62 LQGPKNKHQS | 5334  | 5168  |
| >FBXW7-V62 LQGPKNKHQS | 218  | >FBXW7-V62 LQGPKNKHQS | 6141  | 5923  |
| >FBXW7-V62 LQGPKNKHQS | 134  | >FBXW7-V62 LQGPKNKHQS | 10547 | 10413 |
| >FBXW7-V62 LQGPKNKHQS | 445  | >FBXW7-V62 LQGPKNKHQS | 463   | 18    |
| >FBXW7-V62 LQGPKNKHQS | 236  | >FBXW7-V62 LQGPKNKHQS | 1028  | 792   |
| >FBXW7-V62 SAVTCLQFNK | 497  | >FBXW7-V62 SAATCLQFNK | 477   | 20    |
| >FBXW7-V62 SAVTCLQFNK | 29   | >FBXW7-V62 SAATCLQFNK | 25    | 4     |
| >FBXW7-V62 SAVTCLQFNK | 346  | >FBXW7-V62 SAATCLQFNK | 549   | 203   |
| >FBXW7-V62 SAVTCLQFNK | 58   | >FBXW7-V62 SAATCLQFNK | 33    | 25    |

|                       |       |                       |     |       |
|-----------------------|-------|-----------------------|-----|-------|
| >FBXW7-V62 SAVTCLQF   | 133   | >FBXW7-V62 SAATCLQF   | 148 | 15    |
| >FBXW7-V62 SAVTCLQF   | 15    | >FBXW7-V62 SAATCLQF   | 43  | 28    |
| >FBXW7-V62 SAVTCLQF   | 383   | >FBXW7-V62 SAATCLQF   | 342 | 41    |
| >FBXW7-V62 SAVTCLQF   | 475   | >FBXW7-V62 SAATCLQF   | 257 | 218   |
| >FBXW7-V62 SAVTCLQFNK | 268   | >FBXW7-V62 SAATCLQFNK | 197 | 71    |
| >FBXW7-V62 QSAVTCLQFM | 396   | >FBXW7-V62 QSAATCLQFM | 171 | 225   |
| >FBXW7-V62 QSAVTCLQFM | 30    | >FBXW7-V62 QSAATCLQFM | 21  | 9     |
| >FBXW7-V62 QSAVTCLQFM | 736   | >FBXW7-V62 QSAATCLQFM | 497 | 239   |
| >FBXW7-V62 QSAVTCLQFM | 44    | >FBXW7-V62 QSAATCLQFM | 35  | 9     |
| >FBXW7-V62 QSAVTCLQF  | 365   | >FBXW7-V62 QSAATCLQF  | 142 | 223   |
| >FBXW7-V62 QSAVTCLQF  | 53    | >FBXW7-V62 QSAATCLQF  | 45  | 8     |
| >FBXW7-V62 QSAVTCLQF  | 4     | >FBXW7-V62 QSAATCLQF  | 4   | 0     |
| >FBXW7-V62 QSAVTCLQF  | 24    | >FBXW7-V62 QSAATCLQF  | 17  | 7     |
| >FBXW7-V62 QSAVTCLQF  | 88    | >FBXW7-V62 QSAATCLQF  | 82  | 6     |
| >FBXW7-V62 QSAVTCLQFM | 84    | >FBXW7-V62 QSAATCLQFM | 103 | 19    |
| >FBXW7-V62 HQSAVTCL   | 71    | >FBXW7-V62 HQSAATCL   | 185 | 114   |
| >FBXW7-V62 HQSAVTCL   | 225   | >FBXW7-V62 HQSAATCL   | 342 | 117   |
| >FBXW7-V62 HQSAVTCL   | 285   | >FBXW7-V62 HQSAATCL   | 297 | 12    |
| >FBXW7-V62 HQSAVTCLQF | 43    | >FBXW7-V62 HQSAATCLQF | 36  | 7     |
| >FBXW7-V62 HQSAVTCLQF | 464   | >FBXW7-V62 HQSAATCLQF | 279 | 185   |
| >FBXW7-V62 HQSAVTCL   | 103   | >FBXW7-V62 HQSAATCL   | 91  | 12    |
| >FBXW7-V62 HQSAVTCLQF | 11    | >FBXW7-V62 HQSAATCLQF | 8   | 3     |
| >FBXW7-V62 HQSAVTCL   | 14    | >FBXW7-V62 HQSAATCL   | 13  | 1     |
| >FBXW7-V62 HQSAVTCLQF | 519   | >FBXW7-V62 HQSAATCLQF | 480 | 39    |
| >FBXW7-V62 KHQSAVTCLC | 217   | >FBXW7-V62 KHQSAATCLC | 301 | 84    |
| >FBXW7-V62 KHQSAVTCL  | 246   | >FBXW7-V62 KHQSAATCL  | 414 | 168   |
| >FBXW7-V62 KHQSAVTCLC | 18    | >FBXW7-V62 KHQSAATCLC | 20  | 2     |
| >FBXW7-V62 KHQSAVTCL  | 328   | >FBXW7-V62 KHQSAATCL  | 178 | 150   |
| >FBXW7-V62 NKHQSAVTCL | 53    | >FBXW7-V62 NKHQSAATCL | 96  | 43    |
| >FBXW7-V62 NKHQSAVTCL | 51    | >FBXW7-V62 NKHQSAATCL | 42  | 9     |
| >FBXW7-V62 GPNKHQSAV  | 34    | >FBXW7-V62 GPNKHQSAA  | 111 | 77    |
| >FBXW7-V62 GPNKHQSAV  | 1894  | >FBXW7-V62 GPNKHQSAA  | 462 | 1432  |
| >FBXW7-V62 GPNKHQSAV  | 498   | >FBXW7-V62 GPNKHQSAA  | 598 | 100   |
| >FBXW7-V67 VWRIRASNT  | 23    | >FBXW7-V67 MWRIRASNT  | 5   | 18    |
| >FBXW7-V67 VWRIRASNT  | 3927  | >FBXW7-V67 MWRIRASNT  | 489 | 3438  |
| >FBXW7-V67 VWRIRASNT  | 2362  | >FBXW7-V67 MWRIRASNT  | 479 | 1883  |
| >FBXW7-V67 VWRIRASN   | 1091  | >FBXW7-V67 MWRIRASN   | 353 | 738   |
| >FBXW7-V67 VWRIRASNT  | 565   | >FBXW7-V67 MWRIRASNT  | 173 | 392   |
| >FBXW7-V67 VVWRIRAS   | 10649 | >FBXW7-V67 VMWRIRAS   | 227 | 10422 |
| >FBXW7-V67 VVWRIRASN  | 10127 | >FBXW7-V67 VMWRIRASN  | 135 | 9992  |
| >FBXW7-V67 VVWRIRASN  | 6309  | >FBXW7-V67 VMWRIRASN  | 79  | 6230  |
| >FBXW7-V67 VVWRIRASN  | 94    | >FBXW7-V67 VMWRIRASN  | 48  | 46    |
| >FBXW7-V67 VVWRIRASN  | 44    | >FBXW7-V67 VMWRIRASN  | 63  | 19    |

|                         |       |                         |       |       |
|-------------------------|-------|-------------------------|-------|-------|
| >FBXW7-V67 VVWRIRASN`   | 75    | >FBXW7-V67 VMWRIRASN    | 337   | 262   |
| >FBXW7-V67 VVWRIRASN`   | 171   | >FBXW7-V67 VMWRIRASN    | 75    | 96    |
| >FBXW7-V67 VVWRIRASN`   | 429   | >FBXW7-V67 VMWRIRASN    | 1528  | 1099  |
| >FBXW7-V67 VVWRIRASN`   | 8231  | >FBXW7-V67 VMWRIRASN    | 333   | 7898  |
| >FBXW7-V67 TLESGGSGGV\  | 235   | >FBXW7-V67 TLESGGSGGV\  | 8744  | 8509  |
| >FBXW7-V67 TLESGGSGGV\  | 183   | >FBXW7-V67 TLESGGSGGV\  | 8641  | 8458  |
| >FBXW7-V67 TLESGGSGGV\  | 439   | >FBXW7-V67 TLESGGSGGV\  | 11349 | 10910 |
| >FBXW7-V67 TLESGGSGGV\  | 11    | >FBXW7-V67 TLESGGSGGV\  | 3014  | 3003  |
| >FBXW7-V67 TLESGGSGGV\  | 702   | >FBXW7-V67 TLESGGSGGV\  | 113   | 589   |
| >FBXW7-V67 TLESGGSGGV\  | 3579  | >FBXW7-V67 TLESGGSGGV\  | 289   | 3290  |
| >FBXW7-V67 GSGGVVWRI    | 265   | >FBXW7-V67 GSGGVMWR     | 1147  | 882   |
| >FBXW7-V67 GSGGVVWR     | 312   | >FBXW7-V67 GSGGVMWR     | 349   | 37    |
| >FBXW7-V67 GSGGVVWRI    | 377   | >FBXW7-V67 GSGGVMWR     | 386   | 9     |
| >FBXW7-V67 GSGGVVWRI    | 313   | >FBXW7-V67 GSGGVMWR     | 1757  | 1444  |
| >FBXW7-V67 GSGGVVWR     | 587   | >FBXW7-V67 GSGGVMWR     | 370   | 217   |
| >FBXW7-V67 GSGGVVWRI    | 916   | >FBXW7-V67 GSGGVMWR     | 498   | 418   |
| >FBXW7-V67 ESGGSGGVV\   | 7819  | >FBXW7-V67 ESGGSGGVM    | 94    | 7725  |
| >FBXW7-V67 ESGGSGGVV\   | 4823  | >FBXW7-V67 ESGGSGGVM    | 85    | 4738  |
| >FBXW7-V67 ESGGSGGVV\   | 425   | >FBXW7-V67 ESGGSGGVM    | 491   | 66    |
| >FBXW7-V67 ESGGSGGVV\   | 33    | >FBXW7-V67 ESGGSGGVM    | 31    | 2     |
| >FBXW7-V67 ESGGSGGVV\   | 58    | >FBXW7-V67 ESGGSGGVM    | 64    | 6     |
| >FBXW7-V67 ESGGSGGVV\   | 392   | >FBXW7-V67 ESGGSGGVM    | 1063  | 671   |
| >FBXW7-V67 LESGGS GGVA\ | 4422  | >FBXW7-V67 LESGGS GGVA\ | 327   | 4095  |
| >FBXW7-V67 LESGGS GGVA\ | 104   | >FBXW7-V67 LESGGS GGVA\ | 165   | 61    |
| >FBXW7-V67 LESGGS GGVA\ | 408   | >FBXW7-V67 LESGGS GGVA\ | 462   | 54    |
| >FBXW7-V67 LESGGS GGVA\ | 453   | >FBXW7-V67 LESGGS GGVA\ | 179   | 274   |
| >FBXW7-V67 LESGGS GGVA\ | 172   | >FBXW7-V67 LESGGS GGVA\ | 95    | 77    |
| >FBXW7-V67 LESGGS GGVA\ | 9029  | >FBXW7-V67 LESGGS GGVA\ | 343   | 8686  |
| >FBXW7-V67 LESGGS GGVA\ | 280   | >FBXW7-V67 LESGGS GGVA\ | 212   | 68    |
| >FBXW7-V67 LESGGS GGVA\ | 90    | >FBXW7-V67 LESGGS GGVA\ | 103   | 13    |
| >FBXW7-W5: VWDPETETCI   | 19545 | >FBXW7-W5: VRDPETETCL   | 453   | 19092 |
| >FBXW7-W5: VWDPETETCI   | 11840 | >FBXW7-W5: VRDPETETCL   | 242   | 11598 |
| >FBXW7-W5: KVWDPETETC   | 105   | >FBXW7-W5: KVRDPETETC   | 14657 | 14552 |
| >FBXW7-W5: KVWDPETETC   | 177   | >FBXW7-W5: KVRDPETETC   | 9969  | 9792  |
| >FBXW7-W5: KVWDPETETC   | 145   | >FBXW7-W5: KVRDPETETC   | 7499  | 7354  |
| >FBXW7-W5: KVWDPETETC   | 76    | >FBXW7-W5: KVRDPETETC   | 10023 | 9947  |
| >FBXW7-W5: KVWDPETETC   | 111   | >FBXW7-W5: KVRDPETETC   | 1465  | 1354  |
| >FBXW7-W5: KVWDPETETC   | 11239 | >FBXW7-W5: KVRDPETETC   | 144   | 11095 |
| >FBXW7-W5: KVWDPETETC   | 168   | >FBXW7-W5: KVRDPETETC   | 3405  | 3237  |
| >FBXW7-W5: KVWDPETETC   | 354   | >FBXW7-W5: KVRDPETETC   | 7313  | 6959  |
| >FBXW7-W5: KVWDPETETC   | 4805  | >FBXW7-W5: KVRDPETETC   | 348   | 4457  |
| >FBXW7-W5: MVKVWDPEI    | 1416  | >FBXW7-W5: MVKVRDPET    | 487   | 929   |
| >FBXW7-W5: FMVKVWDPEI   | 439   | >FBXW7-W5: FMKVRDPET    | 1755  | 1316  |

|                      |       |                      |       |       |
|----------------------|-------|----------------------|-------|-------|
| >FBXW7-W5: FMVKVWDPE | 142   | >FBXW7-W5: FMVKVRDPE | 299   | 157   |
| >FBXW7-W5: FMVKVWDPE | 18    | >FBXW7-W5: FMVKVRDPE | 169   | 151   |
| >FBXW7-W5: FMVKVWDPE | 34    | >FBXW7-W5: FMVKVRDPE | 199   | 165   |
| >FBXW7-W5: FMVKVWDPE | 76    | >FBXW7-W5: FMVKVRDPE | 118   | 42    |
| >FBXW7-W5: YDFMVKVW  | 324   | >FBXW7-W5: YDFMVKVR  | 1735  | 1411  |
| >FBXW7-W5: YDFMVKVW  | 30872 | >FBXW7-W5: YDFMVKVR  | 249   | 30623 |
| >FBXW7-W5: YDFMVKVW  | 299   | >FBXW7-W5: YDFMVKVR  | 31736 | 31437 |
| >FBXW7-W5: AYDFMVKVW | 152   | >FBXW7-W5: AYDFMVKVR | 9050  | 8898  |
| >FBXW7-W5: GAYDFMVKV | 27623 | >FBXW7-W5: GAYDFMVKV | 223   | 27400 |
| >FBXW7-W5: GAYDFMVKV | 32321 | >FBXW7-W5: GAYDFMVKV | 188   | 32133 |
| >FBXW7-W5: GAYDFMVKV | 5     | >FBXW7-W5: GAYDFMVKV | 10974 | 10969 |
| >FBXW7-W5: GAYDFMVKV | 58    | >FBXW7-W5: GAYDFMVKV | 22378 | 22320 |
| >FBXW7-W5: GAYDFMVKV | 45    | >FBXW7-W5: GAYDFMVKV | 22113 | 22068 |
| >FBXW7-W5: GAYDFMVKV | 33    | >FBXW7-W5: GAYDFMVKV | 26219 | 26186 |
| >FBXW7-W5: GAYDFMVKV | 10631 | >FBXW7-W5: GAYDFMVKV | 386   | 10245 |
| >FBXW7-Y51 YDFMVKVW  | 324   | >FBXW7-Y51 CDFMVKVW  | 5125  | 4801  |
| >FBXW7-Y51 YDFMVKVW  | 299   | >FBXW7-Y51 CDFMVKVW  | 803   | 504   |
| >FBXW7-Y51 AYDFMVKVW | 152   | >FBXW7-Y51 ACDFMVKVW | 22427 | 22275 |
| >FBXW7-Y51 AYDFMVKV  | 227   | >FBXW7-Y51 ACDFMVKV  | 7700  | 7473  |
| >FBXW7-Y51 GAYDFMVKV | 92    | >FBXW7-Y51 GACDFMVKV | 8923  | 8831  |
| >FBXW7-Y51 GAYDFMVKV | 85    | >FBXW7-Y51 GACDFMVKV | 1624  | 1539  |
| >FBXW7-Y51 GAYDFMVKV | 73    | >FBXW7-Y51 GACDFMVKV | 844   | 771   |
| >FBXW7-Y51 GAYDFMVKV | 64    | >FBXW7-Y51 GACDFMVKV | 1443  | 1379  |
| >FBXW7-Y51 GAYDFMVKV | 42    | >FBXW7-Y51 GACDFMVKV | 366   | 324   |
| >FBXW7-Y51 GAYDFMVKV | 17    | >FBXW7-Y51 GACDFMVKV | 209   | 192   |
| >FBXW7-Y51 GAYDFMVKV | 55    | >FBXW7-Y51 GACDFMVKV | 3358  | 3303  |
| >FBXW7-Y51 GAYDFMVKV | 11    | >FBXW7-Y51 GACDFMVKV | 91    | 80    |
| >FBXW7-Y51 GAYDFMVK  | 104   | >FBXW7-Y51 GACDFMVK  | 2954  | 2850  |
| >FBXW7-Y51 GAYDFMVK  | 10    | >FBXW7-Y51 GACDFMVK  | 18    | 8     |
| >FBXW7-Y51 GAYDFMVK  | 98    | >FBXW7-Y51 GACDFMVK  | 663   | 565   |
| >FBXW7-Y51 GAYDFMVKV | 319   | >FBXW7-Y51 GACDFMVKV | 2378  | 2059  |
| >FBXW7-Y51 GAYDFMVKV | 76    | >FBXW7-Y51 GACDFMVKV | 2672  | 2596  |
| >FBXW7-Y51 GAYDFMVKV | 425   | >FBXW7-Y51 GACDFMVKV | 2664  | 2239  |
| >FBXW7-Y51 GAYDFMVKV | 5     | >FBXW7-Y51 GACDFMVKV | 33    | 28    |
| >FBXW7-Y51 GAYDFMVKV | 58    | >FBXW7-Y51 GACDFMVKV | 452   | 394   |
| >FBXW7-Y51 GAYDFMVKV | 45    | >FBXW7-Y51 GACDFMVKV | 640   | 595   |
| >FBXW7-Y51 GAYDFMVKV | 33    | >FBXW7-Y51 GACDFMVKV | 245   | 212   |
| >FBXW7-Y51 GAYDFMVK  | 112   | >FBXW7-Y51 GACDFMVK  | 248   | 136   |
| >FBXW7-Y51 SGAYDFMV  | 540   | >FBXW7-Y51 SGACDFMV  | 412   | 128   |
| >FBXW7-Y51 SGAYDFMVK | 208   | >FBXW7-Y51 SGACDFMVK | 271   | 63    |
| >FBXW7-Y51 SGAYDFMV  | 167   | >FBXW7-Y51 SGACDFMV  | 151   | 16    |
| >FBXW7-Y51 SGAYDFMVK | 137   | >FBXW7-Y51 SGACDFMVK | 130   | 7     |
| >FBXW7-Y51 VSGAYDFMV | 348   | >FBXW7-Y51 VSGACDFMV | 400   | 52    |

|                       |      |                       |       |       |
|-----------------------|------|-----------------------|-------|-------|
| >FBXW7-Y51 VSGAYDFMV  | 50   | >FBXW7-Y51 VSGACDFMV  | 87    | 37    |
| >FBXW7-Y51 VSGAYDFM   | 415  | >FBXW7-Y51 VSGACDFM   | 699   | 284   |
| >FBXW7-Y51 VSGAYDFM   | 2521 | >FBXW7-Y51 VSGACDFM   | 387   | 2134  |
| >FBXW7-Y51 VVSGAYDFM  | 374  | >FBXW7-Y51 VVSGACDFM  | 294   | 80    |
| >FBXW7-Y51 VVSGAYDFM  | 287  | >FBXW7-Y51 VVSGACDFM  | 401   | 114   |
| >FBXW7-Y51 VVSGAYDFM  | 72   | >FBXW7-Y51 VVSGACDFM  | 216   | 144   |
| >FBXW7-Y51 VVSGAYDFM  | 233  | >FBXW7-Y51 VVSGACDFM  | 152   | 81    |
| >FBXW7-Y51 VVSGAYDFM  | 39   | >FBXW7-Y51 VVSGACDFM  | 173   | 134   |
| >FBXW7-Y51 VVSGAYDFM  | 33   | >FBXW7-Y51 VVSGACDFM  | 46    | 13    |
| >FBXW7-Y51 VVSGAYDFM  | 45   | >FBXW7-Y51 VVSGACDFM  | 41    | 4     |
| >FBXW7-Y51 VVSGAYDFM  | 8    | >FBXW7-Y51 VVSGACDFM  | 11    | 3     |
| >FBXW7-Y51 VVSGAYDFM  | 162  | >FBXW7-Y51 VVSGACDFM  | 187   | 25    |
| >FBXW7-Y51 VVSGAYDFM  | 17   | >FBXW7-Y51 VVSGACDFM  | 25    | 8     |
| >FBXW7-Y51 VVSGAYDFM  | 177  | >FBXW7-Y51 VVSGACDFM  | 477   | 300   |
| >FBXW7-Y51 VVSGAYDFM  | 442  | >FBXW7-Y51 VVSGACDFM  | 1103  | 661   |
| >FBXW7-Y51 VVSGAYDFM  | 254  | >FBXW7-Y51 VVSGACDFM  | 242   | 12    |
| >FBXW7-Y51 VVSGAYDFM  | 353  | >FBXW7-Y51 VVSGACDFM  | 166   | 187   |
| >FBXW7-Y51 RVVSGAYDFM | 167  | >FBXW7-Y51 RVVSGACDFM | 340   | 173   |
| >FBXW7-Y51 RVVSGAYDFM | 495  | >FBXW7-Y51 RVVSGACDFM | 1112  | 617   |
| >FBXW7-Y51 RVVSGAYDFM | 353  | >FBXW7-Y51 RVVSGACDFM | 755   | 402   |
| >FBXW7-Y51 RVVSGAYDFM | 210  | >FBXW7-Y51 RVVSGACDFM | 290   | 80    |
| >FBXW7-Y51 RVVSGAYDFM | 12   | >FBXW7-Y51 RVVSGACDFM | 16    | 4     |
| >FBXW7-Y51 RVVSGAYDFM | 43   | >FBXW7-Y51 RVVSGACDFM | 102   | 59    |
| >FBXW7-Y51 RVVSGAYDFM | 319  | >FBXW7-Y51 RVVSGACDFM | 560   | 241   |
| >FBXW7-Y51 RVVSGAYDFM | 99   | >FBXW7-Y51 RVVSGACDFM | 95    | 4     |
| >FBXW7-Y51 RVVSGAYDFM | 38   | >FBXW7-Y51 RVVSGACDFM | 33    | 5     |
| >FBXW7-Y51 RVVSGAYDF  | 233  | >FBXW7-Y51 RVVSGACDF  | 5861  | 5628  |
| >FBXW7-Y51 RVVSGAYDF  | 117  | >FBXW7-Y51 RVVSGACDF  | 802   | 685   |
| >FBXW7-Y51 RVVSGAYDFM | 19   | >FBXW7-Y51 RVVSGACDFM | 50    | 31    |
| >FBXW7-Y51 RVVSGAYDF  | 194  | >FBXW7-Y51 RVVSGACDF  | 7567  | 7373  |
| >FBXW7-Y51 RVVSGAYDF  | 21   | >FBXW7-Y51 RVVSGACDF  | 145   | 124   |
| >FBXW7-Y51 RVVSGAYDFM | 177  | >FBXW7-Y51 RVVSGACDFM | 330   | 153   |
| >FBXW7-Y51 RVVSGAYDFM | 204  | >FBXW7-Y51 RVVSGACDFM | 465   | 261   |
| >FBXW7-Y51 RVVSGAYDF  | 316  | >FBXW7-Y51 RVVSGACDF  | 135   | 181   |
| >FBXW7-Y51 RVVSGAYDF  | 119  | >FBXW7-Y51 RVVSGACDF  | 135   | 16    |
| >FBXW7-Y51 RVVSGAYDF  | 15   | >FBXW7-Y51 RVVSGACDF  | 12    | 3     |
| >FBXW7-Y51 RVVSGAYDFM | 269  | >FBXW7-Y51 RVVSGACDFM | 200   | 69    |
| >FBXW7-Y51 RVVSGAYDF  | 378  | >FBXW7-Y51 RVVSGACDF  | 322   | 56    |
| >FBXW7-Y51 RVVSGAYDF  | 202  | >FBXW7-Y51 RVVSGACDF  | 452   | 250   |
| >FBXW7-Y51 RVVSGAYDFM | 474  | >FBXW7-Y51 RVVSGACDFM | 1478  | 1004  |
| >FBXW7-Y51 RRVVSGAY   | 393  | >FBXW7-Y51 RRVVSGAC   | 29835 | 29442 |
| >FBXW7-Y51 RRVVSGAY   | 19   | >FBXW7-Y51 RRVVSGAC   | 1975  | 1956  |
| >FBXW7-Y51 RRVVSGAYDF | 6    | >FBXW7-Y51 RRVVSGACDI | 8     | 2     |

|                        |      |                        |       |       |
|------------------------|------|------------------------|-------|-------|
| >FBXW7-Y51 RRVVSGAYDF  | 89   | >FBXW7-Y51 RRVVSGACDI  | 132   | 43    |
| >FBXW7-Y51 RRVVSGAY    | 73   | >FBXW7-Y51 RRVVSGAC    | 1652  | 1579  |
| >FBXW7-Y51 RRVVSGAYDF  | 18   | >FBXW7-Y51 RRVVSGACDI  | 43    | 25    |
| >FBXW7-Y51 RRVVSGAYDF  | 48   | >FBXW7-Y51 RRVVSGACDI  | 103   | 55    |
| >FBXW7-Y51 RRVVSGAYDF  | 322  | >FBXW7-Y51 RRVVSGACDI  | 123   | 199   |
| >FBXW7-Y51 RRVVSGAYDF  | 153  | >FBXW7-Y51 RRVVSGACDI  | 219   | 66    |
| >FBXW7-Y51 RRVVSGAYDF  | 136  | >FBXW7-Y51 RRVVSGACDI  | 169   | 33    |
| >FBXW7-Y51 RRVVSGAYDF  | 137  | >FBXW7-Y51 RRVVSGACDI  | 225   | 88    |
| >FBXW7-Y51 GRRVVSAGAY  | 443  | >FBXW7-Y51 GRRVVSAGAC  | 33762 | 33319 |
| >FBXW7-Y51 GRRVVSAGAYI | 123  | >FBXW7-Y51 GRRVVSAGACI | 141   | 18    |
| >FBXW7-Y51 GRRVVSAGAYI | 429  | >FBXW7-Y51 GRRVVSAGACI | 358   | 71    |
| >FBXW7-Y51 GRRVVSAGAY  | 470  | >FBXW7-Y51 GRRVVSAGAC  | 1125  | 655   |
| >FBXW7-Y51 GRRVVSAGAYI | 180  | >FBXW7-Y51 GRRVVSAGACI | 192   | 12    |
| >FBXW7-Y54 YSLQFDGIHV  | 117  | >FBXW7-Y54 CSLQFDGIHV  | 1931  | 1814  |
| >FBXW7-Y54 YSLQFDGIHV  | 434  | >FBXW7-Y54 CSLQFDGIHV  | 6165  | 5731  |
| >FBXW7-Y54 YSLQFDGI    | 241  | >FBXW7-Y54 CSLQFDGI    | 6184  | 5943  |
| >FBXW7-Y54 YSLQFDGIHV  | 52   | >FBXW7-Y54 CSLQFDGIHV  | 697   | 645   |
| >FBXW7-Y54 YSLQFDGIHV  | 150  | >FBXW7-Y54 CSLQFDGIHV  | 2334  | 2184  |
| >FBXW7-Y54 YSLQFDGIHV  | 151  | >FBXW7-Y54 CSLQFDGIHV  | 6198  | 6047  |
| >FBXW7-Y54 YSLQFDGIHV  | 41   | >FBXW7-Y54 CSLQFDGIHV  | 1720  | 1679  |
| >FBXW7-Y54 YSLQFDGIHV  | 224  | >FBXW7-Y54 CSLQFDGIHV  | 10429 | 10205 |
| >FBXW7-Y54 YSLQFDGIHV  | 149  | >FBXW7-Y54 CSLQFDGIHV  | 7852  | 7703  |
| >FBXW7-Y54 YSLQFDGIHV  | 134  | >FBXW7-Y54 CSLQFDGIHV  | 4969  | 4835  |
| >FBXW7-Y54 YSLQFDGIHV  | 163  | >FBXW7-Y54 CSLQFDGIHV  | 753   | 590   |
| >FBXW7-Y54 YSLQFDGI    | 263  | >FBXW7-Y54 CSLQFDGI    | 5729  | 5466  |
| >FBXW7-Y54 YSLQFDGIHV  | 118  | >FBXW7-Y54 CSLQFDGIHV  | 4353  | 4235  |
| >FBXW7-Y54 YSLQFDGIHV  | 78   | >FBXW7-Y54 CSLQFDGIHV  | 1739  | 1661  |
| >FBXW7-Y54 YSLQFDGI    | 155  | >FBXW7-Y54 CSLQFDGI    | 4013  | 3858  |
| >FBXW7-Y54 YSLQFDGIHV  | 277  | >FBXW7-Y54 CSLQFDGIHV  | 5057  | 4780  |
| >FBXW7-Y54 YSLQFDGIH   | 86   | >FBXW7-Y54 CSLQFDGIH   | 2887  | 2801  |
| >FBXW7-Y54 YSLQFDGIHV  | 199  | >FBXW7-Y54 CSLQFDGIHV  | 5167  | 4968  |
| >FBXW7-Y54 YSLQFDGI    | 215  | >FBXW7-Y54 CSLQFDGI    | 4180  | 3965  |
| >FBXW7-Y54 YSLQFDGI    | 33   | >FBXW7-Y54 CSLQFDGI    | 12    | 21    |
| >FBXW7-Y54 YSLQFDGIHV  | 1282 | >FBXW7-Y54 CSLQFDGIHV  | 280   | 1002  |
| >FBXW7-Y54 VYSLQFDGI   | 17   | >FBXW7-Y54 VCSLQFDGI   | 16036 | 16019 |
| >FBXW7-Y54 VYSLQFDGIH  | 472  | >FBXW7-Y54 VCSLQFDGIH  | 25310 | 24838 |
| >FBXW7-Y54 HTLQGHTNR'  | 200  | >FBXW7-Y54 HTLQGHTNR'  | 18025 | 17825 |
| >FBXW7-Y54 HTLQGHTNR'  | 84   | >FBXW7-Y54 HTLQGHTNR'  | 21574 | 21490 |
| >FBXW7-Y54 HTLQGHTNR'  | 20   | >FBXW7-Y54 HTLQGHTNR'  | 13392 | 13372 |
| >FBXW7-Y54 HTLQGHTNR'  | 162  | >FBXW7-Y54 HTLQGHTNR'  | 23303 | 23141 |
| >FBXW7-Y54 HTLQGHTNR'  | 158  | >FBXW7-Y54 HTLQGHTNR'  | 23817 | 23659 |
| >FBXW7-Y54 HTLQGHTNR'  | 226  | >FBXW7-Y54 HTLQGHTNR'  | 16667 | 16441 |
| >FBXW7-Y54 HTLQGHTNR'  | 209  | >FBXW7-Y54 HTLQGHTNR'  | 21870 | 21661 |

|                       |     |                       |       |       |
|-----------------------|-----|-----------------------|-------|-------|
| >FBXW7-Y54 HTLQGHTNR' | 276 | >FBXW7-Y54 HTLQGHTNR' | 12344 | 12068 |
| >FBXW7-Y54 HTLQGHTNR' | 5   | >FBXW7-Y54 HTLQGHTNR' | 3934  | 3929  |
| >FBXW7-Y54 HTLQGHTNR' | 483 | >FBXW7-Y54 HTLQGHTNR' | 20508 | 20025 |
| >FBXW7-Y54 HTLQGHTNR' | 12  | >FBXW7-Y54 HTLQGHTNR' | 3884  | 3872  |
| >FBXW7-Y54 RVYSLQFDGI | 173 | >FBXW7-Y54 RVCSLQFDGI | 1142  | 969   |
| >FBXW7-Y54 RVYSLQFDGI | 113 | >FBXW7-Y54 RVCSLQFDGI | 722   | 609   |
| >FBXW7-Y54 RVYSLQFDGI | 137 | >FBXW7-Y54 RVCSLQFDGI | 446   | 309   |
| >FBXW7-Y54 RVYSLQFDGI | 162 | >FBXW7-Y54 RVCSLQFDGI | 2160  | 1998  |
| >FBXW7-Y54 RVYSLQFDGI | 390 | >FBXW7-Y54 RVCSLQFDGI | 6369  | 5979  |
| >FBXW7-Y54 RVYSLQFDGI | 24  | >FBXW7-Y54 RVCSLQFDGI | 135   | 111   |
| >FBXW7-Y54 RVYSLQFDGI | 84  | >FBXW7-Y54 RVCSLQFDGI | 373   | 289   |
| >FBXW7-Y54 RVYSLQFDGI | 229 | >FBXW7-Y54 RVCSLQFDGI | 1069  | 840   |
| >FBXW7-Y54 NRVYSLQF   | 45  | >FBXW7-Y54 NRVCSLQF   | 42    | 3     |
| >FBXW7-Y54 TNRVYSLQF  | 230 | >FBXW7-Y54 TNRVCSLQF  | 363   | 133   |
| >FBXW7-Y54 TNRVYSLQF  | 824 | >FBXW7-Y54 TNRVCSLQF  | 489   | 335   |
| >FBXW7-Y54 HTNRVYSL   | 320 | >FBXW7-Y54 HTNRVCSL   | 1451  | 1131  |
| >FBXW7-Y54 HTNRVYSL   | 208 | >FBXW7-Y54 HTNRVCSL   | 268   | 60    |
| >FBXW7-Y54 HTNRVYSLQ  | 439 | >FBXW7-Y54 HTNRVCSLQ  | 2487  | 2048  |
| >FBXW7-Y54 HTNRVYSL   | 105 | >FBXW7-Y54 HTNRVCSL   | 287   | 182   |
| >FBXW7-Y54 HTNRVYSLQF | 199 | >FBXW7-Y54 HTNRVCSLQF | 219   | 20    |
| >FBXW7-Y54 HTNRVYSLQ  | 114 | >FBXW7-Y54 HTNRVCSLQ  | 91    | 23    |
| >FBXW7-Y54 HTNRVYSL   | 16  | >FBXW7-Y54 HTNRVCSL   | 81    | 65    |
| >FBXW7-Y54 HTNRVYSL   | 361 | >FBXW7-Y54 HTNRVCSL   | 1022  | 661   |
| >FBXW7-Y54 HTNRVYSLQF | 257 | >FBXW7-Y54 HTNRVCSLQF | 261   | 4     |
| >FBXW7-Y54 HTNRVYSLQF | 159 | >FBXW7-Y54 HTNRVCSLQF | 285   | 126   |
| >FBXW7-Y54 HTNRVYSL   | 173 | >FBXW7-Y54 HTNRVCSL   | 118   | 55    |
| >FBXW7-Y54 HTNRVYSLQF | 10  | >FBXW7-Y54 HTNRVCSLQF | 10    | 0     |
| >FBXW7-Y54 HTNRVYSLQF | 166 | >FBXW7-Y54 HTNRVCSLQF | 193   | 27    |
| >FBXW7-Y54 HTNRVYSL   | 276 | >FBXW7-Y54 HTNRVCSL   | 585   | 309   |
| >FBXW7-Y54 HTNRVYSLQF | 14  | >FBXW7-Y54 HTNRVCSLQF | 18    | 4     |
| >FBXW7-Y54 HTNRVYSLQ  | 140 | >FBXW7-Y54 HTNRVCSLQ  | 76    | 64    |
| >FBXW7-Y54 HTNRVYSLQF | 74  | >FBXW7-Y54 HTNRVCSLQF | 45    | 29    |
| >FBXW7-Y54 HTNRVYSLQF | 328 | >FBXW7-Y54 HTNRVCSLQF | 649   | 321   |
| >FBXW7-Y54 GHTNRVYSLC | 400 | >FBXW7-Y54 GHTNRVCSLC | 443   | 43    |
| >FBXW7-Y54 GHTNRVYSL  | 381 | >FBXW7-Y54 GHTNRVCSL  | 1871  | 1490  |
| >FBXW7-Y54 LQGHTNRVY! | 430 | >FBXW7-Y54 LQGHTNRVC! | 1899  | 1469  |
| >FBXW7-Y54 LQGHTNRVY! | 309 | >FBXW7-Y54 LQGHTNRVC! | 616   | 307   |
| >FBXW7-Y54 LQGHTNRVY  | 299 | >FBXW7-Y54 LQGHTNRVC  | 32789 | 32490 |
| >FBXW7-Y54 LQGHTNRVY  | 36  | >FBXW7-Y54 LQGHTNRVC  | 3438  | 3402  |
| >FBXW7-Y54 LQGHTNRVY! | 88  | >FBXW7-Y54 LQGHTNRVC! | 60    | 28    |
| >FBXW7-Y54 LQGHTNRVY  | 238 | >FBXW7-Y54 LQGHTNRVC  | 23893 | 23655 |
| >FBXW7-Y54 LQGHTNRVY  | 15  | >FBXW7-Y54 LQGHTNRVC  | 1718  | 1703  |
| >FBXW7-Y54 LQGHTNRVY! | 41  | >FBXW7-Y54 LQGHTNRVC! | 44    | 3     |



|                       |      |                       |       |       |
|-----------------------|------|-----------------------|-------|-------|
| >FBXW7-Y54 TLQGHTNRV' | 212  | >FBXW7-Y54 TLQGHTNRV' | 30181 | 29969 |
| >FBXW7-Y54 TLQGHTNRV' | 94   | >FBXW7-Y54 TLQGHTNRV' | 15901 | 15807 |
| >FBXW7-Y54 TLQGHTNRV' | 40   | >FBXW7-Y54 TLQGHTNRV' | 14052 | 14012 |
| >FBXW7_NM HVVSGSLDTS  | 393  | >FBXW7_NM HVVSGSLDTS  | 4526  | 4133  |
| >FBXW7_NM HVVSGSLDTS  | 351  | >FBXW7_NM HVVSGSLDTS  | 16746 | 16395 |
| >FBXW7_NM HVVSGSLDTS  | 84   | >FBXW7_NM HVVSGSLDTS  | 2314  | 2230  |
| >FBXW7_NM TSIRVWDV    | 42   | >FBXW7_NM TSTRVWDV    | 115   | 73    |
| >FBXW7_NM DTSIRVWDV   | 169  | >FBXW7_NM DTSTRVWDV   | 84    | 85    |
| >FBXW7_NM DTSIRVWDV   | 296  | >FBXW7_NM DTSTRVWDV   | 366   | 70    |
| >FBXW7_NM LDTSIRVW    | 433  | >FBXW7_NM LDTSTRVW    | 609   | 176   |
| >FBXW7_NM LDTSIRVWDV  | 176  | >FBXW7_NM LDTSTRVWDV  | 94    | 82    |
| >FBXW7_NM SLDTSIRV    | 23   | >FBXW7_NM SLDTSTRV    | 44    | 21    |
| >FBXW7_NM SLDTSIRVWD  | 36   | >FBXW7_NM SLDTSTRVWI  | 49    | 13    |
| >FBXW7_NM SLDTSIRV    | 81   | >FBXW7_NM SLDTSTRV    | 43    | 38    |
| >FBXW7_NM SLDTSIRVWD  | 75   | >FBXW7_NM SLDTSTRVWI  | 76    | 1     |
| >FBXW7_NM SLDTSIRV    | 95   | >FBXW7_NM SLDTSTRV    | 42    | 53    |
| >FBXW7_NM SLDTSIRVWD  | 63   | >FBXW7_NM SLDTSTRVWI  | 73    | 10    |
| >FBXW7_NM SLDTSIRV    | 213  | >FBXW7_NM SLDTSTRV    | 334   | 121   |
| >FBXW7_NM SLDTSIRVWD  | 73   | >FBXW7_NM SLDTSTRVWI  | 109   | 36    |
| >FBXW7_NM SLDTSIRV    | 3    | >FBXW7_NM SLDTSTRV    | 4     | 1     |
| >FBXW7_NM SLDTSIRVWD  | 3    | >FBXW7_NM SLDTSTRVWI  | 4     | 1     |
| >FBXW7_NM SLDTSIRV    | 6    | >FBXW7_NM SLDTSTRV    | 10    | 4     |
| >FBXW7_NM SLDTSIRVWD  | 6    | >FBXW7_NM SLDTSTRVWI  | 7     | 1     |
| >FBXW7_NM SLDTSIRV    | 5    | >FBXW7_NM SLDTSTRV    | 6     | 1     |
| >FBXW7_NM SLDTSIRVWD  | 5    | >FBXW7_NM SLDTSTRVWI  | 6     | 1     |
| >FBXW7_NM SLDTSIRV    | 17   | >FBXW7_NM SLDTSTRV    | 22    | 5     |
| >FBXW7_NM SLDTSIRVWD  | 22   | >FBXW7_NM SLDTSTRVWI  | 21    | 1     |
| >FBXW7_NM SLDTSIRV    | 2    | >FBXW7_NM SLDTSTRV    | 3     | 1     |
| >FBXW7_NM SLDTSIRVWD  | 2    | >FBXW7_NM SLDTSTRVWI  | 3     | 1     |
| >FBXW7_NM GSLDTSIRV   | 179  | >FBXW7_NM GSLDTSTRV   | 439   | 260   |
| >FBXW7_NM GSLDTSIRV   | 302  | >FBXW7_NM GSLDTSTRV   | 795   | 493   |
| >FBXW7_NM GSLDTSIR    | 277  | >FBXW7_NM GSLDTSTR    | 157   | 120   |
| >FBXW7_NM GSLDTSIR    | 906  | >FBXW7_NM GSLDTSTR    | 499   | 407   |
| >FBXW7_NM GSLDTSIRV   | 304  | >FBXW7_NM GSLDTSTRV   | 189   | 115   |
| >FBXW7_NM GSLDTSIRVW  | 5    | >FBXW7_NM GSLDTSTRVW  | 5     | 0     |
| >FBXW7_NM GSLDTSIRVW  | 89   | >FBXW7_NM GSLDTSTRVW  | 87    | 2     |
| >FBXW7_NM GSLDTSIRVW  | 30   | >FBXW7_NM GSLDTSTRVW  | 25    | 5     |
| >FBXW7_NM GSLDTSIRV   | 378  | >FBXW7_NM GSLDTSTRV   | 70    | 308   |
| >FBXW7_NM GSLDTSIR    | 385  | >FBXW7_NM GSLDTSTR    | 440   | 55    |
| >FBXW7_NM SGSLDTSI    | 348  | >FBXW7_NM SGSLDTST    | 33128 | 32780 |
| >FBXW7_NM VSGSLDTSIR  | 355  | >FBXW7_NM VSGSLDTSTR  | 178   | 177   |
| >FBXW7_NM VSGSLDTSI   | 493  | >FBXW7_NM VSGSLDTST   | 3923  | 3430  |
| >FBXW7_NM VSGSLDTSIRV | 1335 | >FBXW7_NM VSGSLDTSTRV | 396   | 939   |

|                       |      |                      |       |       |
|-----------------------|------|----------------------|-------|-------|
| >FBXW7_NM VSGSLDTSI   | 44   | >FBXW7_NM VSGSLDTST  | 28879 | 28835 |
| >FBXW7_NM VVSGSLDTSI  | 322  | >FBXW7_NM VVSGSLDTST | 2674  | 2352  |
| >FBXW7_NM VVSGSLDTSIF | 127  | >FBXW7_NM VVSGSLDTST | 83    | 44    |
| >FBXW7_NM VVSGSLDTSI  | 355  | >FBXW7_NM VVSGSLDTST | 31450 | 31095 |
| >FBXW7_NM RCVQYDGR    | 60   | >FBXW7_NM CCVQYDGR   | 159   | 99    |
| >FBXW7_NM RCVQYDGRR   | 63   | >FBXW7_NM CCVQYDGRR  | 228   | 165   |
| >FBXW7_NM HVLMGHVAA   | 20   | >FBXW7_NM HVLMGHVAA  | 14812 | 14792 |
| >FBXW7_NM HVLMGHVAA   | 39   | >FBXW7_NM HVLMGHVAA  | 22990 | 22951 |
| >FBXW7_NM HVLMGHVAA   | 35   | >FBXW7_NM HVLMGHVAA  | 29286 | 29251 |
| >FBXW7_NM HVLMGHVAA   | 143  | >FBXW7_NM HVLMGHVAA  | 36212 | 36069 |
| >FBXW7_NM AVRCVQYD    | 350  | >FBXW7_NM AVCCVQYD   | 8921  | 8571  |
| >FBXW7_NM AVRCVQYDG   | 247  | >FBXW7_NM AVCCVQYDG  | 10697 | 10450 |
| >FBXW7_NM AVRCVQYDG   | 262  | >FBXW7_NM AVCCVQYDG  | 10741 | 10479 |
| >FBXW7_NM AVRCVQYDG   | 158  | >FBXW7_NM AVCCVQYDG  | 134   | 24    |
| >FBXW7_NM AVRCVQYDG   | 82   | >FBXW7_NM AVCCVQYDG  | 198   | 116   |
| >FBXW7_NM AVRCVQYDG   | 516  | >FBXW7_NM AVCCVQYDG  | 161   | 355   |
| >FBXW7_NM AVRCVQYDG   | 684  | >FBXW7_NM AVCCVQYDG  | 141   | 543   |
| >FBXW7_NM AAVRCVQY    | 410  | >FBXW7_NM AAVCCVQY   | 628   | 218   |
| >FBXW7_NM AAVRCVQYD   | 383  | >FBXW7_NM AAVCCVQYD  | 718   | 335   |
| >FBXW7_NM AAVRCVQYD   | 501  | >FBXW7_NM AAVCCVQYD  | 416   | 85    |
| >FBXW7_NM AAVRCVQY    | 513  | >FBXW7_NM AAVCCVQY   | 345   | 168   |
| >FBXW7_NM AAVRCVQY    | 181  | >FBXW7_NM AAVCCVQY   | 96    | 85    |
| >FBXW7_NM AAVRCVQY    | 14   | >FBXW7_NM AAVCCVQY   | 15    | 1     |
| >FBXW7_NM AAVRCVQY    | 558  | >FBXW7_NM AAVCCVQY   | 113   | 445   |
| >FBXW7_NM VAAVRCVQY   | 451  | >FBXW7_NM VAAVCCVQY  | 217   | 234   |
| >FBXW7_NM VAAVRCVQY   | 675  | >FBXW7_NM VAAVCCVQY  | 108   | 567   |
| >FBXW7_NM VAAVRCVQY   | 833  | >FBXW7_NM VAAVCCVQY  | 257   | 576   |
| >FBXW7_NM VAAVRCVQY   | 29   | >FBXW7_NM VAAVCCVQY  | 54    | 25    |
| >FBXW7_NM VAAVRCVQY   | 703  | >FBXW7_NM VAAVCCVQY  | 86    | 617   |
| >FBXW7_NM VAAVRCVQY   | 766  | >FBXW7_NM VAAVCCVQY  | 266   | 500   |
| >FBXW7_NM HVAAVRCV    | 3903 | >FBXW7_NM HVAAVCCV   | 495   | 3408  |
| >FBXW7_NM HVAAVRCV    | 294  | >FBXW7_NM HVAAVCCV   | 61    | 233   |
| >FBXW7_NM HVAAVRCV    | 398  | >FBXW7_NM HVAAVCCV   | 165   | 233   |
| >FBXW7_NM HVAAVRCV    | 1076 | >FBXW7_NM HVAAVCCV   | 102   | 974   |
| >FBXW7_NM HVAAVRCV    | 1502 | >FBXW7_NM HVAAVCCV   | 295   | 1207  |
| >FBXW7_NM HVAAVRCV    | 531  | >FBXW7_NM HVAAVCCV   | 48    | 483   |
| >FBXW7_NM HVAAVRCV    | 3068 | >FBXW7_NM HVAAVCCV   | 178   | 2890  |
| >FBXW7_NM HVAAVRCV    | 322  | >FBXW7_NM HVAAVCCV   | 34    | 288   |
| >FBXW7_NM HVAAVRCVQ   | 451  | >FBXW7_NM HVAAVCCVQ  | 541   | 90    |
| >FBXW7_NM HVAAVRCVQ   | 228  | >FBXW7_NM HVAAVCCVQ  | 189   | 39    |
| >FBXW7_NM HVAAVRCVQ   | 142  | >FBXW7_NM HVAAVCCVQ  | 188   | 46    |
| >FBXW7_NM HVAAVRCVQ   | 294  | >FBXW7_NM HVAAVCCVQ  | 310   | 16    |
| >FBXW7_NM HVAAVRCVQ   | 80   | >FBXW7_NM HVAAVCCVQ  | 140   | 60    |

|                      |       |                      |       |       |
|----------------------|-------|----------------------|-------|-------|
| >FBXW7_NM HVAAVRCV   | 9     | >FBXW7_NM HVAAVCCV   | 7     | 2     |
| >FBXW7_NM HVAAVRCV   | 320   | >FBXW7_NM HVAAVCCV   | 97    | 223   |
| >FBXW7_NM HVAAVRCVQ  | 373   | >FBXW7_NM HVAAVCCVQ  | 385   | 12    |
| >FBXW7_NM HVAAVRCVQ  | 192   | >FBXW7_NM HVAAVCCVQ  | 160   | 32    |
| >FBXW7_NM HVAAVRCVQ  | 33    | >FBXW7_NM HVAAVCCVQ  | 35    | 2     |
| >FBXW7_NM GHVAAVRCV  | 876   | >FBXW7_NM GHVAAVCCV  | 459   | 417   |
| >FBXW7_NM MGHVA AVR  | 252   | >FBXW7_NM MGHVA AVC  | 23674 | 23422 |
| >FBXW7_NM MGHVA AVR  | 108   | >FBXW7_NM MGHVA AVC  | 38672 | 38564 |
| >FBXW7_NM LMGHVA AVR | 348   | >FBXW7_NM LMGHVA AVC | 81    | 267   |
| >FBXW7_NM LMGHVA AVR | 129   | >FBXW7_NM LMGHVA AVC | 46    | 83    |
| >FBXW7_NM LMGHVA AVR | 48    | >FBXW7_NM LMGHVA AVC | 34    | 14    |
| >FBXW7_NM LMGHVA AVR | 805   | >FBXW7_NM LMGHVA AVC | 159   | 646   |
| >FBXW7_NM LMGHVA AVR | 10813 | >FBXW7_NM LMGHVA AVC | 103   | 10710 |
| >FBXW7_NM LMGHVA AVR | 170   | >FBXW7_NM LMGHVA AVC | 546   | 376   |
| >FBXW7_NM LMGHVA AVR | 5     | >FBXW7_NM LMGHVA AVC | 3     | 2     |
| >FBXW7_NM LMGHVA AVR | 18665 | >FBXW7_NM LMGHVA AVC | 419   | 18246 |
| >FBXW7_NM LMGHVA AVR | 10    | >FBXW7_NM LMGHVA AVC | 4     | 6     |
| >FBXW7_NM LMGHVA AVR | 14    | >FBXW7_NM LMGHVA AVC | 7     | 7     |
| >FBXW7_NM LMGHVA AVR | 11    | >FBXW7_NM LMGHVA AVC | 4     | 7     |
| >FBXW7_NM LMGHVA AVR | 206   | >FBXW7_NM LMGHVA AVC | 1076  | 870   |
| >FBXW7_NM LMGHVA AVR | 6     | >FBXW7_NM LMGHVA AVC | 3     | 3     |
| >FBXW7_NM LMGHVA AVR | 85    | >FBXW7_NM LMGHVA AVC | 20993 | 20908 |
| >FBXW7_NM LMGHVA AVR | 325   | >FBXW7_NM LMGHVA AVC | 39680 | 39355 |
| >FBXW7_NM LMGHVA AVR | 980   | >FBXW7_NM LMGHVA AVC | 358   | 622   |
| >FBXW7_NM VLMGHVA AV | 436   | >FBXW7_NM VLMGHVA AV | 951   | 515   |
| >FBXW7_NM VLMGHVA AV | 2928  | >FBXW7_NM VLMGHVA AV | 19    | 2909  |
| >FBXW7_NM VLMGHVA AV | 31    | >FBXW7_NM VLMGHVA AV | 84    | 53    |
| >FBXW7_NM VLMGHVA AV | 13744 | >FBXW7_NM VLMGHVA AV | 145   | 13599 |
| >FBXW7_NM VLMGHVA AV | 454   | >FBXW7_NM VLMGHVA AV | 297   | 157   |
| >FBXW7_NM VLMGHVA AV | 9109  | >FBXW7_NM VLMGHVA AV | 44    | 9065  |
| >FBXW7_NM VLMGHVA AV | 53    | >FBXW7_NM VLMGHVA AV | 44    | 9     |
| >FBXW7_NM VLMGHVA AV | 2030  | >FBXW7_NM VLMGHVA AV | 18    | 2012  |
| >FBXW7_NM VLMGHVA AV | 11    | >FBXW7_NM VLMGHVA AV | 28    | 17    |
| >FBXW7_NM VLMGHVA AV | 195   | >FBXW7_NM VLMGHVA AV | 19008 | 18813 |
| >FBXW7_NM VLMGHVA AV | 18    | >FBXW7_NM VLMGHVA AV | 12788 | 12770 |
| >FBXW7_NM VLMGHVA AV | 477   | >FBXW7_NM VLMGHVA AV | 29577 | 29100 |
| >FBXW7_NM VLMGHVA AV | 70    | >FBXW7_NM VLMGHVA AV | 33955 | 33885 |
| >FCRL4-G171YGDENDVF  | 9026  | >FCRL4-G171YVDENDVF  | 462   | 8564  |
| >FCRL4-G171YGDENDVFR | 7634  | >FCRL4-G171YVDENDVFR | 428   | 7206  |
| >FCRL4-G171YGDENDVFR | 324   | >FCRL4-G171YVDENDVFR | 8     | 316   |
| >FCRL4-G171YGDENDVF  | 106   | >FCRL4-G171YVDENDVF  | 41    | 65    |
| >FCRL4-G171YGDENDVFR | 438   | >FCRL4-G171YVDENDVFR | 423   | 15    |
| >FCRL4-G171GYGDENDVF | 152   | >FCRL4-G171GYVDENDVF | 75    | 77    |

|                         |       |                         |       |       |
|-------------------------|-------|-------------------------|-------|-------|
| >FCRL4-G171GYGDENDVF    | 13    | >FCRL4-G171GYVDENDVF    | 21    | 8     |
| >FCRL4-G171GYGDENDVFI   | 35    | >FCRL4-G171GYVDENDVFI   | 33    | 2     |
| >FCRL4-G171IGYGDENDVF   | 136   | >FCRL4-G171IGYVDENDVF   | 161   | 25    |
| >FCRL4-G171IGYGDENDVF   | 620   | >FCRL4-G171IGYVDENDVF   | 296   | 324   |
| >FCRL4-G171IGYGDENDVF   | 124   | >FCRL4-G171IGYVDENDVF   | 257   | 133   |
| >FCRL4-L99R LFSSDSL     | 1251  | >FCRL4-L99R RFSSDSL     | 408   | 843   |
| >FCRL4-L99R LFSSDSL     | 512   | >FCRL4-L99R RFSSDSL     | 135   | 377   |
| >FCRL4-L99R LFSSDSLIL   | 285   | >FCRL4-L99R RFSSDSLIL   | 78    | 207   |
| >FCRL4-L99R LLFSSDSL    | 37    | >FCRL4-L99R LRFSSDSL    | 22402 | 22365 |
| >FCRL4-L99R LLFSSDSL    | 58    | >FCRL4-L99R LRFSSDSL    | 22440 | 22382 |
| >FCRL4-L99R LLFSSDSLIL  | 77    | >FCRL4-L99R LRFSSDSLIL  | 18524 | 18447 |
| >FCRL4-L99R LLFSSDSL    | 7     | >FCRL4-L99R LRFSSDSL    | 3576  | 3569  |
| >FCRL4-L99R LLFSSDSL    | 13    | >FCRL4-L99R LRFSSDSL    | 9272  | 9259  |
| >FCRL4-L99R LLFSSDSLIL  | 10    | >FCRL4-L99R LRFSSDSLIL  | 3011  | 3001  |
| >FCRL4-L99R LLFSSDSLILQ | 146   | >FCRL4-L99R LRFSSDSLILQ | 22276 | 22130 |
| >FCRL4-L99R LLFSSDSL    | 20    | >FCRL4-L99R LRFSSDSL    | 18316 | 18296 |
| >FCRL4-L99R LLFSSDSL    | 13    | >FCRL4-L99R LRFSSDSL    | 16038 | 16025 |
| >FCRL4-L99R LLFSSDSLIL  | 32    | >FCRL4-L99R LRFSSDSLIL  | 9811  | 9779  |
| >FCRL4-L99R LLFSSDSL    | 181   | >FCRL4-L99R LRFSSDSL    | 16594 | 16413 |
| >FCRL4-L99R LLFSSDSL    | 373   | >FCRL4-L99R LRFSSDSL    | 19127 | 18754 |
| >FCRL4-L99R LLFSSDSLIL  | 282   | >FCRL4-L99R LRFSSDSLIL  | 8848  | 8566  |
| >FCRL4-L99R LLFSSDSL    | 7     | >FCRL4-L99R LRFSSDSL    | 15191 | 15184 |
| >FCRL4-L99R LLFSSDSL    | 17    | >FCRL4-L99R LRFSSDSL    | 18355 | 18338 |
| >FCRL4-L99R LLFSSDSLIL  | 30    | >FCRL4-L99R LRFSSDSLIL  | 19576 | 19546 |
| >FCRL4-L99R LLFSSDSL    | 16    | >FCRL4-L99R LRFSSDSL    | 20113 | 20097 |
| >FCRL4-L99R LLFSSDSL    | 56    | >FCRL4-L99R LRFSSDSL    | 22614 | 22558 |
| >FCRL4-L99R LLFSSDSLIL  | 28    | >FCRL4-L99R LRFSSDSLIL  | 22741 | 22713 |
| >FCRL4-L99R LLFSSDSL    | 17    | >FCRL4-L99R LRFSSDSL    | 20614 | 20597 |
| >FCRL4-L99R LLFSSDSL    | 25    | >FCRL4-L99R LRFSSDSL    | 21310 | 21285 |
| >FCRL4-L99R LLFSSDSLIL  | 21    | >FCRL4-L99R LRFSSDSLIL  | 20852 | 20831 |
| >FCRL4-L99R LLFSSDSL    | 87    | >FCRL4-L99R LRFSSDSL    | 22823 | 22736 |
| >FCRL4-L99R LLFSSDSLIL  | 346   | >FCRL4-L99R LRFSSDSLIL  | 23526 | 23180 |
| >FCRL4-L99R LLFSSDSL    | 5     | >FCRL4-L99R LRFSSDSL    | 19972 | 19967 |
| >FCRL4-L99R LLFSSDSL    | 11    | >FCRL4-L99R LRFSSDSL    | 26550 | 26539 |
| >FCRL4-L99R LLFSSDSLIL  | 7     | >FCRL4-L99R LRFSSDSLIL  | 20558 | 20551 |
| >FCRL4-L99R LLFSSDSLILQ | 25    | >FCRL4-L99R LRFSSDSLILQ | 29626 | 29601 |
| >FCRL4-L99R LLFSSDSL    | 97    | >FCRL4-L99R LRFSSDSL    | 12700 | 12603 |
| >FCRL4-L99R LLFSSDSLIL  | 163   | >FCRL4-L99R LRFSSDSLIL  | 14263 | 14100 |
| >FCRL4-L99R LLFSSDSL    | 33    | >FCRL4-L99R LRFSSDSL    | 21    | 12    |
| >FCRL4-L99R LLFSSDSL    | 89    | >FCRL4-L99R LRFSSDSL    | 42    | 47    |
| >FCRL4-L99R LLFSSDSLIL  | 26    | >FCRL4-L99R LRFSSDSLIL  | 15    | 11    |
| >FCRL4-L99R LLFSSDSL    | 22271 | >FCRL4-L99R LRFSSDSL    | 175   | 22096 |
| >FCRL4-L99R LLFSSDSL    | 19784 | >FCRL4-L99R LRFSSDSL    | 158   | 19626 |

|                         |       |                         |       |       |
|-------------------------|-------|-------------------------|-------|-------|
| >FCRL4-L99R LLFSSDSLIL  | 22714 | >FCRL4-L99R LRFSSDSLIL  | 46    | 22668 |
| >FCRL4-L99R LLFSSDSL    | 4145  | >FCRL4-L99R LRFSSDSL    | 205   | 3940  |
| >FCRL4-L99R LLFSSDSLIL  | 1760  | >FCRL4-L99R LRFSSDSLIL  | 92    | 1668  |
| >FCRL4-L99R LLFSSDSL    | 46    | >FCRL4-L99R LRFSSDSL    | 152   | 106   |
| >FCRL4-L99R LLFSSDSLIL  | 28291 | >FCRL4-L99R LRFSSDSLIL  | 399   | 27892 |
| >FCRL4-L99R LLFSSDSL    | 7564  | >FCRL4-L99R LRFSSDSL    | 222   | 7342  |
| >FCRL4-L99R LLFSSDSL    | 2161  | >FCRL4-L99R LRFSSDSL    | 80    | 2081  |
| >FCRL4-L99R LLFSSDSL    | 80    | >FCRL4-L99R LRFSSDSL    | 94    | 14    |
| >FCRL4-L99R GSPRSNPVRL  | 469   | >FCRL4-L99R GSPRSNPVRL  | 7845  | 7376  |
| >FCRL4-L99R GSPRSNPVRL  | 5     | >FCRL4-L99R GSPRSNPVRL  | 1542  | 1537  |
| >FCRL4-L99R RLLFSSDSL   | 137   | >FCRL4-L99R RLLFSSDSL   | 8386  | 8249  |
| >FCRL4-L99R RLLFSSDSL   | 160   | >FCRL4-L99R RLLFSSDSL   | 4414  | 4254  |
| >FCRL4-L99R RLLFSSDSLIL | 137   | >FCRL4-L99R RLLFSSDSLIL | 6653  | 6516  |
| >FCRL4-L99R RLLFSSDSL   | 35    | >FCRL4-L99R RLLFSSDSL   | 133   | 98    |
| >FCRL4-L99R RLLFSSDSL   | 46    | >FCRL4-L99R RLLFSSDSL   | 177   | 131   |
| >FCRL4-L99R RLLFSSDSLIL | 194   | >FCRL4-L99R RLLFSSDSLIL | 672   | 478   |
| >FCRL4-L99R RLLFSSDSL   | 138   | >FCRL4-L99R RLLFSSDSL   | 66    | 72    |
| >FCRL4-L99R RLLFSSDSL   | 136   | >FCRL4-L99R RLLFSSDSL   | 380   | 244   |
| >FCRL4-L99R RLLFSSDSLIL | 295   | >FCRL4-L99R RLLFSSDSLIL | 146   | 149   |
| >FCRL4-L99R RLLFSSDSL   | 171   | >FCRL4-L99R RLLFSSDSL   | 4420  | 4249  |
| >FCRL4-L99R RLLFSSDSLIL | 257   | >FCRL4-L99R RLLFSSDSLIL | 7693  | 7436  |
| >FCRL4-L99R RLLFSSDSL   | 12    | >FCRL4-L99R RLLFSSDSL   | 685   | 673   |
| >FCRL4-L99R RLLFSSDSL   | 26    | >FCRL4-L99R RLLFSSDSL   | 1327  | 1301  |
| >FCRL4-L99R RLLFSSDSLIL | 43    | >FCRL4-L99R RLLFSSDSLIL | 2266  | 2223  |
| >FCRL4-L99R RLLFSSDSL   | 13    | >FCRL4-L99R RLLFSSDSL   | 689   | 676   |
| >FCRL4-L99R RLLFSSDSL   | 31    | >FCRL4-L99R RLLFSSDSL   | 2153  | 2122  |
| >FCRL4-L99R RLLFSSDSLIL | 19    | >FCRL4-L99R RLLFSSDSLIL | 1164  | 1145  |
| >FCRL4-L99R RLLFSSDSL   | 30    | >FCRL4-L99R RLLFSSDSL   | 3986  | 3956  |
| >FCRL4-L99R RLLFSSDSL   | 50    | >FCRL4-L99R RLLFSSDSL   | 5758  | 5708  |
| >FCRL4-L99R RLLFSSDSLIL | 37    | >FCRL4-L99R RLLFSSDSLIL | 4421  | 4384  |
| >FCRL4-L99R RLLFSSDSL   | 18    | >FCRL4-L99R RLLFSSDSL   | 2887  | 2869  |
| >FCRL4-L99R RLLFSSDSL   | 166   | >FCRL4-L99R RLLFSSDSL   | 11457 | 11291 |
| >FCRL4-L99R RLLFSSDSLIL | 50    | >FCRL4-L99R RLLFSSDSLIL | 8085  | 8035  |
| >FCRL4-L99R RLLFSSDSL   | 46    | >FCRL4-L99R RLLFSSDSL   | 153   | 107   |
| >FCRL4-L99R RLLFSSDSL   | 119   | >FCRL4-L99R RLLFSSDSL   | 484   | 365   |
| >FCRL4-L99R RLLFSSDSLIL | 58    | >FCRL4-L99R RLLFSSDSLIL | 191   | 133   |
| >FCRL4-L99R RLLFSSDSL   | 6780  | >FCRL4-L99R RLLFSSDSL   | 118   | 6662  |
| >FCRL4-L99R RLLFSSDSL   | 1762  | >FCRL4-L99R RLLFSSDSL   | 19    | 1743  |
| >FCRL4-L99R RLLFSSDSL   | 558   | >FCRL4-L99R RLLFSSDSL   | 11    | 547   |
| >FCRL4-L99R RLLFSSDSLIL | 912   | >FCRL4-L99R RLLFSSDSLIL | 14    | 898   |
| >FCRL4-L99R RLLFSSDSL   | 23    | >FCRL4-L99R RLLFSSDSL   | 224   | 201   |
| >FCRL4-L99R RLLFSSDSL   | 138   | >FCRL4-L99R RLLFSSDSL   | 1507  | 1369  |
| >FCRL4-L99R RLLFSSDSLIL | 52    | >FCRL4-L99R RLLFSSDSLIL | 597   | 545   |

|                         |       |                         |       |       |
|-------------------------|-------|-------------------------|-------|-------|
| >FCRL4-L99R RLLFSSDSL   | 4588  | >FCRL4-L99R RRLFSSDSL   | 80    | 4508  |
| >FCRL4-L99R RLLFSSDSLIL | 9067  | >FCRL4-L99R RRLFSSDSLIL | 262   | 8805  |
| >FCRL4-L99R RLLFSSDSL   | 505   | >FCRL4-L99R RRLFSSDSL   | 93    | 412   |
| >FCRL4-L99R RLLFSSDSLIL | 1126  | >FCRL4-L99R RRLFSSDSLIL | 179   | 947   |
| >FCRL4-L99R RLLFSSDSL   | 215   | >FCRL4-L99R RRLFSSDSL   | 112   | 103   |
| >FCRL4-L99R RLLFSSDSL   | 740   | >FCRL4-L99R RRLFSSDSL   | 465   | 275   |
| >FCRL4-L99R RLLFSSDSLIL | 161   | >FCRL4-L99R RRLFSSDSLIL | 93    | 68    |
| >FCRL4-L99R RLLFSSDSL   | 518   | >FCRL4-L99R RRLFSSDSL   | 155   | 363   |
| >FCRL4-L99R RLLFSSDSLIL | 869   | >FCRL4-L99R RRLFSSDSLIL | 322   | 547   |
| >FCRL4-L99R VRLLFSSDSL  | 242   | >FCRL4-L99R VRLFSSDSL   | 312   | 70    |
| >FCRL4-L99R VRLLFSSDSL  | 312   | >FCRL4-L99R VRLFSSDSL   | 122   | 190   |
| >FCRL4-L99R VRLLFSSDSL  | 529   | >FCRL4-L99R VRLFSSDSL   | 215   | 314   |
| >FCRL4-L99R VRLLFSSDSL  | 247   | >FCRL4-L99R VRLFSSDSL   | 365   | 118   |
| >FCRL4-L99R VRLLFSSDSL  | 454   | >FCRL4-L99R VRLFSSDSL   | 303   | 151   |
| >FCRL4-L99R VRLLFSSDSL  | 407   | >FCRL4-L99R VRLFSSDSL   | 305   | 102   |
| >FCRL4-L99R PVRLLFSSDSL | 2974  | >FCRL4-L99R PVRLFSSDSL  | 453   | 2521  |
| >FCRL4-L99R NPVRLLFSS   | 465   | >FCRL4-L99R NPVRLFSS    | 1259  | 794   |
| >FCRL4-L99R RSNPVRL     | 12752 | >FCRL4-L99R RSNPVRL     | 358   | 12394 |
| >FCRL4-L99R RSNPVRL     | 14583 | >FCRL4-L99R RSNPVRL     | 151   | 14432 |
| >FCRL4-L99R RSNPVRL     | 185   | >FCRL4-L99R RSNPVRL     | 304   | 119   |
| >FCRL4-L99R RSNPVRL     | 402   | >FCRL4-L99R RSNPVRL     | 1156  | 754   |
| >FCRL4-L99R RSNPVRL     | 53    | >FCRL4-L99R RSNPVRL     | 127   | 74    |
| >FCRL4-L99R RSNPVRL     | 271   | >FCRL4-L99R RSNPVRL     | 177   | 94    |
| >FCRL4-L99R RSNPVRL     | 2187  | >FCRL4-L99R RSNPVRL     | 9     | 2178  |
| >FCRL4-L99R RSNPVRL     | 103   | >FCRL4-L99R RSNPVRL     | 95    | 8     |
| >FCRL4-L99R RSNPVRL     | 34013 | >FCRL4-L99R RSNPVRL     | 403   | 33610 |
| >FCRL4-L99R RSNPVRL     | 210   | >FCRL4-L99R RSNPVRL     | 176   | 34    |
| >FCRL4-L99R RSNPVRL     | 65    | >FCRL4-L99R RSNPVRL     | 87    | 22    |
| >FCRL4-L99R RSNPVRL     | 14    | >FCRL4-L99R RSNPVRL     | 7384  | 7370  |
| >FCRL4-L99R RSNPVRL     | 4     | >FCRL4-L99R RSNPVRL     | 3     | 1     |
| >FCRL4-L99R RSNPVRL     | 260   | >FCRL4-L99R RSNPVRL     | 6986  | 6726  |
| >FCRL4-L99R RSNPVRL     | 40    | >FCRL4-L99R RSNPVRL     | 40    | 0     |
| >FCRL4-L99R RSNPVRL     | 57    | >FCRL4-L99R RSNPVRL     | 10607 | 10550 |
| >FCRL4-L99R RSNPVRL     | 8     | >FCRL4-L99R RSNPVRL     | 8     | 0     |
| >FCRL4-L99R RSNPVRL     | 201   | >FCRL4-L99R RSNPVRL     | 2399  | 2198  |
| >FCRL4-L99R RSNPVRL     | 108   | >FCRL4-L99R RSNPVRL     | 2393  | 2285  |
| >FCRL4-L99R RSNPVRL     | 16    | >FCRL4-L99R RSNPVRL     | 31    | 15    |
| >FCRL4-L99R RSNPVRL     | 100   | >FCRL4-L99R RSNPVRL     | 31332 | 31232 |
| >FCRL4-L99R PRSNPVRL    | 373   | >FCRL4-L99R PRSNPVRL    | 503   | 130   |
| >FCRL4-L99R PRSNPVRL    | 190   | >FCRL4-L99R PRSNPVRL    | 5876  | 5686  |
| >FCRL4-L99R SPRSNPVRL   | 279   | >FCRL4-L99R SPRSNPVRL   | 167   | 112   |
| >FCRL4-L99R SPRSNPVRL   | 75    | >FCRL4-L99R SPRSNPVRL   | 3871  | 3796  |
| >FCRL4-L99R SPRSNPVRL   | 27    | >FCRL4-L99R SPRSNPVRL   | 20    | 7     |

|                         |       |                        |      |       |
|-------------------------|-------|------------------------|------|-------|
| >FCRL4-L99R SPRSNPVRLLI | 288   | >FCRL4-L99R SPRSNPVRLR | 403  | 115   |
| >FCRL4-L99R SPRSNPVRLLI | 300   | >FCRL4-L99R SPRSNPVRLR | 519  | 219   |
| >FGFR1-G31!GVNTTDKEM    | 491   | >FGFR1-G31!EVNTTDKEM   | 5891 | 5400  |
| >FGFR1-G31!GVNTTDKEM    | 360   | >FGFR1-G31!EVNTTDKEM   | 3919 | 3559  |
| >FGFR1-G31!GVNTTDKEM    | 93    | >FGFR1-G31!EVNTTDKEM   | 659  | 566   |
| >FGFR1-G31!GVNTTDKEM    | 14630 | >FGFR1-G31!EVNTTDKEM   | 176  | 14454 |
| >FGFR1-G31!GVNTTDKEM    | 3853  | >FGFR1-G31!EVNTTDKEM   | 17   | 3836  |
| >FGFR1-G31!GVNTTDKEM    | 9530  | >FGFR1-G31!EVNTTDKEM   | 256  | 9274  |
| >FGFR1-G31!AGVNTTDKEI   | 28447 | >FGFR1-G31!AEVNTTDKEN  | 45   | 28402 |
| >FGFR1-G31!LPYVQILKTAC  | 382   | >FGFR1-G31!LPYVQILKTAE | 595  | 213   |
| >FGFR1-G31!LPYVQILKTAC  | 73    | >FGFR1-G31!LPYVQILKTAE | 193  | 120   |
| >FGFR1-G31!TAGVNTTDK    | 527   | >FGFR1-G31!TAEVNTTDK   | 338  | 189   |
| >FGFR1-G31!KTAGVNTTDI   | 73    | >FGFR1-G31!KTAEVNTTDK  | 248  | 175   |
| >FGFR1-G31!KTAGVNTTDI   | 57    | >FGFR1-G31!KTAEVNTTDK  | 88   | 31    |
| >FGFR1-G31!KTAGVNTTDI   | 195   | >FGFR1-G31!KTAEVNTTDK  | 218  | 23    |
| >FGFR1-G31!KTAGVNTT     | 213   | >FGFR1-G31!KTAEVNTT    | 447  | 234   |
| >FGFR1-G31!KTAGVNTTD    | 163   | >FGFR1-G31!KTAEVNTTD   | 311  | 148   |
| >FGFR1-G31!KTAGVNTTDI   | 107   | >FGFR1-G31!KTAEVNTTDK  | 213  | 106   |
| >FGFR1-G31!ILKTAGVNTT   | 168   | >FGFR1-G31!ILKTAEVNTT  | 292  | 124   |
| >FGFR1-G31!QILKTAGV     | 979   | >FGFR1-G31!QILKTAEV    | 466  | 513   |
| >FGFR1-G31!QILKTAGV     | 344   | >FGFR1-G31!QILKTAEV    | 554  | 210   |
| >FGFR1-G31!QILKTAGV     | 70    | >FGFR1-G31!QILKTAEV    | 56   | 14    |
| >FGFR1-G31!QILKTAGV     | 53    | >FGFR1-G31!QILKTAEV    | 44   | 9     |
| >FGFR1-G31!QILKTAGV     | 223   | >FGFR1-G31!QILKTAEV    | 304  | 81    |
| >FGFR1-G31!QILKTAGV     | 133   | >FGFR1-G31!QILKTAEV    | 102  | 31    |
| >FGFR1-G31!QILKTAGV     | 56    | >FGFR1-G31!QILKTAEV    | 67   | 11    |
| >FGFR1-G31!QILKTAGV     | 48    | >FGFR1-G31!QILKTAEV    | 28   | 20    |
| >FGFR1-G31!QILKTAGV     | 521   | >FGFR1-G31!QILKTAEV    | 389  | 132   |
| >FGFR1-G31!QILKTAGV     | 13    | >FGFR1-G31!QILKTAEV    | 19   | 6     |
| >FGFR1-G31!VQILKTAGV    | 426   | >FGFR1-G31!VQILKTAEV   | 181  | 245   |
| >FGFR1-G31!VQILKTAGV    | 527   | >FGFR1-G31!VQILKTAEV   | 206  | 321   |
| >FGFR1-G31!VQILKTAGV    | 19    | >FGFR1-G31!VQILKTAEV   | 27   | 8     |
| >FGFR1-G31!VQILKTAGV    | 8     | >FGFR1-G31!VQILKTAEV   | 9    | 1     |
| >FGFR1-G31!VQILKTAGV    | 422   | >FGFR1-G31!VQILKTAEV   | 478  | 56    |
| >FGFR1-G31!VQILKTAGV    | 74    | >FGFR1-G31!VQILKTAEV   | 147  | 73    |
| >FGFR1-G31!YVQILKTAGV   | 53    | >FGFR1-G31!YVQILKTAEV  | 73   | 20    |
| >FGFR1-G31!YVQILKTAGV   | 82    | >FGFR1-G31!YVQILKTAEV  | 109  | 27    |
| >FGFR1-G31!YVQILKTAGV   | 44    | >FGFR1-G31!YVQILKTAEV  | 48   | 4     |
| >FGFR1-G31!YVQILKTAGV   | 72    | >FGFR1-G31!YVQILKTAEV  | 113  | 41    |
| >FGFR1-G31!YVQILKTAGV   | 229   | >FGFR1-G31!YVQILKTAEV  | 192  | 37    |
| >FGFR1-G31!YVQILKTAGV   | 149   | >FGFR1-G31!YVQILKTAEV  | 286  | 137   |
| >FGFR1-G31!YVQILKTAGV   | 5     | >FGFR1-G31!YVQILKTAEV  | 5    | 0     |
| >FGFR1-G31!YVQILKTAGV   | 308   | >FGFR1-G31!YVQILKTAEV  | 305  | 3     |

|                       |       |                       |      |       |
|-----------------------|-------|-----------------------|------|-------|
| >FGFR1-G31!YVQILKTAGV | 100   | >FGFR1-G31!YVQILKTAEV | 192  | 92    |
| >FGFR1-G70IGVQLAESNR  | 881   | >FGFR1-G70IRVQLAESNR  | 46   | 835   |
| >FGFR1-G70IGVQLAESNR† | 1072  | >FGFR1-G70IRVQLAESNR† | 52   | 1020  |
| >FGFR1-G70IDVQSINWLRI | 18810 | >FGFR1-G70IDVQSINWLRI | 27   | 18783 |
| >FGFR1-G70IDVQSINWLRI | 30215 | >FGFR1-G70IDVQSINWLRI | 65   | 30150 |
| >FGFR1-G70IWLRDGVQL   | 72    | >FGFR1-G70IWLRDRVQL   | 100  | 28    |
| >FGFR1-G70IWLRDGVQLA  | 107   | >FGFR1-G70IWLRDRVQLA  | 116  | 9     |
| >FGFR1-G70IWLRDGVQL   | 32    | >FGFR1-G70IWLRDRVQL   | 68   | 36    |
| >FGFR1-G70IWLRDGVQLA  | 6     | >FGFR1-G70IWLRDRVQLA  | 8    | 2     |
| >FGFR1-G70IWLRDGVQLA  | 217   | >FGFR1-G70IWLRDRVQLA  | 296  | 79    |
| >FGFR1-G70IWLRDGVQLA  | 491   | >FGFR1-G70IWLRDRVQLA  | 1743 | 1252  |
| >FGFR1-G70IWLRDGVQL   | 20    | >FGFR1-G70IWLRDRVQL   | 85   | 65    |
| >FGFR1-G70IWLRDGVQLA  | 35    | >FGFR1-G70IWLRDRVQLA  | 110  | 75    |
| >FGFR1-G70IWLRDGVQL   | 236   | >FGFR1-G70IWLRDRVQL   | 929  | 693   |
| >FGFR1-G70IWLRDGVQL   | 97    | >FGFR1-G70IWLRDRVQL   | 484  | 387   |
| >FGFR1-G70IWLRDGVQLA  | 200   | >FGFR1-G70IWLRDRVQLA  | 817  | 617   |
| >FGFR1-G70IWLRDGVQL   | 84    | >FGFR1-G70IWLRDRVQL   | 590  | 506   |
| >FGFR1-G70IWLRDGVQLA  | 313   | >FGFR1-G70IWLRDRVQLA  | 2476 | 2163  |
| >FGFR1-G70IWLRDGVQL   | 3     | >FGFR1-G70IWLRDRVQL   | 3    | 0     |
| >FGFR1-G70IWLRDGVQLA  | 3     | >FGFR1-G70IWLRDRVQLA  | 4    | 1     |
| >FGFR1-G70IWLRDGVQLA  | 67    | >FGFR1-G70IWLRDRVQLA  | 103  | 36    |
| >FGFR1-G70IWLRDGVQL   | 4943  | >FGFR1-G70IWLRDRVQL   | 107  | 4836  |
| >FGFR1-G70IWLRDGVQL   | 434   | >FGFR1-G70IWLRDRVQL   | 1162 | 728   |
| >FGFR1-G70INWLRDGVQL  | 63    | >FGFR1-G70INWLRDRVQL  | 58   | 5     |
| >FGFR1-G70INWLRDGVQL  | 653   | >FGFR1-G70INWLRDRVQL  | 398  | 255   |
| >FGFR1-G70ISINWLRDGV  | 290   | >FGFR1-G70ISINWLRDRV  | 548  | 258   |
| >FGFR1-G70ISINWLRDGV  | 123   | >FGFR1-G70ISINWLRDRV  | 376  | 253   |
| >FGFR1-G70ISINWLRDGV  | 364   | >FGFR1-G70ISINWLRDRV  | 2063 | 1699  |
| >FGFR1-G70ISINWLRDGV  | 37    | >FGFR1-G70ISINWLRDRV  | 59   | 22    |
| >FGFR1-G70ISINWLRDGV( | 266   | >FGFR1-G70ISINWLRDRV( | 798  | 532   |
| >FGFR1-G70ISINWLRDGV  | 43    | >FGFR1-G70ISINWLRDRV  | 96   | 53    |
| >FGFR1-G70ISINWLRDGV( | 357   | >FGFR1-G70ISINWLRDRV( | 1155 | 798   |
| >FGFR1-G70ISINWLRDGV  | 14    | >FGFR1-G70ISINWLRDRV  | 14   | 0     |
| >FGFR1-G70ISINWLRDGV( | 77    | >FGFR1-G70ISINWLRDRV( | 67   | 10    |
| >FGFR1-G70ISINWLRDGV  | 21265 | >FGFR1-G70ISINWLRDR   | 114  | 21151 |
| >FGFR1-G70ISINWLRDGV( | 620   | >FGFR1-G70ISINWLRDRV( | 490  | 130   |
| >FGFR1-G70ISINWLRDGV  | 37082 | >FGFR1-G70ISINWLRDR   | 174  | 36908 |
| >FGFR1-G70ISINWLRDGV  | 39    | >FGFR1-G70ISINWLRDRV  | 64   | 25    |
| >FGFR1-G70ISINWLRDGV  | 105   | >FGFR1-G70ISINWLRDRV  | 584  | 479   |
| >FGFR1-G70IQSINWLRDGV | 476   | >FGFR1-G70IQSINWLRDR\ | 1382 | 906   |
| >FGFR1-G70IQSINWLRDGV | 41462 | >FGFR1-G70IQSINWLRDR  | 447  | 41015 |
| >FGFR1-G70IQSINWLRDGV | 101   | >FGFR1-G70IQSINWLRDR\ | 122  | 21    |
| >FGFR1-G70IQSINWLRDGV | 213   | >FGFR1-G70IQSINWLRDR\ | 801  | 588   |



|                       |       |                       |       |       |
|-----------------------|-------|-----------------------|-------|-------|
| >FGFR1-G70IQSINWLRDG  | 11971 | >FGFR1-G70IQSINWLRDR  | 159   | 11812 |
| >FGFR1-G70IVQSINWLRDI | 60    | >FGFR1-G70IVQSINWLRDI | 204   | 144   |
| >FGFR1-G70IVQSINWLRDI | 470   | >FGFR1-G70IVQSINWLRDI | 656   | 186   |
| >FGFR1-G70IVQSINWLRDI | 28805 | >FGFR1-G70IVQSINWLRDI | 142   | 28663 |
| >FGFR1-K65€KTTNGRLPV  | 136   | >FGFR1-K65€ETTNGRLPV  | 4836  | 4700  |
| >FGFR1-K65€KTTNGRLPV  | 349   | >FGFR1-K65€ETTNGRLPV  | 3316  | 2967  |
| >FGFR1-K65€KTTNGRLPVK | 62    | >FGFR1-K65€ETTNGRLPVK | 1205  | 1143  |
| >FGFR1-K65€KTTNGRLPVK | 25    | >FGFR1-K65€ETTNGRLPVK | 108   | 83    |
| >FGFR1-K65€KTTNGRLPV  | 22    | >FGFR1-K65€ETTNGRLPV  | 10519 | 10497 |
| >FGFR1-K65€KTTNGRLPVK | 6     | >FGFR1-K65€ETTNGRLPVK | 3960  | 3954  |
| >FGFR1-K65€KTTNGRLPV  | 209   | >FGFR1-K65€ETTNGRLPV  | 5423  | 5214  |
| >FGFR1-K65€KTTNGRLPVK | 28    | >FGFR1-K65€ETTNGRLPVK | 1300  | 1272  |
| >FGFR1-K65€KTTNGRLPVK | 2921  | >FGFR1-K65€ETTNGRLPVK | 84    | 2837  |
| >FGFR1-K65€KTTNGRLPV  | 578   | >FGFR1-K65€ETTNGRLPV  | 9     | 569   |
| >FGFR1-K65€KTTNGRLPV  | 1438  | >FGFR1-K65€ETTNGRLPV  | 11    | 1427  |
| >FGFR1-K65€KTTNGRLPV  | 141   | >FGFR1-K65€ETTNGRLPV  | 6261  | 6120  |
| >FGFR1-K65€KTTNGRLPVK | 15    | >FGFR1-K65€ETTNGRLPVK | 63    | 48    |
| >FGFR1-K65€KTTNGRLPVK | 47    | >FGFR1-K65€ETTNGRLPVK | 576   | 529   |
| >FGFR1-K65€KTTNGRLPVK | 13    | >FGFR1-K65€ETTNGRLPVK | 223   | 210   |
| >FGFR1-K65€KTTNGRLPVK | 332   | >FGFR1-K65€ETTNGRLPVK | 4077  | 3745  |
| >FGFR1-K65€KTTNGRL    | 24861 | >FGFR1-K65€KETTNGRL   | 109   | 24752 |
| >FGFR1-K65€KTTNGRLPV  | 12161 | >FGFR1-K65€KETTNGRLPV | 386   | 11775 |
| >FGFR1-K65€KTTNGRL    | 450   | >FGFR1-K65€KETTNGRL   | 7508  | 7058  |
| >FGFR1-K65€KTTNGRLPV  | 56    | >FGFR1-K65€KETTNGRLPV | 2557  | 2501  |
| >FGFR1-K65€KTTNGRL    | 17650 | >FGFR1-K65€KETTNGRL   | 46    | 17604 |
| >FGFR1-K65€YKTTNGR    | 289   | >FGFR1-K65€YKETTNGR   | 5367  | 5078  |
| >FGFR1-K65€YKTTNGRL   | 154   | >FGFR1-K65€YKETTNGRL  | 2906  | 2752  |
| >FGFR1-K65€YKTTNGRLP  | 28    | >FGFR1-K65€YKETTNGRLP | 435   | 407   |
| >FGFR1-K65€YKTTNGRL   | 6299  | >FGFR1-K65€YKETTNGRL  | 355   | 5944  |
| >FGFR1-K65€YKTTNGRLP  | 4446  | >FGFR1-K65€YKETTNGRLP | 220   | 4226  |
| >FGFR1-K65€YKTTNGRL   | 12    | >FGFR1-K65€YKETTNGRL  | 29    | 17    |
| >FGFR1-K65€YKTTNGRL   | 374   | >FGFR1-K65€YKETTNGRL  | 632   | 258   |
| >FGFR1-K65€YKTTNGRL   | 158   | >FGFR1-K65€YKETTNGRL  | 314   | 156   |
| >FGFR1-K65€YKTTNGRL   | 12    | >FGFR1-K65€YKETTNGRL  | 15    | 3     |
| >FGFR1-K65€YKTTNGR    | 104   | >FGFR1-K65€YKETTNGR   | 168   | 64    |
| >FGFR1-K65€YKTTNGR    | 105   | >FGFR1-K65€YKETTNGR   | 51    | 54    |
| >FGFR1-K65€YKTTNGR    | 162   | >FGFR1-K65€YKETTNGR   | 134   | 28    |
| >FGFR1-K65€YKTTNGR    | 35    | >FGFR1-K65€YKETTNGR   | 46    | 11    |
| >FGFR1-K65€DYYKTTNGF  | 262   | >FGFR1-K65€DYYKETTNGF | 586   | 324   |
| >FGFR1-K65€DYYKTTNGF  | 702   | >FGFR1-K65€DYYKETTNGF | 452   | 250   |
| >FGFR1-K65€DYYKTTNGF  | 224   | >FGFR1-K65€DYYKETTNGF | 828   | 604   |
| >FGFR1-K65€DYYKTTNGF  | 149   | >FGFR1-K65€DYYKETTNGF | 283   | 134   |
| >FGFR1-K65€DYYKTTNGF  | 25    | >FGFR1-K65€DYYKETTNGF | 24    | 1     |

|                         |       |                         |       |       |
|-------------------------|-------|-------------------------|-------|-------|
| >FGFR1-K65E DIHHIDYYKK  | 162   | >FGFR1-K65E DIHHIDYYKE  | 25218 | 25056 |
| >FGFR1-N54I NLLGACTQ    | 2004  | >FGFR1-N54I KLLGACTQ    | 334   | 1670  |
| >FGFR1-N54I NLLGACTQ    | 2018  | >FGFR1-N54I KLLGACTQ    | 194   | 1824  |
| >FGFR1-N54I NLLGACTQ    | 174   | >FGFR1-N54I KLLGACTQ    | 30    | 144   |
| >FGFR1-N54I KMIGKHKNIII | 16131 | >FGFR1-N54I KMIGKHKNIII | 66    | 16065 |
| >FGFR1-N54I KMIGKHKNIII | 20887 | >FGFR1-N54I KMIGKHKNIII | 72    | 20815 |
| >FGFR1-N54I KMIGKHKNIII | 9167  | >FGFR1-N54I KMIGKHKNIII | 25    | 9142  |
| >FGFR1-N54I KMIGKHKNIII | 9173  | >FGFR1-N54I KMIGKHKNIII | 92    | 9081  |
| >FGFR1-N54I KMIGKHKNIII | 11157 | >FGFR1-N54I KMIGKHKNIII | 246   | 10911 |
| >FGFR1-N54I NIINLLGA    | 93    | >FGFR1-N54I NIIKLLGA    | 183   | 90    |
| >FGFR1-N54I NIINLLGA    | 84    | >FGFR1-N54I NIIKLLGA    | 187   | 103   |
| >FGFR1-N54I NIINLLGA    | 495   | >FGFR1-N54I NIIKLLGA    | 809   | 314   |
| >FGFR1-N54I KHKNIINL    | 440   | >FGFR1-N54I KHKNIIKL    | 884   | 444   |
| >FGFR1-N54I GKHKNIINL   | 121   | >FGFR1-N54I GKHKNIIKL   | 276   | 155   |
| >FGFR1-N54I GKHKNIINLL  | 313   | >FGFR1-N54I GKHKNIIKLL  | 354   | 41    |
| >FGFR1-N54I GKHKNIINL   | 469   | >FGFR1-N54I GKHKNIIKL   | 547   | 78    |
| >FGFR1-N54I IGKHKNIIN   | 9109  | >FGFR1-N54I IGKHKNIIK   | 37    | 9072  |
| >FGFR1-N54I MIGKHKNIIN  | 401   | >FGFR1-N54I MIGKHKNIIKI | 715   | 314   |
| >FGFR1-N54I MIGKHKNIIN  | 239   | >FGFR1-N54I MIGKHKNIIKI | 226   | 13    |
| >FGFR1-N54I MIGKHKNIIN  | 26325 | >FGFR1-N54I MIGKHKNIIK  | 149   | 26176 |
| >FGFR1-N54I MIGKHKNIIN  | 35227 | >FGFR1-N54I MIGKHKNIIK  | 342   | 34885 |
| >FGFR1-N54I MIGKHKNIIN  | 14648 | >FGFR1-N54I MIGKHKNIIK  | 323   | 14325 |
| >FGFR1-P252 PHRPILQAGL  | 1023  | >FGFR1-P252 THRPILQAGL  | 338   | 685   |
| >FGFR1-P252 SPHRPILQAG  | 197   | >FGFR1-P252 STHRPILQAG  | 34075 | 33878 |
| >FGFR1-P252 SPHRPILQAG  | 15917 | >FGFR1-P252 STHRPILQAG  | 448   | 15469 |
| >FGFR1-P252 SPHRPILQAG  | 12975 | >FGFR1-P252 STHRPILQAG  | 229   | 12746 |
| >FGFR1-P252 SPHRPILQ    | 16807 | >FGFR1-P252 STHRPILQ    | 139   | 16668 |
| >FGFR1-P252 SPHRPILQA   | 15006 | >FGFR1-P252 STHRPILQA   | 21    | 14985 |
| >FGFR1-P252 SPHRPILQAG  | 17804 | >FGFR1-P252 STHRPILQAG  | 265   | 17539 |
| >FGFR1-P252 SPHRPILQAG  | 16663 | >FGFR1-P252 STHRPILQAG  | 108   | 16555 |
| >FGFR1-P252 SPHRPILQAG  | 12056 | >FGFR1-P252 STHRPILQAG  | 70    | 11986 |
| >FGFR1-P252 SPHRPILQA   | 300   | >FGFR1-P252 STHRPILQA   | 22238 | 21938 |
| >FGFR1-P252 SPHRPILQAG  | 68    | >FGFR1-P252 STHRPILQAG  | 13402 | 13334 |
| >FGFR1-P252 SPHRPILQAG  | 15603 | >FGFR1-P252 STHRPILQAG  | 16    | 15587 |
| >FGFR1-P252 SPHRPILQA   | 465   | >FGFR1-P252 STHRPILQA   | 31678 | 31213 |
| >FGFR1-P252 SPHRPILQAG  | 14314 | >FGFR1-P252 STHRPILQAG  | 481   | 13833 |
| >FGFR1-P252 SPHRPILQAG  | 9207  | >FGFR1-P252 STHRPILQAG  | 219   | 8988  |
| >FGFR1-P252 RSPHRPIL    | 1162  | >FGFR1-P252 RSTHRPIL    | 217   | 945   |
| >FGFR1-P252 RSPHRPILQA  | 662   | >FGFR1-P252 RSTHRPILQA  | 116   | 546   |
| >FGFR1-P252 RSPHRPIL    | 1426  | >FGFR1-P252 RSTHRPIL    | 468   | 958   |
| >FGFR1-P252 RSPHRPIL    | 265   | >FGFR1-P252 RSTHRPIL    | 14    | 251   |
| >FGFR1-P252 RSPHRPIL    | 13742 | >FGFR1-P252 RSTHRPIL    | 234   | 13508 |
| >FGFR1-P252 RSPHRPIL    | 278   | >FGFR1-P252 RSTHRPIL    | 19680 | 19402 |

|                       |       |                       |       |       |
|-----------------------|-------|-----------------------|-------|-------|
| >FGFR1-P252RSPHRPIL   | 1010  | >FGFR1-P252RSTHRPIL   | 65    | 945   |
| >FGFR1-P252RSPHRPILQA | 1905  | >FGFR1-P252RSTHRPILQA | 445   | 1460  |
| >FGFR1-P252RSPHRPIL   | 273   | >FGFR1-P252RSTHRPIL   | 248   | 25    |
| >FGFR1-P252ERSPHRPIL  | 105   | >FGFR1-P252ERSTHRPIL  | 78    | 27    |
| >FGFR1-P252ERSPHRPIL  | 469   | >FGFR1-P252ERSTHRPIL  | 323   | 146   |
| >FGFR1-P252ERSPHRPIL  | 59    | >FGFR1-P252ERSTHRPIL  | 125   | 66    |
| >FGFR1-P252VERSPHRPI  | 2409  | >FGFR1-P252VERSTHRPI  | 222   | 2187  |
| >FGFR1-P252VERSPHRPI  | 319   | >FGFR1-P252VERSTHRPI  | 184   | 135   |
| >FGFR1-P252VERSPHRPIL | 386   | >FGFR1-P252VERSTHRPIL | 273   | 113   |
| >FGFR1-P252VERSPHRPI  | 434   | >FGFR1-P252VERSTHRPI  | 149   | 285   |
| >FGFR1-P252VERSPHRPI  | 197   | >FGFR1-P252VERSTHRPI  | 236   | 39    |
| >FGFR1-P252VERSPHRPIL | 272   | >FGFR1-P252VERSTHRPIL | 113   | 159   |
| >FGFR1-P252VVERSPHR   | 255   | >FGFR1-P252VVERSTHR   | 121   | 134   |
| >FGFR1-P252VVERSPHR   | 668   | >FGFR1-P252VVERSTHR   | 322   | 346   |
| >FGFR1-P252DVVERSPH   | 382   | >FGFR1-P252DVVERSTH   | 1026  | 644   |
| >FGFR1-P252DVVERSPH   | 338   | >FGFR1-P252DVVERSTH   | 774   | 436   |
| >FGFR1-P252DVVERSPHRF | 365   | >FGFR1-P252DVVERSTHRF | 858   | 493   |
| >FGFR1-P252DVVERSPHR  | 41    | >FGFR1-P252DVVERSTHR  | 18    | 23    |
| >FGFR1-P252DVVERSPHR  | 28    | >FGFR1-P252DVVERSTHR  | 19    | 9     |
| >FGFR1-P252DVVERSPHRF | 202   | >FGFR1-P252DVVERSTHRF | 180   | 22    |
| >FGFR1-P252DVVERSPHRF | 65    | >FGFR1-P252DVVERSTHRF | 126   | 61    |
| >FGFR1-P252YQLDVVERSP | 8648  | >FGFR1-P252YQLDVVERST | 313   | 8335  |
| >FGFR1-P252YQLDVVERSP | 2493  | >FGFR1-P252YQLDVVERST | 160   | 2333  |
| >FGFR1-P252YQLDVVERSP | 346   | >FGFR1-P252YQLDVVERST | 918   | 572   |
| >FGFR1-P252YQLDVVERSP | 101   | >FGFR1-P252YQLDVVERST | 141   | 40    |
| >FGFR1-R576RRPPGLEY   | 138   | >FGFR1-R576WRPPGLEY   | 398   | 260   |
| >FGFR1-R576RRPPGLEYCY | 40    | >FGFR1-R576WRPPGLEYC  | 146   | 106   |
| >FGFR1-R576RRPPGLEY   | 480   | >FGFR1-R576WRPPGLEY   | 11183 | 10703 |
| >FGFR1-R576RRPPGLEYC  | 329   | >FGFR1-R576WRPPGLEYC  | 1739  | 1410  |
| >FGFR1-R576ARRPPGLEY  | 861   | >FGFR1-R576AWRPPGLEY  | 29    | 832   |
| >FGFR1-R576ARRPPGLEYC | 2476  | >FGFR1-R576AWRPPGLEYC | 91    | 2385  |
| >FGFR1-R576ARRPPGLEY  | 3472  | >FGFR1-R576AWRPPGLEY  | 442   | 3030  |
| >FGFR1-R576ARRPPGLEYC | 2146  | >FGFR1-R576AWRPPGLEYC | 364   | 1782  |
| >FGFR1-R576ARRPPGLEY  | 8     | >FGFR1-R576AWRPPGLEY  | 384   | 376   |
| >FGFR1-R576ARRPPGLEYC | 40    | >FGFR1-R576AWRPPGLEYC | 1190  | 1150  |
| >FGFR1-R576ARRPPGLEY  | 318   | >FGFR1-R576AWRPPGLEY  | 16795 | 16477 |
| >FGFR1-R576ARRPPGLEY  | 433   | >FGFR1-R576AWRPPGLEY  | 26214 | 25781 |
| >FGFR1-R576KGNLREYLQA | 26    | >FGFR1-R576KGNLREYLQA | 16924 | 16898 |
| >FGFR1-R576KGNLREYLQA | 24677 | >FGFR1-R576KGNLREYLQA | 301   | 24376 |
| >FGFR1-R576KGNLREYLQA | 21863 | >FGFR1-R576KGNLREYLQA | 92    | 21771 |
| >FGFR1-R576KGNLREYLQA | 215   | >FGFR1-R576KGNLREYLQA | 29833 | 29618 |
| >FGFR1-R576QARRPPGL   | 197   | >FGFR1-R576QAWRPPGL   | 12250 | 12053 |
| >FGFR1-R576QARRPPGLEY | 368   | >FGFR1-R576QAWRPPGLE  | 13147 | 12779 |

|                       |       |                       |       |       |
|-----------------------|-------|-----------------------|-------|-------|
| >FGFR1-R57€QARRPPGLE  | 1617  | >FGFR1-R57€QAWRPPGLE  | 285   | 1332  |
| >FGFR1-R57€QARRPPGL   | 7985  | >FGFR1-R57€QAWRPPGL   | 123   | 7862  |
| >FGFR1-R57€QARRPPGLE  | 823   | >FGFR1-R57€QAWRPPGLE  | 189   | 634   |
| >FGFR1-R57€QARRPPGLE  | 472   | >FGFR1-R57€QAWRPPGLE  | 553   | 81    |
| >FGFR1-R57€QARRPPGLE  | 159   | >FGFR1-R57€QAWRPPGLE  | 83    | 76    |
| >FGFR1-R57€QARRPPGL   | 209   | >FGFR1-R57€QAWRPPGL   | 242   | 33    |
| >FGFR1-R57€QARRPPGLE  | 26    | >FGFR1-R57€QAWRPPGLE  | 29    | 3     |
| >FGFR1-R57€LQARRPPGL  | 2470  | >FGFR1-R57€LQAWRPPGL  | 328   | 2142  |
| >FGFR1-R57€LQARRPPGL  | 915   | >FGFR1-R57€LQAWRPPGL  | 356   | 559   |
| >FGFR1-R57€LQARRPPGL  | 156   | >FGFR1-R57€LQAWRPPGL  | 34    | 122   |
| >FGFR1-R57€LQARRPPGL  | 1987  | >FGFR1-R57€LQAWRPPGL  | 181   | 1806  |
| >FGFR1-R57€LQARRPPGLE | 195   | >FGFR1-R57€LQAWRPPGL  | 55    | 140   |
| >FGFR1-R57€LQARRPPGLE | 564   | >FGFR1-R57€LQAWRPPGL  | 159   | 405   |
| >FGFR1-R57€LQARRPPGLE | 248   | >FGFR1-R57€LQAWRPPGL  | 655   | 407   |
| >FGFR1-R57€LQARRPPGLE | 57    | >FGFR1-R57€LQAWRPPGL  | 73    | 16    |
| >FGFR1-R57€LQARRPPGLE | 326   | >FGFR1-R57€LQAWRPPGL  | 504   | 178   |
| >FGFR1-R57€LQARRPPGL  | 195   | >FGFR1-R57€LQAWRPPGL  | 1079  | 884   |
| >FGFR1-R57€LQARRPPGLE | 8     | >FGFR1-R57€LQAWRPPGL  | 25    | 17    |
| >FGFR1-R57€LQARRPPGL  | 2340  | >FGFR1-R57€LQAWRPPGL  | 441   | 1899  |
| >FGFR1-R57€LQARRPPGL  | 168   | >FGFR1-R57€LQAWRPPGL  | 141   | 27    |
| >FGFR1-R57€YLQARRPPGL | 398   | >FGFR1-R57€YLQAWRPPG  | 33    | 365   |
| >FGFR1-R57€YLQARRPPGL | 142   | >FGFR1-R57€YLQAWRPPG  | 22    | 120   |
| >FGFR1-R57€YLQARRPPGL | 72    | >FGFR1-R57€YLQAWRPPG  | 19    | 53    |
| >FGFR1-R57€YLQARRPPGL | 751   | >FGFR1-R57€YLQAWRPPG  | 96    | 655   |
| >FGFR1-R57€YLQARRPPG  | 7162  | >FGFR1-R57€YLQAWRPPG  | 330   | 6832  |
| >FGFR1-R57€YLQARRPPGL | 10    | >FGFR1-R57€YLQAWRPPG  | 2     | 8     |
| >FGFR1-R57€YLQARRPPGL | 24    | >FGFR1-R57€YLQAWRPPG  | 8     | 16    |
| >FGFR1-R57€YLQARRPPGL | 21    | >FGFR1-R57€YLQAWRPPG  | 7     | 14    |
| >FGFR1-R57€YLQARRPPGL | 58    | >FGFR1-R57€YLQAWRPPG  | 7     | 51    |
| >FGFR1-R57€YLQARRPPG  | 817   | >FGFR1-R57€YLQAWRPPG  | 71    | 746   |
| >FGFR1-R57€YLQARRPPGL | 3     | >FGFR1-R57€YLQAWRPPG  | 2     | 1     |
| >FGFR1-R57€YLQARRPPGL | 3344  | >FGFR1-R57€YLQAWRPPG  | 230   | 3114  |
| >FGFR1-R57€YLQARRPPG  | 113   | >FGFR1-R57€YLQAWRPPG  | 6144  | 6031  |
| >FGFR1-R57€YLQARRPPG  | 771   | >FGFR1-R57€YLQAWRPPG  | 372   | 399   |
| >FGFR1-R57€YLQARRPPGL | 2164  | >FGFR1-R57€YLQAWRPPG  | 437   | 1727  |
| >FGFR1-R57€EYLQARRPPG | 120   | >FGFR1-R57€EYLQAWRPPG | 119   | 1     |
| >FGFR1-R57€REYLQARR   | 389   | >FGFR1-R57€REYLQAWR   | 218   | 171   |
| >FGFR1-R57€REYLQARRPP | 208   | >FGFR1-R57€REYLQAWRP  | 165   | 43    |
| >FGFR1-R57€REYLQARRPP | 454   | >FGFR1-R57€REYLQAWRP  | 290   | 164   |
| >FGFR1-R57€REYLQARRPP | 305   | >FGFR1-R57€REYLQAWRP  | 163   | 142   |
| >FGFR1-R57€REYLQARR   | 101   | >FGFR1-R57€REYLQAWR   | 53    | 48    |
| >FGFR1-R57€LREYLQAR   | 24173 | >FGFR1-R57€LREYLQAW   | 43    | 24130 |
| >FGFR1-R57€NLREYLQAR  | 141   | >FGFR1-R57€NLREYLQAW  | 21601 | 21460 |

|                       |       |                       |       |       |
|-----------------------|-------|-----------------------|-------|-------|
| >FGFR1-R576NLREYLQARR | 126   | >FGFR1-R576NLREYLQAW  | 42    | 84    |
| >FGFR1-R576NLREYLQAR  | 35    | >FGFR1-R576NLREYLQAW  | 20101 | 20066 |
| >FGFR1-R576NLREYLQARR | 1095  | >FGFR1-R576NLREYLQAW  | 266   | 829   |
| >FGFR1-R576NLREYLQARR | 1160  | >FGFR1-R576NLREYLQAW  | 304   | 856   |
| >FGFR1-S125SVNVSDALPS | 6909  | >FGFR1-S125SVNVSDALPS | 323   | 6586  |
| >FGFR1-S125SVNVSDALPS | 17414 | >FGFR1-S125SVNVSDALPS | 268   | 17146 |
| >FGFR1-S125VSDALPSS   | 8025  | >FGFR1-S125VSDALPSL   | 46    | 7979  |
| >FGFR1-S125NVSDALPSS  | 15347 | >FGFR1-S125NVSDALPSL  | 234   | 15113 |
| >FGFR1-S125NVSDALPSS  | 7713  | >FGFR1-S125NVSDALPSL  | 79    | 7634  |
| >FGFR1-S125NVSDALPSS  | 6206  | >FGFR1-S125NVSDALPSL  | 134   | 6072  |
| >FGFR1-S125NVSDALPSS  | 519   | >FGFR1-S125NVSDALPSL  | 13    | 506   |
| >FGFR1-S125NVSDALPSS  | 14836 | >FGFR1-S125NVSDALPSL  | 188   | 14648 |
| >FGFR1-S125NVSDALPSS  | 16217 | >FGFR1-S125NVSDALPSL  | 86    | 16131 |
| >FGFR1-S125NVSDALPSS  | 4511  | >FGFR1-S125NVSDALPSL  | 258   | 4253  |
| >FGFR1-S125NVSDALPSS  | 4341  | >FGFR1-S125NVSDALPSL  | 24    | 4317  |
| >FGFR1-S433SSASMNSGV  | 5728  | >FGFR1-S433FSASMNSGV  | 485   | 5243  |
| >FGFR1-S433SSASMNSGV  | 486   | >FGFR1-S433FSASMNSGV  | 22    | 464   |
| >FGFR1-S433SSASMNSGV  | 481   | >FGFR1-S433FSASMNSGV  | 23    | 458   |
| >FGFR1-S433SSASMNSGV  | 685   | >FGFR1-S433FSASMNSGV  | 44    | 641   |
| >FGFR1-S433SSASMNSGV  | 1864  | >FGFR1-S433FSASMNSGV  | 154   | 1710  |
| >FGFR1-S433SSASMNSGV  | 3695  | >FGFR1-S433FSASMNSGV  | 467   | 3228  |
| >FGFR1-S433SSASMNSGV  | 18    | >FGFR1-S433FSASMNSGV  | 9     | 9     |
| >FGFR1-S433SSASMNSGV  | 412   | >FGFR1-S433FSASMNSGV  | 236   | 176   |
| >FGFR1-S433SSASMNSGV  | 297   | >FGFR1-S433FSASMNSGV  | 73    | 224   |
| >FGFR1-S433SSASMNSGV  | 218   | >FGFR1-S433FSASMNSGV  | 61    | 157   |
| >FGFR1-S433SSASMNSGV  | 815   | >FGFR1-S433FSASMNSGV  | 154   | 661   |
| >FGFR1-S433SSASMNSGV  | 102   | >FGFR1-S433FSASMNSGV  | 56    | 46    |
| >FGFR1-S433SSASMNSGV  | 71    | >FGFR1-S433FSASMNSGV  | 41    | 30    |
| >FGFR1-S433SSASMNSGV  | 1320  | >FGFR1-S433FSASMNSGV  | 203   | 1117  |
| >FGFR1-S433SSASMNSGV  | 1928  | >FGFR1-S433FSASMNSGV  | 315   | 1613  |
| >FGFR1-S433SSASMNSGV  | 377   | >FGFR1-S433FSASMNSGV  | 122   | 255   |
| >FGFR1-S433SSASMNSGV  | 27    | >FGFR1-S433FSASMNSGV  | 17    | 10    |
| >FGFR1-S433SSASMNSGV  | 27    | >FGFR1-S433FSASMNSGV  | 33    | 6     |
| >FGFR1-S433SSASMNSGV  | 33    | >FGFR1-S433FSASMNSGV  | 45    | 12    |
| >FGFR1-S433SSASMNSGV  | 18    | >FGFR1-S433FSASMNSGV  | 26    | 8     |
| >FGFR1-S433SSASMNSGV  | 153   | >FGFR1-S433FSASMNSGV  | 95    | 58    |
| >FGFR1-S433SSASMNSGV  | 137   | >FGFR1-S433FSASMNSGV  | 156   | 19    |
| >FGFR1-S433DSSASMNSG  | 97    | >FGFR1-S433DFSASMNSG  | 3318  | 3221  |
| >FGFR1-S433DSSASMNSG  | 256   | >FGFR1-S433DFSASMNSG  | 4268  | 4012  |
| >FGFR1-S433LRRQVTVSAL | 3927  | >FGFR1-S433LRRQVTVSAL | 27    | 3900  |
| >FGFR1-S433LRRQVTVSAL | 15934 | >FGFR1-S433LRRQVTVSAL | 440   | 15494 |
| >FGFR1-S433ADSSASMNSG | 4829  | >FGFR1-S433ADFSASMNSG | 277   | 4552  |
| >FGFR1-S433ADSSASMNSG | 1049  | >FGFR1-S433ADFSASMNSG | 113   | 936   |

|                        |       |                        |      |       |
|------------------------|-------|------------------------|------|-------|
| >FGFR1-S433ADSSASMNSI  | 140   | >FGFR1-S433ADFSASMNSI  | 132  | 8     |
| >FGFR1-S433SADSSASM    | 89    | >FGFR1-S433SADFSASM    | 135  | 46    |
| >FGFR1-S433SADSSASM    | 280   | >FGFR1-S433SADFSASM    | 399  | 119   |
| >FGFR1-S433VSADSSASM   | 1397  | >FGFR1-S433VSADFSASM   | 36   | 1361  |
| >FGFR1-S433VSADSSASM   | 1793  | >FGFR1-S433VSADFSASM   | 357  | 1436  |
| >FGFR1-S433VSADSSASM   | 59    | >FGFR1-S433VSADFSASM   | 98   | 39    |
| >FGFR1-S433VSADSSASM   | 124   | >FGFR1-S433VSADFSASM   | 175  | 51    |
| >FGFR1-S433VSADSSASM   | 3     | >FGFR1-S433VSADFSASM   | 5    | 2     |
| >FGFR1-S433VSADSSASM   | 254   | >FGFR1-S433VSADFSASM   | 240  | 14    |
| >FGFR1-S433VSADSSASM   | 74    | >FGFR1-S433VSADFSASM   | 90   | 16    |
| >FGFR1-S433VSADSSASM   | 39    | >FGFR1-S433VSADFSASM   | 14   | 25    |
| >FGFR1-S433VSADSSASM   | 28    | >FGFR1-S433VSADFSASM   | 15   | 13    |
| >FGFR1-S433VSADSSASM   | 344   | >FGFR1-S433VSADFSASM   | 94   | 250   |
| >FGFR1-S433TVSADSSASM  | 602   | >FGFR1-S433TVSADFSASM  | 371  | 231   |
| >FGFR1-S433TVSADSSA    | 2535  | >FGFR1-S433TVSADFSAS   | 103  | 2432  |
| >FGFR1-S433TVSADSSASM  | 473   | >FGFR1-S433TVSADFSASM  | 209  | 264   |
| >FGFR1-S433TVSADSSA    | 61    | >FGFR1-S433TVSADFSAS   | 24   | 37    |
| >FGFR1-S433TVSADSSAS   | 1022  | >FGFR1-S433TVSADFSAS   | 445  | 577   |
| >FGFR1-S433TVSADSSASM  | 373   | >FGFR1-S433TVSADFSASM  | 285  | 88    |
| >FGFR1-S433TVSADSSASM  | 524   | >FGFR1-S433TVSADFSASM  | 254  | 270   |
| >FGFR1-S433TVSADSSASM  | 138   | >FGFR1-S433TVSADFSASM  | 190  | 52    |
| >FGFR1-S433TVSADSSASM  | 98    | >FGFR1-S433TVSADFSASM  | 112  | 14    |
| >FGFR1-S433VTVSADSSAS  | 752   | >FGFR1-S433VTVSADFSAS  | 248  | 504   |
| >FGFR1-S433VTVSADSSA   | 2798  | >FGFR1-S433VTVSADFSAS  | 95   | 2703  |
| >FGFR1-S433VTVSADSSAS  | 20    | >FGFR1-S433VTVSADFSAS  | 38   | 18    |
| >FGFR1-S433VTVSADSSA   | 662   | >FGFR1-S433VTVSADFSAS  | 172  | 490   |
| >FGFR1-S433VTVSADSSAS  | 127   | >FGFR1-S433VTVSADFSAS  | 245  | 118   |
| >FGFR1-S433VTVSADSSAS  | 358   | >FGFR1-S433VTVSADFSAS  | 675  | 317   |
| >FGFR1-S433VTVSADSSAS  | 4     | >FGFR1-S433VTVSADFSAS  | 5    | 1     |
| >FGFR1-S433VTVSADSSAS  | 359   | >FGFR1-S433VTVSADFSAS  | 291  | 68    |
| >FGFR1-S433VTVSADSSAS  | 308   | >FGFR1-S433VTVSADFSAS  | 145  | 163   |
| >FGFR1-S433VTVSADSSAS  | 45    | >FGFR1-S433VTVSADFSAS  | 25   | 20    |
| >FGFR1-S433VTVSADSSA   | 220   | >FGFR1-S433VTVSADFSAS  | 4388 | 4168  |
| >FGFR1-S433VTVSADSSAS  | 8     | >FGFR1-S433VTVSADFSAS  | 14   | 6     |
| >FGFR1-S433RQVTVSADSS  | 42    | >FGFR1-S433RQVTVSADFS  | 13   | 29    |
| >FGFR1-S433RQVTVSADS   | 18383 | >FGFR1-S433RQVTVSADF   | 126  | 18257 |
| >FGFR1-S433RQVTVSADS   | 6103  | >FGFR1-S433RQVTVSADF   | 49   | 6054  |
| >FGFR1-S433RQVTVSADSS  | 198   | >FGFR1-S433RQVTVSADFS  | 357  | 159   |
| >FGFR1-S433RQVTVSADS   | 1566  | >FGFR1-S433RQVTVSADF   | 3    | 1563  |
| >FGFR1-S433RQVTVSADSS  | 102   | >FGFR1-S433RQVTVSADFS  | 275  | 173   |
| >FGFR1-S433RRQVTVSADSS | 3207  | >FGFR1-S433RRQVTVSADFI | 13   | 3194  |
| >FGFR1-S433RRQVTVSADSS | 987   | >FGFR1-S433RRQVTVSADFI | 30   | 957   |
| >FGFR1-S433RRQVTVSADSS | 447   | >FGFR1-S433RRQVTVSADFI | 466  | 19    |

|                       |       |                       |       |       |
|-----------------------|-------|-----------------------|-------|-------|
| >FGFR1-S433RRQVTVSAD  | 74    | >FGFR1-S433RRQVTVSADI | 32    | 42    |
| >FGFR1-S433RRQVTVSAD  | 205   | >FGFR1-S433RRQVTVSADI | 100   | 105   |
| >FGFR1-S433RRQVTVSAD  | 111   | >FGFR1-S433RRQVTVSADI | 42    | 69    |
| >FGFR1-S433RRQVTVSAD  | 440   | >FGFR1-S433RRQVTVSADI | 218   | 222   |
| >FGFR1-T141TDNTKPNRM  | 453   | >FGFR1-T141RDNTKPNRM  | 674   | 221   |
| >FGFR1-T141ETDNTKPNRM | 302   | >FGFR1-T141ERDNTKPNRM | 6054  | 5752  |
| >FGFR1-T141ETDNTKPNR  | 15    | >FGFR1-T141ERDNTKPNR  | 5275  | 5260  |
| >FGFR1-T141ETDNTKPNRM | 147   | >FGFR1-T141ERDNTKPNRM | 17160 | 17013 |
| >FGFR1-T141KETDNTKPNF | 154   | >FGFR1-T141KERDNTKPNF | 71    | 83    |
| >FGFR1-T141KETDNTKPNF | 111   | >FGFR1-T141KERDNTKPNF | 138   | 27    |
| >FGFR1-T141EEKETDNT   | 298   | >FGFR1-T141EEKERDNT   | 615   | 317   |
| >FGFR1-T141SSSEEKET   | 33249 | >FGFR1-T141SSSEEKER   | 159   | 33090 |
| >FGFR1-T141DSSSEEKET  | 28867 | >FGFR1-T141DSSSEEKER  | 76    | 28791 |
| >FGFR1-V66VKWMAPEA    | 373   | >FGFR1-V66LKWMAPEA    | 204   | 169   |
| >FGFR1-V66VKWMAPEAL   | 10    | >FGFR1-V66LKWMAPEAL   | 7     | 3     |
| >FGFR1-V66VKWMAPEAL   | 4     | >FGFR1-V66LKWMAPEAL   | 3     | 1     |
| >FGFR1-V66VKWMAPEAL   | 274   | >FGFR1-V66LKWMAPEAL   | 165   | 109   |
| >FGFR1-V66PVKWMAPEA   | 10085 | >FGFR1-V66PLKWMAPEA   | 75    | 10010 |
| >FGFR1-V66PVKWMAPEA   | 10171 | >FGFR1-V66PLKWMAPEA   | 156   | 10015 |
| >FGFR1-V66YKKTNGRLP   | 28    | >FGFR1-V66YKKTNGRLP   | 14    | 14    |
| >FGFR1-V66YKKTNGRLP   | 4446  | >FGFR1-V66YKKTNGRLP   | 370   | 4076  |
| >FGFR1-V66LPVKWMAPE   | 26    | >FGFR1-V66LPLKWMAPE   | 31    | 5     |
| >FGFR1-V66LPVKWMAPE   | 473   | >FGFR1-V66LPLKWMAPE   | 1089  | 616   |
| >FGFR1-V66LPVKWMAPE   | 30    | >FGFR1-V66LPLKWMAPE   | 52    | 22    |
| >FGFR1-V66LPVKWMAPE   | 93    | >FGFR1-V66LPLKWMAPE   | 98    | 5     |
| >FGFR1-V66LPVKWMAPE   | 87    | >FGFR1-V66LPLKWMAPE   | 120   | 33    |
| >FGFR1-V66LPVKWMAP    | 73    | >FGFR1-V66LPLKWMAP    | 102   | 29    |
| >FGFR1-V66LPVKWMAPE   | 48    | >FGFR1-V66LPLKWMAPE   | 69    | 21    |
| >FGFR1-V66LPVKWMAPE   | 25    | >FGFR1-V66LPLKWMAPE   | 20    | 5     |
| >FGFR1-V66LPVKWMAPE   | 464   | >FGFR1-V66LPLKWMAPE   | 721   | 257   |
| >FGFR1-V66LPVKWMAPE   | 347   | >FGFR1-V66LPLKWMAPE   | 195   | 152   |
| >FGFR1-V66RLPVKWMAF   | 311   | >FGFR1-V66RLPLKWMAP   | 283   | 28    |
| >FGFR1-V66RLPVKWMA    | 443   | >FGFR1-V66RLPLKWMA    | 635   | 192   |
| >FGFR1-V66RLPVKWMAF   | 476   | >FGFR1-V66RLPLKWMAP   | 683   | 207   |
| >FGFR1-V66RLPVKWMA    | 71    | >FGFR1-V66RLPLKWMA    | 111   | 40    |
| >FGFR1-V66RLPVKWMAF   | 231   | >FGFR1-V66RLPLKWMAP   | 299   | 68    |
| >FGFR1-V66RLPVKWMA    | 140   | >FGFR1-V66RLPLKWMA    | 227   | 87    |
| >FGFR1-V66RLPVKWMAF   | 212   | >FGFR1-V66RLPLKWMAP   | 306   | 94    |
| >FGFR1-V66RLPVKWMA    | 55    | >FGFR1-V66RLPLKWMA    | 77    | 22    |
| >FGFR1-V66RLPVKWMAF   | 58    | >FGFR1-V66RLPLKWMAP   | 78    | 20    |
| >FGFR1-V66GRLPVKWM    | 166   | >FGFR1-V66GRLPLKWM    | 117   | 49    |
| >FGFR1-V66GRLPVKWM    | 406   | >FGFR1-V66GRLPLKWMA   | 227   | 179   |
| >FGFR1-V66GRLPVKWM    | 2061  | >FGFR1-V66GRLPLKWM    | 498   | 1563  |

|                        |      |                        |       |       |
|------------------------|------|------------------------|-------|-------|
| >FGFR1-V664TNGRLPVKW   | 2726 | >FGFR1-V664TNGRLPLKW   | 479   | 2247  |
| >FGFR1-V664TTNGRLPV    | 165  | >FGFR1-V664TTNGRLPL    | 1952  | 1787  |
| >FGFR1-V664TTNGRLPV    | 277  | >FGFR1-V664TTNGRLPL    | 1623  | 1346  |
| >FGFR1-V664TTNGRLPV    | 328  | >FGFR1-V664TTNGRLPL    | 5538  | 5210  |
| >FGFR1-V664TTNGRLPVK   | 121  | >FGFR1-V664TTNGRLPLK   | 60    | 61    |
| >FGFR1-V664TTNGRLPVK   | 20   | >FGFR1-V664TTNGRLPLK   | 12    | 8     |
| >FGFR1-V664TTNGRLPVKV  | 20   | >FGFR1-V664TTNGRLPLKV  | 18    | 2     |
| >FGFR1-V664TTNGRLPVKV  | 311  | >FGFR1-V664TTNGRLPLKV  | 294   | 17    |
| >FGFR1-V664TTNGRLPVK   | 48   | >FGFR1-V664TTNGRLPLK   | 27    | 21    |
| >FGFR1-V664TTNGRLPVK   | 507  | >FGFR1-V664TTNGRLPLK   | 170   | 337   |
| >FGFR1-V664TTNGRLPV    | 2442 | >FGFR1-V664TTNGRLPL    | 475   | 1967  |
| >FGFR1-V664TTNGRLPVKV  | 266  | >FGFR1-V664TTNGRLPLKV  | 542   | 276   |
| >FGFR1-V664TTNGRLPVK   | 107  | >FGFR1-V664TTNGRLPLK   | 30    | 77    |
| >FGFR1-V664TTNGRLPV    | 18   | >FGFR1-V664TTNGRLPL    | 91    | 73    |
| >FGFR1-V664TTNGRLPV    | 32   | >FGFR1-V664TTNGRLPL    | 473   | 441   |
| >FGFR1-V664TTNGRLPV    | 2003 | >FGFR1-V664TTNGRLPL    | 38    | 1965  |
| >FGFR1-V664TTNGRLPVKV  | 17   | >FGFR1-V664TTNGRLPLKV  | 11    | 6     |
| >FGFR1-V664TTNGRLPVKV  | 32   | >FGFR1-V664TTNGRLPLKV  | 41    | 9     |
| >FGFR1-V664TTNGRLPVKV  | 44   | >FGFR1-V664TTNGRLPLKV  | 44    | 0     |
| >FGFR1-V664TTNGRLPVKV  | 28   | >FGFR1-V664TTNGRLPLKV  | 20    | 8     |
| >FGFR1-V664TTNGRLPVKV  | 327  | >FGFR1-V664TTNGRLPLKV  | 301   | 26    |
| >FGFR1-V664TTNGRLPVKV  | 85   | >FGFR1-V664TTNGRLPLKV  | 59    | 26    |
| >FGFR1-V664KTTNGRLPV   | 136  | >FGFR1-V664KTTNGRLPL   | 1102  | 966   |
| >FGFR1-V664KTTNGRLPV   | 349  | >FGFR1-V664KTTNGRLPL   | 7908  | 7559  |
| >FGFR1-V664KTTNGRLPVK  | 62   | >FGFR1-V664KTTNGRLPLK  | 29    | 33    |
| >FGFR1-V664KTTNGRLPVK  | 25   | >FGFR1-V664KTTNGRLPLK  | 15    | 10    |
| >FGFR1-V664KTTNGRLPV   | 22   | >FGFR1-V664KTTNGRLPL   | 31    | 9     |
| >FGFR1-V664KTTNGRLPVK  | 6    | >FGFR1-V664KTTNGRLPLK  | 5     | 1     |
| >FGFR1-V664KTTNGRLPV   | 209  | >FGFR1-V664KTTNGRLPL   | 42    | 167   |
| >FGFR1-V664KTTNGRLPVK  | 28   | >FGFR1-V664KTTNGRLPLK  | 47    | 19    |
| >FGFR1-V664KTTNGRLPV   | 3309 | >FGFR1-V664KTTNGRLPL   | 420   | 2889  |
| >FGFR1-V664KTTNGRLPV   | 141  | >FGFR1-V664KTTNGRLPL   | 7     | 134   |
| >FGFR1-V664KTTNGRLPVK  | 15   | >FGFR1-V664KTTNGRLPLK  | 11    | 4     |
| >FGFR1-V664KTTNGRLPVK  | 47   | >FGFR1-V664KTTNGRLPLK  | 50    | 3     |
| >FGFR1-V664KTTNGRLPVK  | 13   | >FGFR1-V664KTTNGRLPLK  | 11    | 2     |
| >FGFR1-V664KTTNGRLPV   | 2525 | >FGFR1-V664KTTNGRLPL   | 457   | 2068  |
| >FGFR1-V664KTTNGRLPV   | 1093 | >FGFR1-V664KTTNGRLPL   | 369   | 724   |
| >FGFR1-V664KTTNGRLPVK  | 332  | >FGFR1-V664KTTNGRLPLK  | 212   | 120   |
| >FGFR1-V664KKTTNGRLPV  | 56   | >FGFR1-V664KKTTNGRLPL  | 25    | 31    |
| >FGFR1-V664KKTTNGRLPV  | 4117 | >FGFR1-V664KKTTNGRLPL  | 477   | 3640  |
| >FGFR2-A314AAGVNTTDDI  | 326  | >FGFR2-A314DAGVNTTDDI  | 5280  | 4954  |
| >FGFR2-A314KAAGVNTTDDI | 292  | >FGFR2-A314KDAGVNTTDDI | 12663 | 12371 |
| >FGFR2-A314KAAGVNTTDDI | 369  | >FGFR2-A314KDAGVNTTDDI | 18483 | 18114 |



|                                     |      |                                     |       |       |
|-------------------------------------|------|-------------------------------------|-------|-------|
| >FGFR2-A31 <sup>4</sup> KAAGVNTTDI  | 335  | >FGFR2-A31 <sup>4</sup> KDAGVNTTDI  | 19724 | 19389 |
| >FGFR2-A31 <sup>4</sup> VLKAAGVNT   | 803  | >FGFR2-A31 <sup>4</sup> VLKDAGVNT   | 419   | 384   |
| >FGFR2-A31 <sup>4</sup> VLKAAGVNTI  | 317  | >FGFR2-A31 <sup>4</sup> VLKDAGVNTI  | 413   | 96    |
| >FGFR2-A31 <sup>4</sup> VLKAAGVNT   | 656  | >FGFR2-A31 <sup>4</sup> VLKDAGVNT   | 49    | 607   |
| >FGFR2-A31 <sup>4</sup> VLKAAGVNTI  | 241  | >FGFR2-A31 <sup>4</sup> VLKDAGVNTI  | 35    | 206   |
| >FGFR2-A31 <sup>4</sup> KVLKAAGV    | 300  | >FGFR2-A31 <sup>4</sup> KVLKDAGV    | 370   | 70    |
| >FGFR2-A31 <sup>4</sup> KVLKAAGV    | 203  | >FGFR2-A31 <sup>4</sup> KVLKDAGV    | 520   | 317   |
| >FGFR2-A31 <sup>4</sup> KVLKAAGV    | 17   | >FGFR2-A31 <sup>4</sup> KVLKDAGV    | 37    | 20    |
| >FGFR2-A31 <sup>4</sup> KVLKAAGV    | 39   | >FGFR2-A31 <sup>4</sup> KVLKDAGV    | 57    | 18    |
| >FGFR2-A31 <sup>4</sup> KVLKAAGV    | 80   | >FGFR2-A31 <sup>4</sup> KVLKDAGV    | 63    | 17    |
| >FGFR2-A31 <sup>4</sup> KVLKAAGV    | 35   | >FGFR2-A31 <sup>4</sup> KVLKDAGV    | 51    | 16    |
| >FGFR2-A31 <sup>4</sup> KVLKAAGV    | 81   | >FGFR2-A31 <sup>4</sup> KVLKDAGV    | 178   | 97    |
| >FGFR2-A31 <sup>4</sup> KVLKAAGV    | 67   | >FGFR2-A31 <sup>4</sup> KVLKDAGV    | 84    | 17    |
| >FGFR2-A31 <sup>4</sup> KVLKAAGV    | 180  | >FGFR2-A31 <sup>4</sup> KVLKDAGV    | 1670  | 1490  |
| >FGFR2-A31 <sup>4</sup> KVLKAAGV    | 83   | >FGFR2-A31 <sup>4</sup> KVLKDAGV    | 584   | 501   |
| >FGFR2-A31 <sup>4</sup> YLVKVLKAAGV | 218  | >FGFR2-A31 <sup>4</sup> YLVKVLKDAGV | 105   | 113   |
| >FGFR2-A31 <sup>4</sup> YLVKVLKAA   | 407  | >FGFR2-A31 <sup>4</sup> YLVKVLKDA   | 1593  | 1186  |
| >FGFR2-A31 <sup>4</sup> YLVKVLKAAGV | 88   | >FGFR2-A31 <sup>4</sup> YLVKVLKDAGV | 52    | 36    |
| >FGFR2-A31 <sup>4</sup> YLVKVLKAA   | 20   | >FGFR2-A31 <sup>4</sup> YLVKVLKDA   | 94    | 74    |
| >FGFR2-A31 <sup>4</sup> YLVKVLKAAGV | 16   | >FGFR2-A31 <sup>4</sup> YLVKVLKDAGV | 20    | 4     |
| >FGFR2-A31 <sup>4</sup> YLVKVLKAAGV | 440  | >FGFR2-A31 <sup>4</sup> YLVKVLKDAGV | 290   | 150   |
| >FGFR2-A31 <sup>4</sup> YLVKVLKAAGV | 11   | >FGFR2-A31 <sup>4</sup> YLVKVLKDAGV | 21    | 10    |
| >FGFR2-A31 <sup>4</sup> YLVKVLKAAGV | 10   | >FGFR2-A31 <sup>4</sup> YLVKVLKDAGV | 13    | 3     |
| >FGFR2-A31 <sup>4</sup> YLVKVLKAAGV | 41   | >FGFR2-A31 <sup>4</sup> YLVKVLKDAGV | 43    | 2     |
| >FGFR2-A31 <sup>4</sup> YLVKVLKAAGV | 30   | >FGFR2-A31 <sup>4</sup> YLVKVLKDAGV | 102   | 72    |
| >FGFR2-A31 <sup>4</sup> YLVKVLKAA   | 34   | >FGFR2-A31 <sup>4</sup> YLVKVLKDA   | 80    | 46    |
| >FGFR2-A31 <sup>4</sup> YLVKVLKAAGV | 2    | >FGFR2-A31 <sup>4</sup> YLVKVLKDAGV | 3     | 1     |
| >FGFR2-A31 <sup>4</sup> YLVKVLKAA   | 153  | >FGFR2-A31 <sup>4</sup> YLVKVLKDA   | 1158  | 1005  |
| >FGFR2-A31 <sup>4</sup> YLVKVLKAAG  | 351  | >FGFR2-A31 <sup>4</sup> YLVKVLKDAG  | 3124  | 2773  |
| >FGFR2-A31 <sup>4</sup> LPYLKVLKA   | 19   | >FGFR2-A31 <sup>4</sup> LPYLKVLKD   | 1494  | 1475  |
| >FGFR2-A31 <sup>4</sup> LPYLKVLKAA  | 12   | >FGFR2-A31 <sup>4</sup> LPYLKVLKDA  | 17    | 5     |
| >FGFR2-A31 <sup>4</sup> LPYLKVLKAAI | 60   | >FGFR2-A31 <sup>4</sup> LPYLKVLKDAI | 52    | 8     |
| >FGFR2-A31 <sup>4</sup> GLPYLKVLKA  | 351  | >FGFR2-A31 <sup>4</sup> GLPYLKVLKD  | 1119  | 768   |
| >FGFR2-A31 <sup>4</sup> GLPYLKVLKA  | 471  | >FGFR2-A31 <sup>4</sup> GLPYLKVLKD  | 28036 | 27565 |
| >FGFR2-A31 <sup>5</sup> AAGVNTTDDKI | 326  | >FGFR2-A31 <sup>5</sup> ATGVNTTDDKI | 1088  | 762   |
| >FGFR2-A31 <sup>5</sup> AAGVNTTDDK  | 1334 | >FGFR2-A31 <sup>5</sup> ATGVNTTDDK  | 160   | 1174  |
| >FGFR2-A31 <sup>5</sup> AAGVNTTDDK  | 938  | >FGFR2-A31 <sup>5</sup> ATGVNTTDDK  | 144   | 794   |
| >FGFR2-A31 <sup>5</sup> AAGVNTTDDKI | 842  | >FGFR2-A31 <sup>5</sup> ATGVNTTDDKI | 134   | 708   |
| >FGFR2-A31 <sup>5</sup> GLPYLKVLKA  | 351  | >FGFR2-A31 <sup>5</sup> GLPYLKVLKA  | 2474  | 2123  |
| >FGFR2-A31 <sup>5</sup> KAAGVNTTDDI | 292  | >FGFR2-A31 <sup>5</sup> KATGVNTTDDI | 479   | 187   |
| >FGFR2-A31 <sup>5</sup> KAAGVNTTDDI | 369  | >FGFR2-A31 <sup>5</sup> KATGVNTTDDI | 349   | 20    |
| >FGFR2-A31 <sup>5</sup> KAAGVNTTDDI | 335  | >FGFR2-A31 <sup>5</sup> KATGVNTTDDI | 1081  | 746   |
| >FGFR2-A31 <sup>5</sup> VLKAAGVNTI  | 317  | >FGFR2-A31 <sup>5</sup> VLKATGVNTI  | 251   | 66    |

|                                     |      |                                     |      |      |
|-------------------------------------|------|-------------------------------------|------|------|
| >FGFR2-A31 <sup>!</sup> VLKAAGVNTI  | 241  | >FGFR2-A31 <sup>!</sup> VLKATGVNTI  | 260  | 19   |
| >FGFR2-A31 <sup>!</sup> KVLKAAGV    | 300  | >FGFR2-A31 <sup>!</sup> KVLKATGV    | 280  | 20   |
| >FGFR2-A31 <sup>!</sup> KVLKAAGV    | 203  | >FGFR2-A31 <sup>!</sup> KVLKATGV    | 140  | 63   |
| >FGFR2-A31 <sup>!</sup> KVLKAAGV    | 17   | >FGFR2-A31 <sup>!</sup> KVLKATGV    | 17   | 0    |
| >FGFR2-A31 <sup>!</sup> KVLKAAGV    | 39   | >FGFR2-A31 <sup>!</sup> KVLKATGV    | 54   | 15   |
| >FGFR2-A31 <sup>!</sup> KVLKAAGV    | 80   | >FGFR2-A31 <sup>!</sup> KVLKATGV    | 150  | 70   |
| >FGFR2-A31 <sup>!</sup> KVLKAAGV    | 35   | >FGFR2-A31 <sup>!</sup> KVLKATGV    | 30   | 5    |
| >FGFR2-A31 <sup>!</sup> KVLKAAGV    | 81   | >FGFR2-A31 <sup>!</sup> KVLKATGV    | 136  | 55   |
| >FGFR2-A31 <sup>!</sup> KVLKAAGV    | 67   | >FGFR2-A31 <sup>!</sup> KVLKATGV    | 66   | 1    |
| >FGFR2-A31 <sup>!</sup> KVLKAAGV    | 180  | >FGFR2-A31 <sup>!</sup> KVLKATGV    | 372  | 192  |
| >FGFR2-A31 <sup>!</sup> KVLKAAGV    | 83   | >FGFR2-A31 <sup>!</sup> KVLKATGV    | 131  | 48   |
| >FGFR2-A31 <sup>!</sup> YLVKVLKAAGV | 218  | >FGFR2-A31 <sup>!</sup> YLVKVLKATGV | 237  | 19   |
| >FGFR2-A31 <sup>!</sup> YLVKVLKAA   | 407  | >FGFR2-A31 <sup>!</sup> YLVKVLKAT   | 2250 | 1843 |
| >FGFR2-A31 <sup>!</sup> YLVKVLKAAGV | 88   | >FGFR2-A31 <sup>!</sup> YLVKVLKATGV | 101  | 13   |
| >FGFR2-A31 <sup>!</sup> YLVKVLKAA   | 20   | >FGFR2-A31 <sup>!</sup> YLVKVLKAT   | 191  | 171  |
| >FGFR2-A31 <sup>!</sup> YLVKVLKAAGV | 16   | >FGFR2-A31 <sup>!</sup> YLVKVLKATGV | 18   | 2    |
| >FGFR2-A31 <sup>!</sup> YLVKVLKAAGV | 440  | >FGFR2-A31 <sup>!</sup> YLVKVLKATGV | 445  | 5    |
| >FGFR2-A31 <sup>!</sup> YLVKVLKAAGV | 11   | >FGFR2-A31 <sup>!</sup> YLVKVLKATGV | 17   | 6    |
| >FGFR2-A31 <sup>!</sup> YLVKVLKAAGV | 10   | >FGFR2-A31 <sup>!</sup> YLVKVLKATGV | 18   | 8    |
| >FGFR2-A31 <sup>!</sup> YLVKVLKAAGV | 41   | >FGFR2-A31 <sup>!</sup> YLVKVLKATGV | 32   | 9    |
| >FGFR2-A31 <sup>!</sup> YLVKVLKAAGV | 30   | >FGFR2-A31 <sup>!</sup> YLVKVLKATGV | 60   | 30   |
| >FGFR2-A31 <sup>!</sup> YLVKVLKAA   | 34   | >FGFR2-A31 <sup>!</sup> YLVKVLKAT   | 387  | 353  |
| >FGFR2-A31 <sup>!</sup> YLVKVLKAAGV | 2    | >FGFR2-A31 <sup>!</sup> YLVKVLKATGV | 2    | 0    |
| >FGFR2-A31 <sup>!</sup> YLVKVLKAA   | 153  | >FGFR2-A31 <sup>!</sup> YLVKVLKAT   | 1656 | 1503 |
| >FGFR2-A31 <sup>!</sup> YLVKVLKAAG  | 351  | >FGFR2-A31 <sup>!</sup> YLVKVLKATG  | 563  | 212  |
| >FGFR2-A31 <sup>!</sup> LPYLVKVLKAA | 12   | >FGFR2-A31 <sup>!</sup> LPYLVKVLKAT | 219  | 207  |
| >FGFR2-A31 <sup>!</sup> LPYLVKVLKAA | 60   | >FGFR2-A31 <sup>!</sup> LPYLVKVLKAT | 137  | 77   |
| >FGFR2-A38 <sup>!</sup> ACMVVTVILC  | 481  | >FGFR2-A38 <sup>!</sup> TCMVVTVILC  | 665  | 184  |
| >FGFR2-A38 <sup>!</sup> ACMVVTVI    | 238  | >FGFR2-A38 <sup>!</sup> TCMVVTVI    | 888  | 650  |
| >FGFR2-A38 <sup>!</sup> ACMVVTVIL   | 164  | >FGFR2-A38 <sup>!</sup> TCMVVTVIL   | 631  | 467  |
| >FGFR2-A38 <sup>!</sup> ACMVVTVILC  | 3078 | >FGFR2-A38 <sup>!</sup> TCMVVTVILC  | 200  | 2878 |
| >FGFR2-A38 <sup>!</sup> ACMVVTVI    | 4003 | >FGFR2-A38 <sup>!</sup> TCMVVTVI    | 267  | 3736 |
| >FGFR2-A38 <sup>!</sup> ACMVVTVIL   | 4525 | >FGFR2-A38 <sup>!</sup> TCMVVTVIL   | 438  | 4087 |
| >FGFR2-A38 <sup>!</sup> ACMVVTVIL   | 1001 | >FGFR2-A38 <sup>!</sup> TCMVVTVIL   | 256  | 745  |
| >FGFR2-A38 <sup>!</sup> IACMVVTV    | 943  | >FGFR2-A38 <sup>!</sup> ITCMVVTV    | 403  | 540  |
| >FGFR2-A38 <sup>!</sup> IACMVVTV    | 344  | >FGFR2-A38 <sup>!</sup> ITCMVVTV    | 220  | 124  |
| >FGFR2-A38 <sup>!</sup> IACMVVTV    | 78   | >FGFR2-A38 <sup>!</sup> ITCMVVTV    | 22   | 56   |
| >FGFR2-A38 <sup>!</sup> IACMVVTV    | 216  | >FGFR2-A38 <sup>!</sup> ITCMVVTV    | 152  | 64   |
| >FGFR2-A38 <sup>!</sup> IACMVVTV    | 7451 | >FGFR2-A38 <sup>!</sup> ITCMVVTV    | 437  | 7014 |
| >FGFR2-A38 <sup>!</sup> IACMVVTVI   | 4799 | >FGFR2-A38 <sup>!</sup> ITCMVVTVI   | 232  | 4567 |
| >FGFR2-A38 <sup>!</sup> IACMVVTVIL  | 5967 | >FGFR2-A38 <sup>!</sup> ITCMVVTVIL  | 216  | 5751 |
| >FGFR2-A38 <sup>!</sup> IACMVVTV    | 2030 | >FGFR2-A38 <sup>!</sup> ITCMVVTV    | 234  | 1796 |
| >FGFR2-A38 <sup>!</sup> IACMVVTV    | 1734 | >FGFR2-A38 <sup>!</sup> ITCMVVTV    | 175  | 1559 |

|                                   |      |                                   |      |      |
|-----------------------------------|------|-----------------------------------|------|------|
| >FGFR2-A38 $\epsilon$ IACMVVTVI   | 1306 | >FGFR2-A38 $\epsilon$ ITCMVVTVI   | 101  | 1205 |
| >FGFR2-A38 $\epsilon$ IACMVVTVIL  | 761  | >FGFR2-A38 $\epsilon$ ITCMVVTVIL  | 68   | 693  |
| >FGFR2-A38 $\epsilon$ IACMVVTVI   | 459  | >FGFR2-A38 $\epsilon$ ITCMVVTVI   | 337  | 122  |
| >FGFR2-A38 $\epsilon$ IACMVVTVIL  | 1833 | >FGFR2-A38 $\epsilon$ ITCMVVTVIL  | 185  | 1648 |
| >FGFR2-A38 $\epsilon$ IACMVVTVI   | 830  | >FGFR2-A38 $\epsilon$ ITCMVVTVI   | 45   | 785  |
| >FGFR2-A38 $\epsilon$ IACMVVTVI   | 227  | >FGFR2-A38 $\epsilon$ ITCMVVTVI   | 36   | 191  |
| >FGFR2-A38 $\epsilon$ AIYCIGVFLIA | 85   | >FGFR2-A38 $\epsilon$ AIYCIGVFLIT | 1012 | 927  |
| >FGFR2-A38 $\epsilon$ AIYCIGVFLIA | 193  | >FGFR2-A38 $\epsilon$ AIYCIGVFLIT | 896  | 703  |
| >FGFR2-A38 $\epsilon$ AIYCIGVFLIA | 244  | >FGFR2-A38 $\epsilon$ AIYCIGVFLIT | 1560 | 1316 |
| >FGFR2-A38 $\epsilon$ LIACMVVTV   | 24   | >FGFR2-A38 $\epsilon$ LITCMVVTV   | 77   | 53   |
| >FGFR2-A38 $\epsilon$ LIACMVVTVII | 351  | >FGFR2-A38 $\epsilon$ LITCMVVTVII | 1569 | 1218 |
| >FGFR2-A38 $\epsilon$ LIACMVVTV   | 35   | >FGFR2-A38 $\epsilon$ LITCMVVTV   | 333  | 298  |
| >FGFR2-A38 $\epsilon$ LIACMVVTVII | 57   | >FGFR2-A38 $\epsilon$ LITCMVVTVII | 490  | 433  |
| >FGFR2-A38 $\epsilon$ LIACMVVTV   | 9    | >FGFR2-A38 $\epsilon$ LITCMVVTV   | 39   | 30   |
| >FGFR2-A38 $\epsilon$ LIACMVVTVI  | 403  | >FGFR2-A38 $\epsilon$ LITCMVVTVI  | 655  | 252  |
| >FGFR2-A38 $\epsilon$ LIACMVVTVII | 133  | >FGFR2-A38 $\epsilon$ LITCMVVTVII | 748  | 615  |
| >FGFR2-A38 $\epsilon$ LIACMVVTV   | 32   | >FGFR2-A38 $\epsilon$ LITCMVVTV   | 66   | 34   |
| >FGFR2-A38 $\epsilon$ LIACMVVTV   | 8    | >FGFR2-A38 $\epsilon$ LITCMVVTV   | 18   | 10   |
| >FGFR2-A38 $\epsilon$ LIACMVVTVI  | 209  | >FGFR2-A38 $\epsilon$ LITCMVVTVI  | 550  | 341  |
| >FGFR2-A38 $\epsilon$ LIACMVVTV   | 21   | >FGFR2-A38 $\epsilon$ LITCMVVTV   | 29   | 8    |
| >FGFR2-A38 $\epsilon$ LIACMVVTV   | 25   | >FGFR2-A38 $\epsilon$ LITCMVVTV   | 47   | 22   |
| >FGFR2-A38 $\epsilon$ LIACMVVTV   | 13   | >FGFR2-A38 $\epsilon$ LITCMVVTV   | 90   | 77   |
| >FGFR2-A38 $\epsilon$ LIACMVVTV   | 4    | >FGFR2-A38 $\epsilon$ LITCMVVTV   | 4    | 0    |
| >FGFR2-A38 $\epsilon$ LIACMVVTVII | 212  | >FGFR2-A38 $\epsilon$ LITCMVVTVII | 259  | 47   |
| >FGFR2-A38 $\epsilon$ LIACMVVTV   | 34   | >FGFR2-A38 $\epsilon$ LITCMVVTV   | 135  | 101  |
| >FGFR2-A38 $\epsilon$ LIACMVVTVII | 295  | >FGFR2-A38 $\epsilon$ LITCMVVTVII | 1188 | 893  |
| >FGFR2-A38 $\epsilon$ LIACMVVTV   | 195  | >FGFR2-A38 $\epsilon$ LITCMVVTV   | 746  | 551  |
| >FGFR2-A38 $\epsilon$ LIACMVVTVI  | 280  | >FGFR2-A38 $\epsilon$ LITCMVVTVI  | 421  | 141  |
| >FGFR2-A38 $\epsilon$ FLIACMVV    | 7    | >FGFR2-A38 $\epsilon$ FLITCMVV    | 7    | 0    |
| >FGFR2-A38 $\epsilon$ FLIACMVVT   | 18   | >FGFR2-A38 $\epsilon$ FLITCMVVT   | 24   | 6    |
| >FGFR2-A38 $\epsilon$ FLIACMVVTV  | 10   | >FGFR2-A38 $\epsilon$ FLITCMVVTV  | 11   | 1    |
| >FGFR2-A38 $\epsilon$ FLIACMVVTV  | 10   | >FGFR2-A38 $\epsilon$ FLITCMVVTV  | 10   | 0    |
| >FGFR2-A38 $\epsilon$ FLIACMVV    | 3    | >FGFR2-A38 $\epsilon$ FLITCMVV    | 4    | 1    |
| >FGFR2-A38 $\epsilon$ FLIACMVVT   | 11   | >FGFR2-A38 $\epsilon$ FLITCMVVT   | 20   | 9    |
| >FGFR2-A38 $\epsilon$ FLIACMVVTV  | 7    | >FGFR2-A38 $\epsilon$ FLITCMVVTV  | 8    | 1    |
| >FGFR2-A38 $\epsilon$ FLIACMVVTV  | 4    | >FGFR2-A38 $\epsilon$ FLITCMVVTV  | 5    | 1    |
| >FGFR2-A38 $\epsilon$ FLIACMVV    | 2    | >FGFR2-A38 $\epsilon$ FLITCMVV    | 3    | 1    |
| >FGFR2-A38 $\epsilon$ FLIACMVVT   | 14   | >FGFR2-A38 $\epsilon$ FLITCMVVT   | 23   | 9    |
| >FGFR2-A38 $\epsilon$ FLIACMVVTV  | 8    | >FGFR2-A38 $\epsilon$ FLITCMVVTV  | 9    | 1    |
| >FGFR2-A38 $\epsilon$ FLIACMVVTV  | 3    | >FGFR2-A38 $\epsilon$ FLITCMVVTV  | 3    | 0    |
| >FGFR2-A38 $\epsilon$ FLIACMVV    | 4    | >FGFR2-A38 $\epsilon$ FLITCMVV    | 5    | 1    |
| >FGFR2-A38 $\epsilon$ FLIACMVVT   | 22   | >FGFR2-A38 $\epsilon$ FLITCMVVT   | 47   | 25   |
| >FGFR2-A38 $\epsilon$ FLIACMVVTV  | 25   | >FGFR2-A38 $\epsilon$ FLITCMVVTV  | 24   | 1    |

|                                    |     |                                    |      |      |
|------------------------------------|-----|------------------------------------|------|------|
| >FGFR2-A38 <sup>ϵ</sup> FLIACMVVTV | 9   | >FGFR2-A38 <sup>ϵ</sup> FLITCMVTV  | 13   | 4    |
| >FGFR2-A38 <sup>ϵ</sup> FLIACMVV   | 3   | >FGFR2-A38 <sup>ϵ</sup> FLITCMVV   | 3    | 0    |
| >FGFR2-A38 <sup>ϵ</sup> FLIACMVVT  | 178 | >FGFR2-A38 <sup>ϵ</sup> FLITCMVVT  | 553  | 375  |
| >FGFR2-A38 <sup>ϵ</sup> FLIACMVVTV | 2   | >FGFR2-A38 <sup>ϵ</sup> FLITCMVTV  | 2    | 0    |
| >FGFR2-A38 <sup>ϵ</sup> FLIACMVVTV | 5   | >FGFR2-A38 <sup>ϵ</sup> FLITCMVTV  | 10   | 5    |
| >FGFR2-A38 <sup>ϵ</sup> FLIACMVV   | 3   | >FGFR2-A38 <sup>ϵ</sup> FLITCMVV   | 3    | 0    |
| >FGFR2-A38 <sup>ϵ</sup> FLIACMVVT  | 149 | >FGFR2-A38 <sup>ϵ</sup> FLITCMVVT  | 167  | 18   |
| >FGFR2-A38 <sup>ϵ</sup> FLIACMVVTV | 2   | >FGFR2-A38 <sup>ϵ</sup> FLITCMVTV  | 2    | 0    |
| >FGFR2-A38 <sup>ϵ</sup> FLIACMVVTV | 7   | >FGFR2-A38 <sup>ϵ</sup> FLITCMVTV  | 7    | 0    |
| >FGFR2-A38 <sup>ϵ</sup> FLIACMVV   | 6   | >FGFR2-A38 <sup>ϵ</sup> FLITCMVV   | 7    | 1    |
| >FGFR2-A38 <sup>ϵ</sup> FLIACMVVTV | 5   | >FGFR2-A38 <sup>ϵ</sup> FLITCMVTV  | 5    | 0    |
| >FGFR2-A38 <sup>ϵ</sup> FLIACMVVTV | 21  | >FGFR2-A38 <sup>ϵ</sup> FLITCMVTV  | 38   | 17   |
| >FGFR2-A38 <sup>ϵ</sup> FLIACMVV   | 6   | >FGFR2-A38 <sup>ϵ</sup> FLITCMVV   | 7    | 1    |
| >FGFR2-A38 <sup>ϵ</sup> FLIACMVVTV | 5   | >FGFR2-A38 <sup>ϵ</sup> FLITCMVTV  | 6    | 1    |
| >FGFR2-A38 <sup>ϵ</sup> FLIACMVVTV | 98  | >FGFR2-A38 <sup>ϵ</sup> FLITCMVTV  | 137  | 39   |
| >FGFR2-A38 <sup>ϵ</sup> FLIACMVV   | 2   | >FGFR2-A38 <sup>ϵ</sup> FLITCMVV   | 2    | 0    |
| >FGFR2-A38 <sup>ϵ</sup> FLIACMVVT  | 20  | >FGFR2-A38 <sup>ϵ</sup> FLITCMVVT  | 38   | 18   |
| >FGFR2-A38 <sup>ϵ</sup> FLIACMVVTV | 1   | >FGFR2-A38 <sup>ϵ</sup> FLITCMVTV  | 1    | 0    |
| >FGFR2-A38 <sup>ϵ</sup> FLIACMVVTV | 4   | >FGFR2-A38 <sup>ϵ</sup> FLITCMVTV  | 6    | 2    |
| >FGFR2-A38 <sup>ϵ</sup> FLIACMVV   | 56  | >FGFR2-A38 <sup>ϵ</sup> FLITCMVV   | 122  | 66   |
| >FGFR2-A38 <sup>ϵ</sup> FLIACMVVTV | 321 | >FGFR2-A38 <sup>ϵ</sup> FLITCMVTV  | 728  | 407  |
| >FGFR2-A38 <sup>ϵ</sup> FLIACMVVTV | 181 | >FGFR2-A38 <sup>ϵ</sup> FLITCMVTV  | 309  | 128  |
| >FGFR2-A38 <sup>ϵ</sup> FLIACMVV   | 315 | >FGFR2-A38 <sup>ϵ</sup> FLITCMVV   | 613  | 298  |
| >FGFR2-A38 <sup>ϵ</sup> FLIACMVVTV | 126 | >FGFR2-A38 <sup>ϵ</sup> FLITCMVTV  | 236  | 110  |
| >FGFR2-A38 <sup>ϵ</sup> FLIACMVV   | 455 | >FGFR2-A38 <sup>ϵ</sup> FLITCMVV   | 1487 | 1032 |
| >FGFR2-A38 <sup>ϵ</sup> FLIACMVVTV | 430 | >FGFR2-A38 <sup>ϵ</sup> FLITCMVTV  | 1404 | 974  |
| >FGFR2-A38 <sup>ϵ</sup> FLIACMVVTV | 194 | >FGFR2-A38 <sup>ϵ</sup> FLITCMVTV  | 629  | 435  |
| >FGFR2-A38 <sup>ϵ</sup> FLIACMVV   | 332 | >FGFR2-A38 <sup>ϵ</sup> FLITCMVV   | 252  | 80   |
| >FGFR2-A38 <sup>ϵ</sup> FLIACMVVTV | 246 | >FGFR2-A38 <sup>ϵ</sup> FLITCMVTV  | 211  | 35   |
| >FGFR2-A38 <sup>ϵ</sup> FLIACMVVTV | 203 | >FGFR2-A38 <sup>ϵ</sup> FLITCMVTV  | 174  | 29   |
| >FGFR2-A38 <sup>ϵ</sup> FLIACMVVTV | 385 | >FGFR2-A38 <sup>ϵ</sup> FLITCMVTV  | 696  | 311  |
| >FGFR2-A38 <sup>ϵ</sup> FLIACMVVTV | 297 | >FGFR2-A38 <sup>ϵ</sup> FLITCMVTV  | 555  | 258  |
| >FGFR2-A38 <sup>ϵ</sup> VFLIACMV   | 437 | >FGFR2-A38 <sup>ϵ</sup> VFLITCMV   | 256  | 181  |
| >FGFR2-A38 <sup>ϵ</sup> VFLIACMVVT | 408 | >FGFR2-A38 <sup>ϵ</sup> VFLITCMVVT | 276  | 132  |
| >FGFR2-A38 <sup>ϵ</sup> VFLIACMV   | 258 | >FGFR2-A38 <sup>ϵ</sup> VFLITCMV   | 185  | 73   |
| >FGFR2-A38 <sup>ϵ</sup> VFLIACMVVT | 277 | >FGFR2-A38 <sup>ϵ</sup> VFLITCMVVT | 272  | 5    |
| >FGFR2-A38 <sup>ϵ</sup> VFLIACMV   | 506 | >FGFR2-A38 <sup>ϵ</sup> VFLITCMV   | 414  | 92   |
| >FGFR2-A38 <sup>ϵ</sup> VFLIACMVVT | 344 | >FGFR2-A38 <sup>ϵ</sup> VFLITCMVVT | 352  | 8    |
| >FGFR2-A38 <sup>ϵ</sup> VFLIACMVVT | 458 | >FGFR2-A38 <sup>ϵ</sup> VFLITCMVVT | 464  | 6    |
| >FGFR2-A38 <sup>ϵ</sup> VFLIACMVV  | 606 | >FGFR2-A38 <sup>ϵ</sup> VFLITCMVV  | 145  | 461  |
| >FGFR2-A38 <sup>ϵ</sup> VFLIACMVVT | 745 | >FGFR2-A38 <sup>ϵ</sup> VFLITCMVVT | 311  | 434  |
| >FGFR2-A38 <sup>ϵ</sup> GVFLIACMV  | 496 | >FGFR2-A38 <sup>ϵ</sup> GVFLITCMV  | 148  | 348  |
| >FGFR2-A38 <sup>ϵ</sup> GVFLIACMVV | 191 | >FGFR2-A38 <sup>ϵ</sup> GVFLITCMVV | 215  | 24   |

|                                     |      |                                     |      |      |
|-------------------------------------|------|-------------------------------------|------|------|
| >FGFR2-A38 <sup>9</sup> GVFLIACMV   | 181  | >FGFR2-A38 <sup>9</sup> GVFLITCMV   | 71   | 110  |
| >FGFR2-A38 <sup>9</sup> GVFLIACMV\  | 273  | >FGFR2-A38 <sup>9</sup> GVFLITCMVV  | 250  | 23   |
| >FGFR2-A38 <sup>9</sup> GVFLIACMV   | 230  | >FGFR2-A38 <sup>9</sup> GVFLITCMV   | 122  | 108  |
| >FGFR2-A38 <sup>9</sup> GVFLIACMV\  | 129  | >FGFR2-A38 <sup>9</sup> GVFLITCMVV  | 93   | 36   |
| >FGFR2-A38 <sup>9</sup> GVFLIACMV   | 79   | >FGFR2-A38 <sup>9</sup> GVFLITCMV   | 69   | 10   |
| >FGFR2-A38 <sup>9</sup> GVFLIACMV\  | 187  | >FGFR2-A38 <sup>9</sup> GVFLITCMVV  | 158  | 29   |
| >FGFR2-A38 <sup>9</sup> GVFLIACMV   | 29   | >FGFR2-A38 <sup>9</sup> GVFLITCMV   | 19   | 10   |
| >FGFR2-A38 <sup>9</sup> GVFLIACMV\  | 233  | >FGFR2-A38 <sup>9</sup> GVFLITCMVV  | 147  | 86   |
| >FGFR2-A38 <sup>9</sup> GVFLIACMV   | 426  | >FGFR2-A38 <sup>9</sup> GVFLITCMV   | 192  | 234  |
| >FGFR2-A38 <sup>9</sup> GVFLIACMV\  | 754  | >FGFR2-A38 <sup>9</sup> GVFLITCMVV  | 395  | 359  |
| >FGFR2-A38 <sup>9</sup> GVFLIACMV   | 19   | >FGFR2-A38 <sup>9</sup> GVFLITCMV   | 14   | 5    |
| >FGFR2-A38 <sup>9</sup> GVFLIACMV\  | 75   | >FGFR2-A38 <sup>9</sup> GVFLITCMVV  | 59   | 16   |
| >FGFR2-A38 <sup>9</sup> GVFLIACMV   | 1278 | >FGFR2-A38 <sup>9</sup> GVFLITCMV   | 322  | 956  |
| >FGFR2-A38 <sup>9</sup> GVFLIACMV   | 37   | >FGFR2-A38 <sup>9</sup> GVFLITCMV   | 23   | 14   |
| >FGFR2-A38 <sup>9</sup> GVFLIACMV\  | 55   | >FGFR2-A38 <sup>9</sup> GVFLITCMVV  | 42   | 13   |
| >FGFR2-A38 <sup>9</sup> GVFLIACMV   | 226  | >FGFR2-A38 <sup>9</sup> GVFLITCMV   | 76   | 150  |
| >FGFR2-A38 <sup>9</sup> GVFLIACMV\  | 287  | >FGFR2-A38 <sup>9</sup> GVFLITCMVV  | 157  | 130  |
| >FGFR2-A38 <sup>9</sup> GVFLIACMV   | 746  | >FGFR2-A38 <sup>9</sup> GVFLITCMV   | 481  | 265  |
| >FGFR2-A38 <sup>9</sup> GVFLIACMV   | 292  | >FGFR2-A38 <sup>9</sup> GVFLITCMV   | 794  | 502  |
| >FGFR2-A38 <sup>9</sup> IGVFLIACM   | 983  | >FGFR2-A38 <sup>9</sup> IGVFLITCM   | 365  | 618  |
| >FGFR2-A38 <sup>9</sup> CIGVFLIACM\ | 184  | >FGFR2-A38 <sup>9</sup> CIGVFLITCM\ | 132  | 52   |
| >FGFR2-A38 <sup>9</sup> CIGVFLIACM\ | 760  | >FGFR2-A38 <sup>9</sup> CIGVFLITCM\ | 409  | 351  |
| >FGFR2-A38 <sup>9</sup> CIGVFLIACM\ | 354  | >FGFR2-A38 <sup>9</sup> CIGVFLITCM\ | 165  | 189  |
| >FGFR2-A38 <sup>9</sup> CIGVFLIACM\ | 115  | >FGFR2-A38 <sup>9</sup> CIGVFLITCM\ | 66   | 49   |
| >FGFR2-A38 <sup>9</sup> YCIGVFLIACM | 35   | >FGFR2-A38 <sup>9</sup> YCIGVFLITCM | 92   | 57   |
| >FGFR2-A38 <sup>9</sup> YCIGVFLIA   | 489  | >FGFR2-A38 <sup>9</sup> YCIGVFLIT   | 3919 | 3430 |
| >FGFR2-A38 <sup>9</sup> YCIGVFLIACM | 241  | >FGFR2-A38 <sup>9</sup> YCIGVFLITCM | 142  | 99   |
| >FGFR2-A38 <sup>9</sup> IYCIGVFLIA  | 64   | >FGFR2-A38 <sup>9</sup> IYCIGVFLIT  | 267  | 203  |
| >FGFR2-A64 <sup>8</sup> ARDINNIDYY  | 382  | >FGFR2-A64 <sup>8</sup> TRDINNIDYY  | 1464 | 1082 |
| >FGFR2-A64 <sup>8</sup> LARDINNIDY  | 2394 | >FGFR2-A64 <sup>8</sup> LTRDINNIDY  | 98   | 2296 |
| >FGFR2-A64 <sup>8</sup> LARDINNIDY\ | 7202 | >FGFR2-A64 <sup>8</sup> LTRDINNIDY\ | 435  | 6767 |
| >FGFR2-A64 <sup>8</sup> LARDINNIDY\ | 2400 | >FGFR2-A64 <sup>8</sup> LTRDINNIDY\ | 110  | 2290 |
| >FGFR2-A64 <sup>8</sup> LARDINNIDY  | 5836 | >FGFR2-A64 <sup>8</sup> LTRDINNIDY  | 197  | 5639 |
| >FGFR2-A64 <sup>8</sup> LARDINNIDY\ | 562  | >FGFR2-A64 <sup>8</sup> LTRDINNIDY\ | 71   | 491  |
| >FGFR2-A64 <sup>8</sup> LARDINNI    | 143  | >FGFR2-A64 <sup>8</sup> LTRDINNI    | 27   | 116  |
| >FGFR2-A64 <sup>8</sup> LARDINNIDY  | 844  | >FGFR2-A64 <sup>8</sup> LTRDINNIDY  | 124  | 720  |
| >FGFR2-A64 <sup>8</sup> LARDINNIDY\ | 710  | >FGFR2-A64 <sup>8</sup> LTRDINNIDY\ | 122  | 588  |
| >FGFR2-A64 <sup>8</sup> LARDINNIDY  | 847  | >FGFR2-A64 <sup>8</sup> LTRDINNIDY  | 333  | 514  |
| >FGFR2-A64 <sup>8</sup> LARDINNIDY\ | 106  | >FGFR2-A64 <sup>8</sup> LTRDINNIDY\ | 34   | 72   |
| >FGFR2-A64 <sup>8</sup> LARDINNIDY  | 479  | >FGFR2-A64 <sup>8</sup> LTRDINNIDY  | 340  | 139  |
| >FGFR2-A64 <sup>8</sup> LARDINNIDY\ | 261  | >FGFR2-A64 <sup>8</sup> LTRDINNIDY\ | 190  | 71   |
| >FGFR2-A64 <sup>8</sup> LARDINNIDY  | 294  | >FGFR2-A64 <sup>8</sup> LTRDINNIDY  | 516  | 222  |
| >FGFR2-A64 <sup>8</sup> LARDINNI    | 1650 | >FGFR2-A64 <sup>8</sup> LTRDINNI    | 114  | 1536 |

|                         |     |                          |      |      |
|-------------------------|-----|--------------------------|------|------|
| >FGFR2-A64\xLARDINNIDY  | 65  | >FGFR2-A64\xLTRDINNIDY   | 9    | 56   |
| >FGFR2-A64\xLARDINNIDY' | 60  | >FGFR2-A64\xLTRDINNIDY\  | 9    | 51   |
| >FGFR2-A64\xLARDINNIDY' | 209 | >FGFR2-A64\xLTRDINNIDY\  | 4839 | 4630 |
| >FGFR2-A64\xLARDINNIDY  | 276 | >FGFR2-A64\xLTRDINNIDY   | 20   | 256  |
| >FGFR2-A64\xLARDINNIDY' | 72  | >FGFR2-A64\xLTRDINNIDY\  | 6    | 66   |
| >FGFR2-A64\xLARDINNI    | 421 | >FGFR2-A64\xLTRDINNI     | 106  | 315  |
| >FGFR2-A64\xNVMKIADFGI  | 464 | >FGFR2-A64\xNVMKIADFGI   | 2888 | 2424 |
| >FGFR2-A64\xNVMKIADFGI  | 468 | >FGFR2-A64\xNVMKIADFGI   | 3714 | 3246 |
| >FGFR2-A64\xNVMKIADFGI  | 221 | >FGFR2-A64\xNVMKIADFGI   | 2056 | 1835 |
| >FGFR2-A64\xNVMKIADFGI  | 16  | >FGFR2-A64\xNVMKIADFGI   | 138  | 122  |
| >FGFR2-A64\xNVMKIADFGI  | 345 | >FGFR2-A64\xNVMKIADFGI   | 1738 | 1393 |
| >FGFR2-A64\xGLARDINNI   | 280 | >FGFR2-A64\xGLTRDINNI    | 1684 | 1404 |
| >FGFR2-A64\xGLARDINNI   | 8   | >FGFR2-A64\xGLTRDINNI    | 49   | 41   |
| >FGFR2-A64\xGLARDINNI   | 9   | >FGFR2-A64\xGLTRDINNI    | 62   | 53   |
| >FGFR2-A64\xGLARDINNI   | 65  | >FGFR2-A64\xGLTRDINNI    | 172  | 107  |
| >FGFR2-A64\xGLARDINNI   | 17  | >FGFR2-A64\xGLTRDINNI    | 24   | 7    |
| >FGFR2-A64\xGLARDINNI   | 41  | >FGFR2-A64\xGLTRDINNI    | 92   | 51   |
| >FGFR2-A64\xGLARDINNI   | 404 | >FGFR2-A64\xGLTRDINNI    | 3181 | 2777 |
| >FGFR2-A64\xGLARDINNI   | 15  | >FGFR2-A64\xGLTRDINNI    | 18   | 3    |
| >FGFR2-A64\xGLARDINNID  | 144 | >FGFR2-A64\xGLTRDINNID'  | 356  | 212  |
| >FGFR2-A64\xGLARDINNID  | 238 | >FGFR2-A64\xGLTRDINNID'  | 512  | 274  |
| >FGFR2-A64\xADFLGARDI   | 361 | >FGFR2-A64\xADFLGLTRDI   | 148  | 213  |
| >FGFR2-A64\xADFLGARDI   | 295 | >FGFR2-A64\xADFLGLTRDI   | 98   | 197  |
| >FGFR2-A64\xADFLGARDI   | 115 | >FGFR2-A64\xADFLGLTRDI   | 180  | 65   |
| >FGFR2-A64\xKIADFLA     | 83  | >FGFR2-A64\xKIADFLGT     | 831  | 748  |
| >FGFR2-A64\xKIADFLGARD  | 659 | >FGFR2-A64\xKIADFLGLTRDI | 389  | 270  |
| >FGFR2-A64\xKIADFLA     | 38  | >FGFR2-A64\xKIADFLGT     | 598  | 560  |
| >FGFR2-A64\xKIADFLGARD  | 352 | >FGFR2-A64\xKIADFLGLTRDI | 181  | 171  |
| >FGFR2-A64\xKIADFLA     | 44  | >FGFR2-A64\xKIADFLGT     | 442  | 398  |
| >FGFR2-A64\xKIADFLGAR   | 366 | >FGFR2-A64\xKIADFLGLTR   | 422  | 56   |
| >FGFR2-A64\xKIADFLGAR   | 67  | >FGFR2-A64\xKIADFLGLTR   | 78   | 11   |
| >FGFR2-A64\xKIADFLGAR   | 50  | >FGFR2-A64\xKIADFLGLTR   | 62   | 12   |
| >FGFR2-A64\xKIADFLGARD  | 84  | >FGFR2-A64\xKIADFLGLTRDI | 45   | 39   |
| >FGFR2-A64\xKIADFLGAR   | 386 | >FGFR2-A64\xKIADFLGLTR   | 230  | 156  |
| >FGFR2-A64\xKIADFLGAR   | 16  | >FGFR2-A64\xKIADFLGLTR   | 15   | 1    |
| >FGFR2-A64\xMKIADFLGLAF | 454 | >FGFR2-A64\xMKIADFLGLTR  | 497  | 43   |
| >FGFR2-A64\xMKIADFLGLAF | 576 | >FGFR2-A64\xMKIADFLGLTR  | 305  | 271  |
| >FGFR2-A64\xMKIADFLGLAF | 79  | >FGFR2-A64\xMKIADFLGLTR  | 115  | 36   |
| >FGFR2-A64\xMKIADFLGLAF | 388 | >FGFR2-A64\xMKIADFLGLTR  | 339  | 49   |
| >FGFR2-A64\xVMKIADFLGLA | 331 | >FGFR2-A64\xVMKIADFLGLT  | 829  | 498  |
| >FGFR2-A64\xVMKIADFLGLA | 20  | >FGFR2-A64\xVMKIADFLGLT  | 23   | 3    |
| >FGFR2-A64\xVMKIADFLGLA | 365 | >FGFR2-A64\xVMKIADFLGLT  | 434  | 69   |
| >FGFR2-A64\xVMKIADFLGLA | 266 | >FGFR2-A64\xVMKIADFLGLT  | 232  | 34   |

|                        |      |                        |      |      |
|------------------------|------|------------------------|------|------|
| >FGFR2-A971ATPRDSGLY   | 664  | >FGFR2-A971TTPRDSGLY   | 69   | 595  |
| >FGFR2-A971ATPRDSGLY   | 107  | >FGFR2-A971TTPRDSGLY   | 88   | 19   |
| >FGFR2-A971ATPRDSGLY   | 294  | >FGFR2-A971TTPRDSGLY   | 148  | 146  |
| >FGFR2-A971ATPRDSGLY   | 110  | >FGFR2-A971TTPRDSGLY   | 168  | 58   |
| >FGFR2-A971ATPRDSGL    | 3001 | >FGFR2-A971TTPRDSGL    | 82   | 2919 |
| >FGFR2-A971ATPRDSGLYA  | 784  | >FGFR2-A971TTPRDSGLYA  | 177  | 607  |
| >FGFR2-A971ATPRDSGLY   | 362  | >FGFR2-A971TTPRDSGLY   | 261  | 101  |
| >FGFR2-A971ATPRDSGL    | 326  | >FGFR2-A971TTPRDSGL    | 384  | 58   |
| >FGFR2-A971ATPRDSGLY   | 634  | >FGFR2-A971TTPRDSGLY   | 415  | 219  |
| >FGFR2-A971ATPRDSGLYA  | 239  | >FGFR2-A971TTPRDSGLYA  | 149  | 90   |
| >FGFR2-A971ATPRDSGLYA  | 184  | >FGFR2-A971TTPRDSGLYA  | 128  | 56   |
| >FGFR2-A971ATPRDSGLY   | 179  | >FGFR2-A971TTPRDSGLY   | 250  | 71   |
| >FGFR2-A971GATPRDSGLY  | 5559 | >FGFR2-A971GTTPRDSGLY  | 209  | 5350 |
| >FGFR2-A971GATPRDSGLY  | 549  | >FGFR2-A971GTTPRDSGLY  | 164  | 385  |
| >FGFR2-A971GATPRDSGL   | 63   | >FGFR2-A971GTTPRDSGL   | 12   | 51   |
| >FGFR2-A971GATPRDSGLY  | 103  | >FGFR2-A971GTTPRDSGLY  | 19   | 84   |
| >FGFR2-A971GATPRDSGL   | 1422 | >FGFR2-A971GTTPRDSGL   | 61   | 1361 |
| >FGFR2-A971GATPRDSGLY  | 150  | >FGFR2-A971GTTPRDSGLY  | 18   | 132  |
| >FGFR2-A971LIGEYLQIKGA | 254  | >FGFR2-A971LIGEYLQIKGT | 2737 | 2483 |
| >FGFR2-A971LIGEYLQIKGA | 195  | >FGFR2-A971LIGEYLQIKGT | 1217 | 1022 |
| >FGFR2-A971LIGEYLQIKGA | 170  | >FGFR2-A971LIGEYLQIKGT | 2006 | 1836 |
| >FGFR2-A971KGATPRDSGL  | 30   | >FGFR2-A971KGTTPRDSGL  | 58   | 28   |
| >FGFR2-A971KGATPRDSGL  | 133  | >FGFR2-A971KGTTPRDSGL  | 124  | 9    |
| >FGFR2-A971IKGATPRDSG  | 270  | >FGFR2-A971IKGTTPRDSG  | 244  | 26   |
| >FGFR2-A971QIKGATPR    | 138  | >FGFR2-A971QIKGTTPR    | 51   | 87   |
| >FGFR2-A971QIKGATPR    | 572  | >FGFR2-A971QIKGTTPR    | 356  | 216  |
| >FGFR2-A971QIKGATPR    | 181  | >FGFR2-A971QIKGTTPR    | 156  | 25   |
| >FGFR2-A971QIKGATPR    | 79   | >FGFR2-A971QIKGTTPR    | 52   | 27   |
| >FGFR2-A971LQIKGATPR   | 115  | >FGFR2-A971LQIKGTTPR   | 42   | 73   |
| >FGFR2-A971LQIKGATPR   | 71   | >FGFR2-A971LQIKGTTPR   | 49   | 22   |
| >FGFR2-A971LQIKGATPR   | 441  | >FGFR2-A971LQIKGTTPR   | 199  | 242  |
| >FGFR2-A971YLQIKGAT    | 342  | >FGFR2-A971YLQIKGTT    | 306  | 36   |
| >FGFR2-A971YLQIKGAT    | 166  | >FGFR2-A971YLQIKGTT    | 59   | 107  |
| >FGFR2-A971YLQIKGATPR  | 327  | >FGFR2-A971YLQIKGTTPR  | 333  | 6    |
| >FGFR2-A971YLQIKGATPR  | 386  | >FGFR2-A971YLQIKGTTPR  | 321  | 65   |
| >FGFR2-A971YLQIKGATPR  | 639  | >FGFR2-A971YLQIKGTTPR  | 420  | 219  |
| >FGFR2-A971EYLQIKGATPI | 660  | >FGFR2-A971EYLQIKGTTPI | 381  | 279  |
| >FGFR2-A971EYLQIKGATPI | 18   | >FGFR2-A971EYLQIKGTTPI | 14   | 4    |
| >FGFR2-A971EYLQIKGATPI | 127  | >FGFR2-A971EYLQIKGTTPI | 105  | 22   |
| >FGFR2-A971EYLQIKGATPI | 16   | >FGFR2-A971EYLQIKGTTPI | 14   | 2    |
| >FGFR2-A971GEYLQIKGA   | 340  | >FGFR2-A971GEYLQIKGT   | 334  | 6    |
| >FGFR2-A971GEYLQIKGA   | 207  | >FGFR2-A971GEYLQIKGT   | 271  | 64   |
| >FGFR2-A971GEYLQIKGAT  | 501  | >FGFR2-A971GEYLQIKGTT  | 372  | 129  |

|                        |       |                        |      |       |
|------------------------|-------|------------------------|------|-------|
| >FGFR2-A971GEYLQIKGA   | 137   | >FGFR2-A971GEYLQIKGT   | 825  | 688   |
| >FGFR2-A971GEYLQIKGAT  | 361   | >FGFR2-A971GEYLQIKGTT  | 305  | 56    |
| >FGFR2-A971GEYLQIKGA   | 95    | >FGFR2-A971GEYLQIKGT   | 70   | 25    |
| >FGFR2-C382CIGVFLIACM' | 1555  | >FGFR2-C382RIGVFLIACM' | 241  | 1314  |
| >FGFR2-C382CIGVFLIACM' | 184   | >FGFR2-C382RIGVFLIACM' | 18   | 166   |
| >FGFR2-C382CIGVFLIACM' | 1625  | >FGFR2-C382RIGVFLIACM' | 450  | 1175  |
| >FGFR2-C382CIGVFLIACM' | 760   | >FGFR2-C382RIGVFLIACM' | 57   | 703   |
| >FGFR2-C382CIGVFLIACM' | 354   | >FGFR2-C382RIGVFLIACM' | 311  | 43    |
| >FGFR2-C382CIGVFLIACM' | 115   | >FGFR2-C382RIGVFLIACM' | 30   | 85    |
| >FGFR2-C382YCIGVFLI    | 194   | >FGFR2-C382YRIGVFLI    | 6253 | 6059  |
| >FGFR2-C382YCIGVFLI    | 279   | >FGFR2-C382YRIGVFLI    | 2094 | 1815  |
| >FGFR2-C382YCIGVFLI    | 312   | >FGFR2-C382YRIGVFLI    | 287  | 25    |
| >FGFR2-C382YCIGVFLI    | 171   | >FGFR2-C382YRIGVFLI    | 2316 | 2145  |
| >FGFR2-C382YCIGVFLIACM | 35    | >FGFR2-C382YRIGVFLIACM | 916  | 881   |
| >FGFR2-C382YCIGVFLI    | 173   | >FGFR2-C382YRIGVFLI    | 2112 | 1939  |
| >FGFR2-C382YCIGVFLIACM | 4407  | >FGFR2-C382YRIGVFLIACM | 234  | 4173  |
| >FGFR2-C382YCIGVFLI    | 18862 | >FGFR2-C382YRIGVFLI    | 28   | 18834 |
| >FGFR2-C382YCIGVFLIA   | 21753 | >FGFR2-C382YRIGVFLIA   | 194  | 21559 |
| >FGFR2-C382YCIGVFLIACM | 17701 | >FGFR2-C382YRIGVFLIACM | 20   | 17681 |
| >FGFR2-C382YCIGVFLI    | 8204  | >FGFR2-C382YRIGVFLI    | 66   | 8138  |
| >FGFR2-C382YCIGVFLIAC  | 17573 | >FGFR2-C382YRIGVFLIAC  | 432  | 17141 |
| >FGFR2-C382YCIGVFLIACM | 2855  | >FGFR2-C382YRIGVFLIACM | 28   | 2827  |
| >FGFR2-C382YCIGVFLIA   | 489   | >FGFR2-C382YRIGVFLIA   | 2526 | 2037  |
| >FGFR2-C382YCIGVFLIACM | 241   | >FGFR2-C382YRIGVFLIACM | 2552 | 2311  |
| >FGFR2-C382YCIGVFLI    | 1131  | >FGFR2-C382YRIGVFLI    | 96   | 1035  |
| >FGFR2-C382YCIGVFLIACM | 39082 | >FGFR2-C382YRIGVFLIACM | 432  | 38650 |
| >FGFR2-C382IYCIGVFL    | 211   | >FGFR2-C382IYRIGVFL    | 2308 | 2097  |
| >FGFR2-C382IYCIGVFLI   | 110   | >FGFR2-C382IYRIGVFLI   | 84   | 26    |
| >FGFR2-C382IYCIGVFL    | 201   | >FGFR2-C382IYRIGVFL    | 242  | 41    |
| >FGFR2-C382IYCIGVFLI   | 24    | >FGFR2-C382IYRIGVFLI   | 29   | 5     |
| >FGFR2-C382IYCIGVFL    | 18    | >FGFR2-C382IYRIGVFL    | 40   | 22    |
| >FGFR2-C382IYCIGVFLI   | 19    | >FGFR2-C382IYRIGVFLI   | 37   | 18    |
| >FGFR2-C382IYCIGVFL    | 6105  | >FGFR2-C382IYRIGVFL    | 36   | 6069  |
| >FGFR2-C382IYCIGVFLI   | 5726  | >FGFR2-C382IYRIGVFLI   | 25   | 5701  |
| >FGFR2-C382IYCIGVFLIA  | 5465  | >FGFR2-C382IYRIGVFLIA  | 23   | 5442  |
| >FGFR2-C382IYCIGVFLIA  | 64    | >FGFR2-C382IYRIGVFLIA  | 91   | 27    |
| >FGFR2-C382IYCIGVFL    | 647   | >FGFR2-C382IYRIGVFL    | 423  | 224   |
| >FGFR2-C382AIYCIGVFL   | 77    | >FGFR2-C382AIYRIGVFL   | 301  | 224   |
| >FGFR2-C382AIYCIGVFLI  | 257   | >FGFR2-C382AIYRIGVFLI  | 616  | 359   |
| >FGFR2-C382AIYCIGVFL   | 16    | >FGFR2-C382AIYRIGVFL   | 30   | 14    |
| >FGFR2-C382AIYCIGVFLI  | 80    | >FGFR2-C382AIYRIGVFLI  | 146  | 66    |
| >FGFR2-C382AIYCIGVFL   | 65    | >FGFR2-C382AIYRIGVFL   | 161  | 96    |
| >FGFR2-C382AIYCIGVFLI  | 167   | >FGFR2-C382AIYRIGVFLI  | 122  | 45    |



|                        |      |                        |      |      |
|------------------------|------|------------------------|------|------|
| >FGFR2-C382AIYCIGVFLIA | 85   | >FGFR2-C382AIYRIGVFLIA | 182  | 97   |
| >FGFR2-C382AIYCIGVFL   | 77   | >FGFR2-C382AIYRIGVFL   | 108  | 31   |
| >FGFR2-C382AIYCIGVFLI  | 268  | >FGFR2-C382AIYRIGVFLI  | 579  | 311  |
| >FGFR2-C382AIYCIGVFLIA | 193  | >FGFR2-C382AIYRIGVFLIA | 283  | 90   |
| >FGFR2-C382AIYCIGVFL   | 13   | >FGFR2-C382AIYRIGVFL   | 22   | 9    |
| >FGFR2-C382AIYCIGVFLI  | 9    | >FGFR2-C382AIYRIGVFLI  | 14   | 5    |
| >FGFR2-C382AIYCIGVFLIA | 244  | >FGFR2-C382AIYRIGVFLIA | 441  | 197  |
| >FGFR2-C382AIYCIGVFL   | 99   | >FGFR2-C382AIYRIGVFL   | 1053 | 954  |
| >FGFR2-C382AIYCIGVFLI  | 152  | >FGFR2-C382AIYRIGVFLI  | 794  | 642  |
| >FGFR2-C382AIYCIGVFL   | 54   | >FGFR2-C382AIYRIGVFL   | 43   | 11   |
| >FGFR2-C382AIYCIGVFLI  | 62   | >FGFR2-C382AIYRIGVFLI  | 52   | 10   |
| >FGFR2-C382AIYCIGVFL   | 142  | >FGFR2-C382AIYRIGVFL   | 30   | 112  |
| >FGFR2-C382AIYCIGVFLI  | 155  | >FGFR2-C382AIYRIGVFLI  | 41   | 114  |
| >FGFR2-C382AIYCIGVFLIA | 1360 | >FGFR2-C382AIYRIGVFLIA | 315  | 1045 |
| >FGFR2-C382AIYCIGVF    | 628  | >FGFR2-C382AIYRIGVF    | 438  | 190  |
| >FGFR2-C382AIYCIGVF    | 185  | >FGFR2-C382AIYRIGVF    | 173  | 12   |
| >FGFR2-C382AIYCIGVFL   | 238  | >FGFR2-C382AIYRIGVFL   | 221  | 17   |
| >FGFR2-C382AIYCIGVFLI  | 75   | >FGFR2-C382AIYRIGVFLI  | 71   | 4    |
| >FGFR2-C382AIYCIGVFL   | 324  | >FGFR2-C382AIYRIGVFL   | 1474 | 1150 |
| >FGFR2-C382AIYCIGVFLI  | 355  | >FGFR2-C382AIYRIGVFLI  | 1126 | 771  |
| >FGFR2-C382AIYCIGVF    | 58   | >FGFR2-C382AIYRIGVF    | 78   | 20   |
| >FGFR2-C382AIYCIGVF    | 65   | >FGFR2-C382AIYRIGVF    | 100  | 35   |
| >FGFR2-C382AIYCIGVFL   | 368  | >FGFR2-C382AIYRIGVFL   | 545  | 177  |
| >FGFR2-C382AIYCIGVF    | 345  | >FGFR2-C382AIYRIGVF    | 402  | 57   |
| >FGFR2-C382AIYCIGVF    | 2722 | >FGFR2-C382AIYRIGVF    | 266  | 2456 |
| >FGFR2-C382IAIYCIGVF   | 947  | >FGFR2-C382IAIYRIGVF   | 265  | 682  |
| >FGFR2-C382IAIYCIGVFLI | 902  | >FGFR2-C382IAIYRIGVFLI | 416  | 486  |
| >FGFR2-C382IAIYCIGV    | 267  | >FGFR2-C382IAIYRIGV    | 1788 | 1521 |
| >FGFR2-C382IAIYCIGVFLI | 491  | >FGFR2-C382IAIYRIGVFLI | 1019 | 528  |
| >FGFR2-C382IAIYCIGVFL  | 279  | >FGFR2-C382IAIYRIGVFL  | 872  | 593  |
| >FGFR2-C382IAIYCIGV    | 334  | >FGFR2-C382IAIYRIGV    | 471  | 137  |
| >FGFR2-C382IAIYCIGV    | 36   | >FGFR2-C382IAIYRIGV    | 101  | 65   |
| >FGFR2-C382IAIYCIGVFL  | 488  | >FGFR2-C382IAIYRIGVFL  | 1276 | 788  |
| >FGFR2-C382IAIYCIGVFLI | 121  | >FGFR2-C382IAIYRIGVFLI | 164  | 43   |
| >FGFR2-C382IAIYCIGVF   | 280  | >FGFR2-C382IAIYRIGVF   | 488  | 208  |
| >FGFR2-C382IAIYCIGV    | 81   | >FGFR2-C382IAIYRIGV    | 128  | 47   |
| >FGFR2-C382IAIYCIGVFLI | 108  | >FGFR2-C382IAIYRIGVFLI | 323  | 215  |
| >FGFR2-C382IAIYCIGVF   | 81   | >FGFR2-C382IAIYRIGVF   | 88   | 7    |
| >FGFR2-C382IAIYCIGVF   | 58   | >FGFR2-C382IAIYRIGVF   | 149  | 91   |
| >FGFR2-C382IAIYCIGVFL  | 351  | >FGFR2-C382IAIYRIGVFL  | 723  | 372  |
| >FGFR2-C382IAIYCIGVF   | 22   | >FGFR2-C382IAIYRIGVF   | 13   | 9    |
| >FGFR2-C382IAIYCIGVFL  | 195  | >FGFR2-C382IAIYRIGVFL  | 130  | 65   |
| >FGFR2-C382IAIYCIGVFLI | 367  | >FGFR2-C382IAIYRIGVFLI | 251  | 116  |

|                        |     |                        |      |      |
|------------------------|-----|------------------------|------|------|
| >FGFR2-C382IAIYCIGVF   | 118 | >FGFR2-C382IAIYRIGVF   | 1088 | 970  |
| >FGFR2-C382IAIYCIGVFLI | 162 | >FGFR2-C382IAIYRIGVFLI | 617  | 455  |
| >FGFR2-C382IAIYCIGVF   | 121 | >FGFR2-C382IAIYRIGVF   | 383  | 262  |
| >FGFR2-C382IAIYCIGVFLI | 137 | >FGFR2-C382IAIYRIGVFLI | 264  | 127  |
| >FGFR2-C382IAIYCIGVF   | 92  | >FGFR2-C382IAIYRIGVF   | 305  | 213  |
| >FGFR2-C382IAIYCIGVFLI | 142 | >FGFR2-C382IAIYRIGVFLI | 153  | 11   |
| >FGFR2-C382EIAIYCIGVFL | 187 | >FGFR2-C382EIAIYRIGVFL | 394  | 207  |
| >FGFR2-C382EIAIYCIGV   | 367 | >FGFR2-C382EIAIYRIGV   | 1504 | 1137 |
| >FGFR2-C382EIAIYCIGV   | 416 | >FGFR2-C382EIAIYRIGV   | 927  | 511  |
| >FGFR2-C382EIAIYCIGV   | 359 | >FGFR2-C382EIAIYRIGV   | 4826 | 4467 |
| >FGFR2-C382EIAIYCIGV   | 82  | >FGFR2-C382EIAIYRIGV   | 86   | 4    |
| >FGFR2-C382EIAIYCIGVF  | 199 | >FGFR2-C382EIAIYRIGVF  | 325  | 126  |
| >FGFR2-C382EIAIYCIGVF  | 94  | >FGFR2-C382EIAIYRIGVF  | 84   | 10   |
| >FGFR2-C382EIAIYCIGV   | 19  | >FGFR2-C382EIAIYRIGV   | 10   | 9    |
| >FGFR2-C382EIAIYCIGVFL | 27  | >FGFR2-C382EIAIYRIGVFL | 19   | 8    |
| >FGFR2-C382EIAIYCIGV   | 6   | >FGFR2-C382EIAIYRIGV   | 6    | 0    |
| >FGFR2-C382EIAIYCIGVFL | 37  | >FGFR2-C382EIAIYRIGVFL | 54   | 17   |
| >FGFR2-C382LEIAIYCI    | 186 | >FGFR2-C382LEIAIYRI    | 743  | 557  |
| >FGFR2-C382LEIAIYCIGV  | 101 | >FGFR2-C382LEIAIYRIGV  | 220  | 119  |
| >FGFR2-C382LEIAIYCIGVF | 90  | >FGFR2-C382LEIAIYRIGVF | 141  | 51   |
| >FGFR2-C382LEIAIYCIGVF | 132 | >FGFR2-C382LEIAIYRIGVF | 174  | 42   |
| >FGFR2-C382LEIAIYCI    | 256 | >FGFR2-C382LEIAIYRI    | 570  | 314  |
| >FGFR2-C382LEIAIYCIGVF | 20  | >FGFR2-C382LEIAIYRIGVF | 26   | 6    |
| >FGFR2-C382LEIAIYCI    | 44  | >FGFR2-C382LEIAIYRI    | 59   | 15   |
| >FGFR2-C382LEIAIYCIGVF | 32  | >FGFR2-C382LEIAIYRIGVF | 68   | 36   |
| >FGFR2-C382LEIAIYCI    | 42  | >FGFR2-C382LEIAIYRI    | 158  | 116  |
| >FGFR2-C382LEIAIYCIGV  | 623 | >FGFR2-C382LEIAIYRIGV  | 478  | 145  |
| >FGFR2-C382LEIAIYCIGVF | 134 | >FGFR2-C382LEIAIYRIGVF | 253  | 119  |
| >FGFR2-C382LEIAIYCI    | 260 | >FGFR2-C382LEIAIYRI    | 844  | 584  |
| >FGFR2-C382LEIAIYCI    | 355 | >FGFR2-C382LEIAIYRI    | 411  | 56   |
| >FGFR2-C382LEIAIYCIGVF | 92  | >FGFR2-C382LEIAIYRIGVF | 133  | 41   |
| >FGFR2-C382LEIAIYCI    | 470 | >FGFR2-C382LEIAIYRI    | 1017 | 547  |
| >FGFR2-C382LEIAIYCI    | 8   | >FGFR2-C382LEIAIYRI    | 9    | 1    |
| >FGFR2-C382LEIAIYCIGV  | 16  | >FGFR2-C382LEIAIYRIGV  | 40   | 24   |
| >FGFR2-C382LEIAIYCIGVF | 40  | >FGFR2-C382LEIAIYRIGVF | 83   | 43   |
| >FGFR2-C382YLEIAIYCI   | 30  | >FGFR2-C382YLEIAIYRI   | 29   | 1    |
| >FGFR2-C382YLEIAIYCIGV | 22  | >FGFR2-C382YLEIAIYRIGV | 38   | 16   |
| >FGFR2-C382YLEIAIYCI   | 14  | >FGFR2-C382YLEIAIYRI   | 13   | 1    |
| >FGFR2-C382YLEIAIYCIGV | 10  | >FGFR2-C382YLEIAIYRIGV | 19   | 9    |
| >FGFR2-C382YLEIAIYCI   | 499 | >FGFR2-C382YLEIAIYRI   | 116  | 383  |
| >FGFR2-C382YLEIAIYCIGV | 36  | >FGFR2-C382YLEIAIYRIGV | 44   | 8    |
| >FGFR2-C382YLEIAIYCIGV | 26  | >FGFR2-C382YLEIAIYRIGV | 52   | 26   |
| >FGFR2-C382YLEIAIYC    | 25  | >FGFR2-C382YLEIAIYR    | 3646 | 3621 |

|                        |       |                        |       |       |
|------------------------|-------|------------------------|-------|-------|
| >FGFR2-C382YLEIAIYCI   | 12    | >FGFR2-C382YLEIAIYRI   | 5     | 7     |
| >FGFR2-C382YLEIAIYCIGV | 3     | >FGFR2-C382YLEIAIYRIGV | 4     | 1     |
| >FGFR2-C382YLEIAIYC    | 174   | >FGFR2-C382YLEIAIYR    | 15766 | 15592 |
| >FGFR2-C382YLEIAIYCI   | 8     | >FGFR2-C382YLEIAIYRI   | 12    | 4     |
| >FGFR2-C382YLEIAIYCIGV | 6     | >FGFR2-C382YLEIAIYRIGV | 9     | 3     |
| >FGFR2-C382YLEIAIYCI   | 22    | >FGFR2-C382YLEIAIYRI   | 36    | 14    |
| >FGFR2-C382YLEIAIYCIGV | 7     | >FGFR2-C382YLEIAIYRIGV | 10    | 3     |
| >FGFR2-C382YLEIAIYCI   | 32    | >FGFR2-C382YLEIAIYRI   | 50    | 18    |
| >FGFR2-C382YLEIAIYCIGV | 8     | >FGFR2-C382YLEIAIYRIGV | 39    | 31    |
| >FGFR2-C382YLEIAIYC    | 9     | >FGFR2-C382YLEIAIYR    | 1596  | 1587  |
| >FGFR2-C382YLEIAIYCI   | 8     | >FGFR2-C382YLEIAIYRI   | 3     | 5     |
| >FGFR2-C382YLEIAIYCIGV | 2     | >FGFR2-C382YLEIAIYRIGV | 2     | 0     |
| >FGFR2-C382YLEIAIYC    | 22448 | >FGFR2-C382YLEIAIYR    | 191   | 22257 |
| >FGFR2-C382YLEIAIYC    | 36636 | >FGFR2-C382YLEIAIYR    | 354   | 36282 |
| >FGFR2-C382YLEIAIYC    | 34654 | >FGFR2-C382YLEIAIYR    | 33    | 34621 |
| >FGFR2-C382YLEIAIYCIGV | 444   | >FGFR2-C382YLEIAIYRIGV | 383   | 61    |
| >FGFR2-C382YLEIAIYC    | 32762 | >FGFR2-C382YLEIAIYR    | 47    | 32715 |
| >FGFR2-C382DYLEIAIYCI  | 425   | >FGFR2-C382DYLEIAIYRI  | 1517  | 1092  |
| >FGFR2-C382DYLEIAIYCI  | 106   | >FGFR2-C382DYLEIAIYRI  | 276   | 170   |
| >FGFR2-C382DYLEIAIYCI  | 330   | >FGFR2-C382DYLEIAIYRI  | 95    | 235   |
| >FGFR2-C382DYLEIAIYC   | 22350 | >FGFR2-C382DYLEIAIYR   | 276   | 22074 |
| >FGFR2-C382DYLEIAIYC   | 7618  | >FGFR2-C382DYLEIAIYR   | 6     | 7612  |
| >FGFR2-C382DYLEIAIYC   | 33856 | >FGFR2-C382DYLEIAIYR   | 35    | 33821 |
| >FGFR2-C382DYLEIAIYC   | 19304 | >FGFR2-C382DYLEIAIYR   | 10    | 19294 |
| >FGFR2-C382PDYLEIAIYCI | 287   | >FGFR2-C382PDYLEIAIYRI | 1453  | 1166  |
| >FGFR2-C382PDYLEIAIYCI | 605   | >FGFR2-C382PDYLEIAIYRI | 444   | 161   |
| >FGFR2-C382PDYLEIAIYCI | 241   | >FGFR2-C382PDYLEIAIYRI | 156   | 85    |
| >FGFR2-C382PDYLEIAIYC  | 34335 | >FGFR2-C382PDYLEIAIYR  | 222   | 34113 |
| >FGFR2-C382PDYLEIAIYCI | 30    | >FGFR2-C382PDYLEIAIYRI | 23    | 7     |
| >FGFR2-D10:DSGLYACTAS  | 3158  | >FGFR2-D10:YSGLYACTAS  | 309   | 2849  |
| >FGFR2-D10:DSGLYACTAS  | 79    | >FGFR2-D10:YSGLYACTAS  | 477   | 398   |
| >FGFR2-D10:DSGLYACTAS  | 68    | >FGFR2-D10:YSGLYACTAS  | 46    | 22    |
| >FGFR2-D10:DSGLYACTAS  | 1603  | >FGFR2-D10:YSGLYACTAS  | 336   | 1267  |
| >FGFR2-D10:RDSGLYAC    | 22083 | >FGFR2-D10:RYSGLYAC    | 169   | 21914 |
| >FGFR2-D10:RDSGLYACTA  | 22550 | >FGFR2-D10:RYSGLYACTA  | 320   | 22230 |
| >FGFR2-D10:RDSGLYACTA  | 12556 | >FGFR2-D10:RYSGLYACTA  | 186   | 12370 |
| >FGFR2-D10:RDSGLYAC    | 25592 | >FGFR2-D10:RYSGLYAC    | 194   | 25398 |
| >FGFR2-D10:YLQIKGATPR  | 1677  | >FGFR2-D10:YLQIKGATPR' | 173   | 1504  |
| >FGFR2-D10:YLQIKGATPR  | 22467 | >FGFR2-D10:YLQIKGATPR' | 34    | 22433 |
| >FGFR2-D10:YLQIKGATPR  | 26531 | >FGFR2-D10:YLQIKGATPR' | 128   | 26403 |
| >FGFR2-D10:YLQIKGATPR  | 25639 | >FGFR2-D10:YLQIKGATPR' | 197   | 25442 |
| >FGFR2-D10:YLQIKGATPR  | 18726 | >FGFR2-D10:YLQIKGATPR' | 83    | 18643 |
| >FGFR2-D10:YLQIKGATPR  | 23746 | >FGFR2-D10:YLQIKGATPR' | 59    | 23687 |

|                       |       |                        |     |       |
|-----------------------|-------|------------------------|-----|-------|
| >FGFR2-D10:YLQIKGATPR | 21160 | >FGFR2-D10:YLQIKGATPR' | 100 | 21060 |
| >FGFR2-D10:YLQIKGATPR | 38046 | >FGFR2-D10:YLQIKGATPR' | 498 | 37548 |
| >FGFR2-D10:PRDSGLYAC  | 8150  | >FGFR2-D10:PRYSGLYAC   | 469 | 7681  |
| >FGFR2-D10:TPRDSGLYA  | 55    | >FGFR2-D10:TPRYSGLYA   | 50  | 5     |
| >FGFR2-D10:TPRDSGLYAC | 156   | >FGFR2-D10:TPRYSGLYAC  | 190 | 34    |
| >FGFR2-D10:TPRDSGLY   | 470   | >FGFR2-D10:TPRYSGLY    | 430 | 40    |
| >FGFR2-D10:TPRDSGLY   | 136   | >FGFR2-D10:TPRYSGLY    | 150 | 14    |
| >FGFR2-D10:TPRDSGLYAC | 612   | >FGFR2-D10:TPRYSGLYAC  | 136 | 476   |
| >FGFR2-D10:ATPRDSGL   | 8038  | >FGFR2-D10:ATPRYSGL    | 9   | 8029  |
| >FGFR2-D10:ATPRDSGLY  | 676   | >FGFR2-D10:ATPRYSGLY   | 204 | 472   |
| >FGFR2-D10:ATPRDSGLY  | 664   | >FGFR2-D10:ATPRYSGLY   | 372 | 292   |
| >FGFR2-D10:ATPRDSGLY  | 107   | >FGFR2-D10:ATPRYSGLY   | 158 | 51    |
| >FGFR2-D10:ATPRDSGLY  | 294   | >FGFR2-D10:ATPRYSGLY   | 125 | 169   |
| >FGFR2-D10:ATPRDSGLYA | 1835  | >FGFR2-D10:ATPRYSGLYA  | 475 | 1360  |
| >FGFR2-D10:ATPRDSGLY  | 110   | >FGFR2-D10:ATPRYSGLY   | 150 | 40    |
| >FGFR2-D10:ATPRDSGLYA | 784   | >FGFR2-D10:ATPRYSGLYA  | 290 | 494   |
| >FGFR2-D10:ATPRDSGLY  | 362   | >FGFR2-D10:ATPRYSGLY   | 96  | 266   |
| >FGFR2-D10:ATPRDSGLY  | 1540  | >FGFR2-D10:ATPRYSGLY   | 305 | 1235  |
| >FGFR2-D10:ATPRDSGL   | 326   | >FGFR2-D10:ATPRYSGL    | 62  | 264   |
| >FGFR2-D10:ATPRDSGLY  | 634   | >FGFR2-D10:ATPRYSGLY   | 44  | 590   |
| >FGFR2-D10:ATPRDSGLYA | 239   | >FGFR2-D10:ATPRYSGLYA  | 43  | 196   |
| >FGFR2-D10:ATPRDSGLYA | 184   | >FGFR2-D10:ATPRYSGLYA  | 38  | 146   |
| >FGFR2-D10:ATPRDSGLY  | 179   | >FGFR2-D10:ATPRYSGLY   | 60  | 119   |
| >FGFR2-D10:GATPRDSGL  | 63    | >FGFR2-D10:GATPRYSGL   | 116 | 53    |
| >FGFR2-D10:GATPRDSGLY | 103   | >FGFR2-D10:GATPRYSGLY  | 76  | 27    |
| >FGFR2-D10:GATPRDSGLY | 150   | >FGFR2-D10:GATPRYSGLY  | 122 | 28    |
| >FGFR2-D10:KGATPRDSGL | 1740  | >FGFR2-D10:KGATPRYSGL  | 486 | 1254  |
| >FGFR2-D10:KGATPRDSGL | 30    | >FGFR2-D10:KGATPRYSGL  | 18  | 12    |
| >FGFR2-D10:KGATPRDSGL | 133   | >FGFR2-D10:KGATPRYSGL  | 103 | 30    |
| >FGFR2-D10:KGATPRDSGL | 797   | >FGFR2-D10:KGATPRYSGL  | 400 | 397   |
| >FGFR2-D10:IKGATPRD   | 18516 | >FGFR2-D10:IKGATPRY    | 52  | 18464 |
| >FGFR2-D10:IKGATPRDSG | 270   | >FGFR2-D10:IKGATPRYSGI | 103 | 167   |
| >FGFR2-D10:QIKGATPRD  | 32846 | >FGFR2-D10:QIKGATPRY   | 58  | 32788 |
| >FGFR2-D10:QIKGATPRD  | 26103 | >FGFR2-D10:QIKGATPRY   | 265 | 25838 |
| >FGFR2-D10:QIKGATPRD  | 29749 | >FGFR2-D10:QIKGATPRY   | 157 | 29592 |
| >FGFR2-D10:QIKGATPRD  | 21766 | >FGFR2-D10:QIKGATPRY   | 201 | 21565 |
| >FGFR2-D10:QIKGATPRD  | 38647 | >FGFR2-D10:QIKGATPRY   | 479 | 38168 |
| >FGFR2-D10:LQIKGATPRD | 29841 | >FGFR2-D10:LQIKGATPRY  | 117 | 29724 |
| >FGFR2-D10:LQIKGATPRD | 6940  | >FGFR2-D10:LQIKGATPRY  | 40  | 6900  |
| >FGFR2-D10:LQIKGATPRD | 28087 | >FGFR2-D10:LQIKGATPRY  | 334 | 27753 |
| >FGFR2-D10:LQIKGATPRD | 13580 | >FGFR2-D10:LQIKGATPRY  | 14  | 13566 |
| >FGFR2-D28:DAQPHIQWII | 1472  | >FGFR2-D28:NAQPHIQWII  | 360 | 1112  |
| >FGFR2-D28:DAQPHIQWII | 102   | >FGFR2-D28:NAQPHIQWII  | 61  | 41    |

|                       |      |                       |      |      |
|-----------------------|------|-----------------------|------|------|
| >FGFR2-D28:DAQPHIQW   | 396  | >FGFR2-D28:NAQPHIQW   | 77   | 319  |
| >FGFR2-D28:DAQPHIQW   | 413  | >FGFR2-D28:NAQPHIQW   | 198  | 215  |
| >FGFR2-D28:DAQPHIQW   | 969  | >FGFR2-D28:NAQPHIQW   | 124  | 845  |
| >FGFR2-D28:DAQPHIQW   | 397  | >FGFR2-D28:NAQPHIQW   | 352  | 45   |
| >FGFR2-D28:DAQPHIQWI  | 927  | >FGFR2-D28:NAQPHIQWI  | 130  | 797  |
| >FGFR2-D28:SDAQPHIQW  | 337  | >FGFR2-D28:SNAQPHIQW  | 9387 | 9050 |
| >FGFR2-D28:YSDAQPHIQV | 432  | >FGFR2-D28:YSNAQPHIQV | 811  | 379  |
| >FGFR2-D28:YSDAQPHI   | 196  | >FGFR2-D28:YSNAQPHI   | 119  | 77   |
| >FGFR2-D28:YSDAQPHIQV | 6    | >FGFR2-D28:YSNAQPHIQV | 4    | 2    |
| >FGFR2-D28:YSDAQPHIQV | 76   | >FGFR2-D28:YSNAQPHIQV | 65   | 11   |
| >FGFR2-D28:YSDAQPHIQV | 68   | >FGFR2-D28:YSNAQPHIQV | 34   | 34   |
| >FGFR2-D28:YSDAQPHI   | 198  | >FGFR2-D28:YSNAQPHI   | 45   | 153  |
| >FGFR2-D28:YSDAQPHIQV | 10   | >FGFR2-D28:YSNAQPHIQV | 9    | 1    |
| >FGFR2-D28:YSDAQPHIQV | 1941 | >FGFR2-D28:YSNAQPHIQV | 440  | 1501 |
| >FGFR2-D28:YSDAQPHIQV | 513  | >FGFR2-D28:YSNAQPHIQV | 474  | 39   |
| >FGFR2-D28:YSDAQPHI   | 153  | >FGFR2-D28:YSNAQPHI   | 96   | 57   |
| >FGFR2-D28:YSDAQPHIQV | 219  | >FGFR2-D28:YSNAQPHIQV | 142  | 77   |
| >FGFR2-D28:VYSDAQPHI  | 344  | >FGFR2-D28:VYSNAQPHI  | 199  | 145  |
| >FGFR2-D28:VYSDAQPHIC | 670  | >FGFR2-D28:VYSNAQPHIC | 425  | 245  |
| >FGFR2-D28:VYSDAQPHI  | 535  | >FGFR2-D28:VYSNAQPHI  | 266  | 269  |
| >FGFR2-D28:VYSDAQPHIC | 536  | >FGFR2-D28:VYSNAQPHIC | 311  | 225  |
| >FGFR2-D28:VYSDAQPHI  | 62   | >FGFR2-D28:VYSNAQPHI  | 29   | 33   |
| >FGFR2-D28:VYSDAQPHIC | 38   | >FGFR2-D28:VYSNAQPHIC | 19   | 19   |
| >FGFR2-D28:KVYSDAQPHI | 379  | >FGFR2-D28:KVYSNAQPHI | 761  | 382  |
| >FGFR2-D28:KVYSDAQPHI | 141  | >FGFR2-D28:KVYSNAQPHI | 93   | 48   |
| >FGFR2-D28:KVYSDAQPHI | 536  | >FGFR2-D28:KVYSNAQPHI | 338  | 198  |
| >FGFR2-D28:KVYSDAQPHI | 75   | >FGFR2-D28:KVYSNAQPHI | 94   | 19   |
| >FGFR2-D28:KVYSDAQPH  | 585  | >FGFR2-D28:KVYSNAQPH  | 211  | 374  |
| >FGFR2-D28:KVYSDAQPHI | 84   | >FGFR2-D28:KVYSNAQPHI | 19   | 65   |
| >FGFR2-D28:KVYSDAQPHI | 150  | >FGFR2-D28:KVYSNAQPHI | 69   | 81   |
| >FGFR2-D28:KVYSDAQPHI | 443  | >FGFR2-D28:KVYSNAQPHI | 218  | 225  |
| >FGFR2-D28:KVYSDAQPHI | 133  | >FGFR2-D28:KVYSNAQPHI | 96   | 37   |
| >FGFR2-D28:CKVYSDAQPH | 237  | >FGFR2-D28:CKVYSNAQPH | 125  | 112  |
| >FGFR2-D28:CKVYSDAQPH | 256  | >FGFR2-D28:CKVYSNAQPH | 101  | 155  |
| >FGFR2-D28:CKVYSDAQPH | 483  | >FGFR2-D28:CKVYSNAQPH | 511  | 28   |
| >FGFR2-D28:FVCKVYSDA  | 2340 | >FGFR2-D28:FVCKVYSNA  | 301  | 2039 |
| >FGFR2-D28:FVCKVYSDA  | 252  | >FGFR2-D28:FVCKVYSNA  | 63   | 189  |
| >FGFR2-D28:FVCKVYSDA  | 846  | >FGFR2-D28:FVCKVYSNA  | 260  | 586  |
| >FGFR2-D28:FVCKVYSDA  | 979  | >FGFR2-D28:FVCKVYSNA  | 160  | 819  |
| >FGFR2-D28:VEFVCKVYSD | 367  | >FGFR2-D28:VEFVCKVYSN | 364  | 3    |
| >FGFR2-D28:VEFVCKVYSD | 299  | >FGFR2-D28:VEFVCKVYSN | 157  | 142  |
| >FGFR2-D28:VEFVCKVYSD | 431  | >FGFR2-D28:VEFVCKVYSN | 426  | 5    |
| >FGFR2-D53(DLVSEMEM   | 5524 | >FGFR2-D53(NLVSEMEM   | 203  | 5321 |

|                        |      |                        |       |       |
|------------------------|------|------------------------|-------|-------|
| >FGFR2-D53(DLVSEMEMM   | 4091 | >FGFR2-D53(NLVSEMEMM   | 93    | 3998  |
| >FGFR2-D53(DLVSEMEMM   | 6183 | >FGFR2-D53(NLVSEMEMM   | 235   | 5948  |
| >FGFR2-D53(DLVSEMEMM   | 659  | >FGFR2-D53(NLVSEMEMM   | 147   | 512   |
| >FGFR2-D53(DLVSEMEMM   | 553  | >FGFR2-D53(NLVSEMEMM   | 145   | 408   |
| >FGFR2-D53(DLVSEMEMM   | 362  | >FGFR2-D53(NLVSEMEMM   | 2500  | 2138  |
| >FGFR2-D53(DLVSEMEMM   | 191  | >FGFR2-D53(NLVSEMEMM   | 1359  | 1168  |
| >FGFR2-D53(DLVSEMEM    | 144  | >FGFR2-D53(NLVSEMEM    | 586   | 442   |
| >FGFR2-D53(DLVSEMEMM   | 9    | >FGFR2-D53(NLVSEMEMM   | 30    | 21    |
| >FGFR2-D53(DLVSEMEMM   | 22   | >FGFR2-D53(NLVSEMEMM   | 106   | 84    |
| >FGFR2-D53(DLVSEMEMM   | 184  | >FGFR2-D53(NLVSEMEMM   | 101   | 83    |
| >FGFR2-D53(SDLVSEMEM   | 2924 | >FGFR2-D53(SNLVSEMEM   | 434   | 2490  |
| >FGFR2-D53(SDLVSEMEM   | 284  | >FGFR2-D53(SNLVSEMEM   | 11141 | 10857 |
| >FGFR2-D53(SDLVSEMEM   | 182  | >FGFR2-D53(SNLVSEMEM   | 6608  | 6426  |
| >FGFR2-D53(LSDLVSEM    | 76   | >FGFR2-D53(LSNLVSEM    | 42    | 34    |
| >FGFR2-D53(LSDLVSEMEN  | 141  | >FGFR2-D53(LSNLVSEMEN  | 88    | 53    |
| >FGFR2-D53(LSDLVSEMEN  | 192  | >FGFR2-D53(LSNLVSEMEN  | 105   | 87    |
| >FGFR2-D53(LSDLVSEM    | 604  | >FGFR2-D53(LSNLVSEM    | 105   | 499   |
| >FGFR2-D53(LSDLVSEMEN  | 274  | >FGFR2-D53(LSNLVSEMEN  | 54    | 220   |
| >FGFR2-D53(LSDLVSEMEN  | 1212 | >FGFR2-D53(LSNLVSEMEN  | 197   | 1015  |
| >FGFR2-D53(LSDLVSEM    | 215  | >FGFR2-D53(LSNLVSEM    | 657   | 442   |
| >FGFR2-D53(LSDLVSEMEN  | 47   | >FGFR2-D53(LSNLVSEMEN  | 33    | 14    |
| >FGFR2-D53(LSDLVSEMEN  | 47   | >FGFR2-D53(LSNLVSEMEN  | 24    | 23    |
| >FGFR2-D53(DLSDLVSEM   | 410  | >FGFR2-D53(DLSNLVSEM   | 1666  | 1256  |
| >FGFR2-D53(DLSDLVSEM   | 194  | >FGFR2-D53(DLSNLVSEM   | 1148  | 954   |
| >FGFR2-D53(DLSDLVSEM   | 204  | >FGFR2-D53(DLSNLVSEM   | 1684  | 1480  |
| >FGFR2-D53(DLSDLVSEME  | 354  | >FGFR2-D53(DLSNLVSEME  | 2031  | 1677  |
| >FGFR2-D53(TEKDLSDLV   | 23   | >FGFR2-D53(TEKDLSNLV   | 26    | 3     |
| >FGFR2-D53(TEKDLSDL    | 396  | >FGFR2-D53(TEKDLSNL    | 359   | 37    |
| >FGFR2-D53(TEKDLSDL    | 182  | >FGFR2-D53(TEKDLSNL    | 103   | 79    |
| >FGFR2-D53(TEKDLSDLV   | 334  | >FGFR2-D53(TEKDLSNLV   | 300   | 34    |
| >FGFR2-D53(TEKDLSDLV   | 27   | >FGFR2-D53(TEKDLSNLV   | 32    | 5     |
| >FGFR2-D53(ATEKDLSDL   | 1716 | >FGFR2-D53(ATEKDLSNL   | 433   | 1283  |
| >FGFR2-D53(ATEKDLSDL   | 1225 | >FGFR2-D53(ATEKDLSNL   | 179   | 1046  |
| >FGFR2-D53(ATEKDLSDL   | 202  | >FGFR2-D53(ATEKDLSNL   | 93    | 109   |
| >FGFR2-D53(DATEKDLSDL  | 159  | >FGFR2-D53(DATEKDLSNL  | 123   | 36    |
| >FGFR2-E16C(EKMEKRLHA) | 925  | >FGFR2-E16C(AKMEKRLHA) | 69    | 856   |
| >FGFR2-E16C(TEKMEKRL   | 41   | >FGFR2-E16C(TAKMEKRL   | 23493 | 23452 |
| >FGFR2-E16C(TEKMEKRLH/ | 51   | >FGFR2-E16C(TAKMEKRLH/ | 16879 | 16828 |
| >FGFR2-E16C(TEKMEKRLH/ | 1424 | >FGFR2-E16C(TAKMEKRLH/ | 297   | 1127  |
| >FGFR2-E16C(TEKMEKRLH/ | 386  | >FGFR2-E16C(TAKMEKRLH/ | 36934 | 36548 |
| >FGFR2-E16C(TEKMEKRLH/ | 266  | >FGFR2-E16C(TAKMEKRLH/ | 32064 | 31798 |
| >FGFR2-E16C(TEKMEKRLH/ | 331  | >FGFR2-E16C(TAKMEKRLH/ | 29665 | 29334 |
| >FGFR2-E16C(NTEKMEKR   | 35   | >FGFR2-E16C(NTAKMEKR   | 6     | 29    |

|                        |       |                        |      |       |
|------------------------|-------|------------------------|------|-------|
| >FGFR2-E16C NTEKMEKRLI | 10034 | >FGFR2-E16C NTAKMEKRLI | 336  | 9698  |
| >FGFR2-E16C TNTEKMEKR  | 392   | >FGFR2-E16C TNTAKMEKR  | 446  | 54    |
| >FGFR2-E16C WTNTEKMEK  | 207   | >FGFR2-E16C WTNTAKMEK  | 119  | 88    |
| >FGFR2-E16C WTNTEKMEK  | 201   | >FGFR2-E16C WTNTAKMEK  | 85   | 116   |
| >FGFR2-E16C WTNTEKMEK  | 266   | >FGFR2-E16C WTNTAKMEK  | 90   | 176   |
| >FGFR2-E16C WTNTEKMEK  | 209   | >FGFR2-E16C WTNTAKMEK  | 133  | 76    |
| >FGFR2-E16C WTNTEKMEK  | 261   | >FGFR2-E16C WTNTAKMEK  | 138  | 123   |
| >FGFR2-E16C YWTNTEKME  | 551   | >FGFR2-E16C YWTNTAKME  | 419  | 132   |
| >FGFR2-E16C YWTNTEKME  | 58    | >FGFR2-E16C YWTNTAKME  | 41   | 17    |
| >FGFR2-E16C YWTNTEKM   | 450   | >FGFR2-E16C YWTNTAKM   | 514  | 64    |
| >FGFR2-E16C PYWTNTEKM  | 600   | >FGFR2-E16C PYWTNTAKM  | 497  | 103   |
| >FGFR2-E16C PYWTNTEKM  | 471   | >FGFR2-E16C PYWTNTAKM  | 677  | 206   |
| >FGFR2-E16C PYWTNTEK   | 284   | >FGFR2-E16C PYWTNTAK   | 129  | 155   |
| >FGFR2-E16C PYWTNTEKM  | 160   | >FGFR2-E16C PYWTNTAKM  | 139  | 21    |
| >FGFR2-E16C APYWTNTEKI | 110   | >FGFR2-E16C APYWTNTAK  | 131  | 21    |
| >FGFR2-E16C APYWTNTE   | 6633  | >FGFR2-E16C APYWTNTA   | 109  | 6524  |
| >FGFR2-E16C APYWTNTEKI | 447   | >FGFR2-E16C APYWTNTAK  | 156  | 291   |
| >FGFR2-E16C APYWTNTE   | 1170  | >FGFR2-E16C APYWTNTA   | 395  | 775   |
| >FGFR2-E16C APYWTNTE   | 1810  | >FGFR2-E16C APYWTNTA   | 20   | 1790  |
| >FGFR2-E16C ROPYWTNTEI | 41    | >FGFR2-E16C ROPYWTNTA  | 36   | 5     |
| >FGFR2-E16C ROPYWTNTEI | 45    | >FGFR2-E16C ROPYWTNTA  | 53   | 8     |
| >FGFR2-E16C ROPYWTNTEI | 571   | >FGFR2-E16C ROPYWTNTA  | 373  | 198   |
| >FGFR2-E16C ROPYWTNTEI | 416   | >FGFR2-E16C ROPYWTNTA  | 457  | 41    |
| >FGFR2-E16C ROPYWTNTEI | 1754  | >FGFR2-E16C ROPYWTNTA  | 403  | 1351  |
| >FGFR2-E16C ROPYWTNTEI | 28    | >FGFR2-E16C ROPYWTNTA  | 9    | 19    |
| >FGFR2-E16C KROPYWTNT  | 1201  | >FGFR2-E16C KROPYWTNT  | 222  | 979   |
| >FGFR2-E16C KROPYWTNT  | 88    | >FGFR2-E16C KROPYWTNT  | 74   | 14    |
| >FGFR2-E16C KROPYWTNT  | 202   | >FGFR2-E16C KROPYWTNT  | 278  | 76    |
| >FGFR2-E16C KROPYWTNT  | 122   | >FGFR2-E16C KROPYWTNT  | 135  | 13    |
| >FGFR2-E21C ESVVPSDK   | 10570 | >FGFR2-E21C KSVVPSDK   | 427  | 10143 |
| >FGFR2-E21C ESVVPSDK   | 3690  | >FGFR2-E21C KSVVPSDK   | 134  | 3556  |
| >FGFR2-E21C ESVVPSDKGM | 9     | >FGFR2-E21C KSVVPSDKGM | 414  | 405   |
| >FGFR2-E21C ESVVPSDKGM | 104   | >FGFR2-E21C KSVVPSDKGM | 2909 | 2805  |
| >FGFR2-E21C ESVVPSDK   | 15357 | >FGFR2-E21C KSVVPSDK   | 203  | 15154 |
| >FGFR2-E21C ESVVPSDKGM | 714   | >FGFR2-E21C KSVVPSDKGM | 53   | 661   |
| >FGFR2-E21C ESVVPSDK   | 56    | >FGFR2-E21C KSVVPSDK   | 5318 | 5262  |
| >FGFR2-E21C ESVVPSDKGM | 66    | >FGFR2-E21C KSVVPSDKGM | 7    | 59    |
| >FGFR2-E21C ESVVPSDKGM | 15014 | >FGFR2-E21C KSVVPSDKGM | 221  | 14793 |
| >FGFR2-E21C ESVVPSDKGM | 1072  | >FGFR2-E21C KSVVPSDKGM | 76   | 996   |
| >FGFR2-E21C MESVVPSDK  | 7804  | >FGFR2-E21C MKSVVPSDK  | 408  | 7396  |
| >FGFR2-E21C VRNQHWSLII | 9847  | >FGFR2-E21C VRNQHWSLII | 200  | 9647  |
| >FGFR2-E21C VRNQHWSLII | 9238  | >FGFR2-E21C VRNQHWSLII | 273  | 8965  |
| >FGFR2-E21C IMESVVPS   | 4848  | >FGFR2-E21C IMKSVVPS   | 242  | 4606  |

|                                   |       |                                   |      |       |
|-----------------------------------|-------|-----------------------------------|------|-------|
| >FGFR2-E21 $\epsilon$ IMESVVPSDK  | 160   | >FGFR2-E21 $\epsilon$ IMKSVVPSDK  | 57   | 103   |
| >FGFR2-E21 $\epsilon$ IMESVVPSDK  | 249   | >FGFR2-E21 $\epsilon$ IMKSVVPSDK  | 195  | 54    |
| >FGFR2-E21 $\epsilon$ IMESVVPSDK  | 8318  | >FGFR2-E21 $\epsilon$ IMKSVVPSDK  | 102  | 8216  |
| >FGFR2-E21 $\epsilon$ IMESVVPS    | 5123  | >FGFR2-E21 $\epsilon$ IMKSVVPS    | 416  | 4707  |
| >FGFR2-E21 $\epsilon$ IMESVVPSDK  | 4808  | >FGFR2-E21 $\epsilon$ IMKSVVPSDK  | 343  | 4465  |
| >FGFR2-E21 $\epsilon$ LIMESVVPS   | 497   | >FGFR2-E21 $\epsilon$ LIMKSVVPS   | 4584 | 4087  |
| >FGFR2-E21 $\epsilon$ LIMESVVPS   | 282   | >FGFR2-E21 $\epsilon$ LIMKSVVPS   | 1352 | 1070  |
| >FGFR2-E21 $\epsilon$ LIMESVVPS   | 153   | >FGFR2-E21 $\epsilon$ LIMKSVVPS   | 982  | 829   |
| >FGFR2-E21 $\epsilon$ LIMESVVPS   | 69    | >FGFR2-E21 $\epsilon$ LIMKSVVPS   | 794  | 725   |
| >FGFR2-E21 $\epsilon$ LIMESVVPSD  | 71    | >FGFR2-E21 $\epsilon$ LIMKSVVPSD  | 58   | 13    |
| >FGFR2-E21 $\epsilon$ LIMESVVPSD  | 30    | >FGFR2-E21 $\epsilon$ LIMKSVVPSD  | 30   | 0     |
| >FGFR2-E21 $\epsilon$ LIMESVVPSD  | 122   | >FGFR2-E21 $\epsilon$ LIMKSVVPSD  | 147  | 25    |
| >FGFR2-E21 $\epsilon$ SLIMESVV    | 65    | >FGFR2-E21 $\epsilon$ SLIMKSVV    | 109  | 44    |
| >FGFR2-E21 $\epsilon$ SLIMESVV    | 42    | >FGFR2-E21 $\epsilon$ SLIMKSVV    | 78   | 36    |
| >FGFR2-E21 $\epsilon$ SLIMESVV    | 10    | >FGFR2-E21 $\epsilon$ SLIMKSVV    | 8    | 2     |
| >FGFR2-E21 $\epsilon$ SLIMESVV    | 166   | >FGFR2-E21 $\epsilon$ SLIMKSVV    | 285  | 119   |
| >FGFR2-E21 $\epsilon$ SLIMESVV    | 7     | >FGFR2-E21 $\epsilon$ SLIMKSVV    | 7    | 0     |
| >FGFR2-E21 $\epsilon$ SLIMESVV    | 9     | >FGFR2-E21 $\epsilon$ SLIMKSVV    | 12   | 3     |
| >FGFR2-E21 $\epsilon$ SLIMESVV    | 9     | >FGFR2-E21 $\epsilon$ SLIMKSVV    | 11   | 2     |
| >FGFR2-E21 $\epsilon$ SLIMESVV    | 315   | >FGFR2-E21 $\epsilon$ SLIMKSVV    | 422  | 107   |
| >FGFR2-E21 $\epsilon$ SLIMESVV    | 3     | >FGFR2-E21 $\epsilon$ SLIMKSVV    | 3    | 0     |
| >FGFR2-E21 $\epsilon$ SLIMESVV    | 3056  | >FGFR2-E21 $\epsilon$ SLIMKSVV    | 243  | 2813  |
| >FGFR2-E21 $\epsilon$ WSLIMESV    | 329   | >FGFR2-E21 $\epsilon$ WSLIMKSV    | 1395 | 1066  |
| >FGFR2-E21 $\epsilon$ WSLIMESV    | 461   | >FGFR2-E21 $\epsilon$ WSLIMKSV    | 1919 | 1458  |
| >FGFR2-E21 $\epsilon$ WSLIMESV    | 338   | >FGFR2-E21 $\epsilon$ WSLIMKSV    | 587  | 249   |
| >FGFR2-E21 $\epsilon$ WSLIMESV    | 485   | >FGFR2-E21 $\epsilon$ WSLIMKSV    | 303  | 182   |
| >FGFR2-E21 $\epsilon$ WSLIMESVV   | 388   | >FGFR2-E21 $\epsilon$ WSLIMKSVV   | 613  | 225   |
| >FGFR2-E21 $\epsilon$ WSLIMESVV   | 26    | >FGFR2-E21 $\epsilon$ WSLIMKSVV   | 16   | 10    |
| >FGFR2-E21 $\epsilon$ HWSLIMESV   | 176   | >FGFR2-E21 $\epsilon$ HWSLIMKSV   | 1794 | 1618  |
| >FGFR2-E21 $\epsilon$ HWSLIMESV   | 491   | >FGFR2-E21 $\epsilon$ HWSLIMKSV   | 6428 | 5937  |
| >FGFR2-E21 $\epsilon$ HWSLIMESV   | 136   | >FGFR2-E21 $\epsilon$ HWSLIMKSV   | 152  | 16    |
| >FGFR2-E21 $\epsilon$ QHWSLIMES'  | 418   | >FGFR2-E21 $\epsilon$ QHWSLIMKS'  | 381  | 37    |
| >FGFR2-E21 $\epsilon$ QHWSLIMES'  | 295   | >FGFR2-E21 $\epsilon$ QHWSLIMKS'  | 425  | 130   |
| >FGFR2-E21 $\epsilon$ NQHWSLIME   | 55    | >FGFR2-E21 $\epsilon$ NQHWSLIMK   | 70   | 15    |
| >FGFR2-E21 $\epsilon$ NQHWSLIME   | 11    | >FGFR2-E21 $\epsilon$ NQHWSLIMK   | 44   | 33    |
| >FGFR2-E21 $\epsilon$ NQHWSLIME   | 154   | >FGFR2-E21 $\epsilon$ NQHWSLIMK   | 415  | 261   |
| >FGFR2-E21 $\epsilon$ NQHWSLIME   | 25529 | >FGFR2-E21 $\epsilon$ NQHWSLIMK   | 65   | 25464 |
| >FGFR2-E21 $\epsilon$ RNQHWSLIM   | 28196 | >FGFR2-E21 $\epsilon$ RNQHWSLIM   | 494  | 27702 |
| >FGFR2-E21 $\epsilon$ RNQHWSLIM   | 15808 | >FGFR2-E21 $\epsilon$ RNQHWSLIM   | 191  | 15617 |
| >FGFR2-E47 $\epsilon$ EFPRDKLTL   | 1642  | >FGFR2-E47 $\epsilon$ KFPRDKLTL   | 461  | 1181  |
| >FGFR2-E47 $\epsilon$ EFPRDKLTL   | 470   | >FGFR2-E47 $\epsilon$ KFPRDKLTL   | 51   | 419   |
| >FGFR2-E47 $\epsilon$ EFPRDKLTLGI | 1049  | >FGFR2-E47 $\epsilon$ KFPRDKLTLGI | 121  | 928   |
| >FGFR2-E47 $\epsilon$ WEFPRDKLT   | 226   | >FGFR2-E47 $\epsilon$ WKFPRDKLT   | 9159 | 8933  |



|                        |       |                        |       |       |
|------------------------|-------|------------------------|-------|-------|
| >FGFR2-E475 WEFPRDKLTL | 61    | >FGFR2-E475 WKFPRDKLTL | 3861  | 3800  |
| >FGFR2-E475 WEFPRDKL   | 2390  | >FGFR2-E475 WKFPRDKL   | 52    | 2338  |
| >FGFR2-E475 WEFPRDKLTL | 584   | >FGFR2-E475 WKFPRDKLTL | 18    | 566   |
| >FGFR2-E475 WEFPRDKL   | 110   | >FGFR2-E475 WKFPRDKL   | 18778 | 18668 |
| >FGFR2-E475 WEFPRDKLTL | 449   | >FGFR2-E475 WKFPRDKLTL | 154   | 295   |
| >FGFR2-E475 WEFPRDKL   | 24    | >FGFR2-E475 WKFPRDKL   | 14222 | 14198 |
| >FGFR2-E475 WEFPRDKLTL | 200   | >FGFR2-E475 WKFPRDKLTL | 16311 | 16111 |
| >FGFR2-E475 WEFPRDKL   | 135   | >FGFR2-E475 WKFPRDKL   | 20004 | 19869 |
| >FGFR2-E475 WEFPRDKLT  | 492   | >FGFR2-E475 WKFPRDKLT  | 33274 | 32782 |
| >FGFR2-E475 WEFPRDKLTL | 200   | >FGFR2-E475 WKFPRDKLTL | 25438 | 25238 |
| >FGFR2-E475 WEFPRDKLT  | 388   | >FGFR2-E475 WKFPRDKLT  | 29738 | 29350 |
| >FGFR2-E475 WEFPRDKLTL | 194   | >FGFR2-E475 WKFPRDKLTL | 17808 | 17614 |
| >FGFR2-E475 KWEFPRDK   | 3907  | >FGFR2-E475 KWKFPRDK   | 16    | 3891  |
| >FGFR2-E475 KWEFPRDKLT | 11019 | >FGFR2-E475 KWKFPRDKLT | 431   | 10588 |
| >FGFR2-E475 KWEFPRDK   | 200   | >FGFR2-E475 KWKFPRDK   | 136   | 64    |
| >FGFR2-E475 KWEFPRDK   | 373   | >FGFR2-E475 KWKFPRDK   | 495   | 122   |
| >FGFR2-E475 KWEFPRDKL  | 109   | >FGFR2-E475 KWKFPRDKL  | 149   | 40    |
| >FGFR2-E475 KWEFPRDKLT | 108   | >FGFR2-E475 KWKFPRDKLT | 151   | 43    |
| >FGFR2-E475 DPKWEFPR   | 62    | >FGFR2-E475 DPKWKFPR   | 42    | 20    |
| >FGFR2-E475 DPKWEFPR   | 469   | >FGFR2-E475 DPKWKFPR   | 697   | 228   |
| >FGFR2-E475 DPKWEFPRD  | 2824  | >FGFR2-E475 DPKWKFPRD  | 462   | 2362  |
| >FGFR2-E475 DPKWEFPR   | 431   | >FGFR2-E475 DPKWKFPR   | 386   | 45    |
| >FGFR2-E475 EDPKWEFPR  | 210   | >FGFR2-E475 EDPKWKFPR  | 116   | 94    |
| >FGFR2-E475 LPEDPKWEF  | 53    | >FGFR2-E475 LPEDPKWKF  | 241   | 188   |
| >FGFR2-E475 LPEDPKWEF  | 29    | >FGFR2-E475 LPEDPKWKF  | 41    | 12    |
| >FGFR2-E475 LPEDPKWEF  | 52    | >FGFR2-E475 LPEDPKWKF  | 104   | 52    |
| >FGFR2-E475 LPEDPKWEFF | 527   | >FGFR2-E475 LPEDPKWKFF | 339   | 188   |
| >FGFR2-E475 YELPEDPKWE | 214   | >FGFR2-E475 YELPEDPKWk | 394   | 180   |
| >FGFR2-E475 YELPEDPKWE | 79    | >FGFR2-E475 YELPEDPKWk | 148   | 69    |
| >FGFR2-E475 YELPEDPKWE | 9     | >FGFR2-E475 YELPEDPKWk | 11    | 2     |
| >FGFR2-E475 YELPEDPKWE | 486   | >FGFR2-E475 YELPEDPKWk | 650   | 164   |
| >FGFR2-E475 YELPEDPKWE | 253   | >FGFR2-E475 YELPEDPKWk | 585   | 332   |
| >FGFR2-E475 YELPEDPKWE | 397   | >FGFR2-E475 YELPEDPKWk | 945   | 548   |
| >FGFR2-E475 YELPEDPKWE | 157   | >FGFR2-E475 YELPEDPKWk | 222   | 65    |
| >FGFR2-E475 YELPEDPKWE | 294   | >FGFR2-E475 YELPEDPKWk | 188   | 106   |
| >FGFR2-E574 EYLRARRPPG | 1703  | >FGFR2-E574 KYLRARRPPG | 204   | 1499  |
| >FGFR2-E574 EYLRARRPPG | 435   | >FGFR2-E574 KYLRARRPPG | 13612 | 13177 |
| >FGFR2-E574 EYLRARRPP  | 13566 | >FGFR2-E574 KYLRARRPP  | 54    | 13512 |
| >FGFR2-E574 EYLRARRPPG | 8916  | >FGFR2-E574 KYLRARRPPG | 13    | 8903  |
| >FGFR2-E574 EYLRARRPPG | 10525 | >FGFR2-E574 KYLRARRPPG | 21    | 10504 |
| >FGFR2-E574 EYLRARRPP  | 3188  | >FGFR2-E574 KYLRARRPP  | 376   | 2812  |
| >FGFR2-E574 EYLRARRPPG | 1655  | >FGFR2-E574 KYLRARRPPG | 160   | 1495  |
| >FGFR2-E574 REYLRARR   | 143   | >FGFR2-E574 RKYLRARR   | 284   | 141   |

|                        |       |                           |       |       |
|------------------------|-------|---------------------------|-------|-------|
| >FGFR2-E574REYLRARR    | 6983  | >FGFR2-E574RKYLRRARR      | 299   | 6684  |
| >FGFR2-E574REYLRARRPP  | 206   | >FGFR2-E574RKYLRRARRPP    | 27445 | 27239 |
| >FGFR2-E574REYLRARRPP  | 498   | >FGFR2-E574RKYLRRARRPP    | 18264 | 17766 |
| >FGFR2-E574REYLRARRPP  | 239   | >FGFR2-E574RKYLRRARRPP    | 27421 | 27182 |
| >FGFR2-E574REYLRARR    | 96    | >FGFR2-E574RKYLRRARR      | 118   | 22    |
| >FGFR2-E574LREYLRAR    | 2090  | >FGFR2-E574LRKYLRRARR     | 336   | 1754  |
| >FGFR2-E574LREYLRARR   | 1361  | >FGFR2-E574LRKYLRRARR     | 205   | 1156  |
| >FGFR2-E574NLREYLRA    | 56    | >FGFR2-E574NLRKYLRA       | 212   | 156   |
| >FGFR2-E574NLREYLRA    | 132   | >FGFR2-E574NLRKYLRA       | 741   | 609   |
| >FGFR2-E574NLREYLRRAR  | 232   | >FGFR2-E574NLRKYLRRARR    | 124   | 108   |
| >FGFR2-E574NLREYLRRARR | 31    | >FGFR2-E574NLRKYLRRARR    | 15    | 16    |
| >FGFR2-E574NLREYLRRAR  | 44    | >FGFR2-E574NLRKYLRRARR    | 86    | 42    |
| >FGFR2-E574NLREYLRRARR | 424   | >FGFR2-E574NLRKYLRRARR    | 538   | 114   |
| >FGFR2-E574NLREYLRA    | 1633  | >FGFR2-E574NLRKYLRA       | 341   | 1292  |
| >FGFR2-E574GNLREYLR    | 895   | >FGFR2-E574GNLRKYLRRARR   | 107   | 788   |
| >FGFR2-E574GNLREYLRAR  | 984   | >FGFR2-E574GNLRKYLRRARR   | 255   | 729   |
| >FGFR2-E574KGNLREYLR   | 13    | >FGFR2-E574KGNLRKYLRRARR  | 7     | 6     |
| >FGFR2-E574KGNLREYLRAR | 32    | >FGFR2-E574KGNLRKYLRRARR  | 19    | 13    |
| >FGFR2-E574KGNLREYLR   | 37    | >FGFR2-E574KGNLRKYLRRARR  | 33    | 4     |
| >FGFR2-E574KGNLREYLRAR | 319   | >FGFR2-E574KGNLRKYLRRARR  | 244   | 75    |
| >FGFR2-E574SKGNLREYLR  | 511   | >FGFR2-E574SKGNLRKYLRRARR | 189   | 322   |
| >FGFR2-E574SKGNLREY    | 188   | >FGFR2-E574SKGNLRKYLRRARR | 323   | 135   |
| >FGFR2-E574SKGNLREYLR  | 354   | >FGFR2-E574SKGNLRKYLRRARR | 226   | 128   |
| >FGFR2-E574ASKGNLRE    | 26028 | >FGFR2-E574ASKGNLRRARR    | 205   | 25823 |
| >FGFR2-E574ASKGNLREY   | 48    | >FGFR2-E574ASKGNLRRARR    | 59    | 11    |
| >FGFR2-E574ASKGNLRE    | 3687  | >FGFR2-E574ASKGNLRRARR    | 6     | 3681  |
| >FGFR2-E574ASKGNLREY   | 409   | >FGFR2-E574ASKGNLRRARR    | 627   | 218   |
| >FGFR2-E574ASKGNLREYL  | 192   | >FGFR2-E574ASKGNLRRARR    | 56    | 136   |
| >FGFR2-E574ASKGNLREYL  | 483   | >FGFR2-E574ASKGNLRRARR    | 332   | 151   |
| >FGFR2-E574ASKGNLREY   | 167   | >FGFR2-E574ASKGNLRRARR    | 143   | 24    |
| >FGFR2-E574ASKGNLREYL  | 22    | >FGFR2-E574ASKGNLRRARR    | 18    | 4     |
| >FGFR2-E574ASKGNLREY   | 319   | >FGFR2-E574ASKGNLRRARR    | 1792  | 1473  |
| >FGFR2-E574ASKGNLREY   | 11    | >FGFR2-E574ASKGNLRRARR    | 9     | 2     |
| >FGFR2-E574ASKGNLREYL  | 238   | >FGFR2-E574ASKGNLRRARR    | 102   | 136   |
| >FGFR2-E574ASKGNLREY   | 557   | >FGFR2-E574ASKGNLRRARR    | 382   | 175   |
| >FGFR2-E574ASKGNLRE    | 9050  | >FGFR2-E574ASKGNLRRARR    | 326   | 8724  |
| >FGFR2-E574ASKGNLREYL  | 538   | >FGFR2-E574ASKGNLRRARR    | 465   | 73    |
| >FGFR2-E574YASKGNLREY  | 144   | >FGFR2-E574YASKGNLRRARR   | 1006  | 862   |
| >FGFR2-E574YASKGNLREY  | 451   | >FGFR2-E574YASKGNLRRARR   | 2218  | 1767  |
| >FGFR2-E574YASKGNLRE   | 27069 | >FGFR2-E574YASKGNLRRARR   | 410   | 26659 |
| >FGFR2-E574YASKGNLREY  | 1298  | >FGFR2-E574YASKGNLRRARR   | 476   | 822   |
| >FGFR2-E574YASKGNLREY  | 266   | >FGFR2-E574YASKGNLRRARR   | 244   | 22    |
| >FGFR2-E574YASKGNLRE   | 16617 | >FGFR2-E574YASKGNLRRARR   | 124   | 16493 |

|                       |       |                       |       |       |
|-----------------------|-------|-----------------------|-------|-------|
| >FGFR2-E574YASKGNLREY | 269   | >FGFR2-E574YASKGNLRKY | 2310  | 2041  |
| >FGFR2-E574YASKGNLREY | 373   | >FGFR2-E574YASKGNLRKY | 732   | 359   |
| >FGFR2-E574YASKGNLREY | 190   | >FGFR2-E574YASKGNLRKY | 672   | 482   |
| >FGFR2-E574YASKGNLREY | 430   | >FGFR2-E574YASKGNLRKY | 415   | 15    |
| >FGFR2-E574YASKGNLREY | 270   | >FGFR2-E574YASKGNLRKY | 550   | 280   |
| >FGFR2-E574YASKGNLREY | 15    | >FGFR2-E574YASKGNLRKY | 13    | 2     |
| >FGFR2-E574YASKGNLREY | 543   | >FGFR2-E574YASKGNLRKY | 251   | 292   |
| >FGFR2-E574YASKGNLREY | 316   | >FGFR2-E574YASKGNLRKY | 3188  | 2872  |
| >FGFR2-E574YASKGNLREY | 576   | >FGFR2-E574YASKGNLRKY | 382   | 194   |
| >FGFR2-E574YASKGNLREY | 397   | >FGFR2-E574YASKGNLRKY | 541   | 144   |
| >FGFR2-E574YASKGNLREY | 202   | >FGFR2-E574YASKGNLRKY | 630   | 428   |
| >FGFR2-E574EYASKGNLRE | 515   | >FGFR2-E574EYASKGNLRK | 252   | 263   |
| >FGFR2-E574EYASKGNLRE | 53    | >FGFR2-E574EYASKGNLRK | 63    | 10    |
| >FGFR2-E574EYASKGNLRE | 359   | >FGFR2-E574EYASKGNLRK | 367   | 8     |
| >FGFR2-E574EYASKGNLRE | 451   | >FGFR2-E574EYASKGNLRK | 422   | 29    |
| >FGFR2-E574EYASKGNLRE | 641   | >FGFR2-E574EYASKGNLRK | 327   | 314   |
| >FGFR2-E63€TENNVMKI   | 133   | >FGFR2-E63€TKNNVMKI   | 19463 | 19330 |
| >FGFR2-E63€TENNVMKIAI | 957   | >FGFR2-E63€TKNNVMKIAI | 33    | 924   |
| >FGFR2-E63€TENNVMKIAI | 283   | >FGFR2-E63€TKNNVMKIAI | 17227 | 16944 |
| >FGFR2-E63€TENNVMKI   | 405   | >FGFR2-E63€TKNNVMKI   | 23239 | 22834 |
| >FGFR2-E63€TENNVMKI   | 373   | >FGFR2-E63€TKNNVMKI   | 28034 | 27661 |
| >FGFR2-E63€TENNVMKIA  | 266   | >FGFR2-E63€TKNNVMKIA  | 30903 | 30637 |
| >FGFR2-E63€TENNVMKIAI | 155   | >FGFR2-E63€TKNNVMKIAI | 11888 | 11733 |
| >FGFR2-E63€TENNVMKIAI | 130   | >FGFR2-E63€TKNNVMKIAI | 15479 | 15349 |
| >FGFR2-E63€TENNVMKIA  | 90    | >FGFR2-E63€TKNNVMKIA  | 23634 | 23544 |
| >FGFR2-E63€TENNVMKI   | 315   | >FGFR2-E63€TKNNVMKI   | 9680  | 9365  |
| >FGFR2-E63€DLAARNVLVT | 12754 | >FGFR2-E63€DLAARNVLVT | 449   | 12305 |
| >FGFR2-E63€DLAARNVLVT | 8775  | >FGFR2-E63€DLAARNVLVT | 44    | 8731  |
| >FGFR2-E63€VTENNVMK   | 1896  | >FGFR2-E63€VTKNNVMK   | 311   | 1585  |
| >FGFR2-E63€VTENNVMK   | 61    | >FGFR2-E63€VTKNNVMK   | 57    | 4     |
| >FGFR2-E63€VTENNVMK   | 2171  | >FGFR2-E63€VTKNNVMK   | 12    | 2159  |
| >FGFR2-E63€VTENNVMKI  | 8221  | >FGFR2-E63€VTKNNVMKI  | 85    | 8136  |
| >FGFR2-E63€VTENNVMKI/ | 10421 | >FGFR2-E63€VTKNNVMKI/ | 266   | 10155 |
| >FGFR2-E63€VTENNVMK   | 4934  | >FGFR2-E63€VTKNNVMK   | 425   | 4509  |
| >FGFR2-E63€VTENNVMK   | 254   | >FGFR2-E63€VTKNNVMK   | 203   | 51    |
| >FGFR2-E63€VTENNVMKI  | 252   | >FGFR2-E63€VTKNNVMKI  | 109   | 143   |
| >FGFR2-E63€LVTENNVMK  | 491   | >FGFR2-E63€LVTKNNVMK  | 3520  | 3029  |
| >FGFR2-E63€LVTENNVMK  | 151   | >FGFR2-E63€LVTKNNVMK  | 1286  | 1135  |
| >FGFR2-E63€LVTENNVMK  | 146   | >FGFR2-E63€LVTKNNVMK  | 163   | 17    |
| >FGFR2-E63€LVTENNVMK  | 825   | >FGFR2-E63€LVTKNNVMK  | 348   | 477   |
| >FGFR2-E63€LVTENNVMK  | 33    | >FGFR2-E63€LVTKNNVMK  | 36    | 3     |
| >FGFR2-E63€LVTENNVM   | 157   | >FGFR2-E63€LVTKNNVM   | 686   | 529   |
| >FGFR2-E63€LVTENNVM   | 1366  | >FGFR2-E63€LVTKNNVM   | 149   | 1217  |

|                        |       |                        |      |       |
|------------------------|-------|------------------------|------|-------|
| >FGFR2-E63€LVTENNVMK   | 313   | >FGFR2-E63€LVTKNNVMK   | 614  | 301   |
| >FGFR2-E63€VLVTENNV    | 369   | >FGFR2-E63€VLVTKNNV    | 653  | 284   |
| >FGFR2-E63€VLVTENNV    | 25    | >FGFR2-E63€VLVTKNNV    | 46   | 21    |
| >FGFR2-E63€VLVTENNV    | 167   | >FGFR2-E63€VLVTKNNVM   | 284  | 117   |
| >FGFR2-E63€VLVTENNV    | 27    | >FGFR2-E63€VLVTKNNV    | 21   | 6     |
| >FGFR2-E63€VLVTENNV    | 59    | >FGFR2-E63€VLVTKNNVM   | 42   | 17    |
| >FGFR2-E63€VLVTENNV    | 236   | >FGFR2-E63€VLVTKNNV    | 430  | 194   |
| >FGFR2-E63€VLVTENNV    | 17    | >FGFR2-E63€VLVTKNNV    | 17   | 0     |
| >FGFR2-E63€VLVTENNV    | 77    | >FGFR2-E63€VLVTKNNVM   | 72   | 5     |
| >FGFR2-E63€VLVTENNV    | 18    | >FGFR2-E63€VLVTKNNV    | 24   | 6     |
| >FGFR2-E63€VLVTENNV    | 94    | >FGFR2-E63€VLVTKNNVM   | 104  | 10    |
| >FGFR2-E63€VLVTENNV    | 25    | >FGFR2-E63€VLVTKNNV    | 35   | 10    |
| >FGFR2-E63€VLVTENNV    | 340   | >FGFR2-E63€VLVTKNNVM   | 410  | 70    |
| >FGFR2-E63€VLVTENNV    | 70    | >FGFR2-E63€VLVTKNNV    | 90   | 20    |
| >FGFR2-E63€VLVTENNV    | 4     | >FGFR2-E63€VLVTKNNV    | 4    | 0     |
| >FGFR2-E63€VLVTENNV    | 29    | >FGFR2-E63€VLVTKNNVM   | 32   | 3     |
| >FGFR2-E63€VLVTENNV    | 174   | >FGFR2-E63€VLVTKNNVM   | 68   | 106   |
| >FGFR2-E63€VLVTENNV    | 234   | >FGFR2-E63€VLVTKNNVM   | 211  | 23    |
| >FGFR2-E63€NVLVTENNV   | 340   | >FGFR2-E63€NVLVTKNNV   | 330  | 10    |
| >FGFR2-E63€NVLVTENNV   | 64    | >FGFR2-E63€NVLVTKNNV   | 87   | 23    |
| >FGFR2-E63€NVLVTENNV   | 702   | >FGFR2-E63€NVLVTKNNV   | 369  | 333   |
| >FGFR2-E63€NVLVTENNV   | 97    | >FGFR2-E63€NVLVTKNNV   | 24   | 73    |
| >FGFR2-E63€ARNVLVTE    | 5074  | >FGFR2-E63€ARNVLVTK    | 51   | 5023  |
| >FGFR2-E63€ARNVLVTEN   | 767   | >FGFR2-E63€ARNVLVTKN   | 494  | 273   |
| >FGFR2-E63€ARNVLVTEN   | 727   | >FGFR2-E63€ARNVLVTKN   | 474  | 253   |
| >FGFR2-E63€AARNVLVTE   | 21853 | >FGFR2-E63€AARNVLVTK   | 324  | 21529 |
| >FGFR2-E63€AARNVLVTE   | 1744  | >FGFR2-E63€AARNVLVTK   | 5    | 1739  |
| >FGFR2-E63€AARNVLVTE   | 14730 | >FGFR2-E63€AARNVLVTK   | 350  | 14380 |
| >FGFR2-E63€LAARNVLVTE  | 26462 | >FGFR2-E63€LAARNVLVTK  | 382  | 26080 |
| >FGFR2-E63€LAARNVLVTE  | 32174 | >FGFR2-E63€LAARNVLVTK  | 76   | 32098 |
| >FGFR2-E63€LAARNVLVTE  | 26483 | >FGFR2-E63€LAARNVLVTK  | 78   | 26405 |
| >FGFR2-G22: GNYTCVVENI | 483   | >FGFR2-G22: ENYTCVVENE | 1780 | 1297  |
| >FGFR2-G22: GNYTCVVENI | 476   | >FGFR2-G22: ENYTCVVENE | 642  | 166   |
| >FGFR2-G22: GNYTCVVENI | 6262  | >FGFR2-G22: ENYTCVVENE | 485  | 5777  |
| >FGFR2-G22: GNYTCVVENI | 370   | >FGFR2-G22: ENYTCVVENE | 4459 | 4089  |
| >FGFR2-G22: KGNVTCVV   | 36049 | >FGFR2-G22: KENVTCVV   | 94   | 35955 |
| >FGFR2-G22: KGNVTCVV   | 24637 | >FGFR2-G22: KENVTCVV   | 187  | 24450 |
| >FGFR2-G22: KGNVTCVV   | 31503 | >FGFR2-G22: KENVTCVV   | 90   | 31413 |
| >FGFR2-G22: KGNVTCVV   | 35822 | >FGFR2-G22: KENVTCVV   | 150  | 35672 |
| >FGFR2-G22: SDKGNVTCV  | 358   | >FGFR2-G22: SDKENVTCV  | 173  | 185   |
| >FGFR2-G22: VPSDKGNY   | 139   | >FGFR2-G22: VPSDKENY   | 106  | 33    |
| >FGFR2-G22: VPSDKGNY   | 340   | >FGFR2-G22: VPSDKENY   | 149  | 191   |
| >FGFR2-G22: VPSDKGNY   | 338   | >FGFR2-G22: VPSDKENY   | 792  | 454   |

|                         |       |                         |      |       |
|-------------------------|-------|-------------------------|------|-------|
| >FGFR2-G22:VVP SDKGN Y  | 151   | >FGFR2-G22:VVP SDKEN Y  | 196  | 45    |
| >FGFR2-G22:VVP SDKGN Y  | 42    | >FGFR2-G22:VVP SDKEN Y  | 454  | 412   |
| >FGFR2-G22:SVVP SDKGN \ | 21    | >FGFR2-G22:SVVP SDKEN Y | 22   | 1     |
| >FGFR2-G22:SVVP SDKGN \ | 297   | >FGFR2-G22:SVVP SDKEN Y | 1126 | 829   |
| >FGFR2-G22:SVVP SDKGN \ | 62    | >FGFR2-G22:SVVP SDKEN Y | 72   | 10    |
| >FGFR2-G22:ESVVP SDKGN  | 9     | >FGFR2-G22:ESVVP SDKEN  | 8    | 1     |
| >FGFR2-G22:ESVVP SDKGN  | 104   | >FGFR2-G22:ESVVP SDKEN  | 170  | 66    |
| >FGFR2-G22:ESVVP SDKGN  | 66    | >FGFR2-G22:ESVVP SDKEN  | 70   | 4     |
| >FGFR2-G27:VGGDVEFVCI   | 25385 | >FGFR2-G27:VEGDVEFVCh   | 410  | 24975 |
| >FGFR2-G27:VGGDVEFV     | 340   | >FGFR2-G27:VEGDVEFV     | 503  | 163   |
| >FGFR2-G27:VGGDVEFVCI   | 247   | >FGFR2-G27:VEGDVEFVCh   | 370  | 123   |
| >FGFR2-G27:VGGDVEFV     | 300   | >FGFR2-G27:VEGDVEFV     | 568  | 268   |
| >FGFR2-G27:VGGDVEFVCI   | 250   | >FGFR2-G27:VEGDVEFVCh   | 457  | 207   |
| >FGFR2-G27:VGGDVEFVCI   | 496   | >FGFR2-G27:VEGDVEFVCh   | 817  | 321   |
| >FGFR2-G27:VGGDVEFVCI   | 26942 | >FGFR2-G27:VEGDVEFVCh   | 29   | 26913 |
| >FGFR2-G27:VVGGDVEFV    | 65    | >FGFR2-G27:VVEGDVEFV    | 144  | 79    |
| >FGFR2-G27:VVGGDVEFV    | 329   | >FGFR2-G27:VVEGDVEFV    | 1396 | 1067  |
| >FGFR2-G27:VVGGDVEFV    | 32    | >FGFR2-G27:VVEGDVEFV    | 45   | 13    |
| >FGFR2-G27:VVGGDVEFV    | 9     | >FGFR2-G27:VVEGDVEFV    | 57   | 48    |
| >FGFR2-G27:VVGGDVEFV    | 210   | >FGFR2-G27:VVEGDVEFV    | 1609 | 1399  |
| >FGFR2-G27:VVGGDVEFV    | 19    | >FGFR2-G27:VVEGDVEFV    | 264  | 245   |
| >FGFR2-G27:VVGGDVEFV    | 6     | >FGFR2-G27:VVEGDVEFV    | 153  | 147   |
| >FGFR2-G27:VVGGDVEFV    | 5     | >FGFR2-G27:VVEGDVEFV    | 11   | 6     |
| >FGFR2-G27:VVGGDVEFV\   | 129   | >FGFR2-G27:VVEGDVEFV\   | 282  | 153   |
| >FGFR2-G27:VVGGDVEFV    | 317   | >FGFR2-G27:VVEGDVEFV    | 589  | 272   |
| >FGFR2-G27:TVVGGDVEF\   | 591   | >FGFR2-G27:TVVEGDVEFV   | 469  | 122   |
| >FGFR2-G27:TVVGGDVEF\   | 192   | >FGFR2-G27:TVVEGDVEFV   | 185  | 7     |
| >FGFR2-G27:TVVGGDVEF\   | 175   | >FGFR2-G27:TVVEGDVEFV   | 198  | 23    |
| >FGFR2-G27:TVVGGDVEF    | 1683  | >FGFR2-G27:TVVEGDVEF    | 408  | 1275  |
| >FGFR2-G27:TVVGGDVEF\   | 187   | >FGFR2-G27:TVVEGDVEFV   | 179  | 8     |
| >FGFR2-G27:TVVGGDVEF\   | 111   | >FGFR2-G27:TVVEGDVEFV   | 40   | 71    |
| >FGFR2-G27:TVVGGDVEF\   | 1689  | >FGFR2-G27:TVVEGDVEFV   | 225  | 1464  |
| >FGFR2-G27:TVVGGDVEF\   | 87    | >FGFR2-G27:TVVEGDVEFV   | 38   | 49    |
| >FGFR2-G27:TVVGGDVEF\   | 428   | >FGFR2-G27:TVVEGDVEFV   | 222  | 206   |
| >FGFR2-G27:TVVGGDVEF\   | 14    | >FGFR2-G27:TVVEGDVEFV   | 16   | 2     |
| >FGFR2-G27:TVVGGDVEF    | 23    | >FGFR2-G27:TVVEGDVEF    | 28   | 5     |
| >FGFR2-G27:TVVGGDVEF\   | 107   | >FGFR2-G27:TVVEGDVEFV   | 138  | 31    |
| >FGFR2-G27:TVVGGDVEF\   | 73    | >FGFR2-G27:TVVEGDVEFV   | 50   | 23    |
| >FGFR2-G27:TVVGGDVEF\   | 126   | >FGFR2-G27:TVVEGDVEFV   | 23   | 103   |
| >FGFR2-G27:TVVGGDVEF    | 127   | >FGFR2-G27:TVVEGDVEF    | 76   | 51    |
| >FGFR2-G27:TVVGGDVEF    | 41    | >FGFR2-G27:TVVEGDVEF    | 31   | 10    |
| >FGFR2-G27:STVVGGDVEF   | 337   | >FGFR2-G27:STVVEGDVEF   | 257  | 80    |
| >FGFR2-G27:STVVGGDVEF   | 33    | >FGFR2-G27:STVVEGDVEF   | 67   | 34    |

|                       |       |                       |      |       |
|-----------------------|-------|-----------------------|------|-------|
| >FGFR2-G27:STVVGGDVEI | 123   | >FGFR2-G27:STVVEGDVEF | 215  | 92    |
| >FGFR2-G27:STVVGGDVEI | 79    | >FGFR2-G27:STVVEGDVEF | 184  | 105   |
| >FGFR2-G27:STVVGGDVEI | 59    | >FGFR2-G27:STVVEGDVEF | 73   | 14    |
| >FGFR2-G27:STVVGGDVEI | 233   | >FGFR2-G27:STVVEGDVEF | 281  | 48    |
| >FGFR2-G27:STVVGGDV   | 303   | >FGFR2-G27:STVVEGDV   | 645  | 342   |
| >FGFR2-G27:STVVGGDVEI | 27    | >FGFR2-G27:STVVEGDVEF | 52   | 25    |
| >FGFR2-G27:STVVGGDVEI | 82    | >FGFR2-G27:STVVEGDVEF | 171  | 89    |
| >FGFR2-G27:STVVGGDVEI | 332   | >FGFR2-G27:STVVEGDVEF | 692  | 360   |
| >FGFR2-G27:STVVGGDVEI | 558   | >FGFR2-G27:STVVEGDVEF | 452  | 106   |
| >FGFR2-G27:STVVGGDVEI | 5     | >FGFR2-G27:STVVEGDVEF | 7    | 2     |
| >FGFR2-G27:STVVGGDVEI | 40    | >FGFR2-G27:STVVEGDVEF | 48   | 8     |
| >FGFR2-G27:STVVGGDVEI | 350   | >FGFR2-G27:STVVEGDVEF | 1063 | 713   |
| >FGFR2-G27:ASTVVGGDVI | 340   | >FGFR2-G27:ASTVVEGDVE | 448  | 108   |
| >FGFR2-G27:ASTVVGGDVI | 13    | >FGFR2-G27:ASTVVEGDVE | 22   | 9     |
| >FGFR2-G27:ASTVVGGDVI | 590   | >FGFR2-G27:ASTVVEGDVE | 366  | 224   |
| >FGFR2-G27:ASTVVGGDVI | 328   | >FGFR2-G27:ASTVVEGDVE | 856  | 528   |
| >FGFR2-G27:NASTVVGGD  | 154   | >FGFR2-G27:NASTVVEGD  | 232  | 78    |
| >FGFR2-G27:LPANASTVVC | 595   | >FGFR2-G27:LPANASTVVE | 166  | 429   |
| >FGFR2-G27:LPANASTVVC | 521   | >FGFR2-G27:LPANASTVVE | 337  | 184   |
| >FGFR2-G27:GDVEFVCKV  | 43    | >FGFR2-G27:VDVEFVCKV  | 97   | 54    |
| >FGFR2-G27:GDVEFVCKV  | 129   | >FGFR2-G27:VDVEFVCKV  | 98   | 31    |
| >FGFR2-G27:GGDVEFVCK\ | 3055  | >FGFR2-G27:GVDVEFVCK\ | 121  | 2934  |
| >FGFR2-G27:GGDVEFVCK\ | 11532 | >FGFR2-G27:GVDVEFVCK\ | 201  | 11331 |
| >FGFR2-G27:GGDVEFVCK\ | 1370  | >FGFR2-G27:GVDVEFVCK\ | 41   | 1329  |
| >FGFR2-G27:GGDVEFVCK\ | 9304  | >FGFR2-G27:GVDVEFVCK\ | 54   | 9250  |
| >FGFR2-G27:GGDVEFVCK  | 2459  | >FGFR2-G27:GVDVEFVCK  | 65   | 2394  |
| >FGFR2-G27:GGDVEFVCK  | 885   | >FGFR2-G27:GVDVEFVCK  | 274  | 611   |
| >FGFR2-G27:LPANASTVVC | 29405 | >FGFR2-G27:LPANASTVVC | 213  | 29192 |
| >FGFR2-G27:LPANASTVVC | 16043 | >FGFR2-G27:LPANASTVVC | 397  | 15646 |
| >FGFR2-G27:LPANASTVVC | 13239 | >FGFR2-G27:LPANASTVVC | 124  | 13115 |
| >FGFR2-G27:LPANASTVVC | 595   | >FGFR2-G27:LPANASTVVC | 368  | 227   |
| >FGFR2-G27:LPANASTVVC | 12565 | >FGFR2-G27:LPANASTVVC | 225  | 12340 |
| >FGFR2-G27:LPANASTVVC | 521   | >FGFR2-G27:LPANASTVVC | 33   | 488   |
| >FGFR2-G27:VGGDVEFV   | 1974  | >FGFR2-G27:VGVDVEFV   | 155  | 1819  |
| >FGFR2-G27:VGGDVEFV   | 340   | >FGFR2-G27:VGVDVEFV   | 384  | 44    |
| >FGFR2-G27:VGGDVEFVCI | 247   | >FGFR2-G27:VGVDVEFVCI | 277  | 30    |
| >FGFR2-G27:VGGDVEFV   | 300   | >FGFR2-G27:VGVDVEFV   | 560  | 260   |
| >FGFR2-G27:VGGDVEFVCI | 250   | >FGFR2-G27:VGVDVEFVCI | 460  | 210   |
| >FGFR2-G27:VGGDVEFVCI | 496   | >FGFR2-G27:VGVDVEFVCI | 480  | 16    |
| >FGFR2-G27:VVGDDVEFV  | 65    | >FGFR2-G27:VVGDDVEFV  | 352  | 287   |
| >FGFR2-G27:VVGDDVEFV  | 329   | >FGFR2-G27:VVGDDVEFV  | 987  | 658   |
| >FGFR2-G27:VVGDDVEFV  | 32    | >FGFR2-G27:VVGDDVEFV  | 60   | 28    |
| >FGFR2-G27:VVGDDVEFV  | 9     | >FGFR2-G27:VVGDDVEFV  | 45   | 36    |

|                       |      |                        |      |      |
|-----------------------|------|------------------------|------|------|
| >FGFR2-G27;VVGGDVEFV  | 210  | >FGFR2-G27;VVGVDVEFV   | 292  | 82   |
| >FGFR2-G27;VVGGDVEFV  | 19   | >FGFR2-G27;VVGVDVEFV   | 41   | 22   |
| >FGFR2-G27;VVGGDVEFV  | 6    | >FGFR2-G27;VVGVDVEFV   | 11   | 5    |
| >FGFR2-G27;VVGGDVEFV  | 5    | >FGFR2-G27;VVGVDVEFV   | 35   | 30   |
| >FGFR2-G27;VVGGDVEFV  | 129  | >FGFR2-G27;VVGVDVEFV   | 161  | 32   |
| >FGFR2-G27;VVGGDVEFV  | 317  | >FGFR2-G27;VVGVDVEFV   | 784  | 467  |
| >FGFR2-G27;TVVGGDVEF\ | 192  | >FGFR2-G27;TVVGVDFEF\  | 362  | 170  |
| >FGFR2-G27;TVVGGDVEF\ | 175  | >FGFR2-G27;TVVGVDFEF\  | 222  | 47   |
| >FGFR2-G27;TVVGGDVEF\ | 187  | >FGFR2-G27;TVVGVDFEF\  | 142  | 45   |
| >FGFR2-G27;TVVGGDVEF\ | 111  | >FGFR2-G27;TVVGVDFEF\  | 76   | 35   |
| >FGFR2-G27;TVVGGDVEF\ | 87   | >FGFR2-G27;TVVGVDFEF\  | 83   | 4    |
| >FGFR2-G27;TVVGGDVEF\ | 428  | >FGFR2-G27;TVVGVDFEF\  | 680  | 252  |
| >FGFR2-G27;TVVGGDVEF\ | 14   | >FGFR2-G27;TVVGVDFEF\  | 42   | 28   |
| >FGFR2-G27;TVVGGDVEF  | 752  | >FGFR2-G27;TVVGVDFEF   | 309  | 443  |
| >FGFR2-G27;TVVGGDVEF  | 23   | >FGFR2-G27;TVVGVDFEF   | 53   | 30   |
| >FGFR2-G27;TVVGGDVEF\ | 107  | >FGFR2-G27;TVVGVDFEF\  | 235  | 128  |
| >FGFR2-G27;TVVGGDVEF  | 742  | >FGFR2-G27;TVVGVDFEF   | 196  | 546  |
| >FGFR2-G27;TVVGGDVEF\ | 73   | >FGFR2-G27;TVVGVDFEF\  | 78   | 5    |
| >FGFR2-G27;TVVGGDVEF\ | 126  | >FGFR2-G27;TVVGVDFEF\  | 129  | 3    |
| >FGFR2-G27;TVVGGDVEF  | 127  | >FGFR2-G27;TVVGVDFEF   | 1277 | 1150 |
| >FGFR2-G27;TVVGGDVEF  | 41   | >FGFR2-G27;TVVGVDFEF   | 58   | 17   |
| >FGFR2-G27;STVVGGDVEI | 337  | >FGFR2-G27;STVVGVDFEF  | 192  | 145  |
| >FGFR2-G27;STVVGGDVEI | 592  | >FGFR2-G27;STVVGVDFEF  | 329  | 263  |
| >FGFR2-G27;STVVGGDV   | 1862 | >FGFR2-G27;STVVGVDFEF  | 424  | 1438 |
| >FGFR2-G27;STVVGGDVEI | 33   | >FGFR2-G27;STVVGVDFEF  | 19   | 14   |
| >FGFR2-G27;STVVGGDVEI | 123  | >FGFR2-G27;STVVGVDFEF  | 76   | 47   |
| >FGFR2-G27;STVVGGDV   | 2048 | >FGFR2-G27;STVVGVDFEF  | 407  | 1641 |
| >FGFR2-G27;STVVGGDVEI | 79   | >FGFR2-G27;STVVGVDFEF  | 49   | 30   |
| >FGFR2-G27;STVVGGDVEI | 59   | >FGFR2-G27;STVVGVDFEF  | 31   | 28   |
| >FGFR2-G27;STVVGGDVEI | 233  | >FGFR2-G27;STVVGVDFEF  | 90   | 143  |
| >FGFR2-G27;STVVGGDVEI | 944  | >FGFR2-G27;STVVGVDFEF  | 246  | 698  |
| >FGFR2-G27;STVVGGDV   | 303  | >FGFR2-G27;STVVGVDFEF  | 99   | 204  |
| >FGFR2-G27;STVVGGDVEI | 27   | >FGFR2-G27;STVVGVDFEF  | 16   | 11   |
| >FGFR2-G27;STVVGGDV   | 849  | >FGFR2-G27;STVVGVDFEF  | 417  | 432  |
| >FGFR2-G27;STVVGGDVEI | 82   | >FGFR2-G27;STVVGVDFEF  | 52   | 30   |
| >FGFR2-G27;STVVGGDVEI | 332  | >FGFR2-G27;STVVGVDFEF  | 404  | 72   |
| >FGFR2-G27;STVVGGDVEI | 5    | >FGFR2-G27;STVVGVDFEF  | 5    | 0    |
| >FGFR2-G27;STVVGGDVEI | 1766 | >FGFR2-G27;STVVGVDFEF  | 311  | 1455 |
| >FGFR2-G27;STVVGGDVEI | 40   | >FGFR2-G27;STVVGVDFEF  | 43   | 3    |
| >FGFR2-G27;STVVGGDVEI | 350  | >FGFR2-G27;STVVGVDFEF  | 628  | 278  |
| >FGFR2-G27;ASTVVGGDVI | 340  | >FGFR2-G27;ASTVVGVDFEF | 168  | 172  |
| >FGFR2-G27;ASTVVGGDVI | 13   | >FGFR2-G27;ASTVVGVDFEF | 13   | 0    |
| >FGFR2-G27;ASTVVGGDVI | 590  | >FGFR2-G27;ASTVVGVDFEF | 259  | 331  |

|                       |       |                        |      |       |
|-----------------------|-------|------------------------|------|-------|
| >FGFR2-G27:ASTVVGGDVI | 328   | >FGFR2-G27:ASTVVGGDVI  | 479  | 151   |
| >FGFR2-G27:NASTVVGG   | 19956 | >FGFR2-G27:NASTVVGV    | 313  | 19643 |
| >FGFR2-G27:NASTVVGG   | 5118  | >FGFR2-G27:NASTVVGV    | 15   | 5103  |
| >FGFR2-G27:NASTVVGGD  | 154   | >FGFR2-G27:NASTVVGVD'  | 203  | 49    |
| >FGFR2-G27:NASTVVGG   | 18536 | >FGFR2-G27:NASTVVGV    | 127  | 18409 |
| >FGFR2-G30:GLPYLKVL   | 449   | >FGFR2-G30:RLPYLKVL    | 515  | 66    |
| >FGFR2-G30:GLPYLKVLKA | 675   | >FGFR2-G30:RLPYLKVLKA  | 427  | 248   |
| >FGFR2-G30:GLPYLKVLKA | 351   | >FGFR2-G30:RLPYLKVLKA/ | 241  | 110   |
| >FGFR2-G30:GLPYLKVL   | 605   | >FGFR2-G30:RLPYLKVL    | 340  | 265   |
| >FGFR2-G30:GLPYLKVL   | 154   | >FGFR2-G30:RLPYLKVL    | 209  | 55    |
| >FGFR2-G30:GLPYLKVLKA | 471   | >FGFR2-G30:RLPYLKVLKA  | 669  | 198   |
| >FGFR2-G30:GLPYLKVLK  | 403   | >FGFR2-G30:RLPYLKVLK   | 80   | 323   |
| >FGFR2-G30:GLPYLKVLK  | 538   | >FGFR2-G30:RLPYLKVLK   | 329  | 209   |
| >FGFR2-G30:GLPYLKVLK  | 3143  | >FGFR2-G30:RLPYLKVLK   | 220  | 2923  |
| >FGFR2-G30:GLPYLKVL   | 5138  | >FGFR2-G30:RLPYLKVL    | 212  | 4926  |
| >FGFR2-G30:GLPYLKVLK  | 11501 | >FGFR2-G30:RLPYLKVLK   | 490  | 11011 |
| >FGFR2-G30:DGLPYLKVL  | 33154 | >FGFR2-G30:DRLPYLKVL   | 126  | 33028 |
| >FGFR2-G30:PDGLPYLKV  | 699   | >FGFR2-G30:PDRLPYLKV   | 348  | 351   |
| >FGFR2-G30:GPDGLPYL   | 121   | >FGFR2-G30:GPDRLPYL    | 170  | 49    |
| >FGFR2-G30:YGPDGLPY   | 4047  | >FGFR2-G30:YGPDRLPY    | 457  | 3590  |
| >FGFR2-G30:YGPDGLPYL  | 753   | >FGFR2-G30:YGPDRLPYL   | 39   | 714   |
| >FGFR2-G30:YGPDGLPYL  | 39    | >FGFR2-G30:YGPDRLPYL   | 72   | 33    |
| >FGFR2-G30:YGPDGLPYLK | 342   | >FGFR2-G30:YGPDRLPYLK' | 482  | 140   |
| >FGFR2-G30:YGPDGLPYL  | 130   | >FGFR2-G30:YGPDRLPYL   | 370  | 240   |
| >FGFR2-G30:YGPDGLPYLK | 221   | >FGFR2-G30:YGPDRLPYLK' | 419  | 198   |
| >FGFR2-G30:YGPDGLPYL  | 170   | >FGFR2-G30:YGPDRLPYL   | 1110 | 940   |
| >FGFR2-G30:YGPDGLPYLK | 323   | >FGFR2-G30:YGPDRLPYLK' | 751  | 428   |
| >FGFR2-G30:YGPDGLPYL  | 117   | >FGFR2-G30:YGPDRLPYL   | 322  | 205   |
| >FGFR2-G30:YGPDGLPYLK | 74    | >FGFR2-G30:YGPDRLPYLK' | 144  | 70    |
| >FGFR2-G30:YGPDGLPY   | 99    | >FGFR2-G30:YGPDRLPY    | 289  | 190   |
| >FGFR2-G30:YGPDGLPY   | 242   | >FGFR2-G30:YGPDRLPY    | 519  | 277   |
| >FGFR2-G30:YGPDGLPY   | 289   | >FGFR2-G30:YGPDRLPY    | 1490 | 1201  |
| >FGFR2-G30:YGPDGLPY   | 120   | >FGFR2-G30:YGPDRLPY    | 414  | 294   |
| >FGFR2-G30:YGPDGLPYL  | 6     | >FGFR2-G30:YGPDRLPYL   | 7    | 1     |
| >FGFR2-G30:YGPDGLPYLK | 118   | >FGFR2-G30:YGPDRLPYLK' | 131  | 13    |
| >FGFR2-G30:KYGPDGLPYL | 576   | >FGFR2-G30:KYGPDRLPYL  | 465  | 111   |
| >FGFR2-G30:KYGPDGLPYL | 506   | >FGFR2-G30:KYGPDRLPYL  | 312  | 194   |
| >FGFR2-G30:KYGPDGLPYL | 13    | >FGFR2-G30:KYGPDRLPYL  | 14   | 1     |
| >FGFR2-G30:KYGPDGLPY  | 23    | >FGFR2-G30:KYGPDRLPY   | 30   | 7     |
| >FGFR2-G30:KYGPDGLPYL | 1105  | >FGFR2-G30:KYGPDRLPYL  | 445  | 660   |
| >FGFR2-G30:KYGPDGLPYL | 112   | >FGFR2-G30:KYGPDRLPYL  | 43   | 69    |
| >FGFR2-G30:KYGPDGLPY  | 240   | >FGFR2-G30:KYGPDRLPY   | 93   | 147   |
| >FGFR2-G30:KYGPDGLPYL | 293   | >FGFR2-G30:KYGPDRLPYL  | 107  | 186   |



|                        |       |                         |     |       |
|------------------------|-------|-------------------------|-----|-------|
| >FGFR2-G30! KYGPDGLPY  | 10    | >FGFR2-G30! KYGPDRLPY   | 30  | 20    |
| >FGFR2-G30! KYGPDGLPY  | 367   | >FGFR2-G30! KYGPDRLPY   | 256 | 111   |
| >FGFR2-G30! KYGPDGLPYL | 25    | >FGFR2-G30! KYGPDRLPYL  | 20  | 5     |
| >FGFR2-G30! KYGPDGLPYL | 297   | >FGFR2-G30! KYGPDRLPYL  | 189 | 108   |
| >FGFR2-G30! KYGPDGLPYL | 44    | >FGFR2-G30! KYGPDRLPYL  | 39  | 5     |
| >FGFR2-G30! SKYGPDGLPY | 390   | >FGFR2-G30! SKYGPDRLPY  | 587 | 197   |
| >FGFR2-G30! SKYGPDGLPY | 349   | >FGFR2-G30! SKYGPDRLPY  | 451 | 102   |
| >FGFR2-G30! SKYGPDGLPY | 296   | >FGFR2-G30! SKYGPDRLPY  | 519 | 223   |
| >FGFR2-G30! SKYGPDGLPY | 56    | >FGFR2-G30! SKYGPDRLPY  | 162 | 106   |
| >FGFR2-G30! SKYGPDGLPY | 15    | >FGFR2-G30! SKYGPDRLPY  | 10  | 5     |
| >FGFR2-G30! SKYGPDGLPY | 298   | >FGFR2-G30! SKYGPDRLPY  | 204 | 94    |
| >FGFR2-G30! GSKYGPDGLF | 129   | >FGFR2-G30! GSKYGPDRLP  | 166 | 37    |
| >FGFR2-G30! GSKYGPDGLF | 180   | >FGFR2-G30! GSKYGPDRLP  | 133 | 47    |
| >FGFR2-G30! GSKYGPDG   | 23512 | >FGFR2-G30! GSKYGPDR    | 441 | 23071 |
| >FGFR2-G30! GSKYGPDGLF | 92    | >FGFR2-G30! GSKYGPDRLP  | 116 | 24    |
| >FGFR2-G30! GSKYGPDGLF | 355   | >FGFR2-G30! GSKYGPDRLP  | 482 | 127   |
| >FGFR2-G30! GSKYGPDGLF | 26    | >FGFR2-G30! GSKYGPDRLP  | 37  | 11    |
| >FGFR2-G30! GSKYGPDGL  | 1459  | >FGFR2-G30! GSKYGPDR    | 258 | 1201  |
| >FGFR2-G30! GSKYGPDGLF | 118   | >FGFR2-G30! GSKYGPDRLP  | 140 | 22    |
| >FGFR2-G30! KNGSKYGPDI | 35539 | >FGFR2-G30! KNGSKYGPDI  | 385 | 35154 |
| >FGFR2-G70: GSPYPGIPV  | 1227  | >FGFR2-G70: SSPYPGIPV   | 30  | 1197  |
| >FGFR2-G70: GSPYPGIPV  | 20    | >FGFR2-G70: SSPYPGIPV   | 8   | 12    |
| >FGFR2-G70: GSPYPGIPVE | 704   | >FGFR2-G70: SSPYPGIPVE  | 170 | 534   |
| >FGFR2-G70: GGSPYPGIPV | 12781 | >FGFR2-G70: GSSPYPGIPV  | 353 | 12428 |
| >FGFR2-G70: GGSPYPGI   | 15756 | >FGFR2-G70: GSSPYPGI    | 177 | 15579 |
| >FGFR2-G70: GGSPYPGI   | 815   | >FGFR2-G70: GSSPYPGI    | 39  | 776   |
| >FGFR2-G70: VLMWEIFTLC | 2215  | >FGFR2-G70: VLMWEIFTLC  | 232 | 1983  |
| >FGFR2-G70: VLMWEIFTLC | 518   | >FGFR2-G70: VLMWEIFTLC  | 262 | 256   |
| >FGFR2-G70: VLMWEIFTLC | 1619  | >FGFR2-G70: VLMWEIFTLC  | 465 | 1154  |
| >FGFR2-G70: VLMWEIFTLC | 131   | >FGFR2-G70: VLMWEIFTLC  | 55  | 76    |
| >FGFR2-G70: VLMWEIFTLC | 2645  | >FGFR2-G70: VLMWEIFTLC  | 422 | 2223  |
| >FGFR2-G70: VLMWEIFTLC | 389   | >FGFR2-G70: VLMWEIFTLC  | 76  | 313   |
| >FGFR2-G70: LGSPYPGI   | 319   | >FGFR2-G70: LGSSPYPGI   | 198 | 121   |
| >FGFR2-G70: TLGGSPYPGI | 302   | >FGFR2-G70: TLGSSPYPGI  | 393 | 91    |
| >FGFR2-G70: TLGGSPYPGI | 118   | >FGFR2-G70: TLGSSPYPGI  | 73  | 45    |
| >FGFR2-G70: TLGGSPYPGI | 110   | >FGFR2-G70: TLGSSPYPGI  | 96  | 14    |
| >FGFR2-G70: TLGGSPYPGI | 11    | >FGFR2-G70: TLGSSPYPGI  | 16  | 5     |
| >FGFR2-G70: TLGGSPYPGI | 88    | >FGFR2-G70: TLGSSPYPGI  | 71  | 17    |
| >FGFR2-G70: TLGGSPYPGI | 40    | >FGFR2-G70: TLGSSPYPGI  | 58  | 18    |
| >FGFR2-G70: TLGGSPYPGI | 39    | >FGFR2-G70: TLGSSPYPGI  | 48  | 9     |
| >FGFR2-G70: TLGGSPYPGI | 14    | >FGFR2-G70: TLGSSPYPGI  | 39  | 25    |
| >FGFR2-G70: TLGGSPYPGI | 329   | >FGFR2-G70: TLGSSPYPGI  | 227 | 102   |
| >FGFR2-G70: FTLGGSPYPG | 41    | >FGFR2-G70: FTLGSSPYPGI | 48  | 7     |

|                       |     |                        |     |     |
|-----------------------|-----|------------------------|-----|-----|
| >FGFR2-G70:FTLGGSPYPG | 728 | >FGFR2-G70:FTLGSSPYPGI | 492 | 236 |
| >FGFR2-G70:FTLGGSPYP  | 269 | >FGFR2-G70:FTLGSSPYP   | 479 | 210 |
| >FGFR2-G70:FTLGGSPYPG | 373 | >FGFR2-G70:FTLGSSPYPG  | 274 | 99  |
| >FGFR2-G70:FTLGGSPYPG | 7   | >FGFR2-G70:FTLGSSPYPGI | 8   | 1   |
| >FGFR2-G70:FTLGGSPYPG | 6   | >FGFR2-G70:FTLGSSPYPGI | 8   | 2   |
| >FGFR2-G70:FTLGGSPYPG | 138 | >FGFR2-G70:FTLGSSPYPGI | 140 | 2   |
| >FGFR2-G70:FTLGGSPYPG | 20  | >FGFR2-G70:FTLGSSPYPGI | 27  | 7   |
| >FGFR2-G70:FTLGGSPYPG | 72  | >FGFR2-G70:FTLGSSPYPGI | 135 | 63  |
| >FGFR2-G70:FTLGGSPYPG | 86  | >FGFR2-G70:FTLGSSPYPGI | 141 | 55  |
| >FGFR2-G70:FTLGGSPY   | 434 | >FGFR2-G70:FTLGSSPY    | 259 | 175 |
| >FGFR2-G70:FTLGGSPY   | 48  | >FGFR2-G70:FTLGSSPY    | 40  | 8   |
| >FGFR2-G70:FTLGGSPY   | 22  | >FGFR2-G70:FTLGSSPY    | 22  | 0   |
| >FGFR2-G70:FTLGGSPY   | 37  | >FGFR2-G70:FTLGSSPY    | 48  | 11  |
| >FGFR2-G70:FTLGGSPY   | 9   | >FGFR2-G70:FTLGSSPY    | 12  | 3   |
| >FGFR2-G70:FTLGGSPY   | 231 | >FGFR2-G70:FTLGSSPY    | 313 | 82  |
| >FGFR2-G70:FTLGGSPYPG | 291 | >FGFR2-G70:FTLGSSPYPGI | 252 | 39  |
| >FGFR2-G70:FTLGGSPYPG | 4   | >FGFR2-G70:FTLGSSPYPGI | 4   | 0   |
| >FGFR2-G70:FTLGGSPY   | 63  | >FGFR2-G70:FTLGSSPY    | 50  | 13  |
| >FGFR2-G70:FTLGGSPY   | 26  | >FGFR2-G70:FTLGSSPY    | 34  | 8   |
| >FGFR2-G70:FTLGGSPY   | 97  | >FGFR2-G70:FTLGSSPY    | 35  | 62  |
| >FGFR2-G70:FTLGGSPY   | 4   | >FGFR2-G70:FTLGSSPY    | 3   | 1   |
| >FGFR2-G70:FTLGGSPYPG | 22  | >FGFR2-G70:FTLGSSPYPGI | 17  | 5   |
| >FGFR2-G70:FTLGGSPY   | 36  | >FGFR2-G70:FTLGSSPY    | 27  | 9   |
| >FGFR2-G70:FTLGGSPY   | 180 | >FGFR2-G70:FTLGSSPY    | 164 | 16  |
| >FGFR2-G70:FTLGGSPYPG | 465 | >FGFR2-G70:FTLGSSPYPGI | 554 | 89  |
| >FGFR2-G70:FTLGGSPYPG | 19  | >FGFR2-G70:FTLGSSPYPGI | 20  | 1   |
| >FGFR2-G70:IFTLGGSPY  | 18  | >FGFR2-G70:IFTLGGSPY   | 18  | 0   |
| >FGFR2-G70:IFTLGGSPY  | 315 | >FGFR2-G70:IFTLGGSPY   | 239 | 76  |
| >FGFR2-G70:IFTLGGSPY  | 38  | >FGFR2-G70:IFTLGGSPY   | 50  | 12  |
| >FGFR2-G70:IFTLGGSPY  | 236 | >FGFR2-G70:IFTLGGSPY   | 87  | 149 |
| >FGFR2-G70:IFTLGGSPY  | 166 | >FGFR2-G70:IFTLGGSPY   | 170 | 4   |
| >FGFR2-G70:EIFTLGGSPY | 144 | >FGFR2-G70:EIFTLGGSPY  | 197 | 53  |
| >FGFR2-G70:EIFTLGGSPY | 88  | >FGFR2-G70:EIFTLGGSPY  | 79  | 9   |
| >FGFR2-G70:EIFTLGGSPY | 31  | >FGFR2-G70:EIFTLGGSPY  | 49  | 18  |
| >FGFR2-G70:EIFTLGGSPY | 240 | >FGFR2-G70:EIFTLGGSPY  | 240 | 0   |
| >FGFR2-G70:EIFTLGGSPY | 75  | >FGFR2-G70:EIFTLGGSPY  | 67  | 8   |
| >FGFR2-G70:EIFTLGGSPY | 113 | >FGFR2-G70:EIFTLGGSPY  | 79  | 34  |
| >FGFR2-G70:EIFTLGGSPY | 77  | >FGFR2-G70:EIFTLGGSPY  | 73  | 4   |
| >FGFR2-G70:EIFTLGGSPY | 340 | >FGFR2-G70:EIFTLGGSPY  | 154 | 186 |
| >FGFR2-G70:EIFTLGGSPY | 881 | >FGFR2-G70:EIFTLGGSPY  | 421 | 460 |
| >FGFR2-G70:WEIFTLGGSP | 261 | >FGFR2-G70:WEIFTLGGSP` | 245 | 16  |
| >FGFR2-G70:WEIFTLGGSP | 101 | >FGFR2-G70:WEIFTLGGSP` | 71  | 30  |
| >FGFR2-G70:WEIFTLGGSP | 194 | >FGFR2-G70:WEIFTLGGSP` | 227 | 33  |

|                       |       |                        |      |       |
|-----------------------|-------|------------------------|------|-------|
| >FGFR2-G70:WEIFTLGGSP | 153   | >FGFR2-G70:WEIFTLGSSP\ | 132  | 21    |
| >FGFR2-G70:WEIFTLGG   | 2458  | >FGFR2-G70:WEIFTLGS    | 313  | 2145  |
| >FGFR2-G70:WEIFTLGGS  | 602   | >FGFR2-G70:WEIFTLGSS   | 149  | 453   |
| >FGFR2-G70:WEIFTLGGSP | 4     | >FGFR2-G70:WEIFTLGSSP\ | 4    | 0     |
| >FGFR2-G70:WEIFTLGGSP | 452   | >FGFR2-G70:WEIFTLGSSP\ | 249  | 203   |
| >FGFR2-G70:WEIFTLGGSP | 431   | >FGFR2-G70:WEIFTLGSSP\ | 555  | 124   |
| >FGFR2-G70:WEIFTLGGSP | 477   | >FGFR2-G70:WEIFTLGSSP\ | 518  | 41    |
| >FGFR2-G70:WEIFTLGGSP | 425   | >FGFR2-G70:WEIFTLGSSP\ | 402  | 23    |
| >FGFR2-G70:WEIFTLGGS  | 326   | >FGFR2-G70:WEIFTLGSS   | 285  | 41    |
| >FGFR2-G70:WEIFTLGGSP | 391   | >FGFR2-G70:WEIFTLGSSP\ | 223  | 168   |
| >FGFR2-G70:MWEIFTLGG  | 207   | >FGFR2-G70:MWEIFTLGS   | 270  | 63    |
| >FGFR2-G70:MWEIFTLGG\ | 116   | >FGFR2-G70:MWEIFTLGSS  | 124  | 8     |
| >FGFR2-G70:LMWEIFTLGC | 268   | >FGFR2-G70:LMWEIFTLGS  | 203  | 65    |
| >FGFR2-G70:LMWEIFTLGC | 551   | >FGFR2-G70:LMWEIFTLGS  | 444  | 107   |
| >FGFR2-G70:LMWEIFTLGC | 403   | >FGFR2-G70:LMWEIFTLGS  | 330  | 73    |
| >FGFR2-G70:LMWEIFTLGC | 203   | >FGFR2-G70:LMWEIFTLGS  | 256  | 53    |
| >FGFR2-G70:LMWEIFTLGC | 31    | >FGFR2-G70:LMWEIFTLGS  | 14   | 17    |
| >FGFR2-G70:LMWEIFTLGC | 20    | >FGFR2-G70:LMWEIFTLGS  | 24   | 4     |
| >FGFR2-G70:LMWEIFTLGC | 468   | >FGFR2-G70:LMWEIFTLGS  | 187  | 281   |
| >FGFR2-G70:LMWEIFTLGC | 443   | >FGFR2-G70:LMWEIFTLGS  | 75   | 368   |
| >FGFR2-G70:LMWEIFTLGC | 249   | >FGFR2-G70:LMWEIFTLGS  | 198  | 51    |
| >FGFR2-H21:HWSLIMESV  | 176   | >FGFR2-H21:YWSLIMESV   | 28   | 148   |
| >FGFR2-H21:HWSLIMESV  | 1870  | >FGFR2-H21:YWSLIMESV   | 116  | 1754  |
| >FGFR2-H21:HWSLIMESV  | 491   | >FGFR2-H21:YWSLIMESV   | 756  | 265   |
| >FGFR2-H21:HWSLIMESV  | 136   | >FGFR2-H21:YWSLIMESV   | 145  | 9     |
| >FGFR2-H21:QHWSLIMES\ | 9009  | >FGFR2-H21:QYWSLIMES\  | 61   | 8948  |
| >FGFR2-H21:QHWSLIMES\ | 4711  | >FGFR2-H21:QYWSLIMES\  | 30   | 4681  |
| >FGFR2-H21:QHWSLIMES  | 20288 | >FGFR2-H21:QYWSLIMES   | 320  | 19968 |
| >FGFR2-H21:QHWSLIMES\ | 15688 | >FGFR2-H21:QYWSLIMES\  | 110  | 15578 |
| >FGFR2-H21:QHWSLIMES\ | 16268 | >FGFR2-H21:QYWSLIMES\  | 214  | 16054 |
| >FGFR2-H21:QHWSLIMES\ | 418   | >FGFR2-H21:QYWSLIMES\  | 2738 | 2320  |
| >FGFR2-H21:QHWSLIMES\ | 295   | >FGFR2-H21:QYWSLIMES\  | 2218 | 1923  |
| >FGFR2-H21:QHWSLIMES\ | 7840  | >FGFR2-H21:QYWSLIMES\  | 257  | 7583  |
| >FGFR2-H21:QHWSLIMES\ | 6991  | >FGFR2-H21:QYWSLIMES\  | 80   | 6911  |
| >FGFR2-H21:RIGGYKVRNC | 13795 | >FGFR2-H21:RIGGYKVRNC  | 338  | 13457 |
| >FGFR2-H21:RIGGYKVRNC | 20342 | >FGFR2-H21:RIGGYKVRNC  | 331  | 20011 |
| >FGFR2-H21:RIGGYKVRNC | 13775 | >FGFR2-H21:RIGGYKVRNC  | 418  | 13357 |
| >FGFR2-H21:RIGGYKVRNC | 14720 | >FGFR2-H21:RIGGYKVRNC  | 270  | 14450 |
| >FGFR2-H21:NQHWSLIME  | 2321  | >FGFR2-H21:NQYWSLIME:  | 416  | 1905  |
| >FGFR2-H21:NQHWSLIME  | 852   | >FGFR2-H21:NQYWSLIME:  | 64   | 788   |
| >FGFR2-H21:NQHWSLIME  | 658   | >FGFR2-H21:NQYWSLIME:  | 98   | 560   |
| >FGFR2-H21:NQHWSLIME  | 55    | >FGFR2-H21:NQYWSLIME:  | 14   | 41    |
| >FGFR2-H21:NQHWSLIM   | 1372  | >FGFR2-H21:NQYWSLIM    | 131  | 1241  |

|                       |      |                       |     |      |
|-----------------------|------|-----------------------|-----|------|
| >FGFR2-H21:NQHWSLIME  | 11   | >FGFR2-H21:NQYWSLIME  | 4   | 7    |
| >FGFR2-H21:NQHWSLIME  | 154  | >FGFR2-H21:NQYWSLIME  | 24  | 130  |
| >FGFR2-H21:NQHWSLIME  | 1978 | >FGFR2-H21:NQYWSLIME  | 268 | 1710 |
| >FGFR2-H21:NQHWSLIME  | 2575 | >FGFR2-H21:NQYWSLIME  | 152 | 2423 |
| >FGFR2-H21:NQHWSLIME  | 3585 | >FGFR2-H21:NQYWSLIME  | 164 | 3421 |
| >FGFR2-H21:NQHWSLIM   | 437  | >FGFR2-H21:NQYWSLIM   | 192 | 245  |
| >FGFR2-H21:NQHWSLIM   | 224  | >FGFR2-H21:NQYWSLIM   | 52  | 172  |
| >FGFR2-H21:NQHWSLIME  | 1577 | >FGFR2-H21:NQYWSLIME  | 338 | 1239 |
| >FGFR2-H21:NQHWSLIM   | 73   | >FGFR2-H21:NQYWSLIM   | 39  | 34   |
| >FGFR2-H21:NQHWSLIM   | 1846 | >FGFR2-H21:NQYWSLIM   | 458 | 1388 |
| >FGFR2-H21:RNQHWSLIM  | 219  | >FGFR2-H21:RNQYWSLIM  | 123 | 96   |
| >FGFR2-H21:RNQHWSLIM  | 381  | >FGFR2-H21:RNQYWSLIM  | 272 | 109  |
| >FGFR2-H21:RNQHWSLI   | 57   | >FGFR2-H21:RNQYWSLI   | 46  | 11   |
| >FGFR2-H21:VRNQHWSLI  | 622  | >FGFR2-H21:VRNQYWSLI  | 174 | 448  |
| >FGFR2-H21:VRNQHWSL   | 622  | >FGFR2-H21:VRNQYWSL   | 475 | 147  |
| >FGFR2-H21:VRNQHWSLII | 260  | >FGFR2-H21:VRNQYWSLII | 229 | 31   |
| >FGFR2-H21:VRNQHWSL   | 324  | >FGFR2-H21:VRNQYWSL   | 152 | 172  |
| >FGFR2-H21:VRNQHWSLI  | 422  | >FGFR2-H21:VRNQYWSLI  | 189 | 233  |
| >FGFR2-H21:VRNQHWSLII | 110  | >FGFR2-H21:VRNQYWSLII | 55  | 55   |
| >FGFR2-H21:VRNQHWSL   | 337  | >FGFR2-H21:VRNQYWSL   | 191 | 146  |
| >FGFR2-H21:VRNQHWSLII | 776  | >FGFR2-H21:VRNQYWSLII | 433 | 343  |
| >FGFR2-H21:VRNQHWSL   | 250  | >FGFR2-H21:VRNQYWSL   | 160 | 90   |
| >FGFR2-H21:VRNQHWSLI  | 688  | >FGFR2-H21:VRNQYWSLI  | 350 | 338  |
| >FGFR2-H21:VRNQHWSLII | 296  | >FGFR2-H21:VRNQYWSLII | 215 | 81   |
| >FGFR2-H21:VRNQHWSLI  | 48   | >FGFR2-H21:VRNQYWSLI  | 47  | 1    |
| >FGFR2-H21:VRNQHWSLII | 114  | >FGFR2-H21:VRNQYWSLII | 57  | 57   |
| >FGFR2-H21:KVRNQHWSL  | 544  | >FGFR2-H21:KVRNQYWSL  | 135 | 409  |
| >FGFR2-H21:KVRNQHWSL  | 127  | >FGFR2-H21:KVRNQYWSL  | 106 | 21   |
| >FGFR2-H21:KVRNQHWS   | 11   | >FGFR2-H21:KVRNQYWS   | 14  | 3    |
| >FGFR2-H21:KVRNQHWSL  | 4    | >FGFR2-H21:KVRNQYWSL  | 4   | 0    |
| >FGFR2-H21:KVRNQHWSL  | 3    | >FGFR2-H21:KVRNQYWSL  | 3   | 0    |
| >FGFR2-H21:KVRNQHWSL  | 4    | >FGFR2-H21:KVRNQYWSL  | 4   | 0    |
| >FGFR2-H21:KVRNQHWSL  | 75   | >FGFR2-H21:KVRNQYWSL  | 265 | 190  |
| >FGFR2-H21:KVRNQHWSL  | 123  | >FGFR2-H21:KVRNQYWSL  | 323 | 200  |
| >FGFR2-H21:KVRNQHWSL  | 231  | >FGFR2-H21:KVRNQYWSL  | 384 | 153  |
| >FGFR2-H21:KVRNQHWSL  | 170  | >FGFR2-H21:KVRNQYWSL  | 196 | 26   |
| >FGFR2-H21:KVRNQHWSL  | 473  | >FGFR2-H21:KVRNQYWSL  | 586 | 113  |
| >FGFR2-H21:KVRNQHWSL  | 459  | >FGFR2-H21:KVRNQYWSL  | 374 | 85   |
| >FGFR2-H21:KVRNQHWSL  | 116  | >FGFR2-H21:KVRNQYWSL  | 413 | 297  |
| >FGFR2-H21:KVRNQHWSL  | 90   | >FGFR2-H21:KVRNQYWSL  | 176 | 86   |
| >FGFR2-H21:KVRNQHWSL  | 54   | >FGFR2-H21:KVRNQYWSL  | 68  | 14   |
| >FGFR2-H21:KVRNQHWSL  | 152  | >FGFR2-H21:KVRNQYWSL  | 122 | 30   |
| >FGFR2-H21:YKVRNQHWS  | 555  | >FGFR2-H21:YKVRNQYWS  | 396 | 159  |

|                        |       |                        |      |       |
|------------------------|-------|------------------------|------|-------|
| >FGFR2-H21:YKVRNQHW\$  | 325   | >FGFR2-H21:YKVRNQYWS   | 255  | 70    |
| >FGFR2-H21:YKVRNQHW    | 61    | >FGFR2-H21:YKVRNQYW    | 50   | 11    |
| >FGFR2-H21:YKVRNQHW\$  | 16    | >FGFR2-H21:YKVRNQYWS   | 13   | 3     |
| >FGFR2-H21:YKVRNQHW\$  | 51    | >FGFR2-H21:YKVRNQYWS   | 40   | 11    |
| >FGFR2-H21:YKVRNQHW\$  | 37    | >FGFR2-H21:YKVRNQYWS   | 42   | 5     |
| >FGFR2-H21:GYKVRNQHM   | 129   | >FGFR2-H21:GYKVRNQYM   | 115  | 14    |
| >FGFR2-H21:GYKVRNQHM   | 413   | >FGFR2-H21:GYKVRNQYM   | 891  | 478   |
| >FGFR2-H21:GYKVRNQHM   | 280   | >FGFR2-H21:GYKVRNQYM   | 125  | 155   |
| >FGFR2-H21:GYKVRNQHM   | 41    | >FGFR2-H21:GYKVRNQYM   | 27   | 14    |
| >FGFR2-H21:GYKVRNQHM   | 236   | >FGFR2-H21:GYKVRNQYM   | 262  | 26    |
| >FGFR2-H21:GYKVRNQH    | 17793 | >FGFR2-H21:GYKVRNQY    | 485  | 17308 |
| >FGFR2-H21:GYKVRNQH    | 19976 | >FGFR2-H21:GYKVRNQY    | 358  | 19618 |
| >FGFR2-H21:GGYKVRNQH   | 18496 | >FGFR2-H21:GGYKVRNQY   | 310  | 18186 |
| >FGFR2-H21:GGYKVRNQH   | 585   | >FGFR2-H21:GGYKVRNQY   | 493  | 92    |
| >FGFR2-H21:GGYKVRNQH   | 265   | >FGFR2-H21:GGYKVRNQY   | 172  | 93    |
| >FGFR2-H21:GGYKVRNQH   | 367   | >FGFR2-H21:GGYKVRNQY   | 348  | 19    |
| >FGFR2-H21:GGYKVRNQH   | 986   | >FGFR2-H21:GGYKVRNQY   | 40   | 946   |
| >FGFR2-H21:GGYKVRNQH   | 33456 | >FGFR2-H21:GGYKVRNQY   | 429  | 33027 |
| >FGFR2-H21:IGGYKVRNQ\  | 24939 | >FGFR2-H21:IGGYKVRNQ\  | 382  | 24557 |
| >FGFR2-H21:IGGYKVRNQ\  | 564   | >FGFR2-H21:IGGYKVRNQ\  | 344  | 220   |
| >FGFR2-H54:KHKNIINLL   | 3231  | >FGFR2-H54:KQKNIINLL   | 70   | 3161  |
| >FGFR2-H54:KHKNIINL    | 16120 | >FGFR2-H54:KQKNIINL    | 383  | 15737 |
| >FGFR2-H54:KHKNIINLL   | 12405 | >FGFR2-H54:KQKNIINLL   | 79   | 12326 |
| >FGFR2-H54:KHKNIINLLG/ | 10473 | >FGFR2-H54:KQKNIINLLG/ | 100  | 10373 |
| >FGFR2-H54:KHKNIINL    | 20984 | >FGFR2-H54:KQKNIINL    | 234  | 20750 |
| >FGFR2-H54:KHKNIINLL   | 18463 | >FGFR2-H54:KQKNIINLL   | 49   | 18414 |
| >FGFR2-H54:KHKNIINLLG/ | 21332 | >FGFR2-H54:KQKNIINLLG/ | 71   | 21261 |
| >FGFR2-H54:KHKNIINL    | 2116  | >FGFR2-H54:KQKNIINL    | 140  | 1976  |
| >FGFR2-H54:KHKNIINLL   | 2568  | >FGFR2-H54:KQKNIINLL   | 160  | 2408  |
| >FGFR2-H54:KHKNIINLLG  | 4301  | >FGFR2-H54:KQKNIINLLG  | 429  | 3872  |
| >FGFR2-H54:KHKNIINLLG/ | 1673  | >FGFR2-H54:KQKNIINLLG/ | 82   | 1591  |
| >FGFR2-H54:KHKNIINL    | 440   | >FGFR2-H54:KQKNIINL    | 36   | 404   |
| >FGFR2-H54:KHKNIINLL   | 1076  | >FGFR2-H54:KQKNIINLL   | 91   | 985   |
| >FGFR2-H54:KHKNIINLL   | 9740  | >FGFR2-H54:KQKNIINLL   | 235  | 9505  |
| >FGFR2-H54:KHKNIINLL   | 548   | >FGFR2-H54:KQKNIINLL   | 202  | 346   |
| >FGFR2-H54:KHKNIINLL   | 678   | >FGFR2-H54:KQKNIINLL   | 68   | 610   |
| >FGFR2-H54:GKHKNIINL   | 121   | >FGFR2-H54:GKQKNIINL   | 493  | 372   |
| >FGFR2-H54:GKHKNIINLL  | 313   | >FGFR2-H54:GKQKNIINLL  | 1230 | 917   |
| >FGFR2-H54:GKHKNIINL   | 469   | >FGFR2-H54:GKQKNIINL   | 78   | 391   |
| >FGFR2-H54:MIGKHKNIIN  | 401   | >FGFR2-H54:MIGKQKNIIN  | 653  | 252   |
| >FGFR2-H54:MIGKHKNIIN  | 239   | >FGFR2-H54:MIGKQKNIIN  | 206  | 33    |
| >FGFR2-H54:MIGKHKNI    | 431   | >FGFR2-H54:MIGKQKNI    | 2209 | 1778  |
| >FGFR2-H54:MIGKHKNII   | 174   | >FGFR2-H54:MIGKQKNII   | 1359 | 1185  |

|                         |     |                         |     |     |
|-------------------------|-----|-------------------------|-----|-----|
| >FGFR2-H54' KMIGKHKNI   | 783 | >FGFR2-H54' KMIGKQKNI   | 401 | 382 |
| >FGFR2-H54' KMIGKHKNI   | 76  | >FGFR2-H54' KMIGKQKNI   | 70  | 6   |
| >FGFR2-H54' KMIGKHKNII  | 423 | >FGFR2-H54' KMIGKQKNII  | 509 | 86  |
| >FGFR2-H54' KMIGKHKNI   | 47  | >FGFR2-H54' KMIGKQKNI   | 69  | 22  |
| >FGFR2-H54' KMIGKHKNII  | 144 | >FGFR2-H54' KMIGKQKNII  | 228 | 84  |
| >FGFR2-H54' KMIGKHKNI   | 596 | >FGFR2-H54' KMIGKQKNI   | 195 | 401 |
| >FGFR2-H54' KMIGKHKNII  | 188 | >FGFR2-H54' KMIGKQKNII  | 110 | 78  |
| >FGFR2-H54' KMIGKHKNI   | 187 | >FGFR2-H54' KMIGKQKNI   | 156 | 31  |
| >FGFR2-H54' KMIGKHKNII  | 336 | >FGFR2-H54' KMIGKQKNII  | 282 | 54  |
| >FGFR2-H54' KMIGKHKNI   | 33  | >FGFR2-H54' KMIGKQKNI   | 61  | 28  |
| >FGFR2-H54' KMIGKHKNII  | 64  | >FGFR2-H54' KMIGKQKNII  | 96  | 32  |
| >FGFR2-H54' MKMIGKHKN   | 460 | >FGFR2-H54' MKMIGKQKN   | 524 | 64  |
| >FGFR2-H54' MKMIGKHKN   | 102 | >FGFR2-H54' MKMIGKQKN   | 98  | 4   |
| >FGFR2-H54' MKMIGKHKN   | 106 | >FGFR2-H54' MKMIGKQKN   | 84  | 22  |
| >FGFR2-H54' MKMIGKHKN   | 445 | >FGFR2-H54' MKMIGKQKN   | 889 | 444 |
| >FGFR2-H54' MMKMIGKHI   | 25  | >FGFR2-H54' MMKMIGKQ    | 23  | 2   |
| >FGFR2-H54' MMKMIGKHI   | 353 | >FGFR2-H54' MMKMIGKQ    | 257 | 96  |
| >FGFR2-H54' MMKMIGKHI   | 138 | >FGFR2-H54' MMKMIGKQ    | 160 | 22  |
| >FGFR2-H54' MMKMIGKHI   | 867 | >FGFR2-H54' MMKMIGKQ    | 395 | 472 |
| >FGFR2-H54' MMKMIGKHI   | 10  | >FGFR2-H54' MMKMIGKQ    | 16  | 6   |
| >FGFR2-H54' MMKMIGKHI   | 104 | >FGFR2-H54' MMKMIGKQ    | 244 | 140 |
| >FGFR2-H54' MMKMIGKHI   | 26  | >FGFR2-H54' MMKMIGKQ    | 51  | 25  |
| >FGFR2-H54' MMKMIGKHI   | 644 | >FGFR2-H54' MMKMIGKQ    | 398 | 246 |
| >FGFR2-H54' MMKMIGKHI   | 42  | >FGFR2-H54' MMKMIGKQ    | 58  | 16  |
| >FGFR2-H54' MMKMIGKHI   | 491 | >FGFR2-H54' MMKMIGKQ    | 804 | 313 |
| >FGFR2-H54' MMKMIGKHI   | 123 | >FGFR2-H54' MMKMIGKQ    | 182 | 59  |
| >FGFR2-H54' EMMKMIGKI   | 74  | >FGFR2-H54' EMMKMIGKI   | 113 | 39  |
| >FGFR2-H54' EMMKMIGKI   | 177 | >FGFR2-H54' EMMKMIGKI   | 305 | 128 |
| >FGFR2-H54' EMMKMIGKI   | 100 | >FGFR2-H54' EMMKMIGKI   | 111 | 11  |
| >FGFR2-I380' IYCIGVFL   | 211 | >FGFR2-I380' VYCIGVFL   | 352 | 141 |
| >FGFR2-I380' IYCIGVFLI  | 110 | >FGFR2-I380' VYCIGVFLI  | 134 | 24  |
| >FGFR2-I380' IYCIGVFL   | 201 | >FGFR2-I380' VYCIGVFL   | 353 | 152 |
| >FGFR2-I380' IYCIGVFLI  | 24  | >FGFR2-I380' VYCIGVFLI  | 35  | 11  |
| >FGFR2-I380' IYCIGVFL   | 18  | >FGFR2-I380' VYCIGVFL   | 15  | 3   |
| >FGFR2-I380' IYCIGVFLI  | 19  | >FGFR2-I380' VYCIGVFLI  | 15  | 4   |
| >FGFR2-I380' IYCIGVFLIA | 64  | >FGFR2-I380' VYCIGVFLIA | 54  | 10  |
| >FGFR2-I380' IYCIGVFL   | 647 | >FGFR2-I380' VYCIGVFL   | 496 | 151 |
| >FGFR2-I380' AIYCIGVFL  | 77  | >FGFR2-I380' AVYCIGVFL  | 148 | 71  |
| >FGFR2-I380' AIYCIGVFLI | 257 | >FGFR2-I380' AVYCIGVFLI | 502 | 245 |
| >FGFR2-I380' AIYCIGVFL  | 16  | >FGFR2-I380' AVYCIGVFL  | 27  | 11  |
| >FGFR2-I380' AIYCIGVFLI | 80  | >FGFR2-I380' AVYCIGVFLI | 112 | 32  |
| >FGFR2-I380' AIYCIGVFL  | 65  | >FGFR2-I380' AVYCIGVFL  | 138 | 73  |
| >FGFR2-I380' AIYCIGVFLI | 167 | >FGFR2-I380' AVYCIGVFLI | 252 | 85  |

|                           |      |                           |      |      |
|---------------------------|------|---------------------------|------|------|
| >FGFR2-I380' AIYCIGVFLIA  | 85   | >FGFR2-I380' AVYCIGVFLIA  | 173  | 88   |
| >FGFR2-I380' AIYCIGVFL    | 77   | >FGFR2-I380' AVYCIGVFL    | 55   | 22   |
| >FGFR2-I380' AIYCIGVFLI   | 268  | >FGFR2-I380' AVYCIGVFLI   | 275  | 7    |
| >FGFR2-I380' AIYCIGVFLIA  | 193  | >FGFR2-I380' AVYCIGVFLIA  | 157  | 36   |
| >FGFR2-I380' AIYCIGVFL    | 13   | >FGFR2-I380' AVYCIGVFL    | 36   | 23   |
| >FGFR2-I380' AIYCIGVFLI   | 9    | >FGFR2-I380' AVYCIGVFLI   | 24   | 15   |
| >FGFR2-I380' AIYCIGVFLIA  | 244  | >FGFR2-I380' AVYCIGVFLIA  | 760  | 516  |
| >FGFR2-I380' AIYCIGVFL    | 99   | >FGFR2-I380' AVYCIGVFL    | 196  | 97   |
| >FGFR2-I380' AIYCIGVFLI   | 152  | >FGFR2-I380' AVYCIGVFLI   | 286  | 134  |
| >FGFR2-I380' AIYCIGVFL    | 54   | >FGFR2-I380' AVYCIGVFL    | 131  | 77   |
| >FGFR2-I380' AIYCIGVFLI   | 62   | >FGFR2-I380' AVYCIGVFLI   | 155  | 93   |
| >FGFR2-I380' AIYCIGVFL    | 142  | >FGFR2-I380' AVYCIGVFL    | 465  | 323  |
| >FGFR2-I380' AIYCIGVFLI   | 155  | >FGFR2-I380' AVYCIGVFLI   | 496  | 341  |
| >FGFR2-I380' AIYCIGVF     | 628  | >FGFR2-I380' AVYCIGVF     | 160  | 468  |
| >FGFR2-I380' AIYCIGVF     | 185  | >FGFR2-I380' AVYCIGVF     | 154  | 31   |
| >FGFR2-I380' AIYCIGVFL    | 238  | >FGFR2-I380' AVYCIGVFL    | 182  | 56   |
| >FGFR2-I380' AIYCIGVFLI   | 75   | >FGFR2-I380' AVYCIGVFLI   | 60   | 15   |
| >FGFR2-I380' AIYCIGVFL    | 324  | >FGFR2-I380' AVYCIGVFL    | 58   | 266  |
| >FGFR2-I380' AIYCIGVFLI   | 1105 | >FGFR2-I380' AVYCIGVFLI   | 443  | 662  |
| >FGFR2-I380' AIYCIGVFLI   | 355  | >FGFR2-I380' AVYCIGVFLI   | 182  | 173  |
| >FGFR2-I380' AIYCIGVF     | 58   | >FGFR2-I380' AVYCIGVF     | 64   | 6    |
| >FGFR2-I380' AIYCIGVF     | 65   | >FGFR2-I380' AVYCIGVF     | 90   | 25   |
| >FGFR2-I380' AIYCIGVFL    | 368  | >FGFR2-I380' AVYCIGVFL    | 555  | 187  |
| >FGFR2-I380' AIYCIGVF     | 345  | >FGFR2-I380' AVYCIGVF     | 86   | 259  |
| >FGFR2-I380' AIYCIGVFL    | 1191 | >FGFR2-I380' AVYCIGVFL    | 400  | 791  |
| >FGFR2-I380' TASP DYLEIAI | 365  | >FGFR2-I380' TASP DYLEIAV | 74   | 291  |
| >FGFR2-I380' TASP DYLEIAI | 290  | >FGFR2-I380' TASP DYLEIAV | 8183 | 7893 |
| >FGFR2-I380' IAIYCIGV     | 267  | >FGFR2-I380' IAVYCIGV     | 1289 | 1022 |
| >FGFR2-I380' IAIYCIGVFLI  | 491  | >FGFR2-I380' IAVYCIGVFLI  | 1437 | 946  |
| >FGFR2-I380' IAIYCIGVFL   | 279  | >FGFR2-I380' IAVYCIGVFL   | 456  | 177  |
| >FGFR2-I380' IAIYCIGV     | 334  | >FGFR2-I380' IAVYCIGV     | 539  | 205  |
| >FGFR2-I380' IAIYCIGV     | 36   | >FGFR2-I380' IAVYCIGV     | 57   | 21   |
| >FGFR2-I380' IAIYCIGVFL   | 488  | >FGFR2-I380' IAVYCIGVFL   | 752  | 264  |
| >FGFR2-I380' IAIYCIGVFLI  | 121  | >FGFR2-I380' IAVYCIGVFLI  | 180  | 59   |
| >FGFR2-I380' IAIYCIGVF    | 280  | >FGFR2-I380' IAVYCIGVF    | 694  | 414  |
| >FGFR2-I380' IAIYCIGV     | 81   | >FGFR2-I380' IAVYCIGV     | 134  | 53   |
| >FGFR2-I380' IAIYCIGVFL   | 517  | >FGFR2-I380' IAVYCIGVFL   | 457  | 60   |
| >FGFR2-I380' IAIYCIGVFLI  | 108  | >FGFR2-I380' IAVYCIGVFLI  | 177  | 69   |
| >FGFR2-I380' IAIYCIGVF    | 81   | >FGFR2-I380' IAVYCIGVF    | 141  | 60   |
| >FGFR2-I380' IAIYCIGVF    | 58   | >FGFR2-I380' IAVYCIGVF    | 84   | 26   |
| >FGFR2-I380' IAIYCIGVFL   | 351  | >FGFR2-I380' IAVYCIGVFL   | 505  | 154  |
| >FGFR2-I380' IAIYCIGVF    | 22   | >FGFR2-I380' IAVYCIGVF    | 20   | 2    |
| >FGFR2-I380' IAIYCIGVFL   | 195  | >FGFR2-I380' IAVYCIGVFL   | 191  | 4    |

|                          |     |                          |      |     |
|--------------------------|-----|--------------------------|------|-----|
| >FGFR2-I380' IAIYCIGVFLI | 367 | >FGFR2-I380' IAVYCIGVFLI | 362  | 5   |
| >FGFR2-I380' IAIYCIGVF   | 118 | >FGFR2-I380' IAVYCIGVF   | 119  | 1   |
| >FGFR2-I380' IAIYCIGVFLI | 162 | >FGFR2-I380' IAVYCIGVFLI | 199  | 37  |
| >FGFR2-I380' IAIYCIGVF   | 121 | >FGFR2-I380' IAVYCIGVF   | 239  | 118 |
| >FGFR2-I380' IAIYCIGVFLI | 137 | >FGFR2-I380' IAVYCIGVFLI | 203  | 66  |
| >FGFR2-I380' IAIYCIGVFL  | 835 | >FGFR2-I380' IAVYCIGVFL  | 427  | 408 |
| >FGFR2-I380' IAIYCIGVF   | 92  | >FGFR2-I380' IAVYCIGVF   | 63   | 29  |
| >FGFR2-I380' IAIYCIGVFLI | 142 | >FGFR2-I380' IAVYCIGVFLI | 232  | 90  |
| >FGFR2-I380' EIAIYCIGVFL | 187 | >FGFR2-I380' EIAVYCIGVFL | 181  | 6   |
| >FGFR2-I380' EIAIYCIGV   | 367 | >FGFR2-I380' EIAVYCIGV   | 300  | 67  |
| >FGFR2-I380' EIAIYCIGV   | 416 | >FGFR2-I380' EIAVYCIGV   | 1083 | 667 |
| >FGFR2-I380' EIAIYCIGV   | 359 | >FGFR2-I380' EIAVYCIGV   | 145  | 214 |
| >FGFR2-I380' EIAIYCIGV   | 82  | >FGFR2-I380' EIAVYCIGV   | 135  | 53  |
| >FGFR2-I380' EIAIYCIGVF  | 199 | >FGFR2-I380' EIAVYCIGVF  | 263  | 64  |
| >FGFR2-I380' EIAIYCIGVF  | 94  | >FGFR2-I380' EIAVYCIGVF  | 57   | 37  |
| >FGFR2-I380' EIAIYCIGV   | 19  | >FGFR2-I380' EIAVYCIGV   | 18   | 1   |
| >FGFR2-I380' EIAIYCIGVFL | 27  | >FGFR2-I380' EIAVYCIGVFL | 25   | 2   |
| >FGFR2-I380' EIAIYCIGV   | 6   | >FGFR2-I380' EIAVYCIGV   | 6    | 0   |
| >FGFR2-I380' EIAIYCIGVFL | 37  | >FGFR2-I380' EIAVYCIGVFL | 39   | 2   |
| >FGFR2-I380' LEIAIYCI    | 186 | >FGFR2-I380' LEIAVYCI    | 86   | 100 |
| >FGFR2-I380' LEIAIYCIGV  | 101 | >FGFR2-I380' LEIAVYCIGV  | 108  | 7   |
| >FGFR2-I380' LEIAIYCIGVF | 90  | >FGFR2-I380' LEIAVYCIGVF | 73   | 17  |
| >FGFR2-I380' LEIAIYCIGVF | 132 | >FGFR2-I380' LEIAVYCIGVF | 137  | 5   |
| >FGFR2-I380' LEIAIYCI    | 256 | >FGFR2-I380' LEIAVYCI    | 273  | 17  |
| >FGFR2-I380' LEIAIYCIGVF | 20  | >FGFR2-I380' LEIAVYCIGVF | 21   | 1   |
| >FGFR2-I380' LEIAIYCI    | 44  | >FGFR2-I380' LEIAVYCI    | 51   | 7   |
| >FGFR2-I380' LEIAIYCIGVF | 32  | >FGFR2-I380' LEIAVYCIGVF | 34   | 2   |
| >FGFR2-I380' LEIAIYCI    | 42  | >FGFR2-I380' LEIAVYCI    | 55   | 13  |
| >FGFR2-I380' LEIAIYCIGVF | 134 | >FGFR2-I380' LEIAVYCIGVF | 183  | 49  |
| >FGFR2-I380' LEIAIYCI    | 260 | >FGFR2-I380' LEIAVYCI    | 262  | 2   |
| >FGFR2-I380' LEIAIYCI    | 355 | >FGFR2-I380' LEIAVYCI    | 386  | 31  |
| >FGFR2-I380' LEIAIYCIGVF | 92  | >FGFR2-I380' LEIAVYCIGVF | 101  | 9   |
| >FGFR2-I380' LEIAIYCI    | 470 | >FGFR2-I380' LEIAVYCI    | 594  | 124 |
| >FGFR2-I380' LEIAIYCI    | 8   | >FGFR2-I380' LEIAVYCI    | 9    | 1   |
| >FGFR2-I380' LEIAIYCIGV  | 16  | >FGFR2-I380' LEIAVYCIGV  | 17   | 1   |
| >FGFR2-I380' LEIAIYCIGVF | 40  | >FGFR2-I380' LEIAVYCIGVF | 45   | 5   |
| >FGFR2-I380' YLEIAIYCI   | 30  | >FGFR2-I380' YLEIAVYCI   | 37   | 7   |
| >FGFR2-I380' YLEIAIYCIGV | 22  | >FGFR2-I380' YLEIAVYCIGV | 24   | 2   |
| >FGFR2-I380' YLEIAIYCI   | 14  | >FGFR2-I380' YLEIAVYCI   | 15   | 1   |
| >FGFR2-I380' YLEIAIYCIGV | 10  | >FGFR2-I380' YLEIAVYCIGV | 10   | 0   |
| >FGFR2-I380' YLEIAIYCI   | 499 | >FGFR2-I380' YLEIAVYCI   | 384  | 115 |
| >FGFR2-I380' YLEIAIYCIGV | 36  | >FGFR2-I380' YLEIAVYCIGV | 32   | 4   |
| >FGFR2-I380' YLEIAIYCIGV | 26  | >FGFR2-I380' YLEIAVYCIGV | 33   | 7   |



|                          |      |                          |      |      |
|--------------------------|------|--------------------------|------|------|
| >FGFR2-I380' YLEIAIYC    | 25   | >FGFR2-I380' YLEIAVYC    | 32   | 7    |
| >FGFR2-I380' YLEIAIYCI   | 12   | >FGFR2-I380' YLEIAVYCI   | 14   | 2    |
| >FGFR2-I380' YLEIAIYCIGV | 3    | >FGFR2-I380' YLEIAVYCIGV | 3    | 0    |
| >FGFR2-I380' YLEIAIYC    | 174  | >FGFR2-I380' YLEIAVYC    | 183  | 9    |
| >FGFR2-I380' YLEIAIYCI   | 8    | >FGFR2-I380' YLEIAVYCI   | 9    | 1    |
| >FGFR2-I380' YLEIAIYCIGV | 6    | >FGFR2-I380' YLEIAVYCIGV | 6    | 0    |
| >FGFR2-I380' YLEIAIYCI   | 22   | >FGFR2-I380' YLEIAVYCI   | 24   | 2    |
| >FGFR2-I380' YLEIAIYCIGV | 7    | >FGFR2-I380' YLEIAVYCIGV | 7    | 0    |
| >FGFR2-I380' YLEIAIYCI   | 32   | >FGFR2-I380' YLEIAVYCI   | 26   | 6    |
| >FGFR2-I380' YLEIAIYCIGV | 8    | >FGFR2-I380' YLEIAVYCIGV | 7    | 1    |
| >FGFR2-I380' YLEIAIYC    | 9    | >FGFR2-I380' YLEIAVYC    | 10   | 1    |
| >FGFR2-I380' YLEIAIYCI   | 8    | >FGFR2-I380' YLEIAVYCI   | 11   | 3    |
| >FGFR2-I380' YLEIAIYCIGV | 2    | >FGFR2-I380' YLEIAVYCIGV | 2    | 0    |
| >FGFR2-I380' YLEIAIYCIGV | 444  | >FGFR2-I380' YLEIAVYCIGV | 444  | 0    |
| >FGFR2-I380' DYLEIAIYCI  | 425  | >FGFR2-I380' DYLEIAVYCI  | 352  | 73   |
| >FGFR2-I380' DYLEIAIYCI  | 106  | >FGFR2-I380' DYLEIAVYCI  | 76   | 30   |
| >FGFR2-I380' DYLEIAIYCI  | 647  | >FGFR2-I380' DYLEIAVYCI  | 344  | 303  |
| >FGFR2-I380' DYLEIAIYCI  | 330  | >FGFR2-I380' DYLEIAVYCI  | 278  | 52   |
| >FGFR2-I380' DYLEIAIY    | 470  | >FGFR2-I380' DYLEIAVY    | 356  | 114  |
| >FGFR2-I380' DYLEIAIY    | 235  | >FGFR2-I380' DYLEIAVY    | 249  | 14   |
| >FGFR2-I380' DYLEIAIY    | 535  | >FGFR2-I380' DYLEIAVY    | 419  | 116  |
| >FGFR2-I380' PDYLEIAIYCI | 287  | >FGFR2-I380' PDYLEIAVYCI | 264  | 23   |
| >FGFR2-I380' PDYLEIAI    | 199  | >FGFR2-I380' PDYLEIAV    | 1005 | 806  |
| >FGFR2-I380' PDYLEIAIYCI | 241  | >FGFR2-I380' PDYLEIAVYCI | 278  | 37   |
| >FGFR2-I380' PDYLEIAI    | 50   | >FGFR2-I380' PDYLEIAV    | 94   | 44   |
| >FGFR2-I380' PDYLEIAIYCI | 30   | >FGFR2-I380' PDYLEIAVYCI | 32   | 2    |
| >FGFR2-I380' SPDYLEIAI   | 337  | >FGFR2-I380' SPDYLEIAV   | 556  | 219  |
| >FGFR2-I380' SPDYLEIAIY  | 96   | >FGFR2-I380' SPDYLEIAVY  | 82   | 14   |
| >FGFR2-I380' SPDYLEIAI   | 311  | >FGFR2-I380' SPDYLEIAV   | 2827 | 2516 |
| >FGFR2-I380' SPDYLEIAIY  | 384  | >FGFR2-I380' SPDYLEIAVY  | 455  | 71   |
| >FGFR2-I380' SPDYLEIAIY  | 447  | >FGFR2-I380' SPDYLEIAVY  | 584  | 137  |
| >FGFR2-I380' SPDYLEIAIY  | 158  | >FGFR2-I380' SPDYLEIAVY  | 64   | 94   |
| >FGFR2-I380' ASPDYLEIAIY | 40   | >FGFR2-I380' ASPDYLEIAV\ | 28   | 12   |
| >FGFR2-I380' ASPDYLEIAIY | 249  | >FGFR2-I380' ASPDYLEIAV\ | 233  | 16   |
| >FGFR2-I380' ASPDYLEIAI  | 1185 | >FGFR2-I380' ASPDYLEIAV  | 322  | 863  |
| >FGFR2-I380' ASPDYLEIAIY | 1270 | >FGFR2-I380' ASPDYLEIAV\ | 325  | 945  |
| >FGFR2-I380' ASPDYLEIAIY | 112  | >FGFR2-I380' ASPDYLEIAV\ | 72   | 40   |
| >FGFR2-I380' ASPDYLEIAI  | 17   | >FGFR2-I380' ASPDYLEIAV  | 29   | 12   |
| >FGFR2-I380' ASPDYLEIAIY | 16   | >FGFR2-I380' ASPDYLEIAV\ | 25   | 9    |
| >FGFR2-I547' NIINLLGA    | 93   | >FGFR2-I547' NVINLLGA    | 200  | 107  |
| >FGFR2-I547' NIINLLGA    | 84   | >FGFR2-I547' NVINLLGA    | 75   | 9    |
| >FGFR2-I547' NIINLLGA    | 495  | >FGFR2-I547' NVINLLGA    | 95   | 400  |
| >FGFR2-I547' NIINLLGA    | 966  | >FGFR2-I547' NVINLLGA    | 464  | 502  |

|                        |      |                        |     |      |
|------------------------|------|------------------------|-----|------|
| >FGFR2-I547 MMKMIGKHI  | 997  | >FGFR2-I547 MMKMIGKHI  | 262 | 735  |
| >FGFR2-I547 MMKMIGKHI  | 25   | >FGFR2-I547 MMKMIGKHI  | 7   | 18   |
| >FGFR2-I547 MMKMIGKHI  | 791  | >FGFR2-I547 MMKMIGKHI  | 53  | 738  |
| >FGFR2-I547 MMKMIGKHI  | 353  | >FGFR2-I547 MMKMIGKHI  | 6   | 347  |
| >FGFR2-I547 MMKMIGKHI  | 104  | >FGFR2-I547 MMKMIGKHI  | 184 | 80   |
| >FGFR2-I547 MMKMIGKHI  | 42   | >FGFR2-I547 MMKMIGKHI  | 59  | 17   |
| >FGFR2-I547 MMKMIGKHI  | 123  | >FGFR2-I547 MMKMIGKHI  | 175 | 52   |
| >FGFR2-I547 HKNIINLL   | 722  | >FGFR2-I547 HKNVINLL   | 439 | 283  |
| >FGFR2-I547 HKNIINLL   | 603  | >FGFR2-I547 HKNVINLL   | 278 | 325  |
| >FGFR2-I547 KHKNIINL   | 440  | >FGFR2-I547 KHKNVINL   | 380 | 60   |
| >FGFR2-I547 GKHKNIINL  | 121  | >FGFR2-I547 GKHKNVINL  | 90  | 31   |
| >FGFR2-I547 GKHKNIINLL | 313  | >FGFR2-I547 GKHKNVINLL | 265 | 48   |
| >FGFR2-I547 GKHKNIINL  | 469  | >FGFR2-I547 GKHKNVINL  | 844 | 375  |
| >FGFR2-I547 MIGKHKNIIN | 401  | >FGFR2-I547 MIGKHKNVIN | 407 | 6    |
| >FGFR2-I547 MIGKHKNI   | 2384 | >FGFR2-I547 MIGKHKNV   | 303 | 2081 |
| >FGFR2-I547 MIGKHKNI   | 3105 | >FGFR2-I547 MIGKHKNV   | 199 | 2906 |
| >FGFR2-I547 MIGKHKNI   | 5538 | >FGFR2-I547 MIGKHKNV   | 30  | 5508 |
| >FGFR2-I547 MIGKHKNIIN | 239  | >FGFR2-I547 MIGKHKNVIN | 339 | 100  |
| >FGFR2-I547 MIGKHKNI   | 431  | >FGFR2-I547 MIGKHKNV   | 641 | 210  |
| >FGFR2-I547 MIGKHKNII  | 174  | >FGFR2-I547 MIGKHKNVI  | 126 | 48   |
| >FGFR2-I547 KMIGKHKNI  | 783  | >FGFR2-I547 KMIGKHKNV  | 130 | 653  |
| >FGFR2-I547 KMIGKHKNI  | 76   | >FGFR2-I547 KMIGKHKNV  | 13  | 63   |
| >FGFR2-I547 KMIGKHKNII | 423  | >FGFR2-I547 KMIGKHKNVI | 382 | 41   |
| >FGFR2-I547 KMIGKHKNI  | 47   | >FGFR2-I547 KMIGKHKNV  | 7   | 40   |
| >FGFR2-I547 KMIGKHKNII | 144  | >FGFR2-I547 KMIGKHKNVI | 57  | 87   |
| >FGFR2-I547 KMIGKHKNI  | 596  | >FGFR2-I547 KMIGKHKNV  | 55  | 541  |
| >FGFR2-I547 KMIGKHKNII | 188  | >FGFR2-I547 KMIGKHKNVI | 145 | 43   |
| >FGFR2-I547 KMIGKHKNI  | 1446 | >FGFR2-I547 KMIGKHKNV  | 47  | 1399 |
| >FGFR2-I547 KMIGKHKNI  | 187  | >FGFR2-I547 KMIGKHKNV  | 5   | 182  |
| >FGFR2-I547 KMIGKHKNII | 336  | >FGFR2-I547 KMIGKHKNVI | 247 | 89   |
| >FGFR2-I547 KMIGKHKNI  | 33   | >FGFR2-I547 KMIGKHKNV  | 620 | 587  |
| >FGFR2-I547 KMIGKHKNII | 64   | >FGFR2-I547 KMIGKHKNVI | 48  | 16   |
| >FGFR2-I547 MKMIGKHKN  | 460  | >FGFR2-I547 MKMIGKHKN  | 513 | 53   |
| >FGFR2-I547 MKMIGKHKN  | 102  | >FGFR2-I547 MKMIGKHKN  | 140 | 38   |
| >FGFR2-I547 MKMIGKHKN  | 106  | >FGFR2-I547 MKMIGKHKN  | 77  | 29   |
| >FGFR2-I547 MKMIGKHKN  | 445  | >FGFR2-I547 MKMIGKHKN  | 192 | 253  |
| >FGFR2-I642 KIADFLA    | 83   | >FGFR2-I642 KVADFLA    | 204 | 121  |
| >FGFR2-I642 KIADFLA    | 38   | >FGFR2-I642 KVADFLA    | 88  | 50   |
| >FGFR2-I642 KIADFLARD  | 352  | >FGFR2-I642 KVADFLARD  | 790 | 438  |
| >FGFR2-I642 KIADFLA    | 44   | >FGFR2-I642 KVADFLA    | 38  | 6    |
| >FGFR2-I642 KIADFLAR   | 366  | >FGFR2-I642 KVADFLAR   | 411 | 45   |
| >FGFR2-I642 KIADFLAR   | 67   | >FGFR2-I642 KVADFLAR   | 30  | 37   |
| >FGFR2-I642 KIADFLAR   | 50   | >FGFR2-I642 KVADFLAR   | 36  | 14   |

|                         |      |                         |      |      |
|-------------------------|------|-------------------------|------|------|
| >FGFR2-I642' KIADFLGARD | 84   | >FGFR2-I642' KVADFLGARD | 67   | 17   |
| >FGFR2-I642' KIADFLGAR  | 386  | >FGFR2-I642' KVADFLGAR  | 150  | 236  |
| >FGFR2-I642' KIADFLGAR  | 16   | >FGFR2-I642' KVADFLGAR  | 22   | 6    |
| >FGFR2-I642' KIADFLGARD | 1892 | >FGFR2-I642' KVADFLGARD | 443  | 1449 |
| >FGFR2-I642' VLVTEENVVM | 899  | >FGFR2-I642' VLVTEENVVM | 156  | 743  |
| >FGFR2-I642' VLVTEENVVM | 167  | >FGFR2-I642' VLVTEENVVM | 38   | 129  |
| >FGFR2-I642' VLVTEENVVM | 59   | >FGFR2-I642' VLVTEENVVM | 13   | 46   |
| >FGFR2-I642' VLVTEENVVM | 1203 | >FGFR2-I642' VLVTEENVVM | 139  | 1064 |
| >FGFR2-I642' VLVTEENVVM | 77   | >FGFR2-I642' VLVTEENVVM | 9    | 68   |
| >FGFR2-I642' VLVTEENVVM | 94   | >FGFR2-I642' VLVTEENVVM | 12   | 82   |
| >FGFR2-I642' VLVTEENVVM | 340  | >FGFR2-I642' VLVTEENVVM | 18   | 322  |
| >FGFR2-I642' VLVTEENVVM | 549  | >FGFR2-I642' VLVTEENVVM | 23   | 526  |
| >FGFR2-I642' VLVTEENVVM | 29   | >FGFR2-I642' VLVTEENVVM | 3    | 26   |
| >FGFR2-I642' MKIADFLG   | 339  | >FGFR2-I642' MKVADFLG   | 531  | 192  |
| >FGFR2-I642' MKIADFLGAF | 454  | >FGFR2-I642' MKVADFLGA  | 974  | 520  |
| >FGFR2-I642' MKIADFLG   | 103  | >FGFR2-I642' MKVADFLG   | 146  | 43   |
| >FGFR2-I642' MKIADFLGAF | 79   | >FGFR2-I642' MKVADFLGA  | 106  | 27   |
| >FGFR2-I642' MKIADFLG   | 168  | >FGFR2-I642' MKVADFLG   | 252  | 84   |
| >FGFR2-I642' MKIADFLGAF | 388  | >FGFR2-I642' MKVADFLGA  | 332  | 56   |
| >FGFR2-I642' VMKIADFLG  | 170  | >FGFR2-I642' VMKVADFLG  | 165  | 5    |
| >FGFR2-I642' VMKIADFLG  | 473  | >FGFR2-I642' VMKVADFLG  | 661  | 188  |
| >FGFR2-I642' VMKIADFLG  | 331  | >FGFR2-I642' VMKVADFLG  | 394  | 63   |
| >FGFR2-I642' VMKIADFLG  | 423  | >FGFR2-I642' VMKVADFLG  | 337  | 86   |
| >FGFR2-I642' VMKIADFLG  | 263  | >FGFR2-I642' VMKVADFLG  | 666  | 403  |
| >FGFR2-I642' VMKIADFLG  | 128  | >FGFR2-I642' VMKVADFLG  | 75   | 53   |
| >FGFR2-I642' VMKIADFLG  | 207  | >FGFR2-I642' VMKVADFLG  | 329  | 122  |
| >FGFR2-I642' VMKIADFLG  | 15   | >FGFR2-I642' VMKVADFLG  | 22   | 7    |
| >FGFR2-I642' VMKIADFLG  | 20   | >FGFR2-I642' VMKVADFLG  | 17   | 3    |
| >FGFR2-I642' VMKIADFLG  | 365  | >FGFR2-I642' VMKVADFLG  | 257  | 108  |
| >FGFR2-I642' VMKIADFLG  | 266  | >FGFR2-I642' VMKVADFLG  | 489  | 223  |
| >FGFR2-I642' NVMKIADFLG | 435  | >FGFR2-I642' NVMKVADFLC | 553  | 118  |
| >FGFR2-I642' NVMKIADFLG | 127  | >FGFR2-I642' NVMKVADFLC | 135  | 8    |
| >FGFR2-I642' NVMKIADFLG | 464  | >FGFR2-I642' NVMKVADFLC | 1026 | 562  |
| >FGFR2-I642' NVMKIADFLG | 468  | >FGFR2-I642' NVMKVADFLC | 539  | 71   |
| >FGFR2-I642' NVMKIADFLG | 232  | >FGFR2-I642' NVMKVADFLC | 330  | 98   |
| >FGFR2-I642' NVMKIADFLG | 221  | >FGFR2-I642' NVMKVADFLC | 212  | 9    |
| >FGFR2-I642' NVMKIADFLG | 226  | >FGFR2-I642' NVMKVADFLC | 283  | 57   |
| >FGFR2-I642' NVMKIADFL  | 283  | >FGFR2-I642' NVMKVADFL  | 296  | 13   |
| >FGFR2-I642' NVMKIADFLG | 378  | >FGFR2-I642' NVMKVADFLC | 599  | 221  |
| >FGFR2-I642' NVMKIADFLG | 16   | >FGFR2-I642' NVMKVADFLC | 19   | 3    |
| >FGFR2-I642' NVMKIADFLG | 40   | >FGFR2-I642' NVMKVADFLC | 54   | 14   |
| >FGFR2-I642' NVMKIADFLG | 345  | >FGFR2-I642' NVMKVADFLC | 403  | 58   |
| >FGFR2-I642' TENNVMMKI  | 133  | >FGFR2-I642' TENNVMMKV  | 302  | 169  |

|                         |      |                        |       |       |
|-------------------------|------|------------------------|-------|-------|
| >FGFR2-I642'TENNVMKIAI  | 506  | >FGFR2-I642'TENNVMKVA  | 409   | 97    |
| >FGFR2-I642'TENNVMKIAI  | 283  | >FGFR2-I642'TENNVMKVA  | 266   | 17    |
| >FGFR2-I642'TENNVMKI    | 405  | >FGFR2-I642'TENNVMKV   | 991   | 586   |
| >FGFR2-I642'TENNVMKI    | 373  | >FGFR2-I642'TENNVMKV   | 534   | 161   |
| >FGFR2-I642'TENNVMKIA   | 266  | >FGFR2-I642'TENNVMKVA  | 194   | 72    |
| >FGFR2-I642'TENNVMKIAI  | 155  | >FGFR2-I642'TENNVMKVA  | 164   | 9     |
| >FGFR2-I642'TENNVMKIAI  | 130  | >FGFR2-I642'TENNVMKVA  | 156   | 26    |
| >FGFR2-I642'TENNVMKI    | 1510 | >FGFR2-I642'TENNVMKV   | 372   | 1138  |
| >FGFR2-I642'TENNVMKIA   | 90   | >FGFR2-I642'TENNVMKVA  | 37    | 53    |
| >FGFR2-I642'TENNVMKI    | 315  | >FGFR2-I642'TENNVMKV   | 3308  | 2993  |
| >FGFR2-I642'VTENNVMKI   | 3274 | >FGFR2-I642'VTENNVMKV  | 233   | 3041  |
| >FGFR2-I642'VTENNVMKI   | 9273 | >FGFR2-I642'VTENNVMKV  | 111   | 9162  |
| >FGFR2-I642'VTENNVMKI   | 252  | >FGFR2-I642'VTENNVMKV  | 1152  | 900   |
| >FGFR2-I642'LVTENNVMK   | 1062 | >FGFR2-I642'LVTENNVMK  | 483   | 579   |
| >FGFR2-I642'LVTENNVMK   | 691  | >FGFR2-I642'LVTENNVMK  | 160   | 531   |
| >FGFR2-I642'LVTENNVMK   | 1727 | >FGFR2-I642'LVTENNVMK  | 360   | 1367  |
| >FGFR2-I642'LVTENNVMK   | 491  | >FGFR2-I642'LVTENNVMK  | 31    | 460   |
| >FGFR2-I642'LVTENNVMK   | 1319 | >FGFR2-I642'LVTENNVMK  | 93    | 1226  |
| >FGFR2-I642'LVTENNVMK   | 2740 | >FGFR2-I642'LVTENNVMK  | 90    | 2650  |
| >FGFR2-I642'LVTENNVMK   | 3827 | >FGFR2-I642'LVTENNVMK  | 151   | 3676  |
| >FGFR2-I642'LVTENNVMK   | 151  | >FGFR2-I642'LVTENNVMK  | 4     | 147   |
| >FGFR2-I642'LVTENNVMK   | 500  | >FGFR2-I642'LVTENNVMK  | 150   | 350   |
| >FGFR2-I642'LVTENNVMK   | 829  | >FGFR2-I642'LVTENNVMK  | 125   | 704   |
| >FGFR2-I642'LVTENNVMK   | 313  | >FGFR2-I642'LVTENNVMK  | 11011 | 10698 |
| >FGFR2-K31C'KVLKAAGV    | 300  | >FGFR2-K31C'RVLKAAGV   | 773   | 473   |
| >FGFR2-K31C'KVLKAAGV    | 203  | >FGFR2-K31C'RVLKAAGV   | 236   | 33    |
| >FGFR2-K31C'KVLKAAGV    | 17   | >FGFR2-K31C'RVLKAAGV   | 19    | 2     |
| >FGFR2-K31C'KVLKAAGV    | 39   | >FGFR2-K31C'RVLKAAGV   | 41    | 2     |
| >FGFR2-K31C'KVLKAAGV    | 80   | >FGFR2-K31C'RVLKAAGV   | 163   | 83    |
| >FGFR2-K31C'KVLKAAGV    | 35   | >FGFR2-K31C'RVLKAAGV   | 63    | 28    |
| >FGFR2-K31C'KVLKAAGV    | 81   | >FGFR2-K31C'RVLKAAGV   | 112   | 31    |
| >FGFR2-K31C'KVLKAAGV    | 67   | >FGFR2-K31C'RVLKAAGV   | 74    | 7     |
| >FGFR2-K31C'KVLKAAGV    | 180  | >FGFR2-K31C'RVLKAAGV   | 159   | 21    |
| >FGFR2-K31C'KVLKAAGV    | 83   | >FGFR2-K31C'RVLKAAGV   | 58    | 25    |
| >FGFR2-K31C'KYGPDGLPYL  | 112  | >FGFR2-K31C'KYGPDGLPYL | 5737  | 5625  |
| >FGFR2-K31C'KYGPDGLPYL  | 293  | >FGFR2-K31C'KYGPDGLPYL | 32    | 261   |
| >FGFR2-K31C'KYGPDGLPYL  | 25   | >FGFR2-K31C'KYGPDGLPYL | 9     | 16    |
| >FGFR2-K31C'YLVKVLKAAGV | 218  | >FGFR2-K31C'YLRVLKAAGV | 231   | 13    |
| >FGFR2-K31C'YLVKVLKAA   | 407  | >FGFR2-K31C'YLRVLKAA   | 852   | 445   |
| >FGFR2-K31C'YLVKVLKAAGV | 88   | >FGFR2-K31C'YLRVLKAAGV | 144   | 56    |
| >FGFR2-K31C'YLVKVLKAA   | 20   | >FGFR2-K31C'YLRVLKAA   | 38    | 18    |
| >FGFR2-K31C'YLVKVLKAAGV | 16   | >FGFR2-K31C'YLRVLKAAGV | 23    | 7     |
| >FGFR2-K31C'YLVKVLKAAGV | 440  | >FGFR2-K31C'YLRVLKAAGV | 527   | 87    |

|                           |      |                           |       |       |
|---------------------------|------|---------------------------|-------|-------|
| >FGFR2-K31C YLKV LKAA     | 537  | >FGFR2-K31C YLRV LKAA     | 259   | 278   |
| >FGFR2-K31C YLKV LKAAGV   | 11   | >FGFR2-K31C YLRV LKAAGV   | 6     | 5     |
| >FGFR2-K31C YLKV LKAAGV   | 10   | >FGFR2-K31C YLRV LKAAGV   | 12    | 2     |
| >FGFR2-K31C YLKV LKAAGV   | 41   | >FGFR2-K31C YLRV LKAAGV   | 20    | 21    |
| >FGFR2-K31C YLKV LKAAGV   | 30   | >FGFR2-K31C YLRV LKAAGV   | 26    | 4     |
| >FGFR2-K31C YLKV LKAA     | 34   | >FGFR2-K31C YLRV LKAA     | 24    | 10    |
| >FGFR2-K31C YLKV LKAAGV   | 2    | >FGFR2-K31C YLRV LKAAGV   | 2     | 0     |
| >FGFR2-K31C YLKV LKAA     | 153  | >FGFR2-K31C YLRV LKAA     | 193   | 40    |
| >FGFR2-K31C YLKV LKAAG    | 351  | >FGFR2-K31C YLRV LKAAG    | 459   | 108   |
| >FGFR2-K31C LPY LKV LKA   | 1022 | >FGFR2-K31C LPY LRV LKA   | 459   | 563   |
| >FGFR2-K31C LPY LKV LK    | 175  | >FGFR2-K31C LPY LRV LK    | 161   | 14    |
| >FGFR2-K31C LPY LKV LKA   | 19   | >FGFR2-K31C LPY LRV LKA   | 19    | 0     |
| >FGFR2-K31C LPY LKV LKAA  | 12   | >FGFR2-K31C LPY LRV LKAA  | 13    | 1     |
| >FGFR2-K31C LPY LKV LKAA  | 60   | >FGFR2-K31C LPY LRV LKAA  | 58    | 2     |
| >FGFR2-K31C GLP Y LKV L   | 449  | >FGFR2-K31C GLP Y LRV L   | 363   | 86    |
| >FGFR2-K31C GLP Y LKV LKA | 351  | >FGFR2-K31C GLP Y LRV LKA | 294   | 57    |
| >FGFR2-K31C GLP Y LKV L   | 154  | >FGFR2-K31C GLP Y LRV L   | 197   | 43    |
| >FGFR2-K31C GLP Y LKV LKA | 471  | >FGFR2-K31C GLP Y LRV LKA | 390   | 81    |
| >FGFR2-K31C GLP Y LKV LK  | 403  | >FGFR2-K31C GLP Y LRV LK  | 211   | 192   |
| >FGFR2-K31C GLP Y LKV LK  | 538  | >FGFR2-K31C GLP Y LRV LK  | 270   | 268   |
| >FGFR2-K31C GPD GLP Y LKV | 1310 | >FGFR2-K31C GPD GLP Y LRV | 393   | 917   |
| >FGFR2-K31C GPD GLP Y LKV | 505  | >FGFR2-K31C GPD GLP Y LRV | 499   | 6     |
| >FGFR2-K31C YGP DGLP Y LK | 342  | >FGFR2-K31C YGP DGLP Y LR | 267   | 75    |
| >FGFR2-K31C YGP DGLP Y LK | 221  | >FGFR2-K31C YGP DGLP Y LR | 142   | 79    |
| >FGFR2-K31C YGP DGLP Y LK | 323  | >FGFR2-K31C YGP DGLP Y LR | 436   | 113   |
| >FGFR2-K31C YGP DGLP Y LK | 74   | >FGFR2-K31C YGP DGLP Y LR | 46    | 28    |
| >FGFR2-K31C YGP DGLP Y LK | 118  | >FGFR2-K31C YGP DGLP Y LR | 142   | 24    |
| >FGFR2-K31C YGP DGLP Y LK | 2684 | >FGFR2-K31C YGP DGLP Y LR | 143   | 2541  |
| >FGFR2-K65C ETT NGR LPV   | 136  | >FGFR2-K65C ETT NGR LPV   | 4836  | 4700  |
| >FGFR2-K65C ETT NGR LPV   | 349  | >FGFR2-K65C ETT NGR LPV   | 3316  | 2967  |
| >FGFR2-K65C ETT NGR LPVK  | 62   | >FGFR2-K65C ETT NGR LPVK  | 1205  | 1143  |
| >FGFR2-K65C ETT NGR LPVK  | 25   | >FGFR2-K65C ETT NGR LPVK  | 108   | 83    |
| >FGFR2-K65C ETT NGR LPV   | 22   | >FGFR2-K65C ETT NGR LPV   | 10519 | 10497 |
| >FGFR2-K65C ETT NGR LPVK  | 6    | >FGFR2-K65C ETT NGR LPVK  | 3960  | 3954  |
| >FGFR2-K65C ETT NGR LPV   | 209  | >FGFR2-K65C ETT NGR LPV   | 5423  | 5214  |
| >FGFR2-K65C ETT NGR LPVK  | 28   | >FGFR2-K65C ETT NGR LPVK  | 1300  | 1272  |
| >FGFR2-K65C ETT NGR LPVK  | 2921 | >FGFR2-K65C ETT NGR LPVK  | 84    | 2837  |
| >FGFR2-K65C ETT NGR LPV   | 578  | >FGFR2-K65C ETT NGR LPV   | 9     | 569   |
| >FGFR2-K65C ETT NGR LPV   | 1438 | >FGFR2-K65C ETT NGR LPV   | 11    | 1427  |
| >FGFR2-K65C ETT NGR LPV   | 141  | >FGFR2-K65C ETT NGR LPV   | 6261  | 6120  |
| >FGFR2-K65C ETT NGR LPVK  | 15   | >FGFR2-K65C ETT NGR LPVK  | 63    | 48    |
| >FGFR2-K65C ETT NGR LPVK  | 47   | >FGFR2-K65C ETT NGR LPVK  | 576   | 529   |
| >FGFR2-K65C ETT NGR LPVK  | 13   | >FGFR2-K65C ETT NGR LPVK  | 223   | 210   |

|                        |       |                        |       |       |
|------------------------|-------|------------------------|-------|-------|
| >FGFR2-K65☹KTTNGRLPVK  | 332   | >FGFR2-K65☹ETTNGRLPVK  | 4077  | 3745  |
| >FGFR2-K65☹KKTTNGRL    | 24861 | >FGFR2-K65☹KETTNGRL    | 109   | 24752 |
| >FGFR2-K65☹KKTTNGRLPV  | 12161 | >FGFR2-K65☹KETTNGRLPV  | 386   | 11775 |
| >FGFR2-K65☹KKTTNGRL    | 450   | >FGFR2-K65☹KETTNGRL    | 7508  | 7058  |
| >FGFR2-K65☹KKTTNGRLPV  | 56    | >FGFR2-K65☹KETTNGRLPV  | 2557  | 2501  |
| >FGFR2-K65☹KKTTNGRL    | 17650 | >FGFR2-K65☹KETTNGRL    | 46    | 17604 |
| >FGFR2-K65☹YKKTTNGR    | 289   | >FGFR2-K65☹YKETTNGR    | 5367  | 5078  |
| >FGFR2-K65☹YKKTTNGRL   | 154   | >FGFR2-K65☹YKETTNGRL   | 2906  | 2752  |
| >FGFR2-K65☹YKKTTNGRLPV | 28    | >FGFR2-K65☹YKETTNGRLPV | 435   | 407   |
| >FGFR2-K65☹YKKTTNGRL   | 6299  | >FGFR2-K65☹YKETTNGRL   | 355   | 5944  |
| >FGFR2-K65☹YKKTTNGRLPV | 4446  | >FGFR2-K65☹YKETTNGRLPV | 220   | 4226  |
| >FGFR2-K65☹YYKTTNGRL   | 12    | >FGFR2-K65☹YYKETTNGRL  | 29    | 17    |
| >FGFR2-K65☹YYKTTNGRL   | 374   | >FGFR2-K65☹YYKETTNGRL  | 632   | 258   |
| >FGFR2-K65☹YYKTTNGRL   | 158   | >FGFR2-K65☹YYKETTNGRL  | 314   | 156   |
| >FGFR2-K65☹YYKTTNGRL   | 12    | >FGFR2-K65☹YYKETTNGRL  | 15    | 3     |
| >FGFR2-K65☹YYKTTNGR    | 104   | >FGFR2-K65☹YYKETTNGR   | 168   | 64    |
| >FGFR2-K65☹YYKTTNGR    | 105   | >FGFR2-K65☹YYKETTNGR   | 51    | 54    |
| >FGFR2-K65☹YYKTTNGR    | 162   | >FGFR2-K65☹YYKETTNGR   | 134   | 28    |
| >FGFR2-K65☹YYKTTNGR    | 35    | >FGFR2-K65☹YYKETTNGR   | 46    | 11    |
| >FGFR2-K65☹DYYKTTNGF   | 262   | >FGFR2-K65☹DYYKETTNGF  | 586   | 324   |
| >FGFR2-K65☹DYYKTTNGF   | 702   | >FGFR2-K65☹DYYKETTNGF  | 452   | 250   |
| >FGFR2-K65☹DYYKTTNGF   | 224   | >FGFR2-K65☹DYYKETTNGF  | 828   | 604   |
| >FGFR2-K65☹DYYKTTNGF   | 149   | >FGFR2-K65☹DYYKETTNGF  | 283   | 134   |
| >FGFR2-K65☹DYYKTTNGF   | 25    | >FGFR2-K65☹DYYKETTNGF  | 24    | 1     |
| >FGFR2-K65☹NNIDYYK     | 331   | >FGFR2-K65☹NNIDYYKE    | 18801 | 18470 |
| >FGFR2-K65☹DINNIDYYK   | 189   | >FGFR2-K65☹DINNIDYYKE  | 30541 | 30352 |
| >FGFR2-K65☹DINNIDYYK   | 101   | >FGFR2-K65☹DINNIDYYKE  | 22732 | 22631 |
| >FGFR2-K65☹KTTNGRLPV   | 1349  | >FGFR2-K65☹MTTNGRLPV   | 365   | 984   |
| >FGFR2-K65☹KTTNGRLPV   | 136   | >FGFR2-K65☹MTTNGRLPV   | 82    | 54    |
| >FGFR2-K65☹KTTNGRLPV   | 349   | >FGFR2-K65☹MTTNGRLPV   | 32    | 317   |
| >FGFR2-K65☹KTTNGRLPVK  | 62    | >FGFR2-K65☹MTTNGRLPV   | 91    | 29    |
| >FGFR2-K65☹KTTNGRLPVK  | 25    | >FGFR2-K65☹MTTNGRLPV   | 20    | 5     |
| >FGFR2-K65☹KTTNGRLPV   | 22    | >FGFR2-K65☹MTTNGRLPV   | 90    | 68    |
| >FGFR2-K65☹KTTNGRLPVK  | 6     | >FGFR2-K65☹MTTNGRLPV   | 11    | 5     |
| >FGFR2-K65☹KTTNGRLPV   | 209   | >FGFR2-K65☹MTTNGRLPV   | 1799  | 1590  |
| >FGFR2-K65☹KTTNGRLPVK  | 28    | >FGFR2-K65☹MTTNGRLPV   | 238   | 210   |
| >FGFR2-K65☹KTTNGRLPVK  | 2921  | >FGFR2-K65☹MTTNGRLPV   | 50    | 2871  |
| >FGFR2-K65☹KTTNGRLPV   | 578   | >FGFR2-K65☹MTTNGRLPV   | 7     | 571   |
| >FGFR2-K65☹KTTNGRLPV   | 1438  | >FGFR2-K65☹MTTNGRLPV   | 35    | 1403  |
| >FGFR2-K65☹KTTNGRLPV   | 141   | >FGFR2-K65☹MTTNGRLPV   | 307   | 166   |
| >FGFR2-K65☹KTTNGRLPVK  | 15    | >FGFR2-K65☹MTTNGRLPV   | 9     | 6     |
| >FGFR2-K65☹KTTNGRLPVK  | 6489  | >FGFR2-K65☹MTTNGRLPV   | 363   | 6126  |
| >FGFR2-K65☹KTTNGRLPVK  | 47    | >FGFR2-K65☹MTTNGRLPV   | 65    | 18    |

|                       |       |                       |       |       |
|-----------------------|-------|-----------------------|-------|-------|
| >FGFR2-K65☹KTTNGRLPVK | 13    | >FGFR2-K65☹MTTNGRLPV  | 13    | 0     |
| >FGFR2-K65☹KTTNGRLPVK | 332   | >FGFR2-K65☹MTTNGRLPV  | 290   | 42    |
| >FGFR2-K65☹KTTNGRLPVK | 2818  | >FGFR2-K65☹MTTNGRLPV  | 84    | 2734  |
| >FGFR2-K65☹KKTTNGRLPV | 22432 | >FGFR2-K65☹KMTTNGRLP' | 172   | 22260 |
| >FGFR2-K65☹KKTTNGRL   | 26620 | >FGFR2-K65☹KMTTNGRL   | 380   | 26240 |
| >FGFR2-K65☹KKTTNGRLPV | 14895 | >FGFR2-K65☹KMTTNGRLP' | 61    | 14834 |
| >FGFR2-K65☹KKTTNGRLPV | 10118 | >FGFR2-K65☹KMTTNGRLP' | 25    | 10093 |
| >FGFR2-K65☹KKTTNGRLPV | 8516  | >FGFR2-K65☹KMTTNGRLP' | 235   | 8281  |
| >FGFR2-K65☹KKTTNGRL   | 24700 | >FGFR2-K65☹KMTTNGRL   | 110   | 24590 |
| >FGFR2-K65☹KKTTNGRLPV | 15272 | >FGFR2-K65☹KMTTNGRLP' | 11    | 15261 |
| >FGFR2-K65☹KKTTNGRL   | 23633 | >FGFR2-K65☹KMTTNGRL   | 230   | 23403 |
| >FGFR2-K65☹KKTTNGRLPV | 13135 | >FGFR2-K65☹KMTTNGRLP' | 14    | 13121 |
| >FGFR2-K65☹KKTTNGRLPV | 14117 | >FGFR2-K65☹KMTTNGRLP' | 18    | 14099 |
| >FGFR2-K65☹KKTTNGRL   | 30935 | >FGFR2-K65☹KMTTNGRL   | 53    | 30882 |
| >FGFR2-K65☹KKTTNGRLPV | 16595 | >FGFR2-K65☹KMTTNGRLP' | 5     | 16590 |
| >FGFR2-K65☹KKTTNGRLPV | 16198 | >FGFR2-K65☹KMTTNGRLP' | 57    | 16141 |
| >FGFR2-K65☹KKTTNGRLPV | 18251 | >FGFR2-K65☹KMTTNGRLP' | 167   | 18084 |
| >FGFR2-K65☹KKTTNGRLPV | 5884  | >FGFR2-K65☹KMTTNGRLP' | 389   | 5495  |
| >FGFR2-K65☹KKTTNGRLPV | 1312  | >FGFR2-K65☹KMTTNGRLP' | 35    | 1277  |
| >FGFR2-K65☹KKTTNGRLPV | 14206 | >FGFR2-K65☹KMTTNGRLP' | 353   | 13853 |
| >FGFR2-K65☹KKTTNGRL   | 450   | >FGFR2-K65☹KMTTNGRL   | 1079  | 629   |
| >FGFR2-K65☹KKTTNGRLPV | 56    | >FGFR2-K65☹KMTTNGRLP' | 157   | 101   |
| >FGFR2-K65☹YKKTTNGRLP | 6623  | >FGFR2-K65☹YKMTTNGRLI | 290   | 6333  |
| >FGFR2-K65☹YKKTTNGR   | 1684  | >FGFR2-K65☹YKMTTNGR   | 413   | 1271  |
| >FGFR2-K65☹YKKTTNGR   | 289   | >FGFR2-K65☹YKMTTNGR   | 101   | 188   |
| >FGFR2-K65☹YKKTTNGRL  | 154   | >FGFR2-K65☹YKMTTNGRL  | 61    | 93    |
| >FGFR2-K65☹YKKTTNGRLP | 28    | >FGFR2-K65☹YKMTTNGRLI | 13    | 15    |
| >FGFR2-K65☹YKKTTNGRL  | 6299  | >FGFR2-K65☹YKMTTNGRL  | 39    | 6260  |
| >FGFR2-K65☹YKKTTNGRLP | 4446  | >FGFR2-K65☹YKMTTNGRLI | 38    | 4408  |
| >FGFR2-K65☹YKKTTNGR   | 1028  | >FGFR2-K65☹YKMTTNGR   | 498   | 530   |
| >FGFR2-K65☹YYKTTNGRL  | 12    | >FGFR2-K65☹YYKMTTNGR  | 14    | 2     |
| >FGFR2-K65☹YYKTTNGRL  | 374   | >FGFR2-K65☹YYKMTTNGR  | 507   | 133   |
| >FGFR2-K65☹YYKTTNGRL  | 158   | >FGFR2-K65☹YYKMTTNGR  | 305   | 147   |
| >FGFR2-K65☹YYKTTNGRL  | 12    | >FGFR2-K65☹YYKMTTNGR  | 19    | 7     |
| >FGFR2-K65☹YYKTTNGR   | 104   | >FGFR2-K65☹YYKMTTNGR  | 71    | 33    |
| >FGFR2-K65☹YYKTTNGR   | 105   | >FGFR2-K65☹YYKMTTNGR  | 43    | 62    |
| >FGFR2-K65☹YYKTTNGR   | 162   | >FGFR2-K65☹YYKMTTNGR  | 113   | 49    |
| >FGFR2-K65☹YYKTTNGR   | 35    | >FGFR2-K65☹YYKMTTNGR  | 44    | 9     |
| >FGFR2-K65☹DYYKTTNGF  | 262   | >FGFR2-K65☹DYYKMTTNG  | 20    | 242   |
| >FGFR2-K65☹DYYKTTNGF  | 224   | >FGFR2-K65☹DYYKMTTNG  | 106   | 118   |
| >FGFR2-K65☹DYYKTTNGF  | 149   | >FGFR2-K65☹DYYKMTTNG  | 63    | 86    |
| >FGFR2-K65☹DYYKTTNGF  | 25    | >FGFR2-K65☹DYYKMTTNG  | 25    | 0     |
| >FGFR2-K65☹NNIDYYKK   | 331   | >FGFR2-K65☹NNIDYYKM   | 23844 | 23513 |

|                        |      |                        |       |       |
|------------------------|------|------------------------|-------|-------|
| >FGFR2-K65E DINNIDYYKK | 189  | >FGFR2-K65E DINNIDYYKM | 31794 | 31605 |
| >FGFR2-K65E DINNIDYYKK | 101  | >FGFR2-K65E DINNIDYYKM | 26542 | 26441 |
| >FGFR2-K65E KTTNGRLPV  | 136  | >FGFR2-K65E NTTNGRLPV  | 807   | 671   |
| >FGFR2-K65E KTTNGRLPV  | 349  | >FGFR2-K65E NTTNGRLPV  | 2408  | 2059  |
| >FGFR2-K65E KTTNGRLPVK | 62   | >FGFR2-K65E NTTNGRLPVK | 452   | 390   |
| >FGFR2-K65E KTTNGRLPVK | 25   | >FGFR2-K65E NTTNGRLPVK | 49    | 24    |
| >FGFR2-K65E KTTNGRLPV  | 22   | >FGFR2-K65E NTTNGRLPV  | 5619  | 5597  |
| >FGFR2-K65E KTTNGRLPVK | 6    | >FGFR2-K65E NTTNGRLPVK | 1033  | 1027  |
| >FGFR2-K65E KTTNGRLPV  | 209  | >FGFR2-K65E NTTNGRLPV  | 7558  | 7349  |
| >FGFR2-K65E KTTNGRLPVK | 28   | >FGFR2-K65E NTTNGRLPVK | 2352  | 2324  |
| >FGFR2-K65E KTTNGRLPVK | 2921 | >FGFR2-K65E NTTNGRLPVK | 78    | 2843  |
| >FGFR2-K65E KTTNGRLPV  | 578  | >FGFR2-K65E NTTNGRLPV  | 16    | 562   |
| >FGFR2-K65E KTTNGRLPV  | 1438 | >FGFR2-K65E NTTNGRLPV  | 38    | 1400  |
| >FGFR2-K65E KTTNGRLPV  | 141  | >FGFR2-K65E NTTNGRLPV  | 9772  | 9631  |
| >FGFR2-K65E KTTNGRLPVK | 15   | >FGFR2-K65E NTTNGRLPVK | 146   | 131   |
| >FGFR2-K65E KTTNGRLPVK | 47   | >FGFR2-K65E NTTNGRLPVK | 429   | 382   |
| >FGFR2-K65E KTTNGRLPVK | 13   | >FGFR2-K65E NTTNGRLPVK | 213   | 200   |
| >FGFR2-K65E KTTNGRLPVK | 332  | >FGFR2-K65E NTTNGRLPVK | 3020  | 2688  |
| >FGFR2-K65E KKTTNGRLPV | 1312 | >FGFR2-K65E KNTTNGRLPV | 404   | 908   |
| >FGFR2-K65E KKTTNGRL   | 450  | >FGFR2-K65E KNTTNGRL   | 10630 | 10180 |
| >FGFR2-K65E KKTTNGRLPV | 56   | >FGFR2-K65E KNTTNGRLPV | 4598  | 4542  |
| >FGFR2-K65E YKKTTNGR   | 289  | >FGFR2-K65E YKNTTNGR   | 403   | 114   |
| >FGFR2-K65E YKKTTNGRL  | 154  | >FGFR2-K65E YKNTTNGRL  | 200   | 46    |
| >FGFR2-K65E YKKTTNGRLP | 28   | >FGFR2-K65E YKNTTNGRLP | 29    | 1     |
| >FGFR2-K65E YKKTTNGRLP | 4446 | >FGFR2-K65E YKNTTNGRLP | 338   | 4108  |
| >FGFR2-K65E YKKTTNGRL  | 12   | >FGFR2-K65E YKNTTNGRL  | 19    | 7     |
| >FGFR2-K65E YKKTTNGRL  | 374  | >FGFR2-K65E YKNTTNGRL  | 730   | 356   |
| >FGFR2-K65E YKKTTNGRL  | 158  | >FGFR2-K65E YKNTTNGRL  | 416   | 258   |
| >FGFR2-K65E YKKTTNGRL  | 12   | >FGFR2-K65E YKNTTNGRL  | 14    | 2     |
| >FGFR2-K65E YKKTTNGR   | 104  | >FGFR2-K65E YKNTTNGR   | 70    | 34    |
| >FGFR2-K65E YKKTTNGR   | 105  | >FGFR2-K65E YKNTTNGR   | 81    | 24    |
| >FGFR2-K65E YKKTTNGR   | 162  | >FGFR2-K65E YKNTTNGR   | 130   | 32    |
| >FGFR2-K65E YKKTTNGR   | 35   | >FGFR2-K65E YKNTTNGR   | 54    | 19    |
| >FGFR2-K65E DYYKTTNGF  | 262  | >FGFR2-K65E DYYKNTTNGF | 67    | 195   |
| >FGFR2-K65E DYYKTTNGF  | 702  | >FGFR2-K65E DYYKNTTNGF | 352   | 350   |
| >FGFR2-K65E DYYKTTNGF  | 224  | >FGFR2-K65E DYYKNTTNGF | 252   | 28    |
| >FGFR2-K65E DYYKTTNGF  | 149  | >FGFR2-K65E DYYKNTTNGF | 123   | 26    |
| >FGFR2-K65E DYYKTTNGF  | 25   | >FGFR2-K65E DYYKNTTNGF | 25    | 0     |
| >FGFR2-K65E NNIDYYKK   | 331  | >FGFR2-K65E NNIDYYKN   | 21331 | 21000 |
| >FGFR2-K65E DINNIDYYKK | 189  | >FGFR2-K65E DINNIDYYKN | 31279 | 31090 |
| >FGFR2-K65E DINNIDYYKK | 101  | >FGFR2-K65E DINNIDYYKN | 25722 | 25621 |
| >FGFR2-L770 YLDLSQPLEQ | 35   | >FGFR2-L770 YVDLSQPLEQ | 29    | 6     |
| >FGFR2-L770 YLDLSQPL   | 17   | >FGFR2-L770 YVDLSQPL   | 254   | 237   |



|                         |      |                         |       |       |
|-------------------------|------|-------------------------|-------|-------|
| >FGFR2-L770YLDLSQPL     | 11   | >FGFR2-L770YVDLSQPL     | 265   | 254   |
| >FGFR2-L770YLDLSQPL     | 124  | >FGFR2-L770YVDLSQPL     | 2322  | 2198  |
| >FGFR2-L770YLDLSQPL     | 44   | >FGFR2-L770YVDLSQPL     | 41    | 3     |
| >FGFR2-L770YLDLSQPL     | 5    | >FGFR2-L770YVDLSQPL     | 236   | 231   |
| >FGFR2-L770YLDLSQPLEQ   | 478  | >FGFR2-L770YVDLSQPLEQ   | 10250 | 9772  |
| >FGFR2-L770YLDLSQPL     | 5    | >FGFR2-L770YVDLSQPL     | 197   | 192   |
| >FGFR2-L770YLDLSQPL     | 7    | >FGFR2-L770YVDLSQPL     | 243   | 236   |
| >FGFR2-L770YLDLSQPLEQ   | 260  | >FGFR2-L770YVDLSQPLEQ   | 9431  | 9171  |
| >FGFR2-L770YLDLSQPL     | 9    | >FGFR2-L770YVDLSQPL     | 422   | 413   |
| >FGFR2-L770YLDLSQPL     | 3    | >FGFR2-L770YVDLSQPL     | 137   | 134   |
| >FGFR2-L770YLDLSQPLEQ   | 47   | >FGFR2-L770YVDLSQPLEQ   | 7779  | 7732  |
| >FGFR2-L770YLDLSQPLEQ   | 468  | >FGFR2-L770YVDLSQPLEQ   | 18160 | 17692 |
| >FGFR2-L770YLDLSQPLEQ   | 167  | >FGFR2-L770YVDLSQPLEQ   | 130   | 37    |
| >FGFR2-L770YLDLSQPL     | 677  | >FGFR2-L770YVDLSQPL     | 126   | 551   |
| >FGFR2-L770YLDLSQPLEQ   | 314  | >FGFR2-L770YVDLSQPLEQ   | 2142  | 1828  |
| >FGFR2-L770YLDLSQPLEQ   | 902  | >FGFR2-L770YVDLSQPLEQ   | 161   | 741   |
| >FGFR2-L770YLDLSQPL     | 235  | >FGFR2-L770YVDLSQPL     | 401   | 166   |
| >FGFR2-L770YLDLSQPLEQ   | 1351 | >FGFR2-L770YVDLSQPLEQ   | 255   | 1096  |
| >FGFR2-L770YLDLSQPLEQ   | 171  | >FGFR2-L770YVDLSQPLEQ   | 303   | 132   |
| >FGFR2-L770ILTTLTTNEEYL | 525  | >FGFR2-L770ILTTLTTNEEYV | 110   | 415   |
| >FGFR2-L770ILTTLTTNEEYL | 19   | >FGFR2-L770ILTTLTTNEEYV | 13    | 6     |
| >FGFR2-L770ILTTLTTNEEYL | 764  | >FGFR2-L770ILTTLTTNEEYV | 78    | 686   |
| >FGFR2-L770ILTTLTTNEEYL | 970  | >FGFR2-L770ILTTLTTNEEYV | 175   | 795   |
| >FGFR2-L770ILTTLTTNEEYL | 44   | >FGFR2-L770ILTTLTTNEEYV | 6     | 38    |
| >FGFR2-L770ILTTLTTNEEYL | 59   | >FGFR2-L770ILTTLTTNEEYV | 8     | 51    |
| >FGFR2-L770ILTTLTTNEEYL | 71   | >FGFR2-L770ILTTLTTNEEYV | 10    | 61    |
| >FGFR2-L770ILTTLTTNEEYL | 28   | >FGFR2-L770ILTTLTTNEEYV | 4     | 24    |
| >FGFR2-L770ILTTLTTNEEYL | 10   | >FGFR2-L770ILTTLTTNEEYV | 3     | 7     |
| >FGFR2-L770EYLDLSQPL    | 108  | >FGFR2-L770EYVDLSQPL    | 776   | 668   |
| >FGFR2-L770EYLDLSQPL    | 308  | >FGFR2-L770EYVDLSQPL    | 1817  | 1509  |
| >FGFR2-L770EEYLDLSQ     | 285  | >FGFR2-L770EEYVDLSQ     | 1230  | 945   |
| >FGFR2-L770EEYLDLSQPL   | 31   | >FGFR2-L770EEYVDLSQPL   | 62    | 31    |
| >FGFR2-L770EEYLDLSQPL   | 343  | >FGFR2-L770EEYVDLSQPL   | 279   | 64    |
| >FGFR2-L770EEYLDLSQPL   | 71   | >FGFR2-L770EEYVDLSQPL   | 86    | 15    |
| >FGFR2-L770EEYLDLSQPL   | 460  | >FGFR2-L770EEYVDLSQPL   | 463   | 3     |
| >FGFR2-L770EEYLDLSQPL   | 280  | >FGFR2-L770EEYVDLSQPL   | 229   | 51    |
| >FGFR2-L770NEEYLDLSQP   | 171  | >FGFR2-L770NEEYVDLSQP   | 151   | 20    |
| >FGFR2-L770NEEYLDLSQP   | 59   | >FGFR2-L770NEEYVDLSQP   | 77    | 18    |
| >FGFR2-L770NEEYLDLSQP   | 545  | >FGFR2-L770NEEYVDLSQP   | 498   | 47    |
| >FGFR2-L770NEEYLDLSQP   | 62   | >FGFR2-L770NEEYVDLSQP   | 44    | 18    |
| >FGFR2-L770NEEYLDLSQP   | 328  | >FGFR2-L770NEEYVDLSQP   | 791   | 463   |
| >FGFR2-L770TTNEEYLDL    | 3583 | >FGFR2-L770TTNEEYVDL    | 485   | 3098  |
| >FGFR2-L770LTTNEEYL     | 527  | >FGFR2-L770LTTNEEYV     | 437   | 90    |

|                         |      |                        |      |      |
|-------------------------|------|------------------------|------|------|
| >FGFR2-L770 LTTNEEYL    | 3100 | >FGFR2-L770 LTTNEEYV   | 448  | 2652 |
| >FGFR2-L770 LTTNEEYL    | 1686 | >FGFR2-L770 LTTNEEYV   | 92   | 1594 |
| >FGFR2-L770 LTTNEEYL    | 5090 | >FGFR2-L770 LTTNEEYV   | 246  | 4844 |
| >FGFR2-L770 LTTNEEYL    | 2808 | >FGFR2-L770 LTTNEEYV   | 67   | 2741 |
| >FGFR2-L770 LTTNEEYL    | 880  | >FGFR2-L770 LTTNEEYV   | 82   | 798  |
| >FGFR2-L770 LTTNEEYL    | 373  | >FGFR2-L770 LTTNEEYV   | 6497 | 6124 |
| >FGFR2-L770 LTTNEEYLDL  | 426  | >FGFR2-L770 LTTNEEYVDL | 756  | 330  |
| >FGFR2-L770 LTTNEEYLDL  | 332  | >FGFR2-L770 LTTNEEYVDL | 447  | 115  |
| >FGFR2-L770 LTTNEEYLDL  | 122  | >FGFR2-L770 LTTNEEYVDL | 106  | 16   |
| >FGFR2-L770 TLTTNEEYL   | 1171 | >FGFR2-L770 TLTTNEEYV  | 219  | 952  |
| >FGFR2-L770 TLTTNEEYL   | 23   | >FGFR2-L770 TLTTNEEYV  | 19   | 4    |
| >FGFR2-L770 TLTTNEEYLDI | 385  | >FGFR2-L770 TLTTNEEYVD | 195  | 190  |
| >FGFR2-L770 TLTTNEEYL   | 3621 | >FGFR2-L770 TLTTNEEYV  | 347  | 3274 |
| >FGFR2-L770 TLTTNEEYL   | 83   | >FGFR2-L770 TLTTNEEYV  | 8    | 75   |
| >FGFR2-L770 TLTTNEEYL   | 74   | >FGFR2-L770 TLTTNEEYV  | 10   | 64   |
| >FGFR2-L770 TLTTNEEYL   | 157  | >FGFR2-L770 TLTTNEEYV  | 15   | 142  |
| >FGFR2-L770 TLTTNEEYL   | 160  | >FGFR2-L770 TLTTNEEYV  | 9    | 151  |
| >FGFR2-L770 TLTTNEEYL   | 13   | >FGFR2-L770 TLTTNEEYV  | 4    | 9    |
| >FGFR2-L770 TLTTNEEYLDI | 24   | >FGFR2-L770 TLTTNEEYVD | 18   | 6    |
| >FGFR2-L770 TLTTNEEYL   | 1222 | >FGFR2-L770 TLTTNEEYV  | 85   | 1137 |
| >FGFR2-L770 LTLTTNEEYL  | 763  | >FGFR2-L770 LTLTTNEEYV | 142  | 621  |
| >FGFR2-L770 LTLTTNEEYL  | 69   | >FGFR2-L770 LTLTTNEEYV | 69   | 0    |
| >FGFR2-L770 LTLTTNEEYL  | 1046 | >FGFR2-L770 LTLTTNEEYV | 202  | 844  |
| >FGFR2-L770 LTLTTNEEYL  | 198  | >FGFR2-L770 LTLTTNEEYV | 60   | 138  |
| >FGFR2-L770 LTLTTNEEYL  | 189  | >FGFR2-L770 LTLTTNEEYV | 13   | 176  |
| >FGFR2-L770 LTLTTNEEYL  | 2007 | >FGFR2-L770 LTLTTNEEYV | 135  | 1872 |
| >FGFR2-L770 LTLTTNEEYL  | 2756 | >FGFR2-L770 LTLTTNEEYV | 92   | 2664 |
| >FGFR2-L770 LTLTTNEEYL  | 1870 | >FGFR2-L770 LTLTTNEEYV | 119  | 1751 |
| >FGFR2-L770 LTLTTNEEYL  | 3986 | >FGFR2-L770 LTLTTNEEYV | 118  | 3868 |
| >FGFR2-L770 LTLTTNEEYL  | 812  | >FGFR2-L770 LTLTTNEEYV | 118  | 694  |
| >FGFR2-L770 LTLTTNEEYL  | 713  | >FGFR2-L770 LTLTTNEEYV | 64   | 649  |
| >FGFR2-L770 LTLTTNEEYL  | 89   | >FGFR2-L770 LTLTTNEEYV | 1940 | 1851 |
| >FGFR2-L770 LTLTTNEEYL  | 389  | >FGFR2-L770 LTLTTNEEYV | 5752 | 5363 |
| >FGFR2-L770 LTLTTNEEYL  | 270  | >FGFR2-L770 LTLTTNEEYV | 482  | 212  |
| >FGFR2-M39 MVVTVILCR    | 825  | >FGFR2-M39 RVVTVILCR   | 449  | 376  |
| >FGFR2-M39 MVVTVILCRM   | 188  | >FGFR2-M39 RVVTVILCRM  | 121  | 67   |
| >FGFR2-M39 MVVTVILCR    | 62   | >FGFR2-M39 RVVTVILCR   | 67   | 5    |
| >FGFR2-M39 MVVTVILCRM   | 63   | >FGFR2-M39 RVVTVILCRM  | 63   | 0    |
| >FGFR2-M39 MVVTVILCRM   | 30   | >FGFR2-M39 RVVTVILCRM  | 67   | 37   |
| >FGFR2-M39 MVVTVILCRM   | 339  | >FGFR2-M39 RVVTVILCRM  | 65   | 274  |
| >FGFR2-M39 MVVTVILCR    | 67   | >FGFR2-M39 RVVTVILCR   | 41   | 26   |
| >FGFR2-M39 MVVTVILCR    | 122  | >FGFR2-M39 RVVTVILCR   | 2619 | 2497 |
| >FGFR2-M39 MVVTVILCR    | 4    | >FGFR2-M39 RVVTVILCR   | 55   | 51   |

|                        |       |                        |       |       |
|------------------------|-------|------------------------|-------|-------|
| >FGFR2-M39 MVVTVILCRM  | 9     | >FGFR2-M39 RVVTVILCRM  | 375   | 366   |
| >FGFR2-M39 MVVTVILC    | 426   | >FGFR2-M39 RVVTVILC    | 10480 | 10054 |
| >FGFR2-M39 MVVTVILCRM  | 372   | >FGFR2-M39 RVVTVILCRM  | 1500  | 1128  |
| >FGFR2-M39 MVVTVILCRM  | 621   | >FGFR2-M39 RVVTVILCRM  | 124   | 497   |
| >FGFR2-M39 MVVTVILCRM  | 409   | >FGFR2-M39 RVVTVILCRM  | 173   | 236   |
| >FGFR2-M39 MVVTVILCRM  | 1050  | >FGFR2-M39 RVVTVILCRM  | 291   | 759   |
| >FGFR2-M39 MVVTVILCR   | 287   | >FGFR2-M39 RVVTVILCR   | 121   | 166   |
| >FGFR2-M39 CMVVTVILCR  | 249   | >FGFR2-M39 CRVVTVILCRI | 3168  | 2919  |
| >FGFR2-M39 CMVVTVIL    | 414   | >FGFR2-M39 CRVVTVIL    | 29101 | 28687 |
| >FGFR2-M39 CMVVTVIL    | 175   | >FGFR2-M39 CRVVTVIL    | 23356 | 23181 |
| >FGFR2-M39 CMVVTVIL    | 186   | >FGFR2-M39 CRVVTVIL    | 31084 | 30898 |
| >FGFR2-M39 CMVVTVILCR  | 149   | >FGFR2-M39 CRVVTVILCR  | 1492  | 1343  |
| >FGFR2-M39 CMVVTVILCR  | 206   | >FGFR2-M39 CRVVTVILCR  | 2001  | 1795  |
| >FGFR2-M39 CMVVTVILCR  | 399   | >FGFR2-M39 CRVVTVILCR  | 6305  | 5906  |
| >FGFR2-M39 CMVVTVIL    | 162   | >FGFR2-M39 CRVVTVIL    | 414   | 252   |
| >FGFR2-M39 CMVVTVILCR  | 19043 | >FGFR2-M39 CRVVTVILCR  | 68    | 18975 |
| >FGFR2-M39 CMVVTVILCR  | 14156 | >FGFR2-M39 CRVVTVILCRI | 289   | 13867 |
| >FGFR2-M39 CMVVTVIL    | 342   | >FGFR2-M39 CRVVTVIL    | 103   | 239   |
| >FGFR2-M39 CMVVTVIL    | 13631 | >FGFR2-M39 CRVVTVIL    | 297   | 13334 |
| >FGFR2-M39 CMVVTVILCR  | 26206 | >FGFR2-M39 CRVVTVILCR  | 419   | 25787 |
| >FGFR2-M39 CMVVTVILCR  | 232   | >FGFR2-M39 CRVVTVILCR  | 9459  | 9227  |
| >FGFR2-M39 CMVVTVILCR  | 146   | >FGFR2-M39 CRVVTVILCR  | 1113  | 967   |
| >FGFR2-M39 YCIGVFLIACM | 35    | >FGFR2-M39 YCIGVFLIACR | 9619  | 9584  |
| >FGFR2-M39 YCIGVFLIACM | 23609 | >FGFR2-M39 YCIGVFLIACR | 170   | 23439 |
| >FGFR2-M39 YCIGVFLIACM | 27785 | >FGFR2-M39 YCIGVFLIACR | 132   | 27653 |
| >FGFR2-M39 YCIGVFLIACM | 241   | >FGFR2-M39 YCIGVFLIACR | 11008 | 10767 |
| >FGFR2-M39 YCIGVFLIACM | 28411 | >FGFR2-M39 YCIGVFLIACR | 248   | 28163 |
| >FGFR2-M39 ACMVVTVI    | 8313  | >FGFR2-M39 ACRVVTVI    | 315   | 7998  |
| >FGFR2-M39 ACMVVTVIL   | 7902  | >FGFR2-M39 ACRVVTVIL   | 221   | 7681  |
| >FGFR2-M39 ACMVVTVILC  | 481   | >FGFR2-M39 ACRVVTVILCI | 569   | 88    |
| >FGFR2-M39 ACMVVTVI    | 238   | >FGFR2-M39 ACRVVTVI    | 4785  | 4547  |
| >FGFR2-M39 ACMVVTVIL   | 164   | >FGFR2-M39 ACRVVTVIL   | 4556  | 4392  |
| >FGFR2-M39 IACMVVTV    | 344   | >FGFR2-M39 IACRVVTV    | 306   | 38    |
| >FGFR2-M39 IACMVVTV    | 78    | >FGFR2-M39 IACRVVTV    | 83    | 5     |
| >FGFR2-M39 IACMVVTV    | 216   | >FGFR2-M39 IACRVVTV    | 238   | 22    |
| >FGFR2-M39 IACMVVTVI   | 459   | >FGFR2-M39 IACRVVTVI   | 123   | 336   |
| >FGFR2-M39 IACMVVTVI   | 227   | >FGFR2-M39 IACRVVTVI   | 110   | 117   |
| >FGFR2-M39 LIACMVVTV   | 24    | >FGFR2-M39 LIACRVVTV   | 39    | 15    |
| >FGFR2-M39 LIACMVVTVII | 351   | >FGFR2-M39 LIACRVVTVII | 570   | 219   |
| >FGFR2-M39 LIACMVVTV   | 35    | >FGFR2-M39 LIACRVVTV   | 31    | 4     |
| >FGFR2-M39 LIACMVVTVII | 57    | >FGFR2-M39 LIACRVVTVII | 54    | 3     |
| >FGFR2-M39 LIACMVVTV   | 9     | >FGFR2-M39 LIACRVVTV   | 7     | 2     |
| >FGFR2-M39 LIACMVVTVI  | 403   | >FGFR2-M39 LIACRVVTVI  | 529   | 126   |

|                        |      |                        |      |      |
|------------------------|------|------------------------|------|------|
| >FGFR2-M39 LIACMVVTVII | 133  | >FGFR2-M39 LIACRVVTVII | 113  | 20   |
| >FGFR2-M39 LIACMVVTV   | 32   | >FGFR2-M39 LIACRVVTV   | 21   | 11   |
| >FGFR2-M39 LIACMVVTVII | 500  | >FGFR2-M39 LIACRVVTVII | 407  | 93   |
| >FGFR2-M39 LIACMVVTV   | 8    | >FGFR2-M39 LIACRVVTV   | 8    | 0    |
| >FGFR2-M39 LIACMVVTVI  | 209  | >FGFR2-M39 LIACRVVTVI  | 230  | 21   |
| >FGFR2-M39 LIACMVVTV   | 21   | >FGFR2-M39 LIACRVVTV   | 23   | 2    |
| >FGFR2-M39 LIACMVVTV   | 25   | >FGFR2-M39 LIACRVVTV   | 36   | 11   |
| >FGFR2-M39 LIACMVVTV   | 13   | >FGFR2-M39 LIACRVVTV   | 41   | 28   |
| >FGFR2-M39 LIACMVVTV   | 4    | >FGFR2-M39 LIACRVVTV   | 4    | 0    |
| >FGFR2-M39 LIACMVVTVII | 212  | >FGFR2-M39 LIACRVVTVII | 336  | 124  |
| >FGFR2-M39 LIACMVVTV   | 34   | >FGFR2-M39 LIACRVVTV   | 74   | 40   |
| >FGFR2-M39 LIACMVVTVII | 295  | >FGFR2-M39 LIACRVVTVII | 569  | 274  |
| >FGFR2-M39 LIACMVVTV   | 195  | >FGFR2-M39 LIACRVVTV   | 546  | 351  |
| >FGFR2-M39 LIACMVVTV   | 3273 | >FGFR2-M39 LIACRVVTV   | 147  | 3126 |
| >FGFR2-M39 LIACMVVTVII | 2248 | >FGFR2-M39 LIACRVVTVII | 288  | 1960 |
| >FGFR2-M39 LIACMVVTVI  | 280  | >FGFR2-M39 LIACRVVTVI  | 204  | 76   |
| >FGFR2-M39 FLIACMVVTV  | 584  | >FGFR2-M39 FLIACRVVTVI | 423  | 161  |
| >FGFR2-M39 FLIACMVV    | 7    | >FGFR2-M39 FLIACRVV    | 15   | 8    |
| >FGFR2-M39 FLIACMVVT   | 18   | >FGFR2-M39 FLIACRVVT   | 102  | 84   |
| >FGFR2-M39 FLIACMVVTV  | 10   | >FGFR2-M39 FLIACRVVTV  | 12   | 2    |
| >FGFR2-M39 FLIACMVVTV  | 10   | >FGFR2-M39 FLIACRVVTVI | 14   | 4    |
| >FGFR2-M39 FLIACMVV    | 3    | >FGFR2-M39 FLIACRVV    | 7    | 4    |
| >FGFR2-M39 FLIACMVVT   | 11   | >FGFR2-M39 FLIACRVVT   | 53   | 42   |
| >FGFR2-M39 FLIACMVVTV  | 7    | >FGFR2-M39 FLIACRVVTV  | 10   | 3    |
| >FGFR2-M39 FLIACMVVTV  | 4    | >FGFR2-M39 FLIACRVVTVI | 6    | 2    |
| >FGFR2-M39 FLIACMVV    | 2    | >FGFR2-M39 FLIACRVV    | 3    | 1    |
| >FGFR2-M39 FLIACMVVT   | 14   | >FGFR2-M39 FLIACRVVT   | 151  | 137  |
| >FGFR2-M39 FLIACMVVTV  | 8    | >FGFR2-M39 FLIACRVVTV  | 9    | 1    |
| >FGFR2-M39 FLIACMVVTV  | 3    | >FGFR2-M39 FLIACRVVTVI | 5    | 2    |
| >FGFR2-M39 FLIACMVV    | 4    | >FGFR2-M39 FLIACRVV    | 10   | 6    |
| >FGFR2-M39 FLIACMVVT   | 22   | >FGFR2-M39 FLIACRVVT   | 193  | 171  |
| >FGFR2-M39 FLIACMVVTV  | 25   | >FGFR2-M39 FLIACRVVTV  | 30   | 5    |
| >FGFR2-M39 FLIACMVVTV  | 9    | >FGFR2-M39 FLIACRVVTVI | 16   | 7    |
| >FGFR2-M39 FLIACMVV    | 3    | >FGFR2-M39 FLIACRVV    | 5    | 2    |
| >FGFR2-M39 FLIACMVVT   | 178  | >FGFR2-M39 FLIACRVVT   | 1642 | 1464 |
| >FGFR2-M39 FLIACMVVTV  | 2    | >FGFR2-M39 FLIACRVVTV  | 3    | 1    |
| >FGFR2-M39 FLIACMVVTV  | 5    | >FGFR2-M39 FLIACRVVTVI | 14   | 9    |
| >FGFR2-M39 FLIACMVV    | 3    | >FGFR2-M39 FLIACRVV    | 6    | 3    |
| >FGFR2-M39 FLIACMVVT   | 149  | >FGFR2-M39 FLIACRVVT   | 1913 | 1764 |
| >FGFR2-M39 FLIACMVVTV  | 2    | >FGFR2-M39 FLIACRVVTV  | 3    | 1    |
| >FGFR2-M39 FLIACMVVTV  | 7    | >FGFR2-M39 FLIACRVVTVI | 13   | 6    |
| >FGFR2-M39 FLIACMVV    | 6    | >FGFR2-M39 FLIACRVV    | 14   | 8    |
| >FGFR2-M39 FLIACMVVTV  | 5    | >FGFR2-M39 FLIACRVVTV  | 6    | 1    |

|                       |     |                        |      |      |
|-----------------------|-----|------------------------|------|------|
| >FGFR2-M39 FLIACMVVTV | 21  | >FGFR2-M39 FLIACRVVTVI | 48   | 27   |
| >FGFR2-M39 FLIACMVV   | 6   | >FGFR2-M39 FLIACRVV    | 25   | 19   |
| >FGFR2-M39 FLIACMVVTV | 5   | >FGFR2-M39 FLIACRVVTV  | 9    | 4    |
| >FGFR2-M39 FLIACMVVTV | 98  | >FGFR2-M39 FLIACRVVTVI | 219  | 121  |
| >FGFR2-M39 FLIACMVV   | 2   | >FGFR2-M39 FLIACRVV    | 2    | 0    |
| >FGFR2-M39 FLIACMVVT  | 20  | >FGFR2-M39 FLIACRVVT   | 26   | 6    |
| >FGFR2-M39 FLIACMVVTV | 1   | >FGFR2-M39 FLIACRVVTV  | 1    | 0    |
| >FGFR2-M39 FLIACMVVTV | 4   | >FGFR2-M39 FLIACRVVTVI | 5    | 1    |
| >FGFR2-M39 FLIACMVV   | 56  | >FGFR2-M39 FLIACRVV    | 298  | 242  |
| >FGFR2-M39 FLIACMVVTV | 321 | >FGFR2-M39 FLIACRVVTV  | 241  | 80   |
| >FGFR2-M39 FLIACMVVTV | 181 | >FGFR2-M39 FLIACRVVTVI | 231  | 50   |
| >FGFR2-M39 FLIACMVV   | 315 | >FGFR2-M39 FLIACRVV    | 2344 | 2029 |
| >FGFR2-M39 FLIACMVVTV | 126 | >FGFR2-M39 FLIACRVVTV  | 343  | 217  |
| >FGFR2-M39 FLIACMVV   | 455 | >FGFR2-M39 FLIACRVV    | 869  | 414  |
| >FGFR2-M39 FLIACMVVTV | 430 | >FGFR2-M39 FLIACRVVTV  | 597  | 167  |
| >FGFR2-M39 FLIACMVVTV | 194 | >FGFR2-M39 FLIACRVVTVI | 258  | 64   |
| >FGFR2-M39 FLIACMVV   | 332 | >FGFR2-M39 FLIACRVV    | 701  | 369  |
| >FGFR2-M39 FLIACMVVTV | 246 | >FGFR2-M39 FLIACRVVTV  | 197  | 49   |
| >FGFR2-M39 FLIACMVVTV | 203 | >FGFR2-M39 FLIACRVVTVI | 182  | 21   |
| >FGFR2-M39 FLIACMVVTV | 385 | >FGFR2-M39 FLIACRVVTV  | 511  | 126  |
| >FGFR2-M39 FLIACMVVTV | 297 | >FGFR2-M39 FLIACRVVTVI | 355  | 58   |
| >FGFR2-M39 VFLIACMV   | 537 | >FGFR2-M39 VFLIACRV    | 309  | 228  |
| >FGFR2-M39 VFLIACMV   | 437 | >FGFR2-M39 VFLIACRV    | 688  | 251  |
| >FGFR2-M39 VFLIACMVVT | 408 | >FGFR2-M39 VFLIACRVVT  | 550  | 142  |
| >FGFR2-M39 VFLIACMV   | 258 | >FGFR2-M39 VFLIACRV    | 793  | 535  |
| >FGFR2-M39 VFLIACMVVT | 277 | >FGFR2-M39 VFLIACRVVT  | 661  | 384  |
| >FGFR2-M39 VFLIACMV   | 506 | >FGFR2-M39 VFLIACRV    | 440  | 66   |
| >FGFR2-M39 VFLIACMVVT | 344 | >FGFR2-M39 VFLIACRVVT  | 938  | 594  |
| >FGFR2-M39 VFLIACMVVT | 458 | >FGFR2-M39 VFLIACRVVT  | 1531 | 1073 |
| >FGFR2-M39 GVFLIACMV  | 496 | >FGFR2-M39 GVFLIACRV   | 768  | 272  |
| >FGFR2-M39 GVFLIACMV  | 191 | >FGFR2-M39 GVFLIACRVV  | 1836 | 1645 |
| >FGFR2-M39 GVFLIACMV  | 181 | >FGFR2-M39 GVFLIACRV   | 196  | 15   |
| >FGFR2-M39 GVFLIACMV  | 273 | >FGFR2-M39 GVFLIACRVV  | 1294 | 1021 |
| >FGFR2-M39 GVFLIACMV  | 230 | >FGFR2-M39 GVFLIACRV   | 281  | 51   |
| >FGFR2-M39 GVFLIACMV  | 129 | >FGFR2-M39 GVFLIACRVV  | 289  | 160  |
| >FGFR2-M39 GVFLIACMV  | 79  | >FGFR2-M39 GVFLIACRV   | 174  | 95   |
| >FGFR2-M39 GVFLIACMV  | 187 | >FGFR2-M39 GVFLIACRVV  | 950  | 763  |
| >FGFR2-M39 GVFLIACMV  | 29  | >FGFR2-M39 GVFLIACRV   | 44   | 15   |
| >FGFR2-M39 GVFLIACMV  | 233 | >FGFR2-M39 GVFLIACRVV  | 489  | 256  |
| >FGFR2-M39 GVFLIACMV  | 426 | >FGFR2-M39 GVFLIACRV   | 481  | 55   |
| >FGFR2-M39 GVFLIACMV  | 19  | >FGFR2-M39 GVFLIACRV   | 33   | 14   |
| >FGFR2-M39 GVFLIACMV  | 75  | >FGFR2-M39 GVFLIACRVV  | 442  | 367  |
| >FGFR2-M39 GVFLIACMV  | 37  | >FGFR2-M39 GVFLIACRV   | 26   | 11   |

|                        |       |                        |      |       |
|------------------------|-------|------------------------|------|-------|
| >FGFR2-M39 GVFLIACMVV  | 55    | >FGFR2-M39 GVFLIACRVV  | 306  | 251   |
| >FGFR2-M39 GVFLIACM    | 13032 | >FGFR2-M39 GVFLIACR    | 95   | 12937 |
| >FGFR2-M39 GVFLIACM    | 10110 | >FGFR2-M39 GVFLIACR    | 30   | 10080 |
| >FGFR2-M39 GVFLIACM    | 25458 | >FGFR2-M39 GVFLIACR    | 240  | 25218 |
| >FGFR2-M39 GVFLIACM    | 13033 | >FGFR2-M39 GVFLIACR    | 15   | 13018 |
| >FGFR2-M39 GVFLIACMV   | 226   | >FGFR2-M39 GVFLIACRV   | 177  | 49    |
| >FGFR2-M39 GVFLIACMVV  | 287   | >FGFR2-M39 GVFLIACRVV  | 1957 | 1670  |
| >FGFR2-M39 GVFLIACMV   | 292   | >FGFR2-M39 GVFLIACRV   | 704  | 412   |
| >FGFR2-M39 IGVFLIACM   | 18457 | >FGFR2-M39 IGVFLIACR   | 211  | 18246 |
| >FGFR2-M39 IGVFLIACM   | 28830 | >FGFR2-M39 IGVFLIACR   | 145  | 28685 |
| >FGFR2-M39 IGVFLIACM   | 31348 | >FGFR2-M39 IGVFLIACR   | 451  | 30897 |
| >FGFR2-M39 CIGVFLIACM' | 184   | >FGFR2-M39 CIGVFLIACRV | 250  | 66    |
| >FGFR2-M39 CIGVFLIACM' | 354   | >FGFR2-M39 CIGVFLIACRV | 383  | 29    |
| >FGFR2-M39 CIGVFLIACM' | 115   | >FGFR2-M39 CIGVFLIACRV | 65   | 50    |
| >FGFR2-M39 CIGVFLIACM  | 11498 | >FGFR2-M39 CIGVFLIACR  | 81   | 11417 |
| >FGFR2-M39 CIGVFLIACM  | 16528 | >FGFR2-M39 CIGVFLIACR  | 163  | 16365 |
| >FGFR2-M39 CIGVFLIACM  | 35294 | >FGFR2-M39 CIGVFLIACR  | 441  | 34853 |
| >FGFR2-M39 CIGVFLIACM  | 27444 | >FGFR2-M39 CIGVFLIACR  | 172  | 27272 |
| >FGFR2-M64 MKIADFGL    | 339   | >FGFR2-M64 IKIADFGL    | 1118 | 779   |
| >FGFR2-M64 MKIADFGLAF  | 454   | >FGFR2-M64 IKIADFGLAR  | 1292 | 838   |
| >FGFR2-M64 MKIADFGL    | 103   | >FGFR2-M64 IKIADFGL    | 134  | 31    |
| >FGFR2-M64 MKIADFGLAF  | 79    | >FGFR2-M64 IKIADFGLAR  | 98   | 19    |
| >FGFR2-M64 MKIADFGL    | 168   | >FGFR2-M64 IKIADFGL    | 2825 | 2657  |
| >FGFR2-M64 MKIADFGLAF  | 388   | >FGFR2-M64 IKIADFGLAR  | 553  | 165   |
| >FGFR2-M64 VMKIADFGL   | 170   | >FGFR2-M64 VIKIADFGL   | 2211 | 2041  |
| >FGFR2-M64 VMKIADFGL   | 473   | >FGFR2-M64 VIKIADFGL   | 3740 | 3267  |
| >FGFR2-M64 VMKIADFGLA  | 331   | >FGFR2-M64 VIKIADFGLA  | 1433 | 1102  |
| >FGFR2-M64 VMKIADFGL   | 423   | >FGFR2-M64 VIKIADFGL   | 996  | 573   |
| >FGFR2-M64 VMKIADFGL   | 263   | >FGFR2-M64 VIKIADFGL   | 7179 | 6916  |
| >FGFR2-M64 VMKIADFGL   | 128   | >FGFR2-M64 VIKIADFGL   | 8261 | 8133  |
| >FGFR2-M64 VMKIADFGL   | 207   | >FGFR2-M64 VIKIADFGL   | 6874 | 6667  |
| >FGFR2-M64 VMKIADFGL   | 15    | >FGFR2-M64 VIKIADFGL   | 835  | 820   |
| >FGFR2-M64 VMKIADFGLA  | 20    | >FGFR2-M64 VIKIADFGLA  | 86   | 66    |
| >FGFR2-M64 VMKIADFGLA  | 365   | >FGFR2-M64 VIKIADFGLA  | 675  | 310   |
| >FGFR2-M64 VMKIADFGLA  | 266   | >FGFR2-M64 VIKIADFGLA  | 393  | 127   |
| >FGFR2-M64 NVMKIADFGI  | 435   | >FGFR2-M64 NVIKIADFGL  | 2508 | 2073  |
| >FGFR2-M64 NVMKIADFGI  | 127   | >FGFR2-M64 NVIKIADFGL  | 590  | 463   |
| >FGFR2-M64 NVMKIADFGI  | 464   | >FGFR2-M64 NVIKIADFGLA | 1753 | 1289  |
| >FGFR2-M64 NVMKIADFGI  | 468   | >FGFR2-M64 NVIKIADFGLA | 1054 | 586   |
| >FGFR2-M64 NVMKIADFGI  | 232   | >FGFR2-M64 NVIKIADFGL  | 439  | 207   |
| >FGFR2-M64 NVMKIADFGI  | 221   | >FGFR2-M64 NVIKIADFGLA | 471  | 250   |
| >FGFR2-M64 NVMKIADFGI  | 226   | >FGFR2-M64 NVIKIADFGL  | 8333 | 8107  |
| >FGFR2-M64 NVMKIADF    | 1100  | >FGFR2-M64 NVIKIADF    | 425  | 675   |

|                        |      |                         |      |      |
|------------------------|------|-------------------------|------|------|
| >FGFR2-M64 NVMKIADF    | 283  | >FGFR2-M64 NVIKIADF     | 36   | 247  |
| >FGFR2-M64 NVMKIADFG   | 378  | >FGFR2-M64 NVIKIADFG    | 573  | 195  |
| >FGFR2-M64 NVMKIADFGI  | 16   | >FGFR2-M64 NVIKIADFGL/  | 23   | 7    |
| >FGFR2-M64 NVMKIADFGI  | 40   | >FGFR2-M64 NVIKIADFGL   | 121  | 81   |
| >FGFR2-M64 NVMKIADFGI  | 345  | >FGFR2-M64 NVIKIADFGL/  | 1113 | 768  |
| >FGFR2-M64 TENNVMIKI   | 133  | >FGFR2-M64 TENNVIKI     | 135  | 2    |
| >FGFR2-M64 TENNVMIKIAI | 283  | >FGFR2-M64 TENNVIKIADI  | 263  | 20   |
| >FGFR2-M64 TENNVMIKI   | 405  | >FGFR2-M64 TENNVIKI     | 353  | 52   |
| >FGFR2-M64 TENNVMIKI   | 373  | >FGFR2-M64 TENNVIKI     | 378  | 5    |
| >FGFR2-M64 TENNVMIKIA  | 266  | >FGFR2-M64 TENNVIKIA    | 287  | 21   |
| >FGFR2-M64 TENNVMIKIAI | 155  | >FGFR2-M64 TENNVIKIADI  | 132  | 23   |
| >FGFR2-M64 TENNVMIKIAI | 130  | >FGFR2-M64 TENNVIKIADI  | 103  | 27   |
| >FGFR2-M64 TENNVMIKIA  | 90   | >FGFR2-M64 TENNVIKIA    | 104  | 14   |
| >FGFR2-M64 TENNVMIKI   | 315  | >FGFR2-M64 TENNVIKI     | 561  | 246  |
| >FGFR2-M64 VTENNVMIK   | 61   | >FGFR2-M64 VTENNVIK     | 96   | 35   |
| >FGFR2-M64 VTENNVMIK   | 254  | >FGFR2-M64 VTENNVIK     | 654  | 400  |
| >FGFR2-M64 VTENNVMIKI  | 252  | >FGFR2-M64 VTENNVIKI    | 325  | 73   |
| >FGFR2-M64 VTENNVMIKI  | 698  | >FGFR2-M64 VTENNVIKI    | 401  | 297  |
| >FGFR2-M64 LVTENNVMIK  | 491  | >FGFR2-M64 LVTENNVIKI   | 481  | 10   |
| >FGFR2-M64 LVTENNVMIK  | 151  | >FGFR2-M64 LVTENNVIKI   | 258  | 107  |
| >FGFR2-M64 LVTENNVMIK  | 146  | >FGFR2-M64 LVTENNVIK    | 258  | 112  |
| >FGFR2-M64 LVTENNVMIK  | 33   | >FGFR2-M64 LVTENNVIK    | 80   | 47   |
| >FGFR2-M64 LVTENNVMI   | 157  | >FGFR2-M64 LVTENNVIKI   | 6975 | 6818 |
| >FGFR2-M64 LVTENNVMIK  | 313  | >FGFR2-M64 LVTENNVIKI   | 841  | 528  |
| >FGFR2-M64 VLVTENNVMI  | 624  | >FGFR2-M64 VLVTENNVIKI  | 161  | 463  |
| >FGFR2-M64 VLVTENNVMI  | 167  | >FGFR2-M64 VLVTENNVIK   | 196  | 29   |
| >FGFR2-M64 VLVTENNVMI  | 4330 | >FGFR2-M64 VLVTENNVIKI  | 346  | 3984 |
| >FGFR2-M64 VLVTENNVMI  | 59   | >FGFR2-M64 VLVTENNVIK   | 139  | 80   |
| >FGFR2-M64 VLVTENNVMI  | 77   | >FGFR2-M64 VLVTENNVIK   | 62   | 15   |
| >FGFR2-M64 VLVTENNVMI  | 2699 | >FGFR2-M64 VLVTENNVIKI  | 219  | 2480 |
| >FGFR2-M64 VLVTENNVMI  | 94   | >FGFR2-M64 VLVTENNVIK   | 101  | 7    |
| >FGFR2-M64 VLVTENNVMI  | 340  | >FGFR2-M64 VLVTENNVIK   | 284  | 56   |
| >FGFR2-M64 VLVTENNVMI  | 1754 | >FGFR2-M64 VLVTENNVIKI  | 260  | 1494 |
| >FGFR2-M64 VLVTENNVMI  | 29   | >FGFR2-M64 VLVTENNVIK   | 39   | 10   |
| >FGFR2-M64 VLVTENNVMI  | 174  | >FGFR2-M64 VLVTENNVIK   | 402  | 228  |
| >FGFR2-M64 VLVTENNVMI  | 234  | >FGFR2-M64 VLVTENNVIK   | 408  | 174  |
| >FGFR2-M64 NVLVTENNVMI | 340  | >FGFR2-M64 NVLVTENNVIKI | 573  | 233  |
| >FGFR2-M64 NVLVTENNVMI | 64   | >FGFR2-M64 NVLVTENNVIKI | 146  | 82   |
| >FGFR2-N21: NQHWSLIME  | 852  | >FGFR2-N21: IQHWSLIMES  | 171  | 681  |
| >FGFR2-N21: NQHWSLIME  | 658  | >FGFR2-N21: IQHWSLIMES  | 279  | 379  |
| >FGFR2-N21: NQHWSLIME  | 55   | >FGFR2-N21: IQHWSLIMES  | 26   | 29   |
| >FGFR2-N21: NQHWSLIM   | 1372 | >FGFR2-N21: IQHWSLIM    | 485  | 887  |
| >FGFR2-N21: NQHWSLIME  | 11   | >FGFR2-N21: IQHWSLIMES  | 7    | 4    |

|                       |       |                       |      |       |
|-----------------------|-------|-----------------------|------|-------|
| >FGFR2-N21:NQHWSLIME  | 154   | >FGFR2-N21:IQHWSLIMES | 29   | 125   |
| >FGFR2-N21:NQHWSLIME  | 3276  | >FGFR2-N21:IQHWSLIMES | 236  | 3040  |
| >FGFR2-N21:NQHWSLIM   | 437   | >FGFR2-N21:IQHWSLIM   | 139  | 298   |
| >FGFR2-N21:NQHWSLIM   | 224   | >FGFR2-N21:IQHWSLIM   | 18   | 206   |
| >FGFR2-N21:NQHWSLIME  | 1577  | >FGFR2-N21:IQHWSLIMES | 115  | 1462  |
| >FGFR2-N21:NQHWSLIM   | 73    | >FGFR2-N21:IQHWSLIM   | 895  | 822   |
| >FGFR2-N21:RNQHWSLI   | 14441 | >FGFR2-N21:RIQHWSLI   | 196  | 14245 |
| >FGFR2-N21:RNQHWSLI   | 17510 | >FGFR2-N21:RIQHWSLI   | 499  | 17011 |
| >FGFR2-N21:RNQHWSLI   | 18407 | >FGFR2-N21:RIQHWSLI   | 473  | 17934 |
| >FGFR2-N21:RNQHWSLI   | 3878  | >FGFR2-N21:RIQHWSLI   | 310  | 3568  |
| >FGFR2-N21:RNQHWSLI   | 5695  | >FGFR2-N21:RIQHWSLI   | 324  | 5371  |
| >FGFR2-N21:RNQHWSLIM  | 7111  | >FGFR2-N21:RIQHWSLIM  | 262  | 6849  |
| >FGFR2-N21:RNQHWSLIM  | 634   | >FGFR2-N21:RIQHWSLIM  | 115  | 519   |
| >FGFR2-N21:RNQHWSLIM  | 4519  | >FGFR2-N21:RIQHWSLIM  | 360  | 4159  |
| >FGFR2-N21:RNQHWSLIM  | 219   | >FGFR2-N21:RIQHWSLIM  | 199  | 20    |
| >FGFR2-N21:RNQHWSLIM  | 381   | >FGFR2-N21:RIQHWSLIM  | 2097 | 1716  |
| >FGFR2-N21:RNQHWSLI   | 57    | >FGFR2-N21:RIQHWSLI   | 275  | 218   |
| >FGFR2-N21:VRNQHWSLI  | 1545  | >FGFR2-N21:VRIQHWSLI  | 272  | 1273  |
| >FGFR2-N21:VRNQHWSL   | 622   | >FGFR2-N21:VRIQHWSL   | 448  | 174   |
| >FGFR2-N21:VRNQHWSLII | 260   | >FGFR2-N21:VRIQHWSLIM | 168  | 92    |
| >FGFR2-N21:VRNQHWSL   | 324   | >FGFR2-N21:VRIQHWSL   | 205  | 119   |
| >FGFR2-N21:VRNQHWSLI  | 422   | >FGFR2-N21:VRIQHWSLI  | 240  | 182   |
| >FGFR2-N21:VRNQHWSLII | 110   | >FGFR2-N21:VRIQHWSLIM | 45   | 65    |
| >FGFR2-N21:VRNQHWSL   | 337   | >FGFR2-N21:VRIQHWSL   | 87   | 250   |
| >FGFR2-N21:VRNQHWSLII | 776   | >FGFR2-N21:VRIQHWSLIM | 206  | 570   |
| >FGFR2-N21:VRNQHWSL   | 250   | >FGFR2-N21:VRIQHWSL   | 264  | 14    |
| >FGFR2-N21:VRNQHWSLI  | 688   | >FGFR2-N21:VRIQHWSLI  | 281  | 407   |
| >FGFR2-N21:VRNQHWSLII | 296   | >FGFR2-N21:VRIQHWSLIM | 142  | 154   |
| >FGFR2-N21:VRNQHWSLI  | 48    | >FGFR2-N21:VRIQHWSLI  | 23   | 25    |
| >FGFR2-N21:VRNQHWSLII | 114   | >FGFR2-N21:VRIQHWSLIM | 69   | 45    |
| >FGFR2-N21:KVRNQHWSL  | 127   | >FGFR2-N21:KVRIQHWSL  | 340  | 213   |
| >FGFR2-N21:KVRNQHWS   | 11    | >FGFR2-N21:KVRIQHWS   | 14   | 3     |
| >FGFR2-N21:KVRNQHWSL  | 4     | >FGFR2-N21:KVRIQHWSL  | 4    | 0     |
| >FGFR2-N21:KVRNQHWSL  | 3     | >FGFR2-N21:KVRIQHWSLI | 4    | 1     |
| >FGFR2-N21:KVRNQHWSL  | 4     | >FGFR2-N21:KVRIQHWSLI | 4    | 0     |
| >FGFR2-N21:KVRNQHWSL  | 75    | >FGFR2-N21:KVRIQHWSL  | 593  | 518   |
| >FGFR2-N21:KVRNQHWSL  | 123   | >FGFR2-N21:KVRIQHWSL  | 123  | 0     |
| >FGFR2-N21:KVRNQHWSL  | 231   | >FGFR2-N21:KVRIQHWSLI | 239  | 8     |
| >FGFR2-N21:KVRNQHWSL  | 170   | >FGFR2-N21:KVRIQHWSL  | 104  | 66    |
| >FGFR2-N21:KVRNQHWSL  | 473   | >FGFR2-N21:KVRIQHWSLI | 952  | 479   |
| >FGFR2-N21:KVRNQHWSL  | 459   | >FGFR2-N21:KVRIQHWSLI | 1372 | 913   |
| >FGFR2-N21:KVRNQHWSL  | 116   | >FGFR2-N21:KVRIQHWSL  | 30   | 86    |
| >FGFR2-N21:KVRNQHWSL  | 724   | >FGFR2-N21:KVRIQHWSLI | 258  | 466   |



|                       |       |                        |     |       |
|-----------------------|-------|------------------------|-----|-------|
| >FGFR2-N21:KVRNQHWSL  | 90    | >FGFR2-N21:KVRIQHWSLI  | 33  | 57    |
| >FGFR2-N21:KVRNQHWSL  | 54    | >FGFR2-N21:KVRIQHWSLI  | 160 | 106   |
| >FGFR2-N21:KVRNQHWSL  | 152   | >FGFR2-N21:KVRIQHWSLI  | 190 | 38    |
| >FGFR2-N21:YKVRNQHWS  | 325   | >FGFR2-N21:YKVRIQHWSI  | 175 | 150   |
| >FGFR2-N21:YKVRNQHW   | 61    | >FGFR2-N21:YKVRIQHW    | 98  | 37    |
| >FGFR2-N21:YKVRNQHWS  | 16    | >FGFR2-N21:YKVRIQHWSI  | 30  | 14    |
| >FGFR2-N21:YKVRNQHWS  | 51    | >FGFR2-N21:YKVRIQHWSI  | 102 | 51    |
| >FGFR2-N21:YKVRNQHWS  | 37    | >FGFR2-N21:YKVRIQHWSI  | 42  | 5     |
| >FGFR2-N21:YKVRNQHW   | 609   | >FGFR2-N21:YKVRIQHW    | 265 | 344   |
| >FGFR2-N21:GYKVRNQHM  | 129   | >FGFR2-N21:GYKVRIQHW   | 158 | 29    |
| >FGFR2-N21:GYKVRNQHM  | 413   | >FGFR2-N21:GYKVRIQHW   | 398 | 15    |
| >FGFR2-N21:GYKVRNQHM  | 280   | >FGFR2-N21:GYKVRIQHW   | 62  | 218   |
| >FGFR2-N21:GYKVRNQHM  | 41    | >FGFR2-N21:GYKVRIQHW   | 24  | 17    |
| >FGFR2-N21:GYKVRNQHM  | 236   | >FGFR2-N21:GYKVRIQHW   | 302 | 66    |
| >FGFR2-N21:GYKVRNQHM  | 605   | >FGFR2-N21:GYKVRIQHW   | 383 | 222   |
| >FGFR2-N21:GGYKVRNQH  | 585   | >FGFR2-N21:GGYKVRIQH   | 379 | 206   |
| >FGFR2-N21:GGYKVRNQH  | 265   | >FGFR2-N21:GGYKVRIQH   | 207 | 58    |
| >FGFR2-N21:GGYKVRNQH  | 367   | >FGFR2-N21:GGYKVRIQH   | 219 | 148   |
| >FGFR2-N21:IGGYKVRNQ  | 564   | >FGFR2-N21:IGGYKVRIQH  | 365 | 199   |
| >FGFR2-N21:IGGYKVRNQ  | 656   | >FGFR2-N21:IGGYKVRIQH  | 485 | 171   |
| >FGFR2-N21:RIGGYKVRN  | 18468 | >FGFR2-N21:RIGGYKVRI   | 189 | 18279 |
| >FGFR2-N21:RIGGYKVRN  | 25454 | >FGFR2-N21:RIGGYKVRI   | 424 | 25030 |
| >FGFR2-N21:RIGGYKVRN  | 16967 | >FGFR2-N21:RIGGYKVRI   | 141 | 16826 |
| >FGFR2-N21:HRIGGYKVRN | 545   | >FGFR2-N21:HRIGGYKVRI  | 34  | 511   |
| >FGFR2-N21:HRIGGYKVRN | 11346 | >FGFR2-N21:HRIGGYKVRI  | 174 | 11172 |
| >FGFR2-N54:KLLGACTQ   | 2004  | >FGFR2-N54:KLLGACTQ    | 334 | 1670  |
| >FGFR2-N54:KLLGACTQ   | 2018  | >FGFR2-N54:KLLGACTQ    | 194 | 1824  |
| >FGFR2-N54:KLLGACTQ   | 174   | >FGFR2-N54:KLLGACTQ    | 30  | 144   |
| >FGFR2-N54:KMIGKHKNI  | 16131 | >FGFR2-N54:KMIGKHKNI   | 66  | 16065 |
| >FGFR2-N54:KMIGKHKNI  | 20887 | >FGFR2-N54:KMIGKHKNI   | 72  | 20815 |
| >FGFR2-N54:KMIGKHKNI  | 9167  | >FGFR2-N54:KMIGKHKNI   | 25  | 9142  |
| >FGFR2-N54:KMIGKHKNI  | 9173  | >FGFR2-N54:KMIGKHKNI   | 92  | 9081  |
| >FGFR2-N54:KMIGKHKNI  | 11157 | >FGFR2-N54:KMIGKHKNI   | 246 | 10911 |
| >FGFR2-N54:NIINLLGA   | 93    | >FGFR2-N54:NIKLLGA     | 183 | 90    |
| >FGFR2-N54:NIINLLGA   | 84    | >FGFR2-N54:NIKLLGA     | 187 | 103   |
| >FGFR2-N54:NIINLLGA   | 495   | >FGFR2-N54:NIKLLGA     | 809 | 314   |
| >FGFR2-N54:KHKNIINL   | 440   | >FGFR2-N54:KHKNIIKL    | 884 | 444   |
| >FGFR2-N54:GKHKNIINL  | 121   | >FGFR2-N54:GKHKNIIKL   | 276 | 155   |
| >FGFR2-N54:GKHKNIINLL | 313   | >FGFR2-N54:GKHKNIIKLL  | 354 | 41    |
| >FGFR2-N54:GKHKNIINL  | 469   | >FGFR2-N54:GKHKNIIKL   | 547 | 78    |
| >FGFR2-N54:IGKHKNIIN  | 9109  | >FGFR2-N54:IGKHKNIIK   | 37  | 9072  |
| >FGFR2-N54:MIGKHKNIIN | 401   | >FGFR2-N54:MIGKHKNIIKI | 715 | 314   |
| >FGFR2-N54:MIGKHKNIIN | 239   | >FGFR2-N54:MIGKHKNIIKI | 226 | 13    |

|                       |       |                       |       |       |
|-----------------------|-------|-----------------------|-------|-------|
| >FGFR2-N54!MIGKHKNIIN | 26325 | >FGFR2-N54!MIGKHKNIIK | 149   | 26176 |
| >FGFR2-N54!MIGKHKNIIN | 35227 | >FGFR2-N54!MIGKHKNIIK | 342   | 34885 |
| >FGFR2-N54!MIGKHKNIIN | 14648 | >FGFR2-N54!MIGKHKNIIK | 323   | 14325 |
| >FGFR2-P25!PHRPILQA   | 10601 | >FGFR2-P25!RHRPILQA   | 153   | 10448 |
| >FGFR2-P25!SPHRPILQAG | 197   | >FGFR2-P25!SRHRPILQAG | 32855 | 32658 |
| >FGFR2-P25!SPHRPILQA  | 300   | >FGFR2-P25!SRHRPILQA  | 26378 | 26078 |
| >FGFR2-P25!SPHRPILQAG | 68    | >FGFR2-P25!SRHRPILQAG | 22116 | 22048 |
| >FGFR2-P25!SPHRPILQAG | 23048 | >FGFR2-P25!SRHRPILQAG | 131   | 22917 |
| >FGFR2-P25!SPHRPILQA  | 465   | >FGFR2-P25!SRHRPILQA  | 33062 | 32597 |
| >FGFR2-P25!SPHRPILQAG | 17387 | >FGFR2-P25!SRHRPILQAG | 183   | 17204 |
| >FGFR2-P25!SPHRPILQAG | 11306 | >FGFR2-P25!SRHRPILQAG | 44    | 11262 |
| >FGFR2-P25!TYHLDVVERS | 35830 | >FGFR2-P25!TYHLDVVERS | 258   | 35572 |
| >FGFR2-P25!TYHLDVVERS | 32508 | >FGFR2-P25!TYHLDVVERS | 260   | 32248 |
| >FGFR2-P25!RSPHRPIL   | 1162  | >FGFR2-P25!RSRHRPIL   | 4     | 1158  |
| >FGFR2-P25!RSPHRPILQ  | 2847  | >FGFR2-P25!RSRHRPILQ  | 5     | 2842  |
| >FGFR2-P25!RSPHRPILQA | 662   | >FGFR2-P25!RSRHRPILQA | 4     | 658   |
| >FGFR2-P25!RSPHRPILQA | 5387  | >FGFR2-P25!RSRHRPILQA | 7     | 5380  |
| >FGFR2-P25!RSPHRPIL   | 14754 | >FGFR2-P25!RSRHRPIL   | 415   | 14339 |
| >FGFR2-P25!RSPHRPIL   | 8005  | >FGFR2-P25!RSRHRPIL   | 485   | 7520  |
| >FGFR2-P25!RSPHRPIL   | 1426  | >FGFR2-P25!RSRHRPIL   | 82    | 1344  |
| >FGFR2-P25!RSPHRPIL   | 265   | >FGFR2-P25!RSRHRPIL   | 5     | 260   |
| >FGFR2-P25!RSPHRPILQA | 5130  | >FGFR2-P25!RSRHRPILQA | 72    | 5058  |
| >FGFR2-P25!RSPHRPIL   | 278   | >FGFR2-P25!RSRHRPIL   | 31995 | 31717 |
| >FGFR2-P25!RSPHRPIL   | 1010  | >FGFR2-P25!RSRHRPIL   | 192   | 818   |
| >FGFR2-P25!RSPHRPIL   | 273   | >FGFR2-P25!RSRHRPIL   | 420   | 147   |
| >FGFR2-P25!ERSPHRPIL  | 2953  | >FGFR2-P25!ERSRHRPIL  | 465   | 2488  |
| >FGFR2-P25!ERSPHRPIL  | 105   | >FGFR2-P25!ERSRHRPIL  | 355   | 250   |
| >FGFR2-P25!ERSPHRPIL  | 469   | >FGFR2-P25!ERSRHRPIL  | 313   | 156   |
| >FGFR2-P25!ERSPHRPIL  | 59    | >FGFR2-P25!ERSRHRPIL  | 87    | 28    |
| >FGFR2-P25!VERSPHRPI  | 2409  | >FGFR2-P25!VERSRHRPI  | 173   | 2236  |
| >FGFR2-P25!VERSPHRPI  | 15519 | >FGFR2-P25!VERSRHRPI  | 231   | 15288 |
| >FGFR2-P25!VERSPHRPI  | 319   | >FGFR2-P25!VERSRHRPI  | 906   | 587   |
| >FGFR2-P25!VERSPHRPIL | 386   | >FGFR2-P25!VERSRHRPIL | 759   | 373   |
| >FGFR2-P25!VERSPHRPI  | 434   | >FGFR2-P25!VERSRHRPI  | 297   | 137   |
| >FGFR2-P25!VERSPHRPI  | 197   | >FGFR2-P25!VERSRHRPI  | 149   | 48    |
| >FGFR2-P25!VERSPHRPIL | 272   | >FGFR2-P25!VERSRHRPIL | 511   | 239   |
| >FGFR2-P25!VVERSPhR   | 255   | >FGFR2-P25!VVERSPhR   | 174   | 81    |
| >FGFR2-P25!DVVERSPh   | 382   | >FGFR2-P25!DVVERSPh   | 636   | 254   |
| >FGFR2-P25!DVVERSPh   | 338   | >FGFR2-P25!DVVERSPh   | 614   | 276   |
| >FGFR2-P25!DVVERSPhRF | 365   | >FGFR2-P25!DVVERSPhRF | 1014  | 649   |
| >FGFR2-P25!DVVERSPhR  | 41    | >FGFR2-P25!DVVERSPhR  | 42    | 1     |
| >FGFR2-P25!DVVERSPhR  | 28    | >FGFR2-P25!DVVERSPhR  | 72    | 44    |
| >FGFR2-P25!DVVERSPhRF | 202   | >FGFR2-P25!DVVERSPhRF | 424   | 222   |

|                        |       |                         |       |       |
|------------------------|-------|-------------------------|-------|-------|
| >FGFR2-P25E DVVERSPHRF | 65    | >FGFR2-P25E DVVERSRHRF  | 404   | 339   |
| >FGFR2-P25E HLDVVERSPT | 477   | >FGFR2-P25E HLDVVERSRT  | 438   | 39    |
| >FGFR2-P30E GPDGLPYL   | 121   | >FGFR2-P30E GLDGLPYL    | 24227 | 24106 |
| >FGFR2-P30E GPDGLPYL   | 20175 | >FGFR2-P30E GLDGLPYL    | 14    | 20161 |
| >FGFR2-P30E GPDGLPYLKV | 18586 | >FGFR2-P30E GLDGLPYLKV  | 90    | 18496 |
| >FGFR2-P30E GPDGLPYLKV | 22645 | >FGFR2-P30E GLDGLPYLKV  | 217   | 22428 |
| >FGFR2-P30E GPDGLPYL   | 19924 | >FGFR2-P30E GLDGLPYL    | 14    | 19910 |
| >FGFR2-P30E GPDGLPYLKV | 14073 | >FGFR2-P30E GLDGLPYLKV  | 44    | 14029 |
| >FGFR2-P30E GPDGLPYLKV | 24489 | >FGFR2-P30E GLDGLPYLKV  | 109   | 24380 |
| >FGFR2-P30E GPDGLPYL   | 24402 | >FGFR2-P30E GLDGLPYL    | 492   | 23910 |
| >FGFR2-P30E GPDGLPYLKV | 17531 | >FGFR2-P30E GLDGLPYLKV  | 71    | 17460 |
| >FGFR2-P30E GPDGLPYL   | 12854 | >FGFR2-P30E GLDGLPYL    | 132   | 12722 |
| >FGFR2-P30E GPDGLPYLKV | 13781 | >FGFR2-P30E GLDGLPYLKV  | 478   | 13303 |
| >FGFR2-P30E GPDGLPYL   | 7204  | >FGFR2-P30E GLDGLPYL    | 3     | 7201  |
| >FGFR2-P30E GPDGLPYLKV | 5800  | >FGFR2-P30E GLDGLPYLKV  | 3     | 5797  |
| >FGFR2-P30E GPDGLPYLKV | 17191 | >FGFR2-P30E GLDGLPYLKV  | 11    | 17180 |
| >FGFR2-P30E GPDGLPYL   | 18427 | >FGFR2-P30E GLDGLPYL    | 6     | 18421 |
| >FGFR2-P30E GPDGLPYLKV | 18724 | >FGFR2-P30E GLDGLPYLKV  | 11    | 18713 |
| >FGFR2-P30E GPDGLPYLKV | 21817 | >FGFR2-P30E GLDGLPYLKV  | 26    | 21791 |
| >FGFR2-P30E GPDGLPYL   | 10252 | >FGFR2-P30E GLDGLPYL    | 6     | 10246 |
| >FGFR2-P30E GPDGLPYLKV | 9746  | >FGFR2-P30E GLDGLPYLKV  | 5     | 9741  |
| >FGFR2-P30E GPDGLPYLKV | 22138 | >FGFR2-P30E GLDGLPYLKV  | 32    | 22106 |
| >FGFR2-P30E GPDGLPYL   | 19268 | >FGFR2-P30E GLDGLPYL    | 8     | 19260 |
| >FGFR2-P30E GPDGLPYLKV | 21503 | >FGFR2-P30E GLDGLPYLKV  | 19    | 21484 |
| >FGFR2-P30E GPDGLPYLKV | 23100 | >FGFR2-P30E GLDGLPYLKV  | 385   | 22715 |
| >FGFR2-P30E GPDGLPYL   | 21574 | >FGFR2-P30E GLDGLPYL    | 5     | 21569 |
| >FGFR2-P30E GPDGLPYLKV | 19652 | >FGFR2-P30E GLDGLPYLKV  | 3     | 19649 |
| >FGFR2-P30E GPDGLPYLKV | 30168 | >FGFR2-P30E GLDGLPYLKV  | 18    | 30150 |
| >FGFR2-P30E GPDGLPYLK  | 17891 | >FGFR2-P30E GLDGLPYLK   | 239   | 17652 |
| >FGFR2-P30E GPDGLPYLK  | 4495  | >FGFR2-P30E GLDGLPYLK   | 31    | 4464  |
| >FGFR2-P30E YGPDGLPYL  | 648   | >FGFR2-P30E YGLDGLPYL   | 53    | 595   |
| >FGFR2-P30E YGPDGLPYLK | 2917  | >FGFR2-P30E YGLDGLPYLK' | 491   | 2426  |
| >FGFR2-P30E YGPDGLPYL  | 39    | >FGFR2-P30E YGLDGLPYL   | 12    | 27    |
| >FGFR2-P30E YGPDGLPYLK | 342   | >FGFR2-P30E YGLDGLPYLK' | 88    | 254   |
| >FGFR2-P30E YGPDGLPYL  | 130   | >FGFR2-P30E YGLDGLPYL   | 16    | 114   |
| >FGFR2-P30E YGPDGLPYLK | 221   | >FGFR2-P30E YGLDGLPYLK' | 35    | 186   |
| >FGFR2-P30E YGPDGLPYL  | 170   | >FGFR2-P30E YGLDGLPYL   | 19    | 151   |
| >FGFR2-P30E YGPDGLPYLK | 323   | >FGFR2-P30E YGLDGLPYLK' | 39    | 284   |
| >FGFR2-P30E YGPDGLPYL  | 3278  | >FGFR2-P30E YGLDGLPYL   | 109   | 3169  |
| >FGFR2-P30E YGPDGLPYL  | 117   | >FGFR2-P30E YGLDGLPYL   | 35    | 82    |
| >FGFR2-P30E YGPDGLPYLK | 74    | >FGFR2-P30E YGLDGLPYLK' | 36    | 38    |
| >FGFR2-P30E YGPDGLPY   | 99    | >FGFR2-P30E YGLDGLPY    | 20    | 79    |
| >FGFR2-P30E YGPDGLPYL  | 3267  | >FGFR2-P30E YGLDGLPYL   | 102   | 3165  |

|                        |       |                        |       |       |
|------------------------|-------|------------------------|-------|-------|
| >FGFR2-P30EYGPDGLPYLK  | 2623  | >FGFR2-P30EYGLDGLPYLK' | 97    | 2526  |
| >FGFR2-P30EYGPDGLPY    | 242   | >FGFR2-P30EYGLDGLPY    | 137   | 105   |
| >FGFR2-P30EYGPDGLPY    | 289   | >FGFR2-P30EYGLDGLPY    | 109   | 180   |
| >FGFR2-P30EYGPDGLPY    | 3857  | >FGFR2-P30EYGLDGLPY    | 491   | 3366  |
| >FGFR2-P30EYGPDGLPY    | 3680  | >FGFR2-P30EYGLDGLPY    | 44    | 3636  |
| >FGFR2-P30EYGPDGLPY    | 120   | >FGFR2-P30EYGLDGLPY    | 34    | 86    |
| >FGFR2-P30EYGPDGLPY    | 1376  | >FGFR2-P30EYGLDGLPY    | 400   | 976   |
| >FGFR2-P30EYGPDGLPYL   | 6     | >FGFR2-P30EYGLDGLPYL   | 3993  | 3987  |
| >FGFR2-P30EYGPDGLPYLK  | 118   | >FGFR2-P30EYGLDGLPYLK' | 18125 | 18007 |
| >FGFR2-P30EKYGPDGLPYL  | 13    | >FGFR2-P30EKYGLDGLPYL  | 20    | 7     |
| >FGFR2-P30EKYGPDGLPY   | 23    | >FGFR2-P30EKYGLDGLPY   | 40    | 17    |
| >FGFR2-P30EKYGPDGLPYL  | 112   | >FGFR2-P30EKYGLDGLPYL  | 247   | 135   |
| >FGFR2-P30EKYGPDGLPY   | 240   | >FGFR2-P30EKYGLDGLPY   | 766   | 526   |
| >FGFR2-P30EKYGPDGLPYL  | 293   | >FGFR2-P30EKYGLDGLPYL  | 494   | 201   |
| >FGFR2-P30EKYGPDGLPY   | 10    | >FGFR2-P30EKYGLDGLPY   | 13    | 3     |
| >FGFR2-P30EKYGPDGLPY   | 367   | >FGFR2-P30EKYGLDGLPY   | 736   | 369   |
| >FGFR2-P30EKYGPDGLPYL  | 25    | >FGFR2-P30EKYGLDGLPYL  | 31    | 6     |
| >FGFR2-P30EKYGPDGLPYL  | 297   | >FGFR2-P30EKYGLDGLPYL  | 366   | 69    |
| >FGFR2-P30EKYGPDGLPYL  | 44    | >FGFR2-P30EKYGLDGLPYL  | 84    | 40    |
| >FGFR2-P30ESKYGPDGLPY  | 390   | >FGFR2-P30ESKYGLDGLPY  | 550   | 160   |
| >FGFR2-P30ESKYGPDGLPY  | 349   | >FGFR2-P30ESKYGLDGLPY  | 360   | 11    |
| >FGFR2-P30ESKYGPDGLPY  | 296   | >FGFR2-P30ESKYGLDGLPY  | 827   | 531   |
| >FGFR2-P30ESKYGPDGLPY  | 56    | >FGFR2-P30ESKYGLDGLPY  | 215   | 159   |
| >FGFR2-P30ESKYGPDGLPY  | 15    | >FGFR2-P30ESKYGLDGLPY  | 25    | 10    |
| >FGFR2-P30ESKYGPDGLPY  | 298   | >FGFR2-P30ESKYGLDGLPY  | 424   | 126   |
| >FGFR2-P30ESKYGPDGLF   | 129   | >FGFR2-P30ESKYGLDGLP   | 165   | 36    |
| >FGFR2-P30ESKYGPDGLF   | 180   | >FGFR2-P30ESKYGLDGLP   | 144   | 36    |
| >FGFR2-P30ESKYGPDGLF   | 92    | >FGFR2-P30ESKYGLDGLP   | 73    | 19    |
| >FGFR2-P30ESKYGPDGLF   | 355   | >FGFR2-P30ESKYGLDGLP   | 639   | 284   |
| >FGFR2-P30ESKYGPDGLF   | 26    | >FGFR2-P30ESKYGLDGLP   | 27    | 1     |
| >FGFR2-P30ESKYGPDGLF   | 118   | >FGFR2-P30ESKYGLDGLP   | 88    | 30    |
| >FGFR2-P30EVEKNGSKYGF  | 4422  | >FGFR2-P30EVEKNGSKYGL  | 401   | 4021  |
| >FGFR2-P70EIPVEELFKL   | 9704  | >FGFR2-P70EISVEELFKL   | 158   | 9546  |
| >FGFR2-P70EIPVEELFKLLK | 5971  | >FGFR2-P70EISVEELFKLLK | 489   | 5482  |
| >FGFR2-P70EIPVEELFKLLK | 1210  | >FGFR2-P70EISVEELFKLLK | 28    | 1182  |
| >FGFR2-P70EIPVEELFKLLK | 7131  | >FGFR2-P70EISVEELFKLLK | 335   | 6796  |
| >FGFR2-P70EIPVEELFKLLK | 6415  | >FGFR2-P70EISVEELFKLLK | 345   | 6070  |
| >FGFR2-P70EIPVEELFKL   | 467   | >FGFR2-P70EISVEELFKL   | 34933 | 34466 |
| >FGFR2-P70EIPVEELFKL   | 10821 | >FGFR2-P70EISVEELFKL   | 251   | 10570 |
| >FGFR2-P70EIPVEELFKL   | 3351  | >FGFR2-P70EISVEELFKL   | 184   | 3167  |
| >FGFR2-P70EIPVEELFK    | 14785 | >FGFR2-P70EISVEELFK    | 456   | 14329 |
| >FGFR2-P70EIPVEELFKLLK | 13556 | >FGFR2-P70EISVEELFKLLK | 330   | 13226 |
| >FGFR2-P70EIPVEELFK    | 9001  | >FGFR2-P70EISVEELFK    | 27    | 8974  |

|                        |       |                        |       |       |
|------------------------|-------|------------------------|-------|-------|
| >FGFR2-P70EIPVEELFKLLK | 7801  | >FGFR2-P70EISVEELFKLLK | 23    | 7778  |
| >FGFR2-P70EIPVEELFK    | 2433  | >FGFR2-P70EISVEELFK    | 94    | 2339  |
| >FGFR2-P70EIPVEELFKLLK | 2926  | >FGFR2-P70EISVEELFKLLK | 161   | 2765  |
| >FGFR2-P70EIPVEELFKL   | 12081 | >FGFR2-P70EISVEELFKL   | 15    | 12066 |
| >FGFR2-P70EIPVEELFKLL  | 16583 | >FGFR2-P70EISVEELFKLL  | 27    | 16556 |
| >FGFR2-P70EIPVEELFKL   | 294   | >FGFR2-P70EISVEELFKL   | 13255 | 12961 |
| >FGFR2-P70EIPVEELFKL   | 50    | >FGFR2-P70EISVEELFKL   | 6591  | 6541  |
| >FGFR2-P70EIPVEELFKL   | 20168 | >FGFR2-P70EISVEELFKL   | 203   | 19965 |
| >FGFR2-P70EIPVEELFKL   | 9300  | >FGFR2-P70EISVEELFKL   | 274   | 9026  |
| >FGFR2-P70EIPVEELFKLL  | 2817  | >FGFR2-P70EISVEELFKLL  | 68    | 2749  |
| >FGFR2-P70EIPVEELFKL   | 344   | >FGFR2-P70EISVEELFKL   | 17831 | 17487 |
| >FGFR2-P70EIPVEELFKLL  | 201   | >FGFR2-P70EISVEELFKLL  | 15990 | 15789 |
| >FGFR2-P70EIPVEELFKLLK | 4978  | >FGFR2-P70EISVEELFKLLK | 388   | 4590  |
| >FGFR2-P70EGIPVEELFKL  | 451   | >FGFR2-P70EGISVEELFKL  | 127   | 324   |
| >FGFR2-P70EGIPVEELFKLL | 3137  | >FGFR2-P70EGISVEELFKLL | 413   | 2724  |
| >FGFR2-P70EGIPVEELFK   | 1827  | >FGFR2-P70EGISVEELFK   | 265   | 1562  |
| >FGFR2-P70EGIPVEELFK   | 173   | >FGFR2-P70EGISVEELFK   | 25    | 148   |
| >FGFR2-P70EGIPVEELFKLL | 276   | >FGFR2-P70EGISVEELFKLL | 12404 | 12128 |
| >FGFR2-P70EYPGIPVEEL   | 215   | >FGFR2-P70EYPGISVEEL   | 234   | 19    |
| >FGFR2-P70EYPGIPVEEL   | 749   | >FGFR2-P70EYPGISVEEL   | 324   | 425   |
| >FGFR2-P70EYPGIPVEELF  | 79    | >FGFR2-P70EYPGISVEELF  | 90    | 11    |
| >FGFR2-P70EYPGIPVEEL   | 576   | >FGFR2-P70EYPGISVEEL   | 351   | 225   |
| >FGFR2-P70EYPGIPVEELF  | 94    | >FGFR2-P70EYPGISVEELF  | 130   | 36    |
| >FGFR2-P70EYPGIPVEELF  | 454   | >FGFR2-P70EYPGISVEELF  | 248   | 206   |
| >FGFR2-P70EPYPGIPVEELF | 88    | >FGFR2-P70EPYPGISVEELF | 134   | 46    |
| >FGFR2-P70EPYPGIPVEEL  | 479   | >FGFR2-P70EPYPGISVEEL  | 238   | 241   |
| >FGFR2-P70EPYPGIPVEELF | 42    | >FGFR2-P70EPYPGISVEELF | 50    | 8     |
| >FGFR2-P70EPYPGIPVEEL  | 14    | >FGFR2-P70EPYPGISVEEL  | 10    | 4     |
| >FGFR2-P70EPYPGIPVEELF | 9     | >FGFR2-P70EPYPGISVEELF | 8     | 1     |
| >FGFR2-P70ESPYPGIPV    | 149   | >FGFR2-P70ESPYPGISV    | 37    | 112   |
| >FGFR2-P70ESPYPGIPVEEL | 20    | >FGFR2-P70ESPYPGISVEEL | 15    | 5     |
| >FGFR2-P70ESPYPGIPV    | 59    | >FGFR2-P70ESPYPGISV    | 183   | 124   |
| >FGFR2-P70ESPYPGIPV    | 35    | >FGFR2-P70ESPYPGISV    | 35    | 0     |
| >FGFR2-P70ESPYPGIPVEEL | 114   | >FGFR2-P70ESPYPGISVEEL | 92    | 22    |
| >FGFR2-P70ESPYPGIPVEEL | 567   | >FGFR2-P70ESPYPGISVEEL | 418   | 149   |
| >FGFR2-P70ESPYPGIPVEEL | 415   | >FGFR2-P70ESPYPGISVEEL | 302   | 113   |
| >FGFR2-P70ESPYPGIPV    | 323   | >FGFR2-P70ESPYPGISV    | 276   | 47    |
| >FGFR2-P70ESPYPGIPV    | 48    | >FGFR2-P70ESPYPGISV    | 226   | 178   |
| >FGFR2-P70ESPYPGIPVEEL | 364   | >FGFR2-P70ESPYPGISVEEL | 241   | 123   |
| >FGFR2-P70EGSPYPGIPV   | 20    | >FGFR2-P70EGSPYPGISV   | 25    | 5     |
| >FGFR2-Q21:QHWSLIMES'  | 418   | >FGFR2-Q21:KHWSLIMES\  | 202   | 216   |
| >FGFR2-Q21:QHWSLIMES'  | 295   | >FGFR2-Q21:KHWSLIMES\  | 147   | 148   |
| >FGFR2-Q21:NQHWSLIME   | 55    | >FGFR2-Q21:NKHWSLIME'  | 4638  | 4583  |

|                       |      |                       |       |       |
|-----------------------|------|-----------------------|-------|-------|
| >FGFR2-Q21:NQHWSLIME  | 11   | >FGFR2-Q21:NKHWSLIME  | 2369  | 2358  |
| >FGFR2-Q21:NQHWSLIME  | 154  | >FGFR2-Q21:NKHWSLIME  | 4362  | 4208  |
| >FGFR2-Q21:NQHWSLIM   | 437  | >FGFR2-Q21:NKHWSLIM   | 18409 | 17972 |
| >FGFR2-Q21:NQHWSLIM   | 224  | >FGFR2-Q21:NKHWSLIM   | 224   | 0     |
| >FGFR2-Q21:NQHWSLIM   | 73   | >FGFR2-Q21:NKHWSLIM   | 284   | 211   |
| >FGFR2-Q21:HRIGGYKVRN | 1511 | >FGFR2-Q21:HRIGGYKVRN | 61    | 1450  |
| >FGFR2-Q21:RNQHWSLI   | 3878 | >FGFR2-Q21:RNKHWSLI   | 64    | 3814  |
| >FGFR2-Q21:RNQHWSLIM  | 6288 | >FGFR2-Q21:RNKHWSLIM  | 143   | 6145  |
| >FGFR2-Q21:RNQHWSLIM  | 634  | >FGFR2-Q21:RNKHWSLIM  | 304   | 330   |
| >FGFR2-Q21:RNQHWSLIM  | 584  | >FGFR2-Q21:RNKHWSLIM  | 199   | 385   |
| >FGFR2-Q21:RNQHWSLIM  | 219  | >FGFR2-Q21:RNKHWSLIM  | 151   | 68    |
| >FGFR2-Q21:RNQHWSLIM  | 381  | >FGFR2-Q21:RNKHWSLIM  | 1066  | 685   |
| >FGFR2-Q21:RNQHWSLI   | 57   | >FGFR2-Q21:RNKHWSLI   | 250   | 193   |
| >FGFR2-Q21:VRNQHWSLII | 260  | >FGFR2-Q21:VRNKHWSLII | 189   | 71    |
| >FGFR2-Q21:VRNQHWSL   | 324  | >FGFR2-Q21:VRNKHWSL   | 325   | 1     |
| >FGFR2-Q21:VRNQHWSLI  | 422  | >FGFR2-Q21:VRNKHWSLI  | 369   | 53    |
| >FGFR2-Q21:VRNQHWSLII | 110  | >FGFR2-Q21:VRNKHWSLII | 198   | 88    |
| >FGFR2-Q21:VRNQHWSL   | 337  | >FGFR2-Q21:VRNKHWSL   | 737   | 400   |
| >FGFR2-Q21:VRNQHWSL   | 250  | >FGFR2-Q21:VRNKHWSL   | 232   | 18    |
| >FGFR2-Q21:VRNQHWSLII | 296  | >FGFR2-Q21:VRNKHWSLII | 592   | 296   |
| >FGFR2-Q21:VRNQHWSLI  | 48   | >FGFR2-Q21:VRNKHWSLI  | 59    | 11    |
| >FGFR2-Q21:VRNQHWSLII | 114  | >FGFR2-Q21:VRNKHWSLII | 256   | 142   |
| >FGFR2-Q21:KVRNQHWSL  | 127  | >FGFR2-Q21:KVRNKHWSL  | 240   | 113   |
| >FGFR2-Q21:KVRNQHWS   | 11   | >FGFR2-Q21:KVRNKHWS   | 18    | 7     |
| >FGFR2-Q21:KVRNQHWSL  | 4    | >FGFR2-Q21:KVRNKHWSL  | 4     | 0     |
| >FGFR2-Q21:KVRNQHWSL  | 3    | >FGFR2-Q21:KVRNKHWSL  | 3     | 0     |
| >FGFR2-Q21:KVRNQHWSL  | 4    | >FGFR2-Q21:KVRNKHWSL  | 4     | 0     |
| >FGFR2-Q21:KVRNQHWSL  | 75   | >FGFR2-Q21:KVRNKHWSL  | 90    | 15    |
| >FGFR2-Q21:KVRNQHWSL  | 123  | >FGFR2-Q21:KVRNKHWSL  | 61    | 62    |
| >FGFR2-Q21:KVRNQHWSL  | 231  | >FGFR2-Q21:KVRNKHWSL  | 141   | 90    |
| >FGFR2-Q21:KVRNQHWSL  | 170  | >FGFR2-Q21:KVRNKHWSL  | 31    | 139   |
| >FGFR2-Q21:KVRNQHWSL  | 473  | >FGFR2-Q21:KVRNKHWSL  | 676   | 203   |
| >FGFR2-Q21:KVRNQHWSL  | 459  | >FGFR2-Q21:KVRNKHWSL  | 841   | 382   |
| >FGFR2-Q21:KVRNQHWSL  | 116  | >FGFR2-Q21:KVRNKHWSL  | 99    | 17    |
| >FGFR2-Q21:KVRNQHWSL  | 90   | >FGFR2-Q21:KVRNKHWSL  | 78    | 12    |
| >FGFR2-Q21:KVRNQHWSL  | 54   | >FGFR2-Q21:KVRNKHWSL  | 57    | 3     |
| >FGFR2-Q21:KVRNQHWSL  | 152  | >FGFR2-Q21:KVRNKHWSL  | 152   | 0     |
| >FGFR2-Q21:YKVRNQHWS  | 325  | >FGFR2-Q21:YKVRNKHWS  | 239   | 86    |
| >FGFR2-Q21:YKVRNQHW   | 61   | >FGFR2-Q21:YKVRNKHW   | 122   | 61    |
| >FGFR2-Q21:YKVRNQHWS  | 16   | >FGFR2-Q21:YKVRNKHWS  | 28    | 12    |
| >FGFR2-Q21:YKVRNQHWS  | 51   | >FGFR2-Q21:YKVRNKHWS  | 67    | 16    |
| >FGFR2-Q21:YKVRNQHWS  | 37   | >FGFR2-Q21:YKVRNKHWS  | 51    | 14    |
| >FGFR2-Q21:GYKVRNQHM  | 129  | >FGFR2-Q21:GYKVRNKHM  | 337   | 208   |

|                       |       |                       |       |       |
|-----------------------|-------|-----------------------|-------|-------|
| >FGFR2-Q21:GYKVRNQHV  | 413   | >FGFR2-Q21:GYKVRNKHV  | 1370  | 957   |
| >FGFR2-Q21:GYKVRNQHV  | 280   | >FGFR2-Q21:GYKVRNKHV  | 678   | 398   |
| >FGFR2-Q21:GYKVRNQHV  | 41    | >FGFR2-Q21:GYKVRNKHV  | 65    | 24    |
| >FGFR2-Q21:GYKVRNQHV  | 236   | >FGFR2-Q21:GYKVRNKHV  | 420   | 184   |
| >FGFR2-Q21:GYKVRNQHV  | 605   | >FGFR2-Q21:GYKVRNKHV  | 278   | 327   |
| >FGFR2-Q21:GGYKVRNQH  | 265   | >FGFR2-Q21:GGYKVRNKH  | 295   | 30    |
| >FGFR2-Q21:GGYKVRNQH  | 367   | >FGFR2-Q21:GGYKVRNKH  | 1095  | 728   |
| >FGFR2-Q21:RIGGYKVRNC | 17467 | >FGFR2-Q21:RIGGYKVRNK | 52    | 17415 |
| >FGFR2-Q21:RIGGYKVRNC | 10024 | >FGFR2-Q21:RIGGYKVRNK | 288   | 9736  |
| >FGFR2-Q21:RIGGYKVRNC | 6564  | >FGFR2-Q21:RIGGYKVRNK | 188   | 6376  |
| >FGFR2-Q21:RIGGYKVRNC | 5932  | >FGFR2-Q21:RIGGYKVRNK | 173   | 5759  |
| >FGFR2-R20:RIGGYKVR   | 50    | >FGFR2-R20:CIGGYKVR   | 1081  | 1031  |
| >FGFR2-R20:RIGGYKVR   | 50    | >FGFR2-R20:CIGGYKVR   | 90    | 40    |
| >FGFR2-R20:HRIGGYKV   | 4511  | >FGFR2-R20:HCIGGYKV   | 334   | 4177  |
| >FGFR2-R20:HRIGGYKV   | 108   | >FGFR2-R20:HCIGGYKV   | 23387 | 23279 |
| >FGFR2-R20:HRIGGYKVR  | 135   | >FGFR2-R20:HCIGGYKVR  | 23657 | 23522 |
| >FGFR2-R20:HRIGGYKV   | 455   | >FGFR2-R20:HCIGGYKV   | 17034 | 16579 |
| >FGFR2-R20:HRIGGYKVR  | 442   | >FGFR2-R20:HCIGGYKVR  | 149   | 293   |
| >FGFR2-R20:KNGKEFKQEH | 55    | >FGFR2-R20:KNGKEFKQEH | 28920 | 28865 |
| >FGFR2-R20:QEHRIGGY   | 662   | >FGFR2-R20:QEHCIGGY   | 320   | 342   |
| >FGFR2-R20:QEHRIGGYKV | 199   | >FGFR2-R20:QEHCIGGYKV | 928   | 729   |
| >FGFR2-R20:QEHRIGGY   | 411   | >FGFR2-R20:QEHCIGGY   | 180   | 231   |
| >FGFR2-R20:QEHRIGGY   | 205   | >FGFR2-R20:QEHCIGGY   | 143   | 62    |
| >FGFR2-R20:QEHRIGGYKV | 369   | >FGFR2-R20:QEHCIGGYKV | 325   | 44    |
| >FGFR2-R20:KQEHRIGGYK | 95    | >FGFR2-R20:KQEHCIGGYK | 72    | 23    |
| >FGFR2-R20:KQEHRIGGYK | 140   | >FGFR2-R20:KQEHCIGGYK | 126   | 14    |
| >FGFR2-R20:KQEHRIGGYK | 384   | >FGFR2-R20:KQEHCIGGYK | 1244  | 860   |
| >FGFR2-R20:KQEHRIGGY  | 55    | >FGFR2-R20:KQEHCIGGY  | 13    | 42    |
| >FGFR2-R20:KQEHRIGGY  | 325   | >FGFR2-R20:KQEHCIGGY  | 279   | 46    |
| >FGFR2-R20:KQEHRIGGYK | 1132  | >FGFR2-R20:KQEHCIGGYK | 336   | 796   |
| >FGFR2-R20:FKQEHRIGGY | 108   | >FGFR2-R20:FKQEHCIGGY | 92    | 16    |
| >FGFR2-R20:EFKQEHRIGG | 238   | >FGFR2-R20:EFKQEHCIGG | 331   | 93    |
| >FGFR2-R20:EFKQEHRIGG | 410   | >FGFR2-R20:EFKQEHCIGG | 400   | 10    |
| >FGFR2-R20:KEFKQEHR   | 36    | >FGFR2-R20:KEFKQEHCI  | 10    | 26    |
| >FGFR2-R20:KEFKQEHR   | 259   | >FGFR2-R20:KEFKQEHC   | 22735 | 22476 |
| >FGFR2-R20:KEFKQEHR   | 253   | >FGFR2-R20:KEFKQEHCI  | 215   | 38    |
| >FGFR2-R20:KEFKQEHR   | 147   | >FGFR2-R20:KEFKQEHCI  | 60    | 87    |
| >FGFR2-R20:KEFKQEHR   | 13    | >FGFR2-R20:KEFKQEHCI  | 11    | 2     |
| >FGFR2-R20:KEFKQEHR   | 27    | >FGFR2-R20:KEFKQEHC   | 28703 | 28676 |
| >FGFR2-R251RSPHRPIL   | 824   | >FGFR2-R251QSPHRPIL   | 353   | 471   |
| >FGFR2-R251RSPHRPIL   | 265   | >FGFR2-R251QSPHRPIL   | 3813  | 3548  |
| >FGFR2-R251RSPHRPIL   | 278   | >FGFR2-R251QSPHRPIL   | 363   | 85    |
| >FGFR2-R251RSPHRPIL   | 273   | >FGFR2-R251QSPHRPIL   | 2675  | 2402  |

|                        |       |                        |       |       |
|------------------------|-------|------------------------|-------|-------|
| >FGFR2-R251ERSPHRPI    | 1799  | >FGFR2-R251EQSPHRPI    | 439   | 1360  |
| >FGFR2-R251ERSPHRPIL   | 1436  | >FGFR2-R251EQSPHRPIL   | 328   | 1108  |
| >FGFR2-R251ERSPHRPI    | 105   | >FGFR2-R251EQSPHRPIL   | 80    | 25    |
| >FGFR2-R251ERSPHRPIL   | 469   | >FGFR2-R251EQSPHRPIL   | 8307  | 7838  |
| >FGFR2-R251ERSPHRPI    | 59    | >FGFR2-R251EQSPHRPIL   | 3722  | 3663  |
| >FGFR2-R251VERSPHRPI   | 319   | >FGFR2-R251VEQSPHRPI   | 2093  | 1774  |
| >FGFR2-R251VERSPHRPIL  | 386   | >FGFR2-R251VEQSPHRPIL  | 2223  | 1837  |
| >FGFR2-R251VERSPHRPI   | 434   | >FGFR2-R251VEQSPHRPI   | 1098  | 664   |
| >FGFR2-R251VERSPHRPIL  | 539   | >FGFR2-R251VEQSPHRPIL  | 320   | 219   |
| >FGFR2-R251VERSPHRPI   | 197   | >FGFR2-R251VEQSPHRPI   | 350   | 153   |
| >FGFR2-R251VERSPHRPIL  | 272   | >FGFR2-R251VEQSPHRPIL  | 232   | 40    |
| >FGFR2-R251VVERSPHR    | 255   | >FGFR2-R251VVEQSPHR    | 1231  | 976   |
| >FGFR2-R251DVVERSPH    | 382   | >FGFR2-R251DVVEQSPH    | 295   | 87    |
| >FGFR2-R251DVVERSPH    | 338   | >FGFR2-R251DVVEQSPH    | 139   | 199   |
| >FGFR2-R251DVVERSPHRF  | 365   | >FGFR2-R251DVVEQSPHRI  | 184   | 181   |
| >FGFR2-R251DVVERSPHR   | 41    | >FGFR2-R251DVVEQSPHR   | 143   | 102   |
| >FGFR2-R251DVVERSPHR   | 28    | >FGFR2-R251DVVEQSPHR   | 29    | 1     |
| >FGFR2-R251DVVERSPHRF  | 202   | >FGFR2-R251DVVEQSPHRI  | 153   | 49    |
| >FGFR2-R251DVVERSPHRF  | 65    | >FGFR2-R251DVVEQSPHRI  | 37    | 28    |
| >FGFR2-R251HLDVVERSPH  | 477   | >FGFR2-R251HLDVVEQSPH  | 689   | 212   |
| >FGFR2-R251TYHLDVVER   | 173   | >FGFR2-R251TYHLDVVEQ   | 19596 | 19423 |
| >FGFR2-R251TYHLDVVER   | 277   | >FGFR2-R251TYHLDVVEQ   | 25199 | 24922 |
| >FGFR2-R251TYHLDVVER   | 288   | >FGFR2-R251TYHLDVVEQ   | 17288 | 17000 |
| >FGFR2-R251TYHLDVVER   | 78    | >FGFR2-R251TYHLDVVEQ   | 7979  | 7901  |
| >FGFR2-R251HTYHLDVVEF  | 398   | >FGFR2-R251HTYHLDVVEC  | 30162 | 29764 |
| >FGFR2-R251HTYHLDVVEF  | 104   | >FGFR2-R251HTYHLDVVEC  | 18714 | 18610 |
| >FGFR2-R251HTYHLDVVEF  | 389   | >FGFR2-R251HTYHLDVVEC  | 21146 | 20757 |
| >FGFR2-R251HTYHLDVVEF  | 5     | >FGFR2-R251HTYHLDVVEC  | 11223 | 11218 |
| >FGFR2-R251HTYHLDVVEF  | 142   | >FGFR2-R251HTYHLDVVEC  | 186   | 44    |
| >FGFR2-R251HTYHLDVVEF  | 52    | >FGFR2-R251HTYHLDVVEC  | 8653  | 8601  |
| >FGFR2-R612RGMEYLASQI  | 193   | >FGFR2-R612TGMEYLASQI  | 6324  | 6131  |
| >FGFR2-R612ARGMEYLASQI | 19424 | >FGFR2-R612ATGMEYLASQI | 462   | 18962 |
| >FGFR2-R612ARGMEYLASQI | 11893 | >FGFR2-R612ATGMEYLASQI | 30    | 11863 |
| >FGFR2-R612ARGMEYLASQI | 11150 | >FGFR2-R612ATGMEYLASQI | 408   | 10742 |
| >FGFR2-R612ARGMEYLASQI | 439   | >FGFR2-R612ATGMEYLASQI | 24849 | 24410 |
| >FGFR2-R612ARGMEYLASQI | 8218  | >FGFR2-R612ATGMEYLASQI | 234   | 7984  |
| >FGFR2-R612DLVSCTYQLA  | 41    | >FGFR2-R612DLVSCTYQLA  | 20297 | 20256 |
| >FGFR2-R612DLVSCTYQLA  | 54    | >FGFR2-R612DLVSCTYQLA  | 25523 | 25469 |
| >FGFR2-R612DLVSCTYQLA  | 109   | >FGFR2-R612DLVSCTYQLA  | 30286 | 30177 |
| >FGFR2-R612LARGMEYL    | 2549  | >FGFR2-R612LATGMEYL    | 385   | 2164  |
| >FGFR2-R612LARGMEYL    | 70    | >FGFR2-R612LATGMEYL    | 673   | 603   |
| >FGFR2-R612LARGMEYLA   | 50    | >FGFR2-R612LATGMEYLA   | 36    | 14    |
| >FGFR2-R612QLARGMEYL   | 149   | >FGFR2-R612QLATGMEYL   | 55    | 94    |



|                      |     |                      |     |     |
|----------------------|-----|----------------------|-----|-----|
| >FGFR2-R612QLARGMEYL | 676 | >FGFR2-R612QLATGMEYL | 335 | 341 |
| >FGFR2-R612QLARGMEYL | 4   | >FGFR2-R612QLATGMEYL | 3   | 1   |
| >FGFR2-R612QLARGMEYL | 45  | >FGFR2-R612QLATGMEYL | 22  | 23  |
| >FGFR2-R612QLARGMEYL | 36  | >FGFR2-R612QLATGMEYL | 21  | 15  |
| >FGFR2-R612QLARGMEYL | 31  | >FGFR2-R612QLATGMEYL | 23  | 8   |
| >FGFR2-R612QLARGMEYL | 24  | >FGFR2-R612QLATGMEYL | 33  | 9   |
| >FGFR2-R612QLARGMEYL | 167 | >FGFR2-R612QLATGMEYL | 144 | 23  |
| >FGFR2-R612QLARGMEYL | 101 | >FGFR2-R612QLATGMEYL | 108 | 7   |
| >FGFR2-R612QLARGMEYL | 60  | >FGFR2-R612QLATGMEYL | 50  | 10  |
| >FGFR2-R612QLARGMEYL | 8   | >FGFR2-R612QLATGMEYL | 10  | 2   |
| >FGFR2-R612QLARGMEYL | 36  | >FGFR2-R612QLATGMEYL | 53  | 17  |
| >FGFR2-R612QLARGMEY  | 577 | >FGFR2-R612QLATGMEY  | 457 | 120 |
| >FGFR2-R612QLARGMEYL | 232 | >FGFR2-R612QLATGMEYL | 222 | 10  |
| >FGFR2-R612QLARGMEY  | 43  | >FGFR2-R612QLATGMEY  | 23  | 20  |
| >FGFR2-R612QLARGMEY  | 314 | >FGFR2-R612QLATGMEY  | 141 | 173 |
| >FGFR2-R612QLARGMEYL | 93  | >FGFR2-R612QLATGMEYL | 51  | 42  |
| >FGFR2-R612QLARGMEY  | 16  | >FGFR2-R612QLATGMEY  | 24  | 8   |
| >FGFR2-R612QLARGMEY  | 146 | >FGFR2-R612QLATGMEY  | 173 | 27  |
| >FGFR2-R612QLARGMEY  | 61  | >FGFR2-R612QLATGMEY  | 61  | 0   |
| >FGFR2-R612QLARGMEY  | 325 | >FGFR2-R612QLATGMEY  | 255 | 70  |
| >FGFR2-R612YQLARGMEY | 143 | >FGFR2-R612YQLATGMEY | 60  | 83  |
| >FGFR2-R612YQLARGMEY | 41  | >FGFR2-R612YQLATGMEY | 38  | 3   |
| >FGFR2-R612YQLARGMEY | 31  | >FGFR2-R612YQLATGMEY | 24  | 7   |
| >FGFR2-R612YQLARGMEY | 441 | >FGFR2-R612YQLATGMEY | 377 | 64  |
| >FGFR2-R612YQLARGMEY | 76  | >FGFR2-R612YQLATGMEY | 45  | 31  |
| >FGFR2-R612YQLARGMEY | 212 | >FGFR2-R612YQLATGMEY | 203 | 9   |
| >FGFR2-R612YQLARGMEY | 73  | >FGFR2-R612YQLATGMEY | 35  | 38  |
| >FGFR2-R612YQLARGMEY | 8   | >FGFR2-R612YQLATGMEY | 7   | 1   |
| >FGFR2-R612YQLARGMEY | 16  | >FGFR2-R612YQLATGMEY | 10  | 6   |
| >FGFR2-R612YQLARGMEY | 279 | >FGFR2-R612YQLATGMEY | 130 | 149 |
| >FGFR2-R612YQLARGMEY | 37  | >FGFR2-R612YQLATGMEY | 17  | 20  |
| >FGFR2-R612YQLARGMEY | 335 | >FGFR2-R612YQLATGMEY | 131 | 204 |
| >FGFR2-R612YQLARGMEY | 83  | >FGFR2-R612YQLATGMEY | 40  | 43  |
| >FGFR2-R612YQLARGMEY | 541 | >FGFR2-R612YQLATGMEY | 227 | 314 |
| >FGFR2-R612YQLARGMEY | 369 | >FGFR2-R612YQLATGMEY | 114 | 255 |
| >FGFR2-R612YQLARGMEY | 53  | >FGFR2-R612YQLATGMEY | 33  | 20  |
| >FGFR2-R612YQLARGMEY | 13  | >FGFR2-R612YQLATGMEY | 15  | 2   |
| >FGFR2-R612YQLARGMEY | 49  | >FGFR2-R612YQLATGMEY | 43  | 6   |
| >FGFR2-R612YQLARGMEY | 254 | >FGFR2-R612YQLATGMEY | 189 | 65  |
| >FGFR2-R612YQLARGMEY | 16  | >FGFR2-R612YQLATGMEY | 14  | 2   |
| >FGFR2-R612YQLARGMEY | 430 | >FGFR2-R612YQLATGMEY | 335 | 95  |
| >FGFR2-R612YQLARGMEY | 3   | >FGFR2-R612YQLATGMEY | 2   | 1   |
| >FGFR2-R612YQLARGMEY | 19  | >FGFR2-R612YQLATGMEY | 11  | 8   |

|                       |      |                       |       |       |
|-----------------------|------|-----------------------|-------|-------|
| >FGFR2-R612YQLARGMEY  | 623  | >FGFR2-R612YQLATGMEY  | 239   | 384   |
| >FGFR2-R612YQLARGMEY  | 526  | >FGFR2-R612YQLATGMEY  | 131   | 395   |
| >FGFR2-R612YQLARGMEY  | 1157 | >FGFR2-R612YQLATGMEY  | 259   | 898   |
| >FGFR2-R612YQLARGMEY  | 82   | >FGFR2-R612YQLATGMEY  | 30    | 52    |
| >FGFR2-R612YQLARGMEY  | 374  | >FGFR2-R612YQLATGMEY  | 330   | 44    |
| >FGFR2-R612TYQLARGM   | 354  | >FGFR2-R612TYQLATGM   | 88    | 266   |
| >FGFR2-R612TYQLARGME' | 14   | >FGFR2-R612TYQLATGME' | 20    | 6     |
| >FGFR2-R612TYQLARGME' | 392  | >FGFR2-R612TYQLATGME' | 231   | 161   |
| >FGFR2-R612TYQLARGME' | 420  | >FGFR2-R612TYQLATGME' | 376   | 44    |
| >FGFR2-R612TYQLARGM   | 493  | >FGFR2-R612TYQLATGM   | 242   | 251   |
| >FGFR2-R612TYQLARGME' | 126  | >FGFR2-R612TYQLATGME' | 55    | 71    |
| >FGFR2-R612TYQLARGME' | 9    | >FGFR2-R612TYQLATGME' | 7     | 2     |
| >FGFR2-R612TYQLARGME' | 47   | >FGFR2-R612TYQLATGME' | 28    | 19    |
| >FGFR2-R612TYQLARGME' | 66   | >FGFR2-R612TYQLATGME' | 47    | 19    |
| >FGFR2-R612TYQLARGME' | 745  | >FGFR2-R612TYQLATGME' | 176   | 569   |
| >FGFR2-R612CTYQLARGM  | 194  | >FGFR2-R612CTYQLATGM  | 105   | 89    |
| >FGFR2-R612CTYQLARGM  | 170  | >FGFR2-R612CTYQLATGM  | 87    | 83    |
| >FGFR2-R612CTYQLARGM  | 343  | >FGFR2-R612CTYQLATGM  | 214   | 129   |
| >FGFR2-R612CTYQLARGM  | 460  | >FGFR2-R612CTYQLATGM  | 406   | 54    |
| >FGFR2-R612CTYQLARGM  | 24   | >FGFR2-R612CTYQLATGM  | 50    | 26    |
| >FGFR2-R612CTYQLARGM  | 88   | >FGFR2-R612CTYQLATGM  | 127   | 39    |
| >FGFR2-R612CTYQLARGM  | 36   | >FGFR2-R612CTYQLATGM  | 24    | 12    |
| >FGFR2-R612CTYQLARGM  | 253  | >FGFR2-R612CTYQLATGM  | 185   | 68    |
| >FGFR2-R612CTYQLARGM  | 373  | >FGFR2-R612CTYQLATGM  | 175   | 198   |
| >FGFR2-R612CTYQLARGM  | 1290 | >FGFR2-R612CTYQLATGM  | 453   | 837   |
| >FGFR2-R612CTYQLARGM  | 46   | >FGFR2-R612CTYQLATGM  | 36    | 10    |
| >FGFR2-R612CTYQLARGM  | 482  | >FGFR2-R612CTYQLATGM  | 289   | 193   |
| >FGFR2-R612CTYQLARGM  | 225  | >FGFR2-R612CTYQLATGM  | 96    | 129   |
| >FGFR2-R612CTYQLARGM  | 16   | >FGFR2-R612CTYQLATGM  | 10    | 6     |
| >FGFR2-R612CTYQLARGM  | 8    | >FGFR2-R612CTYQLATGM  | 7     | 1     |
| >FGFR2-R612CTYQLARGM  | 1147 | >FGFR2-R612CTYQLATGM  | 453   | 694   |
| >FGFR2-R612CTYQLARGM  | 846  | >FGFR2-R612CTYQLATGM  | 160   | 686   |
| >FGFR2-R612CTYQLARGM  | 146  | >FGFR2-R612CTYQLATGM  | 27    | 119   |
| >FGFR2-R612CTYQLARGM  | 42   | >FGFR2-R612CTYQLATGM  | 18    | 24    |
| >FGFR2-R612CTYQLARGM  | 741  | >FGFR2-R612CTYQLATGM  | 479   | 262   |
| >FGFR2-R612CTYQLARGM  | 59   | >FGFR2-R612CTYQLATGM  | 51    | 8     |
| >FGFR2-R612SCTYQLARGM | 425  | >FGFR2-R612SCTYQLATGM | 211   | 214   |
| >FGFR2-R612VSCTYQLAR  | 262  | >FGFR2-R612VSCTYQLAT  | 20866 | 20604 |
| >FGFR2-R612VSCTYQLAR  | 83   | >FGFR2-R612VSCTYQLAT  | 18894 | 18811 |
| >FGFR2-R612VSCTYQLARC | 20   | >FGFR2-R612VSCTYQLATG | 13    | 7     |
| >FGFR2-R612VSCTYQLARC | 495  | >FGFR2-R612VSCTYQLATG | 144   | 351   |
| >FGFR2-R612LVSCTYQLAR | 137  | >FGFR2-R612LVSCTYQLAT | 29073 | 28936 |
| >FGFR2-R612LVSCTYQLAR | 61   | >FGFR2-R612LVSCTYQLAT | 17102 | 17041 |

|                        |      |                        |       |       |
|------------------------|------|------------------------|-------|-------|
| >FGFR2-R612LVSCYQLAR   | 415  | >FGFR2-R612LVSCYQLAT   | 23312 | 22897 |
| >FGFR2-R612LVSCYQLAR   | 32   | >FGFR2-R612LVSCYQLAT   | 26870 | 26838 |
| >FGFR2-R612LVSCYQLAR   | 374  | >FGFR2-R612LVSCYQLAT   | 26297 | 25923 |
| >FGFR2-R759RILTLLTNEEY | 1780 | >FGFR2-R759QILTLLTNEEY | 411   | 1369  |
| >FGFR2-R759RILTLLTNEEY | 290  | >FGFR2-R759QILTLLTNEEY | 142   | 148   |
| >FGFR2-R759RILTLLTNEEY | 381  | >FGFR2-R759QILTLLTNEEY | 1136  | 755   |
| >FGFR2-R759RILTLLTNEEY | 64   | >FGFR2-R759QILTLLTNEEY | 651   | 587   |
| >FGFR2-R759RILTLLTNEEY | 31   | >FGFR2-R759QILTLLTNEEY | 152   | 121   |
| >FGFR2-R759RILTLLTNEEY | 393  | >FGFR2-R759QILTLLTNEEY | 2029  | 1636  |
| >FGFR2-R759RILTLLTNEEY | 162  | >FGFR2-R759QILTLLTNEEY | 678   | 516   |
| >FGFR2-R759RILTLLTNEEY | 190  | >FGFR2-R759QILTLLTNEEY | 2950  | 2760  |
| >FGFR2-R759RILTLLTNEEY | 216  | >FGFR2-R759QILTLLTNEEY | 1058  | 842   |
| >FGFR2-R759TFKQLVEDLD  | 494  | >FGFR2-R759TFKQLVEDLD  | 31300 | 30806 |
| >FGFR2-R759TFKQLVEDLD  | 127  | >FGFR2-R759TFKQLVEDLD  | 12974 | 12847 |
| >FGFR2-R759DLDRILTL    | 190  | >FGFR2-R759DLDQILTL    | 119   | 71    |
| >FGFR2-R759DLDRILTL    | 227  | >FGFR2-R759DLDQILTL    | 112   | 115   |
| >FGFR2-R759DLDRILTL    | 483  | >FGFR2-R759DLDQILTL    | 272   | 211   |
| >FGFR2-R759DLDRILTL    | 106  | >FGFR2-R759DLDQILTL    | 84    | 22    |
| >FGFR2-R759EDLDRILTL   | 264  | >FGFR2-R759EDLDQILTL   | 140   | 124   |
| >FGFR2-R759VEDLDRIL    | 26   | >FGFR2-R759VEDLDQIL    | 55    | 29    |
| >FGFR2-R759VEDLDRIL    | 89   | >FGFR2-R759VEDLDQIL    | 49    | 40    |
| >FGFR2-R759VEDLDRILTL  | 113  | >FGFR2-R759VEDLDQILTL  | 140   | 27    |
| >FGFR2-R759VEDLDRILTL  | 637  | >FGFR2-R759VEDLDQILTL  | 211   | 426   |
| >FGFR2-R759LVEDLDRILTL | 146  | >FGFR2-R759LVEDLDQILTL | 52    | 94    |
| >FGFR2-R759QLVEDLDRI   | 461  | >FGFR2-R759QLVEDLDQI   | 434   | 27    |
| >FGFR2-R759QLVEDLDRI   | 33   | >FGFR2-R759QLVEDLDQI   | 22    | 11    |
| >FGFR2-R759QLVEDLDRI   | 146  | >FGFR2-R759QLVEDLDQIL  | 101   | 45    |
| >FGFR2-R759QLVEDLDRI   | 57   | >FGFR2-R759QLVEDLDQI   | 35    | 22    |
| >FGFR2-R759QLVEDLDRI   | 49   | >FGFR2-R759QLVEDLDQI   | 31    | 18    |
| >FGFR2-R759QLVEDLDRI   | 25   | >FGFR2-R759QLVEDLDQI   | 20    | 5     |
| >FGFR2-R759QLVEDLDRI   | 469  | >FGFR2-R759QLVEDLDQIL  | 225   | 244   |
| >FGFR2-R759QLVEDLDRI   | 32   | >FGFR2-R759QLVEDLDQI   | 29    | 3     |
| >FGFR2-R759QLVEDLDRI   | 244  | >FGFR2-R759QLVEDLDQIL  | 65    | 179   |
| >FGFR2-R759QLVEDLDRI   | 632  | >FGFR2-R759QLVEDLDQI   | 225   | 407   |
| >FGFR2-R759QLVEDLDRI   | 1956 | >FGFR2-R759QLVEDLDQIL  | 432   | 1524  |
| >FGFR2-R759QLVEDLDRI   | 475  | >FGFR2-R759QLVEDLDQI   | 95    | 380   |
| >FGFR2-R759QLVEDLDRI   | 60   | >FGFR2-R759QLVEDLDQI   | 43    | 17    |
| >FGFR2-R759QLVEDLDRI   | 160  | >FGFR2-R759QLVEDLDQIL  | 25    | 135   |
| >FGFR2-R759QLVEDLDRI   | 432  | >FGFR2-R759QLVEDLDQI   | 496   | 64    |
| >FGFR2-R759KQLVEDLDRI  | 207  | >FGFR2-R759KQLVEDLDQI  | 151   | 56    |
| >FGFR2-R759KQLVEDLDRI  | 650  | >FGFR2-R759KQLVEDLDQI  | 254   | 396   |
| >FGFR2-R759KQLVEDLDRI  | 129  | >FGFR2-R759KQLVEDLDQI  | 66    | 63    |
| >FGFR2-R759KQLVEDLDR   | 66   | >FGFR2-R759KQLVEDLDQ   | 10413 | 10347 |

|                                  |       |                                  |      |       |
|----------------------------------|-------|----------------------------------|------|-------|
| >FGFR2-R75 $\epsilon$ FKQLVEDLDR | 608   | >FGFR2-R75 $\epsilon$ FKQLVEDLDC | 222  | 386   |
| >FGFR2-S24F SFSLVEDTTL           | 86    | >FGFR2-S24F FFSLVEDTTL           | 291  | 205   |
| >FGFR2-S24F SFSLVEDTTL           | 1790  | >FGFR2-S24F FFSLVEDTTL           | 392  | 1398  |
| >FGFR2-S24F SFSLVEDTTL           | 576   | >FGFR2-S24F FFSLVEDTTL           | 126  | 450   |
| >FGFR2-S24F PSFLVEDTTL           | 476   | >FGFR2-S24F PFFSLVEDTTL          | 3988 | 3512  |
| >FGFR2-S24F TMATLSLARP           | 10205 | >FGFR2-S24F TMATLSLARP           | 322  | 9883  |
| >FGFR2-S24F TMATLSLARP           | 13728 | >FGFR2-S24F TMATLSLARP           | 149  | 13579 |
| >FGFR2-S24F TMATLSLARP           | 6416  | >FGFR2-S24F TMATLSLARP           | 36   | 6380  |
| >FGFR2-S24F TMATLSLARP           | 18163 | >FGFR2-S24F TMATLSLARP           | 136  | 18027 |
| >FGFR2-S24F TMATLSLARP           | 8784  | >FGFR2-S24F TMATLSLARP           | 11   | 8773  |
| >FGFR2-S24F TMATLSLARP           | 10103 | >FGFR2-S24F TMATLSLARP           | 119  | 9984  |
| >FGFR2-S24F LARPSFSL             | 15148 | >FGFR2-S24F LARPFFSL             | 446  | 14702 |
| >FGFR2-S24F LARPSFSLV            | 2427  | >FGFR2-S24F LARPFFSLV            | 102  | 2325  |
| >FGFR2-S24F LARPSFSLV            | 114   | >FGFR2-S24F LARPFFSLV            | 156  | 42    |
| >FGFR2-S24F LARPSFSL             | 1241  | >FGFR2-S24F LARPFFSL             | 307  | 934   |
| >FGFR2-S24F LARPSFSLV            | 236   | >FGFR2-S24F LARPFFSLV            | 92   | 144   |
| >FGFR2-S24F LARPSFSLV            | 63    | >FGFR2-S24F LARPFFSLV            | 55   | 8     |
| >FGFR2-S24F LARPSFSL             | 44    | >FGFR2-S24F LARPFFSL             | 60   | 16    |
| >FGFR2-S24F LARPSFSLV            | 24    | >FGFR2-S24F LARPFFSLV            | 26   | 2     |
| >FGFR2-S24F LARPSFSL             | 43    | >FGFR2-S24F LARPFFSL             | 130  | 87    |
| >FGFR2-S24F LARPSFSL             | 740   | >FGFR2-S24F LARPFFSL             | 200  | 540   |
| >FGFR2-S24F LARPSFSL             | 356   | >FGFR2-S24F LARPFFSL             | 700  | 344   |
| >FGFR2-S24F LARPSFSL             | 82    | >FGFR2-S24F LARPFFSL             | 101  | 19    |
| >FGFR2-S24F LARPSFSLV            | 113   | >FGFR2-S24F LARPFFSLV            | 183  | 70    |
| >FGFR2-S24F LARPSFSL             | 6     | >FGFR2-S24F LARPFFSL             | 21   | 15    |
| >FGFR2-S24F LARPSFSLV            | 198   | >FGFR2-S24F LARPFFSLV            | 1322 | 1124  |
| >FGFR2-S24F LARPSFSLV            | 350   | >FGFR2-S24F LARPFFSLV            | 202  | 148   |
| >FGFR2-S24F LARPSFSLV            | 412   | >FGFR2-S24F LARPFFSLV            | 310  | 102   |
| >FGFR2-S24F LARPSFSLV            | 17    | >FGFR2-S24F LARPFFSLV            | 11   | 6     |
| >FGFR2-S24F LARPSFSL             | 237   | >FGFR2-S24F LARPFFSL             | 134  | 103   |
| >FGFR2-S24F SLARPSFSL            | 26    | >FGFR2-S24F SLARPFFSL            | 22   | 4     |
| >FGFR2-S24F SLARPSFSLV           | 167   | >FGFR2-S24F SLARPFFSLV           | 109  | 58    |
| >FGFR2-S24F SLARPSFSL            | 769   | >FGFR2-S24F SLARPFFSL            | 254  | 515   |
| >FGFR2-S24F SLARPSFSL            | 12    | >FGFR2-S24F SLARPFFSL            | 8    | 4     |
| >FGFR2-S24F SLARPSFSLV           | 23    | >FGFR2-S24F SLARPFFSLV           | 23   | 0     |
| >FGFR2-S24F SLARPSFSL            | 47    | >FGFR2-S24F SLARPFFSL            | 35   | 12    |
| >FGFR2-S24F SLARPSFSLV           | 9     | >FGFR2-S24F SLARPFFSLV           | 10   | 1     |
| >FGFR2-S24F SLARPSFSL            | 73    | >FGFR2-S24F SLARPFFSL            | 15   | 58    |
| >FGFR2-S24F SLARPSFSLV           | 126   | >FGFR2-S24F SLARPFFSLV           | 59   | 67    |
| >FGFR2-S24F SLARPSFSL            | 974   | >FGFR2-S24F SLARPFFSL            | 343  | 631   |
| >FGFR2-S24F SLARPSFSL            | 5     | >FGFR2-S24F SLARPFFSL            | 4    | 1     |
| >FGFR2-S24F SLARPSFSLV           | 3     | >FGFR2-S24F SLARPFFSLV           | 3    | 0     |
| >FGFR2-S24F SLARPSFSL            | 14    | >FGFR2-S24F SLARPFFSL            | 19   | 5     |

|                         |      |                          |     |      |
|-------------------------|------|--------------------------|-----|------|
| >FGFR2-S24F SLARPSFSLV  | 10   | >FGFR2-S24F SLARPPFFSLV  | 11  | 1    |
| >FGFR2-S24F SLARPSFSL   | 9    | >FGFR2-S24F SLARPPFFSL   | 9   | 0    |
| >FGFR2-S24F SLARPSFSLV  | 6    | >FGFR2-S24F SLARPPFFSLV  | 6   | 0    |
| >FGFR2-S24F SLARPSFSL   | 20   | >FGFR2-S24F SLARPPFFSL   | 42  | 22   |
| >FGFR2-S24F SLARPSFSLV  | 19   | >FGFR2-S24F SLARPPFFSLV  | 22  | 3    |
| >FGFR2-S24F SLARPSFS    | 995  | >FGFR2-S24F SLARPPFFS    | 457 | 538  |
| >FGFR2-S24F SLARPSFSL   | 3    | >FGFR2-S24F SLARPPFFSL   | 2   | 1    |
| >FGFR2-S24F SLARPSFSLV  | 2    | >FGFR2-S24F SLARPPFFSLV  | 2   | 0    |
| >FGFR2-S24F SLARPSFSL   | 250  | >FGFR2-S24F SLARPPFFSL   | 570 | 320  |
| >FGFR2-S24F SLARPSFSL   | 206  | >FGFR2-S24F SLARPPFFSL   | 129 | 77   |
| >FGFR2-S24F SLARPSFSLV  | 134  | >FGFR2-S24F SLARPPFFSLV  | 110 | 24   |
| >FGFR2-S24F SLARPSFSL   | 95   | >FGFR2-S24F SLARPPFFSL   | 62  | 33   |
| >FGFR2-S24F SLARPSFSLV  | 60   | >FGFR2-S24F SLARPPFFSLV  | 29  | 31   |
| >FGFR2-S24F SLARPSFSL   | 3982 | >FGFR2-S24F SLARPPFFSL   | 325 | 3657 |
| >FGFR2-S24F SLARPSFSLV  | 531  | >FGFR2-S24F SLARPPFFSLV  | 106 | 425  |
| >FGFR2-S24F LSLARPSFSLV | 686  | >FGFR2-S24F LSLARPPFFSLV | 312 | 374  |
| >FGFR2-S24F LSLARPSFSL  | 595  | >FGFR2-S24F LSLARPPFFSL  | 342 | 253  |
| >FGFR2-S24F LSLARPSFSL  | 1425 | >FGFR2-S24F LSLARPPFFSL  | 358 | 1067 |
| >FGFR2-S24F LSLARPSFSLV | 220  | >FGFR2-S24F LSLARPPFFSLV | 78  | 142  |
| >FGFR2-S24F LSLARPSFSLV | 1223 | >FGFR2-S24F LSLARPPFFSLV | 429 | 794  |
| >FGFR2-S24F LSLARPSFSLV | 1094 | >FGFR2-S24F LSLARPPFFSLV | 297 | 797  |
| >FGFR2-S24F LSLARPSF    | 184  | >FGFR2-S24F LSLARPPF     | 888 | 704  |
| >FGFR2-S24F LSLARPSF    | 13   | >FGFR2-S24F LSLARPPF     | 41  | 28   |
| >FGFR2-S24F LSLARPSFSL  | 220  | >FGFR2-S24F LSLARPPFFSL  | 276 | 56   |
| >FGFR2-S24F LSLARPSF    | 4    | >FGFR2-S24F LSLARPPF     | 5   | 1    |
| >FGFR2-S24F LSLARPSFSL  | 6    | >FGFR2-S24F LSLARPPFFSL  | 11  | 5    |
| >FGFR2-S24F LSLARPSFSLV | 293  | >FGFR2-S24F LSLARPPFFSLV | 579 | 286  |
| >FGFR2-S24F LSLARPSF    | 373  | >FGFR2-S24F LSLARPPF     | 252 | 121  |
| >FGFR2-S24F LSLARPSF    | 45   | >FGFR2-S24F LSLARPPF     | 31  | 14   |
| >FGFR2-S24F LSLARPSFSL  | 172  | >FGFR2-S24F LSLARPPFFSL  | 91  | 81   |
| >FGFR2-S24F LSLARPSF    | 425  | >FGFR2-S24F LSLARPPF     | 753 | 328  |
| >FGFR2-S24F LSLARPSFSL  | 54   | >FGFR2-S24F LSLARPPFFSL  | 151 | 97   |
| >FGFR2-S24F LSLARPSFSLV | 37   | >FGFR2-S24F LSLARPPFFSLV | 93  | 56   |
| >FGFR2-S24F LSLARPSFSL  | 196  | >FGFR2-S24F LSLARPPFFSL  | 196 | 0    |
| >FGFR2-S24F TSLARPSFSL  | 315  | >FGFR2-S24F TSLARPPFFSL  | 224 | 91   |
| >FGFR2-S24F TSLARPSFSL  | 32   | >FGFR2-S24F TSLARPPFFSL  | 24  | 8    |
| >FGFR2-S24F TSLARPSFSL  | 323  | >FGFR2-S24F TSLARPPFFSL  | 291 | 32   |
| >FGFR2-S24F TSLARPSFSL  | 707  | >FGFR2-S24F TSLARPPFFSL  | 266 | 441  |
| >FGFR2-S24F TSLARPSFSL  | 525  | >FGFR2-S24F TSLARPPFFSL  | 476 | 49   |
| >FGFR2-S24F TSLARPSFSL  | 398  | >FGFR2-S24F TSLARPPFFSL  | 531 | 133  |
| >FGFR2-S24F TSLARPSFSL  | 213  | >FGFR2-S24F TSLARPPFFSL  | 195 | 18   |
| >FGFR2-S24F TSLARPSFSL  | 137  | >FGFR2-S24F TSLARPPFFSL  | 175 | 38   |
| >FGFR2-S24F TSLARPSFSL  | 12   | >FGFR2-S24F TSLARPPFFSL  | 11  | 1    |

|                        |       |                        |       |       |
|------------------------|-------|------------------------|-------|-------|
| >FGFR2-S24FTLSLARPS    | 16658 | >FGFR2-S24FTLSLARPF    | 232   | 16426 |
| >FGFR2-S24FTLSLARPSF   | 221   | >FGFR2-S24FTLSLARPPF   | 1160  | 939   |
| >FGFR2-S24FTLSLARPS    | 24801 | >FGFR2-S24FTLSLARPF    | 472   | 24329 |
| >FGFR2-S24FTLSLARPSF   | 329   | >FGFR2-S24FTLSLARPPF   | 810   | 481   |
| >FGFR2-S24FATLSLARPS   | 19252 | >FGFR2-S24FATLSLARPF   | 214   | 19038 |
| >FGFR2-S24FATLSLARPSF  | 158   | >FGFR2-S24FATLSLARPPF  | 41    | 117   |
| >FGFR2-S24FATLSLARPS   | 4164  | >FGFR2-S24FATLSLARPF   | 12    | 4152  |
| >FGFR2-S24FATLSLARPSF  | 39    | >FGFR2-S24FATLSLARPPF  | 289   | 250   |
| >FGFR2-S24FATLSLARPS   | 17421 | >FGFR2-S24FATLSLARPF   | 306   | 17115 |
| >FGFR2-S24FATLSLARPSF  | 397   | >FGFR2-S24FATLSLARPPF  | 1698  | 1301  |
| >FGFR2-S24FATLSLARPS   | 13386 | >FGFR2-S24FATLSLARPF   | 25    | 13361 |
| >FGFR2-S24FATLSLARPSF  | 32    | >FGFR2-S24FATLSLARPPF  | 77    | 45    |
| >FGFR2-S24FATLSLARPS   | 4856  | >FGFR2-S24FATLSLARPF   | 4     | 4852  |
| >FGFR2-S24FATLSLARPSF  | 5     | >FGFR2-S24FATLSLARPPF  | 5     | 0     |
| >FGFR2-S24FATLSLARPSF  | 1050  | >FGFR2-S24FATLSLARPPF  | 240   | 810   |
| >FGFR2-S24FATLSLARPS   | 3562  | >FGFR2-S24FATLSLARPF   | 27    | 3535  |
| >FGFR2-S24FATLSLARPSF  | 58    | >FGFR2-S24FATLSLARPPF  | 45    | 13    |
| >FGFR2-S24FATLSLARPSFS | 399   | >FGFR2-S24FATLSLARPPFS | 2178  | 1779  |
| >FGFR2-S24FMATLSLARPS  | 20478 | >FGFR2-S24FMATLSLARPF  | 66    | 20412 |
| >FGFR2-S24FMATLSLARPS  | 73    | >FGFR2-S24FMATLSLARPF  | 219   | 146   |
| >FGFR2-S24FMATLSLARPS  | 6883  | >FGFR2-S24FMATLSLARPF  | 8     | 6875  |
| >FGFR2-S24FMATLSLARPS  | 12    | >FGFR2-S24FMATLSLARPF  | 19    | 7     |
| >FGFR2-S24FMATLSLARPS  | 36    | >FGFR2-S24FMATLSLARPF  | 101   | 65    |
| >FGFR2-S24FMATLSLARPS  | 75    | >FGFR2-S24FMATLSLARPF  | 65    | 10    |
| >FGFR2-S24FMATLSLARPS  | 491   | >FGFR2-S24FMATLSLARPF  | 109   | 382   |
| >FGFR2-S24FMATLSLARPS  | 394   | >FGFR2-S24FMATLSLARPF  | 215   | 179   |
| >FGFR2-S252SPHRPILQAG  | 197   | >FGFR2-S252WPHRPILQA   | 3722  | 3525  |
| >FGFR2-S252SPHRPILQA   | 300   | >FGFR2-S252WPHRPILQA   | 391   | 91    |
| >FGFR2-S252SPHRPILQAG  | 68    | >FGFR2-S252WPHRPILQA   | 90    | 22    |
| >FGFR2-S252SPHRPILQA   | 465   | >FGFR2-S252WPHRPILQA   | 33    | 432   |
| >FGFR2-S252RSPHRPIL    | 5448  | >FGFR2-S252RWPHRPIL    | 226   | 5222  |
| >FGFR2-S252RSPHRPIL    | 10977 | >FGFR2-S252RWPHRPIL    | 51    | 10926 |
| >FGFR2-S252RSPHRPIL    | 265   | >FGFR2-S252RWPHRPIL    | 26530 | 26265 |
| >FGFR2-S252RSPHRPIL    | 278   | >FGFR2-S252RWPHRPIL    | 14298 | 14020 |
| >FGFR2-S252RSPHRPILQ   | 15772 | >FGFR2-S252RWPHRPILQ   | 97    | 15675 |
| >FGFR2-S252RSPHRPIL    | 33405 | >FGFR2-S252RWPHRPIL    | 226   | 33179 |
| >FGFR2-S252RSPHRPILQA  | 29449 | >FGFR2-S252RWPHRPILQ/  | 285   | 29164 |
| >FGFR2-S252RSPHRPILQA  | 34775 | >FGFR2-S252RWPHRPILQ/  | 357   | 34418 |
| >FGFR2-S252RSPHRPIL    | 273   | >FGFR2-S252RWPHRPIL    | 21233 | 20960 |
| >FGFR2-S252HTYHLDVVEF  | 5350  | >FGFR2-S252HTYHLDVVEF  | 44    | 5306  |
| >FGFR2-S252HTYHLDVVEF  | 142   | >FGFR2-S252HTYHLDVVEF  | 10663 | 10521 |
| >FGFR2-S252HTYHLDVVEF  | 2378  | >FGFR2-S252HTYHLDVVEF  | 4     | 2374  |
| >FGFR2-S252HTYHLDVVEF  | 35653 | >FGFR2-S252HTYHLDVVEF  | 448   | 35205 |

|                        |       |                       |      |       |
|------------------------|-------|-----------------------|------|-------|
| >FGFR2-S252HTYHLDVVEF  | 14629 | >FGFR2-S252HTYHLDVVEF | 32   | 14597 |
| >FGFR2-S252HTYHLDVVEF  | 14283 | >FGFR2-S252HTYHLDVVEF | 10   | 14273 |
| >FGFR2-S252HTYHLDVVEF  | 4461  | >FGFR2-S252HTYHLDVVEF | 283  | 4178  |
| >FGFR2-S252HTYHLDVVEF  | 30581 | >FGFR2-S252HTYHLDVVEF | 77   | 30504 |
| >FGFR2-S252ERSPHRPI    | 4527  | >FGFR2-S252ERWPHRPI   | 272  | 4255  |
| >FGFR2-S252ERSPHRPILQ  | 5954  | >FGFR2-S252ERWPHRPILC | 474  | 5480  |
| >FGFR2-S252ERSPHRPIL   | 105   | >FGFR2-S252ERWPHRPIL  | 244  | 139   |
| >FGFR2-S252ERSPHRPI    | 7538  | >FGFR2-S252ERWPHRPI   | 472  | 7066  |
| >FGFR2-S252ERSPHRPILQ  | 3705  | >FGFR2-S252ERWPHRPILC | 246  | 3459  |
| >FGFR2-S252ERSPHRPI    | 7600  | >FGFR2-S252ERWPHRPI   | 333  | 7267  |
| >FGFR2-S252ERSPHRPIL   | 469   | >FGFR2-S252ERWPHRPIL  | 67   | 402   |
| >FGFR2-S252ERSPHRPIL   | 59    | >FGFR2-S252ERWPHRPIL  | 12   | 47    |
| >FGFR2-S252VERSHPRPI   | 319   | >FGFR2-S252VERWPHRPI  | 3092 | 2773  |
| >FGFR2-S252VERSHPRPIL  | 386   | >FGFR2-S252VERWPHRPIL | 2511 | 2125  |
| >FGFR2-S252VERSHPRPI   | 2499  | >FGFR2-S252VERWPHRPI  | 427  | 2072  |
| >FGFR2-S252VERSHPRPI   | 434   | >FGFR2-S252VERWPHRPI  | 483  | 49    |
| >FGFR2-S252VERSHPRPIL  | 539   | >FGFR2-S252VERWPHRPIL | 304  | 235   |
| >FGFR2-S252VERSHPRPI   | 197   | >FGFR2-S252VERWPHRPI  | 238  | 41    |
| >FGFR2-S252VERSHPRPIL  | 272   | >FGFR2-S252VERWPHRPIL | 417  | 145   |
| >FGFR2-S252VVERSHPRPII | 817   | >FGFR2-S252VVERWPHRPI | 280  | 537   |
| >FGFR2-S252VVERSHPR    | 255   | >FGFR2-S252VVERWPHR   | 85   | 170   |
| >FGFR2-S252DVVERSHP    | 382   | >FGFR2-S252DVVERWPH   | 452  | 70    |
| >FGFR2-S252DVVERSHP    | 338   | >FGFR2-S252DVVERWPH   | 405  | 67    |
| >FGFR2-S252DVVERSHPRF  | 365   | >FGFR2-S252DVVERWPHR  | 263  | 102   |
| >FGFR2-S252DVVERSHPR   | 41    | >FGFR2-S252DVVERWPHR  | 16   | 25    |
| >FGFR2-S252DVVERSHPR   | 28    | >FGFR2-S252DVVERWPHR  | 44   | 16    |
| >FGFR2-S252DVVERSHPRF  | 202   | >FGFR2-S252DVVERWPHR  | 201  | 1     |
| >FGFR2-S252DVVERSHPRF  | 65    | >FGFR2-S252DVVERWPHR  | 80   | 15    |
| >FGFR2-S252HLDVVERSPT  | 699   | >FGFR2-S252HLDVVERWP  | 327  | 372   |
| >FGFR2-S252HLDVVERSPT  | 477   | >FGFR2-S252HLDVVERWP  | 223  | 254   |
| >FGFR2-S252HLDVVERS    | 22729 | >FGFR2-S252HLDVVERW   | 207  | 22522 |
| >FGFR2-S252YHLDVVERS   | 22488 | >FGFR2-S252YHLDVVERW  | 404  | 22084 |
| >FGFR2-S252YHLDVVERS   | 31133 | >FGFR2-S252YHLDVVERW  | 94   | 31039 |
| >FGFR2-S252YHLDVVERS   | 27116 | >FGFR2-S252YHLDVVERW  | 44   | 27072 |
| >FGFR2-S252TYHLDVVERS  | 3683  | >FGFR2-S252TYHLDVVERV | 21   | 3662  |
| >FGFR2-S267STVVGGDVEI  | 337   | >FGFR2-S267PTVVGGDVEI | 4409 | 4072  |
| >FGFR2-S267STVVGGDVEI  | 33    | >FGFR2-S267PTVVGGDVEI | 2803 | 2770  |
| >FGFR2-S267STVVGGDVEI  | 123   | >FGFR2-S267PTVVGGDVEI | 2904 | 2781  |
| >FGFR2-S267STVVGGDVEI  | 79    | >FGFR2-S267PTVVGGDVEI | 3654 | 3575  |
| >FGFR2-S267STVVGGDVEI  | 59    | >FGFR2-S267PTVVGGDVEI | 352  | 293   |
| >FGFR2-S267STVVGGDVEI  | 233   | >FGFR2-S267PTVVGGDVEI | 931  | 698   |
| >FGFR2-S267STVVGGDV    | 303   | >FGFR2-S267PTVVGGDV   | 9349 | 9046  |
| >FGFR2-S267STVVGGDVEI  | 27    | >FGFR2-S267PTVVGGDVEI | 854  | 827   |

|                       |       |                       |       |       |
|-----------------------|-------|-----------------------|-------|-------|
| >FGFR2-S267STVVGGDVEI | 82    | >FGFR2-S267PTVVGGDVEI | 2823  | 2741  |
| >FGFR2-S267STVVGGDVEI | 332   | >FGFR2-S267PTVVGGDVEI | 9116  | 8784  |
| >FGFR2-S267STVVGGDVEI | 5     | >FGFR2-S267PTVVGGDVEI | 108   | 103   |
| >FGFR2-S267STVVGGDVEI | 40    | >FGFR2-S267PTVVGGDVEI | 857   | 817   |
| >FGFR2-S267STVVGGDVEI | 350   | >FGFR2-S267PTVVGGDVEI | 14646 | 14296 |
| >FGFR2-S267ASTVVGGDVI | 21236 | >FGFR2-S267APTVVGGDV  | 131   | 21105 |
| >FGFR2-S267ASTVVGGDV  | 23893 | >FGFR2-S267APTVVGGDV  | 266   | 23627 |
| >FGFR2-S267ASTVVGGDVI | 21096 | >FGFR2-S267APTVVGGDV  | 228   | 20868 |
| >FGFR2-S267ASTVVGGDVI | 340   | >FGFR2-S267APTVVGGDV  | 2248  | 1908  |
| >FGFR2-S267ASTVVGGDVI | 13    | >FGFR2-S267APTVVGGDV  | 13538 | 13525 |
| >FGFR2-S267ASTVVGGDVI | 2477  | >FGFR2-S267APTVVGGDV  | 87    | 2390  |
| >FGFR2-S267ASTVVGGDVI | 20417 | >FGFR2-S267APTVVGGDV  | 396   | 20021 |
| >FGFR2-S267ASTVVGGDVI | 328   | >FGFR2-S267APTVVGGDV  | 5168  | 4840  |
| >FGFR2-S267ASTVVGGDVI | 7161  | >FGFR2-S267APTVVGGDV  | 136   | 7025  |
| >FGFR2-S267ASTVVGGDVI | 13522 | >FGFR2-S267APTVVGGDV  | 91    | 13431 |
| >FGFR2-S267NASTVVGGD  | 154   | >FGFR2-S267NAPTVVGGD  | 175   | 21    |
| >FGFR2-S267LPANASTV   | 149   | >FGFR2-S267LPANAPT    | 53    | 96    |
| >FGFR2-S267LPANASTVV  | 35    | >FGFR2-S267LPANAPT    | 46    | 11    |
| >FGFR2-S267LPANASTV   | 45    | >FGFR2-S267LPANAPT    | 157   | 112   |
| >FGFR2-S267LPANASTVV  | 25    | >FGFR2-S267LPANAPT    | 59    | 34    |
| >FGFR2-S267LPANASTV   | 116   | >FGFR2-S267LPANAPT    | 217   | 101   |
| >FGFR2-S267LPANASTVV  | 81    | >FGFR2-S267LPANAPT    | 239   | 158   |
| >FGFR2-S267LPANASTV   | 147   | >FGFR2-S267LPANAPT    | 128   | 19    |
| >FGFR2-S267LPANASTVV  | 123   | >FGFR2-S267LPANAPT    | 155   | 32    |
| >FGFR2-S267LPANASTV   | 466   | >FGFR2-S267LPANAPT    | 418   | 48    |
| >FGFR2-S267LPANASTV   | 22    | >FGFR2-S267LPANAPT    | 17    | 5     |
| >FGFR2-S267LPANASTVV  | 15    | >FGFR2-S267LPANAPT    | 18    | 3     |
| >FGFR2-S267LPANASTVV  | 319   | >FGFR2-S267LPANAPT    | 14089 | 13770 |
| >FGFR2-S267GLPANASTV  | 670   | >FGFR2-S267GLPANAPT   | 90    | 580   |
| >FGFR2-S267GLPANASTV\ | 665   | >FGFR2-S267GLPANAPT   | 362   | 303   |
| >FGFR2-S267GLPANASTV  | 141   | >FGFR2-S267GLPANAPT   | 325   | 184   |
| >FGFR2-S267GLPANASTV\ | 112   | >FGFR2-S267GLPANAPT   | 96    | 16    |
| >FGFR2-S267GLPANASTV  | 7     | >FGFR2-S267GLPANAPT   | 19    | 12    |
| >FGFR2-S267GLPANASTV\ | 64    | >FGFR2-S267GLPANAPT   | 35    | 29    |
| >FGFR2-S267GLPANASTV  | 214   | >FGFR2-S267GLPANAPT   | 61    | 153   |
| >FGFR2-S267GLPANASTV  | 4     | >FGFR2-S267GLPANAPT   | 3     | 1     |
| >FGFR2-S267GLPANASTV\ | 9     | >FGFR2-S267GLPANAPT   | 6     | 3     |
| >FGFR2-S267GLPANASTV  | 4     | >FGFR2-S267GLPANAPT   | 6     | 2     |
| >FGFR2-S267GLPANASTV\ | 9     | >FGFR2-S267GLPANAPT   | 11    | 2     |
| >FGFR2-S267GLPANASTV  | 8     | >FGFR2-S267GLPANAPT   | 5     | 3     |
| >FGFR2-S267GLPANASTV\ | 9     | >FGFR2-S267GLPANAPT   | 7     | 2     |
| >FGFR2-S267GLPANASTV  | 37    | >FGFR2-S267GLPANAPT   | 11    | 26    |
| >FGFR2-S267GLPANASTV\ | 77    | >FGFR2-S267GLPANAPT   | 61    | 16    |



|                        |      |                        |       |       |
|------------------------|------|------------------------|-------|-------|
| >FGFR2-S267GLPANAST    | 145  | >FGFR2-S267GLPANAPT    | 251   | 106   |
| >FGFR2-S267GLPANASTV   | 2    | >FGFR2-S267GLPANAPTV   | 3     | 1     |
| >FGFR2-S267GLPANASTV\  | 4    | >FGFR2-S267GLPANAPTV\  | 6     | 2     |
| >FGFR2-S267AGLPANAST\  | 1224 | >FGFR2-S267AGLPANAPT\  | 315   | 909   |
| >FGFR2-S267AGLPANASTV  | 727  | >FGFR2-S267AGLPANAPTV  | 450   | 277   |
| >FGFR2-S267QAGLPANAS`  | 448  | >FGFR2-S267QAGLPANAP`  | 118   | 330   |
| >FGFR2-S267LQAGLPANA!  | 365  | >FGFR2-S267LQAGLPANA!  | 217   | 148   |
| >FGFR2-S372SPDYLEIAI   | 337  | >FGFR2-S372CPDYLEIAI   | 155   | 182   |
| >FGFR2-S372SPDYLEIAIY  | 96   | >FGFR2-S372CPDYLEIAIY  | 557   | 461   |
| >FGFR2-S372SPDYLEIAI   | 311  | >FGFR2-S372CPDYLEIAI   | 100   | 211   |
| >FGFR2-S372SPDYLEIAIY  | 384  | >FGFR2-S372CPDYLEIAIY  | 415   | 31    |
| >FGFR2-S372SPDYLEIA    | 1977 | >FGFR2-S372CPDYLEIA    | 130   | 1847  |
| >FGFR2-S372SPDYLEIAI   | 3890 | >FGFR2-S372CPDYLEIAI   | 338   | 3552  |
| >FGFR2-S372SPDYLEIAIY  | 447  | >FGFR2-S372CPDYLEIAIY  | 909   | 462   |
| >FGFR2-S372SPDYLEIAIY  | 158  | >FGFR2-S372CPDYLEIAIY  | 332   | 174   |
| >FGFR2-S372ASPDYLEIAIY | 40   | >FGFR2-S372ACPDYLEIAIY | 233   | 193   |
| >FGFR2-S372ASPDYLEIAIY | 249  | >FGFR2-S372ACPDYLEIAIY | 2249  | 2000  |
| >FGFR2-S372ASPDYLEIAIY | 112  | >FGFR2-S372ACPDYLEIAIY | 18545 | 18433 |
| >FGFR2-S372ASPDYLEI    | 293  | >FGFR2-S372ACPDYLEI    | 23700 | 23407 |
| >FGFR2-S372ASPDYLEIA   | 74   | >FGFR2-S372ACPDYLEIA   | 8412  | 8338  |
| >FGFR2-S372ASPDYLEIAI  | 17   | >FGFR2-S372ACPDYLEIAI  | 2292  | 2275  |
| >FGFR2-S372ASPDYLEIAIY | 16   | >FGFR2-S372ACPDYLEIAIY | 2490  | 2474  |
| >FGFR2-S372ASPDYLEI    | 124  | >FGFR2-S372ACPDYLEI    | 2993  | 2869  |
| >FGFR2-S372TASPDYLEI   | 359  | >FGFR2-S372TACPDYLEI   | 2223  | 1864  |
| >FGFR2-S372TASPDYLEIAI | 365  | >FGFR2-S372TACPDYLEIAI | 2001  | 1636  |
| >FGFR2-S372TASPDYLEI   | 154  | >FGFR2-S372TACPDYLEI   | 87    | 67    |
| >FGFR2-S372TASPDYLEIAI | 290  | >FGFR2-S372TACPDYLEIAI | 158   | 132   |
| >FGFR2-S372ITASPDYL    | 57   | >FGFR2-S372ITACPDYL    | 86    | 29    |
| >FGFR2-S372ITASPDYLEI  | 435  | >FGFR2-S372ITACPDYLEI  | 1007  | 572   |
| >FGFR2-S372ITASPDYLEI  | 560  | >FGFR2-S372ITACPDYLEI  | 489   | 71    |
| >FGFR2-S372ITASPDYL    | 405  | >FGFR2-S372ITACPDYL    | 390   | 15    |
| >FGFR2-S372ITASPDYL    | 23   | >FGFR2-S372ITACPDYL    | 13    | 10    |
| >FGFR2-S372ITASPDYLEI  | 396  | >FGFR2-S372ITACPDYLEI  | 651   | 255   |
| >FGFR2-S372ITASPDYLEIA | 98   | >FGFR2-S372ITACPDYLEIA | 48    | 50    |
| >FGFR2-S372ITASPDYL    | 30   | >FGFR2-S372ITACPDYL    | 59    | 29    |
| >FGFR2-S372ITASPDYLEI  | 51   | >FGFR2-S372ITACPDYLEI  | 67    | 16    |
| >FGFR2-S372ITASPDYL    | 308  | >FGFR2-S372ITACPDYL    | 1263  | 955   |
| >FGFR2-S372ITASPDYLEI  | 103  | >FGFR2-S372ITACPDYLEI  | 367   | 264   |
| >FGFR2-S372ITASPDYL    | 53   | >FGFR2-S372ITACPDYL    | 327   | 274   |
| >FGFR2-S372ITASPDYLEI  | 170  | >FGFR2-S372ITACPDYLEI  | 750   | 580   |
| >FGFR2-S372ITASPDYLEIA | 381  | >FGFR2-S372ITACPDYLEIA | 763   | 382   |
| >FGFR2-S372ITASPDYL    | 318  | >FGFR2-S372ITACPDYL    | 395   | 77    |
| >FGFR2-S372ITASPDYLEI  | 52   | >FGFR2-S372ITACPDYLEI  | 45    | 7     |

|                         |      |                         |      |      |
|-------------------------|------|-------------------------|------|------|
| >FGFR2-S372 EITASPDY    | 45   | >FGFR2-S372 EITACPDY    | 76   | 31   |
| >FGFR2-S372 EITASPDYL   | 270  | >FGFR2-S372 EITACPDYL   | 491  | 221  |
| >FGFR2-S372 EITASPDY    | 990  | >FGFR2-S372 EITACPDY    | 467  | 523  |
| >FGFR2-S372 EITASPDYL   | 28   | >FGFR2-S372 EITACPDYL   | 17   | 11   |
| >FGFR2-S372 EITASPDYLEI | 65   | >FGFR2-S372 EITACPDYLEI | 42   | 23   |
| >FGFR2-S372 EITASPDYL   | 309  | >FGFR2-S372 EITACPDYL   | 1293 | 984  |
| >FGFR2-S372 EITASPDYLEI | 195  | >FGFR2-S372 EITACPDYLEI | 456  | 261  |
| >FGFR2-S372 KEITASPDYL  | 476  | >FGFR2-S372 KEITACPDYL  | 335  | 141  |
| >FGFR2-S372 KEITASPDY   | 320  | >FGFR2-S372 KEITACPDY   | 278  | 42   |
| >FGFR2-S372 KEITASPDY   | 121  | >FGFR2-S372 KEITACPDY   | 183  | 62   |
| >FGFR2-S372 KEITASPDY   | 361  | >FGFR2-S372 KEITACPDY   | 468  | 107  |
| >FGFR2-S372 KEITASPDYL  | 388  | >FGFR2-S372 KEITACPDYL  | 418  | 30   |
| >FGFR2-S372 KEITASPDYL  | 167  | >FGFR2-S372 KEITACPDYL  | 209  | 42   |
| >FGFR2-S372 KEITASPDY   | 129  | >FGFR2-S372 KEITACPDY   | 307  | 178  |
| >FGFR2-S372 KEITASPDYL  | 966  | >FGFR2-S372 KEITACPDYL  | 352  | 614  |
| >FGFR2-S372 KEITASPDY   | 59   | >FGFR2-S372 KEITACPDY   | 94   | 35   |
| >FGFR2-S372 KEITASPDYL  | 692  | >FGFR2-S372 KEITACPDYL  | 223  | 469  |
| >FGFR2-S372 KEITASPDY   | 119  | >FGFR2-S372 KEITACPDY   | 168  | 49   |
| >FGFR2-S372 KEITASPDYL  | 18   | >FGFR2-S372 KEITACPDYL  | 91   | 73   |
| >FGFR2-S372 REKEITASPDY | 249  | >FGFR2-S372 REKEITACPDY | 458  | 209  |
| >FGFR2-S372 REKEITASPDY | 203  | >FGFR2-S372 REKEITACPDY | 317  | 114  |
| >FGFR2-S372 REKEITASPDY | 257  | >FGFR2-S372 REKEITACPDY | 338  | 81   |
| >FGFR2-S372 REKEITAS    | 267  | >FGFR2-S372 REKEITAC    | 335  | 68   |
| >FGFR2-S372 REKEITASPDY | 358  | >FGFR2-S372 REKEITACPDY | 478  | 120  |
| >FGFR2-S372 REKEITASPDY | 174  | >FGFR2-S372 REKEITACPDY | 218  | 44   |
| >FGFR2-S372 REKEITAS    | 383  | >FGFR2-S372 REKEITAC    | 467  | 84   |
| >FGFR2-S372 REKEITASP   | 149  | >FGFR2-S372 REKEITACP   | 404  | 255  |
| >FGFR2-S372 REKEITASPDY | 121  | >FGFR2-S372 REKEITACPDY | 165  | 44   |
| >FGFR2-S688 SFGVLMWEI   | 1112 | >FGFR2-S688 FFGVLMWEI   | 50   | 1062 |
| >FGFR2-S688 SFGVLMWEI   | 563  | >FGFR2-S688 FFGVLMWEI   | 117  | 446  |
| >FGFR2-S688 SFGVLMWEI   | 17   | >FGFR2-S688 FFGVLMWEI   | 10   | 7    |
| >FGFR2-S688 SFGVLMWEIIF | 40   | >FGFR2-S688 FFGVLMWEIIF | 22   | 18   |
| >FGFR2-S688 SFGVLMWEIIF | 616  | >FGFR2-S688 FFGVLMWEIIF | 321  | 295  |
| >FGFR2-S688 SFGVLMWEI   | 486  | >FGFR2-S688 FFGVLMWEI   | 2016 | 1530 |
| >FGFR2-S688 SFGVLMWEIIF | 45   | >FGFR2-S688 FFGVLMWEIIF | 66   | 21   |
| >FGFR2-S688 WSFGVLMW    | 169  | >FGFR2-S688 WFFGVLMW    | 752  | 583  |
| >FGFR2-S688 WSFGVLMW    | 121  | >FGFR2-S688 WFFGVLMW    | 88   | 33   |
| >FGFR2-S688 WSFGVLMW    | 1364 | >FGFR2-S688 WFFGVLMW    | 405  | 959  |
| >FGFR2-S688 WSFGVLMW    | 4456 | >FGFR2-S688 WFFGVLMW    | 123  | 4333 |
| >FGFR2-S688 WSFGVLMW    | 584  | >FGFR2-S688 WFFGVLMW    | 27   | 557  |
| >FGFR2-S688 WSFGVLMW    | 3318 | >FGFR2-S688 WFFGVLMW    | 396  | 2922 |
| >FGFR2-S688 WSFGVLMW    | 2415 | >FGFR2-S688 WFFGVLMW    | 13   | 2402 |
| >FGFR2-S688 WSFGVLMW    | 664  | >FGFR2-S688 WFFGVLMW    | 6    | 658  |

|                         |       |                         |       |       |
|-------------------------|-------|-------------------------|-------|-------|
| >FGFR2-S688 WSFGVLMW    | 609   | >FGFR2-S688 WFFGVLMW    | 9     | 600   |
| >FGFR2-S688 WSFGVLMW    | 3781  | >FGFR2-S688 WFFGVLMW    | 394   | 3387  |
| >FGFR2-S688 WSFGVLMW    | 2030  | >FGFR2-S688 WFFGVLMW    | 184   | 1846  |
| >FGFR2-S688 WSFGVLMW    | 158   | >FGFR2-S688 WFFGVLMW    | 3774  | 3616  |
| >FGFR2-S688 WSFGVLMW    | 130   | >FGFR2-S688 WFFGVLMW    | 2258  | 2128  |
| >FGFR2-S688 WSFGVLMW    | 221   | >FGFR2-S688 WFFGVLMW    | 2121  | 1900  |
| >FGFR2-S688 WSFGVLMW    | 1959  | >FGFR2-S688 WFFGVLMW    | 239   | 1720  |
| >FGFR2-S688 WSFGVLMW    | 35    | >FGFR2-S688 WFFGVLMW    | 629   | 594   |
| >FGFR2-S688 WSFGVLMW    | 5     | >FGFR2-S688 WFFGVLMW    | 4164  | 4159  |
| >FGFR2-S688 WSFGVLMW    | 74    | >FGFR2-S688 WFFGVLMW    | 25766 | 25692 |
| >FGFR2-S688 WSFGVLMW    | 19    | >FGFR2-S688 WFFGVLMW    | 21841 | 21822 |
| >FGFR2-S688 WSFGVLMW    | 306   | >FGFR2-S688 WFFGVLMW    | 489   | 183   |
| >FGFR2-S688 WSFGVLMW    | 31    | >FGFR2-S688 WFFGVLMW    | 6947  | 6916  |
| >FGFR2-S688 WSFGVLMW    | 136   | >FGFR2-S688 WFFGVLMW    | 20767 | 20631 |
| >FGFR2-S688 WSFGVLMW    | 10    | >FGFR2-S688 WFFGVLMW    | 141   | 131   |
| >FGFR2-S688 WSFGVLMW    | 105   | >FGFR2-S688 WFFGVLMW    | 10648 | 10543 |
| >FGFR2-S688 WSFGVLMW    | 41    | >FGFR2-S688 WFFGVLMW    | 7275  | 7234  |
| >FGFR2-S688 WSFGVLMW    | 385   | >FGFR2-S688 WFFGVLMW    | 9077  | 8692  |
| >FGFR2-S688 WSFGVLMW    | 165   | >FGFR2-S688 WFFGVLMW    | 4066  | 3901  |
| >FGFR2-S688 WSFGVLMW    | 376   | >FGFR2-S688 WFFGVLMW    | 19498 | 19122 |
| >FGFR2-S688 WSFGVLMW    | 4     | >FGFR2-S688 WFFGVLMW    | 43    | 39    |
| >FGFR2-S688 WSFGVLMW    | 129   | >FGFR2-S688 WFFGVLMW    | 652   | 523   |
| >FGFR2-S688 WSFGVLMW    | 63    | >FGFR2-S688 WFFGVLMW    | 442   | 379   |
| >FGFR2-S688 WSFGVLMW    | 99    | >FGFR2-S688 WFFGVLMW    | 1539  | 1440  |
| >FGFR2-S688 WSFGVLMW    | 475   | >FGFR2-S688 WFFGVLMW    | 8612  | 8137  |
| >FGFR2-S688 WSFGVLMW    | 10583 | >FGFR2-S688 WFFGVLMW    | 325   | 10258 |
| >FGFR2-S688 RYVYTHQSDV\ | 10881 | >FGFR2-S688 RYVYTHQSDV\ | 105   | 10776 |
| >FGFR2-S688 RYVYTHQSDV\ | 7566  | >FGFR2-S688 RYVYTHQSDV\ | 46    | 7520  |
| >FGFR2-S688 RYVYTHQSDV\ | 17532 | >FGFR2-S688 RYVYTHQSDV\ | 252   | 17280 |
| >FGFR2-S688 RYVYTHQSDV\ | 10591 | >FGFR2-S688 RYVYTHQSDV\ | 37    | 10554 |
| >FGFR2-S688 RYVYTHQSDV\ | 5726  | >FGFR2-S688 RYVYTHQSDV\ | 7     | 5719  |
| >FGFR2-S688 RYVYTHQSDV\ | 19346 | >FGFR2-S688 RYVYTHQSDV\ | 141   | 19205 |
| >FGFR2-S688 RYVYTHQSDV\ | 11973 | >FGFR2-S688 RYVYTHQSDV\ | 141   | 11832 |
| >FGFR2-S688 VWSFGVLMV   | 1239  | >FGFR2-S688 VWFFGVLMV   | 498   | 741   |
| >FGFR2-S688 VWSFGVLMV   | 1241  | >FGFR2-S688 VWFFGVLMV   | 185   | 1056  |
| >FGFR2-S688 VWSFGVLMV   | 341   | >FGFR2-S688 VWFFGVLMV   | 64    | 277   |
| >FGFR2-S688 VWSFGVLMV   | 302   | >FGFR2-S688 VWFFGVLMV   | 324   | 22    |
| >FGFR2-S688 VWSFGVLMV   | 224   | >FGFR2-S688 VWFFGVLMV   | 244   | 20    |
| >FGFR2-S688 VWSFGVLMV   | 167   | >FGFR2-S688 VWFFGVLMV   | 96    | 71    |
| >FGFR2-S688 VWSFGVLMV   | 59    | >FGFR2-S688 VWFFGVLMV   | 29    | 30    |
| >FGFR2-S688 VWSFGVLM    | 232   | >FGFR2-S688 VWFFGVLM    | 85    | 147   |
| >FGFR2-S688 VWSFGVLMV   | 369   | >FGFR2-S688 VWFFGVLMV   | 128   | 241   |
| >FGFR2-S688 VWSFGVLMV   | 115   | >FGFR2-S688 VWFFGVLMV   | 54    | 61    |

|                        |      |                        |      |      |
|------------------------|------|------------------------|------|------|
| >FGFR2-S688 DVWSFGVL   | 523  | >FGFR2-S688 DVWFFGVL   | 208  | 315  |
| >FGFR2-S688 DVWSFGVL   | 96   | >FGFR2-S688 DVWFFGVL   | 86   | 10   |
| >FGFR2-S688 DVWSFGVLM  | 41   | >FGFR2-S688 DVWFFGVL   | 53   | 12   |
| >FGFR2-S688 DVWSFGVLM  | 301  | >FGFR2-S688 DVWFFGVL   | 447  | 146  |
| >FGFR2-S688 DVWSFGVLM  | 342  | >FGFR2-S688 DVWFFGVL   | 905  | 563  |
| >FGFR2-S688 SDVWSFGV   | 494  | >FGFR2-S688 SDVWFFGV   | 120  | 374  |
| >FGFR2-S688 SDVWSFGV   | 565  | >FGFR2-S688 SDVWFFGV   | 182  | 383  |
| >FGFR2-S688 SDVWSFGVLI | 2386 | >FGFR2-S688 SDVWFFGVLI | 476  | 1910 |
| >FGFR2-S688 SDVWSFGVLI | 727  | >FGFR2-S688 SDVWFFGVLI | 420  | 307  |
| >FGFR2-S688 SDVWSFGV   | 117  | >FGFR2-S688 SDVWFFGV   | 137  | 20   |
| >FGFR2-S688 SDVWSFGVL  | 271  | >FGFR2-S688 SDVWFFGVL  | 504  | 233  |
| >FGFR2-S688 QSDVWSFGV  | 856  | >FGFR2-S688 QSDVWFFGV  | 412  | 444  |
| >FGFR2-S688 QSDVWSFGV  | 162  | >FGFR2-S688 QSDVWFFGV  | 113  | 49   |
| >FGFR2-S688 QSDVWSFGV  | 380  | >FGFR2-S688 QSDVWFFGV  | 320  | 60   |
| >FGFR2-S688 QSDVWSFGV  | 83   | >FGFR2-S688 QSDVWFFGV  | 15   | 68   |
| >FGFR2-S688 QSDVWSFGV  | 380  | >FGFR2-S688 QSDVWFFGV  | 182  | 198  |
| >FGFR2-S688 QSDVWSFGV  | 8    | >FGFR2-S688 QSDVWFFGV  | 6    | 2    |
| >FGFR2-S688 QSDVWSFGV  | 723  | >FGFR2-S688 QSDVWFFGV  | 383  | 340  |
| >FGFR2-S688 QSDVWSFGV  | 263  | >FGFR2-S688 QSDVWFFGV  | 1489 | 1226 |
| >FGFR2-S688 QSDVWSFGV  | 118  | >FGFR2-S688 QSDVWFFGV  | 347  | 229  |
| >FGFR2-S688 QSDVWSFGV  | 477  | >FGFR2-S688 QSDVWFFGV  | 266  | 211  |
| >FGFR2-S688 QSDVWSFGV  | 192  | >FGFR2-S688 QSDVWFFGV  | 190  | 2    |
| >FGFR2-S688 QSDVWSFGV  | 283  | >FGFR2-S688 QSDVWFFGV  | 964  | 681  |
| >FGFR2-S688 HQSDVWSFC  | 261  | >FGFR2-S688 HQSDVWFFG  | 96   | 165  |
| >FGFR2-S688 HQSDVWSFC  | 137  | >FGFR2-S688 HQSDVWFFG  | 90   | 47   |
| >FGFR2-S688 HQSDVWSFC  | 462  | >FGFR2-S688 HQSDVWFFG  | 214  | 248  |
| >FGFR2-S688 HQSDVWSFC  | 771  | >FGFR2-S688 HQSDVWFFG  | 375  | 396  |
| >FGFR2-S688 HQSDVWSF   | 29   | >FGFR2-S688 HQSDVWFF   | 15   | 14   |
| >FGFR2-S688 HQSDVWSFC  | 315  | >FGFR2-S688 HQSDVWFFG  | 49   | 266  |
| >FGFR2-S688 HQSDVWSFC  | 93   | >FGFR2-S688 HQSDVWFFG  | 51   | 42   |
| >FGFR2-S688 HQSDVWSFC  | 67   | >FGFR2-S688 HQSDVWFFG  | 33   | 34   |
| >FGFR2-S688 HQSDVWSFC  | 25   | >FGFR2-S688 HQSDVWFFG  | 17   | 8    |
| >FGFR2-S688 HQSDVWSFC  | 36   | >FGFR2-S688 HQSDVWFFG  | 19   | 17   |
| >FGFR2-S688 HQSDVWSFC  | 29   | >FGFR2-S688 HQSDVWFFG  | 19   | 10   |
| >FGFR2-S688 HQSDVWSFC  | 109  | >FGFR2-S688 HQSDVWFFG  | 53   | 56   |
| >FGFR2-S688 HQSDVWSFC  | 107  | >FGFR2-S688 HQSDVWFFG  | 71   | 36   |
| >FGFR2-S688 HQSDVWSFC  | 450  | >FGFR2-S688 HQSDVWFFG  | 185  | 265  |
| >FGFR2-S688 HQSDVWSF   | 50   | >FGFR2-S688 HQSDVWFF   | 99   | 49   |
| >FGFR2-S688 HQSDVWSFC  | 150  | >FGFR2-S688 HQSDVWFFG  | 257  | 107  |
| >FGFR2-S688 HQSDVWSF   | 9    | >FGFR2-S688 HQSDVWFF   | 25   | 16   |
| >FGFR2-S688 HQSDVWSFC  | 365  | >FGFR2-S688 HQSDVWFFG  | 645  | 280  |
| >FGFR2-S688 HQSDVWSF   | 363  | >FGFR2-S688 HQSDVWFF   | 678  | 315  |
| >FGFR2-S688 HQSDVWSF   | 168  | >FGFR2-S688 HQSDVWFF   | 702  | 534  |

|                          |       |                         |       |       |
|--------------------------|-------|-------------------------|-------|-------|
| >FGFR2-S688 HQSDVWSFG    | 241   | >FGFR2-S688 HQSDVWFFG   | 297   | 56    |
| >FGFR2-S688 HQSDVWSFG    | 17    | >FGFR2-S688 HQSDVWFFG   | 16    | 1     |
| >FGFR2-S688 HQSDVWSFG    | 110   | >FGFR2-S688 HQSDVWFFG   | 69    | 41    |
| >FGFR2-S688 THQSDVWS     | 29673 | >FGFR2-S688 THQSDVWF    | 442   | 29231 |
| >FGFR2-S688 THQSDVWSF    | 166   | >FGFR2-S688 THQSDVWFF   | 112   | 54    |
| >FGFR2-S688 THQSDVWSF    | 575   | >FGFR2-S688 THQSDVWFF   | 214   | 361   |
| >FGFR2-S688 THQSDVWSF    | 79    | >FGFR2-S688 THQSDVWFF   | 52    | 27    |
| >FGFR2-S688 THQSDVWSF    | 127   | >FGFR2-S688 THQSDVWFF   | 434   | 307   |
| >FGFR2-S688 THQSDVWSF    | 150   | >FGFR2-S688 THQSDVWFF   | 1279  | 1129  |
| >FGFR2-S688 THQSDVWSF    | 284   | >FGFR2-S688 THQSDVWFF   | 638   | 354   |
| >FGFR2-S688 YTHQSDVWS    | 18696 | >FGFR2-S688 YTHQSDVWF   | 152   | 18544 |
| >FGFR2-S688 YTHQSDVWS    | 31    | >FGFR2-S688 YTHQSDVWF   | 24    | 7     |
| >FGFR2-S688 YTHQSDVWS    | 470   | >FGFR2-S688 YTHQSDVWF   | 5720  | 5250  |
| >FGFR2-S688 YTHQSDVWS    | 7229  | >FGFR2-S688 YTHQSDVWF   | 27    | 7202  |
| >FGFR2-S688 YTHQSDVWS    | 20    | >FGFR2-S688 YTHQSDVWF   | 8     | 12    |
| >FGFR2-S688 YTHQSDVWS    | 10014 | >FGFR2-S688 YTHQSDVWF   | 166   | 9848  |
| >FGFR2-S688 YTHQSDVWS    | 125   | >FGFR2-S688 YTHQSDVWF   | 126   | 1     |
| >FGFR2-S688 YTHQSDVWS    | 1036  | >FGFR2-S688 YTHQSDVWF   | 151   | 885   |
| >FGFR2-S688 YTHQSDVWS    | 389   | >FGFR2-S688 YTHQSDVWF   | 2994  | 2605  |
| >FGFR2-S688 YTHQSDVWS    | 17004 | >FGFR2-S688 YTHQSDVWF   | 197   | 16807 |
| >FGFR2-S688 YTHQSDVWS    | 61    | >FGFR2-S688 YTHQSDVWF   | 200   | 139   |
| >FGFR2-S688 YTHQSDVWS    | 19333 | >FGFR2-S688 YTHQSDVWF   | 86    | 19247 |
| >FGFR2-S688 YTHQSDVWS    | 16    | >FGFR2-S688 YTHQSDVWF   | 42    | 26    |
| >FGFR2-S688 YTHQSDVWS    | 724   | >FGFR2-S688 YTHQSDVWF   | 3     | 721   |
| >FGFR2-S688 YTHQSDVWS    | 3     | >FGFR2-S688 YTHQSDVWF   | 4     | 1     |
| >FGFR2-S688 YTHQSDVWS    | 14014 | >FGFR2-S688 YTHQSDVWF   | 287   | 13727 |
| >FGFR2-S688 YTHQSDVWS    | 231   | >FGFR2-S688 YTHQSDVWF   | 205   | 26    |
| >FGFR2-S688 YTHQSDVWS    | 108   | >FGFR2-S688 YTHQSDVWF   | 97    | 11    |
| >FGFR2-S688 YTHQSDVWS    | 7423  | >FGFR2-S688 YTHQSDVWF   | 283   | 7140  |
| >FGFR2-S688 YTHQSDVWS    | 221   | >FGFR2-S688 YTHQSDVWF   | 60    | 161   |
| >FGFR2-S688 YTHQSDVWS    | 5613  | >FGFR2-S688 YTHQSDVWF   | 30    | 5583  |
| >FGFR2-S688 YTHQSDVWS    | 55    | >FGFR2-S688 YTHQSDVWF   | 39    | 16    |
| >FGFR2-S688 VYTHQSDVW    | 30183 | >FGFR2-S688 VYTHQSDVW   | 304   | 29879 |
| >FGFR2-S688 VYTHQSDVW    | 111   | >FGFR2-S688 VYTHQSDVW   | 100   | 11    |
| >FGFR2-S688 VYTHQSDVW    | 21529 | >FGFR2-S688 VYTHQSDVW   | 113   | 21416 |
| >FGFR2-S688 VYTHQSDVW    | 93    | >FGFR2-S688 VYTHQSDVW   | 53    | 40    |
| >FGFR2-S688 VYTHQSDVW    | 4503  | >FGFR2-S688 VYTHQSDVW   | 7     | 4496  |
| >FGFR2-S688 VYTHQSDVW    | 7     | >FGFR2-S688 VYTHQSDVW   | 6     | 1     |
| >FGFR2-S688 VYTHQSDVW    | 17176 | >FGFR2-S688 VYTHQSDVW   | 305   | 16871 |
| >FGFR2-T37C TASPDPYLEI   | 3019  | >FGFR2-T37C RASPDYLEI   | 433   | 2586  |
| >FGFR2-T37C TASPDPYLEI   | 359   | >FGFR2-T37C RASPDYLEI   | 10807 | 10448 |
| >FGFR2-T37C TASPDPYLEIAI | 365   | >FGFR2-T37C RASPDYLEIAI | 9192  | 8827  |
| >FGFR2-T37C TASPDPYLEI   | 3546  | >FGFR2-T37C RASPDYLEI   | 57    | 3489  |

|                          |      |                         |       |       |
|--------------------------|------|-------------------------|-------|-------|
| >FGFR2-T37C TASP DYLEIAI | 5818 | >FGFR2-T37C RASPDYLEIAI | 184   | 5634  |
| >FGFR2-T37C TASP DYLEI   | 1099 | >FGFR2-T37C RASPDYLEI   | 25    | 1074  |
| >FGFR2-T37C TASP DYLEIAI | 5086 | >FGFR2-T37C RASPDYLEIAI | 141   | 4945  |
| >FGFR2-T37C TASP DYLEI   | 154  | >FGFR2-T37C RASPDYLEI   | 35    | 119   |
| >FGFR2-T37C TASP DYLEIAI | 290  | >FGFR2-T37C RASPDYLEIAI | 57    | 233   |
| >FGFR2-T37C ITASP DYL    | 57   | >FGFR2-T37C IRASPDYL    | 5335  | 5278  |
| >FGFR2-T37C ITASP DYLEI  | 435  | >FGFR2-T37C IRASPDYLEI  | 10068 | 9633  |
| >FGFR2-T37C ITASP DYL    | 405  | >FGFR2-T37C IRASPDYL    | 14679 | 14274 |
| >FGFR2-T37C ITASP DYL    | 23   | >FGFR2-T37C IRASPDYL    | 13592 | 13569 |
| >FGFR2-T37C ITASP DYLEI  | 396  | >FGFR2-T37C IRASPDYLEI  | 23633 | 23237 |
| >FGFR2-T37C ITASP DYLEIA | 98   | >FGFR2-T37C IRASPDYLEIA | 17389 | 17291 |
| >FGFR2-T37C ITASP DYL    | 2678 | >FGFR2-T37C IRASPDYL    | 364   | 2314  |
| >FGFR2-T37C ITASP DYLEI  | 1474 | >FGFR2-T37C IRASPDYLEI  | 218   | 1256  |
| >FGFR2-T37C ITASP DYL    | 30   | >FGFR2-T37C IRASPDYL    | 24626 | 24596 |
| >FGFR2-T37C ITASP DYLEI  | 51   | >FGFR2-T37C IRASPDYLEI  | 24742 | 24691 |
| >FGFR2-T37C ITASP DYL    | 308  | >FGFR2-T37C IRASPDYL    | 19927 | 19619 |
| >FGFR2-T37C ITASP DYLEI  | 103  | >FGFR2-T37C IRASPDYLEI  | 18670 | 18567 |
| >FGFR2-T37C ITASP DYL    | 53   | >FGFR2-T37C IRASPDYL    | 28798 | 28745 |
| >FGFR2-T37C ITASP DYLEI  | 170  | >FGFR2-T37C IRASPDYLEI  | 30795 | 30625 |
| >FGFR2-T37C ITASP DYLEIA | 381  | >FGFR2-T37C IRASPDYLEIA | 19370 | 18989 |
| >FGFR2-T37C ITASP DYL    | 318  | >FGFR2-T37C IRASPDYL    | 13782 | 13464 |
| >FGFR2-T37C ITASP DYLEI  | 52   | >FGFR2-T37C IRASPDYLEI  | 2811  | 2759  |
| >FGFR2-T37C EITASP DY    | 45   | >FGFR2-T37C EIRASPDY    | 75    | 30    |
| >FGFR2-T37C EITASP DYL   | 270  | >FGFR2-T37C EIRASPDYL   | 596   | 326   |
| >FGFR2-T37C EITASP DY    | 959  | >FGFR2-T37C EIRASPDY    | 140   | 819   |
| >FGFR2-T37C EITASP DYL   | 28   | >FGFR2-T37C EIRASPDYL   | 1173  | 1145  |
| >FGFR2-T37C EITASP DYLEI | 65   | >FGFR2-T37C EIRASPDYLEI | 2606  | 2541  |
| >FGFR2-T37C EITASP DYL   | 309  | >FGFR2-T37C EIRASPDYL   | 2761  | 2452  |
| >FGFR2-T37C EITASP DYLEI | 195  | >FGFR2-T37C EIRASPDYLEI | 1276  | 1081  |
| >FGFR2-T37C KEITASP DYL  | 476  | >FGFR2-T37C KEIRASPDYL  | 973   | 497   |
| >FGFR2-T37C KEITASP DY   | 320  | >FGFR2-T37C KEIRASPDY   | 662   | 342   |
| >FGFR2-T37C KEITASP DY   | 636  | >FGFR2-T37C KEIRASPDY   | 436   | 200   |
| >FGFR2-T37C KEITASP DY   | 121  | >FGFR2-T37C KEIRASPDY   | 119   | 2     |
| >FGFR2-T37C KEITASP DY   | 361  | >FGFR2-T37C KEIRASPDY   | 695   | 334   |
| >FGFR2-T37C KEITASP DYL  | 388  | >FGFR2-T37C KEIRASPDYL  | 476   | 88    |
| >FGFR2-T37C KEITASP DYL  | 167  | >FGFR2-T37C KEIRASPDYL  | 130   | 37    |
| >FGFR2-T37C KEITASP DY   | 129  | >FGFR2-T37C KEIRASPDY   | 164   | 35    |
| >FGFR2-T37C KEITASP DY   | 59   | >FGFR2-T37C KEIRASPDY   | 50    | 9     |
| >FGFR2-T37C KEITASP DY   | 119  | >FGFR2-T37C KEIRASPDY   | 627   | 508   |
| >FGFR2-T37C KEITASP DYL  | 18   | >FGFR2-T37C KEIRASPDYL  | 21    | 3     |
| >FGFR2-T37C REKEITASP DY | 508  | >FGFR2-T37C REKEIRASPDY | 456   | 52    |
| >FGFR2-T37C REKEITASP DY | 249  | >FGFR2-T37C REKEIRASPDY | 350   | 101   |
| >FGFR2-T37C REKEITASP DY | 203  | >FGFR2-T37C REKEIRASPDY | 225   | 22    |

|                          |      |                          |       |       |
|--------------------------|------|--------------------------|-------|-------|
| >FGFR2-T37C REKEITASPD\  | 257  | >FGFR2-T37C REKEIRASPD\  | 230   | 27    |
| >FGFR2-T37C REKEITAS     | 267  | >FGFR2-T37C REKEIRAS     | 392   | 125   |
| >FGFR2-T37C REKEITASPD\  | 358  | >FGFR2-T37C REKEIRASPD\  | 723   | 365   |
| >FGFR2-T37C REKEITASPD\  | 174  | >FGFR2-T37C REKEIRASPD\  | 304   | 130   |
| >FGFR2-T37C REKEITAS     | 383  | >FGFR2-T37C REKEIRAS     | 479   | 96    |
| >FGFR2-T37C REKEITASP    | 149  | >FGFR2-T37C REKEIRASP    | 399   | 250   |
| >FGFR2-T37C REKEITASPD\  | 121  | >FGFR2-T37C REKEIRASPD\  | 280   | 159   |
| >FGFR2-V24\xVVERSPhR     | 255  | >FGFR2-V24\xDVERSPhR     | 3981  | 3726  |
| >FGFR2-V24\xVVERSPhR     | 3437 | >FGFR2-V24\xDVERSPhR     | 146   | 3291  |
| >FGFR2-V24\xVVERSPhR     | 668  | >FGFR2-V24\xDVERSPhR     | 70    | 598   |
| >FGFR2-V24\xDVVERSPh     | 382  | >FGFR2-V24\xDDVERSPh     | 17564 | 17182 |
| >FGFR2-V24\xDVVERSPh     | 338  | >FGFR2-V24\xDDVERSPh     | 26329 | 25991 |
| >FGFR2-V24\xDVVERSPhRF   | 365  | >FGFR2-V24\xDDVERSPhRF   | 24595 | 24230 |
| >FGFR2-V24\xDVVERSPhR    | 41   | >FGFR2-V24\xDDVERSPhR    | 3638  | 3597  |
| >FGFR2-V24\xDVVERSPhR    | 28   | >FGFR2-V24\xDDVERSPhR    | 1701  | 1673  |
| >FGFR2-V24\xDVVERSPhRF   | 202  | >FGFR2-V24\xDDVERSPhRF   | 14570 | 14368 |
| >FGFR2-V24\xDVVERSPhRF   | 65   | >FGFR2-V24\xDDVERSPhRF   | 7744  | 7679  |
| >FGFR2-V24\xHLDVVERSPh   | 477  | >FGFR2-V24\xHLDDVERSPh   | 497   | 20    |
| >FGFR2-V24\xTYHLDVVER    | 173  | >FGFR2-V24\xTYHLDDVER    | 527   | 354   |
| >FGFR2-V24\xTYHLDVVER    | 277  | >FGFR2-V24\xTYHLDDVER    | 335   | 58    |
| >FGFR2-V24\xTYHLDVVER    | 288  | >FGFR2-V24\xTYHLDDVER    | 232   | 56    |
| >FGFR2-V24\xTYHLDVVER    | 78   | >FGFR2-V24\xTYHLDDVER    | 62    | 16    |
| >FGFR2-V24\xHTYHLDVV     | 266  | >FGFR2-V24\xHTYHLDDV     | 506   | 240   |
| >FGFR2-V24\xHTYHLDVV     | 342  | >FGFR2-V24\xHTYHLDDV     | 1050  | 708   |
| >FGFR2-V24\xHTYHLDVV     | 192  | >FGFR2-V24\xHTYHLDDV     | 923   | 731   |
| >FGFR2-V24\xHTYHLDVV     | 359  | >FGFR2-V24\xHTYHLDDV     | 632   | 273   |
| >FGFR2-V24\xHTYHLDVVEF   | 398  | >FGFR2-V24\xHTYHLDDVEF   | 738   | 340   |
| >FGFR2-V24\xHTYHLDVVEF   | 104  | >FGFR2-V24\xHTYHLDDVEF   | 294   | 190   |
| >FGFR2-V24\xHTYHLDVVEF   | 389  | >FGFR2-V24\xHTYHLDDVEF   | 741   | 352   |
| >FGFR2-V24\xHTYHLDVVEF   | 5    | >FGFR2-V24\xHTYHLDDVEF   | 5     | 0     |
| >FGFR2-V24\xHTYHLDVV     | 13   | >FGFR2-V24\xHTYHLDDV     | 26    | 13    |
| >FGFR2-V24\xHTYHLDVVEF   | 142  | >FGFR2-V24\xHTYHLDDVEF   | 377   | 235   |
| >FGFR2-V24\xHTYHLDVV     | 99   | >FGFR2-V24\xHTYHLDDV     | 208   | 109   |
| >FGFR2-V24\xHTYHLDVV     | 326  | >FGFR2-V24\xHTYHLDDV     | 1093  | 767   |
| >FGFR2-V24\xHTYHLDVVEF   | 52   | >FGFR2-V24\xHTYHLDDVEF   | 80    | 28    |
| >FGFR2-V24\xSINH TYHL DV | 64   | >FGFR2-V24\xSINH TYHL DD | 152   | 88    |
| >FGFR2-V24\xSINH TYHL DV | 294  | >FGFR2-V24\xSINH TYHL DD | 27155 | 26861 |
| >FGFR2-V24\xSINH TYHL DV | 15   | >FGFR2-V24\xSINH TYHL DD | 22    | 7     |
| >FGFR2-V24\xSINH TYHL DV | 120  | >FGFR2-V24\xSINH TYHL DD | 340   | 220   |
| >FGFR2-V24\xSINH TYHL DV | 98   | >FGFR2-V24\xSINH TYHL DD | 28462 | 28364 |
| >FGFR2-V24\xSINH TYHL DV | 39   | >FGFR2-V24\xSINH TYHL DD | 176   | 137   |
| >FGFR2-V24\xSINH TYHL DV | 116  | >FGFR2-V24\xSINH TYHL DD | 381   | 265   |
| >FGFR2-V24\xSINH TYHL DV | 98   | >FGFR2-V24\xSINH TYHL DD | 24899 | 24801 |

|                        |      |                        |       |       |
|------------------------|------|------------------------|-------|-------|
| >FGFR2-V24\SINHTYHLDV  | 69   | >FGFR2-V24\SINHTYHLDD  | 110   | 41    |
| >FGFR2-V24\SINHTYHLDV  | 17   | >FGFR2-V24\SINHTYHLDD  | 31104 | 31087 |
| >FGFR2-V24\SINHTYHLDV  | 46   | >FGFR2-V24\SINHTYHLDD  | 62    | 16    |
| >FGFR2-V24\SINHTYHLDV  | 228  | >FGFR2-V24\SINHTYHLDD  | 540   | 312   |
| >FGFR2-V24\SINHTYHLDV  | 490  | >FGFR2-V24\SINHTYHLDD  | 22498 | 22008 |
| >FGFR2-V77I\VHLGPNNRTI | 813  | >FGFR2-V77I\MHLGPNNRT  | 288   | 525   |
| >FGFR2-V77I\VHLGPNNRTI | 513  | >FGFR2-V77I\MHLGPNNRT  | 430   | 83    |
| >FGFR2-V77I\VHLGPNNRTI | 4123 | >FGFR2-V77I\MHLGPNNRT  | 318   | 3805  |
| >FGFR2-V77I\VHLGPNNRTI | 79   | >FGFR2-V77I\MHLGPNNRT  | 12    | 67    |
| >FGFR2-V77I\VHLGPNNRTI | 9621 | >FGFR2-V77I\MHLGPNNRT  | 312   | 9309  |
| >FGFR2-V77I\VHLGPNNR   | 1234 | >FGFR2-V77I\MHLGPNNR   | 262   | 972   |
| >FGFR2-V77I\GVHLGPNNR  | 467  | >FGFR2-V77I\GMHLGPNNF  | 20    | 447   |
| >FGFR2-V77I\GVHLGPNNR  | 801  | >FGFR2-V77I\GMHLGPNNF  | 7     | 794   |
| >FGFR2-V77I\GVHLGPNNR  | 1318 | >FGFR2-V77I\GMHLGPNNF  | 11    | 1307  |
| >FGFR2-V77I\GVHLGPNNR  | 2965 | >FGFR2-V77I\GMHLGPNNF  | 33    | 2932  |
| >FGFR2-V77I\GVHLGPNNR  | 433  | >FGFR2-V77I\GMHLGPNNF  | 10    | 423   |
| >FGFR2-V77I\GVHLGPNNR  | 511  | >FGFR2-V77I\GMHLGPNNF  | 141   | 370   |
| >FGFR2-V77I\AAVISWTKDC | 258  | >FGFR2-V77I\AAVISWTKDC | 4851  | 4593  |
| >FGFR2-V77I\AAVISWTKDC | 1349 | >FGFR2-V77I\AAVISWTKDC | 35    | 1314  |
| >FGFR2-V77I\WTKDGVHL   | 653  | >FGFR2-V77I\WTKDGMHL   | 461   | 192   |
| >FGFR2-V77I\WTKDGVHL   | 37   | >FGFR2-V77I\WTKDGMHL   | 37    | 0     |
| >FGFR2-V77I\WTKDGVHL   | 408  | >FGFR2-V77I\WTKDGMHL   | 252   | 156   |
| >FGFR2-V77I\SWTKDGVHL  | 272  | >FGFR2-V77I\SWTKDGMHI  | 96    | 176   |
| >FGFR2-V77I\ISWTKDGVHI | 364  | >FGFR2-V77I\ISWTKDGMH  | 391   | 27    |
| >FGFR2-V77I\ISWTKDGV   | 866  | >FGFR2-V77I\ISWTKDGM   | 18    | 848   |
| >FGFR2-V77I\ISWTKDGVHI | 17   | >FGFR2-V77I\ISWTKDGMH  | 19    | 2     |
| >FGFR2-V77I\ISWTKDGVHI | 164  | >FGFR2-V77I\ISWTKDGMH  | 67    | 97    |
| >FGFR2-V77I\VISWTKDGV  | 462  | >FGFR2-V77I\VISWTKDGM  | 11320 | 10858 |
| >FGFR2-V77I\VISWTKDGV  | 317  | >FGFR2-V77I\VISWTKDGM  | 4519  | 4202  |
| >FGFR2-V77I\VISWTKDGV  | 18   | >FGFR2-V77I\VISWTKDGM  | 2312  | 2294  |
| >FGFR2-V77I\VISWTKDGV  | 49   | >FGFR2-V77I\VISWTKDGM  | 5254  | 5205  |
| >FGFR2-V77I\VISWTKDGV  | 471  | >FGFR2-V77I\VISWTKDGM  | 548   | 77    |
| >FGFR2-V77I\VISWTKDGV  | 100  | >FGFR2-V77I\VISWTKDGM  | 8998  | 8898  |
| >FGFR2-V77I\VISWTKDGV  | 9    | >FGFR2-V77I\VISWTKDGM  | 5207  | 5198  |
| >FGFR2-V77I\VISWTKDGV  | 103  | >FGFR2-V77I\VISWTKDGM  | 90    | 13    |
| >FGFR2-V77I\AVISWTKDGI | 161  | >FGFR2-V77I\AVISWTKDGI | 1022  | 861   |
| >FGFR2-V77I\AVISWTKDGI | 58   | >FGFR2-V77I\AVISWTKDGI | 1779  | 1721  |
| >FGFR2-V77I\AVISWTKDGI | 165  | >FGFR2-V77I\AVISWTKDGI | 1955  | 1790  |
| >FGFR2-V77I\AVISWTKDGI | 43   | >FGFR2-V77I\AVISWTKDGI | 3879  | 3836  |
| >FGFR2-V77I\AVISWTKDGI | 319  | >FGFR2-V77I\AVISWTKDGI | 8221  | 7902  |
| >FGFR2-V77I\AVISWTKDGI | 185  | >FGFR2-V77I\AVISWTKDGI | 10932 | 10747 |
| >FGFR2-V77I\AVISWTKDGI | 13   | >FGFR2-V77I\AVISWTKDGI | 7664  | 7651  |
| >FGFR2-V77I\AVISWTKDGI | 760  | >FGFR2-V77I\AVISWTKDGI | 10    | 750   |



|                         |      |                         |       |       |
|-------------------------|------|-------------------------|-------|-------|
| >FGFR2-V77I AVISWTKDGI  | 213  | >FGFR2-V77I AVISWTKDGI  | 287   | 74    |
| >FGFR2-V77I AVISWTKDGI  | 169  | >FGFR2-V77I AVISWTKDGI  | 4809  | 4640  |
| >FGFR2-V77I AVISWTKDGI  | 125  | >FGFR2-V77I AVISWTKDGI  | 1599  | 1474  |
| >FGFR2-W29 WIKHVEKNGI   | 1658 | >FGFR2-W29 CIKHVEKNGS   | 87    | 1571  |
| >FGFR2-W29 QWIKHVEK     | 92   | >FGFR2-W29 QCIKHVEK     | 4712  | 4620  |
| >FGFR2-W29 VYSDAQPHIC   | 38   | >FGFR2-W29 VYSDAQPHIC   | 5418  | 5380  |
| >FGFR2-W29 IQWIKHVEK    | 393  | >FGFR2-W29 IQCIKHVEK    | 375   | 18    |
| >FGFR2-W29 IQWIKHVEK    | 36   | >FGFR2-W29 IQCIKHVEK    | 180   | 144   |
| >FGFR2-W29 IQWIKHVEK    | 300  | >FGFR2-W29 IQCIKHVEK    | 2437  | 2137  |
| >FGFR2-W29 HIQWIKHV     | 67   | >FGFR2-W29 HIQCIKHV     | 504   | 437   |
| >FGFR2-W29 HIQWIKHV     | 913  | >FGFR2-W29 HIQCIKHV     | 217   | 696   |
| >FGFR2-W29 HIQWIKHV     | 333  | >FGFR2-W29 HIQCIKHV     | 2334  | 2001  |
| >FGFR2-W29 HIQWIKHV     | 9    | >FGFR2-W29 HIQCIKHV     | 146   | 137   |
| >FGFR2-W29 HIQWIKHVEK   | 108  | >FGFR2-W29 HIQCIKHVEK   | 114   | 6     |
| >FGFR2-W29 HIQWIKHVEK   | 277  | >FGFR2-W29 HIQCIKHVEK   | 215   | 62    |
| >FGFR2-W29 HIQWIKHVEK   | 320  | >FGFR2-W29 HIQCIKHVEK   | 142   | 178   |
| >FGFR2-W29 HIQWIKHVEK   | 181  | >FGFR2-W29 HIQCIKHVEK   | 285   | 104   |
| >FGFR2-W29 HIQWIKHVEK   | 398  | >FGFR2-W29 HIQCIKHVEK   | 326   | 72    |
| >FGFR2-W29 HIQWIKHV     | 297  | >FGFR2-W29 HIQCIKHV     | 135   | 162   |
| >FGFR2-W29 HIQWIKHV     | 290  | >FGFR2-W29 HIQCIKHV     | 940   | 650   |
| >FGFR2-W29 QPHIQWIKHV   | 538  | >FGFR2-W29 QPHIQCIKHV   | 494   | 44    |
| >FGFR2-W29 AQPHIQWI     | 420  | >FGFR2-W29 AQPHIQCI     | 2307  | 1887  |
| >FGFR2-W29 AQPHIQWIKI   | 191  | >FGFR2-W29 AQPHIQCIKH   | 319   | 128   |
| >FGFR2-W29 AQPHIQWI     | 68   | >FGFR2-W29 AQPHIQCI     | 356   | 288   |
| >FGFR2-W29 AQPHIQWIKI   | 27   | >FGFR2-W29 AQPHIQCIKH   | 66    | 39    |
| >FGFR2-W29 AQPHIQWIKI   | 203  | >FGFR2-W29 AQPHIQCIKH   | 1029  | 826   |
| >FGFR2-W29 AQPHIQWIKI   | 265  | >FGFR2-W29 AQPHIQCIKH   | 905   | 640   |
| >FGFR2-W29 AQPHIQWI     | 1420 | >FGFR2-W29 AQPHIQCI     | 425   | 995   |
| >FGFR2-W29 DAQPHIQWII   | 102  | >FGFR2-W29 DAQPHIQCIK   | 200   | 98    |
| >FGFR2-W29 DAQPHIQW     | 396  | >FGFR2-W29 DAQPHIQC     | 26387 | 25991 |
| >FGFR2-W29 DAQPHIQW     | 413  | >FGFR2-W29 DAQPHIQC     | 24293 | 23880 |
| >FGFR2-W29 DAQPHIQW     | 397  | >FGFR2-W29 DAQPHIQC     | 31767 | 31370 |
| >FGFR2-W29 SDAQPHIQW    | 337  | >FGFR2-W29 SDAQPHIQCI   | 223   | 114   |
| >FGFR2-W29 YSDAQPHIQV   | 432  | >FGFR2-W29 YSDAQPHIQC   | 1566  | 1134  |
| >FGFR2-W29 YSDAQPHIQV   | 6    | >FGFR2-W29 YSDAQPHIQC   | 6132  | 6126  |
| >FGFR2-W29 YSDAQPHIQV   | 76   | >FGFR2-W29 YSDAQPHIQC   | 1039  | 963   |
| >FGFR2-W29 YSDAQPHIQV   | 68   | >FGFR2-W29 YSDAQPHIQC   | 22211 | 22143 |
| >FGFR2-W29 YSDAQPHIQV   | 10   | >FGFR2-W29 YSDAQPHIQC   | 10220 | 10210 |
| >FGFR2-W29 YSDAQPHIQV   | 219  | >FGFR2-W29 YSDAQPHIQC   | 293   | 74    |
| >FGFR2-Y375 YLEIAIYCI   | 30   | >FGFR2-Y375 CLEIAIYCI   | 1467  | 1437  |
| >FGFR2-Y375 YLEIAIYCIGV | 22   | >FGFR2-Y375 CLEIAIYCIGV | 533   | 511   |
| >FGFR2-Y375 YLEIAIYCI   | 14   | >FGFR2-Y375 CLEIAIYCI   | 410   | 396   |
| >FGFR2-Y375 YLEIAIYCIGV | 10   | >FGFR2-Y375 CLEIAIYCIGV | 311   | 301   |

|                         |      |                         |       |       |
|-------------------------|------|-------------------------|-------|-------|
| >FGFR2-Y375 YLEIAIYCI   | 499  | >FGFR2-Y375 CLEIAIYCI   | 5392  | 4893  |
| >FGFR2-Y375 YLEIAIYCIGV | 36   | >FGFR2-Y375 CLEIAIYCIGV | 1326  | 1290  |
| >FGFR2-Y375 YLEIAIYCIGV | 26   | >FGFR2-Y375 CLEIAIYCIGV | 1124  | 1098  |
| >FGFR2-Y375 YLEIAIYCI   | 25   | >FGFR2-Y375 CLEIAIYCI   | 2452  | 2427  |
| >FGFR2-Y375 YLEIAIYCI   | 12   | >FGFR2-Y375 CLEIAIYCI   | 977   | 965   |
| >FGFR2-Y375 YLEIAIYCIGV | 3    | >FGFR2-Y375 CLEIAIYCIGV | 68    | 65    |
| >FGFR2-Y375 YLEIAIYCI   | 174  | >FGFR2-Y375 CLEIAIYCI   | 5820  | 5646  |
| >FGFR2-Y375 YLEIAIYCI   | 8    | >FGFR2-Y375 CLEIAIYCI   | 257   | 249   |
| >FGFR2-Y375 YLEIAIYCIGV | 6    | >FGFR2-Y375 CLEIAIYCIGV | 111   | 105   |
| >FGFR2-Y375 YLEIAIYCI   | 22   | >FGFR2-Y375 CLEIAIYCI   | 3200  | 3178  |
| >FGFR2-Y375 YLEIAIYCIGV | 7    | >FGFR2-Y375 CLEIAIYCIGV | 298   | 291   |
| >FGFR2-Y375 YLEIAIYCI   | 32   | >FGFR2-Y375 CLEIAIYCI   | 1737  | 1705  |
| >FGFR2-Y375 YLEIAIYCIGV | 8    | >FGFR2-Y375 CLEIAIYCIGV | 273   | 265   |
| >FGFR2-Y375 YLEIAIYCI   | 9    | >FGFR2-Y375 CLEIAIYCI   | 1887  | 1878  |
| >FGFR2-Y375 YLEIAIYCI   | 8    | >FGFR2-Y375 CLEIAIYCI   | 635   | 627   |
| >FGFR2-Y375 YLEIAIYCIGV | 2    | >FGFR2-Y375 CLEIAIYCIGV | 9     | 7     |
| >FGFR2-Y375 YLEIAIYCIGV | 444  | >FGFR2-Y375 CLEIAIYCIGV | 4818  | 4374  |
| >FGFR2-Y375 DYLEIAIYCI  | 425  | >FGFR2-Y375 DCLEIAIYCI  | 1748  | 1323  |
| >FGFR2-Y375 DYLEIAIYCI  | 106  | >FGFR2-Y375 DCLEIAIYCI  | 17278 | 17172 |
| >FGFR2-Y375 DYLEIAIYCI  | 330  | >FGFR2-Y375 DCLEIAIYCI  | 24684 | 24354 |
| >FGFR2-Y375 DYLEIAIY    | 470  | >FGFR2-Y375 DCLEIAIY    | 472   | 2     |
| >FGFR2-Y375 DYLEIAIY    | 235  | >FGFR2-Y375 DCLEIAIY    | 3657  | 3422  |
| >FGFR2-Y375 DYLEIAIYCI  | 3220 | >FGFR2-Y375 DCLEIAIYCI  | 356   | 2864  |
| >FGFR2-Y375 REKEITASPDY | 249  | >FGFR2-Y375 REKEITASPDY | 18464 | 18215 |
| >FGFR2-Y375 REKEITASPDY | 203  | >FGFR2-Y375 REKEITASPDY | 12303 | 12100 |
| >FGFR2-Y375 REKEITASPDY | 257  | >FGFR2-Y375 REKEITASPDY | 15924 | 15667 |
| >FGFR2-Y375 REKEITASPDY | 358  | >FGFR2-Y375 REKEITASPDY | 6873  | 6515  |
| >FGFR2-Y375 REKEITASPDY | 174  | >FGFR2-Y375 REKEITASPDY | 7671  | 7497  |
| >FGFR2-Y375 REKEITASPDY | 121  | >FGFR2-Y375 REKEITASPDY | 32    | 89    |
| >FGFR2-Y375 PDYLEIAIYCI | 287  | >FGFR2-Y375 PDCLEIAIYCI | 2602  | 2315  |
| >FGFR2-Y375 PDYLEIAI    | 199  | >FGFR2-Y375 PDCLEIAI    | 5367  | 5168  |
| >FGFR2-Y375 PDYLEIAIYCI | 241  | >FGFR2-Y375 PDCLEIAIYCI | 4422  | 4181  |
| >FGFR2-Y375 PDYLEIAI    | 50   | >FGFR2-Y375 PDCLEIAI    | 118   | 68    |
| >FGFR2-Y375 PDYLEIAIYCI | 30   | >FGFR2-Y375 PDCLEIAIYCI | 58    | 28    |
| >FGFR2-Y375 SPDYLEIAI   | 337  | >FGFR2-Y375 SPDCLEIAI   | 136   | 201   |
| >FGFR2-Y375 SPDYLEIAIY  | 96   | >FGFR2-Y375 SPDCLEIAIY  | 36    | 60    |
| >FGFR2-Y375 SPDYLEIAI   | 311  | >FGFR2-Y375 SPDCLEIAI   | 661   | 350   |
| >FGFR2-Y375 SPDYLEIAIY  | 384  | >FGFR2-Y375 SPDCLEIAIY  | 354   | 30    |
| >FGFR2-Y375 SPDYLEIAIY  | 447  | >FGFR2-Y375 SPDCLEIAIY  | 695   | 248   |
| >FGFR2-Y375 SPDYLEIAIY  | 158  | >FGFR2-Y375 SPDCLEIAIY  | 547   | 389   |
| >FGFR2-Y375 ASPDYLEIAIY | 40   | >FGFR2-Y375 ASPDCLEIAIY | 71    | 31    |
| >FGFR2-Y375 ASPDYLEIAIY | 249  | >FGFR2-Y375 ASPDCLEIAIY | 110   | 139   |
| >FGFR2-Y375 ASPDYLEIAIY | 112  | >FGFR2-Y375 ASPDCLEIAIY | 201   | 89    |

|                          |      |                          |       |       |
|--------------------------|------|--------------------------|-------|-------|
| >FGFR2-Y375 ASPDYLEI     | 293  | >FGFR2-Y375 ASPDCLEI     | 160   | 133   |
| >FGFR2-Y375 ASPDYLEIA    | 74   | >FGFR2-Y375 ASPDCLEIA    | 176   | 102   |
| >FGFR2-Y375 ASPDYLEIAI   | 17   | >FGFR2-Y375 ASPDCLEIAI   | 31    | 14    |
| >FGFR2-Y375 ASPDYLEIAIY  | 16   | >FGFR2-Y375 ASPDCLEIAIY  | 23    | 7     |
| >FGFR2-Y375 ASPDYLEI     | 124  | >FGFR2-Y375 ASPDCLEI     | 100   | 24    |
| >FGFR2-Y375 TASP DYLEI   | 359  | >FGFR2-Y375 TASPDCLEI    | 1131  | 772   |
| >FGFR2-Y375 TASP DYLEIAI | 365  | >FGFR2-Y375 TASPDCLEIAI  | 666   | 301   |
| >FGFR2-Y375 TASP DYLEI   | 154  | >FGFR2-Y375 TASPDCLEI    | 191   | 37    |
| >FGFR2-Y375 TASP DYLEIAI | 290  | >FGFR2-Y375 TASPDCLEIAI  | 347   | 57    |
| >FGFR2-Y375 ITASP DYL    | 57   | >FGFR2-Y375 ITASPDCLEI   | 774   | 717   |
| >FGFR2-Y375 ITASP DYLEI  | 435  | >FGFR2-Y375 ITASPDCLEI   | 851   | 416   |
| >FGFR2-Y375 ITASP DYL    | 405  | >FGFR2-Y375 ITASPDCLEI   | 4944  | 4539  |
| >FGFR2-Y375 ITASP DYL    | 23   | >FGFR2-Y375 ITASPDCLEI   | 239   | 216   |
| >FGFR2-Y375 ITASP DYLEI  | 396  | >FGFR2-Y375 ITASPDCLEI   | 195   | 201   |
| >FGFR2-Y375 ITASP DYLEIA | 98   | >FGFR2-Y375 ITASPDCLEIA  | 161   | 63    |
| >FGFR2-Y375 ITASP DYL    | 30   | >FGFR2-Y375 ITASPDCLEI   | 206   | 176   |
| >FGFR2-Y375 ITASP DYLEI  | 51   | >FGFR2-Y375 ITASPDCLEI   | 36    | 15    |
| >FGFR2-Y375 ITASP DYL    | 308  | >FGFR2-Y375 ITASPDCLEI   | 2964  | 2656  |
| >FGFR2-Y375 ITASP DYLEI  | 103  | >FGFR2-Y375 ITASPDCLEI   | 237   | 134   |
| >FGFR2-Y375 ITASP DYL    | 53   | >FGFR2-Y375 ITASPDCLEI   | 79    | 26    |
| >FGFR2-Y375 ITASP DYLEI  | 170  | >FGFR2-Y375 ITASPDCLEI   | 547   | 377   |
| >FGFR2-Y375 ITASP DYL    | 3298 | >FGFR2-Y375 ITASPDCLEI   | 372   | 2926  |
| >FGFR2-Y375 ITASP DYLEIA | 381  | >FGFR2-Y375 ITASPDCLEIA  | 369   | 12    |
| >FGFR2-Y375 ITASP DYL    | 318  | >FGFR2-Y375 ITASPDCLEI   | 593   | 275   |
| >FGFR2-Y375 ITASP DYLEI  | 52   | >FGFR2-Y375 ITASPDCLEI   | 132   | 80    |
| >FGFR2-Y375 EITASP DY    | 45   | >FGFR2-Y375 EITASPDC     | 22665 | 22620 |
| >FGFR2-Y375 EITASP DYL   | 270  | >FGFR2-Y375 EITASPDCLEI  | 872   | 602   |
| >FGFR2-Y375 EITASP DYL   | 28   | >FGFR2-Y375 EITASPDCLEI  | 339   | 311   |
| >FGFR2-Y375 EITASP DYLEI | 65   | >FGFR2-Y375 EITASPDCLEI  | 170   | 105   |
| >FGFR2-Y375 EITASP DYL   | 309  | >FGFR2-Y375 EITASPDCLEI  | 6922  | 6613  |
| >FGFR2-Y375 EITASP DYLEI | 195  | >FGFR2-Y375 EITASPDCLEI  | 719   | 524   |
| >FGFR2-Y375 KEITASP DYL  | 476  | >FGFR2-Y375 KEITASPDC    | 8694  | 8218  |
| >FGFR2-Y375 KEITASP DY   | 320  | >FGFR2-Y375 KEITASPDCLEI | 27627 | 27307 |
| >FGFR2-Y375 KEITASP DY   | 121  | >FGFR2-Y375 KEITASPDC    | 11443 | 11322 |
| >FGFR2-Y375 KEITASP DY   | 361  | >FGFR2-Y375 KEITASPDC    | 16931 | 16570 |
| >FGFR2-Y375 KEITASP DYL  | 388  | >FGFR2-Y375 KEITASPDCLEI | 241   | 147   |
| >FGFR2-Y375 KEITASP DYL  | 167  | >FGFR2-Y375 KEITASPDCLEI | 750   | 583   |
| >FGFR2-Y375 KEITASP DY   | 129  | >FGFR2-Y375 KEITASPDC    | 2386  | 2257  |
| >FGFR2-Y375 KEITASP DY   | 59   | >FGFR2-Y375 KEITASPDC    | 2966  | 2907  |
| >FGFR2-Y375 KEITASP DY   | 119  | >FGFR2-Y375 KEITASPDC    | 31    | 88    |
| >FGFR2-Y375 KEITASP DYL  | 18   | >FGFR2-Y375 KEITASPDCLEI | 13    | 5     |
| >FGFR3-A26 AVLGSDVEF     | 2046 | >FGFR3-A26 TVLGSDVEF     | 359   | 1687  |
| >FGFR3-A26 AVLGSDVEF     | 427  | >FGFR3-A26 TVLGSDVEF     | 535   | 108   |

|                                    |      |                                    |      |      |
|------------------------------------|------|------------------------------------|------|------|
| >FGFR3-A26 <sup>!</sup> AVLGSDVEF  | 482  | >FGFR3-A26 <sup>!</sup> TVLGSDVEF  | 405  | 77   |
| >FGFR3-A26 <sup>!</sup> AVLGSDVEFH | 489  | >FGFR3-A26 <sup>!</sup> TVLGSDVEFH | 450  | 39   |
| >FGFR3-A26 <sup>!</sup> AVLGSDVEF  | 85   | >FGFR3-A26 <sup>!</sup> TVLGSDVEF  | 321  | 236  |
| >FGFR3-A26 <sup>!</sup> AVLGSDVEF  | 240  | >FGFR3-A26 <sup>!</sup> TVLGSDVEF  | 997  | 757  |
| >FGFR3-A26 <sup>!</sup> AVLGSDVEF  | 14   | >FGFR3-A26 <sup>!</sup> TVLGSDVEF  | 55   | 41   |
| >FGFR3-A26 <sup>!</sup> AVLGSDVEF  | 203  | >FGFR3-A26 <sup>!</sup> TVLGSDVEF  | 68   | 135  |
| >FGFR3-A26 <sup>!</sup> TAVLGSDVEF | 3276 | >FGFR3-A26 <sup>!</sup> TTVLGSDVEF | 54   | 3222 |
| >FGFR3-A26 <sup>!</sup> TAVLGSDVEF | 2989 | >FGFR3-A26 <sup>!</sup> TTVLGSDVEF | 91   | 2898 |
| >FGFR3-A26 <sup>!</sup> TAVLGSDV   | 411  | >FGFR3-A26 <sup>!</sup> TTVLGSDV   | 55   | 356  |
| >FGFR3-A26 <sup>!</sup> TAVLGSDV   | 1970 | >FGFR3-A26 <sup>!</sup> TTVLGSDV   | 420  | 1550 |
| >FGFR3-A26 <sup>!</sup> TAVLGSDVEF | 19   | >FGFR3-A26 <sup>!</sup> TTVLGSDVEF | 4    | 15   |
| >FGFR3-A26 <sup>!</sup> TAVLGSDVEF | 3833 | >FGFR3-A26 <sup>!</sup> TTVLGSDVEF | 57   | 3776 |
| >FGFR3-A26 <sup>!</sup> LQAGLPANQ  | 232  | >FGFR3-A26 <sup>!</sup> LQAGLPANQ  | 1979 | 1747 |
| >FGFR3-A26 <sup>!</sup> LQAGLPANQ  | 247  | >FGFR3-A26 <sup>!</sup> LQAGLPANQ  | 3007 | 2760 |
| >FGFR3-A26 <sup>!</sup> LQAGLPANQ  | 89   | >FGFR3-A26 <sup>!</sup> LQAGLPANQ  | 808  | 719  |
| >FGFR3-A26 <sup>!</sup> QTAVLGSDV  | 82   | >FGFR3-A26 <sup>!</sup> QTTVLGSDV  | 411  | 329  |
| >FGFR3-A26 <sup>!</sup> QTAVLGSDVE | 192  | >FGFR3-A26 <sup>!</sup> QTTVLGSDVE | 392  | 200  |
| >FGFR3-A26 <sup>!</sup> QTAVLGSDVE | 7    | >FGFR3-A26 <sup>!</sup> QTTVLGSDVE | 9    | 2    |
| >FGFR3-A26 <sup>!</sup> QTAVLGSDV  | 125  | >FGFR3-A26 <sup>!</sup> QTTVLGSDV  | 130  | 5    |
| >FGFR3-A26 <sup>!</sup> QTAVLGSDVE | 98   | >FGFR3-A26 <sup>!</sup> QTTVLGSDVE | 101  | 3    |
| >FGFR3-A26 <sup>!</sup> LPANQTAV   | 30   | >FGFR3-A26 <sup>!</sup> LPANQTTV   | 79   | 49   |
| >FGFR3-A26 <sup>!</sup> LPANQTAVL  | 22   | >FGFR3-A26 <sup>!</sup> LPANQTTVL  | 18   | 4    |
| >FGFR3-A26 <sup>!</sup> LPANQTAV   | 80   | >FGFR3-A26 <sup>!</sup> LPANQTTV   | 202  | 122  |
| >FGFR3-A26 <sup>!</sup> LPANQTAVL  | 22   | >FGFR3-A26 <sup>!</sup> LPANQTTVL  | 23   | 1    |
| >FGFR3-A26 <sup>!</sup> LPANQTAVLC | 393  | >FGFR3-A26 <sup>!</sup> LPANQTTVLC | 539  | 146  |
| >FGFR3-A26 <sup>!</sup> LPANQTAVL  | 99   | >FGFR3-A26 <sup>!</sup> LPANQTTVL  | 272  | 173  |
| >FGFR3-A26 <sup>!</sup> LPANQTAV   | 264  | >FGFR3-A26 <sup>!</sup> LPANQTTV   | 178  | 86   |
| >FGFR3-A26 <sup>!</sup> LPANQTAV   | 594  | >FGFR3-A26 <sup>!</sup> LPANQTTV   | 266  | 328  |
| >FGFR3-A26 <sup>!</sup> LPANQTAVL  | 132  | >FGFR3-A26 <sup>!</sup> LPANQTTVL  | 92   | 40   |
| >FGFR3-A26 <sup>!</sup> LPANQTAV   | 18   | >FGFR3-A26 <sup>!</sup> LPANQTTV   | 35   | 17   |
| >FGFR3-A26 <sup>!</sup> LPANQTAVL  | 68   | >FGFR3-A26 <sup>!</sup> LPANQTTVL  | 97   | 29   |
| >FGFR3-A26 <sup>!</sup> LPANQTAVL  | 93   | >FGFR3-A26 <sup>!</sup> LPANQTTVL  | 175  | 82   |
| >FGFR3-A26 <sup>!</sup> GLPANQTAV  | 191  | >FGFR3-A26 <sup>!</sup> GLPANQTTV  | 147  | 44   |
| >FGFR3-A26 <sup>!</sup> GLPANQTAV  | 19   | >FGFR3-A26 <sup>!</sup> GLPANQTTV  | 44   | 25   |
| >FGFR3-A26 <sup>!</sup> GLPANQTAVI | 112  | >FGFR3-A26 <sup>!</sup> GLPANQTTVI | 126  | 14   |
| >FGFR3-A26 <sup>!</sup> GLPANQTA   | 114  | >FGFR3-A26 <sup>!</sup> GLPANQTT   | 1596 | 1482 |
| >FGFR3-A26 <sup>!</sup> GLPANQTAV  | 7    | >FGFR3-A26 <sup>!</sup> GLPANQTTV  | 9    | 2    |
| >FGFR3-A26 <sup>!</sup> GLPANQTAVI | 253  | >FGFR3-A26 <sup>!</sup> GLPANQTTVI | 304  | 51   |
| >FGFR3-A26 <sup>!</sup> GLPANQTAV  | 193  | >FGFR3-A26 <sup>!</sup> GLPANQTTV  | 274  | 81   |
| >FGFR3-A26 <sup>!</sup> GLPANQTA   | 131  | >FGFR3-A26 <sup>!</sup> GLPANQTT   | 931  | 800  |
| >FGFR3-A26 <sup>!</sup> GLPANQTAV  | 6    | >FGFR3-A26 <sup>!</sup> GLPANQTTV  | 5    | 1    |
| >FGFR3-A26 <sup>!</sup> GLPANQTAVI | 64   | >FGFR3-A26 <sup>!</sup> GLPANQTTVI | 109  | 45   |
| >FGFR3-A26 <sup>!</sup> GLPANQTA   | 191  | >FGFR3-A26 <sup>!</sup> GLPANQTT   | 2358 | 2167 |

|                                      |       |                                      |       |       |
|--------------------------------------|-------|--------------------------------------|-------|-------|
| >FGFR3-A26 <sup>5</sup> GLPANQTAV    | 9     | >FGFR3-A26 <sup>5</sup> GLPANQTTV    | 8     | 1     |
| >FGFR3-A26 <sup>5</sup> GLPANQTAVI   | 24    | >FGFR3-A26 <sup>5</sup> GLPANQTTVI   | 62    | 38    |
| >FGFR3-A26 <sup>5</sup> GLPANQTA     | 130   | >FGFR3-A26 <sup>5</sup> GLPANQTT     | 2321  | 2191  |
| >FGFR3-A26 <sup>5</sup> GLPANQTAV    | 11    | >FGFR3-A26 <sup>5</sup> GLPANQTTV    | 7     | 4     |
| >FGFR3-A26 <sup>5</sup> GLPANQTAVI   | 106   | >FGFR3-A26 <sup>5</sup> GLPANQTTVI   | 78    | 28    |
| >FGFR3-A26 <sup>5</sup> GLPANQTAV    | 81    | >FGFR3-A26 <sup>5</sup> GLPANQTTV    | 47    | 34    |
| >FGFR3-A26 <sup>5</sup> GLPANQTA     | 18    | >FGFR3-A26 <sup>5</sup> GLPANQTT     | 103   | 85    |
| >FGFR3-A26 <sup>5</sup> GLPANQTAV    | 3     | >FGFR3-A26 <sup>5</sup> GLPANQTTV    | 2     | 1     |
| >FGFR3-A26 <sup>5</sup> GLPANQTAVI   | 11    | >FGFR3-A26 <sup>5</sup> GLPANQTTVI   | 11    | 0     |
| >FGFR3-A26 <sup>5</sup> GLPANQTAVI   | 352   | >FGFR3-A26 <sup>5</sup> GLPANQTTVI   | 952   | 600   |
| >FGFR3-A36 <sup>6</sup> ADEAGSVYAK   | 334   | >FGFR3-A36 <sup>6</sup> DDEAGSVYAK   | 14129 | 13795 |
| >FGFR3-A36 <sup>6</sup> ADEAGSVYAK   | 112   | >FGFR3-A36 <sup>6</sup> DDEAGSVYAK   | 832   | 720   |
| >FGFR3-A36 <sup>6</sup> EADEAGSVY    | 144   | >FGFR3-A36 <sup>6</sup> EDDEAGSVY    | 6928  | 6784  |
| >FGFR3-A36 <sup>6</sup> EADEAGSV     | 8     | >FGFR3-A36 <sup>6</sup> EDDEAGSV     | 916   | 908   |
| >FGFR3-A36 <sup>6</sup> EADEAGSVYA   | 38    | >FGFR3-A36 <sup>6</sup> EDDEAGSVYA   | 4762  | 4724  |
| >FGFR3-A36 <sup>6</sup> EADEAGSVY    | 27    | >FGFR3-A36 <sup>6</sup> EDDEAGSVY    | 1054  | 1027  |
| >FGFR3-A36 <sup>6</sup> EADEAGSV     | 31264 | >FGFR3-A36 <sup>6</sup> EDDEAGSV     | 260   | 31004 |
| >FGFR3-A36 <sup>6</sup> VLPAAEEELVEI | 439   | >FGFR3-A36 <sup>6</sup> VLPAAEEELVEI | 22067 | 21628 |
| >FGFR3-A36 <sup>6</sup> VLPAAEEELVEI | 87    | >FGFR3-A36 <sup>6</sup> VLPAAEEELVEI | 9050  | 8963  |
| >FGFR3-A36 <sup>6</sup> VLPAAEEELVEI | 219   | >FGFR3-A36 <sup>6</sup> VLPAAEEELVEI | 19896 | 19677 |
| >FGFR3-A36 <sup>6</sup> VLPAAEEELVEI | 378   | >FGFR3-A36 <sup>6</sup> VLPAAEEELVEI | 18710 | 18332 |
| >FGFR3-A36 <sup>6</sup> VLPAAEEELVEI | 69    | >FGFR3-A36 <sup>6</sup> VLPAAEEELVEI | 11241 | 11172 |
| >FGFR3-A36 <sup>6</sup> VLPAAEEELVEI | 115   | >FGFR3-A36 <sup>6</sup> VLPAAEEELVEI | 18284 | 18169 |
| >FGFR3-A36 <sup>6</sup> VLPAAEEELVEI | 13    | >FGFR3-A36 <sup>6</sup> VLPAAEEELVEI | 9203  | 9190  |
| >FGFR3-A36 <sup>6</sup> VEADEAGSV    | 77    | >FGFR3-A36 <sup>6</sup> VEDDEAGSV    | 643   | 566   |
| >FGFR3-A36 <sup>6</sup> VEADEAGSVI   | 229   | >FGFR3-A36 <sup>6</sup> VEDDEAGSVI   | 3837  | 3608  |
| >FGFR3-A36 <sup>6</sup> VEADEAGSVI   | 194   | >FGFR3-A36 <sup>6</sup> VEDDEAGSVI   | 2094  | 1900  |
| >FGFR3-A36 <sup>6</sup> VEADEAGSV    | 107   | >FGFR3-A36 <sup>6</sup> VEDDEAGSV    | 956   | 849   |
| >FGFR3-A36 <sup>6</sup> LVEADEAGSV   | 56    | >FGFR3-A36 <sup>6</sup> LVEDDEAGSV   | 11    | 45    |
| >FGFR3-A36 <sup>6</sup> LVEADEAGSV   | 197   | >FGFR3-A36 <sup>6</sup> LVEDDEAGSV   | 217   | 20    |
| >FGFR3-A36 <sup>6</sup> LVEADEAGSV   | 375   | >FGFR3-A36 <sup>6</sup> LVEDDEAGSV   | 469   | 94    |
| >FGFR3-A36 <sup>6</sup> LVEADEAGSV   | 467   | >FGFR3-A36 <sup>6</sup> LVEDDEAGSV   | 951   | 484   |
| >FGFR3-A36 <sup>6</sup> LVEADEAGSV   | 93    | >FGFR3-A36 <sup>6</sup> LVEDDEAGSV   | 89    | 4     |
| >FGFR3-A36 <sup>6</sup> LVEADEAGSV   | 83    | >FGFR3-A36 <sup>6</sup> LVEDDEAGSV   | 66    | 17    |
| >FGFR3-A36 <sup>6</sup> ELVEADEAGS   | 290   | >FGFR3-A36 <sup>6</sup> ELVEDDEAGS   | 479   | 189   |
| >FGFR3-A36 <sup>6</sup> ELVEADEAGS   | 185   | >FGFR3-A36 <sup>6</sup> ELVEDDEAGS   | 254   | 69    |
| >FGFR3-A36 <sup>6</sup> ELVEADEAGS   | 383   | >FGFR3-A36 <sup>6</sup> ELVEDDEAGS   | 686   | 303   |
| >FGFR3-A36 <sup>6</sup> ELVEADEAGS   | 21    | >FGFR3-A36 <sup>6</sup> ELVEDDEAGS   | 21    | 0     |
| >FGFR3-A36 <sup>6</sup> ELVEADEAGS   | 86    | >FGFR3-A36 <sup>6</sup> ELVEDDEAGS   | 66    | 20    |
| >FGFR3-A36 <sup>6</sup> ELVEADEAGS   | 55    | >FGFR3-A36 <sup>6</sup> ELVEDDEAGS   | 70    | 15    |
| >FGFR3-A36 <sup>6</sup> ELVEADEAGS   | 64    | >FGFR3-A36 <sup>6</sup> ELVEDDEAGS   | 81    | 17    |
| >FGFR3-A36 <sup>6</sup> ELVEADEA     | 300   | >FGFR3-A36 <sup>6</sup> ELVEDDEA     | 370   | 70    |
| >FGFR3-A36 <sup>6</sup> ELVEADEAGS   | 7     | >FGFR3-A36 <sup>6</sup> ELVEDDEAGS   | 7     | 0     |

|                       |       |                       |       |       |
|-----------------------|-------|-----------------------|-------|-------|
| >FGFR3-A36{ELVEADEA   | 319   | >FGFR3-A36{ELVEDDEA   | 684   | 365   |
| >FGFR3-A36{ELVEADEAGS | 74    | >FGFR3-A36{ELVEDDEAGS | 127   | 53    |
| >FGFR3-A36{ELVEADEAGS | 28    | >FGFR3-A36{ELVEDDEAGS | 53    | 25    |
| >FGFR3-A36{EELVEADEA  | 29    | >FGFR3-A36{EELVEDDEA  | 84    | 55    |
| >FGFR3-A36{EEELVEADEA | 59    | >FGFR3-A36{EEELVEDDEA | 72    | 13    |
| >FGFR3-A36{AEEELVEA   | 352   | >FGFR3-A36{AEEELVED   | 6105  | 5753  |
| >FGFR3-A36{AEEELVEA   | 9     | >FGFR3-A36{AEEELVED   | 900   | 891   |
| >FGFR3-A36{AEEELVEADE | 346   | >FGFR3-A36{AEEELVEDDE | 600   | 254   |
| >FGFR3-A36{AEEELVEADE | 14    | >FGFR3-A36{AEEELVEDDE | 22    | 8     |
| >FGFR3-A36{AEEELVEAD  | 427   | >FGFR3-A36{AEEELVEDD  | 424   | 3     |
| >FGFR3-A36{AEEELVEADE | 338   | >FGFR3-A36{AEEELVEDDE | 525   | 187   |
| >FGFR3-A36{LPAEEELVEA | 95    | >FGFR3-A36{LPAEEELVED | 7358  | 7263  |
| >FGFR3-A39{AAVTLCRL   | 457   | >FGFR3-A39{EAVTLCRL   | 3941  | 3484  |
| >FGFR3-A39{AAVTLCRLR  | 334   | >FGFR3-A39{EAVTLCRLR  | 4896  | 4562  |
| >FGFR3-A39{AAVTLCRLR  | 4513  | >FGFR3-A39{EAVTLCRLR  | 151   | 4362  |
| >FGFR3-A39{AAVTLCRLR  | 295   | >FGFR3-A39{EAVTLCRLR  | 7     | 288   |
| >FGFR3-A39{AAVTLCRL   | 8229  | >FGFR3-A39{EAVTLCRL   | 282   | 7947  |
| >FGFR3-A39{AAVTLCRL   | 95    | >FGFR3-A39{EAVTLCRL   | 1203  | 1108  |
| >FGFR3-A39{VAAVTLCRL  | 440   | >FGFR3-A39{VEAVTLCRL  | 4388  | 3948  |
| >FGFR3-A39{VAAVTLCRL  | 17538 | >FGFR3-A39{VEAVTLCRL  | 142   | 17396 |
| >FGFR3-A39{VAAVTLCR   | 418   | >FGFR3-A39{VEAVTLCR   | 10272 | 9854  |
| >FGFR3-A39{VAAVTLCR   | 74    | >FGFR3-A39{VEAVTLCR   | 3269  | 3195  |
| >FGFR3-A39{VAAVTLCRLR | 198   | >FGFR3-A39{VEAVTLCRLR | 15456 | 15258 |
| >FGFR3-A39{VAAVTLCRL  | 40    | >FGFR3-A39{VEAVTLCRL  | 19526 | 19486 |
| >FGFR3-A39{VAAVTLCRL  | 338   | >FGFR3-A39{VEAVTLCRL  | 20313 | 19975 |
| >FGFR3-A39{VAAVTLCRL  | 15973 | >FGFR3-A39{VEAVTLCRL  | 14    | 15959 |
| >FGFR3-A39{VVAAVTLCRL | 387   | >FGFR3-A39{VVEAVTLCRL | 2931  | 2544  |
| >FGFR3-A39{VVAAVTLCRL | 289   | >FGFR3-A39{VVEAVTLCRL | 2553  | 2264  |
| >FGFR3-A39{VVAAVTLCRL | 383   | >FGFR3-A39{VVEAVTLCRL | 9069  | 8686  |
| >FGFR3-A39{VVAAVTLCRL | 64    | >FGFR3-A39{VVEAVTLCRL | 403   | 339   |
| >FGFR3-A39{VVAAVTLCR  | 304   | >FGFR3-A39{VVEAVTLCR  | 3682  | 3378  |
| >FGFR3-A39{VVAAVTLCR  | 37    | >FGFR3-A39{VVEAVTLCR  | 230   | 193   |
| >FGFR3-A39{VVAAVTLCRL | 167   | >FGFR3-A39{VVEAVTLCRL | 917   | 750   |
| >FGFR3-A39{VVAAVTLCR  | 246   | >FGFR3-A39{VVEAVTLCR  | 749   | 503   |
| >FGFR3-A39{VVAAVTLCRL | 204   | >FGFR3-A39{VVEAVTLCRL | 563   | 359   |
| >FGFR3-A39{VVAAVTLCR  | 15    | >FGFR3-A39{VVEAVTLCR  | 92    | 77    |
| >FGFR3-A39{VVAAVTLCRL | 26    | >FGFR3-A39{VVEAVTLCRL | 160   | 134   |
| >FGFR3-A39{VVAAVTLCRL | 231   | >FGFR3-A39{VVEAVTLCRL | 3647  | 3416  |
| >FGFR3-A39{LVVAAVTL   | 212   | >FGFR3-A39{LVVEAVTL   | 171   | 41    |
| >FGFR3-A39{LVVAAVTLCR | 186   | >FGFR3-A39{LVVEAVTLCR | 150   | 36    |
| >FGFR3-A39{LVVAAVTL   | 359   | >FGFR3-A39{LVVEAVTL   | 240   | 119   |
| >FGFR3-A39{LVVAAVTLCR | 251   | >FGFR3-A39{LVVEAVTLCR | 149   | 102   |
| >FGFR3-A39{LVVAAVTL   | 37    | >FGFR3-A39{LVVEAVTL   | 17    | 20    |

|                        |      |                        |     |     |
|------------------------|------|------------------------|-----|-----|
| >FGFR3-A39:LVVAAVTLC   | 799  | >FGFR3-A39:LVVEAVTLC   | 184 | 615 |
| >FGFR3-A39:LVVAAVTLCR  | 64   | >FGFR3-A39:LVVEAVTLCR  | 27  | 37  |
| >FGFR3-A39:LVVAAVTL    | 1141 | >FGFR3-A39:LVVEAVTL    | 243 | 898 |
| >FGFR3-A39:LVVAAVTLCR  | 745  | >FGFR3-A39:LVVEAVTLCR  | 150 | 595 |
| >FGFR3-A39:LVVAAVTL    | 94   | >FGFR3-A39:LVVEAVTL    | 39  | 55  |
| >FGFR3-A39:LVVAAVTLCR  | 41   | >FGFR3-A39:LVVEAVTLCR  | 19  | 22  |
| >FGFR3-A39:LVVAAVTLCR  | 160  | >FGFR3-A39:LVVEAVTLCR  | 343 | 183 |
| >FGFR3-A39:LVVAAVTLCR  | 746  | >FGFR3-A39:LVVEAVTLCR  | 419 | 327 |
| >FGFR3-A39:LVVAAVTLCR  | 79   | >FGFR3-A39:LVVEAVTLCR  | 138 | 59  |
| >FGFR3-A39:LVVAAVTLCR  | 203  | >FGFR3-A39:LVVEAVTLCR  | 199 | 4   |
| >FGFR3-A39:LVVAAVTLCR  | 22   | >FGFR3-A39:LVVEAVTLCR  | 36  | 14  |
| >FGFR3-A39:LVVAAVTL    | 250  | >FGFR3-A39:LVVEAVTL    | 422 | 172 |
| >FGFR3-A39:LVVAAVTLCR  | 392  | >FGFR3-A39:LVVEAVTLCR  | 462 | 70  |
| >FGFR3-A39:LVVAAVTL    | 1099 | >FGFR3-A39:LVVEAVTL    | 467 | 632 |
| >FGFR3-A39:LVVAAVTL    | 181  | >FGFR3-A39:LVVEAVTL    | 135 | 46  |
| >FGFR3-A39:LVVAAVTLCR  | 236  | >FGFR3-A39:LVVEAVTLCR  | 146 | 90  |
| >FGFR3-A39:LVVAAVTL    | 617  | >FGFR3-A39:LVVEAVTL    | 479 | 138 |
| >FGFR3-A39:LVVAAVTL    | 438  | >FGFR3-A39:LVVEAVTL    | 553 | 115 |
| >FGFR3-A39:ILVVAAVTL   | 129  | >FGFR3-A39:ILVVEAVTL   | 128 | 1   |
| >FGFR3-A39:ILVVAAVTL   | 354  | >FGFR3-A39:ILVVEAVTL   | 611 | 257 |
| >FGFR3-A39:ILVVAAVTL   | 304  | >FGFR3-A39:ILVVEAVTL   | 530 | 226 |
| >FGFR3-A39:ILVVAAVTL   | 75   | >FGFR3-A39:ILVVEAVTL   | 95  | 20  |
| >FGFR3-A39:ILVVAAVTL   | 80   | >FGFR3-A39:ILVVEAVTL   | 80  | 0   |
| >FGFR3-A39:ILVVAAVTL   | 75   | >FGFR3-A39:ILVVEAVTL   | 255 | 180 |
| >FGFR3-A39:ILVVAAVTL   | 169  | >FGFR3-A39:ILVVEAVTL   | 431 | 262 |
| >FGFR3-A39:ILVVAAVTL   | 10   | >FGFR3-A39:ILVVEAVTL   | 13  | 3   |
| >FGFR3-A39:ILVVAAVTLC  | 139  | >FGFR3-A39:ILVVEAVTLC  | 156 | 17  |
| >FGFR3-A39:ILVVAAVTL   | 426  | >FGFR3-A39:ILVVEAVTL   | 550 | 124 |
| >FGFR3-A39:ILVVAAVTLCF | 91   | >FGFR3-A39:ILVVEAVTLCF | 153 | 62  |
| >FGFR3-A39:ILVVAAVTL   | 350  | >FGFR3-A39:ILVVEAVTL   | 475 | 125 |
| >FGFR3-A39:ILVVAAVTL   | 345  | >FGFR3-A39:ILVVEAVTL   | 616 | 271 |
| >FGFR3-A39:ILVVAAVTLCF | 386  | >FGFR3-A39:ILVVEAVTLCF | 330 | 56  |
| >FGFR3-A39:FILVVAAV    | 16   | >FGFR3-A39:FILVVEAV    | 20  | 4   |
| >FGFR3-A39:FILVVAAVTL  | 185  | >FGFR3-A39:FILVVEAVTL  | 216 | 31  |
| >FGFR3-A39:FILVVAAV    | 26   | >FGFR3-A39:FILVVEAV    | 30  | 4   |
| >FGFR3-A39:FILVVAAVTL  | 93   | >FGFR3-A39:FILVVEAVTL  | 94  | 1   |
| >FGFR3-A39:FILVVAAV    | 12   | >FGFR3-A39:FILVVEAV    | 38  | 26  |
| >FGFR3-A39:FILVVAAVTL  | 302  | >FGFR3-A39:FILVVEAVTL  | 319 | 17  |
| >FGFR3-A39:FILVVAAV    | 4    | >FGFR3-A39:FILVVEAV    | 5   | 1   |
| >FGFR3-A39:FILVVAAVT   | 269  | >FGFR3-A39:FILVVEAVT   | 917 | 648 |
| >FGFR3-A39:FILVVAAVTL  | 85   | >FGFR3-A39:FILVVEAVTL  | 78  | 7   |
| >FGFR3-A39:FILVVAAVTLC | 308  | >FGFR3-A39:FILVVEAVTLC | 409 | 101 |
| >FGFR3-A39:FILVVAAV    | 2    | >FGFR3-A39:FILVVEAV    | 2   | 0   |

|                         |     |                         |      |      |
|-------------------------|-----|-------------------------|------|------|
| >FGFR3-A39: FILVVAAVTL  | 14  | >FGFR3-A39: FILVVEAVTL  | 19   | 5    |
| >FGFR3-A39: FILVVAAVTLC | 189 | >FGFR3-A39: FILVVEAVTLC | 191  | 2    |
| >FGFR3-A39: FILVVAAV    | 7   | >FGFR3-A39: FILVVEAV    | 10   | 3    |
| >FGFR3-A39: FILVVAAVTL  | 46  | >FGFR3-A39: FILVVEAVTL  | 62   | 16   |
| >FGFR3-A39: FILVVAAV    | 6   | >FGFR3-A39: FILVVEAV    | 7    | 1    |
| >FGFR3-A39: FILVVAAVTL  | 20  | >FGFR3-A39: FILVVEAVTL  | 28   | 8    |
| >FGFR3-A39: FILVVAAV    | 4   | >FGFR3-A39: FILVVEAV    | 5    | 1    |
| >FGFR3-A39: FILVVAAVTL  | 36  | >FGFR3-A39: FILVVEAVTL  | 92   | 56   |
| >FGFR3-A39: FILVVAAV    | 3   | >FGFR3-A39: FILVVEAV    | 4    | 1    |
| >FGFR3-A39: FILVVAAVTL  | 16  | >FGFR3-A39: FILVVEAVTL  | 20   | 4    |
| >FGFR3-A39: FILVVAAV    | 98  | >FGFR3-A39: FILVVEAV    | 148  | 50   |
| >FGFR3-A39: FILVVAAV    | 9   | >FGFR3-A39: FILVVEAV    | 35   | 26   |
| >FGFR3-A39: FILVVAAVTL  | 83  | >FGFR3-A39: FILVVEAVTL  | 658  | 575  |
| >FGFR3-A39: FILVVAAVTL  | 41  | >FGFR3-A39: FILVVEAVTL  | 138  | 97   |
| >FGFR3-A39: LFILVVAAV   | 287 | >FGFR3-A39: LFILVVEAV   | 329  | 42   |
| >FGFR3-A39: LFILVVAAV   | 329 | >FGFR3-A39: LFILVVEAV   | 435  | 106  |
| >FGFR3-A39: LFILVVAAV   | 434 | >FGFR3-A39: LFILVVEAV   | 530  | 96   |
| >FGFR3-A39: LFILVVAAVTL | 414 | >FGFR3-A39: LFILVVEAVTL | 464  | 50   |
| >FGFR3-A39: LFILVVAAVTL | 47  | >FGFR3-A39: LFILVVEAVTL | 45   | 2    |
| >FGFR3-A39: FLFILVVA    | 17  | >FGFR3-A39: FLFILVVE    | 4330 | 4313 |
| >FGFR3-A39: FLFILVVAA   | 15  | >FGFR3-A39: FLFILVVEA   | 11   | 4    |
| >FGFR3-A39: FLFILVVAAV  | 13  | >FGFR3-A39: FLFILVVEAV  | 12   | 1    |
| >FGFR3-A39: FLFILVVAAVT | 76  | >FGFR3-A39: FLFILVVEAVT | 76   | 0    |
| >FGFR3-A39: FLFILVVA    | 11  | >FGFR3-A39: FLFILVVE    | 307  | 296  |
| >FGFR3-A39: FLFILVVAA   | 9   | >FGFR3-A39: FLFILVVEA   | 6    | 3    |
| >FGFR3-A39: FLFILVVAAV  | 12  | >FGFR3-A39: FLFILVVEAV  | 11   | 1    |
| >FGFR3-A39: FLFILVVAAVT | 70  | >FGFR3-A39: FLFILVVEAVT | 64   | 6    |
| >FGFR3-A39: FLFILVVA    | 8   | >FGFR3-A39: FLFILVVE    | 3695 | 3687 |
| >FGFR3-A39: FLFILVVAA   | 6   | >FGFR3-A39: FLFILVVEA   | 7    | 1    |
| >FGFR3-A39: FLFILVVAAV  | 7   | >FGFR3-A39: FLFILVVEAV  | 10   | 3    |
| >FGFR3-A39: FLFILVVAAVT | 36  | >FGFR3-A39: FLFILVVEAVT | 77   | 41   |
| >FGFR3-A39: FLFILVVA    | 98  | >FGFR3-A39: FLFILVVE    | 5168 | 5070 |
| >FGFR3-A39: FLFILVVAA   | 102 | >FGFR3-A39: FLFILVVEA   | 177  | 75   |
| >FGFR3-A39: FLFILVVAAV  | 34  | >FGFR3-A39: FLFILVVEAV  | 34   | 0    |
| >FGFR3-A39: FLFILVVA    | 3   | >FGFR3-A39: FLFILVVE    | 451  | 448  |
| >FGFR3-A39: FLFILVVAA   | 2   | >FGFR3-A39: FLFILVVEA   | 2    | 0    |
| >FGFR3-A39: FLFILVVAAV  | 1   | >FGFR3-A39: FLFILVVEAV  | 1    | 0    |
| >FGFR3-A39: FLFILVVAAVT | 6   | >FGFR3-A39: FLFILVVEAVT | 8    | 2    |
| >FGFR3-A39: FLFILVVA    | 29  | >FGFR3-A39: FLFILVVE    | 6778 | 6749 |
| >FGFR3-A39: FLFILVVAA   | 25  | >FGFR3-A39: FLFILVVEA   | 37   | 12   |
| >FGFR3-A39: FLFILVVAAV  | 3   | >FGFR3-A39: FLFILVVEAV  | 4    | 1    |
| >FGFR3-A39: FLFILVVAAVT | 301 | >FGFR3-A39: FLFILVVEAVT | 452  | 151  |
| >FGFR3-A39: FLFILVVA    | 8   | >FGFR3-A39: FLFILVVE    | 3742 | 3734 |



|                         |       |                        |       |       |
|-------------------------|-------|------------------------|-------|-------|
| >FGFR3-A39:FLFILVVAA    | 8     | >FGFR3-A39:FLFILVVEA   | 6     | 2     |
| >FGFR3-A39:FLFILVVA AV  | 3     | >FGFR3-A39:FLFILVVEAV  | 4     | 1     |
| >FGFR3-A39:FLFILVVA AVT | 40    | >FGFR3-A39:FLFILVVEAVT | 32    | 8     |
| >FGFR3-A39:FLFILVVA     | 259   | >FGFR3-A39:FLFILVVE    | 21285 | 21026 |
| >FGFR3-A39:FLFILVVAA    | 242   | >FGFR3-A39:FLFILVVEA   | 131   | 111   |
| >FGFR3-A39:FLFILVVA AV  | 3     | >FGFR3-A39:FLFILVVEAV  | 3     | 0     |
| >FGFR3-A39:FLFILVVA     | 3     | >FGFR3-A39:FLFILVVE    | 524   | 521   |
| >FGFR3-A39:FLFILVVAA    | 3     | >FGFR3-A39:FLFILVVEA   | 2     | 1     |
| >FGFR3-A39:FLFILVVA AV  | 1     | >FGFR3-A39:FLFILVVEAV  | 2     | 1     |
| >FGFR3-A39:FLFILVVA AVT | 11    | >FGFR3-A39:FLFILVVEAVT | 11    | 0     |
| >FGFR3-A39:FLFILVVAA    | 413   | >FGFR3-A39:FLFILVVEA   | 295   | 118   |
| >FGFR3-A39:FLFILVVA AV  | 138   | >FGFR3-A39:FLFILVVEAV  | 259   | 121   |
| >FGFR3-A39:FLFILVVA AV  | 28    | >FGFR3-A39:FLFILVVEAV  | 60    | 32    |
| >FGFR3-A39:FLFILVVAA    | 400   | >FGFR3-A39:FLFILVVEA   | 1549  | 1149  |
| >FGFR3-A39:FLFILVVA AV  | 301   | >FGFR3-A39:FLFILVVEAV  | 595   | 294   |
| >FGFR3-A39:FLFILVVAA    | 273   | >FGFR3-A39:FLFILVVEA   | 713   | 440   |
| >FGFR3-A39:FLFILVVA AV  | 115   | >FGFR3-A39:FLFILVVEAV  | 172   | 57    |
| >FGFR3-A39:FLFILVVAA    | 237   | >FGFR3-A39:FLFILVVEA   | 1869  | 1632  |
| >FGFR3-A39:FFLFILVVA AV | 155   | >FGFR3-A39:FFLFILVVEAV | 266   | 111   |
| >FGFR3-A39:FFLFILVVA    | 472   | >FGFR3-A39:FFLFILVVE   | 6349  | 5877  |
| >FGFR3-A39:FFLFILVVA AV | 40    | >FGFR3-A39:FFLFILVVEAV | 38    | 2     |
| >FGFR3-A39:FFLFILVVA AV | 404   | >FGFR3-A39:FFLFILVVEAV | 885   | 481   |
| >FGFR3-A39:FFLFILVVA AV | 42    | >FGFR3-A39:FFLFILVVEAV | 44    | 2     |
| >FGFR3-A39:FFLFILVVA AV | 17    | >FGFR3-A39:FFLFILVVEAV | 19    | 2     |
| >FGFR3-A39:FFLFILVVA AV | 105   | >FGFR3-A39:FFLFILVVEAV | 269   | 164   |
| >FGFR3-A39:FFLFILVVA AV | 70    | >FGFR3-A39:FFLFILVVEAV | 75    | 5     |
| >FGFR3-A39:FFLFILVVA AV | 72    | >FGFR3-A39:FFLFILVVEAV | 106   | 34    |
| >FGFR3-A39:FFLFILVVA AV | 98    | >FGFR3-A39:FFLFILVVEAV | 221   | 123   |
| >FGFR3-A39:FFLFILVVA AV | 449   | >FGFR3-A39:FFLFILVVEAV | 341   | 108   |
| >FGFR3-A39:FFLFILVVA AV | 357   | >FGFR3-A39:FFLFILVVEAV | 716   | 359   |
| >FGFR3-A39:FFLFILVVA    | 284   | >FGFR3-A39:FFLFILVVE   | 11322 | 11038 |
| >FGFR3-C22:CVVENKFGSI   | 718   | >FGFR3-C22:RVVENKFGSI  | 247   | 471   |
| >FGFR3-C22:CVVENKFGSI   | 3212  | >FGFR3-C22:RVVENKFGSI  | 469   | 2743  |
| >FGFR3-C22:CVVENKFGSI   | 446   | >FGFR3-C22:RVVENKFGSI  | 33    | 413   |
| >FGFR3-C22:CVVENKFGSI   | 13839 | >FGFR3-C22:RVVENKFGSI  | 268   | 13571 |
| >FGFR3-C22:CVVENKFGSI   | 48    | >FGFR3-C22:RVVENKFGSI  | 112   | 64    |
| >FGFR3-C22:CVVENKFGSI   | 106   | >FGFR3-C22:RVVENKFGSI  | 112   | 6     |
| >FGFR3-C22:CVVENKFGSI   | 605   | >FGFR3-C22:RVVENKFGSI  | 252   | 353   |
| >FGFR3-C22:CVVENKFGSI   | 457   | >FGFR3-C22:RVVENKFGSI  | 1088  | 631   |
| >FGFR3-C22:TCVVENKF     | 3730  | >FGFR3-C22:TRVVENKF    | 243   | 3487  |
| >FGFR3-C22:VVPSDRGNY    | 24935 | >FGFR3-C22:VVPSDRGNY   | 441   | 24494 |
| >FGFR3-C22:VVPSDRGNY    | 40394 | >FGFR3-C22:VVPSDRGNY   | 352   | 40042 |
| >FGFR3-C22:YTCVVENK     | 68    | >FGFR3-C22:YTRVVENK    | 1222  | 1154  |

|                        |      |                        |       |       |
|------------------------|------|------------------------|-------|-------|
| >FGFR3-C22EYTCVVENKF   | 190  | >FGFR3-C22EYTRVVENKF   | 173   | 17    |
| >FGFR3-C22EYTCVVENKF   | 456  | >FGFR3-C22EYTRVVENKF   | 1828  | 1372  |
| >FGFR3-C22EYTCVVENK    | 2462 | >FGFR3-C22EYTRVVENK    | 28    | 2434  |
| >FGFR3-C22EYTCVVENK    | 7    | >FGFR3-C22EYTRVVENK    | 28    | 21    |
| >FGFR3-C22EYTCVVENKF   | 751  | >FGFR3-C22EYTRVVENKF   | 111   | 640   |
| >FGFR3-C22EYTCVVENKF   | 34   | >FGFR3-C22EYTRVVENKF   | 8     | 26    |
| >FGFR3-C22EYTCVVENKF   | 5424 | >FGFR3-C22EYTRVVENKF   | 452   | 4972  |
| >FGFR3-C22EYTCVVENKF   | 22   | >FGFR3-C22EYTRVVENKF   | 7     | 15    |
| >FGFR3-C22ENYTCVVENKF  | 140  | >FGFR3-C22ENYTRVVENKF  | 258   | 118   |
| >FGFR3-C22ENYTCVVENKF  | 99   | >FGFR3-C22ENYTRVVENKF  | 102   | 3     |
| >FGFR3-C22ENYTCVVENKF  | 9    | >FGFR3-C22ENYTRVVENKF  | 6     | 3     |
| >FGFR3-C22ENYTCVVENK   | 173  | >FGFR3-C22ENYTRVVENK   | 267   | 94    |
| >FGFR3-C22EGNYTCVVENI  | 228  | >FGFR3-C22EGNYTRVVENI  | 432   | 204   |
| >FGFR3-C22EGNYTCVVENI  | 434  | >FGFR3-C22EGNYTRVVENI  | 1002  | 568   |
| >FGFR3-C22ERGNYTCVVENI | 477  | >FGFR3-C22ERGNYTRVVENI | 162   | 315   |
| >FGFR3-C22ERGNYTCVVENI | 1010 | >FGFR3-C22ERGNYTRVVENI | 441   | 569   |
| >FGFR3-C22ESDRGNYTCV   | 178  | >FGFR3-C22ESDRGNYTRV   | 394   | 216   |
| >FGFR3-C22EVPSDRGNYTC  | 310  | >FGFR3-C22EVPSDRGNYTF  | 179   | 131   |
| >FGFR3-C22EVPSDRGNYTC  | 500  | >FGFR3-C22EVPSDRGNYTF  | 462   | 38    |
| >FGFR3-D61DLAARNVLV    | 2941 | >FGFR3-D61GLAARNVLV    | 15    | 2926  |
| >FGFR3-D61DLAARNVL     | 862  | >FGFR3-D61GLAARNVL     | 10    | 852   |
| >FGFR3-D61DLAARNVLV    | 88   | >FGFR3-D61GLAARNVLV    | 3     | 85    |
| >FGFR3-D61DLAARNVL     | 6175 | >FGFR3-D61GLAARNVL     | 74    | 6101  |
| >FGFR3-D61DLAARNVLV    | 559  | >FGFR3-D61GLAARNVLV    | 6     | 553   |
| >FGFR3-D61DLAARNVLV    | 2595 | >FGFR3-D61GLAARNVLV    | 42    | 2553  |
| >FGFR3-D61DLAARNVL     | 6630 | >FGFR3-D61GLAARNVL     | 470   | 6160  |
| >FGFR3-D61DLAARNVLV    | 340  | >FGFR3-D61GLAARNVLV    | 11    | 329   |
| >FGFR3-D61DLAARNVL     | 8517 | >FGFR3-D61GLAARNVL     | 239   | 8278  |
| >FGFR3-D61DLAARNVLV    | 1714 | >FGFR3-D61GLAARNVLV    | 17    | 1697  |
| >FGFR3-D61DLAARNVL     | 4525 | >FGFR3-D61GLAARNVL     | 124   | 4401  |
| >FGFR3-D61DLAARNVLV    | 65   | >FGFR3-D61GLAARNVLV    | 7     | 58    |
| >FGFR3-D61DLAARNVLV    | 158  | >FGFR3-D61GLAARNVLV    | 83    | 75    |
| >FGFR3-D61DLAARNVL     | 326  | >FGFR3-D61GLAARNVL     | 17    | 309   |
| >FGFR3-D61DLAARNVLV    | 17   | >FGFR3-D61GLAARNVLV    | 3     | 14    |
| >FGFR3-D61DLAARNVLV    | 5301 | >FGFR3-D61GLAARNVLV    | 228   | 5073  |
| >FGFR3-D61DLAARNVLV    | 64   | >FGFR3-D61GLAARNVLV    | 2779  | 2715  |
| >FGFR3-D61DLAARNVLV    | 334  | >FGFR3-D61GLAARNVLV    | 6411  | 6077  |
| >FGFR3-D61RDLAARNVL    | 5627 | >FGFR3-D61RGLAARNVL    | 305   | 5322  |
| >FGFR3-D61RDLAARNVL    | 97   | >FGFR3-D61RGLAARNVL    | 20537 | 20440 |
| >FGFR3-D61RDLAARNVL    | 369  | >FGFR3-D61RGLAARNVL    | 28064 | 27695 |
| >FGFR3-D61RDLAARNV     | 187  | >FGFR3-D61RGLAARNV     | 16867 | 16680 |
| >FGFR3-D61RDLAARNV     | 210  | >FGFR3-D61RGLAARNV     | 19322 | 19112 |
| >FGFR3-D61RDLAARNVL    | 96   | >FGFR3-D61RGLAARNVL    | 13786 | 13690 |

|                        |      |                        |      |      |
|------------------------|------|------------------------|------|------|
| >FGFR3-D61:YLASQKCIHRI | 636  | >FGFR3-D61:YLASQKCIHRI | 175  | 461  |
| >FGFR3-D61:YLASQKCIHRI | 2237 | >FGFR3-D61:YLASQKCIHRI | 466  | 1771 |
| >FGFR3-D61:YLASQKCIHRI | 141  | >FGFR3-D61:YLASQKCIHRI | 47   | 94   |
| >FGFR3-D61:HRDLAARNV   | 62   | >FGFR3-D61:HRGLAARNV   | 57   | 5    |
| >FGFR3-D61:HRDLAARNV   | 1037 | >FGFR3-D61:HRGLAARNV   | 463  | 574  |
| >FGFR3-D61:HRDLAARNV   | 21   | >FGFR3-D61:HRGLAARNV   | 210  | 189  |
| >FGFR3-D61:HRDLAARNV   | 347  | >FGFR3-D61:HRGLAARNV   | 451  | 104  |
| >FGFR3-D61:IHRDLAARNV  | 413  | >FGFR3-D61:IHRGLAARNV  | 820  | 407  |
| >FGFR3-D61:IHRDLAARNV  | 588  | >FGFR3-D61:IHRGLAARNV  | 363  | 225  |
| >FGFR3-D61:CIHRDLAARN  | 252  | >FGFR3-D61:CIHRGLAARN  | 165  | 87   |
| >FGFR3-D61:CIHRDLAARN  | 439  | >FGFR3-D61:CIHRGLAARN  | 282  | 157  |
| >FGFR3-D61:CIHRDLAAR   | 121  | >FGFR3-D61:CIHRGLAAR   | 38   | 83   |
| >FGFR3-D61:CIHRDLAAR   | 959  | >FGFR3-D61:CIHRGLAAR   | 286  | 673  |
| >FGFR3-D61:CIHRDLAAR   | 323  | >FGFR3-D61:CIHRGLAAR   | 362  | 39   |
| >FGFR3-D61:KCIHRDLAAR  | 48   | >FGFR3-D61:KCIHRGLAAR  | 23   | 25   |
| >FGFR3-D61:KCIHRDLAAR  | 76   | >FGFR3-D61:KCIHRGLAAR  | 123  | 47   |
| >FGFR3-D61:SQKCIHRDLA  | 1435 | >FGFR3-D61:SQKCIHRGLA  | 376  | 1059 |
| >FGFR3-D61:SQKCIHRDLA  | 634  | >FGFR3-D61:SQKCIHRGLA  | 327  | 307  |
| >FGFR3-D61:SQKCIHRDL   | 1437 | >FGFR3-D61:SQKCIHRGL   | 487  | 950  |
| >FGFR3-D61:SQKCIHRDLA  | 326  | >FGFR3-D61:SQKCIHRGLA  | 210  | 116  |
| >FGFR3-D61:SQKCIHRDL   | 116  | >FGFR3-D61:SQKCIHRGL   | 190  | 74   |
| >FGFR3-D61:SQKCIHRDLA  | 767  | >FGFR3-D61:SQKCIHRGLA  | 308  | 459  |
| >FGFR3-D61:ASQKCIHRDL  | 725  | >FGFR3-D61:ASQKCIHRGL  | 121  | 604  |
| >FGFR3-D61:LASQKCIHRD  | 1873 | >FGFR3-D61:LASQKCIHRG  | 329  | 1544 |
| >FGFR3-D64:DVHNLDDYYK  | 242  | >FGFR3-D64:NVHNLDDYYK  | 45   | 197  |
| >FGFR3-D64:DVHNLDDYYK  | 408  | >FGFR3-D64:NVHNLDDYYK  | 126  | 282  |
| >FGFR3-D64:DVHNLDDYY   | 70   | >FGFR3-D64:NVHNLDDYY   | 478  | 408  |
| >FGFR3-D64:DVHNLDDYY   | 18   | >FGFR3-D64:NVHNLDDYY   | 92   | 74   |
| >FGFR3-D64:DVHNLDDYY   | 350  | >FGFR3-D64:NVHNLDDYY   | 1563 | 1213 |
| >FGFR3-D64:DVHNLDDYY   | 151  | >FGFR3-D64:NVHNLDDYY   | 78   | 73   |
| >FGFR3-D64:DVHNLDDYYK  | 1687 | >FGFR3-D64:NVHNLDDYYK  | 299  | 1388 |
| >FGFR3-D64:DVHNLDDYY   | 306  | >FGFR3-D64:NVHNLDDYY   | 186  | 120  |
| >FGFR3-D64:DVHNLDDYYK  | 663  | >FGFR3-D64:NVHNLDDYYK  | 97   | 566  |
| >FGFR3-D64:DVHNLDDYYK  | 82   | >FGFR3-D64:NVHNLDDYYK  | 490  | 408  |
| >FGFR3-D64:DVHNLDDYY   | 265  | >FGFR3-D64:NVHNLDDYY   | 392  | 127  |
| >FGFR3-D64:DVHNLDDYYK  | 8    | >FGFR3-D64:NVHNLDDYYK  | 10   | 2    |
| >FGFR3-D64:DVHNLDDYYK  | 48   | >FGFR3-D64:NVHNLDDYYK  | 27   | 21   |
| >FGFR3-D64:DVHNLDDYY   | 3016 | >FGFR3-D64:NVHNLDDYY   | 203  | 2813 |
| >FGFR3-D64:DVHNLDDYYK  | 1308 | >FGFR3-D64:NVHNLDDYYK  | 206  | 1102 |
| >FGFR3-D64:RDVHNLDDYY  | 814  | >FGFR3-D64:RNVHNLDDYY  | 245  | 569  |
| >FGFR3-D64:RDVHNLDDY   | 1136 | >FGFR3-D64:RNVHNLDDY   | 382  | 754  |
| >FGFR3-D64:RDVHNLDDYY  | 1279 | >FGFR3-D64:RNVHNLDDYY  | 269  | 1010 |
| >FGFR3-D64:RDVHNLDDY   | 999  | >FGFR3-D64:RNVHNLDDY   | 389  | 610  |

|                        |      |                        |     |      |
|------------------------|------|------------------------|-----|------|
| >FGFR3-D64:RDVHNLDY    | 1585 | >FGFR3-D64:RNVHNLDY    | 339 | 1246 |
| >FGFR3-D64:RDVHNLDYYI  | 533  | >FGFR3-D64:RNVHNLDYYI  | 161 | 372  |
| >FGFR3-D64:ARDVHNLDY   | 1540 | >FGFR3-D64:ARNVHNLDY   | 133 | 1407 |
| >FGFR3-D64:ARDVHNLDY'  | 2062 | >FGFR3-D64:ARNVHNLDY'  | 240 | 1822 |
| >FGFR3-D64:ARDVHNLDY'  | 468  | >FGFR3-D64:ARNVHNLDY'  | 226 | 242  |
| >FGFR3-D64:ARDVHNLDY'  | 1106 | >FGFR3-D64:ARNVHNLDY'  | 161 | 945  |
| >FGFR3-D64:LARDVHNLD'  | 266  | >FGFR3-D64:LARNVHNLD'  | 479 | 213  |
| >FGFR3-D64:LARDVHNL    | 322  | >FGFR3-D64:LARNVHNL    | 153 | 169  |
| >FGFR3-D64:LARDVHNLD'  | 498  | >FGFR3-D64:LARNVHNLD'  | 376 | 122  |
| >FGFR3-D64:LARDVHNLD'  | 381  | >FGFR3-D64:LARNVHNLD'  | 295 | 86   |
| >FGFR3-D64:LARDVHNLD'  | 185  | >FGFR3-D64:LARNVHNLD'  | 150 | 35   |
| >FGFR3-D64:LARDVHNLD'  | 153  | >FGFR3-D64:LARNVHNLD'  | 153 | 0    |
| >FGFR3-D64:LARDVHNLD'  | 218  | >FGFR3-D64:LARNVHNLD'  | 219 | 1    |
| >FGFR3-D64:LARDVHNLD'  | 280  | >FGFR3-D64:LARNVHNLD'  | 96  | 184  |
| >FGFR3-D64:LARDVHNLD'  | 761  | >FGFR3-D64:LARNVHNLD'  | 305 | 456  |
| >FGFR3-D64:LARDVHNL    | 83   | >FGFR3-D64:LARNVHNL    | 174 | 91   |
| >FGFR3-D64:LARDVHNLD'  | 38   | >FGFR3-D64:LARNVHNLD'  | 79  | 41   |
| >FGFR3-D64:LARDVHNLD'  | 50   | >FGFR3-D64:LARNVHNLD'  | 124 | 74   |
| >FGFR3-D64:LARDVHNLD'  | 352  | >FGFR3-D64:LARNVHNLD'  | 535 | 183  |
| >FGFR3-D64:LARDVHNLD'  | 596  | >FGFR3-D64:LARNVHNLD'  | 468 | 128  |
| >FGFR3-D64:LARDVHNLD'  | 484  | >FGFR3-D64:LARNVHNLD'  | 587 | 103  |
| >FGFR3-D64:LARDVHNLD'  | 58   | >FGFR3-D64:LARNVHNLD'  | 39  | 19   |
| >FGFR3-D64:GLARDVHNL   | 62   | >FGFR3-D64:GLARNVHNL   | 92  | 30   |
| >FGFR3-D64:GLARDVHNL   | 5    | >FGFR3-D64:GLARNVHNL   | 5   | 0    |
| >FGFR3-D64:GLARDVHNL   | 10   | >FGFR3-D64:GLARNVHNL   | 10  | 0    |
| >FGFR3-D64:GLARDVHNL   | 16   | >FGFR3-D64:GLARNVHNL   | 9   | 7    |
| >FGFR3-D64:GLARDVHNL   | 6    | >FGFR3-D64:GLARNVHNL   | 4   | 2    |
| >FGFR3-D64:GLARDVHNL   | 9    | >FGFR3-D64:GLARNVHNL   | 10  | 1    |
| >FGFR3-D64:GLARDVHNL   | 15   | >FGFR3-D64:GLARNVHNL   | 9   | 6    |
| >FGFR3-D64:GLARDVHNL   | 3    | >FGFR3-D64:GLARNVHNL   | 2   | 1    |
| >FGFR3-D64:GLARDVHNLI  | 27   | >FGFR3-D64:GLARNVHNLI  | 23  | 4    |
| >FGFR3-D64:GLARDVHNLI  | 220  | >FGFR3-D64:GLARNVHNLI  | 222 | 2    |
| >FGFR3-D64:GLARDVHNLI  | 217  | >FGFR3-D64:GLARNVHNLI  | 195 | 22   |
| >FGFR3-D64:GLARDVHNLI  | 350  | >FGFR3-D64:GLARNVHNLI  | 285 | 65   |
| >FGFR3-D64:GLARDVHNLI  | 463  | >FGFR3-D64:GLARNVHNLI  | 277 | 186  |
| >FGFR3-D64:GLARDVHNLI  | 293  | >FGFR3-D64:GLARNVHNLI  | 222 | 71   |
| >FGFR3-D64:ADFGGLARDV  | 488  | >FGFR3-D64:ADFGGLARNV  | 219 | 269  |
| >FGFR3-D64:ADFGGLARDV  | 235  | >FGFR3-D64:ADFGGLARNV  | 193 | 42   |
| >FGFR3-D64:KIADFGGLARD | 645  | >FGFR3-D64:KIADFGGLARN | 201 | 444  |
| >FGFR3-D64:KIADFGGLARD | 172  | >FGFR3-D64:KIADFGGLARN | 27  | 145  |
| >FGFR3-D64:KIADFGGLARD | 48   | >FGFR3-D64:KIADFGGLARN | 15  | 33   |
| >FGFR3-D64:KIADFGGLARD | 187  | >FGFR3-D64:KIADFGGLARN | 72  | 115  |
| >FGFR3-D64:KIADFGGLARD | 73   | >FGFR3-D64:KIADFGGLARN | 21  | 52   |

|                       |       |                       |     |       |
|-----------------------|-------|-----------------------|-----|-------|
| >FGFR3-D64:KIADFLGARD | 983   | >FGFR3-D64:KIADFLGARN | 417 | 566   |
| >FGFR3-D64:KIADFLGARD | 119   | >FGFR3-D64:KIADFLGARN | 55  | 64    |
| >FGFR3-D64:KIADFLGARD | 1639  | >FGFR3-D64:KIADFLGARN | 329 | 1310  |
| >FGFR3-D64:KIADFLGARD | 19    | >FGFR3-D64:KIADFLGARN | 11  | 8     |
| >FGFR3-D64{DYYKKTNGF  | 2190  | >FGFR3-D64{YYYKKTNGR  | 410 | 1780  |
| >FGFR3-D64{DYYKKTNGF  | 262   | >FGFR3-D64{YYYKKTNGR  | 39  | 223   |
| >FGFR3-D64{DYYKKTNGF  | 1865  | >FGFR3-D64{YYYKKTNGR  | 91  | 1774  |
| >FGFR3-D64{DYYKKTNGF  | 2586  | >FGFR3-D64{YYYKKTNGR  | 354 | 2232  |
| >FGFR3-D64{DYYKKTNGF  | 6892  | >FGFR3-D64{YYYKKTNGR  | 309 | 6583  |
| >FGFR3-D64{DYYKKTNGF  | 702   | >FGFR3-D64{YYYKKTNGR  | 9   | 693   |
| >FGFR3-D64{DYYKKTNGF  | 224   | >FGFR3-D64{YYYKKTNGR  | 69  | 155   |
| >FGFR3-D64{DYYKKTNGF  | 149   | >FGFR3-D64{YYYKKTNGR  | 401 | 252   |
| >FGFR3-D64{DYYKKTNGF  | 25    | >FGFR3-D64{YYYKKTNGR  | 15  | 10    |
| >FGFR3-D64{LDYYKKTNG  | 4828  | >FGFR3-D64{LYYYKKTNG  | 32  | 4796  |
| >FGFR3-D64{LDYYKKTNG  | 13174 | >FGFR3-D64{LYYYKKTNG  | 76  | 13098 |
| >FGFR3-D64{LDYYKKTNG  | 1001  | >FGFR3-D64{LYYYKKTNG  | 232 | 769   |
| >FGFR3-D64{LDYYKKTNG  | 1835  | >FGFR3-D64{LYYYKKTNG  | 56  | 1779  |
| >FGFR3-D64{FGLARDVHNI | 22651 | >FGFR3-D64{FGLARDVHNI | 65  | 22586 |
| >FGFR3-D64{FGLARDVHNI | 32400 | >FGFR3-D64{FGLARDVHNI | 396 | 32004 |
| >FGFR3-D64{FGLARDVHNI | 24012 | >FGFR3-D64{FGLARDVHNI | 465 | 23547 |
| >FGFR3-D64{FGLARDVHNI | 25753 | >FGFR3-D64{FGLARDVHNI | 415 | 25338 |
| >FGFR3-D64{HNLDYYKK   | 352   | >FGFR3-D64{HNLYYYKK   | 594 | 242   |
| >FGFR3-D64{DVHNLDYYK  | 242   | >FGFR3-D64{DVHNLYYYK  | 53  | 189   |
| >FGFR3-D64{DVHNLDYYK} | 408   | >FGFR3-D64{DVHNLYYYKK | 201 | 207   |
| >FGFR3-D64{DVHNLDYY   | 70    | >FGFR3-D64{DVHNLYYY   | 22  | 48    |
| >FGFR3-D64{DVHNLDYY   | 18    | >FGFR3-D64{DVHNLYYY   | 13  | 5     |
| >FGFR3-D64{DVHNLDYY   | 350   | >FGFR3-D64{DVHNLYYY   | 227 | 123   |
| >FGFR3-D64{DVHNLDYY   | 151   | >FGFR3-D64{DVHNLYYY   | 23  | 128   |
| >FGFR3-D64{DVHNLDYYK  | 1687  | >FGFR3-D64{DVHNLYYYK  | 184 | 1503  |
| >FGFR3-D64{DVHNLDYY   | 306   | >FGFR3-D64{DVHNLYYY   | 127 | 179   |
| >FGFR3-D64{DVHNLDYYK  | 663   | >FGFR3-D64{DVHNLYYYK  | 63  | 600   |
| >FGFR3-D64{DVHNLDYYK  | 82    | >FGFR3-D64{DVHNLYYYK  | 29  | 53    |
| >FGFR3-D64{DVHNLDYY   | 265   | >FGFR3-D64{DVHNLYYY   | 155 | 110   |
| >FGFR3-D64{DVHNLDYYK  | 8     | >FGFR3-D64{DVHNLYYYK  | 9   | 1     |
| >FGFR3-D64{DVHNLDYYK} | 48    | >FGFR3-D64{DVHNLYYYKK | 49  | 1     |
| >FGFR3-D64{RDVHNLDY   | 1136  | >FGFR3-D64{RDVHNLYY   | 185 | 951   |
| >FGFR3-D64{RDVHNLDYY  | 2709  | >FGFR3-D64{RDVHNLYYY  | 69  | 2640  |
| >FGFR3-D64{RDVHNLDYY  | 1279  | >FGFR3-D64{RDVHNLYYY  | 174 | 1105  |
| >FGFR3-D64{RDVHNLDY   | 999   | >FGFR3-D64{RDVHNLYY   | 487 | 512   |
| >FGFR3-D64{RDVHNLDYY} | 533   | >FGFR3-D64{RDVHNLYYYK | 169 | 364   |
| >FGFR3-D64{ARDVHNLDY} | 4643  | >FGFR3-D64{ARDVHNLYY} | 465 | 4178  |
| >FGFR3-D64{ARDVHNLDY} | 2387  | >FGFR3-D64{ARDVHNLYY} | 418 | 1969  |
| >FGFR3-D64{ARDVHNLDY} | 468   | >FGFR3-D64{ARDVHNLYY} | 139 | 329   |

|                       |       |                       |      |       |
|-----------------------|-------|-----------------------|------|-------|
| >FGFR3-D64(LARDVHNLD  | 25597 | >FGFR3-D64(LARDVHNLY  | 100  | 25497 |
| >FGFR3-D64(LARDVHNLD\ | 2336  | >FGFR3-D64(LARDVHNLYY | 387  | 1949  |
| >FGFR3-D64(LARDVHNLD\ | 266   | >FGFR3-D64(LARDVHNLYY | 38   | 228   |
| >FGFR3-D64(LARDVHNLD  | 1378  | >FGFR3-D64(LARDVHNLY  | 86   | 1292  |
| >FGFR3-D64(LARDVHNLD\ | 498   | >FGFR3-D64(LARDVHNLYY | 36   | 462   |
| >FGFR3-D64(LARDVHNLD\ | 381   | >FGFR3-D64(LARDVHNLYY | 79   | 302   |
| >FGFR3-D64(LARDVHNLD  | 32187 | >FGFR3-D64(LARDVHNLY  | 255  | 31932 |
| >FGFR3-D64(LARDVHNLD\ | 185   | >FGFR3-D64(LARDVHNLYY | 58   | 127   |
| >FGFR3-D64(LARDVHNLD  | 22385 | >FGFR3-D64(LARDVHNLY  | 213  | 22172 |
| >FGFR3-D64(LARDVHNLD\ | 153   | >FGFR3-D64(LARDVHNLYY | 92   | 61    |
| >FGFR3-D64(LARDVHNLD\ | 218   | >FGFR3-D64(LARDVHNLYY | 139  | 79    |
| >FGFR3-D64(LARDVHNLD\ | 280   | >FGFR3-D64(LARDVHNLYY | 206  | 74    |
| >FGFR3-D64(LARDVHNLD\ | 761   | >FGFR3-D64(LARDVHNLYY | 323  | 438   |
| >FGFR3-D64(LARDVHNLD  | 22222 | >FGFR3-D64(LARDVHNLY  | 100  | 22122 |
| >FGFR3-D64(LARDVHNLD\ | 38    | >FGFR3-D64(LARDVHNLYY | 17   | 21    |
| >FGFR3-D64(LARDVHNLD\ | 50    | >FGFR3-D64(LARDVHNLYY | 22   | 28    |
| >FGFR3-D64(LARDVHNLD  | 25108 | >FGFR3-D64(LARDVHNLY  | 247  | 24861 |
| >FGFR3-D64(LARDVHNLD\ | 352   | >FGFR3-D64(LARDVHNLYY | 220  | 132   |
| >FGFR3-D64(LARDVHNLD\ | 596   | >FGFR3-D64(LARDVHNLYY | 187  | 409   |
| >FGFR3-D64(LARDVHNLD  | 6154  | >FGFR3-D64(LARDVHNLY  | 9    | 6145  |
| >FGFR3-D64(LARDVHNLD\ | 484   | >FGFR3-D64(LARDVHNLYY | 127  | 357   |
| >FGFR3-D64(LARDVHNLD\ | 58    | >FGFR3-D64(LARDVHNLYY | 66   | 8     |
| >FGFR3-D64(GLARDVHNLI | 1551  | >FGFR3-D64(GLARDVHNLI | 260  | 1291  |
| >FGFR3-D64(GLARDVHNLI | 27    | >FGFR3-D64(GLARDVHNLI | 14   | 13    |
| >FGFR3-D64(GLARDVHNLI | 29366 | >FGFR3-D64(GLARDVHNLI | 101  | 29265 |
| >FGFR3-D64(GLARDVHNLI | 220   | >FGFR3-D64(GLARDVHNLI | 80   | 140   |
| >FGFR3-D64(GLARDVHNLI | 26011 | >FGFR3-D64(GLARDVHNLI | 312  | 25699 |
| >FGFR3-D64(GLARDVHNLI | 217   | >FGFR3-D64(GLARDVHNLI | 123  | 94    |
| >FGFR3-D64(GLARDVHNLI | 22610 | >FGFR3-D64(GLARDVHNLI | 474  | 22136 |
| >FGFR3-D64(GLARDVHNLI | 350   | >FGFR3-D64(GLARDVHNLI | 166  | 184   |
| >FGFR3-D64(GLARDVHNLI | 463   | >FGFR3-D64(GLARDVHNLI | 457  | 6     |
| >FGFR3-D64(GLARDVHNLI | 293   | >FGFR3-D64(GLARDVHNLI | 150  | 143   |
| >FGFR3-E322EVLSLHNV   | 4183  | >FGFR3-E322KVLSLHNV   | 54   | 4129  |
| >FGFR3-E322EVLSLHNV   | 1970  | >FGFR3-E322KVLSLHNV   | 115  | 1855  |
| >FGFR3-E322EVLSLHNV   | 2538  | >FGFR3-E322KVLSLHNV   | 142  | 2396  |
| >FGFR3-E322EVLSLHNV   | 597   | >FGFR3-E322KVLSLHNV   | 22   | 575   |
| >FGFR3-E322EVLSLHNV   | 194   | >FGFR3-E322KVLSLHNV   | 14   | 180   |
| >FGFR3-E322EVLSLHNV   | 1330  | >FGFR3-E322KVLSLHNV   | 59   | 1271  |
| >FGFR3-E322EVLSLHNV   | 232   | >FGFR3-E322KVLSLHNV   | 22   | 210   |
| >FGFR3-E322EVLSLHNV   | 72    | >FGFR3-E322KVLSLHNV   | 52   | 20    |
| >FGFR3-E322EVLSLHNV   | 100   | >FGFR3-E322KVLSLHNV   | 15   | 85    |
| >FGFR3-E322EVLSLHNVTF | 1642  | >FGFR3-E322KVLSLHNVTF | 205  | 1437  |
| >FGFR3-E322EVLSLHNV   | 210   | >FGFR3-E322KVLSLHNV   | 7163 | 6953  |

|                         |       |                          |       |       |
|-------------------------|-------|--------------------------|-------|-------|
| >FGFR3-E322 EVLSLHNVTF  | 20    | >FGFR3-E322 KVLSSLHNVTF  | 1854  | 1834  |
| >FGFR3-E322 EVLSLHNVTF  | 297   | >FGFR3-E322 KVLSSLHNVTF  | 5539  | 5242  |
| >FGFR3-E322 EVLSLHNV    | 14279 | >FGFR3-E322 KVLSSLHNV    | 91    | 14188 |
| >FGFR3-E322 EVLSLHNV    | 6612  | >FGFR3-E322 KVLSSLHNV    | 453   | 6159  |
| >FGFR3-E322 EVLSLHNVTF  | 46    | >FGFR3-E322 KVLSSLHNVTF  | 5     | 41    |
| >FGFR3-E322 EVLSLHNV    | 12    | >FGFR3-E322 KVLSSLHNV    | 2332  | 2320  |
| >FGFR3-E322 EVLSLHNV    | 3     | >FGFR3-E322 KVLSSLHNV    | 44    | 41    |
| >FGFR3-E322 EVLSLHNVTF  | 2178  | >FGFR3-E322 KVLSSLHNVTF  | 395   | 1783  |
| >FGFR3-E322 EVLSLHNVTF  | 280   | >FGFR3-E322 KVLSSLHNVTF  | 31    | 249   |
| >FGFR3-E322 EVLSLHNVTF  | 1175  | >FGFR3-E322 KVLSSLHNVTF  | 36    | 1139  |
| >FGFR3-E322 EVLSLHNVTF  | 13846 | >FGFR3-E322 KVLSSLHNVTF  | 87    | 13759 |
| >FGFR3-E322 EVLSLHNVTF  | 5811  | >FGFR3-E322 KVLSSLHNVTF  | 416   | 5395  |
| >FGFR3-E322 LEVLSLHNV   | 23    | >FGFR3-E322 LKVLSSLHNV   | 2359  | 2336  |
| >FGFR3-E322 LEVLSLHNV   | 4883  | >FGFR3-E322 LKVLSSLHNV   | 179   | 4704  |
| >FGFR3-E322 LEVLSLHNVTF | 46    | >FGFR3-E322 LKVLSSLHNVTF | 4     | 42    |
| >FGFR3-E322 LEVLSLHNV   | 127   | >FGFR3-E322 LKVLSSLHNV   | 22713 | 22586 |
| >FGFR3-E322 LEVLSLHNVTF | 9     | >FGFR3-E322 LKVLSSLHNVTF | 3139  | 3130  |
| >FGFR3-E322 LEVLSLHNV   | 179   | >FGFR3-E322 LKVLSSLHNV   | 22078 | 21899 |
| >FGFR3-E322 LEVLSLHNVTF | 47    | >FGFR3-E322 LKVLSSLHNVTF | 19253 | 19206 |
| >FGFR3-E322 LEVLSLHNV   | 385   | >FGFR3-E322 LKVLSSLHNV   | 30648 | 30263 |
| >FGFR3-E322 LEVLSLHNVTF | 367   | >FGFR3-E322 LKVLSSLHNVTF | 14475 | 14108 |
| >FGFR3-E322 LEVLSLHNVTF | 157   | >FGFR3-E322 LKVLSSLHNVTF | 18585 | 18428 |
| >FGFR3-E322 LEVLSLHNV   | 18    | >FGFR3-E322 LKVLSSLHNV   | 8966  | 8948  |
| >FGFR3-E322 LEVLSLHNVTF | 160   | >FGFR3-E322 LKVLSSLHNVTF | 20735 | 20575 |
| >FGFR3-E322 ELEVLSLHNV  | 192   | >FGFR3-E322 ELKVLSSLHNV  | 56    | 136   |
| >FGFR3-E322 ELEVLSLHNV  | 222   | >FGFR3-E322 ELKVLSSLHNV  | 468   | 246   |
| >FGFR3-E322 ELEVLSLHNV  | 321   | >FGFR3-E322 ELKVLSSLHNV  | 748   | 427   |
| >FGFR3-E322 ELEVLSLHNV  | 245   | >FGFR3-E322 ELKVLSSLHNV  | 402   | 157   |
| >FGFR3-E322 ELEVLSLHNV  | 12    | >FGFR3-E322 ELKVLSSLHNV  | 12    | 0     |
| >FGFR3-E322 ELEVLSLHNV  | 126   | >FGFR3-E322 ELKVLSSLHNV  | 229   | 103   |
| >FGFR3-E322 KELEVLSL    | 37    | >FGFR3-E322 KELKVLSL     | 36    | 1     |
| >FGFR3-E322 KELEVLSLHNV | 20    | >FGFR3-E322 KELKVLSLHNV  | 28    | 8     |
| >FGFR3-E322 KELEVLSL    | 236   | >FGFR3-E322 KELKVLSL     | 1369  | 1133  |
| >FGFR3-E322 KELEVLSLHNV | 84    | >FGFR3-E322 KELKVLSLHNV  | 264   | 180   |
| >FGFR3-E322 KELEVLSLHNV | 100   | >FGFR3-E322 KELKVLSLHNV  | 1047  | 947   |
| >FGFR3-E322 KELEVLSLHNV | 378   | >FGFR3-E322 KELKVLSLHNV  | 2988  | 2610  |
| >FGFR3-E322 KELEVLSLHNV | 128   | >FGFR3-E322 KELKVLSLHNV  | 548   | 420   |
| >FGFR3-E322 KELEVLSL    | 227   | >FGFR3-E322 KELKVLSL     | 754   | 527   |
| >FGFR3-E322 KELEVLSL    | 17    | >FGFR3-E322 KELKVLSL     | 24    | 7     |
| >FGFR3-E322 KELEVLSLHNV | 82    | >FGFR3-E322 KELKVLSLHNV  | 184   | 102   |
| >FGFR3-E322 KELEVLSL    | 14    | >FGFR3-E322 KELKVLSL     | 18    | 4     |
| >FGFR3-E322 KELEVLSLHNV | 70    | >FGFR3-E322 KELKVLSLHNV  | 96    | 26    |
| >FGFR3-E322 KELEVLSL    | 250   | >FGFR3-E322 KELKVLSL     | 439   | 189   |

|                        |       |                        |       |       |
|------------------------|-------|------------------------|-------|-------|
| >FGFR3-E322KELEVLSLHN' | 164   | >FGFR3-E322KELKVLSLHN' | 234   | 70    |
| >FGFR3-E322KELEVLSLH   | 1857  | >FGFR3-E322KELKVLSLH   | 477   | 1380  |
| >FGFR3-E322KELEVLSL    | 223   | >FGFR3-E322KELKVLSL    | 110   | 113   |
| >FGFR3-E322KELEVLSLH   | 238   | >FGFR3-E322KELKVLSLH   | 476   | 238   |
| >FGFR3-E322KELEVLSLHN' | 4     | >FGFR3-E322KELKVLSLHN' | 5     | 1     |
| >FGFR3-E322TTDKKELEV   | 346   | >FGFR3-E322TTDKELKV    | 754   | 408   |
| >FGFR3-E322TTDKKELEV   | 118   | >FGFR3-E322TTDKELKV    | 277   | 159   |
| >FGFR3-E322TTDKKEVLSL  | 325   | >FGFR3-E322TTDKELKVLSL | 166   | 159   |
| >FGFR3-E322NTTDKELEV   | 417   | >FGFR3-E322NTTDKELKV   | 1234  | 817   |
| >FGFR3-E322NTTDKELE    | 4581  | >FGFR3-E322NTTDKELK    | 22    | 4559  |
| >FGFR3-E322NTTDKELEV   | 95    | >FGFR3-E322NTTDKELKV   | 290   | 195   |
| >FGFR3-E46€ELSRARLTL   | 2391  | >FGFR3-E46€KLSRARLTL   | 151   | 2240  |
| >FGFR3-E46€ELSRARLTL   | 5358  | >FGFR3-E46€KLSRARLTL   | 237   | 5121  |
| >FGFR3-E46€ELSRARLTL   | 7329  | >FGFR3-E46€KLSRARLTL   | 494   | 6835  |
| >FGFR3-E46€ELSRARLTL   | 3490  | >FGFR3-E46€KLSRARLTL   | 172   | 3318  |
| >FGFR3-E46€ELSRARLTL   | 43    | >FGFR3-E46€KLSRARLTL   | 12    | 31    |
| >FGFR3-E46€ELSRARLTLG† | 179   | >FGFR3-E46€KLSRARLTLG† | 32    | 147   |
| >FGFR3-E46€ELSRARLTLG† | 726   | >FGFR3-E46€KLSRARLTLG† | 42    | 684   |
| >FGFR3-E46€ELSRARLTL   | 14185 | >FGFR3-E46€KLSRARLTL   | 82    | 14103 |
| >FGFR3-E46€ELSRARLTLG† | 6525  | >FGFR3-E46€KLSRARLTLG† | 12    | 6513  |
| >FGFR3-E46€ELSRARLTL   | 4126  | >FGFR3-E46€KLSRARLTL   | 63    | 4063  |
| >FGFR3-E46€ELSRARLTLG† | 118   | >FGFR3-E46€KLSRARLTLG† | 7878  | 7760  |
| >FGFR3-E46€ELSRARLTL   | 443   | >FGFR3-E46€KLSRARLTL   | 1368  | 925   |
| >FGFR3-E46€ELSRARLTLG† | 4382  | >FGFR3-E46€KLSRARLTLG† | 475   | 3907  |
| >FGFR3-E46€WELSRARLT   | 234   | >FGFR3-E46€WKLSRARLT   | 5729  | 5495  |
| >FGFR3-E46€WELSRARLTL  | 59    | >FGFR3-E46€WKLSRARLTL  | 3038  | 2979  |
| >FGFR3-E46€WELSRARL    | 2259  | >FGFR3-E46€WKLSRARL    | 55    | 2204  |
| >FGFR3-E46€WELSRARLTL  | 537   | >FGFR3-E46€WKLSRARLTL  | 20    | 517   |
| >FGFR3-E46€WELSRARL    | 259   | >FGFR3-E46€WKLSRARL    | 21249 | 20990 |
| >FGFR3-E46€WELSRARL    | 475   | >FGFR3-E46€WKLSRARL    | 145   | 330   |
| >FGFR3-E46€WELSRARLTL  | 103   | >FGFR3-E46€WKLSRARLTL  | 41    | 62    |
| >FGFR3-E46€WELSRARL    | 91    | >FGFR3-E46€WKLSRARL    | 19328 | 19237 |
| >FGFR3-E46€WELSRARL    | 368   | >FGFR3-E46€WKLSRARL    | 30697 | 30329 |
| >FGFR3-E46€WELSRARLTL  | 140   | >FGFR3-E46€WKLSRARLTL  | 23567 | 23427 |
| >FGFR3-E46€WELSRARL    | 249   | >FGFR3-E46€WKLSRARL    | 16681 | 16432 |
| >FGFR3-E46€WELSRARLT   | 197   | >FGFR3-E46€WKLSRARLT   | 25088 | 24891 |
| >FGFR3-E46€WELSRARLTL  | 18    | >FGFR3-E46€WKLSRARLTL  | 7907  | 7889  |
| >FGFR3-E46€WELSRARLTL  | 383   | >FGFR3-E46€WKLSRARLTL  | 23871 | 23488 |
| >FGFR3-E46€WELSRARLTL  | 1624  | >FGFR3-E46€WKLSRARLTL  | 287   | 1337  |
| >FGFR3-E46€KWELSRAR    | 8770  | >FGFR3-E46€KWKLSRAR    | 157   | 8613  |
| >FGFR3-E46€KWELSRARL   | 5760  | >FGFR3-E46€KWKLSRARL   | 61    | 5699  |
| >FGFR3-E46€KWELSRARLT  | 3129  | >FGFR3-E46€KWKLSRARLT  | 23    | 3106  |
| >FGFR3-E46€KWELSRAR    | 136   | >FGFR3-E46€KWKLSRAR    | 16    | 120   |



|                       |      |                       |       |       |
|-----------------------|------|-----------------------|-------|-------|
| >FGFR3-E46€KWELSRAR   | 14   | >FGFR3-E46€KWKLSRAR   | 13    | 1     |
| >FGFR3-E46€KWELSRAR   | 152  | >FGFR3-E46€KWKLSRAR   | 218   | 66    |
| >FGFR3-E46€KWELSRARL  | 157  | >FGFR3-E46€KWKLSRARL  | 219   | 62    |
| >FGFR3-E46€KWELSRARLT | 67   | >FGFR3-E46€KWKLSRARLT | 93    | 26    |
| >FGFR3-E46€DPKWELSR   | 257  | >FGFR3-E46€DPKWKLSR   | 156   | 101   |
| >FGFR3-E46€DPKWELSRAI | 1142 | >FGFR3-E46€DPKWKLSRAI | 137   | 1005  |
| >FGFR3-E46€LPADPKWEL  | 27   | >FGFR3-E46€LPADPKWKL  | 56    | 29    |
| >FGFR3-E46€LPADPKWEL  | 314  | >FGFR3-E46€LPADPKWKL  | 1336  | 1022  |
| >FGFR3-E46€LPADPKWEL  | 81   | >FGFR3-E46€LPADPKWKL  | 120   | 39    |
| >FGFR3-E46€ELPADPKWEI | 332  | >FGFR3-E46€ELPADPKWKI | 492   | 160   |
| >FGFR3-E46€ELPADPKWEI | 72   | >FGFR3-E46€ELPADPKWKI | 143   | 71    |
| >FGFR3-E46€ELPADPKWEI | 308  | >FGFR3-E46€ELPADPKWKI | 463   | 155   |
| >FGFR3-E46€ELPADPKWEI | 457  | >FGFR3-E46€ELPADPKWKI | 605   | 148   |
| >FGFR3-E46€ELPADPKWEI | 22   | >FGFR3-E46€ELPADPKWKI | 34    | 12    |
| >FGFR3-E46€ELPADPKWEI | 497  | >FGFR3-E46€ELPADPKWKI | 1098  | 601   |
| >FGFR3-E46€LELPADPKWE | 27   | >FGFR3-E46€LELPADPKWK | 39    | 12    |
| >FGFR3-E46€LELPADPKWE | 40   | >FGFR3-E46€LELPADPKWK | 58    | 18    |
| >FGFR3-E46€LELPADPKWE | 124  | >FGFR3-E46€LELPADPKWK | 347   | 223   |
| >FGFR3-E46€LELPADPKWE | 448  | >FGFR3-E46€LELPADPKWK | 250   | 198   |
| >FGFR3-E627TEDNVMKI   | 128  | >FGFR3-E627TDDNVMKI   | 5824  | 5696  |
| >FGFR3-E627TEDNVMKI   | 213  | >FGFR3-E627TDDNVMKI   | 20447 | 20234 |
| >FGFR3-E627TEDNVMKIAI | 466  | >FGFR3-E627TDDNVMKIAI | 16651 | 16185 |
| >FGFR3-E627TEDNVMKI   | 6193 | >FGFR3-E627TDDNVMKI   | 129   | 6064  |
| >FGFR3-E627VTEDNVMKI  | 1184 | >FGFR3-E627VTDDNVMKI  | 44    | 1140  |
| >FGFR3-E627VTEDNVMK   | 73   | >FGFR3-E627VTDDNVMK   | 31    | 42    |
| >FGFR3-E627VTEDNVMK   | 243  | >FGFR3-E627VTDDNVMK   | 524   | 281   |
| >FGFR3-E627VTEDNVMKI  | 4451 | >FGFR3-E627VTDDNVMKI  | 365   | 4086  |
| >FGFR3-E627VTEDNVMKI  | 105  | >FGFR3-E627VTDDNVMKI  | 62    | 43    |
| >FGFR3-E627LVTEDNVMK  | 597  | >FGFR3-E627LVTDDNVMK  | 436   | 161   |
| >FGFR3-E627LVTEDNVMK  | 144  | >FGFR3-E627LVTDDNVMK  | 49    | 95    |
| >FGFR3-E627LVTEDNVMK  | 267  | >FGFR3-E627LVTDDNVMK  | 173   | 94    |
| >FGFR3-E627LVTEDNVMK  | 56   | >FGFR3-E627LVTDDNVMK  | 53    | 3     |
| >FGFR3-E627LVTEDNVM   | 106  | >FGFR3-E627LVTDDNVM   | 140   | 34    |
| >FGFR3-E627LVTEDNVMK  | 498  | >FGFR3-E627LVTDDNVMK  | 1288  | 790   |
| >FGFR3-E627VLVTEDNV   | 40   | >FGFR3-E627VLVTDDNV   | 46    | 6     |
| >FGFR3-E627VLVTEDNVM  | 223  | >FGFR3-E627VLVTDDNVM  | 282   | 59    |
| >FGFR3-E627VLVTEDNV   | 68   | >FGFR3-E627VLVTDDNV   | 49    | 19    |
| >FGFR3-E627VLVTEDNVM  | 93   | >FGFR3-E627VLVTDDNVM  | 81    | 12    |
| >FGFR3-E627VLVTEDNV   | 291  | >FGFR3-E627VLVTDDNV   | 173   | 118   |
| >FGFR3-E627VLVTEDNV   | 20   | >FGFR3-E627VLVTDDNV   | 21    | 1     |
| >FGFR3-E627VLVTEDNVM  | 101  | >FGFR3-E627VLVTDDNVM  | 86    | 15    |
| >FGFR3-E627VLVTEDNV   | 20   | >FGFR3-E627VLVTDDNV   | 12    | 8     |
| >FGFR3-E627VLVTEDNVM  | 85   | >FGFR3-E627VLVTDDNVM  | 49    | 36    |

|                       |       |                       |       |       |
|-----------------------|-------|-----------------------|-------|-------|
| >FGFR3-E627VLVTEDNV   | 19    | >FGFR3-E627VLVTDDNV   | 16    | 3     |
| >FGFR3-E627VLVTEDNVM  | 247   | >FGFR3-E627VLVTDDNVM  | 187   | 60    |
| >FGFR3-E627VLVTEDNV   | 87    | >FGFR3-E627VLVTDDNV   | 73    | 14    |
| >FGFR3-E627VLVTEDNVM  | 592   | >FGFR3-E627VLVTDDNVM  | 404   | 188   |
| >FGFR3-E627VLVTEDNV   | 6     | >FGFR3-E627VLVTDDNV   | 6     | 0     |
| >FGFR3-E627VLVTEDNVM  | 32    | >FGFR3-E627VLVTDDNVM  | 25    | 7     |
| >FGFR3-E627VLVTEDNVM  | 342   | >FGFR3-E627VLVTDDNVM  | 231   | 111   |
| >FGFR3-E627NVLVTEDNVI | 476   | >FGFR3-E627NVLVTDDNVI | 560   | 84    |
| >FGFR3-E627NVLVTEDNVI | 84    | >FGFR3-E627NVLVTDDNVI | 74    | 10    |
| >FGFR3-E627NVLVTEDNV  | 1021  | >FGFR3-E627NVLVTDDNV  | 232   | 789   |
| >FGFR3-E627NVLVTEDNV  | 210   | >FGFR3-E627NVLVTDDNV  | 255   | 45    |
| >FGFR3-E68€EIFTLGGSPY | 734   | >FGFR3-E68€KIFTLGGSPY | 57    | 677   |
| >FGFR3-E68€EIFTLGGSPY | 144   | >FGFR3-E68€KIFTLGGSPY | 3977  | 3833  |
| >FGFR3-E68€EIFTLGGSPY | 88    | >FGFR3-E68€KIFTLGGSPY | 4243  | 4155  |
| >FGFR3-E68€EIFTLGGSPY | 31    | >FGFR3-E68€KIFTLGGSPY | 1746  | 1715  |
| >FGFR3-E68€EIFTLGGSPY | 240   | >FGFR3-E68€KIFTLGGSPY | 261   | 21    |
| >FGFR3-E68€EIFTLGGSPY | 740   | >FGFR3-E68€KIFTLGGSPY | 197   | 543   |
| >FGFR3-E68€EIFTLGGSPY | 8097  | >FGFR3-E68€KIFTLGGSPY | 242   | 7855  |
| >FGFR3-E68€EIFTLGGSPY | 75    | >FGFR3-E68€KIFTLGGSPY | 1701  | 1626  |
| >FGFR3-E68€EIFTLGGSPY | 2619  | >FGFR3-E68€KIFTLGGSPY | 69    | 2550  |
| >FGFR3-E68€EIFTLGGSPY | 113   | >FGFR3-E68€KIFTLGGSPY | 50    | 63    |
| >FGFR3-E68€EIFTLGGSPY | 77    | >FGFR3-E68€KIFTLGGSPY | 115   | 38    |
| >FGFR3-E68€EIFTLGGSPY | 340   | >FGFR3-E68€KIFTLGGSPY | 37    | 303   |
| >FGFR3-E68€EIFTLGGSPY | 1654  | >FGFR3-E68€KIFTLGGSPY | 75    | 1579  |
| >FGFR3-E68€EIFTLGGSPY | 881   | >FGFR3-E68€KIFTLGGSPY | 449   | 432   |
| >FGFR3-E68€WEIFTLGGSP | 261   | >FGFR3-E68€WKIFTLGGSP | 261   | 0     |
| >FGFR3-E68€WEIFTLGGSP | 101   | >FGFR3-E68€WKIFTLGGSP | 490   | 389   |
| >FGFR3-E68€WEIFTLGGSP | 194   | >FGFR3-E68€WKIFTLGGSP | 308   | 114   |
| >FGFR3-E68€WEIFTLGGSP | 153   | >FGFR3-E68€WKIFTLGGSP | 9     | 144   |
| >FGFR3-E68€WEIFTLGGSP | 4     | >FGFR3-E68€WKIFTLGGSP | 810   | 806   |
| >FGFR3-E68€WEIFTLGGSP | 452   | >FGFR3-E68€WKIFTLGGSP | 625   | 173   |
| >FGFR3-E68€WEIFTLGGSP | 431   | >FGFR3-E68€WKIFTLGGSP | 19672 | 19241 |
| >FGFR3-E68€WEIFTLGGSP | 477   | >FGFR3-E68€WKIFTLGGSP | 24683 | 24206 |
| >FGFR3-E68€WEIFTLGGSP | 425   | >FGFR3-E68€WKIFTLGGSP | 335   | 90    |
| >FGFR3-E68€WEIFTLGGS  | 326   | >FGFR3-E68€WKIFTLGGS  | 26808 | 26482 |
| >FGFR3-E68€WEIFTLGGSP | 391   | >FGFR3-E68€WKIFTLGGSP | 26367 | 25976 |
| >FGFR3-E68€DVWSFGVLL\ | 26828 | >FGFR3-E68€DVWSFGVLL\ | 219   | 26609 |
| >FGFR3-E68€DVWSFGVLL\ | 5170  | >FGFR3-E68€DVWSFGVLL\ | 113   | 5057  |
| >FGFR3-E68€DVWSFGVLL\ | 9902  | >FGFR3-E68€DVWSFGVLL\ | 40    | 9862  |
| >FGFR3-E68€LWEIFTLG   | 379   | >FGFR3-E68€LWKIFTLG   | 536   | 157   |
| >FGFR3-E68€LWEIFTLGG  | 475   | >FGFR3-E68€LWKIFTLGG  | 672   | 197   |
| >FGFR3-E68€LWEIFTLGGS | 274   | >FGFR3-E68€LWKIFTLGGS | 408   | 134   |
| >FGFR3-E68€LLWEIFTL   | 8     | >FGFR3-E68€LLWKIFTL   | 13    | 5     |

|                        |      |                        |      |      |
|------------------------|------|------------------------|------|------|
| >FGFR3-E68€LLWEIFTLG   | 463  | >FGFR3-E68€LLWKIFTLG   | 3165 | 2702 |
| >FGFR3-E68€LLWEIFTLGG! | 405  | >FGFR3-E68€LLWKIFTLGG! | 2128 | 1723 |
| >FGFR3-E68€LLWEIFTL    | 18   | >FGFR3-E68€LLWKIFTL    | 42   | 24   |
| >FGFR3-E68€LLWEIFTLG   | 87   | >FGFR3-E68€LLWKIFTLG   | 378  | 291  |
| >FGFR3-E68€LLWEIFTLGG! | 413  | >FGFR3-E68€LLWKIFTLGG! | 1200 | 787  |
| >FGFR3-E68€LLWEIFTL    | 43   | >FGFR3-E68€LLWKIFTL    | 135  | 92   |
| >FGFR3-E68€LLWEIFTL    | 11   | >FGFR3-E68€LLWKIFTL    | 50   | 39   |
| >FGFR3-E68€LLWEIFTLGG! | 279  | >FGFR3-E68€LLWKIFTLGG! | 1436 | 1157 |
| >FGFR3-E68€LLWEIFTL    | 1    | >FGFR3-E68€LLWKIFTL    | 3    | 2    |
| >FGFR3-E68€LLWEIFTLG   | 89   | >FGFR3-E68€LLWKIFTLG   | 1344 | 1255 |
| >FGFR3-E68€LLWEIFTLGG  | 48   | >FGFR3-E68€LLWKIFTLGG  | 427  | 379  |
| >FGFR3-E68€LLWEIFTLGG! | 31   | >FGFR3-E68€LLWKIFTLGG! | 332  | 301  |
| >FGFR3-E68€LLWEIFTL    | 3    | >FGFR3-E68€LLWKIFTL    | 6    | 3    |
| >FGFR3-E68€LLWEIFTL    | 4    | >FGFR3-E68€LLWKIFTL    | 6    | 2    |
| >FGFR3-E68€LLWEIFTL    | 2    | >FGFR3-E68€LLWKIFTL    | 4    | 2    |
| >FGFR3-E68€LLWEIFTL    | 2    | >FGFR3-E68€LLWKIFTL    | 2    | 0    |
| >FGFR3-E68€LLWEIFTLG   | 182  | >FGFR3-E68€LLWKIFTLG   | 1330 | 1148 |
| >FGFR3-E68€LLWEIFTLGG  | 225  | >FGFR3-E68€LLWKIFTLGG  | 1393 | 1168 |
| >FGFR3-E68€LLWEIFTLGG! | 126  | >FGFR3-E68€LLWKIFTLGG! | 784  | 658  |
| >FGFR3-E68€LLWEIFTL    | 103  | >FGFR3-E68€LLWKIFTL    | 154  | 51   |
| >FGFR3-E68€LLWEIFTL    | 119  | >FGFR3-E68€LLWKIFTL    | 825  | 706  |
| >FGFR3-E68€LLWEIFTL    | 1665 | >FGFR3-E68€LLWKIFTL    | 357  | 1308 |
| >FGFR3-E68€LLWEIFTL    | 465  | >FGFR3-E68€LLWKIFTL    | 316  | 149  |
| >FGFR3-E68€VLLWEIFT    | 91   | >FGFR3-E68€VLLWKIFT    | 158  | 67   |
| >FGFR3-E68€VLLWEIFTL   | 9    | >FGFR3-E68€VLLWKIFTL   | 10   | 1    |
| >FGFR3-E68€VLLWEIFTL   | 67   | >FGFR3-E68€VLLWKIFTL   | 105  | 38   |
| >FGFR3-E68€VLLWEIFTL   | 275  | >FGFR3-E68€VLLWKIFTL   | 148  | 127  |
| >FGFR3-E68€VLLWEIFT    | 322  | >FGFR3-E68€VLLWKIFT    | 539  | 217  |
| >FGFR3-E68€VLLWEIFTL   | 16   | >FGFR3-E68€VLLWKIFTL   | 22   | 6    |
| >FGFR3-E68€VLLWEIFT    | 7    | >FGFR3-E68€VLLWKIFT    | 6    | 1    |
| >FGFR3-E68€VLLWEIFTL   | 1    | >FGFR3-E68€VLLWKIFTL   | 1    | 0    |
| >FGFR3-E68€VLLWEIFTLG  | 122  | >FGFR3-E68€VLLWKIFTLG  | 174  | 52   |
| >FGFR3-E68€VLLWEIFTLG! | 65   | >FGFR3-E68€VLLWKIFTLG! | 61   | 4    |
| >FGFR3-E68€VLLWEIFT    | 468  | >FGFR3-E68€VLLWKIFT    | 732  | 264  |
| >FGFR3-E68€VLLWEIFTL   | 5    | >FGFR3-E68€VLLWKIFTL   | 5    | 0    |
| >FGFR3-E68€VLLWEIFT    | 17   | >FGFR3-E68€VLLWKIFT    | 24   | 7    |
| >FGFR3-E68€VLLWEIFTL   | 4    | >FGFR3-E68€VLLWKIFTL   | 5    | 1    |
| >FGFR3-E68€VLLWEIFT    | 67   | >FGFR3-E68€VLLWKIFT    | 88   | 21   |
| >FGFR3-E68€VLLWEIFTL   | 3    | >FGFR3-E68€VLLWKIFTL   | 2    | 1    |
| >FGFR3-E68€VLLWEIFT    | 11   | >FGFR3-E68€VLLWKIFT    | 11   | 0    |
| >FGFR3-E68€VLLWEIFTL   | 2    | >FGFR3-E68€VLLWKIFTL   | 2    | 0    |
| >FGFR3-E68€VLLWEIFTLG  | 361  | >FGFR3-E68€VLLWKIFTLG  | 523  | 162  |
| >FGFR3-E68€VLLWEIFTLG! | 415  | >FGFR3-E68€VLLWKIFTLG! | 447  | 32   |

|                        |       |                        |     |       |
|------------------------|-------|------------------------|-----|-------|
| >FGFR3-E68€VLLWEIFTL   | 113   | >FGFR3-E68€VLLWKIFTL   | 85  | 28    |
| >FGFR3-E68€VLLWEIFTL   | 5168  | >FGFR3-E68€VLLWKIFTL   | 351 | 4817  |
| >FGFR3-E68€GVLLWEIFTL  | 59    | >FGFR3-E68€GVLLWKIFTL  | 90  | 31    |
| >FGFR3-E68€GVLLWEIFTL  | 68    | >FGFR3-E68€GVLLWKIFTL  | 130 | 62    |
| >FGFR3-E68€GVLLWEIFTL  | 401   | >FGFR3-E68€GVLLWKIFTL  | 559 | 158   |
| >FGFR3-E68€GVLLWEIFTL  | 80    | >FGFR3-E68€GVLLWKIFTL  | 131 | 51    |
| >FGFR3-E68€GVLLWEIFTL  | 49    | >FGFR3-E68€GVLLWKIFTL  | 51  | 2     |
| >FGFR3-E68€GVLLWEIFTL  | 69    | >FGFR3-E68€GVLLWKIFTL  | 110 | 41    |
| >FGFR3-E68€GVLLWEIFTL  | 42    | >FGFR3-E68€GVLLWKIFTL  | 65  | 23    |
| >FGFR3-E68€GVLLWEIFTL  | 287   | >FGFR3-E68€GVLLWKIFTL  | 390 | 103   |
| >FGFR3-E68€GVLLWEIFTL  | 91    | >FGFR3-E68€GVLLWKIFTL  | 96  | 5     |
| >FGFR3-E68€FGVLLWEI    | 266   | >FGFR3-E68€FGVLLWKI    | 936 | 670   |
| >FGFR3-E68€FGVLLWEIFTI | 468   | >FGFR3-E68€FGVLLWKIFTI | 890 | 422   |
| >FGFR3-E68€FGVLLWEI    | 68    | >FGFR3-E68€FGVLLWKI    | 257 | 189   |
| >FGFR3-E68€FGVLLWEIFTI | 89    | >FGFR3-E68€FGVLLWKIFTI | 188 | 99    |
| >FGFR3-E68€FGVLLWEIF   | 444   | >FGFR3-E68€FGVLLWKIF   | 807 | 363   |
| >FGFR3-E68€FGVLLWEI    | 195   | >FGFR3-E68€FGVLLWKI    | 720 | 525   |
| >FGFR3-E68€SFGVLLWEI   | 267   | >FGFR3-E68€SFGVLLWKI   | 302 | 35    |
| >FGFR3-E68€SFGVLLWEI   | 400   | >FGFR3-E68€SFGVLLWKI   | 311 | 89    |
| >FGFR3-E68€SFGVLLWEI   | 15    | >FGFR3-E68€SFGVLLWKI   | 28  | 13    |
| >FGFR3-E68€SFGVLLWEIF  | 33    | >FGFR3-E68€SFGVLLWKIF  | 60  | 27    |
| >FGFR3-E68€SFGVLLWEI   | 263   | >FGFR3-E68€SFGVLLWKI   | 272 | 9     |
| >FGFR3-E68€SFGVLLWEIF  | 37    | >FGFR3-E68€SFGVLLWKIF  | 61  | 24    |
| >FGFR3-E68€WSFGVLLWE   | 383   | >FGFR3-E68€WSFGVLLWK   | 590 | 207   |
| >FGFR3-E68€WSFGVLLWE   | 85    | >FGFR3-E68€WSFGVLLWK   | 171 | 86    |
| >FGFR3-E68€WSFGVLLWE   | 87    | >FGFR3-E68€WSFGVLLWK   | 177 | 90    |
| >FGFR3-E68€WSFGVLLWE   | 19562 | >FGFR3-E68€WSFGVLLWK   | 167 | 19395 |
| >FGFR3-E68€WSFGVLLWE   | 23272 | >FGFR3-E68€WSFGVLLWK   | 33  | 23239 |
| >FGFR3-E68€WSFGVLLWE   | 6755  | >FGFR3-E68€WSFGVLLWK   | 18  | 6737  |
| >FGFR3-E68€WSFGVLLWE   | 219   | >FGFR3-E68€WSFGVLLWK   | 409 | 190   |
| >FGFR3-E68€WSFGVLLWE   | 199   | >FGFR3-E68€WSFGVLLWK   | 305 | 106   |
| >FGFR3-E68€WSFGVLLWE   | 193   | >FGFR3-E68€WSFGVLLWK   | 401 | 208   |
| >FGFR3-E68€WSFGVLLWE   | 41    | >FGFR3-E68€WSFGVLLWK   | 27  | 14    |
| >FGFR3-E68€WSFGVLLWE   | 107   | >FGFR3-E68€WSFGVLLWK   | 95  | 12    |
| >FGFR3-E68€WSFGVLLWE   | 14    | >FGFR3-E68€WSFGVLLWK   | 9   | 5     |
| >FGFR3-E68€WSFGVLLWE   | 270   | >FGFR3-E68€WSFGVLLWK   | 402 | 132   |
| >FGFR3-E68€WSFGVLLWE   | 131   | >FGFR3-E68€WSFGVLLWK   | 120 | 11    |
| >FGFR3-E68€WSFGVLLWE   | 85    | >FGFR3-E68€WSFGVLLWK   | 84  | 1     |
| >FGFR3-E68€WSFGVLLWE   | 34    | >FGFR3-E68€WSFGVLLWK   | 170 | 136   |
| >FGFR3-E68€WSFGVLLWE   | 241   | >FGFR3-E68€WSFGVLLWK   | 185 | 56    |
| >FGFR3-E68€WSFGVLLWE   | 447   | >FGFR3-E68€WSFGVLLWK   | 246 | 201   |
| >FGFR3-E68€WSFGVLLWE   | 5     | >FGFR3-E68€WSFGVLLWK   | 5   | 0     |
| >FGFR3-E68€WSFGVLLWE   | 289   | >FGFR3-E68€WSFGVLLWK   | 164 | 125   |

|                         |       |                         |      |       |
|-------------------------|-------|-------------------------|------|-------|
| >FGFR3-E68€VWSFGVLLW    | 9987  | >FGFR3-E68€VWSFGVLLW    | 109  | 9878  |
| >FGFR3-E68€VWSFGVLLW    | 29344 | >FGFR3-E68€VWSFGVLLW    | 63   | 29281 |
| >FGFR3-E68€VWSFGVLLW    | 249   | >FGFR3-E68€VWSFGVLLW    | 286  | 37    |
| >FGFR3-E68€VWSFGVLLW    | 158   | >FGFR3-E68€VWSFGVLLW    | 140  | 18    |
| >FGFR3-E68€VWSFGVLLW    | 68    | >FGFR3-E68€VWSFGVLLW    | 139  | 71    |
| >FGFR3-E68€VWSFGVLLW    | 6543  | >FGFR3-E68€VWSFGVLLW    | 422  | 6121  |
| >FGFR3-E68€VWSFGVLLW    | 12047 | >FGFR3-E68€VWSFGVLLW    | 463  | 11584 |
| >FGFR3-E68€VWSFGVLLW    | 112   | >FGFR3-E68€VWSFGVLLW    | 124  | 12    |
| >FGFR3-F384FLFILVVA     | 17    | >FGFR3-F384LLFILVVA     | 71   | 54    |
| >FGFR3-F384FLFILVVAA    | 15    | >FGFR3-F384LLFILVVAA    | 48   | 33    |
| >FGFR3-F384FLFILVVA AV  | 13    | >FGFR3-F384LLFILVVA AV  | 33   | 20    |
| >FGFR3-F384FLFILVVA AVT | 76    | >FGFR3-F384LLFILVVA AVT | 871  | 795   |
| >FGFR3-F384FLFILVVA     | 11    | >FGFR3-F384LLFILVVA     | 89   | 78    |
| >FGFR3-F384FLFILVVAA    | 9     | >FGFR3-F384LLFILVVAA    | 60   | 51    |
| >FGFR3-F384FLFILVVA AV  | 12    | >FGFR3-F384LLFILVVA AV  | 26   | 14    |
| >FGFR3-F384FLFILVVA AVT | 70    | >FGFR3-F384LLFILVVA AVT | 580  | 510   |
| >FGFR3-F384FLFILVVA     | 8     | >FGFR3-F384LLFILVVA     | 51   | 43    |
| >FGFR3-F384FLFILVVAA    | 6     | >FGFR3-F384LLFILVVAA    | 27   | 21    |
| >FGFR3-F384FLFILVVA AV  | 7     | >FGFR3-F384LLFILVVA AV  | 12   | 5     |
| >FGFR3-F384FLFILVVA AVT | 36    | >FGFR3-F384LLFILVVA AVT | 323  | 287   |
| >FGFR3-F384FLFILVVA     | 98    | >FGFR3-F384LLFILVVA     | 469  | 371   |
| >FGFR3-F384FLFILVVAA    | 102   | >FGFR3-F384LLFILVVAA    | 452  | 350   |
| >FGFR3-F384FLFILVVA AV  | 34    | >FGFR3-F384LLFILVVA AV  | 73   | 39    |
| >FGFR3-F384FLFILVVA     | 3     | >FGFR3-F384LLFILVVA     | 8    | 5     |
| >FGFR3-F384FLFILVVAA    | 2     | >FGFR3-F384LLFILVVAA    | 4    | 2     |
| >FGFR3-F384FLFILVVA AV  | 1     | >FGFR3-F384LLFILVVA AV  | 1    | 0     |
| >FGFR3-F384FLFILVVA AVT | 6     | >FGFR3-F384LLFILVVA AVT | 34   | 28    |
| >FGFR3-F384FLFILVVA     | 29    | >FGFR3-F384LLFILVVA     | 194  | 165   |
| >FGFR3-F384FLFILVVAA    | 25    | >FGFR3-F384LLFILVVAA    | 139  | 114   |
| >FGFR3-F384FLFILVVA AV  | 3     | >FGFR3-F384LLFILVVA AV  | 5    | 2     |
| >FGFR3-F384FLFILVVA AVT | 301   | >FGFR3-F384LLFILVVA AVT | 2654 | 2353  |
| >FGFR3-F384FLFILVVA     | 8     | >FGFR3-F384LLFILVVA     | 25   | 17    |
| >FGFR3-F384FLFILVVAA    | 8     | >FGFR3-F384LLFILVVAA    | 22   | 14    |
| >FGFR3-F384FLFILVVA AV  | 3     | >FGFR3-F384LLFILVVA AV  | 4    | 1     |
| >FGFR3-F384FLFILVVA AVT | 40    | >FGFR3-F384LLFILVVA AVT | 390  | 350   |
| >FGFR3-F384FLFILVVA     | 259   | >FGFR3-F384LLFILVVA     | 1305 | 1046  |
| >FGFR3-F384FLFILVVAA    | 242   | >FGFR3-F384LLFILVVAA    | 1720 | 1478  |
| >FGFR3-F384FLFILVVA AV  | 3     | >FGFR3-F384LLFILVVA AV  | 4    | 1     |
| >FGFR3-F384FLFILVVA     | 3     | >FGFR3-F384LLFILVVA     | 8    | 5     |
| >FGFR3-F384FLFILVVAA    | 3     | >FGFR3-F384LLFILVVAA    | 6    | 3     |
| >FGFR3-F384FLFILVVA AV  | 1     | >FGFR3-F384LLFILVVA AV  | 2    | 1     |
| >FGFR3-F384FLFILVVA AVT | 11    | >FGFR3-F384LLFILVVA AVT | 50   | 39    |
| >FGFR3-F384FLFILVVAA    | 949   | >FGFR3-F384LLFILVVAA    | 461  | 488   |

|                         |       |                        |      |       |
|-------------------------|-------|------------------------|------|-------|
| >FGFR3-F384FLFILVVAA    | 413   | >FGFR3-F384LLFILVVAA   | 2077 | 1664  |
| >FGFR3-F384FLFILVVA AV  | 138   | >FGFR3-F384LLFILVVA AV | 237  | 99    |
| >FGFR3-F384FLFILVVA AV  | 28    | >FGFR3-F384LLFILVVA AV | 347  | 319   |
| >FGFR3-F384FLFILVVAA    | 400   | >FGFR3-F384LLFILVVAA   | 309  | 91    |
| >FGFR3-F384FLFILVVA AV  | 301   | >FGFR3-F384LLFILVVA AV | 238  | 63    |
| >FGFR3-F384FLFILVVAA    | 273   | >FGFR3-F384LLFILVVAA   | 495  | 222   |
| >FGFR3-F384FLFILVVA AV  | 115   | >FGFR3-F384LLFILVVA AV | 225  | 110   |
| >FGFR3-F384FLFILVVAA    | 237   | >FGFR3-F384LLFILVVAA   | 1675 | 1438  |
| >FGFR3-F384FFLFILVV     | 242   | >FGFR3-F384LLFILVV     | 7    | 235   |
| >FGFR3-F384FFLFILVVA    | 2486  | >FGFR3-F384LLFILVVA    | 17   | 2469  |
| >FGFR3-F384FFLFILVVAA   | 2819  | >FGFR3-F384LLFILVVAA   | 46   | 2773  |
| >FGFR3-F384FFLFILVVA AV | 155   | >FGFR3-F384LLFILVVA AV | 8    | 147   |
| >FGFR3-F384FFLFILVV     | 198   | >FGFR3-F384LLFILVV     | 13   | 185   |
| >FGFR3-F384FFLFILVVA    | 472   | >FGFR3-F384LLFILVVA    | 22   | 450   |
| >FGFR3-F384FFLFILVVAA   | 2803  | >FGFR3-F384LLFILVVAA   | 57   | 2746  |
| >FGFR3-F384FFLFILVVA AV | 40    | >FGFR3-F384LLFILVVA AV | 5    | 35    |
| >FGFR3-F384FFLFILVV     | 1521  | >FGFR3-F384LLFILVV     | 8    | 1513  |
| >FGFR3-F384FFLFILVVA    | 3411  | >FGFR3-F384LLFILVVA    | 21   | 3390  |
| >FGFR3-F384FFLFILVVAA   | 4794  | >FGFR3-F384LLFILVVAA   | 81   | 4713  |
| >FGFR3-F384FFLFILVVA AV | 404   | >FGFR3-F384LLFILVVA AV | 4    | 400   |
| >FGFR3-F384FFLFILVV     | 138   | >FGFR3-F384LLFILVV     | 6    | 132   |
| >FGFR3-F384FFLFILVVA    | 895   | >FGFR3-F384LLFILVVA    | 33   | 862   |
| >FGFR3-F384FFLFILVVAA   | 579   | >FGFR3-F384LLFILVVAA   | 61   | 518   |
| >FGFR3-F384FFLFILVVA AV | 42    | >FGFR3-F384LLFILVVA AV | 6    | 36    |
| >FGFR3-F384FFLFILVV     | 41    | >FGFR3-F384LLFILVV     | 1    | 40    |
| >FGFR3-F384FFLFILVVA    | 2921  | >FGFR3-F384LLFILVVA    | 3    | 2918  |
| >FGFR3-F384FFLFILVVAA   | 1228  | >FGFR3-F384LLFILVVAA   | 2    | 1226  |
| >FGFR3-F384FFLFILVVA AV | 17    | >FGFR3-F384LLFILVVA AV | 1    | 16    |
| >FGFR3-F384FFLFILVV     | 602   | >FGFR3-F384LLFILVV     | 3    | 599   |
| >FGFR3-F384FFLFILVVA    | 7874  | >FGFR3-F384LLFILVVA    | 8    | 7866  |
| >FGFR3-F384FFLFILVVAA   | 5759  | >FGFR3-F384LLFILVVAA   | 8    | 5751  |
| >FGFR3-F384FFLFILVVA AV | 105   | >FGFR3-F384LLFILVVA AV | 2    | 103   |
| >FGFR3-F384FFLFILVV     | 76    | >FGFR3-F384LLFILVV     | 4    | 72    |
| >FGFR3-F384FFLFILVVA    | 5245  | >FGFR3-F384LLFILVVA    | 11   | 5234  |
| >FGFR3-F384FFLFILVVAA   | 4052  | >FGFR3-F384LLFILVVAA   | 9    | 4043  |
| >FGFR3-F384FFLFILVVA AV | 70    | >FGFR3-F384LLFILVVA AV | 4    | 66    |
| >FGFR3-F384FFLFILVV     | 266   | >FGFR3-F384LLFILVV     | 2    | 264   |
| >FGFR3-F384FFLFILVVA    | 5800  | >FGFR3-F384LLFILVVA    | 7    | 5793  |
| >FGFR3-F384FFLFILVVAA   | 6387  | >FGFR3-F384LLFILVVAA   | 9    | 6378  |
| >FGFR3-F384FFLFILVVA AV | 72    | >FGFR3-F384LLFILVVA AV | 2    | 70    |
| >FGFR3-F384FFLFILVV     | 107   | >FGFR3-F384LLFILVV     | 1    | 106   |
| >FGFR3-F384FFLFILVVA    | 10379 | >FGFR3-F384LLFILVVA    | 4    | 10375 |
| >FGFR3-F384FFLFILVVAA   | 9845  | >FGFR3-F384LLFILVVAA   | 4    | 9841  |

|                        |      |                        |       |       |
|------------------------|------|------------------------|-------|-------|
| >FGFR3-F384FFLFILVVAAV | 98   | >FGFR3-F384FLLFILVVAAV | 2     | 96    |
| >FGFR3-F384FFLFILVV    | 367  | >FGFR3-F384FLLFILVV    | 14245 | 13878 |
| >FGFR3-F384FFLFILVVAAV | 449  | >FGFR3-F384FLLFILVVAAV | 14163 | 13714 |
| >FGFR3-F384FFLFILVVAAV | 1132 | >FGFR3-F384FLLFILVVAAV | 147   | 985   |
| >FGFR3-F384FFLFILVV    | 1525 | >FGFR3-F384FLLFILVV    | 44    | 1481  |
| >FGFR3-F384FFLFILVVAAV | 357  | >FGFR3-F384FLLFILVVAAV | 14    | 343   |
| >FGFR3-F384FFLFILVVA   | 284  | >FGFR3-F384FLLFILVVA   | 284   | 0     |
| >FGFR3-F384AGILSYGVGFI | 450  | >FGFR3-F384AGILSYGVGFI | 4997  | 4547  |
| >FGFR3-F384GFFLFILV    | 311  | >FGFR3-F384GFFLFILV    | 1527  | 1216  |
| >FGFR3-F384GFFLFILVV   | 415  | >FGFR3-F384GFFLFILVV   | 701   | 286   |
| >FGFR3-F384GFFLFILV    | 383  | >FGFR3-F384GFFLFILV    | 385   | 2     |
| >FGFR3-F384VGFFLFIL    | 191  | >FGFR3-F384VGFFLFIL    | 131   | 60    |
| >FGFR3-F384VGFFLFILV   | 45   | >FGFR3-F384VGFFLFILV   | 50    | 5     |
| >FGFR3-F384VGFFLFILV   | 223  | >FGFR3-F384VGFFLFILV   | 285   | 62    |
| >FGFR3-F384VGFFLFILV   | 372  | >FGFR3-F384VGFFLFILV   | 1419  | 1047  |
| >FGFR3-F384VGFFLFILV   | 424  | >FGFR3-F384VGFFLFILV   | 1223  | 799   |
| >FGFR3-F384GVGFFLFILV  | 247  | >FGFR3-F384GVGFFLFILV  | 405   | 158   |
| >FGFR3-F384GVGFFLFILV  | 494  | >FGFR3-F384GVGFFLFILV  | 846   | 352   |
| >FGFR3-F384GVGFFLFIL   | 417  | >FGFR3-F384GVGFFLFIL   | 673   | 256   |
| >FGFR3-F384GVGFFLFILV  | 181  | >FGFR3-F384GVGFFLFILV  | 328   | 147   |
| >FGFR3-F384GVGFFLFILV  | 361  | >FGFR3-F384GVGFFLFILV  | 666   | 305   |
| >FGFR3-F384GVGFFLFILV  | 181  | >FGFR3-F384GVGFFLFILV  | 254   | 73    |
| >FGFR3-F384GVGFFLFILV  | 124  | >FGFR3-F384GVGFFLFILV  | 290   | 166   |
| >FGFR3-F384GVGFFLFILV  | 77   | >FGFR3-F384GVGFFLFILV  | 156   | 79    |
| >FGFR3-F384GVGFFLFILV  | 271  | >FGFR3-F384GVGFFLFILV  | 351   | 80    |
| >FGFR3-F384GVGFFLFILV  | 261  | >FGFR3-F384GVGFFLFILV  | 302   | 41    |
| >FGFR3-F384GVGFFLFILV  | 114  | >FGFR3-F384GVGFFLFILV  | 103   | 11    |
| >FGFR3-F384GVGFFLFILV  | 150  | >FGFR3-F384GVGFFLFILV  | 126   | 24    |
| >FGFR3-F384GVGFFLFILV  | 105  | >FGFR3-F384GVGFFLFILV  | 175   | 70    |
| >FGFR3-F384GVGFFLFILV  | 97   | >FGFR3-F384GVGFFLFILV  | 163   | 66    |
| >FGFR3-F384GVGFFLFILV  | 312  | >FGFR3-F384GVGFFLFILV  | 828   | 516   |
| >FGFR3-F384YGVGFFLFI   | 349  | >FGFR3-F384YGVGFFLFI   | 223   | 126   |
| >FGFR3-F384YGVGFFLFILV | 230  | >FGFR3-F384YGVGFFLFILV | 215   | 15    |
| >FGFR3-F384YGVGFFLF    | 262  | >FGFR3-F384YGVGFFLF    | 1065  | 803   |
| >FGFR3-F384YGVGFFLFI   | 22   | >FGFR3-F384YGVGFFLFI   | 32    | 10    |
| >FGFR3-F384YGVGFFLFIL  | 207  | >FGFR3-F384YGVGFFLFIL  | 245   | 38    |
| >FGFR3-F384YGVGFFLFILV | 14   | >FGFR3-F384YGVGFFLFILV | 17    | 3     |
| >FGFR3-F384YGVGFFLFILV | 251  | >FGFR3-F384YGVGFFLFILV | 208   | 43    |
| >FGFR3-F384YGVGFFLFILV | 258  | >FGFR3-F384YGVGFFLFILV | 213   | 45    |
| >FGFR3-F384YGVGFFLF    | 260  | >FGFR3-F384YGVGFFLF    | 809   | 549   |
| >FGFR3-F384YGVGFFLF    | 113  | >FGFR3-F384YGVGFFLF    | 133   | 20    |
| >FGFR3-F384YGVGFFLFILV | 163  | >FGFR3-F384YGVGFFLFILV | 345   | 182   |
| >FGFR3-F384YGVGFFLFILV | 473  | >FGFR3-F384YGVGFFLFILV | 767   | 294   |

|                        |       |                        |      |       |
|------------------------|-------|------------------------|------|-------|
| >FGFR3-F384YGVGFLLF    | 460   | >FGFR3-F384YGVGFLLF    | 519  | 59    |
| >FGFR3-F384YGVGFLLF    | 476   | >FGFR3-F384YGVGFLLF    | 215  | 261   |
| >FGFR3-F384YGVGFLLF    | 195   | >FGFR3-F384YGVGFLLF    | 325  | 130   |
| >FGFR3-F384YGVGFLLFI   | 194   | >FGFR3-F384YGVGFLLFI   | 673  | 479   |
| >FGFR3-F384YGVGFLLFIL  | 185   | >FGFR3-F384YGVGFLLFIL  | 498  | 313   |
| >FGFR3-F384YGVGFLLFILV | 371   | >FGFR3-F384YGVGFLLFILV | 672  | 301   |
| >FGFR3-F384YGVGFLLF    | 525   | >FGFR3-F384YGVGFLLF    | 362  | 163   |
| >FGFR3-F384SYGVGFLL    | 219   | >FGFR3-F384SYGVGFLL    | 725  | 506   |
| >FGFR3-F384SYGVGFLLFI  | 197   | >FGFR3-F384SYGVGFLLFI  | 211  | 14    |
| >FGFR3-F384SYGVGFLL    | 512   | >FGFR3-F384SYGVGFLL    | 396  | 116   |
| >FGFR3-F384SYGVGFLLF   | 14    | >FGFR3-F384SYGVGFLLF   | 20   | 6     |
| >FGFR3-F384SYGVGFLLFIL | 178   | >FGFR3-F384SYGVGFLLFIL | 248  | 70    |
| >FGFR3-F384SYGVGFLL    | 103   | >FGFR3-F384SYGVGFLL    | 98   | 5     |
| >FGFR3-F384SYGVGFLLF   | 11    | >FGFR3-F384SYGVGFLLF   | 18   | 7     |
| >FGFR3-F384SYGVGFLLFIL | 92    | >FGFR3-F384SYGVGFLLFIL | 123  | 31    |
| >FGFR3-F384SYGVGFLL    | 6     | >FGFR3-F384SYGVGFLL    | 8    | 2     |
| >FGFR3-F384SYGVGFLLF   | 5     | >FGFR3-F384SYGVGFLLF   | 5    | 0     |
| >FGFR3-F384SYGVGFLLFI  | 6     | >FGFR3-F384SYGVGFLLFI  | 7    | 1     |
| >FGFR3-F384SYGVGFLLFIL | 9     | >FGFR3-F384SYGVGFLLFIL | 9    | 0     |
| >FGFR3-F384SYGVGFLLF   | 50    | >FGFR3-F384SYGVGFLLF   | 36   | 14    |
| >FGFR3-F384SYGVGFLLF   | 1092  | >FGFR3-F384SYGVGFLLF   | 190  | 902   |
| >FGFR3-F384SYGVGFLL    | 203   | >FGFR3-F384SYGVGFLL    | 195  | 8     |
| >FGFR3-F384SYGVGFLLF   | 133   | >FGFR3-F384SYGVGFLLF   | 118  | 15    |
| >FGFR3-F384SYGVGFLLFI  | 17    | >FGFR3-F384SYGVGFLLFI  | 27   | 10    |
| >FGFR3-F384SYGVGFLLFIL | 117   | >FGFR3-F384SYGVGFLLFIL | 124  | 7     |
| >FGFR3-F384SYGVGFLL    | 281   | >FGFR3-F384SYGVGFLL    | 1110 | 829   |
| >FGFR3-F384SYGVGFLLFI  | 75    | >FGFR3-F384SYGVGFLLFI  | 110  | 35    |
| >FGFR3-F384LSYGVGFF    | 5476  | >FGFR3-F384LSYGVGFL    | 67   | 5409  |
| >FGFR3-F384LSYGVGFFL   | 1349  | >FGFR3-F384LSYGVGFL    | 286  | 1063  |
| >FGFR3-F384LSYGVGFFLFI | 110   | >FGFR3-F384LSYGVGFFLFI | 110  | 0     |
| >FGFR3-F384LSYGVGFFL   | 389   | >FGFR3-F384LSYGVGFFL   | 2551 | 2162  |
| >FGFR3-F384LSYGVGFF    | 5747  | >FGFR3-F384LSYGVGFL    | 346  | 5401  |
| >FGFR3-F384LSYGVGFFL   | 82    | >FGFR3-F384LSYGVGFL    | 153  | 71    |
| >FGFR3-F384LSYGVGFFLFI | 278   | >FGFR3-F384LSYGVGFFLFI | 246  | 32    |
| >FGFR3-F384LSYGVGFFL   | 60    | >FGFR3-F384LSYGVGFL    | 233  | 173   |
| >FGFR3-F384LSYGVGFFLFI | 76    | >FGFR3-F384LSYGVGFFLFI | 118  | 42    |
| >FGFR3-F384LSYGVGFF    | 12395 | >FGFR3-F384LSYGVGFL    | 428  | 11967 |
| >FGFR3-F384LSYGVGFFL   | 54    | >FGFR3-F384LSYGVGFL    | 214  | 160   |
| >FGFR3-F384LSYGVGFFLFI | 144   | >FGFR3-F384LSYGVGFFLFI | 135  | 9     |
| >FGFR3-F384LSYGVGFFL   | 253   | >FGFR3-F384LSYGVGFL    | 1728 | 1475  |
| >FGFR3-F384LSYGVGFFLF  | 127   | >FGFR3-F384LSYGVGFFLF  | 283  | 156   |
| >FGFR3-F384LSYGVGFFLF  | 331   | >FGFR3-F384LSYGVGFFLF  | 744  | 413   |
| >FGFR3-F384LSYGVGFF    | 358   | >FGFR3-F384LSYGVGFL    | 2134 | 1776  |



|                        |       |                         |      |       |
|------------------------|-------|-------------------------|------|-------|
| >FGFR3-F384LSYGVGFFLF  | 48    | >FGFR3-F384LSYGVGFFLLF  | 57   | 9     |
| >FGFR3-F384LSYGVGFFLF  | 328   | >FGFR3-F384LSYGVGFFLLF  | 929  | 601   |
| >FGFR3-F384LSYGVGFFLF  | 398   | >FGFR3-F384LSYGVGFFLLF  | 464  | 66    |
| >FGFR3-F384LSYGVGFFL   | 303   | >FGFR3-F384LSYGVGFFLL   | 718  | 415   |
| >FGFR3-F384LSYGVGFFLFI | 264   | >FGFR3-F384LSYGVGFFLLFI | 544  | 280   |
| >FGFR3-F384LSYGVGFFLFI | 462   | >FGFR3-F384LSYGVGFFLLFI | 677  | 215   |
| >FGFR3-F384LSYGVGFF    | 87    | >FGFR3-F384LSYGVGFFL    | 2129 | 2042  |
| >FGFR3-F384LSYGVGFFLF  | 109   | >FGFR3-F384LSYGVGFFLLF  | 79   | 30    |
| >FGFR3-F384LSYGVGFF    | 102   | >FGFR3-F384LSYGVGFFL    | 2020 | 1918  |
| >FGFR3-F384LSYGVGFFLF  | 51    | >FGFR3-F384LSYGVGFFLLF  | 35   | 16    |
| >FGFR3-F384LSYGVGFF    | 4     | >FGFR3-F384LSYGVGFFL    | 13   | 9     |
| >FGFR3-F384LSYGVGFFL   | 12    | >FGFR3-F384LSYGVGFFLL   | 15   | 3     |
| >FGFR3-F384LSYGVGFFLF  | 4     | >FGFR3-F384LSYGVGFFLLF  | 4    | 0     |
| >FGFR3-F384LSYGVGFFLFI | 45    | >FGFR3-F384LSYGVGFFLLFI | 30   | 15    |
| >FGFR3-F384LSYGVGFF    | 152   | >FGFR3-F384LSYGVGFFL    | 1302 | 1150  |
| >FGFR3-F384LSYGVGFFL   | 199   | >FGFR3-F384LSYGVGFFLL   | 260  | 61    |
| >FGFR3-F384LSYGVGFFLF  | 76    | >FGFR3-F384LSYGVGFFLLF  | 121  | 45    |
| >FGFR3-F384LSYGVGFF    | 21    | >FGFR3-F384LSYGVGFFL    | 171  | 150   |
| >FGFR3-F384LSYGVGFFL   | 31    | >FGFR3-F384LSYGVGFFLL   | 26   | 5     |
| >FGFR3-F384LSYGVGFFLF  | 11    | >FGFR3-F384LSYGVGFFLLF  | 12   | 1     |
| >FGFR3-F384LSYGVGFFLFI | 24    | >FGFR3-F384LSYGVGFFLLFI | 23   | 1     |
| >FGFR3-F384LSYGVGFFL   | 18    | >FGFR3-F384LSYGVGFFLL   | 17   | 1     |
| >FGFR3-F384LSYGVGFFLF  | 27    | >FGFR3-F384LSYGVGFFLLF  | 46   | 19    |
| >FGFR3-F384LSYGVGFFLFI | 43    | >FGFR3-F384LSYGVGFFLLFI | 74   | 31    |
| >FGFR3-F384LSYGVGFF    | 226   | >FGFR3-F384LSYGVGFFL    | 1110 | 884   |
| >FGFR3-F384LSYGVGFFL   | 41    | >FGFR3-F384LSYGVGFFLL   | 20   | 21    |
| >FGFR3-F384LSYGVGFFLF  | 33    | >FGFR3-F384LSYGVGFFLLF  | 30   | 3     |
| >FGFR3-F384LSYGVGFFLFI | 77    | >FGFR3-F384LSYGVGFFLLFI | 80   | 3     |
| >FGFR3-F384LSYGVGFF    | 368   | >FGFR3-F384LSYGVGFFL    | 3093 | 2725  |
| >FGFR3-F384LSYGVGFF    | 846   | >FGFR3-F384LSYGVGFFL    | 43   | 803   |
| >FGFR3-F384LSYGVGFFL   | 31    | >FGFR3-F384LSYGVGFFLL   | 41   | 10    |
| >FGFR3-F384LSYGVGFFLFI | 8     | >FGFR3-F384LSYGVGFFLLFI | 8    | 0     |
| >FGFR3-F384ILSYGVGFF   | 11896 | >FGFR3-F384ILSYGVGFFL   | 127  | 11769 |
| >FGFR3-F384ILSYGVGFFL  | 23    | >FGFR3-F384ILSYGVGFFLL  | 51   | 28    |
| >FGFR3-F384ILSYGVGFF   | 558   | >FGFR3-F384ILSYGVGFFL   | 6    | 552   |
| >FGFR3-F384ILSYGVGFFL  | 10    | >FGFR3-F384ILSYGVGFFLL  | 12   | 2     |
| >FGFR3-F384ILSYGVGFFLF | 239   | >FGFR3-F384ILSYGVGFFLLF | 871  | 632   |
| >FGFR3-F384ILSYGVGFF   | 901   | >FGFR3-F384ILSYGVGFFL   | 9    | 892   |
| >FGFR3-F384ILSYGVGFFL  | 273   | >FGFR3-F384ILSYGVGFFLL  | 315  | 42    |
| >FGFR3-F384ILSYGVGFF   | 2760  | >FGFR3-F384ILSYGVGFFL   | 397  | 2363  |
| >FGFR3-F384ILSYGVGFFL  | 303   | >FGFR3-F384ILSYGVGFFLL  | 467  | 164   |
| >FGFR3-F384ILSYGVGFF   | 4477  | >FGFR3-F384ILSYGVGFFL   | 43   | 4434  |
| >FGFR3-F384ILSYGVGFFL  | 13    | >FGFR3-F384ILSYGVGFFLL  | 30   | 17    |

|                        |       |                        |      |       |
|------------------------|-------|------------------------|------|-------|
| >FGFR3-F384ILSYGVGFF   | 16212 | >FGFR3-F384ILSYGVGFL   | 211  | 16001 |
| >FGFR3-F384ILSYGVGFFL  | 37    | >FGFR3-F384ILSYGVGFLL  | 101  | 64    |
| >FGFR3-F384ILSYGVGFF   | 15185 | >FGFR3-F384ILSYGVGFL   | 63   | 15122 |
| >FGFR3-F384ILSYGVGFFL  | 17    | >FGFR3-F384ILSYGVGFLL  | 39   | 22    |
| >FGFR3-F384ILSYGVGFF   | 12165 | >FGFR3-F384ILSYGVGFL   | 72   | 12093 |
| >FGFR3-F384ILSYGVGFFL  | 19    | >FGFR3-F384ILSYGVGFLL  | 59   | 40    |
| >FGFR3-F384ILSYGVGFF   | 11716 | >FGFR3-F384ILSYGVGFL   | 19   | 11697 |
| >FGFR3-F384ILSYGVGFFL  | 8     | >FGFR3-F384ILSYGVGFLL  | 9    | 1     |
| >FGFR3-F384ILSYGVGFFLF | 395   | >FGFR3-F384ILSYGVGFLLF | 829  | 434   |
| >FGFR3-F384ILSYGVGFFLF | 76    | >FGFR3-F384ILSYGVGFLLF | 59   | 17    |
| >FGFR3-F384ILSYGVGFF   | 404   | >FGFR3-F384ILSYGVGFL   | 1852 | 1448  |
| >FGFR3-F384ILSYGVGFF   | 81    | >FGFR3-F384ILSYGVGFL   | 1593 | 1512  |
| >FGFR3-F384ILSYGVGFFLF | 112   | >FGFR3-F384ILSYGVGFLLF | 79   | 33    |
| >FGFR3-F384ILSYGVGFF   | 444   | >FGFR3-F384ILSYGVGFL   | 6759 | 6315  |
| >FGFR3-F384ILSYGVGFF   | 276   | >FGFR3-F384ILSYGVGFL   | 4184 | 3908  |
| >FGFR3-F384ILSYGVGFFLF | 112   | >FGFR3-F384ILSYGVGFLLF | 75   | 37    |
| >FGFR3-F384ILSYGVGFF   | 316   | >FGFR3-F384ILSYGVGFL   | 2032 | 1716  |
| >FGFR3-F384ILSYGVGFFLF | 169   | >FGFR3-F384ILSYGVGFLLF | 164  | 5     |
| >FGFR3-F384GILSYGVGFFI | 41    | >FGFR3-F384GILSYGVGFLL | 62   | 21    |
| >FGFR3-F384GILSYGVGFF  | 7882  | >FGFR3-F384GILSYGVGFL  | 133  | 7749  |
| >FGFR3-F384GILSYGVGFFI | 49    | >FGFR3-F384GILSYGVGFLL | 94   | 45    |
| >FGFR3-F384GILSYGVGFF  | 8959  | >FGFR3-F384GILSYGVGFL  | 130  | 8829  |
| >FGFR3-F384GILSYGVGFFI | 21    | >FGFR3-F384GILSYGVGFLL | 52   | 31    |
| >FGFR3-F384GILSYGVGFF  | 4707  | >FGFR3-F384GILSYGVGFL  | 44   | 4663  |
| >FGFR3-F384GILSYGVGFFI | 10    | >FGFR3-F384GILSYGVGFLL | 23   | 13    |
| >FGFR3-F384GILSYGVGFF  | 15120 | >FGFR3-F384GILSYGVGFL  | 374  | 14746 |
| >FGFR3-F384GILSYGVGFFI | 50    | >FGFR3-F384GILSYGVGFLL | 171  | 121   |
| >FGFR3-F384GILSYGVGFF  | 15216 | >FGFR3-F384GILSYGVGFL  | 109  | 15107 |
| >FGFR3-F384GILSYGVGFFI | 22    | >FGFR3-F384GILSYGVGFLL | 52   | 30    |
| >FGFR3-F384GILSYGVGFFI | 286   | >FGFR3-F384GILSYGVGFLL | 1282 | 996   |
| >FGFR3-F384GILSYGVGFF  | 23167 | >FGFR3-F384GILSYGVGFL  | 473  | 22694 |
| >FGFR3-F384GILSYGVGFFI | 85    | >FGFR3-F384GILSYGVGFLL | 104  | 19    |
| >FGFR3-G37(GSVYAGILSY  | 1066  | >FGFR3-G37(CSVYAGILSY  | 469  | 597   |
| >FGFR3-G37(GSVYAGILSY  | 306   | >FGFR3-G37(CSVYAGILSY  | 341  | 35    |
| >FGFR3-G37(GSVYAGILSY  | 267   | >FGFR3-G37(CSVYAGILSY  | 524  | 257   |
| >FGFR3-G37(GSVYAGILSY  | 697   | >FGFR3-G37(CSVYAGILSY  | 133  | 564   |
| >FGFR3-G37(GSVYAGILSY  | 186   | >FGFR3-G37(CSVYAGILSY  | 258  | 72    |
| >FGFR3-G37(GSVYAGILSY  | 99    | >FGFR3-G37(CSVYAGILSY  | 117  | 18    |
| >FGFR3-G37(GSVYAGILSY  | 85    | >FGFR3-G37(CSVYAGILSY  | 178  | 93    |
| >FGFR3-G37(GSVYAGILSY  | 242   | >FGFR3-G37(CSVYAGILSY  | 111  | 131   |
| >FGFR3-G37(GSVYAGIL    | 94    | >FGFR3-G37(CSVYAGIL    | 307  | 213   |
| >FGFR3-G37(GSVYAGILSY  | 5     | >FGFR3-G37(CSVYAGILSY  | 8    | 3     |
| >FGFR3-G37(GSVYAGILSY  | 1430  | >FGFR3-G37(CSVYAGILSY  | 329  | 1101  |

|                        |      |                        |      |      |
|------------------------|------|------------------------|------|------|
| >FGFR3-G37(GSVYAGIL    | 2086 | >FGFR3-G37(CSVYAGIL    | 291  | 1795 |
| >FGFR3-G37(GSVYAGILSY  | 34   | >FGFR3-G37(CSVYAGILSY  | 49   | 15   |
| >FGFR3-G37(GSVYAGIL    | 2344 | >FGFR3-G37(CSVYAGIL    | 109  | 2235 |
| >FGFR3-G37(AGSVYAGI    | 342  | >FGFR3-G37(ACSVYAGI    | 6013 | 5671 |
| >FGFR3-G37(AGSVYAGILS' | 623  | >FGFR3-G37(ACSVYAGILS' | 454  | 169  |
| >FGFR3-G37(AGSVYAGILS' | 68   | >FGFR3-G37(ACSVYAGILS' | 255  | 187  |
| >FGFR3-G37(AGSVYAGILS' | 1940 | >FGFR3-G37(ACSVYAGILS' | 202  | 1738 |
| >FGFR3-G37(AGSVYAGILS' | 343  | >FGFR3-G37(ACSVYAGILS' | 3434 | 3091 |
| >FGFR3-G37(AGSVYAGILS' | 178  | >FGFR3-G37(ACSVYAGILS' | 1319 | 1141 |
| >FGFR3-G37(AGSVYAGILS' | 774  | >FGFR3-G37(ACSVYAGILS' | 376  | 398  |
| >FGFR3-G37(EAGSVYAGI   | 22   | >FGFR3-G37(EACSVYAGI   | 16   | 6    |
| >FGFR3-G37(EAGSVYAGIL  | 1927 | >FGFR3-G37(EACSVYAGIL  | 365  | 1562 |
| >FGFR3-G37(EAGSVYAGI   | 27   | >FGFR3-G37(EACSVYAGI   | 80   | 53   |
| >FGFR3-G37(EAGSVYAGI   | 1070 | >FGFR3-G37(EACSVYAGI   | 271  | 799  |
| >FGFR3-G37(DEAGSVYAGI  | 26   | >FGFR3-G37(DEACSVYAGI  | 26   | 0    |
| >FGFR3-G37(DEAGSVYAGI  | 216  | >FGFR3-G37(DEACSVYAGI  | 223  | 7    |
| >FGFR3-G37(DEAGSVYA    | 237  | >FGFR3-G37(DEACSVYA    | 419  | 182  |
| >FGFR3-G37(DEAGSVYAG   | 109  | >FGFR3-G37(DEACSVYAG   | 239  | 130  |
| >FGFR3-G37(DEAGSVYAGI  | 30   | >FGFR3-G37(DEACSVYAGI  | 49   | 19   |
| >FGFR3-G37(DEAGSVYAGI  | 120  | >FGFR3-G37(DEACSVYAGI  | 388  | 268  |
| >FGFR3-G37(DEAGSVYA    | 99   | >FGFR3-G37(DEACSVYA    | 177  | 78   |
| >FGFR3-G37(DEAGSVYAGI  | 246  | >FGFR3-G37(DEACSVYAGI  | 150  | 96   |
| >FGFR3-G37(ADEAGSVYAC  | 965  | >FGFR3-G37(ADEACSVYAC  | 466  | 499  |
| >FGFR3-G37(ADEAGSVYAC  | 334  | >FGFR3-G37(ADEACSVYAC  | 379  | 45   |
| >FGFR3-G37(ADEAGSVYAC  | 112  | >FGFR3-G37(ADEACSVYAC  | 119  | 7    |
| >FGFR3-G37(EADEAGSVY   | 144  | >FGFR3-G37(EADEACSVY   | 1237 | 1093 |
| >FGFR3-G37(EADEAGSV    | 569  | >FGFR3-G37(EADEACSV    | 451  | 118  |
| >FGFR3-G37(EADEAGSVYA  | 1018 | >FGFR3-G37(EADEACSVYA  | 283  | 735  |
| >FGFR3-G37(EADEAGSV    | 8    | >FGFR3-G37(EADEACSV    | 6    | 2    |
| >FGFR3-G37(EADEAGSVYA  | 38   | >FGFR3-G37(EADEACSVYA  | 55   | 17   |
| >FGFR3-G37(EADEAGSVY   | 27   | >FGFR3-G37(EADEACSVY   | 28   | 1    |
| >FGFR3-G37(VEADEAGSV   | 77   | >FGFR3-G37(VEADEACSV   | 44   | 33   |
| >FGFR3-G37(VEADEAGSV   | 1410 | >FGFR3-G37(VEADEACSV   | 497  | 913  |
| >FGFR3-G37(VEADEAGSV   | 4965 | >FGFR3-G37(VEADEACSV   | 144  | 4821 |
| >FGFR3-G37(VEADEAGSV\  | 229  | >FGFR3-G37(VEADEACSVY  | 183  | 46   |
| >FGFR3-G37(VEADEAGSV\  | 644  | >FGFR3-G37(VEADEACSVY  | 488  | 156  |
| >FGFR3-G37(VEADEAGSV\  | 194  | >FGFR3-G37(VEADEACSVY  | 343  | 149  |
| >FGFR3-G37(VEADEAGSV   | 107  | >FGFR3-G37(VEADEACSV   | 32   | 75   |
| >FGFR3-G37(LVEADEAGSV  | 56   | >FGFR3-G37(LVEADEACSV  | 14   | 42   |
| >FGFR3-G37(LVEADEAGSV  | 197  | >FGFR3-G37(LVEADEACSV  | 201  | 4    |
| >FGFR3-G37(LVEADEAGSV  | 375  | >FGFR3-G37(LVEADEACSV  | 448  | 73   |
| >FGFR3-G37(LVEADEAGSV  | 467  | >FGFR3-G37(LVEADEACSV  | 1418 | 951  |
| >FGFR3-G37(LVEADEAGSV  | 93   | >FGFR3-G37(LVEADEACSV  | 98   | 5    |

|                        |       |                        |      |       |
|------------------------|-------|------------------------|------|-------|
| >FGFR3-G37(LVEADEAGSV  | 83    | >FGFR3-G37(LVEADEACSV  | 79   | 4     |
| >FGFR3-G37(ELVEADEAGS  | 290   | >FGFR3-G37(ELVEADEACS  | 128  | 162   |
| >FGFR3-G37(ELVEADEAGS  | 185   | >FGFR3-G37(ELVEADEACS  | 253  | 68    |
| >FGFR3-G37(ELVEADEAGS  | 383   | >FGFR3-G37(ELVEADEACS  | 101  | 282   |
| >FGFR3-G37(ELVEADEAGS  | 21    | >FGFR3-G37(ELVEADEACS  | 8    | 13    |
| >FGFR3-G37(ELVEADEAGS  | 86    | >FGFR3-G37(ELVEADEACS  | 24   | 62    |
| >FGFR3-G37(ELVEADEAGS  | 55    | >FGFR3-G37(ELVEADEACS  | 14   | 41    |
| >FGFR3-G37(ELVEADEAGS  | 64    | >FGFR3-G37(ELVEADEACS  | 9    | 55    |
| >FGFR3-G37(ELVEADEAGS  | 7     | >FGFR3-G37(ELVEADEACS  | 4    | 3     |
| >FGFR3-G37(ELVEADEAGS  | 74    | >FGFR3-G37(ELVEADEACS  | 93   | 19    |
| >FGFR3-G37(ELVEADEAGS  | 28    | >FGFR3-G37(ELVEADEACS  | 23   | 5     |
| >FGFR3-G37(EELVEADEAG  | 634   | >FGFR3-G37(EELVEADEAC  | 238  | 396   |
| >FGFR3-G38(GVGFFLFILV  | 247   | >FGFR3-G38(EVGFFLFILV  | 989  | 742   |
| >FGFR3-G38(GVGFFLFILV  | 494   | >FGFR3-G38(EVGFFLFILVV | 6723 | 6229  |
| >FGFR3-G38(GVGFFLFIL   | 417   | >FGFR3-G38(EVGFFLFIL   | 2858 | 2441  |
| >FGFR3-G38(GVGFFLFILV  | 181   | >FGFR3-G38(EVGFFLFILV  | 713  | 532   |
| >FGFR3-G38(GVGFFLFILV  | 361   | >FGFR3-G38(EVGFFLFILV  | 822  | 461   |
| >FGFR3-G38(GVGFFLFILV  | 181   | >FGFR3-G38(EVGFFLFILV  | 288  | 107   |
| >FGFR3-G38(GVGFFLFILV  | 124   | >FGFR3-G38(EVGFFLFILV  | 952  | 828   |
| >FGFR3-G38(GVGFFLFILV  | 77    | >FGFR3-G38(EVGFFLFILVV | 652  | 575   |
| >FGFR3-G38(GVGFFLFILV  | 271   | >FGFR3-G38(EVGFFLFILV  | 3161 | 2890  |
| >FGFR3-G38(GVGFFLFILV  | 261   | >FGFR3-G38(EVGFFLFILVV | 3467 | 3206  |
| >FGFR3-G38(GVGFFLFILV  | 114   | >FGFR3-G38(EVGFFLFILV  | 1802 | 1688  |
| >FGFR3-G38(GVGFFLFILV  | 150   | >FGFR3-G38(EVGFFLFILVV | 2365 | 2215  |
| >FGFR3-G38(GVGFFLFILV  | 1049  | >FGFR3-G38(EVGFFLFILVV | 468  | 581   |
| >FGFR3-G38(GVGFFLFILV  | 105   | >FGFR3-G38(EVGFFLFILV  | 1107 | 1002  |
| >FGFR3-G38(GVGFFLFILV  | 97    | >FGFR3-G38(EVGFFLFILVV | 1167 | 1070  |
| >FGFR3-G38(GVGFFLFIL   | 16765 | >FGFR3-G38(EVGFFLFIL   | 248  | 16517 |
| >FGFR3-G38(GVGFFLFI    | 4763  | >FGFR3-G38(EVGFFLFI    | 19   | 4744  |
| >FGFR3-G38(GVGFFLFIL   | 7180  | >FGFR3-G38(EVGFFLFIL   | 69   | 7111  |
| >FGFR3-G38(GVGFFLFILV  | 312   | >FGFR3-G38(EVGFFLFILV  | 26   | 286   |
| >FGFR3-G38(GVGFFLFILV  | 4004  | >FGFR3-G38(EVGFFLFILVV | 30   | 3974  |
| >FGFR3-G38(GVGFFLFI    | 4342  | >FGFR3-G38(EVGFFLFI    | 12   | 4330  |
| >FGFR3-G38(GVGFFLFIL   | 6161  | >FGFR3-G38(EVGFFLFIL   | 27   | 6134  |
| >FGFR3-G38(GVGFFLFILV  | 991   | >FGFR3-G38(EVGFFLFILV  | 6    | 985   |
| >FGFR3-G38(GVGFFLFILV  | 2784  | >FGFR3-G38(EVGFFLFILVV | 14   | 2770  |
| >FGFR3-G38(YGVGFFLF    | 36385 | >FGFR3-G38(YEVGFFLF    | 41   | 36344 |
| >FGFR3-G38(YGVGFFLFI   | 1519  | >FGFR3-G38(YEVGFFLFI   | 7    | 1512  |
| >FGFR3-G38(YGVGFFLFIL  | 25931 | >FGFR3-G38(YEVGFFLFIL  | 171  | 25760 |
| >FGFR3-G38(YGVGFFLFILV | 19261 | >FGFR3-G38(YEVGFFLFILV | 55   | 19206 |
| >FGFR3-G38(YGVGFFLFI   | 349   | >FGFR3-G38(YEVGFFLFI   | 862  | 513   |
| >FGFR3-G38(YGVGFFLFILV | 230   | >FGFR3-G38(YEVGFFLFILV | 611  | 381   |
| >FGFR3-G38(YGVGFFLF    | 262   | >FGFR3-G38(YEVGFFLF    | 196  | 66    |

|                        |       |                        |       |       |
|------------------------|-------|------------------------|-------|-------|
| >FGFR3-G38(YGVGFFLFI   | 22    | >FGFR3-G38(YEVGFFLFI   | 20    | 2     |
| >FGFR3-G38(YGVGFFLFIL  | 207   | >FGFR3-G38(YEVGFFLFIL  | 159   | 48    |
| >FGFR3-G38(YGVGFFLFILV | 14    | >FGFR3-G38(YEVGFFLFILV | 14    | 0     |
| >FGFR3-G38(YGVGFFLFILV | 251   | >FGFR3-G38(YEVGFFLFILV | 347   | 96    |
| >FGFR3-G38(YGVGFFLFILV | 258   | >FGFR3-G38(YEVGFFLFILV | 429   | 171   |
| >FGFR3-G38(YGVGFFLFL   | 260   | >FGFR3-G38(YEVGFFLFL   | 274   | 14    |
| >FGFR3-G38(YGVGFFLFL   | 113   | >FGFR3-G38(YEVGFFLFL   | 212   | 99    |
| >FGFR3-G38(YGVGFFLFILV | 163   | >FGFR3-G38(YEVGFFLFILV | 1190  | 1027  |
| >FGFR3-G38(YGVGFFLFILV | 473   | >FGFR3-G38(YEVGFFLFILV | 2265  | 1792  |
| >FGFR3-G38(YGVGFFLFL   | 460   | >FGFR3-G38(YEVGFFLFL   | 89    | 371   |
| >FGFR3-G38(YGVGFFLFL   | 476   | >FGFR3-G38(YEVGFFLFL   | 13942 | 13466 |
| >FGFR3-G38(YGVGFFLFL   | 6464  | >FGFR3-G38(YEVGFFLFL   | 5     | 6459  |
| >FGFR3-G38(YGVGFFLFI   | 18339 | >FGFR3-G38(YEVGFFLFI   | 28    | 18311 |
| >FGFR3-G38(YGVGFFLFIL  | 33861 | >FGFR3-G38(YEVGFFLFIL  | 485   | 33376 |
| >FGFR3-G38(YGVGFFLFILV | 18277 | >FGFR3-G38(YEVGFFLFILV | 32    | 18245 |
| >FGFR3-G38(YGVGFFLFL   | 195   | >FGFR3-G38(YEVGFFLFL   | 1733  | 1538  |
| >FGFR3-G38(YGVGFFLFIL  | 885   | >FGFR3-G38(YEVGFFLFIL  | 67    | 818   |
| >FGFR3-G38(YGVGFFLFL   | 17919 | >FGFR3-G38(YEVGFFLFL   | 9     | 17910 |
| >FGFR3-G38(YGVGFFLFI   | 15585 | >FGFR3-G38(YEVGFFLFI   | 7     | 15578 |
| >FGFR3-G38(YGVGFFLFIL  | 23347 | >FGFR3-G38(YEVGFFLFIL  | 117   | 23230 |
| >FGFR3-G38(YGVGFFLFILV | 17127 | >FGFR3-G38(YEVGFFLFILV | 9     | 17118 |
| >FGFR3-G38(YGVGFFLFL   | 27244 | >FGFR3-G38(YEVGFFLFL   | 60    | 27184 |
| >FGFR3-G38(YGVGFFLFI   | 22184 | >FGFR3-G38(YEVGFFLFI   | 19    | 22165 |
| >FGFR3-G38(YGVGFFLFIL  | 28411 | >FGFR3-G38(YEVGFFLFIL  | 44    | 28367 |
| >FGFR3-G38(YGVGFFLFILV | 26196 | >FGFR3-G38(YEVGFFLFILV | 36    | 26160 |
| >FGFR3-G38(YGVGFFLFL   | 22773 | >FGFR3-G38(YEVGFFLFL   | 26    | 22747 |
| >FGFR3-G38(YGVGFFLFI   | 30586 | >FGFR3-G38(YEVGFFLFI   | 72    | 30514 |
| >FGFR3-G38(YGVGFFLFIL  | 27557 | >FGFR3-G38(YEVGFFLFIL  | 250   | 27307 |
| >FGFR3-G38(YGVGFFLFILV | 35040 | >FGFR3-G38(YEVGFFLFILV | 161   | 34879 |
| >FGFR3-G38(YGVGFFLFI   | 37038 | >FGFR3-G38(YEVGFFLFI   | 103   | 36935 |
| >FGFR3-G38(YGVGFFLFILV | 34389 | >FGFR3-G38(YEVGFFLFILV | 52    | 34337 |
| >FGFR3-G38(YGVGFFLFI   | 194   | >FGFR3-G38(YEVGFFLFI   | 2926  | 2732  |
| >FGFR3-G38(YGVGFFLFIL  | 185   | >FGFR3-G38(YEVGFFLFIL  | 2877  | 2692  |
| >FGFR3-G38(YGVGFFLFILV | 371   | >FGFR3-G38(YEVGFFLFILV | 4409  | 4038  |
| >FGFR3-G38(YGVGFFLFL   | 30789 | >FGFR3-G38(YEVGFFLFL   | 383   | 30406 |
| >FGFR3-G38(YGVGFFLFI   | 14662 | >FGFR3-G38(YEVGFFLFI   | 6     | 14656 |
| >FGFR3-G38(YGVGFFLFIL  | 26818 | >FGFR3-G38(YEVGFFLFIL  | 77    | 26741 |
| >FGFR3-G38(YGVGFFLFILV | 13588 | >FGFR3-G38(YEVGFFLFILV | 7     | 13581 |
| >FGFR3-G38(SYGVGFFL    | 219   | >FGFR3-G38(SYEVGFFL    | 104   | 115   |
| >FGFR3-G38(SYGVGFFLFI  | 197   | >FGFR3-G38(SYEVGFFLFI  | 86    | 111   |
| >FGFR3-G38(SYGVGFFLFL  | 14    | >FGFR3-G38(SYEVGFFLFL  | 18    | 4     |
| >FGFR3-G38(SYGVGFFLFIL | 178   | >FGFR3-G38(SYEVGFFLFIL | 328   | 150   |
| >FGFR3-G38(SYGVGFFL    | 103   | >FGFR3-G38(SYEVGFFL    | 302   | 199   |

|                        |     |                        |      |     |
|------------------------|-----|------------------------|------|-----|
| >FGFR3-G38(SYGVGFFLF   | 11  | >FGFR3-G38(SYEVGFFLF   | 21   | 10  |
| >FGFR3-G38(SYGVGFFLFIL | 92  | >FGFR3-G38(SYEVGFFLFIL | 251  | 159 |
| >FGFR3-G38(SYGVGFFL    | 6   | >FGFR3-G38(SYEVGFFL    | 12   | 6   |
| >FGFR3-G38(SYGVGFFLF   | 5   | >FGFR3-G38(SYEVGFFLF   | 6    | 1   |
| >FGFR3-G38(SYGVGFFLFI  | 6   | >FGFR3-G38(SYEVGFFLFI  | 9    | 3   |
| >FGFR3-G38(SYGVGFFLFIL | 9   | >FGFR3-G38(SYEVGFFLFIL | 21   | 12  |
| >FGFR3-G38(SYGVGFFLF   | 50  | >FGFR3-G38(SYEVGFFLF   | 216  | 166 |
| >FGFR3-G38(SYGVGFFL    | 203 | >FGFR3-G38(SYEVGFFL    | 205  | 2   |
| >FGFR3-G38(SYGVGFFLF   | 133 | >FGFR3-G38(SYEVGFFLF   | 133  | 0   |
| >FGFR3-G38(SYGVGFFLFI  | 17  | >FGFR3-G38(SYEVGFFLFI  | 24   | 7   |
| >FGFR3-G38(SYGVGFFLFIL | 117 | >FGFR3-G38(SYEVGFFLFIL | 114  | 3   |
| >FGFR3-G38(SYGVGFFL    | 281 | >FGFR3-G38(SYEVGFFL    | 143  | 138 |
| >FGFR3-G38(SYGVGFFLFI  | 75  | >FGFR3-G38(SYEVGFFLFI  | 82   | 7   |
| >FGFR3-G38(LSYGVGFFLFI | 528 | >FGFR3-G38(LSYEVGFFLFI | 489  | 39  |
| >FGFR3-G38(LSYGVGFFLFI | 110 | >FGFR3-G38(LSYEVGFFLFI | 41   | 69  |
| >FGFR3-G38(LSYGVGFFL   | 389 | >FGFR3-G38(LSYEVGFFL   | 1285 | 896 |
| >FGFR3-G38(LSYGVGFFL   | 732 | >FGFR3-G38(LSYEVGFFL   | 159  | 573 |
| >FGFR3-G38(LSYGVGFFLFI | 928 | >FGFR3-G38(LSYEVGFFLFI | 298  | 630 |
| >FGFR3-G38(LSYGVGFFL   | 82  | >FGFR3-G38(LSYEVGFFL   | 62   | 20  |
| >FGFR3-G38(LSYGVGFFLFI | 278 | >FGFR3-G38(LSYEVGFFLFI | 220  | 58  |
| >FGFR3-G38(LSYGVGFFL   | 60  | >FGFR3-G38(LSYEVGFFL   | 14   | 46  |
| >FGFR3-G38(LSYGVGFFLFI | 76  | >FGFR3-G38(LSYEVGFFLFI | 23   | 53  |
| >FGFR3-G38(LSYGVGFFL   | 54  | >FGFR3-G38(LSYEVGFFL   | 17   | 37  |
| >FGFR3-G38(LSYGVGFFLFI | 144 | >FGFR3-G38(LSYEVGFFLFI | 55   | 89  |
| >FGFR3-G38(LSYGVGFFL   | 253 | >FGFR3-G38(LSYEVGFFL   | 87   | 166 |
| >FGFR3-G38(LSYGVGFFLF  | 127 | >FGFR3-G38(LSYEVGFFLF  | 150  | 23  |
| >FGFR3-G38(LSYGVGFFLF  | 331 | >FGFR3-G38(LSYEVGFFLF  | 524  | 193 |
| >FGFR3-G38(LSYGVGFF    | 358 | >FGFR3-G38(LSYEVGFF    | 474  | 116 |
| >FGFR3-G38(LSYGVGFFLF  | 48  | >FGFR3-G38(LSYEVGFFLF  | 72   | 24  |
| >FGFR3-G38(LSYGVGFFLF  | 328 | >FGFR3-G38(LSYEVGFFLF  | 816  | 488 |
| >FGFR3-G38(LSYGVGFFLF  | 398 | >FGFR3-G38(LSYEVGFFLF  | 841  | 443 |
| >FGFR3-G38(LSYGVGFFL   | 303 | >FGFR3-G38(LSYEVGFFL   | 217  | 86  |
| >FGFR3-G38(LSYGVGFFLFI | 264 | >FGFR3-G38(LSYEVGFFLFI | 207  | 57  |
| >FGFR3-G38(LSYGVGFFL   | 849 | >FGFR3-G38(LSYEVGFFL   | 140  | 709 |
| >FGFR3-G38(LSYGVGFFLFI | 462 | >FGFR3-G38(LSYEVGFFLFI | 103  | 359 |
| >FGFR3-G38(LSYGVGFF    | 87  | >FGFR3-G38(LSYEVGFF    | 91   | 4   |
| >FGFR3-G38(LSYGVGFFLF  | 109 | >FGFR3-G38(LSYEVGFFLF  | 101  | 8   |
| >FGFR3-G38(LSYGVGFF    | 102 | >FGFR3-G38(LSYEVGFF    | 51   | 51  |
| >FGFR3-G38(LSYGVGFFLF  | 51  | >FGFR3-G38(LSYEVGFFLF  | 23   | 28  |
| >FGFR3-G38(LSYGVGFFLFI | 626 | >FGFR3-G38(LSYEVGFFLFI | 280  | 346 |
| >FGFR3-G38(LSYGVGFF    | 4   | >FGFR3-G38(LSYEVGFF    | 6    | 2   |
| >FGFR3-G38(LSYGVGFFL   | 12  | >FGFR3-G38(LSYEVGFFL   | 25   | 13  |
| >FGFR3-G38(LSYGVGFFLF  | 4   | >FGFR3-G38(LSYEVGFFLF  | 6    | 2   |

|                         |     |                         |      |      |
|-------------------------|-----|-------------------------|------|------|
| >FGFR3-G38( LSYGVGFFLFI | 45  | >FGFR3-G38( LSYEVGFFLFI | 73   | 28   |
| >FGFR3-G38( LSYGVGFF    | 152 | >FGFR3-G38( LSYEVGFF    | 178  | 26   |
| >FGFR3-G38( LSYGVGFFL   | 199 | >FGFR3-G38( LSYEVGFFL   | 406  | 207  |
| >FGFR3-G38( LSYGVGFFLF  | 76  | >FGFR3-G38( LSYEVGFFLF  | 101  | 25   |
| >FGFR3-G38( LSYGVGFF    | 21  | >FGFR3-G38( LSYEVGFF    | 22   | 1    |
| >FGFR3-G38( LSYGVGFFL   | 31  | >FGFR3-G38( LSYEVGFFL   | 31   | 0    |
| >FGFR3-G38( LSYGVGFFLF  | 11  | >FGFR3-G38( LSYEVGFFLF  | 11   | 0    |
| >FGFR3-G38( LSYGVGFFLFI | 24  | >FGFR3-G38( LSYEVGFFLFI | 25   | 1    |
| >FGFR3-G38( LSYGVGFFL   | 18  | >FGFR3-G38( LSYEVGFFL   | 18   | 0    |
| >FGFR3-G38( LSYGVGFFLF  | 27  | >FGFR3-G38( LSYEVGFFLF  | 28   | 1    |
| >FGFR3-G38( LSYGVGFFLFI | 43  | >FGFR3-G38( LSYEVGFFLFI | 46   | 3    |
| >FGFR3-G38( LSYGVGFF    | 226 | >FGFR3-G38( LSYEVGFF    | 1025 | 799  |
| >FGFR3-G38( LSYGVGFFL   | 41  | >FGFR3-G38( LSYEVGFFL   | 137  | 96   |
| >FGFR3-G38( LSYGVGFFLF  | 33  | >FGFR3-G38( LSYEVGFFLF  | 33   | 0    |
| >FGFR3-G38( LSYGVGFFLFI | 77  | >FGFR3-G38( LSYEVGFFLFI | 198  | 121  |
| >FGFR3-G38( LSYGVGFF    | 368 | >FGFR3-G38( LSYEVGFF    | 927  | 559  |
| >FGFR3-G38( LSYGVGFFL   | 31  | >FGFR3-G38( LSYEVGFFL   | 19   | 12   |
| >FGFR3-G38( LSYGVGFFLFI | 8   | >FGFR3-G38( LSYEVGFFLFI | 6    | 2    |
| >FGFR3-G38( ILSYGVGFFL  | 23  | >FGFR3-G38( ILSYEVGFFL  | 16   | 7    |
| >FGFR3-G38( ILSYGVGFF   | 558 | >FGFR3-G38( ILSYEVGFF   | 289  | 269  |
| >FGFR3-G38( ILSYGVGFFL  | 10  | >FGFR3-G38( ILSYEVGFFL  | 11   | 1    |
| >FGFR3-G38( ILSYGVGFFLF | 239 | >FGFR3-G38( ILSYEVGFFLF | 148  | 91   |
| >FGFR3-G38( ILSYGVGFFL  | 273 | >FGFR3-G38( ILSYEVGFFL  | 267  | 6    |
| >FGFR3-G38( ILSYGVGFFL  | 303 | >FGFR3-G38( ILSYEVGFFL  | 221  | 82   |
| >FGFR3-G38( ILSYGVGFFL  | 13  | >FGFR3-G38( ILSYEVGFFL  | 22   | 9    |
| >FGFR3-G38( ILSYGVGFFL  | 37  | >FGFR3-G38( ILSYEVGFFL  | 38   | 1    |
| >FGFR3-G38( ILSYGVGFFL  | 17  | >FGFR3-G38( ILSYEVGFFL  | 31   | 14   |
| >FGFR3-G38( ILSYGVGFFL  | 19  | >FGFR3-G38( ILSYEVGFFL  | 31   | 12   |
| >FGFR3-G38( ILSYGVGFFL  | 8   | >FGFR3-G38( ILSYEVGFFL  | 15   | 7    |
| >FGFR3-G38( ILSYGVGFFLF | 395 | >FGFR3-G38( ILSYEVGFFLF | 297  | 98   |
| >FGFR3-G38( ILSYGVGFFLF | 76  | >FGFR3-G38( ILSYEVGFFLF | 179  | 103  |
| >FGFR3-G38( ILSYGVGFF   | 404 | >FGFR3-G38( ILSYEVGFF   | 985  | 581  |
| >FGFR3-G38( ILSYGVGF    | 74  | >FGFR3-G38( ILSYEVGF    | 194  | 120  |
| >FGFR3-G38( ILSYGVGFF   | 81  | >FGFR3-G38( ILSYEVGFF   | 171  | 90   |
| >FGFR3-G38( ILSYGVGFFLF | 112 | >FGFR3-G38( ILSYEVGFFLF | 193  | 81   |
| >FGFR3-G38( ILSYGVGF    | 254 | >FGFR3-G38( ILSYEVGF    | 3008 | 2754 |
| >FGFR3-G38( ILSYGVGFF   | 444 | >FGFR3-G38( ILSYEVGFF   | 4765 | 4321 |
| >FGFR3-G38( ILSYGVGF    | 37  | >FGFR3-G38( ILSYEVGF    | 55   | 18   |
| >FGFR3-G38( ILSYGVGFF   | 276 | >FGFR3-G38( ILSYEVGFF   | 258  | 18   |
| >FGFR3-G38( ILSYGVGFFLF | 112 | >FGFR3-G38( ILSYEVGFFLF | 108  | 4    |
| >FGFR3-G38( ILSYGVGFF   | 316 | >FGFR3-G38( ILSYEVGFF   | 1200 | 884  |
| >FGFR3-G38( ILSYGVGFFLF | 169 | >FGFR3-G38( ILSYEVGFFLF | 433  | 264  |
| >FGFR3-G38( GILSYGVGFFL | 41  | >FGFR3-G38( GILSYEVGFFL | 30   | 11   |

|                        |     |                        |     |     |
|------------------------|-----|------------------------|-----|-----|
| >FGFR3-G38(GILSYGVGFFL | 49  | >FGFR3-G38(GILSYEVGFFL | 45  | 4   |
| >FGFR3-G38(GILSYGVGFFL | 21  | >FGFR3-G38(GILSYEVGFFL | 26  | 5   |
| >FGFR3-G38(GILSYGVGFFL | 10  | >FGFR3-G38(GILSYEVGFFL | 13  | 3   |
| >FGFR3-G38(GILSYGVGFFL | 50  | >FGFR3-G38(GILSYEVGFFL | 49  | 1   |
| >FGFR3-G38(GILSYGVGFFL | 22  | >FGFR3-G38(GILSYEVGFFL | 19  | 3   |
| >FGFR3-G38(GILSYGVGFFL | 286 | >FGFR3-G38(GILSYEVGFFL | 222 | 64  |
| >FGFR3-G38(GILSYGVGFFL | 85  | >FGFR3-G38(GILSYEVGFFL | 85  | 0   |
| >FGFR3-G38(GILSYGVGF   | 118 | >FGFR3-G38(GILSYEVGF   | 314 | 196 |
| >FGFR3-G38(AGILSYGVGF  | 295 | >FGFR3-G38(AGILSYEVGF  | 303 | 8   |
| >FGFR3-G38(AGILSYGVGF  | 107 | >FGFR3-G38(AGILSYEVGF  | 235 | 128 |
| >FGFR3-G38(AGILSYGVGF  | 450 | >FGFR3-G38(AGILSYEVGF  | 738 | 288 |
| >FGFR3-G38(AGILSYGVGF  | 490 | >FGFR3-G38(AGILSYEVGF  | 770 | 280 |
| >FGFR3-G38(YAGILSYGV   | 389 | >FGFR3-G38(YAGILSYEV   | 166 | 223 |
| >FGFR3-G38(YAGILSYGV   | 152 | >FGFR3-G38(YAGILSYEV   | 69  | 83  |
| >FGFR3-G38(YAGILSYGV   | 92  | >FGFR3-G38(YAGILSYEV   | 137 | 45  |
| >FGFR3-G38(YAGILSYGV   | 18  | >FGFR3-G38(YAGILSYEV   | 19  | 1   |
| >FGFR3-G38(YAGILSYGV   | 50  | >FGFR3-G38(YAGILSYEV   | 99  | 49  |
| >FGFR3-G38(YAGILSYGV   | 44  | >FGFR3-G38(YAGILSYEV   | 48  | 4   |
| >FGFR3-G38(YAGILSYGV   | 105 | >FGFR3-G38(YAGILSYEV   | 229 | 124 |
| >FGFR3-G38(YAGILSYGV   | 51  | >FGFR3-G38(YAGILSYEV   | 31  | 20  |
| >FGFR3-G38(YAGILSYGV   | 72  | >FGFR3-G38(YAGILSYEV   | 68  | 4   |
| >FGFR3-G38(YAGILSYGV   | 29  | >FGFR3-G38(YAGILSYEV   | 69  | 40  |
| >FGFR3-G38(YAGILSYGVG  | 195 | >FGFR3-G38(YAGILSYEVGF | 517 | 322 |
| >FGFR3-G38(YAGILSYGVG  | 261 | >FGFR3-G38(YAGILSYEVGF | 391 | 130 |
| >FGFR3-G38(YAGILSYGVG  | 16  | >FGFR3-G38(YAGILSYEVGF | 28  | 12  |
| >FGFR3-G38(YAGILSYGVG  | 72  | >FGFR3-G38(YAGILSYEVGF | 50  | 22  |
| >FGFR3-G38(VYAGILSYGV  | 761 | >FGFR3-G38(VYAGILSYEV  | 412 | 349 |
| >FGFR3-G38(VYAGILSYGV  | 160 | >FGFR3-G38(VYAGILSYEV  | 167 | 7   |
| >FGFR3-G38(VYAGILSYGV  | 191 | >FGFR3-G38(VYAGILSYEV  | 171 | 20  |
| >FGFR3-G38(VYAGILSYGV  | 55  | >FGFR3-G38(VYAGILSYEV  | 40  | 15  |
| >FGFR3-G38(VYAGILSYGV  | 230 | >FGFR3-G38(VYAGILSYEV  | 56  | 174 |
| >FGFR3-G38(SVYAGILSYG\ | 14  | >FGFR3-G38(SVYAGILSYEV | 11  | 3   |
| >FGFR3-G38(SVYAGILSYG\ | 33  | >FGFR3-G38(SVYAGILSYEV | 19  | 14  |
| >FGFR3-G38(SVYAGILSYG\ | 9   | >FGFR3-G38(SVYAGILSYEV | 10  | 1   |
| >FGFR3-G38(SVYAGILSYG\ | 6   | >FGFR3-G38(SVYAGILSYEV | 8   | 2   |
| >FGFR3-G38(SVYAGILSYG\ | 3   | >FGFR3-G38(SVYAGILSYEV | 3   | 0   |
| >FGFR3-G38(SVYAGILSYG\ | 13  | >FGFR3-G38(SVYAGILSYEV | 20  | 7   |
| >FGFR3-G38(SVYAGILSYG\ | 6   | >FGFR3-G38(SVYAGILSYEV | 6   | 0   |
| >FGFR3-G38(SVYAGILSYG\ | 87  | >FGFR3-G38(SVYAGILSYEV | 164 | 77  |
| >FGFR3-G38(SVYAGILSYG\ | 4   | >FGFR3-G38(SVYAGILSYEV | 3   | 1   |
| >FGFR3-G38(SVYAGILSYG\ | 427 | >FGFR3-G38(SVYAGILSYEV | 362 | 65  |
| >FGFR3-G38(SVYAGILSYG\ | 8   | >FGFR3-G38(SVYAGILSYEV | 8   | 0   |
| >FGFR3-G38(SVYAGILSYG\ | 6   | >FGFR3-G38(SVYAGILSYEV | 8   | 2   |



|                        |      |                        |      |      |
|------------------------|------|------------------------|------|------|
| >FGFR3-G38(GVGFFLFIL   | 597  | >FGFR3-G38(RVGFFLFIL   | 412  | 185  |
| >FGFR3-G38(GVGFFLFILV  | 247  | >FGFR3-G38(RVGFFLFILV  | 167  | 80   |
| >FGFR3-G38(GVGFFLFILVV | 494  | >FGFR3-G38(RVGFFLFILVV | 337  | 157  |
| >FGFR3-G38(GVGFFLFIL   | 417  | >FGFR3-G38(RVGFFLFIL   | 532  | 115  |
| >FGFR3-G38(GVGFFLFILV  | 181  | >FGFR3-G38(RVGFFLFILV  | 208  | 27   |
| >FGFR3-G38(GVGFFLFILV  | 361  | >FGFR3-G38(RVGFFLFILV  | 255  | 106  |
| >FGFR3-G38(GVGFFLFILVV | 610  | >FGFR3-G38(RVGFFLFILVV | 350  | 260  |
| >FGFR3-G38(GVGFFLFI    | 799  | >FGFR3-G38(RVGFFLFI    | 271  | 528  |
| >FGFR3-G38(GVGFFLFIL   | 896  | >FGFR3-G38(RVGFFLFIL   | 279  | 617  |
| >FGFR3-G38(GVGFFLFILV  | 181  | >FGFR3-G38(RVGFFLFILV  | 93   | 88   |
| >FGFR3-G38(GVGFFLFILVV | 510  | >FGFR3-G38(RVGFFLFILVV | 171  | 339  |
| >FGFR3-G38(GVGFFLFI    | 762  | >FGFR3-G38(RVGFFLFI    | 418  | 344  |
| >FGFR3-G38(GVGFFLFILV  | 124  | >FGFR3-G38(RVGFFLFILV  | 64   | 60   |
| >FGFR3-G38(GVGFFLFILVV | 77   | >FGFR3-G38(RVGFFLFILVV | 40   | 37   |
| >FGFR3-G38(GVGFFLFILV  | 271  | >FGFR3-G38(RVGFFLFILV  | 537  | 266  |
| >FGFR3-G38(GVGFFLFILVV | 261  | >FGFR3-G38(RVGFFLFILVV | 539  | 278  |
| >FGFR3-G38(GVGFFLFILV  | 114  | >FGFR3-G38(RVGFFLFILV  | 223  | 109  |
| >FGFR3-G38(GVGFFLFILVV | 150  | >FGFR3-G38(RVGFFLFILVV | 300  | 150  |
| >FGFR3-G38(GVGFFLFILVV | 1049 | >FGFR3-G38(RVGFFLFILVV | 484  | 565  |
| >FGFR3-G38(GVGFFLFILV  | 105  | >FGFR3-G38(RVGFFLFILV  | 151  | 46   |
| >FGFR3-G38(GVGFFLFILVV | 97   | >FGFR3-G38(RVGFFLFILVV | 145  | 48   |
| >FGFR3-G38(GVGFFLFI    | 3762 | >FGFR3-G38(RVGFFLFI    | 73   | 3689 |
| >FGFR3-G38(GVGFFLFILV  | 7383 | >FGFR3-G38(RVGFFLFILV  | 313  | 7070 |
| >FGFR3-G38(GVGFFLFI    | 2742 | >FGFR3-G38(RVGFFLFI    | 93   | 2649 |
| >FGFR3-G38(GVGFFLFIL   | 1590 | >FGFR3-G38(RVGFFLFIL   | 60   | 1530 |
| >FGFR3-G38(GVGFFLFILVV | 5523 | >FGFR3-G38(RVGFFLFILVV | 363  | 5160 |
| >FGFR3-G38(GVGFFLFILV  | 312  | >FGFR3-G38(RVGFFLFILV  | 97   | 215  |
| >FGFR3-G38(GVGFFLFILV  | 991  | >FGFR3-G38(RVGFFLFILV  | 299  | 692  |
| >FGFR3-G38(GVGFFLFI    | 1491 | >FGFR3-G38(RVGFFLFI    | 101  | 1390 |
| >FGFR3-G38(YGVGFFLFI   | 1519 | >FGFR3-G38(YRVGFFLFI   | 175  | 1344 |
| >FGFR3-G38(YGVGFFLFI   | 349  | >FGFR3-G38(YRVGFFLFI   | 1601 | 1252 |
| >FGFR3-G38(YGVGFFLFILV | 230  | >FGFR3-G38(YRVGFFLFILV | 1184 | 954  |
| >FGFR3-G38(YGVGFFLF    | 262  | >FGFR3-G38(YRVGFFLF    | 1471 | 1209 |
| >FGFR3-G38(YGVGFFLFI   | 22   | >FGFR3-G38(YRVGFFLFI   | 148  | 126  |
| >FGFR3-G38(YGVGFFLFIL  | 207  | >FGFR3-G38(YRVGFFLFIL  | 164  | 43   |
| >FGFR3-G38(YGVGFFLFILV | 14   | >FGFR3-G38(YRVGFFLFILV | 89   | 75   |
| >FGFR3-G38(YGVGFFLFILV | 251  | >FGFR3-G38(YRVGFFLFILV | 758  | 507  |
| >FGFR3-G38(YGVGFFLFILV | 258  | >FGFR3-G38(YRVGFFLFILV | 562  | 304  |
| >FGFR3-G38(YGVGFFLF    | 260  | >FGFR3-G38(YRVGFFLF    | 274  | 14   |
| >FGFR3-G38(YGVGFFLF    | 113  | >FGFR3-G38(YRVGFFLF    | 198  | 85   |
| >FGFR3-G38(YGVGFFLFILV | 163  | >FGFR3-G38(YRVGFFLFILV | 986  | 823  |
| >FGFR3-G38(YGVGFFLFILV | 473  | >FGFR3-G38(YRVGFFLFILV | 5023 | 4550 |
| >FGFR3-G38(YGVGFFLF    | 460  | >FGFR3-G38(YRVGFFLF    | 37   | 423  |

|                        |       |                        |       |       |
|------------------------|-------|------------------------|-------|-------|
| >FGFR3-G38(YGVGFFLFI   | 3221  | >FGFR3-G38(YRVGFFLFI   | 274   | 2947  |
| >FGFR3-G38(YGVGFFLFIL  | 3864  | >FGFR3-G38(YRVGFFLFIL  | 251   | 3613  |
| >FGFR3-G38(YGVGFFLF    | 476   | >FGFR3-G38(YRVGFFLF    | 17333 | 16857 |
| >FGFR3-G38(YGVGFFLF    | 14174 | >FGFR3-G38(YRVGFFLF    | 25    | 14149 |
| >FGFR3-G38(YGVGFFLFI   | 14085 | >FGFR3-G38(YRVGFFLFI   | 28    | 14057 |
| >FGFR3-G38(YGVGFFLFIL  | 18399 | >FGFR3-G38(YRVGFFLFIL  | 40    | 18359 |
| >FGFR3-G38(YGVGFFLFILV | 15463 | >FGFR3-G38(YRVGFFLFILV | 41    | 15422 |
| >FGFR3-G38(YGVGFFLF    | 195   | >FGFR3-G38(YRVGFFLF    | 5281  | 5086  |
| >FGFR3-G38(YGVGFFLF    | 13194 | >FGFR3-G38(YRVGFFLF    | 192   | 13002 |
| >FGFR3-G38(YGVGFFLFI   | 11328 | >FGFR3-G38(YRVGFFLFI   | 298   | 11030 |
| >FGFR3-G38(YGVGFFLFIL  | 885   | >FGFR3-G38(YRVGFFLFIL  | 19    | 866   |
| >FGFR3-G38(YGVGFFLFILV | 10254 | >FGFR3-G38(YRVGFFLFILV | 182   | 10072 |
| >FGFR3-G38(YGVGFFLFI   | 194   | >FGFR3-G38(YRVGFFLFI   | 2761  | 2567  |
| >FGFR3-G38(YGVGFFLFIL  | 185   | >FGFR3-G38(YRVGFFLFIL  | 2843  | 2658  |
| >FGFR3-G38(YGVGFFLFILV | 371   | >FGFR3-G38(YRVGFFLFILV | 4217  | 3846  |
| >FGFR3-G38(YGVGFFLFI   | 23586 | >FGFR3-G38(YRVGFFLFI   | 257   | 23329 |
| >FGFR3-G38(YGVGFFLFILV | 25772 | >FGFR3-G38(YRVGFFLFILV | 350   | 25422 |
| >FGFR3-G38(YGVGFFLFI   | 28843 | >FGFR3-G38(YRVGFFLFI   | 87    | 28756 |
| >FGFR3-G38(YGVGFFLFIL  | 25746 | >FGFR3-G38(YRVGFFLFIL  | 138   | 25608 |
| >FGFR3-G38(YGVGFFLFILV | 27742 | >FGFR3-G38(YRVGFFLFILV | 101   | 27641 |
| >FGFR3-G38(YGVGFFLF    | 9009  | >FGFR3-G38(YRVGFFLF    | 467   | 8542  |
| >FGFR3-G38(GSVYAGILSYF | 25152 | >FGFR3-G38(GSVYAGILSYF | 230   | 24922 |
| >FGFR3-G38(GSVYAGILSYF | 19535 | >FGFR3-G38(GSVYAGILSYF | 43    | 19492 |
| >FGFR3-G38(GSVYAGILSYF | 30075 | >FGFR3-G38(GSVYAGILSYF | 30    | 30045 |
| >FGFR3-G38(SYGVGFFL    | 219   | >FGFR3-G38(SYRVGFFL    | 137   | 82    |
| >FGFR3-G38(SYGVGFFLFI  | 197   | >FGFR3-G38(SYRVGFFLFI  | 119   | 78    |
| >FGFR3-G38(SYGVGFFLF   | 14    | >FGFR3-G38(SYRVGFFLF   | 16    | 2     |
| >FGFR3-G38(SYGVGFFLFIL | 178   | >FGFR3-G38(SYRVGFFLFIL | 244   | 66    |
| >FGFR3-G38(SYGVGFFL    | 103   | >FGFR3-G38(SYRVGFFL    | 219   | 116   |
| >FGFR3-G38(SYGVGFFLF   | 11    | >FGFR3-G38(SYRVGFFLF   | 18    | 7     |
| >FGFR3-G38(SYGVGFFLFI  | 919   | >FGFR3-G38(SYRVGFFLFI  | 418   | 501   |
| >FGFR3-G38(SYGVGFFLFIL | 92    | >FGFR3-G38(SYRVGFFLFIL | 187   | 95    |
| >FGFR3-G38(SYGVGFFL    | 6     | >FGFR3-G38(SYRVGFFL    | 12    | 6     |
| >FGFR3-G38(SYGVGFFLF   | 5     | >FGFR3-G38(SYRVGFFLF   | 6     | 1     |
| >FGFR3-G38(SYGVGFFLFI  | 6     | >FGFR3-G38(SYRVGFFLFI  | 9     | 3     |
| >FGFR3-G38(SYGVGFFLFIL | 9     | >FGFR3-G38(SYRVGFFLFIL | 20    | 11    |
| >FGFR3-G38(SYGVGFFLF   | 50    | >FGFR3-G38(SYRVGFFLF   | 87    | 37    |
| >FGFR3-G38(SYGVGFFL    | 6705  | >FGFR3-G38(SYRVGFFL    | 12    | 6693  |
| >FGFR3-G38(SYGVGFFLF   | 14413 | >FGFR3-G38(SYRVGFFLF   | 182   | 14231 |
| >FGFR3-G38(SYGVGFFLFI  | 1422  | >FGFR3-G38(SYRVGFFLFI  | 5     | 1417  |
| >FGFR3-G38(SYGVGFFLFIL | 9199  | >FGFR3-G38(SYRVGFFLFIL | 21    | 9178  |
| >FGFR3-G38(SYGVGFFLF   | 1989  | >FGFR3-G38(SYRVGFFLF   | 197   | 1792  |
| >FGFR3-G38(SYGVGFFL    | 203   | >FGFR3-G38(SYRVGFFL    | 202   | 1     |

|                        |      |                        |      |      |
|------------------------|------|------------------------|------|------|
| >FGFR3-G38(SYGVGFFLF   | 133  | >FGFR3-G38(SYRVGFFLF   | 140  | 7    |
| >FGFR3-G38(SYGVGFFLFI  | 17   | >FGFR3-G38(SYRVGFFLFI  | 23   | 6    |
| >FGFR3-G38(SYGVGFFLFIL | 117  | >FGFR3-G38(SYRVGFFLFIL | 118  | 1    |
| >FGFR3-G38(SYGVGFFL    | 281  | >FGFR3-G38(SYRVGFFL    | 109  | 172  |
| >FGFR3-G38(SYGVGFFLFI  | 75   | >FGFR3-G38(SYRVGFFLFI  | 105  | 30   |
| >FGFR3-G38(SYGVGFFLFIL | 1139 | >FGFR3-G38(SYRVGFFLFIL | 411  | 728  |
| >FGFR3-G38(LSYGVGFFLFI | 528  | >FGFR3-G38(LSYRVGFFLFI | 327  | 201  |
| >FGFR3-G38(LSYGVGFFLFI | 110  | >FGFR3-G38(LSYRVGFFLFI | 31   | 79   |
| >FGFR3-G38(LSYGVGFFL   | 389  | >FGFR3-G38(LSYRVGFFL   | 613  | 224  |
| >FGFR3-G38(LSYGVGFFL   | 82   | >FGFR3-G38(LSYRVGFFL   | 281  | 199  |
| >FGFR3-G38(LSYGVGFFLFI | 278  | >FGFR3-G38(LSYRVGFFLFI | 722  | 444  |
| >FGFR3-G38(LSYGVGFFL   | 60   | >FGFR3-G38(LSYRVGFFL   | 126  | 66   |
| >FGFR3-G38(LSYGVGFFLFI | 76   | >FGFR3-G38(LSYRVGFFLFI | 147  | 71   |
| >FGFR3-G38(LSYGVGFFL   | 54   | >FGFR3-G38(LSYRVGFFL   | 200  | 146  |
| >FGFR3-G38(LSYGVGFFLFI | 144  | >FGFR3-G38(LSYRVGFFLFI | 395  | 251  |
| >FGFR3-G38(LSYGVGFFL   | 253  | >FGFR3-G38(LSYRVGFFL   | 1057 | 804  |
| >FGFR3-G38(LSYGVGFFLF  | 127  | >FGFR3-G38(LSYRVGFFLF  | 188  | 61   |
| >FGFR3-G38(LSYGVGFFLF  | 331  | >FGFR3-G38(LSYRVGFFLF  | 383  | 52   |
| >FGFR3-G38(LSYGVGFF    | 358  | >FGFR3-G38(LSYRVGFF    | 653  | 295  |
| >FGFR3-G38(LSYGVGFFLF  | 48   | >FGFR3-G38(LSYRVGFFLF  | 70   | 22   |
| >FGFR3-G38(LSYGVGFFLFI | 657  | >FGFR3-G38(LSYRVGFFLFI | 173  | 484  |
| >FGFR3-G38(LSYGVGFFLF  | 328  | >FGFR3-G38(LSYRVGFFLF  | 381  | 53   |
| >FGFR3-G38(LSYGVGFFLF  | 398  | >FGFR3-G38(LSYRVGFFLF  | 886  | 488  |
| >FGFR3-G38(LSYGVGFFL   | 303  | >FGFR3-G38(LSYRVGFFL   | 692  | 389  |
| >FGFR3-G38(LSYGVGFFLFI | 264  | >FGFR3-G38(LSYRVGFFLFI | 540  | 276  |
| >FGFR3-G38(LSYGVGFFLFI | 462  | >FGFR3-G38(LSYRVGFFLFI | 647  | 185  |
| >FGFR3-G38(LSYGVGFF    | 87   | >FGFR3-G38(LSYRVGFF    | 90   | 3    |
| >FGFR3-G38(LSYGVGFFLF  | 109  | >FGFR3-G38(LSYRVGFFLF  | 103  | 6    |
| >FGFR3-G38(LSYGVGFF    | 102  | >FGFR3-G38(LSYRVGFF    | 37   | 65   |
| >FGFR3-G38(LSYGVGFFL   | 1445 | >FGFR3-G38(LSYRVGFFL   | 322  | 1123 |
| >FGFR3-G38(LSYGVGFFLF  | 51   | >FGFR3-G38(LSYRVGFFLF  | 15   | 36   |
| >FGFR3-G38(LSYGVGFFLFI | 626  | >FGFR3-G38(LSYRVGFFLFI | 183  | 443  |
| >FGFR3-G38(LSYGVGFF    | 4    | >FGFR3-G38(LSYRVGFF    | 6    | 2    |
| >FGFR3-G38(LSYGVGFFL   | 12   | >FGFR3-G38(LSYRVGFFL   | 31   | 19   |
| >FGFR3-G38(LSYGVGFFLF  | 4    | >FGFR3-G38(LSYRVGFFLF  | 6    | 2    |
| >FGFR3-G38(LSYGVGFFLFI | 45   | >FGFR3-G38(LSYRVGFFLFI | 133  | 88   |
| >FGFR3-G38(LSYGVGFF    | 152  | >FGFR3-G38(LSYRVGFF    | 126  | 26   |
| >FGFR3-G38(LSYGVGFFL   | 199  | >FGFR3-G38(LSYRVGFFL   | 167  | 32   |
| >FGFR3-G38(LSYGVGFFLF  | 76   | >FGFR3-G38(LSYRVGFFLF  | 72   | 4    |
| >FGFR3-G38(LSYGVGFF    | 21   | >FGFR3-G38(LSYRVGFF    | 21   | 0    |
| >FGFR3-G38(LSYGVGFFL   | 31   | >FGFR3-G38(LSYRVGFFL   | 22   | 9    |
| >FGFR3-G38(LSYGVGFFLF  | 11   | >FGFR3-G38(LSYRVGFFLF  | 11   | 0    |
| >FGFR3-G38(LSYGVGFFLFI | 24   | >FGFR3-G38(LSYRVGFFLFI | 21   | 3    |

|                         |     |                         |      |      |
|-------------------------|-----|-------------------------|------|------|
| >FGFR3-G38( LSYGVGFFL   | 18  | >FGFR3-G38( LSYRVGFFL   | 41   | 23   |
| >FGFR3-G38( LSYGVGFFLF  | 27  | >FGFR3-G38( LSYRVGFFLF  | 64   | 37   |
| >FGFR3-G38( LSYGVGFFLFI | 43  | >FGFR3-G38( LSYRVGFFLFI | 99   | 56   |
| >FGFR3-G38( LSYGVGFF    | 226 | >FGFR3-G38( LSYRVGFF    | 321  | 95   |
| >FGFR3-G38( LSYGVGFFL   | 41  | >FGFR3-G38( LSYRVGFFL   | 42   | 1    |
| >FGFR3-G38( LSYGVGFFLF  | 33  | >FGFR3-G38( LSYRVGFFLF  | 27   | 6    |
| >FGFR3-G38( LSYGVGFFLFI | 77  | >FGFR3-G38( LSYRVGFFLFI | 80   | 3    |
| >FGFR3-G38( LSYGVGFF    | 368 | >FGFR3-G38( LSYRVGFF    | 1277 | 909  |
| >FGFR3-G38( LSYGVGFFL   | 31  | >FGFR3-G38( LSYRVGFFL   | 20   | 11   |
| >FGFR3-G38( LSYGVGFFLFI | 8   | >FGFR3-G38( LSYRVGFFLFI | 7    | 1    |
| >FGFR3-G38( ILSYGVGFFL  | 23  | >FGFR3-G38( ILSYRVGFFL  | 43   | 20   |
| >FGFR3-G38( ILSYGVGFFL  | 10  | >FGFR3-G38( ILSYRVGFFL  | 17   | 7    |
| >FGFR3-G38( ILSYGVGFFLF | 239 | >FGFR3-G38( ILSYRVGFFLF | 242  | 3    |
| >FGFR3-G38( ILSYGVGFFL  | 273 | >FGFR3-G38( ILSYRVGFFL  | 358  | 85   |
| >FGFR3-G38( ILSYGVGFFL  | 303 | >FGFR3-G38( ILSYRVGFFL  | 554  | 251  |
| >FGFR3-G38( ILSYGVGFFL  | 13  | >FGFR3-G38( ILSYRVGFFL  | 26   | 13   |
| >FGFR3-G38( ILSYGVGFFL  | 37  | >FGFR3-G38( ILSYRVGFFL  | 62   | 25   |
| >FGFR3-G38( ILSYGVGFFL  | 17  | >FGFR3-G38( ILSYRVGFFL  | 40   | 23   |
| >FGFR3-G38( ILSYGVGFFL  | 19  | >FGFR3-G38( ILSYRVGFFL  | 69   | 50   |
| >FGFR3-G38( ILSYGVGFFL  | 8   | >FGFR3-G38( ILSYRVGFFL  | 15   | 7    |
| >FGFR3-G38( ILSYGVGFFLF | 395 | >FGFR3-G38( ILSYRVGFFLF | 237  | 158  |
| >FGFR3-G38( ILSYGVGFFLF | 76  | >FGFR3-G38( ILSYRVGFFLF | 177  | 101  |
| >FGFR3-G38( ILSYGVGFF   | 404 | >FGFR3-G38( ILSYRVGFF   | 1518 | 1114 |
| >FGFR3-G38( ILSYGVGF    | 74  | >FGFR3-G38( ILSYRVGF    | 123  | 49   |
| >FGFR3-G38( ILSYGVGFF   | 81  | >FGFR3-G38( ILSYRVGFF   | 133  | 52   |
| >FGFR3-G38( ILSYGVGFFLF | 112 | >FGFR3-G38( ILSYRVGFFLF | 164  | 52   |
| >FGFR3-G38( ILSYGVGF    | 254 | >FGFR3-G38( ILSYRVGF    | 1513 | 1259 |
| >FGFR3-G38( ILSYGVGFF   | 444 | >FGFR3-G38( ILSYRVGFF   | 1939 | 1495 |
| >FGFR3-G38( ILSYGVGF    | 37  | >FGFR3-G38( ILSYRVGF    | 51   | 14   |
| >FGFR3-G38( ILSYGVGFF   | 276 | >FGFR3-G38( ILSYRVGFF   | 302  | 26   |
| >FGFR3-G38( ILSYGVGFFLF | 112 | >FGFR3-G38( ILSYRVGFFLF | 122  | 10   |
| >FGFR3-G38( ILSYGVGFF   | 316 | >FGFR3-G38( ILSYRVGFF   | 692  | 376  |
| >FGFR3-G38( ILSYGVGFFLF | 169 | >FGFR3-G38( ILSYRVGFFLF | 294  | 125  |
| >FGFR3-G38( GILSYGVGFFL | 41  | >FGFR3-G38( GILSYRVGFFL | 67   | 26   |
| >FGFR3-G38( GILSYGVGFFL | 49  | >FGFR3-G38( GILSYRVGFFL | 72   | 23   |
| >FGFR3-G38( GILSYGVGFFL | 21  | >FGFR3-G38( GILSYRVGFFL | 37   | 16   |
| >FGFR3-G38( GILSYGVGFFL | 10  | >FGFR3-G38( GILSYRVGFFL | 35   | 25   |
| >FGFR3-G38( GILSYGVGFFL | 50  | >FGFR3-G38( GILSYRVGFFL | 189  | 139  |
| >FGFR3-G38( GILSYGVGFFL | 22  | >FGFR3-G38( GILSYRVGFFL | 48   | 26   |
| >FGFR3-G38( GILSYGVGFFL | 286 | >FGFR3-G38( GILSYRVGFFL | 905  | 619  |
| >FGFR3-G38( GILSYGVGFFL | 85  | >FGFR3-G38( GILSYRVGFFL | 102  | 17   |
| >FGFR3-G38( GILSYGVGF   | 118 | >FGFR3-G38( GILSYRVGF   | 185  | 67   |
| >FGFR3-G38( AGILSYGVGF  | 295 | >FGFR3-G38( AGILSYRVGF  | 229  | 66   |

|                        |       |                        |     |       |
|------------------------|-------|------------------------|-----|-------|
| >FGFR3-G38(AGILSYGVGF  | 107   | >FGFR3-G38(AGILSYRVGF  | 233 | 126   |
| >FGFR3-G38(AGILSYGVGF  | 450   | >FGFR3-G38(AGILSYRVGF  | 470 | 20    |
| >FGFR3-G38(AGILSYGVGF  | 490   | >FGFR3-G38(AGILSYRVGF  | 612 | 122   |
| >FGFR3-G38(YAGILSYGV   | 389   | >FGFR3-G38(YAGILSYRV   | 492 | 103   |
| >FGFR3-G38(YAGILSYGV   | 152   | >FGFR3-G38(YAGILSYRV   | 257 | 105   |
| >FGFR3-G38(YAGILSYGV   | 92    | >FGFR3-G38(YAGILSYRV   | 622 | 530   |
| >FGFR3-G38(YAGILSYGV   | 18    | >FGFR3-G38(YAGILSYRV   | 27  | 9     |
| >FGFR3-G38(YAGILSYGV   | 50    | >FGFR3-G38(YAGILSYRV   | 349 | 299   |
| >FGFR3-G38(YAGILSYGV   | 44    | >FGFR3-G38(YAGILSYRV   | 123 | 79    |
| >FGFR3-G38(YAGILSYGV   | 105   | >FGFR3-G38(YAGILSYRV   | 351 | 246   |
| >FGFR3-G38(YAGILSYGV   | 51    | >FGFR3-G38(YAGILSYRV   | 38  | 13    |
| >FGFR3-G38(YAGILSYG    | 20833 | >FGFR3-G38(YAGILSYR    | 55  | 20778 |
| >FGFR3-G38(YAGILSYG    | 33107 | >FGFR3-G38(YAGILSYR    | 164 | 32943 |
| >FGFR3-G38(YAGILSYG    | 26564 | >FGFR3-G38(YAGILSYR    | 20  | 26544 |
| >FGFR3-G38(YAGILSYGV   | 72    | >FGFR3-G38(YAGILSYRV   | 124 | 52    |
| >FGFR3-G38(YAGILSYGV   | 29    | >FGFR3-G38(YAGILSYRV   | 133 | 104   |
| >FGFR3-G38(YAGILSYGVG  | 195   | >FGFR3-G38(YAGILSYRVGI | 348 | 153   |
| >FGFR3-G38(YAGILSYGVG  | 261   | >FGFR3-G38(YAGILSYRVGI | 365 | 104   |
| >FGFR3-G38(YAGILSYGVG  | 16    | >FGFR3-G38(YAGILSYRVGI | 32  | 16    |
| >FGFR3-G38(YAGILSYGVG  | 72    | >FGFR3-G38(YAGILSYRVGI | 113 | 41    |
| >FGFR3-G38(YAGILSYG    | 34940 | >FGFR3-G38(YAGILSYR    | 148 | 34792 |
| >FGFR3-G38(VYAGILSYGV  | 761   | >FGFR3-G38(VYAGILSYRV  | 458 | 303   |
| >FGFR3-G38(VYAGILSYGV  | 160   | >FGFR3-G38(VYAGILSYRV  | 231 | 71    |
| >FGFR3-G38(VYAGILSYGV  | 191   | >FGFR3-G38(VYAGILSYRV  | 472 | 281   |
| >FGFR3-G38(VYAGILSYGV  | 55    | >FGFR3-G38(VYAGILSYRV  | 46  | 9     |
| >FGFR3-G38(VYAGILSYGV  | 230   | >FGFR3-G38(VYAGILSYRV  | 218 | 12    |
| >FGFR3-G38(VYAGILSYG   | 16639 | >FGFR3-G38(VYAGILSYR   | 13  | 16626 |
| >FGFR3-G38(VYAGILSYG   | 23709 | >FGFR3-G38(VYAGILSYR   | 31  | 23678 |
| >FGFR3-G38(VYAGILSYG   | 30971 | >FGFR3-G38(VYAGILSYR   | 48  | 30923 |
| >FGFR3-G38(VYAGILSYG   | 27147 | >FGFR3-G38(VYAGILSYR   | 21  | 27126 |
| >FGFR3-G38(SVYAGILSYG\ | 588   | >FGFR3-G38(SVYAGILSYR\ | 384 | 204   |
| >FGFR3-G38(SVYAGILSYG\ | 14    | >FGFR3-G38(SVYAGILSYR\ | 16  | 2     |
| >FGFR3-G38(SVYAGILSYG\ | 33    | >FGFR3-G38(SVYAGILSYR\ | 44  | 11    |
| >FGFR3-G38(SVYAGILSYG\ | 9     | >FGFR3-G38(SVYAGILSYR\ | 14  | 5     |
| >FGFR3-G38(SVYAGILSYG\ | 6     | >FGFR3-G38(SVYAGILSYR\ | 14  | 8     |
| >FGFR3-G38(SVYAGILSYG\ | 3     | >FGFR3-G38(SVYAGILSYR\ | 3   | 0     |
| >FGFR3-G38(SVYAGILSYG\ | 13    | >FGFR3-G38(SVYAGILSYR\ | 42  | 29    |
| >FGFR3-G38(SVYAGILSYG\ | 6     | >FGFR3-G38(SVYAGILSYR\ | 8   | 2     |
| >FGFR3-G38(SVYAGILSYG\ | 87    | >FGFR3-G38(SVYAGILSYR\ | 224 | 137   |
| >FGFR3-G38(SVYAGILSYG\ | 4     | >FGFR3-G38(SVYAGILSYR\ | 3   | 1     |
| >FGFR3-G38(SVYAGILSYG  | 3504  | >FGFR3-G38(SVYAGILSYR  | 24  | 3480  |
| >FGFR3-G38(SVYAGILSYG  | 22300 | >FGFR3-G38(SVYAGILSYR  | 16  | 22284 |
| >FGFR3-G38(SVYAGILSYG  | 8755  | >FGFR3-G38(SVYAGILSYR  | 11  | 8744  |

|                        |       |                        |      |       |
|------------------------|-------|------------------------|------|-------|
| >FGFR3-G38(SVYAGILSYG\ | 427   | >FGFR3-G38(SVYAGILSYR\ | 484  | 57    |
| >FGFR3-G38(SVYAGILSYG  | 11859 | >FGFR3-G38(SVYAGILSYR  | 45   | 11814 |
| >FGFR3-G38(SVYAGILSYG  | 9738  | >FGFR3-G38(SVYAGILSYR  | 2    | 9736  |
| >FGFR3-G38(SVYAGILSYG\ | 8     | >FGFR3-G38(SVYAGILSYR\ | 10   | 2     |
| >FGFR3-G38(SVYAGILSYG\ | 6     | >FGFR3-G38(SVYAGILSYR\ | 10   | 4     |
| >FGFR3-G38(SVYAGILSYG  | 26056 | >FGFR3-G38(SVYAGILSYR  | 107  | 25949 |
| >FGFR3-G38(SVYAGILSYG  | 30296 | >FGFR3-G38(SVYAGILSYR  | 65   | 30231 |
| >FGFR3-G38;GFFLFILV    | 311   | >FGFR3-G38;DFFLFILV    | 2997 | 2686  |
| >FGFR3-G38;GFFLFILVV   | 415   | >FGFR3-G38;DFFLFILVV   | 5981 | 5566  |
| >FGFR3-G38;GFFLFILV    | 383   | >FGFR3-G38;DFFLFILV    | 6737 | 6354  |
| >FGFR3-G38;GFFLFILV    | 12035 | >FGFR3-G38;DFFLFILV    | 393  | 11642 |
| >FGFR3-G38;GFFLFILVV   | 973   | >FGFR3-G38;DFFLFILVV   | 396  | 577   |
| >FGFR3-G38;VGFFLFIL    | 191   | >FGFR3-G38;VDFFLFIL    | 1951 | 1760  |
| >FGFR3-G38;VGFFLFILV   | 45    | >FGFR3-G38;VDFFLFILV   | 376  | 331   |
| >FGFR3-G38;VGFFLFILV   | 223   | >FGFR3-G38;VDFFLFILV   | 1038 | 815   |
| >FGFR3-G38;VGFFLFILV   | 372   | >FGFR3-G38;VDFFLFILV   | 1195 | 823   |
| >FGFR3-G38;VGFFLFIL    | 18625 | >FGFR3-G38;VDFFLFIL    | 77   | 18548 |
| >FGFR3-G38;VGFFLFILV   | 22885 | >FGFR3-G38;VDFFLFILV   | 183  | 22702 |
| >FGFR3-G38;VGFFLFILVVA | 22288 | >FGFR3-G38;VDFFLFILVVA | 305  | 21983 |
| >FGFR3-G38;VGFFLFILV   | 424   | >FGFR3-G38;VDFFLFILV   | 1531 | 1107  |
| >FGFR3-G38;VGFFLFIL    | 18805 | >FGFR3-G38;VDFFLFIL    | 404  | 18401 |
| >FGFR3-G38;VGFFLFILV   | 13404 | >FGFR3-G38;VDFFLFILV   | 92   | 13312 |
| >FGFR3-G38;VGFFLFILV   | 17067 | >FGFR3-G38;VDFFLFILV   | 166  | 16901 |
| >FGFR3-G38;VGFFLFILVV  | 14784 | >FGFR3-G38;VDFFLFILVV  | 188  | 14596 |
| >FGFR3-G38;GVGFFLFI    | 934   | >FGFR3-G38;GVDFFLFI    | 220  | 714   |
| >FGFR3-G38;GVGFFLFIL   | 597   | >FGFR3-G38;GVDFFLFIL   | 118  | 479   |
| >FGFR3-G38;GVGFFLFILV  | 247   | >FGFR3-G38;GVDFFLFILV  | 177  | 70    |
| >FGFR3-G38;GVGFFLFILV\ | 494   | >FGFR3-G38;GVDFFLFILV\ | 103  | 391   |
| >FGFR3-G38;GVGFFLFI    | 615   | >FGFR3-G38;GVDFFLFI    | 457  | 158   |
| >FGFR3-G38;GVGFFLFIL   | 417   | >FGFR3-G38;GVDFFLFIL   | 287  | 130   |
| >FGFR3-G38;GVGFFLFILV  | 181   | >FGFR3-G38;GVDFFLFILV  | 197  | 16    |
| >FGFR3-G38;GVGFFLFILV  | 361   | >FGFR3-G38;GVDFFLFILV  | 503  | 142   |
| >FGFR3-G38;GVGFFLFI    | 799   | >FGFR3-G38;GVDFFLFI    | 127  | 672   |
| >FGFR3-G38;GVGFFLFIL   | 896   | >FGFR3-G38;GVDFFLFIL   | 118  | 778   |
| >FGFR3-G38;GVGFFLFILV  | 181   | >FGFR3-G38;GVDFFLFILV  | 131  | 50    |
| >FGFR3-G38;GVGFFLFILV\ | 510   | >FGFR3-G38;GVDFFLFILV\ | 84   | 426   |
| >FGFR3-G38;GVGFFLFI    | 762   | >FGFR3-G38;GVDFFLFI    | 257  | 505   |
| >FGFR3-G38;GVGFFLFILV  | 124   | >FGFR3-G38;GVDFFLFILV  | 43   | 81    |
| >FGFR3-G38;GVGFFLFILV\ | 77    | >FGFR3-G38;GVDFFLFILV\ | 28   | 49    |
| >FGFR3-G38;GVGFFLFIL   | 643   | >FGFR3-G38;GVDFFLFIL   | 301  | 342   |
| >FGFR3-G38;GVGFFLFILV  | 271   | >FGFR3-G38;GVDFFLFILV  | 115  | 156   |
| >FGFR3-G38;GVGFFLFILV\ | 261   | >FGFR3-G38;GVDFFLFILV\ | 112  | 149   |
| >FGFR3-G38;GVGFFLFILV  | 114   | >FGFR3-G38;GVDFFLFILV  | 40   | 74    |

|                        |      |                        |     |     |
|------------------------|------|------------------------|-----|-----|
| >FGFR3-G38:GVGFLLFILV  | 150  | >FGFR3-G38:GVDFLLFILV  | 52  | 98  |
| >FGFR3-G38:GVGFLLFILV  | 105  | >FGFR3-G38:GVDFLLFILV  | 141 | 36  |
| >FGFR3-G38:GVGFLLFILV  | 97   | >FGFR3-G38:GVDFLLFILV  | 135 | 38  |
| >FGFR3-G38:GVGFLLFILV  | 312  | >FGFR3-G38:GVDFLLFILV  | 231 | 81  |
| >FGFR3-G38:GVGFLLFILV  | 991  | >FGFR3-G38:GVDFLLFILV  | 256 | 735 |
| >FGFR3-G38:YGVGFLLFILV | 520  | >FGFR3-G38:YGVDFLLFILV | 325 | 195 |
| >FGFR3-G38:YGVGFLLFILV | 959  | >FGFR3-G38:YGVDFLLFILV | 268 | 691 |
| >FGFR3-G38:YGVGFLLFI   | 349  | >FGFR3-G38:YGVDFLLFI   | 247 | 102 |
| >FGFR3-G38:YGVGFLLFILV | 230  | >FGFR3-G38:YGVDFLLFILV | 180 | 50  |
| >FGFR3-G38:YGVGFLLF    | 262  | >FGFR3-G38:YGVDFLLF    | 93  | 169 |
| >FGFR3-G38:YGVGFLLFI   | 22   | >FGFR3-G38:YGVDFLLFI   | 9   | 13  |
| >FGFR3-G38:YGVGFLLFIL  | 207  | >FGFR3-G38:YGVDFLLFIL  | 162 | 45  |
| >FGFR3-G38:YGVGFLLFILV | 14   | >FGFR3-G38:YGVDFLLFILV | 9   | 5   |
| >FGFR3-G38:YGVGFLLFILV | 251  | >FGFR3-G38:YGVDFLLFILV | 165 | 86  |
| >FGFR3-G38:YGVGFLLFILV | 599  | >FGFR3-G38:YGVDFLLFILV | 352 | 247 |
| >FGFR3-G38:YGVGFLLFILV | 258  | >FGFR3-G38:YGVDFLLFILV | 119 | 139 |
| >FGFR3-G38:YGVGFLLF    | 260  | >FGFR3-G38:YGVDFLLF    | 227 | 33  |
| >FGFR3-G38:YGVGFLLF    | 113  | >FGFR3-G38:YGVDFLLF    | 125 | 12  |
| >FGFR3-G38:YGVGFLLFI   | 548  | >FGFR3-G38:YGVDFLLFI   | 388 | 160 |
| >FGFR3-G38:YGVGFLLFILV | 163  | >FGFR3-G38:YGVDFLLFILV | 122 | 41  |
| >FGFR3-G38:YGVGFLLFI   | 1166 | >FGFR3-G38:YGVDFLLFI   | 277 | 889 |
| >FGFR3-G38:YGVGFLLFILV | 473  | >FGFR3-G38:YGVDFLLFILV | 130 | 343 |
| >FGFR3-G38:YGVGFLLF    | 460  | >FGFR3-G38:YGVDFLLF    | 223 | 237 |
| >FGFR3-G38:YGVGFLLF    | 476  | >FGFR3-G38:YGVDFLLF    | 452 | 24  |
| >FGFR3-G38:YGVGFLLF    | 195  | >FGFR3-G38:YGVDFLLF    | 193 | 2   |
| >FGFR3-G38:YGVGFLLFI   | 194  | >FGFR3-G38:YGVDFLLFI   | 186 | 8   |
| >FGFR3-G38:YGVGFLLFIL  | 185  | >FGFR3-G38:YGVDFLLFIL  | 182 | 3   |
| >FGFR3-G38:YGVGFLLFILV | 371  | >FGFR3-G38:YGVDFLLFILV | 374 | 3   |
| >FGFR3-G38:YGVGFLLFI   | 929  | >FGFR3-G38:YGVDFLLFI   | 361 | 568 |
| >FGFR3-G38:SYGVGFLL    | 219  | >FGFR3-G38:SYGVDFLL    | 804 | 585 |
| >FGFR3-G38:SYGVGFLLFI  | 197  | >FGFR3-G38:SYGVDFLLFI  | 912 | 715 |
| >FGFR3-G38:SYGVGFLLF   | 14   | >FGFR3-G38:SYGVDFLLF   | 16  | 2   |
| >FGFR3-G38:SYGVGFLLFIL | 178  | >FGFR3-G38:SYGVDFLLFIL | 248 | 70  |
| >FGFR3-G38:SYGVGFLL    | 103  | >FGFR3-G38:SYGVDFLL    | 149 | 46  |
| >FGFR3-G38:SYGVGFLLF   | 11   | >FGFR3-G38:SYGVDFLLF   | 13  | 2   |
| >FGFR3-G38:SYGVGFLLFIL | 92   | >FGFR3-G38:SYGVDFLLFIL | 107 | 15  |
| >FGFR3-G38:SYGVGFLL    | 6    | >FGFR3-G38:SYGVDFLL    | 8   | 2   |
| >FGFR3-G38:SYGVGFLLF   | 5    | >FGFR3-G38:SYGVDFLLF   | 6   | 1   |
| >FGFR3-G38:SYGVGFLLFI  | 6    | >FGFR3-G38:SYGVDFLLFI  | 7   | 1   |
| >FGFR3-G38:SYGVGFLLFIL | 9    | >FGFR3-G38:SYGVDFLLFIL | 11  | 2   |
| >FGFR3-G38:SYGVGFLLF   | 50   | >FGFR3-G38:SYGVDFLLF   | 109 | 59  |
| >FGFR3-G38:SYGVGFLL    | 203  | >FGFR3-G38:SYGVDFLL    | 256 | 53  |
| >FGFR3-G38:SYGVGFLLF   | 133  | >FGFR3-G38:SYGVDFLLF   | 142 | 9   |

|                        |      |                        |     |      |
|------------------------|------|------------------------|-----|------|
| >FGFR3-G38;SYGVGFFLFI  | 17   | >FGFR3-G38;SYGVDFFLFI  | 16  | 1    |
| >FGFR3-G38;SYGVGFFLFIL | 117  | >FGFR3-G38;SYGVDFFLFIL | 123 | 6    |
| >FGFR3-G38;SYGVGFFL    | 281  | >FGFR3-G38;SYGVDFFL    | 563 | 282  |
| >FGFR3-G38;SYGVGFFLFI  | 75   | >FGFR3-G38;SYGVDFFLFI  | 101 | 26   |
| >FGFR3-G38;LSYGVGFFLFI | 110  | >FGFR3-G38;LSYGVDFFLFI | 136 | 26   |
| >FGFR3-G38;LSYGVGFFL   | 389  | >FGFR3-G38;LSYGVDFFL   | 254 | 135  |
| >FGFR3-G38;LSYGVGFFL   | 732  | >FGFR3-G38;LSYGVDFFL   | 454 | 278  |
| >FGFR3-G38;LSYGVGFFL   | 82   | >FGFR3-G38;LSYGVDFFL   | 72  | 10   |
| >FGFR3-G38;LSYGVGFFLFI | 278  | >FGFR3-G38;LSYGVDFFLFI | 249 | 29   |
| >FGFR3-G38;LSYGVGFFL   | 60   | >FGFR3-G38;LSYGVDFFL   | 66  | 6    |
| >FGFR3-G38;LSYGVGFFLFI | 76   | >FGFR3-G38;LSYGVDFFLFI | 63  | 13   |
| >FGFR3-G38;LSYGVGFFL   | 54   | >FGFR3-G38;LSYGVDFFL   | 172 | 118  |
| >FGFR3-G38;LSYGVGFFLFI | 144  | >FGFR3-G38;LSYGVDFFLFI | 229 | 85   |
| >FGFR3-G38;LSYGVGFFL   | 253  | >FGFR3-G38;LSYGVDFFL   | 253 | 0    |
| >FGFR3-G38;LSYGVGFFLF  | 127  | >FGFR3-G38;LSYGVDFFLF  | 213 | 86   |
| >FGFR3-G38;LSYGVGFFLF  | 331  | >FGFR3-G38;LSYGVDFFLF  | 419 | 88   |
| >FGFR3-G38;LSYGVGFF    | 358  | >FGFR3-G38;LSYGVDFF    | 317 | 41   |
| >FGFR3-G38;LSYGVGFFLF  | 48   | >FGFR3-G38;LSYGVDFFLF  | 103 | 55   |
| >FGFR3-G38;LSYGVGFFLF  | 328  | >FGFR3-G38;LSYGVDFFLF  | 466 | 138  |
| >FGFR3-G38;LSYGVGFFLF  | 398  | >FGFR3-G38;LSYGVDFFLF  | 393 | 5    |
| >FGFR3-G38;LSYGVGFFL   | 303  | >FGFR3-G38;LSYGVDFFL   | 85  | 218  |
| >FGFR3-G38;LSYGVGFFLFI | 264  | >FGFR3-G38;LSYGVDFFLFI | 134 | 130  |
| >FGFR3-G38;LSYGVGFFLFI | 462  | >FGFR3-G38;LSYGVDFFLFI | 776 | 314  |
| >FGFR3-G38;LSYGVGFF    | 87   | >FGFR3-G38;LSYGVDFF    | 161 | 74   |
| >FGFR3-G38;LSYGVGFFLF  | 109  | >FGFR3-G38;LSYGVDFFLF  | 195 | 86   |
| >FGFR3-G38;LSYGVGFF    | 102  | >FGFR3-G38;LSYGVDFF    | 162 | 60   |
| >FGFR3-G38;LSYGVGFFLF  | 51   | >FGFR3-G38;LSYGVDFFLF  | 129 | 78   |
| >FGFR3-G38;LSYGVGFF    | 4    | >FGFR3-G38;LSYGVDFF    | 5   | 1    |
| >FGFR3-G38;LSYGVGFFL   | 12   | >FGFR3-G38;LSYGVDFFL   | 17  | 5    |
| >FGFR3-G38;LSYGVGFFLF  | 4    | >FGFR3-G38;LSYGVDFFLF  | 5   | 1    |
| >FGFR3-G38;LSYGVGFFLFI | 45   | >FGFR3-G38;LSYGVDFFLFI | 55  | 10   |
| >FGFR3-G38;LSYGVGFF    | 1439 | >FGFR3-G38;LSYGVDFF    | 411 | 1028 |
| >FGFR3-G38;LSYGVGFF    | 152  | >FGFR3-G38;LSYGVDFF    | 122 | 30   |
| >FGFR3-G38;LSYGVGFFL   | 199  | >FGFR3-G38;LSYGVDFFL   | 154 | 45   |
| >FGFR3-G38;LSYGVGFFLF  | 76   | >FGFR3-G38;LSYGVDFFLF  | 61  | 15   |
| >FGFR3-G38;LSYGVGFF    | 21   | >FGFR3-G38;LSYGVDFF    | 16  | 5    |
| >FGFR3-G38;LSYGVGFFL   | 31   | >FGFR3-G38;LSYGVDFFL   | 16  | 15   |
| >FGFR3-G38;LSYGVGFFLF  | 11   | >FGFR3-G38;LSYGVDFFLF  | 10  | 1    |
| >FGFR3-G38;LSYGVGFFLFI | 24   | >FGFR3-G38;LSYGVDFFLFI | 20  | 4    |
| >FGFR3-G38;LSYGVGFFL   | 18   | >FGFR3-G38;LSYGVDFFL   | 59  | 41   |
| >FGFR3-G38;LSYGVGFFLF  | 27   | >FGFR3-G38;LSYGVDFFLF  | 64  | 37   |
| >FGFR3-G38;LSYGVGFFLFI | 43   | >FGFR3-G38;LSYGVDFFLFI | 89  | 46   |
| >FGFR3-G38;LSYGVGFF    | 226  | >FGFR3-G38;LSYGVDFF    | 561 | 335  |



|                        |     |                        |      |      |
|------------------------|-----|------------------------|------|------|
| >FGFR3-G38:LSYGVGFFL   | 41  | >FGFR3-G38:LSYGVDFFL   | 159  | 118  |
| >FGFR3-G38:LSYGVGFFLF  | 33  | >FGFR3-G38:LSYGVDFFLF  | 46   | 13   |
| >FGFR3-G38:LSYGVGFFLFI | 77  | >FGFR3-G38:LSYGVDFFLFI | 150  | 73   |
| >FGFR3-G38:LSYGVGFF    | 368 | >FGFR3-G38:LSYGVDF     | 214  | 154  |
| >FGFR3-G38:LSYGVGFFL   | 31  | >FGFR3-G38:LSYGVDFFL   | 43   | 12   |
| >FGFR3-G38:LSYGVGFFLFI | 8   | >FGFR3-G38:LSYGVDFFLFI | 9    | 1    |
| >FGFR3-G38:ILSYGVGFFL  | 23  | >FGFR3-G38:ILSYGVDFFL  | 16   | 7    |
| >FGFR3-G38:ILSYGVGFF   | 558 | >FGFR3-G38:ILSYGVDF    | 111  | 447  |
| >FGFR3-G38:ILSYGVGFFL  | 10  | >FGFR3-G38:ILSYGVDFFL  | 7    | 3    |
| >FGFR3-G38:ILSYGVGFFLF | 239 | >FGFR3-G38:ILSYGVDFFLF | 119  | 120  |
| >FGFR3-G38:ILSYGVGFFL  | 273 | >FGFR3-G38:ILSYGVDFFL  | 323  | 50   |
| >FGFR3-G38:ILSYGVGFFL  | 303 | >FGFR3-G38:ILSYGVDFFL  | 373  | 70   |
| >FGFR3-G38:ILSYGVGFFL  | 13  | >FGFR3-G38:ILSYGVDFFL  | 16   | 3    |
| >FGFR3-G38:ILSYGVGFFL  | 37  | >FGFR3-G38:ILSYGVDFFL  | 18   | 19   |
| >FGFR3-G38:ILSYGVGFFL  | 17  | >FGFR3-G38:ILSYGVDFFL  | 12   | 5    |
| >FGFR3-G38:ILSYGVGFFL  | 19  | >FGFR3-G38:ILSYGVDFFL  | 11   | 8    |
| >FGFR3-G38:ILSYGVGFFL  | 8   | >FGFR3-G38:ILSYGVDFFL  | 8    | 0    |
| >FGFR3-G38:ILSYGVGFFLF | 395 | >FGFR3-G38:ILSYGVDFFLF | 429  | 34   |
| >FGFR3-G38:ILSYGVGFFLF | 76  | >FGFR3-G38:ILSYGVDFFLF | 160  | 84   |
| >FGFR3-G38:ILSYGVGFF   | 404 | >FGFR3-G38:ILSYGVDF    | 2399 | 1995 |
| >FGFR3-G38:ILSYGVGF    | 74  | >FGFR3-G38:ILSYGVDF    | 133  | 59   |
| >FGFR3-G38:ILSYGVGFF   | 81  | >FGFR3-G38:ILSYGVDF    | 135  | 54   |
| >FGFR3-G38:ILSYGVGFFLF | 112 | >FGFR3-G38:ILSYGVDFFLF | 175  | 63   |
| >FGFR3-G38:ILSYGVGF    | 254 | >FGFR3-G38:ILSYGVDF    | 557  | 303  |
| >FGFR3-G38:ILSYGVGFF   | 444 | >FGFR3-G38:ILSYGVDF    | 1186 | 742  |
| >FGFR3-G38:ILSYGVGF    | 37  | >FGFR3-G38:ILSYGVDF    | 26   | 11   |
| >FGFR3-G38:ILSYGVGFF   | 276 | >FGFR3-G38:ILSYGVDF    | 183  | 93   |
| >FGFR3-G38:ILSYGVGFFLF | 112 | >FGFR3-G38:ILSYGVDFFLF | 96   | 16   |
| >FGFR3-G38:ILSYGVGFF   | 316 | >FGFR3-G38:ILSYGVDF    | 582  | 266  |
| >FGFR3-G38:ILSYGVGFFLF | 169 | >FGFR3-G38:ILSYGVDFFLF | 303  | 134  |
| >FGFR3-G38:GILSYGVGFFL | 41  | >FGFR3-G38:GILSYGVDFFL | 51   | 10   |
| >FGFR3-G38:GILSYGVGFFL | 49  | >FGFR3-G38:GILSYGVDFFL | 59   | 10   |
| >FGFR3-G38:GILSYGVGFFL | 21  | >FGFR3-G38:GILSYGVDFFL | 34   | 13   |
| >FGFR3-G38:GILSYGVGFFL | 10  | >FGFR3-G38:GILSYGVDFFL | 26   | 16   |
| >FGFR3-G38:GILSYGVGFFL | 50  | >FGFR3-G38:GILSYGVDFFL | 70   | 20   |
| >FGFR3-G38:GILSYGVGFFL | 22  | >FGFR3-G38:GILSYGVDFFL | 25   | 3    |
| >FGFR3-G38:GILSYGVGFFL | 286 | >FGFR3-G38:GILSYGVDFFL | 458  | 172  |
| >FGFR3-G38:GILSYGVGFFL | 85  | >FGFR3-G38:GILSYGVDFFL | 127  | 42   |
| >FGFR3-G38:GILSYGVGF   | 118 | >FGFR3-G38:GILSYGVDF   | 79   | 39   |
| >FGFR3-G38:AGILSYGVGF  | 295 | >FGFR3-G38:AGILSYGVDF  | 212  | 83   |
| >FGFR3-G38:AGILSYGVGF  | 107 | >FGFR3-G38:AGILSYGVDF  | 660  | 553  |
| >FGFR3-G38:AGILSYGVGFI | 450 | >FGFR3-G38:AGILSYGVDFI | 1068 | 618  |
| >FGFR3-G38:AGILSYGVGF  | 490 | >FGFR3-G38:AGILSYGVDF  | 807  | 317  |

|                        |       |                        |      |       |
|------------------------|-------|------------------------|------|-------|
| >FGFR3-G38;YAGILSYGVG  | 195   | >FGFR3-G38;YAGILSYGVD  | 415  | 220   |
| >FGFR3-G38;YAGILSYGVG  | 261   | >FGFR3-G38;YAGILSYGVD  | 181  | 80    |
| >FGFR3-G38;YAGILSYGVG  | 16    | >FGFR3-G38;YAGILSYGVD  | 72   | 56    |
| >FGFR3-G38;YAGILSYGVG  | 72    | >FGFR3-G38;YAGILSYGVD  | 92   | 20    |
| >FGFR3-G69;GIPVEELFKL  | 451   | >FGFR3-G69;CIPVEELFKL  | 997  | 546   |
| >FGFR3-G69;GIPVEELFK   | 173   | >FGFR3-G69;CIPVEELFK   | 376  | 203   |
| >FGFR3-G69;GIPVEELFKLL | 276   | >FGFR3-G69;CIPVEELFKLL | 163  | 113   |
| >FGFR3-G69;YPGIPVEEL   | 215   | >FGFR3-G69;YPCIPVEEL   | 1392 | 1177  |
| >FGFR3-G69;YPGIPVEEL   | 749   | >FGFR3-G69;YPCIPVEEL   | 373  | 376   |
| >FGFR3-G69;YPGIPVEELF  | 79    | >FGFR3-G69;YPCIPVEELF  | 68   | 11    |
| >FGFR3-G69;YPGIPVEELF  | 94    | >FGFR3-G69;YPCIPVEELF  | 111  | 17    |
| >FGFR3-G69;YPGIPVEELF  | 454   | >FGFR3-G69;YPCIPVEELF  | 231  | 223   |
| >FGFR3-G69;PYPGIPVEELF | 88    | >FGFR3-G69;PYPCIPVEELF | 45   | 43    |
| >FGFR3-G69;PYPGIPVEEL  | 479   | >FGFR3-G69;PYPCIPVEEL  | 688  | 209   |
| >FGFR3-G69;PYPGIPVEELF | 42    | >FGFR3-G69;PYPCIPVEELF | 40   | 2     |
| >FGFR3-G69;PYPGIPVEEL  | 14    | >FGFR3-G69;PYPCIPVEEL  | 20   | 6     |
| >FGFR3-G69;PYPGIPVEELF | 9     | >FGFR3-G69;PYPCIPVEELF | 13   | 4     |
| >FGFR3-G69;SPYPGIPV    | 149   | >FGFR3-G69;SPYPCIPV    | 89   | 60    |
| >FGFR3-G69;SPYPGIPVEEL | 20    | >FGFR3-G69;SPYPCIPVEEL | 18   | 2     |
| >FGFR3-G69;SPYPGIPV    | 59    | >FGFR3-G69;SPYPCIPV    | 124  | 65    |
| >FGFR3-G69;SPYPGIPV    | 35    | >FGFR3-G69;SPYPCIPV    | 50   | 15    |
| >FGFR3-G69;SPYPGIPVEEL | 114   | >FGFR3-G69;SPYPCIPVEEL | 101  | 13    |
| >FGFR3-G69;SPYPGIPV    | 722   | >FGFR3-G69;SPYPCIPV    | 454  | 268   |
| >FGFR3-G69;SPYPGIPVEEL | 567   | >FGFR3-G69;SPYPCIPVEEL | 352  | 215   |
| >FGFR3-G69;SPYPGIPVEEL | 415   | >FGFR3-G69;SPYPCIPVEEL | 642  | 227   |
| >FGFR3-G69;SPYPGIPV    | 323   | >FGFR3-G69;SPYPCIPV    | 456  | 133   |
| >FGFR3-G69;SPYPGIPV    | 48    | >FGFR3-G69;SPYPCIPV    | 25   | 23    |
| >FGFR3-G69;SPYPGIPVEEL | 364   | >FGFR3-G69;SPYPCIPVEEL | 251  | 113   |
| >FGFR3-G69;GSPYPGIPVE  | 807   | >FGFR3-G69;GSPYPCIPVE  | 358  | 449   |
| >FGFR3-G69;GSPYPGIP    | 9270  | >FGFR3-G69;GSPYPCIP    | 350  | 8920  |
| >FGFR3-G69;GSPYPGIPV   | 20    | >FGFR3-G69;GSPYPCIPV   | 21   | 1     |
| >FGFR3-G69;GSPYPGIPVE  | 704   | >FGFR3-G69;GSPYPCIPVE  | 456  | 248   |
| >FGFR3-G69;LGGSPYPGI   | 319   | >FGFR3-G69;LGGSPYPCI   | 263  | 56    |
| >FGFR3-G69;TLGGSPYPGI  | 302   | >FGFR3-G69;TLGGSPYPCI  | 627  | 325   |
| >FGFR3-G69;TLGGSPYPGI  | 118   | >FGFR3-G69;TLGGSPYPCI  | 242  | 124   |
| >FGFR3-G69;TLGGSPYPGI  | 110   | >FGFR3-G69;TLGGSPYPCI  | 385  | 275   |
| >FGFR3-G69;TLGGSPYPG   | 2043  | >FGFR3-G69;TLGGSPYPC   | 89   | 1954  |
| >FGFR3-G69;TLGGSPYPGI  | 11    | >FGFR3-G69;TLGGSPYPCI  | 46   | 35    |
| >FGFR3-G69;TLGGSPYPG   | 6131  | >FGFR3-G69;TLGGSPYPC   | 281  | 5850  |
| >FGFR3-G69;TLGGSPYPGI  | 88    | >FGFR3-G69;TLGGSPYPCI  | 175  | 87    |
| >FGFR3-G69;TLGGSPYPGI  | 40    | >FGFR3-G69;TLGGSPYPCI  | 40   | 0     |
| >FGFR3-G69;TLGGSPYPGI  | 39    | >FGFR3-G69;TLGGSPYPCI  | 64   | 25    |
| >FGFR3-G69;TLGGSPYPG   | 11998 | >FGFR3-G69;TLGGSPYPC   | 173  | 11825 |

|                       |       |                       |      |       |
|-----------------------|-------|-----------------------|------|-------|
| >FGFR3-G69:TLGGSPYPGI | 14    | >FGFR3-G69:TLGGSPYPCI | 39   | 25    |
| >FGFR3-G69:TLGGSPYPGI | 329   | >FGFR3-G69:TLGGSPYPCI | 2416 | 2087  |
| >FGFR3-G69:FTLGGSPYPG | 41    | >FGFR3-G69:FTLGGSPYPC | 63   | 22    |
| >FGFR3-G69:FTLGGSPYPG | 373   | >FGFR3-G69:FTLGGSPYPC | 188  | 185   |
| >FGFR3-G69:FTLGGSPYPG | 7     | >FGFR3-G69:FTLGGSPYPC | 17   | 10    |
| >FGFR3-G69:FTLGGSPYPG | 921   | >FGFR3-G69:FTLGGSPYPC | 41   | 880   |
| >FGFR3-G69:FTLGGSPYPG | 6     | >FGFR3-G69:FTLGGSPYPC | 23   | 17    |
| >FGFR3-G69:FTLGGSPYPG | 138   | >FGFR3-G69:FTLGGSPYPC | 342  | 204   |
| >FGFR3-G69:FTLGGSPYPG | 20    | >FGFR3-G69:FTLGGSPYPC | 21   | 1     |
| >FGFR3-G69:FTLGGSPYPG | 72    | >FGFR3-G69:FTLGGSPYPC | 107  | 35    |
| >FGFR3-G69:FTLGGSPYPG | 86    | >FGFR3-G69:FTLGGSPYPC | 310  | 224   |
| >FGFR3-G69:FTLGGSPYPG | 291   | >FGFR3-G69:FTLGGSPYPC | 1064 | 773   |
| >FGFR3-G69:FTLGGSPYPG | 1086  | >FGFR3-G69:FTLGGSPYPC | 351  | 735   |
| >FGFR3-G69:FTLGGSPYPG | 4     | >FGFR3-G69:FTLGGSPYPC | 13   | 9     |
| >FGFR3-G69:FTLGGSPYPG | 22    | >FGFR3-G69:FTLGGSPYPC | 208  | 186   |
| >FGFR3-G69:FTLGGSPYPG | 465   | >FGFR3-G69:FTLGGSPYPC | 560  | 95    |
| >FGFR3-G69:FTLGGSPYPG | 19    | >FGFR3-G69:FTLGGSPYPC | 18   | 1     |
| >FGFR3-H64:HNLDYYKK   | 352   | >FGFR3-H64:DNLDYYKK   | 5752 | 5400  |
| >FGFR3-H64:DVHNLDYY   | 12517 | >FGFR3-H64:DVDNLDYY   | 63   | 12454 |
| >FGFR3-H64:DVHNLDYYK  | 242   | >FGFR3-H64:DVDNLDYYK  | 283  | 41    |
| >FGFR3-H64:DVHNLDYYK  | 408   | >FGFR3-H64:DVDNLDYYK  | 269  | 139   |
| >FGFR3-H64:DVHNLDYY   | 70    | >FGFR3-H64:DVDNLDYY   | 7258 | 7188  |
| >FGFR3-H64:DVHNLDYY   | 18    | >FGFR3-H64:DVDNLDYY   | 714  | 696   |
| >FGFR3-H64:DVHNLDYY   | 350   | >FGFR3-H64:DVDNLDYY   | 8561 | 8211  |
| >FGFR3-H64:DVHNLDYY   | 151   | >FGFR3-H64:DVDNLDYY   | 601  | 450   |
| >FGFR3-H64:DVHNLDYY   | 306   | >FGFR3-H64:DVDNLDYY   | 616  | 310   |
| >FGFR3-H64:DVHNLDYYK  | 82    | >FGFR3-H64:DVDNLDYYK  | 298  | 216   |
| >FGFR3-H64:DVHNLDYY   | 265   | >FGFR3-H64:DVDNLDYY   | 1889 | 1624  |
| >FGFR3-H64:DVHNLDYYK  | 8     | >FGFR3-H64:DVDNLDYYK  | 35   | 27    |
| >FGFR3-H64:DVHNLDYYK  | 48    | >FGFR3-H64:DVDNLDYYK  | 128  | 80    |
| >FGFR3-H64:DVHNLDYY   | 2307  | >FGFR3-H64:DVDNLDYY   | 388  | 1919  |
| >FGFR3-H64:RDVHNLDYY  | 533   | >FGFR3-H64:RDVDNLDYY  | 376  | 157   |
| >FGFR3-H64:ARDVHNLDY  | 468   | >FGFR3-H64:ARDVDNLDY  | 499  | 31    |
| >FGFR3-H64:LARDVHNLD  | 266   | >FGFR3-H64:LARDVDNLD  | 390  | 124   |
| >FGFR3-H64:LARDVHNL   | 322   | >FGFR3-H64:LARDVDNL   | 3853 | 3531  |
| >FGFR3-H64:LARDVHNLD  | 498   | >FGFR3-H64:LARDVDNLD  | 3472 | 2974  |
| >FGFR3-H64:LARDVHNLD  | 381   | >FGFR3-H64:LARDVDNLD  | 1789 | 1408  |
| >FGFR3-H64:LARDVHNLD  | 185   | >FGFR3-H64:LARDVDNLD  | 169  | 16    |
| >FGFR3-H64:LARDVHNLD  | 153   | >FGFR3-H64:LARDVDNLD  | 239  | 86    |
| >FGFR3-H64:LARDVHNLD  | 218   | >FGFR3-H64:LARDVDNLD  | 264  | 46    |
| >FGFR3-H64:LARDVHNLD  | 280   | >FGFR3-H64:LARDVDNLD  | 778  | 498   |
| >FGFR3-H64:LARDVHNL   | 83    | >FGFR3-H64:LARDVDNL   | 411  | 328   |
| >FGFR3-H64:LARDVHNLD  | 38    | >FGFR3-H64:LARDVDNLD  | 78   | 40    |

|                         |      |                         |      |      |
|-------------------------|------|-------------------------|------|------|
| >FGFR3-H64:LARDVHNLD\   | 50   | >FGFR3-H64:LARDVDNLD\   | 66   | 16   |
| >FGFR3-H64:LARDVHNLD\   | 352  | >FGFR3-H64:LARDVDNLD\   | 165  | 187  |
| >FGFR3-H64:LARDVHNLD\   | 484  | >FGFR3-H64:LARDVDNLD\   | 906  | 422  |
| >FGFR3-H64:LARDVHNLD\   | 58   | >FGFR3-H64:LARDVDNLD\   | 102  | 44   |
| >FGFR3-H64:GLARDVHNL    | 62   | >FGFR3-H64:GLARDVDNL    | 488  | 426  |
| >FGFR3-H64:GLARDVHNL    | 5    | >FGFR3-H64:GLARDVDNL    | 6    | 1    |
| >FGFR3-H64:GLARDVHNL    | 10   | >FGFR3-H64:GLARDVDNL    | 27   | 17   |
| >FGFR3-H64:GLARDVHNL    | 16   | >FGFR3-H64:GLARDVDNL    | 68   | 52   |
| >FGFR3-H64:GLARDVHNL    | 6    | >FGFR3-H64:GLARDVDNL    | 20   | 14   |
| >FGFR3-H64:GLARDVHNL    | 9    | >FGFR3-H64:GLARDVDNL    | 18   | 9    |
| >FGFR3-H64:GLARDVHNL    | 15   | >FGFR3-H64:GLARDVDNL    | 107  | 92   |
| >FGFR3-H64:GLARDVHNL    | 3    | >FGFR3-H64:GLARDVDNL    | 17   | 14   |
| >FGFR3-H64:GLARDVHNLI   | 27   | >FGFR3-H64:GLARDVDNLI   | 68   | 41   |
| >FGFR3-H64:GLARDVHNLI   | 220  | >FGFR3-H64:GLARDVDNLI   | 339  | 119  |
| >FGFR3-H64:GLARDVHNLI   | 217  | >FGFR3-H64:GLARDVDNLI   | 368  | 151  |
| >FGFR3-H64:GLARDVHNLI   | 350  | >FGFR3-H64:GLARDVDNLI   | 625  | 275  |
| >FGFR3-H64:GLARDVHNLI   | 463  | >FGFR3-H64:GLARDVDNLI   | 742  | 279  |
| >FGFR3-H64:GLARDVHNLI   | 293  | >FGFR3-H64:GLARDVDNLI   | 422  | 129  |
| >FGFR3-I376 ILSYGVGFFL  | 23   | >FGFR3-I376 CLSYGVGFFL  | 82   | 59   |
| >FGFR3-I376 ILSYGVGFFL  | 10   | >FGFR3-I376 CLSYGVGFFL  | 17   | 7    |
| >FGFR3-I376 ILSYGVGFFL  | 239  | >FGFR3-I376 CLSYGVGFFLI | 1135 | 896  |
| >FGFR3-I376 ILSYGVGFFL  | 273  | >FGFR3-I376 CLSYGVGFFL  | 751  | 478  |
| >FGFR3-I376 ILSYGVGFFL  | 303  | >FGFR3-I376 CLSYGVGFFL  | 808  | 505  |
| >FGFR3-I376 ILSYGVGFFL  | 13   | >FGFR3-I376 CLSYGVGFFL  | 91   | 78   |
| >FGFR3-I376 ILSYGVGFFL  | 37   | >FGFR3-I376 CLSYGVGFFL  | 129  | 92   |
| >FGFR3-I376 ILSYGVGFFL  | 17   | >FGFR3-I376 CLSYGVGFFL  | 102  | 85   |
| >FGFR3-I376 ILSYGVGFFL  | 19   | >FGFR3-I376 CLSYGVGFFL  | 54   | 35   |
| >FGFR3-I376 ILSYGVGFFL  | 8    | >FGFR3-I376 CLSYGVGFFL  | 60   | 52   |
| >FGFR3-I376 ILSYGVGFFL  | 395  | >FGFR3-I376 CLSYGVGFFLI | 1092 | 697  |
| >FGFR3-I376 ILSYGVGFFL  | 2430 | >FGFR3-I376 CLSYGVGFFLI | 317  | 2113 |
| >FGFR3-I376 ILSYGVGFFL  | 76   | >FGFR3-I376 CLSYGVGFFLI | 138  | 62   |
| >FGFR3-I376 ILSYGVGFF   | 404  | >FGFR3-I376 CLSYGVGFF   | 731  | 327  |
| >FGFR3-I376 ILSYGVGF    | 74   | >FGFR3-I376 CLSYGVGF    | 251  | 177  |
| >FGFR3-I376 ILSYGVGFF   | 81   | >FGFR3-I376 CLSYGVGFF   | 327  | 246  |
| >FGFR3-I376 ILSYGVGFFL  | 112  | >FGFR3-I376 CLSYGVGFFLI | 529  | 417  |
| >FGFR3-I376 ILSYGVGF    | 254  | >FGFR3-I376 CLSYGVGF    | 1090 | 836  |
| >FGFR3-I376 ILSYGVGFF   | 444  | >FGFR3-I376 CLSYGVGFF   | 2003 | 1559 |
| >FGFR3-I376 ILSYGVGF    | 37   | >FGFR3-I376 CLSYGVGF    | 195  | 158  |
| >FGFR3-I376 ILSYGVGFF   | 276  | >FGFR3-I376 CLSYGVGFF   | 1156 | 880  |
| >FGFR3-I376 ILSYGVGFFL  | 112  | >FGFR3-I376 CLSYGVGFFLI | 532  | 420  |
| >FGFR3-I376 ILSYGVGFF   | 316  | >FGFR3-I376 CLSYGVGFF   | 3678 | 3362 |
| >FGFR3-I376 ILSYGVGFFL  | 169  | >FGFR3-I376 CLSYGVGFFLI | 2070 | 1901 |
| >FGFR3-I376 GILSYGVGFFI | 41   | >FGFR3-I376 GCLSYGVGFF  | 2865 | 2824 |

|                         |      |                        |       |       |
|-------------------------|------|------------------------|-------|-------|
| >FGFR3-I376 GILSYGVGFFI | 49   | >FGFR3-I376 GCLSYGVGFF | 914   | 865   |
| >FGFR3-I376 GILSYGVGFFI | 21   | >FGFR3-I376 GCLSYGVGFF | 5812  | 5791  |
| >FGFR3-I376 GILSYGVGFFI | 10   | >FGFR3-I376 GCLSYGVGFF | 552   | 542   |
| >FGFR3-I376 GILSYGVGFFI | 50   | >FGFR3-I376 GCLSYGVGFF | 2956  | 2906  |
| >FGFR3-I376 GILSYGVGFFI | 22   | >FGFR3-I376 GCLSYGVGFF | 602   | 580   |
| >FGFR3-I376 GILSYGVGFFI | 286  | >FGFR3-I376 GCLSYGVGFF | 8627  | 8341  |
| >FGFR3-I376 GILSYGVGFFI | 85   | >FGFR3-I376 GCLSYGVGFF | 8966  | 8881  |
| >FGFR3-I376 GILSYGVGF   | 118  | >FGFR3-I376 GCLSYGVGF  | 191   | 73    |
| >FGFR3-I376 GILSYGVGF   | 742  | >FGFR3-I376 GCLSYGVGF  | 265   | 477   |
| >FGFR3-I376 GILSYGVGFFI | 893  | >FGFR3-I376 GCLSYGVGFF | 327   | 566   |
| >FGFR3-I376 ADEAGSVYAC  | 334  | >FGFR3-I376 ADEAGSVYAC | 16594 | 16260 |
| >FGFR3-I376 ADEAGSVYAC  | 112  | >FGFR3-I376 ADEAGSVYAC | 14264 | 14152 |
| >FGFR3-I376 AGILSYGVGF  | 295  | >FGFR3-I376 AGCLSYGVGF | 1095  | 800   |
| >FGFR3-I376 AGILSYGVGF  | 107  | >FGFR3-I376 AGCLSYGVGF | 370   | 263   |
| >FGFR3-I376 AGILSYGVGF  | 450  | >FGFR3-I376 AGCLSYGVGF | 1112  | 662   |
| >FGFR3-I376 AGILSYGVGF  | 490  | >FGFR3-I376 AGCLSYGVGF | 989   | 499   |
| >FGFR3-I376 YAGILSYGV   | 389  | >FGFR3-I376 YAGCLSYGV  | 91    | 298   |
| >FGFR3-I376 YAGILSYGV   | 152  | >FGFR3-I376 YAGCLSYGV  | 57    | 95    |
| >FGFR3-I376 YAGILSYGV   | 1134 | >FGFR3-I376 YAGCLSYGV  | 317   | 817   |
| >FGFR3-I376 YAGILSYGV   | 92   | >FGFR3-I376 YAGCLSYGV  | 34    | 58    |
| >FGFR3-I376 YAGILSYGV   | 18   | >FGFR3-I376 YAGCLSYGV  | 12    | 6     |
| >FGFR3-I376 YAGILSYGV   | 50   | >FGFR3-I376 YAGCLSYGV  | 8     | 42    |
| >FGFR3-I376 YAGILSYGV   | 44   | >FGFR3-I376 YAGCLSYGV  | 89    | 45    |
| >FGFR3-I376 YAGILSYGV   | 105  | >FGFR3-I376 YAGCLSYGV  | 31    | 74    |
| >FGFR3-I376 YAGILSYGV   | 51   | >FGFR3-I376 YAGCLSYGV  | 213   | 162   |
| >FGFR3-I376 YAGILSYGV   | 72   | >FGFR3-I376 YAGCLSYGV  | 19    | 53    |
| >FGFR3-I376 YAGILSYGV   | 29   | >FGFR3-I376 YAGCLSYGV  | 13    | 16    |
| >FGFR3-I376 YAGILSYGVG  | 195  | >FGFR3-I376 YAGCLSYGVC | 106   | 89    |
| >FGFR3-I376 YAGILSYGVG  | 261  | >FGFR3-I376 YAGCLSYGVC | 80    | 181   |
| >FGFR3-I376 YAGILSYGVG  | 16   | >FGFR3-I376 YAGCLSYGVC | 59    | 43    |
| >FGFR3-I376 YAGILSYGVG  | 72   | >FGFR3-I376 YAGCLSYGVC | 40    | 32    |
| >FGFR3-I376 VYAGILSYGV  | 160  | >FGFR3-I376 VYAGCLSYGV | 342   | 182   |
| >FGFR3-I376 VYAGILSYGV  | 191  | >FGFR3-I376 VYAGCLSYGV | 366   | 175   |
| >FGFR3-I376 VYAGILSYGV  | 55   | >FGFR3-I376 VYAGCLSYGV | 68    | 13    |
| >FGFR3-I376 VYAGILSY    | 333  | >FGFR3-I376 VYAGCLSY   | 734   | 401   |
| >FGFR3-I376 VYAGILSYGV  | 230  | >FGFR3-I376 VYAGCLSYGV | 387   | 157   |
| >FGFR3-I376 VYAGILSY    | 12   | >FGFR3-I376 VYAGCLSY   | 14    | 2     |
| >FGFR3-I376 VYAGILSY    | 27   | >FGFR3-I376 VYAGCLSY   | 19    | 8     |
| >FGFR3-I376 VYAGILSY    | 24   | >FGFR3-I376 VYAGCLSY   | 90    | 66    |
| >FGFR3-I376 VYAGILSY    | 140  | >FGFR3-I376 VYAGCLSY   | 68    | 72    |
| >FGFR3-I376 SVYAGILSYG\ | 14   | >FGFR3-I376 SVYAGCLSYG | 18    | 4     |
| >FGFR3-I376 SVYAGILSYG\ | 33   | >FGFR3-I376 SVYAGCLSYG | 46    | 13    |
| >FGFR3-I376 SVYAGILSYG\ | 9    | >FGFR3-I376 SVYAGCLSYG | 11    | 2     |

|                         |     |                        |       |       |
|-------------------------|-----|------------------------|-------|-------|
| >FGFR3-I376 SVYAGILSYG\ | 6   | >FGFR3-I376 SVYAGCLSYG | 6     | 0     |
| >FGFR3-I376 SVYAGILSYG\ | 3   | >FGFR3-I376 SVYAGCLSYG | 6     | 3     |
| >FGFR3-I376 SVYAGILSYG\ | 13  | >FGFR3-I376 SVYAGCLSYG | 36    | 23    |
| >FGFR3-I376 SVYAGILSYG\ | 6   | >FGFR3-I376 SVYAGCLSYG | 9     | 3     |
| >FGFR3-I376 SVYAGILSYG\ | 87  | >FGFR3-I376 SVYAGCLSYG | 140   | 53    |
| >FGFR3-I376 SVYAGILSYG\ | 4   | >FGFR3-I376 SVYAGCLSYG | 5     | 1     |
| >FGFR3-I376 SVYAGILSY   | 40  | >FGFR3-I376 SVYAGCLSY  | 52    | 12    |
| >FGFR3-I376 SVYAGILSY   | 12  | >FGFR3-I376 SVYAGCLSY  | 20    | 8     |
| >FGFR3-I376 SVYAGILSY   | 145 | >FGFR3-I376 SVYAGCLSY  | 1389  | 1244  |
| >FGFR3-I376 SVYAGILSY   | 32  | >FGFR3-I376 SVYAGCLSY  | 467   | 435   |
| >FGFR3-I376 SVYAGILSY   | 15  | >FGFR3-I376 SVYAGCLSY  | 257   | 242   |
| >FGFR3-I376 SVYAGILSY   | 240 | >FGFR3-I376 SVYAGCLSY  | 383   | 143   |
| >FGFR3-I376 SVYAGILSY   | 7   | >FGFR3-I376 SVYAGCLSY  | 6     | 1     |
| >FGFR3-I376 SVYAGILSY   | 37  | >FGFR3-I376 SVYAGCLSY  | 29    | 8     |
| >FGFR3-I376 SVYAGILSY   | 334 | >FGFR3-I376 SVYAGCLSY  | 551   | 217   |
| >FGFR3-I376 SVYAGILSYG\ | 427 | >FGFR3-I376 SVYAGCLSYG | 483   | 56    |
| >FGFR3-I376 SVYAGILSYG\ | 8   | >FGFR3-I376 SVYAGCLSYG | 12    | 4     |
| >FGFR3-I376 SVYAGILSYG\ | 6   | >FGFR3-I376 SVYAGCLSYG | 7     | 1     |
| >FGFR3-I376 SVYAGILSY   | 5   | >FGFR3-I376 SVYAGCLSY  | 7     | 2     |
| >FGFR3-I376 SVYAGILSY   | 37  | >FGFR3-I376 SVYAGCLSY  | 34    | 3     |
| >FGFR3-I376 SVYAGILSY   | 31  | >FGFR3-I376 SVYAGCLSY  | 40    | 9     |
| >FGFR3-I376 SVYAGILSY   | 244 | >FGFR3-I376 SVYAGCLSY  | 260   | 16    |
| >FGFR3-I376 SVYAGILSY   | 8   | >FGFR3-I376 SVYAGCLSY  | 19    | 11    |
| >FGFR3-I376 SVYAGILSY   | 116 | >FGFR3-I376 SVYAGCLSY  | 101   | 15    |
| >FGFR3-I376 SVYAGILSY   | 88  | >FGFR3-I376 SVYAGCLSY  | 36    | 52    |
| >FGFR3-I376 GSVYAGILSY  | 306 | >FGFR3-I376 GSVYAGCLSY | 259   | 47    |
| >FGFR3-I376 GSVYAGILSY  | 267 | >FGFR3-I376 GSVYAGCLSY | 193   | 74    |
| >FGFR3-I376 GSVYAGILSY  | 186 | >FGFR3-I376 GSVYAGCLSY | 195   | 9     |
| >FGFR3-I376 GSVYAGILSY  | 99  | >FGFR3-I376 GSVYAGCLSY | 80    | 19    |
| >FGFR3-I376 GSVYAGILSY  | 85  | >FGFR3-I376 GSVYAGCLSY | 61    | 24    |
| >FGFR3-I376 GSVYAGILSY  | 242 | >FGFR3-I376 GSVYAGCLSY | 240   | 2     |
| >FGFR3-I376 GSVYAGIL    | 94  | >FGFR3-I376 GSVYAGCL   | 301   | 207   |
| >FGFR3-I376 GSVYAGILSY  | 5   | >FGFR3-I376 GSVYAGCLSY | 7     | 2     |
| >FGFR3-I376 GSVYAGILSY  | 34  | >FGFR3-I376 GSVYAGCLSY | 76    | 42    |
| >FGFR3-I376 AGSVYAGI    | 342 | >FGFR3-I376 AGSVYAGC   | 2219  | 1877  |
| >FGFR3-I376 AGSVYAGILS' | 623 | >FGFR3-I376 AGSVYAGCLS | 416   | 207   |
| >FGFR3-I376 AGSVYAGILS' | 68  | >FGFR3-I376 AGSVYAGCLS | 74    | 6     |
| >FGFR3-I376 AGSVYAGILS' | 343 | >FGFR3-I376 AGSVYAGCLS | 334   | 9     |
| >FGFR3-I376 AGSVYAGILS' | 178 | >FGFR3-I376 AGSVYAGCLS | 398   | 220   |
| >FGFR3-I376 EAGSVYAGI   | 22  | >FGFR3-I376 EAGSVYAGC  | 3668  | 3646  |
| >FGFR3-I376 EAGSVYAGI   | 27  | >FGFR3-I376 EAGSVYAGC  | 5643  | 5616  |
| >FGFR3-I376 DEAGSVYAGI  | 26  | >FGFR3-I376 DEAGSVYAGC | 11631 | 11605 |
| >FGFR3-I376 DEAGSVYAGI  | 216 | >FGFR3-I376 DEAGSVYAGC | 103   | 113   |

|                        |       |                        |       |       |
|------------------------|-------|------------------------|-------|-------|
| >FGFR3-I376 DEAGSVYAGI | 30    | >FGFR3-I376 DEAGSVYAGI | 37    | 7     |
| >FGFR3-I376 DEAGSVYAGI | 120   | >FGFR3-I376 DEAGSVYAGI | 431   | 311   |
| >FGFR3-I376 DEAGSVYAGI | 246   | >FGFR3-I376 DEAGSVYAGI | 28624 | 28378 |
| >FGFR3-K65C KTTNGRLPV  | 136   | >FGFR3-K65C ETTNGRLPV  | 4836  | 4700  |
| >FGFR3-K65C KTTNGRLPV  | 349   | >FGFR3-K65C ETTNGRLPV  | 3316  | 2967  |
| >FGFR3-K65C KTTNGRLPVK | 62    | >FGFR3-K65C ETTNGRLPVK | 1205  | 1143  |
| >FGFR3-K65C KTTNGRLPVK | 25    | >FGFR3-K65C ETTNGRLPVK | 108   | 83    |
| >FGFR3-K65C KTTNGRLPV  | 22    | >FGFR3-K65C ETTNGRLPV  | 10519 | 10497 |
| >FGFR3-K65C KTTNGRLPVK | 6     | >FGFR3-K65C ETTNGRLPVK | 3960  | 3954  |
| >FGFR3-K65C KTTNGRLPV  | 209   | >FGFR3-K65C ETTNGRLPV  | 5423  | 5214  |
| >FGFR3-K65C KTTNGRLPVK | 28    | >FGFR3-K65C ETTNGRLPVK | 1300  | 1272  |
| >FGFR3-K65C KTTNGRLPVK | 2921  | >FGFR3-K65C ETTNGRLPVK | 84    | 2837  |
| >FGFR3-K65C KTTNGRLPV  | 578   | >FGFR3-K65C ETTNGRLPV  | 9     | 569   |
| >FGFR3-K65C KTTNGRLPV  | 1438  | >FGFR3-K65C ETTNGRLPV  | 11    | 1427  |
| >FGFR3-K65C KTTNGRLPV  | 141   | >FGFR3-K65C ETTNGRLPV  | 6261  | 6120  |
| >FGFR3-K65C KTTNGRLPVK | 15    | >FGFR3-K65C ETTNGRLPVK | 63    | 48    |
| >FGFR3-K65C KTTNGRLPVK | 47    | >FGFR3-K65C ETTNGRLPVK | 576   | 529   |
| >FGFR3-K65C KTTNGRLPVK | 13    | >FGFR3-K65C ETTNGRLPVK | 223   | 210   |
| >FGFR3-K65C KTTNGRLPVK | 332   | >FGFR3-K65C ETTNGRLPVK | 4077  | 3745  |
| >FGFR3-K65C KKTTNGRL   | 24861 | >FGFR3-K65C KETTNGRL   | 109   | 24752 |
| >FGFR3-K65C KKTTNGRLPV | 12161 | >FGFR3-K65C KETTNGRLPV | 386   | 11775 |
| >FGFR3-K65C KKTTNGRL   | 450   | >FGFR3-K65C KETTNGRL   | 7508  | 7058  |
| >FGFR3-K65C KKTTNGRLPV | 56    | >FGFR3-K65C KETTNGRLPV | 2557  | 2501  |
| >FGFR3-K65C KKTTNGRL   | 17650 | >FGFR3-K65C KETTNGRL   | 46    | 17604 |
| >FGFR3-K65C YKKTNGR    | 289   | >FGFR3-K65C YKETTNGR   | 5367  | 5078  |
| >FGFR3-K65C YKKTNGRL   | 154   | >FGFR3-K65C YKETTNGRL  | 2906  | 2752  |
| >FGFR3-K65C YKKTNGRLP  | 28    | >FGFR3-K65C YKETTNGRLP | 435   | 407   |
| >FGFR3-K65C YKKTNGRL   | 6299  | >FGFR3-K65C YKETTNGRL  | 355   | 5944  |
| >FGFR3-K65C YKKTNGRLP  | 4446  | >FGFR3-K65C YKETTNGRLP | 220   | 4226  |
| >FGFR3-K65C YYKKTNGRL  | 12    | >FGFR3-K65C YYKETTNGRL | 29    | 17    |
| >FGFR3-K65C YYKKTNGRL  | 374   | >FGFR3-K65C YYKETTNGRL | 632   | 258   |
| >FGFR3-K65C YYKKTNGRL  | 158   | >FGFR3-K65C YYKETTNGRL | 314   | 156   |
| >FGFR3-K65C YYKKTNGRL  | 12    | >FGFR3-K65C YYKETTNGRL | 15    | 3     |
| >FGFR3-K65C YYKKTNGR   | 104   | >FGFR3-K65C YYKETTNGR  | 168   | 64    |
| >FGFR3-K65C YYKKTNGR   | 105   | >FGFR3-K65C YYKETTNGR  | 51    | 54    |
| >FGFR3-K65C YYKKTNGR   | 162   | >FGFR3-K65C YYKETTNGR  | 134   | 28    |
| >FGFR3-K65C YYKKTNGR   | 35    | >FGFR3-K65C YYKETTNGR  | 46    | 11    |
| >FGFR3-K65C DYYKKTNGF  | 262   | >FGFR3-K65C DYYKETTNGF | 586   | 324   |
| >FGFR3-K65C DYYKKTNGF  | 702   | >FGFR3-K65C DYYKETTNGF | 452   | 250   |
| >FGFR3-K65C DYYKKTNGF  | 224   | >FGFR3-K65C DYYKETTNGF | 828   | 604   |
| >FGFR3-K65C DYYKKTNGF  | 149   | >FGFR3-K65C DYYKETTNGF | 283   | 134   |
| >FGFR3-K65C DYYKKTNGF  | 25    | >FGFR3-K65C DYYKETTNGF | 24    | 1     |
| >FGFR3-K65C HNLDDYK    | 352   | >FGFR3-K65C HNLDDYK    | 19308 | 18956 |

|                         |       |                         |       |       |
|-------------------------|-------|-------------------------|-------|-------|
| >FGFR3-K65C DVHNLDDYYKI | 408   | >FGFR3-K65C DVHNLDDYYKE | 31881 | 31473 |
| >FGFR3-K65C DVHNLDDYYKI | 48    | >FGFR3-K65C DVHNLDDYYKE | 19506 | 19458 |
| >FGFR3-K65C KTTNGRLPV   | 1349  | >FGFR3-K65C MTTNGRLPV   | 365   | 984   |
| >FGFR3-K65C KTTNGRLPV   | 136   | >FGFR3-K65C MTTNGRLPV   | 82    | 54    |
| >FGFR3-K65C KTTNGRLPV   | 349   | >FGFR3-K65C MTTNGRLPV   | 32    | 317   |
| >FGFR3-K65C KTTNGRLPVK  | 62    | >FGFR3-K65C MTTNGRLPV   | 91    | 29    |
| >FGFR3-K65C KTTNGRLPVK  | 25    | >FGFR3-K65C MTTNGRLPV   | 20    | 5     |
| >FGFR3-K65C KTTNGRLPV   | 22    | >FGFR3-K65C MTTNGRLPV   | 90    | 68    |
| >FGFR3-K65C KTTNGRLPVK  | 6     | >FGFR3-K65C MTTNGRLPV   | 11    | 5     |
| >FGFR3-K65C KTTNGRLPV   | 209   | >FGFR3-K65C MTTNGRLPV   | 1799  | 1590  |
| >FGFR3-K65C KTTNGRLPVK  | 28    | >FGFR3-K65C MTTNGRLPV   | 238   | 210   |
| >FGFR3-K65C KTTNGRLPVK  | 2921  | >FGFR3-K65C MTTNGRLPV   | 50    | 2871  |
| >FGFR3-K65C KTTNGRLPV   | 578   | >FGFR3-K65C MTTNGRLPV   | 7     | 571   |
| >FGFR3-K65C KTTNGRLPV   | 1438  | >FGFR3-K65C MTTNGRLPV   | 35    | 1403  |
| >FGFR3-K65C KTTNGRLPV   | 141   | >FGFR3-K65C MTTNGRLPV   | 307   | 166   |
| >FGFR3-K65C KTTNGRLPVK  | 15    | >FGFR3-K65C MTTNGRLPV   | 9     | 6     |
| >FGFR3-K65C KTTNGRLPVK  | 6489  | >FGFR3-K65C MTTNGRLPV   | 363   | 6126  |
| >FGFR3-K65C KTTNGRLPVK  | 47    | >FGFR3-K65C MTTNGRLPV   | 65    | 18    |
| >FGFR3-K65C KTTNGRLPVK  | 13    | >FGFR3-K65C MTTNGRLPV   | 13    | 0     |
| >FGFR3-K65C KTTNGRLPVK  | 332   | >FGFR3-K65C MTTNGRLPV   | 290   | 42    |
| >FGFR3-K65C KTTNGRLPVK  | 2818  | >FGFR3-K65C MTTNGRLPV   | 84    | 2734  |
| >FGFR3-K65C KKTTNGRLPV  | 22432 | >FGFR3-K65C KMTTNGRLP'  | 172   | 22260 |
| >FGFR3-K65C KKTTNGRL    | 26620 | >FGFR3-K65C KMTTNGRL    | 380   | 26240 |
| >FGFR3-K65C KKTTNGRLPV  | 14895 | >FGFR3-K65C KMTTNGRLP'  | 61    | 14834 |
| >FGFR3-K65C KKTTNGRLPV  | 10118 | >FGFR3-K65C KMTTNGRLP'  | 25    | 10093 |
| >FGFR3-K65C KKTTNGRLPV  | 8516  | >FGFR3-K65C KMTTNGRLP'  | 235   | 8281  |
| >FGFR3-K65C KKTTNGRL    | 24700 | >FGFR3-K65C KMTTNGRL    | 110   | 24590 |
| >FGFR3-K65C KKTTNGRLPV  | 15272 | >FGFR3-K65C KMTTNGRLP'  | 11    | 15261 |
| >FGFR3-K65C KKTTNGRL    | 23633 | >FGFR3-K65C KMTTNGRL    | 230   | 23403 |
| >FGFR3-K65C KKTTNGRLPV  | 13135 | >FGFR3-K65C KMTTNGRLP'  | 14    | 13121 |
| >FGFR3-K65C KKTTNGRLPV  | 14117 | >FGFR3-K65C KMTTNGRLP'  | 18    | 14099 |
| >FGFR3-K65C KKTTNGRL    | 30935 | >FGFR3-K65C KMTTNGRL    | 53    | 30882 |
| >FGFR3-K65C KKTTNGRLPV  | 16595 | >FGFR3-K65C KMTTNGRLP'  | 5     | 16590 |
| >FGFR3-K65C KKTTNGRLPV  | 16198 | >FGFR3-K65C KMTTNGRLP'  | 57    | 16141 |
| >FGFR3-K65C KKTTNGRLPV  | 18251 | >FGFR3-K65C KMTTNGRLP'  | 167   | 18084 |
| >FGFR3-K65C KKTTNGRLPV  | 5884  | >FGFR3-K65C KMTTNGRLP'  | 389   | 5495  |
| >FGFR3-K65C KKTTNGRLPV  | 1312  | >FGFR3-K65C KMTTNGRLP'  | 35    | 1277  |
| >FGFR3-K65C KKTTNGRLPV  | 14206 | >FGFR3-K65C KMTTNGRLP'  | 353   | 13853 |
| >FGFR3-K65C KKTTNGRL    | 450   | >FGFR3-K65C KMTTNGRL    | 1079  | 629   |
| >FGFR3-K65C KKTTNGRLPV  | 56    | >FGFR3-K65C KMTTNGRLP'  | 157   | 101   |
| >FGFR3-K65C YKKTNGRLP   | 6623  | >FGFR3-K65C YKMTTNGRLI  | 290   | 6333  |
| >FGFR3-K65C YKKTNGR     | 1684  | >FGFR3-K65C YKMTTNGR    | 413   | 1271  |
| >FGFR3-K65C YKKTNGR     | 289   | >FGFR3-K65C YKMTTNGR    | 101   | 188   |



|                        |       |                        |       |       |
|------------------------|-------|------------------------|-------|-------|
| >FGFR3-K65C YKKTNGRL   | 154   | >FGFR3-K65C YKMTNGRL   | 61    | 93    |
| >FGFR3-K65C YKKTNGRLP  | 28    | >FGFR3-K65C YKMTNGRLI  | 13    | 15    |
| >FGFR3-K65C YKKTNGRL   | 6299  | >FGFR3-K65C YKMTNGRL   | 39    | 6260  |
| >FGFR3-K65C YKKTNGRLP  | 4446  | >FGFR3-K65C YKMTNGRLI  | 38    | 4408  |
| >FGFR3-K65C YKKTNGR    | 1028  | >FGFR3-K65C YKMTNGR    | 498   | 530   |
| >FGFR3-K65C YKKTNGRL   | 12    | >FGFR3-K65C YKMTNGRI   | 14    | 2     |
| >FGFR3-K65C YKKTNGRL   | 374   | >FGFR3-K65C YKMTNGRI   | 507   | 133   |
| >FGFR3-K65C YKKTNGRL   | 158   | >FGFR3-K65C YKMTNGRI   | 305   | 147   |
| >FGFR3-K65C YKKTNGRL   | 12    | >FGFR3-K65C YKMTNGRI   | 19    | 7     |
| >FGFR3-K65C YKKTNGR    | 104   | >FGFR3-K65C YKMTNGR    | 71    | 33    |
| >FGFR3-K65C YKKTNGR    | 105   | >FGFR3-K65C YKMTNGR    | 43    | 62    |
| >FGFR3-K65C YKKTNGR    | 162   | >FGFR3-K65C YKMTNGR    | 113   | 49    |
| >FGFR3-K65C YKKTNGR    | 35    | >FGFR3-K65C YKMTNGR    | 44    | 9     |
| >FGFR3-K65C DYKKTNGF   | 262   | >FGFR3-K65C DYKMTNG    | 20    | 242   |
| >FGFR3-K65C DYKKTNGF   | 224   | >FGFR3-K65C DYKMTNG    | 106   | 118   |
| >FGFR3-K65C DYKKTNGF   | 149   | >FGFR3-K65C DYKMTNG    | 63    | 86    |
| >FGFR3-K65C DYKKTNGF   | 25    | >FGFR3-K65C DYKMTNG    | 25    | 0     |
| >FGFR3-K65C HNLDYK     | 352   | >FGFR3-K65C HNLDYKM    | 17519 | 17167 |
| >FGFR3-K65C DVHNLDYKI  | 408   | >FGFR3-K65C DVHNLDYKI  | 33365 | 32957 |
| >FGFR3-K65C DVHNLDYKI  | 21851 | >FGFR3-K65C DVHNLDYKI  | 206   | 21645 |
| >FGFR3-K65C DVHNLDYKI  | 48    | >FGFR3-K65C DVHNLDYKI  | 23725 | 23677 |
| >FGFR3-K65C KTTNGRLPV  | 136   | >FGFR3-K65C NTTNGRLPV  | 807   | 671   |
| >FGFR3-K65C KTTNGRLPV  | 349   | >FGFR3-K65C NTTNGRLPV  | 2408  | 2059  |
| >FGFR3-K65C KTTNGRLPVK | 62    | >FGFR3-K65C NTTNGRLPVK | 452   | 390   |
| >FGFR3-K65C KTTNGRLPVK | 25    | >FGFR3-K65C NTTNGRLPVK | 49    | 24    |
| >FGFR3-K65C KTTNGRLPV  | 22    | >FGFR3-K65C NTTNGRLPV  | 5619  | 5597  |
| >FGFR3-K65C KTTNGRLPVK | 6     | >FGFR3-K65C NTTNGRLPVK | 1033  | 1027  |
| >FGFR3-K65C KTTNGRLPV  | 209   | >FGFR3-K65C NTTNGRLPV  | 7558  | 7349  |
| >FGFR3-K65C KTTNGRLPVK | 28    | >FGFR3-K65C NTTNGRLPVK | 2352  | 2324  |
| >FGFR3-K65C KTTNGRLPVK | 2921  | >FGFR3-K65C NTTNGRLPVK | 78    | 2843  |
| >FGFR3-K65C KTTNGRLPV  | 578   | >FGFR3-K65C NTTNGRLPV  | 16    | 562   |
| >FGFR3-K65C KTTNGRLPV  | 1438  | >FGFR3-K65C NTTNGRLPV  | 38    | 1400  |
| >FGFR3-K65C KTTNGRLPV  | 141   | >FGFR3-K65C NTTNGRLPV  | 9772  | 9631  |
| >FGFR3-K65C KTTNGRLPVK | 15    | >FGFR3-K65C NTTNGRLPVK | 146   | 131   |
| >FGFR3-K65C KTTNGRLPVK | 47    | >FGFR3-K65C NTTNGRLPVK | 429   | 382   |
| >FGFR3-K65C KTTNGRLPVK | 13    | >FGFR3-K65C NTTNGRLPVK | 213   | 200   |
| >FGFR3-K65C KTTNGRLPVK | 332   | >FGFR3-K65C NTTNGRLPVK | 3020  | 2688  |
| >FGFR3-K65C KKTTNGRLPV | 1312  | >FGFR3-K65C KNTTNGRLPV | 404   | 908   |
| >FGFR3-K65C KKTTNGRL   | 450   | >FGFR3-K65C KNTTNGRL   | 10630 | 10180 |
| >FGFR3-K65C KKTTNGRLPV | 56    | >FGFR3-K65C KNTTNGRLPV | 4598  | 4542  |
| >FGFR3-K65C YKKTNGR    | 289   | >FGFR3-K65C YKNTNGR    | 403   | 114   |
| >FGFR3-K65C YKKTNGRL   | 154   | >FGFR3-K65C YKNTNGRL   | 200   | 46    |
| >FGFR3-K65C YKKTNGRLP  | 28    | >FGFR3-K65C YKNTNGRLP  | 29    | 1     |

|                        |       |                        |       |       |
|------------------------|-------|------------------------|-------|-------|
| >FGFR3-K65C YKKTTNGRLP | 4446  | >FGFR3-K65C YKNTTNGRLF | 338   | 4108  |
| >FGFR3-K65C YYKTTNGRL  | 12    | >FGFR3-K65C YYKNTTNGRL | 19    | 7     |
| >FGFR3-K65C YYKTTNGRL  | 374   | >FGFR3-K65C YYKNTTNGRL | 730   | 356   |
| >FGFR3-K65C YYKTTNGRL  | 158   | >FGFR3-K65C YYKNTTNGRL | 416   | 258   |
| >FGFR3-K65C YYKTTNGRL  | 12    | >FGFR3-K65C YYKNTTNGRL | 14    | 2     |
| >FGFR3-K65C YYKTTNGR   | 104   | >FGFR3-K65C YYKNTTNGR  | 70    | 34    |
| >FGFR3-K65C YYKTTNGR   | 105   | >FGFR3-K65C YYKNTTNGR  | 81    | 24    |
| >FGFR3-K65C YYKTTNGR   | 162   | >FGFR3-K65C YYKNTTNGR  | 130   | 32    |
| >FGFR3-K65C YYKTTNGR   | 35    | >FGFR3-K65C YYKNTTNGR  | 54    | 19    |
| >FGFR3-K65C DYYKTTNGF  | 262   | >FGFR3-K65C DYYKNTTNGF | 67    | 195   |
| >FGFR3-K65C DYYKTTNGF  | 702   | >FGFR3-K65C DYYKNTTNGF | 352   | 350   |
| >FGFR3-K65C DYYKTTNGF  | 224   | >FGFR3-K65C DYYKNTTNGF | 252   | 28    |
| >FGFR3-K65C DYYKTTNGF  | 149   | >FGFR3-K65C DYYKNTTNGF | 123   | 26    |
| >FGFR3-K65C DYYKTTNGF  | 25    | >FGFR3-K65C DYYKNTTNGF | 25    | 0     |
| >FGFR3-K65C HNLDDYK    | 352   | >FGFR3-K65C HNLDDYKN   | 16520 | 16168 |
| >FGFR3-K65C DVHNLDDYK  | 408   | >FGFR3-K65C DVHNLDDYK  | 32674 | 32266 |
| >FGFR3-K65C DVHNLDDYK  | 48    | >FGFR3-K65C DVHNLDDYK  | 22723 | 22675 |
| >FGFR3-K65C KTTNGRLPV  | 136   | >FGFR3-K65C QTTNGRLPV  | 803   | 667   |
| >FGFR3-K65C KTTNGRLPV  | 349   | >FGFR3-K65C QTTNGRLPV  | 1605  | 1256  |
| >FGFR3-K65C KTTNGRLPVK | 62    | >FGFR3-K65C QTTNGRLPV  | 249   | 187   |
| >FGFR3-K65C KTTNGRLPVK | 25    | >FGFR3-K65C QTTNGRLPV  | 35    | 10    |
| >FGFR3-K65C KTTNGRLPV  | 22    | >FGFR3-K65C QTTNGRLPV  | 971   | 949   |
| >FGFR3-K65C KTTNGRLPVK | 6     | >FGFR3-K65C QTTNGRLPV  | 79    | 73    |
| >FGFR3-K65C KTTNGRLPV  | 209   | >FGFR3-K65C QTTNGRLPV  | 1630  | 1421  |
| >FGFR3-K65C KTTNGRLPVK | 28    | >FGFR3-K65C QTTNGRLPV  | 238   | 210   |
| >FGFR3-K65C KTTNGRLPVK | 2921  | >FGFR3-K65C QTTNGRLPV  | 306   | 2615  |
| >FGFR3-K65C KTTNGRLPV  | 578   | >FGFR3-K65C QTTNGRLPV  | 22    | 556   |
| >FGFR3-K65C KTTNGRLPV  | 1438  | >FGFR3-K65C QTTNGRLPV  | 85    | 1353  |
| >FGFR3-K65C KTTNGRLPV  | 141   | >FGFR3-K65C QTTNGRLPV  | 1914  | 1773  |
| >FGFR3-K65C KTTNGRLPVK | 15    | >FGFR3-K65C QTTNGRLPV  | 28    | 13    |
| >FGFR3-K65C KTTNGRLPVK | 47    | >FGFR3-K65C QTTNGRLPV  | 271   | 224   |
| >FGFR3-K65C KTTNGRLPVK | 13    | >FGFR3-K65C QTTNGRLPV  | 44    | 31    |
| >FGFR3-K65C KTTNGRLPVK | 332   | >FGFR3-K65C QTTNGRLPV  | 997   | 665   |
| >FGFR3-K65C KKTTNGRLPV | 10118 | >FGFR3-K65C KQTTNGRLPV | 269   | 9849  |
| >FGFR3-K65C KKTTNGRLPV | 8516  | >FGFR3-K65C KQTTNGRLPV | 385   | 8131  |
| >FGFR3-K65C KKTTNGRLPV | 1312  | >FGFR3-K65C KQTTNGRLPV | 134   | 1178  |
| >FGFR3-K65C KKTTNGRL   | 450   | >FGFR3-K65C KQTTNGRL   | 447   | 3     |
| >FGFR3-K65C KKTTNGRLPV | 56    | >FGFR3-K65C KQTTNGRLPV | 61    | 5     |
| >FGFR3-K65C YKTTNGR    | 289   | >FGFR3-K65C YKQTTNGR   | 1048  | 759   |
| >FGFR3-K65C YKTTNGRL   | 154   | >FGFR3-K65C YKQTTNGRL  | 432   | 278   |
| >FGFR3-K65C YKTTNGRLP  | 28    | >FGFR3-K65C YKQTTNGRLF | 58    | 30    |
| >FGFR3-K65C YKTTNGRLP  | 4446  | >FGFR3-K65C YKQTTNGRLF | 377   | 4069  |
| >FGFR3-K65C YYKTTNGRL  | 12    | >FGFR3-K65C YYKQTTNGRL | 20    | 8     |

|                        |       |                        |       |       |
|------------------------|-------|------------------------|-------|-------|
| >FGFR3-K65C YYKKTTNGRL | 374   | >FGFR3-K65C YYKQTTNGRL | 605   | 231   |
| >FGFR3-K65C YYKKTTNGRL | 158   | >FGFR3-K65C YYKQTTNGRL | 314   | 156   |
| >FGFR3-K65C YYKKTTNGRL | 12    | >FGFR3-K65C YYKQTTNGRL | 11    | 1     |
| >FGFR3-K65C YYKKTTNGR  | 104   | >FGFR3-K65C YYKQTTNGR  | 354   | 250   |
| >FGFR3-K65C YYKKTTNGR  | 105   | >FGFR3-K65C YYKQTTNGR  | 121   | 16    |
| >FGFR3-K65C YYKKTTNGR  | 162   | >FGFR3-K65C YYKQTTNGR  | 153   | 9     |
| >FGFR3-K65C YYKKTTNGR  | 35    | >FGFR3-K65C YYKQTTNGR  | 33    | 2     |
| >FGFR3-K65C DYYKTTNGF  | 262   | >FGFR3-K65C DYYKQTTNGI | 142   | 120   |
| >FGFR3-K65C DYYKTTNGF  | 702   | >FGFR3-K65C DYYKQTTNGI | 415   | 287   |
| >FGFR3-K65C DYYKTTNGF  | 224   | >FGFR3-K65C DYYKQTTNGI | 346   | 122   |
| >FGFR3-K65C DYYKTTNGF  | 149   | >FGFR3-K65C DYYKQTTNGI | 175   | 26    |
| >FGFR3-K65C DYYKTTNGF  | 25    | >FGFR3-K65C DYYKQTTNGI | 24    | 1     |
| >FGFR3-K65C HNLDDYK    | 352   | >FGFR3-K65C HNLDDYKQ   | 4612  | 4260  |
| >FGFR3-K65C DVHNLDDYK  | 408   | >FGFR3-K65C DVHNLDDYK  | 30954 | 30546 |
| >FGFR3-K65C DVHNLDDYK  | 48    | >FGFR3-K65C DVHNLDDYK  | 16716 | 16668 |
| >FGFR3-K65C KTTNGRLPV  | 136   | >FGFR3-K65C TTTNGRLPV  | 682   | 546   |
| >FGFR3-K65C KTTNGRLPV  | 349   | >FGFR3-K65C TTTNGRLPV  | 622   | 273   |
| >FGFR3-K65C KTTNGRLPVK | 62    | >FGFR3-K65C TTTNGRLPVK | 219   | 157   |
| >FGFR3-K65C KTTNGRLPVK | 25    | >FGFR3-K65C TTTNGRLPVK | 19    | 6     |
| >FGFR3-K65C KTTNGRLPV  | 22    | >FGFR3-K65C TTTNGRLPV  | 1252  | 1230  |
| >FGFR3-K65C KTTNGRLPVK | 6     | >FGFR3-K65C TTTNGRLPVK | 107   | 101   |
| >FGFR3-K65C KTTNGRLPV  | 209   | >FGFR3-K65C TTTNGRLPV  | 4407  | 4198  |
| >FGFR3-K65C KTTNGRLPVK | 28    | >FGFR3-K65C TTTNGRLPVK | 657   | 629   |
| >FGFR3-K65C KTTNGRLPVK | 2921  | >FGFR3-K65C TTTNGRLPVK | 106   | 2815  |
| >FGFR3-K65C KTTNGRLPV  | 578   | >FGFR3-K65C TTTNGRLPV  | 12    | 566   |
| >FGFR3-K65C KTTNGRLPV  | 1438  | >FGFR3-K65C TTTNGRLPV  | 51    | 1387  |
| >FGFR3-K65C KTTNGRLPV  | 141   | >FGFR3-K65C TTTNGRLPV  | 2499  | 2358  |
| >FGFR3-K65C KTTNGRLPVK | 15    | >FGFR3-K65C TTTNGRLPVK | 34    | 19    |
| >FGFR3-K65C KTTNGRLPVK | 47    | >FGFR3-K65C TTTNGRLPVK | 93    | 46    |
| >FGFR3-K65C KTTNGRLPVK | 13    | >FGFR3-K65C TTTNGRLPVK | 40    | 27    |
| >FGFR3-K65C KTTNGRLPVK | 332   | >FGFR3-K65C TTTNGRLPVK | 942   | 610   |
| >FGFR3-K65C KKTTNGRLPV | 10118 | >FGFR3-K65C KTTTNGRLPV | 269   | 9849  |
| >FGFR3-K65C KKTTNGRLPV | 8516  | >FGFR3-K65C KTTTNGRLPV | 478   | 8038  |
| >FGFR3-K65C KKTTNGRLPV | 16198 | >FGFR3-K65C KTTTNGRLPV | 172   | 16026 |
| >FGFR3-K65C KKTTNGRLPV | 18251 | >FGFR3-K65C KTTTNGRLPV | 86    | 18165 |
| >FGFR3-K65C KKTTNGRLPV | 5884  | >FGFR3-K65C KTTTNGRLPV | 59    | 5825  |
| >FGFR3-K65C KKTTNGRLPV | 1312  | >FGFR3-K65C KTTTNGRLPV | 9     | 1303  |
| >FGFR3-K65C KKTTNGRL   | 450   | >FGFR3-K65C KTTTNGRL   | 7601  | 7151  |
| >FGFR3-K65C KKTTNGRLPV | 56    | >FGFR3-K65C KTTTNGRLPV | 2915  | 2859  |
| >FGFR3-K65C KKTTNGRL   | 22056 | >FGFR3-K65C KTTTNGRL   | 11    | 22045 |
| >FGFR3-K65C KKTTNGRLPV | 27125 | >FGFR3-K65C KTTTNGRLPV | 201   | 26924 |
| >FGFR3-K65C KKTTNGRLPV | 19356 | >FGFR3-K65C KTTTNGRLPV | 309   | 19047 |
| >FGFR3-K65C YKTTNGR    | 1684  | >FGFR3-K65C YKTTNGR    | 487   | 1197  |

|                         |       |                         |       |       |
|-------------------------|-------|-------------------------|-------|-------|
| >FGFR3-K65C YKKTNGR     | 289   | >FGFR3-K65C YKTTNGR     | 981   | 692   |
| >FGFR3-K65C YKKTNGRL    | 154   | >FGFR3-K65C YKTTNGRL    | 417   | 263   |
| >FGFR3-K65C YKKTNGRLP   | 28    | >FGFR3-K65C YKTTNGRLP   | 61    | 33    |
| >FGFR3-K65C YKKTNGRL    | 12    | >FGFR3-K65C YKTTNGRL    | 9     | 3     |
| >FGFR3-K65C YKKTNGRL    | 374   | >FGFR3-K65C YKTTNGRL    | 488   | 114   |
| >FGFR3-K65C YKKTNGRL    | 158   | >FGFR3-K65C YKTTNGRL    | 237   | 79    |
| >FGFR3-K65C YKKTNGRL    | 12    | >FGFR3-K65C YKTTNGRL    | 20    | 8     |
| >FGFR3-K65C YKKTNGR     | 104   | >FGFR3-K65C YKTTNGR     | 114   | 10    |
| >FGFR3-K65C YKKTNGR     | 105   | >FGFR3-K65C YKTTNGR     | 125   | 20    |
| >FGFR3-K65C YKKTNGR     | 162   | >FGFR3-K65C YKTTNGR     | 132   | 30    |
| >FGFR3-K65C YKKTNGR     | 35    | >FGFR3-K65C YKTTNGR     | 31    | 4     |
| >FGFR3-K65C DYYKTTNGF   | 262   | >FGFR3-K65C DYYKTTNGF   | 32    | 230   |
| >FGFR3-K65C DYYKTTNGF   | 702   | >FGFR3-K65C DYYKTTNGF   | 468   | 234   |
| >FGFR3-K65C DYYKTTNGF   | 224   | >FGFR3-K65C DYYKTTNGF   | 304   | 80    |
| >FGFR3-K65C DYYKTTNGF   | 149   | >FGFR3-K65C DYYKTTNGF   | 128   | 21    |
| >FGFR3-K65C DYYKTTNGF   | 25    | >FGFR3-K65C DYYKTTNGF   | 22    | 3     |
| >FGFR3-K65C HNL DYYK    | 352   | >FGFR3-K65C HNL DYYK    | 21489 | 21137 |
| >FGFR3-K65C DVHNL DYYK  | 408   | >FGFR3-K65C DVHNL DYYK  | 32923 | 32515 |
| >FGFR3-K65C DVHNL DYYK  | 48    | >FGFR3-K65C DVHNL DYYK  | 23138 | 23090 |
| >FGFR3-N54( NLLGACTQ    | 2004  | >FGFR3-N54( SLLGACTQ    | 293   | 1711  |
| >FGFR3-N54( NLLGACTQ    | 2018  | >FGFR3-N54( SLLGACTQ    | 92    | 1926  |
| >FGFR3-N54( NLLGACTQ    | 174   | >FGFR3-N54( SLLGACTQ    | 12    | 162   |
| >FGFR3-N54( INLLGACTQ   | 20978 | >FGFR3-N54( ISLLGACTQ   | 94    | 20884 |
| >FGFR3-N54( NIINLLGA    | 93    | >FGFR3-N54( NIISLLGA    | 74    | 19    |
| >FGFR3-N54( NIINLLGA    | 84    | >FGFR3-N54( NIISLLGA    | 101   | 17    |
| >FGFR3-N54( NIINLLGA    | 495   | >FGFR3-N54( NIISLLGA    | 375   | 120   |
| >FGFR3-N54( HKNIINLL    | 722   | >FGFR3-N54( HKNIISLL    | 384   | 338   |
| >FGFR3-N54( KHKNIINL    | 440   | >FGFR3-N54( KHKNIISL    | 210   | 230   |
| >FGFR3-N54( KHKNIINLL   | 3047  | >FGFR3-N54( KHKNIISLL   | 312   | 2735  |
| >FGFR3-N54( KHKNIINLL   | 548   | >FGFR3-N54( KHKNIISLL   | 384   | 164   |
| >FGFR3-N54( KHKNIINLL   | 678   | >FGFR3-N54( KHKNIISLL   | 470   | 208   |
| >FGFR3-N54( GKHKNIINL   | 121   | >FGFR3-N54( GKHKNIISL   | 55    | 66    |
| >FGFR3-N54( GKHKNIINLL  | 313   | >FGFR3-N54( GKHKNIISLL  | 165   | 148   |
| >FGFR3-N54( GKHKNIINL   | 469   | >FGFR3-N54( GKHKNIISL   | 500   | 31    |
| >FGFR3-N54( IGKHKNIINLL | 1826  | >FGFR3-N54( IGKHKNIISLL | 345   | 1481  |
| >FGFR3-N54( MIGKHKNIIN  | 401   | >FGFR3-N54( MIGKHKNIISL | 354   | 47    |
| >FGFR3-N54( MIGKHKNIIN  | 712   | >FGFR3-N54( MIGKHKNIISL | 390   | 322   |
| >FGFR3-N54( MIGKHKNIIN  | 239   | >FGFR3-N54( MIGKHKNIISL | 116   | 123   |
| >FGFR3-N54( MIGKHKNIIN  | 599   | >FGFR3-N54( MIGKHKNIISL | 149   | 450   |
| >FGFR3-N65: NGRLPVKW    | 2361  | >FGFR3-N65: HGRLPVKW    | 167   | 2194  |
| >FGFR3-N65: NGRLPVKW    | 3268  | >FGFR3-N65: HGRLPVKW    | 160   | 3108  |
| >FGFR3-N65: TTNGRLPV    | 165   | >FGFR3-N65: TTHGRLPV    | 320   | 155   |
| >FGFR3-N65: TTNGRLPV    | 277   | >FGFR3-N65: TTHGRLPV    | 363   | 86    |

|                       |      |                        |      |      |
|-----------------------|------|------------------------|------|------|
| >FGFR3-N65:TTNGRLPV   | 328  | >FGFR3-N65:TTHGRLPV    | 313  | 15   |
| >FGFR3-N65:TTNGRLPVK  | 121  | >FGFR3-N65:TTHGRLPVK   | 160  | 39   |
| >FGFR3-N65:TTNGRLPVK  | 20   | >FGFR3-N65:TTHGRLPVK   | 34   | 14   |
| >FGFR3-N65:TTNGRLPVKV | 1021 | >FGFR3-N65:TTHGRLPVKV  | 373  | 648  |
| >FGFR3-N65:TTNGRLPVKV | 20   | >FGFR3-N65:TTHGRLPVKV  | 9    | 11   |
| >FGFR3-N65:TTNGRLPVKV | 311  | >FGFR3-N65:TTHGRLPVKV  | 47   | 264  |
| >FGFR3-N65:TTNGRLPV   | 1085 | >FGFR3-N65:TTHGRLPV    | 68   | 1017 |
| >FGFR3-N65:TTNGRLPVK  | 48   | >FGFR3-N65:TTHGRLPVK   | 7    | 41   |
| >FGFR3-N65:TTNGRLPVKV | 266  | >FGFR3-N65:TTHGRLPVKV  | 364  | 98   |
| >FGFR3-N65:TTNGRLPVK  | 107  | >FGFR3-N65:TTHGRLPVK   | 86   | 21   |
| >FGFR3-N65:TTNGRLPV   | 18   | >FGFR3-N65:TTHGRLPV    | 18   | 0    |
| >FGFR3-N65:TTNGRLPV   | 32   | >FGFR3-N65:TTHGRLPV    | 151  | 119  |
| >FGFR3-N65:TTNGRLPVKV | 17   | >FGFR3-N65:TTHGRLPVKV  | 10   | 7    |
| >FGFR3-N65:TTNGRLPVKV | 32   | >FGFR3-N65:TTHGRLPVKV  | 19   | 13   |
| >FGFR3-N65:TTNGRLPVKV | 44   | >FGFR3-N65:TTHGRLPVKV  | 44   | 0    |
| >FGFR3-N65:TTNGRLPVKV | 28   | >FGFR3-N65:TTHGRLPVKV  | 130  | 102  |
| >FGFR3-N65:TTNGRLPVKV | 327  | >FGFR3-N65:TTHGRLPVKV  | 476  | 149  |
| >FGFR3-N65:TTNGRLPVKV | 85   | >FGFR3-N65:TTHGRLPVKV  | 98   | 13   |
| >FGFR3-N65:KTTNGRLPV  | 136  | >FGFR3-N65:KTTHGRLPV   | 197  | 61   |
| >FGFR3-N65:KTTNGRLPV  | 349  | >FGFR3-N65:KTTHGRLPV   | 1320 | 971  |
| >FGFR3-N65:KTTNGRLPVK | 62   | >FGFR3-N65:KTTHGRLPVK  | 83   | 21   |
| >FGFR3-N65:KTTNGRLPVK | 25   | >FGFR3-N65:KTTHGRLPVK  | 40   | 15   |
| >FGFR3-N65:KTTNGRLPV  | 22   | >FGFR3-N65:KTTHGRLPV   | 17   | 5    |
| >FGFR3-N65:KTTNGRLPVK | 6    | >FGFR3-N65:KTTHGRLPVK  | 6    | 0    |
| >FGFR3-N65:KTTNGRLPV  | 209  | >FGFR3-N65:KTTHGRLPV   | 405  | 196  |
| >FGFR3-N65:KTTNGRLPVK | 28   | >FGFR3-N65:KTTHGRLPVK  | 46   | 18   |
| >FGFR3-N65:KTTNGRLPV  | 578  | >FGFR3-N65:KTTHGRLPV   | 223  | 355  |
| >FGFR3-N65:KTTNGRLPV  | 141  | >FGFR3-N65:KTTHGRLPV   | 55   | 86   |
| >FGFR3-N65:KTTNGRLPVK | 15   | >FGFR3-N65:KTTHGRLPVK  | 11   | 4    |
| >FGFR3-N65:KTTNGRLPVK | 47   | >FGFR3-N65:KTTHGRLPVK  | 40   | 7    |
| >FGFR3-N65:KTTNGRLPVK | 13   | >FGFR3-N65:KTTHGRLPVK  | 12   | 1    |
| >FGFR3-N65:KTTNGRLPVK | 332  | >FGFR3-N65:KTTHGRLPVK  | 642  | 310  |
| >FGFR3-N65:KKTNGRL    | 450  | >FGFR3-N65:KKTTHGRL    | 453  | 3    |
| >FGFR3-N65:KKTNGRLPV  | 56   | >FGFR3-N65:KKTTHGRLPV  | 55   | 1    |
| >FGFR3-N65:YKKTNGR    | 289  | >FGFR3-N65:YKKTTHGR    | 300  | 11   |
| >FGFR3-N65:YKKTNGRL   | 154  | >FGFR3-N65:YKKTTHGRL   | 105  | 49   |
| >FGFR3-N65:YKKTNGRLPV | 28   | >FGFR3-N65:YKKTTHGRLPV | 24   | 4    |
| >FGFR3-N65:YKKTNGR    | 1028 | >FGFR3-N65:YKKTTHGR    | 430  | 598  |
| >FGFR3-N65:YKKTNGRL   | 12   | >FGFR3-N65:YKKTTHGRL   | 42   | 30   |
| >FGFR3-N65:YKKTNGRL   | 374  | >FGFR3-N65:YKKTTHGRL   | 172  | 202  |
| >FGFR3-N65:YKKTNGRL   | 158  | >FGFR3-N65:YKKTTHGRL   | 126  | 32   |
| >FGFR3-N65:YKKTNGR    | 531  | >FGFR3-N65:YKKTTHGR    | 308  | 223  |
| >FGFR3-N65:YKKTNGRL   | 12   | >FGFR3-N65:YKKTTHGRL   | 9    | 3    |

|                       |       |                       |       |       |
|-----------------------|-------|-----------------------|-------|-------|
| >FGFR3-N65:YYKKTNGR   | 104   | >FGFR3-N65:YYKKTTHGR  | 25    | 79    |
| >FGFR3-N65:YYKKTNGR   | 105   | >FGFR3-N65:YYKKTTHGR  | 57    | 48    |
| >FGFR3-N65:YYKKTNGR   | 162   | >FGFR3-N65:YYKKTTHGR  | 101   | 61    |
| >FGFR3-N65:YYKKTNGR   | 35    | >FGFR3-N65:YYKKTTHGR  | 23    | 12    |
| >FGFR3-N65:DYYKKTNGF  | 262   | >FGFR3-N65:DYYKKTTHGF | 522   | 260   |
| >FGFR3-N65:DYYKKTNGF  | 224   | >FGFR3-N65:DYYKKTTHGF | 103   | 121   |
| >FGFR3-N65:DYYKKTNGF  | 149   | >FGFR3-N65:DYYKKTTHGF | 110   | 39    |
| >FGFR3-N65:DYYKKTNGF  | 25    | >FGFR3-N65:DYYKKTTHGF | 18    | 7     |
| >FGFR3-P572PPGLDYSF   | 481   | >FGFR3-P572APGLDYSF   | 130   | 351   |
| >FGFR3-P572PPGLDYSF   | 395   | >FGFR3-P572APGLDYSF   | 251   | 144   |
| >FGFR3-P572RPPGLDYSF  | 46    | >FGFR3-P572RAPGLDYSF  | 19580 | 19534 |
| >FGFR3-P572RPPGLDYSF  | 1258  | >FGFR3-P572RAPGLDYSF  | 112   | 1146  |
| >FGFR3-P572RPPGLDYSF  | 402   | >FGFR3-P572RAPGLDYSF  | 37    | 365   |
| >FGFR3-P572RPPGLDYSF  | 381   | >FGFR3-P572RAPGLDYSF  | 7133  | 6752  |
| >FGFR3-P572RPPGLDYSF  | 15141 | >FGFR3-P572RAPGLDYSF  | 346   | 14795 |
| >FGFR3-P572RPPGLDYSF  | 44    | >FGFR3-P572RAPGLDYSF  | 209   | 165   |
| >FGFR3-P572RPPGLDYSF  | 17122 | >FGFR3-P572RAPGLDYSF  | 202   | 16920 |
| >FGFR3-P572RPPGLDYSF  | 1232  | >FGFR3-P572RAPGLDYSF  | 40    | 1192  |
| >FGFR3-P572NLREFLRARR | 13361 | >FGFR3-P572NLREFLRARR | 164   | 13197 |
| >FGFR3-P572RRPPGLDYSF | 464   | >FGFR3-P572RRAPGLDYSF | 2697  | 2233  |
| >FGFR3-P572RRPPGLDY   | 2822  | >FGFR3-P572RRAPGLDY   | 451   | 2371  |
| >FGFR3-P572RRPPGLDY   | 1917  | >FGFR3-P572RRAPGLDY   | 389   | 1528  |
| >FGFR3-P572RRPPGLDY   | 990   | >FGFR3-P572RRAPGLDY   | 132   | 858   |
| >FGFR3-P572RRPPGLDY   | 269   | >FGFR3-P572RRAPGLDY   | 53    | 216   |
| >FGFR3-P572RRPPGLDYSF | 122   | >FGFR3-P572RRAPGLDYSF | 27    | 95    |
| >FGFR3-P572RRPPGLDY   | 2311  | >FGFR3-P572RRAPGLDY   | 298   | 2013  |
| >FGFR3-P572RRPPGLDYSF | 72    | >FGFR3-P572RRAPGLDYSF | 28    | 44    |
| >FGFR3-P572RRPPGLDY   | 485   | >FGFR3-P572RRAPGLDY   | 38    | 447   |
| >FGFR3-P572RRPPGLDYS  | 1121  | >FGFR3-P572RRAPGLDYS  | 464   | 657   |
| >FGFR3-P572RRPPGLDYSF | 812   | >FGFR3-P572RRAPGLDYSF | 355   | 457   |
| >FGFR3-P572RRPPGLDY   | 2369  | >FGFR3-P572RRAPGLDY   | 299   | 2070  |
| >FGFR3-P572RRPPGLDYSF | 176   | >FGFR3-P572RRAPGLDYSF | 148   | 28    |
| >FGFR3-P572ARRPPGLDY  | 863   | >FGFR3-P572ARRAPGLDY  | 405   | 458   |
| >FGFR3-P572ARRPPGLDY  | 14    | >FGFR3-P572ARRAPGLDY  | 14    | 0     |
| >FGFR3-P572ARRPPGLDYS | 12    | >FGFR3-P572ARRAPGLDYS | 11    | 1     |
| >FGFR3-P572ARRPPGLDY  | 487   | >FGFR3-P572ARRAPGLDY  | 362   | 125   |
| >FGFR3-P572ARRPPGLDYS | 457   | >FGFR3-P572ARRAPGLDYS | 676   | 219   |
| >FGFR3-P572RARRPPGL   | 8     | >FGFR3-P572RARRAPGL   | 6     | 2     |
| >FGFR3-P572RARRPPGLD  | 222   | >FGFR3-P572RARRAPGLD  | 82    | 140   |
| >FGFR3-P572RARRPPGLDY | 24    | >FGFR3-P572RARRAPGLDY | 13    | 11    |
| >FGFR3-P572RARRPPGLDY | 28    | >FGFR3-P572RARRAPGLDY | 14    | 14    |
| >FGFR3-P572RARRPPGLDY | 138   | >FGFR3-P572RARRAPGLDY | 94    | 44    |
| >FGFR3-P572RARRPPGL   | 107   | >FGFR3-P572RARRAPGL   | 84    | 23    |

|                       |       |                       |       |       |
|-----------------------|-------|-----------------------|-------|-------|
| >FGFR3-P572RARRPPGLDY | 420   | >FGFR3-P572RARRAPGLDY | 251   | 169   |
| >FGFR3-P572RARRPPGLDY | 62    | >FGFR3-P572RARRAPGLDY | 78    | 16    |
| >FGFR3-P572RARRPPGL   | 11    | >FGFR3-P572RARRAPGL   | 9     | 2     |
| >FGFR3-P572RARRPPGLDY | 9     | >FGFR3-P572RARRAPGLDY | 11    | 2     |
| >FGFR3-P572RARRPPGLDY | 225   | >FGFR3-P572RARRAPGLDY | 173   | 52    |
| >FGFR3-P572RARRPPGLDY | 215   | >FGFR3-P572RARRAPGLDY | 125   | 90    |
| >FGFR3-P572LRARRPPGLD | 102   | >FGFR3-P572LRARRAPGLD | 116   | 14    |
| >FGFR3-P572LRARRPPGL  | 114   | >FGFR3-P572LRARRAPGL  | 87    | 27    |
| >FGFR3-P572LRARRPPG   | 136   | >FGFR3-P572LRARRAPG   | 143   | 7     |
| >FGFR3-P572LRARRPPGL  | 496   | >FGFR3-P572LRARRAPGL  | 466   | 30    |
| >FGFR3-P572LRARRPPGL  | 13    | >FGFR3-P572LRARRAPGL  | 18    | 5     |
| >FGFR3-P572FLRARRPPGL | 126   | >FGFR3-P572FLRARRAPGL | 170   | 44    |
| >FGFR3-P572FLRARRPPGL | 52    | >FGFR3-P572FLRARRAPGL | 149   | 97    |
| >FGFR3-P572FLRARRPPGL | 42    | >FGFR3-P572FLRARRAPGL | 71    | 29    |
| >FGFR3-P572FLRARRPPGL | 319   | >FGFR3-P572FLRARRAPGL | 292   | 27    |
| >FGFR3-P572FLRARRPPGL | 118   | >FGFR3-P572FLRARRAPGL | 229   | 111   |
| >FGFR3-P572FLRARRPPGL | 4     | >FGFR3-P572FLRARRAPGL | 3     | 1     |
| >FGFR3-P572FLRARRPP   | 400   | >FGFR3-P572FLRARRAP   | 299   | 101   |
| >FGFR3-P572FLRARRPPG  | 24    | >FGFR3-P572FLRARRAPG  | 17    | 7     |
| >FGFR3-P572FLRARRPPG  | 710   | >FGFR3-P572FLRARRAPG  | 389   | 321   |
| >FGFR3-P572REFLRARRPP | 234   | >FGFR3-P572REFLRARRAP | 310   | 76    |
| >FGFR3-P572REFLRARRP  | 12985 | >FGFR3-P572REFLRARRA  | 232   | 12753 |
| >FGFR3-P572REFLRARRP  | 1254  | >FGFR3-P572REFLRARRA  | 274   | 980   |
| >FGFR3-P572REFLRARRPP | 286   | >FGFR3-P572REFLRARRAP | 597   | 311   |
| >FGFR3-R248RSPHRPIL   | 824   | >FGFR3-R248CSPHRPIL   | 84    | 740   |
| >FGFR3-R248RSPHRPILQ  | 2731  | >FGFR3-R248CSPHRPILQ  | 330   | 2401  |
| >FGFR3-R248RSPHRPILQA | 2617  | >FGFR3-R248CSPHRPILQA | 249   | 2368  |
| >FGFR3-R248RSPHRPIL   | 265   | >FGFR3-R248CSPHRPIL   | 9919  | 9654  |
| >FGFR3-R248RSPHRPIL   | 278   | >FGFR3-R248CSPHRPIL   | 72    | 206   |
| >FGFR3-R248RSPHRPIL   | 273   | >FGFR3-R248CSPHRPIL   | 227   | 46    |
| >FGFR3-R248ERSPHRPIL  | 105   | >FGFR3-R248ECSPHRPIL  | 9720  | 9615  |
| >FGFR3-R248ERSPHRPIL  | 469   | >FGFR3-R248ECSPHRPIL  | 30530 | 30061 |
| >FGFR3-R248ERSPHRPIL  | 59    | >FGFR3-R248ECSPHRPIL  | 33717 | 33658 |
| >FGFR3-R248RQTYTLDVLE | 68    | >FGFR3-R248RQTYTLDVLE | 19195 | 19127 |
| >FGFR3-R248RQTYTLDVLE | 352   | >FGFR3-R248RQTYTLDVLE | 1430  | 1078  |
| >FGFR3-R248RQTYTLDVLE | 420   | >FGFR3-R248RQTYTLDVLE | 36702 | 36282 |
| >FGFR3-R248LERSPHRPI  | 170   | >FGFR3-R248LECSPHRPI  | 994   | 824   |
| >FGFR3-R248LERSPHRPIL | 225   | >FGFR3-R248LECSPHRPIL | 1450  | 1225  |
| >FGFR3-R248LERSPHRPI  | 756   | >FGFR3-R248LECSPHRPI  | 480   | 276   |
| >FGFR3-R248LERSPHRPI  | 997   | >FGFR3-R248LECSPHRPI  | 128   | 869   |
| >FGFR3-R248LERSPHRPI  | 273   | >FGFR3-R248LECSPHRPI  | 1968  | 1695  |
| >FGFR3-R248LERSPHRPI  | 214   | >FGFR3-R248LECSPHRPI  | 616   | 402   |
| >FGFR3-R248LERSPHRPIL | 393   | >FGFR3-R248LECSPHRPIL | 419   | 26    |

|                          |      |                         |       |       |
|--------------------------|------|-------------------------|-------|-------|
| >FGFR3-R24ε VLERSPHRPI   | 138  | >FGFR3-R24ε VLECSPHRPI  | 81    | 57    |
| >FGFR3-R24ε VLERSPHRPI   | 677  | >FGFR3-R24ε VLECSPHRPI  | 170   | 507   |
| >FGFR3-R24ε VLERSPHRPIL  | 985  | >FGFR3-R24ε VLECSPHRPIL | 233   | 752   |
| >FGFR3-R24ε VLERSPHRPI   | 176  | >FGFR3-R24ε VLECSPHRPI  | 545   | 369   |
| >FGFR3-R24ε VLERSPHRPIL  | 14   | >FGFR3-R24ε VLECSPHRPIL | 30    | 16    |
| >FGFR3-R24ε VLERSPHR     | 448  | >FGFR3-R24ε VLECSPHR    | 919   | 471   |
| >FGFR3-R24ε DVLERSPHR    | 23   | >FGFR3-R24ε DVLECSPHR   | 33    | 10    |
| >FGFR3-R24ε DVLERSPHR    | 119  | >FGFR3-R24ε DVLECSPHR   | 104   | 15    |
| >FGFR3-R24ε DVLERSPHRP   | 1498 | >FGFR3-R24ε DVLECSPHRP  | 479   | 1019  |
| >FGFR3-R24ε DVLERSPHRP   | 20   | >FGFR3-R24ε DVLECSPHRP  | 19    | 1     |
| >FGFR3-R24ε DVLERSPHR    | 1320 | >FGFR3-R24ε DVLECSPHR   | 293   | 1027  |
| >FGFR3-R24ε YTLDVLER     | 4760 | >FGFR3-R24ε YTLDVLEC    | 89    | 4671  |
| >FGFR3-R24ε YTLDVLEERS   | 171  | >FGFR3-R24ε YTLDVLECS   | 202   | 31    |
| >FGFR3-R24ε YTLDVLER     | 3162 | >FGFR3-R24ε YTLDVLEC    | 24    | 3138  |
| >FGFR3-R24ε YTLDVLEERS   | 109  | >FGFR3-R24ε YTLDVLECS   | 543   | 434   |
| >FGFR3-R24ε YTLDVLER     | 202  | >FGFR3-R24ε YTLDVLEC    | 25289 | 25087 |
| >FGFR3-R24ε YTLDVLER     | 143  | >FGFR3-R24ε YTLDVLEC    | 21701 | 21558 |
| >FGFR3-R24ε YTLDVLER     | 84   | >FGFR3-R24ε YTLDVLEC    | 28330 | 28246 |
| >FGFR3-R24ε YTLDVLER     | 8    | >FGFR3-R24ε YTLDVLEC    | 22903 | 22895 |
| >FGFR3-R24ε YTLDVLEERSPI | 458  | >FGFR3-R24ε YTLDVLECSPI | 513   | 55    |
| >FGFR3-R24ε YTLDVLEERS   | 302  | >FGFR3-R24ε YTLDVLECS   | 1965  | 1663  |
| >FGFR3-R24ε YTLDVLEERSPI | 46   | >FGFR3-R24ε YTLDVLECSPI | 48    | 2     |
| >FGFR3-R24ε TYTLDVLER    | 430  | >FGFR3-R24ε TYTLDVLEC   | 39157 | 38727 |
| >FGFR3-R24ε TYTLDVLER    | 459  | >FGFR3-R24ε TYTLDVLEC   | 42711 | 42252 |
| >FGFR3-R24ε TYTLDVLER    | 93   | >FGFR3-R24ε TYTLDVLEC   | 34518 | 34425 |
| >FGFR3-R24ε QTYTLDVLER   | 90   | >FGFR3-R24ε QTYTLDVLEC  | 34275 | 34185 |
| >FGFR3-R24ε QTYTLDVLER   | 181  | >FGFR3-R24ε QTYTLDVLEC  | 30068 | 29887 |
| >FGFR3-R24ε QTYTLDVLER   | 6    | >FGFR3-R24ε QTYTLDVLEC  | 28875 | 28869 |
| >FGFR3-R24ε QTYTLDVLER   | 384  | >FGFR3-R24ε QTYTLDVLEC  | 910   | 526   |
| >FGFR3-R24ε QTYTLDVLER   | 219  | >FGFR3-R24ε QTYTLDVLEC  | 13666 | 13447 |
| >FGFR3-R24ε QTYTLDVLER   | 93   | >FGFR3-R24ε QTYTLDVLEC  | 34797 | 34704 |
| >FGFR3-S24ε SPHRPILQAG   | 197  | >FGFR3-S24ε CPHRPILQAG  | 2633  | 2436  |
| >FGFR3-S24ε SPHRPILQA    | 300  | >FGFR3-S24ε CPHRPILQA   | 1992  | 1692  |
| >FGFR3-S24ε SPHRPILQAG   | 68   | >FGFR3-S24ε CPHRPILQAG  | 322   | 254   |
| >FGFR3-S24ε SPHRPILQA    | 465  | >FGFR3-S24ε CPHRPILQA   | 38    | 427   |
| >FGFR3-S24ε RSPHRPIL     | 265  | >FGFR3-S24ε RCPHRPIL    | 21553 | 21288 |
| >FGFR3-S24ε RSPHRPIL     | 278  | >FGFR3-S24ε RCPHRPIL    | 26033 | 25755 |
| >FGFR3-S24ε RSPHRPIL     | 273  | >FGFR3-S24ε RCPHRPIL    | 5524  | 5251  |
| >FGFR3-S24ε QTYTLDVLER   | 384  | >FGFR3-S24ε QTYTLDVLER  | 1483  | 1099  |
| >FGFR3-S24ε ERSPHRPIL    | 105  | >FGFR3-S24ε ERCPHRPIL   | 165   | 60    |
| >FGFR3-S24ε ERSPHRPIL    | 469  | >FGFR3-S24ε ERCPHRPIL   | 686   | 217   |
| >FGFR3-S24ε ERSPHRPIL    | 59   | >FGFR3-S24ε ERCPHRPIL   | 49    | 10    |
| >FGFR3-S24ε LERSPHRPI    | 170  | >FGFR3-S24ε LERCPHRPI   | 242   | 72    |



|                          |      |                          |      |      |
|--------------------------|------|--------------------------|------|------|
| >FGFR3-S249 LERSPHRPIL   | 225  | >FGFR3-S249 LERCPHRPIL   | 320  | 95   |
| >FGFR3-S249 LERSPHRPI    | 273  | >FGFR3-S249 LERCPHRPI    | 603  | 330  |
| >FGFR3-S249 LERSPHRPI    | 214  | >FGFR3-S249 LERCPHRPI    | 331  | 117  |
| >FGFR3-S249 LERSPHRPIL   | 393  | >FGFR3-S249 LERCPHRPIL   | 230  | 163  |
| >FGFR3-S249 VLERSPHRPI   | 138  | >FGFR3-S249 VLERCPHRPI   | 233  | 95   |
| >FGFR3-S249 VLERSPHRPI   | 677  | >FGFR3-S249 VLERCPHRPI   | 467  | 210  |
| >FGFR3-S249 VLERSPHRPI   | 176  | >FGFR3-S249 VLERCPHRPI   | 266  | 90   |
| >FGFR3-S249 VLERSPHRPIL  | 14   | >FGFR3-S249 VLERCPHRPIL  | 15   | 1    |
| >FGFR3-S249 VLERSPHR     | 448  | >FGFR3-S249 VLERCPHR     | 355  | 93   |
| >FGFR3-S249 DVLERSPHR    | 23   | >FGFR3-S249 DVLERCPHR    | 16   | 7    |
| >FGFR3-S249 DVLERSPHR    | 119  | >FGFR3-S249 DVLERCPHR    | 93   | 26   |
| >FGFR3-S249 DVLERSPHRP   | 20   | >FGFR3-S249 DVLERCPHRP   | 32   | 12   |
| >FGFR3-S249 YTLDV LERS   | 171  | >FGFR3-S249 YTLDV LERC   | 72   | 99   |
| >FGFR3-S249 YTLDV LERS   | 109  | >FGFR3-S249 YTLDV LERC   | 13   | 96   |
| >FGFR3-S249 YTLDV LERSPI | 458  | >FGFR3-S249 YTLDV LERCPI | 547  | 89   |
| >FGFR3-S249 YTLDV LERS   | 302  | >FGFR3-S249 YTLDV LERC   | 574  | 272  |
| >FGFR3-S249 YTLDV LERSPI | 46   | >FGFR3-S249 YTLDV LERCPI | 605  | 559  |
| >FGFR3-S249 SPHRPILQAG   | 197  | >FGFR3-S249 TPHPILQAG    | 311  | 114  |
| >FGFR3-S249 SPHRPILQA    | 300  | >FGFR3-S249 TPHPILQA     | 1388 | 1088 |
| >FGFR3-S249 SPHRPILQAG   | 68   | >FGFR3-S249 TPHPILQAG    | 251  | 183  |
| >FGFR3-S249 SPHRPILQA    | 465  | >FGFR3-S249 TPHPILQA     | 345  | 120  |
| >FGFR3-S249 RSPHRPILQA   | 662  | >FGFR3-S249 RTPHRPILQA   | 301  | 361  |
| >FGFR3-S249 RSPHRPIL     | 1097 | >FGFR3-S249 RTPHRPIL     | 269  | 828  |
| >FGFR3-S249 RSPHRPIL     | 265  | >FGFR3-S249 RTPHRPIL     | 152  | 113  |
| >FGFR3-S249 RSPHRPIL     | 278  | >FGFR3-S249 RTPHRPIL     | 104  | 174  |
| >FGFR3-S249 RSPHRPILQ    | 1462 | >FGFR3-S249 RTPHRPILQ    | 415  | 1047 |
| >FGFR3-S249 RSPHRPILQA   | 949  | >FGFR3-S249 RTPHRPILQA   | 309  | 640  |
| >FGFR3-S249 RSPHRPIL     | 273  | >FGFR3-S249 RTPHRPIL     | 174  | 99   |
| >FGFR3-S249 QTYTLDV LER  | 384  | >FGFR3-S249 QTYTLDV LER  | 371  | 13   |
| >FGFR3-S249 ERSPHRPIL    | 105  | >FGFR3-S249 ERTPHRPIL    | 477  | 372  |
| >FGFR3-S249 ERSPHRPIL    | 469  | >FGFR3-S249 ERTPHRPIL    | 282  | 187  |
| >FGFR3-S249 ERSPHRPIL    | 59   | >FGFR3-S249 ERTPHRPIL    | 59   | 0    |
| >FGFR3-S249 LERSPHRPI    | 170  | >FGFR3-S249 LERTPHRPI    | 327  | 157  |
| >FGFR3-S249 LERSPHRPIL   | 225  | >FGFR3-S249 LERTPHRPIL   | 403  | 178  |
| >FGFR3-S249 LERSPHRPI    | 273  | >FGFR3-S249 LERTPHRPI    | 548  | 275  |
| >FGFR3-S249 LERSPHRPI    | 214  | >FGFR3-S249 LERTPHRPI    | 124  | 90   |
| >FGFR3-S249 LERSPHRPIL   | 393  | >FGFR3-S249 LERTPHRPIL   | 375  | 18   |
| >FGFR3-S249 VLERSPHRPI   | 138  | >FGFR3-S249 VLERTPHRPI   | 110  | 28   |
| >FGFR3-S249 VLERSPHRPI   | 677  | >FGFR3-S249 VLERTPHRPI   | 481  | 196  |
| >FGFR3-S249 VLERSPHRPI   | 176  | >FGFR3-S249 VLERTPHRPI   | 203  | 27   |
| >FGFR3-S249 VLERSPHRPIL  | 14   | >FGFR3-S249 VLERTPHRPIL  | 14   | 0    |
| >FGFR3-S249 VLERSPHR     | 448  | >FGFR3-S249 VLERTPHR     | 358  | 90   |
| >FGFR3-S249 DVLERSPHR    | 23   | >FGFR3-S249 DVLERTPHR    | 20   | 3    |

|                         |      |                         |       |       |
|-------------------------|------|-------------------------|-------|-------|
| >FGFR3-S249 DVLERSPHR   | 119  | >FGFR3-S249 DVLERTPHR   | 72    | 47    |
| >FGFR3-S249 DVLERSPHRP  | 20   | >FGFR3-S249 DVLERTPHRP  | 20    | 0     |
| >FGFR3-S249 YTLDDLERS   | 2731 | >FGFR3-S249 YTLDDLERT   | 334   | 2397  |
| >FGFR3-S249 YTLDDLERS   | 171  | >FGFR3-S249 YTLDDLERT   | 41    | 130   |
| >FGFR3-S249 YTLDDLERS   | 109  | >FGFR3-S249 YTLDDLERT   | 20    | 89    |
| >FGFR3-S249 YTLDDLERS   | 1628 | >FGFR3-S249 YTLDDLERT   | 190   | 1438  |
| >FGFR3-S249 YTLDDLERSPI | 458  | >FGFR3-S249 YTLDDLERTPI | 765   | 307   |
| >FGFR3-S249 YTLDDLERS   | 302  | >FGFR3-S249 YTLDDLERT   | 200   | 102   |
| >FGFR3-S249 YTLDDLERSPI | 46   | >FGFR3-S249 YTLDDLERTPI | 140   | 94    |
| >FGFR3-S371 SVYAGILSYG\ | 14   | >FGFR3-S371 CVYAGILSYG\ | 44    | 30    |
| >FGFR3-S371 SVYAGILSYG\ | 33   | >FGFR3-S371 CVYAGILSYG\ | 114   | 81    |
| >FGFR3-S371 SVYAGILSYG\ | 9    | >FGFR3-S371 CVYAGILSYG\ | 31    | 22    |
| >FGFR3-S371 SVYAGILSYG\ | 6    | >FGFR3-S371 CVYAGILSYG\ | 15    | 9     |
| >FGFR3-S371 SVYAGILSYG\ | 3    | >FGFR3-S371 CVYAGILSYG\ | 10    | 7     |
| >FGFR3-S371 SVYAGILSYG\ | 13   | >FGFR3-S371 CVYAGILSYG\ | 80    | 67    |
| >FGFR3-S371 SVYAGILSYG\ | 6    | >FGFR3-S371 CVYAGILSYG\ | 47    | 41    |
| >FGFR3-S371 SVYAGILSYG\ | 87   | >FGFR3-S371 CVYAGILSYG\ | 85    | 2     |
| >FGFR3-S371 SVYAGILSYG\ | 4    | >FGFR3-S371 CVYAGILSYG\ | 15    | 11    |
| >FGFR3-S371 SVYAGILSY   | 40   | >FGFR3-S371 CVYAGILSY   | 54    | 14    |
| >FGFR3-S371 SVYAGILSY   | 12   | >FGFR3-S371 CVYAGILSY   | 50    | 38    |
| >FGFR3-S371 SVYAGILSY   | 145  | >FGFR3-S371 CVYAGILSY   | 857   | 712   |
| >FGFR3-S371 SVYAGILSY   | 32   | >FGFR3-S371 CVYAGILSY   | 104   | 72    |
| >FGFR3-S371 SVYAGILSY   | 15   | >FGFR3-S371 CVYAGILSY   | 38    | 23    |
| >FGFR3-S371 SVYAGILSY   | 240  | >FGFR3-S371 CVYAGILSY   | 207   | 33    |
| >FGFR3-S371 SVYAGILSY   | 7    | >FGFR3-S371 CVYAGILSY   | 9     | 2     |
| >FGFR3-S371 SVYAGILSY   | 37   | >FGFR3-S371 CVYAGILSY   | 54    | 17    |
| >FGFR3-S371 SVYAGILSY   | 334  | >FGFR3-S371 CVYAGILSY   | 4451  | 4117  |
| >FGFR3-S371 SVYAGILSYG\ | 427  | >FGFR3-S371 CVYAGILSYG\ | 3691  | 3264  |
| >FGFR3-S371 SVYAGILSYG\ | 8    | >FGFR3-S371 CVYAGILSYG\ | 11    | 3     |
| >FGFR3-S371 SVYAGILSYG\ | 6    | >FGFR3-S371 CVYAGILSYG\ | 26    | 20    |
| >FGFR3-S371 SVYAGILSY   | 5    | >FGFR3-S371 CVYAGILSY   | 8     | 3     |
| >FGFR3-S371 SVYAGILSY   | 37   | >FGFR3-S371 CVYAGILSY   | 62    | 25    |
| >FGFR3-S371 SVYAGILSY   | 31   | >FGFR3-S371 CVYAGILSY   | 152   | 121   |
| >FGFR3-S371 SVYAGILSY   | 244  | >FGFR3-S371 CVYAGILSY   | 320   | 76    |
| >FGFR3-S371 SVYAGILSY   | 8    | >FGFR3-S371 CVYAGILSY   | 19    | 11    |
| >FGFR3-S371 SVYAGILSY   | 116  | >FGFR3-S371 CVYAGILSY   | 110   | 6     |
| >FGFR3-S371 SVYAGILSY   | 1300 | >FGFR3-S371 CVYAGILSY   | 407   | 893   |
| >FGFR3-S371 SVYAGILSY   | 88   | >FGFR3-S371 CVYAGILSY   | 1039  | 951   |
| >FGFR3-S371 SVYAGILSY   | 2024 | >FGFR3-S371 CVYAGILSY   | 418   | 1606  |
| >FGFR3-S371 GSVYAGILSY  | 306  | >FGFR3-S371 GCVYAGILSY  | 2338  | 2032  |
| >FGFR3-S371 GSVYAGILSY  | 267  | >FGFR3-S371 GCVYAGILSY  | 11276 | 11009 |
| >FGFR3-S371 GSVYAGILSY  | 186  | >FGFR3-S371 GCVYAGILSY  | 431   | 245   |
| >FGFR3-S371 GSVYAGILSY  | 99   | >FGFR3-S371 GCVYAGILSY  | 444   | 345   |

|                        |      |                        |       |       |
|------------------------|------|------------------------|-------|-------|
| >FGFR3-S371GSVYAGILSY  | 85   | >FGFR3-S371GCVYAGILSY  | 3091  | 3006  |
| >FGFR3-S371GSVYAGILSY  | 242  | >FGFR3-S371GCVYAGILSY  | 2025  | 1783  |
| >FGFR3-S371GSVYAGIL    | 94   | >FGFR3-S371GCVYAGIL    | 15369 | 15275 |
| >FGFR3-S371GSVYAGILSY  | 5    | >FGFR3-S371GCVYAGILSY  | 2538  | 2533  |
| >FGFR3-S371GSVYAGILSY  | 34   | >FGFR3-S371GCVYAGILSY  | 1512  | 1478  |
| >FGFR3-S371AGSVYAGI    | 342  | >FGFR3-S371AGCVYAGI    | 359   | 17    |
| >FGFR3-S371AGSVYAGILS' | 68   | >FGFR3-S371AGCVYAGILS' | 160   | 92    |
| >FGFR3-S371AGSVYAGILS' | 343  | >FGFR3-S371AGCVYAGILS' | 375   | 32    |
| >FGFR3-S371AGSVYAGILS' | 178  | >FGFR3-S371AGCVYAGILS' | 213   | 35    |
| >FGFR3-S371EAGSVYAGI   | 22   | >FGFR3-S371EAGCVYAGI   | 12    | 10    |
| >FGFR3-S371EAGSVYAGI   | 27   | >FGFR3-S371EAGCVYAGI   | 26    | 1     |
| >FGFR3-S371EAGSVYAGIL  | 591  | >FGFR3-S371EAGCVYAGIL  | 383   | 208   |
| >FGFR3-S371DEAGSVYAGI  | 26   | >FGFR3-S371DEAGCVYAGI  | 32    | 6     |
| >FGFR3-S371DEAGSVYAGI  | 216  | >FGFR3-S371DEAGCVYAGI  | 279   | 63    |
| >FGFR3-S371DEAGSVYA    | 237  | >FGFR3-S371DEAGCVYA    | 154   | 83    |
| >FGFR3-S371DEAGSVYAG   | 109  | >FGFR3-S371DEAGCVYAG   | 47    | 62    |
| >FGFR3-S371DEAGSVYAGI  | 30   | >FGFR3-S371DEAGCVYAGI  | 21    | 9     |
| >FGFR3-S371DEAGSVYAGI  | 120  | >FGFR3-S371DEAGCVYAGI  | 142   | 22    |
| >FGFR3-S371DEAGSVYAGI  | 537  | >FGFR3-S371DEAGCVYAGI  | 233   | 304   |
| >FGFR3-S371DEAGSVYA    | 99   | >FGFR3-S371DEAGCVYA    | 225   | 126   |
| >FGFR3-S371DEAGSVYAGI  | 246  | >FGFR3-S371DEAGCVYAGI  | 423   | 177   |
| >FGFR3-S371ADEAGSVYAC  | 965  | >FGFR3-S371ADEAGCVYAC  | 314   | 651   |
| >FGFR3-S371ADEAGSVYAC  | 334  | >FGFR3-S371ADEAGCVYAC  | 387   | 53    |
| >FGFR3-S371ADEAGSVYAC  | 112  | >FGFR3-S371ADEAGCVYAC  | 122   | 10    |
| >FGFR3-S371EADEAGSVY   | 144  | >FGFR3-S371EADEAGCVY   | 174   | 30    |
| >FGFR3-S371EADEAGSVY/  | 1018 | >FGFR3-S371EADEAGCVY/  | 463   | 555   |
| >FGFR3-S371EADEAGSV    | 8    | >FGFR3-S371EADEAGCV    | 26    | 18    |
| >FGFR3-S371EADEAGSVY/  | 38   | >FGFR3-S371EADEAGCVY/  | 52    | 14    |
| >FGFR3-S371EADEAGSVY   | 27   | >FGFR3-S371EADEAGCVY   | 45    | 18    |
| >FGFR3-S371VEADEAGSV   | 77   | >FGFR3-S371VEADEAGCV   | 57    | 20    |
| >FGFR3-S371VEADEAGSV\  | 229  | >FGFR3-S371VEADEAGCV\  | 274   | 45    |
| >FGFR3-S371VEADEAGSV\  | 194  | >FGFR3-S371VEADEAGCV\  | 126   | 68    |
| >FGFR3-S371VEADEAGSV   | 107  | >FGFR3-S371VEADEAGCV   | 196   | 89    |
| >FGFR3-S371LVEADEAGSV  | 56   | >FGFR3-S371LVEADEAGCV  | 242   | 186   |
| >FGFR3-S371LVEADEAGSV  | 197  | >FGFR3-S371LVEADEAGCV  | 660   | 463   |
| >FGFR3-S371LVEADEAGSV  | 375  | >FGFR3-S371LVEADEAGCV  | 327   | 48    |
| >FGFR3-S371LVEADEAGSV  | 467  | >FGFR3-S371LVEADEAGCV  | 1200  | 733   |
| >FGFR3-S371LVEADEAGSV  | 93   | >FGFR3-S371LVEADEAGCV  | 153   | 60    |
| >FGFR3-S371LVEADEAGSV  | 83   | >FGFR3-S371LVEADEAGCV  | 1139  | 1056  |
| >FGFR3-S371ELVEADEAGS  | 290  | >FGFR3-S371ELVEADEAGC  | 782   | 492   |
| >FGFR3-S371ELVEADEAGS  | 185  | >FGFR3-S371ELVEADEAGC  | 1547  | 1362  |
| >FGFR3-S371ELVEADEAGS  | 383  | >FGFR3-S371ELVEADEAGC  | 1501  | 1118  |
| >FGFR3-S371ELVEADEAGS  | 21   | >FGFR3-S371ELVEADEAGC  | 80    | 59    |

|                        |       |                        |      |       |
|------------------------|-------|------------------------|------|-------|
| >FGFR3-S371ELVEADEAGS  | 86    | >FGFR3-S371ELVEADEAGC  | 130  | 44    |
| >FGFR3-S371ELVEADEAGS  | 55    | >FGFR3-S371ELVEADEAGC  | 43   | 12    |
| >FGFR3-S371ELVEADEAGS  | 64    | >FGFR3-S371ELVEADEAGC  | 58   | 6     |
| >FGFR3-S371ELVEADEAGS  | 7     | >FGFR3-S371ELVEADEAGC  | 23   | 16    |
| >FGFR3-S371ELVEADEAGS  | 74    | >FGFR3-S371ELVEADEAGC  | 150  | 76    |
| >FGFR3-S371ELVEADEAGS  | 28    | >FGFR3-S371ELVEADEAGC  | 158  | 130   |
| >FGFR3-T79S GTGLVPSERV | 319   | >FGFR3-T79S GSGLVPSERV | 5804 | 5485  |
| >FGFR3-T79S GTGLVPSER  | 490   | >FGFR3-T79S GSGLVPSER  | 1444 | 954   |
| >FGFR3-T79S GTGLVPSER  | 378   | >FGFR3-T79S GSGLVPSER  | 748  | 370   |
| >FGFR3-T79S GTGLVPSER  | 300   | >FGFR3-T79S GSGLVPSER  | 1192 | 892   |
| >FGFR3-T79S GTGLVPSERV | 273   | >FGFR3-T79S GSGLVPSERV | 768  | 495   |
| >FGFR3-T79S WVKDGTGL   | 117   | >FGFR3-T79S WVKDGSGL   | 131  | 14    |
| >FGFR3-T79S WVKDGTGLV  | 10    | >FGFR3-T79S WVKDGSGLV  | 13   | 3     |
| >FGFR3-T79S WVKDGTGLV  | 234   | >FGFR3-T79S WVKDGSGLV  | 257  | 23    |
| >FGFR3-T79S WVKDGTGL   | 147   | >FGFR3-T79S WVKDGSGL   | 167  | 20    |
| >FGFR3-T79S WVKDGTGLV  | 14    | >FGFR3-T79S WVKDGSGLV  | 21   | 7     |
| >FGFR3-T79S WVKDGTGLV  | 243   | >FGFR3-T79S WVKDGSGLV  | 319  | 76    |
| >FGFR3-T79S WVKDGTGLV  | 49    | >FGFR3-T79S WVKDGSGLV  | 89   | 40    |
| >FGFR3-T79S WVKDGTGLV  | 294   | >FGFR3-T79S WVKDGSGLV  | 405  | 111   |
| >FGFR3-T79S WVKDGTGLV  | 518   | >FGFR3-T79S WVKDGSGLV  | 245  | 273   |
| >FGFR3-T79S TVWVKDGTG  | 488   | >FGFR3-T79S TVWVKDGS   | 573  | 85    |
| >FGFR3-T79S TVWVKDGTG  | 239   | >FGFR3-T79S TVWVKDGS   | 313  | 74    |
| >FGFR3-T79S TVWVKDGTG  | 33    | >FGFR3-T79S TVWVKDGS   | 37   | 4     |
| >FGFR3-T79S TVWVKDGTG  | 196   | >FGFR3-T79S TVWVKDGS   | 214  | 18    |
| >FGFR3-V26(VLGS DVEF   | 3421  | >FGFR3-V26(MLGS DVEF   | 419  | 3002  |
| >FGFR3-V26(VLGS DVEFH  | 44    | >FGFR3-V26(MLGS DVEFH  | 23   | 21    |
| >FGFR3-V26(VLGS DVEFH  | 218   | >FGFR3-V26(MLGS DVEFH  | 124  | 94    |
| >FGFR3-V26(VLGS DVEFH  | 170   | >FGFR3-V26(MLGS DVEFH  | 158  | 12    |
| >FGFR3-V26(VLGS DVEFH  | 202   | >FGFR3-V26(MLGS DVEFH  | 149  | 53    |
| >FGFR3-V26(VLGS DVEFH  | 31    | >FGFR3-V26(MLGS DVEFH  | 15   | 16    |
| >FGFR3-V26(VLGS DVEFH  | 686   | >FGFR3-V26(MLGS DVEFH  | 303  | 383   |
| >FGFR3-V26(VLGS DVEFH  | 238   | >FGFR3-V26(MLGS DVEFH  | 114  | 124   |
| >FGFR3-V26(VLGS DVEFH  | 4380  | >FGFR3-V26(MLGS DVEFH  | 208  | 4172  |
| >FGFR3-V26(VLGS DVEF   | 180   | >FGFR3-V26(MLGS DVEF   | 83   | 97    |
| >FGFR3-V26(VLGS DVEF   | 204   | >FGFR3-V26(MLGS DVEF   | 65   | 139   |
| >FGFR3-V26(VLGS DVEF   | 4379  | >FGFR3-V26(MLGS DVEF   | 390  | 3989  |
| >FGFR3-V26(AVLGS DVEF  | 671   | >FGFR3-V26(AMLGS DVEF  | 248  | 423   |
| >FGFR3-V26(AVLGS DVEF  | 12595 | >FGFR3-V26(AMLGS DVEF  | 349  | 12246 |
| >FGFR3-V26(AVLGS DVEF  | 1451  | >FGFR3-V26(AMLGS DVEF  | 14   | 1437  |
| >FGFR3-V26(AVLGS DVEF  | 6112  | >FGFR3-V26(AMLGS DVEF  | 68   | 6044  |
| >FGFR3-V26(AVLGS DVEF  | 2509  | >FGFR3-V26(AMLGS DVEF  | 34   | 2475  |
| >FGFR3-V26(AVLGS DVEF  | 5975  | >FGFR3-V26(AMLGS DVEF  | 323  | 5652  |
| >FGFR3-V26(AVLGS DVEF  | 14545 | >FGFR3-V26(AMLGS DVEF  | 458  | 14087 |

|                       |       |                       |       |       |
|-----------------------|-------|-----------------------|-------|-------|
| >FGFR3-V26(AVLGSDVEF  | 1665  | >FGFR3-V26(AMLGSDVEFI | 13    | 1652  |
| >FGFR3-V26(AVLGSDVEF  | 427   | >FGFR3-V26(AMLGSDVEF  | 135   | 292   |
| >FGFR3-V26(AVLGSDVEF  | 482   | >FGFR3-V26(AMLGSDVEF  | 10192 | 9710  |
| >FGFR3-V26(AVLGSDVEF  | 489   | >FGFR3-V26(AMLGSDVEFI | 5981  | 5492  |
| >FGFR3-V26(AVLGSDVEF  | 85    | >FGFR3-V26(AMLGSDVEF  | 62    | 23    |
| >FGFR3-V26(AVLGSDVEF  | 646   | >FGFR3-V26(AMLGSDVEF  | 67    | 579   |
| >FGFR3-V26(AVLGSDVEF  | 1191  | >FGFR3-V26(AMLGSDVEF  | 98    | 1093  |
| >FGFR3-V26(AVLGSDVEF  | 240   | >FGFR3-V26(AMLGSDVEF  | 8     | 232   |
| >FGFR3-V26(AVLGSDVEF  | 14    | >FGFR3-V26(AMLGSDVEF  | 22    | 8     |
| >FGFR3-V26(AVLGSDVEF  | 203   | >FGFR3-V26(AMLGSDVEF  | 399   | 196   |
| >FGFR3-V26(QAGLPANQT  | 12773 | >FGFR3-V26(QAGLPANQT  | 339   | 12434 |
| >FGFR3-V26(TAVLGSDV   | 411   | >FGFR3-V26(TAMLGSDV   | 134   | 277   |
| >FGFR3-V26(TAVLGSDVEF | 1529  | >FGFR3-V26(TAMLGSDVEI | 497   | 1032  |
| >FGFR3-V26(TAVLGSDVEF | 855   | >FGFR3-V26(TAMLGSDVEI | 294   | 561   |
| >FGFR3-V26(TAVLGSDVEF | 19    | >FGFR3-V26(TAMLGSDVEI | 22    | 3     |
| >FGFR3-V26(QTAVLGSDVI | 718   | >FGFR3-V26(QTAMLGSDV  | 460   | 258   |
| >FGFR3-V26(QTAVLGSDVI | 505   | >FGFR3-V26(QTAMLGSDV  | 330   | 175   |
| >FGFR3-V26(QTAVLGSDV  | 82    | >FGFR3-V26(QTAMLGSDV  | 87    | 5     |
| >FGFR3-V26(QTAVLGSDVI | 633   | >FGFR3-V26(QTAMLGSDV  | 331   | 302   |
| >FGFR3-V26(QTAVLGSDVI | 192   | >FGFR3-V26(QTAMLGSDV  | 142   | 50    |
| >FGFR3-V26(QTAVLGSDVI | 7     | >FGFR3-V26(QTAMLGSDV  | 7     | 0     |
| >FGFR3-V26(QTAVLGSDVI | 664   | >FGFR3-V26(QTAMLGSDV  | 484   | 180   |
| >FGFR3-V26(QTAVLGSDV  | 125   | >FGFR3-V26(QTAMLGSDV  | 82    | 43    |
| >FGFR3-V26(QTAVLGSDVI | 98    | >FGFR3-V26(QTAMLGSDV  | 74    | 24    |
| >FGFR3-V26(LPANQTAV   | 3185  | >FGFR3-V26(LPANQTAM   | 279   | 2906  |
| >FGFR3-V26(LPANQTAV   | 30    | >FGFR3-V26(LPANQTAM   | 14    | 16    |
| >FGFR3-V26(LPANQTAVL  | 22    | >FGFR3-V26(LPANQTAML  | 32    | 10    |
| >FGFR3-V26(LPANQTAV   | 80    | >FGFR3-V26(LPANQTAM   | 7     | 73    |
| >FGFR3-V26(LPANQTAVL  | 22    | >FGFR3-V26(LPANQTAML  | 45    | 23    |
| >FGFR3-V26(LPANQTAVLC | 393   | >FGFR3-V26(LPANQTAML  | 669   | 276   |
| >FGFR3-V26(LPANQTAVL  | 99    | >FGFR3-V26(LPANQTAML  | 1079  | 980   |
| >FGFR3-V26(LPANQTAV   | 264   | >FGFR3-V26(LPANQTAM   | 1489  | 1225  |
| >FGFR3-V26(LPANQTAV   | 594   | >FGFR3-V26(LPANQTAM   | 99    | 495   |
| >FGFR3-V26(LPANQTAVL  | 132   | >FGFR3-V26(LPANQTAML  | 106   | 26    |
| >FGFR3-V26(LPANQTAV   | 18    | >FGFR3-V26(LPANQTAM   | 1099  | 1081  |
| >FGFR3-V26(LPANQTAV   | 856   | >FGFR3-V26(LPANQTAM   | 101   | 755   |
| >FGFR3-V26(LPANQTAVL  | 68    | >FGFR3-V26(LPANQTAML  | 214   | 146   |
| >FGFR3-V26(LPANQTAVL  | 93    | >FGFR3-V26(LPANQTAML  | 74    | 19    |
| >FGFR3-V26(GLPANQTAV  | 191   | >FGFR3-V26(GLPANQTAM  | 4734  | 4543  |
| >FGFR3-V26(GLPANQTAV  | 19    | >FGFR3-V26(GLPANQTAM  | 387   | 368   |
| >FGFR3-V26(GLPANQTAVI | 112   | >FGFR3-V26(GLPANQTAM  | 81    | 31    |
| >FGFR3-V26(GLPANQTAV  | 7     | >FGFR3-V26(GLPANQTAM  | 552   | 545   |
| >FGFR3-V26(GLPANQTAVI | 253   | >FGFR3-V26(GLPANQTAM  | 233   | 20    |

|                        |      |                       |       |       |
|------------------------|------|-----------------------|-------|-------|
| >FGFR3-V26( GLPANQTAV  | 193  | >FGFR3-V26( GLPANQTAM | 5761  | 5568  |
| >FGFR3-V26( GLPANQTAV  | 6    | >FGFR3-V26( GLPANQTAM | 400   | 394   |
| >FGFR3-V26( GLPANQTAVI | 64   | >FGFR3-V26( GLPANQTAM | 30    | 34    |
| >FGFR3-V26( GLPANQTAV  | 9    | >FGFR3-V26( GLPANQTAM | 434   | 425   |
| >FGFR3-V26( GLPANQTAVI | 24   | >FGFR3-V26( GLPANQTAM | 38    | 14    |
| >FGFR3-V26( GLPANQTAV  | 11   | >FGFR3-V26( GLPANQTAM | 2406  | 2395  |
| >FGFR3-V26( GLPANQTAVI | 106  | >FGFR3-V26( GLPANQTAM | 50    | 56    |
| >FGFR3-V26( GLPANQTAV  | 81   | >FGFR3-V26( GLPANQTAM | 10219 | 10138 |
| >FGFR3-V26( GLPANQTAV  | 3    | >FGFR3-V26( GLPANQTAM | 133   | 130   |
| >FGFR3-V26( GLPANQTAVI | 11   | >FGFR3-V26( GLPANQTAM | 8     | 3     |
| >FGFR3-V26( GLPANQTAVI | 352  | >FGFR3-V26( GLPANQTAM | 185   | 167   |
| >FGFR3-V63( VMKIADFGL  | 1624 | >FGFR3-V63( MMKIADFGL | 231   | 1393  |
| >FGFR3-V63( VMKIADFGL  | 170  | >FGFR3-V63( MMKIADFGL | 19    | 151   |
| >FGFR3-V63( VMKIADFGLA | 1565 | >FGFR3-V63( MMKIADFGL | 366   | 1199  |
| >FGFR3-V63( VMKIADFGL  | 473  | >FGFR3-V63( MMKIADFGL | 81    | 392   |
| >FGFR3-V63( VMKIADFGLA | 331  | >FGFR3-V63( MMKIADFGL | 84    | 247   |
| >FGFR3-V63( VMKIADFGL  | 423  | >FGFR3-V63( MMKIADFGL | 103   | 320   |
| >FGFR3-V63( VMKIADFGL  | 263  | >FGFR3-V63( MMKIADFGL | 138   | 125   |
| >FGFR3-V63( VMKIADFGL  | 128  | >FGFR3-V63( MMKIADFGL | 64    | 64    |
| >FGFR3-V63( VMKIADFGL  | 207  | >FGFR3-V63( MMKIADFGL | 192   | 15    |
| >FGFR3-V63( VMKIADFGL  | 15   | >FGFR3-V63( MMKIADFGL | 9     | 6     |
| >FGFR3-V63( VMKIADFGLA | 511  | >FGFR3-V63( MMKIADFGL | 203   | 308   |
| >FGFR3-V63( VMKIADFGLA | 2786 | >FGFR3-V63( MMKIADFGL | 190   | 2596  |
| >FGFR3-V63( VMKIADFGLA | 3616 | >FGFR3-V63( MMKIADFGL | 321   | 3295  |
| >FGFR3-V63( VMKIADFGLA | 20   | >FGFR3-V63( MMKIADFGL | 10    | 10    |
| >FGFR3-V63( VMKIADFGLA | 365  | >FGFR3-V63( MMKIADFGL | 81    | 284   |
| >FGFR3-V63( VMKIADFGLA | 1180 | >FGFR3-V63( MMKIADFGL | 80    | 1100  |
| >FGFR3-V63( VMKIADFGL  | 1067 | >FGFR3-V63( MMKIADFGL | 387   | 680   |
| >FGFR3-V63( VMKIADFGLA | 266  | >FGFR3-V63( MMKIADFGL | 91    | 175   |
| >FGFR3-V63( NVMKIADFGI | 435  | >FGFR3-V63( NMMKIADFC | 29    | 406   |
| >FGFR3-V63( NVMKIADFGI | 6252 | >FGFR3-V63( NMMKIADFC | 352   | 5900  |
| >FGFR3-V63( NVMKIADFG  | 3568 | >FGFR3-V63( NMMKIADFC | 198   | 3370  |
| >FGFR3-V63( NVMKIADFGI | 127  | >FGFR3-V63( NMMKIADFC | 16    | 111   |
| >FGFR3-V63( NVMKIADFGI | 464  | >FGFR3-V63( NMMKIADFC | 25    | 439   |
| >FGFR3-V63( NVMKIADFGI | 1028 | >FGFR3-V63( NMMKIADFC | 141   | 887   |
| >FGFR3-V63( NVMKIADFGI | 468  | >FGFR3-V63( NMMKIADFC | 20    | 448   |
| >FGFR3-V63( NVMKIADFGI | 232  | >FGFR3-V63( NMMKIADFC | 131   | 101   |
| >FGFR3-V63( NVMKIADFGI | 221  | >FGFR3-V63( NMMKIADFC | 119   | 102   |
| >FGFR3-V63( NVMKIADFGI | 4812 | >FGFR3-V63( NMMKIADFC | 42    | 4770  |
| >FGFR3-V63( NVMKIADFGI | 1333 | >FGFR3-V63( NMMKIADFC | 8     | 1325  |
| >FGFR3-V63( NVMKIADFGI | 4961 | >FGFR3-V63( NMMKIADFC | 49    | 4912  |
| >FGFR3-V63( NVMKIADFGI | 226  | >FGFR3-V63( NMMKIADFC | 6     | 220   |
| >FGFR3-V63( NVMKIADFGI | 6656 | >FGFR3-V63( NMMKIADFC | 95    | 6561  |

|                       |      |                       |      |      |
|-----------------------|------|-----------------------|------|------|
| >FGFR3-V63(NVMKIADF   | 283  | >FGFR3-V63(NMMKIADF   | 5261 | 4978 |
| >FGFR3-V63(NVMKIADFG  | 378  | >FGFR3-V63(NMMKIADFC  | 3952 | 3574 |
| >FGFR3-V63(NVMKIADFGI | 16   | >FGFR3-V63(NMMKIADFC  | 352  | 336  |
| >FGFR3-V63(NVMKIADFGI | 40   | >FGFR3-V63(NMMKIADFC  | 156  | 116  |
| >FGFR3-V63(NVMKIADFGI | 345  | >FGFR3-V63(NMMKIADFC  | 1472 | 1127 |
| >FGFR3-V63(NVMKIADF   | 1793 | >FGFR3-V63(NMMKIADF   | 161  | 1632 |
| >FGFR3-V63(NVMKIADF   | 2183 | >FGFR3-V63(NMMKIADF   | 202  | 1981 |
| >FGFR3-V63(NVMKIADF   | 1775 | >FGFR3-V63(NMMKIADF   | 41   | 1734 |
| >FGFR3-V63(NVMKIADFGI | 2853 | >FGFR3-V63(NMMKIADFC  | 252  | 2601 |
| >FGFR3-V63(ARNVLVTEDN | 1305 | >FGFR3-V63(ARNVLVTEDN | 487  | 818  |
| >FGFR3-V63(ARNVLVTEDN | 847  | >FGFR3-V63(ARNVLVTEDN | 181  | 666  |
| >FGFR3-V63(TEDNMMKI   | 128  | >FGFR3-V63(TEDNMMKI   | 269  | 141  |
| >FGFR3-V63(TEDNMMKI   | 213  | >FGFR3-V63(TEDNMMKI   | 315  | 102  |
| >FGFR3-V63(TEDNMMKIA  | 1664 | >FGFR3-V63(TEDNMMKIA  | 464  | 1200 |
| >FGFR3-V63(TEDNMMKIAI | 466  | >FGFR3-V63(TEDNMMKIA  | 520  | 54   |
| >FGFR3-V63(VTEDNMMK   | 73   | >FGFR3-V63(VTEDNMMK   | 37   | 36   |
| >FGFR3-V63(VTEDNMMK   | 243  | >FGFR3-V63(VTEDNMMK   | 240  | 3    |
| >FGFR3-V63(VTEDNMMKI  | 105  | >FGFR3-V63(VTEDNMMKI  | 56   | 49   |
| >FGFR3-V63(LVTEDNMMK  | 144  | >FGFR3-V63(LVTEDNMMK  | 226  | 82   |
| >FGFR3-V63(LVTEDNMMK  | 267  | >FGFR3-V63(LVTEDNMMK  | 92   | 175  |
| >FGFR3-V63(LVTEDNMMK  | 56   | >FGFR3-V63(LVTEDNMMK  | 48   | 8    |
| >FGFR3-V63(LVTEDNMMK  | 531  | >FGFR3-V63(LVTEDNMMK  | 368  | 163  |
| >FGFR3-V63(LVTEDNMM   | 106  | >FGFR3-V63(LVTEDNMM   | 272  | 166  |
| >FGFR3-V63(LVTEDNMMK  | 498  | >FGFR3-V63(LVTEDNMMK  | 730  | 232  |
| >FGFR3-V63(VLVTEDNM   | 40   | >FGFR3-V63(VLVTEDNM   | 689  | 649  |
| >FGFR3-V63(VLVTEDNM   | 223  | >FGFR3-V63(VLVTEDNM   | 196  | 27   |
| >FGFR3-V63(VLVTEDNM   | 68   | >FGFR3-V63(VLVTEDNM   | 5276 | 5208 |
| >FGFR3-V63(VLVTEDNM   | 93   | >FGFR3-V63(VLVTEDNM   | 102  | 9    |
| >FGFR3-V63(VLVTEDNM   | 291  | >FGFR3-V63(VLVTEDNM   | 6852 | 6561 |
| >FGFR3-V63(VLVTEDNM   | 20   | >FGFR3-V63(VLVTEDNM   | 2520 | 2500 |
| >FGFR3-V63(VLVTEDNM   | 101  | >FGFR3-V63(VLVTEDNM   | 166  | 65   |
| >FGFR3-V63(VLVTEDNM   | 20   | >FGFR3-V63(VLVTEDNM   | 2794 | 2774 |
| >FGFR3-V63(VLVTEDNM   | 85   | >FGFR3-V63(VLVTEDNM   | 129  | 44   |
| >FGFR3-V63(VLVTEDNM   | 19   | >FGFR3-V63(VLVTEDNM   | 3634 | 3615 |
| >FGFR3-V63(VLVTEDNM   | 247  | >FGFR3-V63(VLVTEDNM   | 430  | 183  |
| >FGFR3-V63(VLVTEDNM   | 87   | >FGFR3-V63(VLVTEDNM   | 7378 | 7291 |
| >FGFR3-V63(VLVTEDNM   | 6    | >FGFR3-V63(VLVTEDNM   | 1120 | 1114 |
| >FGFR3-V63(VLVTEDNM   | 32   | >FGFR3-V63(VLVTEDNM   | 39   | 7    |
| >FGFR3-V63(VLVTEDNM   | 831  | >FGFR3-V63(VLVTEDNM   | 268  | 563  |
| >FGFR3-V63(VLVTEDNM   | 342  | >FGFR3-V63(VLVTEDNM   | 112  | 230  |
| >FGFR3-V63(NVLVTEDNM  | 476  | >FGFR3-V63(NVLVTEDNM  | 242  | 234  |
| >FGFR3-V63(NVLVTEDNM  | 84   | >FGFR3-V63(NVLVTEDNM  | 80   | 4    |
| >FGFR3-V63(NVLVTEDNM  | 210  | >FGFR3-V63(NVLVTEDNM  | 3250 | 3040 |

|                        |      |                         |      |      |
|------------------------|------|-------------------------|------|------|
| >FGFR3-Y241YTLVDLERS   | 171  | >FGFR3-Y241CTLDVLEERS   | 8060 | 7889 |
| >FGFR3-Y241YTLVDLERS   | 109  | >FGFR3-Y241CTLDVLEERS   | 8067 | 7958 |
| >FGFR3-Y241YTLVDLER    | 202  | >FGFR3-Y241CTLDVLER     | 170  | 32   |
| >FGFR3-Y241YTLVDLER    | 143  | >FGFR3-Y241CTLDVLER     | 160  | 17   |
| >FGFR3-Y241YTLVDLER    | 84   | >FGFR3-Y241CTLDVLER     | 206  | 122  |
| >FGFR3-Y241YTLVDLER    | 8    | >FGFR3-Y241CTLDVLER     | 32   | 24   |
| >FGFR3-Y241YTLVDLERSPI | 458  | >FGFR3-Y241CTLDVLEERSPI | 8395 | 7937 |
| >FGFR3-Y241YTLVDLERS   | 302  | >FGFR3-Y241CTLDVLEERS   | 5699 | 5397 |
| >FGFR3-Y241YTLVDLERSPI | 46   | >FGFR3-Y241CTLDVLEERSPI | 1056 | 1010 |
| >FGFR3-Y241TYTLVDLER   | 430  | >FGFR3-Y241TCTLDVLER    | 8272 | 7842 |
| >FGFR3-Y241TYTLVDLER   | 459  | >FGFR3-Y241TCTLDVLER    | 2921 | 2462 |
| >FGFR3-Y241TYTLVDLER   | 93   | >FGFR3-Y241TCTLDVLER    | 1376 | 1283 |
| >FGFR3-Y241QTYTLVDLER  | 90   | >FGFR3-Y241QTCTLDVLER   | 251  | 161  |
| >FGFR3-Y241QTYTLVDL    | 268  | >FGFR3-Y241QTCTLDVL     | 253  | 15   |
| >FGFR3-Y241QTYTLVDLER  | 181  | >FGFR3-Y241QTCTLDVLER   | 278  | 97   |
| >FGFR3-Y241QTYTLVDL    | 171  | >FGFR3-Y241QTCTLDVL     | 1559 | 1388 |
| >FGFR3-Y241QTYTLVDLER  | 6    | >FGFR3-Y241QTCTLDVLER   | 27   | 21   |
| >FGFR3-Y241QTYTLVDL    | 159  | >FGFR3-Y241QTCTLDVL     | 974  | 815  |
| >FGFR3-Y241QTYTLVDLER  | 384  | >FGFR3-Y241QTCTLDVLER   | 2459 | 2075 |
| >FGFR3-Y241QTYTLVDL    | 52   | >FGFR3-Y241QTCTLDVL     | 603  | 551  |
| >FGFR3-Y241QTYTLVDLER  | 219  | >FGFR3-Y241QTCTLDVLER   | 621  | 402  |
| >FGFR3-Y241QTYTLVDLER  | 93   | >FGFR3-Y241QTCTLDVLER   | 203  | 110  |
| >FGFR3-Y241QTYTLVDL    | 291  | >FGFR3-Y241QTCTLDVL     | 1081 | 790  |
| >FGFR3-Y241RQTYTLVD    | 518  | >FGFR3-Y241RQTCTLDV     | 346  | 172  |
| >FGFR3-Y241RQTYTLVD    | 43   | >FGFR3-Y241RQTCTLDV     | 35   | 8    |
| >FGFR3-Y241RQTYTLVDL   | 78   | >FGFR3-Y241RQTCTLDVL    | 42   | 36   |
| >FGFR3-Y241RQTYTLVD    | 1772 | >FGFR3-Y241RQTCTLDV     | 360  | 1412 |
| >FGFR3-Y241RQTYTLVDLE  | 68   | >FGFR3-Y241RQTCTLDVLE   | 119  | 51   |
| >FGFR3-Y241RQTYTLVD    | 85   | >FGFR3-Y241RQTCTLDV     | 94   | 9    |
| >FGFR3-Y241RQTYTLVDL   | 53   | >FGFR3-Y241RQTCTLDVL    | 61   | 8    |
| >FGFR3-Y241RQTYTLVDLE  | 352  | >FGFR3-Y241RQTCTLDVLE   | 340  | 12   |
| >FGFR3-Y241RQTYTLVDL   | 68   | >FGFR3-Y241RQTCTLDVL    | 143  | 75   |
| >FGFR3-Y241RQTYTLVDL   | 155  | >FGFR3-Y241RQTCTLDVL    | 381  | 226  |
| >FGFR3-Y241RQTYTLVD    | 331  | >FGFR3-Y241RQTCTLDV     | 190  | 141  |
| >FGFR3-Y241RQTYTLVDL   | 260  | >FGFR3-Y241RQTCTLDVL    | 320  | 60   |
| >FGFR3-Y241RQTYTLVDL   | 239  | >FGFR3-Y241RQTCTLDVL    | 724  | 485  |
| >FGFR3-Y241RQTYTLVDLE  | 420  | >FGFR3-Y241RQTCTLDVLE   | 201  | 219  |
| >FGFR3-Y241IRQTYTLVD   | 440  | >FGFR3-Y241IRQTCTLDV    | 641  | 201  |
| >FGFR3-Y241IRQTYTLVDL  | 363  | >FGFR3-Y241IRQTCTLDVL   | 471  | 108  |
| >FGFR3-Y241IRQTYTLVDL  | 90   | >FGFR3-Y241IRQTCTLDVL   | 60   | 30   |
| >FGFR3-Y241IRQTYTLVD   | 115  | >FGFR3-Y241IRQTCTLDV    | 217  | 102  |
| >FGFR3-Y241IRQTYTLVDL  | 117  | >FGFR3-Y241IRQTCTLDVL   | 91   | 26   |
| >FGFR3-Y241IRQTYTLVD   | 86   | >FGFR3-Y241IRQTCTLDV    | 147  | 61   |



|                        |      |                        |       |       |
|------------------------|------|------------------------|-------|-------|
| >FGFR3-Y241IRQTYTLDVL  | 50   | >FGFR3-Y241IRQTCTLDVL  | 47    | 3     |
| >FGFR3-Y241SIRQTYTLDV  | 113  | >FGFR3-Y241SIRQTCTLDV  | 129   | 16    |
| >FGFR3-Y241SIRQTYTL    | 146  | >FGFR3-Y241SIRQTCTL    | 83    | 63    |
| >FGFR3-Y241SIRQTYTLDV  | 20   | >FGFR3-Y241SIRQTCTLDV  | 36    | 16    |
| >FGFR3-Y241SIRQTYTL    | 81   | >FGFR3-Y241SIRQTCTL    | 127   | 46    |
| >FGFR3-Y241SIRQTYTLDV  | 100  | >FGFR3-Y241SIRQTCTLDV  | 453   | 353   |
| >FGFR3-Y241SIRQTYTL    | 99   | >FGFR3-Y241SIRQTCTL    | 139   | 40    |
| >FGFR3-Y241SIRQTYTLDVI | 268  | >FGFR3-Y241SIRQTCTLDVI | 195   | 73    |
| >FGFR3-Y241GSIRQTYTL   | 408  | >FGFR3-Y241GSIRQTCTL   | 3609  | 3201  |
| >FGFR3-Y241GSIRQTYTL   | 81   | >FGFR3-Y241GSIRQTCTL   | 581   | 500   |
| >FGFR3-Y241GSIRQTYTL   | 67   | >FGFR3-Y241GSIRQTCTL   | 30    | 37    |
| >FGFR3-Y241FGSIRQTY    | 172  | >FGFR3-Y241FGSIRQTC    | 19724 | 19552 |
| >FGFR3-Y241KFGSIRQTYTI | 583  | >FGFR3-Y241KFGSIRQTCTI | 188   | 395   |
| >FGFR3-Y241KFGSIRQTYTI | 111  | >FGFR3-Y241KFGSIRQTCTI | 851   | 740   |
| >FGFR3-Y241KFGSIRQTYTI | 340  | >FGFR3-Y241KFGSIRQTCTI | 1035  | 695   |
| >FGFR3-Y241KFGSIRQTYTI | 34   | >FGFR3-Y241KFGSIRQTCTI | 70    | 36    |
| >FGFR3-Y241KFGSIRQTY   | 95   | >FGFR3-Y241KFGSIRQTC   | 21738 | 21643 |
| >FGFR3-Y241KFGSIRQTY   | 60   | >FGFR3-Y241KFGSIRQTC   | 17699 | 17639 |
| >FGFR3-Y241KFGSIRQTYTI | 76   | >FGFR3-Y241KFGSIRQTCTI | 281   | 205   |
| >FGFR3-Y241KFGSIRQTY   | 179  | >FGFR3-Y241KFGSIRQTC   | 25934 | 25755 |
| >FGFR3-Y241KFGSIRQTY   | 2184 | >FGFR3-Y241KFGSIRQTC   | 459   | 1725  |
| >FGFR3-Y241KFGSIRQTYTI | 265  | >FGFR3-Y241KFGSIRQTCTI | 456   | 191   |
| >FGFR3-Y241NKFGSIRQTY  | 272  | >FGFR3-Y241NKFGSIRQTC  | 31710 | 31438 |
| >FGFR3-Y241NKFGSIRQTY  | 9    | >FGFR3-Y241NKFGSIRQTC  | 2083  | 2074  |
| >FGFR3-Y373YAGILSYGV   | 389  | >FGFR3-Y373CAGILSYGV   | 5386  | 4997  |
| >FGFR3-Y373YAGILSYGV   | 152  | >FGFR3-Y373CAGILSYGV   | 2192  | 2040  |
| >FGFR3-Y373YAGILSYGV   | 92   | >FGFR3-Y373CAGILSYGV   | 3345  | 3253  |
| >FGFR3-Y373YAGILSYGV   | 18   | >FGFR3-Y373CAGILSYGV   | 2105  | 2087  |
| >FGFR3-Y373YAGILSYGV   | 50   | >FGFR3-Y373CAGILSYGV   | 2550  | 2500  |
| >FGFR3-Y373YAGILSYGV   | 44   | >FGFR3-Y373CAGILSYGV   | 6557  | 6513  |
| >FGFR3-Y373YAGILSYGV   | 105  | >FGFR3-Y373CAGILSYGV   | 3062  | 2957  |
| >FGFR3-Y373YAGILSYGV   | 51   | >FGFR3-Y373CAGILSYGV   | 7712  | 7661  |
| >FGFR3-Y373YAGILSYGV   | 72   | >FGFR3-Y373CAGILSYGV   | 270   | 198   |
| >FGFR3-Y373YAGILSYGV   | 29   | >FGFR3-Y373CAGILSYGV   | 1197  | 1168  |
| >FGFR3-Y373YAGILSYGVG  | 195  | >FGFR3-Y373CAGILSYGVG  | 3521  | 3326  |
| >FGFR3-Y373YAGILSYGVG  | 261  | >FGFR3-Y373CAGILSYGVG  | 1879  | 1618  |
| >FGFR3-Y373YAGILSYGVG  | 16   | >FGFR3-Y373CAGILSYGVG  | 358   | 342   |
| >FGFR3-Y373YAGILSYGVG  | 72   | >FGFR3-Y373CAGILSYGVG  | 793   | 721   |
| >FGFR3-Y373VYAGILSYGV  | 160  | >FGFR3-Y373VCAGILSYGV  | 117   | 43    |
| >FGFR3-Y373VYAGILSYGV  | 191  | >FGFR3-Y373VCAGILSYGV  | 225   | 34    |
| >FGFR3-Y373VYAGILSYGV  | 700  | >FGFR3-Y373VCAGILSYGV  | 215   | 485   |
| >FGFR3-Y373VYAGILSYGV  | 55   | >FGFR3-Y373VCAGILSYGV  | 103   | 48    |
| >FGFR3-Y373VYAGILSY    | 333  | >FGFR3-Y373VCAGILSY    | 25522 | 25189 |

|                        |     |                        |       |       |
|------------------------|-----|------------------------|-------|-------|
| >FGFR3-Y373VYAGILSYGV  | 230 | >FGFR3-Y373VCAGILSYGV  | 25252 | 25022 |
| >FGFR3-Y373VYAGILSY    | 12  | >FGFR3-Y373VCAGILSY    | 92    | 80    |
| >FGFR3-Y373VYAGILSY    | 27  | >FGFR3-Y373VCAGILSY    | 141   | 114   |
| >FGFR3-Y373VYAGILSY    | 24  | >FGFR3-Y373VCAGILSY    | 52    | 28    |
| >FGFR3-Y373VYAGILSY    | 140 | >FGFR3-Y373VCAGILSY    | 1094  | 954   |
| >FGFR3-Y373LVEADEAGSV  | 197 | >FGFR3-Y373LVEADEAGSV  | 29600 | 29403 |
| >FGFR3-Y373LVEADEAGSV  | 375 | >FGFR3-Y373LVEADEAGSV  | 17790 | 17415 |
| >FGFR3-Y373LVEADEAGSV  | 467 | >FGFR3-Y373LVEADEAGSV  | 27510 | 27043 |
| >FGFR3-Y373LVEADEAGSV  | 93  | >FGFR3-Y373LVEADEAGSV  | 16471 | 16378 |
| >FGFR3-Y373LVEADEAGSV  | 83  | >FGFR3-Y373LVEADEAGSV  | 9866  | 9783  |
| >FGFR3-Y373SVYAGILSYG\ | 14  | >FGFR3-Y373SVCAGILSYG\ | 95    | 81    |
| >FGFR3-Y373SVYAGILSYG\ | 33  | >FGFR3-Y373SVCAGILSYG\ | 158   | 125   |
| >FGFR3-Y373SVYAGILSYG\ | 9   | >FGFR3-Y373SVCAGILSYG\ | 92    | 83    |
| >FGFR3-Y373SVYAGILSYG\ | 6   | >FGFR3-Y373SVCAGILSYG\ | 15    | 9     |
| >FGFR3-Y373SVYAGILSYG\ | 3   | >FGFR3-Y373SVCAGILSYG\ | 13    | 10    |
| >FGFR3-Y373SVYAGILSYG\ | 13  | >FGFR3-Y373SVCAGILSYG\ | 526   | 513   |
| >FGFR3-Y373SVYAGILSYG\ | 6   | >FGFR3-Y373SVCAGILSYG\ | 46    | 40    |
| >FGFR3-Y373SVYAGILSYG\ | 87  | >FGFR3-Y373SVCAGILSYG\ | 736   | 649   |
| >FGFR3-Y373SVYAGILSYG\ | 4   | >FGFR3-Y373SVCAGILSYG\ | 11    | 7     |
| >FGFR3-Y373SVYAGILSY   | 40  | >FGFR3-Y373SVCAGILSY   | 427   | 387   |
| >FGFR3-Y373SVYAGILSY   | 12  | >FGFR3-Y373SVCAGILSY   | 34    | 22    |
| >FGFR3-Y373SVYAGILSY   | 145 | >FGFR3-Y373SVCAGILSY   | 226   | 81    |
| >FGFR3-Y373SVYAGILSY   | 32  | >FGFR3-Y373SVCAGILSY   | 437   | 405   |
| >FGFR3-Y373SVYAGILSY   | 15  | >FGFR3-Y373SVCAGILSY   | 20    | 5     |
| >FGFR3-Y373SVYAGILSY   | 240 | >FGFR3-Y373SVCAGILSY   | 210   | 30    |
| >FGFR3-Y373SVYAGILSY   | 7   | >FGFR3-Y373SVCAGILSY   | 17    | 10    |
| >FGFR3-Y373SVYAGILSY   | 37  | >FGFR3-Y373SVCAGILSY   | 66    | 29    |
| >FGFR3-Y373SVYAGILSY   | 334 | >FGFR3-Y373SVCAGILSY   | 2735  | 2401  |
| >FGFR3-Y373SVYAGILSYG\ | 427 | >FGFR3-Y373SVCAGILSYG\ | 2691  | 2264  |
| >FGFR3-Y373SVYAGILSYG\ | 8   | >FGFR3-Y373SVCAGILSYG\ | 23    | 15    |
| >FGFR3-Y373SVYAGILSYG\ | 6   | >FGFR3-Y373SVCAGILSYG\ | 80    | 74    |
| >FGFR3-Y373SVYAGILSY   | 5   | >FGFR3-Y373SVCAGILSY   | 6     | 1     |
| >FGFR3-Y373SVYAGILSY   | 37  | >FGFR3-Y373SVCAGILSY   | 52    | 15    |
| >FGFR3-Y373SVYAGILSY   | 31  | >FGFR3-Y373SVCAGILSY   | 216   | 185   |
| >FGFR3-Y373SVYAGILSY   | 244 | >FGFR3-Y373SVCAGILSY   | 2361  | 2117  |
| >FGFR3-Y373SVYAGILSY   | 8   | >FGFR3-Y373SVCAGILSY   | 50    | 42    |
| >FGFR3-Y373SVYAGILSY   | 116 | >FGFR3-Y373SVCAGILSY   | 724   | 608   |
| >FGFR3-Y373SVYAGILSY   | 88  | >FGFR3-Y373SVCAGILSY   | 378   | 290   |
| >FGFR3-Y373GSVYAGILSY  | 306 | >FGFR3-Y373GSVCAGILSY  | 823   | 517   |
| >FGFR3-Y373GSVYAGILSY  | 267 | >FGFR3-Y373GSVCAGILSY  | 471   | 204   |
| >FGFR3-Y373GSVYAGILSY  | 186 | >FGFR3-Y373GSVCAGILSY  | 200   | 14    |
| >FGFR3-Y373GSVYAGILSY  | 99  | >FGFR3-Y373GSVCAGILSY  | 176   | 77    |
| >FGFR3-Y373GSVYAGILSY  | 85  | >FGFR3-Y373GSVCAGILSY  | 86    | 1     |

|                        |     |                        |       |       |
|------------------------|-----|------------------------|-------|-------|
| >FGFR3-Y373GSVYAGILSY  | 242 | >FGFR3-Y373GSVCAGILSY  | 240   | 2     |
| >FGFR3-Y373GSVYAGIL    | 94  | >FGFR3-Y373GSVCAGIL    | 180   | 86    |
| >FGFR3-Y373GSVYAGILSY  | 5   | >FGFR3-Y373GSVCAGILSY  | 6     | 1     |
| >FGFR3-Y373GSVYAGILSY  | 34  | >FGFR3-Y373GSVCAGILSY  | 202   | 168   |
| >FGFR3-Y373AGSVYAGI    | 342 | >FGFR3-Y373AGSVCAGI    | 18572 | 18230 |
| >FGFR3-Y373AGSVYAGILS' | 68  | >FGFR3-Y373AGSVCAGILS' | 38    | 30    |
| >FGFR3-Y373AGSVYAGILS' | 343 | >FGFR3-Y373AGSVCAGILS' | 442   | 99    |
| >FGFR3-Y373AGSVYAGILS' | 178 | >FGFR3-Y373AGSVCAGILS' | 313   | 135   |
| >FGFR3-Y373EAGSVYAGI   | 22  | >FGFR3-Y373EAGSVCAGI   | 55    | 33    |
| >FGFR3-Y373EAGSVYAGI   | 27  | >FGFR3-Y373EAGSVCAGI   | 98    | 71    |
| >FGFR3-Y373DEAGSVYAGI  | 26  | >FGFR3-Y373DEAGSVCAGI  | 22    | 4     |
| >FGFR3-Y373DEAGSVYAGI  | 216 | >FGFR3-Y373DEAGSVCAGI  | 274   | 58    |
| >FGFR3-Y373DEAGSVYA    | 237 | >FGFR3-Y373DEAGSVCA    | 418   | 181   |
| >FGFR3-Y373DEAGSVYAG   | 109 | >FGFR3-Y373DEAGSVCAG   | 1737  | 1628  |
| >FGFR3-Y373DEAGSVYAGI  | 30  | >FGFR3-Y373DEAGSVCAGI  | 58    | 28    |
| >FGFR3-Y373DEAGSVYAGI  | 120 | >FGFR3-Y373DEAGSVCAGI  | 171   | 51    |
| >FGFR3-Y373DEAGSVYA    | 99  | >FGFR3-Y373DEAGSVCA    | 82    | 17    |
| >FGFR3-Y373DEAGSVYAGI  | 246 | >FGFR3-Y373DEAGSVCAGI  | 119   | 127   |
| >FGFR3-Y373ADEAGSVYA   | 971 | >FGFR3-Y373ADEAGSVCA   | 441   | 530   |
| >FGFR3-Y373ADEAGSVYAC  | 334 | >FGFR3-Y373ADEAGSVCA   | 369   | 35    |
| >FGFR3-Y373ADEAGSVYAC  | 112 | >FGFR3-Y373ADEAGSVCA   | 130   | 18    |
| >FGFR3-Y373EADEAGSVY   | 144 | >FGFR3-Y373EADEAGSVC   | 20266 | 20122 |
| >FGFR3-Y373EADEAGSVYA  | 38  | >FGFR3-Y373EADEAGSVC   | 594   | 556   |
| >FGFR3-Y373EADEAGSVY   | 27  | >FGFR3-Y373EADEAGSVC   | 6358  | 6331  |
| >FGFR3-Y373VEADEAGSV   | 229 | >FGFR3-Y373VEADEAGSV   | 18070 | 17841 |
| >FGFR3-Y373VEADEAGSV   | 194 | >FGFR3-Y373VEADEAGSV   | 91    | 103   |
| >FGFR3-Y373YGVGFFLFILV | 520 | >FGFR3-Y373YGVGFFLFILV | 332   | 188   |
| >FGFR3-Y373YGVGFFLFI   | 349 | >FGFR3-Y373YGVGFFLFI   | 2751  | 2402  |
| >FGFR3-Y373YGVGFFLFILV | 230 | >FGFR3-Y373YGVGFFLFILV | 1581  | 1351  |
| >FGFR3-Y373YGVGFFLF    | 262 | >FGFR3-Y373YGVGFFLF    | 5381  | 5119  |
| >FGFR3-Y373YGVGFFLFI   | 22  | >FGFR3-Y373YGVGFFLFI   | 771   | 749   |
| >FGFR3-Y373YGVGFFLFIL  | 207 | >FGFR3-Y373YGVGFFLFIL  | 2449  | 2242  |
| >FGFR3-Y373YGVGFFLFILV | 14  | >FGFR3-Y373YGVGFFLFILV | 409   | 395   |
| >FGFR3-Y373YGVGFFLFILV | 251 | >FGFR3-Y373YGVGFFLFILV | 8652  | 8401  |
| >FGFR3-Y373YGVGFFLFILV | 258 | >FGFR3-Y373YGVGFFLFILV | 10581 | 10323 |
| >FGFR3-Y373YGVGFFLF    | 260 | >FGFR3-Y373YGVGFFLF    | 489   | 229   |
| >FGFR3-Y373YGVGFFLF    | 113 | >FGFR3-Y373YGVGFFLF    | 1530  | 1417  |
| >FGFR3-Y373YGVGFFLFILV | 163 | >FGFR3-Y373YGVGFFLFILV | 522   | 359   |
| >FGFR3-Y373YGVGFFLFILV | 473 | >FGFR3-Y373YGVGFFLFILV | 7657  | 7184  |
| >FGFR3-Y373YGVGFFLF    | 460 | >FGFR3-Y373YGVGFFLF    | 2730  | 2270  |
| >FGFR3-Y373YGVGFFLF    | 476 | >FGFR3-Y373YGVGFFLF    | 6434  | 5958  |
| >FGFR3-Y373YGVGFFLF    | 195 | >FGFR3-Y373YGVGFFLF    | 1937  | 1742  |
| >FGFR3-Y373YGVGFFLFI   | 194 | >FGFR3-Y373YGVGFFLFI   | 732   | 538   |

|                                     |      |                                     |       |       |
|-------------------------------------|------|-------------------------------------|-------|-------|
| >FGFR3-Y37 <sup>ϵ</sup> YGVGFFLFIL  | 185  | >FGFR3-Y37 <sup>ϵ</sup> CGVGFFLFIL  | 714   | 529   |
| >FGFR3-Y37 <sup>ϵ</sup> YGVGFFLFILV | 371  | >FGFR3-Y37 <sup>ϵ</sup> CGVGFFLFILV | 1313  | 942   |
| >FGFR3-Y37 <sup>ϵ</sup> YGVGFFLFI   | 929  | >FGFR3-Y37 <sup>ϵ</sup> CGVGFFLFI   | 153   | 776   |
| >FGFR3-Y37 <sup>ϵ</sup> SYGVGFFL    | 219  | >FGFR3-Y37 <sup>ϵ</sup> SCGVGFFL    | 27514 | 27295 |
| >FGFR3-Y37 <sup>ϵ</sup> SYGVGFFLFI  | 197  | >FGFR3-Y37 <sup>ϵ</sup> SCGVGFFLFI  | 27060 | 26863 |
| >FGFR3-Y37 <sup>ϵ</sup> SYGVGFFLF   | 14   | >FGFR3-Y37 <sup>ϵ</sup> SCGVGFFLF   | 1088  | 1074  |
| >FGFR3-Y37 <sup>ϵ</sup> SYGVGFFLFIL | 178  | >FGFR3-Y37 <sup>ϵ</sup> SCGVGFFLFIL | 18721 | 18543 |
| >FGFR3-Y37 <sup>ϵ</sup> SYGVGFFL    | 103  | >FGFR3-Y37 <sup>ϵ</sup> SCGVGFFL    | 14952 | 14849 |
| >FGFR3-Y37 <sup>ϵ</sup> SYGVGFFLF   | 11   | >FGFR3-Y37 <sup>ϵ</sup> SCGVGFFLF   | 778   | 767   |
| >FGFR3-Y37 <sup>ϵ</sup> SYGVGFFLFIL | 92   | >FGFR3-Y37 <sup>ϵ</sup> SCGVGFFLFIL | 12354 | 12262 |
| >FGFR3-Y37 <sup>ϵ</sup> SYGVGFFL    | 6    | >FGFR3-Y37 <sup>ϵ</sup> SCGVGFFL    | 13516 | 13510 |
| >FGFR3-Y37 <sup>ϵ</sup> SYGVGFFLF   | 5    | >FGFR3-Y37 <sup>ϵ</sup> SCGVGFFLF   | 1594  | 1589  |
| >FGFR3-Y37 <sup>ϵ</sup> SYGVGFFLFI  | 6    | >FGFR3-Y37 <sup>ϵ</sup> SCGVGFFLFI  | 9601  | 9595  |
| >FGFR3-Y37 <sup>ϵ</sup> SYGVGFFLFIL | 9    | >FGFR3-Y37 <sup>ϵ</sup> SCGVGFFLFIL | 14536 | 14527 |
| >FGFR3-Y37 <sup>ϵ</sup> SYGVGFFLF   | 50   | >FGFR3-Y37 <sup>ϵ</sup> SCGVGFFLF   | 1300  | 1250  |
| >FGFR3-Y37 <sup>ϵ</sup> SYGVGFFLF   | 1989 | >FGFR3-Y37 <sup>ϵ</sup> SCGVGFFLF   | 283   | 1706  |
| >FGFR3-Y37 <sup>ϵ</sup> SYGVGFFL    | 203  | >FGFR3-Y37 <sup>ϵ</sup> SCGVGFFL    | 4699  | 4496  |
| >FGFR3-Y37 <sup>ϵ</sup> SYGVGFFLF   | 133  | >FGFR3-Y37 <sup>ϵ</sup> SCGVGFFLF   | 3104  | 2971  |
| >FGFR3-Y37 <sup>ϵ</sup> SYGVGFFLFI  | 17   | >FGFR3-Y37 <sup>ϵ</sup> SCGVGFFLFI  | 713   | 696   |
| >FGFR3-Y37 <sup>ϵ</sup> SYGVGFFLFIL | 117  | >FGFR3-Y37 <sup>ϵ</sup> SCGVGFFLFIL | 2483  | 2366  |
| >FGFR3-Y37 <sup>ϵ</sup> SYGVGFFL    | 281  | >FGFR3-Y37 <sup>ϵ</sup> SCGVGFFL    | 28864 | 28583 |
| >FGFR3-Y37 <sup>ϵ</sup> SYGVGFFLFI  | 75   | >FGFR3-Y37 <sup>ϵ</sup> SCGVGFFLFI  | 14252 | 14177 |
| >FGFR3-Y37 <sup>ϵ</sup> AGSVYAGILS' | 68   | >FGFR3-Y37 <sup>ϵ</sup> AGSVYAGILS' | 26518 | 26450 |
| >FGFR3-Y37 <sup>ϵ</sup> AGSVYAGILS' | 343  | >FGFR3-Y37 <sup>ϵ</sup> AGSVYAGILS' | 18744 | 18401 |
| >FGFR3-Y37 <sup>ϵ</sup> AGSVYAGILS' | 178  | >FGFR3-Y37 <sup>ϵ</sup> AGSVYAGILS' | 22205 | 22027 |
| >FGFR3-Y37 <sup>ϵ</sup> LSYGVGFFLFI | 110  | >FGFR3-Y37 <sup>ϵ</sup> LSCGVGFFLFI | 1320  | 1210  |
| >FGFR3-Y37 <sup>ϵ</sup> LSYGVGFFL   | 389  | >FGFR3-Y37 <sup>ϵ</sup> LSCGVGFFL   | 1015  | 626   |
| >FGFR3-Y37 <sup>ϵ</sup> LSYGVGFFL   | 82   | >FGFR3-Y37 <sup>ϵ</sup> LSCGVGFFL   | 430   | 348   |
| >FGFR3-Y37 <sup>ϵ</sup> LSYGVGFFLFI | 278  | >FGFR3-Y37 <sup>ϵ</sup> LSCGVGFFLFI | 1162  | 884   |
| >FGFR3-Y37 <sup>ϵ</sup> LSYGVGFFL   | 60   | >FGFR3-Y37 <sup>ϵ</sup> LSCGVGFFL   | 453   | 393   |
| >FGFR3-Y37 <sup>ϵ</sup> LSYGVGFFLFI | 76   | >FGFR3-Y37 <sup>ϵ</sup> LSCGVGFFLFI | 464   | 388   |
| >FGFR3-Y37 <sup>ϵ</sup> LSYGVGFFL   | 54   | >FGFR3-Y37 <sup>ϵ</sup> LSCGVGFFL   | 918   | 864   |
| >FGFR3-Y37 <sup>ϵ</sup> LSYGVGFFLFI | 144  | >FGFR3-Y37 <sup>ϵ</sup> LSCGVGFFLFI | 1697  | 1553  |
| >FGFR3-Y37 <sup>ϵ</sup> LSYGVGFFL   | 253  | >FGFR3-Y37 <sup>ϵ</sup> LSCGVGFFL   | 9788  | 9535  |
| >FGFR3-Y37 <sup>ϵ</sup> LSYGVGFFLF  | 127  | >FGFR3-Y37 <sup>ϵ</sup> LSCGVGFFLF  | 190   | 63    |
| >FGFR3-Y37 <sup>ϵ</sup> LSYGVGFFLF  | 331  | >FGFR3-Y37 <sup>ϵ</sup> LSCGVGFFLF  | 653   | 322   |
| >FGFR3-Y37 <sup>ϵ</sup> LSYGVGFF    | 358  | >FGFR3-Y37 <sup>ϵ</sup> LSCGVGFF    | 382   | 24    |
| >FGFR3-Y37 <sup>ϵ</sup> LSYGVGFFLF  | 48   | >FGFR3-Y37 <sup>ϵ</sup> LSCGVGFFLF  | 229   | 181   |
| >FGFR3-Y37 <sup>ϵ</sup> LSYGVGFFLF  | 328  | >FGFR3-Y37 <sup>ϵ</sup> LSCGVGFFLF  | 3979  | 3651  |
| >FGFR3-Y37 <sup>ϵ</sup> LSYGVGFFLF  | 398  | >FGFR3-Y37 <sup>ϵ</sup> LSCGVGFFLF  | 3025  | 2627  |
| >FGFR3-Y37 <sup>ϵ</sup> LSYGVGFFL   | 303  | >FGFR3-Y37 <sup>ϵ</sup> LSCGVGFFL   | 1457  | 1154  |
| >FGFR3-Y37 <sup>ϵ</sup> LSYGVGFFLFI | 264  | >FGFR3-Y37 <sup>ϵ</sup> LSCGVGFFLFI | 1282  | 1018  |
| >FGFR3-Y37 <sup>ϵ</sup> LSYGVGFFLFI | 462  | >FGFR3-Y37 <sup>ϵ</sup> LSCGVGFFLFI | 7143  | 6681  |

|                                   |     |                                   |      |      |
|-----------------------------------|-----|-----------------------------------|------|------|
| >FGFR3-Y37 $\epsilon$ LSYGVGFF    | 87  | >FGFR3-Y37 $\epsilon$ LSCGVGFF    | 196  | 109  |
| >FGFR3-Y37 $\epsilon$ LSYGVGFFLF  | 109 | >FGFR3-Y37 $\epsilon$ LSCGVGFFLF  | 258  | 149  |
| >FGFR3-Y37 $\epsilon$ LSYGVGFF    | 102 | >FGFR3-Y37 $\epsilon$ LSCGVGFF    | 1444 | 1342 |
| >FGFR3-Y37 $\epsilon$ LSYGVGFFLF  | 51  | >FGFR3-Y37 $\epsilon$ LSCGVGFFLF  | 753  | 702  |
| >FGFR3-Y37 $\epsilon$ LSYGVGFF    | 4   | >FGFR3-Y37 $\epsilon$ LSCGVGFF    | 17   | 13   |
| >FGFR3-Y37 $\epsilon$ LSYGVGFFL   | 12  | >FGFR3-Y37 $\epsilon$ LSCGVGFFL   | 70   | 58   |
| >FGFR3-Y37 $\epsilon$ LSYGVGFFLF  | 4   | >FGFR3-Y37 $\epsilon$ LSCGVGFFLF  | 15   | 11   |
| >FGFR3-Y37 $\epsilon$ LSYGVGFFLFI | 45  | >FGFR3-Y37 $\epsilon$ LSCGVGFFLFI | 417  | 372  |
| >FGFR3-Y37 $\epsilon$ LSYGVGFF    | 152 | >FGFR3-Y37 $\epsilon$ LSCGVGFF    | 2295 | 2143 |
| >FGFR3-Y37 $\epsilon$ LSYGVGFFL   | 199 | >FGFR3-Y37 $\epsilon$ LSCGVGFFL   | 4289 | 4090 |
| >FGFR3-Y37 $\epsilon$ LSYGVGFFLF  | 76  | >FGFR3-Y37 $\epsilon$ LSCGVGFFLF  | 1144 | 1068 |
| >FGFR3-Y37 $\epsilon$ LSYGVGFF    | 21  | >FGFR3-Y37 $\epsilon$ LSCGVGFF    | 142  | 121  |
| >FGFR3-Y37 $\epsilon$ LSYGVGFFL   | 31  | >FGFR3-Y37 $\epsilon$ LSCGVGFFL   | 518  | 487  |
| >FGFR3-Y37 $\epsilon$ LSYGVGFFLF  | 11  | >FGFR3-Y37 $\epsilon$ LSCGVGFFLF  | 27   | 16   |
| >FGFR3-Y37 $\epsilon$ LSYGVGFFLFI | 24  | >FGFR3-Y37 $\epsilon$ LSCGVGFFLFI | 282  | 258  |
| >FGFR3-Y37 $\epsilon$ LSYGVGFFL   | 18  | >FGFR3-Y37 $\epsilon$ LSCGVGFFL   | 51   | 33   |
| >FGFR3-Y37 $\epsilon$ LSYGVGFFLF  | 27  | >FGFR3-Y37 $\epsilon$ LSCGVGFFLF  | 77   | 50   |
| >FGFR3-Y37 $\epsilon$ LSYGVGFFLFI | 43  | >FGFR3-Y37 $\epsilon$ LSCGVGFFLFI | 131  | 88   |
| >FGFR3-Y37 $\epsilon$ LSYGVGFF    | 226 | >FGFR3-Y37 $\epsilon$ LSCGVGFF    | 436  | 210  |
| >FGFR3-Y37 $\epsilon$ LSYGVGFFL   | 41  | >FGFR3-Y37 $\epsilon$ LSCGVGFFL   | 202  | 161  |
| >FGFR3-Y37 $\epsilon$ LSYGVGFFLF  | 33  | >FGFR3-Y37 $\epsilon$ LSCGVGFFLF  | 74   | 41   |
| >FGFR3-Y37 $\epsilon$ LSYGVGFFLFI | 77  | >FGFR3-Y37 $\epsilon$ LSCGVGFFLFI | 332  | 255  |
| >FGFR3-Y37 $\epsilon$ LSYGVGFF    | 368 | >FGFR3-Y37 $\epsilon$ LSCGVGFF    | 1959 | 1591 |
| >FGFR3-Y37 $\epsilon$ LSYGVGFFL   | 31  | >FGFR3-Y37 $\epsilon$ LSCGVGFFL   | 97   | 66   |
| >FGFR3-Y37 $\epsilon$ LSYGVGFFLFI | 8   | >FGFR3-Y37 $\epsilon$ LSCGVGFFLFI | 15   | 7    |
| >FGFR3-Y37 $\epsilon$ ILSYGVGFFL  | 23  | >FGFR3-Y37 $\epsilon$ ILSCGVGFFL  | 25   | 2    |
| >FGFR3-Y37 $\epsilon$ ILSYGVGFFL  | 10  | >FGFR3-Y37 $\epsilon$ ILSCGVGFFL  | 10   | 0    |
| >FGFR3-Y37 $\epsilon$ ILSYGVGFFLF | 239 | >FGFR3-Y37 $\epsilon$ ILSCGVGFFLF | 250  | 11   |
| >FGFR3-Y37 $\epsilon$ ILSYGVGFF   | 901 | >FGFR3-Y37 $\epsilon$ ILSCGVGFF   | 398  | 503  |
| >FGFR3-Y37 $\epsilon$ ILSYGVGFFL  | 273 | >FGFR3-Y37 $\epsilon$ ILSCGVGFFL  | 334  | 61   |
| >FGFR3-Y37 $\epsilon$ ILSYGVGFFL  | 303 | >FGFR3-Y37 $\epsilon$ ILSCGVGFFL  | 271  | 32   |
| >FGFR3-Y37 $\epsilon$ ILSYGVGFFLF | 705 | >FGFR3-Y37 $\epsilon$ ILSCGVGFFLF | 457  | 248  |
| >FGFR3-Y37 $\epsilon$ ILSYGVGFFL  | 13  | >FGFR3-Y37 $\epsilon$ ILSCGVGFFL  | 5    | 8    |
| >FGFR3-Y37 $\epsilon$ ILSYGVGFFL  | 37  | >FGFR3-Y37 $\epsilon$ ILSCGVGFFL  | 10   | 27   |
| >FGFR3-Y37 $\epsilon$ ILSYGVGFFL  | 17  | >FGFR3-Y37 $\epsilon$ ILSCGVGFFL  | 13   | 4    |
| >FGFR3-Y37 $\epsilon$ ILSYGVGFFL  | 19  | >FGFR3-Y37 $\epsilon$ ILSCGVGFFL  | 9    | 10   |
| >FGFR3-Y37 $\epsilon$ ILSYGVGFFL  | 8   | >FGFR3-Y37 $\epsilon$ ILSCGVGFFL  | 7    | 1    |
| >FGFR3-Y37 $\epsilon$ ILSYGVGFFLF | 753 | >FGFR3-Y37 $\epsilon$ ILSCGVGFFLF | 462  | 291  |
| >FGFR3-Y37 $\epsilon$ ILSYGVGFFLF | 395 | >FGFR3-Y37 $\epsilon$ ILSCGVGFFLF | 423  | 28   |
| >FGFR3-Y37 $\epsilon$ ILSYGVGFFLF | 76  | >FGFR3-Y37 $\epsilon$ ILSCGVGFFLF | 114  | 38   |
| >FGFR3-Y37 $\epsilon$ ILSYGVGFF   | 404 | >FGFR3-Y37 $\epsilon$ ILSCGVGFF   | 2777 | 2373 |
| >FGFR3-Y37 $\epsilon$ ILSYGVGF    | 74  | >FGFR3-Y37 $\epsilon$ ILSCGVGF    | 83   | 9    |
| >FGFR3-Y37 $\epsilon$ ILSYGVGFF   | 81  | >FGFR3-Y37 $\epsilon$ ILSCGVGFF   | 87   | 6    |

|                        |     |                        |      |      |
|------------------------|-----|------------------------|------|------|
| >FGFR3-Y379ILSYGVGFFLF | 112 | >FGFR3-Y379ILSCGVGFFLF | 117  | 5    |
| >FGFR3-Y379ILSYGVGF    | 254 | >FGFR3-Y379ILSCGVGF    | 400  | 146  |
| >FGFR3-Y379ILSYGVGFF   | 444 | >FGFR3-Y379ILSCGVGFF   | 586  | 142  |
| >FGFR3-Y379ILSYGVGF    | 37  | >FGFR3-Y379ILSCGVGF    | 47   | 10   |
| >FGFR3-Y379ILSYGVGFF   | 276 | >FGFR3-Y379ILSCGVGFF   | 306  | 30   |
| >FGFR3-Y379ILSYGVGFFLF | 112 | >FGFR3-Y379ILSCGVGFFLF | 117  | 5    |
| >FGFR3-Y379ILSYGVGFF   | 316 | >FGFR3-Y379ILSCGVGFF   | 354  | 38   |
| >FGFR3-Y379ILSYGVGFFLF | 169 | >FGFR3-Y379ILSCGVGFFLF | 192  | 23   |
| >FGFR3-Y379ILSYGVGFFL  | 752 | >FGFR3-Y379ILSCGVGFFL  | 356  | 396  |
| >FGFR3-Y379GILSYGVGFFL | 41  | >FGFR3-Y379GILSCGVGFFL | 57   | 16   |
| >FGFR3-Y379GILSYGVGFFI | 49  | >FGFR3-Y379GILSCGVGFFI | 80   | 31   |
| >FGFR3-Y379GILSYGVGFFI | 21  | >FGFR3-Y379GILSCGVGFFI | 28   | 7    |
| >FGFR3-Y379GILSYGVGFFI | 10  | >FGFR3-Y379GILSCGVGFFI | 43   | 33   |
| >FGFR3-Y379GILSYGVGFFI | 50  | >FGFR3-Y379GILSCGVGFFI | 57   | 7    |
| >FGFR3-Y379GILSYGVGFFI | 22  | >FGFR3-Y379GILSCGVGFFI | 28   | 6    |
| >FGFR3-Y379GILSYGVGFFI | 286 | >FGFR3-Y379GILSCGVGFFI | 224  | 62   |
| >FGFR3-Y379GILSYGVGFFI | 85  | >FGFR3-Y379GILSCGVGFFI | 126  | 41   |
| >FGFR3-Y379GILSYGVGF   | 118 | >FGFR3-Y379GILSCGVGF   | 182  | 64   |
| >FGFR3-Y379GILSYGVGF   | 742 | >FGFR3-Y379GILSCGVGF   | 367  | 375  |
| >FGFR3-Y379AGILSYGVGF  | 295 | >FGFR3-Y379AGILSCGVGF  | 474  | 179  |
| >FGFR3-Y379AGILSYGVGF  | 107 | >FGFR3-Y379AGILSCGVGF  | 135  | 28   |
| >FGFR3-Y379AGILSYGVGF  | 450 | >FGFR3-Y379AGILSCGVGF  | 487  | 37   |
| >FGFR3-Y379AGILSYGVGF  | 490 | >FGFR3-Y379AGILSCGVGF  | 241  | 249  |
| >FGFR3-Y379YAGILSYGV   | 389 | >FGFR3-Y379YAGILSCGV   | 2541 | 2152 |
| >FGFR3-Y379YAGILSYGV   | 152 | >FGFR3-Y379YAGILSCGV   | 1072 | 920  |
| >FGFR3-Y379YAGILSYGV   | 92  | >FGFR3-Y379YAGILSCGV   | 189  | 97   |
| >FGFR3-Y379YAGILSYGV   | 18  | >FGFR3-Y379YAGILSCGV   | 22   | 4    |
| >FGFR3-Y379YAGILSYGV   | 50  | >FGFR3-Y379YAGILSCGV   | 333  | 283  |
| >FGFR3-Y379YAGILSYGV   | 44  | >FGFR3-Y379YAGILSCGV   | 31   | 13   |
| >FGFR3-Y379YAGILSYGV   | 105 | >FGFR3-Y379YAGILSCGV   | 339  | 234  |
| >FGFR3-Y379YAGILSYGV   | 51  | >FGFR3-Y379YAGILSCGV   | 15   | 36   |
| >FGFR3-Y379YAGILSYGV   | 72  | >FGFR3-Y379YAGILSCGV   | 770  | 698  |
| >FGFR3-Y379YAGILSYGV   | 29  | >FGFR3-Y379YAGILSCGV   | 45   | 16   |
| >FGFR3-Y379YAGILSYGVG  | 195 | >FGFR3-Y379YAGILSCGVG  | 173  | 22   |
| >FGFR3-Y379YAGILSYGVG  | 261 | >FGFR3-Y379YAGILSCGVG  | 277  | 16   |
| >FGFR3-Y379YAGILSYGVG  | 16  | >FGFR3-Y379YAGILSCGVG  | 19   | 3    |
| >FGFR3-Y379YAGILSYGVG  | 72  | >FGFR3-Y379YAGILSCGVG  | 96   | 24   |
| >FGFR3-Y379VYAGILSYGV  | 761 | >FGFR3-Y379VYAGILSCGV  | 346  | 415  |
| >FGFR3-Y379VYAGILSYGV  | 160 | >FGFR3-Y379VYAGILSCGV  | 353  | 193  |
| >FGFR3-Y379VYAGILSYGV  | 191 | >FGFR3-Y379VYAGILSCGV  | 171  | 20   |
| >FGFR3-Y379VYAGILSYGV  | 55  | >FGFR3-Y379VYAGILSCGV  | 37   | 18   |
| >FGFR3-Y379VYAGILSY    | 333 | >FGFR3-Y379VYAGILSC    | 1741 | 1408 |
| >FGFR3-Y379VYAGILSYGV  | 230 | >FGFR3-Y379VYAGILSCGV  | 1128 | 898  |

|                                   |      |                                   |       |       |
|-----------------------------------|------|-----------------------------------|-------|-------|
| >FGFR3-Y37 $\epsilon$ VYAGILSY    | 12   | >FGFR3-Y37 $\epsilon$ VYAGILSC    | 14600 | 14588 |
| >FGFR3-Y37 $\epsilon$ VYAGILSY    | 27   | >FGFR3-Y37 $\epsilon$ VYAGILSC    | 14972 | 14945 |
| >FGFR3-Y37 $\epsilon$ VYAGILSY    | 24   | >FGFR3-Y37 $\epsilon$ VYAGILSC    | 24803 | 24779 |
| >FGFR3-Y37 $\epsilon$ VYAGILSY    | 140  | >FGFR3-Y37 $\epsilon$ VYAGILSC    | 37006 | 36866 |
| >FGFR3-Y37 $\epsilon$ SVYAGILSYG\ | 14   | >FGFR3-Y37 $\epsilon$ SVYAGILSCG\ | 37    | 23    |
| >FGFR3-Y37 $\epsilon$ SVYAGILSYG\ | 33   | >FGFR3-Y37 $\epsilon$ SVYAGILSCG\ | 92    | 59    |
| >FGFR3-Y37 $\epsilon$ SVYAGILSYG\ | 9    | >FGFR3-Y37 $\epsilon$ SVYAGILSCG\ | 9     | 0     |
| >FGFR3-Y37 $\epsilon$ SVYAGILSY   | 3021 | >FGFR3-Y37 $\epsilon$ SVYAGILSC   | 433   | 2588  |
| >FGFR3-Y37 $\epsilon$ SVYAGILSYG\ | 6    | >FGFR3-Y37 $\epsilon$ SVYAGILSCG\ | 7     | 1     |
| >FGFR3-Y37 $\epsilon$ SVYAGILSY   | 4394 | >FGFR3-Y37 $\epsilon$ SVYAGILSC   | 142   | 4252  |
| >FGFR3-Y37 $\epsilon$ SVYAGILSYG\ | 3    | >FGFR3-Y37 $\epsilon$ SVYAGILSCG\ | 3     | 0     |
| >FGFR3-Y37 $\epsilon$ SVYAGILSYG\ | 13   | >FGFR3-Y37 $\epsilon$ SVYAGILSCG\ | 31    | 18    |
| >FGFR3-Y37 $\epsilon$ SVYAGILSYG\ | 6    | >FGFR3-Y37 $\epsilon$ SVYAGILSCG\ | 6     | 0     |
| >FGFR3-Y37 $\epsilon$ SVYAGILSYG\ | 87   | >FGFR3-Y37 $\epsilon$ SVYAGILSCG\ | 199   | 112   |
| >FGFR3-Y37 $\epsilon$ SVYAGILSY   | 5760 | >FGFR3-Y37 $\epsilon$ SVYAGILSC   | 225   | 5535  |
| >FGFR3-Y37 $\epsilon$ SVYAGILSYG\ | 4    | >FGFR3-Y37 $\epsilon$ SVYAGILSCG\ | 3     | 1     |
| >FGFR3-Y37 $\epsilon$ SVYAGILSY   | 40   | >FGFR3-Y37 $\epsilon$ SVYAGILSC   | 11982 | 11942 |
| >FGFR3-Y37 $\epsilon$ SVYAGILSY   | 12   | >FGFR3-Y37 $\epsilon$ SVYAGILSC   | 11476 | 11464 |
| >FGFR3-Y37 $\epsilon$ SVYAGILSY   | 145  | >FGFR3-Y37 $\epsilon$ SVYAGILSC   | 16656 | 16511 |
| >FGFR3-Y37 $\epsilon$ SVYAGILSY   | 32   | >FGFR3-Y37 $\epsilon$ SVYAGILSC   | 13406 | 13374 |
| >FGFR3-Y37 $\epsilon$ SVYAGILSY   | 15   | >FGFR3-Y37 $\epsilon$ SVYAGILSC   | 21121 | 21106 |
| >FGFR3-Y37 $\epsilon$ SVYAGILSY   | 240  | >FGFR3-Y37 $\epsilon$ SVYAGILSC   | 30417 | 30177 |
| >FGFR3-Y37 $\epsilon$ SVYAGILSY   | 7    | >FGFR3-Y37 $\epsilon$ SVYAGILSC   | 11973 | 11966 |
| >FGFR3-Y37 $\epsilon$ SVYAGILSY   | 37   | >FGFR3-Y37 $\epsilon$ SVYAGILSC   | 20775 | 20738 |
| >FGFR3-Y37 $\epsilon$ SVYAGILSY   | 334  | >FGFR3-Y37 $\epsilon$ SVYAGILSC   | 2110  | 1776  |
| >FGFR3-Y37 $\epsilon$ SVYAGILSYG\ | 427  | >FGFR3-Y37 $\epsilon$ SVYAGILSCG\ | 1606  | 1179  |
| >FGFR3-Y37 $\epsilon$ SVYAGILSYG\ | 8    | >FGFR3-Y37 $\epsilon$ SVYAGILSCG\ | 17    | 9     |
| >FGFR3-Y37 $\epsilon$ SVYAGILSYG\ | 6    | >FGFR3-Y37 $\epsilon$ SVYAGILSCG\ | 7     | 1     |
| >FGFR3-Y37 $\epsilon$ SVYAGILSY   | 5    | >FGFR3-Y37 $\epsilon$ SVYAGILSC   | 21014 | 21009 |
| >FGFR3-Y37 $\epsilon$ SVYAGILSY   | 37   | >FGFR3-Y37 $\epsilon$ SVYAGILSC   | 6506  | 6469  |
| >FGFR3-Y37 $\epsilon$ SVYAGILSY   | 31   | >FGFR3-Y37 $\epsilon$ SVYAGILSC   | 11671 | 11640 |
| >FGFR3-Y37 $\epsilon$ SVYAGILSY   | 244  | >FGFR3-Y37 $\epsilon$ SVYAGILSC   | 14207 | 13963 |
| >FGFR3-Y37 $\epsilon$ SVYAGILSY   | 8    | >FGFR3-Y37 $\epsilon$ SVYAGILSC   | 8340  | 8332  |
| >FGFR3-Y37 $\epsilon$ SVYAGILSY   | 116  | >FGFR3-Y37 $\epsilon$ SVYAGILSC   | 16904 | 16788 |
| >FGFR3-Y37 $\epsilon$ SVYAGILSY   | 88   | >FGFR3-Y37 $\epsilon$ SVYAGILSC   | 16341 | 16253 |
| >FGFR3-Y37 $\epsilon$ GSVYAGILSY  | 306  | >FGFR3-Y37 $\epsilon$ GSVYAGILSC  | 19022 | 18716 |
| >FGFR3-Y37 $\epsilon$ GSVYAGILSY  | 267  | >FGFR3-Y37 $\epsilon$ GSVYAGILSC  | 32139 | 31872 |
| >FGFR3-Y37 $\epsilon$ GSVYAGILSY  | 186  | >FGFR3-Y37 $\epsilon$ GSVYAGILSC  | 28499 | 28313 |
| >FGFR3-Y37 $\epsilon$ GSVYAGILSY  | 99   | >FGFR3-Y37 $\epsilon$ GSVYAGILSC  | 25301 | 25202 |
| >FGFR3-Y37 $\epsilon$ GSVYAGILSY  | 85   | >FGFR3-Y37 $\epsilon$ GSVYAGILSC  | 13755 | 13670 |
| >FGFR3-Y37 $\epsilon$ GSVYAGILSY  | 242  | >FGFR3-Y37 $\epsilon$ GSVYAGILSC  | 13944 | 13702 |
| >FGFR3-Y37 $\epsilon$ GSVYAGILSY  | 5    | >FGFR3-Y37 $\epsilon$ GSVYAGILSC  | 6766  | 6761  |
| >FGFR3-Y37 $\epsilon$ GSVYAGILSY  | 34   | >FGFR3-Y37 $\epsilon$ GSVYAGILSC  | 10381 | 10347 |

|                         |       |                         |      |       |
|-------------------------|-------|-------------------------|------|-------|
| >FH-T442R-v TERINKLM    | 4     | >FH-T442R-n RERINKLM    | 12   | 8     |
| >FH-T442R-v TERINKLM    | 479   | >FH-T442R-n RERINKLM    | 161  | 318   |
| >FH-T442R-v TERINKLMNE  | 772   | >FH-T442R-n RERINKLMNE  | 226  | 546   |
| >FH-T442R-v NTERINKLM   | 56    | >FH-T442R-n NRERINKLM   | 7518 | 7462  |
| >FH-T442R-v NTERINKL    | 22483 | >FH-T442R-n NRERINKL    | 288  | 22195 |
| >FH-T442R-v NTERINKL    | 17498 | >FH-T442R-n NRERINKL    | 393  | 17105 |
| >FH-T442R-v ENCVVGIQAN  | 26131 | >FH-T442R-n ENCVVGIQAN  | 40   | 26091 |
| >FH-T442R-v ANTERINK    | 2898  | >FH-T442R-n ANRERINK    | 11   | 2887  |
| >FH-T442R-v QANTERINK   | 174   | >FH-T442R-n QANRERINK   | 208  | 34    |
| >FH-T442R-v QANTERINK   | 237   | >FH-T442R-n QANRERINK   | 87   | 150   |
| >FH-T442R-v QANTERINK   | 481   | >FH-T442R-n QANRERINK   | 691  | 210   |
| >FH-T442R-v IQANTERINKI | 377   | >FH-T442R-n IQANRERINKI | 516  | 139   |
| >FH-T442R-v IQANTERI    | 324   | >FH-T442R-n IQANRERI    | 889  | 565   |
| >FH-T442R-v IQANTERINKI | 444   | >FH-T442R-n IQANRERINKI | 426  | 18    |
| >FH-T442R-v IQANTERINK  | 657   | >FH-T442R-n IQANRERINK  | 437  | 220   |
| >FH-T442R-v IQANTERINK  | 248   | >FH-T442R-n IQANRERINK  | 323  | 75    |
| >FH-T442R-v IQANTERI    | 131   | >FH-T442R-n IQANRERI    | 379  | 248   |
| >FH-T442R-v IQANTERINK  | 319   | >FH-T442R-n IQANRERINK  | 894  | 575   |
| >FH-T442R-v IQANTERINKI | 49    | >FH-T442R-n IQANRERINKI | 125  | 76    |
| >FH-T442R-v GIQANTERIN  | 29    | >FH-T442R-n GIQANRERIN  | 40   | 11    |
| >FH-T442R-v GIQANTER    | 294   | >FH-T442R-n GIQANRER    | 389  | 95    |
| >FH-T442R-v VVGIQANT    | 22598 | >FH-T442R-n VVGIQANR    | 270  | 22328 |
| >FH-T442R-v CVVGIQANT   | 21018 | >FH-T442R-n CVVGIQANR   | 82   | 20936 |
| >FH-T442R-v CVVGIQANTE  | 305   | >FH-T442R-n CVVGIQANRE  | 635  | 330   |
| >FH-T442R-v CVVGIQANT   | 26714 | >FH-T442R-n CVVGIQANR   | 239  | 26475 |
| >FH-T442R-v CVVGIQANT   | 10748 | >FH-T442R-n CVVGIQANR   | 9    | 10739 |
| >FH-T442R-v CVVGIQANTE  | 12    | >FH-T442R-n CVVGIQANRE  | 28   | 16    |
| >FH-T442R-v CVVGIQANT   | 255   | >FH-T442R-n CVVGIQANR   | 7714 | 7459  |
| >FH-T442R-v CVVGIQANT   | 33503 | >FH-T442R-n CVVGIQANR   | 161  | 33342 |
| >FH-T442R-v CVVGIQANTE  | 486   | >FH-T442R-n CVVGIQANRE  | 838  | 352   |
| >FH-V416M-v VLHSARLL    | 2257  | >FH-V416M-f MLHSARLL    | 398  | 1859  |
| >FH-V416M-v VLHSARLL    | 210   | >FH-V416M-f MLHSARLL    | 23   | 187   |
| >FH-V416M-v VLHSARLL    | 182   | >FH-V416M-f MLHSARLL    | 33   | 149   |
| >FH-V416M-v VLHSARLLGD  | 121   | >FH-V416M-f MLHSARLLGI  | 28   | 93    |
| >FH-V416M-v VLHSARLL    | 126   | >FH-V416M-f MLHSARLL    | 65   | 61    |
| >FH-V416M-v VLHSARLL    | 16    | >FH-V416M-f MLHSARLL    | 8    | 8     |
| >FH-V416M-v VLHSARLLGD  | 91    | >FH-V416M-f MLHSARLLGI  | 39   | 52    |
| >FH-V416M-v VLHSARLL    | 3204  | >FH-V416M-f MLHSARLL    | 267  | 2937  |
| >FH-V416M-v VLHSARLLG   | 2201  | >FH-V416M-f MLHSARLLG   | 136  | 2065  |
| >FH-V416M-v VLHSARLLGD  | 2889  | >FH-V416M-f MLHSARLLGI  | 348  | 2541  |
| >FH-V416M-v NVLHSARL    | 5748  | >FH-V416M-f NMLHSARL    | 314  | 5434  |
| >FH-V416M-v NVLHSARL    | 2132  | >FH-V416M-f NMLHSARL    | 152  | 1980  |
| >FH-V416M-v NVLHSARL    | 3663  | >FH-V416M-f NMLHSARL    | 216  | 3447  |



|                        |       |                       |       |       |
|------------------------|-------|-----------------------|-------|-------|
| >FH-V416M- NVLHSARL    | 3907  | >FH-V416M- NMLHSARL   | 41    | 3866  |
| >FH-V416M- NVLHSARLL   | 11417 | >FH-V416M- NMLHSARLL  | 287   | 11130 |
| >FH-V416M- NVLHSARL    | 4578  | >FH-V416M- NMLHSARL   | 27    | 4551  |
| >FH-V416M- NVLHSARLL   | 10844 | >FH-V416M- NMLHSARLL  | 312   | 10532 |
| >FH-V416M- NVLHSARL    | 9760  | >FH-V416M- NMLHSARL   | 333   | 9427  |
| >FH-V416M- NVLHSARL    | 4974  | >FH-V416M- NMLHSARL   | 74    | 4900  |
| >FH-V416M- NVLHSARL    | 5430  | >FH-V416M- NMLHSARL   | 80    | 5350  |
| >FH-V416M- NVLHSARL    | 465   | >FH-V416M- NMLHSARL   | 7632  | 7167  |
| >FH-V416M- NVLHSARL    | 168   | >FH-V416M- NMLHSARL   | 938   | 770   |
| >FH-V416M- NVLHSARL    | 11295 | >FH-V416M- NMLHSARL   | 460   | 10835 |
| >FH-V416M- NVLHSARLL   | 9872  | >FH-V416M- NMLHSARLL  | 391   | 9481  |
| >FH-V416M- NVLHSARL    | 3572  | >FH-V416M- NMLHSARL   | 323   | 3249  |
| >FH-V416M- NVLHSARLL   | 4583  | >FH-V416M- NMLHSARLL  | 399   | 4184  |
| >FH-V416M- NVFKPMMIK   | 182   | >FH-V416M- NVFKPMMIK  | 6852  | 6670  |
| >FH-V416M- NVFKPMMIK   | 398   | >FH-V416M- NVFKPMMIK  | 13884 | 13486 |
| >FH-V416M- NVFKPMMIK   | 360   | >FH-V416M- NVFKPMMIK  | 22603 | 22243 |
| >FH-V416M- NVFKPMMIK   | 9217  | >FH-V416M- NVFKPMMIK  | 309   | 8908  |
| >FH-V416M- NVFKPMMIK   | 8866  | >FH-V416M- NVFKPMMIK  | 448   | 8418  |
| >FH-V416M- NVFKPMMIK   | 12    | >FH-V416M- NVFKPMMIK  | 353   | 341   |
| >FH-V416M- NVFKPMMIK   | 31    | >FH-V416M- NVFKPMMIK  | 331   | 300   |
| >FH-V416M- NVFKPMMIK   | 5323  | >FH-V416M- NVFKPMMIK  | 364   | 4959  |
| >FH-V416M- KNVLHSARL   | 188   | >FH-V416M- KNMLHSARL  | 128   | 60    |
| >FH-V416M- KNVLHSAR    | 120   | >FH-V416M- KNMLHSAR   | 35    | 85    |
| >FH-V416M- KNVLHSAR    | 159   | >FH-V416M- KNMLHSAR   | 128   | 31    |
| >FH-V416M- IKNVLHSA    | 525   | >FH-V416M- IKNMLHSA   | 392   | 133   |
| >FH-V416M- IKNVLHSAR   | 94    | >FH-V416M- IKNMLHSAR  | 72    | 22    |
| >FH-V416M- IKNVLHSARL  | 110   | >FH-V416M- IKNMLHSARL | 81    | 29    |
| >FH-V416M- IKNVLHSARLI | 61    | >FH-V416M- IKNMLHSARL | 44    | 17    |
| >FH-V416M- MIKNVLHSA   | 134   | >FH-V416M- MIKNMLHSA  | 228   | 94    |
| >FH-V416M- MIKNVLHSAF  | 83    | >FH-V416M- MIKNMLHSA  | 126   | 43    |
| >FH-V416M- MIKNVLHSA   | 7     | >FH-V416M- MIKNMLHSA  | 7     | 0     |
| >FH-V416M- MIKNVLHSAF  | 19    | >FH-V416M- MIKNMLHSA  | 20    | 1     |
| >FH-V416M- MIKNVLHSA   | 97    | >FH-V416M- MIKNMLHSA  | 172   | 75    |
| >FH-V416M- MIKNVLHSA   | 72    | >FH-V416M- MIKNMLHSA  | 30    | 42    |
| >FH-V416M- MIKNVLHSAF  | 59    | >FH-V416M- MIKNMLHSA  | 36    | 23    |
| >FH-V416M- MIKNVLHS    | 442   | >FH-V416M- MIKNMLHS   | 333   | 109   |
| >FH-V416M- MIKNVLHSA   | 42    | >FH-V416M- MIKNMLHSA  | 32    | 10    |
| >FH-V416M- MIKNVLHSAF  | 158   | >FH-V416M- MIKNMLHSA  | 122   | 36    |
| >FH-V416M- MIKNVLHSAF  | 140   | >FH-V416M- MIKNMLHSA  | 107   | 33    |
| >FH-V416M- MIKNVLHSAF  | 13    | >FH-V416M- MIKNMLHSA  | 9     | 4     |
| >FH-V416M- MIKNVLHSAF  | 87    | >FH-V416M- MIKNMLHSA  | 103   | 16    |
| >FH-V416M- MIKNVLHSAF  | 31    | >FH-V416M- MIKNMLHSA  | 41    | 10    |
| >FH-V416M- MIKNVLHSA   | 272   | >FH-V416M- MIKNMLHSA  | 1124  | 852   |

|                       |     |                      |      |      |
|-----------------------|-----|----------------------|------|------|
| >FH-V416M- MIKNVLHSAF | 415 | >FH-V416M- MIKNMLHSA | 1148 | 733  |
| >FH-V416M- MIKNVLHSA  | 380 | >FH-V416M- MIKNMLHSA | 94   | 286  |
| >FH-V416M- MIKNVLHSAF | 84  | >FH-V416M- MIKNMLHSA | 36   | 48   |
| >FH-V416M- MIKNVLHSAF | 731 | >FH-V416M- MIKNMLHSA | 452  | 279  |
| >FH-V416M- MMIKNVLHS  | 92  | >FH-V416M- MMIKNMLHS | 95   | 3    |
| >FH-V416M- MMIKNVLHS  | 66  | >FH-V416M- MMIKNMLHS | 64   | 2    |
| >FH-V416M- MMIKNVLHS  | 393 | >FH-V416M- MMIKNMLHS | 611  | 218  |
| >FH-V416M- MMIKNVLHS  | 15  | >FH-V416M- MMIKNMLHS | 16   | 1    |
| >FH-V416M- MMIKNVLHS  | 89  | >FH-V416M- MMIKNMLHS | 89   | 0    |
| >FH-V416M- MMIKNVLHS  | 454 | >FH-V416M- MMIKNMLHS | 1923 | 1469 |
| >FH-V416M- MMIKNVLHS  | 5   | >FH-V416M- MMIKNMLHS | 12   | 7    |
| >FH-V416M- MMIKNVLHS  | 7   | >FH-V416M- MMIKNMLHS | 10   | 3    |
| >FH-V416M- MMIKNVLHS  | 43  | >FH-V416M- MMIKNMLHS | 103  | 60   |
| >FH-V416M- MMIKNVLHS  | 149 | >FH-V416M- MMIKNMLHS | 504  | 355  |
| >FH-V416M- MMIKNVLHS  | 4   | >FH-V416M- MMIKNMLHS | 5    | 1    |
| >FH-V416M- MMIKNVLH   | 887 | >FH-V416M- MMIKNMLH  | 376  | 511  |
| >FH-V416M- MMIKNVLHS  | 387 | >FH-V416M- MMIKNMLHS | 323  | 64   |
| >FH-V416M- MMIKNVLHS  | 328 | >FH-V416M- MMIKNMLHS | 209  | 119  |
| >FH-V416M- MMIKNVLH   | 370 | >FH-V416M- MMIKNMLH  | 153  | 217  |
| >FH-V416M- MMIKNVLHS  | 10  | >FH-V416M- MMIKNMLHS | 9    | 1    |
| >FH-V416M- MMIKNVLHS  | 94  | >FH-V416M- MMIKNMLHS | 68   | 26   |
| >FH-V416M- MMIKNVLHS  | 10  | >FH-V416M- MMIKNMLHS | 10   | 0    |
| >FH-V416M- MMIKNVLHS  | 301 | >FH-V416M- MMIKNMLHS | 880  | 579  |
| >FH-V416M- MMIKNVLHS  | 170 | >FH-V416M- MMIKNMLHS | 217  | 47   |
| >FH-V416M- MMIKNVLH   | 392 | >FH-V416M- MMIKNMLH  | 528  | 136  |
| >FH-V416M- MMIKNVLHS  | 223 | >FH-V416M- MMIKNMLHS | 333  | 110  |
| >FH-V416M- MMIKNVLHS  | 55  | >FH-V416M- MMIKNMLHS | 77   | 22   |
| >FH-V416M- MMIKNVLHS  | 72  | >FH-V416M- MMIKNMLHS | 65   | 7    |
| >FH-V416M- PMMIKNVL   | 550 | >FH-V416M- PMMIKNML  | 298  | 252  |
| >FH-V416M- PMMIKNVLH  | 395 | >FH-V416M- PMMIKNMLH | 523  | 128  |
| >FH-V416M- PMMIKNVLH  | 307 | >FH-V416M- PMMIKNMLH | 242  | 65   |
| >FH-V416M- PMMIKNVLH  | 212 | >FH-V416M- PMMIKNMLH | 420  | 208  |
| >FH-V416M- PMMIKNVLH  | 232 | >FH-V416M- PMMIKNMLH | 230  | 2    |
| >FH-V416M- PMMIKNVL   | 537 | >FH-V416M- PMMIKNML  | 427  | 110  |
| >FH-V416M- PMMIKNVLH  | 138 | >FH-V416M- PMMIKNMLH | 114  | 24   |
| >FH-V416M- KPMMIKNV   | 83  | >FH-V416M- KPMMIKNM  | 20   | 63   |
| >FH-V416M- KPMMIKNVL  | 8   | >FH-V416M- KPMMIKNMI | 11   | 3    |
| >FH-V416M- KPMMIKNVL  | 177 | >FH-V416M- KPMMIKNMI | 570  | 393  |
| >FH-V416M- KPMMIKNVL  | 136 | >FH-V416M- KPMMIKNMI | 1629 | 1493 |
| >FH-V416M- FKPMMIKNV  | 391 | >FH-V416M- FKPMMIKNV | 1017 | 626  |
| >FH-V416M- FKPMMIKNV  | 531 | >FH-V416M- FKPMMIKNV | 115  | 416  |
| >FH-V416M- FKPMMIKNV  | 266 | >FH-V416M- FKPMMIKNV | 461  | 195  |
| >FH-V416M- FKPMMIKNV  | 761 | >FH-V416M- FKPMMIKNV | 446  | 315  |

|                        |       |                         |      |       |
|------------------------|-------|-------------------------|------|-------|
| >FH-V416M-VFKPMMIKN    | 699   | >FH-V416M-VFKPMMIKN     | 388  | 311   |
| >FIP1L1-V6I-VERLVSEL   | 102   | >FIP1L1-V6I-IERLVSEL    | 67   | 35    |
| >FIP1L1-V6I-VERLVSEL   | 637   | >FIP1L1-V6I-IERLVSEL    | 254  | 383   |
| >FIP1L1-V6I-VERLVSEL   | 77    | >FIP1L1-V6I-IERLVSEL    | 87   | 10    |
| >FIP1L1-V6I-VERLVSEL   | 449   | >FIP1L1-V6I-IERLVSEL    | 436  | 13    |
| >FIP1L1-V6I-VERLVSELS  | 880   | >FIP1L1-V6I-IERLVSELS   | 386  | 494   |
| >FIP1L1-V6I-EVERLVSEL  | 425   | >FIP1L1-V6I-EIERLVSEL   | 1757 | 1332  |
| >FIP1L1-V6I-EVERLVSEL  | 247   | >FIP1L1-V6I-EIERLVSEL   | 1237 | 990   |
| >FIP1L1-V6I-GEVERLVSEL | 195   | >FIP1L1-V6I-GEIERLVSEL  | 218  | 23    |
| >FIP1L1-V6I-GEVERLVSEL | 327   | >FIP1L1-V6I-GEIERLVSEL  | 184  | 143   |
| >FIP1L1-V6I-GEVERLVSEL | 231   | >FIP1L1-V6I-GEIERLVSEL  | 190  | 41    |
| >FIP1L1-V6I-GEVERLVSEL | 967   | >FIP1L1-V6I-GEIERLVSEL  | 423  | 544   |
| >FIP1L1-V6I-GEVERLVSE  | 166   | >FIP1L1-V6I-GEIERLVSE   | 86   | 80    |
| >FIP1L1-V6I-GEVERLVSEL | 239   | >FIP1L1-V6I-GEIERLVSEL  | 46   | 193   |
| >FIP1L1-V6I-GEVERLVSEL | 119   | >FIP1L1-V6I-GEIERLVSELS | 55   | 64    |
| >FIP1L1-V6I-SAGEVERLV  | 207   | >FIP1L1-V6I-SAGEIERLV   | 640  | 433   |
| >FIP1L1-V6I-MSAGEVERL  | 36    | >FIP1L1-V6I-MSAGEIERL   | 34   | 2     |
| >FIP1L1-V6I-MSAGEVERL  | 420   | >FIP1L1-V6I-MSAGEIERL   | 489  | 69    |
| >FIP1L1-V6I-MSAGEVER   | 215   | >FIP1L1-V6I-MSAGEIER    | 246  | 31    |
| >FIP1L1-V6I-MSAGEVER   | 5     | >FIP1L1-V6I-MSAGEIER    | 5    | 0     |
| >FIP1L1-V6I-MSAGEVERL  | 28    | >FIP1L1-V6I-MSAGEIERL   | 24   | 4     |
| >FIP1L1-V6I-MSAGEVERL  | 216   | >FIP1L1-V6I-MSAGEIERLV  | 166  | 50    |
| >FIP1L1-V6I-MSAGEVERL  | 17    | >FIP1L1-V6I-MSAGEIERL   | 22   | 5     |
| >FIP1L1-V6I-MSAGEVERL  | 84    | >FIP1L1-V6I-MSAGEIERL   | 220  | 136   |
| >FIP1L1-V6I-MSAGEVERL  | 935   | >FIP1L1-V6I-MSAGEIERL   | 437  | 498   |
| >FIP1L1-W1€WRKPGADLS   | 1160  | >FIP1L1-W1€RRKPGADLSE   | 276  | 884   |
| >FIP1L1-W1€WRKPGADL    | 577   | >FIP1L1-W1€RRKPGADL     | 230  | 347   |
| >FIP1L1-W1€WRKPGADLS   | 151   | >FIP1L1-W1€RRKPGADLSE   | 55   | 96    |
| >FIP1L1-W1€WRKPGADL    | 2883  | >FIP1L1-W1€RRKPGADL     | 489  | 2394  |
| >FIP1L1-W1€WRKPGADLS   | 359   | >FIP1L1-W1€RRKPGADLSE   | 553  | 194   |
| >FIP1L1-W1€WRKPGADL    | 1305  | >FIP1L1-W1€RRKPGADL     | 57   | 1248  |
| >FIP1L1-W1€WRKPGADLS   | 9651  | >FIP1L1-W1€RRKPGADLS    | 219  | 9432  |
| >FIP1L1-W1€WRKPGADLS   | 1198  | >FIP1L1-W1€RRKPGADLSE   | 176  | 1022  |
| >FIP1L1-W1€WRKPGADLS   | 4840  | >FIP1L1-W1€RRKPGADLSE   | 151  | 4689  |
| >FIP1L1-W1€WRKPGADLS   | 1204  | >FIP1L1-W1€RRKPGADLSE   | 498  | 706   |
| >FIP1L1-W1€KPWRKPGA    | 621   | >FIP1L1-W1€KPRRKPGA     | 40   | 581   |
| >FIP1L1-W1€KPWRKPGAD   | 96    | >FIP1L1-W1€KPRRKPGADL   | 23   | 73    |
| >FIP1L1-W1€KPWRKPGA    | 193   | >FIP1L1-W1€KPRRKPGA     | 1828 | 1635  |
| >FIP1L1-W1€SFEDKPWR    | 145   | >FIP1L1-W1€SFEDKPRR     | 285  | 140   |
| >FIP1L1-W1€SFEDKPWR    | 85    | >FIP1L1-W1€SFEDKPRR     | 259  | 174   |
| >FIP1L1-W1€DSFEDKPW    | 21289 | >FIP1L1-W1€DSFEDKPR     | 51   | 21238 |
| >FIP1L1-W1€DSFEDKPWR   | 71    | >FIP1L1-W1€DSFEDKPRR    | 143  | 72    |
| >FIP1L1-W1€DSFEDKPW    | 16218 | >FIP1L1-W1€DSFEDKPR     | 23   | 16195 |

|                         |       |                         |       |       |
|-------------------------|-------|-------------------------|-------|-------|
| >FIP1L1-W1ϵDSFEDKPWR    | 11    | >FIP1L1-W1ϵDSFEDKPRR    | 21    | 10    |
| >FIP1L1-W1ϵDSFEDKPWR    | 283   | >FIP1L1-W1ϵDSFEDKPRRK   | 3517  | 3234  |
| >FIP1L1-W1ϵDSFEDKPW     | 93    | >FIP1L1-W1ϵDSFEDKPR     | 22164 | 22071 |
| >FIP1L1-W1ϵDSFEDKPW     | 100   | >FIP1L1-W1ϵDSFEDKPR     | 24187 | 24087 |
| >FIP1L1-W1ϵDSFEDKPWR    | 425   | >FIP1L1-W1ϵDSFEDKPRR    | 882   | 457   |
| >FIP1L1-W1ϵDSFEDKPWR    | 216   | >FIP1L1-W1ϵDSFEDKPRRK   | 388   | 172   |
| >FIP1L1-W1ϵDLDSFEDKPV   | 28439 | >FIP1L1-W1ϵDLDSFEDKPR   | 386   | 28053 |
| >FIP1L1-W1ϵDLDSFEDKPV   | 287   | >FIP1L1-W1ϵDLDSFEDKPR   | 572   | 285   |
| >FLI1-G94E-vGGGESNPM    | 22743 | >FLI1-G94E-rGEGESNPM    | 273   | 22470 |
| >FLI1-G94E-vGGGESNPM    | 37628 | >FLI1-G94E-rGEGESNPM    | 148   | 37480 |
| >FLI1-G94E-vGGGESNPM    | 25764 | >FLI1-G94E-rGEGESNPM    | 115   | 25649 |
| >FLI1-G94E-vVGGGESNPM   | 462   | >FLI1-G94E-rVGGGESNPM   | 3320  | 2858  |
| >FLI1-G94E-vLVGGGESNPM  | 387   | >FLI1-G94E-rLVGGGESNPM  | 372   | 15    |
| >FLI1-G94E-vKLVGGGESNPM | 85    | >FLI1-G94E-rKLVGGGESNPM | 44    | 41    |
| >FLI1-G94E-vKLVGGGESNPM | 246   | >FLI1-G94E-rKLVGGGESNPM | 444   | 198   |
| >FLI1-G94E-vKLVGGGESNPM | 129   | >FLI1-G94E-rKLVGGGESNPM | 299   | 170   |
| >FLI1-G94E-vKLVGGGESNPM | 132   | >FLI1-G94E-rKLVGGGESNPM | 248   | 116   |
| >FLI1-G94E-vKLVGGGESNPM | 241   | >FLI1-G94E-rKLVGGGESNPM | 299   | 58    |
| >FLI1-G94E-vKLVGGGESNPM | 125   | >FLI1-G94E-rKLVGGGESNPM | 317   | 192   |
| >FLI1-G94E-vKLVGGGESNPM | 404   | >FLI1-G94E-rKLVGGGESNPM | 475   | 71    |
| >FLI1-G94E-vKLVGGGESNPM | 102   | >FLI1-G94E-rKLVGGGESNPM | 165   | 63    |
| >FLI1-V410I-VTSSFFGA    | 525   | >FLI1-V410I-IITSSFFGA   | 226   | 299   |
| >FLI1-V410I-VTSSFFGA    | 467   | >FLI1-V410I-IITSSFFGA   | 337   | 130   |
| >FLI1-V410I-VTSSFFGAA   | 395   | >FLI1-V410I-IITSSFFGAA  | 153   | 242   |
| >FLI1-V410I-VTSSFFGA    | 26    | >FLI1-V410I-IITSSFFGA   | 22    | 4     |
| >FLI1-V410I-VTSSFFGAA   | 572   | >FLI1-V410I-IITSSFFGAA  | 237   | 335   |
| >FLI1-V410I-VTSSFFGA    | 78    | >FLI1-V410I-IITSSFFGA   | 45    | 33    |
| >FLI1-V410I-VTSSFFGAA   | 53    | >FLI1-V410I-IITSSFFGAA  | 41    | 12    |
| >FLI1-V410I-VTSSFFGA    | 371   | >FLI1-V410I-IITSSFFGA   | 382   | 11    |
| >FLI1-V410I-PVTSSSFF    | 382   | >FLI1-V410I-IITSSSFF    | 1723  | 1341  |
| >FLI1-V410I-FVPPHPSSMF  | 40    | >FLI1-V410I-IIVPAPPSSMF | 165   | 125   |
| >FLI1-V410I-FVPPHPSSMF  | 18    | >FLI1-V410I-IIVPAPPSSMF | 86    | 68    |
| >FLI1-V410I-FVPPHPSSMF  | 3     | >FLI1-V410I-IIVPAPPSSMF | 8     | 5     |
| >FLI1-V410I-FVPPHPSSMF  | 8     | >FLI1-V410I-IIVPAPPSSMF | 15    | 7     |
| >FLI1-V410I-FVPPHPSSMF  | 11    | >FLI1-V410I-IIVPAPPSSMF | 129   | 118   |
| >FLI1-V410I-FVPPHPSSMF  | 76    | >FLI1-V410I-IIVPAPPSSMF | 774   | 698   |
| >FLI1-V410I-FVPPHPSSMF  | 82    | >FLI1-V410I-IIVPAPPSSMF | 1508  | 1426  |
| >FLI1-V410I-FVPPHPSSMF  | 467   | >FLI1-V410I-IIVPAPPSSMF | 6052  | 5585  |
| >FLI1-V410I-FVPPHPSSMF  | 4     | >FLI1-V410I-IIVPAPPSSMF | 130   | 126   |
| >FLI1-V410I-FVPPHPSSMF  | 7     | >FLI1-V410I-IIVPAPPSSMF | 11    | 4     |
| >FLI1-V410I-FVPPHPSSMF  | 36    | >FLI1-V410I-IIVPAPPSSMF | 208   | 172   |
| >FLI1-V410I-FVPPHPSSMF  | 179   | >FLI1-V410I-IIVPAPPSSMF | 89    | 90    |
| >FLI1-V410I-FVPPHPSSMF  | 11000 | >FLI1-V410I-IIVPAPPSSMF | 238   | 10762 |

|                          |      |                           |     |     |
|--------------------------|------|---------------------------|-----|-----|
| >FLI1-V410I-1 MPVTSSSF   | 22   | >FLI1-V410I-1 MPITSSSF    | 9   | 13  |
| >FLI1-V410I-1 MPVTSSSFF  | 6    | >FLI1-V410I-1 MPITSSSFF   | 4   | 2   |
| >FLI1-V410I-1 MPVTSSSFFG | 1354 | >FLI1-V410I-1 MPITSSSFFG  | 380 | 974 |
| >FLI1-V410I-1 MPVTSSSFFG | 595  | >FLI1-V410I-1 MPITSSSFFG  | 310 | 285 |
| >FLI1-V410I-1 MPVTSSSF   | 19   | >FLI1-V410I-1 MPITSSSF    | 17  | 2   |
| >FLI1-V410I-1 MPVTSSSFF  | 66   | >FLI1-V410I-1 MPITSSSFF   | 62  | 4   |
| >FLI1-V410I-1 MPVTSSSF   | 12   | >FLI1-V410I-1 MPITSSSF    | 9   | 3   |
| >FLI1-V410I-1 MPVTSSSFF  | 16   | >FLI1-V410I-1 MPITSSSFF   | 11  | 5   |
| >FLI1-V410I-1 MPVTSSSF   | 8    | >FLI1-V410I-1 MPITSSSF    | 8   | 0   |
| >FLI1-V410I-1 MPVTSSSFF  | 9    | >FLI1-V410I-1 MPITSSSFF   | 10  | 1   |
| >FLI1-V410I-1 MPVTSSSFFG | 58   | >FLI1-V410I-1 MPITSSSFFG  | 77  | 19  |
| >FLI1-V410I-1 MPVTSSSF   | 561  | >FLI1-V410I-1 MPITSSSF    | 369 | 192 |
| >FLI1-V410I-1 MPVTSSSF   | 14   | >FLI1-V410I-1 MPITSSSF    | 13  | 1   |
| >FLI1-V410I-1 MPVTSSSFF  | 18   | >FLI1-V410I-1 MPITSSSFF   | 17  | 1   |
| >FLI1-V410I-1 MPVTSSSFFG | 7    | >FLI1-V410I-1 MPITSSSFFG  | 6   | 1   |
| >FLI1-V410I-1 MPVTSSSFF  | 38   | >FLI1-V410I-1 MPITSSSFF   | 62  | 24  |
| >FLI1-V410I-1 MPVTSSSF   | 13   | >FLI1-V410I-1 MPITSSSF    | 12  | 1   |
| >FLI1-V410I-1 MPVTSSSFF  | 22   | >FLI1-V410I-1 MPITSSSFF   | 26  | 4   |
| >FLI1-V410I-1 MPVTSSSF   | 36   | >FLI1-V410I-1 MPITSSSF    | 27  | 9   |
| >FLI1-V410I-1 MPVTSSSFF  | 63   | >FLI1-V410I-1 MPITSSSFF   | 45  | 18  |
| >FLI1-V410I-1 MPVTSSSF   | 407  | >FLI1-V410I-1 MPITSSSF    | 831 | 424 |
| >FLI1-V410I-1 MPVTSSSFF  | 116  | >FLI1-V410I-1 MPITSSSFF   | 221 | 105 |
| >FLI1-V410I-1 SMPVTSSSFF | 236  | >FLI1-V410I-1 SMPITSSSFF  | 112 | 124 |
| >FLI1-V410I-1 SMPVTSSSFF | 112  | >FLI1-V410I-1 SMPITSSSFF  | 100 | 12  |
| >FLI1-V410I-1 SMPVTSSSF  | 241  | >FLI1-V410I-1 SMPITSSSF   | 223 | 18  |
| >FLI1-V410I-1 SMPVTSSSFF | 204  | >FLI1-V410I-1 SMPITSSSFF  | 192 | 12  |
| >FLI1-V410I-1 SMPVTSSSFF | 212  | >FLI1-V410I-1 SMPITSSSFF  | 222 | 10  |
| >FLI1-V410I-1 SMPVTSSSF  | 471  | >FLI1-V410I-1 SMPITSSSF   | 512 | 41  |
| >FLI1-V410I-1 SMPVTSSSF  | 32   | >FLI1-V410I-1 SMPITSSSF   | 34  | 2   |
| >FLI1-V410I-1 SMPVTSSSFF | 54   | >FLI1-V410I-1 SMPITSSSFF  | 61  | 7   |
| >FLI1-V410I-1 SMPVTSSSF  | 32   | >FLI1-V410I-1 SMPITSSSF   | 48  | 16  |
| >FLI1-V410I-1 SMPVTSSSFF | 72   | >FLI1-V410I-1 SMPITSSSFF  | 104 | 32  |
| >FLI1-V410I-1 SMPVTSSSF  | 7    | >FLI1-V410I-1 SMPITSSSF   | 9   | 2   |
| >FLI1-V410I-1 SMPVTSSSFF | 12   | >FLI1-V410I-1 SMPITSSSFF  | 17  | 5   |
| >FLI1-V410I-1 SMPVTSSSF  | 317  | >FLI1-V410I-1 SMPITSSSF   | 144 | 173 |
| >FLI1-V410I-1 SMPVTSSSFF | 51   | >FLI1-V410I-1 SMPITSSSFF  | 29  | 22  |
| >FLI1-V410I-1 SMPVTSSSFF | 110  | >FLI1-V410I-1 SMPITSSSFF  | 77  | 33  |
| >FLI1-V410I-1 SSMPVTSSSF | 361  | >FLI1-V410I-1 SSMPITSSSF  | 457 | 96  |
| >FLI1-V410I-1 SSMPVTSSSF | 318  | >FLI1-V410I-1 SSMPITSSSFF | 398 | 80  |
| >FLI1-V410I-1 SSMPVTSSSF | 100  | >FLI1-V410I-1 SSMPITSSSFF | 88  | 12  |
| >FLI1-V410I-1 SSMPVTSSSF | 46   | >FLI1-V410I-1 SSMPITSSSF  | 32  | 14  |
| >FLI1-V410I-1 SSMPVTSSSF | 564  | >FLI1-V410I-1 SSMPITSSSFF | 374 | 190 |
| >FLI1-V410I-1 SSMPVTSSS  | 313  | >FLI1-V410I-1 SSMPITSSS   | 180 | 133 |

|                          |      |                           |      |      |
|--------------------------|------|---------------------------|------|------|
| >FLI1-V410I-I SSMPVTSSSF | 28   | >FLI1-V410I-I SSMPITSSSF  | 32   | 4    |
| >FLI1-V410I-I SSMPVTSSSF | 47   | >FLI1-V410I-I SSMPITSSSFF | 55   | 8    |
| >FLI1-V410I-I SSMPVTSSSF | 7    | >FLI1-V410I-I SSMPITSSSF  | 8    | 1    |
| >FLI1-V410I-I SSMPVTSSSF | 10   | >FLI1-V410I-I SSMPITSSSFF | 12   | 2    |
| >FLI1-V410I-I SSMPVTSSSF | 3    | >FLI1-V410I-I SSMPITSSSF  | 3    | 0    |
| >FLI1-V410I-I SSMPVTSSSF | 3    | >FLI1-V410I-I SSMPITSSSFF | 3    | 0    |
| >FLI1-V410I-I SSMPVTSSSF | 250  | >FLI1-V410I-I SSMPITSSSF  | 307  | 57   |
| >FLI1-V410I-I SSMPVTSSSF | 180  | >FLI1-V410I-I SSMPITSSSFF | 208  | 28   |
| >FLI1-V410I-I SSMPVTSSSF | 18   | >FLI1-V410I-I SSMPITSSSF  | 31   | 13   |
| >FLI1-V410I-I SSMPVTSSSF | 21   | >FLI1-V410I-I SSMPITSSSFF | 33   | 12   |
| >FLI1-V410I-I SSMPVTSSSF | 211  | >FLI1-V410I-I SSMPITSSSFF | 200  | 11   |
| >FLI1-V410I-I SSMPVTSSS  | 164  | >FLI1-V410I-I SSMPITSSS   | 142  | 22   |
| >FLI1-V410I-I SSMPVTSSSF | 22   | >FLI1-V410I-I SSMPITSSSF  | 21   | 1    |
| >FLI1-V410I-I SSMPVTSSSF | 2    | >FLI1-V410I-I SSMPITSSSFF | 2    | 0    |
| >FLI1-V410I-I SSMPVTSSSF | 231  | >FLI1-V410I-I SSMPITSSSFF | 219  | 12   |
| >FLI1-V410I-I PSSMPVTSSS | 49   | >FLI1-V410I-I PSSMPITSSSF | 68   | 19   |
| >FLI1-V410I-I PSSMPVTSSS | 64   | >FLI1-V410I-I PSSMPITSSSF | 67   | 3    |
| >FLI1-V410I-I PSSMPVTSSS | 214  | >FLI1-V410I-I PSSMPITSSSF | 228  | 14   |
| >FLI1-V410I-I HPSSMPVT   | 177  | >FLI1-V410I-I HPSSMPIT    | 284  | 107  |
| >FLI1-V410I-I HPSSMPVTS  | 64   | >FLI1-V410I-I HPSSMPITS   | 42   | 22   |
| >FLI1-V410I-I HPSSMPVTSS | 83   | >FLI1-V410I-I HPSSMPITSS  | 67   | 16   |
| >FLI1-V410I-I HPSSMPVTSS | 467  | >FLI1-V410I-I HPSSMPITSS  | 275  | 192  |
| >FLI1-V410I-I PPHPSSMPV  | 149  | >FLI1-V410I-I PPHPSSMPI   | 164  | 15   |
| >FLI1-V410I-I VPPHPSSMPV | 883  | >FLI1-V410I-I VPPHPSSMPI  | 203  | 680  |
| >FLI1-V410I-I VPPHPSSMPV | 52   | >FLI1-V410I-I VPPHPSSMPI  | 60   | 8    |
| >FLI1-V410I-I VPPHPSSMPV | 231  | >FLI1-V410I-I VPPHPSSMPI  | 1607 | 1376 |
| >FLI1-V410I-I VPPHPSSMPV | 918  | >FLI1-V410I-I VPPHPSSMPI  | 449  | 469  |
| >FLT3-A627T ATAYGISKTG\  | 284  | >FLT3-A627T TTAYGISKTG\   | 739  | 455  |
| >FLT3-A627T ATAYGISKTG\  | 46   | >FLT3-A627T TTAYGISKTG\   | 84   | 38   |
| >FLT3-A627T ATAYGISKTG\  | 147  | >FLT3-A627T TTAYGISKTG\   | 341  | 194  |
| >FLT3-A627T ATAYGISKTG\  | 409  | >FLT3-A627T TTAYGISKTG\   | 1255 | 846  |
| >FLT3-A627T ATAYGISKTG\  | 112  | >FLT3-A627T TTAYGISKTG\   | 797  | 685  |
| >FLT3-A627T ATAYGISK     | 99   | >FLT3-A627T TTAYGISK      | 125  | 26   |
| >FLT3-A627T ATAYGISK     | 15   | >FLT3-A627T TTAYGISK      | 14   | 1    |
| >FLT3-A627T ATAYGISK     | 44   | >FLT3-A627T TTAYGISK      | 370  | 326  |
| >FLT3-A627T ATAYGISK     | 56   | >FLT3-A627T TTAYGISK      | 6    | 50   |
| >FLT3-A627T ATAYGISKT    | 2354 | >FLT3-A627T TTAYGISKT     | 70   | 2284 |
| >FLT3-A627T ATAYGISKTG\  | 19   | >FLT3-A627T TTAYGISKTG\   | 5    | 14   |
| >FLT3-A627T ATAYGISKTG\  | 261  | >FLT3-A627T TTAYGISKTG\   | 25   | 236  |
| >FLT3-A627T ATAYGISKTG\  | 140  | >FLT3-A627T TTAYGISKTG\   | 693  | 553  |
| >FLT3-A627T ATAYGISKT    | 224  | >FLT3-A627T TTAYGISKT     | 280  | 56   |
| >FLT3-A627T ATAYGISKTG\  | 335  | >FLT3-A627T TTAYGISKTG\   | 422  | 87   |
| >FLT3-A627T ATAYGISK     | 85   | >FLT3-A627T TTAYGISK      | 215  | 130  |

|                        |     |                         |      |     |
|------------------------|-----|-------------------------|------|-----|
| >FLT3-A627T NATAYGISK  | 313 | >FLT3-A627T NTTAYGISK   | 44   | 269 |
| >FLT3-A627T NATAYGISK  | 116 | >FLT3-A627T NTTAYGISK   | 35   | 81  |
| >FLT3-A627T MNATAYGISK | 571 | >FLT3-A627T MNNTTAYGISK | 469  | 102 |
| >FLT3-A627T MNATAYGISK | 339 | >FLT3-A627T MNNTTAYGISK | 939  | 600 |
| >FLT3-A627T MNATAYGI   | 35  | >FLT3-A627T MNNTTAYGI   | 198  | 163 |
| >FLT3-A627T MNATAYGI   | 413 | >FLT3-A627T MNNTTAYGI   | 1095 | 682 |
| >FLT3-A627T VMNATAYGI  | 56  | >FLT3-A627T VMNNTTAYGI  | 113  | 57  |
| >FLT3-A627T VMNATAYGI  | 28  | >FLT3-A627T VMNNTTAYGI  | 75   | 47  |
| >FLT3-A627T VMNATAYGI  | 14  | >FLT3-A627T VMNNTTAYGI  | 25   | 11  |
| >FLT3-A627T VMNATAYGI  | 168 | >FLT3-A627T VMNNTTAYGI  | 393  | 225 |
| >FLT3-A627T VMNATAYG   | 249 | >FLT3-A627T VMNNTTAYG   | 463  | 214 |
| >FLT3-A627T VMNATAYGI  | 4   | >FLT3-A627T VMNNTTAYGI  | 6    | 2   |
| >FLT3-A627T VMNATAYGI  | 5   | >FLT3-A627T VMNNTTAYGI  | 5    | 0   |
| >FLT3-A627T VMNATAYGI  | 21  | >FLT3-A627T VMNNTTAYGI  | 29   | 8   |
| >FLT3-A627T VMNATAYGI  | 5   | >FLT3-A627T VMNNTTAYGI  | 8    | 3   |
| >FLT3-A627T VMNATAYGI  | 12  | >FLT3-A627T VMNNTTAYGI  | 22   | 10  |
| >FLT3-A627T VMNATAYGI! | 36  | >FLT3-A627T VMNNTTAYGI! | 39   | 3   |
| >FLT3-A627T VMNATAYGI! | 11  | >FLT3-A627T VMNNTTAYGI! | 13   | 2   |
| >FLT3-A627T VMNATAYGI! | 293 | >FLT3-A627T VMNNTTAYGI! | 416  | 123 |
| >FLT3-A627T VMNATAYGI! | 335 | >FLT3-A627T VMNNTTAYGI! | 474  | 139 |
| >FLT3-A627T VMNATAYGI  | 84  | >FLT3-A627T VMNNTTAYGI  | 121  | 37  |
| >FLT3-A627T VMNATAYGI  | 406 | >FLT3-A627T VMNNTTAYGI  | 375  | 31  |
| >FLT3-A627T VMNATAYGI! | 472 | >FLT3-A627T VMNNTTAYGI! | 432  | 40  |
| >FLT3-A627T KVMNATAYG  | 123 | >FLT3-A627T KVMNNTTAYG  | 130  | 7   |
| >FLT3-A627T KVMNATAYG  | 34  | >FLT3-A627T KVMNNTTAYG  | 42   | 8   |
| >FLT3-A627T KVMNATAYG  | 111 | >FLT3-A627T KVMNNTTAYG  | 89   | 22  |
| >FLT3-A627T KVMNATAYG  | 64  | >FLT3-A627T KVMNNTTAYG  | 43   | 21  |
| >FLT3-A627T KVMNATAYG  | 100 | >FLT3-A627T KVMNNTTAYG  | 72   | 28  |
| >FLT3-A627T KVMNATAYG  | 15  | >FLT3-A627T KVMNNTTAYG  | 11   | 4   |
| >FLT3-A627T KVMNATAYG  | 22  | >FLT3-A627T KVMNNTTAYG  | 26   | 4   |
| >FLT3-A627T KVMNATAY   | 88  | >FLT3-A627T KVMNNTTAY   | 78   | 10  |
| >FLT3-A627T KVMNATAY   | 53  | >FLT3-A627T KVMNNTTAY   | 35   | 18  |
| >FLT3-A627T KVMNATAY   | 156 | >FLT3-A627T KVMNNTTAY   | 132  | 24  |
| >FLT3-A627T KVMNATAY   | 160 | >FLT3-A627T KVMNNTTAY   | 130  | 30  |
| >FLT3-A627T KVMNATAY   | 389 | >FLT3-A627T KVMNNTTAY   | 279  | 110 |
| >FLT3-A627T KVMNATAYG  | 36  | >FLT3-A627T KVMNNTTAYG  | 35   | 1   |
| >FLT3-A627T KVMNATAYG  | 59  | >FLT3-A627T KVMNNTTAYG  | 62   | 3   |
| >FLT3-A627T KVMNATAYG  | 213 | >FLT3-A627T KVMNNTTAYG  | 216  | 3   |
| >FLT3-A627T KVMNATAY   | 38  | >FLT3-A627T KVMNNTTAY   | 30   | 8   |
| >FLT3-A627T KVMNATAY   | 17  | >FLT3-A627T KVMNNTTAY   | 11   | 6   |
| >FLT3-A627T KVMNATAYG  | 6   | >FLT3-A627T KVMNNTTAYG  | 5    | 1   |
| >FLT3-A627T KVMNATAYG  | 163 | >FLT3-A627T KVMNNTTAYG  | 336  | 173 |
| >FLT3-A627T KVMNATAYG  | 104 | >FLT3-A627T KVMNNTTAYG  | 142  | 38  |

|                         |     |                         |      |      |
|-------------------------|-----|-------------------------|------|------|
| >FLT3-A627T KVMNATAY    | 79  | >FLT3-A627T KVMNTTAY    | 33   | 46   |
| >FLT3-A627T KVMNATAY    | 62  | >FLT3-A627T KVMNTTAY    | 51   | 11   |
| >FLT3-A627T KVMNATAY    | 444 | >FLT3-A627T KVMNTTAY    | 344  | 100  |
| >FLT3-A627T KVMNATAY    | 52  | >FLT3-A627T KVMNTTAY    | 33   | 19   |
| >FLT3-A627T KVMNATAY    | 35  | >FLT3-A627T KVMNTTAY    | 35   | 0    |
| >FLT3-A627T KVMNATAYG   | 341 | >FLT3-A627T KVMNTTAYG   | 282  | 59   |
| >FLT3-A627T KVMNATAY    | 82  | >FLT3-A627T KVMNTTAY    | 116  | 34   |
| >FLT3-A627T KVMNATAY    | 423 | >FLT3-A627T KVMNTTAY    | 199  | 224  |
| >FLT3-A627T KVMNATAYG   | 175 | >FLT3-A627T KVMNTTAYG   | 122  | 53   |
| >FLT3-A627T KVMNATAY    | 136 | >FLT3-A627T KVMNTTAY    | 128  | 8    |
| >FLT3-A627T GKVMNATAY   | 10  | >FLT3-A627T GKVMNTTAY   | 8    | 2    |
| >FLT3-A627T GKVMNATAY   | 426 | >FLT3-A627T GKVMNTTAY   | 354  | 72   |
| >FLT3-A627T FGKVMNATA   | 350 | >FLT3-A627T FGKVMNTTA   | 265  | 85   |
| >FLT3-A627T FGKVMNATA   | 162 | >FLT3-A627T FGKVMNTTA   | 131  | 31   |
| >FLT3-A627T FGKVMNATA   | 191 | >FLT3-A627T FGKVMNTTA   | 171  | 20   |
| >FLT3-A627T FGKVMNATA   | 313 | >FLT3-A627T FGKVMNTTA   | 221  | 92   |
| >FLT3-A627T FGKVMNATA   | 583 | >FLT3-A627T FGKVMNTTA   | 367  | 216  |
| >FLT3-A627T AFGKVMNAT   | 137 | >FLT3-A627T AFGKVMNTT   | 138  | 1    |
| >FLT3-A627T AFGKVMNAT   | 543 | >FLT3-A627T AFGKVMNTT   | 493  | 50   |
| >FLT3-A627T AFGKVMNAT   | 331 | >FLT3-A627T AFGKVMNTT   | 175  | 156  |
| >FLT3-A627T GAFGKVMNA   | 494 | >FLT3-A627T GAFGKVMNT   | 4655 | 4161 |
| >FLT3-A680V ACTLSGPIY   | 415 | >FLT3-A680V VCTLSGPIY   | 264  | 151  |
| >FLT3-A680V GACTLSGPIY  | 750 | >FLT3-A680V GVCTLSGPIY  | 485  | 265  |
| >FLT3-A680V GACTLSGPIY  | 279 | >FLT3-A680V GVCTLSGPIY  | 1999 | 1720 |
| >FLT3-A680V GACTLSGPI   | 277 | >FLT3-A680V GVCTLSGPI   | 857  | 580  |
| >FLT3-A680V LGACTLSGPIY | 210 | >FLT3-A680V LGVCTLSGPIY | 737  | 527  |
| >FLT3-A680V LGACTLSGPIY | 268 | >FLT3-A680V LGVCTLSGPIY | 351  | 83   |
| >FLT3-A680V LGACTLSGPIY | 466 | >FLT3-A680V LGVCTLSGPIY | 424  | 42   |
| >FLT3-A680V LGACTLSGPIY | 245 | >FLT3-A680V LGVCTLSGPIY | 258  | 13   |
| >FLT3-A680V LGACTLSGPIY | 93  | >FLT3-A680V LGVCTLSGPIY | 96   | 3    |
| >FLT3-A680V LLGACTLSGPI | 179 | >FLT3-A680V LLGVCTLSGPI | 603  | 424  |
| >FLT3-A680V LLGACTLSGPI | 65  | >FLT3-A680V LLGVCTLSGPI | 265  | 200  |
| >FLT3-A680V LLGACTLSGPI | 29  | >FLT3-A680V LLGVCTLSGPI | 138  | 109  |
| >FLT3-A680V LLGACTLSGPI | 52  | >FLT3-A680V LLGVCTLSGPI | 201  | 149  |
| >FLT3-A680V LLGACTLSGPI | 40  | >FLT3-A680V LLGVCTLSGPI | 86   | 46   |
| >FLT3-A680V LLGACTLSGPI | 196 | >FLT3-A680V LLGVCTLSGPI | 452  | 256  |
| >FLT3-A680V LLGACTLSGPI | 296 | >FLT3-A680V LLGVCTLSGPI | 651  | 355  |
| >FLT3-A680V LLGACTLSGPI | 36  | >FLT3-A680V LLGVCTLSGPI | 88   | 52   |
| >FLT3-A680V LLGACTLSGPI | 314 | >FLT3-A680V LLGVCTLSGPI | 721  | 407  |
| >FLT3-A680V NLLGACTL    | 191 | >FLT3-A680V NLLGVCTL    | 72   | 119  |
| >FLT3-A680V NLLGACTL    | 125 | >FLT3-A680V NLLGVCTL    | 102  | 23   |
| >FLT3-A680V NLLGACTL    | 564 | >FLT3-A680V NLLGVCTL    | 267  | 297  |
| >FLT3-A680V NLLGACTL    | 155 | >FLT3-A680V NLLGVCTL    | 157  | 2    |



|                         |       |                         |     |       |
|-------------------------|-------|-------------------------|-----|-------|
| >FLT3-A680V NLLGACTL    | 21    | >FLT3-A680V NLLGVCTL    | 7   | 14    |
| >FLT3-A680V NLLGACTL    | 35    | >FLT3-A680V NLLGVCTL    | 24  | 11    |
| >FLT3-A680V NLLGACTL    | 23    | >FLT3-A680V NLLGVCTL    | 14  | 9     |
| >FLT3-A680V NLLGACTL    | 9     | >FLT3-A680V NLLGVCTL    | 9   | 0     |
| >FLT3-A680V NLLGACTL    | 6     | >FLT3-A680V NLLGVCTL    | 5   | 1     |
| >FLT3-A680V IVNLLGACTL  | 350   | >FLT3-A680V IVNLLGVCTL  | 721 | 371   |
| >FLT3-A680V NIVNLLGA    | 2392  | >FLT3-A680V NIVNLLGV    | 377 | 2015  |
| >FLT3-A680V NIVNLLGA    | 188   | >FLT3-A680V NIVNLLGV    | 31  | 157   |
| >FLT3-A680V NIVNLLGACT  | 570   | >FLT3-A680V NIVNLLGVCT  | 297 | 273   |
| >FLT3-A680V NIVNLLGA    | 135   | >FLT3-A680V NIVNLLGV    | 18  | 117   |
| >FLT3-A680V NIVNLLGACT  | 248   | >FLT3-A680V NIVNLLGVCT  | 251 | 3     |
| >FLT3-A680V NIVNLLGA    | 5501  | >FLT3-A680V NIVNLLGV    | 96  | 5405  |
| >FLT3-A680V NIVNLLGA    | 7652  | >FLT3-A680V NIVNLLGV    | 272 | 7380  |
| >FLT3-A680V NIVNLLGA    | 12309 | >FLT3-A680V NIVNLLGV    | 460 | 11849 |
| >FLT3-A680V NIVNLLGA    | 8005  | >FLT3-A680V NIVNLLGV    | 95  | 7910  |
| >FLT3-A680V NIVNLLGA    | 895   | >FLT3-A680V NIVNLLGV    | 71  | 824   |
| >FLT3-A680V NIVNLLGA    | 1266  | >FLT3-A680V NIVNLLGV    | 27  | 1239  |
| >FLT3-A680V HENIVNLLGA  | 2727  | >FLT3-A680V HENIVNLLGV  | 78  | 2649  |
| >FLT3-A680V HENIVNLLGA  | 3540  | >FLT3-A680V HENIVNLLGV  | 296 | 3244  |
| >FLT3-C563S CHKYKKQFR   | 205   | >FLT3-C563S SHKYKKQFR   | 75  | 130   |
| >FLT3-C563S CHKYKKQF    | 499   | >FLT3-C563S SHKYKKQF    | 229 | 270   |
| >FLT3-C563S ICHKYKKQF   | 4620  | >FLT3-C563S ISHKYKKQF   | 437 | 4183  |
| >FLT3-C563S ICHKYKKQFR` | 1769  | >FLT3-C563S ISHKYKKQFR` | 466 | 1303  |
| >FLT3-C563S ICHKYKKQFR  | 3764  | >FLT3-C563S ISHKYKKQFR  | 498 | 3266  |
| >FLT3-C563S ICHKYKKQFR` | 843   | >FLT3-C563S ISHKYKKQFR` | 85  | 758   |
| >FLT3-C563S ICHKYKKQFR  | 145   | >FLT3-C563S ISHKYKKQFR  | 25  | 120   |
| >FLT3-C563S ICHKYKKQFR  | 860   | >FLT3-C563S ISHKYKKQFR  | 312 | 548   |
| >FLT3-C563S ICHKYKKQFR` | 306   | >FLT3-C563S ISHKYKKQFR` | 595 | 289   |
| >FLT3-C563S ICHKYKKQF   | 238   | >FLT3-C563S ISHKYKKQF   | 29  | 209   |
| >FLT3-C563S ICHKYKKQFR` | 3223  | >FLT3-C563S ISHKYKKQFR` | 330 | 2893  |
| >FLT3-C563S ICHKYKKQF   | 2567  | >FLT3-C563S ISHKYKKQF   | 5   | 2562  |
| >FLT3-C563S ICHKYKKQFR` | 2928  | >FLT3-C563S ISHKYKKQFR` | 4   | 2924  |
| >FLT3-C563S ICHKYKKQF   | 12359 | >FLT3-C563S ISHKYKKQF   | 198 | 12161 |
| >FLT3-C563S ICHKYKKQFR` | 15116 | >FLT3-C563S ISHKYKKQFR` | 239 | 14877 |
| >FLT3-C563S ICHKYKKQF   | 424   | >FLT3-C563S ISHKYKKQF   | 69  | 355   |
| >FLT3-C563S ICHKYKKQFR` | 375   | >FLT3-C563S ISHKYKKQFR` | 56  | 319   |
| >FLT3-C563S ICHKYKKQFR  | 102   | >FLT3-C563S ISHKYKKQFR  | 412 | 310   |
| >FLT3-C563S LICHKYKK    | 550   | >FLT3-C563S LISHKYKK    | 215 | 335   |
| >FLT3-C563S LICHKYKK    | 166   | >FLT3-C563S LISHKYKK    | 128 | 38    |
| >FLT3-C563S LICHKYKKQFI | 31    | >FLT3-C563S LISHKYKKQFF | 35  | 4     |
| >FLT3-C563S LICHKYKKQFI | 87    | >FLT3-C563S LISHKYKKQFF | 205 | 118   |
| >FLT3-C563S LICHKYKKQFI | 344   | >FLT3-C563S LISHKYKKQFF | 187 | 157   |
| >FLT3-C563S LICHKYKKQF  | 538   | >FLT3-C563S LISHKYKKQF  | 261 | 277   |

|                         |      |                         |      |      |
|-------------------------|------|-------------------------|------|------|
| >FLT3-C563S LICHKYKKQF  | 446  | >FLT3-C563S LISHKYKKQF  | 598  | 152  |
| >FLT3-C563S LICHKYKKQFF | 303  | >FLT3-C563S LISHKYKKQFF | 423  | 120  |
| >FLT3-C563S LLICHKYK    | 153  | >FLT3-C563S LLISHKYK    | 94   | 59   |
| >FLT3-C563S LLICHKYKK   | 162  | >FLT3-C563S LLISHKYKK   | 107  | 55   |
| >FLT3-C563S LLICHKYK    | 216  | >FLT3-C563S LLISHKYK    | 133  | 83   |
| >FLT3-C563S LLICHKYKK   | 145  | >FLT3-C563S LLISHKYKK   | 101  | 44   |
| >FLT3-C563S LLICHKYK    | 394  | >FLT3-C563S LLISHKYK    | 169  | 225  |
| >FLT3-C563S LLICHKYKK   | 336  | >FLT3-C563S LLISHKYKK   | 88   | 248  |
| >FLT3-C563S LLICHKYK    | 403  | >FLT3-C563S LLISHKYK    | 219  | 184  |
| >FLT3-C563S LLICHKYKK   | 453  | >FLT3-C563S LLISHKYKK   | 239  | 214  |
| >FLT3-C563S LLICHKYKKQF | 227  | >FLT3-C563S LLISHKYKKQF | 447  | 220  |
| >FLT3-C563S LLICHKYKKQF | 119  | >FLT3-C563S LLISHKYKKQF | 120  | 1    |
| >FLT3-C563S LLICHKYKKQF | 58   | >FLT3-C563S LLISHKYKKQF | 49   | 9    |
| >FLT3-C563S TLLICHKYK   | 145  | >FLT3-C563S TLLISHKYK   | 100  | 45   |
| >FLT3-C563S TLLICHKYKK  | 79   | >FLT3-C563S TLLISHKYKK  | 118  | 39   |
| >FLT3-C563S TLLICHKYK   | 120  | >FLT3-C563S TLLISHKYK   | 58   | 62   |
| >FLT3-C563S TLLICHKYKK  | 85   | >FLT3-C563S TLLISHKYKK  | 69   | 16   |
| >FLT3-C563S TLLICHKY    | 26   | >FLT3-C563S TLLISHKY    | 36   | 10   |
| >FLT3-C563S TLLICHKYK   | 871  | >FLT3-C563S TLLISHKYK   | 124  | 747  |
| >FLT3-C563S TLLICHKY    | 48   | >FLT3-C563S TLLISHKY    | 101  | 53   |
| >FLT3-C563S TLLICHKYK   | 151  | >FLT3-C563S TLLISHKYK   | 237  | 86   |
| >FLT3-C563S TLLICHKYKK  | 379  | >FLT3-C563S TLLISHKYKK  | 1050 | 671  |
| >FLT3-C563S TLLICHKYKK  | 418  | >FLT3-C563S TLLISHKYKK  | 888  | 470  |
| >FLT3-C563S TLLICHKY    | 390  | >FLT3-C563S TLLISHKY    | 209  | 181  |
| >FLT3-C563S TLLICHKY    | 536  | >FLT3-C563S TLLISHKY    | 93   | 443  |
| >FLT3-C563S TLLICHKY    | 1860 | >FLT3-C563S TLLISHKY    | 365  | 1495 |
| >FLT3-C563S TLLICHKYK   | 71   | >FLT3-C563S TLLISHKYK   | 823  | 752  |
| >FLT3-C563S TLLICHKYKK  | 243  | >FLT3-C563S TLLISHKYKK  | 1124 | 881  |
| >FLT3-C563S LTLlichKY   | 2612 | >FLT3-C563S LTLlichKY   | 444  | 2168 |
| >FLT3-C563S LTLlichK    | 497  | >FLT3-C563S LTLlichK    | 206  | 291  |
| >FLT3-C563S LTLlichKYK  | 41   | >FLT3-C563S LTLlichKYK  | 35   | 6    |
| >FLT3-C563S LTLlichKYKK | 553  | >FLT3-C563S LTLlichKYKK | 340  | 213  |
| >FLT3-C563S LTLlichK    | 56   | >FLT3-C563S LTLlichK    | 39   | 17   |
| >FLT3-C563S LTLlichKYK  | 28   | >FLT3-C563S LTLlichKYK  | 20   | 8    |
| >FLT3-C563S LTLlichKYKK | 25   | >FLT3-C563S LTLlichKYKK | 21   | 4    |
| >FLT3-C563S LTLlichKY   | 11   | >FLT3-C563S LTLlichKY   | 11   | 0    |
| >FLT3-C563S LTLlichK    | 90   | >FLT3-C563S LTLlichK    | 61   | 29   |
| >FLT3-C563S LTLlichKYK  | 82   | >FLT3-C563S LTLlichKYK  | 20   | 62   |
| >FLT3-C563S LTLlichKYKK | 625  | >FLT3-C563S LTLlichKYKK | 211  | 414  |
| >FLT3-C563S LTLlichKY   | 19   | >FLT3-C563S LTLlichKY   | 23   | 4    |
| >FLT3-C563S LTLlichK    | 208  | >FLT3-C563S LTLlichK    | 216  | 8    |
| >FLT3-C563S LTLlichKYK  | 88   | >FLT3-C563S LTLlichKYK  | 104  | 16   |
| >FLT3-C563S LTLlichKYKK | 111  | >FLT3-C563S LTLlichKYKK | 84   | 27   |

|                         |      |                         |      |      |
|-------------------------|------|-------------------------|------|------|
| >FLT3-C563S LTLlichk    | 82   | >FLT3-C563S LTLlishk    | 94   | 12   |
| >FLT3-C563S LTLlichkyk  | 511  | >FLT3-C563S LTLlishkyk  | 114  | 397  |
| >FLT3-C563S LTLlichkykk | 74   | >FLT3-C563S LTLlishkykk | 78   | 4    |
| >FLT3-C563S LTLlichky   | 626  | >FLT3-C563S LTLlishky   | 87   | 539  |
| >FLT3-C563S LTLlichky   | 10   | >FLT3-C563S LTLlishky   | 4    | 6    |
| >FLT3-C563S LTLlichky   | 830  | >FLT3-C563S LTLlishky   | 292  | 538  |
| >FLT3-C563S LTLlichky   | 694  | >FLT3-C563S LTLlishky   | 135  | 559  |
| >FLT3-C563S LTLlichky   | 10   | >FLT3-C563S LTLlishky   | 14   | 4    |
| >FLT3-C563S LTLlichkyk  | 432  | >FLT3-C563S LTLlishkyk  | 441  | 9    |
| >FLT3-C563S LTLlichkykk | 403  | >FLT3-C563S LTLlishkykk | 419  | 16   |
| >FLT3-C563S VTLlichk    | 180  | >FLT3-C563S VTLlishk    | 83   | 97   |
| >FLT3-C563S VTLlichkyk  | 189  | >FLT3-C563S VTLlishkyk  | 130  | 59   |
| >FLT3-C563S VTLlichky   | 372  | >FLT3-C563S VTLlishk    | 263  | 109  |
| >FLT3-C563S VTLlichkyk  | 217  | >FLT3-C563S VTLlishkyk  | 158  | 59   |
| >FLT3-C563S VTLlichky   | 720  | >FLT3-C563S VTLlishky   | 447  | 273  |
| >FLT3-C563S VTLlichky   | 78   | >FLT3-C563S VTLlishky   | 115  | 37   |
| >FLT3-C563S VTLlichky   | 185  | >FLT3-C563S VTLlishky   | 48   | 137  |
| >FLT3-C563S VTLlichky   | 2270 | >FLT3-C563S VTLlishky   | 266  | 2004 |
| >FLT3-C563S VVTLlichk   | 97   | >FLT3-C563S VVTLlishk   | 76   | 21   |
| >FLT3-C563S VVTLlichk   | 43   | >FLT3-C563S VVTLlishk   | 38   | 5    |
| >FLT3-C563S VVTLlichky  | 324  | >FLT3-C563S VVTLlishky  | 185  | 139  |
| >FLT3-C563S VVTLlichky  | 187  | >FLT3-C563S VVTLlishky  | 170  | 17   |
| >FLT3-C563S VVTLlichky  | 19   | >FLT3-C563S VVTLlishky  | 18   | 1    |
| >FLT3-C563S VVTLlichk   | 136  | >FLT3-C563S VVTLlishk   | 169  | 33   |
| >FLT3-C563S VVTLlichky  | 39   | >FLT3-C563S VVTLlishky  | 31   | 8    |
| >FLT3-C563S VVTLlichky  | 33   | >FLT3-C563S VVTLlishky  | 16   | 17   |
| >FLT3-C563S VVTLlichky  | 611  | >FLT3-C563S VVTLlishky  | 174  | 437  |
| >FLT3-C563S VVTLlichky  | 134  | >FLT3-C563S VVTLlishky  | 119  | 15   |
| >FLT3-C563S IVVTLlichk  | 350  | >FLT3-C563S IVVTLlishk  | 197  | 153  |
| >FLT3-C563S IVVTLlichk  | 103  | >FLT3-C563S IVVTLlishk  | 76   | 27   |
| >FLT3-C563S IVVTLlichk  | 165  | >FLT3-C563S IVVTLlishk  | 290  | 125  |
| >FLT3-C563S IVVTLlichk  | 163  | >FLT3-C563S IVVTLlishk  | 141  | 22   |
| >FLT3-D324N DTGYYTCSSSI | 1573 | >FLT3-D324N NTGYYTCSSSI | 172  | 1401 |
| >FLT3-D324N DTGYYTCSSSI | 391  | >FLT3-D324N NTGYYTCSSSI | 2224 | 1833 |
| >FLT3-D324N DTGYYTCSSSI | 20   | >FLT3-D324N NTGYYTCSSSI | 31   | 11   |
| >FLT3-D324N ARNDTGYY    | 87   | >FLT3-D324N ARNNTGYY    | 61   | 26   |
| >FLT3-D324N ARNDTGYY    | 236  | >FLT3-D324N ARNNTGYY    | 110  | 126  |
| >FLT3-D324N ARNDTGYY    | 869  | >FLT3-D324N ARNNTGYY    | 420  | 449  |
| >FLT3-D324N VARNDTGYY   | 283  | >FLT3-D324N VARNNTGYY   | 151  | 132  |
| >FLT3-D324N VARNDTGYY   | 1359 | >FLT3-D324N VARNNTGYY   | 169  | 1190 |
| >FLT3-D324N VARNDTGY    | 200  | >FLT3-D324N VARNNTGY    | 180  | 20   |
| >FLT3-D324N VARNDTGYY   | 19   | >FLT3-D324N VARNNTGYY   | 18   | 1    |
| >FLT3-D324N VARNDTGY    | 294  | >FLT3-D324N VARNNTGY    | 235  | 59   |

|                       |      |                       |     |      |
|-----------------------|------|-----------------------|-----|------|
| >FLT3-D324MVARNDTGYY  | 287  | >FLT3-D324MVARNNTGYY  | 220 | 67   |
| >FLT3-D324MVARNDTGY   | 587  | >FLT3-D324MVARNNTGY   | 202 | 385  |
| >FLT3-D324MVARNDTGY   | 23   | >FLT3-D324MVARNNTGY   | 10  | 13   |
| >FLT3-D324MVARNDTGYY  | 113  | >FLT3-D324MVARNNTGYY  | 22  | 91   |
| >FLT3-D324MVARNDTGY   | 276  | >FLT3-D324MVARNNTGY   | 533 | 257  |
| >FLT3-D324MVARNDTGYY  | 96   | >FLT3-D324MVARNNTGYY  | 175 | 79   |
| >FLT3-D324MSVARNDTGY\ | 178  | >FLT3-D324MSVARNNTGY\ | 207 | 29   |
| >FLT3-D324MSVARNDTGY  | 76   | >FLT3-D324MSVARNNTGY  | 67  | 9    |
| >FLT3-D324MSVARNDTGY  | 48   | >FLT3-D324MSVARNNTGY  | 46  | 2    |
| >FLT3-D324MSVARNDTGY\ | 13   | >FLT3-D324MSVARNNTGY\ | 15  | 2    |
| >FLT3-D324MSVARNDTGY  | 202  | >FLT3-D324MSVARNNTGY  | 294 | 92   |
| >FLT3-D324MSVARNDTGY\ | 172  | >FLT3-D324MSVARNNTGY\ | 106 | 66   |
| >FLT3-D324MSVARNDTGY  | 144  | >FLT3-D324MSVARNNTGY  | 111 | 33   |
| >FLT3-D324MSVARNDTGY\ | 38   | >FLT3-D324MSVARNNTGY\ | 31  | 7    |
| >FLT3-D324MSVARNDTGY  | 580  | >FLT3-D324MSVARNNTGY  | 416 | 164  |
| >FLT3-D324MSVARNDTGY\ | 437  | >FLT3-D324MSVARNNTGY\ | 429 | 8    |
| >FLT3-D324MSVARNDTGY  | 693  | >FLT3-D324MSVARNNTGY  | 466 | 227  |
| >FLT3-D324MSVARNDTGY\ | 43   | >FLT3-D324MSVARNNTGY\ | 33  | 10   |
| >FLT3-D324MSVARNDTGY  | 271  | >FLT3-D324MSVARNNTGY  | 221 | 50   |
| >FLT3-D324MSVARNDTGY\ | 290  | >FLT3-D324MSVARNNTGY\ | 235 | 55   |
| >FLT3-D324MSVARNDTGY  | 216  | >FLT3-D324MSVARNNTGY  | 185 | 31   |
| >FLT3-D324MSVARNDTGY\ | 346  | >FLT3-D324MSVARNNTGY\ | 241 | 105  |
| >FLT3-D324MSVARNDTGY  | 257  | >FLT3-D324MSVARNNTGY  | 862 | 605  |
| >FLT3-D324MSVARNDTGY  | 1225 | >FLT3-D324MSVARNNTGY  | 392 | 833  |
| >FLT3-D324MSVARNDTGY\ | 47   | >FLT3-D324MSVARNNTGY\ | 36  | 11   |
| >FLT3-D324MSSVARNDTG\ | 250  | >FLT3-D324MSSVARNNTG\ | 462 | 212  |
| >FLT3-D324MSSVARNDTG\ | 420  | >FLT3-D324MSSVARNNTG\ | 296 | 124  |
| >FLT3-D324MSSVARNDTG\ | 338  | >FLT3-D324MSSVARNNTG\ | 171 | 167  |
| >FLT3-D324MSSVARNDTG\ | 143  | >FLT3-D324MSSVARNNTG\ | 156 | 13   |
| >FLT3-D324MSSVARNDTG\ | 30   | >FLT3-D324MSSVARNNTG\ | 36  | 6    |
| >FLT3-D324MSSVARNDTG\ | 445  | >FLT3-D324MSSVARNNTG\ | 125 | 320  |
| >FLT3-D324MSSVARNDTG\ | 723  | >FLT3-D324MSSVARNNTG\ | 305 | 418  |
| >FLT3-D324MSSVARNDTG\ | 171  | >FLT3-D324MSSVARNNTG\ | 119 | 52   |
| >FLT3-D324MSSVARNDTG\ | 145  | >FLT3-D324MSSVARNNTG\ | 139 | 6    |
| >FLT3-D324MSSVARNDTG\ | 36   | >FLT3-D324MSSVARNNTG\ | 26  | 10   |
| >FLT3-D324MSSVARNDTG\ | 285  | >FLT3-D324MSSVARNNTG\ | 239 | 46   |
| >FLT3-D324MSSVARNDTG\ | 244  | >FLT3-D324MSSVARNNTG\ | 173 | 71   |
| >FLT3-D324MSSVARNDTG\ | 240  | >FLT3-D324MSSVARNNTG\ | 171 | 69   |
| >FLT3-D324MSSVARNDTG\ | 1406 | >FLT3-D324MSSVARNNTG\ | 382 | 1024 |
| >FLT3-D324MSSVARNDTG\ | 7    | >FLT3-D324MSSVARNNTG\ | 6   | 1    |
| >FLT3-D324MSSVARNDTG\ | 16   | >FLT3-D324MSSVARNNTG\ | 11  | 5    |
| >FLT3-D324MSSVARNDTG\ | 115  | >FLT3-D324MSSVARNNTG\ | 57  | 58   |
| >FLT3-D324MSSVARNDTG\ | 49   | >FLT3-D324MSSVARNNTG\ | 44  | 5    |

|                          |       |                          |      |       |
|--------------------------|-------|--------------------------|------|-------|
| >FLT3-D324N VSSVARNDTC   | 410   | >FLT3-D324N VSSVARNNTC   | 264  | 146   |
| >FLT3-D324N VSSVARNDTC   | 40    | >FLT3-D324N VSSVARNNTC   | 37   | 3     |
| >FLT3-D324N VSSVARNDTC   | 730   | >FLT3-D324N VSSVARNNTC   | 340  | 390   |
| >FLT3-D324N VSSVARNDTC   | 14    | >FLT3-D324N VSSVARNNTC   | 10   | 4     |
| >FLT3-D324N VSSVARNDTC   | 268   | >FLT3-D324N VSSVARNNTC   | 124  | 144   |
| >FLT3-D835A DIMSDSNYV    | 3034  | >FLT3-D835A AIMS SDSNYV  | 16   | 3018  |
| >FLT3-D835A DIMSDSNYV\   | 224   | >FLT3-D835A AIMS SDSNYV\ | 26   | 198   |
| >FLT3-D835A DIMSDSNYV    | 200   | >FLT3-D835A AIMS SDSNYV  | 4    | 196   |
| >FLT3-D835A DIMSDSNYV\   | 84    | >FLT3-D835A AIMS SDSNYV\ | 14   | 70    |
| >FLT3-D835A DIMSDSNYV    | 621   | >FLT3-D835A AIMS SDSNYV  | 5    | 616   |
| >FLT3-D835A DIMSDSNYV\   | 282   | >FLT3-D835A AIMS SDSNYV\ | 40   | 242   |
| >FLT3-D835A DIMSDSNYV    | 710   | >FLT3-D835A AIMS SDSNYV  | 11   | 699   |
| >FLT3-D835A DIMSDSNYV\   | 235   | >FLT3-D835A AIMS SDSNYV\ | 52   | 183   |
| >FLT3-D835A DIMSDSNYV    | 324   | >FLT3-D835A AIMS SDSNYV  | 8    | 316   |
| >FLT3-D835A DIMSDSNYV\   | 693   | >FLT3-D835A AIMS SDSNYV\ | 15   | 678   |
| >FLT3-D835A DIMSDSNYV    | 433   | >FLT3-D835A AIMS SDSNYV  | 7    | 426   |
| >FLT3-D835A DIMSDSNYV\   | 438   | >FLT3-D835A AIMS SDSNYV\ | 10   | 428   |
| >FLT3-D835A DIMSDSNYV    | 424   | >FLT3-D835A AIMS SDSNYV  | 23   | 401   |
| >FLT3-D835A DIMSDSNYV\   | 1324  | >FLT3-D835A AIMS SDSNYV\ | 57   | 1267  |
| >FLT3-D835A DIMSDSNYV    | 8     | >FLT3-D835A AIMS SDSNYV  | 3    | 5     |
| >FLT3-D835A DIMSDSNYV\   | 16    | >FLT3-D835A AIMS SDSNYV\ | 5    | 11    |
| >FLT3-D835A DIMSDSNYV    | 355   | >FLT3-D835A AIMS SDSNYV  | 5    | 350   |
| >FLT3-D835A DIMSDSNYV\   | 492   | >FLT3-D835A AIMS SDSNYV\ | 6    | 486   |
| >FLT3-D835A DIMSDSNY     | 12629 | >FLT3-D835A AIMS SDSNY   | 160  | 12469 |
| >FLT3-D835A DIMSDSNYV\   | 7671  | >FLT3-D835A AIMS SDSNYV\ | 98   | 7573  |
| >FLT3-D835A DIMSDSNY     | 133   | >FLT3-D835A AIMS SDSNY   | 4583 | 4450  |
| >FLT3-D835A DIMSDSNY     | 16    | >FLT3-D835A AIMS SDSNY   | 38   | 22    |
| >FLT3-D835A DIMSDSNY     | 258   | >FLT3-D835A AIMS SDSNY   | 3006 | 2748  |
| >FLT3-D835A DIMSDSNY     | 730   | >FLT3-D835A AIMS SDSNY   | 260  | 470   |
| >FLT3-D835A DIMSDSNY     | 251   | >FLT3-D835A AIMS SDSNY   | 38   | 213   |
| >FLT3-D835A DIMSDSNYV\   | 1399  | >FLT3-D835A AIMS SDSNYV\ | 61   | 1338  |
| >FLT3-D835A DIMSDSNYV\   | 74    | >FLT3-D835A AIMS SDSNYV\ | 4472 | 4398  |
| >FLT3-D835A DIMSDSNY     | 472   | >FLT3-D835A AIMS SDSNY   | 6371 | 5899  |
| >FLT3-D835A DIMSDSNYV\   | 16    | >FLT3-D835A AIMS SDSNYV\ | 161  | 145   |
| >FLT3-D835A DIMSDSNYV    | 17    | >FLT3-D835A AIMS SDSNYV  | 59   | 42    |
| >FLT3-D835A DIMSDSNYV\   | 139   | >FLT3-D835A AIMS SDSNYV\ | 281  | 142   |
| >FLT3-D835A DIMSDSNYV    | 7     | >FLT3-D835A AIMS SDSNYV  | 60   | 53    |
| >FLT3-D835A DIMSDSNYV\   | 22    | >FLT3-D835A AIMS SDSNYV\ | 330  | 308   |
| >FLT3-D835A DIMSDSNY     | 3826  | >FLT3-D835A AIMS SDSNY   | 106  | 3720  |
| >FLT3-D835A DIMSDSNY     | 373   | >FLT3-D835A AIMS SDSNY   | 258  | 115   |
| >FLT3-D835A DIMSDSNY     | 2433  | >FLT3-D835A AIMS SDSNY   | 162  | 2271  |
| >FLT3-D835A DIMSDSNY     | 8497  | >FLT3-D835A AIMS SDSNY   | 337  | 8160  |
| >FLT3-D835A RDIMS SDSNY\ | 6302  | >FLT3-D835A RAIMS SDSNY\ | 356  | 5946  |

|                      |       |                       |       |       |
|----------------------|-------|-----------------------|-------|-------|
| >FLT3-D835ARDIMSDSN\ | 8740  | >FLT3-D835A RAIMSDSN\ | 214   | 8526  |
| >FLT3-D835ARDIMSDSN\ | 4140  | >FLT3-D835A RAIMSDSN\ | 143   | 3997  |
| >FLT3-D835ARDIMSDSN\ | 7541  | >FLT3-D835A RAIMSDSN\ | 445   | 7096  |
| >FLT3-D835ARDIMSDSN\ | 1670  | >FLT3-D835A RAIMSDSN\ | 103   | 1567  |
| >FLT3-D835ARDIMSDSN\ | 14270 | >FLT3-D835A RAIMSDSN\ | 391   | 13879 |
| >FLT3-D835ARDIMSDSN\ | 1403  | >FLT3-D835A RAIMSDSN\ | 76    | 1327  |
| >FLT3-D835ARDIMSDSN\ | 384   | >FLT3-D835A RAIMSDSN\ | 22    | 362   |
| >FLT3-D835ARDIMSDSN\ | 3739  | >FLT3-D835A RAIMSDSN\ | 360   | 3379  |
| >FLT3-D835ARDIMSDSN\ | 3119  | >FLT3-D835A RAIMSDSN\ | 242   | 2877  |
| >FLT3-D835ARDIMSDSN\ | 662   | >FLT3-D835A RAIMSDSN\ | 3     | 659   |
| >FLT3-D835ARDIMSDSN\ | 20196 | >FLT3-D835A RAIMSDSN\ | 244   | 19952 |
| >FLT3-D835ARDIMSDSN\ | 17694 | >FLT3-D835A RAIMSDSN\ | 63    | 17631 |
| >FLT3-D835ARDIMSDSN\ | 4540  | >FLT3-D835A RAIMSDSN\ | 105   | 4435  |
| >FLT3-D835ARDIMSDSN\ | 207   | >FLT3-D835A RAIMSDSN\ | 21478 | 21271 |
| >FLT3-D835ARDIMSDSN\ | 18547 | >FLT3-D835A RAIMSDSN\ | 65    | 18482 |
| >FLT3-D835ARDIMSDSN\ | 551   | >FLT3-D835A RAIMSDSN\ | 89    | 462   |
| >FLT3-D835ARDIMSDSN\ | 121   | >FLT3-D835A RAIMSDSN\ | 29125 | 29004 |
| >FLT3-D835ARDIMSDSN\ | 47    | >FLT3-D835A RAIMSDSN\ | 23028 | 22981 |
| >FLT3-D835ARDIMSDSN\ | 207   | >FLT3-D835A RAIMSDSN\ | 142   | 65    |
| >FLT3-D835ARDIMSDSN\ | 1382  | >FLT3-D835A RAIMSDSN\ | 136   | 1246  |
| >FLT3-D835ARDIMSDSN\ | 185   | >FLT3-D835A RAIMSDSN\ | 104   | 81    |
| >FLT3-D835ARDIMSDSN\ | 168   | >FLT3-D835A RAIMSDSN\ | 199   | 31    |
| >FLT3-D835ARDIMSDSN\ | 146   | >FLT3-D835A RAIMSDSN\ | 128   | 18    |
| >FLT3-D835ARDIMSDSN\ | 119   | >FLT3-D835A RAIMSDSN\ | 63    | 56    |
| >FLT3-D835ARDIMSDSN\ | 5     | >FLT3-D835A RAIMSDSN\ | 6     | 1     |
| >FLT3-D835ARDIMSDSN\ | 106   | >FLT3-D835A RAIMSDSN\ | 115   | 9     |
| >FLT3-D835ARDIMSDSN\ | 12    | >FLT3-D835A RAIMSDSN\ | 15    | 3     |
| >FLT3-D835ARDIMSDSN\ | 2057  | >FLT3-D835A RAIMSDSN\ | 320   | 1737  |
| >FLT3-D835ARDIMSDSN\ | 84    | >FLT3-D835A RAIMSDSN\ | 61    | 23    |
| >FLT3-D835ARDIMSDSN\ | 428   | >FLT3-D835A RAIMSDSN\ | 275   | 153   |
| >FLT3-D835ARDIMSDSN\ | 15591 | >FLT3-D835A RAIMSDSN\ | 418   | 15173 |
| >FLT3-D835ARDIMSDSN\ | 13579 | >FLT3-D835A RAIMSDSN\ | 117   | 13462 |
| >FLT3-D835ARDIMSDSN\ | 17356 | >FLT3-D835A RAIMSDSN\ | 331   | 17025 |
| >FLT3-D835ARDIMSDSN\ | 1817  | >FLT3-D835A RAIMSDSN\ | 335   | 1482  |
| >FLT3-D835ARDIMSDSN\ | 16074 | >FLT3-D835A RAIMSDSN\ | 179   | 15895 |
| >FLT3-D835ARDIMSDSN\ | 997   | >FLT3-D835A RAIMSDSN\ | 150   | 847   |
| >FLT3-D835ARDIMSDSN\ | 25897 | >FLT3-D835A RAIMSDSN\ | 286   | 25611 |
| >FLT3-D835ARDIMSDSN\ | 109   | >FLT3-D835A RAIMSDSN\ | 30    | 79    |
| >FLT3-D835ARDIMSDSN\ | 224   | >FLT3-D835A RAIMSDSN\ | 161   | 63    |
| >FLT3-D835ARDIMSDSN\ | 200   | >FLT3-D835A RAIMSDSN\ | 28    | 172   |
| >FLT3-D835ARDIMSDSN\ | 84    | >FLT3-D835A RAIMSDSN\ | 55    | 29    |
| >FLT3-D835ARDIMSDSN\ | 621   | >FLT3-D835A RAIMSDSN\ | 127   | 494   |
| >FLT3-D835ARDIMSDSN\ | 282   | >FLT3-D835A RAIMSDSN\ | 174   | 108   |

|                        |       |                        |      |       |
|------------------------|-------|------------------------|------|-------|
| >FLT3-D835E DIMSDSNV   | 710   | >FLT3-D835E EIMSDSNV   | 133  | 577   |
| >FLT3-D835E DIMSDSNV\  | 235   | >FLT3-D835E EIMSDSNVV  | 126  | 109   |
| >FLT3-D835E DIMSDSNV   | 324   | >FLT3-D835E EIMSDSNV   | 80   | 244   |
| >FLT3-D835E DIMSDSNV\  | 693   | >FLT3-D835E EIMSDSNVV  | 176  | 517   |
| >FLT3-D835E DIMSDSNV   | 433   | >FLT3-D835E EIMSDSNV   | 95   | 338   |
| >FLT3-D835E DIMSDSNV\  | 438   | >FLT3-D835E EIMSDSNVV  | 121  | 317   |
| >FLT3-D835E DIMSDSNV   | 424   | >FLT3-D835E EIMSDSNV   | 214  | 210   |
| >FLT3-D835E DIMSDSNV   | 8     | >FLT3-D835E EIMSDSNV   | 4    | 4     |
| >FLT3-D835E DIMSDSNV\  | 16    | >FLT3-D835E EIMSDSNVV  | 7    | 9     |
| >FLT3-D835E DIMSDSNV   | 355   | >FLT3-D835E EIMSDSNV   | 73   | 282   |
| >FLT3-D835E DIMSDSNV\  | 492   | >FLT3-D835E EIMSDSNVV  | 115  | 377   |
| >FLT3-D835E DIMSDSNY   | 133   | >FLT3-D835E EIMSDSNY   | 29   | 104   |
| >FLT3-D835E DIMSDSNY   | 16    | >FLT3-D835E EIMSDSNY   | 5    | 11    |
| >FLT3-D835E DIMSDSNV   | 1148  | >FLT3-D835E EIMSDSNV   | 314  | 834   |
| >FLT3-D835E DIMSDSNY   | 258   | >FLT3-D835E EIMSDSNY   | 75   | 183   |
| >FLT3-D835E DIMSDSNY   | 251   | >FLT3-D835E EIMSDSNY   | 245  | 6     |
| >FLT3-D835E DIMSDSNV\  | 74    | >FLT3-D835E EIMSDSNVV  | 200  | 126   |
| >FLT3-D835E DIMSDSNY   | 472   | >FLT3-D835E EIMSDSNY   | 134  | 338   |
| >FLT3-D835E DIMSDSNV\  | 16    | >FLT3-D835E EIMSDSNVV  | 7    | 9     |
| >FLT3-D835E DIMSDSNV   | 17    | >FLT3-D835E EIMSDSNV   | 7    | 10    |
| >FLT3-D835E DIMSDSNV\  | 139   | >FLT3-D835E EIMSDSNVV  | 36   | 103   |
| >FLT3-D835E DIMSDSNV   | 7     | >FLT3-D835E EIMSDSNV   | 4    | 3     |
| >FLT3-D835E DIMSDSNV\  | 22    | >FLT3-D835E EIMSDSNVV  | 7    | 15    |
| >FLT3-D835E DIMSDSNY   | 373   | >FLT3-D835E EIMSDSNY   | 334  | 39    |
| >FLT3-D835E DIMSDSNY   | 606   | >FLT3-D835E EIMSDSNY   | 286  | 320   |
| >FLT3-D835E DIMSDSNV\  | 525   | >FLT3-D835E EIMSDSNVV  | 156  | 369   |
| >FLT3-D835E RDIMSDSNY  | 6329  | >FLT3-D835E REIMSDSNV  | 445  | 5884  |
| >FLT3-D835E RDIMSDSNY  | 1403  | >FLT3-D835E REIMSDSNY  | 125  | 1278  |
| >FLT3-D835E RDIMSDSNY  | 384   | >FLT3-D835E REIMSDSNY  | 30   | 354   |
| >FLT3-D835E RDIMSDSNY\ | 3119  | >FLT3-D835E REIMSDSNV  | 358  | 2761  |
| >FLT3-D835E RDIMSDSNY  | 662   | >FLT3-D835E REIMSDSNY  | 437  | 225   |
| >FLT3-D835E RDIMSDSNY\ | 8541  | >FLT3-D835E REIMSDSNV  | 16   | 8525  |
| >FLT3-D835E RDIMSDSNY\ | 19397 | >FLT3-D835E REIMSDSNV  | 192  | 19205 |
| >FLT3-D835E RDIMSDSNY\ | 207   | >FLT3-D835E REIMSDSNV  | 39   | 168   |
| >FLT3-D835E RDIMSDSNY  | 8080  | >FLT3-D835E REIMSDSNY  | 325  | 7755  |
| >FLT3-D835E RDIMSDSNY  | 6774  | >FLT3-D835E REIMSDSNY  | 94   | 6680  |
| >FLT3-D835E RDIMSDSNY\ | 12967 | >FLT3-D835E REIMSDSNV  | 72   | 12895 |
| >FLT3-D835E RDIMSDSNY\ | 1529  | >FLT3-D835E REIMSDSNV  | 19   | 1510  |
| >FLT3-D835E RDIMSDSNY\ | 718   | >FLT3-D835E REIMSDSNV  | 13   | 705   |
| >FLT3-D835E RDIMSDSNY\ | 121   | >FLT3-D835E REIMSDSNV  | 7080 | 6959  |
| >FLT3-D835E RDIMSDSNY\ | 47    | >FLT3-D835E REIMSDSNV  | 2120 | 2073  |
| >FLT3-D835E ARDIMSDSNY | 207   | >FLT3-D835E AREIMSDSNY | 203  | 4     |
| >FLT3-D835E ARDIMSDSNY | 185   | >FLT3-D835E AREIMSDSNY | 217  | 32    |

|                        |      |                         |      |      |
|------------------------|------|-------------------------|------|------|
| >FLT3-D835E LARDIMSDSN | 168  | >FLT3-D835E LAREIMSDSN  | 254  | 86   |
| >FLT3-D835E LARDIMSDSN | 146  | >FLT3-D835E LAREIMSDSN  | 184  | 38   |
| >FLT3-D835E LARDIMSDSN | 119  | >FLT3-D835E LAREIMSDSN  | 95   | 24   |
| >FLT3-D835E LARDIMSDSN | 5    | >FLT3-D835E LAREIMSDSN  | 5    | 0    |
| >FLT3-D835E LARDIMSDSN | 106  | >FLT3-D835E LAREIMSDSN  | 75   | 31   |
| >FLT3-D835E LARDIMSDSN | 12   | >FLT3-D835E LAREIMSDSN  | 24   | 12   |
| >FLT3-D835E CDFGLARDI  | 970  | >FLT3-D835E CDFGLAREI   | 371  | 599  |
| >FLT3-D835E CDFGLARDI  | 84   | >FLT3-D835E CDFGLAREI   | 62   | 22   |
| >FLT3-D835E ICDFGLARDI | 428  | >FLT3-D835E ICDFGLAREI  | 338  | 90   |
| >FLT3-D835E KICDFGLARD | 997  | >FLT3-D835E KICDFGLAREI | 139  | 858  |
| >FLT3-D835E KICDFGLARD | 109  | >FLT3-D835E KICDFGLAREI | 91   | 18   |
| >FLT3-D835F DIMSDSNYV  | 3034 | >FLT3-D835F FIMSDSNYV   | 7    | 3027 |
| >FLT3-D835F DIMSDSNYV\ | 224  | >FLT3-D835F FIMSDSNYVV  | 7    | 217  |
| >FLT3-D835F DIMSDSNYV  | 200  | >FLT3-D835F FIMSDSNYV   | 2    | 198  |
| >FLT3-D835F DIMSDSNYV\ | 84   | >FLT3-D835F FIMSDSNYVV  | 6    | 78   |
| >FLT3-D835F DIMSDSNYV  | 621  | >FLT3-D835F FIMSDSNYV   | 2    | 619  |
| >FLT3-D835F DIMSDSNYV\ | 282  | >FLT3-D835F FIMSDSNYVV  | 14   | 268  |
| >FLT3-D835F DIMSDSNYV  | 710  | >FLT3-D835F FIMSDSNYV   | 3    | 707  |
| >FLT3-D835F DIMSDSNYV\ | 235  | >FLT3-D835F FIMSDSNYVV  | 17   | 218  |
| >FLT3-D835F DIMSDSNYV  | 324  | >FLT3-D835F FIMSDSNYV   | 3    | 321  |
| >FLT3-D835F DIMSDSNYV\ | 693  | >FLT3-D835F FIMSDSNYVV  | 4    | 689  |
| >FLT3-D835F DIMSDSNYV  | 433  | >FLT3-D835F FIMSDSNYV   | 3    | 430  |
| >FLT3-D835F DIMSDSNYV\ | 438  | >FLT3-D835F FIMSDSNYVV  | 3    | 435  |
| >FLT3-D835F DIMSDSNYV  | 424  | >FLT3-D835F FIMSDSNYV   | 9    | 415  |
| >FLT3-D835F DIMSDSNYV\ | 1324 | >FLT3-D835F FIMSDSNYVV  | 15   | 1309 |
| >FLT3-D835F DIMSDSNYV  | 8    | >FLT3-D835F FIMSDSNYV   | 2    | 6    |
| >FLT3-D835F DIMSDSNYV\ | 16   | >FLT3-D835F FIMSDSNYVV  | 2    | 14   |
| >FLT3-D835F DIMSDSNYV  | 355  | >FLT3-D835F FIMSDSNYV   | 2    | 353  |
| >FLT3-D835F DIMSDSNYV\ | 492  | >FLT3-D835F FIMSDSNYVV  | 3    | 489  |
| >FLT3-D835F DIMSDSNY   | 133  | >FLT3-D835F FIMSDSNY    | 153  | 20   |
| >FLT3-D835F DIMSDSNY   | 16   | >FLT3-D835F FIMSDSNY    | 43   | 27   |
| >FLT3-D835F DIMSDSNY   | 258  | >FLT3-D835F FIMSDSNY    | 1697 | 1439 |
| >FLT3-D835F DIMSDSNY   | 730  | >FLT3-D835F FIMSDSNY    | 30   | 700  |
| >FLT3-D835F DIMSDSNY   | 251  | >FLT3-D835F FIMSDSNY    | 120  | 131  |
| >FLT3-D835F DIMSDSNYV\ | 1399 | >FLT3-D835F FIMSDSNYVV  | 452  | 947  |
| >FLT3-D835F DIMSDSNYV\ | 74   | >FLT3-D835F FIMSDSNYVV  | 657  | 583  |
| >FLT3-D835F DIMSDSNY   | 472  | >FLT3-D835F FIMSDSNY    | 431  | 41   |
| >FLT3-D835F DIMSDSNYV\ | 16   | >FLT3-D835F FIMSDSNYVV  | 13   | 3    |
| >FLT3-D835F DIMSDSNYV  | 17   | >FLT3-D835F FIMSDSNYV   | 8    | 9    |
| >FLT3-D835F DIMSDSNYV\ | 139  | >FLT3-D835F FIMSDSNYVV  | 50   | 89   |
| >FLT3-D835F DIMSDSNYV  | 7    | >FLT3-D835F FIMSDSNYV   | 6    | 1    |
| >FLT3-D835F DIMSDSNYV\ | 22   | >FLT3-D835F FIMSDSNYVV  | 15   | 7    |
| >FLT3-D835F DIMSDSNY   | 3826 | >FLT3-D835F FIMSDSNY    | 72   | 3754 |



|                         |       |                         |       |       |
|-------------------------|-------|-------------------------|-------|-------|
| >FLT3-D835F DIMSDSNY    | 373   | >FLT3-D835F FIMSDSNY    | 37    | 336   |
| >FLT3-D835F DIMSDSNY    | 2433  | >FLT3-D835F FIMSDSNY    | 62    | 2371  |
| >FLT3-D835F DIMSDSNYV\  | 8262  | >FLT3-D835F FIMSDSNYVV  | 425   | 7837  |
| >FLT3-D835F DIMSDSNY    | 606   | >FLT3-D835F FIMSDSNY    | 74    | 532   |
| >FLT3-D835F DIMSDSNYV\  | 5917  | >FLT3-D835F FIMSDSNYVV  | 186   | 5731  |
| >FLT3-D835F DIMSDSNYV\  | 525   | >FLT3-D835F FIMSDSNYVV  | 205   | 320   |
| >FLT3-D835F RDIMSDSNY   | 6167  | >FLT3-D835F RFIMSDSNY   | 79    | 6088  |
| >FLT3-D835F RDIMSDSNY   | 1670  | >FLT3-D835F RFIMSDSNY   | 139   | 1531  |
| >FLT3-D835F RDIMSDSNY   | 1403  | >FLT3-D835F RFIMSDSNY   | 275   | 1128  |
| >FLT3-D835F RDIMSDSNY   | 6751  | >FLT3-D835F RFIMSDSNY   | 429   | 6322  |
| >FLT3-D835F RDIMSDSNY   | 384   | >FLT3-D835F RFIMSDSNY   | 391   | 7     |
| >FLT3-D835F RDIMSDSNY\  | 207   | >FLT3-D835F RFIMSDSNYV  | 15222 | 15015 |
| >FLT3-D835F RDIMSDSNY   | 551   | >FLT3-D835F RFIMSDSNY   | 490   | 61    |
| >FLT3-D835F RDIMSDSNY\  | 23251 | >FLT3-D835F RFIMSDSNYV  | 131   | 23120 |
| >FLT3-D835F RDIMSDSNY\  | 121   | >FLT3-D835F RFIMSDSNYV  | 22042 | 21921 |
| >FLT3-D835F RDIMSDSNY\  | 47    | >FLT3-D835F RFIMSDSNYV  | 14782 | 14735 |
| >FLT3-D835F VKICDFGLAR  | 19748 | >FLT3-D835F VKICDFGLAR  | 14    | 19734 |
| >FLT3-D835F ARDIMSDSN\  | 1286  | >FLT3-D835F ARFIMSDSNY  | 261   | 1025  |
| >FLT3-D835F ARDIMSDSN\  | 207   | >FLT3-D835F ARFIMSDSNY  | 53    | 154   |
| >FLT3-D835F ARDIMSDSN\  | 1382  | >FLT3-D835F ARFIMSDSNY  | 26    | 1356  |
| >FLT3-D835F ARDIMSDSN\  | 7381  | >FLT3-D835F ARFIMSDSNY  | 219   | 7162  |
| >FLT3-D835F ARDIMSDSN\  | 185   | >FLT3-D835F ARFIMSDSNY  | 38    | 147   |
| >FLT3-D835F ARDIMSDSN\  | 9994  | >FLT3-D835F ARFIMSDSNY  | 369   | 9625  |
| >FLT3-D835F ARDIMSDSN\  | 2239  | >FLT3-D835F ARFIMSDSNY  | 333   | 1906  |
| >FLT3-D835F LARDIMSDSN  | 644   | >FLT3-D835F LARFIMSDSN  | 499   | 145   |
| >FLT3-D835F LARDIMSDSN  | 168   | >FLT3-D835F LARFIMSDSN  | 123   | 45    |
| >FLT3-D835F LARDIMSDSN  | 146   | >FLT3-D835F LARFIMSDSN  | 206   | 60    |
| >FLT3-D835F LARDIMSDSN  | 119   | >FLT3-D835F LARFIMSDSN  | 132   | 13    |
| >FLT3-D835F LARDIMSDSN  | 5     | >FLT3-D835F LARFIMSDSN  | 7     | 2     |
| >FLT3-D835F LARDIMSDSN  | 106   | >FLT3-D835F LARFIMSDSN  | 165   | 59    |
| >FLT3-D835F LARDIMSDSN  | 12    | >FLT3-D835F LARFIMSDSN  | 10    | 2     |
| >FLT3-D835F CDFGLARDI   | 970   | >FLT3-D835F CDFGLARFI   | 40    | 930   |
| >FLT3-D835F CDFGLARDI   | 1651  | >FLT3-D835F CDFGLARFI   | 301   | 1350  |
| >FLT3-D835F CDFGLARDI   | 84    | >FLT3-D835F CDFGLARFI   | 39    | 45    |
| >FLT3-D835F ICDFGLARD   | 22037 | >FLT3-D835F ICDFGLARF   | 178   | 21859 |
| >FLT3-D835F ICDFGLARDI\ | 428   | >FLT3-D835F ICDFGLARFIM | 402   | 26    |
| >FLT3-D835F KICDFGLARD  | 1817  | >FLT3-D835F KICDFGLARFI | 174   | 1643  |
| >FLT3-D835F KICDFGLARD  | 997   | >FLT3-D835F KICDFGLARFI | 106   | 891   |
| >FLT3-D835F KICDFGLARD  | 3284  | >FLT3-D835F KICDFGLARFI | 275   | 3009  |
| >FLT3-D835F KICDFGLARD  | 14521 | >FLT3-D835F KICDFGLARF  | 132   | 14389 |
| >FLT3-D835F KICDFGLARD  | 109   | >FLT3-D835F KICDFGLARFI | 329   | 220   |
| >FLT3-D835F KICDFGLARD  | 19581 | >FLT3-D835F KICDFGLARF  | 207   | 19374 |
| >FLT3-D835F KICDFGLARD  | 19830 | >FLT3-D835F KICDFGLARF  | 62    | 19768 |

|                        |       |                         |     |      |
|------------------------|-------|-------------------------|-----|------|
| >FLT3-D835F KICDFGLARD | 1636  | >FLT3-D835F KICDFGLARFI | 461 | 1175 |
| >FLT3-D835F DIMSDSNV   | 3034  | >FLT3-D835F HIMSDSNV    | 28  | 3006 |
| >FLT3-D835F DIMSDSNV\  | 224   | >FLT3-D835F HIMSDSNV\   | 38  | 186  |
| >FLT3-D835F DIMSDSNV   | 200   | >FLT3-D835F HIMSDSNV    | 4   | 196  |
| >FLT3-D835F DIMSDSNV\  | 84    | >FLT3-D835F HIMSDSNV\   | 20  | 64   |
| >FLT3-D835F DIMSDSNV   | 621   | >FLT3-D835F HIMSDSNV    | 9   | 612  |
| >FLT3-D835F DIMSDSNV\  | 282   | >FLT3-D835F HIMSDSNV\   | 81  | 201  |
| >FLT3-D835F DIMSDSNV   | 710   | >FLT3-D835F HIMSDSNV    | 24  | 686  |
| >FLT3-D835F DIMSDSNV\  | 235   | >FLT3-D835F HIMSDSNV\   | 71  | 164  |
| >FLT3-D835F DIMSDSNV   | 324   | >FLT3-D835F HIMSDSNV    | 24  | 300  |
| >FLT3-D835F DIMSDSNV\  | 693   | >FLT3-D835F HIMSDSNV\   | 52  | 641  |
| >FLT3-D835F DIMSDSNV   | 433   | >FLT3-D835F HIMSDSNV    | 8   | 425  |
| >FLT3-D835F DIMSDSNV\  | 438   | >FLT3-D835F HIMSDSNV\   | 13  | 425  |
| >FLT3-D835F DIMSDSNV   | 424   | >FLT3-D835F HIMSDSNV    | 63  | 361  |
| >FLT3-D835F DIMSDSNV\  | 1324  | >FLT3-D835F HIMSDSNV\   | 188 | 1136 |
| >FLT3-D835F DIMSDSNV   | 8     | >FLT3-D835F HIMSDSNV    | 5   | 3    |
| >FLT3-D835F DIMSDSNV\  | 16    | >FLT3-D835F HIMSDSNV\   | 8   | 8    |
| >FLT3-D835F DIMSDSNV   | 355   | >FLT3-D835F HIMSDSNV    | 12  | 343  |
| >FLT3-D835F DIMSDSNV\  | 492   | >FLT3-D835F HIMSDSNV\   | 18  | 474  |
| >FLT3-D835F DIMSDSNY   | 133   | >FLT3-D835F HIMSDSNY    | 226 | 93   |
| >FLT3-D835F DIMSDSNY   | 16    | >FLT3-D835F HIMSDSNY    | 38  | 22   |
| >FLT3-D835F DIMSDSNY   | 258   | >FLT3-D835F HIMSDSNY    | 414 | 156  |
| >FLT3-D835F DIMSDSNY   | 730   | >FLT3-D835F HIMSDSNY    | 202 | 528  |
| >FLT3-D835F DIMSDSNY   | 251   | >FLT3-D835F HIMSDSNY    | 60  | 191  |
| >FLT3-D835F DIMSDSNV\  | 1399  | >FLT3-D835F HIMSDSNV\   | 35  | 1364 |
| >FLT3-D835F DIMSDSNV\  | 74    | >FLT3-D835F HIMSDSNV\   | 260 | 186  |
| >FLT3-D835F DIMSDSNY   | 472   | >FLT3-D835F HIMSDSNY    | 504 | 32   |
| >FLT3-D835F DIMSDSNV\  | 16    | >FLT3-D835F HIMSDSNV\   | 18  | 2    |
| >FLT3-D835F DIMSDSNV   | 17    | >FLT3-D835F HIMSDSNV    | 10  | 7    |
| >FLT3-D835F DIMSDSNV\  | 139   | >FLT3-D835F HIMSDSNV\   | 163 | 24   |
| >FLT3-D835F DIMSDSNV   | 7     | >FLT3-D835F HIMSDSNV    | 8   | 1    |
| >FLT3-D835F DIMSDSNV\  | 22    | >FLT3-D835F HIMSDSNV\   | 24  | 2    |
| >FLT3-D835F DIMSDSNY   | 6743  | >FLT3-D835F HIMSDSNY    | 294 | 6449 |
| >FLT3-D835F DIMSDSNY   | 3826  | >FLT3-D835F HIMSDSNY    | 129 | 3697 |
| >FLT3-D835F DIMSDSNY   | 373   | >FLT3-D835F HIMSDSNY    | 83  | 290  |
| >FLT3-D835F DIMSDSNY   | 2433  | >FLT3-D835F HIMSDSNY    | 250 | 2183 |
| >FLT3-D835F DIMSDSNY   | 8497  | >FLT3-D835F HIMSDSNY    | 466 | 8031 |
| >FLT3-D835F DIMSDSNY   | 606   | >FLT3-D835F HIMSDSNY    | 129 | 477  |
| >FLT3-D835F DIMSDSNV\  | 5917  | >FLT3-D835F HIMSDSNV\   | 228 | 5689 |
| >FLT3-D835F DIMSDSNY   | 10280 | >FLT3-D835F HIMSDSNY    | 428 | 9852 |
| >FLT3-D835F DIMSDSNY   | 1256  | >FLT3-D835F HIMSDSNY    | 383 | 873  |
| >FLT3-D835F DIMSDSNV\  | 525   | >FLT3-D835F HIMSDSNV\   | 46  | 479  |
| >FLT3-D835F RDIMSDSNY  | 1670  | >FLT3-D835F RHIMSDSNY   | 289 | 1381 |

|                         |       |                         |       |       |
|-------------------------|-------|-------------------------|-------|-------|
| >FLT3-D835F RDIMSDSNY   | 384   | >FLT3-D835F RHIMSDSNY   | 10    | 374   |
| >FLT3-D835F RDIMSDSNY\  | 3739  | >FLT3-D835F RHIMSDSNY\  | 155   | 3584  |
| >FLT3-D835F RDIMSDSNY\  | 3119  | >FLT3-D835F RHIMSDSNY\  | 112   | 3007  |
| >FLT3-D835F RDIMSDSNY\  | 11626 | >FLT3-D835F RHIMSDSNY\  | 394   | 11232 |
| >FLT3-D835F RDIMSDSNY\  | 207   | >FLT3-D835F RHIMSDSNY\  | 11902 | 11695 |
| >FLT3-D835F RDIMSDSNY   | 27800 | >FLT3-D835F RHIMSDSNY   | 384   | 27416 |
| >FLT3-D835F RDIMSDSNY\  | 121   | >FLT3-D835F RHIMSDSNY\  | 18189 | 18068 |
| >FLT3-D835F RDIMSDSNY\  | 47    | >FLT3-D835F RHIMSDSNY\  | 9920  | 9873  |
| >FLT3-D835F ARDIMSDSN\  | 207   | >FLT3-D835F ARHIMSDSN\  | 388   | 181   |
| >FLT3-D835F ARDIMSDSN\  | 1382  | >FLT3-D835F ARHIMSDSN\  | 91    | 1291  |
| >FLT3-D835F ARDIMSDSN\  | 185   | >FLT3-D835F ARHIMSDSN\  | 84    | 101   |
| >FLT3-D835F LARDIMSDSN  | 168   | >FLT3-D835F LARHIMSDSN  | 123   | 45    |
| >FLT3-D835F LARDIMSDSN  | 146   | >FLT3-D835F LARHIMSDSN  | 136   | 10    |
| >FLT3-D835F LARDIMSDSN  | 119   | >FLT3-D835F LARHIMSDSN  | 39    | 80    |
| >FLT3-D835F LARDIMSDSN  | 5     | >FLT3-D835F LARHIMSDSN  | 5     | 0     |
| >FLT3-D835F LARDIMSDSN  | 106   | >FLT3-D835F LARHIMSDSN  | 114   | 8     |
| >FLT3-D835F LARDIMSDSN  | 12    | >FLT3-D835F LARHIMSDSN  | 12    | 0     |
| >FLT3-D835F FGLARDIM    | 3343  | >FLT3-D835F FGLARHIM    | 489   | 2854  |
| >FLT3-D835F CDFGLARDI   | 1651  | >FLT3-D835F CDFGLARHI   | 342   | 1309  |
| >FLT3-D835F CDFGLARDI   | 84    | >FLT3-D835F CDFGLARHI   | 105   | 21    |
| >FLT3-D835F ICDFGLARDIM | 428   | >FLT3-D835F ICDFGLARHIM | 452   | 24    |
| >FLT3-D835F KICDFGLARD  | 1817  | >FLT3-D835F KICDFGLARH  | 373   | 1444  |
| >FLT3-D835F KICDFGLARD  | 997   | >FLT3-D835F KICDFGLARH  | 261   | 736   |
| >FLT3-D835F KICDFGLARD  | 109   | >FLT3-D835F KICDFGLARH  | 260   | 151   |
| >FLT3-D835F KICDFGLARD  | 1636  | >FLT3-D835F KICDFGLARH  | 468   | 1168  |
| >FLT3-D835I DIMSDSNYV   | 3034  | >FLT3-D835I IIMSDSNYV   | 14    | 3020  |
| >FLT3-D835I DIMSDSNYV\  | 224   | >FLT3-D835I IIMSDSNYVV  | 17    | 207   |
| >FLT3-D835I DIMSDSNYV   | 200   | >FLT3-D835I IIMSDSNYV   | 3     | 197   |
| >FLT3-D835I DIMSDSNYV\  | 84    | >FLT3-D835I IIMSDSNYVV  | 13    | 71    |
| >FLT3-D835I DIMSDSNYV   | 621   | >FLT3-D835I IIMSDSNYV   | 5     | 616   |
| >FLT3-D835I DIMSDSNYV\  | 282   | >FLT3-D835I IIMSDSNYVV  | 37    | 245   |
| >FLT3-D835I DIMSDSNYV   | 710   | >FLT3-D835I IIMSDSNYV   | 10    | 700   |
| >FLT3-D835I DIMSDSNYV\  | 235   | >FLT3-D835I IIMSDSNYVV  | 39    | 196   |
| >FLT3-D835I DIMSDSNYV   | 324   | >FLT3-D835I IIMSDSNYV   | 8     | 316   |
| >FLT3-D835I DIMSDSNYV\  | 693   | >FLT3-D835I IIMSDSNYVV  | 14    | 679   |
| >FLT3-D835I DIMSDSNYV   | 433   | >FLT3-D835I IIMSDSNYV   | 9     | 424   |
| >FLT3-D835I DIMSDSNYV\  | 438   | >FLT3-D835I IIMSDSNYVV  | 14    | 424   |
| >FLT3-D835I DIMSDSNYV   | 424   | >FLT3-D835I IIMSDSNYV   | 38    | 386   |
| >FLT3-D835I DIMSDSNYV\  | 1324  | >FLT3-D835I IIMSDSNYVV  | 104   | 1220  |
| >FLT3-D835I DIMSDSNYV   | 8     | >FLT3-D835I IIMSDSNYV   | 2     | 6     |
| >FLT3-D835I DIMSDSNYV\  | 16    | >FLT3-D835I IIMSDSNYVV  | 3     | 13    |
| >FLT3-D835I DIMSDSNYV   | 355   | >FLT3-D835I IIMSDSNYV   | 7     | 348   |
| >FLT3-D835I DIMSDSNYV\  | 492   | >FLT3-D835I IIMSDSNYVV  | 8     | 484   |

|                          |       |                           |      |       |
|--------------------------|-------|---------------------------|------|-------|
| >FLT3-D835I- DIMSDSNYYV\ | 7671  | >FLT3-D835I- IIMSDSNYYVV  | 269  | 7402  |
| >FLT3-D835I- DIMSDSNYY   | 133   | >FLT3-D835I- IIMSDSNYY    | 7595 | 7462  |
| >FLT3-D835I- DIMSDSNYY   | 16    | >FLT3-D835I- IIMSDSNYY    | 196  | 180   |
| >FLT3-D835I- DIMSDSNYY   | 258   | >FLT3-D835I- IIMSDSNYY    | 3159 | 2901  |
| >FLT3-D835I- DIMSDSNYY   | 730   | >FLT3-D835I- IIMSDSNYY    | 100  | 630   |
| >FLT3-D835I- DIMSDSNYY   | 251   | >FLT3-D835I- IIMSDSNYY    | 27   | 224   |
| >FLT3-D835I- DIMSDSNYYV\ | 1399  | >FLT3-D835I- IIMSDSNYYVV  | 66   | 1333  |
| >FLT3-D835I- DIMSDSNYYV\ | 74    | >FLT3-D835I- IIMSDSNYYVV  | 677  | 603   |
| >FLT3-D835I- DIMSDSNYY   | 472   | >FLT3-D835I- IIMSDSNYY    | 1248 | 776   |
| >FLT3-D835I- DIMSDSNYYV\ | 16    | >FLT3-D835I- IIMSDSNYYVV  | 31   | 15    |
| >FLT3-D835I- DIMSDSNYYV  | 17    | >FLT3-D835I- IIMSDSNYYV   | 33   | 16    |
| >FLT3-D835I- DIMSDSNYYV\ | 139   | >FLT3-D835I- IIMSDSNYYVV  | 259  | 120   |
| >FLT3-D835I- DIMSDSNYYV  | 7     | >FLT3-D835I- IIMSDSNYYV   | 61   | 54    |
| >FLT3-D835I- DIMSDSNYYV\ | 22    | >FLT3-D835I- IIMSDSNYYVV  | 322  | 300   |
| >FLT3-D835I- DIMSDSNYY   | 6743  | >FLT3-D835I- IIMSDSNYY    | 461  | 6282  |
| >FLT3-D835I- DIMSDSNYY   | 3826  | >FLT3-D835I- IIMSDSNYY    | 119  | 3707  |
| >FLT3-D835I- DIMSDSNYY   | 373   | >FLT3-D835I- IIMSDSNYY    | 173  | 200   |
| >FLT3-D835I- DIMSDSNYY   | 2433  | >FLT3-D835I- IIMSDSNYY    | 112  | 2321  |
| >FLT3-D835I- DIMSDSNYY   | 8497  | >FLT3-D835I- IIMSDSNYY    | 257  | 8240  |
| >FLT3-D835I- DIMSDSNYY   | 606   | >FLT3-D835I- IIMSDSNYY    | 444  | 162   |
| >FLT3-D835I- DIMSDSNYYV\ | 525   | >FLT3-D835I- IIMSDSNYYVV  | 116  | 409   |
| >FLT3-D835I- RDIMSDSNYY\ | 14956 | >FLT3-D835I- RIIMSDSNYYV  | 111  | 14845 |
| >FLT3-D835I- RDIMSDSNYY\ | 19023 | >FLT3-D835I- RIIMSDSNYYV' | 291  | 18732 |
| >FLT3-D835I- RDIMSDSNYY\ | 6302  | >FLT3-D835I- RIIMSDSNYYV  | 107  | 6195  |
| >FLT3-D835I- RDIMSDSNYY\ | 15594 | >FLT3-D835I- RIIMSDSNYYV' | 444  | 15150 |
| >FLT3-D835I- RDIMSDSNYY\ | 8740  | >FLT3-D835I- RIIMSDSNYYV  | 45   | 8695  |
| >FLT3-D835I- RDIMSDSNYY\ | 15234 | >FLT3-D835I- RIIMSDSNYYV' | 74   | 15160 |
| >FLT3-D835I- RDIMSDSNYY\ | 4140  | >FLT3-D835I- RIIMSDSNYYV  | 77   | 4063  |
| >FLT3-D835I- RDIMSDSNYY\ | 7541  | >FLT3-D835I- RIIMSDSNYYV' | 71   | 7470  |
| >FLT3-D835I- RDIMSDSNYY\ | 12877 | >FLT3-D835I- RIIMSDSNYYV  | 42   | 12835 |
| >FLT3-D835I- RDIMSDSNYY\ | 14848 | >FLT3-D835I- RIIMSDSNYYV' | 83   | 14765 |
| >FLT3-D835I- RDIMSDSNYY\ | 15003 | >FLT3-D835I- RIIMSDSNYYV  | 65   | 14938 |
| >FLT3-D835I- RDIMSDSNYY\ | 13969 | >FLT3-D835I- RIIMSDSNYYV' | 84   | 13885 |
| >FLT3-D835I- RDIMSDSNYY\ | 17244 | >FLT3-D835I- RIIMSDSNYYV  | 120  | 17124 |
| >FLT3-D835I- RDIMSDSNYY\ | 19966 | >FLT3-D835I- RIIMSDSNYYV' | 384  | 19582 |
| >FLT3-D835I- RDIMSDSNYY\ | 21663 | >FLT3-D835I- RIIMSDSNYYV  | 32   | 21631 |
| >FLT3-D835I- RDIMSDSNYY\ | 23091 | >FLT3-D835I- RIIMSDSNYYV' | 44   | 23047 |
| >FLT3-D835I- RDIMSDSNYY  | 8085  | >FLT3-D835I- RIIMSDSNYY   | 69   | 8016  |
| >FLT3-D835I- RDIMSDSNYY  | 3416  | >FLT3-D835I- RIIMSDSNYY   | 389  | 3027  |
| >FLT3-D835I- RDIMSDSNYY  | 6167  | >FLT3-D835I- RIIMSDSNYY   | 473  | 5694  |
| >FLT3-D835I- RDIMSDSNYY  | 1670  | >FLT3-D835I- RIIMSDSNYY   | 65   | 1605  |
| >FLT3-D835I- RDIMSDSNYY\ | 14270 | >FLT3-D835I- RIIMSDSNYYV  | 419  | 13851 |
| >FLT3-D835I- RDIMSDSNYY  | 5320  | >FLT3-D835I- RIIMSDSNYY   | 308  | 5012  |

|                         |       |                         |       |       |
|-------------------------|-------|-------------------------|-------|-------|
| >FLT3-D835I-RDIMSDSNY   | 1403  | >FLT3-D835I-RIIMSDSNY   | 57    | 1346  |
| >FLT3-D835I-RDIMSDSNY   | 384   | >FLT3-D835I-RIIMSDSNY   | 93    | 291   |
| >FLT3-D835I-RDIMSDSNY   | 662   | >FLT3-D835I-RIIMSDSNY   | 8     | 654   |
| >FLT3-D835I-RDIMSDSNY\  | 207   | >FLT3-D835I-RIIMSDSNYV' | 30346 | 30139 |
| >FLT3-D835I-RDIMSDSNY   | 551   | >FLT3-D835I-RIIMSDSNY   | 190   | 361   |
| >FLT3-D835I-RDIMSDSNY\  | 121   | >FLT3-D835I-RIIMSDSNYV  | 20076 | 19955 |
| >FLT3-D835I-RDIMSDSNY\  | 47    | >FLT3-D835I-RIIMSDSNYV' | 11787 | 11740 |
| >FLT3-D835I-ARDIMSDSN\  | 207   | >FLT3-D835I-ARIIMSDSNY  | 101   | 106   |
| >FLT3-D835I-ARDIMSDSN\  | 1382  | >FLT3-D835I-ARIIMSDSNY  | 86    | 1296  |
| >FLT3-D835I-ARDIMSDSN\  | 185   | >FLT3-D835I-ARIIMSDSNY  | 39    | 146   |
| >FLT3-D835I-LARDIMSDSN  | 168   | >FLT3-D835I-LARIIMSDSN' | 164   | 4     |
| >FLT3-D835I-LARDIMSDSN  | 146   | >FLT3-D835I-LARIIMSDSN' | 320   | 174   |
| >FLT3-D835I-LARDIMSDSN  | 119   | >FLT3-D835I-LARIIMSDSN' | 172   | 53    |
| >FLT3-D835I-LARDIMSDSN  | 5     | >FLT3-D835I-LARIIMSDSN' | 5     | 0     |
| >FLT3-D835I-LARDIMSDSN  | 106   | >FLT3-D835I-LARIIMSDSN' | 194   | 88    |
| >FLT3-D835I-LARDIMSDSN  | 12    | >FLT3-D835I-LARIIMSDSN' | 19    | 7     |
| >FLT3-D835I-GLARDIMS    | 3150  | >FLT3-D835I-GLARIIMS    | 398   | 2752  |
| >FLT3-D835I-CDFGLARDI   | 970   | >FLT3-D835I-CDFGLARII   | 321   | 649   |
| >FLT3-D835I-CDFGLARD    | 41836 | >FLT3-D835I-CDFGLARI    | 305   | 41531 |
| >FLT3-D835I-CDFGLARDI   | 1651  | >FLT3-D835I-CDFGLARII   | 460   | 1191  |
| >FLT3-D835I-CDFGLARD    | 22993 | >FLT3-D835I-CDFGLARI    | 73    | 22920 |
| >FLT3-D835I-CDFGLARDI   | 84    | >FLT3-D835I-CDFGLARII   | 42    | 42    |
| >FLT3-D835I-ICDFGLARDIM | 428   | >FLT3-D835I-ICDFGLARIIM | 501   | 73    |
| >FLT3-D835I-KICDFGLARD  | 15591 | >FLT3-D835I-KICDFGLARI  | 155   | 15436 |
| >FLT3-D835I-KICDFGLARD  | 13579 | >FLT3-D835I-KICDFGLARI  | 66    | 13513 |
| >FLT3-D835I-KICDFGLARD  | 17356 | >FLT3-D835I-KICDFGLARI  | 250   | 17106 |
| >FLT3-D835I-KICDFGLARD  | 16074 | >FLT3-D835I-KICDFGLARI  | 48    | 16026 |
| >FLT3-D835I-KICDFGLARD  | 25897 | >FLT3-D835I-KICDFGLARI  | 253   | 25644 |
| >FLT3-D835I-KICDFGLARD  | 14521 | >FLT3-D835I-KICDFGLARI  | 257   | 14264 |
| >FLT3-D835I-KICDFGLARD  | 109   | >FLT3-D835I-KICDFGLARII | 96    | 13    |
| >FLT3-D835\NDIMSDSNYV   | 3034  | >FLT3-D835\NIMSDSNYV    | 40    | 2994  |
| >FLT3-D835\NDIMSDSNYV\  | 224   | >FLT3-D835\NIMSDSNYV\   | 35    | 189   |
| >FLT3-D835\NDIMSDSNYV   | 200   | >FLT3-D835\NIMSDSNYV    | 7     | 193   |
| >FLT3-D835\NDIMSDSNYV\  | 84    | >FLT3-D835\NIMSDSNYV\   | 21    | 63    |
| >FLT3-D835\NDIMSDSNYV   | 621   | >FLT3-D835\NIMSDSNYV    | 10    | 611   |
| >FLT3-D835\NDIMSDSNYV\  | 282   | >FLT3-D835\NIMSDSNYV\   | 63    | 219   |
| >FLT3-D835\NDIMSDSNYV   | 710   | >FLT3-D835\NIMSDSNYV    | 26    | 684   |
| >FLT3-D835\NDIMSDSNYV\  | 235   | >FLT3-D835\NIMSDSNYV\   | 63    | 172   |
| >FLT3-D835\NDIMSDSNYV   | 324   | >FLT3-D835\NIMSDSNYV    | 42    | 282   |
| >FLT3-D835\NDIMSDSNYV\  | 693   | >FLT3-D835\NIMSDSNYV\   | 92    | 601   |
| >FLT3-D835\NDIMSDSNYV   | 433   | >FLT3-D835\NIMSDSNYV    | 15    | 418   |
| >FLT3-D835\NDIMSDSNYV\  | 438   | >FLT3-D835\NIMSDSNYV\   | 21    | 417   |
| >FLT3-D835\NDIMSDSNYV   | 424   | >FLT3-D835\NIMSDSNYV    | 159   | 265   |

|                         |      |                         |      |      |
|-------------------------|------|-------------------------|------|------|
| >FLT3-D835N DIMSDSNV    | 8    | >FLT3-D835N NIMSDSNV    | 5    | 3    |
| >FLT3-D835N DIMSDSNV\   | 16   | >FLT3-D835N NIMSDSNV\   | 7    | 9    |
| >FLT3-D835N DIMSDSNV    | 355  | >FLT3-D835N NIMSDSNV    | 58   | 297  |
| >FLT3-D835N DIMSDSNV\   | 492  | >FLT3-D835N NIMSDSNV\   | 91   | 401  |
| >FLT3-D835N DIMSDSNY    | 133  | >FLT3-D835N NIMSDSNY    | 881  | 748  |
| >FLT3-D835N DIMSDSNY    | 16   | >FLT3-D835N NIMSDSNY    | 103  | 87   |
| >FLT3-D835N DIMSDSNY    | 258  | >FLT3-D835N NIMSDSNY    | 1060 | 802  |
| >FLT3-D835N DIMSDSNY    | 730  | >FLT3-D835N NIMSDSNY    | 390  | 340  |
| >FLT3-D835N DIMSDSNY    | 251  | >FLT3-D835N NIMSDSNY    | 166  | 85   |
| >FLT3-D835N DIMSDSNV\   | 1399 | >FLT3-D835N NIMSDSNV\   | 351  | 1048 |
| >FLT3-D835N DIMSDSNV\   | 74   | >FLT3-D835N NIMSDSNV\   | 366  | 292  |
| >FLT3-D835N DIMSDSNY    | 472  | >FLT3-D835N NIMSDSNY    | 631  | 159  |
| >FLT3-D835N DIMSDSNV\   | 16   | >FLT3-D835N NIMSDSNV\   | 18   | 2    |
| >FLT3-D835N DIMSDSNV    | 17   | >FLT3-D835N NIMSDSNV    | 12   | 5    |
| >FLT3-D835N DIMSDSNV\   | 139  | >FLT3-D835N NIMSDSNV\   | 65   | 74   |
| >FLT3-D835N DIMSDSNV    | 7    | >FLT3-D835N NIMSDSNV    | 7    | 0    |
| >FLT3-D835N DIMSDSNV\   | 22   | >FLT3-D835N NIMSDSNV\   | 20   | 2    |
| >FLT3-D835N DIMSDSNY    | 3826 | >FLT3-D835N NIMSDSNY    | 350  | 3476 |
| >FLT3-D835N DIMSDSNY    | 373  | >FLT3-D835N NIMSDSNY    | 120  | 253  |
| >FLT3-D835N DIMSDSNY    | 606  | >FLT3-D835N NIMSDSNY    | 465  | 141  |
| >FLT3-D835N DIMSDSNV\   | 525  | >FLT3-D835N NIMSDSNV\   | 152  | 373  |
| >FLT3-D835N RDIMSDSNY   | 1670 | >FLT3-D835N RNIMSDSNY   | 421  | 1249 |
| >FLT3-D835N RDIMSDSNY   | 1403 | >FLT3-D835N RNIMSDSNY   | 230  | 1173 |
| >FLT3-D835N RDIMSDSNY   | 384  | >FLT3-D835N RNIMSDSNY   | 76   | 308  |
| >FLT3-D835N RDIMSDSNY   | 662  | >FLT3-D835N RNIMSDSNY   | 90   | 572  |
| >FLT3-D835N RDIMSDSNY\  | 207  | >FLT3-D835N RNIMSDSNY\  | 9620 | 9413 |
| >FLT3-D835N RDIMSDSNY   | 551  | >FLT3-D835N RNIMSDSNY   | 240  | 311  |
| >FLT3-D835N RDIMSDSNY\  | 121  | >FLT3-D835N RNIMSDSNY\  | 6776 | 6655 |
| >FLT3-D835N RDIMSDSNY\  | 47   | >FLT3-D835N RNIMSDSNY\  | 2295 | 2248 |
| >FLT3-D835N ARDIMSDSN\  | 207  | >FLT3-D835N ARNIMSDSN\  | 275  | 68   |
| >FLT3-D835N ARDIMSDSN\  | 1382 | >FLT3-D835N ARNIMSDSN\  | 139  | 1243 |
| >FLT3-D835N ARDIMSDSN\  | 185  | >FLT3-D835N ARNIMSDSN\  | 93   | 92   |
| >FLT3-D835N LARDIMSDSN  | 168  | >FLT3-D835N LARNIMSDSN  | 139  | 29   |
| >FLT3-D835N LARDIMSDSN  | 146  | >FLT3-D835N LARNIMSDSN  | 147  | 1    |
| >FLT3-D835N LARDIMSDSN  | 119  | >FLT3-D835N LARNIMSDSN  | 46   | 73   |
| >FLT3-D835N LARDIMSDSN  | 5    | >FLT3-D835N LARNIMSDSN  | 7    | 2    |
| >FLT3-D835N LARDIMSDSN  | 106  | >FLT3-D835N LARNIMSDSN  | 142  | 36   |
| >FLT3-D835N LARDIMSDSN  | 12   | >FLT3-D835N LARNIMSDSN  | 8    | 4    |
| >FLT3-D835N CDFGLARDI   | 84   | >FLT3-D835N CDFGLARNI   | 72   | 12   |
| >FLT3-D835N ICDFGLARDI\ | 428  | >FLT3-D835N ICDFGLARNI\ | 248  | 180  |
| >FLT3-D835N KICDFGLARD  | 997  | >FLT3-D835N KICDFGLARN  | 306  | 691  |
| >FLT3-D835N KICDFGLARD  | 109  | >FLT3-D835N KICDFGLARN  | 98   | 11   |
| >FLT3-D835V DIMSDSNV    | 3034 | >FLT3-D835V VIMSDSNV    | 17   | 3017 |

|                        |       |                        |       |       |
|------------------------|-------|------------------------|-------|-------|
| >FLT3-D835V DIMSDSNV\  | 224   | >FLT3-D835V VIMSDSNV\  | 32    | 192   |
| >FLT3-D835V DIMSDSNV   | 200   | >FLT3-D835V VIMSDSNV   | 4     | 196   |
| >FLT3-D835V DIMSDSNV\  | 84    | >FLT3-D835V VIMSDSNV\  | 25    | 59    |
| >FLT3-D835V DIMSDSNV   | 621   | >FLT3-D835V VIMSDSNV   | 6     | 615   |
| >FLT3-D835V DIMSDSNV\  | 282   | >FLT3-D835V VIMSDSNV\  | 77    | 205   |
| >FLT3-D835V DIMSDSNV   | 710   | >FLT3-D835V VIMSDSNV   | 10    | 700   |
| >FLT3-D835V DIMSDSNV\  | 235   | >FLT3-D835V VIMSDSNV\  | 64    | 171   |
| >FLT3-D835V DIMSDSNV   | 324   | >FLT3-D835V VIMSDSNV   | 6     | 318   |
| >FLT3-D835V DIMSDSNV\  | 693   | >FLT3-D835V VIMSDSNV\  | 11    | 682   |
| >FLT3-D835V DIMSDSNV   | 433   | >FLT3-D835V VIMSDSNV   | 7     | 426   |
| >FLT3-D835V DIMSDSNV\  | 438   | >FLT3-D835V VIMSDSNV\  | 10    | 428   |
| >FLT3-D835V DIMSDSNV   | 424   | >FLT3-D835V VIMSDSNV   | 25    | 399   |
| >FLT3-D835V DIMSDSNV\  | 1324  | >FLT3-D835V VIMSDSNV\  | 57    | 1267  |
| >FLT3-D835V DIMSDSNV   | 8     | >FLT3-D835V VIMSDSNV   | 2     | 6     |
| >FLT3-D835V DIMSDSNV\  | 16    | >FLT3-D835V VIMSDSNV\  | 3     | 13    |
| >FLT3-D835V DIMSDSNV   | 355   | >FLT3-D835V VIMSDSNV   | 5     | 350   |
| >FLT3-D835V DIMSDSNV\  | 492   | >FLT3-D835V VIMSDSNV\  | 7     | 485   |
| >FLT3-D835V DIMSDSNY   | 12629 | >FLT3-D835V VIMSDSNY   | 495   | 12134 |
| >FLT3-D835V DIMSDSNV\  | 7671  | >FLT3-D835V VIMSDSNV\  | 210   | 7461  |
| >FLT3-D835V DIMSDSNY   | 133   | >FLT3-D835V VIMSDSNY   | 10599 | 10466 |
| >FLT3-D835V DIMSDSNY   | 16    | >FLT3-D835V VIMSDSNY   | 128   | 112   |
| >FLT3-D835V DIMSDSNY   | 258   | >FLT3-D835V VIMSDSNY   | 3403  | 3145  |
| >FLT3-D835V DIMSDSNY   | 730   | >FLT3-D835V VIMSDSNY   | 148   | 582   |
| >FLT3-D835V DIMSDSNY   | 251   | >FLT3-D835V VIMSDSNY   | 26    | 225   |
| >FLT3-D835V DIMSDSNV\  | 1399  | >FLT3-D835V VIMSDSNV\  | 105   | 1294  |
| >FLT3-D835V DIMSDSNV\  | 74    | >FLT3-D835V VIMSDSNV\  | 1533  | 1459  |
| >FLT3-D835V DIMSDSNY   | 472   | >FLT3-D835V VIMSDSNY   | 4669  | 4197  |
| >FLT3-D835V DIMSDSNV\  | 16    | >FLT3-D835V VIMSDSNV\  | 108   | 92    |
| >FLT3-D835V DIMSDSNV   | 17    | >FLT3-D835V VIMSDSNV   | 54    | 37    |
| >FLT3-D835V DIMSDSNV\  | 139   | >FLT3-D835V VIMSDSNV\  | 369   | 230   |
| >FLT3-D835V DIMSDSNV   | 7     | >FLT3-D835V VIMSDSNV   | 72    | 65    |
| >FLT3-D835V DIMSDSNV\  | 22    | >FLT3-D835V VIMSDSNV\  | 401   | 379   |
| >FLT3-D835V DIMSDSNY   | 6743  | >FLT3-D835V VIMSDSNY   | 285   | 6458  |
| >FLT3-D835V DIMSDSNY   | 3826  | >FLT3-D835V VIMSDSNY   | 141   | 3685  |
| >FLT3-D835V DIMSDSNY   | 373   | >FLT3-D835V VIMSDSNY   | 186   | 187   |
| >FLT3-D835V DIMSDSNY   | 2433  | >FLT3-D835V VIMSDSNY   | 231   | 2202  |
| >FLT3-D835V DIMSDSNY   | 8497  | >FLT3-D835V VIMSDSNY   | 435   | 8062  |
| >FLT3-D835V DIMSDSNV\  | 525   | >FLT3-D835V VIMSDSNV\  | 311   | 214   |
| >FLT3-D835V RDIMSDSNY\ | 14956 | >FLT3-D835V RVIMSDSNY\ | 283   | 14673 |
| >FLT3-D835V RDIMSDSNY\ | 6302  | >FLT3-D835V RVIMSDSNY\ | 147   | 6155  |
| >FLT3-D835V RDIMSDSNY\ | 8740  | >FLT3-D835V RVIMSDSNY\ | 70    | 8670  |
| >FLT3-D835V RDIMSDSNY\ | 15234 | >FLT3-D835V RVIMSDSNY\ | 228   | 15006 |
| >FLT3-D835V RDIMSDSNY\ | 4140  | >FLT3-D835V RVIMSDSNY\ | 78    | 4062  |

|                         |       |                         |       |       |
|-------------------------|-------|-------------------------|-------|-------|
| >FLT3-D835V RDIMSDSN\   | 7541  | >FLT3-D835V RVIMSDSN\   | 67    | 7474  |
| >FLT3-D835V RDIMSDSN\   | 12877 | >FLT3-D835V RVIMSDSN\   | 128   | 12749 |
| >FLT3-D835V RDIMSDSN\   | 14848 | >FLT3-D835V RVIMSDSN\   | 275   | 14573 |
| >FLT3-D835V RDIMSDSN\   | 15003 | >FLT3-D835V RVIMSDSN\   | 134   | 14869 |
| >FLT3-D835V RDIMSDSN\   | 13969 | >FLT3-D835V RVIMSDSN\   | 169   | 13800 |
| >FLT3-D835V RDIMSDSN\   | 17244 | >FLT3-D835V RVIMSDSN\   | 355   | 16889 |
| >FLT3-D835V RDIMSDSN\   | 21663 | >FLT3-D835V RVIMSDSN\   | 81    | 21582 |
| >FLT3-D835V RDIMSDSN\   | 23091 | >FLT3-D835V RVIMSDSN\   | 122   | 22969 |
| >FLT3-D835V RDIMSDSN    | 22586 | >FLT3-D835V RVIMSDSN    | 299   | 22287 |
| >FLT3-D835V RDIMSDSN    | 8085  | >FLT3-D835V RVIMSDSN    | 22    | 8063  |
| >FLT3-D835V RDIMSDSN    | 3416  | >FLT3-D835V RVIMSDSN    | 105   | 3311  |
| >FLT3-D835V RDIMSDSN    | 6167  | >FLT3-D835V RVIMSDSN    | 231   | 5936  |
| >FLT3-D835V RDIMSDSN\   | 12158 | >FLT3-D835V RVIMSDSN\   | 190   | 11968 |
| >FLT3-D835V RDIMSDSN    | 1670  | >FLT3-D835V RVIMSDSN    | 53    | 1617  |
| >FLT3-D835V RDIMSDSN\   | 14270 | >FLT3-D835V RVIMSDSN\   | 181   | 14089 |
| >FLT3-D835V RDIMSDSN\   | 16215 | >FLT3-D835V RVIMSDSN\   | 182   | 16033 |
| >FLT3-D835V RDIMSDSN    | 5320  | >FLT3-D835V RVIMSDSN    | 121   | 5199  |
| >FLT3-D835V RDIMSDSN    | 1403  | >FLT3-D835V RVIMSDSN    | 59    | 1344  |
| >FLT3-D835V RDIMSDSN    | 384   | >FLT3-D835V RVIMSDSN    | 115   | 269   |
| >FLT3-D835V RDIMSDSN    | 662   | >FLT3-D835V RVIMSDSN    | 5     | 657   |
| >FLT3-D835V RDIMSDSN    | 4540  | >FLT3-D835V RVIMSDSN    | 434   | 4106  |
| >FLT3-D835V RDIMSDSN\   | 207   | >FLT3-D835V RVIMSDSN\   | 27239 | 27032 |
| >FLT3-D835V RDIMSDSN    | 18547 | >FLT3-D835V RVIMSDSN    | 325   | 18222 |
| >FLT3-D835V RDIMSDSN    | 551   | >FLT3-D835V RVIMSDSN    | 44    | 507   |
| >FLT3-D835V RDIMSDSN\   | 121   | >FLT3-D835V RVIMSDSN\   | 21988 | 21867 |
| >FLT3-D835V RDIMSDSN\   | 47    | >FLT3-D835V RVIMSDSN\   | 13826 | 13779 |
| >FLT3-D835V ARDIMSDSN\  | 207   | >FLT3-D835V ARVIMSDSN\  | 173   | 34    |
| >FLT3-D835V ARDIMSDSN\  | 1382  | >FLT3-D835V ARVIMSDSN\  | 115   | 1267  |
| >FLT3-D835V ARDIMSDSN\  | 185   | >FLT3-D835V ARVIMSDSN\  | 57    | 128   |
| >FLT3-D835V LARDIMSDSN  | 168   | >FLT3-D835V LARVIMSDSN  | 189   | 21    |
| >FLT3-D835V LARDIMSDSN  | 146   | >FLT3-D835V LARVIMSDSN  | 259   | 113   |
| >FLT3-D835V LARDIMSDSN  | 119   | >FLT3-D835V LARVIMSDSN  | 89    | 30    |
| >FLT3-D835V LARDIMSDSN  | 5     | >FLT3-D835V LARVIMSDSN  | 6     | 1     |
| >FLT3-D835V LARDIMSDSN  | 106   | >FLT3-D835V LARVIMSDSN  | 180   | 74    |
| >FLT3-D835V LARDIMSDSN  | 12    | >FLT3-D835V LARVIMSDSN  | 17    | 5     |
| >FLT3-D835V CDFGLARDI   | 970   | >FLT3-D835V CDFGLARVI   | 378   | 592   |
| >FLT3-D835V CDFGLARDI   | 2057  | >FLT3-D835V CDFGLARVI   | 450   | 1607  |
| >FLT3-D835V CDFGLARDI   | 1651  | >FLT3-D835V CDFGLARVI   | 329   | 1322  |
| >FLT3-D835V CDFGLARD    | 22993 | >FLT3-D835V CDFGLARV    | 141   | 22852 |
| >FLT3-D835V CDFGLARDI   | 84    | >FLT3-D835V CDFGLARVI   | 47    | 37    |
| >FLT3-D835V ICDFGLARD   | 29870 | >FLT3-D835V ICDFGLARV   | 395   | 29475 |
| >FLT3-D835V ICDFGLARDIM | 428   | >FLT3-D835V ICDFGLARVIN | 543   | 115   |
| >FLT3-D835V KICDFGLARD  | 21510 | >FLT3-D835V KICDFGLARV  | 100   | 21410 |



|                        |       |                        |      |       |
|------------------------|-------|------------------------|------|-------|
| >FLT3-D835V KICDFGLARD | 15591 | >FLT3-D835V KICDFGLARV | 81   | 15510 |
| >FLT3-D835V KICDFGLARD | 13579 | >FLT3-D835V KICDFGLARV | 26   | 13553 |
| >FLT3-D835V KICDFGLARD | 17356 | >FLT3-D835V KICDFGLARV | 78   | 17278 |
| >FLT3-D835V KICDFGLARD | 16074 | >FLT3-D835V KICDFGLARV | 6    | 16068 |
| >FLT3-D835V KICDFGLARD | 997   | >FLT3-D835V KICDFGLARV | 282  | 715   |
| >FLT3-D835V KICDFGLARD | 25536 | >FLT3-D835V KICDFGLARV | 179  | 25357 |
| >FLT3-D835V KICDFGLARD | 26345 | >FLT3-D835V KICDFGLARV | 474  | 25871 |
| >FLT3-D835V KICDFGLARD | 25897 | >FLT3-D835V KICDFGLARV | 5    | 25892 |
| >FLT3-D835V KICDFGLARD | 109   | >FLT3-D835V KICDFGLARV | 76   | 33    |
| >FLT3-D835Y DIMSDSNV   | 3034  | >FLT3-D835Y YIMSDSNV   | 7    | 3027  |
| >FLT3-D835Y DIMSDSNV   | 224   | >FLT3-D835Y YIMSDSNV   | 7    | 217   |
| >FLT3-D835Y DIMSDSNV   | 200   | >FLT3-D835Y YIMSDSNV   | 2    | 198   |
| >FLT3-D835Y DIMSDSNV   | 84    | >FLT3-D835Y YIMSDSNV   | 7    | 77    |
| >FLT3-D835Y DIMSDSNV   | 621   | >FLT3-D835Y YIMSDSNV   | 3    | 618   |
| >FLT3-D835Y DIMSDSNV   | 282   | >FLT3-D835Y YIMSDSNV   | 15   | 267   |
| >FLT3-D835Y DIMSDSNV   | 710   | >FLT3-D835Y YIMSDSNV   | 4    | 706   |
| >FLT3-D835Y DIMSDSNV   | 235   | >FLT3-D835Y YIMSDSNV   | 19   | 216   |
| >FLT3-D835Y DIMSDSNV   | 324   | >FLT3-D835Y YIMSDSNV   | 2    | 322   |
| >FLT3-D835Y DIMSDSNV   | 693   | >FLT3-D835Y YIMSDSNV   | 3    | 690   |
| >FLT3-D835Y DIMSDSNV   | 433   | >FLT3-D835Y YIMSDSNV   | 3    | 430   |
| >FLT3-D835Y DIMSDSNV   | 438   | >FLT3-D835Y YIMSDSNV   | 3    | 435   |
| >FLT3-D835Y DIMSDSNV   | 424   | >FLT3-D835Y YIMSDSNV   | 9    | 415   |
| >FLT3-D835Y DIMSDSNV   | 1324  | >FLT3-D835Y YIMSDSNV   | 14   | 1310  |
| >FLT3-D835Y DIMSDSNV   | 8     | >FLT3-D835Y YIMSDSNV   | 2    | 6     |
| >FLT3-D835Y DIMSDSNV   | 16    | >FLT3-D835Y YIMSDSNV   | 2    | 14    |
| >FLT3-D835Y DIMSDSNV   | 355   | >FLT3-D835Y YIMSDSNV   | 2    | 353   |
| >FLT3-D835Y DIMSDSNV   | 492   | >FLT3-D835Y YIMSDSNV   | 3    | 489   |
| >FLT3-D835Y DIMSDSNV   | 133   | >FLT3-D835Y YIMSDSNV   | 226  | 93    |
| >FLT3-D835Y DIMSDSNV   | 16    | >FLT3-D835Y YIMSDSNV   | 15   | 1     |
| >FLT3-D835Y DIMSDSNV   | 258   | >FLT3-D835Y YIMSDSNV   | 1702 | 1444  |
| >FLT3-D835Y DIMSDSNV   | 730   | >FLT3-D835Y YIMSDSNV   | 24   | 706   |
| >FLT3-D835Y DIMSDSNV   | 251   | >FLT3-D835Y YIMSDSNV   | 91   | 160   |
| >FLT3-D835Y DIMSDSNV   | 1399  | >FLT3-D835Y YIMSDSNV   | 128  | 1271  |
| >FLT3-D835Y DIMSDSNV   | 74    | >FLT3-D835Y YIMSDSNV   | 490  | 416   |
| >FLT3-D835Y DIMSDSNV   | 472   | >FLT3-D835Y YIMSDSNV   | 350  | 122   |
| >FLT3-D835Y DIMSDSNV   | 16    | >FLT3-D835Y YIMSDSNV   | 11   | 5     |
| >FLT3-D835Y DIMSDSNV   | 17    | >FLT3-D835Y YIMSDSNV   | 12   | 5     |
| >FLT3-D835Y DIMSDSNV   | 139   | >FLT3-D835Y YIMSDSNV   | 42   | 97    |
| >FLT3-D835Y DIMSDSNV   | 7     | >FLT3-D835Y YIMSDSNV   | 6    | 1     |
| >FLT3-D835Y DIMSDSNV   | 22    | >FLT3-D835Y YIMSDSNV   | 13   | 9     |
| >FLT3-D835Y DIMSDSNV   | 6743  | >FLT3-D835Y YIMSDSNV   | 134  | 6609  |
| >FLT3-D835Y DIMSDSNV   | 3826  | >FLT3-D835Y YIMSDSNV   | 56   | 3770  |
| >FLT3-D835Y DIMSDSNV   | 15261 | >FLT3-D835Y YIMSDSNV   | 455  | 14806 |

|                         |       |                         |       |       |
|-------------------------|-------|-------------------------|-------|-------|
| >FLT3-D835Y DIMSDSNY    | 373   | >FLT3-D835Y YIMSDSNY    | 39    | 334   |
| >FLT3-D835Y DIMSDSNY    | 2433  | >FLT3-D835Y YIMSDSNY    | 47    | 2386  |
| >FLT3-D835Y DIMSDSNYV\  | 8262  | >FLT3-D835Y YIMSDSNYV\  | 300   | 7962  |
| >FLT3-D835Y DIMSDSNY    | 8497  | >FLT3-D835Y YIMSDSNY    | 157   | 8340  |
| >FLT3-D835Y DIMSDSNY    | 606   | >FLT3-D835Y YIMSDSNY    | 64    | 542   |
| >FLT3-D835Y DIMSDSNYV\  | 5917  | >FLT3-D835Y YIMSDSNYV\  | 191   | 5726  |
| >FLT3-D835Y DIMSDSNY    | 10280 | >FLT3-D835Y YIMSDSNY    | 398   | 9882  |
| >FLT3-D835Y DIMSDSNYV\  | 525   | >FLT3-D835Y YIMSDSNYV\  | 139   | 386   |
| >FLT3-D835Y RDIMSDSNY\  | 25997 | >FLT3-D835Y RYIMSDSNYV  | 57    | 25940 |
| >FLT3-D835Y RDIMSDSNY\  | 27315 | >FLT3-D835Y RYIMSDSNYV  | 136   | 27179 |
| >FLT3-D835Y RDIMSDSNY\  | 23080 | >FLT3-D835Y RYIMSDSNYV  | 254   | 22826 |
| >FLT3-D835Y RDIMSDSNY\  | 24559 | >FLT3-D835Y RYIMSDSNYV  | 66    | 24493 |
| >FLT3-D835Y RDIMSDSNY\  | 25519 | >FLT3-D835Y RYIMSDSNYV  | 136   | 25383 |
| >FLT3-D835Y RDIMSDSNY   | 6167  | >FLT3-D835Y RYIMSDSNY   | 210   | 5957  |
| >FLT3-D835Y RDIMSDSNY\  | 12158 | >FLT3-D835Y RYIMSDSNYV  | 252   | 11906 |
| >FLT3-D835Y RDIMSDSNY   | 1670  | >FLT3-D835Y RYIMSDSNY   | 64    | 1606  |
| >FLT3-D835Y RDIMSDSNY   | 5320  | >FLT3-D835Y RYIMSDSNY   | 312   | 5008  |
| >FLT3-D835Y RDIMSDSNY   | 384   | >FLT3-D835Y RYIMSDSNY   | 193   | 191   |
| >FLT3-D835Y RDIMSDSNY\  | 207   | >FLT3-D835Y RYIMSDSNYV  | 21954 | 21747 |
| >FLT3-D835Y RDIMSDSNY   | 8443  | >FLT3-D835Y RYIMSDSNY   | 496   | 7947  |
| >FLT3-D835Y RDIMSDSNY\  | 23251 | >FLT3-D835Y RYIMSDSNYV  | 100   | 23151 |
| >FLT3-D835Y RDIMSDSNY\  | 121   | >FLT3-D835Y RYIMSDSNYV  | 21770 | 21649 |
| >FLT3-D835Y RDIMSDSNY\  | 47    | >FLT3-D835Y RYIMSDSNYV  | 14598 | 14551 |
| >FLT3-D835Y VKICDFGLAR\ | 34637 | >FLT3-D835Y VKICDFGLAR' | 332   | 34305 |
| >FLT3-D835Y VKICDFGLAR\ | 26510 | >FLT3-D835Y VKICDFGLAR' | 388   | 26122 |
| >FLT3-D835Y VKICDFGLAR\ | 30174 | >FLT3-D835Y VKICDFGLAR' | 324   | 29850 |
| >FLT3-D835Y VKICDFGLAR\ | 19748 | >FLT3-D835Y VKICDFGLAR' | 54    | 19694 |
| >FLT3-D835Y ARDIMSDSNY\ | 207   | >FLT3-D835Y ARYIMSDSNY  | 52    | 155   |
| >FLT3-D835Y ARDIMSDSNY\ | 1382  | >FLT3-D835Y ARYIMSDSNY  | 31    | 1351  |
| >FLT3-D835Y ARDIMSDSNY\ | 7381  | >FLT3-D835Y ARYIMSDSNY  | 263   | 7118  |
| >FLT3-D835Y ARDIMSDSNY\ | 185   | >FLT3-D835Y ARYIMSDSNY  | 36    | 149   |
| >FLT3-D835Y ARDIMSDSNY\ | 2239  | >FLT3-D835Y ARYIMSDSNY  | 168   | 2071  |
| >FLT3-D835Y LARDIMSDSN  | 168   | >FLT3-D835Y LARYIMSDSN  | 95    | 73    |
| >FLT3-D835Y LARDIMSDSN  | 146   | >FLT3-D835Y LARYIMSDSN  | 141   | 5     |
| >FLT3-D835Y LARDIMSDSN  | 119   | >FLT3-D835Y LARYIMSDSN  | 42    | 77    |
| >FLT3-D835Y LARDIMSDSN  | 5     | >FLT3-D835Y LARYIMSDSN  | 8     | 3     |
| >FLT3-D835Y LARDIMSDSN  | 106   | >FLT3-D835Y LARYIMSDSN  | 137   | 31    |
| >FLT3-D835Y LARDIMSDSN  | 12    | >FLT3-D835Y LARYIMSDSN  | 10    | 2     |
| >FLT3-D835Y CDFGLARDI   | 970   | >FLT3-D835Y CDFGLARYI   | 180   | 790   |
| >FLT3-D835Y CDFGLARD    | 38205 | >FLT3-D835Y CDFGLARY    | 415   | 37790 |
| >FLT3-D835Y CDFGLARDI   | 84    | >FLT3-D835Y CDFGLARYI   | 71    | 13    |
| >FLT3-D835Y ICDFGLARD   | 23535 | >FLT3-D835Y ICDFGLARY   | 433   | 23102 |
| >FLT3-D835Y ICDFGLARD   | 29492 | >FLT3-D835Y ICDFGLARY   | 328   | 29164 |

|                         |       |                         |       |       |
|-------------------------|-------|-------------------------|-------|-------|
| >FLT3-D835Y ICDFGLARD   | 22037 | >FLT3-D835Y ICDFGLARY   | 123   | 21914 |
| >FLT3-D835Y ICDFGLARDIM | 428   | >FLT3-D835Y ICDFGLARYIM | 488   | 60    |
| >FLT3-D835Y KICDFGLARD  | 1817  | >FLT3-D835Y KICDFGLARYI | 185   | 1632  |
| >FLT3-D835Y KICDFGLARD  | 997   | >FLT3-D835Y KICDFGLARYI | 40    | 957   |
| >FLT3-D835Y KICDFGLARD  | 14395 | >FLT3-D835Y KICDFGLARY  | 102   | 14293 |
| >FLT3-D835Y KICDFGLARD  | 33996 | >FLT3-D835Y KICDFGLARY  | 326   | 33670 |
| >FLT3-D835Y KICDFGLARD  | 3284  | >FLT3-D835Y KICDFGLARYI | 419   | 2865  |
| >FLT3-D835Y KICDFGLARD  | 32006 | >FLT3-D835Y KICDFGLARY  | 374   | 31632 |
| >FLT3-D835Y KICDFGLARD  | 109   | >FLT3-D835Y KICDFGLARYI | 267   | 158   |
| >FLT3-D835Y KICDFGLARD  | 24872 | >FLT3-D835Y KICDFGLARY  | 38    | 24834 |
| >FLT3-D835Y KICDFGLARD  | 19581 | >FLT3-D835Y KICDFGLARY  | 183   | 19398 |
| >FLT3-D835Y KICDFGLARD  | 19830 | >FLT3-D835Y KICDFGLARY  | 75    | 19755 |
| >FLT3-E598G EYDLKWEF    | 538   | >FLT3-E598G GYDLKWEF    | 255   | 283   |
| >FLT3-E598G EYDLKWEF    | 425   | >FLT3-E598G GYDLKWEF    | 801   | 376   |
| >FLT3-E598G EYDLKWEF    | 72    | >FLT3-E598G GYDLKWEF    | 25    | 47    |
| >FLT3-E598G EYDLKWEFPF  | 148   | >FLT3-E598G GYDLKWEFPF  | 1185  | 1037  |
| >FLT3-E598G EYDLKWEFPF  | 33    | >FLT3-E598G GYDLKWEFPF  | 116   | 83    |
| >FLT3-E598G YEYDLKWE    | 239   | >FLT3-E598G YGYDLKWE    | 39488 | 39249 |
| >FLT3-E598G YEYDLKWEF   | 88    | >FLT3-E598G YGYDLKWEF   | 22383 | 22295 |
| >FLT3-E598G YEYDLKWEFF  | 337   | >FLT3-E598G YGYDLKWEFF  | 28714 | 28377 |
| >FLT3-E598G YEYDLKWEF   | 431   | >FLT3-E598G YGYDLKWEF   | 556   | 125   |
| >FLT3-E598G YEYDLKWEF   | 371   | >FLT3-E598G YGYDLKWEF   | 365   | 6     |
| >FLT3-E598G YEYDLKWEFF  | 388   | >FLT3-E598G YGYDLKWEFF  | 43    | 345   |
| >FLT3-E598G YEYDLKWEFF  | 162   | >FLT3-E598G YGYDLKWEFF  | 384   | 222   |
| >FLT3-E598G YEYDLKWEFF  | 165   | >FLT3-E598G YGYDLKWEFF  | 64    | 101   |
| >FLT3-E598G YEYDLKWEF   | 72    | >FLT3-E598G YGYDLKWEF   | 364   | 292   |
| >FLT3-E598G YEYDLKWEF   | 8622  | >FLT3-E598G YGYDLKWEF   | 82    | 8540  |
| >FLT3-E598G YEYDLKWEF   | 3     | >FLT3-E598G YGYDLKWEF   | 1217  | 1214  |
| >FLT3-E598G YEYDLKWEFF  | 35    | >FLT3-E598G YGYDLKWEFF  | 16221 | 16186 |
| >FLT3-E598G YEYDLKWEF   | 1250  | >FLT3-E598G YGYDLKWEF   | 118   | 1132  |
| >FLT3-E598G YEYDLKWEF   | 49    | >FLT3-E598G YGYDLKWEF   | 21078 | 21029 |
| >FLT3-E598G YEYDLKWEF   | 32    | >FLT3-E598G YGYDLKWEF   | 18575 | 18543 |
| >FLT3-E598G YEYDLKWEFF  | 424   | >FLT3-E598G YGYDLKWEFF  | 39033 | 38609 |
| >FLT3-E598G YEYDLKWEF   | 165   | >FLT3-E598G YGYDLKWEF   | 19585 | 19420 |
| >FLT3-E598G YEYDLKWEF   | 39    | >FLT3-E598G YGYDLKWEF   | 27830 | 27791 |
| >FLT3-E598G YEYDLKWEF   | 30    | >FLT3-E598G YGYDLKWEF   | 26214 | 26184 |
| >FLT3-E598G YEYDLKWEFF  | 113   | >FLT3-E598G YGYDLKWEFF  | 34609 | 34496 |
| >FLT3-E598G YEYDLKWEFF  | 33    | >FLT3-E598G YGYDLKWEFF  | 28    | 5     |
| >FLT3-E598G EYFYVDFREYI | 313   | >FLT3-E598G EYFYVDFREYI | 3876  | 3563  |
| >FLT3-E598G EYFYDLKWEF  | 94    | >FLT3-E598G EYGYDLKWEI  | 103   | 9     |
| >FLT3-E598G EYFYDLKWEF  | 147   | >FLT3-E598G EYGYDLKWEI  | 142   | 5     |
| >FLT3-E598G EYFYDLKW    | 1013  | >FLT3-E598G EYGYDLKW    | 213   | 800   |
| >FLT3-E598G EYFYDLKWEF  | 33    | >FLT3-E598G EYGYDLKWEI  | 16    | 17    |

|                         |      |                        |      |      |
|-------------------------|------|------------------------|------|------|
| >FLT3-E598G EYEYDLKWEF  | 1895 | >FLT3-E598G EYGYDLKWEI | 453  | 1442 |
| >FLT3-E598G REYEYDLKWE  | 889  | >FLT3-E598G REYGYDLKWI | 412  | 477  |
| >FLT3-E598G REYEYDLKWE  | 29   | >FLT3-E598G REYGYDLKWI | 62   | 33   |
| >FLT3-E598G REYEYDLKW   | 39   | >FLT3-E598G REYGYDLKW  | 124  | 85   |
| >FLT3-E598G REYEYDLKW   | 117  | >FLT3-E598G REYGYDLKW  | 260  | 143  |
| >FLT3-E598G REYEYDLKWE  | 8    | >FLT3-E598G REYGYDLKWI | 10   | 2    |
| >FLT3-E598G REYEYDLKW   | 559  | >FLT3-E598G REYGYDLKW  | 312  | 247  |
| >FLT3-E598G REYEYDLKWE  | 23   | >FLT3-E598G REYGYDLKWI | 15   | 8    |
| >FLT3-E598G REYEYDLKW   | 301  | >FLT3-E598G REYGYDLKW  | 327  | 26   |
| >FLT3-E598G REYEYDLKWE  | 17   | >FLT3-E598G REYGYDLKWI | 19   | 2    |
| >FLT3-E598G REYEYDLKW   | 165  | >FLT3-E598G REYGYDLKW  | 403  | 238  |
| >FLT3-E598G REYEYDLKWE  | 344  | >FLT3-E598G REYGYDLKWI | 711  | 367  |
| >FLT3-E598G REYEYDLKW   | 12   | >FLT3-E598G REYGYDLKW  | 15   | 3    |
| >FLT3-E598G REYEYDLKWE  | 22   | >FLT3-E598G REYGYDLKWI | 25   | 3    |
| >FLT3-E598G REYEYDLKWE  | 678  | >FLT3-E598G REYGYDLKWI | 482  | 196  |
| >FLT3-E598G REYEYDLKW   | 1016 | >FLT3-E598G REYGYDLKW  | 470  | 546  |
| >FLT3-E598G REYEYDLKW   | 58   | >FLT3-E598G REYGYDLKW  | 49   | 9    |
| >FLT3-E598G REYEYDLKW   | 22   | >FLT3-E598G REYGYDLKW  | 88   | 66   |
| >FLT3-E598G REYEYDLKWE  | 16   | >FLT3-E598G REYGYDLKWI | 54   | 38   |
| >FLT3-E598G REYEYDLKW   | 284  | >FLT3-E598G REYGYDLKW  | 451  | 167  |
| >FLT3-E598G REYEYDLKW   | 55   | >FLT3-E598G REYGYDLKW  | 23   | 32   |
| >FLT3-E598G FREYEYDL    | 227  | >FLT3-E598G FREYGYDL   | 102  | 125  |
| >FLT3-E598G FREYEYDLKW  | 69   | >FLT3-E598G FREYGYDLKW | 74   | 5    |
| >FLT3-E598G FREYEYDLKW  | 222  | >FLT3-E598G FREYGYDLKW | 288  | 66   |
| >FLT3-E598G VDFREYEYDL  | 411  | >FLT3-E598G VDFREYGYDL | 482  | 71   |
| >FLT3-E598G YVDFREYEY   | 20   | >FLT3-E598G YVDFREYGY  | 21   | 1    |
| >FLT3-E598G YVDFREYEYD  | 212  | >FLT3-E598G YVDFREYGYD | 290  | 78   |
| >FLT3-E598G YVDFREYEYD  | 475  | >FLT3-E598G YVDFREYGYD | 511  | 36   |
| >FLT3-E598G YVDFREYEYD  | 774  | >FLT3-E598G YVDFREYGYD | 457  | 317  |
| >FLT3-E598G YVDFREYEYD  | 419  | >FLT3-E598G YVDFREYGYD | 304  | 115  |
| >FLT3-E598G YVDFREYEYD  | 244  | >FLT3-E598G YVDFREYGYD | 172  | 72   |
| >FLT3-E598G YVDFREYEY   | 38   | >FLT3-E598G YVDFREYGY  | 57   | 19   |
| >FLT3-E598G YVDFREYEY   | 274  | >FLT3-E598G YVDFREYGY  | 273  | 1    |
| >FLT3-E598G YVDFREYEY   | 20   | >FLT3-E598G YVDFREYGY  | 42   | 22   |
| >FLT3-E598G YVDFREYEY   | 90   | >FLT3-E598G YVDFREYGY  | 307  | 217  |
| >FLT3-E598G YVDFREYEY   | 18   | >FLT3-E598G YVDFREYGY  | 22   | 4    |
| >FLT3-E598G FYVDFREYEY  | 404  | >FLT3-E598G FYVDFREYGY | 690  | 286  |
| >FLT3-E598G FYVDFREYEY  | 271  | >FLT3-E598G FYVDFREYGY | 1002 | 731  |
| >FLT3-E598G FYVDFREYEY  | 24   | >FLT3-E598G FYVDFREYGY | 22   | 2    |
| >FLT3-E598G FYVDFREYEY  | 68   | >FLT3-E598G FYVDFREYGY | 116  | 48   |
| >FLT3-E598G FYVDFREYE   | 849  | >FLT3-E598G FYVDFREYG  | 485  | 364  |
| >FLT3-E598G YFYVDFREYE' | 6    | >FLT3-E598G YFYVDFREYG | 7    | 1    |
| >FLT3-E598G YFYVDFREYE' | 310  | >FLT3-E598G YFYVDFREYG | 276  | 34   |

|                          |       |                          |      |       |
|--------------------------|-------|--------------------------|------|-------|
| >FLT3-E598G YFYVDFREYE'  | 177   | >FLT3-E598G YFYVDFREYG   | 326  | 149   |
| >FLT3-E598G YFYVDFREYE'  | 132   | >FLT3-E598G YFYVDFREYG   | 95   | 37    |
| >FLT3-E598G YFYVDFREYE'  | 460   | >FLT3-E598G YFYVDFREYG   | 854  | 394   |
| >FLT3-E598G YFYVDFREYE'  | 73    | >FLT3-E598G YFYVDFREYG   | 231  | 158   |
| >FLT3-E598G YFYVDFREYE'  | 372   | >FLT3-E598G YFYVDFREYG   | 6157 | 5785  |
| >FLT3-E598G YFYVDFREYE'  | 312   | >FLT3-E598G YFYVDFREYG   | 341  | 29    |
| >FLT3-F594L- FREYEYDL    | 227   | >FLT3-F594L- LREYEYDL    | 3606 | 3379  |
| >FLT3-F594L- FREYEYDLKW  | 69    | >FLT3-F594L- LREYEYDLKW  | 156  | 87    |
| >FLT3-F594L- FREYEYDLKW  | 222   | >FLT3-F594L- LREYEYDLKW  | 119  | 103   |
| >FLT3-F594L- DFREYEYDL   | 26782 | >FLT3-F594L- DLREYEYDL   | 369  | 26413 |
| >FLT3-F594L- SSDNEYFYVD  | 375   | >FLT3-F594L- SSDNEYFYVD  | 2430 | 2055  |
| >FLT3-F594L- VDFREYEYDL  | 411   | >FLT3-F594L- VDLREYEYDL  | 212  | 199   |
| >FLT3-F594L- YVDFREYEY   | 20    | >FLT3-F594L- YVDLREYEY   | 19   | 1     |
| >FLT3-F594L- YVDFREYEYD  | 212   | >FLT3-F594L- YVDLREYEYD  | 388  | 176   |
| >FLT3-F594L- YVDFREYEYD  | 475   | >FLT3-F594L- YVDLREYEYD  | 790  | 315   |
| >FLT3-F594L- YVDFREYEYD  | 419   | >FLT3-F594L- YVDLREYEYD  | 907  | 488   |
| >FLT3-F594L- YVDFREYEYD  | 244   | >FLT3-F594L- YVDLREYEYD  | 400  | 156   |
| >FLT3-F594L- YVDFREYEY   | 38    | >FLT3-F594L- YVDLREYEY   | 93   | 55    |
| >FLT3-F594L- YVDFREYEY   | 274   | >FLT3-F594L- YVDLREYEY   | 882  | 608   |
| >FLT3-F594L- YVDFREYEY   | 20    | >FLT3-F594L- YVDLREYEY   | 71   | 51    |
| >FLT3-F594L- YVDFREYEY   | 90    | >FLT3-F594L- YVDLREYEY   | 102  | 12    |
| >FLT3-F594L- YVDFREYEY   | 18    | >FLT3-F594L- YVDLREYEY   | 45   | 27    |
| >FLT3-F594L- FYVDFREYEY  | 574   | >FLT3-F594L- FYVDLREYEY  | 434  | 140   |
| >FLT3-F594L- FYVDFREYEY  | 404   | >FLT3-F594L- FYVDLREYEY  | 735  | 331   |
| >FLT3-F594L- FYVDFREY    | 313   | >FLT3-F594L- FYVDLREY    | 501  | 188   |
| >FLT3-F594L- FYVDFREYEY  | 271   | >FLT3-F594L- FYVDLREYEY  | 307  | 36    |
| >FLT3-F594L- FYVDFREY    | 377   | >FLT3-F594L- FYVDLREY    | 372  | 5     |
| >FLT3-F594L- FYVDFREY    | 713   | >FLT3-F594L- FYVDLREY    | 326  | 387   |
| >FLT3-F594L- FYVDFREY    | 15    | >FLT3-F594L- FYVDLREY    | 18   | 3     |
| >FLT3-F594L- FYVDFREYEY  | 24    | >FLT3-F594L- FYVDLREYEY  | 50   | 26    |
| >FLT3-F594L- FYVDFREYEY  | 68    | >FLT3-F594L- FYVDLREYEY  | 151  | 83    |
| >FLT3-F594L- YFYVDFREY   | 2523  | >FLT3-F594L- YFYVDLREY   | 423  | 2100  |
| >FLT3-F594L- YFYVDFREY   | 7     | >FLT3-F594L- YFYVDLREY   | 10   | 3     |
| >FLT3-F594L- YFYVDFREYE' | 6     | >FLT3-F594L- YFYVDLREYE' | 7    | 1     |
| >FLT3-F594L- YFYVDFREYE' | 310   | >FLT3-F594L- YFYVDLREYE' | 369  | 59    |
| >FLT3-F594L- YFYVDFREYE' | 177   | >FLT3-F594L- YFYVDLREYE' | 291  | 114   |
| >FLT3-F594L- YFYVDFREY   | 461   | >FLT3-F594L- YFYVDLREY   | 1379 | 918   |
| >FLT3-F594L- YFYVDFREY   | 102   | >FLT3-F594L- YFYVDLREY   | 112  | 10    |
| >FLT3-F594L- YFYVDFREYE' | 132   | >FLT3-F594L- YFYVDLREYE' | 146  | 14    |
| >FLT3-F594L- YFYVDFREY   | 294   | >FLT3-F594L- YFYVDLREY   | 857  | 563   |
| >FLT3-F594L- YFYVDFREYE' | 460   | >FLT3-F594L- YFYVDLREYE' | 859  | 399   |
| >FLT3-F594L- YFYVDFREY   | 146   | >FLT3-F594L- YFYVDLREY   | 305  | 159   |
| >FLT3-F594L- YFYVDFREYE' | 73    | >FLT3-F594L- YFYVDLREYE' | 106  | 33    |

|                         |       |                         |      |       |
|-------------------------|-------|-------------------------|------|-------|
| >FLT3-F594L-YFYVDFREY   | 411   | >FLT3-F594L-YFYVDLREY   | 413  | 2     |
| >FLT3-F594L-YFYVDFREYE` | 372   | >FLT3-F594L-YFYVDLREYE` | 392  | 20    |
| >FLT3-F594L-YFYVDFREYE` | 312   | >FLT3-F594L-YFYVDLREYE` | 215  | 97    |
| >FLT3-F594L-EYFYVDFREY  | 355   | >FLT3-F594L-EYFYVDLREY  | 323  | 32    |
| >FLT3-F594L-EYFYVDFREY  | 288   | >FLT3-F594L-EYFYVDLREY  | 828  | 540   |
| >FLT3-F594L-EYFYVDFREY  | 804   | >FLT3-F594L-EYFYVDLREY  | 409  | 395   |
| >FLT3-F594L-EYFYVDFREY  | 18    | >FLT3-F594L-EYFYVDLREY  | 27   | 9     |
| >FLT3-F594L-EYFYVDFREY  | 39    | >FLT3-F594L-EYFYVDLREY  | 40   | 1     |
| >FLT3-F594L-EYFYVDFR    | 65    | >FLT3-F594L-EYFYVDLR    | 345  | 280   |
| >FLT3-F594L-EYFYVDFR    | 6     | >FLT3-F594L-EYFYVDLR    | 10   | 4     |
| >FLT3-F594L-EYFYVDFR    | 2     | >FLT3-F594L-EYFYVDLR    | 4    | 2     |
| >FLT3-F594L-EYFYVDFREYI | 313   | >FLT3-F594L-EYFYVDLREYI | 854  | 541   |
| >FLT3-F594L-EYFYVDFR    | 25    | >FLT3-F594L-EYFYVDLR    | 31   | 6     |
| >FLT3-F594L-NEYFYVDF    | 1224  | >FLT3-F594L-NEYFYVDL    | 243  | 981   |
| >FLT3-F594L-NEYFYVDFR   | 207   | >FLT3-F594L-NEYFYVDLR   | 767  | 560   |
| >FLT3-F594L-NEYFYVDFRE  | 63    | >FLT3-F594L-NEYFYVDLRE  | 54   | 9     |
| >FLT3-F594L-NEYFYVDFR   | 28    | >FLT3-F594L-NEYFYVDLR   | 69   | 41    |
| >FLT3-F594L-NEYFYVDF    | 99    | >FLT3-F594L-NEYFYVDL    | 2219 | 2120  |
| >FLT3-F594L-NEYFYVDF    | 9     | >FLT3-F594L-NEYFYVDL    | 47   | 38    |
| >FLT3-F594L-NEYFYVDFRE  | 7     | >FLT3-F594L-NEYFYVDLRE  | 8    | 1     |
| >FLT3-F594L-NEYFYVDF    | 959   | >FLT3-F594L-NEYFYVDL    | 80   | 879   |
| >FLT3-F594L-NEYFYVDF    | 426   | >FLT3-F594L-NEYFYVDL    | 145  | 281   |
| >FLT3-F594L-NEYFYVDF    | 447   | >FLT3-F594L-NEYFYVDL    | 2073 | 1626  |
| >FLT3-F594L-NEYFYVDFRE  | 293   | >FLT3-F594L-NEYFYVDLRE  | 277  | 16    |
| >FLT3-F594L-NEYFYVDF    | 43    | >FLT3-F594L-NEYFYVDL    | 214  | 171   |
| >FLT3-F594L-NEYFYVDFRE  | 53    | >FLT3-F594L-NEYFYVDLRE  | 77   | 24    |
| >FLT3-F594L-NEYFYVDFR   | 275   | >FLT3-F594L-NEYFYVDLR   | 638  | 363   |
| >FLT3-F594L-DNEYFYVDFR  | 198   | >FLT3-F594L-DNEYFYVDLR  | 829  | 631   |
| >FLT3-F594L-SDNEYFYVDF  | 355   | >FLT3-F594L-SDNEYFYVDL  | 741  | 386   |
| >FLT3-F594L-SDNEYFYVDF  | 371   | >FLT3-F594L-SDNEYFYVDL  | 5268 | 4897  |
| >FLT3-F594L-SDNEYFYVDF  | 5592  | >FLT3-F594L-SDNEYFYVDL  | 357  | 5235  |
| >FLT3-G831E-FGLARDIM    | 23753 | >FLT3-G831E-FELARDIM    | 487  | 23266 |
| >FLT3-G831E-FGLARDIM    | 21321 | >FLT3-G831E-FELARDIM    | 164  | 21157 |
| >FLT3-G831E-FGLARDIM    | 36866 | >FLT3-G831E-FELARDIM    | 113  | 36753 |
| >FLT3-G831E-FGLARDIM    | 26485 | >FLT3-G831E-FELARDIM    | 159  | 26326 |
| >FLT3-G831E-CDFGLARDI   | 970   | >FLT3-G831E-CDFELARDI   | 214  | 756   |
| >FLT3-G831E-CDFGLARDI   | 1604  | >FLT3-G831E-CDFELARDI   | 449  | 1155  |
| >FLT3-G831E-CDFGLARDI   | 84    | >FLT3-G831E-CDFELARDI   | 47   | 37    |
| >FLT3-G831E-ICDFGLARDIM | 428   | >FLT3-G831E-ICDFELARDIM | 1090 | 662   |
| >FLT3-G831E-KICDFGLA    | 1457  | >FLT3-G831E-KICDFELA    | 473  | 984   |
| >FLT3-G831E-KICDFGLA    | 433   | >FLT3-G831E-KICDFELA    | 1259 | 826   |
| >FLT3-G831E-KICDFGLA    | 195   | >FLT3-G831E-KICDFELA    | 106  | 89    |
| >FLT3-G831E-KICDFGLAR   | 53    | >FLT3-G831E-KICDFELAR   | 81   | 28    |

|                         |      |                         |       |       |
|-------------------------|------|-------------------------|-------|-------|
| >FLT3-G831E KICDFGLAR   | 30   | >FLT3-G831E KICDFELAR   | 50    | 20    |
| >FLT3-G831E KICDFGLARD  | 109  | >FLT3-G831E KICDFELARDI | 110   | 1     |
| >FLT3-G831E KICDFGLAR   | 14   | >FLT3-G831E KICDFELAR   | 13    | 1     |
| >FLT3-G831E VKICDFGL    | 237  | >FLT3-G831E VKICDFEL    | 67    | 170   |
| >FLT3-G831E VKICDFGLAR  | 155  | >FLT3-G831E VKICDFELAR  | 161   | 6     |
| >FLT3-G831E VVKICDFGLA  | 29   | >FLT3-G831E VVKICDFELAF | 37    | 8     |
| >FLT3-G831E VVKICDFGLA  | 318  | >FLT3-G831E VVKICDFELAF | 255   | 63    |
| >FLT3-G831E VVKICDFGLA  | 441  | >FLT3-G831E VVKICDFELAF | 253   | 188   |
| >FLT3-G831E VVKICDFGLA  | 325  | >FLT3-G831E VVKICDFELAF | 305   | 20    |
| >FLT3-G831E KVVKICDFGL  | 1292 | >FLT3-G831E KVVKICDFEL/ | 393   | 899   |
| >FLT3-G831E KVVKICDFGL  | 168  | >FLT3-G831E KVVKICDFEL  | 203   | 35    |
| >FLT3-G831E KVVKICDFGL  | 143  | >FLT3-G831E KVVKICDFEL/ | 59    | 84    |
| >FLT3-I836D- IMSDSNYV   | 11   | >FLT3-I836D- DMSDSNYV   | 1218  | 1207  |
| >FLT3-I836D- IMSDSNYVV  | 12   | >FLT3-I836D- DMSDSNYVV  | 1418  | 1406  |
| >FLT3-I836D- IMSDSNYV   | 2    | >FLT3-I836D- DMSDSNYV   | 32    | 30    |
| >FLT3-I836D- IMSDSNYVV  | 3    | >FLT3-I836D- DMSDSNYVV  | 87    | 84    |
| >FLT3-I836D- IMSDSNYVVF | 261  | >FLT3-I836D- DMSDSNYVV  | 11821 | 11560 |
| >FLT3-I836D- IMSDSNYV   | 3    | >FLT3-I836D- DMSDSNYV   | 130   | 127   |
| >FLT3-I836D- IMSDSNYVV  | 6    | >FLT3-I836D- DMSDSNYVV  | 750   | 744   |
| >FLT3-I836D- IMSDSNYV   | 9    | >FLT3-I836D- DMSDSNYV   | 1035  | 1026  |
| >FLT3-I836D- IMSDSNYVV  | 21   | >FLT3-I836D- DMSDSNYVV  | 3222  | 3201  |
| >FLT3-I836D- IMSDSNYV   | 2    | >FLT3-I836D- DMSDSNYV   | 13    | 11    |
| >FLT3-I836D- IMSDSNYVV  | 2    | >FLT3-I836D- DMSDSNYVV  | 24    | 22    |
| >FLT3-I836D- IMSDSNYV   | 3    | >FLT3-I836D- DMSDSNYV   | 16    | 13    |
| >FLT3-I836D- IMSDSNYVV  | 3    | >FLT3-I836D- DMSDSNYVV  | 12    | 9     |
| >FLT3-I836D- IMSDSNYV   | 6    | >FLT3-I836D- DMSDSNYV   | 19    | 13    |
| >FLT3-I836D- IMSDSNYVV  | 8    | >FLT3-I836D- DMSDSNYVV  | 37    | 29    |
| >FLT3-I836D- IMSDSNYV   | 2    | >FLT3-I836D- DMSDSNYV   | 3     | 1     |
| >FLT3-I836D- IMSDSNYVV  | 2    | >FLT3-I836D- DMSDSNYVV  | 4     | 2     |
| >FLT3-I836D- IMSDSNYV   | 2    | >FLT3-I836D- DMSDSNYV   | 6     | 4     |
| >FLT3-I836D- IMSDSNYVV  | 2    | >FLT3-I836D- DMSDSNYVV  | 7     | 5     |
| >FLT3-I836D- IMSDSNYVVF | 280  | >FLT3-I836D- DMSDSNYVV  | 1826  | 1546  |
| >FLT3-I836D- IMSDSNYVVF | 68   | >FLT3-I836D- DMSDSNYVV  | 293   | 225   |
| >FLT3-I836D- IMSDSNYVVF | 347  | >FLT3-I836D- DMSDSNYVV  | 108   | 239   |
| >FLT3-I836D- IMSDSNYVVF | 129  | >FLT3-I836D- DMSDSNYVV  | 63    | 66    |
| >FLT3-I836D- IMSDSNYV   | 408  | >FLT3-I836D- DMSDSNYV   | 72    | 336   |
| >FLT3-I836D- IMSDSNYVV  | 644  | >FLT3-I836D- DMSDSNYVV  | 103   | 541   |
| >FLT3-I836D- IMSDSNYV   | 980  | >FLT3-I836D- DMSDSNYV   | 63    | 917   |
| >FLT3-I836D- IMSDSNYVV  | 2711 | >FLT3-I836D- DMSDSNYVV  | 214   | 2497  |
| >FLT3-I836D- IMSDSNYVV  | 244  | >FLT3-I836D- DMSDSNYVV  | 7650  | 7406  |
| >FLT3-I836D- IMSDSNYV   | 125  | >FLT3-I836D- DMSDSNYV   | 4515  | 4390  |
| >FLT3-I836D- IMSDSNYVV  | 53   | >FLT3-I836D- DMSDSNYVV  | 3119  | 3066  |
| >FLT3-I836D- IMSDSNYVVF | 132  | >FLT3-I836D- DMSDSNYVV  | 3732  | 3600  |

|                        |       |                        |       |       |
|------------------------|-------|------------------------|-------|-------|
| >FLT3-I836D-IMSDSNYVV  | 47    | >FLT3-I836D-DMSDSNYVV  | 158   | 111   |
| >FLT3-I836D-DIMSDSNYV\ | 224   | >FLT3-I836D-DDMSDSNYV  | 13454 | 13230 |
| >FLT3-I836D-DIMSDSNYV  | 200   | >FLT3-I836D-DDMSDSNYV  | 9079  | 8879  |
| >FLT3-I836D-DIMSDSNYV\ | 84    | >FLT3-I836D-DDMSDSNYV  | 9473  | 9389  |
| >FLT3-I836D-DIMSDSNYV\ | 282   | >FLT3-I836D-DDMSDSNYV  | 17575 | 17293 |
| >FLT3-I836D-DIMSDSNYV\ | 235   | >FLT3-I836D-DDMSDSNYV  | 10755 | 10520 |
| >FLT3-I836D-DIMSDSNYV  | 324   | >FLT3-I836D-DDMSDSNYV  | 20319 | 19995 |
| >FLT3-I836D-DIMSDSNYV  | 433   | >FLT3-I836D-DDMSDSNYV  | 16800 | 16367 |
| >FLT3-I836D-DIMSDSNYV\ | 438   | >FLT3-I836D-DDMSDSNYV  | 16315 | 15877 |
| >FLT3-I836D-DIMSDSNYV  | 424   | >FLT3-I836D-DDMSDSNYV  | 20300 | 19876 |
| >FLT3-I836D-DIMSDSNYV  | 8     | >FLT3-I836D-DDMSDSNYV  | 12855 | 12847 |
| >FLT3-I836D-DIMSDSNYV\ | 16    | >FLT3-I836D-DDMSDSNYV  | 13388 | 13372 |
| >FLT3-I836D-DIMSDSNYV  | 355   | >FLT3-I836D-DDMSDSNYV  | 26969 | 26614 |
| >FLT3-I836D-DIMSDSNYV\ | 492   | >FLT3-I836D-DDMSDSNYV  | 28158 | 27666 |
| >FLT3-I836D-DIMSDSNY   | 133   | >FLT3-I836D-DDMSDSNY   | 12356 | 12223 |
| >FLT3-I836D-DIMSDSNY   | 16    | >FLT3-I836D-DDMSDSNY   | 3495  | 3479  |
| >FLT3-I836D-DIMSDSNY   | 258   | >FLT3-I836D-DDMSDSNY   | 2102  | 1844  |
| >FLT3-I836D-DIMSDSNY   | 251   | >FLT3-I836D-DDMSDSNY   | 4001  | 3750  |
| >FLT3-I836D-DIMSDSNYV\ | 74    | >FLT3-I836D-DDMSDSNYV  | 4834  | 4760  |
| >FLT3-I836D-DIMSDSNY   | 472   | >FLT3-I836D-DDMSDSNY   | 12398 | 11926 |
| >FLT3-I836D-DIMSDSNYV\ | 16    | >FLT3-I836D-DDMSDSNYV  | 591   | 575   |
| >FLT3-I836D-DIMSDSNYV  | 17    | >FLT3-I836D-DDMSDSNYV  | 623   | 606   |
| >FLT3-I836D-DIMSDSNYV\ | 139   | >FLT3-I836D-DDMSDSNYV  | 6514  | 6375  |
| >FLT3-I836D-DIMSDSNYV  | 7     | >FLT3-I836D-DDMSDSNYV  | 1366  | 1359  |
| >FLT3-I836D-DIMSDSNYV\ | 22    | >FLT3-I836D-DDMSDSNYV  | 4336  | 4314  |
| >FLT3-I836D-DIMSDSNY   | 373   | >FLT3-I836D-DDMSDSNY   | 5173  | 4800  |
| >FLT3-I836D-DIMSDSNYV\ | 23064 | >FLT3-I836D-DDMSDSNYV  | 317   | 22747 |
| >FLT3-I836D-KICDFGLARD | 109   | >FLT3-I836D-KICDFGLARD | 10951 | 10842 |
| >FLT3-I836D-RDIMSDSNY  | 384   | >FLT3-I836D-RDDMSDSNY  | 3727  | 3343  |
| >FLT3-I836D-RDIMSDSNY\ | 207   | >FLT3-I836D-RDDMSDSNY  | 1926  | 1719  |
| >FLT3-I836D-RDIMSDSNY\ | 121   | >FLT3-I836D-RDDMSDSNY  | 247   | 126   |
| >FLT3-I836D-RDIMSDSNY\ | 47    | >FLT3-I836D-RDDMSDSNY  | 80    | 33    |
| >FLT3-I836D-ARDIMSDSN\ | 207   | >FLT3-I836D-ARDDMSDSN  | 214   | 7     |
| >FLT3-I836D-ARDIMSDSN\ | 185   | >FLT3-I836D-ARDDMSDSN  | 214   | 29    |
| >FLT3-I836D-LARDIMSDSN | 168   | >FLT3-I836D-LARDDMSDS  | 245   | 77    |
| >FLT3-I836D-LARDIMSDSN | 146   | >FLT3-I836D-LARDDMSDS  | 134   | 12    |
| >FLT3-I836D-LARDIMSDSN | 119   | >FLT3-I836D-LARDDMSDS  | 130   | 11    |
| >FLT3-I836D-LARDIMSDSN | 5     | >FLT3-I836D-LARDDMSDS  | 8     | 3     |
| >FLT3-I836D-LARDIMSDSN | 106   | >FLT3-I836D-LARDDMSDS  | 105   | 1     |
| >FLT3-I836D-LARDIMSDSN | 12    | >FLT3-I836D-LARDDMSDS  | 26    | 14    |
| >FLT3-I836D-CDFGLARDI  | 84    | >FLT3-I836D-CDFGLARDD  | 24901 | 24817 |
| >FLT3-I836D-ICDFGLARDI | 428   | >FLT3-I836D-ICDFGLARDD | 2347  | 1919  |
| >FLT3-I836F-IMSDSNYV   | 11    | >FLT3-I836F-FMSDSNYV   | 6     | 5     |



|                         |      |                         |      |      |
|-------------------------|------|-------------------------|------|------|
| >FLT3-I836F- IMSDSNYVV  | 12   | >FLT3-I836F- FMSDSNYVV  | 6    | 6    |
| >FLT3-I836F- IMSDSNYV   | 2    | >FLT3-I836F- FMSDSNYV   | 1    | 1    |
| >FLT3-I836F- IMSDSNYVV  | 3    | >FLT3-I836F- FMSDSNYVV  | 2    | 1    |
| >FLT3-I836F- IMSDSNYVVV | 261  | >FLT3-I836F- FMSDSNYVVV | 20   | 241  |
| >FLT3-I836F- IMSDSNYV   | 3    | >FLT3-I836F- FMSDSNYV   | 2    | 1    |
| >FLT3-I836F- IMSDSNYVV  | 6    | >FLT3-I836F- FMSDSNYVV  | 3    | 3    |
| >FLT3-I836F- IMSDSNYVVV | 2340 | >FLT3-I836F- FMSDSNYVVV | 238  | 2102 |
| >FLT3-I836F- IMSDSNYV   | 9    | >FLT3-I836F- FMSDSNYV   | 3    | 6    |
| >FLT3-I836F- IMSDSNYVV  | 21   | >FLT3-I836F- FMSDSNYVV  | 5    | 16   |
| >FLT3-I836F- IMSDSNYV   | 2    | >FLT3-I836F- FMSDSNYV   | 1    | 1    |
| >FLT3-I836F- IMSDSNYVV  | 2    | >FLT3-I836F- FMSDSNYVV  | 1    | 1    |
| >FLT3-I836F- IMSDSNYVVV | 631  | >FLT3-I836F- FMSDSNYVVV | 88   | 543  |
| >FLT3-I836F- IMSDSNYV   | 3    | >FLT3-I836F- FMSDSNYV   | 2    | 1    |
| >FLT3-I836F- IMSDSNYVV  | 3    | >FLT3-I836F- FMSDSNYVV  | 2    | 1    |
| >FLT3-I836F- IMSDSNYV   | 6    | >FLT3-I836F- FMSDSNYV   | 4    | 2    |
| >FLT3-I836F- IMSDSNYVV  | 8    | >FLT3-I836F- FMSDSNYVV  | 5    | 3    |
| >FLT3-I836F- IMSDSNYV   | 2    | >FLT3-I836F- FMSDSNYV   | 2    | 0    |
| >FLT3-I836F- IMSDSNYVV  | 2    | >FLT3-I836F- FMSDSNYVV  | 2    | 0    |
| >FLT3-I836F- IMSDSNYV   | 2    | >FLT3-I836F- FMSDSNYV   | 1    | 1    |
| >FLT3-I836F- IMSDSNYVV  | 2    | >FLT3-I836F- FMSDSNYVV  | 1    | 1    |
| >FLT3-I836F- IMSDSNYVVV | 4686 | >FLT3-I836F- FMSDSNYVVV | 391  | 4295 |
| >FLT3-I836F- IMSDSNYVVV | 1154 | >FLT3-I836F- FMSDSNYVVV | 76   | 1078 |
| >FLT3-I836F- IMSDSNYVVV | 280  | >FLT3-I836F- FMSDSNYVVV | 377  | 97   |
| >FLT3-I836F- IMSDSNYVVV | 68   | >FLT3-I836F- FMSDSNYVVV | 101  | 33   |
| >FLT3-I836F- IMSDSNYVVV | 347  | >FLT3-I836F- FMSDSNYVVV | 166  | 181  |
| >FLT3-I836F- IMSDSNYVVV | 129  | >FLT3-I836F- FMSDSNYVVV | 25   | 104  |
| >FLT3-I836F- IMSDSNYV   | 408  | >FLT3-I836F- FMSDSNYV   | 35   | 373  |
| >FLT3-I836F- IMSDSNYVV  | 644  | >FLT3-I836F- FMSDSNYVV  | 49   | 595  |
| >FLT3-I836F- IMSDSNYV   | 980  | >FLT3-I836F- FMSDSNYV   | 44   | 936  |
| >FLT3-I836F- IMSDSNYVV  | 2711 | >FLT3-I836F- FMSDSNYVV  | 137  | 2574 |
| >FLT3-I836F- IMSDSNYVV  | 244  | >FLT3-I836F- FMSDSNYVV  | 139  | 105  |
| >FLT3-I836F- IMSDSNYV   | 125  | >FLT3-I836F- FMSDSNYV   | 101  | 24   |
| >FLT3-I836F- IMSDSNYVV  | 53   | >FLT3-I836F- FMSDSNYVV  | 41   | 12   |
| >FLT3-I836F- IMSDSNYVVV | 132  | >FLT3-I836F- FMSDSNYVVV | 95   | 37   |
| >FLT3-I836F- IMSDSNYVV  | 2385 | >FLT3-I836F- FMSDSNYVV  | 60   | 2325 |
| >FLT3-I836F- IMSDSNYVVV | 47   | >FLT3-I836F- FMSDSNYVVV | 71   | 24   |
| >FLT3-I836F- DIMSDSNV\  | 224  | >FLT3-I836F- DFMSDSNYV  | 3825 | 3601 |
| >FLT3-I836F- DIMSDSNYV  | 200  | >FLT3-I836F- DFMSDSNYV  | 1332 | 1132 |
| >FLT3-I836F- DIMSDSNV\  | 84   | >FLT3-I836F- DFMSDSNYV  | 1756 | 1672 |
| >FLT3-I836F- DIMSDSNV\  | 282  | >FLT3-I836F- DFMSDSNYV  | 7156 | 6874 |
| >FLT3-I836F- DIMSDSNV\  | 235  | >FLT3-I836F- DFMSDSNYV  | 5514 | 5279 |
| >FLT3-I836F- DIMSDSNYV  | 324  | >FLT3-I836F- DFMSDSNYV  | 8172 | 7848 |
| >FLT3-I836F- DIMSDSNYV  | 433  | >FLT3-I836F- DFMSDSNYV  | 7762 | 7329 |

|                          |      |                          |       |       |
|--------------------------|------|--------------------------|-------|-------|
| >FLT3-I836F- DIMSDSNV\   | 438  | >FLT3-I836F- DFMSDSNYV'  | 7571  | 7133  |
| >FLT3-I836F- DIMSDSNV    | 424  | >FLT3-I836F- DFMSDSNYV   | 8695  | 8271  |
| >FLT3-I836F- DIMSDSNV    | 8    | >FLT3-I836F- DFMSDSNYV   | 1021  | 1013  |
| >FLT3-I836F- DIMSDSNV\   | 16   | >FLT3-I836F- DFMSDSNYV'  | 1548  | 1532  |
| >FLT3-I836F- DIMSDSNV    | 355  | >FLT3-I836F- DFMSDSNYV   | 9301  | 8946  |
| >FLT3-I836F- DIMSDSNV\   | 492  | >FLT3-I836F- DFMSDSNYV'  | 11551 | 11059 |
| >FLT3-I836F- DIMSDSNY    | 133  | >FLT3-I836F- DFMSDSNY    | 4902  | 4769  |
| >FLT3-I836F- DIMSDSNY    | 16   | >FLT3-I836F- DFMSDSNY    | 352   | 336   |
| >FLT3-I836F- DIMSDSNY    | 258  | >FLT3-I836F- DFMSDSNY    | 986   | 728   |
| >FLT3-I836F- DIMSDSNY    | 730  | >FLT3-I836F- DFMSDSNY    | 136   | 594   |
| >FLT3-I836F- DIMSDSNY    | 251  | >FLT3-I836F- DFMSDSNY    | 524   | 273   |
| >FLT3-I836F- DIMSDSNV\   | 1399 | >FLT3-I836F- DFMSDSNYV'  | 377   | 1022  |
| >FLT3-I836F- DIMSDSNV\   | 74   | >FLT3-I836F- DFMSDSNYV'  | 22    | 52    |
| >FLT3-I836F- DIMSDSNY    | 472  | >FLT3-I836F- DFMSDSNY    | 2910  | 2438  |
| >FLT3-I836F- DIMSDSNV\   | 16   | >FLT3-I836F- DFMSDSNYV'  | 82    | 66    |
| >FLT3-I836F- DIMSDSNV    | 17   | >FLT3-I836F- DFMSDSNYV   | 838   | 821   |
| >FLT3-I836F- DIMSDSNV\   | 139  | >FLT3-I836F- DFMSDSNYV'  | 2984  | 2845  |
| >FLT3-I836F- DIMSDSNV    | 7    | >FLT3-I836F- DFMSDSNYV   | 482   | 475   |
| >FLT3-I836F- DIMSDSNV\   | 22   | >FLT3-I836F- DFMSDSNYV'  | 2076  | 2054  |
| >FLT3-I836F- DIMSDSNY    | 373  | >FLT3-I836F- DFMSDSNY    | 294   | 79    |
| >FLT3-I836F- DIMSDSNV\   | 525  | >FLT3-I836F- DFMSDSNYV'  | 167   | 358   |
| >FLT3-I836F- KICDFGLARD  | 109  | >FLT3-I836F- KICDFGLARD  | 56    | 53    |
| >FLT3-I836F- RDIMSDSNY   | 384  | >FLT3-I836F- RDFMSDSNY   | 81    | 303   |
| >FLT3-I836F- RDIMSDSNY   | 662  | >FLT3-I836F- RDFMSDSNY   | 410   | 252   |
| >FLT3-I836F- RDIMSDSNY\  | 207  | >FLT3-I836F- RDFMSDSNY'  | 57    | 150   |
| >FLT3-I836F- RDIMSDSNY   | 551  | >FLT3-I836F- RDFMSDSNY   | 61    | 490   |
| >FLT3-I836F- RDIMSDSNY\  | 718  | >FLT3-I836F- RDFMSDSNY'  | 365   | 353   |
| >FLT3-I836F- RDIMSDSNY\  | 121  | >FLT3-I836F- RDFMSDSNY'  | 182   | 61    |
| >FLT3-I836F- RDIMSDSNY\  | 47   | >FLT3-I836F- RDFMSDSNY'  | 63    | 16    |
| >FLT3-I836F- ARDIMSDSN\  | 207  | >FLT3-I836F- ARDFMSDSN   | 135   | 72    |
| >FLT3-I836F- ARDIMSDSN\  | 185  | >FLT3-I836F- ARDFMSDSN   | 236   | 51    |
| >FLT3-I836F- LARDIMSDSN  | 168  | >FLT3-I836F- LARDFMSDSI' | 221   | 53    |
| >FLT3-I836F- LARDIMSDSN  | 146  | >FLT3-I836F- LARDFMSDSI' | 113   | 33    |
| >FLT3-I836F- LARDIMSDSN  | 119  | >FLT3-I836F- LARDFMSDSI' | 41    | 78    |
| >FLT3-I836F- LARDIMSDSN  | 5    | >FLT3-I836F- LARDFMSDSI' | 4     | 1     |
| >FLT3-I836F- LARDIMSDSN  | 106  | >FLT3-I836F- LARDFMSDSI' | 96    | 10    |
| >FLT3-I836F- LARDIMSDSN  | 12   | >FLT3-I836F- LARDFMSDSI' | 12    | 0     |
| >FLT3-I836F- CDFGLARDI   | 84   | >FLT3-I836F- CDFGLARDF   | 12145 | 12061 |
| >FLT3-I836F- ICDFGLARDI\ | 428  | >FLT3-I836F- ICDFGLARDF\ | 514   | 86    |
| >FLT3-I836H- IMSDSNYV    | 11   | >FLT3-I836H- HMSDSNYV    | 17    | 6     |
| >FLT3-I836H- IMSDSNYVV   | 12   | >FLT3-I836H- HMSDSNYVV   | 19    | 7     |
| >FLT3-I836H- IMSDSNYV    | 2    | >FLT3-I836H- HMSDSNYV    | 2     | 0     |
| >FLT3-I836H- IMSDSNYVV   | 3    | >FLT3-I836H- HMSDSNYVV   | 4     | 1     |

|                         |      |                        |       |       |
|-------------------------|------|------------------------|-------|-------|
| >FLT3-I836H-IMSDSNYYVVF | 261  | >FLT3-I836H-HMSDSNYVV  | 380   | 119   |
| >FLT3-I836H-IMSDSNYYV   | 3    | >FLT3-I836H-HMSDSNYV   | 5     | 2     |
| >FLT3-I836H-IMSDSNYYVV  | 6    | >FLT3-I836H-HMSDSNYVV  | 12    | 6     |
| >FLT3-I836H-IMSDSNYYV   | 9    | >FLT3-I836H-HMSDSNYV   | 23    | 14    |
| >FLT3-I836H-IMSDSNYYVV  | 21   | >FLT3-I836H-HMSDSNYVV  | 73    | 52    |
| >FLT3-I836H-IMSDSNYYV   | 2    | >FLT3-I836H-HMSDSNYV   | 3     | 1     |
| >FLT3-I836H-IMSDSNYYVV  | 2    | >FLT3-I836H-HMSDSNYVV  | 4     | 2     |
| >FLT3-I836H-IMSDSNYYV   | 3    | >FLT3-I836H-HMSDSNYV   | 3     | 0     |
| >FLT3-I836H-IMSDSNYYVV  | 3    | >FLT3-I836H-HMSDSNYVV  | 3     | 0     |
| >FLT3-I836H-IMSDSNYYV   | 6    | >FLT3-I836H-HMSDSNYV   | 8     | 2     |
| >FLT3-I836H-IMSDSNYYVV  | 8    | >FLT3-I836H-HMSDSNYVV  | 11    | 3     |
| >FLT3-I836H-IMSDSNYYV   | 2    | >FLT3-I836H-HMSDSNYV   | 3     | 1     |
| >FLT3-I836H-IMSDSNYYVV  | 2    | >FLT3-I836H-HMSDSNYVV  | 3     | 1     |
| >FLT3-I836H-IMSDSNYYV   | 2    | >FLT3-I836H-HMSDSNYV   | 2     | 0     |
| >FLT3-I836H-IMSDSNYYVV  | 2    | >FLT3-I836H-HMSDSNYVV  | 2     | 0     |
| >FLT3-I836H-IMSDSNYYVVF | 280  | >FLT3-I836H-HMSDSNYVV  | 549   | 269   |
| >FLT3-I836H-IMSDSNYYVVF | 68   | >FLT3-I836H-HMSDSNYVV  | 80    | 12    |
| >FLT3-I836H-IMSDSNYYVVF | 347  | >FLT3-I836H-HMSDSNYVV  | 563   | 216   |
| >FLT3-I836H-IMSDSNYYVVF | 129  | >FLT3-I836H-HMSDSNYVV  | 41    | 88    |
| >FLT3-I836H-IMSDSNYYV   | 408  | >FLT3-I836H-HMSDSNYV   | 37    | 371   |
| >FLT3-I836H-IMSDSNYYVV  | 644  | >FLT3-I836H-HMSDSNYVV  | 48    | 596   |
| >FLT3-I836H-IMSDSNYYV   | 980  | >FLT3-I836H-HMSDSNYV   | 69    | 911   |
| >FLT3-I836H-IMSDSNYYVV  | 2711 | >FLT3-I836H-HMSDSNYVV  | 293   | 2418  |
| >FLT3-I836H-IMSDSNYYVV  | 244  | >FLT3-I836H-HMSDSNYVV  | 288   | 44    |
| >FLT3-I836H-IMSDSNYYV   | 125  | >FLT3-I836H-HMSDSNYV   | 364   | 239   |
| >FLT3-I836H-IMSDSNYYVV  | 53   | >FLT3-I836H-HMSDSNYVV  | 131   | 78    |
| >FLT3-I836H-IMSDSNYYVVF | 132  | >FLT3-I836H-HMSDSNYVV  | 332   | 200   |
| >FLT3-I836H-IMSDSNYYVV  | 2385 | >FLT3-I836H-HMSDSNYVV  | 67    | 2318  |
| >FLT3-I836H-IMSDSNYYVVF | 500  | >FLT3-I836H-HMSDSNYVV  | 365   | 135   |
| >FLT3-I836H-IMSDSNYYVVF | 47   | >FLT3-I836H-HMSDSNYVV  | 21    | 26    |
| >FLT3-I836H-DIMSDSNYYV\ | 224  | >FLT3-I836H-DHMMSDSNYV | 8831  | 8607  |
| >FLT3-I836H-DIMSDSNYYV  | 200  | >FLT3-I836H-DHMMSDSNYV | 7237  | 7037  |
| >FLT3-I836H-DIMSDSNYYV\ | 84   | >FLT3-I836H-DHMMSDSNYV | 6077  | 5993  |
| >FLT3-I836H-DIMSDSNYYV\ | 282  | >FLT3-I836H-DHMMSDSNYV | 13185 | 12903 |
| >FLT3-I836H-DIMSDSNYYV\ | 235  | >FLT3-I836H-DHMMSDSNYV | 8659  | 8424  |
| >FLT3-I836H-DIMSDSNYYV  | 324  | >FLT3-I836H-DHMMSDSNYV | 18315 | 17991 |
| >FLT3-I836H-DIMSDSNYYV  | 433  | >FLT3-I836H-DHMMSDSNYV | 14347 | 13914 |
| >FLT3-I836H-DIMSDSNYYV\ | 438  | >FLT3-I836H-DHMMSDSNYV | 13735 | 13297 |
| >FLT3-I836H-DIMSDSNYYV  | 424  | >FLT3-I836H-DHMMSDSNYV | 19071 | 18647 |
| >FLT3-I836H-DIMSDSNYYV  | 8    | >FLT3-I836H-DHMMSDSNYV | 9873  | 9865  |
| >FLT3-I836H-DIMSDSNYYV\ | 16   | >FLT3-I836H-DHMMSDSNYV | 10578 | 10562 |
| >FLT3-I836H-DIMSDSNYYV  | 355  | >FLT3-I836H-DHMMSDSNYV | 22279 | 21924 |
| >FLT3-I836H-DIMSDSNYYV\ | 492  | >FLT3-I836H-DHMMSDSNYV | 23931 | 23439 |

|                        |       |                        |       |       |
|------------------------|-------|------------------------|-------|-------|
| >FLT3-I836H-DIMSDSNY   | 133   | >FLT3-I836H-DHMSDSNY   | 14485 | 14352 |
| >FLT3-I836H-DIMSDSNY   | 16    | >FLT3-I836H-DHMSDSNY   | 2463  | 2447  |
| >FLT3-I836H-DIMSDSNY   | 258   | >FLT3-I836H-DHMSDSNY   | 2870  | 2612  |
| >FLT3-I836H-DIMSDSNY   | 251   | >FLT3-I836H-DHMSDSNY   | 975   | 724   |
| >FLT3-I836H-DIMSDSNYV\ | 74    | >FLT3-I836H-DHMSDSNYV  | 2026  | 1952  |
| >FLT3-I836H-DIMSDSNY   | 472   | >FLT3-I836H-DHMSDSNY   | 11839 | 11367 |
| >FLT3-I836H-DIMSDSNYV\ | 16    | >FLT3-I836H-DHMSDSNYV  | 571   | 555   |
| >FLT3-I836H-DIMSDSNYV  | 17    | >FLT3-I836H-DHMSDSNYV  | 3446  | 3429  |
| >FLT3-I836H-DIMSDSNYV\ | 139   | >FLT3-I836H-DHMSDSNYV  | 7856  | 7717  |
| >FLT3-I836H-DIMSDSNYV  | 7     | >FLT3-I836H-DHMSDSNYV  | 7181  | 7174  |
| >FLT3-I836H-DIMSDSNYV\ | 22    | >FLT3-I836H-DHMSDSNYV  | 11514 | 11492 |
| >FLT3-I836H-DIMSDSNY   | 373   | >FLT3-I836H-DHMSDSNY   | 2231  | 1858  |
| >FLT3-I836H-DIMSDSNYV  | 17502 | >FLT3-I836H-DHMSDSNYV  | 416   | 17086 |
| >FLT3-I836H-DIMSDSNYV\ | 19106 | >FLT3-I836H-DHMSDSNYV  | 445   | 18661 |
| >FLT3-I836H-DIMSDSNYV\ | 5917  | >FLT3-I836H-DHMSDSNYV  | 98    | 5819  |
| >FLT3-I836H-KICDFGLARD | 109   | >FLT3-I836H-KICDFGLARD | 6176  | 6067  |
| >FLT3-I836H-RDIMSDSNY  | 384   | >FLT3-I836H-RDHMSDSNY  | 409   | 25    |
| >FLT3-I836H-RDIMSDSNY\ | 207   | >FLT3-I836H-RDHMSDSNY  | 147   | 60    |
| >FLT3-I836H-RDIMSDSNY\ | 121   | >FLT3-I836H-RDHMSDSNY  | 327   | 206   |
| >FLT3-I836H-RDIMSDSNY\ | 47    | >FLT3-I836H-RDHMSDSNY  | 94    | 47    |
| >FLT3-I836H-ARDIMSDSN\ | 207   | >FLT3-I836H-ARDHMSDSN  | 254   | 47    |
| >FLT3-I836H-ARDIMSDSN\ | 185   | >FLT3-I836H-ARDHMSDSN  | 175   | 10    |
| >FLT3-I836H-LARDIMSDSN | 1928  | >FLT3-I836H-LARDHMSDS  | 478   | 1450  |
| >FLT3-I836H-LARDIMSDSN | 168   | >FLT3-I836H-LARDHMSDS  | 597   | 429   |
| >FLT3-I836H-LARDIMSDSN | 146   | >FLT3-I836H-LARDHMSDS  | 86    | 60    |
| >FLT3-I836H-LARDIMSDSN | 119   | >FLT3-I836H-LARDHMSDS  | 73    | 46    |
| >FLT3-I836H-LARDIMSDSN | 5     | >FLT3-I836H-LARDHMSDS  | 4     | 1     |
| >FLT3-I836H-LARDIMSDSN | 106   | >FLT3-I836H-LARDHMSDS  | 99    | 7     |
| >FLT3-I836H-LARDIMSDSN | 12    | >FLT3-I836H-LARDHMSDS  | 44    | 32    |
| >FLT3-I836H-CDFGLARDI  | 84    | >FLT3-I836H-CDFGLARDH  | 24852 | 24768 |
| >FLT3-I836H-ICDFGLARDI | 428   | >FLT3-I836H-ICDFGLARDH | 1828  | 1400  |
| >FLT3-I836L-IMSDSNYV   | 11    | >FLT3-I836L-LMSDSNYV   | 11    | 0     |
| >FLT3-I836L-IMSDSNYVV  | 12    | >FLT3-I836L-LMSDSNYVV  | 11    | 1     |
| >FLT3-I836L-IMSDSNYV   | 2     | >FLT3-I836L-LMSDSNYV   | 2     | 0     |
| >FLT3-I836L-IMSDSNYVV  | 3     | >FLT3-I836L-LMSDSNYVV  | 3     | 0     |
| >FLT3-I836L-IMSDSNYVVI | 261   | >FLT3-I836L-LMSDSNYVVI | 184   | 77    |
| >FLT3-I836L-IMSDSNYV   | 3     | >FLT3-I836L-LMSDSNYV   | 3     | 0     |
| >FLT3-I836L-IMSDSNYVV  | 6     | >FLT3-I836L-LMSDSNYVV  | 5     | 1     |
| >FLT3-I836L-IMSDSNYV   | 9     | >FLT3-I836L-LMSDSNYV   | 8     | 1     |
| >FLT3-I836L-IMSDSNYVV  | 21    | >FLT3-I836L-LMSDSNYVV  | 19    | 2     |
| >FLT3-I836L-IMSDSNYV   | 2     | >FLT3-I836L-LMSDSNYV   | 2     | 0     |
| >FLT3-I836L-IMSDSNYVV  | 2     | >FLT3-I836L-LMSDSNYVV  | 2     | 0     |
| >FLT3-I836L-IMSDSNYV   | 3     | >FLT3-I836L-LMSDSNYV   | 2     | 1     |

|                         |      |                         |     |      |
|-------------------------|------|-------------------------|-----|------|
| >FLT3-I836L- IMSDSNYVV  | 3    | >FLT3-I836L- LMSDSNYVV  | 2   | 1    |
| >FLT3-I836L- IMSDSNYV   | 6    | >FLT3-I836L- LMSDSNYV   | 6   | 0    |
| >FLT3-I836L- IMSDSNYVV  | 8    | >FLT3-I836L- LMSDSNYVV  | 8   | 0    |
| >FLT3-I836L- IMSDSNYV   | 2    | >FLT3-I836L- LMSDSNYV   | 2   | 0    |
| >FLT3-I836L- IMSDSNYVV  | 2    | >FLT3-I836L- LMSDSNYVV  | 2   | 0    |
| >FLT3-I836L- IMSDSNYV   | 2    | >FLT3-I836L- LMSDSNYV   | 2   | 0    |
| >FLT3-I836L- IMSDSNYVV  | 2    | >FLT3-I836L- LMSDSNYVV  | 2   | 0    |
| >FLT3-I836L- IMSDSNYVVF | 1154 | >FLT3-I836L- LMSDSNYVVI | 489 | 665  |
| >FLT3-I836L- IMSDSNYVVF | 280  | >FLT3-I836L- LMSDSNYVVI | 326 | 46   |
| >FLT3-I836L- IMSDSNYVVF | 68   | >FLT3-I836L- LMSDSNYVVI | 60  | 8    |
| >FLT3-I836L- IMSDSNYVVF | 347  | >FLT3-I836L- LMSDSNYVVI | 471 | 124  |
| >FLT3-I836L- IMSDSNYVVF | 129  | >FLT3-I836L- LMSDSNYVVI | 104 | 25   |
| >FLT3-I836L- IMSDSNYV   | 408  | >FLT3-I836L- LMSDSNYV   | 267 | 141  |
| >FLT3-I836L- IMSDSNYVV  | 644  | >FLT3-I836L- LMSDSNYVV  | 414 | 230  |
| >FLT3-I836L- IMSDSNYV   | 980  | >FLT3-I836L- LMSDSNYV   | 414 | 566  |
| >FLT3-I836L- IMSDSNYV   | 1199 | >FLT3-I836L- LMSDSNYV   | 479 | 720  |
| >FLT3-I836L- IMSDSNYVV  | 244  | >FLT3-I836L- LMSDSNYVV  | 122 | 122  |
| >FLT3-I836L- IMSDSNYV   | 125  | >FLT3-I836L- LMSDSNYV   | 190 | 65   |
| >FLT3-I836L- IMSDSNYVV  | 53   | >FLT3-I836L- LMSDSNYVV  | 71  | 18   |
| >FLT3-I836L- IMSDSNYVVF | 132  | >FLT3-I836L- LMSDSNYVVI | 188 | 56   |
| >FLT3-I836L- IMSDSNYVVF | 47   | >FLT3-I836L- LMSDSNYVVI | 102 | 55   |
| >FLT3-I836L- DIMSDSNYV  | 3034 | >FLT3-I836L- DLMSDSNYV  | 366 | 2668 |
| >FLT3-I836L- DIMSDSNYV\ | 224  | >FLT3-I836L- DLMSDSNYV' | 38  | 186  |
| >FLT3-I836L- DIMSDSNYV  | 200  | >FLT3-I836L- DLMSDSNYV  | 18  | 182  |
| >FLT3-I836L- DIMSDSNYV\ | 84   | >FLT3-I836L- DLMSDSNYV' | 18  | 66   |
| >FLT3-I836L- DIMSDSNYV  | 621  | >FLT3-I836L- DLMSDSNYV  | 79  | 542  |
| >FLT3-I836L- DIMSDSNYV\ | 282  | >FLT3-I836L- DLMSDSNYV' | 78  | 204  |
| >FLT3-I836L- DIMSDSNYV\ | 235  | >FLT3-I836L- DLMSDSNYV' | 206 | 29   |
| >FLT3-I836L- DIMSDSNYV  | 324  | >FLT3-I836L- DLMSDSNYV  | 14  | 310  |
| >FLT3-I836L- DIMSDSNYV\ | 693  | >FLT3-I836L- DLMSDSNYV' | 27  | 666  |
| >FLT3-I836L- DIMSDSNYV  | 433  | >FLT3-I836L- DLMSDSNYV  | 7   | 426  |
| >FLT3-I836L- DIMSDSNYV\ | 438  | >FLT3-I836L- DLMSDSNYV' | 10  | 428  |
| >FLT3-I836L- DIMSDSNYV  | 424  | >FLT3-I836L- DLMSDSNYV  | 24  | 400  |
| >FLT3-I836L- DIMSDSNYV\ | 1324 | >FLT3-I836L- DLMSDSNYV' | 48  | 1276 |
| >FLT3-I836L- DIMSDSNYV  | 8    | >FLT3-I836L- DLMSDSNYV  | 2   | 6    |
| >FLT3-I836L- DIMSDSNYV\ | 16   | >FLT3-I836L- DLMSDSNYV' | 3   | 13   |
| >FLT3-I836L- DIMSDSNYV  | 355  | >FLT3-I836L- DLMSDSNYV  | 10  | 345  |
| >FLT3-I836L- DIMSDSNYV\ | 492  | >FLT3-I836L- DLMSDSNYV' | 13  | 479  |
| >FLT3-I836L- DIMSDSNY   | 133  | >FLT3-I836L- DLMSDSNY   | 723 | 590  |
| >FLT3-I836L- DIMSDSNY   | 16   | >FLT3-I836L- DLMSDSNY   | 122 | 106  |
| >FLT3-I836L- DIMSDSNY   | 258  | >FLT3-I836L- DLMSDSNY   | 490 | 232  |
| >FLT3-I836L- DIMSDSNY   | 251  | >FLT3-I836L- DLMSDSNY   | 197 | 54   |
| >FLT3-I836L- DIMSDSNY\  | 74   | >FLT3-I836L- DLMSDSNYV' | 72  | 2    |

|                          |     |                          |      |      |
|--------------------------|-----|--------------------------|------|------|
| >FLT3-I836L- DIMSDSNY    | 472 | >FLT3-I836L- DLMSDSNY    | 1691 | 1219 |
| >FLT3-I836L- DIMSDSNYV\  | 16  | >FLT3-I836L- DLMSDSNYV'  | 40   | 24   |
| >FLT3-I836L- DIMSDSNYV   | 17  | >FLT3-I836L- DLMSDSNYV   | 41   | 24   |
| >FLT3-I836L- DIMSDSNYV\  | 139 | >FLT3-I836L- DLMSDSNYV'  | 576  | 437  |
| >FLT3-I836L- DIMSDSNYV   | 7   | >FLT3-I836L- DLMSDSNYV   | 16   | 9    |
| >FLT3-I836L- DIMSDSNYV\  | 22  | >FLT3-I836L- DLMSDSNYV'  | 66   | 44   |
| >FLT3-I836L- DIMSDSNY    | 373 | >FLT3-I836L- DLMSDSNY    | 80   | 293  |
| >FLT3-I836L- KICDFGLARD  | 109 | >FLT3-I836L- KICDFGLARD  | 283  | 174  |
| >FLT3-I836L- RDIMSDSNY   | 384 | >FLT3-I836L- RDLMSDSNY   | 355  | 29   |
| >FLT3-I836L- RDIMSDSNY\  | 207 | >FLT3-I836L- RDLMSDSNY'  | 182  | 25   |
| >FLT3-I836L- RDIMSDSNY   | 551 | >FLT3-I836L- RDLMSDSNY   | 250  | 301  |
| >FLT3-I836L- RDIMSDSNY\  | 121 | >FLT3-I836L- RDLMSDSNY'  | 95   | 26   |
| >FLT3-I836L- RDIMSDSNY\  | 47  | >FLT3-I836L- RDLMSDSNY'  | 38   | 9    |
| >FLT3-I836L- ARDIMSDSN\  | 207 | >FLT3-I836L- ARDLMSDSN   | 173  | 34   |
| >FLT3-I836L- ARDIMSDSN\  | 185 | >FLT3-I836L- ARDLMSDSN   | 139  | 46   |
| >FLT3-I836L- LARDIMSDSN  | 168 | >FLT3-I836L- LARDLMSDSN  | 307  | 139  |
| >FLT3-I836L- LARDIMSDSN  | 146 | >FLT3-I836L- LARDLMSDSN  | 109  | 37   |
| >FLT3-I836L- LARDIMSDSN  | 119 | >FLT3-I836L- LARDLMSDSN  | 125  | 6    |
| >FLT3-I836L- LARDIMSDSN  | 5   | >FLT3-I836L- LARDLMSDSN  | 5    | 0    |
| >FLT3-I836L- LARDIMSDSN  | 106 | >FLT3-I836L- LARDLMSDSN  | 111  | 5    |
| >FLT3-I836L- LARDIMSDSN  | 12  | >FLT3-I836L- LARDLMSDSN  | 12   | 0    |
| >FLT3-I836L- CDFGLARDI   | 84  | >FLT3-I836L- CDFGLARDL   | 873  | 789  |
| >FLT3-I836L- ICDFGLARDI\ | 428 | >FLT3-I836L- ICDFGLARDLI | 287  | 141  |
| >FLT3-I836M IMSDSNYV     | 11  | >FLT3-I836M MMSDSNYV     | 8    | 3    |
| >FLT3-I836M IMSDSNYVV    | 12  | >FLT3-I836M MMSDSNYV\    | 8    | 4    |
| >FLT3-I836M IMSDSNYV     | 2   | >FLT3-I836M MMSDSNYV     | 2    | 0    |
| >FLT3-I836M IMSDSNYVV    | 3   | >FLT3-I836M MMSDSNYV\    | 2    | 1    |
| >FLT3-I836M IMSDSNYVV\   | 261 | >FLT3-I836M MMSDSNYV\    | 65   | 196  |
| >FLT3-I836M IMSDSNYV     | 3   | >FLT3-I836M MMSDSNYV     | 2    | 1    |
| >FLT3-I836M IMSDSNYVV    | 6   | >FLT3-I836M MMSDSNYV\    | 3    | 3    |
| >FLT3-I836M IMSDSNYV     | 9   | >FLT3-I836M MMSDSNYV     | 6    | 3    |
| >FLT3-I836M IMSDSNYVV    | 21  | >FLT3-I836M MMSDSNYV\    | 11   | 10   |
| >FLT3-I836M IMSDSNYV     | 2   | >FLT3-I836M MMSDSNYV     | 2    | 0    |
| >FLT3-I836M IMSDSNYVV    | 2   | >FLT3-I836M MMSDSNYV\    | 2    | 0    |
| >FLT3-I836M IMSDSNYVV\   | 631 | >FLT3-I836M MMSDSNYV\    | 276  | 355  |
| >FLT3-I836M IMSDSNYV     | 3   | >FLT3-I836M MMSDSNYV     | 2    | 1    |
| >FLT3-I836M IMSDSNYVV    | 3   | >FLT3-I836M MMSDSNYV\    | 2    | 1    |
| >FLT3-I836M IMSDSNYV     | 6   | >FLT3-I836M MMSDSNYV     | 6    | 0    |
| >FLT3-I836M IMSDSNYVV    | 8   | >FLT3-I836M MMSDSNYV\    | 7    | 1    |
| >FLT3-I836M IMSDSNYV     | 2   | >FLT3-I836M MMSDSNYV     | 2    | 0    |
| >FLT3-I836M IMSDSNYVV    | 2   | >FLT3-I836M MMSDSNYV\    | 2    | 0    |
| >FLT3-I836M IMSDSNYV     | 2   | >FLT3-I836M MMSDSNYV     | 2    | 0    |
| >FLT3-I836M IMSDSNYVV    | 2   | >FLT3-I836M MMSDSNYV\    | 2    | 0    |

|                        |      |                       |      |      |
|------------------------|------|-----------------------|------|------|
| >FLT3-I836M IMSDSNYVVF | 1154 | >FLT3-I836M MMSDSNYV\ | 325  | 829  |
| >FLT3-I836M IMSDSNYVVF | 280  | >FLT3-I836M MMSDSNYV\ | 191  | 89   |
| >FLT3-I836M IMSDSNYVVF | 68   | >FLT3-I836M MMSDSNYV\ | 27   | 41   |
| >FLT3-I836M IMSDSNYVVF | 347  | >FLT3-I836M MMSDSNYV\ | 185  | 162  |
| >FLT3-I836M IMSDSNYVVF | 129  | >FLT3-I836M MMSDSNYV\ | 19   | 110  |
| >FLT3-I836M IMSDSNYV   | 408  | >FLT3-I836M MMSDSNYV  | 13   | 395  |
| >FLT3-I836M IMSDSNYVV  | 644  | >FLT3-I836M MMSDSNYV\ | 17   | 627  |
| >FLT3-I836M IMSDSNYV   | 980  | >FLT3-I836M MMSDSNYV  | 47   | 933  |
| >FLT3-I836M IMSDSNYVV  | 2711 | >FLT3-I836M MMSDSNYV\ | 183  | 2528 |
| >FLT3-I836M IMSDSNYVV  | 244  | >FLT3-I836M MMSDSNYV\ | 148  | 96   |
| >FLT3-I836M IMSDSNYV   | 125  | >FLT3-I836M MMSDSNYV  | 100  | 25   |
| >FLT3-I836M IMSDSNYVV  | 53   | >FLT3-I836M MMSDSNYV\ | 42   | 11   |
| >FLT3-I836M IMSDSNYVVF | 132  | >FLT3-I836M MMSDSNYV\ | 98   | 34   |
| >FLT3-I836M IMSDSNYVV  | 2385 | >FLT3-I836M MMSDSNYV\ | 121  | 2264 |
| >FLT3-I836M IMSDSNYVVF | 500  | >FLT3-I836M MMSDSNYV\ | 458  | 42   |
| >FLT3-I836M IMSDSNYVVF | 47   | >FLT3-I836M MMSDSNYV\ | 41   | 6    |
| >FLT3-I836M DIMSDSNYV  | 3034 | >FLT3-I836M DMMSDSNY  | 261  | 2773 |
| >FLT3-I836M DIMSDSNYV\ | 224  | >FLT3-I836M DMMSDSNY  | 34   | 190  |
| >FLT3-I836M DIMSDSNYV  | 200  | >FLT3-I836M DMMSDSNY  | 20   | 180  |
| >FLT3-I836M DIMSDSNYV\ | 84   | >FLT3-I836M DMMSDSNY  | 18   | 66   |
| >FLT3-I836M DIMSDSNYV  | 621  | >FLT3-I836M DMMSDSNY  | 49   | 572  |
| >FLT3-I836M DIMSDSNYV\ | 282  | >FLT3-I836M DMMSDSNY  | 73   | 209  |
| >FLT3-I836M DIMSDSNYV  | 710  | >FLT3-I836M DMMSDSNY  | 317  | 393  |
| >FLT3-I836M DIMSDSNYV\ | 235  | >FLT3-I836M DMMSDSNY  | 133  | 102  |
| >FLT3-I836M DIMSDSNYV  | 324  | >FLT3-I836M DMMSDSNY  | 9    | 315  |
| >FLT3-I836M DIMSDSNYV\ | 693  | >FLT3-I836M DMMSDSNY  | 17   | 676  |
| >FLT3-I836M DIMSDSNYV  | 433  | >FLT3-I836M DMMSDSNY  | 5    | 428  |
| >FLT3-I836M DIMSDSNYV\ | 438  | >FLT3-I836M DMMSDSNY  | 7    | 431  |
| >FLT3-I836M DIMSDSNYV  | 424  | >FLT3-I836M DMMSDSNY  | 20   | 404  |
| >FLT3-I836M DIMSDSNYV\ | 1324 | >FLT3-I836M DMMSDSNY  | 41   | 1283 |
| >FLT3-I836M DIMSDSNYV  | 8    | >FLT3-I836M DMMSDSNY  | 2    | 6    |
| >FLT3-I836M DIMSDSNYV\ | 16   | >FLT3-I836M DMMSDSNY  | 2    | 14   |
| >FLT3-I836M DIMSDSNYV  | 355  | >FLT3-I836M DMMSDSNY  | 14   | 341  |
| >FLT3-I836M DIMSDSNYV\ | 492  | >FLT3-I836M DMMSDSNY  | 19   | 473  |
| >FLT3-I836M DIMSDSNY   | 133  | >FLT3-I836M DMMSDSNY  | 2510 | 2377 |
| >FLT3-I836M DIMSDSNY   | 16   | >FLT3-I836M DMMSDSNY  | 90   | 74   |
| >FLT3-I836M DIMSDSNY   | 258  | >FLT3-I836M DMMSDSNY  | 1005 | 747  |
| >FLT3-I836M DIMSDSNY   | 730  | >FLT3-I836M DMMSDSNY  | 101  | 629  |
| >FLT3-I836M DIMSDSNY   | 251  | >FLT3-I836M DMMSDSNY  | 53   | 198  |
| >FLT3-I836M DIMSDSNYV\ | 1399 | >FLT3-I836M DMMSDSNY  | 291  | 1108 |
| >FLT3-I836M DIMSDSNYV\ | 74   | >FLT3-I836M DMMSDSNY  | 39   | 35   |
| >FLT3-I836M DIMSDSNY   | 472  | >FLT3-I836M DMMSDSNY  | 1334 | 862  |
| >FLT3-I836M DIMSDSNYV\ | 16   | >FLT3-I836M DMMSDSNY  | 34   | 18   |

|                         |      |                         |      |      |
|-------------------------|------|-------------------------|------|------|
| >FLT3-I836M DIMSDSNVY   | 17   | >FLT3-I836M DMMSDSNY    | 56   | 39   |
| >FLT3-I836M DIMSDSNV\   | 139  | >FLT3-I836M DMMSDSNY    | 225  | 86   |
| >FLT3-I836M DIMSDSNV    | 7    | >FLT3-I836M DMMSDSNY    | 13   | 6    |
| >FLT3-I836M DIMSDSNV\   | 22   | >FLT3-I836M DMMSDSNY    | 50   | 28   |
| >FLT3-I836M DIMSDSNY    | 3826 | >FLT3-I836M DMMSDSNY    | 359  | 3467 |
| >FLT3-I836M DIMSDSNY    | 373  | >FLT3-I836M DMMSDSNY    | 57   | 316  |
| >FLT3-I836M DIMSDSNY    | 2433 | >FLT3-I836M DMMSDSNY    | 88   | 2345 |
| >FLT3-I836M DIMSDSNY    | 606  | >FLT3-I836M DMMSDSNY    | 325  | 281  |
| >FLT3-I836M DIMSDSNV\   | 525  | >FLT3-I836M DMMSDSNY    | 272  | 253  |
| >FLT3-I836M KICDFGLARD  | 109  | >FLT3-I836M KICDFGLARD  | 1225 | 1116 |
| >FLT3-I836M RDIMSDSNY   | 384  | >FLT3-I836M RDMMSDSN\   | 188  | 196  |
| >FLT3-I836M RDIMSDSN\   | 207  | >FLT3-I836M RDMMSDSN\   | 117  | 90   |
| >FLT3-I836M RDIMSDSNY   | 551  | >FLT3-I836M RDMMSDSN\   | 189  | 362  |
| >FLT3-I836M RDIMSDSN\   | 718  | >FLT3-I836M RDMMSDSN\   | 203  | 515  |
| >FLT3-I836M RDIMSDSN\   | 121  | >FLT3-I836M RDMMSDSN\   | 169  | 48   |
| >FLT3-I836M RDIMSDSN\   | 47   | >FLT3-I836M RDMMSDSN\   | 60   | 13   |
| >FLT3-I836M ARDIMSDSN\  | 207  | >FLT3-I836M ARDMMSDSI   | 194  | 13   |
| >FLT3-I836M ARDIMSDSN\  | 185  | >FLT3-I836M ARDMMSDSI   | 139  | 46   |
| >FLT3-I836M LARDIMSDSN  | 168  | >FLT3-I836M LARDMMSDS   | 299  | 131  |
| >FLT3-I836M LARDIMSDSN  | 146  | >FLT3-I836M LARDMMSDS   | 110  | 36   |
| >FLT3-I836M LARDIMSDSN  | 119  | >FLT3-I836M LARDMMSDS   | 135  | 16   |
| >FLT3-I836M LARDIMSDSN  | 5    | >FLT3-I836M LARDMMSDS   | 4    | 1    |
| >FLT3-I836M LARDIMSDSN  | 106  | >FLT3-I836M LARDMMSDS   | 93   | 13   |
| >FLT3-I836M LARDIMSDSN  | 12   | >FLT3-I836M LARDMMSDS   | 14   | 2    |
| >FLT3-I836M CDFGLARDI   | 84   | >FLT3-I836M CDFGLARDM   | 2576 | 2492 |
| >FLT3-I836M ICDFGLARDI  | 428  | >FLT3-I836M ICDFGLARDM  | 246  | 182  |
| >FLT3-I836S- IMSDSNYV   | 11   | >FLT3-I836S- SMSDSNYV   | 11   | 0    |
| >FLT3-I836S- IMSDSNYVV  | 12   | >FLT3-I836S- SMSDSNYVV  | 11   | 1    |
| >FLT3-I836S- IMSDSNYV   | 2    | >FLT3-I836S- SMSDSNYV   | 2    | 0    |
| >FLT3-I836S- IMSDSNYVV  | 3    | >FLT3-I836S- SMSDSNYVV  | 3    | 0    |
| >FLT3-I836S- IMSDSNYVVF | 261  | >FLT3-I836S- SMSDSNYVVI | 377  | 116  |
| >FLT3-I836S- IMSDSNYV   | 3    | >FLT3-I836S- SMSDSNYV   | 4    | 1    |
| >FLT3-I836S- IMSDSNYVV  | 6    | >FLT3-I836S- SMSDSNYVV  | 7    | 1    |
| >FLT3-I836S- IMSDSNYV   | 9    | >FLT3-I836S- SMSDSNYV   | 12   | 3    |
| >FLT3-I836S- IMSDSNYVV  | 21   | >FLT3-I836S- SMSDSNYVV  | 26   | 5    |
| >FLT3-I836S- IMSDSNYV   | 2    | >FLT3-I836S- SMSDSNYV   | 2    | 0    |
| >FLT3-I836S- IMSDSNYVV  | 2    | >FLT3-I836S- SMSDSNYVV  | 2    | 0    |
| >FLT3-I836S- IMSDSNYV   | 3    | >FLT3-I836S- SMSDSNYV   | 3    | 0    |
| >FLT3-I836S- IMSDSNYVV  | 3    | >FLT3-I836S- SMSDSNYVV  | 3    | 0    |
| >FLT3-I836S- IMSDSNYV   | 6    | >FLT3-I836S- SMSDSNYV   | 5    | 1    |
| >FLT3-I836S- IMSDSNYVV  | 8    | >FLT3-I836S- SMSDSNYVV  | 6    | 2    |
| >FLT3-I836S- IMSDSNYV   | 2    | >FLT3-I836S- SMSDSNYV   | 5    | 3    |
| >FLT3-I836S- IMSDSNYVV  | 2    | >FLT3-I836S- SMSDSNYVV  | 4    | 2    |



|                         |      |                         |       |       |
|-------------------------|------|-------------------------|-------|-------|
| >FLT3-I836S- IMSDSNYV   | 2    | >FLT3-I836S- SMSDSNYV   | 2     | 0     |
| >FLT3-I836S- IMSDSNYVV  | 2    | >FLT3-I836S- SMSDSNYVV  | 2     | 0     |
| >FLT3-I836S- IMSDSNYVVF | 280  | >FLT3-I836S- SMSDSNYVVF | 86    | 194   |
| >FLT3-I836S- IMSDSNYVVF | 68   | >FLT3-I836S- SMSDSNYVVF | 52    | 16    |
| >FLT3-I836S- IMSDSNYVVF | 347  | >FLT3-I836S- SMSDSNYVVF | 449   | 102   |
| >FLT3-I836S- IMSDSNYVVF | 129  | >FLT3-I836S- SMSDSNYVVF | 77    | 52    |
| >FLT3-I836S- IMSDSNYV   | 408  | >FLT3-I836S- SMSDSNYV   | 94    | 314   |
| >FLT3-I836S- IMSDSNYVV  | 644  | >FLT3-I836S- SMSDSNYVV  | 136   | 508   |
| >FLT3-I836S- IMSDSNYV   | 980  | >FLT3-I836S- SMSDSNYV   | 112   | 868   |
| >FLT3-I836S- IMSDSNYVV  | 2711 | >FLT3-I836S- SMSDSNYVV  | 392   | 2319  |
| >FLT3-I836S- IMSDSNYVV  | 244  | >FLT3-I836S- SMSDSNYVV  | 262   | 18    |
| >FLT3-I836S- IMSDSNYV   | 125  | >FLT3-I836S- SMSDSNYV   | 473   | 348   |
| >FLT3-I836S- IMSDSNYVV  | 53   | >FLT3-I836S- SMSDSNYVV  | 198   | 145   |
| >FLT3-I836S- IMSDSNYVVF | 132  | >FLT3-I836S- SMSDSNYVVF | 453   | 321   |
| >FLT3-I836S- IMSDSNYVV  | 2385 | >FLT3-I836S- SMSDSNYVV  | 416   | 1969  |
| >FLT3-I836S- IMSDSNYVVF | 500  | >FLT3-I836S- SMSDSNYVVF | 162   | 338   |
| >FLT3-I836S- IMSDSNYVVF | 47   | >FLT3-I836S- SMSDSNYVVF | 52    | 5     |
| >FLT3-I836S- DIMSDSNV\  | 224  | >FLT3-I836S- DSMSDSNYV' | 2034  | 1810  |
| >FLT3-I836S- DIMSDSNYV  | 200  | >FLT3-I836S- DSMSDSNYV  | 2154  | 1954  |
| >FLT3-I836S- DIMSDSNV\  | 84   | >FLT3-I836S- DSMSDSNYV' | 1009  | 925   |
| >FLT3-I836S- DIMSDSNV\  | 282  | >FLT3-I836S- DSMSDSNYV' | 3975  | 3693  |
| >FLT3-I836S- DIMSDSNV\  | 235  | >FLT3-I836S- DSMSDSNYV' | 1859  | 1624  |
| >FLT3-I836S- DIMSDSNYV  | 324  | >FLT3-I836S- DSMSDSNYV  | 10961 | 10637 |
| >FLT3-I836S- DIMSDSNYV  | 433  | >FLT3-I836S- DSMSDSNYV  | 9722  | 9289  |
| >FLT3-I836S- DIMSDSNV\  | 438  | >FLT3-I836S- DSMSDSNYV' | 9021  | 8583  |
| >FLT3-I836S- DIMSDSNYV  | 424  | >FLT3-I836S- DSMSDSNYV  | 14748 | 14324 |
| >FLT3-I836S- DIMSDSNYV  | 8    | >FLT3-I836S- DSMSDSNYV  | 3983  | 3975  |
| >FLT3-I836S- DIMSDSNV\  | 16   | >FLT3-I836S- DSMSDSNYV' | 5015  | 4999  |
| >FLT3-I836S- DIMSDSNYV  | 355  | >FLT3-I836S- DSMSDSNYV  | 19140 | 18785 |
| >FLT3-I836S- DIMSDSNV\  | 492  | >FLT3-I836S- DSMSDSNYV' | 21042 | 20550 |
| >FLT3-I836S- DIMSDSNY   | 133  | >FLT3-I836S- DSMSDSNY   | 930   | 797   |
| >FLT3-I836S- DIMSDSNY   | 16   | >FLT3-I836S- DSMSDSNY   | 18    | 2     |
| >FLT3-I836S- DIMSDSNY   | 258  | >FLT3-I836S- DSMSDSNY   | 225   | 33    |
| >FLT3-I836S- DIMSDSNY   | 251  | >FLT3-I836S- DSMSDSNY   | 126   | 125   |
| >FLT3-I836S- DIMSDSNV\  | 74   | >FLT3-I836S- DSMSDSNYV' | 93    | 19    |
| >FLT3-I836S- DIMSDSNY   | 472  | >FLT3-I836S- DSMSDSNY   | 415   | 57    |
| >FLT3-I836S- DIMSDSNV\  | 16   | >FLT3-I836S- DSMSDSNYV' | 12    | 4     |
| >FLT3-I836S- DIMSDSNYV  | 17   | >FLT3-I836S- DSMSDSNYV  | 17    | 0     |
| >FLT3-I836S- DIMSDSNV\  | 139  | >FLT3-I836S- DSMSDSNYV' | 79    | 60    |
| >FLT3-I836S- DIMSDSNYV  | 7    | >FLT3-I836S- DSMSDSNYV  | 21    | 14    |
| >FLT3-I836S- DIMSDSNV\  | 22   | >FLT3-I836S- DSMSDSNYV' | 94    | 72    |
| >FLT3-I836S- DIMSDSNY   | 373  | >FLT3-I836S- DSMSDSNY   | 2319  | 1946  |
| >FLT3-I836S- DIMSDSNY   | 8497 | >FLT3-I836S- DSMSDSNY   | 273   | 8224  |

|                          |     |                          |       |       |
|--------------------------|-----|--------------------------|-------|-------|
| >FLT3-I836S- DIMSDSNY    | 606 | >FLT3-I836S- DSMSDSNY    | 446   | 160   |
| >FLT3-I836S- KICDFGLARD  | 109 | >FLT3-I836S- KICDFGLARD  | 10182 | 10073 |
| >FLT3-I836S- RDIMSDSNY   | 384 | >FLT3-I836S- RDSMSDSNY   | 520   | 136   |
| >FLT3-I836S- RDIMSDSNY\  | 207 | >FLT3-I836S- RDSMSDSNY'  | 769   | 562   |
| >FLT3-I836S- RDIMSDSNY   | 551 | >FLT3-I836S- RDSMSDSNY   | 272   | 279   |
| >FLT3-I836S- RDIMSDSNY\  | 121 | >FLT3-I836S- RDSMSDSNY'  | 191   | 70    |
| >FLT3-I836S- RDIMSDSNY\  | 47  | >FLT3-I836S- RDSMSDSNY'  | 68    | 21    |
| >FLT3-I836S- ARDIMSDSN\  | 207 | >FLT3-I836S- ARDSMSDSN   | 297   | 90    |
| >FLT3-I836S- ARDIMSDSN\  | 185 | >FLT3-I836S- ARDSMSDSN   | 196   | 11    |
| >FLT3-I836S- LARDIMSDSN  | 168 | >FLT3-I836S- LARDSMSDSI  | 337   | 169   |
| >FLT3-I836S- LARDIMSDSN  | 146 | >FLT3-I836S- LARDSMSDSI  | 80    | 66    |
| >FLT3-I836S- LARDIMSDSN  | 119 | >FLT3-I836S- LARDSMSDSI  | 36    | 83    |
| >FLT3-I836S- LARDIMSDSN  | 5   | >FLT3-I836S- LARDSMSDSI  | 3     | 2     |
| >FLT3-I836S- LARDIMSDSN  | 106 | >FLT3-I836S- LARDSMSDSI  | 104   | 2     |
| >FLT3-I836S- LARDIMSDSN  | 12  | >FLT3-I836S- LARDSMSDSI  | 17    | 5     |
| >FLT3-I836S- FGLARDIM    | 608 | >FLT3-I836S- FGLARDSM    | 446   | 162   |
| >FLT3-I836S- CDFGLARDI   | 84  | >FLT3-I836S- CDFGLARDS   | 17148 | 17064 |
| >FLT3-I836S- ICDFGLARDIM | 428 | >FLT3-I836S- ICDFGLARDSI | 595   | 167   |
| >FLT3-I836V- IMSDSNYV    | 11  | >FLT3-I836V- VMSDSNYV    | 12    | 1     |
| >FLT3-I836V- IMSDSNYVV   | 12  | >FLT3-I836V- VMSDSNYVV   | 13    | 1     |
| >FLT3-I836V- IMSDSNYV    | 2   | >FLT3-I836V- VMSDSNYV    | 2     | 0     |
| >FLT3-I836V- IMSDSNYVV   | 3   | >FLT3-I836V- VMSDSNYVV   | 4     | 1     |
| >FLT3-I836V- IMSDSNYVVF  | 261 | >FLT3-I836V- VMSDSNYVV   | 613   | 352   |
| >FLT3-I836V- IMSDSNYV    | 3   | >FLT3-I836V- VMSDSNYV    | 4     | 1     |
| >FLT3-I836V- IMSDSNYVV   | 6   | >FLT3-I836V- VMSDSNYVV   | 7     | 1     |
| >FLT3-I836V- IMSDSNYV    | 9   | >FLT3-I836V- VMSDSNYV    | 10    | 1     |
| >FLT3-I836V- IMSDSNYVV   | 21  | >FLT3-I836V- VMSDSNYVV   | 22    | 1     |
| >FLT3-I836V- IMSDSNYV    | 2   | >FLT3-I836V- VMSDSNYV    | 2     | 0     |
| >FLT3-I836V- IMSDSNYVV   | 2   | >FLT3-I836V- VMSDSNYVV   | 2     | 0     |
| >FLT3-I836V- IMSDSNYV    | 3   | >FLT3-I836V- VMSDSNYV    | 3     | 0     |
| >FLT3-I836V- IMSDSNYVV   | 3   | >FLT3-I836V- VMSDSNYVV   | 2     | 1     |
| >FLT3-I836V- IMSDSNYV    | 6   | >FLT3-I836V- VMSDSNYV    | 6     | 0     |
| >FLT3-I836V- IMSDSNYVV   | 8   | >FLT3-I836V- VMSDSNYVV   | 7     | 1     |
| >FLT3-I836V- IMSDSNYV    | 2   | >FLT3-I836V- VMSDSNYV    | 2     | 0     |
| >FLT3-I836V- IMSDSNYVV   | 2   | >FLT3-I836V- VMSDSNYVV   | 2     | 0     |
| >FLT3-I836V- IMSDSNYV    | 2   | >FLT3-I836V- VMSDSNYV    | 2     | 0     |
| >FLT3-I836V- IMSDSNYVV   | 2   | >FLT3-I836V- VMSDSNYVV   | 2     | 0     |
| >FLT3-I836V- IMSDSNYVVF  | 280 | >FLT3-I836V- VMSDSNYVV   | 279   | 1     |
| >FLT3-I836V- IMSDSNYVVF  | 68  | >FLT3-I836V- VMSDSNYVV   | 88    | 20    |
| >FLT3-I836V- IMSDSNYVVF  | 347 | >FLT3-I836V- VMSDSNYVV   | 588   | 241   |
| >FLT3-I836V- IMSDSNYVVF  | 129 | >FLT3-I836V- VMSDSNYVV   | 279   | 150   |
| >FLT3-I836V- IMSDSNYV    | 408 | >FLT3-I836V- VMSDSNYV    | 688   | 280   |
| >FLT3-I836V- IMSDSNYVV   | 244 | >FLT3-I836V- VMSDSNYVV   | 309   | 65    |

|                         |      |                          |      |      |
|-------------------------|------|--------------------------|------|------|
| >FLT3-I836V- IMSDSNYV   | 125  | >FLT3-I836V- VMDSDSNYV   | 323  | 198  |
| >FLT3-I836V- IMSDSNYVV  | 53   | >FLT3-I836V- VMDSDSNYVV  | 128  | 75   |
| >FLT3-I836V- IMSDSNYVVF | 132  | >FLT3-I836V- VMDSDSNYVVF | 312  | 180  |
| >FLT3-I836V- IMSDSNYVVF | 47   | >FLT3-I836V- VMDSDSNYVVF | 98   | 51   |
| >FLT3-I836V- DIMSDSNV\  | 224  | >FLT3-I836V- DVMSDSNYV   | 465  | 241  |
| >FLT3-I836V- DIMSDSNYV  | 200  | >FLT3-I836V- DVMSDSNYV   | 412  | 212  |
| >FLT3-I836V- DIMSDSNV\  | 84   | >FLT3-I836V- DVMSDSNYV   | 136  | 52   |
| >FLT3-I836V- DIMSDSNV\  | 282  | >FLT3-I836V- DVMSDSNYV   | 473  | 191  |
| >FLT3-I836V- DIMSDSNV\  | 235  | >FLT3-I836V- DVMSDSNYV   | 252  | 17   |
| >FLT3-I836V- DIMSDSNYV  | 324  | >FLT3-I836V- DVMSDSNYV   | 1134 | 810  |
| >FLT3-I836V- DIMSDSNYV  | 433  | >FLT3-I836V- DVMSDSNYV   | 808  | 375  |
| >FLT3-I836V- DIMSDSNV\  | 438  | >FLT3-I836V- DVMSDSNYV   | 780  | 342  |
| >FLT3-I836V- DIMSDSNYV  | 424  | >FLT3-I836V- DVMSDSNYV   | 1151 | 727  |
| >FLT3-I836V- DIMSDSNYV  | 8    | >FLT3-I836V- DVMSDSNYV   | 15   | 7    |
| >FLT3-I836V- DIMSDSNV\  | 16   | >FLT3-I836V- DVMSDSNYV   | 34   | 18   |
| >FLT3-I836V- DIMSDSNYV  | 355  | >FLT3-I836V- DVMSDSNYV   | 1025 | 670  |
| >FLT3-I836V- DIMSDSNV\  | 492  | >FLT3-I836V- DVMSDSNYV   | 1405 | 913  |
| >FLT3-I836V- DIMSDSNY   | 133  | >FLT3-I836V- DVMSDSNY    | 40   | 93   |
| >FLT3-I836V- DIMSDSNY   | 16   | >FLT3-I836V- DVMSDSNY    | 7    | 9    |
| >FLT3-I836V- DIMSDSNYV  | 1148 | >FLT3-I836V- DVMSDSNYV   | 400  | 748  |
| >FLT3-I836V- DIMSDSNY   | 258  | >FLT3-I836V- DVMSDSNY    | 75   | 183  |
| >FLT3-I836V- DIMSDSNY   | 730  | >FLT3-I836V- DVMSDSNY    | 430  | 300  |
| >FLT3-I836V- DIMSDSNY   | 251  | >FLT3-I836V- DVMSDSNY    | 209  | 42   |
| >FLT3-I836V- DIMSDSNV\  | 74   | >FLT3-I836V- DVMSDSNYV   | 62   | 12   |
| >FLT3-I836V- DIMSDSNY   | 472  | >FLT3-I836V- DVMSDSNY    | 155  | 317  |
| >FLT3-I836V- DIMSDSNV\  | 16   | >FLT3-I836V- DVMSDSNYV   | 8    | 8    |
| >FLT3-I836V- DIMSDSNYV  | 17   | >FLT3-I836V- DVMSDSNYV   | 9    | 8    |
| >FLT3-I836V- DIMSDSNV\  | 139  | >FLT3-I836V- DVMSDSNYV   | 68   | 71   |
| >FLT3-I836V- DIMSDSNYV  | 7    | >FLT3-I836V- DVMSDSNYV   | 6    | 1    |
| >FLT3-I836V- DIMSDSNV\  | 22   | >FLT3-I836V- DVMSDSNYV   | 14   | 8    |
| >FLT3-I836V- DIMSDSNY   | 373  | >FLT3-I836V- DVMSDSNY    | 468  | 95   |
| >FLT3-I836V- DIMSDSNY   | 606  | >FLT3-I836V- DVMSDSNY    | 175  | 431  |
| >FLT3-I836V- KICDFGLARD | 2732 | >FLT3-I836V- KICDFGLARD  | 439  | 2293 |
| >FLT3-I836V- KICDFGLARD | 1817 | >FLT3-I836V- KICDFGLARD  | 466  | 1351 |
| >FLT3-I836V- KICDFGLARD | 997  | >FLT3-I836V- KICDFGLARD  | 90   | 907  |
| >FLT3-I836V- KICDFGLARD | 5150 | >FLT3-I836V- KICDFGLARD  | 61   | 5089 |
| >FLT3-I836V- KICDFGLARD | 109  | >FLT3-I836V- KICDFGLARD  | 1139 | 1030 |
| >FLT3-I836V- RDIMSDSNY  | 384  | >FLT3-I836V- RDVMSDSNY   | 502  | 118  |
| >FLT3-I836V- RDIMSDSN\  | 207  | >FLT3-I836V- RDVMSDSNY   | 363  | 156  |
| >FLT3-I836V- RDIMSDSNY  | 551  | >FLT3-I836V- RDVMSDSNY   | 343  | 208  |
| >FLT3-I836V- RDIMSDSN\  | 121  | >FLT3-I836V- RDVMSDSNY   | 187  | 66   |
| >FLT3-I836V- RDIMSDSN\  | 47   | >FLT3-I836V- RDVMSDSNY   | 66   | 19   |
| >FLT3-I836V- ARDIMSDSN\ | 207  | >FLT3-I836V- ARDVMSDSN   | 254  | 47   |

|                          |       |                         |      |       |
|--------------------------|-------|-------------------------|------|-------|
| >FLT3-I836V- ARDIMSDSN\  | 185   | >FLT3-I836V- ARDVMSDSN  | 222  | 37    |
| >FLT3-I836V- LARDIMSDSN  | 168   | >FLT3-I836V- LARDVMSDSI | 251  | 83    |
| >FLT3-I836V- LARDIMSDSN  | 146   | >FLT3-I836V- LARDVMSDSI | 114  | 32    |
| >FLT3-I836V- LARDIMSDSN  | 119   | >FLT3-I836V- LARDVMSDSI | 142  | 23    |
| >FLT3-I836V- LARDIMSDSN  | 5     | >FLT3-I836V- LARDVMSDSI | 6    | 1     |
| >FLT3-I836V- LARDIMSDSN  | 106   | >FLT3-I836V- LARDVMSDSI | 120  | 14    |
| >FLT3-I836V- LARDIMSDSN  | 12    | >FLT3-I836V- LARDVMSDSI | 12   | 0     |
| >FLT3-I836V- FGLARDIM    | 608   | >FLT3-I836V- FGLARDVM   | 418  | 190   |
| >FLT3-I836V- CDFGLARDI   | 84    | >FLT3-I836V- CDFGLARDV  | 163  | 79    |
| >FLT3-I836V- ICDFGLARDIM | 428   | >FLT3-I836V- ICDFGLARDV | 382  | 46    |
| >FLT3-K663C KMMTQLGS     | 463   | >FLT3-K663C QMMTQLGS    | 1630 | 1167  |
| >FLT3-K663C KMMTQLGSF    | 167   | >FLT3-K663C QMMTQLGSI   | 2236 | 2069  |
| >FLT3-K663C KMMTQLGSF    | 419   | >FLT3-K663C QMMTQLGSI   | 2523 | 2104  |
| >FLT3-K663C LKMMTQLGS    | 15255 | >FLT3-K663C LQMMTQLGS   | 156  | 15099 |
| >FLT3-K663C LKMMTQLGS    | 17980 | >FLT3-K663C LQMMTQLGS   | 336  | 17644 |
| >FLT3-K663C LKMMTQLGS    | 250   | >FLT3-K663C LQMMTQLGS   | 251  | 1     |
| >FLT3-K663C SREALMSEL    | 433   | >FLT3-K663C SREALMSEL   | 9476 | 9043  |
| >FLT3-K663C SREALMSEL    | 451   | >FLT3-K663C SREALMSEL   | 569  | 118   |
| >FLT3-K663C ELKMMTQL     | 54    | >FLT3-K663C ELQMMTQL    | 21   | 33    |
| >FLT3-K663C ELKMMTQL     | 72    | >FLT3-K663C ELQMMTQL    | 945  | 873   |
| >FLT3-K663C SELKMMTQL    | 27    | >FLT3-K663C SELQMMTQL   | 17   | 10    |
| >FLT3-K663C SELKMMTQL    | 451   | >FLT3-K663C SELQMMTQL   | 507  | 56    |
| >FLT3-K663C SELKMMTQL    | 282   | >FLT3-K663C SELQMMTQL   | 234  | 48    |
| >FLT3-K663C SELKMMTQL    | 20    | >FLT3-K663C SELQMMTQL   | 15   | 5     |
| >FLT3-K663C SELKMMTQL    | 484   | >FLT3-K663C SELQMMTQL   | 308  | 176   |
| >FLT3-K663C SELKMMTQL    | 498   | >FLT3-K663C SELQMMTQL   | 331  | 167   |
| >FLT3-K663C SELKMMTQL    | 693   | >FLT3-K663C SELQMMTQL   | 331  | 362   |
| >FLT3-K663C SELKMMTQL    | 517   | >FLT3-K663C SELQMMTQL   | 379  | 138   |
| >FLT3-K663C SELKMMTQL    | 709   | >FLT3-K663C SELQMMTQL   | 381  | 328   |
| >FLT3-K663C SELKMMTQL    | 6     | >FLT3-K663C SELQMMTQL   | 5    | 1     |
| >FLT3-K663C MSELKMMTC    | 9     | >FLT3-K663C MSELQMMTC   | 11   | 2     |
| >FLT3-K663C MSELKMMTC    | 127   | >FLT3-K663C MSELQMMTC   | 116  | 11    |
| >FLT3-K663C LMSELKMM     | 1022  | >FLT3-K663C LMSELQMM    | 137  | 885   |
| >FLT3-K663C LMSELKMMT    | 2384  | >FLT3-K663C LMSELQMMT   | 355  | 2029  |
| >FLT3-K663C LMSELKMMT    | 63    | >FLT3-K663C LMSELQMMT   | 32   | 31    |
| >FLT3-K663C LMSELKMM     | 152   | >FLT3-K663C LMSELQMM    | 20   | 132   |
| >FLT3-K663C LMSELKMMT    | 721   | >FLT3-K663C LMSELQMMT   | 91   | 630   |
| >FLT3-K663C LMSELKMMT    | 6     | >FLT3-K663C LMSELQMMT   | 4    | 2     |
| >FLT3-K663C LMSELKMM     | 247   | >FLT3-K663C LMSELQMM    | 77   | 170   |
| >FLT3-K663C LMSELKMMT    | 380   | >FLT3-K663C LMSELQMMT   | 91   | 289   |
| >FLT3-K663C LMSELKMM     | 12    | >FLT3-K663C LMSELQMM    | 7    | 5     |
| >FLT3-K663C LMSELKMM     | 1828  | >FLT3-K663C LMSELQMM    | 371  | 1457  |
| >FLT3-K663C LMSELKMMT    | 162   | >FLT3-K663C LMSELQMMT   | 96   | 66    |

|                       |      |                       |     |      |
|-----------------------|------|-----------------------|-----|------|
| >FLT3-K663C LMSELKMM  | 65   | >FLT3-K663C LMSELQMM  | 23  | 42   |
| >FLT3-K663C LMSELKMMT | 116  | >FLT3-K663C LMSELQMMT | 58  | 58   |
| >FLT3-K663C LMSELKMMT | 14   | >FLT3-K663C LMSELQMMT | 9   | 5    |
| >FLT3-K663C LMSELKMM  | 1012 | >FLT3-K663C LMSELQMM  | 156 | 856  |
| >FLT3-K663C LMSELKMMT | 93   | >FLT3-K663C LMSELQMMT | 49  | 44   |
| >FLT3-K663C LMSELKMM  | 754  | >FLT3-K663C LMSELQMM  | 145 | 609  |
| >FLT3-K663C LMSELKMMT | 670  | >FLT3-K663C LMSELQMMT | 237 | 433  |
| >FLT3-K663C LMSELKMMT | 31   | >FLT3-K663C LMSELQMMT | 22  | 9    |
| >FLT3-K663C LMSELKMM  | 891  | >FLT3-K663C LMSELQMM  | 73  | 818  |
| >FLT3-K663C LMSELKMMT | 45   | >FLT3-K663C LMSELQMMT | 18  | 27   |
| >FLT3-K663C LMSELKMM  | 84   | >FLT3-K663C LMSELQMM  | 14  | 70   |
| >FLT3-K663C LMSELKMMT | 41   | >FLT3-K663C LMSELQMMT | 19  | 22   |
| >FLT3-K663C LMSELKMMT | 51   | >FLT3-K663C LMSELQMMT | 30  | 21   |
| >FLT3-K663C LMSELKMMT | 3    | >FLT3-K663C LMSELQMMT | 3   | 0    |
| >FLT3-K663C LMSELKMM  | 259  | >FLT3-K663C LMSELQMM  | 117 | 142  |
| >FLT3-K663C LMSELKMMT | 509  | >FLT3-K663C LMSELQMMT | 344 | 165  |
| >FLT3-K663C LMSELKMM  | 287  | >FLT3-K663C LMSELQMM  | 138 | 149  |
| >FLT3-K663C LMSELKMMT | 553  | >FLT3-K663C LMSELQMMT | 428 | 125  |
| >FLT3-K663C ALMSELKM  | 112  | >FLT3-K663C ALMSELQM  | 57  | 55   |
| >FLT3-K663C ALMSELKMM | 243  | >FLT3-K663C ALMSELQMM | 38  | 205  |
| >FLT3-K663C ALMSELKMM | 113  | >FLT3-K663C ALMSELQMM | 109 | 4    |
| >FLT3-K663C ALMSELKM  | 56   | >FLT3-K663C ALMSELQM  | 27  | 29   |
| >FLT3-K663C ALMSELKMM | 58   | >FLT3-K663C ALMSELQMM | 9   | 49   |
| >FLT3-K663C ALMSELKMM | 44   | >FLT3-K663C ALMSELQMM | 30  | 14   |
| >FLT3-K663C ALMSELKMM | 486  | >FLT3-K663C ALMSELQMM | 227 | 259  |
| >FLT3-K663C ALMSELKM  | 267  | >FLT3-K663C ALMSELQM  | 147 | 120  |
| >FLT3-K663C ALMSELKMM | 93   | >FLT3-K663C ALMSELQMM | 38  | 55   |
| >FLT3-K663C ALMSELKMM | 84   | >FLT3-K663C ALMSELQMM | 118 | 34   |
| >FLT3-K663C ALMSELKM  | 931  | >FLT3-K663C ALMSELQM  | 453 | 478  |
| >FLT3-K663C ALMSELKMM | 1182 | >FLT3-K663C ALMSELQMM | 113 | 1069 |
| >FLT3-K663C ALMSELKM  | 226  | >FLT3-K663C ALMSELQM  | 84  | 142  |
| >FLT3-K663C ALMSELKMM | 147  | >FLT3-K663C ALMSELQMM | 31  | 116  |
| >FLT3-K663C ALMSELKMM | 306  | >FLT3-K663C ALMSELQMM | 123 | 183  |
| >FLT3-K663C ALMSELKM  | 660  | >FLT3-K663C ALMSELQM  | 383 | 277  |
| >FLT3-K663C ALMSELKMM | 1241 | >FLT3-K663C ALMSELQMM | 106 | 1135 |
| >FLT3-K663C ALMSELKMM | 3585 | >FLT3-K663C ALMSELQMM | 442 | 3143 |
| >FLT3-K663C ALMSELKM  | 231  | >FLT3-K663C ALMSELQM  | 68  | 163  |
| >FLT3-K663C ALMSELKMM | 375  | >FLT3-K663C ALMSELQMM | 35  | 340  |
| >FLT3-K663C ALMSELKMM | 2606 | >FLT3-K663C ALMSELQMM | 449 | 2157 |
| >FLT3-K663C ALMSELKM  | 50   | >FLT3-K663C ALMSELQM  | 14  | 36   |
| >FLT3-K663C ALMSELKMM | 178  | >FLT3-K663C ALMSELQMM | 13  | 165  |
| >FLT3-K663C ALMSELKMM | 79   | >FLT3-K663C ALMSELQMM | 23  | 56   |
| >FLT3-K663C ALMSELKMM | 83   | >FLT3-K663C ALMSELQMM | 29  | 54   |

|                       |      |                       |      |      |
|-----------------------|------|-----------------------|------|------|
| >FLT3-K663CALMSELKMM  | 370  | >FLT3-K663CALMSELQMM  | 190  | 180  |
| >FLT3-K663CALMSELKM   | 1432 | >FLT3-K663CALMSELQM   | 291  | 1141 |
| >FLT3-K663CALMSELKMM  | 1035 | >FLT3-K663CALMSELQMM  | 292  | 743  |
| >FLT3-K663CALMSELKM   | 377  | >FLT3-K663CALMSELQM   | 272  | 105  |
| >FLT3-K663CALMSELKMM  | 272  | >FLT3-K663CALMSELQMM  | 162  | 110  |
| >FLT3-K663CEALMSELK   | 22   | >FLT3-K663CEALMSELQ   | 1825 | 1803 |
| >FLT3-K663CEALMSELKMI | 1217 | >FLT3-K663CEALMSELQM  | 411  | 806  |
| >FLT3-K663CEALMSELKM  | 67   | >FLT3-K663CEALMSELQM  | 31   | 36   |
| >FLT3-K663CEALMSELKMI | 270  | >FLT3-K663CEALMSELQM  | 216  | 54   |
| >FLT3-K663CEALMSELKM  | 228  | >FLT3-K663CEALMSELQM  | 131  | 97   |
| >FLT3-K663REALMSELKN  | 454  | >FLT3-K663REALMSELQM  | 176  | 278  |
| >FLT3-K663REALMSELKN  | 39   | >FLT3-K663REALMSELQM  | 134  | 95   |
| >FLT3-K663REALMSELKN  | 370  | >FLT3-K663REALMSELQM  | 335  | 35   |
| >FLT3-K663REALMSELKN  | 171  | >FLT3-K663REALMSELQM  | 75   | 96   |
| >FLT3-K663REALMSELKN  | 128  | >FLT3-K663REALMSELQM  | 80   | 48   |
| >FLT3-K663REALMSELKN  | 168  | >FLT3-K663REALMSELQM  | 99   | 69   |
| >FLT3-K663REALMSELKN  | 760  | >FLT3-K663REALMSELQM  | 239  | 521  |
| >FLT3-K663REALMSELKN  | 377  | >FLT3-K663REALMSELQM  | 183  | 194  |
| >FLT3-K663REALMSELKN  | 115  | >FLT3-K663REALMSELQM  | 157  | 42   |
| >FLT3-K663REALMSELK   | 146  | >FLT3-K663REALMSELQ   | 200  | 54   |
| >FLT3-K663REALMSELKN  | 48   | >FLT3-K663REALMSELQM  | 105  | 57   |
| >FLT3-K663REALMSELKN  | 12   | >FLT3-K663REALMSELQM  | 9    | 3    |
| >FLT3-M737IIPGSREVQI  | 2067 | >FLT3-M737IIPGSREVQI  | 462  | 1605 |
| >FLT3-M737IIPGSREVQI  | 55   | >FLT3-M737IIPGSREVQI  | 63   | 8    |
| >FLT3-M737IIPGSREVQI  | 272  | >FLT3-M737IIPGSREVQI  | 735  | 463  |
| >FLT3-M737IIPGSREVQI  | 485  | >FLT3-M737IIPGSREVQI  | 4115 | 3630 |
| >FLT3-M737IIPGSREVQI  | 178  | >FLT3-M737IIPGSREVQI  | 1084 | 906  |
| >FLT3-M737IIPGSREVQI  | 440  | >FLT3-M737IIPGSREVQI  | 3360 | 2920 |
| >FLT3-M737ISMPGSREV   | 400  | >FLT3-M737ISIPGSREV   | 3832 | 3432 |
| >FLT3-M737ISMPGSREV   | 100  | >FLT3-M737ISIPGSREV   | 1218 | 1118 |
| >FLT3-M737ISMPGSREVQ  | 393  | >FLT3-M737ISIPGSREVQI | 3107 | 2714 |
| >FLT3-M737ISMPGSREV   | 25   | >FLT3-M737ISIPGSREV   | 271  | 246  |
| >FLT3-M737ISMPGSREV   | 341  | >FLT3-M737ISIPGSREV   | 856  | 515  |
| >FLT3-M737ISMPGSREV   | 5    | >FLT3-M737ISIPGSREV   | 98   | 93   |
| >FLT3-M737ISMPGSREVQ  | 44   | >FLT3-M737ISIPGSREVQI | 1443 | 1399 |
| >FLT3-M737ISMPGSREV   | 147  | >FLT3-M737ISIPGSREV   | 5231 | 5084 |
| >FLT3-M737ISMPGSREV   | 12   | >FLT3-M737ISIPGSREV   | 189  | 177  |
| >FLT3-M737ISMPGSREVQ  | 84   | >FLT3-M737ISIPGSREVQI | 2620 | 2536 |
| >FLT3-M737ISMPGSREV   | 284  | >FLT3-M737ISIPGSREV   | 7898 | 7614 |
| >FLT3-M737ISMPGSREV   | 3    | >FLT3-M737ISIPGSREV   | 11   | 8    |
| >FLT3-M737ISMPGSREVQ  | 455  | >FLT3-M737ISIPGSREVQ  | 8024 | 7569 |
| >FLT3-M737ISMPGSREVQ  | 16   | >FLT3-M737ISIPGSREVQI | 327  | 311  |
| >FLT3-M737ISMPGSREVQ  | 433  | >FLT3-M737ISIPGSREVQI | 820  | 387  |

|                         |      |                         |       |       |
|-------------------------|------|-------------------------|-------|-------|
| >FLT3-M737I SMPGSREV    | 1455 | >FLT3-M737I SIPGSREV    | 146   | 1309  |
| >FLT3-M737I PTFQSHPNSS  | 93   | >FLT3-M737I PTFQSHPNSS  | 3253  | 3160  |
| >FLT3-M737I PTFQSHPNSS  | 4132 | >FLT3-M737I PTFQSHPNSS  | 376   | 3756  |
| >FLT3-M737I PTFQSHPNSS  | 326  | >FLT3-M737I PTFQSHPNSS  | 1106  | 780   |
| >FLT3-M737I PTFQSHPNSS  | 33   | >FLT3-M737I PTFQSHPNSS  | 277   | 244   |
| >FLT3-M737I PTFQSHPNSS  | 40   | >FLT3-M737I PTFQSHPNSS  | 394   | 354   |
| >FLT3-M737I PTFQSHPNSS  | 818  | >FLT3-M737I PTFQSHPNSS  | 39    | 779   |
| >FLT3-M737I SSMPGSREV   | 259  | >FLT3-M737I SSIPGSREV   | 401   | 142   |
| >FLT3-M737I SSMPGSREV(C | 286  | >FLT3-M737I SSIPGSREVQI | 1110  | 824   |
| >FLT3-M737I SSMPGSREV   | 88   | >FLT3-M737I SSIPGSREV   | 162   | 74    |
| >FLT3-M737I SSMPGSREV   | 339  | >FLT3-M737I SSIPGSREV   | 1198  | 859   |
| >FLT3-M737I SSMPGSREV   | 59   | >FLT3-M737I SSIPGSREV   | 69    | 10    |
| >FLT3-M737I SSMPGSREV(C | 23   | >FLT3-M737I SSIPGSREVQI | 25    | 2     |
| >FLT3-M737I SSMPGSREV   | 387  | >FLT3-M737I SSIPGSREV   | 733   | 346   |
| >FLT3-M737I SSMPGSREV(C | 18   | >FLT3-M737I SSIPGSREVQI | 24    | 6     |
| >FLT3-M737I NSSMPGSR    | 89   | >FLT3-M737I NSSIPGSR    | 113   | 24    |
| >FLT3-M737I HPNSSMPG    | 214  | >FLT3-M737I HPNSSIPG    | 117   | 97    |
| >FLT3-M737I QSHPNSSM    | 409  | >FLT3-M737I QSHPNSSI    | 148   | 261   |
| >FLT3-M737I QSHPNSSMP   | 144  | >FLT3-M737I QSHPNSSIPG  | 173   | 29    |
| >FLT3-M737I QSHPNSSM    | 5716 | >FLT3-M737I QSHPNSSI    | 361   | 5355  |
| >FLT3-M737I QSHPNSSM    | 431  | >FLT3-M737I QSHPNSSI    | 4958  | 4527  |
| >FLT3-M737I QSHPNSSM    | 95   | >FLT3-M737I QSHPNSSI    | 340   | 245   |
| >FLT3-M737I QSHPNSSM    | 8    | >FLT3-M737I QSHPNSSI    | 35    | 27    |
| >FLT3-M737I QSHPNSSM    | 229  | >FLT3-M737I QSHPNSSI    | 21    | 208   |
| >FLT3-M737I FQSHPNSSM   | 503  | >FLT3-M737I FQSHPNSSI   | 117   | 386   |
| >FLT3-M737I FQSHPNSSM   | 488  | >FLT3-M737I FQSHPNSSI   | 41    | 447   |
| >FLT3-M737I FQSHPNSSM   | 78   | >FLT3-M737I FQSHPNSSI   | 17    | 61    |
| >FLT3-M737I FQSHPNSSM   | 36   | >FLT3-M737I FQSHPNSSI   | 141   | 105   |
| >FLT3-M737I FQSHPNSSM   | 153  | >FLT3-M737I FQSHPNSSIP  | 194   | 41    |
| >FLT3-M737I FQSHPNSSM   | 29   | >FLT3-M737I FQSHPNSSI   | 194   | 165   |
| >FLT3-M737I FQSHPNSSM   | 4    | >FLT3-M737I FQSHPNSSI   | 6     | 2     |
| >FLT3-M737I FQSHPNSSM   | 225  | >FLT3-M737I FQSHPNSSIP  | 168   | 57    |
| >FLT3-M737I FQSHPNSSM   | 210  | >FLT3-M737I FQSHPNSSIP  | 369   | 159   |
| >FLT3-M737I FQSHPNSSM   | 67   | >FLT3-M737I FQSHPNSSI   | 193   | 126   |
| >FLT3-M737I FQSHPNSSM   | 179  | >FLT3-M737I FQSHPNSSI   | 2317  | 2138  |
| >FLT3-M737I FQSHPNSSM   | 6298 | >FLT3-M737I FQSHPNSSI   | 312   | 5986  |
| >FLT3-M737I TFQSHPNSSM  | 2272 | >FLT3-M737I TFQSHPNSSI  | 166   | 2106  |
| >FLT3-M837I MSDSNYVV    | 205  | >FLT3-M837I PSDSNYVV    | 1554  | 1349  |
| >FLT3-M837I MSDSNYVV    | 365  | >FLT3-M837I PSDSNYVV    | 8365  | 8000  |
| >FLT3-M837I MSDSNYVV(R  | 42   | >FLT3-M837I PSDSNYVV(R  | 3054  | 3012  |
| >FLT3-M837I MSDSNYVV(R  | 51   | >FLT3-M837I PSDSNYVV(R  | 8176  | 8125  |
| >FLT3-M837I MSDSNYVV    | 151  | >FLT3-M837I PSDSNYVV    | 16618 | 16467 |
| >FLT3-M837I MSDSNYVV    | 229  | >FLT3-M837I PSDSNYVV    | 8575  | 8346  |

|                        |       |                        |       |       |
|------------------------|-------|------------------------|-------|-------|
| >FLT3-M837IIMSDSNYV    | 11    | >FLT3-M837IIPSDSNYV    | 16031 | 16020 |
| >FLT3-M837IIMSDSNYVV   | 12    | >FLT3-M837IIPSDSNYVV   | 15259 | 15247 |
| >FLT3-M837IIMSDSNYV    | 2     | >FLT3-M837IIPSDSNYV    | 4450  | 4448  |
| >FLT3-M837IIMSDSNYVV   | 3     | >FLT3-M837IIPSDSNYVV   | 9995  | 9992  |
| >FLT3-M837IIMSDSNYVVF  | 261   | >FLT3-M837IIPSDSNYVVR  | 32932 | 32671 |
| >FLT3-M837IIMSDSNYV    | 3     | >FLT3-M837IIPSDSNYV    | 11870 | 11867 |
| >FLT3-M837IIMSDSNYVV   | 6     | >FLT3-M837IIPSDSNYVV   | 17257 | 17251 |
| >FLT3-M837IIMSDSNYV    | 9     | >FLT3-M837IIPSDSNYV    | 4884  | 4875  |
| >FLT3-M837IIMSDSNYVV   | 21    | >FLT3-M837IIPSDSNYVV   | 8435  | 8414  |
| >FLT3-M837IIMSDSNYV    | 2     | >FLT3-M837IIPSDSNYV    | 6211  | 6209  |
| >FLT3-M837IIMSDSNYVV   | 2     | >FLT3-M837IIPSDSNYVV   | 8299  | 8297  |
| >FLT3-M837IIMSDSNYV    | 3     | >FLT3-M837IIPSDSNYV    | 14674 | 14671 |
| >FLT3-M837IIMSDSNYVV   | 3     | >FLT3-M837IIPSDSNYVV   | 12708 | 12705 |
| >FLT3-M837IIMSDSNYV    | 6     | >FLT3-M837IIPSDSNYV    | 14624 | 14618 |
| >FLT3-M837IIMSDSNYVV   | 8     | >FLT3-M837IIPSDSNYVV   | 17847 | 17839 |
| >FLT3-M837IIMSDSNYV    | 2     | >FLT3-M837IIPSDSNYV    | 14038 | 14036 |
| >FLT3-M837IIMSDSNYVV   | 2     | >FLT3-M837IIPSDSNYVV   | 14200 | 14198 |
| >FLT3-M837IIMSDSNYV    | 2     | >FLT3-M837IIPSDSNYV    | 6729  | 6727  |
| >FLT3-M837IIMSDSNYVV   | 2     | >FLT3-M837IIPSDSNYVV   | 9286  | 9284  |
| >FLT3-M837IIMSDSNYVVF  | 280   | >FLT3-M837IIPSDSNYVVR  | 10881 | 10601 |
| >FLT3-M837IIMSDSNYVVF  | 68    | >FLT3-M837IIPSDSNYVVR  | 1746  | 1678  |
| >FLT3-M837IIMSDSNYVVF  | 347   | >FLT3-M837IIPSDSNYVVR  | 4741  | 4394  |
| >FLT3-M837IIMSDSNYVVF  | 129   | >FLT3-M837IIPSDSNYVVR  | 1856  | 1727  |
| >FLT3-M837IIMSDSNYV    | 408   | >FLT3-M837IIPSDSNYV    | 3051  | 2643  |
| >FLT3-M837IIMSDSNYVV   | 19835 | >FLT3-M837IIPSDSNYVV   | 185   | 19650 |
| >FLT3-M837IIMSDSNYVV   | 244   | >FLT3-M837IIPSDSNYVV   | 19576 | 19332 |
| >FLT3-M837IIMSDSNYV    | 125   | >FLT3-M837IIPSDSNYV    | 5702  | 5577  |
| >FLT3-M837IIMSDSNYVV   | 53    | >FLT3-M837IIPSDSNYVV   | 3335  | 3282  |
| >FLT3-M837IIMSDSNYVVF  | 132   | >FLT3-M837IIPSDSNYVVR  | 5375  | 5243  |
| >FLT3-M837IIMSDSNYV    | 18566 | >FLT3-M837IIPSDSNYV    | 200   | 18366 |
| >FLT3-M837IIMSDSNYVV   | 19656 | >FLT3-M837IIPSDSNYVV   | 217   | 19439 |
| >FLT3-M837IIMSDSNYVV   | 26197 | >FLT3-M837IIPSDSNYVV   | 174   | 26023 |
| >FLT3-M837IIMSDSNYVV   | 23970 | >FLT3-M837IIPSDSNYVV   | 129   | 23841 |
| >FLT3-M837IIMSDSNYVVF  | 47    | >FLT3-M837IIPSDSNYVVR  | 238   | 191   |
| >FLT3-M837IICDFGLARDIF | 428   | >FLT3-M837IICDFGLARDIF | 25013 | 24585 |
| >FLT3-M837IDIMSDSNYV\  | 224   | >FLT3-M837IDIPSDSNYVV  | 6157  | 5933  |
| >FLT3-M837IDIMSDSNYV   | 200   | >FLT3-M837IDIPSDSNYV   | 3024  | 2824  |
| >FLT3-M837IDIMSDSNYV\  | 84    | >FLT3-M837IDIPSDSNYVV  | 1059  | 975   |
| >FLT3-M837IDIMSDSNYV\  | 282   | >FLT3-M837IDIPSDSNYVV  | 3068  | 2786  |
| >FLT3-M837IDIMSDSNYV\  | 235   | >FLT3-M837IDIPSDSNYVV  | 1488  | 1253  |
| >FLT3-M837IDIMSDSNYV   | 324   | >FLT3-M837IDIPSDSNYV   | 1044  | 720   |
| >FLT3-M837IDIMSDSNYV   | 433   | >FLT3-M837IDIPSDSNYV   | 4949  | 4516  |
| >FLT3-M837IDIMSDSNYV\  | 438   | >FLT3-M837IDIPSDSNYVV  | 4799  | 4361  |



|                        |       |                         |      |       |
|------------------------|-------|-------------------------|------|-------|
| >FLT3-M837I DIMSDSNV   | 424   | >FLT3-M837I DIPSDSNV    | 1241 | 817   |
| >FLT3-M837I DIMSDSNV   | 8     | >FLT3-M837I DIPSDSNV    | 950  | 942   |
| >FLT3-M837I DIMSDSNV\  | 16    | >FLT3-M837I DIPSDSNVV   | 1610 | 1594  |
| >FLT3-M837I DIMSDSNV   | 355   | >FLT3-M837I DIPSDSNV    | 738  | 383   |
| >FLT3-M837I DIMSDSNV\  | 492   | >FLT3-M837I DIPSDSNVV   | 971  | 479   |
| >FLT3-M837I DIMSDSNY   | 133   | >FLT3-M837I DIPSDSNY    | 985  | 852   |
| >FLT3-M837I DIMSDSNY   | 16    | >FLT3-M837I DIPSDSNY    | 55   | 39    |
| >FLT3-M837I DIMSDSNY   | 258   | >FLT3-M837I DIPSDSNY    | 267  | 9     |
| >FLT3-M837I DIMSDSNY   | 251   | >FLT3-M837I DIPSDSNY    | 993  | 742   |
| >FLT3-M837I DIMSDSNV\  | 74    | >FLT3-M837I DIPSDSNVV   | 722  | 648   |
| >FLT3-M837I DIMSDSNY   | 472   | >FLT3-M837I DIPSDSNY    | 4279 | 3807  |
| >FLT3-M837I DIMSDSNV\  | 16    | >FLT3-M837I DIPSDSNVV   | 106  | 90    |
| >FLT3-M837I DIMSDSNV   | 17    | >FLT3-M837I DIPSDSNV    | 50   | 33    |
| >FLT3-M837I DIMSDSNV\  | 139   | >FLT3-M837I DIPSDSNVV   | 209  | 70    |
| >FLT3-M837I DIMSDSNV   | 7     | >FLT3-M837I DIPSDSNV    | 164  | 157   |
| >FLT3-M837I DIMSDSNV\  | 22    | >FLT3-M837I DIPSDSNVV   | 780  | 758   |
| >FLT3-M837I DIMSDSNY   | 373   | >FLT3-M837I DIPSDSNY    | 1981 | 1608  |
| >FLT3-M837I RDIMSDSNY  | 384   | >FLT3-M837I RDIPSDSNY   | 311  | 73    |
| >FLT3-M837I RDIMSDSNY  | 662   | >FLT3-M837I RDIPSDSNY   | 136  | 526   |
| >FLT3-M837I RDIMSDSNY\ | 207   | >FLT3-M837I RDIPSDSNY'  | 520  | 313   |
| >FLT3-M837I RDIMSDSNY  | 551   | >FLT3-M837I RDIPSDSNY   | 394  | 157   |
| >FLT3-M837I RDIMSDSNY\ | 121   | >FLT3-M837I RDIPSDSNYV  | 102  | 19    |
| >FLT3-M837I RDIMSDSNY\ | 47    | >FLT3-M837I RDIPSDSNYV' | 40   | 7     |
| >FLT3-M837I ARDIMSDSNY | 207   | >FLT3-M837I ARDIPSDSNY  | 174  | 33    |
| >FLT3-M837I ARDIMSDSNY | 185   | >FLT3-M837I ARDIPSDSNY  | 274  | 89    |
| >FLT3-M837I LARDIMSDSN | 168   | >FLT3-M837I LARDIPSDSN' | 298  | 130   |
| >FLT3-M837I LARDIMSDSN | 146   | >FLT3-M837I LARDIPSDSN' | 231  | 85    |
| >FLT3-M837I LARDIMSDSN | 119   | >FLT3-M837I LARDIPSDSN' | 84   | 35    |
| >FLT3-M837I LARDIMSDSN | 5     | >FLT3-M837I LARDIPSDSN' | 7    | 2     |
| >FLT3-M837I LARDIMSDSN | 106   | >FLT3-M837I LARDIPSDSN' | 77   | 29    |
| >FLT3-M837I LARDIMSDSN | 12    | >FLT3-M837I LARDIPSDSN' | 16   | 4     |
| >FLT3-N530Y NSPGPFPI   | 633   | >FLT3-N530Y YSPGPFPI    | 22   | 611   |
| >FLT3-N530Y NSPGPFPI   | 10900 | >FLT3-N530Y YSPGPFPI    | 381  | 10519 |
| >FLT3-N530Y NSPGPFPI   | 2010  | >FLT3-N530Y YSPGPFPI    | 371  | 1639  |
| >FLT3-N530Y NSPGPFPI   | 2480  | >FLT3-N530Y YSPGPFPI    | 229  | 2251  |
| >FLT3-N530Y NSPGPFPI   | 897   | >FLT3-N530Y YSPGPFPI    | 191  | 706   |
| >FLT3-N530Y NSPGPFPI   | 1188  | >FLT3-N530Y YSPGPFPI    | 492  | 696   |
| >FLT3-N530Y NSPGPFPI   | 72    | >FLT3-N530Y YSPGPFPI    | 100  | 28    |
| >FLT3-N530Y NSPGPFPI   | 342   | >FLT3-N530Y YSPGPFPI    | 216  | 126   |
| >FLT3-N530Y NSPGPFPI   | 3452  | >FLT3-N530Y YSPGPFPI    | 262  | 3190  |
| >FLT3-N530Y NSPGPFPI   | 2363  | >FLT3-N530Y YSPGPFPI    | 121  | 2242  |
| >FLT3-N530Y NSPGPFPI   | 1459  | >FLT3-N530Y YSPGPFPI    | 17   | 1442  |
| >FLT3-N530Y NSPGPFPI   | 1854  | >FLT3-N530Y YSPGPFPI    | 276  | 1578  |

|                         |       |                          |      |       |
|-------------------------|-------|--------------------------|------|-------|
| >FLT3-N530YNSPGPFPPF    | 13    | >FLT3-N530Y YSPGPFPPF    | 4    | 9     |
| >FLT3-N530YNSPGPFPPFI   | 3     | >FLT3-N530Y YSPGPFPPFI   | 1    | 2     |
| >FLT3-N530YNSPGPFPPFIQ  | 121   | >FLT3-N530Y YSPGPFPPFIQ  | 5    | 116   |
| >FLT3-N530YNSPGPFPPFIQI | 628   | >FLT3-N530Y YSPGPFPPFIQI | 15   | 613   |
| >FLT3-N530YNSPGPFPPF    | 4486  | >FLT3-N530Y YSPGPFPPF    | 326  | 4160  |
| >FLT3-N530YNSPGPFPPFI   | 93    | >FLT3-N530Y YSPGPFPPFI   | 23   | 70    |
| >FLT3-N530YLNSPGPFPPF   | 5815  | >FLT3-N530Y LYSPGPFPPF   | 25   | 5790  |
| >FLT3-N530YLNSPGPFPPF   | 3046  | >FLT3-N530Y LYSPGPFPPF   | 33   | 3013  |
| >FLT3-N530YLNSPGPFPPFI  | 30459 | >FLT3-N530Y LYSPGPFPPFI  | 436  | 30023 |
| >FLT3-N530YLNSPGPFPPF   | 9945  | >FLT3-N530Y LYSPGPFPPF   | 7    | 9938  |
| >FLT3-N530YLNSPGPFPPFI  | 15997 | >FLT3-N530Y LYSPGPFPPFI  | 8    | 15989 |
| >FLT3-N530YLNSPGPFPPF   | 996   | >FLT3-N530Y LYSPGPFPPF   | 49   | 947   |
| >FLT3-N530YLNSPGPFPPFI  | 7423  | >FLT3-N530Y LYSPGPFPPFI  | 488  | 6935  |
| >FLT3-N530YLNSPGPFPPF   | 290   | >FLT3-N530Y LYSPGPFPPF   | 2568 | 2278  |
| >FLT3-N530YLNSPGPFPPF   | 108   | >FLT3-N530Y LYSPGPFPPF   | 298  | 190   |
| >FLT3-N530YLNSPGPFPPF   | 242   | >FLT3-N530Y LYSPGPFPPF   | 307  | 65    |
| >FLT3-N530YLNSPGPFPPFI  | 13229 | >FLT3-N530Y LYSPGPFPPFI  | 103  | 13126 |
| >FLT3-N530YLNSPGPFPPF   | 23079 | >FLT3-N530Y LYSPGPFPPF   | 451  | 22628 |
| >FLT3-N530YLNSPGPFPPF   | 28790 | >FLT3-N530Y LYSPGPFPPF   | 361  | 28429 |
| >FLT3-N530YLNSPGPFPPFI  | 9532  | >FLT3-N530Y LYSPGPFPPFI  | 31   | 9501  |
| >FLT3-N530Y LGTSCETILLN | 22614 | >FLT3-N530Y LGTSCETILLY  | 202  | 22412 |
| >FLT3-N530Y LGTSCETILLN | 28213 | >FLT3-N530Y LGTSCETILLY  | 182  | 28031 |
| >FLT3-N530Y LGTSCETILLN | 8399  | >FLT3-N530Y LGTSCETILLY  | 60   | 8339  |
| >FLT3-N530YLLNSPGPFPPFI | 63    | >FLT3-N530Y LLYSPGPFPPFI | 18   | 45    |
| >FLT3-N530YLLNSPGPFPPF  | 1649  | >FLT3-N530Y LLYSPGPFPPF  | 205  | 1444  |
| >FLT3-N530YLLNSPGPFPPFI | 41    | >FLT3-N530Y LLYSPGPFPPFI | 33   | 8     |
| >FLT3-N530YLLNSPGPFPPFI | 23    | >FLT3-N530Y LLYSPGPFPPFI | 14   | 9     |
| >FLT3-N530YLLNSPGPFPPFI | 105   | >FLT3-N530Y LLYSPGPFPPFI | 26   | 79    |
| >FLT3-N530YLLNSPGPF     | 1332  | >FLT3-N530Y LLYSPGPF     | 88   | 1244  |
| >FLT3-N530YLLNSPGPFPPF  | 2289  | >FLT3-N530Y LLYSPGPFPPF  | 176  | 2113  |
| >FLT3-N530YLLNSPGPFPPF  | 160   | >FLT3-N530Y LLYSPGPFPPF  | 15   | 145   |
| >FLT3-N530YLLNSPGPFPPFI | 4     | >FLT3-N530Y LLYSPGPFPPFI | 2    | 2     |
| >FLT3-N530YLLNSPGPFPPFI | 41    | >FLT3-N530Y LLYSPGPFPPFI | 14   | 27    |
| >FLT3-N530YLLNSPGPFPPFI | 13    | >FLT3-N530Y LLYSPGPFPPFI | 6    | 7     |
| >FLT3-N530YLLNSPGPFPPFI | 18    | >FLT3-N530Y LLYSPGPFPPFI | 20   | 2     |
| >FLT3-N530YLLNSPGPFPPF  | 865   | >FLT3-N530Y LLYSPGPFPPF  | 173  | 692   |
| >FLT3-N530YLLNSPGPFPPFI | 10    | >FLT3-N530Y LLYSPGPFPPFI | 7    | 3     |
| >FLT3-N530YLLNSPGPFPPF  | 1266  | >FLT3-N530Y LLYSPGPFPPF  | 282  | 984   |
| >FLT3-N530YLLNSPGPFPPF  | 1105  | >FLT3-N530Y LLYSPGPFPPF  | 298  | 807   |
| >FLT3-N530YLLNSPGPFPPFI | 360   | >FLT3-N530Y LLYSPGPFPPFI | 52   | 308   |
| >FLT3-N530YLLNSPGPF     | 32    | >FLT3-N530Y LLYSPGPF     | 24   | 8     |
| >FLT3-N530YLLNSPGPFPPF  | 35    | >FLT3-N530Y LLYSPGPFPPF  | 27   | 8     |
| >FLT3-N530YLLNSPGPF     | 80    | >FLT3-N530Y LLYSPGPF     | 20   | 60    |

|                         |       |                         |      |       |
|-------------------------|-------|-------------------------|------|-------|
| >FLT3-N530Y LLNSPGPF    | 107   | >FLT3-N530Y LLYSPGPF    | 23   | 84    |
| >FLT3-N530Y LLNSPGPF    | 22    | >FLT3-N530Y LLYSPGPF    | 5    | 17    |
| >FLT3-N530Y LLNSPGPF    | 11    | >FLT3-N530Y LLYSPGPF    | 4    | 7     |
| >FLT3-N530Y LLNSPGPFPI  | 832   | >FLT3-N530Y LLYSPGPFPI  | 131  | 701   |
| >FLT3-N530Y LLNSPGPF    | 1606  | >FLT3-N530Y LLYSPGPF    | 54   | 1552  |
| >FLT3-N530Y LLNSPGPF    | 484   | >FLT3-N530Y LLYSPGPF    | 24   | 460   |
| >FLT3-N530Y LLNSPGPF    | 835   | >FLT3-N530Y LLYSPGPF    | 335  | 500   |
| >FLT3-N530Y LLNSPGPFPI  | 1147  | >FLT3-N530Y LLYSPGPFPI  | 461  | 686   |
| >FLT3-N530Y LLNSPGPF    | 441   | >FLT3-N530Y LLYSPGPF    | 117  | 324   |
| >FLT3-N530Y LLNSPGPFPI  | 897   | >FLT3-N530Y LLYSPGPFPI  | 66   | 831   |
| >FLT3-N530Y ILLNSPGPF   | 246   | >FLT3-N530Y ILLYSPGPF   | 494  | 248   |
| >FLT3-N530Y ILLNSPGPF   | 362   | >FLT3-N530Y ILLYSPGPF   | 2481 | 2119  |
| >FLT3-N530Y ILLNSPGPF   | 71    | >FLT3-N530Y ILLYSPGPF   | 382  | 311   |
| >FLT3-N530Y ILLNSPGPF   | 135   | >FLT3-N530Y ILLYSPGPF   | 183  | 48    |
| >FLT3-N530Y ILLNSPGPF   | 430   | >FLT3-N530Y ILLYSPGPF   | 211  | 219   |
| >FLT3-N530Y ILLNSPGPF   | 108   | >FLT3-N530Y ILLYSPGPF   | 85   | 23    |
| >FLT3-N530Y ILLNSPGPF   | 88    | >FLT3-N530Y ILLYSPGPF   | 91   | 3     |
| >FLT3-N530Y ILLNSPGPF   | 107   | >FLT3-N530Y ILLYSPGPF   | 109  | 2     |
| >FLT3-N530Y ILLNSPGPF   | 38    | >FLT3-N530Y ILLYSPGPF   | 56   | 18    |
| >FLT3-N530Y ILLNSPGPF   | 60    | >FLT3-N530Y ILLYSPGPF   | 85   | 25    |
| >FLT3-N530Y ILLNSPGPF   | 8     | >FLT3-N530Y ILLYSPGPF   | 9    | 1     |
| >FLT3-N530Y ILLNSPGPF   | 7     | >FLT3-N530Y ILLYSPGPF   | 8    | 1     |
| >FLT3-N530Y ILLNSPGPF   | 175   | >FLT3-N530Y ILLYSPGPF   | 130  | 45    |
| >FLT3-N530Y ILLNSPGPF   | 82    | >FLT3-N530Y ILLYSPGPF   | 66   | 16    |
| >FLT3-N530Y ILLNSPGPF   | 494   | >FLT3-N530Y ILLYSPGPF   | 461  | 33    |
| >FLT3-N530Y TILLNSPGPF  | 252   | >FLT3-N530Y TILLYSPGPF  | 403  | 151   |
| >FLT3-N530Y ETILLNSPGPF | 177   | >FLT3-N530Y ETILLYSPGPF | 89   | 88    |
| >FLT3-N530Y ETILLNSPGPF | 38    | >FLT3-N530Y ETILLYSPGPF | 23   | 15    |
| >FLT3-N530Y ETILLNSPGPF | 4     | >FLT3-N530Y ETILLYSPGPF | 3    | 1     |
| >FLT3-N530Y ETILLNSPGPF | 16    | >FLT3-N530Y ETILLYSPGPF | 28   | 12    |
| >FLT3-N530Y ETILLNSPG   | 291   | >FLT3-N530Y ETILLYSPG   | 235  | 56    |
| >FLT3-N530Y ETILLNSPGPF | 668   | >FLT3-N530Y ETILLYSPGPF | 472  | 196   |
| >FLT3-N530Y ETILLNSPGPF | 10    | >FLT3-N530Y ETILLYSPGPF | 11   | 1     |
| >FLT3-N530Y CETILLNSPG  | 1396  | >FLT3-N530Y CETILLYSPG  | 454  | 942   |
| >FLT3-N530Y SCETILLN    | 20860 | >FLT3-N530Y SCETILLY    | 222  | 20638 |
| >FLT3-N530Y SCETILLN    | 22904 | >FLT3-N530Y SCETILLY    | 229  | 22675 |
| >FLT3-N530Y SCETILLN    | 21271 | >FLT3-N530Y SCETILLY    | 22   | 21249 |
| >FLT3-N530Y SCETILLN    | 36756 | >FLT3-N530Y SCETILLY    | 406  | 36350 |
| >FLT3-N530Y TSCETILLN   | 18708 | >FLT3-N530Y TSCETILLY   | 50   | 18658 |
| >FLT3-N530Y TSCETILLN   | 9217  | >FLT3-N530Y TSCETILLY   | 50   | 9167  |
| >FLT3-N530Y TSCETILLN   | 29826 | >FLT3-N530Y TSCETILLY   | 349  | 29477 |
| >FLT3-N530Y TSCETILLN   | 30540 | >FLT3-N530Y TSCETILLY   | 435  | 30105 |
| >FLT3-N530Y TSCETILLN   | 16935 | >FLT3-N530Y TSCETILLY   | 32   | 16903 |

|                       |       |                       |     |       |
|-----------------------|-------|-----------------------|-----|-------|
| >FLT3-N530YTSCETILLN  | 25759 | >FLT3-N530YTSCETILLY  | 386 | 25373 |
| >FLT3-N530YTSCETILLN  | 19195 | >FLT3-N530YTSCETILLY  | 34  | 19161 |
| >FLT3-N530YTSCETILLN  | 12599 | >FLT3-N530YTSCETILLY  | 11  | 12588 |
| >FLT3-N530YTSCETILLN  | 20003 | >FLT3-N530YTSCETILLY  | 458 | 19545 |
| >FLT3-N530YTSCETILLN  | 16878 | >FLT3-N530YTSCETILLY  | 241 | 16637 |
| >FLT3-N530YGTSCETILLN | 24279 | >FLT3-N530YGTSCETILLY | 91  | 24188 |
| >FLT3-N530YGTSCETILLN | 17200 | >FLT3-N530YGTSCETILLY | 437 | 16763 |
| >FLT3-N530YGTSCETILLN | 19202 | >FLT3-N530YGTSCETILLY | 70  | 19132 |
| >FLT3-N530YGTSCETILLN | 24610 | >FLT3-N530YGTSCETILLY | 47  | 24563 |
| >FLT3-N530YGTSCETILLN | 24217 | >FLT3-N530YGTSCETILLY | 135 | 24082 |
| >FLT3-N530YGTSCETILLN | 20672 | >FLT3-N530YGTSCETILLY | 84  | 20588 |
| >FLT3-N530YGTSCETILLN | 15113 | >FLT3-N530YGTSCETILLY | 24  | 15089 |
| >FLT3-N530YGTSCETILLN | 12907 | >FLT3-N530YGTSCETILLY | 42  | 12865 |
| >FLT3-N530YGTSCETILLN | 1881  | >FLT3-N530YGTSCETILLY | 391 | 1490  |
| >FLT3-N841FNYVVRGNAR  | 81    | >FLT3-N841FHYVVRGNAR  | 110 | 29    |
| >FLT3-N841FNYVVRGNAR  | 292   | >FLT3-N841FHYVVRGNAR  | 80  | 212   |
| >FLT3-N841FNYVVRGNAR  | 344   | >FLT3-N841FHYVVRGNAR  | 30  | 314   |
| >FLT3-N841FNYVVRGNAR  | 65    | >FLT3-N841FHYVVRGNAR  | 33  | 32    |
| >FLT3-N841FNYVVRGNAR  | 294   | >FLT3-N841FHYVVRGNAR  | 46  | 248   |
| >FLT3-N841FSNYVVRGNAI | 103   | >FLT3-N841FSHYVVRGNAI | 276 | 173   |
| >FLT3-N841FSNYVVRGNAI | 4208  | >FLT3-N841FSHYVVRGNAI | 126 | 4082  |
| >FLT3-N841FSNYVVRGNAI | 7605  | >FLT3-N841FSHYVVRGNAI | 148 | 7457  |
| >FLT3-N841FDSNYVVRGN. | 53    | >FLT3-N841FDSHYVVRGN. | 54  | 1     |
| >FLT3-N841FDSNYVVRGN. | 24    | >FLT3-N841FDSHYVVRGN. | 25  | 1     |
| >FLT3-N841FMSDSNYVV   | 205   | >FLT3-N841FMSDSHYVV   | 325 | 120   |
| >FLT3-N841FMSDSNYVV   | 365   | >FLT3-N841FMSDSHYVV   | 337 | 28    |
| >FLT3-N841FMSDSNYVVR  | 42    | >FLT3-N841FMSDSHYVVR  | 17  | 25    |
| >FLT3-N841FMSDSNYVVR  | 51    | >FLT3-N841FMSDSHYVVR  | 78  | 27    |
| >FLT3-N841FMSDSNYVV   | 151   | >FLT3-N841FMSDSHYVV   | 268 | 117   |
| >FLT3-N841FMSDSNYVV   | 229   | >FLT3-N841FMSDSHYVV   | 209 | 20    |
| >FLT3-N841FIMSDSNYV   | 11    | >FLT3-N841FIMSDSHYV   | 10  | 1     |
| >FLT3-N841FIMSDSNYVV  | 12    | >FLT3-N841FIMSDSHYVV  | 22  | 10    |
| >FLT3-N841FIMSDSNYV   | 2     | >FLT3-N841FIMSDSHYV   | 2   | 0     |
| >FLT3-N841FIMSDSNYVV  | 3     | >FLT3-N841FIMSDSHYVV  | 4   | 1     |
| >FLT3-N841FIMSDSNYVVF | 261   | >FLT3-N841FIMSDSHYVVF | 345 | 84    |
| >FLT3-N841FIMSDSNYV   | 3     | >FLT3-N841FIMSDSHYV   | 3   | 0     |
| >FLT3-N841FIMSDSNYVV  | 6     | >FLT3-N841FIMSDSHYVV  | 6   | 0     |
| >FLT3-N841FIMSDSNYV   | 9     | >FLT3-N841FIMSDSHYV   | 8   | 1     |
| >FLT3-N841FIMSDSNYVV  | 21    | >FLT3-N841FIMSDSHYVV  | 32  | 11    |
| >FLT3-N841FIMSDSNYV   | 2     | >FLT3-N841FIMSDSHYV   | 2   | 0     |
| >FLT3-N841FIMSDSNYVV  | 2     | >FLT3-N841FIMSDSHYVV  | 2   | 0     |
| >FLT3-N841FIMSDSNYVVF | 631   | >FLT3-N841FIMSDSHYVVF | 498 | 133   |
| >FLT3-N841FIMSDSNYV   | 3     | >FLT3-N841FIMSDSHYV   | 2   | 1     |

|                        |     |                        |      |     |
|------------------------|-----|------------------------|------|-----|
| >FLT3-N841F IMSDSNYVV  | 3   | >FLT3-N841F IMSDSHYVV  | 3    | 0   |
| >FLT3-N841F IMSDSNYV   | 6   | >FLT3-N841F IMSDSHYV   | 5    | 1   |
| >FLT3-N841F IMSDSNYVV  | 8   | >FLT3-N841F IMSDSHYVV  | 8    | 0   |
| >FLT3-N841F IMSDSNYV   | 2   | >FLT3-N841F IMSDSHYV   | 2    | 0   |
| >FLT3-N841F IMSDSNYVV  | 2   | >FLT3-N841F IMSDSHYVV  | 2    | 0   |
| >FLT3-N841F IMSDSNYV   | 2   | >FLT3-N841F IMSDSHYV   | 1    | 1   |
| >FLT3-N841F IMSDSNYVV  | 2   | >FLT3-N841F IMSDSHYVV  | 2    | 0   |
| >FLT3-N841F IMSDSNYVVF | 280 | >FLT3-N841F IMSDSHYVVF | 379  | 99  |
| >FLT3-N841F IMSDSNYVVF | 68  | >FLT3-N841F IMSDSHYVVF | 63   | 5   |
| >FLT3-N841F IMSDSNYVVF | 347 | >FLT3-N841F IMSDSHYVVF | 280  | 67  |
| >FLT3-N841F IMSDSNYVVF | 129 | >FLT3-N841F IMSDSHYVVF | 164  | 35  |
| >FLT3-N841F IMSDSNYV   | 408 | >FLT3-N841F IMSDSHYV   | 364  | 44  |
| >FLT3-N841F IMSDSNYV   | 980 | >FLT3-N841F IMSDSHYV   | 269  | 711 |
| >FLT3-N841F IMSDSNYVV  | 244 | >FLT3-N841F IMSDSHYVV  | 209  | 35  |
| >FLT3-N841F IMSDSNYV   | 125 | >FLT3-N841F IMSDSHYV   | 148  | 23  |
| >FLT3-N841F IMSDSNYVV  | 53  | >FLT3-N841F IMSDSHYVV  | 36   | 17  |
| >FLT3-N841F IMSDSNYVVF | 132 | >FLT3-N841F IMSDSHYVVF | 109  | 23  |
| >FLT3-N841F IMSDSNYVVF | 500 | >FLT3-N841F IMSDSHYVVF | 451  | 49  |
| >FLT3-N841F IMSDSNYVVF | 47  | >FLT3-N841F IMSDSHYVVF | 51   | 4   |
| >FLT3-N841F DIMSDSNV\  | 224 | >FLT3-N841F DIMSDSHY\  | 278  | 54  |
| >FLT3-N841F DIMSDSNYV  | 200 | >FLT3-N841F DIMSDSHYV  | 157  | 43  |
| >FLT3-N841F DIMSDSNV\  | 84  | >FLT3-N841F DIMSDSHY\  | 114  | 30  |
| >FLT3-N841F DIMSDSNYV  | 621 | >FLT3-N841F DIMSDSHYV  | 475  | 146 |
| >FLT3-N841F DIMSDSNV\  | 282 | >FLT3-N841F DIMSDSHY\  | 270  | 12  |
| >FLT3-N841F DIMSDSNYV  | 710 | >FLT3-N841F DIMSDSHYV  | 296  | 414 |
| >FLT3-N841F DIMSDSNV\  | 235 | >FLT3-N841F DIMSDSHY\  | 350  | 115 |
| >FLT3-N841F DIMSDSNYV  | 324 | >FLT3-N841F DIMSDSHYV  | 44   | 280 |
| >FLT3-N841F DIMSDSNV\  | 693 | >FLT3-N841F DIMSDSHY\  | 254  | 439 |
| >FLT3-N841F DIMSDSNYV  | 433 | >FLT3-N841F DIMSDSHYV  | 62   | 371 |
| >FLT3-N841F DIMSDSNV\  | 438 | >FLT3-N841F DIMSDSHY\  | 339  | 99  |
| >FLT3-N841F DIMSDSNYV  | 424 | >FLT3-N841F DIMSDSHYV  | 76   | 348 |
| >FLT3-N841F DIMSDSNYV  | 8   | >FLT3-N841F DIMSDSHYV  | 2    | 6   |
| >FLT3-N841F DIMSDSNV\  | 16  | >FLT3-N841F DIMSDSHY\  | 14   | 2   |
| >FLT3-N841F DIMSDSNYV  | 355 | >FLT3-N841F DIMSDSHYV  | 23   | 332 |
| >FLT3-N841F DIMSDSNV\  | 492 | >FLT3-N841F DIMSDSHY\  | 159  | 333 |
| >FLT3-N841F DIMSDSNY   | 133 | >FLT3-N841F DIMSDSHY   | 138  | 5   |
| >FLT3-N841F DIMSDSNY   | 16  | >FLT3-N841F DIMSDSHY   | 11   | 5   |
| >FLT3-N841F DIMSDSNY   | 258 | >FLT3-N841F DIMSDSHY   | 1229 | 971 |
| >FLT3-N841F DIMSDSNY   | 730 | >FLT3-N841F DIMSDSHY   | 375  | 355 |
| >FLT3-N841F DIMSDSNY   | 251 | >FLT3-N841F DIMSDSHY   | 137  | 114 |
| >FLT3-N841F DIMSDSNV\  | 74  | >FLT3-N841F DIMSDSHY\  | 53   | 21  |
| >FLT3-N841F DIMSDSNY   | 472 | >FLT3-N841F DIMSDSHY   | 389  | 83  |
| >FLT3-N841F DIMSDSNV\  | 16  | >FLT3-N841F DIMSDSHY\  | 15   | 1   |

|                        |       |                        |      |       |
|------------------------|-------|------------------------|------|-------|
| >FLT3-N841F DIMSDSNV   | 17    | >FLT3-N841F DIMSDSHYV  | 11   | 6     |
| >FLT3-N841F DIMSDSNV\  | 139   | >FLT3-N841F DIMSDSHYV\ | 98   | 41    |
| >FLT3-N841F DIMSDSNV   | 7     | >FLT3-N841F DIMSDSHYV  | 4    | 3     |
| >FLT3-N841F DIMSDSNV\  | 22    | >FLT3-N841F DIMSDSHYV\ | 16   | 6     |
| >FLT3-N841F DIMSDSNY   | 373   | >FLT3-N841F DIMSDSHY   | 535  | 162   |
| >FLT3-N841F DIMSDSNV\  | 525   | >FLT3-N841F DIMSDSHYV\ | 329  | 196   |
| >FLT3-N841F RDIMSDSNY  | 1403  | >FLT3-N841F RDIMSDSHY  | 167  | 1236  |
| >FLT3-N841F RDIMSDSNY  | 384   | >FLT3-N841F RDIMSDSHY  | 436  | 52    |
| >FLT3-N841F RDIMSDSNV\ | 207   | >FLT3-N841F RDIMSDSHY\ | 228  | 21    |
| >FLT3-N841F RDIMSDSNV\ | 121   | >FLT3-N841F RDIMSDSHY\ | 101  | 20    |
| >FLT3-N841F RDIMSDSNV\ | 47    | >FLT3-N841F RDIMSDSHY\ | 66   | 19    |
| >FLT3-N841F ARDIMSDSN\ | 207   | >FLT3-N841F ARDIMSDSH\ | 300  | 93    |
| >FLT3-N841F ARDIMSDSN\ | 185   | >FLT3-N841F ARDIMSDSH\ | 157  | 28    |
| >FLT3-N841F LARDIMSDSN | 644   | >FLT3-N841F LARDIMSDSH | 435  | 209   |
| >FLT3-N841F LARDIMSDSN | 168   | >FLT3-N841F LARDIMSDSH | 115  | 53    |
| >FLT3-N841F LARDIMSDSN | 146   | >FLT3-N841F LARDIMSDSH | 60   | 86    |
| >FLT3-N841F LARDIMSDSN | 119   | >FLT3-N841F LARDIMSDSH | 145  | 26    |
| >FLT3-N841F LARDIMSDSN | 5     | >FLT3-N841F LARDIMSDSH | 5    | 0     |
| >FLT3-N841F LARDIMSDSN | 106   | >FLT3-N841F LARDIMSDSH | 197  | 91    |
| >FLT3-N841F LARDIMSDSN | 12    | >FLT3-N841F LARDIMSDSH | 13   | 1     |
| >FLT3-N841KNYVVRGNAR   | 81    | >FLT3-N841KNYVVRGNARI  | 20   | 61    |
| >FLT3-N841KNYVVRGNAR   | 292   | >FLT3-N841KNYVVRGNARI  | 107  | 185   |
| >FLT3-N841KNYVVRGNAR   | 344   | >FLT3-N841KNYVVRGNAR   | 13   | 331   |
| >FLT3-N841KNYVVRGNAR   | 65    | >FLT3-N841KNYVVRGNAR   | 1794 | 1729  |
| >FLT3-N841KNYVVRGNAR   | 294   | >FLT3-N841KNYVVRGNAR   | 28   | 266   |
| >FLT3-N841KNYVVRGNA    | 2623  | >FLT3-N841KNYVVRGNA    | 311  | 2312  |
| >FLT3-N841KSNYVVRGNA\  | 103   | >FLT3-N841KSNYVVRGNA\  | 771  | 668   |
| >FLT3-N841KSNYVVRGNA\  | 507   | >FLT3-N841KSNYVVRGNA\  | 404  | 103   |
| >FLT3-N841KSNYVVRGNA\  | 7624  | >FLT3-N841KSNYVVRGNA\  | 209  | 7415  |
| >FLT3-N841KSNYVVRGNA\  | 7146  | >FLT3-N841KSNYVVRGNA\  | 183  | 6963  |
| >FLT3-N841KGLARDIMSDS  | 19918 | >FLT3-N841KGLARDIMSDS  | 209  | 19709 |
| >FLT3-N841KGLARDIMSDS  | 25539 | >FLT3-N841KGLARDIMSDS  | 151  | 25388 |
| >FLT3-N841KDSNYVVRGN.  | 749   | >FLT3-N841KDSNYVVRGN.  | 463  | 286   |
| >FLT3-N841KDSNYVVRGN.  | 53    | >FLT3-N841KDSNYVVRGN.  | 34   | 19    |
| >FLT3-N841KDSNYVVRGN.  | 24    | >FLT3-N841KDSNYVVRGN.  | 45   | 21    |
| >FLT3-N841KMSDSNYVV    | 205   | >FLT3-N841KMSDSNYVV    | 716  | 511   |
| >FLT3-N841KMSDSNYVV    | 365   | >FLT3-N841KMSDSNYVV    | 784  | 419   |
| >FLT3-N841KMSDSNYVVR   | 42    | >FLT3-N841KMSDSNYVVR   | 27   | 15    |
| >FLT3-N841KMSDSNYVVR   | 51    | >FLT3-N841KMSDSNYVVR   | 145  | 94    |
| >FLT3-N841KMSDSNYVV    | 151   | >FLT3-N841KMSDSNYVV    | 419  | 268   |
| >FLT3-N841KMSDSNYVV    | 229   | >FLT3-N841KMSDSNYVV    | 1068 | 839   |
| >FLT3-N841KIMSDSNYV    | 11    | >FLT3-N841KIMSDSNYV    | 28   | 17    |
| >FLT3-N841KIMSDSNYVV   | 12    | >FLT3-N841KIMSDSNYVV   | 29   | 17    |

|                       |     |                       |      |      |
|-----------------------|-----|-----------------------|------|------|
| >FLT3-N841KIMSDSNYV   | 2   | >FLT3-N841KIMSDSKYV   | 5    | 3    |
| >FLT3-N841KIMSDSNYVV  | 3   | >FLT3-N841KIMSDSKYVV  | 7    | 4    |
| >FLT3-N841KIMSDSNYVVF | 261 | >FLT3-N841KIMSDSKYVVR | 711  | 450  |
| >FLT3-N841KIMSDSNYV   | 3   | >FLT3-N841KIMSDSKYV   | 5    | 2    |
| >FLT3-N841KIMSDSNYVV  | 6   | >FLT3-N841KIMSDSKYVV  | 14   | 8    |
| >FLT3-N841KIMSDSNYV   | 9   | >FLT3-N841KIMSDSKYV   | 37   | 28   |
| >FLT3-N841KIMSDSNYVV  | 21  | >FLT3-N841KIMSDSKYVV  | 75   | 54   |
| >FLT3-N841KIMSDSNYV   | 2   | >FLT3-N841KIMSDSKYV   | 2    | 0    |
| >FLT3-N841KIMSDSNYVV  | 2   | >FLT3-N841KIMSDSKYVV  | 3    | 1    |
| >FLT3-N841KIMSDSNYV   | 3   | >FLT3-N841KIMSDSKYV   | 4    | 1    |
| >FLT3-N841KIMSDSNYVV  | 3   | >FLT3-N841KIMSDSKYVV  | 3    | 0    |
| >FLT3-N841KIMSDSNYV   | 6   | >FLT3-N841KIMSDSKYV   | 9    | 3    |
| >FLT3-N841KIMSDSNYVV  | 8   | >FLT3-N841KIMSDSKYVV  | 10   | 2    |
| >FLT3-N841KIMSDSNYV   | 2   | >FLT3-N841KIMSDSKYV   | 3    | 1    |
| >FLT3-N841KIMSDSNYVV  | 2   | >FLT3-N841KIMSDSKYVV  | 2    | 0    |
| >FLT3-N841KIMSDSNYV   | 2   | >FLT3-N841KIMSDSKYV   | 2    | 0    |
| >FLT3-N841KIMSDSNYVV  | 2   | >FLT3-N841KIMSDSKYVV  | 2    | 0    |
| >FLT3-N841KIMSDSNYVVF | 280 | >FLT3-N841KIMSDSKYVVR | 299  | 19   |
| >FLT3-N841KIMSDSNYVVF | 68  | >FLT3-N841KIMSDSKYVVR | 34   | 34   |
| >FLT3-N841KIMSDSNYVVF | 347 | >FLT3-N841KIMSDSKYVVR | 221  | 126  |
| >FLT3-N841KIMSDSNYVVF | 129 | >FLT3-N841KIMSDSKYVVR | 261  | 132  |
| >FLT3-N841KIMSDSNYV   | 408 | >FLT3-N841KIMSDSKYV   | 2986 | 2578 |
| >FLT3-N841KIMSDSNYVV  | 244 | >FLT3-N841KIMSDSKYVV  | 701  | 457  |
| >FLT3-N841KIMSDSNYV   | 125 | >FLT3-N841KIMSDSKYV   | 219  | 94   |
| >FLT3-N841KIMSDSNYVV  | 53  | >FLT3-N841KIMSDSKYVV  | 162  | 109  |
| >FLT3-N841KIMSDSNYVVF | 132 | >FLT3-N841KIMSDSKYVVR | 375  | 243  |
| >FLT3-N841KIMSDSNYVVF | 500 | >FLT3-N841KIMSDSKYVVR | 257  | 243  |
| >FLT3-N841KIMSDSNYVVF | 47  | >FLT3-N841KIMSDSKYVVR | 60   | 13   |
| >FLT3-N841KDIMSdsnYV\ | 224 | >FLT3-N841KDIMSdsnYVV | 652  | 428  |
| >FLT3-N841KDIMSdsnYV  | 200 | >FLT3-N841KDIMSdsnYV  | 2778 | 2578 |
| >FLT3-N841KDIMSdsnYV\ | 84  | >FLT3-N841KDIMSdsnYVV | 245  | 161  |
| >FLT3-N841KDIMSdsnYV\ | 282 | >FLT3-N841KDIMSdsnYVV | 456  | 174  |
| >FLT3-N841KDIMSdsnYV\ | 235 | >FLT3-N841KDIMSdsnYVV | 832  | 597  |
| >FLT3-N841KDIMSdsnYV  | 324 | >FLT3-N841KDIMSdsnYV  | 574  | 250  |
| >FLT3-N841KDIMSdsnYV  | 433 | >FLT3-N841KDIMSdsnYV  | 2122 | 1689 |
| >FLT3-N841KDIMSdsnYV\ | 438 | >FLT3-N841KDIMSdsnYVV | 1153 | 715  |
| >FLT3-N841KDIMSdsnYV  | 424 | >FLT3-N841KDIMSdsnYV  | 1410 | 986  |
| >FLT3-N841KDIMSdsnYV  | 8   | >FLT3-N841KDIMSdsnYV  | 21   | 13   |
| >FLT3-N841KDIMSdsnYV\ | 16  | >FLT3-N841KDIMSdsnYVV | 38   | 22   |
| >FLT3-N841KDIMSdsnYV  | 355 | >FLT3-N841KDIMSdsnYV  | 788  | 433  |
| >FLT3-N841KDIMSdsnYV\ | 492 | >FLT3-N841KDIMSdsnYVV | 633  | 141  |
| >FLT3-N841KDIMSdsnY   | 133 | >FLT3-N841KDIMSdsnY   | 107  | 26   |
| >FLT3-N841KDIMSdsnY   | 16  | >FLT3-N841KDIMSdsnY   | 35   | 19   |

|                          |       |                          |       |       |
|--------------------------|-------|--------------------------|-------|-------|
| >FLT3-N841K DIMSDSNY     | 258   | >FLT3-N841K DIMSDSKY     | 2554  | 2296  |
| >FLT3-N841K DIMSDSNY     | 251   | >FLT3-N841K DIMSDSKY     | 310   | 59    |
| >FLT3-N841K DIMSDSNYV\   | 74    | >FLT3-N841K DIMSDSKYV\   | 73    | 1     |
| >FLT3-N841K DIMSDSNY     | 472   | >FLT3-N841K DIMSDSKY     | 633   | 161   |
| >FLT3-N841K DIMSDSNYV\   | 16    | >FLT3-N841K DIMSDSKYV\   | 31    | 15    |
| >FLT3-N841K DIMSDSNYV    | 17    | >FLT3-N841K DIMSDSKYV    | 112   | 95    |
| >FLT3-N841K DIMSDSNYV\   | 139   | >FLT3-N841K DIMSDSKYV\   | 494   | 355   |
| >FLT3-N841K DIMSDSNYV    | 7     | >FLT3-N841K DIMSDSKYV    | 23    | 16    |
| >FLT3-N841K DIMSDSNYV\   | 22    | >FLT3-N841K DIMSDSKYV\   | 62    | 40    |
| >FLT3-N841K DIMSDSNY     | 373   | >FLT3-N841K DIMSDSKY     | 366   | 7     |
| >FLT3-N841K RDIMSDSNY    | 384   | >FLT3-N841K RDIMSDSKY    | 756   | 372   |
| >FLT3-N841K RDIMSDSNY\   | 207   | >FLT3-N841K RDIMSDSKYV   | 403   | 196   |
| >FLT3-N841K RDIMSDSNY    | 551   | >FLT3-N841K RDIMSDSKY    | 212   | 339   |
| >FLT3-N841K RDIMSDSNY\   | 121   | >FLT3-N841K RDIMSDSKYV   | 181   | 60    |
| >FLT3-N841K RDIMSDSNY\   | 47    | >FLT3-N841K RDIMSDSKYV   | 51    | 4     |
| >FLT3-N841K ARDIMSDSNY   | 207   | >FLT3-N841K ARDIMSDSKY   | 183   | 24    |
| >FLT3-N841K ARDIMSDSNY   | 185   | >FLT3-N841K ARDIMSDSKY   | 135   | 50    |
| >FLT3-N841K LARDIMSDSN   | 6695  | >FLT3-N841K LARDIMSDSK   | 18    | 6677  |
| >FLT3-N841K LARDIMSDSN   | 168   | >FLT3-N841K LARDIMSDSK   | 124   | 44    |
| >FLT3-N841K LARDIMSDSN   | 146   | >FLT3-N841K LARDIMSDSK   | 262   | 116   |
| >FLT3-N841K LARDIMSDSN   | 119   | >FLT3-N841K LARDIMSDSK   | 285   | 166   |
| >FLT3-N841K LARDIMSDSN   | 5     | >FLT3-N841K LARDIMSDSK   | 5     | 0     |
| >FLT3-N841K LARDIMSDSN   | 106   | >FLT3-N841K LARDIMSDSK   | 95    | 11    |
| >FLT3-N841K LARDIMSDSN   | 12    | >FLT3-N841K LARDIMSDSK   | 8     | 4     |
| >FLT3-P31L-v PVIKCVLI    | 11043 | >FLT3-P31L-r LVIKCVLI    | 371   | 10672 |
| >FLT3-P31L-v PVIKCVLI    | 7723  | >FLT3-P31L-r LVIKCVLI    | 382   | 7341  |
| >FLT3-P31L-v PVIKCVLI    | 6025  | >FLT3-P31L-r LVIKCVLI    | 335   | 5690  |
| >FLT3-P31L-v PVIKCVLI    | 9191  | >FLT3-P31L-r LVIKCVLI    | 89    | 9102  |
| >FLT3-P31L-v PVIKCVLINHK | 4180  | >FLT3-P31L-r LVIKCVLINHK | 293   | 3887  |
| >FLT3-P31L-v PVIKCVLINHK | 1107  | >FLT3-P31L-r LVIKCVLINHK | 71    | 1036  |
| >FLT3-P31L-v PVIKCVLINHK | 2534  | >FLT3-P31L-r LVIKCVLINHK | 327   | 2207  |
| >FLT3-P31L-v PVIKCVLINHK | 2367  | >FLT3-P31L-r LVIKCVLINHK | 116   | 2251  |
| >FLT3-P31L-v PVIKCVLI    | 4604  | >FLT3-P31L-r LVIKCVLI    | 205   | 4399  |
| >FLT3-P31L-v LPVIKCVL    | 26038 | >FLT3-P31L-r LLVIKCVL    | 293   | 25745 |
| >FLT3-P31L-v LPVIKCVLI   | 26309 | >FLT3-P31L-r LLVIKCVLI   | 97    | 26212 |
| >FLT3-P31L-v LPVIKCVLI   | 18951 | >FLT3-P31L-r LLVIKCVLI   | 190   | 18761 |
| >FLT3-P31L-v LPVIKCVL    | 26062 | >FLT3-P31L-r LLVIKCVL    | 90    | 25972 |
| >FLT3-P31L-v LPVIKCVLI   | 28956 | >FLT3-P31L-r LLVIKCVLI   | 345   | 28611 |
| >FLT3-P31L-v LPVIKCVL    | 25995 | >FLT3-P31L-r LLVIKCVL    | 318   | 25677 |
| >FLT3-P31L-v LPVIKCVL    | 29619 | >FLT3-P31L-r LLVIKCVL    | 9     | 29610 |
| >FLT3-P31L-v LPVIKCVLI   | 34429 | >FLT3-P31L-r LLVIKCVLI   | 33    | 34396 |
| >FLT3-P31L-v LPVIKCVL    | 67    | >FLT3-P31L-r LLVIKCVL    | 20168 | 20101 |
| >FLT3-P31L-v LPVIKCVL    | 353   | >FLT3-P31L-r LLVIKCVL    | 328   | 25    |



|                          |       |                          |       |       |
|--------------------------|-------|--------------------------|-------|-------|
| >FLT3-P31L-v LPVIKCVLI   | 65    | >FLT3-P31L-r LLVIKCVLI   | 16003 | 15938 |
| >FLT3-P31L-v LPVIKCVL    | 224   | >FLT3-P31L-r LLVIKCVL    | 28229 | 28005 |
| >FLT3-P31L-v LPVIKCVLI   | 172   | >FLT3-P31L-r LLVIKCVLI   | 26894 | 26722 |
| >FLT3-P31L-v LPVIKCVLI   | 44    | >FLT3-P31L-r LLVIKCVLI   | 22367 | 22323 |
| >FLT3-P31L-v IFGTITNQDLF | 17347 | >FLT3-P31L-r IFGTITNQDLL | 479   | 16868 |
| >FLT3-P31L-v DLPVIKCV    | 736   | >FLT3-P31L-r DLLVIKCV    | 100   | 636   |
| >FLT3-P31L-v DLPVIKCV    | 184   | >FLT3-P31L-r DLLVIKCV    | 31    | 153   |
| >FLT3-P31L-v DLPVIKCVL   | 3813  | >FLT3-P31L-r DLLVIKCVL   | 431   | 3382  |
| >FLT3-P31L-v DLPVIKCV    | 670   | >FLT3-P31L-r DLLVIKCV    | 16    | 654   |
| >FLT3-P31L-v DLPVIKCVL   | 7181  | >FLT3-P31L-r DLLVIKCVL   | 296   | 6885  |
| >FLT3-P31L-v DLPVIKCV    | 84    | >FLT3-P31L-r DLLVIKCV    | 48    | 36    |
| >FLT3-P31L-v DLPVIKCVL   | 382   | >FLT3-P31L-r DLLVIKCVL   | 179   | 203   |
| >FLT3-P31L-v QDLPVIKCV   | 103   | >FLT3-P31L-r QDLLVIKCV   | 58    | 45    |
| >FLT3-P31L-v QDLPVIKCVL  | 571   | >FLT3-P31L-r QDLLVIKCVL  | 393   | 178   |
| >FLT3-P31L-v QDLPVIKCVLI | 33    | >FLT3-P31L-r QDLLVIKCVLI | 20    | 13    |
| >FLT3-P31L-v QDLPVIKCVLI | 775   | >FLT3-P31L-r QDLLVIKCVLI | 225   | 550   |
| >FLT3-P31L-v QDLPVIKCVLI | 54    | >FLT3-P31L-r QDLLVIKCVLI | 54    | 0     |
| >FLT3-P31L-v NQDLPVIKCV  | 49    | >FLT3-P31L-r NQDLLVIKCV  | 37    | 12    |
| >FLT3-P31L-v ITNQDLPV    | 232   | >FLT3-P31L-r ITNQDLLV    | 392   | 160   |
| >FLT3-P31L-v ITNQDLPV    | 202   | >FLT3-P31L-r ITNQDLLV    | 431   | 229   |
| >FLT3-P31L-v ITNQDLPV    | 154   | >FLT3-P31L-r ITNQDLLV    | 323   | 169   |
| >FLT3-P31L-v ITNQDLPV    | 291   | >FLT3-P31L-r ITNQDLLV    | 277   | 14    |
| >FLT3-P31L-v ITNQDLPVIK  | 1170  | >FLT3-P31L-r ITNQDLLVIK  | 430   | 740   |
| >FLT3-P31L-v ITNQDLPVIK  | 29    | >FLT3-P31L-r ITNQDLLVIK  | 26    | 3     |
| >FLT3-P31L-v ITNQDLPV    | 386   | >FLT3-P31L-r ITNQDLLV    | 1097  | 711   |
| >FLT3-P31L-v ITNQDLPV    | 444   | >FLT3-P31L-r ITNQDLLV    | 2152  | 1708  |
| >FLT3-P31L-v ITNQDLPV    | 375   | >FLT3-P31L-r ITNQDLLV    | 1154  | 779   |
| >FLT3-P31L-v ITNQDLPVI   | 146   | >FLT3-P31L-r ITNQDLLVI   | 90    | 56    |
| >FLT3-P31L-v ITNQDLPVI   | 222   | >FLT3-P31L-r ITNQDLLVI   | 93    | 129   |
| >FLT3-P31L-v ITNQDLPVI   | 509   | >FLT3-P31L-r ITNQDLLVI   | 269   | 240   |
| >FLT3-P31L-v ITNQDLPVI   | 38    | >FLT3-P31L-r ITNQDLLVI   | 40    | 2     |
| >FLT3-P31L-v TITNQDLPVI  | 1269  | >FLT3-P31L-r TITNQDLLVI  | 443   | 826   |
| >FLT3-P31L-v TITNQDLPV   | 284   | >FLT3-P31L-r TITNQDLLV   | 731   | 447   |
| >FLT3-P31L-v TITNQDLPV   | 181   | >FLT3-P31L-r TITNQDLLV   | 240   | 59    |
| >FLT3-P31L-v TITNQDLPV   | 49    | >FLT3-P31L-r TITNQDLLV   | 54    | 5     |
| >FLT3-P31L-v TITNQDLPVIK | 70    | >FLT3-P31L-r TITNQDLLVIK | 65    | 5     |
| >FLT3-P31L-v TITNQDLPVIK | 174   | >FLT3-P31L-r TITNQDLLVIK | 114   | 60    |
| >FLT3-P31L-v TITNQDLPV   | 96    | >FLT3-P31L-r TITNQDLLV   | 417   | 321   |
| >FLT3-P31L-v GTITNQDLP   | 23888 | >FLT3-P31L-r GTITNQDLL   | 129   | 23759 |
| >FLT3-P31L-v GTITNQDLPV  | 426   | >FLT3-P31L-r GTITNQDLLV  | 525   | 99    |
| >FLT3-P31L-v GTITNQDLPV  | 228   | >FLT3-P31L-r GTITNQDLLV  | 284   | 56    |
| >FLT3-P31L-v GTITNQDLPV  | 348   | >FLT3-P31L-r GTITNQDLLV  | 499   | 151   |
| >FLT3-P31L-v GTITNQDLPV  | 208   | >FLT3-P31L-r GTITNQDLLV  | 402   | 194   |

|                         |       |                         |       |       |
|-------------------------|-------|-------------------------|-------|-------|
| >FLT3-P31L-v GTITNQDLPV | 157   | >FLT3-P31L-r GTITNQDLLV | 628   | 471   |
| >FLT3-P31L-v GTITNQDLPV | 437   | >FLT3-P31L-r GTITNQDLLV | 1327  | 890   |
| >FLT3-P31L-v GTITNQDLP  | 16097 | >FLT3-P31L-r GTITNQDLL  | 423   | 15674 |
| >FLT3-P31L-v GTITNQDLPV | 136   | >FLT3-P31L-r GTITNQDLLV | 159   | 23    |
| >FLT3-R834C RDIMSDSNY   | 384   | >FLT3-R834C QDIMSDSNY   | 1144  | 760   |
| >FLT3-R834C RDIMSDSNY\  | 207   | >FLT3-R834C QDIMSDSNY\  | 1509  | 1302  |
| >FLT3-R834C RDIMSDSNY\  | 121   | >FLT3-R834C QDIMSDSNY\  | 177   | 56    |
| >FLT3-R834C RDIMSDSNY\  | 47    | >FLT3-R834C QDIMSDSNY\  | 62    | 15    |
| >FLT3-R834C ARDIMSDSN\  | 19117 | >FLT3-R834C AQDIMSDSN\  | 322   | 18795 |
| >FLT3-R834C ARDIMSDSN\  | 8766  | >FLT3-R834C AQDIMSDSN\  | 152   | 8614  |
| >FLT3-R834C ARDIMSDSN\  | 9365  | >FLT3-R834C AQDIMSDSN\  | 10    | 9355  |
| >FLT3-R834C ARDIMSDSN\  | 5857  | >FLT3-R834C AQDIMSDSN\  | 94    | 5763  |
| >FLT3-R834C ARDIMSDSN\  | 14118 | >FLT3-R834C AQDIMSDSN\  | 107   | 14011 |
| >FLT3-R834C ARDIMSDSN\  | 8109  | >FLT3-R834C AQDIMSDSN\  | 70    | 8039  |
| >FLT3-R834C ARDIMSDSN\  | 207   | >FLT3-R834C AQDIMSDSN\  | 51    | 156   |
| >FLT3-R834C ARDIMSDSN\  | 185   | >FLT3-R834C AQDIMSDSN\  | 11968 | 11783 |
| >FLT3-R834C VVKICDFGLA  | 29    | >FLT3-R834C VVKICDFGLA\ | 11047 | 11018 |
| >FLT3-R834C VVKICDFGLA  | 318   | >FLT3-R834C VVKICDFGLA\ | 24296 | 23978 |
| >FLT3-R834C VVKICDFGLA  | 441   | >FLT3-R834C VVKICDFGLA\ | 20962 | 20521 |
| >FLT3-R834C VVKICDFGLA  | 325   | >FLT3-R834C VVKICDFGLA\ | 22170 | 21845 |
| >FLT3-R834C LARDIMSDSN  | 168   | >FLT3-R834C LAQDIMSDSN  | 85    | 83    |
| >FLT3-R834C LARDIMSDSN  | 146   | >FLT3-R834C LAQDIMSDSN  | 247   | 101   |
| >FLT3-R834C LARDIMSDSN  | 119   | >FLT3-R834C LAQDIMSDSN  | 856   | 737   |
| >FLT3-R834C LARDIMSDSN  | 5     | >FLT3-R834C LAQDIMSDSN  | 17    | 12    |
| >FLT3-R834C LARDIMSDSN  | 106   | >FLT3-R834C LAQDIMSDSN  | 77    | 29    |
| >FLT3-R834C LARDIMSDSN  | 12    | >FLT3-R834C LAQDIMSDSN  | 37    | 25    |
| >FLT3-R834C FGLARDIM    | 608   | >FLT3-R834C FGLAQDIM    | 160   | 448   |
| >FLT3-R834C CDFGLARDI   | 84    | >FLT3-R834C CDFGLAQDI   | 61    | 23    |
| >FLT3-R834C CDFGLARDIM  | 1083  | >FLT3-R834C CDFGLAQDIM  | 406   | 677   |
| >FLT3-R834C ICDFGLARDIM | 428   | >FLT3-R834C ICDFGLAQDIM | 470   | 42    |
| >FLT3-R834C KICDFGLARD  | 997   | >FLT3-R834C KICDFGLAQD  | 489   | 508   |
| >FLT3-R834C KICDFGLAR   | 53    | >FLT3-R834C KICDFGLAQ   | 9587  | 9534  |
| >FLT3-R834C KICDFGLAR   | 30    | >FLT3-R834C KICDFGLAQ   | 9763  | 9733  |
| >FLT3-R834C KICDFGLARD  | 109   | >FLT3-R834C KICDFGLAQD  | 97    | 12    |
| >FLT3-R834C KICDFGLAR   | 14    | >FLT3-R834C KICDFGLAQ   | 589   | 575   |
| >FLT3-R834C VKICDFGLAR  | 155   | >FLT3-R834C VKICDFGLAQ  | 492   | 337   |
| >FLT3-S451F-SCFSDGYPL   | 964   | >FLT3-S451F-FCFSDGYPL   | 309   | 655   |
| >FLT3-S451F-SCFSDGYPL   | 2602  | >FLT3-S451F-FCFSDGYPL   | 129   | 2473  |
| >FLT3-S451F-SCFSDGYPL   | 329   | >FLT3-S451F-FCFSDGYPL   | 19    | 310   |
| >FLT3-S451F-SCFSDGYPL   | 1249  | >FLT3-S451F-FCFSDGYPL   | 143   | 1106  |
| >FLT3-S451F-SCFSDGYPL   | 1887  | >FLT3-S451F-FCFSDGYPL   | 240   | 1647  |
| >FLT3-S451F-SCFSDGYPL   | 922   | >FLT3-S451F-FCFSDGYPL   | 236   | 686   |
| >FLT3-S451F-SCFSDGYPL   | 475   | >FLT3-S451F-FCFSDGYPL   | 76    | 399   |

|                        |       |                        |       |       |
|------------------------|-------|------------------------|-------|-------|
| >FLT3-S451F·SCFSDGYPL  | 1026  | >FLT3-S451F·FCFSDGYPL  | 180   | 846   |
| >FLT3-S451F·ASCFSDGY   | 316   | >FLT3-S451F·AFCFSDGY   | 3953  | 3637  |
| >FLT3-S451F·ASCFSDGY   | 1274  | >FLT3-S451F·AFCFSDGY   | 107   | 1167  |
| >FLT3-S451F·ASCFSDGY   | 58    | >FLT3-S451F·AFCFSDGY   | 207   | 149   |
| >FLT3-S451F·ASCFSDGY   | 284   | >FLT3-S451F·AFCFSDGY   | 2498  | 2214  |
| >FLT3-S451F·ASCFSDGY   | 7     | >FLT3-S451F·AFCFSDGY   | 14942 | 14935 |
| >FLT3-S451F·ASCFSDGYPL | 25    | >FLT3-S451F·AFCFSDGYPL | 22367 | 22342 |
| >FLT3-S451F·ASCFSDGYPL | 23781 | >FLT3-S451F·AFCFSDGYPL | 341   | 23440 |
| >FLT3-S451F·VLAEASASQA | 208   | >FLT3-S451F·VLAEASASQA | 133   | 75    |
| >FLT3-S451F·VLAEASASQA | 193   | >FLT3-S451F·VLAEASASQA | 428   | 235   |
| >FLT3-S451F·VLAEASASQA | 743   | >FLT3-S451F·VLAEASASQA | 152   | 591   |
| >FLT3-S451F·VLAEASASQA | 378   | >FLT3-S451F·VLAEASASQA | 296   | 82    |
| >FLT3-S451F·VLAEASASQA | 187   | >FLT3-S451F·VLAEASASQA | 420   | 233   |
| >FLT3-S451F·VLAEASASQA | 3649  | >FLT3-S451F·VLAEASASQA | 26    | 3623  |
| >FLT3-S451F·VLAEASASQA | 7416  | >FLT3-S451F·VLAEASASQA | 34    | 7382  |
| >FLT3-S451F·VLAEASASQA | 10936 | >FLT3-S451F·VLAEASASQA | 15    | 10921 |
| >FLT3-S451F·VLAEASASQA | 22706 | >FLT3-S451F·VLAEASASQA | 165   | 22541 |
| >FLT3-S451F·VLAEASASQA | 6513  | >FLT3-S451F·VLAEASASQA | 53    | 6460  |
| >FLT3-S451F·VLAEASASQA | 11501 | >FLT3-S451F·VLAEASASQA | 39    | 11462 |
| >FLT3-S451F·QASCFSDGYF | 1778  | >FLT3-S451F·QAFCFSDGYF | 115   | 1663  |
| >FLT3-S451F·QASCFSDGYF | 319   | >FLT3-S451F·QAFCFSDGYF | 162   | 157   |
| >FLT3-S451F·QASCFSDGYF | 1996  | >FLT3-S451F·QAFCFSDGYF | 414   | 1582  |
| >FLT3-S451F·QASCFSDGY  | 1682  | >FLT3-S451F·QAFCFSDGY  | 428   | 1254  |
| >FLT3-S451F·QASCFSDGYF | 2679  | >FLT3-S451F·QAFCFSDGYF | 162   | 2517  |
| >FLT3-S451F·QASCFSDGY  | 1484  | >FLT3-S451F·QAFCFSDGY  | 257   | 1227  |
| >FLT3-S451F·QASCFSDGYF | 50    | >FLT3-S451F·QAFCFSDGYF | 16    | 34    |
| >FLT3-S451F·QASCFSDGYF | 266   | >FLT3-S451F·QAFCFSDGYF | 71    | 195   |
| >FLT3-S451F·QASCFSDGY  | 876   | >FLT3-S451F·QAFCFSDGY  | 291   | 585   |
| >FLT3-S451F·QASCFSDGY  | 1741  | >FLT3-S451F·QAFCFSDGY  | 305   | 1436  |
| >FLT3-S451F·QASCFSDGY  | 993   | >FLT3-S451F·QAFCFSDGY  | 124   | 869   |
| >FLT3-S451F·QASCFSDGYF | 533   | >FLT3-S451F·QAFCFSDGYF | 71    | 462   |
| >FLT3-S451F·QASCFSDGY  | 419   | >FLT3-S451F·QAFCFSDGY  | 86    | 333   |
| >FLT3-S451F·QASCFSDGYF | 1555  | >FLT3-S451F·QAFCFSDGYF | 289   | 1266  |
| >FLT3-S451F·QASCFSDGY  | 24    | >FLT3-S451F·QAFCFSDGY  | 24    | 0     |
| >FLT3-S451F·QASCFSDGYF | 118   | >FLT3-S451F·QAFCFSDGYF | 108   | 10    |
| >FLT3-S451F·QASCFSDGY  | 817   | >FLT3-S451F·QAFCFSDGY  | 211   | 606   |
| >FLT3-S451F·SQASCFSDGY | 278   | >FLT3-S451F·SQAFCFSDGY | 165   | 113   |
| >FLT3-S451F·SQASCFSDGY | 40    | >FLT3-S451F·SQAFCFSDGY | 48    | 8     |
| >FLT3-S451F·SQASCFSDGY | 147   | >FLT3-S451F·SQAFCFSDGY | 270   | 123   |
| >FLT3-S451F·SQASCFSDGY | 17    | >FLT3-S451F·SQAFCFSDGY | 41    | 24    |
| >FLT3-S451F·ASQASCFSDC | 201   | >FLT3-S451F·ASQAFCFSDC | 134   | 67    |
| >FLT3-S451F·ASQASCFSDC | 67    | >FLT3-S451F·ASQAFCFSDC | 55    | 12    |
| >FLT3-S451F·ASQASCFSDC | 127   | >FLT3-S451F·ASQAFCFSDC | 196   | 69    |

|                        |       |                        |     |       |
|------------------------|-------|------------------------|-----|-------|
| >FLT3-S451F-ASQASCFSDC | 9     | >FLT3-S451F-ASQAFCFSDC | 17  | 8     |
| >FLT3-S451F-ASQASCFSDC | 237   | >FLT3-S451F-ASQAFCFSDC | 152 | 85    |
| >FLT3-S451F-SASQASCF   | 215   | >FLT3-S451F-SASQAFCF   | 462 | 247   |
| >FLT3-S451F-SASQASCF   | 115   | >FLT3-S451F-SASQAFCF   | 258 | 143   |
| >FLT3-S451F-SASQASCF   | 81    | >FLT3-S451F-SASQAFCF   | 172 | 91    |
| >FLT3-S451F-SASQASCF   | 143   | >FLT3-S451F-SASQAFCF   | 151 | 8     |
| >FLT3-S451F-ASASQASCF  | 127   | >FLT3-S451F-ASASQAFCF  | 677 | 550   |
| >FLT3-S451F-ASASQASCF  | 226   | >FLT3-S451F-ASASQAFCF  | 809 | 583   |
| >FLT3-S451F-ASASQASCF  | 15    | >FLT3-S451F-ASASQAFCF  | 52  | 37    |
| >FLT3-S451F-ASASQASCF  | 7     | >FLT3-S451F-ASASQAFCF  | 8   | 1     |
| >FLT3-S451F-ASASQASCF  | 2036  | >FLT3-S451F-ASASQAFCF  | 132 | 1904  |
| >FLT3-S451F-ASASQASCF  | 13    | >FLT3-S451F-ASASQAFCF  | 301 | 288   |
| >FLT3-S451F-EASASQASCF | 566   | >FLT3-S451F-EASASQAFCF | 292 | 274   |
| >FLT3-S451F-EASASQAS   | 19002 | >FLT3-S451F-EASASQAF   | 322 | 18680 |
| >FLT3-S451F-EASASQAS   | 18800 | >FLT3-S451F-EASASQAF   | 71  | 18729 |
| >FLT3-S451F-EASASQASCF | 154   | >FLT3-S451F-EASASQAFCF | 519 | 365   |
| >FLT3-S451F-EASASQAS   | 17413 | >FLT3-S451F-EASASQAF   | 60  | 17353 |
| >FLT3-S451F-EASASQASCF | 202   | >FLT3-S451F-EASASQAFCF | 258 | 56    |
| >FLT3-S451F-EASASQAS   | 1486  | >FLT3-S451F-EASASQAF   | 24  | 1462  |
| >FLT3-S451F-EASASQAS   | 24088 | >FLT3-S451F-EASASQAF   | 350 | 23738 |
| >FLT3-S451F-AEASASQAS  | 11152 | >FLT3-S451F-AEASASQAF  | 46  | 11106 |
| >FLT3-S451F-AEASASQASC | 266   | >FLT3-S451F-AEASASQAF  | 557 | 291   |
| >FLT3-S451F-AEASASQAS  | 5596  | >FLT3-S451F-AEASASQAF  | 7   | 5589  |
| >FLT3-S451F-AEASASQASC | 18    | >FLT3-S451F-AEASASQAF  | 48  | 30    |
| >FLT3-S451F-AEASASQAS  | 10625 | >FLT3-S451F-AEASASQAF  | 140 | 10485 |
| >FLT3-S451F-AEASASQASC | 1054  | >FLT3-S451F-AEASASQAF  | 457 | 597   |
| >FLT3-S451F-AEASASQAS  | 4033  | >FLT3-S451F-AEASASQAF  | 39  | 3994  |
| >FLT3-S451F-AEASASQASC | 358   | >FLT3-S451F-AEASASQAF  | 97  | 261   |
| >FLT3-S451F-AEASASQAS  | 1498  | >FLT3-S451F-AEASASQAF  | 223 | 1275  |
| >FLT3-S451F-AEASASQASC | 507   | >FLT3-S451F-AEASASQAF  | 321 | 186   |
| >FLT3-S451F-AEASASQAS  | 315   | >FLT3-S451F-AEASASQAF  | 51  | 264   |
| >FLT3-S451F-AEASASQASC | 64    | >FLT3-S451F-AEASASQAF  | 64  | 0     |
| >FLT3-S451F-AEASASQAS  | 821   | >FLT3-S451F-AEASASQAF  | 25  | 796   |
| >FLT3-S451F-AEASASQASC | 31    | >FLT3-S451F-AEASASQAF  | 19  | 12    |
| >FLT3-S451F-AEASASQAS  | 26    | >FLT3-S451F-AEASASQAF  | 82  | 56    |
| >FLT3-S451F-AEASASQASC | 170   | >FLT3-S451F-AEASASQAF  | 225 | 55    |
| >FLT3-S451F-AEASASQASC | 184   | >FLT3-S451F-AEASASQAF  | 53  | 131   |
| >FLT3-S451F-AEASASQAS  | 1839  | >FLT3-S451F-AEASASQAF  | 52  | 1787  |
| >FLT3-S451F-AEASASQASC | 84    | >FLT3-S451F-AEASASQAF  | 42  | 42    |
| >FLT3-S451F-AEASASQAS  | 11880 | >FLT3-S451F-AEASASQAF  | 154 | 11726 |
| >FLT3-S451F-LAEASASQAS | 16723 | >FLT3-S451F-LAEASASQAF | 197 | 16526 |
| >FLT3-S451F-LAEASASQAS | 17486 | >FLT3-S451F-LAEASASQAF | 76  | 17410 |
| >FLT3-S451F-LAEASASQAS | 7822  | >FLT3-S451F-LAEASASQAF | 10  | 7812  |

|                        |     |                       |      |      |
|------------------------|-----|-----------------------|------|------|
| >FLT3-S574G SQLQMVQV   | 86  | >FLT3-S574G GQLQMVQV  | 206  | 120  |
| >FLT3-S574G SQLQMVQV   | 295 | >FLT3-S574G GQLQMVQV  | 466  | 171  |
| >FLT3-S574G SQLQMVQV   | 8   | >FLT3-S574G GQLQMVQV  | 19   | 11   |
| >FLT3-S574G SQLQMVQV   | 22  | >FLT3-S574G GQLQMVQV  | 46   | 24   |
| >FLT3-S574G SQLQMVQV   | 243 | >FLT3-S574G GQLQMVQV  | 133  | 110  |
| >FLT3-S574G SQLQMVQV   | 18  | >FLT3-S574G GQLQMVQV  | 33   | 15   |
| >FLT3-S574G SQLQMVQV   | 85  | >FLT3-S574G GQLQMVQV  | 217  | 132  |
| >FLT3-S574G SQLQMVQV   | 402 | >FLT3-S574G GQLQMVQV  | 1174 | 772  |
| >FLT3-S574G SQLQMVQV   | 344 | >FLT3-S574G GQLQMVQV  | 65   | 279  |
| >FLT3-S574G ESQLQMVQV  | 183 | >FLT3-S574G EGQLQMVQ\ | 3606 | 3423 |
| >FLT3-S574G ESQLQMVQV  | 338 | >FLT3-S574G EGQLQMVQ\ | 3586 | 3248 |
| >FLT3-S574G YESQLQMV   | 50  | >FLT3-S574G YEGQLQMV  | 130  | 80   |
| >FLT3-S574G YESQLQMVQ  | 46  | >FLT3-S574G YEGQLQMVQ | 60   | 14   |
| >FLT3-S574G YESQLQMV   | 484 | >FLT3-S574G YEGQLQMV  | 1605 | 1121 |
| >FLT3-S574G YESQLQMVQ  | 253 | >FLT3-S574G YEGQLQMVQ | 863  | 610  |
| >FLT3-S574G YESQLQMV   | 120 | >FLT3-S574G YEGQLQMV  | 932  | 812  |
| >FLT3-S574G YESQLQMV   | 120 | >FLT3-S574G YEGQLQMV  | 190  | 70   |
| >FLT3-S574G YESQLQMVQ  | 85  | >FLT3-S574G YEGQLQMVQ | 186  | 101  |
| >FLT3-S574G YESQLQMVQ  | 70  | >FLT3-S574G YEGQLQMVQ | 101  | 31   |
| >FLT3-S574G YESQLQMVQ  | 244 | >FLT3-S574G YEGQLQMVQ | 291  | 47   |
| >FLT3-S574G YESQLQMV   | 110 | >FLT3-S574G YEGQLQMV  | 130  | 20   |
| >FLT3-S574G YESQLQMVQ  | 55  | >FLT3-S574G YEGQLQMVQ | 96   | 41   |
| >FLT3-S574G YESQLQMVQ  | 58  | >FLT3-S574G YEGQLQMVQ | 125  | 67   |
| >FLT3-S574G RYESQLQM   | 39  | >FLT3-S574G RYEGQLQM  | 32   | 7    |
| >FLT3-S574G RYESQLQMV  | 32  | >FLT3-S574G RYEGQLQMV | 29   | 3    |
| >FLT3-S574G RYESQLQMV  | 39  | >FLT3-S574G RYEGQLQMV | 35   | 4    |
| >FLT3-S574G FRYESQLQM\ | 59  | >FLT3-S574G FRYEGQLQM | 34   | 25   |
| >FLT3-S574G FRYESQLQM\ | 171 | >FLT3-S574G FRYEGQLQM | 96   | 75   |
| >FLT3-S574G FRYESQLQM\ | 50  | >FLT3-S574G FRYEGQLQM | 25   | 25   |
| >FLT3-S574G FRYESQLQM  | 13  | >FLT3-S574G FRYEGQLQM | 61   | 48   |
| >FLT3-S574G FRYESQLQM\ | 41  | >FLT3-S574G FRYEGQLQM | 164  | 123  |
| >FLT3-S574G FRYESQLQM\ | 405 | >FLT3-S574G FRYEGQLQM | 915  | 510  |
| >FLT3-S574G FRYESQLQM  | 18  | >FLT3-S574G FRYEGQLQM | 17   | 1    |
| >FLT3-S574G FRYESQLQM\ | 111 | >FLT3-S574G FRYEGQLQM | 127  | 16   |
| >FLT3-S574G FRYESQLQM\ | 489 | >FLT3-S574G FRYEGQLQM | 425  | 64   |
| >FLT3-S574G FRYESQLQM  | 26  | >FLT3-S574G FRYEGQLQM | 20   | 6    |
| >FLT3-S574G FRYESQLQM\ | 287 | >FLT3-S574G FRYEGQLQM | 214  | 73   |
| >FLT3-S574G FRYESQLQM  | 625 | >FLT3-S574G FRYEGQLQM | 402  | 223  |
| >FLT3-S574G FRYESQLQM\ | 428 | >FLT3-S574G FRYEGQLQM | 320  | 108  |
| >FLT3-S574G FRYESQLQM\ | 336 | >FLT3-S574G FRYEGQLQM | 259  | 77   |
| >FLT3-S574G FRYESQLQM  | 475 | >FLT3-S574G FRYEGQLQM | 299  | 176  |
| >FLT3-S574G FRYESQLQM  | 707 | >FLT3-S574G FRYEGQLQM | 372  | 335  |
| >FLT3-S574G FRYESQLQM\ | 164 | >FLT3-S574G FRYEGQLQM | 166  | 2    |

|                         |      |                         |      |      |
|-------------------------|------|-------------------------|------|------|
| >FLT3-S574G QFRYESQLQM  | 282  | >FLT3-S574G QFRYEGQLQI  | 807  | 525  |
| >FLT3-S574G QFRYESQLQM  | 327  | >FLT3-S574G QFRYEGQLQI  | 694  | 367  |
| >FLT3-S574G KQFRYESQL   | 136  | >FLT3-S574G KQFRYEGQL   | 302  | 166  |
| >FLT3-S574G KQFRYESQLC  | 344  | >FLT3-S574G KQFRYEGQLC  | 542  | 198  |
| >FLT3-S574G KQFRYESQL   | 155  | >FLT3-S574G KQFRYEGQL   | 757  | 602  |
| >FLT3-S574G KQFRYESQL   | 138  | >FLT3-S574G KQFRYEGQL   | 570  | 432  |
| >FLT3-S574G KQFRYESQLC  | 297  | >FLT3-S574G KQFRYEGQLC  | 350  | 53   |
| >FLT3-S574G KQFRYESQL   | 372  | >FLT3-S574G KQFRYEGQL   | 855  | 483  |
| >FLT3-S574G KQFRYESQL   | 420  | >FLT3-S574G KQFRYEGQL   | 1251 | 831  |
| >FLT3-S574G KQFRYESQLC  | 78   | >FLT3-S574G KQFRYEGQLC  | 111  | 33   |
| >FLT3-S574G KQFRYESQ    | 95   | >FLT3-S574G KQFRYEGQ    | 785  | 690  |
| >FLT3-S574G KQFRYESQL   | 6    | >FLT3-S574G KQFRYEGQL   | 71   | 65   |
| >FLT3-S574G KQFRYESQLC  | 176  | >FLT3-S574G KQFRYEGQLC  | 381  | 205  |
| >FLT3-S574G KQFRYESQLC  | 4    | >FLT3-S574G KQFRYEGQLC  | 10   | 6    |
| >FLT3-S574G KQFRYESQLC  | 146  | >FLT3-S574G KQFRYEGQLC  | 132  | 14   |
| >FLT3-S574G KQFRYESQL   | 101  | >FLT3-S574G KQFRYEGQL   | 223  | 122  |
| >FLT3-S574G KQFRYESQLC  | 462  | >FLT3-S574G KQFRYEGQLC  | 718  | 256  |
| >FLT3-S574G KQFRYESQL   | 320  | >FLT3-S574G KQFRYEGQL   | 601  | 281  |
| >FLT3-S574G KQFRYESQL   | 355  | >FLT3-S574G KQFRYEGQL   | 1618 | 1263 |
| >FLT3-S574G KKQFRYESQL  | 113  | >FLT3-S574G KKQFRYEGQL  | 1209 | 1096 |
| >FLT3-S574G KKQFRYESQL  | 638  | >FLT3-S574G KKQFRYEGQL  | 429  | 209  |
| >FLT3-S574G KKQFRYESQL  | 879  | >FLT3-S574G KKQFRYEGQL  | 433  | 446  |
| >FLT3-S574G YKKQFRYESQ  | 324  | >FLT3-S574G YKKQFRYEGC  | 885  | 561  |
| >FLT3-S574G YKKQFRYES   | 481  | >FLT3-S574G YKKQFRYEG   | 1511 | 1030 |
| >FLT3-S574G YKKQFRYESQ  | 384  | >FLT3-S574G YKKQFRYEGC  | 1451 | 1067 |
| >FLT3-S574G YKKQFRYESQ  | 19   | >FLT3-S574G YKKQFRYEGC  | 128  | 109  |
| >FLT3-S574G KYKKQFRYES  | 26   | >FLT3-S574G KYKKQFRYEG  | 28   | 2    |
| >FLT3-S574G KYKKQFRYES  | 57   | >FLT3-S574G KYKKQFRYEG  | 185  | 128  |
| >FLT3-S574G KYKKQFRYES  | 540  | >FLT3-S574G KYKKQFRYEG  | 330  | 210  |
| >FLT3-T167A TLRRPYFRKM  | 1820 | >FLT3-T167A ALRRPYFRKM  | 450  | 1370 |
| >FLT3-T167A TLRRPYFR    | 176  | >FLT3-T167A ALRRPYFR    | 138  | 38   |
| >FLT3-T167A TLRRPYFRK   | 34   | >FLT3-T167A ALRRPYFRK   | 32   | 2    |
| >FLT3-T167A TLRRPYFRK   | 90   | >FLT3-T167A ALRRPYFRK   | 87   | 3    |
| >FLT3-T167A TLRRPYFR    | 188  | >FLT3-T167A ALRRPYFR    | 25   | 163  |
| >FLT3-T167A TLRRPYFRK   | 9    | >FLT3-T167A ALRRPYFRK   | 5    | 4    |
| >FLT3-T167A TLRRPYFRKM  | 748  | >FLT3-T167A ALRRPYFRKM  | 75   | 673  |
| >FLT3-T167A TLRRPYFR    | 9    | >FLT3-T167A ALRRPYFR    | 8    | 1    |
| >FLT3-T167A TLRRPYFRK   | 59   | >FLT3-T167A ALRRPYFRK   | 48   | 11   |
| >FLT3-T167A TLRRPYFR    | 19   | >FLT3-T167A ALRRPYFR    | 91   | 72   |
| >FLT3-T167A TLRRPYFR    | 137  | >FLT3-T167A ALRRPYFR    | 2103 | 1966 |
| >FLT3-T167A TLRRPYFRKM  | 1404 | >FLT3-T167A ALRRPYFRKM  | 225  | 1179 |
| >FLT3-T167A TLRRPYFR    | 203  | >FLT3-T167A ALRRPYFR    | 621  | 418  |
| >FLT3-T167A YTLRRPYFRKI | 422  | >FLT3-T167A YALRRPYFRKI | 305  | 117  |

|                         |      |                         |      |      |
|-------------------------|------|-------------------------|------|------|
| >FLT3-T167A YTLRRPYFRK  | 45   | >FLT3-T167A YALRRPYFRK  | 179  | 134  |
| >FLT3-T167A YTLRRPYFR   | 34   | >FLT3-T167A YALRRPYFR   | 293  | 259  |
| >FLT3-T167A YTLRRPYFRK  | 18   | >FLT3-T167A YALRRPYFRK  | 73   | 55   |
| >FLT3-T167A YTLRRPYF    | 118  | >FLT3-T167A YALRRPYF    | 506  | 388  |
| >FLT3-T167A YTLRRPYF    | 62   | >FLT3-T167A YALRRPYF    | 3100 | 3038 |
| >FLT3-T167A YTLRRPYFRKI | 144  | >FLT3-T167A YALRRPYFRKI | 5523 | 5379 |
| >FLT3-T167A YTLRRPYFRKI | 231  | >FLT3-T167A YALRRPYFRKI | 7352 | 7121 |
| >FLT3-T167A YTLRRPYF    | 226  | >FLT3-T167A YALRRPYF    | 1571 | 1345 |
| >FLT3-T167A YTLRRPYFRK  | 49   | >FLT3-T167A YALRRPYFRK  | 224  | 175  |
| >FLT3-T167A YTLRRPYFR   | 6    | >FLT3-T167A YALRRPYFR   | 9    | 3    |
| >FLT3-T167A YTLRRPYFR   | 7    | >FLT3-T167A YALRRPYFR   | 11   | 4    |
| >FLT3-T167A YTLRRPYFR   | 5    | >FLT3-T167A YALRRPYFR   | 15   | 10   |
| >FLT3-T167A YTLRRPYFRK  | 144  | >FLT3-T167A YALRRPYFRK  | 526  | 382  |
| >FLT3-T167A YTLRRPYFRKI | 292  | >FLT3-T167A YALRRPYFRKI | 1401 | 1109 |
| >FLT3-T167A YTLRRPYF    | 973  | >FLT3-T167A YALRRPYF    | 202  | 771  |
| >FLT3-T167A YTLRRPYFRKI | 306  | >FLT3-T167A YALRRPYFRKI | 79   | 227  |
| >FLT3-T167A YTLRRPYF    | 32   | >FLT3-T167A YALRRPYF    | 23   | 9    |
| >FLT3-T167A YTLRRPYFRKI | 540  | >FLT3-T167A YALRRPYFRKI | 296  | 244  |
| >FLT3-T167A YTLRRPYF    | 5    | >FLT3-T167A YALRRPYF    | 16   | 11   |
| >FLT3-T167A YTLRRPYFRKI | 14   | >FLT3-T167A YALRRPYFRKI | 121  | 107  |
| >FLT3-T167A YTLRRPYF    | 410  | >FLT3-T167A YALRRPYF    | 677  | 267  |
| >FLT3-T167A YTLRRPYF    | 74   | >FLT3-T167A YALRRPYF    | 89   | 15   |
| >FLT3-T167A YTLRRPYFRKI | 17   | >FLT3-T167A YALRRPYFRKI | 334  | 317  |
| >FLT3-T167A YTLRRPYFR   | 138  | >FLT3-T167A YALRRPYFR   | 501  | 363  |
| >FLT3-T167A YTLRRPYFRK  | 122  | >FLT3-T167A YALRRPYFRK  | 405  | 283  |
| >FLT3-T167A YTLRRPYFR   | 40   | >FLT3-T167A YALRRPYFR   | 56   | 16   |
| >FLT3-T167A TVSIRNTLLYT | 4003 | >FLT3-T167A TVSIRNTLLYA | 317  | 3686 |
| >FLT3-T167A LYTLRRPYF   | 526  | >FLT3-T167A LYALRRPYF   | 327  | 199  |
| >FLT3-T167A LYTLRRPYF   | 584  | >FLT3-T167A LYALRRPYF   | 203  | 381  |
| >FLT3-T167A LYTLRRPYF   | 12   | >FLT3-T167A LYALRRPYF   | 11   | 1    |
| >FLT3-T167A LYTLRRPY    | 345  | >FLT3-T167A LYALRRPY    | 137  | 208  |
| >FLT3-T167A LYTLRRPYFRK | 218  | >FLT3-T167A LYALRRPYFRK | 263  | 45   |
| >FLT3-T167A LYTLRRPY    | 941  | >FLT3-T167A LYALRRPY    | 424  | 517  |
| >FLT3-T167A LYTLRRPYFR  | 9    | >FLT3-T167A LYALRRPYFR  | 11   | 2    |
| >FLT3-T167A LYTLRRPYFRK | 134  | >FLT3-T167A LYALRRPYFRK | 111  | 23   |
| >FLT3-T167A LYTLRRPYFR  | 36   | >FLT3-T167A LYALRRPYFR  | 45   | 9    |
| >FLT3-T167A LYTLRRPYFRK | 304  | >FLT3-T167A LYALRRPYFRK | 627  | 323  |
| >FLT3-T167A LYTLRRPYFR  | 856  | >FLT3-T167A LYALRRPYFR  | 275  | 581  |
| >FLT3-T167A LYTLRRPYFR  | 19   | >FLT3-T167A LYALRRPYFR  | 19   | 0    |
| >FLT3-T167A LLYTLRRPYF  | 912  | >FLT3-T167A LLYALRRPYF  | 382  | 530  |
| >FLT3-T167A LLYTLRRPYF  | 753  | >FLT3-T167A LLYALRRPYF  | 451  | 302  |
| >FLT3-T167A LLYTLRRPY   | 127  | >FLT3-T167A LLYALRRPY   | 92   | 35   |
| >FLT3-T167A LLYTLRRPYFR | 57   | >FLT3-T167A LLYALRRPYFF | 48   | 9    |

|                         |      |                         |     |     |
|-------------------------|------|-------------------------|-----|-----|
| >FLT3-T167A LLYTLRRPYFR | 210  | >FLT3-T167A LLYALRRPYFF | 157 | 53  |
| >FLT3-T167A LLYTLRRPY   | 81   | >FLT3-T167A LLYALRRPY   | 63  | 18  |
| >FLT3-T167A LLYTLRRPY   | 260  | >FLT3-T167A LLYALRRPY   | 326 | 66  |
| >FLT3-T167A LLYTLRRPYFR | 7    | >FLT3-T167A LLYALRRPYFF | 7   | 0   |
| >FLT3-T167A LLYTLRRPYFR | 26   | >FLT3-T167A LLYALRRPYFF | 22  | 4   |
| >FLT3-T167A LLYTLRRPYFR | 37   | >FLT3-T167A LLYALRRPYFF | 34  | 3   |
| >FLT3-T167A LLYTLRRPY   | 44   | >FLT3-T167A LLYALRRPY   | 37  | 7   |
| >FLT3-T167A LLYTLRRPYF  | 77   | >FLT3-T167A LLYALRRPYF  | 51  | 26  |
| >FLT3-T167A LLYTLRRPY   | 129  | >FLT3-T167A LLYALRRPY   | 42  | 87  |
| >FLT3-T167A LLYTLRRPYF  | 1451 | >FLT3-T167A LLYALRRPYF  | 498 | 953 |
| >FLT3-T167A LLYTLRRPY   | 18   | >FLT3-T167A LLYALRRPY   | 18  | 0   |
| >FLT3-T167A LLYTLRRPYF  | 16   | >FLT3-T167A LLYALRRPYF  | 17  | 1   |
| >FLT3-T167A LLYTLRRPY   | 988  | >FLT3-T167A LLYALRRPY   | 465 | 523 |
| >FLT3-T167A LLYTLRRPYF  | 650  | >FLT3-T167A LLYALRRPYF  | 326 | 324 |
| >FLT3-T167A LLYTLRRPY   | 331  | >FLT3-T167A LLYALRRPY   | 296 | 35  |
| >FLT3-T167A LLYTLRRPYF  | 337  | >FLT3-T167A LLYALRRPYF  | 320 | 17  |
| >FLT3-T167A LLYTLRRPY   | 260  | >FLT3-T167A LLYALRRPY   | 80  | 180 |
| >FLT3-T167A LLYTLRRPYFR | 35   | >FLT3-T167A LLYALRRPYFF | 36  | 1   |
| >FLT3-T167A TLLYTLRRPY  | 153  | >FLT3-T167A TLLYALRRPY  | 109 | 44  |
| >FLT3-T167A TLLYTLRRPY  | 382  | >FLT3-T167A TLLYALRRPY  | 538 | 156 |
| >FLT3-T167A TLLYTLRRPY  | 599  | >FLT3-T167A TLLYALRRPY  | 452 | 147 |
| >FLT3-T167A TLLYTLRR    | 105  | >FLT3-T167A TLLYALRR    | 258 | 153 |
| >FLT3-T167A TLLYTLRR    | 468  | >FLT3-T167A TLLYALRR    | 760 | 292 |
| >FLT3-T167A TLLYTLRR    | 223  | >FLT3-T167A TLLYALRR    | 249 | 26  |
| >FLT3-T167A TLLYTLRRPY  | 279  | >FLT3-T167A TLLYALRRPY  | 201 | 78  |
| >FLT3-T167A TLLYTLRRPY  | 152  | >FLT3-T167A TLLYALRRPY  | 135 | 17  |
| >FLT3-T167A TLLYTLRRPY  | 213  | >FLT3-T167A TLLYALRRPY  | 366 | 153 |
| >FLT3-T167A TLLYTLRRPYF | 125  | >FLT3-T167A TLLYALRRPYF | 202 | 77  |
| >FLT3-T167A TLLYTLRR    | 219  | >FLT3-T167A TLLYALRR    | 281 | 62  |
| >FLT3-T167A NLLYTLRR    | 382  | >FLT3-T167A NLLYALRR    | 871 | 489 |
| >FLT3-T167A NLLYTLRRPY  | 302  | >FLT3-T167A NLLYALRRPY  | 554 | 252 |
| >FLT3-T167A NLLYTLRRPY  | 97   | >FLT3-T167A NLLYALRRPY  | 234 | 137 |
| >FLT3-T167A NLLYTLRRPY  | 146  | >FLT3-T167A NLLYALRRPY  | 147 | 1   |
| >FLT3-T167A NLLYTLR     | 51   | >FLT3-T167A NLLYALR     | 64  | 13  |
| >FLT3-T167A NLLYTLRR    | 270  | >FLT3-T167A NLLYALRR    | 784 | 514 |
| >FLT3-T167A NLLYTLR     | 21   | >FLT3-T167A NLLYALR     | 26  | 5   |
| >FLT3-T167A NLLYTLRR    | 92   | >FLT3-T167A NLLYALRR    | 249 | 157 |
| >FLT3-T167A NLLYTLR     | 16   | >FLT3-T167A NLLYALR     | 14  | 2   |
| >FLT3-T167A NLLYTLRR    | 37   | >FLT3-T167A NLLYALRR    | 47  | 10  |
| >FLT3-T167A NLLYTLRRPY  | 377  | >FLT3-T167A NLLYALRRPY  | 473 | 96  |
| >FLT3-T167A NLLYTLRRPY  | 44   | >FLT3-T167A NLLYALRRPY  | 32  | 12  |
| >FLT3-T167A NLLYTLRR    | 269  | >FLT3-T167A NLLYALRR    | 689 | 420 |
| >FLT3-T167A NLLYTLR     | 159  | >FLT3-T167A NLLYALR     | 196 | 37  |



|                        |      |                        |     |      |
|------------------------|------|------------------------|-----|------|
| >FLT3-T167A NTLTYLRR   | 74   | >FLT3-T167A NTLTYALRR  | 156 | 82   |
| >FLT3-T167A RNTLYTLR   | 38   | >FLT3-T167A RNTLYALR   | 29  | 9    |
| >FLT3-T167A RNTLYTLRR  | 240  | >FLT3-T167A RNTLYALRR  | 268 | 28   |
| >FLT3-T167A RNTLYTLR   | 107  | >FLT3-T167A RNTLYALR   | 95  | 12   |
| >FLT3-T167A RNTLYTLRR  | 67   | >FLT3-T167A RNTLYALRR  | 88  | 21   |
| >FLT3-T167A IRNTLYTLR  | 309  | >FLT3-T167A IRNTLYALR  | 137 | 172  |
| >FLT3-T167A IRNTLYTLR  | 569  | >FLT3-T167A IRNTLYALR  | 352 | 217  |
| >FLT3-T167A IRNTLYTL   | 357  | >FLT3-T167A IRNTLYAL   | 265 | 92   |
| >FLT3-T167A IRNTLYTL   | 72   | >FLT3-T167A IRNTLYAL   | 82  | 10   |
| >FLT3-T167A IRNTLYTLR  | 58   | >FLT3-T167A IRNTLYALR  | 72  | 14   |
| >FLT3-T167A IRNTLYTLRR | 155  | >FLT3-T167A IRNTLYALRR | 115 | 40   |
| >FLT3-T167A IRNTLYTL   | 403  | >FLT3-T167A IRNTLYAL   | 136 | 267  |
| >FLT3-T167A IRNTLYTL   | 200  | >FLT3-T167A IRNTLYAL   | 511 | 311  |
| >FLT3-T167A IRNTLYTL   | 27   | >FLT3-T167A IRNTLYAL   | 40  | 13   |
| >FLT3-T167A IRNTLYTLR  | 154  | >FLT3-T167A IRNTLYALR  | 200 | 46   |
| >FLT3-T167A IRNTLYTLR  | 376  | >FLT3-T167A IRNTLYALR  | 336 | 40   |
| >FLT3-T167A IRNTLYTLRR | 220  | >FLT3-T167A IRNTLYALRR | 338 | 118  |
| >FLT3-T167A SIRNTLYTL  | 68   | >FLT3-T167A SIRNTLYAL  | 92  | 24   |
| >FLT3-T167A SIRNTLYT   | 1792 | >FLT3-T167A SIRNTLYA   | 123 | 1669 |
| >FLT3-T167A SIRNTLYTL  | 164  | >FLT3-T167A SIRNTLYAL  | 194 | 30   |
| >FLT3-T167A SIRNTLYTL  | 154  | >FLT3-T167A SIRNTLYAL  | 138 | 16   |
| >FLT3-T167A SIRNTLYTL  | 275  | >FLT3-T167A SIRNTLYAL  | 381 | 106  |
| >FLT3-T167A SIRNTLYTL  | 136  | >FLT3-T167A SIRNTLYAL  | 351 | 215  |
| >FLT3-T167A SIRNTLYT   | 27   | >FLT3-T167A SIRNTLYA   | 5   | 22   |
| >FLT3-T167A SIRNTLYTL  | 32   | >FLT3-T167A SIRNTLYAL  | 33  | 1    |
| >FLT3-T167A SIRNTLYTLR | 53   | >FLT3-T167A SIRNTLYALR | 16  | 37   |
| >FLT3-T167A SIRNTLYTLR | 13   | >FLT3-T167A SIRNTLYALR | 11  | 2    |
| >FLT3-T167A SIRNTLYTL  | 335  | >FLT3-T167A SIRNTLYAL  | 728 | 393  |
| >FLT3-T167A SIRNTLYTLR | 183  | >FLT3-T167A SIRNTLYALR | 131 | 52   |
| >FLT3-T167A SIRNTLYTLR | 238  | >FLT3-T167A SIRNTLYALR | 172 | 66   |
| >FLT3-T167A SIRNTLYTLR | 357  | >FLT3-T167A SIRNTLYALR | 312 | 45   |
| >FLT3-T167A VSIRNTLYTL | 7    | >FLT3-T167A VSIRNTLYAL | 12  | 5    |
| >FLT3-T167A VSIRNTLYTL | 138  | >FLT3-T167A VSIRNTLYAL | 132 | 6    |
| >FLT3-T167A VSIRNTLYTL | 396  | >FLT3-T167A VSIRNTLYAL | 170 | 226  |
| >FLT3-T167A VSIRNTLYTL | 169  | >FLT3-T167A VSIRNTLYAL | 338 | 169  |
| >FLT3-T167A VSIRNTLYTL | 691  | >FLT3-T167A VSIRNTLYAL | 427 | 264  |
| >FLT3-T167A VSIRNTLYTL | 15   | >FLT3-T167A VSIRNTLYAL | 35  | 20   |
| >FLT3-T167A VSIRNTLYTL | 57   | >FLT3-T167A VSIRNTLYAL | 186 | 129  |
| >FLT3-V194N VEWVLCDSQ  | 1331 | >FLT3-V194N MEWVLCDSQ  | 407 | 924  |
| >FLT3-V194N VEWVLCDSQ  | 1909 | >FLT3-V194N MEWVLCDSQ  | 372 | 1537 |
| >FLT3-V194N VEWVLCDSQ  | 774  | >FLT3-V194N MEWVLCDSQ  | 495 | 279  |
| >FLT3-V194N VEWVLCDSQ  | 1844 | >FLT3-V194N MEWVLCDSQ  | 389 | 1455 |
| >FLT3-V194N VEWVLCDSQ  | 385  | >FLT3-V194N MEWVLCDSQ  | 117 | 268  |

|                         |      |                         |       |      |
|-------------------------|------|-------------------------|-------|------|
| >FLT3-V194N VEWVLCDSQ   | 187  | >FLT3-V194N MEWVLCDSQ   | 58    | 129  |
| >FLT3-V194N CISESVPEPIV | 178  | >FLT3-V194N CISESVPEPIM | 5191  | 5013 |
| >FLT3-V194N CISESVPEPIV | 379  | >FLT3-V194N CISESVPEPIM | 7106  | 6727 |
| >FLT3-V194N CISESVPEPIV | 215  | >FLT3-V194N CISESVPEPIM | 6145  | 5930 |
| >FLT3-V194N CISESVPEPIV | 186  | >FLT3-V194N CISESVPEPIM | 10078 | 9892 |
| >FLT3-V194N CISESVPEPIV | 88   | >FLT3-V194N CISESVPEPIM | 4762  | 4674 |
| >FLT3-V194N CISESVPEPIV | 27   | >FLT3-V194N CISESVPEPIM | 6340  | 6313 |
| >FLT3-V194N EPIVEWVL    | 158  | >FLT3-V194N EPIMEWVL    | 106   | 52   |
| >FLT3-V194N EPIVEWVL    | 74   | >FLT3-V194N EPIMEWVL    | 93    | 19   |
| >FLT3-V194N EPIVEWVL    | 88   | >FLT3-V194N EPIMEWVL    | 81    | 7    |
| >FLT3-V194N EPIVEWVL    | 501  | >FLT3-V194N EPIMEWVL    | 368   | 133  |
| >FLT3-V194N VPEPIVEWVL  | 235  | >FLT3-V194N VPEPIMEWV   | 260   | 25   |
| >FLT3-V194N VPEPIVEW    | 25   | >FLT3-V194N VPEPIMEW    | 29    | 4    |
| >FLT3-V194N VPEPIVEW    | 4    | >FLT3-V194N VPEPIMEW    | 5     | 1    |
| >FLT3-V194N VPEPIVEWVL  | 362  | >FLT3-V194N VPEPIMEWV   | 627   | 265  |
| >FLT3-V194N VPEPIVEW    | 1215 | >FLT3-V194N VPEPIMEW    | 196   | 1019 |
| >FLT3-V194N SVPEPIVEWV  | 469  | >FLT3-V194N SVPEPIMEW   | 421   | 48   |
| >FLT3-V194N SVPEPIVEWV  | 318  | >FLT3-V194N SVPEPIMEW   | 287   | 31   |
| >FLT3-V194N SVPEPIVEWV  | 104  | >FLT3-V194N SVPEPIMEW   | 90    | 14   |
| >FLT3-V194N SVPEPIVEWV  | 83   | >FLT3-V194N SVPEPIMEW   | 124   | 41   |
| >FLT3-V194N SVPEPIVEWV  | 5    | >FLT3-V194N SVPEPIMEW   | 10    | 5    |
| >FLT3-V194N SVPEPIVEWV  | 34   | >FLT3-V194N SVPEPIMEW   | 70    | 36   |
| >FLT3-V194N SVPEPIVEWV  | 17   | >FLT3-V194N SVPEPIMEW   | 31    | 14   |
| >FLT3-V194N SVPEPIVEWV  | 101  | >FLT3-V194N SVPEPIMEW   | 191   | 90   |
| >FLT3-V194N SVPEPIVEWV  | 6    | >FLT3-V194N SVPEPIMEW   | 8     | 2    |
| >FLT3-V194N SVPEPIVEWV  | 74   | >FLT3-V194N SVPEPIMEW   | 56    | 18   |
| >FLT3-V194N SVPEPIVEWV  | 817  | >FLT3-V194N SVPEPIMEW   | 386   | 431  |
| >FLT3-V194N SVPEPIVEWV  | 47   | >FLT3-V194N SVPEPIMEW   | 42    | 5    |
| >FLT3-V194N SVPEPIVEWV  | 62   | >FLT3-V194N SVPEPIMEW   | 103   | 41   |
| >FLT3-V194N SVPEPIVEWV  | 77   | >FLT3-V194N SVPEPIMEW   | 46    | 31   |
| >FLT3-V194N SVPEPIVEW   | 332  | >FLT3-V194N SVPEPIMEW   | 374   | 42   |
| >FLT3-V194N SVPEPIVEWV  | 37   | >FLT3-V194N SVPEPIMEW   | 32    | 5    |
| >FLT3-V194N SVPEPIVEWV  | 23   | >FLT3-V194N SVPEPIMEW   | 25    | 2    |
| >FLT3-V194N ESVPEPIV    | 1455 | >FLT3-V194N ESVPEPIM    | 16    | 1439 |
| >FLT3-V194N ESVPEPIVEW  | 425  | >FLT3-V194N ESVPEPIMEW  | 534   | 109  |
| >FLT3-V194N ESVPEPIVEW  | 203  | >FLT3-V194N ESVPEPIMEW  | 111   | 92   |
| >FLT3-V194N ESVPEPIVEW  | 28   | >FLT3-V194N ESVPEPIMEW  | 24    | 4    |
| >FLT3-V194N ESVPEPIV    | 353  | >FLT3-V194N ESVPEPIM    | 4483  | 4130 |
| >FLT3-V194N ESVPEPIVEW  | 190  | >FLT3-V194N ESVPEPIMEW  | 91    | 99   |
| >FLT3-V194N ESVPEPIV    | 4022 | >FLT3-V194N ESVPEPIM    | 109   | 3913 |
| >FLT3-V194N ESVPEPIVEW  | 7    | >FLT3-V194N ESVPEPIMEW  | 7     | 0    |
| >FLT3-V194N ESVPEPIVEW  | 106  | >FLT3-V194N ESVPEPIMEW  | 77    | 29   |
| >FLT3-V194N ESVPEPIVEW  | 34   | >FLT3-V194N ESVPEPIMEW  | 21    | 13   |

|                           |      |                           |      |      |
|---------------------------|------|---------------------------|------|------|
| >FLT3-V194N SESVPEPIVEV   | 54   | >FLT3-V194N SESVPEPIVEV   | 54   | 0    |
| >FLT3-V194N SESVPEPIVEV   | 142  | >FLT3-V194N SESVPEPIVEV   | 143  | 1    |
| >FLT3-V194N SESVPEPIV     | 109  | >FLT3-V194N SESVPEPIV     | 1357 | 1248 |
| >FLT3-V194N SESVPEPIV     | 86   | >FLT3-V194N SESVPEPIV     | 312  | 226  |
| >FLT3-V194N ISESVPEPIV    | 9206 | >FLT3-V194N ISESVPEPIV    | 417  | 8789 |
| >FLT3-V557I-VLTLTLLCHK    | 180  | >FLT3-V557I-VLTLTLLCHK    | 129  | 51   |
| >FLT3-V557I-VLTLTLLCHKYK  | 189  | >FLT3-V557I-VLTLTLLCHKYK  | 132  | 57   |
| >FLT3-V557I-VLTLTLLCHK    | 372  | >FLT3-V557I-VLTLTLLCHK    | 520  | 148  |
| >FLT3-V557I-VLTLTLLCHKYK  | 217  | >FLT3-V557I-VLTLTLLCHKYK  | 278  | 61   |
| >FLT3-V557I-VLTLTLLCHKY   | 78   | >FLT3-V557I-VLTLTLLCHKY   | 69   | 9    |
| >FLT3-V557I-VLTLTLLCHKY   | 185  | >FLT3-V557I-VLTLTLLCHKY   | 310  | 125  |
| >FLT3-V557I-VLTLTLLCHKYK  | 773  | >FLT3-V557I-VLTLTLLCHKYK  | 350  | 423  |
| >FLT3-V557I-VVLTLLTLLCHK  | 97   | >FLT3-V557I-VVLTLLTLLCHK  | 76   | 21   |
| >FLT3-V557I-VVLTLLTLLCHK  | 43   | >FLT3-V557I-VVLTLLTLLCHK  | 56   | 13   |
| >FLT3-V557I-VVLTLLTLLCHKY | 324  | >FLT3-V557I-VVLTLLTLLCHKY | 846  | 522  |
| >FLT3-V557I-VVLTLLTLLCHKY | 187  | >FLT3-V557I-VVLTLLTLLCHKY | 609  | 422  |
| >FLT3-V557I-VVLTLLTLLCHKY | 19   | >FLT3-V557I-VVLTLLTLLCHKY | 30   | 11   |
| >FLT3-V557I-VVLTLLTLLCHK  | 136  | >FLT3-V557I-VVLTLLTLLCHK  | 421  | 285  |
| >FLT3-V557I-VVLTLLTLLCHKY | 39   | >FLT3-V557I-VVLTLLTLLCHKY | 46   | 7    |
| >FLT3-V557I-VVLTLLTLLCHKY | 33   | >FLT3-V557I-VVLTLLTLLCHKY | 86   | 53   |
| >FLT3-V557I-VVLTLLTLLCHKY | 134  | >FLT3-V557I-VVLTLLTLLCHKY | 538  | 404  |
| >FLT3-V557I-VVLTLLTLLCHK  | 1213 | >FLT3-V557I-VVLTLLTLLCHK  | 429  | 784  |
| >FLT3-V557I-TIGVCLLFIVV   | 430  | >FLT3-V557I-TIGVCLLFIVV   | 2951 | 2521 |
| >FLT3-V557I-TIGVCLLFIVV   | 474  | >FLT3-V557I-TIGVCLLFIVV   | 8233 | 7759 |
| >FLT3-V557I-TIGVCLLFIVV   | 142  | >FLT3-V557I-TIGVCLLFIVV   | 8033 | 7891 |
| >FLT3-V557I-IVVLTLLI      | 695  | >FLT3-V557I-IVVLTLLI      | 422  | 273  |
| >FLT3-V557I-IVVLTLLI      | 233  | >FLT3-V557I-IVVLTLLI      | 165  | 68   |
| >FLT3-V557I-IVVLTLLTLLCHK | 350  | >FLT3-V557I-IVVLTLLTLLCHK | 280  | 70   |
| >FLT3-V557I-IVVLTLLTLLCHK | 103  | >FLT3-V557I-IVVLTLLTLLCHK | 44   | 59   |
| >FLT3-V557I-IVVLTLLTLLCHK | 165  | >FLT3-V557I-IVVLTLLTLLCHK | 102  | 63   |
| >FLT3-V557I-IVVLTLLTLLCHK | 163  | >FLT3-V557I-IVVLTLLTLLCHK | 88   | 75   |
| >FLT3-V557I-IVVLTLLI      | 411  | >FLT3-V557I-IVVLTLLI      | 612  | 201  |
| >FLT3-V557I-FIVVLTLL      | 86   | >FLT3-V557I-FIVVLTLL      | 91   | 5    |
| >FLT3-V557I-FIVVLTLLI     | 94   | >FLT3-V557I-FIVVLTLLI     | 112  | 18   |
| >FLT3-V557I-FIVVLTLL      | 15   | >FLT3-V557I-FIVVLTLL      | 16   | 1    |
| >FLT3-V557I-FIVVLTLLI     | 76   | >FLT3-V557I-FIVVLTLLI     | 85   | 9    |
| >FLT3-V557I-FIVVLTLL      | 43   | >FLT3-V557I-FIVVLTLL      | 36   | 7    |
| >FLT3-V557I-FIVVLTLLI     | 116  | >FLT3-V557I-FIVVLTLLI     | 94   | 22   |
| >FLT3-V557I-FIVVLTLL      | 14   | >FLT3-V557I-FIVVLTLL      | 18   | 4    |
| >FLT3-V557I-FIVVLTLLI     | 45   | >FLT3-V557I-FIVVLTLLI     | 65   | 20   |
| >FLT3-V557I-FIVVLTLLIC    | 719  | >FLT3-V557I-FIVVLTLLIC    | 474  | 245  |
| >FLT3-V557I-FIVVLTLL      | 253  | >FLT3-V557I-FIVVLTLL      | 154  | 99   |
| >FLT3-V557I-FIVVLTLLI     | 474  | >FLT3-V557I-FIVVLTLLI     | 194  | 280  |

|                          |     |                          |     |     |
|--------------------------|-----|--------------------------|-----|-----|
| >FLT3-V557I- FIVVLTLL    | 327 | >FLT3-V557I- FIVILTLL    | 274 | 53  |
| >FLT3-V557I- FIVVLTLLI   | 498 | >FLT3-V557I- FIVILTLLI   | 338 | 160 |
| >FLT3-V557I- FIVVLTLL    | 32  | >FLT3-V557I- FIVILTLL    | 21  | 11  |
| >FLT3-V557I- FIVVLTLLI   | 461 | >FLT3-V557I- FIVILTLLI   | 272 | 189 |
| >FLT3-V557I- FIVVLTLL    | 266 | >FLT3-V557I- FIVILTLL    | 263 | 3   |
| >FLT3-V557I- FIVVLTLLI   | 216 | >FLT3-V557I- FIVILTLLI   | 236 | 20  |
| >FLT3-V557I- FIVVLTLLI   | 237 | >FLT3-V557I- FIVILTLLI   | 237 | 0   |
| >FLT3-V557I- LFIVVLT     | 480 | >FLT3-V557I- LFIVILT     | 382 | 98  |
| >FLT3-V557I- LFIVVLTLL   | 368 | >FLT3-V557I- LFIVILTLL   | 455 | 87  |
| >FLT3-V557I- LFIVVLTLL   | 266 | >FLT3-V557I- LFIVILTLL   | 94  | 172 |
| >FLT3-V557I- LFIVVLT     | 152 | >FLT3-V557I- LFIVILT     | 114 | 38  |
| >FLT3-V557I- LFIVVLTLL   | 159 | >FLT3-V557I- LFIVILTLL   | 137 | 22  |
| >FLT3-V557I- LFIVVLT     | 48  | >FLT3-V557I- LFIVILT     | 56  | 8   |
| >FLT3-V557I- LFIVVLTLL   | 261 | >FLT3-V557I- LFIVILTLL   | 341 | 80  |
| >FLT3-V557I- LFIVVLTLLI  | 108 | >FLT3-V557I- LFIVILTLLI  | 129 | 21  |
| >FLT3-V557I- LFIVVLT     | 398 | >FLT3-V557I- LFIVILT     | 321 | 77  |
| >FLT3-V557I- LFIVVLTLL   | 421 | >FLT3-V557I- LFIVILTLL   | 383 | 38  |
| >FLT3-V557I- LLFIVVLT    | 167 | >FLT3-V557I- LLFIVILT    | 147 | 20  |
| >FLT3-V557I- LLFIVVLT    | 36  | >FLT3-V557I- LLFIVILT    | 30  | 6   |
| >FLT3-V557I- LLFIVVLTLL  | 61  | >FLT3-V557I- LLFIVILTLL  | 60  | 1   |
| >FLT3-V557I- LLFIVVLTLLI | 35  | >FLT3-V557I- LLFIVILTLLI | 32  | 3   |
| >FLT3-V557I- LLFIVVLT    | 158 | >FLT3-V557I- LLFIVILT    | 226 | 68  |
| >FLT3-V557I- LLFIVVLT    | 169 | >FLT3-V557I- LLFIVILT    | 163 | 6   |
| >FLT3-V557I- LLFIVVLTLL  | 18  | >FLT3-V557I- LLFIVILTLL  | 17  | 1   |
| >FLT3-V557I- LLFIVVLTLLI | 92  | >FLT3-V557I- LLFIVILTLLI | 91  | 1   |
| >FLT3-V557I- LLFIVVLT    | 212 | >FLT3-V557I- LLFIVILT    | 281 | 69  |
| >FLT3-V557I- LLFIVVLT    | 65  | >FLT3-V557I- LLFIVILT    | 82  | 17  |
| >FLT3-V557I- LLFIVVLTLL  | 51  | >FLT3-V557I- LLFIVILTLL  | 51  | 0   |
| >FLT3-V557I- LLFIVVLTLLI | 50  | >FLT3-V557I- LLFIVILTLLI | 53  | 3   |
| >FLT3-V557I- LLFIVVLT    | 695 | >FLT3-V557I- LLFIVILT    | 457 | 238 |
| >FLT3-V557I- LLFIVVLTLL  | 168 | >FLT3-V557I- LLFIVILTLL  | 170 | 2   |
| >FLT3-V557I- LLFIVVLTLLI | 549 | >FLT3-V557I- LLFIVILTLLI | 465 | 84  |
| >FLT3-V557I- LLFIVVLT    | 14  | >FLT3-V557I- LLFIVILT    | 12  | 2   |
| >FLT3-V557I- LLFIVVLT    | 2   | >FLT3-V557I- LLFIVILT    | 2   | 0   |
| >FLT3-V557I- LLFIVVLTLL  | 3   | >FLT3-V557I- LLFIVILTLL  | 3   | 0   |
| >FLT3-V557I- LLFIVVLTLLI | 4   | >FLT3-V557I- LLFIVILTLLI | 3   | 1   |
| >FLT3-V557I- LLFIVVLT    | 33  | >FLT3-V557I- LLFIVILT    | 30  | 3   |
| >FLT3-V557I- LLFIVVLTLL  | 83  | >FLT3-V557I- LLFIVILTLL  | 83  | 0   |
| >FLT3-V557I- LLFIVVLTLLI | 128 | >FLT3-V557I- LLFIVILTLLI | 127 | 1   |
| >FLT3-V557I- LLFIVVLT    | 92  | >FLT3-V557I- LLFIVILT    | 90  | 2   |
| >FLT3-V557I- LLFIVVLT    | 6   | >FLT3-V557I- LLFIVILT    | 6   | 0   |
| >FLT3-V557I- LLFIVVLTLL  | 9   | >FLT3-V557I- LLFIVILTLL  | 10  | 1   |
| >FLT3-V557I- LLFIVVLTLLI | 12  | >FLT3-V557I- LLFIVILTLLI | 11  | 1   |

|                         |      |                         |     |     |
|-------------------------|------|-------------------------|-----|-----|
| >FLT3-V557I-LLFIVVLT    | 62   | >FLT3-V557I-LLFIVILT    | 79  | 17  |
| >FLT3-V557I-LLFIVVLTLL  | 221  | >FLT3-V557I-LLFIVILTLL  | 190 | 31  |
| >FLT3-V557I-LLFIVVLT    | 23   | >FLT3-V557I-LLFIVILT    | 21  | 2   |
| >FLT3-V557I-LLFIVVLT    | 3    | >FLT3-V557I-LLFIVILT    | 2   | 1   |
| >FLT3-V557I-LLFIVVLTLL  | 3    | >FLT3-V557I-LLFIVILTLL  | 3   | 0   |
| >FLT3-V557I-LLFIVVLTLLI | 8    | >FLT3-V557I-LLFIVILTLLI | 7   | 1   |
| >FLT3-V557I-LLFIVVLT    | 45   | >FLT3-V557I-LLFIVILT    | 93  | 48  |
| >FLT3-V557I-LLFIVVLTLLI | 115  | >FLT3-V557I-LLFIVILTLLI | 179 | 64  |
| >FLT3-V557I-LLFIVVLT    | 156  | >FLT3-V557I-LLFIVILT    | 216 | 60  |
| >FLT3-V557I-LLFIVVLT    | 217  | >FLT3-V557I-LLFIVILT    | 355 | 138 |
| >FLT3-V557I-LLFIVVLT    | 490  | >FLT3-V557I-LLFIVILT    | 603 | 113 |
| >FLT3-V557I-LLFIVVLTLL  | 169  | >FLT3-V557I-LLFIVILTLL  | 146 | 23  |
| >FLT3-V557I-LLFIVVLTLLI | 371  | >FLT3-V557I-LLFIVILTLLI | 320 | 51  |
| >FLT3-V557I-CLLFIVV     | 79   | >FLT3-V557I-CLLFIVIL    | 87  | 8   |
| >FLT3-V557I-CLLFIVVLT   | 456  | >FLT3-V557I-CLLFIVILT   | 373 | 83  |
| >FLT3-V557I-CLLFIVVLT   | 120  | >FLT3-V557I-CLLFIVILT   | 85  | 35  |
| >FLT3-V557I-CLLFIVVLTLL | 49   | >FLT3-V557I-CLLFIVILTLL | 47  | 2   |
| >FLT3-V557I-CLLFIVV     | 443  | >FLT3-V557I-CLLFIVIL    | 520 | 77  |
| >FLT3-V557I-CLLFIVVLT   | 86   | >FLT3-V557I-CLLFIVILT   | 77  | 9   |
| >FLT3-V557I-CLLFIVVLTLL | 107  | >FLT3-V557I-CLLFIVILTLL | 109 | 2   |
| >FLT3-V557I-CLLFIVVLT   | 282  | >FLT3-V557I-CLLFIVILT   | 235 | 47  |
| >FLT3-V557I-CLLFIVVLTLL | 219  | >FLT3-V557I-CLLFIVILTLL | 228 | 9   |
| >FLT3-V557I-CLLFIVVLT   | 395  | >FLT3-V557I-CLLFIVILT   | 236 | 159 |
| >FLT3-V557I-CLLFIVVLTLL | 368  | >FLT3-V557I-CLLFIVILTLL | 390 | 22  |
| >FLT3-V557I-CLLFIVV     | 15   | >FLT3-V557I-CLLFIVIL    | 37  | 22  |
| >FLT3-V557I-CLLFIVVLT   | 465  | >FLT3-V557I-CLLFIVILT   | 355 | 110 |
| >FLT3-V557I-CLLFIVVLT   | 8    | >FLT3-V557I-CLLFIVILT   | 7   | 1   |
| >FLT3-V557I-CLLFIVVLTLL | 26   | >FLT3-V557I-CLLFIVILTLL | 37  | 11  |
| >FLT3-V557I-CLLFIVV     | 45   | >FLT3-V557I-CLLFIVIL    | 56  | 11  |
| >FLT3-V557I-CLLFIVVLT   | 37   | >FLT3-V557I-CLLFIVILT   | 36  | 1   |
| >FLT3-V557I-CLLFIVVLTLL | 138  | >FLT3-V557I-CLLFIVILTLL | 153 | 15  |
| >FLT3-V557I-CLLFIVV     | 120  | >FLT3-V557I-CLLFIVIL    | 146 | 26  |
| >FLT3-V557I-CLLFIVVLT   | 40   | >FLT3-V557I-CLLFIVILT   | 39  | 1   |
| >FLT3-V557I-CLLFIVVLTLL | 101  | >FLT3-V557I-CLLFIVILTLL | 131 | 30  |
| >FLT3-V557I-CLLFIVV     | 11   | >FLT3-V557I-CLLFIVIL    | 17  | 6   |
| >FLT3-V557I-CLLFIVVLT   | 362  | >FLT3-V557I-CLLFIVILT   | 447 | 85  |
| >FLT3-V557I-CLLFIVVLT   | 8    | >FLT3-V557I-CLLFIVILT   | 10  | 2   |
| >FLT3-V557I-CLLFIVVLTLL | 18   | >FLT3-V557I-CLLFIVILTLL | 16  | 2   |
| >FLT3-V557I-CLLFIVV     | 27   | >FLT3-V557I-CLLFIVIL    | 38  | 11  |
| >FLT3-V557I-CLLFIVVLT   | 17   | >FLT3-V557I-CLLFIVILT   | 14  | 3   |
| >FLT3-V557I-CLLFIVVLTLL | 28   | >FLT3-V557I-CLLFIVILTLL | 28  | 0   |
| >FLT3-V557I-CLLFIVVLT   | 155  | >FLT3-V557I-CLLFIVILT   | 355 | 200 |
| >FLT3-V557I-CLLFIVVLT   | 1297 | >FLT3-V557I-CLLFIVILT   | 462 | 835 |

|                        |       |                         |       |       |
|------------------------|-------|-------------------------|-------|-------|
| >FLT3-V557I- VCLLFIVV  | 314   | >FLT3-V557I- VCLLFIVI   | 3625  | 3311  |
| >FLT3-V557I- GVCLLFIVV | 373   | >FLT3-V557I- GVCLLFIVI  | 2257  | 1884  |
| >FLT3-V571I- RYESQLQM  | 39    | >FLT3-V571I- IYESQLQM   | 483   | 444   |
| >FLT3-V571I- RYESQLQMV | 32    | >FLT3-V571I- IYESQLQMV  | 431   | 399   |
| >FLT3-V571I- RYESQLQMV | 39    | >FLT3-V571I- IYESQLQMVC | 477   | 438   |
| >FLT3-V571I- FRYESQLQM | 2728  | >FLT3-V571I- FIYESQLQM  | 247   | 2481  |
| >FLT3-V571I- FRYESQLQM | 17728 | >FLT3-V571I- FIYESQLQM  | 39    | 17689 |
| >FLT3-V571I- FRYESQLQM | 2104  | >FLT3-V571I- FIYESQLQMV | 19    | 2085  |
| >FLT3-V571I- FRYESQLQ  | 16236 | >FLT3-V571I- FIYESQLQ   | 317   | 15919 |
| >FLT3-V571I- FRYESQLQM | 9639  | >FLT3-V571I- FIYESQLQM  | 62    | 9577  |
| >FLT3-V571I- FRYESQLQM | 958   | >FLT3-V571I- FIYESQLQMV | 24    | 934   |
| >FLT3-V571I- FRYESQLQM | 14684 | >FLT3-V571I- FIYESQLQM  | 56    | 14628 |
| >FLT3-V571I- FRYESQLQM | 1065  | >FLT3-V571I- FIYESQLQMV | 12    | 1053  |
| >FLT3-V571I- FRYESQLQM | 11474 | >FLT3-V571I- FIYESQLQM  | 50    | 11424 |
| >FLT3-V571I- FRYESQLQM | 511   | >FLT3-V571I- FIYESQLQMV | 28    | 483   |
| >FLT3-V571I- FRYESQLQ  | 16132 | >FLT3-V571I- FIYESQLQ   | 325   | 15807 |
| >FLT3-V571I- FRYESQLQM | 4032  | >FLT3-V571I- FIYESQLQM  | 13    | 4019  |
| >FLT3-V571I- FRYESQLQM | 59    | >FLT3-V571I- FIYESQLQMV | 1     | 58    |
| >FLT3-V571I- FRYESQLQM | 16953 | >FLT3-V571I- FIYESQLQMV | 406   | 16547 |
| >FLT3-V571I- FRYESQLQM | 2950  | >FLT3-V571I- FIYESQLQMV | 5     | 2945  |
| >FLT3-V571I- FRYESQLQM | 13409 | >FLT3-V571I- FIYESQLQM  | 57    | 13352 |
| >FLT3-V571I- FRYESQLQM | 171   | >FLT3-V571I- FIYESQLQMV | 4     | 167   |
| >FLT3-V571I- FRYESQLQM | 19673 | >FLT3-V571I- FIYESQLQM  | 224   | 19449 |
| >FLT3-V571I- FRYESQLQM | 9611  | >FLT3-V571I- FIYESQLQMV | 8     | 9603  |
| >FLT3-V571I- FRYESQLQ  | 21473 | >FLT3-V571I- FIYESQLQ   | 54    | 21419 |
| >FLT3-V571I- FRYESQLQM | 14667 | >FLT3-V571I- FIYESQLQM  | 10    | 14657 |
| >FLT3-V571I- FRYESQLQM | 50    | >FLT3-V571I- FIYESQLQMV | 2     | 48    |
| >FLT3-V571I- FRYESQLQM | 21558 | >FLT3-V571I- FIYESQLQMV | 71    | 21487 |
| >FLT3-V571I- FRYESQLQM | 19309 | >FLT3-V571I- FIYESQLQM  | 415   | 18894 |
| >FLT3-V571I- FRYESQLQM | 6915  | >FLT3-V571I- FIYESQLQM  | 405   | 6510  |
| >FLT3-V571I- FRYESQLQM | 4510  | >FLT3-V571I- FIYESQLQMV | 94    | 4416  |
| >FLT3-V571I- FRYESQLQM | 12114 | >FLT3-V571I- FIYESQLQM  | 29    | 12085 |
| >FLT3-V571I- FRYESQLQM | 3000  | >FLT3-V571I- FIYESQLQMV | 6     | 2994  |
| >FLT3-V571I- FRYESQLQM | 12950 | >FLT3-V571I- FIYESQLQM  | 208   | 12742 |
| >FLT3-V571I- FRYESQLQM | 2498  | >FLT3-V571I- FIYESQLQM  | 257   | 2241  |
| >FLT3-V571I- FRYESQLQM | 13    | >FLT3-V571I- FIYESQLQM  | 185   | 172   |
| >FLT3-V571I- FRYESQLQM | 41    | >FLT3-V571I- FIYESQLQMV | 569   | 528   |
| >FLT3-V571I- FRYESQLQM | 405   | >FLT3-V571I- FIYESQLQMV | 3071  | 2666  |
| >FLT3-V571I- FRYESQLQM | 6844  | >FLT3-V571I- FIYESQLQM  | 28    | 6816  |
| >FLT3-V571I- FRYESQLQM | 18    | >FLT3-V571I- FIYESQLQM  | 13515 | 13497 |
| >FLT3-V571I- FRYESQLQM | 111   | >FLT3-V571I- FIYESQLQMV | 28730 | 28619 |
| >FLT3-V571I- FRYESQLQM | 489   | >FLT3-V571I- FIYESQLQMV | 24299 | 23810 |
| >FLT3-V571I- FRYESQLQM | 3606  | >FLT3-V571I- FIYESQLQM  | 217   | 3389  |

|                          |       |                          |       |       |
|--------------------------|-------|--------------------------|-------|-------|
| >FLT3-V571I- FRYESQLQM   | 26    | >FLT3-V571I- FIYESQLQM   | 1675  | 1649  |
| >FLT3-V571I- FRYESQLQM'  | 287   | >FLT3-V571I- FIYESQLQMV  | 9262  | 8975  |
| >FLT3-V571I- FRYESQLQM   | 16343 | >FLT3-V571I- FIYESQLQM   | 109   | 16234 |
| >FLT3-V571I- FRYESQLQM'  | 428   | >FLT3-V571I- FIYESQLQMV  | 23198 | 22770 |
| >FLT3-V571I- FRYESQLQM'  | 336   | >FLT3-V571I- FIYESQLQMV  | 23278 | 22942 |
| >FLT3-V571I- FRYESQLQM   | 475   | >FLT3-V571I- FIYESQLQM   | 27356 | 26881 |
| >FLT3-V571I- FRYESQLQM'  | 164   | >FLT3-V571I- FIYESQLQMV  | 28300 | 28136 |
| >FLT3-V571I- LICHKYKKQFI | 31    | >FLT3-V571I- LICHKYKKQFI | 13702 | 13671 |
| >FLT3-V571I- LICHKYKKQFI | 87    | >FLT3-V571I- LICHKYKKQFI | 23396 | 23309 |
| >FLT3-V571I- LICHKYKKQFI | 344   | >FLT3-V571I- LICHKYKKQFI | 35416 | 35072 |
| >FLT3-V571I- LICHKYKKQFI | 303   | >FLT3-V571I- LICHKYKKQFI | 33788 | 33485 |
| >FLT3-V571I- QFRYESQL    | 2692  | >FLT3-V571I- QFIYESQL    | 383   | 2309  |
| >FLT3-V571I- QFRYESQLQM  | 282   | >FLT3-V571I- QFIYESQLQM  | 13320 | 13038 |
| >FLT3-V571I- QFRYESQLQM  | 327   | >FLT3-V571I- QFIYESQLQM  | 13419 | 13092 |
| >FLT3-V571I- QFRYESQLQM  | 1131  | >FLT3-V571I- QFIYESQLQM  | 491   | 640   |
| >FLT3-V571I- KQFRYESQL   | 136   | >FLT3-V571I- KQFIYESQL   | 190   | 54    |
| >FLT3-V571I- KQFRYESQLC  | 344   | >FLT3-V571I- KQFIYESQLQ  | 482   | 138   |
| >FLT3-V571I- KQFRYESQL   | 155   | >FLT3-V571I- KQFIYESQL   | 112   | 43    |
| >FLT3-V571I- KQFRYESQL   | 138   | >FLT3-V571I- KQFIYESQL   | 125   | 13    |
| >FLT3-V571I- KQFRYESQLC  | 297   | >FLT3-V571I- KQFIYESQLQ  | 299   | 2     |
| >FLT3-V571I- KQFRYESQL   | 372   | >FLT3-V571I- KQFIYESQL   | 318   | 54    |
| >FLT3-V571I- KQFRYESQL   | 420   | >FLT3-V571I- KQFIYESQL   | 664   | 244   |
| >FLT3-V571I- KQFRYESQLC  | 78    | >FLT3-V571I- KQFIYESQLQ  | 96    | 18    |
| >FLT3-V571I- KQFRYESQ    | 95    | >FLT3-V571I- KQFIYESQ    | 228   | 133   |
| >FLT3-V571I- KQFRYESQL   | 6     | >FLT3-V571I- KQFIYESQL   | 11    | 5     |
| >FLT3-V571I- KQFRYESQLC  | 176   | >FLT3-V571I- KQFIYESQLQ  | 419   | 243   |
| >FLT3-V571I- KQFRYESQLC  | 4     | >FLT3-V571I- KQFIYESQLQ  | 6     | 2     |
| >FLT3-V571I- KQFRYESQLC  | 1216  | >FLT3-V571I- KQFIYESQLQ  | 224   | 992   |
| >FLT3-V571I- KQFRYESQLC  | 146   | >FLT3-V571I- KQFIYESQLQ  | 262   | 116   |
| >FLT3-V571I- KQFRYESQL   | 101   | >FLT3-V571I- KQFIYESQL   | 71    | 30    |
| >FLT3-V571I- KQFRYESQLC  | 462   | >FLT3-V571I- KQFIYESQLQ  | 1234  | 772   |
| >FLT3-V571I- KQFRYESQL   | 320   | >FLT3-V571I- KQFIYESQL   | 562   | 242   |
| >FLT3-V571I- KQFRYESQL   | 355   | >FLT3-V571I- KQFIYESQL   | 911   | 556   |
| >FLT3-V571I- KKQFRYESQL  | 113   | >FLT3-V571I- KKQFIYESQL  | 152   | 39    |
| >FLT3-V571I- YKKQFRYESQ  | 324   | >FLT3-V571I- YKKQFIYESQ  | 657   | 333   |
| >FLT3-V571I- YKKQFRYES   | 481   | >FLT3-V571I- YKKQFIYES   | 349   | 132   |
| >FLT3-V571I- YKKQFRYESQ  | 384   | >FLT3-V571I- YKKQFIYESQ  | 323   | 61    |
| >FLT3-V571I- YKKQFRYESQ  | 19    | >FLT3-V571I- YKKQFIYESQ  | 18    | 1     |
| >FLT3-V571I- KYKKQFRY    | 26    | >FLT3-V571I- KYKKQFIY    | 16    | 10    |
| >FLT3-V571I- KYKKQFRYE   | 70    | >FLT3-V571I- KYKKQFIYE   | 23    | 47    |
| >FLT3-V571I- KYKKQFRYES  | 26    | >FLT3-V571I- KYKKQFIYES  | 35    | 9     |
| >FLT3-V571I- KYKKQFRYES  | 57    | >FLT3-V571I- KYKKQFIYESC | 60    | 3     |
| >FLT3-V571I- KYKKQFRY    | 67    | >FLT3-V571I- KYKKQFIY    | 62    | 5     |

|                          |      |                          |       |       |
|--------------------------|------|--------------------------|-------|-------|
| >FLT3-V571I- KYKKQFRY    | 292  | >FLT3-V571I- KYKKQFIY    | 342   | 50    |
| >FLT3-V571I- KYKKQFRYE   | 736  | >FLT3-V571I- KYKKQFIYE   | 281   | 455   |
| >FLT3-V571I- KYKKQFRY    | 31   | >FLT3-V571I- KYKKQFIY    | 24    | 7     |
| >FLT3-V571I- KYKKQFRY    | 151  | >FLT3-V571I- KYKKQFIY    | 187   | 36    |
| >FLT3-V571I- KYKKQFRYE   | 433  | >FLT3-V571I- KYKKQFIYE   | 76    | 357   |
| >FLT3-V571I- KYKKQFRYES  | 696  | >FLT3-V571I- KYKKQFIYES  | 360   | 336   |
| >FLT3-V571I- KYKKQFRYES  | 540  | >FLT3-V571I- KYKKQFIYESC | 307   | 233   |
| >FLT3-V571I- HKYKKQFRY   | 556  | >FLT3-V571I- HKYKKQFIY   | 425   | 131   |
| >FLT3-V571I- HKYKKQFR    | 302  | >FLT3-V571I- HKYKKQFI    | 21202 | 20900 |
| >FLT3-V571I- HKYKKQFRY   | 249  | >FLT3-V571I- HKYKKQFIY   | 281   | 32    |
| >FLT3-V571I- HKYKKQFR    | 782  | >FLT3-V571I- HKYKKQFI    | 111   | 671   |
| >FLT3-V571I- HKYKKQFRY   | 34   | >FLT3-V571I- HKYKKQFIY   | 10    | 24    |
| >FLT3-V571I- HKYKKQFRY   | 338  | >FLT3-V571I- HKYKKQFIY   | 135   | 203   |
| >FLT3-V571I- HKYKKQFRY   | 153  | >FLT3-V571I- HKYKKQFIY   | 325   | 172   |
| >FLT3-V571I- HKYKKQFR    | 48   | >FLT3-V571I- HKYKKQFI    | 30755 | 30707 |
| >FLT3-V571I- CHKYKKQFR   | 205  | >FLT3-V571I- CHKYKKQFI   | 21683 | 21478 |
| >FLT3-V571I- ICHKYKKQFR  | 145  | >FLT3-V571I- ICHKYKKQFI  | 23828 | 23683 |
| >FLT3-V571I- ICHKYKKQFR' | 306  | >FLT3-V571I- ICHKYKKQFIY | 305   | 1     |
| >FLT3-V571I- ICHKYKKQFR' | 375  | >FLT3-V571I- ICHKYKKQFIY | 327   | 48    |
| >FLT3-V571I- ICHKYKKQFR  | 102  | >FLT3-V571I- ICHKYKKQFI  | 28158 | 28056 |
| >FLT3-V579A VQVTGSSDNI   | 47   | >FLT3-V579A AQTGSSDNI    | 72    | 25    |
| >FLT3-V579A VQVTGSSDNI   | 67   | >FLT3-V579A AQTGSSDNI    | 56    | 11    |
| >FLT3-V579A VQVTGSSDNI   | 99   | >FLT3-V579A AQTGSSDNI    | 126   | 27    |
| >FLT3-V579A VQVTGSSDNI   | 8    | >FLT3-V579A AQTGSSDNI    | 6     | 2     |
| >FLT3-V579A QFRYESQLQM   | 327  | >FLT3-V579A QFRYESQLQM   | 165   | 162   |
| >FLT3-V579A LQMVQVTGS    | 2425 | >FLT3-V579A LQMAQVTGS    | 485   | 1940  |
| >FLT3-V579A LQMVQVTGS    | 389  | >FLT3-V579A LQMAQVTGS    | 113   | 276   |
| >FLT3-V579A LQMVQVTG     | 364  | >FLT3-V579A LQMAQVTG     | 179   | 185   |
| >FLT3-V579A LQMVQVTGS    | 808  | >FLT3-V579A LQMAQVTGS    | 355   | 453   |
| >FLT3-V579A SQLQMVQV     | 86   | >FLT3-V579A SQLQMAQV     | 208   | 122   |
| >FLT3-V579A SQLQMVQV     | 295  | >FLT3-V579A SQLQMAQV     | 290   | 5     |
| >FLT3-V579A SQLQMVQV     | 8    | >FLT3-V579A SQLQMAQV     | 10    | 2     |
| >FLT3-V579A SQLQMVQV     | 22   | >FLT3-V579A SQLQMAQV     | 35    | 13    |
| >FLT3-V579A SQLQMVQV     | 243  | >FLT3-V579A SQLQMAQV     | 234   | 9     |
| >FLT3-V579A SQLQMVQV     | 18   | >FLT3-V579A SQLQMAQV     | 32    | 14    |
| >FLT3-V579A SQLQMVQV     | 85   | >FLT3-V579A SQLQMAQV     | 107   | 22    |
| >FLT3-V579A SQLQMVQV     | 402  | >FLT3-V579A SQLQMAQV     | 859   | 457   |
| >FLT3-V579A SQLQMVQV     | 344  | >FLT3-V579A SQLQMAQV     | 640   | 296   |
| >FLT3-V579A ESQQLQMVQV   | 183  | >FLT3-V579A ESQQLQMAQV   | 118   | 65    |
| >FLT3-V579A ESQQLQMVQV   | 338  | >FLT3-V579A ESQQLQMAQV   | 193   | 145   |
| >FLT3-V579A YESQLQMV     | 50   | >FLT3-V579A YESQLQMA     | 495   | 445   |
| >FLT3-V579A YESQLQMVQ    | 46   | >FLT3-V579A YESQLQMAQ    | 36    | 10    |
| >FLT3-V579A YESQLQMVQ    | 616  | >FLT3-V579A YESQLQMAQ    | 448   | 168   |



|                        |      |                        |      |      |
|------------------------|------|------------------------|------|------|
| >FLT3-V579A YESQLQMV   | 484  | >FLT3-V579A YESQLQMA   | 1239 | 755  |
| >FLT3-V579A YESQLQMVQ  | 253  | >FLT3-V579A YESQLQMAQ  | 78   | 175  |
| >FLT3-V579A YESQLQMV   | 120  | >FLT3-V579A YESQLQMA   | 5559 | 5439 |
| >FLT3-V579A YESQLQMV   | 120  | >FLT3-V579A YESQLQMA   | 128  | 8    |
| >FLT3-V579A YESQLQMVQ  | 611  | >FLT3-V579A YESQLQMAQ  | 376  | 235  |
| >FLT3-V579A YESQLQMVQ  | 85   | >FLT3-V579A YESQLQMAQ  | 116  | 31   |
| >FLT3-V579A YESQLQMVQ  | 70   | >FLT3-V579A YESQLQMAQ  | 103  | 33   |
| >FLT3-V579A YESQLQMV   | 582  | >FLT3-V579A YESQLQMA   | 121  | 461  |
| >FLT3-V579A YESQLQMVQ  | 244  | >FLT3-V579A YESQLQMAQ  | 241  | 3    |
| >FLT3-V579A YESQLQMV   | 110  | >FLT3-V579A YESQLQMA   | 2178 | 2068 |
| >FLT3-V579A YESQLQMVQ  | 55   | >FLT3-V579A YESQLQMAQ  | 91   | 36   |
| >FLT3-V579A YESQLQMVQ  | 58   | >FLT3-V579A YESQLQMAQ  | 101  | 43   |
| >FLT3-V579A RYESQLQMV  | 32   | >FLT3-V579A RYESQLQMA  | 400  | 368  |
| >FLT3-V579A RYESQLQMV  | 39   | >FLT3-V579A RYESQLQMA  | 66   | 27   |
| >FLT3-V579A FRYESQLQM' | 59   | >FLT3-V579A FRYESQLQM' | 1784 | 1725 |
| >FLT3-V579A FRYESQLQM' | 171  | >FLT3-V579A FRYESQLQM' | 6879 | 6708 |
| >FLT3-V579A FRYESQLQM' | 50   | >FLT3-V579A FRYESQLQM' | 5959 | 5909 |
| >FLT3-V579A FRYESQLQM' | 41   | >FLT3-V579A FRYESQLQM' | 212  | 171  |
| >FLT3-V579A FRYESQLQM' | 405  | >FLT3-V579A FRYESQLQM' | 264  | 141  |
| >FLT3-V579A FRYESQLQM' | 111  | >FLT3-V579A FRYESQLQM' | 134  | 23   |
| >FLT3-V579A FRYESQLQM' | 489  | >FLT3-V579A FRYESQLQM' | 492  | 3    |
| >FLT3-V579A FRYESQLQM' | 287  | >FLT3-V579A FRYESQLQM' | 7886 | 7599 |
| >FLT3-V579A FRYESQLQM' | 428  | >FLT3-V579A FRYESQLQM' | 211  | 217  |
| >FLT3-V579A FRYESQLQM' | 336  | >FLT3-V579A FRYESQLQM' | 394  | 58   |
| >FLT3-V579A FRYESQLQM' | 164  | >FLT3-V579A FRYESQLQM' | 315  | 151  |
| >FLT3-V592A VDFREYEYDL | 2322 | >FLT3-V592A ADFREYEYDL | 423  | 1899 |
| >FLT3-V592A VDFREYEYDL | 411  | >FLT3-V592A ADFREYEYDL | 218  | 193  |
| >FLT3-V592A YVDFREYEY  | 20   | >FLT3-V592A YADFREYEY  | 27   | 7    |
| >FLT3-V592A YVDFREYEYD | 212  | >FLT3-V592A YADFREYEYD | 1310 | 1098 |
| >FLT3-V592A YVDFREYEYD | 475  | >FLT3-V592A YADFREYEYD | 2046 | 1571 |
| >FLT3-V592A YVDFREYEYD | 419  | >FLT3-V592A YADFREYEYD | 1705 | 1286 |
| >FLT3-V592A YVDFREYEYD | 244  | >FLT3-V592A YADFREYEYD | 2215 | 1971 |
| >FLT3-V592A YVDFREYEY  | 38   | >FLT3-V592A YADFREYEY  | 187  | 149  |
| >FLT3-V592A YVDFREYEY  | 274  | >FLT3-V592A YADFREYEY  | 528  | 254  |
| >FLT3-V592A YVDFREYEY  | 20   | >FLT3-V592A YADFREYEY  | 353  | 333  |
| >FLT3-V592A YVDFREYEY  | 1594 | >FLT3-V592A YADFREYEY  | 193  | 1401 |
| >FLT3-V592A YVDFREYEY  | 90   | >FLT3-V592A YADFREYEY  | 23   | 67   |
| >FLT3-V592A YVDFREYEY  | 18   | >FLT3-V592A YADFREYEY  | 34   | 16   |
| >FLT3-V592A TGSSDNEYFY | 103  | >FLT3-V592A TGSSDNEYFY | 1638 | 1535 |
| >FLT3-V592A FYVDFREYEY | 574  | >FLT3-V592A FYADFREYEY | 108  | 466  |
| >FLT3-V592A FYVDFREYEY | 404  | >FLT3-V592A FYADFREYEY | 465  | 61   |
| >FLT3-V592A FYVDFREY   | 313  | >FLT3-V592A FYADFREY   | 173  | 140  |
| >FLT3-V592A FYVDFREYEY | 271  | >FLT3-V592A FYADFREYEY | 151  | 120  |

|                          |      |                          |      |     |
|--------------------------|------|--------------------------|------|-----|
| >FLT3-V592A FYVDFREY     | 377  | >FLT3-V592A FYADFREY     | 251  | 126 |
| >FLT3-V592A FYVDFREY     | 15   | >FLT3-V592A FYADFREY     | 15   | 0   |
| >FLT3-V592A FYVDFREY EY  | 24   | >FLT3-V592A FYADFREY EY  | 16   | 8   |
| >FLT3-V592A FYVDFREY     | 1073 | >FLT3-V592A FYADFREY     | 294  | 779 |
| >FLT3-V592A FYVDFREY EY  | 68   | >FLT3-V592A FYADFREY EY  | 51   | 17  |
| >FLT3-V592A FYVDFREY EY  | 626  | >FLT3-V592A FYADFREY EY  | 291  | 335 |
| >FLT3-V592A YFYVDFREY    | 7    | >FLT3-V592A YFYADFREY    | 6    | 1   |
| >FLT3-V592A YFYVDFREY E' | 6    | >FLT3-V592A YFYADFREY E' | 5    | 1   |
| >FLT3-V592A YFYVDFREY E' | 310  | >FLT3-V592A YFYADFREY E' | 323  | 13  |
| >FLT3-V592A YFYVDFREY    | 642  | >FLT3-V592A YFYADFREY    | 127  | 515 |
| >FLT3-V592A YFYVDFREY E' | 177  | >FLT3-V592A YFYADFREY E' | 54   | 123 |
| >FLT3-V592A YFYVDFREY    | 461  | >FLT3-V592A YFYADFREY    | 184  | 277 |
| >FLT3-V592A YFYVDFREY E' | 826  | >FLT3-V592A YFYADFREY E' | 380  | 446 |
| >FLT3-V592A YFYVDFREY    | 102  | >FLT3-V592A YFYADFREY    | 52   | 50  |
| >FLT3-V592A YFYVDFREY E' | 132  | >FLT3-V592A YFYADFREY E' | 72   | 60  |
| >FLT3-V592A YFYVDFREY    | 294  | >FLT3-V592A YFYADFREY    | 222  | 72  |
| >FLT3-V592A YFYVDFREY E' | 460  | >FLT3-V592A YFYADFREY E' | 363  | 97  |
| >FLT3-V592A YFYVDFREY    | 146  | >FLT3-V592A YFYADFREY    | 98   | 48  |
| >FLT3-V592A YFYVDFREY E' | 73   | >FLT3-V592A YFYADFREY E' | 59   | 14  |
| >FLT3-V592A YFYVDFREY    | 411  | >FLT3-V592A YFYADFREY    | 132  | 279 |
| >FLT3-V592A YFYVDFREY E' | 372  | >FLT3-V592A YFYADFREY E' | 147  | 225 |
| >FLT3-V592A YFYVDFREY E' | 312  | >FLT3-V592A YFYADFREY E' | 297  | 15  |
| >FLT3-V592A EYFYVDFREY   | 355  | >FLT3-V592A EYFYADFREY   | 215  | 140 |
| >FLT3-V592A EYFYVDFREY   | 288  | >FLT3-V592A EYFYADFREY   | 455  | 167 |
| >FLT3-V592A EYFYVDFREY   | 644  | >FLT3-V592A EYFYADFREY   | 459  | 185 |
| >FLT3-V592A EYFYVDFREY   | 18   | >FLT3-V592A EYFYADFREY   | 28   | 10  |
| >FLT3-V592A EYFYVDFREY   | 39   | >FLT3-V592A EYFYADFREY   | 43   | 4   |
| >FLT3-V592A EYFYVDFR     | 65   | >FLT3-V592A EYFYADFR     | 176  | 111 |
| >FLT3-V592A EYFYVDFR     | 6    | >FLT3-V592A EYFYADFR     | 10   | 4   |
| >FLT3-V592A EYFYVDFR     | 2    | >FLT3-V592A EYFYADFR     | 3    | 1   |
| >FLT3-V592A EYFYVDFREY I | 313  | >FLT3-V592A EYFYADFREY I | 577  | 264 |
| >FLT3-V592A EYFYVDFR     | 25   | >FLT3-V592A EYFYADFR     | 19   | 6   |
| >FLT3-V592A NEYFYVDFR    | 207  | >FLT3-V592A NEYFYADFR    | 125  | 82  |
| >FLT3-V592A NEYFYVDFRE   | 63   | >FLT3-V592A NEYFYADFRE   | 56   | 7   |
| >FLT3-V592A NEYFYVDFR    | 28   | >FLT3-V592A NEYFYADFR    | 24   | 4   |
| >FLT3-V592A NEYFYVDF     | 99   | >FLT3-V592A NEYFYADF     | 218  | 119 |
| >FLT3-V592A NEYFYVDF     | 9    | >FLT3-V592A NEYFYADF     | 9    | 0   |
| >FLT3-V592A NEYFYVDFRE   | 7    | >FLT3-V592A NEYFYADFRE   | 7    | 0   |
| >FLT3-V592A NEYFYVDF     | 426  | >FLT3-V592A NEYFYADF     | 1412 | 986 |
| >FLT3-V592A NEYFYVDF     | 447  | >FLT3-V592A NEYFYADF     | 424  | 23  |
| >FLT3-V592A NEYFYVDFRE   | 293  | >FLT3-V592A NEYFYADFRE   | 299  | 6   |
| >FLT3-V592A NEYFYVDF     | 43   | >FLT3-V592A NEYFYADF     | 43   | 0   |
| >FLT3-V592A NEYFYVDFR    | 518  | >FLT3-V592A NEYFYADFR    | 432  | 86  |

|                        |      |                        |       |       |
|------------------------|------|------------------------|-------|-------|
| >FLT3-V592A NEYFYVDFRE | 53   | >FLT3-V592A NEYFYADFRE | 44    | 9     |
| >FLT3-V592A NEYFYVDFR  | 275  | >FLT3-V592A NEYFYADFR  | 216   | 59    |
| >FLT3-V592A DNEYFYVDFR | 198  | >FLT3-V592A DNEYFYADFR | 191   | 7     |
| >FLT3-V592A SDNEYFYV   | 245  | >FLT3-V592A SDNEYFYA   | 2989  | 2744  |
| >FLT3-V592A SDNEYFYV   | 221  | >FLT3-V592A SDNEYFYA   | 5489  | 5268  |
| >FLT3-V592A SDNEYFYVDF | 355  | >FLT3-V592A SDNEYFYADF | 367   | 12    |
| >FLT3-V592A SDNEYFYVDF | 371  | >FLT3-V592A SDNEYFYADF | 637   | 266   |
| >FLT3-V592A SDNEYFYV   | 2342 | >FLT3-V592A SDNEYFYA   | 458   | 1884  |
| >FLT3-V592A SDNEYFYV   | 36   | >FLT3-V592A SDNEYFYA   | 987   | 951   |
| >FLT3-V592A SSDNEYFYV  | 414  | >FLT3-V592A SSDNEYFYA  | 928   | 514   |
| >FLT3-V592A SSDNEYFYV  | 185  | >FLT3-V592A SSDNEYFYA  | 3657  | 3472  |
| >FLT3-V592A SSDNEYFYV  | 24   | >FLT3-V592A SSDNEYFYA  | 419   | 395   |
| >FLT3-V592A SSDNEYFYV  | 39   | >FLT3-V592A SSDNEYFYA  | 1806  | 1767  |
| >FLT3-V592A SSDNEYFYV  | 55   | >FLT3-V592A SSDNEYFYA  | 3987  | 3932  |
| >FLT3-V592A SSDNEYFYV  | 34   | >FLT3-V592A SSDNEYFYA  | 1309  | 1275  |
| >FLT3-V592A SSDNEYFYVD | 375  | >FLT3-V592A SSDNEYFYAD | 181   | 194   |
| >FLT3-V592A GSSDNEYFYV | 336  | >FLT3-V592A GSSDNEYFYA | 2818  | 2482  |
| >FLT3-V592A GSSDNEYFYV | 129  | >FLT3-V592A GSSDNEYFYA | 793   | 664   |
| >FLT3-V592A GSSDNEYFYV | 186  | >FLT3-V592A GSSDNEYFYA | 5376  | 5190  |
| >FLT3-V592A GSSDNEYFYV | 376  | >FLT3-V592A GSSDNEYFYA | 8211  | 7835  |
| >FLT3-V592A GSSDNEYFYV | 392  | >FLT3-V592A GSSDNEYFYA | 10440 | 10048 |
| >FLT3-V592A GSSDNEYFYV | 199  | >FLT3-V592A GSSDNEYFYA | 1985  | 1786  |
| >FLT3-V592A GSSDNEYFYV | 227  | >FLT3-V592A GSSDNEYFYA | 1350  | 1123  |
| >FLT3-V592C VDFREYEYDL | 411  | >FLT3-V592C GDFREYEYDL | 615   | 204   |
| >FLT3-V592C YVDFREYEY  | 20   | >FLT3-V592C YGDFREYEY  | 311   | 291   |
| >FLT3-V592C YVDFREYEYD | 212  | >FLT3-V592C YGDFREYEYD | 9590  | 9378  |
| >FLT3-V592C YVDFREYEYD | 475  | >FLT3-V592C YGDFREYEYD | 5891  | 5416  |
| >FLT3-V592C YVDFREYEYD | 419  | >FLT3-V592C YGDFREYEYD | 8125  | 7706  |
| >FLT3-V592C YVDFREYEYD | 244  | >FLT3-V592C YGDFREYEYD | 12780 | 12536 |
| >FLT3-V592C YVDFREYEY  | 38   | >FLT3-V592C YGDFREYEY  | 651   | 613   |
| >FLT3-V592C YVDFREYEY  | 274  | >FLT3-V592C YGDFREYEY  | 509   | 235   |
| >FLT3-V592C YVDFREYEY  | 20   | >FLT3-V592C YGDFREYEY  | 1323  | 1303  |
| >FLT3-V592C YVDFREYEY  | 90   | >FLT3-V592C YGDFREYEY  | 222   | 132   |
| >FLT3-V592C YVDFREYEY  | 18   | >FLT3-V592C YGDFREYEY  | 75    | 57    |
| >FLT3-V592C TGSSDNEYFY | 103  | >FLT3-V592C TGSSDNEYFY | 15846 | 15743 |
| >FLT3-V592C FYVDFREYEY | 574  | >FLT3-V592C FYGDFREYEY | 295   | 279   |
| >FLT3-V592C FYVDFREYEY | 404  | >FLT3-V592C FYGDFREYEY | 1433  | 1029  |
| >FLT3-V592C FYVDFREY   | 313  | >FLT3-V592C FYGDFREY   | 196   | 117   |
| >FLT3-V592C FYVDFREYEY | 271  | >FLT3-V592C FYGDFREYEY | 169   | 102   |
| >FLT3-V592C FYVDFREY   | 377  | >FLT3-V592C FYGDFREY   | 1249  | 872   |
| >FLT3-V592C FYVDFREY   | 15   | >FLT3-V592C FYGDFREY   | 22    | 7     |
| >FLT3-V592C FYVDFREYEY | 24   | >FLT3-V592C FYGDFREYEY | 25    | 1     |
| >FLT3-V592C FYVDFREYEY | 68   | >FLT3-V592C FYGDFREYEY | 87    | 19    |

|                          |      |                          |       |       |
|--------------------------|------|--------------------------|-------|-------|
| >FLT3-V592G FYVDFREY     | 1819 | >FLT3-V592G FYGDFREY     | 437   | 1382  |
| >FLT3-V592G FYVDFREY EY  | 626  | >FLT3-V592G FYGDFREY EY  | 143   | 483   |
| >FLT3-V592G YFYVDFREY    | 1037 | >FLT3-V592G YFYGDFREY    | 421   | 616   |
| >FLT3-V592G YFYVDFREY E' | 963  | >FLT3-V592G YFYGDFREY E' | 467   | 496   |
| >FLT3-V592G YFYVDFREY    | 2523 | >FLT3-V592G YFYGDFREY    | 349   | 2174  |
| >FLT3-V592G YFYVDFREY    | 7    | >FLT3-V592G YFYGDFREY    | 6     | 1     |
| >FLT3-V592G YFYVDFREY E' | 6    | >FLT3-V592G YFYGDFREY E' | 5     | 1     |
| >FLT3-V592G YFYVDFREY E' | 310  | >FLT3-V592G YFYGDFREY E' | 366   | 56    |
| >FLT3-V592G YFYVDFREY E' | 177  | >FLT3-V592G YFYGDFREY E' | 237   | 60    |
| >FLT3-V592G YFYVDFREY    | 461  | >FLT3-V592G YFYGDFREY    | 327   | 134   |
| >FLT3-V592G YFYVDFREY    | 102  | >FLT3-V592G YFYGDFREY    | 71    | 31    |
| >FLT3-V592G YFYVDFREY E' | 132  | >FLT3-V592G YFYGDFREY E' | 94    | 38    |
| >FLT3-V592G YFYVDFREY    | 294  | >FLT3-V592G YFYGDFREY    | 682   | 388   |
| >FLT3-V592G YFYVDFREY E' | 460  | >FLT3-V592G YFYGDFREY E' | 881   | 421   |
| >FLT3-V592G YFYVDFREY    | 146  | >FLT3-V592G YFYGDFREY    | 93    | 53    |
| >FLT3-V592G YFYVDFREY E' | 73   | >FLT3-V592G YFYGDFREY E' | 58    | 15    |
| >FLT3-V592G YFYVDFREY    | 411  | >FLT3-V592G YFYGDFREY    | 679   | 268   |
| >FLT3-V592G YFYVDFREY E' | 372  | >FLT3-V592G YFYGDFREY E' | 571   | 199   |
| >FLT3-V592G YFYVDFREY E' | 312  | >FLT3-V592G YFYGDFREY E' | 212   | 100   |
| >FLT3-V592G EYFYVDFREY   | 355  | >FLT3-V592G EYFYGDFREY   | 576   | 221   |
| >FLT3-V592G EYFYVDFREY   | 288  | >FLT3-V592G EYFYGDFREY   | 1206  | 918   |
| >FLT3-V592G EYFYVDFREY   | 18   | >FLT3-V592G EYFYGDFREY   | 59    | 41    |
| >FLT3-V592G EYFYVDFREY   | 39   | >FLT3-V592G EYFYGDFREY   | 54    | 15    |
| >FLT3-V592G EYFYVDFR     | 65   | >FLT3-V592G EYFYGDFR     | 123   | 58    |
| >FLT3-V592G EYFYVDFR     | 6    | >FLT3-V592G EYFYGDFR     | 11    | 5     |
| >FLT3-V592G EYFYVDFR     | 2    | >FLT3-V592G EYFYGDFR     | 4     | 2     |
| >FLT3-V592G EYFYVDFREY I | 313  | >FLT3-V592G EYFYGDFREY I | 887   | 574   |
| >FLT3-V592G EYFYVDFR     | 25   | >FLT3-V592G EYFYGDFR     | 29    | 4     |
| >FLT3-V592G NEYFYVDF     | 1224 | >FLT3-V592G NEYFYGDF     | 393   | 831   |
| >FLT3-V592G NEYFYVDFR    | 207  | >FLT3-V592G NEYFYGDFR    | 521   | 314   |
| >FLT3-V592G NEYFYVDFRE   | 63   | >FLT3-V592G NEYFYGDFRE   | 106   | 43    |
| >FLT3-V592G NEYFYVDFR    | 28   | >FLT3-V592G NEYFYGDFR    | 69    | 41    |
| >FLT3-V592G NEYFYVDF     | 99   | >FLT3-V592G NEYFYGDF     | 490   | 391   |
| >FLT3-V592G NEYFYVDF     | 9    | >FLT3-V592G NEYFYGDF     | 14    | 5     |
| >FLT3-V592G NEYFYVDFRE   | 7    | >FLT3-V592G NEYFYGDFRE   | 7     | 0     |
| >FLT3-V592G NEYFYVDF     | 426  | >FLT3-V592G NEYFYGDF     | 1170  | 744   |
| >FLT3-V592G NEYFYVDF     | 447  | >FLT3-V592G NEYFYGDF     | 979   | 532   |
| >FLT3-V592G NEYFYVDFRE   | 293  | >FLT3-V592G NEYFYGDFRE   | 454   | 161   |
| >FLT3-V592G NEYFYVDF     | 43   | >FLT3-V592G NEYFYGDF     | 75    | 32    |
| >FLT3-V592G NEYFYVDFRE   | 53   | >FLT3-V592G NEYFYGDFRE   | 48    | 5     |
| >FLT3-V592G NEYFYVDFR    | 275  | >FLT3-V592G NEYFYGDFR    | 524   | 249   |
| >FLT3-V592G DNEYFYVDFR   | 198  | >FLT3-V592G DNEYFYGDFR   | 201   | 3     |
| >FLT3-V592G SDNEYFYV     | 245  | >FLT3-V592G SDNEYFYG     | 23184 | 22939 |

|                        |     |                        |       |       |
|------------------------|-----|------------------------|-------|-------|
| >FLT3-V592C SDNEYFYV   | 221 | >FLT3-V592C SDNEYFYG   | 21199 | 20978 |
| >FLT3-V592C SDNEYFYVDF | 355 | >FLT3-V592C SDNEYFYGDF | 632   | 277   |
| >FLT3-V592C SDNEYFYVDF | 371 | >FLT3-V592C SDNEYFYGDF | 2163  | 1792  |
| >FLT3-V592C SDNEYFYV   | 36  | >FLT3-V592C SDNEYFYG   | 12262 | 12226 |
| >FLT3-V592C SSDNEYFYV  | 414 | >FLT3-V592C SSDNEYFYG  | 11742 | 11328 |
| >FLT3-V592C SSDNEYFYV  | 185 | >FLT3-V592C SSDNEYFYG  | 22001 | 21816 |
| >FLT3-V592C SSDNEYFYV  | 24  | >FLT3-V592C SSDNEYFYG  | 16498 | 16474 |
| >FLT3-V592C SSDNEYFYV  | 39  | >FLT3-V592C SSDNEYFYG  | 16453 | 16414 |
| >FLT3-V592C SSDNEYFYV  | 55  | >FLT3-V592C SSDNEYFYG  | 19518 | 19463 |
| >FLT3-V592C SSDNEYFYV  | 34  | >FLT3-V592C SSDNEYFYG  | 15312 | 15278 |
| >FLT3-V592C SSDNEYFYVD | 375 | >FLT3-V592C SSDNEYFYGD | 670   | 295   |
| >FLT3-V592C GSSDNEYFYV | 336 | >FLT3-V592C GSSDNEYFYG | 19394 | 19058 |
| >FLT3-V592C GSSDNEYFYV | 129 | >FLT3-V592C GSSDNEYFYG | 13585 | 13456 |
| >FLT3-V592C GSSDNEYFYV | 186 | >FLT3-V592C GSSDNEYFYG | 22294 | 22108 |
| >FLT3-V592C GSSDNEYFYV | 376 | >FLT3-V592C GSSDNEYFYG | 19204 | 18828 |
| >FLT3-V592C GSSDNEYFYV | 392 | >FLT3-V592C GSSDNEYFYG | 23712 | 23320 |
| >FLT3-V592C GSSDNEYFYV | 199 | >FLT3-V592C GSSDNEYFYG | 30532 | 30333 |
| >FLT3-V592C GSSDNEYFYV | 227 | >FLT3-V592C GSSDNEYFYG | 11148 | 10921 |
| >FLT3-V615A VLGSGAFGK\ | 337 | >FLT3-V615A ALGSGAFGK\ | 305   | 32    |
| >FLT3-V615A VLGSGAFGK\ | 92  | >FLT3-V615A ALGSGAFGK\ | 44    | 48    |
| >FLT3-V615A VLGSGAFGK\ | 48  | >FLT3-V615A ALGSGAFGK\ | 28    | 20    |
| >FLT3-V615A VLGSGAFGK\ | 4   | >FLT3-V615A ALGSGAFGK\ | 5     | 1     |
| >FLT3-V615A VLGSGAFGK\ | 239 | >FLT3-V615A ALGSGAFGK\ | 316   | 77    |
| >FLT3-V615A VLGSGAFGK\ | 26  | >FLT3-V615A ALGSGAFGK\ | 30    | 4     |
| >FLT3-V615A VLGSGAFGK\ | 10  | >FLT3-V615A ALGSGAFGK\ | 10    | 0     |
| >FLT3-V615A VLGSGAFGK\ | 8   | >FLT3-V615A ALGSGAFGK\ | 16    | 8     |
| >FLT3-V615A VLGSGAFGK  | 334 | >FLT3-V615A ALGSGAFGK  | 269   | 65    |
| >FLT3-V615A VLGSGAFGK\ | 2   | >FLT3-V615A ALGSGAFGK\ | 2     | 0     |
| >FLT3-V615A VLGSGAFGK\ | 242 | >FLT3-V615A ALGSGAFGK\ | 217   | 25    |
| >FLT3-V615A VLGSGAFGK  | 61  | >FLT3-V615A ALGSGAFGK  | 65    | 4     |
| >FLT3-V615A VLGSGAFGK  | 81  | >FLT3-V615A ALGSGAFGK  | 64    | 17    |
| >FLT3-V615A VLGSGAFGK\ | 485 | >FLT3-V615A ALGSGAFGK\ | 298   | 187   |
| >FLT3-V615A KVLGSGAFGk | 290 | >FLT3-V615A KALGSGAFGk | 2198  | 1908  |
| >FLT3-V615A KVLGSGAFGk | 29  | >FLT3-V615A KALGSGAFGk | 140   | 111   |
| >FLT3-V615A KVLGSGAFGk | 30  | >FLT3-V615A KALGSGAFGk | 144   | 114   |
| >FLT3-V615A KVLGSGAFGk | 60  | >FLT3-V615A KALGSGAFGk | 476   | 416   |
| >FLT3-V615A KVLGSGAFGk | 398 | >FLT3-V615A KALGSGAFGk | 3274  | 2876  |
| >FLT3-V615A KVLGSGAFGk | 28  | >FLT3-V615A KALGSGAFGk | 454   | 426   |
| >FLT3-V615A KVLGSGAFGk | 30  | >FLT3-V615A KALGSGAFGk | 95    | 65    |
| >FLT3-V615A KVLGSGAFGk | 42  | >FLT3-V615A KALGSGAFGk | 121   | 79    |
| >FLT3-V615A KVLGSGAFG  | 103 | >FLT3-V615A KALGSGAFG  | 392   | 289   |
| >FLT3-V615A KVLGSGAFGk | 11  | >FLT3-V615A KALGSGAFGk | 23    | 12    |
| >FLT3-V615A KVLGSGAFGk | 175 | >FLT3-V615A KALGSGAFGk | 618   | 443   |

|                       |      |                       |      |      |
|-----------------------|------|-----------------------|------|------|
| >FLT3-V615AKVLGSGAFGK | 125  | >FLT3-V615AKALGSGAFGK | 279  | 154  |
| >FLT3-V615AKVLGSGAF   | 32   | >FLT3-V615AKALGSGAF   | 454  | 422  |
| >FLT3-V615AKVLGSGAFGK | 476  | >FLT3-V615AKALGSGAFGK | 1306 | 830  |
| >FLT3-V615AKVLGSGAF   | 172  | >FLT3-V615AKALGSGAF   | 264  | 92   |
| >FLT3-V615AKVLGSGAF   | 345  | >FLT3-V615AKALGSGAF   | 1246 | 901  |
| >FLT3-V615AKVLGSGAF   | 165  | >FLT3-V615AKALGSGAF   | 42   | 123  |
| >FLT3-V615AKVLGSGAF   | 16   | >FLT3-V615AKALGSGAF   | 6    | 10   |
| >FLT3-V615AKVLGSGAFGK | 2419 | >FLT3-V615AKALGSGAFGK | 312  | 2107 |
| >FLT3-V615AKVLGSGAF   | 763  | >FLT3-V615AKALGSGAF   | 259  | 504  |
| >FLT3-V615AKVLGSGAF   | 476  | >FLT3-V615AKALGSGAF   | 69   | 407  |
| >FLT3-V615AKVLGSGAFGK | 177  | >FLT3-V615AKALGSGAFGK | 1022 | 845  |
| >FLT3-V615AFPRENLEFGK | 102  | >FLT3-V615AFPRENLEFGK | 283  | 181  |
| >FLT3-V615AFPRENLEFGK | 231  | >FLT3-V615AFPRENLEFGK | 4318 | 4087 |
| >FLT3-V615AFPRENLEFGK | 18   | >FLT3-V615AFPRENLEFGK | 9    | 9    |
| >FLT3-V615AGKVLGSGAF  | 60   | >FLT3-V615AGKALGSGAF  | 68   | 8    |
| >FLT3-V615AFGKVLGSGAF | 116  | >FLT3-V615AFGKALGSGAF | 72   | 44   |
| >FLT3-V615AFGKVLGSGAF | 125  | >FLT3-V615AFGKALGSGAF | 65   | 60   |
| >FLT3-V615AFGKVLGSGAF | 352  | >FLT3-V615AFGKALGSGAF | 270  | 82   |
| >FLT3-V615AFGKVLGSGAF | 311  | >FLT3-V615AFGKALGSGAF | 408  | 97   |
| >FLT3-V615AEFGKVLGSGA | 70   | >FLT3-V615AEFGKALGSGA | 75   | 5    |
| >FLT3-V615ALEFGKVLGS  | 499  | >FLT3-V615ALEFGKALGS  | 1787 | 1288 |
| >FLT3-V615ALEFGKVLGSG | 124  | >FLT3-V615ALEFGKALGSG | 198  | 74   |
| >FLT3-V615ALEFGKVLGSG | 507  | >FLT3-V615ALEFGKALGSG | 434  | 73   |
| >FLT3-V615AENLEFGKV   | 122  | >FLT3-V615AENLEFGKA   | 2270 | 2148 |
| >FLT3-V615ARENLEFGKV  | 457  | >FLT3-V615ARENLEFGKA  | 7657 | 7200 |
| >FLT3-V615ARENLEFGKVL | 230  | >FLT3-V615ARENLEFGKAL | 130  | 100  |
| >FLT3-V615ARENLEFGKV  | 432  | >FLT3-V615ARENLEFGKA  | 85   | 347  |
| >FLT3-V615ARENLEFGKV  | 17   | >FLT3-V615ARENLEFGKA  | 589  | 572  |
| >FLT3-V615ARENLEFGKVL | 95   | >FLT3-V615ARENLEFGKAL | 81   | 14   |
| >FLT3-Y364HYEEFCFSV   | 36   | >FLT3-Y364HYEEFCFSV   | 49   | 13   |
| >FLT3-Y364HYEEFCFSV   | 164  | >FLT3-Y364HYEEFCFSV   | 3090 | 2926 |
| >FLT3-Y364HYEEFCFSVRF | 347  | >FLT3-Y364HYEEFCFSVRF | 1362 | 1015 |
| >FLT3-Y364HYEEFCFSV   | 201  | >FLT3-Y364HYEEFCFSV   | 716  | 515  |
| >FLT3-Y364HYEEFCFSVRF | 364  | >FLT3-Y364HYEEFCFSVRF | 689  | 325  |
| >FLT3-Y364HYEEFCFSV   | 27   | >FLT3-Y364HYEEFCFSV   | 23   | 4    |
| >FLT3-Y364HYEEFCFSV   | 167  | >FLT3-Y364HYEEFCFSV   | 90   | 77   |
| >FLT3-Y364HYEEFCFSVRF | 205  | >FLT3-Y364HYEEFCFSVRF | 282  | 77   |
| >FLT3-Y364HYEEFCFSVRF | 76   | >FLT3-Y364HYEEFCFSVRF | 104  | 28   |
| >FLT3-Y364HYEEFCFSVRF | 251  | >FLT3-Y364HYEEFCFSVRF | 246  | 5    |
| >FLT3-Y364HYEEFCFSV   | 330  | >FLT3-Y364HYEEFCFSV   | 92   | 238  |
| >FLT3-Y364HYEEFCFSVR  | 253  | >FLT3-Y364HYEEFCFSVR  | 78   | 175  |
| >FLT3-Y364HQYEEFCFSVR | 88   | >FLT3-Y364HQYEEFCFSVR | 5322 | 5234 |
| >FLT3-Y364HQYEEFCFSVR | 299  | >FLT3-Y364HQYEEFCFSVR | 8385 | 8086 |

|                        |     |                        |       |       |
|------------------------|-----|------------------------|-------|-------|
| >FLT3-Y364HQYEEFCFSVR  | 11  | >FLT3-Y364HQHEEFCFSVR  | 8474  | 8463  |
| >FLT3-Y364HQYEEFCFSVR  | 306 | >FLT3-Y364HQHEEFCFSVR  | 2916  | 2610  |
| >FLT3-Y364HQYEEFCFSVR  | 334 | >FLT3-Y364HQHEEFCFSVR  | 5797  | 5463  |
| >FLT3-Y364HQYEEFCFSVR  | 25  | >FLT3-Y364HQHEEFCFSVR  | 403   | 378   |
| >FLT3-Y364HQYEEFCFSV   | 111 | >FLT3-Y364HQHEEFCFSV   | 1301  | 1190  |
| >FLT3-Y364HQYEEFCFSV   | 155 | >FLT3-Y364HQHEEFCFSV   | 10714 | 10559 |
| >FLT3-Y364HNSSEDEYIDQ  | 263 | >FLT3-Y364HNSSEDEYIDQ  | 20183 | 19920 |
| >FLT3-Y364HNSSEDEYIDQ  | 341 | >FLT3-Y364HNSSEDEYIDQ  | 14433 | 14092 |
| >FLT3-Y364HDQYEEFCFSV  | 283 | >FLT3-Y364HDQHEEFCFSV  | 1461  | 1178  |
| >FLT3-Y364HDQYEEFCFSV  | 71  | >FLT3-Y364HDQHEEFCFSV  | 616   | 545   |
| >FLT3-Y364HDQYEEFCFSV  | 175 | >FLT3-Y364HDQHEEFCFSV  | 1256  | 1081  |
| >FLT3-Y364HDQYEEFCFSV  | 280 | >FLT3-Y364HDQHEEFCFSV  | 1613  | 1333  |
| >FLT3-Y364HDQYEEFCFSV  | 56  | >FLT3-Y364HDQHEEFCFSV  | 331   | 275   |
| >FLT3-Y364HDQYEEFCFSV  | 46  | >FLT3-Y364HDQHEEFCFSV  | 448   | 402   |
| >FLT3-Y364HDQYEEFCFSV  | 386 | >FLT3-Y364HDQHEEFCFSV  | 2394  | 2008  |
| >FLT3-Y364HDQYEEFCFSV  | 65  | >FLT3-Y364HDQHEEFCFSV  | 1725  | 1660  |
| >FLT3-Y364HDQYEEFCFSV  | 70  | >FLT3-Y364HDQHEEFCFSV  | 171   | 101   |
| >FLT3-Y364HDQYEEFCFSV  | 163 | >FLT3-Y364HDQHEEFCFSV  | 626   | 463   |
| >FLT3-Y364HDQYEEFCFSV  | 246 | >FLT3-Y364HDQHEEFCFSV  | 2209  | 1963  |
| >FLT3-Y364HDQYEEFCFSV  | 63  | >FLT3-Y364HDQHEEFCFSV  | 1646  | 1583  |
| >FLT3-Y364HDQYEEFCF    | 47  | >FLT3-Y364HDQHEEFCF    | 160   | 113   |
| >FLT3-Y364HDQYEEFCF    | 101 | >FLT3-Y364HDQHEEFCF    | 343   | 242   |
| >FLT3-Y364HDQYEEFCFSV  | 143 | >FLT3-Y364HDQHEEFCFSV  | 363   | 220   |
| >FLT3-Y364HIDQYEEFCFSV | 237 | >FLT3-Y364HIDQHEEFCFSV | 96    | 141   |
| >FLT3-Y364HYEIDQYEEF   | 364 | >FLT3-Y364HYEIDQHEEF   | 1552  | 1188  |
| >FLT3-Y364HYEIDQYEEF   | 197 | >FLT3-Y364HYEIDQHEEF   | 132   | 65    |
| >FLT3-Y364HYEIDQYEEF   | 32  | >FLT3-Y364HYEIDQHEEF   | 44    | 12    |
| >FLT3-Y364HYEIDQYEEFCF | 72  | >FLT3-Y364HYEIDQHEEFCF | 92    | 20    |
| >FLT3-Y364HYEIDQYEEF   | 14  | >FLT3-Y364HYEIDQHEEF   | 10    | 4     |
| >FLT3-Y364HYEIDQYEEFCF | 21  | >FLT3-Y364HYEIDQHEEFCF | 21    | 0     |
| >FLT3-Y364HYEIDQYEEF   | 25  | >FLT3-Y364HYEIDQHEEF   | 30    | 5     |
| >FLT3-Y364HYEIDQYEEFCF | 67  | >FLT3-Y364HYEIDQHEEFCF | 81    | 14    |
| >FLT3-Y364HYEIDQYEEF   | 189 | >FLT3-Y364HYEIDQHEEF   | 162   | 27    |
| >FLT3-Y364HYEIDQYEEFCF | 217 | >FLT3-Y364HYEIDQHEEFCF | 193   | 24    |
| >FLT3-Y364HYEIDQYEEF   | 166 | >FLT3-Y364HYEIDQHEEF   | 280   | 114   |
| >FLT3-Y364HYEIDQYEEFCF | 267 | >FLT3-Y364HYEIDQHEEFCF | 330   | 63    |
| >FLT3-Y364HYEIDQYEEF   | 114 | >FLT3-Y364HYEIDQHEEF   | 233   | 119   |
| >FLT3-Y364HYEIDQYEEFCF | 94  | >FLT3-Y364HYEIDQHEEFCF | 124   | 30    |
| >FLT3-Y364HYEIDQYEEF   | 18  | >FLT3-Y364HYEIDQHEEF   | 46    | 28    |
| >FLT3-Y364HYEIDQYEEFCF | 26  | >FLT3-Y364HYEIDQHEEFCF | 45    | 19    |
| >FLT3-Y364HDYEIDQYEEF  | 289 | >FLT3-Y364HDYEIDQHEEF  | 364   | 75    |
| >FLT3-Y364HDYEIDQYEEF  | 72  | >FLT3-Y364HDYEIDQHEEF  | 133   | 61    |
| >FLT3-Y364HSSSEDEYIDQY | 27  | >FLT3-Y364HSSSEDEYIDQH | 7870  | 7843  |

|                         |     |                         |       |       |
|-------------------------|-----|-------------------------|-------|-------|
| >FLT3-Y364H SSEDYEIDQY  | 136 | >FLT3-Y364H SSEDYEIDQH  | 16100 | 15964 |
| >FLT3-Y364H SSEDYEIDQY  | 75  | >FLT3-Y364H SSEDYEIDQH  | 9487  | 9412  |
| >FLT3-Y364H SSEDYEIDQY  | 484 | >FLT3-Y364H SSEDYEIDQH  | 17000 | 16516 |
| >FLT3-Y572C YESQLQMV    | 50  | >FLT3-Y572C CESQLQMV    | 881   | 831   |
| >FLT3-Y572C YESQLQMVQ   | 46  | >FLT3-Y572C CESQLQMVQ   | 346   | 300   |
| >FLT3-Y572C YESQLQMV    | 484 | >FLT3-Y572C CESQLQMV    | 2378  | 1894  |
| >FLT3-Y572C YESQLQMVQ   | 253 | >FLT3-Y572C CESQLQMVQ   | 1456  | 1203  |
| >FLT3-Y572C YESQLQMV    | 120 | >FLT3-Y572C CESQLQMV    | 1206  | 1086  |
| >FLT3-Y572C YESQLQMV    | 120 | >FLT3-Y572C CESQLQMV    | 268   | 148   |
| >FLT3-Y572C YESQLQMVQ   | 85  | >FLT3-Y572C CESQLQMVQ   | 252   | 167   |
| >FLT3-Y572C YESQLQMVQ   | 70  | >FLT3-Y572C CESQLQMVQ   | 127   | 57    |
| >FLT3-Y572C YESQLQMV    | 860 | >FLT3-Y572C CESQLQMV    | 404   | 456   |
| >FLT3-Y572C YESQLQMV    | 582 | >FLT3-Y572C CESQLQMV    | 129   | 453   |
| >FLT3-Y572C YESQLQMVQ   | 244 | >FLT3-Y572C CESQLQMVQ   | 64    | 180   |
| >FLT3-Y572C YESQLQMV    | 110 | >FLT3-Y572C CESQLQMV    | 2076  | 1966  |
| >FLT3-Y572C YESQLQMVQ   | 55  | >FLT3-Y572C CESQLQMVQ   | 2238  | 2183  |
| >FLT3-Y572C YESQLQMVQ   | 58  | >FLT3-Y572C CESQLQMVQ   | 743   | 685   |
| >FLT3-Y572C RYESQLQM    | 39  | >FLT3-Y572C RCESQLQM    | 22432 | 22393 |
| >FLT3-Y572C RYESQLQMV   | 32  | >FLT3-Y572C RCESQLQMV   | 19828 | 19796 |
| >FLT3-Y572C RYESQLQMV   | 39  | >FLT3-Y572C RCESQLQMV   | 21342 | 21303 |
| >FLT3-Y572C ICHKYKKQFR' | 306 | >FLT3-Y572C ICHKYKKQFR' | 26782 | 26476 |
| >FLT3-Y572C ICHKYKKQFR' | 375 | >FLT3-Y572C ICHKYKKQFR' | 22652 | 22277 |
| >FLT3-Y572C FRYESQLQM'  | 59  | >FLT3-Y572C FRCESQLQM'  | 730   | 671   |
| >FLT3-Y572C FRYESQLQM'  | 171 | >FLT3-Y572C FRCESQLQM'  | 6062  | 5891  |
| >FLT3-Y572C FRYESQLQM'  | 50  | >FLT3-Y572C FRCESQLQM'  | 672   | 622   |
| >FLT3-Y572C FRYESQLQM   | 13  | >FLT3-Y572C FRCESQLQM   | 144   | 131   |
| >FLT3-Y572C FRYESQLQM'  | 41  | >FLT3-Y572C FRCESQLQM'  | 434   | 393   |
| >FLT3-Y572C FRYESQLQM'  | 405 | >FLT3-Y572C FRCESQLQM'  | 3268  | 2863  |
| >FLT3-Y572C FRYESQLQM   | 18  | >FLT3-Y572C FRCESQLQM   | 236   | 218   |
| >FLT3-Y572C FRYESQLQM'  | 111 | >FLT3-Y572C FRCESQLQM'  | 711   | 600   |
| >FLT3-Y572C FRYESQLQM'  | 489 | >FLT3-Y572C FRCESQLQM'  | 6561  | 6072  |
| >FLT3-Y572C FRYESQLQM   | 26  | >FLT3-Y572C FRCESQLQM   | 64    | 38    |
| >FLT3-Y572C FRYESQLQM'  | 287 | >FLT3-Y572C FRCESQLQM'  | 815   | 528   |
| >FLT3-Y572C FRYESQLQM'  | 428 | >FLT3-Y572C FRCESQLQM'  | 5590  | 5162  |
| >FLT3-Y572C FRYESQLQM'  | 336 | >FLT3-Y572C FRCESQLQM'  | 5436  | 5100  |
| >FLT3-Y572C FRYESQLQM   | 475 | >FLT3-Y572C FRCESQLQM   | 3433  | 2958  |
| >FLT3-Y572C FRYESQLQM'  | 164 | >FLT3-Y572C FRCESQLQM'  | 489   | 325   |
| >FLT3-Y572C QFRYESQLQM  | 282 | >FLT3-Y572C QFRCESQLQM  | 339   | 57    |
| >FLT3-Y572C QFRYESQLQM  | 327 | >FLT3-Y572C QFRCESQLQM  | 395   | 68    |
| >FLT3-Y572C KQFRYESQL   | 136 | >FLT3-Y572C KQFRCESQL   | 1105  | 969   |
| >FLT3-Y572C KQFRYESQLC  | 344 | >FLT3-Y572C KQFRCESQLC  | 1327  | 983   |
| >FLT3-Y572C KQFRYESQL   | 155 | >FLT3-Y572C KQFRCESQL   | 435   | 280   |
| >FLT3-Y572C KQFRYESQL   | 138 | >FLT3-Y572C KQFRCESQL   | 290   | 152   |



|                        |     |                        |       |       |
|------------------------|-----|------------------------|-------|-------|
| >FLT3-Y572C KQFRYESQLC | 297 | >FLT3-Y572C KQFRCESQLC | 483   | 186   |
| >FLT3-Y572C KQFRYESQL  | 372 | >FLT3-Y572C KQFRCESQL  | 2430  | 2058  |
| >FLT3-Y572C KQFRYESQL  | 420 | >FLT3-Y572C KQFRCESQL  | 704   | 284   |
| >FLT3-Y572C KQFRYESQLC | 78  | >FLT3-Y572C KQFRCESQLC | 100   | 22    |
| >FLT3-Y572C KQFRYESQ   | 95  | >FLT3-Y572C KQFRCESQ   | 198   | 103   |
| >FLT3-Y572C KQFRYESQL  | 6   | >FLT3-Y572C KQFRCESQL  | 10    | 4     |
| >FLT3-Y572C KQFRYESQLC | 176 | >FLT3-Y572C KQFRCESQLC | 229   | 53    |
| >FLT3-Y572C KQFRYESQLC | 4   | >FLT3-Y572C KQFRCESQLC | 5     | 1     |
| >FLT3-Y572C KQFRYESQLC | 146 | >FLT3-Y572C KQFRCESQLC | 455   | 309   |
| >FLT3-Y572C KQFRYESQL  | 101 | >FLT3-Y572C KQFRCESQL  | 114   | 13    |
| >FLT3-Y572C KQFRYESQLC | 462 | >FLT3-Y572C KQFRCESQLC | 599   | 137   |
| >FLT3-Y572C KQFRYESQL  | 890 | >FLT3-Y572C KQFRCESQL  | 455   | 435   |
| >FLT3-Y572C KQFRYESQL  | 320 | >FLT3-Y572C KQFRCESQL  | 538   | 218   |
| >FLT3-Y572C KQFRYESQL  | 355 | >FLT3-Y572C KQFRCESQL  | 485   | 130   |
| >FLT3-Y572C KKQFRYESQL | 113 | >FLT3-Y572C KKQFRCESQL | 254   | 141   |
| >FLT3-Y572C YKKQFRYESQ | 324 | >FLT3-Y572C YKKQFRCESQ | 626   | 302   |
| >FLT3-Y572C YKKQFRYES  | 481 | >FLT3-Y572C YKKQFRCES  | 882   | 401   |
| >FLT3-Y572C YKKQFRYESQ | 384 | >FLT3-Y572C YKKQFRCESQ | 734   | 350   |
| >FLT3-Y572C YKKQFRYESQ | 19  | >FLT3-Y572C YKKQFRCESQ | 27    | 8     |
| >FLT3-Y572C KYKKQFRY   | 26  | >FLT3-Y572C KYKKQFRC   | 390   | 364   |
| >FLT3-Y572C KYKKQFRYE  | 70  | >FLT3-Y572C KYKKQFRCE  | 1040  | 970   |
| >FLT3-Y572C KYKKQFRYES | 26  | >FLT3-Y572C KYKKQFRCES | 24    | 2     |
| >FLT3-Y572C KYKKQFRYES | 57  | >FLT3-Y572C KYKKQFRCES | 230   | 173   |
| >FLT3-Y572C KYKKQFRY   | 67  | >FLT3-Y572C KYKKQFRC   | 13766 | 13699 |
| >FLT3-Y572C KYKKQFRY   | 292 | >FLT3-Y572C KYKKQFRC   | 4431  | 4139  |
| >FLT3-Y572C KYKKQFRY   | 31  | >FLT3-Y572C KYKKQFRC   | 26450 | 26419 |
| >FLT3-Y572C KYKKQFRY   | 151 | >FLT3-Y572C KYKKQFRC   | 33642 | 33491 |
| >FLT3-Y572C KYKKQFRYE  | 433 | >FLT3-Y572C KYKKQFRCE  | 4020  | 3587  |
| >FLT3-Y572C HKYKKQFRY  | 249 | >FLT3-Y572C HKYKKQFRC  | 27281 | 27032 |
| >FLT3-Y572C HKYKKQFRY  | 34  | >FLT3-Y572C HKYKKQFRC  | 8607  | 8573  |
| >FLT3-Y572C HKYKKQFRY  | 338 | >FLT3-Y572C HKYKKQFRC  | 36446 | 36108 |
| >FLT3-Y572C HKYKKQFRY  | 153 | >FLT3-Y572C HKYKKQFRC  | 38121 | 37968 |
| >FLT3-Y591C YVDFREYEY  | 20  | >FLT3-Y591C CVDFREYEY  | 21    | 1     |
| >FLT3-Y591C YVDFREYEYD | 212 | >FLT3-Y591C CVDFREYEYD | 4761  | 4549  |
| >FLT3-Y591C YVDFREYEYD | 475 | >FLT3-Y591C CVDFREYEYD | 4227  | 3752  |
| >FLT3-Y591C YVDFREYEYD | 419 | >FLT3-Y591C CVDFREYEYD | 10172 | 9753  |
| >FLT3-Y591C YVDFREYEYD | 244 | >FLT3-Y591C CVDFREYEYD | 4935  | 4691  |
| >FLT3-Y591C YVDFREYEY  | 38  | >FLT3-Y591C CVDFREYEY  | 269   | 231   |
| >FLT3-Y591C YVDFREYEY  | 274 | >FLT3-Y591C CVDFREYEY  | 181   | 93    |
| >FLT3-Y591C YVDFREYEY  | 20  | >FLT3-Y591C CVDFREYEY  | 132   | 112   |
| >FLT3-Y591C YVDFREYEY  | 90  | >FLT3-Y591C CVDFREYEY  | 899   | 809   |
| >FLT3-Y591C YVDFREYEY  | 18  | >FLT3-Y591C CVDFREYEY  | 12    | 6     |
| >FLT3-Y591C FYVDFREYEY | 404 | >FLT3-Y591C FCVDFREYEY | 24569 | 24165 |

|                          |     |                          |       |       |
|--------------------------|-----|--------------------------|-------|-------|
| >FLT3-Y591C FYVDFREY     | 313 | >FLT3-Y591C FCVDFREY     | 24374 | 24061 |
| >FLT3-Y591C FYVDFREY EY  | 271 | >FLT3-Y591C FCVDFREY EY  | 24257 | 23986 |
| >FLT3-Y591C FYVDFREY     | 377 | >FLT3-Y591C FCVDFREY     | 2124  | 1747  |
| >FLT3-Y591C FYVDFREY     | 15  | >FLT3-Y591C FCVDFREY     | 160   | 145   |
| >FLT3-Y591C FYVDFREY EY  | 24  | >FLT3-Y591C FCVDFREY EY  | 295   | 271   |
| >FLT3-Y591C FYVDFREY EY  | 68  | >FLT3-Y591C FCVDFREY EY  | 239   | 171   |
| >FLT3-Y591C FYVDFREY     | 887 | >FLT3-Y591C FCVDFREY     | 359   | 528   |
| >FLT3-Y591C VTGSSDNEYF   | 65  | >FLT3-Y591C VTGSSDNEYF   | 18960 | 18895 |
| >FLT3-Y591C VTGSSDNEYF   | 327 | >FLT3-Y591C VTGSSDNEYF   | 23451 | 23124 |
| >FLT3-Y591C VTGSSDNEYF   | 107 | >FLT3-Y591C VTGSSDNEYF   | 27780 | 27673 |
| >FLT3-Y591C VTGSSDNEYF   | 27  | >FLT3-Y591C VTGSSDNEYF   | 19755 | 19728 |
| >FLT3-Y591C VTGSSDNEYF   | 9   | >FLT3-Y591C VTGSSDNEYF   | 8973  | 8964  |
| >FLT3-Y591C VTGSSDNEYF   | 26  | >FLT3-Y591C VTGSSDNEYF   | 23158 | 23132 |
| >FLT3-Y591C VTGSSDNEYF   | 33  | >FLT3-Y591C VTGSSDNEYF   | 17583 | 17550 |
| >FLT3-Y591C VTGSSDNEYF   | 102 | >FLT3-Y591C VTGSSDNEYF   | 13563 | 13461 |
| >FLT3-Y591C VTGSSDNEYF   | 452 | >FLT3-Y591C VTGSSDNEYF   | 37647 | 37195 |
| >FLT3-Y591C YFYVDFREY    | 7   | >FLT3-Y591C YFCVDFREY    | 14    | 7     |
| >FLT3-Y591C YFYVDFREY E' | 6   | >FLT3-Y591C YFCVDFREY E' | 9     | 3     |
| >FLT3-Y591C YFYVDFREY E' | 310 | >FLT3-Y591C YFCVDFREY E' | 405   | 95    |
| >FLT3-Y591C YFYVDFREY E' | 177 | >FLT3-Y591C YFCVDFREY E' | 198   | 21    |
| >FLT3-Y591C YFYVDFREY    | 461 | >FLT3-Y591C YFCVDFREY    | 1298  | 837   |
| >FLT3-Y591C YFYVDFREY    | 102 | >FLT3-Y591C YFCVDFREY    | 692   | 590   |
| >FLT3-Y591C YFYVDFREY E' | 132 | >FLT3-Y591C YFCVDFREY E' | 1268  | 1136  |
| >FLT3-Y591C YFYVDFREY    | 294 | >FLT3-Y591C YFCVDFREY    | 2807  | 2513  |
| >FLT3-Y591C YFYVDFREY E' | 460 | >FLT3-Y591C YFCVDFREY E' | 3883  | 3423  |
| >FLT3-Y591C YFYVDFREY    | 146 | >FLT3-Y591C YFCVDFREY    | 1037  | 891   |
| >FLT3-Y591C YFYVDFREY E' | 73  | >FLT3-Y591C YFCVDFREY E' | 364   | 291   |
| >FLT3-Y591C YFYVDFREY    | 411 | >FLT3-Y591C YFCVDFREY    | 7633  | 7222  |
| >FLT3-Y591C YFYVDFREY E' | 372 | >FLT3-Y591C YFCVDFREY E' | 6543  | 6171  |
| >FLT3-Y591C YFYVDFREY E' | 312 | >FLT3-Y591C YFCVDFREY E' | 289   | 23    |
| >FLT3-Y591C EYFYVDFREY   | 355 | >FLT3-Y591C EYFCVDFREY   | 530   | 175   |
| >FLT3-Y591C EYFYVDFREY   | 288 | >FLT3-Y591C EYFCVDFREY   | 567   | 279   |
| >FLT3-Y591C EYFYVDFREY   | 18  | >FLT3-Y591C EYFCVDFREY   | 18    | 0     |
| >FLT3-Y591C EYFYVDFREY   | 39  | >FLT3-Y591C EYFCVDFREY   | 50    | 11    |
| >FLT3-Y591C EYFYVDFR     | 65  | >FLT3-Y591C EYFCVDFR     | 154   | 89    |
| >FLT3-Y591C EYFYVDFR     | 6   | >FLT3-Y591C EYFCVDFR     | 8     | 2     |
| >FLT3-Y591C EYFYVDFR     | 2   | >FLT3-Y591C EYFCVDFR     | 3     | 1     |
| >FLT3-Y591C EYFYVDFREY   | 313 | >FLT3-Y591C EYFCVDFREY   | 669   | 356   |
| >FLT3-Y591C EYFYVDFR     | 25  | >FLT3-Y591C EYFCVDFR     | 15    | 10    |
| >FLT3-Y591C NEYFYVDFR    | 207 | >FLT3-Y591C NEYFCVDFR    | 410   | 203   |
| >FLT3-Y591C NEYFYVDFRE   | 63  | >FLT3-Y591C NEYFCVDFRE   | 121   | 58    |
| >FLT3-Y591C NEYFYVDFR    | 28  | >FLT3-Y591C NEYFCVDFR    | 61    | 33    |
| >FLT3-Y591C NEYFYVDF     | 99  | >FLT3-Y591C NEYFCVDF     | 164   | 65    |

|                        |      |                        |       |       |
|------------------------|------|------------------------|-------|-------|
| >FLT3-Y591C NEYFYVDF   | 9    | >FLT3-Y591C NEYFCVDF   | 11    | 2     |
| >FLT3-Y591C NEYFYVDFRE | 7    | >FLT3-Y591C NEYFCVDFRE | 7     | 0     |
| >FLT3-Y591C NEYFYVDF   | 426  | >FLT3-Y591C NEYFCVDF   | 458   | 32    |
| >FLT3-Y591C NEYFYVDFRE | 1836 | >FLT3-Y591C NEYFCVDFRE | 488   | 1348  |
| >FLT3-Y591C NEYFYVDF   | 447  | >FLT3-Y591C NEYFCVDF   | 497   | 50    |
| >FLT3-Y591C NEYFYVDFRE | 293  | >FLT3-Y591C NEYFCVDFRE | 275   | 18    |
| >FLT3-Y591C NEYFYVDF   | 43   | >FLT3-Y591C NEYFCVDF   | 49    | 6     |
| >FLT3-Y591C NEYFYVDFRE | 53   | >FLT3-Y591C NEYFCVDFRE | 48    | 5     |
| >FLT3-Y591C NEYFYVDFR  | 275  | >FLT3-Y591C NEYFCVDFR  | 67    | 208   |
| >FLT3-Y591C DNEYFYVDFR | 198  | >FLT3-Y591C DNEYFCVDFR | 331   | 133   |
| >FLT3-Y591C SDNEYFYV   | 245  | >FLT3-Y591C SDNEYFCV   | 2063  | 1818  |
| >FLT3-Y591C SDNEYFYV   | 221  | >FLT3-Y591C SDNEYFCV   | 2554  | 2333  |
| >FLT3-Y591C SDNEYFYVDF | 355  | >FLT3-Y591C SDNEYFCVDF | 632   | 277   |
| >FLT3-Y591C SDNEYFYVDF | 371  | >FLT3-Y591C SDNEYFCVDF | 555   | 184   |
| >FLT3-Y591C SDNEYFYV   | 36   | >FLT3-Y591C SDNEYFCV   | 57    | 21    |
| >FLT3-Y591C SSDNEYFY   | 8    | >FLT3-Y591C SSDNEYFC   | 8927  | 8919  |
| >FLT3-Y591C SSDNEYFYV  | 414  | >FLT3-Y591C SSDNEYFCV  | 1523  | 1109  |
| >FLT3-Y591C SSDNEYFYV  | 185  | >FLT3-Y591C SSDNEYFCV  | 2102  | 1917  |
| >FLT3-Y591C SSDNEYFYV  | 24   | >FLT3-Y591C SSDNEYFCV  | 536   | 512   |
| >FLT3-Y591C SSDNEYFYV  | 39   | >FLT3-Y591C SSDNEYFCV  | 1116  | 1077  |
| >FLT3-Y591C SSDNEYFYV  | 55   | >FLT3-Y591C SSDNEYFCV  | 223   | 168   |
| >FLT3-Y591C SSDNEYFY   | 129  | >FLT3-Y591C SSDNEYFC   | 20050 | 19921 |
| >FLT3-Y591C SSDNEYFY   | 337  | >FLT3-Y591C SSDNEYFC   | 24453 | 24116 |
| >FLT3-Y591C SSDNEYFY   | 47   | >FLT3-Y591C SSDNEYFC   | 15713 | 15666 |
| >FLT3-Y591C SSDNEYFYV  | 34   | >FLT3-Y591C SSDNEYFCV  | 1019  | 985   |
| >FLT3-Y591C SSDNEYFY   | 274  | >FLT3-Y591C SSDNEYFC   | 24600 | 24326 |
| >FLT3-Y591C SSDNEYFY   | 243  | >FLT3-Y591C SSDNEYFC   | 22126 | 21883 |
| >FLT3-Y591C SSDNEYFYVD | 375  | >FLT3-Y591C SSDNEYFCVD | 669   | 294   |
| >FLT3-Y591C SSDNEYFY   | 120  | >FLT3-Y591C SSDNEYFC   | 35994 | 35874 |
| >FLT3-Y591C GSSDNEYFY  | 83   | >FLT3-Y591C GSSDNEYFC  | 19861 | 19778 |
| >FLT3-Y591C GSSDNEYFYV | 336  | >FLT3-Y591C GSSDNEYFCV | 3455  | 3119  |
| >FLT3-Y591C GSSDNEYFYV | 129  | >FLT3-Y591C GSSDNEYFCV | 1285  | 1156  |
| >FLT3-Y591C GSSDNEYFYV | 186  | >FLT3-Y591C GSSDNEYFCV | 2387  | 2201  |
| >FLT3-Y591C GSSDNEYFYV | 376  | >FLT3-Y591C GSSDNEYFCV | 1601  | 1225  |
| >FLT3-Y591C GSSDNEYFYV | 392  | >FLT3-Y591C GSSDNEYFCV | 1190  | 798   |
| >FLT3-Y591C GSSDNEYFY  | 137  | >FLT3-Y591C GSSDNEYFC  | 19828 | 19691 |
| >FLT3-Y591C GSSDNEYFY  | 25   | >FLT3-Y591C GSSDNEYFC  | 20015 | 19990 |
| >FLT3-Y591C GSSDNEYFY  | 16   | >FLT3-Y591C GSSDNEYFC  | 14043 | 14027 |
| >FLT3-Y591C GSSDNEYFYV | 199  | >FLT3-Y591C GSSDNEYFCV | 780   | 581   |
| >FLT3-Y591C GSSDNEYFY  | 42   | >FLT3-Y591C GSSDNEYFC  | 19744 | 19702 |
| >FLT3-Y591C GSSDNEYFY  | 240  | >FLT3-Y591C GSSDNEYFC  | 19766 | 19526 |
| >FLT3-Y591C GSSDNEYFYV | 227  | >FLT3-Y591C GSSDNEYFCV | 1236  | 1009  |
| >FLT3-Y591C GSSDNEYFY  | 240  | >FLT3-Y591C GSSDNEYFC  | 37278 | 37038 |

|                         |      |                         |       |       |
|-------------------------|------|-------------------------|-------|-------|
| >FLT3-Y591C TGSSDNEYFY  | 112  | >FLT3-Y591C TGSSDNEYFC  | 27272 | 27160 |
| >FLT3-Y591C TGSSDNEYFY  | 139  | >FLT3-Y591C TGSSDNEYFC  | 28938 | 28799 |
| >FLT3-Y591C TGSSDNEYFY  | 103  | >FLT3-Y591C TGSSDNEYFC  | 1071  | 968   |
| >FLT3-Y599F YDLKWEFPR   | 126  | >FLT3-Y599F FDLKWEFPR   | 203   | 77    |
| >FLT3-Y599F EYDLKWEF    | 425  | >FLT3-Y599F EFDLKWEF    | 1787  | 1362  |
| >FLT3-Y599F EYDLKWEF    | 72   | >FLT3-Y599F EFDLKWEF    | 457   | 385   |
| >FLT3-Y599F EYDLKWEFPF  | 804  | >FLT3-Y599F EFDLKWEFPF  | 230   | 574   |
| >FLT3-Y599F EYDLKWEFPF  | 148  | >FLT3-Y599F EFDLKWEFPF  | 49    | 99    |
| >FLT3-Y599F EYDLKWEFPF  | 33   | >FLT3-Y599F EFDLKWEFPF  | 100   | 67    |
| >FLT3-Y599F YFYVDFREYE' | 840  | >FLT3-Y599F YFYVDFREYEI | 16    | 824   |
| >FLT3-Y599F YFYVDFREYE' | 6911 | >FLT3-Y599F YFYVDFREYEI | 207   | 6704  |
| >FLT3-Y599F YFYVDFREYE' | 963  | >FLT3-Y599F YFYVDFREYEI | 6     | 957   |
| >FLT3-Y599F YFYVDFREYE' | 6    | >FLT3-Y599F YFYVDFREYEI | 40    | 34    |
| >FLT3-Y599F YFYVDFREYE' | 310  | >FLT3-Y599F YFYVDFREYEI | 10818 | 10508 |
| >FLT3-Y599F YFYVDFREYE' | 177  | >FLT3-Y599F YFYVDFREYEI | 15653 | 15476 |
| >FLT3-Y599F YFYVDFREYE' | 132  | >FLT3-Y599F YFYVDFREYEI | 317   | 185   |
| >FLT3-Y599F YFYVDFREYE' | 460  | >FLT3-Y599F YFYVDFREYEI | 132   | 328   |
| >FLT3-Y599F YFYVDFREYE' | 73   | >FLT3-Y599F YFYVDFREYEI | 171   | 98    |
| >FLT3-Y599F YFYVDFREYE' | 372  | >FLT3-Y599F YFYVDFREYEI | 1761  | 1389  |
| >FLT3-Y599F YFYVDFREYE' | 312  | >FLT3-Y599F YFYVDFREYEI | 5766  | 5454  |
| >FLT3-Y599F YEYDLKWE    | 239  | >FLT3-Y599F YEFDLKWE    | 655   | 416   |
| >FLT3-Y599F YEYDLKWEF   | 88   | >FLT3-Y599F YEFDLKWEF   | 184   | 96    |
| >FLT3-Y599F YEYDLKWEFP  | 337  | >FLT3-Y599F YEFDLKWEFP  | 671   | 334   |
| >FLT3-Y599F YEYDLKWEF   | 431  | >FLT3-Y599F YEFDLKWEF   | 399   | 32    |
| >FLT3-Y599F YEYDLKWEF   | 371  | >FLT3-Y599F YEFDLKWEF   | 512   | 141   |
| >FLT3-Y599F YEYDLKWEFP  | 388  | >FLT3-Y599F YEFDLKWEFP  | 302   | 86    |
| >FLT3-Y599F YEYDLKWEFP  | 162  | >FLT3-Y599F YEFDLKWEFP  | 115   | 47    |
| >FLT3-Y599F YEYDLKWEFP  | 165  | >FLT3-Y599F YEFDLKWEFP  | 92    | 73    |
| >FLT3-Y599F YEYDLKWEF   | 72   | >FLT3-Y599F YEFDLKWEF   | 48    | 24    |
| >FLT3-Y599F YEYDLKWE    | 527  | >FLT3-Y599F YEFDLKWE    | 365   | 162   |
| >FLT3-Y599F YEYDLKWEF   | 3    | >FLT3-Y599F YEFDLKWEF   | 3     | 0     |
| >FLT3-Y599F YEYDLKWEFP  | 35   | >FLT3-Y599F YEFDLKWEFP  | 27    | 8     |
| >FLT3-Y599F YEYDLKWEF   | 49   | >FLT3-Y599F YEFDLKWEF   | 34    | 15    |
| >FLT3-Y599F YEYDLKWEF   | 32   | >FLT3-Y599F YEFDLKWEF   | 25    | 7     |
| >FLT3-Y599F YEYDLKWEFP  | 424  | >FLT3-Y599F YEFDLKWEFP  | 192   | 232   |
| >FLT3-Y599F YEYDLKWEF   | 165  | >FLT3-Y599F YEFDLKWEF   | 130   | 35    |
| >FLT3-Y599F YEYDLKWEF   | 39   | >FLT3-Y599F YEFDLKWEF   | 18    | 21    |
| >FLT3-Y599F YEYDLKWEF   | 30   | >FLT3-Y599F YEFDLKWEF   | 31    | 1     |
| >FLT3-Y599F YEYDLKWEFP  | 113  | >FLT3-Y599F YEFDLKWEFP  | 134   | 21    |
| >FLT3-Y599F YEYDLKWEFP  | 33   | >FLT3-Y599F YEFDLKWEFP  | 30    | 3     |
| >FLT3-Y599F EYEYDLKWEF  | 94   | >FLT3-Y599F EYEFDLKWEF  | 149   | 55    |
| >FLT3-Y599F EYEYDLKWEF  | 147  | >FLT3-Y599F EYEFDLKWEF  | 226   | 79    |
| >FLT3-Y599F EYEYDLKWEF  | 33   | >FLT3-Y599F EYEFDLKWEF  | 33    | 0     |

|                         |      |                         |       |       |
|-------------------------|------|-------------------------|-------|-------|
| >FLT3-Y599F·REYEYDLKW   | 2285 | >FLT3-Y599F·REYEFDLKW   | 497   | 1788  |
| >FLT3-Y599F·REYEYDLKWE  | 889  | >FLT3-Y599F·REYEFDLKWE  | 275   | 614   |
| >FLT3-Y599F·REYEYDLKWE  | 29   | >FLT3-Y599F·REYEFDLKWE  | 29    | 0     |
| >FLT3-Y599F·REYEYDLKW   | 39   | >FLT3-Y599F·REYEFDLKW   | 56    | 17    |
| >FLT3-Y599F·REYEYDLKW   | 117  | >FLT3-Y599F·REYEFDLKW   | 66    | 51    |
| >FLT3-Y599F·REYEYDLKWE  | 8    | >FLT3-Y599F·REYEFDLKWE  | 6     | 2     |
| >FLT3-Y599F·REYEYDLKW   | 559  | >FLT3-Y599F·REYEFDLKW   | 447   | 112   |
| >FLT3-Y599F·REYEYDLKWE  | 23   | >FLT3-Y599F·REYEFDLKWE  | 20    | 3     |
| >FLT3-Y599F·REYEYDLKW   | 301  | >FLT3-Y599F·REYEFDLKW   | 325   | 24    |
| >FLT3-Y599F·REYEYDLKWE  | 17   | >FLT3-Y599F·REYEFDLKWE  | 18    | 1     |
| >FLT3-Y599F·REYEYDLKW   | 165  | >FLT3-Y599F·REYEFDLKW   | 165   | 0     |
| >FLT3-Y599F·REYEYDLKWE  | 344  | >FLT3-Y599F·REYEFDLKWE  | 340   | 4     |
| >FLT3-Y599F·REYEYDLKW   | 12   | >FLT3-Y599F·REYEFDLKW   | 14    | 2     |
| >FLT3-Y599F·REYEYDLKWE  | 22   | >FLT3-Y599F·REYEFDLKWE  | 23    | 1     |
| >FLT3-Y599F·REYEYDLKWE  | 678  | >FLT3-Y599F·REYEFDLKWE  | 488   | 190   |
| >FLT3-Y599F·REYEYDLKW   | 1016 | >FLT3-Y599F·REYEFDLKW   | 223   | 793   |
| >FLT3-Y599F·REYEYDLKW   | 58   | >FLT3-Y599F·REYEFDLKW   | 56    | 2     |
| >FLT3-Y599F·REYEYDLKW   | 22   | >FLT3-Y599F·REYEFDLKW   | 24    | 2     |
| >FLT3-Y599F·REYEYDLKWE  | 16   | >FLT3-Y599F·REYEFDLKWE  | 18    | 2     |
| >FLT3-Y599F·REYEYDLKW   | 284  | >FLT3-Y599F·REYEFDLKW   | 130   | 154   |
| >FLT3-Y599F·REYEYDLKW   | 55   | >FLT3-Y599F·REYEFDLKW   | 143   | 88    |
| >FLT3-Y599F·REYEYDLK    | 1076 | >FLT3-Y599F·REYEFDLK    | 260   | 816   |
| >FLT3-Y599F·FREYEYDL    | 227  | >FLT3-Y599F·FREYEFDL    | 267   | 40    |
| >FLT3-Y599F·FREYEYDLKW  | 69   | >FLT3-Y599F·FREYEFDLKW  | 65    | 4     |
| >FLT3-Y599F·FREYEYDLKW  | 222  | >FLT3-Y599F·FREYEFDLKW  | 228   | 6     |
| >FLT3-Y599F·VDFREYEF    | 1014 | >FLT3-Y599F·VDFREYEF    | 239   | 775   |
| >FLT3-Y599F·VDFREYEFDL  | 411  | >FLT3-Y599F·VDFREYEFDL  | 298   | 113   |
| >FLT3-Y599F·YVDFREYEF   | 20   | >FLT3-Y599F·YVDFREYEF   | 3472  | 3452  |
| >FLT3-Y599F·YVDFREYEFYD | 212  | >FLT3-Y599F·YVDFREYEFYD | 171   | 41    |
| >FLT3-Y599F·YVDFREYEFYD | 475  | >FLT3-Y599F·YVDFREYEFYD | 597   | 122   |
| >FLT3-Y599F·YVDFREYEFYD | 774  | >FLT3-Y599F·YVDFREYEFYD | 258   | 516   |
| >FLT3-Y599F·YVDFREYEFYD | 419  | >FLT3-Y599F·YVDFREYEFYD | 362   | 57    |
| >FLT3-Y599F·YVDFREYEFYD | 244  | >FLT3-Y599F·YVDFREYEFYD | 314   | 70    |
| >FLT3-Y599F·YVDFREYEFYD | 885  | >FLT3-Y599F·YVDFREYEFYD | 422   | 463   |
| >FLT3-Y599F·YVDFREYEFYD | 523  | >FLT3-Y599F·YVDFREYEFYD | 272   | 251   |
| >FLT3-Y599F·YVDFREYEF   | 38   | >FLT3-Y599F·YVDFREYEF   | 1096  | 1058  |
| >FLT3-Y599F·YVDFREYEF   | 274  | >FLT3-Y599F·YVDFREYEF   | 11132 | 10858 |
| >FLT3-Y599F·YVDFREYEF   | 20   | >FLT3-Y599F·YVDFREYEF   | 8582  | 8562  |
| >FLT3-Y599F·YVDFREYEF   | 90   | >FLT3-Y599F·YVDFREYEF   | 189   | 99    |
| >FLT3-Y599F·YVDFREYEF   | 18   | >FLT3-Y599F·YVDFREYEF   | 668   | 650   |
| >FLT3-Y599F·FYVDFREYEF  | 404  | >FLT3-Y599F·FYVDFREYEF  | 10    | 394   |
| >FLT3-Y599F·FYVDFREYEF  | 1091 | >FLT3-Y599F·FYVDFREYEF  | 33    | 1058  |
| >FLT3-Y599F·FYVDFREYEF  | 271  | >FLT3-Y599F·FYVDFREYEF  | 6     | 265   |

|                        |     |                        |       |       |
|------------------------|-----|------------------------|-------|-------|
| >FLT3-Y599F.FYVDFREYEF | 24  | >FLT3-Y599F.FYVDFREYEF | 125   | 101   |
| >FLT3-Y599F.FYVDFREYEF | 68  | >FLT3-Y599F.FYVDFREYEF | 2276  | 2208  |
| >FLT3-Y599F.FYVDFREYEF | 984 | >FLT3-Y599F.FYVDFREYEF | 278   | 706   |
| >FLT3-Y842C.YVVRGNARLI | 190 | >FLT3-Y842C.CVVRGNARLI | 4341  | 4151  |
| >FLT3-Y842C.YVVRGNARL  | 394 | >FLT3-Y842C.CVVRGNARL  | 3897  | 3503  |
| >FLT3-Y842C.YVVRGNARL  | 405 | >FLT3-Y842C.CVVRGNARL  | 5700  | 5295  |
| >FLT3-Y842C.YVVRGNARLI | 28  | >FLT3-Y842C.CVVRGNARLI | 595   | 567   |
| >FLT3-Y842C.YVVRGNARL  | 64  | >FLT3-Y842C.CVVRGNARL  | 4315  | 4251  |
| >FLT3-Y842C.YVVRGNARLI | 8   | >FLT3-Y842C.CVVRGNARLI | 196   | 188   |
| >FLT3-Y842C.YVVRGNARL  | 361 | >FLT3-Y842C.CVVRGNARL  | 11657 | 11296 |
| >FLT3-Y842C.YVVRGNARLI | 58  | >FLT3-Y842C.CVVRGNARLI | 3946  | 3888  |
| >FLT3-Y842C.YVVRGNARLI | 194 | >FLT3-Y842C.CVVRGNARLI | 3919  | 3725  |
| >FLT3-Y842C.YVVRGNARLI | 135 | >FLT3-Y842C.CVVRGNARLI | 8665  | 8530  |
| >FLT3-Y842C.YVVRGNARL  | 12  | >FLT3-Y842C.CVVRGNARL  | 2896  | 2884  |
| >FLT3-Y842C.YVVRGNARLI | 5   | >FLT3-Y842C.CVVRGNARLI | 351   | 346   |
| >FLT3-Y842C.YVVRGNARL  | 32  | >FLT3-Y842C.CVVRGNARL  | 194   | 162   |
| >FLT3-Y842C.YVVRGNAR   | 262 | >FLT3-Y842C.CVVRGNAR   | 273   | 11    |
| >FLT3-Y842C.YVVRGNAR   | 291 | >FLT3-Y842C.CVVRGNAR   | 833   | 542   |
| >FLT3-Y842C.YVVRGNAR   | 16  | >FLT3-Y842C.CVVRGNAR   | 93    | 77    |
| >FLT3-Y842C.YVVRGNARL  | 93  | >FLT3-Y842C.CVVRGNARL  | 332   | 239   |
| >FLT3-Y842C.YVVRGNARLI | 13  | >FLT3-Y842C.CVVRGNARLI | 25    | 12    |
| >FLT3-Y842C.YVVRGNARL  | 353 | >FLT3-Y842C.CVVRGNARL  | 8762  | 8409  |
| >FLT3-Y842C.YVVRGNARLI | 14  | >FLT3-Y842C.CVVRGNARLI | 612   | 598   |
| >FLT3-Y842C.YVVRGNARL  | 109 | >FLT3-Y842C.CVVRGNARL  | 2308  | 2199  |
| >FLT3-Y842C.YVVRGNARL  | 197 | >FLT3-Y842C.CVVRGNARL  | 5648  | 5451  |
| >FLT3-Y842C.NYVVRGNAR  | 81  | >FLT3-Y842C.NCVVRGNAR  | 22855 | 22774 |
| >FLT3-Y842C.NYVVRGNAR  | 292 | >FLT3-Y842C.NCVVRGNAR  | 24381 | 24089 |
| >FLT3-Y842C.NYVVRGNAR  | 344 | >FLT3-Y842C.NCVVRGNAR  | 6915  | 6571  |
| >FLT3-Y842C.NYVVRGNAR  | 65  | >FLT3-Y842C.NCVVRGNAR  | 1331  | 1266  |
| >FLT3-Y842C.NYVVRGNAR  | 294 | >FLT3-Y842C.NCVVRGNAR  | 5866  | 5572  |
| >FLT3-Y842C.LARDIMSDSN | 168 | >FLT3-Y842C.LARDIMSDSN | 30662 | 30494 |
| >FLT3-Y842C.LARDIMSDSN | 146 | >FLT3-Y842C.LARDIMSDSN | 17503 | 17357 |
| >FLT3-Y842C.LARDIMSDSN | 119 | >FLT3-Y842C.LARDIMSDSN | 11870 | 11751 |
| >FLT3-Y842C.LARDIMSDSN | 5   | >FLT3-Y842C.LARDIMSDSN | 3981  | 3976  |
| >FLT3-Y842C.LARDIMSDSN | 106 | >FLT3-Y842C.LARDIMSDSN | 16884 | 16778 |
| >FLT3-Y842C.LARDIMSDSN | 12  | >FLT3-Y842C.LARDIMSDSN | 3467  | 3455  |
| >FLT3-Y842C.SNYVVRGNAI | 103 | >FLT3-Y842C.SNCVVRGNA  | 8488  | 8385  |
| >FLT3-Y842C.DSNYVVRGN. | 53  | >FLT3-Y842C.DSNCVVRGN. | 73    | 20    |
| >FLT3-Y842C.DSNYVVRGN. | 24  | >FLT3-Y842C.DSNCVVRGN. | 49    | 25    |
| >FLT3-Y842C.MSDSNYVV   | 205 | >FLT3-Y842C.MSDSNYVV   | 840   | 635   |
| >FLT3-Y842C.MSDSNYVV   | 365 | >FLT3-Y842C.MSDSNYVV   | 760   | 395   |
| >FLT3-Y842C.MSDSNYVVR  | 42  | >FLT3-Y842C.MSDSNYVVR  | 251   | 209   |
| >FLT3-Y842C.MSDSNYVVR  | 51  | >FLT3-Y842C.MSDSNYVVR  | 46    | 5     |

|                        |     |                        |      |      |
|------------------------|-----|------------------------|------|------|
| >FLT3-Y842C MSDSNYVV   | 151 | >FLT3-Y842C MSDSNCVV   | 1047 | 896  |
| >FLT3-Y842C MSDSNYVV   | 229 | >FLT3-Y842C MSDSNCVV   | 606  | 377  |
| >FLT3-Y842C IMSDSNYV   | 11  | >FLT3-Y842C IMSDSNCV   | 32   | 21   |
| >FLT3-Y842C IMSDSNYVV  | 12  | >FLT3-Y842C IMSDSNCVV  | 39   | 27   |
| >FLT3-Y842C IMSDSNYV   | 2   | >FLT3-Y842C IMSDSNCV   | 5    | 3    |
| >FLT3-Y842C IMSDSNYVV  | 3   | >FLT3-Y842C IMSDSNCVV  | 8    | 5    |
| >FLT3-Y842C IMSDSNYVVF | 261 | >FLT3-Y842C IMSDSNCVVF | 570  | 309  |
| >FLT3-Y842C IMSDSNYV   | 3   | >FLT3-Y842C IMSDSNCV   | 8    | 5    |
| >FLT3-Y842C IMSDSNYVV  | 6   | >FLT3-Y842C IMSDSNCVV  | 7    | 1    |
| >FLT3-Y842C IMSDSNYV   | 9   | >FLT3-Y842C IMSDSNCV   | 54   | 45   |
| >FLT3-Y842C IMSDSNYVV  | 21  | >FLT3-Y842C IMSDSNCVV  | 46   | 25   |
| >FLT3-Y842C IMSDSNYV   | 2   | >FLT3-Y842C IMSDSNCV   | 7    | 5    |
| >FLT3-Y842C IMSDSNYVV  | 2   | >FLT3-Y842C IMSDSNCVV  | 3    | 1    |
| >FLT3-Y842C IMSDSNYV   | 3   | >FLT3-Y842C IMSDSNCV   | 4    | 1    |
| >FLT3-Y842C IMSDSNYVV  | 3   | >FLT3-Y842C IMSDSNCVV  | 5    | 2    |
| >FLT3-Y842C IMSDSNYV   | 6   | >FLT3-Y842C IMSDSNCV   | 9    | 3    |
| >FLT3-Y842C IMSDSNYVV  | 8   | >FLT3-Y842C IMSDSNCVV  | 7    | 1    |
| >FLT3-Y842C IMSDSNYV   | 2   | >FLT3-Y842C IMSDSNCV   | 3    | 1    |
| >FLT3-Y842C IMSDSNYVV  | 2   | >FLT3-Y842C IMSDSNCVV  | 3    | 1    |
| >FLT3-Y842C IMSDSNYV   | 2   | >FLT3-Y842C IMSDSNCV   | 2    | 0    |
| >FLT3-Y842C IMSDSNYVV  | 2   | >FLT3-Y842C IMSDSNCVV  | 2    | 0    |
| >FLT3-Y842C IMSDSNYVVF | 280 | >FLT3-Y842C IMSDSNCVVF | 390  | 110  |
| >FLT3-Y842C IMSDSNYVVF | 68  | >FLT3-Y842C IMSDSNCVVF | 98   | 30   |
| >FLT3-Y842C IMSDSNYVVF | 347 | >FLT3-Y842C IMSDSNCVVF | 377  | 30   |
| >FLT3-Y842C IMSDSNYVVF | 129 | >FLT3-Y842C IMSDSNCVVF | 94   | 35   |
| >FLT3-Y842C IMSDSNYV   | 408 | >FLT3-Y842C IMSDSNCV   | 3819 | 3411 |
| >FLT3-Y842C IMSDSNYVV  | 244 | >FLT3-Y842C IMSDSNCVV  | 117  | 127  |
| >FLT3-Y842C IMSDSNYV   | 125 | >FLT3-Y842C IMSDSNCV   | 174  | 49   |
| >FLT3-Y842C IMSDSNYVV  | 53  | >FLT3-Y842C IMSDSNCVV  | 66   | 13   |
| >FLT3-Y842C IMSDSNYVVF | 132 | >FLT3-Y842C IMSDSNCVVF | 170  | 38   |
| >FLT3-Y842C IMSDSNYVVF | 500 | >FLT3-Y842C IMSDSNCVVF | 498  | 2    |
| >FLT3-Y842C IMSDSNYVVF | 47  | >FLT3-Y842C IMSDSNCVVF | 72   | 25   |
| >FLT3-Y842C DIMSDSNYV\ | 224 | >FLT3-Y842C DIMSDSNCV\ | 1025 | 801  |
| >FLT3-Y842C DIMSDSNYV  | 200 | >FLT3-Y842C DIMSDSNCV  | 1933 | 1733 |
| >FLT3-Y842C DIMSDSNYV\ | 84  | >FLT3-Y842C DIMSDSNCV\ | 248  | 164  |
| >FLT3-Y842C DIMSDSNYV\ | 282 | >FLT3-Y842C DIMSDSNCV\ | 154  | 128  |
| >FLT3-Y842C DIMSDSNYV\ | 235 | >FLT3-Y842C DIMSDSNCV\ | 963  | 728  |
| >FLT3-Y842C DIMSDSNYV  | 324 | >FLT3-Y842C DIMSDSNCV  | 5412 | 5088 |
| >FLT3-Y842C DIMSDSNYV  | 433 | >FLT3-Y842C DIMSDSNCV  | 2507 | 2074 |
| >FLT3-Y842C DIMSDSNYV\ | 438 | >FLT3-Y842C DIMSDSNCV\ | 1968 | 1530 |
| >FLT3-Y842C DIMSDSNYV  | 424 | >FLT3-Y842C DIMSDSNCV  | 1755 | 1331 |
| >FLT3-Y842C DIMSDSNYV  | 8   | >FLT3-Y842C DIMSDSNCV  | 34   | 26   |
| >FLT3-Y842C DIMSDSNYV\ | 16  | >FLT3-Y842C DIMSDSNCV\ | 42   | 26   |

|                        |       |                        |       |       |
|------------------------|-------|------------------------|-------|-------|
| >FLT3-Y842C DIMSDSNYV  | 355   | >FLT3-Y842C DIMSDSNCV  | 1916  | 1561  |
| >FLT3-Y842C DIMSDSNYV\ | 492   | >FLT3-Y842C DIMSDSNCV\ | 263   | 229   |
| >FLT3-Y842C DIMSDSNY   | 133   | >FLT3-Y842C DIMSDSNC   | 17086 | 16953 |
| >FLT3-Y842C DIMSDSNY   | 16    | >FLT3-Y842C DIMSDSNC   | 15850 | 15834 |
| >FLT3-Y842C DIMSDSNY   | 258   | >FLT3-Y842C DIMSDSNC   | 31203 | 30945 |
| >FLT3-Y842C DIMSDSNY   | 251   | >FLT3-Y842C DIMSDSNC   | 30858 | 30607 |
| >FLT3-Y842C DIMSDSNYV\ | 74    | >FLT3-Y842C DIMSDSNCV\ | 91    | 17    |
| >FLT3-Y842C DIMSDSNY   | 472   | >FLT3-Y842C DIMSDSNC   | 25003 | 24531 |
| >FLT3-Y842C DIMSDSNYV\ | 16    | >FLT3-Y842C DIMSDSNCV\ | 19    | 3     |
| >FLT3-Y842C DIMSDSNYV  | 17    | >FLT3-Y842C DIMSDSNCV  | 77    | 60    |
| >FLT3-Y842C DIMSDSNYV\ | 139   | >FLT3-Y842C DIMSDSNCV\ | 305   | 166   |
| >FLT3-Y842C DIMSDSNYV  | 7     | >FLT3-Y842C DIMSDSNCV  | 108   | 101   |
| >FLT3-Y842C DIMSDSNYV\ | 22    | >FLT3-Y842C DIMSDSNCV\ | 45    | 23    |
| >FLT3-Y842C DIMSDSNY   | 373   | >FLT3-Y842C DIMSDSNC   | 26408 | 26035 |
| >FLT3-Y842C RDIMSDSNY  | 384   | >FLT3-Y842C RDIMSDSNC  | 16496 | 16112 |
| >FLT3-Y842C RDIMSDSNY\ | 207   | >FLT3-Y842C RDIMSDSNC\ | 368   | 161   |
| >FLT3-Y842C RDIMSDSNY\ | 121   | >FLT3-Y842C RDIMSDSNC\ | 193   | 72    |
| >FLT3-Y842C RDIMSDSNY\ | 47    | >FLT3-Y842C RDIMSDSNC\ | 65    | 18    |
| >FLT3-Y842C ARDIMSDSN\ | 207   | >FLT3-Y842C ARDIMSDSN\ | 31420 | 31213 |
| >FLT3-Y842C ARDIMSDSN\ | 185   | >FLT3-Y842C ARDIMSDSN\ | 5813  | 5628  |
| >FOXL2-C134 CEDMFEKGN  | 13983 | >FOXL2-C134 WEDMFEKGN  | 216   | 13767 |
| >FOXL2-C134 ACEDMFEKG  | 1472  | >FOXL2-C134 AWEDMFEKG  | 251   | 1221  |
| >FOXL2-C134 KGNWTLDP   | 24911 | >FOXL2-C134 KGNWTLDP   | 343   | 24568 |
| >FOXL2-C134 KGNWTLDP   | 15422 | >FOXL2-C134 KGNWTLDP   | 21    | 15401 |
| >FOXL2-C134 DPACEDMF   | 29    | >FOXL2-C134 DPAWEDMF   | 30    | 1     |
| >FOXL2-C134 DPACEDMF   | 798   | >FOXL2-C134 DPAWEDMF   | 460   | 338   |
| >FOXL2-C134 DPACEDMF   | 222   | >FOXL2-C134 DPAWEDMF   | 247   | 25    |
| >FOXL2-C134 WTLDPACED  | 278   | >FOXL2-C134 WTLDPAWEL  | 87    | 191   |
| >FOXL2-C134 WTLDPACED  | 803   | >FOXL2-C134 WTLDPAWEL  | 290   | 513   |
| >FOXL2-C134 WTLDPACED  | 92    | >FOXL2-C134 WTLDPAWEL  | 58    | 34    |
| >FOXL2-C134 WTLDPACED  | 257   | >FOXL2-C134 WTLDPAWEL  | 392   | 135   |
| >FOXL2-C134 WTLDPACED  | 37    | >FOXL2-C134 WTLDPAWEL  | 32    | 5     |
| >FOXL2-C134 WTLDPACED  | 7     | >FOXL2-C134 WTLDPAWEL  | 6     | 1     |
| >FOXL2-C134 WTLDPACED  | 522   | >FOXL2-C134 WTLDPAWEL  | 427   | 95    |
| >FOXL2-C134 WTLDPACED  | 52    | >FOXL2-C134 WTLDPAWEL  | 32    | 20    |
| >FOXL2-C134 WTLDPACED  | 6     | >FOXL2-C134 WTLDPAWEL  | 8     | 2     |
| >FOXL2-C134 YWTLDPAC   | 11746 | >FOXL2-C134 YWTLDPAW   | 379   | 11367 |
| >FOXL2-C134 YWTLDPAC   | 349   | >FOXL2-C134 YWTLDPAW   | 346   | 3     |
| >FOXL2-C134 YWTLDPACEI | 459   | >FOXL2-C134 YWTLDPawe  | 609   | 150   |
| >FOXL2-C134 NYWTLDPAC  | 8150  | >FOXL2-C134 NYWTLDPAW  | 197   | 7953  |
| >FOXL2-E135 EDMFEKGN   | 257   | >FOXL2-E135 GDMFEKGN   | 7351  | 7094  |
| >FOXL2-E135 CEDMFEKGN  | 562   | >FOXL2-E135 CGDMFEKGN  | 388   | 174   |
| >FOXL2-E135 CEDMFEKGN  | 528   | >FOXL2-E135 CGDMFEKGN  | 402   | 126   |



|                        |      |                        |     |      |
|------------------------|------|------------------------|-----|------|
| >FOXL2-E135 DPACEDMFE  | 606  | >FOXL2-E135 DPACGDMFE  | 351 | 255  |
| >FOXL2-E135 DPACEDMF   | 29   | >FOXL2-E135 DPACGDMF   | 40  | 11   |
| >FOXL2-E135 DPACEDMF   | 222  | >FOXL2-E135 DPACGDMF   | 239 | 17   |
| >FOXL2-E135 WTLDPACED  | 278  | >FOXL2-E135 WTLDPACGD  | 368 | 90   |
| >FOXL2-E135 WTLDPACED  | 996  | >FOXL2-E135 WTLDPACGD  | 452 | 544  |
| >FOXL2-E135 WTLDPACED  | 92   | >FOXL2-E135 WTLDPACGD  | 94  | 2    |
| >FOXL2-E135 WTLDPACED  | 257  | >FOXL2-E135 WTLDPACGD  | 167 | 90   |
| >FOXL2-E135 WTLDPACED  | 37   | >FOXL2-E135 WTLDPACGD  | 30  | 7    |
| >FOXL2-E135 WTLDPACED  | 7    | >FOXL2-E135 WTLDPACGD  | 5   | 2    |
| >FOXL2-E135 WTLDPACED  | 52   | >FOXL2-E135 WTLDPACGD  | 28  | 24   |
| >FOXL2-E135 WTLDPACED  | 6    | >FOXL2-E135 WTLDPACGD  | 5   | 1    |
| >FOXL2-E135 YWTLDPACED | 459  | >FOXL2-E135 YWTLDPACG  | 424 | 35   |
| >FOXO3-A6S ASPAPLSPL   | 261  | >FOXO3-A6S SSPAPLSPL   | 151 | 110  |
| >FOXO3-A6S ASPAPLSPL   | 151  | >FOXO3-A6S SSPAPLSPL   | 155 | 4    |
| >FOXO3-A6S ASPAPLSPL   | 523  | >FOXO3-A6S SSPAPLSPL   | 53  | 470  |
| >FOXO3-A6S ASPAPLSPLEV | 655  | >FOXO3-A6S SSPAPLSPLEV | 102 | 553  |
| >FOXO3-A6S ASPAPLSPL   | 112  | >FOXO3-A6S SSPAPLSPL   | 240 | 128  |
| >FOXO3-A6S ASPAPLSPL   | 2    | >FOXO3-A6S SSPAPLSPL   | 2   | 0    |
| >FOXO3-A6S ASPAPLSPLE  | 35   | >FOXO3-A6S SSPAPLSPLE  | 24  | 11   |
| >FOXO3-A6S ASPAPLSPLEV | 24   | >FOXO3-A6S SSPAPLSPLEV | 15  | 9    |
| >FOXO3-A6S ASPAPLSPL   | 701  | >FOXO3-A6S SSPAPLSPL   | 274 | 427  |
| >FOXO3-A6S PASPAPLSPL  | 2935 | >FOXO3-A6S PSSPAPLSPL  | 424 | 2511 |
| >FOXO3-A6S APASPAPL    | 16   | >FOXO3-A6S APSSPAPL    | 20  | 4    |
| >FOXO3-A6S APASPAPLSP  | 15   | >FOXO3-A6S APSSPAPLSPI | 18  | 3    |
| >FOXO3-A6S APASPAPL    | 319  | >FOXO3-A6S APSSPAPL    | 399 | 80   |
| >FOXO3-A6S APASPAPLSP  | 368  | >FOXO3-A6S APSSPAPLSPI | 477 | 109  |
| >FOXO3-A6S APASPAPL    | 52   | >FOXO3-A6S APSSPAPL    | 71  | 19   |
| >FOXO3-A6S APASPAPLSP  | 102  | >FOXO3-A6S APSSPAPLSPI | 142 | 40   |
| >FOXO3-A6S APASPAPLSP  | 318  | >FOXO3-A6S APSSPAPLSPI | 514 | 196  |
| >FOXO3-A6S EAPASPAPL   | 13   | >FOXO3-A6S EAPSSPAPL   | 20  | 7    |
| >FOXO3-A6S EAPASPAPL   | 196  | >FOXO3-A6S EAPSSPAPL   | 242 | 46   |
| >FOXO3-A6S EAPASPAPL   | 40   | >FOXO3-A6S EAPSSPAPL   | 35  | 5    |
| >FOXO3-A6S AEAPASPAPL  | 470  | >FOXO3-A6S AEAPSSPAPL  | 166 | 304  |
| >FOXO3-A6S AEAPASPAPL  | 74   | >FOXO3-A6S AEAPSSPAPL  | 67  | 7    |
| >FOXO3-A6S AEAPASPAPL  | 83   | >FOXO3-A6S AEAPSSPAPL  | 91  | 8    |
| >FOXO3-A6S AEAPASPA    | 418  | >FOXO3-A6S AEAPSSPA    | 308 | 110  |
| >FOXO3-A6S AEAPASPAPL  | 108  | >FOXO3-A6S AEAPSSPAPL  | 106 | 2    |
| >FOXO3-A6S AEAPASPAPL  | 161  | >FOXO3-A6S AEAPSSPAPL  | 224 | 63   |
| >FOXO3-A6S AEAPASPAPL  | 306  | >FOXO3-A6S AEAPSSPAPL  | 282 | 24   |
| >FOXO3-A6S AEAPASPA    | 8    | >FOXO3-A6S AEAPSSPA    | 7   | 1    |
| >FOXO3-A6S AEAPASPAP   | 249  | >FOXO3-A6S AEAPSSPAP   | 136 | 113  |
| >FOXO3-A6S AEAPASPAPL  | 270  | >FOXO3-A6S AEAPSSPAPL  | 353 | 83   |
| >FOXO3-A6S AEAPASPAPL  | 91   | >FOXO3-A6S AEAPSSPAPL  | 60  | 31   |

|                       |       |                       |     |       |
|-----------------------|-------|-----------------------|-----|-------|
| >FOXO3-A6S AEAPASPAPL | 69    | >FOXO3-A6S AEAPSSPAPL | 61  | 8     |
| >FOXO3-A6S MAEAPASPA  | 124   | >FOXO3-A6S MAEAPSSPA  | 73  | 51    |
| >FOXO3-A6S MAEAPASPA  | 77    | >FOXO3-A6S MAEAPSSPAI | 69  | 8     |
| >FOXO3-A6S MAEAPASPA  | 398   | >FOXO3-A6S MAEAPSSPAI | 409 | 11    |
| >FOXO3-A6S MAEAPASPA  | 243   | >FOXO3-A6S MAEAPSSPAI | 239 | 4     |
| >FOXO3-A6S MAEAPASPA  | 17    | >FOXO3-A6S MAEAPSSPAI | 19  | 2     |
| >FOXO3-A6S MAEAPASPA  | 365   | >FOXO3-A6S MAEAPSSPA  | 185 | 180   |
| >FOXO3-A6S MAEAPASPA  | 53    | >FOXO3-A6S MAEAPSSPAI | 43  | 10    |
| >FOXO3-A6S MAEAPASPA  | 81    | >FOXO3-A6S MAEAPSSPAI | 101 | 20    |
| >FOXO3-A6S MAEAPASPA  | 258   | >FOXO3-A6S MAEAPSSPA  | 174 | 84    |
| >FOXO3-G86 GTLGSGLLL  | 1305  | >FOXO3-G86 RTLGSGLLL  | 373 | 932   |
| >FOXO3-G86 GTLGSGLL   | 4977  | >FOXO3-G86 RTLGSGLL   | 100 | 4877  |
| >FOXO3-G86 GTLGSGLLL  | 2978  | >FOXO3-G86 RTLGSGLLL  | 46  | 2932  |
| >FOXO3-G86 GTLGSGLL   | 7747  | >FOXO3-G86 RTLGSGLL   | 258 | 7489  |
| >FOXO3-G86 GTLGSGLLL  | 5283  | >FOXO3-G86 RTLGSGLLL  | 130 | 5153  |
| >FOXO3-G86 GTLGSGLL   | 21    | >FOXO3-G86 RTLGSGLL   | 3   | 18    |
| >FOXO3-G86 GTLGSGLLL  | 7     | >FOXO3-G86 RTLGSGLLL  | 3   | 4     |
| >FOXO3-G86 GTLGSGLLLE | 4024  | >FOXO3-G86 RTLGSGLLLE | 226 | 3798  |
| >FOXO3-G86 GTLGSGLLL  | 8548  | >FOXO3-G86 RTLGSGLLL  | 388 | 8160  |
| >FOXO3-G86 GTLGSGLL   | 13499 | >FOXO3-G86 RTLGSGLL   | 444 | 13055 |
| >FOXO3-G86 GTLGSGLLL  | 8016  | >FOXO3-G86 RTLGSGLLL  | 77  | 7939  |
| >FOXO3-G86 GTLGSGLLL  | 267   | >FOXO3-G86 RTLGSGLLL  | 85  | 182   |
| >FOXO3-G86 GTLGSGLL   | 1286  | >FOXO3-G86 RTLGSGLL   | 35  | 1251  |
| >FOXO3-G86 GTLGSGLLL  | 19    | >FOXO3-G86 RTLGSGLLL  | 15  | 4     |
| >FOXO3-G86 GTLGSGLL   | 1221  | >FOXO3-G86 RTLGSGLL   | 66  | 1155  |
| >FOXO3-G86 GTLGSGLLL  | 1797  | >FOXO3-G86 RTLGSGLLL  | 89  | 1708  |
| >FOXO3-G86 SGTLGSGL   | 22709 | >FOXO3-G86 SRTLGSGL   | 398 | 22311 |
| >FOXO3-G86 SGTLGSGLLL | 18789 | >FOXO3-G86 SRTLGSGLLL | 41  | 18748 |
| >FOXO3-G86 SGTLGSGLL  | 27811 | >FOXO3-G86 SRTLGSGLL  | 348 | 27463 |
| >FOXO3-G86 SGTLGSGLLL | 24516 | >FOXO3-G86 SRTLGSGLLL | 216 | 24300 |
| >FOXO3-G86 SGTLGSGLL  | 21223 | >FOXO3-G86 SRTLGSGLL  | 48  | 21175 |
| >FOXO3-G86 SGTLGSGLLL | 23270 | >FOXO3-G86 SRTLGSGLLL | 173 | 23097 |
| >FOXO3-G86 AMAIGGGGC  | 23394 | >FOXO3-G86 AMAIGGGGC  | 497 | 22897 |
| >FOXO3-G86 GSGTLGSGLL | 14335 | >FOXO3-G86 GSRTLGSGLL | 242 | 14093 |
| >FOXO3-G86 GSGTLGSGLL | 13410 | >FOXO3-G86 GSRTLGSGLL | 147 | 13263 |
| >FOXO3-G86 GSGTLGSGL  | 472   | >FOXO3-G86 GSRTLGSGL  | 14  | 458   |
| >FOXO3-G86 GSGTLGSGLL | 1969  | >FOXO3-G86 GSRTLGSGLL | 58  | 1911  |
| >FOXO3-G86 GSGTLGSGLL | 529   | >FOXO3-G86 GSRTLGSGLL | 20  | 509   |
| >FOXO3-G86 GSGTLGSGL  | 74    | >FOXO3-G86 GSRTLGSGL  | 8   | 66    |
| >FOXO3-G86 GSGTLGSGLL | 262   | >FOXO3-G86 GSRTLGSGLL | 86  | 176   |
| >FOXO3-G86 GSGTLGSGLL | 103   | >FOXO3-G86 GSRTLGSGLL | 11  | 92    |
| >FOXO3-G86 GGGSGTLGSC | 5138  | >FOXO3-G86 GGGSRTLGSC | 352 | 4786  |
| >FOXO3-G86 AIGGGGGSG  | 85    | >FOXO3-G86 AIGGGGGSR  | 103 | 18    |

|                        |       |                        |       |       |
|------------------------|-------|------------------------|-------|-------|
| >FOXO3-G86 MAIGGGGGS   | 33510 | >FOXO3-G86 MAIGGGGGS   | 388   | 33122 |
| >FOXO3-G86 MAIGGGGGS   | 34852 | >FOXO3-G86 MAIGGGGGS   | 47    | 34805 |
| >FOXO3-S31:STVSGRLSPI  | 133   | >FOXO3-S31:CTVSGRLSPI  | 475   | 342   |
| >FOXO3-S31:STVSGRLSPI  | 85    | >FOXO3-S31:CTVSGRLSPI  | 386   | 301   |
| >FOXO3-S31:STVSGRLSPI  | 159   | >FOXO3-S31:CTVSGRLSPI  | 659   | 500   |
| >FOXO3-S31:STVSGRLSPIM | 407   | >FOXO3-S31:CTVSGRLSPIM | 1584  | 1177  |
| >FOXO3-S31:STVSGRLSPI  | 116   | >FOXO3-S31:CTVSGRLSPI  | 340   | 224   |
| >FOXO3-S31:STVSGRLSPIM | 18    | >FOXO3-S31:CTVSGRLSPIM | 50    | 32    |
| >FOXO3-S31:STVSGRLSPI  | 27    | >FOXO3-S31:CTVSGRLSPI  | 52    | 25    |
| >FOXO3-S31:STVSGRLSPI  | 156   | >FOXO3-S31:CTVSGRLSPI  | 1848  | 1692  |
| >FOXO3-S31:STVSGRLSPI  | 24    | >FOXO3-S31:CTVSGRLSPI  | 147   | 123   |
| >FOXO3-S31:STVSGRLSPIM | 18    | >FOXO3-S31:CTVSGRLSPIM | 114   | 96    |
| >FOXO3-S31:STVSGRLSPIM | 124   | >FOXO3-S31:CTVSGRLSPIM | 213   | 89    |
| >FOXO3-S31:STVSGRLSPIM | 7     | >FOXO3-S31:CTVSGRLSPIM | 56    | 49    |
| >FOXO3-S31:STVSGRLSPI  | 128   | >FOXO3-S31:CTVSGRLSPI  | 67    | 61    |
| >FOXO3-S31:STVSGRLSPIM | 705   | >FOXO3-S31:CTVSGRLSPIM | 232   | 473   |
| >FOXO3-S31:ASTVSGRL    | 16    | >FOXO3-S31:ACTVSGRL    | 8856  | 8840  |
| >FOXO3-S31:ASTVSGRLSPI | 23    | >FOXO3-S31:ACTVSGRLSP  | 10043 | 10020 |
| >FOXO3-S31:ASTVSGRL    | 229   | >FOXO3-S31:ACTVSGRL    | 11355 | 11126 |
| >FOXO3-S31:ASTVSGRLSPI | 44    | >FOXO3-S31:ACTVSGRLSP  | 1829  | 1785  |
| >FOXO3-S31:NASTVSGR    | 413   | >FOXO3-S31:NACTVSGR    | 167   | 246   |
| >FOXO3-S31:NASTVSGR    | 10    | >FOXO3-S31:NACTVSGR    | 15    | 5     |
| >FOXO3-S31:NASTVSGRL   | 94    | >FOXO3-S31:NACTVSGRL   | 664   | 570   |
| >FOXO3-S31:SNASTVSGR   | 55    | >FOXO3-S31:SNACTVSGR   | 117   | 62    |
| >FOXO3-S31:NSNASTVSGF  | 281   | >FOXO3-S31:NSNACTVSGF  | 102   | 179   |
| >FOXO3-S31:NSNASTVSGF  | 32    | >FOXO3-S31:NSNACTVSGF  | 21    | 11    |
| >FOXO3-S31:NSNASTVSGF  | 164   | >FOXO3-S31:NSNACTVSGF  | 103   | 61    |
| >FOXO3-S31:NSNASTVSGF  | 467   | >FOXO3-S31:NSNACTVSGF  | 1785  | 1318  |
| >FOXO3-S31:TNSNASTVSC  | 76    | >FOXO3-S31:TNSNACTVSC  | 84    | 8     |
| >FOXO3-S31:RTNSNASTV   | 43    | >FOXO3-S31:RTNSNACTV   | 213   | 170   |
| >FOXO3-S31:RTNSNASTV   | 48    | >FOXO3-S31:RTNSNACTV   | 20    | 28    |
| >FOXO3-S31:RTNSNASTV   | 251   | >FOXO3-S31:RTNSNACTV   | 112   | 139   |
| >FOXO3-S31:RTNSNASTV   | 1494  | >FOXO3-S31:RTNSNACTV   | 241   | 1253  |
| >FOXO3-S31:RTNSNASTV   | 256   | >FOXO3-S31:RTNSNACTV   | 71    | 185   |
| >FOXO3-S31:RTNSNASTV   | 137   | >FOXO3-S31:RTNSNACTV   | 54    | 83    |
| >FOXO3-S31:RTNSNASTVS  | 292   | >FOXO3-S31:RTNSNACTVS  | 414   | 122   |
| >FOXO3-S31:RTNSNASTV   | 101   | >FOXO3-S31:RTNSNACTV   | 55    | 46    |
| >FOXO3-S31:RTNSNASTVS  | 325   | >FOXO3-S31:RTNSNACTVS  | 274   | 51    |
| >FOXO3-S31:RTNSNASTV   | 444   | >FOXO3-S31:RTNSNACTV   | 266   | 178   |
| >FOXO3-S31:RTNSNASTV   | 328   | >FOXO3-S31:RTNSNACTV   | 831   | 503   |
| >FOXO3-S31:RTNSNAST    | 326   | >FOXO3-S31:RTNSNACT    | 2338  | 2012  |
| >FOXO3-S31:RTNSNASTV   | 8     | >FOXO3-S31:RTNSNACTV   | 10    | 2     |
| >FOXO3-S31:RTNSNASTV   | 8     | >FOXO3-S31:RTNSNACTV   | 395   | 387   |

|                        |       |                        |       |       |
|------------------------|-------|------------------------|-------|-------|
| >FOXO3-S31:RTNSNASTV   | 381   | >FOXO3-S31:RTNSNACTV   | 1691  | 1310  |
| >FOXO3-S31:SRTNSNASTV  | 302   | >FOXO3-S31:SRTNSNACTV  | 599   | 297   |
| >FOXO3-S31:RSRTNSNAS   | 6     | >FOXO3-S31:RSRTNSNAC   | 14    | 8     |
| >FOXO3-S31:RSRTNSNAST  | 7     | >FOXO3-S31:RSRTNSNACT  | 14    | 7     |
| >FOXO3-S31:RSRTNSNAST  | 5     | >FOXO3-S31:RSRTNSNACT  | 4     | 1     |
| >FOXO3-S31:RSRTNSNAST  | 46    | >FOXO3-S31:RSRTNSNACT  | 104   | 58    |
| >FOXO3-S31:RSRTNSNAST  | 122   | >FOXO3-S31:RSRTNSNACT  | 1072  | 950   |
| >FOXO3-S31:RSRTNSNAST  | 10    | >FOXO3-S31:RSRTNSNACT  | 11    | 1     |
| >FOXO3-S31:RSRTNSNAST  | 27    | >FOXO3-S31:RSRTNSNACT  | 403   | 376   |
| >FOXO4-S34:SLFSPAEGPL  | 195   | >FOXO4-S34:FLFSPAEGPL  | 33    | 162   |
| >FOXO4-S34:SLFSPAEGPLS | 4028  | >FOXO4-S34:FLFSPAEGPLS | 293   | 3735  |
| >FOXO4-S34:SLFSPAEG    | 1402  | >FOXO4-S34:FLFSPAEG    | 76    | 1326  |
| >FOXO4-S34:SLFSPAEGP   | 4531  | >FOXO4-S34:FLFSPAEGP   | 304   | 4227  |
| >FOXO4-S34:SLFSPAEGPL  | 11    | >FOXO4-S34:FLFSPAEGPL  | 5     | 6     |
| >FOXO4-S34:SLFSPAEGPLS | 1812  | >FOXO4-S34:FLFSPAEGPLS | 75    | 1737  |
| >FOXO4-S34:SLFSPAEG    | 2441  | >FOXO4-S34:FLFSPAEG    | 306   | 2135  |
| >FOXO4-S34:SLFSPAEGPL  | 35    | >FOXO4-S34:FLFSPAEGPL  | 14    | 21    |
| >FOXO4-S34:SLFSPAEGPLS | 2948  | >FOXO4-S34:FLFSPAEGPLS | 261   | 2687  |
| >FOXO4-S34:SLFSPAEGPL  | 1033  | >FOXO4-S34:FLFSPAEGPL  | 122   | 911   |
| >FOXO4-S34:SLFSPAEGPLS | 4860  | >FOXO4-S34:FLFSPAEGPLS | 339   | 4521  |
| >FOXO4-S34:SLFSPAEG    | 173   | >FOXO4-S34:FLFSPAEG    | 24    | 149   |
| >FOXO4-S34:SLFSPAEGP   | 753   | >FOXO4-S34:FLFSPAEGP   | 83    | 670   |
| >FOXO4-S34:SLFSPAEGPL  | 5     | >FOXO4-S34:FLFSPAEGPL  | 2     | 3     |
| >FOXO4-S34:SLFSPAEGPLS | 182   | >FOXO4-S34:FLFSPAEGPLS | 26    | 156   |
| >FOXO4-S34:SLFSPAEGPL  | 65    | >FOXO4-S34:FLFSPAEGPL  | 8     | 57    |
| >FOXO4-S34:SLFSPAEGPL  | 17    | >FOXO4-S34:FLFSPAEGPL  | 9     | 8     |
| >FOXO4-S34:SLFSPAEGPLS | 1040  | >FOXO4-S34:FLFSPAEGPLS | 404   | 636   |
| >FOXO4-S34:SLFSPAEGPL  | 1670  | >FOXO4-S34:FLFSPAEGPL  | 79    | 1591  |
| >FOXO4-S34:SLFSPAEG    | 1659  | >FOXO4-S34:FLFSPAEG    | 161   | 1498  |
| >FOXO4-S34:SLFSPAEGPL  | 10    | >FOXO4-S34:FLFSPAEGPL  | 3     | 7     |
| >FOXO4-S34:SLFSPAEGPLS | 390   | >FOXO4-S34:FLFSPAEGPLS | 48    | 342   |
| >FOXO4-S34:SLFSPAEGPL  | 546   | >FOXO4-S34:FLFSPAEGPL  | 345   | 201   |
| >FOXO4-S34:SLFSPAEGPL  | 594   | >FOXO4-S34:FLFSPAEGPL  | 214   | 380   |
| >FOXO4-S34:SLFSPAEGPL  | 502   | >FOXO4-S34:FLFSPAEGPL  | 273   | 229   |
| >FOXO4-S34:SLFSPAEGPL  | 218   | >FOXO4-S34:FLFSPAEGPL  | 74    | 144   |
| >FOXO4-S34:SLFSPAEGPL  | 484   | >FOXO4-S34:FLFSPAEGPL  | 76    | 408   |
| >FOXO4-S34:SLFSPAEGPL  | 1946  | >FOXO4-S34:FLFSPAEGPL  | 315   | 1631  |
| >FOXO4-S34:SSLFSPAEGPL | 14588 | >FOXO4-S34:SFLFSPAEGPL | 314   | 14274 |
| >FOXO4-S34:SSLFSPAEGPL | 13    | >FOXO4-S34:SFLFSPAEGPL | 21459 | 21446 |
| >FOXO4-S34:SSLFSPAEGPL | 25014 | >FOXO4-S34:SFLFSPAEGPL | 216   | 24798 |
| >FOXO4-S34:SSLFSPAEGPL | 477   | >FOXO4-S34:SFLFSPAEGPL | 16626 | 16149 |
| >FOXO4-S34:VTGPLHTYSS  | 22560 | >FOXO4-S34:VTGPLHTYSS  | 440   | 22120 |
| >FOXO4-S34:VTGPLHTYSS  | 15163 | >FOXO4-S34:VTGPLHTYSS  | 115   | 15048 |

|                        |       |                        |      |       |
|------------------------|-------|------------------------|------|-------|
| >FOXO4-S34.VTGPLHTYSS: | 15804 | >FOXO4-S34.VTGPLHTYSS  | 106  | 15698 |
| >FOXO4-S34.VTGPLHTYSS: | 6108  | >FOXO4-S34.VTGPLHTYSS  | 5    | 6103  |
| >FOXO4-S34.VTGPLHTYSS: | 18889 | >FOXO4-S34.VTGPLHTYSS  | 77   | 18812 |
| >FOXO4-S34.VTGPLHTYSS: | 6113  | >FOXO4-S34.VTGPLHTYSS  | 127  | 5986  |
| >FOXO4-S34.VTGPLHTYSS: | 620   | >FOXO4-S34.VTGPLHTYSS  | 5    | 615   |
| >FOXO4-S34.SSFLFSPA    | 571   | >FOXO4-S34.SSFLFSPA    | 7    | 564   |
| >FOXO4-S34.SSFLFSPA    | 948   | >FOXO4-S34.SSFLFSPA    | 158  | 790   |
| >FOXO4-S34.SSFLFSPA    | 387   | >FOXO4-S34.SSFLFSPA    | 112  | 275   |
| >FOXO4-S34.YSSFLFSPA   | 199   | >FOXO4-S34.YSSFLFSPA   | 229  | 30    |
| >FOXO4-S34.YSSFLFSPA   | 210   | >FOXO4-S34.YSSFLFSPA   | 251  | 41    |
| >FOXO4-S34.YSSFLFSPA   | 135   | >FOXO4-S34.YSSFLFSPA   | 213  | 78    |
| >FOXO4-S34.YSSFLFSPA   | 43    | >FOXO4-S34.YSSFLFSPA   | 23   | 20    |
| >FOXO4-S34.YSSFLFSPA   | 226   | >FOXO4-S34.YSSFLFSPA   | 272  | 46    |
| >FOXO4-S34.YSSFLFSPA   | 132   | >FOXO4-S34.YSSFLFSPA   | 681  | 549   |
| >FOXO4-S34.YSSFLFSPA   | 65    | >FOXO4-S34.YSSFLFSPA   | 109  | 44    |
| >FOXO4-S34.TYSSFLFSPA  | 300   | >FOXO4-S34.TYSSFLFSPA  | 1904 | 1604  |
| >FOXO4-S34.TYSSFLFSPA  | 291   | >FOXO4-S34.TYSSFLFSPA  | 180  | 111   |
| >FOXO4-S34.TYSSFLFSPA  | 461   | >FOXO4-S34.TYSSFLFSPA  | 400  | 61    |
| >FOXO4-S34.HTYSSFLFSPA | 77    | >FOXO4-S34.HTYSSFLFSPA | 61   | 16    |
| >FOXO4-S34.HTYSSFLFSPA | 195   | >FOXO4-S34.HTYSSFLFSPA | 78   | 117   |
| >FOXO4-S34.HTYSSFLF    | 617   | >FOXO4-S34.HTYSSFLF    | 82   | 535   |
| >FOXO4-S34.HTYSSFLF    | 1461  | >FOXO4-S34.HTYSSFLF    | 199  | 1262  |
| >FOXO4-S34.HTYSSFLF    | 82    | >FOXO4-S34.HTYSSFLF    | 356  | 274   |
| >FOXO4-S34.HTYSSFLF    | 213   | >FOXO4-S34.HTYSSFLF    | 299  | 86    |
| >FOXO4-S34.HTYSSFLF    | 530   | >FOXO4-S34.HTYSSFLF    | 397  | 133   |
| >FOXO4-S34.HTYSSFLF    | 288   | >FOXO4-S34.HTYSSFLF    | 72   | 216   |
| >FOXO4-S34.HTYSSFLFS   | 34    | >FOXO4-S34.HTYSSFLFS   | 66   | 32    |
| >FOXO4-S34.HTYSSFLFSPA | 22    | >FOXO4-S34.HTYSSFLFSPA | 25   | 3     |
| >FOXO4-S34.HTYSSFLF    | 143   | >FOXO4-S34.HTYSSFLF    | 54   | 89    |
| >FOXO4-S34.HTYSSFLF    | 190   | >FOXO4-S34.HTYSSFLF    | 88   | 102   |
| >FOXO4-S34.HTYSSFLFS   | 305   | >FOXO4-S34.HTYSSFLFS   | 212  | 93    |
| >FOXO4-S34.HTYSSFLFS   | 865   | >FOXO4-S34.HTYSSFLFS   | 305  | 560   |
| >FOXO4-S34.HTYSSFLFSPA | 14    | >FOXO4-S34.HTYSSFLFSPA | 10   | 4     |
| >FOXO4-S34.HTYSSFLFSPA | 25    | >FOXO4-S34.HTYSSFLFSPA | 24   | 1     |
| >FOXO4-S34.HTYSSFLF    | 68    | >FOXO4-S34.HTYSSFLF    | 129  | 61    |
| >FOXO4-S34.HTYSSFLFSPA | 467   | >FOXO4-S34.HTYSSFLFSPA | 548  | 81    |
| >FOXO4-S34.HTYSSFLF    | 143   | >FOXO4-S34.HTYSSFLF    | 627  | 484   |
| >FOXO4-S34.HTYSSFLF    | 7     | >FOXO4-S34.HTYSSFLF    | 11   | 4     |
| >FOXO4-S34.HTYSSFLFSPA | 260   | >FOXO4-S34.HTYSSFLFSPA | 264  | 4     |
| >FOXO4-S34.HTYSSFLF    | 2     | >FOXO4-S34.HTYSSFLF    | 3    | 1     |
| >FOXO4-S34.HTYSSFLFS   | 130   | >FOXO4-S34.HTYSSFLFS   | 815  | 685   |
| >FOXO4-S34.HTYSSFLFSPA | 200   | >FOXO4-S34.HTYSSFLFSPA | 519  | 319   |
| >FOXO4-S34.HTYSSFLF    | 277   | >FOXO4-S34.HTYSSFLF    | 299  | 22    |

|                        |       |                        |      |       |
|------------------------|-------|------------------------|------|-------|
| >FOXO4-S34:HTYSSSLF    | 144   | >FOXO4-S34:HTYSSFLF    | 99   | 45    |
| >FOXO4-S34:HTYSSSLF    | 33    | >FOXO4-S34:HTYSSFLF    | 19   | 14    |
| >FOXO4-S34:HTYSSSLF    | 145   | >FOXO4-S34:HTYSSFLF    | 17   | 128   |
| >FOXO4-S34:HTYSSSLFS   | 2308  | >FOXO4-S34:HTYSSFLFS   | 467  | 1841  |
| >FOXO4-S34:HTYSSSLF    | 54    | >FOXO4-S34:HTYSSFLF    | 55   | 1     |
| >FOXO4-S34:HTYSSSLFSPA | 341   | >FOXO4-S34:HTYSSFLFSPA | 329  | 12    |
| >FOXO4-S34:LHTYSSSLF   | 2309  | >FOXO4-S34:LHTYSSFLF   | 490  | 1819  |
| >FOXO4-S34:LHTYSSSL    | 106   | >FOXO4-S34:LHTYSSFL    | 453  | 347   |
| >FOXO4-S34:LHTYSSSLF   | 12    | >FOXO4-S34:LHTYSSFLF   | 37   | 25    |
| >FOXO4-S34:LHTYSSSL    | 259   | >FOXO4-S34:LHTYSSFL    | 992  | 733   |
| >FOXO4-S34:LHTYSSSLF   | 38    | >FOXO4-S34:LHTYSSFLF   | 1017 | 979   |
| >FOXO4-S34:LHTYSSSL    | 226   | >FOXO4-S34:LHTYSSFL    | 127  | 99    |
| >FOXO4-S34:LHTYSSSLF   | 20    | >FOXO4-S34:LHTYSSFLF   | 14   | 6     |
| >FOXO4-S34:PLHTYSSSL   | 270   | >FOXO4-S34:PLHTYSSFL   | 70   | 200   |
| >FOXO4-S34:PLHTYSSSL   | 440   | >FOXO4-S34:PLHTYSSFL   | 469  | 29    |
| >FOXO4-S34:PLHTYSSSL   | 305   | >FOXO4-S34:PLHTYSSFL   | 143  | 162   |
| >FOXO4-S34:PLHTYSSSL   | 39    | >FOXO4-S34:PLHTYSSFL   | 55   | 16    |
| >FOXO4-S34:PLHTYSSSLF  | 585   | >FOXO4-S34:PLHTYSSFLF  | 267  | 318   |
| >FOXO4-S34:PLHTYSSSL   | 344   | >FOXO4-S34:PLHTYSSFL   | 2285 | 1941  |
| >FOXO4-S34:PLHTYSSS    | 14430 | >FOXO4-S34:PLHTYSSF    | 39   | 14391 |
| >FOXO4-S34:PLHTYSSSLF  | 82    | >FOXO4-S34:PLHTYSSFLF  | 247  | 165   |
| >FOXO4-S34:GPLHTYSSSL  | 1283  | >FOXO4-S34:GPLHTYSSFL  | 170  | 1113  |
| >FOXO4-S34:GPLHTYSSSLF | 1731  | >FOXO4-S34:GPLHTYSSFLF | 365  | 1366  |
| >FOXO4-S34:GPLHTYSSS   | 13623 | >FOXO4-S34:GPLHTYSSF   | 165  | 13458 |
| >FOXO4-S34:GPLHTYSSSL  | 448   | >FOXO4-S34:GPLHTYSSFL  | 1692 | 1244  |
| >FOXO4-S34:GPLHTYSSS   | 10804 | >FOXO4-S34:GPLHTYSSF   | 21   | 10783 |
| >FOXO4-S34:GPLHTYSSSLF | 86    | >FOXO4-S34:GPLHTYSSFLF | 211  | 125   |
| >FOXO4-S34:GPLHTYSSS   | 10528 | >FOXO4-S34:GPLHTYSSF   | 153  | 10375 |
| >FOXO4-S34:GPLHTYSSSLF | 318   | >FOXO4-S34:GPLHTYSSFLF | 238  | 80    |
| >FOXO4-S34:GPLHTYSSSL  | 244   | >FOXO4-S34:GPLHTYSSFL  | 1184 | 940   |
| >FOXO4-S34:GPLHTYSSS   | 20717 | >FOXO4-S34:GPLHTYSSF   | 395  | 20322 |
| >FOXO4-S34:GPLHTYSSSLF | 336   | >FOXO4-S34:GPLHTYSSFLF | 119  | 217   |
| >FOXO4-S34:GPLHTYSSS   | 5491  | >FOXO4-S34:GPLHTYSSF   | 31   | 5460  |
| >FOXO4-S34:GPLHTYSSSLF | 12    | >FOXO4-S34:GPLHTYSSFLF | 111  | 99    |
| >FOXO4-S34:GPLHTYSSS   | 7106  | >FOXO4-S34:GPLHTYSSF   | 13   | 7093  |
| >FOXO4-S34:GPLHTYSSSL  | 289   | >FOXO4-S34:GPLHTYSSFL  | 453  | 164   |
| >FOXO4-S34:GPLHTYSSSLF | 36    | >FOXO4-S34:GPLHTYSSFLF | 23   | 13    |
| >FOXO4-S34:TGPLHTYSSS  | 8678  | >FOXO4-S34:TGPLHTYSSF  | 447  | 8231  |
| >FOXO4-S34:TGPLHTYSSS  | 10254 | >FOXO4-S34:TGPLHTYSSF  | 164  | 10090 |
| >FOXO4-S34:TGPLHTYSSSI | 61    | >FOXO4-S34:TGPLHTYSSFI | 14   | 47    |
| >FOXP1-R60:REELNGAM    | 43    | >FOXP1-R60:QEELNGAM    | 8    | 35    |
| >FOXP1-R60:REELNGAM    | 26    | >FOXP1-R60:QEELNGAM    | 160  | 134   |
| >FOXP1-R60:REELNGAM    | 423   | >FOXP1-R60:QEELNGAM    | 3010 | 2587  |

|                         |       |                        |       |       |
|-------------------------|-------|------------------------|-------|-------|
| >FOXP1-R60: IREELNGA    | 18244 | >FOXP1-R60: IQEELNGA   | 99    | 18145 |
| >FOXP1-R60: AIREELNGA   | 1132  | >FOXP1-R60: AIQEELNGA  | 290   | 842   |
| >FOXP1-R60: AIREELNGA   | 43    | >FOXP1-R60: AIQEELNGA  | 87    | 44    |
| >FOXP1-R60: AIREELNGA   | 325   | >FOXP1-R60: AIQEELNGA  | 80    | 245   |
| >FOXP1-R60: AIREELNGA   | 994   | >FOXP1-R60: AIQEELNGA  | 399   | 595   |
| >FOXP1-R60: AIREELNGAM  | 132   | >FOXP1-R60: AIQEELNGAM | 209   | 77    |
| >FOXP1-R60: AIREELNGA   | 205   | >FOXP1-R60: AIQEELNGA  | 12254 | 12049 |
| >FOXP1-R60: AIREELNGAM  | 256   | >FOXP1-R60: AIQEELNGAM | 12600 | 12344 |
| >FOXP1-R60: SAIREELNGA  | 515   | >FOXP1-R60: SAIQEELNGA | 341   | 174   |
| >FOXP1-R60: SAIREELNGAI | 195   | >FOXP1-R60: SAIQEELNGA | 178   | 17    |
| >FOXP1-R60: SAIREELNGAI | 1283  | >FOXP1-R60: SAIQEELNGA | 397   | 886   |
| >FOXP1-R60: SAIREELNGAI | 143   | >FOXP1-R60: SAIQEELNGA | 54    | 89    |
| >FOXP1-R60: ASAIREEEL   | 93    | >FOXP1-R60: ASAIQEEL   | 88    | 5     |
| >FOXP1-R60: LASAIREEEL  | 63    | >FOXP1-R60: LASAIQEEL  | 17    | 46    |
| >FOXP1-R60: LASAIREEEL  | 33    | >FOXP1-R60: LASAIQEEL  | 43    | 10    |
| >FOXP1-R60: LASAIREEEL  | 1451  | >FOXP1-R60: LASAIQEEL  | 137   | 1314  |
| >FOXP1-R60: NLASAIREEEL | 25    | >FOXP1-R60: NLASAIQEEL | 26    | 1     |
| >FOXP1-R60: NLASAIREEEL | 270   | >FOXP1-R60: NLASAIQEEL | 519   | 249   |
| >FOXP1-R60: NLASAIREEEL | 179   | >FOXP1-R60: NLASAIQEEL | 44    | 135   |
| >FOXP1-R60: NLASAIREEEL | 1268  | >FOXP1-R60: NLASAIQEEL | 193   | 1075  |
| >FOXP1-R60: NLASAIREEEL | 349   | >FOXP1-R60: NLASAIQEEL | 53    | 296   |
| >FOXP1-R60: NLASAIREEEL | 131   | >FOXP1-R60: NLASAIQEEL | 12    | 119   |
| >FOXP1-R60: NLASAIREEEL | 22    | >FOXP1-R60: NLASAIQEEL | 9     | 13    |
| >FOXP1-R60: NLASAIREEEL | 240   | >FOXP1-R60: NLASAIQEEL | 381   | 141   |
| >FOXP1-R60: TLGNLASAIR  | 188   | >FOXP1-R60: TLGNLASAIQ | 32652 | 32464 |
| >FUS-K312Q: KTNKKTGQPI  | 495   | >FUS-K312Q: QTNKKTGQPI | 121   | 374   |
| >FUS-K312Q: KTNKKTGQPI  | 45    | >FUS-K312Q: QTNKKTGQPI | 2026  | 1981  |
| >FUS-K312Q: KTNKKTGQPI  | 35    | >FUS-K312Q: QTNKKTGQPI | 1683  | 1648  |
| >FUS-K312Q: KTNKKTGQPI  | 447   | >FUS-K312Q: QTNKKTGQPI | 3821  | 3374  |
| >FUS-K312Q: KTNKKTGQPI  | 135   | >FUS-K312Q: QTNKKTGQPI | 1377  | 1242  |
| >FUS-K312Q: KTNKKTGQPI  | 4027  | >FUS-K312Q: QTNKKTGQPI | 303   | 3724  |
| >FUS-K312Q: KTNKKTGQPI  | 10    | >FUS-K312Q: QTNKKTGQPI | 42    | 32    |
| >FUS-K312Q: KTNKKTGQPI  | 59    | >FUS-K312Q: QTNKKTGQPI | 767   | 708   |
| >FUS-K312Q: KTNKKTGQPI  | 486   | >FUS-K312Q: QTNKKTGQPI | 9864  | 9378  |
| >FUS-K312Q: KTNKKTGQPI  | 150   | >FUS-K312Q: QTNKKTGQPI | 4963  | 4813  |
| >FUS-K312Q: KTNKKTGQPI  | 287   | >FUS-K312Q: QTNKKTGQPI | 347   | 60    |
| >FUS-K312Q: KTNKKTGQPI  | 37    | >FUS-K312Q: QTNKKTGQPI | 140   | 103   |
| >FUS-K312Q: IKTNKKTGQP  | 15176 | >FUS-K312Q: IQTNKKTGQF | 335   | 14841 |
| >FUS-K312Q: IKTNKKTGQP  | 23    | >FUS-K312Q: IQTNKKTGQF | 25    | 2     |
| >FUS-K312Q: GIIKTNKK    | 80    | >FUS-K312Q: GIIQTNKK   | 108   | 28    |
| >FUS-K312Q: QIGIIKTNK   | 629   | >FUS-K312Q: QIGIIQTNK  | 411   | 218   |
| >FUS-K312Q: KQIGIIKT    | 90    | >FUS-K312Q: KQIGIIQT   | 39    | 51    |
| >FUS-K312Q: KQIGIIKTNK  | 64    | >FUS-K312Q: KQIGIIQTNK | 65    | 1     |

|                         |       |                         |      |       |
|-------------------------|-------|-------------------------|------|-------|
| >FUS-K312Q- KQIGIIKTNKK | 484   | >FUS-K312Q- KQIGIIQTNKK | 411  | 73    |
| >FUS-K312Q- KQIGIIKTNK  | 151   | >FUS-K312Q- KQIGIIQTNK  | 120  | 31    |
| >FUS-K312Q- KQIGIIKTNKK | 152   | >FUS-K312Q- KQIGIIQTNKK | 103  | 49    |
| >FUS-K312Q- KQIGIIKTNKK | 612   | >FUS-K312Q- KQIGIIQTNKK | 361  | 251   |
| >FUS-K312Q- KQIGIIKTNK  | 105   | >FUS-K312Q- KQIGIIQTNK  | 149  | 44    |
| >FUS-K312Q- KQIGIIKTNKK | 354   | >FUS-K312Q- KQIGIIQTNKK | 335  | 19    |
| >FUS-K312Q- KQIGIIKTNKK | 550   | >FUS-K312Q- KQIGIIQTNKK | 474  | 76    |
| >FUS-K312Q- YFKQIGIIK   | 194   | >FUS-K312Q- YFKQIGIIQ   | 8307 | 8113  |
| >FUS-K312Q- DYFKQIGIIK  | 248   | >FUS-K312Q- DYFKQIGIIQ  | 2999 | 2751  |
| >GATA1-A59' ALAYYRDA    | 179   | >GATA1-A59' VLAYYRDA    | 347  | 168   |
| >GATA1-A59' ALAYYRDAEA  | 139   | >GATA1-A59' VLAYYRDAEA  | 341  | 202   |
| >GATA1-A59' ALAYYRDA    | 71    | >GATA1-A59' VLAYYRDA    | 98   | 27    |
| >GATA1-A59' ALAYYRDAEA  | 270   | >GATA1-A59' VLAYYRDAEA  | 540  | 270   |
| >GATA1-A59' ALAYYRDA    | 205   | >GATA1-A59' VLAYYRDA    | 222  | 17    |
| >GATA1-A59' ALAYYRDAEA  | 43    | >GATA1-A59' VLAYYRDAEA  | 49   | 6     |
| >GATA1-A59' ALAYYRDAEA  | 290   | >GATA1-A59' VLAYYRDAEA  | 1059 | 769   |
| >GATA1-A59' ALAYYRDAEA  | 100   | >GATA1-A59' VLAYYRDAEA  | 62   | 38    |
| >GATA1-A59' ALAYYRDAEA  | 49    | >GATA1-A59' VLAYYRDAEA  | 31   | 18    |
| >GATA1-A59' ALAYYRDAEA  | 1097  | >GATA1-A59' VLAYYRDAEA  | 400  | 697   |
| >GATA1-A59' ALAYYRDAEA  | 64    | >GATA1-A59' VLAYYRDAEA  | 79   | 15    |
| >GATA1-A59' ALAYYRDAEA  | 254   | >GATA1-A59' VLAYYRDAEA  | 185  | 69    |
| >GATA1-A59' ALAYYRDAEA  | 59    | >GATA1-A59' VLAYYRDAEA  | 89   | 30    |
| >GATA1-A59' ALAYYRDAEA  | 1059  | >GATA1-A59' VLAYYRDAEA  | 401  | 658   |
| >GATA1-A59' ALAYYRDAEA  | 269   | >GATA1-A59' VLAYYRDAEA  | 874  | 605   |
| >GATA1-A59' ALAYYRDAEA  | 402   | >GATA1-A59' VLAYYRDAEA  | 443  | 41    |
| >GATA1-A59' AALAYYRDAE  | 1186  | >GATA1-A59' AVLAYYRDAE  | 243  | 943   |
| >GATA1-A59' AALAYYRDAE  | 1610  | >GATA1-A59' AVLAYYRDAE  | 481  | 1129  |
| >GATA1-A59' APSTATAAAA^ | 11226 | >GATA1-A59' APSTATAAAA^ | 61   | 11165 |
| >GATA1-A59' APSTATAAAA^ | 38    | >GATA1-A59' APSTATAAAA^ | 22   | 16    |
| >GATA1-A59' APSTATAAAA^ | 239   | >GATA1-A59' APSTATAAAA^ | 413  | 174   |
| >GATA1-A59' APSTATAAAA^ | 5583  | >GATA1-A59' APSTATAAAA^ | 215  | 5368  |
| >GATA1-A59' APSTATAAAA^ | 430   | >GATA1-A59' APSTATAAAA^ | 2347 | 1917  |
| >GATA1-A59' APSTATAAAA^ | 440   | >GATA1-A59' APSTATAAAA^ | 363  | 77    |
| >GATA1-A59' AAALAYYR    | 164   | >GATA1-A59' AAVLAYYR    | 276  | 112   |
| >GATA1-A59' AAALAYYR    | 17    | >GATA1-A59' AAVLAYYR    | 16   | 1     |
| >GATA1-A59' AAALAYYR    | 22    | >GATA1-A59' AAVLAYYR    | 38   | 16    |
| >GATA1-A59' AAALAYYR    | 315   | >GATA1-A59' AAVLAYYR    | 466  | 151   |
| >GATA1-A59' AAALAYYR    | 251   | >GATA1-A59' AAVLAYYR    | 160  | 91    |
| >GATA1-A59' AAAALAYY    | 270   | >GATA1-A59' AAAVLAYY    | 526  | 256   |
| >GATA1-A59' AAAALAYYR   | 56    | >GATA1-A59' AAAVLAYYR   | 105  | 49    |
| >GATA1-A59' AAAALAYY    | 217   | >GATA1-A59' AAAVLAYY    | 523  | 306   |
| >GATA1-A59' AAAALAYY    | 54    | >GATA1-A59' AAAVLAYY    | 74   | 20    |
| >GATA1-A59' AAAALAYY    | 28    | >GATA1-A59' AAAVLAYY    | 26   | 2     |



|                       |      |                         |     |     |
|-----------------------|------|-------------------------|-----|-----|
| >GATA1-A59 AAAALAYYR  | 12   | >GATA1-A59 AA AVLAYYR   | 11  | 1   |
| >GATA1-A59 AAAALAYYR  | 8    | >GATA1-A59 AA AVLAYYR   | 11  | 3   |
| >GATA1-A59 AAAALAYY   | 334  | >GATA1-A59 AA AVLAYY    | 890 | 556 |
| >GATA1-A59 AAAALAYY   | 200  | >GATA1-A59 AA AVLAYY    | 436 | 236 |
| >GATA1-A59 AAAALAYY   | 14   | >GATA1-A59 AA AVLAYY    | 18  | 4   |
| >GATA1-A59 AAAALAYY   | 301  | >GATA1-A59 AA AVLAYY    | 527 | 226 |
| >GATA1-A59 AAAALAYY   | 130  | >GATA1-A59 AA AVLAYY    | 155 | 25  |
| >GATA1-A59 AAAALAYY   | 289  | >GATA1-A59 AA AVLAYY    | 645 | 356 |
| >GATA1-A59 AAAALAYY   | 405  | >GATA1-A59 AA AVLAYY    | 411 | 6   |
| >GATA1-A59 AAAALAYYR  | 241  | >GATA1-A59 AA AVLAYYR   | 161 | 80  |
| >GATA1-A59 AAAALAYYR  | 54   | >GATA1-A59 AA AVLAYYR   | 168 | 114 |
| >GATA1-A59 AAAAALAYY  | 286  | >GATA1-A59 AAA AVLAYY   | 120 | 166 |
| >GATA1-A59 AAAAALAYYF | 36   | >GATA1-A59 AAA AVLAYYF  | 50  | 14  |
| >GATA1-A59 AAAAALAY   | 392  | >GATA1-A59 AAA AVLAY    | 252 | 140 |
| >GATA1-A59 AAAAALAYY  | 21   | >GATA1-A59 AAA AVLAYY   | 45  | 24  |
| >GATA1-A59 AAAAALAY   | 100  | >GATA1-A59 AAA AVLAY    | 134 | 34  |
| >GATA1-A59 AAAAALAYY  | 104  | >GATA1-A59 AAA AVLAYY   | 95  | 9   |
| >GATA1-A59 AAAAALAY   | 115  | >GATA1-A59 AAA AVLAY    | 113 | 2   |
| >GATA1-A59 AAAAALAYY  | 20   | >GATA1-A59 AAA AVLAYY   | 18  | 2   |
| >GATA1-A59 AAAAALAYYF | 44   | >GATA1-A59 AAA AVLAYYF  | 36  | 8   |
| >GATA1-A59 AAAAALAYY  | 1193 | >GATA1-A59 AAA AVLAYY   | 380 | 813 |
| >GATA1-A59 AAAAALAYYF | 5    | >GATA1-A59 AAA AVLAYYF  | 4   | 1   |
| >GATA1-A59 AAAAALAY   | 377  | >GATA1-A59 AAA AVLAY    | 217 | 160 |
| >GATA1-A59 AAAAALAYY  | 1304 | >GATA1-A59 AAA AVLAYY   | 363 | 941 |
| >GATA1-A59 AAAAALAY   | 87   | >GATA1-A59 AAA AVLAY    | 86  | 1   |
| >GATA1-A59 AAAAALAYY  | 110  | >GATA1-A59 AAA AVLAYY   | 162 | 52  |
| >GATA1-A59 AAAAALAY   | 148  | >GATA1-A59 AAA AVLAY    | 157 | 9   |
| >GATA1-A59 AAAAALAY   | 10   | >GATA1-A59 AAA AVLAY    | 24  | 14  |
| >GATA1-A59 AAAAALAYY  | 8    | >GATA1-A59 AAA AVLAYY   | 24  | 16  |
| >GATA1-A59 AAAAALAY   | 28   | >GATA1-A59 AAA AVLAY    | 41  | 13  |
| >GATA1-A59 AAAAALAYY  | 365  | >GATA1-A59 AAA AVLAYY   | 636 | 271 |
| >GATA1-A59 AAAAALAY   | 992  | >GATA1-A59 AAA AVLAY    | 289 | 703 |
| >GATA1-A59 AAAAALAYY  | 103  | >GATA1-A59 AAA AVLAYY   | 36  | 67  |
| >GATA1-A59 AAAAALAYY  | 568  | >GATA1-A59 AAA AVLAYY   | 228 | 340 |
| >GATA1-A59 AAAAALAY   | 54   | >GATA1-A59 AAA AVLAY    | 38  | 16  |
| >GATA1-A59 AAAAALAYY  | 142  | >GATA1-A59 AAA AVLAYY   | 152 | 10  |
| >GATA1-A59 AAAAALAYY  | 465  | >GATA1-A59 AAA AVLAYY   | 421 | 44  |
| >GATA1-A59 AAAAALAYYF | 517  | >GATA1-A59 AAA AVLAYYF  | 495 | 22  |
| >GATA1-A59 AAAAALAYYF | 235  | >GATA1-A59 AAA AVLAYYF  | 359 | 124 |
| >GATA1-A59 TAAAAALAYY | 100  | >GATA1-A59 TAAAA AVLAYY | 136 | 36  |
| >GATA1-A59 TAAAAALAYY | 454  | >GATA1-A59 TAAAA AVLAYY | 266 | 188 |
| >GATA1-A59 TAAAAALAYY | 109  | >GATA1-A59 TAAAA AVLAYY | 102 | 7   |
| >GATA1-A59 TAAAAALAYY | 473  | >GATA1-A59 TAAAA AVLAYY | 350 | 123 |

|                       |      |                       |      |      |
|-----------------------|------|-----------------------|------|------|
| >GATA1-A59 TAAAAALAY  | 1606 | >GATA1-A59 TAAAAVLAY  | 153  | 1453 |
| >GATA1-A59 TAAAAALAYY | 119  | >GATA1-A59 TAAAAVLAYY | 54   | 65   |
| >GATA1-A59 TAAAAALAY  | 25   | >GATA1-A59 TAAAAVLAY  | 46   | 21   |
| >GATA1-A59 TAAAAALAYY | 191  | >GATA1-A59 TAAAAVLAYY | 161  | 30   |
| >GATA1-A59 TAAAAALAY  | 349  | >GATA1-A59 TAAAAVLAY  | 444  | 95   |
| >GATA1-A59 TAAAAALAYY | 44   | >GATA1-A59 TAAAAVLAYY | 36   | 8    |
| >GATA1-A59 TAAAAALAYY | 66   | >GATA1-A59 TAAAAVLAYY | 43   | 23   |
| >GATA1-A59 TAAAAALAYY | 19   | >GATA1-A59 TAAAAVLAYY | 13   | 6    |
| >GATA1-A59 TAAAAALAYY | 3    | >GATA1-A59 TAAAAVLAYY | 3    | 0    |
| >GATA1-A59 TAAAAALA   | 33   | >GATA1-A59 TAAAAVLA   | 28   | 5    |
| >GATA1-A59 TAAAAALAY  | 55   | >GATA1-A59 TAAAAVLAY  | 98   | 43   |
| >GATA1-A59 TAAAAALAYY | 328  | >GATA1-A59 TAAAAVLAYY | 271  | 57   |
| >GATA1-A59 TAAAAALAY  | 113  | >GATA1-A59 TAAAAVLAY  | 66   | 47   |
| >GATA1-A59 TAAAAALAYY | 209  | >GATA1-A59 TAAAAVLAYY | 176  | 33   |
| >GATA1-A59 TAAAAALAY  | 374  | >GATA1-A59 TAAAAVLAY  | 578  | 204  |
| >GATA1-A59 TAAAAALAY  | 443  | >GATA1-A59 TAAAAVLAY  | 254  | 189  |
| >GATA1-A59 TAAAAALAY  | 24   | >GATA1-A59 TAAAAVLAY  | 31   | 7    |
| >GATA1-A59 TAAAAALAYY | 20   | >GATA1-A59 TAAAAVLAYY | 41   | 21   |
| >GATA1-A59 TAAAAALAY  | 8    | >GATA1-A59 TAAAAVLAY  | 9    | 1    |
| >GATA1-A59 TAAAAALAYY | 348  | >GATA1-A59 TAAAAVLAYY | 386  | 38   |
| >GATA1-A59 TAAAAALAY  | 438  | >GATA1-A59 TAAAAVLAY  | 154  | 284  |
| >GATA1-A59 TAAAAALAYY | 92   | >GATA1-A59 TAAAAVLAYY | 49   | 43   |
| >GATA1-A59 TAAAAALAYY | 261  | >GATA1-A59 TAAAAVLAYY | 308  | 47   |
| >GATA1-A59 TAAAAALAY  | 101  | >GATA1-A59 TAAAAVLAY  | 40   | 61   |
| >GATA1-A59 TAAAAALAYY | 532  | >GATA1-A59 TAAAAVLAYY | 280  | 252  |
| >GATA1-A59 TAAAAALAY  | 281  | >GATA1-A59 TAAAAVLAY  | 487  | 206  |
| >GATA1-A59 TAAAAALAYY | 54   | >GATA1-A59 TAAAAVLAYY | 64   | 10   |
| >GATA1-A59 ATAAAAALA\ | 29   | >GATA1-A59 ATAAAAVLA\ | 35   | 6    |
| >GATA1-A59 ATAAAAALA\ | 67   | >GATA1-A59 ATAAAAVLA\ | 57   | 10   |
| >GATA1-A59 ATAAAAAL   | 31   | >GATA1-A59 ATAAAAVL   | 115  | 84   |
| >GATA1-A59 ATAAAAALA  | 111  | >GATA1-A59 ATAAAAVLA  | 217  | 106  |
| >GATA1-A59 ATAAAAAL   | 387  | >GATA1-A59 ATAAAAVL   | 1405 | 1018 |
| >GATA1-A59 ATAAAAALA  | 235  | >GATA1-A59 ATAAAAVLA  | 1032 | 797  |
| >GATA1-A59 ATAAAAAL   | 127  | >GATA1-A59 ATAAAAVL   | 716  | 589  |
| >GATA1-A59 ATAAAAALA  | 253  | >GATA1-A59 ATAAAAVLA  | 271  | 18   |
| >GATA1-A59 ATAAAAALA\ | 191  | >GATA1-A59 ATAAAAVLA\ | 199  | 8    |
| >GATA1-A59 ATAAAAALA\ | 265  | >GATA1-A59 ATAAAAVLA\ | 213  | 52   |
| >GATA1-A59 ATAAAAALA\ | 55   | >GATA1-A59 ATAAAAVLAY | 51   | 4    |
| >GATA1-A59 ATAAAAALA\ | 35   | >GATA1-A59 ATAAAAVLA\ | 25   | 10   |
| >GATA1-A59 ATAAAAALA\ | 418  | >GATA1-A59 ATAAAAVLA\ | 225  | 193  |
| >GATA1-A59 ATAAAAALA\ | 86   | >GATA1-A59 ATAAAAVLA\ | 140  | 54   |
| >GATA1-A59 ATAAAAAL   | 209  | >GATA1-A59 ATAAAAVL   | 591  | 382  |
| >GATA1-A59 ATAAAAALA\ | 28   | >GATA1-A59 ATAAAAVLA\ | 19   | 9    |

|                        |      |                        |      |      |
|------------------------|------|------------------------|------|------|
| >GATA1-A59' ATAAAAALA\ | 6    | >GATA1-A59' ATAAAAVLA\ | 11   | 5    |
| >GATA1-A59' ATAAAAALA\ | 30   | >GATA1-A59' ATAAAAVLA\ | 46   | 16   |
| >GATA1-A59' ATAAAAALA\ | 18   | >GATA1-A59' ATAAAAVLA\ | 18   | 0    |
| >GATA1-A59' ATAAAAALA  | 276  | >GATA1-A59' ATAAAAVLA  | 508  | 232  |
| >GATA1-A59' ATAAAAALA\ | 463  | >GATA1-A59' ATAAAAVLA\ | 871  | 408  |
| >GATA1-A59' ATAAAAALA\ | 121  | >GATA1-A59' ATAAAAVLA\ | 109  | 12   |
| >GATA1-A59' ATAAAAALA\ | 11   | >GATA1-A59' ATAAAAVLA\ | 17   | 6    |
| >GATA1-A59' ATAAAAAL   | 386  | >GATA1-A59' ATAAAAVL   | 718  | 332  |
| >GATA1-A59' ATAAAAALA\ | 722  | >GATA1-A59' ATAAAAVLA\ | 365  | 357  |
| >GATA1-A59' ATAAAAALA\ | 370  | >GATA1-A59' ATAAAAVLA\ | 550  | 180  |
| >GATA1-A59' ATAAAAALA\ | 134  | >GATA1-A59' ATAAAAVLA\ | 100  | 34   |
| >GATA1-A59' ATAAAAAL   | 44   | >GATA1-A59' ATAAAAVL   | 115  | 71   |
| >GATA1-A59' ATAAAAALA  | 31   | >GATA1-A59' ATAAAAVLA  | 43   | 12   |
| >GATA1-A59' ATAAAAAL   | 339  | >GATA1-A59' ATAAAAVL   | 1518 | 1179 |
| >GATA1-A59' ATAAAAALA\ | 29   | >GATA1-A59' ATAAAAVLA\ | 37   | 8    |
| >GATA1-A59' ATAAAAALA\ | 110  | >GATA1-A59' ATAAAAVLA\ | 76   | 34   |
| >GATA1-A59' ATAAAAAL   | 256  | >GATA1-A59' ATAAAAVL   | 832  | 576  |
| >GATA1-A59' ATAAAAALA\ | 67   | >GATA1-A59' ATAAAAVLA\ | 63   | 4    |
| >GATA1-A59' ATAAAAALA\ | 99   | >GATA1-A59' ATAAAAVLA\ | 133  | 34   |
| >GATA1-A59' ATAAAAALA\ | 201  | >GATA1-A59' ATAAAAVLA\ | 112  | 89   |
| >GATA1-A59' ATAAAAAL   | 6    | >GATA1-A59' ATAAAAVL   | 6    | 0    |
| >GATA1-A59' ATAAAAALA\ | 3    | >GATA1-A59' ATAAAAVLA\ | 3    | 0    |
| >GATA1-A59' ATAAAAALA\ | 3    | >GATA1-A59' ATAAAAVLA\ | 4    | 1    |
| >GATA1-A59' ATAAAAAL   | 326  | >GATA1-A59' ATAAAAVL   | 408  | 82   |
| >GATA1-A59' ATAAAAALA\ | 449  | >GATA1-A59' ATAAAAVLA\ | 601  | 152  |
| >GATA1-A59' ATAAAAALA\ | 384  | >GATA1-A59' ATAAAAVLA\ | 306  | 78   |
| >GATA1-A59' ATAAAAALA\ | 81   | >GATA1-A59' ATAAAAVLA\ | 86   | 5    |
| >GATA1-A59' ATAAAAAL   | 22   | >GATA1-A59' ATAAAAVL   | 14   | 8    |
| >GATA1-A59' ATAAAAALA  | 107  | >GATA1-A59' ATAAAAVLA  | 372  | 265  |
| >GATA1-A59' ATAAAAALA\ | 80   | >GATA1-A59' ATAAAAVLA\ | 150  | 70   |
| >GATA1-A59' ATAAAAAL   | 490  | >GATA1-A59' ATAAAAVL   | 215  | 275  |
| >GATA1-A59' ATAAAAALA\ | 33   | >GATA1-A59' ATAAAAVLA\ | 43   | 10   |
| >GATA1-A59' ATAAAAALA\ | 17   | >GATA1-A59' ATAAAAVLA\ | 19   | 2    |
| >GATA1-A59' ATAAAAALA\ | 61   | >GATA1-A59' ATAAAAVLA\ | 41   | 20   |
| >GATA1-A59' ATAAAAALA\ | 263  | >GATA1-A59' ATAAAAVLA\ | 250  | 13   |
| >GATA1-A59' ATAAAAALA\ | 138  | >GATA1-A59' ATAAAAVLA\ | 151  | 13   |
| >GATA1-A59' ATAAAAAL   | 222  | >GATA1-A59' ATAAAAVL   | 159  | 63   |
| >GATA1-A59' TATAAAAA   | 2787 | >GATA1-A59' TATAAAAV   | 226  | 2561 |
| >GATA1-A59' TATAAAAAA\ | 84   | >GATA1-A59' TATAAAAV\  | 154  | 70   |
| >GATA1-A59' TATAAAAAA\ | 457  | >GATA1-A59' TATAAAAV\  | 525  | 68   |
| >GATA1-A59' TATAAAAA   | 129  | >GATA1-A59' TATAAAAV   | 13   | 116  |
| >GATA1-A59' TATAAAAAAL | 49   | >GATA1-A59' TATAAAAVL  | 153  | 104  |
| >GATA1-A59' TATAAAAAA\ | 197  | >GATA1-A59' TATAAAAV\  | 320  | 123  |

|                                    |       |                                   |      |       |
|------------------------------------|-------|-----------------------------------|------|-------|
| >GATA1-A59 TATAAAAA                | 2334  | >GATA1-A59 TATAAAAV               | 47   | 2287  |
| >GATA1-A59 TATAAAAAAL              | 359   | >GATA1-A59 TATAAAAVL              | 2091 | 1732  |
| >GATA1-A59 TATAAAAAAL <sup>A</sup> | 291   | >GATA1-A59 TATAAAAVL <sup>A</sup> | 378  | 87    |
| >GATA1-A59 TATAAAAAAL <sup>A</sup> | 750   | >GATA1-A59 TATAAAAVL <sup>A</sup> | 462  | 288   |
| >GATA1-A59 TATAAAAAAL              | 120   | >GATA1-A59 TATAAAAVL              | 144  | 24    |
| >GATA1-A59 TATAAAAAAL <sup>A</sup> | 45    | >GATA1-A59 TATAAAAVL <sup>A</sup> | 45   | 0     |
| >GATA1-A59 TATAAAAAAL              | 138   | >GATA1-A59 TATAAAAVL              | 647  | 509   |
| >GATA1-A59 TATAAAAAAL <sup>A</sup> | 11    | >GATA1-A59 TATAAAAVL <sup>A</sup> | 13   | 2     |
| >GATA1-A59 TATAAAAAAL              | 58    | >GATA1-A59 TATAAAAVL              | 78   | 20    |
| >GATA1-A59 TATAAAAAAL              | 51    | >GATA1-A59 TATAAAAVL              | 41   | 10    |
| >GATA1-A59 TATAAAAAAL <sup>A</sup> | 284   | >GATA1-A59 TATAAAAVL <sup>A</sup> | 186  | 98    |
| >GATA1-A59 STATAAAAA               | 763   | >GATA1-A59 STATAAAAV              | 66   | 697   |
| >GATA1-A59 STATAAAAAAL             | 252   | >GATA1-A59 STATAAAAVL             | 516  | 264   |
| >GATA1-A59 STATAAAAAAL             | 427   | >GATA1-A59 STATAAAAVL             | 647  | 220   |
| >GATA1-A59 STATAAAAA               | 379   | >GATA1-A59 STATAAAAV              | 47   | 332   |
| >GATA1-A59 STATAAAAAAL             | 406   | >GATA1-A59 STATAAAAVL             | 1106 | 700   |
| >GATA1-A59 STATAAAAA               | 436   | >GATA1-A59 STATAAAAV              | 31   | 405   |
| >GATA1-A59 STATAAAAA               | 8098  | >GATA1-A59 STATAAAAV              | 288  | 7810  |
| >GATA1-A59 STATAAAAA               | 8980  | >GATA1-A59 STATAAAAV              | 293  | 8687  |
| >GATA1-A59 STATAAAAA               | 15585 | >GATA1-A59 STATAAAAV              | 263  | 15322 |
| >GATA1-A59 STATAAAAAAL             | 69    | >GATA1-A59 STATAAAAVL             | 150  | 81    |
| >GATA1-A59 STATAAAAA               | 14    | >GATA1-A59 STATAAAAV              | 6    | 8     |
| >GATA1-A59 STATAAAAAAL             | 36    | >GATA1-A59 STATAAAAVL             | 60   | 24    |
| >GATA1-A59 STATAAAAAAL             | 12    | >GATA1-A59 STATAAAAVL             | 14   | 2     |
| >GATA1-A59 STATAAAAA               | 177   | >GATA1-A59 STATAAAAV              | 8    | 169   |
| >GATA1-A59 STATAAAAAAL             | 52    | >GATA1-A59 STATAAAAVL             | 197  | 145   |
| >GATA1-A59 STATAAAAAAL             | 262   | >GATA1-A59 STATAAAAVL             | 398  | 136   |
| >GATA1-A59 STATAAAAA               | 3200  | >GATA1-A59 STATAAAAV              | 244  | 2956  |
| >GATA1-A59 STATAAAAAAL             | 9     | >GATA1-A59 STATAAAAVL             | 9    | 0     |
| >GATA1-A59 STATAAAAAAL             | 122   | >GATA1-A59 STATAAAAVL             | 154  | 32    |
| >GATA1-A59 STATAAAAA               | 1777  | >GATA1-A59 STATAAAAV              | 56   | 1721  |
| >GATA1-A59 STATAAAAAAL             | 10    | >GATA1-A59 STATAAAAVL             | 8    | 2     |
| >GATA1-A59 STATAAAAAAL             | 182   | >GATA1-A59 STATAAAAVL             | 387  | 205   |
| >GATA1-A59 STATAAAAA               | 3350  | >GATA1-A59 STATAAAAV              | 394  | 2956  |
| >GATA1-A59 STATAAAAAAL             | 93    | >GATA1-A59 STATAAAAVL             | 52   | 41    |
| >GATA1-A59 STATAAAAAAL             | 214   | >GATA1-A59 STATAAAAVL             | 107  | 107   |
| >GATA1-A59 PSTATAAAAA <sup>A</sup> | 216   | >GATA1-A59 PSTATAAAAV             | 139  | 77    |
| >GATA1-A61 AYYRDAEAY               | 214   | >GATA1-A61 DYYRDAEAY              | 66   | 148   |
| >GATA1-A61 AYYRDAEAY               | 69    | >GATA1-A61 DYYRDAEAY              | 198  | 129   |
| >GATA1-A61 AYYRDAEAY               | 433   | >GATA1-A61 DYYRDAEAY              | 2135 | 1702  |
| >GATA1-A61 AYYRDAEAYF              | 43    | >GATA1-A61 DYYRDAEAYF             | 297  | 254   |
| >GATA1-A61 AYYRDAEAYF              | 83    | >GATA1-A61 DYYRDAEAYF             | 20   | 63    |
| >GATA1-A61 AYYRDAEAYF              | 1627  | >GATA1-A61 DYYRDAEAYF             | 421  | 1206  |

|                        |      |                        |       |       |
|------------------------|------|------------------------|-------|-------|
| >GATA1-A61 AYYRDAEAY   | 280  | >GATA1-A61 DYYRDAEAY   | 3116  | 2836  |
| >GATA1-A61 AYYRDAEAYF  | 54   | >GATA1-A61 DYYRDAEAYF  | 48    | 6     |
| >GATA1-A61 LAYYRDAEAY  | 363  | >GATA1-A61 LDYYRDAEAY  | 2631  | 2268  |
| >GATA1-A61 LAYYRDAEAY  | 11   | >GATA1-A61 LDYYRDAEAY  | 793   | 782   |
| >GATA1-A61 LAYYRDAEAY  | 26   | >GATA1-A61 LDYYRDAEAY  | 1913  | 1887  |
| >GATA1-A61 LAYYRDAEAY  | 6    | >GATA1-A61 LDYYRDAEAY  | 229   | 223   |
| >GATA1-A61 LAYYRDAEAY  | 60   | >GATA1-A61 LDYYRDAEAY  | 674   | 614   |
| >GATA1-A61 LAYYRDAEAY  | 475  | >GATA1-A61 LDYYRDAEAY  | 2281  | 1806  |
| >GATA1-A61 LAYYRDAEAY  | 39   | >GATA1-A61 LDYYRDAEAY  | 491   | 452   |
| >GATA1-A61 LAYYRDAEAY  | 14   | >GATA1-A61 LDYYRDAEAY  | 9631  | 9617  |
| >GATA1-A61 LAYYRDAEAY  | 326  | >GATA1-A61 LDYYRDAEAY  | 3060  | 2734  |
| >GATA1-A61 LAYYRDAEAY  | 306  | >GATA1-A61 LDYYRDAEAY  | 717   | 411   |
| >GATA1-A61 STATAAAAAAL | 427  | >GATA1-A61 STATAAAAAAL | 17698 | 17271 |
| >GATA1-A61 STATAAAAAAL | 406  | >GATA1-A61 STATAAAAAAL | 20774 | 20368 |
| >GATA1-A61 STATAAAAAAL | 12   | >GATA1-A61 STATAAAAAAL | 3495  | 3483  |
| >GATA1-A61 STATAAAAAAL | 262  | >GATA1-A61 STATAAAAAAL | 13839 | 13577 |
| >GATA1-A61 STATAAAAAAL | 182  | >GATA1-A61 STATAAAAAAL | 1395  | 1213  |
| >GATA1-A61 ALAYYRDAEA  | 3474 | >GATA1-A61 ALDYYRDAEA  | 59    | 3415  |
| >GATA1-A61 ALAYYRDA    | 179  | >GATA1-A61 ALDYYRDA    | 2120  | 1941  |
| >GATA1-A61 ALAYYRDAEA  | 139  | >GATA1-A61 ALDYYRDAEA  | 652   | 513   |
| >GATA1-A61 ALAYYRDA    | 71   | >GATA1-A61 ALDYYRDA    | 2303  | 2232  |
| >GATA1-A61 ALAYYRDAEA  | 270  | >GATA1-A61 ALDYYRDAEA  | 964   | 694   |
| >GATA1-A61 ALAYYRDAEA  | 953  | >GATA1-A61 ALDYYRDAEA  | 418   | 535   |
| >GATA1-A61 ALAYYRDAEA  | 1161 | >GATA1-A61 ALDYYRDAEA  | 482   | 679   |
| >GATA1-A61 ALAYYRDA    | 205  | >GATA1-A61 ALDYYRDA    | 682   | 477   |
| >GATA1-A61 ALAYYRDAEA  | 43   | >GATA1-A61 ALDYYRDAEA  | 131   | 88    |
| >GATA1-A61 ALAYYRDAEA  | 290  | >GATA1-A61 ALDYYRDAEA  | 13830 | 13540 |
| >GATA1-A61 ALAYYRDAEA  | 100  | >GATA1-A61 ALDYYRDAEA  | 1072  | 972   |
| >GATA1-A61 ALAYYRDAEA  | 49   | >GATA1-A61 ALDYYRDAEA  | 279   | 230   |
| >GATA1-A61 ALAYYRDAEA  | 64   | >GATA1-A61 ALDYYRDAEA  | 810   | 746   |
| >GATA1-A61 ALAYYRDAEA  | 254  | >GATA1-A61 ALDYYRDAEA  | 1614  | 1360  |
| >GATA1-A61 ALAYYRDAEA  | 59   | >GATA1-A61 ALDYYRDAEA  | 1818  | 1759  |
| >GATA1-A61 ALAYYRDAEA  | 269  | >GATA1-A61 ALDYYRDAEA  | 2553  | 2284  |
| >GATA1-A61 ALAYYRDAEA  | 402  | >GATA1-A61 ALDYYRDAEA  | 302   | 100   |
| >GATA1-A61 AAALAYYR    | 164  | >GATA1-A61 AAALDYYR    | 465   | 301   |
| >GATA1-A61 AAALAYYR    | 17   | >GATA1-A61 AAALDYYR    | 24    | 7     |
| >GATA1-A61 AAALAYYR    | 22   | >GATA1-A61 AAALDYYR    | 45    | 23    |
| >GATA1-A61 AAALAYYR    | 315  | >GATA1-A61 AAALDYYR    | 275   | 40    |
| >GATA1-A61 AAALAYYR    | 251  | >GATA1-A61 AAALDYYR    | 332   | 81    |
| >GATA1-A61 AAAALAYY    | 270  | >GATA1-A61 AAAALDYY    | 709   | 439   |
| >GATA1-A61 AAAALAYYR   | 56   | >GATA1-A61 AAAALDYYR   | 154   | 98    |
| >GATA1-A61 AAAALAYY    | 217  | >GATA1-A61 AAAALDYY    | 337   | 120   |
| >GATA1-A61 AAAALAYY    | 54   | >GATA1-A61 AAAALDYY    | 175   | 121   |

|                       |     |                       |      |      |
|-----------------------|-----|-----------------------|------|------|
| >GATA1-A61 AAAALAYY   | 28  | >GATA1-A61 AAAALDYY   | 52   | 24   |
| >GATA1-A61 AAAALAYYR  | 12  | >GATA1-A61 AAAALDYR   | 11   | 1    |
| >GATA1-A61 AAAALAYYR  | 8   | >GATA1-A61 AAAALDYR   | 12   | 4    |
| >GATA1-A61 AAAALAYY   | 334 | >GATA1-A61 AAAALDYY   | 916  | 582  |
| >GATA1-A61 AAAALAYY   | 200 | >GATA1-A61 AAAALDYY   | 457  | 257  |
| >GATA1-A61 AAAALAYY   | 14  | >GATA1-A61 AAAALDYY   | 112  | 98   |
| >GATA1-A61 AAAALAYY   | 301 | >GATA1-A61 AAAALDYY   | 228  | 73   |
| >GATA1-A61 AAAALAYY   | 130 | >GATA1-A61 AAAALDYY   | 239  | 109  |
| >GATA1-A61 AAAALAYY   | 289 | >GATA1-A61 AAAALDYY   | 681  | 392  |
| >GATA1-A61 AAAALAYY   | 405 | >GATA1-A61 AAAALDYY   | 642  | 237  |
| >GATA1-A61 AAAALAYYR  | 241 | >GATA1-A61 AAAALDYR   | 368  | 127  |
| >GATA1-A61 AAAALAYYR  | 54  | >GATA1-A61 AAAALDYR   | 46   | 8    |
| >GATA1-A61 AAAAALAYY  | 286 | >GATA1-A61 AAAAALDYY  | 598  | 312  |
| >GATA1-A61 AAAAALAYYF | 36  | >GATA1-A61 AAAAALDYF  | 49   | 13   |
| >GATA1-A61 AAAAALAY   | 392 | >GATA1-A61 AAAAALDY   | 1491 | 1099 |
| >GATA1-A61 AAAAALAYY  | 21  | >GATA1-A61 AAAAALDYY  | 41   | 20   |
| >GATA1-A61 AAAAALAY   | 100 | >GATA1-A61 AAAAALDY   | 141  | 41   |
| >GATA1-A61 AAAAALAYY  | 104 | >GATA1-A61 AAAAALDYY  | 584  | 480  |
| >GATA1-A61 AAAAALAY   | 115 | >GATA1-A61 AAAAALDY   | 268  | 153  |
| >GATA1-A61 AAAAALAYY  | 20  | >GATA1-A61 AAAAALDYY  | 62   | 42   |
| >GATA1-A61 AAAAALAYYF | 44  | >GATA1-A61 AAAAALDYF  | 101  | 57   |
| >GATA1-A61 AAAAALAYYF | 5   | >GATA1-A61 AAAAALDYF  | 5    | 0    |
| >GATA1-A61 AAAAALAY   | 377 | >GATA1-A61 AAAAALDY   | 204  | 173  |
| >GATA1-A61 AAAAALAY   | 87  | >GATA1-A61 AAAAALDY   | 372  | 285  |
| >GATA1-A61 AAAAALAYY  | 110 | >GATA1-A61 AAAAALDYY  | 381  | 271  |
| >GATA1-A61 AAAAALAY   | 148 | >GATA1-A61 AAAAALDY   | 876  | 728  |
| >GATA1-A61 AAAAALAY   | 10  | >GATA1-A61 AAAAALDY   | 34   | 24   |
| >GATA1-A61 AAAAALAYY  | 8   | >GATA1-A61 AAAAALDYY  | 99   | 91   |
| >GATA1-A61 AAAAALAY   | 28  | >GATA1-A61 AAAAALDY   | 180  | 152  |
| >GATA1-A61 AAAAALAYY  | 365 | >GATA1-A61 AAAAALDYY  | 409  | 44   |
| >GATA1-A61 AAAAALAYY  | 103 | >GATA1-A61 AAAAALDYY  | 337  | 234  |
| >GATA1-A61 AAAAALAY   | 54  | >GATA1-A61 AAAAALDY   | 1097 | 1043 |
| >GATA1-A61 AAAAALAYY  | 142 | >GATA1-A61 AAAAALDYY  | 610  | 468  |
| >GATA1-A61 AAAAALAYY  | 465 | >GATA1-A61 AAAAALDYY  | 669  | 204  |
| >GATA1-A61 AAAAALAYYF | 235 | >GATA1-A61 AAAAALDYF  | 287  | 52   |
| >GATA1-A61 TAAAAALAYY | 100 | >GATA1-A61 TAAAAALDYY | 116  | 16   |
| >GATA1-A61 TAAAAALAYY | 454 | >GATA1-A61 TAAAAALDYY | 682  | 228  |
| >GATA1-A61 TAAAAALAYY | 109 | >GATA1-A61 TAAAAALDYY | 234  | 125  |
| >GATA1-A61 TAAAAALAYY | 473 | >GATA1-A61 TAAAAALDYY | 2701 | 2228 |
| >GATA1-A61 TAAAAALAYY | 119 | >GATA1-A61 TAAAAALDYY | 229  | 110  |
| >GATA1-A61 TAAAAALAY  | 25  | >GATA1-A61 TAAAAALDY  | 27   | 2    |
| >GATA1-A61 TAAAAALAYY | 191 | >GATA1-A61 TAAAAALDYY | 847  | 656  |
| >GATA1-A61 TAAAAALAY  | 349 | >GATA1-A61 TAAAAALDY  | 689  | 340  |

|                       |     |                       |       |       |
|-----------------------|-----|-----------------------|-------|-------|
| >GATA1-A61 TAAAAALAYY | 44  | >GATA1-A61 TAAAAALDYY | 139   | 95    |
| >GATA1-A61 TAAAAALAYY | 66  | >GATA1-A61 TAAAAALDYY | 78    | 12    |
| >GATA1-A61 TAAAAALAYY | 19  | >GATA1-A61 TAAAAALDYY | 61    | 42    |
| >GATA1-A61 TAAAAALAYY | 3   | >GATA1-A61 TAAAAALDYY | 4     | 1     |
| >GATA1-A61 TAAAAALA   | 33  | >GATA1-A61 TAAAAALD   | 8391  | 8358  |
| >GATA1-A61 TAAAAALAY  | 55  | >GATA1-A61 TAAAAALDY  | 25    | 30    |
| >GATA1-A61 TAAAAALAYY | 328 | >GATA1-A61 TAAAAALDYY | 386   | 58    |
| >GATA1-A61 TAAAAALAY  | 113 | >GATA1-A61 TAAAAALDY  | 658   | 545   |
| >GATA1-A61 TAAAAALAYY | 209 | >GATA1-A61 TAAAAALDYY | 780   | 571   |
| >GATA1-A61 TAAAAALAY  | 374 | >GATA1-A61 TAAAAALDY  | 1675  | 1301  |
| >GATA1-A61 TAAAAALAY  | 443 | >GATA1-A61 TAAAAALDY  | 2011  | 1568  |
| >GATA1-A61 TAAAAALAY  | 24  | >GATA1-A61 TAAAAALDY  | 56    | 32    |
| >GATA1-A61 TAAAAALAYY | 20  | >GATA1-A61 TAAAAALDYY | 170   | 150   |
| >GATA1-A61 TAAAAALAY  | 8   | >GATA1-A61 TAAAAALDY  | 33    | 25    |
| >GATA1-A61 TAAAAALAYY | 348 | >GATA1-A61 TAAAAALDYY | 645   | 297   |
| >GATA1-A61 TAAAAALAY  | 438 | >GATA1-A61 TAAAAALDY  | 1164  | 726   |
| >GATA1-A61 TAAAAALAYY | 92  | >GATA1-A61 TAAAAALDYY | 230   | 138   |
| >GATA1-A61 TAAAAALAYY | 261 | >GATA1-A61 TAAAAALDYY | 1881  | 1620  |
| >GATA1-A61 TAAAAALAY  | 101 | >GATA1-A61 TAAAAALDY  | 5507  | 5406  |
| >GATA1-A61 TAAAAALAY  | 281 | >GATA1-A61 TAAAAALDY  | 364   | 83    |
| >GATA1-A61 TAAAAALAYY | 54  | >GATA1-A61 TAAAAALDYY | 59    | 5     |
| >GATA1-A61 ATAAAAALA\ | 29  | >GATA1-A61 ATAAAAALD\ | 22    | 7     |
| >GATA1-A61 ATAAAAALA\ | 67  | >GATA1-A61 ATAAAAALD\ | 63    | 4     |
| >GATA1-A61 ATAAAAALA  | 111 | >GATA1-A61 ATAAAAALD  | 13236 | 13125 |
| >GATA1-A61 ATAAAAALA  | 235 | >GATA1-A61 ATAAAAALD  | 19805 | 19570 |
| >GATA1-A61 ATAAAAALA  | 253 | >GATA1-A61 ATAAAAALD  | 26064 | 25811 |
| >GATA1-A61 ATAAAAALA\ | 191 | >GATA1-A61 ATAAAAALD\ | 485   | 294   |
| >GATA1-A61 ATAAAAALA\ | 265 | >GATA1-A61 ATAAAAALD\ | 1600  | 1335  |
| >GATA1-A61 ATAAAAALA\ | 55  | >GATA1-A61 ATAAAAALD\ | 90    | 35    |
| >GATA1-A61 ATAAAAALA\ | 35  | >GATA1-A61 ATAAAAALD\ | 56    | 21    |
| >GATA1-A61 ATAAAAALA\ | 418 | >GATA1-A61 ATAAAAALD\ | 502   | 84    |
| >GATA1-A61 ATAAAAALA\ | 86  | >GATA1-A61 ATAAAAALD\ | 514   | 428   |
| >GATA1-A61 ATAAAAALA\ | 28  | >GATA1-A61 ATAAAAALD\ | 116   | 88    |
| >GATA1-A61 ATAAAAALA\ | 6   | >GATA1-A61 ATAAAAALD\ | 8     | 2     |
| >GATA1-A61 ATAAAAALA\ | 30  | >GATA1-A61 ATAAAAALD\ | 72    | 42    |
| >GATA1-A61 ATAAAAALA\ | 18  | >GATA1-A61 ATAAAAALD\ | 40    | 22    |
| >GATA1-A61 ATAAAAALA  | 276 | >GATA1-A61 ATAAAAALD  | 5657  | 5381  |
| >GATA1-A61 ATAAAAALA\ | 463 | >GATA1-A61 ATAAAAALD\ | 2445  | 1982  |
| >GATA1-A61 ATAAAAALA\ | 121 | >GATA1-A61 ATAAAAALD\ | 124   | 3     |
| >GATA1-A61 ATAAAAALA\ | 11  | >GATA1-A61 ATAAAAALD\ | 21    | 10    |
| >GATA1-A61 ATAAAAALA\ | 370 | >GATA1-A61 ATAAAAALD\ | 886   | 516   |
| >GATA1-A61 ATAAAAALA\ | 134 | >GATA1-A61 ATAAAAALD\ | 233   | 99    |
| >GATA1-A61 ATAAAAALA  | 31  | >GATA1-A61 ATAAAAALD  | 9511  | 9480  |

|                        |      |                        |       |       |
|------------------------|------|------------------------|-------|-------|
| >GATA1-A61 ATAAAAALA\  | 29   | >GATA1-A61 ATAAAAALD\  | 17    | 12    |
| >GATA1-A61 ATAAAAALA\  | 110  | >GATA1-A61 ATAAAAALD\  | 143   | 33    |
| >GATA1-A61 ATAAAAALA\  | 67   | >GATA1-A61 ATAAAAALD\  | 188   | 121   |
| >GATA1-A61 ATAAAAALA\  | 99   | >GATA1-A61 ATAAAAALD\  | 218   | 119   |
| >GATA1-A61 ATAAAAALA\  | 201  | >GATA1-A61 ATAAAAALD\  | 898   | 697   |
| >GATA1-A61 ATAAAAALA\  | 3    | >GATA1-A61 ATAAAAALD\  | 4     | 1     |
| >GATA1-A61 ATAAAAALA\  | 3    | >GATA1-A61 ATAAAAALD\  | 7     | 4     |
| >GATA1-A61 ATAAAAALA\  | 449  | >GATA1-A61 ATAAAAALD\  | 1147  | 698   |
| >GATA1-A61 ATAAAAALA\  | 384  | >GATA1-A61 ATAAAAALD\  | 842   | 458   |
| >GATA1-A61 ATAAAAALA\  | 81   | >GATA1-A61 ATAAAAALD\  | 175   | 94    |
| >GATA1-A61 ATAAAAALA   | 107  | >GATA1-A61 ATAAAAALD   | 966   | 859   |
| >GATA1-A61 ATAAAAALA\  | 80   | >GATA1-A61 ATAAAAALD\  | 315   | 235   |
| >GATA1-A61 ATAAAAALA\  | 33   | >GATA1-A61 ATAAAAALD\  | 32    | 1     |
| >GATA1-A61 ATAAAAALA\  | 17   | >GATA1-A61 ATAAAAALD\  | 27    | 10    |
| >GATA1-A61 ATAAAAALA\  | 61   | >GATA1-A61 ATAAAAALD\  | 1807  | 1746  |
| >GATA1-A61 ATAAAAALA\  | 263  | >GATA1-A61 ATAAAAALD\  | 839   | 576   |
| >GATA1-A61 ATAAAAALA\  | 138  | >GATA1-A61 ATAAAAALD\  | 186   | 48    |
| >GATA1-A61 TATAAAAAALA | 84   | >GATA1-A61 TATAAAAAALE | 88    | 4     |
| >GATA1-A61 TATAAAAAALA | 457  | >GATA1-A61 TATAAAAAALE | 784   | 327   |
| >GATA1-A61 TATAAAAAALA | 197  | >GATA1-A61 TATAAAAAALE | 26529 | 26332 |
| >GATA1-A61 TATAAAAAALA | 291  | >GATA1-A61 TATAAAAAALE | 155   | 136   |
| >GATA1-A61 TATAAAAAALA | 45   | >GATA1-A61 TATAAAAAALE | 84    | 39    |
| >GATA1-A61 TATAAAAAALA | 11   | >GATA1-A61 TATAAAAAALE | 41    | 30    |
| >GATA1-A61 TATAAAAAALA | 284  | >GATA1-A61 TATAAAAAALE | 5745  | 5461  |
| >GATA1-E2G EFPGLGSL    | 273  | >GATA1-E2G GFPGLGSL    | 75    | 198   |
| >GATA1-E2G EFPGLGSL    | 480  | >GATA1-E2G GFPGLGSL    | 3625  | 3145  |
| >GATA1-E2G MEFPGLGSL   | 33   | >GATA1-E2G MGFPGLGSL   | 16732 | 16699 |
| >GATA1-E2G MEFPGLGSL   | 1321 | >GATA1-E2G MGFPGLGSL   | 464   | 857   |
| >GATA1-E2G MEFPGLGSL   | 233  | >GATA1-E2G MGFPGLGSL   | 289   | 56    |
| >GATA1-E2G MEFPGLGSL   | 5205 | >GATA1-E2G MGFPGLGSL   | 479   | 4726  |
| >GATA1-E2G MEFPGLGSL   | 7564 | >GATA1-E2G MGFPGLGSL   | 90    | 7474  |
| >GATA1-E2G MEFPGLGSL   | 17   | >GATA1-E2G MGFPGLGSL   | 16382 | 16365 |
| >GATA1-E2G MEFPGLGSL   | 8    | >GATA1-E2G MGFPGLGSL   | 18739 | 18731 |
| >GATA1-E2G MEFPGLGSL   | 34   | >GATA1-E2G MGFPGLGSL   | 30456 | 30422 |
| >GATA1-E2G MEFPGLGSLC  | 96   | >GATA1-E2G MGFPGLGSLC  | 36948 | 36852 |
| >GATA1-E2G MEFPGLGSL   | 409  | >GATA1-E2G MGFPGLGSL   | 38928 | 38519 |
| >GATA1-E2G MEFPGLGSLC  | 416  | >GATA1-E2G MGFPGLGSLC  | 26473 | 26057 |
| >GATA1-E2G MEFPGLGSLC  | 171  | >GATA1-E2G MGFPGLGSLC  | 38584 | 38413 |
| >GATA1-E2G MEFPGLGSL   | 2012 | >GATA1-E2G MGFPGLGSL   | 287   | 1725  |
| >GATA1-E2G MEFPGLGSL   | 9    | >GATA1-E2G MGFPGLGSL   | 16792 | 16783 |
| >GATA1-E2G MEFPGLGSLC  | 80   | >GATA1-E2G MGFPGLGSLC  | 34893 | 34813 |
| >GATA1-E2G MEFPGLGSL   | 632  | >GATA1-E2G MGFPGLGSL   | 363   | 269   |
| >GATA1-E2G MEFPGLGSL   | 411  | >GATA1-E2G MGFPGLGSL   | 55    | 356   |



|                       |      |                       |      |      |
|-----------------------|------|-----------------------|------|------|
| >GATA1-M1I MEFPGLGSL  | 33   | >GATA1-M1I IEFPLGSL   | 40   | 7    |
| >GATA1-M1I MEFPGLGSL  | 233  | >GATA1-M1I IEFPLGSL   | 1021 | 788  |
| >GATA1-M1I MEFPGLGSL  | 17   | >GATA1-M1I IEFPLGSL   | 28   | 11   |
| >GATA1-M1I MEFPGLGSL  | 8    | >GATA1-M1I IEFPLGSL   | 10   | 2    |
| >GATA1-M1I MEFPGLGSL  | 34   | >GATA1-M1I IEFPLGSL   | 70   | 36   |
| >GATA1-M1I MEFPGLGSLC | 96   | >GATA1-M1I IEFPLGSLGT | 256  | 160  |
| >GATA1-M1I MEFPGLGSL  | 409  | >GATA1-M1I IEFPLGSL   | 2207 | 1798 |
| >GATA1-M1I MEFPGLGSLC | 416  | >GATA1-M1I IEFPLGSLG  | 1475 | 1059 |
| >GATA1-M1I MEFPGLGSLC | 171  | >GATA1-M1I IEFPLGSLGT | 4861 | 4690 |
| >GATA1-M1I MEFPGLGSL  | 9    | >GATA1-M1I IEFPLGSL   | 10   | 1    |
| >GATA1-M1I MEFPGLGSLC | 80   | >GATA1-M1I IEFPLGSLGT | 104  | 24   |
| >GATA1-M1I MEFPGLGSL  | 411  | >GATA1-M1I IEFPLGSL   | 1104 | 693  |
| >GATA1-M1I MEFPGLGSL  | 33   | >GATA1-M1I NEFPGLGSL  | 33   | 0    |
| >GATA1-M1I MEFPGLGSL  | 233  | >GATA1-M1I NEFPGLGSL  | 1874 | 1641 |
| >GATA1-M1I MEFPGLGS   | 650  | >GATA1-M1I NEFPGLGS   | 418  | 232  |
| >GATA1-M1I MEFPGLGSL  | 17   | >GATA1-M1I NEFPGLGSL  | 14   | 3    |
| >GATA1-M1I MEFPGLGSLC | 616  | >GATA1-M1I NEFPGLGSLG | 403  | 213  |
| >GATA1-M1I MEFPGLGSL  | 8    | >GATA1-M1I NEFPGLGSL  | 35   | 27   |
| >GATA1-M1I MEFPGLGSL  | 34   | >GATA1-M1I NEFPGLGSL  | 174  | 140  |
| >GATA1-M1I MEFPGLGSLC | 96   | >GATA1-M1I NEFPGLGSLG | 641  | 545  |
| >GATA1-M1I MEFPGLGSL  | 409  | >GATA1-M1I NEFPGLGSL  | 863  | 454  |
| >GATA1-M1I MEFPGLGSLC | 416  | >GATA1-M1I NEFPGLGSLG | 1417 | 1001 |
| >GATA1-M1I MEFPGLGSLC | 171  | >GATA1-M1I NEFPGLGSLG | 915  | 744  |
| >GATA1-M1I MEFPGLGSL  | 9    | >GATA1-M1I NEFPGLGSL  | 35   | 26   |
| >GATA1-M1I MEFPGLGSLC | 80   | >GATA1-M1I NEFPGLGSLG | 588  | 508  |
| >GATA1-M1I MEFPGLGSL  | 411  | >GATA1-M1I NEFPGLGSL  | 2998 | 2587 |
| >GATA1-M1I MEFPGLGSL  | 33   | >GATA1-M1I VEFPLGSL   | 64   | 31   |
| >GATA1-M1I MEFPGLGSL  | 233  | >GATA1-M1I VEFPLGSL   | 1099 | 866  |
| >GATA1-M1I MEFPGLGSL  | 17   | >GATA1-M1I VEFPLGSL   | 68   | 51   |
| >GATA1-M1I MEFPGLGSL  | 8    | >GATA1-M1I VEFPLGSL   | 14   | 6    |
| >GATA1-M1I MEFPGLGSL  | 34   | >GATA1-M1I VEFPLGSL   | 65   | 31   |
| >GATA1-M1I MEFPGLGSLC | 96   | >GATA1-M1I VEFPLGSLG  | 222  | 126  |
| >GATA1-M1I MEFPGLGSL  | 409  | >GATA1-M1I VEFPLGSL   | 1736 | 1327 |
| >GATA1-M1I MEFPGLGSLC | 416  | >GATA1-M1I VEFPLGSLG  | 1685 | 1269 |
| >GATA1-M1I MEFPGLGSLC | 171  | >GATA1-M1I VEFPLGSLG  | 2987 | 2816 |
| >GATA1-M1I MEFPGLGSL  | 9    | >GATA1-M1I VEFPLGSL   | 13   | 4    |
| >GATA1-M1I MEFPGLGSLC | 80   | >GATA1-M1I VEFPLGSLG  | 189  | 109  |
| >GATA1-M1I MEFPGLGSL  | 411  | >GATA1-M1I VEFPLGSL   | 2149 | 1738 |
| >GATA1-Q76 QVYPLLNCM  | 103  | >GATA1-Q76 EVYPLLNCM  | 633  | 530  |
| >GATA1-Q76 QVYPLLNCM  | 9923 | >GATA1-Q76 EVYPLLNCM  | 322  | 9601 |
| >GATA1-Q76 QVYPLLNCM  | 22   | >GATA1-Q76 EVYPLLNCM  | 4    | 18   |
| >GATA1-Q76 QVYPLLNCM  | 378  | >GATA1-Q76 EVYPLLNCM  | 44   | 334  |
| >GATA1-Q76 QVYPLLNCM  | 1133 | >GATA1-Q76 EVYPLLNCM  | 131  | 1002 |

|                       |       |                       |      |       |
|-----------------------|-------|-----------------------|------|-------|
| >GATA1-Q76 QVYPLLNCM  | 1217  | >GATA1-Q76 EVYPLLNCM  | 112  | 1105  |
| >GATA1-Q76 QVYPLLNCM  | 743   | >GATA1-Q76 EVYPLLNCM  | 459  | 284   |
| >GATA1-Q76 QVYPLLNCM  | 272   | >GATA1-Q76 EVYPLLNCM  | 1289 | 1017  |
| >GATA1-Q76 FQVYPLLNCM | 15509 | >GATA1-Q76 FEVYPLLNCM | 142  | 15367 |
| >GATA1-Q76 FQVYPLLNCM | 5386  | >GATA1-Q76 FEVYPLLNCM | 197  | 5189  |
| >GATA1-Q76 FQVYPLLNC  | 69    | >GATA1-Q76 FEVYPLLNC  | 5814 | 5745  |
| >GATA1-Q76 FQVYPLLNCM | 115   | >GATA1-Q76 FEVYPLLNCM | 2940 | 2825  |
| >GATA1-Q76 FQVYPLLNCM | 145   | >GATA1-Q76 FEVYPLLNCM | 941  | 796   |
| >GATA1-Q76 FQVYPLLNCM | 136   | >GATA1-Q76 FEVYPLLNCM | 5874 | 5738  |
| >GATA1-Q76 FQVYPLLNCM | 19    | >GATA1-Q76 FEVYPLLNCM | 522  | 503   |
| >GATA1-Q76 FQVYPLLNCM | 313   | >GATA1-Q76 FEVYPLLNCM | 3052 | 2739  |
| >GATA1-Q76 FQVYPLLNCM | 25402 | >GATA1-Q76 FEVYPLLNCM | 395  | 25007 |
| >GATA1-Q76 FQVYPLLNC  | 13614 | >GATA1-Q76 FEVYPLLNC  | 307  | 13307 |
| >GATA1-Q76 FQVYPLLNCM | 5938  | >GATA1-Q76 FEVYPLLNCM | 39   | 5899  |
| >GATA1-Q76 AEAYRHSPVF | 230   | >GATA1-Q76 AEAYRHSPVF | 337  | 107   |
| >GATA1-Q76 VFQVYPLL   | 81    | >GATA1-Q76 VFEVYPLL   | 530  | 449   |
| >GATA1-Q76 VFQVYPLL   | 94    | >GATA1-Q76 VFEVYPLL   | 450  | 356   |
| >GATA1-Q76 VFQVYPLL   | 297   | >GATA1-Q76 VFEVYPLL   | 1222 | 925   |
| >GATA1-Q76 VFQVYPLL   | 291   | >GATA1-Q76 VFEVYPLL   | 2350 | 2059  |
| >GATA1-Q76 PVFQVYPLL  | 117   | >GATA1-Q76 PVFEVYPLL  | 127  | 10    |
| >GATA1-Q76 PVFQVYPL   | 640   | >GATA1-Q76 PVFEVYPL   | 223  | 417   |
| >GATA1-Q76 PVFQVYPL   | 2148  | >GATA1-Q76 PVFEVYPL   | 438  | 1710  |
| >GATA1-Q76 PVFQVYPLL  | 2721  | >GATA1-Q76 PVFEVYPLL  | 419  | 2302  |
| >GATA1-Q76 PVFQVYPL   | 496   | >GATA1-Q76 PVFEVYPL   | 88   | 408   |
| >GATA1-Q76 PVFQVYPLL  | 1099  | >GATA1-Q76 PVFEVYPLL  | 128  | 971   |
| >GATA1-Q76 PVFQVYPLL  | 961   | >GATA1-Q76 PVFEVYPLL  | 199  | 762   |
| >GATA1-Q76 PVFQVYPL   | 228   | >GATA1-Q76 PVFEVYPL   | 224  | 4     |
| >GATA1-Q76 PVFQVYPL   | 346   | >GATA1-Q76 PVFEVYPL   | 149  | 197   |
| >GATA1-Q76 PVFQVYPL   | 1515  | >GATA1-Q76 PVFEVYPL   | 348  | 1167  |
| >GATA1-Q76 PVFQVYPLL  | 1654  | >GATA1-Q76 PVFEVYPLL  | 271  | 1383  |
| >GATA1-Q76 SPVFQVYPLL | 253   | >GATA1-Q76 SPVFEVYPLL | 682  | 429   |
| >GATA1-Q76 SPVFQVYPL  | 38    | >GATA1-Q76 SPVFEVYPL  | 92   | 54    |
| >GATA1-Q76 SPVFQVYPLL | 191   | >GATA1-Q76 SPVFEVYPLL | 573  | 382   |
| >GATA1-Q76 SPVFQVYPL  | 36    | >GATA1-Q76 SPVFEVYPL  | 39   | 3     |
| >GATA1-Q76 SPVFQVYPL  | 77    | >GATA1-Q76 SPVFEVYPL  | 70   | 7     |
| >GATA1-Q76 SPVFQVYPLL | 473   | >GATA1-Q76 SPVFEVYPLL | 422  | 51    |
| >GATA1-Q76 SPVFQVYPL  | 368   | >GATA1-Q76 SPVFEVYPL  | 248  | 120   |
| >GATA1-Q76 SPVFQVYPL  | 34    | >GATA1-Q76 SPVFEVYPL  | 67   | 33    |
| >GATA1-Q76 HSPVFQVYPL | 95    | >GATA1-Q76 HSPVFEVYPL | 100  | 5     |
| >GATA1-Q76 HSPVFQVY   | 401   | >GATA1-Q76 HSPVFEVY   | 562  | 161   |
| >GATA1-Q76 HSPVFQVYPL | 298   | >GATA1-Q76 HSPVFEVYPL | 457  | 159   |
| >GATA1-Q76 HSPVFQVYPL | 492   | >GATA1-Q76 HSPVFEVYPL | 435  | 57    |
| >GATA1-Q76 HSPVFQVY   | 458   | >GATA1-Q76 HSPVFEVY   | 906  | 448   |

|                       |      |                       |      |      |
|-----------------------|------|-----------------------|------|------|
| >GATA1-Q76 HSPVFQVY   | 330  | >GATA1-Q76 HSPVFEVY   | 874  | 544  |
| >GATA1-Q76 HSPVFQVY   | 137  | >GATA1-Q76 HSPVFEVY   | 246  | 109  |
| >GATA1-Q76 HSPVFQVYPL | 6    | >GATA1-Q76 HSPVFEVYPL | 7    | 1    |
| >GATA1-Q76 HSPVFQVYPL | 3    | >GATA1-Q76 HSPVFEVYPL | 4    | 1    |
| >GATA1-Q76 HSPVFQVY   | 239  | >GATA1-Q76 HSPVFEVY   | 548  | 309  |
| >GATA1-Q76 RHSPVFQVY  | 212  | >GATA1-Q76 RHSPVFEVY  | 236  | 24   |
| >GATA1-Q76 RHSPVFQVY  | 16   | >GATA1-Q76 RHSPVFEVY  | 50   | 34   |
| >GATA1-Q76 RHSPVFQVYF | 106  | >GATA1-Q76 RHSPVFEVYP | 150  | 44   |
| >GATA1-Q76 RHSPVFQVYF | 32   | >GATA1-Q76 RHSPVFEVYP | 38   | 6    |
| >GATA1-Q76 RHSPVFQVY  | 370  | >GATA1-Q76 RHSPVFEVY  | 300  | 70   |
| >GATA1-Q76 RHSPVFQVY  | 444  | >GATA1-Q76 RHSPVFEVY  | 1220 | 776  |
| >GATA1-Q76 RHSPVFQVY  | 159  | >GATA1-Q76 RHSPVFEVY  | 69   | 90   |
| >GATA1-Q76 RHSPVFQVYF | 661  | >GATA1-Q76 RHSPVFEVYP | 363  | 298  |
| >GATA1-Q76 YRHSPVFQV  | 55   | >GATA1-Q76 YRHSPFEV   | 46   | 9    |
| >GATA1-Q76 YRHSPVFQV  | 163  | >GATA1-Q76 YRHSPFEV   | 189  | 26   |
| >GATA1-Q76 YRHSPVFQVY | 323  | >GATA1-Q76 YRHSPVFEVY | 579  | 256  |
| >GATA1-Q76 YRHSPVFQV  | 123  | >GATA1-Q76 YRHSPFEV   | 53   | 70   |
| >GATA1-Q76 YRHSPVFQVY | 6    | >GATA1-Q76 YRHSPVFEVY | 9    | 3    |
| >GATA1-Q76 YRHSPVFQV  | 124  | >GATA1-Q76 YRHSPFEV   | 186  | 62   |
| >GATA1-Q76 YRHSPVFQVY | 45   | >GATA1-Q76 YRHSPVFEVY | 117  | 72   |
| >GATA1-Q76 YRHSPVFQV  | 188  | >GATA1-Q76 YRHSPFEV   | 207  | 19   |
| >GATA1-Q76 AYRHSPVFQ\ | 366  | >GATA1-Q76 AYRHSPFEV  | 364  | 2    |
| >GATA1-Q76 AYRHSPVFQ  | 8    | >GATA1-Q76 AYRHSPFE   | 34   | 26   |
| >GATA1-Q76 AYRHSPVFQ\ | 11   | >GATA1-Q76 AYRHSPFEV  | 10   | 1    |
| >GATA1-Q76 AYRHSPVFQ\ | 15   | >GATA1-Q76 AYRHSPFEV  | 86   | 71   |
| >GATA1-Q76 AYRHSPVFQ\ | 364  | >GATA1-Q76 AYRHSPFEV  | 371  | 7    |
| >GATA1-Q76 AYRHSPVFQ\ | 55   | >GATA1-Q76 AYRHSPFEV  | 97   | 42   |
| >GATA1-Q76 EAYRHSPVFC | 1038 | >GATA1-Q76 EAYRHSPFE  | 420  | 618  |
| >GATA1-Q76 EAYRHSPVFC | 88   | >GATA1-Q76 EAYRHSPFE  | 76   | 12   |
| >GATA1-Q76 EAYRHSPVFC | 190  | >GATA1-Q76 EAYRHSPFE  | 204  | 14   |
| >GATA1-Q76 EAYRHSPVFC | 37   | >GATA1-Q76 EAYRHSPFE  | 25   | 12   |
| >GATA1-Q76 EAYRHSPVFC | 4    | >GATA1-Q76 EAYRHSPFE  | 4    | 0    |
| >GATA1-S26ISTPESGVFF  | 1131 | >GATA1-S26IFTPESGVFF  | 51   | 1080 |
| >GATA1-S26ISTPESGVFFP | 721  | >GATA1-S26IFTPESGVFFP | 64   | 657  |
| >GATA1-S26ISTPESGVF   | 812  | >GATA1-S26IFTPESGVF   | 113  | 699  |
| >GATA1-S26ISTPESGVFF  | 483  | >GATA1-S26IFTPESGVFF  | 63   | 420  |
| >GATA1-S26ISTPESGVF   | 714  | >GATA1-S26IFTPESGVF   | 136  | 578  |
| >GATA1-S26ISTPESGVFF  | 1916 | >GATA1-S26IFTPESGVFF  | 356  | 1560 |
| >GATA1-S26ISTPESGVF   | 218  | >GATA1-S26IFTPESGVF   | 388  | 170  |
| >GATA1-S26ISTPESGVFF  | 95   | >GATA1-S26IFTPESGVFF  | 156  | 61   |
| >GATA1-S26ISTPESGVFF  | 153  | >GATA1-S26IFTPESGVFF  | 109  | 44   |
| >GATA1-S26ISTPESGVFFP | 114  | >GATA1-S26IFTPESGVFFP | 40   | 74   |
| >GATA1-S26ISTPESGVF   | 434  | >GATA1-S26IFTPESGVF   | 203  | 231  |

|                        |       |                        |       |       |
|------------------------|-------|------------------------|-------|-------|
| >GATA1-S26ISTPESGVF    | 1487  | >GATA1-S26IFTPESGVF    | 365   | 1122  |
| >GATA1-S26ISTPESGVFF   | 321   | >GATA1-S26IFTPESGVFF   | 59    | 262   |
| >GATA1-S26ISTPESGVF    | 63    | >GATA1-S26IFTPESGVF    | 29    | 34    |
| >GATA1-S26ISTPESGVFF   | 23    | >GATA1-S26IFTPESGVFF   | 12    | 11    |
| >GATA1-S26ISTPESGVF    | 18    | >GATA1-S26IFTPESGVF    | 5     | 13    |
| >GATA1-S26ISTPESGVFF   | 2     | >GATA1-S26IFTPESGVFF   | 2     | 0     |
| >GATA1-S26ISTPESGVFFP  | 17    | >GATA1-S26IFTPESGVFFP  | 20    | 3     |
| >GATA1-S26ISTPESGVFFP  | 15    | >GATA1-S26IFTPESGVFFP  | 17    | 2     |
| >GATA1-S26ISTPESGVF    | 2492  | >GATA1-S26IFTPESGVF    | 350   | 2142  |
| >GATA1-S26ISSTPESGV    | 3347  | >GATA1-S26ISFTPESGV    | 499   | 2848  |
| >GATA1-S26ISSTPESGVFF  | 5228  | >GATA1-S26ISFTPESGVFF  | 309   | 4919  |
| >GATA1-S26ISSTPESGVF   | 3028  | >GATA1-S26ISFTPESGVF   | 10    | 3018  |
| >GATA1-S26ISSTPESGVFF  | 2691  | >GATA1-S26ISFTPESGVFF  | 9     | 2682  |
| >GATA1-S26ISSTPESGVFF  | 1254  | >GATA1-S26ISFTPESGVFF  | 247   | 1007  |
| >GATA1-S26ISSTPESGV    | 316   | >GATA1-S26ISFTPESGV    | 9745  | 9429  |
| >GATA1-S26ISSTPESGVF   | 373   | >GATA1-S26ISFTPESGVF   | 3688  | 3315  |
| >GATA1-S26ISSTPESGVFF  | 112   | >GATA1-S26ISFTPESGVFF  | 1889  | 1777  |
| >GATA1-S26ISSTPESGVF   | 7     | >GATA1-S26ISFTPESGVF   | 19380 | 19373 |
| >GATA1-S26ISSTPESGVFF  | 5     | >GATA1-S26ISFTPESGVFF  | 18637 | 18632 |
| >GATA1-S26ISSTPESGVF   | 359   | >GATA1-S26ISFTPESGVF   | 16146 | 15787 |
| >GATA1-S26ISSTPESGVFF  | 479   | >GATA1-S26ISFTPESGVFF  | 16557 | 16078 |
| >GATA1-S26ISSTPESGVF   | 421   | >GATA1-S26ISFTPESGVF   | 17404 | 16983 |
| >GATA1-S26ISSTPESGVFF  | 40    | >GATA1-S26ISFTPESGVFF  | 3607  | 3567  |
| >GATA1-S26ISSTPESGVF   | 27    | >GATA1-S26ISFTPESGVF   | 955   | 928   |
| >GATA1-S26ISSTPESGVFF  | 28    | >GATA1-S26ISFTPESGVFF  | 664   | 636   |
| >GATA1-S26ISSTPESGVFF  | 24119 | >GATA1-S26ISFTPESGVFF  | 460   | 23659 |
| >GATA1-S26ISSTPESGVFFI | 20627 | >GATA1-S26ISFTPESGVFFI | 390   | 20237 |
| >GATA1-S26IPQFVDPALVS  | 14866 | >GATA1-S26IPQFVDPALVS  | 368   | 14498 |
| >GATA1-S26IPQFVDPALVS  | 2301  | >GATA1-S26IPQFVDPALVS  | 6     | 2295  |
| >GATA1-S26IVSSTPESGV   | 9449  | >GATA1-S26IVSFTPESGV   | 496   | 8953  |
| >GATA1-S26IVSSTPESGV   | 1092  | >GATA1-S26IVSFTPESGV   | 186   | 906   |
| >GATA1-S26IVSSTPESGVF  | 401   | >GATA1-S26IVSFTPESGVF  | 147   | 254   |
| >GATA1-S26IVSSTPESGVFI | 1296  | >GATA1-S26IVSFTPESGVFI | 477   | 819   |
| >GATA1-S26IVSSTPESGV   | 3310  | >GATA1-S26IVSFTPESGV   | 437   | 2873  |
| >GATA1-S26IVSSTPESGVF  | 110   | >GATA1-S26IVSFTPESGVF  | 13    | 97    |
| >GATA1-S26IVSSTPESGVFI | 23    | >GATA1-S26IVSFTPESGVFI | 4     | 19    |
| >GATA1-S26IVSSTPESGV   | 883   | >GATA1-S26IVSFTPESGV   | 129   | 754   |
| >GATA1-S26IVSSTPESGVF  | 8     | >GATA1-S26IVSFTPESGVF  | 4     | 4     |
| >GATA1-S26IVSSTPESGVFI | 6     | >GATA1-S26IVSFTPESGVFI | 4     | 2     |
| >GATA1-S26IVSSTPESGVF  | 2823  | >GATA1-S26IVSFTPESGVF  | 492   | 2331  |
| >GATA1-S26IVSSTPESGVFI | 1080  | >GATA1-S26IVSFTPESGVFI | 217   | 863   |
| >GATA1-S26IVSSTPESGVF  | 157   | >GATA1-S26IVSFTPESGVF  | 130   | 27    |
| >GATA1-S26IVSSTPESGVFI | 212   | >GATA1-S26IVSFTPESGVFI | 164   | 48    |

|                        |       |                        |     |       |
|------------------------|-------|------------------------|-----|-------|
| >GATA1-S26IVSSTPESGVFI | 266   | >GATA1-S26IVSFTPESGVFI | 284 | 18    |
| >GATA1-S26IVSSTPESGV   | 291   | >GATA1-S26IVSFTPESGV   | 50  | 241   |
| >GATA1-S26IVSSTPESGVF  | 27    | >GATA1-S26IVSFTPESGVF  | 55  | 28    |
| >GATA1-S26IVSSTPESGVFI | 33    | >GATA1-S26IVSFTPESGVFI | 12  | 21    |
| >GATA1-S26ILVSSTPESGV  | 72    | >GATA1-S26ILVSFTPESGV  | 205 | 133   |
| >GATA1-S26ILVSSTPESGV  | 62    | >GATA1-S26ILVSFTPESGV  | 182 | 120   |
| >GATA1-S26ILVSSTPESGV  | 441   | >GATA1-S26ILVSFTPESGV  | 428 | 13    |
| >GATA1-S26ILVSSTPESGV  | 97    | >GATA1-S26ILVSFTPESGV  | 169 | 72    |
| >GATA1-S26ILVSSTPESGV  | 262   | >GATA1-S26ILVSFTPESGV  | 219 | 43    |
| >GATA1-S26ILVSSTPESGV  | 13    | >GATA1-S26ILVSFTPESGV  | 34  | 21    |
| >GATA1-S26ILVSSTPESGV  | 211   | >GATA1-S26ILVSFTPESGV  | 92  | 119   |
| >GATA1-S26ILVSSTPESGVI | 52    | >GATA1-S26ILVSFTPESGVI | 68  | 16    |
| >GATA1-S26ILVSSTPESGVI | 190   | >GATA1-S26ILVSFTPESGVI | 635 | 445   |
| >GATA1-S26ILVSSTPESGVI | 336   | >GATA1-S26ILVSFTPESGVI | 426 | 90    |
| >GATA1-S26ILVSSTPESGVI | 255   | >GATA1-S26ILVSFTPESGVI | 371 | 116   |
| >GATA1-S26ILVSSTPESGVI | 236   | >GATA1-S26ILVSFTPESGVI | 571 | 335   |
| >GATA1-S26ILVSSTPESGVI | 50    | >GATA1-S26ILVSFTPESGVI | 89  | 39    |
| >GATA1-S26IALVSSTPESG\ | 117   | >GATA1-S26IALVSFTPESG\ | 65  | 52    |
| >GATA1-S26IALVSSTPES   | 1067  | >GATA1-S26IALVSFTPES   | 191 | 876   |
| >GATA1-S26IALVSSTPESG\ | 23    | >GATA1-S26IALVSFTPESG\ | 16  | 7     |
| >GATA1-S26IALVSSTPESG\ | 7     | >GATA1-S26IALVSFTPESG\ | 7   | 0     |
| >GATA1-S26IALVSSTPESG\ | 45    | >GATA1-S26IALVSFTPESG\ | 36  | 9     |
| >GATA1-S26IALVSSTPES   | 1522  | >GATA1-S26IALVSFTPES   | 445 | 1077  |
| >GATA1-S26IALVSSTPESG\ | 4     | >GATA1-S26IALVSFTPESG\ | 3   | 1     |
| >GATA1-S26IALVSSTPESG\ | 10    | >GATA1-S26IALVSFTPESG\ | 9   | 1     |
| >GATA1-S26IALVSSTPESG\ | 8     | >GATA1-S26IALVSFTPESG\ | 8   | 0     |
| >GATA1-S26IALVSSTPESG\ | 18    | >GATA1-S26IALVSFTPESG\ | 14  | 4     |
| >GATA1-S26IALVSSTPES   | 159   | >GATA1-S26IALVSFTPES   | 136 | 23    |
| >GATA1-S26IALVSSTPESG\ | 2     | >GATA1-S26IALVSFTPESG\ | 2   | 0     |
| >GATA1-S26IDPALVSSTPE! | 497   | >GATA1-S26IDPALVSFTPE! | 384 | 113   |
| >GATA1-S26IFVDPALVSST  | 338   | >GATA1-S26IFVDPALVSFT  | 514 | 176   |
| >GATA1-S26IFVDPALVSS   | 27    | >GATA1-S26IFVDPALVSF   | 11  | 16    |
| >GATA1-S26IFVDPALVSST  | 188   | >GATA1-S26IFVDPALVSFT  | 183 | 5     |
| >GATA1-S26IFVDPALVSST  | 869   | >GATA1-S26IFVDPALVSFT  | 274 | 595   |
| >GATA1-S26IFVDPALVSST  | 650   | >GATA1-S26IFVDPALVSFT  | 375 | 275   |
| >GATA1-S26IFVDPALVSS   | 23029 | >GATA1-S26IFVDPALVSF   | 189 | 22840 |
| >GATA1-S26IFVDPALVSS   | 20323 | >GATA1-S26IFVDPALVSF   | 480 | 19843 |
| >GATA1-S26IFVDPALVSS   | 21288 | >GATA1-S26IFVDPALVSF   | 55  | 21233 |
| >GATA1-S26IFVDPALVSS   | 7124  | >GATA1-S26IFVDPALVSF   | 81  | 7043  |
| >GATA1-S26IQFVDPALVSS  | 34182 | >GATA1-S26IQFVDPALVSF  | 99  | 34083 |
| >GATA1-S26IQFVDPALVSS  | 18502 | >GATA1-S26IQFVDPALVSF  | 40  | 18462 |
| >GATA1-T11ITSEPLPQFV   | 337   | >GATA1-T11INSEPLPQFV   | 469 | 132   |
| >GATA1-T11ITSEPLPQF    | 7     | >GATA1-T11INSEPLPQF    | 34  | 27    |

|                        |       |                       |       |       |
|------------------------|-------|-----------------------|-------|-------|
| >GATA1-T11 GTSEPLPQFV  | 240   | >GATA1-T11 GNSEPLPQFV | 2267  | 2027  |
| >GATA1-T11 GTSEPLPQFV  | 193   | >GATA1-T11 GNSEPLPQFV | 4299  | 4106  |
| >GATA1-T11 GTSEPLPQFV  | 12    | >GATA1-T11 GNSEPLPQFV | 1740  | 1728  |
| >GATA1-T11 GTSEPLPQFV  | 113   | >GATA1-T11 GNSEPLPQFV | 10339 | 10226 |
| >GATA1-T11 GTSEPLPQFV  | 21    | >GATA1-T11 GNSEPLPQFV | 2466  | 2445  |
| >GATA1-T11 GTSEPLPQFV  | 68    | >GATA1-T11 GNSEPLPQFV | 5550  | 5482  |
| >GATA1-T11 GTSEPLPQF   | 77    | >GATA1-T11 GNSEPLPQF  | 17064 | 16987 |
| >GATA1-T11 GTSEPLPQFV  | 481   | >GATA1-T11 GNSEPLPQFV | 13405 | 12924 |
| >GATA1-T11 GTSEPLPQFV  | 121   | >GATA1-T11 GNSEPLPQFV | 10763 | 10642 |
| >GATA1-T11 GTSEPLPQF   | 5     | >GATA1-T11 GNSEPLPQF  | 7802  | 7797  |
| >GATA1-T11 GTSEPLPQF   | 247   | >GATA1-T11 GNSEPLPQF  | 18947 | 18700 |
| >GATA1-T11 GTSEPLPQF   | 24    | >GATA1-T11 GNSEPLPQF  | 1075  | 1051  |
| >GATA1-T11 GTSEPLPQFV  | 114   | >GATA1-T11 GNSEPLPQFV | 14853 | 14739 |
| >GATA1-T11 MEFPGLGSLC  | 96    | >GATA1-T11 MEFPGLGSLC | 1671  | 1575  |
| >GATA1-T11 MEFPGLGSLC  | 171   | >GATA1-T11 MEFPGLGSLC | 2068  | 1897  |
| >GATA1-T11 MEFPGLGSLC  | 80    | >GATA1-T11 MEFPGLGSLC | 723   | 643   |
| >GATA1-T11 LGTSEPLPQF  | 887   | >GATA1-T11 LGNSEPLPQF | 479   | 408   |
| >GATA1-T11 LGTSEPLPQF  | 280   | >GATA1-T11 LGNSEPLPQF | 1741  | 1461  |
| >GATA1-T11 SLGTSEPL    | 315   | >GATA1-T11 SLGNSEPL   | 264   | 51    |
| >GATA1-T11 SLGTSEPL    | 37    | >GATA1-T11 SLGNSEPL   | 45    | 8     |
| >GATA1-T11 SLGTSEPL    | 485   | >GATA1-T11 SLGNSEPL   | 407   | 78    |
| >GATA1-T11 SLGTSEPL    | 34    | >GATA1-T11 SLGNSEPL   | 14    | 20    |
| >GATA1-T11 SLGTSEPL    | 48    | >GATA1-T11 SLGNSEPL   | 22    | 26    |
| >GATA1-T11 SLGTSEPL    | 25    | >GATA1-T11 SLGNSEPL   | 15    | 10    |
| >GATA1-T11 SLGTSEPL    | 323   | >GATA1-T11 SLGNSEPL   | 208   | 115   |
| >GATA1-T11 SLGTSEPL    | 10    | >GATA1-T11 SLGNSEPL   | 6     | 4     |
| >GATA1-T11 SLGTSEPLPQI | 760   | >GATA1-T11 SLGNSEPLPQ | 496   | 264   |
| >GATA1-T11 SLGTSEPLPQI | 677   | >GATA1-T11 SLGNSEPLPQ | 310   | 367   |
| >GATA1-T11 GSLGTSEPL   | 13718 | >GATA1-T11 GSLGNSEPL  | 35    | 13683 |
| >GATA1-T11 GSLGTSEPL   | 199   | >GATA1-T11 GSLGNSEPL  | 230   | 31    |
| >GATA1-T11 GSLGTSEPL   | 24    | >GATA1-T11 GSLGNSEPL  | 29    | 5     |
| >GATA1-T11 GSLGTSEPL   | 409   | >GATA1-T11 GSLGNSEPL  | 2346  | 1937  |
| >GATA1-T11 GLGSLGTSEP  | 20    | >GATA1-T11 GLGSLGNSEP | 21    | 1     |
| >GATA1-T11 GLGSLGTSEP  | 192   | >GATA1-T11 GLGSLGNSEP | 313   | 121   |
| >GATA1-T11 GLGSLGTSEP  | 27    | >GATA1-T11 GLGSLGNSEP | 31    | 4     |
| >GATA1-T11 GLGSLGTSEP  | 31    | >GATA1-T11 GLGSLGNSEP | 23    | 8     |
| >GATA1-T11 GLGSLGTSEP  | 27    | >GATA1-T11 GLGSLGNSEP | 38    | 11    |
| >GATA1-T11 GLGSLGTSEP  | 15    | >GATA1-T11 GLGSLGNSEP | 21    | 6     |
| >GATA1-T11 GLGSLGTSEP  | 455   | >GATA1-T11 GLGSLGNSEP | 659   | 204   |
| >GATA1-V74 VFQVYPLL    | 81    | >GATA1-V74 DFQVYPLL   | 4457  | 4376  |
| >GATA1-V74 VFQVYPLL    | 94    | >GATA1-V74 DFQVYPLL   | 1096  | 1002  |
| >GATA1-V74 VFQVYPLL    | 297   | >GATA1-V74 DFQVYPLL   | 1316  | 1019  |
| >GATA1-V74 VFQVYPLL    | 291   | >GATA1-V74 DFQVYPLL   | 3893  | 3602  |

|                       |     |                       |       |       |
|-----------------------|-----|-----------------------|-------|-------|
| >GATA1-V74 PVFQVYPLL  | 117 | >GATA1-V74 PDFQVYPLL  | 3574  | 3457  |
| >GATA1-V74 PVFQVYPL   | 496 | >GATA1-V74 PDFQVYPL   | 18977 | 18481 |
| >GATA1-V74 PVFQVYPL   | 228 | >GATA1-V74 PDFQVYPL   | 12854 | 12626 |
| >GATA1-V74 PVFQVYPL   | 346 | >GATA1-V74 PDFQVYPL   | 17997 | 17651 |
| >GATA1-V74 SPVFQVYPLL | 253 | >GATA1-V74 SPDFQVYPLL | 620   | 367   |
| >GATA1-V74 SPVFQVYPL  | 38  | >GATA1-V74 SPDFQVYPL  | 116   | 78    |
| >GATA1-V74 SPVFQVYPLL | 191 | >GATA1-V74 SPDFQVYPLL | 373   | 182   |
| >GATA1-V74 SPVFQVYPL  | 36  | >GATA1-V74 SPDFQVYPL  | 126   | 90    |
| >GATA1-V74 SPVFQVYPL  | 77  | >GATA1-V74 SPDFQVYPL  | 84    | 7     |
| >GATA1-V74 SPVFQVYPLL | 473 | >GATA1-V74 SPDFQVYPLL | 494   | 21    |
| >GATA1-V74 SPVFQVYPL  | 368 | >GATA1-V74 SPDFQVYPL  | 523   | 155   |
| >GATA1-V74 SPVFQVYPL  | 34  | >GATA1-V74 SPDFQVYPL  | 184   | 150   |
| >GATA1-V74 HSPVFQVYPL | 95  | >GATA1-V74 HSPDFQVYPL | 120   | 25    |
| >GATA1-V74 HSPVFQVY   | 755 | >GATA1-V74 HSPDFQVY   | 155   | 600   |
| >GATA1-V74 HSPVFQVY   | 401 | >GATA1-V74 HSPDFQVY   | 399   | 2     |
| >GATA1-V74 HSPVFQVYPL | 298 | >GATA1-V74 HSPDFQVYPL | 217   | 81    |
| >GATA1-V74 HSPVFQVYPL | 492 | >GATA1-V74 HSPDFQVYPL | 173   | 319   |
| >GATA1-V74 HSPVFQVYPL | 543 | >GATA1-V74 HSPDFQVYPL | 163   | 380   |
| >GATA1-V74 HSPVFQVY   | 458 | >GATA1-V74 HSPDFQVY   | 663   | 205   |
| >GATA1-V74 HSPVFQVY   | 330 | >GATA1-V74 HSPDFQVY   | 277   | 53    |
| >GATA1-V74 HSPVFQVY   | 137 | >GATA1-V74 HSPDFQVY   | 684   | 547   |
| >GATA1-V74 HSPVFQVYP  | 675 | >GATA1-V74 HSPDFQVYP  | 385   | 290   |
| >GATA1-V74 HSPVFQVYPL | 6   | >GATA1-V74 HSPDFQVYPL | 5     | 1     |
| >GATA1-V74 HSPVFQVYPL | 3   | >GATA1-V74 HSPDFQVYPL | 3     | 0     |
| >GATA1-V74 HSPVFQVY   | 239 | >GATA1-V74 HSPDFQVY   | 467   | 228   |
| >GATA1-V74 RHSPVFQVY  | 212 | >GATA1-V74 RHSPDFQVY  | 191   | 21    |
| >GATA1-V74 RHSPVFQVY  | 16  | >GATA1-V74 RHSPDFQVY  | 11    | 5     |
| >GATA1-V74 RHSPVFQVYF | 106 | >GATA1-V74 RHSPDFQVYF | 82    | 24    |
| >GATA1-V74 RHSPVFQVYF | 32  | >GATA1-V74 RHSPDFQVYF | 43    | 11    |
| >GATA1-V74 RHSPVFQVY  | 370 | >GATA1-V74 RHSPDFQVY  | 1471  | 1101  |
| >GATA1-V74 RHSPVFQVY  | 444 | >GATA1-V74 RHSPDFQVY  | 4146  | 3702  |
| >GATA1-V74 RHSPVFQVY  | 159 | >GATA1-V74 RHSPDFQVY  | 97    | 62    |
| >GATA1-V74 YRHSPVFQV  | 55  | >GATA1-V74 YRHSPDFQV  | 712   | 657   |
| >GATA1-V74 YRHSPVFQV  | 163 | >GATA1-V74 YRHSPDFQV  | 934   | 771   |
| >GATA1-V74 YRHSPVFQVY | 323 | >GATA1-V74 YRHSPDFQVY | 205   | 118   |
| >GATA1-V74 YRHSPVFQV  | 123 | >GATA1-V74 YRHSPDFQV  | 848   | 725   |
| >GATA1-V74 YRHSPVFQVY | 6   | >GATA1-V74 YRHSPDFQVY | 11    | 5     |
| >GATA1-V74 YRHSPVFQV  | 124 | >GATA1-V74 YRHSPDFQV  | 466   | 342   |
| >GATA1-V74 YRHSPVFQVY | 45  | >GATA1-V74 YRHSPDFQVY | 99    | 54    |
| >GATA1-V74 YRHSPVFQV  | 188 | >GATA1-V74 YRHSPDFQV  | 1266  | 1078  |
| >GATA1-V74 AYRHSPVF   | 134 | >GATA1-V74 AYRHSPDF   | 155   | 21    |
| >GATA1-V74 AYRHSPVF   | 183 | >GATA1-V74 AYRHSPDF   | 421   | 238   |
| >GATA1-V74 AYRHSPVF   | 10  | >GATA1-V74 AYRHSPDF   | 19    | 9     |

|                       |      |                       |       |       |
|-----------------------|------|-----------------------|-------|-------|
| >GATA1-V74 AYRHSPVFQ\ | 366  | >GATA1-V74 AYRHSPDFQ\ | 518   | 152   |
| >GATA1-V74 AYRHSPVF   | 50   | >GATA1-V74 AYRHSPDF   | 257   | 207   |
| >GATA1-V74 AYRHSPVFQ  | 8    | >GATA1-V74 AYRHSPDFQ  | 49    | 41    |
| >GATA1-V74 AYRHSPVFQ\ | 11   | >GATA1-V74 AYRHSPDFQ\ | 31    | 20    |
| >GATA1-V74 AYRHSPVFQ\ | 15   | >GATA1-V74 AYRHSPDFQ\ | 45    | 30    |
| >GATA1-V74 AYRHSPVFQ\ | 364  | >GATA1-V74 AYRHSPDFQ\ | 310   | 54    |
| >GATA1-V74 AYRHSPVF   | 29   | >GATA1-V74 AYRHSPDF   | 76    | 47    |
| >GATA1-V74 AYRHSPVFQ\ | 55   | >GATA1-V74 AYRHSPDFQ\ | 107   | 52    |
| >GATA1-V74 EAYRHSPV   | 312  | >GATA1-V74 EAYRHSPD   | 18845 | 18533 |
| >GATA1-V74 EAYRHSPVF  | 233  | >GATA1-V74 EAYRHSPDF  | 408   | 175   |
| >GATA1-V74 EAYRHSPVFC | 88   | >GATA1-V74 EAYRHSPDFC | 428   | 340   |
| >GATA1-V74 EAYRHSPVFC | 190  | >GATA1-V74 EAYRHSPDFC | 435   | 245   |
| >GATA1-V74 EAYRHSPVF  | 62   | >GATA1-V74 EAYRHSPDF  | 152   | 90    |
| >GATA1-V74 EAYRHSPV   | 23   | >GATA1-V74 EAYRHSPD   | 14687 | 14664 |
| >GATA1-V74 EAYRHSPVFC | 37   | >GATA1-V74 EAYRHSPDFC | 49    | 12    |
| >GATA1-V74 EAYRHSPV   | 6    | >GATA1-V74 EAYRHSPD   | 12193 | 12187 |
| >GATA1-V74 EAYRHSPVFC | 4    | >GATA1-V74 EAYRHSPDFC | 6     | 2     |
| >GATA1-V74 EAYRHSPV   | 278  | >GATA1-V74 EAYRHSPD   | 9373  | 9095  |
| >GATA1-V74 EAYRHSPVF  | 478  | >GATA1-V74 EAYRHSPDF  | 1723  | 1245  |
| >GATA1-V74 EAYRHSPVF  | 95   | >GATA1-V74 EAYRHSPDF  | 894   | 799   |
| >GATA1-V74 EAYRHSPVF  | 32   | >GATA1-V74 EAYRHSPDF  | 74    | 42    |
| >GATA1-V74 EAYRHSPVF  | 25   | >GATA1-V74 EAYRHSPDF  | 83    | 58    |
| >GATA1-V74 EAYRHSPVF  | 23   | >GATA1-V74 EAYRHSPDF  | 64    | 41    |
| >GATA1-V74 EAYRHSPVF  | 468  | >GATA1-V74 EAYRHSPDF  | 6821  | 6353  |
| >GATA1-V74 AEAYRHSPV  | 264  | >GATA1-V74 AEAYRHSPD  | 16788 | 16524 |
| >GATA1-V74 AEAYRHSPVF | 92   | >GATA1-V74 AEAYRHSPDF | 611   | 519   |
| >GATA1-V74 AEAYRHSPVF | 31   | >GATA1-V74 AEAYRHSPDF | 64    | 33    |
| >GATA1-V74 AEAYRHSPV  | 128  | >GATA1-V74 AEAYRHSPD  | 8774  | 8646  |
| >GATA1-V74 AEAYRHSPV  | 169  | >GATA1-V74 AEAYRHSPD  | 4872  | 4703  |
| >GATA1-V74 AEAYRHSPVF | 287  | >GATA1-V74 AEAYRHSPDF | 326   | 39    |
| >GATA1-V74 AEAYRHSPVF | 85   | >GATA1-V74 AEAYRHSPDF | 54    | 31    |
| >GATA1-V74 AEAYRHSPVF | 148  | >GATA1-V74 AEAYRHSPDF | 112   | 36    |
| >GATA1-V74 AEAYRHSPV  | 11   | >GATA1-V74 AEAYRHSPD  | 413   | 402   |
| >GATA1-V74 AEAYRHSPVF | 270  | >GATA1-V74 AEAYRHSPDF | 462   | 192   |
| >GATA1-V74 AEAYRHSPVF | 230  | >GATA1-V74 AEAYRHSPDF | 339   | 109   |
| >GATA1-V74 AEAYRHSPV  | 32   | >GATA1-V74 AEAYRHSPD  | 2393  | 2361  |
| >GATA1-V74 AEAYRHSPVF | 210  | >GATA1-V74 AEAYRHSPDF | 293   | 83    |
| >GATA1-V74 DAEAYRHSP\ | 396  | >GATA1-V74 DAEAYRHSP\ | 32624 | 32228 |
| >GATA1-V74 DAEAYRHSP\ | 257  | >GATA1-V74 DAEAYRHSP\ | 20190 | 19933 |
| >GATA1-V74 DAEAYRHSP\ | 318  | >GATA1-V74 DAEAYRHSP\ | 840   | 522   |
| >GATA1-V74 VFQVYPLL   | 81   | >GATA1-V74 FFQVYPLL   | 522   | 441   |
| >GATA1-V74 VFQVYPLL   | 8002 | >GATA1-V74 FFQVYPLL   | 432   | 7570  |
| >GATA1-V74 VFQVYPLL   | 94   | >GATA1-V74 FFQVYPLL   | 196   | 102   |



|                       |       |                       |       |       |
|-----------------------|-------|-----------------------|-------|-------|
| >GATA1-V74 VFQVYPLL   | 297   | >GATA1-V74 FFQVYPLL   | 656   | 359   |
| >GATA1-V74 VFQVYPLL   | 291   | >GATA1-V74 FFQVYPLL   | 49    | 242   |
| >GATA1-V74 PVFQVYPLL  | 117   | >GATA1-V74 PFFQVYPLL  | 634   | 517   |
| >GATA1-V74 PVFQVYPL   | 496   | >GATA1-V74 PFFQVYPL   | 6103  | 5607  |
| >GATA1-V74 PVFQVYPL   | 11034 | >GATA1-V74 PFFQVYPL   | 428   | 10606 |
| >GATA1-V74 PVFQVYPLL  | 4148  | >GATA1-V74 PFFQVYPLL  | 114   | 4034  |
| >GATA1-V74 PVFQVYPL   | 12890 | >GATA1-V74 PFFQVYPL   | 372   | 12518 |
| >GATA1-V74 PVFQVYPLL  | 8093  | >GATA1-V74 PFFQVYPLL  | 87    | 8006  |
| >GATA1-V74 PVFQVYPL   | 228   | >GATA1-V74 PFFQVYPL   | 3085  | 2857  |
| >GATA1-V74 PVFQVYPL   | 346   | >GATA1-V74 PFFQVYPL   | 16225 | 15879 |
| >GATA1-V74 RDAEAYRHSF | 4461  | >GATA1-V74 RDAEAYRHSF | 108   | 4353  |
| >GATA1-V74 SPVFQVYPL  | 2088  | >GATA1-V74 SPFFQVYPL  | 222   | 1866  |
| >GATA1-V74 SPVFQVYPLL | 253   | >GATA1-V74 SPFFQVYPLL | 28    | 225   |
| >GATA1-V74 SPVFQVYPL  | 766   | >GATA1-V74 SPFFQVYPL  | 216   | 550   |
| >GATA1-V74 SPVFQVYPL  | 38    | >GATA1-V74 SPFFQVYPL  | 117   | 79    |
| >GATA1-V74 SPVFQVYPLL | 191   | >GATA1-V74 SPFFQVYPLL | 324   | 133   |
| >GATA1-V74 SPVFQVYPL  | 626   | >GATA1-V74 SPFFQVYPL  | 229   | 397   |
| >GATA1-V74 SPVFQVYPL  | 36    | >GATA1-V74 SPFFQVYPL  | 44    | 8     |
| >GATA1-V74 SPVFQVYPL  | 77    | >GATA1-V74 SPFFQVYPL  | 53    | 24    |
| >GATA1-V74 SPVFQVYPLL | 473   | >GATA1-V74 SPFFQVYPLL | 273   | 200   |
| >GATA1-V74 SPVFQVYPL  | 368   | >GATA1-V74 SPFFQVYPL  | 955   | 587   |
| >GATA1-V74 SPVFQVYPL  | 34    | >GATA1-V74 SPFFQVYPL  | 31    | 3     |
| >GATA1-V74 HSPVFQVYPL | 3575  | >GATA1-V74 HSPFFQVYPL | 413   | 3162  |
| >GATA1-V74 HSPVFQVYPL | 95    | >GATA1-V74 HSPFFQVYPL | 119   | 24    |
| >GATA1-V74 HSPVFQVY   | 401   | >GATA1-V74 HSPFFQVY   | 296   | 105   |
| >GATA1-V74 HSPVFQVYPL | 298   | >GATA1-V74 HSPFFQVYPL | 102   | 196   |
| >GATA1-V74 HSPVFQVYPL | 492   | >GATA1-V74 HSPFFQVYPL | 92    | 400   |
| >GATA1-V74 HSPVFQVYPL | 543   | >GATA1-V74 HSPFFQVYPL | 146   | 397   |
| >GATA1-V74 HSPVFQVY   | 458   | >GATA1-V74 HSPFFQVY   | 509   | 51    |
| >GATA1-V74 HSPVFQVY   | 330   | >GATA1-V74 HSPFFQVY   | 323   | 7     |
| >GATA1-V74 HSPVFQVY   | 137   | >GATA1-V74 HSPFFQVY   | 211   | 74    |
| >GATA1-V74 HSPVFQVYPL | 6     | >GATA1-V74 HSPFFQVYPL | 7     | 1     |
| >GATA1-V74 HSPVFQVYPL | 3     | >GATA1-V74 HSPFFQVYPL | 3     | 0     |
| >GATA1-V74 HSPVFQVY   | 239   | >GATA1-V74 HSPFFQVY   | 435   | 196   |
| >GATA1-V74 HSPVFQVYPL | 548   | >GATA1-V74 HSPFFQVYPL | 242   | 306   |
| >GATA1-V74 RHSPVFQVY  | 212   | >GATA1-V74 RHSPFFQVY  | 174   | 38    |
| >GATA1-V74 RHSPVFQVY  | 16    | >GATA1-V74 RHSPFFQVY  | 7     | 9     |
| >GATA1-V74 RHSPVFQVYF | 106   | >GATA1-V74 RHSPFFQVYF | 54    | 52    |
| >GATA1-V74 RHSPVFQVYF | 32    | >GATA1-V74 RHSPFFQVYF | 29    | 3     |
| >GATA1-V74 RHSPVFQVY  | 370   | >GATA1-V74 RHSPFFQVY  | 353   | 17    |
| >GATA1-V74 RHSPVFQVY  | 444   | >GATA1-V74 RHSPFFQVY  | 690   | 246   |
| >GATA1-V74 RHSPVFQVYF | 788   | >GATA1-V74 RHSPFFQVYF | 496   | 292   |
| >GATA1-V74 RHSPVFQVY  | 159   | >GATA1-V74 RHSPFFQVY  | 96    | 63    |

|                       |      |                       |       |       |
|-----------------------|------|-----------------------|-------|-------|
| >GATA1-V74 YRHSPVFQV  | 55   | >GATA1-V74 YRHSPFFQV  | 182   | 127   |
| >GATA1-V74 YRHSPVFQV  | 163  | >GATA1-V74 YRHSPFFQV  | 267   | 104   |
| >GATA1-V74 YRHSPVFQVY | 323  | >GATA1-V74 YRHSPFFQVY | 230   | 93    |
| >GATA1-V74 YRHSPVFQV  | 123  | >GATA1-V74 YRHSPFFQV  | 80    | 43    |
| >GATA1-V74 YRHSPVFQVY | 6    | >GATA1-V74 YRHSPFFQVY | 5     | 1     |
| >GATA1-V74 YRHSPVFQV  | 124  | >GATA1-V74 YRHSPFFQV  | 97    | 27    |
| >GATA1-V74 YRHSPVFQVY | 45   | >GATA1-V74 YRHSPFFQVY | 50    | 5     |
| >GATA1-V74 YRHSPVFQV  | 188  | >GATA1-V74 YRHSPFFQV  | 340   | 152   |
| >GATA1-V74 AYRHSPVF   | 134  | >GATA1-V74 AYRHSPFF   | 113   | 21    |
| >GATA1-V74 AYRHSPVF   | 183  | >GATA1-V74 AYRHSPFF   | 105   | 78    |
| >GATA1-V74 AYRHSPVF   | 10   | >GATA1-V74 AYRHSPFF   | 8     | 2     |
| >GATA1-V74 AYRHSPVFQ\ | 657  | >GATA1-V74 AYRHSPFFQV | 316   | 341   |
| >GATA1-V74 AYRHSPVFQ\ | 366  | >GATA1-V74 AYRHSPFFQV | 176   | 190   |
| >GATA1-V74 AYRHSPVF   | 50   | >GATA1-V74 AYRHSPFF   | 14    | 36    |
| >GATA1-V74 AYRHSPVFQ  | 8    | >GATA1-V74 AYRHSPFFQ  | 7     | 1     |
| >GATA1-V74 AYRHSPVFQ\ | 11   | >GATA1-V74 AYRHSPFFQV | 9     | 2     |
| >GATA1-V74 AYRHSPVFQ\ | 15   | >GATA1-V74 AYRHSPFFQV | 12    | 3     |
| >GATA1-V74 AYRHSPVFQ\ | 364  | >GATA1-V74 AYRHSPFFQV | 207   | 157   |
| >GATA1-V74 AYRHSPVF   | 29   | >GATA1-V74 AYRHSPFF   | 62    | 33    |
| >GATA1-V74 AYRHSPVFQ\ | 55   | >GATA1-V74 AYRHSPFFQV | 50    | 5     |
| >GATA1-V74 AYRHSPVFQ\ | 609  | >GATA1-V74 AYRHSPFFQV | 68    | 541   |
| >GATA1-V74 AYRHSPVFQ\ | 969  | >GATA1-V74 AYRHSPFFQV | 457   | 512   |
| >GATA1-V74 EAYRHSPV   | 312  | >GATA1-V74 EAYRHSPF   | 4160  | 3848  |
| >GATA1-V74 EAYRHSPVF  | 233  | >GATA1-V74 EAYRHSPFF  | 310   | 77    |
| >GATA1-V74 EAYRHSPVFC | 761  | >GATA1-V74 EAYRHSPFFQ | 338   | 423   |
| >GATA1-V74 EAYRHSPVFC | 1038 | >GATA1-V74 EAYRHSPFFQ | 243   | 795   |
| >GATA1-V74 EAYRHSPVFC | 88   | >GATA1-V74 EAYRHSPFFQ | 122   | 34    |
| >GATA1-V74 EAYRHSPVFC | 190  | >GATA1-V74 EAYRHSPFFQ | 208   | 18    |
| >GATA1-V74 EAYRHSPVF  | 677  | >GATA1-V74 EAYRHSPFF  | 177   | 500   |
| >GATA1-V74 EAYRHSPV   | 5170 | >GATA1-V74 EAYRHSPF   | 61    | 5109  |
| >GATA1-V74 EAYRHSPVF  | 62   | >GATA1-V74 EAYRHSPFF  | 13    | 49    |
| >GATA1-V74 EAYRHSPV   | 23   | >GATA1-V74 EAYRHSPF   | 11591 | 11568 |
| >GATA1-V74 EAYRHSPVFC | 37   | >GATA1-V74 EAYRHSPFFQ | 23    | 14    |
| >GATA1-V74 EAYRHSPV   | 6    | >GATA1-V74 EAYRHSPF   | 4239  | 4233  |
| >GATA1-V74 EAYRHSPVFC | 4    | >GATA1-V74 EAYRHSPFFQ | 3     | 1     |
| >GATA1-V74 EAYRHSPV   | 278  | >GATA1-V74 EAYRHSPF   | 294   | 16    |
| >GATA1-V74 EAYRHSPVF  | 478  | >GATA1-V74 EAYRHSPFF  | 1672  | 1194  |
| >GATA1-V74 EAYRHSPV   | 7319 | >GATA1-V74 EAYRHSPF   | 129   | 7190  |
| >GATA1-V74 EAYRHSPVF  | 95   | >GATA1-V74 EAYRHSPFF  | 451   | 356   |
| >GATA1-V74 EAYRHSPV   | 1329 | >GATA1-V74 EAYRHSPF   | 18    | 1311  |
| >GATA1-V74 EAYRHSPVF  | 32   | >GATA1-V74 EAYRHSPFF  | 90    | 58    |
| >GATA1-V74 EAYRHSPV   | 4783 | >GATA1-V74 EAYRHSPF   | 17    | 4766  |
| >GATA1-V74 EAYRHSPVF  | 25   | >GATA1-V74 EAYRHSPFF  | 26    | 1     |

|                        |      |                        |       |       |
|------------------------|------|------------------------|-------|-------|
| >GATA1-V74 EAYRHSPV    | 1889 | >GATA1-V74 EAYRHSPF    | 22    | 1867  |
| >GATA1-V74 EAYRHSPVF   | 23   | >GATA1-V74 EAYRHSPFF   | 78    | 55    |
| >GATA1-V74 EAYRHSPVF   | 468  | >GATA1-V74 EAYRHSPFF   | 625   | 157   |
| >GATA1-V74 AEAYRHSPV   | 264  | >GATA1-V74 AEAYRHSPF   | 1668  | 1404  |
| >GATA1-V74 AEAYRHSPVF  | 3312 | >GATA1-V74 AEAYRHSPFF  | 195   | 3117  |
| >GATA1-V74 AEAYRHSPV   | 4176 | >GATA1-V74 AEAYRHSPF   | 65    | 4111  |
| >GATA1-V74 AEAYRHSPVF  | 92   | >GATA1-V74 AEAYRHSPFF  | 316   | 224   |
| >GATA1-V74 AEAYRHSPV   | 689  | >GATA1-V74 AEAYRHSPF   | 16    | 673   |
| >GATA1-V74 AEAYRHSPVF  | 31   | >GATA1-V74 AEAYRHSPFF  | 64    | 33    |
| >GATA1-V74 AEAYRHSPV   | 128  | >GATA1-V74 AEAYRHSPF   | 200   | 72    |
| >GATA1-V74 AEAYRHSPV   | 169  | >GATA1-V74 AEAYRHSPF   | 139   | 30    |
| >GATA1-V74 AEAYRHSPVF  | 287  | >GATA1-V74 AEAYRHSPFF  | 221   | 66    |
| >GATA1-V74 AEAYRHSPVF  | 85   | >GATA1-V74 AEAYRHSPFF  | 23    | 62    |
| >GATA1-V74 AEAYRHSPV   | 3114 | >GATA1-V74 AEAYRHSPF   | 253   | 2861  |
| >GATA1-V74 AEAYRHSPVF  | 148  | >GATA1-V74 AEAYRHSPFF  | 61    | 87    |
| >GATA1-V74 AEAYRHSPV   | 11   | >GATA1-V74 AEAYRHSPF   | 193   | 182   |
| >GATA1-V74 AEAYRHSPVF  | 270  | >GATA1-V74 AEAYRHSPFF  | 232   | 38    |
| >GATA1-V74 AEAYRHSPVF  | 230  | >GATA1-V74 AEAYRHSPFF  | 124   | 106   |
| >GATA1-V74 AEAYRHSPVF  | 822  | >GATA1-V74 AEAYRHSPFF  | 357   | 465   |
| >GATA1-V74 AEAYRHSPV   | 32   | >GATA1-V74 AEAYRHSPF   | 148   | 116   |
| >GATA1-V74 AEAYRHSPVF  | 210  | >GATA1-V74 AEAYRHSPFF  | 86    | 124   |
| >GATA1-V74 DAEAYRHSPV  | 396  | >GATA1-V74 DAEAYRHSPF  | 28310 | 27914 |
| >GATA1-V74 DAEAYRHSPV  | 257  | >GATA1-V74 DAEAYRHSPF  | 17017 | 16760 |
| >GATA1-V74 DAEAYRHSPV  | 318  | >GATA1-V74 DAEAYRHSPF  | 1149  | 831   |
| >GATA1-V74 VFQVYPLL    | 81   | >GATA1-V74 IFQVYPLL    | 71    | 10    |
| >GATA1-V74 VFQVYPLL    | 94   | >GATA1-V74 IFQVYPLL    | 106   | 12    |
| >GATA1-V74 VFQVYPLL    | 297  | >GATA1-V74 IFQVYPLL    | 179   | 118   |
| >GATA1-V74 VFQVYPLL    | 291  | >GATA1-V74 IFQVYPLL    | 389   | 98    |
| >GATA1-V74 PVFQVYPLL   | 117  | >GATA1-V74 PIFQVYPLL   | 165   | 48    |
| >GATA1-V74 PVFQVYPL    | 640  | >GATA1-V74 PIFQVYPL    | 326   | 314   |
| >GATA1-V74 PVFQVYPL    | 496  | >GATA1-V74 PIFQVYPL    | 126   | 370   |
| >GATA1-V74 PVFQVYPLL   | 1099 | >GATA1-V74 PIFQVYPLL   | 300   | 799   |
| >GATA1-V74 PVFQVYPLL   | 961  | >GATA1-V74 PIFQVYPLL   | 332   | 629   |
| >GATA1-V74 PVFQVYPL    | 228  | >GATA1-V74 PIFQVYPL    | 274   | 46    |
| >GATA1-V74 PVFQVYPL    | 346  | >GATA1-V74 PIFQVYPL    | 1461  | 1115  |
| >GATA1-V74 RDAEAYRHSPV | 1019 | >GATA1-V74 RDAEAYRHSPF | 231   | 788   |
| >GATA1-V74 RDAEAYRHSPV | 9353 | >GATA1-V74 RDAEAYRHSPF | 224   | 9129  |
| >GATA1-V74 RDAEAYRHSPV | 615  | >GATA1-V74 RDAEAYRHSPF | 279   | 336   |
| >GATA1-V74 SPVFQVYPLL  | 253  | >GATA1-V74 SPIFQVYPLL  | 74    | 179   |
| >GATA1-V74 SPVFQVYPL   | 766  | >GATA1-V74 SPIFQVYPL   | 448   | 318   |
| >GATA1-V74 SPVFQVYPL   | 38   | >GATA1-V74 SPIFQVYPL   | 34    | 4     |
| >GATA1-V74 SPVFQVYPLL  | 191  | >GATA1-V74 SPIFQVYPLL  | 145   | 46    |
| >GATA1-V74 SPVFQVYPL   | 626  | >GATA1-V74 SPIFQVYPL   | 211   | 415   |

|                       |     |                        |     |     |
|-----------------------|-----|------------------------|-----|-----|
| >GATA1-V74 SPVFQVYPL  | 36  | >GATA1-V74 SPIFQVYPL   | 40  | 4   |
| >GATA1-V74 SPVFQVYPL  | 77  | >GATA1-V74 SPIFQVYPL   | 53  | 24  |
| >GATA1-V74 SPVFQVYPLL | 473 | >GATA1-V74 SPIFQVYPLL  | 328 | 145 |
| >GATA1-V74 SPVFQVYPL  | 368 | >GATA1-V74 SPIFQVYPL   | 337 | 31  |
| >GATA1-V74 SPVFQVYPL  | 34  | >GATA1-V74 SPIFQVYPL   | 35  | 1   |
| >GATA1-V74 HSPVFQVYPL | 95  | >GATA1-V74 HSPIFQVYPLL | 133 | 38  |
| >GATA1-V74 HSPVFQVY   | 401 | >GATA1-V74 HSPIFQVY    | 341 | 60  |
| >GATA1-V74 HSPVFQVYPL | 298 | >GATA1-V74 HSPIFQVYPL  | 347 | 49  |
| >GATA1-V74 HSPVFQVYPL | 492 | >GATA1-V74 HSPIFQVYPL  | 231 | 261 |
| >GATA1-V74 HSPVFQVY   | 458 | >GATA1-V74 HSPIFQVY    | 878 | 420 |
| >GATA1-V74 HSPVFQVY   | 330 | >GATA1-V74 HSPIFQVY    | 175 | 155 |
| >GATA1-V74 HSPVFQVYPL | 797 | >GATA1-V74 HSPIFQVYPL  | 423 | 374 |
| >GATA1-V74 HSPVFQVY   | 137 | >GATA1-V74 HSPIFQVY    | 256 | 119 |
| >GATA1-V74 HSPVFQVYP  | 675 | >GATA1-V74 HSPIFQVYP   | 306 | 369 |
| >GATA1-V74 HSPVFQVYPL | 6   | >GATA1-V74 HSPIFQVYPL  | 5   | 1   |
| >GATA1-V74 HSPVFQVYPL | 3   | >GATA1-V74 HSPIFQVYPLL | 3   | 0   |
| >GATA1-V74 HSPVFQVY   | 239 | >GATA1-V74 HSPIFQVY    | 590 | 351 |
| >GATA1-V74 RHSPVFQVY  | 212 | >GATA1-V74 RHSPIFQVY   | 120 | 92  |
| >GATA1-V74 RHSPVFQVY  | 760 | >GATA1-V74 RHSPIFQVY   | 274 | 486 |
| >GATA1-V74 RHSPVFQVY  | 16  | >GATA1-V74 RHSPIFQVY   | 17  | 1   |
| >GATA1-V74 RHSPVFQVYF | 106 | >GATA1-V74 RHSPIFQVYPI | 111 | 5   |
| >GATA1-V74 RHSPVFQVYF | 32  | >GATA1-V74 RHSPIFQVYPI | 34  | 2   |
| >GATA1-V74 RHSPVFQVY  | 370 | >GATA1-V74 RHSPIFQVY   | 304 | 66  |
| >GATA1-V74 RHSPVFQVY  | 444 | >GATA1-V74 RHSPIFQVY   | 610 | 166 |
| >GATA1-V74 RHSPVFQVY  | 159 | >GATA1-V74 RHSPIFQVY   | 105 | 54  |
| >GATA1-V74 YRHSPVFQV  | 55  | >GATA1-V74 YRHSPIFQV   | 39  | 16  |
| >GATA1-V74 YRHSPVFQV  | 163 | >GATA1-V74 YRHSPIFQV   | 73  | 90  |
| >GATA1-V74 YRHSPVFQVY | 323 | >GATA1-V74 YRHSPIFQVY  | 347 | 24  |
| >GATA1-V74 YRHSPVFQV  | 123 | >GATA1-V74 YRHSPIFQV   | 172 | 49  |
| >GATA1-V74 YRHSPVFQVY | 6   | >GATA1-V74 YRHSPIFQVY  | 7   | 1   |
| >GATA1-V74 YRHSPVFQV  | 124 | >GATA1-V74 YRHSPIFQV   | 68  | 56  |
| >GATA1-V74 YRHSPVFQVY | 45  | >GATA1-V74 YRHSPIFQVY  | 30  | 15  |
| >GATA1-V74 YRHSPVFQV  | 188 | >GATA1-V74 YRHSPIFQV   | 344 | 156 |
| >GATA1-V74 AYRHSPVF   | 134 | >GATA1-V74 AYRHSPIF    | 168 | 34  |
| >GATA1-V74 AYRHSPVF   | 183 | >GATA1-V74 AYRHSPIF    | 235 | 52  |
| >GATA1-V74 AYRHSPVF   | 10  | >GATA1-V74 AYRHSPIF    | 18  | 8   |
| >GATA1-V74 AYRHSPVFQ\ | 366 | >GATA1-V74 AYRHSPIFQV  | 248 | 118 |
| >GATA1-V74 AYRHSPVF   | 50  | >GATA1-V74 AYRHSPIF    | 36  | 14  |
| >GATA1-V74 AYRHSPVFQ  | 8   | >GATA1-V74 AYRHSPIFQ   | 5   | 3   |
| >GATA1-V74 AYRHSPVFQ\ | 11  | >GATA1-V74 AYRHSPIFQV  | 10  | 1   |
| >GATA1-V74 AYRHSPVFQ\ | 15  | >GATA1-V74 AYRHSPIFQV  | 13  | 2   |
| >GATA1-V74 AYRHSPVFQ\ | 364 | >GATA1-V74 AYRHSPIFQV  | 330 | 34  |
| >GATA1-V74 AYRHSPVF   | 29  | >GATA1-V74 AYRHSPIF    | 33  | 4   |

|                         |      |                         |      |      |
|-------------------------|------|-------------------------|------|------|
| >GATA1-V74 AYRHSPVFQ\   | 55   | >GATA1-V74 AYRHSPVFQ\   | 67   | 12   |
| >GATA1-V74 AYRHSPVFQ\   | 609  | >GATA1-V74 AYRHSPVFQ\   | 233  | 376  |
| >GATA1-V74 EAYRHSPV     | 312  | >GATA1-V74 EAYRHSPV     | 607  | 295  |
| >GATA1-V74 EAYRHSPVF    | 233  | >GATA1-V74 EAYRHSPVF    | 135  | 98   |
| >GATA1-V74 EAYRHSPVFC   | 88   | >GATA1-V74 EAYRHSPVFC   | 91   | 3    |
| >GATA1-V74 EAYRHSPVFC   | 190  | >GATA1-V74 EAYRHSPVFC   | 155  | 35   |
| >GATA1-V74 EAYRHSPV     | 62   | >GATA1-V74 EAYRHSPV     | 94   | 32   |
| >GATA1-V74 EAYRHSPV     | 23   | >GATA1-V74 EAYRHSPV     | 77   | 54   |
| >GATA1-V74 EAYRHSPVFC   | 37   | >GATA1-V74 EAYRHSPVFC   | 38   | 1    |
| >GATA1-V74 EAYRHSPV     | 6    | >GATA1-V74 EAYRHSPV     | 17   | 11   |
| >GATA1-V74 EAYRHSPVFC   | 4    | >GATA1-V74 EAYRHSPVFC   | 4    | 0    |
| >GATA1-V74 EAYRHSPV     | 278  | >GATA1-V74 EAYRHSPV     | 192  | 86   |
| >GATA1-V74 EAYRHSPVF    | 478  | >GATA1-V74 EAYRHSPVF    | 771  | 293  |
| >GATA1-V74 EAYRHSPVF    | 95   | >GATA1-V74 EAYRHSPVF    | 474  | 379  |
| >GATA1-V74 EAYRHSPVF    | 32   | >GATA1-V74 EAYRHSPVF    | 39   | 7    |
| >GATA1-V74 EAYRHSPVF    | 25   | >GATA1-V74 EAYRHSPVF    | 51   | 26   |
| >GATA1-V74 EAYRHSPVF    | 23   | >GATA1-V74 EAYRHSPVF    | 32   | 9    |
| >GATA1-V74 EAYRHSPVF    | 468  | >GATA1-V74 EAYRHSPVF    | 669  | 201  |
| >GATA1-V74 EAYRHSPV     | 8543 | >GATA1-V74 EAYRHSPV     | 139  | 8404 |
| >GATA1-V74 AEAYRHSPV    | 264  | >GATA1-V74 AEAYRHSPV    | 49   | 215  |
| >GATA1-V74 AEAYRHSPVF   | 92   | >GATA1-V74 AEAYRHSPVF   | 341  | 249  |
| >GATA1-V74 AEAYRHSPV    | 689  | >GATA1-V74 AEAYRHSPV    | 434  | 255  |
| >GATA1-V74 AEAYRHSPVF   | 31   | >GATA1-V74 AEAYRHSPVF   | 34   | 3    |
| >GATA1-V74 AEAYRHSPV    | 128  | >GATA1-V74 AEAYRHSPV    | 61   | 67   |
| >GATA1-V74 AEAYRHSPV    | 169  | >GATA1-V74 AEAYRHSPV    | 142  | 27   |
| >GATA1-V74 AEAYRHSPVF   | 287  | >GATA1-V74 AEAYRHSPVF   | 291  | 4    |
| >GATA1-V74 AEAYRHSPVF   | 85   | >GATA1-V74 AEAYRHSPVF   | 98   | 13   |
| >GATA1-V74 AEAYRHSPVF   | 148  | >GATA1-V74 AEAYRHSPVF   | 127  | 21   |
| >GATA1-V74 AEAYRHSPV    | 11   | >GATA1-V74 AEAYRHSPV    | 28   | 17   |
| >GATA1-V74 AEAYRHSPVF   | 270  | >GATA1-V74 AEAYRHSPVF   | 377  | 107  |
| >GATA1-V74 AEAYRHSPVF   | 230  | >GATA1-V74 AEAYRHSPVF   | 188  | 42   |
| >GATA1-V74 AEAYRHSPV    | 32   | >GATA1-V74 AEAYRHSPV    | 15   | 17   |
| >GATA1-V74 AEAYRHSPVF   | 210  | >GATA1-V74 AEAYRHSPVF   | 185  | 25   |
| >GATA1-V74 DAEAYRHSPV   | 396  | >GATA1-V74 DAEAYRHSPV   | 1455 | 1059 |
| >GATA1-V74 DAEAYRHSPV   | 257  | >GATA1-V74 DAEAYRHSPV   | 1452 | 1195 |
| >GATA1-V74 DAEAYRHSPV   | 318  | >GATA1-V74 DAEAYRHSPV   | 477  | 159  |
| >GATA2-L35! LWRRNANGI   | 266  | >GATA2-L35! LWRRNANGI   | 372  | 106  |
| >GATA2-L35! CANCEQTTTTI | 2114 | >GATA2-L35! CANCEQTTTTI | 226  | 1888 |
| >GATA2-L35! CANCEQTTTTI | 2063 | >GATA2-L35! CANCEQTTTTI | 159  | 1904 |
| >GATA2-L35! CANCEQTTTTI | 180  | >GATA2-L35! CANCEQTTTTI | 1832 | 1652 |
| >GATA2-L35! CANCEQTTTTI | 409  | >GATA2-L35! CANCEQTTTTI | 1939 | 1530 |
| >GATA2-L35! TTLWRRNA    | 1459 | >GATA2-L35! TTLWRRNA    | 150  | 1309 |
| >GATA2-L35! TTTLWRRNA   | 368  | >GATA2-L35! TTTLWRRNA   | 361  | 7    |

|                       |      |                       |      |      |
|-----------------------|------|-----------------------|------|------|
| >GATA2-L35!TTTTLWRR   | 317  | >GATA2-L35!TTTTVWRR   | 225  | 92   |
| >GATA2-L35!TTTTLWRR   | 43   | >GATA2-L35!TTTTVWRR   | 46   | 3    |
| >GATA2-L35!TTTTLWRR   | 83   | >GATA2-L35!TTTTVWRR   | 66   | 17   |
| >GATA2-L35!TTTTLWRR   | 8    | >GATA2-L35!TTTTVWRR   | 5    | 3    |
| >GATA2-L35!TTTTLWRR   | 381  | >GATA2-L35!TTTTVWRR   | 517  | 136  |
| >GATA2-L35!TTTTLWRR   | 426  | >GATA2-L35!TTTTVWRR   | 714  | 288  |
| >GATA2-L35!TTTTTLWR   | 151  | >GATA2-L35!TTTTTVWR   | 274  | 123  |
| >GATA2-L35!TTTTTLWRR  | 124  | >GATA2-L35!TTTTTVWRR  | 118  | 6    |
| >GATA2-L35!TTTTTLWR   | 96   | >GATA2-L35!TTTTTVWR   | 52   | 44   |
| >GATA2-L35!TTTTTLWRR  | 37   | >GATA2-L35!TTTTTVWRR  | 57   | 20   |
| >GATA2-L35!TTTTTLWR   | 253  | >GATA2-L35!TTTTTVWR   | 178  | 75   |
| >GATA2-L35!TTTTTLWRR  | 91   | >GATA2-L35!TTTTTVWRR  | 137  | 46   |
| >GATA2-L35!TTTTTLWR   | 4    | >GATA2-L35!TTTTTVWR   | 3    | 1    |
| >GATA2-L35!TTTTTLWRR  | 5    | >GATA2-L35!TTTTTVWRR  | 4    | 1    |
| >GATA2-L35!TTTTTLWRRM | 212  | >GATA2-L35!TTTTTVWRRM | 161  | 51   |
| >GATA2-L35!TTTTTLWR   | 347  | >GATA2-L35!TTTTTVWR   | 387  | 40   |
| >GATA2-L35!TTTTTLWR   | 280  | >GATA2-L35!TTTTTVWR   | 241  | 39   |
| >GATA2-L35!TTTTTLWRR  | 512  | >GATA2-L35!TTTTTVWRR  | 286  | 226  |
| >GATA2-L35!QTTTTLWRF  | 102  | >GATA2-L35!QTTTTVWRM  | 202  | 100  |
| >GATA2-L35!QTTTTLWR   | 474  | >GATA2-L35!QTTTTVWR   | 111  | 363  |
| >GATA2-L35!QTTTTLWRF  | 48   | >GATA2-L35!QTTTTVWRM  | 71   | 23   |
| >GATA2-L35!QTTTTLW    | 626  | >GATA2-L35!QTTTTVW    | 245  | 381  |
| >GATA2-L35!QTTTTLWR   | 7    | >GATA2-L35!QTTTTVWR   | 4    | 3    |
| >GATA2-L35!QTTTTLWRF  | 16   | >GATA2-L35!QTTTTVWRM  | 21   | 5    |
| >GATA2-L35!QTTTTLW    | 14   | >GATA2-L35!QTTTTVW    | 14   | 0    |
| >GATA2-L35!QTTTTLW    | 191  | >GATA2-L35!QTTTTVW    | 239  | 48   |
| >GATA2-L35!QTTTTLW    | 15   | >GATA2-L35!QTTTTVW    | 15   | 0    |
| >GATA2-L35!QTTTTLW    | 201  | >GATA2-L35!QTTTTVW    | 198  | 3    |
| >GATA2-L35!QTTTTLWR   | 147  | >GATA2-L35!QTTTTVWR   | 205  | 58   |
| >GATA2-L35!QTTTTLWRF  | 317  | >GATA2-L35!QTTTTVWRM  | 295  | 22   |
| >GATA2-L35!QTTTTLWR   | 91   | >GATA2-L35!QTTTTVWR   | 103  | 12   |
| >GATA2-L35!QTTTTLWRF  | 137  | >GATA2-L35!QTTTTVWRM  | 111  | 26   |
| >GATA2-L35!CQTTTTL    | 2265 | >GATA2-L35!CQTTTTV    | 232  | 2033 |
| >GATA2-L35!CQTTTTL    | 379  | >GATA2-L35!CQTTTTV    | 45   | 334  |
| >GATA2-L35!CQTTTTLWF  | 241  | >GATA2-L35!CQTTTTVWM  | 176  | 65   |
| >GATA2-L35!CQTTTTLWF  | 173  | >GATA2-L35!CQTTTTVWM  | 238  | 65   |
| >GATA2-L35!CQTTTTLWF  | 715  | >GATA2-L35!CQTTTTVWM  | 362  | 353  |
| >GATA2-L35!CQTTTTL    | 97   | >GATA2-L35!CQTTTTV    | 219  | 122  |
| >GATA2-L35!CQTTTTLW   | 690  | >GATA2-L35!CQTTTTVW   | 178  | 512  |
| >GATA2-L35!CQTTTTL    | 458  | >GATA2-L35!CQTTTTV    | 4357 | 3899 |
| >GATA2-L35!CQTTTTLW   | 206  | >GATA2-L35!CQTTTTVW   | 172  | 34   |
| >GATA2-L35!CQTTTTLW   | 20   | >GATA2-L35!CQTTTTVW   | 34   | 14   |
| >GATA2-L35!CQTTTTLWF  | 48   | >GATA2-L35!CQTTTTVWM  | 56   | 8    |

|                        |       |                        |       |       |
|------------------------|-------|------------------------|-------|-------|
| >GATA2-L35!CQTTTTTLWF  | 106   | >GATA2-L35!CQTTTTTVW   | 93    | 13    |
| >GATA2-L35!NCQTTTTTL   | 337   | >GATA2-L35!NCQTTTTTV   | 1248  | 911   |
| >GATA2-L35!NCQTTTTTLV  | 163   | >GATA2-L35!NCQTTTTTVV  | 167   | 4     |
| >GATA2-P12!TPLHPSAA    | 11938 | >GATA2-P12!TTLHPSAA    | 106   | 11832 |
| >GATA2-P12!TPLHPSAA    | 1447  | >GATA2-P12!TTLHPSAA    | 118   | 1329  |
| >GATA2-P12!TPLHPSAA    | 361   | >GATA2-P12!TTLHPSAA    | 21530 | 21169 |
| >GATA2-P12!TPLHPSAA    | 431   | >GATA2-P12!TTLHPSAA    | 15854 | 15423 |
| >GATA2-P12!TPLHPSAAG   | 423   | >GATA2-P12!TTLHPSAAG   | 15460 | 15037 |
| >GATA2-P12!TPLHPSAA    | 40    | >GATA2-P12!TTLHPSAA    | 22910 | 22870 |
| >GATA2-P12!KTPLHPSA    | 306   | >GATA2-P12!KTTLHPSA    | 59    | 247   |
| >GATA2-P12!KTPLHPSAA   | 1504  | >GATA2-P12!KTTLHPSAA   | 249   | 1255  |
| >GATA2-P12!KTPLHPSAAG  | 269   | >GATA2-P12!KTTLHPSAAG  | 5206  | 4937  |
| >GATA2-P12!KTPLHPSAAG  | 345   | >GATA2-P12!KTTLHPSAAG  | 6714  | 6369  |
| >GATA2-P12!FSKTPLHPSA/ | 553   | >GATA2-P12!FSKTTLHPSA/ | 311   | 242   |
| >GATA2-P12!FSKTPLHPSA  | 530   | >GATA2-P12!FSKTTLHPSA  | 200   | 330   |
| >GATA2-P12!FSKTPLHPSA/ | 807   | >GATA2-P12!FSKTTLHPSA/ | 404   | 403   |
| >GATA2-P12!SPFSKTPL    | 24    | >GATA2-P12!SPFSKTTL    | 12    | 12    |
| >GATA2-P12!SPFSKTPL    | 18    | >GATA2-P12!SPFSKTTL    | 34    | 16    |
| >GATA2-P12!SPFSKTPL    | 189   | >GATA2-P12!SPFSKTTL    | 207   | 18    |
| >GATA2-P12!SPFSKTPL    | 288   | >GATA2-P12!SPFSKTTL    | 455   | 167   |
| >GATA2-P12!SPFSKTPL    | 109   | >GATA2-P12!SPFSKTTL    | 191   | 82    |
| >GATA2-P12!SPFSKTPL    | 401   | >GATA2-P12!SPFSKTTL    | 174   | 227   |
| >GATA2-P12!VSPFSKTPL   | 237   | >GATA2-P12!VSPFSKTTL   | 623   | 386   |
| >GATA2-P12!VSPFSKTPL   | 179   | >GATA2-P12!VSPFSKTTL   | 484   | 305   |
| >GATA2-P12!VSPFSKTPL   | 333   | >GATA2-P12!VSPFSKTTL   | 161   | 172   |
| >GATA2-P12!VSPFSKTPL   | 15    | >GATA2-P12!VSPFSKTTL   | 16    | 1     |
| >GATA2-P12!VSPFSKTPLH  | 434   | >GATA2-P12!VSPFSKTTLH  | 702   | 268   |
| >GATA2-P12!TVSPFSKTPL  | 223   | >GATA2-P12!TVSPFSKTTL  | 323   | 100   |
| >GATA2-P12!TVSPFSKTPL  | 292   | >GATA2-P12!TVSPFSKTTL  | 277   | 15    |
| >GATA2-P12!TVSPFSKTPL  | 460   | >GATA2-P12!TVSPFSKTTL  | 679   | 219   |
| >GATA2-P12!TVSPFSKTPL  | 426   | >GATA2-P12!TVSPFSKTTL  | 1424  | 998   |
| >GATA2-P12!TVSPFSKTPL  | 898   | >GATA2-P12!TVSPFSKTTL  | 473   | 425   |
| >GATA2-P12!WTVSPFSKTP  | 210   | >GATA2-P12!WTVSPFSKTT  | 293   | 83    |
| >GATA2-P12!WTVSPFSKTP  | 236   | >GATA2-P12!WTVSPFSKTT  | 377   | 141   |
| >GATA2-P12!WTVSPFSKTP  | 357   | >GATA2-P12!WTVSPFSKTT  | 344   | 13    |
| >GATA2-P12!WTVSPFSKTP  | 13    | >GATA2-P12!WTVSPFSKTT  | 39    | 26    |
| >GATA2-P12!WTVSPFSKTP  | 43    | >GATA2-P12!WTVSPFSKTT  | 137   | 94    |
| >GATA2-P12!WTVSPFSKTP  | 150   | >GATA2-P12!WTVSPFSKTT  | 233   | 83    |
| >GATA2-P12!WTVSPFSKTP  | 16    | >GATA2-P12!WTVSPFSKTT  | 14    | 2     |
| >GATA2-P12!WTVSPFSKTP  | 233   | >GATA2-P12!WTVSPFSKTT  | 195   | 38    |
| >GATA2-P12!WTVSPFSKTP  | 15    | >GATA2-P12!WTVSPFSKTT  | 4     | 11    |
| >GATA2-S71!SYSPAHARL   | 59    | >GATA2-S71!FYSPAHARL   | 182   | 123   |
| >GATA2-S71!SYSPAHARL   | 1927  | >GATA2-S71!FYSPAHARL   | 80    | 1847  |

|                        |       |                         |       |       |
|------------------------|-------|-------------------------|-------|-------|
| >GATA2-S71ISYSPA HARL  | 2840  | >GATA2-S71IFYS PA HARL  | 177   | 2663  |
| >GATA2-S71ISYSPA HARL  | 817   | >GATA2-S71IFYS PA HARL  | 195   | 622   |
| >GATA2-S71ISYSPA HARL  | 298   | >GATA2-S71IFYS PA HARL  | 320   | 22    |
| >GATA2-S71ISYSPA HAR   | 981   | >GATA2-S71IFYS PA HAR   | 420   | 561   |
| >GATA2-S71ISYSPA HARL  | 12    | >GATA2-S71IFYS PA HARL  | 7     | 5     |
| >GATA2-S71ISYSPA HAR   | 33    | >GATA2-S71IFYS PA HAR   | 293   | 260   |
| >GATA2-S71ISYSPA HAR   | 275   | >GATA2-S71IFYS PA HAR   | 76    | 199   |
| >GATA2-S71ISYSPA HAR   | 356   | >GATA2-S71IFYS PA HAR   | 85    | 271   |
| >GATA2-S71ISYSPA HAR   | 35    | >GATA2-S71IFYS PA HAR   | 45    | 10    |
| >GATA2-S71IVSYSPA HA   | 194   | >GATA2-S71IVFYS PA HA   | 1164  | 970   |
| >GATA2-S71IVSYSPA HAR  | 312   | >GATA2-S71IVFYS PA HAR  | 4064  | 3752  |
| >GATA2-S71IVSYSPA HAR  | 66    | >GATA2-S71IVFYS PA HAR  | 3770  | 3704  |
| >GATA2-S71IVSYSPA HARL | 18554 | >GATA2-S71IVFYS PA HARL | 343   | 18211 |
| >GATA2-S71IVSYSPA HAR  | 28    | >GATA2-S71IVFYS PA HAR  | 16    | 12    |
| >GATA2-S71IVSYSPA HAR  | 894   | >GATA2-S71IVFYS PA HAR  | 127   | 767   |
| >GATA2-S71IVSYSPA HAR  | 38    | >GATA2-S71IVFYS PA HAR  | 309   | 271   |
| >GATA2-S71IVSYSPA HARL | 384   | >GATA2-S71IVFYS PA HARL | 10896 | 10512 |
| >GATA2-S71IVSYSPA HAR  | 399   | >GATA2-S71IVFYS PA HAR  | 5526  | 5127  |
| >GATA2-S71IVSYSPA HARL | 213   | >GATA2-S71IVFYS PA HARL | 4086  | 3873  |
| >GATA2-S71IVSYSPA HARL | 3     | >GATA2-S71IVFYS PA HARL | 9173  | 9170  |
| >GATA2-S71IVSYSPA HARL | 358   | >GATA2-S71IVFYS PA HARL | 16584 | 16226 |
| >GATA2-S71IVSYSPA HARL | 28    | >GATA2-S71IVFYS PA HARL | 3221  | 3193  |
| >GATA2-S71IVSYSPA HAR  | 938   | >GATA2-S71IVFYS PA HAR  | 65    | 873   |
| >GATA2-S71IVSYSPA HARL | 15673 | >GATA2-S71IVFYS PA HARL | 119   | 15554 |
| >GATA2-S71IVSYSPA HARL | 265   | >GATA2-S71IVFYS PA HARL | 22126 | 21861 |
| >GATA2-S71IRVSYSPA HAR | 4873  | >GATA2-S71IRVFYS PA HAR | 240   | 4633  |
| >GATA2-S71IRVSYSPA HAR | 620   | >GATA2-S71IRVFYS PA HAR | 281   | 339   |
| >GATA2-S71IRVSYSPA HA  | 208   | >GATA2-S71IRVFYS PA HA  | 117   | 91    |
| >GATA2-S71IRVSYSPA HAR | 684   | >GATA2-S71IRVFYS PA HAR | 361   | 323   |
| >GATA2-S71IRVSYSPA HAR | 5011  | >GATA2-S71IRVFYS PA HAR | 492   | 4519  |
| >GATA2-S71IRVSYSPA H   | 1020  | >GATA2-S71IRVFYS PA H   | 204   | 816   |
| >GATA2-S71IRVSYSPA HAR | 323   | >GATA2-S71IRVFYS PA HAR | 167   | 156   |
| >GATA2-S71IRVSYSPA HAR | 176   | >GATA2-S71IRVFYS PA HAR | 200   | 24    |
| >GATA2-S71IRVSYSPA H   | 1344  | >GATA2-S71IRVFYS PA H   | 251   | 1093  |
| >GATA2-S71IRVSYSPA HA  | 23    | >GATA2-S71IRVFYS PA HA  | 8     | 15    |
| >GATA2-S71IRVSYSPA HAR | 455   | >GATA2-S71IRVFYS PA HAR | 83    | 372   |
| >GATA2-S71IRVSYSPA HAR | 78    | >GATA2-S71IRVFYS PA HAR | 18    | 60    |
| >GATA2-S71IRVSYSPA HAR | 34    | >GATA2-S71IRVFYS PA HAR | 29    | 5     |
| >GATA2-S71IRVSYSPA H   | 2935  | >GATA2-S71IRVFYS PA H   | 212   | 2723  |
| >GATA2-S71IRVSYSPA HAR | 3097  | >GATA2-S71IRVFYS PA HAR | 208   | 2889  |
| >GATA2-S71IRVSYSPA HAR | 541   | >GATA2-S71IRVFYS PA HAR | 28    | 513   |
| >GATA2-S71IRVSYSPA HAR | 47    | >GATA2-S71IRVFYS PA HAR | 27    | 20    |
| >GATA2-S71IRVSYSPA HA  | 1739  | >GATA2-S71IRVFYS PA HA  | 282   | 1457  |



|                        |      |                        |      |      |
|------------------------|------|------------------------|------|------|
| >GATA2-S71IRVSYSPA HAR | 1242 | >GATA2-S71IRVFYSPA HAR | 196  | 1046 |
| >GATA2-S71IRVSYSPA HAR | 1093 | >GATA2-S71IRVFYSPA HAR | 380  | 713  |
| >GATA2-S71IRVSYSPA H   | 2287 | >GATA2-S71IRVFYSPA H   | 327  | 1960 |
| >GATA2-S71IRVSYSPA HAR | 2626 | >GATA2-S71IRVFYSPA HAR | 384  | 2242 |
| >GATA2-S71IRVSYSPA HAR | 1680 | >GATA2-S71IRVFYSPA HAR | 223  | 1457 |
| >GATA2-S71IRVSYSPA HAR | 15   | >GATA2-S71IRVFYSPA HAR | 6    | 9    |
| >GATA2-S71IRVSYSPA HAR | 396  | >GATA2-S71IRVFYSPA HAR | 78   | 318  |
| >GATA2-S71IRVSYSPA HAR | 25   | >GATA2-S71IRVFYSPA HAR | 21   | 4    |
| >GATA2-S71IRVSYSPA HAR | 191  | >GATA2-S71IRVFYSPA HAR | 58   | 133  |
| >GATA2-S71IRVSYSPA HAR | 2319 | >GATA2-S71IRVFYSPA HAR | 408  | 1911 |
| >GATA2-S71IARVSYSPA    | 166  | >GATA2-S71IARVFYSPA    | 581  | 415  |
| >GATA2-S71IARVSYSPA H  | 140  | >GATA2-S71IARVFYSPA H  | 763  | 623  |
| >GATA2-S71IARVSYSPA HA | 464  | >GATA2-S71IARVFYSPA HA | 1353 | 889  |
| >GATA2-S71IARVSYSPA HA | 259  | >GATA2-S71IARVFYSPA HA | 904  | 645  |
| >GATA2-S71IARVSYSPA HA | 166  | >GATA2-S71IARVFYSPA HA | 207  | 41   |
| >GATA2-S71IARVSYSPA HA | 185  | >GATA2-S71IARVFYSPA HA | 294  | 109  |
| >GATA2-S71IRARVSYSPA   | 3476 | >GATA2-S71IRARVFYSPA   | 208  | 3268 |
| >GATA2-S71IRARVSYSP    | 26   | >GATA2-S71IRARVFYSP    | 34   | 8    |
| >GATA2-S71IRARVSYSPA   | 3    | >GATA2-S71IRARVFYSPA   | 3    | 0    |
| >GATA2-S71IRARVSYSPA H | 10   | >GATA2-S71IRARVFYSPA H | 10   | 0    |
| >GATA2-S71IRARVSYSPA H | 4    | >GATA2-S71IRARVFYSPA H | 4    | 0    |
| >GATA2-S71IRARVSYSPA   | 137  | >GATA2-S71IRARVFYSPA   | 542  | 405  |
| >GATA2-S71IRARVSYSPA   | 83   | >GATA2-S71IRARVFYSPA   | 116  | 33   |
| >GATA2-S71IRARVSYSPA H | 133  | >GATA2-S71IRARVFYSPA H | 206  | 73   |
| >GATA2-S71IRARVSYSPA H | 447  | >GATA2-S71IRARVFYSPA H | 550  | 103  |
| >GATA2-S71IRARVSYSPA   | 242  | >GATA2-S71IRARVFYSPA   | 1897 | 1655 |
| >GATA2-S71IRARVSYSPA H | 60   | >GATA2-S71IRARVFYSPA H | 226  | 166  |
| >GATA2-S71IRARVSYSPA H | 347  | >GATA2-S71IRARVFYSPA H | 1241 | 894  |
| >GATA2-S71IARARVSYSPA  | 377  | >GATA2-S71IARARVFYSPA  | 404  | 27   |
| >GATA2-S71IARARVSYSPA  | 403  | >GATA2-S71IARARVFYSPA  | 290  | 113  |
| >GATA2-S71IHARARVSY    | 12   | >GATA2-S71IHARARV FY   | 7    | 5    |
| >GATA2-S71IHARARVSY S  | 14   | >GATA2-S71IHARARV FYS  | 12   | 2    |
| >GATA2-S71IHARARVSYSP  | 53   | >GATA2-S71IHARARV FYSP | 65   | 12   |
| >GATA2-S71IHARARVSYSP  | 4    | >GATA2-S71IHARARV FYSP | 4    | 0    |
| >GATA2-S71IHARARVSYSP  | 237  | >GATA2-S71IHARARV FYSP | 658  | 421  |
| >GATA2-S71IHARARVSYSP  | 213  | >GATA2-S71IHARARV FYSP | 244  | 31   |
| >GATA2-S71IHARARVSY    | 92   | >GATA2-S71IHARARV FY   | 268  | 176  |
| >GATA2-S71IHARARVSY    | 425  | >GATA2-S71IHARARV FY   | 1637 | 1212 |
| >GATA2-S71IHARARVSY    | 50   | >GATA2-S71IHARARV FY   | 204  | 154  |
| >GATA2-S71IHARARVSY    | 10   | >GATA2-S71IHARARV FY   | 19   | 9    |
| >GATA2-S71IHARARVSY    | 153  | >GATA2-S71IHARARV FY   | 507  | 354  |
| >GATA2-S71IHARARVSY    | 446  | >GATA2-S71IHARARV FY   | 293  | 153  |
| >GATA2-S71IAHARARVSY   | 471  | >GATA2-S71IAHARARV FY  | 258  | 213  |

|                        |       |                        |      |       |
|------------------------|-------|------------------------|------|-------|
| >GATA2-S71IAHARARVS    | 12731 | >GATA2-S71IAHARARVF    | 30   | 12701 |
| >GATA2-S71IAHARARVSY   | 20    | >GATA2-S71IAHARARVfy   | 83   | 63    |
| >GATA2-S71IAHARARVSY   | 100   | >GATA2-S71IAHARARVfy   | 333  | 233   |
| >GATA2-S71INPAHARARV   | 4067  | >GATA2-S71INPAHARARV   | 104  | 3963  |
| >GATA2-S71INPAHARARV   | 87    | >GATA2-S71INPAHARARV   | 1094 | 1007  |
| >GATA2-S71INPAHARARV   | 14    | >GATA2-S71INPAHARARV   | 31   | 17    |
| >GATA2-S71INPAHARARV   | 265   | >GATA2-S71INPAHARARV   | 295  | 30    |
| >GATA2-S71INPAHARARV   | 4020  | >GATA2-S71INPAHARARV   | 25   | 3995  |
| >GATA2-S71INPAHARARV   | 8     | >GATA2-S71INPAHARARV   | 15   | 7     |
| >GATA2-S71INPAHARARV   | 22975 | >GATA2-S71INPAHARARV   | 236  | 22739 |
| >GATA3-A14 ASPHLFTF    | 560   | >GATA3-A14 TSPHLFTF    | 286  | 274   |
| >GATA3-A14 ASPHLFTF    | 363   | >GATA3-A14 TSPHLFTF    | 151  | 212   |
| >GATA3-A14 ASPHLFTF    | 291   | >GATA3-A14 TSPHLFTF    | 369  | 78    |
| >GATA3-A14 ASPHLFTF    | 83    | >GATA3-A14 TSPHLFTF    | 254  | 171   |
| >GATA3-A14 ASPHLFTF    | 115   | >GATA3-A14 TSPHLFTF    | 576  | 461   |
| >GATA3-A14 ASPHLFTF    | 39    | >GATA3-A14 TSPHLFTF    | 155  | 116   |
| >GATA3-A14 ASPHLFTF    | 33    | >GATA3-A14 TSPHLFTF    | 30   | 3     |
| >GATA3-A14 ASPHLFTFP   | 76    | >GATA3-A14 TSPHLFTFP   | 59   | 17    |
| >GATA3-A14 ASPHLFTFPP  | 225   | >GATA3-A14 TSPHLFTFPP  | 153  | 72    |
| >GATA3-A14 ASPHLFTFPP* | 149   | >GATA3-A14 TSPHLFTFPP† | 102  | 47    |
| >GATA3-A14 ASPHLFTF    | 811   | >GATA3-A14 TSPHLFTF    | 297  | 514   |
| >GATA3-A14 HASPHLFTF   | 241   | >GATA3-A14 HTSPHLFTF   | 152  | 89    |
| >GATA3-A14 HASPHLFTF   | 641   | >GATA3-A14 HTSPHLFTF   | 305  | 336   |
| >GATA3-A14 HASPHLFTF   | 111   | >GATA3-A14 HTSPHLFTF   | 40   | 71    |
| >GATA3-A14 HASPHLFTF   | 3849  | >GATA3-A14 HTSPHLFTF   | 153  | 3696  |
| >GATA3-A14 HASPHLFTF   | 2033  | >GATA3-A14 HTSPHLFTF   | 28   | 2005  |
| >GATA3-A14 HASPHLFTF   | 1383  | >GATA3-A14 HTSPHLFTF   | 241  | 1142  |
| >GATA3-A14 HASPHLFTF   | 1381  | >GATA3-A14 HTSPHLFTF   | 49   | 1332  |
| >GATA3-A14 HASPHLFTF   | 240   | >GATA3-A14 HTSPHLFTF   | 179  | 61    |
| >GATA3-A14 HASPHLFTF   | 114   | >GATA3-A14 HTSPHLFTF   | 247  | 133   |
| >GATA3-A14 HASPHLFTF   | 4     | >GATA3-A14 HTSPHLFTF   | 3    | 1     |
| >GATA3-A14 HASPHLFTF   | 13    | >GATA3-A14 HTSPHLFTF   | 90   | 77    |
| >GATA3-A14 HASPHLFTF   | 433   | >GATA3-A14 HTSPHLFTF   | 7485 | 7052  |
| >GATA3-A14 HASPHLFTF   | 125   | >GATA3-A14 HTSPHLFTF   | 84   | 41    |
| >GATA3-A14 HASPHLFTF   | 18    | >GATA3-A14 HTSPHLFTF   | 17   | 1     |
| >GATA3-A14 HASPHLFTF   | 822   | >GATA3-A14 HTSPHLFTF   | 71   | 751   |
| >GATA3-A14 HASPHLFTF   | 1299  | >GATA3-A14 HTSPHLFTF   | 57   | 1242  |
| >GATA3-A14 HASPHLFTF   | 64    | >GATA3-A14 HTSPHLFTF   | 53   | 11    |
| >GATA3-A14 HASPHLFTF   | 190   | >GATA3-A14 HTSPHLFTF   | 3937 | 3747  |
| >GATA3-A14 HASPHLFTF   | 2169  | >GATA3-A14 HTSPHLFTF   | 435  | 1734  |
| >GATA3-A14 GHASPHLF    | 184   | >GATA3-A14 GHTSPHLF    | 439  | 255   |
| >GATA3-A14 GHASPHLFTF  | 75    | >GATA3-A14 GHTSPHLFTF  | 173  | 98    |
| >GATA3-A14 GGHASPHLFT  | 160   | >GATA3-A14 GGHTSPHLFT  | 370  | 210   |

|                        |      |                        |       |       |
|------------------------|------|------------------------|-------|-------|
| >GATA3-A14 LSGGHASPHL  | 537  | >GATA3-A14 LSGGHTSPHL  | 400   | 137   |
| >GATA3-A14 LSGGHASPHL  | 464  | >GATA3-A14 LSGGHTSPHL  | 416   | 48    |
| >GATA3-A14 LSGGHASPHL  | 564  | >GATA3-A14 LSGGHTSPHL  | 475   | 89    |
| >GATA3-A14 LSGGHASPHL  | 42   | >GATA3-A14 LSGGHTSPHL  | 68    | 26    |
| >GATA3-A14 LSGGHASPHL  | 9    | >GATA3-A14 LSGGHTSPHL  | 14    | 5     |
| >GATA3-A14 LSGGHASPHL  | 65   | >GATA3-A14 LSGGHTSPHL  | 56    | 9     |
| >GATA3-A14 LSGGHASPHL  | 161  | >GATA3-A14 LSGGHTSPHL  | 163   | 2     |
| >GATA3-A14 LSGGHASPHL  | 155  | >GATA3-A14 LSGGHTSPHL  | 241   | 86    |
| >GATA3-A14 LSGGHASPHL  | 766  | >GATA3-A14 LSGGHTSPHL  | 298   | 468   |
| >GATA3-A14 SLSGGHASPT  | 97   | >GATA3-A14 SLSGGHTSPH  | 138   | 41    |
| >GATA3-A14 SLSGGHASPT  | 19   | >GATA3-A14 SLSGGHTSPH  | 20    | 1     |
| >GATA3-A14 SLSGGHASPT  | 39   | >GATA3-A14 SLSGGHTSPH  | 39    | 0     |
| >GATA3-A14 SLSGGHASPT  | 144  | >GATA3-A14 SLSGGHTSPH  | 188   | 44    |
| >GATA3-A14 SLSGGHASPT  | 17   | >GATA3-A14 SLSGGHTSPH  | 17    | 0     |
| >GATA3-A14 SLSGGHASPT  | 72   | >GATA3-A14 SLSGGHTSPH  | 104   | 32    |
| >GATA3-A14 SLSGGHASPT  | 8    | >GATA3-A14 SLSGGHTSPH  | 8     | 0     |
| >GATA3-A14 SLSGGHASPT  | 91   | >GATA3-A14 SLSGGHTSPH  | 156   | 65    |
| >GATA3-A14 SLSGGHAS    | 87   | >GATA3-A14 SLSGGHTS    | 35    | 52    |
| >GATA3-A14 SLSGGHASP   | 465  | >GATA3-A14 SLSGGHTSP   | 730   | 265   |
| >GATA3-A14 SLSGGHASPT  | 3    | >GATA3-A14 SLSGGHTSPH  | 3     | 0     |
| >GATA3-A14 SLSGGHASPT  | 236  | >GATA3-A14 SLSGGHTSPH  | 288   | 52    |
| >GATA3-A14 SLSGGHASPT  | 373  | >GATA3-A14 SLSGGHTSPH  | 312   | 61    |
| >GATA3-A14 SSSLGGHASP  | 353  | >GATA3-A14 SSSLGGHTSP  | 491   | 138   |
| >GATA3-A14 SSSLGGHASP  | 138  | >GATA3-A14 SSSLGGHTSP  | 152   | 14    |
| >GATA3-A14 SSSSLGGHA   | 279  | >GATA3-A14 SSSSLGGHT   | 842   | 563   |
| >GATA3-L34< LYYKLHNI   | 98   | >GATA3-L34< FYYKLHNI   | 27    | 71    |
| >GATA3-L34< LYYKLHNI   | 1193 | >GATA3-L34< FYYKLHNI   | 113   | 1080  |
| >GATA3-L34< LYYKLHNI   | 3314 | >GATA3-L34< FYYKLHNI   | 496   | 2818  |
| >GATA3-L34< LYYKLHNI   | 26   | >GATA3-L34< FYYKLHNI   | 24    | 2     |
| >GATA3-L34< LYYKLHNI   | 78   | >GATA3-L34< FYYKLHNI   | 132   | 54    |
| >GATA3-L34< LYYKLHNI   | 6    | >GATA3-L34< FYYKLHNI   | 5     | 1     |
| >GATA3-L34< LYYKLHNINR | 27   | >GATA3-L34< FYYKLHNINR | 44    | 17    |
| >GATA3-L34< LYYKLHNINR | 138  | >GATA3-L34< FYYKLHNINR | 61    | 77    |
| >GATA3-L34< LYYKLHNINR | 491  | >GATA3-L34< FYYKLHNINR | 103   | 388   |
| >GATA3-L34< LYYKLHNINR | 16   | >GATA3-L34< FYYKLHNINR | 13    | 3     |
| >GATA3-L34< GLYYKLHNI  | 26   | >GATA3-L34< GFYYKLHNI  | 11225 | 11199 |
| >GATA3-L34< GLYYKLHNI  | 13   | >GATA3-L34< GFYYKLHNI  | 1089  | 1076  |
| >GATA3-L34< GLYYKLHNI  | 6    | >GATA3-L34< GFYYKLHNI  | 3079  | 3073  |
| >GATA3-L34< GLYYKLHNI  | 272  | >GATA3-L34< GFYYKLHNI  | 13368 | 13096 |
| >GATA3-L34< GLYYKLHNI  | 9    | >GATA3-L34< GFYYKLHNI  | 6813  | 6804  |
| >GATA3-L34< GLYYKLHNI  | 5    | >GATA3-L34< GFYYKLHNI  | 4563  | 4558  |
| >GATA3-L34< GLYYKLHNI  | 16   | >GATA3-L34< GFYYKLHNI  | 8780  | 8764  |
| >GATA3-L34< GLYYKLHNI  | 323  | >GATA3-L34< GFYYKLHNI  | 18736 | 18413 |

|                       |       |                       |       |       |
|-----------------------|-------|-----------------------|-------|-------|
| >GATA3-L34<GLYYKLHNI  | 12    | >GATA3-L34<GFYYKLHNI  | 17060 | 17048 |
| >GATA3-L34<GLYYKLHNIN | 103   | >GATA3-L34<GFYYKLHNIN | 5401  | 5298  |
| >GATA3-L34<GLYYKLHNI  | 1645  | >GATA3-L34<GFYYKLHNI  | 38    | 1607  |
| >GATA3-L34<GLYYKLHNI  | 16132 | >GATA3-L34<GFYYKLHNI  | 414   | 15718 |
| >GATA3-L34<GLYYKLHNIN | 25    | >GATA3-L34<GFYYKLHNIN | 12    | 13    |
| >GATA3-L34<GLYYKLHNI  | 334   | >GATA3-L34<GFYYKLHNI  | 5913  | 5579  |
| >GATA3-L34<GLYYKLHNIN | 696   | >GATA3-L34<GFYYKLHNIN | 119   | 577   |
| >GATA3-L34<GLYYKLHNIN | 418   | >GATA3-L34<GFYYKLHNIN | 888   | 470   |
| >GATA3-L34<GLYYKLHNIN | 362   | >GATA3-L34<GFYYKLHNIN | 99    | 263   |
| >GATA3-L34<NACGLYYK   | 54    | >GATA3-L34<NACGFYYK   | 23    | 31    |
| >GATA3-L34<NACGLYYK   | 338   | >GATA3-L34<NACGFYYK   | 175   | 163   |
| >GATA3-L34<NACGLYYK   | 197   | >GATA3-L34<NACGFYYK   | 96    | 101   |
| >GATA3-L34<NACGLYYK   | 31    | >GATA3-L34<NACGFYYK   | 14    | 17    |
| >GATA3-L34<NACGLYYKL  | 204   | >GATA3-L34<NACGFYYKL  | 127   | 77    |
| >GATA3-L34<NACGLYYK   | 1161  | >GATA3-L34<NACGFYYK   | 231   | 930   |
| >GATA3-L34<CNACGLYYK  | 795   | >GATA3-L34<CNACGFYYK  | 293   | 502   |
| >GATA3-L34<CNACGLYY   | 27    | >GATA3-L34<CNACGFYY   | 24    | 3     |
| >GATA3-L34<CNACGLYY   | 452   | >GATA3-L34<CNACGFYY   | 187   | 265   |
| >GATA3-L34<CNACGLYYK  | 262   | >GATA3-L34<CNACGFYYK  | 161   | 101   |
| >GATA3-L34<CNACGLYY   | 91    | >GATA3-L34<CNACGFYY   | 84    | 7     |
| >GATA3-L34<CNACGLYYK  | 1944  | >GATA3-L34<CNACGFYYK  | 498   | 1446  |
| >GATA3-L34<CNACGLYYK  | 1014  | >GATA3-L34<CNACGFYYK  | 123   | 891   |
| >GATA3-L34<VCNACGLYYK | 297   | >GATA3-L34<VCNACGFYYK | 259   | 38    |
| >GATA3-L34<VCNACGLYYK | 446   | >GATA3-L34<VCNACGFYYK | 424   | 22    |
| >GATA3-L34<VCNACGLY   | 291   | >GATA3-L34<VCNACGFY   | 506   | 215   |
| >GATA3-L34<VCNACGLYY  | 37    | >GATA3-L34<VCNACGFYY  | 54    | 17    |
| >GATA3-L34<VCNACGLY   | 79    | >GATA3-L34<VCNACGFY   | 30    | 49    |
| >GATA3-L34<VCNACGLYY  | 106   | >GATA3-L34<VCNACGFYY  | 28    | 78    |
| >GATA3-L34<VCNACGLYYK | 560   | >GATA3-L34<VCNACGFYYK | 299   | 261   |
| >GATA3-L34<VCNACGLY   | 53    | >GATA3-L34<VCNACGFY   | 47    | 6     |
| >GATA3-L34<VCNACGLYY  | 7     | >GATA3-L34<VCNACGFYY  | 22    | 15    |
| >GATA3-L34<VCNACGLYY  | 195   | >GATA3-L34<VCNACGFYY  | 222   | 27    |
| >GATA3-L34<VCNACGLYY  | 293   | >GATA3-L34<VCNACGFYY  | 109   | 184   |
| >GATA3-L34<VCNACGLYYK | 549   | >GATA3-L34<VCNACGFYYK | 214   | 335   |
| >GATA3-L34<PVCNACGLY  | 177   | >GATA3-L34<PVCNACGFY  | 116   | 61    |
| >GATA3-L34<PVCNACGLY  | 3133  | >GATA3-L34<PVCNACGFY  | 210   | 2923  |
| >GATA3-L34<PVCNACGLY  | 112   | >GATA3-L34<PVCNACGFY  | 163   | 51    |
| >GATA3-L34<PVCNACGLYY | 567   | >GATA3-L34<PVCNACGFY  | 443   | 124   |
| >GATA3-L34<PVCNACGLY  | 162   | >GATA3-L34<PVCNACGFY  | 68    | 94    |
| >GATA3-L34<PVCNACGLYY | 199   | >GATA3-L34<PVCNACGFY  | 551   | 352   |
| >GATA3-L34<DPVCNACGL' | 2275  | >GATA3-L34<DPVCNACGF' | 294   | 1981  |
| >GATA3-L34<DPVCNACGL  | 442   | >GATA3-L34<DPVCNACGF  | 10225 | 9783  |
| >GATA3-L34<DPVCNACGL' | 399   | >GATA3-L34<DPVCNACGF' | 307   | 92    |

|                        |       |                        |       |       |
|------------------------|-------|------------------------|-------|-------|
| >GATA3-L34' DPVCNACGL  | 608   | >GATA3-L34' DPVCNACGF  | 39    | 569   |
| >GATA3-L34' DPVCNACGL' | 161   | >GATA3-L34' DPVCNACGF' | 280   | 119   |
| >GATA3-L34' DPVCNACGL' | 32    | >GATA3-L34' DPVCNACGF' | 30    | 2     |
| >GATA3-L34' DPVCNACGL' | 389   | >GATA3-L34' DPVCNACGF' | 244   | 145   |
| >GATA3-R36' RKMSSKSK   | 367   | >GATA3-R36' LKMSSKSK   | 6432  | 6065  |
| >GATA3-R36' RKMSSKSK   | 12    | >GATA3-R36' LKMSSKSK   | 25    | 13    |
| >GATA3-R36' RKMSSKSKK  | 21    | >GATA3-R36' LKMSSKSKK  | 54    | 33    |
| >GATA3-R36' RKMSSKSKKC | 199   | >GATA3-R36' LKMSSKSKKC | 400   | 201   |
| >GATA3-R36' RKMSSKSKKC | 25    | >GATA3-R36' LKMSSKSKKC | 81    | 56    |
| >GATA3-R36' RKMSSKSK   | 310   | >GATA3-R36' LKMSSKSK   | 4930  | 4620  |
| >GATA3-R36' RKMSSKSKK  | 289   | >GATA3-R36' LKMSSKSKK  | 4571  | 4282  |
| >GATA3-R36' RKMSSKSKKC | 478   | >GATA3-R36' LKMSSKSKKC | 6017  | 5539  |
| >GATA3-R36' NRKMSSKSKI | 11703 | >GATA3-R36' NLKMSSKSKK | 207   | 11496 |
| >GATA3-R36' NRKMSSKSK  | 2425  | >GATA3-R36' NLKMSSKSK  | 141   | 2284  |
| >GATA3-R36' MKKEGIQTR' | 508   | >GATA3-R36' MKKEGIQTR' | 31    | 477   |
| >GATA3-R36' RNRKMSSK   | 4     | >GATA3-R36' RNLKMSSK   | 69    | 65    |
| >GATA3-R36' RNRKMSSKS  | 297   | >GATA3-R36' RNLKMSSKS  | 9592  | 9295  |
| >GATA3-R36' RNRKMSSKSI | 4     | >GATA3-R36' RNLKMSSKSK | 44    | 40    |
| >GATA3-R36' RNRKMSSKSI | 6     | >GATA3-R36' RNLKMSSKSK | 201   | 195   |
| >GATA3-R36' TRNRKMSSK  | 430   | >GATA3-R36' TRNLKMSSK  | 669   | 239   |
| >GATA3-R36' QTRNRKMSS  | 34    | >GATA3-R36' QTRNLKMSSI | 42    | 8     |
| >GATA3-R36' QTRNRKMSS  | 145   | >GATA3-R36' QTRNLKMSSI | 116   | 29    |
| >GATA3-R36' QTRNRKMS   | 304   | >GATA3-R36' QTRNLKMS   | 741   | 437   |
| >GATA3-R36' QTRNRKMSS  | 39    | >GATA3-R36' QTRNLKMSS  | 87    | 48    |
| >GATA3-R36' QTRNRKMSS  | 4     | >GATA3-R36' QTRNLKMSSI | 4     | 0     |
| >GATA3-R36' QTRNRKMSS  | 168   | >GATA3-R36' QTRNLKMSSI | 293   | 125   |
| >GATA3-R36' QTRNRKMSS  | 249   | >GATA3-R36' QTRNLKMSSI | 103   | 146   |
| >GATA3-R36' IQTRNRKM   | 118   | >GATA3-R36' IQTRNLKM   | 95    | 23    |
| >GATA3-R36' IQTRNRKMS' | 438   | >GATA3-R36' IQTRNLKMSS | 741   | 303   |
| >GATA3-R36' GIQTRNRK   | 1154  | >GATA3-R36' GIQTRNLK   | 370   | 784   |
| >GATA3-R36' GIQTRNRK   | 120   | >GATA3-R36' GIQTRNLK   | 32    | 88    |
| >GATA3-R36' EGIQTRNRKM | 514   | >GATA3-R36' EGIQTRNLKM | 495   | 19    |
| >GATA3-R36' EGIQTRNR   | 103   | >GATA3-R36' EGIQTRNL   | 30493 | 30390 |
| >GATA3-R36' EGIQTRNRK  | 240   | >GATA3-R36' EGIQTRNLK  | 72    | 168   |
| >GATA3-R36' EGIQTRNR   | 483   | >GATA3-R36' EGIQTRNL   | 34783 | 34300 |
| >GATA3-R36' KEGIQTRNR  | 7683  | >GATA3-R36' KEGIQTRNL  | 300   | 7383  |
| >GATA3-R36' KEGIQTRNR  | 4441  | >GATA3-R36' KEGIQTRNL  | 190   | 4251  |
| >GATA3-R36' KEGIQTRNRK | 540   | >GATA3-R36' KEGIQTRNLK | 236   | 304   |
| >GATA3-R36' KEGIQTRNR  | 109   | >GATA3-R36' KEGIQTRNL  | 17849 | 17740 |
| >GATA3-R36' KKEGIQTRNR | 369   | >GATA3-R36' KKEGIQTRNL | 25958 | 25589 |
| >GATA3-S19' SHSRGSMTAI | 267   | >GATA3-S19' FHSRGSMTAI | 742   | 475   |
| >GATA3-S19' SHSRGSMTAI | 240   | >GATA3-S19' FHSRGSMTAI | 54    | 186   |
| >GATA3-S19' SHSRGSMTA  | 953   | >GATA3-S19' FHSRGSMTA  | 391   | 562   |

|                         |       |                         |       |       |
|-------------------------|-------|-------------------------|-------|-------|
| >GATA3-S19!SHSRGSMTAI   | 296   | >GATA3-S19!FHSRGSMTAI   | 129   | 167   |
| >GATA3-S19!SHSRGSMTAI   | 18    | >GATA3-S19!FHSRGSMTAI   | 7     | 11    |
| >GATA3-S19!SSHSRGSMT/   | 420   | >GATA3-S19!SFHSRGSMT/   | 1371  | 951   |
| >GATA3-S19!SSHSRGSMT    | 7639  | >GATA3-S19!SFHSRGSMT    | 132   | 7507  |
| >GATA3-S19!SSHSRGSMT/   | 1331  | >GATA3-S19!SFHSRGSMT/   | 20    | 1311  |
| >GATA3-S19!SSHSRGSMT    | 189   | >GATA3-S19!SFHSRGSMT    | 647   | 458   |
| >GATA3-S19!SSHSRGSMT/   | 32    | >GATA3-S19!SFHSRGSMT/   | 79    | 47    |
| >GATA3-S19!SSHSRGSMT    | 488   | >GATA3-S19!SFHSRGSMT    | 4648  | 4160  |
| >GATA3-S19!SSHSRGSMT/   | 141   | >GATA3-S19!SFHSRGSMT/   | 4588  | 4447  |
| >GATA3-S19!SSHSRGSMT    | 57    | >GATA3-S19!SFHSRGSMT    | 23329 | 23272 |
| >GATA3-S19!SSHSRGSMT/   | 18    | >GATA3-S19!SFHSRGSMT/   | 20104 | 20086 |
| >GATA3-S19!SSHSRGSMT    | 276   | >GATA3-S19!SFHSRGSMT    | 11430 | 11154 |
| >GATA3-S19!SSHSRGSMT    | 69    | >GATA3-S19!SFHSRGSMT    | 2021  | 1952  |
| >GATA3-S19!SSHSRGSMT/   | 413   | >GATA3-S19!SFHSRGSMT/   | 20802 | 20389 |
| >GATA3-S19!SSHSRGSMT/   | 55    | >GATA3-S19!SFHSRGSMT/   | 1866  | 1811  |
| >GATA3-S19!SSHSRGSMT    | 28946 | >GATA3-S19!SFHSRGSMT    | 303   | 28643 |
| >GATA3-S19!SSHSRGSMT/   | 29437 | >GATA3-S19!SFHSRGSMT/   | 461   | 28976 |
| >GATA3-S19!SSHSRGSMT    | 186   | >GATA3-S19!SFHSRGSMT    | 12751 | 12565 |
| >GATA3-S19!SSHSRGSMT/   | 211   | >GATA3-S19!SFHSRGSMT/   | 12312 | 12101 |
| >GATA3-S19!ESSHSRGSMT   | 1287  | >GATA3-S19!ESFHSRGSMT   | 271   | 1016  |
| >GATA3-S19!ESSHSRGSMT   | 408   | >GATA3-S19!ESFHSRGSMT   | 771   | 363   |
| >GATA3-S19!ESSHSRGSMT   | 1294  | >GATA3-S19!ESFHSRGSMT   | 274   | 1020  |
| >GATA3-S19!ESSHSRGSMT   | 848   | >GATA3-S19!ESFHSRGSMT   | 142   | 706   |
| >GATA3-S19!ESSHSRGSMT   | 119   | >GATA3-S19!ESFHSRGSMT   | 32    | 87    |
| >GATA3-S19!ESSHSRGSMT   | 1945  | >GATA3-S19!ESFHSRGSMT   | 170   | 1775  |
| >GATA3-S19!ESSHSRGSMT   | 228   | >GATA3-S19!ESFHSRGSMT   | 24    | 204   |
| >GATA3-S19!ESSHSRGSMT   | 520   | >GATA3-S19!ESFHSRGSMT   | 86    | 434   |
| >GATA3-S19!LESSHSRGSMT  | 345   | >GATA3-S19!LESFHSRGSMT  | 372   | 27    |
| >GATA3-S19!LESSHSRGSMT  | 407   | >GATA3-S19!LESFHSRGSMT  | 536   | 129   |
| >GATA3-S19!LESSHSRGSMT  | 551   | >GATA3-S19!LESFHSRGSMT  | 312   | 239   |
| >GATA3-S19!LESSHSRGSMT  | 204   | >GATA3-S19!LESFHSRGSMT  | 122   | 82    |
| >GATA3-S19!LESSHSRGSMT  | 104   | >GATA3-S19!LESFHSRGSMT  | 106   | 2     |
| >GATA3-S19!KLESSHSR     | 22    | >GATA3-S19!KLESFHSR     | 11    | 11    |
| >GATA3-S19!KLESSHSRGSMT | 196   | >GATA3-S19!KLESFHSRGSMT | 121   | 75    |
| >GATA3-S19!KLESSHSR     | 86    | >GATA3-S19!KLESFHSR     | 27    | 59    |
| >GATA3-S19!MKLESSHSR    | 341   | >GATA3-S19!MKLESFHSR    | 203   | 138   |
| >GATA3-S19!MKLESSHSR    | 332   | >GATA3-S19!MKLESFHSR    | 699   | 367   |
| >GATA3-S19!MKLESSHSR    | 38    | >GATA3-S19!MKLESFHSR    | 25    | 13    |
| >GATA3-S19!MKLESSHSR    | 374   | >GATA3-S19!MKLESFHSR    | 126   | 248   |
| >GATA3-S19!SMKLESSHSR   | 40    | >GATA3-S19!SMKLESFHSR   | 13    | 27    |
| >GATA3-S19!SMKLESSHSR   | 600   | >GATA3-S19!SMKLESFHSR   | 181   | 419   |
| >GATA3-S19!SMKLESSHSR   | 487   | >GATA3-S19!SMKLESFHSR   | 329   | 158   |
| >GATA3-S19!SMKLESSHSR   | 188   | >GATA3-S19!SMKLESFHSR   | 71    | 117   |

|                        |       |                        |       |       |
|------------------------|-------|------------------------|-------|-------|
| >GATA3-S19:DSMKLESS    | 17372 | >GATA3-S19:DSMKLESF    | 107   | 17265 |
| >GATA3-S19:DSMKLESSHS  | 1489  | >GATA3-S19:DSMKLESFHS  | 401   | 1088  |
| >GATA3-S19:DSMKLESSHS  | 36    | >GATA3-S19:DSMKLESFHS  | 18    | 18    |
| >GATA3-S19:DSMKLESSHS  | 9     | >GATA3-S19:DSMKLESFHS  | 7     | 2     |
| >GATA3-S19:DSMKLESS    | 24542 | >GATA3-S19:DSMKLESF    | 461   | 24081 |
| >GATA3-S19:DSMKLESSHS  | 1037  | >GATA3-S19:DSMKLESFHS  | 499   | 538   |
| >GATA3-S19:LPDSMKLESS  | 33182 | >GATA3-S19:LPDSMKLESF  | 145   | 33037 |
| >GATA3-S19:LPDSMKLESS  | 5657  | >GATA3-S19:LPDSMKLESF  | 62    | 5595  |
| >GATA3-S19:LPDSMKLESS  | 168   | >GATA3-S19:LPDSMKLESF  | 575   | 407   |
| >GATA3-S19:LPDSMKLESS  | 8916  | >GATA3-S19:LPDSMKLESF  | 260   | 8656  |
| >GATA3-S19:LPDSMKLESS  | 15974 | >GATA3-S19:LPDSMKLESF  | 50    | 15924 |
| >GATA3-S40:SLSHISPF    | 1537  | >GATA3-S40:FLSHISPF    | 86    | 1451  |
| >GATA3-S40:SLSHISPF    | 100   | >GATA3-S40:FLSHISPF    | 8     | 92    |
| >GATA3-S40:SLSHISPF    | 83    | >GATA3-S40:FLSHISPF    | 7     | 76    |
| >GATA3-S40:SLSHISPFHS  | 413   | >GATA3-S40:FLSHISPFHS  | 25    | 388   |
| >GATA3-S40:SLSHISPF    | 301   | >GATA3-S40:FLSHISPF    | 32    | 269   |
| >GATA3-S40:SLSHISPF    | 897   | >GATA3-S40:FLSHISPF    | 57    | 840   |
| >GATA3-S40:SLSHISPFHS  | 690   | >GATA3-S40:FLSHISPFHS  | 47    | 643   |
| >GATA3-S40:SLSHISPF    | 1427  | >GATA3-S40:FLSHISPF    | 108   | 1319  |
| >GATA3-S40:SLSHISPF    | 2713  | >GATA3-S40:FLSHISPF    | 199   | 2514  |
| >GATA3-S40:SLSHISPFHS  | 4030  | >GATA3-S40:FLSHISPFHS  | 263   | 3767  |
| >GATA3-S40:SLSHISPF    | 2163  | >GATA3-S40:FLSHISPF    | 303   | 1860  |
| >GATA3-S40:SLSHISPF    | 1772  | >GATA3-S40:FLSHISPF    | 237   | 1535  |
| >GATA3-S40:SLSHISPF    | 317   | >GATA3-S40:FLSHISPF    | 132   | 185   |
| >GATA3-S40:SLSHISPF    | 1777  | >GATA3-S40:FLSHISPF    | 293   | 1484  |
| >GATA3-S40:SLSHISPF    | 1437  | >GATA3-S40:FLSHISPF    | 91    | 1346  |
| >GATA3-S40:SLSHISPFHS  | 2068  | >GATA3-S40:FLSHISPFHS  | 166   | 1902  |
| >GATA3-S40:SLSHISPF    | 2003  | >GATA3-S40:FLSHISPF    | 400   | 1603  |
| >GATA3-S40:SLSHISPF    | 227   | >GATA3-S40:FLSHISPF    | 1999  | 1772  |
| >GATA3-S40:SLSHISPF    | 35    | >GATA3-S40:FLSHISPF    | 32    | 3     |
| >GATA3-S40:SLSHISPF    | 150   | >GATA3-S40:FLSHISPF    | 52    | 98    |
| >GATA3-S40:SLSHISPF    | 24    | >GATA3-S40:FLSHISPF    | 9     | 15    |
| >GATA3-S40:SLSHISPF    | 638   | >GATA3-S40:FLSHISPF    | 94    | 544   |
| >GATA3-S40:SSLSHISPF   | 98    | >GATA3-S40:SFLSHISPF   | 392   | 294   |
| >GATA3-S40:SSLSHISPFHS | 364   | >GATA3-S40:SFLSHISPFHS | 8518  | 8154  |
| >GATA3-S40:SSLSHISPF   | 5867  | >GATA3-S40:SFLSHISPF   | 181   | 5686  |
| >GATA3-S40:SSLSHISPF   | 4412  | >GATA3-S40:SFLSHISPF   | 15    | 4397  |
| >GATA3-S40:SSLSHISPF   | 9     | >GATA3-S40:SFLSHISPF   | 141   | 132   |
| >GATA3-S40:SSLSHISPF   | 314   | >GATA3-S40:SFLSHISPF   | 3957  | 3643  |
| >GATA3-S40:SSLSHISPF   | 37    | >GATA3-S40:SFLSHISPF   | 211   | 174   |
| >GATA3-S40:SSLSHISPF   | 1046  | >GATA3-S40:SFLSHISPF   | 118   | 928   |
| >GATA3-S40:SSLSHISPF   | 5     | >GATA3-S40:SFLSHISPF   | 80    | 75    |
| >GATA3-S40:SSLSHISPF   | 5     | >GATA3-S40:SFLSHISPF   | 14413 | 14408 |

|                        |       |                        |       |       |
|------------------------|-------|------------------------|-------|-------|
| >GATA3-S40: SSSLHISPF  | 489   | >GATA3-S40: SFLSHISPF  | 26832 | 26343 |
| >GATA3-S40: SSSLHISPF  | 364   | >GATA3-S40: SFLSHISPF  | 495   | 131   |
| >GATA3-S40: SSSLHISPF  | 19    | >GATA3-S40: SFLSHISPF  | 759   | 740   |
| >GATA3-S40: SSSLHISPF  | 116   | >GATA3-S40: SFLSHISPF  | 1379  | 1263  |
| >GATA3-S40: NPAALSRHM  | 2104  | >GATA3-S40: NPAALSRHM  | 19    | 2085  |
| >GATA3-S40: NPAALSRHM  | 3422  | >GATA3-S40: NPAALSRHM  | 446   | 2976  |
| >GATA3-S40: NPAALSRHM  | 1878  | >GATA3-S40: NPAALSRHM  | 30    | 1848  |
| >GATA3-S40: NPAALSRHM  | 19747 | >GATA3-S40: NPAALSRHM  | 417   | 19330 |
| >GATA3-S40: NPAALSRHM  | 3063  | >GATA3-S40: NPAALSRHM  | 31    | 3032  |
| >GATA3-S40: NPAALSRHM  | 22861 | >GATA3-S40: NPAALSRHM  | 265   | 22596 |
| >GATA3-S40: MSSLSHISP  | 1891  | >GATA3-S40: MSFLSHISP  | 331   | 1560  |
| >GATA3-S40: MSSLSHISPF | 224   | >GATA3-S40: MSFLSHISPF | 41    | 183   |
| >GATA3-S40: MSSLSHISPF | 1888  | >GATA3-S40: MSFLSHISPF | 71    | 1817  |
| >GATA3-S40: MSSLSHISPF | 2464  | >GATA3-S40: MSFLSHISPF | 334   | 2130  |
| >GATA3-S40: MSSLSHISPF | 42    | >GATA3-S40: MSFLSHISPF | 27    | 15    |
| >GATA3-S40: MSSLSHISPF | 6     | >GATA3-S40: MSFLSHISPF | 2     | 4     |
| >GATA3-S40: MSSLSHISPF | 3     | >GATA3-S40: MSFLSHISPF | 3     | 0     |
| >GATA3-S40: MSSLSHISPF | 892   | >GATA3-S40: MSFLSHISPF | 180   | 712   |
| >GATA3-S40: MSSLSHISPF | 52    | >GATA3-S40: MSFLSHISPF | 48    | 4     |
| >GATA3-S40: MSSLSHISPF | 229   | >GATA3-S40: MSFLSHISPF | 327   | 98    |
| >GATA3-S40: MSSLSHISPF | 23    | >GATA3-S40: MSFLSHISPF | 52    | 29    |
| >GATA3-S40: HMSSLSHI   | 236   | >GATA3-S40: HMSFLSHI   | 325   | 89    |
| >GATA3-S40: HMSSLSHI   | 9     | >GATA3-S40: HMSFLSHI   | 11    | 2     |
| >GATA3-S40: HMSSLSHIS  | 412   | >GATA3-S40: HMSFLSHIS  | 715   | 303   |
| >GATA3-S40: HMSSLSHISP | 104   | >GATA3-S40: HMSFLSHISP | 194   | 90    |
| >GATA3-S40: HMSSLSHI   | 12    | >GATA3-S40: HMSFLSHI   | 13    | 1     |
| >GATA3-S40: HMSSLSHISP | 371   | >GATA3-S40: HMSFLSHISP | 442   | 71    |
| >GATA3-S40: HMSSLSHI   | 256   | >GATA3-S40: HMSFLSHI   | 337   | 81    |
| >GATA3-S40: HMSSLSHI   | 66    | >GATA3-S40: HMSFLSHI   | 90    | 24    |
| >GATA3-S40: HMSSLSHI   | 21    | >GATA3-S40: HMSFLSHI   | 29    | 8     |
| >GATA3-S40: HMSSLSHI   | 69    | >GATA3-S40: HMSFLSHI   | 117   | 48    |
| >GATA3-S40: HMSSLSHI   | 319   | >GATA3-S40: HMSFLSHI   | 346   | 27    |
| >GATA3-S40: HMSSLSHI   | 31    | >GATA3-S40: HMSFLSHI   | 87    | 56    |
| >GATA3-S40: HMSSLSHISP | 522   | >GATA3-S40: HMSFLSHISP | 380   | 142   |
| >GATA3-S40: HMSSLSHISP | 212   | >GATA3-S40: HMSFLSHISP | 108   | 104   |
| >GATA3-S40: HMSSLSHI   | 1217  | >GATA3-S40: HMSFLSHI   | 460   | 757   |
| >GATA3-S40: HMSSLSHI   | 320   | >GATA3-S40: HMSFLSHI   | 467   | 147   |
| >GATA3-S40: HMSSLSHISP | 21    | >GATA3-S40: HMSFLSHISP | 24    | 3     |
| >GATA3-S40: HMSSLSHISP | 39    | >GATA3-S40: HMSFLSHISP | 67    | 28    |
| >GATA3-S40: HMSSLSHI   | 170   | >GATA3-S40: HMSFLSHI   | 565   | 395   |
| >GATA3-S40: HMSSLSHISP | 4     | >GATA3-S40: HMSFLSHISP | 6     | 2     |
| >GATA3-S40: HMSSLSHISP | 212   | >GATA3-S40: HMSFLSHISP | 239   | 27    |
| >GATA3-S40: HMSSLSHISP | 39    | >GATA3-S40: HMSFLSHISP | 53    | 14    |



|                       |      |                       |      |      |
|-----------------------|------|-----------------------|------|------|
| >GATA3-S40:HMSSSLHISP | 243  | >GATA3-S40:HMSFSLHISP | 1068 | 825  |
| >GATA3-S40:HMSSSLHISP | 110  | >GATA3-S40:HMSFSLHISP | 261  | 151  |
| >GATA3-S40:RHMSSSLHI  | 4416 | >GATA3-S40:RHMSFSLHI  | 244  | 4172 |
| >GATA3-S40:RHMSSSLHI  | 22   | >GATA3-S40:RHMSFSLHI  | 464  | 442  |
| >GATA3-S40:RHMSSSLH   | 84   | >GATA3-S40:RHMSFSLH   | 92   | 8    |
| >GATA3-S40:RHMSSSLHI  | 17   | >GATA3-S40:RHMSFSLHI  | 29   | 12   |
| >GATA3-S40:RHMSSSLHIS | 349  | >GATA3-S40:RHMSFSLHIS | 521  | 172  |
| >GATA3-S40:RHMSSSLHI  | 234  | >GATA3-S40:RHMSFSLHI  | 71   | 163  |
| >GATA3-S40:RHMSSSLHI  | 348  | >GATA3-S40:RHMSFSLHI  | 208  | 140  |
| >GATA3-S40:SRHMSSSLH  | 167  | >GATA3-S40:SRHMSFSLH  | 129  | 38   |
| >GATA3-S40:SRHMSSSLHI | 56   | >GATA3-S40:SRHMSFSLHI | 64   | 8    |
| >GATA3-S40:SRHMSSSLH  | 1236 | >GATA3-S40:SRHMSFSLH  | 473  | 763  |
| >GATA3-S40:SRHMSSSLHI | 198  | >GATA3-S40:SRHMSFSLHI | 144  | 54   |
| >GATA3-S40:SRHMSSSLHI | 831  | >GATA3-S40:SRHMSFSLHI | 438  | 393  |
| >GATA3-S40:LSRHMSSSL  | 33   | >GATA3-S40:LSRHMSFSL  | 15   | 18   |
| >GATA3-S40:LSRHMSSSL  | 69   | >GATA3-S40:LSRHMSFSL  | 48   | 21   |
| >GATA3-S40:LSRHMSSSLH | 94   | >GATA3-S40:LSRHMSFSLH | 109  | 15   |
| >GATA3-S40:LSRHMSSSLH | 13   | >GATA3-S40:LSRHMSFSLH | 12   | 1    |
| >GATA3-S40:LSRHMSSSL  | 294  | >GATA3-S40:LSRHMSFSL  | 5580 | 5286 |
| >GATA3-S40:LSRHMSSSL  | 175  | >GATA3-S40:LSRHMSFSL  | 964  | 789  |
| >GATA3-S40:LSRHMSSSLH | 240  | >GATA3-S40:LSRHMSFSLH | 383  | 143  |
| >GATA3-S40:LSRHMSSSLH | 363  | >GATA3-S40:LSRHMSFSLH | 662  | 299  |
| >GATA3-S40:LSRHMSSSL  | 64   | >GATA3-S40:LSRHMSFSL  | 224  | 160  |
| >GATA3-S40:LSRHMSSSLH | 340  | >GATA3-S40:LSRHMSFSLH | 405  | 65   |
| >GATA3-S40:LSRHMSSSLH | 109  | >GATA3-S40:LSRHMSFSLH | 211  | 102  |
| >GATA3-S40:LSRHMSSSL  | 4    | >GATA3-S40:LSRHMSFSL  | 5    | 1    |
| >GATA3-S40:LSRHMSSSLH | 30   | >GATA3-S40:LSRHMSFSLH | 86   | 56   |
| >GATA3-S40:LSRHMSSSLH | 9    | >GATA3-S40:LSRHMSFSLH | 15   | 6    |
| >GATA3-S40:LSRHMSSSL  | 338  | >GATA3-S40:LSRHMSFSL  | 652  | 314  |
| >GATA3-S40:LSRHMSSSL  | 26   | >GATA3-S40:LSRHMSFSL  | 520  | 494  |
| >GATA3-S40:LSRHMSSSLH | 14   | >GATA3-S40:LSRHMSFSLH | 30   | 16   |
| >GATA3-S40:LSRHMSSSL  | 242  | >GATA3-S40:LSRHMSFSL  | 295  | 53   |
| >GATA3-S40:LSRHMSSSLH | 17   | >GATA3-S40:LSRHMSFSLH | 18   | 1    |
| >GATA3-S40:ALSRHMSSSL | 222  | >GATA3-S40:ALSRHMSFSL | 83   | 139  |
| >GATA3-S40:ALSRHMSSSL | 5    | >GATA3-S40:ALSRHMSFSL | 3    | 2    |
| >GATA3-S40:ALSRHMSSSL | 4    | >GATA3-S40:ALSRHMSFSL | 4    | 0    |
| >GATA3-S40:ALSRHMSSSL | 294  | >GATA3-S40:ALSRHMSFSL | 114  | 180  |
| >GATA3-S40:ALSRHMSSSL | 71   | >GATA3-S40:ALSRHMSFSL | 37   | 34   |
| >GATA3-S40:ALSRHMSSSL | 111  | >GATA3-S40:ALSRHMSFSL | 53   | 58   |
| >GATA3-S40:ALSRHMSSSL | 749  | >GATA3-S40:ALSRHMSFSL | 88   | 661  |
| >GATA3-S40:ALSRHMSSSL | 3    | >GATA3-S40:ALSRHMSFSL | 5    | 2    |
| >GATA3-S40:ALSRHMSSSL | 177  | >GATA3-S40:ALSRHMSFSL | 143  | 34   |
| >GATA3-S40:ALSRHMSSSL | 837  | >GATA3-S40:ALSRHMSFSL | 154  | 683  |

|                       |       |                       |       |       |
|-----------------------|-------|-----------------------|-------|-------|
| >GATA3-S40:ALSRHMSS   | 18532 | >GATA3-S40:ALSRHMSF   | 315   | 18217 |
| >GATA3-S40:ALSRHMSS   | 5135  | >GATA3-S40:ALSRHMSF   | 395   | 4740  |
| >GATA3-S40:ALSRHMSSL  | 82    | >GATA3-S40:ALSRHMSFL  | 626   | 544   |
| >GATA3-S40:ALSRHMSS   | 10499 | >GATA3-S40:ALSRHMSF   | 57    | 10442 |
| >GATA3-S40:ALSRHMSSL  | 309   | >GATA3-S40:ALSRHMSFL  | 1920  | 1611  |
| >GATA3-S40:ALSRHMSS   | 7199  | >GATA3-S40:ALSRHMSF   | 17    | 7182  |
| >GATA3-S40:ALSRHMSSL  | 266   | >GATA3-S40:ALSRHMSFL  | 955   | 689   |
| >GATA3-S40:AALSRHMSS  | 8140  | >GATA3-S40:AALSRHMSF  | 317   | 7823  |
| >GATA3-S40:AALSRHMSSL | 499   | >GATA3-S40:AALSRHMSFL | 326   | 173   |
| >GATA3-S40:AALSRHMSSL | 665   | >GATA3-S40:AALSRHMSFL | 236   | 429   |
| >GATA3-S40:AALSRHMSS  | 1899  | >GATA3-S40:AALSRHMSF  | 73    | 1826  |
| >GATA3-S40:AALSRHMSS  | 17947 | >GATA3-S40:AALSRHMSF  | 286   | 17661 |
| >GATA3-S40:AALSRHMSS  | 3262  | >GATA3-S40:AALSRHMSF  | 8     | 3254  |
| >GATA3-S40:AALSRHMSSL | 90    | >GATA3-S40:AALSRHMSFL | 345   | 255   |
| >GATA3-S40:AALSRHMSS  | 12422 | >GATA3-S40:AALSRHMSF  | 7     | 12415 |
| >GATA3-S40:AALSRHMSSL | 24    | >GATA3-S40:AALSRHMSFL | 49    | 25    |
| >GATA3-S40:AALSRHMSS  | 13548 | >GATA3-S40:AALSRHMSF  | 196   | 13352 |
| >GATA3-S40:PAALSRHMSS | 22443 | >GATA3-S40:PAALSRHMSF | 281   | 22162 |
| >GMPS-P359PEEVFLAQGT  | 409   | >GMPS-P359AEEVFLAQGT  | 17    | 392   |
| >GMPS-P359PEEVFLAQGT  | 11802 | >GMPS-P359AEEVFLAQGT  | 340   | 11462 |
| >GMPS-P359PEEVFLAQGT  | 9989  | >GMPS-P359AEEVFLAQGT  | 197   | 9792  |
| >GMPS-P359PEEVFLAQGT  | 6098  | >GMPS-P359AEEVFLAQGT  | 154   | 5944  |
| >GMPS-P359PEEVFLAQ    | 7661  | >GMPS-P359AEEVFLAQ    | 70    | 7591  |
| >GMPS-P359PEEVFLAQQ   | 19813 | >GMPS-P359AEEVFLAQQ   | 460   | 19353 |
| >GMPS-P359PEEVFLAQGT  | 2577  | >GMPS-P359AEEVFLAQGT  | 36    | 2541  |
| >GMPS-P359PEEVFLAQGT  | 16393 | >GMPS-P359AEEVFLAQGT  | 230   | 16163 |
| >GMPS-P359PEEVFLAQQ   | 12085 | >GMPS-P359AEEVFLAQQ   | 495   | 11590 |
| >GMPS-P359PEEVFLAQGT  | 7925  | >GMPS-P359AEEVFLAQGT  | 165   | 7760  |
| >GMPS-P359PEEVFLAQGT  | 1066  | >GMPS-P359AEEVFLAQGT  | 30    | 1036  |
| >GMPS-P359KPEEVFLA    | 10311 | >GMPS-P359KAEEVFLA    | 228   | 10083 |
| >GMPS-P359KPEEVFLA    | 498   | >GMPS-P359KAEEVFLA    | 17709 | 17211 |
| >GMPS-P359NEVIGEMNLI  | 13895 | >GMPS-P359NEVIGEMNLI  | 189   | 13706 |
| >GMPS-P359LKPEEVFL    | 4203  | >GMPS-P359LKAEEVFL    | 324   | 3879  |
| >GMPS-P359LKPEEVFLA   | 5347  | >GMPS-P359LKAEEVFLA   | 448   | 4899  |
| >GMPS-P359LKPEEVFL    | 873   | >GMPS-P359LKAEEVFL    | 133   | 740   |
| >GMPS-P359NLKPEEVFL   | 55    | >GMPS-P359NLKAEVFL    | 36    | 19    |
| >GMPS-P359NLKPEEVFLA  | 350   | >GMPS-P359NLKAEVFLA   | 192   | 158   |
| >GMPS-P359NLKPEEVFLA  | 665   | >GMPS-P359NLKAEVFLA   | 371   | 294   |
| >GMPS-P359NLKPEEVFL   | 54    | >GMPS-P359NLKAEVFL    | 113   | 59    |
| >GMPS-P359NLKPEEVFLA  | 109   | >GMPS-P359NLKAEVFLA   | 239   | 130   |
| >GMPS-P359NLKPEEVF    | 316   | >GMPS-P359NLKAEVVF    | 219   | 97    |
| >GMPS-P359NLKPEEVF    | 732   | >GMPS-P359NLKAEVVF    | 483   | 249   |
| >GMPS-P359NLKPEEVF    | 464   | >GMPS-P359NLKAEVVF    | 484   | 20    |

|                       |       |                         |      |       |
|-----------------------|-------|-------------------------|------|-------|
| >GMPS-P359 MNLKPEEVF  | 49    | >GMPS-P359 MNLKAEVVF    | 71   | 22    |
| >GMPS-P359 MNLKPEEVF  | 385   | >GMPS-P359 MNLKAEVVF    | 1022 | 637   |
| >GMPS-P359 EMNLKPEEV  | 660   | >GMPS-P359 EMNLKAEVVF   | 483  | 177   |
| >GMPS-P359 EMNLKPEEVF | 290   | >GMPS-P359 EMNLKAEVVI   | 220  | 70    |
| >GMPS-P359 EMNLKPEEV  | 318   | >GMPS-P359 EMNLKAEVVF   | 642  | 324   |
| >GMPS-P359 EMNLKPEEV  | 19    | >GMPS-P359 EMNLKAEVVF   | 51   | 32    |
| >GMPS-P359 EMNLKPEEVF | 342   | >GMPS-P359 EMNLKAEVVI   | 640  | 298   |
| >GMPS-P359 EMNLKPEEV  | 333   | >GMPS-P359 EMNLKAEVVF   | 479  | 146   |
| >GMPS-P359 EMNLKPEEV  | 132   | >GMPS-P359 EMNLKAEVVF   | 159  | 27    |
| >GMPS-P359 EMNLKPEEV  | 21    | >GMPS-P359 EMNLKAEVVF   | 28   | 7     |
| >GMPS-P359 EMNLKPEEVF | 127   | >GMPS-P359 EMNLKAEVVI   | 163  | 36    |
| >GMPS-P359 EMNLKPEEV  | 44    | >GMPS-P359 EMNLKAEVVF   | 39   | 5     |
| >GMPS-P359 EMNLKPEEVF | 357   | >GMPS-P359 EMNLKAEVVI   | 371  | 14    |
| >GMPS-P359 EMNLKPEEV  | 318   | >GMPS-P359 EMNLKAEVVF   | 266  | 52    |
| >GMPS-P359 EMNLKPEEV  | 742   | >GMPS-P359 EMNLKAEVVF   | 371  | 371   |
| >GMPS-P359 EMNLKPEEVF | 750   | >GMPS-P359 EMNLKAEVVI   | 367  | 383   |
| >GMPS-P359 EMNLKPEEVF | 204   | >GMPS-P359 EMNLKAEVVI   | 270  | 66    |
| >GMPS-P359 GEMNLKPEE\ | 257   | >GMPS-P359 GEMNLKAEV\   | 63   | 194   |
| >GMPS-P359 GEMNLKPEE\ | 893   | >GMPS-P359 GEMNLKAEV\   | 490  | 403   |
| >GMPS-P359 GEMNLKPEE\ | 323   | >GMPS-P359 GEMNLKAEV\   | 378  | 55    |
| >GMPS-P359 GEMNLKPEE\ | 103   | >GMPS-P359 GEMNLKAEV\   | 79   | 24    |
| >GMPS-P359 GEMNLKPEE  | 427   | >GMPS-P359 GEMNLKAEV    | 2285 | 1858  |
| >GMPS-P359 GEMNLKPEE\ | 98    | >GMPS-P359 GEMNLKAEV\   | 121  | 23    |
| >GMPS-P359 GEMNLKPEE\ | 235   | >GMPS-P359 GEMNLKAEV\   | 272  | 37    |
| >GMPS-P359 GEMNLKPEE\ | 142   | >GMPS-P359 GEMNLKAEV\   | 103  | 39    |
| >GMPS-P359 GEMNLKPEE  | 248   | >GMPS-P359 GEMNLKAEV    | 519  | 271   |
| >GMPS-P359 GEMNLKPEE\ | 54    | >GMPS-P359 GEMNLKAEV\   | 52   | 2     |
| >GMPS-P359 GEMNLKPEE\ | 19    | >GMPS-P359 GEMNLKAEV\   | 19   | 0     |
| >GMPS-P359 EVIGEMNLKF | 565   | >GMPS-P359 EVIGEMNLKAEV | 367  | 198   |
| >GMPS-P359 EVIGEMNLKF | 595   | >GMPS-P359 EVIGEMNLKAEV | 119  | 476   |
| >GMPS-P359 EVIGEMNLKF | 14    | >GMPS-P359 EVIGEMNLKAEV | 12   | 2     |
| >GMPS-P359 EVIGEMNLKF | 11244 | >GMPS-P359 EVIGEMNLKAEV | 354  | 10890 |
| >GNA11-D33 DTENIRFV   | 15095 | >GNA11-D33 YTENIRFV     | 347  | 14748 |
| >GNA11-D33 DTENIRFV   | 16596 | >GNA11-D33 YTENIRFV     | 73   | 16523 |
| >GNA11-D33 DTENIRFVFA | 8624  | >GNA11-D33 YTENIRFVFA   | 208  | 8416  |
| >GNA11-D33 DTENIRFVFA | 19606 | >GNA11-D33 YTENIRFVFA   | 148  | 19458 |
| >GNA11-D33 DTENIRFV   | 10906 | >GNA11-D33 YTENIRFV     | 70   | 10836 |
| >GNA11-D33 DTENIRFV   | 11818 | >GNA11-D33 YTENIRFV     | 76   | 11742 |
| >GNA11-D33 DTENIRFVF  | 5383  | >GNA11-D33 YTENIRFVF    | 449  | 4934  |
| >GNA11-D33 DTENIRFVF  | 12687 | >GNA11-D33 YTENIRFVF    | 382  | 12305 |
| >GNA11-D33 DTENIRFVF  | 662   | >GNA11-D33 YTENIRFVF    | 190  | 472   |
| >GNA11-D33 DTENIRFV   | 66    | >GNA11-D33 YTENIRFV     | 45   | 21    |
| >GNA11-D33 DTENIRFVFA | 634   | >GNA11-D33 YTENIRFVFA   | 222  | 412   |

|                        |       |                        |       |       |
|------------------------|-------|------------------------|-------|-------|
| >GNA11-D33 DTENIRFVFA/ | 131   | >GNA11-D33 YTENIRFVFA/ | 93    | 38    |
| >GNA11-D33 DTENIRFV    | 334   | >GNA11-D33 YTENIRFV    | 163   | 171   |
| >GNA11-D33 DTENIRFVFA/ | 868   | >GNA11-D33 YTENIRFVFA/ | 460   | 408   |
| >GNA11-D33 DTENIRFVF   | 4369  | >GNA11-D33 YTENIRFVF   | 22    | 4347  |
| >GNA11-D33 DTENIRFVF   | 8532  | >GNA11-D33 YTENIRFVF   | 102   | 8430  |
| >GNA11-D33 DTENIRFVF   | 195   | >GNA11-D33 YTENIRFVF   | 6     | 189   |
| >GNA11-D33 DTENIRFVF   | 12050 | >GNA11-D33 YTENIRFVF   | 371   | 11679 |
| >GNA11-D33 TDTENIRFV   | 32205 | >GNA11-D33 TYTENIRFV   | 456   | 31749 |
| >GNA11-D33 TDTENIRFV   | 181   | >GNA11-D33 TYTENIRFV   | 1841  | 1660  |
| >GNA11-D33 TDTENIRF    | 16444 | >GNA11-D33 TYTENIRF    | 50    | 16394 |
| >GNA11-D33 TDTENIRFVF  | 9011  | >GNA11-D33 TYTENIRFVF  | 14    | 8997  |
| >GNA11-D33 TDTENIRF    | 23300 | >GNA11-D33 TYTENIRF    | 295   | 23005 |
| >GNA11-D33 TDTENIRFVF  | 15623 | >GNA11-D33 TYTENIRFVF  | 33    | 15590 |
| >GNA11-D33 TDTENIRF    | 22228 | >GNA11-D33 TYTENIRF    | 9     | 22219 |
| >GNA11-D33 TDTENIRFVF  | 17953 | >GNA11-D33 TYTENIRFVF  | 5     | 17948 |
| >GNA11-D33 TDTENIRFVF  | 7775  | >GNA11-D33 TYTENIRFVF  | 83    | 7692  |
| >GNA11-D33 TDTENIRFV   | 32298 | >GNA11-D33 TYTENIRFV   | 387   | 31911 |
| >GNA11-D33 TDTENIRFVF/ | 31110 | >GNA11-D33 TYTENIRFVF/ | 447   | 30663 |
| >GNA11-D33 TDTENIRFV   | 61    | >GNA11-D33 TYTENIRFV   | 15602 | 15541 |
| >GNA11-D33 IIYSHFTCATD | 3534  | >GNA11-D33 IIYSHFTCATY | 287   | 3247  |
| >GNA11-D33 IIYSHFTCATD | 11130 | >GNA11-D33 IIYSHFTCATY | 57    | 11073 |
| >GNA11-D33 IIYSHFTCATD | 22885 | >GNA11-D33 IIYSHFTCATY | 407   | 22478 |
| >GNA11-D33 IIYSHFTCATD | 32687 | >GNA11-D33 IIYSHFTCATY | 209   | 32478 |
| >GNA11-D33 IIYSHFTCATD | 19765 | >GNA11-D33 IIYSHFTCATY | 14    | 19751 |
| >GNA11-D33 IIYSHFTCATD | 23833 | >GNA11-D33 IIYSHFTCATY | 41    | 23792 |
| >GNA11-D33 IIYSHFTCATD | 15375 | >GNA11-D33 IIYSHFTCATY | 311   | 15064 |
| >GNA11-D33 IIYSHFTCATD | 13909 | >GNA11-D33 IIYSHFTCATY | 41    | 13868 |
| >GNA11-D33 IIYSHFTCATD | 30145 | >GNA11-D33 IIYSHFTCATY | 192   | 29953 |
| >GNA11-D33 IIYSHFTCATD | 10430 | >GNA11-D33 IIYSHFTCATY | 20    | 10410 |
| >GNA11-D33 IIYSHFTCATD | 18053 | >GNA11-D33 IIYSHFTCATY | 31    | 18022 |
| >GNA11-D33 IIYSHFTCATD | 19403 | >GNA11-D33 IIYSHFTCATY | 150   | 19253 |
| >GNA11-D33 IIYSHFTCATD | 13744 | >GNA11-D33 IIYSHFTCATY | 33    | 13711 |
| >GNA11-D33 IIYSHFTCATD | 27008 | >GNA11-D33 IIYSHFTCATY | 53    | 26955 |
| >GNA11-D33 ATDTENIRF   | 68    | >GNA11-D33 ATYTENIRF   | 11198 | 11130 |
| >GNA11-D33 ATDTENIRFV/ | 170   | >GNA11-D33 ATYTENIRFV/ | 14278 | 14108 |
| >GNA11-D33 ATDTENIRFV  | 1766  | >GNA11-D33 ATYTENIRFV  | 354   | 1412  |
| >GNA11-D33 ATDTENIRFV  | 1033  | >GNA11-D33 ATYTENIRFV  | 159   | 874   |
| >GNA11-D33 ATDTENIRFV  | 576   | >GNA11-D33 ATYTENIRFV  | 49    | 527   |
| >GNA11-D33 ATDTENIRFV  | 873   | >GNA11-D33 ATYTENIRFV  | 194   | 679   |
| >GNA11-D33 ATDTENIRFV  | 72    | >GNA11-D33 ATYTENIRFV  | 19    | 53    |
| >GNA11-D33 ATDTENIRFV  | 830   | >GNA11-D33 ATYTENIRFV  | 449   | 381   |
| >GNA11-D33 ATDTENIRFV  | 330   | >GNA11-D33 ATYTENIRFV  | 95    | 235   |
| >GNA11-D33 ATDTENIRFV  | 821   | >GNA11-D33 ATYTENIRFV  | 110   | 711   |

|                        |       |                        |     |       |
|------------------------|-------|------------------------|-----|-------|
| >GNA11-D33 ATDTENIR    | 1787  | >GNA11-D33 ATYTENIR    | 122 | 1665  |
| >GNA11-D33 ATDTENIRF   | 7804  | >GNA11-D33 ATYTENIRF   | 77  | 7727  |
| >GNA11-D33 ATDTENIRFV  | 10384 | >GNA11-D33 ATYTENIRFV  | 204 | 10180 |
| >GNA11-D33 ATDTENIRFV  | 8374  | >GNA11-D33 ATYTENIRFV  | 291 | 8083  |
| >GNA11-D33 ATDTENIR    | 4610  | >GNA11-D33 ATYTENIR    | 113 | 4497  |
| >GNA11-D33 ATDTENIRF   | 1204  | >GNA11-D33 ATYTENIRF   | 49  | 1155  |
| >GNA11-D33 ATDTENIRFV  | 263   | >GNA11-D33 ATYTENIRFV  | 19  | 244   |
| >GNA11-D33 ATDTENIR    | 898   | >GNA11-D33 ATYTENIR    | 32  | 866   |
| >GNA11-D33 ATDTENIRFV  | 1638  | >GNA11-D33 ATYTENIRFV  | 161 | 1477  |
| >GNA11-D33 ATDTENIRFV  | 713   | >GNA11-D33 ATYTENIRFV  | 236 | 477   |
| >GNA11-D33 ATDTENIRFV  | 9830  | >GNA11-D33 ATYTENIRFV  | 286 | 9544  |
| >GNA11-D33 ATDTENIRF   | 6786  | >GNA11-D33 ATYTENIRF   | 53  | 6733  |
| >GNA11-D33 ATDTENIRFV  | 2962  | >GNA11-D33 ATYTENIRFV  | 23  | 2939  |
| >GNA11-D33 ATDTENIRF   | 17    | >GNA11-D33 ATYTENIRF   | 4   | 13    |
| >GNA11-D33 ATDTENIRFV  | 5003  | >GNA11-D33 ATYTENIRFV  | 327 | 4676  |
| >GNA11-D33 ATDTENIRFV  | 37    | >GNA11-D33 ATYTENIRFV  | 5   | 32    |
| >GNA11-D33 ATDTENIRFV  | 1266  | >GNA11-D33 ATYTENIRFV  | 170 | 1096  |
| >GNA11-D33 ATDTENIRFV  | 861   | >GNA11-D33 ATYTENIRFV  | 367 | 494   |
| >GNA11-D33 ATDTENIRFV  | 949   | >GNA11-D33 ATYTENIRFV  | 370 | 579   |
| >GNA11-D33 ATDTENIRF   | 595   | >GNA11-D33 ATYTENIRF   | 67  | 528   |
| >GNA11-D33 ATDTENIRFV  | 2871  | >GNA11-D33 ATYTENIRFV  | 351 | 2520  |
| >GNA11-D33 ATDTENIRFV  | 204   | >GNA11-D33 ATYTENIRFV  | 30  | 174   |
| >GNA11-D33 ATDTENIR    | 1415  | >GNA11-D33 ATYTENIR    | 309 | 1106  |
| >GNA11-D33 CATDTENIR   | 61    | >GNA11-D33 CATYTENIR   | 30  | 31    |
| >GNA11-D33 CATDTENIRF  | 478   | >GNA11-D33 CATYTENIRF  | 366 | 112   |
| >GNA11-D33 CATDTENIRF  | 402   | >GNA11-D33 CATYTENIRF  | 864 | 462   |
| >GNA11-D33 CATDTENI    | 110   | >GNA11-D33 CATYTENI    | 83  | 27    |
| >GNA11-D33 TCATDTENI   | 165   | >GNA11-D33 TCATYTENI   | 58  | 107   |
| >GNA11-D33 FTCATDTENI  | 217   | >GNA11-D33 FTCATYTENI  | 92  | 125   |
| >GNA11-D33 FTCATDTENI  | 163   | >GNA11-D33 FTCATYTENI  | 87  | 76    |
| >GNA11-D33 FTCATDTENI  | 109   | >GNA11-D33 FTCATYTENI  | 76  | 33    |
| >GNA11-D33 FTCATDTENI  | 653   | >GNA11-D33 FTCATYTENI  | 198 | 455   |
| >GNA11-D33 FTCATDTENIF | 1170  | >GNA11-D33 FTCATYTENIF | 449 | 721   |
| >GNA11-D33 FTCATDTENIF | 685   | >GNA11-D33 FTCATYTENIF | 377 | 308   |
| >GNA11-D33 FTCATDTENIF | 9     | >GNA11-D33 FTCATYTENIF | 9   | 0     |
| >GNA11-D33 FTCATDTENI  | 81    | >GNA11-D33 FTCATYTENI  | 29  | 52    |
| >GNA11-D33 FTCATDTENI  | 1366  | >GNA11-D33 FTCATYTENI  | 196 | 1170  |
| >GNA11-D33 FTCATDTENI  | 361   | >GNA11-D33 FTCATYTENI  | 283 | 78    |
| >GNA11-D33 FTCATDTENI  | 153   | >GNA11-D33 FTCATYTENI  | 62  | 91    |
| >GNA11-D33 HFTCATDTEN  | 727   | >GNA11-D33 HFTCATYTEN  | 245 | 482   |
| >GNA11-D33 HFTCATDTEN  | 131   | >GNA11-D33 HFTCATYTEN  | 97  | 34    |
| >GNA11-D33 SHFTCATD    | 25155 | >GNA11-D33 SHFTCATY    | 133 | 25022 |
| >GNA11-D33 SHFTCATD    | 28167 | >GNA11-D33 SHFTCATY    | 74  | 28093 |

|                        |       |                        |      |       |
|------------------------|-------|------------------------|------|-------|
| >GNA11-D33 SHFTCATD    | 16087 | >GNA11-D33 SHFTCATY    | 17   | 16070 |
| >GNA11-D33 SHFTCATD    | 38699 | >GNA11-D33 SHFTCATY    | 404  | 38295 |
| >GNA11-D33 YSHFTCATD   | 34797 | >GNA11-D33 YSHFTCATY   | 335  | 34462 |
| >GNA11-D33 YSHFTCATD   | 21662 | >GNA11-D33 YSHFTCATY   | 27   | 21635 |
| >GNA11-D33 YSHFTCATD   | 21320 | >GNA11-D33 YSHFTCATY   | 33   | 21287 |
| >GNA11-D33 YSHFTCATD   | 15474 | >GNA11-D33 YSHFTCATY   | 197  | 15277 |
| >GNA11-D33 YSHFTCATD   | 15606 | >GNA11-D33 YSHFTCATY   | 40   | 15566 |
| >GNA11-D33 YSHFTCATD   | 12008 | >GNA11-D33 YSHFTCATY   | 42   | 11966 |
| >GNA11-D33 YSHFTCATD   | 4055  | >GNA11-D33 YSHFTCATY   | 3    | 4052  |
| >GNA11-D33 YSHFTCATD   | 21600 | >GNA11-D33 YSHFTCATY   | 69   | 21531 |
| >GNA11-D33 YSHFTCATD   | 2671  | >GNA11-D33 YSHFTCATY   | 5    | 2666  |
| >GNA11-D33 YSHFTCATD   | 37698 | >GNA11-D33 YSHFTCATY   | 336  | 37362 |
| >GNA11-D33 YSHFTCATD   | 36057 | >GNA11-D33 YSHFTCATY   | 273  | 35784 |
| >GNA11-D33 IYSHFTCATD  | 17702 | >GNA11-D33 IYSHFTCATY  | 21   | 17681 |
| >GNA11-D33 IYSHFTCATD  | 13597 | >GNA11-D33 IYSHFTCATY  | 12   | 13585 |
| >GNA11-D33 IYSHFTCATD  | 26389 | >GNA11-D33 IYSHFTCATY  | 441  | 25948 |
| >GNA11-D33 IYSHFTCATD  | 21635 | >GNA11-D33 IYSHFTCATY  | 169  | 21466 |
| >GNA11-D33 IYSHFTCATD  | 36254 | >GNA11-D33 IYSHFTCATY  | 354  | 35900 |
| >GNA11-N26 NSSVILFL    | 296   | >GNA11-N26 KSSVILFL    | 117  | 179   |
| >GNA11-N26 NSSVILFLNK  | 210   | >GNA11-N26 KSSVILFLNK  | 46   | 164   |
| >GNA11-N26 NSSVILFLNKK | 2932  | >GNA11-N26 KSSVILFLNKK | 91   | 2841  |
| >GNA11-N26 NSSVILFLNK  | 17    | >GNA11-N26 KSSVILFLNK  | 10   | 7     |
| >GNA11-N26 NSSVILFLNKK | 69    | >GNA11-N26 KSSVILFLNKK | 14   | 55    |
| >GNA11-N26 NSSVILFL    | 11240 | >GNA11-N26 KSSVILFL    | 147  | 11093 |
| >GNA11-N26 NSSVILFLNK  | 2701  | >GNA11-N26 KSSVILFLNK  | 9    | 2692  |
| >GNA11-N26 NSSVILFLNKK | 5195  | >GNA11-N26 KSSVILFLNKK | 17   | 5178  |
| >GNA11-N26 NSSVILFLNK  | 639   | >GNA11-N26 KSSVILFLNK  | 64   | 575   |
| >GNA11-N26 NSSVILFLNKK | 2000  | >GNA11-N26 KSSVILFLNKK | 61   | 1939  |
| >GNA11-N26 NSSVILFLNK  | 32    | >GNA11-N26 KSSVILFLNK  | 748  | 716   |
| >GNA11-N26 NSSVILFLNKK | 24    | >GNA11-N26 KSSVILFLNKK | 644  | 620   |
| >GNA11-N26 NSSVILFL    | 102   | >GNA11-N26 KSSVILFL    | 5421 | 5319  |
| >GNA11-N26 NSSVILFL    | 1635  | >GNA11-N26 KSSVILFL    | 14   | 1621  |
| >GNA11-N26 NSSVILFL    | 5370  | >GNA11-N26 KSSVILFL    | 24   | 5346  |
| >GNA11-N26 NSSVILFL    | 1042  | >GNA11-N26 KSSVILFL    | 380  | 662   |
| >GNA11-N26 NSSVILFL    | 628   | >GNA11-N26 KSSVILFL    | 199  | 429   |
| >GNA11-N26 NSSVILFLNK  | 187   | >GNA11-N26 KSSVILFLNK  | 112  | 75    |
| >GNA11-N26 NSSVILFL    | 1939  | >GNA11-N26 KSSVILFL    | 237  | 1702  |
| >GNA11-N26 QNSSVILFLNK | 390   | >GNA11-N26 QKSSVILFLNK | 3447 | 3057  |
| >GNA11-N26 QNSSVILF    | 410   | >GNA11-N26 QKSSVILF    | 7    | 403   |
| >GNA11-N26 QNSSVILFL   | 5044  | >GNA11-N26 QKSSVILFL   | 77   | 4967  |
| >GNA11-N26 RTIITYPWFQI | 18052 | >GNA11-N26 RTIITYPWFQI | 109  | 17943 |
| >GNA11-N26 RTIITYPWFQI | 7377  | >GNA11-N26 RTIITYPWFQI | 11   | 7366  |
| >GNA11-N26 RTIITYPWFQI | 1514  | >GNA11-N26 RTIITYPWFQI | 6    | 1508  |

|                        |       |                        |       |       |
|------------------------|-------|------------------------|-------|-------|
| >GNA11-N26 RTIITYPWFQI | 1746  | >GNA11-N26 RTIITYPWFQI | 18    | 1728  |
| >GNA11-N26 RTIITYPWFQI | 12176 | >GNA11-N26 RTIITYPWFQI | 90    | 12086 |
| >GNA11-N26 RTIITYPWFQI | 153   | >GNA11-N26 RTIITYPWFQI | 391   | 238   |
| >GNA11-N26 RTIITYPWFQI | 1310  | >GNA11-N26 RTIITYPWFQI | 97    | 1213  |
| >GNA11-N26 FQNSSVIL    | 160   | >GNA11-N26 FQKSSVIL    | 1922  | 1762  |
| >GNA11-N26 FQNSSVILFL  | 87    | >GNA11-N26 FQKSSVILFL  | 247   | 160   |
| >GNA11-N26 FQNSSVIL    | 19    | >GNA11-N26 FQKSSVIL    | 201   | 182   |
| >GNA11-N26 FQNSSVILFL  | 15    | >GNA11-N26 FQKSSVILFL  | 18    | 3     |
| >GNA11-N26 FQNSSVIL    | 33    | >GNA11-N26 FQKSSVIL    | 57    | 24    |
| >GNA11-N26 FQNSSVILFL  | 56    | >GNA11-N26 FQKSSVILFL  | 51    | 5     |
| >GNA11-N26 FQNSSVIL    | 16    | >GNA11-N26 FQKSSVIL    | 71    | 55    |
| >GNA11-N26 FQNSSVILF   | 59    | >GNA11-N26 FQKSSVILF   | 236   | 177   |
| >GNA11-N26 FQNSSVILFL  | 62    | >GNA11-N26 FQKSSVILFL  | 111   | 49    |
| >GNA11-N26 FQNSSVILFL  | 30    | >GNA11-N26 FQKSSVILFL  | 627   | 597   |
| >GNA11-N26 FQNSSVIL    | 459   | >GNA11-N26 FQKSSVIL    | 3776  | 3317  |
| >GNA11-N26 FQNSSVILFL  | 164   | >GNA11-N26 FQKSSVILFL  | 1873  | 1709  |
| >GNA11-N26 FQNSSVILFL  | 83    | >GNA11-N26 FQKSSVILFL  | 2821  | 2738  |
| >GNA11-N26 FQNSSVILFL  | 477   | >GNA11-N26 FQKSSVILFL  | 11217 | 10740 |
| >GNA11-N26 FQNSSVIL    | 127   | >GNA11-N26 FQKSSVIL    | 80    | 47    |
| >GNA11-N26 FQNSSVILF   | 35    | >GNA11-N26 FQKSSVILF   | 31    | 4     |
| >GNA11-N26 FQNSSVILFL  | 150   | >GNA11-N26 FQKSSVILFL  | 89    | 61    |
| >GNA11-N26 FQNSSVILF   | 304   | >GNA11-N26 FQKSSVILF   | 164   | 140   |
| >GNA11-N26 FQNSSVIL    | 4     | >GNA11-N26 FQKSSVIL    | 4     | 0     |
| >GNA11-N26 FQNSSVILF   | 2     | >GNA11-N26 FQKSSVILF   | 2     | 0     |
| >GNA11-N26 FQNSSVILFL  | 10    | >GNA11-N26 FQKSSVILFL  | 8     | 2     |
| >GNA11-N26 FQNSSVIL    | 10    | >GNA11-N26 FQKSSVIL    | 66    | 56    |
| >GNA11-N26 FQNSSVILF   | 208   | >GNA11-N26 FQKSSVILF   | 4822  | 4614  |
| >GNA11-N26 FQNSSVILFL  | 25    | >GNA11-N26 FQKSSVILFL  | 422   | 397   |
| >GNA11-N26 FQNSSVIL    | 182   | >GNA11-N26 FQKSSVIL    | 291   | 109   |
| >GNA11-N26 WFQNSSVI    | 345   | >GNA11-N26 WFQKSSVI    | 325   | 20    |
| >GNA11-N26 WFQNSSVI    | 175   | >GNA11-N26 WFQKSSVI    | 304   | 129   |
| >GNA11-N26 WFQNSSVIL   | 276   | >GNA11-N26 WFQKSSVIL   | 382   | 106   |
| >GNA11-N26 WFQNSSVILF  | 92    | >GNA11-N26 WFQKSSVILF  | 54    | 38    |
| >GNA11-N26 WFQNSSVILF  | 219   | >GNA11-N26 WFQKSSVILF  | 297   | 78    |
| >GNA11-N26 WFQNSSVILF  | 347   | >GNA11-N26 WFQKSSVILF  | 176   | 171   |
| >GNA11-N26 WFQNSSVI    | 47    | >GNA11-N26 WFQKSSVI    | 50    | 3     |
| >GNA11-N26 WFQNSSVIL   | 49    | >GNA11-N26 WFQKSSVIL   | 37    | 12    |
| >GNA11-N26 WFQNSSVILF  | 7     | >GNA11-N26 WFQKSSVILF  | 6     | 1     |
| >GNA11-N26 WFQNSSVILF  | 18    | >GNA11-N26 WFQKSSVILF  | 15    | 3     |
| >GNA11-N26 WFQNSSVILF  | 288   | >GNA11-N26 WFQKSSVILF  | 389   | 101   |
| >GNA11-N26 WFQNSSVILF  | 374   | >GNA11-N26 WFQKSSVILF  | 461   | 87    |
| >GNA11-N26 WFQNSSVILF  | 312   | >GNA11-N26 WFQKSSVILF  | 556   | 244   |
| >GNA11-N26 PWFQNSSVIL  | 115   | >GNA11-N26 PWFQKSSVIL  | 164   | 49    |

|                       |     |                       |      |      |
|-----------------------|-----|-----------------------|------|------|
| >GNA11-N26 PWFQNSSVIL | 77  | >GNA11-N26 PWFQKSSVIL | 150  | 73   |
| >GNA11-N26 PWFQNSSVIL | 191 | >GNA11-N26 PWFQKSSVIL | 271  | 80   |
| >GNA11-N26 PWFQNSSVIL | 276 | >GNA11-N26 PWFQKSSVIL | 351  | 75   |
| >GNA11-N26 PWFQNSSVI  | 364 | >GNA11-N26 PWFQKSSVI  | 1397 | 1033 |
| >GNA11-N26 PWFQNSSVIL | 30  | >GNA11-N26 PWFQKSSVIL | 64   | 34   |
| >GNA11-N26 PWFQNSSV   | 280 | >GNA11-N26 PWFQKSSV   | 341  | 61   |
| >GNA11-N26 PWFQNSSVIL | 392 | >GNA11-N26 PWFQKSSVIL | 665  | 273  |
| >GNA11-N26 YPWFQNSSV  | 626 | >GNA11-N26 YPWFQKSSVI | 496  | 130  |
| >GNA11-N26 YPWFQNSSV  | 95  | >GNA11-N26 YPWFQKSSV  | 283  | 188  |
| >GNA11-N26 YPWFQNSSV  | 39  | >GNA11-N26 YPWFQKSSV  | 30   | 9    |
| >GNA11-N26 YPWFQNSSV  | 29  | >GNA11-N26 YPWFQKSSVI | 25   | 4    |
| >GNA11-N26 YPWFQNSSV  | 252 | >GNA11-N26 YPWFQKSSVI | 457  | 205  |
| >GNA11-N26 YPWFQNSS   | 42  | >GNA11-N26 YPWFQKSS   | 122  | 80   |
| >GNA11-N26 YPWFQNSSV  | 42  | >GNA11-N26 YPWFQKSSV  | 127  | 85   |
| >GNA11-N26 YPWFQNSSV  | 14  | >GNA11-N26 YPWFQKSSVI | 21   | 7    |
| >GNA11-N26 YPWFQNSSV  | 89  | >GNA11-N26 YPWFQKSSVI | 135  | 46   |
| >GNA11-N26 YPWFQNSSV  | 177 | >GNA11-N26 YPWFQKSSV  | 286  | 109  |
| >GNA11-N26 YPWFQNSSV  | 326 | >GNA11-N26 YPWFQKSSVI | 414  | 88   |
| >GNA11-N26 YPWFQNSSV  | 274 | >GNA11-N26 YPWFQKSSV  | 355  | 81   |
| >GNA11-N26 YPWFQNSSV  | 283 | >GNA11-N26 YPWFQKSSVI | 490  | 207  |
| >GNA11-N26 YPWFQNSSV  | 80  | >GNA11-N26 YPWFQKSSVI | 89   | 9    |
| >GNA11-N26 YPWFQNSS   | 130 | >GNA11-N26 YPWFQKSS   | 230  | 100  |
| >GNA11-N26 YPWFQNSSV  | 40  | >GNA11-N26 YPWFQKSSV  | 40   | 0    |
| >GNA11-N26 YPWFQNSSV  | 273 | >GNA11-N26 YPWFQKSSVI | 299  | 26   |
| >GNA11-N26 YPWFQNSSV  | 242 | >GNA11-N26 YPWFQKSSVI | 387  | 145  |
| >GNA11-N26 TYPWFQNSS' | 353 | >GNA11-N26 TYPWFQKSS\ | 1161 | 808  |
| >GNA11-N26 TYPWFQNSS' | 442 | >GNA11-N26 TYPWFQKSS\ | 664  | 222  |
| >GNA11-N26 TYPWFQNSS' | 42  | >GNA11-N26 TYPWFQKSS\ | 57   | 15   |
| >GNA11-N26 TYPWFQNS   | 511 | >GNA11-N26 TYPWFQKS   | 493  | 18   |
| >GNA11-N26 TYPWFQNSS' | 71  | >GNA11-N26 TYPWFQKSS\ | 116  | 45   |
| >GNA11-N26 TYPWFQNSS' | 6   | >GNA11-N26 TYPWFQKSS\ | 8    | 2    |
| >GNA11-N26 TYPWFQNSS' | 465 | >GNA11-N26 TYPWFQKSS\ | 2212 | 1747 |
| >GNA11-N26 TYPWFQNSS' | 210 | >GNA11-N26 TYPWFQKSS\ | 181  | 29   |
| >GNA11-N26 TYPWFQNSS' | 479 | >GNA11-N26 TYPWFQKSS\ | 615  | 136  |
| >GNA11-N26 ITYPWFQNSS | 127 | >GNA11-N26 ITYPWFQKSS | 73   | 54   |
| >GNA11-N26 ITYPWFQNSS | 115 | >GNA11-N26 ITYPWFQKSS | 309  | 194  |
| >GNA11-N26 ITYPWFQNSS | 86  | >GNA11-N26 ITYPWFQKSS | 265  | 179  |
| >GNA11-N26 ITYPWFQNSS | 13  | >GNA11-N26 ITYPWFQKSS | 25   | 12   |
| >GNA11-N26 ITYPWFQNSS | 18  | >GNA11-N26 ITYPWFQKSS | 38   | 20   |
| >GNA11-N26 ITYPWFQNSS | 7   | >GNA11-N26 ITYPWFQKSS | 9    | 2    |
| >GNA11-N26 ITYPWFQNSS | 240 | >GNA11-N26 ITYPWFQKSS | 464  | 224  |
| >GNA11-N26 ITYPWFQNSS | 63  | >GNA11-N26 ITYPWFQKSS | 79   | 16   |
| >GNA11-N26 ITYPWFQNSS | 9   | >GNA11-N26 ITYPWFQKSS | 9    | 0    |



|                       |       |                       |     |       |
|-----------------------|-------|-----------------------|-----|-------|
| >GNA11-N26 ITYPWFQN   | 9376  | >GNA11-N26 ITYPWFQK   | 31  | 9345  |
| >GNA11-N26 ITYPWFQN   | 4101  | >GNA11-N26 ITYPWFQK   | 7   | 4094  |
| >GNA11-N26 ITYPWFQN   | 11187 | >GNA11-N26 ITYPWFQK   | 54  | 11133 |
| >GNA11-N26 ITYPWFQN   | 3248  | >GNA11-N26 ITYPWFQK   | 18  | 3230  |
| >GNA11-N26 ITYPWFQN   | 5064  | >GNA11-N26 ITYPWFQK   | 140 | 4924  |
| >GNA11-N26 ITYPWFQN   | 2020  | >GNA11-N26 ITYPWFQK   | 12  | 2008  |
| >GNA11-N26 ITYPWFQNSS | 23    | >GNA11-N26 ITYPWFQKSS | 38  | 15    |
| >GNA11-N26 ITYPWFQNSS | 16    | >GNA11-N26 ITYPWFQKSS | 31  | 15    |
| >GNA11-N26 ITYPWFQNSS | 119   | >GNA11-N26 ITYPWFQKSS | 232 | 113   |
| >GNA11-N26 ITYPWFQN   | 266   | >GNA11-N26 ITYPWFQK   | 600 | 334   |
| >GNA11-N26 ITYPWFQNSS | 1140  | >GNA11-N26 ITYPWFQKSS | 378 | 762   |
| >GNA11-N26 ITYPWFQNSS | 18    | >GNA11-N26 ITYPWFQKSS | 24  | 6     |
| >GNA11-N26 ITYPWFQNSS | 267   | >GNA11-N26 ITYPWFQKSS | 507 | 240   |
| >GNA11-N26 ITYPWFQNS  | 1176  | >GNA11-N26 ITYPWFQKS  | 471 | 705   |
| >GNA11-N26 ITYPWFQNSS | 14    | >GNA11-N26 ITYPWFQKSS | 13  | 1     |
| >GNA11-N26 ITYPWFQN   | 530   | >GNA11-N26 ITYPWFQK   | 65  | 465   |
| >GNA11-N26 ITYPWFQNSS | 88    | >GNA11-N26 ITYPWFQKSS | 111 | 23    |
| >GNA11-N26 IITYPWFQN  | 19623 | >GNA11-N26 IITYPWFQK  | 93  | 19530 |
| >GNA11-N26 IITYPWFQN  | 18757 | >GNA11-N26 IITYPWFQK  | 19  | 18738 |
| >GNA11-N26 IITYPWFQN  | 12970 | >GNA11-N26 IITYPWFQK  | 188 | 12782 |
| >GNA11-N26 IITYPWFQN  | 10103 | >GNA11-N26 IITYPWFQK  | 64  | 10039 |
| >GNA11-N26 TIITYPWFQN | 17100 | >GNA11-N26 TIITYPWFQK | 98  | 17002 |
| >GNA11-N26 TIITYPWFQN | 21854 | >GNA11-N26 TIITYPWFQK | 11  | 21843 |
| >GNA11-N26 TIITYPWFQN | 19099 | >GNA11-N26 TIITYPWFQK | 13  | 19086 |
| >GNA11-Q2C QRSERRKWI  | 223   | >GNA11-Q2C LRSERRKWI  | 184 | 39    |
| >GNA11-Q2C QRSERRKWI  | 209   | >GNA11-Q2C LRSERRKWI  | 322 | 113   |
| >GNA11-Q2C QRSERRKW   | 5320  | >GNA11-Q2C LRSERRKW   | 166 | 5154  |
| >GNA11-Q2C GQRSERRKW  | 31031 | >GNA11-Q2C GLRSERRKWI | 329 | 30702 |
| >GNA11-Q2C GQRSERRK   | 4333  | >GNA11-Q2C GLRSERRK   | 261 | 4072  |
| >GNA11-Q2C GQRSERRK   | 191   | >GNA11-Q2C GLRSERRK   | 91  | 100   |
| >GNA11-Q2C IIFRMVDVGG | 10678 | >GNA11-Q2C IIFRMVDVGG | 186 | 10492 |
| >GNA11-Q2C IIFRMVDVGG | 8643  | >GNA11-Q2C IIFRMVDVGG | 276 | 8367  |
| >GNA11-Q2C IIFRMVDVGG | 7654  | >GNA11-Q2C IIFRMVDVGG | 111 | 7543  |
| >GNA11-Q2C IIFRMVDVGG | 8719  | >GNA11-Q2C IIFRMVDVGG | 88  | 8631  |
| >GNA11-Q2C IIFRMVDVGG | 9219  | >GNA11-Q2C IIFRMVDVGG | 139 | 9080  |
| >GNA11-Q2C GGQRSERRK  | 492   | >GNA11-Q2C GGLRSERRKV | 222 | 270   |
| >GNA11-Q2C DVGGQRSER  | 53    | >GNA11-Q2C DVGGLRSER  | 24  | 29    |
| >GNA11-Q2C DVGGQRSER  | 971   | >GNA11-Q2C DVGGLRSERF | 395 | 576   |
| >GNA11-Q2C DVGGQRSER  | 55    | >GNA11-Q2C DVGGLRSER  | 30  | 25    |
| >GNA11-Q2C DVGGQRSER  | 265   | >GNA11-Q2C DVGGLRSERF | 51  | 214   |
| >GNA11-Q2C DVGGQRSER  | 777   | >GNA11-Q2C DVGGLRSERF | 479 | 298   |
| >GNA11-Q2C MVDVGGQR   | 755   | >GNA11-Q2C MVDVGGLR   | 487 | 268   |
| >GNA11-Q2C MVDVGGQR   | 232   | >GNA11-Q2C MVDVGGLRS  | 233 | 1     |

|                       |       |                       |       |       |
|-----------------------|-------|-----------------------|-------|-------|
| >GNA11-Q2C MVDVGGQR   | 120   | >GNA11-Q2C MVDVGGLR   | 72    | 48    |
| >GNA11-Q2C MVDVGGQR!  | 73    | >GNA11-Q2C MVDVGGLR!  | 57    | 16    |
| >GNA11-Q2C RMVDVGGQ   | 15622 | >GNA11-Q2C RMVDVGGGL  | 314   | 15308 |
| >GNA11-Q2C RMVDVGGQ   | 4346  | >GNA11-Q2C RMVDVGGGL  | 46    | 4300  |
| >GNA11-Q2C RMVDVGGQ   | 2171  | >GNA11-Q2C RMVDVGGGL  | 11    | 2160  |
| >GNA11-Q2C RMVDVGGQ   | 3637  | >GNA11-Q2C RMVDVGGGL  | 46    | 3591  |
| >GNA11-Q2C RMVDVGGQ   | 451   | >GNA11-Q2C RMVDVGGGL  | 4     | 447   |
| >GNA11-Q2C RMVDVGGQ!  | 337   | >GNA11-Q2C RMVDVGGGL! | 492   | 155   |
| >GNA11-Q2C RMVDVGGQ   | 7384  | >GNA11-Q2C RMVDVGGGL  | 21    | 7363  |
| >GNA11-Q2C RMVDVGGQ   | 5327  | >GNA11-Q2C RMVDVGGGL  | 47    | 5280  |
| >GNA11-Q2C RMVDVGGQ   | 16100 | >GNA11-Q2C RMVDVGGGL  | 402   | 15698 |
| >GNA11-Q2C RMVDVGGQ   | 1142  | >GNA11-Q2C RMVDVGGGL  | 13    | 1129  |
| >GNA11-Q2C RMVDVGGQ!  | 742   | >GNA11-Q2C RMVDVGGGL! | 327   | 415   |
| >GNA11-Q2C RMVDVGGQ!  | 27    | >GNA11-Q2C RMVDVGGGL! | 22    | 5     |
| >GNA11-Q2C RMVDVGGQ   | 2302  | >GNA11-Q2C RMVDVGGGL  | 293   | 2009  |
| >GNA11-Q2C RMVDVGGQ   | 15692 | >GNA11-Q2C RMVDVGGGL  | 298   | 15394 |
| >GNA11-Q2C RMVDVGGQ   | 15842 | >GNA11-Q2C RMVDVGGGL  | 402   | 15440 |
| >GNA11-Q2C RMVDVGGQ!  | 268   | >GNA11-Q2C RMVDVGGGL! | 129   | 139   |
| >GNA11-Q2C FRMVDVGGC  | 337   | >GNA11-Q2C FRMVDVGGGL | 25    | 312   |
| >GNA11-Q2C FRMVDVGGC  | 136   | >GNA11-Q2C FRMVDVGGGL | 91    | 45    |
| >GNA11-Q2C FRMVDVGGC  | 359   | >GNA11-Q2C FRMVDVGGGL | 197   | 162   |
| >GNA11-Q2C FRMVDVGGC  | 12981 | >GNA11-Q2C FRMVDVGGGL | 60    | 12921 |
| >GNA11-Q2C FRMVDVGGC  | 9673  | >GNA11-Q2C FRMVDVGGGL | 424   | 9249  |
| >GNA11-Q2C FRMVDVGGC  | 9299  | >GNA11-Q2C FRMVDVGGGL | 65    | 9234  |
| >GNA11-Q2C FRMVDVGGC  | 907   | >GNA11-Q2C FRMVDVGGGL | 398   | 509   |
| >GNA11-Q2C IFRMVDVGG! | 33    | >GNA11-Q2C IFRMVDVGG! | 22    | 11    |
| >GNA11-Q2C IFRMVDVGG! | 28    | >GNA11-Q2C IFRMVDVGG! | 17    | 11    |
| >GNA11-Q2C IFRMVDVGG! | 788   | >GNA11-Q2C IFRMVDVGG! | 372   | 416   |
| >GNA11-Q2C QRSERRKWI  | 223   | >GNA11-Q2C PRSERRKWI  | 1477  | 1254  |
| >GNA11-Q2C QRSERRKWI  | 209   | >GNA11-Q2C PRSERRKWI  | 1664  | 1455  |
| >GNA11-Q2C GQRSERRK   | 191   | >GNA11-Q2C GPRSERRK   | 10374 | 10183 |
| >GNA11-Q2C GQRSERRKW  | 23261 | >GNA11-Q2C GPRSERRKW  | 229   | 23032 |
| >GNA11-Q2C GQRSERRKW  | 13542 | >GNA11-Q2C GPRSERRKW  | 219   | 13323 |
| >GNA11-Q2C GGQRSERRK! | 25424 | >GNA11-Q2C GGPRSERRK! | 412   | 25012 |
| >GNA11-Q2C GGQRSERRK! | 6672  | >GNA11-Q2C GGPRSERRK! | 54    | 6618  |
| >GNA11-Q2C GGQRSERRK! | 492   | >GNA11-Q2C GGPRSERRK! | 1578  | 1086  |
| >GNA11-Q2C VGGQRSERR! | 1066  | >GNA11-Q2C VGGPRSERR! | 326   | 740   |
| >GNA11-Q2C DVGGQRSER  | 53    | >GNA11-Q2C DVGGPRSER  | 39    | 14    |
| >GNA11-Q2C DVGGQRSER  | 55    | >GNA11-Q2C DVGGPRSER  | 68    | 13    |
| >GNA11-Q2C DVGGQRSER  | 265   | >GNA11-Q2C DVGGPRSER! | 70    | 195   |
| >GNA11-Q2C MVDVGGQR   | 755   | >GNA11-Q2C MVDVGGPR   | 286   | 469   |
| >GNA11-Q2C MVDVGGQR!  | 232   | >GNA11-Q2C MVDVGGPRS  | 252   | 20    |
| >GNA11-Q2C MVDVGGQR   | 120   | >GNA11-Q2C MVDVGGPR   | 144   | 24    |

|                         |      |                         |       |       |
|-------------------------|------|-------------------------|-------|-------|
| >GNA11-Q2C MVDVGGQR!    | 73   | >GNA11-Q2C MVDVGGPRS    | 65    | 8     |
| >GNA11-Q2C RMVDVGGQ     | 451  | >GNA11-Q2C RMVDVGGP     | 1857  | 1406  |
| >GNA11-Q2C RMVDVGGQI    | 337  | >GNA11-Q2C RMVDVGGPF    | 260   | 77    |
| >GNA11-Q2C RMVDVGGQI    | 27   | >GNA11-Q2C RMVDVGGPF    | 17    | 10    |
| >GNA11-Q2C RMVDVGGQI    | 268  | >GNA11-Q2C RMVDVGGPF    | 81    | 187   |
| >GNA11-Q2C FRMVDVGGC    | 337  | >GNA11-Q2C FRMVDVGGF    | 449   | 112   |
| >GNA11-Q2C FRMVDVGGC    | 136  | >GNA11-Q2C FRMVDVGGF    | 127   | 9     |
| >GNA11-Q2C FRMVDVGGC    | 359  | >GNA11-Q2C FRMVDVGGF    | 373   | 14    |
| >GNA11-Q2C IFRMVDVGGI   | 33   | >GNA11-Q2C IFRMVDVGGI   | 18    | 15    |
| >GNA11-Q2C IFRMVDVGGI   | 28   | >GNA11-Q2C IFRMVDVGGI   | 16    | 12    |
| >GNA11-Q2C IFRMVDVGGI   | 788  | >GNA11-Q2C IFRMVDVGGI   | 213   | 575   |
| >GNA11-R18 RVPTTGIIIEY  | 297  | >GNA11-R18 CVPTTGIIIEY  | 183   | 114   |
| >GNA11-R18 RVPTTGIIIEY  | 173  | >GNA11-R18 CVPTTGIIIEY  | 994   | 821   |
| >GNA11-R18 RVPTTGII     | 472  | >GNA11-R18 CVPTTGII     | 19591 | 19119 |
| >GNA11-R18 RVPTTGIIIEY  | 183  | >GNA11-R18 CVPTTGIIIEY  | 1962  | 1779  |
| >GNA11-R18 RVPTTGII     | 171  | >GNA11-R18 CVPTTGII     | 35    | 136   |
| >GNA11-R18 RVPTTGIIIEY  | 186  | >GNA11-R18 CVPTTGIIIEY  | 2219  | 2033  |
| >GNA11-R18 RVPTTGII     | 168  | >GNA11-R18 CVPTTGII     | 157   | 11    |
| >GNA11-R18 VRVPTTGIIIEY | 980  | >GNA11-R18 VCVPTTGIIIEY | 467   | 513   |
| >GNA11-R18 VRVPTTGIIIEY | 1439 | >GNA11-R18 VCVPTTGIIIEY | 247   | 1192  |
| >GNA11-R18 VRVPTTGIIIEY | 123  | >GNA11-R18 VCVPTTGIIIEY | 1684  | 1561  |
| >GNA11-R18 VRVPTTGIIIEY | 4469 | >GNA11-R18 VCVPTTGIIIEY | 470   | 3999  |
| >GNA11-R18 VRVPTTGII    | 2129 | >GNA11-R18 VCVPTTGII    | 435   | 1694  |
| >GNA11-R18 RVRVPTTG     | 24   | >GNA11-R18 RVCVPTTG     | 4788  | 4764  |
| >GNA11-R18 RVRVPTTGI    | 9    | >GNA11-R18 RVCVPTTGI    | 1658  | 1649  |
| >GNA11-R18 RVRVPTTGII   | 5    | >GNA11-R18 RVCVPTTGII   | 360   | 355   |
| >GNA11-R18 RVRVPTTGIIIE | 76   | >GNA11-R18 RVCVPTTGIIIE | 5075  | 4999  |
| >GNA11-R18 RVRVPTTGI    | 199  | >GNA11-R18 RVCVPTTGI    | 60    | 139   |
| >GNA11-R18 RVRVPTTGII   | 936  | >GNA11-R18 RVCVPTTGII   | 295   | 641   |
| >GNA11-R18 RVRVPTTGI    | 78   | >GNA11-R18 RVCVPTTGI    | 15734 | 15656 |
| >GNA11-R18 RVRVPTTGI    | 52   | >GNA11-R18 RVCVPTTGI    | 374   | 322   |
| >GNA11-R18 RVRVPTTGII   | 385  | >GNA11-R18 RVCVPTTGII   | 1543  | 1158  |
| >GNA11-R18 RVRVPTTGI    | 177  | >GNA11-R18 RVCVPTTGI    | 65    | 112   |
| >GNA11-R18 RVRVPTTGII   | 424  | >GNA11-R18 RVCVPTTGII   | 173   | 251   |
| >GNA11-R18 LRVRVPTTGI   | 427  | >GNA11-R18 LRVCVPTTGI   | 264   | 163   |
| >GNA11-R18 LRVRVPTTGII  | 628  | >GNA11-R18 LRVCVPTTGII  | 438   | 190   |
| >GNA11-R18 LRVRVPTTGI   | 332  | >GNA11-R18 LRVCVPTTGI   | 844   | 512   |
| >GNA11-R18 LRVRVPTTGII  | 466  | >GNA11-R18 LRVCVPTTGII  | 615   | 149   |
| >GNA11-R18 VLRVRVPTTG   | 43   | >GNA11-R18 VLRVCVPTTG   | 45    | 2     |
| >GNA11-R18 VLRVRVPTTG   | 255  | >GNA11-R18 VLRVCVPTTG   | 302   | 47    |
| >GNA11-R18 VLRVRVPTT    | 94   | >GNA11-R18 VLRVCVPTT    | 87    | 7     |
| >GNA11-R18 VLRVRVPTTG   | 26   | >GNA11-R18 VLRVCVPTTG   | 25    | 1     |
| >GNA11-R18 TQQDVLVRV    | 270  | >GNA11-R18 TQQDVLRVC    | 22599 | 22329 |

|                         |      |                         |       |       |
|-------------------------|------|-------------------------|-------|-------|
| >GNA11-R18 RVPTTGIIIEY  | 297  | >GNA11-R18 HVPTTGIIIEY  | 86    | 211   |
| >GNA11-R18 RVPTTGIIIEY  | 2411 | >GNA11-R18 HVPTTGIIIEY  | 269   | 2142  |
| >GNA11-R18 RVPTTGIIIEY  | 598  | >GNA11-R18 HVPTTGIIIEY  | 366   | 232   |
| >GNA11-R18 RVPTTGIIIEY  | 173  | >GNA11-R18 HVPTTGIIIEY  | 647   | 474   |
| >GNA11-R18 RVPTTGII     | 472  | >GNA11-R18 HVPTTGII     | 4948  | 4476  |
| >GNA11-R18 RVPTTGII     | 8401 | >GNA11-R18 HVPTTGII     | 413   | 7988  |
| >GNA11-R18 RVPTTGIIIEY  | 183  | >GNA11-R18 HVPTTGIIIEY  | 604   | 421   |
| >GNA11-R18 RVPTTGII     | 171  | >GNA11-R18 HVPTTGII     | 70    | 101   |
| >GNA11-R18 RVPTTGIIIEY  | 186  | >GNA11-R18 HVPTTGIIIEY  | 1916  | 1730  |
| >GNA11-R18 RVPTTGII     | 168  | >GNA11-R18 HVPTTGII     | 1100  | 932   |
| >GNA11-R18 VRVPTTGIIIEY | 980  | >GNA11-R18 VHVPTTGIIIEY | 288   | 692   |
| >GNA11-R18 VRVPTTGIIIEY | 635  | >GNA11-R18 VHVPTTGIIIEY | 435   | 200   |
| >GNA11-R18 VRVPTTGIIIEY | 123  | >GNA11-R18 VHVPTTGIIIEY | 149   | 26    |
| >GNA11-R18 VRVPTTGII    | 775  | >GNA11-R18 VHVPTTGII    | 141   | 634   |
| >GNA11-R18 LPTQQDVLRL   | 2636 | >GNA11-R18 LPTQQDVLRL   | 110   | 2526  |
| >GNA11-R18 RVRVPTTG     | 24   | >GNA11-R18 RVHVPTTG     | 246   | 222   |
| >GNA11-R18 RVRVPTTGI    | 9    | >GNA11-R18 RVHVPTTGI    | 47    | 38    |
| >GNA11-R18 RVRVPTTGII   | 5    | >GNA11-R18 RVHVPTTGII   | 15    | 10    |
| >GNA11-R18 RVRVPTTGIIIE | 76   | >GNA11-R18 RVHVPTTGIIIE | 609   | 533   |
| >GNA11-R18 RVRVPTTGI    | 199  | >GNA11-R18 RVHVPTTGI    | 46    | 153   |
| >GNA11-R18 RVRVPTTGII   | 936  | >GNA11-R18 RVHVPTTGII   | 227   | 709   |
| >GNA11-R18 RVRVPTTGI    | 78   | >GNA11-R18 RVHVPTTGI    | 2100  | 2022  |
| >GNA11-R18 RVRVPTTGI    | 52   | >GNA11-R18 RVHVPTTGI    | 274   | 222   |
| >GNA11-R18 RVRVPTTGII   | 385  | >GNA11-R18 RVHVPTTGII   | 1493  | 1108  |
| >GNA11-R18 RVRVPTTGI    | 177  | >GNA11-R18 RVHVPTTGI    | 61    | 116   |
| >GNA11-R18 RVRVPTTGII   | 424  | >GNA11-R18 RVHVPTTGII   | 279   | 145   |
| >GNA11-R18 LRVRVPTTGI   | 427  | >GNA11-R18 LRVHVPTTGI   | 208   | 219   |
| >GNA11-R18 LRVRVPTTGII  | 628  | >GNA11-R18 LRVHVPTTGII  | 373   | 255   |
| >GNA11-R18 LRVRVPTTGI   | 332  | >GNA11-R18 LRVHVPTTGI   | 335   | 3     |
| >GNA11-R18 LRVRVPTTGII  | 466  | >GNA11-R18 LRVHVPTTGII  | 813   | 347   |
| >GNA11-R18 VLRVRVPTT    | 1309 | >GNA11-R18 VLRVHVPTT    | 329   | 980   |
| >GNA11-R18 VLRVRVPTTG   | 43   | >GNA11-R18 VLRVHVPTTG   | 20    | 23    |
| >GNA11-R18 VLRVRVPTTG   | 255  | >GNA11-R18 VLRVHVPTTG   | 140   | 115   |
| >GNA11-R18 VLRVRVPTT    | 94   | >GNA11-R18 VLRVHVPTT    | 100   | 6     |
| >GNA11-R18 VLRVRVPTTG   | 26   | >GNA11-R18 VLRVHVPTTG   | 28    | 2     |
| >GNA11-R18 QQDVLRLRV    | 596  | >GNA11-R18 QQDVLRLRVH   | 141   | 455   |
| >GNA11-R18 TQQDVLRLRV   | 270  | >GNA11-R18 TQQDVLRLVH   | 14071 | 13801 |
| >GNA11-R25 RTIITYPWF    | 132  | >GNA11-R25 WTIITYPWF    | 111   | 21    |
| >GNA11-R25 RTIITYPWF    | 351  | >GNA11-R25 WTIITYPWF    | 1555  | 1204  |
| >GNA11-R25 RTIITYPWF    | 55   | >GNA11-R25 WTIITYPWF    | 92    | 37    |
| >GNA11-R25 RTIITYPWF    | 4724 | >GNA11-R25 WTIITYPWF    | 87    | 4637  |
| >GNA11-R25 RTIITYPWF    | 38   | >GNA11-R25 WTIITYPWF    | 27    | 11    |
| >GNA11-R25 RTIITYPW     | 2019 | >GNA11-R25 WTIITYPW     | 460   | 1559  |

|                         |       |                        |       |       |
|-------------------------|-------|------------------------|-------|-------|
| >GNA11-R25 RTIITYPWFAQ  | 196   | >GNA11-R25 WTIITYPWFAQ | 13222 | 13026 |
| >GNA11-R25 RTIITYPW     | 22    | >GNA11-R25 WTIITYPW    | 1049  | 1027  |
| >GNA11-R25 RTIITYPWF    | 69    | >GNA11-R25 WTIITYPWF   | 209   | 140   |
| >GNA11-R25 RTIITYPW     | 3     | >GNA11-R25 WTIITYPW    | 4     | 1     |
| >GNA11-R25 RTIITYPWF    | 3     | >GNA11-R25 WTIITYPWF   | 4     | 1     |
| >GNA11-R25 RTIITYPWFAQ  | 267   | >GNA11-R25 WTIITYPWFAQ | 2953  | 2686  |
| >GNA11-R25 RTIITYPWFAQI | 153   | >GNA11-R25 WTIITYPWFAQ | 1907  | 1754  |
| >GNA11-R25 RTIITYPW     | 4691  | >GNA11-R25 WTIITYPW    | 491   | 4200  |
| >GNA11-R25 RTIITYPW     | 33    | >GNA11-R25 WTIITYPW    | 46    | 13    |
| >GNA11-R25 RTIITYPWF    | 219   | >GNA11-R25 WTIITYPWF   | 2836  | 2617  |
| >GNA11-R25 RTIITYPW     | 10    | >GNA11-R25 WTIITYPW    | 14    | 4     |
| >GNA11-R25 RTIITYPWF    | 24    | >GNA11-R25 WTIITYPWF   | 166   | 142   |
| >GNA11-R25 RTIITYPWF    | 43    | >GNA11-R25 WTIITYPWF   | 119   | 76    |
| >GNA11-R25 RTIITYPWF    | 21    | >GNA11-R25 WTIITYPWF   | 20    | 1     |
| >GNA11-R25 RTIITYPWFAQ  | 204   | >GNA11-R25 WTIITYPWFAQ | 115   | 89    |
| >GNA11-R25 RTIITYPW     | 1176  | >GNA11-R25 WTIITYPW    | 118   | 1058  |
| >GNA11-R25 FRTIITYPW    | 13210 | >GNA11-R25 FWTIITYPW   | 256   | 12954 |
| >GNA11-R25 FRTIITYPWF   | 4564  | >GNA11-R25 FWTIITYPWF  | 26    | 4538  |
| >GNA11-R25 FRTIITYPWF   | 18120 | >GNA11-R25 FWTIITYPWF  | 160   | 17960 |
| >GNA11-R25 FRTIITYPW    | 16668 | >GNA11-R25 FWTIITYPW   | 147   | 16521 |
| >GNA11-R25 FRTIITYPWF   | 5215  | >GNA11-R25 FWTIITYPWF  | 9     | 5206  |
| >GNA11-R25 FRTIITYPWF   | 4031  | >GNA11-R25 FWTIITYPWF  | 200   | 3831  |
| >GNA11-R25 FRTIITYPWF   | 110   | >GNA11-R25 FWTIITYPWF  | 2173  | 2063  |
| >GNA11-R25 FRTIITYPW    | 324   | >GNA11-R25 FWTIITYPW   | 18546 | 18222 |
| >GNA11-R25 FRTIITYPWF   | 63    | >GNA11-R25 FWTIITYPWF  | 6311  | 6248  |
| >GNA11-R25 FRTIITYPW    | 156   | >GNA11-R25 FWTIITYPW   | 348   | 192   |
| >GNA11-R25 FRTIITYPWF   | 299   | >GNA11-R25 FWTIITYPWF  | 12618 | 12319 |
| >GNA11-R25 FRTIITYPW    | 9     | >GNA11-R25 FWTIITYPW   | 65    | 56    |
| >GNA11-R25 FRTIITYPWFAQ | 8848  | >GNA11-R25 FWTIITYPWF  | 102   | 8746  |
| >GNA11-R25 FRTIITYP     | 33057 | >GNA11-R25 FWTIITYP    | 241   | 32816 |
| >GNA11-R25 FRTIITYPW    | 35212 | >GNA11-R25 FWTIITYPW   | 254   | 34958 |
| >GNA11-R25 FRTIITYPWF   | 24753 | >GNA11-R25 FWTIITYPWF  | 192   | 24561 |
| >GNA11-R25 FRTIITYPWFAQ | 24305 | >GNA11-R25 FWTIITYPWF  | 63    | 24242 |
| >GNA11-R25 NRMEESKALF   | 343   | >GNA11-R25 NRMEESKALF  | 2927  | 2584  |
| >GNA11-R25 NRMEESKALF   | 279   | >GNA11-R25 NRMEESKALF  | 31545 | 31266 |
| >GNA11-R25 LFRTIITYPW   | 1635  | >GNA11-R25 LFWTIITYPW  | 384   | 1251  |
| >GNA11-R25 LFRTIITYPWF  | 114   | >GNA11-R25 LFWTIITYPWF | 32    | 82    |
| >GNA11-R25 LFRTIITYPW   | 3150  | >GNA11-R25 LFWTIITYPW  | 323   | 2827  |
| >GNA11-R25 LFRTIITYPWF  | 663   | >GNA11-R25 LFWTIITYPWF | 360   | 303   |
| >GNA11-R25 LFRTIITYPW   | 1513  | >GNA11-R25 LFWTIITYPW  | 365   | 1148  |
| >GNA11-R25 LFRTIITYPWF  | 29    | >GNA11-R25 LFWTIITYPWF | 16    | 13    |
| >GNA11-R25 LFRTIITY     | 53    | >GNA11-R25 LFWTIITY    | 10    | 43    |
| >GNA11-R25 LFRTIITYPW   | 1209  | >GNA11-R25 LFWTIITYPW  | 279   | 930   |

|                        |      |                        |       |       |
|------------------------|------|------------------------|-------|-------|
| >GNA11-R25 LFRTIITYPWF | 3619 | >GNA11-R25 LFWTIITYPW  | 202   | 3417  |
| >GNA11-R25 LFRTIITY    | 287  | >GNA11-R25 LFWTIITY    | 11497 | 11210 |
| >GNA11-R25 LFRTIITY    | 862  | >GNA11-R25 LFWTIITY    | 177   | 685   |
| >GNA11-R25 LFRTIITYPW  | 6461 | >GNA11-R25 LFWTIITYPW  | 356   | 6105  |
| >GNA11-R25 LFRTIITYPWF | 570  | >GNA11-R25 LFWTIITYPW  | 306   | 264   |
| >GNA11-R25 LFRTIITY    | 847  | >GNA11-R25 LFWTIITY    | 43    | 804   |
| >GNA11-R25 LFRTIITYPW  | 3625 | >GNA11-R25 LFWTIITYPW  | 286   | 3339  |
| >GNA11-R25 LFRTIITYPWF | 205  | >GNA11-R25 LFWTIITYPW  | 770   | 565   |
| >GNA11-R25 LFRTIITYPW  | 349  | >GNA11-R25 LFWTIITYPW  | 178   | 171   |
| >GNA11-R25 ALFRTIIT    | 746  | >GNA11-R25 ALFWTIIT    | 119   | 627   |
| >GNA11-R25 ALFRTIITYP  | 668  | >GNA11-R25 ALFWTIITYP  | 263   | 405   |
| >GNA11-R25 ALFRTIIT    | 762  | >GNA11-R25 ALFWTIIT    | 400   | 362   |
| >GNA11-R25 ALFRTIITYP  | 708  | >GNA11-R25 ALFWTIITYP  | 420   | 288   |
| >GNA11-R25 ALFRTIIT    | 500  | >GNA11-R25 ALFWTIIT    | 246   | 254   |
| >GNA11-R25 ALFRTIIT    | 120  | >GNA11-R25 ALFWTIIT    | 14    | 106   |
| >GNA11-R25 ALFRTIITY   | 88   | >GNA11-R25 ALFWTIITY   | 11    | 77    |
| >GNA11-R25 ALFRTIITYP  | 112  | >GNA11-R25 ALFWTIITYP  | 22    | 90    |
| >GNA11-R25 ALFRTIITYPW | 614  | >GNA11-R25 ALFWTIITYPV | 88    | 526   |
| >GNA11-R25 ALFRTIIT    | 316  | >GNA11-R25 ALFWTIIT    | 54    | 262   |
| >GNA11-R25 ALFRTIITY   | 1591 | >GNA11-R25 ALFWTIITY   | 239   | 1352  |
| >GNA11-R25 ALFRTIITYP  | 1719 | >GNA11-R25 ALFWTIITYP  | 497   | 1222  |
| >GNA11-R25 ALFRTIIT    | 32   | >GNA11-R25 ALFWTIIT    | 8     | 24    |
| >GNA11-R25 ALFRTIITY   | 93   | >GNA11-R25 ALFWTIITY   | 15    | 78    |
| >GNA11-R25 ALFRTIITYP  | 360  | >GNA11-R25 ALFWTIITYP  | 79    | 281   |
| >GNA11-R25 ALFRTIITY   | 66   | >GNA11-R25 ALFWTIITY   | 61    | 5     |
| >GNA11-R25 ALFRTIITY   | 175  | >GNA11-R25 ALFWTIITY   | 78    | 97    |
| >GNA11-R25 ALFRTIITY   | 207  | >GNA11-R25 ALFWTIITY   | 51    | 156   |
| >GNA11-R25 ALFRTIITY   | 491  | >GNA11-R25 ALFWTIITY   | 2865  | 2374  |
| >GNA11-R25 ALFRTIITY   | 224  | >GNA11-R25 ALFWTIITY   | 45    | 179   |
| >GNA11-R25 ALFRTIITY   | 34   | >GNA11-R25 ALFWTIITY   | 13    | 21    |
| >GNA11-R25 ALFRTIITYPW | 8    | >GNA11-R25 ALFWTIITYPV | 5     | 3     |
| >GNA11-R25 ALFRTIITY   | 227  | >GNA11-R25 ALFWTIITY   | 995   | 768   |
| >GNA11-R25 ALFRTIITY   | 63   | >GNA11-R25 ALFWTIITY   | 85    | 22    |
| >GNA11-R25 ALFRTIITYPW | 329  | >GNA11-R25 ALFWTIITYPV | 572   | 243   |
| >GNA11-R25 ALFRTIITY   | 147  | >GNA11-R25 ALFWTIITY   | 263   | 116   |
| >GNA11-R25 ALFRTIITY   | 9    | >GNA11-R25 ALFWTIITY   | 29    | 20    |
| >GNA11-R25 ALFRTIITYPW | 151  | >GNA11-R25 ALFWTIITYPV | 546   | 395   |
| >GNA11-R25 ALFRTIITY   | 104  | >GNA11-R25 ALFWTIITY   | 33    | 71    |
| >GNA11-R25 ALFRTIITYPW | 79   | >GNA11-R25 ALFWTIITYPV | 45    | 34    |
| >GNA11-R25 ALFRTIITY   | 2040 | >GNA11-R25 ALFWTIITY   | 214   | 1826  |
| >GNA11-R25 ALFRTIITYPW | 209  | >GNA11-R25 ALFWTIITYPV | 721   | 512   |
| >GNA11-R25 ALFRTIITYPW | 126  | >GNA11-R25 ALFWTIITYPV | 131   | 5     |
| >GNA11-R25 ALFRTIITY   | 266  | >GNA11-R25 ALFWTIITY   | 255   | 11    |

|                         |      |                        |       |       |
|-------------------------|------|------------------------|-------|-------|
| >GNA11-R25 ALFRTIITY    | 47   | >GNA11-R25 ALFWTIITY   | 574   | 527   |
| >GNA11-R25 ALFRTIITYPW  | 949  | >GNA11-R25 ALFWTIITYPV | 408   | 541   |
| >GNA11-R25 ALFRTIITY    | 416  | >GNA11-R25 ALFWTIITY   | 73    | 343   |
| >GNA11-R25 KALFRITII    | 2103 | >GNA11-R25 KALFWTII    | 281   | 1822  |
| >GNA11-R25 KALFRTIITY   | 112  | >GNA11-R25 KALFWTIITY  | 72    | 40    |
| >GNA11-R25 KALFRTIITY   | 271  | >GNA11-R25 KALFWTIITY  | 198   | 73    |
| >GNA11-R25 KALFRITII    | 185  | >GNA11-R25 KALFWTII    | 313   | 128   |
| >GNA11-R25 KALFRTIITY   | 94   | >GNA11-R25 KALFWTIITY  | 282   | 188   |
| >GNA11-R25 KALFRTIITY   | 274  | >GNA11-R25 KALFWTIITY  | 180   | 94    |
| >GNA11-R25 KALFRITII    | 123  | >GNA11-R25 KALFWTII    | 142   | 19    |
| >GNA11-R25 KALFRTIITY   | 147  | >GNA11-R25 KALFWTIITY  | 62    | 85    |
| >GNA11-R25 KALFRTIITY   | 162  | >GNA11-R25 KALFWTIITY  | 148   | 14    |
| >GNA11-R25 KALFRTIITY   | 100  | >GNA11-R25 KALFWTIITY  | 105   | 5     |
| >GNA11-R25 KALFRTIITY   | 7    | >GNA11-R25 KALFWTIITY  | 8     | 1     |
| >GNA11-R25 KALFRTIITY   | 524  | >GNA11-R25 KALFWTIITY  | 303   | 221   |
| >GNA11-R25 KALFRITII    | 505  | >GNA11-R25 KALFWTII    | 121   | 384   |
| >GNA11-R25 KALFRTIITY   | 94   | >GNA11-R25 KALFWTIITY  | 33    | 61    |
| >GNA11-R25 KALFRTIITY   | 235  | >GNA11-R25 KALFWTIITY  | 444   | 209   |
| >GNA11-R25 KALFRITII    | 97   | >GNA11-R25 KALFWTII    | 66    | 31    |
| >GNA11-R25 SKALFRITII   | 158  | >GNA11-R25 SKALFWTII   | 100   | 58    |
| >GNA11-R25 SKALFRITII   | 293  | >GNA11-R25 SKALFWTI    | 375   | 82    |
| >GNA11-R25 SKALFRITII   | 149  | >GNA11-R25 SKALFWTII   | 225   | 76    |
| >GNA11-R25 SKALFRTIITY  | 12   | >GNA11-R25 SKALFWTIITY | 18    | 6     |
| >GNA11-R25 SKALFRITII   | 627  | >GNA11-R25 SKALFWTII   | 278   | 349   |
| >GNA11-R25 ESKALFRITII  | 1797 | >GNA11-R25 ESKALFWTI   | 66    | 1731  |
| >GNA11-R25 ESKALFRITII  | 463  | >GNA11-R25 ESKALFWTII  | 670   | 207   |
| >GNA11-R25 ESKALFRITII  | 7192 | >GNA11-R25 ESKALFWTI   | 270   | 6922  |
| >GNA11-R25 ESKALFRITII  | 498  | >GNA11-R25 ESKALFWTI   | 190   | 308   |
| >GNA11-R25 ESKALFRITII  | 135  | >GNA11-R25 ESKALFWTII  | 61    | 74    |
| >GNA11-R25 EESKALFR     | 219  | >GNA11-R25 EESKALFW    | 38    | 181   |
| >GNA11-R25 EESKALFRITII | 20   | >GNA11-R25 EESKALFWTI  | 36    | 16    |
| >GNA11-R25 EESKALFRITII | 17   | >GNA11-R25 EESKALFWTII | 13    | 4     |
| >GNA11-R25 EESKALFR     | 77   | >GNA11-R25 EESKALFW    | 29028 | 28951 |
| >GNA11-R25 EESKALFRITII | 3750 | >GNA11-R25 EESKALFWTI  | 469   | 3281  |
| >GNA11-R25 EESKALFRITII | 258  | >GNA11-R25 EESKALFWTII | 112   | 146   |
| >GNA11-R25 EESKALFRITII | 125  | >GNA11-R25 EESKALFWTI  | 62    | 63    |
| >GNA11-R25 EESKALFRITII | 555  | >GNA11-R25 EESKALFWTII | 386   | 169   |
| >GNA11-R25 EESKALFR     | 7752 | >GNA11-R25 EESKALFW    | 87    | 7665  |
| >GNA11-R25 EESKALFRITII | 97   | >GNA11-R25 EESKALFWTI  | 60    | 37    |
| >GNA11-R25 EESKALFR     | 1155 | >GNA11-R25 EESKALFW    | 14    | 1141  |
| >GNA11-R25 EESKALFRITII | 353  | >GNA11-R25 EESKALFWTI  | 193   | 160   |
| >GNA11-R25 EESKALFRITII | 1325 | >GNA11-R25 EESKALFWTII | 438   | 887   |
| >GNA11-R25 EESKALFRITII | 43   | >GNA11-R25 EESKALFWT   | 18    | 25    |

|                        |       |                        |       |       |
|------------------------|-------|------------------------|-------|-------|
| >GNA11-R25 EESKALFRTI  | 98    | >GNA11-R25 EESKALFWTI  | 66    | 32    |
| >GNA11-R25 EESKALFRTII | 176   | >GNA11-R25 EESKALFWTII | 77    | 99    |
| >GNA11-R25 EESKALFRTI  | 236   | >GNA11-R25 EESKALFWTI  | 43    | 193   |
| >GNA11-R25 EESKALFRTII | 31    | >GNA11-R25 EESKALFWTII | 24    | 7     |
| >GNA11-R25 EESKALFR    | 288   | >GNA11-R25 EESKALFW    | 33263 | 32975 |
| >GNA11-R25 MEESKALFR   | 4843  | >GNA11-R25 MEESKALFW   | 59    | 4784  |
| >GNA11-R25 MEESKALFRT  | 17    | >GNA11-R25 MEESKALFW   | 26    | 9     |
| >GNA11-R25 MEESKALFRT  | 2004  | >GNA11-R25 MEESKALFW   | 416   | 1588  |
| >GNA11-R25 MEESKALFRT  | 49    | >GNA11-R25 MEESKALFW   | 23    | 26    |
| >GNA11-R25 MEESKALFR   | 8013  | >GNA11-R25 MEESKALFW   | 104   | 7909  |
| >GNA11-R25 MEESKALFR   | 1255  | >GNA11-R25 MEESKALFW   | 17    | 1238  |
| >GNA11-R25 MEESKALFRT  | 587   | >GNA11-R25 MEESKALFW   | 254   | 333   |
| >GNA11-R25 MEESKALFRT  | 246   | >GNA11-R25 MEESKALFW   | 97    | 149   |
| >GNA11-R25 MEESKALFRT  | 56    | >GNA11-R25 MEESKALFW   | 27    | 29    |
| >GNA11-R25 MEESKALFR   | 32410 | >GNA11-R25 MEESKALFW   | 320   | 32090 |
| >GNA11-R25 MEESKALFR   | 151   | >GNA11-R25 MEESKALFW   | 30958 | 30807 |
| >GNA11-R25 MEESKALFRT  | 2530  | >GNA11-R25 MEESKALFW   | 343   | 2187  |
| >GNA11-R25 RMEESKALFR  | 363   | >GNA11-R25 RMEESKALFV  | 331   | 32    |
| >GNA11-R25 RMEESKALFR  | 235   | >GNA11-R25 RMEESKALFV  | 159   | 76    |
| >GNA11-R25 RMEESKALFR  | 40    | >GNA11-R25 RMEESKALFV  | 20066 | 20026 |
| >GNA11-R25 RMEESKALFR  | 17477 | >GNA11-R25 RMEESKALFV  | 22    | 17455 |
| >GNA11-R25 RMEESKALFR  | 24870 | >GNA11-R25 RMEESKALFV  | 222   | 24648 |
| >GNA11-R25 RMEESKALFR  | 22223 | >GNA11-R25 RMEESKALFV  | 68    | 22155 |
| >GNA11-R25 RMEESKALFR  | 30    | >GNA11-R25 RMEESKALFV  | 18386 | 18356 |
| >GNA11-R25 RMEESKALFR  | 45    | >GNA11-R25 RMEESKALFV  | 16494 | 16449 |
| >GNA11-V22 VTSIMFLV    | 434   | >GNA11-V22 MTSIMFLV    | 76    | 358   |
| >GNA11-V22 VTSIMFLV    | 109   | >GNA11-V22 MTSIMFLV    | 17    | 92    |
| >GNA11-V22 VTSIMFLVAL  | 701   | >GNA11-V22 MTSIMFLVAL  | 220   | 481   |
| >GNA11-V22 VTSIMFLV    | 308   | >GNA11-V22 MTSIMFLV    | 79    | 229   |
| >GNA11-V22 VTSIMFLVAL  | 1064  | >GNA11-V22 MTSIMFLVAL  | 287   | 777   |
| >GNA11-V22 VTSIMFLV    | 57    | >GNA11-V22 MTSIMFLV    | 16    | 41    |
| >GNA11-V22 VTSIMFLVAL  | 294   | >GNA11-V22 MTSIMFLVAL  | 102   | 192   |
| >GNA11-V22 VTSIMFLV    | 262   | >GNA11-V22 MTSIMFLV    | 132   | 130   |
| >GNA11-V22 VTSIMFLV    | 261   | >GNA11-V22 MTSIMFLV    | 234   | 27    |
| >GNA11-V22 VTSIMFLV    | 97    | >GNA11-V22 MTSIMFLV    | 40    | 57    |
| >GNA11-V22 VTSIMFLVA   | 4009  | >GNA11-V22 MTSIMFLVA   | 362   | 3647  |
| >GNA11-V22 VTSIMFLVAL  | 546   | >GNA11-V22 MTSIMFLVAL  | 165   | 381   |
| >GNA11-V22 VTSIMFLV    | 52    | >GNA11-V22 MTSIMFLV    | 5     | 47    |
| >GNA11-V22 VTSIMFLVA   | 5098  | >GNA11-V22 MTSIMFLVA   | 88    | 5010  |
| >GNA11-V22 VTSIMFLVAL  | 230   | >GNA11-V22 MTSIMFLVAL  | 37    | 193   |
| >GNA11-V22 VTSIMFLVAL  | 3952  | >GNA11-V22 MTSIMFLVAL  | 112   | 3840  |
| >GNA11-V22 VTSIMFLV    | 382   | >GNA11-V22 MTSIMFLV    | 18    | 364   |
| >GNA11-V22 VTSIMFLVAL  | 4398  | >GNA11-V22 MTSIMFLVAL  | 351   | 4047  |



|                       |       |                       |      |       |
|-----------------------|-------|-----------------------|------|-------|
| >GNA11-V22 VTSIMFLV   | 470   | >GNA11-V22 MTSIMFLV   | 236  | 234   |
| >GNA11-V22 VTSIMFLVAL | 17    | >GNA11-V22 MTSIMFLVAL | 10   | 7     |
| >GNA11-V22 VTSIMFLV   | 231   | >GNA11-V22 MTSIMFLV   | 380  | 149   |
| >GNA11-V22 VTSIMFLVAL | 44    | >GNA11-V22 MTSIMFLVAL | 56   | 12    |
| >GNA11-V22 VTSIMFLVAL | 334   | >GNA11-V22 MTSIMFLVAL | 446  | 112   |
| >GNA11-V22 VTSIMFLVAL | 64    | >GNA11-V22 MTSIMFLVAL | 45   | 19    |
| >GNA11-V22 NVTSIMFL   | 1498  | >GNA11-V22 NMTSIMFL   | 38   | 1460  |
| >GNA11-V22 NVTSIMFLV  | 48    | >GNA11-V22 NMTSIMFLV  | 9    | 39    |
| >GNA11-V22 NVTSIMFLVA | 1181  | >GNA11-V22 NMTSIMFLV/ | 44   | 1137  |
| >GNA11-V22 NVTSIMFL   | 65    | >GNA11-V22 NMTSIMFL   | 6    | 59    |
| >GNA11-V22 NVTSIMFLV  | 11    | >GNA11-V22 NMTSIMFLV  | 2    | 9     |
| >GNA11-V22 NVTSIMFLVA | 2486  | >GNA11-V22 NMTSIMFLV/ | 249  | 2237  |
| >GNA11-V22 NVTSIMFLVA | 62    | >GNA11-V22 NMTSIMFLV/ | 6    | 56    |
| >GNA11-V22 NVTSIMFL   | 759   | >GNA11-V22 NMTSIMFL   | 27   | 732   |
| >GNA11-V22 NVTSIMFLV  | 113   | >GNA11-V22 NMTSIMFLV  | 7    | 106   |
| >GNA11-V22 NVTSIMFLVA | 1015  | >GNA11-V22 NMTSIMFLV/ | 140  | 875   |
| >GNA11-V22 NVTSIMFLVA | 1008  | >GNA11-V22 NMTSIMFLV/ | 42   | 966   |
| >GNA11-V22 NVTSIMFL   | 97    | >GNA11-V22 NMTSIMFL   | 59   | 38    |
| >GNA11-V22 NVTSIMFLV  | 8     | >GNA11-V22 NMTSIMFLV  | 6    | 2     |
| >GNA11-V22 NVTSIMFLVA | 77    | >GNA11-V22 NMTSIMFLV/ | 45   | 32    |
| >GNA11-V22 NVTSIMFL   | 5012  | >GNA11-V22 NMTSIMFL   | 39   | 4973  |
| >GNA11-V22 NVTSIMFLV  | 843   | >GNA11-V22 NMTSIMFLV  | 6    | 837   |
| >GNA11-V22 NVTSIMFLVA | 5523  | >GNA11-V22 NMTSIMFLV/ | 40   | 5483  |
| >GNA11-V22 NVTSIMFL   | 6879  | >GNA11-V22 NMTSIMFL   | 34   | 6845  |
| >GNA11-V22 NVTSIMFLV  | 1497  | >GNA11-V22 NMTSIMFLV  | 6    | 1491  |
| >GNA11-V22 NVTSIMFLVA | 6242  | >GNA11-V22 NMTSIMFLV/ | 31   | 6211  |
| >GNA11-V22 NVTSIMFL   | 4206  | >GNA11-V22 NMTSIMFL   | 32   | 4174  |
| >GNA11-V22 NVTSIMFLV  | 306   | >GNA11-V22 NMTSIMFLV  | 8    | 298   |
| >GNA11-V22 NVTSIMFLVA | 10073 | >GNA11-V22 NMTSIMFLV/ | 162  | 9911  |
| >GNA11-V22 NVTSIMFL   | 4618  | >GNA11-V22 NMTSIMFL   | 40   | 4578  |
| >GNA11-V22 NVTSIMFLV  | 661   | >GNA11-V22 NMTSIMFLV  | 6    | 655   |
| >GNA11-V22 NVTSIMFLVA | 7528  | >GNA11-V22 NMTSIMFLV/ | 178  | 7350  |
| >GNA11-V22 NVTSIMFL   | 1477  | >GNA11-V22 NMTSIMFL   | 21   | 1456  |
| >GNA11-V22 NVTSIMFLV  | 110   | >GNA11-V22 NMTSIMFLV  | 4    | 106   |
| >GNA11-V22 NVTSIMFLVA | 12580 | >GNA11-V22 NMTSIMFLV/ | 332  | 12248 |
| >GNA11-V22 NVTSIMFLVA | 3269  | >GNA11-V22 NMTSIMFLV/ | 27   | 3242  |
| >GNA11-V22 NVTSIMFL   | 330   | >GNA11-V22 NMTSIMFL   | 4140 | 3810  |
| >GNA11-V22 NVTSIMFLVA | 332   | >GNA11-V22 NMTSIMFLV/ | 5961 | 5629  |
| >GNA11-V22 NVTSIMFL   | 8     | >GNA11-V22 NMTSIMFL   | 120  | 112   |
| >GNA11-V22 NVTSIMFLV  | 5     | >GNA11-V22 NMTSIMFLV  | 14   | 9     |
| >GNA11-V22 NVTSIMFLVA | 14    | >GNA11-V22 NMTSIMFLV/ | 234  | 220   |
| >GNA11-V22 NVTSIMFL   | 109   | >GNA11-V22 NMTSIMFL   | 608  | 499   |
| >GNA11-V22 NVTSIMFLV  | 7     | >GNA11-V22 NMTSIMFLV  | 15   | 8     |

|                        |      |                       |      |     |
|------------------------|------|-----------------------|------|-----|
| >GNA11-V22 NVTSIMFLVA  | 95   | >GNA11-V22 NMTSIMFLV/ | 456  | 361 |
| >GNA11-V22 NVTSIMFLVA  | 1037 | >GNA11-V22 NMTSIMFLV/ | 89   | 948 |
| >GNA11-V22 RRKWIHCFEN  | 736  | >GNA11-V22 RRKWIHCFEN | 246  | 490 |
| >GNA11-V22 RRKWIHCFEN  | 195  | >GNA11-V22 RRKWIHCFEN | 67   | 128 |
| >GNA11-V22 RRKWIHCFEN  | 86   | >GNA11-V22 RRKWIHCFEN | 102  | 16  |
| >GNA11-V22 RRKWIHCFEN  | 75   | >GNA11-V22 RRKWIHCFEN | 71   | 4   |
| >GNA11-V22 ENVTSIMF    | 485  | >GNA11-V22 ENMTSIMF   | 1421 | 936 |
| >GNA11-V22 ENVTSIMFL   | 245  | >GNA11-V22 ENMTSIMFL  | 1054 | 809 |
| >GNA11-V22 ENVTSIMFL   | 55   | >GNA11-V22 ENMTSIMFL  | 24   | 31  |
| >GNA11-V22 ENVTSIMFLV  | 51   | >GNA11-V22 ENMTSIMFL\ | 43   | 8   |
| >GNA11-V22 ENVTSIMFLV  | 199  | >GNA11-V22 ENMTSIMFL\ | 51   | 148 |
| >GNA11-V22 ENVTSIMF    | 482  | >GNA11-V22 ENMTSIMF   | 183  | 299 |
| >GNA11-V22 FENVTSIM    | 50   | >GNA11-V22 FENMTSIM   | 30   | 20  |
| >GNA11-V22 FENVTSIMF   | 258  | >GNA11-V22 FENMTSIMF  | 68   | 190 |
| >GNA11-V22 FENVTSIMFL  | 18   | >GNA11-V22 FENMTSIMFL | 11   | 7   |
| >GNA11-V22 FENVTSIMFL' | 16   | >GNA11-V22 FENMTSIMFL | 10   | 6   |
| >GNA11-V22 FENVTSIMFL' | 248  | >GNA11-V22 FENMTSIMFL | 237  | 11  |
| >GNA11-V22 FENVTSIMFL' | 64   | >GNA11-V22 FENMTSIMFL | 56   | 8   |
| >GNA11-V22 FENVTSIMF   | 370  | >GNA11-V22 FENMTSIMF  | 180  | 190 |
| >GNA11-V22 FENVTSIM    | 342  | >GNA11-V22 FENMTSIM   | 246  | 96  |
| >GNA11-V22 FENVTSIMF   | 19   | >GNA11-V22 FENMTSIMF  | 14   | 5   |
| >GNA11-V22 FENVTSIMFL  | 526  | >GNA11-V22 FENMTSIMFL | 346  | 180 |
| >GNA11-V22 FENVTSIM    | 442  | >GNA11-V22 FENMTSIM   | 363  | 79  |
| >GNA11-V22 FENVTSIMF   | 36   | >GNA11-V22 FENMTSIMF  | 30   | 6   |
| >GNA11-V22 FENVTSIMFL  | 255  | >GNA11-V22 FENMTSIMFL | 313  | 58  |
| >GNA11-V22 FENVTSIM    | 233  | >GNA11-V22 FENMTSIM   | 158  | 75  |
| >GNA11-V22 FENVTSIMF   | 89   | >GNA11-V22 FENMTSIMF  | 44   | 45  |
| >GNA11-V22 FENVTSIMFL  | 126  | >GNA11-V22 FENMTSIMFL | 139  | 13  |
| >GNA11-V22 FENVTSIMFL' | 99   | >GNA11-V22 FENMTSIMFL | 54   | 45  |
| >GNA11-V22 FENVTSIM    | 164  | >GNA11-V22 FENMTSIM   | 88   | 76  |
| >GNA11-V22 FENVTSIMF   | 196  | >GNA11-V22 FENMTSIMF  | 99   | 97  |
| >GNA11-V22 FENVTSIMFL  | 67   | >GNA11-V22 FENMTSIMFL | 72   | 5   |
| >GNA11-V22 FENVTSIMFL' | 114  | >GNA11-V22 FENMTSIMFL | 80   | 34  |
| >GNA11-V22 FENVTSIMF   | 96   | >GNA11-V22 FENMTSIMF  | 107  | 11  |
| >GNA11-V22 FENVTSIMF   | 169  | >GNA11-V22 FENMTSIMF  | 166  | 3   |
| >GNA11-V22 FENVTSIMFL' | 259  | >GNA11-V22 FENMTSIMFL | 296  | 37  |
| >GNA11-V22 FENVTSIMF   | 359  | >GNA11-V22 FENMTSIMF  | 586  | 227 |
| >GNA11-V22 FENVTSIMFL  | 6    | >GNA11-V22 FENMTSIMFL | 4    | 2   |
| >GNA11-V22 FENVTSIMFL' | 14   | >GNA11-V22 FENMTSIMFL | 20   | 6   |
| >GNA11-V22 CFENVTSI    | 181  | >GNA11-V22 CFENMTSI   | 82   | 99  |
| >GNA11-V22 CFENVTSI    | 206  | >GNA11-V22 CFENMTSI   | 420  | 214 |
| >GNA11-V22 CFENVTSIMF  | 10   | >GNA11-V22 CFENMTSIMI | 14   | 4   |
| >GNA11-V22 CFENVTSIMF  | 36   | >GNA11-V22 CFENMTSIMI | 59   | 23  |

|                       |      |                       |       |       |
|-----------------------|------|-----------------------|-------|-------|
| >GNA11-V22 CFENVTSIM  | 414  | >GNA11-V22 CFENMTSIM  | 491   | 77    |
| >GNA11-V22 HCFENVTSI  | 460  | >GNA11-V22 HCFENMTSI  | 1741  | 1281  |
| >GNA11-V22 HCFENVTSI  | 2049 | >GNA11-V22 HCFENMTSI  | 400   | 1649  |
| >GNA11-V22 HCFENVTSI  | 38   | >GNA11-V22 HCFENMTSI  | 133   | 95    |
| >GNA11-V22 HCFENVTSIM | 191  | >GNA11-V22 HCFENMTSIM | 332   | 141   |
| >GNA11-V22 HCFENVTSI  | 193  | >GNA11-V22 HCFENMTSI  | 113   | 80    |
| >GNA11-V22 HCFENVTSI  | 521  | >GNA11-V22 HCFENMTSI  | 214   | 307   |
| >GNA11-V22 HCFENVTSIM | 342  | >GNA11-V22 HCFENMTSIM | 544   | 202   |
| >GNA11-V22 HCFENVTSIM | 29   | >GNA11-V22 HCFENMTSIM | 41    | 12    |
| >GNA11-V22 HCFENVTSIM | 412  | >GNA11-V22 HCFENMTSIM | 312   | 100   |
| >GNA11-V22 HCFENVTSIM | 273  | >GNA11-V22 HCFENMTSIM | 325   | 52    |
| >GNA11-V22 HCFENVTSIM | 427  | >GNA11-V22 HCFENMTSIM | 270   | 157   |
| >GNA11-V22 HCFENVTSI  | 336  | >GNA11-V22 HCFENMTSI  | 269   | 67    |
| >GNA11-V22 WIHCFENV   | 118  | >GNA11-V22 WIHCFENM   | 1620  | 1502  |
| >GNA11-V22 WIHCFENVTS | 371  | >GNA11-V22 WIHCFENMT  | 324   | 47    |
| >GNA11-V22 WIHCFENV   | 45   | >GNA11-V22 WIHCFENM   | 3878  | 3833  |
| >GNA11-V22 WIHCFENVTS | 54   | >GNA11-V22 WIHCFENMT  | 57    | 3     |
| >GNA11-V22 WIHCFENV   | 72   | >GNA11-V22 WIHCFENM   | 2286  | 2214  |
| >GNA11-V22 WIHCFENVTS | 385  | >GNA11-V22 WIHCFENMT  | 268   | 117   |
| >GNA11-V22 WIHCFENV   | 25   | >GNA11-V22 WIHCFENM   | 3017  | 2992  |
| >GNA11-V22 WIHCFENVTS | 103  | >GNA11-V22 WIHCFENMT  | 176   | 73    |
| >GNA11-V22 WIHCFENV   | 314  | >GNA11-V22 WIHCFENM   | 8014  | 7700  |
| >GNA11-V22 WIHCFENV   | 428  | >GNA11-V22 WIHCFENM   | 16777 | 16349 |
| >GNA11-V22 WIHCFENV   | 36   | >GNA11-V22 WIHCFENM   | 8491  | 8455  |
| >GNA11-V22 WIHCFENV   | 7095 | >GNA11-V22 WIHCFENM   | 360   | 6735  |
| >GNA11-V22 WIHCFENV   | 26   | >GNA11-V22 WIHCFENM   | 1201  | 1175  |
| >GNA11-V22 WIHCFENVTS | 193  | >GNA11-V22 WIHCFENMT  | 130   | 63    |
| >GNA11-V22 WIHCFENV   | 351  | >GNA11-V22 WIHCFENM   | 3636  | 3285  |
| >GNA11-V22 WIHCFENVTS | 413  | >GNA11-V22 WIHCFENMT  | 640   | 227   |
| >GNA11-V22 KWIHCFENV  | 936  | >GNA11-V22 KWIHCFENM  | 167   | 769   |
| >GNA11-V22 KWIHCFENV  | 402  | >GNA11-V22 KWIHCFENM  | 4092  | 3690  |
| >GNA11-V22 KWIHCFENV  | 99   | >GNA11-V22 KWIHCFENM  | 2466  | 2367  |
| >GNA11-V22 KWIHCFENV  | 94   | >GNA11-V22 KWIHCFENM  | 68    | 26    |
| >GNA11-V22 KWIHCFENV  | 584  | >GNA11-V22 KWIHCFENM  | 401   | 183   |
| >GNA11-V22 KWIHCFENV  | 331  | >GNA11-V22 KWIHCFENM  | 118   | 213   |
| >GNA11-V22 KWIHCFENV1 | 340  | >GNA11-V22 KWIHCFENM  | 426   | 86    |
| >GNA11-V22 KWIHCFENV1 | 232  | >GNA11-V22 KWIHCFENM  | 258   | 26    |
| >GNA11-V22 KWIHCFENV  | 163  | >GNA11-V22 KWIHCFENM  | 159   | 4     |
| >GNA11-V22 KWIHCFENV1 | 337  | >GNA11-V22 KWIHCFENM  | 323   | 14    |
| >GNA11-V22 RKWIHCFENV | 22   | >GNA11-V22 RKWIHCFENM | 8     | 14    |
| >GNA11-V22 RKWIHCFENV | 426  | >GNA11-V22 RKWIHCFENM | 660   | 234   |
| >GNA11-V22 RKWIHCFENV | 920  | >GNA11-V22 RKWIHCFENM | 458   | 462   |
| >GNAS-D141 DFPPEFYEHA | 481  | >GNAS-D141 VFPPEFYEHA | 6962  | 6481  |

|                        |       |                        |      |       |
|------------------------|-------|------------------------|------|-------|
| >GNAS-D141 FDFPPEFYEH, | 16068 | >GNAS-D141 FVFPPEFYEH, | 71   | 15997 |
| >GNAS-D141 FDFPPEFYEH, | 2189  | >GNAS-D141 FVFPPEFYEH, | 30   | 2159  |
| >GNAS-D141 FDFPPEFYEH, | 13045 | >GNAS-D141 FVFPPEFYEH, | 133  | 12912 |
| >GNAS-D141 FDFPPEFYEH, | 21184 | >GNAS-D141 FVFPPEFYEH, | 427  | 20757 |
| >GNAS-D141 FDFPPEFYEH, | 1111  | >GNAS-D141 FVFPPEFYEH, | 6    | 1105  |
| >GNAS-D141 FDFPPEFYEH, | 3923  | >GNAS-D141 FVFPPEFYEH, | 19   | 3904  |
| >GNAS-D141 FDFPPEFYEH, | 11103 | >GNAS-D141 FVFPPEFYEH, | 64   | 11039 |
| >GNAS-D141 FDFPPEFYEH, | 17603 | >GNAS-D141 FVFPPEFYEH, | 30   | 17573 |
| >GNAS-D141 FDFPPEFY    | 19311 | >GNAS-D141 FVFPPEFY    | 170  | 19141 |
| >GNAS-D141 FDFPPEFY    | 23201 | >GNAS-D141 FVFPPEFY    | 183  | 23018 |
| >GNAS-D141 FDFPPEFY    | 53    | >GNAS-D141 FVFPPEFY    | 6    | 47    |
| >GNAS-D141 FDFPPEFY    | 5453  | >GNAS-D141 FVFPPEFY    | 244  | 5209  |
| >GNAS-D141 FDFPPEFY    | 3925  | >GNAS-D141 FVFPPEFY    | 27   | 3898  |
| >GNAS-D141 FDFPPEFY    | 13253 | >GNAS-D141 FVFPPEFY    | 203  | 13050 |
| >GNAS-D141 FDFPPEFYEH  | 19851 | >GNAS-D141 FVFPPEFYEH  | 403  | 19448 |
| >GNAS-D141 FDFPPEFYEH, | 789   | >GNAS-D141 FVFPPEFYEH, | 7    | 782   |
| >GNAS-D141 FDFPPEFYEH, | 11182 | >GNAS-D141 FVFPPEFYEH, | 108  | 11074 |
| >GNAS-D141 FDFPPEFY    | 3167  | >GNAS-D141 FVFPPEFY    | 72   | 3095  |
| >GNAS-D141 FDFPPEFY    | 5230  | >GNAS-D141 FVFPPEFY    | 183  | 5047  |
| >GNAS-D141 FDFPPEFY    | 1273  | >GNAS-D141 FVFPPEFY    | 87   | 1186  |
| >GNAS-D141 FDFPPEFY    | 362   | >GNAS-D141 FVFPPEFY    | 102  | 260   |
| >GNAS-D141 FDFPPEFY    | 11151 | >GNAS-D141 FVFPPEFY    | 45   | 11106 |
| >GNAS-D141 FDFPPEFY    | 2057  | >GNAS-D141 FVFPPEFY    | 128  | 1929  |
| >GNAS-D141 FDFPPEFY    | 1583  | >GNAS-D141 FVFPPEFY    | 202  | 1381  |
| >GNAS-D141 ILSVMNVPDF  | 21636 | >GNAS-D141 ILSVMNVPDF  | 46   | 21590 |
| >GNAS-D141 ILSVMNVPDF  | 3646  | >GNAS-D141 ILSVMNVPDF  | 4    | 3642  |
| >GNAS-D141 ILSVMNVPDF  | 17310 | >GNAS-D141 ILSVMNVPDF  | 16   | 17294 |
| >GNAS-D141 ILSVMNVPDF  | 20578 | >GNAS-D141 ILSVMNVPDF  | 114  | 20464 |
| >GNAS-D141 ILSVMNVPDF  | 13994 | >GNAS-D141 ILSVMNVPDF  | 8    | 13986 |
| >GNAS-D141 ILSVMNVPDF  | 20504 | >GNAS-D141 ILSVMNVPDF  | 17   | 20487 |
| >GNAS-D141 ILSVMNVPDF  | 17560 | >GNAS-D141 ILSVMNVPDF  | 10   | 17550 |
| >GNAS-D141 ILSVMNVPDF  | 23695 | >GNAS-D141 ILSVMNVPDF  | 4    | 23691 |
| >GNAS-D141 ILSVMNVPDF  | 23254 | >GNAS-D141 ILSVMNVPDF  | 6    | 23248 |
| >GNAS-D141 DFDFPPEF    | 3169  | >GNAS-D141 DFVFPPEF    | 281  | 2888  |
| >GNAS-D141 DFDFPPEFY   | 10264 | >GNAS-D141 DFVFPPEFY   | 40   | 10224 |
| >GNAS-D141 DFDFPPEFY   | 137   | >GNAS-D141 DFVFPPEFY   | 19   | 118   |
| >GNAS-D141 DFDFPPEFY   | 188   | >GNAS-D141 DFVFPPEFY   | 1566 | 1378  |
| >GNAS-D141 PDFDFPPEFY  | 309   | >GNAS-D141 PDFVFPPEFY  | 238  | 71    |
| >GNAS-D141 VPDFDFPPEF  | 804   | >GNAS-D141 VPDFVFPPEF  | 112  | 692   |
| >GNAS-D141 VPDFDFPPEF  | 190   | >GNAS-D141 VPDFVFPPEF  | 391  | 201   |
| >GNAS-D141 VPDFDFPPEF  | 205   | >GNAS-D141 VPDFVFPPEF  | 205  | 0     |
| >GNAS-D141 VPDFDFPPEF  | 159   | >GNAS-D141 VPDFVFPPEF  | 264  | 105   |
| >GNAS-D141 VPDFDFPPE   | 2484  | >GNAS-D141 VPDFVFPPE   | 462  | 2022  |

|                       |       |                       |     |       |
|-----------------------|-------|-----------------------|-----|-------|
| >GNAS-D141 VPDFDFPPEF | 356   | >GNAS-D141 VPDFVFPPEF | 351 | 5     |
| >GNAS-D141 NVPDFDFPP  | 830   | >GNAS-D141 NVPDFVFPP  | 448 | 382   |
| >GNAS-D141 NVPDFDFPPE | 382   | >GNAS-D141 NVPDFVFPPE | 858 | 476   |
| >GNAS-D141 NVPDFDFPPE | 1946  | >GNAS-D141 NVPDFVFPPE | 463 | 1483  |
| >GNAS-D141 MNVPDFDF   | 689   | >GNAS-D141 MNVPDFVF   | 499 | 190   |
| >GNAS-D141 MNVPDFDF   | 300   | >GNAS-D141 MNVPDFVF   | 96  | 204   |
| >GNAS-D141 MNVPDFDF   | 462   | >GNAS-D141 MNVPDFVF   | 154 | 308   |
| >GNAS-D141 VMNVPDFD   | 23509 | >GNAS-D141 VMNVPDFV   | 111 | 23398 |
| >GNAS-D141 VMNVPDFD   | 16853 | >GNAS-D141 VMNVPDFV   | 18  | 16835 |
| >GNAS-D141 VMNVPDFD   | 21499 | >GNAS-D141 VMNVPDFV   | 23  | 21476 |
| >GNAS-D141 VMNVPDFD   | 23782 | >GNAS-D141 VMNVPDFV   | 134 | 23648 |
| >GNAS-D141 VMNVPDFD   | 7219  | >GNAS-D141 VMNVPDFV   | 3   | 7216  |
| >GNAS-D141 VMNVPDFD   | 19276 | >GNAS-D141 VMNVPDFV   | 7   | 19269 |
| >GNAS-D141 VMNVPDFD   | 15149 | >GNAS-D141 VMNVPDFV   | 7   | 15142 |
| >GNAS-D141 VMNVPDFD   | 22576 | >GNAS-D141 VMNVPDFV   | 4   | 22572 |
| >GNAS-D141 VMNVPDFD   | 26221 | >GNAS-D141 VMNVPDFV   | 7   | 26214 |
| >GNAS-D141 VMNVPDFDF  | 359   | >GNAS-D141 VMNVPDFVF  | 52  | 307   |
| >GNAS-D141 VMNVPDFDF  | 222   | >GNAS-D141 VMNVPDFVF  | 121 | 101   |
| >GNAS-D141 VMNVPDFDF  | 49    | >GNAS-D141 VMNVPDFVF  | 19  | 30    |
| >GNAS-D141 VMNVPDFDF  | 943   | >GNAS-D141 VMNVPDFVF  | 427 | 516   |
| >GNAS-D141 VMNVPDFDF  | 505   | >GNAS-D141 VMNVPDFVF  | 36  | 469   |
| >GNAS-D141 SVMNVPDFD  | 20809 | >GNAS-D141 SVMNVPDFV  | 24  | 20785 |
| >GNAS-D141 SVMNVPDFD  | 12336 | >GNAS-D141 SVMNVPDFV  | 13  | 12323 |
| >GNAS-D141 SVMNVPDFD  | 21230 | >GNAS-D141 SVMNVPDFV  | 20  | 21210 |
| >GNAS-D141 SVMNVPDFD  | 18462 | >GNAS-D141 SVMNVPDFV  | 10  | 18452 |
| >GNAS-D141 SVMNVPDFD  | 16488 | >GNAS-D141 SVMNVPDFV  | 4   | 16484 |
| >GNAS-D141 SVMNVPDFD  | 22769 | >GNAS-D141 SVMNVPDFV  | 20  | 22749 |
| >GNAS-D141 SVMNVPDFD  | 20950 | >GNAS-D141 SVMNVPDFV  | 12  | 20938 |
| >GNAS-D141 SVMNVPDFD  | 23906 | >GNAS-D141 SVMNVPDFV  | 19  | 23887 |
| >GNAS-D141 SVMNVPDFD  | 35365 | >GNAS-D141 SVMNVPDFV  | 106 | 35259 |
| >GNAS-D141 SVMNVPDFD  | 737   | >GNAS-D141 SVMNVPDFV  | 248 | 489   |
| >GNAS-D141 SVMNVPDFD  | 711   | >GNAS-D141 SVMNVPDFV  | 319 | 392   |
| >GNAS-D141 SVMNVPDFD  | 671   | >GNAS-D141 SVMNVPDFV  | 305 | 366   |
| >GNAS-D141 SVMNVPDFD  | 831   | >GNAS-D141 SVMNVPDFV  | 421 | 410   |
| >GNAS-D141 SVMNVPDFD  | 48    | >GNAS-D141 SVMNVPDFV  | 40  | 8     |
| >GNAS-D141 SVMNVPDFD  | 4212  | >GNAS-D141 SVMNVPDFV  | 6   | 4206  |
| >GNAS-D141 SVMNVPDFD  | 15778 | >GNAS-D141 SVMNVPDFV  | 29  | 15749 |
| >GNAS-D141 SVMNVPDFD  | 1368  | >GNAS-D141 SVMNVPDFV  | 186 | 1182  |
| >GNAS-D141 SVMNVPDFD  | 2327  | >GNAS-D141 SVMNVPDFV  | 230 | 2097  |
| >GNAS-D141 LSVMNVPDFI | 11496 | >GNAS-D141 LSVMNVPDFI | 443 | 11053 |
| >GNAS-D141 LSVMNVPDFI | 484   | >GNAS-D141 LSVMNVPDFI | 78  | 406   |
| >GNAS-D141 LSVMNVPDFI | 86    | >GNAS-D141 LSVMNVPDFI | 42  | 44    |
| >GNAS-D141 LSVMNVPDFI | 4     | >GNAS-D141 LSVMNVPDFI | 3   | 1     |

|                        |       |                        |       |       |
|------------------------|-------|------------------------|-------|-------|
| >GNAS-D141 LSVMNVPDFI  | 549   | >GNAS-D141 LSVMNVPDF'  | 167   | 382   |
| >GNAS-D141 LSVMNVPDFI  | 60    | >GNAS-D141 LSVMNVPDF'  | 25    | 35    |
| >GNAS-D141 LSVMNVPDFI  | 2188  | >GNAS-D141 LSVMNVPDF'  | 330   | 1858  |
| >GNAS-L203ILTSGIFET    | 388   | >GNAS-L203IPTSGIFET    | 9422  | 9034  |
| >GNAS-L203ILTSGIFETK   | 37    | >GNAS-L203IPTSGIFETK   | 529   | 492   |
| >GNAS-L203ILTSGIFETKF  | 171   | >GNAS-L203IPTSGIFETKF  | 439   | 268   |
| >GNAS-L203ILTSGIFETKF  | 200   | >GNAS-L203IPTSGIFETKF  | 435   | 235   |
| >GNAS-L203ILTSGIFETK   | 8     | >GNAS-L203IPTSGIFETK   | 202   | 194   |
| >GNAS-L203ILTSGIFET    | 267   | >GNAS-L203IPTSGIFET    | 5438  | 5171  |
| >GNAS-L203ILTSGIFETKF  | 10    | >GNAS-L203IPTSGIFETKF  | 1425  | 1415  |
| >GNAS-L203ILTSGIFETKF  | 247   | >GNAS-L203IPTSGIFETKF  | 8911  | 8664  |
| >GNAS-L203ILTSGIFETKF  | 82    | >GNAS-L203IPTSGIFETKF  | 10832 | 10750 |
| >GNAS-L203ILTSGIFETKF  | 219   | >GNAS-L203IPTSGIFETKF  | 2829  | 2610  |
| >GNAS-L203ILTSGIFETK   | 455   | >GNAS-L203IPTSGIFETK   | 8813  | 8358  |
| >GNAS-L203ILTSGIFETKF  | 19    | >GNAS-L203IPTSGIFETKF  | 140   | 121   |
| >GNAS-L203ILTSGIFETK   | 368   | >GNAS-L203IPTSGIFETK   | 1185  | 817   |
| >GNAS-L203IVLTSGIFETKF | 13366 | >GNAS-L203IVPTSGIFETKF | 62    | 13304 |
| >GNAS-L203IVLTSGIFET   | 56    | >GNAS-L203IVPTSGIFET   | 23057 | 23001 |
| >GNAS-L203IVLTSGIFET   | 172   | >GNAS-L203IVPTSGIFET   | 31174 | 31002 |
| >GNAS-L203IVLTSGIFET   | 257   | >GNAS-L203IVPTSGIFET   | 23647 | 23390 |
| >GNAS-L203IVLTSGIFET   | 164   | >GNAS-L203IVPTSGIFET   | 19622 | 19458 |
| >GNAS-L203IVLTSGIFET   | 21    | >GNAS-L203IVPTSGIFET   | 22482 | 22461 |
| >GNAS-L203IVLTSGIFET   | 24    | >GNAS-L203IVPTSGIFET   | 21409 | 21385 |
| >GNAS-L203IVLTSGIFET   | 132   | >GNAS-L203IVPTSGIFET   | 23448 | 23316 |
| >GNAS-L203IVLTSGIFET   | 4     | >GNAS-L203IVPTSGIFET   | 26611 | 26607 |
| >GNAS-L203IVLTSGIFETK  | 98    | >GNAS-L203IVPTSGIFETK  | 35501 | 35403 |
| >GNAS-L203IVLTSGIFETKF | 456   | >GNAS-L203IVPTSGIFETKF | 36341 | 35885 |
| >GNAS-L203IVLTSGIFETK  | 71    | >GNAS-L203IVPTSGIFETK  | 5856  | 5785  |
| >GNAS-L203IVLTSGIFETK  | 68    | >GNAS-L203IVPTSGIFETK  | 2876  | 2808  |
| >GNAS-L203IVLTSGIFETK  | 356   | >GNAS-L203IVPTSGIFETK  | 2482  | 2126  |
| >GNAS-L203IVLTSGIFETKF | 179   | >GNAS-L203IVPTSGIFETKF | 1131  | 952   |
| >GNAS-L203IVLTSGIFETKF | 3860  | >GNAS-L203IVPTSGIFETKF | 62    | 3798  |
| >GNAS-L203IVLTSGIFETKF | 19698 | >GNAS-L203IVPTSGIFETKF | 119   | 19579 |
| >GNAS-L203IVLTSGIFETKF | 483   | >GNAS-L203IVPTSGIFETKF | 638   | 155   |
| >GNAS-L203IVLTSGIFETKF | 17623 | >GNAS-L203IVPTSGIFETKF | 86    | 17537 |
| >GNAS-L203IRVLTSGIFET  | 235   | >GNAS-L203IRVPTSGIFET  | 1313  | 1078  |
| >GNAS-L203IRVLTSGIFETK | 84    | >GNAS-L203IRVPTSGIFETK | 278   | 194   |
| >GNAS-L203IRVLTSGIFETK | 17    | >GNAS-L203IRVPTSGIFETK | 72    | 55    |
| >GNAS-L203IRVLTSGIF    | 670   | >GNAS-L203IRVPTSGIF    | 472   | 198   |
| >GNAS-L203IRVLTSGIFE   | 328   | >GNAS-L203IRVPTSGIFE   | 4290  | 3962  |
| >GNAS-L203IRVLTSGIFETK | 14    | >GNAS-L203IRVPTSGIFETK | 172   | 158   |
| >GNAS-L203IRVLTSGIFETK | 94    | >GNAS-L203IRVPTSGIFETK | 1129  | 1035  |
| >GNAS-L203IRVLTSGIF    | 233   | >GNAS-L203IRVPTSGIF    | 921   | 688   |

|                        |       |                        |       |       |
|------------------------|-------|------------------------|-------|-------|
| >GNAS-L203IRVLTSGIF    | 490   | >GNAS-L203IRVPTSGIF    | 1050  | 560   |
| >GNAS-L203IRVLTSGIF    | 46    | >GNAS-L203IRVPTSGIF    | 492   | 446   |
| >GNAS-L203IRVLTSGIF    | 19    | >GNAS-L203IRVPTSGIF    | 1397  | 1378  |
| >GNAS-L203IRVLTSGIF    | 237   | >GNAS-L203IRVPTSGIF    | 14416 | 14179 |
| >GNAS-L203IRVLTSGIF    | 19626 | >GNAS-L203IRVPTSGIF    | 96    | 19530 |
| >GNAS-L203IRVLTSGIF    | 276   | >GNAS-L203IRVPTSGIF    | 1066  | 790   |
| >GNAS-L203ICRVLTSGIF   | 336   | >GNAS-L203ICRVPTSGIF   | 115   | 221   |
| >GNAS-L203ICRVLTSGIF   | 363   | >GNAS-L203ICRVPTSGIF   | 87    | 276   |
| >GNAS-L203ICRVLTSGI    | 2274  | >GNAS-L203ICRVPTSGI    | 324   | 1950  |
| >GNAS-L203ICRVLTSG     | 230   | >GNAS-L203ICRVPTSG     | 249   | 19    |
| >GNAS-L203ICRVLTSGI    | 25    | >GNAS-L203ICRVPTSGI    | 30    | 5     |
| >GNAS-L203ICRVLTSGIF   | 354   | >GNAS-L203ICRVPTSGIF   | 335   | 19    |
| >GNAS-L203ICRVLTSGIFE  | 154   | >GNAS-L203ICRVPTSGIFE  | 169   | 15    |
| >GNAS-L203ICRVLTSGIF   | 172   | >GNAS-L203ICRVPTSGIF   | 85    | 87    |
| >GNAS-L203ICRVLTSGIF   | 509   | >GNAS-L203ICRVPTSGIF   | 247   | 262   |
| >GNAS-L203ICRVLTSGI    | 182   | >GNAS-L203ICRVPTSGI    | 198   | 16    |
| >GNAS-L203ICRVLTSGIF   | 104   | >GNAS-L203ICRVPTSGIF   | 140   | 36    |
| >GNAS-L203ICRVLTSGI    | 577   | >GNAS-L203ICRVPTSGI    | 245   | 332   |
| >GNAS-L203ILRCRVLTSGI  | 386   | >GNAS-L203ILRCRVPTSGI  | 2376  | 1990  |
| >GNAS-L203ILRCRVLTSGIF | 123   | >GNAS-L203ILRCRVPTSGIF | 76    | 47    |
| >GNAS-L203ILRCRVLTSGIF | 392   | >GNAS-L203ILRCRVPTSGIF | 377   | 15    |
| >GNAS-L203ILLRCRVLT    | 696   | >GNAS-L203ILLRCRVPT    | 383   | 313   |
| >GNAS-L203ILLRCRVLTSGI | 12    | >GNAS-L203ILLRCRVPTSGI | 11    | 1     |
| >GNAS-L203ILLRCRVLTSGI | 104   | >GNAS-L203ILLRCRVPTSGI | 62    | 42    |
| >GNAS-L203ILLRCRVLTSGI | 122   | >GNAS-L203ILLRCRVPTSGI | 96    | 26    |
| >GNAS-L203ILLRCRVLTSGI | 38    | >GNAS-L203ILLRCRVPTSGI | 28    | 10    |
| >GNAS-L203ILLRCRVLTS   | 629   | >GNAS-L203ILLRCRVPTS   | 378   | 251   |
| >GNAS-L203ILLRCRVLTSGI | 227   | >GNAS-L203ILLRCRVPTSGI | 206   | 21    |
| >GNAS-L203ILLRCRVLTS   | 98    | >GNAS-L203ILLRCRVPTS   | 202   | 104   |
| >GNAS-L203ILLRCRVLTSGI | 73    | >GNAS-L203ILLRCRVPTSGI | 159   | 86    |
| >GNAS-L203ILLRCRVLTSGI | 473   | >GNAS-L203ILLRCRVPTSGI | 657   | 184   |
| >GNAS-L203IQDLLRCRVL   | 364   | >GNAS-L203IQDLLRCRVP   | 15764 | 15400 |
| >GNAS-Q227QRDERRKWI    | 451   | >GNAS-Q227ERDERRKWI    | 523   | 72    |
| >GNAS-Q227GQRDERRKVA   | 2064  | >GNAS-Q227GERDERRKW    | 69    | 1995  |
| >GNAS-Q227GQRDERRK     | 377   | >GNAS-Q227GERDERRK     | 7371  | 6994  |
| >GNAS-Q227GQRDERRKVA   | 10714 | >GNAS-Q227GERDERRKW    | 283   | 10431 |
| >GNAS-Q227GQRDERRKVA   | 11779 | >GNAS-Q227GERDERRKW    | 391   | 11388 |
| >GNAS-Q227GQRDERRKVA   | 21609 | >GNAS-Q227GERDERRKW    | 285   | 21324 |
| >GNAS-Q227GQRDERRKVA   | 15758 | >GNAS-Q227GERDERRKW    | 124   | 15634 |
| >GNAS-Q227DVGGQORDER   | 202   | >GNAS-Q227DVGGORDER    | 368   | 166   |
| >GNAS-Q227DVGGQORDER   | 75    | >GNAS-Q227DVGGORDER    | 70    | 5     |
| >GNAS-Q227DVGGQORDER   | 439   | >GNAS-Q227DVGGORDER    | 388   | 51    |
| >GNAS-Q227MFDVGGQR     | 267   | >GNAS-Q227MFDVGGER     | 274   | 7     |

|                       |      |                       |       |       |
|-----------------------|------|-----------------------|-------|-------|
| >GNAS-Q227 MFDVGGQRI  | 359  | >GNAS-Q227 MFDVGGERC  | 745   | 386   |
| >GNAS-Q227 HMFVDVGGQ  | 148  | >GNAS-Q227 HMFVDVGGE  | 1686  | 1538  |
| >GNAS-Q227 HMFVDVGGQ  | 246  | >GNAS-Q227 HMFVDVGGE  | 8915  | 8669  |
| >GNAS-Q227 HMFVDVGGQI | 151  | >GNAS-Q227 HMFVDVGGEF | 264   | 113   |
| >GNAS-Q227 HMFVDVGGQI | 18   | >GNAS-Q227 HMFVDVGGEF | 20    | 2     |
| >GNAS-Q227 HMFVDVGGQI | 33   | >GNAS-Q227 HMFVDVGGEF | 28    | 5     |
| >GNAS-Q227 HMFVDVGGQI | 19   | >GNAS-Q227 HMFVDVGGEF | 20    | 1     |
| >GNAS-Q227 HMFVDVGGQI | 88   | >GNAS-Q227 HMFVDVGGEF | 134   | 46    |
| >GNAS-Q227 NFHMFDVGC  | 223  | >GNAS-Q227 NFHMFDVGC  | 199   | 24    |
| >GNAS-Q227 NFHMFDVGC  | 57   | >GNAS-Q227 NFHMFDVGC  | 48    | 9     |
| >GNAS-Q227 NFHMFDVGC  | 137  | >GNAS-Q227 NFHMFDVGC  | 139   | 2     |
| >GNAS-Q227 NFHMFDVGC  | 121  | >GNAS-Q227 NFHMFDVGC  | 159   | 38    |
| >GNAS-Q227 QRDERRKWI  | 451  | >GNAS-Q227 HRDERRKWI  | 339   | 112   |
| >GNAS-Q227 QRDERRKWI  | 3088 | >GNAS-Q227 HRDERRKWI  | 259   | 2829  |
| >GNAS-Q227 GQRDERRK   | 377  | >GNAS-Q227 GHRDERRK   | 4242  | 3865  |
| >GNAS-Q227 GGQRDERRK  | 845  | >GNAS-Q227 GGHRDERRK  | 497   | 348   |
| >GNAS-Q227 DVGGQRDER  | 202  | >GNAS-Q227 DVGGHRDER  | 182   | 20    |
| >GNAS-Q227 DVGGQRDER  | 75   | >GNAS-Q227 DVGGHRDER  | 44    | 31    |
| >GNAS-Q227 DVGGQRDER  | 439  | >GNAS-Q227 DVGGHRDER  | 117   | 322   |
| >GNAS-Q227 MFDVGGQR   | 267  | >GNAS-Q227 MFDVGGHR   | 84    | 183   |
| >GNAS-Q227 MFDVGGQRI  | 359  | >GNAS-Q227 MFDVGGHRI  | 167   | 192   |
| >GNAS-Q227 MFDVGGQR   | 601  | >GNAS-Q227 MFDVGGHR   | 191   | 410   |
| >GNAS-Q227 MFDVGGQRI  | 650  | >GNAS-Q227 MFDVGGHRI  | 433   | 217   |
| >GNAS-Q227 HMFVDVGGQ  | 148  | >GNAS-Q227 HMFVDVGGH  | 2758  | 2610  |
| >GNAS-Q227 HMFVDVGGQ  | 246  | >GNAS-Q227 HMFVDVGGH  | 11212 | 10966 |
| >GNAS-Q227 HMFVDVGGQI | 151  | >GNAS-Q227 HMFVDVGGHI | 130   | 21    |
| >GNAS-Q227 HMFVDVGGQI | 18   | >GNAS-Q227 HMFVDVGGHI | 12    | 6     |
| >GNAS-Q227 HMFVDVGGQI | 33   | >GNAS-Q227 HMFVDVGGHI | 19    | 14    |
| >GNAS-Q227 HMFVDVGGQI | 19   | >GNAS-Q227 HMFVDVGGHI | 29    | 10    |
| >GNAS-Q227 HMFVDVGGQ  | 3172 | >GNAS-Q227 HMFVDVGGH  | 394   | 2778  |
| >GNAS-Q227 HMFVDVGGQI | 88   | >GNAS-Q227 HMFVDVGGHI | 54    | 34    |
| >GNAS-Q227 NFHMFDVGC  | 223  | >GNAS-Q227 NFHMFDVGC  | 102   | 121   |
| >GNAS-Q227 NFHMFDVGC  | 57   | >GNAS-Q227 NFHMFDVGC  | 30    | 27    |
| >GNAS-Q227 NFHMFDVGC  | 137  | >GNAS-Q227 NFHMFDVGC  | 197   | 60    |
| >GNAS-Q227 NFHMFDVGC  | 121  | >GNAS-Q227 NFHMFDVGC  | 66    | 55    |
| >GNAS-Q227 QRDERRKWI  | 451  | >GNAS-Q227 KRDERRKWI  | 964   | 513   |
| >GNAS-Q227 QRDERRKWI  | 2953 | >GNAS-Q227 KRDERRKWI  | 378   | 2575  |
| >GNAS-Q227 QRDERRKWI  | 2737 | >GNAS-Q227 KRDERRKWIC | 300   | 2437  |
| >GNAS-Q227 QRDERRKWI  | 726  | >GNAS-Q227 KRDERRKWI  | 296   | 430   |
| >GNAS-Q227 QRDERRKWI  | 1622 | >GNAS-Q227 KRDERRKWIC | 444   | 1178  |
| >GNAS-Q227 GQRDERRK   | 377  | >GNAS-Q227 GKRDERRK   | 2791  | 2414  |
| >GNAS-Q227 GGQRDERRK  | 845  | >GNAS-Q227 GGKRDERRK  | 369   | 476   |
| >GNAS-Q227 DVGGQRDER  | 202  | >GNAS-Q227 DVGGKRDER  | 109   | 93    |



|                      |       |                       |      |       |
|----------------------|-------|-----------------------|------|-------|
| >GNAS-Q227 DVGGQRDER | 75    | >GNAS-Q227 DVGGKRDER  | 102  | 27    |
| >GNAS-Q227 DVGGQRDER | 439   | >GNAS-Q227 DVGGKRDER  | 502  | 63    |
| >GNAS-Q227 MFDVGGQR  | 267   | >GNAS-Q227 MFDVGGKR   | 352  | 85    |
| >GNAS-Q227 MFDVGGQRI | 359   | >GNAS-Q227 MFDVGGKRE  | 377  | 18    |
| >GNAS-Q227 HMFVGGQ   | 148   | >GNAS-Q227 HMFVGGK    | 585  | 437   |
| >GNAS-Q227 HMFVGGQ   | 246   | >GNAS-Q227 HMFVGGK    | 2850 | 2604  |
| >GNAS-Q227 HMFVGGQ   | 12274 | >GNAS-Q227 HMFVGGK    | 39   | 12235 |
| >GNAS-Q227 HMFVGGQI  | 151   | >GNAS-Q227 HMFVGGKF   | 144  | 7     |
| >GNAS-Q227 HMFVGGQ   | 23571 | >GNAS-Q227 HMFVGGK    | 57   | 23514 |
| >GNAS-Q227 HMFVGGQ   | 11073 | >GNAS-Q227 HMFVGGK    | 262  | 10811 |
| >GNAS-Q227 HMFVGGQ   | 9963  | >GNAS-Q227 HMFVGGK    | 466  | 9497  |
| >GNAS-Q227 HMFVGGQI  | 18    | >GNAS-Q227 HMFVGGKF   | 20   | 2     |
| >GNAS-Q227 HMFVGGQI  | 33    | >GNAS-Q227 HMFVGGKF   | 47   | 14    |
| >GNAS-Q227 HMFVGGQ   | 2189  | >GNAS-Q227 HMFVGGK    | 54   | 2135  |
| >GNAS-Q227 HMFVGGQI  | 19    | >GNAS-Q227 HMFVGGKF   | 27   | 8     |
| >GNAS-Q227 HMFVGGQ   | 3034  | >GNAS-Q227 HMFVGGK    | 357  | 2677  |
| >GNAS-Q227 HMFVGGQI  | 88    | >GNAS-Q227 HMFVGGKF   | 60   | 28    |
| >GNAS-Q227 NFHMFDVGC | 223   | >GNAS-Q227 NFHMFDVGC  | 259  | 36    |
| >GNAS-Q227 NFHMFDVGC | 57    | >GNAS-Q227 NFHMFDVGC  | 75   | 18    |
| >GNAS-Q227 NFHMFDVGC | 137   | >GNAS-Q227 NFHMFDVGC  | 203  | 66    |
| >GNAS-Q227 NFHMFDVGC | 121   | >GNAS-Q227 NFHMFDVGC  | 84   | 37    |
| >GNAS-Q227 QRDERRKWI | 451   | >GNAS-Q227 LRDERRKWI  | 362  | 89    |
| >GNAS-Q227 GQRDERRKW | 24917 | >GNAS-Q227 GLRDERRKW  | 60   | 24857 |
| >GNAS-Q227 GQRDERRKW | 29065 | >GNAS-Q227 GLRDERRKW  | 296  | 28769 |
| >GNAS-Q227 GQRDERRK  | 377   | >GNAS-Q227 GLRDERRK   | 189  | 188   |
| >GNAS-Q227 VNFHMFDVC | 4529  | >GNAS-Q227 VNFHMFDVC  | 102  | 4427  |
| >GNAS-Q227 GGQRDERRK | 845   | >GNAS-Q227 GGGLRDERRK | 359  | 486   |
| >GNAS-Q227 DVGGQRDER | 202   | >GNAS-Q227 DVGGLRDER  | 80   | 122   |
| >GNAS-Q227 DVGGQRDER | 75    | >GNAS-Q227 DVGGLRDER  | 37   | 38    |
| >GNAS-Q227 DVGGQRDER | 439   | >GNAS-Q227 DVGGLRDERI | 79   | 360   |
| >GNAS-Q227 MFDVGGQR  | 267   | >GNAS-Q227 MFDVGGLR   | 176  | 91    |
| >GNAS-Q227 MFDVGGQRI | 359   | >GNAS-Q227 MFDVGGLRD  | 334  | 25    |
| >GNAS-Q227 MFDVGGQR  | 601   | >GNAS-Q227 MFDVGGLR   | 289  | 312   |
| >GNAS-Q227 HMFVGGQ   | 11956 | >GNAS-Q227 HMFVGGGL   | 57   | 11899 |
| >GNAS-Q227 HMFVGGQ   | 943   | >GNAS-Q227 HMFVGGGL   | 13   | 930   |
| >GNAS-Q227 HMFVGGQ   | 1877  | >GNAS-Q227 HMFVGGGL   | 12   | 1865  |
| >GNAS-Q227 HMFVGGQ   | 4761  | >GNAS-Q227 HMFVGGGL   | 96   | 4665  |
| >GNAS-Q227 HMFVGGQ   | 148   | >GNAS-Q227 HMFVGGGL   | 3    | 145   |
| >GNAS-Q227 HMFVGGQ   | 3230  | >GNAS-Q227 HMFVGGGL   | 12   | 3218  |
| >GNAS-Q227 HMFVGGQ   | 1461  | >GNAS-Q227 HMFVGGGL   | 13   | 1448  |
| >GNAS-Q227 HMFVGGQ   | 13486 | >GNAS-Q227 HMFVGGGL   | 135  | 13351 |
| >GNAS-Q227 HMFVGGQ   | 246   | >GNAS-Q227 HMFVGGGL   | 6    | 240   |
| >GNAS-Q227 HMFVGGQI  | 151   | >GNAS-Q227 HMFVGGGLR  | 90   | 61    |

|                       |       |                       |      |       |
|-----------------------|-------|-----------------------|------|-------|
| >GNAS-Q227 HMFVGGQI   | 949   | >GNAS-Q227 HMFVGGLR   | 290  | 659   |
| >GNAS-Q227 HMFVGGQI   | 18    | >GNAS-Q227 HMFVGGLR   | 16   | 2     |
| >GNAS-Q227 HMFVGGQI   | 33    | >GNAS-Q227 HMFVGGLR   | 19   | 14    |
| >GNAS-Q227 HMFVGGQI   | 19    | >GNAS-Q227 HMFVGGLR   | 11   | 8     |
| >GNAS-Q227 HMFVGGQ    | 12698 | >GNAS-Q227 HMFVGG     | 474  | 12224 |
| >GNAS-Q227 HMFVGGQ    | 9922  | >GNAS-Q227 HMFVGG     | 461  | 9461  |
| >GNAS-Q227 HMFVGGQ    | 2333  | >GNAS-Q227 HMFVGG     | 272  | 2061  |
| >GNAS-Q227 HMFVGGQ    | 3172  | >GNAS-Q227 HMFVGG     | 310  | 2862  |
| >GNAS-Q227 HMFVGGQ    | 7005  | >GNAS-Q227 HMFVGG     | 470  | 6535  |
| >GNAS-Q227 HMFVGGQ    | 20658 | >GNAS-Q227 HMFVGG     | 346  | 20312 |
| >GNAS-Q227 HMFVGGQI   | 88    | >GNAS-Q227 HMFVGGLR   | 50   | 38    |
| >GNAS-Q227 FHMFDVGGC  | 14165 | >GNAS-Q227 FHMFDVGG   | 57   | 14108 |
| >GNAS-Q227 NFHMFDVGC  | 223   | >GNAS-Q227 NFHMFDVGC  | 122  | 101   |
| >GNAS-Q227 NFHMFDVGC  | 57    | >GNAS-Q227 NFHMFDVGC  | 28   | 29    |
| >GNAS-Q227 NFHMFDVGC  | 137   | >GNAS-Q227 NFHMFDVGC  | 71   | 66    |
| >GNAS-Q227 NFHMFDVGC  | 121   | >GNAS-Q227 NFHMFDVGC  | 61   | 60    |
| >GNAS-Q227 QRDERRKWI  | 451   | >GNAS-Q227 RRDERRKWI  | 1133 | 682   |
| >GNAS-Q227 QRDERRKWI  | 2990  | >GNAS-Q227 RRDERRKWI  | 428  | 2562  |
| >GNAS-Q227 QRDERRKWI  | 3088  | >GNAS-Q227 RRDERRKWI  | 106  | 2982  |
| >GNAS-Q227 QRDERRKW   | 13412 | >GNAS-Q227 RRDERRKW   | 244  | 13168 |
| >GNAS-Q227 QRDERRKWI  | 2953  | >GNAS-Q227 RRDERRKWI  | 143  | 2810  |
| >GNAS-Q227 QRDERRKWI  | 2737  | >GNAS-Q227 RRDERRKWI  | 96   | 2641  |
| >GNAS-Q227 QRDERRKWI  | 5487  | >GNAS-Q227 RRDERRKWI  | 354  | 5133  |
| >GNAS-Q227 QRDERRKW   | 2329  | >GNAS-Q227 RRDERRKW   | 149  | 2180  |
| >GNAS-Q227 QRDERRKWI  | 726   | >GNAS-Q227 RRDERRKWI  | 63   | 663   |
| >GNAS-Q227 QRDERRKWI  | 1622  | >GNAS-Q227 RRDERRKWI  | 106  | 1516  |
| >GNAS-Q227 GQRDERRK   | 377   | >GNAS-Q227 GRRDERRK   | 3037 | 2660  |
| >GNAS-Q227 GQRDERRKW  | 14564 | >GNAS-Q227 GRRDERRKW  | 287  | 14277 |
| >GNAS-Q227 VNFHMFDVGC | 21507 | >GNAS-Q227 VNFHMFDVGC | 487  | 21020 |
| >GNAS-Q227 GGQRDERRK  | 845   | >GNAS-Q227 GGRRDERRK  | 238  | 607   |
| >GNAS-Q227 DVGGQRDER  | 202   | >GNAS-Q227 DVGGRRDER  | 43   | 159   |
| >GNAS-Q227 DVGGQRDER  | 75    | >GNAS-Q227 DVGGRRDER  | 67   | 8     |
| >GNAS-Q227 DVGGQRDER  | 439   | >GNAS-Q227 DVGGRRDER  | 296  | 143   |
| >GNAS-Q227 MFDVGGQR   | 267   | >GNAS-Q227 MFDVGGRR   | 323  | 56    |
| >GNAS-Q227 MFDVGGQRI  | 359   | >GNAS-Q227 MFDVGGRRI  | 296  | 63    |
| >GNAS-Q227 MFDVGGQRI  | 650   | >GNAS-Q227 MFDVGGRRI  | 446  | 204   |
| >GNAS-Q227 HMFVGGQ    | 148   | >GNAS-Q227 HMFVGG     | 1558 | 1410  |
| >GNAS-Q227 HMFVGGQ    | 246   | >GNAS-Q227 HMFVGG     | 7538 | 7292  |
| >GNAS-Q227 HMFVGGQ    | 12274 | >GNAS-Q227 HMFVGG     | 236  | 12038 |
| >GNAS-Q227 HMFVGGQI   | 151   | >GNAS-Q227 HMFVGGRF   | 149  | 2     |
| >GNAS-Q227 HMFVGGQ    | 9963  | >GNAS-Q227 HMFVGG     | 29   | 9934  |
| >GNAS-Q227 HMFVGGQI   | 18    | >GNAS-Q227 HMFVGGRF   | 21   | 3     |
| >GNAS-Q227 HMFVGGQ    | 10803 | >GNAS-Q227 HMFVGG     | 46   | 10757 |

|                         |       |                         |       |       |
|-------------------------|-------|-------------------------|-------|-------|
| >GNAS-Q227 HMFVDVGGQI   | 33    | >GNAS-Q227 HMFVDVGGRF   | 42    | 9     |
| >GNAS-Q227 HMFVDVGGQ    | 2189  | >GNAS-Q227 HMFVDVGGR    | 20    | 2169  |
| >GNAS-Q227 HMFVDVGGQI   | 19    | >GNAS-Q227 HMFVDVGGRF   | 27    | 8     |
| >GNAS-Q227 HMFVDVGGQ    | 3034  | >GNAS-Q227 HMFVDVGGR    | 43    | 2991  |
| >GNAS-Q227 HMFVDVGGQI   | 88    | >GNAS-Q227 HMFVDVGGRF   | 83    | 5     |
| >GNAS-Q227 NFHMFDVGC    | 29777 | >GNAS-Q227 NFHMFDVGC    | 410   | 29367 |
| >GNAS-Q227 NFHMFDVGC    | 223   | >GNAS-Q227 NFHMFDVGC    | 242   | 19    |
| >GNAS-Q227 NFHMFDVGC    | 14211 | >GNAS-Q227 NFHMFDVGC    | 133   | 14078 |
| >GNAS-Q227 NFHMFDVGC    | 57    | >GNAS-Q227 NFHMFDVGC    | 63    | 6     |
| >GNAS-Q227 NFHMFDVGC    | 31479 | >GNAS-Q227 NFHMFDVGC    | 239   | 31240 |
| >GNAS-Q227 NFHMFDVGC    | 137   | >GNAS-Q227 NFHMFDVGC    | 195   | 58    |
| >GNAS-Q227 NFHMFDVGC    | 5730  | >GNAS-Q227 NFHMFDVGC    | 68    | 5662  |
| >GNAS-Q227 NFHMFDVGC    | 121   | >GNAS-Q227 NFHMFDVGC    | 100   | 21    |
| >GNAS-R201 RVLTS GIFET  | 235   | >GNAS-R201 CVLTS GIFET  | 636   | 401   |
| >GNAS-R201 RVLTS GIFETK | 84    | >GNAS-R201 CVLTS GIFETK | 541   | 457   |
| >GNAS-R201 RVLTS GIFETK | 17    | >GNAS-R201 CVLTS GIFETK | 36    | 19    |
| >GNAS-R201 RVLTS GIF E  | 328   | >GNAS-R201 CVLTS GIF E  | 7096  | 6768  |
| >GNAS-R201 RVLTS GIFETK | 14    | >GNAS-R201 CVLTS GIFETK | 426   | 412   |
| >GNAS-R201 RVLTS GIFETK | 94    | >GNAS-R201 CVLTS GIFETK | 1916  | 1822  |
| >GNAS-R201 RVLTS GIF    | 233   | >GNAS-R201 CVLTS GIF    | 13352 | 13119 |
| >GNAS-R201 RVLTS GIFETK | 797   | >GNAS-R201 CVLTS GIFETK | 171   | 626   |
| >GNAS-R201 RVLTS GIF    | 490   | >GNAS-R201 CVLTS GIF    | 4457  | 3967  |
| >GNAS-R201 RVLTS GIF    | 46    | >GNAS-R201 CVLTS GIF    | 395   | 349   |
| >GNAS-R201 RVLTS GIF    | 19    | >GNAS-R201 CVLTS GIF    | 1283  | 1264  |
| >GNAS-R201 RVLTS GIF    | 237   | >GNAS-R201 CVLTS GIF    | 5905  | 5668  |
| >GNAS-R201 RVLTS GIF    | 276   | >GNAS-R201 CVLTS GIF    | 5581  | 5305  |
| >GNAS-R201 CRVLTSGIF    | 336   | >GNAS-R201 CCVLTSGIF    | 4074  | 3738  |
| >GNAS-R201 CRVLTSGIF    | 363   | >GNAS-R201 CCVLTSGIF    | 17662 | 17299 |
| >GNAS-R201 RCRVLTSG     | 230   | >GNAS-R201 RCCVLTSG     | 10650 | 10420 |
| >GNAS-R201 RCRVLTSGI    | 25    | >GNAS-R201 RCCVLTSGI    | 4323  | 4298  |
| >GNAS-R201 RCRVLTSGIF   | 354   | >GNAS-R201 RCCVLTSGIF   | 12043 | 11689 |
| >GNAS-R201 RCRVLTSGIFE  | 154   | >GNAS-R201 RCCVLTSGIFE  | 6021  | 5867  |
| >GNAS-R201 RCRVLTSGIF   | 172   | >GNAS-R201 RCCVLTSGIF   | 897   | 725   |
| >GNAS-R201 RCRVLTSGI    | 182   | >GNAS-R201 RCCVLTSGI    | 1081  | 899   |
| >GNAS-R201 RCRVLTSGIF   | 104   | >GNAS-R201 RCCVLTSGIF   | 271   | 167   |
| >GNAS-R201 RCRVLTSGI    | 577   | >GNAS-R201 RCCVLTSGI    | 121   | 456   |
| >GNAS-R201 LRCRVLTSGI   | 386   | >GNAS-R201 LRCCVLTSGI   | 1069  | 683   |
| >GNAS-R201 LRCRVLTSGIF  | 123   | >GNAS-R201 LRCCVLTSGIF  | 72    | 51    |
| >GNAS-R201 LRCRVLTSGIF  | 392   | >GNAS-R201 LRCCVLTSGIF  | 1327  | 935   |
| >GNAS-R201 LLRCRVLTSGI  | 640   | >GNAS-R201 LLRCCVLTSGI  | 348   | 292   |
| >GNAS-R201 LLRCRVLTSGI  | 12    | >GNAS-R201 LLRCCVLTSGI  | 13    | 1     |
| >GNAS-R201 LLRCRVLTSGI  | 104   | >GNAS-R201 LLRCCVLTSGI  | 120   | 16    |
| >GNAS-R201 LLRCRVLTSGI  | 122   | >GNAS-R201 LLRCCVLTSGI  | 65    | 57    |

|                         |      |                         |      |      |
|-------------------------|------|-------------------------|------|------|
| >GNAS-R201 LLRCRVLTSGI  | 38   | >GNAS-R201 LLRCCVLTSGI  | 35   | 3    |
| >GNAS-R201 LLRCRVLTSGI  | 227  | >GNAS-R201 LLRCCVLTSGI  | 647  | 420  |
| >GNAS-R201 LLRCRVLTSGI  | 98   | >GNAS-R201 LLRCCVLTSGI  | 6030 | 5932 |
| >GNAS-R201 LLRCRVLTSGI  | 73   | >GNAS-R201 LLRCCVLTSGI  | 955  | 882  |
| >GNAS-R201 LLRCRVLTSGI  | 533  | >GNAS-R201 LLRCCVLTSGI  | 436  | 97   |
| >GNAS-R201 LLRCRVLTSGI  | 473  | >GNAS-R201 LLRCCVLTSGI  | 428  | 45   |
| >GNAS-R201 LLRCRVLTSGI  | 561  | >GNAS-R201 LLRCCVLTSGI  | 297  | 264  |
| >GNAS-R201 DLLRCRVL     | 3772 | >GNAS-R201 DLLRCCVL     | 299  | 3473 |
| >GNAS-R201 DLLRCRVL     | 701  | >GNAS-R201 DLLRCCVL     | 104  | 597  |
| >GNAS-R201 QDLLRCRVL    | 364  | >GNAS-R201 QDLLRCCVL    | 215  | 149  |
| >GNAS-R201 QDLLRCRVL    | 273  | >GNAS-R201 QDLLRCCVL    | 303  | 30   |
| >GNAS-R201 QDLLRCRVL    | 1643 | >GNAS-R201 QDLLRCCVL    | 305  | 1338 |
| >GNAS-R201 RVLTSIGIFET  | 235  | >GNAS-R201 HVLTSIGIFET  | 637  | 402  |
| >GNAS-R201 RVLTSIGIFETK | 84   | >GNAS-R201 HVLTSIGIFETK | 169  | 85   |
| >GNAS-R201 RVLTSIGIFETK | 17   | >GNAS-R201 HVLTSIGIFETK | 44   | 27   |
| >GNAS-R201 RVLTSIGIF    | 2306 | >GNAS-R201 HVLTSIGIF    | 490  | 1816 |
| >GNAS-R201 RVLTSIGIFE   | 328  | >GNAS-R201 HVLTSIGIFE   | 1121 | 793  |
| >GNAS-R201 RVLTSIGIFETK | 14   | >GNAS-R201 HVLTSIGIFETK | 33   | 19   |
| >GNAS-R201 RVLTSIGIFETK | 94   | >GNAS-R201 HVLTSIGIFETK | 384  | 290  |
| >GNAS-R201 RVLTSIGIF    | 233  | >GNAS-R201 HVLTSIGIF    | 2890 | 2657 |
| >GNAS-R201 RVLTSIGIFETK | 797  | >GNAS-R201 HVLTSIGIFETK | 51   | 746  |
| >GNAS-R201 RVLTSIGIF    | 490  | >GNAS-R201 HVLTSIGIF    | 1576 | 1086 |
| >GNAS-R201 RVLTSIGIF    | 1938 | >GNAS-R201 HVLTSIGIF    | 247  | 1691 |
| >GNAS-R201 RVLTSIGIF    | 46   | >GNAS-R201 HVLTSIGIF    | 196  | 150  |
| >GNAS-R201 RVLTSIGIF    | 19   | >GNAS-R201 HVLTSIGIF    | 149  | 130  |
| >GNAS-R201 RVLTSIGIF    | 2518 | >GNAS-R201 HVLTSIGIF    | 208  | 2310 |
| >GNAS-R201 RVLTSIGIF    | 237  | >GNAS-R201 HVLTSIGIF    | 4323 | 4086 |
| >GNAS-R201 RVLTSIGIF    | 276  | >GNAS-R201 HVLTSIGIF    | 2449 | 2173 |
| >GNAS-R201 CRVLTSGIF    | 336  | >GNAS-R201 CHVLTSGIF    | 726  | 390  |
| >GNAS-R201 CRVLTSGIF    | 363  | >GNAS-R201 CHVLTSGIF    | 97   | 266  |
| >GNAS-R201 VPSDQDLLRC   | 7784 | >GNAS-R201 VPSDQDLLRC   | 426  | 7358 |
| >GNAS-R201 RCRVLTSG     | 230  | >GNAS-R201 RCHVLTSG     | 2280 | 2050 |
| >GNAS-R201 RCRVLTSGI    | 25   | >GNAS-R201 RCHVLTSGI    | 237  | 212  |
| >GNAS-R201 RCRVLTSGIF   | 354  | >GNAS-R201 RCHVLTSGIF   | 2994 | 2640 |
| >GNAS-R201 RCRVLTSGIFE  | 154  | >GNAS-R201 RCHVLTSGIFE  | 1095 | 941  |
| >GNAS-R201 RCRVLTSGIF   | 172  | >GNAS-R201 RCHVLTSGIF   | 298  | 126  |
| >GNAS-R201 RCRVLTSGI    | 182  | >GNAS-R201 RCHVLTSGI    | 1155 | 973  |
| >GNAS-R201 RCRVLTSGIF   | 104  | >GNAS-R201 RCHVLTSGIF   | 186  | 82   |
| >GNAS-R201 RCRVLTSGI    | 577  | >GNAS-R201 RCHVLTSGI    | 184  | 393  |
| >GNAS-R201 LRCRVLTSGI   | 386  | >GNAS-R201 LRCHVLTSGI   | 432  | 46   |
| >GNAS-R201 LRCRVLTSGIF  | 123  | >GNAS-R201 LRCHVLTSGIF  | 64   | 59   |
| >GNAS-R201 LRCRVLTSGIF  | 392  | >GNAS-R201 LRCHVLTSGIF  | 673  | 281  |
| >GNAS-R201 LLRCRVLTSGI  | 640  | >GNAS-R201 LLRCHVLTSGI  | 317  | 323  |

|                         |       |                        |       |       |
|-------------------------|-------|------------------------|-------|-------|
| >GNAS-R201 LLRCRVLT     | 696   | >GNAS-R201 LLRCHVLT    | 250   | 446   |
| >GNAS-R201 LLRCRVLTS    | 1213  | >GNAS-R201 LLRCHVLTS   | 331   | 882   |
| >GNAS-R201 LLRCRVLTSGI  | 12    | >GNAS-R201 LLRCHVLTSGI | 8     | 4     |
| >GNAS-R201 LLRCRVLTSGI  | 104   | >GNAS-R201 LLRCHVLTSGI | 58    | 46    |
| >GNAS-R201 LLRCRVLTSGI  | 122   | >GNAS-R201 LLRCHVLTSGI | 81    | 41    |
| >GNAS-R201 LLRCRVLTSGI  | 38    | >GNAS-R201 LLRCHVLTSGI | 39    | 1     |
| >GNAS-R201 LLRCRVLTSGI  | 227   | >GNAS-R201 LLRCHVLTSGI | 260   | 33    |
| >GNAS-R201 LLRCRVLTS    | 98    | >GNAS-R201 LLRCHVLTS   | 287   | 189   |
| >GNAS-R201 LLRCRVLTSGI  | 73    | >GNAS-R201 LLRCHVLTSGI | 109   | 36    |
| >GNAS-R201 LLRCRVLTSG   | 533   | >GNAS-R201 LLRCHVLTSG  | 273   | 260   |
| >GNAS-R201 LLRCRVLTSGI  | 473   | >GNAS-R201 LLRCHVLTSGI | 253   | 220   |
| >GNAS-R201 LLRCRVLTSGI  | 561   | >GNAS-R201 LLRCHVLTSGI | 314   | 247   |
| >GNAS-R201 DLLRCRVL     | 3772  | >GNAS-R201 DLLRCHVL    | 233   | 3539  |
| >GNAS-R201 DLLRCRVL     | 701   | >GNAS-R201 DLLRCHVL    | 73    | 628   |
| >GNAS-R201 QDLLRCRVL    | 364   | >GNAS-R201 QDLLRCHVL   | 281   | 83    |
| >GNAS-R201 QDLLRCRV     | 273   | >GNAS-R201 QDLLRCHV    | 257   | 16    |
| >GNAS-R201 QDLLRCRVL    | 1643  | >GNAS-R201 QDLLRCHVL   | 416   | 1227  |
| >GNAS-R201 RVLTS GIFET  | 235   | >GNAS-R201 SVLTSGIFET  | 153   | 82    |
| >GNAS-R201 RVLTS GIFETK | 84    | >GNAS-R201 SVLTSGIFETK | 277   | 193   |
| >GNAS-R201 RVLTS GIFETK | 17    | >GNAS-R201 SVLTSGIFETK | 12    | 5     |
| >GNAS-R201 RVLTS GIF    | 2306  | >GNAS-R201 SVLTSGIF    | 454   | 1852  |
| >GNAS-R201 RVLTS GIFE   | 328   | >GNAS-R201 SVLTSGIFE   | 2968  | 2640  |
| >GNAS-R201 RVLTS GIFETK | 14    | >GNAS-R201 SVLTSGIFETK | 97    | 83    |
| >GNAS-R201 RVLTS GIFETK | 94    | >GNAS-R201 SVLTSGIFETK | 768   | 674   |
| >GNAS-R201 RVLTS GIF    | 233   | >GNAS-R201 SVLTSGIF    | 2299  | 2066  |
| >GNAS-R201 RVLTS GIFETK | 797   | >GNAS-R201 SVLTSGIFETK | 105   | 692   |
| >GNAS-R201 RVLTS GIF    | 490   | >GNAS-R201 SVLTSGIF    | 1236  | 746   |
| >GNAS-R201 RVLTS GIF    | 1938  | >GNAS-R201 SVLTSGIF    | 364   | 1574  |
| >GNAS-R201 RVLTS GIF    | 46    | >GNAS-R201 SVLTSGIF    | 245   | 199   |
| >GNAS-R201 RVLTS GIF    | 19    | >GNAS-R201 SVLTSGIF    | 328   | 309   |
| >GNAS-R201 RVLTS GIF    | 237   | >GNAS-R201 SVLTSGIF    | 10118 | 9881  |
| >GNAS-R201 RVLTS GIF    | 276   | >GNAS-R201 SVLTSGIF    | 4455  | 4179  |
| >GNAS-R201 RVLTS GIFETK | 1418  | >GNAS-R201 SVLTSGIFETK | 341   | 1077  |
| >GNAS-R201 CRVLTSGIF    | 336   | >GNAS-R201 CSVLTSGIF   | 707   | 371   |
| >GNAS-R201 CRVLTSGI     | 27048 | >GNAS-R201 CSVLTSGI    | 242   | 26806 |
| >GNAS-R201 CRVLTSGIF    | 23800 | >GNAS-R201 CSVLTSGIF   | 20    | 23780 |
| >GNAS-R201 CRVLTSGIF    | 21119 | >GNAS-R201 CSVLTSGIF   | 253   | 20866 |
| >GNAS-R201 CRVLTSGIF    | 8423  | >GNAS-R201 CSVLTSGIF   | 196   | 8227  |
| >GNAS-R201 CRVLTSGIF    | 363   | >GNAS-R201 CSVLTSGIF   | 3059  | 2696  |
| >GNAS-R201 CRVLTSGI     | 2274  | >GNAS-R201 CSVLTSGI    | 20    | 2254  |
| >GNAS-R201 RCRVLTSG     | 230   | >GNAS-R201 RCSVLTSG    | 11229 | 10999 |
| >GNAS-R201 RCRVLTSGI    | 25    | >GNAS-R201 RCSVLTSGI   | 4637  | 4612  |
| >GNAS-R201 RCRVLTSGIF   | 354   | >GNAS-R201 RCSVLTSGIF  | 12119 | 11765 |

|                        |      |                        |      |      |
|------------------------|------|------------------------|------|------|
| >GNAS-R201 RCRVLTSGIFE | 154  | >GNAS-R201 RCSVLTSGIFE | 6962 | 6808 |
| >GNAS-R201 RCRVLTSGIF  | 172  | >GNAS-R201 RCSVLTSGIF  | 437  | 265  |
| >GNAS-R201 RCRVLTSGI   | 182  | >GNAS-R201 RCSVLTSGI   | 547  | 365  |
| >GNAS-R201 RCRVLTSGIF  | 104  | >GNAS-R201 RCSVLTSGIF  | 59   | 45   |
| >GNAS-R201 RCRVLTSGI   | 577  | >GNAS-R201 RCSVLTSGI   | 239  | 338  |
| >GNAS-R201 LRCRVLTSGI  | 386  | >GNAS-R201 LRCSVLTSGI  | 1005 | 619  |
| >GNAS-R201 LRCRVLTSGIF | 123  | >GNAS-R201 LRCSVLTSGIF | 83   | 40   |
| >GNAS-R201 LRCRVLTSGIF | 392  | >GNAS-R201 LRCSVLTSGIF | 745  | 353  |
| >GNAS-R201 LLRCRVLTSGI | 640  | >GNAS-R201 LLRCSVLTSGI | 437  | 203  |
| >GNAS-R201 LLRCRVLT    | 696  | >GNAS-R201 LLRCSVLT    | 363  | 333  |
| >GNAS-R201 LLRCRVLTSGI | 12   | >GNAS-R201 LLRCSVLTSGI | 11   | 1    |
| >GNAS-R201 LLRCRVLTSGI | 104  | >GNAS-R201 LLRCSVLTSGI | 72   | 32   |
| >GNAS-R201 LLRCRVLTSGI | 122  | >GNAS-R201 LLRCSVLTSGI | 72   | 50   |
| >GNAS-R201 LLRCRVLTSGI | 38   | >GNAS-R201 LLRCSVLTSGI | 30   | 8    |
| >GNAS-R201 LLRCRVLT    | 629  | >GNAS-R201 LLRCSVLT    | 446  | 183  |
| >GNAS-R201 LLRCRVLTSGI | 227  | >GNAS-R201 LLRCSVLTSGI | 186  | 41   |
| >GNAS-R201 LLRCRVLT    | 98   | >GNAS-R201 LLRCSVLT    | 4501 | 4403 |
| >GNAS-R201 LLRCRVLTSGI | 73   | >GNAS-R201 LLRCSVLTSGI | 646  | 573  |
| >GNAS-R201 LLRCRVLTSG  | 533  | >GNAS-R201 LLRCSVLTSG  | 259  | 274  |
| >GNAS-R201 LLRCRVLTSGI | 473  | >GNAS-R201 LLRCSVLTSGI | 242  | 231  |
| >GNAS-R201 LLRCRVLTSGI | 561  | >GNAS-R201 LLRCSVLTSGI | 149  | 412  |
| >GNAS-R201 DLLRCRVL    | 3772 | >GNAS-R201 DLLRCSVL    | 300  | 3472 |
| >GNAS-R201 DLLRCRVL    | 701  | >GNAS-R201 DLLRCSVL    | 178  | 523  |
| >GNAS-R201 QDLLRCRVL   | 364  | >GNAS-R201 QDLLRCSVL   | 399  | 35   |
| >GNAS-R201 QDLLRCRV    | 273  | >GNAS-R201 QDLLRCSV    | 244  | 29   |
| >GNAS-V248 VASSSYNM    | 4576 | >GNAS-V248 MASSSYNM    | 443  | 4133 |
| >GNAS-V248 VASSSYNMV   | 557  | >GNAS-V248 MASSSYNMV   | 44   | 513  |
| >GNAS-V248 VASSSYNMVI  | 710  | >GNAS-V248 MASSSYNMV   | 123  | 587  |
| >GNAS-V248 VASSSYNMV   | 286  | >GNAS-V248 MASSSYNMV   | 51   | 235  |
| >GNAS-V248 VASSSYNMV   | 2009 | >GNAS-V248 MASSSYNMV   | 398  | 1611 |
| >GNAS-V248 VASSSYNMV   | 615  | >GNAS-V248 MASSSYNMV   | 211  | 404  |
| >GNAS-V248 VASSSYNMVI  | 108  | >GNAS-V248 MASSSYNMV   | 19   | 89   |
| >GNAS-V248 VASSSYNMVI  | 84   | >GNAS-V248 MASSSYNMV   | 5    | 79   |
| >GNAS-V248 VASSSYNM    | 9717 | >GNAS-V248 MASSSYNM    | 200  | 9517 |
| >GNAS-V248 VASSSYNMV   | 595  | >GNAS-V248 MASSSYNMV   | 9    | 586  |
| >GNAS-V248 VASSSYNMVI  | 779  | >GNAS-V248 MASSSYNMV   | 63   | 716  |
| >GNAS-V248 VASSSYNMV   | 1478 | >GNAS-V248 MASSSYNMV   | 74   | 1404 |
| >GNAS-V248 VASSSYNM    | 203  | >GNAS-V248 MASSSYNM    | 58   | 145  |
| >GNAS-V248 VASSSYNMV   | 346  | >GNAS-V248 MASSSYNMV   | 88   | 258  |
| >GNAS-V248 VASSSYNMVI  | 139  | >GNAS-V248 MASSSYNMV   | 47   | 92   |
| >GNAS-V248 VASSSYNM    | 80   | >GNAS-V248 MASSSYNM    | 39   | 41   |
| >GNAS-V248 VASSSYNM    | 246  | >GNAS-V248 MASSSYNM    | 18   | 228  |
| >GNAS-V248 VASSSYNM    | 1840 | >GNAS-V248 MASSSYNM    | 166  | 1674 |

|                       |      |                      |      |      |
|-----------------------|------|----------------------|------|------|
| >GNAS-V248 VASSSYNM   | 711  | >GNAS-V248 MASSSYNM  | 131  | 580  |
| >GNAS-V248 VASSSYNMV  | 363  | >GNAS-V248 MASSSYNMV | 93   | 270  |
| >GNAS-V248 VASSSYNMV  | 480  | >GNAS-V248 MASSSYNMV | 622  | 142  |
| >GNAS-V248 VASSSYNMV  | 45   | >GNAS-V248 MASSSYNMV | 52   | 7    |
| >GNAS-V248 VVASSSYNM  | 2196 | >GNAS-V248 VMASSSYNM | 41   | 2155 |
| >GNAS-V248 VVASSSYNM' | 6044 | >GNAS-V248 VMASSSYNM | 287  | 5757 |
| >GNAS-V248 VVASSSYNM' | 1173 | >GNAS-V248 VMASSSYNM | 35   | 1138 |
| >GNAS-V248 VVASSSYNM  | 193  | >GNAS-V248 VMASSSYNM | 10   | 183  |
| >GNAS-V248 VVASSSYNM' | 272  | >GNAS-V248 VMASSSYNM | 26   | 246  |
| >GNAS-V248 VVASSSYNM' | 297  | >GNAS-V248 VMASSSYNM | 13   | 284  |
| >GNAS-V248 VVASSSYNM  | 2823 | >GNAS-V248 VMASSSYNM | 66   | 2757 |
| >GNAS-V248 VVASSSYNM' | 275  | >GNAS-V248 VMASSSYNM | 35   | 240  |
| >GNAS-V248 VVASSSYNM' | 260  | >GNAS-V248 VMASSSYNM | 9    | 251  |
| >GNAS-V248 VVASSSYNM' | 736  | >GNAS-V248 VMASSSYNM | 242  | 494  |
| >GNAS-V248 VVASSSYNM  | 6203 | >GNAS-V248 VMASSSYNM | 44   | 6159 |
| >GNAS-V248 VVASSSYNM' | 96   | >GNAS-V248 VMASSSYNM | 3    | 93   |
| >GNAS-V248 VVASSSYNM' | 1601 | >GNAS-V248 VMASSSYNM | 12   | 1589 |
| >GNAS-V248 VVASSSYNM  | 6638 | >GNAS-V248 VMASSSYNM | 32   | 6606 |
| >GNAS-V248 VVASSSYNM' | 831  | >GNAS-V248 VMASSSYNM | 7    | 824  |
| >GNAS-V248 VVASSSYNM' | 3567 | >GNAS-V248 VMASSSYNM | 20   | 3547 |
| >GNAS-V248 VVASSSYNM  | 8516 | >GNAS-V248 VMASSSYNM | 77   | 8439 |
| >GNAS-V248 VVASSSYNM' | 89   | >GNAS-V248 VMASSSYNM | 7    | 82   |
| >GNAS-V248 VVASSSYNM' | 3795 | >GNAS-V248 VMASSSYNM | 36   | 3759 |
| >GNAS-V248 VVASSSYNM  | 1097 | >GNAS-V248 VMASSSYNM | 10   | 1087 |
| >GNAS-V248 VVASSSYNM' | 119  | >GNAS-V248 VMASSSYNM | 4    | 115  |
| >GNAS-V248 VVASSSYNM' | 1475 | >GNAS-V248 VMASSSYNM | 13   | 1462 |
| >GNAS-V248 VVASSSYNM  | 6847 | >GNAS-V248 VMASSSYNM | 62   | 6785 |
| >GNAS-V248 VVASSSYNM' | 13   | >GNAS-V248 VMASSSYNM | 2    | 11   |
| >GNAS-V248 VVASSSYNM' | 2090 | >GNAS-V248 VMASSSYNM | 12   | 2078 |
| >GNAS-V248 VVASSSYNM  | 415  | >GNAS-V248 VMASSSYNM | 9543 | 9128 |
| >GNAS-V248 VVASSSYNM' | 358  | >GNAS-V248 VMASSSYNM | 1027 | 669  |
| >GNAS-V248 VVASSSYNM' | 92   | >GNAS-V248 VMASSSYNM | 2874 | 2782 |
| >GNAS-V248 VVASSSYNM' | 93   | >GNAS-V248 VMASSSYNM | 510  | 417  |
| >GNAS-V248 VVASSSYNM  | 651  | >GNAS-V248 VMASSSYNM | 63   | 588  |
| >GNAS-V248 VVASSSYNM' | 2232 | >GNAS-V248 VMASSSYNM | 203  | 2029 |
| >GNAS-V248 VVASSSYNM  | 5510 | >GNAS-V248 VMASSSYNM | 479  | 5031 |
| >GNAS-V248 VVASSSYNM  | 702  | >GNAS-V248 VMASSSYNM | 8    | 694  |
| >GNAS-V248 VVASSSYNM' | 2117 | >GNAS-V248 VMASSSYNM | 26   | 2091 |
| >GNAS-V248 VVASSSYNM' | 962  | >GNAS-V248 VMASSSYNM | 19   | 943  |
| >GNAS-V248 VVASSSYNM  | 154  | >GNAS-V248 VMASSSYNM | 362  | 208  |
| >GNAS-V248 VVASSSYNM  | 264  | >GNAS-V248 VMASSSYNM | 591  | 327  |
| >GNAS-V248 VVASSSYNM  | 299  | >GNAS-V248 VMASSSYNM | 3058 | 2759 |
| >GNAS-V248 FNDVTAIFV  | 403  | >GNAS-V248 FNDVTAIFV | 101  | 302  |

|                       |      |                       |     |      |
|-----------------------|------|-----------------------|-----|------|
| >GNAS-V248 FVVASSSYNM | 1680 | >GNAS-V248 FVMASSSYNM | 79  | 1601 |
| >GNAS-V248 FVVASSSYNM | 61   | >GNAS-V248 FVMASSSYNM | 10  | 51   |
| >GNAS-V248 FVVASSSYNM | 100  | >GNAS-V248 FVMASSSYNM | 17  | 83   |
| >GNAS-V248 FVVASSSYNM | 7    | >GNAS-V248 FVMASSSYNM | 3   | 4    |
| >GNAS-V248 FVVASSSYNM | 492  | >GNAS-V248 FVMASSSYNM | 92  | 400  |
| >GNAS-V248 FVVASSSYNM | 5    | >GNAS-V248 FVMASSSYNM | 3   | 2    |
| >GNAS-V248 FVVASSSY   | 806  | >GNAS-V248 FVMASSSY   | 246 | 560  |
| >GNAS-V248 FVVASSSYNM | 75   | >GNAS-V248 FVMASSSYNM | 38  | 37   |
| >GNAS-V248 FVVASSSYNM | 4    | >GNAS-V248 FVMASSSYNM | 3   | 1    |
| >GNAS-V248 FVVASSSYNM | 1474 | >GNAS-V248 FVMASSSYNM | 472 | 1002 |
| >GNAS-V248 FVVASSSYNM | 19   | >GNAS-V248 FVMASSSYNM | 8   | 11   |
| >GNAS-V248 FVVASSSYNM | 1155 | >GNAS-V248 FVMASSSYNM | 134 | 1021 |
| >GNAS-V248 FVVASSSYNM | 111  | >GNAS-V248 FVMASSSYNM | 15  | 96   |
| >GNAS-V248 FVVASSSYNM | 65   | >GNAS-V248 FVMASSSYNM | 32  | 33   |
| >GNAS-V248 FVVASSSYNM | 2411 | >GNAS-V248 FVMASSSYNM | 38  | 2373 |
| >GNAS-V248 FVVASSSYNM | 290  | >GNAS-V248 FVMASSSYNM | 8   | 282  |
| >GNAS-V248 FVVASSSYNM | 5    | >GNAS-V248 FVMASSSYNM | 3   | 2    |
| >GNAS-V248 FVVASSSY   | 3883 | >GNAS-V248 FVMASSSY   | 443 | 3440 |
| >GNAS-V248 FVVASSSY   | 3678 | >GNAS-V248 FVMASSSY   | 166 | 3512 |
| >GNAS-V248 FVVASSSY   | 78   | >GNAS-V248 FVMASSSY   | 70  | 8    |
| >GNAS-V248 FVVASSSY   | 10   | >GNAS-V248 FVMASSSY   | 11  | 1    |
| >GNAS-V248 FVVASSSY   | 12   | >GNAS-V248 FVMASSSY   | 35  | 23   |
| >GNAS-V248 FVVASSSYNM | 32   | >GNAS-V248 FVMASSSYNM | 123 | 91   |
| >GNAS-V248 FVVASSSY   | 210  | >GNAS-V248 FVMASSSY   | 404 | 194  |
| >GNAS-V248 FVVASSSYNM | 364  | >GNAS-V248 FVMASSSYNM | 614 | 250  |
| >GNAS-V248 FVVASSSY   | 20   | >GNAS-V248 FVMASSSY   | 21  | 1    |
| >GNAS-V248 FVVASSSY   | 256  | >GNAS-V248 FVMASSSY   | 116 | 140  |
| >GNAS-V248 FVVASSSY   | 243  | >GNAS-V248 FVMASSSY   | 117 | 126  |
| >GNAS-V248 FVVASSSYNM | 199  | >GNAS-V248 FVMASSSYNM | 140 | 59   |
| >GNAS-V248 FVVASSSYNM | 6    | >GNAS-V248 FVMASSSYNM | 5   | 1    |
| >GNAS-V248 FVVASSSYNM | 65   | >GNAS-V248 FVMASSSYNM | 17  | 48   |
| >GNAS-V248 FVVASSSYNM | 10   | >GNAS-V248 FVMASSSYNM | 5   | 5    |
| >GNAS-V248 FVVASSSY   | 253  | >GNAS-V248 FVMASSSY   | 134 | 119  |
| >GNAS-V248 FVVASSSY   | 34   | >GNAS-V248 FVMASSSY   | 30  | 4    |
| >GNAS-V248 FVVASSSYNM | 161  | >GNAS-V248 FVMASSSYNM | 77  | 84   |
| >GNAS-V248 FVVASSSY   | 21   | >GNAS-V248 FVMASSSY   | 12  | 9    |
| >GNAS-V248 FVVASSSYNM | 454  | >GNAS-V248 FVMASSSYNM | 131 | 323  |
| >GNAS-V248 FVVASSSY   | 39   | >GNAS-V248 FVMASSSY   | 16  | 23   |
| >GNAS-V248 FVVASSSYNM | 237  | >GNAS-V248 FVMASSSYNM | 80  | 157  |
| >GNAS-V248 FVVASSSYNM | 830  | >GNAS-V248 FVMASSSYNM | 304 | 526  |
| >GNAS-V248 FVVASSSY   | 11   | >GNAS-V248 FVMASSSY   | 13  | 2    |
| >GNAS-V248 FVVASSSYNM | 45   | >GNAS-V248 FVMASSSYNM | 50  | 5    |
| >GNAS-V248 FVVASSSY   | 18   | >GNAS-V248 FVMASSSY   | 15  | 3    |



|                        |      |                        |      |      |
|------------------------|------|------------------------|------|------|
| >GNAS-V248 FVVASSSYNM  | 1286 | >GNAS-V248 FVMASSSYN   | 241  | 1045 |
| >GNAS-V248 FVVASSSY    | 485  | >GNAS-V248 FVMASSSY    | 724  | 239  |
| >GNAS-V248 FVVASSSYNM  | 332  | >GNAS-V248 FVMASSSYN   | 139  | 193  |
| >GNAS-V248 FVVASSSYNM  | 511  | >GNAS-V248 FVMASSSYN   | 303  | 208  |
| >GNAS-V248 FVVASSSY    | 39   | >GNAS-V248 FVMASSSY    | 75   | 36   |
| >GNAS-V248 IFVVASSSYN  | 406  | >GNAS-V248 IFVMASSSYN  | 644  | 238  |
| >GNAS-V248 IFVVASSSY   | 33   | >GNAS-V248 IFVMASSSY   | 32   | 1    |
| >GNAS-V248 IFVVASSSY   | 90   | >GNAS-V248 IFVMASSSY   | 80   | 10   |
| >GNAS-V248 IFVVASSSY   | 174  | >GNAS-V248 IFVMASSSY   | 109  | 65   |
| >GNAS-V248 IFVVASSSY   | 106  | >GNAS-V248 IFVMASSSY   | 143  | 37   |
| >GNAS-V248 IFVVASSSY   | 432  | >GNAS-V248 IFVMASSSY   | 355  | 77   |
| >GNAS-V248 IFVVASSSY   | 123  | >GNAS-V248 IFVMASSSY   | 85   | 38   |
| >GNAS-V248 IFVVASSSY   | 64   | >GNAS-V248 IFVMASSSY   | 46   | 18   |
| >GNAS-V248 IFVVASSSY   | 278  | >GNAS-V248 IFVMASSSY   | 351  | 73   |
| >GNAS-V248 IIFVVASSSY  | 136  | >GNAS-V248 IIFVMASSSY  | 148  | 12   |
| >GNAS-V248 IIFVVASSSY  | 94   | >GNAS-V248 IIFVMASSSY  | 144  | 50   |
| >GNAS-V248 IIFVVASSSY  | 33   | >GNAS-V248 IIFVMASSSY  | 34   | 1    |
| >GNAS-V248 IIFVVASSSY  | 398  | >GNAS-V248 IIFVMASSSY  | 600  | 202  |
| >GNAS-V248 IIFVVASSSY  | 406  | >GNAS-V248 IIFVMASSSY  | 423  | 17   |
| >GNAS-V248 IIFVVASSSY  | 63   | >GNAS-V248 IIFVMASSSY  | 58   | 5    |
| >GNAS-V248 IIFVVASSSY  | 63   | >GNAS-V248 IIFVMASSSY  | 77   | 14   |
| >GNAS-V248 IIFVVASSSY  | 30   | >GNAS-V248 IIFVMASSSY  | 28   | 2    |
| >GNAS-V248 IIFVVASSSY  | 35   | >GNAS-V248 IIFVMASSSY  | 20   | 15   |
| >GNAS-V248 IIFVVASSS   | 398  | >GNAS-V248 IIFVMASSS   | 470  | 72   |
| >GNAS-V248 IIFVVASSSY  | 415  | >GNAS-V248 IIFVMASSSY  | 187  | 228  |
| >GNAS-V248 IIFVVASSSY  | 140  | >GNAS-V248 IIFVMASSSY  | 202  | 62   |
| >GNAS-V248 AIIFVVASSSY | 159  | >GNAS-V248 AIIFVMASSSY | 103  | 56   |
| >GNAS-V248 AIIFVVASSSY | 282  | >GNAS-V248 AIIFVMASSSY | 118  | 164  |
| >GNAS-V248 AIIFVVASSSY | 328  | >GNAS-V248 AIIFVMASSSY | 139  | 189  |
| >GNAS-V248 AIIFVVASSSY | 15   | >GNAS-V248 AIIFVMASSSY | 10   | 5    |
| >GNAS-V248 AIIFVVASSSY | 84   | >GNAS-V248 AIIFVMASSSY | 56   | 28   |
| >GNAS-V248 AIIFVVASSSY | 30   | >GNAS-V248 AIIFVMASSSY | 20   | 10   |
| >GNAS-V248 AIIFVVASSSY | 674  | >GNAS-V248 AIIFVMASSSY | 352  | 322  |
| >GNAS-V248 AIIFVVASSSY | 41   | >GNAS-V248 AIIFVMASSSY | 46   | 5    |
| >GNAS-V248 AIIFVVASSSY | 275  | >GNAS-V248 AIIFVMASSSY | 379  | 104  |
| >GNAS-V248 AIIFVVASSSY | 145  | >GNAS-V248 AIIFVMASSSY | 88   | 57   |
| >GNAS-V248 AIIFVVASSSY | 112  | >GNAS-V248 AIIFVMASSSY | 68   | 44   |
| >GNAS-V248 AIIFVVASSSY | 49   | >GNAS-V248 AIIFVMASSSY | 68   | 19   |
| >GNAS-V248 TAIIFVVA    | 123  | >GNAS-V248 TAIIFVMA    | 72   | 51   |
| >GNAS-V248 VTAIIFVV    | 332  | >GNAS-V248 VTAIIFVM    | 4952 | 4620 |
| >GNAS-V248 VTAIIFVV    | 101  | >GNAS-V248 VTAIIFVM    | 966  | 865  |
| >GNAS-V248 VTAIIFVV    | 318  | >GNAS-V248 VTAIIFVM    | 6216 | 5898 |
| >GNAS-V248 VTAIIFVV    | 36   | >GNAS-V248 VTAIIFVM    | 1474 | 1438 |

|                       |       |                      |       |       |
|-----------------------|-------|----------------------|-------|-------|
| >GNAS-V248 VTAIFVV    | 43    | >GNAS-V248 VTAIFVM   | 3183  | 3140  |
| >GNAS-V248 VTAIFVV    | 53    | >GNAS-V248 VTAIFVM   | 8670  | 8617  |
| >GNAS-V248 VTAIFVV    | 416   | >GNAS-V248 VTAIFVM   | 9290  | 8874  |
| >GNAS-V248 VTAIFVV    | 57    | >GNAS-V248 VTAIFVM   | 16331 | 16274 |
| >GNAS-V248 VTAIFVV    | 14    | >GNAS-V248 VTAIFVM   | 324   | 310   |
| >GNAS-V248 VTAIFVVA   | 48    | >GNAS-V248 VTAIFVMA  | 29    | 19    |
| >GNAS-V248 VTAIFVVASS | 332   | >GNAS-V248 VTAIFVMAS | 225   | 107   |
| >GNAS-V248 VTAIFVV    | 145   | >GNAS-V248 VTAIFVM   | 1886  | 1741  |
| >GNAS-V248 VTAIFVV    | 1154  | >GNAS-V248 VTAIFVM   | 21    | 1133  |
| >GNAS-V248 VTAIFVV    | 4686  | >GNAS-V248 VTAIFVM   | 170   | 4516  |
| >GNAS-V248 VTAIFVV    | 21    | >GNAS-V248 VTAIFVM   | 7     | 14    |
| >GNAS-V248 VTAIFVVA   | 554   | >GNAS-V248 VTAIFVMA  | 235   | 319   |
| >GNAS-V248 VTAIFVV    | 1726  | >GNAS-V248 VTAIFVM   | 93    | 1633  |
| >GNAS-V248 DVTAIFVV   | 414   | >GNAS-V248 DVTAIFVM  | 10138 | 9724  |
| >GNAS-V248 DVTAIFVV   | 355   | >GNAS-V248 DVTAIFVM  | 17405 | 17050 |
| >GNAS-V248 DVTAIFVV   | 195   | >GNAS-V248 DVTAIFVM  | 9771  | 9576  |
| >GNAS-V248 DVTAIFVV   | 157   | >GNAS-V248 DVTAIFVM  | 16266 | 16109 |
| >GNAS-V248 DVTAIFVV   | 7998  | >GNAS-V248 DVTAIFVM  | 456   | 7542  |
| >GNAS-V248 DVTAIFVV   | 4632  | >GNAS-V248 DVTAIFVM  | 51    | 4581  |
| >GNAS-V248 DVTAIFVV   | 5     | >GNAS-V248 DVTAIFVM  | 32    | 27    |
| >GNAS-V248 DVTAIFVVA  | 98    | >GNAS-V248 DVTAIFVMA | 96    | 2     |
| >GNAS-V248 DVTAIFVVAS | 136   | >GNAS-V248 DVTAIFVMA | 108   | 28    |
| >GNAS-V248 DVTAIFVV   | 21    | >GNAS-V248 DVTAIFVM  | 333   | 312   |
| >GNAS-V248 DVTAIFVVA  | 2436  | >GNAS-V248 DVTAIFVMA | 409   | 2027  |
| >GNAS-V248 DVTAIFVV   | 12657 | >GNAS-V248 DVTAIFVM  | 321   | 12336 |
| >GNAS-V248 NDVTAIFVV  | 156   | >GNAS-V248 NDVTAIFVM | 1907  | 1751  |
| >GNAS_NM_ETESETESEI   | 5892  | >GNAS_NM_KTESETESEI  | 235   | 5657  |
| >GNAS_NM_ETESETESEI   | 332   | >GNAS_NM_KTESETESEI  | 9435  | 9103  |
| >GNAS_NM_ETESETESEI   | 5154  | >GNAS_NM_KTESETESEI  | 175   | 4979  |
| >GNAS_NM_ETESETESEI   | 718   | >GNAS_NM_KTESETESEI  | 448   | 270   |
| >GNAS_NM_YETESETESEI  | 13    | >GNAS_NM_YKTESETESEI | 1250  | 1237  |
| >GNAS_NM_YETESETESEI  | 1147  | >GNAS_NM_YKTESETESEI | 28    | 1119  |
| >GNAS_NM_YETESETESEI  | 48    | >GNAS_NM_YKTESETESEI | 19435 | 19387 |
| >GNAS_NM_YETESETESEI  | 183   | >GNAS_NM_YKTESETESEI | 27758 | 27575 |
| >GNAS_NM_YETESETESEI  | 10    | >GNAS_NM_YKTESETESEI | 6139  | 6129  |
| >GNAS_NM_EEFDYETES    | 206   | >GNAS_NM_EEFDYKTES   | 236   | 30    |
| >GNAS_NM_EEFDYETES    | 235   | >GNAS_NM_EEFDYKTES   | 437   | 202   |
| >GNAS_NM_EEFDYETES    | 89    | >GNAS_NM_EEFDYKTES   | 128   | 39    |
| >GNAS_NM_EEFDYET      | 54    | >GNAS_NM_EEFDYKT     | 117   | 63    |
| >GNAS_NM_EEFDYETES    | 436   | >GNAS_NM_EEFDYKTES   | 484   | 48    |
| >GNAS_NM_YEEFDYET     | 103   | >GNAS_NM_YEEFDYKT    | 190   | 87    |
| >GNAS_NM_YEEFDYETES   | 574   | >GNAS_NM_YEEFDYKTES  | 334   | 240   |
| >GNAS_NM_YEEFDYET     | 135   | >GNAS_NM_YEEFDYKT    | 688   | 553   |

|                       |       |                       |       |       |
|-----------------------|-------|-----------------------|-------|-------|
| >GNAS_NM_ YEEFFDYET   | 286   | >GNAS_NM_ YEEFFDYKT   | 699   | 413   |
| >GNAS_NM_ YEEFFDYET   | 451   | >GNAS_NM_ YEEFFDYKT   | 288   | 163   |
| >GNAS_NM_ EYEEFFDYK   | 20981 | >GNAS_NM_ EYEEFFDYK   | 201   | 20780 |
| >GNAS_NM_ EYEEFFDYK   | 12356 | >GNAS_NM_ EYEEFFDYK   | 108   | 12248 |
| >GNAS_NM_ LEYEEFFDYET | 267   | >GNAS_NM_ LEYEEFFDYKT | 396   | 129   |
| >GNAS_NM_ LEYEEFFDYET | 118   | >GNAS_NM_ LEYEEFFDYKT | 408   | 290   |
| >GNAS_NM_ LEYEEFFDYET | 420   | >GNAS_NM_ LEYEEFFDYKT | 302   | 118   |
| >GNAS_NM_ EEADLELSL   | 501   | >GNAS_NM_ DEADLELSL   | 443   | 58    |
| >GNAS_NM_ EEADLELSL   | 948   | >GNAS_NM_ DEADLELSL   | 19    | 929   |
| >GNAS_NM_ EEADLELSLPE | 4288  | >GNAS_NM_ DEADLELSLPE | 101   | 4187  |
| >GNAS_NM_ EEADLELSL   | 89    | >GNAS_NM_ DEADLELSL   | 594   | 505   |
| >GNAS_NM_ EEADLELSL   | 122   | >GNAS_NM_ DEADLELSL   | 1277  | 1155  |
| >GNAS_NM_ EEADLELSL   | 296   | >GNAS_NM_ DEADLELSL   | 1467  | 1171  |
| >GNAS_NM_ HEEADLELSL  | 319   | >GNAS_NM_ HDEADLELSL  | 2793  | 2474  |
| >GNAS_NM_ HEEADLEL    | 9     | >GNAS_NM_ HDEADLEL    | 7603  | 7594  |
| >GNAS_NM_ HEEADLEL    | 225   | >GNAS_NM_ HDEADLEL    | 3100  | 2875  |
| >GNAS_NM_ HEEADLELSL  | 129   | >GNAS_NM_ HDEADLELSL  | 16038 | 15909 |
| >GNAS_NM_ EHEEADLEL   | 277   | >GNAS_NM_ EHDEADLEL   | 137   | 140   |
| >GNAS_NM_ EHEEADLELSI | 78    | >GNAS_NM_ EHDEADLELS  | 45    | 33    |
| >GNAS_NM_ HEHEEADL    | 186   | >GNAS_NM_ HEHDEADL    | 326   | 140   |
| >GNAS_NM_ HEHEEADLEL  | 274   | >GNAS_NM_ HEHDEADLEL  | 607   | 333   |
| >GNAS_NM_ HEHEEADLEL  | 461   | >GNAS_NM_ HEHDEADLEL  | 784   | 323   |
| >GNAS_NM_ HEHEEADL    | 35    | >GNAS_NM_ HEHDEADL    | 31    | 4     |
| >GNAS_NM_ HEHEEADL    | 196   | >GNAS_NM_ HEHDEADL    | 284   | 88    |
| >GNAS_NM_ HEHEEADLEL  | 243   | >GNAS_NM_ HEHDEADLEL  | 252   | 9     |
| >GNAS_NM_ HEHEEADLEL  | 429   | >GNAS_NM_ HEHDEADLEL  | 566   | 137   |
| >GNAS_NM_ SESDHEHEEA  | 160   | >GNAS_NM_ SESDHEHEEA  | 153   | 7     |
| >GNAS_NM_ NARAQQRA    | 1018  | >GNAS_NM_ KARAQQRA    | 6     | 1012  |
| >GNAS_NM_ NARAQQRAA   | 408   | >GNAS_NM_ KARAQQRAA   | 4     | 404   |
| >GNAS_NM_ NARAQQRAA   | 174   | >GNAS_NM_ KARAQQRAA   | 4     | 170   |
| >GNAS_NM_ NARAQQRAA   | 3424  | >GNAS_NM_ KARAQQRAA   | 13    | 3411  |
| >GNAS_NM_ NARAQQRAA   | 1977  | >GNAS_NM_ KARAQQRAA   | 361   | 1616  |
| >GNAS_NM_ IALLRALATSN | 20817 | >GNAS_NM_ IALLRALATSK | 263   | 20554 |
| >GNAS_NM_ IALLRALATSN | 25286 | >GNAS_NM_ IALLRALATSK | 146   | 25140 |
| >GNAS_NM_ TSNARAQQR   | 3794  | >GNAS_NM_ TSKARAQQR/  | 166   | 3628  |
| >GNAS_NM_ TSNARAQQR   | 3367  | >GNAS_NM_ TSKARAQQR/  | 118   | 3249  |
| >GNAS_NM_ TSNARAQQR   | 53    | >GNAS_NM_ TSKARAQQR   | 39    | 14    |
| >GNAS_NM_ TSNARAQQR   | 55    | >GNAS_NM_ TSKARAQQR   | 90    | 35    |
| >GNAS_NM_ ATSNARAQQ   | 72    | >GNAS_NM_ ATSKARAQQI  | 171   | 99    |
| >GNAS_NM_ ATSNARAQQ   | 228   | >GNAS_NM_ ATSKARAQQI  | 195   | 33    |
| >GNAS_NM_ ATSNARAQQ   | 89    | >GNAS_NM_ ATSKARAQQI  | 83    | 6     |
| >GNAS_NM_ ATSNARAQQ   | 65    | >GNAS_NM_ ATSKARAQQI  | 131   | 66    |
| >GNAS_NM_ ATSNARAQQ   | 412   | >GNAS_NM_ ATSKARAQQI  | 534   | 122   |

|                     |       |                      |      |       |
|---------------------|-------|----------------------|------|-------|
| >GNAS_NM_LATSNARAQC | 59    | >GNAS_NM_LATSKARAQC  | 114  | 55    |
| >GNAS_NM_ALATSNARA  | 234   | >GNAS_NM_ALATSKARA   | 2144 | 1910  |
| >GNAS_NM_ALATSNARA  | 27    | >GNAS_NM_ALATSKARA   | 213  | 186   |
| >GNAS_NM_ALATSNARA  | 19    | >GNAS_NM_ALATSKARA   | 55   | 36    |
| >GNAS_NM_ALATSNARA  | 330   | >GNAS_NM_ALATSKARA   | 533  | 203   |
| >GNAS_NM_ALATSNARA  | 8     | >GNAS_NM_ALATSKARA   | 8    | 0     |
| >GNAS_NM_ALATSNARAC | 48    | >GNAS_NM_ALATSKARAC  | 57   | 9     |
| >GNAS_NM_ALATSNAR   | 291   | >GNAS_NM_ALATSKAR    | 307  | 16    |
| >GNAS_NM_ALATSNAR   | 332   | >GNAS_NM_ALATSKAR    | 1059 | 727   |
| >GNAS_NM_RALATSNA   | 46    | >GNAS_NM_RALATSKA    | 104  | 58    |
| >GNAS_NM_RALATSNA   | 60    | >GNAS_NM_RALATSKAR   | 163  | 103   |
| >GNAS_NM_RALATSNA   | 34    | >GNAS_NM_RALATSKARA  | 77   | 43    |
| >GNAS_NM_RALATSNA   | 17    | >GNAS_NM_RALATSKAR   | 27   | 10    |
| >GNAS_NM_RALATSNA   | 305   | >GNAS_NM_RALATSKAR   | 404  | 99    |
| >GNAS_NM_RALATSNA   | 123   | >GNAS_NM_RALATSKAR   | 113  | 10    |
| >GNAS_NM_LRALATSN   | 3192  | >GNAS_NM_LRALATSK    | 93   | 3099  |
| >GNAS_NM_LLRLATSNA  | 216   | >GNAS_NM_LLRLATSKA   | 295  | 79    |
| >GNAS_NM_LLRLATSNA  | 48    | >GNAS_NM_LLRLATSKA   | 77   | 29    |
| >GNAS_NM_LLRLATSNA  | 23    | >GNAS_NM_LLRLATSKA   | 22   | 1     |
| >GNAS_NM_LLRLATSN   | 15974 | >GNAS_NM_LLRLATSK    | 43   | 15931 |
| >GNAS_NM_LLRLATSN   | 8207  | >GNAS_NM_LLRLATSK    | 19   | 8188  |
| >GNAS_NM_LLRLATSNA  | 163   | >GNAS_NM_LLRLATSKA   | 322  | 159   |
| >GNAS_NM_LLRLATSNA  | 396   | >GNAS_NM_LLRLATSKAF  | 748  | 352   |
| >GNAS_NM_LLRLATSNA  | 64    | >GNAS_NM_LLRLATSKAF  | 106  | 42    |
| >GNAS_NM_LLRLATSNA  | 454   | >GNAS_NM_LLRLATSKAF  | 1012 | 558   |
| >GNAS_NM_ALLRALATSN | 245   | >GNAS_NM_ALLRALATSK/ | 440  | 195   |
| >GNAS_NM_ALLRALATSN | 167   | >GNAS_NM_ALLRALATSK/ | 321  | 154   |
| >GNAS_NM_ALLRALATSN | 25    | >GNAS_NM_ALLRALATSK/ | 43   | 18    |
| >GNAS_NM_ALLRALATSN | 146   | >GNAS_NM_ALLRALATSK/ | 215  | 69    |
| >GNAS_NM_ALLRALATSN | 38    | >GNAS_NM_ALLRALATSK/ | 37   | 1     |
| >GNAS_NM_ALLRALATSN | 53    | >GNAS_NM_ALLRALATSK/ | 88   | 35    |
| >GNAS_NM_ALLRALATSN | 25    | >GNAS_NM_ALLRALATSK/ | 30   | 5     |
| >GNAS_NM_ALLRALATSN | 51    | >GNAS_NM_ALLRALATSK/ | 85   | 34    |
| >GNAS_NM_ALLRALATSN | 3202  | >GNAS_NM_ALLRALATSK  | 462  | 2740  |
| >GNAS_NM_ALLRALATSN | 8     | >GNAS_NM_ALLRALATSK/ | 7    | 1     |
| >GNAS_NM_ALLRALATSN | 15944 | >GNAS_NM_ALLRALATSK  | 19   | 15925 |
| >GNAS_NM_ALLRALATSN | 32417 | >GNAS_NM_ALLRALATSK  | 40   | 32377 |
| >GNAS_NM_ALLRALATSN | 10239 | >GNAS_NM_ALLRALATSK  | 72   | 10167 |
| >GNAS_NM_RRCKPKKPTR | 132   | >GNAS_NM_CRCKPKKPTR  | 894  | 762   |
| >GNAS_NM_RRCKPKKPTR | 64    | >GNAS_NM_CRCKPKKPTR  | 1316 | 1252  |
| >GNAS_NM_RRCKPKKPTR | 156   | >GNAS_NM_CRCKPKKPTR  | 4427 | 4271  |
| >GNAS_NM_RRCKPKKPTR | 252   | >GNAS_NM_CRCKPKKPTR  | 3564 | 3312  |
| >GNAS_NM_RRCKPKKPTR | 207   | >GNAS_NM_CRCKPKKPTR  | 936  | 729   |

|                       |       |                      |       |       |
|-----------------------|-------|----------------------|-------|-------|
| >GNAS_NM_RRCKPKKPTR   | 175   | >GNAS_NM_CRCKPKKPTR  | 787   | 612   |
| >GNAS_NM_RRRCKPKK     | 11    | >GNAS_NM_RCRCKPKK    | 4     | 7     |
| >GNAS_NM_RRRCKPKKPT   | 3127  | >GNAS_NM_RCRCKPKKPT  | 415   | 2712  |
| >GNAS_NM_RRRCKPKKPT   | 365   | >GNAS_NM_RCRCKPKKPT  | 39    | 326   |
| >GNAS_NM_RRRCKPKKPT   | 2640  | >GNAS_NM_RCRCKPKKPT  | 114   | 2526  |
| >GNAS_NM_RRRCKPKK     | 72    | >GNAS_NM_RCRCKPKK    | 18705 | 18633 |
| >GNAS_NM_RRRCKPKKPT   | 204   | >GNAS_NM_RCRCKPKKPT  | 20086 | 19882 |
| >GNAS_NM_RRRCKPKK     | 22    | >GNAS_NM_RCRCKPKK    | 2881  | 2859  |
| >GNAS_NM_RRRCKPKKPT   | 50    | >GNAS_NM_RCRCKPKKPT  | 16344 | 16294 |
| >GNAS_NM_RRRCKPKKPT   | 140   | >GNAS_NM_RCRCKPKKPT  | 19560 | 19420 |
| >GNAS_NM_RRRCKPKK     | 479   | >GNAS_NM_RCRCKPKK    | 15062 | 14583 |
| >GNAS_NM_RRRCKPKKPT   | 311   | >GNAS_NM_RCRCKPKKPT  | 30545 | 30234 |
| >GNAS_NM_RRRCKPKKPT   | 507   | >GNAS_NM_RCRCKPKKPT  | 169   | 338   |
| >GNAS_NM_QRRRCKPK     | 183   | >GNAS_NM_QRCRCKPK    | 10673 | 10490 |
| >GNAS_NM_QRRRCKPKK    | 261   | >GNAS_NM_QRCRCKPKK   | 11567 | 11306 |
| >GNAS_NM_QRRRCKPKK    | 437   | >GNAS_NM_QRCRCKPKK   | 547   | 110   |
| >GNAS_NM_KQRRRCKPK    | 177   | >GNAS_NM_KQRCRCKPK   | 316   | 139   |
| >GNAS_NM_KQRRRCKPKk   | 938   | >GNAS_NM_KQRCRCKPKk  | 410   | 528   |
| >GNAS_NM_KQRRRCKP     | 221   | >GNAS_NM_KQRCRCKP    | 692   | 471   |
| >GNAS_NM_KQRRRCKPK    | 4     | >GNAS_NM_KQRCRCKPK   | 5     | 1     |
| >GNAS_NM_KQRRRCKPKk   | 4     | >GNAS_NM_KQRCRCKPKk  | 5     | 1     |
| >GNAS_NM_KQRRRCKPK    | 72    | >GNAS_NM_KQRCRCKPK   | 123   | 51    |
| >GNAS_NM_KQRRRCKPKk   | 677   | >GNAS_NM_KQRCRCKPKk  | 442   | 235   |
| >GNAS_NM_KQRRRCKPK    | 162   | >GNAS_NM_KQRCRCKPK   | 122   | 40    |
| >GNAS_NM_KEEKQRRR     | 513   | >GNAS_NM_KEEKQRCR    | 455   | 58    |
| >GNAS_NM KEPKEEKQRR   | 218   | >GNAS_NM KEPKEEKQRC  | 34011 | 33793 |
| >GNAS_NM KEPKEEKQRR   | 438   | >GNAS_NM KEPKEEKQRC  | 687   | 249   |
| >GOLGA5-E4 EMQREEIQKL | 453   | >GOLGA5-E4 QMQREEIQK | 284   | 169   |
| >GOLGA5-E4 EMQREEIQKL | 1146  | >GOLGA5-E4 QMQREEIQK | 399   | 747   |
| >GOLGA5-E4 EMQREEIQKL | 63    | >GOLGA5-E4 QMQREEIQK | 32    | 31    |
| >GOLGA5-E4 EMQREEIQK  | 1091  | >GOLGA5-E4 QMQREEIQK | 157   | 934   |
| >GOLGA5-E4 EMQREEIQK  | 483   | >GOLGA5-E4 QMQREEIQK | 4634  | 4151  |
| >GOLGA5-E4 KEMQREEIQk | 11637 | >GOLGA5-E4 KQMQREEIQ | 432   | 11205 |
| >GOLGA5-E4 KEMQREEI   | 4205  | >GOLGA5-E4 KQMQREEI  | 34    | 4171  |
| >GOLGA5-E4 KEMQREEIQk | 3819  | >GOLGA5-E4 KQMQREEIQ | 65    | 3754  |
| >GOLGA5-E4 KEMQREEIQk | 11339 | >GOLGA5-E4 KQMQREEIQ | 364   | 10975 |
| >GOLGA5-E4 KEMQREEIQk | 11379 | >GOLGA5-E4 KQMQREEIQ | 102   | 11277 |
| >GOLGA5-E4 KEMQREEI   | 1360  | >GOLGA5-E4 KQMQREEI  | 117   | 1243  |
| >GOLGA5-E4 KEMQREEI   | 3434  | >GOLGA5-E4 KQMQREEI  | 90    | 3344  |
| >GOLGA5-E4 KEMQREEIQk | 2396  | >GOLGA5-E4 KQMQREEIQ | 50    | 2346  |
| >GOLGA5-E4 KEMQREEI   | 306   | >GOLGA5-E4 KQMQREEI  | 9952  | 9646  |
| >GOLGA5-E4 KEMQREEIQk | 84    | >GOLGA5-E4 KQMQREEIQ | 5506  | 5422  |
| >GOLGA5-E4 KEMQREEI   | 94    | >GOLGA5-E4 KQMQREEI  | 8192  | 8098  |

|                        |       |                        |       |       |
|------------------------|-------|------------------------|-------|-------|
| >GOLGA5-E4 KEMQREEIQ   | 118   | >GOLGA5-E4 KQMQRREEIQ  | 8152  | 8034  |
| >GOLGA5-E4 KEMQREEI    | 358   | >GOLGA5-E4 KQMQRREEI   | 22670 | 22312 |
| >GOLGA5-E4 KEMQREEIQ   | 6482  | >GOLGA5-E4 KQMQRREEIQ  | 342   | 6140  |
| >GOLGA5-E4 KEMQREEI    | 125   | >GOLGA5-E4 KQMQRREEI   | 1326  | 1201  |
| >GOLGA5-E4 KEMQREEIQ   | 6     | >GOLGA5-E4 KQMQRREEIQ  | 809   | 803   |
| >GOLGA5-E4 MELEELRHEK  | 1721  | >GOLGA5-E4 MELEELRHEK  | 454   | 1267  |
| >GOLGA5-E4 HEKEMQREE   | 9     | >GOLGA5-E4 HEKQMQRREE  | 9     | 0     |
| >GOLGA5-E4 HEKEMQREE   | 535   | >GOLGA5-E4 HEKQMQRREE  | 473   | 62    |
| >GOLGA5-E4 HEKEMQREE   | 263   | >GOLGA5-E4 HEKQMQRREE  | 175   | 88    |
| >GOLGA5-E4 HEKEMQREE   | 75    | >GOLGA5-E4 HEKQMQRREE  | 142   | 67    |
| >GOLGA5-E4 RHEKEMQR    | 378   | >GOLGA5-E4 RHEKQMQR    | 314   | 64    |
| >GOLGA5-E4 LRHEKEMQR   | 1536  | >GOLGA5-E4 LRHEKQMQR   | 422   | 1114  |
| >GOLGA5-E4 EELRHEKEM   | 91    | >GOLGA5-E4 EELRHEKQM   | 81    | 10    |
| >GOLGA5-E4 LEELRHEKEM  | 121   | >GOLGA5-E4 LEELRHEKQM  | 111   | 10    |
| >GOLGA5-G8 GS RTPVEA   | 146   | >GOLGA5-G8 AS RTPVEA   | 22    | 124   |
| >GOLGA5-G8 GS RTPVEASH | 1588  | >GOLGA5-G8 AS RTPVEASH | 415   | 1173  |
| >GOLGA5-G8 ILAGTANVKV  | 2990  | >GOLGA5-G8 ILAGTANVKV  | 155   | 2835  |
| >GOLGA5-G8 ILAGTANVKV  | 7024  | >GOLGA5-G8 ILAGTANVKV  | 34    | 6990  |
| >GOLGA5-G8 ILAGTANVKV  | 5684  | >GOLGA5-G8 ILAGTANVKV  | 89    | 5595  |
| >GOLGA5-G8 ILAGTANVKV  | 17784 | >GOLGA5-G8 ILAGTANVKV  | 325   | 17459 |
| >GOLGA5-G8 ILAGTANVKV  | 19369 | >GOLGA5-G8 ILAGTANVKV  | 202   | 19167 |
| >GOLGA5-G8 ILAGTANVKV  | 8671  | >GOLGA5-G8 ILAGTANVKV  | 14    | 8657  |
| >GOLGA5-G8 KVGSRTPV    | 737   | >GOLGA5-G8 KVASRTPV    | 102   | 635   |
| >GOLGA5-G8 KVGSRTPV    | 945   | >GOLGA5-G8 KVASRTPV    | 71    | 874   |
| >GOLGA5-G8 KVGSRTPV    | 140   | >GOLGA5-G8 KVASRTPV    | 13    | 127   |
| >GOLGA5-G8 KVGSRTPV    | 175   | >GOLGA5-G8 KVASRTPV    | 25    | 150   |
| >GOLGA5-G8 KVGSRTPV    | 481   | >GOLGA5-G8 KVASRTPV    | 392   | 89    |
| >GOLGA5-G8 KVGSRTPV    | 381   | >GOLGA5-G8 KVASRTPV    | 166   | 215   |
| >GOLGA5-G8 KVGSRTPV    | 69    | >GOLGA5-G8 KVASRTPV    | 29    | 40    |
| >GOLGA5-G8 KVGSRTPV    | 539   | >GOLGA5-G8 KVASRTPV    | 238   | 301   |
| >GOLGA5-G8 KVGSRTPVEA  | 334   | >GOLGA5-G8 KVASRTPVEA  | 133   | 201   |
| >GOLGA5-G8 KVGSRTPV    | 3421  | >GOLGA5-G8 KVASRTPV    | 94    | 3327  |
| >GOLGA5-G8 KVGSRTPV    | 1829  | >GOLGA5-G8 KVASRTPV    | 461   | 1368  |
| >GOLGA5-G8 KVGSRTPV    | 1920  | >GOLGA5-G8 KVASRTPV    | 218   | 1702  |
| >GOLGA5-G8 VKVGSRTPV   | 44    | >GOLGA5-G8 VKVASRTPV   | 12    | 32    |
| >GOLGA5-G8 VKVGSRTPVE  | 328   | >GOLGA5-G8 VKVASRTPVE  | 90    | 238   |
| >GOLGA5-G8 NVKVGSRTPV  | 480   | >GOLGA5-G8 NVKVASRTPV  | 462   | 18    |
| >GOLGA5-G8 NVKVGSRTPV  | 1047  | >GOLGA5-G8 NVKVASRTPV  | 421   | 626   |
| >GOLGA5-G8 NVKVGSRTPV  | 286   | >GOLGA5-G8 NVKVASRTPV  | 184   | 102   |
| >GOLGA5-G8 TANVKVGSR   | 132   | >GOLGA5-G8 TANVKVASR   | 25    | 107   |
| >GOLGA5-G8 TANVKVGSR   | 657   | >GOLGA5-G8 TANVKVASR   | 161   | 496   |
| >GOLGA5-G8 TANVKVGSR   | 133   | >GOLGA5-G8 TANVKVASR   | 42    | 91    |
| >GOLGA5-G8 GTANVKVGSR  | 1855  | >GOLGA5-G8 GTANVKVASR  | 323   | 1532  |

|                      |      |                      |       |       |
|----------------------|------|----------------------|-------|-------|
| >GOLGA5-G8GTANVKVGS  | 386  | >GOLGA5-G8GTANVKVASI | 37    | 349   |
| >GOLGA5-G8GTANVKVGS  | 82   | >GOLGA5-G8GTANVKVASI | 72    | 10    |
| >GOLGA5-G8GTANVKVGS  | 338  | >GOLGA5-G8GTANVKVASI | 378   | 40    |
| >GOLGA5-L4LRSELQDM   | 617  | >GOLGA5-L4FRSELQDM   | 390   | 227   |
| >GOLGA5-L4LRSELQDM   | 844  | >GOLGA5-L4FRSELQDM   | 330   | 514   |
| >GOLGA5-L4QLRSELQDM  | 496  | >GOLGA5-L4QFRSELQDM  | 16560 | 16064 |
| >GOLGA5-L4QLRSELQDM  | 193  | >GOLGA5-L4QFRSELQDM  | 29177 | 28984 |
| >GOLGA5-L4QLRSELQDM  | 876  | >GOLGA5-L4QFRSELQDM  | 403   | 473   |
| >GOLGA5-L4QLRSELQDM  | 2069 | >GOLGA5-L4QFRSELQDM  | 303   | 1766  |
| >GOLGA5-L4IQKLMGQIHC | 732  | >GOLGA5-L4IQKLMGQIHC | 70    | 662   |
| >GOLGA5-L4IQKLMGQIHC | 223  | >GOLGA5-L4IQKLMGQIHC | 11    | 212   |
| >GOLGA5-L4HQLRSELQDM | 1834 | >GOLGA5-L4HQFRSELQDM | 186   | 1648  |
| >GOLGA5-L4HQLRSELQDM | 17   | >GOLGA5-L4HQFRSELQDM | 5     | 12    |
| >GOLGA5-L4QIHQLRSEL  | 1440 | >GOLGA5-L4QIHQFRSEL  | 160   | 1280  |
| >GOLGA5-L4QIHQLRSEL  | 892  | >GOLGA5-L4QIHQFRSEL  | 478   | 414   |
| >GOLGA5-L4QIHQLRSEL  | 923  | >GOLGA5-L4QIHQFRSEL  | 497   | 426   |
| >GOLGA5-L4GQIHQLRSEL | 387  | >GOLGA5-L4GQIHQFRSEL | 269   | 118   |
| >GOLGA5-L4GQIHQLRSEL | 91   | >GOLGA5-L4GQIHQFRSEL | 36    | 55    |
| >GOLGA5-L4GQIHQLRSEL | 600  | >GOLGA5-L4GQIHQFRSEL | 475   | 125   |
| >GOLGA5-L4MGQIHQLR   | 67   | >GOLGA5-L4MGQIHQFR   | 22    | 45    |
| >GOLGA5-L4MGQIHQLR   | 579  | >GOLGA5-L4MGQIHQFR   | 204   | 375   |
| >GOLGA5-L4MGQIHQLR   | 613  | >GOLGA5-L4MGQIHQFR   | 329   | 284   |
| >GOLGA5-L4LMGQIHQL   | 265  | >GOLGA5-L4LMGQIHQF   | 14486 | 14221 |
| >GOLGA5-L4LMGQIHQL   | 21   | >GOLGA5-L4LMGQIHQF   | 1441  | 1420  |
| >GOLGA5-L4LMGQIHQL   | 200  | >GOLGA5-L4LMGQIHQF   | 10763 | 10563 |
| >GOLGA5-L4LMGQIHQL   | 5    | >GOLGA5-L4LMGQIHQF   | 280   | 275   |
| >GOLGA5-L4LMGQIHQL   | 49   | >GOLGA5-L4LMGQIHQF   | 7671  | 7622  |
| >GOLGA5-L4LMGQIHQL   | 24   | >GOLGA5-L4LMGQIHQF   | 7970  | 7946  |
| >GOLGA5-L4LMGQIHQL   | 13   | >GOLGA5-L4LMGQIHQF   | 5678  | 5665  |
| >GOLGA5-L4LMGQIHQL   | 2    | >GOLGA5-L4LMGQIHQF   | 305   | 303   |
| >GOLGA5-L4LMGQIHQL   | 6969 | >GOLGA5-L4LMGQIHQF   | 359   | 6610  |
| >GOLGA5-L4LMGQIHQL   | 1912 | >GOLGA5-L4LMGQIHQF   | 76    | 1836  |
| >GOLGA5-L4LMGQIHQL   | 9581 | >GOLGA5-L4LMGQIHQF   | 275   | 9306  |
| >GOLGA5-L4LMGQIHQLR  | 31   | >GOLGA5-L4LMGQIHQFR  | 14    | 17    |
| >GOLGA5-L4LMGQIHQLR  | 258  | >GOLGA5-L4LMGQIHQFR  | 74    | 184   |
| >GOLGA5-L4LMGQIHQLR  | 285  | >GOLGA5-L4LMGQIHQFR  | 107   | 178   |
| >GOLGA5-L4LMGQIHQL   | 544  | >GOLGA5-L4LMGQIHQF   | 47    | 497   |
| >GOLGA5-L4LMGQIHQL   | 2411 | >GOLGA5-L4LMGQIHQF   | 83    | 2328  |
| >GOLGA5-L4LMGQIHQL   | 6125 | >GOLGA5-L4LMGQIHQF   | 349   | 5776  |
| >GOLGA5-L4LMGQIHQLR  | 72   | >GOLGA5-L4LMGQIHQFR  | 40    | 32    |
| >GOLGA5-L4KLMGQIHQL  | 9    | >GOLGA5-L4KLMGQIHQF  | 362   | 353   |
| >GOLGA5-L4KLMGQIHQL  | 552  | >GOLGA5-L4KLMGQIHQF  | 142   | 410   |
| >GOLGA5-L4KLMGQIHQL  | 2    | >GOLGA5-L4KLMGQIHQF  | 27    | 25    |

|                       |       |                       |      |       |
|-----------------------|-------|-----------------------|------|-------|
| >GOLGA5-L4:KLMGQIHQLI | 261   | >GOLGA5-L4:KLMGQIHQFI | 63   | 198   |
| >GOLGA5-L4:KLMGQIHQL  | 6     | >GOLGA5-L4:KLMGQIHQF  | 479  | 473   |
| >GOLGA5-L4:KLMGQIHQL  | 15    | >GOLGA5-L4:KLMGQIHQF  | 181  | 166   |
| >GOLGA5-L4:KLMGQIHQL  | 2     | >GOLGA5-L4:KLMGQIHQF  | 29   | 27    |
| >GOLGA5-L4:KLMGQIHQLI | 335   | >GOLGA5-L4:KLMGQIHQFI | 103  | 232   |
| >GOLGA5-L4:KLMGQIHQL  | 4     | >GOLGA5-L4:KLMGQIHQF  | 804  | 800   |
| >GOLGA5-L4:KLMGQIHQL  | 7     | >GOLGA5-L4:KLMGQIHQF  | 2829 | 2822  |
| >GOLGA5-L4:KLMGQIHQL  | 2     | >GOLGA5-L4:KLMGQIHQF  | 397  | 395   |
| >GOLGA5-L4:KLMGQIHQL  | 2     | >GOLGA5-L4:KLMGQIHQF  | 28   | 26    |
| >GOLGA5-L4:KLMGQIHQLI | 157   | >GOLGA5-L4:KLMGQIHQFI | 57   | 100   |
| >GOLGA5-L4:KLMGQIHQLI | 49    | >GOLGA5-L4:KLMGQIHQFI | 29   | 20    |
| >GOLGA5-L4:KLMGQIHQLI | 280   | >GOLGA5-L4:KLMGQIHQFI | 118  | 162   |
| >GOLGA5-L4:KLMGQIHQL  | 5651  | >GOLGA5-L4:KLMGQIHQF  | 361  | 5290  |
| >GOLGA5-L4:KLMGQIHQL  | 773   | >GOLGA5-L4:KLMGQIHQF  | 45   | 728   |
| >GOLGA5-L4:KLMGQIHQL  | 1746  | >GOLGA5-L4:KLMGQIHQF  | 400  | 1346  |
| >GOLGA5-L4:KLMGQIHQLI | 5     | >GOLGA5-L4:KLMGQIHQFI | 3    | 2     |
| >GOLGA5-L4:KLMGQIHQL  | 22    | >GOLGA5-L4:KLMGQIHQF  | 9    | 13    |
| >GOLGA5-L4:KLMGQIHQLI | 376   | >GOLGA5-L4:KLMGQIHQFI | 85   | 291   |
| >GOLGA5-L4:KLMGQIHQLI | 475   | >GOLGA5-L4:KLMGQIHQFI | 300  | 175   |
| >GOLGA5-L4:KLMGQIHQL  | 2311  | >GOLGA5-L4:KLMGQIHQF  | 115  | 2196  |
| >GOLGA5-L4:KLMGQIHQL  | 6867  | >GOLGA5-L4:KLMGQIHQF  | 412  | 6455  |
| >GOLGA5-L4:KLMGQIHQL  | 4110  | >GOLGA5-L4:KLMGQIHQF  | 111  | 3999  |
| >GOLGA5-L4:KLMGQIHQL  | 277   | >GOLGA5-L4:KLMGQIHQF  | 30   | 247   |
| >GOLGA5-L4:KLMGQIHQL  | 3857  | >GOLGA5-L4:KLMGQIHQF  | 294  | 3563  |
| >GOLGA5-L4:KLMGQIHQL  | 940   | >GOLGA5-L4:KLMGQIHQF  | 36   | 904   |
| >GOLGA5-L4:KLMGQIHQLI | 48    | >GOLGA5-L4:KLMGQIHQFI | 40   | 8     |
| >GOLGA5-L4:KLMGQIHQLI | 21    | >GOLGA5-L4:KLMGQIHQFI | 16   | 5     |
| >GOLGA5-L4:QKLMGQIHQ  | 181   | >GOLGA5-L4:QKLMGQIHQ  | 8    | 173   |
| >GOLGA5-L4:QKLMGQIHQ  | 616   | >GOLGA5-L4:QKLMGQIHQ  | 304  | 312   |
| >GPC3-D164 DDMVNELFD  | 3447  | >GPC3-D164 HDMVNELFD  | 58   | 3389  |
| >GPC3-D164 DDMVNELFD  | 5196  | >GPC3-D164 HDMVNELFD  | 176  | 5020  |
| >GPC3-D164 DDMVNELFD  | 1774  | >GPC3-D164 HDMVNELFD  | 304  | 1470  |
| >GPC3-D164 VDDMVNEL   | 14331 | >GPC3-D164 VHDMVNEL   | 410  | 13921 |
| >GPC3-D164 NVDDMVNEL  | 102   | >GPC3-D164 NVHDMVNEL  | 103  | 1     |
| >GPC3-D164 NVDDMVNEL  | 1712  | >GPC3-D164 NVHDMVNEL  | 127  | 1585  |
| >GPC3-D164 NVDDMVNEL  | 213   | >GPC3-D164 NVHDMVNEL  | 964  | 751   |
| >GPC3-D164 NVDDMVNEL  | 745   | >GPC3-D164 NVHDMVNEL  | 407  | 338   |
| >GPC3-D164 NVDDMVNEL  | 222   | >GPC3-D164 NVHDMVNEL  | 16   | 206   |
| >GPC3-D164 NVDDMVNEL  | 147   | >GPC3-D164 NVHDMVNEL  | 1417 | 1270  |
| >GPC3-D164 INVDDMVNE  | 688   | >GPC3-D164 INVHDMVNE  | 197  | 491   |
| >GPC3-D164 INVDDMVNE  | 427   | >GPC3-D164 INVHDMVNE  | 442  | 15    |
| >GPC3-D164 DINVDDMV   | 312   | >GPC3-D164 DINVHDMV   | 320  | 8     |
| >GPC3-D164 DINVDDMV   | 1305  | >GPC3-D164 DINVHDMV   | 305  | 1000  |



|                        |      |                        |       |       |
|------------------------|------|------------------------|-------|-------|
| >GPC3-D164 SDINVDDMV   | 134  | >GPC3-D164 SDINVHDMV   | 328   | 194   |
| >GPC3-D164 GSDINVDDM   | 1765 | >GPC3-D164 GSDINVHDM   | 221   | 1544  |
| >GPC3-D164 LGSDINVDDM  | 419  | >GPC3-D164 LGSDINVHDM  | 282   | 137   |
| >GPC3-D164 ILGSDINVDDI | 641  | >GPC3-D164 ILGSDINVHDI | 445   | 196   |
| >GPC3-D164 ILGSDINVDDI | 621  | >GPC3-D164 ILGSDINVHDI | 210   | 411   |
| >GPC3-D164 ILGSDINVDDI | 1020 | >GPC3-D164 ILGSDINVHDI | 296   | 724   |
| >GPC3-D164 ILGSDINVDDI | 762  | >GPC3-D164 ILGSDINVHDI | 150   | 612   |
| >GPC3-D164 ILGSDINVDDI | 398  | >GPC3-D164 ILGSDINVHDI | 37    | 361   |
| >GPC3-E317 ENVLLGLFSTI | 3506 | >GPC3-E317 KNVLLGLFSTI | 433   | 3073  |
| >GPC3-E317 MENVLLGL    | 180  | >GPC3-E317 MKNVLLGL    | 23765 | 23585 |
| >GPC3-E317 MENVLLGLF   | 42   | >GPC3-E317 MKNVLLGLF   | 5328  | 5286  |
| >GPC3-E317 MENVLLGL    | 4229 | >GPC3-E317 MKNVLLGL    | 203   | 4026  |
| >GPC3-E317 MENVLLGLF   | 1801 | >GPC3-E317 MKNVLLGLF   | 57    | 1744  |
| >GPC3-E317 MENVLLGL    | 177  | >GPC3-E317 MKNVLLGL    | 19123 | 18946 |
| >GPC3-E317 MENVLLGLF   | 41   | >GPC3-E317 MKNVLLGLF   | 11504 | 11463 |
| >GPC3-E317 MENVLLGL    | 24   | >GPC3-E317 MKNVLLGL    | 16656 | 16632 |
| >GPC3-E317 MENVLLGL    | 63   | >GPC3-E317 MKNVLLGL    | 18879 | 18816 |
| >GPC3-E317 MENVLLGLF   | 258  | >GPC3-E317 MKNVLLGLF   | 24769 | 24511 |
| >GPC3-E317 MENVLLGLFS  | 82   | >GPC3-E317 MKNVLLGLFS  | 19444 | 19362 |
| >GPC3-E317 MENVLLGLF   | 435  | >GPC3-E317 MKNVLLGLF   | 14709 | 14274 |
| >GPC3-E317 MENVLLGL    | 193  | >GPC3-E317 MKNVLLGL    | 22519 | 22326 |
| >GPC3-E317 MENVLLGLF   | 74   | >GPC3-E317 MKNVLLGLF   | 11616 | 11542 |
| >GPC3-E317 MENVLLGLFS  | 306  | >GPC3-E317 MKNVLLGLFS  | 18215 | 17909 |
| >GPC3-E317 MENVLLGLFS  | 28   | >GPC3-E317 MKNVLLGLFS  | 14466 | 14438 |
| >GPC3-E317 MENVLLGLF   | 30   | >GPC3-E317 MKNVLLGLF   | 14136 | 14106 |
| >GPC3-E317 MENVLLGLFS  | 105  | >GPC3-E317 MKNVLLGLFS  | 21067 | 20962 |
| >GPC3-E317 MENVLLGLF   | 1841 | >GPC3-E317 MKNVLLGLF   | 432   | 1409  |
| >GPC3-E317 YDMENVLL    | 111  | >GPC3-E317 YDMKNVLL    | 92    | 19    |
| >GPC3-E317 YDMENVLLG   | 351  | >GPC3-E317 YDMKNVLLG   | 1212  | 861   |
| >GPC3-E317 YDMENVLL    | 142  | >GPC3-E317 YDMKNVLL    | 477   | 335   |
| >GPC3-E317 YDMENVLLG   | 481  | >GPC3-E317 YDMKNVLLG   | 1263  | 782   |
| >GPC3-E317 YDMENVLL    | 359  | >GPC3-E317 YDMKNVLL    | 480   | 121   |
| >GPC3-E317 YDMENVLLG   | 844  | >GPC3-E317 YDMKNVLLG   | 258   | 586   |
| >GPC3-E317 YDMENVLL    | 244  | >GPC3-E317 YDMKNVLL    | 118   | 126   |
| >GPC3-E317 YDMENVLLG   | 79   | >GPC3-E317 YDMKNVLLG   | 94    | 15    |
| >GPC3-E317 YDMENVLL    | 446  | >GPC3-E317 YDMKNVLL    | 961   | 515   |
| >GPC3-E317 YDMENVLL    | 474  | >GPC3-E317 YDMKNVLL    | 558   | 84    |
| >GPC3-E317 YDMENVL     | 242  | >GPC3-E317 YDMKNVL     | 514   | 272   |
| >GPC3-E317 YDMENVLL    | 268  | >GPC3-E317 YDMKNVLL    | 679   | 411   |
| >GPC3-E317 YDMENVLLG   | 234  | >GPC3-E317 YDMKNVLLG   | 424   | 190   |
| >GPC3-E317 RIYDMENVL   | 226  | >GPC3-E317 RIYDMKNVL   | 188   | 38    |
| >GPC3-E317 RIYDMENV    | 58   | >GPC3-E317 RIYDMKNV    | 331   | 273   |
| >GPC3-E317 RIYDMENVLL  | 153  | >GPC3-E317 RIYDMKNVLL  | 340   | 187   |

|                        |       |                        |      |       |
|------------------------|-------|------------------------|------|-------|
| >GPC3-E317f RIYDMENV   | 36    | >GPC3-E317f RIYDMKNV   | 233  | 197   |
| >GPC3-E317f RIYDMENVL  | 335   | >GPC3-E317f RIYDMKNVL  | 691  | 356   |
| >GPC3-E317f RIYDMENVLL | 61    | >GPC3-E317f RIYDMKNVLL | 124  | 63    |
| >GPC3-E317f RIYDMENV   | 9     | >GPC3-E317f RIYDMKNV   | 11   | 2     |
| >GPC3-E317f RIYDMENVLL | 200   | >GPC3-E317f RIYDMKNVLL | 285  | 85    |
| >GPC3-E317f RIYDMENV   | 25    | >GPC3-E317f RIYDMKNV   | 108  | 83    |
| >GPC3-E317f RIYDMENVLL | 244   | >GPC3-E317f RIYDMKNVLL | 519  | 275   |
| >GPC3-E317f RIYDMENV   | 6     | >GPC3-E317f RIYDMKNV   | 11   | 5     |
| >GPC3-E317f RIYDMENVL  | 213   | >GPC3-E317f RIYDMKNVL  | 245  | 32    |
| >GPC3-E317f RIYDMENVLL | 103   | >GPC3-E317f RIYDMKNVLL | 106  | 3     |
| >GPC3-E317f RIYDMENV   | 89    | >GPC3-E317f RIYDMKNV   | 358  | 269   |
| >GPC3-E317f RIYDMENV   | 16    | >GPC3-E317f RIYDMKNV   | 45   | 29    |
| >GPC3-E317f RIYDMENVLL | 314   | >GPC3-E317f RIYDMKNVLL | 549  | 235   |
| >GPC3-E317f RIYDMENV   | 320   | >GPC3-E317f RIYDMKNV   | 1547 | 1227  |
| >GPC3-E317f RIYDMENV   | 5     | >GPC3-E317f RIYDMKNV   | 6    | 1     |
| >GPC3-E317f RIYDMENVL  | 47    | >GPC3-E317f RIYDMKNVL  | 46   | 1     |
| >GPC3-E317f RIYDMENVLL | 31    | >GPC3-E317f RIYDMKNVLL | 32   | 1     |
| >GPC3-E317f RIYDMENV   | 479   | >GPC3-E317f RIYDMKNV   | 754  | 275   |
| >GPC3-E317f RIYDMENVL  | 85    | >GPC3-E317f RIYDMKNVL  | 138  | 53    |
| >GPC3-E317f RIYDMENVLL | 46    | >GPC3-E317f RIYDMKNVLL | 52   | 6     |
| >GPC3-E317f RIYDMENV   | 462   | >GPC3-E317f RIYDMKNV   | 965  | 503   |
| >GPC3-E317f RIYDMENVLL | 377   | >GPC3-E317f RIYDMKNVLL | 349  | 28    |
| >GPC3-E317f RIYDMENVL  | 764   | >GPC3-E317f RIYDMKNVL  | 430  | 334   |
| >GPC3-E317f RIYDMENVLL | 417   | >GPC3-E317f RIYDMKNVLL | 873  | 456   |
| >GPC3-E317f YRIYDMENV  | 268   | >GPC3-E317f YRIYDMKNV  | 157  | 111   |
| >GPC3-E317f YRIYDMENVL | 109   | >GPC3-E317f YRIYDMKNVL | 107  | 2     |
| >GPC3-E317f YRIYDMENVL | 110   | >GPC3-E317f YRIYDMKNVL | 120  | 10    |
| >GPC3-E317f YRIYDMENV  | 490   | >GPC3-E317f YRIYDMKNV  | 359  | 131   |
| >GPC3-E317f YRIYDMENVL | 56    | >GPC3-E317f YRIYDMKNVL | 67   | 11    |
| >GPC3-E317f YRIYDMENVL | 99    | >GPC3-E317f YRIYDMKNVL | 82   | 17    |
| >GPC3-E317f YRIYDMENVL | 30    | >GPC3-E317f YRIYDMKNVL | 33   | 3     |
| >GPC3-E317f YRIYDMENVL | 49    | >GPC3-E317f YRIYDMKNVL | 79   | 30    |
| >GPC3-E317f YRIYDMENVL | 377   | >GPC3-E317f YRIYDMKNVL | 308  | 69    |
| >GPC3-E317f YRIYDMENVL | 154   | >GPC3-E317f YRIYDMKNVL | 180  | 26    |
| >GPC3-E317f YRIYDMENVL | 333   | >GPC3-E317f YRIYDMKNVL | 216  | 117   |
| >GPC3-E317f MYRIYDMEN  | 352   | >GPC3-E317f MYRIYDMKN  | 334  | 18    |
| >GPC3-E317f MYRIYDMEN  | 36    | >GPC3-E317f MYRIYDMKN  | 51   | 15    |
| >GPC3-E317f MYRIYDME   | 2541  | >GPC3-E317f MYRIYDMK   | 5    | 2536  |
| >GPC3-E317f MYRIYDMEN  | 380   | >GPC3-E317f MYRIYDMKN  | 556  | 176   |
| >GPC3-E317f MYRIYDMEN  | 114   | >GPC3-E317f MYRIYDMKN  | 34   | 80    |
| >GPC3-E317f MYRIYDMEN  | 46    | >GPC3-E317f MYRIYDMKN  | 34   | 12    |
| >GPC3-E317f MYRIYDME   | 11687 | >GPC3-E317f MYRIYDMK   | 153  | 11534 |
| >GPC3-E317f MYRIYDME   | 11386 | >GPC3-E317f MYRIYDMK   | 379  | 11007 |

|                         |       |                         |       |       |
|-------------------------|-------|-------------------------|-------|-------|
| >GPC3-E317†MYRIYDMEN    | 457   | >GPC3-E317†MYRIYDMKN    | 326   | 131   |
| >GPC3-E317†GMYRIYDME    | 27    | >GPC3-E317†GMYRIYDMK    | 99    | 72    |
| >GPC3-E317†GMYRIYDME    | 6     | >GPC3-E317†GMYRIYDMK    | 21    | 15    |
| >GPC3-E317†GMYRIYDME    | 5     | >GPC3-E317†GMYRIYDMK    | 5     | 0     |
| >GPC3-E317†GMYRIYDME    | 39    | >GPC3-E317†GMYRIYDMK    | 248   | 209   |
| >GPC3-E317†GMYRIYDME    | 2     | >GPC3-E317†GMYRIYDMK    | 4     | 2     |
| >GPC3-E317†GMYRIYDME    | 4     | >GPC3-E317†GMYRIYDMK    | 7     | 3     |
| >GPC3-E317†GMYRIYDME    | 6     | >GPC3-E317†GMYRIYDMK    | 9     | 3     |
| >GPC3-E317†GMYRIYDME    | 31    | >GPC3-E317†GMYRIYDMK    | 149   | 118   |
| >GPC3-E317†GMYRIYDME    | 5     | >GPC3-E317†GMYRIYDMK    | 6     | 1     |
| >GPC3-E317†GMYRIYDME    | 16750 | >GPC3-E317†GMYRIYDMK    | 46    | 16704 |
| >GPC3-E317†GMYRIYDME    | 17879 | >GPC3-E317†GMYRIYDMK    | 12    | 17867 |
| >GPC3-E317†GMYRIYDME    | 11797 | >GPC3-E317†GMYRIYDMK    | 283   | 11514 |
| >GPC3-E317†GMYRIYDME    | 20801 | >GPC3-E317†GMYRIYDMK    | 396   | 20405 |
| >GPC3-E317†GMYRIYDME    | 648   | >GPC3-E317†GMYRIYDMK    | 453   | 195   |
| >GPHN-I377†IINYRDGMGF   | 47    | >GPHN-I377†NINYRDGMG    | 111   | 64    |
| >GPHN-I377†IINYRDGMGF   | 278   | >GPHN-I377†NINYRDGMG    | 2055  | 1777  |
| >GPHN-I377†IINYRDGMGF   | 269   | >GPHN-I377†NINYRDGMG    | 1209  | 940   |
| >GPHN-I377†IINYRDGMGF   | 390   | >GPHN-I377†NINYRDGMG    | 880   | 490   |
| >GPHN-I377†IINYRDGMGF   | 136   | >GPHN-I377†NINYRDGMG    | 304   | 168   |
| >GPHN-I377†IINYRDGMGF   | 189   | >GPHN-I377†NINYRDGMG    | 166   | 23    |
| >GPHN-I377†IINYRDGMGF   | 129   | >GPHN-I377†NINYRDGMG    | 38    | 91    |
| >GPHN-I377†IINYRDGMGF   | 666   | >GPHN-I377†NINYRDGMG    | 67    | 599   |
| >GPHN-I377†EIINYRDGM    | 20    | >GPHN-I377†ENINYRDGM    | 2057  | 2037  |
| >GPHN-I377†EIINYRDGM    | 6     | >GPHN-I377†ENINYRDGM    | 404   | 398   |
| >GPHN-I377†EIINYRDGM    | 74    | >GPHN-I377†ENINYRDGM    | 363   | 289   |
| >GPHN-I377†EIINYRDGMC   | 186   | >GPHN-I377†ENINYRDGM    | 5123  | 4937  |
| >GPHN-I377†EIINYRDGMC   | 7     | >GPHN-I377†ENINYRDGM    | 35    | 28    |
| >GPHN-I377†EIINYRDGM    | 199   | >GPHN-I377†ENINYRDGM    | 3428  | 3229  |
| >GPHN-I377†EIINYRDGM    | 217   | >GPHN-I377†ENINYRDGM    | 7318  | 7101  |
| >GPHN-I377†LEMTPLVLTGTE | 58    | >GPHN-I377†LEMTPLVLTGTE | 18858 | 18800 |
| >GPHN-I377†LEMTPLVLTGTE | 301   | >GPHN-I377†LEMTPLVLTGTE | 9208  | 8907  |
| >GPHN-I377†LEMTPLVLTGTE | 189   | >GPHN-I377†LEMTPLVLTGTE | 12442 | 12253 |
| >GPHN-I377†LEMTPLVLTGTE | 168   | >GPHN-I377†LEMTPLVLTGTE | 3524  | 3356  |
| >GPHN-I377†LEMTPLVLTGTE | 317   | >GPHN-I377†LEMTPLVLTGTE | 1694  | 1377  |
| >GPHN-I377†LEMTPLVLTGTE | 4     | >GPHN-I377†LEMTPLVLTGTE | 766   | 762   |
| >GPHN-I377†TEIINYRDGM   | 359   | >GPHN-I377†TENINYRDGM   | 173   | 186   |
| >GPHN-I377†TEIINYRDGM   | 63    | >GPHN-I377†TENINYRDGM   | 226   | 163   |
| >GPHN-I377†GTEIINYR     | 466   | >GPHN-I377†GTENINYR     | 345   | 121   |
| >GPHN-I377†GTEIINYR     | 25    | >GPHN-I377†GTENINYR     | 27    | 2     |
| >GPHN-I377†GTEIINYR     | 27    | >GPHN-I377†GTENINYR     | 29    | 2     |
| >GPHN-I377†GTEIINYRDGI  | 82    | >GPHN-I377†GTENINYRDC   | 30    | 52    |
| >GPHN-I377†GTEIINYR     | 585   | >GPHN-I377†GTENINYR     | 448   | 137   |

|                         |       |                         |       |       |
|-------------------------|-------|-------------------------|-------|-------|
| >GPHN-I377I LGTEIINYR   | 133   | >GPHN-I377I LGTENINYR   | 633   | 500   |
| >GPHN-I377I LGTEIINYR   | 46    | >GPHN-I377I LGTENINYR   | 187   | 141   |
| >GPHN-I377I LGTEIINY    | 452   | >GPHN-I377I LGTENINY    | 375   | 77    |
| >GPHN-I377I LGTEIINYR   | 162   | >GPHN-I377I LGTENINYR   | 272   | 110   |
| >GPHN-I377I VLGTEIINY   | 447   | >GPHN-I377I VLGTENINY   | 439   | 8     |
| >GPHN-I377I VLGTEIINY   | 496   | >GPHN-I377I VLGTENINY   | 297   | 199   |
| >GPHN-I377I VLGTEIINYR  | 356   | >GPHN-I377I VLGTENINYR  | 1018  | 662   |
| >GPHN-I377I VLGTEIINY   | 42    | >GPHN-I377I VLGTENINY   | 53    | 11    |
| >GPHN-I377I VLGTEIINYR  | 49    | >GPHN-I377I VLGTENINYR  | 57    | 8     |
| >GPHN-I377I PVLGTEIINY  | 135   | >GPHN-I377I PVLGTENINY  | 352   | 217   |
| >GPHN-I377I PVLGTEIINY  | 471   | >GPHN-I377I PVLGTENINY  | 253   | 218   |
| >GPHN-I377I PVLGTEIINYR | 100   | >GPHN-I377I PVLGTENINY  | 160   | 60    |
| >GPHN-I377I TPVLGTEII   | 5920  | >GPHN-I377I TPVLGTENI   | 368   | 5552  |
| >GPHN-I377I TPVLGTEIINY | 286   | >GPHN-I377I TPVLGTENIN' | 768   | 482   |
| >GPHN-I377I TPVLGTEIINY | 20    | >GPHN-I377I TPVLGTENIN' | 20    | 0     |
| >GPHN-I377I TPVLGTEI    | 324   | >GPHN-I377I TPVLGTEN    | 19578 | 19254 |
| >GPHN-I377I TPVLGTEII   | 158   | >GPHN-I377I TPVLGTENI   | 222   | 64    |
| >GPHN-I377I TPVLGTEIINY | 43    | >GPHN-I377I TPVLGTENIN' | 40    | 3     |
| >GPHN-I377I TPVLGTEIINY | 210   | >GPHN-I377I TPVLGTENIN' | 353   | 143   |
| >GPHN-I377I MTPVLGTEII  | 439   | >GPHN-I377I MTPVLGTENI  | 390   | 49    |
| >GPHN-I377I MTPVLGTEI   | 18    | >GPHN-I377I MTPVLGTEN   | 9938  | 9920  |
| >GPHN-I377I MTPVLGTEII  | 433   | >GPHN-I377I MTPVLGTENI  | 159   | 274   |
| >GPHN-I377I MTPVLGTEI   | 17    | >GPHN-I377I MTPVLGTEN   | 2988  | 2971  |
| >GPHN-I377I MTPVLGTEII  | 7     | >GPHN-I377I MTPVLGTENI  | 14    | 7     |
| >GPHN-I377I MTPVLGTEII  | 344   | >GPHN-I377I MTPVLGTENI  | 561   | 217   |
| >GPHN-I377I MTPVLGTEI   | 66    | >GPHN-I377I MTPVLGTEN   | 35724 | 35658 |
| >GPHN-I377I MTPVLGTEII  | 454   | >GPHN-I377I MTPVLGTENI  | 1408  | 954   |
| >GPHN-I377I EMTPVLGTEI  | 122   | >GPHN-I377I EMTPVLGTEN  | 15883 | 15761 |
| >GPHN-I377I EMTPVLGTEI  | 406   | >GPHN-I377I EMTPVLGTEN  | 163   | 243   |
| >GPHN-I377I EMTPVLGTEI  | 201   | >GPHN-I377I EMTPVLGTEN  | 20550 | 20349 |
| >GPHN-I377I EMTPVLGTEI  | 547   | >GPHN-I377I EMTPVLGTEN  | 272   | 275   |
| >GPHN-I377I EMTPVLGTEI  | 770   | >GPHN-I377I EMTPVLGTEN  | 370   | 400   |
| >GPHN-I377I EMTPVLGTEI  | 143   | >GPHN-I377I EMTPVLGTEN  | 20545 | 20402 |
| >GPHN-I377I EMTPVLGTEI  | 442   | >GPHN-I377I EMTPVLGTEN  | 236   | 206   |
| >GPHN-I377I EMTPVLGTEI  | 384   | >GPHN-I377I EMTPVLGTEN  | 106   | 278   |
| >GPHN-I377I EMTPVLGTEI  | 1550  | >GPHN-I377I EMTPVLGTEN  | 363   | 1187  |
| >GPHN-P685 PRPTIIKARL   | 1505  | >GPHN-P685 LRPTIIKARL   | 449   | 1056  |
| >GPHN-P685 DPRPTIIKA    | 35297 | >GPHN-P685 DLRPTIIKA    | 274   | 35023 |
| >GPHN-P685 DPRPTIIKARL  | 32514 | >GPHN-P685 DLRPTIIKARL  | 70    | 32444 |
| >GPHN-P685 DPRPTIIK     | 9524  | >GPHN-P685 DLRPTIIK     | 183   | 9341  |
| >GPHN-P685 DPRPTIIKAR   | 4841  | >GPHN-P685 DLRPTIIKAR   | 433   | 4408  |
| >GPHN-P685 DPRPTIIKARL  | 362   | >GPHN-P685 DLRPTIIKARL  | 19266 | 18904 |
| >GPHN-P685 ALRKMQGILL   | 16983 | >GPHN-P685 ALRKMQGILL   | 378   | 16605 |

|                        |       |                        |      |       |
|------------------------|-------|------------------------|------|-------|
| >GPHN-P685 ALRKMQGILC  | 15951 | >GPHN-P685 ALRKMQGILC  | 21   | 15930 |
| >GPHN-P685 ALRKMQGILC  | 3739  | >GPHN-P685 ALRKMQGILC  | 448  | 3291  |
| >GPHN-P685 LDRPRTII    | 2482  | >GPHN-P685 LDRPRTII    | 62   | 2420  |
| >GPHN-P685 LDRPRTII    | 1092  | >GPHN-P685 LDRPRTII    | 106  | 986   |
| >GPHN-P685 ILDRPRTI    | 118   | >GPHN-P685 ILDRPRTI    | 335  | 217   |
| >GPHN-P685 ILDRPRTII   | 293   | >GPHN-P685 ILDRPRTII   | 1256 | 963   |
| >GPHN-P685 ILDRPRTIIKA | 212   | >GPHN-P685 ILDRPRTIIKA | 729  | 517   |
| >GPHN-P685 ILDRPRTII   | 411   | >GPHN-P685 ILDRPRTII   | 1343 | 932   |
| >GPHN-P685 ILDRPRTI    | 468   | >GPHN-P685 ILDRPRTI    | 1031 | 563   |
| >GPHN-P685 ILDRPRTII   | 101   | >GPHN-P685 ILDRPRTII   | 488  | 387   |
| >GPHN-P685 ILDRPRTIIKA | 338   | >GPHN-P685 ILDRPRTIIKA | 996  | 658   |
| >GPHN-P685 ILDRPRTI    | 344   | >GPHN-P685 ILDRPRTI    | 1542 | 1198  |
| >GPHN-P685 ILDRPRTI    | 9     | >GPHN-P685 ILDRPRTI    | 34   | 25    |
| >GPHN-P685 ILDRPRTII   | 52    | >GPHN-P685 ILDRPRTII   | 384  | 332   |
| >GPHN-P685 ILDRPRTIIKA | 24    | >GPHN-P685 ILDRPRTIIKA | 113  | 89    |
| >GPHN-P685 ILDRPRTI    | 64    | >GPHN-P685 ILDRPRTI    | 169  | 105   |
| >GPHN-P685 ILDRPRTII   | 143   | >GPHN-P685 ILDRPRTII   | 566  | 423   |
| >GPHN-P685 ILDRPRTIIKA | 268   | >GPHN-P685 ILDRPRTIIKA | 816  | 548   |
| >GPHN-P685 ILDRPRTI    | 32    | >GPHN-P685 ILDRPRTI    | 74   | 42    |
| >GPHN-P685 ILDRPRTII   | 178   | >GPHN-P685 ILDRPRTII   | 882  | 704   |
| >GPHN-P685 ILDRPRTIIKA | 56    | >GPHN-P685 ILDRPRTIIKA | 225  | 169   |
| >GPHN-P685 ILDRPRTI    | 136   | >GPHN-P685 ILDRPRTI    | 395  | 259   |
| >GPHN-P685 ILDRPRTIIKA | 469   | >GPHN-P685 ILDRPRTIIKA | 1267 | 798   |
| >GPHN-P685 ILDRPRTI    | 12    | >GPHN-P685 ILDRPRTI    | 46   | 34    |
| >GPHN-P685 ILDRPRTII   | 34    | >GPHN-P685 ILDRPRTII   | 330  | 296   |
| >GPHN-P685 ILDRPRTIIKA | 11    | >GPHN-P685 ILDRPRTIIKA | 66   | 55    |
| >GPHN-P685 ILDRPRTIIK  | 45    | >GPHN-P685 ILDRPRTIIK  | 70   | 25    |
| >GPHN-P685 ILDRPRTIIK  | 188   | >GPHN-P685 ILDRPRTIIK  | 170  | 18    |
| >GPHN-P685 GILDRPRTI   | 1359  | >GPHN-P685 GILDRPRTI   | 440  | 919   |
| >GPHN-P685 GILDRPRTII  | 348   | >GPHN-P685 GILDRPRTII  | 246  | 102   |
| >GPHN-P685 GILDRPRTI   | 198   | >GPHN-P685 GILDRPRTI   | 91   | 107   |
| >GPHN-P685 GILDRPRTI   | 54    | >GPHN-P685 GILDRPRTI   | 117  | 63    |
| >GPHN-P685 GILDRPRTII  | 358   | >GPHN-P685 GILDRPRTII  | 735  | 377   |
| >GPHN-P685 GILDRPRTI   | 532   | >GPHN-P685 GILDRPRTI   | 359  | 173   |
| >GPHN-P685 GILDRPRTI   | 162   | >GPHN-P685 GILDRPRTI   | 42   | 120   |
| >GPHN-P685 GILDRPRTII  | 665   | >GPHN-P685 GILDRPRTII  | 418  | 247   |
| >GPHN-P685 GILDRPRTI   | 49    | >GPHN-P685 GILDRPRTI   | 46   | 3     |
| >GPHN-P685 GILDRPRTII  | 327   | >GPHN-P685 GILDRPRTII  | 593  | 266   |
| >GPHN-P685 GILDRPRTIIK | 219   | >GPHN-P685 GILDRPRTIIK | 317  | 98    |
| >GPHN-P685 GILDRPRTIIK | 20    | >GPHN-P685 GILDRPRTIIK | 20   | 0     |
| >GPHN-P685 GILDRPRTIIK | 210   | >GPHN-P685 GILDRPRTIIK | 176  | 34    |
| >GPHN-P685 GILDRPRTI   | 1199  | >GPHN-P685 GILDRPRTI   | 445  | 754   |
| >GPHN-P685 MQGILDPRPT  | 243   | >GPHN-P685 MQGILDPRPT  | 250  | 7     |

|                        |       |                       |      |       |
|------------------------|-------|-----------------------|------|-------|
| >GPHN-P685 MQGILDPR    | 76    | >GPHN-P685 MQGILDLR   | 120  | 44    |
| >GPHN-P685 MQGILDPR    | 114   | >GPHN-P685 MQGILDLR   | 168  | 54    |
| >GPHN-P685 KMQGILDP    | 18636 | >GPHN-P685 KMQGILDL   | 51   | 18585 |
| >GPHN-P685 KMQGILDP    | 5757  | >GPHN-P685 KMQGILDL   | 63   | 5694  |
| >GPHN-P685 KMQGILDPRF  | 885   | >GPHN-P685 KMQGILDRLF | 471  | 414   |
| >GPHN-P685 KMQGILDP    | 13822 | >GPHN-P685 KMQGILDL   | 113  | 13709 |
| >GPHN-P685 KMQGILDPRF  | 484   | >GPHN-P685 KMQGILDRLF | 289  | 195   |
| >GPHN-P685 KMQGILDP    | 16209 | >GPHN-P685 KMQGILDL   | 236  | 15973 |
| >GPHN-P685 KMQGILDP    | 9924  | >GPHN-P685 KMQGILDL   | 28   | 9896  |
| >GPHN-P685 KMQGILDPRF  | 293   | >GPHN-P685 KMQGILDRLF | 339  | 46    |
| >GPHN-P685 KMQGILDP    | 15376 | >GPHN-P685 KMQGILDL   | 35   | 15341 |
| >GPHN-P685 KMQGILDP    | 16682 | >GPHN-P685 KMQGILDL   | 59   | 16623 |
| >GPHN-P685 KMQGILDP    | 22283 | >GPHN-P685 KMQGILDL   | 172  | 22111 |
| >GPHN-P685 KMQGILDP    | 14046 | >GPHN-P685 KMQGILDL   | 8    | 14038 |
| >GPHN-P685 KMQGILDPR   | 327   | >GPHN-P685 KMQGILDLR  | 299  | 28    |
| >GPHN-P685 KMQGILDPR   | 11    | >GPHN-P685 KMQGILDLR  | 12   | 1     |
| >GPHN-P685 KMQGILDP    | 2906  | >GPHN-P685 KMQGILDL   | 37   | 2869  |
| >GPHN-P685 KMQGILDPR   | 393   | >GPHN-P685 KMQGILDLR  | 2093 | 1700  |
| >GPHN-P685 KMQGILDPR   | 27    | >GPHN-P685 KMQGILDLR  | 44   | 17    |
| >GPHN-P685 RKMQGILDPI  | 170   | >GPHN-P685 RKMQGILDPI | 188  | 18    |
| >GPHN-P685 RKMQGILDP   | 769   | >GPHN-P685 RKMQGILDL  | 17   | 752   |
| >GPHN-P685 RKMQGILDPI  | 256   | >GPHN-P685 RKMQGILDPI | 1222 | 966   |
| >GPHN-P685 RKMQGILDP   | 4989  | >GPHN-P685 RKMQGILDL  | 327  | 4662  |
| >GPHN-P685 RKMQGILDP   | 19784 | >GPHN-P685 RKMQGILDL  | 445  | 19339 |
| >GPHN-P685 RKMQGILDP   | 19066 | >GPHN-P685 RKMQGILDL  | 276  | 18790 |
| >GPHN-P685 RKMQGILDP   | 1585  | >GPHN-P685 RKMQGILDL  | 69   | 1516  |
| >GPHN-P685 RKMQGILDP   | 4064  | >GPHN-P685 RKMQGILDL  | 30   | 4034  |
| >GPHN-P685 RKMQGILDPI  | 92    | >GPHN-P685 RKMQGILDPI | 227  | 135   |
| >GPHN-P685 LRKMQGILDF  | 6852  | >GPHN-P685 LRKMQGILDL | 422  | 6430  |
| >GPHN-P685 LRKMQGILDF  | 10091 | >GPHN-P685 LRKMQGILDL | 81   | 10010 |
| >GPHN-P685 LRKMQGILDF  | 10877 | >GPHN-P685 LRKMQGILDL | 349  | 10528 |
| >GPHN-P685 LRKMQGILDF  | 6067  | >GPHN-P685 LRKMQGILDL | 87   | 5980  |
| >HIP1-A949V TAGVVASTI  | 2007  | >HIP1-A949V TVGVVASTI | 377  | 1630  |
| >HIP1-A949V TAGVVASTI  | 613   | >HIP1-A949V TVGVVASTI | 309  | 304   |
| >HIP1-A949V TAGVVASTI  | 111   | >HIP1-A949V TVGVVASTI | 327  | 216   |
| >HIP1-A949V QASRGVNQA  | 17325 | >HIP1-A949V QASRGVNQA | 442  | 16883 |
| >HIP1-A949V QASRGVNQA  | 2112  | >HIP1-A949V QASRGVNQA | 123  | 1989  |
| >HIP1-A949V ATAGVVASTI | 330   | >HIP1-A949V ATGVVASTI | 666  | 336   |
| >HIP1-A949V ATAGVVAST  | 474   | >HIP1-A949V ATGVVAST  | 1328 | 854   |
| >HIP1-A949V ATAGVVASTI | 320   | >HIP1-A949V ATGVVASTI | 377  | 57    |
| >HIP1-A949V ATAGVVASTI | 125   | >HIP1-A949V ATGVVASTI | 157  | 32    |
| >HIP1-A949V ATAGVVAST  | 1434  | >HIP1-A949V ATGVVAST  | 245  | 1189  |
| >HIP1-A949V ATAGVVASTI | 892   | >HIP1-A949V ATGVVASTI | 196  | 696   |

|                        |       |                        |      |       |
|------------------------|-------|------------------------|------|-------|
| >HIP1-A949V ATAGVVASTI | 18    | >HIP1-A949V ATVGVVASTI | 18   | 0     |
| >HIP1-A949V ATAGVVAST  | 238   | >HIP1-A949V ATVGVVAST  | 899  | 661   |
| >HIP1-A949V ATAGVVASTI | 46    | >HIP1-A949V ATVGVVASTI | 57   | 11    |
| >HIP1-A949V ATAGVVASTI | 18    | >HIP1-A949V ATVGVVASTI | 11   | 7     |
| >HIP1-A949V ATAGVVASTI | 306   | >HIP1-A949V ATVGVVASTI | 593  | 287   |
| >HIP1-A949V ATAGVVASTI | 108   | >HIP1-A949V ATVGVVASTI | 232  | 124   |
| >HIP1-A949V ATAGVVASTI | 335   | >HIP1-A949V ATVGVVASTI | 1078 | 743   |
| >HIP1-A949V ATAGVVASTI | 76    | >HIP1-A949V ATVGVVASTI | 131  | 55    |
| >HIP1-A949V QATAGVVAS` | 395   | >HIP1-A949V QATVGVVAS` | 1308 | 913   |
| >HIP1-A949V QATAGVVAS` | 306   | >HIP1-A949V QATVGVVAS` | 1063 | 757   |
| >HIP1-A949V QATAGVVAS` | 325   | >HIP1-A949V QATVGVVAS` | 409  | 84    |
| >HIP1-A949V QATAGVVAS` | 165   | >HIP1-A949V QATVGVVAS` | 157  | 8     |
| >HIP1-A949V NQATAGVV   | 345   | >HIP1-A949V NQATVGVV   | 122  | 223   |
| >HIP1-A949V NQATAGVV   | 169   | >HIP1-A949V NQATVGVV   | 110  | 59    |
| >HIP1-A949V NQATAGVV   | 203   | >HIP1-A949V NQATVGVV   | 233  | 30    |
| >HIP1-A949V GVNQATAGV  | 139   | >HIP1-A949V GVNQATVGV  | 350  | 211   |
| >HIP1-A949V GVNQATAGV  | 14    | >HIP1-A949V GVNQATVGV  | 56   | 42    |
| >HIP1-A949V GVNQATAGV  | 1036  | >HIP1-A949V GVNQATVGV  | 365  | 671   |
| >HIP1-A949V GVNQATAGV  | 88    | >HIP1-A949V GVNQATVGV  | 85   | 3     |
| >HIP1-A949V GVNQATAGV  | 82    | >HIP1-A949V GVNQATVGV  | 102  | 20    |
| >HIP1-A949V GVNQATAGV  | 568   | >HIP1-A949V GVNQATVGV  | 238  | 330   |
| >HIP1-A949V GVNQATAGV  | 119   | >HIP1-A949V GVNQATVGV  | 176  | 57    |
| >HIP1-A949V GVNQATAGV  | 57    | >HIP1-A949V GVNQATVGV  | 35   | 22    |
| >HIP1-A949V GVNQATAGV  | 542   | >HIP1-A949V GVNQATVGV  | 232  | 310   |
| >HIP1-A949V GVNQATAGV  | 98    | >HIP1-A949V GVNQATVGV  | 234  | 136   |
| >HIP1-A949V GVNQATAGV  | 10    | >HIP1-A949V GVNQATVGV  | 14   | 4     |
| >HIP1-A949V GVNQATAGV  | 182   | >HIP1-A949V GVNQATVGV  | 131  | 51    |
| >HIP1-A949V GVNQATAGV  | 259   | >HIP1-A949V GVNQATVGV  | 358  | 99    |
| >HIP1-A949V GVNQATAGV  | 242   | >HIP1-A949V GVNQATVGV  | 401  | 159   |
| >HIP1-A949V ASRGNVQAT. | 8     | >HIP1-A949V ASRGNVQAT` | 11   | 3     |
| >HIP1-A949V ASRGNVQAT. | 257   | >HIP1-A949V ASRGNVQAT` | 407  | 150   |
| >HIP1-A949V ASRGNVQAT. | 1918  | >HIP1-A949V ASRGNVQAT` | 125  | 1793  |
| >HIP1-N464T NEQRYSKL   | 2709  | >HIP1-N464T TEQRYSKL   | 384  | 2325  |
| >HIP1-N464T NEQRYSKLK  | 477   | >HIP1-N464T TEQRYSKLK  | 707  | 230   |
| >HIP1-N464T NEQRYSKL   | 1542  | >HIP1-N464T TEQRYSKL   | 410  | 1132  |
| >HIP1-N464T ANEQRYSKLK | 16200 | >HIP1-N464T ATEQRYSKLK | 400  | 15800 |
| >HIP1-N464T ANEQRYSK   | 7349  | >HIP1-N464T ATEQRYSK   | 63   | 7286  |
| >HIP1-N464T ANEQRYSKLK | 12367 | >HIP1-N464T ATEQRYSKLK | 82   | 12285 |
| >HIP1-N464T ANEQRYSK   | 6276  | >HIP1-N464T ATEQRYSK   | 187  | 6089  |
| >HIP1-N464T ANEQRYSKLK | 6830  | >HIP1-N464T ATEQRYSKLK | 229  | 6601  |
| >HIP1-N464T ANEQRYSKL  | 20241 | >HIP1-N464T ATEQRYSKL  | 25   | 20216 |
| >HIP1-N464T ANEQRYSKL  | 2420  | >HIP1-N464T ATEQRYSKL  | 38   | 2382  |
| >HIP1-N464T ANEQRYSK   | 3677  | >HIP1-N464T ATEQRYSK   | 159  | 3518  |

|                         |      |                          |      |      |
|-------------------------|------|--------------------------|------|------|
| >HIP1-N464T ANEQRYSKLK  | 4260 | >HIP1-N464T ATEQRYSKLK   | 152  | 4108 |
| >HIP1-N464T ANEQRYSKL   | 6174 | >HIP1-N464T ATEQRYSKL    | 433  | 5741 |
| >HIP1-N464T QANEQRYSK   | 90   | >HIP1-N464T QATEQRYSK    | 329  | 239  |
| >HIP1-N464T QANEQRYSKI  | 245  | >HIP1-N464T QATEQRYSKL   | 810  | 565  |
| >HIP1-N464T QANEQRYSK   | 174  | >HIP1-N464T QATEQRYSK    | 792  | 618  |
| >HIP1-N464T QANEQRYSKI  | 289  | >HIP1-N464T QATEQRYSKL   | 1211 | 922  |
| >HIP1-N464T QANEQRYSK   | 395  | >HIP1-N464T QATEQRYSK    | 1987 | 1592 |
| >HIP1-N464T QANEQRYSK   | 192  | >HIP1-N464T QATEQRYSK    | 115  | 77   |
| >HIP1-N464T QANEQRYSKI  | 415  | >HIP1-N464T QATEQRYSKL   | 271  | 144  |
| >HIP1-N464T AQANEQRYSKI | 90   | >HIP1-N464T AQATEQRYSKI  | 133  | 43   |
| >HIP1-N464T AQANEQRY    | 124  | >HIP1-N464T AQATEQRY     | 146  | 22   |
| >HIP1-N464T AQANEQRY    | 96   | >HIP1-N464T AQATEQRY     | 144  | 48   |
| >HIP1-N464T AQANEQRY    | 23   | >HIP1-N464T AQATEQRY     | 27   | 4    |
| >HIP1-N464T AQANEQRYSKI | 57   | >HIP1-N464T AQATEQRYSKI  | 73   | 16   |
| >HIP1-N464T KAQANEQRY   | 85   | >HIP1-N464T KAQATEQRYSKI | 68   | 17   |
| >HIP1-N464T KAQANEQRY   | 28   | >HIP1-N464T KAQATEQRYSKI | 18   | 10   |
| >HIP1-N464T KAQANEQRY   | 207  | >HIP1-N464T KAQATEQRY    | 237  | 30   |
| >HIP1-N464T KAQANEQR    | 52   | >HIP1-N464T KAQATEQR     | 35   | 17   |
| >HIP1-N464T KAQANEQRY   | 189  | >HIP1-N464T KAQATEQRYSKI | 147  | 42   |
| >HIP1-N464T KAQANEQRY   | 16   | >HIP1-N464T KAQATEQRY    | 12   | 4    |
| >HIP1-N464T KAQANEQRY   | 187  | >HIP1-N464T KAQATEQRY    | 141  | 46   |
| >HIP1-N464T KAQANEQRY   | 135  | >HIP1-N464T KAQATEQRY    | 47   | 88   |
| >HIP1-N464T RKAQANEQR   | 328  | >HIP1-N464T RKAQATEQR'   | 217  | 111  |
| >HIP1-N464T RKAQANEQR   | 15   | >HIP1-N464T RKAQATEQR'   | 12   | 3    |
| >HIP1-N464T RKAQANEQR   | 264  | >HIP1-N464T RKAQATEQR'   | 174  | 90   |
| >HIP1-N464T RKAQANEQR   | 647  | >HIP1-N464T RKAQATEQR    | 295  | 352  |
| >HIP1-N464T IERKAQAN    | 575  | >HIP1-N464T IERKAQAT     | 218  | 357  |
| >HIP1-N464T SEIERKAQAN  | 1097 | >HIP1-N464T SEIERKAQAT   | 338  | 759  |
| >HIP1-R459K RKAQANEQR   | 328  | >HIP1-R459K KKAQANEQR    | 966  | 638  |
| >HIP1-R459K RKAQANEQR   | 15   | >HIP1-R459K KKAQANEQR    | 22   | 7    |
| >HIP1-R459K RKAQANEQR   | 264  | >HIP1-R459K KKAQANEQR    | 1876 | 1612 |
| >HIP1-R459K RKAQANEQR   | 647  | >HIP1-R459K KKAQANEQR    | 368  | 279  |
| >HIP1-R459K ERKAQANEQ   | 1224 | >HIP1-R459K EKKAQANEQ    | 242  | 982  |
| >HIP1-R459K KAQRSLSEIEF | 1099 | >HIP1-R459K KAQRSLSEIEK  | 41   | 1058 |
| >HIP1-R459K KAQRSLSEIEF | 1713 | >HIP1-R459K KAQRSLSEIEK  | 18   | 1695 |
| >HIP1-R459K KAQRSLSEIEF | 22   | >HIP1-R459K KAQRSLSEIEK  | 471  | 449  |
| >HIP1-R459K SEIERKAQA   | 163  | >HIP1-R459K SEIEKKAQA    | 186  | 23   |
| >HIP1-R459K SLSEIERKA   | 88   | >HIP1-R459K SLSEIEKKA    | 105  | 17   |
| >HIP1-R459K SLSEIERKAQA | 54   | >HIP1-R459K SLSEIEKKAQA  | 55   | 1    |
| >HIP1-R459K SLSEIERKA   | 225  | >HIP1-R459K SLSEIEKKA    | 285  | 60   |
| >HIP1-R459K SLSEIERKAQA | 53   | >HIP1-R459K SLSEIEKKAQA  | 57   | 4    |
| >HIP1-R459K SLSEIERKA   | 111  | >HIP1-R459K SLSEIEKKA    | 159  | 48   |
| >HIP1-R459K SLSEIERKAQA | 39   | >HIP1-R459K SLSEIEKKAQA  | 40   | 1    |



|                         |      |                         |       |       |
|-------------------------|------|-------------------------|-------|-------|
| >HIP1-R459K SLSEIERKA   | 90   | >HIP1-R459K SLSEIEKKA   | 71    | 19    |
| >HIP1-R459K SLSEIERKAQA | 44   | >HIP1-R459K SLSEIEKKAQA | 40    | 4     |
| >HIP1-R459K SLSEIERKAQA | 772  | >HIP1-R459K SLSEIEKKAQA | 492   | 280   |
| >HIP1-R459K SLSEIERKA   | 47   | >HIP1-R459K SLSEIEKKA   | 26    | 21    |
| >HIP1-R459K SLSEIERKAQA | 8    | >HIP1-R459K SLSEIEKKAQA | 7     | 1     |
| >HIP1-R459K SLSEIERK    | 315  | >HIP1-R459K SLSEIEKK    | 360   | 45    |
| >HIP1-R459K SLSEIERK    | 99   | >HIP1-R459K SLSEIEKK    | 101   | 2     |
| >HIP1-R459K SLSEIERK    | 472  | >HIP1-R459K SLSEIEKK    | 481   | 9     |
| >HIP1-R459K RSLSEIER    | 5463 | >HIP1-R459K RSLSEIEK    | 285   | 5178  |
| >HIP1-R459K RSLSEIER    | 371  | >HIP1-R459K RSLSEIEK    | 19    | 352   |
| >HIP1-R459K RSLSEIERK   | 47   | >HIP1-R459K RSLSEIEKK   | 45    | 2     |
| >HIP1-R459K RSLSEIER    | 1879 | >HIP1-R459K RSLSEIEK    | 27    | 1852  |
| >HIP1-R459K RSLSEIERK   | 427  | >HIP1-R459K RSLSEIEKK   | 419   | 8     |
| >HIP1-R459K RSLSEIER    | 20   | >HIP1-R459K RSLSEIEK    | 319   | 299   |
| >HIP1-R459K RSLSEIERK   | 480  | >HIP1-R459K RSLSEIEKK   | 533   | 53    |
| >HIP1-R459K RSLSEIER    | 575  | >HIP1-R459K RSLSEIEK    | 358   | 217   |
| >HIP1-R459K RSLSEIERK   | 230  | >HIP1-R459K RSLSEIEKK   | 449   | 219   |
| >HIP1-R459K RSLSEIER    | 231  | >HIP1-R459K RSLSEIEK    | 5353  | 5122  |
| >HIP1-R459K AQRSLSEIER  | 8096 | >HIP1-R459K AQRSLSEIEK  | 487   | 7609  |
| >HIP1-R459K AQRSLSEIER  | 2837 | >HIP1-R459K AQRSLSEIEK  | 193   | 2644  |
| >HIP1-R459K AQRSLSEIER  | 1003 | >HIP1-R459K AQRSLSEIEK  | 16    | 987   |
| >HIP1-R459K AQRSLSEIERK | 133  | >HIP1-R459K AQRSLSEIEKK | 131   | 2     |
| >HIP1-R459K AQRSLSEIER  | 186  | >HIP1-R459K AQRSLSEIEK  | 2937  | 2751  |
| >HIP1-R459K AQRSLSEIER  | 128  | >HIP1-R459K AQRSLSEIEK  | 160   | 32    |
| >HLF-R196G- RKRKFSEELK  | 61   | >HLF-R196G- GKRKFSEELI  | 1999  | 1938  |
| >HLF-R196G- RKRKFSEE    | 395  | >HLF-R196G- GKRKFSEE    | 3537  | 3142  |
| >HLF-R196G- RKRKFSEEE   | 460  | >HLF-R196G- GKRKFSEEE   | 3803  | 3343  |
| >HLF-R196G- RKRKFSEEEL  | 10   | >HLF-R196G- GKRKFSEEEL  | 85    | 75    |
| >HLF-R196G- RKRKFSEELK  | 232  | >HLF-R196G- GKRKFSEELI  | 2264  | 2032  |
| >HLF-R196G- RKRKFSEEEL  | 228  | >HLF-R196G- GKRKFSEEEL  | 7349  | 7121  |
| >HLF-R196G- SIPGQEMFDF  | 320  | >HLF-R196G- SIPGQEMFDF  | 39081 | 38761 |
| >HLF-R196G- SIPGQEMFDF  | 76   | >HLF-R196G- SIPGQEMFDF  | 29769 | 29693 |
| >HLF-R196G- MFDPRKRKF   | 233  | >HLF-R196G- EMFDPGKRKF  | 100   | 133   |
| >HLF-R196G- EMFDPRKRK   | 445  | >HLF-R196G- EMFDPGKRK   | 746   | 301   |
| >HLF-R196G- EMFDPRKR    | 464  | >HLF-R196G- EMFDPGKR    | 1025  | 561   |
| >HLF-R196G- EMFDPRKR    | 77   | >HLF-R196G- EMFDPGKR    | 122   | 45    |
| >HLF-R196G- EMFDPRKR    | 29   | >HLF-R196G- EMFDPGKR    | 34    | 5     |
| >HLF-R196G- EMFDPRKRK   | 89   | >HLF-R196G- EMFDPGKRK   | 309   | 220   |
| >HLF-R196G- EMFDPRKRKI  | 231  | >HLF-R196G- EMFDPGKRKI  | 65    | 166   |
| >HLF-R196G- EMFDPRKRKI  | 26   | >HLF-R196G- EMFDPGKRKI  | 19    | 7     |
| >HLF-R196G- EMFDPRKRKI  | 779  | >HLF-R196G- EMFDPGKRKI  | 351   | 428   |
| >HLF-R196G- EMFDPRKR    | 68   | >HLF-R196G- EMFDPGKR    | 91    | 23    |
| >HLF-R196G- QEMFDPRKR   | 293  | >HLF-R196G- QEMFDPGKR   | 237   | 56    |

|                        |     |                        |       |       |
|------------------------|-----|------------------------|-------|-------|
| >HLF-R196G- QEMFDPRKR  | 323 | >HLF-R196G- QEMFDPGKR  | 401   | 78    |
| >HLF-R196G- GQEMFDPR   | 393 | >HLF-R196G- GQEMFDPG   | 24234 | 23841 |
| >HLF-R196G- IPGQEMFDPI | 127 | >HLF-R196G- IPGQEMFDPI | 31903 | 31776 |
| >HNF1A-F26: FANRRKEEAF | 82  | >HNF1A-F26: CANRRKEEAF | 35    | 47    |
| >HNF1A-F26: FANRRKEEAF | 72  | >HNF1A-F26: CANRRKEEAF | 109   | 37    |
| >HNF1A-F26: FANRRKEEAF | 12  | >HNF1A-F26: CANRRKEEAF | 39    | 27    |
| >HNF1A-F26: FANRRKEEAF | 63  | >HNF1A-F26: CANRRKEEAF | 614   | 551   |
| >HNF1A-F26: FANRRKEEAF | 479 | >HNF1A-F26: CANRRKEEAF | 8778  | 8299  |
| >HNF1A-F26: WFANRRKEE. | 353 | >HNF1A-F26: WCANRRKEE  | 11937 | 11584 |
| >HNF1A-F26: WFANRRKEE. | 21  | >HNF1A-F26: WCANRRKEE  | 7218  | 7197  |
| >HNF1A-F26: WFANRRKEE. | 808 | >HNF1A-F26: WCANRRKEE  | 239   | 569   |
| >HNF1A-F26: LVTEVRVYNV | 304 | >HNF1A-F26: LVTEVRVYNV | 19886 | 19582 |
| >HNF1A-F26: LVTEVRVYNV | 145 | >HNF1A-F26: LVTEVRVYNV | 15265 | 15120 |
| >HNF1A-F26: NWFANRRK   | 63  | >HNF1A-F26: NWCANRRK   | 316   | 253   |
| >HNF1A-F26: NWFANRRKE  | 235 | >HNF1A-F26: NWCANRRKE  | 702   | 467   |
| >HNF1A-F26: YNWFANRR   | 189 | >HNF1A-F26: YNWCANRR   | 554   | 365   |
| >HNF1A-F26: YNWFANRR   | 153 | >HNF1A-F26: YNWCANRR   | 99    | 54    |
| >HNF1A-F26: VYNWFANR   | 13  | >HNF1A-F26: VYNWCANR   | 24    | 11    |
| >HNF1A-F26: VYNWFANRR  | 52  | >HNF1A-F26: VYNWCANRF  | 85    | 33    |
| >HNF1A-F26: VYNWFANR   | 48  | >HNF1A-F26: VYNWCANR   | 78    | 30    |
| >HNF1A-F26: VYNWFANRR  | 247 | >HNF1A-F26: VYNWCANRF  | 442   | 195   |
| >HNF1A-F26: VYNWFANRR  | 415 | >HNF1A-F26: VYNWCANRF  | 1517  | 1102  |
| >HNF1A-F26: VYNWFANR   | 21  | >HNF1A-F26: VYNWCANR   | 26    | 5     |
| >HNF1A-F26: VYNWFANRR  | 20  | >HNF1A-F26: VYNWCANRF  | 18    | 2     |
| >HNF1A-F26: RVYNWFANR  | 32  | >HNF1A-F26: RVYNWCANF  | 41    | 9     |
| >HNF1A-F26: RVYNWFANR  | 137 | >HNF1A-F26: RVYNWCANF  | 146   | 9     |
| >HNF1A-F26: RVYNWFANR  | 28  | >HNF1A-F26: RVYNWCANF  | 30    | 2     |
| >HNF1A-F26: RVYNWFANR  | 13  | >HNF1A-F26: RVYNWCANF  | 32    | 19    |
| >HNF1A-F26: RVYNWFANR  | 256 | >HNF1A-F26: RVYNWCANF  | 610   | 354   |
| >HNF1A-F26: RVYNWFANR  | 17  | >HNF1A-F26: RVYNWCANF  | 23    | 6     |
| >HNF1A-F26: RVYNWFANR  | 262 | >HNF1A-F26: RVYNWCANF  | 1102  | 840   |
| >HNF1A-F26: RVYNWFANR  | 8   | >HNF1A-F26: RVYNWCANF  | 15    | 7     |
| >HNF1A-F26: RVYNWFAN   | 468 | >HNF1A-F26: RVYNWCAN   | 2194  | 1726  |
| >HNF1A-F26: RVYNWFANR  | 5   | >HNF1A-F26: RVYNWCANF  | 10    | 5     |
| >HNF1A-F26: RVYNWFANR  | 4   | >HNF1A-F26: RVYNWCANF  | 5     | 1     |
| >HNF1A-F26: RVYNWFANR  | 38  | >HNF1A-F26: RVYNWCANF  | 76    | 38    |
| >HNF1A-F26: RVYNWFANR  | 50  | >HNF1A-F26: RVYNWCANF  | 81    | 31    |
| >HNF1A-F26: RVYNWFANR  | 39  | >HNF1A-F26: RVYNWCANF  | 51    | 12    |
| >HNF1A-F26: RVYNWFANR  | 57  | >HNF1A-F26: RVYNWCANF  | 179   | 122   |
| >HNF1A-F26: RVYNWFANR  | 390 | >HNF1A-F26: RVYNWCANF  | 476   | 86    |
| >HNF1A-F26: RVYNWFANR  | 658 | >HNF1A-F26: RVYNWCANF  | 126   | 532   |
| >HNF1A-F26: RVYNWFANR  | 289 | >HNF1A-F26: RVYNWCANF  | 1599  | 1310  |
| >HNF1A-F26: RVYNWFANR  | 34  | >HNF1A-F26: RVYNWCANF  | 74    | 40    |

|                       |       |                       |       |       |
|-----------------------|-------|-----------------------|-------|-------|
| >HNF1A-F26:RVYNWFANR  | 34    | >HNF1A-F26:RVYNWCANF  | 53    | 19    |
| >HNF1A-F26:VRVYNWFAN  | 188   | >HNF1A-F26:VRVYNWCAN  | 627   | 439   |
| >HNF1A-F26:VRVYNWFAN  | 80    | >HNF1A-F26:VRVYNWCAN  | 160   | 80    |
| >HNF1A-F26:VRVYNWFAN  | 374   | >HNF1A-F26:VRVYNWCAN  | 930   | 556   |
| >HNF1A-F26:VRVYNWFAN  | 474   | >HNF1A-F26:VRVYNWCAN  | 930   | 456   |
| >HNF1A-F26:EVRVYNWF   | 22    | >HNF1A-F26:EVRVYNWC   | 12918 | 12896 |
| >HNF1A-F26:EVRVYNWF   | 175   | >HNF1A-F26:EVRVYNWC   | 13107 | 12932 |
| >HNF1A-F26:EVRVYNWFA  | 402   | >HNF1A-F26:EVRVYNWCA  | 5153  | 4751  |
| >HNF1A-F26:EVRVYNWFA  | 28    | >HNF1A-F26:EVRVYNWCA  | 86    | 58    |
| >HNF1A-F26:EVRVYNWFA  | 8     | >HNF1A-F26:EVRVYNWCA  | 10    | 2     |
| >HNF1A-F26:EVRVYNWFA  | 9     | >HNF1A-F26:EVRVYNWCA  | 12    | 3     |
| >HNF1A-F26:EVRVYNWFA  | 205   | >HNF1A-F26:EVRVYNWCA  | 2297  | 2092  |
| >HNF1A-F26:EVRVYNWFA  | 263   | >HNF1A-F26:EVRVYNWCA  | 3031  | 2768  |
| >HNF1A-F26:EVRVYNWFA  | 444   | >HNF1A-F26:EVRVYNWCA  | 1076  | 632   |
| >HNF1A-F26:TEVRVYNWF  | 65    | >HNF1A-F26:TEVRVYNWC  | 2321  | 2256  |
| >HNF1A-F26:TEVRVYNWF  | 435   | >HNF1A-F26:TEVRVYNWC  | 2130  | 1695  |
| >HNF1A-F26:TEVRVYNWF  | 112   | >HNF1A-F26:TEVRVYNWC  | 11022 | 10910 |
| >HNF1A-F26:TEVRVYNWF  | 226   | >HNF1A-F26:TEVRVYNWC  | 1815  | 1589  |
| >HNF1A-F26:TEVRVYNWF  | 475   | >HNF1A-F26:TEVRVYNWC  | 7736  | 7261  |
| >HNF1A-F26:TEVRVYNWF  | 55    | >HNF1A-F26:TEVRVYNWC  | 2209  | 2154  |
| >HNF1A-F26:TEVRVYNWF  | 1380  | >HNF1A-F26:TEVRVYNWC  | 476   | 904   |
| >HNF1A-F26:TEVRVYNWF  | 316   | >HNF1A-F26:TEVRVYNWC  | 405   | 89    |
| >HNF1A-F26:TEVRVYNWF  | 292   | >HNF1A-F26:TEVRVYNWC  | 1617  | 1325  |
| >HNF1A-F26:TEVRVYNWF  | 85    | >HNF1A-F26:TEVRVYNWC  | 101   | 16    |
| >HNF1A-F26:VTEVRVYNW  | 246   | >HNF1A-F26:VTEVRVYNW  | 14738 | 14492 |
| >HNF1A-F26:VTEVRVYNW  | 38    | >HNF1A-F26:VTEVRVYNW  | 16995 | 16957 |
| >HNF1A-F26:VTEVRVYNW  | 177   | >HNF1A-F26:VTEVRVYNW  | 1747  | 1570  |
| >HNF1A-F26:VTEVRVYNW  | 28    | >HNF1A-F26:VTEVRVYNW  | 5696  | 5668  |
| >HNF1A-G20 GPASQQILF  | 499   | >HNF1A-G20 DPASQQILF  | 3805  | 3306  |
| >HNF1A-G20 GPASQQIL   | 168   | >HNF1A-G20 DPASQQIL   | 1985  | 1817  |
| >HNF1A-G20 GPASQQILF  | 219   | >HNF1A-G20 DPASQQILF  | 51    | 168   |
| >HNF1A-G20 GPASQQILF  | 204   | >HNF1A-G20 DPASQQILF  | 209   | 5     |
| >HNF1A-G20 GPASQQILFQ | 153   | >HNF1A-G20 DPASQQILFQ | 131   | 22    |
| >HNF1A-G20 GPASQQILF  | 105   | >HNF1A-G20 DPASQQILF  | 415   | 310   |
| >HNF1A-G20 GPASQQILF  | 363   | >HNF1A-G20 DPASQQILF  | 202   | 161   |
| >HNF1A-G20 WGPASQQI   | 133   | >HNF1A-G20 WDPASQQI   | 3264  | 3131  |
| >HNF1A-G20 WGPASQQIL  | 111   | >HNF1A-G20 WDPASQQIL  | 3646  | 3535  |
| >HNF1A-G20 WGPASQQILI | 53    | >HNF1A-G20 WDPASQQILI | 1946  | 1893  |
| >HNF1A-G20 WGPASQQIL  | 235   | >HNF1A-G20 WDPASQQIL  | 10311 | 10076 |
| >HNF1A-G20 WGPASQQILI | 183   | >HNF1A-G20 WDPASQQILI | 8047  | 7864  |
| >HNF1A-G20 WGPASQQILI | 108   | >HNF1A-G20 WDPASQQILI | 681   | 573   |
| >HNF1A-G20 WGPASQQI   | 19364 | >HNF1A-G20 WDPASQQI   | 303   | 19061 |
| >HNF1A-G20 KWGPASQQI  | 463   | >HNF1A-G20 KWDPASQQI  | 2182  | 1719  |

|                       |     |                       |      |      |
|-----------------------|-----|-----------------------|------|------|
| >HNF1A-G20 KWGPASQQI  | 87  | >HNF1A-G20 KWDPASQQI  | 514  | 427  |
| >HNF1A-G20 KWGPASQQI  | 131 | >HNF1A-G20 KWDPASQQI  | 620  | 489  |
| >HNF1A-G20 KWGPASQQI  | 59  | >HNF1A-G20 KWDPASQQI  | 255  | 196  |
| >HNF1A-G20 KWGPASQQI  | 25  | >HNF1A-G20 KWDPASQQI  | 142  | 117  |
| >HNF1A-G20 KWGPASQQI  | 103 | >HNF1A-G20 KWDPASQQI  | 674  | 571  |
| >HNF1A-G20 KWGPASQQI  | 9   | >HNF1A-G20 KWDPASQQI  | 29   | 20   |
| >HNF1A-G20 KWGPASQQI  | 327 | >HNF1A-G20 KWDPASQQI  | 344  | 17   |
| >HNF1A-G20 KWGPASQQI  | 399 | >HNF1A-G20 KWDPASQQI  | 370  | 29   |
| >HNF1A-G20 KWGPASQQI  | 288 | >HNF1A-G20 KWDPASQQI  | 266  | 22   |
| >HNF1A-G20 FKWGPASQC  | 301 | >HNF1A-G20 FKWDPASQC  | 181  | 120  |
| >HNF1A-G20 FKWGPASQ   | 346 | >HNF1A-G20 FKWDPASQ   | 201  | 145  |
| >HNF1A-G20 FKWGPASQC  | 628 | >HNF1A-G20 FKWDPASQC  | 318  | 310  |
| >HNF1A-G20 FKWGPASQC  | 26  | >HNF1A-G20 FKWDPASQC  | 15   | 11   |
| >HNF1A-G20 FKWGPASQC  | 8   | >HNF1A-G20 FKWDPASQC  | 6    | 2    |
| >HNF1A-G20 FKWGPASQC  | 50  | >HNF1A-G20 FKWDPASQC  | 72   | 22   |
| >HNF1A-G20 FKWGPASQC  | 127 | >HNF1A-G20 FKWDPASQC  | 164  | 37   |
| >HNF1A-G20 RFKWGPASQ  | 227 | >HNF1A-G20 RFKWDPASQ  | 286  | 59   |
| >HNF1A-G20 RFKWGPASQ  | 76  | >HNF1A-G20 RFKWDPASQ  | 114  | 38   |
| >HNF1A-G20 RFKWGPAS   | 265 | >HNF1A-G20 RFKWDPAS   | 1245 | 980  |
| >HNF1A-G20 RFKWGPASQ  | 167 | >HNF1A-G20 RFKWDPASQ  | 1139 | 972  |
| >HNF1A-G20 RFKWGPASQ  | 18  | >HNF1A-G20 RFKWDPASQ  | 60   | 42   |
| >HNF1A-G20 RFKWGPASQ  | 351 | >HNF1A-G20 RFKWDPASQ  | 1148 | 797  |
| >HNF1A-G20 RFKWGPASQ  | 412 | >HNF1A-G20 RFKWDPASQ  | 762  | 350  |
| >HNF1A-G20 NRFKWGPA   | 325 | >HNF1A-G20 NRFKWDPA   | 743  | 418  |
| >HNF1A-G20 NRFKWGPA   | 97  | >HNF1A-G20 NRFKWDPA   | 109  | 12   |
| >HNF1A-G20 NRFKWGPAS  | 157 | >HNF1A-G20 NRFKWDPAS  | 181  | 24   |
| >HNF1A-G20 NRFKWGPAS  | 413 | >HNF1A-G20 NRFKWDPAS  | 561  | 148  |
| >HNF1A-G20 NRFKWGPAS  | 394 | >HNF1A-G20 NRFKWDPAS  | 423  | 29   |
| >HNF1A-G20 RNRFKWGPA  | 7   | >HNF1A-G20 RNRFKWDPA  | 21   | 14   |
| >HNF1A-G20 RNRFKWGPA  | 77  | >HNF1A-G20 RNRFKWDPA  | 270  | 193  |
| >HNF1A-G20 RNRFKWGPA  | 69  | >HNF1A-G20 RNRFKWDPA  | 254  | 185  |
| >HNF1A-G20 RRNRFKWGP  | 196 | >HNF1A-G20 RRNRFKWDP  | 909  | 713  |
| >HNF1A-G20 RRNRFKWGP  | 47  | >HNF1A-G20 RRNRFKWDP  | 139  | 92   |
| >HNF1A-G20 RRNRFKWGP  | 214 | >HNF1A-G20 RRNRFKWDP  | 400  | 186  |
| >HNF1A-G20 RRNRFKWG   | 32  | >HNF1A-G20 RRNRFKWD   | 86   | 54   |
| >HNF1A-G20 RRNRFKWGP  | 353 | >HNF1A-G20 RRNRFKWDP  | 318  | 35   |
| >HNF1A-G20 RRNRFKWGP  | 176 | >HNF1A-G20 RRNRFKWDP  | 608  | 432  |
| >HNF1A-G20 RRNRFKWGP  | 222 | >HNF1A-G20 RRNRFKWDP  | 289  | 67   |
| >HNF1A-G20 RRNRFKWG   | 480 | >HNF1A-G20 RRNRFKWD   | 1207 | 727  |
| >HNF1A-G20 RRNRFKWGP  | 112 | >HNF1A-G20 RRNRFKWDP  | 779  | 667  |
| >HNF1A-G20 KGRRNRFKW  | 114 | >HNF1A-G20 KGRRNRFKW  | 763  | 649  |
| >HNF1A-G57 GIQHLQPAHF | 223 | >HNF1A-G57 DIQHLQPAHF | 5125 | 4902 |
| >HNF1A-G57 GIQHLQPAHF | 156 | >HNF1A-G57 DIQHLQPAHF | 277  | 121  |

|                        |       |                        |       |       |
|------------------------|-------|------------------------|-------|-------|
| >HNF1A-G57 GIQHLQPAHF  | 6285  | >HNF1A-G57 DIQHLQPAHF  | 251   | 6034  |
| >HNF1A-G57 GIQHLQPAHF  | 3092  | >HNF1A-G57 DIQHLQPAHF  | 282   | 2810  |
| >HNF1A-G57 AGIQHLQPA   | 27929 | >HNF1A-G57 ADIQHLQPA   | 185   | 27744 |
| >HNF1A-G57 DPAGIQHLQF  | 550   | >HNF1A-G57 DPADIQHLQF  | 432   | 118   |
| >HNF1A-G57 DPAGIQHLQF  | 64    | >HNF1A-G57 DPADIQHLQF  | 82    | 18    |
| >HNF1A-G57 SQDPAGIQHI  | 433   | >HNF1A-G57 SQDPADIQHI  | 827   | 394   |
| >HNF1A-G57 SQDPAGIQHI  | 191   | >HNF1A-G57 SQDPADIQHI  | 233   | 42    |
| >HNF1A-G57 SQDPAGIQHI  | 383   | >HNF1A-G57 SQDPADIQHI  | 918   | 535   |
| >HNF1A-G57 VPSQDPAG    | 298   | >HNF1A-G57 VPSQDPAD    | 1151  | 853   |
| >HNF1A-G57 VPSQDPAGIC  | 157   | >HNF1A-G57 VPSQDPADIC  | 81    | 76    |
| >HNF1A-G57 VPSQDPAGI   | 483   | >HNF1A-G57 VPSQDPADI   | 276   | 207   |
| >HNF1A-G57 HVPSQDPAG   | 490   | >HNF1A-G57 HVPSQDPAD   | 2181  | 1691  |
| >HNF1A-G57 LHVPSQDPAC  | 78    | >HNF1A-G57 LHVPSQDPAI  | 123   | 45    |
| >HNF1A-K15. KTQKRAALY  | 248   | >HNF1A-K15. NTQKRAALY  | 87    | 161   |
| >HNF1A-K15. KTQKRAALY  | 226   | >HNF1A-K15. NTQKRAALY  | 8279  | 8053  |
| >HNF1A-K15. KTQKRAALY  | 170   | >HNF1A-K15. NTQKRAALY  | 2868  | 2698  |
| >HNF1A-K15. KTQKRAALY  | 6116  | >HNF1A-K15. NTQKRAALY  | 123   | 5993  |
| >HNF1A-K15. KTQKRAALY  | 298   | >HNF1A-K15. NTQKRAALY  | 271   | 27    |
| >HNF1A-K15. KTQKRAAL   | 161   | >HNF1A-K15. NTQKRAAL   | 11727 | 11566 |
| >HNF1A-K15. KTQKRAALY  | 236   | >HNF1A-K15. NTQKRAALY  | 11769 | 11533 |
| >HNF1A-K15. KTQKRAALYT | 415   | >HNF1A-K15. NTQKRAALYT | 12263 | 11848 |
| >HNF1A-K15. KTQKRAALY  | 39    | >HNF1A-K15. NTQKRAALY  | 396   | 357   |
| >HNF1A-K15. KTQKRAAL   | 68    | >HNF1A-K15. NTQKRAAL   | 8605  | 8537  |
| >HNF1A-K15. KTQKRAALYT | 15    | >HNF1A-K15. NTQKRAALYT | 795   | 780   |
| >HNF1A-K15. KTQKRAALY  | 5793  | >HNF1A-K15. NTQKRAALY  | 376   | 5417  |
| >HNF1A-K15. KTQKRAALY  | 14    | >HNF1A-K15. NTQKRAALY  | 71    | 57    |
| >HNF1A-K15. KTQKRAAL   | 1214  | >HNF1A-K15. NTQKRAAL   | 307   | 907   |
| >HNF1A-K15. KTQKRAAL   | 13    | >HNF1A-K15. NTQKRAAL   | 1328  | 1315  |
| >HNF1A-K15. KTQKRAALY  | 4     | >HNF1A-K15. NTQKRAALY  | 57    | 53    |
| >HNF1A-K15. KTQKRAALYT | 8     | >HNF1A-K15. NTQKRAALYT | 36    | 28    |
| >HNF1A-K15. KTQKRAALY  | 216   | >HNF1A-K15. NTQKRAALY  | 9682  | 9466  |
| >HNF1A-K15. KTQKRAALYT | 33    | >HNF1A-K15. NTQKRAALYT | 79    | 46    |
| >HNF1A-K15. KTQKRAALY  | 171   | >HNF1A-K15. NTQKRAALY  | 15664 | 15493 |
| >HNF1A-K15. KTQKRAALYT | 11    | >HNF1A-K15. NTQKRAALYT | 240   | 229   |
| >HNF1A-K15. KTQKRAALY  | 7     | >HNF1A-K15. NTQKRAALY  | 32    | 25    |
| >HNF1A-K15. KTQKRAALYT | 159   | >HNF1A-K15. NTQKRAALYT | 1332  | 1173  |
| >HNF1A-K15. KTQKRAALY  | 240   | >HNF1A-K15. NTQKRAALY  | 454   | 214   |
| >HNF1A-K15. KTQKRAAL   | 403   | >HNF1A-K15. NTQKRAAL   | 3007  | 2604  |
| >HNF1A-K15. MKTQKRAAL  | 82    | >HNF1A-K15. MNTQKRAAL  | 43    | 39    |
| >HNF1A-K15. MKTQKRAAL  | 162   | >HNF1A-K15. MNTQKRAAL  | 4918  | 4756  |
| >HNF1A-K15. MKTQKRAAL  | 65    | >HNF1A-K15. MNTQKRAAL  | 4050  | 3985  |
| >HNF1A-K15. MKTQKRAAL  | 163   | >HNF1A-K15. MNTQKRAAL  | 2093  | 1930  |
| >HNF1A-K15. SQHLNKGTPF | 161   | >HNF1A-K15. SQHLNKGTPF | 25298 | 25137 |

|                       |       |                       |       |       |
|-----------------------|-------|-----------------------|-------|-------|
| >HNF1A-K15.SQHLNKGTPI | 58    | >HNF1A-K15.SQHLNKGTPI | 10089 | 10031 |
| >HNF1A-K15.PMKTQKRAA  | 190   | >HNF1A-K15.PMNTQKRAA  | 73    | 117   |
| >HNF1A-K15.PMKTQKRAA  | 247   | >HNF1A-K15.PMNTQKRAA  | 123   | 124   |
| >HNF1A-K15.TPMKTQKRA  | 217   | >HNF1A-K15.TPMNTQKRA  | 224   | 7     |
| >HNF1A-K15.TPMKTQKRA  | 133   | >HNF1A-K15.TPMNTQKRA  | 103   | 30    |
| >HNF1A-K15.TPMKTQKRA  | 16    | >HNF1A-K15.TPMNTQKRA  | 23    | 7     |
| >HNF1A-K15.TPMKTQKRA  | 74    | >HNF1A-K15.TPMNTQKRA  | 139   | 65    |
| >HNF1A-K15.TPMKTQKRA  | 439   | >HNF1A-K15.TPMNTQKRA  | 325   | 114   |
| >HNF1A-K15.TPMKTQKRA  | 23    | >HNF1A-K15.TPMNTQKRA  | 21    | 2     |
| >HNF1A-K15.TPMKTQKRA  | 510   | >HNF1A-K15.TPMNTQKRA  | 275   | 235   |
| >HNF1A-K15.TPMKTQKRA  | 35    | >HNF1A-K15.TPMNTQKRA  | 14    | 21    |
| >HNF1A-K15.TPMKTQKRA  | 298   | >HNF1A-K15.TPMNTQKRA  | 483   | 185   |
| >HNF1A-K15.GTPMKTQK   | 213   | >HNF1A-K15.GTPMNTQK   | 127   | 86    |
| >HNF1A-K15.GTPMKTQKR  | 1561  | >HNF1A-K15.GTPMNTQKR  | 498   | 1063  |
| >HNF1A-K15.KGTPMKTQK  | 111   | >HNF1A-K15.KGTPMNTQK  | 82    | 29    |
| >HNF1A-K15.LNKGTPMK   | 85    | >HNF1A-K15.LNKGTPMN   | 12742 | 12657 |
| >HNF1A-K15.LNKGTPMKT  | 516   | >HNF1A-K15.LNKGTPMNT  | 284   | 232   |
| >HNF1A-K15.HLNKGTPMK  | 736   | >HNF1A-K15.HLNKGTPMN  | 384   | 352   |
| >HNF1A-K15.HLNKGTPMK  | 282   | >HNF1A-K15.HLNKGTPMN  | 289   | 7     |
| >HNF1A-K15.HLNKGTPMK  | 33    | >HNF1A-K15.HLNKGTPMN  | 13071 | 13038 |
| >HNF1A-K15.HLNKGTPMK  | 288   | >HNF1A-K15.HLNKGTPMN  | 26682 | 26394 |
| >HNF1A-K15.HLNKGTPMK  | 26    | >HNF1A-K15.HLNKGTPMN  | 9682  | 9656  |
| >HNF1A-K15.HLNKGTPMK  | 340   | >HNF1A-K15.HLNKGTPMN  | 21237 | 20897 |
| >HNF1A-K27.KEEAFRHKL  | 664   | >HNF1A-K27.EEEAFRHKL  | 232   | 432   |
| >HNF1A-K27.KEEAFRHKL  | 860   | >HNF1A-K27.EEEAFRHKL  | 334   | 526   |
| >HNF1A-K27.KEEAFRHKLA | 571   | >HNF1A-K27.EEEAFRHKLA | 236   | 335   |
| >HNF1A-K27.KEEAFRHKL  | 11    | >HNF1A-K27.EEEAFRHKL  | 43    | 32    |
| >HNF1A-K27.KEEAFRHKLA | 33    | >HNF1A-K27.EEEAFRHKLA | 177   | 144   |
| >HNF1A-K27.KEEAFRHKL  | 90    | >HNF1A-K27.EEEAFRHKL  | 579   | 489   |
| >HNF1A-K27.KEEAFRHKLA | 109   | >HNF1A-K27.EEEAFRHKLA | 622   | 513   |
| >HNF1A-K27.KEEAFRHKL  | 503   | >HNF1A-K27.EEEAFRHKL  | 155   | 348   |
| >HNF1A-K27.KEEAFRHKLA | 41    | >HNF1A-K27.EEEAFRHKLA | 21    | 20    |
| >HNF1A-K27.KEEAFRHKLA | 556   | >HNF1A-K27.EEEAFRHKLA | 154   | 402   |
| >HNF1A-K27.KEEAFRHKL  | 35    | >HNF1A-K27.EEEAFRHKL  | 989   | 954   |
| >HNF1A-K27.KEEAFRHKLA | 207   | >HNF1A-K27.EEEAFRHKLA | 4832  | 4625  |
| >HNF1A-K27.RKEEAFRHKL | 14915 | >HNF1A-K27.REEEAFRHKL | 410   | 14505 |
| >HNF1A-K27.RKEEAFRHKL | 19529 | >HNF1A-K27.REEEAFRHKL | 70    | 19459 |
| >HNF1A-K27.RKEEAFRHKL | 20862 | >HNF1A-K27.REEEAFRHKL | 60    | 20802 |
| >HNF1A-K27.RKEEAFRHKL | 10871 | >HNF1A-K27.REEEAFRHKL | 34    | 10837 |
| >HNF1A-K27.RVYNWFANR  | 28    | >HNF1A-K27.RVYNWFANR  | 6660  | 6632  |
| >HNF1A-K27.RVYNWFANR  | 17    | >HNF1A-K27.RVYNWFANR  | 9811  | 9794  |
| >HNF1A-K27.RVYNWFANR  | 8     | >HNF1A-K27.RVYNWFANR  | 5146  | 5138  |
| >HNF1A-K27.RVYNWFANR  | 38    | >HNF1A-K27.RVYNWFANR  | 2037  | 1999  |

|                        |      |                        |       |       |
|------------------------|------|------------------------|-------|-------|
| >HNF1A-K27.RVYNWFANR   | 390  | >HNF1A-K27.RVYNWFANR   | 20270 | 19880 |
| >HNF1A-K27.RRKEEAFRHK  | 63   | >HNF1A-K27.RREEEAFRHK  | 6714  | 6651  |
| >HNF1A-K27.RRKEEAFRHK  | 479  | >HNF1A-K27.RREEEAFRHK  | 2860  | 2381  |
| >HNF1A-K27.RRKEEAFR    | 217  | >HNF1A-K27.RREEEAFR    | 1544  | 1327  |
| >HNF1A-K27.RRKEEAFRH   | 157  | >HNF1A-K27.RREEEAFRH   | 1319  | 1162  |
| >HNF1A-K27.RRKEEAFRHK  | 34   | >HNF1A-K27.RREEEAFRHK  | 76    | 42    |
| >HNF1A-K27.RRKEEAFRHK  | 24   | >HNF1A-K27.RREEEAFRHK  | 137   | 113   |
| >HNF1A-K27.RRKEEAFRHK  | 5478 | >HNF1A-K27.RREEEAFRHK  | 357   | 5121  |
| >HNF1A-K27.RRKEEAFR    | 910  | >HNF1A-K27.RREEEAFR    | 335   | 575   |
| >HNF1A-K27.RRKEEAFRHK  | 90   | >HNF1A-K27.RREEEAFRHK  | 196   | 106   |
| >HNF1A-K27.RRKEEAFRHK  | 56   | >HNF1A-K27.RREEEAFRHK  | 62    | 6     |
| >HNF1A-K27.RRKEEAFRHK  | 55   | >HNF1A-K27.RREEEAFRHK  | 86    | 31    |
| >HNF1A-K27.RRKEEAFRHK  | 53   | >HNF1A-K27.RREEEAFRHK  | 31    | 22    |
| >HNF1A-K27.RRKEEAFR    | 138  | >HNF1A-K27.RREEEAFR    | 192   | 54    |
| >HNF1A-K27.NRRKEEAF    | 81   | >HNF1A-K27.NRREEEAF    | 87    | 6     |
| >HNF1A-K27.ANRRKEEAF   | 143  | >HNF1A-K27.ANRREEEAF   | 64    | 79    |
| >HNF1A-K27.FANRRKEEAF  | 82   | >HNF1A-K27.FANRREEEAF  | 199   | 117   |
| >HNF1A-K27.FANRRKEEAF  | 72   | >HNF1A-K27.FANRREEEAF  | 72    | 0     |
| >HNF1A-K27.FANRRKEEAF  | 12   | >HNF1A-K27.FANRREEEAF  | 10    | 2     |
| >HNF1A-K27.FANRRKEEAF  | 63   | >HNF1A-K27.FANRREEEAF  | 39    | 24    |
| >HNF1A-K27.FANRRKEEAF  | 479  | >HNF1A-K27.FANRREEEAF  | 425   | 54    |
| >HNF1A-K27.FANRRKEEAF  | 706  | >HNF1A-K27.FANRREEEAF  | 280   | 426   |
| >HNF1A-K27.WFANRRKEE.  | 353  | >HNF1A-K27.WFANRREEE.  | 216   | 137   |
| >HNF1A-K27.WFANRRKEE.  | 21   | >HNF1A-K27.WFANRREEE.  | 14    | 7     |
| >HNF1A-K27.WFANRRKEE.  | 886  | >HNF1A-K27.WFANRREEE.  | 486   | 400   |
| >HNF1A-K27.NWFANRRK    | 63   | >HNF1A-K27.NWFANRRE    | 7002  | 6939  |
| >HNF1A-K27.NWFANRRKE   | 235  | >HNF1A-K27.NWFANRREE   | 274   | 39    |
| >HNF1A-L26(LIQALGEPGP' | 155  | >HNF1A-L26(QIQALGEPGF  | 247   | 92    |
| >HNF1A-L26(LIQALGEPGP' | 287  | >HNF1A-L26(QIQALGEPGF  | 578   | 291   |
| >HNF1A-L26(LIQALGEPGP' | 561  | >HNF1A-L26(QIQALGEPGF  | 308   | 253   |
| >HNF1A-L26(LIQALGEPGP' | 65   | >HNF1A-L26(QIQALGEPGF  | 146   | 81    |
| >HNF1A-L26(LIQALGEPGP' | 162  | >HNF1A-L26(QIQALGEPGF  | 107   | 55    |
| >HNF1A-L26(ALIQALGEPG  | 563  | >HNF1A-L26(AQIQALGEPG  | 154   | 409   |
| >HNF1A-L26(LLESGLSKEAL | 65   | >HNF1A-L26(LLESGLSKEAC | 5387  | 5322  |
| >HNF1A-L26(LLESGLSKEAL | 190  | >HNF1A-L26(LLESGLSKEAC | 10107 | 9917  |
| >HNF1A-L26(LLESGLSKEAL | 340  | >HNF1A-L26(LLESGLSKEAC | 15925 | 15585 |
| >HNF1A-L26(LLESGLSKEAL | 11   | >HNF1A-L26(LLESGLSKEAC | 377   | 366   |
| >HNF1A-L26(KEALIQAL    | 59   | >HNF1A-L26(KEAQIQAL    | 218   | 159   |
| >HNF1A-L26(KEALIQAL    | 15   | >HNF1A-L26(KEAQIQAL    | 16    | 1     |
| >HNF1A-L26(KEALIQAL    | 42   | >HNF1A-L26(KEAQIQAL    | 48    | 6     |
| >HNF1A-L26(KEALIQAL    | 503  | >HNF1A-L26(KEAQIQAL    | 479   | 24    |
| >HNF1A-L26(KEALIQAL    | 492  | >HNF1A-L26(KEAQIQAL    | 307   | 185   |
| >HNF1A-L26(KEALIQAL    | 230  | >HNF1A-L26(KEAQIQAL    | 487   | 257   |

|                        |       |                        |       |       |
|------------------------|-------|------------------------|-------|-------|
| >HNF1A-L26(SKEALIQAL   | 568   | >HNF1A-L26(SKEAQIQAL   | 467   | 101   |
| >HNF1A-L26(SKEALIQAL   | 58    | >HNF1A-L26(SKEAQIQAL   | 92    | 34    |
| >HNF1A-L26(LSKEALIQA   | 46    | >HNF1A-L26(LSKEAQIQA   | 41    | 5     |
| >HNF1A-L26(LSKEALIQAL  | 250   | >HNF1A-L26(LSKEAQIQAL  | 168   | 82    |
| >HNF1A-L26(LSKEALIQAL  | 438   | >HNF1A-L26(LSKEAQIQAL  | 573   | 135   |
| >HNF1A-L26(LSKEALIQAL  | 353   | >HNF1A-L26(LSKEAQIQAL  | 300   | 53    |
| >HNF1A-L26(LSKEALIQAL  | 42    | >HNF1A-L26(LSKEAQIQAL  | 51    | 9     |
| >HNF1A-L26(GLSKEALI    | 46    | >HNF1A-L26(GLSKEAQI    | 84    | 38    |
| >HNF1A-L26(GLSKEALIQA  | 201   | >HNF1A-L26(GLSKEAQIQA  | 822   | 621   |
| >HNF1A-L26(GLSKEALIQAI | 17    | >HNF1A-L26(GLSKEAQIQA  | 17    | 0     |
| >HNF1A-L26(GLSKEALI    | 95    | >HNF1A-L26(GLSKEAQI    | 129   | 34    |
| >HNF1A-L26(GLSKEALIQA  | 282   | >HNF1A-L26(GLSKEAQIQA  | 3030  | 2748  |
| >HNF1A-L26(GLSKEALIQAI | 83    | >HNF1A-L26(GLSKEAQIQA  | 87    | 4     |
| >HNF1A-L26(GLSKEALI    | 396   | >HNF1A-L26(GLSKEAQI    | 203   | 193   |
| >HNF1A-L26(GLSKEALIQA  | 446   | >HNF1A-L26(GLSKEAQIQA  | 665   | 219   |
| >HNF1A-L26(GLSKEALIQAI | 111   | >HNF1A-L26(GLSKEAQIQA  | 119   | 8     |
| >HNF1A-L26(GLSKEALI    | 177   | >HNF1A-L26(GLSKEAQI    | 184   | 7     |
| >HNF1A-L26(GLSKEALIQAI | 43    | >HNF1A-L26(GLSKEAQIQA  | 33    | 10    |
| >HNF1A-L26(GLSKEALI    | 182   | >HNF1A-L26(GLSKEAQI    | 138   | 44    |
| >HNF1A-L26(GLSKEALIQA  | 142   | >HNF1A-L26(GLSKEAQIQA  | 177   | 35    |
| >HNF1A-L26(GLSKEALIQAI | 80    | >HNF1A-L26(GLSKEAQIQA  | 99    | 19    |
| >HNF1A-L26(GLSKEALI    | 67    | >HNF1A-L26(GLSKEAQI    | 34    | 33    |
| >HNF1A-L26(GLSKEALIQA  | 37    | >HNF1A-L26(GLSKEAQIQA  | 36    | 1     |
| >HNF1A-L26(GLSKEALIQAI | 14    | >HNF1A-L26(GLSKEAQIQA  | 12    | 2     |
| >HNF1A-L26(LESGLSKEAL  | 265   | >HNF1A-L26(LESGLSKEAQ  | 13091 | 12826 |
| >HNF1A-L26(LESGLSKEALI | 17    | >HNF1A-L26(LESGLSKEAQI | 30    | 13    |
| >HNF1A-L26(LESGLSKEALI | 112   | >HNF1A-L26(LESGLSKEAQI | 224   | 112   |
| >HNF1A-L26(LESGLSKEAL  | 185   | >HNF1A-L26(LESGLSKEAQ  | 2346  | 2161  |
| >HNF1A-L26(LESGLSKEAL  | 107   | >HNF1A-L26(LESGLSKEAQ  | 18307 | 18200 |
| >HNF1A-L26(LESGLSKEALI | 45    | >HNF1A-L26(LESGLSKEAQI | 56    | 11    |
| >HNF1A-N12 NIPQREVV    | 4638  | >HNF1A-N12 YIPQREVV    | 290   | 4348  |
| >HNF1A-N12 NIPQREVV    | 4499  | >HNF1A-N12 YIPQREVV    | 203   | 4296  |
| >HNF1A-N12 NIPQREVV    | 2516  | >HNF1A-N12 YIPQREVV    | 40    | 2476  |
| >HNF1A-N12 NIPQREVV    | 5682  | >HNF1A-N12 YIPQREVV    | 88    | 5594  |
| >HNF1A-N12 NIPQREVV    | 278   | >HNF1A-N12 YIPQREVV    | 7     | 271   |
| >HNF1A-N12 NIPQREVV    | 444   | >HNF1A-N12 YIPQREVV    | 559   | 115   |
| >HNF1A-N12 HNIPQREV    | 29541 | >HNF1A-N12 HYIPQREV    | 338   | 29203 |
| >HNF1A-N12 HNIPQREVV   | 20688 | >HNF1A-N12 HYIPQREVV   | 74    | 20614 |
| >HNF1A-N12 HNIPQREV    | 23501 | >HNF1A-N12 HYIPQREV    | 85    | 23416 |
| >HNF1A-N12 HNIPQREVV   | 21055 | >HNF1A-N12 HYIPQREVV   | 58    | 20997 |
| >HNF1A-N12 HNIPQREVVD  | 24245 | >HNF1A-N12 HYIPQREVVD  | 447   | 23798 |
| >HNF1A-N12 HNIPQREV    | 412   | >HNF1A-N12 HYIPQREV    | 1453  | 1041  |
| >HNF1A-N12 HNIPQREVV   | 282   | >HNF1A-N12 HYIPQREVV   | 956   | 674   |



|                        |       |                        |     |       |
|------------------------|-------|------------------------|-----|-------|
| >HNF1A-N12 KMKVKSYLEQQ | 13473 | >HNF1A-N12 KMKVKSYLEQQ | 191 | 13282 |
| >HNF1A-N12 KMKVKSYLEQQ | 17622 | >HNF1A-N12 KMKVKSYLEQQ | 48  | 17574 |
| >HNF1A-N12 KMKVKSYLEQQ | 15597 | >HNF1A-N12 KMKVKSYLEQQ | 68  | 15529 |
| >HNF1A-N12 KMKVKSYLEQQ | 18337 | >HNF1A-N12 KMKVKSYLEQQ | 23  | 18314 |
| >HNF1A-N12 KMKVKSYLEQQ | 7366  | >HNF1A-N12 KMKVKSYLEQQ | 33  | 7333  |
| >HNF1A-N12 KMKVKSYLEQQ | 1626  | >HNF1A-N12 KMKVKSYLEQQ | 6   | 1620  |
| >HNF1A-N12 KMKVKSYLEQQ | 18017 | >HNF1A-N12 KMKVKSYLEQQ | 42  | 17975 |
| >HNF1A-N12 KMKVKSYLEQQ | 9804  | >HNF1A-N12 KMKVKSYLEQQ | 34  | 9770  |
| >HNF1A-N12 QHNIPQREV   | 1432  | >HNF1A-N12 QHYIPQREV   | 325 | 1107  |
| >HNF1A-N12 QHNIPQREV   | 1086  | >HNF1A-N12 QHYIPQREV   | 315 | 771   |
| >HNF1A-N12 QQHNIPQR    | 187   | >HNF1A-N12 QQHYIPQR    | 114 | 73    |
| >HNF1A-N12 QQHNIPQR    | 217   | >HNF1A-N12 QQHYIPQR    | 186 | 31    |
| >HNF1A-N12 QQHNIPQR    | 154   | >HNF1A-N12 QQHYIPQR    | 118 | 36    |
| >HNF1A-N12 QQHNIPQR    | 421   | >HNF1A-N12 QQHYIPQR    | 357 | 64    |
| >HNF1A-N12 LQQHNIPQR   | 1357  | >HNF1A-N12 LQQHYIPQR   | 390 | 967   |
| >HNF1A-N12 LQQHNIPQR   | 589   | >HNF1A-N12 LQQHYIPQR   | 295 | 294   |
| >HNF1A-N12 LQQHNIPQR   | 196   | >HNF1A-N12 LQQHYIPQR   | 95  | 101   |
| >HNF1A-N12 LQQHNIPQR   | 291   | >HNF1A-N12 LQQHYIPQR   | 184 | 107   |
| >HNF1A-N12 LQQHNIPQR   | 399   | >HNF1A-N12 LQQHYIPQR   | 783 | 384   |
| >HNF1A-N12 LQQHNIPQR   | 155   | >HNF1A-N12 LQQHYIPQR   | 33  | 122   |
| >HNF1A-N12 LQQHNIPQ    | 445   | >HNF1A-N12 LQQHYIPQ    | 369 | 76    |
| >HNF1A-N12 LQQHNIPQR   | 194   | >HNF1A-N12 LQQHYIPQR   | 131 | 63    |
| >HNF1A-N12 YLQQHNIPQ   | 764   | >HNF1A-N12 YLQQHYIPQ   | 376 | 388   |
| >HNF1A-N12 YLQQHNIPQ   | 37    | >HNF1A-N12 YLQQHYIPQ   | 20  | 17    |
| >HNF1A-N12 YLQQHNIPQ   | 265   | >HNF1A-N12 YLQQHYIPQR  | 180 | 85    |
| >HNF1A-N12 YLQQHNIPQ   | 1134  | >HNF1A-N12 YLQQHYIPQR  | 393 | 741   |
| >HNF1A-N12 YLQQHNIPQ   | 278   | >HNF1A-N12 YLQQHYIPQR  | 323 | 45    |
| >HNF1A-N12 SYLQQHNI    | 11    | >HNF1A-N12 SYLQQHYI    | 15  | 4     |
| >HNF1A-N12 SYLQQHNI    | 168   | >HNF1A-N12 SYLQQHYI    | 206 | 38    |
| >HNF1A-N12 SYLQQHNI    | 225   | >HNF1A-N12 SYLQQHYI    | 156 | 69    |
| >HNF1A-N12 SYLQQHNI    | 5     | >HNF1A-N12 SYLQQHYI    | 4   | 1     |
| >HNF1A-N12 SYLQQHNIPC  | 254   | >HNF1A-N12 SYLQQHYIPQ  | 260 | 6     |
| >HNF1A-N12 SYLQQHNIPC  | 85    | >HNF1A-N12 SYLQQHYIPQ  | 31  | 54    |
| >HNF1A-N12 SYLQQHNIPC  | 706   | >HNF1A-N12 SYLQQHYIPQ  | 244 | 462   |
| >HNF1A-N12 SYLQQHNIPC  | 523   | >HNF1A-N12 SYLQQHYIPQ  | 284 | 239   |
| >HNF1A-N12 SYLQQHNIPC  | 235   | >HNF1A-N12 SYLQQHYIPQ  | 92  | 143   |
| >HNF1A-N12 SYLQQHNIPC  | 29    | >HNF1A-N12 SYLQQHYIPQ  | 23  | 6     |
| >HNF1A-N12 SYLQQHNI    | 531   | >HNF1A-N12 SYLQQHYI    | 389 | 142   |
| >HNF1A-N12 SYLQQHNI    | 457   | >HNF1A-N12 SYLQQHYI    | 136 | 321   |
| >HNF1A-N12 KSYLQQHNI   | 1647  | >HNF1A-N12 KSYLQQHYI   | 386 | 1261  |
| >HNF1A-N12 KSYLQQHN    | 15009 | >HNF1A-N12 KSYLQQHY    | 198 | 14811 |
| >HNF1A-N12 KSYLQQHN    | 24297 | >HNF1A-N12 KSYLQQHY    | 227 | 24070 |
| >HNF1A-N12 KSYLQQHN    | 3725  | >HNF1A-N12 KSYLQQHY    | 450 | 3275  |

|                        |       |                        |     |       |
|------------------------|-------|------------------------|-----|-------|
| >HNF1A-N12 KSYLQQHNI   | 88    | >HNF1A-N12 KSYLQQHYI   | 27  | 61    |
| >HNF1A-N12 KSYLQQHNIP  | 255   | >HNF1A-N12 KSYLQQHYIP  | 148 | 107   |
| >HNF1A-N12 KSYLQQHN    | 10683 | >HNF1A-N12 KSYLQQHY    | 44  | 10639 |
| >HNF1A-N12 KSYLQQHNI   | 82    | >HNF1A-N12 KSYLQQHYI   | 246 | 164   |
| >HNF1A-N12 KSYLQQHN    | 24491 | >HNF1A-N12 KSYLQQHY    | 180 | 24311 |
| >HNF1A-N12 KSYLQQHN    | 16997 | >HNF1A-N12 KSYLQQHY    | 170 | 16827 |
| >HNF1A-N12 KSYLQQHN    | 11057 | >HNF1A-N12 KSYLQQHY    | 52  | 11005 |
| >HNF1A-N12 KSYLQQHN    | 2857  | >HNF1A-N12 KSYLQQHY    | 4   | 2853  |
| >HNF1A-N12 KSYLQQHNI   | 19    | >HNF1A-N12 KSYLQQHYI   | 22  | 3     |
| >HNF1A-N12 KSYLQQHN    | 7682  | >HNF1A-N12 KSYLQQHY    | 68  | 7614  |
| >HNF1A-N12 KSYLQQHNI   | 1189  | >HNF1A-N12 KSYLQQHYI   | 181 | 1008  |
| >HNF1A-N12 KSYLQQHN    | 2612  | >HNF1A-N12 KSYLQQHY    | 15  | 2597  |
| >HNF1A-N12 KSYLQQHNI   | 20    | >HNF1A-N12 KSYLQQHYI   | 12  | 8     |
| >HNF1A-N12 KSYLQQHNI   | 36    | >HNF1A-N12 KSYLQQHYI   | 31  | 5     |
| >HNF1A-N12 VKSYLQQHN   | 28302 | >HNF1A-N12 VKSYLQQHY   | 200 | 28102 |
| >HNF1A-N12 VKSYLQQHN   | 5244  | >HNF1A-N12 VKSYLQQHY   | 9   | 5235  |
| >HNF1A-N12 VKSYLQQHNI  | 208   | >HNF1A-N12 VKSYLQQHYI  | 230 | 22    |
| >HNF1A-N12 MVKSYLQQH   | 259   | >HNF1A-N12 MVKSYLQQH   | 66  | 193   |
| >HNF1A-N12 MVKSYLQQH   | 63    | >HNF1A-N12 MVKSYLQQH   | 38  | 25    |
| >HNF1A-N12 MVKSYLQQH   | 1529  | >HNF1A-N12 MVKSYLQQH   | 267 | 1262  |
| >HNF1A-N12 MVKSYLQQH   | 593   | >HNF1A-N12 MVKSYLQQH   | 212 | 381   |
| >HNF1A-N12 MVKSYLQQH   | 22814 | >HNF1A-N12 MVKSYLQQH   | 37  | 22777 |
| >HNF1A-N12 MVKSYLQQH   | 32491 | >HNF1A-N12 MVKSYLQQH   | 403 | 32088 |
| >HNF1A-N12 MVKSYLQQH   | 622   | >HNF1A-N12 MVKSYLQQH   | 48  | 574   |
| >HNF1A-N12 MVKSYLQQH   | 16    | >HNF1A-N12 MVKSYLQQH   | 9   | 7     |
| >HNF1A-N12 MVKSYLQQH   | 29929 | >HNF1A-N12 MVKSYLQQH   | 483 | 29446 |
| >HNF1A-N12 MVKSYLQQH   | 133   | >HNF1A-N12 MVKSYLQQH   | 48  | 85    |
| >HNF1A-N12 MVKSYLQQH   | 810   | >HNF1A-N12 MVKSYLQQH   | 373 | 437   |
| >HNF1A-N12 MVKSYLQQH   | 25026 | >HNF1A-N12 MVKSYLQQH   | 82  | 24944 |
| >HNF1A-N12 MVKSYLQQH   | 359   | >HNF1A-N12 MVKSYLQQH   | 362 | 3     |
| >HNF1A-N12 MVKSYLQQH   | 10773 | >HNF1A-N12 MVKSYLQQH   | 44  | 10729 |
| >HNF1A-N12 MVKSYLQQH   | 15208 | >HNF1A-N12 MVKSYLQQH   | 147 | 15061 |
| >HNF1A-N12 MVKSYLQQH   | 24025 | >HNF1A-N12 MVKSYLQQH   | 146 | 23879 |
| >HNF1A-N23 NRAECIQRGV  | 1002  | >HNF1A-N23 SRAECIQRGV  | 266 | 736   |
| >HNF1A-N23 EERETLVEECI | 1004  | >HNF1A-N23 EERETLVEECI | 316 | 688   |
| >HNF1A-N23 EECNRAECI   | 8     | >HNF1A-N23 EECSRAECI   | 9   | 1     |
| >HNF1A-N23 EECNRAECIQ  | 340   | >HNF1A-N23 EECSRAECIQI | 246 | 94    |
| >HNF1A-N23 EECNRAECI   | 232   | >HNF1A-N23 EECSRAECI   | 243 | 11    |
| >HNF1A-N23 EECNRAECI   | 371   | >HNF1A-N23 EECSRAECI   | 464 | 93    |
| >HNF1A-N23 VEECNRAECI  | 30    | >HNF1A-N23 VEECSRAECI  | 26  | 4     |
| >HNF1A-N23 VEECNRAECI  | 19    | >HNF1A-N23 VEECSRAECI  | 18  | 1     |
| >HNF1A-N23 TLVEECNRA   | 91    | >HNF1A-N23 TLVEECSRA   | 198 | 107   |
| >HNF1A-N23 TLVEECNRA   | 79    | >HNF1A-N23 TLVEECSRA   | 28  | 51    |

|                        |       |                        |       |       |
|------------------------|-------|------------------------|-------|-------|
| >HNF1A-N23 TLVEECNRA   | 58    | >HNF1A-N23 TLVEECSRA   | 23    | 35    |
| >HNF1A-N23 TLVEECNRAE  | 138   | >HNF1A-N23 TLVEECSRAE  | 102   | 36    |
| >HNF1A-N23 TLVEECNR    | 83    | >HNF1A-N23 TLVEECSR    | 75    | 8     |
| >HNF1A-N23 TLVEECNR    | 273   | >HNF1A-N23 TLVEECSR    | 513   | 240   |
| >HNF1A-N23 ETLVEECNR   | 55    | >HNF1A-N23 ETLVEECSR   | 50    | 5     |
| >HNF1A-N23 ETLVEECNR   | 11    | >HNF1A-N23 ETLVEECSR   | 10    | 1     |
| >HNF1A-N23 RETLVEECNR  | 114   | >HNF1A-N23 RETLVEECSR  | 114   | 0     |
| >HNF1A-P44' PVINSMGSSL | 2571  | >HNF1A-P44' LVINSMGSSL | 81    | 2490  |
| >HNF1A-P44' PVINSMGSSL | 3479  | >HNF1A-P44' LVINSMGSSL | 136   | 3343  |
| >HNF1A-P44' PVINSMGSSL | 8669  | >HNF1A-P44' LVINSMGSSL | 141   | 8528  |
| >HNF1A-P44' PVINSMGSSL | 7425  | >HNF1A-P44' LVINSMGSSL | 278   | 7147  |
| >HNF1A-P44' PVINSMGSSL | 105   | >HNF1A-P44' LVINSMGSSL | 111   | 6     |
| >HNF1A-P44' PVINSMGSSL | 7541  | >HNF1A-P44' LVINSMGSSL | 129   | 7412  |
| >HNF1A-P44' PVINSMGSSL | 6417  | >HNF1A-P44' LVINSMGSSL | 112   | 6305  |
| >HNF1A-P44' PVINSMGSSL | 7207  | >HNF1A-P44' LVINSMGSSL | 235   | 6972  |
| >HNF1A-P44' VPVINSMGSS | 243   | >HNF1A-P44' VLVINSMGSS | 34867 | 34624 |
| >HNF1A-P44' VPVINSMGSS | 25070 | >HNF1A-P44' VLVINSMGSS | 169   | 24901 |
| >HNF1A-P44' VPVINSMGSS | 20141 | >HNF1A-P44' VLVINSMGSS | 50    | 20091 |
| >HNF1A-P44' VPVINSMGSS | 23573 | >HNF1A-P44' VLVINSMGSS | 24    | 23549 |
| >HNF1A-P44' VPVINSMGSS | 22595 | >HNF1A-P44' VLVINSMGSS | 58    | 22537 |
| >HNF1A-P44' VPVINSMGSS | 25560 | >HNF1A-P44' VLVINSMGSS | 151   | 25409 |
| >HNF1A-P44' VPVINSMGSS | 25524 | >HNF1A-P44' VLVINSMGSS | 485   | 25039 |
| >HNF1A-P44' VPVINSMGSS | 29473 | >HNF1A-P44' VLVINSMGSS | 5     | 29468 |
| >HNF1A-P44' VPVINSMGSS | 19    | >HNF1A-P44' VLVINSMGSS | 5138  | 5119  |
| >HNF1A-P44' VPVINSMGSS | 2723  | >HNF1A-P44' VLVINSMGSS | 494   | 2229  |
| >HNF1A-P44' VPVINSMGSS | 273   | >HNF1A-P44' VLVINSMGSS | 11476 | 11203 |
| >HNF1A-P44' GLASTQAQS\ | 23235 | >HNF1A-P44' GLASTQAQS\ | 480   | 22755 |
| >HNF1A-P44' GLASTQAQS\ | 3259  | >HNF1A-P44' GLASTQAQS\ | 11    | 3248  |
| >HNF1A-P44' GLASTQAQS\ | 7609  | >HNF1A-P44' GLASTQAQS\ | 28    | 7581  |
| >HNF1A-P44' GLASTQAQS\ | 13992 | >HNF1A-P44' GLASTQAQS\ | 73    | 13919 |
| >HNF1A-P44' GLASTQAQS\ | 16604 | >HNF1A-P44' GLASTQAQS\ | 41    | 16563 |
| >HNF1A-P44' GLASTQAQS\ | 13511 | >HNF1A-P44' GLASTQAQS\ | 22    | 13489 |
| >HNF1A-P44' GLASTQAQS\ | 22417 | >HNF1A-P44' GLASTQAQS\ | 74    | 22343 |
| >HNF1A-P44' GLASTQAQS\ | 9402  | >HNF1A-P44' GLASTQAQS\ | 7     | 9395  |
| >HNF1A-P44' GLASTQAQS\ | 10039 | >HNF1A-P44' GLASTQAQS\ | 185   | 9854  |
| >HNF1A-P44' SVPVINSM   | 546   | >HNF1A-P44' SVLVINSM   | 362   | 184   |
| >HNF1A-P44' SVPVINSM   | 386   | >HNF1A-P44' SVLVINSM   | 2282  | 1896  |
| >HNF1A-P44' SVPVINSM   | 7472  | >HNF1A-P44' SVLVINSM   | 304   | 7168  |
| >HNF1A-P44' SVPVINSM   | 78    | >HNF1A-P44' SVLVINSM   | 12084 | 12006 |
| >HNF1A-P44' QSVPVINSM  | 474   | >HNF1A-P44' QSVLVINSM  | 706   | 232   |
| >HNF1A-P44' QSVPVINSM  | 58    | >HNF1A-P44' QSVLVINSM  | 73    | 15    |
| >HNF1A-P44' QSVPVINSM  | 281   | >HNF1A-P44' QSVLVINSM  | 1207  | 926   |
| >HNF1A-P44' QSVPVINSM  | 46    | >HNF1A-P44' QSVLVINSM  | 255   | 209   |

|                        |       |                        |      |       |
|------------------------|-------|------------------------|------|-------|
| >HNF1A-P44' QSVPVINSM  | 288   | >HNF1A-P44' QSVLVINSM  | 2239 | 1951  |
| >HNF1A-P44' QSVPVINSM  | 320   | >HNF1A-P44' QSVLVINSM  | 1050 | 730   |
| >HNF1A-P44' QSVPVINSM  | 52    | >HNF1A-P44' QSVLVINSM  | 115  | 63    |
| >HNF1A-P44' AQSVPVINSM | 83    | >HNF1A-P44' AQSVLVINSM | 74   | 9     |
| >HNF1A-P44' AQSVPVINSM | 14    | >HNF1A-P44' AQSVLVINSM | 31   | 17    |
| >HNF1A-P44' QAQSVPVINS | 417   | >HNF1A-P44' QAQSVLVINS | 634  | 217   |
| >HNF1A-P44' QAQSVPVINS | 413   | >HNF1A-P44' QAQSVLVINS | 302  | 111   |
| >HNF1A-P44' QAQSVPVI   | 155   | >HNF1A-P44' QAQSVLVI   | 157  | 2     |
| >HNF1A-P44' TQAQSVPVI  | 523   | >HNF1A-P44' TQAQSVLVI  | 352  | 171   |
| >HNF1A-P44' TQAQSVPV   | 178   | >HNF1A-P44' TQAQSVLV   | 289  | 111   |
| >HNF1A-P44' TQAQSVPV   | 177   | >HNF1A-P44' TQAQSVLV   | 134  | 43    |
| >HNF1A-P44' TQAQSVPV   | 37    | >HNF1A-P44' TQAQSVLV   | 56   | 19    |
| >HNF1A-P44' TQAQSVPVI  | 713   | >HNF1A-P44' TQAQSVLVI  | 436  | 277   |
| >HNF1A-P44' TQAQSVPV   | 10    | >HNF1A-P44' TQAQSVLV   | 13   | 3     |
| >HNF1A-P44' TQAQSVPVI  | 146   | >HNF1A-P44' TQAQSVLVI  | 257  | 111   |
| >HNF1A-P44' TQAQSVPV   | 443   | >HNF1A-P44' TQAQSVLV   | 833  | 390   |
| >HNF1A-P44' TQAQSVPV   | 190   | >HNF1A-P44' TQAQSVLV   | 318  | 128   |
| >HNF1A-P44' TQAQSVPV   | 251   | >HNF1A-P44' TQAQSVLV   | 711  | 460   |
| >HNF1A-P44' TQAQSVPV   | 224   | >HNF1A-P44' TQAQSVLV   | 1762 | 1538  |
| >HNF1A-P44' TQAQSVPVI  | 172   | >HNF1A-P44' TQAQSVLVI  | 103  | 69    |
| >HNF1A-P44' TQAQSVPV   | 109   | >HNF1A-P44' TQAQSVLV   | 471  | 362   |
| >HNF1A-P44' TQAQSVPVI  | 102   | >HNF1A-P44' TQAQSVLVI  | 66   | 36    |
| >HNF1A-P44' TQAQSVPV   | 67    | >HNF1A-P44' TQAQSVLV   | 243  | 176   |
| >HNF1A-P44' TQAQSVPVI  | 44    | >HNF1A-P44' TQAQSVLVI  | 35   | 9     |
| >HNF1A-P44' STQAQSVPV  | 455   | >HNF1A-P44' STQAQSVLV  | 945  | 490   |
| >HNF1A-P44' STQAQSVPV  | 138   | >HNF1A-P44' STQAQSVLV  | 414  | 276   |
| >HNF1A-P44' STQAQSVPV  | 208   | >HNF1A-P44' STQAQSVLV  | 401  | 193   |
| >HNF1A-P44' STQAQSVPV  | 200   | >HNF1A-P44' STQAQSVLV  | 1079 | 879   |
| >HNF1A-P44' STQAQSVPV  | 351   | >HNF1A-P44' STQAQSVLV  | 452  | 101   |
| >HNF1A-P44' STQAQSVPV  | 287   | >HNF1A-P44' STQAQSVLV  | 180  | 107   |
| >HNF1A-P44' STQAQSVPV  | 148   | >HNF1A-P44' STQAQSVLV  | 388  | 240   |
| >HNF1A-P44' STQAQSVPVI | 292   | >HNF1A-P44' STQAQSVLVI | 495  | 203   |
| >HNF1A-P44' STQAQSVPV  | 237   | >HNF1A-P44' STQAQSVLV  | 1727 | 1490  |
| >HNF1A-P44' STQAQSVPVI | 170   | >HNF1A-P44' STQAQSVLVI | 96   | 74    |
| >HNF1A-P44' STQAQSVPV  | 14    | >HNF1A-P44' STQAQSVLV  | 42   | 28    |
| >HNF1A-P44' STQAQSVPV  | 28    | >HNF1A-P44' STQAQSVLV  | 139  | 111   |
| >HNF1A-P44' STQAQSV    | 19073 | >HNF1A-P44' STQAQSVL   | 47   | 19026 |
| >HNF1A-P44' STQAQSVPVI | 102   | >HNF1A-P44' STQAQSVLVI | 89   | 13    |
| >HNF1A-P44' STQAQSVPVI | 217   | >HNF1A-P44' STQAQSVLVI | 99   | 118   |
| >HNF1A-P44' STQAQSV    | 19481 | >HNF1A-P44' STQAQSVL   | 239  | 19242 |
| >HNF1A-P44' STQAQSVPVI | 97    | >HNF1A-P44' STQAQSVLVI | 59   | 38    |
| >HNF1A-P44' ASTQAQSV   | 17014 | >HNF1A-P44' ASTQAQSVL  | 23   | 16991 |
| >HNF1A-P44' ASTQAQSV   | 458   | >HNF1A-P44' ASTQAQSVL  | 1472 | 1014  |

|                         |       |                         |       |       |
|-------------------------|-------|-------------------------|-------|-------|
| >HNF1A-P44' ASTQAQSVPI  | 72    | >HNF1A-P44' ASTQAQSVLI  | 55    | 17    |
| >HNF1A-P44' ASTQAQSVPI  | 322   | >HNF1A-P44' ASTQAQSVLI  | 181   | 141   |
| >HNF1A-P44' ASTQAQSVPI  | 18757 | >HNF1A-P44' ASTQAQSVLI  | 203   | 18554 |
| >HNF1A-P44' ASTQAQSVPI  | 1393  | >HNF1A-P44' ASTQAQSVLI  | 292   | 1101  |
| >HNF1A-P44' ASTQAQSVPI  | 334   | >HNF1A-P44' ASTQAQSVLI  | 459   | 125   |
| >HNF1A-P44' ASTQAQSVPI  | 4064  | >HNF1A-P44' ASTQAQSVLI  | 27    | 4037  |
| >HNF1A-P44' ASTQAQSVPI  | 657   | >HNF1A-P44' ASTQAQSVLI  | 249   | 408   |
| >HNF1A-P44' ASTQAQSVPI  | 684   | >HNF1A-P44' ASTQAQSVLI  | 476   | 208   |
| >HNF1A-P44' ASTQAQSVPI  | 24027 | >HNF1A-P44' ASTQAQSVLI  | 222   | 23805 |
| >HNF1A-P44' ASTQAQSVPI  | 23    | >HNF1A-P44' ASTQAQSVLI  | 27    | 4     |
| >HNF1A-P44' LASTQAQSVFI | 497   | >HNF1A-P44' LASTQAQSVLI | 404   | 93    |
| >HNF1A-P44' LASTQAQSVFI | 469   | >HNF1A-P44' LASTQAQSVLI | 864   | 395   |
| >HNF1A-P44' LASTQAQSVFI | 466   | >HNF1A-P44' LASTQAQSVLI | 937   | 471   |
| >HNF1A-P44' LASTQAQSVFI | 176   | >HNF1A-P44' LASTQAQSVLI | 129   | 47    |
| >HNF1A-P44' LASTQAQSVFI | 153   | >HNF1A-P44' LASTQAQSVLI | 471   | 318   |
| >HNF1A-P44' LASTQAQSVFI | 20971 | >HNF1A-P44' LASTQAQSVLI | 229   | 20742 |
| >HNF1A-Q21 QQILFQAYER   | 353   | >HNF1A-Q21 PQILFQAYER   | 3655  | 3302  |
| >HNF1A-Q21 QQILFQAY     | 352   | >HNF1A-Q21 PQILFQAY     | 1466  | 1114  |
| >HNF1A-Q21 QQILFQAY     | 254   | >HNF1A-Q21 PQILFQAY     | 748   | 494   |
| >HNF1A-Q21 QQILFQAYER   | 38    | >HNF1A-Q21 PQILFQAYER   | 362   | 324   |
| >HNF1A-Q21 QQILFQAYER   | 249   | >HNF1A-Q21 PQILFQAYER   | 1368  | 1119  |
| >HNF1A-Q21 QQILFQAYER   | 54    | >HNF1A-Q21 PQILFQAYER   | 1909  | 1855  |
| >HNF1A-Q21 QQILFQAY     | 63    | >HNF1A-Q21 PQILFQAY     | 413   | 350   |
| >HNF1A-Q21 QQILFQAY     | 215   | >HNF1A-Q21 PQILFQAY     | 1446  | 1231  |
| >HNF1A-Q21 QQILFQAY     | 7     | >HNF1A-Q21 PQILFQAY     | 42    | 35    |
| >HNF1A-Q21 QQILFQAY     | 339   | >HNF1A-Q21 PQILFQAY     | 1827  | 1488  |
| >HNF1A-Q21 QQILFQAYER   | 66    | >HNF1A-Q21 PQILFQAYER   | 210   | 144   |
| >HNF1A-Q21 SQQILFQA     | 95    | >HNF1A-Q21 SPQILFQA     | 17996 | 17901 |
| >HNF1A-Q21 SQQILFQAY    | 203   | >HNF1A-Q21 SPQILFQAY    | 1809  | 1606  |
| >HNF1A-Q21 SQQILFQAYE   | 23    | >HNF1A-Q21 SPQILFQAYE   | 1275  | 1252  |
| >HNF1A-Q21 SQQILFQAY    | 31    | >HNF1A-Q21 SPQILFQAY    | 4184  | 4153  |
| >HNF1A-Q21 SQQILFQAY    | 157   | >HNF1A-Q21 SPQILFQAY    | 1272  | 1115  |
| >HNF1A-Q21 SQQILFQAY    | 11    | >HNF1A-Q21 SPQILFQAY    | 2783  | 2772  |
| >HNF1A-Q21 SQQILFQAY    | 2770  | >HNF1A-Q21 SPQILFQAY    | 24    | 2746  |
| >HNF1A-Q21 SQQILFQA     | 27200 | >HNF1A-Q21 SPQILFQA     | 106   | 27094 |
| >HNF1A-Q21 SQQILFQAYE   | 31581 | >HNF1A-Q21 SPQILFQAYE   | 490   | 31091 |
| >HNF1A-Q21 SQQILFQAY    | 3811  | >HNF1A-Q21 SPQILFQAY    | 13    | 3798  |
| >HNF1A-Q21 SQQILFQAYE   | 242   | >HNF1A-Q21 SPQILFQAYE   | 599   | 357   |
| >HNF1A-Q21 RNRFKWGPA    | 69    | >HNF1A-Q21 RNRFKWGPA    | 210   | 141   |
| >HNF1A-Q21 ASQQILFQAY   | 353   | >HNF1A-Q21 ASPQILFQAY   | 833   | 480   |
| >HNF1A-Q21 ASQQILFQAY   | 228   | >HNF1A-Q21 ASPQILFQAY   | 114   | 114   |
| >HNF1A-Q21 ASQQILFQAY   | 247   | >HNF1A-Q21 ASPQILFQAY   | 191   | 56    |
| >HNF1A-Q21 ASQQILFQAY   | 112   | >HNF1A-Q21 ASPQILFQAY   | 402   | 290   |

|                       |       |                        |      |       |
|-----------------------|-------|------------------------|------|-------|
| >HNF1A-Q21 ASQQILFQAY | 97    | >HNF1A-Q21 ASPQILFQAY  | 392  | 295   |
| >HNF1A-Q21 ASQQILFQAY | 261   | >HNF1A-Q21 ASPQILFQAY  | 738  | 477   |
| >HNF1A-Q21 ASQQILFQAY | 18    | >HNF1A-Q21 ASPQILFQAY  | 226  | 208   |
| >HNF1A-Q21 ASQQILFQ   | 28733 | >HNF1A-Q21 ASPQILFQ    | 284  | 28449 |
| >HNF1A-Q21 ASQQILFQA  | 16356 | >HNF1A-Q21 ASPQILFQA   | 89   | 16267 |
| >HNF1A-Q21 ASQQILFQAY | 13616 | >HNF1A-Q21 ASPQILFQAY  | 76   | 13540 |
| >HNF1A-Q21 ASQQILFQAY | 11623 | >HNF1A-Q21 ASPQILFQAYI | 59   | 11564 |
| >HNF1A-Q21 ASQQILFQAY | 233   | >HNF1A-Q21 ASPQILFQAY  | 4547 | 4314  |
| >HNF1A-Q21 PASQQILFQA | 550   | >HNF1A-Q21 PASPQILFQA' | 256  | 294   |
| >HNF1A-Q21 PASQQILFQA | 152   | >HNF1A-Q21 PASPQILFQA' | 156  | 4     |
| >HNF1A-Q21 GPASQQILF  | 499   | >HNF1A-Q21 GPASPQILF   | 786  | 287   |
| >HNF1A-Q21 GPASQQIL   | 168   | >HNF1A-Q21 GPASPQIL    | 104  | 64    |
| >HNF1A-Q21 GPASQQILF  | 219   | >HNF1A-Q21 GPASPQILF   | 408  | 189   |
| >HNF1A-Q21 GPASQQILF  | 204   | >HNF1A-Q21 GPASPQILF   | 643  | 439   |
| >HNF1A-Q21 GPASQQILFQ | 153   | >HNF1A-Q21 GPASPQILFQ  | 67   | 86    |
| >HNF1A-Q21 GPASQQILF  | 1169  | >HNF1A-Q21 GPASPQILF   | 224  | 945   |
| >HNF1A-Q21 GPASQQILF  | 105   | >HNF1A-Q21 GPASPQILF   | 197  | 92    |
| >HNF1A-Q21 GPASQQILF  | 363   | >HNF1A-Q21 GPASPQILF   | 865  | 502   |
| >HNF1A-Q21 WGPASQQI   | 133   | >HNF1A-Q21 WGPASPQI    | 108  | 25    |
| >HNF1A-Q21 WGPASQQIL  | 111   | >HNF1A-Q21 WGPASPQIL   | 267  | 156   |
| >HNF1A-Q21 WGPASQQILI | 53    | >HNF1A-Q21 WGPASPQILF  | 74   | 21    |
| >HNF1A-Q21 WGPASQQIL  | 235   | >HNF1A-Q21 WGPASPQIL   | 350  | 115   |
| >HNF1A-Q21 WGPASQQILI | 183   | >HNF1A-Q21 WGPASPQILF  | 87   | 96    |
| >HNF1A-Q21 WGPASQQILI | 108   | >HNF1A-Q21 WGPASPQILF  | 75   | 33    |
| >HNF1A-Q21 KWGPASQQI  | 463   | >HNF1A-Q21 KWGPASPQI   | 503  | 40    |
| >HNF1A-Q21 KWGPASQQI  | 87    | >HNF1A-Q21 KWGPASPQII  | 104  | 17    |
| >HNF1A-Q21 KWGPASQQI  | 131   | >HNF1A-Q21 KWGPASPQI   | 187  | 56    |
| >HNF1A-Q21 KWGPASQQI  | 59    | >HNF1A-Q21 KWGPASPQII  | 74   | 15    |
| >HNF1A-Q21 KWGPASQQI  | 25    | >HNF1A-Q21 KWGPASPQI   | 36   | 11    |
| >HNF1A-Q21 KWGPASQQI  | 103   | >HNF1A-Q21 KWGPASPQII  | 186  | 83    |
| >HNF1A-Q21 KWGPASQQI  | 9     | >HNF1A-Q21 KWGPASPQII  | 12   | 3     |
| >HNF1A-Q21 KWGPASQQ   | 597   | >HNF1A-Q21 KWGPASPQ    | 257  | 340   |
| >HNF1A-Q21 KWGPASQQ   | 627   | >HNF1A-Q21 KWGPASPQ    | 443  | 184   |
| >HNF1A-Q21 KWGPASQQI  | 327   | >HNF1A-Q21 KWGPASPQI   | 309  | 18    |
| >HNF1A-Q21 KWGPASQQI  | 399   | >HNF1A-Q21 KWGPASPQII  | 452  | 53    |
| >HNF1A-Q21 KWGPASQQI  | 288   | >HNF1A-Q21 KWGPASPQII  | 306  | 18    |
| >HNF1A-Q21 FKWGPASQC  | 301   | >HNF1A-Q21 FKWGPASPQ   | 216  | 85    |
| >HNF1A-Q21 FKWGPASQ   | 346   | >HNF1A-Q21 FKWGPASP    | 473  | 127   |
| >HNF1A-Q21 FKWGPASQC  | 628   | >HNF1A-Q21 FKWGPASPQ   | 146  | 482   |
| >HNF1A-Q21 FKWGPASQC  | 26    | >HNF1A-Q21 FKWGPASPQ   | 37   | 11    |
| >HNF1A-Q21 FKWGPASQC  | 8     | >HNF1A-Q21 FKWGPASPQ   | 7    | 1     |
| >HNF1A-Q21 FKWGPASQC  | 50    | >HNF1A-Q21 FKWGPASPQ   | 30   | 20    |
| >HNF1A-Q21 FKWGPASQC  | 127   | >HNF1A-Q21 FKWGPASPQ   | 117  | 10    |

|                        |       |                        |       |       |
|------------------------|-------|------------------------|-------|-------|
| >HNF1A-Q21 RFKWGPASQ   | 227   | >HNF1A-Q21 RFKWGPASPI  | 278   | 51    |
| >HNF1A-Q21 RFKWGPASQ   | 76    | >HNF1A-Q21 RFKWGPASPI  | 110   | 34    |
| >HNF1A-Q21 RFKWGPASQ   | 167   | >HNF1A-Q21 RFKWGPASP   | 557   | 390   |
| >HNF1A-Q21 RFKWGPASQ   | 884   | >HNF1A-Q21 RFKWGPASPI  | 221   | 663   |
| >HNF1A-Q21 RFKWGPASQ   | 18    | >HNF1A-Q21 RFKWGPASPI  | 12    | 6     |
| >HNF1A-Q21 RFKWGPASQ   | 351   | >HNF1A-Q21 RFKWGPASP   | 349   | 2     |
| >HNF1A-Q21 RFKWGPASQ   | 412   | >HNF1A-Q21 RFKWGPASPI  | 359   | 53    |
| >HNF1A-Q21 NRFKWGPAS   | 413   | >HNF1A-Q21 NRFKWGPAS   | 181   | 232   |
| >HNF1A-Q21 NRFKWGPAS   | 394   | >HNF1A-Q21 NRFKWGPAS   | 350   | 44    |
| >HNF1A-Q25 QAQGLGSNL   | 440   | >HNF1A-Q25 PAQGLGSNL   | 7264  | 6824  |
| >HNF1A-Q25 QAQGLGSNL   | 435   | >HNF1A-Q25 PAQGLGSNL   | 8638  | 8203  |
| >HNF1A-Q25 SQAQGLGSN   | 30239 | >HNF1A-Q25 SPAQGLGSNI  | 106   | 30133 |
| >HNF1A-Q25 SQAQGLGSN   | 321   | >HNF1A-Q25 SPAQGLGSNI  | 21278 | 20957 |
| >HNF1A-Q25 SQAQGLGSN   | 182   | >HNF1A-Q25 SPAQGLGSNI  | 11876 | 11694 |
| >HNF1A-Q25 SQAQGLGSN   | 79    | >HNF1A-Q25 SPAQGLGSNI  | 11749 | 11670 |
| >HNF1A-Q25 SQAQGLGSN   | 19    | >HNF1A-Q25 SPAQGLGSNI  | 11953 | 11934 |
| >HNF1A-Q25 SQAQGLGSN   | 7     | >HNF1A-Q25 SPAQGLGSNI  | 6782  | 6775  |
| >HNF1A-Q25 SQAQGLGSN   | 83    | >HNF1A-Q25 SPAQGLGSNI  | 10191 | 10108 |
| >HNF1A-Q25 SQAQGLGSN   | 3372  | >HNF1A-Q25 SPAQGLGSNI  | 257   | 3115  |
| >HNF1A-Q25 SQAQGLGSN   | 16635 | >HNF1A-Q25 SPAQGLGSNI  | 42    | 16593 |
| >HNF1A-Q25 SQAQGLGSN   | 22845 | >HNF1A-Q25 SPAQGLGSNI  | 54    | 22791 |
| >HNF1A-Q25 SQAQGLGSN   | 244   | >HNF1A-Q25 SPAQGLGSNI  | 19579 | 19335 |
| >HNF1A-Q25 SQAQGLGSN   | 282   | >HNF1A-Q25 SPAQGLGSNI  | 9619  | 9337  |
| >HNF1A-Q25 SQAQGLGSN   | 395   | >HNF1A-Q25 SPAQGLGSNI  | 1187  | 792   |
| >HNF1A-Q25 SQAQGLGSN   | 27020 | >HNF1A-Q25 SPAQGLGSNI  | 416   | 26604 |
| >HNF1A-Q25 PSQAQGLGSI  | 15420 | >HNF1A-Q25 PSPAQGLGSI  | 72    | 15348 |
| >HNF1A-Q25 SPSQAQGL    | 178   | >HNF1A-Q25 SPSPAQGL    | 182   | 4     |
| >HNF1A-Q25 SPSQAQGL    | 55    | >HNF1A-Q25 SPSPAQGL    | 62    | 7     |
| >HNF1A-Q25 VSPSQAQGL   | 394   | >HNF1A-Q25 VSPSPAQGL   | 340   | 54    |
| >HNF1A-Q25 VSPSQAQGL   | 209   | >HNF1A-Q25 VSPSPAQGL   | 130   | 79    |
| >HNF1A-Q25 VSPSQAQGL   | 12    | >HNF1A-Q25 VSPSPAQGL   | 3     | 9     |
| >HNF1A-Q25 VSPSQAQGLC  | 684   | >HNF1A-Q25 VSPSPAQGLC  | 97    | 587   |
| >HNF1A-Q25 VSPSQAQGLC  | 2846  | >HNF1A-Q25 VSPSPAQGLC  | 478   | 2368  |
| >HNF1A-Q25 GVSPSQAQGI  | 139   | >HNF1A-Q25 GVSPSPAQGI  | 249   | 110   |
| >HNF1A-Q25 GVSPSQAQGI  | 172   | >HNF1A-Q25 GVSPSPAQGI  | 117   | 55    |
| >HNF1A-Q25 RGVSPSQAQGI | 83    | >HNF1A-Q25 RGVSPSPAQGI | 67    | 16    |
| >HNF1A-Q25 IQRGVSPSPA  | 1420  | >HNF1A-Q25 IQRGVSPSPA  | 426   | 994   |
| >HNF1A-Q25 IQRGVSPSPA  | 260   | >HNF1A-Q25 IQRGVSPSPA  | 63    | 197   |
| >HNF1A-Q25 IQRGVSPSP   | 403   | >HNF1A-Q25 IQRGVSPSP   | 1024  | 621   |
| >HNF1A-Q25 IQRGVSPSPA  | 623   | >HNF1A-Q25 IQRGVSPSPA  | 155   | 468   |
| >HNF1A-Q25 IQRGVSPSPA  | 303   | >HNF1A-Q25 IQRGVSPSPA  | 360   | 57    |
| >HNF1A-Q25 IQRGVSPSPA  | 358   | >HNF1A-Q25 IQRGVSPSPA  | 103   | 255   |
| >HNF1A-Q25 IQRGVSPSPA  | 464   | >HNF1A-Q25 IQRGVSPSPA  | 771   | 307   |

|                       |       |                        |       |       |
|-----------------------|-------|------------------------|-------|-------|
| >HNF1A-Q25 CIQRGVSPSQ | 850   | >HNF1A-Q25 CIQRGVSPSP, | 318   | 532   |
| >HNF1A-R13 REVVDTTGL  | 8260  | >HNF1A-R13 WEVVDTTGL   | 187   | 8073  |
| >HNF1A-R13 REVVDTTGL  | 10    | >HNF1A-R13 WEVVDTTGL   | 12    | 2     |
| >HNF1A-R13 REVVDTTGL  | 180   | >HNF1A-R13 WEVVDTTGL   | 182   | 2     |
| >HNF1A-R13 REVVDTTGL  | 6     | >HNF1A-R13 WEVVDTTGL   | 7     | 1     |
| >HNF1A-R13 SYLQQHNIPC | 10738 | >HNF1A-R13 SYLQQHNIPC  | 331   | 10407 |
| >HNF1A-R13 SYLQQHNIPC | 8345  | >HNF1A-R13 SYLQQHNIPC  | 231   | 8114  |
| >HNF1A-R13 SYLQQHNIPC | 254   | >HNF1A-R13 SYLQQHNIPC  | 5     | 249   |
| >HNF1A-R13 SYLQQHNIPC | 85    | >HNF1A-R13 SYLQQHNIPC  | 20547 | 20462 |
| >HNF1A-R13 SYLQQHNIPC | 29    | >HNF1A-R13 SYLQQHNIPC  | 11849 | 11820 |
| >HNF1A-R13 PQREVVDTT  | 4385  | >HNF1A-R13 PQWEVVDTT   | 322   | 4063  |
| >HNF1A-R13 PQREVVDTT  | 8866  | >HNF1A-R13 PQWEVVDTT   | 224   | 8642  |
| >HNF1A-R13 PQREVVDTT  | 14770 | >HNF1A-R13 PQWEVVDTT   | 363   | 14407 |
| >HNF1A-R13 NIPQREV    | 2516  | >HNF1A-R13 NIPQWEV     | 145   | 2371  |
| >HNF1A-R13 NIPQREV    | 278   | >HNF1A-R13 NIPQWEV     | 78    | 200   |
| >HNF1A-R13 NIPQREV    | 444   | >HNF1A-R13 NIPQWEV     | 166   | 278   |
| >HNF1A-R13 HNIPQREV   | 412   | >HNF1A-R13 HNIPQWEV    | 62    | 350   |
| >HNF1A-R13 HNIPQREV   | 282   | >HNF1A-R13 HNIPQWEV    | 310   | 28    |
| >HNF1A-R13 QQHNIPQRE  | 1032  | >HNF1A-R13 QQHNIPQWE   | 210   | 822   |
| >HNF1A-R13 QQHNIPQRE  | 740   | >HNF1A-R13 QQHNIPQWE   | 60    | 680   |
| >HNF1A-R13 QQHNIPQR   | 187   | >HNF1A-R13 QQHNIPQW    | 20032 | 19845 |
| >HNF1A-R13 QQHNIPQR   | 1470  | >HNF1A-R13 QQHNIPQW    | 460   | 1010  |
| >HNF1A-R13 QQHNIPQRE  | 217   | >HNF1A-R13 QQHNIPQWE   | 249   | 32    |
| >HNF1A-R13 QQHNIPQRE  | 154   | >HNF1A-R13 QQHNIPQWE   | 206   | 52    |
| >HNF1A-R13 QQHNIPQR   | 421   | >HNF1A-R13 QQHNIPQW    | 33582 | 33161 |
| >HNF1A-R13 LQQHNIPQRI | 1357  | >HNF1A-R13 LQQHNIPQW   | 60    | 1297  |
| >HNF1A-R13 LQQHNIPQRI | 589   | >HNF1A-R13 LQQHNIPQW   | 327   | 262   |
| >HNF1A-R13 LQQHNIPQRI | 196   | >HNF1A-R13 LQQHNIPQW   | 10    | 186   |
| >HNF1A-R13 LQQHNIPQRI | 291   | >HNF1A-R13 LQQHNIPQW   | 26    | 265   |
| >HNF1A-R13 LQQHNIPQRI | 399   | >HNF1A-R13 LQQHNIPQW   | 21    | 378   |
| >HNF1A-R13 LQQHNIPQRI | 3367  | >HNF1A-R13 LQQHNIPQW   | 235   | 3132  |
| >HNF1A-R13 LQQHNIPQRI | 966   | >HNF1A-R13 LQQHNIPQW   | 39    | 927   |
| >HNF1A-R13 LQQHNIPQR  | 155   | >HNF1A-R13 LQQHNIPQW   | 20109 | 19954 |
| >HNF1A-R13 LQQHNIPQR  | 7772  | >HNF1A-R13 LQQHNIPQW   | 318   | 7454  |
| >HNF1A-R13 LQQHNIPQR  | 1178  | >HNF1A-R13 LQQHNIPQW   | 299   | 879   |
| >HNF1A-R13 LQQHNIPQRI | 194   | >HNF1A-R13 LQQHNIPQW   | 193   | 1     |
| >HNF1A-R13 LQQHNIPQR  | 22496 | >HNF1A-R13 LQQHNIPQW   | 178   | 22318 |
| >HNF1A-R13 LQQHNIPQR  | 31976 | >HNF1A-R13 LQQHNIPQW   | 104   | 31872 |
| >HNF1A-R13 YLQQHNIPQF | 265   | >HNF1A-R13 YLQQHNIPQ\  | 534   | 269   |
| >HNF1A-R13 YLQQHNIPQF | 25929 | >HNF1A-R13 YLQQHNIPQ\  | 81    | 25848 |
| >HNF1A-R13 YLQQHNIPQF | 22433 | >HNF1A-R13 YLQQHNIPQ\  | 261   | 22172 |
| >HNF1A-R13 YLQQHNIPQF | 278   | >HNF1A-R13 YLQQHNIPQ\  | 29022 | 28744 |
| >HNF1A-R16 RKQREVAQQ  | 4     | >HNF1A-R16 CKQREVAQQ   | 21    | 17    |



|                       |       |                       |       |       |
|-----------------------|-------|-----------------------|-------|-------|
| >HNF1A-R16.RKQREVAQQ  | 300   | >HNF1A-R16.CKQREVAQQ  | 8631  | 8331  |
| >HNF1A-R16.VRKQREVAQ  | 81    | >HNF1A-R16.VCKQREVAQ  | 972   | 891   |
| >HNF1A-R16.KRAALYTWY  | 443   | >HNF1A-R16.KRAALYTWY  | 22228 | 21785 |
| >HNF1A-R16.KRAALYTWY  | 58    | >HNF1A-R16.KRAALYTWY  | 1561  | 1503  |
| >HNF1A-R16.KRAALYTWY  | 160   | >HNF1A-R16.KRAALYTWY  | 122   | 38    |
| >HNF1A-R16.KRAALYTWY  | 30    | >HNF1A-R16.KRAALYTWY  | 26597 | 26567 |
| >HNF1A-R16.YVRKQREV   | 304   | >HNF1A-R16.YVCKQREV   | 470   | 166   |
| >HNF1A-R16.YVRKQREV   | 2921  | >HNF1A-R16.YVCKQREV   | 472   | 2449  |
| >HNF1A-R16.YVRKQREV   | 1116  | >HNF1A-R16.YVCKQREV   | 115   | 1001  |
| >HNF1A-R16.YVRKQREV   | 25    | >HNF1A-R16.YVCKQREV   | 20    | 5     |
| >HNF1A-R16.YVRKQREV   | 138   | >HNF1A-R16.YVCKQREV   | 7735  | 7597  |
| >HNF1A-R16.YVRKQREVA  | 194   | >HNF1A-R16.YVCKQREVA  | 8876  | 8682  |
| >HNF1A-R16.YVRKQREV   | 2834  | >HNF1A-R16.YVCKQREV   | 478   | 2356  |
| >HNF1A-R16.YVRKQREV   | 355   | >HNF1A-R16.YVCKQREV   | 20326 | 19971 |
| >HNF1A-R16.WYVRKQREV  | 419   | >HNF1A-R16.WYVCKQREV  | 725   | 306   |
| >HNF1A-R16.TWYVRKQR   | 56    | >HNF1A-R16.TWYVCKQR   | 164   | 108   |
| >HNF1A-R16.TWYVRKQR   | 25    | >HNF1A-R16.TWYVCKQR   | 20    | 5     |
| >HNF1A-R16.TWYVRKQRE  | 324   | >HNF1A-R16.TWYVCKQRE  | 345   | 21    |
| >HNF1A-R16.YTWYVRKQR  | 158   | >HNF1A-R16.YTWYVCKQR  | 48    | 110   |
| >HNF1A-R16.YTWYVRKQR  | 752   | >HNF1A-R16.YTWYVCKQR  | 295   | 457   |
| >HNF1A-R16.YTWYVRKQR  | 17    | >HNF1A-R16.YTWYVCKQR  | 11    | 6     |
| >HNF1A-R16.YTWYVRKQR  | 940   | >HNF1A-R16.YTWYVCKQR  | 425   | 515   |
| >HNF1A-R16.YTWYVRKQR  | 100   | >HNF1A-R16.YTWYVCKQR  | 65    | 35    |
| >HNF1A-R16.YTWYVRKQR  | 122   | >HNF1A-R16.YTWYVCKQR  | 159   | 37    |
| >HNF1A-R16.YTWYVRKQR  | 13    | >HNF1A-R16.YTWYVCKQR  | 34    | 21    |
| >HNF1A-R16.YTWYVRKQR  | 16    | >HNF1A-R16.YTWYVCKQR  | 24    | 8     |
| >HNF1A-R16.YTWYVRKQR  | 6     | >HNF1A-R16.YTWYVCKQR  | 6     | 0     |
| >HNF1A-R16.YTWYVRKQR  | 23    | >HNF1A-R16.YTWYVCKQR  | 23    | 0     |
| >HNF1A-R16.YTWYVRKQR  | 69    | >HNF1A-R16.YTWYVCKQR  | 48    | 21    |
| >HNF1A-R16.YTWYVRKQR  | 604   | >HNF1A-R16.YTWYVCKQR  | 441   | 163   |
| >HNF1A-R16.YTWYVRKQR  | 1031  | >HNF1A-R16.YTWYVCKQR  | 418   | 613   |
| >HNF1A-R16.YTWYVRKQR  | 302   | >HNF1A-R16.YTWYVCKQR  | 198   | 104   |
| >HNF1A-R16.LYTWYVRK   | 692   | >HNF1A-R16.LYTWYVCK   | 417   | 275   |
| >HNF1A-R16.LYTWYVRKQI | 35    | >HNF1A-R16.LYTWYVCKQI | 124   | 89    |
| >HNF1A-R16.LYTWYVRKQI | 147   | >HNF1A-R16.LYTWYVCKQI | 186   | 39    |
| >HNF1A-R16.LYTWYVRK   | 1169  | >HNF1A-R16.LYTWYVCK   | 461   | 708   |
| >HNF1A-R16.LYTWYVRK   | 258   | >HNF1A-R16.LYTWYVCK   | 334   | 76    |
| >HNF1A-R16.LYTWYVRKQI | 99    | >HNF1A-R16.LYTWYVCKQI | 75    | 24    |
| >HNF1A-R16.LYTWYVRKQ  | 463   | >HNF1A-R16.LYTWYVCKQ  | 663   | 200   |
| >HNF1A-R16.ALYTWYVVR  | 812   | >HNF1A-R16.ALYTWYVVC  | 8     | 804   |
| >HNF1A-R16.ALYTWYVVRK | 152   | >HNF1A-R16.ALYTWYVVC  | 636   | 484   |
| >HNF1A-R16.ALYTWYVVRK | 92    | >HNF1A-R16.ALYTWYVVC  | 33    | 59    |
| >HNF1A-R16.ALYTWYVVR  | 12918 | >HNF1A-R16.ALYTWYVVC  | 92    | 12826 |

|                       |      |                       |       |       |
|-----------------------|------|-----------------------|-------|-------|
| >HNF1A-R16.ALYTWYVR   | 7687 | >HNF1A-R16.ALYTWYVC   | 139   | 7548  |
| >HNF1A-R16.ALYTWYVRK  | 951  | >HNF1A-R16.ALYTWYVCK  | 81    | 870   |
| >HNF1A-R16.ALYTWYVR   | 1184 | >HNF1A-R16.ALYTWYVC   | 12    | 1172  |
| >HNF1A-R16.ALYTWYVRK  | 30   | >HNF1A-R16.ALYTWYVCK  | 146   | 116   |
| >HNF1A-R16.ALYTWYVRK  | 30   | >HNF1A-R16.ALYTWYVCK  | 8     | 22    |
| >HNF1A-R16.ALYTWYVR   | 114  | >HNF1A-R16.ALYTWYVC   | 17231 | 17117 |
| >HNF1A-R16.ALYTWYVRK  | 25   | >HNF1A-R16.ALYTWYVCK  | 29    | 4     |
| >HNF1A-R16.ALYTWYVRK  | 92   | >HNF1A-R16.ALYTWYVCK  | 113   | 21    |
| >HNF1A-R16.ALYTWYVR   | 112  | >HNF1A-R16.ALYTWYVC   | 19457 | 19345 |
| >HNF1A-R16.ALYTWYVRK  | 12   | >HNF1A-R16.ALYTWYVCK  | 14    | 2     |
| >HNF1A-R16.ALYTWYVRK  | 472  | >HNF1A-R16.ALYTWYVCK  | 559   | 87    |
| >HNF1A-R16.ALYTWYVRK  | 288  | >HNF1A-R16.ALYTWYVCK  | 500   | 212   |
| >HNF1A-R16.ALYTWYVR   | 11   | >HNF1A-R16.ALYTWYVC   | 10735 | 10724 |
| >HNF1A-R16.ALYTWYVRK  | 80   | >HNF1A-R16.ALYTWYVCK  | 92    | 12    |
| >HNF1A-R16.ALYTWYVRK  | 17   | >HNF1A-R16.ALYTWYVCK  | 38    | 21    |
| >HNF1A-R16.ALYTWYVR   | 340  | >HNF1A-R16.ALYTWYVC   | 33275 | 32935 |
| >HNF1A-R16.ALYTWYVR   | 413  | >HNF1A-R16.ALYTWYVC   | 41394 | 40981 |
| >HNF1A-R16.ALYTWYVRK  | 468  | >HNF1A-R16.ALYTWYVCK  | 481   | 13    |
| >HNF1A-R16.ALYTWYVRK  | 416  | >HNF1A-R16.ALYTWYVCK  | 511   | 95    |
| >HNF1A-R16.ALYTWYVR   | 121  | >HNF1A-R16.ALYTWYVC   | 31137 | 31016 |
| >HNF1A-R16.ALYTWYVRK  | 436  | >HNF1A-R16.ALYTWYVCK  | 579   | 143   |
| >HNF1A-R16.AALYTWYVRI | 57   | >HNF1A-R16.AALYTWYVCI | 65    | 8     |
| >HNF1A-R16.AALYTWYVRI | 18   | >HNF1A-R16.AALYTWYVCI | 21    | 3     |
| >HNF1A-R16.AALYTWYVRI | 32   | >HNF1A-R16.AALYTWYVCI | 49    | 17    |
| >HNF1A-R16.AALYTWYVR  | 11   | >HNF1A-R16.AALYTWYVC  | 12881 | 12870 |
| >HNF1A-R16.AALYTWYVRI | 617  | >HNF1A-R16.AALYTWYVCI | 391   | 226   |
| >HNF1A-R16.AALYTWYVR  | 438  | >HNF1A-R16.AALYTWYVC  | 36900 | 36462 |
| >HNF1A-R16.AALYTWYVR  | 278  | >HNF1A-R16.AALYTWYVC  | 41478 | 41200 |
| >HNF1A-R16.AALYTWYVR  | 131  | >HNF1A-R16.AALYTWYVC  | 4328  | 4197  |
| >HNF1A-R16.AALYTWYVRI | 91   | >HNF1A-R16.AALYTWYVCI | 111   | 20    |
| >HNF1A-R16.RAALYTWYVI | 128  | >HNF1A-R16.RAALYTWYVI | 301   | 173   |
| >HNF1A-R16.RAALYTWYVI | 153  | >HNF1A-R16.RAALYTWYVI | 30186 | 30033 |
| >HNF1A-R16.RAALYTWYVI | 19   | >HNF1A-R16.RAALYTWYVI | 22    | 3     |
| >HNF1A-R16.RAALYTWYVI | 79   | >HNF1A-R16.RAALYTWYVI | 135   | 56    |
| >HNF1A-R16.RAALYTWYVI | 15   | >HNF1A-R16.RAALYTWYVI | 11444 | 11429 |
| >HNF1A-R16.RAALYTWYVI | 57   | >HNF1A-R16.RAALYTWYVI | 71    | 14    |
| >HNF1A-R16.RAALYTWYVI | 49   | >HNF1A-R16.RAALYTWYVI | 32177 | 32128 |
| >HNF1A-R16.RAALYTWYVI | 330  | >HNF1A-R16.RAALYTWYVI | 227   | 103   |
| >HNF1A-R16.RAALYTWYVI | 454  | >HNF1A-R16.RAALYTWYVI | 629   | 175   |
| >HNF1A-R16.RAALYTWYVI | 40   | >HNF1A-R16.RAALYTWYVI | 28255 | 28215 |
| >HNF1A-R16.RAALYTWYVI | 471  | >HNF1A-R16.RAALYTWYVI | 802   | 331   |
| >HNF1A-R20.RFKWGPASQ  | 227  | >HNF1A-R20.CFKWGPASQ  | 790   | 563   |
| >HNF1A-R20.RFKWGPASQ  | 76   | >HNF1A-R20.CFKWGPASQ  | 115   | 39    |

|                         |      |                         |       |       |
|-------------------------|------|-------------------------|-------|-------|
| >HNF1A-R20 RFKWGPAS     | 265  | >HNF1A-R20 CFKWGPAS     | 8394  | 8129  |
| >HNF1A-R20 RFKWGPASQ    | 167  | >HNF1A-R20 CFKWGPASQ    | 7252  | 7085  |
| >HNF1A-R20 RFKWGPASQ    | 18   | >HNF1A-R20 CFKWGPASQ    | 1264  | 1246  |
| >HNF1A-R20 RFKWGPASQ    | 351  | >HNF1A-R20 CFKWGPASQ    | 1355  | 1004  |
| >HNF1A-R20 RFKWGPASQ    | 412  | >HNF1A-R20 CFKWGPASQ    | 1215  | 803   |
| >HNF1A-R20 NRFKWGPA     | 325  | >HNF1A-R20 NCFKWGPA     | 24802 | 24477 |
| >HNF1A-R20 NRFKWGPA     | 97   | >HNF1A-R20 NCFKWGPA     | 15251 | 15154 |
| >HNF1A-R20 NRFKWGPAS    | 157  | >HNF1A-R20 NCFKWGPAS    | 19262 | 19105 |
| >HNF1A-R20 NRFKWGPAS    | 413  | >HNF1A-R20 NCFKWGPAS    | 24936 | 24523 |
| >HNF1A-R20 NRFKWGPAS    | 394  | >HNF1A-R20 NCFKWGPAS    | 24731 | 24337 |
| >HNF1A-R20 RNRFKWGPA    | 7    | >HNF1A-R20 RNCFKWGPA    | 1034  | 1027  |
| >HNF1A-R20 RNRFKWGPA    | 77   | >HNF1A-R20 RNCFKWGPA    | 8107  | 8030  |
| >HNF1A-R20 RNRFKWGPA    | 69   | >HNF1A-R20 RNCFKWGPA    | 7582  | 7513  |
| >HNF1A-R20 RRNRFKWGP    | 196  | >HNF1A-R20 RRNCFKWGP    | 189   | 7     |
| >HNF1A-R20 RRNRFKWGP    | 47   | >HNF1A-R20 RRNCFKWGP    | 96    | 49    |
| >HNF1A-R20 RRNRFKWGP    | 214  | >HNF1A-R20 RRNCFKWGP    | 210   | 4     |
| >HNF1A-R20 RRNRFKWG     | 32   | >HNF1A-R20 RRNCFKWG     | 45    | 13    |
| >HNF1A-R20 RRNRFKWGP    | 353  | >HNF1A-R20 RRNCFKWGP    | 452   | 99    |
| >HNF1A-R20 RRNRFKWGP    | 176  | >HNF1A-R20 RRNCFKWGP    | 274   | 98    |
| >HNF1A-R20 RRNRFKWGP    | 222  | >HNF1A-R20 RRNCFKWGP    | 274   | 52    |
| >HNF1A-R20 RRNRFKWG     | 480  | >HNF1A-R20 RRNCFKWG     | 705   | 225   |
| >HNF1A-R20 RRNRFKWGP    | 112  | >HNF1A-R20 RRNCFKWGP    | 249   | 137   |
| >HNF1A-R20 GRRNRFKW     | 975  | >HNF1A-R20 GRRNCFKW     | 401   | 574   |
| >HNF1A-R20 KGRRNRFK     | 420  | >HNF1A-R20 KGRRNCFK     | 351   | 69    |
| >HNF1A-R20 KGRRNRFK     | 3    | >HNF1A-R20 KGRRNCFK     | 3     | 0     |
| >HNF1A-R20 KGRRNRFKW    | 114  | >HNF1A-R20 KGRRNCFKW    | 628   | 514   |
| >HNF1A-R20 KGRRNRFK     | 194  | >HNF1A-R20 KGRRNCFK     | 208   | 14    |
| >HNF1A-R20 KGRRNRFKW    | 326  | >HNF1A-R20 KGRRNCFKW    | 254   | 72    |
| >HNF1A-R20 KGRRNRFKW    | 50   | >HNF1A-R20 KGRRNCFKW    | 62    | 12    |
| >HNF1A-R20 KGRRNRFKW    | 50   | >HNF1A-R20 KGRRNCFKW    | 53    | 3     |
| >HNF1A-R20 KKGRRRNFK    | 210  | >HNF1A-R20 KKGRRRNCFK   | 85    | 125   |
| >HNF1A-R20 KKGRRRNRF    | 33   | >HNF1A-R20 KKGRRRNCF    | 13    | 20    |
| >HNF1A-R20 TTKGRRRNFK   | 148  | >HNF1A-R20 TTKGRRRNCFK  | 91    | 57    |
| >HNF1A-R20 TTKGRRRNRF   | 311  | >HNF1A-R20 TTKGRRRNCF   | 85    | 226   |
| >HNF1A-R20 PTKKGRRRNRF  | 7    | >HNF1A-R20 PTKKGRRRNCF  | 6     | 1     |
| >HNF1A-R20 PTKKGRRRNR   | 470  | >HNF1A-R20 PTKKGRRRNC   | 23887 | 23417 |
| >HNF1A-R20 LPTKKGRRRNR  | 39   | >HNF1A-R20 LPTKKGRRRNC  | 60    | 21    |
| >HNF1A-R20 LPTKKGRRRNR  | 942  | >HNF1A-R20 LPTKKGRRRNC  | 362   | 580   |
| >HNF1A-R20 LPTKKGRRRNR  | 664  | >HNF1A-R20 LPTKKGRRRNC  | 349   | 315   |
| >HNF1A-R20 LPTKKGRRRNR  | 249  | >HNF1A-R20 LPTKKGRRRNC  | 469   | 220   |
| >HNF1A-R20 LPTKKGRRRNR  | 490  | >HNF1A-R20 LPTKKGRRRNC  | 331   | 159   |
| >HNF1A-R22' RETLVEECNR  | 114  | >HNF1A-R22' GETLVEECNR  | 149   | 35    |
| >HNF1A-R22' EERETLVEECI | 1004 | >HNF1A-R22' EEGETLVEECI | 488   | 516   |

|                        |      |                        |       |       |
|------------------------|------|------------------------|-------|-------|
| >HNF1A-R22 KEERETLV    | 386  | >HNF1A-R22 KEEGETLV    | 510   | 124   |
| >HNF1A-R22 KEERETLV    | 1034 | >HNF1A-R22 KEEGETLV    | 139   | 895   |
| >HNF1A-R22 NPSKEERETL  | 267  | >HNF1A-R22 NPSKEEGETL  | 361   | 94    |
| >HNF1A-R22 RQKNPSKEEF  | 45   | >HNF1A-R22 RQKNPSKEEC  | 25148 | 25103 |
| >HNF1A-R22 RQKNPSKEEF  | 95   | >HNF1A-R22 RQKNPSKEEC  | 1616  | 1521  |
| >HNF1A-R22 RETLVEECNR  | 114  | >HNF1A-R22 QETLVEECNR  | 88    | 26    |
| >HNF1A-R22 EERETLVEEC  | 1579 | >HNF1A-R22 EEQETLVEEC  | 347   | 1232  |
| >HNF1A-R22 EERETLVEECI | 1004 | >HNF1A-R22 EEQETLVEECI | 350   | 654   |
| >HNF1A-R22 KEERETLV    | 386  | >HNF1A-R22 KEEQETLV    | 206   | 180   |
| >HNF1A-R22 KEERETLVEEC | 1040 | >HNF1A-R22 KEEQETLVEEC | 472   | 568   |
| >HNF1A-R22 NPSKEERETL  | 267  | >HNF1A-R22 NPSKEEQETL  | 259   | 8     |
| >HNF1A-R22 RQKNPSKEEF  | 45   | >HNF1A-R22 RQKNPSKEEC  | 15746 | 15701 |
| >HNF1A-R22 RQKNPSKEEF  | 95   | >HNF1A-R22 RQKNPSKEEC  | 406   | 311   |
| >HNF1A-R24 RGVSPSQAQI  | 83   | >HNF1A-R24 GGVSPSQAQ   | 4143  | 4060  |
| >HNF1A-R24 EECNRAECIQ  | 340  | >HNF1A-R24 EECNRAECIQ  | 40970 | 40630 |
| >HNF1A-R24 IQRGVSPSQA  | 260  | >HNF1A-R24 IQGGVSPSQA  | 14809 | 14549 |
| >HNF1A-R24 IQRGVSPSQ   | 403  | >HNF1A-R24 IQGGVSPSQ   | 1081  | 678   |
| >HNF1A-R24 IQRGVSPSQA  | 303  | >HNF1A-R24 IQGGVSPSQA  | 884   | 581   |
| >HNF1A-R24 IQRGVSPSQA  | 358  | >HNF1A-R24 IQGGVSPSQA  | 3936  | 3578  |
| >HNF1A-R24 IQRGVSPSQA  | 464  | >HNF1A-R24 IQGGVSPSQA  | 3405  | 2941  |
| >HNF1A-R24 CIQRGVSPSQ  | 850  | >HNF1A-R24 CIQGGVSPSC  | 440   | 410   |
| >HNF1A-R24 AECIQRGV    | 644  | >HNF1A-R24 AECIQGGV    | 455   | 189   |
| >HNF1A-R24 AECIQRGV    | 84   | >HNF1A-R24 AECIQGGV    | 113   | 29    |
| >HNF1A-R24 AECIQRGVSP  | 327  | >HNF1A-R24 AECIQGGVSP  | 271   | 56    |
| >HNF1A-R26 RVYNWFANR   | 32   | >HNF1A-R26 CVYNWFANR   | 87    | 55    |
| >HNF1A-R26 RVYNWFANR   | 137  | >HNF1A-R26 CVYNWFANR   | 960   | 823   |
| >HNF1A-R26 RVYNWFANR   | 28   | >HNF1A-R26 CVYNWFANR   | 48    | 20    |
| >HNF1A-R26 RVYNWFANR   | 13   | >HNF1A-R26 CVYNWFANR   | 29    | 16    |
| >HNF1A-R26 RVYNWFANR   | 256  | >HNF1A-R26 CVYNWFANR   | 820   | 564   |
| >HNF1A-R26 RVYNWFANR   | 17   | >HNF1A-R26 CVYNWFANR   | 40    | 23    |
| >HNF1A-R26 RVYNWFANR   | 262  | >HNF1A-R26 CVYNWFANR   | 8746  | 8484  |
| >HNF1A-R26 RVYNWFANR   | 8    | >HNF1A-R26 CVYNWFANR   | 365   | 357   |
| >HNF1A-R26 RVYNWFAN    | 468  | >HNF1A-R26 CVYNWFAN    | 6215  | 5747  |
| >HNF1A-R26 RVYNWFANR   | 5    | >HNF1A-R26 CVYNWFANR   | 7     | 2     |
| >HNF1A-R26 RVYNWFANR   | 4    | >HNF1A-R26 CVYNWFANR   | 11    | 7     |
| >HNF1A-R26 RVYNWFANR   | 38   | >HNF1A-R26 CVYNWFANR   | 503   | 465   |
| >HNF1A-R26 RVYNWFANR   | 50   | >HNF1A-R26 CVYNWFANR   | 22    | 28    |
| >HNF1A-R26 RVYNWFANR   | 819  | >HNF1A-R26 CVYNWFANR   | 209   | 610   |
| >HNF1A-R26 RVYNWFANR   | 39   | >HNF1A-R26 CVYNWFANR   | 13    | 26    |
| >HNF1A-R26 RVYNWFANR   | 57   | >HNF1A-R26 CVYNWFANR   | 37    | 20    |
| >HNF1A-R26 RVYNWFANR   | 390  | >HNF1A-R26 CVYNWFANR   | 92    | 298   |
| >HNF1A-R26 RVYNWFANR   | 289  | >HNF1A-R26 CVYNWFANR   | 340   | 51    |
| >HNF1A-R26 RVYNWFANR   | 34   | >HNF1A-R26 CVYNWFANR   | 53    | 19    |

|                       |       |                       |       |       |
|-----------------------|-------|-----------------------|-------|-------|
| >HNF1A-R26 RVYNWFANR  | 34    | >HNF1A-R26 CVYNWFANR  | 66    | 32    |
| >HNF1A-R26 VRVYNWFAN  | 188   | >HNF1A-R26 VCVYNWFAN  | 126   | 62    |
| >HNF1A-R26 VRVYNWFAN  | 80    | >HNF1A-R26 VCVYNWFAN  | 27742 | 27662 |
| >HNF1A-R26 VRVYNWFAN  | 374   | >HNF1A-R26 VCVYNWFAN  | 32461 | 32087 |
| >HNF1A-R26 VRVYNWFAN  | 474   | >HNF1A-R26 VCVYNWFAN  | 209   | 265   |
| >HNF1A-R26 VRVYNWFAN  | 922   | >HNF1A-R26 VCVYNWFAN  | 321   | 601   |
| >HNF1A-R26 GLGSNLVTEV | 11423 | >HNF1A-R26 GLGSNLVTEV | 185   | 11238 |
| >HNF1A-R26 GLGSNLVTEV | 15609 | >HNF1A-R26 GLGSNLVTEV | 230   | 15379 |
| >HNF1A-R26 GLGSNLVTEV | 11595 | >HNF1A-R26 GLGSNLVTEV | 270   | 11325 |
| >HNF1A-R26 EVRVYNWF   | 22    | >HNF1A-R26 EVCVYNWF   | 11    | 11    |
| >HNF1A-R26 EVRVYNWF   | 175   | >HNF1A-R26 EVCVYNWF   | 243   | 68    |
| >HNF1A-R26 EVRVYNWFA  | 402   | >HNF1A-R26 EVCVYNWFA  | 12138 | 11736 |
| >HNF1A-R26 EVRVYNWFA  | 28    | >HNF1A-R26 EVCVYNWFA  | 48    | 20    |
| >HNF1A-R26 EVRVYNWFA  | 8     | >HNF1A-R26 EVCVYNWFA  | 10    | 2     |
| >HNF1A-R26 EVRVYNWFA  | 9     | >HNF1A-R26 EVCVYNWFA  | 4     | 5     |
| >HNF1A-R26 EVRVYNWFA  | 205   | >HNF1A-R26 EVCVYNWFA  | 29    | 176   |
| >HNF1A-R26 EVRVYNWFA  | 263   | >HNF1A-R26 EVCVYNWFA  | 83    | 180   |
| >HNF1A-R26 EVRVYNWFA  | 444   | >HNF1A-R26 EVCVYNWFA  | 185   | 259   |
| >HNF1A-R26 TEVRVYNWF  | 65    | >HNF1A-R26 TEVCVYNWF  | 406   | 341   |
| >HNF1A-R26 TEVRVYNWF  | 435   | >HNF1A-R26 TEVCVYNWF  | 1535  | 1100  |
| >HNF1A-R26 TEVRVYNWF  | 564   | >HNF1A-R26 TEVCVYNWF  | 387   | 177   |
| >HNF1A-R26 TEVRVYNW   | 226   | >HNF1A-R26 TEVCVYNW   | 99    | 127   |
| >HNF1A-R26 TEVRVYNWF  | 112   | >HNF1A-R26 TEVCVYNWF  | 60    | 52    |
| >HNF1A-R26 TEVRVYNWF  | 226   | >HNF1A-R26 TEVCVYNWF  | 140   | 86    |
| >HNF1A-R26 TEVRVYNW   | 68    | >HNF1A-R26 TEVCVYNW   | 51    | 17    |
| >HNF1A-R26 TEVRVYNWF  | 475   | >HNF1A-R26 TEVCVYNWF  | 183   | 292   |
| >HNF1A-R26 TEVRVYNW   | 27    | >HNF1A-R26 TEVCVYNW   | 20    | 7     |
| >HNF1A-R26 TEVRVYNWF  | 55    | >HNF1A-R26 TEVCVYNWF  | 53    | 2     |
| >HNF1A-R26 TEVRVYNWF  | 514   | >HNF1A-R26 TEVCVYNWF  | 322   | 192   |
| >HNF1A-R26 TEVRVYNWF  | 316   | >HNF1A-R26 TEVCVYNWF  | 626   | 310   |
| >HNF1A-R26 TEVRVYNWF  | 292   | >HNF1A-R26 TEVCVYNWF  | 250   | 42    |
| >HNF1A-R26 TEVRVYNWF  | 85    | >HNF1A-R26 TEVCVYNWF  | 87    | 2     |
| >HNF1A-R26 TEVRVYNW   | 165   | >HNF1A-R26 TEVCVYNW   | 201   | 36    |
| >HNF1A-R26 VTEVRVYNW  | 246   | >HNF1A-R26 VTEVCVYNW  | 326   | 80    |
| >HNF1A-R26 VTEVRVYNW  | 8     | >HNF1A-R26 VTEVCVYNW  | 9     | 1     |
| >HNF1A-R26 VTEVRVYNW  | 38    | >HNF1A-R26 VTEVCVYNW  | 39    | 1     |
| >HNF1A-R26 VTEVRVYNW  | 1379  | >HNF1A-R26 VTEVCVYNW  | 111   | 1268  |
| >HNF1A-R26 VTEVRVYNW  | 160   | >HNF1A-R26 VTEVCVYNW  | 80    | 80    |
| >HNF1A-R26 VTEVRVYNW  | 143   | >HNF1A-R26 VTEVCVYNW  | 63    | 80    |
| >HNF1A-R26 VTEVRVYNW  | 177   | >HNF1A-R26 VTEVCVYNW  | 86    | 91    |
| >HNF1A-R26 VTEVRVYNW  | 28    | >HNF1A-R26 VTEVCVYNW  | 48    | 20    |
| >HNF1A-R26 VTEVRVYNW  | 286   | >HNF1A-R26 VTEVCVYNW  | 115   | 171   |
| >HNF1A-R26 LVTEVRVYNV | 304   | >HNF1A-R26 LVTEVCVYNV | 321   | 17    |

|                       |      |                       |       |       |
|-----------------------|------|-----------------------|-------|-------|
| >HNF1A-R26 LVTEVRVY   | 492  | >HNF1A-R26 LVTEVCVY   | 929   | 437   |
| >HNF1A-R26 LVTEVRVY   | 395  | >HNF1A-R26 LVTEVCVY   | 533   | 138   |
| >HNF1A-R26 LVTEVRVY   | 753  | >HNF1A-R26 LVTEVCVY   | 263   | 490   |
| >HNF1A-R26 LVTEVRVYNV | 303  | >HNF1A-R26 LVTEVCVYNV | 394   | 91    |
| >HNF1A-R26 LVTEVRVY   | 217  | >HNF1A-R26 LVTEVCVY   | 137   | 80    |
| >HNF1A-R26 LVTEVRVYNV | 339  | >HNF1A-R26 LVTEVCVYNV | 397   | 58    |
| >HNF1A-R26 LVTEVRVYNV | 24   | >HNF1A-R26 LVTEVCVYNV | 22    | 2     |
| >HNF1A-R26 LVTEVRVYNV | 145  | >HNF1A-R26 LVTEVCVYNV | 97    | 48    |
| >HNF1A-R26 LVTEVRVY   | 88   | >HNF1A-R26 LVTEVCVY   | 274   | 186   |
| >HNF1A-R26 LVTEVRVYNV | 243  | >HNF1A-R26 LVTEVCVYNV | 162   | 81    |
| >HNF1A-R26 NLVTEVRV   | 649  | >HNF1A-R26 NLVTEVCV   | 446   | 203   |
| >HNF1A-R26 NLVTEVRV   | 79   | >HNF1A-R26 NLVTEVCV   | 73    | 6     |
| >HNF1A-R26 NLVTEVRV   | 72   | >HNF1A-R26 NLVTEVCV   | 194   | 122   |
| >HNF1A-R26 NLVTEVRV   | 583  | >HNF1A-R26 NLVTEVCV   | 337   | 246   |
| >HNF1A-R26 NLVTEVRV   | 28   | >HNF1A-R26 NLVTEVCV   | 61    | 33    |
| >HNF1A-R26 NLVTEVRV   | 60   | >HNF1A-R26 NLVTEVCV   | 20    | 40    |
| >HNF1A-R26 NLVTEVRV   | 107  | >HNF1A-R26 NLVTEVCV   | 30    | 77    |
| >HNF1A-R26 NLVTEVRV   | 167  | >HNF1A-R26 NLVTEVCV   | 38    | 129   |
| >HNF1A-R26 NLVTEVRV   | 9    | >HNF1A-R26 NLVTEVCV   | 14    | 5     |
| >HNF1A-R26 NLVTEVRVY  | 102  | >HNF1A-R26 NLVTEVCVY  | 196   | 94    |
| >HNF1A-R26 NLVTEVRVY  | 407  | >HNF1A-R26 NLVTEVCVY  | 110   | 297   |
| >HNF1A-R26 NLVTEVRVY  | 1151 | >HNF1A-R26 NLVTEVCVY  | 456   | 695   |
| >HNF1A-R26 NLVTEVRVY  | 428  | >HNF1A-R26 NLVTEVCVY  | 2887  | 2459  |
| >HNF1A-R26 SNLVTEVRVY | 728  | >HNF1A-R26 SNLVTEVCVY | 381   | 347   |
| >HNF1A-R26 GSNLVTEVRV | 390  | >HNF1A-R26 GSNLVTEVCV | 457   | 67    |
| >HNF1A-R26 GSNLVTEVR  | 133  | >HNF1A-R26 GSNLVTEVC  | 18865 | 18732 |
| >HNF1A-R26 GSNLVTEVR  | 213  | >HNF1A-R26 GSNLVTEVC  | 39844 | 39631 |
| >HNF1A-R26 GSNLVTEVRV | 293  | >HNF1A-R26 GSNLVTEVCV | 118   | 175   |
| >HNF1A-R26 GSNLVTEVRV | 155  | >HNF1A-R26 GSNLVTEVCV | 82    | 73    |
| >HNF1A-R26 GSNLVTEVRV | 1613 | >HNF1A-R26 GSNLVTEVCV | 164   | 1449  |
| >HNF1A-R26 GSNLVTEVRV | 99   | >HNF1A-R26 GSNLVTEVCV | 158   | 59    |
| >HNF1A-R26 RVYNWFANR  | 32   | >HNF1A-R26 HVYNWFANF  | 44    | 12    |
| >HNF1A-R26 RVYNWFANR  | 137  | >HNF1A-R26 HVYNWFANF  | 618   | 481   |
| >HNF1A-R26 RVYNWFANR  | 28   | >HNF1A-R26 HVYNWFANF  | 33    | 5     |
| >HNF1A-R26 RVYNWFANR  | 13   | >HNF1A-R26 HVYNWFANF  | 29    | 16    |
| >HNF1A-R26 RVYNWFANR  | 256  | >HNF1A-R26 HVYNWFANF  | 939   | 683   |
| >HNF1A-R26 RVYNWFANR  | 17   | >HNF1A-R26 HVYNWFANF  | 37    | 20    |
| >HNF1A-R26 RVYNWFANR  | 262  | >HNF1A-R26 HVYNWFANF  | 1085  | 823   |
| >HNF1A-R26 RVYNWFANR  | 8    | >HNF1A-R26 HVYNWFANF  | 17    | 9     |
| >HNF1A-R26 RVYNWFAN   | 468  | >HNF1A-R26 HVYNWFAN   | 1896  | 1428  |
| >HNF1A-R26 RVYNWFANR  | 5    | >HNF1A-R26 HVYNWFANF  | 5     | 0     |
| >HNF1A-R26 RVYNWFANR  | 4    | >HNF1A-R26 HVYNWFANF  | 11    | 7     |
| >HNF1A-R26 RVYNWFANR  | 38   | >HNF1A-R26 HVYNWFANF  | 115   | 77    |

|                      |      |                      |       |       |
|----------------------|------|----------------------|-------|-------|
| >HNF1A-R26 RVYNWFANR | 50   | >HNF1A-R26 HVYNWFANF | 8     | 42    |
| >HNF1A-R26 RVYNWFANR | 819  | >HNF1A-R26 HVYNWFANF | 289   | 530   |
| >HNF1A-R26 RVYNWFANR | 39   | >HNF1A-R26 HVYNWFANF | 5     | 34    |
| >HNF1A-R26 RVYNWFANR | 57   | >HNF1A-R26 HVYNWFANF | 11    | 46    |
| >HNF1A-R26 RVYNWFANR | 390  | >HNF1A-R26 HVYNWFANF | 29    | 361   |
| >HNF1A-R26 RVYNWFANR | 289  | >HNF1A-R26 HVYNWFANF | 454   | 165   |
| >HNF1A-R26 RVYNWFANR | 34   | >HNF1A-R26 HVYNWFANF | 27    | 7     |
| >HNF1A-R26 RVYNWFANR | 34   | >HNF1A-R26 HVYNWFANF | 31    | 3     |
| >HNF1A-R26 VRVYNWFAN | 188  | >HNF1A-R26 VHVYNWFAN | 424   | 236   |
| >HNF1A-R26 VRVYNWFAN | 80   | >HNF1A-R26 VHVYNWFAN | 7460  | 7380  |
| >HNF1A-R26 VRVYNWFAN | 374  | >HNF1A-R26 VHVYNWFAN | 24196 | 23822 |
| >HNF1A-R26 VRVYNWFAN | 474  | >HNF1A-R26 VHVYNWFAN | 480   | 6     |
| >HNF1A-R26 EVRVYNWF  | 526  | >HNF1A-R26 EVHVYNWF  | 170   | 356   |
| >HNF1A-R26 EVRVYNWF  | 22   | >HNF1A-R26 EVHVYNWF  | 14    | 8     |
| >HNF1A-R26 EVRVYNWF  | 175  | >HNF1A-R26 EVHVYNWF  | 169   | 6     |
| >HNF1A-R26 EVRVYNWFA | 402  | >HNF1A-R26 EVHVYNWFA | 3732  | 3330  |
| >HNF1A-R26 EVRVYNWFA | 28   | >HNF1A-R26 EVHVYNWFA | 37    | 9     |
| >HNF1A-R26 EVRVYNWFA | 8    | >HNF1A-R26 EVHVYNWFA | 13    | 5     |
| >HNF1A-R26 EVRVYNWFA | 9    | >HNF1A-R26 EVHVYNWFA | 4     | 5     |
| >HNF1A-R26 EVRVYNWFA | 205  | >HNF1A-R26 EVHVYNWFA | 13    | 192   |
| >HNF1A-R26 EVRVYNWFA | 263  | >HNF1A-R26 EVHVYNWFA | 58    | 205   |
| >HNF1A-R26 EVRVYNWFA | 444  | >HNF1A-R26 EVHVYNWFA | 181   | 263   |
| >HNF1A-R26 TEVRVYNWF | 65   | >HNF1A-R26 TEVHVYNWF | 80    | 15    |
| >HNF1A-R26 TEVRVYNWF | 435  | >HNF1A-R26 TEVHVYNWF | 453   | 18    |
| >HNF1A-R26 TEVRVYNW  | 226  | >HNF1A-R26 TEVHVYNW  | 233   | 7     |
| >HNF1A-R26 TEVRVYNWF | 112  | >HNF1A-R26 TEVHVYNWF | 174   | 62    |
| >HNF1A-R26 TEVRVYNWF | 226  | >HNF1A-R26 TEVHVYNWF | 155   | 71    |
| >HNF1A-R26 TEVRVYNWF | 505  | >HNF1A-R26 TEVHVYNWF | 321   | 184   |
| >HNF1A-R26 TEVRVYNW  | 68   | >HNF1A-R26 TEVHVYNW  | 65    | 3     |
| >HNF1A-R26 TEVRVYNWF | 475  | >HNF1A-R26 TEVHVYNWF | 403   | 72    |
| >HNF1A-R26 TEVRVYNWF | 1097 | >HNF1A-R26 TEVHVYNWF | 411   | 686   |
| >HNF1A-R26 TEVRVYNW  | 27   | >HNF1A-R26 TEVHVYNW  | 19    | 8     |
| >HNF1A-R26 TEVRVYNWF | 55   | >HNF1A-R26 TEVHVYNWF | 43    | 12    |
| >HNF1A-R26 TEVRVYNWF | 514  | >HNF1A-R26 TEVHVYNWF | 223   | 291   |
| >HNF1A-R26 TEVRVYNWF | 316  | >HNF1A-R26 TEVHVYNWF | 310   | 6     |
| >HNF1A-R26 TEVRVYNWF | 292  | >HNF1A-R26 TEVHVYNWF | 404   | 112   |
| >HNF1A-R26 TEVRVYNWF | 85   | >HNF1A-R26 TEVHVYNWF | 187   | 102   |
| >HNF1A-R26 TEVRVYNW  | 165  | >HNF1A-R26 TEVHVYNW  | 69    | 96    |
| >HNF1A-R26 VTEVRVYNW | 246  | >HNF1A-R26 VTEVHVYNW | 274   | 28    |
| >HNF1A-R26 VTEVRVYNW | 8    | >HNF1A-R26 VTEVHVYNW | 8     | 0     |
| >HNF1A-R26 VTEVRVYNW | 38   | >HNF1A-R26 VTEVHVYNW | 32    | 6     |
| >HNF1A-R26 VTEVRVYNW | 160  | >HNF1A-R26 VTEVHVYNW | 281   | 121   |
| >HNF1A-R26 VTEVRVYNW | 143  | >HNF1A-R26 VTEVHVYNW | 73    | 70    |

|                       |      |                       |       |       |
|-----------------------|------|-----------------------|-------|-------|
| >HNF1A-R26 VTEVRVYNW  | 177  | >HNF1A-R26.VTEVHVYNW  | 75    | 102   |
| >HNF1A-R26 VTEVRVYNW  | 28   | >HNF1A-R26.VTEVHVYNW  | 38    | 10    |
| >HNF1A-R26 VTEVRVYNW  | 286  | >HNF1A-R26.VTEVHVYNW  | 89    | 197   |
| >HNF1A-R26 LVTEVRVYNV | 304  | >HNF1A-R26.LVTEVHVYNV | 245   | 59    |
| >HNF1A-R26 LVTEVRVY   | 492  | >HNF1A-R26.LVTEVHVY   | 162   | 330   |
| >HNF1A-R26 LVTEVRVYNV | 608  | >HNF1A-R26.LVTEVHVYNV | 388   | 220   |
| >HNF1A-R26 LVTEVRVY   | 690  | >HNF1A-R26.LVTEVHVY   | 98    | 592   |
| >HNF1A-R26 LVTEVRVY   | 395  | >HNF1A-R26.LVTEVHVY   | 89    | 306   |
| >HNF1A-R26 LVTEVRVY   | 2409 | >HNF1A-R26.LVTEVHVY   | 220   | 2189  |
| >HNF1A-R26 LVTEVRVY   | 753  | >HNF1A-R26.LVTEVHVY   | 442   | 311   |
| >HNF1A-R26 LVTEVRVYNV | 303  | >HNF1A-R26.LVTEVHVYNV | 174   | 129   |
| >HNF1A-R26 LVTEVRVY   | 217  | >HNF1A-R26.LVTEVHVY   | 90    | 127   |
| >HNF1A-R26 LVTEVRVYNV | 339  | >HNF1A-R26.LVTEVHVYNV | 301   | 38    |
| >HNF1A-R26 LVTEVRVY   | 4731 | >HNF1A-R26.LVTEVHVY   | 319   | 4412  |
| >HNF1A-R26 LVTEVRVYNV | 24   | >HNF1A-R26.LVTEVHVYNV | 19    | 5     |
| >HNF1A-R26 LVTEVRVYNV | 939  | >HNF1A-R26.LVTEVHVYNV | 395   | 544   |
| >HNF1A-R26 LVTEVRVYNV | 145  | >HNF1A-R26.LVTEVHVYNV | 109   | 36    |
| >HNF1A-R26 LVTEVRVY   | 88   | >HNF1A-R26.LVTEVHVY   | 109   | 21    |
| >HNF1A-R26 LVTEVRVYNV | 243  | >HNF1A-R26.LVTEVHVYNV | 123   | 120   |
| >HNF1A-R26 NLVTEVRV   | 649  | >HNF1A-R26.NLVTEVHV   | 331   | 318   |
| >HNF1A-R26 NLVTEVRV   | 79   | >HNF1A-R26.NLVTEVHV   | 37    | 42    |
| >HNF1A-R26 NLVTEVRV   | 72   | >HNF1A-R26.NLVTEVHV   | 47    | 25    |
| >HNF1A-R26 NLVTEVRV   | 583  | >HNF1A-R26.NLVTEVHV   | 63    | 520   |
| >HNF1A-R26 NLVTEVRV   | 28   | >HNF1A-R26.NLVTEVHV   | 25    | 3     |
| >HNF1A-R26 NLVTEVRV   | 60   | >HNF1A-R26.NLVTEVHV   | 13    | 47    |
| >HNF1A-R26 NLVTEVRV   | 107  | >HNF1A-R26.NLVTEVHV   | 22    | 85    |
| >HNF1A-R26 NLVTEVRV   | 167  | >HNF1A-R26.NLVTEVHV   | 77    | 90    |
| >HNF1A-R26 NLVTEVRV   | 9    | >HNF1A-R26.NLVTEVHV   | 7     | 2     |
| >HNF1A-R26 NLVTEVRVY  | 102  | >HNF1A-R26.NLVTEVHVY  | 37    | 65    |
| >HNF1A-R26 NLVTEVRVY  | 3560 | >HNF1A-R26.NLVTEVHVY  | 423   | 3137  |
| >HNF1A-R26 NLVTEVRVY  | 2675 | >HNF1A-R26.NLVTEVHVY  | 148   | 2527  |
| >HNF1A-R26 NLVTEVRV   | 800  | >HNF1A-R26.NLVTEVHV   | 459   | 341   |
| >HNF1A-R26 NLVTEVRVY  | 3658 | >HNF1A-R26.NLVTEVHVY  | 285   | 3373  |
| >HNF1A-R26 NLVTEVRVY  | 407  | >HNF1A-R26.NLVTEVHVY  | 288   | 119   |
| >HNF1A-R26 NLVTEVRVY  | 796  | >HNF1A-R26.NLVTEVHVY  | 465   | 331   |
| >HNF1A-R26 NLVTEVRVY  | 428  | >HNF1A-R26.NLVTEVHVY  | 216   | 212   |
| >HNF1A-R26 GSNLVTEVRV | 1882 | >HNF1A-R26.GSNLVTEVHV | 317   | 1565  |
| >HNF1A-R26 GSNLVTEVRV | 390  | >HNF1A-R26.GSNLVTEVHV | 68    | 322   |
| >HNF1A-R26 GSNLVTEVR  | 133  | >HNF1A-R26.GSNLVTEVH  | 9179  | 9046  |
| >HNF1A-R26 GSNLVTEVR  | 213  | >HNF1A-R26.GSNLVTEVH  | 20601 | 20388 |
| >HNF1A-R26 GSNLVTEVRV | 293  | >HNF1A-R26.GSNLVTEVHV | 233   | 60    |
| >HNF1A-R26 GSNLVTEVRV | 155  | >HNF1A-R26.GSNLVTEVHV | 97    | 58    |
| >HNF1A-R26 GSNLVTEVRV | 1613 | >HNF1A-R26.GSNLVTEVHV | 100   | 1513  |



|                       |       |                       |       |       |
|-----------------------|-------|-----------------------|-------|-------|
| >HNF1A-R26 GSNLVTEVRV | 99    | >HNF1A-R26 GSNLVTEVHV | 90    | 9     |
| >HNF1A-R27 RRKEEAFRHK | 63    | >HNF1A-R27 WRKEEAFRH  | 9899  | 9836  |
| >HNF1A-R27 RRKEEAFRHK | 479   | >HNF1A-R27 WRKEEAFRH  | 1140  | 661   |
| >HNF1A-R27 RRKEEAFR   | 217   | >HNF1A-R27 WRKEEAFR   | 892   | 675   |
| >HNF1A-R27 RRKEEAFRH  | 157   | >HNF1A-R27 WRKEEAFRH  | 789   | 632   |
| >HNF1A-R27 RRKEEAFRHK | 34    | >HNF1A-R27 WRKEEAFRH  | 141   | 107   |
| >HNF1A-R27 RRKEEAFRHK | 24    | >HNF1A-R27 WRKEEAFRH  | 122   | 98    |
| >HNF1A-R27 RRKEEAFRHK | 90    | >HNF1A-R27 WRKEEAFRH  | 636   | 546   |
| >HNF1A-R27 RRKEEAFRHK | 56    | >HNF1A-R27 WRKEEAFRH  | 1174  | 1118  |
| >HNF1A-R27 RRKEEAFRHK | 55    | >HNF1A-R27 WRKEEAFRH  | 185   | 130   |
| >HNF1A-R27 RRKEEAFRHK | 53    | >HNF1A-R27 WRKEEAFRH  | 157   | 104   |
| >HNF1A-R27 RRKEEAFR   | 138   | >HNF1A-R27 WRKEEAFR   | 599   | 461   |
| >HNF1A-R27 NRRKEEAF   | 21088 | >HNF1A-R27 NWRKEEAF   | 194   | 20894 |
| >HNF1A-R27 NRRKEEAFR  | 2147  | >HNF1A-R27 NWRKEEAFR  | 299   | 1848  |
| >HNF1A-R27 NRRKEEAFR  | 1692  | >HNF1A-R27 NWRKEEAFR  | 89    | 1603  |
| >HNF1A-R27 NRRKEEAF   | 81    | >HNF1A-R27 NWRKEEAF   | 2130  | 2049  |
| >HNF1A-R27 NRRKEEAFR  | 1589  | >HNF1A-R27 NWRKEEAFR  | 22    | 1567  |
| >HNF1A-R27 NRRKEEAFR  | 14145 | >HNF1A-R27 NWRKEEAFR  | 181   | 13964 |
| >HNF1A-R27 EVRVYNWFA  | 1574  | >HNF1A-R27 EVRVYNWFA  | 47    | 1527  |
| >HNF1A-R27 EVRVYNWFA  | 28    | >HNF1A-R27 EVRVYNWFA  | 17597 | 17569 |
| >HNF1A-R27 EVRVYNWFA  | 8     | >HNF1A-R27 EVRVYNWFA  | 3388  | 3380  |
| >HNF1A-R27 EVRVYNWFA  | 9     | >HNF1A-R27 EVRVYNWFA  | 13376 | 13367 |
| >HNF1A-R27 EVRVYNWFA  | 22565 | >HNF1A-R27 EVRVYNWFA  | 389   | 22176 |
| >HNF1A-R27 EVRVYNWFA  | 444   | >HNF1A-R27 EVRVYNWFA  | 26075 | 25631 |
| >HNF1A-R27 ANRRKEEAF  | 143   | >HNF1A-R27 ANWRKEEAF  | 117   | 26    |
| >HNF1A-R27 FANRRKEEAF | 82    | >HNF1A-R27 FANWRKEEA  | 65    | 17    |
| >HNF1A-R27 FANRRKEEAF | 72    | >HNF1A-R27 FANWRKEEA  | 41    | 31    |
| >HNF1A-R27 FANRRKEEAF | 12    | >HNF1A-R27 FANWRKEEA  | 7     | 5     |
| >HNF1A-R27 FANRRKEEAF | 63    | >HNF1A-R27 FANWRKEEA  | 265   | 202   |
| >HNF1A-R27 FANRRKEEAF | 1267  | >HNF1A-R27 FANWRKEEA  | 411   | 856   |
| >HNF1A-R27 FANRRKEEAF | 479   | >HNF1A-R27 FANWRKEEA  | 937   | 458   |
| >HNF1A-R27 WFANRRKEE  | 353   | >HNF1A-R27 WFANWRKEE  | 101   | 252   |
| >HNF1A-R27 WFANRRKEE  | 21    | >HNF1A-R27 WFANWRKEE  | 20    | 1     |
| >HNF1A-R27 WFANRRKEE  | 886   | >HNF1A-R27 WFANWRKEE  | 249   | 637   |
| >HNF1A-R27 NWFANRRK   | 63    | >HNF1A-R27 NWFANWRK   | 22    | 41    |
| >HNF1A-R27 NWFANRRK   | 585   | >HNF1A-R27 NWFANWRK   | 258   | 327   |
| >HNF1A-R27 NWFANRRKE  | 235   | >HNF1A-R27 NWFANWRK   | 187   | 48    |
| >HNF1A-R27 YNWFANRR   | 189   | >HNF1A-R27 YNWFANWR   | 65    | 124   |
| >HNF1A-R27 YNWFANRR   | 153   | >HNF1A-R27 YNWFANWR   | 84    | 69    |
| >HNF1A-R27 VYNWFANR   | 4933  | >HNF1A-R27 VYNWFANW   | 236   | 4697  |
| >HNF1A-R27 VYNWFANR   | 6244  | >HNF1A-R27 VYNWFANW   | 192   | 6052  |
| >HNF1A-R27 VYNWFANR   | 4518  | >HNF1A-R27 VYNWFANW   | 44    | 4474  |
| >HNF1A-R27 VYNWFANR   | 13    | >HNF1A-R27 VYNWFANW   | 9953  | 9940  |

|                      |       |                      |       |       |
|----------------------|-------|----------------------|-------|-------|
| >HNF1A-R27 VYNWFANRR | 52    | >HNF1A-R27 VYNWFANW  | 32    | 20    |
| >HNF1A-R27 VYNWFANRR | 786   | >HNF1A-R27 VYNWFANW  | 288   | 498   |
| >HNF1A-R27 VYNWFANR  | 48    | >HNF1A-R27 VYNWFANW  | 15007 | 14959 |
| >HNF1A-R27 VYNWFANRR | 247   | >HNF1A-R27 VYNWFANW  | 126   | 121   |
| >HNF1A-R27 VYNWFANRR | 415   | >HNF1A-R27 VYNWFANW  | 180   | 235   |
| >HNF1A-R27 VYNWFANR  | 21    | >HNF1A-R27 VYNWFANW  | 9794  | 9773  |
| >HNF1A-R27 VYNWFANRR | 20    | >HNF1A-R27 VYNWFANW  | 21    | 1     |
| >HNF1A-R27 VYNWFANRR | 609   | >HNF1A-R27 VYNWFANW  | 116   | 493   |
| >HNF1A-R27 RVYNWFANR | 32    | >HNF1A-R27 RVYNWFANV | 3845  | 3813  |
| >HNF1A-R27 RVYNWFANR | 137   | >HNF1A-R27 RVYNWFANV | 62    | 75    |
| >HNF1A-R27 RVYNWFANR | 28    | >HNF1A-R27 RVYNWFANV | 28    | 0     |
| >HNF1A-R27 RVYNWFANR | 13    | >HNF1A-R27 RVYNWFANV | 9156  | 9143  |
| >HNF1A-R27 RVYNWFANR | 256   | >HNF1A-R27 RVYNWFANV | 96    | 160   |
| >HNF1A-R27 RVYNWFANR | 17    | >HNF1A-R27 RVYNWFANV | 9     | 8     |
| >HNF1A-R27 RVYNWFANR | 2355  | >HNF1A-R27 RVYNWFANV | 34    | 2321  |
| >HNF1A-R27 RVYNWFANR | 2797  | >HNF1A-R27 RVYNWFANV | 313   | 2484  |
| >HNF1A-R27 RVYNWFANR | 262   | >HNF1A-R27 RVYNWFANV | 4999  | 4737  |
| >HNF1A-R27 RVYNWFANR | 8     | >HNF1A-R27 RVYNWFANV | 10    | 2     |
| >HNF1A-R27 RVYNWFANR | 5     | >HNF1A-R27 RVYNWFANV | 264   | 259   |
| >HNF1A-R27 RVYNWFANR | 4     | >HNF1A-R27 RVYNWFANV | 3     | 1     |
| >HNF1A-R27 RVYNWFANR | 38    | >HNF1A-R27 RVYNWFANV | 15    | 23    |
| >HNF1A-R27 RVYNWFANR | 769   | >HNF1A-R27 RVYNWFANV | 16    | 753   |
| >HNF1A-R27 RVYNWFANR | 50    | >HNF1A-R27 RVYNWFANV | 14689 | 14639 |
| >HNF1A-R27 RVYNWFANR | 819   | >HNF1A-R27 RVYNWFANV | 210   | 609   |
| >HNF1A-R27 RVYNWFANR | 39    | >HNF1A-R27 RVYNWFANV | 19368 | 19329 |
| >HNF1A-R27 RVYNWFANR | 57    | >HNF1A-R27 RVYNWFANV | 20    | 37    |
| >HNF1A-R27 RVYNWFANR | 390   | >HNF1A-R27 RVYNWFANV | 121   | 269   |
| >HNF1A-R27 RVYNWFANR | 11133 | >HNF1A-R27 RVYNWFANV | 354   | 10779 |
| >HNF1A-R27 RVYNWFANR | 10506 | >HNF1A-R27 RVYNWFANV | 10    | 10496 |
| >HNF1A-R27 RVYNWFANR | 23080 | >HNF1A-R27 RVYNWFANV | 66    | 23014 |
| >HNF1A-R27 RVYNWFANR | 20348 | >HNF1A-R27 RVYNWFANV | 11    | 20337 |
| >HNF1A-R27 RVYNWFANR | 5295  | >HNF1A-R27 RVYNWFANV | 268   | 5027  |
| >HNF1A-R27 RVYNWFANR | 30285 | >HNF1A-R27 RVYNWFANV | 92    | 30193 |
| >HNF1A-R27 RVYNWFANR | 23605 | >HNF1A-R27 RVYNWFANV | 36    | 23569 |
| >HNF1A-R27 RVYNWFANR | 658   | >HNF1A-R27 RVYNWFANV | 198   | 460   |
| >HNF1A-R27 RVYNWFANR | 289   | >HNF1A-R27 RVYNWFANV | 4492  | 4203  |
| >HNF1A-R27 RVYNWFANR | 806   | >HNF1A-R27 RVYNWFANV | 475   | 331   |
| >HNF1A-R27 RVYNWFANR | 676   | >HNF1A-R27 RVYNWFANV | 467   | 209   |
| >HNF1A-R27 RVYNWFANR | 34    | >HNF1A-R27 RVYNWFANV | 4683  | 4649  |
| >HNF1A-R27 RVYNWFANR | 34    | >HNF1A-R27 RVYNWFANV | 42    | 8     |
| >HNF1A-R27 RVYNWFANR | 672   | >HNF1A-R27 RVYNWFANV | 146   | 526   |
| >HNF1A-R27 VRVYNWFAN | 188   | >HNF1A-R27 VRVYNWFAN | 24201 | 24013 |
| >HNF1A-R27 VRVYNWFAN | 80    | >HNF1A-R27 VRVYNWFAN | 402   | 322   |

|                       |       |                       |       |       |
|-----------------------|-------|-----------------------|-------|-------|
| >HNF1A-R27 VRVYNWFAN  | 374   | >HNF1A-R27 VRVYNWFAN  | 762   | 388   |
| >HNF1A-R27 VRVYNWFAN  | 27390 | >HNF1A-R27 VRVYNWFAN  | 395   | 26995 |
| >HNF1A-R27 VRVYNWFAN  | 474   | >HNF1A-R27 VRVYNWFAN  | 31749 | 31275 |
| >HNF1A-R27 RKEEAFRHL  | 2357  | >HNF1A-R27 HKEEAFRHL  | 273   | 2084  |
| >HNF1A-R27 RRKEEAFRHK | 63    | >HNF1A-R27 RHKEEAFRHK | 123   | 60    |
| >HNF1A-R27 RRKEEAFR   | 1284  | >HNF1A-R27 RHKEEAFR   | 230   | 1054  |
| >HNF1A-R27 RRKEEAFRHK | 479   | >HNF1A-R27 RHKEEAFRHK | 1193  | 714   |
| >HNF1A-R27 RRKEEAFR   | 217   | >HNF1A-R27 RHKEEAFR   | 12701 | 12484 |
| >HNF1A-R27 RRKEEAFRH  | 157   | >HNF1A-R27 RHKEEAFRH  | 14085 | 13928 |
| >HNF1A-R27 RRKEEAFRHK | 34    | >HNF1A-R27 RHKEEAFRHK | 3537  | 3503  |
| >HNF1A-R27 RRKEEAFRHK | 24    | >HNF1A-R27 RHKEEAFRHK | 7348  | 7324  |
| >HNF1A-R27 RRKEEAFRHK | 90    | >HNF1A-R27 RHKEEAFRHK | 10499 | 10409 |
| >HNF1A-R27 RRKEEAFRHK | 56    | >HNF1A-R27 RHKEEAFRHK | 1800  | 1744  |
| >HNF1A-R27 RRKEEAFRHK | 55    | >HNF1A-R27 RHKEEAFRHK | 10479 | 10424 |
| >HNF1A-R27 RRKEEAFRHK | 53    | >HNF1A-R27 RHKEEAFRHK | 3461  | 3408  |
| >HNF1A-R27 RRKEEAFR   | 138   | >HNF1A-R27 RHKEEAFR   | 153   | 15    |
| >HNF1A-R27 NRRKEEAF   | 81    | >HNF1A-R27 NRHKEEAF   | 137   | 56    |
| >HNF1A-R27 ANRRKEEAF  | 143   | >HNF1A-R27 ANRHKEEAF  | 87    | 56    |
| >HNF1A-R27 FANRRKEEAF | 82    | >HNF1A-R27 FANRHKEEAF | 84    | 2     |
| >HNF1A-R27 FANRRKEEAF | 72    | >HNF1A-R27 FANRHKEEAF | 157   | 85    |
| >HNF1A-R27 FANRRKEEAF | 12    | >HNF1A-R27 FANRHKEEAF | 11    | 1     |
| >HNF1A-R27 FANRRKEEAF | 601   | >HNF1A-R27 FANRHKEEAF | 295   | 306   |
| >HNF1A-R27 FANRRKEEAF | 63    | >HNF1A-R27 FANRHKEEAF | 40    | 23    |
| >HNF1A-R27 FANRRKEEAF | 479   | >HNF1A-R27 FANRHKEEAF | 372   | 107   |
| >HNF1A-R27 FANRRKEEAF | 706   | >HNF1A-R27 FANRHKEEAF | 385   | 321   |
| >HNF1A-R27 WFANRRKEE. | 353   | >HNF1A-R27 WFANRHKEE  | 288   | 65    |
| >HNF1A-R27 WFANRRKEE. | 21    | >HNF1A-R27 WFANRHKEE  | 19    | 2     |
| >HNF1A-R27 WFANRRKEE. | 681   | >HNF1A-R27 WFANRHKEE  | 407   | 274   |
| >HNF1A-R27 WFANRRKEE. | 886   | >HNF1A-R27 WFANRHKEE  | 494   | 392   |
| >HNF1A-R27 NWFANRRK   | 63    | >HNF1A-R27 NWFANRHK   | 34    | 29    |
| >HNF1A-R27 NWFANRRKE  | 626   | >HNF1A-R27 NWFANRHK   | 290   | 336   |
| >HNF1A-R27 NWFANRRKE  | 235   | >HNF1A-R27 NWFANRHK   | 182   | 53    |
| >HNF1A-R27 YNWFANRR   | 189   | >HNF1A-R27 YNWFANRH   | 21924 | 21735 |
| >HNF1A-R27 YNWFANRR   | 153   | >HNF1A-R27 YNWFANRH   | 26064 | 25911 |
| >HNF1A-R27 VYNWFANRR  | 1081  | >HNF1A-R27 VYNWFANRH  | 403   | 678   |
| >HNF1A-R27 VYNWFANRR  | 52    | >HNF1A-R27 VYNWFANRH  | 8107  | 8055  |
| >HNF1A-R27 VYNWFANRR  | 247   | >HNF1A-R27 VYNWFANRH  | 26756 | 26509 |
| >HNF1A-R27 VYNWFANRR  | 415   | >HNF1A-R27 VYNWFANRH  | 24643 | 24228 |
| >HNF1A-R27 VYNWFANRR  | 20    | >HNF1A-R27 VYNWFANRH  | 11723 | 11703 |
| >HNF1A-R27 VYNWFANRR  | 609   | >HNF1A-R27 VYNWFANRH  | 325   | 284   |
| >HNF1A-R27 RVYNWFANR  | 137   | >HNF1A-R27 RVYNWFANR  | 2980  | 2843  |
| >HNF1A-R27 RVYNWFANR  | 28    | >HNF1A-R27 RVYNWFANR  | 28    | 0     |
| >HNF1A-R27 RVYNWFANR  | 256   | >HNF1A-R27 RVYNWFANR  | 11178 | 10922 |

|                       |       |                       |       |       |
|-----------------------|-------|-----------------------|-------|-------|
| >HNF1A-R27 RVYNWFANR  | 17    | >HNF1A-R27 RVYNWFANR  | 19    | 2     |
| >HNF1A-R27 RVYNWFANR  | 8     | >HNF1A-R27 RVYNWFANR  | 6     | 2     |
| >HNF1A-R27 RVYNWFANR  | 4     | >HNF1A-R27 RVYNWFANR  | 279   | 275   |
| >HNF1A-R27 RVYNWFANR  | 38    | >HNF1A-R27 RVYNWFANR  | 23    | 15    |
| >HNF1A-R27 RVYNWFANR  | 669   | >HNF1A-R27 RVYNWFANR  | 468   | 201   |
| >HNF1A-R27 RVYNWFANR  | 57    | >HNF1A-R27 RVYNWFANR  | 12183 | 12126 |
| >HNF1A-R27 RVYNWFANR  | 390   | >HNF1A-R27 RVYNWFANR  | 392   | 2     |
| >HNF1A-R27 RVYNWFANR  | 34    | >HNF1A-R27 RVYNWFANR  | 5282  | 5248  |
| >HNF1A-R27 RVYNWFANR  | 672   | >HNF1A-R27 RVYNWFANR  | 356   | 316   |
| >HNF1A-R27 RRKEEAFR   | 3641  | >HNF1A-R27 RSKEEAFR   | 37    | 3604  |
| >HNF1A-R27 RRKEEAFRHK | 63    | >HNF1A-R27 RSKEEAFRHK | 4     | 59    |
| >HNF1A-R27 RRKEEAFRHK | 3896  | >HNF1A-R27 RSKEEAFRHK | 61    | 3835  |
| >HNF1A-R27 RRKEEAFR   | 1284  | >HNF1A-R27 RSKEEAFR   | 12    | 1272  |
| >HNF1A-R27 RRKEEAFR   | 10844 | >HNF1A-R27 RSKEEAFR   | 248   | 10596 |
| >HNF1A-R27 RRKEEAFRHK | 479   | >HNF1A-R27 RSKEEAFRHK | 1481  | 1002  |
| >HNF1A-R27 RRKEEAFRH  | 24439 | >HNF1A-R27 RSKEEAFRH  | 47    | 24392 |
| >HNF1A-R27 RRKEEAFRHK | 19710 | >HNF1A-R27 RSKEEAFRHK | 10    | 19700 |
| >HNF1A-R27 RRKEEAFR   | 217   | >HNF1A-R27 RSKEEAFR   | 13659 | 13442 |
| >HNF1A-R27 RRKEEAFRH  | 157   | >HNF1A-R27 RSKEEAFRH  | 16346 | 16189 |
| >HNF1A-R27 RRKEEAFRHK | 34    | >HNF1A-R27 RSKEEAFRHK | 14837 | 14803 |
| >HNF1A-R27 RRKEEAFRHK | 24    | >HNF1A-R27 RSKEEAFRHK | 9975  | 9951  |
| >HNF1A-R27 RRKEEAFRHK | 21395 | >HNF1A-R27 RSKEEAFRHK | 210   | 21185 |
| >HNF1A-R27 RRKEEAFRHK | 90    | >HNF1A-R27 RSKEEAFRHK | 11341 | 11251 |
| >HNF1A-R27 RRKEEAFRHK | 56    | >HNF1A-R27 RSKEEAFRHK | 3289  | 3233  |
| >HNF1A-R27 RRKEEAFRHK | 55    | >HNF1A-R27 RSKEEAFRHK | 11670 | 11615 |
| >HNF1A-R27 RRKEEAFRHK | 53    | >HNF1A-R27 RSKEEAFRHK | 6876  | 6823  |
| >HNF1A-R27 RRKEEAFR   | 138   | >HNF1A-R27 RSKEEAFR   | 232   | 94    |
| >HNF1A-R27 NRRKEEAF   | 81    | >HNF1A-R27 NRSKEEAF   | 201   | 120   |
| >HNF1A-R27 ANRRKEEAF  | 143   | >HNF1A-R27 ANRSKEEAF  | 69    | 74    |
| >HNF1A-R27 FANRRKEEAF | 82    | >HNF1A-R27 FANRSKEEAF | 124   | 42    |
| >HNF1A-R27 FANRRKEEAF | 72    | >HNF1A-R27 FANRSKEEAF | 168   | 96    |
| >HNF1A-R27 FANRRKEEAF | 12    | >HNF1A-R27 FANRSKEEAF | 8     | 4     |
| >HNF1A-R27 FANRRKEEAF | 601   | >HNF1A-R27 FANRSKEEAF | 280   | 321   |
| >HNF1A-R27 FANRRKEEAF | 63    | >HNF1A-R27 FANRSKEEAF | 20    | 43    |
| >HNF1A-R27 FANRRKEEAF | 1267  | >HNF1A-R27 FANRSKEEAF | 357   | 910   |
| >HNF1A-R27 FANRRKEEAF | 479   | >HNF1A-R27 FANRSKEEAF | 341   | 138   |
| >HNF1A-R27 FANRRKEEAF | 706   | >HNF1A-R27 FANRSKEEAF | 190   | 516   |
| >HNF1A-R27 WFANRRKEE  | 353   | >HNF1A-R27 WFANRSKEE  | 298   | 55    |
| >HNF1A-R27 WFANRRKEE  | 21    | >HNF1A-R27 WFANRSKEE  | 19    | 2     |
| >HNF1A-R27 WFANRRKEE  | 681   | >HNF1A-R27 WFANRSKEE  | 299   | 382   |
| >HNF1A-R27 WFANRRKEE  | 886   | >HNF1A-R27 WFANRSKEE  | 286   | 600   |
| >HNF1A-R27 NWFANRRK   | 63    | >HNF1A-R27 NWFANRSK   | 83    | 20    |
| >HNF1A-R27 NWFANRRK   | 585   | >HNF1A-R27 NWFANRSK   | 242   | 343   |

|                        |       |                       |       |       |
|------------------------|-------|-----------------------|-------|-------|
| >HNF1A-R27 NWFANRRKE   | 235   | >HNF1A-R27 NWFANRSKE  | 197   | 38    |
| >HNF1A-R27 YNWFANRR    | 189   | >HNF1A-R27 YNWFANRS   | 31339 | 31150 |
| >HNF1A-R27 YNWFANRR    | 153   | >HNF1A-R27 YNWFANRS   | 28165 | 28012 |
| >HNF1A-R27 VYNWFANRR   | 1081  | >HNF1A-R27 VYNWFANRS  | 405   | 676   |
| >HNF1A-R27 VYNWFANRR   | 52    | >HNF1A-R27 VYNWFANRS  | 16225 | 16173 |
| >HNF1A-R27 VYNWFANRR   | 247   | >HNF1A-R27 VYNWFANRS  | 31221 | 30974 |
| >HNF1A-R27 VYNWFANRR   | 415   | >HNF1A-R27 VYNWFANRS  | 34574 | 34159 |
| >HNF1A-R27 VYNWFANRR   | 20    | >HNF1A-R27 VYNWFANRS  | 15689 | 15669 |
| >HNF1A-R27 RVYNWFANR   | 137   | >HNF1A-R27 RVYNWFANR  | 11752 | 11615 |
| >HNF1A-R27 RVYNWFANR   | 28    | >HNF1A-R27 RVYNWFANR  | 27    | 1     |
| >HNF1A-R27 RVYNWFANR   | 256   | >HNF1A-R27 RVYNWFANR  | 29853 | 29597 |
| >HNF1A-R27 RVYNWFANR   | 17    | >HNF1A-R27 RVYNWFANR  | 14    | 3     |
| >HNF1A-R27 RVYNWFANR   | 8     | >HNF1A-R27 RVYNWFANR  | 6     | 2     |
| >HNF1A-R27 RVYNWFANR   | 4     | >HNF1A-R27 RVYNWFANR  | 3001  | 2997  |
| >HNF1A-R27 RVYNWFANR   | 38    | >HNF1A-R27 RVYNWFANR  | 43    | 5     |
| >HNF1A-R27 RVYNWFANR   | 1569  | >HNF1A-R27 RVYNWFANR  | 352   | 1217  |
| >HNF1A-R27 RVYNWFANR   | 57    | >HNF1A-R27 RVYNWFANR  | 30211 | 30154 |
| >HNF1A-R27 RVYNWFANR   | 390   | >HNF1A-R27 RVYNWFANR  | 331   | 59    |
| >HNF1A-R27 RVYNWFANR   | 34    | >HNF1A-R27 RVYNWFANR  | 8682  | 8648  |
| >HNF1A-T26I TEVRVYNWF  | 65    | >HNF1A-T26I MEVRVYNWI | 51    | 14    |
| >HNF1A-T26I TEVRVYNWF, | 435   | >HNF1A-T26I MEVRVYNWI | 365   | 70    |
| >HNF1A-T26I TEVRVYNWF  | 564   | >HNF1A-T26I MEVRVYNWI | 260   | 304   |
| >HNF1A-T26I TEVRVYNWF  | 1040  | >HNF1A-T26I MEVRVYNWI | 135   | 905   |
| >HNF1A-T26I TEVRVYNW   | 226   | >HNF1A-T26I MEVRVYNW  | 74    | 152   |
| >HNF1A-T26I TEVRVYNWF  | 112   | >HNF1A-T26I MEVRVYNWI | 36    | 76    |
| >HNF1A-T26I TEVRVYNWF, | 1281  | >HNF1A-T26I MEVRVYNWI | 455   | 826   |
| >HNF1A-T26I TEVRVYNWF  | 226   | >HNF1A-T26I MEVRVYNWI | 99    | 127   |
| >HNF1A-T26I TEVRVYNWF, | 505   | >HNF1A-T26I MEVRVYNWI | 354   | 151   |
| >HNF1A-T26I TEVRVYNW   | 68    | >HNF1A-T26I MEVRVYNW  | 68    | 0     |
| >HNF1A-T26I TEVRVYNWF  | 475   | >HNF1A-T26I MEVRVYNWI | 456   | 19    |
| >HNF1A-T26I TEVRVYNWF, | 1097  | >HNF1A-T26I MEVRVYNWI | 379   | 718   |
| >HNF1A-T26I TEVRVYNW   | 27    | >HNF1A-T26I MEVRVYNW  | 12    | 15    |
| >HNF1A-T26I TEVRVYNWF  | 55    | >HNF1A-T26I MEVRVYNWI | 21    | 34    |
| >HNF1A-T26I TEVRVYNWF, | 514   | >HNF1A-T26I MEVRVYNWI | 238   | 276   |
| >HNF1A-T26I TEVRVYNWF, | 1469  | >HNF1A-T26I MEVRVYNWI | 426   | 1043  |
| >HNF1A-T26I TEVRVYNWF  | 1380  | >HNF1A-T26I MEVRVYNWI | 310   | 1070  |
| >HNF1A-T26I TEVRVYNWF, | 316   | >HNF1A-T26I MEVRVYNWI | 94    | 222   |
| >HNF1A-T26I TEVRVYNWF, | 292   | >HNF1A-T26I MEVRVYNWI | 55    | 237   |
| >HNF1A-T26I TEVRVYNW   | 3611  | >HNF1A-T26I MEVRVYNW  | 367   | 3244  |
| >HNF1A-T26I TEVRVYNW   | 4302  | >HNF1A-T26I MEVRVYNW  | 365   | 3937  |
| >HNF1A-T26I TEVRVYNWF, | 85    | >HNF1A-T26I MEVRVYNWI | 47    | 38    |
| >HNF1A-T26I TEVRVYNW   | 165   | >HNF1A-T26I MEVRVYNW  | 75    | 90    |
| >HNF1A-T26I TEVRVYNW   | 19190 | >HNF1A-T26I MEVRVYNW  | 288   | 18902 |

|                       |       |                       |      |       |
|-----------------------|-------|-----------------------|------|-------|
| >HNF1A-T26 VTEVRVYNW  | 246   | >HNF1A-T26 VMEVRVYNV  | 1221 | 975   |
| >HNF1A-T26 VTEVRVYNW  | 8550  | >HNF1A-T26 VMEVRVYNV  | 237  | 8313  |
| >HNF1A-T26 VTEVRVYNW  | 4629  | >HNF1A-T26 VMEVRVYNV  | 88   | 4541  |
| >HNF1A-T26 VTEVRVYNW  | 1457  | >HNF1A-T26 VMEVRVYNV  | 483  | 974   |
| >HNF1A-T26 VTEVRVYNW  | 6621  | >HNF1A-T26 VMEVRVYNV  | 79   | 6542  |
| >HNF1A-T26 VTEVRVYNW  | 11895 | >HNF1A-T26 VMEVRVYNV  | 88   | 11807 |
| >HNF1A-T26 VTEVRVYNW  | 13462 | >HNF1A-T26 VMEVRVYNV  | 277  | 13185 |
| >HNF1A-T26 VTEVRVYNW  | 13764 | >HNF1A-T26 VMEVRVYNV  | 35   | 13729 |
| >HNF1A-T26 VTEVRVYNW  | 8     | >HNF1A-T26 VMEVRVYNV  | 235  | 227   |
| >HNF1A-T26 VTEVRVYNW  | 38    | >HNF1A-T26 VMEVRVYNV  | 3340 | 3302  |
| >HNF1A-T26 VTEVRVYNW  | 160   | >HNF1A-T26 VMEVRVYNV  | 2608 | 2448  |
| >HNF1A-T26 VTEVRVYNW  | 143   | >HNF1A-T26 VMEVRVYNV  | 746  | 603   |
| >HNF1A-T26 VTEVRVYNW  | 177   | >HNF1A-T26 VMEVRVYNV  | 8195 | 8018  |
| >HNF1A-T26 VTEVRVYNW  | 28    | >HNF1A-T26 VMEVRVYNV  | 608  | 580   |
| >HNF1A-T26 VTEVRVYNW  | 286   | >HNF1A-T26 VMEVRVYNV  | 568  | 282   |
| >HNF1A-T26 QAQGLGSNL' | 13881 | >HNF1A-T26 QAQGLGSNL' | 275  | 13606 |
| >HNF1A-T26 QAQGLGSNL' | 10988 | >HNF1A-T26 QAQGLGSNL' | 294  | 10694 |
| >HNF1A-T26 QAQGLGSNL' | 8884  | >HNF1A-T26 QAQGLGSNL' | 200  | 8684  |
| >HNF1A-T26 LVTEVRVYNV | 1261  | >HNF1A-T26 LVMEVRVYN' | 164  | 1097  |
| >HNF1A-T26 LVTEVRVYNV | 304   | >HNF1A-T26 LVMEVRVYN' | 49   | 255   |
| >HNF1A-T26 LVTEVRVY   | 492   | >HNF1A-T26 LVMEVRVY   | 182  | 310   |
| >HNF1A-T26 LVTEVRVYNV | 608   | >HNF1A-T26 LVMEVRVYN' | 190  | 418   |
| >HNF1A-T26 LVTEVRVY   | 690   | >HNF1A-T26 LVMEVRVY   | 452  | 238   |
| >HNF1A-T26 LVTEVRVY   | 395   | >HNF1A-T26 LVMEVRVY   | 273  | 122   |
| >HNF1A-T26 LVTEVRVYNV | 2639  | >HNF1A-T26 LVMEVRVYN' | 245  | 2394  |
| >HNF1A-T26 LVTEVRVY   | 753   | >HNF1A-T26 LVMEVRVY   | 73   | 680   |
| >HNF1A-T26 LVTEVRVYNV | 7042  | >HNF1A-T26 LVMEVRVYN' | 449  | 6593  |
| >HNF1A-T26 LVTEVRVYNV | 1696  | >HNF1A-T26 LVMEVRVYN' | 363  | 1333  |
| >HNF1A-T26 LVTEVRVYNV | 303   | >HNF1A-T26 LVMEVRVYN' | 71   | 232   |
| >HNF1A-T26 LVTEVRVY   | 217   | >HNF1A-T26 LVMEVRVY   | 108  | 109   |
| >HNF1A-T26 LVTEVRVYNV | 339   | >HNF1A-T26 LVMEVRVYN' | 125  | 214   |
| >HNF1A-T26 LVTEVRVYNV | 24    | >HNF1A-T26 LVMEVRVYN' | 16   | 8     |
| >HNF1A-T26 LVTEVRVYNV | 1050  | >HNF1A-T26 LVMEVRVYN' | 380  | 670   |
| >HNF1A-T26 LVTEVRVYNV | 145   | >HNF1A-T26 LVMEVRVYN' | 107  | 38    |
| >HNF1A-T26 LVTEVRVY   | 88    | >HNF1A-T26 LVMEVRVY   | 70   | 18    |
| >HNF1A-T26 LVTEVRVYNV | 243   | >HNF1A-T26 LVMEVRVYN' | 167  | 76    |
| >HNF1A-T26 NLVTEVRV   | 79    | >HNF1A-T26 NLVMEVRV   | 132  | 53    |
| >HNF1A-T26 NLVTEVRV   | 72    | >HNF1A-T26 NLVMEVRV   | 80   | 8     |
| >HNF1A-T26 NLVTEVRV   | 28    | >HNF1A-T26 NLVMEVRV   | 25   | 3     |
| >HNF1A-T26 NLVTEVRV   | 60    | >HNF1A-T26 NLVMEVRV   | 132  | 72    |
| >HNF1A-T26 NLVTEVRV   | 107   | >HNF1A-T26 NLVMEVRV   | 92   | 15    |
| >HNF1A-T26 NLVTEVRV   | 167   | >HNF1A-T26 NLVMEVRV   | 275  | 108   |
| >HNF1A-T26 NLVTEVRV   | 9     | >HNF1A-T26 NLVMEVRV   | 8    | 1     |

|                       |       |                      |      |       |
|-----------------------|-------|----------------------|------|-------|
| >HNF1A-T26INLVTEVRVY  | 102   | >HNF1A-T26INLVMEVRVY | 275  | 173   |
| >HNF1A-T26INLVTEVRVY  | 407   | >HNF1A-T26INLVMEVRVY | 172  | 235   |
| >HNF1A-T26INLVTEVRVY  | 428   | >HNF1A-T26INLVMEVRVY | 433  | 5     |
| >HNF1A-T26ISNLVTEVRV  | 1101  | >HNF1A-T26ISNLVMEVRV | 466  | 635   |
| >HNF1A-T26IGSNLVTEVRV | 390   | >HNF1A-T26IGSNLVMEVR | 318  | 72    |
| >HNF1A-T26IGSNLVTEVR  | 133   | >HNF1A-T26IGSNLVMEVR | 64   | 69    |
| >HNF1A-T26IGSNLVTEVR  | 213   | >HNF1A-T26IGSNLVMEVR | 472  | 259   |
| >HNF1A-T26IGSNLVTEVRV | 293   | >HNF1A-T26IGSNLVMEVR | 333  | 40    |
| >HNF1A-T26IGSNLVTEVRV | 155   | >HNF1A-T26IGSNLVMEVR | 67   | 88    |
| >HNF1A-T26IGSNLVTEVRV | 99    | >HNF1A-T26IGSNLVMEVR | 63   | 36    |
| >HNF1A-T26LGSNLVTEV   | 205   | >HNF1A-T26LGSNLVMEV  | 371  | 166   |
| >HNF1A-T26GLGSNLVTEV  | 115   | >HNF1A-T26GLGSNLVME  | 45   | 70    |
| >HNF1A-T26GLGSNLVTEV  | 34    | >HNF1A-T26GLGSNLVME  | 20   | 14    |
| >HNF1A-T26GLGSNLVTEV  | 23    | >HNF1A-T26GLGSNLVME  | 19   | 4     |
| >HNF1A-T26GLGSNLVTEV  | 995   | >HNF1A-T26GLGSNLVME  | 331  | 664   |
| >HNF1A-T26GLGSNLVT    | 1249  | >HNF1A-T26GLGSNLVM   | 386  | 863   |
| >HNF1A-T26GLGSNLVTEV  | 2     | >HNF1A-T26GLGSNLVME  | 2    | 0     |
| >HNF1A-T26GLGSNLVT    | 1613  | >HNF1A-T26GLGSNLVM   | 221  | 1392  |
| >HNF1A-T26GLGSNLVTEV  | 4     | >HNF1A-T26GLGSNLVME  | 3    | 1     |
| >HNF1A-T26GLGSNLVTEV  | 5     | >HNF1A-T26GLGSNLVME  | 5    | 0     |
| >HNF1A-T26GLGSNLVTEV  | 5     | >HNF1A-T26GLGSNLVME  | 4    | 1     |
| >HNF1A-T26GLGSNLVT    | 480   | >HNF1A-T26GLGSNLVM   | 312  | 168   |
| >HNF1A-T26GLGSNLVTEV  | 2     | >HNF1A-T26GLGSNLVME  | 2    | 0     |
| >HNF1A-T26GLGSNLVT    | 13938 | >HNF1A-T26GLGSNLVM   | 367  | 13571 |
| >HNF1A-T26AQGLGSNLV   | 4116  | >HNF1A-T26AQGLGSNLVI | 58   | 4058  |
| >HNF1A-T26AQGLGSNLV   | 11461 | >HNF1A-T26AQGLGSNLVI | 278  | 11183 |
| >HNF1A-V25VTEVRVYNW   | 246   | >HNF1A-V25LTEVRVYNWI | 298  | 52    |
| >HNF1A-V25VTEVRVYNW   | 8     | >HNF1A-V25LTEVRVYNW  | 7    | 1     |
| >HNF1A-V25VTEVRVYNW   | 38    | >HNF1A-V25LTEVRVYNWI | 38   | 0     |
| >HNF1A-V25VTEVRVYNW   | 1379  | >HNF1A-V25LTEVRVYNW  | 250  | 1129  |
| >HNF1A-V25VTEVRVYNW   | 160   | >HNF1A-V25LTEVRVYNW  | 110  | 50    |
| >HNF1A-V25VTEVRVYNW   | 143   | >HNF1A-V25LTEVRVYNW  | 81   | 62    |
| >HNF1A-V25VTEVRVYNW   | 177   | >HNF1A-V25LTEVRVYNWI | 167  | 10    |
| >HNF1A-V25VTEVRVYNW   | 28    | >HNF1A-V25LTEVRVYNWI | 19   | 9     |
| >HNF1A-V25VTEVRVYNW   | 286   | >HNF1A-V25LTEVRVYNW  | 67   | 219   |
| >HNF1A-V25LVTEVRVYNV  | 5605  | >HNF1A-V25LLTEVRVYNW | 469  | 5136  |
| >HNF1A-V25LVTEVRVYNV  | 17550 | >HNF1A-V25LLTEVRVYNW | 424  | 17126 |
| >HNF1A-V25LVTEVRVYNV  | 304   | >HNF1A-V25LLTEVRVYNW | 710  | 406   |
| >HNF1A-V25LVTEVRVY    | 492   | >HNF1A-V25LLTEVRVY   | 7598 | 7106  |
| >HNF1A-V25LVTEVRVY    | 395   | >HNF1A-V25LLTEVRVY   | 380  | 15    |
| >HNF1A-V25LVTEVRVY    | 753   | >HNF1A-V25LLTEVRVY   | 279  | 474   |
| >HNF1A-V25LVTEVRVY    | 2889  | >HNF1A-V25LLTEVRVY   | 452  | 2437  |
| >HNF1A-V25LVTEVRVYNV  | 1696  | >HNF1A-V25LLTEVRVYNW | 450  | 1246  |

|                       |      |                       |      |      |
|-----------------------|------|-----------------------|------|------|
| >HNF1A-V25 LVTEVRVYNV | 303  | >HNF1A-V25 LLTEVRVYNM | 935  | 632  |
| >HNF1A-V25 LVTEVRVY   | 217  | >HNF1A-V25 LLTEVRVY   | 1184 | 967  |
| >HNF1A-V25 LVTEVRVYNV | 339  | >HNF1A-V25 LLTEVRVYNM | 892  | 553  |
| >HNF1A-V25 LVTEVRVYNV | 24   | >HNF1A-V25 LLTEVRVYNM | 67   | 43   |
| >HNF1A-V25 LVTEVRVYNV | 145  | >HNF1A-V25 LLTEVRVYNM | 767  | 622  |
| >HNF1A-V25 LVTEVRVY   | 88   | >HNF1A-V25 LLTEVRVY   | 283  | 195  |
| >HNF1A-V25 LVTEVRVYNV | 243  | >HNF1A-V25 LLTEVRVYNM | 575  | 332  |
| >HNF1A-V25 SQAQGLGSN  | 321  | >HNF1A-V25 SQAQGLGSN  | 2011 | 1690 |
| >HNF1A-V25 SQAQGLGSN  | 79   | >HNF1A-V25 SQAQGLGSN  | 84   | 5    |
| >HNF1A-V25 SQAQGLGSN  | 19   | >HNF1A-V25 SQAQGLGSN  | 237  | 218  |
| >HNF1A-V25 SQAQGLGSN  | 7    | >HNF1A-V25 SQAQGLGSN  | 21   | 14   |
| >HNF1A-V25 SQAQGLGSN  | 83   | >HNF1A-V25 SQAQGLGSN  | 2292 | 2209 |
| >HNF1A-V25 SQAQGLGSN  | 1090 | >HNF1A-V25 SQAQGLGSN  | 380  | 710  |
| >HNF1A-V25 SQAQGLGSN  | 1300 | >HNF1A-V25 SQAQGLGSN  | 81   | 1219 |
| >HNF1A-V25 SQAQGLGSN  | 3748 | >HNF1A-V25 SQAQGLGSN  | 328  | 3420 |
| >HNF1A-V25 NLVTEVRV   | 649  | >HNF1A-V25 NLLTEVRV   | 86   | 563  |
| >HNF1A-V25 NLVTEVRV   | 79   | >HNF1A-V25 NLLTEVRV   | 131  | 52   |
| >HNF1A-V25 NLVTEVRV   | 72   | >HNF1A-V25 NLLTEVRV   | 228  | 156  |
| >HNF1A-V25 NLVTEVRV   | 583  | >HNF1A-V25 NLLTEVRV   | 295  | 288  |
| >HNF1A-V25 NLVTEVRV   | 28   | >HNF1A-V25 NLLTEVRV   | 7    | 21   |
| >HNF1A-V25 NLVTEVRV   | 60   | >HNF1A-V25 NLLTEVRV   | 12   | 48   |
| >HNF1A-V25 NLVTEVRV   | 107  | >HNF1A-V25 NLLTEVRV   | 14   | 93   |
| >HNF1A-V25 NLVTEVRV   | 167  | >HNF1A-V25 NLLTEVRV   | 6    | 161  |
| >HNF1A-V25 NLVTEVRV   | 9    | >HNF1A-V25 NLLTEVRV   | 7    | 2    |
| >HNF1A-V25 NLVTEVRVY  | 102  | >HNF1A-V25 NLLTEVRVY  | 1088 | 986  |
| >HNF1A-V25 NLVTEVRVY  | 407  | >HNF1A-V25 NLLTEVRVY  | 1110 | 703  |
| >HNF1A-V25 NLVTEVRVY  | 796  | >HNF1A-V25 NLLTEVRVY  | 465  | 331  |
| >HNF1A-V25 NLVTEVRVY  | 428  | >HNF1A-V25 NLLTEVRVY  | 2608 | 2180 |
| >HNF1A-V25 GSNLVTEVRV | 390  | >HNF1A-V25 GSNLLTEVRV | 475  | 85   |
| >HNF1A-V25 GSNLVTEVR  | 133  | >HNF1A-V25 GSNLLTEVR  | 151  | 18   |
| >HNF1A-V25 GSNLVTEVR  | 213  | >HNF1A-V25 GSNLLTEVR  | 718  | 505  |
| >HNF1A-V25 GSNLVTEVRV | 293  | >HNF1A-V25 GSNLLTEVRV | 276  | 17   |
| >HNF1A-V25 GSNLVTEVRV | 155  | >HNF1A-V25 GSNLLTEVRV | 72   | 83   |
| >HNF1A-V25 GSNLVTEVRV | 99   | >HNF1A-V25 GSNLLTEVRV | 100  | 1    |
| >HNF1A-V25 LGSNLVTEV  | 205  | >HNF1A-V25 LGSNLLTEV  | 158  | 47   |
| >HNF1A-V25 GLGSNLVTEV | 115  | >HNF1A-V25 GLGSNLLTEV | 46   | 69   |
| >HNF1A-V25 GLGSNLVTEV | 34   | >HNF1A-V25 GLGSNLLTEV | 21   | 13   |
| >HNF1A-V25 GLGSNLVTEV | 23   | >HNF1A-V25 GLGSNLLTEV | 14   | 9    |
| >HNF1A-V25 GLGSNLVTEV | 995  | >HNF1A-V25 GLGSNLLTEV | 282  | 713  |
| >HNF1A-V25 GLGSNLVTEV | 2    | >HNF1A-V25 GLGSNLLTEV | 3    | 1    |
| >HNF1A-V25 GLGSNLVTEV | 4    | >HNF1A-V25 GLGSNLLTEV | 4    | 0    |
| >HNF1A-V25 GLGSNLVTEV | 5    | >HNF1A-V25 GLGSNLLTEV | 5    | 0    |
| >HNF1A-V25 GLGSNLVTEV | 5    | >HNF1A-V25 GLGSNLLTEV | 7    | 2    |



|                       |     |                       |       |       |
|-----------------------|-----|-----------------------|-------|-------|
| >HNF1A-V25 GLGSNLVT   | 480 | >HNF1A-V25 GLGSNLLT   | 334   | 146   |
| >HNF1A-V25 GLGSNLVTEV | 2   | >HNF1A-V25 GLGSNLLTEV | 2     | 0     |
| >HNF1A-V25 AQGLGSNLV  | 29  | >HNF1A-V25 AQGLGSNLL  | 289   | 260   |
| >HNF1A-W1{WYVRKQREV   | 419 | >HNF1A-W1{CYVRKQREV   | 343   | 76    |
| >HNF1A-W1{TWYVRKQR    | 56  | >HNF1A-W1{TCYVRKQR    | 236   | 180   |
| >HNF1A-W1{TWYVRKQR    | 25  | >HNF1A-W1{TCYVRKQR    | 460   | 435   |
| >HNF1A-W1{TWYVRKQRE   | 324 | >HNF1A-W1{TCYVRKQREV  | 37208 | 36884 |
| >HNF1A-W1{KTQKRAALYT  | 15  | >HNF1A-W1{KTQKRAALYT  | 229   | 214   |
| >HNF1A-W1{KTQKRAALYT  | 8   | >HNF1A-W1{KTQKRAALYT  | 2729  | 2721  |
| >HNF1A-W1{KTQKRAALYT  | 33  | >HNF1A-W1{KTQKRAALYT  | 8883  | 8850  |
| >HNF1A-W1{KTQKRAALYT  | 11  | >HNF1A-W1{KTQKRAALYT  | 7685  | 7674  |
| >HNF1A-W1{KTQKRAALYT  | 159 | >HNF1A-W1{KTQKRAALYT  | 2964  | 2805  |
| >HNF1A-W1{YTWYVRKQR   | 158 | >HNF1A-W1{YTCYVRKQRE  | 4522  | 4364  |
| >HNF1A-W1{YTWYVRKQR   | 17  | >HNF1A-W1{YTCYVRKQRE  | 262   | 245   |
| >HNF1A-W1{YTWYVRKQR   | 100 | >HNF1A-W1{YTCYVRKQRE  | 6215  | 6115  |
| >HNF1A-W1{YTWYVRKQR   | 122 | >HNF1A-W1{YTCYVRKQRE  | 1453  | 1331  |
| >HNF1A-W1{YTWYVRKQR   | 13  | >HNF1A-W1{YTCYVRKQR   | 39    | 26    |
| >HNF1A-W1{YTWYVRKQR   | 16  | >HNF1A-W1{YTCYVRKQR   | 24    | 8     |
| >HNF1A-W1{YTWYVRKQR   | 6   | >HNF1A-W1{YTCYVRKQR   | 3     | 3     |
| >HNF1A-W1{YTWYVRKQR   | 23  | >HNF1A-W1{YTCYVRKQRE  | 62    | 39    |
| >HNF1A-W1{YTWYVRKQR   | 69  | >HNF1A-W1{YTCYVRKQRE  | 2106  | 2037  |
| >HNF1A-W1{YTWYVRKQR   | 302 | >HNF1A-W1{YTCYVRKQRE  | 529   | 227   |
| >HNF1A-W1{LYTWYVRKQI  | 35  | >HNF1A-W1{LYTCYVRKQR  | 55    | 20    |
| >HNF1A-W1{LYTWYVRKQI  | 147 | >HNF1A-W1{LYTCYVRKQR  | 219   | 72    |
| >HNF1A-W1{LYTWYVRK    | 258 | >HNF1A-W1{LYTCYVRK    | 332   | 74    |
| >HNF1A-W1{LYTWYVRKQI  | 99  | >HNF1A-W1{LYTCYVRKQR  | 113   | 14    |
| >HNF1A-W1{LYTWYVRKQ   | 463 | >HNF1A-W1{LYTCYVRKQ   | 5833  | 5370  |
| >HNF1A-W1{ALYTWYVRK   | 152 | >HNF1A-W1{ALYTCYVRK   | 3868  | 3716  |
| >HNF1A-W1{ALYTWYVRKQ  | 92  | >HNF1A-W1{ALYTCYVRKQ  | 1142  | 1050  |
| >HNF1A-W1{ALYTWYVRK   | 30  | >HNF1A-W1{ALYTCYVRK   | 270   | 240   |
| >HNF1A-W1{ALYTWYVRKQ  | 30  | >HNF1A-W1{ALYTCYVRKQ  | 196   | 166   |
| >HNF1A-W1{ALYTWYVR    | 114 | >HNF1A-W1{ALYTCYVR    | 129   | 15    |
| >HNF1A-W1{ALYTWYVRK   | 25  | >HNF1A-W1{ALYTCYVRK   | 25    | 0     |
| >HNF1A-W1{ALYTWYVRKQ  | 92  | >HNF1A-W1{ALYTCYVRKQ  | 102   | 10    |
| >HNF1A-W1{ALYTWYVR    | 112 | >HNF1A-W1{ALYTCYVR    | 232   | 120   |
| >HNF1A-W1{ALYTWYVRK   | 12  | >HNF1A-W1{ALYTCYVRK   | 17    | 5     |
| >HNF1A-W1{ALYTWYVRKQ  | 472 | >HNF1A-W1{ALYTCYVRKQ  | 750   | 278   |
| >HNF1A-W1{ALYTWYVRK   | 288 | >HNF1A-W1{ALYTCYVRK   | 422   | 134   |
| >HNF1A-W1{ALYTWYVR    | 11  | >HNF1A-W1{ALYTCYVR    | 19    | 8     |
| >HNF1A-W1{ALYTWYVRK   | 80  | >HNF1A-W1{ALYTCYVRK   | 198   | 118   |
| >HNF1A-W1{ALYTWYVRKQ  | 17  | >HNF1A-W1{ALYTCYVRKQ  | 25    | 8     |
| >HNF1A-W1{ALYTWYVR    | 340 | >HNF1A-W1{ALYTCYVR    | 1003  | 663   |
| >HNF1A-W1{ALYTWYVR    | 413 | >HNF1A-W1{ALYTCYVR    | 361   | 52    |

|                      |      |                      |      |      |
|----------------------|------|----------------------|------|------|
| >HNF1A-W1{ALYTWYVRK{ | 468  | >HNF1A-W1{ALYTCYVRKQ | 452  | 16   |
| >HNF1A-W1{ALYTWYVRK  | 416  | >HNF1A-W1{ALYTCYVRK  | 570  | 154  |
| >HNF1A-W1{ALYTWYVR   | 121  | >HNF1A-W1{ALYTCYVR   | 69   | 52   |
| >HNF1A-W1{ALYTWYVRK  | 1051 | >HNF1A-W1{ALYTCYVRK  | 421  | 630  |
| >HNF1A-W1{ALYTWYVRK{ | 436  | >HNF1A-W1{ALYTCYVRKQ | 205  | 231  |
| >HNF1A-W1{AALYTWYV   | 40   | >HNF1A-W1{AALYTCYV   | 162  | 122  |
| >HNF1A-W1{AALYTWYV   | 231  | >HNF1A-W1{AALYTCYV   | 516  | 285  |
| >HNF1A-W1{AALYTWYV   | 7    | >HNF1A-W1{AALYTCYV   | 25   | 18   |
| >HNF1A-W1{AALYTWYV   | 12   | >HNF1A-W1{AALYTCYV   | 47   | 35   |
| >HNF1A-W1{AALYTWYV   | 72   | >HNF1A-W1{AALYTCYV   | 347  | 275  |
| >HNF1A-W1{AALYTWYV   | 33   | >HNF1A-W1{AALYTCYV   | 109  | 76   |
| >HNF1A-W1{AALYTWYV   | 66   | >HNF1A-W1{AALYTCYV   | 204  | 138  |
| >HNF1A-W1{AALYTWYV   | 72   | >HNF1A-W1{AALYTCYV   | 138  | 66   |
| >HNF1A-W1{AALYTWYVRI | 57   | >HNF1A-W1{AALYTCYVRK | 31   | 26   |
| >HNF1A-W1{AALYTWYVRI | 18   | >HNF1A-W1{AALYTCYVRK | 18   | 0    |
| >HNF1A-W1{AALYTWYVRI | 32   | >HNF1A-W1{AALYTCYVRK | 121  | 89   |
| >HNF1A-W1{AALYTWYVR  | 11   | >HNF1A-W1{AALYTCYVR  | 20   | 9    |
| >HNF1A-W1{AALYTWYVR  | 438  | >HNF1A-W1{AALYTCYVR  | 680  | 242  |
| >HNF1A-W1{AALYTWYVR  | 278  | >HNF1A-W1{AALYTCYVR  | 204  | 74   |
| >HNF1A-W1{AALYTWYV   | 315  | >HNF1A-W1{AALYTCYV   | 1126 | 811  |
| >HNF1A-W1{AALYTWYV   | 43   | >HNF1A-W1{AALYTCYV   | 111  | 68   |
| >HNF1A-W1{AALYTWYVR  | 131  | >HNF1A-W1{AALYTCYVR  | 407  | 276  |
| >HNF1A-W1{AALYTWYVRI | 91   | >HNF1A-W1{AALYTCYVRK | 153  | 62   |
| >HNF1A-W1{RAALYTWYV  | 15   | >HNF1A-W1{RAALYTCYV  | 155  | 140  |
| >HNF1A-W1{RAALYTWYV  | 13   | >HNF1A-W1{RAALYTCYV  | 46   | 33   |
| >HNF1A-W1{RAALYTWYV  | 85   | >HNF1A-W1{RAALYTCYV  | 142  | 57   |
| >HNF1A-W1{RAALYTWYV  | 5    | >HNF1A-W1{RAALYTCYV  | 21   | 16   |
| >HNF1A-W1{RAALYTWYV  | 10   | >HNF1A-W1{RAALYTCYV  | 43   | 33   |
| >HNF1A-W1{RAALYTWYV  | 97   | >HNF1A-W1{RAALYTCYV  | 1540 | 1443 |
| >HNF1A-W1{RAALYTWYV  | 57   | >HNF1A-W1{RAALYTCYV  | 177  | 120  |
| >HNF1A-W1{RAALYTWYV  | 14   | >HNF1A-W1{RAALYTCYV  | 121  | 107  |
| >HNF1A-W1{RAALYTWYV  | 29   | >HNF1A-W1{RAALYTCYV  | 100  | 71   |
| >HNF1A-W1{RAALYTWYVI | 128  | >HNF1A-W1{RAALYTCYVR | 128  | 0    |
| >HNF1A-W1{RAALYTWYVI | 153  | >HNF1A-W1{RAALYTCYVR | 148  | 5    |
| >HNF1A-W1{RAALYTWYVI | 19   | >HNF1A-W1{RAALYTCYVR | 26   | 7    |
| >HNF1A-W1{RAALYTWYV  | 1268 | >HNF1A-W1{RAALYTCYV  | 287  | 981  |
| >HNF1A-W1{RAALYTWYVI | 79   | >HNF1A-W1{RAALYTCYVR | 61   | 18   |
| >HNF1A-W1{RAALYTWY   | 413  | >HNF1A-W1{RAALYTCY   | 1052 | 639  |
| >HNF1A-W1{RAALYTWYVI | 15   | >HNF1A-W1{RAALYTCYVR | 21   | 6    |
| >HNF1A-W1{RAALYTWYVI | 57   | >HNF1A-W1{RAALYTCYVR | 92   | 35   |
| >HNF1A-W1{RAALYTWYVI | 49   | >HNF1A-W1{RAALYTCYVR | 36   | 13   |
| >HNF1A-W1{RAALYTWYVI | 330  | >HNF1A-W1{RAALYTCYVR | 355  | 25   |
| >HNF1A-W1{RAALYTWYV  | 41   | >HNF1A-W1{RAALYTCYV  | 189  | 148  |

|                      |      |                      |       |       |
|----------------------|------|----------------------|-------|-------|
| >HNF1A-W1{RAALYTWYV  | 22   | >HNF1A-W1{RAALYTCYV  | 129   | 107   |
| >HNF1A-W1{RAALYTWY   | 1121 | >HNF1A-W1{RAALYTCY   | 274   | 847   |
| >HNF1A-W1{RAALYTWY   | 720  | >HNF1A-W1{RAALYTCY   | 138   | 582   |
| >HNF1A-W1{RAALYTWY   | 13   | >HNF1A-W1{RAALYTCY   | 51    | 38    |
| >HNF1A-W1{RAALYTWYV  | 1222 | >HNF1A-W1{RAALYTCYV  | 396   | 826   |
| >HNF1A-W1{RAALYTWY   | 358  | >HNF1A-W1{RAALYTCY   | 189   | 169   |
| >HNF1A-W1{RAALYTWY   | 440  | >HNF1A-W1{RAALYTCY   | 3741  | 3301  |
| >HNF1A-W1{RAALYTWY   | 100  | >HNF1A-W1{RAALYTCY   | 148   | 48    |
| >HNF1A-W1{RAALYTWYV  | 172  | >HNF1A-W1{RAALYTCYV  | 622   | 450   |
| >HNF1A-W1{RAALYTWYV  | 209  | >HNF1A-W1{RAALYTCYV  | 1738  | 1529  |
| >HNF1A-W1{RAALYTWY   | 3343 | >HNF1A-W1{RAALYTCY   | 167   | 3176  |
| >HNF1A-W1{RAALYTWYVI | 454  | >HNF1A-W1{RAALYTCYVR | 696   | 242   |
| >HNF1A-W1{RAALYTWYVI | 40   | >HNF1A-W1{RAALYTCYVR | 50    | 10    |
| >HNF1A-W1{RAALYTWYVI | 471  | >HNF1A-W1{RAALYTCYVR | 452   | 19    |
| >HNF1A-W1{KRAALYTWY\ | 391  | >HNF1A-W1{KRAALYTCYV | 723   | 332   |
| >HNF1A-W1{KRAALYTWY\ | 400  | >HNF1A-W1{KRAALYTCYV | 1732  | 1332  |
| >HNF1A-W1{KRAALYTWY\ | 443  | >HNF1A-W1{KRAALYTCYV | 1064  | 621   |
| >HNF1A-W1{KRAALYTWY  | 127  | >HNF1A-W1{KRAALYTCY  | 30    | 97    |
| >HNF1A-W1{KRAALYTWY\ | 748  | >HNF1A-W1{KRAALYTCYV | 468   | 280   |
| >HNF1A-W1{KRAALYTW   | 491  | >HNF1A-W1{KRAALYTC   | 1690  | 1199  |
| >HNF1A-W1{KRAALYTWY  | 171  | >HNF1A-W1{KRAALYTCY  | 100   | 71    |
| >HNF1A-W1{KRAALYTWY\ | 72   | >HNF1A-W1{KRAALYTCYV | 258   | 186   |
| >HNF1A-W1{KRAALYTWY\ | 58   | >HNF1A-W1{KRAALYTCYV | 159   | 101   |
| >HNF1A-W1{KRAALYTW   | 316  | >HNF1A-W1{KRAALYTC   | 20997 | 20681 |
| >HNF1A-W1{KRAALYTWY  | 290  | >HNF1A-W1{KRAALYTCY  | 2817  | 2527  |
| >HNF1A-W1{KRAALYTW   | 195  | >HNF1A-W1{KRAALYTC   | 100   | 95    |
| >HNF1A-W1{KRAALYTWY  | 88   | >HNF1A-W1{KRAALYTCY  | 122   | 34    |
| >HNF1A-W1{KRAALYTWY\ | 362  | >HNF1A-W1{KRAALYTCYV | 242   | 120   |
| >HNF1A-W1{KRAALYTWY\ | 160  | >HNF1A-W1{KRAALYTCYV | 379   | 219   |
| >HNF1A-W1{KRAALYTW   | 445  | >HNF1A-W1{KRAALYTC   | 1227  | 782   |
| >HNF1A-W1{KRAALYTWY  | 115  | >HNF1A-W1{KRAALYTCY  | 298   | 183   |
| >HNF1A-W1{KRAALYTWY\ | 71   | >HNF1A-W1{KRAALYTCYV | 155   | 84    |
| >HNF1A-W1{KRAALYTW   | 40   | >HNF1A-W1{KRAALYTC   | 31980 | 31940 |
| >HNF1A-W1{KRAALYTWY\ | 30   | >HNF1A-W1{KRAALYTCYV | 37    | 7     |
| >HNF1A-W1{QKRAALYTW  | 132  | >HNF1A-W1{QKRAALYTC  | 1424  | 1292  |
| >HNF1A-W1{QKRAALYTW  | 15   | >HNF1A-W1{QKRAALYTCY | 7     | 8     |
| >HNF1A-W1{QKRAALYTW  | 132  | >HNF1A-W1{QKRAALYTCY | 122   | 10    |
| >HNF1A-W1{TQKRAALYTV | 409  | >HNF1A-W1{TQKRAALYTC | 7956  | 7547  |
| >HNF1A-W1{TQKRAALYTV | 100  | >HNF1A-W1{TQKRAALYTC | 58    | 42    |
| >HNF1A-W1{TQKRAALYTV | 57   | >HNF1A-W1{TQKRAALYTC | 19    | 38    |
| >HNF1A-W1{TQKRAALYTV | 210  | >HNF1A-W1{TQKRAALYTC | 24004 | 23794 |
| >HNF1A-W1{WYVRKQREV  | 419  | >HNF1A-W1{RYVRKQREV  | 233   | 186   |
| >HNF1A-W1{TWYVRKQR   | 56   | >HNF1A-W1{TRYVRKQR   | 4840  | 4784  |

|                      |       |                      |       |       |
|----------------------|-------|----------------------|-------|-------|
| >HNF1A-W1{TWYVRKQR   | 16757 | >HNF1A-W1{TRYVRKQR   | 165   | 16592 |
| >HNF1A-W1{TWYVRKQRE  | 22261 | >HNF1A-W1{TRYVRKQREV | 385   | 21876 |
| >HNF1A-W1{TWYVRKQR   | 25    | >HNF1A-W1{TRYVRKQR   | 1497  | 1472  |
| >HNF1A-W1{TWYVRKQRE  | 324   | >HNF1A-W1{TRYVRKQREV | 36256 | 35932 |
| >HNF1A-W1{KTQKRAALYT | 21420 | >HNF1A-W1{KTQKRAALYT | 165   | 21255 |
| >HNF1A-W1{KTQKRAALYT | 4960  | >HNF1A-W1{KTQKRAALYT | 326   | 4634  |
| >HNF1A-W1{KTQKRAALYT | 3955  | >HNF1A-W1{KTQKRAALYT | 9     | 3946  |
| >HNF1A-W1{KTQKRAALYT | 15    | >HNF1A-W1{KTQKRAALYT | 590   | 575   |
| >HNF1A-W1{KTQKRAALYT | 33149 | >HNF1A-W1{KTQKRAALYT | 370   | 32779 |
| >HNF1A-W1{KTQKRAALYT | 8     | >HNF1A-W1{KTQKRAALYT | 3693  | 3685  |
| >HNF1A-W1{KTQKRAALYT | 33    | >HNF1A-W1{KTQKRAALYT | 10635 | 10602 |
| >HNF1A-W1{KTQKRAALYT | 11    | >HNF1A-W1{KTQKRAALYT | 17708 | 17697 |
| >HNF1A-W1{KTQKRAALYT | 159   | >HNF1A-W1{KTQKRAALYT | 2620  | 2461  |
| >HNF1A-W1{KTQKRAALYT | 25568 | >HNF1A-W1{KTQKRAALYT | 72    | 25496 |
| >HNF1A-W1{YTWYVRKQR  | 158   | >HNF1A-W1{YTRYVRKQRE | 11454 | 11296 |
| >HNF1A-W1{YTWYVRKQR  | 17    | >HNF1A-W1{YTRYVRKQRE | 2225  | 2208  |
| >HNF1A-W1{YTWYVRKQR  | 100   | >HNF1A-W1{YTRYVRKQRE | 11060 | 10960 |
| >HNF1A-W1{YTWYVRKQR  | 122   | >HNF1A-W1{YTRYVRKQRE | 2021  | 1899  |
| >HNF1A-W1{YTWYVRKQR  | 12485 | >HNF1A-W1{YTRYVRKQR  | 210   | 12275 |
| >HNF1A-W1{YTWYVRKQR  | 8104  | >HNF1A-W1{YTRYVRKQRE | 76    | 8028  |
| >HNF1A-W1{YTWYVRKQR  | 13    | >HNF1A-W1{YTRYVRKQR  | 28    | 15    |
| >HNF1A-W1{YTWYVRKQR  | 16    | >HNF1A-W1{YTRYVRKQR  | 18    | 2     |
| >HNF1A-W1{YTWYVRKQR  | 6     | >HNF1A-W1{YTRYVRKQR  | 9     | 3     |
| >HNF1A-W1{YTWYVRKQR  | 23    | >HNF1A-W1{YTRYVRKQRE | 396   | 373   |
| >HNF1A-W1{YTWYVRKQR  | 69    | >HNF1A-W1{YTRYVRKQRE | 4539  | 4470  |
| >HNF1A-W1{YTWYVRKQR  | 604   | >HNF1A-W1{YTRYVRKQRE | 441   | 163   |
| >HNF1A-W1{YTWYVRKQR  | 1031  | >HNF1A-W1{YTRYVRKQR  | 194   | 837   |
| >HNF1A-W1{YTWYVRKQR  | 302   | >HNF1A-W1{YTRYVRKQRE | 73    | 229   |
| >HNF1A-W1{LYTWYVRK   | 2135  | >HNF1A-W1{LYTRYVRK   | 370   | 1765  |
| >HNF1A-W1{LYTWYVRKQI | 35    | >HNF1A-W1{LYTRYVRKQR | 64    | 29    |
| >HNF1A-W1{LYTWYVRKQI | 147   | >HNF1A-W1{LYTRYVRKQR | 190   | 43    |
| >HNF1A-W1{LYTWYVRK   | 258   | >HNF1A-W1{LYTRYVRK   | 997   | 739   |
| >HNF1A-W1{LYTWYVRKQI | 99    | >HNF1A-W1{LYTRYVRKQR | 290   | 191   |
| >HNF1A-W1{LYTWYVRKQ  | 463   | >HNF1A-W1{LYTRYVRKQ  | 4721  | 4258  |
| >HNF1A-W1{ALYTWYVRK  | 152   | >HNF1A-W1{ALYTRYVRK  | 4115  | 3963  |
| >HNF1A-W1{ALYTWYVRKQ | 92    | >HNF1A-W1{ALYTRYVRKQ | 1227  | 1135  |
| >HNF1A-W1{ALYTWYVRK  | 30    | >HNF1A-W1{ALYTRYVRK  | 324   | 294   |
| >HNF1A-W1{ALYTWYVRKQ | 30    | >HNF1A-W1{ALYTRYVRKQ | 158   | 128   |
| >HNF1A-W1{ALYTWYVR   | 114   | >HNF1A-W1{ALYTRYVR   | 87    | 27    |
| >HNF1A-W1{ALYTWYVRK  | 25    | >HNF1A-W1{ALYTRYVRK  | 24    | 1     |
| >HNF1A-W1{ALYTWYVRKQ | 92    | >HNF1A-W1{ALYTRYVRKQ | 76    | 16    |
| >HNF1A-W1{ALYTWYVR   | 112   | >HNF1A-W1{ALYTRYVR   | 186   | 74    |
| >HNF1A-W1{ALYTWYVRK  | 12    | >HNF1A-W1{ALYTRYVRK  | 18    | 6     |

|                      |     |                      |      |      |
|----------------------|-----|----------------------|------|------|
| >HNF1A-W1{ALYTWYVRKQ | 472 | >HNF1A-W1{ALYTRYVRKQ | 748  | 276  |
| >HNF1A-W1{ALYTWYVRK  | 288 | >HNF1A-W1{ALYTRYVRK  | 94   | 194  |
| >HNF1A-W1{ALYTWYVR   | 11  | >HNF1A-W1{ALYTRYVR   | 10   | 1    |
| >HNF1A-W1{ALYTWYVRK  | 80  | >HNF1A-W1{ALYTRYVRK  | 77   | 3    |
| >HNF1A-W1{ALYTWYVRKQ | 17  | >HNF1A-W1{ALYTRYVRKQ | 17   | 0    |
| >HNF1A-W1{ALYTWYVR   | 340 | >HNF1A-W1{ALYTRYVR   | 472  | 132  |
| >HNF1A-W1{ALYTWYVR   | 413 | >HNF1A-W1{ALYTRYVR   | 347  | 66   |
| >HNF1A-W1{ALYTWYVRKQ | 468 | >HNF1A-W1{ALYTRYVRKQ | 510  | 42   |
| >HNF1A-W1{ALYTWYVRK  | 416 | >HNF1A-W1{ALYTRYVRK  | 656  | 240  |
| >HNF1A-W1{ALYTWYVR   | 121 | >HNF1A-W1{ALYTRYVR   | 144  | 23   |
| >HNF1A-W1{ALYTWYVRKQ | 436 | >HNF1A-W1{ALYTRYVRKQ | 530  | 94   |
| >HNF1A-W1{AALYTWYV   | 40  | >HNF1A-W1{AALYTRYV   | 1763 | 1723 |
| >HNF1A-W1{AALYTWYV   | 231 | >HNF1A-W1{AALYTRYV   | 1560 | 1329 |
| >HNF1A-W1{AALYTWYV   | 7   | >HNF1A-W1{AALYTRYV   | 191  | 184  |
| >HNF1A-W1{AALYTWYV   | 12  | >HNF1A-W1{AALYTRYV   | 194  | 182  |
| >HNF1A-W1{AALYTWYV   | 72  | >HNF1A-W1{AALYTRYV   | 1946 | 1874 |
| >HNF1A-W1{AALYTWYV   | 33  | >HNF1A-W1{AALYTRYV   | 1230 | 1197 |
| >HNF1A-W1{AALYTWYV   | 66  | >HNF1A-W1{AALYTRYV   | 2338 | 2272 |
| >HNF1A-W1{AALYTWYV   | 72  | >HNF1A-W1{AALYTRYV   | 1128 | 1056 |
| >HNF1A-W1{AALYTWYVRI | 57  | >HNF1A-W1{AALYTRYVRK | 29   | 28   |
| >HNF1A-W1{AALYTWYVRI | 18  | >HNF1A-W1{AALYTRYVRK | 17   | 1    |
| >HNF1A-W1{AALYTWYV   | 588 | >HNF1A-W1{AALYTRYV   | 461  | 127  |
| >HNF1A-W1{AALYTWYVRI | 32  | >HNF1A-W1{AALYTRYVRK | 26   | 6    |
| >HNF1A-W1{AALYTWYVR  | 11  | >HNF1A-W1{AALYTRYVR  | 9    | 2    |
| >HNF1A-W1{AALYTWYVR  | 438 | >HNF1A-W1{AALYTRYVR  | 363  | 75   |
| >HNF1A-W1{AALYTWYVR  | 278 | >HNF1A-W1{AALYTRYVR  | 143  | 135  |
| >HNF1A-W1{AALYTWYV   | 315 | >HNF1A-W1{AALYTRYV   | 1781 | 1466 |
| >HNF1A-W1{AALYTWYV   | 43  | >HNF1A-W1{AALYTRYV   | 360  | 317  |
| >HNF1A-W1{AALYTWYVR  | 131 | >HNF1A-W1{AALYTRYVR  | 1012 | 881  |
| >HNF1A-W1{AALYTWYVRI | 91  | >HNF1A-W1{AALYTRYVRK | 233  | 142  |
| >HNF1A-W1{RAALYTWYV  | 15  | >HNF1A-W1{RAALYTRYV  | 2039 | 2024 |
| >HNF1A-W1{RAALYTWYV  | 13  | >HNF1A-W1{RAALYTRYV  | 246  | 233  |
| >HNF1A-W1{RAALYTWYV  | 85  | >HNF1A-W1{RAALYTRYV  | 247  | 162  |
| >HNF1A-W1{RAALYTWYV  | 5   | >HNF1A-W1{RAALYTRYV  | 173  | 168  |
| >HNF1A-W1{RAALYTWYV  | 10  | >HNF1A-W1{RAALYTRYV  | 330  | 320  |
| >HNF1A-W1{RAALYTWYV  | 97  | >HNF1A-W1{RAALYTRYV  | 8602 | 8505 |
| >HNF1A-W1{RAALYTWYV  | 57  | >HNF1A-W1{RAALYTRYV  | 4894 | 4837 |
| >HNF1A-W1{RAALYTWYV  | 14  | >HNF1A-W1{RAALYTRYV  | 4136 | 4122 |
| >HNF1A-W1{RAALYTWYV  | 29  | >HNF1A-W1{RAALYTRYV  | 4815 | 4786 |
| >HNF1A-W1{RAALYTWYVI | 128 | >HNF1A-W1{RAALYTRYVR | 116  | 12   |
| >HNF1A-W1{RAALYTWYVI | 153 | >HNF1A-W1{RAALYTRYVR | 263  | 110  |
| >HNF1A-W1{RAALYTWYVI | 19  | >HNF1A-W1{RAALYTRYVR | 40   | 21   |
| >HNF1A-W1{RAALYTWYVI | 79  | >HNF1A-W1{RAALYTRYVR | 48   | 31   |

|                      |       |                      |       |       |
|----------------------|-------|----------------------|-------|-------|
| >HNF1A-W1{RAALYTWY   | 413   | >HNF1A-W1{RAALYTRY   | 463   | 50    |
| >HNF1A-W1{RAALYTWYVI | 15    | >HNF1A-W1{RAALYTRYVR | 8     | 7     |
| >HNF1A-W1{RAALYTWYVI | 57    | >HNF1A-W1{RAALYTRYVR | 98    | 41    |
| >HNF1A-W1{RAALYTWYVI | 49    | >HNF1A-W1{RAALYTRYVR | 60    | 11    |
| >HNF1A-W1{RAALYTWYVI | 330   | >HNF1A-W1{RAALYTRYVR | 624   | 294   |
| >HNF1A-W1{RAALYTWYV  | 41    | >HNF1A-W1{RAALYTRYV  | 754   | 713   |
| >HNF1A-W1{RAALYTWYV  | 22    | >HNF1A-W1{RAALYTRYV  | 1067  | 1045  |
| >HNF1A-W1{RAALYTWY   | 1121  | >HNF1A-W1{RAALYTRY   | 410   | 711   |
| >HNF1A-W1{RAALYTWY   | 720   | >HNF1A-W1{RAALYTRY   | 454   | 266   |
| >HNF1A-W1{RAALYTWY   | 13    | >HNF1A-W1{RAALYTRY   | 9     | 4     |
| >HNF1A-W1{RAALYTWY   | 358   | >HNF1A-W1{RAALYTRY   | 326   | 32    |
| >HNF1A-W1{RAALYTWY   | 440   | >HNF1A-W1{RAALYTRY   | 783   | 343   |
| >HNF1A-W1{RAALYTWY   | 100   | >HNF1A-W1{RAALYTRY   | 87    | 13    |
| >HNF1A-W1{RAALYTWYV  | 172   | >HNF1A-W1{RAALYTRYV  | 10166 | 9994  |
| >HNF1A-W1{RAALYTWYV  | 209   | >HNF1A-W1{RAALYTRYV  | 1185  | 976   |
| >HNF1A-W1{RAALYTWYVI | 454   | >HNF1A-W1{RAALYTRYVR | 629   | 175   |
| >HNF1A-W1{RAALYTWYVI | 40    | >HNF1A-W1{RAALYTRYVR | 71    | 31    |
| >HNF1A-W1{RAALYTWYVI | 471   | >HNF1A-W1{RAALYTRYVR | 1553  | 1082  |
| >HNF1A-W1{KRAALYTWY\ | 391   | >HNF1A-W1{KRAALYTRYV | 1943  | 1552  |
| >HNF1A-W1{KRAALYTWY\ | 400   | >HNF1A-W1{KRAALYTRYV | 4828  | 4428  |
| >HNF1A-W1{KRAALYTWY\ | 443   | >HNF1A-W1{KRAALYTRYV | 495   | 52    |
| >HNF1A-W1{KRAALYTWY  | 127   | >HNF1A-W1{KRAALYTRY  | 94    | 33    |
| >HNF1A-W1{KRAALYTW   | 491   | >HNF1A-W1{KRAALYTR   | 60    | 431   |
| >HNF1A-W1{KRAALYTWY  | 171   | >HNF1A-W1{KRAALYTRY  | 68    | 103   |
| >HNF1A-W1{KRAALYTWY\ | 72    | >HNF1A-W1{KRAALYTRYV | 138   | 66    |
| >HNF1A-W1{KRAALYTWY\ | 58    | >HNF1A-W1{KRAALYTRYV | 57    | 1     |
| >HNF1A-W1{KRAALYTW   | 316   | >HNF1A-W1{KRAALYTR   | 22046 | 21730 |
| >HNF1A-W1{KRAALYTWY  | 290   | >HNF1A-W1{KRAALYTRY  | 528   | 238   |
| >HNF1A-W1{KRAALYTW   | 195   | >HNF1A-W1{KRAALYTR   | 156   | 39    |
| >HNF1A-W1{KRAALYTWY  | 88    | >HNF1A-W1{KRAALYTRY  | 114   | 26    |
| >HNF1A-W1{KRAALYTWY\ | 362   | >HNF1A-W1{KRAALYTRYV | 294   | 68    |
| >HNF1A-W1{KRAALYTWY\ | 160   | >HNF1A-W1{KRAALYTRYV | 204   | 44    |
| >HNF1A-W1{KRAALYTW   | 445   | >HNF1A-W1{KRAALYTR   | 2823  | 2378  |
| >HNF1A-W1{KRAALYTWY  | 115   | >HNF1A-W1{KRAALYTRY  | 242   | 127   |
| >HNF1A-W1{KRAALYTWY\ | 71    | >HNF1A-W1{KRAALYTRYV | 133   | 62    |
| >HNF1A-W1{KRAALYTW   | 40    | >HNF1A-W1{KRAALYTR   | 26831 | 26791 |
| >HNF1A-W1{KRAALYTW   | 21848 | >HNF1A-W1{KRAALYTR   | 37    | 21811 |
| >HNF1A-W1{KRAALYTWY\ | 30    | >HNF1A-W1{KRAALYTRYV | 34    | 4     |
| >HNF1A-W1{QKRAALYTW  | 132   | >HNF1A-W1{QKRAALYTR  | 478   | 346   |
| >HNF1A-W1{QKRAALYTW  | 15    | >HNF1A-W1{QKRAALYTRY | 12    | 3     |
| >HNF1A-W1{QKRAALYTW  | 132   | >HNF1A-W1{QKRAALYTRY | 121   | 11    |
| >HNF1A-W1{TQKRAALYTV | 25636 | >HNF1A-W1{TQKRAALYTR | 77    | 25559 |
| >HNF1A-W1{TQKRAALYTV | 409   | >HNF1A-W1{TQKRAALYTR | 10548 | 10139 |

|                      |       |                      |       |       |
|----------------------|-------|----------------------|-------|-------|
| >HNF1A-W1(TQKRAALYTV | 100   | >HNF1A-W1(TQKRAALYTR | 66    | 34    |
| >HNF1A-W1(TQKRAALYTV | 57    | >HNF1A-W1(TQKRAALYTR | 41    | 16    |
| >HNF1A-W1(TQKRAALYTV | 210   | >HNF1A-W1(TQKRAALYTR | 23971 | 23761 |
| >HNF1A-W1(TQKRAALYTV | 32915 | >HNF1A-W1(TQKRAALYTR | 354   | 32561 |
| >HNF1A-W2(WGPASQQI   | 133   | >HNF1A-W2(CGPASQQI   | 97    | 36    |
| >HNF1A-W2(WGPASQQIL  | 111   | >HNF1A-W2(CGPASQQIL  | 77    | 34    |
| >HNF1A-W2(WGPASQQILI | 53    | >HNF1A-W2(CGPASQQILF | 39    | 14    |
| >HNF1A-W2(WGPASQQIL  | 235   | >HNF1A-W2(CGPASQQIL  | 124   | 111   |
| >HNF1A-W2(WGPASQQILI | 183   | >HNF1A-W2(CGPASQQILF | 98    | 85    |
| >HNF1A-W2(WGPASQQILI | 108   | >HNF1A-W2(CGPASQQILF | 1283  | 1175  |
| >HNF1A-W2(WGPASQQI   | 1748  | >HNF1A-W2(CGPASQQI   | 260   | 1488  |
| >HNF1A-W2(KWGPASQQI  | 463   | >HNF1A-W2(KCGPASQQI  | 14672 | 14209 |
| >HNF1A-W2(KWGPASQQI  | 87    | >HNF1A-W2(KCGPASQQIL | 6771  | 6684  |
| >HNF1A-W2(KWGPASQQI  | 131   | >HNF1A-W2(KCGPASQQI  | 6410  | 6279  |
| >HNF1A-W2(KWGPASQQI  | 59    | >HNF1A-W2(KCGPASQQIL | 3074  | 3015  |
| >HNF1A-W2(KWGPASQQI  | 25    | >HNF1A-W2(KCGPASQQI  | 8516  | 8491  |
| >HNF1A-W2(KWGPASQQI  | 103   | >HNF1A-W2(KCGPASQQIL | 14747 | 14644 |
| >HNF1A-W2(KWGPASQQI  | 9     | >HNF1A-W2(KCGPASQQIL | 3553  | 3544  |
| >HNF1A-W2(KWGPASQQI  | 327   | >HNF1A-W2(KCGPASQQI  | 32394 | 32067 |
| >HNF1A-W2(KWGPASQQI  | 399   | >HNF1A-W2(KCGPASQQIL | 30297 | 29898 |
| >HNF1A-W2(KWGPASQQI  | 288   | >HNF1A-W2(KCGPASQQIL | 34351 | 34063 |
| >HNF1A-W2(KWGPASQQI  | 3642  | >HNF1A-W2(KCGPASQQI  | 139   | 3503  |
| >HNF1A-W2(FKWGPASQC  | 301   | >HNF1A-W2(FKCGPASQQI | 3669  | 3368  |
| >HNF1A-W2(FKWGPASQ   | 346   | >HNF1A-W2(FKCGPASQ   | 3340  | 2994  |
| >HNF1A-W2(FKWGPASQC  | 26    | >HNF1A-W2(FKCGPASQQI | 210   | 184   |
| >HNF1A-W2(FKWGPASQC  | 8     | >HNF1A-W2(FKCGPASQQI | 66    | 58    |
| >HNF1A-W2(FKWGPASQC  | 50    | >HNF1A-W2(FKCGPASQQI | 34    | 16    |
| >HNF1A-W2(FKWGPASQC  | 127   | >HNF1A-W2(FKCGPASQQI | 2961  | 2834  |
| >HNF1A-W2(RFKWGPASQ  | 848   | >HNF1A-W2(RFKCGPASQC | 400   | 448   |
| >HNF1A-W2(RFKWGPASQ  | 227   | >HNF1A-W2(RFKCGPASQC | 447   | 220   |
| >HNF1A-W2(RFKWGPASQ  | 76    | >HNF1A-W2(RFKCGPASQC | 145   | 69    |
| >HNF1A-W2(RFKWGPAS   | 265   | >HNF1A-W2(RFKCGPAS   | 121   | 144   |
| >HNF1A-W2(RFKWGPASQ  | 167   | >HNF1A-W2(RFKCGPASQ  | 59    | 108   |
| >HNF1A-W2(RFKWGPASQ  | 884   | >HNF1A-W2(RFKCGPASQC | 389   | 495   |
| >HNF1A-W2(RFKWGPASQ  | 18    | >HNF1A-W2(RFKCGPASQC | 11    | 7     |
| >HNF1A-W2(RFKWGPASQ  | 351   | >HNF1A-W2(RFKCGPASQ  | 4534  | 4183  |
| >HNF1A-W2(RFKWGPASQ  | 412   | >HNF1A-W2(RFKCGPASQC | 3382  | 2970  |
| >HNF1A-W2(NRFKWGPA   | 325   | >HNF1A-W2(NRFKCGPA   | 1964  | 1639  |
| >HNF1A-W2(NRFKWGPAS  | 540   | >HNF1A-W2(NRFKCGPASC | 495   | 45    |
| >HNF1A-W2(NRFKWGPA   | 97    | >HNF1A-W2(NRFKCGPA   | 152   | 55    |
| >HNF1A-W2(NRFKWGPAS  | 157   | >HNF1A-W2(NRFKCGPAS  | 231   | 74    |
| >HNF1A-W2(NRFKWGPAS  | 413   | >HNF1A-W2(NRFKCGPASC | 614   | 201   |
| >HNF1A-W2(NRFKWGPAS  | 394   | >HNF1A-W2(NRFKCGPASC | 468   | 74    |

|                      |       |                      |       |       |
|----------------------|-------|----------------------|-------|-------|
| >HNF1A-W2(RNRFKWGPA  | 7     | >HNF1A-W2(RNRFKCGPA  | 39    | 32    |
| >HNF1A-W2(RNRFKWGPA  | 77    | >HNF1A-W2(RNRFKCGPAS | 345   | 268   |
| >HNF1A-W2(RNRFKWGPA  | 69    | >HNF1A-W2(RNRFKCGPAS | 220   | 151   |
| >HNF1A-W2(RRNRFKWGP  | 196   | >HNF1A-W2(RRNRFKCGP  | 531   | 335   |
| >HNF1A-W2(RRNRFKWGP  | 47    | >HNF1A-W2(RRNRFKCGP/ | 109   | 62    |
| >HNF1A-W2(RRNRFKWGP  | 214   | >HNF1A-W2(RRNRFKCGP/ | 504   | 290   |
| >HNF1A-W2(RRNRFKWG   | 32    | >HNF1A-W2(RRNRFKCG   | 83    | 51    |
| >HNF1A-W2(RRNRFKWGP  | 353   | >HNF1A-W2(RRNRFKCGP  | 392   | 39    |
| >HNF1A-W2(RRNRFKWGP  | 176   | >HNF1A-W2(RRNRFKCGP/ | 206   | 30    |
| >HNF1A-W2(RRNRFKWGP  | 222   | >HNF1A-W2(RRNRFKCGP/ | 314   | 92    |
| >HNF1A-W2(RRNRFKWG   | 480   | >HNF1A-W2(RRNRFKCG   | 2967  | 2487  |
| >HNF1A-W2(RRNRFKWGP  | 112   | >HNF1A-W2(RRNRFKCGP/ | 269   | 157   |
| >HNF1A-W2(KGRRNRFKW  | 504   | >HNF1A-W2(KGRRNRFKC  | 181   | 323   |
| >HNF1A-W2(KGRRNRFKW  | 114   | >HNF1A-W2(KGRRNRFKCC | 185   | 71    |
| >HNF1A-W2(KGRRNRFKW  | 522   | >HNF1A-W2(KGRRNRFKCC | 213   | 309   |
| >HNF1A-W2(KGRRNRFKW  | 326   | >HNF1A-W2(KGRRNRFKC  | 21705 | 21379 |
| >HNF1A-W2(KGRRNRFKW  | 50    | >HNF1A-W2(KGRRNRFKC  | 17815 | 17765 |
| >HNF1A-W2(KGRRNRFKW  | 50    | >HNF1A-W2(KGRRNRFKC  | 20744 | 20694 |
| >HNF1A-W2(WGPASQQI   | 133   | >HNF1A-W2(LGPASQQI   | 664   | 531   |
| >HNF1A-W2(WGPASQQIL  | 111   | >HNF1A-W2(LGPASQQIL  | 463   | 352   |
| >HNF1A-W2(WGPASQQILI | 53    | >HNF1A-W2(LGPASQQILF | 169   | 116   |
| >HNF1A-W2(WGPASQQIL  | 235   | >HNF1A-W2(LGPASQQIL  | 32    | 203   |
| >HNF1A-W2(WGPASQQILI | 183   | >HNF1A-W2(LGPASQQILF | 34    | 149   |
| >HNF1A-W2(WGPASQQILI | 108   | >HNF1A-W2(LGPASQQILF | 190   | 82    |
| >HNF1A-W2(KWGPASQQI  | 21293 | >HNF1A-W2(KLGPASQQI  | 460   | 20833 |
| >HNF1A-W2(KWGPASQQI  | 6411  | >HNF1A-W2(KLGPASQQI  | 74    | 6337  |
| >HNF1A-W2(KWGPASQQI  | 22787 | >HNF1A-W2(KLGPASQQIL | 385   | 22402 |
| >HNF1A-W2(KWGPASQQI  | 21652 | >HNF1A-W2(KLGPASQQI  | 108   | 21544 |
| >HNF1A-W2(KWGPASQQI  | 15328 | >HNF1A-W2(KLGPASQQI  | 16    | 15312 |
| >HNF1A-W2(KWGPASQQI  | 22186 | >HNF1A-W2(KLGPASQQIL | 103   | 22083 |
| >HNF1A-W2(KWGPASQQI  | 20829 | >HNF1A-W2(KLGPASQQI  | 29    | 20800 |
| >HNF1A-W2(KWGPASQQI  | 20823 | >HNF1A-W2(KLGPASQQIL | 36    | 20787 |
| >HNF1A-W2(KWGPASQQI  | 13892 | >HNF1A-W2(KLGPASQQI  | 15    | 13877 |
| >HNF1A-W2(KWGPASQQI  | 18057 | >HNF1A-W2(KLGPASQQIL | 33    | 18024 |
| >HNF1A-W2(KWGPASQQI  | 23416 | >HNF1A-W2(KLGPASQQI  | 20    | 23396 |
| >HNF1A-W2(KWGPASQQI  | 24661 | >HNF1A-W2(KLGPASQQIL | 77    | 24584 |
| >HNF1A-W2(KWGPASQQ   | 34260 | >HNF1A-W2(KLGPASQQ   | 151   | 34109 |
| >HNF1A-W2(KWGPASQQI  | 26079 | >HNF1A-W2(KLGPASQQI  | 8     | 26071 |
| >HNF1A-W2(KWGPASQQI  | 22577 | >HNF1A-W2(KLGPASQQIL | 9     | 22568 |
| >HNF1A-W2(KWGPASQQI  | 463   | >HNF1A-W2(KLGPASQQI  | 9377  | 8914  |
| >HNF1A-W2(KWGPASQQI  | 87    | >HNF1A-W2(KLGPASQQIL | 2066  | 1979  |
| >HNF1A-W2(KWGPASQQI  | 131   | >HNF1A-W2(KLGPASQQI  | 3939  | 3808  |
| >HNF1A-W2(KWGPASQQI  | 59    | >HNF1A-W2(KLGPASQQIL | 1372  | 1313  |



|                     |       |                      |       |       |
|---------------------|-------|----------------------|-------|-------|
| >HNF1A-W2(KWGPASQQI | 25    | >HNF1A-W2(KLGPASQQI  | 4720  | 4695  |
| >HNF1A-W2(KWGPASQQI | 103   | >HNF1A-W2(KLGPASQQIL | 10500 | 10397 |
| >HNF1A-W2(KWGPASQQI | 9     | >HNF1A-W2(KLGPASQQIL | 1386  | 1377  |
| >HNF1A-W2(KWGPASQQI | 14464 | >HNF1A-W2(KLGPASQQI  | 339   | 14125 |
| >HNF1A-W2(KWGPASQQI | 14078 | >HNF1A-W2(KLGPASQQIL | 332   | 13746 |
| >HNF1A-W2(KWGPASQQI | 10887 | >HNF1A-W2(KLGPASQQIL | 294   | 10593 |
| >HNF1A-W2(KWGPASQQI | 2539  | >HNF1A-W2(KLGPASQQIL | 237   | 2302  |
| >HNF1A-W2(KWGPASQQI | 3989  | >HNF1A-W2(KLGPASQQIL | 371   | 3618  |
| >HNF1A-W2(KWGPASQQI | 327   | >HNF1A-W2(KLGPASQQI  | 22055 | 21728 |
| >HNF1A-W2(KWGPASQQI | 399   | >HNF1A-W2(KLGPASQQIL | 22964 | 22565 |
| >HNF1A-W2(KWGPASQQI | 288   | >HNF1A-W2(KLGPASQQIL | 26708 | 26420 |
| >HNF1A-W2(KWGPASQQI | 3642  | >HNF1A-W2(KLGPASQQI  | 426   | 3216  |
| >HNF1A-W2(FKWGPASQC | 301   | >HNF1A-W2(FKLGASQQI  | 748   | 447   |
| >HNF1A-W2(FKWGPASQ  | 346   | >HNF1A-W2(FKLGASQ    | 1098  | 752   |
| >HNF1A-W2(FKWGPASQC | 26    | >HNF1A-W2(FKLGASQQI  | 47    | 21    |
| >HNF1A-W2(FKWGPASQC | 8     | >HNF1A-W2(FKLGASQQI  | 15    | 7     |
| >HNF1A-W2(FKWGPASQC | 1619  | >HNF1A-W2(FKLGASQQI  | 488   | 1131  |
| >HNF1A-W2(FKWGPASQC | 50    | >HNF1A-W2(FKLGASQQI  | 21    | 29    |
| >HNF1A-W2(FKWGPASQC | 127   | >HNF1A-W2(FKLGASQQI  | 568   | 441   |
| >HNF1A-W2(RFKWGPASQ | 227   | >HNF1A-W2(RFKLGASQC  | 465   | 238   |
| >HNF1A-W2(RFKWGPASQ | 76    | >HNF1A-W2(RFKLGASQC  | 188   | 112   |
| >HNF1A-W2(RFKWGPAS  | 265   | >HNF1A-W2(RFKLGAS    | 146   | 119   |
| >HNF1A-W2(RFKWGPASQ | 167   | >HNF1A-W2(RFKLGASQ   | 89    | 78    |
| >HNF1A-W2(RFKWGPASQ | 18    | >HNF1A-W2(RFKLGASQC  | 13    | 5     |
| >HNF1A-W2(RFKWGPASQ | 351   | >HNF1A-W2(RFKLGASQ   | 4711  | 4360  |
| >HNF1A-W2(RFKWGPASQ | 412   | >HNF1A-W2(RFKLGASQC  | 3013  | 2601  |
| >HNF1A-W2(NRFKWGPA  | 325   | >HNF1A-W2(NRFKLGPA   | 344   | 19    |
| >HNF1A-W2(NRFKWGPA  | 97    | >HNF1A-W2(NRFKLGPA   | 148   | 51    |
| >HNF1A-W2(NRFKWGPAS | 157   | >HNF1A-W2(NRFKLGAS   | 180   | 23    |
| >HNF1A-W2(NRFKWGPAS | 413   | >HNF1A-W2(NRFKLGASC  | 502   | 89    |
| >HNF1A-W2(NRFKWGPAS | 394   | >HNF1A-W2(NRFKLGASC  | 416   | 22    |
| >HNF1A-W2(RNRFKWGPA | 7     | >HNF1A-W2(RNRKLGPA   | 14    | 7     |
| >HNF1A-W2(RNRFKWGPA | 77    | >HNF1A-W2(RNRKLGAS   | 137   | 60    |
| >HNF1A-W2(RNRFKWGPA | 69    | >HNF1A-W2(RNRKLGAS   | 126   | 57    |
| >HNF1A-W2(RRNRFKWGP | 196   | >HNF1A-W2(RRNRKLG    | 245   | 49    |
| >HNF1A-W2(RRNRFKWGP | 47    | >HNF1A-W2(RRNRKLGPA  | 62    | 15    |
| >HNF1A-W2(RRNRFKWGP | 214   | >HNF1A-W2(RRNRKLGPA  | 224   | 10    |
| >HNF1A-W2(RRNRFKWG  | 32    | >HNF1A-W2(RRNRKLG    | 20    | 12    |
| >HNF1A-W2(RRNRFKWGP | 353   | >HNF1A-W2(RRNRKLG    | 134   | 219   |
| >HNF1A-W2(RRNRFKWGP | 176   | >HNF1A-W2(RRNRKLGPA  | 133   | 43    |
| >HNF1A-W2(RRNRFKWGP | 222   | >HNF1A-W2(RRNRKLGPA  | 180   | 42    |
| >HNF1A-W2(RRNRFKWG  | 480   | >HNF1A-W2(RRNRKLG    | 911   | 431   |
| >HNF1A-W2(RRNRFKWGP | 1455  | >HNF1A-W2(RRNRKLG    | 249   | 1206  |

|                        |      |                        |       |       |
|------------------------|------|------------------------|-------|-------|
| >HNF1A-W2(CRRNRFKWGP   | 112  | >HNF1A-W2(CRRNRFKLGPA  | 117   | 5     |
| >HNF1A-W2(CRRNRFKWGP   | 1036 | >HNF1A-W2(CRRNRFKLGPA  | 454   | 582   |
| >HNF1A-W2(CGRRNRFKW    | 1045 | >HNF1A-W2(CGRRNRFKL    | 77    | 968   |
| >HNF1A-W2(CGRRNRFKW    | 6918 | >HNF1A-W2(CGRRNRFKL    | 409   | 6509  |
| >HNF1A-W2(CGRRNRFKW    | 1532 | >HNF1A-W2(CGRRNRFKL    | 328   | 1204  |
| >HNF1A-W2(CGRRNRFKWC   | 672  | >HNF1A-W2(CGRRNRFKLG   | 426   | 246   |
| >HNF1A-W2(CKGRRNRFKW   | 504  | >HNF1A-W2(CKGRRNRFKL   | 12    | 492   |
| >HNF1A-W2(CKGRRNRFKW   | 114  | >HNF1A-W2(CKGRRNRFKLC  | 45    | 69    |
| >HNF1A-W2(CKGRRNRFKW   | 522  | >HNF1A-W2(CKGRRNRFKLC  | 189   | 333   |
| >HNF1A-W2(CKGRRNRFKW   | 326  | >HNF1A-W2(CKGRRNRFKL   | 2481  | 2155  |
| >HNF1A-W2(CKGRRNRFKW   | 50   | >HNF1A-W2(CKGRRNRFKL   | 3781  | 3731  |
| >HNF1A-W2(CKGRRNRFKW   | 50   | >HNF1A-W2(CKGRRNRFKL   | 12842 | 12792 |
| >HNF1A-Y21:AYERQKNPSK  | 51   | >HNF1A-Y21:ACERQKNPSK  | 696   | 645   |
| >HNF1A-Y21: PASQQILFQA | 152  | >HNF1A-Y21: PASQQILFQA | 15577 | 15425 |
| >HNF1A-Y21: QAYERQKNP: | 253  | >HNF1A-Y21: QACERQKNP: | 6243  | 5990  |
| >HNF1A-Y21: QAYERQKNP: | 407  | >HNF1A-Y21: QACERQKNP: | 1560  | 1153  |
| >HNF1A-Y21: QAYERQKNP: | 237  | >HNF1A-Y21: QACERQKNP: | 672   | 435   |
| >HNF1A-Y21: QAYERQKNP: | 239  | >HNF1A-Y21: QACERQKNP: | 1161  | 922   |
| >HNF1A-Y21: ILFQAYERQ  | 416  | >HNF1A-Y21: ILFQACERQ  | 706   | 290   |
| >HNF1A-Y21: ILFQAYERQ  | 68   | >HNF1A-Y21: ILFQACERQ  | 100   | 32    |
| >HNF1A-Y21: ILFQAYERQK | 133  | >HNF1A-Y21: ILFQACERQK | 135   | 2     |
| >HNF1A-Y21: ILFQAYERQK | 457  | >HNF1A-Y21: ILFQACERQK | 733   | 276   |
| >HNF1A-Y21: ILFQAYER   | 50   | >HNF1A-Y21: ILFQACER   | 246   | 196   |
| >HNF1A-Y21: ILFQAYER   | 154  | >HNF1A-Y21: ILFQACER   | 256   | 102   |
| >HNF1A-Y21: ILFQAYER   | 20   | >HNF1A-Y21: ILFQACER   | 30    | 10    |
| >HNF1A-Y21: ILFQAYER   | 43   | >HNF1A-Y21: ILFQACER   | 70    | 27    |
| >HNF1A-Y21: QILFQAYERQ | 189  | >HNF1A-Y21: QILFQACERQ | 348   | 159   |
| >HNF1A-Y21: QILFQAYER  | 87   | >HNF1A-Y21: QILFQACER  | 626   | 539   |
| >HNF1A-Y21: QILFQAYER  | 60   | >HNF1A-Y21: QILFQACER  | 122   | 62    |
| >HNF1A-Y21: QILFQAYER  | 34   | >HNF1A-Y21: QILFQACER  | 61    | 27    |
| >HNF1A-Y21: QQILFQAY   | 1973 | >HNF1A-Y21: QQILFQAC   | 440   | 1533  |
| >HNF1A-Y21: QQILFQAYER | 353  | >HNF1A-Y21: QQILFQACER | 2029  | 1676  |
| >HNF1A-Y21: QQILFQAY   | 352  | >HNF1A-Y21: QQILFQAC   | 31018 | 30666 |
| >HNF1A-Y21: QQILFQAY   | 254  | >HNF1A-Y21: QQILFQAC   | 25071 | 24817 |
| >HNF1A-Y21: QQILFQAYER | 38   | >HNF1A-Y21: QQILFQACER | 50    | 12    |
| >HNF1A-Y21: QQILFQAYER | 249  | >HNF1A-Y21: QQILFQACER | 298   | 49    |
| >HNF1A-Y21: QQILFQAYER | 54   | >HNF1A-Y21: QQILFQACER | 149   | 95    |
| >HNF1A-Y21: QQILFQAY   | 63   | >HNF1A-Y21: QQILFQAC   | 7338  | 7275  |
| >HNF1A-Y21: QQILFQAY   | 215  | >HNF1A-Y21: QQILFQAC   | 21888 | 21673 |
| >HNF1A-Y21: QQILFQAY   | 7    | >HNF1A-Y21: QQILFQAC   | 1549  | 1542  |
| >HNF1A-Y21: QQILFQAY   | 339  | >HNF1A-Y21: QQILFQAC   | 18366 | 18027 |
| >HNF1A-Y21: QQILFQAYER | 66   | >HNF1A-Y21: QQILFQACER | 157   | 91    |
| >HNF1A-Y21: SQQILFQAY  | 203  | >HNF1A-Y21: SQQILFQAC  | 27077 | 26874 |

|                       |      |                       |       |       |
|-----------------------|------|-----------------------|-------|-------|
| >HNF1A-Y21:SQQILFQAYE | 23   | >HNF1A-Y21:SQQILFQACE | 56    | 33    |
| >HNF1A-Y21:SQQILFQAY  | 31   | >HNF1A-Y21:SQQILFQAC  | 4835  | 4804  |
| >HNF1A-Y21:SQQILFQAY  | 157  | >HNF1A-Y21:SQQILFQAC  | 22334 | 22177 |
| >HNF1A-Y21:SQQILFQAY  | 11   | >HNF1A-Y21:SQQILFQAC  | 3561  | 3550  |
| >HNF1A-Y21:SQQILFQAYE | 242  | >HNF1A-Y21:SQQILFQACE | 382   | 140   |
| >HNF1A-Y21:ASQQILFQAY | 353  | >HNF1A-Y21:ASQQILFQAC | 33199 | 32846 |
| >HNF1A-Y21:ASQQILFQAY | 228  | >HNF1A-Y21:ASQQILFQAC | 30864 | 30636 |
| >HNF1A-Y21:ASQQILFQAY | 247  | >HNF1A-Y21:ASQQILFQAC | 30281 | 30034 |
| >HNF1A-Y21:ASQQILFQAY | 112  | >HNF1A-Y21:ASQQILFQAC | 26404 | 26292 |
| >HNF1A-Y21:ASQQILFQAY | 97   | >HNF1A-Y21:ASQQILFQAC | 13886 | 13789 |
| >HNF1A-Y21:ASQQILFQAY | 261  | >HNF1A-Y21:ASQQILFQAC | 11658 | 11397 |
| >HNF1A-Y21:ASQQILFQAY | 18   | >HNF1A-Y21:ASQQILFQAC | 15832 | 15814 |
| >HNF1A-Y21:ASQQILFQAY | 233  | >HNF1A-Y21:ASQQILFQAC | 35407 | 35174 |
| >HOOK3-Q2:QVLMERLNQ   | 6658 | >HOOK3-Q2:RVLMERLNQ   | 337   | 6321  |
| >HOOK3-Q2:ENQVLMER    | 133  | >HOOK3-Q2:ENRVLMER    | 264   | 131   |
| >HOOK3-Q2:AENQVLMER   | 325  | >HOOK3-Q2:AENRVLMER   | 515   | 190   |
| >HOOK3-Q2:AENQVLMER   | 358  | >HOOK3-Q2:AENRVLMER   | 637   | 279   |
| >HOOK3-Q2:AENQVLMER   | 349  | >HOOK3-Q2:AENRVLMER   | 520   | 171   |
| >HOOK3-Q2:AENQVLMER   | 425  | >HOOK3-Q2:AENRVLMER   | 636   | 211   |
| >HOOK3-Q2:AENQVLMER   | 29   | >HOOK3-Q2:AENRVLMER   | 18    | 11    |
| >HOOK3-Q2:LAENQVLMER  | 621  | >HOOK3-Q2:LAENRVLMER  | 226   | 395   |
| >HOOK3-Q2:LAENQVLMER  | 544  | >HOOK3-Q2:LAENRVLMER  | 397   | 147   |
| >HOOK3-Q2:LAENQVLM    | 419  | >HOOK3-Q2:LAENRVLM    | 1584  | 1165  |
| >HOOK3-Q2:LLAENQVL    | 85   | >HOOK3-Q2:LLAENRVL    | 527   | 442   |
| >HOOK3-Q2:LLAENQVLM   | 53   | >HOOK3-Q2:LLAENRVLM   | 349   | 296   |
| >HOOK3-Q2:LLAENQVL    | 7    | >HOOK3-Q2:LLAENRVL    | 28    | 21    |
| >HOOK3-Q2:LLAENQVLM   | 9    | >HOOK3-Q2:LLAENRVLM   | 32    | 23    |
| >HOOK3-Q2:LLAENQVL    | 31   | >HOOK3-Q2:LLAENRVL    | 67    | 36    |
| >HOOK3-Q2:LLAENQVLM   | 135  | >HOOK3-Q2:LLAENRVLM   | 355   | 220   |
| >HOOK3-Q2:LLAENQVL    | 235  | >HOOK3-Q2:LLAENRVL    | 1288  | 1053  |
| >HOOK3-Q2:LLAENQVLM   | 305  | >HOOK3-Q2:LLAENRVLM   | 605   | 300   |
| >HOOK3-Q2:LLAENQVL    | 10   | >HOOK3-Q2:LLAENRVL    | 31    | 21    |
| >HOOK3-Q2:LLAENQVLM   | 27   | >HOOK3-Q2:LLAENRVLM   | 159   | 132   |
| >HOOK3-Q2:LLAENQVL    | 12   | >HOOK3-Q2:LLAENRVL    | 71    | 59    |
| >HOOK3-Q2:LLAENQVLM   | 39   | >HOOK3-Q2:LLAENRVLM   | 811   | 772   |
| >HOOK3-Q2:LLAENQVL    | 22   | >HOOK3-Q2:LLAENRVL    | 165   | 143   |
| >HOOK3-Q2:LLAENQVLM   | 72   | >HOOK3-Q2:LLAENRVLM   | 689   | 617   |
| >HOOK3-Q2:LLAENQVL    | 11   | >HOOK3-Q2:LLAENRVL    | 132   | 121   |
| >HOOK3-Q2:LLAENQVLM   | 21   | >HOOK3-Q2:LLAENRVLM   | 860   | 839   |
| >HOOK3-Q2:LLAENQVL    | 3    | >HOOK3-Q2:LLAENRVL    | 6     | 3     |
| >HOOK3-Q2:LLAENQVLM   | 5    | >HOOK3-Q2:LLAENRVLM   | 8     | 3     |
| >HOOK3-Q2:LLAENQVLM   | 217  | >HOOK3-Q2:LLAENRVLM   | 314   | 97    |
| >HOOK3-Q2:LLAENQVLM   | 433  | >HOOK3-Q2:LLAENRVLM   | 160   | 273   |

|                       |       |                       |      |       |
|-----------------------|-------|-----------------------|------|-------|
| >HOOK3-Q22LLAENQVLM   | 49    | >HOOK3-Q22LLAENRVLME  | 41   | 8     |
| >HOOK3-Q22SLLAENQV    | 24    | >HOOK3-Q22SLLAENRV    | 32   | 8     |
| >HOOK3-Q22SLLAENQVL   | 108   | >HOOK3-Q22SLLAENRVL   | 867  | 759   |
| >HOOK3-Q22SLLAENQVLM  | 272   | >HOOK3-Q22SLLAENRVLM  | 262  | 10    |
| >HOOK3-Q22SLLAENQV    | 16    | >HOOK3-Q22SLLAENRV    | 31   | 15    |
| >HOOK3-Q22SLLAENQVL   | 55    | >HOOK3-Q22SLLAENRVL   | 365  | 310   |
| >HOOK3-Q22SLLAENQVLM  | 89    | >HOOK3-Q22SLLAENRVLM  | 95   | 6     |
| >HOOK3-Q22SLLAENQV    | 52    | >HOOK3-Q22SLLAENRV    | 84   | 32    |
| >HOOK3-Q22SLLAENQV    | 57    | >HOOK3-Q22SLLAENRV    | 135  | 78    |
| >HOOK3-Q22SLLAENQV    | 3     | >HOOK3-Q22SLLAENRV    | 3    | 0     |
| >HOOK3-Q22SLLAENQVL   | 13    | >HOOK3-Q22SLLAENRVL   | 38   | 25    |
| >HOOK3-Q22SLLAENQVLM  | 44    | >HOOK3-Q22SLLAENRVLM  | 163  | 119   |
| >HOOK3-Q22SLLAENQV    | 9     | >HOOK3-Q22SLLAENRV    | 12   | 3     |
| >HOOK3-Q22SLLAENQVL   | 26    | >HOOK3-Q22SLLAENRVL   | 172  | 146   |
| >HOOK3-Q22SLLAENQVLM  | 167   | >HOOK3-Q22SLLAENRVLM  | 1149 | 982   |
| >HOOK3-Q22SLLAENQV    | 5     | >HOOK3-Q22SLLAENRV    | 6    | 1     |
| >HOOK3-Q22SLLAENQVL   | 16    | >HOOK3-Q22SLLAENRVL   | 113  | 97    |
| >HOOK3-Q22SLLAENQVLM  | 53    | >HOOK3-Q22SLLAENRVLM  | 317  | 264   |
| >HOOK3-Q22SLLAENQV    | 8     | >HOOK3-Q22SLLAENRV    | 19   | 11    |
| >HOOK3-Q22SLLAENQVL   | 128   | >HOOK3-Q22SLLAENRVL   | 1759 | 1631  |
| >HOOK3-Q22SLLAENQV    | 2     | >HOOK3-Q22SLLAENRV    | 3    | 1     |
| >HOOK3-Q22SLLAENQVL   | 8     | >HOOK3-Q22SLLAENRVL   | 58   | 50    |
| >HOOK3-Q22SLLAENQVLM  | 46    | >HOOK3-Q22SLLAENRVLM  | 145  | 99    |
| >HOOK3-Q22SLLAENQV    | 245   | >HOOK3-Q22SLLAENRV    | 867  | 622   |
| >HOOK3-Q22SLLAENQVL   | 353   | >HOOK3-Q22SLLAENRVL   | 1719 | 1366  |
| >HOOK3-Q22SLLAENQVLM  | 190   | >HOOK3-Q22SLLAENRVLM  | 447  | 257   |
| >HOOK3-Q22SSLLAENQVLI | 341   | >HOOK3-Q22SSLLAENRVLI | 382  | 41    |
| >HOOK3-Q22SSLLAENQVLI | 318   | >HOOK3-Q22SSLLAENRVLI | 280  | 38    |
| >HOOK3-Q22SSLLAENQ    | 19810 | >HOOK3-Q22SSLLAENR    | 300  | 19510 |
| >HOOK3-Q22SSLLAENQ    | 19886 | >HOOK3-Q22SSLLAENR    | 246  | 19640 |
| >HOOK3-Q22SSLLAENQVL  | 137   | >HOOK3-Q22SSLLAENRVL  | 211  | 74    |
| >HOOK3-Q22SSLLAENQVLI | 107   | >HOOK3-Q22SSLLAENRVLI | 156  | 49    |
| >HOOK3-Q22SSLLAENQVL  | 476   | >HOOK3-Q22SSLLAENRVL  | 472  | 4     |
| >HOOK3-Q22SSLLAENQVLI | 128   | >HOOK3-Q22SSLLAENRVLI | 112  | 16    |
| >HOOK3-Q22SSLLAENQ    | 5473  | >HOOK3-Q22SSLLAENR    | 474  | 4999  |
| >HOOK3-Q22SSLLAENQVL  | 432   | >HOOK3-Q22SSLLAENRVL  | 498  | 66    |
| >HOOK3-Q22KSSLLAENQ   | 15384 | >HOOK3-Q22KSSLLAENR   | 60   | 15324 |
| >HOOK3-Q22KSSLLAENQV  | 350   | >HOOK3-Q22KSSLLAENRV  | 380  | 30    |
| >HOOK3-Q22KSSLLAENQV  | 19    | >HOOK3-Q22KSSLLAENRV  | 25   | 6     |
| >HOOK3-Q22KSSLLAENQV  | 89    | >HOOK3-Q22KSSLLAENRV  | 487  | 398   |
| >HOOK3-Q22KSSLLAENQV  | 217   | >HOOK3-Q22KSSLLAENRV  | 368  | 151   |
| >HOOK3-Q22KSSLLAENQV  | 305   | >HOOK3-Q22KSSLLAENRV  | 375  | 70    |
| >HOOK3-Q22KSSLLAENQ   | 14774 | >HOOK3-Q22KSSLLAENR   | 307  | 14467 |

|                         |      |                        |       |       |
|-------------------------|------|------------------------|-------|-------|
| >HSP90AA1-I EIVKKHSQF   | 63   | >HSP90AA1-I DIVKKHSQF  | 424   | 361   |
| >HSP90AA1-I EIVKKHSQF   | 9    | >HSP90AA1-I DIVKKHSQF  | 44    | 35    |
| >HSP90AA1-I EIVKKHSQFI  | 161  | >HSP90AA1-I DIVKKHSQFI | 831   | 670   |
| >HSP90AA1-I EIVKKHSQFI  | 173  | >HSP90AA1-I DIVKKHSQFI | 1041  | 868   |
| >HSP90AA1-I KEIVKKHSQFI | 16   | >HSP90AA1-I KDIVKKHSQF | 776   | 760   |
| >HSP90AA1-I KEIVKKHSQF  | 159  | >HSP90AA1-I KDIVKKHSQF | 1880  | 1721  |
| >HSP90AA1-I KEIVKKHSQFI | 123  | >HSP90AA1-I KDIVKKHSQF | 19220 | 19097 |
| >HSP90AA1-I KEIVKKHSQF  | 288  | >HSP90AA1-I KDIVKKHSQF | 21444 | 21156 |
| >HSP90AA1-I KEIVKKHSQFI | 178  | >HSP90AA1-I KDIVKKHSQF | 2289  | 2111  |
| >HSP90AA1-I KEIVKKHSQF  | 102  | >HSP90AA1-I KDIVKKHSQF | 3301  | 3199  |
| >HSP90AA1-I KEIVKKHSQF  | 80   | >HSP90AA1-I KDIVKKHSQF | 3989  | 3909  |
| >HSP90AA1-I KEIVKKHSQFI | 12   | >HSP90AA1-I KDIVKKHSQF | 569   | 557   |
| >HSP90AA1-I KEIVKKHSQFI | 3070 | >HSP90AA1-I KDIVKKHSQF | 64    | 3006  |
| >HSP90AA1-I KEIVKKHSQF  | 125  | >HSP90AA1-I KDIVKKHSQF | 194   | 69    |
| >HSP90AA1-IRIKEIVKK     | 90   | >HSP90AA1-IRIKDIVKK    | 130   | 40    |
| >HSP90AA1-IRIKEIVKK     | 157  | >HSP90AA1-IRIKDIVKK    | 130   | 27    |
| >HSP90AA1-IRIKEIVKK     | 7    | >HSP90AA1-IRIKDIVKK    | 7     | 0     |
| >HSP90AA1-IRIKEIVKKHSC  | 377  | >HSP90AA1-IRIKDIVKKHSC | 308   | 69    |
| >HSP90AA1-IRIKEIVKK     | 75   | >HSP90AA1-IRIKDIVKK    | 62    | 13    |
| >HSP90AA1-IRIKEIVKK     | 543  | >HSP90AA1-IRIKDIVKK    | 383   | 160   |
| >HSP90AA1-IRRIKEIVK     | 42   | >HSP90AA1-IRRIKDIVK    | 40    | 2     |
| >HSP90AA1-IRRIKEIVKK    | 20   | >HSP90AA1-IRRIKDIVKK   | 19    | 1     |
| >HSP90AA1-IRRIKEIVKKH   | 30   | >HSP90AA1-IRRIKDIVKKH  | 29    | 1     |
| >HSP90AA1-IRRIKEIVKKHS  | 187  | >HSP90AA1-IRRIKDIVKKHS | 150   | 37    |
| >HSP90AA1-IRRIKEIVK     | 59   | >HSP90AA1-IRRIKDIVK    | 32    | 27    |
| >HSP90AA1-IRRIKEIVKK    | 351  | >HSP90AA1-IRRIKDIVKK   | 178   | 173   |
| >HSP90AA1-IRRIKEIVKKH   | 231  | >HSP90AA1-IRRIKDIVKKH  | 216   | 15    |
| >HSP90AA1-IRRIKEIVKKHS  | 635  | >HSP90AA1-IRRIKDIVKKHS | 431   | 204   |
| >HSP90AA1-IRRIKEIVKK    | 230  | >HSP90AA1-IRRIKDIVKK   | 100   | 130   |
| >HSP90AA1-IRRIKEIVKKH   | 308  | >HSP90AA1-IRRIKDIVKKH  | 273   | 35    |
| >HSP90AA1-IEERRIKEI     | 31   | >HSP90AA1-IEERRIKDI    | 24    | 7     |
| >HSP90AA1-IEERRIKEIV    | 76   | >HSP90AA1-IEERRIKDIV   | 51    | 25    |
| >HSP90AA1-IEERRIKEIV    | 282  | >HSP90AA1-IEERRIKDIV   | 322   | 40    |
| >HSP90AA1-IEERRIKEI     | 473  | >HSP90AA1-IEERRIKDI    | 1034  | 561   |
| >HSP90AA1-ILEERRIKEI    | 7    | >HSP90AA1-ILEERRIKDI   | 7     | 0     |
| >HSP90AA1-ILEERRIKEIV   | 31   | >HSP90AA1-ILEERRIKDIV  | 24    | 7     |
| >HSP90AA1-ILEERRIKEI    | 61   | >HSP90AA1-ILEERRIKDI   | 57    | 4     |
| >HSP90AA1-ILEERRIKEIV   | 438  | >HSP90AA1-ILEERRIKDIV  | 750   | 312   |
| >HSP90AA1-IYLEERRIKEIV  | 259  | >HSP90AA1-IYLEERRIKDIV | 360   | 101   |
| >HSP90AA1-IYLEERRIKEIV  | 69   | >HSP90AA1-IYLEERRIKDIV | 74    | 5     |
| >HSP90AA1-IYLEERRIKEI   | 209  | >HSP90AA1-IYLEERRIKDI  | 555   | 346   |
| >HSP90AA1-IYLEERRIKEIV  | 97   | >HSP90AA1-IYLEERRIKDIV | 115   | 18    |
| >HSP90AA1-IYLEERRIKEIV  | 176  | >HSP90AA1-IYLEERRIKDIV | 206   | 30    |

|                         |       |                         |       |       |
|-------------------------|-------|-------------------------|-------|-------|
| >HSP90AA1-IYLEERRIKEI   | 22    | >HSP90AA1-IYLEERRIKDI   | 150   | 128   |
| >HSP90AA1-IYLEERRIKEIV  | 11    | >HSP90AA1-IYLEERRIKDIV  | 15    | 4     |
| >HSP90AA1-IYLEERRIKEI   | 66    | >HSP90AA1-IYLEERRIKDI   | 240   | 174   |
| >HSP90AA1-IYLEERRIKEIV  | 19    | >HSP90AA1-IYLEERRIKDIV  | 16    | 3     |
| >HSP90AA1-IYLEERRIKEI   | 304   | >HSP90AA1-IYLEERRIKDI   | 1131  | 827   |
| >HSP90AA1-IYLEERRIKEIV  | 27    | >HSP90AA1-IYLEERRIKDIV  | 25    | 2     |
| >HSP90AA1-IYLEERRIKEIV  | 233   | >HSP90AA1-IYLEERRIKDIV  | 387   | 154   |
| >HSP90AA1-IYLEERRIKEI   | 4     | >HSP90AA1-IYLEERRIKDI   | 9     | 5     |
| >HSP90AA1-IYLEERRIKEIV  | 2     | >HSP90AA1-IYLEERRIKDIV  | 3     | 1     |
| >HSP90AA1-I EYLEERRIKEI | 42    | >HSP90AA1-I EYLEERRIKDI | 136   | 94    |
| >HSP90AA1-I PFLRSRAPV   | 10908 | >HSP90AA1-ISFLRSRAPV    | 134   | 10774 |
| >HSP90AA1-I PFLRSRAPVN  | 153   | >HSP90AA1-ISFLRSRAPVN   | 251   | 98    |
| >HSP90AA1-I PFLRSRAPVN  | 1446  | >HSP90AA1-ISFLRSRAPVN   | 187   | 1259  |
| >HSP90AA1-I PFLRSRAPV   | 1344  | >HSP90AA1-ISFLRSRAPV    | 56    | 1288  |
| >HSP90AA1-I PFLRSRAPV   | 3166  | >HSP90AA1-ISFLRSRAPV    | 204   | 2962  |
| >HSP90AA1-I PPFLRSRAPV  | 357   | >HSP90AA1-IPSFLRSRAPV   | 26056 | 25699 |
| >HSP90AA1-I SPPFLRSRAPV | 242   | >HSP90AA1-ISPSFLRSRAPV  | 235   | 7     |
| >HSP90AA1-I SPPFLRSRA   | 2274  | >HSP90AA1-ISPSFLRSRA    | 318   | 1956  |
| >HSP90AA1-I SPPFLRSRAPV | 51    | >HSP90AA1-ISPSFLRSRAPV  | 14    | 37    |
| >HSP90AA1-I SSPPFLRSR   | 490   | >HSP90AA1-ISSPSFLRSR    | 411   | 79    |
| >HSP90AA1-I SSPPFLRSR   | 647   | >HSP90AA1-ISSPSFLRSR    | 337   | 310   |
| >HSP90AA1-I SSPPFLRSRA  | 1213  | >HSP90AA1-ISSPSFLRSRA   | 383   | 830   |
| >HSP90AA1-I SSPPFLRSR   | 139   | >HSP90AA1-ISSPSFLRSR    | 195   | 56    |
| >HSP90AA1-I SSPPFLRSRA  | 130   | >HSP90AA1-ISSPSFLRSRA   | 176   | 46    |
| >HSP90AA1-I SSPPFLRSRAF | 397   | >HSP90AA1-ISSPSFLRSRAF  | 513   | 116   |
| >HSP90AA1-I SSPPFLRSR   | 312   | >HSP90AA1-ISSPSFLRSR    | 540   | 228   |
| >HSP90AA1-I ASSPPFLR    | 21    | >HSP90AA1-IASSPSFLR     | 19    | 2     |
| >HSP90AA1-I ASSPPFLRSR  | 93    | >HSP90AA1-IASSPSFLRSR   | 95    | 2     |
| >HSP90AA1-I ASSPPFLR    | 27    | >HSP90AA1-IASSPSFLR     | 19    | 8     |
| >HSP90AA1-I ASSPPFLRSR  | 12    | >HSP90AA1-IASSPSFLRSR   | 14    | 2     |
| >HSP90AA1-I ASSPPFLR    | 171   | >HSP90AA1-IASSPSFLR     | 80    | 91    |
| >HSP90AA1-I ASSPPFLRSR  | 327   | >HSP90AA1-IASSPSFLRSR   | 521   | 194   |
| >HSP90AA1-I ASSPPFLRSR/ | 469   | >HSP90AA1-IASSPSFLRSR/  | 709   | 240   |
| >HSP90AA1-I ASSPPFLR    | 67    | >HSP90AA1-IASSPSFLR     | 64    | 3     |
| >HSP90AA1-I ASSPPFLRS   | 255   | >HSP90AA1-IASSPSFLRS    | 118   | 137   |
| >HSP90AA1-I ASSPPFLRSR  | 89    | >HSP90AA1-IASSPSFLRSR   | 71    | 18    |
| >HSP90AA1-I EASSPPFLR   | 566   | >HSP90AA1-I EASSPSFLR   | 354   | 212   |
| >HSP90AA1-I EASSPPFLR   | 55    | >HSP90AA1-I EASSPSFLR   | 49    | 6     |
| >HSP90AA1-I EASSPPFLRSF | 140   | >HSP90AA1-I EASSPSFLRSF | 136   | 4     |
| >HSP90AA1-I EASSPPFLR   | 4     | >HSP90AA1-I EASSPSFLR   | 3     | 1     |
| >HSP90AA1-I EASSPPFLRSF | 10    | >HSP90AA1-I EASSPSFLRSF | 8     | 2     |
| >HSP90AA1-I EASSPPFL    | 112   | >HSP90AA1-I EASSPSFL    | 22    | 90    |
| >HSP90AA1-I EASSPPFL    | 39    | >HSP90AA1-I EASSPSFL    | 101   | 62    |

|                         |       |                         |      |       |
|-------------------------|-------|-------------------------|------|-------|
| >HSP90AA1-I SEASSPPFL   | 82    | >HSP90AA1-I SEASSPSFL   | 47   | 35    |
| >HSP90AA1-I SEASSPPF    | 159   | >HSP90AA1-I SEASSPSF    | 194  | 35    |
| >HSP90AA1-I SEASSPPF    | 14    | >HSP90AA1-I SEASSPSF    | 13   | 1     |
| >HSP90AA1-I SEASSPPFL   | 1133  | >HSP90AA1-I SEASSPSFL   | 485  | 648   |
| >HSP90AA1-I SEASSPPF    | 116   | >HSP90AA1-I SEASSPSF    | 203  | 87    |
| >HSP90AA1-I SEASSPPFL   | 90    | >HSP90AA1-I SEASSPSFL   | 134  | 44    |
| >HSP90AA1-I SEASSPPF    | 374   | >HSP90AA1-I SEASSPSF    | 630  | 256   |
| >HSP90AA1-I SEASSPPFLR  | 648   | >HSP90AA1-I SEASSPSFLR  | 495  | 153   |
| >HSP90AA1-I SEASSPPF    | 154   | >HSP90AA1-I SEASSPSF    | 107  | 47    |
| >HSP90AA1-I SEASSPPFL   | 424   | >HSP90AA1-I SEASSPSFL   | 630  | 206   |
| >HSP90AA1-I SEASSPPF    | 88    | >HSP90AA1-I SEASSPSF    | 75   | 13    |
| >HSP90AA1-I SEASSPPFL   | 203   | >HSP90AA1-I SEASSPSFL   | 286  | 83    |
| >HSP90AA1-I SEASSPPF    | 433   | >HSP90AA1-I SEASSPSF    | 835  | 402   |
| >HSP90AA1-I SEASSPPFL   | 366   | >HSP90AA1-I SEASSPSFL   | 1124 | 758   |
| >HSP90AA1-I SEASSPPFLRS | 210   | >HSP90AA1-I SEASSPSFLRS | 267  | 57    |
| >HSP90AA1-I SEASSPPFL   | 86    | >HSP90AA1-I SEASSPSFL   | 133  | 47    |
| >HSP90AA1-I SEASSPPFLR  | 382   | >HSP90AA1-I SEASSPSFLR  | 487  | 105   |
| >HSP90AA1-I PSEASSPPF   | 48    | >HSP90AA1-I PSEASSPSF   | 61   | 13    |
| >HSP90AA1-I PSEASSPPFL  | 431   | >HSP90AA1-I PSEASSPSFL  | 934  | 503   |
| >HSP90AA1-I SPSEASSPPF  | 44    | >HSP90AA1-I SPSEASSPSF  | 14   | 30    |
| >HSP90AA1-I SPSEASSPPFL | 9     | >HSP90AA1-I SPSEASSPSFL | 15   | 6     |
| >HSP90AA1-I SPSEASSPPF  | 114   | >HSP90AA1-I SPSEASSPSF  | 290  | 176   |
| >HSP90AA1-I SPSEASSPPFL | 202   | >HSP90AA1-I SPSEASSPSFL | 66   | 136   |
| >HSP90AA1-I SPSEASSPPF  | 122   | >HSP90AA1-I SPSEASSPSF  | 130  | 8     |
| >HSP90AA1-I SPSEASSPP   | 516   | >HSP90AA1-I SPSEASSPS   | 62   | 454   |
| >HSP90AA1-I SPSEASSPPFL | 335   | >HSP90AA1-I SPSEASSPSFL | 301  | 34    |
| >HSP90AA1-I SPSEASSPPFL | 166   | >HSP90AA1-I SPSEASSPSFL | 149  | 17    |
| >HSP90AA1-I SPSEASSPP   | 2188  | >HSP90AA1-I SPSEASSPS   | 451  | 1737  |
| >HSP90AA1-I SPSEASSPPF  | 11    | >HSP90AA1-I SPSEASSPSF  | 12   | 1     |
| >HSP90AA1-I SPSEASSPPF  | 424   | >HSP90AA1-I SPSEASSPSF  | 369  | 55    |
| >HSP90AA1-I GSPSEASSPPI | 292   | >HSP90AA1-I GSPSEASSPSI | 233  | 59    |
| >HSP90AA1-I GSPSEASSPPI | 347   | >HSP90AA1-I GSPSEASSPSI | 538  | 191   |
| >HSP90AA1-I GSPSEASSPPI | 151   | >HSP90AA1-I GSPSEASSPSI | 173  | 22    |
| >HSP90AA1-I GSPSEASSPPI | 53    | >HSP90AA1-I GSPSEASSPSI | 71   | 18    |
| >HSP90AA1-I GSPSEASSPPI | 11    | >HSP90AA1-I GSPSEASSPSI | 14   | 3     |
| >HSP90AA1-I GSPSEASSPPI | 730   | >HSP90AA1-I GSPSEASSPSI | 195  | 535   |
| >IDH1-G123E GWVKPIIIGR  | 30    | >IDH1-G123E EWVKPIIIGR  | 15   | 15    |
| >IDH1-G123E GWVKPIII    | 613   | >IDH1-G123E EWVKPIII    | 331  | 282   |
| >IDH1-G123E SGWVKPII    | 32510 | >IDH1-G123E SEWVKPII    | 23   | 32487 |
| >IDH1-G123E SGWVKPIII   | 13077 | >IDH1-G123E SEWVKPIII   | 37   | 13040 |
| >IDH1-G123E SGWVKPIIIGF | 153   | >IDH1-G123E SEWVKPIIIGR | 1461 | 1308  |
| >IDH1-G123E SGWVKPIIIG  | 27542 | >IDH1-G123E SEWVKPIIIG  | 418  | 27124 |
| >IDH1-G123E SGWVKPIII   | 25027 | >IDH1-G123E SEWVKPIII   | 21   | 25006 |

|                        |      |                        |      |      |
|------------------------|------|------------------------|------|------|
| >IDH1-G123ESGWVKPIIIGF | 85   | >IDH1-G123ESEWVKPIIIGR | 136  | 51   |
| >IDH1-G123ESGWVKPII    | 171  | >IDH1-G123ESEWVKPII    | 1197 | 1026 |
| >IDH1-G123ESGWVKPIII   | 208  | >IDH1-G123ESEWVKPIII   | 1550 | 1342 |
| >IDH1-G123EVSGWVKPI    | 132  | >IDH1-G123EVSEWVKPI    | 116  | 16   |
| >IDH1-G123EVSGWVKPII   | 117  | >IDH1-G123EVSEWVKPII   | 81   | 36   |
| >IDH1-G123EVSGWVKPIII  | 58   | >IDH1-G123EVSEWVKPIII  | 66   | 8    |
| >IDH1-G123ELVSGWVKPI   | 1080 | >IDH1-G123ELVSEWVKPI   | 204  | 876  |
| >IDH1-G123ELVSGWVKPII  | 34   | >IDH1-G123ELVSEWVKPII  | 13   | 21   |
| >IDH1-G123ELVSGWVKPIII | 350  | >IDH1-G123ELVSEWVKPIII | 143  | 207  |
| >IDH1-G123ELVSGWVKPI   | 286  | >IDH1-G123ELVSEWVKPI   | 56   | 230  |
| >IDH1-G123ELVSGWVKPII  | 485  | >IDH1-G123ELVSEWVKPII  | 505  | 20   |
| >IDH1-G123ELVSGWVKPIII | 94   | >IDH1-G123ELVSEWVKPIII | 27   | 67   |
| >IDH1-G123ELVSGWVKPI   | 510  | >IDH1-G123ELVSEWVKPII  | 187  | 323  |
| >IDH1-G123ELVSGWVKPII  | 578  | >IDH1-G123ELVSEWVKPIII | 216  | 362  |
| >IDH1-G123ELVSGWVKPIII | 175  | >IDH1-G123ELVSEWVKPII  | 194  | 19   |
| >IDH1-G123ELVSGWVKPI   | 204  | >IDH1-G123ELVSEWVKPII  | 237  | 33   |
| >IDH1-G123ELVSGWVKPII  | 476  | >IDH1-G123ELVSEWVKPIII | 538  | 62   |
| >IDH1-G123ELVSGWVKPIII | 412  | >IDH1-G123ELVSEWVKPI   | 1023 | 611  |
| >IDH1-G123ELVSGWVKPI   | 190  | >IDH1-G123ELVSEWVKPII  | 161  | 29   |
| >IDH1-G123ELVSGWVKPII  | 692  | >IDH1-G123ELVSEWVKPII  | 84   | 608  |
| >IDH1-G123ELVSGWVKPIII | 1913 | >IDH1-G123ELVSEWVKPII  | 392  | 1521 |
| >IDH1-G123ELVSGWVKPI   | 110  | >IDH1-G123ELVSEWVKPII  | 169  | 59   |
| >IDH1-G123ELVSGWVKPII  | 103  | >IDH1-G123ELVSEWVKPII  | 122  | 19   |
| >IDH1-G123ELVSGWVKPIII | 157  | >IDH1-G123ELVSEWVKPII  | 302  | 145  |
| >IDH1-G123ELVSGWVKPI   | 162  | >IDH1-G123ELVSEWVKPII  | 283  | 121  |
| >IDH1-G123ELVSGWVKPII  | 10   | >IDH1-G123ELVSEWVKPII  | 15   | 5    |
| >IDH1-G123ELVSGWVKPIII | 35   | >IDH1-G123ELVSEWVKPII  | 63   | 28   |
| >IDH1-G123ELVSGWVKPI   | 102  | >IDH1-G123ELVSEWVKPII  | 105  | 3    |
| >IDH1-G123ELVSGWVKPII  | 96   | >IDH1-G123ELVSEWVKPII  | 162  | 66   |
| >IDH1-G123ELVSGWVKPIII | 65   | >IDH1-G123ELVSEWVKPII  | 126  | 61   |
| >IDH1-G123ELVSGWVKPI   | 39   | >IDH1-G123ELVSEWVKPII  | 85   | 46   |
| >IDH1-G123ELVSGWVKPII  | 51   | >IDH1-G123ELVSEWVKPII  | 87   | 36   |
| >IDH1-G123ELVSGWVKPIII | 72   | >IDH1-G123ELVSEWVK     | 154  | 82   |
| >IDH1-G123ELVSGWVK     | 115  | >IDH1-G123ELVSEWVK     | 175  | 60   |
| >IDH1-G123ELVSGWVK     | 255  | >IDH1-G123ELVSEWVK     | 797  | 542  |
| >IDH1-G123ELVSGWVK     | 196  | >IDH1-G123ELVSEWVK     | 593  | 397  |
| >IDH1-G123ELVSGWVK     | 90   | >IDH1-G123ELVSEWVKPI   | 112  | 22   |
| >IDH1-G123ELVSGWVKPI   | 294  | >IDH1-G123ELVSEWVKPI   | 206  | 88   |
| >IDH1-G123ELVSGWVKPII  | 802  | >IDH1-G123ELVSEWVK     | 350  | 452  |
| >IDH1-G123ELVSGWVKPIII | 138  | >IDH1-G123ELVSEWVK     | 124  | 14   |
| >IDH1-G123ELVSGWVK     | 22   | >IDH1-G123ELVSEWVK     | 136  | 114  |
| >IDH1-G123ELVSGWVK     | 145  | >IDH1-G123ELVSEWVK     | 49   | 96   |
| >IDH1-G123ELVSGWVK     | 220  | >IDH1-G123ELVSEWVK     | 1169 | 949  |



|                        |      |                        |      |      |
|------------------------|------|------------------------|------|------|
| >IDH1-G123EIPRLVSGW    | 49   | >IDH1-G123EIPRLVSEW    | 12   | 37   |
| >IDH1-G123ENIPRLVSGW\  | 347  | >IDH1-G123ENIPRLVSEWV  | 704  | 357  |
| >IDH1-G123ENIPRLVSGW\  | 384  | >IDH1-G123ENIPRLVSEWV  | 186  | 198  |
| >IDH1-G123ENIPRLVSGW\  | 374  | >IDH1-G123ENIPRLVSEWV  | 118  | 256  |
| >IDH1-G123ENIPRLVSGW\  | 146  | >IDH1-G123ENIPRLVSEWV  | 306  | 160  |
| >IDH1-G123EKNIPRLVSGW  | 102  | >IDH1-G123EKNIPRLVSEW  | 136  | 34   |
| >IDH1-G123EKNIPRLVSGW  | 288  | >IDH1-G123EKNIPRLVSEW  | 249  | 39   |
| >IDH1-G123EKNIPRLVSGW  | 59   | >IDH1-G123EKNIPRLVSEW  | 41   | 18   |
| >IDH1-G97D-GTIRNILGGT\ | 322  | >IDH1-G97D-DTIRNILGGT\ | 5411 | 5089 |
| >IDH1-G97D-GTIRNILGGT\ | 138  | >IDH1-G97D-DTIRNILGGT\ | 2732 | 2594 |
| >IDH1-G97D-GTIRNILGGT\ | 191  | >IDH1-G97D-DTIRNILGGT\ | 7084 | 6893 |
| >IDH1-G97D-GTIRNILGGT\ | 8359 | >IDH1-G97D-DTIRNILGGT\ | 409  | 7950 |
| >IDH1-G97D-GTIRNILGGT  | 3927 | >IDH1-G97D-DTIRNILGGT  | 85   | 3842 |
| >IDH1-G97D-GTIRNILGGT\ | 4660 | >IDH1-G97D-DTIRNILGGT\ | 144  | 4516 |
| >IDH1-G97D-GTIRNILGGT  | 1155 | >IDH1-G97D-DTIRNILGGT  | 302  | 853  |
| >IDH1-G97D-GTIRNILGGT\ | 1955 | >IDH1-G97D-DTIRNILGGT\ | 32   | 1923 |
| >IDH1-G97D-GTIRNILGGT\ | 2887 | >IDH1-G97D-DTIRNILGGT\ | 35   | 2852 |
| >IDH1-G97D-GTIRNILGGT\ | 477  | >IDH1-G97D-DTIRNILGGT\ | 8736 | 8259 |
| >IDH1-G97D-KLKQMWKSF   | 204  | >IDH1-G97D-KLKQMWKSF   | 1242 | 1038 |
| >IDH1-G97D-SPNGTIRNI   | 245  | >IDH1-G97D-SPNDTIRNI   | 540  | 295  |
| >IDH1-G97D-SPNGTIRNIL  | 23   | >IDH1-G97D-SPNDTIRNIL  | 28   | 5    |
| >IDH1-G97D-SPNGTIRNIL  | 247  | >IDH1-G97D-SPNDTIRNIL  | 371  | 124  |
| >IDH1-G97D-KSPNGTIR    | 174  | >IDH1-G97D-KSPNDTIR    | 394  | 220  |
| >IDH1-G97D-KSPNGTIRNI  | 81   | >IDH1-G97D-KSPNDTIRNI  | 128  | 47   |
| >IDH1-G97D-KSPNGTIRNIL | 172  | >IDH1-G97D-KSPNDTIRNIL | 217  | 45   |
| >IDH1-G97D-KSPNGTIRNI  | 19   | >IDH1-G97D-KSPNDTIRNI  | 29   | 10   |
| >IDH1-G97D-KSPNGTIRNIL | 6    | >IDH1-G97D-KSPNDTIRNIL | 8    | 2    |
| >IDH1-G97D-KSPNGTIR    | 551  | >IDH1-G97D-KSPNDTIR    | 305  | 246  |
| >IDH1-G97D-KSPNGTIRNI  | 464  | >IDH1-G97D-KSPNDTIRNI  | 708  | 244  |
| >IDH1-G97D-WKSPNGTI    | 137  | >IDH1-G97D-WKSPNDTI    | 206  | 69   |
| >IDH1-G97D-WKSPNGTIR   | 80   | >IDH1-G97D-WKSPNDTIR   | 722  | 642  |
| >IDH1-G97D-WKSPNGTIR\  | 52   | >IDH1-G97D-WKSPNDTIR\  | 104  | 52   |
| >IDH1-G97D-MWKSPNGTI   | 324  | >IDH1-G97D-MWKSPNDTI   | 202  | 122  |
| >IDH1-G97D-MWKSPNGTI   | 304  | >IDH1-G97D-MWKSPNDTI   | 633  | 329  |
| >IDH1-G97D-MWKSPNGTI   | 43   | >IDH1-G97D-MWKSPNDTI   | 29   | 14   |
| >IDH1-G97D-MWKSPNGT    | 390  | >IDH1-G97D-MWKSPNDT    | 528  | 138  |
| >IDH1-G97D-MWKSPNGTI   | 180  | >IDH1-G97D-MWKSPNDTI   | 130  | 50   |
| >IDH1-G97D-QMWKSPNG`   | 332  | >IDH1-G97D-QMWKSPND`   | 196  | 136  |
| >IDH1-G97D-QMWKSPNG`   | 141  | >IDH1-G97D-QMWKSPND`   | 397  | 256  |
| >IDH1-G97D-QMWKSPNG`   | 369  | >IDH1-G97D-QMWKSPND`   | 4023 | 3654 |
| >IDH1-G97D-QMWKSPNG`   | 13   | >IDH1-G97D-QMWKSPND`   | 17   | 4    |
| >IDH1-G97D-QMWKSPNG`   | 102  | >IDH1-G97D-QMWKSPND`   | 53   | 49   |
| >IDH1-G97D-QMWKSPNG`   | 223  | >IDH1-G97D-QMWKSPND`   | 111  | 112  |

|                        |      |                       |      |      |
|------------------------|------|-----------------------|------|------|
| >IDH1-G97D-QMWKSPNG    | 426  | >IDH1-G97D-QMWKSPND   | 145  | 281  |
| >IDH1-G97D-QMWKSPNG    | 418  | >IDH1-G97D-QMWKSPND   | 364  | 54   |
| >IDH1-G97D-QMWKSPNG    | 46   | >IDH1-G97D-QMWKSPND   | 67   | 21   |
| >IDH1-G97D-QMWKSPNG    | 88   | >IDH1-G97D-QMWKSPND   | 34   | 54   |
| >IDH1-G97D-QMWKSPNG    | 470  | >IDH1-G97D-QMWKSPND   | 948  | 478  |
| >IDH1-G97D-QMWKSPNG    | 79   | >IDH1-G97D-QMWKSPND   | 49   | 30   |
| >IDH1-G97D-QMWKSPNG    | 88   | >IDH1-G97D-QMWKSPND   | 204  | 116  |
| >IDH1-G97D-QMWKSPNG    | 46   | >IDH1-G97D-QMWKSPND   | 35   | 11   |
| >IDH1-G97D-KQMWKSPNI   | 298  | >IDH1-G97D-KQMWKSPNI  | 123  | 175  |
| >IDH1-G97D-KQMWKSPNI   | 470  | >IDH1-G97D-KQMWKSPNI  | 1480 | 1010 |
| >IDH1-G97D-KQMWKSPNI   | 253  | >IDH1-G97D-KQMWKSPNI  | 494  | 241  |
| >IDH1-G97D-KQMWKSPNI   | 21   | >IDH1-G97D-KQMWKSPNI  | 11   | 10   |
| >IDH1-G97D-KQMWKSPNI   | 311  | >IDH1-G97D-KQMWKSPNI  | 229  | 82   |
| >IDH1-G97D-KQMWKSPNI   | 598  | >IDH1-G97D-KQMWKSPNI  | 221  | 377  |
| >IDH1-G97D-KQMWKSPNI   | 26   | >IDH1-G97D-KQMWKSPNI  | 14   | 12   |
| >IDH1-G97D-KQMWKSPNI   | 271  | >IDH1-G97D-KQMWKSPNI  | 186  | 85   |
| >IDH1-G97D-KQMWKSPNI   | 684  | >IDH1-G97D-KQMWKSPNI  | 426  | 258  |
| >IDH1-G97D-KQMWKSPNI   | 246  | >IDH1-G97D-KQMWKSPNI  | 432  | 186  |
| >IDH1-I99M-IRNILGGTVFF | 1994 | >IDH1-I99M-MRNILGGTVI | 298  | 1696 |
| >IDH1-I99M-IRNILGGTVF  | 30   | >IDH1-I99M-MRNILGGTVI | 24   | 6    |
| >IDH1-I99M-IRNILGGTVF  | 79   | >IDH1-I99M-MRNILGGTVI | 46   | 33   |
| >IDH1-I99M-IRNILGGTVFF | 459  | >IDH1-I99M-MRNILGGTVI | 262  | 197  |
| >IDH1-I99M-IRNILGGTVF  | 201  | >IDH1-I99M-MRNILGGTVI | 236  | 35   |
| >IDH1-I99M-IRNILGGTVFF | 449  | >IDH1-I99M-MRNILGGTVI | 282  | 167  |
| >IDH1-I99M-TIRNILGGTV  | 2103 | >IDH1-I99M-TMRNILGGTV | 279  | 1824 |
| >IDH1-I99M-TIRNILGGT   | 1016 | >IDH1-I99M-TMRNILGGT  | 73   | 943  |
| >IDH1-I99M-TIRNILGGTV  | 122  | >IDH1-I99M-TMRNILGGTV | 31   | 91   |
| >IDH1-I99M-TIRNILGGTV  | 1095 | >IDH1-I99M-TMRNILGGTV | 20   | 1075 |
| >IDH1-I99M-TIRNILGGTV  | 7982 | >IDH1-I99M-TMRNILGGTV | 112  | 7870 |
| >IDH1-I99M-TIRNILGGTV  | 5229 | >IDH1-I99M-TMRNILGGTV | 167  | 5062 |
| >IDH1-I99M-TIRNILGGTV  | 279  | >IDH1-I99M-TMRNILGGTV | 8    | 271  |
| >IDH1-I99M-TIRNILGGTVF | 133  | >IDH1-I99M-TMRNILGGTV | 38   | 95   |
| >IDH1-I99M-TIRNILGGTVF | 565  | >IDH1-I99M-TMRNILGGTV | 76   | 489  |
| >IDH1-I99M-TIRNILGGTVF | 338  | >IDH1-I99M-TMRNILGGTV | 17   | 321  |
| >IDH1-I99M-TIRNILGGTVF | 58   | >IDH1-I99M-TMRNILGGTV | 124  | 66   |
| >IDH1-I99M-KQMWKSPNI   | 298  | >IDH1-I99M-KQMWKSPNI  | 1390 | 1092 |
| >IDH1-I99M-KQMWKSPNI   | 253  | >IDH1-I99M-KQMWKSPNI  | 3078 | 2825 |
| >IDH1-I99M-KQMWKSPNI   | 21   | >IDH1-I99M-KQMWKSPNI  | 86   | 65   |
| >IDH1-I99M-KQMWKSPNI   | 311  | >IDH1-I99M-KQMWKSPNI  | 2473 | 2162 |
| >IDH1-I99M-KQMWKSPNI   | 26   | >IDH1-I99M-KQMWKSPNI  | 244  | 218  |
| >IDH1-I99M-KQMWKSPNI   | 1387 | >IDH1-I99M-KQMWKSPNI  | 133  | 1254 |
| >IDH1-I99M-KQMWKSPNI   | 271  | >IDH1-I99M-KQMWKSPNI  | 79   | 192  |
| >IDH1-I99M-KQMWKSPNI   | 1198 | >IDH1-I99M-KQMWKSPNI  | 458  | 740  |

|                         |      |                        |      |      |
|-------------------------|------|------------------------|------|------|
| >IDH1-I99M- KQMWKSPNG   | 246  | >IDH1-I99M- KQMWKSPNG  | 6221 | 5975 |
| >IDH1-I99M- GTIRNILGGT  | 540  | >IDH1-I99M- GTMRNILGG  | 177  | 363  |
| >IDH1-I99M- GTIRNILGGT\ | 322  | >IDH1-I99M- GTMRNILGG  | 149  | 173  |
| >IDH1-I99M- GTIRNILGGT\ | 510  | >IDH1-I99M- GTMRNILGG  | 277  | 233  |
| >IDH1-I99M- GTIRNILGGT\ | 138  | >IDH1-I99M- GTMRNILGG  | 62   | 76   |
| >IDH1-I99M- GTIRNILGGT\ | 191  | >IDH1-I99M- GTMRNILGG  | 78   | 113  |
| >IDH1-I99M- GTIRNILGGT\ | 646  | >IDH1-I99M- GTMRNILGG  | 397  | 249  |
| >IDH1-I99M- GTIRNILGGT\ | 477  | >IDH1-I99M- GTMRNILGG  | 193  | 284  |
| >IDH1-I99M- SPNGTIRNI   | 245  | >IDH1-I99M- SPNGTMRNI  | 91   | 154  |
| >IDH1-I99M- SPNGTIRNIL  | 23   | >IDH1-I99M- SPNGTMRNII | 22   | 1    |
| >IDH1-I99M- SPNGTIRNIL  | 247  | >IDH1-I99M- SPNGTMRNII | 225  | 22   |
| >IDH1-I99M- KSPNGTIR    | 174  | >IDH1-I99M- KSPNGTMR   | 153  | 21   |
| >IDH1-I99M- KSPNGTIRNI  | 81   | >IDH1-I99M- KSPNGTMRN  | 84   | 3    |
| >IDH1-I99M- KSPNGTIRNIL | 172  | >IDH1-I99M- KSPNGTMRN  | 227  | 55   |
| >IDH1-I99M- KSPNGTIRNI  | 19   | >IDH1-I99M- KSPNGTMRN  | 27   | 8    |
| >IDH1-I99M- KSPNGTIRNIL | 6    | >IDH1-I99M- KSPNGTMRN  | 7    | 1    |
| >IDH1-I99M- KSPNGTIRNI  | 464  | >IDH1-I99M- KSPNGTMRN  | 469  | 5    |
| >IDH1-I99M- WKSPNGTI    | 137  | >IDH1-I99M- WKSPNGTM   | 44   | 93   |
| >IDH1-I99M- WKSPNGTIR   | 80   | >IDH1-I99M- WKSPNGTMF  | 111  | 31   |
| >IDH1-I99M- WKSPNGTIRM  | 52   | >IDH1-I99M- WKSPNGTMF  | 66   | 14   |
| >IDH1-I99M- MWKSPNGTI   | 324  | >IDH1-I99M- MWKSPNGTI  | 3457 | 3133 |
| >IDH1-I99M- MWKSPNGTI   | 304  | >IDH1-I99M- MWKSPNGTI  | 140  | 164  |
| >IDH1-I99M- MWKSPNGTI   | 2489 | >IDH1-I99M- MWKSPNGTI  | 172  | 2317 |
| >IDH1-I99M- MWKSPNGTI   | 43   | >IDH1-I99M- MWKSPNGTI  | 53   | 10   |
| >IDH1-I99M- MWKSPNGTI   | 180  | >IDH1-I99M- MWKSPNGTI  | 174  | 6    |
| >IDH1-I99M- QMWKSPNG    | 332  | >IDH1-I99M- QMWKSPNG   | 837  | 505  |
| >IDH1-I99M- QMWKSPNG    | 141  | >IDH1-I99M- QMWKSPNG   | 955  | 814  |
| >IDH1-I99M- QMWKSPNG    | 13   | >IDH1-I99M- QMWKSPNG   | 97   | 84   |
| >IDH1-I99M- QMWKSPNG    | 102  | >IDH1-I99M- QMWKSPNG   | 1204 | 1102 |
| >IDH1-I99M- QMWKSPNG    | 223  | >IDH1-I99M- QMWKSPNG   | 2009 | 1786 |
| >IDH1-I99M- QMWKSPNG    | 426  | >IDH1-I99M- QMWKSPNG   | 1687 | 1261 |
| >IDH1-I99M- QMWKSPNG    | 418  | >IDH1-I99M- QMWKSPNG   | 3016 | 2598 |
| >IDH1-I99M- QMWKSPNG    | 46   | >IDH1-I99M- QMWKSPNG   | 37   | 9    |
| >IDH1-I99M- QMWKSPNG    | 88   | >IDH1-I99M- QMWKSPNG   | 1161 | 1073 |
| >IDH1-I99M- QMWKSPNG    | 470  | >IDH1-I99M- QMWKSPNG   | 1032 | 562  |
| >IDH1-I99M- QMWKSPNG    | 747  | >IDH1-I99M- QMWKSPNG   | 89   | 658  |
| >IDH1-I99M- QMWKSPNG    | 79   | >IDH1-I99M- QMWKSPNG   | 26   | 53   |
| >IDH1-I99M- QMWKSPNG    | 88   | >IDH1-I99M- QMWKSPNG   | 109  | 21   |
| >IDH1-I99M- QMWKSPNG    | 46   | >IDH1-I99M- QMWKSPNG   | 59   | 13   |
| >IDH1-R132C RHAYGDQY    | 803  | >IDH1-R132C CHAYGDQY   | 499  | 304  |
| >IDH1-R132C RHAYGDQY    | 304  | >IDH1-R132C CHAYGDQY   | 555  | 251  |
| >IDH1-R132C RHAYGDQY    | 220  | >IDH1-R132C CHAYGDQY   | 1333 | 1113 |
| >IDH1-R132C RHAYGDQY    | 167  | >IDH1-R132C CHAYGDQY   | 215  | 48   |

|                         |      |                         |       |       |
|-------------------------|------|-------------------------|-------|-------|
| >IDH1-R132C RHAYGDQYR   | 135  | >IDH1-R132C CHAYGDQYR   | 438   | 303   |
| >IDH1-R132C GRHAYGDQY   | 382  | >IDH1-R132C GCHAYGDQY   | 23057 | 22675 |
| >IDH1-R132C GRHAYGDQY   | 38   | >IDH1-R132C GCHAYGDQY   | 23172 | 23134 |
| >IDH1-R132C GRHAYGDQY   | 2893 | >IDH1-R132C GCHAYGDQY   | 254   | 2639  |
| >IDH1-R132C GRHAYGDQY   | 418  | >IDH1-R132C GCHAYGDQY   | 33079 | 32661 |
| >IDH1-R132C SGWVKPIIIGF | 153  | >IDH1-R132C SGWVKPIIIGC | 21750 | 21597 |
| >IDH1-R132C SGWVKPIIIGF | 85   | >IDH1-R132C SGWVKPIIIGC | 33154 | 33069 |
| >IDH1-R132C IGRHAYGDQ\  | 273  | >IDH1-R132C IGCHAYGDQ\  | 531   | 258   |
| >IDH1-R132C IGRHAYGDQ\  | 406  | >IDH1-R132C IGCHAYGDQ\  | 1744  | 1338  |
| >IDH1-R132C IGRHAYGDQ\  | 665  | >IDH1-R132C IGCHAYGDQ\  | 262   | 403   |
| >IDH1-R132C IIGRHAYGDQ  | 102  | >IDH1-R132C IIGCHAYGDQ  | 54    | 48    |
| >IDH1-R132C IIGRHAYGDQ  | 292  | >IDH1-R132C IIGCHAYGDQ  | 514   | 222   |
| >IDH1-R132C IIGRHAYGDQ  | 541  | >IDH1-R132C IIGCHAYGDQ  | 361   | 180   |
| >IDH1-R132C IIIGRHAY    | 23   | >IDH1-R132C IIIGCHAY    | 23    | 0     |
| >IDH1-R132C IIIGRHAY    | 214  | >IDH1-R132C IIIGCHAY    | 891   | 677   |
| >IDH1-R132C IIIGRHAY    | 13   | >IDH1-R132C IIIGCHAY    | 9     | 4     |
| >IDH1-R132C IIIGRHAY    | 35   | >IDH1-R132C IIIGCHAY    | 13    | 22    |
| >IDH1-R132C IIIGRHAY    | 101  | >IDH1-R132C IIIGCHAY    | 88    | 13    |
| >IDH1-R132C IIIGRHAY    | 223  | >IDH1-R132C IIIGCHAY    | 499   | 276   |
| >IDH1-R132C IIIGRHAY    | 269  | >IDH1-R132C IIIGCHAY    | 407   | 138   |
| >IDH1-R132C IIIGRHAY    | 476  | >IDH1-R132C IIIGCHAY    | 123   | 353   |
| >IDH1-R132C IIIGRHAY    | 233  | >IDH1-R132C IIIGCHAY    | 369   | 136   |
| >IDH1-R132C PIIIGRHAY   | 106  | >IDH1-R132C PIIIGCHAY   | 185   | 79    |
| >IDH1-R132C PIIIGRHAY   | 30   | >IDH1-R132C PIIIGCHAY   | 19    | 11    |
| >IDH1-R132C PIIIGRHAY   | 24   | >IDH1-R132C PIIIGCHAY   | 31    | 7     |
| >IDH1-R132C KPIIIGRHAY  | 96   | >IDH1-R132C KPIIIGCHAY  | 189   | 93    |
| >IDH1-R132C KPIIIGRHAY  | 390  | >IDH1-R132C KPIIIGCHAY  | 106   | 284   |
| >IDH1-R132C KPIIIGRHAY  | 998  | >IDH1-R132C KPIIIGCHAY  | 451   | 547   |
| >IDH1-R132C KPIIIGRHA   | 114  | >IDH1-R132C KPIIIGCHA   | 38    | 76    |
| >IDH1-R132C KPIIIGRHAY  | 10   | >IDH1-R132C KPIIIGCHAY  | 15    | 5     |
| >IDH1-R132C VKPIIIGRHAY | 87   | >IDH1-R132C VKPIIIGCHAY | 116   | 29    |
| >IDH1-R132C VKPIIIGRHAY | 302  | >IDH1-R132C VKPIIIGCHAY | 324   | 22    |
| >IDH1-R132C WVKPIIIGRH/ | 606  | >IDH1-R132C WVKPIIIGCH/ | 463   | 143   |
| >IDH1-R132C WVKPIIIGR   | 134  | >IDH1-R132C WVKPIIIGC   | 22497 | 22363 |
| >IDH1-R132C WVKPIIIGR   | 442  | >IDH1-R132C WVKPIIIGC   | 31155 | 30713 |
| >IDH1-R132C WVKPIIIGR   | 44   | >IDH1-R132C WVKPIIIGC   | 29413 | 29369 |
| >IDH1-R132C WVKPIIIGRH/ | 798  | >IDH1-R132C WVKPIIIGCH/ | 320   | 478   |
| >IDH1-R132C WVKPIIIGR   | 131  | >IDH1-R132C WVKPIIIGC   | 35378 | 35247 |
| >IDH1-R132C GWVKPIIIGR  | 30   | >IDH1-R132C GWVKPIIIGC  | 28357 | 28327 |
| >IDH1-R132C RHAYGDQY    | 803  | >IDH1-R132C GHAYGDQY    | 200   | 603   |
| >IDH1-R132C RHAYGDQY    | 304  | >IDH1-R132C GHAYGDQY    | 717   | 413   |
| >IDH1-R132C RHAYGDQY    | 220  | >IDH1-R132C GHAYGDQY    | 2390  | 2170  |
| >IDH1-R132C RHAYGDQY    | 167  | >IDH1-R132C GHAYGDQY    | 4041  | 3874  |

|                         |      |                         |       |       |
|-------------------------|------|-------------------------|-------|-------|
| >IDH1-R132C RHAYGDQYR   | 135  | >IDH1-R132C GHAYGDQYR   | 3952  | 3817  |
| >IDH1-R132C GRHAYGDQY   | 382  | >IDH1-R132C GGHAYGDQY   | 22293 | 21911 |
| >IDH1-R132C GRHAYGDQY   | 38   | >IDH1-R132C GGHAYGDQY   | 21219 | 21181 |
| >IDH1-R132C GRHAYGDQY   | 418  | >IDH1-R132C GGHAYGDQY   | 30669 | 30251 |
| >IDH1-R132C SGWVKPIIIGF | 153  | >IDH1-R132C SGWVKPIIIGC | 22197 | 22044 |
| >IDH1-R132C SGWVKPIIIGF | 85   | >IDH1-R132C SGWVKPIIIGC | 31562 | 31477 |
| >IDH1-R132C IGRHAYGDQ'  | 273  | >IDH1-R132C IGGHAYGDQ'  | 1654  | 1381  |
| >IDH1-R132C IGRHAYGDQ'  | 406  | >IDH1-R132C IGGHAYGDQ'  | 5468  | 5062  |
| >IDH1-R132C IGRHAYGDQ'  | 665  | >IDH1-R132C IGGHAYGDQ'  | 281   | 384   |
| >IDH1-R132C IIGRHAYGDQ  | 102  | >IDH1-R132C IIGGHAYGDC  | 40    | 62    |
| >IDH1-R132C IIGRHAYGDQ  | 292  | >IDH1-R132C IIGGHAYGDC  | 678   | 386   |
| >IDH1-R132C IIGRHAYGDQ  | 541  | >IDH1-R132C IIGGHAYGDC  | 473   | 68    |
| >IDH1-R132C IIIGRHAY    | 23   | >IDH1-R132C IIIGGHAY    | 13    | 10    |
| >IDH1-R132C IIIGRHAY    | 214  | >IDH1-R132C IIIGGHAY    | 171   | 43    |
| >IDH1-R132C IIIGRHAY    | 13   | >IDH1-R132C IIIGGHAY    | 8     | 5     |
| >IDH1-R132C IIIGRHAY    | 35   | >IDH1-R132C IIIGGHAY    | 18    | 17    |
| >IDH1-R132C IIIGRHAY    | 1059 | >IDH1-R132C IIIGGHAY    | 495   | 564   |
| >IDH1-R132C IIIGRHAY    | 101  | >IDH1-R132C IIIGGHAY    | 69    | 32    |
| >IDH1-R132C IIIGRHAY    | 223  | >IDH1-R132C IIIGGHAY    | 59    | 164   |
| >IDH1-R132C IIIGRHAY    | 269  | >IDH1-R132C IIIGGHAY    | 125   | 144   |
| >IDH1-R132C IIIGRHAY    | 476  | >IDH1-R132C IIIGGHAY    | 144   | 332   |
| >IDH1-R132C IIIGRHAY    | 233  | >IDH1-R132C IIIGGHAY    | 375   | 142   |
| >IDH1-R132C PIIIGRHAY   | 106  | >IDH1-R132C PIIIGGHAY   | 137   | 31    |
| >IDH1-R132C PIIIGRHAY   | 30   | >IDH1-R132C PIIIGGHAY   | 18    | 12    |
| >IDH1-R132C PIIIGRHAY   | 24   | >IDH1-R132C PIIIGGHAY   | 42    | 18    |
| >IDH1-R132C PIIIGRHAY   | 1476 | >IDH1-R132C PIIIGGHAY   | 255   | 1221  |
| >IDH1-R132C KPIIIGRHAY  | 96   | >IDH1-R132C KPIIIGGHAY  | 123   | 27    |
| >IDH1-R132C KPIIIGRHAY  | 390  | >IDH1-R132C KPIIIGGHAY  | 100   | 290   |
| >IDH1-R132C KPIIIGRHA   | 114  | >IDH1-R132C KPIIIGGHA   | 83    | 31    |
| >IDH1-R132C KPIIIGRHAY  | 10   | >IDH1-R132C KPIIIGGHAY  | 13    | 3     |
| >IDH1-R132C VKPIIIGRHAY | 87   | >IDH1-R132C VKPIIIGGHAY | 127   | 40    |
| >IDH1-R132C VKPIIIGRHAY | 302  | >IDH1-R132C VKPIIIGGHAY | 213   | 89    |
| >IDH1-R132C WVKPIIIGRH/ | 606  | >IDH1-R132C WVKPIIIGGH/ | 345   | 261   |
| >IDH1-R132C WVKPIIIGR   | 134  | >IDH1-R132C WVKPIIIGG   | 21951 | 21817 |
| >IDH1-R132C WVKPIIIGR   | 442  | >IDH1-R132C WVKPIIIGG   | 29885 | 29443 |
| >IDH1-R132C WVKPIIIGR   | 44   | >IDH1-R132C WVKPIIIGG   | 26337 | 26293 |
| >IDH1-R132C WVKPIIIGRH/ | 798  | >IDH1-R132C WVKPIIIGGH/ | 283   | 515   |
| >IDH1-R132C WVKPIIIGR   | 131  | >IDH1-R132C WVKPIIIGG   | 33713 | 33582 |
| >IDH1-R132C GWVKPIIIGR  | 30   | >IDH1-R132C GWVKPIIIGG  | 23951 | 23921 |
| >IDH1-R132F RHAYGDQY    | 803  | >IDH1-R132F HHAYGDQY    | 405   | 398   |
| >IDH1-R132F RHAYGDQY    | 304  | >IDH1-R132F HHAYGDQY    | 573   | 269   |
| >IDH1-R132F RHAYGDQYR   | 3476 | >IDH1-R132F HHAYGDQYR   | 311   | 3165  |
| >IDH1-R132F RHAYGDQY    | 220  | >IDH1-R132F HHAYGDQY    | 823   | 603   |

|                         |      |                         |       |       |
|-------------------------|------|-------------------------|-------|-------|
| >IDH1-R132F RHAYGDQYR   | 3268 | >IDH1-R132F HHAYGDQYR   | 321   | 2947  |
| >IDH1-R132F RHAYGDQY    | 167  | >IDH1-R132F HHAYGDQY    | 356   | 189   |
| >IDH1-R132F RHAYGDQYR   | 135  | >IDH1-R132F HHAYGDQYR   | 143   | 8     |
| >IDH1-R132F GRHAYGDQY   | 382  | >IDH1-R132F GHHAYGDQY   | 20387 | 20005 |
| >IDH1-R132F GRHAYGDQY   | 38   | >IDH1-R132F GHHAYGDQY   | 3535  | 3497  |
| >IDH1-R132F GRHAYGDQY   | 418  | >IDH1-R132F GHHAYGDQY   | 24243 | 23825 |
| >IDH1-R132F SGWVKPIIIGF | 153  | >IDH1-R132F SGWVKPIIIGF | 12892 | 12739 |
| >IDH1-R132F SGWVKPIIIGF | 85   | >IDH1-R132F SGWVKPIIIGF | 22014 | 21929 |
| >IDH1-R132F IGRHAYGDQ'  | 273  | >IDH1-R132F IGHHAYGDQ'  | 431   | 158   |
| >IDH1-R132F IGRHAYGDQ'  | 406  | >IDH1-R132F IGHHAYGDQ'  | 1282  | 876   |
| >IDH1-R132F IGRHAYGDQ'  | 665  | >IDH1-R132F IGHHAYGDQ'  | 283   | 382   |
| >IDH1-R132F IIGRHAYGDQ  | 102  | >IDH1-R132F IIGHHAYGDC  | 48    | 54    |
| >IDH1-R132F IIGRHAYGDQ  | 1055 | >IDH1-R132F IIGHHAYGDC  | 481   | 574   |
| >IDH1-R132F IIGRHAYGDQ  | 292  | >IDH1-R132F IIGHHAYGDC  | 258   | 34    |
| >IDH1-R132F IIGRHAYGDQ  | 541  | >IDH1-R132F IIGHHAYGDC  | 359   | 182   |
| >IDH1-R132F IIIGRHAY    | 23   | >IDH1-R132F IIIGHHAY    | 6     | 17    |
| >IDH1-R132F IIIGRHAY    | 214  | >IDH1-R132F IIIGHHAY    | 613   | 399   |
| >IDH1-R132F IIIGRHAY    | 13   | >IDH1-R132F IIIGHHAY    | 8     | 5     |
| >IDH1-R132F IIIGRHAY    | 35   | >IDH1-R132F IIIGHHAY    | 49    | 14    |
| >IDH1-R132F IIIGRHAY    | 101  | >IDH1-R132F IIIGHHAY    | 70    | 31    |
| >IDH1-R132F IIIGRHAY    | 223  | >IDH1-R132F IIIGHHAY    | 167   | 56    |
| >IDH1-R132F IIIGRHAY    | 269  | >IDH1-R132F IIIGHHAY    | 174   | 95    |
| >IDH1-R132F IIIGRHAY    | 476  | >IDH1-R132F IIIGHHAY    | 140   | 336   |
| >IDH1-R132F IIIGRHAY    | 233  | >IDH1-R132F IIIGHHAY    | 168   | 65    |
| >IDH1-R132F PIIIGRHAY   | 106  | >IDH1-R132F PIIIGHHAY   | 41    | 65    |
| >IDH1-R132F PIIIGRHAY   | 30   | >IDH1-R132F PIIIGHHAY   | 13    | 17    |
| >IDH1-R132F PIIIGRHAY   | 24   | >IDH1-R132F PIIIGHHAY   | 40    | 16    |
| >IDH1-R132F KPIIIGRHAY  | 96   | >IDH1-R132F KPIIIGHHAY  | 210   | 114   |
| >IDH1-R132F KPIIIGRHAY  | 390  | >IDH1-R132F KPIIIGHHAY  | 146   | 244   |
| >IDH1-R132F KPIIIGRHA   | 114  | >IDH1-R132F KPIIIGHHA   | 27    | 87    |
| >IDH1-R132F KPIIIGRHAY  | 10   | >IDH1-R132F KPIIIGHHAY  | 12    | 2     |
| >IDH1-R132F KPIIIGRHAY  | 798  | >IDH1-R132F KPIIIGHHAY  | 471   | 327   |
| >IDH1-R132F VKPIIIGRHAY | 87   | >IDH1-R132F VKPIIIGHHAY | 121   | 34    |
| >IDH1-R132F VKPIIIGRHAY | 302  | >IDH1-R132F VKPIIIGHHAY | 228   | 74    |
| >IDH1-R132F WVKPIIIGRH/ | 606  | >IDH1-R132F WVKPIIIGHH/ | 321   | 285   |
| >IDH1-R132F WVKPIIIGR   | 134  | >IDH1-R132F WVKPIIIGH   | 11456 | 11322 |
| >IDH1-R132F WVKPIIIGR   | 442  | >IDH1-R132F WVKPIIIGH   | 21543 | 21101 |
| >IDH1-R132F WVKPIIIGR   | 44   | >IDH1-R132F WVKPIIIGH   | 8750  | 8706  |
| >IDH1-R132F WVKPIIIGRH/ | 798  | >IDH1-R132F WVKPIIIGHH/ | 109   | 689   |
| >IDH1-R132F WVKPIIIGR   | 131  | >IDH1-R132F WVKPIIIGH   | 25568 | 25437 |
| >IDH1-R132F GWVKPIIIGR  | 30   | >IDH1-R132F GWVKPIIIGH  | 9540  | 9510  |
| >IDH1-R132L RHAYGDQY    | 803  | >IDH1-R132L LHAYGDQY    | 221   | 582   |
| >IDH1-R132L RHAYGDQY    | 304  | >IDH1-R132L LHAYGDQY    | 557   | 253   |

|                         |       |                         |       |       |
|-------------------------|-------|-------------------------|-------|-------|
| >IDH1-R132L RHAYGDQY    | 220   | >IDH1-R132L LHAYGDQY    | 496   | 276   |
| >IDH1-R132L RHAYGDQY    | 167   | >IDH1-R132L LHAYGDQY    | 106   | 61    |
| >IDH1-R132L RHAYGDQYR   | 135   | >IDH1-R132L LHAYGDQYR   | 1107  | 972   |
| >IDH1-R132L GRHAYGDQY   | 23778 | >IDH1-R132L GLHAYGDQY   | 352   | 23426 |
| >IDH1-R132L GRHAYGDQY   | 24018 | >IDH1-R132L GLHAYGDQY   | 77    | 23941 |
| >IDH1-R132L GRHAYGDQY   | 20411 | >IDH1-R132L GLHAYGDQY   | 116   | 20295 |
| >IDH1-R132L GRHAYGDQY   | 22151 | >IDH1-R132L GLHAYGDQY   | 30    | 22121 |
| >IDH1-R132L GRHAYGDQY   | 22804 | >IDH1-R132L GLHAYGDQY   | 147   | 22657 |
| >IDH1-R132L GRHAYGDQY   | 25377 | >IDH1-R132L GLHAYGDQY   | 307   | 25070 |
| >IDH1-R132L GRHAYGDQY   | 30839 | >IDH1-R132L GLHAYGDQY   | 19    | 30820 |
| >IDH1-R132L GRHAYGDQY   | 3375  | >IDH1-R132L GLHAYGDQY   | 92    | 3283  |
| >IDH1-R132L GRHAYGDQY   | 11555 | >IDH1-R132L GLHAYGDQY   | 147   | 11408 |
| >IDH1-R132L GRHAYGDQY   | 3253  | >IDH1-R132L GLHAYGDQY   | 76    | 3177  |
| >IDH1-R132L GRHAYGDQY   | 382   | >IDH1-R132L GLHAYGDQY   | 17695 | 17313 |
| >IDH1-R132L GRHAYGDQY   | 38    | >IDH1-R132L GLHAYGDQY   | 19501 | 19463 |
| >IDH1-R132L GRHAYGDQY   | 418   | >IDH1-R132L GLHAYGDQY   | 27052 | 26634 |
| >IDH1-R132L GRHAYGDQY   | 3688  | >IDH1-R132L GLHAYGDQY   | 108   | 3580  |
| >IDH1-R132L SGWVKPIIIGF | 153   | >IDH1-R132L SGWVKPIIIGL | 16498 | 16345 |
| >IDH1-R132L SGWVKPIIIGF | 85    | >IDH1-R132L SGWVKPIIIGL | 25728 | 25643 |
| >IDH1-R132L IGRHAYGDQ`  | 273   | >IDH1-R132L IGLHAYGDQY  | 415   | 142   |
| >IDH1-R132L IGRHAYGDQ`  | 406   | >IDH1-R132L IGLHAYGDQY  | 741   | 335   |
| >IDH1-R132L IGRHAYGDQ`  | 665   | >IDH1-R132L IGLHAYGDQY  | 158   | 507   |
| >IDH1-R132L IIGRHAYGDQ  | 102   | >IDH1-R132L IIGLHAYGDQ` | 65    | 37    |
| >IDH1-R132L IIGRHAYGDQ  | 292   | >IDH1-R132L IIGLHAYGDQ` | 874   | 582   |
| >IDH1-R132L IIIGRHAY    | 23    | >IDH1-R132L IIIGLHAY    | 9     | 14    |
| >IDH1-R132L IIIGRHAY    | 214   | >IDH1-R132L IIIGLHAY    | 236   | 22    |
| >IDH1-R132L IIIGRHAY    | 13    | >IDH1-R132L IIIGLHAY    | 9     | 4     |
| >IDH1-R132L IIIGRHAY    | 35    | >IDH1-R132L IIIGLHAY    | 24    | 11    |
| >IDH1-R132L IIIGRHAY    | 1059  | >IDH1-R132L IIIGLHAY    | 210   | 849   |
| >IDH1-R132L IIIGRHAY    | 101   | >IDH1-R132L IIIGLHAY    | 94    | 7     |
| >IDH1-R132L IIIGRHAY    | 223   | >IDH1-R132L IIIGLHAY    | 349   | 126   |
| >IDH1-R132L IIIGRHAY    | 269   | >IDH1-R132L IIIGLHAY    | 258   | 11    |
| >IDH1-R132L IIIGRHAY    | 476   | >IDH1-R132L IIIGLHAY    | 203   | 273   |
| >IDH1-R132L IIIGRHAY    | 233   | >IDH1-R132L IIIGLHAY    | 128   | 105   |
| >IDH1-R132L PIIIGRHAY   | 1231  | >IDH1-R132L PIIIGLHAY   | 190   | 1041  |
| >IDH1-R132L PIIIGRHAY   | 106   | >IDH1-R132L PIIIGLHAY   | 7     | 99    |
| >IDH1-R132L PIIIGRHAY   | 30    | >IDH1-R132L PIIIGLHAY   | 19    | 11    |
| >IDH1-R132L PIIIGRHAY   | 24    | >IDH1-R132L PIIIGLHAY   | 28    | 4     |
| >IDH1-R132L KPIIIGRHAY  | 2204  | >IDH1-R132L KPIIIGLHAY  | 257   | 1947  |
| >IDH1-R132L KPIIIGRHAY  | 96    | >IDH1-R132L KPIIIGLHAY  | 195   | 99    |
| >IDH1-R132L KPIIIGRHAY  | 390   | >IDH1-R132L KPIIIGLHAY  | 107   | 283   |
| >IDH1-R132L KPIIIGRHA   | 114   | >IDH1-R132L KPIIIGLHA   | 159   | 45    |
| >IDH1-R132L KPIIIGRHAY  | 10    | >IDH1-R132L KPIIIGLHAY  | 14    | 4     |

|                          |       |                          |       |       |
|--------------------------|-------|--------------------------|-------|-------|
| >IDH1-R132L KPIIIGRHAY   | 798   | >IDH1-R132L KPIIIGLHAY   | 439   | 359   |
| >IDH1-R132L VKPIIIGRHAY  | 87    | >IDH1-R132L VKPIIIGLHAY  | 99    | 12    |
| >IDH1-R132L VKPIIIGRHAY  | 302   | >IDH1-R132L VKPIIIGLHAY  | 402   | 100   |
| >IDH1-R132L WVKPIIIGR    | 16241 | >IDH1-R132L WVKPIIIGL    | 166   | 16075 |
| >IDH1-R132L WVKPIIIGRHAY | 606   | >IDH1-R132L WVKPIIIGLHAY | 439   | 167   |
| >IDH1-R132L WVKPIIIGR    | 21460 | >IDH1-R132L WVKPIIIGL    | 83    | 21377 |
| >IDH1-R132L WVKPIIIGR    | 19195 | >IDH1-R132L WVKPIIIGL    | 69    | 19126 |
| >IDH1-R132L WVKPIIIGR    | 134   | >IDH1-R132L WVKPIIIGL    | 16096 | 15962 |
| >IDH1-R132L WVKPIIIGR    | 442   | >IDH1-R132L WVKPIIIGL    | 21776 | 21334 |
| >IDH1-R132L WVKPIIIGR    | 44    | >IDH1-R132L WVKPIIIGL    | 17273 | 17229 |
| >IDH1-R132L WVKPIIIGR    | 13704 | >IDH1-R132L WVKPIIIGL    | 31    | 13673 |
| >IDH1-R132L WVKPIIIGR    | 131   | >IDH1-R132L WVKPIIIGL    | 29705 | 29574 |
| >IDH1-R132L GWVKPIIIGR   | 30    | >IDH1-R132L GWVKPIIIGL   | 15185 | 15155 |
| >IDH1-R132S RHAYGDQY     | 803   | >IDH1-R132S SHAYGDQY     | 266   | 537   |
| >IDH1-R132S RHAYGDQY     | 304   | >IDH1-R132S SHAYGDQY     | 333   | 29    |
| >IDH1-R132S RHAYGDQY     | 220   | >IDH1-R132S SHAYGDQY     | 1014  | 794   |
| >IDH1-R132S RHAYGDQY     | 167   | >IDH1-R132S SHAYGDQY     | 5663  | 5496  |
| >IDH1-R132S RHAYGDQYR    | 135   | >IDH1-R132S SHAYGDQYR    | 838   | 703   |
| >IDH1-R132S GRHAYGDQY    | 3375  | >IDH1-R132S GSHAYGDQY    | 408   | 2967  |
| >IDH1-R132S GRHAYGDQY    | 8809  | >IDH1-R132S GSHAYGDQY    | 183   | 8626  |
| >IDH1-R132S GRHAYGDQY    | 11555 | >IDH1-R132S GSHAYGDQY    | 306   | 11249 |
| >IDH1-R132S GRHAYGDQY    | 19467 | >IDH1-R132S GSHAYGDQY    | 14    | 19453 |
| >IDH1-R132S GRHAYGDQY    | 382   | >IDH1-R132S GSHAYGDQY    | 19664 | 19282 |
| >IDH1-R132S GRHAYGDQY    | 38    | >IDH1-R132S GSHAYGDQY    | 17061 | 17023 |
| >IDH1-R132S GRHAYGDQY    | 2893  | >IDH1-R132S GSHAYGDQY    | 54    | 2839  |
| >IDH1-R132S GRHAYGDQY    | 418   | >IDH1-R132S GSHAYGDQY    | 26078 | 25660 |
| >IDH1-R132S SGWVKPIIIGF  | 153   | >IDH1-R132S SGWVKPIIIGS  | 20135 | 19982 |
| >IDH1-R132S SGWVKPIIIGF  | 85    | >IDH1-R132S SGWVKPIIIGS  | 25971 | 25886 |
| >IDH1-R132S IGRHAYGDQY   | 273   | >IDH1-R132S IGSHAYGDQY   | 917   | 644   |
| >IDH1-R132S IGRHAYGDQY   | 406   | >IDH1-R132S IGSHAYGDQY   | 1664  | 1258  |
| >IDH1-R132S IGRHAYGDQY   | 665   | >IDH1-R132S IGSHAYGDQY   | 483   | 182   |
| >IDH1-R132S IIGRHAYGDQ   | 102   | >IDH1-R132S IIGSHAYGDQ   | 44    | 58    |
| >IDH1-R132S IIGRHAYGDQ   | 1055  | >IDH1-R132S IIGSHAYGDQ   | 319   | 736   |
| >IDH1-R132S IIGRHAYGDQ   | 292   | >IDH1-R132S IIGSHAYGDQ   | 353   | 61    |
| >IDH1-R132S IIGRHAYGDQ   | 541   | >IDH1-R132S IIGSHAYGDQ   | 361   | 180   |
| >IDH1-R132S IIIGRHAY     | 23    | >IDH1-R132S IIIIGSHAY    | 14    | 9     |
| >IDH1-R132S IIIGRHAY     | 214   | >IDH1-R132S IIIIGSHAY    | 243   | 29    |
| >IDH1-R132S IIIGRHAY     | 13    | >IDH1-R132S IIIIGSHAY    | 11    | 2     |
| >IDH1-R132S IIIGRHAY     | 35    | >IDH1-R132S IIIIGSHAY    | 26    | 9     |
| >IDH1-R132S IIIGRHAY     | 101   | >IDH1-R132S IIIIGSHAY    | 57    | 44    |
| >IDH1-R132S IIIGRHAY     | 223   | >IDH1-R132S IIIIGSHAY    | 89    | 134   |
| >IDH1-R132S IIIGRHAY     | 1051  | >IDH1-R132S IIIIGSHAY    | 285   | 766   |
| >IDH1-R132S IIIGRHAY     | 269   | >IDH1-R132S IIIIGSHAY    | 44    | 225   |



|                         |       |                         |       |       |
|-------------------------|-------|-------------------------|-------|-------|
| >IDH1-R132S IIIGRHAY    | 476   | >IDH1-R132S IIIGSHAY    | 102   | 374   |
| >IDH1-R132S IIIGRHAY    | 233   | >IDH1-R132S IIIGSHAY    | 85    | 148   |
| >IDH1-R132S PIIIGRHAY   | 106   | >IDH1-R132S PIIIGSHAY   | 128   | 22    |
| >IDH1-R132S PIIIGRHAY   | 30    | >IDH1-R132S PIIIGSHAY   | 18    | 12    |
| >IDH1-R132S PIIIGRHAY   | 24    | >IDH1-R132S PIIIGSHAY   | 33    | 9     |
| >IDH1-R132S PIIIGRHAY   | 1476  | >IDH1-R132S PIIIGSHAY   | 389   | 1087  |
| >IDH1-R132S KPIIIGRHA   | 557   | >IDH1-R132S KPIIIGSHA   | 420   | 137   |
| >IDH1-R132S KPIIIGRHAY  | 96    | >IDH1-R132S KPIIIGSHAY  | 339   | 243   |
| >IDH1-R132S KPIIIGRHAY  | 390   | >IDH1-R132S KPIIIGSHAY  | 150   | 240   |
| >IDH1-R132S KPIIIGRHA   | 114   | >IDH1-R132S KPIIIGSHA   | 69    | 45    |
| >IDH1-R132S KPIIIGRHAY  | 10    | >IDH1-R132S KPIIIGSHAY  | 10    | 0     |
| >IDH1-R132S KPIIIGRHAY  | 798   | >IDH1-R132S KPIIIGSHAY  | 385   | 413   |
| >IDH1-R132S VKPIIIGRHAY | 87    | >IDH1-R132S VKPIIIGSHAY | 97    | 10    |
| >IDH1-R132S VKPIIIGRHAY | 302   | >IDH1-R132S VKPIIIGSHAY | 183   | 119   |
| >IDH1-R132S WVKPIIIGRH/ | 606   | >IDH1-R132S WVKPIIIGSH/ | 170   | 436   |
| >IDH1-R132S WVKPIIIGR   | 134   | >IDH1-R132S WVKPIIIGS   | 18893 | 18759 |
| >IDH1-R132S WVKPIIIGR   | 442   | >IDH1-R132S WVKPIIIGS   | 25564 | 25122 |
| >IDH1-R132S WVKPIIIGR   | 44    | >IDH1-R132S WVKPIIIGS   | 17378 | 17334 |
| >IDH1-R132S WVKPIIIGRH/ | 798   | >IDH1-R132S WVKPIIIGSH/ | 198   | 600   |
| >IDH1-R132S WVKPIIIGR   | 131   | >IDH1-R132S WVKPIIIGS   | 29384 | 29253 |
| >IDH1-R132S GWVKPIIIGR  | 30    | >IDH1-R132S GWVKPIIIGS  | 14645 | 14615 |
| >IDH1-R132\ RHAYGDQY    | 803   | >IDH1-R132\ VHAYGDQY    | 325   | 478   |
| >IDH1-R132\ RHAYGDQY    | 304   | >IDH1-R132\ VHAYGDQY    | 242   | 62    |
| >IDH1-R132\ RHAYGDQY    | 220   | >IDH1-R132\ VHAYGDQY    | 793   | 573   |
| >IDH1-R132\ RHAYGDQY    | 167   | >IDH1-R132\ VHAYGDQY    | 719   | 552   |
| >IDH1-R132\ RHAYGDQYR   | 135   | >IDH1-R132\ VHAYGDQYR   | 1453  | 1318  |
| >IDH1-R132\ GRHAYGDQY   | 3375  | >IDH1-R132\ GVHAYGDQY   | 72    | 3303  |
| >IDH1-R132\ GRHAYGDQY   | 8809  | >IDH1-R132\ GVHAYGDQY   | 95    | 8714  |
| >IDH1-R132\ GRHAYGDQY   | 11555 | >IDH1-R132\ GVHAYGDQY   | 337   | 11218 |
| >IDH1-R132\ GRHAYGDQY   | 3253  | >IDH1-R132\ GVHAYGDQY   | 468   | 2785  |
| >IDH1-R132\ GRHAYGDQY   | 382   | >IDH1-R132\ GVHAYGDQY   | 19843 | 19461 |
| >IDH1-R132\ GRHAYGDQY   | 38    | >IDH1-R132\ GVHAYGDQY   | 18171 | 18133 |
| >IDH1-R132\ GRHAYGDQY   | 2893  | >IDH1-R132\ GVHAYGDQY   | 185   | 2708  |
| >IDH1-R132\ GRHAYGDQY   | 418   | >IDH1-R132\ GVHAYGDQY   | 29706 | 29288 |
| >IDH1-R132\ GRHAYGDQY   | 3688  | >IDH1-R132\ GVHAYGDQY   | 371   | 3317  |
| >IDH1-R132\ SGWVKPIIIGF | 27463 | >IDH1-R132\ SGWVKPIIIG\ | 355   | 27108 |
| >IDH1-R132\ SGWVKPIIIGF | 22888 | >IDH1-R132\ SGWVKPIIIG\ | 178   | 22710 |
| >IDH1-R132\ SGWVKPIIIGF | 153   | >IDH1-R132\ SGWVKPIIIG\ | 16487 | 16334 |
| >IDH1-R132\ SGWVKPIIIGF | 85    | >IDH1-R132\ SGWVKPIIIG\ | 30384 | 30299 |
| >IDH1-R132\ IGRHAYGDQ\` | 273   | >IDH1-R132\ IGVHAYGDQ\` | 995   | 722   |
| >IDH1-R132\ IGRHAYGDQ\` | 406   | >IDH1-R132\ IGVHAYGDQ\` | 567   | 161   |
| >IDH1-R132\ IGRHAYGDQ\` | 665   | >IDH1-R132\ IGVHAYGDQ\` | 268   | 397   |
| >IDH1-R132\ IIGRHAYGDQ  | 102   | >IDH1-R132\ IIGVHAYGDQ  | 71    | 31    |

|                        |       |                        |       |       |
|------------------------|-------|------------------------|-------|-------|
| >IDH1-R132\IIGRHAYGDQ  | 292   | >IDH1-R132\IIGVHAYGDQ  | 594   | 302   |
| >IDH1-R132\IIIGRHAY    | 23    | >IDH1-R132\IIIGVHAY    | 11    | 12    |
| >IDH1-R132\IIIGRHAY    | 214   | >IDH1-R132\IIIGVHAY    | 370   | 156   |
| >IDH1-R132\IIIGRHAY    | 13    | >IDH1-R132\IIIGVHAY    | 11    | 2     |
| >IDH1-R132\IIIGRHAY    | 35    | >IDH1-R132\IIIGVHAY    | 24    | 11    |
| >IDH1-R132\IIIGRHAY    | 1040  | >IDH1-R132\IIIGVHAY    | 433   | 607   |
| >IDH1-R132\IIIGRHAY    | 1059  | >IDH1-R132\IIIGVHAY    | 347   | 712   |
| >IDH1-R132\IIIGRHAY    | 101   | >IDH1-R132\IIIGVHAY    | 82    | 19    |
| >IDH1-R132\IIIGRHAY    | 223   | >IDH1-R132\IIIGVHAY    | 258   | 35    |
| >IDH1-R132\IIIGRHAY    | 269   | >IDH1-R132\IIIGVHAY    | 329   | 60    |
| >IDH1-R132\IIIGRHAY    | 476   | >IDH1-R132\IIIGVHAY    | 174   | 302   |
| >IDH1-R132\IIIGRHAY    | 233   | >IDH1-R132\IIIGVHAY    | 75    | 158   |
| >IDH1-R132\PIIIGRHAY   | 1231  | >IDH1-R132\PIIIGVHAY   | 359   | 872   |
| >IDH1-R132\PIIIGRHAY   | 106   | >IDH1-R132\PIIIGVHAY   | 13    | 93    |
| >IDH1-R132\PIIIGRHAY   | 30    | >IDH1-R132\PIIIGVHAY   | 32    | 2     |
| >IDH1-R132\PIIIGRHAY   | 24    | >IDH1-R132\PIIIGVHAY   | 53    | 29    |
| >IDH1-R132\KPIIIGRHAY  | 96    | >IDH1-R132\KPIIIGVHAY  | 646   | 550   |
| >IDH1-R132\KPIIIGRHAY  | 390   | >IDH1-R132\KPIIIGVHAY  | 198   | 192   |
| >IDH1-R132\KPIIIGRHA   | 114   | >IDH1-R132\KPIIIGVHA   | 35    | 79    |
| >IDH1-R132\KPIIIGRHAY  | 10    | >IDH1-R132\KPIIIGVHAY  | 9     | 1     |
| >IDH1-R132\KPIIIGRHAY  | 798   | >IDH1-R132\KPIIIGVHAY  | 160   | 638   |
| >IDH1-R132\VKPIIIGRHAY | 87    | >IDH1-R132\VKPIIIGVHAY | 138   | 51    |
| >IDH1-R132\VKPIIIGRHAY | 302   | >IDH1-R132\VKPIIIGVHAY | 202   | 100   |
| >IDH1-R132\WVKPIIIGR   | 21189 | >IDH1-R132\WVKPIIIGV   | 471   | 20718 |
| >IDH1-R132\WVKPIIIGR   | 16241 | >IDH1-R132\WVKPIIIGV   | 18    | 16223 |
| >IDH1-R132\WVKPIIIGRH/ | 606   | >IDH1-R132\WVKPIIIGVH/ | 462   | 144   |
| >IDH1-R132\WVKPIIIGR   | 21460 | >IDH1-R132\WVKPIIIGV   | 18    | 21442 |
| >IDH1-R132\WVKPIIIGR   | 26596 | >IDH1-R132\WVKPIIIGV   | 83    | 26513 |
| >IDH1-R132\WVKPIIIGR   | 25832 | >IDH1-R132\WVKPIIIGV   | 283   | 25549 |
| >IDH1-R132\WVKPIIIGR   | 19195 | >IDH1-R132\WVKPIIIGV   | 5     | 19190 |
| >IDH1-R132\WVKPIIIGR   | 134   | >IDH1-R132\WVKPIIIGV   | 15709 | 15575 |
| >IDH1-R132\WVKPIIIGR   | 442   | >IDH1-R132\WVKPIIIGV   | 24918 | 24476 |
| >IDH1-R132\WVKPIIIGR   | 44    | >IDH1-R132\WVKPIIIGV   | 21467 | 21423 |
| >IDH1-R132\WVKPIIIGR   | 13704 | >IDH1-R132\WVKPIIIGV   | 9     | 13695 |
| >IDH1-R132\WVKPIIIGRH/ | 798   | >IDH1-R132\WVKPIIIGVH/ | 134   | 664   |
| >IDH1-R132\WVKPIIIGR   | 17926 | >IDH1-R132\WVKPIIIGV   | 114   | 17812 |
| >IDH1-R132\WVKPIIIGR   | 131   | >IDH1-R132\WVKPIIIGV   | 33524 | 33393 |
| >IDH1-R132\GWVKPIIIGR  | 30    | >IDH1-R132\GWVKPIIIGV  | 22220 | 22190 |
| >IDH1-R49C- RDATNDQV   | 166   | >IDH1-R49C- CDATNDQV   | 65    | 101   |
| >IDH1-R49C- NRDATNDQV  | 10933 | >IDH1-R49C- NCDATNDQV  | 399   | 10534 |
| >IDH1-R49C- NRDATNDQV  | 460   | >IDH1-R49C- NCDATNDQV  | 12236 | 11776 |
| >IDH1-R49C- ENRDATNDQ  | 1440  | >IDH1-R49C- ENCDATNDQ  | 303   | 1137  |
| >IDH1-R49C- IENRDATNDC | 87    | >IDH1-R49C- IENCDATNDC | 304   | 217   |

|                         |       |                         |       |       |
|-------------------------|-------|-------------------------|-------|-------|
| >IDH1-R49C- IENRDATNDC  | 189   | >IDH1-R49C- IENCDATNDC  | 134   | 55    |
| >IDH1-R49C- SYDLGIENR   | 413   | >IDH1-R49C- SYDLGIENC   | 33890 | 33477 |
| >IDH1-R49C- HSYDLGIENR  | 100   | >IDH1-R49C- HSYDLGIENC  | 25711 | 25611 |
| >IDH1-R49C- HSYDLGIENR  | 468   | >IDH1-R49C- HSYDLGIENC  | 30270 | 29802 |
| >IDH1-R49C- HSYDLGIENR  | 10    | >IDH1-R49C- HSYDLGIENC  | 29906 | 29896 |
| >IDH1-R49C- HSYDLGIENR  | 111   | >IDH1-R49C- HSYDLGIENC  | 35245 | 35134 |
| >IDH1-V71I-v AEAIKKHNVG | 621   | >IDH1-V71I-r AEAIKKHNVG | 84    | 537   |
| >IDH1-V71I-v AEAIKKHNVG | 312   | >IDH1-V71I-r AEAIKKHNVG | 106   | 206   |
| >IDH1-V71I-v AEAIKKHNVG | 37    | >IDH1-V71I-r AEAIKKHNVG | 128   | 91    |
| >IDH1-V71I-v AEAIKKHNVG | 51    | >IDH1-V71I-r AEAIKKHNVG | 19    | 32    |
| >IDH1-V71I-v KKHNVGK    | 114   | >IDH1-V71I-r KKHNVGK    | 81    | 33    |
| >IDH1-V71I-v KKHNVGK    | 417   | >IDH1-V71I-r KKHNVGK    | 517   | 100   |
| >IDH1-V71I-v KKHNVGKCA  | 185   | >IDH1-V71I-r KKHNVGKCA  | 280   | 95    |
| >IDH1-V71I-v IKKHNVG    | 54    | >IDH1-V71I-r IKKHNVG    | 38    | 16    |
| >IDH1-V71I-v IKKHNVGK   | 428   | >IDH1-V71I-r IKKHNVGK   | 621   | 193   |
| >IDH1-V71I-v IKKHNVGKCA | 277   | >IDH1-V71I-r IKKHNVGKCA | 347   | 70    |
| >IDH1-V71I-v AIKKHNVG   | 31    | >IDH1-V71I-r AIKKHNVG   | 303   | 272   |
| >IDH1-V71I-v AIKKHNVG   | 49    | >IDH1-V71I-r AIKKHNVG   | 6203  | 6154  |
| >IDH1-V71I-v AIKKHNVGK  | 290   | >IDH1-V71I-r AIKKHNVGK  | 276   | 14    |
| >IDH1-V71I-v AIKKHNVG   | 170   | >IDH1-V71I-r AIKKHNVG   | 91    | 79    |
| >IDH1-V71I-v AIKKHNVGK  | 10    | >IDH1-V71I-r AIKKHNVGK  | 9     | 1     |
| >IDH1-V71I-v EAIKKHNVG  | 32    | >IDH1-V71I-r EAIKKHNVG  | 30    | 2     |
| >IDH1-V71I-v EAIKKHNVG  | 380   | >IDH1-V71I-r EAIKKHNVG  | 864   | 484   |
| >IDH1-V71I-v EAIKKHNVG  | 34    | >IDH1-V71I-r EAIKKHNVG  | 219   | 185   |
| >IDH2-R140L RNILGGTVFR  | 105   | >IDH2-R140L LNILGGTVFR  | 491   | 386   |
| >IDH2-R140L RNILGGTVFR  | 1551  | >IDH2-R140L LNILGGTVFR  | 415   | 1136  |
| >IDH2-R140L RNILGGTVFR  | 1090  | >IDH2-R140L LNILGGTVFR  | 419   | 671   |
| >IDH2-R140L RNILGGTVF   | 112   | >IDH2-R140L LNILGGTVF   | 114   | 2     |
| >IDH2-R140L RNILGGTVF   | 35    | >IDH2-R140L LNILGGTVF   | 69    | 34    |
| >IDH2-R140L RNILGGTVF   | 123   | >IDH2-R140L LNILGGTVF   | 184   | 61    |
| >IDH2-R140L RNILGGTVFR  | 156   | >IDH2-R140L LNILGGTVFR  | 1102  | 946   |
| >IDH2-R140L IRNILGGTV   | 14945 | >IDH2-R140L ILNILGGTV   | 251   | 14694 |
| >IDH2-R140L IRNILGGT    | 18974 | >IDH2-R140L ILNILGGT    | 217   | 18757 |
| >IDH2-R140L IRNILGGTV   | 11508 | >IDH2-R140L ILNILGGTV   | 14    | 11494 |
| >IDH2-R140L IRNILGGTV   | 12851 | >IDH2-R140L ILNILGGTV   | 4     | 12847 |
| >IDH2-R140L IRNILGGTV   | 22951 | >IDH2-R140L ILNILGGTV   | 62    | 22889 |
| >IDH2-R140L IRNILGGTV   | 20309 | >IDH2-R140L ILNILGGTV   | 20    | 20289 |
| >IDH2-R140L IRNILGGTV   | 22444 | >IDH2-R140L ILNILGGTV   | 5     | 22439 |
| >IDH2-R140L IRNILGGTVFR | 19507 | >IDH2-R140L ILNILGGTVFR | 210   | 19297 |
| >IDH2-R140L IRNILGGTVFR | 2879  | >IDH2-R140L ILNILGGTVFR | 19    | 2860  |
| >IDH2-R140L IRNILGGTVFR | 5815  | >IDH2-R140L ILNILGGTVFR | 130   | 5685  |
| >IDH2-R140L IRNILGGTVFR | 1994  | >IDH2-R140L ILNILGGTVFR | 116   | 1878  |
| >IDH2-R140L IRNILGGTVF  | 6936  | >IDH2-R140L ILNILGGTVF  | 56    | 6880  |

|                                   |       |                                   |       |       |
|-----------------------------------|-------|-----------------------------------|-------|-------|
| >IDH2-R140L IRNILGGTVF            | 8825  | >IDH2-R140L ILNILGGTVF            | 261   | 8564  |
| >IDH2-R140L IRNILGGTVF            | 30    | >IDH2-R140L ILNILGGTVF            | 59    | 29    |
| >IDH2-R140L IRNILGGTVF            | 79    | >IDH2-R140L ILNILGGTVF            | 23214 | 23135 |
| >IDH2-R140L IRNILGGTVFF           | 459   | >IDH2-R140L ILNILGGTVFR           | 19825 | 19366 |
| >IDH2-R140L IRNILGGTVF            | 201   | >IDH2-R140L ILNILGGTVF            | 25171 | 24970 |
| >IDH2-R140L IRNILGGTVFF           | 449   | >IDH2-R140L ILNILGGTVFR           | 165   | 284   |
| >IDH2-R140L KMWKSPNG <sup>-</sup> | 18821 | >IDH2-R140L KMWKSPNG <sup>-</sup> | 38    | 18783 |
| >IDH2-R140L KMWKSPNG <sup>-</sup> | 21601 | >IDH2-R140L KMWKSPNG <sup>-</sup> | 204   | 21397 |
| >IDH2-R140L KMWKSPNG <sup>-</sup> | 18299 | >IDH2-R140L KMWKSPNG <sup>-</sup> | 194   | 18105 |
| >IDH2-R140L KMWKSPNG <sup>-</sup> | 7586  | >IDH2-R140L KMWKSPNG <sup>-</sup> | 9     | 7577  |
| >IDH2-R140L KMWKSPNG <sup>-</sup> | 16708 | >IDH2-R140L KMWKSPNG <sup>-</sup> | 11    | 16697 |
| >IDH2-R140L KMWKSPNG <sup>-</sup> | 11622 | >IDH2-R140L KMWKSPNG <sup>-</sup> | 13    | 11609 |
| >IDH2-R140L KMWKSPNG <sup>-</sup> | 23501 | >IDH2-R140L KMWKSPNG <sup>-</sup> | 84    | 23417 |
| >IDH2-R140L KMWKSPNG <sup>-</sup> | 16339 | >IDH2-R140L KMWKSPNG <sup>-</sup> | 27    | 16312 |
| >IDH2-R140L KMWKSPNG <sup>-</sup> | 138   | >IDH2-R140L KMWKSPNG <sup>-</sup> | 9581  | 9443  |
| >IDH2-R140L KMWKSPNG <sup>-</sup> | 9     | >IDH2-R140L KMWKSPNG <sup>-</sup> | 1824  | 1815  |
| >IDH2-R140L KMWKSPNG <sup>-</sup> | 3941  | >IDH2-R140L KMWKSPNG <sup>-</sup> | 82    | 3859  |
| >IDH2-R140L KMWKSPNG <sup>-</sup> | 48    | >IDH2-R140L KMWKSPNG <sup>-</sup> | 6     | 42    |
| >IDH2-R140L KMWKSPNG <sup>-</sup> | 18335 | >IDH2-R140L KMWKSPNG <sup>-</sup> | 319   | 18016 |
| >IDH2-R140L KMWKSPNG <sup>-</sup> | 11187 | >IDH2-R140L KMWKSPNG <sup>-</sup> | 121   | 11066 |
| >IDH2-R140L KMWKSPNG <sup>-</sup> | 16    | >IDH2-R140L KMWKSPNG <sup>-</sup> | 5057  | 5041  |
| >IDH2-R140L TIRNILGGTV            | 6489  | >IDH2-R140L TILNILGGTV            | 249   | 6240  |
| >IDH2-R140L TIRNILGGTV            | 2103  | >IDH2-R140L TILNILGGTV            | 385   | 1718  |
| >IDH2-R140L TIRNILGGTV            | 122   | >IDH2-R140L TILNILGGTV            | 48    | 74    |
| >IDH2-R140L TIRNILGGTV            | 1505  | >IDH2-R140L TILNILGGTV            | 53    | 1452  |
| >IDH2-R140L TIRNILGGTV            | 1095  | >IDH2-R140L TILNILGGTV            | 16    | 1079  |
| >IDH2-R140L TIRNILGGTV            | 7982  | >IDH2-R140L TILNILGGTV            | 155   | 7827  |
| >IDH2-R140L TIRNILGGTV            | 5229  | >IDH2-R140L TILNILGGTV            | 57    | 5172  |
| >IDH2-R140L TIRNILGGTV            | 14180 | >IDH2-R140L TILNILGGTV            | 279   | 13901 |
| >IDH2-R140L TIRNILGGTV            | 279   | >IDH2-R140L TILNILGGTV            | 53    | 226   |
| >IDH2-R140L TIRNILGGTV            | 612   | >IDH2-R140L TILNILGGTV            | 362   | 250   |
| >IDH2-R140L TIRNILGGTV            | 3277  | >IDH2-R140L TILNILGGTV            | 29    | 3248  |
| >IDH2-R140L TIRNILGGTVF           | 133   | >IDH2-R140L TILNILGGTVF           | 638   | 505   |
| >IDH2-R140L TIRNILGGTVF           | 338   | >IDH2-R140L TILNILGGTVF           | 468   | 130   |
| >IDH2-R140L TIRNILGGTVF           | 58    | >IDH2-R140L TILNILGGTVF           | 119   | 61    |
| >IDH2-R140L GTIRNILGGTV           | 322   | >IDH2-R140L GTILNILGGTV           | 425   | 103   |
| >IDH2-R140L GTIRNILGGTV           | 138   | >IDH2-R140L GTILNILGGTV           | 363   | 225   |
| >IDH2-R140L GTIRNILGGTV           | 191   | >IDH2-R140L GTILNILGGTV           | 297   | 106   |
| >IDH2-R140L GTIRNILGGTV           | 1025  | >IDH2-R140L GTILNILGGTV           | 417   | 608   |
| >IDH2-R140L GTIRNILGGTV           | 477   | >IDH2-R140L GTILNILGGTV           | 693   | 216   |
| >IDH2-R140L SPNGTIRNI             | 710   | >IDH2-R140L SPNGTILNI             | 42    | 668   |
| >IDH2-R140L SPNGTIRNIL            | 522   | >IDH2-R140L SPNGTILNIL            | 417   | 105   |
| >IDH2-R140L SPNGTIRNI             | 245   | >IDH2-R140L SPNGTILNI             | 448   | 203   |

|                                   |       |                                   |       |       |
|-----------------------------------|-------|-----------------------------------|-------|-------|
| >IDH2-R140L SPNGTIRNIL            | 23    | >IDH2-R140L SPNGTILNIL            | 37    | 14    |
| >IDH2-R140L SPNGTIRNIL            | 247   | >IDH2-R140L SPNGTILNIL            | 208   | 39    |
| >IDH2-R140L SPNGTIRNI             | 768   | >IDH2-R140L SPNGTILNI             | 122   | 646   |
| >IDH2-R140L KSPNGTIR              | 174   | >IDH2-R140L KSPNGTIL              | 15759 | 15585 |
| >IDH2-R140L KSPNGTIR              | 7977  | >IDH2-R140L KSPNGTIL              | 260   | 7717  |
| >IDH2-R140L KSPNGTIRNI            | 81    | >IDH2-R140L KSPNGTILNI            | 44    | 37    |
| >IDH2-R140L KSPNGTIRNIL           | 172   | >IDH2-R140L KSPNGTILNIL           | 155   | 17    |
| >IDH2-R140L KSPNGTIRNI            | 1149  | >IDH2-R140L KSPNGTILNI            | 429   | 720   |
| >IDH2-R140L KSPNGTIR              | 6886  | >IDH2-R140L KSPNGTIL              | 10    | 6876  |
| >IDH2-R140L KSPNGTIRNI            | 19    | >IDH2-R140L KSPNGTILNI            | 9     | 10    |
| >IDH2-R140L KSPNGTIRNIL           | 6     | >IDH2-R140L KSPNGTILNIL           | 3     | 3     |
| >IDH2-R140L KSPNGTIR              | 35709 | >IDH2-R140L KSPNGTIL              | 383   | 35326 |
| >IDH2-R140L KSPNGTIRNI            | 464   | >IDH2-R140L KSPNGTILNI            | 199   | 265   |
| >IDH2-R140L WKSPNGTIR             | 80    | >IDH2-R140L WKSPNGTIL             | 13    | 67    |
| >IDH2-R140L WKSPNGTIRNI           | 52    | >IDH2-R140L WKSPNGTILNI           | 36    | 16    |
| >IDH2-R140L WKSPNGTIR             | 18768 | >IDH2-R140L WKSPNGTIL             | 120   | 18648 |
| >IDH2-R140L MWKSPNGTI             | 17999 | >IDH2-R140L MWKSPNGTI             | 87    | 17912 |
| >IDH2-R140L MWKSPNGTI             | 19648 | >IDH2-R140L MWKSPNGTI             | 333   | 19315 |
| >IDH2-R140L MWKSPNGTI             | 304   | >IDH2-R140L MWKSPNGTI             | 20387 | 20083 |
| >IDH2-R140L MWKSPNGTI             | 43    | >IDH2-R140L MWKSPNGTI             | 19822 | 19779 |
| >IDH2-R140L MWKSPNGTI             | 5120  | >IDH2-R140L MWKSPNGTI             | 139   | 4981  |
| >IDH2-R140C RNILGGTVFR            | 105   | >IDH2-R140C QNILGGTVFR            | 621   | 516   |
| >IDH2-R140C RNILGGTVFR            | 1090  | >IDH2-R140C QNILGGTVFR            | 371   | 719   |
| >IDH2-R140C RNILGGTVF             | 112   | >IDH2-R140C QNILGGTVF             | 506   | 394   |
| >IDH2-R140C RNILGGTVF             | 35    | >IDH2-R140C QNILGGTVF             | 177   | 142   |
| >IDH2-R140C RNILGGTVF             | 123   | >IDH2-R140C QNILGGTVF             | 456   | 333   |
| >IDH2-R140C RNILGGTVFR            | 156   | >IDH2-R140C QNILGGTVFR            | 483   | 327   |
| >IDH2-R140C IRNILGGTV             | 11508 | >IDH2-R140C IQNILGGTV             | 143   | 11365 |
| >IDH2-R140C IRNILGGTV             | 17973 | >IDH2-R140C IQNILGGTV             | 214   | 17759 |
| >IDH2-R140C IRNILGGTV             | 12851 | >IDH2-R140C IQNILGGTV             | 308   | 12543 |
| >IDH2-R140C IRNILGGTVFF           | 2879  | >IDH2-R140C IQNILGGTVFF           | 17    | 2862  |
| >IDH2-R140C IRNILGGTVF            | 6936  | >IDH2-R140C IQNILGGTVF            | 39    | 6897  |
| >IDH2-R140C IRNILGGTVF            | 8825  | >IDH2-R140C IQNILGGTVF            | 438   | 8387  |
| >IDH2-R140C IRNILGGTVF            | 30    | >IDH2-R140C IQNILGGTVF            | 6     | 24    |
| >IDH2-R140C IRNILGGTVF            | 79    | >IDH2-R140C IQNILGGTVF            | 7768  | 7689  |
| >IDH2-R140C IRNILGGTVFF           | 459   | >IDH2-R140C IQNILGGTVFF           | 7189  | 6730  |
| >IDH2-R140C IRNILGGTVF            | 201   | >IDH2-R140C IQNILGGTVF            | 8372  | 8171  |
| >IDH2-R140C IRNILGGTVFF           | 449   | >IDH2-R140C IQNILGGTVFF           | 195   | 254   |
| >IDH2-R140C KMWKSPNG <sup>-</sup> | 138   | >IDH2-R140C KMWKSPNG <sup>-</sup> | 10520 | 10382 |
| >IDH2-R140C KMWKSPNG <sup>-</sup> | 9     | >IDH2-R140C KMWKSPNG <sup>-</sup> | 2778  | 2769  |
| >IDH2-R140C KMWKSPNG <sup>-</sup> | 48    | >IDH2-R140C KMWKSPNG <sup>-</sup> | 150   | 102   |
| >IDH2-R140C KMWKSPNG <sup>-</sup> | 16    | >IDH2-R140C KMWKSPNG <sup>-</sup> | 634   | 618   |
| >IDH2-R140C TIRNILGGTV            | 122   | >IDH2-R140C TIQNILGGTV            | 135   | 13    |

|                         |       |                         |       |       |
|-------------------------|-------|-------------------------|-------|-------|
| >IDH2-R140C TIRNILGGTV  | 1505  | >IDH2-R140C TIQNILGGTV  | 411   | 1094  |
| >IDH2-R140C TIRNILGGTV  | 1095  | >IDH2-R140C TIQNILGGTV  | 198   | 897   |
| >IDH2-R140C TIRNILGGTV  | 279   | >IDH2-R140C TIQNILGGTV  | 130   | 149   |
| >IDH2-R140C TIRNILGGTVF | 133   | >IDH2-R140C TIQNILGGTVI | 226   | 93    |
| >IDH2-R140C TIRNILGGTVF | 338   | >IDH2-R140C TIQNILGGTVI | 1591  | 1253  |
| >IDH2-R140C TIRNILGGTVF | 58    | >IDH2-R140C TIQNILGGTVI | 200   | 142   |
| >IDH2-R140C GTIRNILGGT  | 540   | >IDH2-R140C GTIQNILGGT  | 481   | 59    |
| >IDH2-R140C GTIRNILGGT\ | 322   | >IDH2-R140C GTIQNILGGT' | 315   | 7     |
| >IDH2-R140C GTIRNILGGT\ | 510   | >IDH2-R140C GTIQNILGGT' | 414   | 96    |
| >IDH2-R140C GTIRNILGGT\ | 138   | >IDH2-R140C GTIQNILGGT' | 90    | 48    |
| >IDH2-R140C GTIRNILGGT\ | 191   | >IDH2-R140C GTIQNILGGT' | 241   | 50    |
| >IDH2-R140C GTIRNILGGT\ | 646   | >IDH2-R140C GTIQNILGGT' | 486   | 160   |
| >IDH2-R140C GTIRNILGGT\ | 1025  | >IDH2-R140C GTIQNILGGT' | 299   | 726   |
| >IDH2-R140C GTIRNILGGT\ | 477   | >IDH2-R140C GTIQNILGGT' | 404   | 73    |
| >IDH2-R140C SPNGTIRNI   | 710   | >IDH2-R140C SPNGTIQNI   | 60    | 650   |
| >IDH2-R140C SPNGTIRNIL  | 522   | >IDH2-R140C SPNGTIQNIL  | 260   | 262   |
| >IDH2-R140C SPNGTIRNI   | 245   | >IDH2-R140C SPNGTIQNI   | 652   | 407   |
| >IDH2-R140C SPNGTIRNIL  | 23    | >IDH2-R140C SPNGTIQNIL  | 42    | 19    |
| >IDH2-R140C SPNGTIRNIL  | 247   | >IDH2-R140C SPNGTIQNIL  | 188   | 59    |
| >IDH2-R140C KSPNGTIR    | 174   | >IDH2-R140C KSPNGTIQ    | 15581 | 15407 |
| >IDH2-R140C KSPNGTIRNI  | 81    | >IDH2-R140C KSPNGTIQNI  | 66    | 15    |
| >IDH2-R140C KSPNGTIRNIL | 172   | >IDH2-R140C KSPNGTIQNI  | 144   | 28    |
| >IDH2-R140C KSPNGTIRNI  | 19    | >IDH2-R140C KSPNGTIQNI  | 19    | 0     |
| >IDH2-R140C KSPNGTIRNIL | 6     | >IDH2-R140C KSPNGTIQNI  | 5     | 1     |
| >IDH2-R140C KSPNGTIRNI  | 464   | >IDH2-R140C KSPNGTIQNI  | 403   | 61    |
| >IDH2-R140C KSPNGTIRNIL | 551   | >IDH2-R140C KSPNGTIQNI  | 466   | 85    |
| >IDH2-R140C WKSPNGTIR   | 80    | >IDH2-R140C WKSPNGTIQ   | 380   | 300   |
| >IDH2-R140C WKSPNGTIRNI | 52    | >IDH2-R140C WKSPNGTIQI  | 31    | 21    |
| >IDH2-R140C MWKSPNGTI   | 304   | >IDH2-R140C MWKSPNGTI   | 23390 | 23086 |
| >IDH2-R140C MWKSPNGTI   | 43    | >IDH2-R140C MWKSPNGTI   | 5162  | 5119  |
| >IDH2-R140V RNILGGTVFR  | 105   | >IDH2-R140V WNILGGTVFF  | 1662  | 1557  |
| >IDH2-R140V RNILGGTVFR  | 1551  | >IDH2-R140V WNILGGTVFF  | 412   | 1139  |
| >IDH2-R140V RNILGGTVFR  | 1090  | >IDH2-R140V WNILGGTVFF  | 306   | 784   |
| >IDH2-R140V RNILGGTVF   | 112   | >IDH2-R140V WNILGGTVF   | 180   | 68    |
| >IDH2-R140V RNILGGTVF   | 3815  | >IDH2-R140V WNILGGTVF   | 466   | 3349  |
| >IDH2-R140V RNILGGTVF   | 35    | >IDH2-R140V WNILGGTVF   | 57    | 22    |
| >IDH2-R140V RNILGGTVF   | 123   | >IDH2-R140V WNILGGTVF   | 103   | 20    |
| >IDH2-R140V RNILGGTVFR  | 156   | >IDH2-R140V WNILGGTVFF  | 521   | 365   |
| >IDH2-R140V IRNILGGTVF  | 6413  | >IDH2-R140V IWNILGGTVF  | 24    | 6389  |
| >IDH2-R140V IRNILGGTVF  | 13030 | >IDH2-R140V IWNILGGTVF  | 64    | 12966 |
| >IDH2-R140V IRNILGGTVF  | 19654 | >IDH2-R140V IWNILGGTVF  | 335   | 19319 |
| >IDH2-R140V IRNILGGTVFF | 2879  | >IDH2-R140V IWNILGGTVF  | 38    | 2841  |
| >IDH2-R140V IRNILGGTVFF | 5815  | >IDH2-R140V IWNILGGTVF  | 370   | 5445  |

|                                  |       |                                  |       |       |
|----------------------------------|-------|----------------------------------|-------|-------|
| >IDH2-R140VIRNILGGTVF            | 30    | >IDH2-R140VIWNILGGTVF            | 603   | 573   |
| >IDH2-R140VIRNILGGTVF            | 79    | >IDH2-R140VIWNILGGTVF            | 8350  | 8271  |
| >IDH2-R140VIRNILGGTVFF           | 459   | >IDH2-R140VIWNILGGTVF            | 17934 | 17475 |
| >IDH2-R140VIRNILGGTVF            | 201   | >IDH2-R140VIWNILGGTVF            | 11468 | 11267 |
| >IDH2-R140VIRNILGGTVFF           | 449   | >IDH2-R140VIWNILGGTVF            | 17    | 432   |
| >IDH2-R140VIRNILGGTV             | 36577 | >IDH2-R140VIWNILGGTV             | 304   | 36273 |
| >IDH2-R140VIRNILGGTVFF           | 33957 | >IDH2-R140VIWNILGGTVF            | 369   | 33588 |
| >IDH2-R140VKMWKSPNG <sup>-</sup> | 138   | >IDH2-R140VKMWKSPNG <sup>-</sup> | 15807 | 15669 |
| >IDH2-R140VKMWKSPNG <sup>-</sup> | 9     | >IDH2-R140VKMWKSPNG <sup>-</sup> | 6783  | 6774  |
| >IDH2-R140VKMWKSPNG <sup>-</sup> | 3941  | >IDH2-R140VKMWKSPNG <sup>-</sup> | 59    | 3882  |
| >IDH2-R140VKMWKSPNG <sup>-</sup> | 48    | >IDH2-R140VKMWKSPNG <sup>-</sup> | 13    | 35    |
| >IDH2-R140VKMWKSPNG <sup>-</sup> | 18335 | >IDH2-R140VKMWKSPNG <sup>-</sup> | 29    | 18306 |
| >IDH2-R140VKMWKSPNG <sup>-</sup> | 20607 | >IDH2-R140VKMWKSPNG <sup>-</sup> | 54    | 20553 |
| >IDH2-R140VKMWKSPNG <sup>-</sup> | 20188 | >IDH2-R140VKMWKSPNG <sup>-</sup> | 14    | 20174 |
| >IDH2-R140VKMWKSPNG <sup>-</sup> | 16    | >IDH2-R140VKMWKSPNG <sup>-</sup> | 3899  | 3883  |
| >IDH2-R140VTIRNILGGTV            | 2103  | >IDH2-R140VTIWNILGGTV            | 492   | 1611  |
| >IDH2-R140VTIRNILGGTV            | 122   | >IDH2-R140VTIWNILGGTV            | 49    | 73    |
| >IDH2-R140VTIRNILGGTV            | 1505  | >IDH2-R140VTIWNILGGTV            | 94    | 1411  |
| >IDH2-R140VTIRNILGGTV            | 1095  | >IDH2-R140VTIWNILGGTV            | 8     | 1087  |
| >IDH2-R140VTIRNILGGTV            | 7982  | >IDH2-R140VTIWNILGGTV            | 150   | 7832  |
| >IDH2-R140VTIRNILGGTV            | 5229  | >IDH2-R140VTIWNILGGTV            | 30    | 5199  |
| >IDH2-R140VTIRNILGGTV            | 14180 | >IDH2-R140VTIWNILGGTV            | 159   | 14021 |
| >IDH2-R140VTIRNILGGTV            | 279   | >IDH2-R140VTIWNILGGTV            | 20    | 259   |
| >IDH2-R140VTIRNILGGTVF           | 4680  | >IDH2-R140VTIWNILGGTV            | 173   | 4507  |
| >IDH2-R140VTIRNILGGTV            | 612   | >IDH2-R140VTIWNILGGTV            | 67    | 545   |
| >IDH2-R140VTIRNILGGTV            | 3277  | >IDH2-R140VTIWNILGGTV            | 26    | 3251  |
| >IDH2-R140VTIRNILGGTVF           | 133   | >IDH2-R140VTIWNILGGTV            | 418   | 285   |
| >IDH2-R140VTIRNILGGTVF           | 338   | >IDH2-R140VTIWNILGGTV            | 226   | 112   |
| >IDH2-R140VTIRNILGGTVF           | 58    | >IDH2-R140VTIWNILGGTV            | 179   | 121   |
| >IDH2-R140VGTIRNILGGT\           | 322   | >IDH2-R140VGTIWNILGGT            | 181   | 141   |
| >IDH2-R140VGTIRNILGGT\           | 510   | >IDH2-R140VGTIWNILGGT            | 189   | 321   |
| >IDH2-R140VGTIRNILGGT\           | 138   | >IDH2-R140VGTIWNILGGT            | 27    | 111   |
| >IDH2-R140VGTIRNILGGT\           | 191   | >IDH2-R140VGTIWNILGGT            | 177   | 14    |
| >IDH2-R140VGTIRNILGGT\           | 1276  | >IDH2-R140VGTIWNILGGT            | 241   | 1035  |
| >IDH2-R140VGTIRNILGGT\           | 646   | >IDH2-R140VGTIWNILGGT            | 182   | 464   |
| >IDH2-R140VGTIRNILGGT\           | 1025  | >IDH2-R140VGTIWNILGGT            | 290   | 735   |
| >IDH2-R140VGTIRNILGGT\           | 477   | >IDH2-R140VGTIWNILGGT            | 457   | 20    |
| >IDH2-R140VSPNGTIRNI             | 710   | >IDH2-R140VSPNGTIWNI             | 219   | 491   |
| >IDH2-R140VSPNGTIRNIL            | 522   | >IDH2-R140VSPNGTIWNIL            | 474   | 48    |
| >IDH2-R140VSPNGTIRNI             | 245   | >IDH2-R140VSPNGTIWNI             | 2811  | 2566  |
| >IDH2-R140VSPNGTIRNIL            | 23    | >IDH2-R140VSPNGTIWNIL            | 56    | 33    |
| >IDH2-R140VSPNGTIRNIL            | 247   | >IDH2-R140VSPNGTIWNIL            | 91    | 156   |
| >IDH2-R140VSPNGTIRNI             | 768   | >IDH2-R140VSPNGTIWNI             | 78    | 690   |

|                         |       |                         |       |       |
|-------------------------|-------|-------------------------|-------|-------|
| >IDH2-R140V KSPNGTIR    | 174   | >IDH2-R140V KSPNGTIW    | 18924 | 18750 |
| >IDH2-R140V KSPNGTIR    | 7977  | >IDH2-R140V KSPNGTIW    | 180   | 7797  |
| >IDH2-R140V KSPNGTIRNI  | 81    | >IDH2-R140V KSPNGTIWNI  | 48    | 33    |
| >IDH2-R140V KSPNGTIRNIL | 172   | >IDH2-R140V KSPNGTIWNI  | 360   | 188   |
| >IDH2-R140V KSPNGTIR    | 19359 | >IDH2-R140V KSPNGTIW    | 77    | 19282 |
| >IDH2-R140V KSPNGTIR    | 24666 | >IDH2-R140V KSPNGTIW    | 90    | 24576 |
| >IDH2-R140V KSPNGTIR    | 21749 | >IDH2-R140V KSPNGTIW    | 67    | 21682 |
| >IDH2-R140V KSPNGTIRNI  | 19    | >IDH2-R140V KSPNGTIWNI  | 7     | 12    |
| >IDH2-R140V KSPNGTIRNIL | 6     | >IDH2-R140V KSPNGTIWNI  | 5     | 1     |
| >IDH2-R140V KSPNGTIRNI  | 464   | >IDH2-R140V KSPNGTIWNI  | 3336  | 2872  |
| >IDH2-R140V KSPNGTIRNIL | 551   | >IDH2-R140V KSPNGTIWNI  | 353   | 198   |
| >IDH2-R140V WKSPNGTIR   | 80    | >IDH2-R140V WKSPNGTIW   | 43    | 37    |
| >IDH2-R140V WKSPNGTIRNI | 52    | >IDH2-R140V WKSPNGTIW   | 59    | 7     |
| >IDH2-R140V WKSPNGTIR   | 33666 | >IDH2-R140V WKSPNGTIW   | 201   | 33465 |
| >IDH2-R140V MWKSPNGTI   | 17999 | >IDH2-R140V MWKSPNGTI   | 27    | 17972 |
| >IDH2-R140V MWKSPNGTI   | 19648 | >IDH2-R140V MWKSPNGTI   | 110   | 19538 |
| >IDH2-R140V MWKSPNGTI   | 304   | >IDH2-R140V MWKSPNGTI   | 28868 | 28564 |
| >IDH2-R140V MWKSPNGTI   | 14925 | >IDH2-R140V MWKSPNGTI   | 58    | 14867 |
| >IDH2-R140V MWKSPNGTI   | 43    | >IDH2-R140V MWKSPNGTI   | 16005 | 15962 |
| >IDH2-R172C RHAHGDQY    | 1134  | >IDH2-R172C GH AHGDQY   | 295   | 839   |
| >IDH2-R172C RHAHGDQY    | 483   | >IDH2-R172C GH AHGDQY   | 1129  | 646   |
| >IDH2-R172C RHAHGDQY    | 224   | >IDH2-R172C GH AHGDQY   | 2462  | 2238  |
| >IDH2-R172C RHAHGDQY    | 265   | >IDH2-R172C GH AHGDQY   | 6083  | 5818  |
| >IDH2-R172C GRHAHGDQY   | 2498  | >IDH2-R172C GGHAHGDQY   | 475   | 2023  |
| >IDH2-R172C GRHAHGDQY   | 86    | >IDH2-R172C GGHAHGDQY   | 26753 | 26667 |
| >IDH2-R172C PGWTKPITIG  | 55    | >IDH2-R172C PGWTKPITIG  | 30386 | 30331 |
| >IDH2-R172C IGRHAHGDQY  | 10    | >IDH2-R172C IGGHAHGDQY  | 3646  | 3636  |
| >IDH2-R172C IGRHAHGDQY  | 401   | >IDH2-R172C IGGHAHGDQY  | 1229  | 828   |
| >IDH2-R172C IGRHAHGDQY  | 328   | >IDH2-R172C IGGHAHGDQY  | 4785  | 4457  |
| >IDH2-R172C TIGRHAHGDQY | 135   | >IDH2-R172C TIGGHAHGDQY | 82    | 53    |
| >IDH2-R172C TIGRHAHGDQY | 180   | >IDH2-R172C TIGGHAHGDQY | 59    | 121   |
| >IDH2-R172C ITIGRHAH    | 502   | >IDH2-R172C ITIGGHAH    | 205   | 297   |
| >IDH2-R172C ITIGRHAH    | 214   | >IDH2-R172C ITIGGHAH    | 78    | 136   |
| >IDH2-R172C KPITIGRHA   | 187   | >IDH2-R172C KPITIGGHA   | 126   | 61    |
| >IDH2-R172C WTKPITIGR   | 136   | >IDH2-R172C WTKPITIGG   | 21450 | 21314 |
| >IDH2-R172C WTKPITIGR   | 18    | >IDH2-R172C WTKPITIGG   | 21904 | 21886 |
| >IDH2-R172C WTKPITIGRH  | 436   | >IDH2-R172C WTKPITIGGH  | 133   | 303   |
| >IDH2-R172C WTKPITIGR   | 114   | >IDH2-R172C WTKPITIGG   | 33652 | 33538 |
| >IDH2-R172C GWTKPITIGR  | 389   | >IDH2-R172C GWTKPITIGG  | 32550 | 32161 |
| >IDH2-R172C GWTKPITIGR  | 44    | >IDH2-R172C GWTKPITIGG  | 25234 | 25190 |
| >IDH2-R172K RHAHGDQY    | 483   | >IDH2-R172K KHAHGDQY    | 263   | 220   |
| >IDH2-R172K RHAHGDQY    | 224   | >IDH2-R172K KHAHGDQY    | 355   | 131   |
| >IDH2-R172K RHAHGDQY    | 265   | >IDH2-R172K KHAHGDQY    | 2063  | 1798  |



|                       |       |                       |       |       |
|-----------------------|-------|-----------------------|-------|-------|
| >IDH2-R172KGRHAHGDQY  | 964   | >IDH2-R172KGKHAHGDQY  | 122   | 842   |
| >IDH2-R172KGRHAHGDQY  | 86    | >IDH2-R172KGKHAHGDQY  | 8376  | 8290  |
| >IDH2-R172KPGWTKPITIG | 55    | >IDH2-R172KPGWTKPITIG | 1451  | 1396  |
| >IDH2-R172KIGRHAHGDQ` | 10    | >IDH2-R172KIGKHAHGDQ` | 32    | 22    |
| >IDH2-R172KIGRHAHGDQ` | 401   | >IDH2-R172KIGKHAHGDQ` | 436   | 35    |
| >IDH2-R172KIGRHAHGDQ` | 328   | >IDH2-R172KIGKHAHGDQ` | 1765  | 1437  |
| >IDH2-R172KTIGRHAHGD( | 135   | >IDH2-R172KTIGKHAHGD( | 251   | 116   |
| >IDH2-R172KTIGRHAHGD( | 180   | >IDH2-R172KTIGKHAHGD( | 199   | 19    |
| >IDH2-R172KTIGRHAHGD( | 564   | >IDH2-R172KTIGKHAHGD( | 372   | 192   |
| >IDH2-R172KITIGRHAH   | 214   | >IDH2-R172KITIGKHAH   | 217   | 3     |
| >IDH2-R172KKPITIGRHA  | 187   | >IDH2-R172KKPITIGKHA  | 129   | 58    |
| >IDH2-R172KWTKPITIGR  | 6502  | >IDH2-R172KWTKPITIGK  | 393   | 6109  |
| >IDH2-R172KWTKPITIGR  | 4364  | >IDH2-R172KWTKPITIGK  | 99    | 4265  |
| >IDH2-R172KWTKPITIGR  | 136   | >IDH2-R172KWTKPITIGK  | 2546  | 2410  |
| >IDH2-R172KWTKPITIGR  | 18    | >IDH2-R172KWTKPITIGK  | 56    | 38    |
| >IDH2-R172KWTKPITIGRH | 436   | >IDH2-R172KWTKPITIGKH | 543   | 107   |
| >IDH2-R172KWTKPITIGR  | 114   | >IDH2-R172KWTKPITIGK  | 2355  | 2241  |
| >IDH2-R172KGWTKPITIGR | 389   | >IDH2-R172KGWTKPITIGK | 4511  | 4122  |
| >IDH2-R172KGWTKPITIGR | 44    | >IDH2-R172KGWTKPITIGK | 396   | 352   |
| >IDH2-R172MRHAHGDQY   | 1134  | >IDH2-R172MRHAHGDQY   | 99    | 1035  |
| >IDH2-R172MRHAHGDQY   | 483   | >IDH2-R172MRHAHGDQY   | 585   | 102   |
| >IDH2-R172MRHAHGDQY   | 224   | >IDH2-R172MRHAHGDQY   | 290   | 66    |
| >IDH2-R172MRHAHGDQY   | 5786  | >IDH2-R172MRHAHGDQY   | 228   | 5558  |
| >IDH2-R172MRHAHGDQY   | 265   | >IDH2-R172MRHAHGDQY   | 41    | 224   |
| >IDH2-R172MGRHAHGDQY  | 25773 | >IDH2-R172MGMHAHGDQ   | 211   | 25562 |
| >IDH2-R172MGRHAHGDQY  | 20249 | >IDH2-R172MGMHAHGDQ   | 71    | 20178 |
| >IDH2-R172MGRHAHGDQY  | 26091 | >IDH2-R172MGMHAHGDQ   | 52    | 26039 |
| >IDH2-R172MGRHAHGDQY  | 22891 | >IDH2-R172MGMHAHGDQ   | 142   | 22749 |
| >IDH2-R172MGRHAHGDQY  | 25466 | >IDH2-R172MGMHAHGDQ   | 374   | 25092 |
| >IDH2-R172MGRHAHGDQY  | 32990 | >IDH2-R172MGMHAHGDQ   | 87    | 32903 |
| >IDH2-R172MGRHAHGDQY  | 7336  | >IDH2-R172MGMHAHGDQ   | 88    | 7248  |
| >IDH2-R172MGRHAHGDQY  | 12419 | >IDH2-R172MGMHAHGDQ   | 260   | 12159 |
| >IDH2-R172MGRHAHGDQY  | 3344  | >IDH2-R172MGMHAHGDQ   | 32    | 3312  |
| >IDH2-R172MGRHAHGDQY  | 2498  | >IDH2-R172MGMHAHGDQ   | 87    | 2411  |
| >IDH2-R172MGRHAHGDQY  | 10889 | >IDH2-R172MGMHAHGDQ   | 71    | 10818 |
| >IDH2-R172MGRHAHGDQY  | 1898  | >IDH2-R172MGMHAHGDQ   | 43    | 1855  |
| >IDH2-R172MGRHAHGDQY  | 964   | >IDH2-R172MGMHAHGDQ   | 336   | 628   |
| >IDH2-R172MGRHAHGDQY  | 86    | >IDH2-R172MGMHAHGDQ   | 24386 | 24300 |
| >IDH2-R172MGRHAHGDQY  | 8967  | >IDH2-R172MGMHAHGDQ   | 204   | 8763  |
| >IDH2-R172MPGWTKPITIG | 55    | >IDH2-R172MPGWTKPITIG | 22301 | 22246 |
| >IDH2-R172MIGRHAHGDQ` | 10    | >IDH2-R172MIGMHAHGD(  | 562   | 552   |
| >IDH2-R172MIGRHAHGDQ` | 2098  | >IDH2-R172MIGMHAHGD(  | 301   | 1797  |
| >IDH2-R172MIGRHAHGDQ` | 401   | >IDH2-R172MIGMHAHGD(  | 325   | 76    |

|                       |       |                       |       |       |
|-----------------------|-------|-----------------------|-------|-------|
| >IDH2-R172MIGRHAHGDC  | 328   | >IDH2-R172MIGMHAHGDC  | 478   | 150   |
| >IDH2-R172MTIGRHAHGDC | 135   | >IDH2-R172MTIGMHAHGDC | 285   | 150   |
| >IDH2-R172MTIGRHAHGDC | 180   | >IDH2-R172MTIGMHAHGDC | 114   | 66    |
| >IDH2-R172MITIGRHAH   | 502   | >IDH2-R172MITIGMHAH   | 68    | 434   |
| >IDH2-R172MITIGRHAH   | 214   | >IDH2-R172MITIGMHAH   | 72    | 142   |
| >IDH2-R172MKPITIGRHA  | 187   | >IDH2-R172MKPITIGMHA  | 125   | 62    |
| >IDH2-R172MWTKPITIGR  | 12017 | >IDH2-R172MWTKPITIGM  | 86    | 11931 |
| >IDH2-R172MWTKPITIGR  | 7144  | >IDH2-R172MWTKPITIGM  | 147   | 6997  |
| >IDH2-R172MWTKPITIGR  | 136   | >IDH2-R172MWTKPITIGM  | 17868 | 17732 |
| >IDH2-R172MWTKPITIGR  | 18    | >IDH2-R172MWTKPITIGM  | 12558 | 12540 |
| >IDH2-R172MWTKPITIGR  | 9901  | >IDH2-R172MWTKPITIGM  | 169   | 9732  |
| >IDH2-R172MWTKPITIGRH | 436   | >IDH2-R172MWTKPITIGMH | 53    | 383   |
| >IDH2-R172MWTKPITIGR  | 15027 | >IDH2-R172MWTKPITIGM  | 487   | 14540 |
| >IDH2-R172MWTKPITIGR  | 10037 | >IDH2-R172MWTKPITIGM  | 34    | 10003 |
| >IDH2-R172MWTKPITIGR  | 4655  | >IDH2-R172MWTKPITIGM  | 28    | 4627  |
| >IDH2-R172MWTKPITIGRH | 1567  | >IDH2-R172MWTKPITIGMH | 487   | 1080  |
| >IDH2-R172MWTKPITIGR  | 114   | >IDH2-R172MWTKPITIGM  | 28429 | 28315 |
| >IDH2-R172MGWTKPITIGR | 389   | >IDH2-R172MGWTKPITIGM | 25810 | 25421 |
| >IDH2-R172MGWTKPITIGR | 44    | >IDH2-R172MGWTKPITIGM | 13190 | 13146 |
| >IDH2-R172SRHAHGDCQY  | 1134  | >IDH2-R172SSHAHGDCQY  | 403   | 731   |
| >IDH2-R172SRHAHGDCQY  | 483   | >IDH2-R172SSHAHGDCQY  | 539   | 56    |
| >IDH2-R172SRHAHGDCQY  | 224   | >IDH2-R172SSHAHGDCQY  | 1089  | 865   |
| >IDH2-R172SRHAHGDCQY  | 265   | >IDH2-R172SSHAHGDCQY  | 8118  | 7853  |
| >IDH2-R172SGRHAHGDCQY | 7336  | >IDH2-R172SGSHAHGDCQY | 498   | 6838  |
| >IDH2-R172SGRHAHGDCQY | 12419 | >IDH2-R172SGSHAHGDCQY | 172   | 12247 |
| >IDH2-R172SGRHAHGDCQY | 3344  | >IDH2-R172SGSHAHGDCQY | 390   | 2954  |
| >IDH2-R172SGRHAHGDCQY | 2498  | >IDH2-R172SGSHAHGDCQY | 32    | 2466  |
| >IDH2-R172SGRHAHGDCQY | 10889 | >IDH2-R172SGSHAHGDCQY | 258   | 10631 |
| >IDH2-R172SGRHAHGDCQY | 21367 | >IDH2-R172SGSHAHGDCQY | 22    | 21345 |
| >IDH2-R172SGRHAHGDCQY | 86    | >IDH2-R172SGSHAHGDCQY | 22988 | 22902 |
| >IDH2-R172SGRHAHGDCQY | 8262  | >IDH2-R172SGSHAHGDCQY | 251   | 8011  |
| >IDH2-R172SPGWTKPITIG | 55    | >IDH2-R172SPGWTKPITIG | 25127 | 25072 |
| >IDH2-R172SIGRHAHGDCQ | 10    | >IDH2-R172SIGSHAHGDCQ | 1104  | 1094  |
| >IDH2-R172SIGRHAHGDCQ | 401   | >IDH2-R172SIGSHAHGDCQ | 807   | 406   |
| >IDH2-R172SIGRHAHGDCQ | 328   | >IDH2-R172SIGSHAHGDCQ | 1201  | 873   |
| >IDH2-R172STIGRHAHGDC | 135   | >IDH2-R172STIGSHAHGDC | 114   | 21    |
| >IDH2-R172STIGRHAHGDC | 180   | >IDH2-R172STIGSHAHGDC | 68    | 112   |
| >IDH2-R172SITIGRHAH   | 502   | >IDH2-R172SITIGSHAH   | 295   | 207   |
| >IDH2-R172SITIGRHAH   | 214   | >IDH2-R172SITIGSHAH   | 38    | 176   |
| >IDH2-R172SITIGRHAHG  | 1051  | >IDH2-R172SITIGSHAHG  | 262   | 789   |
| >IDH2-R172SKPITIGRHA  | 549   | >IDH2-R172SKPITIGSHA  | 394   | 155   |
| >IDH2-R172SKPITIGRHA  | 187   | >IDH2-R172SKPITIGSHA  | 108   | 79    |
| >IDH2-R172SWTKPITIGR  | 136   | >IDH2-R172SWTKPITIGS  | 18404 | 18268 |

|                        |       |                        |       |       |
|------------------------|-------|------------------------|-------|-------|
| >IDH2-R172S WTKPITIGR  | 18    | >IDH2-R172S WTKPITIGS  | 11988 | 11970 |
| >IDH2-R172S WTKPITIGR  | 9901  | >IDH2-R172S WTKPITIGS  | 493   | 9408  |
| >IDH2-R172S WTKPITIGRH | 436   | >IDH2-R172S WTKPITIGSH | 96    | 340   |
| >IDH2-R172S WTKPITIGRH | 2178  | >IDH2-R172S WTKPITIGSH | 215   | 1963  |
| >IDH2-R172S WTKPITIGR  | 114   | >IDH2-R172S WTKPITIGS  | 29188 | 29074 |
| >IDH2-R172S GWTKPITIGR | 389   | >IDH2-R172S GWTKPITIGS | 28734 | 28345 |
| >IDH2-R172S GWTKPITIGR | 44    | >IDH2-R172S GWTKPITIGS | 17326 | 17282 |
| >IDH2-R172V RHAHGDQY   | 1134  | >IDH2-R172V WHAHGDQY   | 196   | 938   |
| >IDH2-R172V RHAHGDQY   | 483   | >IDH2-R172V WHAHGDQY   | 2059  | 1576  |
| >IDH2-R172V RHAHGDQY   | 3810  | >IDH2-R172V WHAHGDQY   | 475   | 3335  |
| >IDH2-R172V RHAHGDQY   | 224   | >IDH2-R172V WHAHGDQY   | 452   | 228   |
| >IDH2-R172V RHAHGDQY   | 5786  | >IDH2-R172V WHAHGDQY   | 403   | 5383  |
| >IDH2-R172V RHAHGDQY   | 265   | >IDH2-R172V WHAHGDQY   | 1666  | 1401  |
| >IDH2-R172V GRHAHGDQY  | 3344  | >IDH2-R172V GWAHGDQ    | 116   | 3228  |
| >IDH2-R172V GRHAHGDQY  | 2498  | >IDH2-R172V GWAHGDQ    | 305   | 2193  |
| >IDH2-R172V GRHAHGDQY  | 86    | >IDH2-R172V GWAHGDQ    | 9111  | 9025  |
| >IDH2-R172V GRHAHGDQY  | 13667 | >IDH2-R172V GWAHGDQ    | 418   | 13249 |
| >IDH2-R172V PGWTKPITIG | 55    | >IDH2-R172V PGWTKPITIG | 22554 | 22499 |
| >IDH2-R172V IGRHAHGDQ  | 10    | >IDH2-R172V IGWHAHGD   | 1576  | 1566  |
| >IDH2-R172V IGRHAHGDQ  | 2098  | >IDH2-R172V IGWHAHGD   | 460   | 1638  |
| >IDH2-R172V IGRHAHGDQ  | 401   | >IDH2-R172V IGWHAHGD   | 1611  | 1210  |
| >IDH2-R172V IGRHAHGDQ  | 328   | >IDH2-R172V IGWHAHGD   | 294   | 34    |
| >IDH2-R172V TIGRHAHGD  | 135   | >IDH2-R172V TIGWHAHGD  | 238   | 103   |
| >IDH2-R172V TIGRHAHGD  | 180   | >IDH2-R172V TIGWHAHGD  | 62    | 118   |
| >IDH2-R172V TIGRHAHGD  | 1633  | >IDH2-R172V TIGWHAHGD  | 497   | 1136  |
| >IDH2-R172V ITIGRHAH   | 502   | >IDH2-R172V ITIGWHAH   | 109   | 393   |
| >IDH2-R172V ITIGRHAH   | 2233  | >IDH2-R172V ITIGWHAH   | 249   | 1984  |
| >IDH2-R172V ITIGRHAH   | 214   | >IDH2-R172V ITIGWHAH   | 161   | 53    |
| >IDH2-R172V KPITIGRHA  | 187   | >IDH2-R172V KPITIGWHA  | 114   | 73    |
| >IDH2-R172V WTKPITIGR  | 136   | >IDH2-R172V WTKPITIGW  | 19864 | 19728 |
| >IDH2-R172V WTKPITIGR  | 18    | >IDH2-R172V WTKPITIGW  | 13399 | 13381 |
| >IDH2-R172V WTKPITIGRH | 436   | >IDH2-R172V WTKPITIGW  | 49    | 387   |
| >IDH2-R172V WTKPITIGR  | 10037 | >IDH2-R172V WTKPITIGW  | 5     | 10032 |
| >IDH2-R172V WTKPITIGR  | 21214 | >IDH2-R172V WTKPITIGW  | 37    | 21177 |
| >IDH2-R172V WTKPITIGR  | 21811 | >IDH2-R172V WTKPITIGW  | 67    | 21744 |
| >IDH2-R172V WTKPITIGR  | 4655  | >IDH2-R172V WTKPITIGW  | 326   | 4329  |
| >IDH2-R172V WTKPITIGRH | 1567  | >IDH2-R172V WTKPITIGW  | 210   | 1357  |
| >IDH2-R172V WTKPITIGR  | 114   | >IDH2-R172V WTKPITIGW  | 30408 | 30294 |
| >IDH2-R172V GWTKPITIGR | 389   | >IDH2-R172V GWTKPITIGW | 27782 | 27393 |
| >IDH2-R172V GWTKPITIGR | 44    | >IDH2-R172V GWTKPITIGW | 14972 | 14928 |
| >IDH2-V294M VAQVLKSSG  | 680   | >IDH2-V294M MAQVLKSSG  | 269   | 411   |
| >IDH2-V294M VAQVLKSSG  | 1291  | >IDH2-V294M MAQVLKSSG  | 457   | 834   |
| >IDH2-V294M VAQVLKSSG  | 46    | >IDH2-V294M MAQVLKSSG  | 25    | 21    |

|                       |       |                      |      |       |
|-----------------------|-------|----------------------|------|-------|
| >IDH2-V294MVAQVLKSSGC | 2770  | >IDH2-V294MMAQVLKSSG | 121  | 2649  |
| >IDH2-V294MVAQVLKSSGC | 429   | >IDH2-V294MMAQVLKSSG | 339  | 90    |
| >IDH2-V294MMVAQVLKS   | 5368  | >IDH2-V294MMAQVLKS   | 208  | 5160  |
| >IDH2-V294MMVAQVLKSS  | 4853  | >IDH2-V294MMAQVLKSS  | 234  | 4619  |
| >IDH2-V294MMVAQVLKSS  | 5233  | >IDH2-V294MMAQVLKSS  | 409  | 4824  |
| >IDH2-V294MMVAQVLKS   | 5386  | >IDH2-V294MMAQVLKS   | 264  | 5122  |
| >IDH2-V294MMVAQVLKSS  | 3406  | >IDH2-V294MMAQVLKSS  | 108  | 3298  |
| >IDH2-V294MMVAQVLKSS  | 5210  | >IDH2-V294MMAQVLKSS  | 367  | 4843  |
| >IDH2-V294MMVAQVLKS   | 13903 | >IDH2-V294MMAQVLKS   | 350  | 13553 |
| >IDH2-V294MMVAQVLKSS  | 13359 | >IDH2-V294MMAQVLKSS  | 304  | 13055 |
| >IDH2-V294MWYEHRLIDD  | 488   | >IDH2-V294MWYEHRLIDD | 200  | 288   |
| >IDH2-V294MDMVAQVLK   | 1883  | >IDH2-V294MDMMAQVLK  | 233  | 1650  |
| >IDH2-V294MDMVAQVLK   | 1566  | >IDH2-V294MDMMAQVLK  | 107  | 1459  |
| >IDH2-V294MDMVAQVLK   | 897   | >IDH2-V294MDMMAQVLK  | 223  | 674   |
| >IDH2-V294MDMVAQVLK   | 118   | >IDH2-V294MDMMAQVLK  | 78   | 40    |
| >IDH2-V294MDDMVAQVL   | 1086  | >IDH2-V294MDDMMAQVL  | 453  | 633   |
| >IDH2-V294MIDDMVAQV   | 218   | >IDH2-V294MIDDMMAQV  | 164  | 54    |
| >IDH2-V294MIDDMVAQVL  | 900   | >IDH2-V294MIDDMMAQVI | 493  | 407   |
| >IDH2-V294MLIDDMVAQV  | 18    | >IDH2-V294MLIDDMMAQV | 23   | 5     |
| >IDH2-V294MLIDDMVAQV  | 25    | >IDH2-V294MLIDDMMAQV | 20   | 5     |
| >IDH2-V294MLIDDMVAQV  | 13    | >IDH2-V294MLIDDMMAQV | 23   | 10    |
| >IDH2-V294MLIDDMVAQV  | 16    | >IDH2-V294MLIDDMMAQV | 13   | 3     |
| >IDH2-V294MLIDDMVAQV  | 3     | >IDH2-V294MLIDDMMAQV | 7    | 4     |
| >IDH2-V294MLIDDMVAQV  | 53    | >IDH2-V294MLIDDMMAQV | 215  | 162   |
| >IDH2-V294MLIDDMVAQV  | 28    | >IDH2-V294MLIDDMMAQV | 70   | 42    |
| >IDH2-V294MLIDDMVAQV  | 11    | >IDH2-V294MLIDDMMAQV | 24   | 13    |
| >IDH2-V294MLIDDMVAQV  | 348   | >IDH2-V294MLIDDMMAQV | 1304 | 956   |
| >IDH2-V294MLIDDMVAQV  | 3     | >IDH2-V294MLIDDMMAQV | 10   | 7     |
| >IDH2-V294MLIDDMVAQV  | 180   | >IDH2-V294MLIDDMMAQV | 814  | 634   |
| >IDH2-V294MLIDDMVAQV  | 2     | >IDH2-V294MLIDDMMAQV | 2    | 0     |
| >IDH2-V294MLIDDMVAQV  | 16    | >IDH2-V294MLIDDMMAQV | 17   | 1     |
| >IDH2-V294MLIDDMVAQV  | 64    | >IDH2-V294MLIDDMMAQV | 46   | 18    |
| >IDH2-V294MLIDDMVAQV  | 397   | >IDH2-V294MLIDDMMAQV | 433  | 36    |
| >IDH2-V294MLIDDMVAQV  | 55    | >IDH2-V294MLIDDMMAQV | 29   | 26    |
| >IDH2-V294MLRIDDMVA   | 97    | >IDH2-V294MLRIDDMMA  | 44   | 53    |
| >IDH2-V294MLRIDDMVAQ  | 22    | >IDH2-V294MLRIDDMMAC | 21   | 1     |
| >IDH2-V294MLRIDDMVAQ  | 59    | >IDH2-V294MLRIDDMMAC | 69   | 10    |
| >IDH2-V294MLRIDDMVA   | 155   | >IDH2-V294MLRIDDMMA  | 82   | 73    |
| >IDH2-V294MLRIDDMVAQ  | 255   | >IDH2-V294MLRIDDMMAC | 422  | 167   |
| >IDH2-V294MLRIDDMVAQ  | 24    | >IDH2-V294MLRIDDMMAC | 22   | 2     |
| >IDH2-V294MLRIDDMVAQ  | 24    | >IDH2-V294MLRIDDMMAC | 31   | 7     |
| >IDH2-V294MLRIDDMVA   | 19    | >IDH2-V294MLRIDDMMA  | 12   | 7     |
| >IDH2-V294MLRIDDMVAQ  | 1170  | >IDH2-V294MLRIDDMMAC | 383  | 787   |

|                         |       |                         |       |       |
|-------------------------|-------|-------------------------|-------|-------|
| >IDH2-V294M RLIDDMVAQ'  | 16    | >IDH2-V294M RLIDDMMAC   | 17    | 1     |
| >IDH2-V294M RLIDDMVAQ'  | 20    | >IDH2-V294M RLIDDMMAC   | 17    | 3     |
| >IDH2-V294M RLIDDMVA    | 56    | >IDH2-V294M RLIDDMMA    | 37    | 19    |
| >IDH2-V294M RLIDDMVAQ   | 184   | >IDH2-V294M RLIDDMMAC   | 272   | 88    |
| >IDH2-V294M RLIDDMVAQ'  | 62    | >IDH2-V294M RLIDDMMAC   | 58    | 4     |
| >IDH2-V294M RLIDDMVAQ'  | 42    | >IDH2-V294M RLIDDMMAC   | 58    | 16    |
| >IDH2-V294M RLIDDMVA    | 63    | >IDH2-V294M RLIDDMMA    | 31    | 32    |
| >IDH2-V294M RLIDDMVAQ'  | 2     | >IDH2-V294M RLIDDMMAC   | 2     | 0     |
| >IDH2-V294M RLIDDMVAQ'  | 9     | >IDH2-V294M RLIDDMMAC   | 16    | 7     |
| >IDH2-V294M RLIDDMVA    | 23    | >IDH2-V294M RLIDDMMA    | 34    | 11    |
| >IDH2-V294M RLIDDMVAQ'  | 3     | >IDH2-V294M RLIDDMMAC   | 3     | 0     |
| >IDH2-V294M RLIDDMVAQ'  | 8     | >IDH2-V294M RLIDDMMAC   | 10    | 2     |
| >IDH2-V294M RLIDDMVA    | 223   | >IDH2-V294M RLIDDMMA    | 108   | 115   |
| >IDH2-V294M RLIDDMVAQ'  | 6     | >IDH2-V294M RLIDDMMAC   | 7     | 1     |
| >IDH2-V294M RLIDDMVAQ'  | 55    | >IDH2-V294M RLIDDMMAC   | 91    | 36    |
| >IDH2-V294M RLIDDMVAQ'  | 5     | >IDH2-V294M RLIDDMMAC   | 8     | 3     |
| >IDH2-V294M RLIDDMVAQ'  | 445   | >IDH2-V294M RLIDDMMAC   | 447   | 2     |
| >IDH2-V294M RLIDDMVA    | 18    | >IDH2-V294M RLIDDMMA    | 12    | 6     |
| >IDH2-V294M RLIDDMVAQ   | 92    | >IDH2-V294M RLIDDMMAC   | 71    | 21    |
| >IDH2-V294M RLIDDMVAQ'  | 2     | >IDH2-V294M RLIDDMMAC   | 2     | 0     |
| >IDH2-V294M RLIDDMVAQ'  | 6     | >IDH2-V294M RLIDDMMAC   | 5     | 1     |
| >IDH2-V294M RLIDDMVAQ'  | 175   | >IDH2-V294M RLIDDMMAC   | 256   | 81    |
| >IDH2-V294M RLIDDMVAQ'  | 309   | >IDH2-V294M RLIDDMMAC   | 207   | 102   |
| >IDH2-V294M RLIDDMVAQ'  | 190   | >IDH2-V294M RLIDDMMAC   | 187   | 3     |
| >IDH2-V294M RLIDDMVAQ'  | 358   | >IDH2-V294M RLIDDMMAC   | 341   | 17    |
| >IDH2-V294M RLIDDMVAQ'  | 558   | >IDH2-V294M RLIDDMMAC   | 342   | 216   |
| >IDH2-V294M HRLIDDMV    | 669   | >IDH2-V294M HRLIDDM     | 151   | 518   |
| >IDH2-V294M HRLIDDMVA   | 300   | >IDH2-V294M HRLIDDMMA   | 329   | 29    |
| >IDH2-V294M YEHLIDDM\   | 34    | >IDH2-V294M YEHLIDDM\   | 81    | 47    |
| >IDH2-V294M YEHLIDDM\   | 142   | >IDH2-V294M YEHLIDDM\   | 156   | 14    |
| >IDH2-V294M YEHLIDDM\   | 102   | >IDH2-V294M YEHLIDDM\   | 172   | 70    |
| >IDH2-V294M YEHLIDDM\   | 157   | >IDH2-V294M YEHLIDDM\   | 196   | 39    |
| >IDH2-V294M YEHLIDDM\   | 251   | >IDH2-V294M YEHLIDDM\   | 197   | 54    |
| >IKZF1-R433! RAYDLLRA   | 442   | >IKZF1-R433! SAYDLLRA   | 466   | 24    |
| >IKZF1-R433! RAYDLLRAA  | 163   | >IKZF1-R433! SAYDLLRAA  | 176   | 13    |
| >IKZF1-R433! RAYDLLRA   | 199   | >IKZF1-R433! SAYDLLRA   | 228   | 29    |
| >IKZF1-R433! RAYDLLRAA  | 124   | >IKZF1-R433! SAYDLLRAA  | 150   | 26    |
| >IKZF1-R433! RAYDLLRAA  | 531   | >IKZF1-R433! SAYDLLRAA  | 443   | 88    |
| >IKZF1-R433! HRAYDLLR   | 13350 | >IKZF1-R433! HSAYDLLR   | 147   | 13203 |
| >IKZF1-R433! HRAYDLLR   | 9073  | >IKZF1-R433! HSAYDLLR   | 441   | 8632  |
| >IKZF1-R433! HRAYDLLR   | 618   | >IKZF1-R433! HSAYDLLR   | 9     | 609   |
| >IKZF1-R433! HRAYDLLR   | 117   | >IKZF1-R433! HSAYDLLR   | 16673 | 16556 |
| >IKZF1-R433! HRAYDLLRAA | 136   | >IKZF1-R433! HSAYDLLRAA | 24567 | 24431 |

|                        |      |                        |       |       |
|------------------------|------|------------------------|-------|-------|
| >IKZF1-R433!HRAYDLLR   | 225  | >IKZF1-R433!HSAYDLLR   | 346   | 121   |
| >IKZF1-R433!RNGLSLKEEH | 416  | >IKZF1-R433!RNGLSLKEEH | 33496 | 33080 |
| >IKZF1-R433!EHRAYDLLR  | 1195 | >IKZF1-R433!EHSAYDLLR  | 118   | 1077  |
| >IKZF1-R433!EHRAYDLL   | 2031 | >IKZF1-R433!EHSAYDLL   | 101   | 1930  |
| >IKZF1-R433!EHRAYDLLR  | 310  | >IKZF1-R433!EHSAYDLLR  | 151   | 159   |
| >IKZF1-R433!EEHRAYDL   | 128  | >IKZF1-R433!EEHSAYDL   | 201   | 73    |
| >IKZF1-R433!EEHRAYDLL  | 41   | >IKZF1-R433!EEHSAYDLL  | 79    | 38    |
| >IKZF1-R433!EEHRAYDL   | 149  | >IKZF1-R433!EEHSAYDL   | 59    | 90    |
| >IKZF1-R433!EEHRAYDLL  | 36   | >IKZF1-R433!EEHSAYDLL  | 17    | 19    |
| >IKZF1-R433!EEHRAYDL   | 289  | >IKZF1-R433!EEHSAYDL   | 229   | 60    |
| >IKZF1-R433!EEHRAYDLL  | 218  | >IKZF1-R433!EEHSAYDLL  | 224   | 6     |
| >IKZF1-R433!EEHRAYDL   | 224  | >IKZF1-R433!EEHSAYDL   | 159   | 65    |
| >IKZF1-R433!EEHRAYDLL  | 204  | >IKZF1-R433!EEHSAYDLL  | 176   | 28    |
| >IKZF1-R433!EEHRAYDL   | 155  | >IKZF1-R433!EEHSAYDL   | 111   | 44    |
| >IKZF1-R433!EEHRAYDLL  | 174  | >IKZF1-R433!EEHSAYDLL  | 160   | 14    |
| >IKZF1-R433!EEHRAYDLLR | 11   | >IKZF1-R433!EEHSAYDLLR | 11    | 0     |
| >IKZF1-R433!EEHRAYDLL  | 492  | >IKZF1-R433!EEHSAYDLL  | 276   | 216   |
| >IKZF1-R433!EEHRAYDLLR | 680  | >IKZF1-R433!EEHSAYDLLR | 465   | 215   |
| >IKZF1-R433!KEEHRAYDL  | 155  | >IKZF1-R433!KEEHSAYDL  | 264   | 109   |
| >IKZF1-R433!KEEHRAYDLL | 65   | >IKZF1-R433!KEEHSAYDLL | 105   | 40    |
| >IKZF1-R433!KEEHRAYDL  | 81   | >IKZF1-R433!KEEHSAYDL  | 15    | 66    |
| >IKZF1-R433!KEEHRAYDL  | 1226 | >IKZF1-R433!KEEHSAYDL  | 381   | 845   |
| >IKZF1-R433!KEEHRAYDLL | 151  | >IKZF1-R433!KEEHSAYDLL | 120   | 31    |
| >IKZF1-R433!KEEHRAYDL  | 190  | >IKZF1-R433!KEEHSAYDL  | 192   | 2     |
| >IKZF1-R433!KEEHRAYDLL | 173  | >IKZF1-R433!KEEHSAYDLL | 66    | 107   |
| >IKZF1-R433!KEEHRAYDLL | 79   | >IKZF1-R433!KEEHSAYDLL | 92    | 13    |
| >IKZF1-R433!LKEEHRAY   | 103  | >IKZF1-R433!LKEEHSAY   | 40    | 63    |
| >IKZF1-R433!SLKEEHRA   | 750  | >IKZF1-R433!SLKEEHSAY  | 250   | 500   |
| >IKZF1-R433!SLKEEHRAYD | 183  | >IKZF1-R433!SLKEEHSAYD | 76    | 107   |
| >IKZF1-R433!SLKEEHRA   | 127  | >IKZF1-R433!SLKEEHSAY  | 32    | 95    |
| >IKZF1-R433!SLKEEHRAYD | 214  | >IKZF1-R433!SLKEEHSAYD | 99    | 115   |
| >IKZF1-R433!SLKEEHRA   | 380  | >IKZF1-R433!SLKEEHSAY  | 275   | 105   |
| >IKZF1-R433!SLKEEHRAYD | 606  | >IKZF1-R433!SLKEEHSAYD | 401   | 205   |
| >IKZF1-R433!SLKEEHRAYD | 298  | >IKZF1-R433!SLKEEHSAYD | 148   | 150   |
| >IKZF1-R433!SLKEEHRA   | 15   | >IKZF1-R433!SLKEEHSAY  | 7     | 8     |
| >IKZF1-R433!SLKEEHRAYD | 28   | >IKZF1-R433!SLKEEHSAYD | 11    | 17    |
| >IKZF1-R433!SLKEEHRAY  | 434  | >IKZF1-R433!SLKEEHSAY  | 89    | 345   |
| >IKZF1-R433!SLKEEHRAYD | 113  | >IKZF1-R433!SLKEEHSAYD | 294   | 181   |
| >IKZF1-R433!SLKEEHRAY  | 68   | >IKZF1-R433!SLKEEHSAY  | 43    | 25    |
| >IKZF1-R433!SLKEEHRAY  | 64   | >IKZF1-R433!SLKEEHSAY  | 28    | 36    |
| >IKZF1-R433!SLKEEHRAY  | 327  | >IKZF1-R433!SLKEEHSAY  | 64    | 263   |
| >IKZF1-R433!LSLKEEHRAY | 457  | >IKZF1-R433!LSLKEEHSAY | 229   | 228   |
| >IKZF1-R433!LSLKEEHRAY | 298  | >IKZF1-R433!LSLKEEHSAY | 136   | 162   |

|                        |       |                        |       |       |
|------------------------|-------|------------------------|-------|-------|
| >IKZF1-R433!LSLKEEHR   | 383   | >IKZF1-R433!LSLKEEHS   | 21688 | 21305 |
| >IKZF1-R433!LSLKEEHRA  | 621   | >IKZF1-R433!LSLKEEHSAY | 225   | 396   |
| >IKZF1-R433!LSLKEEHRA  | 84    | >IKZF1-R433!LSLKEEHSAY | 26    | 58    |
| >IKZF1-R433!LSLKEEHRA  | 16    | >IKZF1-R433!LSLKEEHSAY | 10    | 6     |
| >IKZF1-R433!LSLKEEHRA  | 1052  | >IKZF1-R433!LSLKEEHSAY | 288   | 764   |
| >IKZF1-R433!GLSLKEEHRA | 524   | >IKZF1-R433!GLSLKEEHS  | 200   | 324   |
| >IKZF1-R433!GLSLKEEHRA | 71    | >IKZF1-R433!GLSLKEEHS  | 62    | 9     |
| >IKZF1-R433!GLSLKEEHRA | 466   | >IKZF1-R433!GLSLKEEHS  | 260   | 206   |
| >IKZF1-R433!GLSLKEEHRA | 797   | >IKZF1-R433!GLSLKEEHS  | 275   | 522   |
| >IKZF1-R433!GLSLKEEHRA | 642   | >IKZF1-R433!GLSLKEEHS  | 324   | 318   |
| >IL21R-G422 GTTVLSCGCV | 151   | >IL21R-G422 ETTVLSCGCV | 15    | 136   |
| >IL21R-G422 GTTVLSCGCV | 11035 | >IL21R-G422 ETTVLSCGCV | 158   | 10877 |
| >IL21R-G422 AGTTVLSCGC | 12652 | >IL21R-G422 AETTVLSCGC | 27    | 12625 |
| >IL21R-G422 AGTTVLSCGC | 23767 | >IL21R-G422 AETTVLSCGC | 287   | 23480 |
| >IL21R-G422 AGTTVLSC   | 38007 | >IL21R-G422 AETTVLSC   | 254   | 37753 |
| >IL21R-G422 AGTTVLSCGC | 31826 | >IL21R-G422 AETTVLSCGC | 23    | 31803 |
| >IL21R-G422 AGTTVLSCGC | 21690 | >IL21R-G422 AETTVLSCGC | 10    | 21680 |
| >IL21R-G422 LDAGTTVL   | 878   | >IL21R-G422 LDAETTVL   | 334   | 544   |
| >IL21R-G422 LLDAGTTV   | 22    | >IL21R-G422 LLDAETTV   | 21    | 1     |
| >IL21R-G422 LLDAGTTVL  | 72    | >IL21R-G422 LLDAETTVL  | 102   | 30    |
| >IL21R-G422 LLDAGTTV   | 24    | >IL21R-G422 LLDAETTV   | 17    | 7     |
| >IL21R-G422 LLDAGTTVL  | 25    | >IL21R-G422 LLDAETTVL  | 13    | 12    |
| >IL21R-G422 LLDAGTTV   | 14    | >IL21R-G422 LLDAETTV   | 35    | 21    |
| >IL21R-G422 LLDAGTTVL  | 84    | >IL21R-G422 LLDAETTVL  | 226   | 142   |
| >IL21R-G422 LLDAGTTV   | 19    | >IL21R-G422 LLDAETTV   | 32    | 13    |
| >IL21R-G422 LLDAGTTVL  | 81    | >IL21R-G422 LLDAETTVL  | 293   | 212   |
| >IL21R-G422 LLDAGTTV   | 2     | >IL21R-G422 LLDAETTV   | 3     | 1     |
| >IL21R-G422 LLDAGTTVL  | 12    | >IL21R-G422 LLDAETTVL  | 29    | 17    |
| >IL21R-G422 LLDAGTTVLS | 46    | >IL21R-G422 LLDAETTVLS | 78    | 32    |
| >IL21R-G422 LLDAGTTV   | 4     | >IL21R-G422 LLDAETTV   | 5     | 1     |
| >IL21R-G422 LLDAGTTVL  | 17    | >IL21R-G422 LLDAETTVL  | 26    | 9     |
| >IL21R-G422 LLDAGTTVLS | 493   | >IL21R-G422 LLDAETTVLS | 648   | 155   |
| >IL21R-G422 LLDAGTTV   | 4     | >IL21R-G422 LLDAETTV   | 5     | 1     |
| >IL21R-G422 LLDAGTTVL  | 15    | >IL21R-G422 LLDAETTVL  | 36    | 21    |
| >IL21R-G422 LLDAGTTV   | 4     | >IL21R-G422 LLDAETTV   | 5     | 1     |
| >IL21R-G422 LLDAGTTVL  | 14    | >IL21R-G422 LLDAETTVL  | 50    | 36    |
| >IL21R-G422 LLDAGTTVLS | 429   | >IL21R-G422 LLDAETTVLS | 890   | 461   |
| >IL21R-G422 LLDAGTTV   | 2     | >IL21R-G422 LLDAETTV   | 2     | 0     |
| >IL21R-G422 LLDAGTTVL  | 3     | >IL21R-G422 LLDAETTVL  | 8     | 5     |
| >IL21R-G422 LLDAGTTVLS | 313   | >IL21R-G422 LLDAETTVLS | 725   | 412   |
| >IL21R-G422 LLDAGTTVLS | 16    | >IL21R-G422 LLDAETTVLS | 28    | 12    |
| >IL21R-G422 LLDAGTTVL  | 303   | >IL21R-G422 LLDAETTVL  | 1047  | 744   |
| >IL21R-G422 PLLDAGTTV  | 630   | >IL21R-G422 PLLDAETTV  | 372   | 258   |

|                         |       |                          |      |       |
|-------------------------|-------|--------------------------|------|-------|
| >IL21R-G422 PLLDAGTTV   | 317   | >IL21R-G422 PLLDAETTV    | 354  | 37    |
| >IL21R-G422 PLLDAGTTVL  | 627   | >IL21R-G422 PLLDAETTVL   | 475  | 152   |
| >IL21R-G422 PLLDAGTTV   | 194   | >IL21R-G422 PLLDAETTV    | 1030 | 836   |
| >IL21R-G422 PLLDAGTTV   | 182   | >IL21R-G422 PLLDAETTV    | 499  | 317   |
| >IL21R-G422 PLLDAGTTV   | 4     | >IL21R-G422 PLLDAETTV    | 7    | 3     |
| >IL21R-G422 PLLDAGTTVL  | 73    | >IL21R-G422 PLLDAETTVL   | 150  | 77    |
| >IL21R-G422 PLLDAGTTV   | 28    | >IL21R-G422 PLLDAETTV    | 47   | 19    |
| >IL21R-G422 PLLDAGTTVL  | 472   | >IL21R-G422 PLLDAETTVL   | 721  | 249   |
| >IL21R-G422 PLLDAGTTV   | 6     | >IL21R-G422 PLLDAETTV    | 6    | 0     |
| >IL21R-G422 PLLDAGTTVL  | 51    | >IL21R-G422 PLLDAETTVL   | 62   | 11    |
| >IL21R-G422 PLLDAGTTV   | 5     | >IL21R-G422 PLLDAETTV    | 4    | 1     |
| >IL21R-G422 PLLDAGTTVL  | 28    | >IL21R-G422 PLLDAETTVL   | 40   | 12    |
| >IL21R-G422 PLLDAGTT    | 923   | >IL21R-G422 PLLDAETT     | 355  | 568   |
| >IL21R-G422 PLLDAGTTV   | 3     | >IL21R-G422 PLLDAETTV    | 3    | 0     |
| >IL21R-G422 PLLDAGTTVL  | 13    | >IL21R-G422 PLLDAETTVL   | 18   | 5     |
| >IL21R-G422 DPLLDAGTTV  | 463   | >IL21R-G422 DPLLDAETTV   | 1022 | 559   |
| >IL21R-G422 DPLLDAGTTV  | 363   | >IL21R-G422 DPLLDAETTV   | 380  | 17    |
| >IL21R-G422 GLEDPLLDAG  | 188   | >IL21R-G422 GLEDPLLDAE   | 140  | 48    |
| >IL6ST-T415I TIPACDFQA  | 596   | >IL6ST-T415I IIPACDFQA   | 197  | 399   |
| >IL6ST-T415I TIPACDFQA  | 44    | >IL6ST-T415I IIPACDFQA   | 950  | 906   |
| >IL6ST-T415I LTIPACDFQA | 96    | >IL6ST-T415I LIIPACDFQA  | 95   | 1     |
| >IL6ST-T415I LTIPACDFQA | 378   | >IL6ST-T415I LIIPACDFQAT | 104  | 274   |
| >IL6ST-T415I LTIPACDFQA | 5207  | >IL6ST-T415I LIIPACDFQA  | 129  | 5078  |
| >IL6ST-T415I LTIPACDF   | 373   | >IL6ST-T415I LIIPACDF    | 2679 | 2306  |
| >IL6ST-T415I LTIPACDFQ  | 190   | >IL6ST-T415I LIIPACDFQ   | 1551 | 1361  |
| >IL6ST-T415I LTIPACDF   | 117   | >IL6ST-T415I LIIPACDF    | 94   | 23    |
| >IL6ST-T415I LTIPACDF   | 147   | >IL6ST-T415I LIIPACDF    | 224  | 77    |
| >IL6ST-T415I LTIPACDF   | 4     | >IL6ST-T415I LIIPACDF    | 237  | 233   |
| >IL6ST-T415I LTIPACDF   | 339   | >IL6ST-T415I LIIPACDF    | 9231 | 8892  |
| >IL6ST-T415I LTIPACDF   | 91    | >IL6ST-T415I LIIPACDF    | 1701 | 1610  |
| >IL6ST-T415I LTIPACDF   | 38    | >IL6ST-T415I LIIPACDF    | 6476 | 6438  |
| >IL6ST-T415I LVGKSDAAVL | 38124 | >IL6ST-T415I LVGKSDAAVL  | 401  | 37723 |
| >IL6ST-T415I VLTIPACDFQ | 1611  | >IL6ST-T415I VLIIPACDFQA | 423  | 1188  |
| >IL6ST-T415I VLTIPACDFQ | 1974  | >IL6ST-T415I VLIIPACDFQA | 422  | 1552  |
| >IL6ST-T415I VLTIPACDFQ | 136   | >IL6ST-T415I VLIIPACDFQA | 47   | 89    |
| >IL6ST-T415I VLTIPACDFQ | 1680  | >IL6ST-T415I VLIIPACDFQA | 394  | 1286  |
| >IL6ST-T415I VLTIPACDFQ | 66    | >IL6ST-T415I VLIIPACDFQA | 99   | 33    |
| >IL6ST-T415I VLTIPACDFQ | 402   | >IL6ST-T415I VLIIPACDFQ  | 556  | 154   |
| >IL6ST-T415I VLTIPACDFQ | 10    | >IL6ST-T415I VLIIPACDFQA | 14   | 4     |
| >IL6ST-T415I VLTIPACDF  | 4699  | >IL6ST-T415I VLIIPACDF   | 385  | 4314  |
| >IL6ST-T415I VLTIPACDF  | 521   | >IL6ST-T415I VLIIPACDF   | 155  | 366   |
| >IL6ST-T415I VLTIPACDF  | 647   | >IL6ST-T415I VLIIPACDF   | 188  | 459   |
| >IL6ST-T415I AVLTIPACDF | 115   | >IL6ST-T415I AVLIIPACDF  | 200  | 85    |



|                                  |       |                          |       |       |
|----------------------------------|-------|--------------------------|-------|-------|
| >IL6ST-T415I AVLTIPACDF          | 302   | >IL6ST-T415I AVLIIPACDF  | 778   | 476   |
| >IL6ST-T415I AVLTIPACDF          | 340   | >IL6ST-T415I AVLIIPACDF  | 118   | 222   |
| >IL6ST-T415I AAVLTIPA            | 554   | >IL6ST-T415I AAVLIIPA    | 393   | 161   |
| >IL6ST-T415I AAVLTIPACD          | 122   | >IL6ST-T415I AAVLIIPACDF | 273   | 151   |
| >IL6ST-T415I AAVLTIPACD          | 11    | >IL6ST-T415I AAVLIIPACDF | 19    | 8     |
| >IL6ST-T415I DAAVLTIPA           | 43    | >IL6ST-T415I DAAVLIIPA   | 48    | 5     |
| >IL6ST-T415I DAAVLTIPA           | 177   | >IL6ST-T415I DAAVLIIPA   | 412   | 235   |
| >IL6ST-T415I SDAAVLTI            | 848   | >IL6ST-T415I SDAAVLII    | 486   | 362   |
| >IL6ST-T415I SDAAVLTIPA          | 405   | >IL6ST-T415I SDAAVLIIPA  | 369   | 36    |
| >IL6ST-T415I SDAAVLTI            | 325   | >IL6ST-T415I SDAAVLII    | 218   | 107   |
| >IL6ST-T415I SDAAVLTI            | 49    | >IL6ST-T415I SDAAVLII    | 57    | 8     |
| >IL6ST-T415I KSDAAVLT            | 13677 | >IL6ST-T415I KSDAAVLI    | 157   | 13520 |
| >IL6ST-T415I KSDAAVLT            | 22    | >IL6ST-T415I KSDAAVLII   | 170   | 148   |
| >IL6ST-T415I KSDAAVLT            | 2988  | >IL6ST-T415I KSDAAVLI    | 53    | 2935  |
| >IL6ST-T415I KSDAAVLT            | 7     | >IL6ST-T415I KSDAAVLII   | 37    | 30    |
| >IL6ST-T415I KSDAAVLT            | 8080  | >IL6ST-T415I KSDAAVLI    | 40    | 8040  |
| >IL6ST-T415I KSDAAVLT            | 15    | >IL6ST-T415I KSDAAVLII   | 16    | 1     |
| >IL6ST-T415I KSDAAVLT            | 495   | >IL6ST-T415I KSDAAVLII   | 353   | 142   |
| >IL6ST-T415I KSDAAVLT            | 2678  | >IL6ST-T415I KSDAAVLI    | 182   | 2496  |
| >IL6ST-T415I KSDAAVLT            | 31050 | >IL6ST-T415I KSDAAVLI    | 52    | 30998 |
| >IL6ST-T415I KSDAAVLT            | 45    | >IL6ST-T415I KSDAAVLII   | 73    | 28    |
| >IL6ST-T415I GKSDAAVLT           | 417   | >IL6ST-T415I GKSDAAVLII  | 510   | 93    |
| >ITK-A261P- $\lambda$ AFMVRDSR   | 25    | >ITK-A261P-r PFMVRDSR    | 1055  | 1030  |
| >ITK-A261P- $\lambda$ AFMVRDSR   | 151   | >ITK-A261P-r PFMVRDSR    | 172   | 21    |
| >ITK-A261P- $\lambda$ GAFMVRDSR  | 355   | >ITK-A261P-r GPFMVRDSR   | 16640 | 16285 |
| >ITK-A261P- $\lambda$ GAFMVRDSR  | 64    | >ITK-A261P-r GPFMVRDSR   | 3140  | 3076  |
| >ITK-A261P- $\lambda$ GAFMVRDSR  | 219   | >ITK-A261P-r GPFMVRDSR   | 2116  | 1897  |
| >ITK-A261P- $\lambda$ GAFMVRDSR  | 21    | >ITK-A261P-r GPFMVRDSR   | 551   | 530   |
| >ITK-A261P- $\lambda$ KLLLDTGKEG | 292   | >ITK-A261P-r KLLLDTGKEG  | 12352 | 12060 |
| >ITK-A261P- $\lambda$ KLLLDTGKEG | 89    | >ITK-A261P-r KLLLDTGKEG  | 9961  | 9872  |
| >ITK-A261P- $\lambda$ KLLLDTGKEG | 144   | >ITK-A261P-r KLLLDTGKEG  | 13441 | 13297 |
| >ITK-A261P- $\lambda$ KLLLDTGKEG | 113   | >ITK-A261P-r KLLLDTGKEG  | 13271 | 13158 |
| >ITK-A261P- $\lambda$ KLLLDTGKEG | 275   | >ITK-A261P-r KLLLDTGKEG  | 20310 | 20035 |
| >ITK-A261P- $\lambda$ KLLLDTGKEG | 152   | >ITK-A261P-r KLLLDTGKEG  | 22548 | 22396 |
| >ITK-A261P- $\lambda$ KEGAFMVR   | 25    | >ITK-A261P-r KEGPFMVR    | 28    | 3     |
| >ITK-A261P- $\lambda$ KEGAFMVRD  | 87    | >ITK-A261P-r KEGPFMVRD   | 93    | 6     |
| >ITK-A261P- $\lambda$ DTGKEGAF   | 125   | >ITK-A261P-r DTGKEGPF    | 175   | 50    |
| >ITK-A261P- $\lambda$ DTGKEGAFM  | 27    | >ITK-A261P-r DTGKEGPFM   | 31    | 4     |
| >ITK-A261P- $\lambda$ DTGKEGAFM  | 67    | >ITK-A261P-r DTGKEGPFM   | 287   | 220   |
| >ITK-A261P- $\lambda$ DTGKEGAFM  | 106   | >ITK-A261P-r DTGKEGPFM   | 165   | 59    |
| >ITK-A261P- $\lambda$ DTGKEGAFM  | 46    | >ITK-A261P-r DTGKEGPFM   | 85    | 39    |
| >ITK-A261P- $\lambda$ DTGKEGAFM  | 25    | >ITK-A261P-r DTGKEGPFM   | 24    | 1     |
| >ITK-A261P- $\lambda$ LDTGKEGAFM | 75    | >ITK-A261P-r LDTGKEGPFM  | 130   | 55    |

|                              |      |                        |       |       |
|------------------------------|------|------------------------|-------|-------|
| >ITK-A261P- $\nu$ LLDTGKEGAF | 460  | >ITK-A261P-rLLDTGKEGPF | 1279  | 819   |
| >ITK-A261P- $\nu$ LLDTGKEGA  | 71   | >ITK-A261P-rLLDTGKEGP  | 9950  | 9879  |
| >ITK-A261P- $\nu$ LLDTGKEGAF | 89   | >ITK-A261P-rLLDTGKEGPF | 83    | 6     |
| >ITK-A261P- $\nu$ LLDTGKEGAF | 307  | >ITK-A261P-rLLDTGKEGPF | 554   | 247   |
| >ITK-A261P- $\nu$ LLDTGKEGA  | 170  | >ITK-A261P-rLLDTGKEGP  | 14474 | 14304 |
| >ITK-A261P- $\nu$ LLDTGKEGAF | 255  | >ITK-A261P-rLLDTGKEGPF | 85    | 170   |
| >ITK-A261P- $\nu$ LLDTGKEGAF | 330  | >ITK-A261P-rLLDTGKEGPF | 271   | 59    |
| >ITK-A261P- $\nu$ LLDTGKEGA  | 23   | >ITK-A261P-rLLDTGKEGP  | 12952 | 12929 |
| >ITK-A261P- $\nu$ LLDTGKEGAF | 87   | >ITK-A261P-rLLDTGKEGPF | 70    | 17    |
| >ITK-A261P- $\nu$ LLLDTGKEGA | 488  | >ITK-A261P-rLLLDTGKEGP | 12797 | 12309 |
| >ITK-A261P- $\nu$ LLLDTGKEGA | 203  | >ITK-A261P-rLLLDTGKEGP | 9528  | 9325  |
| >ITK-A261P- $\nu$ LLLDTGKEGA | 122  | >ITK-A261P-rLLLDTGKEGP | 9535  | 9413  |
| >ITK-A261P- $\nu$ LLLDTGKEGA | 324  | >ITK-A261P-rLLLDTGKEGP | 13921 | 13597 |
| >ITK-A261P- $\nu$ LLLDTGKEGA | 7    | >ITK-A261P-rLLLDTGKEGP | 1367  | 1360  |
| >ITK-A261P- $\nu$ LLLDTGKEGA | 384  | >ITK-A261P-rLLLDTGKEGP | 389   | 5     |
| >ITK-A261P- $\nu$ LLLDTGKEGA | 39   | >ITK-A261P-rLLLDTGKEGP | 7840  | 7801  |
| >ITK-A261P- $\nu$ LLLDTGKEGA | 26   | >ITK-A261P-rLLLDTGKEGP | 8066  | 8040  |
| >ITK-A261P- $\nu$ LLLDTGKEGA | 29   | >ITK-A261P-rLLLDTGKEGP | 12413 | 12384 |
| >ITK-A261P- $\nu$ LLLDTGKEGA | 5    | >ITK-A261P-rLLLDTGKEGP | 2236  | 2231  |
| >ITK-A261P- $\nu$ LLLDTGKEGA | 144  | >ITK-A261P-rLLLDTGKEGP | 98    | 46    |
| >ITK-A261P- $\nu$ LLLDTGKEGA | 141  | >ITK-A261P-rLLLDTGKEGP | 137   | 4     |
| >ITK-A261P- $\nu$ LLLDTGKEGA | 72   | >ITK-A261P-rLLLDTGKEGP | 77    | 5     |
| >ITK-A261P- $\nu$ LLLDTGKEGA | 493  | >ITK-A261P-rLLLDTGKEGP | 265   | 228   |
| >ITK-A349S- $\nu$ TAGLRYGK   | 144  | >ITK-A349S-rTSGLRYGK   | 44    | 100   |
| >ITK-A349S- $\nu$ TAGLRYGK   | 454  | >ITK-A349S-rTSGLRYGK   | 513   | 59    |
| >ITK-A349S- $\nu$ TAGLRYGKW  | 1616 | >ITK-A349S-rTSGLRYGKW  | 245   | 1371  |
| >ITK-A349S- $\nu$ TAGLRYGKW  | 865  | >ITK-A349S-rTSGLRYGKW  | 472   | 393   |
| >ITK-A349S- $\nu$ TAGLRYGKW  | 973  | >ITK-A349S-rTSGLRYGKW  | 204   | 769   |
| >ITK-A349S- $\nu$ VTAGLRYGKV | 361  | >ITK-A349S-rVTSGLRYGKV | 794   | 433   |
| >ITK-A349S- $\nu$ VTAGLRYGKV | 198  | >ITK-A349S-rVTSGLRYGKV | 359   | 161   |
| >ITK-A349S- $\nu$ VTAGLRYGKV | 64   | >ITK-A349S-rVTSGLRYGKV | 108   | 44    |
| >ITK-A349S- $\nu$ VTAGLRYGK  | 310  | >ITK-A349S-rVTSGLRYGK  | 340   | 30    |
| >ITK-A349S- $\nu$ VTAGLRYGK  | 11   | >ITK-A349S-rVTSGLRYGK  | 11    | 0     |
| >ITK-A349S- $\nu$ VTAGLRYGK  | 288  | >ITK-A349S-rVTSGLRYGK  | 291   | 3     |
| >ITK-A349S- $\nu$ VTAGLRYGK  | 16   | >ITK-A349S-rVTSGLRYGK  | 55    | 39    |
| >ITK-A349S- $\nu$ VTAGLRYGKV | 182  | >ITK-A349S-rVTSGLRYGKV | 522   | 340   |
| >ITK-A349S- $\nu$ VTAGLRYGKV | 21   | >ITK-A349S-rVTSGLRYGKV | 16    | 5     |
| >ITK-A349S- $\nu$ VTAGLRYGKV | 59   | >ITK-A349S-rVTSGLRYGKV | 65    | 6     |
| >ITK-A349S- $\nu$ VTAGLRYGKV | 21   | >ITK-A349S-rVTSGLRYGKV | 25    | 4     |
| >ITK-A349S- $\nu$ VTAGLRYGKV | 142  | >ITK-A349S-rVTSGLRYGKV | 300   | 158   |
| >ITK-A349S- $\nu$ VTAGLRYGKV | 974  | >ITK-A349S-rVTSGLRYGKV | 484   | 490   |
| >ITK-A349S- $\nu$ VTAGLRYGKV | 207  | >ITK-A349S-rVTSGLRYGKV | 201   | 6     |
| >ITK-A349S- $\nu$ PVTAGLRYGK | 400  | >ITK-A349S-rPVTSGLRYGK | 324   | 76    |

|                         |      |                         |      |      |
|-------------------------|------|-------------------------|------|------|
| >ITK-A349S-v PVTAGLRY   | 334  | >ITK-A349S-r PVTSGRLRY  | 203  | 131  |
| >ITK-A349S-v PVTAGLRY   | 52   | >ITK-A349S-r PVTSGRLRY  | 42   | 10   |
| >ITK-A349S-v PVTAGLRY   | 980  | >ITK-A349S-r PVTSGRLRY  | 466  | 514  |
| >ITK-A349S-v PVTAGLRY   | 157  | >ITK-A349S-r PVTSGRLRY  | 251  | 94   |
| >ITK-A349S-v APVTAGLRY  | 65   | >ITK-A349S-r APVTSGLRY  | 97   | 32   |
| >ITK-A349S-v APVTAGLRY  | 162  | >ITK-A349S-r APVTSGLRY  | 102  | 60   |
| >ITK-A349S-v APVTAGLRY  | 35   | >ITK-A349S-r APVTSGLRY  | 53   | 18   |
| >ITK-A349S-v KAPVTAGLR  | 525  | >ITK-A349S-r KAPVTSGLR  | 237  | 288  |
| >ITK-A349S-v KAPVTAGLRY | 67   | >ITK-A349S-r KAPVTSGLRY | 42   | 25   |
| >ITK-A349S-v KAPVTAGL   | 65   | >ITK-A349S-r KAPVTSGL   | 190  | 125  |
| >ITK-A349S-v QKAPVTAGLF | 309  | >ITK-A349S-r QKAPVTSGLF | 391  | 82   |
| >ITK-A349S-v QKAPVTAGL  | 273  | >ITK-A349S-r QKAPVTSGL  | 727  | 454  |
| >ITK-A349S-v QKAPVTAGL  | 477  | >ITK-A349S-r QKAPVTSGL  | 166  | 311  |
| >ITK-A349S-v QKAPVTAGLF | 44   | >ITK-A349S-r QKAPVTSGLF | 21   | 23   |
| >ITK-A349S-v QKAPVTAGL  | 440  | >ITK-A349S-r QKAPVTSGL  | 673  | 233  |
| >ITK-A349S-v RQKAPVTA   | 420  | >ITK-A349S-r RQKAPVTS   | 9260 | 8840 |
| >ITK-A349S-v RQKAPVTAGI | 253  | >ITK-A349S-r RQKAPVTSGL | 232  | 21   |
| >ITK-A349S-v RQKAPVTA   | 57   | >ITK-A349S-r RQKAPVTS   | 780  | 723  |
| >ITK-A349S-v RQKAPVTAGI | 303  | >ITK-A349S-r RQKAPVTSGL | 507  | 204  |
| >ITK-A349S-v RQKAPVTAGI | 420  | >ITK-A349S-r RQKAPVTSGL | 194  | 226  |
| >ITK-A349S-v RQKAPVTAGI | 16   | >ITK-A349S-r RQKAPVTSGL | 13   | 3    |
| >ITK-A349S-v RQKAPVTA   | 168  | >ITK-A349S-r RQKAPVTS   | 1190 | 1022 |
| >ITK-A349S-v RQKAPVTAG  | 90   | >ITK-A349S-r RQKAPVTSGL | 96   | 6    |
| >ITK-A349S-v RQKAPVTAGI | 61   | >ITK-A349S-r RQKAPVTSGL | 62   | 1    |
| >ITK-A349S-v RQKAPVTA   | 51   | >ITK-A349S-r RQKAPVTS   | 216  | 165  |
| >ITK-A349S-v RQKAPVTAG  | 305  | >ITK-A349S-r RQKAPVTSGL | 291  | 14   |
| >ITK-A349S-v RQKAPVTAGI | 24   | >ITK-A349S-r RQKAPVTSGL | 13   | 11   |
| >ITK-A349S-v RQKAPVTAGI | 558  | >ITK-A349S-r RQKAPVTSGL | 440  | 118  |
| >ITK-A349S-v RQKAPVTAGI | 64   | >ITK-A349S-r RQKAPVTSGL | 72   | 8    |
| >ITK-A349S-v RQKAPVTAGI | 231  | >ITK-A349S-r RQKAPVTSGL | 333  | 102  |
| >ITK-A349S-v RQKAPVTAGI | 217  | >ITK-A349S-r RQKAPVTSGL | 298  | 81   |
| >ITK-A349S-v RQKAPVTAGI | 259  | >ITK-A349S-r RQKAPVTSGL | 234  | 25   |
| >ITK-A349S-v GRQKAPVTA  | 120  | >ITK-A349S-r GRQKAPVTS  | 146  | 26   |
| >ITK-A349S-v GRQKAPVTA  | 81   | >ITK-A349S-r GRQKAPVTS  | 65   | 16   |
| >ITK-A349S-v GRQKAPVTA  | 370  | >ITK-A349S-r GRQKAPVTS  | 788  | 418  |
| >ITK-A349S-v GRQKAPVTA  | 8    | >ITK-A349S-r GRQKAPVTS  | 6    | 2    |
| >ITK-D202A-i DSSEIHWWR  | 2579 | >ITK-D202A-i ASSEIHWWR  | 63   | 2516 |
| >ITK-D202A-i DSSEIHWWR  | 7481 | >ITK-D202A-i ASSEIHWWR  | 140  | 7341 |
| >ITK-D202A-i DSSEIHWWR  | 8709 | >ITK-D202A-i ASSEIHWWR  | 97   | 8612 |
| >ITK-D202A-i DSSEIHWWR  | 228  | >ITK-D202A-i ASSEIHWWR  | 13   | 215  |
| >ITK-D202A-i DSSEIHWWR  | 13   | >ITK-D202A-i ASSEIHWWR  | 211  | 198  |
| >ITK-D202A-i DSSEIHWWR  | 3    | >ITK-D202A-i ASSEIHWWR  | 14   | 11   |
| >ITK-D202A-i DSSEIHWWR  | 124  | >ITK-D202A-i ASSEIHWWR  | 235  | 111  |

|                        |       |                        |       |       |
|------------------------|-------|------------------------|-------|-------|
| >ITK-D202A-1 DSSEIHWWR | 46    | >ITK-D202A-1 ASSEIHWWR | 585   | 539   |
| >ITK-D202A-1 DSSEIHW   | 171   | >ITK-D202A-1 ASSEIHW   | 7     | 164   |
| >ITK-D202A-1 DSSEIHW   | 80    | >ITK-D202A-1 ASSEIHW   | 42    | 38    |
| >ITK-D202A-1 DSSEIHW   | 308   | >ITK-D202A-1 ASSEIHW   | 19    | 289   |
| >ITK-D202A-1 DSSEIHWWR | 830   | >ITK-D202A-1 ASSEIHWWR | 100   | 730   |
| >ITK-D202A-1 LDSSEIHWI | 16730 | >ITK-D202A-1 LASSEIHWI | 399   | 16331 |
| >ITK-D202A-1 LDSSEIHWI | 2823  | >ITK-D202A-1 LASSEIHWI | 110   | 2713  |
| >ITK-D202A-1 LDSSEIHWI | 9005  | >ITK-D202A-1 LASSEIHWI | 327   | 8678  |
| >ITK-D202A-1 LDSSEIHWI | 4231  | >ITK-D202A-1 LASSEIHWI | 53    | 4178  |
| >ITK-D202A-1 LDSSEIHWI | 3926  | >ITK-D202A-1 LASSEIHWI | 64    | 3862  |
| >ITK-D202A-1 LDSSEIHWI | 2025  | >ITK-D202A-1 LASSEIHWI | 13    | 2012  |
| >ITK-D202A-1 LDSSEIHWI | 18877 | >ITK-D202A-1 LASSEIHWI | 430   | 18447 |
| >ITK-D202A-1 LDSSEIHWI | 172   | >ITK-D202A-1 LASSEIHWI | 14    | 158   |
| >ITK-D202A-1 LDSSEIHWI | 1562  | >ITK-D202A-1 LASSEIHWI | 178   | 1384  |
| >ITK-D202A-1 LDSSEIHWI | 3731  | >ITK-D202A-1 LASSEIHWI | 12    | 3719  |
| >ITK-D202A-1 LDSSEIHWI | 13250 | >ITK-D202A-1 LASSEIHWI | 418   | 12832 |
| >ITK-D202A-1 LDSSEIHW  | 5532  | >ITK-D202A-1 LASSEIHW  | 30    | 5502  |
| >ITK-D202A-1 LDSSEIHW  | 5225  | >ITK-D202A-1 LASSEIHW  | 24    | 5201  |
| >ITK-D202A-1 LDSSEIHW  | 746   | >ITK-D202A-1 LASSEIHW  | 20    | 726   |
| >ITK-D202A-1 LDSSEIHW  | 646   | >ITK-D202A-1 LASSEIHW  | 21    | 625   |
| >ITK-D202A-1 LDSSEIHW  | 8034  | >ITK-D202A-1 LASSEIHW  | 53    | 7981  |
| >ITK-D202A-1 LDSSEIHW  | 3275  | >ITK-D202A-1 LASSEIHW  | 38    | 3237  |
| >ITK-D202A-1 LDSSEIHW  | 3081  | >ITK-D202A-1 LASSEIHW  | 12    | 3069  |
| >ITK-D202A-1 LDSSEIHW  | 5950  | >ITK-D202A-1 LASSEIHW  | 14    | 5936  |
| >ITK-D202A-1 LDSSEIHW  | 503   | >ITK-D202A-1 LASSEIHW  | 36    | 467   |
| >ITK-D202A-1 LDSSEIHW  | 410   | >ITK-D202A-1 LASSEIHW  | 42    | 368   |
| >ITK-D202A-1 LDSSEIHW  | 4208  | >ITK-D202A-1 LASSEIHW  | 55    | 4153  |
| >ITK-D202A-1 LDSSEIHW  | 1362  | >ITK-D202A-1 LASSEIHW  | 29    | 1333  |
| >ITK-D202A-1 LDSSEIHWI | 666   | >ITK-D202A-1 LASSEIHWI | 380   | 286   |
| >ITK-D202A-1 LDSSEIHWI | 80    | >ITK-D202A-1 LASSEIHWI | 23576 | 23496 |
| >ITK-D202A-1 LLDSEIHW  | 639   | >ITK-D202A-1 LLASSEIHW | 224   | 415   |
| >ITK-D202A-1 LLDSEIHW  | 354   | >ITK-D202A-1 LLASSEIHW | 64    | 290   |
| >ITK-D202A-1 LLDSEIHW  | 522   | >ITK-D202A-1 LLASSEIHW | 270   | 252   |
| >ITK-D202A-1 LLDSEIHW  | 268   | >ITK-D202A-1 LLASSEIHW | 20    | 248   |
| >ITK-D202A-1 LLDSEIHW  | 1058  | >ITK-D202A-1 LLASSEIHW | 250   | 808   |
| >ITK-D202A-1 LLDSEIHW  | 764   | >ITK-D202A-1 LLASSEIHW | 168   | 596   |
| >ITK-D202A-1 LLDSEIHW  | 2324  | >ITK-D202A-1 LLASSEIHW | 450   | 1874  |
| >ITK-D202A-1 LLDSEIHW  | 935   | >ITK-D202A-1 LLASSEIHW | 183   | 752   |
| >ITK-D202A-1 LLDSEIHW  | 78    | >ITK-D202A-1 LLASSEIHW | 34    | 44    |
| >ITK-D202A-1 LLDSEIHW  | 179   | >ITK-D202A-1 LLASSEIHW | 51    | 128   |
| >ITK-D202A-1 LLDSEIHW  | 1141  | >ITK-D202A-1 LLASSEIHW | 409   | 732   |
| >ITK-D202A-1 LLDSEIHW  | 765   | >ITK-D202A-1 LLASSEIHW | 307   | 458   |
| >ITK-D202A-1 CLLDSEI   | 48    | >ITK-D202A-1 CLLASSEI  | 103   | 55    |

|                          |      |                          |      |      |
|--------------------------|------|--------------------------|------|------|
| >ITK-D202A-1 CLLDSSEI    | 99   | >ITK-D202A-1 CLLASSEI    | 175  | 76   |
| >ITK-D202A-1 CLLDSSEI    | 71   | >ITK-D202A-1 CLLASSEI    | 128  | 57   |
| >ITK-D202A-1 CLLDSSEI    | 139  | >ITK-D202A-1 CLLASSEI    | 442  | 303  |
| >ITK-D202A-1 CLLDSSEI    | 11   | >ITK-D202A-1 CLLASSEI    | 24   | 13   |
| >ITK-D202A-1 CLLDSSEI    | 9    | >ITK-D202A-1 CLLASSEI    | 35   | 26   |
| >ITK-D202A-1 CLLDSSEI    | 53   | >ITK-D202A-1 CLLASSEI    | 111  | 58   |
| >ITK-D202A-1 CLLDSSEI    | 8    | >ITK-D202A-1 CLLASSEI    | 29   | 21   |
| >ITK-D202A-1 CLLDSSEI    | 12   | >ITK-D202A-1 CLLASSEI    | 45   | 33   |
| >ITK-D202A-1 CLLDSSEIHW  | 262  | >ITK-D202A-1 CLLASSEIHW  | 377  | 115  |
| >ITK-D202A-1 CLLDSSEIHW' | 171  | >ITK-D202A-1 CLLASSEIHW' | 242  | 71   |
| >ITK-D202A-1 CLLDSSEIHW' | 695  | >ITK-D202A-1 CLLASSEIHW' | 285  | 410  |
| >ITK-D202A-1 CLLDSSEIHW  | 126  | >ITK-D202A-1 CLLASSEIHW  | 44   | 82   |
| >ITK-D202A-1 CLLDSSEIHW' | 379  | >ITK-D202A-1 CLLASSEIHW' | 115  | 264  |
| >ITK-D202A-1 CLLDSSEIHW' | 346  | >ITK-D202A-1 CLLASSEIHW' | 426  | 80   |
| >ITK-D202A-1 YCLLDSSEIHW | 443  | >ITK-D202A-1 YCLLASSEIHW | 176  | 267  |
| >ITK-D202A-1 YCLLDSSEI   | 324  | >ITK-D202A-1 YCLLASSEI   | 194  | 130  |
| >ITK-D202A-1 YCLLDSSEIHW | 377  | >ITK-D202A-1 YCLLASSEIHW | 514  | 137  |
| >ITK-D202A-1 EYCLLDSSEI  | 44   | >ITK-D202A-1 EYCLLASSEI  | 22   | 22   |
| >ITK-D202A-1 EYCLLDSSEI  | 178  | >ITK-D202A-1 EYCLLASSEI  | 99   | 79   |
| >ITK-D202A-1 EEYCLLDSSEI | 6    | >ITK-D202A-1 EEYCLLASSEI | 5    | 1    |
| >ITK-D202A-1 EEYCLLDSSEI | 380  | >ITK-D202A-1 EEYCLLASSEI | 363  | 17   |
| >ITK-D202A-1 EEYCLLDSSEI | 244  | >ITK-D202A-1 EEYCLLASSEI | 197  | 47   |
| >ITK-D202A-1 EEYCLLDSSEI | 565  | >ITK-D202A-1 EEYCLLASSEI | 454  | 111  |
| >ITK-D202A-1 EEYCLLDSSEI | 371  | >ITK-D202A-1 EEYCLLASSEI | 260  | 111  |
| >ITK-D202A-1 EEYCLLDS    | 344  | >ITK-D202A-1 EEYCLLAS    | 66   | 278  |
| >ITK-D202A-1 EEYCLLDSS   | 225  | >ITK-D202A-1 EEYCLLASS   | 110  | 115  |
| >ITK-D202A-1 EEYCLLDSSE  | 556  | >ITK-D202A-1 EEYCLLASSE  | 425  | 131  |
| >ITK-D202A-1 EEYCLLDSSEI | 150  | >ITK-D202A-1 EEYCLLASSEI | 108  | 42   |
| >ITK-D202A-1 EEYCLLDSSEI | 13   | >ITK-D202A-1 EEYCLLASSEI | 10   | 3    |
| >ITK-D202A-1 NEEYCLLD    | 2852 | >ITK-D202A-1 NEEYCLLA    | 412  | 2440 |
| >ITK-D202A-1 NEEYCLLDS   | 4275 | >ITK-D202A-1 NEEYCLLAS   | 352  | 3923 |
| >ITK-D202A-1 NEEYCLLD    | 9524 | >ITK-D202A-1 NEEYCLLA    | 91   | 9433 |
| >ITK-D202A-1 NEEYCLLDSS  | 368  | >ITK-D202A-1 NEEYCLLASS  | 220  | 148  |
| >ITK-D202A-1 RRNEEYCLLD  | 512  | >ITK-D202A-1 RRNEEYCLLA  | 58   | 454  |
| >ITK-D202A-1 RRNEEYCLLD  | 98   | >ITK-D202A-1 RRNEEYCLLA  | 62   | 36   |
| >ITK-D202A-1 RRNEEYCLLD  | 175  | >ITK-D202A-1 RRNEEYCLLA  | 43   | 132  |
| >ITK-E108Q-1 EETRNNNSL   | 420  | >ITK-E108Q-1 QETRNNNSL   | 300  | 120  |
| >ITK-E108Q-1 EETRNNNSLV  | 89   | >ITK-E108Q-1 QETRNNNSLV  | 67   | 22   |
| >ITK-E108Q-1 EETRNNNSL   | 240  | >ITK-E108Q-1 QETRNNNSL   | 75   | 165  |
| >ITK-E108Q-1 EETRNNNSL   | 314  | >ITK-E108Q-1 QETRNNNSL   | 262  | 52   |
| >ITK-E108Q-1 KEETRNNNSL  | 193  | >ITK-E108Q-1 KQETRNNNSL  | 5196 | 5003 |
| >ITK-E108Q-1 KEETRNNNSL  | 6543 | >ITK-E108Q-1 KQETRNNNSL  | 210  | 6333 |
| >ITK-E108Q-1 KEETRNNNSL  | 6689 | >ITK-E108Q-1 KQETRNNNSL  | 282  | 6407 |

|                         |      |                         |       |       |
|-------------------------|------|-------------------------|-------|-------|
| >ITK-E108Q-1 KEETRNNNSL | 84   | >ITK-E108Q-1 KQETRNNNSL | 13657 | 13573 |
| >ITK-E108Q-1 KEETRNNNSL | 38   | >ITK-E108Q-1 KQETRNNNSL | 7908  | 7870  |
| >ITK-E108Q-1 SRQRWVLALI | 359  | >ITK-E108Q-1 SRQRWVLALI | 311   | 48    |
| >ITK-E108Q-1 SRQRWVLALI | 1666 | >ITK-E108Q-1 SRQRWVLALI | 474   | 1192  |
| >ITK-E108Q-1 LKEETRNNNS | 300  | >ITK-E108Q-1 LKQETRNNNS | 39    | 261   |
| >ITK-E108Q-1 LKEETRNNNS | 447  | >ITK-E108Q-1 LKQETRNNNS | 817   | 370   |
| >ITK-E108Q-1 LALKEETR   | 1419 | >ITK-E108Q-1 LALKQETR   | 309   | 1110  |
| >ITK-E108Q-1 LALKEETR   | 444  | >ITK-E108Q-1 LALKQETR   | 466   | 22    |
| >ITK-E108Q-1 VLALKEET   | 368  | >ITK-E108Q-1 VLALKQET   | 124   | 244   |
| >ITK-E108Q-1 WVLALKEETF | 834  | >ITK-E108Q-1 WVLALKQETI | 480   | 354   |
| >ITK-E108Q-1 WVLALKEETF | 62   | >ITK-E108Q-1 WVLALKQETI | 63    | 1     |
| >ITK-E108Q-1 WVLALKEETF | 452  | >ITK-E108Q-1 WVLALKQETI | 350   | 102   |
| >ITK-E108Q-1 RWVLALKEET | 421  | >ITK-E108Q-1 RWVLALKQET | 244   | 177   |
| >ITK-E108Q-1 RWVLALKE   | 2234 | >ITK-E108Q-1 RWVLALKQ   | 196   | 2038  |
| >ITK-E108Q-1 RWVLALKEET | 17   | >ITK-E108Q-1 RWVLALKQET | 15    | 2     |
| >ITK-E108Q-1 RWVLALKE   | 390  | >ITK-E108Q-1 RWVLALKQ   | 316   | 74    |
| >ITK-E108Q-1 RWVLALKEE  | 482  | >ITK-E108Q-1 RWVLALKQET | 550   | 68    |
| >ITK-E108Q-1 RWVLALKEET | 389  | >ITK-E108Q-1 RWVLALKQET | 411   | 22    |
| >ITK-E108Q-1 QRWVLALKE  | 207  | >ITK-E108Q-1 QRWVLALKQ  | 67    | 140   |
| >ITK-E108Q-1 QRWVLALKEI | 220  | >ITK-E108Q-1 QRWVLALKQ  | 204   | 16    |
| >ITK-E108Q-1 QRWVLALKE  | 301  | >ITK-E108Q-1 QRWVLALKQ  | 420   | 119   |
| >ITK-E108Q-1 QRWVLALKE  | 281  | >ITK-E108Q-1 QRWVLALKQ  | 227   | 54    |
| >ITK-E108Q-1 QRWVLALKEI | 259  | >ITK-E108Q-1 QRWVLALKQ  | 239   | 20    |
| >ITK-E108Q-1 QRWVLALKE  | 787  | >ITK-E108Q-1 QRWVLALKQ  | 187   | 600   |
| >ITK-E108Q-1 RQRWVLALK  | 2628 | >ITK-E108Q-1 RQRWVLALKQ | 451   | 2177  |
| >ITK-E108Q-1 RQRWVLALK  | 654  | >ITK-E108Q-1 RQRWVLALKQ | 354   | 300   |
| >ITK-E137D-1 EKLATGCAQY | 387  | >ITK-E137D-1 DKLATGCAQY | 510   | 123   |
| >ITK-E137D-1 EKLATGCAQY | 36   | >ITK-E137D-1 DKLATGCAQY | 127   | 91    |
| >ITK-E137D-1 LEKLATGC   | 265  | >ITK-E137D-1 LDKLATGC   | 11835 | 11570 |
| >ITK-E137D-1 LEKLATGCA  | 298  | >ITK-E137D-1 LDKLATGCA  | 9525  | 9227  |
| >ITK-E137D-1 LEKLATGCAQ | 211  | >ITK-E137D-1 LDKLATGCAC | 8831  | 8620  |
| >ITK-E137D-1 LEKLATGCAQ | 231  | >ITK-E137D-1 LDKLATGCAC | 2419  | 2188  |
| >ITK-E137D-1 LEKLATGCAQ | 55   | >ITK-E137D-1 LDKLATGCAC | 6353  | 6298  |
| >ITK-E137D-1 LEKLATGCAQ | 412  | >ITK-E137D-1 LDKLATGCAC | 7846  | 7434  |
| >ITK-E137D-1 LEKLATGCA  | 248  | >ITK-E137D-1 LDKLATGCA  | 25510 | 25262 |
| >ITK-E137D-1 SQLEKLAT   | 73   | >ITK-E137D-1 SQLDKLAT   | 76    | 3     |
| >ITK-E137D-1 SQLEKLATG  | 169  | >ITK-E137D-1 SQLDKLATG  | 158   | 11    |
| >ITK-E137D-1 SQLEKLATGC | 54   | >ITK-E137D-1 SQLDKLATGC | 61    | 7     |
| >ITK-E137D-1 RCCSQLEK   | 176  | >ITK-E137D-1 WRCCSQLDK  | 536   | 360   |
| >ITK-E137D-1 WRCCSQLEKI | 388  | >ITK-E137D-1 WRCCSQLDK  | 810   | 422   |
| >ITK-E137D-1 WRCCSQLEKI | 103  | >ITK-E137D-1 WRCCSQLDK  | 151   | 48    |
| >ITK-E137D-1 WRCCSQLEKI | 156  | >ITK-E137D-1 WRCCSQLDK  | 295   | 139   |
| >ITK-E137D-1 WRCCSQLEKI | 198  | >ITK-E137D-1 WRCCSQLDK  | 376   | 178   |

|                         |       |                         |      |       |
|-------------------------|-------|-------------------------|------|-------|
| >ITK-E137D-\ KWRCCSQLEI | 278   | >ITK-E137D-r KWRCCSQLD  | 583  | 305   |
| >ITK-E137D-\ KWRCCSQLEI | 4     | >ITK-E137D-r KWRCCSQLD  | 5    | 1     |
| >ITK-E137D-\ KWRCCSQLEI | 364   | >ITK-E137D-r KWRCCSQLD  | 374  | 10    |
| >ITK-E137D-\ KWRCCSQLEI | 314   | >ITK-E137D-r KWRCCSQLD  | 498  | 184   |
| >ITK-E137D-\ KWRCCSQLE  | 473   | >ITK-E137D-r KWRCCSQLD  | 2301 | 1828  |
| >ITK-E137D-\ KWRCCSQLEI | 27    | >ITK-E137D-r KWRCCSQLD  | 32   | 5     |
| >ITK-E137D-\ KWRCCSQLEI | 214   | >ITK-E137D-r KWRCCSQLD  | 154  | 60    |
| >ITK-E137D-\ GKWRCCSQL  | 268   | >ITK-E137D-r GKWRCCSQL  | 400  | 132   |
| >ITK-G372V-\ GQFGLVHL   | 8913  | >ITK-G372V-i VQFGLVHL   | 265  | 8648  |
| >ITK-G372V-\ GQFGLVHL   | 121   | >ITK-G372V-i VQFGLVHL   | 103  | 18    |
| >ITK-G372V-\ GQFGLVHL   | 43    | >ITK-G372V-i VQFGLVHL   | 58   | 15    |
| >ITK-G372V-\ GQFGLVHL   | 339   | >ITK-G372V-i VQFGLVHL   | 318  | 21    |
| >ITK-G372V-\ GQFGLVHL   | 12    | >ITK-G372V-i VQFGLVHL   | 11   | 1     |
| >ITK-G372V-\ GQFGLVHL   | 133   | >ITK-G372V-i VQFGLVHL   | 61   | 72    |
| >ITK-G372V-\ GQFGLVHL   | 247   | >ITK-G372V-i VQFGLVHL   | 591  | 344   |
| >ITK-G372V-\ GQFGLVHL   | 91    | >ITK-G372V-i VQFGLVHL   | 131  | 40    |
| >ITK-G372V-\ GQFGLVHLG\ | 532   | >ITK-G372V-i VQFGLVHLG\ | 499  | 33    |
| >ITK-G372V-\ GQFGLVHLG\ | 99    | >ITK-G372V-i VQFGLVHLG\ | 96   | 3     |
| >ITK-G372V-\ GQFGLVHLG\ | 511   | >ITK-G372V-i VQFGLVHLG\ | 220  | 291   |
| >ITK-G372V-\ GQFGLVHLG\ | 736   | >ITK-G372V-i VQFGLVHLG\ | 38   | 698   |
| >ITK-G372V-\ GQFGLVHL   | 117   | >ITK-G372V-i VQFGLVHL   | 91   | 26    |
| >ITK-G372V-\ GQFGLVHLG\ | 46    | >ITK-G372V-i VQFGLVHLG\ | 43   | 3     |
| >ITK-G372V-\ GQFGLVHLG\ | 685   | >ITK-G372V-i VQFGLVHLG\ | 496  | 189   |
| >ITK-G372V-\ GQFGLVHLG\ | 176   | >ITK-G372V-i VQFGLVHLG\ | 131  | 45    |
| >ITK-G372V-\ GQFGLVHL   | 161   | >ITK-G372V-i VQFGLVHL   | 45   | 116   |
| >ITK-G372V-\ GQFGLVHLG\ | 59    | >ITK-G372V-i VQFGLVHLG\ | 19   | 40    |
| >ITK-G372V-\ GQFGLVHL   | 224   | >ITK-G372V-i VQFGLVHL   | 749  | 525   |
| >ITK-G372V-\ GQFGLVHLG\ | 230   | >ITK-G372V-i VQFGLVHLG\ | 1081 | 851   |
| >ITK-G372V-\ GQFGLVHL   | 510   | >ITK-G372V-i VQFGLVHL   | 311  | 199   |
| >ITK-G372V-\ GQFGLVHL   | 142   | >ITK-G372V-i VQFGLVHL   | 506  | 364   |
| >ITK-G372V-\ GQFGLVHLG\ | 314   | >ITK-G372V-i VQFGLVHLG\ | 512  | 198   |
| >ITK-G372V-\ GQFGLVHL   | 144   | >ITK-G372V-i VQFGLVHL   | 589  | 445   |
| >ITK-G372V-\ GQFGLVHLG\ | 1381  | >ITK-G372V-i VQFGLVHLG\ | 422  | 959   |
| >ITK-G372V-\ GQFGLVHLG\ | 799   | >ITK-G372V-i VQFGLVHLG\ | 125  | 674   |
| >ITK-G372V-\ GQFGLVHLG\ | 93    | >ITK-G372V-i VQFGLVHLG\ | 28   | 65    |
| >ITK-G372V-\ SGQFGLVHL  | 7681  | >ITK-G372V-i SVQFGLVHL  | 229  | 7452  |
| >ITK-G372V-\ SGQFGLVHLC | 5202  | >ITK-G372V-i SVQFGLVHLC | 86   | 5116  |
| >ITK-G372V-\ SGQFGLVHLC | 20149 | >ITK-G372V-i SVQFGLVHLC | 136  | 20013 |
| >ITK-G372V-\ SGQFGLVHLC | 324   | >ITK-G372V-i SVQFGLVHLC | 18   | 306   |
| >ITK-G372V-\ SGQFGLVHLC | 163   | >ITK-G372V-i SVQFGLVHLC | 78   | 85    |
| >ITK-G372V-\ SGQFGLVHLC | 607   | >ITK-G372V-i SVQFGLVHLC | 18   | 589   |
| >ITK-G372V-\ SGQFGLVHLC | 569   | >ITK-G372V-i SVQFGLVHLC | 157  | 412   |
| >ITK-G372V-\ SGQFGLVHLC | 968   | >ITK-G372V-i SVQFGLVHLC | 344  | 624   |

|                          |       |                          |      |       |
|--------------------------|-------|--------------------------|------|-------|
| >ITK-G372V-1 ELTFVQEIGSC | 15595 | >ITK-G372V-1 ELTFVQEIGSV | 408  | 15187 |
| >ITK-G372V-1 ELTFVQEIGSC | 19736 | >ITK-G372V-1 ELTFVQEIGSV | 303  | 19433 |
| >ITK-G372V-1 ELTFVQEIGSC | 18102 | >ITK-G372V-1 ELTFVQEIGSV | 38   | 18064 |
| >ITK-G372V-1 ELTFVQEIGSC | 22241 | >ITK-G372V-1 ELTFVQEIGSV | 75   | 22166 |
| >ITK-G372V-1 ELTFVQEIGSC | 25013 | >ITK-G372V-1 ELTFVQEIGSV | 93   | 24920 |
| >ITK-G372V-1 ELTFVQEIGSC | 27363 | >ITK-G372V-1 ELTFVQEIGSV | 9    | 27354 |
| >ITK-G372V-1 ELTFVQEIGSC | 6290  | >ITK-G372V-1 ELTFVQEIGSV | 54   | 6236  |
| >ITK-G372V-1 ELTFVQEIGSC | 20544 | >ITK-G372V-1 ELTFVQEIGSV | 308  | 20236 |
| >ITK-G372V-1 GSGQFGLVHI  | 576   | >ITK-G372V-1 GSVQFGLVHI  | 32   | 544   |
| >ITK-G372V-1 GSGQFGLVH   | 382   | >ITK-G372V-1 GSVQFGLVH   | 100  | 282   |
| >ITK-G372V-1 EIGSGQFGL   | 112   | >ITK-G372V-1 EIGSVQFGL   | 158  | 46    |
| >ITK-G372V-1 EIGSGQFGL   | 432   | >ITK-G372V-1 EIGSVQFGL   | 1402 | 970   |
| >ITK-G372V-1 EIGSGQFGLV  | 149   | >ITK-G372V-1 EIGSVQFGLV  | 462  | 313   |
| >ITK-G372V-1 EIGSGQFGL   | 230   | >ITK-G372V-1 EIGSVQFGL   | 42   | 188   |
| >ITK-G372V-1 EIGSGQFGLV  | 182   | >ITK-G372V-1 EIGSVQFGLV  | 165  | 17    |
| >ITK-G372V-1 EIGSGQFGL   | 28    | >ITK-G372V-1 EIGSVQFGL   | 26   | 2     |
| >ITK-G372V-1 EIGSGQFGLV  | 26    | >ITK-G372V-1 EIGSVQFGLV  | 27   | 1     |
| >ITK-G372V-1 QEIGSGQF    | 471   | >ITK-G372V-1 QEIGSVQF    | 1416 | 945   |
| >ITK-G372V-1 QEIGSGQFGL  | 139   | >ITK-G372V-1 QEIGSVQFGL  | 47   | 92    |
| >ITK-G372V-1 QEIGSGQF    | 640   | >ITK-G372V-1 QEIGSVQF    | 129  | 511   |
| >ITK-G372V-1 QEIGSGQF    | 108   | >ITK-G372V-1 QEIGSVQF    | 48   | 60    |
| >ITK-G372V-1 QEIGSGQF    | 154   | >ITK-G372V-1 QEIGSVQF    | 112  | 42    |
| >ITK-G372V-1 QEIGSGQFGL  | 52    | >ITK-G372V-1 QEIGSVQFGL  | 103  | 51    |
| >ITK-G372V-1 QEIGSGQFGL  | 99    | >ITK-G372V-1 QEIGSVQFGL  | 61   | 38    |
| >ITK-G372V-1 QEIGSGQF    | 582   | >ITK-G372V-1 QEIGSVQF    | 264  | 318   |
| >ITK-G372V-1 QEIGSGQFGL  | 451   | >ITK-G372V-1 QEIGSVQFGL  | 259  | 192   |
| >ITK-G372V-1 QEIGSGQF    | 96    | >ITK-G372V-1 QEIGSVQF    | 52   | 44    |
| >ITK-G372V-1 QEIGSGQFGL  | 625   | >ITK-G372V-1 QEIGSVQFGL  | 231  | 394   |
| >ITK-G372V-1 QEIGSGQFGL  | 437   | >ITK-G372V-1 QEIGSVQFGL  | 404  | 33    |
| >ITK-G372V-1 QEIGSGQFG   | 480   | >ITK-G372V-1 QEIGSVQFG   | 269  | 211   |
| >ITK-G372V-1 QEIGSGQFGL  | 82    | >ITK-G372V-1 QEIGSVQFGL  | 74   | 8     |
| >ITK-G372V-1 QEIGSGQFGL  | 30    | >ITK-G372V-1 QEIGSVQFGL  | 27   | 3     |
| >ITK-G372V-1 QEIGSGQFGL  | 63    | >ITK-G372V-1 QEIGSVQFGL  | 21   | 42    |
| >ITK-G372V-1 VQEIGSGQFC  | 237   | >ITK-G372V-1 VQEIGSVQFC  | 138  | 99    |
| >ITK-G372V-1 VQEIGSGQF   | 324   | >ITK-G372V-1 VQEIGSVQF   | 227  | 97    |
| >ITK-G372V-1 VQEIGSGQF   | 317   | >ITK-G372V-1 VQEIGSVQF   | 768  | 451   |
| >ITK-G372V-1 VQEIGSGQF   | 1656  | >ITK-G372V-1 VQEIGSVQF   | 121  | 1535  |
| >ITK-G372V-1 FVQEIGSG    | 19247 | >ITK-G372V-1 FVQEIGSV    | 48   | 19199 |
| >ITK-G372V-1 FVQEIGSG    | 5786  | >ITK-G372V-1 FVQEIGSV    | 27   | 5759  |
| >ITK-G372V-1 FVQEIGSG    | 6249  | >ITK-G372V-1 FVQEIGSV    | 6    | 6243  |
| >ITK-G372V-1 FVQEIGSG    | 5611  | >ITK-G372V-1 FVQEIGSV    | 7    | 5604  |
| >ITK-G372V-1 FVQEIGSG    | 9260  | >ITK-G372V-1 FVQEIGSV    | 7    | 9253  |
| >ITK-G372V-1 FVQEIGSG    | 15569 | >ITK-G372V-1 FVQEIGSV    | 22   | 15547 |



|                          |       |                          |       |       |
|--------------------------|-------|--------------------------|-------|-------|
| >ITK-G372V-1 FVQEIGSG    | 22094 | >ITK-G372V-1 FVQEIGSV    | 74    | 22020 |
| >ITK-G372V-1 FVQEIGSG    | 22019 | >ITK-G372V-1 FVQEIGSV    | 109   | 21910 |
| >ITK-G372V-1 FVQEIGSG    | 18812 | >ITK-G372V-1 FVQEIGSV    | 3     | 18809 |
| >ITK-G372V-1 FVQEIGSGQF  | 297   | >ITK-G372V-1 FVQEIGSVQF  | 140   | 157   |
| >ITK-G372V-1 FVQEIGSG    | 9802  | >ITK-G372V-1 FVQEIGSV    | 35    | 9767  |
| >ITK-G372V-1 FVQEIGSG    | 15300 | >ITK-G372V-1 FVQEIGSV    | 47    | 15253 |
| >ITK-G372V-1 FVQEIGSGQF  | 145   | >ITK-G372V-1 FVQEIGSVQF  | 108   | 37    |
| >ITK-G372V-1 FVQEIGSGQF  | 65    | >ITK-G372V-1 FVQEIGSVQF  | 111   | 46    |
| >ITK-G372V-1 FVQEIGSGQF  | 1779  | >ITK-G372V-1 FVQEIGSVQF  | 333   | 1446  |
| >ITK-G372V-1 FVQEIGSGQF  | 108   | >ITK-G372V-1 FVQEIGSVQF  | 74    | 34    |
| >ITK-G372V-1 FVQEIGSGQF  | 94    | >ITK-G372V-1 FVQEIGSVQF  | 106   | 12    |
| >ITK-G372V-1 FVQEIGSGQF  | 1996  | >ITK-G372V-1 FVQEIGSVQF  | 422   | 1574  |
| >ITK-G372V-1 TFVQEIGSGQ  | 88    | >ITK-G372V-1 TFVQEIGSVQ  | 35    | 53    |
| >ITK-G372V-1 TFVQEIGSGQ  | 19    | >ITK-G372V-1 TFVQEIGSVQ  | 13    | 6     |
| >ITK-G372V-1 LTFVQEIGSG  | 15487 | >ITK-G372V-1 LTFVQEIGSV  | 437   | 15050 |
| >ITK-G372V-1 LTFVQEIGSG  | 11500 | >ITK-G372V-1 LTFVQEIGSV  | 41    | 11459 |
| >ITK-G372V-1 LTFVQEIGSG  | 14024 | >ITK-G372V-1 LTFVQEIGSV  | 112   | 13912 |
| >ITK-G372V-1 LTFVQEIGSG  | 19758 | >ITK-G372V-1 LTFVQEIGSV  | 79    | 19679 |
| >ITK-G372V-1 LTFVQEIGSG  | 35018 | >ITK-G372V-1 LTFVQEIGSV  | 103   | 34915 |
| >ITK-G372V-1 LTFVQEIGSG  | 27423 | >ITK-G372V-1 LTFVQEIGSV  | 111   | 27312 |
| >ITK-G372V-1 LTFVQEIGSG  | 5580  | >ITK-G372V-1 LTFVQEIGSV  | 205   | 5375  |
| >ITK-G372V-1 LTFVQEIGSG  | 3995  | >ITK-G372V-1 LTFVQEIGSV  | 63    | 3932  |
| >ITK-G372V-1 LTFVQEIGSG( | 509   | >ITK-G372V-1 LTFVQEIGSV( | 134   | 375   |
| >ITK-L51Q-w TLKGSIEL     | 60    | >ITK-L51Q-m TQKGSIEL     | 3713  | 3653  |
| >ITK-L51Q-w TLKGSIELSRI  | 142   | >ITK-L51Q-m TQKGSIELSRI  | 7375  | 7233  |
| >ITK-L51Q-w TLKGSIEL     | 61    | >ITK-L51Q-m TQKGSIEL     | 1823  | 1762  |
| >ITK-L51Q-w TLKGSIELSRI  | 14    | >ITK-L51Q-m TQKGSIELSRI  | 303   | 289   |
| >ITK-L51Q-w TLKGSIEL     | 386   | >ITK-L51Q-m TQKGSIEL     | 11849 | 11463 |
| >ITK-L51Q-w TLKGSIEL     | 5     | >ITK-L51Q-m TQKGSIEL     | 12938 | 12933 |
| >ITK-L51Q-w TLKGSIELSRI  | 17    | >ITK-L51Q-m TQKGSIELSRI  | 21094 | 21077 |
| >ITK-L51Q-w TLKGSIELSR   | 123   | >ITK-L51Q-m TQKGSIELSR   | 239   | 116   |
| >ITK-L51Q-w TLKGSIELSR   | 311   | >ITK-L51Q-m TQKGSIELSR   | 845   | 534   |
| >ITK-L51Q-w TLKGSIEL     | 2447  | >ITK-L51Q-m TQKGSIEL     | 408   | 2039  |
| >ITK-L51Q-w TLKGSIEL     | 5060  | >ITK-L51Q-m TQKGSIEL     | 329   | 4731  |
| >ITK-L51Q-w FEDRHGKKRT   | 368   | >ITK-L51Q-m FEDRHGKKRT   | 14328 | 13960 |
| >ITK-L51Q-w FEDRHGKKRT   | 70    | >ITK-L51Q-m FEDRHGKKRT   | 12661 | 12591 |
| >ITK-L51Q-w RTLKGSIEL    | 192   | >ITK-L51Q-m RTQKGSIEL    | 2245  | 2053  |
| >ITK-L51Q-w RTLKGSIEL    | 354   | >ITK-L51Q-m RTQKGSIEL    | 3262  | 2908  |
| >ITK-L51Q-w RTLKGSIEL    | 498   | >ITK-L51Q-m RTQKGSIEL    | 7569  | 7071  |
| >ITK-L51Q-w RTLKGSIELSR  | 347   | >ITK-L51Q-m RTQKGSIELSF  | 1582  | 1235  |
| >ITK-L51Q-w RTLKGSIELSR  | 104   | >ITK-L51Q-m RTQKGSIELSF  | 140   | 36    |
| >ITK-L51Q-w RTLKGSIEL    | 23    | >ITK-L51Q-m RTQKGSIEL    | 76    | 53    |
| >ITK-L51Q-w RTLKGSIELSR  | 77    | >ITK-L51Q-m RTQKGSIELSF  | 275   | 198   |

|                          |     |                         |       |       |
|--------------------------|-----|-------------------------|-------|-------|
| >ITK-L51Q-w RTLKGSIELSR  | 23  | >ITK-L51Q-m RTQKGSIELSF | 33    | 10    |
| >ITK-L51Q-w RTLKGSIEL    | 38  | >ITK-L51Q-m RTQKGSIEL   | 91    | 53    |
| >ITK-L51Q-w RTLKGSIELSR  | 380 | >ITK-L51Q-m RTQKGSIELSF | 490   | 110   |
| >ITK-L51Q-w RTLKGSIEL    | 426 | >ITK-L51Q-m RTQKGSIEL   | 1443  | 1017  |
| >ITK-L51Q-w RTLKGSIEL    | 4   | >ITK-L51Q-m RTQKGSIEL   | 6     | 2     |
| >ITK-L51Q-w RTLKGSIEL    | 78  | >ITK-L51Q-m RTQKGSIEL   | 121   | 43    |
| >ITK-L51Q-w RTLKGSIEL    | 745 | >ITK-L51Q-m RTQKGSIEL   | 313   | 432   |
| >ITK-L51Q-w RTLKGSIELSR  | 92  | >ITK-L51Q-m RTQKGSIELSF | 326   | 234   |
| >ITK-L51Q-w RTLKGSIEL    | 146 | >ITK-L51Q-m RTQKGSIEL   | 172   | 26    |
| >ITK-L51Q-w KRTLKGS      | 195 | >ITK-L51Q-m KRTQKGS     | 234   | 39    |
| >ITK-L51Q-w KRTLKGSIEL   | 57  | >ITK-L51Q-m KRTQKGSIEL  | 54    | 3     |
| >ITK-L51Q-w KRTLKGS      | 258 | >ITK-L51Q-m KRTQKGS     | 176   | 82    |
| >ITK-L51Q-w KRTLKGSIEL   | 48  | >ITK-L51Q-m KRTQKGSIEL  | 31    | 17    |
| >ITK-L51Q-w KRTLKGSIEL   | 82  | >ITK-L51Q-m KRTQKGSIEL  | 53    | 29    |
| >ITK-L51Q-w KKRTLKGS     | 322 | >ITK-L51Q-m KKRTQKGS    | 113   | 209   |
| >ITK-L51Q-w KKRTLKGSIEL  | 250 | >ITK-L51Q-m KKRTQKGSIEL | 136   | 114   |
| >ITK-L51Q-w KKRTLKGS     | 442 | >ITK-L51Q-m KKRTQKGS    | 284   | 158   |
| >ITK-L51Q-w KKRTLKGSIEL  | 51  | >ITK-L51Q-m KKRTQKGSIEL | 35    | 16    |
| >ITK-L51Q-w KKRTLKGSIEL  | 154 | >ITK-L51Q-m KKRTQKGSIEL | 303   | 149   |
| >ITK-L51Q-w HGKKRTLK     | 12  | >ITK-L51Q-m HGKKRTQK    | 19    | 7     |
| >ITK-L51Q-w HGKKRTLKGS   | 223 | >ITK-L51Q-m HGKKRTQKG   | 205   | 18    |
| >ITK-L51Q-w HGKKRTLKGS   | 312 | >ITK-L51Q-m HGKKRTQKG   | 292   | 20    |
| >ITK-L582V-v LASTHVYQI   | 109 | >ITK-L582V-r VASTHVYQI  | 469   | 360   |
| >ITK-L582V-v LASTHVYQI   | 313 | >ITK-L582V-r VASTHVYQI  | 540   | 227   |
| >ITK-L582V-v LASTHVYQIM  | 282 | >ITK-L582V-r VASTHVYQIM | 487   | 205   |
| >ITK-L582V-v LASTHVYQI   | 133 | >ITK-L582V-r VASTHVYQI  | 194   | 61    |
| >ITK-L582V-v LASTHVYQIM  | 174 | >ITK-L582V-r VASTHVYQIM | 316   | 142   |
| >ITK-L582V-v LASTHVYQIM  | 260 | >ITK-L582V-r VASTHVYQIM | 800   | 540   |
| >ITK-L582V-v LASTHVYQI   | 233 | >ITK-L582V-r VASTHVYQI  | 807   | 574   |
| >ITK-L582V-v RLASTHVYQI  | 227 | >ITK-L582V-r RVASTHVYQI | 5409  | 5182  |
| >ITK-L582V-v RLASTHVYQ   | 267 | >ITK-L582V-r RVASTHVYQ  | 7226  | 6959  |
| >ITK-L582V-v RLASTHVYQI  | 26  | >ITK-L582V-r RVASTHVYQI | 320   | 294   |
| >ITK-L582V-v RLASTHVYQII | 104 | >ITK-L582V-r RVASTHVYQI | 3125  | 3021  |
| >ITK-L582V-v RLASTHVYQI  | 136 | >ITK-L582V-r RVASTHVYQI | 1267  | 1131  |
| >ITK-L582V-v RLASTHVYQII | 227 | >ITK-L582V-r RVASTHVYQI | 4319  | 4092  |
| >ITK-L582V-v RLASTHVYQI  | 459 | >ITK-L582V-r RVASTHVYQI | 637   | 178   |
| >ITK-L582V-v RLASTHVYQ   | 270 | >ITK-L582V-r RVASTHVYQ  | 8715  | 8445  |
| >ITK-L582V-v RLASTHVYQI  | 4   | >ITK-L582V-r RVASTHVYQI | 156   | 152   |
| >ITK-L582V-v RLASTHVYQII | 188 | >ITK-L582V-r RVASTHVYQI | 6727  | 6539  |
| >ITK-L582V-v RLASTHVYQI  | 26  | >ITK-L582V-r RVASTHVYQI | 2963  | 2937  |
| >ITK-L582V-v RLASTHVYQI  | 19  | >ITK-L582V-r RVASTHVYQI | 1635  | 1616  |
| >ITK-L582V-v RLASTHVYQII | 441 | >ITK-L582V-r RVASTHVYQI | 12643 | 12202 |
| >ITK-L582V-v RLASTHVYQI  | 14  | >ITK-L582V-r RVASTHVYQI | 1250  | 1236  |

|                          |      |                          |       |       |
|--------------------------|------|--------------------------|-------|-------|
| >ITK-L582V-v RLASTHVYQ   | 104  | >ITK-L582V-r RVASTHVYQ   | 11178 | 11074 |
| >ITK-L582V-v RLASTHVYQI  | 8    | >ITK-L582V-r RVASTHVYQI  | 1945  | 1937  |
| >ITK-L582V-v RLASTHVYQII | 200  | >ITK-L582V-r RVASTHVYQII | 13507 | 13307 |
| >ITK-L582V-v RLASTHVY    | 150  | >ITK-L582V-r RVASTHVY    | 366   | 216   |
| >ITK-L582V-v RLASTHVY    | 1361 | >ITK-L582V-r RVASTHVY    | 148   | 1213  |
| >ITK-L582V-v RLASTHVY    | 2356 | >ITK-L582V-r RVASTHVY    | 67    | 2289  |
| >ITK-L582V-v RLASTHVY    | 66   | >ITK-L582V-r RVASTHVY    | 49    | 17    |
| >ITK-L582V-v RLASTHVYQ   | 985  | >ITK-L582V-r RVASTHVYQ   | 108   | 877   |
| >ITK-L582V-v RLASTHVYQI  | 1107 | >ITK-L582V-r RVASTHVYQI  | 154   | 953   |
| >ITK-L582V-v RLASTHVYQII | 1482 | >ITK-L582V-r RVASTHVYQII | 191   | 1291  |
| >ITK-L582V-v RLASTHVY    | 12   | >ITK-L582V-r RVASTHVY    | 12    | 0     |
| >ITK-L582V-v RLASTHVYQ   | 654  | >ITK-L582V-r RVASTHVYQ   | 353   | 301   |
| >ITK-L582V-v RLASTHVY    | 415  | >ITK-L582V-r RVASTHVY    | 413   | 2     |
| >ITK-L582V-v RLASTHVYQI  | 20   | >ITK-L582V-r RVASTHVYQI  | 21    | 1     |
| >ITK-L582V-v RLASTHVYQII | 1863 | >ITK-L582V-r RVASTHVYQII | 251   | 1612  |
| >ITK-L582V-v RLASTHVY    | 11   | >ITK-L582V-r RVASTHVY    | 11    | 0     |
| >ITK-L582V-v RLASTHVYQII | 2646 | >ITK-L582V-r RVASTHVYQII | 262   | 2384  |
| >ITK-L582V-v RLASTHVY    | 35   | >ITK-L582V-r RVASTHVY    | 47    | 12    |
| >ITK-L582V-v RLASTHVYQII | 164  | >ITK-L582V-r RVASTHVYQII | 461   | 297   |
| >ITK-L582V-v RLASTHVY    | 132  | >ITK-L582V-r RVASTHVY    | 872   | 740   |
| >ITK-L582V-v RLASTHVY    | 16   | >ITK-L582V-r RVASTHVY    | 108   | 92    |
| >ITK-L582V-v RLASTHVYQI  | 247  | >ITK-L582V-r RVASTHVYQI  | 1287  | 1040  |
| >ITK-L582V-v RLASTHVYQII | 22   | >ITK-L582V-r RVASTHVYQII | 136   | 114   |
| >ITK-L582V-v RLASTHVY    | 140  | >ITK-L582V-r RVASTHVY    | 24    | 116   |
| >ITK-L582V-v RLASTHVYQI  | 3208 | >ITK-L582V-r RVASTHVYQI  | 446   | 2762  |
| >ITK-L582V-v RLASTHVY    | 1605 | >ITK-L582V-r RVASTHVY    | 326   | 1279  |
| >ITK-L582V-v RLASTHVY    | 192  | >ITK-L582V-r RVASTHVY    | 39    | 153   |
| >ITK-L582V-v RLASTHVYQI  | 493  | >ITK-L582V-r RVASTHVYQI  | 69    | 424   |
| >ITK-L582V-v RLASTHVYQII | 822  | >ITK-L582V-r RVASTHVYQII | 92    | 730   |
| >ITK-L582V-v RLASTHVY    | 107  | >ITK-L582V-r RVASTHVY    | 36    | 71    |
| >ITK-L582V-v RLASTHVYQII | 111  | >ITK-L582V-r RVASTHVYQII | 19    | 92    |
| >ITK-L582V-v RLASTHVY    | 116  | >ITK-L582V-r RVASTHVY    | 51    | 65    |
| >ITK-L582V-v RLASTHVY    | 203  | >ITK-L582V-r RVASTHVY    | 357   | 154   |
| >ITK-L582V-v RLASTHVYQI  | 9791 | >ITK-L582V-r RVASTHVYQI  | 393   | 9398  |
| >ITK-L582V-v STGFRLYKPRI | 259  | >ITK-L582V-r STGFRLYKPR\ | 842   | 583   |
| >ITK-L582V-v STGFRLYKPRI | 2994 | >ITK-L582V-r STGFRLYKPR\ | 207   | 2787  |
| >ITK-L582V-v STGFRLYKPRI | 5759 | >ITK-L582V-r STGFRLYKPR\ | 372   | 5387  |
| >ITK-L582V-v STGFRLYKPRI | 2440 | >ITK-L582V-r STGFRLYKPR\ | 199   | 2241  |
| >ITK-L582V-v STGFRLYKPRI | 281  | >ITK-L582V-r STGFRLYKPR\ | 4982  | 4701  |
| >ITK-L582V-v PRLASTHVY   | 164  | >ITK-L582V-r PRVASTHVY   | 233   | 69    |
| >ITK-L582V-v KPRLASTH    | 70   | >ITK-L582V-r KPRVASTH    | 94    | 24    |
| >ITK-L582V-v KPRLASTHV   | 13   | >ITK-L582V-r KPRVASTHV   | 13    | 0     |
| >ITK-L582V-v KPRLASTHVY  | 241  | >ITK-L582V-r KPRVASTHVY  | 220   | 21    |

|                          |       |                          |      |       |
|--------------------------|-------|--------------------------|------|-------|
| >ITK-L582V-v KPRLASTHVY  | 311   | >ITK-L582V-r KPRVASTHVY  | 418  | 107   |
| >ITK-L582V-v KPRLASTHVY  | 450   | >ITK-L582V-r KPRVASTHVY  | 197  | 253   |
| >ITK-L582V-v KPRLASTHVY  | 37    | >ITK-L582V-r KPRVASTHVY  | 27   | 10    |
| >ITK-L582V-v YKPRLASTHV  | 202   | >ITK-L582V-r YKPRVASTHV  | 169  | 33    |
| >ITK-L582V-v YKPRLASTHV  | 11    | >ITK-L582V-r YKPRVASTHV  | 11   | 0     |
| >ITK-L582V-v LYKPRLASTH  | 92    | >ITK-L582V-r LYKPRVASTH  | 91   | 1     |
| >ITK-L582V-v LYKPRLASTH  | 467   | >ITK-L582V-r LYKPRVASTH  | 448  | 19    |
| >ITK-L582V-v LYKPRLAS    | 473   | >ITK-L582V-r LYKPRVAS    | 772  | 299   |
| >ITK-L582V-v LYKPRLASTH  | 75    | >ITK-L582V-r LYKPRVASTH  | 69   | 6     |
| >ITK-L582V-v RLYKPRLAST  | 339   | >ITK-L582V-r RLYKPRVAST  | 642  | 303   |
| >ITK-L582V-v RLYKPRLA    | 57    | >ITK-L582V-r RLYKPRVA    | 118  | 61    |
| >ITK-L582V-v RLYKPRLAST  | 32    | >ITK-L582V-r RLYKPRVAST  | 54   | 22    |
| >ITK-L582V-v RLYKPRLA    | 32    | >ITK-L582V-r RLYKPRVA    | 30   | 2     |
| >ITK-L582V-v RLYKPRLAST  | 76    | >ITK-L582V-r RLYKPRVAST  | 52   | 24    |
| >ITK-L582V-v RLYKPRLA    | 449   | >ITK-L582V-r RLYKPRVA    | 628  | 179   |
| >ITK-L582V-v RLYKPRLA    | 97    | >ITK-L582V-r RLYKPRVA    | 134  | 37    |
| >ITK-L582V-v RLYKPRLAST  | 68    | >ITK-L582V-r RLYKPRVAST  | 56   | 12    |
| >ITK-L582V-v RLYKPRLASTH | 46    | >ITK-L582V-r RLYKPRVASTH | 48   | 2     |
| >ITK-L582V-v RLYKPRLASTH | 625   | >ITK-L582V-r RLYKPRVASTH | 453  | 172   |
| >ITK-L582V-v RLYKPRLAS   | 901   | >ITK-L582V-r RLYKPRVAS   | 464  | 437   |
| >ITK-L582V-v RLYKPRLASTH | 250   | >ITK-L582V-r RLYKPRVASTH | 198  | 52    |
| >ITK-L582V-v RLYKPRLASTH | 118   | >ITK-L582V-r RLYKPRVASTH | 147  | 29    |
| >ITK-L582V-v FRLYKPRL    | 82    | >ITK-L582V-r FRLYKPRV    | 214  | 132   |
| >ITK-L582V-v FRLYKPRLA   | 395   | >ITK-L582V-r FRLYKPRVA   | 717  | 322   |
| >ITK-L582V-v FRLYKPRL    | 363   | >ITK-L582V-r FRLYKPRV    | 3619 | 3256  |
| >ITK-L582V-v FRLYKPRL    | 287   | >ITK-L582V-r FRLYKPRV    | 1590 | 1303  |
| >ITK-L582V-v GFRLYKPRLA  | 203   | >ITK-L582V-r GFRLYKPRVA  | 380  | 177   |
| >ITK-P159L-v PTPEDNRR    | 4314  | >ITK-P159L-n LTPEDNRR    | 197  | 4117  |
| >ITK-P159L-v PTPEDNRRPL  | 7704  | >ITK-P159L-n LTPEDNRRPL  | 451  | 7253  |
| >ITK-P159L-v PTPEDNRRPL  | 4866  | >ITK-P159L-n LTPEDNRRPL  | 243  | 4623  |
| >ITK-P159L-v PTPEDNRRPL  | 3914  | >ITK-P159L-n LTPEDNRRPL  | 160  | 3754  |
| >ITK-P159L-v PTPEDNRRPL  | 98    | >ITK-P159L-n LTPEDNRRPL  | 7    | 91    |
| >ITK-P159L-v PTPEDNRRPL  | 471   | >ITK-P159L-n LTPEDNRRPL  | 37   | 434   |
| >ITK-P159L-v PPTPEDNRRF  | 35749 | >ITK-P159L-n PLTPEDNRRP  | 162  | 35587 |
| >ITK-P159L-v PPTPEDNRRF  | 381   | >ITK-P159L-n PLTPEDNRRP  | 8269 | 7888  |
| >ITK-P159L-v TKNASKKPLP  | 3013  | >ITK-P159L-n TKNASKKPLP  | 71   | 2942  |
| >ITK-P159L-v TKNASKKPLP  | 19817 | >ITK-P159L-n TKNASKKPLP  | 93   | 19724 |
| >ITK-P159L-v KPLPPTPEDN  | 128   | >ITK-P159L-n KPLPLTPEDN  | 80   | 48    |
| >ITK-P159L-v ASKKPLPP    | 421   | >ITK-P159L-n ASKKPLPL    | 27   | 394   |
| >ITK-P159L-v ASKKPLPPT   | 101   | >ITK-P159L-n ASKKPLPLT   | 289  | 188   |
| >ITK-P159L-v ASKKPLPPTP  | 365   | >ITK-P159L-n ASKKPLPLTP  | 641  | 276   |
| >ITK-P159L-v ASKKPLPP    | 7592  | >ITK-P159L-n ASKKPLPL    | 382  | 7210  |
| >ITK-P159L-v ASKKPLPP    | 18074 | >ITK-P159L-n ASKKPLPL    | 24   | 18050 |

|                          |       |                          |       |       |
|--------------------------|-------|--------------------------|-------|-------|
| >ITK-P159L-v ASKKPLPP    | 28662 | >ITK-P159L-n ASKKPLPL    | 457   | 28205 |
| >ITK-P159L-v NASKKPLPP   | 8130  | >ITK-P159L-n NASKKPLPL   | 117   | 8013  |
| >ITK-P23L-wi PSNFKVRFFV  | 2583  | >ITK-P23L-mi LSNFKVRFFV  | 102   | 2481  |
| >ITK-P23L-wi PSNFKVRF    | 13973 | >ITK-P23L-mi LSNFKVRF    | 427   | 13546 |
| >ITK-P23L-wi PSNFKVRF    | 13024 | >ITK-P23L-mi LSNFKVRF    | 441   | 12583 |
| >ITK-P23L-wi PSNFKVRF    | 2998  | >ITK-P23L-mi LSNFKVRF    | 315   | 2683  |
| >ITK-P23L-wi PSNFKVRF    | 3225  | >ITK-P23L-mi LSNFKVRF    | 368   | 2857  |
| >ITK-P23L-wi PSNFKVRF    | 1063  | >ITK-P23L-mi LSNFKVRF    | 8     | 1055  |
| >ITK-P23L-wi PSNFKVRF    | 1575  | >ITK-P23L-mi LSNFKVRF    | 8     | 1567  |
| >ITK-P23L-wi PSNFKVRFFV  | 6506  | >ITK-P23L-mi LSNFKVRFFV  | 71    | 6435  |
| >ITK-P23L-wi PSNFKVRF    | 14463 | >ITK-P23L-mi LSNFKVRF    | 296   | 14167 |
| >ITK-P23L-wi PSNFKVRF    | 11851 | >ITK-P23L-mi LSNFKVRF    | 336   | 11515 |
| >ITK-P23L-wi PSNFKVRFFV  | 5394  | >ITK-P23L-mi LSNFKVRFFV  | 200   | 5194  |
| >ITK-P23L-wi SPSNFKVRFF\ | 77    | >ITK-P23L-mi SLSNFKVRFF\ | 21423 | 21346 |
| >ITK-P23L-wi SPSNFKVRFF\ | 18784 | >ITK-P23L-mi SLSNFKVRFF\ | 16    | 18768 |
| >ITK-P23L-wi SPSNFKVRFF\ | 11725 | >ITK-P23L-mi SLSNFKVRFF\ | 4     | 11721 |
| >ITK-P23L-wi SPSNFKVRFF\ | 17725 | >ITK-P23L-mi SLSNFKVRFF\ | 16    | 17709 |
| >ITK-P23L-wi SPSNFKVRFF\ | 6446  | >ITK-P23L-mi SLSNFKVRFF\ | 42    | 6404  |
| >ITK-P23L-wi SPSNFKVRFF\ | 6425  | >ITK-P23L-mi SLSNFKVRFF\ | 3     | 6422  |
| >ITK-P23L-wi SPSNFKVRFF\ | 17481 | >ITK-P23L-mi SLSNFKVRFF\ | 11    | 17470 |
| >ITK-P23L-wi SPSNFKVRFF\ | 4656  | >ITK-P23L-mi SLSNFKVRFF\ | 5     | 4651  |
| >ITK-P23L-wi SPSNFKVRFF\ | 19787 | >ITK-P23L-mi SLSNFKVRFF\ | 11    | 19776 |
| >ITK-P23L-wi SPSNFKVRFF\ | 10462 | >ITK-P23L-mi SLSNFKVRFF\ | 2     | 10460 |
| >ITK-P23L-wi SPSNFKVRF   | 4573  | >ITK-P23L-mi SLSNFKVRF   | 97    | 4476  |
| >ITK-P23L-wi SPSNFKVRF   | 15932 | >ITK-P23L-mi SLSNFKVRF   | 163   | 15769 |
| >ITK-P23L-wi SPSNFKVRF   | 1342  | >ITK-P23L-mi SLSNFKVRF   | 283   | 1059  |
| >ITK-P23L-wi SPSNFKVRFF\ | 436   | >ITK-P23L-mi SLSNFKVRFF\ | 66    | 370   |
| >ITK-P23L-wi SPSNFKVRFF\ | 507   | >ITK-P23L-mi SLSNFKVRFF\ | 177   | 330   |
| >ITK-P23L-wi SPSNFKVRF   | 16049 | >ITK-P23L-mi SLSNFKVRF   | 438   | 15611 |
| >ITK-P23L-wi SPSNFKVRF   | 972   | >ITK-P23L-mi SLSNFKVRF   | 156   | 816   |
| >ITK-P23L-wi SPSNFKVRF   | 975   | >ITK-P23L-mi SLSNFKVRF   | 178   | 797   |
| >ITK-P23L-wi SPSNFKVRF   | 288   | >ITK-P23L-mi SLSNFKVRF   | 11335 | 11047 |
| >ITK-P23L-wi SPSNFKVRF   | 170   | >ITK-P23L-mi SLSNFKVRF   | 29439 | 29269 |
| >ITK-P23L-wi SPSNFKVRFF  | 3569  | >ITK-P23L-mi SLSNFKVRFF  | 320   | 3249  |
| >ITK-P23L-wi SPSNFKVRF   | 113   | >ITK-P23L-mi SLSNFKVRF   | 7076  | 6963  |
| >ITK-P23L-wi SPSNFKVRFF  | 96    | >ITK-P23L-mi SLSNFKVRFF  | 3441  | 3345  |
| >ITK-P23L-wi SPSNFKVRF   | 289   | >ITK-P23L-mi SLSNFKVRF   | 22798 | 22509 |
| >ITK-P23L-wi SPSNFKVRFF  | 380   | >ITK-P23L-mi SLSNFKVRFF  | 23260 | 22880 |
| >ITK-P23L-wi SPSNFKVRF   | 438   | >ITK-P23L-mi SLSNFKVRF   | 165   | 273   |
| >ITK-P23L-wi KKSQQKRRTS  | 1925  | >ITK-P23L-mi KKSQQKRRTS  | 70    | 1855  |
| >ITK-P23L-wi TSPSNFKVRFI | 156   | >ITK-P23L-mi TSLSNFKVRFI | 23157 | 23001 |
| >ITK-P23L-wi TSPSNFKVRFI | 148   | >ITK-P23L-mi TSLSNFKVRFI | 110   | 38    |
| >ITK-P23L-wi TSPSNFKVRF  | 771   | >ITK-P23L-mi TSLSNFKVRF  | 50    | 721   |

|                          |      |                          |       |       |
|--------------------------|------|--------------------------|-------|-------|
| >ITK-P23L-wi TSPSNFKVR   | 279  | >ITK-P23L-mi TSLSNFKVR   | 184   | 95    |
| >ITK-P23L-wi TSPSNFKV    | 41   | >ITK-P23L-mi TSLSNFKV    | 182   | 141   |
| >ITK-P23L-wi TSPSNFKV    | 1546 | >ITK-P23L-mi TSLSNFKV    | 34    | 1512  |
| >ITK-P23L-wi TSPSNFKVRF  | 567  | >ITK-P23L-mi TSLSNFKVRF  | 46    | 521   |
| >ITK-P23L-wi TSPSNFKVRFI | 649  | >ITK-P23L-mi TSLSNFKVRFI | 67    | 582   |
| >ITK-P23L-wi TSPSNFKVRF  | 734  | >ITK-P23L-mi TSLSNFKVRF  | 14    | 720   |
| >ITK-P23L-wi TSPSNFKVRFI | 716  | >ITK-P23L-mi TSLSNFKVRFI | 17    | 699   |
| >ITK-P23L-wi TSPSNFKV    | 20   | >ITK-P23L-mi TSLSNFKV    | 9358  | 9338  |
| >ITK-P23L-wi TSPSNFKVR   | 258  | >ITK-P23L-mi TSLSNFKVR   | 22404 | 22146 |
| >ITK-P23L-wi TSPSNFKVRF  | 8    | >ITK-P23L-mi TSLSNFKVRF  | 4084  | 4076  |
| >ITK-P23L-wi TSPSNFKVRFI | 4    | >ITK-P23L-mi TSLSNFKVRFI | 1432  | 1428  |
| >ITK-P23L-wi TSPSNFKVRF  | 245  | >ITK-P23L-mi TSLSNFKVRF  | 253   | 8     |
| >ITK-P23L-wi TSPSNFKVRFI | 2739 | >ITK-P23L-mi TSLSNFKVRFI | 158   | 2581  |
| >ITK-P23L-wi TSPSNFKVR   | 1108 | >ITK-P23L-mi TSLSNFKVR   | 103   | 1005  |
| >ITK-P23L-wi TSPSNFKVR   | 683  | >ITK-P23L-mi TSLSNFKVR   | 306   | 377   |
| >ITK-P23L-wi RTSPSNFKV   | 271  | >ITK-P23L-mi RTSLSNFKV   | 831   | 560   |
| >ITK-P23L-wi RTSPSNFKV   | 106  | >ITK-P23L-mi RTSLSNFKV   | 358   | 252   |
| >ITK-P23L-wi RTSPSNFKV   | 186  | >ITK-P23L-mi RTSLSNFKV   | 1541  | 1355  |
| >ITK-P23L-wi RTSPSNFKV   | 216  | >ITK-P23L-mi RTSLSNFKV   | 1475  | 1259  |
| >ITK-P23L-wi RTSPSNFKV   | 113  | >ITK-P23L-mi RTSLSNFKV   | 2337  | 2224  |
| >ITK-P23L-wi RTSPSNFK    | 37   | >ITK-P23L-mi RTSLSNFK    | 44    | 7     |
| >ITK-P23L-wi RTSPSNFK    | 9    | >ITK-P23L-mi RTSLSNFK    | 9     | 0     |
| >ITK-P23L-wi RTSPSNFKVR  | 316  | >ITK-P23L-mi RTSLSNFKVR  | 277   | 39    |
| >ITK-P23L-wi RTSPSNFKVR  | 252  | >ITK-P23L-mi RTSLSNFKVR  | 1071  | 819   |
| >ITK-P23L-wi RTSPSNFK    | 4    | >ITK-P23L-mi RTSLSNFK    | 5     | 1     |
| >ITK-P23L-wi RTSPSNFKV   | 69   | >ITK-P23L-mi RTSLSNFKV   | 187   | 118   |
| >ITK-P23L-wi RTSPSNFKVR  | 345  | >ITK-P23L-mi RTSLSNFKVR  | 762   | 417   |
| >ITK-P23L-wi RTSPSNFK    | 32   | >ITK-P23L-mi RTSLSNFK    | 38    | 6     |
| >ITK-P23L-wi RTSPSNFKVR  | 32   | >ITK-P23L-mi RTSLSNFKVR  | 22    | 10    |
| >ITK-P23L-wi RTSPSNFKVR  | 45   | >ITK-P23L-mi RTSLSNFKVR  | 47    | 2     |
| >ITK-P23L-wi RTSPSNFK    | 39   | >ITK-P23L-mi RTSLSNFK    | 32    | 7     |
| >ITK-P23L-wi RTSPSNFKVR  | 352  | >ITK-P23L-mi RTSLSNFKVR  | 547   | 195   |
| >ITK-P23L-wi RTSPSNFKV   | 52   | >ITK-P23L-mi RTSLSNFKV   | 211   | 159   |
| >ITK-P23L-wi RTSPSNFKV   | 198  | >ITK-P23L-mi RTSLSNFKV   | 600   | 402   |
| >ITK-P23L-wi RTSPSNFKVR  | 314  | >ITK-P23L-mi RTSLSNFKVR  | 975   | 661   |
| >ITK-P23L-wi RTSPSNFKVR  | 60   | >ITK-P23L-mi RTSLSNFKVR  | 152   | 92    |
| >ITK-P23L-wi RTSPSNFKV   | 7    | >ITK-P23L-mi RTSLSNFKV   | 12    | 5     |
| >ITK-P23L-wi RTSPSNFKVR  | 2    | >ITK-P23L-mi RTSLSNFKVR  | 3     | 1     |
| >ITK-P23L-wi RTSPSNFKVR  | 50   | >ITK-P23L-mi RTSLSNFKVR  | 160   | 110   |
| >ITK-P23L-wi RTSPSNFKV   | 288  | >ITK-P23L-mi RTSLSNFKV   | 2008  | 1720  |
| >ITK-P23L-wi RTSPSNFKVR  | 19   | >ITK-P23L-mi RTSLSNFKVR  | 47    | 28    |
| >ITK-P23L-wi RTSPSNFKV   | 104  | >ITK-P23L-mi RTSLSNFKV   | 403   | 299   |
| >ITK-P23L-wi RTSPSNFKVR  | 195  | >ITK-P23L-mi RTSLSNFKVR  | 534   | 339   |

|                          |      |                          |      |      |
|--------------------------|------|--------------------------|------|------|
| >ITK-P23L-wi RTSPSNFKV   | 165  | >ITK-P23L-mi RTSLSNFKV   | 439  | 274  |
| >ITK-P23L-wi RTSPSNFKVR  | 11   | >ITK-P23L-mi RTSLSNFKVR  | 23   | 12   |
| >ITK-P23L-wi RTSPSNFK    | 365  | >ITK-P23L-mi RTSLSNFK    | 528  | 163  |
| >ITK-P23L-wi RTSPSNFKVR  | 257  | >ITK-P23L-mi RTSLSNFKVR  | 482  | 225  |
| >ITK-P23L-wi RTSPSNFKVR  | 119  | >ITK-P23L-mi RTSLSNFKVR  | 126  | 7    |
| >ITK-P23L-wi RTSPSNFKV   | 175  | >ITK-P23L-mi RTSLSNFKV   | 727  | 552  |
| >ITK-P23L-wi RRTSPSNFK   | 257  | >ITK-P23L-mi RRTSLSNFK   | 203  | 54   |
| >ITK-P23L-wi RRTSPSNF    | 5    | >ITK-P23L-mi RRTSLSNF    | 12   | 7    |
| >ITK-P23L-wi RRTSPSNFKV  | 340  | >ITK-P23L-mi RRTSLSNFKV  | 689  | 349  |
| >ITK-P23L-wi RRTSPSNFKV  | 401  | >ITK-P23L-mi RRTSLSNFKV  | 682  | 281  |
| >ITK-P23L-wi RRTSPSNF    | 114  | >ITK-P23L-mi RRTSLSNF    | 41   | 73   |
| >ITK-P23L-wi RRTSPSNFK   | 177  | >ITK-P23L-mi RRTSLSNFK   | 45   | 132  |
| >ITK-P23L-wi RRTSPSNFKV  | 93   | >ITK-P23L-mi RRTSLSNFKV  | 46   | 47   |
| >ITK-P23L-wi RRTSPSNFKV  | 141  | >ITK-P23L-mi RRTSLSNFKV  | 48   | 93   |
| >ITK-P23L-wi RRTSPSNF    | 246  | >ITK-P23L-mi RRTSLSNF    | 59   | 187  |
| >ITK-P23L-wi RRTSPSNFK   | 401  | >ITK-P23L-mi RRTSLSNFK   | 159  | 242  |
| >ITK-P23L-wi RRTSPSNFKV  | 432  | >ITK-P23L-mi RRTSLSNFKV  | 508  | 76   |
| >ITK-P23L-wi RRTSPSNFKV  | 445  | >ITK-P23L-mi RRTSLSNFKV  | 258  | 187  |
| >ITK-P23L-wi RRTSPSNF    | 198  | >ITK-P23L-mi RRTSLSNF    | 51   | 147  |
| >ITK-P23L-wi RRTSPSNFK   | 366  | >ITK-P23L-mi RRTSLSNFK   | 73   | 293  |
| >ITK-P23L-wi RRTSPSNFKV  | 266  | >ITK-P23L-mi RRTSLSNFKV  | 212  | 54   |
| >ITK-P23L-wi RRTSPSNFKV  | 266  | >ITK-P23L-mi RRTSLSNFKV  | 123  | 143  |
| >ITK-P23L-wi KRRTSPSNFK  | 4    | >ITK-P23L-mi KRRTSLSNFK  | 4    | 0    |
| >ITK-P23L-wi KRRTSPSNFK' | 105  | >ITK-P23L-mi KRRTSLSNFK\ | 135  | 30   |
| >ITK-P23L-wi KRRTSPSNF   | 2    | >ITK-P23L-mi KRRTSLSNF   | 3    | 1    |
| >ITK-P23L-wi KRRTSPSNFK  | 285  | >ITK-P23L-mi KRRTSLSNFK  | 540  | 255  |
| >ITK-P23L-wi KRRTSPSNFK' | 68   | >ITK-P23L-mi KRRTSLSNFK\ | 125  | 57   |
| >ITK-P23L-wi KRRTSPSNFK  | 130  | >ITK-P23L-mi KRRTSLSNFK  | 84   | 46   |
| >ITK-P23L-wi KRRTSPSNFK' | 568  | >ITK-P23L-mi KRRTSLSNFK\ | 401  | 167  |
| >ITK-P23L-wi KRRTSPSNF   | 320  | >ITK-P23L-mi KRRTSLSNF   | 131  | 189  |
| >ITK-P23L-wi KRRTSPSN    | 362  | >ITK-P23L-mi KRRTSLSN    | 311  | 51   |
| >ITK-P23L-wi KRRTSPSNF   | 77   | >ITK-P23L-mi KRRTSLSNF   | 82   | 5    |
| >ITK-P23L-wi KRRTSPSNFK  | 143  | >ITK-P23L-mi KRRTSLSNFK  | 137  | 6    |
| >ITK-P23L-wi KRRTSPSNFK' | 100  | >ITK-P23L-mi KRRTSLSNFK\ | 99   | 1    |
| >ITK-P23L-wi KRRTSPSNF   | 81   | >ITK-P23L-mi KRRTSLSNF   | 75   | 6    |
| >ITK-P23L-wi KRRTSPSNFK  | 328  | >ITK-P23L-mi KRRTSLSNFK  | 191  | 137  |
| >ITK-P23L-wi QKRRTSPSNF  | 7    | >ITK-P23L-mi QKRRTSLSNF  | 7    | 0    |
| >ITK-P23L-wi QKRRTSPS    | 302  | >ITK-P23L-mi QKRRTSLS    | 1177 | 875  |
| >ITK-P23L-wi QKRRTSPSNF  | 2    | >ITK-P23L-mi QKRRTSLSNF  | 2    | 0    |
| >ITK-P23L-wi QKRRTSPSNF  | 185  | >ITK-P23L-mi QKRRTSLSNF  | 234  | 49   |
| >ITK-P23L-wi QQKRRTSP    | 3668 | >ITK-P23L-mi QQKRRTSL    | 42   | 3626 |
| >ITK-P23L-wi QQKRRTSP    | 6159 | >ITK-P23L-mi QQKRRTSL    | 336  | 5823 |
| >ITK-P23L-wi QQKRRTSPSN  | 77   | >ITK-P23L-mi QQKRRTSLSN  | 60   | 17   |

|                         |       |                         |       |       |
|-------------------------|-------|-------------------------|-------|-------|
| >ITK-P23L-wi QQKRRTSPSN | 180   | >ITK-P23L-mi QQKRRTSLSN | 256   | 76    |
| >ITK-P23L-wi QQKRRTSP   | 1697  | >ITK-P23L-mi QQKRRTSL   | 36    | 1661  |
| >ITK-P23L-wi QQKRRTSPSN | 3     | >ITK-P23L-mi QQKRRTSLSN | 3     | 0     |
| >ITK-P23L-wi SQQKRRTSP  | 15512 | >ITK-P23L-mi SQQKRRTSL  | 148   | 15364 |
| >ITK-P23L-wi SQQKRRTSP  | 3454  | >ITK-P23L-mi SQQKRRTSL  | 35    | 3419  |
| >ITK-P23L-wi SQQKRRTSP  | 5816  | >ITK-P23L-mi SQQKRRTSL  | 280   | 5536  |
| >ITK-P23L-wi SQQKRRTSP  | 3501  | >ITK-P23L-mi SQQKRRTSL  | 81    | 3420  |
| >ITK-P23L-wi SQQKRRTSP  | 13329 | >ITK-P23L-mi SQQKRRTSL  | 128   | 13201 |
| >ITK-P23L-wi KSQQKRRTSF | 11735 | >ITK-P23L-mi KSQQKRRTSL | 225   | 11510 |
| >ITK-P23L-wi KSQQKRRTSF | 18031 | >ITK-P23L-mi KSQQKRRTSL | 26    | 18005 |
| >ITK-R19K-w RRTSPSNFK   | 257   | >ITK-R19K-m KRTSPSNFK   | 292   | 35    |
| >ITK-R19K-w RRTSPSNF    | 5     | >ITK-R19K-m KRTSPSNF    | 7     | 2     |
| >ITK-R19K-w RRTSPSNFKV  | 340   | >ITK-R19K-m KRTSPSNFKV  | 672   | 332   |
| >ITK-R19K-w RRTSPSNFKV  | 401   | >ITK-R19K-m KRTSPSNFKV  | 784   | 383   |
| >ITK-R19K-w RRTSPSNF    | 114   | >ITK-R19K-m KRTSPSNF    | 472   | 358   |
| >ITK-R19K-w RRTSPSNFK   | 177   | >ITK-R19K-m KRTSPSNFK   | 813   | 636   |
| >ITK-R19K-w RRTSPSNFKV  | 93    | >ITK-R19K-m KRTSPSNFKV  | 645   | 552   |
| >ITK-R19K-w RRTSPSNFKV  | 141   | >ITK-R19K-m KRTSPSNFKV  | 564   | 423   |
| >ITK-R19K-w RRTSPSNF    | 246   | >ITK-R19K-m KRTSPSNF    | 877   | 631   |
| >ITK-R19K-w RRTSPSNFK   | 401   | >ITK-R19K-m KRTSPSNFK   | 1187  | 786   |
| >ITK-R19K-w RRTSPSNFKV  | 432   | >ITK-R19K-m KRTSPSNFKV  | 1586  | 1154  |
| >ITK-R19K-w RRTSPSNFKV  | 445   | >ITK-R19K-m KRTSPSNFKV  | 1274  | 829   |
| >ITK-R19K-w RRTSPSNF    | 198   | >ITK-R19K-m KRTSPSNF    | 996   | 798   |
| >ITK-R19K-w RRTSPSNFK   | 366   | >ITK-R19K-m KRTSPSNFK   | 1773  | 1407  |
| >ITK-R19K-w RRTSPSNFKV  | 266   | >ITK-R19K-m KRTSPSNFKV  | 1398  | 1132  |
| >ITK-R19K-w RRTSPSNFKV  | 266   | >ITK-R19K-m KRTSPSNFKV  | 191   | 75    |
| >ITK-R19K-w KRRTSPSNFK  | 4     | >ITK-R19K-m KKRTSPSNFK  | 4     | 0     |
| >ITK-R19K-w KRRTSPSNFK' | 105   | >ITK-R19K-m KKRTSPSNFK' | 95    | 10    |
| >ITK-R19K-w KRRTSPSN    | 1732  | >ITK-R19K-m KKRTSPSN    | 304   | 1428  |
| >ITK-R19K-w KRRTSPSNF   | 2     | >ITK-R19K-m KKRTSPSNF   | 2     | 0     |
| >ITK-R19K-w KRRTSPSNFK  | 285   | >ITK-R19K-m KKRTSPSNFK  | 54    | 231   |
| >ITK-R19K-w KRRTSPSNFK' | 68    | >ITK-R19K-m KKRTSPSNFK' | 15    | 53    |
| >ITK-R19K-w KRRTSPSNFK  | 130   | >ITK-R19K-m KKRTSPSNFK  | 8825  | 8695  |
| >ITK-R19K-w KRRTSPSNF   | 320   | >ITK-R19K-m KKRTSPSNF   | 305   | 15    |
| >ITK-R19K-w KRRTSPSN    | 362   | >ITK-R19K-m KKRTSPSN    | 11283 | 10921 |
| >ITK-R19K-w KRRTSPSNF   | 77    | >ITK-R19K-m KKRTSPSNF   | 2365  | 2288  |
| >ITK-R19K-w KRRTSPSNFK  | 143   | >ITK-R19K-m KKRTSPSNFK  | 3932  | 3789  |
| >ITK-R19K-w KRRTSPSNFK' | 100   | >ITK-R19K-m KKRTSPSNFK' | 3313  | 3213  |
| >ITK-R19K-w KRRTSPSNF   | 81    | >ITK-R19K-m KKRTSPSNF   | 5100  | 5019  |
| >ITK-R19K-w KRRTSPSNFK  | 328   | >ITK-R19K-m KKRTSPSNFK  | 9948  | 9620  |
| >ITK-R19K-w QKRRTSPSNF  | 7     | >ITK-R19K-m QKKRTSPSNF  | 18    | 11    |
| >ITK-R19K-w QKRRTSPS    | 302   | >ITK-R19K-m QKKRTSPS    | 615   | 313   |
| >ITK-R19K-w QKRRTSPSNF  | 2     | >ITK-R19K-m QKKRTSPSNF  | 2     | 0     |



|                                     |      |                                     |       |       |
|-------------------------------------|------|-------------------------------------|-------|-------|
| >ITK-R19K-w QKRRTSPSNF              | 185  | >ITK-R19K-m QKKRTSPSNF              | 377   | 192   |
| >ITK-R19K-w QQKRRTSPSN              | 77   | >ITK-R19K-m QQKKRTSPSN              | 64    | 13    |
| >ITK-R19K-w QQKRRTSPSN              | 180  | >ITK-R19K-m QQKKRTSPSN              | 127   | 53    |
| >ITK-R19K-w QQKRRTSPSN              | 3    | >ITK-R19K-m QQKKRTSPSN              | 3     | 0     |
| >ITK-R19K-w KKSQQKRR                | 255  | >ITK-R19K-m KKSQQKRR                | 231   | 24    |
| >ITK-R19K-w IKKSQQKR                | 276  | >ITK-R19K-m IKKSQQKK                | 336   | 60    |
| >ITK-R19K-w LIKKSQQKR               | 6562 | >ITK-R19K-m LIKKSQQKK               | 288   | 6274  |
| >ITK-R19K-w LIKKSQQKR               | 1229 | >ITK-R19K-m LIKKSQQKK               | 17    | 1212  |
| >ITK-R19K-w LIKKSQQKR               | 82   | >ITK-R19K-m LIKKSQQKK               | 2116  | 2034  |
| >ITK-R19K-w LIKKSQQKRR              | 267  | >ITK-R19K-m LIKKSQQKRR              | 324   | 57    |
| >ITK-R19K-w QLIKKSQQKR              | 4997 | >ITK-R19K-m QLIKKSQQKK              | 263   | 4734  |
| >ITK-R19K-w QLIKKSQQKR              | 193  | >ITK-R19K-m QLIKKSQQKK              | 3302  | 3109  |
| >ITK-R19K-w QLIKKSQQKR              | 449  | >ITK-R19K-m QLIKKSQQKK              | 10942 | 10493 |
| >ITK-R19K-w QLIKKSQQKR              | 333  | >ITK-R19K-m QLIKKSQQKK              | 297   | 36    |
| >ITK-R451Q- <sup>1</sup> RGLFAAETL  | 157  | >ITK-R451Q- <sup>1</sup> QGLFAAETL  | 4783  | 4626  |
| >ITK-R451Q- <sup>1</sup> QRGLFAAETL | 345  | >ITK-R451Q- <sup>1</sup> QQGLFAAETL | 16648 | 16303 |
| >ITK-R451Q- <sup>1</sup> QRGLFAAETL | 317  | >ITK-R451Q- <sup>1</sup> QQGLFAAETL | 6428  | 6111  |
| >ITK-R451Q- <sup>1</sup> QRGLFAAETL | 103  | >ITK-R451Q- <sup>1</sup> QQGLFAAETL | 3305  | 3202  |
| >ITK-R451Q- <sup>1</sup> TQRGLFAA   | 65   | >ITK-R451Q- <sup>1</sup> TQQGLFAA   | 18    | 47    |
| >ITK-R451Q- <sup>1</sup> TQRGLFAAET | 318  | >ITK-R451Q- <sup>1</sup> TQQGLFAAET | 71    | 247   |
| >ITK-R451Q- <sup>1</sup> TQRGLFAAET | 202  | >ITK-R451Q- <sup>1</sup> TQQGLFAAET | 395   | 193   |
| >ITK-R451Q- <sup>1</sup> TQRGLFAAET | 380  | >ITK-R451Q- <sup>1</sup> TQQGLFAAET | 1478  | 1098  |
| >ITK-R451Q- <sup>1</sup> TQRGLFAAET | 337  | >ITK-R451Q- <sup>1</sup> TQQGLFAAET | 51    | 286   |
| >ITK-R451Q- <sup>1</sup> TQRGLFAA   | 1009 | >ITK-R451Q- <sup>1</sup> TQQGLFAA   | 336   | 673   |
| >ITK-R451Q- <sup>1</sup> RTQRGLFAA  | 75   | >ITK-R451Q- <sup>1</sup> RTQQGLFAA  | 62    | 13    |
| >ITK-R451Q- <sup>1</sup> RTQRGLFA   | 17   | >ITK-R451Q- <sup>1</sup> RTQQGLFA   | 84    | 67    |
| >ITK-R451Q- <sup>1</sup> RTQRGLFAA  | 38   | >ITK-R451Q- <sup>1</sup> RTQQGLFAA  | 439   | 401   |
| >ITK-R451Q- <sup>1</sup> RTQRGLFAAE | 652  | >ITK-R451Q- <sup>1</sup> RTQQGLFAAI | 157   | 495   |
| >ITK-R451Q- <sup>1</sup> LRTQRGLF   | 383  | >ITK-R451Q- <sup>1</sup> LRTQQGLF   | 343   | 40    |
| >ITK-R451Q- <sup>1</sup> LRTQRGLF   | 134  | >ITK-R451Q- <sup>1</sup> LRTQQGLF   | 174   | 40    |
| >ITK-R451Q- <sup>1</sup> LRTQRGLF   | 593  | >ITK-R451Q- <sup>1</sup> LRTQQGLF   | 233   | 360   |
| >ITK-R451Q- <sup>1</sup> YLRTQRGLFA | 659  | >ITK-R451Q- <sup>1</sup> YLRTQQGLFA | 448   | 211   |
| >ITK-R451Q- <sup>1</sup> YLRTQRGLFA | 480  | >ITK-R451Q- <sup>1</sup> YLRTQQGLFA | 279   | 201   |
| >ITK-R451Q- <sup>1</sup> YLRTQRGL   | 192  | >ITK-R451Q- <sup>1</sup> YLRTQQGL   | 40    | 152   |
| >ITK-R451Q- <sup>1</sup> YLRTQRGLFA | 307  | >ITK-R451Q- <sup>1</sup> YLRTQQGLFA | 240   | 67    |
| >ITK-R451Q- <sup>1</sup> YLRTQRGLFA | 208  | >ITK-R451Q- <sup>1</sup> YLRTQQGLFA | 90    | 118   |
| >ITK-R451Q- <sup>1</sup> YLRTQRGL   | 47   | >ITK-R451Q- <sup>1</sup> YLRTQQGL   | 22    | 25    |
| >ITK-R451Q- <sup>1</sup> YLRTQRGLFA | 142  | >ITK-R451Q- <sup>1</sup> YLRTQQGLFA | 160   | 18    |
| >ITK-R451Q- <sup>1</sup> YLRTQRGLFA | 14   | >ITK-R451Q- <sup>1</sup> YLRTQQGLFA | 9     | 5     |
| >ITK-R451Q- <sup>1</sup> YLRTQRGLFA | 262  | >ITK-R451Q- <sup>1</sup> YLRTQQGLFA | 211   | 51    |
| >ITK-R451Q- <sup>1</sup> YLRTQRGL   | 206  | >ITK-R451Q- <sup>1</sup> YLRTQQGL   | 50    | 156   |
| >ITK-R451Q- <sup>1</sup> YLRTQRGLFA | 683  | >ITK-R451Q- <sup>1</sup> YLRTQQGLFA | 287   | 396   |
| >ITK-R451Q- <sup>1</sup> YLRTQRGLFA | 171  | >ITK-R451Q- <sup>1</sup> YLRTQQGLFA | 72    | 99    |

|                        |      |                        |       |       |
|------------------------|------|------------------------|-------|-------|
| >ITK-R451Q-YLRTQRGL    | 619  | >ITK-R451Q-YLRTQQGL    | 57    | 562   |
| >ITK-R451Q-YLRTQRGLFA  | 241  | >ITK-R451Q-YLRTQQGLFA  | 106   | 135   |
| >ITK-R451Q-YLRTQRGL    | 1582 | >ITK-R451Q-YLRTQQGL    | 167   | 1415  |
| >ITK-R451Q-YLRTQRGLFA  | 724  | >ITK-R451Q-YLRTQQGLFA  | 284   | 440   |
| >ITK-R451Q-YLRTQRGLFA  | 606  | >ITK-R451Q-YLRTQQGLFA  | 284   | 322   |
| >ITK-R451Q-YLRTQRGL    | 4199 | >ITK-R451Q-YLRTQQGL    | 355   | 3844  |
| >ITK-R451Q-YLRTQRGL    | 6    | >ITK-R451Q-YLRTQQGL    | 3     | 3     |
| >ITK-R451Q-YLRTQRGLFA  | 21   | >ITK-R451Q-YLRTQQGLFA  | 16    | 5     |
| >ITK-R451Q-YLRTQRGLFA  | 10   | >ITK-R451Q-YLRTQQGLFA  | 8     | 2     |
| >ITK-R451Q-YLRTQRGLF   | 789  | >ITK-R451Q-YLRTQQGLF   | 329   | 460   |
| >ITK-R451Q-YLRTQRGLFA  | 42   | >ITK-R451Q-YLRTQQGLFA  | 64    | 22    |
| >ITK-R451Q-YLRTQRGLFA  | 145  | >ITK-R451Q-YLRTQQGLFA  | 370   | 225   |
| >ITK-R451Q-YLRTQRGL    | 134  | >ITK-R451Q-YLRTQQGL    | 179   | 45    |
| >ITK-R451Q-YLRTQRGLFA  | 447  | >ITK-R451Q-YLRTQQGLFA  | 1031  | 584   |
| >ITK-R451Q-YLRTQRGLF   | 198  | >ITK-R451Q-YLRTQQGLF   | 214   | 16    |
| >ITK-R451Q-YLRTQRGLF   | 117  | >ITK-R451Q-YLRTQQGLF   | 86    | 31    |
| >ITK-R451Q-YLRTQRGL    | 897  | >ITK-R451Q-YLRTQQGL    | 476   | 421   |
| >ITK-R451Q-YLRTQRGLF   | 101  | >ITK-R451Q-YLRTQQGLF   | 140   | 39    |
| >ITK-R451Q-YLRTQRGLF   | 157  | >ITK-R451Q-YLRTQQGLF   | 180   | 23    |
| >ITK-R451Q-DYLRTQRGL   | 374  | >ITK-R451Q-DYLRTQQGL   | 120   | 254   |
| >ITK-R451Q-DYLRTQRGLF  | 25   | >ITK-R451Q-DYLRTQQGLF  | 40    | 15    |
| >ITK-R451Q-DYLRTQRGLF  | 109  | >ITK-R451Q-DYLRTQQGLF  | 150   | 41    |
| >ITK-R451Q-DYLRTQRGL   | 651  | >ITK-R451Q-DYLRTQQGL   | 188   | 463   |
| >ITK-R451Q-DYLRTQRGLF  | 41   | >ITK-R451Q-DYLRTQQGLF  | 29    | 12    |
| >ITK-R451Q-SDYLRTQRGL  | 307  | >ITK-R451Q-SDYLRTQQGL  | 415   | 108   |
| >ITK-R451Q-SDYLRTQRGL  | 241  | >ITK-R451Q-SDYLRTQQGL  | 251   | 10    |
| >ITK-R451Q-SDYLRTQRGL  | 436  | >ITK-R451Q-SDYLRTQQGL  | 501   | 65    |
| >ITK-R451Q-LSDYLRTRQ   | 124  | >ITK-R451Q-LSDYLRTRQ   | 16072 | 15948 |
| >ITK-R451Q-LSDYLRTRQ   | 189  | >ITK-R451Q-LSDYLRTRQ   | 16876 | 16687 |
| >ITK-R451Q-LSDYLRTRQG  | 241  | >ITK-R451Q-LSDYLRTRQC  | 140   | 101   |
| >ITK-R451Q-CLSDYLRTQR  | 7051 | >ITK-R451Q-CLSDYLRTQQ  | 253   | 6798  |
| >ITK-R451Q-CLSDYLRTQR  | 42   | >ITK-R451Q-CLSDYLRTQQ  | 14607 | 14565 |
| >ITK-R451Q-CLSDYLRTQR  | 380  | >ITK-R451Q-CLSDYLRTQQ  | 32952 | 32572 |
| >ITK-R451Q-CLSDYLRTQR  | 415  | >ITK-R451Q-CLSDYLRTQQ  | 25933 | 25518 |
| >JAK1-A634C AFFEAASMM  | 288  | >JAK1-A634C DFFEAASMM  | 4973  | 4685  |
| >JAK1-A634C AFFEAASMM  | 41   | >JAK1-A634C DFFEAASMM  | 272   | 231   |
| >JAK1-A634C AFFEAASMM  | 145  | >JAK1-A634C DFFEAASMM  | 20    | 125   |
| >JAK1-A634C AFFEAASMM  | 35   | >JAK1-A634C DFFEAASMM  | 14    | 21    |
| >JAK1-A634C AFFEAASM   | 1614 | >JAK1-A634C DFFEAASM   | 432   | 1182  |
| >JAK1-A634C AFFEAASMM  | 34   | >JAK1-A634C DFFEAASMM  | 491   | 457   |
| >JAK1-A634C AFFEAASMM  | 220  | >JAK1-A634C DFFEAASMM  | 594   | 374   |
| >JAK1-A634C AFFEAASMM  | 270  | >JAK1-A634C DFFEAASMM  | 174   | 96    |
| >JAK1-A634C LAFFEAASMM | 382  | >JAK1-A634C LDFFEAASMM | 17399 | 17017 |

|                        |     |                        |       |       |
|------------------------|-----|------------------------|-------|-------|
| >JAK1-A634C LAFFEAASMM | 250 | >JAK1-A634C LDFFEAASMM | 11627 | 11377 |
| >JAK1-A634C LAFFEAASMM | 314 | >JAK1-A634C LDFFEAASMM | 14225 | 13911 |
| >JAK1-A634C LAFFEAASMM | 5   | >JAK1-A634C LDFFEAASMM | 133   | 128   |
| >JAK1-A634C LAFFEAASM  | 161 | >JAK1-A634C LDFFEAASM  | 4599  | 4438  |
| >JAK1-A634C LAFFEAASMM | 419 | >JAK1-A634C LDFFEAASMM | 8048  | 7629  |
| >JAK1-A634C LAFFEAASM  | 107 | >JAK1-A634C LDFFEAASM  | 1572  | 1465  |
| >JAK1-A634C LAFFEAASMM | 105 | >JAK1-A634C LDFFEAASMM | 1323  | 1218  |
| >JAK1-A634C LAFFEAASM  | 9   | >JAK1-A634C LDFFEAASM  | 10765 | 10756 |
| >JAK1-A634C LAFFEAASMM | 10  | >JAK1-A634C LDFFEAASMM | 12211 | 12201 |
| >JAK1-A634C LAFFEAASM  | 40  | >JAK1-A634C LDFFEAASM  | 2808  | 2768  |
| >JAK1-A634C LAFFEAASM  | 64  | >JAK1-A634C LDFFEAASM  | 374   | 310   |
| >JAK1-A634C LAFFEAASMM | 99  | >JAK1-A634C LDFFEAASMM | 660   | 561   |
| >JAK1-A634C LAFFEAASM  | 396 | >JAK1-A634C LDFFEAASM  | 5210  | 4814  |
| >JAK1-A634C SLAFFEAA   | 126 | >JAK1-A634C SLDFFEAA   | 149   | 23    |
| >JAK1-A634C SLAFFEAASM | 458 | >JAK1-A634C SLDFFEAASM | 554   | 96    |
| >JAK1-A634C SLAFFEAASM | 477 | >JAK1-A634C SLDFFEAASM | 648   | 171   |
| >JAK1-A634C SLAFFEAA   | 7   | >JAK1-A634C SLDFFEAA   | 61    | 54    |
| >JAK1-A634C SLAFFEAAS  | 116 | >JAK1-A634C SLDFFEAAS  | 1615  | 1499  |
| >JAK1-A634C SLAFFEAASM | 32  | >JAK1-A634C SLDFFEAASM | 103   | 71    |
| >JAK1-A634C SLAFFEAASM | 29  | >JAK1-A634C SLDFFEAASM | 369   | 340   |
| >JAK1-A634C SLAFFEAA   | 17  | >JAK1-A634C SLDFFEAA   | 547   | 530   |
| >JAK1-A634C SLAFFEAASM | 175 | >JAK1-A634C SLDFFEAASM | 605   | 430   |
| >JAK1-A634C SLAFFEAASM | 110 | >JAK1-A634C SLDFFEAASM | 2544  | 2434  |
| >JAK1-A634C SLAFFEAA   | 248 | >JAK1-A634C SLDFFEAA   | 390   | 142   |
| >JAK1-A634C SLAFFEAA   | 32  | >JAK1-A634C SLDFFEAA   | 15    | 17    |
| >JAK1-A634C SLAFFEAASM | 128 | >JAK1-A634C SLDFFEAASM | 52    | 76    |
| >JAK1-A634C SLAFFEAASM | 97  | >JAK1-A634C SLDFFEAASM | 41    | 56    |
| >JAK1-A634C SLAFFEAA   | 360 | >JAK1-A634C SLDFFEAA   | 121   | 239   |
| >JAK1-A634C SLAFFEAASM | 553 | >JAK1-A634C SLDFFEAASM | 172   | 381   |
| >JAK1-A634C SLAFFEAA   | 79  | >JAK1-A634C SLDFFEAA   | 64    | 15    |
| >JAK1-A634C SLAFFEAASM | 377 | >JAK1-A634C SLDFFEAASM | 269   | 108   |
| >JAK1-A634C SLAFFEAASM | 189 | >JAK1-A634C SLDFFEAASM | 141   | 48    |
| >JAK1-A634C SLAFFEAASM | 432 | >JAK1-A634C SLDFFEAASM | 613   | 181   |
| >JAK1-A634C SLAFFEAA   | 20  | >JAK1-A634C SLDFFEAA   | 74    | 54    |
| >JAK1-A634C SLAFFEAASM | 62  | >JAK1-A634C SLDFFEAASM | 248   | 186   |
| >JAK1-A634C SLAFFEAASM | 108 | >JAK1-A634C SLDFFEAASM | 410   | 302   |
| >JAK1-A634C SLAFFEAA   | 335 | >JAK1-A634C SLDFFEAA   | 7103  | 6768  |
| >JAK1-A634C SLAFFEAASM | 261 | >JAK1-A634C SLDFFEAASM | 6608  | 6347  |
| >JAK1-A634C SLAFFEAASM | 489 | >JAK1-A634C SLDFFEAASM | 3047  | 2558  |
| >JAK1-A634C SLAFFEAASM | 45  | >JAK1-A634C SLDFFEAASM | 174   | 129   |
| >JAK1-A634C SLAFFEAASM | 43  | >JAK1-A634C SLDFFEAASM | 137   | 94    |
| >JAK1-A634C ISLAFEEA   | 401 | >JAK1-A634C ISLDFFEA   | 865   | 464   |
| >JAK1-A634C ISLAFEEA   | 206 | >JAK1-A634C ISLDFFEA   | 140   | 66    |

|                         |       |                         |       |       |
|-------------------------|-------|-------------------------|-------|-------|
| >JAK1-A634C ISLAFFEAASN | 86    | >JAK1-A634C ISLDFFEAASN | 60    | 26    |
| >JAK1-A634C ISLAFFEA    | 68    | >JAK1-A634C ISLDFFEA    | 44    | 24    |
| >JAK1-A634C ISLAFFEAA   | 67    | >JAK1-A634C ISLDFFEAA   | 35    | 32    |
| >JAK1-A634C ISLAFFEAA   | 221   | >JAK1-A634C ISLDFFEAA   | 442   | 221   |
| >JAK1-A634C ISLAFFEAASN | 40    | >JAK1-A634C ISLDFFEAASN | 74    | 34    |
| >JAK1-A634C ISLAFFEAASN | 7     | >JAK1-A634C ISLDFFEAASN | 7     | 0     |
| >JAK1-A634C ISLAFFEAASN | 204   | >JAK1-A634C ISLDFFEAASN | 462   | 258   |
| >JAK1-A634C ISLAFFEAASN | 93    | >JAK1-A634C ISLDFFEAASN | 297   | 204   |
| >JAK1-A634C ISLAFFEAASN | 365   | >JAK1-A634C ISLDFFEAASN | 394   | 29    |
| >JAK1-A634C ISLAFFEAASN | 18    | >JAK1-A634C ISLDFFEAASN | 15    | 3     |
| >JAK1-A634C ISLAFFEAASN | 518   | >JAK1-A634C ISLDFFEAASN | 316   | 202   |
| >JAK1-A634C DISLAFFEA   | 86    | >JAK1-A634C DISLDFFEA   | 329   | 243   |
| >JAK1-A634C DISLAFFEA   | 486   | >JAK1-A634C DISLDFFEA   | 1161  | 675   |
| >JAK1-A634C RDISLAFF    | 279   | >JAK1-A634C RDISLDFF    | 924   | 645   |
| >JAK1-A634C RDISLAFF    | 863   | >JAK1-A634C RDISLDFF    | 467   | 396   |
| >JAK1-A634C RDISLAFFEA  | 230   | >JAK1-A634C RDISLDFFEA  | 209   | 21    |
| >JAK1-A634C RDISLAFFEA  | 372   | >JAK1-A634C RDISLDFFEA  | 740   | 368   |
| >JAK1-A634C HRDISLAF    | 323   | >JAK1-A634C HRDISLDF    | 798   | 475   |
| >JAK1-A634C HRDISLAF    | 286   | >JAK1-A634C HRDISLDF    | 5416  | 5130  |
| >JAK1-A634C HRDISLAFF   | 331   | >JAK1-A634C HRDISLDFF   | 854   | 523   |
| >JAK1-A634C SHRDISLAF   | 15    | >JAK1-A634C SHRDISLDF   | 59    | 44    |
| >JAK1-A634C SHRDISLAFF  | 49    | >JAK1-A634C SHRDISLDFF  | 178   | 129   |
| >JAK1-A634C PSHRDISLAFF | 47    | >JAK1-A634C PSHRDISLDFF | 64    | 17    |
| >JAK1-A634C PSHRDISLAF  | 165   | >JAK1-A634C PSHRDISLDF  | 511   | 346   |
| >JAK1-A634C DPSHRDISLAF | 15    | >JAK1-A634C DPSHRDISLDF | 50    | 35    |
| >JAK1-A634C DPSHRDISLAF | 431   | >JAK1-A634C DPSHRDISLDF | 631   | 200   |
| >JAK1-A634C DPSHRDISLAF | 292   | >JAK1-A634C DPSHRDISLDF | 4837  | 4545  |
| >JAK1-A634C DPSHRDISLAF | 56    | >JAK1-A634C DPSHRDISLDF | 130   | 74    |
| >JAK1-D660F DVENIMVEEF  | 5458  | >JAK1-D660F HVENIMVEEF  | 264   | 5194  |
| >JAK1-D660F DVENIMVEEF  | 5963  | >JAK1-D660F HVENIMVEEF  | 210   | 5753  |
| >JAK1-D660F DVENIMVEEF  | 3904  | >JAK1-D660F HVENIMVEEF  | 319   | 3585  |
| >JAK1-D660F DVENIMVEEF  | 2668  | >JAK1-D660F HVENIMVEEF  | 213   | 2455  |
| >JAK1-D660F DVENIMVEEF  | 29    | >JAK1-D660F HVENIMVEEF  | 16    | 13    |
| >JAK1-D660F DVENIMVEEF  | 457   | >JAK1-D660F HVENIMVEEF  | 524   | 67    |
| >JAK1-D660F DVENIMVEEF  | 8438  | >JAK1-D660F HVENIMVEEF  | 374   | 8064  |
| >JAK1-D660F RDVENIMVEI  | 4445  | >JAK1-D660F RHVENIMVEI  | 407   | 4038  |
| >JAK1-D660F RDVENIMVEI  | 8183  | >JAK1-D660F RHVENIMVEI  | 109   | 8074  |
| >JAK1-D660F RDVENIMVEI  | 391   | >JAK1-D660F RHVENIMVEI  | 17    | 374   |
| >JAK1-D660F RDVENIMVEI  | 27834 | >JAK1-D660F RHVENIMVEI  | 445   | 27389 |
| >JAK1-D660F RDVENIMV    | 125   | >JAK1-D660F RHVENIMV    | 16988 | 16863 |
| >JAK1-D660F IVYLYGVCVRI | 14743 | >JAK1-D660F IVYLYGVCVRI | 461   | 14282 |
| >JAK1-D660F VRDVENIM    | 3741  | >JAK1-D660F VRHVENIM    | 445   | 3296  |
| >JAK1-D660F CVRDVENI    | 1273  | >JAK1-D660F CVRHVENI    | 497   | 776   |

|                        |       |                        |       |       |
|------------------------|-------|------------------------|-------|-------|
| >JAK1-D660F CVRDVENIM  | 320   | >JAK1-D660F CVRHVENIM  | 174   | 146   |
| >JAK1-D660F CVRDVENIM  | 236   | >JAK1-D660F CVRHVENIM  | 257   | 21    |
| >JAK1-D660F VCVRDVENIM | 631   | >JAK1-D660F VCVRHVENIM | 456   | 175   |
| >JAK1-D660F GVCVRDVEN  | 848   | >JAK1-D660F GVCVRHVEN  | 431   | 417   |
| >JAK1-D660F YGVCVRDV   | 1596  | >JAK1-D660F YGVCVRHV   | 401   | 1195  |
| >JAK1-D660F YGVCVRDVEI | 639   | >JAK1-D660F YGVCVRHVEI | 471   | 168   |
| >JAK1-D660F YLYGVCVRDV | 23    | >JAK1-D660F YLYGVCVRHV | 15    | 8     |
| >JAK1-D660F YLYGVCVRDV | 28    | >JAK1-D660F YLYGVCVRHV | 20    | 8     |
| >JAK1-D660F YLYGVCVRDV | 9     | >JAK1-D660F YLYGVCVRHV | 8     | 1     |
| >JAK1-D660F YLYGVCVRDV | 57    | >JAK1-D660F YLYGVCVRHV | 42    | 15    |
| >JAK1-D660F YLYGVCVRD  | 93    | >JAK1-D660F YLYGVCVRH  | 255   | 162   |
| >JAK1-D660F YLYGVCVRDV | 2     | >JAK1-D660F YLYGVCVRHV | 1     | 1     |
| >JAK1-D660F YLYGVCVRDV | 543   | >JAK1-D660F YLYGVCVRHV | 180   | 363   |
| >JAK1-D660F YLYGVCVRDV | 6     | >JAK1-D660F YLYGVCVRHV | 4     | 2     |
| >JAK1-D660F YLYGVCVRDV | 5     | >JAK1-D660F YLYGVCVRHV | 4     | 1     |
| >JAK1-D660F YLYGVCVRDV | 5     | >JAK1-D660F YLYGVCVRHV | 4     | 1     |
| >JAK1-D660F YLYGVCVRD  | 92    | >JAK1-D660F YLYGVCVRH  | 94    | 2     |
| >JAK1-D660F YLYGVCVRDV | 2     | >JAK1-D660F YLYGVCVRHV | 1     | 1     |
| >JAK1-D660F YLYGVCVRDV | 605   | >JAK1-D660F YLYGVCVRHV | 54    | 551   |
| >JAK1-D660F YLYGVCVRD  | 13998 | >JAK1-D660F YLYGVCVRH  | 306   | 13692 |
| >JAK1-D660F YLYGVCVRDV | 1260  | >JAK1-D660F YLYGVCVRHV | 323   | 937   |
| >JAK1-D660F VYLYGVCVRE | 536   | >JAK1-D660F VYLYGVCVRH | 275   | 261   |
| >JAK1-E966V EYLPKNKNI  | 290   | >JAK1-E966V VYLPKNKNI  | 79    | 211   |
| >JAK1-E966V EYLPKNKNI  | 49    | >JAK1-E966V VYLPKNKNI  | 13    | 36    |
| >JAK1-E966V EYLPKNKNK  | 6848  | >JAK1-E966V VYLPKNKNK  | 353   | 6495  |
| >JAK1-E966V EYLPKNKNK  | 229   | >JAK1-E966V VYLPKNKNK  | 366   | 137   |
| >JAK1-E966V KEYLPKNK   | 276   | >JAK1-E966V KVYLPKNK   | 40346 | 40070 |
| >JAK1-E966V KEYLPKNKNK | 15    | >JAK1-E966V KVYLPKNKNK | 7622  | 7607  |
| >JAK1-E966V KEYLPKNK   | 2083  | >JAK1-E966V KVYLPKNK   | 35    | 2048  |
| >JAK1-E966V KEYLPKNKNK | 6146  | >JAK1-E966V KVYLPKNKNK | 32    | 6114  |
| >JAK1-E966V KEYLPKNK   | 9077  | >JAK1-E966V KVYLPKNK   | 36    | 9041  |
| >JAK1-E966V KEYLPKNKNK | 16544 | >JAK1-E966V KVYLPKNKNK | 78    | 16466 |
| >JAK1-E966V KEYLPKNK   | 6862  | >JAK1-E966V KVYLPKNK   | 18    | 6844  |
| >JAK1-E966V KEYLPKNKNK | 6169  | >JAK1-E966V KVYLPKNKNK | 18    | 6151  |
| >JAK1-E966V KEYLPKNK   | 9292  | >JAK1-E966V KVYLPKNK   | 134   | 9158  |
| >JAK1-E966V KEYLPKNKNK | 3248  | >JAK1-E966V KVYLPKNKNK | 160   | 3088  |
| >JAK1-E966V KEYLPKNKNK | 5682  | >JAK1-E966V KVYLPKNKNK | 124   | 5558  |
| >JAK1-E966V KEYLPKNKNK | 351   | >JAK1-E966V KVYLPKNKNK | 23619 | 23268 |
| >JAK1-E966V KEYLPKNKNK | 403   | >JAK1-E966V KVYLPKNKNK | 39288 | 38885 |
| >JAK1-E966V KEYLPKNKNK | 7     | >JAK1-E966V KVYLPKNKNK | 11748 | 11741 |
| >JAK1-E966V KEYLPKNKNK | 2091  | >JAK1-E966V KVYLPKNKNK | 308   | 1783  |
| >JAK1-E966V MEFLPSGSLK | 22296 | >JAK1-E966V MEFLPSGSLK | 91    | 22205 |
| >JAK1-E966V MEFLPSGSLK | 2172  | >JAK1-E966V MEFLPSGSLK | 440   | 1732  |

|                         |       |                         |     |       |
|-------------------------|-------|-------------------------|-----|-------|
| >JAK1-E966V MEFLPSGSLK  | 3917  | >JAK1-E966V MEFLPSGSLK  | 87  | 3830  |
| >JAK1-E966V MEFLPSGSLK  | 3906  | >JAK1-E966V MEFLPSGSLK  | 250 | 3656  |
| >JAK1-E966V MEFLPSGSLK  | 5491  | >JAK1-E966V MEFLPSGSLK  | 282 | 5209  |
| >JAK1-E966V MEFLPSGSLK  | 1093  | >JAK1-E966V MEFLPSGSLK  | 6   | 1087  |
| >JAK1-E966V LKEYLPKNK   | 4996  | >JAK1-E966V LKVYLPKNK   | 381 | 4615  |
| >JAK1-E966V LKEYLPKNKN  | 6385  | >JAK1-E966V LKVYLPKNKN  | 487 | 5898  |
| >JAK1-E966V SLKEYLPK    | 94    | >JAK1-E966V SLKVYLPK    | 96  | 2     |
| >JAK1-E966V SLKEYLPKNK  | 446   | >JAK1-E966V SLKVYLPKNK  | 276 | 170   |
| >JAK1-E966V SLKEYLPK    | 59    | >JAK1-E966V SLKVYLPK    | 49  | 10    |
| >JAK1-E966V SLKEYLPKNK  | 370   | >JAK1-E966V SLKVYLPKNK  | 328 | 42    |
| >JAK1-E966V SLKEYLPK    | 8     | >JAK1-E966V SLKVYLPK    | 6   | 2     |
| >JAK1-E966V SLKEYLPKNK  | 29    | >JAK1-E966V SLKVYLPKNK  | 20  | 9     |
| >JAK1-E966V SLKEYLPK    | 299   | >JAK1-E966V SLKVYLPK    | 94  | 205   |
| >JAK1-E966V GSLKEYLPK   | 403   | >JAK1-E966V GSLKVYLPK   | 98  | 305   |
| >JAK1-E966V GSLKEYLPKN  | 1302  | >JAK1-E966V GSLKVYLPKN  | 438 | 864   |
| >JAK1-E966V GSLKEYLPK   | 12    | >JAK1-E966V GSLKVYLPK   | 7   | 5     |
| >JAK1-E966V GSLKEYLPKN  | 82    | >JAK1-E966V GSLKVYLPKN  | 40  | 42    |
| >JAK1-E966V GSLKEYLPK   | 41    | >JAK1-E966V GSLKVYLPK   | 18  | 23    |
| >JAK1-E966V GSLKEYLPKN  | 355   | >JAK1-E966V GSLKVYLPKN  | 189 | 166   |
| >JAK1-E966V GSLKEYLPK   | 3859  | >JAK1-E966V GSLKVYLPK   | 427 | 3432  |
| >JAK1-E966V GSLKEYLPK   | 100   | >JAK1-E966V GSLKVYLPK   | 118 | 18    |
| >JAK1-E966V GSLKEYLPKN  | 90    | >JAK1-E966V GSLKVYLPKN  | 103 | 13    |
| >JAK1-E966V PSGSLKEYLPK | 1039  | >JAK1-E966V PSGSLKVYLPK | 427 | 612   |
| >JAK1-E966V LPSGSLKEYL  | 53    | >JAK1-E966V LPSGSLKVYL  | 37  | 16    |
| >JAK1-E966V LPSGSLKE    | 17407 | >JAK1-E966V LPSGSLKV    | 482 | 16925 |
| >JAK1-E966V LPSGSLKEYL  | 680   | >JAK1-E966V LPSGSLKVYL  | 312 | 368   |
| >JAK1-E966V LPSGSLKEY   | 15    | >JAK1-E966V LPSGSLKVY   | 16  | 1     |
| >JAK1-E966V LPSGSLKE    | 16692 | >JAK1-E966V LPSGSLKV    | 401 | 16291 |
| >JAK1-E966V LPSGSLKEY   | 109   | >JAK1-E966V LPSGSLKVY   | 88  | 21    |
| >JAK1-E966V LPSGSLKE    | 5141  | >JAK1-E966V LPSGSLKV    | 454 | 4687  |
| >JAK1-E966V LPSGSLKEYLP | 421   | >JAK1-E966V LPSGSLKVYLF | 328 | 93    |
| >JAK1-E966V LPSGSLKEY   | 23    | >JAK1-E966V LPSGSLKVY   | 28  | 5     |
| >JAK1-E966V LPSGSLKEY   | 178   | >JAK1-E966V LPSGSLKVY   | 257 | 79    |
| >JAK1-E966V FLPSGSLKEY  | 251   | >JAK1-E966V FLPSGSLKVY  | 434 | 183   |
| >JAK1-E966V FLPSGSLKE   | 17955 | >JAK1-E966V FLPSGSLKV   | 11  | 17944 |
| >JAK1-E966V FLPSGSLKEYL | 20    | >JAK1-E966V FLPSGSLKVYL | 15  | 5     |
| >JAK1-E966V FLPSGSLKE   | 7780  | >JAK1-E966V FLPSGSLKV   | 9   | 7771  |
| >JAK1-E966V FLPSGSLKEYL | 4     | >JAK1-E966V FLPSGSLKVYL | 4   | 0     |
| >JAK1-E966V FLPSGSLKE   | 6837  | >JAK1-E966V FLPSGSLKV   | 3   | 6834  |
| >JAK1-E966V FLPSGSLKEYL | 14    | >JAK1-E966V FLPSGSLKVYL | 13  | 1     |
| >JAK1-E966V FLPSGSLKE   | 9230  | >JAK1-E966V FLPSGSLKV   | 9   | 9221  |
| >JAK1-E966V FLPSGSLKEYL | 20    | >JAK1-E966V FLPSGSLKVYL | 21  | 1     |
| >JAK1-E966V FLPSGSLKE   | 6574  | >JAK1-E966V FLPSGSLKV   | 2   | 6572  |

|                         |       |                         |      |       |
|-------------------------|-------|-------------------------|------|-------|
| >JAK1-E966V FLPSGSLKEYL | 3     | >JAK1-E966V FLPSGSLKVYL | 3    | 0     |
| >JAK1-E966V FLPSGSLKE   | 20601 | >JAK1-E966V FLPSGSLKV   | 6    | 20595 |
| >JAK1-E966V FLPSGSLKEYL | 17    | >JAK1-E966V FLPSGSLKVYL | 13   | 4     |
| >JAK1-E966V FLPSGSLKE   | 8030  | >JAK1-E966V FLPSGSLKV   | 4    | 8026  |
| >JAK1-E966V FLPSGSLKEYL | 8     | >JAK1-E966V FLPSGSLKVYL | 7    | 1     |
| >JAK1-E966V FLPSGSLKE   | 22624 | >JAK1-E966V FLPSGSLKV   | 4    | 22620 |
| >JAK1-E966V FLPSGSLKEYL | 13    | >JAK1-E966V FLPSGSLKVYL | 14   | 1     |
| >JAK1-E966V FLPSGSLKE   | 1151  | >JAK1-E966V FLPSGSLKV   | 2    | 1149  |
| >JAK1-E966V FLPSGSLKEY  | 238   | >JAK1-E966V FLPSGSLKVY  | 794  | 556   |
| >JAK1-E966V FLPSGSLKEYL | 3     | >JAK1-E966V FLPSGSLKVYL | 2    | 1     |
| >JAK1-E966V FLPSGSLKEY  | 189   | >JAK1-E966V FLPSGSLKVY  | 95   | 94    |
| >JAK1-E966V FLPSGSLKEY  | 30    | >JAK1-E966V FLPSGSLKVY  | 23   | 7     |
| >JAK1-E966V FLPSGSLKEY  | 313   | >JAK1-E966V FLPSGSLKVY  | 267  | 46    |
| >JAK1-E966V FLPSGSLKEYL | 47    | >JAK1-E966V FLPSGSLKVYL | 31   | 16    |
| >JAK1-E966V EFLPSGSLKEY | 433   | >JAK1-E966V EFLPSGSLKVY | 390  | 43    |
| >JAK1-E966V EFLPSGSLKEY | 138   | >JAK1-E966V EFLPSGSLKVY | 293  | 155   |
| >JAK1-E966V EFLPSGSLKEY | 352   | >JAK1-E966V EFLPSGSLKVY | 255  | 97    |
| >JAK1-G882E GEGHFGKVEI  | 949   | >JAK1-G882E EEGHFGKVEL  | 465  | 484   |
| >JAK1-G882E GEGHFGKVEI  | 333   | >JAK1-G882E EEGHFGKVEL  | 576  | 243   |
| >JAK1-G882E GEGHFGKVEI  | 441   | >JAK1-G882E EEGHFGKVEL  | 574  | 133   |
| >JAK1-G882E GEGHFGKVEI  | 1350  | >JAK1-G882E EEGHFGKVEL  | 451  | 899   |
| >JAK1-G882E GEGHFGKV    | 252   | >JAK1-G882E EEGHFGKV    | 75   | 177   |
| >JAK1-G882E LGEGHFGKVE  | 24612 | >JAK1-G882E LEEGHFGKVE  | 300  | 24312 |
| >JAK1-G882E LGEGHFGKV   | 20350 | >JAK1-G882E LEEGHFGKV   | 60   | 20290 |
| >JAK1-G882E LGEGHFGKVE  | 15994 | >JAK1-G882E LEEGHFGKVE  | 9    | 15985 |
| >JAK1-G882E LGEGHFGKV   | 31157 | >JAK1-G882E LEEGHFGKV   | 82   | 31075 |
| >JAK1-G882E KRFLKRIRDLC | 389   | >JAK1-G882E KRFLKRIRDLE | 754  | 365   |
| >JAK1-G882E KRFLKRIRDLC | 383   | >JAK1-G882E KRFLKRIRDLE | 403  | 20    |
| >JAK1-G882E DLGEGHFGK\  | 477   | >JAK1-G882E DLEEGHFGK\  | 1235 | 758   |
| >JAK1-G882E DLGEGHFGK\  | 23    | >JAK1-G882E DLEEGHFGK\  | 167  | 144   |
| >JAK1-G882E DLGEGHFGK\  | 378   | >JAK1-G882E DLEEGHFGK\  | 1129 | 751   |
| >JAK1-G882E DLGEGHFGK\  | 50    | >JAK1-G882E DLEEGHFGK\  | 497  | 447   |
| >JAK1-G882E DLGEGHFGK\  | 75    | >JAK1-G882E DLEEGHFGK\  | 1123 | 1048  |
| >JAK1-G882E DLGEGHFGK\  | 9     | >JAK1-G882E DLEEGHFGK\  | 18   | 9     |
| >JAK1-G882E DLGEGHFGK   | 355   | >JAK1-G882E DLEEGHFGK   | 297  | 58    |
| >JAK1-G882E DLGEGHFGK   | 660   | >JAK1-G882E DLEEGHFGK   | 437  | 223   |
| >JAK1-G882E DLGEGHFGK\  | 84    | >JAK1-G882E DLEEGHFGK\  | 268  | 184   |
| >JAK1-G882E RDLGEGHFGI  | 1056  | >JAK1-G882E RDLEEGHFGK  | 446  | 610   |
| >JAK1-G882E RDLGEGHFGI  | 94    | >JAK1-G882E RDLEEGHFGK  | 51   | 43    |
| >JAK1-G882E RIRDLGEG    | 251   | >JAK1-G882E RIRDLEEG    | 1401 | 1150  |
| >JAK1-G882E RIRDLGEGHF  | 69    | >JAK1-G882E RIRDLEEGHF  | 111  | 42    |
| >JAK1-G882E RIRDLGEGHF  | 56    | >JAK1-G882E RIRDLEEGHF  | 120  | 64    |
| >JAK1-G882E RIRDLGEGHF  | 66    | >JAK1-G882E RIRDLEEGHF  | 133  | 67    |

|                         |       |                         |      |       |
|-------------------------|-------|-------------------------|------|-------|
| >JAK1-G882E RIRDLGEGHF  | 267   | >JAK1-G882E RIRDLEEGHF  | 363  | 96    |
| >JAK1-G882E KRIRDLGEGH  | 151   | >JAK1-G882E KRIRDLEEGH  | 102  | 49    |
| >JAK1-G882E KRIRDLGEGH  | 339   | >JAK1-G882E KRIRDLEEGH  | 552  | 213   |
| >JAK1-G882E KRIRDLGEGH  | 177   | >JAK1-G882E KRIRDLEEGH  | 208  | 31    |
| >JAK1-G882E KRIRDLGE    | 165   | >JAK1-G882E KRIRDL EE   | 87   | 78    |
| >JAK1-G882E KRIRDLGEGH  | 290   | >JAK1-G882E KRIRDLEEGH  | 438  | 148   |
| >JAK1-G882E KRIRDLGEGH  | 323   | >JAK1-G882E KRIRDLEEGH  | 685  | 362   |
| >JAK1-G882E FLKRIRDLGEC | 1455  | >JAK1-G882E FLKRIRDLEEG | 439  | 1016  |
| >JAK1-H647Y HKHIVYLYGV  | 2039  | >JAK1-H647Y YKHIVYLYGV  | 182  | 1857  |
| >JAK1-H647Y HKHIVYLYGV  | 1768  | >JAK1-H647Y YKHIVYLYGV  | 44   | 1724  |
| >JAK1-H647Y HKHIVYLY    | 276   | >JAK1-H647Y YKHIVYLY    | 34   | 242   |
| >JAK1-H647Y HKHIVYLY    | 370   | >JAK1-H647Y YKHIVYLY    | 155  | 215   |
| >JAK1-H647Y HKHIVYLY    | 31    | >JAK1-H647Y YKHIVYLY    | 10   | 21    |
| >JAK1-H647Y HKHIVYLYGV  | 626   | >JAK1-H647Y YKHIVYLYGV  | 124  | 502   |
| >JAK1-H647Y SHKHIVYL    | 13068 | >JAK1-H647Y SYKHIVYL    | 205  | 12863 |
| >JAK1-H647Y SHKHIVYLYG\ | 3167  | >JAK1-H647Y SYKHIVYLYG\ | 422  | 2745  |
| >JAK1-H647Y SHKHIVYL    | 13607 | >JAK1-H647Y SYKHIVYL    | 336  | 13271 |
| >JAK1-H647Y SHKHIVYLY   | 12781 | >JAK1-H647Y SYKHIVYLY   | 268  | 12513 |
| >JAK1-H647Y SHKHIVYL    | 11835 | >JAK1-H647Y SYKHIVYL    | 9    | 11826 |
| >JAK1-H647Y SHKHIVYLY   | 49    | >JAK1-H647Y SYKHIVYLY   | 11   | 38    |
| >JAK1-H647Y SHKHIVYL    | 7028  | >JAK1-H647Y SYKHIVYL    | 61   | 6967  |
| >JAK1-H647Y SHKHIVYLY   | 10679 | >JAK1-H647Y SYKHIVYLY   | 254  | 10425 |
| >JAK1-H647Y SHKHIVYLYG  | 8098  | >JAK1-H647Y SYKHIVYLYG  | 100  | 7998  |
| >JAK1-H647Y SHKHIVYLYG\ | 11025 | >JAK1-H647Y SYKHIVYLYG\ | 250  | 10775 |
| >JAK1-H647Y SHKHIVYLY   | 49    | >JAK1-H647Y SYKHIVYLY   | 17   | 32    |
| >JAK1-H647Y SHKHIVYLY   | 13621 | >JAK1-H647Y SYKHIVYLY   | 439  | 13182 |
| >JAK1-H647Y SHKHIVYLY   | 43    | >JAK1-H647Y SYKHIVYLY   | 10   | 33    |
| >JAK1-H647Y SHKHIVYLY   | 292   | >JAK1-H647Y SYKHIVYLY   | 4086 | 3794  |
| >JAK1-H647Y SHKHIVYLY   | 367   | >JAK1-H647Y SYKHIVYLY   | 48   | 319   |
| >JAK1-H647Y SHKHIVYL    | 2906  | >JAK1-H647Y SYKHIVYL    | 294  | 2612  |
| >JAK1-H647Y SHKHIVYLYG\ | 2071  | >JAK1-H647Y SYKHIVYLYG\ | 179  | 1892  |
| >JAK1-H647Y EAASMMRQ\   | 5321  | >JAK1-H647Y EAASMMRQ\   | 99   | 5222  |
| >JAK1-H647Y EAASMMRQ\   | 5649  | >JAK1-H647Y EAASMMRQ\   | 58   | 5591  |
| >JAK1-H647Y EAASMMRQ\   | 3020  | >JAK1-H647Y EAASMMRQ\   | 32   | 2988  |
| >JAK1-H647Y EAASMMRQ\   | 21891 | >JAK1-H647Y EAASMMRQ\   | 463  | 21428 |
| >JAK1-H647Y EAASMMRQ\   | 722   | >JAK1-H647Y EAASMMRQ\   | 91   | 631   |
| >JAK1-H647Y EAASMMRQ\   | 15320 | >JAK1-H647Y EAASMMRQ\   | 184  | 15136 |
| >JAK1-H647Y EAASMMRQ\   | 1774  | >JAK1-H647Y EAASMMRQ\   | 49   | 1725  |
| >JAK1-H647Y EAASMMRQ\   | 29832 | >JAK1-H647Y EAASMMRQ\   | 265  | 29567 |
| >JAK1-H647Y VSHKHIVYL   | 138   | >JAK1-H647Y VSYKHIVYL   | 13   | 125   |
| >JAK1-H647Y VSHKHIVYLY  | 408   | >JAK1-H647Y VSYKHIVYLY  | 202  | 206   |
| >JAK1-H647Y VSHKHIVYL   | 1690  | >JAK1-H647Y VSYKHIVYL   | 273  | 1417  |
| >JAK1-H647Y VSHKHIVYL   | 3260  | >JAK1-H647Y VSYKHIVYL   | 306  | 2954  |



|                       |      |                       |      |      |
|-----------------------|------|-----------------------|------|------|
| >JAK1-H647YVSHKHIVYL  | 1426 | >JAK1-H647YVSYKHIVYL  | 164  | 1262 |
| >JAK1-H647YVSHKHIVY   | 1917 | >JAK1-H647YVSYKHIVY   | 180  | 1737 |
| >JAK1-H647YVSHKHIVYLY | 1514 | >JAK1-H647YVSYKHIVYLY | 249  | 1265 |
| >JAK1-H647YVSHKHIVY   | 2811 | >JAK1-H647YVSYKHIVY   | 367  | 2444 |
| >JAK1-H647YVSHKHIVYLY | 1064 | >JAK1-H647YVSYKHIVYLY | 176  | 888  |
| >JAK1-H647YVSHKHIVY   | 436  | >JAK1-H647YVSYKHIVY   | 278  | 158  |
| >JAK1-H647YVSHKHIVYLY | 335  | >JAK1-H647YVSYKHIVYLY | 201  | 134  |
| >JAK1-H647YVSHKHIVY   | 1223 | >JAK1-H647YVSYKHIVY   | 243  | 980  |
| >JAK1-H647YVSHKHIVYLY | 175  | >JAK1-H647YVSYKHIVYLY | 48   | 127  |
| >JAK1-H647YVSHKHIVYL  | 305  | >JAK1-H647YVSYKHIVYL  | 3184 | 2879 |
| >JAK1-H647YVSHKHIVY   | 279  | >JAK1-H647YVSYKHIVY   | 169  | 110  |
| >JAK1-H647YVSHKHIVYLY | 24   | >JAK1-H647YVSYKHIVYLY | 14   | 10   |
| >JAK1-H647YVSHKHIVYLY | 2700 | >JAK1-H647YVSYKHIVYLY | 493  | 2207 |
| >JAK1-H647YVSHKHIVYLY | 1430 | >JAK1-H647YVSYKHIVYLY | 219  | 1211 |
| >JAK1-H647YVSHKHIVYLY | 116  | >JAK1-H647YVSYKHIVYLY | 82   | 34   |
| >JAK1-H647YVSHKHIVY   | 123  | >JAK1-H647YVSYKHIVY   | 72   | 51   |
| >JAK1-H647YVSHKHIVYLY | 371  | >JAK1-H647YVSYKHIVYLY | 169  | 202  |
| >JAK1-H647YVSHKHIVY   | 76   | >JAK1-H647YVSYKHIVY   | 22   | 54   |
| >JAK1-H647YVSHKHIVYL  | 308  | >JAK1-H647YVSYKHIVYL  | 66   | 242  |
| >JAK1-H647YVSHKHIVYLY | 175  | >JAK1-H647YVSYKHIVYLY | 43   | 132  |
| >JAK1-H647YVSHKHIVY   | 8    | >JAK1-H647YVSYKHIVY   | 4    | 4    |
| >JAK1-H647YVSHKHIVYL  | 67   | >JAK1-H647YVSYKHIVYL  | 21   | 46   |
| >JAK1-H647YVSHKHIVYLY | 11   | >JAK1-H647YVSYKHIVYLY | 5    | 6    |
| >JAK1-H647YVSHKHIVYLY | 847  | >JAK1-H647YVSYKHIVYLY | 265  | 582  |
| >JAK1-H647YVSHKHIVY   | 2792 | >JAK1-H647YVSYKHIVY   | 173  | 2619 |
| >JAK1-H647YVSHKHIVYLY | 513  | >JAK1-H647YVSYKHIVYLY | 47   | 466  |
| >JAK1-H647YVSHKHIVYL  | 163  | >JAK1-H647YVSYKHIVYL  | 71   | 92   |
| >JAK1-H647YVSHKHIVY   | 238  | >JAK1-H647YVSYKHIVY   | 347  | 109  |
| >JAK1-H647YVSHKHIVYLY | 459  | >JAK1-H647YVSYKHIVYLY | 167  | 292  |
| >JAK1-H647YVSHKHIVYL  | 1462 | >JAK1-H647YVSYKHIVYL  | 256  | 1206 |
| >JAK1-H647YQVSHKHIVYL | 729  | >JAK1-H647YQVSYKHIVYL | 274  | 455  |
| >JAK1-H647YQVSHKHIV   | 461  | >JAK1-H647YQVSYKHIV   | 767  | 306  |
| >JAK1-H647YQVSHKHIVYL | 412  | >JAK1-H647YQVSYKHIVYL | 304  | 108  |
| >JAK1-H647YQVSHKHIVY  | 714  | >JAK1-H647YQVSYKHIVY  | 329  | 385  |
| >JAK1-H647YQVSHKHIVYL | 536  | >JAK1-H647YQVSYKHIVYL | 297  | 239  |
| >JAK1-H647YQVSHKHIVY  | 90   | >JAK1-H647YQVSYKHIVY  | 64   | 26   |
| >JAK1-H647YQVSHKHIVYL | 13   | >JAK1-H647YQVSYKHIVYL | 11   | 2    |
| >JAK1-H647YQVSHKHIVY  | 548  | >JAK1-H647YQVSYKHIVY  | 377  | 171  |
| >JAK1-H647YQVSHKHIVYL | 75   | >JAK1-H647YQVSYKHIVYL | 57   | 18   |
| >JAK1-H647YQVSHKHIVYL | 490  | >JAK1-H647YQVSYKHIVYL | 176  | 314  |
| >JAK1-H647YQVSHKHIV   | 84   | >JAK1-H647YQVSYKHIV   | 55   | 29   |
| >JAK1-H647YQVSHKHIVYL | 1148 | >JAK1-H647YQVSYKHIVYL | 493  | 655  |
| >JAK1-H647YQVSHKHIVY  | 193  | >JAK1-H647YQVSYKHIVY  | 338  | 145  |

|                        |      |                        |     |      |
|------------------------|------|------------------------|-----|------|
| >JAK1-H647Y QVSHKHIVYL | 17   | >JAK1-H647Y QVSYKHIVYL | 21  | 4    |
| >JAK1-H647Y QVSHKHIVY  | 266  | >JAK1-H647Y QVSYKHIVY  | 264 | 2    |
| >JAK1-H647Y QVSHKHIVY  | 339  | >JAK1-H647Y QVSYKHIVY  | 381 | 42   |
| >JAK1-H647Y QVSHKHIVYL | 1973 | >JAK1-H647Y QVSYKHIVYL | 384 | 1589 |
| >JAK1-H647Y QVSHKHIVYL | 457  | >JAK1-H647Y QVSYKHIVYL | 294 | 163  |
| >JAK1-H647Y QVSHKHIVYL | 172  | >JAK1-H647Y QVSYKHIVYL | 182 | 10   |
| >JAK1-H647Y RQVSHKHIVY | 570  | >JAK1-H647Y RQVSYKHIVY | 234 | 336  |
| >JAK1-H647Y RQVSHKHIVY | 212  | >JAK1-H647Y RQVSYKHIVY | 108 | 104  |
| >JAK1-H647Y RQVSHKHIV  | 246  | >JAK1-H647Y RQVSYKHIV  | 423 | 177  |
| >JAK1-H647Y RQVSHKHIVY | 315  | >JAK1-H647Y RQVSYKHIVY | 428 | 113  |
| >JAK1-H647Y RQVSHKHI   | 189  | >JAK1-H647Y RQVSYKHI   | 73  | 116  |
| >JAK1-H647Y RQVSHKHIV  | 51   | >JAK1-H647Y RQVSYKHIV  | 25  | 26   |
| >JAK1-H647Y RQVSHKHIVY | 17   | >JAK1-H647Y RQVSYKHIVY | 11  | 6    |
| >JAK1-H647Y RQVSHKHIV  | 1108 | >JAK1-H647Y RQVSYKHIV  | 384 | 724  |
| >JAK1-H647Y RQVSHKHIVY | 382  | >JAK1-H647Y RQVSYKHIVY | 204 | 178  |
| >JAK1-H647Y RQVSHKHIVY | 232  | >JAK1-H647Y RQVSYKHIVY | 78  | 154  |
| >JAK1-H647Y RQVSHKHIVY | 413  | >JAK1-H647Y RQVSYKHIVY | 321 | 92   |
| >JAK1-H647Y RQVSHKHI   | 346  | >JAK1-H647Y RQVSYKHI   | 486 | 140  |
| >JAK1-H647Y RQVSHKHIVY | 46   | >JAK1-H647Y RQVSYKHIVY | 47  | 1    |
| >JAK1-H647Y RQVSHKHIVY | 202  | >JAK1-H647Y RQVSYKHIVY | 236 | 34   |
| >JAK1-H647Y RQVSHKHI   | 21   | >JAK1-H647Y RQVSYKHI   | 16  | 5    |
| >JAK1-H647Y RQVSHKHIV  | 42   | >JAK1-H647Y RQVSYKHIV  | 30  | 12   |
| >JAK1-H647Y RQVSHKHIVY | 4    | >JAK1-H647Y RQVSYKHIVY | 4   | 0    |
| >JAK1-H647Y RQVSHKHIVY | 13   | >JAK1-H647Y RQVSYKHIVY | 11  | 2    |
| >JAK1-H647Y RQVSHKHI   | 921  | >JAK1-H647Y RQVSYKHI   | 446 | 475  |
| >JAK1-H647Y RQVSHKHIVY | 299  | >JAK1-H647Y RQVSYKHIVY | 151 | 148  |
| >JAK1-H647Y RQVSHKHIVY | 374  | >JAK1-H647Y RQVSYKHIVY | 231 | 143  |
| >JAK1-H647Y RQVSHKHIV  | 470  | >JAK1-H647Y RQVSYKHIV  | 186 | 284  |
| >JAK1-H647Y RQVSHKHIVY | 279  | >JAK1-H647Y RQVSYKHIVY | 161 | 118  |
| >JAK1-H647Y RQVSHKHIVY | 172  | >JAK1-H647Y RQVSYKHIVY | 182 | 10   |
| >JAK1-H647Y RQVSHKHIVY | 87   | >JAK1-H647Y RQVSYKHIVY | 79  | 8    |
| >JAK1-H647Y RQVSHKHIVY | 327  | >JAK1-H647Y RQVSYKHIVY | 228 | 99   |
| >JAK1-H647Y RQVSHKHIVY | 75   | >JAK1-H647Y RQVSYKHIVY | 67  | 8    |
| >JAK1-H647Y MRQVSHKHI  | 150  | >JAK1-H647Y MRQVSYKHI  | 116 | 34   |
| >JAK1-H647Y MRQVSHKHI' | 508  | >JAK1-H647Y MRQVSYKHIV | 355 | 153  |
| >JAK1-H647Y MRQVSHKHI' | 34   | >JAK1-H647Y MRQVSYKHIV | 28  | 6    |
| >JAK1-H647Y MRQVSHKH   | 562  | >JAK1-H647Y MRQVSYKH   | 391 | 171  |
| >JAK1-H647Y MRQVSHKHI  | 619  | >JAK1-H647Y MRQVSYKHI  | 310 | 309  |
| >JAK1-H647Y MRQVSHKHI' | 594  | >JAK1-H647Y MRQVSYKHIV | 418 | 176  |
| >JAK1-H647Y MRQVSHKHI' | 212  | >JAK1-H647Y MRQVSYKHIV | 204 | 8    |
| >JAK1-H647Y MRQVSHKHI  | 847  | >JAK1-H647Y MRQVSYKHI  | 437 | 410  |
| >JAK1-H647Y MRQVSHKHI' | 311  | >JAK1-H647Y MRQVSYKHIV | 147 | 164  |
| >JAK1-H647Y MMRQVSHKI  | 530  | >JAK1-H647Y MMRQVSYKH  | 241 | 289  |

|                       |       |                       |     |       |
|-----------------------|-------|-----------------------|-----|-------|
| >JAK1-H647Y MMRQVSHKI | 58    | >JAK1-H647Y MMRQVSYKI | 39  | 19    |
| >JAK1-H647Y MMRQVSHKI | 393   | >JAK1-H647Y MMRQVSYKI | 260 | 133   |
| >JAK1-H647Y MMRQVSHKI | 8     | >JAK1-H647Y MMRQVSYKI | 10  | 2     |
| >JAK1-H647Y MMRQVSHKI | 579   | >JAK1-H647Y MMRQVSYKI | 436 | 143   |
| >JAK1-H647Y MMRQVSHKI | 61    | >JAK1-H647Y MMRQVSYKI | 59  | 2     |
| >JAK1-H647Y MMRQVSHKI | 6     | >JAK1-H647Y MMRQVSYKI | 4   | 2     |
| >JAK1-H647Y MMRQVSHKI | 29    | >JAK1-H647Y MMRQVSYKI | 20  | 9     |
| >JAK1-H647Y MMRQVSHKI | 35    | >JAK1-H647Y MMRQVSYKI | 26  | 9     |
| >JAK1-H647Y MMRQVSHKI | 142   | >JAK1-H647Y MMRQVSYKI | 79  | 63    |
| >JAK1-H647Y MMRQVSHKI | 56    | >JAK1-H647Y MMRQVSYKI | 82  | 26    |
| >JAK1-H647Y MMRQVSHKI | 2     | >JAK1-H647Y MMRQVSYKI | 2   | 0     |
| >JAK1-H647Y MMRQVSHK  | 37    | >JAK1-H647Y MMRQVSYK  | 30  | 7     |
| >JAK1-H647Y MMRQVSHKI | 479   | >JAK1-H647Y MMRQVSYKI | 586 | 107   |
| >JAK1-H647Y MMRQVSHK  | 547   | >JAK1-H647Y MMRQVSYK  | 61  | 486   |
| >JAK1-H647Y MMRQVSHK  | 5     | >JAK1-H647Y MMRQVSYK  | 4   | 1     |
| >JAK1-H647Y MMRQVSHKI | 19    | >JAK1-H647Y MMRQVSYKI | 23  | 4     |
| >JAK1-H647Y MMRQVSHKI | 87    | >JAK1-H647Y MMRQVSYKI | 99  | 12    |
| >JAK1-H647Y MMRQVSHK  | 62    | >JAK1-H647Y MMRQVSYK  | 26  | 36    |
| >JAK1-H647Y MMRQVSHK  | 328   | >JAK1-H647Y MMRQVSYK  | 156 | 172   |
| >JAK1-H647Y MMRQVSHK  | 226   | >JAK1-H647Y MMRQVSYK  | 68  | 158   |
| >JAK1-H647Y MMRQVSHKI | 69    | >JAK1-H647Y MMRQVSYKI | 84  | 15    |
| >JAK1-H647Y MMRQVSHKI | 180   | >JAK1-H647Y MMRQVSYKI | 217 | 37    |
| >JAK1-H647Y MMRQVSHK  | 297   | >JAK1-H647Y MMRQVSYK  | 294 | 3     |
| >JAK1-H647Y MMRQVSHKI | 70    | >JAK1-H647Y MMRQVSYKI | 53  | 17    |
| >JAK1-H647Y MMRQVSHKI | 166   | >JAK1-H647Y MMRQVSYKI | 129 | 37    |
| >JAK1-H647Y MMRQVSHK  | 1981  | >JAK1-H647Y MMRQVSYK  | 499 | 1482  |
| >JAK1-H647Y SMMRQVSHI | 729   | >JAK1-H647Y SMMRQVSYK | 206 | 523   |
| >JAK1-H647Y SMMRQVSHI | 343   | >JAK1-H647Y SMMRQVSYK | 184 | 159   |
| >JAK1-H647Y SMMRQVSHI | 460   | >JAK1-H647Y SMMRQVSYK | 199 | 261   |
| >JAK1-H647Y SMMRQVSHI | 193   | >JAK1-H647Y SMMRQVSYK | 93  | 100   |
| >JAK1-H647Y SMMRQVSHI | 28    | >JAK1-H647Y SMMRQVSYK | 14  | 14    |
| >JAK1-H647Y SMMRQVSHI | 601   | >JAK1-H647Y SMMRQVSYK | 317 | 284   |
| >JAK1-H647Y SMMRQVSHI | 3158  | >JAK1-H647Y SMMRQVSYK | 396 | 2762  |
| >JAK1-H647Y SMMRQVSHI | 22    | >JAK1-H647Y SMMRQVSYK | 18  | 4     |
| >JAK1-H647Y SMMRQVSHI | 42    | >JAK1-H647Y SMMRQVSYK | 22  | 20    |
| >JAK1-H647Y SMMRQVSHI | 74    | >JAK1-H647Y SMMRQVSYK | 45  | 29    |
| >JAK1-H647Y SMMRQVSHI | 403   | >JAK1-H647Y SMMRQVSYK | 205 | 198   |
| >JAK1-H647Y SMMRQVSHI | 38    | >JAK1-H647Y SMMRQVSYK | 33  | 5     |
| >JAK1-H647Y SMMRQVSH  | 474   | >JAK1-H647Y SMMRQVSY  | 123 | 351   |
| >JAK1-H647Y SMMRQVSHI | 32    | >JAK1-H647Y SMMRQVSYK | 26  | 6     |
| >JAK1-H647Y SMMRQVSH  | 1006  | >JAK1-H647Y SMMRQVSY  | 70  | 936   |
| >JAK1-H647Y SMMRQVSHI | 10    | >JAK1-H647Y SMMRQVSYK | 5   | 5     |
| >JAK1-H647Y SMMRQVSH  | 13808 | >JAK1-H647Y SMMRQVSY  | 381 | 13427 |

|                       |       |                       |     |       |
|-----------------------|-------|-----------------------|-----|-------|
| >JAK1-H647Y SMMRQVSH  | 10107 | >JAK1-H647Y SMMRQVSY  | 59  | 10048 |
| >JAK1-H647Y SMMRQVSHI | 33    | >JAK1-H647Y SMMRQVSYk | 19  | 14    |
| >JAK1-H647Y SMMRQVSH  | 7185  | >JAK1-H647Y SMMRQVSY  | 42  | 7143  |
| >JAK1-H647Y SMMRQVSHI | 86    | >JAK1-H647Y SMMRQVSYk | 31  | 55    |
| >JAK1-H647Y SMMRQVSH  | 2050  | >JAK1-H647Y SMMRQVSY  | 188 | 1862  |
| >JAK1-H647Y SMMRQVSHI | 606   | >JAK1-H647Y SMMRQVSYk | 139 | 467   |
| >JAK1-H647Y SMMRQVSH  | 16453 | >JAK1-H647Y SMMRQVSY  | 79  | 16374 |
| >JAK1-H647Y SMMRQVSHI | 119   | >JAK1-H647Y SMMRQVSYk | 144 | 25    |
| >JAK1-H647Y SMMRQVSH  | 414   | >JAK1-H647Y SMMRQVSY  | 40  | 374   |
| >JAK1-H647Y SMMRQVSHI | 252   | >JAK1-H647Y SMMRQVSYk | 377 | 125   |
| >JAK1-H647Y SMMRQVSH  | 2553  | >JAK1-H647Y SMMRQVSY  | 53  | 2500  |
| >JAK1-H647Y SMMRQVSH  | 228   | >JAK1-H647Y SMMRQVSY  | 6   | 222   |
| >JAK1-H647Y SMMRQVSHI | 338   | >JAK1-H647Y SMMRQVSYk | 352 | 14    |
| >JAK1-H647Y SMMRQVSHI | 58    | >JAK1-H647Y SMMRQVSYk | 47  | 11    |
| >JAK1-H647Y SMMRQVSHI | 476   | >JAK1-H647Y SMMRQVSYk | 414 | 62    |
| >JAK1-H647Y ASMMRQVSI | 2324  | >JAK1-H647Y ASMMRQVSI | 452 | 1872  |
| >JAK1-H647Y ASMMRQVSI | 15    | >JAK1-H647Y ASMMRQVSI | 9   | 6     |
| >JAK1-H647Y ASMMRQVSI | 628   | >JAK1-H647Y ASMMRQVSI | 54  | 574   |
| >JAK1-H647Y ASMMRQVSI | 8     | >JAK1-H647Y ASMMRQVSI | 5   | 3     |
| >JAK1-H647Y ASMMRQVSI | 419   | >JAK1-H647Y ASMMRQVSI | 272 | 147   |
| >JAK1-H647Y ASMMRQVSI | 14    | >JAK1-H647Y ASMMRQVSI | 10  | 4     |
| >JAK1-H647Y ASMMRQVSI | 11584 | >JAK1-H647Y ASMMRQVSI | 68  | 11516 |
| >JAK1-H647Y ASMMRQVSI | 243   | >JAK1-H647Y ASMMRQVSI | 50  | 193   |
| >JAK1-H647Y ASMMRQVSI | 2509  | >JAK1-H647Y ASMMRQVSI | 198 | 2311  |
| >JAK1-H647Y ASMMRQVSI | 333   | >JAK1-H647Y ASMMRQVSI | 34  | 299   |
| >JAK1-H647Y ASMMRQVSI | 3946  | >JAK1-H647Y ASMMRQVSI | 80  | 3866  |
| >JAK1-H647Y ASMMRQVSI | 827   | >JAK1-H647Y ASMMRQVSI | 18  | 809   |
| >JAK1-H647Y ASMMRQVSI | 750   | >JAK1-H647Y ASMMRQVSI | 4   | 746   |
| >JAK1-H647Y ASMMRQVSI | 4747  | >JAK1-H647Y ASMMRQVSI | 291 | 4456  |
| >JAK1-H647Y ASMMRQVSI | 384   | >JAK1-H647Y ASMMRQVSI | 389 | 5     |
| >JAK1-H647Y ASMMRQVSI | 75    | >JAK1-H647Y ASMMRQVSI | 71  | 4     |
| >JAK1-H647Y ASMMRQVSI | 334   | >JAK1-H647Y ASMMRQVSI | 368 | 34    |
| >JAK1-H647Y AASMMRQV: | 662   | >JAK1-H647Y AASMMRQV: | 277 | 385   |
| >JAK1-H647Y AASMMRQV: | 8978  | >JAK1-H647Y AASMMRQV: | 179 | 8799  |
| >JAK1-H647Y AASMMRQV: | 62    | >JAK1-H647Y AASMMRQV: | 18  | 44    |
| >JAK1-H647Y AASMMRQV: | 62    | >JAK1-H647Y AASMMRQV: | 36  | 26    |
| >JAK1-H647Y AASMMRQV: | 23024 | >JAK1-H647Y AASMMRQV: | 164 | 22860 |
| >JAK1-H647Y AASMMRQV: | 1124  | >JAK1-H647Y AASMMRQV: | 379 | 745   |
| >JAK1-H647Y AASMMRQV: | 590   | >JAK1-H647Y AASMMRQV: | 180 | 410   |
| >JAK1-H647Y AASMMRQV: | 9052  | >JAK1-H647Y AASMMRQV: | 183 | 8869  |
| >JAK1-H647Y AASMMRQV: | 3884  | >JAK1-H647Y AASMMRQV: | 101 | 3783  |
| >JAK1-H647Y AASMMRQV: | 8328  | >JAK1-H647Y AASMMRQV: | 33  | 8295  |
| >JAK1-H647Y AASMMRQV: | 13801 | >JAK1-H647Y AASMMRQV: | 103 | 13698 |

|                        |       |                        |       |       |
|------------------------|-------|------------------------|-------|-------|
| >JAK1-H647Y AASMMRQV:  | 29208 | >JAK1-H647Y AASMMRQV:  | 301   | 28907 |
| >JAK1-K204N KKMQLPEL   | 35    | >JAK1-K204N MKMQLPEL   | 25    | 10    |
| >JAK1-K204N KKMQLPELP  | 196   | >JAK1-K204N MKMQLPELP  | 143   | 53    |
| >JAK1-K204N KKMQLPEL   | 1076  | >JAK1-K204N MKMQLPEL   | 68    | 1008  |
| >JAK1-K204N KKMQLPEL   | 314   | >JAK1-K204N MKMQLPEL   | 6056  | 5742  |
| >JAK1-K204N MKKMQLPEL  | 22466 | >JAK1-K204N MMKMQLPE   | 56    | 22410 |
| >JAK1-K204N MKKMQLPEL  | 14519 | >JAK1-K204N MMKMQLPE   | 22    | 14497 |
| >JAK1-K204N MKKMQLPEL  | 10029 | >JAK1-K204N MMKMQLPE   | 8     | 10021 |
| >JAK1-K204N MKKMQLPEL  | 9701  | >JAK1-K204N MMKMQLPE   | 121   | 9580  |
| >JAK1-K204N MKKMQLPEL  | 21693 | >JAK1-K204N MMKMQLPE   | 49    | 21644 |
| >JAK1-K204N MKKMQLPEL  | 23308 | >JAK1-K204N MMKMQLPE   | 149   | 23159 |
| >JAK1-K204N MKKMQLPEL  | 22608 | >JAK1-K204N MMKMQLPE   | 307   | 22301 |
| >JAK1-K204N MKKMQLPEL  | 13813 | >JAK1-K204N MMKMQLPE   | 4     | 13809 |
| >JAK1-K204N MKKMQLPEL  | 17028 | >JAK1-K204N MMKMQLPE   | 61    | 16967 |
| >JAK1-K204N MKKMQLPEL  | 8761  | >JAK1-K204N MMKMQLPE   | 35    | 8726  |
| >JAK1-K204N MKKMQLPEL  | 1472  | >JAK1-K204N MMKMQLPE   | 41    | 1431  |
| >JAK1-K204N MKKMQLPEL  | 33    | >JAK1-K204N MMKMQLPE   | 5     | 28    |
| >JAK1-K204N MKKMQLPEL  | 8071  | >JAK1-K204N MMKMQLPE   | 44    | 8027  |
| >JAK1-K204N MKKMQLPEL  | 509   | >JAK1-K204N MMKMQLPE   | 30    | 479   |
| >JAK1-K204N MKKMQLPEL  | 16991 | >JAK1-K204N MMKMQLPE   | 194   | 16797 |
| >JAK1-K204N MKKMQLPEL  | 34    | >JAK1-K204N MMKMQLPE   | 67    | 33    |
| >JAK1-K204N MKKMQLPEL  | 278   | >JAK1-K204N MMKMQLPE   | 544   | 266   |
| >JAK1-K204N VLAISHYAMN | 7285  | >JAK1-K204N VLAISHYAMN | 116   | 7169  |
| >JAK1-K204N VLAISHYAMN | 12911 | >JAK1-K204N VLAISHYAMN | 410   | 12501 |
| >JAK1-K204N VLAISHYAMN | 5163  | >JAK1-K204N VLAISHYAMN | 83    | 5080  |
| >JAK1-K204N VLAISHYAMN | 13066 | >JAK1-K204N VLAISHYAMN | 442   | 12624 |
| >JAK1-K204N VLAISHYAMN | 2268  | >JAK1-K204N VLAISHYAMN | 40    | 2228  |
| >JAK1-K204N VLAISHYAMN | 46    | >JAK1-K204N VLAISHYAMN | 13746 | 13700 |
| >JAK1-K204N VLAISHYAMN | 36    | >JAK1-K204N VLAISHYAMN | 19521 | 19485 |
| >JAK1-K204N VLAISHYAMN | 188   | >JAK1-K204N VLAISHYAMN | 24055 | 23867 |
| >JAK1-K204N VLAISHYAMN | 6232  | >JAK1-K204N VLAISHYAMN | 383   | 5849  |
| >JAK1-K204N MMKKMQLP   | 286   | >JAK1-K204N MMMKMQLI   | 9     | 277   |
| >JAK1-K204N MMKKMQLP   | 7773  | >JAK1-K204N MMMKMQLI   | 321   | 7452  |
| >JAK1-K204N MMKKMQLP   | 240   | >JAK1-K204N MMMKMQLI   | 23    | 217   |
| >JAK1-K204N MMKKMQLP   | 6390  | >JAK1-K204N MMMKMQLI   | 269   | 6121  |
| >JAK1-K204N MMKKMQLP   | 92    | >JAK1-K204N MMMKMQLI   | 21    | 71    |
| >JAK1-K204N MMKKMQLP   | 1036  | >JAK1-K204N MMMKMQLI   | 48    | 988   |
| >JAK1-K204N MMKKMQLP   | 172   | >JAK1-K204N MMMKMQLI   | 6     | 166   |
| >JAK1-K204N MMKKMQLP   | 319   | >JAK1-K204N MMMKMQLI   | 8     | 311   |
| >JAK1-K204N MMKKMQLP   | 460   | >JAK1-K204N MMMKMQLI   | 14    | 446   |
| >JAK1-K204N MMKKMQLP   | 2455  | >JAK1-K204N MMMKMQLI   | 4     | 2451  |
| >JAK1-K204N MMKKMQLP   | 6     | >JAK1-K204N MMMKMQLI   | 3     | 3     |
| >JAK1-K204N MMKKMQLP   | 48    | >JAK1-K204N MMMKMQLI   | 1315  | 1267  |

|                      |       |                       |     |       |
|----------------------|-------|-----------------------|-----|-------|
| >JAK1-K204N MMKKMQLP | 7483  | >JAK1-K204N MMMMKMQLI | 401 | 7082  |
| >JAK1-K204N MMKKMQLP | 6646  | >JAK1-K204N MMMMKMQLI | 334 | 6312  |
| >JAK1-K204N MMKKMQLP | 173   | >JAK1-K204N MMMMKMQLI | 155 | 18    |
| >JAK1-K204N MMKKMQLP | 84    | >JAK1-K204N MMMMKMQLI | 35  | 49    |
| >JAK1-K204N MMKKMQLP | 10908 | >JAK1-K204N MMMMKMQLI | 151 | 10757 |
| >JAK1-K204N MMKKMQLP | 968   | >JAK1-K204N MMMMKMQLI | 203 | 765   |
| >JAK1-K204N AMMKKMQL | 146   | >JAK1-K204N AMMMKMQ   | 78  | 68    |
| >JAK1-K204N AMMKKMQL | 44    | >JAK1-K204N AMMMKMQ   | 35  | 9     |
| >JAK1-K204N AMMKKMQL | 12    | >JAK1-K204N AMMMKMQ   | 11  | 1     |
| >JAK1-K204N AMMKKMQL | 13    | >JAK1-K204N AMMMKMQ   | 13  | 0     |
| >JAK1-K204N AMMKKMQL | 6     | >JAK1-K204N AMMMKMQ   | 5   | 1     |
| >JAK1-K204N AMMKKMQL | 18    | >JAK1-K204N AMMMKMQ   | 13  | 5     |
| >JAK1-K204N AMMKKMQL | 9     | >JAK1-K204N AMMMKMQ   | 7   | 2     |
| >JAK1-K204N AMMKKMQL | 227   | >JAK1-K204N AMMMKMQ   | 200 | 27    |
| >JAK1-K204N AMMKKMQL | 19    | >JAK1-K204N AMMMKMQ   | 20  | 1     |
| >JAK1-K204N AMMKKMQL | 17    | >JAK1-K204N AMMMKMQ   | 14  | 3     |
| >JAK1-K204N AMMKKMQL | 9     | >JAK1-K204N AMMMKMQ   | 7   | 2     |
| >JAK1-K204N AMMKKMQL | 34    | >JAK1-K204N AMMMKMQ   | 49  | 15    |
| >JAK1-K204N AMMKKMQL | 11    | >JAK1-K204N AMMMKMQ   | 16  | 5     |
| >JAK1-K204N AMMKKMQL | 64    | >JAK1-K204N AMMMKMQ   | 64  | 0     |
| >JAK1-K204N AMMKKMQL | 20    | >JAK1-K204N AMMMKMQ   | 22  | 2     |
| >JAK1-K204N AMMKKMQL | 38    | >JAK1-K204N AMMMKMQ   | 29  | 9     |
| >JAK1-K204N AMMKKMQL | 23    | >JAK1-K204N AMMMKMQ   | 20  | 3     |
| >JAK1-K204N AMMKKMQL | 5     | >JAK1-K204N AMMMKMQ   | 4   | 1     |
| >JAK1-K204N AMMKKMQL | 5     | >JAK1-K204N AMMMKMQ   | 4   | 1     |
| >JAK1-K204N AMMKKMQL | 718   | >JAK1-K204N AMMMKMQ   | 494 | 224   |
| >JAK1-K204N AMMKKMQL | 54    | >JAK1-K204N AMMMKMQ   | 63  | 9     |
| >JAK1-K204N AMMKKMQL | 182   | >JAK1-K204N AMMMKMQ   | 131 | 51    |
| >JAK1-K204N AMMKKMQL | 749   | >JAK1-K204N AMMMKMQ   | 497 | 252   |
| >JAK1-K204N AMMKKMQL | 474   | >JAK1-K204N AMMMKMQ   | 361 | 113   |
| >JAK1-K204N AMMKKMQL | 150   | >JAK1-K204N AMMMKMQ   | 139 | 11    |
| >JAK1-K204N AMMKKMQL | 106   | >JAK1-K204N AMMMKMQ   | 98  | 8     |
| >JAK1-K204N AMMKKMQL | 852   | >JAK1-K204N AMMMKMQ   | 391 | 461   |
| >JAK1-K204N YAMMKKMQ | 2618  | >JAK1-K204N YAMMMKMK  | 229 | 2389  |
| >JAK1-K204N YAMMKKMQ | 309   | >JAK1-K204N YAMMMKMK  | 448 | 139   |
| >JAK1-K204N YAMMKKMQ | 348   | >JAK1-K204N YAMMMKMK  | 109 | 239   |
| >JAK1-K204N YAMMKKMQ | 13    | >JAK1-K204N YAMMMKMK  | 50  | 37    |
| >JAK1-K204N YAMMKKMQ | 30    | >JAK1-K204N YAMMMKMK  | 37  | 7     |
| >JAK1-K204N YAMMKKMQ | 1610  | >JAK1-K204N YAMMMKMK  | 391 | 1219  |
| >JAK1-K204N YAMMKKMQ | 1274  | >JAK1-K204N YAMMMKMK  | 303 | 971   |
| >JAK1-K204N HYAMMKKM | 380   | >JAK1-K204N HYAMMMKN  | 226 | 154   |
| >JAK1-K204N HYAMMKKM | 67    | >JAK1-K204N HYAMMMKN  | 19  | 48    |
| >JAK1-K204N HYAMMKKM | 413   | >JAK1-K204N HYAMMMKN  | 77  | 336   |

|                        |       |                        |       |       |
|------------------------|-------|------------------------|-------|-------|
| >JAK1-K204N HYAMMMKKM  | 22    | >JAK1-K204N HYAMMMKN   | 14    | 8     |
| >JAK1-K204N HYAMMMKKM  | 2189  | >JAK1-K204N HYAMMMKN   | 468   | 1721  |
| >JAK1-K204N SHYAMMKKN  | 514   | >JAK1-K204N SHYAMMMK   | 134   | 380   |
| >JAK1-K204N SHYAMMKKN  | 180   | >JAK1-K204N SHYAMMMK   | 118   | 62    |
| >JAK1-K204N SHYAMMKKN  | 983   | >JAK1-K204N SHYAMMMK   | 264   | 719   |
| >JAK1-K204N SHYAMMKK   | 380   | >JAK1-K204N SHYAMMMK   | 136   | 244   |
| >JAK1-K204N SHYAMMKKN  | 755   | >JAK1-K204N SHYAMMMK   | 325   | 430   |
| >JAK1-K204N SHYAMMKKN  | 488   | >JAK1-K204N SHYAMMMK   | 375   | 113   |
| >JAK1-K204N SHYAMMKKN  | 150   | >JAK1-K204N SHYAMMMK   | 144   | 6     |
| >JAK1-K204N SHYAMMKKN  | 1632  | >JAK1-K204N SHYAMMMK   | 208   | 1424  |
| >JAK1-K204N SHYAMMKKN  | 92    | >JAK1-K204N SHYAMMMK   | 34    | 58    |
| >JAK1-K204N ISHYAMMK   | 90    | >JAK1-K204N ISHYAMMM   | 19202 | 19112 |
| >JAK1-K204N ISHYAMMK   | 69    | >JAK1-K204N ISHYAMMM   | 65    | 4     |
| >JAK1-K204N ISHYAMMK   | 20    | >JAK1-K204N ISHYAMMM   | 18394 | 18374 |
| >JAK1-K204N ISHYAMMK   | 17    | >JAK1-K204N ISHYAMMM   | 13    | 4     |
| >JAK1-K204N ISHYAMMK   | 8     | >JAK1-K204N ISHYAMMM   | 216   | 208   |
| >JAK1-K204N ISHYAMMK   | 6     | >JAK1-K204N ISHYAMMM   | 6     | 0     |
| >JAK1-K204N ISHYAMMK   | 605   | >JAK1-K204N ISHYAMMM   | 130   | 475   |
| >JAK1-K204N ISHYAMMK   | 45    | >JAK1-K204N ISHYAMMM   | 13907 | 13862 |
| >JAK1-K204N ISHYAMMK   | 61    | >JAK1-K204N ISHYAMMM   | 34    | 27    |
| >JAK1-K204N ISHYAMMK   | 1501  | >JAK1-K204N ISHYAMMM   | 82    | 1419  |
| >JAK1-K204N ISHYAMMK   | 369   | >JAK1-K204N ISHYAMMM   | 200   | 169   |
| >JAK1-K204N ISHYAMMK   | 9425  | >JAK1-K204N ISHYAMMM   | 7     | 9418  |
| >JAK1-K204N ISHYAMMK   | 5     | >JAK1-K204N ISHYAMMM   | 5     | 0     |
| >JAK1-K204N ISHYAMMK   | 13846 | >JAK1-K204N ISHYAMMM   | 124   | 13722 |
| >JAK1-K204N ISHYAMMK   | 11161 | >JAK1-K204N ISHYAMMM   | 56    | 11105 |
| >JAK1-K204N ISHYAMMK   | 34    | >JAK1-K204N ISHYAMMM   | 23    | 11    |
| >JAK1-K204N ISHYAMMK   | 478   | >JAK1-K204N ISHYAMMM   | 14199 | 13721 |
| >JAK1-K204N ISHYAMMK   | 284   | >JAK1-K204N ISHYAMMM   | 250   | 34    |
| >JAK1-K204N AISHYAMMK  | 39    | >JAK1-K204N AISHYAMMM  | 14697 | 14658 |
| >JAK1-K204N AISHYAMMK  | 13    | >JAK1-K204N AISHYAMMM  | 11    | 2     |
| >JAK1-K204N AISHYAMMK  | 11    | >JAK1-K204N AISHYAMMM  | 9762  | 9751  |
| >JAK1-K204N AISHYAMMK  | 7     | >JAK1-K204N AISHYAMMM  | 6     | 1     |
| >JAK1-K204N AISHYAMMK  | 66    | >JAK1-K204N AISHYAMMM  | 3307  | 3241  |
| >JAK1-K204N AISHYAMMK  | 53    | >JAK1-K204N AISHYAMMM  | 45    | 8     |
| >JAK1-K204N AISHYAMMK  | 346   | >JAK1-K204N AISHYAMMM  | 267   | 79    |
| >JAK1-K204N AISHYAMMK  | 372   | >JAK1-K204N AISHYAMMM  | 25905 | 25533 |
| >JAK1-K204N AISHYAMMK  | 263   | >JAK1-K204N AISHYAMMM  | 204   | 59    |
| >JAK1-K204N AISHYAMMK  | 4568  | >JAK1-K204N AISHYAMMM  | 245   | 4323  |
| >JAK1-K204N AISHYAMMK  | 17700 | >JAK1-K204N AISHYAMMM  | 176   | 17524 |
| >JAK1-K204N AISHYAMMK  | 340   | >JAK1-K204N AISHYAMMM  | 11163 | 10823 |
| >JAK1-K204N AISHYAMMK  | 295   | >JAK1-K204N AISHYAMMM  | 259   | 36    |
| >JAK1-K204N LAISHYAMMI | 73    | >JAK1-K204N LAISHYAMMI | 16719 | 16646 |

|                        |       |                        |       |       |
|------------------------|-------|------------------------|-------|-------|
| >JAK1-K204N LAISHYAMMI | 370   | >JAK1-K204N LAISHYAMMI | 431   | 61    |
| >JAK1-K204N LAISHYAMMI | 16    | >JAK1-K204N LAISHYAMMI | 28174 | 28158 |
| >JAK1-K204N LAISHYAMMI | 40    | >JAK1-K204N LAISHYAMMI | 37    | 3     |
| >JAK1-K204N LAISHYAMMI | 385   | >JAK1-K204N LAISHYAMMI | 8041  | 7656  |
| >JAK1-K204N LAISHYAMMI | 295   | >JAK1-K204N LAISHYAMMI | 232   | 63    |
| >JAK1-K204N LAISHYAMMI | 14    | >JAK1-K204N LAISHYAMMI | 14554 | 14540 |
| >JAK1-K204N LAISHYAMMI | 28    | >JAK1-K204N LAISHYAMMI | 20    | 8     |
| >JAK1-K204N LAISHYAMMI | 17540 | >JAK1-K204N LAISHYAMMI | 342   | 17198 |
| >JAK1-K204N LAISHYAMMI | 1496  | >JAK1-K204N LAISHYAMMI | 58    | 1438  |
| >JAK1-K204N LAISHYAMMI | 16901 | >JAK1-K204N LAISHYAMMI | 43    | 16858 |
| >JAK1-K204N LAISHYAMMI | 18519 | >JAK1-K204N LAISHYAMMI | 189   | 18330 |
| >JAK1-K204N LAISHYAMMI | 17320 | >JAK1-K204N LAISHYAMMI | 486   | 16834 |
| >JAK1-K204N LAISHYAMMI | 24651 | >JAK1-K204N LAISHYAMMI | 136   | 24515 |
| >JAK1-L653F·YLYGVCVRDV | 23    | >JAK1-L653F·YFYGVCVRDV | 3024  | 3001  |
| >JAK1-L653F·YLYGVCVRDV | 28    | >JAK1-L653F·YFYGVCVRDV | 2690  | 2662  |
| >JAK1-L653F·YLYGVCVRDV | 9     | >JAK1-L653F·YFYGVCVRDV | 750   | 741   |
| >JAK1-L653F·YLYGVCVRDV | 57    | >JAK1-L653F·YFYGVCVRDV | 1635  | 1578  |
| >JAK1-L653F·YLYGVCVCR  | 62    | >JAK1-L653F·YFYGVCVCR  | 12118 | 12056 |
| >JAK1-L653F·YLYGVCVRD  | 93    | >JAK1-L653F·YFYGVCVRD  | 18456 | 18363 |
| >JAK1-L653F·YLYGVCVRDV | 2     | >JAK1-L653F·YFYGVCVRDV | 103   | 101   |
| >JAK1-L653F·YLYGVCVRDV | 6     | >JAK1-L653F·YFYGVCVRDV | 5019  | 5013  |
| >JAK1-L653F·YLYGVCVRDV | 5     | >JAK1-L653F·YFYGVCVRDV | 152   | 147   |
| >JAK1-L653F·YLYGVCVRDV | 5     | >JAK1-L653F·YFYGVCVRDV | 5692  | 5687  |
| >JAK1-L653F·YLYGVCVCR  | 30    | >JAK1-L653F·YFYGVCVCR  | 23951 | 23921 |
| >JAK1-L653F·YLYGVCVRD  | 92    | >JAK1-L653F·YFYGVCVRD  | 30522 | 30430 |
| >JAK1-L653F·YLYGVCVRDV | 2     | >JAK1-L653F·YFYGVCVRDV | 57    | 55    |
| >JAK1-L653F·YLYGVCVCR  | 315   | >JAK1-L653F·YFYGVCVCR  | 10148 | 9833  |
| >JAK1-L653F·YLYGVCVCR  | 171   | >JAK1-L653F·YFYGVCVCR  | 45    | 126   |
| >JAK1-L653F·YLYGVCVCR  | 78    | >JAK1-L653F·YFYGVCVCR  | 25    | 53    |
| >JAK1-L653F·YLYGVCVCR  | 16    | >JAK1-L653F·YFYGVCVCR  | 31    | 15    |
| >JAK1-L653F·YLYGVCVCR  | 129   | >JAK1-L653F·YFYGVCVCR  | 50    | 79    |
| >JAK1-L653F·RQVSHKHIVY | 212   | >JAK1-L653F·RQVSHKHIVY | 9250  | 9038  |
| >JAK1-L653F·RQVSHKHIVY | 315   | >JAK1-L653F·RQVSHKHIVY | 8612  | 8297  |
| >JAK1-L653F·RQVSHKHIVY | 17    | >JAK1-L653F·RQVSHKHIVY | 75    | 58    |
| >JAK1-L653F·RQVSHKHIVY | 382   | >JAK1-L653F·RQVSHKHIVY | 8728  | 8346  |
| >JAK1-L653F·RQVSHKHIVY | 4702  | >JAK1-L653F·RQVSHKHIVY | 286   | 4416  |
| >JAK1-L653F·RQVSHKHIVY | 413   | >JAK1-L653F·RQVSHKHIVY | 538   | 125   |
| >JAK1-L653F·RQVSHKHIVY | 202   | >JAK1-L653F·RQVSHKHIVY | 35    | 167   |
| >JAK1-L653F·RQVSHKHIVY | 13    | >JAK1-L653F·RQVSHKHIVY | 2     | 11    |
| >JAK1-L653F·RQVSHKHIVY | 374   | >JAK1-L653F·RQVSHKHIVY | 492   | 118   |
| >JAK1-L653F·RQVSHKHIVY | 279   | >JAK1-L653F·RQVSHKHIVY | 5654  | 5375  |
| >JAK1-L653F·RQVSHKHIVY | 172   | >JAK1-L653F·RQVSHKHIVY | 1775  | 1603  |
| >JAK1-L653F·RQVSHKHIVY | 87    | >JAK1-L653F·RQVSHKHIVY | 815   | 728   |



|                        |      |                        |      |      |
|------------------------|------|------------------------|------|------|
| >JAK1-L653F·RQVSHKHIVY | 327  | >JAK1-L653F·RQVSHKHIVY | 1051 | 724  |
| >JAK1-L653F·RQVSHKHIVY | 75   | >JAK1-L653F·RQVSHKHIVY | 362  | 287  |
| >JAK1-L653F·VYLYGVCV   | 459  | >JAK1-L653F·VYFYGVCV   | 410  | 49   |
| >JAK1-L653F·VYLYGVCVR  | 88   | >JAK1-L653F·VYFYGVCVR  | 38   | 50   |
| >JAK1-L653F·VYLYGVCVR  | 91   | >JAK1-L653F·VYFYGVCVR  | 50   | 41   |
| >JAK1-L653F·VYLYGVCVR  | 3224 | >JAK1-L653F·VYFYGVCVR  | 332  | 2892 |
| >JAK1-L653F·VYLYGVCVR  | 122  | >JAK1-L653F·VYFYGVCVR  | 85   | 37   |
| >JAK1-L653F·IVYLYGVC   | 19   | >JAK1-L653F·IVYFYGVC   | 73   | 54   |
| >JAK1-L653F·IVYLYGVCV  | 160  | >JAK1-L653F·IVYFYGVCV  | 216  | 56   |
| >JAK1-L653F·IVYLYGVCV  | 221  | >JAK1-L653F·IVYFYGVCV  | 95   | 126  |
| >JAK1-L653F·IVYLYGVCV  | 316  | >JAK1-L653F·IVYFYGVCV  | 132  | 184  |
| >JAK1-L653F·IVYLYGVCV  | 380  | >JAK1-L653F·IVYFYGVCV  | 126  | 254  |
| >JAK1-L653F·IVYLYGVCV  | 108  | >JAK1-L653F·IVYFYGVCV  | 88   | 20   |
| >JAK1-L653F·IVYLYGVCV  | 45   | >JAK1-L653F·IVYFYGVCV  | 17   | 28   |
| >JAK1-L653F·IVYLYGVCV  | 641  | >JAK1-L653F·IVYFYGVCV  | 351  | 290  |
| >JAK1-L653F·IVYLYGVCV  | 71   | >JAK1-L653F·IVYFYGVCV  | 56   | 15   |
| >JAK1-L653F·IVYLYGVCV  | 48   | >JAK1-L653F·IVYFYGVCV  | 35   | 13   |
| >JAK1-L653F·IVYLYGVCVR | 425  | >JAK1-L653F·IVYFYGVCVR | 139  | 286  |
| >JAK1-L653F·IVYLYGVCVR | 633  | >JAK1-L653F·IVYFYGVCVR | 361  | 272  |
| >JAK1-L653F·IVYLYGVCVR | 43   | >JAK1-L653F·IVYFYGVCVR | 28   | 15   |
| >JAK1-L653F·IVYLYGVCVR | 323  | >JAK1-L653F·IVYFYGVCVR | 274  | 49   |
| >JAK1-L653F·IVYLYGVCVR | 112  | >JAK1-L653F·IVYFYGVCVR | 36   | 76   |
| >JAK1-L653F·IVYLYGVCV  | 1246 | >JAK1-L653F·IVYFYGVCV  | 264  | 982  |
| >JAK1-L653F·IVYLYGVCV  | 695  | >JAK1-L653F·IVYFYGVCV  | 457  | 238  |
| >JAK1-L653F·IVYLYGVCVR | 462  | >JAK1-L653F·IVYFYGVCVR | 382  | 80   |
| >JAK1-L653F·IVYLYGVCVR | 197  | >JAK1-L653F·IVYFYGVCVR | 221  | 24   |
| >JAK1-L653F·HIVYLYGV   | 243  | >JAK1-L653F·HIVYFYGV   | 192  | 51   |
| >JAK1-L653F·HIVYLYGV   | 55   | >JAK1-L653F·HIVYFYGV   | 39   | 16   |
| >JAK1-L653F·HIVYLYGV   | 49   | >JAK1-L653F·HIVYFYGV   | 51   | 2    |
| >JAK1-L653F·HIVYLYGV   | 30   | >JAK1-L653F·HIVYFYGV   | 22   | 8    |
| >JAK1-L653F·HIVYLYGVCV | 377  | >JAK1-L653F·HIVYFYGVCV | 260  | 117  |
| >JAK1-L653F·HIVYLYGV   | 155  | >JAK1-L653F·HIVYFYGV   | 101  | 54   |
| >JAK1-L653F·HIVYLYGV   | 133  | >JAK1-L653F·HIVYFYGV   | 141  | 8    |
| >JAK1-L653F·HIVYLYGV   | 473  | >JAK1-L653F·HIVYFYGV   | 630  | 157  |
| >JAK1-L653F·HIVYLYGV   | 107  | >JAK1-L653F·HIVYFYGV   | 76   | 31   |
| >JAK1-L653F·HIVYLYGVCV | 72   | >JAK1-L653F·HIVYFYGVCV | 58   | 14   |
| >JAK1-L653F·HIVYLYGVCV | 114  | >JAK1-L653F·HIVYFYGVCV | 88   | 26   |
| >JAK1-L653F·HIVYLYGVCV | 23   | >JAK1-L653F·HIVYFYGVCV | 14   | 9    |
| >JAK1-L653F·HIVYLYGV   | 11   | >JAK1-L653F·HIVYFYGV   | 10   | 1    |
| >JAK1-L653F·HIVYLYGVCV | 95   | >JAK1-L653F·HIVYFYGVCV | 45   | 50   |
| >JAK1-L653F·HIVYLYGV   | 30   | >JAK1-L653F·HIVYFYGV   | 16   | 14   |
| >JAK1-L653F·HIVYLYGVCV | 815  | >JAK1-L653F·HIVYFYGVCV | 324  | 491  |
| >JAK1-L653F·HIVYLYGVCV | 63   | >JAK1-L653F·HIVYFYGVCV | 45   | 18   |

|                         |      |                         |      |      |
|-------------------------|------|-------------------------|------|------|
| >JAK1-L653F·KHIVYLYGV   | 864  | >JAK1-L653F·KHIVYFYGV   | 311  | 553  |
| >JAK1-L653F·KHIVYLYGV   | 290  | >JAK1-L653F·KHIVYFYGV   | 137  | 153  |
| >JAK1-L653F·KHIVYLYGV   | 1335 | >JAK1-L653F·KHIVYFYGV   | 401  | 934  |
| >JAK1-L653F·KHIVYLYGVC' | 368  | >JAK1-L653F·KHIVYFYGVC' | 163  | 205  |
| >JAK1-L653F·HKHIVYLY    | 276  | >JAK1-L653F·HKHIVYFY    | 432  | 156  |
| >JAK1-L653F·HKHIVYLY    | 661  | >JAK1-L653F·HKHIVYFY    | 203  | 458  |
| >JAK1-L653F·HKHIVYLY    | 370  | >JAK1-L653F·HKHIVYFY    | 324  | 46   |
| >JAK1-L653F·HKHIVYLY    | 31   | >JAK1-L653F·HKHIVYFY    | 26   | 5    |
| >JAK1-L653F·HKHIVYLYGV  | 626  | >JAK1-L653F·HKHIVYFYGV  | 400  | 226  |
| >JAK1-L653F·SHKHIVYLY   | 49   | >JAK1-L653F·SHKHIVYFY   | 75   | 26   |
| >JAK1-L653F·SHKHIVYLY   | 49   | >JAK1-L653F·SHKHIVYFY   | 21   | 28   |
| >JAK1-L653F·SHKHIVYLY   | 43   | >JAK1-L653F·SHKHIVYFY   | 26   | 17   |
| >JAK1-L653F·SHKHIVYL    | 568  | >JAK1-L653F·SHKHIVYF    | 21   | 547  |
| >JAK1-L653F·SHKHIVYLY   | 292  | >JAK1-L653F·SHKHIVYFY   | 157  | 135  |
| >JAK1-L653F·SHKHIVYLY   | 367  | >JAK1-L653F·SHKHIVYFY   | 943  | 576  |
| >JAK1-L653F·VSHKHIVYL   | 138  | >JAK1-L653F·VSHKHIVYF   | 231  | 93   |
| >JAK1-L653F·VSHKHIVYLY  | 408  | >JAK1-L653F·VSHKHIVYFY  | 391  | 17   |
| >JAK1-L653F·VSHKHIVYL   | 1252 | >JAK1-L653F·VSHKHIVYF   | 179  | 1073 |
| >JAK1-L653F·VSHKHIVYLY  | 335  | >JAK1-L653F·VSHKHIVYFY  | 35   | 300  |
| >JAK1-L653F·VSHKHIVYLY  | 175  | >JAK1-L653F·VSHKHIVYFY  | 80   | 95   |
| >JAK1-L653F·VSHKHIVYL   | 305  | >JAK1-L653F·VSHKHIVYF   | 2974 | 2669 |
| >JAK1-L653F·VSHKHIVYLY  | 1423 | >JAK1-L653F·VSHKHIVYFY  | 452  | 971  |
| >JAK1-L653F·VSHKHIVYLY  | 24   | >JAK1-L653F·VSHKHIVYFY  | 21   | 3    |
| >JAK1-L653F·VSHKHIVYLY  | 116  | >JAK1-L653F·VSHKHIVYFY  | 80   | 36   |
| >JAK1-L653F·VSHKHIVYL   | 4360 | >JAK1-L653F·VSHKHIVYF   | 164  | 4196 |
| >JAK1-L653F·VSHKHIVYLY  | 371  | >JAK1-L653F·VSHKHIVYFY  | 248  | 123  |
| >JAK1-L653F·VSHKHIVYL   | 308  | >JAK1-L653F·VSHKHIVYF   | 16   | 292  |
| >JAK1-L653F·VSHKHIVYLY  | 175  | >JAK1-L653F·VSHKHIVYFY  | 121  | 54   |
| >JAK1-L653F·VSHKHIVYL   | 67   | >JAK1-L653F·VSHKHIVYF   | 8    | 59   |
| >JAK1-L653F·VSHKHIVYLY  | 11   | >JAK1-L653F·VSHKHIVYFY  | 10   | 1    |
| >JAK1-L653F·VSHKHIVYL   | 5956 | >JAK1-L653F·VSHKHIVYF   | 278  | 5678 |
| >JAK1-L653F·VSHKHIVYL   | 163  | >JAK1-L653F·VSHKHIVYF   | 261  | 98   |
| >JAK1-L653F·VSHKHIVYLY  | 459  | >JAK1-L653F·VSHKHIVYFY  | 327  | 132  |
| >JAK1-L653F·QVSHKHIVYL  | 412  | >JAK1-L653F·QVSHKHIVYF  | 240  | 172  |
| >JAK1-L653F·QVSHKHIVYL  | 1876 | >JAK1-L653F·QVSHKHIVYF  | 369  | 1507 |
| >JAK1-L653F·QVSHKHIVYL  | 536  | >JAK1-L653F·QVSHKHIVYF  | 61   | 475  |
| >JAK1-L653F·QVSHKHIVYL  | 13   | >JAK1-L653F·QVSHKHIVYF  | 15   | 2    |
| >JAK1-L653F·QVSHKHIVYL  | 75   | >JAK1-L653F·QVSHKHIVYF  | 42   | 33   |
| >JAK1-L653F·QVSHKHIVYL  | 490  | >JAK1-L653F·QVSHKHIVYF  | 240  | 250  |
| >JAK1-L653F·QVSHKHIVYL  | 17   | >JAK1-L653F·QVSHKHIVYF  | 14   | 3    |
| >JAK1-L653F·QVSHKHIVYL  | 4382 | >JAK1-L653F·QVSHKHIVYF  | 233  | 4149 |
| >JAK1-L653F·QVSHKHIVYL  | 3736 | >JAK1-L653F·QVSHKHIVYF  | 394  | 3342 |
| >JAK1-L653F·QVSHKHIVYL  | 1973 | >JAK1-L653F·QVSHKHIVYF  | 209  | 1764 |

|                        |       |                        |       |       |
|------------------------|-------|------------------------|-------|-------|
| >JAK1-L653F·QVSHKHIVYL | 457   | >JAK1-L653F·QVSHKHIVYF | 817   | 360   |
| >JAK1-L653F·QVSHKHIVYL | 172   | >JAK1-L653F·QVSHKHIVYF | 350   | 178   |
| >JAK1-L783F·LWEICYNGEI | 552   | >JAK1-L783F·FWEICYNGEI | 225   | 327   |
| >JAK1-L783F·TLWEICYNG  | 421   | >JAK1-L783F·TFWEICYNG  | 20047 | 19626 |
| >JAK1-L783F·TLWEICYNGE | 12    | >JAK1-L783F·TFWEICYNGE | 2102  | 2090  |
| >JAK1-L783F·TLWEICYNG  | 284   | >JAK1-L783F·TFWEICYNG  | 12846 | 12562 |
| >JAK1-L783F·TLWEICYNGE | 29    | >JAK1-L783F·TFWEICYNGE | 1346  | 1317  |
| >JAK1-L783F·TLWEICYNGE | 63    | >JAK1-L783F·TFWEICYNGE | 13632 | 13569 |
| >JAK1-L783F·TLWEICYNGE | 195   | >JAK1-L783F·TFWEICYNGE | 8161  | 7966  |
| >JAK1-L783F·TLWEICYN   | 67    | >JAK1-L783F·TFWEICYN   | 13188 | 13121 |
| >JAK1-L783F·TLWEICYNG  | 442   | >JAK1-L783F·TFWEICYNG  | 23962 | 23520 |
| >JAK1-L783F·TLWEICYNGE | 4     | >JAK1-L783F·TFWEICYNGE | 2622  | 2618  |
| >JAK1-L783F·TLWEICYNGE | 22    | >JAK1-L783F·TFWEICYNGE | 12970 | 12948 |
| >JAK1-L783F·TLWEICYNGE | 23    | >JAK1-L783F·TFWEICYNGE | 7393  | 7370  |
| >JAK1-L783F·TLWEICYNGE | 28    | >JAK1-L783F·TFWEICYNGE | 8733  | 8705  |
| >JAK1-L783F·TLWEICYNGE | 19    | >JAK1-L783F·TFWEICYNGE | 19986 | 19967 |
| >JAK1-L783F·TLWEICYNGE | 1733  | >JAK1-L783F·TFWEICYNGE | 100   | 1633  |
| >JAK1-L783F·TLWEICYNGE | 14168 | >JAK1-L783F·TFWEICYNGE | 309   | 13859 |
| >JAK1-L783F·TLWEICYNGE | 423   | >JAK1-L783F·TFWEICYNGE | 3551  | 3128  |
| >JAK1-L783F·TLWEICYNGE | 97    | >JAK1-L783F·TFWEICYNGE | 2048  | 1951  |
| >JAK1-L783F·TLWEICYNGE | 41    | >JAK1-L783F·TFWEICYNGE | 1724  | 1683  |
| >JAK1-L783F·AADKWSFGT  | 389   | >JAK1-L783F·AADKWSFGT  | 3347  | 2958  |
| >JAK1-L783F·AADKWSFGT  | 474   | >JAK1-L783F·AADKWSFGT  | 13141 | 12667 |
| >JAK1-L783F·AADKWSFGT  | 158   | >JAK1-L783F·AADKWSFGT  | 19    | 139   |
| >JAK1-L783F·AADKWSFGT  | 4687  | >JAK1-L783F·AADKWSFGT  | 332   | 4355  |
| >JAK1-L783F·AADKWSFGT  | 1110  | >JAK1-L783F·AADKWSFGT  | 161   | 949   |
| >JAK1-L783F·TTLWEICY   | 130   | >JAK1-L783F·TTFWEICY   | 43    | 87    |
| >JAK1-L783F·TTLWEICY   | 35    | >JAK1-L783F·TTFWEICY   | 152   | 117   |
| >JAK1-L783F·TTLWEICY   | 256   | >JAK1-L783F·TTFWEICY   | 399   | 143   |
| >JAK1-L783F·TTLWEICY   | 135   | >JAK1-L783F·TTFWEICY   | 51    | 84    |
| >JAK1-L783F·TTLWEICY   | 378   | >JAK1-L783F·TTFWEICY   | 129   | 249   |
| >JAK1-L783F·TTLWEICY   | 587   | >JAK1-L783F·TTFWEICY   | 21    | 566   |
| >JAK1-L783F·TTLWEICYN  | 3155  | >JAK1-L783F·TTFWEICYN  | 96    | 3059  |
| >JAK1-L783F·TTLWEICYNG | 6926  | >JAK1-L783F·TTFWEICYNG | 361   | 6565  |
| >JAK1-L783F·TTLWEICY   | 54    | >JAK1-L783F·TTFWEICY   | 29    | 25    |
| >JAK1-L783F·TTLWEICY   | 1018  | >JAK1-L783F·TTFWEICY   | 379   | 639   |
| >JAK1-L783F·TTLWEICY   | 115   | >JAK1-L783F·TTFWEICY   | 161   | 46    |
| >JAK1-L783F·TTLWEICY   | 3561  | >JAK1-L783F·TTFWEICY   | 358   | 3203  |
| >JAK1-L783F·GTTLWEICY  | 318   | >JAK1-L783F·GTTFWEICY  | 332   | 14    |
| >JAK1-L783F·GTTLWEICY  | 751   | >JAK1-L783F·GTTFWEICY  | 360   | 391   |
| >JAK1-L783F·GTTLWEICY  | 97    | >JAK1-L783F·GTTFWEICY  | 35    | 62    |
| >JAK1-L783F·GTTLWEICY  | 801   | >JAK1-L783F·GTTFWEICY  | 232   | 569   |
| >JAK1-L783F·GTTLWEICY  | 488   | >JAK1-L783F·GTTFWEICY  | 459   | 29    |

|                         |      |                         |     |      |
|-------------------------|------|-------------------------|-----|------|
| >JAK1-L783F-GTTLWEICY   | 175  | >JAK1-L783F-GTTFWEICY   | 68  | 107  |
| >JAK1-L783F-GTTLWEICY   | 508  | >JAK1-L783F-GTTFWEICY   | 124 | 384  |
| >JAK1-L783F-FGTTLWEI    | 570  | >JAK1-L783F-FGTTFWEI    | 487 | 83   |
| >JAK1-L783F-FGTTLWEI    | 135  | >JAK1-L783F-FGTTFWEI    | 84  | 51   |
| >JAK1-L783F-FGTTLWEICY  | 712  | >JAK1-L783F-FGTTFWEICY  | 347 | 365  |
| >JAK1-L783F-FGTTLWEICY  | 599  | >JAK1-L783F-FGTTFWEICY  | 366 | 233  |
| >JAK1-L783F-SFGTTLWEI   | 173  | >JAK1-L783F-SFGTTFWEI   | 184 | 11   |
| >JAK1-L783F-SFGTTLWEI   | 263  | >JAK1-L783F-SFGTTFWEI   | 97  | 166  |
| >JAK1-L783F-SFGTTLWEI   | 330  | >JAK1-L783F-SFGTTFWEI   | 97  | 233  |
| >JAK1-L783F-SFGTTLWEI   | 17   | >JAK1-L783F-SFGTTFWEI   | 8   | 9    |
| >JAK1-L783F-SFGTTLWEIC' | 42   | >JAK1-L783F-SFGTTFWEIC' | 29  | 13   |
| >JAK1-L783F-SFGTTLWEIC' | 575  | >JAK1-L783F-SFGTTFWEIC' | 496 | 79   |
| >JAK1-L783F-SFGTTLWEIC' | 87   | >JAK1-L783F-SFGTTFWEIC' | 59  | 28   |
| >JAK1-L783F-SFGTTLWEIC' | 320  | >JAK1-L783F-SFGTTFWEIC' | 469 | 149  |
| >JAK1-L783F-SFGTTLWEI   | 178  | >JAK1-L783F-SFGTTFWEI   | 138 | 40   |
| >JAK1-L783F-SFGTTLWEIC  | 307  | >JAK1-L783F-SFGTTFWEIC  | 293 | 14   |
| >JAK1-L783F-SFGTTLWEI   | 224  | >JAK1-L783F-SFGTTFWEI   | 222 | 2    |
| >JAK1-L783F-WSFGTTLWE   | 470  | >JAK1-L783F-WSFGTTFWE   | 558 | 88   |
| >JAK1-L783F-WSFGTTLWE   | 61   | >JAK1-L783F-WSFGTTFWE   | 58  | 3    |
| >JAK1-L783F-WSFGTTLWE   | 174  | >JAK1-L783F-WSFGTTFWE   | 142 | 32   |
| >JAK1-L783F-WSFGTTLWE   | 996  | >JAK1-L783F-WSFGTTFWE   | 387 | 609  |
| >JAK1-L783F-WSFGTTLWE   | 430  | >JAK1-L783F-WSFGTTFWE   | 312 | 118  |
| >JAK1-L783F-WSFGTTLWE   | 102  | >JAK1-L783F-WSFGTTFWE   | 45  | 57   |
| >JAK1-L783F-WSFGTTLWE   | 136  | >JAK1-L783F-WSFGTTFWE   | 62  | 74   |
| >JAK1-L783F-WSFGTTLWE   | 317  | >JAK1-L783F-WSFGTTFWE   | 234 | 83   |
| >JAK1-L783F-WSFGTTLW    | 4    | >JAK1-L783F-WSFGTTFW    | 5   | 1    |
| >JAK1-L783F-WSFGTTLWE   | 41   | >JAK1-L783F-WSFGTTFWE   | 76  | 35   |
| >JAK1-L783F-WSFGTTLW    | 34   | >JAK1-L783F-WSFGTTFW    | 33  | 1    |
| >JAK1-L783F-WSFGTTLW    | 9    | >JAK1-L783F-WSFGTTFW    | 9   | 0    |
| >JAK1-L783F-WSFGTTLWE   | 82   | >JAK1-L783F-WSFGTTFWE   | 73  | 9    |
| >JAK1-L783F-WSFGTTLW    | 71   | >JAK1-L783F-WSFGTTFW    | 224 | 153  |
| >JAK1-L783F-WSFGTTLWE   | 343  | >JAK1-L783F-WSFGTTFWE   | 776 | 433  |
| >JAK1-L783F-WSFGTTLWE   | 437  | >JAK1-L783F-WSFGTTFWE   | 456 | 19   |
| >JAK1-L783F-WSFGTTLWE   | 137  | >JAK1-L783F-WSFGTTFWE   | 159 | 22   |
| >JAK1-L783F-WSFGTTLW    | 107  | >JAK1-L783F-WSFGTTFW    | 151 | 44   |
| >JAK1-L783F-WSFGTTLW    | 29   | >JAK1-L783F-WSFGTTFW    | 26  | 3    |
| >JAK1-L783F-KWSFGTTLW   | 614  | >JAK1-L783F-KWSFGTTFW   | 376 | 238  |
| >JAK1-L783F-KWSFGTTL    | 3293 | >JAK1-L783F-KWSFGTTF    | 202 | 3091 |
| >JAK1-L783F-KWSFGTTLW   | 243  | >JAK1-L783F-KWSFGTTFW   | 160 | 83   |
| >JAK1-L783F-KWSFGTTL    | 912  | >JAK1-L783F-KWSFGTTF    | 125 | 787  |
| >JAK1-L783F-KWSFGTTLW   | 358  | >JAK1-L783F-KWSFGTTFW   | 493 | 135  |
| >JAK1-L783F-KWSFGTTLW   | 166  | >JAK1-L783F-KWSFGTTFW   | 115 | 51   |
| >JAK1-L783F-KWSFGTTL    | 289  | >JAK1-L783F-KWSFGTTF    | 26  | 263  |

|                       |      |                        |      |      |
|-----------------------|------|------------------------|------|------|
| >JAK1-L783F·KWSFGTTLW | 488  | >JAK1-L783F·KWSFGTTFW  | 182  | 306  |
| >JAK1-L783F·KWSFGTTLW | 45   | >JAK1-L783F·KWSFGTTFW  | 27   | 18   |
| >JAK1-L783F·KWSFGTTL  | 5337 | >JAK1-L783F·KWSFGTTF   | 389  | 4948 |
| >JAK1-L783F·KWSFGTTLW | 153  | >JAK1-L783F·KWSFGTTFW  | 221  | 68   |
| >JAK1-L783F·KWSFGTTL  | 48   | >JAK1-L783F·KWSFGTTF   | 63   | 15   |
| >JAK1-L783F·KWSFGTTLW | 128  | >JAK1-L783F·KWSFGTTFW  | 27   | 101  |
| >JAK1-L783F·KWSFGTTLW | 39   | >JAK1-L783F·KWSFGTTFW  | 32   | 7    |
| >JAK1-L783F·DKWSFGTTL | 26   | >JAK1-L783F·DKWSFGTTF  | 3    | 23   |
| >JAK1-L783F·DKWSFGTTL | 481  | >JAK1-L783F·DKWSFGTTF  | 291  | 190  |
| >JAK1-L783F·DKWSFGTTL | 1296 | >JAK1-L783F·DKWSFGTTF  | 119  | 1177 |
| >JAK1-L783F·ADKWSFGTT | 4679 | >JAK1-L783F·ADKWSFGTT  | 265  | 4414 |
| >JAK1-L783F·ADKWSFGTT | 1464 | >JAK1-L783F·ADKWSFGTT  | 236  | 1228 |
| >JAK1-M642 MRQVSHKHI  | 150  | >JAK1-M642 IRQVSHKHI   | 184  | 34   |
| >JAK1-M642 MRQVSHKHI' | 34   | >JAK1-M642 IRQVSHKHIV' | 39   | 5    |
| >JAK1-M642 MRQVSHKHI' | 212  | >JAK1-M642 IRQVSHKHIV  | 243  | 31   |
| >JAK1-M642 MRQVSHKHI  | 847  | >JAK1-M642 IRQVSHKHI   | 471  | 376  |
| >JAK1-M642 MRQVSHKHI' | 311  | >JAK1-M642 IRQVSHKHIV  | 276  | 35   |
| >JAK1-M642 MRQVSHKHI' | 766  | >JAK1-M642 IRQVSHKHIV' | 365  | 401  |
| >JAK1-M642 MMRQVSHKI  | 58   | >JAK1-M642 MIRQVSHKHI  | 695  | 637  |
| >JAK1-M642 MMRQVSHKI  | 393  | >JAK1-M642 MIRQVSHKHI  | 2055 | 1662 |
| >JAK1-M642 MMRQVSHKI  | 8    | >JAK1-M642 MIRQVSHKHI  | 62   | 54   |
| >JAK1-M642 MMRQVSHKI  | 61   | >JAK1-M642 MIRQVSHKHI  | 2183 | 2122 |
| >JAK1-M642 MMRQVSHKI  | 6    | >JAK1-M642 MIRQVSHKHI  | 145  | 139  |
| >JAK1-M642 MMRQVSHKI  | 29   | >JAK1-M642 MIRQVSHKHI  | 2389 | 2360 |
| >JAK1-M642 MMRQVSHKI  | 35   | >JAK1-M642 MIRQVSHKHI  | 698  | 663  |
| >JAK1-M642 MMRQVSHKI  | 142  | >JAK1-M642 MIRQVSHKHI  | 4533 | 4391 |
| >JAK1-M642 MMRQVSHKI  | 56   | >JAK1-M642 MIRQVSHKHI  | 1687 | 1631 |
| >JAK1-M642 MMRQVSHKI  | 2    | >JAK1-M642 MIRQVSHKHI  | 6    | 4    |
| >JAK1-M642 MMRQVSHK   | 37   | >JAK1-M642 MIRQVSHK    | 55   | 18   |
| >JAK1-M642 MMRQVSHKI  | 479  | >JAK1-M642 MIRQVSHKH   | 1670 | 1191 |
| >JAK1-M642 MMRQVSHK   | 5    | >JAK1-M642 MIRQVSHK    | 5    | 0    |
| >JAK1-M642 MMRQVSHKI  | 19   | >JAK1-M642 MIRQVSHKHI  | 15   | 4    |
| >JAK1-M642 MMRQVSHKI  | 87   | >JAK1-M642 MIRQVSHKHI  | 61   | 26   |
| >JAK1-M642 MMRQVSHK   | 62   | >JAK1-M642 MIRQVSHK    | 361  | 299  |
| >JAK1-M642 MMRQVSHK   | 328  | >JAK1-M642 MIRQVSHK    | 688  | 360  |
| >JAK1-M642 MMRQVSHK   | 226  | >JAK1-M642 MIRQVSHK    | 86   | 140  |
| >JAK1-M642 MMRQVSHKI  | 69   | >JAK1-M642 MIRQVSHKHI  | 141  | 72   |
| >JAK1-M642 MMRQVSHKI  | 180  | >JAK1-M642 MIRQVSHKHI  | 1762 | 1582 |
| >JAK1-M642 MMRQVSHK   | 297  | >JAK1-M642 MIRQVSHK    | 7621 | 7324 |
| >JAK1-M642 MMRQVSHKI  | 70   | >JAK1-M642 MIRQVSHKHI  | 1494 | 1424 |
| >JAK1-M642 MMRQVSHKI  | 166  | >JAK1-M642 MIRQVSHKHI  | 3919 | 3753 |
| >JAK1-M642 SLAFFEAASM | 477  | >JAK1-M642 SLAFFEAASM  | 114  | 363  |
| >JAK1-M642 SLAFFEAASM | 29   | >JAK1-M642 SLAFFEAASM  | 10   | 19   |

|                       |      |                       |      |      |
|-----------------------|------|-----------------------|------|------|
| >JAK1-M642 SLAFFEAASM | 110  | >JAK1-M642 SLAFFEAASM | 14   | 96   |
| >JAK1-M642 SLAFFEAASM | 97   | >JAK1-M642 SLAFFEAASM | 13   | 84   |
| >JAK1-M642 SLAFFEAASM | 1562 | >JAK1-M642 SLAFFEAASM | 136  | 1426 |
| >JAK1-M642 SLAFFEAASM | 189  | >JAK1-M642 SLAFFEAASM | 23   | 166  |
| >JAK1-M642 SLAFFEAASM | 953  | >JAK1-M642 SLAFFEAASM | 198  | 755  |
| >JAK1-M642 SLAFFEAASM | 108  | >JAK1-M642 SLAFFEAASM | 17   | 91   |
| >JAK1-M642 SLAFFEAASM | 3638 | >JAK1-M642 SLAFFEAASM | 411  | 3227 |
| >JAK1-M642 SLAFFEAASM | 489  | >JAK1-M642 SLAFFEAASM | 4222 | 3733 |
| >JAK1-M642 SLAFFEAASM | 43   | >JAK1-M642 SLAFFEAASM | 466  | 423  |
| >JAK1-M642 SMMRQVSHI  | 343  | >JAK1-M642 SMIRQVSHK† | 398  | 55   |
| >JAK1-M642 SMMRQVSHI  | 460  | >JAK1-M642 SMIRQVSHK† | 1654 | 1194 |
| >JAK1-M642 SMMRQVSHI  | 193  | >JAK1-M642 SMIRQVSHK† | 733  | 540  |
| >JAK1-M642 SMMRQVSHI  | 28   | >JAK1-M642 SMIRQVSHK† | 54   | 26   |
| >JAK1-M642 SMMRQVSHI  | 22   | >JAK1-M642 SMIRQVSHK† | 44   | 22   |
| >JAK1-M642 SMMRQVSHI  | 42   | >JAK1-M642 SMIRQVSHK† | 95   | 53   |
| >JAK1-M642 SMMRQVSHI  | 74   | >JAK1-M642 SMIRQVSHK† | 132  | 58   |
| >JAK1-M642 SMMRQVSHI  | 403  | >JAK1-M642 SMIRQVSHK† | 5100 | 4697 |
| >JAK1-M642 SMMRQVSHI  | 38   | >JAK1-M642 SMIRQVSHK† | 76   | 38   |
| >JAK1-M642 SMMRQVSH   | 474  | >JAK1-M642 SMIRQVSH   | 3450 | 2976 |
| >JAK1-M642 SMMRQVSHI  | 32   | >JAK1-M642 SMIRQVSHK  | 56   | 24   |
| >JAK1-M642 SMMRQVSHI  | 10   | >JAK1-M642 SMIRQVSHK  | 22   | 12   |
| >JAK1-M642 SMMRQVSHI  | 33   | >JAK1-M642 SMIRQVSHK  | 94   | 61   |
| >JAK1-M642 SMMRQVSHI  | 86   | >JAK1-M642 SMIRQVSHK  | 195  | 109  |
| >JAK1-M642 SMMRQVSHI  | 119  | >JAK1-M642 SMIRQVSHK† | 725  | 606  |
| >JAK1-M642 SMMRQVSH   | 414  | >JAK1-M642 SMIRQVSH   | 572  | 158  |
| >JAK1-M642 SMMRQVSHI  | 252  | >JAK1-M642 SMIRQVSHK† | 332  | 80   |
| >JAK1-M642 SMMRQVSH   | 228  | >JAK1-M642 SMIRQVSH   | 466  | 238  |
| >JAK1-M642 SMMRQVSHI  | 338  | >JAK1-M642 SMIRQVSHK  | 599  | 261  |
| >JAK1-M642 SMMRQVSHI  | 58   | >JAK1-M642 SMIRQVSHK† | 116  | 58   |
| >JAK1-M642 SMMRQVSHI  | 476  | >JAK1-M642 SMIRQVSHK† | 1106 | 630  |
| >JAK1-M642 ASMMRQVSI  | 15   | >JAK1-M642 ASMIRQVSHI | 21   | 6    |
| >JAK1-M642 ASMMRQVSI  | 8    | >JAK1-M642 ASMIRQVSHI | 11   | 3    |
| >JAK1-M642 ASMMRQVSI  | 419  | >JAK1-M642 ASMIRQVSHI | 917  | 498  |
| >JAK1-M642 ASMMRQVSI  | 14   | >JAK1-M642 ASMIRQVSHI | 18   | 4    |
| >JAK1-M642 ASMMRQVSI  | 243  | >JAK1-M642 ASMIRQVSHI | 273  | 30   |
| >JAK1-M642 ASMMRQVSI  | 333  | >JAK1-M642 ASMIRQVSHI | 371  | 38   |
| >JAK1-M642 ASMMRQVSI  | 750  | >JAK1-M642 ASMIRQVSH  | 460  | 290  |
| >JAK1-M642 ASMMRQVSI  | 703  | >JAK1-M642 ASMIRQVSHI | 469  | 234  |
| >JAK1-M642 ASMMRQVSI  | 384  | >JAK1-M642 ASMIRQVSH  | 303  | 81   |
| >JAK1-M642 ASMMRQVSI  | 75   | >JAK1-M642 ASMIRQVSHI | 69   | 6    |
| >JAK1-M642 ASMMRQVSI  | 334  | >JAK1-M642 ASMIRQVSHI | 272  | 62   |
| >JAK1-M642 AASMMRQV   | 449  | >JAK1-M642 AASMMRQV   | 238  | 211  |
| >JAK1-M642 AASMMRQV:  | 62   | >JAK1-M642 AASMMRQVSI | 75   | 13   |

|                       |      |                       |      |      |
|-----------------------|------|-----------------------|------|------|
| >JAK1-M642 AASMMRQV\  | 62   | >JAK1-M642 AASMIRQVSI | 75   | 13   |
| >JAK1-M642 AASMMRQV\  | 590  | >JAK1-M642 AASMIRQVSI | 312  | 278  |
| >JAK1-M642 EAASMMRQ   | 412  | >JAK1-M642 EAASMIRQ   | 497  | 85   |
| >JAK1-M642 EAASMMRQ\  | 15   | >JAK1-M642 EAASMIRQV  | 15   | 0    |
| >JAK1-M642 EAASMMRQ\  | 22   | >JAK1-M642 EAASMIRQV  | 38   | 16   |
| >JAK1-M642 FEAASMMRC  | 22   | >JAK1-M642 FEAASMIRQ\ | 25   | 3    |
| >JAK1-M642 FEAASMMR   | 101  | >JAK1-M642 FEAASMIR   | 250  | 149  |
| >JAK1-M642 FEAASMMRC  | 98   | >JAK1-M642 FEAASMIRQ\ | 103  | 5    |
| >JAK1-M642 FEAASMMRC  | 19   | >JAK1-M642 FEAASMIRQ\ | 17   | 2    |
| >JAK1-M642 FFEASMM    | 4569 | >JAK1-M642 FFEASMI    | 453  | 4116 |
| >JAK1-M642 FFEASMMR   | 647  | >JAK1-M642 FFEASMIRQ  | 304  | 343  |
| >JAK1-M642 FFEASMM    | 1839 | >JAK1-M642 FFEASMI    | 127  | 1712 |
| >JAK1-M642 FFEASMMR   | 443  | >JAK1-M642 FFEASMIR   | 1382 | 939  |
| >JAK1-M642 FFEASMMR   | 66   | >JAK1-M642 FFEASMIR   | 157  | 91   |
| >JAK1-M642 FFEASMMR   | 230  | >JAK1-M642 FFEASMIR   | 170  | 60   |
| >JAK1-M642 AFFEAASMM  | 288  | >JAK1-M642 AFFEAASMIR | 497  | 209  |
| >JAK1-M642 AFFEAASMM  | 1017 | >JAK1-M642 AFFEAASMI  | 73   | 944  |
| >JAK1-M642 AFFEAASMM  | 41   | >JAK1-M642 AFFEAASMIR | 87   | 46   |
| >JAK1-M642 AFFEAASMM  | 145  | >JAK1-M642 AFFEAASMIR | 292  | 147  |
| >JAK1-M642 AFFEAASMM  | 35   | >JAK1-M642 AFFEAASMIR | 82   | 47   |
| >JAK1-M642 AFFEAASMM  | 34   | >JAK1-M642 AFFEAASMI  | 572  | 538  |
| >JAK1-M642 AFFEAASMM  | 220  | >JAK1-M642 AFFEAASMIR | 320  | 100  |
| >JAK1-M642 AFFEAASMM  | 270  | >JAK1-M642 AFFEAASMIR | 218  | 52   |
| >JAK1-M642 LAFFEAASMI | 382  | >JAK1-M642 LAFFEAASMI | 781  | 399  |
| >JAK1-M642 LAFFEAASMI | 250  | >JAK1-M642 LAFFEAASMI | 337  | 87   |
| >JAK1-M642 LAFFEAASMI | 314  | >JAK1-M642 LAFFEAASMI | 757  | 443  |
| >JAK1-M642 LAFFEAASMI | 5    | >JAK1-M642 LAFFEAASMI | 8    | 3    |
| >JAK1-M642 LAFFEAASMI | 419  | >JAK1-M642 LAFFEAASMI | 5125 | 4706 |
| >JAK1-M642 LAFFEAASMI | 105  | >JAK1-M642 LAFFEAASMI | 380  | 275  |
| >JAK1-M642 LAFFEAASMI | 10   | >JAK1-M642 LAFFEAASMI | 38   | 28   |
| >JAK1-M642 LAFFEAASMI | 99   | >JAK1-M642 LAFFEAASMI | 4036 | 3937 |
| >JAK1-M642 LAFFEAASMI | 7906 | >JAK1-M642 LAFFEAASMI | 74   | 7832 |
| >JAK1-M828 MNYPNQR    | 705  | >JAK1-M828 INYPNQRPF  | 301  | 404  |
| >JAK1-M828 MNYPNQR    | 51   | >JAK1-M828 INYPNQR    | 354  | 303  |
| >JAK1-M828 MNYPNQR    | 231  | >JAK1-M828 INYPNQRPF  | 394  | 163  |
| >JAK1-M828 MNYPNQR    | 190  | >JAK1-M828 INYPNQRPF  | 281  | 91   |
| >JAK1-M828 MNYPNQR    | 15   | >JAK1-M828 INYPNQRPF  | 20   | 5    |
| >JAK1-M828 MNYPNQR    | 40   | >JAK1-M828 INYPNQRPF  | 53   | 13   |
| >JAK1-M828 MNYPNQR    | 275  | >JAK1-M828 INYPNQRPF  | 399  | 124  |
| >JAK1-M828 MNYPNQR    | 416  | >JAK1-M828 INYPNQRPF  | 293  | 123  |
| >JAK1-M828 MNYPNQR    | 286  | >JAK1-M828 INYPNQR    | 518  | 232  |
| >JAK1-M828 CMNYPNQF   | 193  | >JAK1-M828 CINYPNQR   | 1125 | 932  |
| >JAK1-M828 CMNYPNQF   | 361  | >JAK1-M828 CINYPNQR   | 153  | 208  |

|                       |      |                        |       |       |
|-----------------------|------|------------------------|-------|-------|
| >JAK1-M828 CMNYDPNQF  | 137  | >JAK1-M828 CINYDPNQRF  | 1395  | 1258  |
| >JAK1-M828 CMNYDPNQF  | 9    | >JAK1-M828 CINYDPNQRF  | 325   | 316   |
| >JAK1-M828 KELADLMTRC | 396  | >JAK1-M828 KELADLMTRC  | 28    | 368   |
| >JAK1-M828 KELADLMTRC | 341  | >JAK1-M828 KELADLMTRC  | 215   | 126   |
| >JAK1-M828 KELADLMTRC | 74   | >JAK1-M828 KELADLMTRC  | 75    | 1     |
| >JAK1-M828 KELADLMTRC | 239  | >JAK1-M828 KELADLMTRC  | 268   | 29    |
| >JAK1-M828 KELADLMTRC | 1519 | >JAK1-M828 KELADLMTRC  | 478   | 1041  |
| >JAK1-M828 KELADLMTRC | 30   | >JAK1-M828 KELADLMTRC  | 7     | 23    |
| >JAK1-M828 RCMNYDPNC  | 114  | >JAK1-M828 RCINYDPNQF  | 310   | 196   |
| >JAK1-M828 RCMNYDPNC  | 134  | >JAK1-M828 RCINYDPNQF  | 194   | 60    |
| >JAK1-M828 MTRCMNYD   | 151  | >JAK1-M828 MTRCINYPD   | 171   | 20    |
| >JAK1-M828 MTRCMNYDI  | 423  | >JAK1-M828 MTRCINYPD   | 538   | 115   |
| >JAK1-M828 MTRCMNYDI  | 146  | >JAK1-M828 MTRCINYPD   | 185   | 39    |
| >JAK1-M828 MTRCMNYDI  | 27   | >JAK1-M828 MTRCINYPD   | 31    | 4     |
| >JAK1-M828 LMTRCMNY   | 31   | >JAK1-M828 LMTRCINYP   | 55    | 24    |
| >JAK1-M828 LMTRCMNY   | 62   | >JAK1-M828 LMTRCINYP   | 90    | 28    |
| >JAK1-M828 LMTRCMNY   | 70   | >JAK1-M828 LMTRCINYP   | 635   | 565   |
| >JAK1-M828 LMTRCMNY   | 307  | >JAK1-M828 LMTRCINYP   | 385   | 78    |
| >JAK1-M828 LMTRCMNY   | 35   | >JAK1-M828 LMTRCINYP   | 48    | 13    |
| >JAK1-M828 DLMTRCMNY  | 504  | >JAK1-M828 DLMTRCINYP  | 182   | 322   |
| >JAK1-M828 DLMTRCMNY  | 495  | >JAK1-M828 DLMTRCINYP  | 879   | 384   |
| >JAK1-M828 ADLMTRCM   | 1333 | >JAK1-M828 ADLMTRCIN   | 320   | 1013  |
| >JAK1-M828 ADLMTRCM   | 1061 | >JAK1-M828 ADLMTRCIN   | 40    | 1021  |
| >JAK1-M828 ADLMTRCM   | 1869 | >JAK1-M828 ADLMTRCIN   | 71    | 1798  |
| >JAK1-M828 LADLMTRCM  | 143  | >JAK1-M828 LADLMTRCIN  | 195   | 52    |
| >JAK1-M828 LADLMTRCM  | 359  | >JAK1-M828 LADLMTRCIN  | 442   | 83    |
| >JAK1-M828 LADLMTRCM  | 496  | >JAK1-M828 LADLMTRCIN  | 13131 | 12635 |
| >JAK1-M828 LADLMTRCM  | 358  | >JAK1-M828 LADLMTRCIN  | 180   | 178   |
| >JAK1-M828 ELADLMTRCI | 1027 | >JAK1-M828 ELADLMTRCIN | 493   | 534   |
| >JAK1-M828 ELADLMTRCI | 2420 | >JAK1-M828 ELADLMTRCIN | 454   | 1966  |
| >JAK1-M828 ELADLMTRCI | 4028 | >JAK1-M828 ELADLMTRCIN | 488   | 3540  |
| >JAK1-M828 ELADLMTRCI | 716  | >JAK1-M828 ELADLMTRCIN | 172   | 544   |
| >JAK1-M828 ELADLMTRCI | 1652 | >JAK1-M828 ELADLMTRCIN | 295   | 1357  |
| >JAK1-M828 ELADLMTRCI | 89   | >JAK1-M828 ELADLMTRCIN | 4166  | 4077  |
| >JAK1-Q644 QVSHKHIVYL | 849  | >JAK1-Q644 HVSHKHIVYL  | 317   | 532   |
| >JAK1-Q644 QVSHKHIV   | 908  | >JAK1-Q644 HVSHKHIV    | 482   | 426   |
| >JAK1-Q644 QVSHKHIV   | 461  | >JAK1-Q644 HVSHKHIV    | 142   | 319   |
| >JAK1-Q644 QVSHKHIVYL | 1740 | >JAK1-Q644 HVSHKHIVYL  | 323   | 1417  |
| >JAK1-Q644 QVSHKHIVYL | 412  | >JAK1-Q644 HVSHKHIVYL  | 496   | 84    |
| >JAK1-Q644 QVSHKHIVY  | 90   | >JAK1-Q644 HVSHKHIVY   | 106   | 16    |
| >JAK1-Q644 QVSHKHIVYL | 13   | >JAK1-Q644 HVSHKHIVYL  | 14    | 1     |
| >JAK1-Q644 QVSHKHIVY  | 3654 | >JAK1-Q644 HVSHKHIVY   | 303   | 3351  |
| >JAK1-Q644 QVSHKHIVYL | 2079 | >JAK1-Q644 HVSHKHIVYL  | 157   | 1922  |



|                        |      |                        |       |       |
|------------------------|------|------------------------|-------|-------|
| >JAK1-Q644F QVSHKHIVY  | 548  | >JAK1-Q644F HVSHKHIVY  | 342   | 206   |
| >JAK1-Q644F QVSHKHIVYL | 75   | >JAK1-Q644F HVSHKHIVYL | 54    | 21    |
| >JAK1-Q644F QVSHKHIVYL | 490  | >JAK1-Q644F HVSHKHIVYL | 190   | 300   |
| >JAK1-Q644F QVSHKHIV   | 84   | >JAK1-Q644F HVSHKHIV   | 40    | 44    |
| >JAK1-Q644F QVSHKHIVY  | 193  | >JAK1-Q644F HVSHKHIVY  | 68    | 125   |
| >JAK1-Q644F QVSHKHIVYL | 17   | >JAK1-Q644F HVSHKHIVYL | 11    | 6     |
| >JAK1-Q644F QVSHKHIVY  | 266  | >JAK1-Q644F HVSHKHIVY  | 162   | 104   |
| >JAK1-Q644F QVSHKHIVY  | 543  | >JAK1-Q644F HVSHKHIVY  | 190   | 353   |
| >JAK1-Q644F QVSHKHIVYL | 872  | >JAK1-Q644F HVSHKHIVYL | 391   | 481   |
| >JAK1-Q644F QVSHKHIVY  | 339  | >JAK1-Q644F HVSHKHIVY  | 100   | 239   |
| >JAK1-Q644F QVSHKHIVYL | 578  | >JAK1-Q644F HVSHKHIVYL | 171   | 407   |
| >JAK1-Q644F QVSHKHIVYL | 457  | >JAK1-Q644F HVSHKHIVYL | 492   | 35    |
| >JAK1-Q644F QVSHKHIVY  | 1249 | >JAK1-Q644F HVSHKHIVY  | 169   | 1080  |
| >JAK1-Q644F QVSHKHIVYL | 972  | >JAK1-Q644F HVSHKHIVYL | 177   | 795   |
| >JAK1-Q644F QVSHKHIVY  | 1435 | >JAK1-Q644F HVSHKHIVY  | 365   | 1070  |
| >JAK1-Q644F QVSHKHIVYL | 172  | >JAK1-Q644F HVSHKHIVYL | 64    | 108   |
| >JAK1-Q644F RQVSHKHIVY | 212  | >JAK1-Q644F RHVSHKHIVY | 6797  | 6585  |
| >JAK1-Q644F RQVSHKHIV  | 246  | >JAK1-Q644F RHVSHKHIV  | 16904 | 16658 |
| >JAK1-Q644F RQVSHKHIVY | 315  | >JAK1-Q644F RHVSHKHIVY | 17161 | 16846 |
| >JAK1-Q644F RQVSHKHI   | 189  | >JAK1-Q644F RHVSHKHI   | 19293 | 19104 |
| >JAK1-Q644F RQVSHKHIV  | 51   | >JAK1-Q644F RHVSHKHIV  | 10134 | 10083 |
| >JAK1-Q644F RQVSHKHIVY | 17   | >JAK1-Q644F RHVSHKHIVY | 9111  | 9094  |
| >JAK1-Q644F RQVSHKHIVY | 382  | >JAK1-Q644F RHVSHKHIVY | 10997 | 10615 |
| >JAK1-Q644F RQVSHKHIVY | 232  | >JAK1-Q644F RHVSHKHIVY | 1791  | 1559  |
| >JAK1-Q644F RQVSHKHIVY | 413  | >JAK1-Q644F RHVSHKHIVY | 10074 | 9661  |
| >JAK1-Q644F RQVSHKHI   | 346  | >JAK1-Q644F RHVSHKHI   | 19982 | 19636 |
| >JAK1-Q644F RQVSHKHIVY | 46   | >JAK1-Q644F RHVSHKHIVY | 4974  | 4928  |
| >JAK1-Q644F RQVSHKHIVY | 202  | >JAK1-Q644F RHVSHKHIVY | 18562 | 18360 |
| >JAK1-Q644F RQVSHKHI   | 21   | >JAK1-Q644F RHVSHKHI   | 275   | 254   |
| >JAK1-Q644F RQVSHKHIV  | 42   | >JAK1-Q644F RHVSHKHIV  | 752   | 710   |
| >JAK1-Q644F RQVSHKHIVY | 4    | >JAK1-Q644F RHVSHKHIVY | 29    | 25    |
| >JAK1-Q644F RQVSHKHIVY | 13   | >JAK1-Q644F RHVSHKHIVY | 126   | 113   |
| >JAK1-Q644F RQVSHKHIVY | 299  | >JAK1-Q644F RHVSHKHIVY | 327   | 28    |
| >JAK1-Q644F RQVSHKHIVY | 374  | >JAK1-Q644F RHVSHKHIVY | 7341  | 6967  |
| >JAK1-Q644F RQVSHKHIV  | 470  | >JAK1-Q644F RHVSHKHIV  | 214   | 256   |
| >JAK1-Q644F RQVSHKHIVY | 279  | >JAK1-Q644F RHVSHKHIVY | 131   | 148   |
| >JAK1-Q644F RQVSHKHIVY | 172  | >JAK1-Q644F RHVSHKHIVY | 9333  | 9161  |
| >JAK1-Q644F RQVSHKHIVY | 87   | >JAK1-Q644F RHVSHKHIVY | 2449  | 2362  |
| >JAK1-Q644F RQVSHKHIVY | 327  | >JAK1-Q644F RHVSHKHIVY | 936   | 609   |
| >JAK1-Q644F RQVSHKHIVY | 75   | >JAK1-Q644F RHVSHKHIVY | 733   | 658   |
| >JAK1-Q644F MRQVSHKHI  | 150  | >JAK1-Q644F MRHVSHKHI  | 43    | 107   |
| >JAK1-Q644F MRQVSHKHI  | 508  | >JAK1-Q644F MRHVSHKHI  | 151   | 357   |
| >JAK1-Q644F MRQVSHKHI  | 34   | >JAK1-Q644F MRHVSHKHI  | 13    | 21    |

|                        |      |                        |     |     |
|------------------------|------|------------------------|-----|-----|
| >JAK1-Q644F MRQVSHKHI' | 212  | >JAK1-Q644F MRHVSHKHI' | 729 | 517 |
| >JAK1-Q644F MRQVSHKHI' | 311  | >JAK1-Q644F MRHVSHKHI' | 917 | 606 |
| >JAK1-Q644F MMRQVSHKI  | 530  | >JAK1-Q644F MMRHVSHKI  | 398 | 132 |
| >JAK1-Q644F MMRQVSHKI  | 58   | >JAK1-Q644F MMRHVSHKI  | 45  | 13  |
| >JAK1-Q644F MMRQVSHKI  | 393  | >JAK1-Q644F MMRHVSHKI  | 627 | 234 |
| >JAK1-Q644F MMRQVSHKI  | 8    | >JAK1-Q644F MMRHVSHKI  | 6   | 2   |
| >JAK1-Q644F MMRQVSHKI  | 579  | >JAK1-Q644F MMRHVSHKI  | 381 | 198 |
| >JAK1-Q644F MMRQVSHKI  | 61   | >JAK1-Q644F MMRHVSHKI  | 104 | 43  |
| >JAK1-Q644F MMRQVSHKI  | 6    | >JAK1-Q644F MMRHVSHKI  | 8   | 2   |
| >JAK1-Q644F MMRQVSHKI  | 29   | >JAK1-Q644F MMRHVSHKI  | 17  | 12  |
| >JAK1-Q644F MMRQVSHKI  | 35   | >JAK1-Q644F MMRHVSHKI  | 51  | 16  |
| >JAK1-Q644F MMRQVSHKI  | 142  | >JAK1-Q644F MMRHVSHKI  | 258 | 116 |
| >JAK1-Q644F MMRQVSHKI  | 56   | >JAK1-Q644F MMRHVSHKI  | 143 | 87  |
| >JAK1-Q644F MMRQVSHKI  | 2    | >JAK1-Q644F MMRHVSHKI  | 2   | 0   |
| >JAK1-Q644F MMRQVSHK   | 37   | >JAK1-Q644F MMRHVSHK   | 30  | 7   |
| >JAK1-Q644F MMRQVSHKI  | 479  | >JAK1-Q644F MMRHVSHKI  | 183 | 296 |
| >JAK1-Q644F MMRQVSHK   | 547  | >JAK1-Q644F MMRHVSHK   | 356 | 191 |
| >JAK1-Q644F MMRQVSHK   | 5    | >JAK1-Q644F MMRHVSHK   | 4   | 1   |
| >JAK1-Q644F MMRQVSHKI  | 19   | >JAK1-Q644F MMRHVSHKI  | 8   | 11  |
| >JAK1-Q644F MMRQVSHKI  | 87   | >JAK1-Q644F MMRHVSHKI  | 26  | 61  |
| >JAK1-Q644F MMRQVSHK   | 62   | >JAK1-Q644F MMRHVSHK   | 26  | 36  |
| >JAK1-Q644F MMRQVSHK   | 328  | >JAK1-Q644F MMRHVSHK   | 199 | 129 |
| >JAK1-Q644F MMRQVSHK   | 226  | >JAK1-Q644F MMRHVSHK   | 225 | 1   |
| >JAK1-Q644F MMRQVSHKI  | 69   | >JAK1-Q644F MMRHVSHKI  | 100 | 31  |
| >JAK1-Q644F MMRQVSHKI  | 180  | >JAK1-Q644F MMRHVSHKI  | 189 | 9   |
| >JAK1-Q644F MMRQVSHK   | 297  | >JAK1-Q644F MMRHVSHK   | 123 | 174 |
| >JAK1-Q644F MMRQVSHKI  | 1260 | >JAK1-Q644F MMRHVSHKI  | 282 | 978 |
| >JAK1-Q644F MMRQVSHKI  | 70   | >JAK1-Q644F MMRHVSHKI  | 31  | 39  |
| >JAK1-Q644F MMRQVSHKI  | 166  | >JAK1-Q644F MMRHVSHKI  | 69  | 97  |
| >JAK1-Q644F SMMRQVSHI  | 343  | >JAK1-Q644F SMMRHVSHI' | 143 | 200 |
| >JAK1-Q644F SMMRQVSHI  | 460  | >JAK1-Q644F SMMRHVSHI' | 290 | 170 |
| >JAK1-Q644F SMMRQVSHI  | 193  | >JAK1-Q644F SMMRHVSHI' | 124 | 69  |
| >JAK1-Q644F SMMRQVSHI  | 28   | >JAK1-Q644F SMMRHVSHI' | 16  | 12  |
| >JAK1-Q644F SMMRQVSHI  | 601  | >JAK1-Q644F SMMRHVSHI' | 365 | 236 |
| >JAK1-Q644F SMMRQVSHI  | 22   | >JAK1-Q644F SMMRHVSHI' | 17  | 5   |
| >JAK1-Q644F SMMRQVSHI  | 42   | >JAK1-Q644F SMMRHVSHI' | 46  | 4   |
| >JAK1-Q644F SMMRQVSHI  | 74   | >JAK1-Q644F SMMRHVSHI' | 110 | 36  |
| >JAK1-Q644F SMMRQVSHI  | 403  | >JAK1-Q644F SMMRHVSHI' | 462 | 59  |
| >JAK1-Q644F SMMRQVSHI  | 38   | >JAK1-Q644F SMMRHVSHI' | 45  | 7   |
| >JAK1-Q644F SMMRQVSH   | 474  | >JAK1-Q644F SMMRHVSH   | 307 | 167 |
| >JAK1-Q644F SMMRQVSHI  | 32   | >JAK1-Q644F SMMRHVSHI' | 29  | 3   |
| >JAK1-Q644F SMMRQVSHI  | 10   | >JAK1-Q644F SMMRHVSHI' | 8   | 2   |
| >JAK1-Q644F SMMRQVSHI  | 33   | >JAK1-Q644F SMMRHVSHI' | 41  | 8   |

|                        |      |                        |       |       |
|------------------------|------|------------------------|-------|-------|
| >JAK1-Q644F SMMRQVSHI  | 86   | >JAK1-Q644F SMMRHVSHI  | 43    | 43    |
| >JAK1-Q644F SMMRQVSHI  | 606  | >JAK1-Q644F SMMRHVSHI  | 341   | 265   |
| >JAK1-Q644F SMMRQVSHI  | 119  | >JAK1-Q644F SMMRHVSHI  | 47    | 72    |
| >JAK1-Q644F SMMRQVSH   | 414  | >JAK1-Q644F SMMRHVSH   | 189   | 225   |
| >JAK1-Q644F SMMRQVSHI  | 252  | >JAK1-Q644F SMMRHVSHI  | 167   | 85    |
| >JAK1-Q644F SMMRQVSH   | 228  | >JAK1-Q644F SMMRHVSH   | 133   | 95    |
| >JAK1-Q644F SMMRQVSHI  | 338  | >JAK1-Q644F SMMRHVSHI  | 198   | 140   |
| >JAK1-Q644F SMMRQVSHI  | 58   | >JAK1-Q644F SMMRHVSHI  | 48    | 10    |
| >JAK1-Q644F SMMRQVSHI  | 1117 | >JAK1-Q644F SMMRHVSHI  | 302   | 815   |
| >JAK1-Q644F SMMRQVSHI  | 476  | >JAK1-Q644F SMMRHVSHI  | 346   | 130   |
| >JAK1-Q644F ASMMRQVSI  | 15   | >JAK1-Q644F ASMMRHVSI  | 15    | 0     |
| >JAK1-Q644F ASMMRQVSI  | 628  | >JAK1-Q644F ASMMRHVSI  | 328   | 300   |
| >JAK1-Q644F ASMMRQVSI  | 8    | >JAK1-Q644F ASMMRHVSI  | 8     | 0     |
| >JAK1-Q644F ASMMRQVSI  | 419  | >JAK1-Q644F ASMMRHVSI  | 281   | 138   |
| >JAK1-Q644F ASMMRQVSI  | 14   | >JAK1-Q644F ASMMRHVSI  | 11    | 3     |
| >JAK1-Q644F ASMMRQVSI  | 243  | >JAK1-Q644F ASMMRHVSI  | 195   | 48    |
| >JAK1-Q644F ASMMRQVSI  | 333  | >JAK1-Q644F ASMMRHVSI  | 331   | 2     |
| >JAK1-Q644F ASMMRQVSI  | 827  | >JAK1-Q644F ASMMRHVSI  | 440   | 387   |
| >JAK1-Q644F ASMMRQVSI  | 750  | >JAK1-Q644F ASMMRHVSI  | 226   | 524   |
| >JAK1-Q644F ASMMRQVSI  | 703  | >JAK1-Q644F ASMMRHVSI  | 394   | 309   |
| >JAK1-Q644F ASMMRQVSI  | 384  | >JAK1-Q644F ASMMRHVSI  | 393   | 9     |
| >JAK1-Q644F ASMMRQVSI  | 75   | >JAK1-Q644F ASMMRHVSI  | 61    | 14    |
| >JAK1-Q644F ASMMRQVSI  | 334  | >JAK1-Q644F ASMMRHVSI  | 334   | 0     |
| >JAK1-Q644F AASMMRQV   | 449  | >JAK1-Q644F AASMMRHV   | 720   | 271   |
| >JAK1-Q644F AASMMRQV:  | 662  | >JAK1-Q644F AASMMRHV:  | 382   | 280   |
| >JAK1-Q644F AASMMRQV:  | 62   | >JAK1-Q644F AASMMRHV:  | 35    | 27    |
| >JAK1-Q644F AASMMRQV:  | 62   | >JAK1-Q644F AASMMRHV:  | 69    | 7     |
| >JAK1-Q644F AASMMRQV:  | 590  | >JAK1-Q644F AASMMRHV:  | 292   | 298   |
| >JAK1-Q644F AASMMRQV:  | 1005 | >JAK1-Q644F AASMMRHV:  | 339   | 666   |
| >JAK1-Q644F EAASMMRQ\  | 1708 | >JAK1-Q644F EAASMMRH\  | 444   | 1264  |
| >JAK1-Q644F EAASMMRQ   | 412  | >JAK1-Q644F EAASMMRH   | 702   | 290   |
| >JAK1-Q644F EAASMMRQ\  | 15   | >JAK1-Q644F EAASMMRH\  | 13    | 2     |
| >JAK1-Q644F EAASMMRQ\  | 22   | >JAK1-Q644F EAASMMRH\  | 39    | 17    |
| >JAK1-Q644F FEAASMMRC  | 22   | >JAK1-Q644F FEAASMMRF  | 48    | 26    |
| >JAK1-Q644F FEAASMMRC  | 98   | >JAK1-Q644F FEAASMMRF  | 124   | 26    |
| >JAK1-Q644F FEAASMMRC  | 19   | >JAK1-Q644F FEAASMMRF  | 14    | 5     |
| >JAK1-R724F REGIDSECGP | 312  | >JAK1-R724F HEGIDSECGP | 1150  | 838   |
| >JAK1-R724F REGIDSECGP | 3293 | >JAK1-R724F HEGIDSECGP | 458   | 2835  |
| >JAK1-R724F REGIDSECGP | 378  | >JAK1-R724F HEGIDSECGP | 771   | 393   |
| >JAK1-R724F REGIDSECGP | 352  | >JAK1-R724F HEGIDSECGP | 751   | 399   |
| >JAK1-R724F NVCTKNLLLA | 412  | >JAK1-R724F NVCTKNLLLA | 13972 | 13560 |
| >JAK1-R724F NVCTKNLLLA | 113  | >JAK1-R724F NVCTKNLLLA | 22639 | 22526 |
| >JAK1-R724F NVCTKNLLLA | 81   | >JAK1-R724F NVCTKNLLLA | 15220 | 15139 |

|                         |      |                         |       |       |
|-------------------------|------|-------------------------|-------|-------|
| >JAK1-R724F NVCTKNLLLA  | 211  | >JAK1-R724F NVCTKNLLLA  | 29889 | 29678 |
| >JAK1-R724F LLAREGIDSEC | 30   | >JAK1-R724F LLAHEGIDSEC | 59    | 29    |
| >JAK1-R724F LLLAREGI    | 241  | >JAK1-R724F LLLAHEGI    | 106   | 135   |
| >JAK1-R724F LLLAREGI    | 228  | >JAK1-R724F LLLAHEGI    | 97    | 131   |
| >JAK1-R724F LLLAREGI    | 304  | >JAK1-R724F LLLAHEGI    | 99    | 205   |
| >JAK1-R724F LLLAREGI    | 164  | >JAK1-R724F LLLAHEGI    | 94    | 70    |
| >JAK1-R724F LLLAREGI    | 13   | >JAK1-R724F LLLAHEGI    | 5     | 8     |
| >JAK1-R724F LLLAREGI    | 87   | >JAK1-R724F LLLAHEGI    | 30    | 57    |
| >JAK1-R724F LLLAREGI    | 53   | >JAK1-R724F LLLAHEGI    | 40    | 13    |
| >JAK1-R724F LLLAREGI    | 105  | >JAK1-R724F LLLAHEGI    | 46    | 59    |
| >JAK1-R724F LLLAREGI    | 13   | >JAK1-R724F LLLAHEGI    | 12    | 1     |
| >JAK1-R724F NLLLAREGI   | 1138 | >JAK1-R724F NLLLAHEGI   | 79    | 1059  |
| >JAK1-R724F NLLLAREGI   | 1518 | >JAK1-R724F NLLLAHEGI   | 309   | 1209  |
| >JAK1-R724F NLLLAREGI   | 427  | >JAK1-R724F NLLLAHEGI   | 91    | 336   |
| >JAK1-R724F NLLLAREGI   | 748  | >JAK1-R724F NLLLAHEGI   | 196   | 552   |
| >JAK1-R724F TKNLLLAREG  | 365  | >JAK1-R724F TKNLLLAHEG  | 630   | 265   |
| >JAK1-R724F CTKNLLLAR   | 19   | >JAK1-R724F CTKNLLLAH   | 5088  | 5069  |
| >JAK1-R724F CTKNLLLAR   | 115  | >JAK1-R724F CTKNLLLAH   | 20222 | 20107 |
| >JAK1-R724F CTKNLLLAR   | 248  | >JAK1-R724F CTKNLLLAH   | 19729 | 19481 |
| >JAK1-R724F VCTKNLLLAR  | 416  | >JAK1-R724F VCTKNLLLAH  | 31747 | 31331 |
| >JAK1-R724C REGIDSECGP  | 312  | >JAK1-R724C QEGIDSECGP  | 1883  | 1571  |
| >JAK1-R724C REGIDSECGP  | 378  | >JAK1-R724C QEGIDSECGP  | 2124  | 1746  |
| >JAK1-R724C REGIDSECGP  | 352  | >JAK1-R724C QEGIDSECGP  | 2633  | 2281  |
| >JAK1-R724C NVCTKNLLLA  | 412  | >JAK1-R724C NVCTKNLLLA  | 18359 | 17947 |
| >JAK1-R724C NVCTKNLLLA  | 113  | >JAK1-R724C NVCTKNLLLA  | 20917 | 20804 |
| >JAK1-R724C NVCTKNLLLA  | 81   | >JAK1-R724C NVCTKNLLLA  | 11892 | 11811 |
| >JAK1-R724C NVCTKNLLLA  | 211  | >JAK1-R724C NVCTKNLLLA  | 23390 | 23179 |
| >JAK1-R724C LLAREGIDSEC | 709  | >JAK1-R724C LLAQEGIDSEC | 483   | 226   |
| >JAK1-R724C LLAREGIDSEC | 30   | >JAK1-R724C LLAQEGIDSEC | 24    | 6     |
| >JAK1-R724C LLLAREGI    | 241  | >JAK1-R724C LLLAQEGI    | 123   | 118   |
| >JAK1-R724C LLLAREGI    | 228  | >JAK1-R724C LLLAQEGI    | 107   | 121   |
| >JAK1-R724C LLLAREGI    | 304  | >JAK1-R724C LLLAQEGI    | 264   | 40    |
| >JAK1-R724C LLLAREGI    | 164  | >JAK1-R724C LLLAQEGI    | 135   | 29    |
| >JAK1-R724C LLLAREGI    | 13   | >JAK1-R724C LLLAQEGI    | 7     | 6     |
| >JAK1-R724C LLLAREGI    | 87   | >JAK1-R724C LLLAQEGI    | 24    | 63    |
| >JAK1-R724C LLLAREGI    | 53   | >JAK1-R724C LLLAQEGI    | 22    | 31    |
| >JAK1-R724C LLLAREGI    | 105  | >JAK1-R724C LLLAQEGI    | 30    | 75    |
| >JAK1-R724C LLLAREGI    | 13   | >JAK1-R724C LLLAQEGI    | 11    | 2     |
| >JAK1-R724C NLLLAREGI   | 1146 | >JAK1-R724C NLLLAQEGI   | 298   | 848   |
| >JAK1-R724C NLLLAREGI   | 1138 | >JAK1-R724C NLLLAQEGI   | 140   | 998   |
| >JAK1-R724C NLLLAREGI   | 1518 | >JAK1-R724C NLLLAQEGI   | 112   | 1406  |
| >JAK1-R724C NLLLAREGI   | 2051 | >JAK1-R724C NLLLAQEGI   | 281   | 1770  |
| >JAK1-R724C NLLLAREGI   | 427  | >JAK1-R724C NLLLAQEGI   | 22    | 405   |

|                         |      |                         |       |       |
|-------------------------|------|-------------------------|-------|-------|
| >JAK1-R724C NLLLAQEGI   | 793  | >JAK1-R724C NLLLAQEGI   | 477   | 316   |
| >JAK1-R724C NLLLAQEGI   | 748  | >JAK1-R724C NLLLAQEGI   | 481   | 267   |
| >JAK1-R724C TKNLLLAQEG  | 365  | >JAK1-R724C TKNLLLAQEG  | 334   | 31    |
| >JAK1-R724C CTKNLLLAQ   | 19   | >JAK1-R724C CTKNLLLAQ   | 11171 | 11152 |
| >JAK1-R724C CTKNLLLAQ   | 115  | >JAK1-R724C CTKNLLLAQ   | 18916 | 18801 |
| >JAK1-R724C CTKNLLLAQ   | 248  | >JAK1-R724C CTKNLLLAQ   | 16498 | 16250 |
| >JAK1-R724C VCTKNLLLAQ  | 416  | >JAK1-R724C VCTKNLLLAQ  | 25499 | 25083 |
| >JAK1-R879C RDLGEGHFGI  | 94   | >JAK1-R879C CDLGEGHFGI  | 48    | 46    |
| >JAK1-R879C HFEKRFLKRIR | 43   | >JAK1-R879C HFEKRFLKRIC | 19956 | 19913 |
| >JAK1-R879C HFEKRFLKRIR | 182  | >JAK1-R879C HFEKRFLKRIC | 34012 | 33830 |
| >JAK1-R879C HFEKRFLKRIR | 37   | >JAK1-R879C HFEKRFLKRIC | 30768 | 30731 |
| >JAK1-R879C RIRDLGEG    | 251  | >JAK1-R879C RICDLGEG    | 12278 | 12027 |
| >JAK1-R879C RIRDLGEGHF  | 69   | >JAK1-R879C RICDLGEGHF  | 6081  | 6012  |
| >JAK1-R879C RIRDLGEGHF  | 56   | >JAK1-R879C RICDLGEGHF  | 90    | 34    |
| >JAK1-R879C RIRDLGEGHF  | 66   | >JAK1-R879C RICDLGEGHF  | 326   | 260   |
| >JAK1-R879C RIRDLGEGHF  | 267  | >JAK1-R879C RICDLGEGHF  | 833   | 566   |
| >JAK1-R879C KRIRDLGEGH  | 151  | >JAK1-R879C KRICDLGEGH  | 97    | 54    |
| >JAK1-R879C KRIRDLGEGH  | 339  | >JAK1-R879C KRICDLGEGH  | 983   | 644   |
| >JAK1-R879C KRIRDLGEGH  | 177  | >JAK1-R879C KRICDLGEGH  | 220   | 43    |
| >JAK1-R879C KRIRDLGE    | 165  | >JAK1-R879C KRICDLGE    | 278   | 113   |
| >JAK1-R879C KRIRDLGEGH  | 290  | >JAK1-R879C KRICDLGEGH  | 354   | 64    |
| >JAK1-R879C KRIRDLGEGH  | 323  | >JAK1-R879C KRICDLGEGH  | 1014  | 691   |
| >JAK1-R879C FLKRIRDL    | 74   | >JAK1-R879C FLKRICDL    | 20    | 54    |
| >JAK1-R879C FLKRIRDLG   | 983  | >JAK1-R879C FLKRICDLG   | 199   | 784   |
| >JAK1-R879C FLKRIRDL    | 26   | >JAK1-R879C FLKRICDL    | 12    | 14    |
| >JAK1-R879C FLKRIRDL    | 1126 | >JAK1-R879C FLKRICDL    | 223   | 903   |
| >JAK1-R879C FLKRIRDL    | 2333 | >JAK1-R879C FLKRICDL    | 242   | 2091  |
| >JAK1-R879C FLKRIRDL    | 4904 | >JAK1-R879C FLKRICDL    | 484   | 4420  |
| >JAK1-R879C FLKRIRDL    | 11   | >JAK1-R879C FLKRICDL    | 4     | 7     |
| >JAK1-R879C FLKRIRDL    | 29   | >JAK1-R879C FLKRICDL    | 35    | 6     |
| >JAK1-R879C RFLKRIRDL   | 61   | >JAK1-R879C RFLKRICDL   | 39    | 22    |
| >JAK1-R879C RFLKRIRDL   | 564  | >JAK1-R879C RFLKRICDL   | 262   | 302   |
| >JAK1-R879C KRFLKRIRDL  | 528  | >JAK1-R879C KRFLKRICDL  | 337   | 191   |
| >JAK1-R879C KRFLKRIR    | 43   | >JAK1-R879C KRFLKRIC    | 1010  | 967   |
| >JAK1-R879C KRFLKRIRDL  | 19   | >JAK1-R879C KRFLKRICDL  | 36    | 17    |
| >JAK1-R879C KRFLKRIRD   | 333  | >JAK1-R879C KRFLKRICD   | 565   | 232   |
| >JAK1-R879C KRFLKRIRDLC | 389  | >JAK1-R879C KRFLKRICDLC | 573   | 184   |
| >JAK1-R879C KRFLKRIR    | 211  | >JAK1-R879C KRFLKRIC    | 145   | 66    |
| >JAK1-R879C KRFLKRIRDL  | 43   | >JAK1-R879C KRFLKRICDL  | 43    | 0     |
| >JAK1-R879C KRFLKRIRDLC | 383  | >JAK1-R879C KRFLKRICDLC | 686   | 303   |
| >JAK1-R879C KRFLKRIRDL  | 63   | >JAK1-R879C KRFLKRICDL  | 75    | 12    |
| >JAK1-R879C KRFLKRIR    | 58   | >JAK1-R879C KRFLKRIC    | 30717 | 30659 |
| >JAK1-R879C RDLGEGHFGI  | 94   | >JAK1-R879C HDLGEGHFGI  | 86    | 8     |

|                         |       |                         |       |       |
|-------------------------|-------|-------------------------|-------|-------|
| >JAK1-R879F HFEKRFLKRIR | 43    | >JAK1-R879F HFEKRFLKRIF | 8639  | 8596  |
| >JAK1-R879F HFEKRFLKRIR | 182   | >JAK1-R879F HFEKRFLKRIF | 23074 | 22892 |
| >JAK1-R879F HFEKRFLKRIR | 37    | >JAK1-R879F HFEKRFLKRIF | 13400 | 13363 |
| >JAK1-R879F RIRDLGEG    | 251   | >JAK1-R879F RIHDLGEG    | 2493  | 2242  |
| >JAK1-R879F RIRDLGEGHF  | 69    | >JAK1-R879F RIHDLGEGHF  | 523   | 454   |
| >JAK1-R879F RIRDLGEGHF  | 56    | >JAK1-R879F RIHDLGEGHF  | 79    | 23    |
| >JAK1-R879F RIRDLGEGHF  | 66    | >JAK1-R879F RIHDLGEGHF  | 197   | 131   |
| >JAK1-R879F RIRDLGEGHF  | 267   | >JAK1-R879F RIHDLGEGHF  | 592   | 325   |
| >JAK1-R879F KRIRDLGEGH  | 151   | >JAK1-R879F KRIHDLGEGH  | 68    | 83    |
| >JAK1-R879F KRIRDLGEGH  | 339   | >JAK1-R879F KRIHDLGEGH  | 324   | 15    |
| >JAK1-R879F KRIRDLGEGH  | 177   | >JAK1-R879F KRIHDLGEGH  | 276   | 99    |
| >JAK1-R879F KRIRDLGE    | 165   | >JAK1-R879F KRIHDLGE    | 526   | 361   |
| >JAK1-R879F KRIRDLGEGH  | 290   | >JAK1-R879F KRIHDLGEGH  | 417   | 127   |
| >JAK1-R879F KRIRDLGEGH  | 323   | >JAK1-R879F KRIHDLGEGH  | 506   | 183   |
| >JAK1-R879F FLKRIRD L   | 74    | >JAK1-R879F FLKRIHDL    | 13    | 61    |
| >JAK1-R879F FLKRIRDLG   | 983   | >JAK1-R879F FLKRIHDLG   | 359   | 624   |
| >JAK1-R879F FLKRIRD L   | 26    | >JAK1-R879F FLKRIHDL    | 11    | 15    |
| >JAK1-R879F FLKRIRD L   | 1126  | >JAK1-R879F FLKRIHDL    | 115   | 1011  |
| >JAK1-R879F FLKRIRD L   | 2333  | >JAK1-R879F FLKRIHDL    | 106   | 2227  |
| >JAK1-R879F FLKRIRD L   | 11    | >JAK1-R879F FLKRIHDL    | 3     | 8     |
| >JAK1-R879F FLKRIRD L   | 29    | >JAK1-R879F FLKRIHDL    | 26    | 3     |
| >JAK1-R879F RFLKRIRD L  | 3929  | >JAK1-R879F RFLKRIHDL   | 165   | 3764  |
| >JAK1-R879F RFLKRIRD L  | 2517  | >JAK1-R879F RFLKRIHDL   | 488   | 2029  |
| >JAK1-R879F RFLKRIRD L  | 61    | >JAK1-R879F RFLKRIHDL   | 12    | 49    |
| >JAK1-R879F RFLKRIRD L  | 564   | >JAK1-R879F RFLKRIHDL   | 306   | 258   |
| >JAK1-R879F RFLKRIRD L  | 766   | >JAK1-R879F RFLKRIHDL   | 311   | 455   |
| >JAK1-R879F KRFLKRIRD L | 528   | >JAK1-R879F KRFLKRIHDL  | 407   | 121   |
| >JAK1-R879F KRFLKRIR    | 43    | >JAK1-R879F KRFLKRIH    | 97    | 54    |
| >JAK1-R879F KRFLKRIRD L | 19    | >JAK1-R879F KRFLKRIHDL  | 16    | 3     |
| >JAK1-R879F KRFLKRIRD   | 333   | >JAK1-R879F KRFLKRIHD   | 547   | 214   |
| >JAK1-R879F KRFLKRIRDLC | 389   | >JAK1-R879F KRFLKRIHDLC | 562   | 173   |
| >JAK1-R879F KRFLKRIR    | 211   | >JAK1-R879F KRFLKRIH    | 409   | 198   |
| >JAK1-R879F KRFLKRIRD L | 43    | >JAK1-R879F KRFLKRIHDL  | 37    | 6     |
| >JAK1-R879F KRFLKRIRDLC | 383   | >JAK1-R879F KRFLKRIHDLC | 552   | 169   |
| >JAK1-R879F KRFLKRIRD L | 63    | >JAK1-R879F KRFLKRIHDL  | 46    | 17    |
| >JAK1-R879F KRFLKRIR    | 58    | >JAK1-R879F KRFLKRIH    | 18641 | 18583 |
| >JAK1-R879S RDLGEGHFGI  | 94    | >JAK1-R879S SDLGEGHFGI  | 83    | 11    |
| >JAK1-R879S IRDLGEGHFG  | 15607 | >JAK1-R879S ISDLGEGHFG  | 171   | 15436 |
| >JAK1-R879S IRDLGEGHF   | 25555 | >JAK1-R879S ISDLGEGHF   | 18    | 25537 |
| >JAK1-R879S IRDLGEGHF   | 21828 | >JAK1-R879S ISDLGEGHF   | 439   | 21389 |
| >JAK1-R879S HFEKRFLKRIR | 43    | >JAK1-R879S HFEKRFLKRIS | 16952 | 16909 |
| >JAK1-R879S HFEKRFLKRIR | 182   | >JAK1-R879S HFEKRFLKRIS | 28522 | 28340 |
| >JAK1-R879S HFEKRFLKRIR | 37    | >JAK1-R879S HFEKRFLKRIS | 18650 | 18613 |

|                         |       |                         |       |       |
|-------------------------|-------|-------------------------|-------|-------|
| >JAK1-R879S RIRDLGEG    | 251   | >JAK1-R879S RISDLGEG    | 11892 | 11641 |
| >JAK1-R879S RIRDLGEGHF  | 69    | >JAK1-R879S RISDLGEGHF  | 5643  | 5574  |
| >JAK1-R879S RIRDLGEGHF  | 56    | >JAK1-R879S RISDLGEGHF  | 88    | 32    |
| >JAK1-R879S RIRDLGEGHF  | 66    | >JAK1-R879S RISDLGEGHF  | 305   | 239   |
| >JAK1-R879S RIRDLGEGHF  | 267   | >JAK1-R879S RISDLGEGHF  | 124   | 143   |
| >JAK1-R879S KRIRDLGEGH  | 151   | >JAK1-R879S KRISDLGEGH  | 103   | 48    |
| >JAK1-R879S KRIRDLGEGH  | 339   | >JAK1-R879S KRISDLGEGH  | 390   | 51    |
| >JAK1-R879S KRIRDLGEGH  | 177   | >JAK1-R879S KRISDLGEGH  | 222   | 45    |
| >JAK1-R879S KRIRDLGE    | 165   | >JAK1-R879S KRISDLGE    | 768   | 603   |
| >JAK1-R879S KRIRDLGEGH  | 290   | >JAK1-R879S KRISDLGEGH  | 454   | 164   |
| >JAK1-R879S KRIRDLGEGH  | 323   | >JAK1-R879S KRISDLGEGH  | 633   | 310   |
| >JAK1-R879S FLKRIRDL    | 74    | >JAK1-R879S FLKRISDL    | 14    | 60    |
| >JAK1-R879S FLKRIRDLG   | 983   | >JAK1-R879S FLKRISDLG   | 123   | 860   |
| >JAK1-R879S FLKRIRDLGEC | 1455  | >JAK1-R879S FLKRISDLGEC | 437   | 1018  |
| >JAK1-R879S FLKRIRDL    | 26    | >JAK1-R879S FLKRISDL    | 6     | 20    |
| >JAK1-R879S FLKRIRDL    | 1126  | >JAK1-R879S FLKRISDL    | 266   | 860   |
| >JAK1-R879S FLKRIRDL    | 2333  | >JAK1-R879S FLKRISDL    | 141   | 2192  |
| >JAK1-R879S FLKRIRDL    | 11    | >JAK1-R879S FLKRISDL    | 4     | 7     |
| >JAK1-R879S FLKRIRDL    | 29    | >JAK1-R879S FLKRISDL    | 35    | 6     |
| >JAK1-R879S RFLKRIRDL   | 4089  | >JAK1-R879S RFLKRISDL   | 294   | 3795  |
| >JAK1-R879S RFLKRIRDL   | 61    | >JAK1-R879S RFLKRISDL   | 28    | 33    |
| >JAK1-R879S RFLKRIRDL   | 564   | >JAK1-R879S RFLKRISDL   | 395   | 169   |
| >JAK1-R879S KRFLKRIRDL  | 528   | >JAK1-R879S KRFLKRISDL  | 163   | 365   |
| >JAK1-R879S KRFLKRIR    | 43    | >JAK1-R879S KRFLKRIS    | 276   | 233   |
| >JAK1-R879S KRFLKRIRDL  | 19    | >JAK1-R879S KRFLKRISDL  | 19    | 0     |
| >JAK1-R879S KRFLKRIRD   | 333   | >JAK1-R879S KRFLKRISD   | 424   | 91    |
| >JAK1-R879S KRFLKRIRDLC | 389   | >JAK1-R879S KRFLKRISDLG | 585   | 196   |
| >JAK1-R879S KRFLKRIR    | 211   | >JAK1-R879S KRFLKRIS    | 727   | 516   |
| >JAK1-R879S KRFLKRIRDL  | 43    | >JAK1-R879S KRFLKRISDL  | 67    | 24    |
| >JAK1-R879S KRFLKRIRDLC | 383   | >JAK1-R879S KRFLKRISDLG | 727   | 344   |
| >JAK1-R879S KRFLKRIRDL  | 63    | >JAK1-R879S KRFLKRISDL  | 69    | 6     |
| >JAK1-R879S KRFLKRIR    | 58    | >JAK1-R879S KRFLKRIS    | 21578 | 21520 |
| >JAK1-S512L·SDRSFPSL    | 468   | >JAK1-S512L·LDRSFPSL    | 537   | 69    |
| >JAK1-S512L·GSDRSFPSL   | 15102 | >JAK1-S512L·GLDRSFPSL   | 64    | 15038 |
| >JAK1-S512L·GSDRSFPSL   | 17216 | >JAK1-S512L·GLDRSFPSL   | 166   | 17050 |
| >JAK1-S512L·GSDRSFPSL   | 1552  | >JAK1-S512L·GLDRSFPSL   | 37    | 1515  |
| >JAK1-S512L·GSDRSFPSL   | 11165 | >JAK1-S512L·GLDRSFPSL   | 19    | 11146 |
| >JAK1-S512L·GSDRSFPSL   | 16653 | >JAK1-S512L·GLDRSFPSL   | 11    | 16642 |
| >JAK1-S512L·GSDRSFPSL   | 12479 | >JAK1-S512L·GLDRSFPSL   | 11    | 12468 |
| >JAK1-S512L·GSDRSFPSL   | 22110 | >JAK1-S512L·GLDRSFPSL   | 242   | 21868 |
| >JAK1-S512L·GSDRSFPSL   | 16144 | >JAK1-S512L·GLDRSFPSL   | 8     | 16136 |
| >JAK1-S512L·GSDRSFPSL   | 453   | >JAK1-S512L·GLDRSFPSL   | 18262 | 17809 |
| >JAK1-S512L·VQKGRYSLHC  | 5703  | >JAK1-S512L·VQKGRYSLHC  | 163   | 5540  |

|                         |       |                         |      |       |
|-------------------------|-------|-------------------------|------|-------|
| >JAK1-S512L·VQKGRYSLHC  | 5860  | >JAK1-S512L·VQKGRYSLHC  | 195  | 5665  |
| >JAK1-S512L·VQKGRYSLHC  | 10976 | >JAK1-S512L·VQKGRYSLHC  | 437  | 10539 |
| >JAK1-S512L·LHGSDRSF    | 102   | >JAK1-S512L·LHGLDRSF    | 650  | 548   |
| >JAK1-S512L·LHGSDRSFPS  | 464   | >JAK1-S512L·LHGLDRSFPS  | 1891 | 1427  |
| >JAK1-S512L·SLHGSDRSF   | 528   | >JAK1-S512L·SLHGLDRSF   | 92   | 436   |
| >JAK1-S512L·SLHGSDRSF   | 64    | >JAK1-S512L·SLHGLDRSF   | 90   | 26    |
| >JAK1-S512L·SLHGSDRSF   | 25    | >JAK1-S512L·SLHGLDRSF   | 92   | 67    |
| >JAK1-S512L·SLHGSDRSF   | 184   | >JAK1-S512L·SLHGLDRSF   | 1060 | 876   |
| >JAK1-S512L·YSLHGSDRSF  | 1246  | >JAK1-S512L·YSLHGLDRSF  | 351  | 895   |
| >JAK1-S512L·YSLHGSDR    | 246   | >JAK1-S512L·YSLHGLDR    | 598  | 352   |
| >JAK1-S512L·YSLHGSDRSF  | 73    | >JAK1-S512L·YSLHGLDRSF  | 141  | 68    |
| >JAK1-S512L·YSLHGSDRSF  | 263   | >JAK1-S512L·YSLHGLDRSF  | 975  | 712   |
| >JAK1-S512L·YSLHGSDRSF  | 14    | >JAK1-S512L·YSLHGLDRSF  | 27   | 13    |
| >JAK1-S512L·YSLHGSDRSF  | 3     | >JAK1-S512L·YSLHGLDRSF  | 4    | 1     |
| >JAK1-S512L·YSLHGSDRSF  | 207   | >JAK1-S512L·YSLHGLDRSF  | 237  | 30    |
| >JAK1-S512L·YSLHGSDRSF  | 199   | >JAK1-S512L·YSLHGLDRSF  | 267  | 68    |
| >JAK1-S512L·RYSLHGSDRS  | 258   | >JAK1-S512L·RYSLHGLDRS  | 206  | 52    |
| >JAK1-S512L·RYSLHGSDRS  | 10    | >JAK1-S512L·RYSLHGLDRS  | 9    | 1     |
| >JAK1-S512L·RYSLHGSDR   | 70    | >JAK1-S512L·RYSLHGLDR   | 186  | 116   |
| >JAK1-S512L·RYSLHGSDRS  | 280   | >JAK1-S512L·RYSLHGLDRS  | 551  | 271   |
| >JAK1-S512L·RYSLHGSDR   | 77    | >JAK1-S512L·RYSLHGLDR   | 25   | 52    |
| >JAK1-S512L·GRYSLHGS    | 240   | >JAK1-S512L·GRYSLHGL    | 28   | 212   |
| >JAK1-S512L·GRYSLHGSDF  | 37    | >JAK1-S512L·GRYSLHGLDR  | 27   | 10    |
| >JAK1-S512L·GRYSLHGS    | 6575  | >JAK1-S512L·GRYSLHGL    | 227  | 6348  |
| >JAK1-S512L·GRYSLHGS    | 8412  | >JAK1-S512L·GRYSLHGL    | 199  | 8213  |
| >JAK1-S512L·GRYSLHGSDF  | 1312  | >JAK1-S512L·GRYSLHGLDR  | 387  | 925   |
| >JAK1-S512L·KGRYSLHGS   | 211   | >JAK1-S512L·KGRYSLHGL   | 51   | 160   |
| >JAK1-S512L·KGRYSLHGSD  | 300   | >JAK1-S512L·KGRYSLHGLD  | 155  | 145   |
| >JAK1-S512L·KGRYSLHGSD  | 191   | >JAK1-S512L·KGRYSLHGLD  | 376  | 185   |
| >JAK1-S512L·KGRYSLHGS   | 11424 | >JAK1-S512L·KGRYSLHGL   | 55   | 11369 |
| >JAK1-S512L·KGRYSLHGSD  | 1363  | >JAK1-S512L·KGRYSLHGLD  | 403  | 960   |
| >JAK1-S512L·QKGRYSLHGSD | 10965 | >JAK1-S512L·QKGRYSLHGL  | 447  | 10518 |
| >JAK1-S646F·SHKHIVYL    | 5117  | >JAK1-S646F·FHKHIVYL    | 448  | 4669  |
| >JAK1-S646F·SHKHIVYLYG\ | 3167  | >JAK1-S646F·FHKHIVYLYG\ | 211  | 2956  |
| >JAK1-S646F·SHKHIVYLY   | 49    | >JAK1-S646F·FHKHIVYLY   | 16   | 33    |
| >JAK1-S646F·SHKHIVYLY   | 49    | >JAK1-S646F·FHKHIVYLY   | 221  | 172   |
| >JAK1-S646F·SHKHIVYLY   | 43    | >JAK1-S646F·FHKHIVYLY   | 99   | 56    |
| >JAK1-S646F·SHKHIVYL    | 568   | >JAK1-S646F·FHKHIVYL    | 136  | 432   |
| >JAK1-S646F·SHKHIVYLY   | 292   | >JAK1-S646F·FHKHIVYLY   | 69   | 223   |
| >JAK1-S646F·SHKHIVYLY   | 367   | >JAK1-S646F·FHKHIVYLY   | 213  | 154   |
| >JAK1-S646F·VSHKHIVYL   | 138   | >JAK1-S646F·VFHKHIVYL   | 624  | 486   |
| >JAK1-S646F·VSHKHIVYLY  | 408   | >JAK1-S646F·VFHKHIVYLY  | 2072 | 1664  |
| >JAK1-S646F·VSHKHIVYL   | 9903  | >JAK1-S646F·VFHKHIVYL   | 24   | 9879  |



|                        |       |                        |       |       |
|------------------------|-------|------------------------|-------|-------|
| >JAK1-S646F VSHKHIVY   | 436   | >JAK1-S646F VFHKHIVY   | 4943  | 4507  |
| >JAK1-S646F VSHKHIVYLY | 335   | >JAK1-S646F VFHKHIVYLY | 5123  | 4788  |
| >JAK1-S646F VSHKHIVY   | 1223  | >JAK1-S646F VFHKHIVY   | 83    | 1140  |
| >JAK1-S646F VSHKHIVYLY | 175   | >JAK1-S646F VFHKHIVYLY | 48    | 127   |
| >JAK1-S646F VSHKHIVYL  | 305   | >JAK1-S646F VFHKHIVYL  | 1092  | 787   |
| >JAK1-S646F VSHKHIVY   | 279   | >JAK1-S646F VFHKHIVY   | 1151  | 872   |
| >JAK1-S646F VSHKHIVYLY | 24    | >JAK1-S646F VFHKHIVYLY | 63    | 39    |
| >JAK1-S646F VSHKHIVYLY | 116   | >JAK1-S646F VFHKHIVYLY | 52    | 64    |
| >JAK1-S646F VSHKHIVY   | 123   | >JAK1-S646F VFHKHIVY   | 1000  | 877   |
| >JAK1-S646F VSHKHIVYLY | 371   | >JAK1-S646F VFHKHIVYLY | 3161  | 2790  |
| >JAK1-S646F VSHKHIVY   | 76    | >JAK1-S646F VFHKHIVY   | 2297  | 2221  |
| >JAK1-S646F VSHKHIVYL  | 308   | >JAK1-S646F VFHKHIVYL  | 5120  | 4812  |
| >JAK1-S646F VSHKHIVYLY | 175   | >JAK1-S646F VFHKHIVYLY | 3631  | 3456  |
| >JAK1-S646F VSHKHIVY   | 8     | >JAK1-S646F VFHKHIVY   | 21917 | 21909 |
| >JAK1-S646F VSHKHIVYL  | 67    | >JAK1-S646F VFHKHIVYL  | 25408 | 25341 |
| >JAK1-S646F VSHKHIVYLY | 11    | >JAK1-S646F VFHKHIVYLY | 21727 | 21716 |
| >JAK1-S646F VSHKHIVYL  | 163   | >JAK1-S646F VFHKHIVYL  | 7065  | 6902  |
| >JAK1-S646F VSHKHIVY   | 238   | >JAK1-S646F VFHKHIVY   | 17860 | 17622 |
| >JAK1-S646F VSHKHIVYLY | 459   | >JAK1-S646F VFHKHIVYLY | 18870 | 18411 |
| >JAK1-S646F FEAASMMRC  | 8216  | >JAK1-S646F FEAASMMRC  | 353   | 7863  |
| >JAK1-S646F FEAASMMRC  | 14150 | >JAK1-S646F FEAASMMRC  | 98    | 14052 |
| >JAK1-S646F FEAASMMRC  | 8896  | >JAK1-S646F FEAASMMRC  | 14    | 8882  |
| >JAK1-S646F FEAASMMRC  | 3135  | >JAK1-S646F FEAASMMRC  | 37    | 3098  |
| >JAK1-S646F FEAASMMRC  | 9578  | >JAK1-S646F FEAASMMRC  | 151   | 9427  |
| >JAK1-S646F FEAASMMRC  | 638   | >JAK1-S646F FEAASMMRC  | 121   | 517   |
| >JAK1-S646F FEAASMMRC  | 7600  | >JAK1-S646F FEAASMMRC  | 410   | 7190  |
| >JAK1-S646F FEAASMMRC  | 12277 | >JAK1-S646F FEAASMMRC  | 487   | 11790 |
| >JAK1-S646F FEAASMMRC  | 1768  | >JAK1-S646F FEAASMMRC  | 63    | 1705  |
| >JAK1-S646F QVSHKHIVYL | 729   | >JAK1-S646F QVFHKHIVYL | 368   | 361   |
| >JAK1-S646F QVSHKHIVYL | 921   | >JAK1-S646F QVFHKHIVYL | 352   | 569   |
| >JAK1-S646F QVSHKHIV   | 2128  | >JAK1-S646F QVFHKHIV   | 440   | 1688  |
| >JAK1-S646F QVSHKHIVYL | 3042  | >JAK1-S646F QVFHKHIVYL | 271   | 2771  |
| >JAK1-S646F QVSHKHIV   | 461   | >JAK1-S646F QVFHKHIV   | 125   | 336   |
| >JAK1-S646F QVSHKHIVYL | 1740  | >JAK1-S646F QVFHKHIVYL | 343   | 1397  |
| >JAK1-S646F QVSHKHIVYL | 412   | >JAK1-S646F QVFHKHIVYL | 133   | 279   |
| >JAK1-S646F QVSHKHIVY  | 90    | >JAK1-S646F QVFHKHIVY  | 29    | 61    |
| >JAK1-S646F QVSHKHIVYL | 13    | >JAK1-S646F QVFHKHIVYL | 7     | 6     |
| >JAK1-S646F QVSHKHIVYL | 2079  | >JAK1-S646F QVFHKHIVYL | 436   | 1643  |
| >JAK1-S646F QVSHKHIVYL | 75    | >JAK1-S646F QVFHKHIVYL | 82    | 7     |
| >JAK1-S646F QVSHKHIVY  | 5142  | >JAK1-S646F QVFHKHIVY  | 466   | 4676  |
| >JAK1-S646F QVSHKHIVYL | 3883  | >JAK1-S646F QVFHKHIVYL | 238   | 3645  |
| >JAK1-S646F QVSHKHIVYL | 1857  | >JAK1-S646F QVFHKHIVYL | 109   | 1748  |
| >JAK1-S646F QVSHKHIVYL | 490   | >JAK1-S646F QVFHKHIVYL | 68    | 422   |

|                        |      |                         |      |      |
|------------------------|------|-------------------------|------|------|
| >JAK1-S646F QVSHKHIV   | 84   | >JAK1-S646F QVFHKKHIV   | 21   | 63   |
| >JAK1-S646F QVSHKHIVYL | 1148 | >JAK1-S646F QVFHKKHIVYL | 464  | 684  |
| >JAK1-S646F QVSHKHIV   | 1300 | >JAK1-S646F QVFHKKHIV   | 199  | 1101 |
| >JAK1-S646F QVSHKHIVYL | 2274 | >JAK1-S646F QVFHKKHIVYL | 447  | 1827 |
| >JAK1-S646F QVSHKHIVY  | 193  | >JAK1-S646F QVFHKKHIVY  | 85   | 108  |
| >JAK1-S646F QVSHKHIVYL | 17   | >JAK1-S646F QVFHKKHIVYL | 11   | 6    |
| >JAK1-S646F QVSHKHIVY  | 266  | >JAK1-S646F QVFHKKHIVY  | 130  | 136  |
| >JAK1-S646F QVSHKHIVYL | 1069 | >JAK1-S646F QVFHKKHIVYL | 426  | 643  |
| >JAK1-S646F QVSHKHIVY  | 959  | >JAK1-S646F QVFHKKHIVY  | 192  | 767  |
| >JAK1-S646F QVSHKHIVYL | 2163 | >JAK1-S646F QVFHKKHIVYL | 377  | 1786 |
| >JAK1-S646F QVSHKHIVY  | 543  | >JAK1-S646F QVFHKKHIVY  | 73   | 470  |
| >JAK1-S646F QVSHKHIVYL | 872  | >JAK1-S646F QVFHKKHIVYL | 156  | 716  |
| >JAK1-S646F QVSHKHIVY  | 339  | >JAK1-S646F QVFHKKHIVY  | 242  | 97   |
| >JAK1-S646F QVSHKHIVYL | 578  | >JAK1-S646F QVFHKKHIVYL | 422  | 156  |
| >JAK1-S646F QVSHKHIVY  | 978  | >JAK1-S646F QVFHKKHIVY  | 208  | 770  |
| >JAK1-S646F QVSHKHIVYL | 457  | >JAK1-S646F QVFHKKHIVYL | 98   | 359  |
| >JAK1-S646F QVSHKHIVYL | 172  | >JAK1-S646F QVFHKKHIVYL | 131  | 41   |
| >JAK1-S646F RQVSHKHIVY | 212  | >JAK1-S646F RQVFHKKHIVY | 305  | 93   |
| >JAK1-S646F RQVSHKHIV  | 246  | >JAK1-S646F RQVFHKKHIV  | 277  | 31   |
| >JAK1-S646F RQVSHKHIVY | 315  | >JAK1-S646F RQVFHKKHIVY | 356  | 41   |
| >JAK1-S646F RQVSHKHI   | 189  | >JAK1-S646F RQVFHKKHI   | 251  | 62   |
| >JAK1-S646F RQVSHKHIV  | 51   | >JAK1-S646F RQVFHKKHIV  | 67   | 16   |
| >JAK1-S646F RQVSHKHIVY | 17   | >JAK1-S646F RQVFHKKHIVY | 26   | 9    |
| >JAK1-S646F RQVSHKHIVY | 382  | >JAK1-S646F RQVFHKKHIVY | 604  | 222  |
| >JAK1-S646F RQVSHKHIVY | 769  | >JAK1-S646F RQVFHKKHIVY | 266  | 503  |
| >JAK1-S646F RQVSHKHIVY | 232  | >JAK1-S646F RQVFHKKHIVY | 152  | 80   |
| >JAK1-S646F RQVSHKHIVY | 413  | >JAK1-S646F RQVFHKKHIVY | 449  | 36   |
| >JAK1-S646F RQVSHKHI   | 346  | >JAK1-S646F RQVFHKKHI   | 513  | 167  |
| >JAK1-S646F RQVSHKHIVY | 46   | >JAK1-S646F RQVFHKKHIVY | 57   | 11   |
| >JAK1-S646F RQVSHKHIVY | 202  | >JAK1-S646F RQVFHKKHIVY | 257  | 55   |
| >JAK1-S646F RQVSHKHI   | 21   | >JAK1-S646F RQVFHKKHI   | 57   | 36   |
| >JAK1-S646F RQVSHKHIV  | 42   | >JAK1-S646F RQVFHKKHIV  | 174  | 132  |
| >JAK1-S646F RQVSHKHIVY | 4    | >JAK1-S646F RQVFHKKHIVY | 8    | 4    |
| >JAK1-S646F RQVSHKHIVY | 13   | >JAK1-S646F RQVFHKKHIVY | 27   | 14   |
| >JAK1-S646F RQVSHKHIVY | 299  | >JAK1-S646F RQVFHKKHIVY | 353  | 54   |
| >JAK1-S646F RQVSHKHIVY | 374  | >JAK1-S646F RQVFHKKHIVY | 677  | 303  |
| >JAK1-S646F RQVSHKHIV  | 470  | >JAK1-S646F RQVFHKKHIV  | 2843 | 2373 |
| >JAK1-S646F RQVSHKHIVY | 279  | >JAK1-S646F RQVFHKKHIVY | 1138 | 859  |
| >JAK1-S646F RQVSHKHIVY | 172  | >JAK1-S646F RQVFHKKHIVY | 163  | 9    |
| >JAK1-S646F RQVSHKHIVY | 87   | >JAK1-S646F RQVFHKKHIVY | 84   | 3    |
| >JAK1-S646F RQVSHKHI   | 1243 | >JAK1-S646F RQVFHKKHI   | 478  | 765  |
| >JAK1-S646F RQVSHKHIVY | 327  | >JAK1-S646F RQVFHKKHIVY | 272  | 55   |
| >JAK1-S646F RQVSHKHIV  | 1048 | >JAK1-S646F RQVFHKKHIV  | 391  | 657  |

|                        |      |                        |     |      |
|------------------------|------|------------------------|-----|------|
| >JAK1-S646F RQVSHKHIVY | 75   | >JAK1-S646F RQVFHKHIVY | 40  | 35   |
| >JAK1-S646F MRQVSHKHI  | 150  | >JAK1-S646F MRQVFHKHI  | 294 | 144  |
| >JAK1-S646F MRQVSHKHI' | 34   | >JAK1-S646F MRQVFHKHI' | 48  | 14   |
| >JAK1-S646F MRQVSHKH   | 562  | >JAK1-S646F MRQVFHKH   | 184 | 378  |
| >JAK1-S646F MRQVSHKHI  | 619  | >JAK1-S646F MRQVFHKHI  | 170 | 449  |
| >JAK1-S646F MRQVSHKHI' | 594  | >JAK1-S646F MRQVFHKHI' | 308 | 286  |
| >JAK1-S646F MRQVSHKHI' | 212  | >JAK1-S646F MRQVFHKHI' | 229 | 17   |
| >JAK1-S646F MRQVSHKHI' | 1149 | >JAK1-S646F MRQVFHKHI' | 479 | 670  |
| >JAK1-S646F MRQVSHKHI  | 847  | >JAK1-S646F MRQVFHKHI  | 125 | 722  |
| >JAK1-S646F MRQVSHKHI' | 311  | >JAK1-S646F MRQVFHKHI' | 276 | 35   |
| >JAK1-S646F MRQVSHKHI' | 766  | >JAK1-S646F MRQVFHKHI' | 257 | 509  |
| >JAK1-S646F MMRQVSHKI  | 530  | >JAK1-S646F MMRQVFHKI  | 433 | 97   |
| >JAK1-S646F MMRQVSHKI  | 58   | >JAK1-S646F MMRQVFHKI  | 72  | 14   |
| >JAK1-S646F MMRQVSHKI  | 393  | >JAK1-S646F MMRQVFHKI  | 361 | 32   |
| >JAK1-S646F MMRQVSHKI  | 8    | >JAK1-S646F MMRQVFHKI  | 8   | 0    |
| >JAK1-S646F MMRQVSHKI  | 579  | >JAK1-S646F MMRQVFHKI  | 196 | 383  |
| >JAK1-S646F MMRQVSHKI  | 61   | >JAK1-S646F MMRQVFHKI  | 38  | 23   |
| >JAK1-S646F MMRQVSHKI  | 6    | >JAK1-S646F MMRQVFHKI  | 6   | 0    |
| >JAK1-S646F MMRQVSHKI  | 29   | >JAK1-S646F MMRQVFHKI  | 33  | 4    |
| >JAK1-S646F MMRQVSHKI  | 35   | >JAK1-S646F MMRQVFHKI  | 40  | 5    |
| >JAK1-S646F MMRQVSHKI  | 142  | >JAK1-S646F MMRQVFHKI  | 211 | 69   |
| >JAK1-S646F MMRQVSHKI  | 56   | >JAK1-S646F MMRQVFHKI  | 47  | 9    |
| >JAK1-S646F MMRQVSHKI  | 2    | >JAK1-S646F MMRQVFHKI  | 2   | 0    |
| >JAK1-S646F MMRQVSHK   | 37   | >JAK1-S646F MMRQVFHK   | 34  | 3    |
| >JAK1-S646F MMRQVSHKI  | 479  | >JAK1-S646F MMRQVFHKI  | 417 | 62   |
| >JAK1-S646F MMRQVSHK   | 547  | >JAK1-S646F MMRQVFHK   | 98  | 449  |
| >JAK1-S646F MMRQVSHK   | 5    | >JAK1-S646F MMRQVFHK   | 5   | 0    |
| >JAK1-S646F MMRQVSHKI  | 19   | >JAK1-S646F MMRQVFHKI  | 25  | 6    |
| >JAK1-S646F MMRQVSHKI  | 87   | >JAK1-S646F MMRQVFHKI  | 117 | 30   |
| >JAK1-S646F MMRQVSHK   | 62   | >JAK1-S646F MMRQVFHK   | 16  | 46   |
| >JAK1-S646F MMRQVSHKI  | 1564 | >JAK1-S646F MMRQVFHKI  | 304 | 1260 |
| >JAK1-S646F MMRQVSHK   | 328  | >JAK1-S646F MMRQVFHK   | 89  | 239  |
| >JAK1-S646F MMRQVSHK   | 226  | >JAK1-S646F MMRQVFHK   | 130 | 96   |
| >JAK1-S646F MMRQVSHKI  | 69   | >JAK1-S646F MMRQVFHKI  | 33  | 36   |
| >JAK1-S646F MMRQVSHKI  | 180  | >JAK1-S646F MMRQVFHKI  | 247 | 67   |
| >JAK1-S646F MMRQVSHK   | 297  | >JAK1-S646F MMRQVFHK   | 590 | 293  |
| >JAK1-S646F MMRQVSHKI  | 70   | >JAK1-S646F MMRQVFHKI  | 75  | 5    |
| >JAK1-S646F MMRQVSHKI  | 166  | >JAK1-S646F MMRQVFHKI  | 187 | 21   |
| >JAK1-S646F MMRQVSHK   | 1981 | >JAK1-S646F MMRQVFHK   | 341 | 1640 |
| >JAK1-S646F SMMRQVSHI  | 343  | >JAK1-S646F SMMRQVFHI  | 133 | 210  |
| >JAK1-S646F SMMRQVSHI  | 460  | >JAK1-S646F SMMRQVFHI  | 176 | 284  |
| >JAK1-S646F SMMRQVSHI  | 193  | >JAK1-S646F SMMRQVFHI  | 92  | 101  |
| >JAK1-S646F SMMRQVSHI  | 28   | >JAK1-S646F SMMRQVFHI  | 31  | 3    |

|                       |       |                       |      |       |
|-----------------------|-------|-----------------------|------|-------|
| >JAK1-S646F-SMMRQVSHI | 601   | >JAK1-S646F-SMMRQVFHI | 265  | 336   |
| >JAK1-S646F-SMMRQVSHI | 22    | >JAK1-S646F-SMMRQVFHI | 12   | 10    |
| >JAK1-S646F-SMMRQVSHI | 42    | >JAK1-S646F-SMMRQVFHI | 34   | 8     |
| >JAK1-S646F-SMMRQVSHI | 74    | >JAK1-S646F-SMMRQVFHI | 54   | 20    |
| >JAK1-S646F-SMMRQVSHI | 403   | >JAK1-S646F-SMMRQVFHI | 241  | 162   |
| >JAK1-S646F-SMMRQVSHI | 38    | >JAK1-S646F-SMMRQVFHI | 30   | 8     |
| >JAK1-S646F-SMMRQVSH  | 474   | >JAK1-S646F-SMMRQVFH  | 170  | 304   |
| >JAK1-S646F-SMMRQVSHI | 32    | >JAK1-S646F-SMMRQVFHI | 30   | 2     |
| >JAK1-S646F-SMMRQVSH  | 1006  | >JAK1-S646F-SMMRQVFH  | 144  | 862   |
| >JAK1-S646F-SMMRQVSHI | 10    | >JAK1-S646F-SMMRQVFHI | 6    | 4     |
| >JAK1-S646F-SMMRQVSHI | 33    | >JAK1-S646F-SMMRQVFHI | 26   | 7     |
| >JAK1-S646F-SMMRQVSH  | 2788  | >JAK1-S646F-SMMRQVFH  | 389  | 2399  |
| >JAK1-S646F-SMMRQVSHI | 86    | >JAK1-S646F-SMMRQVFHI | 18   | 68    |
| >JAK1-S646F-SMMRQVSHI | 951   | >JAK1-S646F-SMMRQVFHI | 243  | 708   |
| >JAK1-S646F-SMMRQVSHI | 606   | >JAK1-S646F-SMMRQVFHI | 260  | 346   |
| >JAK1-S646F-SMMRQVSHI | 119   | >JAK1-S646F-SMMRQVFHI | 139  | 20    |
| >JAK1-S646F-SMMRQVSH  | 414   | >JAK1-S646F-SMMRQVFH  | 2123 | 1709  |
| >JAK1-S646F-SMMRQVSHI | 252   | >JAK1-S646F-SMMRQVFHI | 429  | 177   |
| >JAK1-S646F-SMMRQVSH  | 228   | >JAK1-S646F-SMMRQVFH  | 868  | 640   |
| >JAK1-S646F-SMMRQVSHI | 338   | >JAK1-S646F-SMMRQVFHI | 1324 | 986   |
| >JAK1-S646F-SMMRQVSHI | 58    | >JAK1-S646F-SMMRQVFHI | 110  | 52    |
| >JAK1-S646F-SMMRQVSHI | 1117  | >JAK1-S646F-SMMRQVFHI | 169  | 948   |
| >JAK1-S646F-SMMRQVSHI | 476   | >JAK1-S646F-SMMRQVFHI | 426  | 50    |
| >JAK1-S646F-ASMMRQVSI | 15    | >JAK1-S646F-ASMMRQVFI | 20   | 5     |
| >JAK1-S646F-ASMMRQVSI | 628   | >JAK1-S646F-ASMMRQVFI | 99   | 529   |
| >JAK1-S646F-ASMMRQVSI | 8     | >JAK1-S646F-ASMMRQVFI | 5    | 3     |
| >JAK1-S646F-ASMMRQVSI | 419   | >JAK1-S646F-ASMMRQVFI | 181  | 238   |
| >JAK1-S646F-ASMMRQVSI | 14    | >JAK1-S646F-ASMMRQVFI | 12   | 2     |
| >JAK1-S646F-ASMMRQVSI | 3131  | >JAK1-S646F-ASMMRQVFI | 473  | 2658  |
| >JAK1-S646F-ASMMRQVSI | 243   | >JAK1-S646F-ASMMRQVFI | 63   | 180   |
| >JAK1-S646F-ASMMRQVS  | 17493 | >JAK1-S646F-ASMMRQVF  | 164  | 17329 |
| >JAK1-S646F-ASMMRQVSI | 333   | >JAK1-S646F-ASMMRQVFI | 195  | 138   |
| >JAK1-S646F-ASMMRQVS  | 11689 | >JAK1-S646F-ASMMRQVF  | 72   | 11617 |
| >JAK1-S646F-ASMMRQVS  | 5539  | >JAK1-S646F-ASMMRQVF  | 13   | 5526  |
| >JAK1-S646F-ASMMRQVS  | 7895  | >JAK1-S646F-ASMMRQVF  | 4    | 7891  |
| >JAK1-S646F-ASMMRQVS  | 20401 | >JAK1-S646F-ASMMRQVF  | 232  | 20169 |
| >JAK1-S646F-ASMMRQVS  | 19818 | >JAK1-S646F-ASMMRQVF  | 425  | 19393 |
| >JAK1-S646F-ASMMRQVSI | 384   | >JAK1-S646F-ASMMRQVFI | 280  | 104   |
| >JAK1-S646F-ASMMRQVSI | 75    | >JAK1-S646F-ASMMRQVFI | 49   | 26    |
| >JAK1-S646F-ASMMRQVSI | 334   | >JAK1-S646F-ASMMRQVFI | 136  | 198   |
| >JAK1-S646F-AASMMRQV: | 62    | >JAK1-S646F-AASMMRQVI | 31   | 31    |
| >JAK1-S646F-AASMMRQV: | 62    | >JAK1-S646F-AASMMRQVI | 53   | 9     |
| >JAK1-S646F-AASMMRQV: | 1124  | >JAK1-S646F-AASMMRQVI | 238  | 886   |

|                        |       |                        |      |       |
|------------------------|-------|------------------------|------|-------|
| >JAK1-S646F AASMMRQV   | 590   | >JAK1-S646F AASMMRQV   | 379  | 211   |
| >JAK1-S646F AASMMRQV   | 15730 | >JAK1-S646F AASMMRQV   | 138  | 15592 |
| >JAK1-S646F AASMMRQV   | 12531 | >JAK1-S646F AASMMRQV   | 43   | 12488 |
| >JAK1-S646F AASMMRQV   | 16032 | >JAK1-S646F AASMMRQV   | 38   | 15994 |
| >JAK1-S646F AASMMRQV   | 17778 | >JAK1-S646F AASMMRQV   | 429  | 17349 |
| >JAK1-S646F AASMMRQV   | 1005  | >JAK1-S646F AASMMRQV   | 353  | 652   |
| >JAK1-S646F EAASMMRQ   | 11817 | >JAK1-S646F EAASMMRQ   | 101  | 11716 |
| >JAK1-S646F EAASMMRQ   | 722   | >JAK1-S646F EAASMMRQ   | 139  | 583   |
| >JAK1-S646F EAASMMRQ   | 21634 | >JAK1-S646F EAASMMRQ   | 362  | 21272 |
| >JAK1-S646F EAASMMRQ   | 21952 | >JAK1-S646F EAASMMRQ   | 327  | 21625 |
| >JAK1-S771C SVAADKWSF  | 301   | >JAK1-S771C CVAADKWSF  | 1670 | 1369  |
| >JAK1-S771C SVAADKWSF  | 210   | >JAK1-S771C CVAADKWSF  | 1269 | 1059  |
| >JAK1-S771C SVAADKWSF  | 979   | >JAK1-S771C CVAADKWSF  | 199  | 780   |
| >JAK1-S771C SVAADKWSF  | 282   | >JAK1-S771C CVAADKWSF  | 1146 | 864   |
| >JAK1-S771C SVAADKWSF  | 253   | >JAK1-S771C CVAADKWSF  | 555  | 302   |
| >JAK1-S771C SVAADKWSF  | 444   | >JAK1-S771C CVAADKWSF  | 3139 | 2695  |
| >JAK1-S771C SVAADKWSF  | 1274  | >JAK1-S771C CVAADKWSF  | 386  | 888   |
| >JAK1-S771C LSVAADKWSI | 186   | >JAK1-S771C LCVAADKWS  | 7721 | 7535  |
| >JAK1-S771C LSVAADKWSI | 76    | >JAK1-S771C LCVAADKWS  | 610  | 534   |
| >JAK1-S771C LSVAADKW   | 4     | >JAK1-S771C LCVAADKW   | 696  | 692   |
| >JAK1-S771C LSVAADKWSI | 6     | >JAK1-S771C LCVAADKWS  | 3143 | 3137  |
| >JAK1-S771C LSVAADKW   | 35    | >JAK1-S771C LCVAADKW   | 1615 | 1580  |
| >JAK1-S771C LSVAADKWSI | 69    | >JAK1-S771C LCVAADKWS  | 9067 | 8998  |
| >JAK1-S771C LSVAADKW   | 10    | >JAK1-S771C LCVAADKW   | 451  | 441   |
| >JAK1-S771C LSVAADKWSI | 30    | >JAK1-S771C LCVAADKWS  | 4770 | 4740  |
| >JAK1-S771C LSVAADKWSI | 69    | >JAK1-S771C LCVAADKWS  | 4475 | 4406  |
| >JAK1-S771C LSVAADKW   | 339   | >JAK1-S771C LCVAADKW   | 489  | 150   |
| >JAK1-S771C LSVAADKW   | 66    | >JAK1-S771C LCVAADKW   | 779  | 713   |
| >JAK1-S771C NLSVAADK   | 354   | >JAK1-S771C NLCVAADK   | 690  | 336   |
| >JAK1-S771C KNLSVAADKV | 295   | >JAK1-S771C KNLCVAADKV | 748  | 453   |
| >JAK1-S771C KNLSVAADKV | 53    | >JAK1-S771C KNLCVAADKV | 114  | 61    |
| >JAK1-S771C SKNLSVAA   | 378   | >JAK1-S771C SKNLCVAA   | 978  | 600   |
| >JAK1-S771C DSKNLSVAAE | 202   | >JAK1-S771C DSKNLCVAAE | 211  | 9     |
| >JAK1-S771C VEDSKNLSVA | 762   | >JAK1-S771C VEDSKNLCVA | 487  | 275   |
| >JAK1-S771C CVEDSKNLSV | 210   | >JAK1-S771C CVEDSKNLCV | 733  | 523   |
| >JAK1-S771C ECVEDSKNLS | 99    | >JAK1-S771C ECVEDSKNLC | 656  | 557   |
| >JAK1-T478S TVTCFEKSEQ | 1013  | >JAK1-T478S SVTCFEKSEQ | 465  | 548   |
| >JAK1-T478S TVTCFEKSEQ | 762   | >JAK1-T478S SVTCFEKSEQ | 140  | 622   |
| >JAK1-T478S TVTCFEKSEQ | 2584  | >JAK1-T478S SVTCFEKSEQ | 322  | 2262  |
| >JAK1-T478S TVTCFEKSEQ | 320   | >JAK1-T478S SVTCFEKSEQ | 72   | 248   |
| >JAK1-T478S TVTCFEKSEQ | 20    | >JAK1-T478S SVTCFEKSEQ | 50   | 30    |
| >JAK1-T478S TVTCFEKSEQ | 156   | >JAK1-T478S SVTCFEKSEQ | 238  | 82    |
| >JAK1-T478S MTVTCFEK   | 219   | >JAK1-T478S MSVTCFEK   | 397  | 178   |

|                         |      |                         |      |      |
|-------------------------|------|-------------------------|------|------|
| >JAK1-T478S MTVTCFEK    | 15   | >JAK1-T478S MSVTCFEK    | 15   | 0    |
| >JAK1-T478S MTVTCFEK    | 251  | >JAK1-T478S MSVTCFEK    | 530  | 279  |
| >JAK1-T478S MTVTCFEK    | 56   | >JAK1-T478S MSVTCFEK    | 105  | 49   |
| >JAK1-T478S MTVTCFEK    | 3    | >JAK1-T478S MSVTCFEK    | 9    | 6    |
| >JAK1-T478S MTVTCFEKSE  | 198  | >JAK1-T478S MSVTCFEKSE  | 1379 | 1181 |
| >JAK1-T478S MTVTCFEKS   | 28   | >JAK1-T478S MSVTCFEKS   | 302  | 274  |
| >JAK1-T478S MTVTCFEKSE  | 296  | >JAK1-T478S MSVTCFEKSE  | 830  | 534  |
| >JAK1-T478S MTVTCFEK    | 263  | >JAK1-T478S MSVTCFEK    | 327  | 64   |
| >JAK1-T478S LMTVTCFEK   | 256  | >JAK1-T478S LMSVTCFEK   | 96   | 160  |
| >JAK1-T478S LMTVTCFEK   | 38   | >JAK1-T478S LMSVTCFEK   | 20   | 18   |
| >JAK1-T478S LMTVTCFEK   | 149  | >JAK1-T478S LMSVTCFEK   | 119  | 30   |
| >JAK1-T478S LMTVTCFEK   | 107  | >JAK1-T478S LMSVTCFEK   | 112  | 5    |
| >JAK1-T478S ILMTVTCFEK  | 567  | >JAK1-T478S ILMSVTCFEK  | 499  | 68   |
| >JAK1-T478S ILMTVTCF    | 223  | >JAK1-T478S ILMSVTCF    | 109  | 114  |
| >JAK1-T478S ILMTVTCFE   | 344  | >JAK1-T478S ILMSVTCFE   | 138  | 206  |
| >JAK1-T478S ILMTVTCFEK! | 95   | >JAK1-T478S ILMSVTCFEK! | 48   | 47   |
| >JAK1-T478S ILMTVTCFEK! | 1031 | >JAK1-T478S ILMSVTCFEK! | 492  | 539  |
| >JAK1-T478S ILMTVTCFEK  | 759  | >JAK1-T478S ILMSVTCFEK  | 407  | 352  |
| >JAK1-T478S ILMTVTCFEK  | 13   | >JAK1-T478S ILMSVTCFEK  | 11   | 2    |
| >JAK1-T478S ILMTVTCFEK  | 10   | >JAK1-T478S ILMSVTCFEK  | 9    | 1    |
| >JAK1-T478S ILMTVTCF    | 1362 | >JAK1-T478S ILMSVTCF    | 462  | 900  |
| >JAK1-T478S ILMTVTCFEK  | 176  | >JAK1-T478S ILMSVTCFEK  | 199  | 23   |
| >JAK1-T478S ILMTVTCF    | 229  | >JAK1-T478S ILMSVTCF    | 231  | 2    |
| >JAK1-T478S ILMTVTCFEK  | 69   | >JAK1-T478S ILMSVTCFEK  | 47   | 22   |
| >JAK1-T478S ILMTVTCF    | 78   | >JAK1-T478S ILMSVTCF    | 49   | 29   |
| >JAK1-T478S ILMTVTCF    | 663  | >JAK1-T478S ILMSVTCF    | 356  | 307  |
| >JAK1-T478S ILMTVTCF    | 10   | >JAK1-T478S ILMSVTCF    | 7    | 3    |
| >JAK1-T478S ILMTVTCFEK  | 417  | >JAK1-T478S ILMSVTCFEK  | 283  | 134  |
| >JAK1-T478S NILMTVTCFE  | 90   | >JAK1-T478S NILMSVTCFE  | 61   | 29   |
| >JAK1-T478S NILMTVTCFE  | 73   | >JAK1-T478S NILMSVTCFE  | 61   | 12   |
| >JAK1-T478S NILMTVTCF   | 114  | >JAK1-T478S NILMSVTCF   | 76   | 38   |
| >JAK1-T478S FDNILMTVTC  | 562  | >JAK1-T478S FDNILMSVTC  | 447  | 115  |
| >JAK1-T478S FDNILMTV    | 797  | >JAK1-T478S FDNILMSV    | 415  | 382  |
| >JAK1-T478S FDNILMTVT   | 310  | >JAK1-T478S FDNILMSVT   | 364  | 54   |
| >JAK1-T478S FDNILMTVTC  | 225  | >JAK1-T478S FDNILMSVTC  | 216  | 9    |
| >JAK1-T478S FDNILMTV    | 79   | >JAK1-T478S FDNILMSV    | 170  | 91   |
| >JAK1-T478S TDFDNILMTV  | 248  | >JAK1-T478S TDFDNILMSV  | 285  | 37   |
| >JAK1-T478S TDFDNILMTV  | 331  | >JAK1-T478S TDFDNILMSV  | 1337 | 1006 |
| >JAK1-T478S TDFDNILMTV  | 55   | >JAK1-T478S TDFDNILMSV  | 117  | 62   |
| >JAK1-T478S CTDFDNILMT  | 73   | >JAK1-T478S CTDFDNILMS  | 87   | 14   |
| >JAK1-T478S CTDFDNILMT  | 375  | >JAK1-T478S CTDFDNILMS  | 369  | 6    |
| >JAK1-T478S CTDFDNILMT  | 477  | >JAK1-T478S CTDFDNILMS  | 756  | 279  |
| >JAK1-T478S CTDFDNILMT  | 218  | >JAK1-T478S CTDFDNILMS  | 163  | 55   |

|                         |       |                         |      |       |
|-------------------------|-------|-------------------------|------|-------|
| >JAK1-T478S CTDFDNILMT  | 141   | >JAK1-T478S CTDFDNILMS  | 116  | 25    |
| >JAK1-T593N TRTHIYSGTL  | 1282  | >JAK1-T593N MRTHIYSGTL  | 270  | 1012  |
| >JAK1-T593N TRTHIYSGTLM | 458   | >JAK1-T593N MRTHIYSGTL  | 59   | 399   |
| >JAK1-T593N TRTHIYSGTL  | 332   | >JAK1-T593N MRTHIYSGTL  | 61   | 271   |
| >JAK1-T593N TRTHIYSGTLM | 197   | >JAK1-T593N MRTHIYSGTL  | 78   | 119   |
| >JAK1-T593N TRTHIYSGTL  | 427   | >JAK1-T593N MRTHIYSGTL  | 324  | 103   |
| >JAK1-T593N TRTHIYSGTLM | 366   | >JAK1-T593N MRTHIYSGTL  | 116  | 250   |
| >JAK1-T593N TRTHIYSGTL  | 328   | >JAK1-T593N MRTHIYSGTL  | 114  | 214   |
| >JAK1-T593N TRTHIYSGTLM | 595   | >JAK1-T593N MRTHIYSGTL  | 454  | 141   |
| >JAK1-T593N GTRTHIYSGTI | 6237  | >JAK1-T593N GMRTHIYSGTI | 250  | 5987  |
| >JAK1-T593N GTRTHIYSGT  | 3523  | >JAK1-T593N GMRTHIYSGTI | 373  | 3150  |
| >JAK1-T593N GTRTHIYSGTI | 1498  | >JAK1-T593N GMRTHIYSGTI | 22   | 1476  |
| >JAK1-T593N GTRTHIYSGTI | 8540  | >JAK1-T593N GMRTHIYSGTI | 100  | 8440  |
| >JAK1-T593N GTRTHIYSGTI | 11009 | >JAK1-T593N GMRTHIYSGTI | 104  | 10905 |
| >JAK1-T593N GTRTHIYSGTI | 14996 | >JAK1-T593N GMRTHIYSGTI | 46   | 14950 |
| >JAK1-T593N GTRTHIYS    | 39    | >JAK1-T593N GMRTHIYS    | 210  | 171   |
| >JAK1-T593N GTRTHIYSG   | 194   | >JAK1-T593N GMRTHIYSG   | 1485 | 1291  |
| >JAK1-T593N GTRTHIYSGTI | 44    | >JAK1-T593N GMRTHIYSGTI | 385  | 341   |
| >JAK1-T593N GTRTHIYSGTI | 2069  | >JAK1-T593N GMRTHIYSGTI | 142  | 1927  |
| >JAK1-T593N GTRTHIYSGTI | 3671  | >JAK1-T593N GMRTHIYSGTI | 215  | 3456  |
| >JAK1-T593N GTRTHIYSGTI | 4697  | >JAK1-T593N GMRTHIYSGTI | 394  | 4303  |
| >JAK1-T593N GTRTHIYSGTI | 10    | >JAK1-T593N GMRTHIYSGTI | 1977 | 1967  |
| >JAK1-T593N GTRTHIYSGTI | 45    | >JAK1-T593N GMRTHIYSGTI | 3099 | 3054  |
| >JAK1-T593N RGTRTHIYS   | 318   | >JAK1-T593N RGMRTHIYS   | 72   | 246   |
| >JAK1-T593N RGTRTHIY    | 148   | >JAK1-T593N RGMRTHIY    | 111  | 37    |
| >JAK1-T593N RGTRTHIY    | 307   | >JAK1-T593N RGMRTHIY    | 231  | 76    |
| >JAK1-T593N RGTRTHIY    | 4832  | >JAK1-T593N RGMRTHIY    | 280  | 4552  |
| >JAK1-T593N RGTRTHIY    | 1289  | >JAK1-T593N RGMRTHIY    | 145  | 1144  |
| >JAK1-T593N RGTRTHIY    | 1294  | >JAK1-T593N RGMRTHIY    | 207  | 1087  |
| >JAK1-T593N RGTRTHIY    | 224   | >JAK1-T593N RGMRTHIY    | 77   | 147   |
| >JAK1-T593N RGTRTHIY    | 148   | >JAK1-T593N RGMRTHIY    | 860  | 712   |
| >JAK1-T593N GRGTRTHI    | 511   | >JAK1-T593N GRGMRTHI    | 441  | 70    |
| >JAK1-T593N GRGTRTHI    | 223   | >JAK1-T593N GRGMRTHI    | 488  | 265   |
| >JAK1-T593N GRGTRTHIY   | 480   | >JAK1-T593N GRGMRTHIY   | 1196 | 716   |
| >JAK1-T593N LGRGTRTHI   | 219   | >JAK1-T593N LGRGMRTHI   | 602  | 383   |
| >JAK1-T593N LGRGTRTHIY  | 180   | >JAK1-T593N LGRGMRTHIY  | 322  | 142   |
| >JAK1-T593N LGRGTRTHIY  | 374   | >JAK1-T593N LGRGMRTHIY  | 403  | 29    |
| >JAK1-T593N HLGTRTHI    | 482   | >JAK1-T593N HLGTRMTH    | 882  | 400   |
| >JAK1-T593N HLGTRTHI    | 454   | >JAK1-T593N HLGTRMTH    | 820  | 366   |
| >JAK1-T593N HLGTRT      | 373   | >JAK1-T593N HLGTRMRT    | 388  | 15    |
| >JAK1-T593N HLGTRTHI    | 40    | >JAK1-T593N HLGTRMTH    | 54   | 14    |
| >JAK1-T593N HLGTRTHI    | 212   | >JAK1-T593N HLGTRMTH    | 237  | 25    |
| >JAK1-T593N HLGTRTHI    | 127   | >JAK1-T593N HLGTRMTH    | 104  | 23    |

|                        |       |                       |      |       |
|------------------------|-------|-----------------------|------|-------|
| >JAK1-T593N HLGTRTHI   | 8     | >JAK1-T593N HLGTRMRTH | 10   | 2     |
| >JAK1-T593N HLGTRTHI   | 261   | >JAK1-T593N HLGTRMRTH | 285  | 24    |
| >JAK1-T593N HLGTRTHI   | 61    | >JAK1-T593N HLGTRMRTH | 74   | 13    |
| >JAK1-T593N GEHLGRGT   | 167   | >JAK1-T593N GEHLGRGM  | 31   | 136   |
| >JAK1-T593N GEHLGRGT   | 5018  | >JAK1-T593N GEHLGRGM  | 169  | 4849  |
| >JAK1-T593N GEHLGRGT   | 186   | >JAK1-T593N GEHLGRGM  | 90   | 96    |
| >JAK1-T593N GEHLGRGT   | 202   | >JAK1-T593N GEHLGRGM  | 1674 | 1472  |
| >JAK1-T593N GEHLGRGT   | 1213  | >JAK1-T593N GEHLGRGM  | 23   | 1190  |
| >JAK1-T593N VQGEHLGRG  | 13521 | >JAK1-T593N VQGEHLGRG | 266  | 13255 |
| >JAK1-T782N TLWEICYN   | 2653  | >JAK1-T782N MLWEICYN  | 248  | 2405  |
| >JAK1-T782N TLWEICYNG  | 421   | >JAK1-T782N MLWEICYNG | 51   | 370   |
| >JAK1-T782N TLWEICYNGE | 12    | >JAK1-T782N MLWEICYNG | 8    | 4     |
| >JAK1-T782N TLWEICYN   | 1644  | >JAK1-T782N MLWEICYN  | 212  | 1432  |
| >JAK1-T782N TLWEICYNG  | 284   | >JAK1-T782N MLWEICYNG | 30   | 254   |
| >JAK1-T782N TLWEICYNGE | 29    | >JAK1-T782N MLWEICYNG | 7    | 22    |
| >JAK1-T782N TLWEICYNGE | 63    | >JAK1-T782N MLWEICYNG | 14   | 49    |
| >JAK1-T782N TLWEICYNGE | 195   | >JAK1-T782N MLWEICYNG | 36   | 159   |
| >JAK1-T782N TLWEICYN   | 67    | >JAK1-T782N MLWEICYN  | 11   | 56    |
| >JAK1-T782N TLWEICYNG  | 442   | >JAK1-T782N MLWEICYNG | 48   | 394   |
| >JAK1-T782N TLWEICYNGE | 4     | >JAK1-T782N MLWEICYNG | 2    | 2     |
| >JAK1-T782N TLWEICYNGE | 22    | >JAK1-T782N MLWEICYNG | 8    | 14    |
| >JAK1-T782N TLWEICYN   | 1100  | >JAK1-T782N MLWEICYN  | 296  | 804   |
| >JAK1-T782N TLWEICYNG  | 1512  | >JAK1-T782N MLWEICYNG | 365  | 1147  |
| >JAK1-T782N TLWEICYNGE | 23    | >JAK1-T782N MLWEICYNG | 11   | 12    |
| >JAK1-T782N TLWEICYNGE | 28    | >JAK1-T782N MLWEICYNG | 9    | 19    |
| >JAK1-T782N TLWEICYN   | 736   | >JAK1-T782N MLWEICYN  | 66   | 670   |
| >JAK1-T782N TLWEICYNG  | 4239  | >JAK1-T782N MLWEICYNG | 388  | 3851  |
| >JAK1-T782N TLWEICYNGE | 19    | >JAK1-T782N MLWEICYNG | 6    | 13    |
| >JAK1-T782N TLWEICYNGE | 423   | >JAK1-T782N MLWEICYNG | 201  | 222   |
| >JAK1-T782N TLWEICYNGE | 97    | >JAK1-T782N MLWEICYNG | 39   | 58    |
| >JAK1-T782N TLWEICYNGE | 41    | >JAK1-T782N MLWEICYNG | 28   | 13    |
| >JAK1-T782N TLWEICYNGE | 2010  | >JAK1-T782N MLWEICYNG | 494  | 1516  |
| >JAK1-T782N TTLWEICYN  | 3092  | >JAK1-T782N TMLWEICYN | 22   | 3070  |
| >JAK1-T782N TTLWEICYNG | 10364 | >JAK1-T782N TMLWEICYN | 270  | 10094 |
| >JAK1-T782N TTLWEICY   | 130   | >JAK1-T782N TMLWEICY  | 423  | 293   |
| >JAK1-T782N TTLWEICY   | 35    | >JAK1-T782N TMLWEICY  | 1526 | 1491  |
| >JAK1-T782N TTLWEICY   | 256   | >JAK1-T782N TMLWEICY  | 7988 | 7732  |
| >JAK1-T782N TTLWEICY   | 135   | >JAK1-T782N TMLWEICY  | 46   | 89    |
| >JAK1-T782N TTLWEICY   | 378   | >JAK1-T782N TMLWEICY  | 150  | 228   |
| >JAK1-T782N TTLWEICY   | 4608  | >JAK1-T782N TMLWEICY  | 304  | 4304  |
| >JAK1-T782N TTLWEICY   | 54    | >JAK1-T782N TMLWEICY  | 5749 | 5695  |
| >JAK1-T782N TTLWEICY   | 1018  | >JAK1-T782N TMLWEICY  | 394  | 624   |
| >JAK1-T782N TTLWEICY   | 115   | >JAK1-T782N TMLWEICY  | 5894 | 5779  |



|                         |      |                         |     |      |
|-------------------------|------|-------------------------|-----|------|
| >JAK1-T782N VAADKWSFG   | 3917 | >JAK1-T782N VAADKWSFG   | 184 | 3733 |
| >JAK1-T782N VAADKWSFG   | 8707 | >JAK1-T782N VAADKWSFG   | 37  | 8670 |
| >JAK1-T782N VAADKWSFG   | 7359 | >JAK1-T782N VAADKWSFG   | 195 | 7164 |
| >JAK1-T782N VAADKWSFG   | 8144 | >JAK1-T782N VAADKWSFG   | 108 | 8036 |
| >JAK1-T782N GTTLWEICY   | 318  | >JAK1-T782N GTMLWEICY   | 373 | 55   |
| >JAK1-T782N GTTLWEICY   | 751  | >JAK1-T782N GTMLWEICY   | 47  | 704  |
| >JAK1-T782N GTTLWEICY   | 1388 | >JAK1-T782N GTMLWEICY   | 493 | 895  |
| >JAK1-T782N GTTLWEICY   | 97   | >JAK1-T782N GTMLWEICY   | 102 | 5    |
| >JAK1-T782N GTTLWEICY   | 488  | >JAK1-T782N GTMLWEICY   | 107 | 381  |
| >JAK1-T782N GTTLWEICY   | 175  | >JAK1-T782N GTMLWEICY   | 113 | 62   |
| >JAK1-T782N FGTTLWEI    | 135  | >JAK1-T782N FGTMMLWEI   | 129 | 6    |
| >JAK1-T782N SFGTTLWEI   | 173  | >JAK1-T782N SFGTMMLWEI  | 61  | 112  |
| >JAK1-T782N SFGTTLWEI   | 263  | >JAK1-T782N SFGTMMLWEI  | 199 | 64   |
| >JAK1-T782N SFGTTLWEI   | 330  | >JAK1-T782N SFGTMMLWEI  | 235 | 95   |
| >JAK1-T782N SFGTTLWEI   | 17   | >JAK1-T782N SFGTMMLWEI  | 20  | 3    |
| >JAK1-T782N SFGTTLWEIC' | 42   | >JAK1-T782N SFGTMMLWEIC | 33  | 9    |
| >JAK1-T782N SFGTTLWEIC' | 87   | >JAK1-T782N SFGTMMLWEIC | 73  | 14   |
| >JAK1-T782N SFGTTLWEIC' | 320  | >JAK1-T782N SFGTMMLWEIC | 441 | 121  |
| >JAK1-T782N SFGTTLWEI   | 178  | >JAK1-T782N SFGTMMLWEI  | 171 | 7    |
| >JAK1-T782N SFGTTLWEIC  | 307  | >JAK1-T782N SFGTMMLWEIC | 323 | 16   |
| >JAK1-T782N SFGTTLWEI   | 224  | >JAK1-T782N SFGTMMLWEI  | 596 | 372  |
| >JAK1-T782N WSFGTTLWE   | 510  | >JAK1-T782N WSFGTMMLWI  | 416 | 94   |
| >JAK1-T782N WSFGTTLWE   | 470  | >JAK1-T782N WSFGTMMLWI  | 415 | 55   |
| >JAK1-T782N WSFGTTLWE   | 61   | >JAK1-T782N WSFGTMMLWI  | 76  | 15   |
| >JAK1-T782N WSFGTTLWE   | 174  | >JAK1-T782N WSFGTMMLWI  | 268 | 94   |
| >JAK1-T782N WSFGTTLWE   | 430  | >JAK1-T782N WSFGTMMLWI  | 958 | 528  |
| >JAK1-T782N WSFGTTLWE   | 102  | >JAK1-T782N WSFGTMMLWI  | 276 | 174  |
| >JAK1-T782N WSFGTTLWE   | 136  | >JAK1-T782N WSFGTMMLWI  | 183 | 47   |
| >JAK1-T782N WSFGTTLWE   | 317  | >JAK1-T782N WSFGTMMLWI  | 630 | 313  |
| >JAK1-T782N WSFGTTLW    | 4    | >JAK1-T782N WSFGTMLW    | 4   | 0    |
| >JAK1-T782N WSFGTTLWE   | 1192 | >JAK1-T782N WSFGTMMLWI  | 277 | 915  |
| >JAK1-T782N WSFGTTLWE   | 41   | >JAK1-T782N WSFGTMMLWI  | 28  | 13   |
| >JAK1-T782N WSFGTTLW    | 34   | >JAK1-T782N WSFGTMLW    | 30  | 4    |
| >JAK1-T782N WSFGTTLW    | 9    | >JAK1-T782N WSFGTMLW    | 9   | 0    |
| >JAK1-T782N WSFGTTLWE   | 82   | >JAK1-T782N WSFGTMMLWI  | 188 | 106  |
| >JAK1-T782N WSFGTTLW    | 71   | >JAK1-T782N WSFGTMLW    | 46  | 25   |
| >JAK1-T782N WSFGTTLWE   | 522  | >JAK1-T782N WSFGTMMLWI  | 186 | 336  |
| >JAK1-T782N WSFGTTLWE   | 343  | >JAK1-T782N WSFGTMMLWI  | 148 | 195  |
| >JAK1-T782N WSFGTTLWE   | 437  | >JAK1-T782N WSFGTMMLWI  | 271 | 166  |
| >JAK1-T782N WSFGTTLWE   | 137  | >JAK1-T782N WSFGTMMLWI  | 112 | 25   |
| >JAK1-T782N WSFGTTLW    | 107  | >JAK1-T782N WSFGTMLW    | 94  | 13   |
| >JAK1-T782N WSFGTTLW    | 29   | >JAK1-T782N WSFGTMLW    | 20  | 9    |
| >JAK1-T782N KWSFGTTLW   | 1366 | >JAK1-T782N KWSFGTMLV   | 435 | 931  |

|                        |       |                        |       |       |
|------------------------|-------|------------------------|-------|-------|
| >JAK1-T782N KWSFGTTLW  | 243   | >JAK1-T782N KWSFGTMLV  | 145   | 98    |
| >JAK1-T782N KWSFGTTLW  | 358   | >JAK1-T782N KWSFGTMLV  | 128   | 230   |
| >JAK1-T782N KWSFGTTLW  | 166   | >JAK1-T782N KWSFGTMLV  | 108   | 58    |
| >JAK1-T782N KWSFGTTL   | 289   | >JAK1-T782N KWSFGTML   | 163   | 126   |
| >JAK1-T782N KWSFGTTLW  | 488   | >JAK1-T782N KWSFGTMLV  | 49    | 439   |
| >JAK1-T782N KWSFGTTLW  | 45    | >JAK1-T782N KWSFGTMLV  | 23    | 22    |
| >JAK1-T782N KWSFGTTLW  | 153   | >JAK1-T782N KWSFGTMLV  | 68    | 85    |
| >JAK1-T782N KWSFGTTLW  | 1251  | >JAK1-T782N KWSFGTMLV  | 199   | 1052  |
| >JAK1-T782N KWSFGTTL   | 48    | >JAK1-T782N KWSFGTML   | 56    | 8     |
| >JAK1-T782N KWSFGTTLW  | 128   | >JAK1-T782N KWSFGTMLV  | 108   | 20    |
| >JAK1-T782N KWSFGTTLW  | 39    | >JAK1-T782N KWSFGTMLV  | 37    | 2     |
| >JAK1-T782N DKWSFGTT   | 3816  | >JAK1-T782N DKWSFGTM   | 109   | 3707  |
| >JAK1-T782N DKWSFGTTL  | 26    | >JAK1-T782N DKWSFGTML  | 37    | 11    |
| >JAK1-T782N DKWSFGTTL  | 481   | >JAK1-T782N DKWSFGTML  | 437   | 44    |
| >JAK1-T782N AADKWSFGT  | 389   | >JAK1-T782N AADKWSFGT  | 816   | 427   |
| >JAK1-T782N AADKWSFGT  | 474   | >JAK1-T782N AADKWSFGT  | 600   | 126   |
| >JAK1-T782N AADKWSFGT  | 14043 | >JAK1-T782N AADKWSFGT  | 240   | 13803 |
| >JAK1-T782N AADKWSFGT  | 158   | >JAK1-T782N AADKWSFGT  | 428   | 270   |
| >JAK1-V1045 VFWYAPECL  | 85    | >JAK1-V1045 KFWYAPECL  | 179   | 94    |
| >JAK1-V1045 VFWYAPECLM | 350   | >JAK1-V1045 KFWYAPECLM | 752   | 402   |
| >JAK1-V1045 VFWYAPEC   | 1500  | >JAK1-V1045 KFWYAPEC   | 252   | 1248  |
| >JAK1-V1045 VFWYAPECL  | 625   | >JAK1-V1045 KFWYAPECL  | 92    | 533   |
| >JAK1-V1045 VFWYAPECLM | 535   | >JAK1-V1045 KFWYAPECLM | 254   | 281   |
| >JAK1-V1045 VFWYAPECLM | 1804  | >JAK1-V1045 KFWYAPECLM | 320   | 1484  |
| >JAK1-V1045 PVFWYAPECI | 294   | >JAK1-V1045 PKFWYAPECI | 1890  | 1596  |
| >JAK1-V1045 PVFWYAPECI | 10458 | >JAK1-V1045 PKFWYAPECI | 350   | 10108 |
| >JAK1-V1045 PVFWYAPECI | 11107 | >JAK1-V1045 PKFWYAPECI | 373   | 10734 |
| >JAK1-V1045 YTVKDDRDSF | 173   | >JAK1-V1045 YTVKDDRDSF | 19779 | 19606 |
| >JAK1-V1045 YTVKDDRDSF | 98    | >JAK1-V1045 YTVKDDRDSF | 16118 | 16020 |
| >JAK1-V1045 YTVKDDRDSF | 289   | >JAK1-V1045 YTVKDDRDSF | 26492 | 26203 |
| >JAK1-V1045 YTVKDDRDSF | 245   | >JAK1-V1045 YTVKDDRDSF | 22631 | 22386 |
| >JAK1-V1045 YTVKDDRDSF | 463   | >JAK1-V1045 YTVKDDRDSF | 23292 | 22829 |
| >JAK1-V1045 YTVKDDRDSF | 210   | >JAK1-V1045 YTVKDDRDSF | 30925 | 30715 |
| >JAK1-V1045 YTVKDDRDSF | 14208 | >JAK1-V1045 YTVKDDRDSF | 23    | 14185 |
| >JAK1-V1045 YTVKDDRDSF | 43    | >JAK1-V1045 YTVKDDRDSF | 15164 | 15121 |
| >JAK1-V1045 YTVKDDRDSF | 278   | >JAK1-V1045 YTVKDDRDSF | 19588 | 19310 |
| >JAK1-V1045 YTVKDDRDSF | 228   | >JAK1-V1045 YTVKDDRDSF | 9034  | 8806  |
| >JAK1-V1045 YTVKDDRDSF | 493   | >JAK1-V1045 YTVKDDRDSF | 3284  | 2791  |
| >JAK1-V1045 SPVFWYAPEC | 4127  | >JAK1-V1045 SPKFWYAPEC | 308   | 3819  |
| >JAK1-V1045 SPVFWYAPEC | 254   | >JAK1-V1045 SPKFWYAPEC | 5636  | 5382  |
| >JAK1-V1045 SPVFWYAP   | 314   | >JAK1-V1045 SPKFWYAP   | 2169  | 1855  |
| >JAK1-V1045 DSPVFWYA   | 91    | >JAK1-V1045 DSPKFWYA   | 148   | 57    |
| >JAK1-V1045 RDSPVFWYA  | 141   | >JAK1-V1045 RDSPKFWYA  | 848   | 707   |

|                         |       |                         |       |       |
|-------------------------|-------|-------------------------|-------|-------|
| >JAK1-V1045 DRDSPVFWY   | 251   | >JAK1-V1045 DRDSPKFWY   | 184   | 67    |
| >JAK1-V1045 VKDDRDSPI   | 208   | >JAK1-V1045 VKDDRDSPI   | 482   | 274   |
| >JAK1-V1045 TVKDDRDSPI  | 351   | >JAK1-V1045 TVKDDRDSPI  | 25013 | 24662 |
| >JAK1-V1045 TVKDDRDSPI  | 110   | >JAK1-V1045 TVKDDRDSPI  | 28863 | 28753 |
| >JAK1-V1045 TVKDDRDSPI  | 34399 | >JAK1-V1045 TVKDDRDSPI  | 360   | 34039 |
| >JAK1-V1045 TVKDDRDSPI  | 270   | >JAK1-V1045 TVKDDRDSPI  | 479   | 209   |
| >JAK1-V1045 TVKDDRDSPI  | 1806  | >JAK1-V1045 TVKDDRDSPI  | 45    | 1761  |
| >JAK1-V1045 TVKDDRDSPI  | 31079 | >JAK1-V1045 TVKDDRDSPI  | 193   | 30886 |
| >JAK1-V1045 TVKDDRDSPI  | 201   | >JAK1-V1045 TVKDDRDSPI  | 1897  | 1696  |
| >JAK1-V623A VLDPSHRDISI | 425   | >JAK1-V623A ALDPSHRDISI | 336   | 89    |
| >JAK1-V623A VLDPSHRDISI | 429   | >JAK1-V623A ALDPSHRDISI | 224   | 205   |
| >JAK1-V623A VLDPSHRDI   | 135   | >JAK1-V623A ALDPSHRDI   | 180   | 45    |
| >JAK1-V623A VLDPSHRDISI | 28    | >JAK1-V623A ALDPSHRDISI | 38    | 10    |
| >JAK1-V623A VLDPSHRDISI | 86    | >JAK1-V623A ALDPSHRDISI | 91    | 5     |
| >JAK1-V623A VLDPSHRDISI | 59    | >JAK1-V623A ALDPSHRDISI | 59    | 0     |
| >JAK1-V623A VLDPSHRDI   | 132   | >JAK1-V623A ALDPSHRDI   | 125   | 7     |
| >JAK1-V623A VLDPSHRDISI | 9     | >JAK1-V623A ALDPSHRDISI | 9     | 0     |
| >JAK1-V623A KVLDPSHRDI  | 418   | >JAK1-V623A KALDPSHRDI  | 1648  | 1230  |
| >JAK1-V623A KVLDPSHR    | 194   | >JAK1-V623A KALDPSHR    | 1785  | 1591  |
| >JAK1-V623A KVLDPSHRDI  | 186   | >JAK1-V623A KALDPSHRDI  | 684   | 498   |
| >JAK1-V623A KVLDPSHR    | 18    | >JAK1-V623A KALDPSHR    | 20    | 2     |
| >JAK1-V623A KVLDPSHRDI  | 86    | >JAK1-V623A KALDPSHRDI  | 1182  | 1096  |
| >JAK1-V623A KVLDPSHRDI  | 607   | >JAK1-V623A KALDPSHRDI  | 64    | 543   |
| >JAK1-V623A KVLDPSHR    | 36    | >JAK1-V623A KALDPSHR    | 56    | 20    |
| >JAK1-V623A EEKIKVILKV  | 376   | >JAK1-V623A EEKIKVILKA  | 9549  | 9173  |
| >JAK1-V623A EEKIKVILKV  | 165   | >JAK1-V623A EEKIKVILKA  | 38    | 127   |
| >JAK1-V623A EEKIKVILKV  | 184   | >JAK1-V623A EEKIKVILKA  | 4484  | 4300  |
| >JAK1-V623A LKVLDPSHRD  | 163   | >JAK1-V623A LKALDPSHRD  | 214   | 51    |
| >JAK1-V623A ILKVLDPSHR  | 426   | >JAK1-V623A ILKALDPSHR  | 354   | 72    |
| >JAK1-V623A ILKVLDPSHR  | 1013  | >JAK1-V623A ILKALDPSHR  | 308   | 705   |
| >JAK1-V623A VILKVLDPHF  | 217   | >JAK1-V623A VILKALDPHF  | 531   | 314   |
| >JAK1-V623A VILKVLDPHF  | 455   | >JAK1-V623A VILKALDPHF  | 1319  | 864   |
| >JAK1-V623A VILKVLDPHF  | 459   | >JAK1-V623A VILKALDPHF  | 352   | 107   |
| >JAK1-V623A IKVILKVL    | 107   | >JAK1-V623A IKVILKAL    | 90    | 17    |
| >JAK1-V623A KIKVILKV    | 59    | >JAK1-V623A KIKVILKA    | 575   | 516   |
| >JAK1-V623A KIKVILKVL   | 1114  | >JAK1-V623A KIKVILKAL   | 403   | 711   |
| >JAK1-V623A KIKVILKV    | 118   | >JAK1-V623A KIKVILKA    | 10685 | 10567 |
| >JAK1-V623A KIKVILKV    | 40    | >JAK1-V623A KIKVILKA    | 24    | 16    |
| >JAK1-V623A KIKVILKVL   | 130   | >JAK1-V623A KIKVILKAL   | 75    | 55    |
| >JAK1-V623A KIKVILKVL   | 942   | >JAK1-V623A KIKVILKAL   | 361   | 581   |
| >JAK1-V623A KKIKVILKV   | 122   | >JAK1-V623A KKIKVILKA   | 626   | 504   |
| >JAK1-V623A KKIKVILKVL  | 35    | >JAK1-V623A KKIKVILKAL  | 23    | 12    |
| >JAK1-V623A KKIKVILKV   | 477   | >JAK1-V623A KKIKVILKA   | 1675  | 1198  |

|                         |       |                         |       |       |
|-------------------------|-------|-------------------------|-------|-------|
| >JAK1-V623A EKKIKVILKVL | 654   | >JAK1-V623A EKKIKVILKAL | 345   | 309   |
| >JAK1-V645F VSHKHIVYL   | 138   | >JAK1-V645F FSHKHIVYL   | 508   | 370   |
| >JAK1-V645F VSHKHIVY    | 2477  | >JAK1-V645F FSHKHIVY    | 414   | 2063  |
| >JAK1-V645F VSHKHIVYLY  | 408   | >JAK1-V645F FSHKHIVYLY  | 282   | 126   |
| >JAK1-V645F VSHKHIVYL   | 7474  | >JAK1-V645F FSHKHIVYL   | 442   | 7032  |
| >JAK1-V645F VSHKHIVYL   | 1690  | >JAK1-V645F FSHKHIVYL   | 34    | 1656  |
| >JAK1-V645F VSHKHIVYL   | 3260  | >JAK1-V645F FSHKHIVYL   | 101   | 3159  |
| >JAK1-V645F VSHKHIVYL   | 1426  | >JAK1-V645F FSHKHIVYL   | 257   | 1169  |
| >JAK1-V645F VSHKHIVY    | 436   | >JAK1-V645F FSHKHIVY    | 154   | 282   |
| >JAK1-V645F VSHKHIVYLY  | 335   | >JAK1-V645F FSHKHIVYLY  | 114   | 221   |
| >JAK1-V645F VSHKHIVY    | 1223  | >JAK1-V645F FSHKHIVY    | 199   | 1024  |
| >JAK1-V645F VSHKHIVYLY  | 175   | >JAK1-V645F FSHKHIVYLY  | 99    | 76    |
| >JAK1-V645F VSHKHIVYL   | 305   | >JAK1-V645F FSHKHIVYL   | 2808  | 2503  |
| >JAK1-V645F VSHKHIVY    | 279   | >JAK1-V645F FSHKHIVY    | 1450  | 1171  |
| >JAK1-V645F VSHKHIVYLY  | 24    | >JAK1-V645F FSHKHIVYLY  | 41    | 17    |
| >JAK1-V645F VSHKHIVYLY  | 1430  | >JAK1-V645F FSHKHIVYLY  | 122   | 1308  |
| >JAK1-V645F VSHKHIVYL   | 4114  | >JAK1-V645F FSHKHIVYL   | 124   | 3990  |
| >JAK1-V645F VSHKHIVYLY  | 116   | >JAK1-V645F FSHKHIVYLY  | 217   | 101   |
| >JAK1-V645F VSHKHIVYL   | 2266  | >JAK1-V645F FSHKHIVYL   | 247   | 2019  |
| >JAK1-V645F VSHKHIVY    | 123   | >JAK1-V645F FSHKHIVY    | 65    | 58    |
| >JAK1-V645F VSHKHIVYLY  | 371   | >JAK1-V645F FSHKHIVYLY  | 161   | 210   |
| >JAK1-V645F VSHKHIVY    | 76    | >JAK1-V645F FSHKHIVY    | 23    | 53    |
| >JAK1-V645F VSHKHIVYL   | 308   | >JAK1-V645F FSHKHIVYL   | 95    | 213   |
| >JAK1-V645F VSHKHIVYLY  | 175   | >JAK1-V645F FSHKHIVYLY  | 49    | 126   |
| >JAK1-V645F VSHKHIVY    | 8     | >JAK1-V645F FSHKHIVY    | 10    | 2     |
| >JAK1-V645F VSHKHIVYL   | 67    | >JAK1-V645F FSHKHIVYL   | 113   | 46    |
| >JAK1-V645F VSHKHIVYLY  | 11    | >JAK1-V645F FSHKHIVYLY  | 14    | 3     |
| >JAK1-V645F VSHKHIVY    | 2625  | >JAK1-V645F FSHKHIVY    | 244   | 2381  |
| >JAK1-V645F VSHKHIVYL   | 163   | >JAK1-V645F FSHKHIVYL   | 115   | 48    |
| >JAK1-V645F VSHKHIVY    | 238   | >JAK1-V645F FSHKHIVY    | 49    | 189   |
| >JAK1-V645F VSHKHIVYLY  | 459   | >JAK1-V645F FSHKHIVYLY  | 254   | 205   |
| >JAK1-V645F VSHKHIVYL   | 1462  | >JAK1-V645F FSHKHIVYL   | 418   | 1044  |
| >JAK1-V645F QVSHKHIV    | 461   | >JAK1-V645F QFSHKHIV    | 8313  | 7852  |
| >JAK1-V645F QVSHKHIVYL  | 412   | >JAK1-V645F QFSHKHIVYL  | 8169  | 7757  |
| >JAK1-V645F QVSHKHIVYL  | 11516 | >JAK1-V645F QFSHKHIVYL  | 180   | 11336 |
| >JAK1-V645F QVSHKHIVY   | 90    | >JAK1-V645F QFSHKHIVY   | 40    | 50    |
| >JAK1-V645F QVSHKHIVYL  | 13    | >JAK1-V645F QFSHKHIVYL  | 9     | 4     |
| >JAK1-V645F QVSHKHIVYL  | 75    | >JAK1-V645F QFSHKHIVYL  | 179   | 104   |
| >JAK1-V645F QVSHKHIVYL  | 490   | >JAK1-V645F QFSHKHIVYL  | 4224  | 3734  |
| >JAK1-V645F QVSHKHIV    | 84    | >JAK1-V645F QFSHKHIV    | 11988 | 11904 |
| >JAK1-V645F QVSHKHIVY   | 193   | >JAK1-V645F QFSHKHIVY   | 1373  | 1180  |
| >JAK1-V645F QVSHKHIVYL  | 17    | >JAK1-V645F QFSHKHIVYL  | 62    | 45    |
| >JAK1-V645F QVSHKHIVY   | 266   | >JAK1-V645F QFSHKHIVY   | 2135  | 1869  |

|                        |       |                        |      |       |
|------------------------|-------|------------------------|------|-------|
| >JAK1-V645F QVSHKHIVY  | 339   | >JAK1-V645F QFSHKHIVY  | 1546 | 1207  |
| >JAK1-V645F QVSHKHIVYL | 457   | >JAK1-V645F QFSHKHIVYL | 3194 | 2737  |
| >JAK1-V645F QVSHKHIVYL | 172   | >JAK1-V645F QFSHKHIVYL | 80   | 92    |
| >JAK1-V645F QVSHKHIVYL | 13523 | >JAK1-V645F QFSHKHIVYL | 188  | 13335 |
| >JAK1-V645F FFEAASMMR  | 12062 | >JAK1-V645F FFEAASMMR  | 190  | 11872 |
| >JAK1-V645F FFEAASMMR  | 3871  | >JAK1-V645F FFEAASMMR  | 15   | 3856  |
| >JAK1-V645F FFEAASMMR  | 8373  | >JAK1-V645F FFEAASMMR  | 419  | 7954  |
| >JAK1-V645F RQVSHKHIV  | 3840  | >JAK1-V645F RQFSHKHIV  | 324  | 3516  |
| >JAK1-V645F RQVSHKHIVY | 570   | >JAK1-V645F RQFSHKHIVY | 87   | 483   |
| >JAK1-V645F RQVSHKHIVY | 212   | >JAK1-V645F RQFSHKHIVY | 46   | 166   |
| >JAK1-V645F RQVSHKHIV  | 246   | >JAK1-V645F RQFSHKHIV  | 98   | 148   |
| >JAK1-V645F RQVSHKHIVY | 315   | >JAK1-V645F RQFSHKHIVY | 137  | 178   |
| >JAK1-V645F RQVSHKHI   | 189   | >JAK1-V645F RQFSHKHI   | 147  | 42    |
| >JAK1-V645F RQVSHKHIV  | 51    | >JAK1-V645F RQFSHKHIV  | 34   | 17    |
| >JAK1-V645F RQVSHKHIVY | 17    | >JAK1-V645F RQFSHKHIVY | 14   | 3     |
| >JAK1-V645F RQVSHKHIV  | 1108  | >JAK1-V645F RQFSHKHIV  | 99   | 1009  |
| >JAK1-V645F RQVSHKHIVY | 382   | >JAK1-V645F RQFSHKHIVY | 50   | 332   |
| >JAK1-V645F RQVSHKHIV  | 2071  | >JAK1-V645F RQFSHKHIV  | 461  | 1610  |
| >JAK1-V645F RQVSHKHIVY | 769   | >JAK1-V645F RQFSHKHIVY | 242  | 527   |
| >JAK1-V645F RQVSHKHI   | 3675  | >JAK1-V645F RQFSHKHI   | 486  | 3189  |
| >JAK1-V645F RQVSHKHIVY | 232   | >JAK1-V645F RQFSHKHIVY | 85   | 147   |
| >JAK1-V645F RQVSHKHIV  | 2193  | >JAK1-V645F RQFSHKHIV  | 408  | 1785  |
| >JAK1-V645F RQVSHKHIVY | 413   | >JAK1-V645F RQFSHKHIVY | 93   | 320   |
| >JAK1-V645F RQVSHKHI   | 4870  | >JAK1-V645F RQFSHKHI   | 182  | 4688  |
| >JAK1-V645F RQVSHKHIVY | 4938  | >JAK1-V645F RQFSHKHIVY | 321  | 4617  |
| >JAK1-V645F RQVSHKHIVY | 3599  | >JAK1-V645F RQFSHKHIVY | 191  | 3408  |
| >JAK1-V645F RQVSHKHI   | 346   | >JAK1-V645F RQFSHKHI   | 107  | 239   |
| >JAK1-V645F RQVSHKHIVY | 46    | >JAK1-V645F RQFSHKHIVY | 37   | 9     |
| >JAK1-V645F RQVSHKHIVY | 202   | >JAK1-V645F RQFSHKHIVY | 73   | 129   |
| >JAK1-V645F RQVSHKHIVY | 1503  | >JAK1-V645F RQFSHKHIVY | 373  | 1130  |
| >JAK1-V645F RQVSHKHI   | 21    | >JAK1-V645F RQFSHKHI   | 5    | 16    |
| >JAK1-V645F RQVSHKHIV  | 42    | >JAK1-V645F RQFSHKHIV  | 7    | 35    |
| >JAK1-V645F RQVSHKHIVY | 4     | >JAK1-V645F RQFSHKHIVY | 2    | 2     |
| >JAK1-V645F RQVSHKHIVY | 13    | >JAK1-V645F RQFSHKHIVY | 4    | 9     |
| >JAK1-V645F RQVSHKHI   | 921   | >JAK1-V645F RQFSHKHI   | 162  | 759   |
| >JAK1-V645F RQVSHKHIV  | 1985  | >JAK1-V645F RQFSHKHIV  | 337  | 1648  |
| >JAK1-V645F RQVSHKHIVY | 299   | >JAK1-V645F RQFSHKHIVY | 132  | 167   |
| >JAK1-V645F RQVSHKHIVY | 374   | >JAK1-V645F RQFSHKHIVY | 76   | 298   |
| >JAK1-V645F RQVSHKHIV  | 470   | >JAK1-V645F RQFSHKHIV  | 238  | 232   |
| >JAK1-V645F RQVSHKHIVY | 279   | >JAK1-V645F RQFSHKHIVY | 158  | 121   |
| >JAK1-V645F RQVSHKHIV  | 1019  | >JAK1-V645F RQFSHKHIV  | 493  | 526   |
| >JAK1-V645F RQVSHKHIVY | 172   | >JAK1-V645F RQFSHKHIVY | 81   | 91    |
| >JAK1-V645F RQVSHKHIVY | 87    | >JAK1-V645F RQFSHKHIVY | 64   | 23    |

|                        |      |                        |     |      |
|------------------------|------|------------------------|-----|------|
| >JAK1-V645F RQVSHKHIVY | 327  | >JAK1-V645F RQFSHKHIVY | 166 | 161  |
| >JAK1-V645F RQVSHKHIV  | 1048 | >JAK1-V645F RQFSHKHIV  | 264 | 784  |
| >JAK1-V645F RQVSHKHIVY | 75   | >JAK1-V645F RQFSHKHIVY | 30  | 45   |
| >JAK1-V645F RQVSHKHI   | 1439 | >JAK1-V645F RQFSHKHI   | 162 | 1277 |
| >JAK1-V645F MRQVSHKHI  | 150  | >JAK1-V645F MRQFSHKHI  | 269 | 119  |
| >JAK1-V645F MRQVSHKHI' | 34   | >JAK1-V645F MRQFSHKHI\ | 55  | 21   |
| >JAK1-V645F MRQVSHKHI' | 212  | >JAK1-V645F MRQFSHKHI\ | 559 | 347  |
| >JAK1-V645F MRQVSHKHI' | 311  | >JAK1-V645F MRQFSHKHI\ | 444 | 133  |
| >JAK1-V645F MMRQVSHKI  | 530  | >JAK1-V645F MMRQFSHKI  | 361 | 169  |
| >JAK1-V645F MMRQVSHKI  | 58   | >JAK1-V645F MMRQFSHKI  | 42  | 16   |
| >JAK1-V645F MMRQVSHKI  | 393  | >JAK1-V645F MMRQFSHKI  | 137 | 256  |
| >JAK1-V645F MMRQVSHKI  | 8    | >JAK1-V645F MMRQFSHKI  | 8   | 0    |
| >JAK1-V645F MMRQVSHKI  | 61   | >JAK1-V645F MMRQFSHKI  | 65  | 4    |
| >JAK1-V645F MMRQVSHKI  | 6    | >JAK1-V645F MMRQFSHKI  | 6   | 0    |
| >JAK1-V645F MMRQVSHKI  | 29   | >JAK1-V645F MMRQFSHKI  | 31  | 2    |
| >JAK1-V645F MMRQVSHKI  | 35   | >JAK1-V645F MMRQFSHKI  | 48  | 13   |
| >JAK1-V645F MMRQVSHKI  | 142  | >JAK1-V645F MMRQFSHKI  | 124 | 18   |
| >JAK1-V645F MMRQVSHKI  | 56   | >JAK1-V645F MMRQFSHKI  | 42  | 14   |
| >JAK1-V645F MMRQVSHKI  | 2    | >JAK1-V645F MMRQFSHKI  | 2   | 0    |
| >JAK1-V645F MMRQVSHK   | 37   | >JAK1-V645F MMRQFSHK   | 36  | 1    |
| >JAK1-V645F MMRQVSHKI  | 479  | >JAK1-V645F MMRQFSHKI  | 667 | 188  |
| >JAK1-V645F MMRQVSHK   | 547  | >JAK1-V645F MMRQFSHK   | 217 | 330  |
| >JAK1-V645F MMRQVSHK   | 5    | >JAK1-V645F MMRQFSHK   | 4   | 1    |
| >JAK1-V645F MMRQVSHKI  | 19   | >JAK1-V645F MMRQFSHKI  | 12  | 7    |
| >JAK1-V645F MMRQVSHKI  | 87   | >JAK1-V645F MMRQFSHKI  | 48  | 39   |
| >JAK1-V645F MMRQVSHK   | 62   | >JAK1-V645F MMRQFSHK   | 30  | 32   |
| >JAK1-V645F MMRQVSHK   | 328  | >JAK1-V645F MMRQFSHK   | 201 | 127  |
| >JAK1-V645F MMRQVSHK   | 226  | >JAK1-V645F MMRQFSHK   | 227 | 1    |
| >JAK1-V645F MMRQVSHKI  | 69   | >JAK1-V645F MMRQFSHKI  | 31  | 38   |
| >JAK1-V645F MMRQVSHKI  | 180  | >JAK1-V645F MMRQFSHKI  | 186 | 6    |
| >JAK1-V645F MMRQVSHKI  | 977  | >JAK1-V645F MMRQFSHKI  | 348 | 629  |
| >JAK1-V645F MMRQVSHK   | 297  | >JAK1-V645F MMRQFSHK   | 127 | 170  |
| >JAK1-V645F MMRQVSHKI  | 1260 | >JAK1-V645F MMRQFSHKI  | 263 | 997  |
| >JAK1-V645F MMRQVSHKI  | 70   | >JAK1-V645F MMRQFSHKI  | 38  | 32   |
| >JAK1-V645F MMRQVSHKI  | 166  | >JAK1-V645F MMRQFSHKI  | 82  | 84   |
| >JAK1-V645F MMRQVSHK   | 1981 | >JAK1-V645F MMRQFSHK   | 223 | 1758 |
| >JAK1-V645F SMMRQVSHI  | 343  | >JAK1-V645F SMMRQFSHK  | 163 | 180  |
| >JAK1-V645F SMMRQVSHI  | 460  | >JAK1-V645F SMMRQFSHK  | 482 | 22   |
| >JAK1-V645F SMMRQVSHI  | 193  | >JAK1-V645F SMMRQFSHK  | 167 | 26   |
| >JAK1-V645F SMMRQVSHI  | 28   | >JAK1-V645F SMMRQFSHK  | 29  | 1    |
| >JAK1-V645F SMMRQVSHI  | 601  | >JAK1-V645F SMMRQFSHK  | 230 | 371  |
| >JAK1-V645F SMMRQVSHI  | 22   | >JAK1-V645F SMMRQFSHK  | 31  | 9    |
| >JAK1-V645F SMMRQVSHI  | 42   | >JAK1-V645F SMMRQFSHK  | 44  | 2    |

|                       |      |                       |       |       |
|-----------------------|------|-----------------------|-------|-------|
| >JAK1-V645F SMMRQVSHI | 74   | >JAK1-V645F SMMRQFSHk | 104   | 30    |
| >JAK1-V645F SMMRQVSHI | 403  | >JAK1-V645F SMMRQFSHk | 954   | 551   |
| >JAK1-V645F SMMRQVSHI | 38   | >JAK1-V645F SMMRQFSHk | 51    | 13    |
| >JAK1-V645F SMMRQVSH  | 474  | >JAK1-V645F SMMRQFSH  | 283   | 191   |
| >JAK1-V645F SMMRQVSHI | 32   | >JAK1-V645F SMMRQFSHk | 28    | 4     |
| >JAK1-V645F SMMRQVSH  | 1006 | >JAK1-V645F SMMRQFSH  | 197   | 809   |
| >JAK1-V645F SMMRQVSHI | 10   | >JAK1-V645F SMMRQFSHk | 7     | 3     |
| >JAK1-V645F SMMRQVSHI | 33   | >JAK1-V645F SMMRQFSHk | 23    | 10    |
| >JAK1-V645F SMMRQVSHI | 86   | >JAK1-V645F SMMRQFSHk | 22    | 64    |
| >JAK1-V645F SMMRQVSHI | 119  | >JAK1-V645F SMMRQFSHk | 65    | 54    |
| >JAK1-V645F SMMRQVSH  | 414  | >JAK1-V645F SMMRQFSH  | 549   | 135   |
| >JAK1-V645F SMMRQVSHI | 252  | >JAK1-V645F SMMRQFSHk | 216   | 36    |
| >JAK1-V645F SMMRQVSH  | 228  | >JAK1-V645F SMMRQFSH  | 469   | 241   |
| >JAK1-V645F SMMRQVSHI | 338  | >JAK1-V645F SMMRQFSHk | 232   | 106   |
| >JAK1-V645F SMMRQVSHI | 58   | >JAK1-V645F SMMRQFSHk | 54    | 4     |
| >JAK1-V645F SMMRQVSHI | 1117 | >JAK1-V645F SMMRQFSHk | 177   | 940   |
| >JAK1-V645F SMMRQVSHI | 476  | >JAK1-V645F SMMRQFSHk | 377   | 99    |
| >JAK1-V645F ASMMRQVSI | 15   | >JAK1-V645F ASMMRQFSI | 11    | 4     |
| >JAK1-V645F ASMMRQVSI | 628  | >JAK1-V645F ASMMRQFSI | 72    | 556   |
| >JAK1-V645F ASMMRQVSI | 8    | >JAK1-V645F ASMMRQFSI | 6     | 2     |
| >JAK1-V645F ASMMRQVSI | 419  | >JAK1-V645F ASMMRQFSI | 160   | 259   |
| >JAK1-V645F ASMMRQVSI | 14   | >JAK1-V645F ASMMRQFSI | 13    | 1     |
| >JAK1-V645F ASMMRQVSI | 243  | >JAK1-V645F ASMMRQFSI | 88    | 155   |
| >JAK1-V645F ASMMRQVSI | 333  | >JAK1-V645F ASMMRQFSI | 231   | 102   |
| >JAK1-V645F ASMMRQVSI | 750  | >JAK1-V645F ASMMRQFSI | 325   | 425   |
| >JAK1-V645F ASMMRQVSI | 703  | >JAK1-V645F ASMMRQFSI | 349   | 354   |
| >JAK1-V645F ASMMRQVSI | 384  | >JAK1-V645F ASMMRQFSI | 138   | 246   |
| >JAK1-V645F ASMMRQVSI | 75   | >JAK1-V645F ASMMRQFSI | 47    | 28    |
| >JAK1-V645F ASMMRQVSI | 334  | >JAK1-V645F ASMMRQFSI | 145   | 189   |
| >JAK1-V645F AASMMRQV  | 449  | >JAK1-V645F AASMMRQF  | 34118 | 33669 |
| >JAK1-V645F AASMMRQV: | 662  | >JAK1-V645F AASMMRQF: | 346   | 316   |
| >JAK1-V645F AASMMRQV: | 62   | >JAK1-V645F AASMMRQF: | 33    | 29    |
| >JAK1-V645F AASMMRQV: | 62   | >JAK1-V645F AASMMRQF: | 40    | 22    |
| >JAK1-V645F AASMMRQV: | 1124 | >JAK1-V645F AASMMRQF: | 348   | 776   |
| >JAK1-V645F AASMMRQV: | 590  | >JAK1-V645F AASMMRQF: | 373   | 217   |
| >JAK1-V645F AASMMRQV  | 7598 | >JAK1-V645F AASMMRQF  | 230   | 7368  |
| >JAK1-V645F AASMMRQV  | 2994 | >JAK1-V645F AASMMRQF  | 14    | 2980  |
| >JAK1-V645F AASMMRQV: | 1005 | >JAK1-V645F AASMMRQF: | 477   | 528   |
| >JAK1-V645F EAASMMRQI | 4927 | >JAK1-V645F EAASMMRQI | 194   | 4733  |
| >JAK1-V645F EAASMMRQI | 1708 | >JAK1-V645F EAASMMRQI | 11    | 1697  |
| >JAK1-V645F EAASMMRQI | 722  | >JAK1-V645F EAASMMRQI | 372   | 350   |
| >JAK1-V645F EAASMMRQI | 15   | >JAK1-V645F EAASMMRQI | 11771 | 11756 |
| >JAK1-V645F EAASMMRQI | 22   | >JAK1-V645F EAASMMRQI | 9577  | 9555  |

|                         |       |                         |       |       |
|-------------------------|-------|-------------------------|-------|-------|
| >JAK1-V645F EAASMMRQ\   | 10555 | >JAK1-V645F EAASMMRQI   | 48    | 10507 |
| >JAK1-V645F EAASMMRQ\   | 12971 | >JAK1-V645F EAASMMRQI   | 370   | 12601 |
| >JAK1-V645F FEAASMMRC   | 22    | >JAK1-V645F FEAASMMRC   | 107   | 85    |
| >JAK1-V645F FEAASMMRC   | 12688 | >JAK1-V645F FEAASMMRC   | 386   | 12302 |
| >JAK1-V645F FEAASMMRC   | 3187  | >JAK1-V645F FEAASMMRC   | 57    | 3130  |
| >JAK1-V645F FEAASMMRC   | 98    | >JAK1-V645F FEAASMMRC   | 149   | 51    |
| >JAK1-V645F FEAASMMRC   | 3814  | >JAK1-V645F FEAASMMRC   | 264   | 3550  |
| >JAK1-V645F FEAASMMRC   | 3930  | >JAK1-V645F FEAASMMRC   | 440   | 3490  |
| >JAK1-V645F FEAASMMRC   | 19    | >JAK1-V645F FEAASMMRC   | 41    | 22    |
| >JAK1-V658F VRDVENIM    | 2065  | >JAK1-V658F FRDVENIM    | 58    | 2007  |
| >JAK1-V658F VRDVENIMV   | 6339  | >JAK1-V658F FRDVENIMV   | 349   | 5990  |
| >JAK1-V658F CVRDVENIM\  | 320   | >JAK1-V658F CFRDVENIM\  | 1308  | 988   |
| >JAK1-V658F CVRDVENIM   | 236   | >JAK1-V658F CFRDVENIM   | 1985  | 1749  |
| >JAK1-V658F KHIVYLYGVC\ | 14111 | >JAK1-V658F KHIVYLYGVC\ | 321   | 13790 |
| >JAK1-V658F KHIVYLYGVC\ | 368   | >JAK1-V658F KHIVYLYGVC\ | 9     | 359   |
| >JAK1-V658F VCVRDVENIM  | 2109  | >JAK1-V658F VCFRDVENIM  | 193   | 1916  |
| >JAK1-V658F GVCVRDVENI  | 848   | >JAK1-V658F GVCFRDVENI  | 460   | 388   |
| >JAK1-V658F YLYGVCVRDV  | 23    | >JAK1-V658F YLYGVCFRDV  | 15    | 8     |
| >JAK1-V658F YLYGVCVCR   | 1199  | >JAK1-V658F YLYGVCFR    | 222   | 977   |
| >JAK1-V658F YLYGVCVRD   | 852   | >JAK1-V658F YLYGVCFRD   | 335   | 517   |
| >JAK1-V658F YLYGVCVRDV  | 28    | >JAK1-V658F YLYGVCFRDV  | 25    | 3     |
| >JAK1-V658F YLYGVCVRDV  | 9     | >JAK1-V658F YLYGVCFRDV  | 8     | 1     |
| >JAK1-V658F YLYGVCVRDV  | 57    | >JAK1-V658F YLYGVCFRDV  | 31    | 26    |
| >JAK1-V658F YLYGVCVCR   | 62    | >JAK1-V658F YLYGVCFR    | 19    | 43    |
| >JAK1-V658F YLYGVCVRD   | 93    | >JAK1-V658F YLYGVCFRD   | 29    | 64    |
| >JAK1-V658F YLYGVCVRDV  | 2     | >JAK1-V658F YLYGVCFRDV  | 2     | 0     |
| >JAK1-V658F YLYGVCVRDV  | 543   | >JAK1-V658F YLYGVCFRDV  | 381   | 162   |
| >JAK1-V658F YLYGVCVRDV  | 6     | >JAK1-V658F YLYGVCFRDV  | 6     | 0     |
| >JAK1-V658F YLYGVCVCR   | 685   | >JAK1-V658F YLYGVCFR    | 99    | 586   |
| >JAK1-V658F YLYGVCVRD   | 2381  | >JAK1-V658F YLYGVCFRD   | 454   | 1927  |
| >JAK1-V658F YLYGVCVRDV  | 5     | >JAK1-V658F YLYGVCFRDV  | 5     | 0     |
| >JAK1-V658F YLYGVCVRDV  | 5     | >JAK1-V658F YLYGVCFRDV  | 7     | 2     |
| >JAK1-V658F YLYGVCVCR   | 30    | >JAK1-V658F YLYGVCFR    | 16    | 14    |
| >JAK1-V658F YLYGVCVRD   | 92    | >JAK1-V658F YLYGVCFRD   | 41    | 51    |
| >JAK1-V658F YLYGVCVRDV  | 2     | >JAK1-V658F YLYGVCFRDV  | 2     | 0     |
| >JAK1-V658F YLYGVCVRDV  | 605   | >JAK1-V658F YLYGVCFRDV  | 391   | 214   |
| >JAK1-V658F YLYGVCVCR   | 315   | >JAK1-V658F YLYGVCFR    | 88    | 227   |
| >JAK1-V658F YLYGVCVCR   | 3168  | >JAK1-V658F YLYGVCFR    | 292   | 2876  |
| >JAK1-V658F YLYGVCVCR   | 171   | >JAK1-V658F YLYGVCFR    | 28    | 143   |
| >JAK1-V658F YLYGVCVCR   | 78    | >JAK1-V658F YLYGVCFR    | 14    | 64    |
| >JAK1-V658F YLYGVCVCR   | 16    | >JAK1-V658F YLYGVCFR    | 4     | 12    |
| >JAK1-V658F YLYGVCVCR   | 129   | >JAK1-V658F YLYGVCFR    | 78    | 51    |
| >JAK1-V658F VYLYGVCV    | 459   | >JAK1-V658F VYLYGVCF    | 19931 | 19472 |



|                        |       |                         |       |       |
|------------------------|-------|-------------------------|-------|-------|
| >JAK1-V658F VYLYGVCV   | 1249  | >JAK1-V658F VYLYGVCF    | 40    | 1209  |
| >JAK1-V658F VYLYGVCV   | 1368  | >JAK1-V658F VYLYGVCF    | 90    | 1278  |
| >JAK1-V658F VYLYGVCV   | 1075  | >JAK1-V658F VYLYGVCF    | 17    | 1058  |
| >JAK1-V658F VYLYGVCVRC | 536   | >JAK1-V658F VYLYGVCFRD  | 295   | 241   |
| >JAK1-V658F VYLYGVCVR  | 88    | >JAK1-V658F VYLYGVCFR   | 14    | 74    |
| >JAK1-V658F VYLYGVCVR  | 91    | >JAK1-V658F VYLYGVCFR   | 17    | 74    |
| >JAK1-V658F VYLYGVCV   | 5562  | >JAK1-V658F VYLYGVCF    | 136   | 5426  |
| >JAK1-V658F VYLYGVCVR  | 122   | >JAK1-V658F VYLYGVCFR   | 63    | 59    |
| >JAK1-V658F IVYLYGVCV  | 160   | >JAK1-V658F IVYLYGVCF   | 83    | 77    |
| >JAK1-V658F IVYLYGVCV  | 221   | >JAK1-V658F IVYLYGVCF   | 18558 | 18337 |
| >JAK1-V658F IVYLYGVCV  | 316   | >JAK1-V658F IVYLYGVCF   | 8433  | 8117  |
| >JAK1-V658F IVYLYGVCV  | 380   | >JAK1-V658F IVYLYGVCF   | 14318 | 13938 |
| >JAK1-V658F IVYLYGVCV  | 108   | >JAK1-V658F IVYLYGVCF   | 1886  | 1778  |
| >JAK1-V658F IVYLYGVCV  | 45    | >JAK1-V658F IVYLYGVCF   | 15541 | 15496 |
| >JAK1-V658F IVYLYGVCV  | 71    | >JAK1-V658F IVYLYGVCF   | 21400 | 21329 |
| >JAK1-V658F IVYLYGVCV  | 48    | >JAK1-V658F IVYLYGVCF   | 30595 | 30547 |
| >JAK1-V658F IVYLYGVCVR | 425   | >JAK1-V658F IVYLYGVCFR  | 97    | 328   |
| >JAK1-V658F IVYLYGVCVR | 633   | >JAK1-V658F IVYLYGVCFR  | 123   | 510   |
| >JAK1-V658F IVYLYGVCVR | 43    | >JAK1-V658F IVYLYGVCFR  | 9     | 34    |
| >JAK1-V658F IVYLYGVCVR | 323   | >JAK1-V658F IVYLYGVCFR  | 29    | 294   |
| >JAK1-V658F IVYLYGVCVR | 112   | >JAK1-V658F IVYLYGVCFR  | 15    | 97    |
| >JAK1-V658F IVYLYGVCV  | 7477  | >JAK1-V658F IVYLYGVCF   | 235   | 7242  |
| >JAK1-V658F IVYLYGVCV  | 695   | >JAK1-V658F IVYLYGVCF   | 13    | 682   |
| >JAK1-V658F IVYLYGVCV  | 8379  | >JAK1-V658F IVYLYGVCF   | 64    | 8315  |
| >JAK1-V658F IVYLYGVCV  | 15803 | >JAK1-V658F IVYLYGVCF   | 443   | 15360 |
| >JAK1-V658F IVYLYGVCVR | 462   | >JAK1-V658F IVYLYGVCFR  | 98    | 364   |
| >JAK1-V658F IVYLYGVCVR | 197   | >JAK1-V658F IVYLYGVCFR  | 99    | 98    |
| >JAK1-V658F HIVYLYGVCV | 377   | >JAK1-V658F HIVYLYGVCF  | 20140 | 19763 |
| >JAK1-V658F HIVYLYGVCV | 8660  | >JAK1-V658F HIVYLYGVCF  | 260   | 8400  |
| >JAK1-V658F HIVYLYGVCV | 72    | >JAK1-V658F HIVYLYGVCFI | 19    | 53    |
| >JAK1-V658F HIVYLYGVCV | 114   | >JAK1-V658F HIVYLYGVCFI | 26    | 88    |
| >JAK1-V658F HIVYLYGVCV | 23    | >JAK1-V658F HIVYLYGVCFI | 6     | 17    |
| >JAK1-V658F HIVYLYGVCV | 95    | >JAK1-V658F HIVYLYGVCF  | 16931 | 16836 |
| >JAK1-V658F HIVYLYGVCV | 9610  | >JAK1-V658F HIVYLYGVCF  | 343   | 9267  |
| >JAK1-V658F HIVYLYGVCV | 4175  | >JAK1-V658F HIVYLYGVCF  | 117   | 4058  |
| >JAK1-V658F HIVYLYGVCV | 63    | >JAK1-V658F HIVYLYGVCFI | 39    | 24    |
| >JAK1-W104' WYAPECLM   | 84    | >JAK1-W104' GYAPECLM    | 476   | 392   |
| >JAK1-W104' WYAPECLMC  | 301   | >JAK1-W104' GYAPECLMQ   | 1230  | 929   |
| >JAK1-W104' WYAPECLMC  | 183   | >JAK1-W104' GYAPECLMQ   | 868   | 685   |
| >JAK1-W104' WYAPECLMC  | 314   | >JAK1-W104' GYAPECLMQ   | 1567  | 1253  |
| >JAK1-W104' FWYAPECLM  | 115   | >JAK1-W104' FGYAPECLM   | 453   | 338   |
| >JAK1-W104' FWYAPECL   | 320   | >JAK1-W104' FGYAPECL    | 768   | 448   |
| >JAK1-W104' FWYAPECL   | 244   | >JAK1-W104' FGYAPECL    | 34022 | 33778 |

|                        |       |                        |       |       |
|------------------------|-------|------------------------|-------|-------|
| >JAK1-W104' FWYAPECLM  | 460   | >JAK1-W104' FGYAPECLM  | 36896 | 36436 |
| >JAK1-W104' VFWYAPECL  | 85    | >JAK1-W104' VFGYAPECL  | 365   | 280   |
| >JAK1-W104' VFWYAPECLM | 350   | >JAK1-W104' VFGYAPECLM | 3302  | 2952  |
| >JAK1-W104' PVFWYAPECI | 294   | >JAK1-W104' PVFGYAPECL | 486   | 192   |
| >JAK1-W104' SPVFWYAPEC | 254   | >JAK1-W104' SPVFGYAPEC | 413   | 159   |
| >JAK1-W104' SPVFWYAP   | 314   | >JAK1-W104' SPVFGYAP   | 680   | 366   |
| >JAK1-W104' DSPVFWYA   | 91    | >JAK1-W104' DSPVFGYA   | 375   | 284   |
| >JAK1-W104' RDSPVFWYA  | 141   | >JAK1-W104' RDSPVFGYA  | 6230  | 6089  |
| >JAK1-W104' DRDSPVFWY  | 251   | >JAK1-W104' DRDSPVFGY  | 604   | 353   |
| >JAK1-W104' DDRDSPVFW  | 1207  | >JAK1-W104' DDRDSPVFGY | 385   | 822   |
| >JAK1-Y463S YVLRWSCT   | 263   | >JAK1-Y463S SVLRWSCT   | 2893  | 2630  |
| >JAK1-Y463S YVLRWSCTDF | 356   | >JAK1-Y463S SVLRWSCTDF | 1997  | 1641  |
| >JAK1-Y463S YVLRWSCTDF | 388   | >JAK1-Y463S SVLRWSCTDF | 133   | 255   |
| >JAK1-Y463S YVLRWSCTDF | 230   | >JAK1-Y463S SVLRWSCTDF | 683   | 453   |
| >JAK1-Y463S YVLRWSCTDF | 42    | >JAK1-Y463S SVLRWSCTDF | 221   | 179   |
| >JAK1-Y463S YVLRWSCTDF | 127   | >JAK1-Y463S SVLRWSCTDF | 742   | 615   |
| >JAK1-Y463S MYVLRWSCT  | 31    | >JAK1-Y463S MSVLRWSCT  | 2012  | 1981  |
| >JAK1-Y463S MYVLRWSCT  | 149   | >JAK1-Y463S MSVLRWSCT  | 5734  | 5585  |
| >JAK1-Y463S MYVLRWSCT  | 41    | >JAK1-Y463S MSVLRWSCT  | 12719 | 12678 |
| >JAK1-Y463S MYVLRWSCT  | 453   | >JAK1-Y463S MSVLRWSCT  | 40    | 413   |
| >JAK1-Y463S MYVLRWSCT  | 11748 | >JAK1-Y463S MSVLRWSCT  | 4     | 11744 |
| >JAK1-Y463S MYVLRWSCT  | 3384  | >JAK1-Y463S MSVLRWSCT  | 490   | 2894  |
| >JAK1-Y463S MYVLRWSCT  | 3841  | >JAK1-Y463S MSVLRWSCT  | 94    | 3747  |
| >JAK1-Y463S MYVLRWSC   | 90    | >JAK1-Y463S MSVLRWSC   | 16423 | 16333 |
| >JAK1-Y463S GMYVLRWSC  | 494   | >JAK1-Y463S GMSVLRWSC  | 1324  | 830   |
| >JAK1-Y463S GMYVLRWSC  | 40    | >JAK1-Y463S GMSVLRWSC  | 1017  | 977   |
| >JAK1-Y463S GMYVLRWSC  | 173   | >JAK1-Y463S GMSVLRWSC  | 963   | 790   |
| >JAK1-Y463S GMYVLRWSC  | 166   | >JAK1-Y463S GMSVLRWSC  | 2058  | 1892  |
| >JAK1-Y463S GMYVLRWSC  | 310   | >JAK1-Y463S GMSVLRWSC  | 2420  | 2110  |
| >JAK1-Y463S GMYVLRWSC  | 27    | >JAK1-Y463S GMSVLRWSC  | 61    | 34    |
| >JAK1-Y463S EGMVYVLRW  | 342   | >JAK1-Y463S EGMSVLRW   | 261   | 81    |
| >JAK1-Y463S EEGMYVLR   | 405   | >JAK1-Y463S EEGMSVLR   | 422   | 17    |
| >JAK1-Y463S EEGMYVLRW  | 324   | >JAK1-Y463S EEGMSVLRW  | 263   | 61    |
| >JAK1-Y463S EEGMYVLRW  | 27    | >JAK1-Y463S EEGMSVLRW  | 33    | 6     |
| >JAK1-Y463S EEGMYVLRW  | 110   | >JAK1-Y463S EEGMSVLRW  | 126   | 16    |
| >JAK1-Y463S EEGMYVLR   | 244   | >JAK1-Y463S EEGMSVLR   | 427   | 183   |
| >JAK1-Y463S SEEGMYVL   | 146   | >JAK1-Y463S SEEGMSVL   | 141   | 5     |
| >JAK1-Y463S SEEGMYVL   | 358   | >JAK1-Y463S SEEGMSVL   | 1511  | 1153  |
| >JAK1-Y463S SEEGMYVL   | 163   | >JAK1-Y463S SEEGMSVL   | 180   | 17    |
| >JAK1-Y463S SEEGMYVL   | 11    | >JAK1-Y463S SEEGMSVL   | 18    | 7     |
| >JAK1-Y463S SEEGMYVL   | 112   | >JAK1-Y463S SEEGMSVL   | 206   | 94    |
| >JAK1-Y463S SEEGMYVLR  | 14    | >JAK1-Y463S SEEGMSVLR  | 14    | 0     |
| >JAK1-Y463S SEEGMYVLR  | 23    | >JAK1-Y463S SEEGMSVLR  | 36    | 13    |

|                        |      |                        |       |       |
|------------------------|------|------------------------|-------|-------|
| >JAK1-Y463S SEEGMYVL   | 122  | >JAK1-Y463S SEEGMSVL   | 556   | 434   |
| >JAK1-Y463S SEEGMYVLR\ | 183  | >JAK1-Y463S SEEGMSVLR\ | 350   | 167   |
| >JAK1-Y463S SEEGMYVLR\ | 130  | >JAK1-Y463S SEEGMSVLR\ | 347   | 217   |
| >JAK1-Y463S SEEGMYVLR  | 356  | >JAK1-Y463S SEEGMSVLR  | 542   | 186   |
| >JAK1-Y463S GSEEGMYVLI | 372  | >JAK1-Y463S GSEEGMSVLI | 262   | 110   |
| >JAK1-Y463S GSEEGMYVL  | 94   | >JAK1-Y463S GSEEGMSVL  | 41    | 53    |
| >JAK1-Y463S GSEEGMYVLI | 6    | >JAK1-Y463S GSEEGMSVLI | 5     | 1     |
| >JAK1-Y463S GSEEGMYVLI | 203  | >JAK1-Y463S GSEEGMSVLI | 257   | 54    |
| >JAK1-Y463S GSEEGMYVL  | 457  | >JAK1-Y463S GSEEGMSVL  | 17    | 440   |
| >JAK1-Y463S GSEEGMYVLI | 1391 | >JAK1-Y463S GSEEGMSVLI | 420   | 971   |
| >JAK1-Y463S GSEEGMYVLI | 316  | >JAK1-Y463S GSEEGMSVLI | 897   | 581   |
| >JAK1-Y463S EGSEEGMYVI | 53   | >JAK1-Y463S EGSEEGMSVI | 64    | 11    |
| >JAK1-Y463S EGSEEGMYV  | 304  | >JAK1-Y463S EGSEEGMSV  | 1603  | 1299  |
| >JAK1-Y463S EGSEEGMYV  | 360  | >JAK1-Y463S EGSEEGMSV  | 1220  | 860   |
| >JAK1-Y463S EGSEEGMYVI | 444  | >JAK1-Y463S EGSEEGMSVI | 802   | 358   |
| >JAK1-Y463S QEGSEEGMY  | 295  | >JAK1-Y463S QEGSEEGMS' | 486   | 191   |
| >JAK1-Y463S QEGSEEGMY  | 79   | >JAK1-Y463S QEGSEEGMS' | 69    | 10    |
| >JAK1-Y463S RQEGSEEGM  | 40   | >JAK1-Y463S RQEGSEEGM  | 86    | 46    |
| >JAK1-Y463S RQEGSEEGM  | 259  | >JAK1-Y463S RQEGSEEGM  | 1237  | 978   |
| >JAK1-Y463S RQEGSEEGM  | 38   | >JAK1-Y463S RQEGSEEGM  | 15976 | 15938 |
| >JAK1-Y652HYLYGVCVRD\  | 23   | >JAK1-Y652HHLYGVCVRD\  | 198   | 175   |
| >JAK1-Y652HYLYGVCVRD\  | 28   | >JAK1-Y652HHLYGVCVRD\  | 182   | 154   |
| >JAK1-Y652HYLYGVCVRD\  | 9    | >JAK1-Y652HHLYGVCVRD\  | 37    | 28    |
| >JAK1-Y652HYLYGVCVRD\  | 57   | >JAK1-Y652HHLYGVCVRD\  | 624   | 567   |
| >JAK1-Y652HYLYGVCVR    | 62   | >JAK1-Y652HHLYGVCVR    | 2275  | 2213  |
| >JAK1-Y652HYLYGVCVRD   | 93   | >JAK1-Y652HHLYGVCVRD   | 4355  | 4262  |
| >JAK1-Y652HYLYGVCVRD\  | 2    | >JAK1-Y652HHLYGVCVRD\  | 6     | 4     |
| >JAK1-Y652HYLYGVCVRD\  | 6    | >JAK1-Y652HHLYGVCVRD\  | 52    | 46    |
| >JAK1-Y652HYLYGVCVRD\  | 5    | >JAK1-Y652HHLYGVCVRD\  | 13    | 8     |
| >JAK1-Y652HYLYGVCVRD\  | 5    | >JAK1-Y652HHLYGVCVRD\  | 111   | 106   |
| >JAK1-Y652HYLYGVCVR    | 30   | >JAK1-Y652HHLYGVCVR    | 1580  | 1550  |
| >JAK1-Y652HYLYGVCVRD   | 92   | >JAK1-Y652HHLYGVCVRD   | 5573  | 5481  |
| >JAK1-Y652HYLYGVCVRD\  | 2    | >JAK1-Y652HHLYGVCVRD\  | 3     | 1     |
| >JAK1-Y652HYLYGVCVR    | 315  | >JAK1-Y652HHLYGVCVR    | 94    | 221   |
| >JAK1-Y652HYLYGVCVR    | 171  | >JAK1-Y652HHLYGVCVR    | 40    | 131   |
| >JAK1-Y652HYLYGVCVR    | 78   | >JAK1-Y652HHLYGVCVR    | 44    | 34    |
| >JAK1-Y652HYLYGVCVR    | 16   | >JAK1-Y652HHLYGVCVR    | 25    | 9     |
| >JAK1-Y652HYLYGVCVR    | 129  | >JAK1-Y652HHLYGVCVR    | 46    | 83    |
| >JAK1-Y652HVYLYGVCV    | 459  | >JAK1-Y652HVHLYGVCV    | 4932  | 4473  |
| >JAK1-Y652HVYLYGVCVR   | 88   | >JAK1-Y652HVHLYGVCVR   | 5730  | 5642  |
| >JAK1-Y652HVYLYGVCVR   | 91   | >JAK1-Y652HVHLYGVCVR   | 10557 | 10466 |
| >JAK1-Y652HVYLYGVCVR   | 122  | >JAK1-Y652HVHLYGVCVR   | 1284  | 1162  |
| >JAK1-Y652HMRQVSHKHI'  | 34   | >JAK1-Y652HMRQVSHKHI'  | 937   | 903   |

|                        |     |                        |      |      |
|------------------------|-----|------------------------|------|------|
| >JAK1-Y652HIVYLYGVC    | 19  | >JAK1-Y652HIVHLYGVC    | 1476 | 1457 |
| >JAK1-Y652HIVYLYGVCV   | 160 | >JAK1-Y652HIVHLYGVCV   | 1426 | 1266 |
| >JAK1-Y652HIVYLYGVCV   | 221 | >JAK1-Y652HIVHLYGVCV   | 2599 | 2378 |
| >JAK1-Y652HIVYLYGVCV   | 316 | >JAK1-Y652HIVHLYGVCV   | 1419 | 1103 |
| >JAK1-Y652HIVYLYGVCV   | 380 | >JAK1-Y652HIVHLYGVCV   | 1371 | 991  |
| >JAK1-Y652HIVYLYGVCV   | 108 | >JAK1-Y652HIVHLYGVCV   | 577  | 469  |
| >JAK1-Y652HIVYLYGVCV   | 45  | >JAK1-Y652HIVHLYGVCV   | 537  | 492  |
| >JAK1-Y652HIVYLYGVCV   | 71  | >JAK1-Y652HIVHLYGVCV   | 2524 | 2453 |
| >JAK1-Y652HIVYLYGVCV   | 48  | >JAK1-Y652HIVHLYGVCV   | 155  | 107  |
| >JAK1-Y652HIVYLYGVCVR  | 425 | >JAK1-Y652HIVHLYGVCVR  | 1970 | 1545 |
| >JAK1-Y652HIVYLYGVCVR  | 43  | >JAK1-Y652HIVHLYGVCVR  | 167  | 124  |
| >JAK1-Y652HIVYLYGVCVR  | 323 | >JAK1-Y652HIVHLYGVCVR  | 774  | 451  |
| >JAK1-Y652HIVYLYGVCVR  | 112 | >JAK1-Y652HIVHLYGVCVR  | 562  | 450  |
| >JAK1-Y652HIVYLYGVCVR  | 462 | >JAK1-Y652HIVHLYGVCVR  | 847  | 385  |
| >JAK1-Y652HIVYLYGVCVR  | 197 | >JAK1-Y652HIVHLYGVCVR  | 357  | 160  |
| >JAK1-Y652HHIVYLYGV    | 243 | >JAK1-Y652HHIVHLYGV    | 369  | 126  |
| >JAK1-Y652HHIVYLYGV    | 55  | >JAK1-Y652HHIVHLYGV    | 66   | 11   |
| >JAK1-Y652HHIVYLYGV    | 49  | >JAK1-Y652HHIVHLYGV    | 27   | 22   |
| >JAK1-Y652HHIVYLYGV    | 30  | >JAK1-Y652HHIVHLYGV    | 27   | 3    |
| >JAK1-Y652HHIVYLYGVCV  | 377 | >JAK1-Y652HHIVHLYGVCV  | 620  | 243  |
| >JAK1-Y652HHIVYLYGV    | 155 | >JAK1-Y652HHIVHLYGV    | 81   | 74   |
| >JAK1-Y652HHIVYLYGV    | 133 | >JAK1-Y652HHIVHLYGV    | 103  | 30   |
| >JAK1-Y652HHIVYLYGV    | 473 | >JAK1-Y652HHIVHLYGV    | 329  | 144  |
| >JAK1-Y652HHIVYLYGV    | 107 | >JAK1-Y652HHIVHLYGV    | 48   | 59   |
| >JAK1-Y652HHIVYLYGVCV  | 934 | >JAK1-Y652HHIVHLYGVCV  | 438  | 496  |
| >JAK1-Y652HHIVYLYGVCV  | 72  | >JAK1-Y652HHIVHLYGVCV  | 111  | 39   |
| >JAK1-Y652HHIVYLYGVCV  | 114 | >JAK1-Y652HHIVHLYGVCV  | 178  | 64   |
| >JAK1-Y652HHIVYLYGVCV  | 23  | >JAK1-Y652HHIVHLYGVCV  | 54   | 31   |
| >JAK1-Y652HHIVYLYGV    | 11  | >JAK1-Y652HHIVHLYGV    | 13   | 2    |
| >JAK1-Y652HHIVYLYGVCV  | 95  | >JAK1-Y652HHIVHLYGVCV  | 211  | 116  |
| >JAK1-Y652HHIVYLYGV    | 30  | >JAK1-Y652HHIVHLYGV    | 33   | 3    |
| >JAK1-Y652HHIVYLYGVCV  | 63  | >JAK1-Y652HHIVHLYGVCV  | 49   | 14   |
| >JAK1-Y652HKKHIVYLYGV  | 290 | >JAK1-Y652HKKHIVHLYGV  | 595  | 305  |
| >JAK1-Y652HKKHIVYLYGVC | 368 | >JAK1-Y652HKKHIVHLYGVC | 555  | 187  |
| >JAK1-Y652HKKHIVYLY    | 276 | >JAK1-Y652HKKHIVHLY    | 460  | 184  |
| >JAK1-Y652HKKHIVYLY    | 661 | >JAK1-Y652HKKHIVHLY    | 411  | 250  |
| >JAK1-Y652HKKHIVYLY    | 370 | >JAK1-Y652HKKHIVHLY    | 208  | 162  |
| >JAK1-Y652HKKHIVYLY    | 31  | >JAK1-Y652HKKHIVHLY    | 42   | 11   |
| >JAK1-Y652HSHKHIVYLY   | 49  | >JAK1-Y652HSHKHIVHLY   | 161  | 112  |
| >JAK1-Y652HSHKHIVYLY   | 49  | >JAK1-Y652HSHKHIVHLY   | 31   | 18   |
| >JAK1-Y652HSHKHIVYLY   | 43  | >JAK1-Y652HSHKHIVHLY   | 38   | 5    |
| >JAK1-Y652HSHKHIVYLY   | 292 | >JAK1-Y652HSHKHIVHLY   | 333  | 41   |
| >JAK1-Y652HSHKHIVYLY   | 367 | >JAK1-Y652HSHKHIVHLY   | 995  | 628  |

|                       |     |                       |       |       |
|-----------------------|-----|-----------------------|-------|-------|
| >JAK1-Y652HVSHKHIVYL  | 138 | >JAK1-Y652HVSHKHIVHL  | 63    | 75    |
| >JAK1-Y652HVSHKHIVYLY | 408 | >JAK1-Y652HVSHKHIVHLY | 641   | 233   |
| >JAK1-Y652HVSHKHIVY   | 436 | >JAK1-Y652HVSHKHIVH   | 16505 | 16069 |
| >JAK1-Y652HVSHKHIVYLY | 335 | >JAK1-Y652HVSHKHIVHLY | 231   | 104   |
| >JAK1-Y652HVSHKHIVYLY | 175 | >JAK1-Y652HVSHKHIVHLY | 981   | 806   |
| >JAK1-Y652HVSHKHIVYL  | 305 | >JAK1-Y652HVSHKHIVHL  | 736   | 431   |
| >JAK1-Y652HVSHKHIVY   | 279 | >JAK1-Y652HVSHKHIVH   | 14286 | 14007 |
| >JAK1-Y652HVSHKHIVYLY | 24  | >JAK1-Y652HVSHKHIVHLY | 43    | 19    |
| >JAK1-Y652HVSHKHIVYLY | 116 | >JAK1-Y652HVSHKHIVHLY | 92    | 24    |
| >JAK1-Y652HVSHKHIVY   | 123 | >JAK1-Y652HVSHKHIVH   | 8450  | 8327  |
| >JAK1-Y652HVSHKHIVYLY | 371 | >JAK1-Y652HVSHKHIVHLY | 380   | 9     |
| >JAK1-Y652HVSHKHIVY   | 76  | >JAK1-Y652HVSHKHIVH   | 3902  | 3826  |
| >JAK1-Y652HVSHKHIVYL  | 308 | >JAK1-Y652HVSHKHIVHL  | 315   | 7     |
| >JAK1-Y652HVSHKHIVYLY | 175 | >JAK1-Y652HVSHKHIVHLY | 197   | 22    |
| >JAK1-Y652HVSHKHIVY   | 8   | >JAK1-Y652HVSHKHIVH   | 4185  | 4177  |
| >JAK1-Y652HVSHKHIVYL  | 67  | >JAK1-Y652HVSHKHIVHL  | 70    | 3     |
| >JAK1-Y652HVSHKHIVYLY | 11  | >JAK1-Y652HVSHKHIVHLY | 9     | 2     |
| >JAK1-Y652HVSHKHIVYLY | 513 | >JAK1-Y652HVSHKHIVHLY | 302   | 211   |
| >JAK1-Y652HVSHKHIVYL  | 163 | >JAK1-Y652HVSHKHIVHL  | 926   | 763   |
| >JAK1-Y652HVSHKHIVY   | 238 | >JAK1-Y652HVSHKHIVH   | 7251  | 7013  |
| >JAK1-Y652HVSHKHIVYLY | 459 | >JAK1-Y652HVSHKHIVHLY | 1382  | 923   |
| >JAK1-Y652HQVSHKHIVYL | 412 | >JAK1-Y652HQVSHKHIVHL | 569   | 157   |
| >JAK1-Y652HQVSHKHIVYL | 536 | >JAK1-Y652HQVSHKHIVHL | 387   | 149   |
| >JAK1-Y652HQVSHKHIVY  | 90  | >JAK1-Y652HQVSHKHIVH  | 10837 | 10747 |
| >JAK1-Y652HQVSHKHIVYL | 13  | >JAK1-Y652HQVSHKHIVHL | 18    | 5     |
| >JAK1-Y652HQVSHKHIVYL | 75  | >JAK1-Y652HQVSHKHIVHL | 56    | 19    |
| >JAK1-Y652HQVSHKHIVYL | 490 | >JAK1-Y652HQVSHKHIVHL | 480   | 10    |
| >JAK1-Y652HQVSHKHIVY  | 193 | >JAK1-Y652HQVSHKHIVH  | 20805 | 20612 |
| >JAK1-Y652HQVSHKHIVYL | 17  | >JAK1-Y652HQVSHKHIVHL | 16    | 1     |
| >JAK1-Y652HQVSHKHIVY  | 266 | >JAK1-Y652HQVSHKHIVH  | 11388 | 11122 |
| >JAK1-Y652HQVSHKHIVY  | 339 | >JAK1-Y652HQVSHKHIVH  | 7239  | 6900  |
| >JAK1-Y652HQVSHKHIVYL | 457 | >JAK1-Y652HQVSHKHIVHL | 411   | 46    |
| >JAK1-Y652HQVSHKHIVYL | 172 | >JAK1-Y652HQVSHKHIVHL | 353   | 181   |
| >JAK1-Y652HRQVSHKHIVY | 212 | >JAK1-Y652HRQVSHKHIVH | 1141  | 929   |
| >JAK1-Y652HRQVSHKHIVY | 315 | >JAK1-Y652HRQVSHKHIVH | 787   | 472   |
| >JAK1-Y652HRQVSHKHIVY | 17  | >JAK1-Y652HRQVSHKHIVH | 33    | 16    |
| >JAK1-Y652HRQVSHKHIVY | 382 | >JAK1-Y652HRQVSHKHIVH | 2665  | 2283  |
| >JAK1-Y652HRQVSHKHIVY | 232 | >JAK1-Y652HRQVSHKHIVH | 23839 | 23607 |
| >JAK1-Y652HRQVSHKHIVY | 413 | >JAK1-Y652HRQVSHKHIVH | 993   | 580   |
| >JAK1-Y652HRQVSHKHIVY | 46  | >JAK1-Y652HRQVSHKHIVH | 449   | 403   |
| >JAK1-Y652HRQVSHKHIVY | 202 | >JAK1-Y652HRQVSHKHIVH | 96    | 106   |
| >JAK1-Y652HRQVSHKHIVY | 4   | >JAK1-Y652HRQVSHKHIVH | 91    | 87    |
| >JAK1-Y652HRQVSHKHIVY | 13  | >JAK1-Y652HRQVSHKHIVH | 13    | 0     |

|                        |       |                        |      |       |
|------------------------|-------|------------------------|------|-------|
| >JAK1-Y652HRQVSHKHIVY  | 299   | >JAK1-Y652HRQVSHKHIVF  | 5244 | 4945  |
| >JAK1-Y652HRQVSHKHIVY  | 374   | >JAK1-Y652HRQVSHKHIVF  | 214  | 160   |
| >JAK1-Y652HRQVSHKHIVY  | 279   | >JAK1-Y652HRQVSHKHIVF  | 337  | 58    |
| >JAK1-Y652HRQVSHKHIVY  | 172   | >JAK1-Y652HRQVSHKHIVF  | 265  | 93    |
| >JAK1-Y652HRQVSHKHIVY  | 87    | >JAK1-Y652HRQVSHKHIVF  | 95   | 8     |
| >JAK1-Y652HRQVSHKHIVY  | 327   | >JAK1-Y652HRQVSHKHIVF  | 433  | 106   |
| >JAK1-Y652HRQVSHKHIVY  | 75    | >JAK1-Y652HRQVSHKHIVF  | 67   | 8     |
| >JAK2-C616Y CVCGDENILV | 1278  | >JAK2-C616Y YVCGDENILV | 39   | 1239  |
| >JAK2-C616Y CVCGDENILV | 634   | >JAK2-C616Y YVCGDENILV | 53   | 581   |
| >JAK2-C616Y CVCGDENILV | 1457  | >JAK2-C616Y YVCGDENILV | 114  | 1343  |
| >JAK2-C616Y CVCGDENILV | 267   | >JAK2-C616Y YVCGDENILV | 33   | 234   |
| >JAK2-C616Y CVCGDENI   | 12417 | >JAK2-C616Y YVCGDENI   | 404  | 12013 |
| >JAK2-C616Y CVCGDENILV | 2783  | >JAK2-C616Y YVCGDENILV | 33   | 2750  |
| >JAK2-C616Y CVCGDENILV | 8929  | >JAK2-C616Y YVCGDENILV | 161  | 8768  |
| >JAK2-C616Y CVCGDENI   | 14832 | >JAK2-C616Y YVCGDENI   | 392  | 14440 |
| >JAK2-C616Y CVCGDENIL  | 9705  | >JAK2-C616Y YVCGDENIL  | 225  | 9480  |
| >JAK2-C616Y CVCGDENILV | 285   | >JAK2-C616Y YVCGDENILV | 5    | 280   |
| >JAK2-C616Y CVCGDENIL  | 1075  | >JAK2-C616Y YVCGDENIL  | 152  | 923   |
| >JAK2-C616Y CVCGDENILV | 815   | >JAK2-C616Y YVCGDENILV | 203  | 612   |
| >JAK2-C616Y CVCGDENI   | 478   | >JAK2-C616Y YVCGDENI   | 1978 | 1500  |
| >JAK2-C616Y VCVCGDENI  | 29208 | >JAK2-C616Y VYVCGDENI  | 120  | 29088 |
| >JAK2-C616Y VCVCGDENI  | 11451 | >JAK2-C616Y VYVCGDENI  | 29   | 11422 |
| >JAK2-C616Y VCVCGDENIL | 23158 | >JAK2-C616Y VYVCGDENIL | 427  | 22731 |
| >JAK2-C616Y VCVCGDENI  | 24004 | >JAK2-C616Y VYVCGDENI  | 94   | 23910 |
| >JAK2-C616Y VCVCGDENIL | 24028 | >JAK2-C616Y VYVCGDENIL | 129  | 23899 |
| >JAK2-C616Y HKHLVLNYG\ | 10006 | >JAK2-C616Y HKHLVLNYG\ | 70   | 9936  |
| >JAK2-C616Y GVCVCGDEN  | 1816  | >JAK2-C616Y GVVVCGDEN  | 251  | 1565  |
| >JAK2-C616Y GVCVCGDEN  | 1457  | >JAK2-C616Y GVVVCGDEN  | 369  | 1088  |
| >JAK2-C616Y VLNYGVCV   | 55    | >JAK2-C616Y VLNYGVVYV  | 14   | 41    |
| >JAK2-C616Y VLNYGVCV   | 23    | >JAK2-C616Y VLNYGVVYV  | 5    | 18    |
| >JAK2-C616Y VLNYGVCV   | 17    | >JAK2-C616Y VLNYGVVYV  | 5    | 12    |
| >JAK2-C616Y VLNYGVCV   | 261   | >JAK2-C616Y VLNYGVVYV  | 59   | 202   |
| >JAK2-C616Y VLNYGVCV   | 6     | >JAK2-C616Y VLNYGVVYV  | 2    | 4     |
| >JAK2-C616Y VLNYGVVCV  | 101   | >JAK2-C616Y VLNYGVVYVC | 83   | 18    |
| >JAK2-C616Y VLNYGVCV   | 7     | >JAK2-C616Y VLNYGVVYV  | 4    | 3     |
| >JAK2-C616Y VLNYGVVCV  | 791   | >JAK2-C616Y VLNYGVVYVC | 166  | 625   |
| >JAK2-C616Y VLNYGVCV   | 8     | >JAK2-C616Y VLNYGVVYV  | 6    | 2     |
| >JAK2-C616Y VLNYGVCV   | 7     | >JAK2-C616Y VLNYGVVYV  | 4    | 3     |
| >JAK2-C616Y VLNYGVVCV  | 662   | >JAK2-C616Y VLNYGVVYVC | 265  | 397   |
| >JAK2-C616Y VLNYGVCV   | 4     | >JAK2-C616Y VLNYGVVYV  | 2    | 2     |
| >JAK2-C616Y VLNYGVVCV  | 44    | >JAK2-C616Y VLNYGVVYVC | 151  | 107   |
| >JAK2-C616Y LVLNYGVCV  | 94    | >JAK2-C616Y LVLNYGVVYV | 17   | 77    |
| >JAK2-C616Y LVLNYGVCV  | 762   | >JAK2-C616Y LVLNYGVVYV | 75   | 687   |

|                        |       |                        |     |       |
|------------------------|-------|------------------------|-----|-------|
| >JAK2-C616Y LVLNYGVCV  | 1307  | >JAK2-C616Y LVLNYGVYV  | 157 | 1150  |
| >JAK2-C616Y LVLNYGVCV  | 39    | >JAK2-C616Y LVLNYGVYV  | 6   | 33    |
| >JAK2-C616Y LVLNYGVCV  | 15    | >JAK2-C616Y LVLNYGVYV  | 2   | 13    |
| >JAK2-C616Y LVLNYGVCVC | 734   | >JAK2-C616Y LVLNYGVYVC | 357 | 377   |
| >JAK2-C616Y LVLNYGVCV  | 60    | >JAK2-C616Y LVLNYGVYV  | 11  | 49    |
| >JAK2-C616Y LVLNYGVCV  | 25    | >JAK2-C616Y LVLNYGVYV  | 11  | 14    |
| >JAK2-C616Y LVLNYGVCV  | 55    | >JAK2-C616Y LVLNYGVYV  | 14  | 41    |
| >JAK2-C616Y LVLNYGVCV  | 17    | >JAK2-C616Y LVLNYGVYV  | 4   | 13    |
| >JAK2-C616Y LVLNYGVC   | 20323 | >JAK2-C616Y LVLNYGVY   | 35  | 20288 |
| >JAK2-C616Y LVLNYGVC   | 28679 | >JAK2-C616Y LVLNYGVY   | 118 | 28561 |
| >JAK2-C616Y LVLNYGVCV  | 2644  | >JAK2-C616Y LVLNYGVYV  | 241 | 2403  |
| >JAK2-C616Y LVLNYGVCV  | 542   | >JAK2-C616Y LVLNYGVYV  | 17  | 525   |
| >JAK2-C616Y LVLNYGVC   | 14498 | >JAK2-C616Y LVLNYGVY   | 110 | 14388 |
| >JAK2-C616Y LVLNYGVC   | 28007 | >JAK2-C616Y LVLNYGVY   | 490 | 27517 |
| >JAK2-C616Y LVLNYGVC   | 13429 | >JAK2-C616Y LVLNYGVY   | 365 | 13064 |
| >JAK2-C616Y LVLNYGVC   | 19270 | >JAK2-C616Y LVLNYGVY   | 134 | 19136 |
| >JAK2-C616Y HLVLNYGVC\ | 546   | >JAK2-C616Y HLVLNYGVY\ | 60  | 486   |
| >JAK2-C616Y HLVLNYGVC\ | 454   | >JAK2-C616Y HLVLNYGVY\ | 71  | 383   |
| >JAK2-C616Y HLVLNYGVC\ | 497   | >JAK2-C616Y HLVLNYGVY\ | 81  | 416   |
| >JAK2-C616Y HLVLNYGVC\ | 526   | >JAK2-C616Y HLVLNYGVY\ | 133 | 393   |
| >JAK2-C616Y HLVLNYGVC\ | 57    | >JAK2-C616Y HLVLNYGVY\ | 7   | 50    |
| >JAK2-C616Y HLVLNYGVC\ | 17    | >JAK2-C616Y HLVLNYGVY\ | 8   | 9     |
| >JAK2-C616Y HLVLNYGVC\ | 54    | >JAK2-C616Y HLVLNYGVY\ | 31  | 23    |
| >JAK2-C616Y HLVLNYGVC\ | 263   | >JAK2-C616Y HLVLNYGVY\ | 54  | 209   |
| >JAK2-C616Y HLVLNYGVC\ | 12    | >JAK2-C616Y HLVLNYGVY\ | 5   | 7     |
| >JAK2-C616Y HLVLNYGVC  | 17422 | >JAK2-C616Y HLVLNYGVY  | 170 | 17252 |
| >JAK2-C616Y HLVLNYGVC  | 30860 | >JAK2-C616Y HLVLNYGVY  | 323 | 30537 |
| >JAK2-C616Y HLVLNYGVC  | 23195 | >JAK2-C616Y HLVLNYGVY  | 163 | 23032 |
| >JAK2-C616Y HLVLNYGVC  | 28052 | >JAK2-C616Y HLVLNYGVY  | 239 | 27813 |
| >JAK2-C616Y HLVLNYGVC\ | 2815  | >JAK2-C616Y HLVLNYGVY\ | 235 | 2580  |
| >JAK2-C616Y HLVLNYGVC  | 16214 | >JAK2-C616Y HLVLNYGVY  | 165 | 16049 |
| >JAK2-C616Y HLVLNYGVC  | 19336 | >JAK2-C616Y HLVLNYGVY  | 148 | 19188 |
| >JAK2-C616Y KHLVLNYGVC | 32554 | >JAK2-C616Y KHLVLNYGVY | 244 | 32310 |
| >JAK2-C616Y KHLVLNYGVC | 12684 | >JAK2-C616Y KHLVLNYGVY | 219 | 12465 |
| >JAK2-C616Y KHLVLNYGVC | 511   | >JAK2-C616Y KHLVLNYGVY | 400 | 111   |
| >JAK2-C616Y KHLVLNYGVC | 10138 | >JAK2-C616Y KHLVLNYGVY | 372 | 9766  |
| >JAK2-C618F CGDENILV   | 9310  | >JAK2-C618F FGDENILV   | 495 | 8815  |
| >JAK2-C618F CGDENILV   | 3134  | >JAK2-C618F FGDENILV   | 62  | 3072  |
| >JAK2-C618F CGDENILV   | 2253  | >JAK2-C618F FGDENILV   | 61  | 2192  |
| >JAK2-C618F CGDENILV   | 7943  | >JAK2-C618F FGDENILV   | 141 | 7802  |
| >JAK2-C618F CGDENILV   | 8213  | >JAK2-C618F FGDENILV   | 314 | 7899  |
| >JAK2-C618F CGDENILVQE | 1445  | >JAK2-C618F FGDENILVQE | 217 | 1228  |
| >JAK2-C618F VCGDENILV  | 405   | >JAK2-C618F VFGDENILV  | 264 | 141   |

|                        |       |                        |      |       |
|------------------------|-------|------------------------|------|-------|
| >JAK2-C618F HLVLNYGVC\ | 10313 | >JAK2-C618F HLVLNYGVC\ | 82   | 10231 |
| >JAK2-C618F HLVLNYGVC\ | 19526 | >JAK2-C618F HLVLNYGVC\ | 365  | 19161 |
| >JAK2-C618F HLVLNYGVC\ | 12302 | >JAK2-C618F HLVLNYGVC\ | 106  | 12196 |
| >JAK2-C618F CVCGDENILV | 1278  | >JAK2-C618F CVFGDENILV | 252  | 1026  |
| >JAK2-C618F CVCGDENILV | 634   | >JAK2-C618F CVFGDENILV | 104  | 530   |
| >JAK2-C618F CVCGDENILV | 1457  | >JAK2-C618F CVFGDENILV | 282  | 1175  |
| >JAK2-C618F CVCGDENILV | 267   | >JAK2-C618F CVFGDENILV | 101  | 166   |
| >JAK2-C618F CVCGDENILV | 2783  | >JAK2-C618F CVFGDENILV | 351  | 2432  |
| >JAK2-C618F CVCGDENILV | 285   | >JAK2-C618F CVFGDENILV | 46   | 239   |
| >JAK2-C618F CVCGDENI   | 2021  | >JAK2-C618F CVFGDENI   | 78   | 1943  |
| >JAK2-C618F CVCGDENILV | 815   | >JAK2-C618F CVFGDENILV | 159  | 656   |
| >JAK2-C618F CVCGDENI   | 478   | >JAK2-C618F CVFGDENI   | 155  | 323   |
| >JAK2-C618F LNYGVCVC   | 13843 | >JAK2-C618F LNYGVCVF   | 113  | 13730 |
| >JAK2-C618F LNYGVCVC   | 12690 | >JAK2-C618F LNYGVCVF   | 62   | 12628 |
| >JAK2-C618F VLNYGVCVC  | 101   | >JAK2-C618F VLNYGVCVF  | 1149 | 1048  |
| >JAK2-C618F VLNYGVCVC  | 44    | >JAK2-C618F VLNYGVCVF  | 2791 | 2747  |
| >JAK2-C618F VLNYGVCVC  | 12600 | >JAK2-C618F VLNYGVCVF  | 272  | 12328 |
| >JAK2-C618F VLNYGVCVC  | 4340  | >JAK2-C618F VLNYGVCVF  | 26   | 4314  |
| >JAK2-C618F VLNYGVCVC  | 24520 | >JAK2-C618F VLNYGVCVF  | 428  | 24092 |
| >JAK2-C618F VLNYGVCVC  | 7284  | >JAK2-C618F VLNYGVCVF  | 21   | 7263  |
| >JAK2-C618F LVLNYGVCVC | 9211  | >JAK2-C618F LVLNYGVCVF | 53   | 9158  |
| >JAK2-C618F LVLNYGVCVC | 7335  | >JAK2-C618F LVLNYGVCVF | 23   | 7312  |
| >JAK2-C618F LVLNYGVCVC | 19771 | >JAK2-C618F LVLNYGVCVF | 155  | 19616 |
| >JAK2-C618R CGDENILV   | 2253  | >JAK2-C618R RGDENILV   | 347  | 1906  |
| >JAK2-C618R CGDENILVQE | 5836  | >JAK2-C618R RGDENILVQE | 114  | 5722  |
| >JAK2-C618R VCGDENILV  | 405   | >JAK2-C618R VRGDENILV  | 5035 | 4630  |
| >JAK2-C618R HLVLNYGVC\ | 17915 | >JAK2-C618R HLVLNYGVC\ | 229  | 17686 |
| >JAK2-C618R HLVLNYGVC\ | 36594 | >JAK2-C618R HLVLNYGVC\ | 475  | 36119 |
| >JAK2-C618R HLVLNYGVC\ | 38383 | >JAK2-C618R HLVLNYGVC\ | 229  | 38154 |
| >JAK2-C618R HLVLNYGVC\ | 34717 | >JAK2-C618R HLVLNYGVC\ | 64   | 34653 |
| >JAK2-C618R CVCGDENILV | 267   | >JAK2-C618R CVRGDENILV | 1782 | 1515  |
| >JAK2-C618R CVCGDENILV | 285   | >JAK2-C618R CVRGDENILV | 395  | 110   |
| >JAK2-C618R CVCGDENI   | 478   | >JAK2-C618R CVRGDENI   | 1432 | 954   |
| >JAK2-C618R LNYGVCVC   | 36483 | >JAK2-C618R LNYGVCVR   | 176  | 36307 |
| >JAK2-C618R VLNYGVCVC  | 101   | >JAK2-C618R VLNYGVCVR  | 8055 | 7954  |
| >JAK2-C618R VLNYGVCVC  | 44    | >JAK2-C618R VLNYGVCVR  | 6796 | 6752  |
| >JAK2-C618R VLNYGVCVC  | 18750 | >JAK2-C618R VLNYGVCVR  | 125  | 18625 |
| >JAK2-C618R LVLNYGVCVC | 19055 | >JAK2-C618R LVLNYGVCVR | 86   | 18969 |
| >JAK2-C618R LVLNYGVCVC | 35102 | >JAK2-C618R LVLNYGVCVR | 469  | 34633 |
| >JAK2-D544C DLIFNESL   | 11894 | >JAK2-D544C GLIFNESL   | 199  | 11695 |
| >JAK2-D544C DLIFNESL   | 988   | >JAK2-D544C GLIFNESL   | 19   | 969   |
| >JAK2-D544C DLIFNESL   | 5510  | >JAK2-D544C GLIFNESL   | 74   | 5436  |
| >JAK2-D544C DLIFNESL   | 1053  | >JAK2-D544C GLIFNESL   | 41   | 1012  |



|                         |      |                         |       |       |
|-------------------------|------|-------------------------|-------|-------|
| >JAK2-D544C DLIFNESL    | 1834 | >JAK2-D544C GLIFNESL    | 15    | 1819  |
| >JAK2-D544C DLIFNESL    | 5742 | >JAK2-D544C GLIFNESL    | 272   | 5470  |
| >JAK2-D544C DLIFNESL    | 398  | >JAK2-D544C GLIFNESL    | 16    | 382   |
| >JAK2-D544C EDLIFNESL   | 384  | >JAK2-D544C EGLIFNESL   | 32711 | 32327 |
| >JAK2-D544C NEDLIFNESL  | 76   | >JAK2-D544C NEGLIFNESL  | 57    | 19    |
| >JAK2-D544C NEDLIFNESL  | 434  | >JAK2-D544C NEGLIFNESL  | 820   | 386   |
| >JAK2-D544C NEDLIFNES   | 2059 | >JAK2-D544C NEGLIFNES   | 239   | 1820  |
| >JAK2-D544C NEDLIFNESL  | 229  | >JAK2-D544C NEGLIFNESL  | 216   | 13    |
| >JAK2-D544C IRNEDLIF    | 52   | >JAK2-D544C IRNEGLIF    | 27    | 25    |
| >JAK2-D544C KIRNEDLI    | 53   | >JAK2-D544C KIRNEGLI    | 14    | 39    |
| >JAK2-D544C KIRNEDLIF   | 739  | >JAK2-D544C KIRNEGLIF   | 236   | 503   |
| >JAK2-D544C KIRNEDLIFN  | 107  | >JAK2-D544C KIRNEGLIFN  | 41    | 66    |
| >JAK2-D544C KIRNEDLIF   | 457  | >JAK2-D544C KIRNEGLIF   | 753   | 296   |
| >JAK2-D544C KIRNEDLIF   | 297  | >JAK2-D544C KIRNEGLIF   | 145   | 152   |
| >JAK2-D544C KIRNEDLIF   | 93   | >JAK2-D544C KIRNEGLIF   | 16    | 77    |
| >JAK2-D544C KIRNEDLIF   | 194  | >JAK2-D544C KIRNEGLIF   | 174   | 20    |
| >JAK2-D544C KIRNEDLIF   | 899  | >JAK2-D544C KIRNEGLIF   | 184   | 715   |
| >JAK2-D544C HKIRNEDL    | 227  | >JAK2-D544C HKIRNEGL    | 327   | 100   |
| >JAK2-D544C HKIRNEDLIF  | 9    | >JAK2-D544C HKIRNEGLIF  | 7     | 2     |
| >JAK2-D544C FHKIRNEDLI  | 433  | >JAK2-D544C FHKIRNEGLI  | 429   | 4     |
| >JAK2-D544C FHKIRNEDLIF | 73   | >JAK2-D544C FHKIRNEGLIF | 35    | 38    |
| >JAK2-D544C VFHKIRNEDL  | 519  | >JAK2-D544C VFHKIRNEGL  | 461   | 58    |
| >JAK2-D544C VFHKIRNEDLI | 261  | >JAK2-D544C VFHKIRNEGLI | 328   | 67    |
| >JAK2-D544C MVFHKIRNEI  | 482  | >JAK2-D544C MVFHKIRNEC  | 200   | 282   |
| >JAK2-D544C MVFHKIRNEI  | 1898 | >JAK2-D544C MVFHKIRNEC  | 398   | 1500  |
| >JAK2-D544C MVFHKIRNEI  | 215  | >JAK2-D544C MVFHKIRNEC  | 43    | 172   |
| >JAK2-D544C MVFHKIRNEI  | 542  | >JAK2-D544C MVFHKIRNEC  | 137   | 405   |
| >JAK2-D544C MVFHKIRNEI  | 1265 | >JAK2-D544C MVFHKIRNEC  | 130   | 1135  |
| >JAK2-D544C MVFHKIRNEI  | 1498 | >JAK2-D544C MVFHKIRNEC  | 164   | 1334  |
| >JAK2-D544C MVFHKIRNEI  | 993  | >JAK2-D544C MVFHKIRNEC  | 366   | 627   |
| >JAK2-D544C MVFHKIRNEI  | 268  | >JAK2-D544C MVFHKIRNEC  | 254   | 14    |
| >JAK2-D544C MVFHKIRNEI  | 33   | >JAK2-D544C MVFHKIRNEC  | 10    | 23    |
| >JAK2-D544C MVFHKIRNEI  | 859  | >JAK2-D544C MVFHKIRNEC  | 127   | 732   |
| >JAK2-D620E DENILVQEF   | 418  | >JAK2-D620E EENILVQEF   | 435   | 17    |
| >JAK2-D620E DENILVQEFV  | 11   | >JAK2-D620E EENILVQEFV  | 10    | 1     |
| >JAK2-D620E DENILVQE    | 498  | >JAK2-D620E EENILVQE    | 10509 | 10011 |
| >JAK2-D620E DENILVQEF   | 7    | >JAK2-D620E EENILVQEF   | 70    | 63    |
| >JAK2-D620E DENILVQEFV  | 441  | >JAK2-D620E EENILVQEFVI | 7951  | 7510  |
| >JAK2-D620E DENILVQEF   | 1108 | >JAK2-D620E EENILVQEF   | 154   | 954   |
| >JAK2-D620E DENILVQEF   | 78   | >JAK2-D620E EENILVQEF   | 64    | 14    |
| >JAK2-D620E DENILVQEFV  | 2378 | >JAK2-D620E EENILVQEFV  | 268   | 2110  |
| >JAK2-D620E DENILVQEF   | 120  | >JAK2-D620E EENILVQEF   | 49    | 71    |
| >JAK2-D620E DENILVQEFV  | 2725 | >JAK2-D620E EENILVQEFV  | 424   | 2301  |

|                          |       |                          |       |       |
|--------------------------|-------|--------------------------|-------|-------|
| >JAK2-D620E DENILVQEFV   | 7488  | >JAK2-D620E EENILVQEFVI  | 365   | 7123  |
| >JAK2-D620E GDENILVQEF   | 1011  | >JAK2-D620E GEENILVQEF'  | 31    | 980   |
| >JAK2-D620E GDENILVQEF   | 15408 | >JAK2-D620E GEENILVQEF'  | 43    | 15365 |
| >JAK2-D620E GDENILVQEF   | 5738  | >JAK2-D620E GEENILVQEF   | 122   | 5616  |
| >JAK2-D620E GDENILVQEF   | 10313 | >JAK2-D620E GEENILVQEF   | 159   | 10154 |
| >JAK2-D620E GDENILVQEF   | 24884 | >JAK2-D620E GEENILVQEF'  | 248   | 24636 |
| >JAK2-D620E GDENILVQE    | 12287 | >JAK2-D620E GEENILVQE    | 230   | 12057 |
| >JAK2-D620E GDENILVQEF   | 6263  | >JAK2-D620E GEENILVQEF   | 288   | 5975  |
| >JAK2-D620E GDENILVQEF   | 1028  | >JAK2-D620E GEENILVQEF'  | 16    | 1012  |
| >JAK2-D620E GDENILVQEF   | 215   | >JAK2-D620E GEENILVQEF'  | 9045  | 8830  |
| >JAK2-D620E VCGDENILV    | 405   | >JAK2-D620E VCGEENILV    | 1190  | 785   |
| >JAK2-D620E CVCGDENILV   | 267   | >JAK2-D620E CVCGEENILV   | 351   | 84    |
| >JAK2-D620E CVCGDENILV   | 285   | >JAK2-D620E CVCGEENILV   | 403   | 118   |
| >JAK2-D620E CVCGDENI     | 478   | >JAK2-D620E CVCGEENI     | 777   | 299   |
| >JAK2-F537I- FHKIRNEDLI  | 433   | >JAK2-F537I- IHKIRNEDLI  | 737   | 304   |
| >JAK2-F537I- FHKIRNEDLIF | 73    | >JAK2-F537I- IHKIRNEDLIF | 99    | 26    |
| >JAK2-F537I- VFHKIRNEDLI | 261   | >JAK2-F537I- VIHKIRNEDLI | 16589 | 16328 |
| >JAK2-F537I- QRPTHMNQI   | 94    | >JAK2-F537I- QRPTHMNQI   | 1489  | 1395  |
| >JAK2-F537I- QRPTHMNQI   | 389   | >JAK2-F537I- QRPTHMNQI   | 1041  | 652   |
| >JAK2-F537I- MVFHKIRNEI  | 482   | >JAK2-F537I- MVIHKIRNED  | 1514  | 1032  |
| >JAK2-F537I- MVFHKIRNEI  | 215   | >JAK2-F537I- MVIHKIRNED  | 805   | 590   |
| >JAK2-F537I- MVFHKIRNEI  | 268   | >JAK2-F537I- MVIHKIRNED  | 2810  | 2542  |
| >JAK2-F537I- MVFHKIRNEI  | 33    | >JAK2-F537I- MVIHKIRNED  | 66    | 33    |
| >JAK2-F537I- QMVFHKIR    | 86    | >JAK2-F537I- QMVIHKIR    | 103   | 17    |
| >JAK2-F537I- QMVFHKIR    | 304   | >JAK2-F537I- QMVIHKIR    | 682   | 378   |
| >JAK2-F537I- QMVFHKIR    | 76    | >JAK2-F537I- QMVIHKIR    | 65    | 11    |
| >JAK2-F537I- NQMVFHKI    | 548   | >JAK2-F537I- NQMVIHKI    | 375   | 173   |
| >JAK2-F537I- NQMVFHKI    | 53    | >JAK2-F537I- NQMVIHKI    | 76    | 23    |
| >JAK2-F537I- NQMVFHKIR   | 99    | >JAK2-F537I- NQMVIHKIR   | 116   | 17    |
| >JAK2-F537I- NQMVFHKI    | 302   | >JAK2-F537I- NQMVIHKI    | 924   | 622   |
| >JAK2-F537I- NQMVFHKIR   | 364   | >JAK2-F537I- NQMVIHKIR   | 2092  | 1728  |
| >JAK2-F537I- NQMVFHKIR   | 128   | >JAK2-F537I- NQMVIHKIR   | 453   | 325   |
| >JAK2-F537I- MNQMVFHK    | 328   | >JAK2-F537I- MNQMVIHKI   | 427   | 99    |
| >JAK2-F537I- MNQMVFHK    | 178   | >JAK2-F537I- MNQMVIHK    | 467   | 289   |
| >JAK2-F537I- MNQMVFHK    | 328   | >JAK2-F537I- MNQMVIHK    | 2050  | 1722  |
| >JAK2-F537I- MNQMVFHK    | 280   | >JAK2-F537I- MNQMVIHKI   | 352   | 72    |
| >JAK2-F537I- MNQMVFHK    | 170   | >JAK2-F537I- MNQMVIHKI   | 195   | 25    |
| >JAK2-F537I- MNQMVFHK    | 170   | >JAK2-F537I- MNQMVIHK    | 361   | 191   |
| >JAK2-F537I- MNQMVFHK    | 404   | >JAK2-F537I- MNQMVIHKI   | 795   | 391   |
| >JAK2-F537I- MNQMVFHK    | 484   | >JAK2-F537I- MNQMVIHKI   | 746   | 262   |
| >JAK2-F537I- HMNQMVFH    | 481   | >JAK2-F537I- HMNQMVHI    | 448   | 33    |
| >JAK2-F537I- HMNQMVFH    | 244   | >JAK2-F537I- HMNQMVHI    | 199   | 45    |
| >JAK2-F537I- HMNQMVFH    | 12    | >JAK2-F537I- HMNQMVHI    | 10    | 2     |

|                         |       |                         |       |       |
|-------------------------|-------|-------------------------|-------|-------|
| >JAK2-F537I- HMNQMVFH   | 34    | >JAK2-F537I- HMNQMVIHI  | 42    | 8     |
| >JAK2-F537I- HMNQMVFH   | 39    | >JAK2-F537I- HMNQMVIHI  | 35    | 4     |
| >JAK2-F537I- HMNQMVFH   | 49    | >JAK2-F537I- HMNQMVIHI  | 50    | 1     |
| >JAK2-F537I- HMNQMVFH   | 9     | >JAK2-F537I- HMNQMVIHI  | 8     | 1     |
| >JAK2-F537I- HMNQMVFH   | 322   | >JAK2-F537I- HMNQMVIH   | 1696  | 1374  |
| >JAK2-F537I- HMNQMVFH   | 35    | >JAK2-F537I- HMNQMVIHI  | 36    | 1     |
| >JAK2-F537I- HMNQMVFH   | 26    | >JAK2-F537I- HMNQMVIHI  | 52    | 26    |
| >JAK2-F537I- HMNQMVFH   | 105   | >JAK2-F537I- HMNQMVIHI  | 44    | 61    |
| >JAK2-F537I- HMNQMVFH   | 284   | >JAK2-F537I- HMNQMVIH   | 2313  | 2029  |
| >JAK2-F537I- HMNQMVFH   | 17    | >JAK2-F537I- HMNQMVIHI  | 99    | 82    |
| >JAK2-F537I- HMNQMVFH   | 13    | >JAK2-F537I- HMNQMVIHI  | 18    | 5     |
| >JAK2-F537I- HMNQMVFH   | 133   | >JAK2-F537I- HMNQMVIHI  | 140   | 7     |
| >JAK2-F537I- HMNQMVFH   | 292   | >JAK2-F537I- HMNQMVIHI  | 1579  | 1287  |
| >JAK2-F537I- HMNQMVFH   | 174   | >JAK2-F537I- HMNQMVIHI  | 269   | 95    |
| >JAK2-F537I- HMNQMVFH   | 82    | >JAK2-F537I- HMNQMVIHI  | 285   | 203   |
| >JAK2-F537I- HMNQMVFH   | 152   | >JAK2-F537I- HMNQMVIHI  | 184   | 32    |
| >JAK2-F537I- HMNQMVFH   | 441   | >JAK2-F537I- HMNQMVIHI  | 998   | 557   |
| >JAK2-F537I- HMNQMVFH   | 474   | >JAK2-F537I- HMNQMVIHI  | 760   | 286   |
| >JAK2-F537I- HMNQMVFH   | 129   | >JAK2-F537I- HMNQMVIHI  | 121   | 8     |
| >JAK2-F537I- HMNQMVFH   | 34    | >JAK2-F537I- HMNQMVIHI  | 40    | 6     |
| >JAK2-F537I- THMNQMV    | 318   | >JAK2-F537I- THMNQMVH   | 599   | 281   |
| >JAK2-F537I- THMNQMV    | 197   | >JAK2-F537I- THMNQMV    | 5149  | 4952  |
| >JAK2-F537I- THMNQMV    | 20    | >JAK2-F537I- THMNQMV    | 966   | 946   |
| >JAK2-F537I- THMNQMV    | 796   | >JAK2-F537I- THMNQMV    | 379   | 417   |
| >JAK2-F537I- THMNQMV    | 60    | >JAK2-F537I- THMNQMV    | 37    | 23    |
| >JAK2-F537I- THMNQMV    | 215   | >JAK2-F537I- THMNQMVH   | 166   | 49    |
| >JAK2-F537I- THMNQMV    | 457   | >JAK2-F537I- THMNQMVH   | 1009  | 552   |
| >JAK2-F537I- PTHMNQMV   | 396   | >JAK2-F537I- PTHMNQMV   | 812   | 416   |
| >JAK2-F537I- PTHMNQMV   | 4359  | >JAK2-F537I- PTHMNQMV   | 205   | 4154  |
| >JAK2-F537I- PTHMNQMV   | 20    | >JAK2-F537I- PTHMNQMV   | 13    | 7     |
| >JAK2-F537I- PTHMNQMV   | 421   | >JAK2-F537I- PTHMNQMV   | 8922  | 8501  |
| >JAK2-F537I- PTHMNQMV   | 465   | >JAK2-F537I- PTHMNQMV   | 11529 | 11064 |
| >JAK2-F537I- RPTHMNQM   | 30    | >JAK2-F537I- RPTHMNQM   | 29    | 1     |
| >JAK2-F537I- RPTHMNQM   | 74    | >JAK2-F537I- RPTHMNQM   | 2363  | 2289  |
| >JAK2-F537I- RPTHMNQM   | 111   | >JAK2-F537I- RPTHMNQM   | 4249  | 4138  |
| >JAK2-F537I- RPTHMNQM   | 261   | >JAK2-F537I- RPTHMNQM   | 714   | 453   |
| >JAK2-F537I- RPTHMNQM   | 115   | >JAK2-F537I- RPTHMNQM   | 5065  | 4950  |
| >JAK2-F537I- RPTHMNQM   | 198   | >JAK2-F537I- RPTHMNQM   | 4507  | 4309  |
| >JAK2-F547L- IFNESLGQG  | 21791 | >JAK2-F547L- ILNESLGQG  | 393   | 21398 |
| >JAK2-F547L- IFNESLGQGT | 14819 | >JAK2-F547L- ILNESLGQGT | 48    | 14771 |
| >JAK2-F547L- IFNESLGQ   | 26561 | >JAK2-F547L- ILNESLGQ   | 75    | 26486 |
| >JAK2-F547L- IFNESLGQGT | 24846 | >JAK2-F547L- ILNESLGQGT | 38    | 24808 |
| >JAK2-F547L- IFNESLGQGT | 390   | >JAK2-F547L- ILNESLGQGT | 5672  | 5282  |

|                          |       |                          |      |       |
|--------------------------|-------|--------------------------|------|-------|
| >JAK2-F547L·IFNESLGQGT   | 93    | >JAK2-F547L·ILNESLGQGT   | 9954 | 9861  |
| >JAK2-F547L·IFNESLGQGT   | 2031  | >JAK2-F547L·ILNESLGQGT   | 90   | 1941  |
| >JAK2-F547L·IFNESLGQGT   | 761   | >JAK2-F547L·ILNESLGQGT   | 166  | 595   |
| >JAK2-F547L·IFNESLGQGT   | 1887  | >JAK2-F547L·ILNESLGQGT   | 176  | 1711  |
| >JAK2-F547L·IFNESLGQGT   | 12077 | >JAK2-F547L·ILNESLGQGT   | 167  | 11910 |
| >JAK2-F547L·FHKIRNEDLIF  | 73    | >JAK2-F547L·FHKIRNEDLIL  | 1904 | 1831  |
| >JAK2-F547L·DLIFNESL     | 398   | >JAK2-F547L·DLILNESL     | 516  | 118   |
| >JAK2-F547L·EDLIFNESL    | 384   | >JAK2-F547L·EDLILNESL    | 272  | 112   |
| >JAK2-F547L·NEDLIFNESL   | 76    | >JAK2-F547L·NEDLILNESL   | 64   | 12    |
| >JAK2-F547L·NEDLIFNESL   | 434   | >JAK2-F547L·NEDLILNESL   | 394  | 40    |
| >JAK2-F547L·NEDLIFNESL   | 229   | >JAK2-F547L·NEDLILNESL   | 281  | 52    |
| >JAK2-F547L·IRNEDLIF     | 52    | >JAK2-F547L·IRNEDLIL     | 586  | 534   |
| >JAK2-F547L·KIRNEDLIF    | 739   | >JAK2-F547L·KIRNEDLIL    | 48   | 691   |
| >JAK2-F547L·KIRNEDLIFN   | 107   | >JAK2-F547L·KIRNEDLILN   | 362  | 255   |
| >JAK2-F547L·KIRNEDLIF    | 457   | >JAK2-F547L·KIRNEDLIL    | 2152 | 1695  |
| >JAK2-F547L·KIRNEDLIF    | 297   | >JAK2-F547L·KIRNEDLIL    | 5690 | 5393  |
| >JAK2-F547L·KIRNEDLIF    | 93    | >JAK2-F547L·KIRNEDLIL    | 2644 | 2551  |
| >JAK2-F547L·KIRNEDLIF    | 194   | >JAK2-F547L·KIRNEDLIL    | 2537 | 2343  |
| >JAK2-F547L·HKIRNEDLIF   | 9     | >JAK2-F547L·HKIRNEDLIL   | 154  | 145   |
| >JAK2-F547L·HKIRNEDLIF   | 543   | >JAK2-F547L·HKIRNEDLIL   | 284  | 259   |
| >JAK2-F547L·HKIRNEDLIF   | 6497  | >JAK2-F547L·HKIRNEDLIL   | 297  | 6200  |
| >JAK2-G571F·GQLHETEVEV   | 216   | >JAK2-G571F·RQLHETEVEV   | 139  | 77    |
| >JAK2-G571F·GQLHETEVEV   | 467   | >JAK2-G571F·RQLHETEVEV   | 321  | 146   |
| >JAK2-G571F·GQLHETEVEV   | 21    | >JAK2-G571F·RQLHETEVEV   | 11   | 10    |
| >JAK2-G571F·GQLHETEVEVL  | 182   | >JAK2-G571F·RQLHETEVEVL  | 65   | 117   |
| >JAK2-G571F·GQLHETEVEV   | 216   | >JAK2-G571F·RQLHETEVEV   | 99   | 117   |
| >JAK2-G571F·GQLHETEVEV   | 78    | >JAK2-G571F·RQLHETEVEV   | 177  | 99    |
| >JAK2-G571F·GQLHETEVEV   | 106   | >JAK2-G571F·RQLHETEVEV   | 202  | 96    |
| >JAK2-G571F·GQLHETEVEVLL | 875   | >JAK2-G571F·RQLHETEVEVLL | 186  | 689   |
| >JAK2-G571F·GQLHETEVEVLL | 72    | >JAK2-G571F·RQLHETEVEVLL | 52   | 20    |
| >JAK2-G571F·GQLHETEVEVLL | 4349  | >JAK2-G571F·RQLHETEVEVLL | 120  | 4229  |
| >JAK2-G571F·GQLHETEVEVL  | 2532  | >JAK2-G571F·RQLHETEVEVL  | 91   | 2441  |
| >JAK2-G571F·GQLHETEVEVLL | 5641  | >JAK2-G571F·RQLHETEVEVLL | 223  | 5418  |
| >JAK2-G571F·GQLHETEVEVL  | 835   | >JAK2-G571F·RQLHETEVEVL  | 169  | 666   |
| >JAK2-G571F·GQLHETEVEV   | 199   | >JAK2-G571F·RQLHETEVEV   | 18   | 181   |
| >JAK2-G571F·GQLHETEVEVL  | 77    | >JAK2-G571F·RQLHETEVEVL  | 9    | 68    |
| >JAK2-G571F·GQLHETEVEVLL | 136   | >JAK2-G571F·RQLHETEVEVLL | 13   | 123   |
| >JAK2-G571F·GQLHETEVEVLL | 2052  | >JAK2-G571F·RQLHETEVEVLL | 159  | 1893  |
| >JAK2-G571F·GQLHETEVEVLL | 2095  | >JAK2-G571F·RQLHETEVEVLL | 235  | 1860  |
| >JAK2-G571F·GQLHETEVEVLL | 2092  | >JAK2-G571F·RQLHETEVEVLL | 192  | 1900  |
| >JAK2-G571F·GQLHETEVEVL  | 434   | >JAK2-G571F·RQLHETEVEVL  | 183  | 251   |
| >JAK2-G571F·GQLHETEVEVLL | 653   | >JAK2-G571F·RQLHETEVEVLL | 294  | 359   |
| >JAK2-G571F·GQLHETEVEVL  | 1688  | >JAK2-G571F·RQLHETEVEVL  | 453  | 1235  |

|                        |       |                        |     |       |
|------------------------|-------|------------------------|-----|-------|
| >JAK2-G571FGQLHETEVL   | 663   | >JAK2-G571FRQLHETEVL   | 106 | 557   |
| >JAK2-G571FGQLHETEVL   | 154   | >JAK2-G571FRQLHETEVL   | 56  | 98    |
| >JAK2-G571FGQLHETEVL   | 4851  | >JAK2-G571FRQLHETEVL   | 258 | 4593  |
| >JAK2-G571FYGQLHETEVL  | 21709 | >JAK2-G571FYRQLHETEVL  | 454 | 21255 |
| >JAK2-G571FYGQLHETEVL  | 30035 | >JAK2-G571FYRQLHETEVL  | 218 | 29817 |
| >JAK2-G571FYGQLHETEVL  | 17830 | >JAK2-G571FYRQLHETEVL  | 91  | 17739 |
| >JAK2-G571FYGQLHETEVL  | 8578  | >JAK2-G571FYRQLHETEVL  | 110 | 8468  |
| >JAK2-G571FYGQLHETEVL  | 9093  | >JAK2-G571FYRQLHETEVL  | 167 | 8926  |
| >JAK2-G571FYGQLHETEVL  | 21951 | >JAK2-G571FYRQLHETEVL  | 122 | 21829 |
| >JAK2-G571FYGQLHETEVL  | 29234 | >JAK2-G571FYRQLHETEVL  | 438 | 28796 |
| >JAK2-G571FYGQLHETEVL  | 20392 | >JAK2-G571FYRQLHETEVL  | 25  | 20367 |
| >JAK2-G571FKGVRREVGD'  | 22171 | >JAK2-G571FKGVRREVGD'  | 108 | 22063 |
| >JAK2-G571FKGVRREVGD'  | 29925 | >JAK2-G571FKGVRREVGD'  | 69  | 29856 |
| >JAK2-G571FDYGQLHETEVL | 112   | >JAK2-G571FDYRQLHETEVL | 526 | 414   |
| >JAK2-G571FDYGQLHETEVL | 241   | >JAK2-G571FDYRQLHETEVL | 156 | 85    |
| >JAK2-G571FDYGQLHETEVL | 300   | >JAK2-G571FDYRQLHETEVL | 253 | 47    |
| >JAK2-G571FEVGDYRQL    | 407   | >JAK2-G571FEVGDYRQL    | 747 | 340   |
| >JAK2-G571FEVGDYRQL    | 65    | >JAK2-G571FEVGDYRQL    | 179 | 114   |
| >JAK2-G571FEVGDYRQL    | 7     | >JAK2-G571FEVGDYRQL    | 9   | 2     |
| >JAK2-G571FEVGDYRQL    | 319   | >JAK2-G571FEVGDYRQL    | 126 | 193   |
| >JAK2-G571FEVGDYRQL    | 51    | >JAK2-G571FEVGDYRQL    | 112 | 61    |
| >JAK2-G571FRREVGDYRQL  | 39    | >JAK2-G571FRREVGDYRQL  | 56  | 17    |
| >JAK2-G571FRREVGDYRQL  | 74    | >JAK2-G571FRREVGDYRQL  | 66  | 8     |
| >JAK2-G571FRREVGDYRQL  | 210   | >JAK2-G571FRREVGDYRQL  | 142 | 68    |
| >JAK2-G571FRREVGDYRQL  | 59    | >JAK2-G571FRREVGDYRQL  | 99  | 40    |
| >JAK2-G571FRREVGDYRQL  | 307   | >JAK2-G571FRREVGDYRQL  | 186 | 121   |
| >JAK2-G571FRREVGDYRQL  | 36260 | >JAK2-G571FRREVGDYRQL  | 482 | 35778 |
| >JAK2-G571FRREVGDYRQL  | 337   | >JAK2-G571FRREVGDYRQL  | 203 | 134   |
| >JAK2-G571SGQLHETEVL   | 216   | >JAK2-G571SSQLHETEVL   | 89  | 127   |
| >JAK2-G571SGQLHETEVL   | 775   | >JAK2-G571SSQLHETEVL   | 493 | 282   |
| >JAK2-G571SGQLHETEVL   | 467   | >JAK2-G571SSQLHETEVL   | 299 | 168   |
| >JAK2-G571SGQLHETEVL   | 21    | >JAK2-G571SSQLHETEVL   | 10  | 11    |
| >JAK2-G571SGQLHETEVL   | 182   | >JAK2-G571SSQLHETEVL   | 69  | 113   |
| >JAK2-G571SGQLHETEVL   | 1912  | >JAK2-G571SSQLHETEVL   | 447 | 1465  |
| >JAK2-G571SGQLHETEVL   | 216   | >JAK2-G571SSQLHETEVL   | 89  | 127   |
| >JAK2-G571SGQLHETEVL   | 78    | >JAK2-G571SSQLHETEVL   | 128 | 50    |
| >JAK2-G571SGQLHETEVL   | 106   | >JAK2-G571SSQLHETEVL   | 47  | 59    |
| >JAK2-G571SGQLHETEVL   | 72    | >JAK2-G571SSQLHETEVL   | 33  | 39    |
| >JAK2-G571SGQLHETEVL   | 835   | >JAK2-G571SSQLHETEVL   | 417 | 418   |
| >JAK2-G571SGQLHETEVL   | 199   | >JAK2-G571SSQLHETEVL   | 73  | 126   |
| >JAK2-G571SGQLHETEVL   | 77    | >JAK2-G571SSQLHETEVL   | 28  | 49    |
| >JAK2-G571SGQLHETEVL   | 136   | >JAK2-G571SSQLHETEVL   | 45  | 91    |
| >JAK2-G571SGQLHETEVL   | 434   | >JAK2-G571SSQLHETEVL   | 61  | 373   |

|                         |       |                         |     |       |
|-------------------------|-------|-------------------------|-----|-------|
| >JAK2-G571S GQLHETEVL   | 653   | >JAK2-G571S SQLHETEVL   | 101 | 552   |
| >JAK2-G571S GQLHETEVL   | 154   | >JAK2-G571S SQLHETEVL   | 367 | 213   |
| >JAK2-G571S GQLHETEVL   | 721   | >JAK2-G571S SQLHETEVL   | 453 | 268   |
| >JAK2-G571S YGQLHETEVL  | 15518 | >JAK2-G571S YSQLHETEVL  | 127 | 15391 |
| >JAK2-G571S YGQLHETEVL  | 13809 | >JAK2-G571S YSQLHETEVL  | 99  | 13710 |
| >JAK2-G571S YGQLHETEVL  | 8209  | >JAK2-G571S YSQLHETEVL  | 403 | 7806  |
| >JAK2-G571S YGQLHETEVL  | 1416  | >JAK2-G571S YSQLHETEVL  | 94  | 1322  |
| >JAK2-G571S YGQLHETEVL  | 23757 | >JAK2-G571S YSQLHETEVL  | 498 | 23259 |
| >JAK2-G571S DYGQLHETE   | 112   | >JAK2-G571S DYSQLHETE   | 134 | 22    |
| >JAK2-G571S GDYGQLHETI  | 241   | >JAK2-G571S GDYSQLHETE  | 123 | 118   |
| >JAK2-G571S GDYGQLHETI  | 300   | >JAK2-G571S GDYSQLHETE  | 156 | 144   |
| >JAK2-G571S EVGDYGQL    | 407   | >JAK2-G571S EVGDYSQL    | 310 | 97    |
| >JAK2-G571S EVGDYGQL    | 687   | >JAK2-G571S EVGDYSQL    | 221 | 466   |
| >JAK2-G571S EVGDYGQL    | 65    | >JAK2-G571S EVGDYSQL    | 39  | 26    |
| >JAK2-G571S EVGDYGQLH   | 574   | >JAK2-G571S EVGDYSQLH   | 301 | 273   |
| >JAK2-G571S REVDYDYGQL  | 7     | >JAK2-G571S REVDYDYSQL  | 6   | 1     |
| >JAK2-G571S REVDYDYGQL  | 319   | >JAK2-G571S REVDYDYSQL  | 83  | 236   |
| >JAK2-G571S REVDYDYGQL  | 988   | >JAK2-G571S REVDYDYSQL  | 383 | 605   |
| >JAK2-G571S REVDYDYGQL  | 51    | >JAK2-G571S REVDYDYSQL  | 24  | 27    |
| >JAK2-G571S RREVDYDYGQ  | 39    | >JAK2-G571S RREVDYDYSQI | 49  | 10    |
| >JAK2-G571S RREVDYDYGQ  | 74    | >JAK2-G571S RREVDYDYSQI | 118 | 44    |
| >JAK2-G571S RREVDYDYGQ  | 210   | >JAK2-G571S RREVDYDYSQI | 237 | 27    |
| >JAK2-G571S RREVDYDYGQ  | 59    | >JAK2-G571S RREVDYDYSQI | 116 | 57    |
| >JAK2-G571S RREVDYDYGQ  | 307   | >JAK2-G571S RREVDYDYSQI | 353 | 46    |
| >JAK2-G571S VRREVDYDYG  | 1300  | >JAK2-G571S VRREVDYDYS  | 355 | 945   |
| >JAK2-G571S VRREVDYDYG  | 337   | >JAK2-G571S VRREVDYDYS  | 180 | 157   |
| >JAK2-H538C HKIRNEDL    | 227   | >JAK2-H538C QKIRNEDL    | 227 | 0     |
| >JAK2-H538C HKIRNEDLIF  | 9     | >JAK2-H538C QKIRNEDLIF  | 9   | 0     |
| >JAK2-H538C FHKIRNEDLI  | 433   | >JAK2-H538C FQKIRNEDLI  | 256 | 177   |
| >JAK2-H538C FHKIRNEDL   | 1195  | >JAK2-H538C FQKIRNEDL   | 342 | 853   |
| >JAK2-H538C FHKIRNEDLIF | 12258 | >JAK2-H538C FQKIRNEDLIF | 50  | 12208 |
| >JAK2-H538C FHKIRNEDLIF | 3917  | >JAK2-H538C FQKIRNEDLIF | 137 | 3780  |
| >JAK2-H538C FHKIRNEDL   | 3743  | >JAK2-H538C FQKIRNEDL   | 256 | 3487  |
| >JAK2-H538C FHKIRNEDLIF | 73    | >JAK2-H538C FQKIRNEDLIF | 7   | 66    |
| >JAK2-H538C VFHKIRNEDL  | 678   | >JAK2-H538C VFQKIRNEDL  | 139 | 539   |
| >JAK2-H538C VFHKIRNEDL  | 519   | >JAK2-H538C VFQKIRNEDL  | 398 | 121   |
| >JAK2-H538C VFHKIRNEDL  | 261   | >JAK2-H538C VFQKIRNEDL  | 196 | 65    |
| >JAK2-H538C MVFHKIRNEI  | 482   | >JAK2-H538C MVFQKIRNEI  | 670 | 188   |
| >JAK2-H538C MVFHKIRNEI  | 215   | >JAK2-H538C MVFQKIRNEI  | 285 | 70    |
| >JAK2-H538C MVFHKIRNEI  | 993   | >JAK2-H538C MVFQKIRNEI  | 355 | 638   |
| >JAK2-H538C MVFHKIRNEI  | 268   | >JAK2-H538C MVFQKIRNEI  | 322 | 54    |
| >JAK2-H538C MVFHKIRNEI  | 33    | >JAK2-H538C MVFQKIRNEI  | 96  | 63    |
| >JAK2-H538C QMVFHKIR    | 86    | >JAK2-H538C QMVFQKIR    | 212 | 126   |

|                       |       |                       |      |       |
|-----------------------|-------|-----------------------|------|-------|
| >JAK2-H538C QMVFHKIR  | 304   | >JAK2-H538C QMVFQKIR  | 464  | 160   |
| >JAK2-H538C QMVFHKIR  | 76    | >JAK2-H538C QMVFQKIR  | 87   | 11    |
| >JAK2-H538C NQMVFHKI  | 53    | >JAK2-H538C NQMVFQKI  | 88   | 35    |
| >JAK2-H538C NQMVFHKIR | 99    | >JAK2-H538C NQMVFQKIR | 457  | 358   |
| >JAK2-H538C NQMVFHKI  | 302   | >JAK2-H538C NQMVFQKI  | 207  | 95    |
| >JAK2-H538C NQMVFHKIR | 364   | >JAK2-H538C NQMVFQKIR | 768  | 404   |
| >JAK2-H538C NQMVFHKI  | 128   | >JAK2-H538C NQMVFQKIR | 286  | 158   |
| >JAK2-H538C MNQMVFHK  | 328   | >JAK2-H538C MNQMVFQK  | 745  | 417   |
| >JAK2-H538C MNQMVFHK  | 178   | >JAK2-H538C MNQMVFQK  | 139  | 39    |
| >JAK2-H538C MNQMVFHK  | 328   | >JAK2-H538C MNQMVFQK  | 965  | 637   |
| >JAK2-H538C MNQMVFHK  | 280   | >JAK2-H538C MNQMVFQK  | 726  | 446   |
| >JAK2-H538C MNQMVFHK  | 170   | >JAK2-H538C MNQMVFQK  | 815  | 645   |
| >JAK2-H538C MNQMVFHK  | 170   | >JAK2-H538C MNQMVFQK  | 175  | 5     |
| >JAK2-H538C MNQMVFHK  | 404   | >JAK2-H538C MNQMVFQK  | 854  | 450   |
| >JAK2-H538C MNQMVFHK  | 484   | >JAK2-H538C MNQMVFQK  | 374  | 110   |
| >JAK2-H538C HMNQMVFH  | 481   | >JAK2-H538C HMNQMVFQ  | 937  | 456   |
| >JAK2-H538C HMNQMVFH  | 244   | >JAK2-H538C HMNQMVFQ  | 436  | 192   |
| >JAK2-H538C HMNQMVFH  | 12    | >JAK2-H538C HMNQMVFQ  | 18   | 6     |
| >JAK2-H538C HMNQMVFH  | 34    | >JAK2-H538C HMNQMVFQ  | 117  | 83    |
| >JAK2-H538C HMNQMVFH  | 39    | >JAK2-H538C HMNQMVFQ  | 65   | 26    |
| >JAK2-H538C HMNQMVFH  | 49    | >JAK2-H538C HMNQMVFQ  | 135  | 86    |
| >JAK2-H538C HMNQMVFH  | 13736 | >JAK2-H538C HMNQMVFQ  | 435  | 13301 |
| >JAK2-H538C HMNQMVFH  | 9     | >JAK2-H538C HMNQMVFQ  | 15   | 6     |
| >JAK2-H538C HMNQMVFH  | 322   | >JAK2-H538C HMNQMVFQ  | 9934 | 9612  |
| >JAK2-H538C HMNQMVFH  | 35    | >JAK2-H538C HMNQMVFQ  | 38   | 3     |
| >JAK2-H538C HMNQMVFH  | 26    | >JAK2-H538C HMNQMVFQ  | 16   | 10    |
| >JAK2-H538C HMNQMVFH  | 105   | >JAK2-H538C HMNQMVFQ  | 266  | 161   |
| >JAK2-H538C HMNQMVFH  | 284   | >JAK2-H538C HMNQMVFQ  | 1715 | 1431  |
| >JAK2-H538C HMNQMVFH  | 17    | >JAK2-H538C HMNQMVFQ  | 27   | 10    |
| >JAK2-H538C HMNQMVFH  | 13    | >JAK2-H538C HMNQMVFQ  | 21   | 8     |
| >JAK2-H538C HMNQMVFH  | 133   | >JAK2-H538C HMNQMVFQ  | 132  | 1     |
| >JAK2-H538C HMNQMVFH  | 292   | >JAK2-H538C HMNQMVFQ  | 972  | 680   |
| >JAK2-H538C HMNQMVFH  | 174   | >JAK2-H538C HMNQMVFQ  | 312  | 138   |
| >JAK2-H538C HMNQMVFH  | 82    | >JAK2-H538C HMNQMVFQ  | 56   | 26    |
| >JAK2-H538C HMNQMVFH  | 152   | >JAK2-H538C HMNQMVFQ  | 170  | 18    |
| >JAK2-H538C HMNQMVFH  | 441   | >JAK2-H538C HMNQMVFQ  | 1511 | 1070  |
| >JAK2-H538C HMNQMVFH  | 474   | >JAK2-H538C HMNQMVFQ  | 1616 | 1142  |
| >JAK2-H538C HMNQMVFH  | 129   | >JAK2-H538C HMNQMVFQ  | 315  | 186   |
| >JAK2-H538C HMNQMVFH  | 34    | >JAK2-H538C HMNQMVFQ  | 44   | 10    |
| >JAK2-H538C THMNQMV   | 318   | >JAK2-H538C THMNQMV   | 616  | 298   |
| >JAK2-H538C THMNQMV   | 215   | >JAK2-H538C THMNQMV   | 633  | 418   |
| >JAK2-H538C THMNQMV   | 457   | >JAK2-H538C THMNQMV   | 491  | 34    |
| >JAK2-H538C PTHMNQMV  | 396   | >JAK2-H538C PTHMNQMV  | 206  | 190   |

|                        |      |                        |      |      |
|------------------------|------|------------------------|------|------|
| >JAK2-H538C PTHMNQMV   | 20   | >JAK2-H538C PTHMNQMV   | 35   | 15   |
| >JAK2-H538C PTHMNQMV   | 721  | >JAK2-H538C PTHMNQMV   | 497  | 224  |
| >JAK2-H587M HRNYSESF   | 11   | >JAK2-H587M NRNYSESF   | 34   | 23   |
| >JAK2-H587M HRNYSESFF  | 11   | >JAK2-H587M NRNYSESFF  | 53   | 42   |
| >JAK2-H587M HRNYSESF   | 402  | >JAK2-H587M NRNYSESF   | 3000 | 2598 |
| >JAK2-H587M HRNYSESFFE | 676  | >JAK2-H587M NRNYSESFFE | 436  | 240  |
| >JAK2-H587M AHRNYSESF  | 853  | >JAK2-H587M ANRNYSESF  | 57   | 796  |
| >JAK2-H587M AHRNYSESFF | 4569 | >JAK2-H587M ANRNYSESFF | 422  | 4147 |
| >JAK2-H587M AHRNYSESF  | 5    | >JAK2-H587M ANRNYSESF  | 14   | 9    |
| >JAK2-H587M AHRNYSESFF | 6    | >JAK2-H587M ANRNYSESFF | 17   | 11   |
| >JAK2-H587M AHRNYSESF  | 892  | >JAK2-H587M ANRNYSESF  | 170  | 722  |
| >JAK2-H587M KAHRNYSES  | 47   | >JAK2-H587M KANRNYSES  | 864  | 817  |
| >JAK2-H587M KAHRNYSESF | 484  | >JAK2-H587M KANRNYSESF | 3954 | 3470 |
| >JAK2-H587M KAHRNYSESF | 90   | >JAK2-H587M KANRNYSESF | 1152 | 1062 |
| >JAK2-H587M KAHRNYSESF | 319  | >JAK2-H587M KANRNYSESF | 269  | 50   |
| >JAK2-H587M KAHRNYSESF | 126  | >JAK2-H587M KANRNYSESF | 119  | 7    |
| >JAK2-H587M KAHRNYSESF | 8    | >JAK2-H587M KANRNYSESF | 9    | 1    |
| >JAK2-H587M KAHRNYSESF | 11   | >JAK2-H587M KANRNYSESF | 13   | 2    |
| >JAK2-H587M KAHRNYSESF | 22   | >JAK2-H587M KANRNYSESF | 42   | 20   |
| >JAK2-H587M KAHRNYSESF | 25   | >JAK2-H587M KANRNYSESF | 46   | 21   |
| >JAK2-H587M KAHRNYSESF | 164  | >JAK2-H587M KANRNYSESF | 136  | 28   |
| >JAK2-H587M KAHRNYSESF | 130  | >JAK2-H587M KANRNYSESF | 114  | 16   |
| >JAK2-H587M KAHRNYSESF | 41   | >JAK2-H587M KANRNYSESF | 17   | 24   |
| >JAK2-H587M KAHRNYSESF | 46   | >JAK2-H587M KANRNYSESF | 19   | 27   |
| >JAK2-H587M KAHRNYSESF | 135  | >JAK2-H587M KANRNYSESF | 110  | 25   |
| >JAK2-H587M DKAHRNYSES | 26   | >JAK2-H587M DKANRNYSES | 34   | 8    |
| >JAK2-H587M VLDKAHRNY  | 200  | >JAK2-H587M VLDKANRNY  | 589  | 389  |
| >JAK2-H587M KVLDKAHRN` | 240  | >JAK2-H587M KVLDKANRN` | 348  | 108  |
| >JAK2-H587M KVLDKAHR   | 759  | >JAK2-H587M KVLDKANR   | 459  | 300  |
| >JAK2-H587M KVLDKAHRN` | 691  | >JAK2-H587M KVLDKANRN` | 482  | 209  |
| >JAK2-H587M KVLDKAHRN` | 239  | >JAK2-H587M KVLDKANRN` | 403  | 164  |
| >JAK2-H587M KVLDKAHRN` | 270  | >JAK2-H587M KVLDKANRN` | 264  | 6    |
| >JAK2-H587M KVLDKAHRN` | 356  | >JAK2-H587M KVLDKANRN` | 285  | 71   |
| >JAK2-H587M KVLDKAHR   | 12   | >JAK2-H587M KVLDKANR   | 16   | 4    |
| >JAK2-H587M KVLDKAHRN` | 38   | >JAK2-H587M KVLDKANRN` | 95   | 57   |
| >JAK2-H587M KVLDKAHRN` | 19   | >JAK2-H587M KVLDKANRN` | 34   | 15   |
| >JAK2-H587M KVLDKAHR   | 20   | >JAK2-H587M KVLDKANR   | 35   | 15   |
| >JAK2-H587M LKVLDKAHRM | 35   | >JAK2-H587M LKVLDKANRM | 39   | 4    |
| >JAK2-H587M LLKVLDKAHR | 142  | >JAK2-H587M LLKVLDKANR | 125  | 17   |
| >JAK2-H587M VLLKVLDKAH | 79   | >JAK2-H587M VLLKVLDKAN | 101  | 22   |
| >JAK2-H587M VLLKVLDKAH | 351  | >JAK2-H587M VLLKVLDKAN | 595  | 244  |
| >JAK2-H587M VLLKVLDKAH | 471  | >JAK2-H587M VLLKVLDKAN | 698  | 227  |
| >JAK2-H606C HKHLVLNY   | 467  | >JAK2-H606C QKHLVLNY   | 1050 | 583  |



|                       |       |                        |      |       |
|-----------------------|-------|------------------------|------|-------|
| >JAK2-H606CHKHLVLNY   | 26    | >JAK2-H606C QKHLVLNY   | 29   | 3     |
| >JAK2-H606CSHKHLVLNYC | 8856  | >JAK2-H606C SQKHLVLNYC | 54   | 8802  |
| >JAK2-H606CSHKHLVLNYC | 15328 | >JAK2-H606C SQKHLVLNYC | 47   | 15281 |
| >JAK2-H606CSHKHLVLNY  | 438   | >JAK2-H606C SQKHLVLNY  | 485  | 47    |
| >JAK2-H606CSHKHLVLNY  | 1649  | >JAK2-H606C SQKHLVLNY  | 439  | 1210  |
| >JAK2-H606CSHKHLVLNY  | 17    | >JAK2-H606C SQKHLVLNY  | 12   | 5     |
| >JAK2-H606CSHKHLVLNY  | 5038  | >JAK2-H606C SQKHLVLNY  | 30   | 5008  |
| >JAK2-H606CSHKHLVLNYC | 22012 | >JAK2-H606C SQKHLVLNYC | 486  | 21526 |
| >JAK2-H606CSHKHLVLNY  | 52    | >JAK2-H606C SQKHLVLNY  | 7    | 45    |
| >JAK2-H606CSHKHLVLNYC | 3452  | >JAK2-H606C SQKHLVLNYC | 243  | 3209  |
| >JAK2-H606CEAASMMSKL  | 779   | >JAK2-H606CEAASMMSKL   | 467  | 312   |
| >JAK2-H606CLSHKHLVLNY | 1597  | >JAK2-H606C LSQKHLVLNY | 358  | 1239  |
| >JAK2-H606CLSHKHLVLNY | 211   | >JAK2-H606C LSQKHLVLNY | 714  | 503   |
| >JAK2-H606CLSHKHLVL   | 339   | >JAK2-H606C LSQKHLVL   | 6708 | 6369  |
| >JAK2-H606CLSHKHLVLNY | 542   | >JAK2-H606C LSQKHLVLNY | 181  | 361   |
| >JAK2-H606CLSHKHLVLNY | 149   | >JAK2-H606C LSQKHLVLNY | 278  | 129   |
| >JAK2-H606CLSHKHLVL   | 237   | >JAK2-H606C LSQKHLVL   | 734  | 497   |
| >JAK2-H606CLSHKHLVLNY | 89    | >JAK2-H606C LSQKHLVLNY | 92   | 3     |
| >JAK2-H606CLSHKHLVL   | 323   | >JAK2-H606C LSQKHLVL   | 1198 | 875   |
| >JAK2-H606CLSHKHLVLNY | 47    | >JAK2-H606C LSQKHLVLNY | 162  | 115   |
| >JAK2-H606CLSHKHLVL   | 38    | >JAK2-H606C LSQKHLVL   | 82   | 44    |
| >JAK2-H606CLSHKHLVLNY | 6     | >JAK2-H606C LSQKHLVLNY | 9    | 3     |
| >JAK2-H606CLSHKHLVLNY | 462   | >JAK2-H606C LSQKHLVLNY | 275  | 187   |
| >JAK2-H606CLSHKHLVL   | 297   | >JAK2-H606C LSQKHLVL   | 388  | 91    |
| >JAK2-H606CLSHKHLVLNY | 173   | >JAK2-H606C LSQKHLVLNY | 77   | 96    |
| >JAK2-H606CLSHKHLVL   | 329   | >JAK2-H606C LSQKHLVL   | 325  | 4     |
| >JAK2-H606CKLSHKHLV   | 44    | >JAK2-H606C KLSQKHLV   | 62   | 18    |
| >JAK2-H606CKLSHKHLV   | 10    | >JAK2-H606C KLSQKHLV   | 13   | 3     |
| >JAK2-H606CKLSHKHLVL  | 91    | >JAK2-H606C KLSQKHLVL  | 118  | 27    |
| >JAK2-H606CKLSHKHLV   | 8     | >JAK2-H606C KLSQKHLV   | 14   | 6     |
| >JAK2-H606CKLSHKHLVL  | 134   | >JAK2-H606C KLSQKHLVL  | 380  | 246   |
| >JAK2-H606CKLSHKHLV   | 114   | >JAK2-H606C KLSQKHLV   | 211  | 97    |
| >JAK2-H606CKLSHKHLV   | 8     | >JAK2-H606C KLSQKHLV   | 6    | 2     |
| >JAK2-H606CKLSHKHLVL  | 176   | >JAK2-H606C KLSQKHLVL  | 90   | 86    |
| >JAK2-H606CKLSHKHLV   | 15    | >JAK2-H606C KLSQKHLV   | 23   | 8     |
| >JAK2-H606CKLSHKHLVL  | 323   | >JAK2-H606C KLSQKHLVL  | 715  | 392   |
| >JAK2-H606CKLSHKHLV   | 12    | >JAK2-H606C KLSQKHLV   | 9    | 3     |
| >JAK2-H606CKLSHKHLVL  | 536   | >JAK2-H606C KLSQKHLVL  | 236  | 300   |
| >JAK2-H606CKLSHKHLV   | 58    | >JAK2-H606C KLSQKHLV   | 33   | 25    |
| >JAK2-H606CKLSHKHLV   | 3     | >JAK2-H606C KLSQKHLV   | 2    | 1     |
| >JAK2-H606CKLSHKHLVL  | 53    | >JAK2-H606C KLSQKHLVL  | 20   | 33    |
| >JAK2-H606CKLSHKHLVLN | 46    | >JAK2-H606C KLSQKHLVLN | 76   | 30    |
| >JAK2-H606CKLSHKHLVLN | 36    | >JAK2-H606C KLSQKHLVLN | 46   | 10    |

|                        |     |                        |      |      |
|------------------------|-----|------------------------|------|------|
| >JAK2-H606C KLSHKHLVLN | 72  | >JAK2-H606C KLSQKHLVLN | 93   | 21   |
| >JAK2-H606C KLSHKHLVL  | 248 | >JAK2-H606C KLSQKHLVL  | 293  | 45   |
| >JAK2-H606C KLSHKHLVLN | 4   | >JAK2-H606C KLSQKHLVLN | 5    | 1    |
| >JAK2-H606C KLSHKHLVL  | 168 | >JAK2-H606C KLSQKHLVL  | 111  | 57   |
| >JAK2-H606C KLSHKHLVLN | 101 | >JAK2-H606C KLSQKHLVLN | 95   | 6    |
| >JAK2-H606C KLSHKHLVL  | 352 | >JAK2-H606C KLSQKHLVL  | 1387 | 1035 |
| >JAK2-H606C KLSHKHLVLN | 81  | >JAK2-H606C KLSQKHLVLN | 222  | 141  |
| >JAK2-H606C KLSHKHLVLN | 81  | >JAK2-H606C KLSQKHLVLN | 66   | 15   |
| >JAK2-H606C KLSHKHLVLN | 166 | >JAK2-H606C KLSQKHLVLN | 285  | 119  |
| >JAK2-H606C SKLSHKHL   | 37  | >JAK2-H606C SKLSQKHL   | 56   | 19   |
| >JAK2-H606C SKLSHKHLVL | 39  | >JAK2-H606C SKLSQKHLVL | 61   | 22   |
| >JAK2-H606C SKLSHKHLVL | 72  | >JAK2-H606C SKLSQKHLVL | 91   | 19   |
| >JAK2-H606C MSKLSHKHL  | 17  | >JAK2-H606C MSKLSQKHL  | 51   | 34   |
| >JAK2-H606C MSKLSHKHL\ | 24  | >JAK2-H606C MSKLSQKHL\ | 34   | 10   |
| >JAK2-H606C MSKLSHKHL\ | 16  | >JAK2-H606C MSKLSQKHL\ | 32   | 16   |
| >JAK2-H606C MSKLSHKHL  | 202 | >JAK2-H606C MSKLSQKHL  | 797  | 595  |
| >JAK2-H606C MSKLSHKHL\ | 84  | >JAK2-H606C MSKLSQKHL\ | 160  | 76   |
| >JAK2-H606C MSKLSHKHL  | 215 | >JAK2-H606C MSKLSQKHL  | 471  | 256  |
| >JAK2-H606C MSKLSHKHL\ | 183 | >JAK2-H606C MSKLSQKHL\ | 322  | 139  |
| >JAK2-H606C MSKLSHKH   | 387 | >JAK2-H606C MSKLSQKH   | 577  | 190  |
| >JAK2-H606C MSKLSHKHL  | 6   | >JAK2-H606C MSKLSQKHL  | 11   | 5    |
| >JAK2-H606C MSKLSHKHL\ | 6   | >JAK2-H606C MSKLSQKHL\ | 8    | 2    |
| >JAK2-H606C MSKLSHKHL\ | 474 | >JAK2-H606C MSKLSQKHL\ | 693  | 219  |
| >JAK2-H606C MMSKLSHKH  | 14  | >JAK2-H606C MMSKLSQKH  | 22   | 8    |
| >JAK2-H606C MMSKLSHKH  | 179 | >JAK2-H606C MMSKLSQKH  | 219  | 40   |
| >JAK2-H606C MMSKLSHKH  | 3   | >JAK2-H606C MMSKLSQKH  | 3    | 0    |
| >JAK2-H606C MMSKLSHKH  | 143 | >JAK2-H606C MMSKLSQKH  | 386  | 243  |
| >JAK2-H606C MMSKLSHKH  | 5   | >JAK2-H606C MMSKLSQKH  | 6    | 1    |
| >JAK2-H606C MMSKLSHKH  | 30  | >JAK2-H606C MMSKLSQKH  | 50   | 20   |
| >JAK2-H606C MMSKLSHKH  | 64  | >JAK2-H606C MMSKLSQKH  | 109  | 45   |
| >JAK2-H606C MMSKLSHKH  | 3   | >JAK2-H606C MMSKLSQKH  | 4    | 1    |
| >JAK2-H606C MMSKLSHKH  | 194 | >JAK2-H606C MMSKLSQKH  | 200  | 6    |
| >JAK2-H606C MMSKLSHKH  | 7   | >JAK2-H606C MMSKLSQKH  | 9    | 2    |
| >JAK2-H606C MMSKLSHKH  | 124 | >JAK2-H606C MMSKLSQKH  | 103  | 21   |
| >JAK2-H606C MMSKLSHKH  | 9   | >JAK2-H606C MMSKLSQKH  | 8    | 1    |
| >JAK2-H606C MMSKLSHKH  | 362 | >JAK2-H606C MMSKLSQKH  | 348  | 14   |
| >JAK2-H606C MMSKLSHKH  | 5   | >JAK2-H606C MMSKLSQKH  | 6    | 1    |
| >JAK2-H606C MMSKLSHKH  | 12  | >JAK2-H606C MMSKLSQKH  | 14   | 2    |
| >JAK2-H606C MMSKLSHKH  | 2   | >JAK2-H606C MMSKLSQKH  | 2    | 0    |
| >JAK2-H606C MMSKLSHK   | 35  | >JAK2-H606C MMSKLSQK   | 38   | 3    |
| >JAK2-H606C MMSKLSHKH  | 401 | >JAK2-H606C MMSKLSQKH  | 749  | 348  |
| >JAK2-H606C MMSKLSHK   | 26  | >JAK2-H606C MMSKLSQK   | 22   | 4    |
| >JAK2-H606C MMSKLSHK   | 110 | >JAK2-H606C MMSKLSQK   | 230  | 120  |

|                         |       |                         |       |       |
|-------------------------|-------|-------------------------|-------|-------|
| >JAK2-H606C MMSKLSHK    | 54    | >JAK2-H606C MMSKLSQK    | 134   | 80    |
| >JAK2-H606C MMSKLSHK    | 61    | >JAK2-H606C MMSKLSQK    | 57    | 4     |
| >JAK2-H606C MMSKLSHKH   | 79    | >JAK2-H606C MMSKLSQKH   | 143   | 64    |
| >JAK2-H606C MMSKLSHKH   | 102   | >JAK2-H606C MMSKLSQKH   | 290   | 188   |
| >JAK2-H606C MMSKLSHKH   | 217   | >JAK2-H606C MMSKLSQKH   | 280   | 63    |
| >JAK2-H606C MMSKLSHKH   | 63    | >JAK2-H606C MMSKLSQKH   | 60    | 3     |
| >JAK2-H606C SMMSKLSHK   | 57    | >JAK2-H606C SMMSKLSQK   | 82    | 25    |
| >JAK2-H606C SMMSKLSHK   | 127   | >JAK2-H606C SMMSKLSQK   | 72    | 55    |
| >JAK2-H606C SMMSKLSHK   | 19    | >JAK2-H606C SMMSKLSQK   | 14    | 5     |
| >JAK2-H606C SMMSKLSHK   | 19    | >JAK2-H606C SMMSKLSQK   | 18    | 1     |
| >JAK2-H606C SMMSKLSHK   | 255   | >JAK2-H606C SMMSKLSQK   | 321   | 66    |
| >JAK2-H606C SMMSKLSHK   | 19    | >JAK2-H606C SMMSKLSQK   | 24    | 5     |
| >JAK2-H606C SMMSKLSHK   | 35    | >JAK2-H606C SMMSKLSQK   | 23    | 12    |
| >JAK2-H606C SMMSKLSHK   | 58    | >JAK2-H606C SMMSKLSQK   | 44    | 14    |
| >JAK2-H606C SMMSKLSHK   | 158   | >JAK2-H606C SMMSKLSQK   | 73    | 85    |
| >JAK2-H606C SMMSKLSH    | 10667 | >JAK2-H606C SMMSKLSQ    | 203   | 10464 |
| >JAK2-H606C SMMSKLSHK   | 11    | >JAK2-H606C SMMSKLSQK   | 10    | 1     |
| >JAK2-H606C SMMSKLSH    | 432   | >JAK2-H606C SMMSKLSQ    | 11640 | 11208 |
| >JAK2-H606C SMMSKLSHK   | 32    | >JAK2-H606C SMMSKLSQK   | 34    | 2     |
| >JAK2-H606C SMMSKLSHK   | 10    | >JAK2-H606C SMMSKLSQK   | 8     | 2     |
| >JAK2-H606C SMMSKLSHK   | 195   | >JAK2-H606C SMMSKLSQK   | 515   | 320   |
| >JAK2-H606C SMMSKLSHK   | 40    | >JAK2-H606C SMMSKLSQK   | 63    | 23    |
| >JAK2-H606C SMMSKLSHK   | 550   | >JAK2-H606C SMMSKLSQK   | 346   | 204   |
| >JAK2-H606C SMMSKLSHK   | 34    | >JAK2-H606C SMMSKLSQK   | 56    | 22    |
| >JAK2-H606C SMMSKLSH    | 454   | >JAK2-H606C SMMSKLSQ    | 1091  | 637   |
| >JAK2-H606C SMMSKLSHK   | 171   | >JAK2-H606C SMMSKLSQK   | 286   | 115   |
| >JAK2-H606C SMMSKLSHK   | 72    | >JAK2-H606C SMMSKLSQK   | 92    | 20    |
| >JAK2-H606C ASMMSKLSH   | 14    | >JAK2-H606C ASMMSKLSQ   | 15    | 1     |
| >JAK2-H606C ASMMSKLSH   | 171   | >JAK2-H606C ASMMSKLSQ   | 5978  | 5807  |
| >JAK2-H606C ASMMSKLSH   | 6     | >JAK2-H606C ASMMSKLSQ   | 7     | 1     |
| >JAK2-H606C ASMMSKLSH   | 247   | >JAK2-H606C ASMMSKLSQ   | 1004  | 757   |
| >JAK2-H606C ASMMSKLSH   | 18    | >JAK2-H606C ASMMSKLSQ   | 32    | 14    |
| >JAK2-H606C ASMMSKLSH   | 131   | >JAK2-H606C ASMMSKLSQ   | 216   | 85    |
| >JAK2-H606C ASMMSKLSH   | 212   | >JAK2-H606C ASMMSKLSQ   | 190   | 22    |
| >JAK2-H606C ASMMSKLSH   | 91    | >JAK2-H606C ASMMSKLSQ   | 959   | 868   |
| >JAK2-H606C ASMMSKLSH   | 201   | >JAK2-H606C ASMMSKLSQ   | 188   | 13    |
| >JAK2-H606C ASMMSKLSH   | 405   | >JAK2-H606C ASMMSKLSQ   | 765   | 360   |
| >JAK2-H606C ASMMSKLSH   | 85    | >JAK2-H606C ASMMSKLSQ   | 90    | 5     |
| >JAK2-H606C ASMMSKLSH   | 271   | >JAK2-H606C ASMMSKLSQ   | 1513  | 1242  |
| >JAK2-H606C AASMMSKLS   | 73    | >JAK2-H606C AASMMSKLS   | 45    | 28    |
| >JAK2-H606C AASMMSKLS   | 108   | >JAK2-H606C AASMMSKLS   | 227   | 119   |
| >JAK2-H608Y HLVLNLYGV   | 232   | >JAK2-H608Y YLVLNLYGV   | 23    | 209   |
| >JAK2-H608Y HLVLNLYGVCV | 546   | >JAK2-H608Y YLVLNLYGVCV | 44    | 502   |

|                       |       |                        |     |       |
|-----------------------|-------|------------------------|-----|-------|
| >JAK2-H608YHLVLNYGV   | 33    | >JAK2-H608Y YLVLNYGV   | 8   | 25    |
| >JAK2-H608YHLVLNYGVC\ | 454   | >JAK2-H608Y YLVLNYGVCV | 71  | 383   |
| >JAK2-H608YHLVLNYGV   | 40    | >JAK2-H608Y YLVLNYGV   | 5   | 35    |
| >JAK2-H608YHLVLNYGVC\ | 497   | >JAK2-H608Y YLVLNYGVCV | 67  | 430   |
| >JAK2-H608YHLVLNYGV   | 90    | >JAK2-H608Y YLVLNYGV   | 11  | 79    |
| >JAK2-H608YHLVLNYGVC\ | 526   | >JAK2-H608Y YLVLNYGVCV | 56  | 470   |
| >JAK2-H608YHLVLNYGV   | 11    | >JAK2-H608Y YLVLNYGV   | 2   | 9     |
| >JAK2-H608YHLVLNYGVC  | 6928  | >JAK2-H608Y YLVLNYGVC  | 310 | 6618  |
| >JAK2-H608YHLVLNYGVC\ | 57    | >JAK2-H608Y YLVLNYGVCV | 4   | 53    |
| >JAK2-H608YHLVLNYGVC\ | 1843  | >JAK2-H608Y YLVLNYGVCV | 55  | 1788  |
| >JAK2-H608YHLVLNYGV   | 7     | >JAK2-H608Y YLVLNYGV   | 3   | 4     |
| >JAK2-H608YHLVLNYGVC\ | 17    | >JAK2-H608Y YLVLNYGVCV | 4   | 13    |
| >JAK2-H608YHLVLNYGVC\ | 2176  | >JAK2-H608Y YLVLNYGVCV | 156 | 2020  |
| >JAK2-H608YHLVLNYGV   | 35    | >JAK2-H608Y YLVLNYGV   | 6   | 29    |
| >JAK2-H608YHLVLNYGVC\ | 54    | >JAK2-H608Y YLVLNYGVCV | 8   | 46    |
| >JAK2-H608YHLVLNYGV   | 33    | >JAK2-H608Y YLVLNYGV   | 3   | 30    |
| >JAK2-H608YHLVLNYGVC\ | 263   | >JAK2-H608Y YLVLNYGVCV | 6   | 257   |
| >JAK2-H608YHLVLNYGV   | 4     | >JAK2-H608Y YLVLNYGV   | 2   | 2     |
| >JAK2-H608YHLVLNYGVC  | 6876  | >JAK2-H608Y YLVLNYGVC  | 253 | 6623  |
| >JAK2-H608YHLVLNYGVC\ | 12    | >JAK2-H608Y YLVLNYGVCV | 2   | 10    |
| >JAK2-H608YHLVLNYGVC\ | 694   | >JAK2-H608Y YLVLNYGVCV | 29  | 665   |
| >JAK2-H608YHLVLNYGV   | 95    | >JAK2-H608Y YLVLNYGV   | 173 | 78    |
| >JAK2-H608YHLVLNYGV   | 154   | >JAK2-H608Y YLVLNYGV   | 81  | 73    |
| >JAK2-H608YKHLVLNYGV  | 14136 | >JAK2-H608Y KYLVLNYGV  | 109 | 14027 |
| >JAK2-H608YKHLVLNYGV  | 4103  | >JAK2-H608Y KYLVLNYGV  | 488 | 3615  |
| >JAK2-H608YKHLVLNYGV  | 4347  | >JAK2-H608Y KYLVLNYGV  | 350 | 3997  |
| >JAK2-H608YKHLVLNYGVC | 4363  | >JAK2-H608Y KYLVLNYGVC | 355 | 4008  |
| >JAK2-H608YKHLVLNYGV  | 17701 | >JAK2-H608Y KYLVLNYGV  | 183 | 17518 |
| >JAK2-H608YKHLVLNYGVC | 16983 | >JAK2-H608Y KYLVLNYGVC | 341 | 16642 |
| >JAK2-H608YKHLVLNYGV  | 4272  | >JAK2-H608Y KYLVLNYGV  | 384 | 3888  |
| >JAK2-H608YKHLVLNYG   | 10426 | >JAK2-H608Y KYLVLNYG   | 211 | 10215 |
| >JAK2-H608YKHLVLNYGV  | 10279 | >JAK2-H608Y KYLVLNYGV  | 103 | 10176 |
| >JAK2-H608YKHLVLNYGVC | 14471 | >JAK2-H608Y KYLVLNYGVC | 250 | 14221 |
| >JAK2-H608YASMMSKLSH  | 19821 | >JAK2-H608Y ASMMSKLSH  | 313 | 19508 |
| >JAK2-H608YASMMSKLSH  | 247   | >JAK2-H608Y ASMMSKLSH  | 26  | 221   |
| >JAK2-H608YASMMSKLSH  | 15267 | >JAK2-H608Y ASMMSKLSH  | 392 | 14875 |
| >JAK2-H608YASMMSKLSH  | 4376  | >JAK2-H608Y ASMMSKLSH  | 27  | 4349  |
| >JAK2-H608YASMMSKLSH  | 7881  | >JAK2-H608Y ASMMSKLSH  | 166 | 7715  |
| >JAK2-H608YASMMSKLSH  | 2471  | >JAK2-H608Y ASMMSKLSH  | 50  | 2421  |
| >JAK2-H608YASMMSKLSH  | 201   | >JAK2-H608Y ASMMSKLSH  | 3   | 198   |
| >JAK2-H608YASMMSKLSH  | 10262 | >JAK2-H608Y ASMMSKLSH  | 157 | 10105 |
| >JAK2-H608YASMMSKLSH  | 1196  | >JAK2-H608Y ASMMSKLSH  | 51  | 1145  |
| >JAK2-H608YASMMSKLSH  | 271   | >JAK2-H608Y ASMMSKLSH  | 291 | 20    |

|                        |      |                         |     |      |
|------------------------|------|-------------------------|-----|------|
| >JAK2-H608Y HKHLVLNYG\ | 2078 | >JAK2-H608Y HKYLVLNYGV  | 359 | 1719 |
| >JAK2-H608Y HKHLVLNY   | 467  | >JAK2-H608Y HKYLVLNY    | 333 | 134  |
| >JAK2-H608Y HKHLVLNY   | 26   | >JAK2-H608Y HKYLVLNY    | 8   | 18   |
| >JAK2-H608Y HKHLVLNYG\ | 1759 | >JAK2-H608Y HKYLVLNYGV  | 378 | 1381 |
| >JAK2-H608Y SHKHLVLNY  | 438  | >JAK2-H608Y SHKYLVNLNY  | 247 | 191  |
| >JAK2-H608Y SHKHLVLNY  | 17   | >JAK2-H608Y SHKYLVNLNY  | 22  | 5    |
| >JAK2-H608Y SHKHLVLNY  | 52   | >JAK2-H608Y SHKYLVNLNY  | 103 | 51   |
| >JAK2-H608Y LSHKHLVL   | 2770 | >JAK2-H608Y LSHKYLVL    | 193 | 2577 |
| >JAK2-H608Y LSHKHLVLNY | 211  | >JAK2-H608Y LSHKYLVNLNY | 472 | 261  |
| >JAK2-H608Y LSHKHLVLNY | 973  | >JAK2-H608Y LSHKYLVNLNY | 139 | 834  |
| >JAK2-H608Y LSHKHLVL   | 339  | >JAK2-H608Y LSHKYLVL    | 432 | 93   |
| >JAK2-H608Y LSHKHLVLNY | 542  | >JAK2-H608Y LSHKYLVNLNY | 156 | 386  |
| >JAK2-H608Y LSHKHLVLNY | 149  | >JAK2-H608Y LSHKYLVNLNY | 64  | 85   |
| >JAK2-H608Y LSHKHLVL   | 237  | >JAK2-H608Y LSHKYLVL    | 571 | 334  |
| >JAK2-H608Y LSHKHLVLNY | 89   | >JAK2-H608Y LSHKYLVNLNY | 101 | 12   |
| >JAK2-H608Y LSHKHLVL   | 323  | >JAK2-H608Y LSHKYLVL    | 202 | 121  |
| >JAK2-H608Y LSHKHLVLNY | 47   | >JAK2-H608Y LSHKYLVNLNY | 33  | 14   |
| >JAK2-H608Y LSHKHLVL   | 38   | >JAK2-H608Y LSHKYLVL    | 38  | 0    |
| >JAK2-H608Y LSHKHLVLNY | 6    | >JAK2-H608Y LSHKYLVNLNY | 5   | 1    |
| >JAK2-H608Y LSHKHLVLNY | 462  | >JAK2-H608Y LSHKYLVNLNY | 377 | 85   |
| >JAK2-H608Y LSHKHLVL   | 297  | >JAK2-H608Y LSHKYLVL    | 286 | 11   |
| >JAK2-H608Y LSHKHLVLNY | 173  | >JAK2-H608Y LSHKYLVNLNY | 159 | 14   |
| >JAK2-H608Y LSHKHLVL   | 329  | >JAK2-H608Y LSHKYLVL    | 279 | 50   |
| >JAK2-H608Y KLSHKHLV   | 44   | >JAK2-H608Y KLSHKYLV    | 18  | 26   |
| >JAK2-H608Y KLSHKHLVL  | 1056 | >JAK2-H608Y KLSHKYLVL   | 260 | 796  |
| >JAK2-H608Y KLSHKHLV   | 10   | >JAK2-H608Y KLSHKYLV    | 6   | 4    |
| >JAK2-H608Y KLSHKHLVL  | 91   | >JAK2-H608Y KLSHKYLVL   | 32  | 59   |
| >JAK2-H608Y KLSHKHLV   | 8    | >JAK2-H608Y KLSHKYLV    | 7   | 1    |
| >JAK2-H608Y KLSHKHLVL  | 134  | >JAK2-H608Y KLSHKYLVL   | 34  | 100  |
| >JAK2-H608Y KLSHKHLV   | 114  | >JAK2-H608Y KLSHKYLV    | 56  | 58   |
| >JAK2-H608Y KLSHKHLV   | 8    | >JAK2-H608Y KLSHKYLV    | 7   | 1    |
| >JAK2-H608Y KLSHKHLVL  | 176  | >JAK2-H608Y KLSHKYLVL   | 184 | 8    |
| >JAK2-H608Y KLSHKHLV   | 15   | >JAK2-H608Y KLSHKYLV    | 8   | 7    |
| >JAK2-H608Y KLSHKHLVL  | 323  | >JAK2-H608Y KLSHKYLVL   | 122 | 201  |
| >JAK2-H608Y KLSHKHLV   | 12   | >JAK2-H608Y KLSHKYLV    | 11  | 1    |
| >JAK2-H608Y KLSHKHLVL  | 536  | >JAK2-H608Y KLSHKYLVL   | 190 | 346  |
| >JAK2-H608Y KLSHKHLV   | 58   | >JAK2-H608Y KLSHKYLV    | 33  | 25   |
| >JAK2-H608Y KLSHKHLV   | 3    | >JAK2-H608Y KLSHKYLV    | 4   | 1    |
| >JAK2-H608Y KLSHKHLVL  | 53   | >JAK2-H608Y KLSHKYLVL   | 50  | 3    |
| >JAK2-H608Y KLSHKHLVLN | 46   | >JAK2-H608Y KLSHKYLVLN' | 45  | 1    |
| >JAK2-H608Y KLSHKHLVLN | 36   | >JAK2-H608Y KLSHKYLVLN' | 40  | 4    |
| >JAK2-H608Y KLSHKHLVLN | 72   | >JAK2-H608Y KLSHKYLVLN' | 76  | 4    |
| >JAK2-H608Y KLSHKHLVL  | 248  | >JAK2-H608Y KLSHKYLVL   | 728 | 480  |

|                        |       |                         |     |       |
|------------------------|-------|-------------------------|-----|-------|
| >JAK2-H608Y KLSHKHLVLN | 4     | >JAK2-H608Y KLSHKYLVLN' | 5   | 1     |
| >JAK2-H608Y KLSHKHLVL  | 168   | >JAK2-H608Y KLSHKYLVL   | 197 | 29    |
| >JAK2-H608Y KLSHKHLVLN | 101   | >JAK2-H608Y KLSHKYLVLN' | 115 | 14    |
| >JAK2-H608Y KLSHKHLVL  | 352   | >JAK2-H608Y KLSHKYLVL   | 249 | 103   |
| >JAK2-H608Y KLSHKHLVLN | 81    | >JAK2-H608Y KLSHKYLVLN' | 64  | 17    |
| >JAK2-H608Y KLSHKHLVLN | 81    | >JAK2-H608Y KLSHKYLVLN' | 158 | 77    |
| >JAK2-H608Y KLSHKHLVLN | 166   | >JAK2-H608Y KLSHKYLVLN' | 164 | 2     |
| >JAK2-H608Y SKLSHKHL   | 37    | >JAK2-H608Y SKLSHKYL    | 31  | 6     |
| >JAK2-H608Y SKLSHKHLV  | 665   | >JAK2-H608Y SKLSHKYLV   | 456 | 209   |
| >JAK2-H608Y SKLSHKHLVL | 39    | >JAK2-H608Y SKLSHKYLVL  | 29  | 10    |
| >JAK2-H608Y SKLSHKHLVL | 72    | >JAK2-H608Y SKLSHKYLVL  | 86  | 14    |
| >JAK2-H608Y MSKLSHKH   | 15518 | >JAK2-H608Y MSKLSHKY    | 254 | 15264 |
| >JAK2-H608Y MSKLSHKH   | 1067  | >JAK2-H608Y MSKLSHKY    | 94  | 973   |
| >JAK2-H608Y MSKLSHKHL  | 17    | >JAK2-H608Y MSKLSHKYL   | 10  | 7     |
| >JAK2-H608Y MSKLSHKHLV | 24    | >JAK2-H608Y MSKLSHKYLV  | 27  | 3     |
| >JAK2-H608Y MSKLSHKHLV | 16    | >JAK2-H608Y MSKLSHKYLV  | 17  | 1     |
| >JAK2-H608Y MSKLSHKH   | 8121  | >JAK2-H608Y MSKLSHKY    | 80  | 8041  |
| >JAK2-H608Y MSKLSHKHL  | 202   | >JAK2-H608Y MSKLSHKYL   | 476 | 274   |
| >JAK2-H608Y MSKLSHKHLV | 84    | >JAK2-H608Y MSKLSHKYLV  | 105 | 21    |
| >JAK2-H608Y MSKLSHKH   | 12637 | >JAK2-H608Y MSKLSHKY    | 363 | 12274 |
| >JAK2-H608Y MSKLSHKH   | 5778  | >JAK2-H608Y MSKLSHKY    | 134 | 5644  |
| >JAK2-H608Y MSKLSHKHL  | 215   | >JAK2-H608Y MSKLSHKYL   | 183 | 32    |
| >JAK2-H608Y MSKLSHKHLV | 183   | >JAK2-H608Y MSKLSHKYLV  | 144 | 39    |
| >JAK2-H608Y MSKLSHKH   | 387   | >JAK2-H608Y MSKLSHKY    | 4   | 383   |
| >JAK2-H608Y MSKLSHKHL  | 6     | >JAK2-H608Y MSKLSHKYL   | 6   | 0     |
| >JAK2-H608Y MSKLSHKHLV | 6     | >JAK2-H608Y MSKLSHKYLV  | 8   | 2     |
| >JAK2-H608Y MSKLSHKH   | 11063 | >JAK2-H608Y MSKLSHKY    | 210 | 10853 |
| >JAK2-H608Y MSKLSHKHL  | 1883  | >JAK2-H608Y MSKLSHKYL   | 230 | 1653  |
| >JAK2-H608Y MSKLSHKH   | 7241  | >JAK2-H608Y MSKLSHKY    | 185 | 7056  |
| >JAK2-H608Y MSKLSHKHL  | 2454  | >JAK2-H608Y MSKLSHKYL   | 489 | 1965  |
| >JAK2-H608Y MSKLSHKHLV | 474   | >JAK2-H608Y MSKLSHKYLV  | 485 | 11    |
| >JAK2-H608Y MMSKLSHKH  | 18763 | >JAK2-H608Y MMSKLSHKY   | 268 | 18495 |
| >JAK2-H608Y MMSKLSHKH  | 2306  | >JAK2-H608Y MMSKLSHKY   | 319 | 1987  |
| >JAK2-H608Y MMSKLSHKH  | 14    | >JAK2-H608Y MMSKLSHKY   | 10  | 4     |
| >JAK2-H608Y MMSKLSHKH  | 179   | >JAK2-H608Y MMSKLSHKY   | 33  | 146   |
| >JAK2-H608Y MMSKLSHKH  | 3     | >JAK2-H608Y MMSKLSHKY   | 2   | 1     |
| >JAK2-H608Y MMSKLSHKH  | 143   | >JAK2-H608Y MMSKLSHKY   | 38  | 105   |
| >JAK2-H608Y MMSKLSHKH  | 5     | >JAK2-H608Y MMSKLSHKY   | 5   | 0     |
| >JAK2-H608Y MMSKLSHKH  | 30    | >JAK2-H608Y MMSKLSHKY   | 27  | 3     |
| >JAK2-H608Y MMSKLSHKH  | 64    | >JAK2-H608Y MMSKLSHKY   | 12  | 52    |
| >JAK2-H608Y MMSKLSHKH  | 3     | >JAK2-H608Y MMSKLSHKY   | 3   | 0     |
| >JAK2-H608Y MMSKLSHKH  | 194   | >JAK2-H608Y MMSKLSHKY   | 75  | 119   |
| >JAK2-H608Y MMSKLSHKH  | 7     | >JAK2-H608Y MMSKLSHKY   | 5   | 2     |

|                       |       |                       |     |       |
|-----------------------|-------|-----------------------|-----|-------|
| >JAK2-H608Y MMSKLSHKH | 124   | >JAK2-H608Y MMSKLSHKY | 69  | 55    |
| >JAK2-H608Y MMSKLSHKH | 9     | >JAK2-H608Y MMSKLSHKY | 9   | 0     |
| >JAK2-H608Y MMSKLSHKH | 362   | >JAK2-H608Y MMSKLSHKY | 52  | 310   |
| >JAK2-H608Y MMSKLSHKH | 5     | >JAK2-H608Y MMSKLSHKY | 5   | 0     |
| >JAK2-H608Y MMSKLSHKH | 12    | >JAK2-H608Y MMSKLSHKY | 7   | 5     |
| >JAK2-H608Y MMSKLSHKH | 2     | >JAK2-H608Y MMSKLSHKY | 2   | 0     |
| >JAK2-H608Y MMSKLSHKH | 401   | >JAK2-H608Y MMSKLSHKY | 119 | 282   |
| >JAK2-H608Y MMSKLSHKH | 3029  | >JAK2-H608Y MMSKLSHKY | 246 | 2783  |
| >JAK2-H608Y MMSKLSHKH | 625   | >JAK2-H608Y MMSKLSHKY | 12  | 613   |
| >JAK2-H608Y MMSKLSHKH | 884   | >JAK2-H608Y MMSKLSHKY | 7   | 877   |
| >JAK2-H608Y MMSKLSHKH | 1696  | >JAK2-H608Y MMSKLSHKY | 467 | 1229  |
| >JAK2-H608Y MMSKLSHKH | 3100  | >JAK2-H608Y MMSKLSHKY | 413 | 2687  |
| >JAK2-H608Y MMSKLSHKH | 79    | >JAK2-H608Y MMSKLSHKY | 45  | 34    |
| >JAK2-H608Y MMSKLSHKH | 102   | >JAK2-H608Y MMSKLSHKY | 197 | 95    |
| >JAK2-H608Y MMSKLSHKH | 8275  | >JAK2-H608Y MMSKLSHKY | 13  | 8262  |
| >JAK2-H608Y MMSKLSHKH | 3192  | >JAK2-H608Y MMSKLSHKY | 55  | 3137  |
| >JAK2-H608Y MMSKLSHKH | 217   | >JAK2-H608Y MMSKLSHKY | 571 | 354   |
| >JAK2-H608Y MMSKLSHKH | 6024  | >JAK2-H608Y MMSKLSHKY | 108 | 5916  |
| >JAK2-H608Y MMSKLSHKH | 1510  | >JAK2-H608Y MMSKLSHKY | 24  | 1486  |
| >JAK2-H608Y MMSKLSHKH | 63    | >JAK2-H608Y MMSKLSHKY | 57  | 6     |
| >JAK2-H608Y MMSKLSHKH | 16913 | >JAK2-H608Y MMSKLSHKY | 168 | 16745 |
| >JAK2-H608Y MMSKLSHKH | 1330  | >JAK2-H608Y MMSKLSHKY | 42  | 1288  |
| >JAK2-H608Y MMSKLSHKH | 10111 | >JAK2-H608Y MMSKLSHKY | 115 | 9996  |
| >JAK2-H608Y MMSKLSHKH | 24825 | >JAK2-H608Y MMSKLSHKY | 40  | 24785 |
| >JAK2-H608Y MMSKLSHKH | 19793 | >JAK2-H608Y MMSKLSHKY | 304 | 19489 |
| >JAK2-H608Y SMMSKLSHK | 2058  | >JAK2-H608Y SMMSKLSHK | 499 | 1559  |
| >JAK2-H608Y SMMSKLSHK | 57    | >JAK2-H608Y SMMSKLSHK | 126 | 69    |
| >JAK2-H608Y SMMSKLSHK | 127   | >JAK2-H608Y SMMSKLSHK | 33  | 94    |
| >JAK2-H608Y SMMSKLSHK | 19    | >JAK2-H608Y SMMSKLSHK | 6   | 13    |
| >JAK2-H608Y SMMSKLSHK | 19    | >JAK2-H608Y SMMSKLSHK | 11  | 8     |
| >JAK2-H608Y SMMSKLSHK | 255   | >JAK2-H608Y SMMSKLSHK | 162 | 93    |
| >JAK2-H608Y SMMSKLSHK | 19    | >JAK2-H608Y SMMSKLSHK | 5   | 14    |
| >JAK2-H608Y SMMSKLSHK | 35    | >JAK2-H608Y SMMSKLSHK | 14  | 21    |
| >JAK2-H608Y SMMSKLSHK | 58    | >JAK2-H608Y SMMSKLSHK | 31  | 27    |
| >JAK2-H608Y SMMSKLSHK | 158   | >JAK2-H608Y SMMSKLSHK | 24  | 134   |
| >JAK2-H608Y SMMSKLSHK | 11    | >JAK2-H608Y SMMSKLSHK | 7   | 4     |
| >JAK2-H608Y SMMSKLSHK | 1676  | >JAK2-H608Y SMMSKLSHK | 53  | 1623  |
| >JAK2-H608Y SMMSKLSHK | 4837  | >JAK2-H608Y SMMSKLSHK | 72  | 4765  |
| >JAK2-H608Y SMMSKLSHK | 9811  | >JAK2-H608Y SMMSKLSHK | 224 | 9587  |
| >JAK2-H608Y SMMSKLSHK | 23342 | >JAK2-H608Y SMMSKLSHK | 286 | 23056 |
| >JAK2-H608Y SMMSKLSHK | 12012 | >JAK2-H608Y SMMSKLSHK | 43  | 11969 |
| >JAK2-H608Y SMMSKLSHK | 9274  | >JAK2-H608Y SMMSKLSHK | 29  | 9245  |
| >JAK2-H608Y SMMSKLSHK | 34    | >JAK2-H608Y SMMSKLSHK | 50  | 16    |

|                         |       |                        |       |       |
|-------------------------|-------|------------------------|-------|-------|
| >JAK2-H608Y SMMSKLSHK   | 2370  | >JAK2-H608Y SMMSKLSHK  | 54    | 2316  |
| >JAK2-H608Y SMMSKLSHK   | 171   | >JAK2-H608Y SMMSKLSHK  | 455   | 284   |
| >JAK2-H608Y SMMSKLSHK   | 2215  | >JAK2-H608Y SMMSKLSHK  | 45    | 2170  |
| >JAK2-H608Y SMMSKLSHK   | 2160  | >JAK2-H608Y SMMSKLSHK  | 28    | 2132  |
| >JAK2-H608Y SMMSKLSHK   | 72    | >JAK2-H608Y SMMSKLSHK  | 64    | 8     |
| >JAK2-H608Y SMMSKLSHK   | 15882 | >JAK2-H608Y SMMSKLSHK  | 192   | 15690 |
| >JAK2-H608Y SMMSKLSHK   | 21389 | >JAK2-H608Y SMMSKLSHK  | 485   | 20904 |
| >JAK2-I166T- WIKVPVTHEI | 5547  | >JAK2-I166T- WTKVPVTHE | 173   | 5374  |
| >JAK2-I166T- QWRHDFVHC  | 499   | >JAK2-I166T- QWRHDFVHC | 1061  | 562   |
| >JAK2-I166T- FVHGWIKV   | 31    | >JAK2-I166T- FVHGWTKV  | 55    | 24    |
| >JAK2-I166T- FVHGWIKVP\ | 52    | >JAK2-I166T- FVHGWTKVP | 73    | 21    |
| >JAK2-I166T- FVHGWIKV   | 115   | >JAK2-I166T- FVHGWTKV  | 54    | 61    |
| >JAK2-I166T- FVHGWIKVP\ | 35    | >JAK2-I166T- FVHGWTKVP | 41    | 6     |
| >JAK2-I166T- FVHGWIKV   | 15    | >JAK2-I166T- FVHGWTKV  | 7     | 8     |
| >JAK2-I166T- FVHGWIKVP\ | 24    | >JAK2-I166T- FVHGWTKVP | 24    | 0     |
| >JAK2-I166T- FVHGWIKV   | 12    | >JAK2-I166T- FVHGWTKV  | 12    | 0     |
| >JAK2-I166T- FVHGWIKVP\ | 45    | >JAK2-I166T- FVHGWTKVP | 44    | 1     |
| >JAK2-I166T- FVHGWIKV   | 3     | >JAK2-I166T- FVHGWTKV  | 6     | 3     |
| >JAK2-I166T- FVHGWIKVP\ | 3     | >JAK2-I166T- FVHGWTKVP | 4     | 1     |
| >JAK2-I166T- FVHGWIKVP\ | 200   | >JAK2-I166T- FVHGWTKVP | 475   | 275   |
| >JAK2-I166T- FVHGWIKV   | 197   | >JAK2-I166T- FVHGWTKV  | 433   | 236   |
| >JAK2-I166T- FVHGWIKVP\ | 76    | >JAK2-I166T- FVHGWTKVP | 70    | 6     |
| >JAK2-I166T- FVHGWIKV   | 15    | >JAK2-I166T- FVHGWTKV  | 25    | 10    |
| >JAK2-I166T- FVHGWIKVP\ | 21    | >JAK2-I166T- FVHGWTKVP | 27    | 6     |
| >JAK2-I166T- FVHGWIKV   | 121   | >JAK2-I166T- FVHGWTKV  | 211   | 90    |
| >JAK2-I166T- FVHGWIKVP\ | 137   | >JAK2-I166T- FVHGWTKVP | 197   | 60    |
| >JAK2-I166T- FVHGWIKV   | 2     | >JAK2-I166T- FVHGWTKV  | 2     | 0     |
| >JAK2-I166T- FVHGWIKVP\ | 2     | >JAK2-I166T- FVHGWTKVP | 2     | 0     |
| >JAK2-I166T- FVHGWIKVP\ | 180   | >JAK2-I166T- FVHGWTKVP | 287   | 107   |
| >JAK2-I166T- FVHGWIKV   | 19    | >JAK2-I166T- FVHGWTKV  | 16    | 3     |
| >JAK2-I166T- FVHGWIKVP\ | 102   | >JAK2-I166T- FVHGWTKVP | 124   | 22    |
| >JAK2-I166T- FVHGWIKV   | 98    | >JAK2-I166T- FVHGWTKV  | 113   | 15    |
| >JAK2-I166T- FVHGWIKVP\ | 34    | >JAK2-I166T- FVHGWTKVP | 26    | 8     |
| >JAK2-I166T- DFVHGWIK   | 291   | >JAK2-I166T- DFVHGWTK  | 111   | 180   |
| >JAK2-I166T- HDFVHGW    | 179   | >JAK2-I166T- HDFVHGW   | 7588  | 7409  |
| >JAK2-I166T- HDFVHGW    | 232   | >JAK2-I166T- HDFVHGW   | 24851 | 24619 |
| >JAK2-I166T- HDFVHGW    | 87    | >JAK2-I166T- HDFVHGW   | 5658  | 5571  |
| >JAK2-I166T- HDFVHGWIK  | 200   | >JAK2-I166T- HDFVHGWTK | 177   | 23    |
| >JAK2-I166T- WRHDFVHG\  | 29    | >JAK2-I166T- WRHDFVHG\ | 112   | 83    |
| >JAK2-I166T- WRHDFVHG\  | 67    | >JAK2-I166T- WRHDFVHG\ | 44    | 23    |
| >JAK2-I166T- WRHDFVHG\  | 226   | >JAK2-I166T- WRHDFVHG\ | 491   | 265   |
| >JAK2-I166T- WRHDFVHG\  | 61    | >JAK2-I166T- WRHDFVHG\ | 159   | 98    |
| >JAK2-I166T- WRHDFVHG\  | 534   | >JAK2-I166T- WRHDFVHG\ | 377   | 157   |



|                            |      |                            |       |       |
|----------------------------|------|----------------------------|-------|-------|
| >JAK2-I324S- LQLYCDFPNII   | 378  | >JAK2-I324S- LQLYCDFPNIS   | 11520 | 11142 |
| >JAK2-I324S- LQLYCDFPNII   | 88   | >JAK2-I324S- LQLYCDFPNIS   | 1708  | 1620  |
| >JAK2-I324S- LQLYCDFPNII   | 32   | >JAK2-I324S- LQLYCDFPNIS   | 1138  | 1106  |
| >JAK2-I324S- NIIDVSIK      | 151  | >JAK2-I324S- NISDVSIK      | 176   | 25    |
| >JAK2-I324S- NIIDVSIK      | 20   | >JAK2-I324S- NISDVSIK      | 39    | 19    |
| >JAK2-I324S- FPNIIDVSI     | 2042 | >JAK2-I324S- FPNISDVSI     | 396   | 1646  |
| >JAK2-I324S- FPNIIDVSI     | 442  | >JAK2-I324S- FPNISDVSI     | 151   | 291   |
| >JAK2-I324S- FPNIIDVSI     | 106  | >JAK2-I324S- FPNISDVSI     | 78    | 28    |
| >JAK2-I324S- FPNIIDVSI     | 50   | >JAK2-I324S- FPNISDVSI     | 94    | 44    |
| >JAK2-I324S- FPNIIDVSIKQ   | 137  | >JAK2-I324S- FPNISDVSIKC   | 181   | 44    |
| >JAK2-I324S- FPNIIDVSI     | 154  | >JAK2-I324S- FPNISDVSI     | 156   | 2     |
| >JAK2-I324S- FPNIIDVSI     | 10   | >JAK2-I324S- FPNISDVSI     | 10    | 0     |
| >JAK2-I324S- FPNIIDVSI     | 14   | >JAK2-I324S- FPNISDVSI     | 25    | 11    |
| >JAK2-I324S- FPNIIDVSI     | 14   | >JAK2-I324S- FPNISDVSI     | 34    | 20    |
| >JAK2-I324S- FPNIIDVSIK    | 83   | >JAK2-I324S- FPNISDVSIK    | 549   | 466   |
| >JAK2-I324S- FPNIIDVSIKQ   | 142  | >JAK2-I324S- FPNISDVSIKC   | 309   | 167   |
| >JAK2-I324S- FPNIIDVSI     | 48   | >JAK2-I324S- FPNISDVSI     | 93    | 45    |
| >JAK2-I324S- CDFPNIIDVSI   | 219  | >JAK2-I324S- CDFPNISDVSI   | 288   | 69    |
| >JAK2-I324S- CDFPNIIDVSI   | 51   | >JAK2-I324S- CDFPNISDVSI   | 39    | 12    |
| >JAK2-I324S- CDFPNIIDVSI   | 51   | >JAK2-I324S- CDFPNISDVSI   | 49    | 2     |
| >JAK2-I324S- CDFPNIIDVSI   | 43   | >JAK2-I324S- CDFPNISDVSI   | 32    | 11    |
| >JAK2-I324S- YCDFPNIIDVSI  | 216  | >JAK2-I324S- YCDFPNISDVSI  | 234   | 18    |
| >JAK2-I324S- LYCDFPNIIDVSI | 152  | >JAK2-I324S- LYCDFPNISDVSI | 133   | 19    |
| >JAK2-I324S- LYCDFPNII     | 490  | >JAK2-I324S- LYCDFPNIS     | 20573 | 20083 |
| >JAK2-I324S- LYCDFPNII     | 271  | >JAK2-I324S- LYCDFPNIS     | 13977 | 13706 |
| >JAK2-I324S- LYCDFPNII     | 64   | >JAK2-I324S- LYCDFPNIS     | 10259 | 10195 |
| >JAK2-I324S- QLYCDFPNII    | 255  | >JAK2-I324S- QLYCDFPNIS    | 8406  | 8151  |
| >JAK2-I324S- QLYCDFPNII    | 48   | >JAK2-I324S- QLYCDFPNIS    | 3462  | 3414  |
| >JAK2-I324S- QLYCDFPNII    | 59   | >JAK2-I324S- QLYCDFPNIS    | 4158  | 4099  |
| >JAK2-I324S- QLYCDFPNII    | 443  | >JAK2-I324S- QLYCDFPNIS    | 9615  | 9172  |
| >JAK2-I324S- QLYCDFPNII    | 33   | >JAK2-I324S- QLYCDFPNIS    | 2837  | 2804  |
| >JAK2-I324S- QLYCDFPNII    | 21   | >JAK2-I324S- QLYCDFPNIS    | 4107  | 4086  |
| >JAK2-I324S- QLYCDFPNII    | 311  | >JAK2-I324S- QLYCDFPNIS    | 11866 | 11555 |
| >JAK2-I324S- QLYCDFPNII    | 213  | >JAK2-I324S- QLYCDFPNIS    | 9061  | 8848  |
| >JAK2-I324S- QLYCDFPNII    | 227  | >JAK2-I324S- QLYCDFPNIS    | 16814 | 16587 |
| >JAK2-I324S- QLYCDFPNII    | 380  | >JAK2-I324S- QLYCDFPNIS    | 14116 | 13736 |
| >JAK2-I324S- QLYCDFPNII    | 203  | >JAK2-I324S- QLYCDFPNIS    | 3485  | 3282  |
| >JAK2-I645V- INILWKLEV     | 509  | >JAK2-I645V- VNILWKLEV     | 451   | 58    |
| >JAK2-I645V- CINILWKLEV    | 383  | >JAK2-I645V- CVNILWKLEV    | 1208  | 825   |
| >JAK2-I645V- CINILWKLEV    | 243  | >JAK2-I645V- CVNILWKLEV    | 673   | 430   |
| >JAK2-I645V- DTYLKKKNKNC   | 261  | >JAK2-I645V- DTYLKKKNKNC   | 2071  | 1810  |
| >JAK2-I645V- DTYLKKKNKNC   | 961  | >JAK2-I645V- DTYLKKKNKNC   | 136   | 825   |
| >JAK2-I645V- NCINILWKL     | 389  | >JAK2-I645V- NCVNILWKL     | 532   | 143   |

|                                     |      |                                    |      |      |
|-------------------------------------|------|------------------------------------|------|------|
| >JAK2-I645V-NCINILWKL               | 251  | >JAK2-I645V-NCVNILWKL              | 419  | 168  |
| >JAK2-I645V-NCINILWKLE <sup>1</sup> | 150  | >JAK2-I645V-NCVNILWKLE             | 252  | 102  |
| >JAK2-I645V-NCINILWKLE <sup>1</sup> | 168  | >JAK2-I645V-NCVNILWKLE             | 219  | 51   |
| >JAK2-I645V-KNCINILWK               | 548  | >JAK2-I645V-KNCVNILWK              | 374  | 174  |
| >JAK2-I645V-KNCINILW                | 396  | >JAK2-I645V-KNCVNILW               | 178  | 218  |
| >JAK2-I645V-KNCINILWK               | 377  | >JAK2-I645V-KNCVNILWK              | 731  | 354  |
| >JAK2-I645V-NKNCINIL                | 348  | >JAK2-I645V-NKNCVNIL               | 318  | 30   |
| >JAK2-I645V-NKNCINIL                | 433  | >JAK2-I645V-NKNCVNIL               | 257  | 176  |
| >JAK2-I645V-KNKNKINI                | 367  | >JAK2-I645V-KNKNCVNI               | 681  | 314  |
| >JAK2-I645V-KNKNKINILW              | 24   | >JAK2-I645V-KNKNCVNILV             | 22   | 2    |
| >JAK2-I645V-KNKNKINILW              | 476  | >JAK2-I645V-KNKNCVNILV             | 686  | 210  |
| >JAK2-I645V-KKNKNKINI               | 64   | >JAK2-I645V-KKNKNCVNI              | 30   | 34   |
| >JAK2-I645V-KKNKNKINIL              | 28   | >JAK2-I645V-KKNKNCVNIL             | 21   | 7    |
| >JAK2-I645V-KKNKNKINILA             | 317  | >JAK2-I645V-KKNKNCVNIL             | 227  | 90   |
| >JAK2-I645V-LKKNKNCI                | 187  | >JAK2-I645V-LKKNKNCV               | 261  | 74   |
| >JAK2-I645V-LKKNKNCINI              | 97   | >JAK2-I645V-LKKNKNCVNI             | 57   | 40   |
| >JAK2-I645V-LKKNKNCINIL             | 52   | >JAK2-I645V-LKKNKNCVNI             | 45   | 7    |
| >JAK2-I645V-YLKKNKNCI               | 622  | >JAK2-I645V-YLKKNKNCV              | 133  | 489  |
| >JAK2-I645V-YLKKNKNCIN              | 275  | >JAK2-I645V-YLKKNKNCV <sup>1</sup> | 172  | 103  |
| >JAK2-I645V-YLKKNKNCI               | 576  | >JAK2-I645V-YLKKNKNCV              | 57   | 519  |
| >JAK2-I645V-YLKKNKNCIN              | 49   | >JAK2-I645V-YLKKNKNCV <sup>1</sup> | 43   | 6    |
| >JAK2-I645V-YLKKNKNCI               | 1350 | >JAK2-I645V-YLKKNKNCV              | 98   | 1252 |
| >JAK2-I645V-YLKKNKNCIN              | 349  | >JAK2-I645V-YLKKNKNCV <sup>1</sup> | 387  | 38   |
| >JAK2-I645V-YLKKNKNCI               | 105  | >JAK2-I645V-YLKKNKNCV              | 15   | 90   |
| >JAK2-I645V-YLKKNKNCIN              | 84   | >JAK2-I645V-YLKKNKNCV <sup>1</sup> | 83   | 1    |
| >JAK2-I645V-YLKKNKNCI               | 2756 | >JAK2-I645V-YLKKNKNCV              | 95   | 2661 |
| >JAK2-I645V-YLKKNKNCI               | 7536 | >JAK2-I645V-YLKKNKNCV              | 433  | 7103 |
| >JAK2-I645V-YLKKNKNCI               | 69   | >JAK2-I645V-YLKKNKNCV              | 5    | 64   |
| >JAK2-I645V-YLKKNKNCIN              | 19   | >JAK2-I645V-YLKKNKNCV <sup>1</sup> | 17   | 2    |
| >JAK2-I645V-YLKKNKNCI               | 38   | >JAK2-I645V-YLKKNKNCV              | 51   | 13   |
| >JAK2-I645V-YLKKNKNCIN              | 231  | >JAK2-I645V-YLKKNKNCV <sup>1</sup> | 151  | 80   |
| >JAK2-I645V-YLKKNKNCIN              | 691  | >JAK2-I645V-YLKKNKNCV <sup>1</sup> | 421  | 270  |
| >JAK2-I645V-TYLKKNKNCI              | 63   | >JAK2-I645V-TYLKKNKNCV             | 607  | 544  |
| >JAK2-I645V-TYLKKNKNCI              | 438  | >JAK2-I645V-TYLKKNKNCV             | 1694 | 1256 |
| >JAK2-I645V-TYLKKNKNCI              | 72   | >JAK2-I645V-TYLKKNKNCV             | 1680 | 1608 |
| >JAK2-K191C KENDQTPLAI              | 91   | >JAK2-K191C QENDQTPLAI             | 34   | 57   |
| >JAK2-K191C KENDQTPLAI              | 154  | >JAK2-K191C QENDQTPLAI             | 1002 | 848  |
| >JAK2-K191C KENDQTPLAI              | 402  | >JAK2-K191C QENDQTPLAI             | 3738 | 3336 |
| >JAK2-K191C KENDQTPLAI              | 659  | >JAK2-K191C QENDQTPLAI             | 154  | 505  |
| >JAK2-K191C KENDQTPL                | 52   | >JAK2-K191C QENDQTPL               | 110  | 58   |
| >JAK2-K191C KENDQTPL                | 21   | >JAK2-K191C QENDQTPL               | 87   | 66   |
| >JAK2-K191C KENDQTPLA               | 167  | >JAK2-K191C QENDQTPLA              | 1082 | 915  |
| >JAK2-K191C KENDQTPLAI              | 287  | >JAK2-K191C QENDQTPLAI             | 256  | 31   |

|                        |       |                        |       |       |
|------------------------|-------|------------------------|-------|-------|
| >JAK2-K191C KENDQTPLAI | 274   | >JAK2-K191C QENDQTPLAI | 324   | 50    |
| >JAK2-K191C KENDQTPLAI | 282   | >JAK2-K191C QENDQTPLAI | 223   | 59    |
| >JAK2-K191C KENDQTPLA  | 138   | >JAK2-K191C QENDQTPLA  | 79    | 59    |
| >JAK2-K191C KENDQTPLA  | 184   | >JAK2-K191C QENDQTPLA  | 508   | 324   |
| >JAK2-K191C KENDQTPLAI | 15    | >JAK2-K191C QENDQTPLAI | 54    | 39    |
| >JAK2-K191C KENDQTPL   | 247   | >JAK2-K191C QENDQTPL   | 8440  | 8193  |
| >JAK2-K191C AKENDQTPL  | 13659 | >JAK2-K191C AQENDQTPL  | 237   | 13422 |
| >JAK2-K191C AKENDQTPL/ | 17917 | >JAK2-K191C AQENDQTPL  | 407   | 17510 |
| >JAK2-K191C AKENDQTPL  | 221   | >JAK2-K191C AQENDQTPL  | 249   | 28    |
| >JAK2-K191C AKENDQTPL/ | 260   | >JAK2-K191C AQENDQTPL  | 288   | 28    |
| >JAK2-K191C AKENDQTPL  | 1488  | >JAK2-K191C AQENDQTPL  | 364   | 1124  |
| >JAK2-K191C MAVLDMMR   | 51    | >JAK2-K191C MAVLDMMR   | 22760 | 22709 |
| >JAK2-K191C MAVLDMMR   | 249   | >JAK2-K191C MAVLDMMR   | 9461  | 9212  |
| >JAK2-K191C MAVLDMMR   | 28    | >JAK2-K191C MAVLDMMR   | 2103  | 2075  |
| >JAK2-K191C MAVLDMMR   | 1886  | >JAK2-K191C MAVLDMMR   | 490   | 1396  |
| >JAK2-K191C IAKENDQTPL | 245   | >JAK2-K191C IAQENDQTPL | 6450  | 6205  |
| >JAK2-K191C IAKENDQTPL | 153   | >JAK2-K191C IAQENDQTPL | 225   | 72    |
| >JAK2-K191C RIAKENDQTP | 65    | >JAK2-K191C RIAQENDQTF | 55    | 10    |
| >JAK2-K191C RIAKENDQTP | 311   | >JAK2-K191C RIAQENDQTF | 312   | 1     |
| >JAK2-K191C RIAKENDQTP | 522   | >JAK2-K191C RIAQENDQTF | 493   | 29    |
| >JAK2-K191C RIAKENDQTP | 303   | >JAK2-K191C RIAQENDQTF | 216   | 87    |
| >JAK2-K191C VLDMMRIAK  | 114   | >JAK2-K191C VLDMMRIAC  | 19082 | 18968 |
| >JAK2-K191C VLDMMRIAK  | 63    | >JAK2-K191C VLDMMRIAC  | 22530 | 22467 |
| >JAK2-K191C AVLDMRIA   | 23    | >JAK2-K191C AVLDMRIA   | 11277 | 11254 |
| >JAK2-K191C AVLDMRIA   | 13    | >JAK2-K191C AVLDMRIA   | 19847 | 19834 |
| >JAK2-K191C AVLDMRIA   | 13    | >JAK2-K191C AVLDMRIA   | 2050  | 2037  |
| >JAK2-K191C AVLDMRIA   | 114   | >JAK2-K191C AVLDMRIA   | 4618  | 4504  |
| >JAK2-K191C AVLDMRIA   | 115   | >JAK2-K191C AVLDMRIA   | 22343 | 22228 |
| >JAK2-K191C AVLDMRIA   | 324   | >JAK2-K191C AVLDMRIA   | 3116  | 2792  |
| >JAK2-K539E KIRNEDLI   | 53    | >JAK2-K539E EIRNEDLI   | 12196 | 12143 |
| >JAK2-K539E KIRNEDLIFN | 107   | >JAK2-K539E EIRNEDLIFN | 11925 | 11818 |
| >JAK2-K539E KIRNEDLIF  | 457   | >JAK2-K539E EIRNEDLIF  | 11771 | 11314 |
| >JAK2-K539E KIRNEDLIF  | 297   | >JAK2-K539E EIRNEDLIF  | 1819  | 1522  |
| >JAK2-K539E KIRNEDLIF  | 93    | >JAK2-K539E EIRNEDLIF  | 1066  | 973   |
| >JAK2-K539E KIRNEDLIF  | 194   | >JAK2-K539E EIRNEDLIF  | 6581  | 6387  |
| >JAK2-K539E HKIRNEDL   | 29697 | >JAK2-K539E HEIRNEDL   | 295   | 29402 |
| >JAK2-K539E HKIRNEDLI  | 851   | >JAK2-K539E HEIRNEDLI  | 12    | 839   |
| >JAK2-K539E HKIRNEDL   | 227   | >JAK2-K539E HEIRNEDL   | 4775  | 4548  |
| >JAK2-K539E HKIRNEDLIF | 9     | >JAK2-K539E HEIRNEDLIF | 292   | 283   |
| >JAK2-K539E HKIRNEDL   | 14473 | >JAK2-K539E HEIRNEDL   | 20    | 14453 |
| >JAK2-K539E HKIRNEDLI  | 17920 | >JAK2-K539E HEIRNEDLI  | 68    | 17852 |
| >JAK2-K539E HKIRNEDL   | 27625 | >JAK2-K539E HEIRNEDL   | 242   | 27383 |
| >JAK2-K539E HKIRNEDLI  | 31607 | >JAK2-K539E HEIRNEDLI  | 393   | 31214 |

|                         |       |                         |       |       |
|-------------------------|-------|-------------------------|-------|-------|
| >JAK2-K539E HKIRNEDLI   | 3046  | >JAK2-K539E HEIRNEDLI   | 7     | 3039  |
| >JAK2-K539E HKIRNEDLIF  | 25751 | >JAK2-K539E HEIRNEDLIF  | 208   | 25543 |
| >JAK2-K539E PTHMNQMV    | 396   | >JAK2-K539E PTHMNQMV    | 27971 | 27575 |
| >JAK2-K539E PTHMNQMV    | 20    | >JAK2-K539E PTHMNQMV    | 10166 | 10146 |
| >JAK2-K539E FHKIRNEDLI  | 433   | >JAK2-K539E FHEIRNEDLI  | 312   | 121   |
| >JAK2-K539E FHKIRNEDLIF | 73    | >JAK2-K539E FHEIRNEDLIF | 1293  | 1220  |
| >JAK2-K539E VFHKIRNEDLI | 261   | >JAK2-K539E VFHEIRNEDLI | 433   | 172   |
| >JAK2-K539E MVFHKIRNEI  | 482   | >JAK2-K539E MVFHEIRNEI  | 1858  | 1376  |
| >JAK2-K539E MVFHKIRNEI  | 215   | >JAK2-K539E MVFHEIRNEI  | 144   | 71    |
| >JAK2-K539E MVFHKIRNEI  | 268   | >JAK2-K539E MVFHEIRNEI  | 328   | 60    |
| >JAK2-K539E MVFHKIRNEI  | 33    | >JAK2-K539E MVFHEIRNEI  | 49    | 16    |
| >JAK2-K539E QMVFHKIR    | 86    | >JAK2-K539E QMVFHEIR    | 149   | 63    |
| >JAK2-K539E QMVFHKIR    | 304   | >JAK2-K539E QMVFHEIR    | 97    | 207   |
| >JAK2-K539E QMVFHKIR    | 76    | >JAK2-K539E QMVFHEIR    | 126   | 50    |
| >JAK2-K539E NQMVFHKI    | 1970  | >JAK2-K539E NQMVFHEI    | 403   | 1567  |
| >JAK2-K539E NQMVFHKI    | 548   | >JAK2-K539E NQMVFHEI    | 120   | 428   |
| >JAK2-K539E NQMVFHKI    | 53    | >JAK2-K539E NQMVFHEI    | 15    | 38    |
| >JAK2-K539E NQMVFHKIR   | 99    | >JAK2-K539E NQMVFHEIR   | 74    | 25    |
| >JAK2-K539E NQMVFHKIR   | 1340  | >JAK2-K539E NQMVFHEIR   | 288   | 1052  |
| >JAK2-K539E NQMVFHKI    | 302   | >JAK2-K539E NQMVFHEI    | 167   | 135   |
| >JAK2-K539E NQMVFHKIR   | 364   | >JAK2-K539E NQMVFHEIR   | 715   | 351   |
| >JAK2-K539E NQMVFHKI    | 612   | >JAK2-K539E NQMVFHEI    | 194   | 418   |
| >JAK2-K539E NQMVFHKIR   | 128   | >JAK2-K539E NQMVFHEIR   | 231   | 103   |
| >JAK2-K539E MNQMVFHK    | 328   | >JAK2-K539E MNQMVFHE    | 144   | 184   |
| >JAK2-K539E MNQMVFHK    | 178   | >JAK2-K539E MNQMVFHE    | 23566 | 23388 |
| >JAK2-K539E MNQMVFHK    | 506   | >JAK2-K539E MNQMVFHE    | 462   | 44    |
| >JAK2-K539E MNQMVFHK    | 328   | >JAK2-K539E MNQMVFHE    | 14219 | 13891 |
| >JAK2-K539E MNQMVFHK    | 280   | >JAK2-K539E MNQMVFHE    | 357   | 77    |
| >JAK2-K539E MNQMVFHK    | 170   | >JAK2-K539E MNQMVFHE    | 106   | 64    |
| >JAK2-K539E MNQMVFHK    | 170   | >JAK2-K539E MNQMVFHE    | 16076 | 15906 |
| >JAK2-K539E MNQMVFHK    | 581   | >JAK2-K539E MNQMVFHE    | 174   | 407   |
| >JAK2-K539E MNQMVFHK    | 404   | >JAK2-K539E MNQMVFHE    | 686   | 282   |
| >JAK2-K539E MNQMVFHK    | 484   | >JAK2-K539E MNQMVFHE    | 1013  | 529   |
| >JAK2-K539E HMNQMVFH    | 481   | >JAK2-K539E HMNQMVFH    | 361   | 120   |
| >JAK2-K539E HMNQMVFH    | 244   | >JAK2-K539E HMNQMVFH    | 145   | 99    |
| >JAK2-K539E HMNQMVFH    | 12    | >JAK2-K539E HMNQMVFH    | 7     | 5     |
| >JAK2-K539E HMNQMVFH    | 34    | >JAK2-K539E HMNQMVFH    | 17    | 17    |
| >JAK2-K539E HMNQMVFH    | 39    | >JAK2-K539E HMNQMVFH    | 29    | 10    |
| >JAK2-K539E HMNQMVFH    | 49    | >JAK2-K539E HMNQMVFH    | 39    | 10    |
| >JAK2-K539E HMNQMVFH    | 9     | >JAK2-K539E HMNQMVFH    | 6     | 3     |
| >JAK2-K539E HMNQMVFH    | 35    | >JAK2-K539E HMNQMVFH    | 15534 | 15499 |
| >JAK2-K539E HMNQMVFH    | 26    | >JAK2-K539E HMNQMVFH    | 19265 | 19239 |
| >JAK2-K539E HMNQMVFH    | 105   | >JAK2-K539E HMNQMVFH    | 14099 | 13994 |

|                         |       |                         |       |       |
|-------------------------|-------|-------------------------|-------|-------|
| >JAK2-K539E HMNQMVFH    | 17    | >JAK2-K539E HMNQMVFH    | 1904  | 1887  |
| >JAK2-K539E HMNQMVFH    | 13    | >JAK2-K539E HMNQMVFH    | 11    | 2     |
| >JAK2-K539E HMNQMVFH    | 133   | >JAK2-K539E HMNQMVFH    | 119   | 14    |
| >JAK2-K539E HMNQMVFH    | 292   | >JAK2-K539E HMNQMVFH    | 10447 | 10155 |
| >JAK2-K539E HMNQMVFH    | 174   | >JAK2-K539E HMNQMVFH    | 116   | 58    |
| >JAK2-K539E HMNQMVFH    | 82    | >JAK2-K539E HMNQMVFH    | 9715  | 9633  |
| >JAK2-K539E HMNQMVFH    | 152   | >JAK2-K539E HMNQMVFH    | 48    | 104   |
| >JAK2-K539E HMNQMVFH    | 812   | >JAK2-K539E HMNQMVFH    | 378   | 434   |
| >JAK2-K539E HMNQMVFH    | 441   | >JAK2-K539E HMNQMVFH    | 269   | 172   |
| >JAK2-K539E HMNQMVFH    | 474   | >JAK2-K539E HMNQMVFH    | 407   | 67    |
| >JAK2-K539E HMNQMVFH    | 129   | >JAK2-K539E HMNQMVFH    | 5436  | 5307  |
| >JAK2-K539E HMNQMVFH    | 34    | >JAK2-K539E HMNQMVFH    | 42    | 8     |
| >JAK2-K539E THMNQMV     | 318   | >JAK2-K539E THMNQMV     | 140   | 178   |
| >JAK2-K539E THMNQMV     | 215   | >JAK2-K539E THMNQMV     | 75    | 140   |
| >JAK2-K539E THMNQMV     | 457   | >JAK2-K539E THMNQMV     | 13318 | 12861 |
| >JAK2-K539L KIRNEDLI    | 53    | >JAK2-K539L LIRNEDLI    | 1625  | 1572  |
| >JAK2-K539L KIRNEDLIFN  | 107   | >JAK2-K539L LIRNEDLIFN  | 2220  | 2113  |
| >JAK2-K539L KIRNEDLIF   | 457   | >JAK2-K539L LIRNEDLIF   | 11064 | 10607 |
| >JAK2-K539L KIRNEDLIF   | 297   | >JAK2-K539L LIRNEDLIF   | 100   | 197   |
| >JAK2-K539L KIRNEDLIF   | 93    | >JAK2-K539L LIRNEDLIF   | 138   | 45    |
| >JAK2-K539L KIRNEDLIF   | 194   | >JAK2-K539L LIRNEDLIF   | 845   | 651   |
| >JAK2-K539L HKIRNEDLI   | 696   | >JAK2-K539L HLIRNEDLI   | 196   | 500   |
| >JAK2-K539L HKIRNEDL    | 22929 | >JAK2-K539L HLIRNEDL    | 174   | 22755 |
| >JAK2-K539L HKIRNEDLI   | 21687 | >JAK2-K539L HLIRNEDLI   | 213   | 21474 |
| >JAK2-K539L HKIRNEDLI   | 26683 | >JAK2-K539L HLIRNEDLI   | 390   | 26293 |
| >JAK2-K539L HKIRNEDL    | 18924 | >JAK2-K539L HLIRNEDL    | 172   | 18752 |
| >JAK2-K539L HKIRNEDLI   | 19467 | >JAK2-K539L HLIRNEDLI   | 48    | 19419 |
| >JAK2-K539L HKIRNEDL    | 29018 | >JAK2-K539L HLIRNEDL    | 45    | 28973 |
| >JAK2-K539L HKIRNEDLI   | 33058 | >JAK2-K539L HLIRNEDLI   | 155   | 32903 |
| >JAK2-K539L HKIRNEDLIF  | 10256 | >JAK2-K539L HLIRNEDLIF  | 402   | 9854  |
| >JAK2-K539L HKIRNEDL    | 227   | >JAK2-K539L HLIRNEDL    | 3479  | 3252  |
| >JAK2-K539L HKIRNEDLIF  | 9     | >JAK2-K539L HLIRNEDLIF  | 132   | 123   |
| >JAK2-K539L PTHMNQMV    | 396   | >JAK2-K539L PTHMNQMV    | 26789 | 26393 |
| >JAK2-K539L PTHMNQMV    | 20    | >JAK2-K539L PTHMNQMV    | 900   | 880   |
| >JAK2-K539L FHKIRNEDLI  | 433   | >JAK2-K539L FHLIRNEDLI  | 165   | 268   |
| >JAK2-K539L FHKIRNEDLIF | 73    | >JAK2-K539L FHLIRNEDLIF | 51    | 22    |
| >JAK2-K539L VFHKIRNEDLI | 261   | >JAK2-K539L VFHLIRNEDLI | 529   | 268   |
| >JAK2-K539L MVFHKIRNEI  | 482   | >JAK2-K539L MVFHLIRNEC  | 665   | 183   |
| >JAK2-K539L MVFHKIRNEI  | 215   | >JAK2-K539L MVFHLIRNEC  | 148   | 67    |
| >JAK2-K539L MVFHKIRNEI  | 268   | >JAK2-K539L MVFHLIRNEC  | 120   | 148   |
| >JAK2-K539L MVFHKIRNEI  | 33    | >JAK2-K539L MVFHLIRNEC  | 21    | 12    |
| >JAK2-K539L QMVFHKIR    | 86    | >JAK2-K539L QMVFHLIR    | 83    | 3     |
| >JAK2-K539L QMVFHKIR    | 304   | >JAK2-K539L QMVFHLIR    | 151   | 153   |

|                       |       |                       |       |       |
|-----------------------|-------|-----------------------|-------|-------|
| >JAK2-K539L QMVFHKIR  | 76    | >JAK2-K539L QMVFHLIR  | 71    | 5     |
| >JAK2-K539L NQMVFHKI  | 1970  | >JAK2-K539L NQMVFHLI  | 416   | 1554  |
| >JAK2-K539L NQMVFHKI  | 548   | >JAK2-K539L NQMVFHLI  | 144   | 404   |
| >JAK2-K539L NQMVFHKI  | 1170  | >JAK2-K539L NQMVFHLI  | 430   | 740   |
| >JAK2-K539L NQMVFHKI  | 53    | >JAK2-K539L NQMVFHLI  | 16    | 37    |
| >JAK2-K539L NQMVFHKIR | 99    | >JAK2-K539L NQMVFHLIR | 80    | 19    |
| >JAK2-K539L NQMVFHKIR | 1340  | >JAK2-K539L NQMVFHLIR | 392   | 948   |
| >JAK2-K539L NQMVFHKI  | 302   | >JAK2-K539L NQMVFHLI  | 311   | 9     |
| >JAK2-K539L NQMVFHKIR | 364   | >JAK2-K539L NQMVFHLIR | 301   | 63    |
| >JAK2-K539L NQMVFHKI  | 612   | >JAK2-K539L NQMVFHLI  | 110   | 502   |
| >JAK2-K539L NQMVFHKIR | 128   | >JAK2-K539L NQMVFHLIR | 54    | 74    |
| >JAK2-K539L MNQMVFHK  | 328   | >JAK2-K539L MNQMVFHLI | 51    | 277   |
| >JAK2-K539L MNQMVFHK  | 178   | >JAK2-K539L MNQMVFHL  | 21086 | 20908 |
| >JAK2-K539L MNQMVFHK  | 506   | >JAK2-K539L MNQMVFHLI | 367   | 139   |
| >JAK2-K539L MNQMVFHK  | 328   | >JAK2-K539L MNQMVFHL  | 9826  | 9498  |
| >JAK2-K539L MNQMVFHK  | 280   | >JAK2-K539L MNQMVFHLI | 133   | 147   |
| >JAK2-K539L MNQMVFHK  | 170   | >JAK2-K539L MNQMVFHLI | 57    | 113   |
| >JAK2-K539L MNQMVFHK  | 170   | >JAK2-K539L MNQMVFHL  | 21654 | 21484 |
| >JAK2-K539L MNQMVFHK  | 581   | >JAK2-K539L MNQMVFHLI | 211   | 370   |
| >JAK2-K539L MNQMVFHK  | 404   | >JAK2-K539L MNQMVFHLI | 239   | 165   |
| >JAK2-K539L MNQMVFHK  | 484   | >JAK2-K539L MNQMVFHLI | 772   | 288   |
| >JAK2-K539L HMNQMVFH  | 18253 | >JAK2-K539L HMNQMVFH  | 35    | 18218 |
| >JAK2-K539L HMNQMVFH  | 5618  | >JAK2-K539L HMNQMVFH  | 8     | 5610  |
| >JAK2-K539L HMNQMVFH  | 481   | >JAK2-K539L HMNQMVFH  | 201   | 280   |
| >JAK2-K539L HMNQMVFH  | 11676 | >JAK2-K539L HMNQMVFH  | 18    | 11658 |
| >JAK2-K539L HMNQMVFH  | 244   | >JAK2-K539L HMNQMVFH  | 157   | 87    |
| >JAK2-K539L HMNQMVFH  | 20383 | >JAK2-K539L HMNQMVFH  | 84    | 20299 |
| >JAK2-K539L HMNQMVFH  | 4654  | >JAK2-K539L HMNQMVFH  | 10    | 4644  |
| >JAK2-K539L HMNQMVFH  | 12    | >JAK2-K539L HMNQMVFH  | 12    | 0     |
| >JAK2-K539L HMNQMVFH  | 10237 | >JAK2-K539L HMNQMVFH  | 12    | 10225 |
| >JAK2-K539L HMNQMVFH  | 34    | >JAK2-K539L HMNQMVFH  | 26    | 8     |
| >JAK2-K539L HMNQMVFH  | 5501  | >JAK2-K539L HMNQMVFH  | 13    | 5488  |
| >JAK2-K539L HMNQMVFH  | 39    | >JAK2-K539L HMNQMVFH  | 44    | 5     |
| >JAK2-K539L HMNQMVFH  | 17258 | >JAK2-K539L HMNQMVFH  | 12    | 17246 |
| >JAK2-K539L HMNQMVFH  | 49    | >JAK2-K539L HMNQMVFH  | 90    | 41    |
| >JAK2-K539L HMNQMVFH  | 1963  | >JAK2-K539L HMNQMVFH  | 3     | 1960  |
| >JAK2-K539L HMNQMVFH  | 9     | >JAK2-K539L HMNQMVFH  | 9     | 0     |
| >JAK2-K539L HMNQMVFH  | 35    | >JAK2-K539L HMNQMVFH  | 12293 | 12258 |
| >JAK2-K539L HMNQMVFH  | 1516  | >JAK2-K539L HMNQMVFH  | 284   | 1232  |
| >JAK2-K539L HMNQMVFH  | 26    | >JAK2-K539L HMNQMVFH  | 17712 | 17686 |
| >JAK2-K539L HMNQMVFH  | 105   | >JAK2-K539L HMNQMVFH  | 5092  | 4987  |
| >JAK2-K539L HMNQMVFH  | 17    | >JAK2-K539L HMNQMVFH  | 496   | 479   |
| >JAK2-K539L HMNQMVFH  | 13    | >JAK2-K539L HMNQMVFH  | 12    | 1     |

|                       |       |                       |       |       |
|-----------------------|-------|-----------------------|-------|-------|
| >JAK2-K539L HMNQMVFH  | 8686  | >JAK2-K539L HMNQMVFH  | 491   | 8195  |
| >JAK2-K539L HMNQMVFH  | 133   | >JAK2-K539L HMNQMVFH  | 199   | 66    |
| >JAK2-K539L HMNQMVFH  | 292   | >JAK2-K539L HMNQMVFH  | 5772  | 5480  |
| >JAK2-K539L HMNQMVFH  | 174   | >JAK2-K539L HMNQMVFH  | 112   | 62    |
| >JAK2-K539L HMNQMVFH  | 82    | >JAK2-K539L HMNQMVFH  | 15314 | 15232 |
| >JAK2-K539L HMNQMVFH  | 152   | >JAK2-K539L HMNQMVFH  | 71    | 81    |
| >JAK2-K539L HMNQMVFH  | 812   | >JAK2-K539L HMNQMVFH  | 451   | 361   |
| >JAK2-K539L HMNQMVFH  | 441   | >JAK2-K539L HMNQMVFH  | 376   | 65    |
| >JAK2-K539L HMNQMVFH  | 6483  | >JAK2-K539L HMNQMVFH  | 127   | 6356  |
| >JAK2-K539L HMNQMVFH  | 21903 | >JAK2-K539L HMNQMVFH  | 368   | 21535 |
| >JAK2-K539L HMNQMVFH  | 17758 | >JAK2-K539L HMNQMVFH  | 198   | 17560 |
| >JAK2-K539L HMNQMVFH  | 474   | >JAK2-K539L HMNQMVFH  | 248   | 226   |
| >JAK2-K539L HMNQMVFH  | 129   | >JAK2-K539L HMNQMVFH  | 7715  | 7586  |
| >JAK2-K539L HMNQMVFH  | 34    | >JAK2-K539L HMNQMVFH  | 27    | 7     |
| >JAK2-K539L THMNQMVF  | 318   | >JAK2-K539L THMNQMVF  | 68    | 250   |
| >JAK2-K539L THMNQMVF  | 7903  | >JAK2-K539L THMNQMVF  | 18    | 7885  |
| >JAK2-K539L THMNQMVF  | 215   | >JAK2-K539L THMNQMVF  | 62    | 153   |
| >JAK2-K539L THMNQMVF  | 457   | >JAK2-K539L THMNQMVF  | 12062 | 11605 |
| >JAK2-K607N KHLVLYGV  | 4236  | >JAK2-K607N NHLVLYGV  | 422   | 3814  |
| >JAK2-K607N KHLVLYGVC | 1640  | >JAK2-K607N NHLVLYGVC | 143   | 1497  |
| >JAK2-K607N HKHLVLY   | 467   | >JAK2-K607N HNHLVLY   | 417   | 50    |
| >JAK2-K607N HKHLVLY   | 26    | >JAK2-K607N HNHLVLY   | 3152  | 3126  |
| >JAK2-K607N AASMMSKLS | 73    | >JAK2-K607N AASMMSKLS | 23157 | 23084 |
| >JAK2-K607N AASMMSKLS | 108   | >JAK2-K607N AASMMSKLS | 12017 | 11909 |
| >JAK2-K607N SHKHLVLY  | 438   | >JAK2-K607N SHNHLVLY  | 150   | 288   |
| >JAK2-K607N SHKHLVLY  | 17    | >JAK2-K607N SHNHLVLY  | 9     | 8     |
| >JAK2-K607N SHKHLVLY  | 52    | >JAK2-K607N SHNHLVLY  | 75    | 23    |
| >JAK2-K607N LSHKHLVLY | 211   | >JAK2-K607N LSHNHLVLY | 253   | 42    |
| >JAK2-K607N LSHKHLVL  | 339   | >JAK2-K607N LSHNHLVL  | 366   | 27    |
| >JAK2-K607N LSHKHLVLY | 149   | >JAK2-K607N LSHNHLVLY | 298   | 149   |
| >JAK2-K607N LSHKHLVL  | 237   | >JAK2-K607N LSHNHLVL  | 1069  | 832   |
| >JAK2-K607N LSHKHLVL  | 695   | >JAK2-K607N LSHNHLVL  | 471   | 224   |
| >JAK2-K607N LSHKHLVLY | 89    | >JAK2-K607N LSHNHLVLY | 77    | 12    |
| >JAK2-K607N LSHKHLVL  | 323   | >JAK2-K607N LSHNHLVL  | 183   | 140   |
| >JAK2-K607N LSHKHLVLY | 47    | >JAK2-K607N LSHNHLVLY | 37    | 10    |
| >JAK2-K607N LSHKHLVL  | 38    | >JAK2-K607N LSHNHLVL  | 31    | 7     |
| >JAK2-K607N LSHKHLVLY | 6     | >JAK2-K607N LSHNHLVLY | 5     | 1     |
| >JAK2-K607N LSHKHLVLY | 462   | >JAK2-K607N LSHNHLVLY | 604   | 142   |
| >JAK2-K607N LSHKHLVL  | 297   | >JAK2-K607N LSHNHLVL  | 620   | 323   |
| >JAK2-K607N LSHKHLVLY | 173   | >JAK2-K607N LSHNHLVLY | 98    | 75    |
| >JAK2-K607N LSHKHLVL  | 329   | >JAK2-K607N LSHNHLVL  | 259   | 70    |
| >JAK2-K607N KLSHKHLV  | 44    | >JAK2-K607N KLSHNHLV  | 29    | 15    |
| >JAK2-K607N KLSHKHLV  | 10    | >JAK2-K607N KLSHNHLV  | 6     | 4     |

|                        |      |                        |      |      |
|------------------------|------|------------------------|------|------|
| >JAK2-K607N KLSHKHLVL  | 91   | >JAK2-K607N KLSHNHLVL  | 79   | 12   |
| >JAK2-K607N KLSHKHLV   | 8    | >JAK2-K607N KLSHNHLV   | 7    | 1    |
| >JAK2-K607N KLSHKHLVL  | 134  | >JAK2-K607N KLSHNHLVL  | 164  | 30   |
| >JAK2-K607N KLSHKHLV   | 114  | >JAK2-K607N KLSHNHLV   | 50   | 64   |
| >JAK2-K607N KLSHKHLV   | 8    | >JAK2-K607N KLSHNHLV   | 5    | 3    |
| >JAK2-K607N KLSHKHLVL  | 176  | >JAK2-K607N KLSHNHLVL  | 61   | 115  |
| >JAK2-K607N KLSHKHLV   | 15   | >JAK2-K607N KLSHNHLV   | 6    | 9    |
| >JAK2-K607N KLSHKHLVL  | 323  | >JAK2-K607N KLSHNHLVL  | 58   | 265  |
| >JAK2-K607N KLSHKHLV   | 12   | >JAK2-K607N KLSHNHLV   | 10   | 2    |
| >JAK2-K607N KLSHKHLVL  | 536  | >JAK2-K607N KLSHNHLVL  | 355  | 181  |
| >JAK2-K607N KLSHKHLV   | 58   | >JAK2-K607N KLSHNHLV   | 16   | 42   |
| >JAK2-K607N KLSHKHLV   | 3    | >JAK2-K607N KLSHNHLV   | 2    | 1    |
| >JAK2-K607N KLSHKHLVL  | 53   | >JAK2-K607N KLSHNHLVL  | 21   | 32   |
| >JAK2-K607N KLSHKHLVLN | 46   | >JAK2-K607N KLSHNHLVLN | 47   | 1    |
| >JAK2-K607N KLSHKHLVLN | 36   | >JAK2-K607N KLSHNHLVLN | 24   | 12   |
| >JAK2-K607N KLSHKHLVL  | 692  | >JAK2-K607N KLSHNHLVL  | 464  | 228  |
| >JAK2-K607N KLSHKHLVLN | 72   | >JAK2-K607N KLSHNHLVLN | 45   | 27   |
| >JAK2-K607N KLSHKHLVL  | 248  | >JAK2-K607N KLSHNHLVL  | 160  | 88   |
| >JAK2-K607N KLSHKHLVLN | 518  | >JAK2-K607N KLSHNHLVLN | 386  | 132  |
| >JAK2-K607N KLSHKHLVLN | 4    | >JAK2-K607N KLSHNHLVLN | 4    | 0    |
| >JAK2-K607N KLSHKHLVL  | 168  | >JAK2-K607N KLSHNHLVL  | 3957 | 3789 |
| >JAK2-K607N KLSHKHLVL  | 579  | >JAK2-K607N KLSHNHLVL  | 314  | 265  |
| >JAK2-K607N KLSHKHLVLN | 101  | >JAK2-K607N KLSHNHLVLN | 81   | 20   |
| >JAK2-K607N KLSHKHLVL  | 352  | >JAK2-K607N KLSHNHLVL  | 113  | 239  |
| >JAK2-K607N KLSHKHLVLN | 81   | >JAK2-K607N KLSHNHLVLN | 37   | 44   |
| >JAK2-K607N KLSHKHLVLN | 81   | >JAK2-K607N KLSHNHLVLN | 93   | 12   |
| >JAK2-K607N KLSHKHLVLN | 918  | >JAK2-K607N KLSHNHLVLN | 428  | 490  |
| >JAK2-K607N KLSHKHLVLN | 166  | >JAK2-K607N KLSHNHLVLN | 125  | 41   |
| >JAK2-K607N SKLSHKHL   | 37   | >JAK2-K607N SKLSHNHL   | 27   | 10   |
| >JAK2-K607N SKLSHKHLV  | 665  | >JAK2-K607N SKLSHNHLV  | 168  | 497  |
| >JAK2-K607N SKLSHKHLVL | 39   | >JAK2-K607N SKLSHNHLVL | 18   | 21   |
| >JAK2-K607N SKLSHKHLVL | 72   | >JAK2-K607N SKLSHNHLVL | 33   | 39   |
| >JAK2-K607N MSKLSHKH   | 1067 | >JAK2-K607N MSKLSHNH   | 417  | 650  |
| >JAK2-K607N MSKLSHKHL  | 17   | >JAK2-K607N MSKLSHNHL  | 10   | 7    |
| >JAK2-K607N MSKLSHKHL\ | 24   | >JAK2-K607N MSKLSHNHL\ | 12   | 12   |
| >JAK2-K607N MSKLSHKHL\ | 16   | >JAK2-K607N MSKLSHNHL\ | 12   | 4    |
| >JAK2-K607N MSKLSHKHL  | 202  | >JAK2-K607N MSKLSHNHL  | 332  | 130  |
| >JAK2-K607N MSKLSHKHL\ | 84   | >JAK2-K607N MSKLSHNHL\ | 204  | 120  |
| >JAK2-K607N MSKLSHKHL  | 215  | >JAK2-K607N MSKLSHNHL  | 256  | 41   |
| >JAK2-K607N MSKLSHKHL\ | 183  | >JAK2-K607N MSKLSHNHL\ | 119  | 64   |
| >JAK2-K607N MSKLSHKH   | 387  | >JAK2-K607N MSKLSHNH   | 618  | 231  |
| >JAK2-K607N MSKLSHKHL  | 6    | >JAK2-K607N MSKLSHNHL  | 16   | 10   |
| >JAK2-K607N MSKLSHKHL\ | 6    | >JAK2-K607N MSKLSHNHL\ | 9    | 3    |



|                        |      |                        |       |       |
|------------------------|------|------------------------|-------|-------|
| >JAK2-K607N MSKLSHKHL  | 1883 | >JAK2-K607N MSKLSHNHL  | 469   | 1414  |
| >JAK2-K607N MSKLSHKHL\ | 1198 | >JAK2-K607N MSKLSHNHL\ | 364   | 834   |
| >JAK2-K607N MSKLSHKHL\ | 474  | >JAK2-K607N MSKLSHNHL\ | 357   | 117   |
| >JAK2-K607N MMSKLSHKH  | 14   | >JAK2-K607N MMSKLSHNF  | 10    | 4     |
| >JAK2-K607N MMSKLSHKH  | 179  | >JAK2-K607N MMSKLSHNF  | 52    | 127   |
| >JAK2-K607N MMSKLSHKH  | 3    | >JAK2-K607N MMSKLSHNF  | 2     | 1     |
| >JAK2-K607N MMSKLSHKH  | 143  | >JAK2-K607N MMSKLSHNF  | 91    | 52    |
| >JAK2-K607N MMSKLSHKH  | 5    | >JAK2-K607N MMSKLSHNF  | 4     | 1     |
| >JAK2-K607N MMSKLSHKH  | 30   | >JAK2-K607N MMSKLSHNF  | 16    | 14    |
| >JAK2-K607N MMSKLSHKH  | 64   | >JAK2-K607N MMSKLSHNF  | 48    | 16    |
| >JAK2-K607N MMSKLSHKH  | 3    | >JAK2-K607N MMSKLSHNF  | 3     | 0     |
| >JAK2-K607N MMSKLSHKH  | 194  | >JAK2-K607N MMSKLSHNF  | 42    | 152   |
| >JAK2-K607N MMSKLSHKH  | 7    | >JAK2-K607N MMSKLSHNF  | 4     | 3     |
| >JAK2-K607N MMSKLSHKH  | 124  | >JAK2-K607N MMSKLSHNF  | 50    | 74    |
| >JAK2-K607N MMSKLSHKH  | 9    | >JAK2-K607N MMSKLSHNF  | 8     | 1     |
| >JAK2-K607N MMSKLSHKH  | 362  | >JAK2-K607N MMSKLSHNF  | 197   | 165   |
| >JAK2-K607N MMSKLSHKH  | 5    | >JAK2-K607N MMSKLSHNF  | 3     | 2     |
| >JAK2-K607N MMSKLSHKH  | 12   | >JAK2-K607N MMSKLSHNF  | 8     | 4     |
| >JAK2-K607N MMSKLSHKH  | 2    | >JAK2-K607N MMSKLSHNF  | 2     | 0     |
| >JAK2-K607N MMSKLSHK   | 35   | >JAK2-K607N MMSKLSHN   | 12735 | 12700 |
| >JAK2-K607N MMSKLSHKH  | 401  | >JAK2-K607N MMSKLSHNF  | 301   | 100   |
| >JAK2-K607N MMSKLSHK   | 26   | >JAK2-K607N MMSKLSHN   | 20128 | 20102 |
| >JAK2-K607N MMSKLSHK   | 110  | >JAK2-K607N MMSKLSHN   | 13299 | 13189 |
| >JAK2-K607N MMSKLSHK   | 54   | >JAK2-K607N MMSKLSHN   | 9098  | 9044  |
| >JAK2-K607N MMSKLSHK   | 61   | >JAK2-K607N MMSKLSHN   | 11654 | 11593 |
| >JAK2-K607N MMSKLSHKH  | 79   | >JAK2-K607N MMSKLSHNF  | 43    | 36    |
| >JAK2-K607N MMSKLSHKH  | 102  | >JAK2-K607N MMSKLSHNF  | 51    | 51    |
| >JAK2-K607N MMSKLSHKH  | 217  | >JAK2-K607N MMSKLSHNF  | 127   | 90    |
| >JAK2-K607N MMSKLSHKH  | 63   | >JAK2-K607N MMSKLSHNF  | 57    | 6     |
| >JAK2-K607N MMSKLSHKH  | 668  | >JAK2-K607N MMSKLSHNF  | 328   | 340   |
| >JAK2-K607N MMSKLSHKH  | 1647 | >JAK2-K607N MMSKLSHNF  | 467   | 1180  |
| >JAK2-K607N SMMSKLSHK  | 57   | >JAK2-K607N SMMSKLSHN  | 30    | 27    |
| >JAK2-K607N SMMSKLSHK  | 127  | >JAK2-K607N SMMSKLSHN  | 35    | 92    |
| >JAK2-K607N SMMSKLSHK  | 19   | >JAK2-K607N SMMSKLSHN  | 4     | 15    |
| >JAK2-K607N SMMSKLSHK  | 19   | >JAK2-K607N SMMSKLSHN  | 10    | 9     |
| >JAK2-K607N SMMSKLSHK  | 255  | >JAK2-K607N SMMSKLSHN  | 56    | 199   |
| >JAK2-K607N SMMSKLSHK  | 19   | >JAK2-K607N SMMSKLSHN  | 14    | 5     |
| >JAK2-K607N SMMSKLSHK  | 35   | >JAK2-K607N SMMSKLSHN  | 10    | 25    |
| >JAK2-K607N SMMSKLSHK  | 58   | >JAK2-K607N SMMSKLSHN  | 25    | 33    |
| >JAK2-K607N SMMSKLSHK  | 158  | >JAK2-K607N SMMSKLSHN  | 75    | 83    |
| >JAK2-K607N SMMSKLSHK  | 11   | >JAK2-K607N SMMSKLSHN  | 7     | 4     |
| >JAK2-K607N SMMSKLSHK  | 32   | >JAK2-K607N SMMSKLSHN  | 12818 | 12786 |
| >JAK2-K607N SMMSKLSHK  | 10   | >JAK2-K607N SMMSKLSHN  | 15332 | 15322 |

|                         |      |                         |       |       |
|-------------------------|------|-------------------------|-------|-------|
| >JAK2-K607N SMMSKLSHK   | 195  | >JAK2-K607N SMMSKLSHN   | 13860 | 13665 |
| >JAK2-K607N SMMSKLSHK   | 40   | >JAK2-K607N SMMSKLSHN   | 4683  | 4643  |
| >JAK2-K607N SMMSKLSHK   | 34   | >JAK2-K607N SMMSKLSHN   | 41    | 7     |
| >JAK2-K607N SMMSKLSHK   | 171  | >JAK2-K607N SMMSKLSHN   | 119   | 52    |
| >JAK2-K607N SMMSKLSHK   | 72   | >JAK2-K607N SMMSKLSHN   | 69    | 3     |
| >JAK2-K607N ASMMSKLSH   | 14   | >JAK2-K607N ASMMSKLSH   | 11936 | 11922 |
| >JAK2-K607N ASMMSKLSH   | 6    | >JAK2-K607N ASMMSKLSH   | 20125 | 20119 |
| >JAK2-K607N ASMMSKLSH   | 247  | >JAK2-K607N ASMMSKLSH   | 157   | 90    |
| >JAK2-K607N ASMMSKLSH   | 18   | >JAK2-K607N ASMMSKLSH   | 6532  | 6514  |
| >JAK2-K607N ASMMSKLSH   | 131  | >JAK2-K607N ASMMSKLSH   | 9690  | 9559  |
| >JAK2-K607N ASMMSKLSH   | 212  | >JAK2-K607N ASMMSKLSH   | 29106 | 28894 |
| >JAK2-K607N ASMMSKLSH   | 201  | >JAK2-K607N ASMMSKLSH   | 200   | 1     |
| >JAK2-K607N ASMMSKLSH   | 85   | >JAK2-K607N ASMMSKLSH   | 2222  | 2137  |
| >JAK2-K607N ASMMSKLSH   | 271  | >JAK2-K607N ASMMSKLSH   | 177   | 94    |
| >JAK2-L545S DLIFNESL    | 398  | >JAK2-L545S DSIFNESL    | 34580 | 34182 |
| >JAK2-L545S DLIFNESL    | 1754 | >JAK2-L545S DSIFNESL    | 196   | 1558  |
| >JAK2-L545S DLIFNESL    | 843  | >JAK2-L545S DSIFNESL    | 239   | 604   |
| >JAK2-L545S MVFHKIRNEI  | 482  | >JAK2-L545S MVFHKIRNEI  | 14326 | 13844 |
| >JAK2-L545S MVFHKIRNEI  | 215  | >JAK2-L545S MVFHKIRNEI  | 12209 | 11994 |
| >JAK2-L545S MVFHKIRNEI  | 268  | >JAK2-L545S MVFHKIRNEI  | 12423 | 12155 |
| >JAK2-L545S MVFHKIRNEI  | 33   | >JAK2-L545S MVFHKIRNEI  | 709   | 676   |
| >JAK2-L545S EDLIFNESL   | 384  | >JAK2-L545S EDSIFNESL   | 1937  | 1553  |
| >JAK2-L545S NEDLIFNESL  | 76   | >JAK2-L545S NEDSIFNESL  | 234   | 158   |
| >JAK2-L545S NEDLIFNESL  | 1242 | >JAK2-L545S NEDSIFNESL  | 383   | 859   |
| >JAK2-L545S NEDLIFNESL  | 434  | >JAK2-L545S NEDSIFNESL  | 560   | 126   |
| >JAK2-L545S NEDLIFNESL  | 229  | >JAK2-L545S NEDSIFNESL  | 166   | 63    |
| >JAK2-L545S IRNEDLIF    | 52   | >JAK2-L545S IRNEDSIF    | 26    | 26    |
| >JAK2-L545S KIRNEDLI    | 53   | >JAK2-L545S KIRNEDSI    | 52    | 1     |
| >JAK2-L545S KIRNEDLIFN  | 107  | >JAK2-L545S KIRNEDSIFN  | 99    | 8     |
| >JAK2-L545S KIRNEDLI    | 1500 | >JAK2-L545S KIRNEDSI    | 332   | 1168  |
| >JAK2-L545S KIRNEDLIF   | 457  | >JAK2-L545S KIRNEDSIF   | 2349  | 1892  |
| >JAK2-L545S KIRNEDLIF   | 297  | >JAK2-L545S KIRNEDSIF   | 242   | 55    |
| >JAK2-L545S KIRNEDLIF   | 93   | >JAK2-L545S KIRNEDSIF   | 45    | 48    |
| >JAK2-L545S KIRNEDLIF   | 194  | >JAK2-L545S KIRNEDSIF   | 290   | 96    |
| >JAK2-L545S KIRNEDLIF   | 899  | >JAK2-L545S KIRNEDSIF   | 33    | 866   |
| >JAK2-L545S HKIRNEDL    | 227  | >JAK2-L545S HKIRNEDS    | 6252  | 6025  |
| >JAK2-L545S HKIRNEDLI   | 1280 | >JAK2-L545S HKIRNEDSI   | 282   | 998   |
| >JAK2-L545S HKIRNEDLIF  | 9    | >JAK2-L545S HKIRNEDSIF  | 5     | 4     |
| >JAK2-L545S FHKIRNEDLI  | 433  | >JAK2-L545S FHKIRNEDSI  | 1091  | 658   |
| >JAK2-L545S FHKIRNEDLIF | 73   | >JAK2-L545S FHKIRNEDSIF | 48    | 25    |
| >JAK2-L545S VFHKIRNEDLI | 1912 | >JAK2-L545S VFHKIRNEDS  | 209   | 1703  |
| >JAK2-L545S VFHKIRNEDLI | 261  | >JAK2-L545S VFHKIRNEDS  | 177   | 84    |
| >JAK2-L545V DLIFNESL    | 398  | >JAK2-L545V DVIFNESL    | 15800 | 15402 |

|                         |      |                         |       |       |
|-------------------------|------|-------------------------|-------|-------|
| >JAK2-L545V DLIFNESL    | 1754 | >JAK2-L545V DVIFNESL    | 36    | 1718  |
| >JAK2-L545V DLIFNESL    | 843  | >JAK2-L545V DVIFNESL    | 46    | 797   |
| >JAK2-L545V MVFHKIRNEI  | 482  | >JAK2-L545V MVFHKIRNEI  | 1753  | 1271  |
| >JAK2-L545V MVFHKIRNEI  | 1898 | >JAK2-L545V MVFHKIRNEI  | 450   | 1448  |
| >JAK2-L545V MVFHKIRNEI  | 215  | >JAK2-L545V MVFHKIRNEI  | 141   | 74    |
| >JAK2-L545V MVFHKIRNEI  | 542  | >JAK2-L545V MVFHKIRNEI  | 56    | 486   |
| >JAK2-L545V MVFHKIRNEI  | 1265 | >JAK2-L545V MVFHKIRNEI  | 169   | 1096  |
| >JAK2-L545V MVFHKIRNEI  | 1498 | >JAK2-L545V MVFHKIRNEI  | 88    | 1410  |
| >JAK2-L545V MVFHKIRNEI  | 993  | >JAK2-L545V MVFHKIRNEI  | 32    | 961   |
| >JAK2-L545V MVFHKIRNEI  | 268  | >JAK2-L545V MVFHKIRNEI  | 1269  | 1001  |
| >JAK2-L545V MVFHKIRNEI  | 33   | >JAK2-L545V MVFHKIRNEI  | 9     | 24    |
| >JAK2-L545V EDLIFNESL   | 384  | >JAK2-L545V EDVIFNESL   | 824   | 440   |
| >JAK2-L545V NEDLIFNESL  | 76   | >JAK2-L545V NEDVIFNESL  | 159   | 83    |
| >JAK2-L545V NEDLIFNESL  | 434  | >JAK2-L545V NEDVIFNESL  | 513   | 79    |
| >JAK2-L545V NEDLIFNESL  | 229  | >JAK2-L545V NEDVIFNESL  | 289   | 60    |
| >JAK2-L545V IRNEDLIF    | 52   | >JAK2-L545V IRNEDVIF    | 28    | 24    |
| >JAK2-L545V KIRNEDLI    | 53   | >JAK2-L545V KIRNEDVI    | 100   | 47    |
| >JAK2-L545V KIRNEDLIFN  | 107  | >JAK2-L545V KIRNEDVIFN  | 135   | 28    |
| >JAK2-L545V KIRNEDLIF   | 457  | >JAK2-L545V KIRNEDVIF   | 142   | 315   |
| >JAK2-L545V KIRNEDLIF   | 297  | >JAK2-L545V KIRNEDVIF   | 447   | 150   |
| >JAK2-L545V KIRNEDLIF   | 93   | >JAK2-L545V KIRNEDVIF   | 46    | 47    |
| >JAK2-L545V KIRNEDLIF   | 194  | >JAK2-L545V KIRNEDVIF   | 560   | 366   |
| >JAK2-L545V HKIRNEDLI   | 696  | >JAK2-L545V HKIRNEDVI   | 480   | 216   |
| >JAK2-L545V HKIRNEDL    | 227  | >JAK2-L545V HKIRNEDV    | 562   | 335   |
| >JAK2-L545V HKIRNEDLI   | 1280 | >JAK2-L545V HKIRNEDVI   | 388   | 892   |
| >JAK2-L545V HKIRNEDLIF  | 9    | >JAK2-L545V HKIRNEDVIF  | 6     | 3     |
| >JAK2-L545V FHKIRNEDLI  | 433  | >JAK2-L545V FHKIRNEDVI  | 1357  | 924   |
| >JAK2-L545V FHKIRNEDLIF | 73   | >JAK2-L545V FHKIRNEDVIF | 49    | 24    |
| >JAK2-L545V VFHKIRNEDLI | 261  | >JAK2-L545V VFHKIRNEDV  | 167   | 94    |
| >JAK2-L579F·LLKVLDKA    | 973  | >JAK2-L579F·FLKVLDKA    | 75    | 898   |
| >JAK2-L579F·LLKVLDKA    | 341  | >JAK2-L579F·FLKVLDKA    | 31    | 310   |
| >JAK2-L579F·LLKVLDKA    | 415  | >JAK2-L579F·FLKVLDKA    | 63    | 352   |
| >JAK2-L579F·LLKVLDKAHR  | 142  | >JAK2-L579F·FLKVLDKAHR  | 233   | 91    |
| >JAK2-L579F·LLKVLDKAHR  | 1298 | >JAK2-L579F·FLKVLDKAHR  | 219   | 1079  |
| >JAK2-L579F·VLLKVLDKA   | 419  | >JAK2-L579F·VFLKVLDKA   | 18397 | 17978 |
| >JAK2-L579F·VLLKVLDKA   | 317  | >JAK2-L579F·VFLKVLDKA   | 8922  | 8605  |
| >JAK2-L579F·VLLKVLDKA   | 364  | >JAK2-L579F·VFLKVLDKA   | 16431 | 16067 |
| >JAK2-L579F·VLLKVLDKA   | 148  | >JAK2-L579F·VFLKVLDKA   | 13751 | 13603 |
| >JAK2-L579F·VLLKVLDKA   | 10   | >JAK2-L579F·VFLKVLDKA   | 9517  | 9507  |
| >JAK2-L579F·VLLKVLDKA   | 129  | >JAK2-L579F·VFLKVLDKA   | 18793 | 18664 |
| >JAK2-L579F·VLLKVLDKA   | 16   | >JAK2-L579F·VFLKVLDKA   | 8134  | 8118  |
| >JAK2-L579F·VLLKVLDKA   | 124  | >JAK2-L579F·VFLKVLDKA   | 17839 | 17715 |
| >JAK2-L579F·VLLKVLDKA   | 64   | >JAK2-L579F·VFLKVLDKA   | 27304 | 27240 |

|                         |      |                         |       |       |
|-------------------------|------|-------------------------|-------|-------|
| >JAK2-L579F·VLLKVLDK    | 79   | >JAK2-L579F·VFLKVLDK    | 3997  | 3918  |
| >JAK2-L579F·VLLKVLDK    | 153  | >JAK2-L579F·VFLKVLDK    | 2023  | 1870  |
| >JAK2-L579F·VLLKVLDKAH  | 79   | >JAK2-L579F·VFLKVLDKAH  | 27    | 52    |
| >JAK2-L579F·VLLKVLDKAH  | 351  | >JAK2-L579F·VFLKVLDKAH  | 79    | 272   |
| >JAK2-L579F·VLLKVLDKAH  | 471  | >JAK2-L579F·VFLKVLDKAH  | 149   | 322   |
| >JAK2-L579F·DYGQLHETE\  | 2961 | >JAK2-L579F·DYGQLHETE\  | 158   | 2803  |
| >JAK2-L579F·DYGQLHETE\  | 863  | >JAK2-L579F·DYGQLHETE\  | 152   | 711   |
| >JAK2-L579F·DYGQLHETE\  | 112  | >JAK2-L579F·DYGQLHETE\  | 18    | 94    |
| >JAK2-L579F·EVLLKVLDK   | 804  | >JAK2-L579F·EVFLKVLDK   | 237   | 567   |
| >JAK2-L579F·EVLLKVLDK   | 444  | >JAK2-L579F·EVFLKVLDK   | 18    | 426   |
| >JAK2-L579F·EVLLKVLDKA  | 3241 | >JAK2-L579F·EVFLKVLDKA  | 385   | 2856  |
| >JAK2-L579F·TEVLLKVL    | 6    | >JAK2-L579F·TEVFLKVL    | 13    | 7     |
| >JAK2-L579F·TEVLLKVL    | 125  | >JAK2-L579F·TEVFLKVL    | 106   | 19    |
| >JAK2-L579F·TEVLLKVL    | 82   | >JAK2-L579F·TEVFLKVL    | 41    | 41    |
| >JAK2-L579F·TEVLLKVL    | 99   | >JAK2-L579F·TEVFLKVL    | 121   | 22    |
| >JAK2-L579F·TEVLLKVLDK\ | 272  | >JAK2-L579F·TEVFLKVLDK\ | 205   | 67    |
| >JAK2-L579F·ETEVLKVLDI  | 161  | >JAK2-L579F·ETEVLKVLDI  | 76    | 85    |
| >JAK2-L579F·ETEVLKV     | 239  | >JAK2-L579F·ETEVLKV     | 118   | 121   |
| >JAK2-L579F·ETEVLKV     | 88   | >JAK2-L579F·ETEVLKV     | 33    | 55    |
| >JAK2-L579F·HETEVLK     | 105  | >JAK2-L579F·HETEVLK     | 63    | 42    |
| >JAK2-L579F·HETEVLKV    | 36   | >JAK2-L579F·HETEVLKV    | 52    | 16    |
| >JAK2-L579F·HETEVLKVL   | 30   | >JAK2-L579F·HETEVLKVL   | 35    | 5     |
| >JAK2-L579F·HETEVLKV    | 316  | >JAK2-L579F·HETEVLKV    | 271   | 45    |
| >JAK2-L579F·HETEVLKV    | 28   | >JAK2-L579F·HETEVLKV    | 15    | 13    |
| >JAK2-L579F·HETEVLKV    | 205  | >JAK2-L579F·HETEVLKV    | 101   | 104   |
| >JAK2-L579F·HETEVLKV    | 659  | >JAK2-L579F·HETEVLKV    | 351   | 308   |
| >JAK2-L579F·HETEVLKV    | 508  | >JAK2-L579F·HETEVLKV    | 101   | 407   |
| >JAK2-L579F·HETEVLKV    | 5    | >JAK2-L579F·HETEVLKV    | 7     | 2     |
| >JAK2-L579F·LHETEVL     | 243  | >JAK2-L579F·LHETEVL     | 464   | 221   |
| >JAK2-L579F·LHETEVLKVI  | 316  | >JAK2-L579F·LHETEVLKVI  | 248   | 68    |
| >JAK2-L579F·QLHETEVL    | 458  | >JAK2-L579F·QLHETEVL    | 209   | 249   |
| >JAK2-L579F·QLHETEVLK'  | 95   | >JAK2-L579F·QLHETEVLK'  | 104   | 9     |
| >JAK2-L579F·QLHETEVL    | 112  | >JAK2-L579F·QLHETEVL    | 4290  | 4178  |
| >JAK2-L579F·QLHETEVL    | 75   | >JAK2-L579F·QLHETEVL    | 36    | 39    |
| >JAK2-L579F·QLHETEVLK'  | 97   | >JAK2-L579F·QLHETEVLK'  | 96    | 1     |
| >JAK2-L579F·QLHETEVLK'  | 32   | >JAK2-L579F·QLHETEVLK'  | 40    | 8     |
| >JAK2-L579F·QLHETEVLK'  | 110  | >JAK2-L579F·QLHETEVLK'  | 75    | 35    |
| >JAK2-L579F·QLHETEVL    | 37   | >JAK2-L579F·QLHETEVL    | 3713  | 3676  |
| >JAK2-L579F·QLHETEVL    | 36   | >JAK2-L579F·QLHETEVL    | 12    | 24    |
| >JAK2-L579F·QLHETEVLK'  | 3    | >JAK2-L579F·QLHETEVLK'  | 3     | 0     |
| >JAK2-L579F·QLHETEVL    | 152  | >JAK2-L579F·QLHETEVL    | 13474 | 13322 |
| >JAK2-L579F·QLHETEVL    | 177  | >JAK2-L579F·QLHETEVL    | 35    | 142   |
| >JAK2-L579F·QLHETEVLK'  | 20   | >JAK2-L579F·QLHETEVLK'  | 24    | 4     |

|                        |      |                        |       |       |
|------------------------|------|------------------------|-------|-------|
| >JAK2-L579F·QLHETEVL   | 173  | >JAK2-L579F·QLHETEVL   | 34    | 139   |
| >JAK2-L579F·QLHETEVLK' | 11   | >JAK2-L579F·QLHETEVLK' | 11    | 0     |
| >JAK2-L579F·QLHETEVLK' | 60   | >JAK2-L579F·QLHETEVLK' | 68    | 8     |
| >JAK2-L579F·QLHETEVL   | 21   | >JAK2-L579F·QLHETEVL   | 8136  | 8115  |
| >JAK2-L579F·QLHETEVL   | 14   | >JAK2-L579F·QLHETEVL   | 12    | 2     |
| >JAK2-L579F·QLHETEVLK' | 3    | >JAK2-L579F·QLHETEVLK' | 3     | 0     |
| >JAK2-L579F·QLHETEVLK  | 249  | >JAK2-L579F·QLHETEVLK  | 546   | 297   |
| >JAK2-L579F·QLHETEVLK  | 324  | >JAK2-L579F·QLHETEVLK  | 283   | 41    |
| >JAK2-L579F·QLHETEVLK  | 120  | >JAK2-L579F·QLHETEVLK  | 142   | 22    |
| >JAK2-L579F·QLHETEVL   | 1048 | >JAK2-L579F·QLHETEVL   | 230   | 818   |
| >JAK2-L579F·QLHETEVL   | 2998 | >JAK2-L579F·QLHETEVL   | 142   | 2856  |
| >JAK2-L579F·QLHETEVL   | 3973 | >JAK2-L579F·QLHETEVL   | 216   | 3757  |
| >JAK2-L579F·QLHETEVL   | 1598 | >JAK2-L579F·QLHETEVL   | 43    | 1555  |
| >JAK2-L579F·QLHETEVLK  | 595  | >JAK2-L579F·QLHETEVLK  | 321   | 274   |
| >JAK2-L579F·GQLHETEVL  | 773  | >JAK2-L579F·GQLHETEVL  | 474   | 299   |
| >JAK2-L579F·GQLHETEVL  | 182  | >JAK2-L579F·GQLHETEVL  | 1145  | 963   |
| >JAK2-L579F·GQLHETEVL  | 528  | >JAK2-L579F·GQLHETEVL  | 130   | 398   |
| >JAK2-L579F·GQLHETEVL  | 1794 | >JAK2-L579F·GQLHETEVL  | 382   | 1412  |
| >JAK2-L579F·GQLHETEVL  | 72   | >JAK2-L579F·GQLHETEVL  | 47    | 25    |
| >JAK2-L579F·GQLHETEVL  | 835  | >JAK2-L579F·GQLHETEVL  | 54    | 781   |
| >JAK2-L579F·GQLHETEVL  | 77   | >JAK2-L579F·GQLHETEVL  | 6     | 71    |
| >JAK2-L579F·GQLHETEVL  | 136  | >JAK2-L579F·GQLHETEVL  | 94    | 42    |
| >JAK2-L579F·GQLHETEVL  | 434  | >JAK2-L579F·GQLHETEVL  | 9741  | 9307  |
| >JAK2-L579F·GQLHETEVL  | 154  | >JAK2-L579F·GQLHETEVL  | 532   | 378   |
| >JAK2-L579F·GQLHETEVL  | 721  | >JAK2-L579F·GQLHETEVL  | 456   | 265   |
| >JAK2-L579F·YGQLHETEVL | 6862 | >JAK2-L579F·YGQLHETEVL | 397   | 6465  |
| >JAK2-L579F·YGQLHETEVL | 1416 | >JAK2-L579F·YGQLHETEVL | 145   | 1271  |
| >JAK2-L609S·LVLNYGVCV  | 94   | >JAK2-L609S·LVLNYGVCV  | 82    | 12    |
| >JAK2-L609S·LVLNYGVCV  | 39   | >JAK2-L609S·LVLNYGVCV  | 33    | 6     |
| >JAK2-L609S·LVLNYGVCV  | 15   | >JAK2-L609S·LVLNYGVCV  | 14    | 1     |
| >JAK2-L609S·LVLNYGVCV  | 60   | >JAK2-L609S·LVLNYGVCV  | 50    | 10    |
| >JAK2-L609S·LVLNYGVCV  | 25   | >JAK2-L609S·LVLNYGVCV  | 13    | 12    |
| >JAK2-L609S·LVLNYGVCV  | 55   | >JAK2-L609S·LVLNYGVCV  | 395   | 340   |
| >JAK2-L609S·LVLNYGVCV  | 17   | >JAK2-L609S·LVLNYGVCV  | 35    | 18    |
| >JAK2-L609S·LVLNYGVCV  | 542  | >JAK2-L609S·LVLNYGVCV  | 104   | 438   |
| >JAK2-L609S·HLVLNYGV   | 232  | >JAK2-L609S·HLVLNYGV   | 9756  | 9524  |
| >JAK2-L609S·HLVLNYGV   | 33   | >JAK2-L609S·HLVLNYGV   | 2446  | 2413  |
| >JAK2-L609S·HLVLNYGVC\ | 454  | >JAK2-L609S·HLVLNYGVC\ | 9238  | 8784  |
| >JAK2-L609S·HLVLNYGV   | 40   | >JAK2-L609S·HLVLNYGV   | 5028  | 4988  |
| >JAK2-L609S·HLVLNYGVC\ | 497  | >JAK2-L609S·HLVLNYGVC\ | 13017 | 12520 |
| >JAK2-L609S·HLVLNYGV   | 90   | >JAK2-L609S·HLVLNYGV   | 2138  | 2048  |
| >JAK2-L609S·HLVLNYGV   | 11   | >JAK2-L609S·HLVLNYGV   | 9203  | 9192  |
| >JAK2-L609S·HLVLNYGVC\ | 57   | >JAK2-L609S·HLVLNYGVC\ | 15151 | 15094 |

|                        |      |                        |       |       |
|------------------------|------|------------------------|-------|-------|
| >JAK2-L609S·HLVLNYGV   | 7    | >JAK2-L609S·HSVLNYGV   | 7357  | 7350  |
| >JAK2-L609S·HLVLNYGVC\ | 17   | >JAK2-L609S·HSVLNYGVC\ | 14580 | 14563 |
| >JAK2-L609S·HLVLNYGV   | 35   | >JAK2-L609S·HSVLNYGV   | 15799 | 15764 |
| >JAK2-L609S·HLVLNYGVC\ | 54   | >JAK2-L609S·HSVLNYGVC\ | 18554 | 18500 |
| >JAK2-L609S·HLVLNYGV   | 33   | >JAK2-L609S·HSVLNYGV   | 17879 | 17846 |
| >JAK2-L609S·HLVLNYGVC\ | 263  | >JAK2-L609S·HSVLNYGVC\ | 22314 | 22051 |
| >JAK2-L609S·HLVLNYGV   | 4    | >JAK2-L609S·HSVLNYGV   | 19652 | 19648 |
| >JAK2-L609S·HLVLNYGVC\ | 12   | >JAK2-L609S·HSVLNYGVC\ | 21994 | 21982 |
| >JAK2-L609S·HLVLNYGV   | 95   | >JAK2-L609S·HSVLNYGV   | 19    | 76    |
| >JAK2-L609S·HLVLNYGVC\ | 2900 | >JAK2-L609S·HSVLNYGVC\ | 471   | 2429  |
| >JAK2-L609S·HLVLNYGV   | 154  | >JAK2-L609S·HSVLNYGV   | 212   | 58    |
| >JAK2-L609S·SMMSKLSHK  | 57   | >JAK2-L609S·SMMSKLSHK  | 3530  | 3473  |
| >JAK2-L609S·SMMSKLSHK  | 127  | >JAK2-L609S·SMMSKLSHK  | 6560  | 6433  |
| >JAK2-L609S·SMMSKLSHK  | 19   | >JAK2-L609S·SMMSKLSHK  | 2503  | 2484  |
| >JAK2-L609S·SMMSKLSHK  | 19   | >JAK2-L609S·SMMSKLSHK  | 589   | 570   |
| >JAK2-L609S·SMMSKLSHK  | 255  | >JAK2-L609S·SMMSKLSHK  | 4435  | 4180  |
| >JAK2-L609S·SMMSKLSHK  | 19   | >JAK2-L609S·SMMSKLSHK  | 2708  | 2689  |
| >JAK2-L609S·SMMSKLSHK  | 35   | >JAK2-L609S·SMMSKLSHK  | 6319  | 6284  |
| >JAK2-L609S·SMMSKLSHK  | 58   | >JAK2-L609S·SMMSKLSHK  | 9668  | 9610  |
| >JAK2-L609S·SMMSKLSHK  | 158  | >JAK2-L609S·SMMSKLSHK  | 9415  | 9257  |
| >JAK2-L609S·SMMSKLSHK  | 11   | >JAK2-L609S·SMMSKLSHK  | 5992  | 5981  |
| >JAK2-L609S·SMMSKLSHK  | 34   | >JAK2-L609S·SMMSKLSHK  | 1290  | 1256  |
| >JAK2-L609S·SMMSKLSHK  | 171  | >JAK2-L609S·SMMSKLSHK  | 3360  | 3189  |
| >JAK2-L609S·SMMSKLSHK  | 72   | >JAK2-L609S·SMMSKLSHK  | 2797  | 2725  |
| >JAK2-L609S·HKHLVLNY   | 467  | >JAK2-L609S·HKHSVLNY   | 267   | 200   |
| >JAK2-L609S·HKHLVLNY   | 26   | >JAK2-L609S·HKHSVLNY   | 6     | 20    |
| >JAK2-L609S·HKHLVLNYG\ | 1759 | >JAK2-L609S·HKHSVLNYG\ | 339   | 1420  |
| >JAK2-L609S·SHKHLVLNY  | 438  | >JAK2-L609S·SHKHSVLNY  | 1046  | 608   |
| >JAK2-L609S·SHKHLVLNY  | 17   | >JAK2-L609S·SHKHSVLNY  | 104   | 87    |
| >JAK2-L609S·SHKHLVLNY  | 52   | >JAK2-L609S·SHKHSVLNY  | 13    | 39    |
| >JAK2-L609S·LSHKHLVLNY | 211  | >JAK2-L609S·LSHKHSVLNY | 1069  | 858   |
| >JAK2-L609S·LSHKHLVL   | 339  | >JAK2-L609S·LSHKHSVL   | 414   | 75    |
| >JAK2-L609S·LSHKHLVLNY | 527  | >JAK2-L609S·LSHKHSVLNY | 207   | 320   |
| >JAK2-L609S·LSHKHLVLNY | 542  | >JAK2-L609S·LSHKHSVLNY | 388   | 154   |
| >JAK2-L609S·LSHKHLVLNY | 149  | >JAK2-L609S·LSHKHSVLNY | 236   | 87    |
| >JAK2-L609S·LSHKHLVL   | 237  | >JAK2-L609S·LSHKHSVL   | 199   | 38    |
| >JAK2-L609S·LSHKHLVL   | 695  | >JAK2-L609S·LSHKHSVL   | 378   | 317   |
| >JAK2-L609S·LSHKHLVLNY | 89   | >JAK2-L609S·LSHKHSVLNY | 51    | 38    |
| >JAK2-L609S·LSHKHLVL   | 323  | >JAK2-L609S·LSHKHSVL   | 150   | 173   |
| >JAK2-L609S·LSHKHLVLNY | 47   | >JAK2-L609S·LSHKHSVLNY | 19    | 28    |
| >JAK2-L609S·LSHKHLVL   | 38   | >JAK2-L609S·LSHKHSVL   | 25    | 13    |
| >JAK2-L609S·LSHKHLVLNY | 6    | >JAK2-L609S·LSHKHSVLNY | 4     | 2     |
| >JAK2-L609S·LSHKHLVLNY | 462  | >JAK2-L609S·LSHKHSVLNY | 447   | 15    |

|                        |      |                        |      |      |
|------------------------|------|------------------------|------|------|
| >JAK2-L609S·LSHKHLVL   | 297  | >JAK2-L609S·LSHKHSVL   | 436  | 139  |
| >JAK2-L609S·LSHKHLVLNY | 173  | >JAK2-L609S·LSHKHSVLNY | 118  | 55   |
| >JAK2-L609S·LSHKHLVL   | 329  | >JAK2-L609S·LSHKHSVL   | 178  | 151  |
| >JAK2-L609S·KLSHKHLV   | 44   | >JAK2-L609S·KLSHKHSV   | 77   | 33   |
| >JAK2-L609S·KLSHKHLV   | 10   | >JAK2-L609S·KLSHKHSV   | 11   | 1    |
| >JAK2-L609S·KLSHKHLVL  | 91   | >JAK2-L609S·KLSHKHSVL  | 46   | 45   |
| >JAK2-L609S·KLSHKHLV   | 8    | >JAK2-L609S·KLSHKHSV   | 6    | 2    |
| >JAK2-L609S·KLSHKHLVL  | 134  | >JAK2-L609S·KLSHKHSVL  | 42   | 92   |
| >JAK2-L609S·KLSHKHLV   | 114  | >JAK2-L609S·KLSHKHSV   | 108  | 6    |
| >JAK2-L609S·KLSHKHLV   | 8    | >JAK2-L609S·KLSHKHSV   | 6    | 2    |
| >JAK2-L609S·KLSHKHLVL  | 176  | >JAK2-L609S·KLSHKHSVL  | 178  | 2    |
| >JAK2-L609S·KLSHKHLV   | 15   | >JAK2-L609S·KLSHKHSV   | 9    | 6    |
| >JAK2-L609S·KLSHKHLVL  | 323  | >JAK2-L609S·KLSHKHSVL  | 220  | 103  |
| >JAK2-L609S·KLSHKHLV   | 12   | >JAK2-L609S·KLSHKHSV   | 13   | 1    |
| >JAK2-L609S·KLSHKHLV   | 58   | >JAK2-L609S·KLSHKHSV   | 29   | 29   |
| >JAK2-L609S·KLSHKHLV   | 3    | >JAK2-L609S·KLSHKHSV   | 2    | 1    |
| >JAK2-L609S·KLSHKHLVL  | 53   | >JAK2-L609S·KLSHKHSVL  | 40   | 13   |
| >JAK2-L609S·KLSHKHLVLN | 46   | >JAK2-L609S·KLSHKHSVLN | 51   | 5    |
| >JAK2-L609S·KLSHKHLVLN | 36   | >JAK2-L609S·KLSHKHSVLN | 102  | 66   |
| >JAK2-L609S·KLSHKHLVLN | 72   | >JAK2-L609S·KLSHKHSVLN | 50   | 22   |
| >JAK2-L609S·KLSHKHLVL  | 248  | >JAK2-L609S·KLSHKHSVL  | 1141 | 893  |
| >JAK2-L609S·KLSHKHLVLN | 4    | >JAK2-L609S·KLSHKHSVLN | 9    | 5    |
| >JAK2-L609S·KLSHKHLVL  | 168  | >JAK2-L609S·KLSHKHSVL  | 127  | 41   |
| >JAK2-L609S·KLSHKHLVL  | 579  | >JAK2-L609S·KLSHKHSVL  | 494  | 85   |
| >JAK2-L609S·KLSHKHLVLN | 101  | >JAK2-L609S·KLSHKHSVLN | 87   | 14   |
| >JAK2-L609S·KLSHKHLVL  | 352  | >JAK2-L609S·KLSHKHSVL  | 225  | 127  |
| >JAK2-L609S·KLSHKHLVLN | 81   | >JAK2-L609S·KLSHKHSVLN | 43   | 38   |
| >JAK2-L609S·KLSHKHLVLN | 81   | >JAK2-L609S·KLSHKHSVLN | 46   | 35   |
| >JAK2-L609S·KLSHKHLVL  | 7110 | >JAK2-L609S·KLSHKHSVL  | 428  | 6682 |
| >JAK2-L609S·KLSHKHLVLN | 166  | >JAK2-L609S·KLSHKHSVLN | 201  | 35   |
| >JAK2-L609S·SKLSHKHL   | 37   | >JAK2-L609S·SKLSHKHS   | 2043 | 2006 |
| >JAK2-L609S·SKLSHKHLV  | 665  | >JAK2-L609S·SKLSHKHSV  | 93   | 572  |
| >JAK2-L609S·SKLSHKHLVL | 39   | >JAK2-L609S·SKLSHKHSVL | 21   | 18   |
| >JAK2-L609S·SKLSHKHLVL | 72   | >JAK2-L609S·SKLSHKHSVL | 68   | 4    |
| >JAK2-L609S·MSKLSHKHL  | 17   | >JAK2-L609S·MSKLSHKHS  | 58   | 41   |
| >JAK2-L609S·MSKLSHKHL\ | 24   | >JAK2-L609S·MSKLSHKHS\ | 21   | 3    |
| >JAK2-L609S·MSKLSHKHL\ | 16   | >JAK2-L609S·MSKLSHKHS\ | 26   | 10   |
| >JAK2-L609S·MSKLSHKHL  | 202  | >JAK2-L609S·MSKLSHKHS  | 9037 | 8835 |
| >JAK2-L609S·MSKLSHKHL\ | 84   | >JAK2-L609S·MSKLSHKHS\ | 80   | 4    |
| >JAK2-L609S·MSKLSHKHL  | 215  | >JAK2-L609S·MSKLSHKHS  | 8157 | 7942 |
| >JAK2-L609S·MSKLSHKHL\ | 183  | >JAK2-L609S·MSKLSHKHS\ | 119  | 64   |
| >JAK2-L609S·MSKLSHKHL  | 6    | >JAK2-L609S·MSKLSHKHS  | 2991 | 2985 |
| >JAK2-L609S·MSKLSHKHL\ | 692  | >JAK2-L609S·MSKLSHKHS\ | 287  | 405  |

|                        |      |                        |       |       |
|------------------------|------|------------------------|-------|-------|
| >JAK2-L609S·MSKLSHKHL\ | 6    | >JAK2-L609S·MSKLSHKHS\ | 6     | 0     |
| >JAK2-L609S·MSKLSHKHL\ | 474  | >JAK2-L609S·MSKLSHKHS\ | 58    | 416   |
| >JAK2-L609S·MMSKLSHKH  | 14   | >JAK2-L609S·MMSKLSHKH  | 18    | 4     |
| >JAK2-L609S·MMSKLSHKH  | 179  | >JAK2-L609S·MMSKLSHKH  | 11398 | 11219 |
| >JAK2-L609S·MMSKLSHKH  | 3    | >JAK2-L609S·MMSKLSHKH  | 3     | 0     |
| >JAK2-L609S·MMSKLSHKH  | 143  | >JAK2-L609S·MMSKLSHKH  | 6537  | 6394  |
| >JAK2-L609S·MMSKLSHKH  | 5    | >JAK2-L609S·MMSKLSHKH  | 4     | 1     |
| >JAK2-L609S·MMSKLSHKH  | 30   | >JAK2-L609S·MMSKLSHKH  | 27    | 3     |
| >JAK2-L609S·MMSKLSHKH  | 64   | >JAK2-L609S·MMSKLSHKH  | 5280  | 5216  |
| >JAK2-L609S·MMSKLSHKH  | 3    | >JAK2-L609S·MMSKLSHKH  | 3     | 0     |
| >JAK2-L609S·MMSKLSHKH  | 194  | >JAK2-L609S·MMSKLSHKH  | 11878 | 11684 |
| >JAK2-L609S·MMSKLSHKH  | 7    | >JAK2-L609S·MMSKLSHKH  | 4     | 3     |
| >JAK2-L609S·MMSKLSHKH  | 124  | >JAK2-L609S·MMSKLSHKH  | 9157  | 9033  |
| >JAK2-L609S·MMSKLSHKH  | 9    | >JAK2-L609S·MMSKLSHKH  | 9     | 0     |
| >JAK2-L609S·MMSKLSHKH  | 362  | >JAK2-L609S·MMSKLSHKH  | 18945 | 18583 |
| >JAK2-L609S·MMSKLSHKH  | 5    | >JAK2-L609S·MMSKLSHKH  | 4     | 1     |
| >JAK2-L609S·MMSKLSHKH  | 12   | >JAK2-L609S·MMSKLSHKH  | 4773  | 4761  |
| >JAK2-L609S·MMSKLSHKH  | 2    | >JAK2-L609S·MMSKLSHKH  | 2     | 0     |
| >JAK2-L609S·MMSKLSHKH  | 79   | >JAK2-L609S·MMSKLSHKH  | 99    | 20    |
| >JAK2-L609S·MMSKLSHKH  | 102  | >JAK2-L609S·MMSKLSHKH  | 72    | 30    |
| >JAK2-L609S·MMSKLSHKH  | 687  | >JAK2-L609S·MMSKLSHKH  | 104   | 583   |
| >JAK2-L609S·MMSKLSHKH  | 217  | >JAK2-L609S·MMSKLSHKH  | 3970  | 3753  |
| >JAK2-L609S·MMSKLSHKH  | 63   | >JAK2-L609S·MMSKLSHKH  | 2268  | 2205  |
| >JAK2-L609S·MMSKLSHKH  | 668  | >JAK2-L609S·MMSKLSHKH  | 161   | 507   |
| >JAK2-L611S·VLNYGVCV   | 55   | >JAK2-L611S·VSNYGVCV   | 11451 | 11396 |
| >JAK2-L611S·VLNYGVCV   | 23   | >JAK2-L611S·VSNYGVCV   | 6020  | 5997  |
| >JAK2-L611S·VLNYGVCV   | 17   | >JAK2-L611S·VSNYGVCV   | 3695  | 3678  |
| >JAK2-L611S·VLNYGVCV   | 261  | >JAK2-L611S·VSNYGVCV   | 5819  | 5558  |
| >JAK2-L611S·VLNYGVCV   | 6    | >JAK2-L611S·VSNYGVCV   | 4883  | 4877  |
| >JAK2-L611S·VLNYGVCVC  | 101  | >JAK2-L611S·VSNYGVCVC  | 17984 | 17883 |
| >JAK2-L611S·VLNYGVCV   | 7    | >JAK2-L611S·VSNYGVCV   | 13487 | 13480 |
| >JAK2-L611S·VLNYGVCV   | 8    | >JAK2-L611S·VSNYGVCV   | 7492  | 7484  |
| >JAK2-L611S·VLNYGVCV   | 7    | >JAK2-L611S·VSNYGVCV   | 11213 | 11206 |
| >JAK2-L611S·VLNYGVCV   | 4    | >JAK2-L611S·VSNYGVCV   | 10977 | 10973 |
| >JAK2-L611S·VLNYGVCVC  | 44   | >JAK2-L611S·VSNYGVCVC  | 31329 | 31285 |
| >JAK2-L611S·MSKLSHKHL\ | 16   | >JAK2-L611S·MSKLSHKHL\ | 51    | 35    |
| >JAK2-L611S·MSKLSHKHL\ | 84   | >JAK2-L611S·MSKLSHKHL\ | 3803  | 3719  |
| >JAK2-L611S·MSKLSHKHL\ | 183  | >JAK2-L611S·MSKLSHKHL\ | 6681  | 6498  |
| >JAK2-L611S·MSKLSHKHL\ | 6    | >JAK2-L611S·MSKLSHKHL\ | 2079  | 2073  |
| >JAK2-L611S·MSKLSHKHL\ | 474  | >JAK2-L611S·MSKLSHKHL\ | 7835  | 7361  |
| >JAK2-L611S·LVLNYGVCV  | 94   | >JAK2-L611S·LVSNYGVCV  | 524   | 430   |
| >JAK2-L611S·LVLNYGVCV  | 762  | >JAK2-L611S·LVSNYGVCV  | 145   | 617   |
| >JAK2-L611S·LVLNYGVCV  | 1307 | >JAK2-L611S·LVSNYGVCV  | 464   | 843   |



|                        |      |                        |      |      |
|------------------------|------|------------------------|------|------|
| >JAK2-L611S·LVLNYGVCV  | 39   | >JAK2-L611S·LVSNYGVCV  | 198  | 159  |
| >JAK2-L611S·LVLNYGVCV  | 15   | >JAK2-L611S·LVSNYGVCV  | 157  | 142  |
| >JAK2-L611S·LVLNYGVCV  | 60   | >JAK2-L611S·LVSNYGVCV  | 621  | 561  |
| >JAK2-L611S·LVLNYGVCV  | 25   | >JAK2-L611S·LVSNYGVCV  | 188  | 163  |
| >JAK2-L611S·LVLNYGVCV  | 55   | >JAK2-L611S·LVSNYGVCV  | 441  | 386  |
| >JAK2-L611S·LVLNYGVCV  | 17   | >JAK2-L611S·LVSNYGVCV  | 22   | 5    |
| >JAK2-L611S·HLVLNYGV   | 232  | >JAK2-L611S·HLVSNYGV   | 96   | 136  |
| >JAK2-L611S·HLVLNYGVC\ | 546  | >JAK2-L611S·HLVSNYGVC\ | 485  | 61   |
| >JAK2-L611S·HLVLNYGV   | 33   | >JAK2-L611S·HLVSNYGV   | 13   | 20   |
| >JAK2-L611S·HLVLNYGVC\ | 454  | >JAK2-L611S·HLVSNYGVC\ | 132  | 322  |
| >JAK2-L611S·HLVLNYGV   | 40   | >JAK2-L611S·HLVSNYGV   | 12   | 28   |
| >JAK2-L611S·HLVLNYGVC\ | 497  | >JAK2-L611S·HLVSNYGVC\ | 223  | 274  |
| >JAK2-L611S·HLVLNYGV   | 90   | >JAK2-L611S·HLVSNYGV   | 59   | 31   |
| >JAK2-L611S·HLVLNYGV   | 11   | >JAK2-L611S·HLVSNYGV   | 5    | 6    |
| >JAK2-L611S·HLVLNYGVC\ | 57   | >JAK2-L611S·HLVSNYGVC\ | 14   | 43   |
| >JAK2-L611S·HLVLNYGV   | 7    | >JAK2-L611S·HLVSNYGV   | 5    | 2    |
| >JAK2-L611S·HLVLNYGVC\ | 17   | >JAK2-L611S·HLVSNYGVC\ | 9    | 8    |
| >JAK2-L611S·HLVLNYGV   | 35   | >JAK2-L611S·HLVSNYGV   | 18   | 17   |
| >JAK2-L611S·HLVLNYGVC\ | 54   | >JAK2-L611S·HLVSNYGVC\ | 26   | 28   |
| >JAK2-L611S·HLVLNYGV   | 33   | >JAK2-L611S·HLVSNYGV   | 18   | 15   |
| >JAK2-L611S·HLVLNYGVC\ | 263  | >JAK2-L611S·HLVSNYGVC\ | 99   | 164  |
| >JAK2-L611S·HLVLNYGV   | 4    | >JAK2-L611S·HLVSNYGV   | 3    | 1    |
| >JAK2-L611S·HLVLNYGVC\ | 12   | >JAK2-L611S·HLVSNYGVC\ | 6    | 6    |
| >JAK2-L611S·HLVLNYGVC\ | 694  | >JAK2-L611S·HLVSNYGVC\ | 208  | 486  |
| >JAK2-L611S·HLVLNYGV   | 95   | >JAK2-L611S·HLVSNYGV   | 46   | 49   |
| >JAK2-L611S·HLVLNYGV   | 154  | >JAK2-L611S·HLVSNYGV   | 58   | 96   |
| >JAK2-L611S·KHLVLNYGVC | 511  | >JAK2-L611S·KHLVSNYGVC | 181  | 330  |
| >JAK2-L611S·HKHLVLNY   | 467  | >JAK2-L611S·HKHLVSNY   | 3895 | 3428 |
| >JAK2-L611S·HKHLVLNY   | 26   | >JAK2-L611S·HKHLVSNY   | 13   | 13   |
| >JAK2-L611S·SHKHLVLNY  | 438  | >JAK2-L611S·SHKHLVSNY  | 3469 | 3031 |
| >JAK2-L611S·SHKHLVLNY  | 1649 | >JAK2-L611S·SHKHLVSNY  | 420  | 1229 |
| >JAK2-L611S·SHKHLVLNY  | 17   | >JAK2-L611S·SHKHLVSNY  | 742  | 725  |
| >JAK2-L611S·SHKHLVLNY  | 52   | >JAK2-L611S·SHKHLVSNY  | 27   | 25   |
| >JAK2-L611S·SHKHLVLNY  | 4240 | >JAK2-L611S·SHKHLVSNY  | 252  | 3988 |
| >JAK2-L611S·LSHKHLVLNY | 211  | >JAK2-L611S·LSHKHLVSNY | 47   | 164  |
| >JAK2-L611S·LSHKHLVL   | 339  | >JAK2-L611S·LSHKHLVS   | 1277 | 938  |
| >JAK2-L611S·LSHKHLVLNY | 542  | >JAK2-L611S·LSHKHLVSNY | 120  | 422  |
| >JAK2-L611S·LSHKHLVLNY | 149  | >JAK2-L611S·LSHKHLVSNY | 2292 | 2143 |
| >JAK2-L611S·LSHKHLVL   | 237  | >JAK2-L611S·LSHKHLVS   | 8670 | 8433 |
| >JAK2-L611S·LSHKHLVLNY | 89   | >JAK2-L611S·LSHKHLVSNY | 70   | 19   |
| >JAK2-L611S·LSHKHLVL   | 323  | >JAK2-L611S·LSHKHLVS   | 9543 | 9220 |
| >JAK2-L611S·LSHKHLVLNY | 47   | >JAK2-L611S·LSHKHLVSNY | 22   | 25   |
| >JAK2-L611S·LSHKHLVL   | 38   | >JAK2-L611S·LSHKHLVS   | 8898 | 8860 |

|                        |      |                        |       |       |
|------------------------|------|------------------------|-------|-------|
| >JAK2-L611S·LSHKHLVLNY | 6    | >JAK2-L611S·LSHKHLVSNY | 6     | 0     |
| >JAK2-L611S·LSHKHLVLNY | 462  | >JAK2-L611S·LSHKHLVSNY | 1425  | 963   |
| >JAK2-L611S·LSHKHLVL   | 297  | >JAK2-L611S·LSHKHLVS   | 4698  | 4401  |
| >JAK2-L611S·LSHKHLVLNY | 173  | >JAK2-L611S·LSHKHLVSNY | 145   | 28    |
| >JAK2-L611S·LSHKHLVL   | 329  | >JAK2-L611S·LSHKHLVS   | 24012 | 23683 |
| >JAK2-L611S·KLSHKHLVL  | 91   | >JAK2-L611S·KLSHKHLVS  | 11123 | 11032 |
| >JAK2-L611S·KLSHKHLVL  | 134  | >JAK2-L611S·KLSHKHLVS  | 6346  | 6212  |
| >JAK2-L611S·KLSHKHLVL  | 176  | >JAK2-L611S·KLSHKHLVS  | 11452 | 11276 |
| >JAK2-L611S·KLSHKHLVL  | 323  | >JAK2-L611S·KLSHKHLVS  | 16707 | 16384 |
| >JAK2-L611S·KLSHKHLVL  | 53   | >JAK2-L611S·KLSHKHLVS  | 13554 | 13501 |
| >JAK2-L611S·KLSHKHLVLN | 46   | >JAK2-L611S·KLSHKHLVSN | 57    | 11    |
| >JAK2-L611S·KLSHKHLVLN | 36   | >JAK2-L611S·KLSHKHLVSN | 178   | 142   |
| >JAK2-L611S·KLSHKHLVLN | 72   | >JAK2-L611S·KLSHKHLVSN | 33    | 39    |
| >JAK2-L611S·KLSHKHLVL  | 248  | >JAK2-L611S·KLSHKHLVS  | 8756  | 8508  |
| >JAK2-L611S·KLSHKHLVLN | 4    | >JAK2-L611S·KLSHKHLVSN | 10    | 6     |
| >JAK2-L611S·KLSHKHLVL  | 168  | >JAK2-L611S·KLSHKHLVS  | 9233  | 9065  |
| >JAK2-L611S·KLSHKHLVLN | 101  | >JAK2-L611S·KLSHKHLVSN | 92    | 9     |
| >JAK2-L611S·KLSHKHLVL  | 352  | >JAK2-L611S·KLSHKHLVS  | 7888  | 7536  |
| >JAK2-L611S·KLSHKHLVLN | 81   | >JAK2-L611S·KLSHKHLVSN | 56    | 25    |
| >JAK2-L611S·KLSHKHLVLN | 81   | >JAK2-L611S·KLSHKHLVSN | 99    | 18    |
| >JAK2-L611S·KLSHKHLVLN | 3046 | >JAK2-L611S·KLSHKHLVSN | 376   | 2670  |
| >JAK2-L611S·KLSHKHLVLN | 166  | >JAK2-L611S·KLSHKHLVSN | 238   | 72    |
| >JAK2-L611S·SKLSHKHLVL | 39   | >JAK2-L611S·SKLSHKHLVS | 2109  | 2070  |
| >JAK2-L611S·SKLSHKHLVL | 72   | >JAK2-L611S·SKLSHKHLVS | 16916 | 16844 |
| >JAK2-L611V·VLNYGVCV   | 55   | >JAK2-L611V·VVNYGVCV   | 1542  | 1487  |
| >JAK2-L611V·VLNYGVCV   | 23   | >JAK2-L611V·VVNYGVCV   | 1089  | 1066  |
| >JAK2-L611V·VLNYGVCV   | 17   | >JAK2-L611V·VVNYGVCV   | 224   | 207   |
| >JAK2-L611V·VLNYGVCV   | 261  | >JAK2-L611V·VVNYGVCV   | 273   | 12    |
| >JAK2-L611V·VLNYGVCV   | 6    | >JAK2-L611V·VVNYGVCV   | 275   | 269   |
| >JAK2-L611V·VLNYGVCVC  | 101  | >JAK2-L611V·VVNYGVCVC  | 5439  | 5338  |
| >JAK2-L611V·VLNYGVCV   | 7    | >JAK2-L611V·VVNYGVCV   | 835   | 828   |
| >JAK2-L611V·VLNYGVCV   | 8    | >JAK2-L611V·VVNYGVCV   | 146   | 138   |
| >JAK2-L611V·VLNYGVCV   | 7    | >JAK2-L611V·VVNYGVCV   | 297   | 290   |
| >JAK2-L611V·VLNYGVCV   | 4    | >JAK2-L611V·VVNYGVCV   | 66    | 62    |
| >JAK2-L611V·VLNYGVCVC  | 44   | >JAK2-L611V·VVNYGVCVC  | 7390  | 7346  |
| >JAK2-L611V·VLNYGVCV   | 3740 | >JAK2-L611V·VVNYGVCV   | 391   | 3349  |
| >JAK2-L611V·MSKLSHKHL\ | 16   | >JAK2-L611V·MSKLSHKHL\ | 12    | 4     |
| >JAK2-L611V·MSKLSHKHL\ | 84   | >JAK2-L611V·MSKLSHKHL\ | 295   | 211   |
| >JAK2-L611V·MSKLSHKHL\ | 183  | >JAK2-L611V·MSKLSHKHL\ | 433   | 250   |
| >JAK2-L611V·MSKLSHKHL\ | 6    | >JAK2-L611V·MSKLSHKHL\ | 84    | 78    |
| >JAK2-L611V·MSKLSHKHL\ | 474  | >JAK2-L611V·MSKLSHKHL\ | 1397  | 923   |
| >JAK2-L611V·LVLNYGVCV  | 94   | >JAK2-L611V·LVVNYGVCV  | 732   | 638   |
| >JAK2-L611V·LVLNYGVCV  | 39   | >JAK2-L611V·LVVNYGVCV  | 55    | 16    |

|                        |      |                        |      |      |
|------------------------|------|------------------------|------|------|
| >JAK2-L611V LVLNYGVCV  | 15   | >JAK2-L611V LVVNYGVCV  | 109  | 94   |
| >JAK2-L611V LVLNYGVCV  | 60   | >JAK2-L611V LVVNYGVCV  | 470  | 410  |
| >JAK2-L611V LVLNYGVCV  | 25   | >JAK2-L611V LVVNYGVCV  | 261  | 236  |
| >JAK2-L611V LVLNYGVCV  | 55   | >JAK2-L611V LVVNYGVCV  | 2375 | 2320 |
| >JAK2-L611V LVLNYGVCV  | 17   | >JAK2-L611V LVVNYGVCV  | 29   | 12   |
| >JAK2-L611V LVLNYGVCV  | 2644 | >JAK2-L611V LVVNYGVCV  | 480  | 2164 |
| >JAK2-L611V HLVLNYGV   | 232  | >JAK2-L611V HLVVNYGV   | 249  | 17   |
| >JAK2-L611V HLVLNYGV   | 33   | >JAK2-L611V HLVVNYGV   | 28   | 5    |
| >JAK2-L611V HLVLNYGVC\ | 454  | >JAK2-L611V HLVVNYGVC\ | 619  | 165  |
| >JAK2-L611V HLVLNYGV   | 40   | >JAK2-L611V HLVVNYGV   | 36   | 4    |
| >JAK2-L611V HLVLNYGVC\ | 497  | >JAK2-L611V HLVVNYGVC\ | 544  | 47   |
| >JAK2-L611V HLVLNYGV   | 90   | >JAK2-L611V HLVVNYGV   | 72   | 18   |
| >JAK2-L611V HLVLNYGV   | 11   | >JAK2-L611V HLVVNYGV   | 8    | 3    |
| >JAK2-L611V HLVLNYGVC\ | 57   | >JAK2-L611V HLVVNYGVC\ | 44   | 13   |
| >JAK2-L611V HLVLNYGV   | 7    | >JAK2-L611V HLVVNYGV   | 7    | 0    |
| >JAK2-L611V HLVLNYGVC\ | 17   | >JAK2-L611V HLVVNYGVC\ | 15   | 2    |
| >JAK2-L611V HLVLNYGV   | 35   | >JAK2-L611V HLVVNYGV   | 26   | 9    |
| >JAK2-L611V HLVLNYGVC\ | 54   | >JAK2-L611V HLVVNYGVC\ | 42   | 12   |
| >JAK2-L611V HLVLNYGV   | 33   | >JAK2-L611V HLVVNYGV   | 30   | 3    |
| >JAK2-L611V HLVLNYGVC\ | 263  | >JAK2-L611V HLVVNYGVC\ | 214  | 49   |
| >JAK2-L611V HLVLNYGV   | 4    | >JAK2-L611V HLVVNYGV   | 4    | 0    |
| >JAK2-L611V HLVLNYGVC\ | 12   | >JAK2-L611V HLVVNYGVC\ | 10   | 2    |
| >JAK2-L611V HLVLNYGVC\ | 694  | >JAK2-L611V HLVVNYGVC\ | 481  | 213  |
| >JAK2-L611V HLVLNYGV   | 95   | >JAK2-L611V HLVVNYGV   | 77   | 18   |
| >JAK2-L611V HLVLNYGV   | 154  | >JAK2-L611V HLVVNYGV   | 111  | 43   |
| >JAK2-L611V HKHLVLNY   | 467  | >JAK2-L611V HKHLVVNY   | 5944 | 5477 |
| >JAK2-L611V HKHLVLNY   | 26   | >JAK2-L611V HKHLVVNY   | 14   | 12   |
| >JAK2-L611V SHKHLVLNY  | 438  | >JAK2-L611V SHKHLVVNY  | 3402 | 2964 |
| >JAK2-L611V SHKHLVLNY  | 17   | >JAK2-L611V SHKHLVVNY  | 1298 | 1281 |
| >JAK2-L611V SHKHLVLNY  | 52   | >JAK2-L611V SHKHLVVNY  | 31   | 21   |
| >JAK2-L611V LSHKHLVLNY | 211  | >JAK2-L611V LSHKHLVVNY | 119  | 92   |
| >JAK2-L611V LSHKHLVL   | 339  | >JAK2-L611V LSHKHLVV   | 205  | 134  |
| >JAK2-L611V LSHKHLVLNY | 542  | >JAK2-L611V LSHKHLVVNY | 329  | 213  |
| >JAK2-L611V LSHKHLVLNY | 149  | >JAK2-L611V LSHKHLVVNY | 2880 | 2731 |
| >JAK2-L611V LSHKHLVL   | 237  | >JAK2-L611V LSHKHLVV   | 1024 | 787  |
| >JAK2-L611V LSHKHLVLNY | 89   | >JAK2-L611V LSHKHLVVNY | 92   | 3    |
| >JAK2-L611V LSHKHLVL   | 323  | >JAK2-L611V LSHKHLVV   | 729  | 406  |
| >JAK2-L611V LSHKHLVLNY | 47   | >JAK2-L611V LSHKHLVVNY | 25   | 22   |
| >JAK2-L611V LSHKHLVL   | 38   | >JAK2-L611V LSHKHLVV   | 1262 | 1224 |
| >JAK2-L611V LSHKHLVLNY | 6    | >JAK2-L611V LSHKHLVVNY | 7    | 1    |
| >JAK2-L611V LSHKHLVLNY | 462  | >JAK2-L611V LSHKHLVVNY | 1330 | 868  |
| >JAK2-L611V LSHKHLVL   | 297  | >JAK2-L611V LSHKHLVV   | 1031 | 734  |
| >JAK2-L611V LSHKHLVLNY | 173  | >JAK2-L611V LSHKHLVVNY | 160  | 13   |

|                        |       |                        |       |       |
|------------------------|-------|------------------------|-------|-------|
| >JAK2-L611V LSHKHLVL   | 329   | >JAK2-L611V LSHKHLVV   | 1321  | 992   |
| >JAK2-L611V KLSHKHLVL  | 1056  | >JAK2-L611V KLSHKHLVV  | 280   | 776   |
| >JAK2-L611V KLSHKHLVL  | 91    | >JAK2-L611V KLSHKHLVV  | 81    | 10    |
| >JAK2-L611V KLSHKHLVL  | 134   | >JAK2-L611V KLSHKHLVV  | 13    | 121   |
| >JAK2-L611V KLSHKHLVL  | 3827  | >JAK2-L611V KLSHKHLVV  | 462   | 3365  |
| >JAK2-L611V KLSHKHLVL  | 176   | >JAK2-L611V KLSHKHLVV  | 13    | 163   |
| >JAK2-L611V KLSHKHLVL  | 323   | >JAK2-L611V KLSHKHLVV  | 35    | 288   |
| >JAK2-L611V KLSHKHLVL  | 536   | >JAK2-L611V KLSHKHLVV  | 23    | 513   |
| >JAK2-L611V KLSHKHLVL  | 6968  | >JAK2-L611V KLSHKHLVV  | 307   | 6661  |
| >JAK2-L611V KLSHKHLVL  | 53    | >JAK2-L611V KLSHKHLVV  | 6     | 47    |
| >JAK2-L611V KLSHKHLVLN | 46    | >JAK2-L611V KLSHKHLVVN | 60    | 14    |
| >JAK2-L611V KLSHKHLVLN | 36    | >JAK2-L611V KLSHKHLVVN | 154   | 118   |
| >JAK2-L611V KLSHKHLVL  | 692   | >JAK2-L611V KLSHKHLVV  | 411   | 281   |
| >JAK2-L611V KLSHKHLVLN | 72    | >JAK2-L611V KLSHKHLVVN | 81    | 9     |
| >JAK2-L611V KLSHKHLVL  | 248   | >JAK2-L611V KLSHKHLVV  | 944   | 696   |
| >JAK2-L611V KLSHKHLVLN | 518   | >JAK2-L611V KLSHKHLVVN | 247   | 271   |
| >JAK2-L611V KLSHKHLVLN | 4     | >JAK2-L611V KLSHKHLVVN | 13    | 9     |
| >JAK2-L611V KLSHKHLVL  | 168   | >JAK2-L611V KLSHKHLVV  | 806   | 638   |
| >JAK2-L611V KLSHKHLVLN | 101   | >JAK2-L611V KLSHKHLVVN | 125   | 24    |
| >JAK2-L611V KLSHKHLVL  | 352   | >JAK2-L611V KLSHKHLVV  | 642   | 290   |
| >JAK2-L611V KLSHKHLVLN | 81    | >JAK2-L611V KLSHKHLVVN | 58    | 23    |
| >JAK2-L611V KLSHKHLVLN | 81    | >JAK2-L611V KLSHKHLVVN | 157   | 76    |
| >JAK2-L611V KLSHKHLVLN | 166   | >JAK2-L611V KLSHKHLVVN | 423   | 257   |
| >JAK2-L611V SKLSHKHLVL | 39    | >JAK2-L611V SKLSHKHLVV | 84    | 45    |
| >JAK2-L611V SKLSHKHLVL | 72    | >JAK2-L611V SKLSHKHLVV | 1103  | 1031  |
| >JAK2-L624P LVQEFVKFGS | 475   | >JAK2-L624P PVQEFVKFGS | 6457  | 5982  |
| >JAK2-L624P LVQEFVKFGS | 277   | >JAK2-L624P PVQEFVKFGS | 11313 | 11036 |
| >JAK2-L624P LVQEFVKFGS | 480   | >JAK2-L624P PVQEFVKFGS | 5630  | 5150  |
| >JAK2-L624P LVQEFVKFGS | 440   | >JAK2-L624P PVQEFVKFGS | 8452  | 8012  |
| >JAK2-L624P LVQEFVKF   | 213   | >JAK2-L624P PVQEFVKF   | 2015  | 1802  |
| >JAK2-L624P LVQEFVKF   | 381   | >JAK2-L624P PVQEFVKF   | 4046  | 3665  |
| >JAK2-L624P ILVQEFVKF  | 35276 | >JAK2-L624P IPVQEFVKF  | 158   | 35118 |
| >JAK2-L624P ILVQEFVK   | 347   | >JAK2-L624P IPVQEFVK   | 18341 | 17994 |
| >JAK2-L624P ILVQEFVK   | 448   | >JAK2-L624P IPVQEFVK   | 15409 | 14961 |
| >JAK2-L624P ILVQEFVKF  | 46    | >JAK2-L624P IPVQEFVKF  | 325   | 279   |
| >JAK2-L624P ILVQEFVKF  | 286   | >JAK2-L624P IPVQEFVKF  | 14618 | 14332 |
| >JAK2-L624P ILVQEFVKF  | 25    | >JAK2-L624P IPVQEFVKF  | 166   | 141   |
| >JAK2-L624P ILVQEFVKF  | 2553  | >JAK2-L624P IPVQEFVKF  | 25    | 2528  |
| >JAK2-L624P ILVQEFVKF  | 12622 | >JAK2-L624P IPVQEFVKF  | 19    | 12603 |
| >JAK2-L624P ILVQEFVKF  | 4484  | >JAK2-L624P IPVQEFVKF  | 89    | 4395  |
| >JAK2-L624P ILVQEFVKF  | 5212  | >JAK2-L624P IPVQEFVKF  | 9     | 5203  |
| >JAK2-L624P NILVQEFV   | 268   | >JAK2-L624P NIPVQEFV   | 514   | 246   |
| >JAK2-L624P NILVQEFV   | 49    | >JAK2-L624P NIPVQEFV   | 267   | 218   |

|                        |      |                         |      |      |
|------------------------|------|-------------------------|------|------|
| >JAK2-L624P NILVQEFV   | 86   | >JAK2-L624P NIPVQEFV    | 656  | 570  |
| >JAK2-L624P NILVQEFV   | 295  | >JAK2-L624P NIPVQEFV    | 3812 | 3517 |
| >JAK2-L624P NILVQEFV   | 49   | >JAK2-L624P NIPVQEFV    | 505  | 456  |
| >JAK2-L624P NILVQEFV   | 39   | >JAK2-L624P NIPVQEFV    | 1878 | 1839 |
| >JAK2-L624P NILVQEFV   | 127  | >JAK2-L624P NIPVQEFV    | 248  | 121  |
| >JAK2-L624P NILVQEFVK  | 294  | >JAK2-L624P NIPVQEFVK   | 2511 | 2217 |
| >JAK2-L624P NILVQEFVK  | 337  | >JAK2-L624P NIPVQEFVK   | 453  | 116  |
| >JAK2-L624P NILVQEFV   | 205  | >JAK2-L624P NIPVQEFV    | 68   | 137  |
| >JAK2-L624P NILVQEFV   | 51   | >JAK2-L624P NIPVQEFV    | 2003 | 1952 |
| >JAK2-L624P ENILVQEF   | 464  | >JAK2-L624P ENIPVQEF    | 249  | 215  |
| >JAK2-L624P ENILVQEFV  | 12   | >JAK2-L624P ENIPVQEFV   | 8    | 4    |
| >JAK2-L624P DENILVQEF  | 418  | >JAK2-L624P DENIPVQEF   | 9393 | 8975 |
| >JAK2-L624P DENILVQEFV | 11   | >JAK2-L624P DENIPVQEFV  | 74   | 63   |
| >JAK2-L624P DENILVQE   | 498  | >JAK2-L624P DENIPVQE    | 3060 | 2562 |
| >JAK2-L624P DENILVQEF  | 7    | >JAK2-L624P DENIPVQEF   | 21   | 14   |
| >JAK2-L624P DENILVQEFV | 441  | >JAK2-L624P DENIPVQEFV  | 1659 | 1218 |
| >JAK2-L624P DENILVQEF  | 78   | >JAK2-L624P DENIPVQEF   | 76   | 2    |
| >JAK2-L624P DENILVQEF  | 120  | >JAK2-L624P DENIPVQEF   | 556  | 436  |
| >JAK2-L624P GDENILVQEF | 215  | >JAK2-L624P GDENIPVQEF  | 222  | 7    |
| >JAK2-L624P VCGDENILV  | 405  | >JAK2-L624P VCGDENIPV   | 521  | 116  |
| >JAK2-L624P CVCGDENILV | 267  | >JAK2-L624P CVCGDENIPV  | 179  | 88   |
| >JAK2-L624P CVCGDENILV | 285  | >JAK2-L624P CVCGDENIPV  | 382  | 97   |
| >JAK2-L624P CVCGDENILV | 815  | >JAK2-L624P CVCGDENIPV  | 386  | 429  |
| >JAK2-M535I MVFHKIRNEI | 482  | >JAK2-M535I IVFHKIRNEDL | 202  | 280  |
| >JAK2-M535I MVFHKIRNEI | 215  | >JAK2-M535I IVFHKIRNEDL | 924  | 709  |
| >JAK2-M535I MVFHKIRNEI | 268  | >JAK2-M535I IVFHKIRNEDL | 578  | 310  |
| >JAK2-M535I MVFHKIRNEI | 33   | >JAK2-M535I IVFHKIRNEDL | 1756 | 1723 |
| >JAK2-M535I QMVFHKIR   | 86   | >JAK2-M535I QIVFHKIR    | 462  | 376  |
| >JAK2-M535I QMVFHKIR   | 304  | >JAK2-M535I QIVFHKIR    | 122  | 182  |
| >JAK2-M535I QMVFHKIR   | 76   | >JAK2-M535I QIVFHKIR    | 127  | 51   |
| >JAK2-M535I TLQRPTHMN  | 2038 | >JAK2-M535I TLQRPTHMN   | 488  | 1550 |
| >JAK2-M535I TLQRPTHMN  | 2690 | >JAK2-M535I TLQRPTHMN   | 223  | 2467 |
| >JAK2-M535I TLQRPTHMN  | 1477 | >JAK2-M535I TLQRPTHMN   | 185  | 1292 |
| >JAK2-M535I TLQRPTHMN  | 2993 | >JAK2-M535I TLQRPTHMN   | 280  | 2713 |
| >JAK2-M535I TLQRPTHMN  | 386  | >JAK2-M535I TLQRPTHMN   | 61   | 325  |
| >JAK2-M535I TLQRPTHMN  | 447  | >JAK2-M535I TLQRPTHMN   | 8317 | 7870 |
| >JAK2-M535I NQMVFHKI   | 53   | >JAK2-M535I NQIVFHKI    | 90   | 37   |
| >JAK2-M535I NQMVFHKIR  | 99   | >JAK2-M535I NQIVFHKIR   | 249  | 150  |
| >JAK2-M535I NQMVFHKI   | 302  | >JAK2-M535I NQIVFHKI    | 593  | 291  |
| >JAK2-M535I NQMVFHKIR  | 364  | >JAK2-M535I NQIVFHKIR   | 614  | 250  |
| >JAK2-M535I NQMVFHKIR  | 128  | >JAK2-M535I NQIVFHKIR   | 164  | 36   |
| >JAK2-M535I MNQMVFHK   | 328  | >JAK2-M535I MNQIVFHKI   | 476  | 148  |
| >JAK2-M535I MNQMVFHK   | 178  | >JAK2-M535I MNQIVFHK    | 385  | 207  |

|                     |      |                       |     |     |
|---------------------|------|-----------------------|-----|-----|
| >JAK2-M535IMNQMVFHK | 506  | >JAK2-M535IMNQIVFHKI  | 429 | 77  |
| >JAK2-M535IMNQMVFHK | 328  | >JAK2-M535IMNQIVFHK   | 337 | 9   |
| >JAK2-M535IMNQMVFHK | 280  | >JAK2-M535IMNQIVFHKIF | 344 | 64  |
| >JAK2-M535IMNQMVFHK | 170  | >JAK2-M535IMNQIVFHKIF | 261 | 91  |
| >JAK2-M535IMNQMVFHK | 170  | >JAK2-M535IMNQIVFHK   | 204 | 34  |
| >JAK2-M535IMNQMVFHK | 404  | >JAK2-M535IMNQIVFHKIF | 389 | 15  |
| >JAK2-M535IMNQMVFHK | 484  | >JAK2-M535IMNQIVFHKI  | 370 | 114 |
| >JAK2-M535IHMNQMVFH | 481  | >JAK2-M535IHMNQIVFHK  | 327 | 154 |
| >JAK2-M535IHMNQMVFH | 244  | >JAK2-M535IHMNQIVFHK  | 225 | 19  |
| >JAK2-M535IHMNQMVFH | 12   | >JAK2-M535IHMNQIVFHK  | 8   | 4   |
| >JAK2-M535IHMNQMVFH | 34   | >JAK2-M535IHMNQIVFHK  | 26  | 8   |
| >JAK2-M535IHMNQMVFH | 39   | >JAK2-M535IHMNQIVFHK  | 30  | 9   |
| >JAK2-M535IHMNQMVFH | 49   | >JAK2-M535IHMNQIVFHK  | 37  | 12  |
| >JAK2-M535IHMNQMVFH | 9    | >JAK2-M535IHMNQIVFHK  | 11  | 2   |
| >JAK2-M535IHMNQMVFH | 322  | >JAK2-M535IHMNQIVFH   | 302 | 20  |
| >JAK2-M535IHMNQMVFH | 35   | >JAK2-M535IHMNQIVFHK  | 34  | 1   |
| >JAK2-M535IHMNQMVFH | 26   | >JAK2-M535IHMNQIVFHK  | 30  | 4   |
| >JAK2-M535IHMNQMVFH | 105  | >JAK2-M535IHMNQIVFHK  | 133 | 28  |
| >JAK2-M535IHMNQMVFH | 284  | >JAK2-M535IHMNQIVFH   | 211 | 73  |
| >JAK2-M535IHMNQMVFH | 17   | >JAK2-M535IHMNQIVFHK  | 14  | 3   |
| >JAK2-M535IHMNQMVFH | 13   | >JAK2-M535IHMNQIVFHK  | 13  | 0   |
| >JAK2-M535IHMNQMVFH | 133  | >JAK2-M535IHMNQIVFHK  | 95  | 38  |
| >JAK2-M535IHMNQMVFH | 292  | >JAK2-M535IHMNQIVFHK  | 147 | 145 |
| >JAK2-M535IHMNQMVFH | 174  | >JAK2-M535IHMNQIVFHK  | 119 | 55  |
| >JAK2-M535IHMNQMVFH | 82   | >JAK2-M535IHMNQIVFHK  | 36  | 46  |
| >JAK2-M535IHMNQMVFH | 152  | >JAK2-M535IHMNQIVFHK  | 84  | 68  |
| >JAK2-M535IHMNQMVFH | 441  | >JAK2-M535IHMNQIVFHK  | 208 | 233 |
| >JAK2-M535IHMNQMVFH | 474  | >JAK2-M535IHMNQIVFHK  | 473 | 1   |
| >JAK2-M535IHMNQMVFH | 129  | >JAK2-M535IHMNQIVFHK  | 63  | 66  |
| >JAK2-M535IHMNQMVFH | 34   | >JAK2-M535IHMNQIVFHK  | 24  | 10  |
| >JAK2-M535ITHMNQMV  | 318  | >JAK2-M535ITHMNQIVFH  | 435 | 117 |
| >JAK2-M535ITHMNQMV  | 197  | >JAK2-M535ITHMNQIVF   | 447 | 250 |
| >JAK2-M535ITHMNQMV  | 20   | >JAK2-M535ITHMNQIVF   | 29  | 9   |
| >JAK2-M535ITHMNQMV  | 60   | >JAK2-M535ITHMNQIVF   | 56  | 4   |
| >JAK2-M535ITHMNQMV  | 215  | >JAK2-M535ITHMNQIVFH  | 255 | 40  |
| >JAK2-M535ITHMNQMV  | 457  | >JAK2-M535ITHMNQIVFH  | 825 | 368 |
| >JAK2-M535IPTHMNQMV | 396  | >JAK2-M535IPTHMNQIVFI | 494 | 98  |
| >JAK2-M535IPTHMNQMV | 20   | >JAK2-M535IPTHMNQIVFI | 22  | 2   |
| >JAK2-M535IPTHMNQMV | 421  | >JAK2-M535IPTHMNQIVF  | 994 | 573 |
| >JAK2-M535IPTHMNQMV | 465  | >JAK2-M535IPTHMNQIVF  | 594 | 129 |
| >JAK2-M535IPTHMNQMV | 1058 | >JAK2-M535IPTHMNQIV   | 446 | 612 |
| >JAK2-M535IPTHMNQM  | 17   | >JAK2-M535IPTHMNQI    | 42  | 25  |
| >JAK2-M535IPTHMNQM  | 54   | >JAK2-M535IPTHMNQIV   | 40  | 14  |

|                      |       |                       |      |       |
|----------------------|-------|-----------------------|------|-------|
| >JAK2-M535IRPTHMNQM  | 30    | >JAK2-M535IRPTHMNQIV  | 45   | 15    |
| >JAK2-M535IRPTHMNQM  | 74    | >JAK2-M535IRPTHMNQIV  | 119  | 45    |
| >JAK2-M535IRPTHMNQM  | 193   | >JAK2-M535IRPTHMNQI   | 6772 | 6579  |
| >JAK2-M535IRPTHMNQM  | 111   | >JAK2-M535IRPTHMNQIV  | 120  | 9     |
| >JAK2-M535IRPTHMNQM  | 261   | >JAK2-M535IRPTHMNQIV  | 383  | 122   |
| >JAK2-M535IRPTHMNQM  | 209   | >JAK2-M535IRPTHMNQI   | 1466 | 1257  |
| >JAK2-M535IRPTHMNQM  | 580   | >JAK2-M535IRPTHMNQIV  | 371  | 209   |
| >JAK2-M535IRPTHMNQM  | 115   | >JAK2-M535IRPTHMNQIV  | 83   | 32    |
| >JAK2-M535IRPTHMNQM  | 198   | >JAK2-M535IRPTHMNQIV  | 217  | 19    |
| >JAK2-M535IQRPTHMNQI | 94    | >JAK2-M535IQRPTHMNQI  | 155  | 61    |
| >JAK2-M535IQRPTHMNQI | 389   | >JAK2-M535IQRPTHMNQI  | 283  | 106   |
| >JAK2-M535IQRPTHMNC  | 289   | >JAK2-M535IQRPTHMNC   | 407  | 118   |
| >JAK2-M535IQRPTHMNC  | 415   | >JAK2-M535IQRPTHMNC   | 674  | 259   |
| >JAK2-M535IQRPTHMNC  | 419   | >JAK2-M535IQRPTHMNC   | 783  | 364   |
| >JAK2-M535IQRPTHMNC  | 127   | >JAK2-M535IQRPTHMNC   | 51   | 76    |
| >JAK2-M535IQRPTHMNC  | 80    | >JAK2-M535IQRPTHMNC   | 63   | 17    |
| >JAK2-M535IQRPTHMNC  | 45    | >JAK2-M535IQRPTHMNC   | 228  | 183   |
| >JAK2-M535IQRPTHMNC  | 198   | >JAK2-M535IQRPTHMNC   | 248  | 50    |
| >JAK2-M535IQRPTHMNC  | 11    | >JAK2-M535IQRPTHMNC   | 31   | 20    |
| >JAK2-M535IQRPTHMNC  | 15    | >JAK2-M535IQRPTHMNC   | 13   | 2     |
| >JAK2-N110ENNVNQRPSF | 1201  | >JAK2-N110ENNVNQRPSFF | 437  | 764   |
| >JAK2-N110ENNVNQRPSF | 525   | >JAK2-N110ENNVNQRPSF  | 167  | 358   |
| >JAK2-N110ENNVNQRPS  | 1478  | >JAK2-N110ENNVNQRPS   | 56   | 1422  |
| >JAK2-N110ENNVNQRPS  | 2301  | >JAK2-N110ENNVNQRPS   | 130  | 2171  |
| >JAK2-N110ENNVNQRPS  | 293   | >JAK2-N110ENNVNQRPS   | 29   | 264   |
| >JAK2-N110ENNVNQRPS  | 949   | >JAK2-N110ENNVNQRPS   | 176  | 773   |
| >JAK2-N110ENNVNQRPS  | 22495 | >JAK2-N110ENNVNQRPS   | 211  | 22284 |
| >JAK2-N110EWNNNVNQR  | 397   | >JAK2-N110EWNNNVNQR   | 223  | 174   |
| >JAK2-N110EWNNNVNQR  | 75    | >JAK2-N110EWNNNVNQRI  | 80   | 5     |
| >JAK2-N110EWNNNVNQR  | 481   | >JAK2-N110EWNNNVNQRI  | 274  | 207   |
| >JAK2-N110ECWNNNVNQ  | 474   | >JAK2-N110ECWNNNVNQI  | 345  | 129   |
| >JAK2-N110ECWNNNVNQ  | 39    | >JAK2-N110ECWNNNVNQI  | 29   | 10    |
| >JAK2-N110ECWNNNVNC  | 100   | >JAK2-N110ECWNNNVNC   | 137  | 37    |
| >JAK2-N110TECWNSNV   | 93    | >JAK2-N110TECWNSNV    | 228  | 135   |
| >JAK2-N110TECWNSNV   | 278   | >JAK2-N110TECWNSVN    | 310  | 32    |
| >JAK2-N110TECWNSNV   | 330   | >JAK2-N110TECWNSNV    | 320  | 10    |
| >JAK2-N110TECWNSNV   | 441   | >JAK2-N110TECWNSNV    | 477  | 36    |
| >JAK2-N110MTECWNSN   | 870   | >JAK2-N110MTECWNSN    | 329  | 541   |
| >JAK2-N110MTECWNSN   | 343   | >JAK2-N110MTECWNSN    | 136  | 207   |
| >JAK2-N110MTECWNSN   | 941   | >JAK2-N110MTECWNSN    | 345  | 596   |
| >JAK2-N110MTECWNSN   | 7     | >JAK2-N110MTECWNSN    | 8    | 1     |
| >JAK2-N110MTECWNSN   | 8     | >JAK2-N110MTECWNSN    | 9    | 1     |
| >JAK2-N110MTECWNSN   | 276   | >JAK2-N110MTECWNSN    | 19   | 257   |

|                       |       |                       |     |       |
|-----------------------|-------|-----------------------|-----|-------|
| >JAK2-N110EIMTECWNNN  | 80    | >JAK2-N110EIMTECWNSN  | 62  | 18    |
| >JAK2-N110EIMTECWNNN  | 41    | >JAK2-N110EIMTECWNSN  | 26  | 15    |
| >JAK2-N110EIMTECWNNN  | 81    | >JAK2-N110EIMTECWNSN  | 34  | 47    |
| >JAK2-N110EIMTECWNNN  | 189   | >JAK2-N110EIMTECWNSN  | 141 | 48    |
| >JAK2-N110EIMTECWNNN  | 4     | >JAK2-N110EIMTECWNSN  | 3   | 1     |
| >JAK2-N110EIMTECWNNN  | 6     | >JAK2-N110EIMTECWNSN  | 6   | 0     |
| >JAK2-N110EIMTECWNNN  | 8     | >JAK2-N110EIMTECWNSN  | 7   | 1     |
| >JAK2-N110EIMTECWNNN  | 7     | >JAK2-N110EIMTECWNSN  | 5   | 2     |
| >JAK2-N110EIMTECWNN   | 3222  | >JAK2-N110EIMTECWNS   | 399 | 2823  |
| >JAK2-N110EIMTECWNNN  | 2     | >JAK2-N110EIMTECWNSN  | 2   | 0     |
| >JAK2-N110EIMTECWNNN  | 508   | >JAK2-N110EIMTECWNSN  | 279 | 229   |
| >JAK2-N110EMIMTECWNI  | 14    | >JAK2-N110EMIMTECWNS  | 14  | 0     |
| >JAK2-N110EMIMTECWNI  | 2263  | >JAK2-N110EMIMTECWNS  | 289 | 1974  |
| >JAK2-N110EMIMTECWNI  | 6     | >JAK2-N110EMIMTECWNS  | 7   | 1     |
| >JAK2-N110EMIMTECWNI  | 7     | >JAK2-N110EMIMTECWNS  | 5   | 2     |
| >JAK2-N110EMIMTECWNI  | 13    | >JAK2-N110EMIMTECWNS  | 14  | 1     |
| >JAK2-N110EMIMTECWNI  | 34    | >JAK2-N110EMIMTECWNS  | 22  | 12    |
| >JAK2-N110EMIMTECWNI  | 34    | >JAK2-N110EMIMTECWNS  | 32  | 2     |
| >JAK2-N110EMIMTECWNI  | 141   | >JAK2-N110EMIMTECWNS  | 109 | 32    |
| >JAK2-N110EMIMTECWNI  | 10    | >JAK2-N110EMIMTECWNS  | 7   | 3     |
| >JAK2-N110EMIMTECWNI  | 7     | >JAK2-N110EMIMTECWNS  | 4   | 3     |
| >JAK2-N110EMIMTECWNI  | 10    | >JAK2-N110EMIMTECWNS  | 11  | 1     |
| >JAK2-N110EMIMTECWNI  | 17    | >JAK2-N110EMIMTECWNS  | 18  | 1     |
| >JAK2-N110EYMIMTECWNI | 1997  | >JAK2-N110EYMIMTECWNI | 212 | 1785  |
| >JAK2-N110EYMIMTECWNI | 1394  | >JAK2-N110EYMIMTECWNI | 105 | 1289  |
| >JAK2-N110EYMIMTECWNI | 584   | >JAK2-N110EYMIMTECWNI | 118 | 466   |
| >JAK2-N110EYMIMTECWNI | 3151  | >JAK2-N110EYMIMTECWNI | 413 | 2738  |
| >JAK2-N110EYMIMTECWNI | 671   | >JAK2-N110EYMIMTECWNI | 58  | 613   |
| >JAK2-N533YNQMVFHKI   | 1970  | >JAK2-N533YNQMVFHKI   | 58  | 1912  |
| >JAK2-N533YNQMVFHKI   | 548   | >JAK2-N533YNQMVFHKI   | 47  | 501   |
| >JAK2-N533YNQMVFHKI   | 1170  | >JAK2-N533YNQMVFHKI   | 80  | 1090  |
| >JAK2-N533YNQMVFHKI   | 53    | >JAK2-N533YNQMVFHKI   | 8   | 45    |
| >JAK2-N533YNQMVFHKI   | 5025  | >JAK2-N533YNQMVFHKI   | 115 | 4910  |
| >JAK2-N533YNQMVFHKI   | 2884  | >JAK2-N533YNQMVFHKI   | 154 | 2730  |
| >JAK2-N533YNQMVFHKI   | 4645  | >JAK2-N533YNQMVFHKI   | 473 | 4172  |
| >JAK2-N533YNQMVFHKIR  | 99    | >JAK2-N533YNQMVFHKIR  | 38  | 61    |
| >JAK2-N533YNQMVFHKI   | 302   | >JAK2-N533YNQMVFHKI   | 20  | 282   |
| >JAK2-N533YNQMVFHKIR  | 364   | >JAK2-N533YNQMVFHKIR  | 19  | 345   |
| >JAK2-N533YNQMVFHKI   | 2530  | >JAK2-N533YNQMVFHKI   | 264 | 2266  |
| >JAK2-N533YNQMVFHKI   | 612   | >JAK2-N533YNQMVFHKI   | 173 | 439   |
| >JAK2-N533YNQMVFHKI   | 5654  | >JAK2-N533YNQMVFHKI   | 363 | 5291  |
| >JAK2-N533YNQMVFHKIR  | 128   | >JAK2-N533YNQMVFHKIR  | 116 | 12    |
| >JAK2-N533YMNQMVFHKI  | 24529 | >JAK2-N533YMYQMVFHKI  | 34  | 24495 |



|                       |       |                       |      |       |
|-----------------------|-------|-----------------------|------|-------|
| >JAK2-N533YMNQMVFHK   | 328   | >JAK2-N533YMYQMVFHKI  | 431  | 103   |
| >JAK2-N533YMNQMVFHK   | 178   | >JAK2-N533YMYQMVFHK   | 80   | 98    |
| >JAK2-N533YMNQMVFHK   | 8585  | >JAK2-N533YMYQMVFHK   | 44   | 8541  |
| >JAK2-N533YMNQMVFHK   | 506   | >JAK2-N533YMYQMVFHKI  | 9    | 497   |
| >JAK2-N533YMNQMVFHK   | 7200  | >JAK2-N533YMYQMVFHKI  | 31   | 7169  |
| >JAK2-N533YMNQMVFHK   | 24799 | >JAK2-N533YMYQMVFHK   | 150  | 24649 |
| >JAK2-N533YMNQMVFHK   | 9014  | >JAK2-N533YMYQMVFHKI  | 4    | 9010  |
| >JAK2-N533YMNQMVFHK   | 1786  | >JAK2-N533YMYQMVFHK   | 40   | 1746  |
| >JAK2-N533YMNQMVFHK   | 328   | >JAK2-N533YMYQMVFHK   | 14   | 314   |
| >JAK2-N533YMNQMVFHK   | 280   | >JAK2-N533YMYQMVFHKI  | 21   | 259   |
| >JAK2-N533YMNQMVFHK   | 6085  | >JAK2-N533YMYQMVFHK   | 47   | 6038  |
| >JAK2-N533YMNQMVFHK   | 170   | >JAK2-N533YMYQMVFHKI  | 22   | 148   |
| >JAK2-N533YMNQMVFHK   | 170   | >JAK2-N533YMYQMVFHK   | 178  | 8     |
| >JAK2-N533YMNQMVFHK   | 6196  | >JAK2-N533YMYQMVFHK   | 106  | 6090  |
| >JAK2-N533YMNQMVFHK   | 404   | >JAK2-N533YMYQMVFHKI  | 36   | 368   |
| >JAK2-N533YMNQMVFHK   | 9917  | >JAK2-N533YMYQMVFHKI  | 262  | 9655  |
| >JAK2-N533YMNQMVFHK   | 20267 | >JAK2-N533YMYQMVFHKI  | 153  | 20114 |
| >JAK2-N533YMNQMVFHK   | 484   | >JAK2-N533YMYQMVFHKI  | 2925 | 2441  |
| >JAK2-N533YSPTLQRPTHM | 12486 | >JAK2-N533YSPTLQRPTHM | 56   | 12430 |
| >JAK2-N533YSPTLQRPTHM | 23740 | >JAK2-N533YSPTLQRPTHM | 314  | 23426 |
| >JAK2-N533YSPTLQRPTHM | 22512 | >JAK2-N533YSPTLQRPTHM | 48   | 22464 |
| >JAK2-N533YHMNQMVFH   | 1992  | >JAK2-N533YHMYQMVFH   | 315  | 1677  |
| >JAK2-N533YHMNQMVFH   | 1720  | >JAK2-N533YHMYQMVFH   | 182  | 1538  |
| >JAK2-N533YHMNQMVFH   | 481   | >JAK2-N533YHMYQMVFH   | 77   | 404   |
| >JAK2-N533YHMNQMVFH   | 244   | >JAK2-N533YHMYQMVFH   | 44   | 200   |
| >JAK2-N533YHMNQMVFH   | 3273  | >JAK2-N533YHMYQMVFH   | 468  | 2805  |
| >JAK2-N533YHMNQMVFH   | 12    | >JAK2-N533YHMYQMVFH   | 3    | 9     |
| >JAK2-N533YHMNQMVFH   | 34    | >JAK2-N533YHMYQMVFH   | 13   | 21    |
| >JAK2-N533YHMNQMVFH   | 39    | >JAK2-N533YHMYQMVFH   | 10   | 29    |
| >JAK2-N533YHMNQMVFH   | 49    | >JAK2-N533YHMYQMVFH   | 58   | 9     |
| >JAK2-N533YHMNQMVFH   | 1963  | >JAK2-N533YHMYQMVFH   | 295  | 1668  |
| >JAK2-N533YHMNQMVFH   | 9     | >JAK2-N533YHMYQMVFH   | 4    | 5     |
| >JAK2-N533YHMNQMVFH   | 322   | >JAK2-N533YHMYQMVFH   | 66   | 256   |
| >JAK2-N533YHMNQMVFH   | 35    | >JAK2-N533YHMYQMVFH   | 24   | 11    |
| >JAK2-N533YHMNQMVFH   | 1516  | >JAK2-N533YHMYQMVFH   | 222  | 1294  |
| >JAK2-N533YHMNQMVFH   | 26    | >JAK2-N533YHMYQMVFH   | 14   | 12    |
| >JAK2-N533YHMNQMVFH   | 105   | >JAK2-N533YHMYQMVFH   | 88   | 17    |
| >JAK2-N533YHMNQMVFH   | 284   | >JAK2-N533YHMYQMVFH   | 255  | 29    |
| >JAK2-N533YHMNQMVFH   | 17    | >JAK2-N533YHMYQMVFH   | 19   | 2     |
| >JAK2-N533YHMNQMVFH   | 13    | >JAK2-N533YHMYQMVFH   | 14   | 1     |
| >JAK2-N533YHMNQMVFH   | 133   | >JAK2-N533YHMYQMVFH   | 38   | 95    |
| >JAK2-N533YHMNQMVFH   | 292   | >JAK2-N533YHMYQMVFH   | 129  | 163   |
| >JAK2-N533YHMNQMVFH   | 174   | >JAK2-N533YHMYQMVFH   | 97   | 77    |

|                      |       |                      |      |       |
|----------------------|-------|----------------------|------|-------|
| >JAK2-N533YHMNQMVFH  | 82    | >JAK2-N533YHMYQMVFH  | 18   | 64    |
| >JAK2-N533YHMNQMVFH  | 152   | >JAK2-N533YHMYQMVFH  | 46   | 106   |
| >JAK2-N533YHMNQMVFH  | 812   | >JAK2-N533YHMYQMVFH  | 172  | 640   |
| >JAK2-N533YHMNQMVFH  | 441   | >JAK2-N533YHMYQMVFH  | 70   | 371   |
| >JAK2-N533YHMNQMVFH  | 1611  | >JAK2-N533YHMYQMVFH  | 261  | 1350  |
| >JAK2-N533YHMNQMVFH  | 1859  | >JAK2-N533YHMYQMVFH  | 345  | 1514  |
| >JAK2-N533YHMNQMVFH  | 474   | >JAK2-N533YHMYQMVFH  | 333  | 141   |
| >JAK2-N533YHMNQMVFH  | 129   | >JAK2-N533YHMYQMVFH  | 45   | 84    |
| >JAK2-N533YHMNQMVFH  | 34    | >JAK2-N533YHMYQMVFH  | 18   | 16    |
| >JAK2-N533YTHMNQMV   | 318   | >JAK2-N533YTHMYQMV   | 190  | 128   |
| >JAK2-N533YTHMNQMV   | 197   | >JAK2-N533YTHMYQMV   | 410  | 213   |
| >JAK2-N533YTHMNQMV   | 20    | >JAK2-N533YTHMYQMV   | 20   | 0     |
| >JAK2-N533YTHMNQMV   | 60    | >JAK2-N533YTHMYQMV   | 66   | 6     |
| >JAK2-N533YTHMNQMV   | 215   | >JAK2-N533YTHMYQMV   | 279  | 64    |
| >JAK2-N533YTHMNQMV   | 457   | >JAK2-N533YTHMYQMV   | 510  | 53    |
| >JAK2-N533YPTHMNQMV  | 396   | >JAK2-N533YPTHMYQMV  | 220  | 176   |
| >JAK2-N533YPTHMNQMV  | 20    | >JAK2-N533YPTHMYQMV  | 20   | 0     |
| >JAK2-N533YPTHMNQMV  | 421   | >JAK2-N533YPTHMYQMV  | 167  | 254   |
| >JAK2-N533YPTHMNQMV  | 465   | >JAK2-N533YPTHMYQMV  | 279  | 186   |
| >JAK2-N533YRPTHMNQM  | 1053  | >JAK2-N533YRPTHMYQM  | 327  | 726   |
| >JAK2-N533YRPTHMNQM  | 17    | >JAK2-N533YRPTHMYQM  | 19   | 2     |
| >JAK2-N533YRPTHMNQM  | 54    | >JAK2-N533YRPTHMYQM  | 72   | 18    |
| >JAK2-N533YRPTHMNQM  | 30    | >JAK2-N533YRPTHMYQM  | 27   | 3     |
| >JAK2-N533YRPTHMNQM  | 74    | >JAK2-N533YRPTHMYQM  | 49   | 25    |
| >JAK2-N533YRPTHMNQM  | 193   | >JAK2-N533YRPTHMYQM  | 93   | 100   |
| >JAK2-N533YRPTHMNQM  | 111   | >JAK2-N533YRPTHMYQM  | 74   | 37    |
| >JAK2-N533YRPTHMNQM  | 261   | >JAK2-N533YRPTHMYQM  | 241  | 20    |
| >JAK2-N533YRPTHMNQM  | 209   | >JAK2-N533YRPTHMYQM  | 4992 | 4783  |
| >JAK2-N533YRPTHMNQM  | 115   | >JAK2-N533YRPTHMYQM  | 55   | 60    |
| >JAK2-N533YRPTHMNQM  | 198   | >JAK2-N533YRPTHMYQM  | 82   | 116   |
| >JAK2-N533YQRPTHMNQI | 94    | >JAK2-N533YQRPTHMYQI | 88   | 6     |
| >JAK2-N533YQRPTHMNQI | 389   | >JAK2-N533YQRPTHMYQI | 322  | 67    |
| >JAK2-N533YLQRPTHMNC | 289   | >JAK2-N533YLQRPTHMYQ | 124  | 165   |
| >JAK2-N533YLQRPTHMNC | 415   | >JAK2-N533YLQRPTHMYQ | 183  | 232   |
| >JAK2-N533YLQRPTHMNC | 419   | >JAK2-N533YLQRPTHMYQ | 235  | 184   |
| >JAK2-N533YLQRPTHMN  | 23424 | >JAK2-N533YLQRPTHMY  | 180  | 23244 |
| >JAK2-N533YLQRPTHMN  | 3168  | >JAK2-N533YLQRPTHMY  | 429  | 2739  |
| >JAK2-N533YLQRPTHMNC | 45    | >JAK2-N533YLQRPTHMYQ | 16   | 29    |
| >JAK2-N533YLQRPTHMNC | 127   | >JAK2-N533YLQRPTHMYQ | 156  | 29    |
| >JAK2-N533YLQRPTHMNC | 80    | >JAK2-N533YLQRPTHMYQ | 50   | 30    |
| >JAK2-N533YLQRPTHMN  | 22540 | >JAK2-N533YLQRPTHMY  | 109  | 22431 |
| >JAK2-N533YLQRPTHMN  | 4298  | >JAK2-N533YLQRPTHMY  | 34   | 4264  |
| >JAK2-N533YLQRPTHMNC | 794   | >JAK2-N533YLQRPTHMYQ | 309  | 485   |

|                         |       |                         |     |       |
|-------------------------|-------|-------------------------|-----|-------|
| >JAK2-N533YLQRPTHMNC    | 45    | >JAK2-N533YLQRPTHMYQ    | 44  | 1     |
| >JAK2-N533YLQRPTHMNC    | 198   | >JAK2-N533YLQRPTHMYQ    | 194 | 4     |
| >JAK2-N533YLQRPTHMN     | 15921 | >JAK2-N533YLQRPTHMY     | 74  | 15847 |
| >JAK2-N533YLQRPTHMN     | 1748  | >JAK2-N533YLQRPTHMY     | 4   | 1744  |
| >JAK2-N533YLQRPTHMNC    | 75    | >JAK2-N533YLQRPTHMYQ    | 79  | 4     |
| >JAK2-N533YLQRPTHMNC    | 11    | >JAK2-N533YLQRPTHMYQ    | 9   | 2     |
| >JAK2-N533YLQRPTHMNC    | 15    | >JAK2-N533YLQRPTHMYQ    | 12  | 3     |
| >JAK2-N533YLQRPTHMN     | 22832 | >JAK2-N533YLQRPTHMY     | 350 | 22482 |
| >JAK2-N533YTLQRPTHMN    | 1477  | >JAK2-N533YTLQRPTHMYI   | 421 | 1056  |
| >JAK2-N533YTLQRPTHMN    | 481   | >JAK2-N533YTLQRPTHMYI   | 188 | 293   |
| >JAK2-N533YTLQRPTHMN    | 386   | >JAK2-N533YTLQRPTHMYI   | 193 | 193   |
| >JAK2-N533YTLQRPTHMN    | 16906 | >JAK2-N533YTLQRPTHMY    | 401 | 16505 |
| >JAK2-N533YTLQRPTHMN    | 447   | >JAK2-N533YTLQRPTHMYI   | 462 | 15    |
| >JAK2-N533YTLQRPTHMN    | 18652 | >JAK2-N533YTLQRPTHMY    | 68  | 18584 |
| >JAK2-N533YTLQRPTHMN    | 15054 | >JAK2-N533YTLQRPTHMY    | 86  | 14968 |
| >JAK2-N533YTLQRPTHMN    | 23484 | >JAK2-N533YTLQRPTHMY    | 34  | 23450 |
| >JAK2-N533YTLQRPTHMN    | 21753 | >JAK2-N533YTLQRPTHMY    | 308 | 21445 |
| >JAK2-N533YTLQRPTHMN    | 9692  | >JAK2-N533YTLQRPTHMY    | 28  | 9664  |
| >JAK2-N533YPTLQRPTHMI   | 24774 | >JAK2-N533YPTLQRPTHMI   | 223 | 24551 |
| >JAK2-N533YPTLQRPTHMI   | 23859 | >JAK2-N533YPTLQRPTHMI   | 49  | 23810 |
| >JAK2-N533YPTLQRPTHMI   | 29772 | >JAK2-N533YPTLQRPTHMI   | 499 | 29273 |
| >JAK2-N533YPTLQRPTHMI   | 23349 | >JAK2-N533YPTLQRPTHMI   | 171 | 23178 |
| >JAK2-P503L KPKDKSNLLVF | 333   | >JAK2-P503L KDKDKSNLLVF | 20  | 313   |
| >JAK2-P503L KPKDKSNLL   | 23830 | >JAK2-P503L KDKDKSNLL   | 487 | 23343 |
| >JAK2-P503L KPKDKSNLLV  | 22213 | >JAK2-P503L KDKDKSNLLV  | 228 | 21985 |
| >JAK2-P503L KPKDKSNL    | 27683 | >JAK2-P503L KDKDKSNL    | 49  | 27634 |
| >JAK2-P503L KPKDKSNLL   | 18973 | >JAK2-P503L KDKDKSNLL   | 8   | 18965 |
| >JAK2-P503L KPKDKSNLLV  | 14918 | >JAK2-P503L KDKDKSNLLV  | 37  | 14881 |
| >JAK2-P503L KPKDKSNL    | 18605 | >JAK2-P503L KDKDKSNL    | 23  | 18582 |
| >JAK2-P503L KPKDKSNLL   | 16631 | >JAK2-P503L KDKDKSNLL   | 11  | 16620 |
| >JAK2-P503L KPKDKSNLLV  | 11863 | >JAK2-P503L KDKDKSNLLV  | 31  | 11832 |
| >JAK2-P503L KPKDKSNLLV  | 21619 | >JAK2-P503L KDKDKSNLLV  | 45  | 21574 |
| >JAK2-P503L KPKDKSNL    | 24022 | >JAK2-P503L KDKDKSNL    | 213 | 23809 |
| >JAK2-P503L KPKDKSNLL   | 23855 | >JAK2-P503L KDKDKSNLL   | 81  | 23774 |
| >JAK2-P503L KPKDKSNLLV  | 21945 | >JAK2-P503L KDKDKSNLLV  | 28  | 21917 |
| >JAK2-P503L KPKDKSNLLV  | 23996 | >JAK2-P503L KDKDKSNLLV  | 72  | 23924 |
| >JAK2-P503L KPKDKSNL    | 28652 | >JAK2-P503L KDKDKSNL    | 11  | 28641 |
| >JAK2-P503L KPKDKSNLL   | 28857 | >JAK2-P503L KDKDKSNLL   | 12  | 28845 |
| >JAK2-P503L KPKDKSNLLV  | 18339 | >JAK2-P503L KDKDKSNLLV  | 4   | 18335 |
| >JAK2-P503L KPKDKSNL    | 13007 | >JAK2-P503L KDKDKSNL    | 248 | 12759 |
| >JAK2-P503L KPKDKSNLL   | 9432  | >JAK2-P503L KDKDKSNLL   | 37  | 9395  |
| >JAK2-P503L KPKDKSNLLV  | 5991  | >JAK2-P503L KDKDKSNLLV  | 17  | 5974  |
| >JAK2-P503L KPKDKSNLLV  | 16892 | >JAK2-P503L KDKDKSNLLV  | 345 | 16547 |

|                        |       |                        |       |       |
|------------------------|-------|------------------------|-------|-------|
| >JAK2-P503L KPKDKSNL   | 55    | >JAK2-P503L KLKDKSNL   | 12059 | 12004 |
| >JAK2-P503L KPKDKSNLL  | 102   | >JAK2-P503L KLKDKSNLL  | 14644 | 14542 |
| >JAK2-P503L KPKDKSNLLV | 162   | >JAK2-P503L KLKDKSNLLV | 26927 | 26765 |
| >JAK2-P503L KPKDKSNLLV | 99    | >JAK2-P503L KLKDKSNLLV | 15426 | 15327 |
| >JAK2-P503L KPKDKSNLLV | 4692  | >JAK2-P503L KLKDKSNLLV | 47    | 4645  |
| >JAK2-P503L KPKDKSNLLV | 450   | >JAK2-P503L KLKDKSNLLV | 50    | 400   |
| >JAK2-P503L KPKDKSNLLV | 5824  | >JAK2-P503L KLKDKSNLLV | 256   | 5568  |
| >JAK2-P503L FQFTKCCPPK | 14722 | >JAK2-P503L FQFTKCCPPK | 25    | 14697 |
| >JAK2-P503L FQFTKCCPPK | 8094  | >JAK2-P503L FQFTKCCPPK | 47    | 8047  |
| >JAK2-P503L FQFTKCCPPK | 10373 | >JAK2-P503L FQFTKCCPPK | 118   | 10255 |
| >JAK2-P503L FQFTKCCPPK | 1789  | >JAK2-P503L FQFTKCCPPK | 16    | 1773  |
| >JAK2-P503L FQFTKCCPPK | 16068 | >JAK2-P503L FQFTKCCPPK | 161   | 15907 |
| >JAK2-P503L FQFTKCCPPK | 14619 | >JAK2-P503L FQFTKCCPPK | 438   | 14181 |
| >JAK2-P503L FQFTKCCPPK | 16136 | >JAK2-P503L FQFTKCCPPK | 416   | 15720 |
| >JAK2-P503L FQFTKCCPPK | 446   | >JAK2-P503L FQFTKCCPPK | 13    | 433   |
| >JAK2-P503L FQFTKCCPPK | 20561 | >JAK2-P503L FQFTKCCPPK | 125   | 20436 |
| >JAK2-P503L PKPKDKSNL  | 3767  | >JAK2-P503L PKLKDKSNL  | 497   | 3270  |
| >JAK2-P503L CPPKPKDKSN | 399   | >JAK2-P503L CPPKPKDKSN | 436   | 37    |
| >JAK2-P503L CPPKPKDKSN | 528   | >JAK2-P503L CPPKPKDKSN | 333   | 195   |
| >JAK2-P503L KCCPPKPK   | 131   | >JAK2-P503L KCCPPKPK   | 314   | 183   |
| >JAK2-P503L FTKCCPPKP  | 16179 | >JAK2-P503L FTKCCPPKL  | 407   | 15772 |
| >JAK2-P503L FTKCCPPKPK | 395   | >JAK2-P503L FTKCCPPKPK | 312   | 83    |
| >JAK2-P503L FTKCCPPKPK | 340   | >JAK2-P503L FTKCCPPKPK | 237   | 103   |
| >JAK2-P503L FTKCCPPKPK | 71    | >JAK2-P503L FTKCCPPKPK | 157   | 86    |
| >JAK2-P503L FTKCCPPKPK | 156   | >JAK2-P503L FTKCCPPKPK | 65    | 91    |
| >JAK2-P503L FTKCCPPKP  | 20719 | >JAK2-P503L FTKCCPPKL  | 54    | 20665 |
| >JAK2-P503L FTKCCPPKP  | 11029 | >JAK2-P503L FTKCCPPKL  | 160   | 10869 |
| >JAK2-P503L QFTKCCPPPK | 347   | >JAK2-P503L QFTKCCPPKL | 506   | 159   |
| >JAK2-R1122 LRVDQIRDNN | 28587 | >JAK2-R1122 LPVDQIRDNN | 148   | 28439 |
| >JAK2-R1122 LRVDQIRDNN | 37750 | >JAK2-R1122 LPVDQIRDNN | 234   | 37516 |
| >JAK2-R1122 LRVDQIRDNN | 19621 | >JAK2-R1122 LPVDQIRDNN | 277   | 19344 |
| >JAK2-R1122 LRVDQIRDNN | 18038 | >JAK2-R1122 LPVDQIRDNN | 16    | 18022 |
| >JAK2-R1122 ALRVDQIR   | 315   | >JAK2-R1122 ALPVDQIR   | 4108  | 3793  |
| >JAK2-R1122 LALRVDQI   | 1281  | >JAK2-R1122 LALPVDQI   | 466   | 815   |
| >JAK2-R1122 LALRVDQIR  | 278   | >JAK2-R1122 LALPVDQIR  | 313   | 35    |
| >JAK2-R1122 LALRVDQIR  | 411   | >JAK2-R1122 LALPVDQIR  | 349   | 62    |
| >JAK2-R1122 LALRVDQI   | 177   | >JAK2-R1122 LALPVDQI   | 108   | 69    |
| >JAK2-R1122 LALRVDQI   | 90    | >JAK2-R1122 LALPVDQI   | 33    | 57    |
| >JAK2-R1122 DLALRVDQI  | 574   | >JAK2-R1122 DLALPVDQI  | 231   | 343   |
| >JAK2-R1122 DLALRVDQIR | 336   | >JAK2-R1122 DLALPVDQIR | 1180  | 844   |
| >JAK2-R1122 DLALRVDQIR | 240   | >JAK2-R1122 DLALPVDQIR | 100   | 140   |
| >JAK2-R1122 DLALRVDQI  | 3347  | >JAK2-R1122 DLALPVDQI  | 486   | 2861  |
| >JAK2-R1122 RDLALRVDQI | 470   | >JAK2-R1122 RDLALPVDQI | 2093  | 1623  |

|                          |       |                          |       |       |
|--------------------------|-------|--------------------------|-------|-------|
| >JAK2-R1122 RDLALRVDQI   | 1041  | >JAK2-R1122 RDLALPVDQI   | 259   | 782   |
| >JAK2-R1122 RDLALRVDQI   | 284   | >JAK2-R1122 RDLALPVDQI   | 211   | 73    |
| >JAK2-R1122 RDLALRVDQI   | 77    | >JAK2-R1122 RDLALPVDQI   | 57    | 20    |
| >JAK2-R1122 FRDLALRVDC   | 307   | >JAK2-R1122 FRDLALPVDC   | 954   | 647   |
| >JAK2-R1122 FRDLALRV     | 4130  | >JAK2-R1122 FRDLALPV     | 444   | 3686  |
| >JAK2-R1122 FRDLALRV     | 1551  | >JAK2-R1122 FRDLALPV     | 149   | 1402  |
| >JAK2-R1122 SFRDLALRV    | 469   | >JAK2-R1122 SFRDLALPV    | 890   | 421   |
| >JAK2-R1122 SFRDLALR     | 244   | >JAK2-R1122 SFRDLALP     | 1975  | 1731  |
| >JAK2-R1122 SFRDLALRV    | 164   | >JAK2-R1122 SFRDLALPV    | 23    | 141   |
| >JAK2-R1122 SFRDLALR     | 18    | >JAK2-R1122 SFRDLALP     | 17585 | 17567 |
| >JAK2-R1122 SFRDLALR     | 54    | >JAK2-R1122 SFRDLALP     | 27342 | 27288 |
| >JAK2-R1122 SFRDLALR     | 94    | >JAK2-R1122 SFRDLALP     | 30580 | 30486 |
| >JAK2-R1122 PSFRDLALR    | 293   | >JAK2-R1122 PSFRDLALP    | 22885 | 22592 |
| >JAK2-R1122 PSFRDLALR    | 392   | >JAK2-R1122 PSFRDLALP    | 36924 | 36532 |
| >JAK2-R1122 RPSFRDLALR   | 60    | >JAK2-R1122 RPSFRDLALP   | 20907 | 20847 |
| >JAK2-R1122 RPSFRDLALR   | 350   | >JAK2-R1122 RPSFRDLALP   | 35699 | 35349 |
| >JAK2-R1122 RPSFRDLALR'  | 64    | >JAK2-R1122 RPSFRDLALP'  | 12    | 52    |
| >JAK2-R1122 RPSFRDLALR   | 370   | >JAK2-R1122 RPSFRDLALP   | 32402 | 32032 |
| >JAK2-R564L RREVG DYGQ   | 39    | >JAK2-R564L LREVG DYGQI  | 1134  | 1095  |
| >JAK2-R564L RREVG DYGQ   | 74    | >JAK2-R564L LREVG DYGQI  | 5757  | 5683  |
| >JAK2-R564L RREVG DYGQ   | 210   | >JAK2-R564L LREVG DYGQI  | 10082 | 9872  |
| >JAK2-R564L RREVG DYGQ   | 59    | >JAK2-R564L LREVG DYGQI  | 1548  | 1489  |
| >JAK2-R564L RREVG DYGQ   | 307   | >JAK2-R564L LREVG DYGQI  | 6076  | 5769  |
| >JAK2-R564L VRREVG DYGC  | 24152 | >JAK2-R564L VLREVG DYGC  | 293   | 23859 |
| >JAK2-R564L VRREVG DYGC  | 20777 | >JAK2-R564L VLREVG DYGC  | 60    | 20717 |
| >JAK2-R564L VRREVG DYGC  | 18718 | >JAK2-R564L VLREVG DYGC  | 19    | 18699 |
| >JAK2-R564L VRREVG DYGC  | 23791 | >JAK2-R564L VLREVG DYGC  | 216   | 23575 |
| >JAK2-R564L VRREVG DYGC  | 35837 | >JAK2-R564L VLREVG DYGC  | 464   | 35373 |
| >JAK2-R564L VRREVG DYGC  | 26239 | >JAK2-R564L VLREVG DYGC  | 9     | 26230 |
| >JAK2-R564L VRREVG DY    | 1232  | >JAK2-R564L VLREVG DY    | 166   | 1066  |
| >JAK2-R564L VRREVG DY    | 5133  | >JAK2-R564L VLREVG DY    | 208   | 4925  |
| >JAK2-R564L VRREVG DY    | 12704 | >JAK2-R564L VLREVG DY    | 171   | 12533 |
| >JAK2-R564L VRREVG DY    | 4092  | >JAK2-R564L VLREVG DY    | 106   | 3986  |
| >JAK2-R564L VRREVG DY    | 370   | >JAK2-R564L VLREVG DY    | 1232  | 862   |
| >JAK2-R564L VRREVG DYGC  | 337   | >JAK2-R564L VLREVG DYGC  | 24856 | 24519 |
| >JAK2-R564L GTFTKIFKGV I | 102   | >JAK2-R564L GTFTKIFKGV I | 12826 | 12724 |
| >JAK2-R564L GTFTKIFKGV I | 18    | >JAK2-R564L GTFTKIFKGV I | 4415  | 4397  |
| >JAK2-R564L GTFTKIFKGV I | 34    | >JAK2-R564L GTFTKIFKGV I | 15958 | 15924 |
| >JAK2-R564L GTFTKIFKGV I | 12926 | >JAK2-R564L GTFTKIFKGV I | 51    | 12875 |
| >JAK2-R564L GTFTKIFKGV I | 916   | >JAK2-R564L GTFTKIFKGV I | 31    | 885   |
| >JAK2-R564L GTFTKIFKGV I | 140   | >JAK2-R564L GTFTKIFKGV I | 2088  | 1948  |
| >JAK2-R564L GTFTKIFKGV I | 34074 | >JAK2-R564L GTFTKIFKGV I | 268   | 33806 |
| >JAK2-R564L GVRREVG DY   | 352   | >JAK2-R564L GVLREVG DY   | 217   | 135   |

|                         |       |                         |       |       |
|-------------------------|-------|-------------------------|-------|-------|
| >JAK2-R564L GVRREVG DY  | 1023  | >JAK2-R564L GVLREVG DY  | 240   | 783   |
| >JAK2-R564L KGVRREVG D' | 230   | >JAK2-R564L KGVLEVG D\  | 199   | 31    |
| >JAK2-R564L FKGVRREVG I | 206   | >JAK2-R564L FKGVLEVG I  | 181   | 25    |
| >JAK2-R564L KIFKGVRR EV | 2029  | >JAK2-R564L KIFKGVLR EV | 193   | 1836  |
| >JAK2-R564L KIFKGVRR EV | 487   | >JAK2-R564L KIFKGVLR EV | 190   | 297   |
| >JAK2-R564L KIFKGVRR EV | 109   | >JAK2-R564L KIFKGVLR EV | 25    | 84    |
| >JAK2-R564L KIFKGVRR EV | 1263  | >JAK2-R564L KIFKGVLR EV | 161   | 1102  |
| >JAK2-R564L KIFKGVRR EV | 13    | >JAK2-R564L KIFKGVLR EV | 4     | 9     |
| >JAK2-R564L KIFKGVRR EV | 1310  | >JAK2-R564L KIFKGVLR EV | 174   | 1136  |
| >JAK2-R564L KIFKGVRR EV | 57    | >JAK2-R564L KIFKGVLR EV | 15    | 42    |
| >JAK2-R564L KIFKGVRR EV | 23    | >JAK2-R564L KIFKGVLR EV | 10    | 13    |
| >JAK2-R564L KIFKGVRR    | 109   | >JAK2-R564L KIFKGVLR    | 62    | 47    |
| >JAK2-R564L KIFKGVRR    | 342   | >JAK2-R564L KIFKGVLR    | 67    | 275   |
| >JAK2-R564L KIFKGVRR EV | 282   | >JAK2-R564L KIFKGVLR EV | 365   | 83    |
| >JAK2-R564L KIFKGVRR    | 13    | >JAK2-R564L KIFKGVLR    | 11    | 2     |
| >JAK2-R564L KIFKGVRR EV | 267   | >JAK2-R564L KIFKGVLR EV | 174   | 93    |
| >JAK2-R564L KIFKGVRR    | 525   | >JAK2-R564L KIFKGVLR    | 176   | 349   |
| >JAK2-R564L KIFKGVRR    | 21    | >JAK2-R564L KIFKGVLR    | 18    | 3     |
| >JAK2-R564L TKIFKGVRR   | 1011  | >JAK2-R564L TKIFKGVLR   | 331   | 680   |
| >JAK2-R564L FTKIFKGV R  | 67    | >JAK2-R564L FTKIFKGV L  | 12215 | 12148 |
| >JAK2-R564L FTKIFKGVRR  | 20    | >JAK2-R564L FTKIFKGVLR  | 19    | 1     |
| >JAK2-R564L FTKIFKGV R  | 209   | >JAK2-R564L FTKIFKGV L  | 18525 | 18316 |
| >JAK2-R564L FTKIFKGVRR  | 119   | >JAK2-R564L FTKIFKGVLR  | 52    | 67    |
| >JAK2-R564L FTKIFKGV R  | 29    | >JAK2-R564L FTKIFKGV L  | 18585 | 18556 |
| >JAK2-R564L FTKIFKGVRR  | 13    | >JAK2-R564L FTKIFKGVLR  | 6     | 7     |
| >JAK2-R564L FTKIFKGV R  | 21078 | >JAK2-R564L FTKIFKGV L  | 169   | 20909 |
| >JAK2-R564L FTKIFKGV R  | 2259  | >JAK2-R564L FTKIFKGV L  | 62    | 2197  |
| >JAK2-R564L FTKIFKGV R  | 35904 | >JAK2-R564L FTKIFKGV L  | 367   | 35537 |
| >JAK2-R564L TFTKIFKGV R | 10904 | >JAK2-R564L TFTKIFKGV L | 297   | 10607 |
| >JAK2-R564L TFTKIFKGV R | 53    | >JAK2-R564L TFTKIFKGV L | 11756 | 11703 |
| >JAK2-R564L TFTKIFKGVRF | 36    | >JAK2-R564L TFTKIFKGVLR | 24    | 12    |
| >JAK2-R564L TFTKIFKGVRF | 128   | >JAK2-R564L TFTKIFKGVLR | 55    | 73    |
| >JAK2-R564L TFTKIFKGVRF | 131   | >JAK2-R564L TFTKIFKGVLR | 53    | 78    |
| >JAK2-R564L TFTKIFKGV R | 49    | >JAK2-R564L TFTKIFKGV L | 24110 | 24061 |
| >JAK2-R564L TFTKIFKGVRF | 47    | >JAK2-R564L TFTKIFKGVLR | 42    | 5     |
| >JAK2-R564C RREVG DYGQ  | 39    | >JAK2-R564C QREVG DYGQ  | 1043  | 1004  |
| >JAK2-R564C RREVG DYGQ  | 74    | >JAK2-R564C QREVG DYGQ  | 2646  | 2572  |
| >JAK2-R564C RREVG DYGQ  | 210   | >JAK2-R564C QREVG DYGQ  | 4569  | 4359  |
| >JAK2-R564C RREVG DYGQ  | 59    | >JAK2-R564C QREVG DYGQ  | 1185  | 1126  |
| >JAK2-R564C RREVG DYGQ  | 307   | >JAK2-R564C QREVG DYGQ  | 3127  | 2820  |
| >JAK2-R564C VRREVG DY   | 1232  | >JAK2-R564C VQREVG DY   | 241   | 991   |
| >JAK2-R564C VRREVG DY   | 12704 | >JAK2-R564C VQREVG DY   | 73    | 12631 |
| >JAK2-R564C VRREVG DY   | 4092  | >JAK2-R564C VQREVG DY   | 157   | 3935  |

|                         |      |                         |       |       |
|-------------------------|------|-------------------------|-------|-------|
| >JAK2-R564C VRREVG DY   | 370  | >JAK2-R564C VQREVG DY   | 54    | 316   |
| >JAK2-R564C VRREVG DYG  | 337  | >JAK2-R564C VQREVG DYG  | 8983  | 8646  |
| >JAK2-R564C GTFTKIFKGV  | 102  | >JAK2-R564C GTFTKIFKGV  | 13039 | 12937 |
| >JAK2-R564C GTFTKIFKGV  | 18   | >JAK2-R564C GTFTKIFKGV  | 5479  | 5461  |
| >JAK2-R564C GTFTKIFKGV  | 34   | >JAK2-R564C GTFTKIFKGV  | 3502  | 3468  |
| >JAK2-R564C GTFTKIFKGV  | 916  | >JAK2-R564C GTFTKIFKGV  | 353   | 563   |
| >JAK2-R564C GTFTKIFKGV  | 140  | >JAK2-R564C GTFTKIFKGV  | 1363  | 1223  |
| >JAK2-R564C GVRREVG DY  | 352  | >JAK2-R564C GVQREVG DY  | 620   | 268   |
| >JAK2-R564C GVRREVG DY  | 730  | >JAK2-R564C GVQREVG DY  | 302   | 428   |
| >JAK2-R564C KGVRREVG D  | 230  | >JAK2-R564C KGVQREVG D  | 422   | 192   |
| >JAK2-R564C FKGVRREVG I | 206  | >JAK2-R564C FKGVQREVG I | 166   | 40    |
| >JAK2-R564C KIFKGVRR EV | 487  | >JAK2-R564C KIFKGVQRE V | 457   | 30    |
| >JAK2-R564C KIFKGVRR EV | 109  | >JAK2-R564C KIFKGVQRE V | 188   | 79    |
| >JAK2-R564C KIFKGVRR EV | 13   | >JAK2-R564C KIFKGVQRE V | 5     | 8     |
| >JAK2-R564C KIFKGVRR EV | 1310 | >JAK2-R564C KIFKGVQRE V | 275   | 1035  |
| >JAK2-R564C KIFKGVRR EV | 57   | >JAK2-R564C KIFKGVQRE V | 18    | 39    |
| >JAK2-R564C KIFKGVRR EV | 23   | >JAK2-R564C KIFKGVQRE V | 11    | 12    |
| >JAK2-R564C KIFKGVRR    | 109  | >JAK2-R564C KIFKGVQR    | 115   | 6     |
| >JAK2-R564C KIFKGVRR    | 342  | >JAK2-R564C KIFKGVQR    | 223   | 119   |
| >JAK2-R564C KIFKGVRR EV | 282  | >JAK2-R564C KIFKGVQRE V | 453   | 171   |
| >JAK2-R564C KIFKGVRR    | 13   | >JAK2-R564C KIFKGVQR    | 12    | 1     |
| >JAK2-R564C KIFKGVRR EV | 267  | >JAK2-R564C KIFKGVQRE V | 227   | 40    |
| >JAK2-R564C KIFKGVRR    | 525  | >JAK2-R564C KIFKGVQR    | 317   | 208   |
| >JAK2-R564C KIFKGVRR    | 21   | >JAK2-R564C KIFKGVQR    | 24    | 3     |
| >JAK2-R564C FTKIFKGV R  | 67   | >JAK2-R564C FTKIFKGVQ   | 12747 | 12680 |
| >JAK2-R564C FTKIFKGVRR  | 20   | >JAK2-R564C FTKIFKGVQR  | 30    | 10    |
| >JAK2-R564C FTKIFKGV R  | 209  | >JAK2-R564C FTKIFKGVQ   | 19246 | 19037 |
| >JAK2-R564C FTKIFKGVRR  | 119  | >JAK2-R564C FTKIFKGVQR  | 75    | 44    |
| >JAK2-R564C FTKIFKGV R  | 29   | >JAK2-R564C FTKIFKGVQ   | 5071  | 5042  |
| >JAK2-R564C FTKIFKGVRR  | 13   | >JAK2-R564C FTKIFKGVQR  | 12    | 1     |
| >JAK2-R564C TFTKIFKGV R | 53   | >JAK2-R564C TFTKIFKGVQ  | 16564 | 16511 |
| >JAK2-R564C TFTKIFKGVRF | 36   | >JAK2-R564C TFTKIFKGVQI | 33    | 3     |
| >JAK2-R564C TFTKIFKGVRF | 128  | >JAK2-R564C TFTKIFKGVQI | 114   | 14    |
| >JAK2-R564C TFTKIFKGVRF | 131  | >JAK2-R564C TFTKIFKGVQI | 89    | 42    |
| >JAK2-R564C TFTKIFKGV R | 49   | >JAK2-R564C TFTKIFKGVQ  | 6745  | 6696  |
| >JAK2-R564C TFTKIFKGVRF | 47   | >JAK2-R564C TFTKIFKGVQI | 62    | 15    |
| >JAK2-R683C NVCAKNILLIR | 454  | >JAK2-R683C NVCAKNILLIC | 20933 | 20479 |
| >JAK2-R683C NVCAKNILLIR | 212  | >JAK2-R683C NVCAKNILLIC | 31339 | 31127 |
| >JAK2-R683C NVCAKNILLIR | 53   | >JAK2-R683C NVCAKNILLIC | 30079 | 30026 |
| >JAK2-R683C NVCAKNILLIR | 259  | >JAK2-R683C NVCAKNILLIC | 34990 | 34731 |
| >JAK2-R683C LIREEDRK    | 399  | >JAK2-R683C LIGEE DRK   | 15797 | 15398 |
| >JAK2-R683C LLIREEDRKT  | 1527 | >JAK2-R683C LLIGEE DRKT | 482   | 1045  |
| >JAK2-R683C NILLIREEDR  | 415  | >JAK2-R683C NILLIGEE DR | 1405  | 990   |

|                         |      |                         |       |       |
|-------------------------|------|-------------------------|-------|-------|
| >JAK2-R683C NILLIREEDR  | 126  | >JAK2-R683C NILLIGEEDR  | 180   | 54    |
| >JAK2-R683C NILLIREEDRK | 324  | >JAK2-R683C NILLIGEEDRK | 590   | 266   |
| >JAK2-R683C CAKNILLIR   | 69   | >JAK2-R683C CAKNILLIG   | 19902 | 19833 |
| >JAK2-R683C CAKNILLIR   | 205  | >JAK2-R683C CAKNILLIG   | 34927 | 34722 |
| >JAK2-R683C VCAKNILLIR  | 179  | >JAK2-R683C VCAKNILLIG  | 34807 | 34628 |
| >JAK2-R683K NVCAKNILLIR | 1183 | >JAK2-R683K NVCAKNILLIK | 82    | 1101  |
| >JAK2-R683K NVCAKNILLIR | 454  | >JAK2-R683K NVCAKNILLIK | 4967  | 4513  |
| >JAK2-R683K NVCAKNILLIR | 212  | >JAK2-R683K NVCAKNILLIK | 3769  | 3557  |
| >JAK2-R683K NVCAKNILLIR | 53   | >JAK2-R683K NVCAKNILLIK | 152   | 99    |
| >JAK2-R683K NVCAKNILLIR | 259  | >JAK2-R683K NVCAKNILLIK | 8404  | 8145  |
| >JAK2-R683K LIREEDRK    | 399  | >JAK2-R683K LIKEEDRK    | 2145  | 1746  |
| >JAK2-R683K NILLIREEDR  | 415  | >JAK2-R683K NILLIKEEDR  | 556   | 141   |
| >JAK2-R683K NILLIREEDR  | 126  | >JAK2-R683K NILLIKEEDR  | 254   | 128   |
| >JAK2-R683K NILLIREEDRK | 324  | >JAK2-R683K NILLIKEEDRK | 453   | 129   |
| >JAK2-R683K KNILLIREEDR | 537  | >JAK2-R683K KNILLIKEEDR | 461   | 76    |
| >JAK2-R683K CAKNILLIR   | 6451 | >JAK2-R683K CAKNILLIK   | 311   | 6140  |
| >JAK2-R683K CAKNILLIR   | 3371 | >JAK2-R683K CAKNILLIK   | 27    | 3344  |
| >JAK2-R683K CAKNILLIR   | 69   | >JAK2-R683K CAKNILLIK   | 1984  | 1915  |
| >JAK2-R683K CAKNILLIR   | 205  | >JAK2-R683K CAKNILLIK   | 674   | 469   |
| >JAK2-R683K VCAKNILLIR  | 179  | >JAK2-R683K VCAKNILLIK  | 4592  | 4413  |
| >JAK2-R683S NVCAKNILLIR | 454  | >JAK2-R683S NVCAKNILLIS | 18639 | 18185 |
| >JAK2-R683S NVCAKNILLIR | 212  | >JAK2-R683S NVCAKNILLIS | 27352 | 27140 |
| >JAK2-R683S NVCAKNILLIR | 53   | >JAK2-R683S NVCAKNILLIS | 20796 | 20743 |
| >JAK2-R683S NVCAKNILLIR | 259  | >JAK2-R683S NVCAKNILLIS | 31723 | 31464 |
| >JAK2-R683S LIREEDRK    | 399  | >JAK2-R683S LISEEDRK    | 12174 | 11775 |
| >JAK2-R683S LLIREEDR    | 708  | >JAK2-R683S LLISEEDR    | 302   | 406   |
| >JAK2-R683S NILLIREEDR  | 415  | >JAK2-R683S NILLISEEDR  | 596   | 181   |
| >JAK2-R683S NILLIREEDR  | 126  | >JAK2-R683S NILLISEEDR  | 58    | 68    |
| >JAK2-R683S NILLIREEDRK | 324  | >JAK2-R683S NILLISEEDRK | 340   | 16    |
| >JAK2-R683S CAKNILLIR   | 69   | >JAK2-R683S CAKNILLIS   | 17929 | 17860 |
| >JAK2-R683S CAKNILLIR   | 205  | >JAK2-R683S CAKNILLIS   | 27979 | 27774 |
| >JAK2-R683S VCAKNILLIR  | 179  | >JAK2-R683S VCAKNILLIS  | 31343 | 31164 |
| >JAK2-R683T NVCAKNILLIR | 454  | >JAK2-R683T NVCAKNILLIT | 19624 | 19170 |
| >JAK2-R683T NVCAKNILLIR | 212  | >JAK2-R683T NVCAKNILLIT | 26495 | 26283 |
| >JAK2-R683T NVCAKNILLIR | 53   | >JAK2-R683T NVCAKNILLIT | 23137 | 23084 |
| >JAK2-R683T NVCAKNILLIR | 259  | >JAK2-R683T NVCAKNILLIT | 32358 | 32099 |
| >JAK2-R683T LIREEDRK    | 399  | >JAK2-R683T LITEEDRK    | 13887 | 13488 |
| >JAK2-R683T LLIREEDR    | 708  | >JAK2-R683T LLITEEDR    | 444   | 264   |
| >JAK2-R683T NILLIREEDR  | 415  | >JAK2-R683T NILLITEEDR  | 810   | 395   |
| >JAK2-R683T NILLIREEDR  | 126  | >JAK2-R683T NILLITEEDR  | 99    | 27    |
| >JAK2-R683T NILLIREEDRK | 324  | >JAK2-R683T NILLITEEDRK | 282   | 42    |
| >JAK2-R683T KNILLIREEDR | 537  | >JAK2-R683T KNILLITEEDR | 450   | 87    |
| >JAK2-R683T CAKNILLIR   | 69   | >JAK2-R683T CAKNILLIT   | 19093 | 19024 |



|                        |       |                        |       |       |
|------------------------|-------|------------------------|-------|-------|
| >JAK2-R683T CAKNILLIR  | 205   | >JAK2-R683T CAKNILLIT  | 30009 | 29804 |
| >JAK2-R683T VCAKNILLIR | 179   | >JAK2-R683T VCAKNILLIT | 32222 | 32043 |
| >JAK2-S591L·SESFFEAASM | 230   | >JAK2-S591L·LESFFEAASM | 195   | 35    |
| >JAK2-S591L·SESFFEAASM | 921   | >JAK2-S591L·LESFFEAASM | 418   | 503   |
| >JAK2-S591L·SESFFEAASM | 465   | >JAK2-S591L·LESFFEAASM | 101   | 364   |
| >JAK2-S591L·SESFFEAASM | 388   | >JAK2-S591L·LESFFEAASM | 617   | 229   |
| >JAK2-S591L·SESFFEAASM | 142   | >JAK2-S591L·LESFFEAASM | 67    | 75    |
| >JAK2-S591L·SESFFEA    | 279   | >JAK2-S591L·LESFFEA    | 396   | 117   |
| >JAK2-S591L·SESFFEAASM | 214   | >JAK2-S591L·LESFFEAASM | 333   | 119   |
| >JAK2-S591L·SESFFEAASM | 447   | >JAK2-S591L·LESFFEAASM | 599   | 152   |
| >JAK2-S591L·SESFFEAASM | 76    | >JAK2-S591L·LESFFEAASM | 1213  | 1137  |
| >JAK2-S591L·SESFFEAASM | 107   | >JAK2-S591L·LESFFEAASM | 1803  | 1696  |
| >JAK2-S591L·SESFFEA    | 7     | >JAK2-S591L·LESFFEA    | 27    | 20    |
| >JAK2-S591L·SESFFEAAS  | 38    | >JAK2-S591L·LESFFEAAS  | 425   | 387   |
| >JAK2-S591L·SESFFEAASM | 129   | >JAK2-S591L·LESFFEAASM | 2185  | 2056  |
| >JAK2-S591L·SESFFEAASM | 335   | >JAK2-S591L·LESFFEAASM | 3651  | 3316  |
| >JAK2-S591L·SESFFEAASM | 118   | >JAK2-S591L·LESFFEAASM | 103   | 15    |
| >JAK2-S591L·SESFFEAASM | 128   | >JAK2-S591L·LESFFEAASM | 145   | 17    |
| >JAK2-S591L·SESFFEAASM | 91    | >JAK2-S591L·LESFFEAASM | 101   | 10    |
| >JAK2-S591L·SESFFEAASM | 397   | >JAK2-S591L·LESFFEAASM | 351   | 46    |
| >JAK2-S591L·YSESFFEA   | 5264  | >JAK2-S591L·YLESFFEA   | 21    | 5243  |
| >JAK2-S591L·YSESFFEA   | 13193 | >JAK2-S591L·YLESFFEA   | 60    | 13133 |
| >JAK2-S591L·YSESFFEAAS | 15925 | >JAK2-S591L·YLESFFEAAS | 180   | 15745 |
| >JAK2-S591L·YSESFFEA   | 1558  | >JAK2-S591L·YLESFFEA   | 6     | 1552  |
| >JAK2-S591L·YSESFFEA   | 1335  | >JAK2-S591L·YLESFFEA   | 6     | 1329  |
| >JAK2-S591L·YSESFFEAAS | 3644  | >JAK2-S591L·YLESFFEAAS | 24    | 3620  |
| >JAK2-S591L·YSESFFEA   | 10499 | >JAK2-S591L·YLESFFEA   | 37    | 10462 |
| >JAK2-S591L·YSESFFEA   | 10860 | >JAK2-S591L·YLESFFEA   | 30    | 10830 |
| >JAK2-S591L·YSESFFEAAS | 16571 | >JAK2-S591L·YLESFFEAAS | 294   | 16277 |
| >JAK2-S591L·YSESFFEA   | 282   | >JAK2-S591L·YLESFFEA   | 24    | 258   |
| >JAK2-S591L·YSESFFEA   | 254   | >JAK2-S591L·YLESFFEA   | 21    | 233   |
| >JAK2-S591L·YSESFFEAAS | 2940  | >JAK2-S591L·YLESFFEAAS | 357   | 2583  |
| >JAK2-S591L·YSESFFEA   | 9162  | >JAK2-S591L·YLESFFEA   | 11    | 9151  |
| >JAK2-S591L·YSESFFEA   | 8828  | >JAK2-S591L·YLESFFEA   | 14    | 8814  |
| >JAK2-S591L·YSESFFEAAS | 16050 | >JAK2-S591L·YLESFFEAAS | 60    | 15990 |
| >JAK2-S591L·YSESFFEA   | 18153 | >JAK2-S591L·YLESFFEA   | 27    | 18126 |
| >JAK2-S591L·YSESFFEA   | 20329 | >JAK2-S591L·YLESFFEA   | 44    | 20285 |
| >JAK2-S591L·YSESFFEAAS | 20528 | >JAK2-S591L·YLESFFEAAS | 91    | 20437 |
| >JAK2-S591L·YSESFFEA   | 19535 | >JAK2-S591L·YLESFFEA   | 61    | 19474 |
| >JAK2-S591L·YSESFFEA   | 21220 | >JAK2-S591L·YLESFFEA   | 334   | 20886 |
| >JAK2-S591L·YSESFFEAAS | 22216 | >JAK2-S591L·YLESFFEAAS | 490   | 21726 |
| >JAK2-S591L·YSESFFEA   | 15000 | >JAK2-S591L·YLESFFEA   | 3     | 14997 |
| >JAK2-S591L·YSESFFEA   | 22314 | >JAK2-S591L·YLESFFEA   | 7     | 22307 |

|                        |       |                        |       |       |
|------------------------|-------|------------------------|-------|-------|
| >JAK2-S591L·YSEFFEAAS  | 33299 | >JAK2-S591L·YLEFFEAAS  | 427   | 32872 |
| >JAK2-S591L·YSEFFEAASM | 25698 | >JAK2-S591L·YLEFFEAASM | 12    | 25686 |
| >JAK2-S591L·YSEFFEAASM | 1128  | >JAK2-S591L·YLEFFEAASM | 379   | 749   |
| >JAK2-S591L·YSEFFEAASM | 9899  | >JAK2-S591L·YLEFFEAASM | 440   | 9459  |
| >JAK2-S591L·YSEFFEAASM | 324   | >JAK2-S591L·YLEFFEAASM | 487   | 163   |
| >JAK2-S591L·YSEFFEAASM | 43    | >JAK2-S591L·YLEFFEAASM | 6117  | 6074  |
| >JAK2-S591L·YSEFFEAASM | 279   | >JAK2-S591L·YLEFFEAASM | 559   | 280   |
| >JAK2-S591L·YSEFFEAASM | 30    | >JAK2-S591L·YLEFFEAASM | 659   | 629   |
| >JAK2-S591L·YSEFFEAASM | 9     | >JAK2-S591L·YLEFFEAASM | 117   | 108   |
| >JAK2-S591L·YSEFFEAASM | 432   | >JAK2-S591L·YLEFFEAASM | 16386 | 15954 |
| >JAK2-S591L·KVLDKAHRN\ | 12929 | >JAK2-S591L·KVLDKAHRN\ | 186   | 12743 |
| >JAK2-S591L·KVLDKAHRN\ | 13678 | >JAK2-S591L·KVLDKAHRN\ | 118   | 13560 |
| >JAK2-S591L·KVLDKAHRN\ | 1310  | >JAK2-S591L·KVLDKAHRN\ | 49    | 1261  |
| >JAK2-S591L·KVLDKAHRN\ | 6722  | >JAK2-S591L·KVLDKAHRN\ | 117   | 6605  |
| >JAK2-S591L·KVLDKAHRN\ | 13272 | >JAK2-S591L·KVLDKAHRN\ | 300   | 12972 |
| >JAK2-S591L·KVLDKAHRN\ | 15597 | >JAK2-S591L·KVLDKAHRN\ | 115   | 15482 |
| >JAK2-S591L·KVLDKAHRN\ | 270   | >JAK2-S591L·KVLDKAHRN\ | 70    | 200   |
| >JAK2-S591L·KVLDKAHRN\ | 14940 | >JAK2-S591L·KVLDKAHRN\ | 438   | 14502 |
| >JAK2-S591L·NYSEFFEA   | 344   | >JAK2-S591L·NYLEFFEA   | 63    | 281   |
| >JAK2-S591L·NYSEFFEA   | 348   | >JAK2-S591L·NYLEFFEA   | 78    | 270   |
| >JAK2-S591L·NYSEFFEAA  | 1192  | >JAK2-S591L·NYLEFFEAA  | 323   | 869   |
| >JAK2-S591L·NYSEFFEA   | 567   | >JAK2-S591L·NYLEFFEA   | 467   | 100   |
| >JAK2-S591L·RNYSESFF   | 460   | >JAK2-S591L·RNYLESFF   | 1483  | 1023  |
| >JAK2-S591L·RNYSESFF   | 9     | >JAK2-S591L·RNYLESFF   | 48    | 39    |
| >JAK2-S591L·RNYSESFF   | 198   | >JAK2-S591L·RNYLESFF   | 321   | 123   |
| >JAK2-S591L·HRNYSESF   | 11    | >JAK2-S591L·HRNYLESF   | 42    | 31    |
| >JAK2-S591L·HRNYSESFF  | 11    | >JAK2-S591L·HRNYLESFF  | 53    | 42    |
| >JAK2-S591L·HRNYSESF   | 402   | >JAK2-S591L·HRNYLESF   | 136   | 266   |
| >JAK2-S591L·HRNYSESFF  | 981   | >JAK2-S591L·HRNYLESFF  | 240   | 741   |
| >JAK2-S591L·HRNYSESFF  | 983   | >JAK2-S591L·HRNYLESFF  | 463   | 520   |
| >JAK2-S591L·HRNYSESFF  | 691   | >JAK2-S591L·HRNYLESFF  | 162   | 529   |
| >JAK2-S591L·AHRNYSESF  | 5     | >JAK2-S591L·AHRNYLESF  | 7     | 2     |
| >JAK2-S591L·AHRNYSESFF | 6     | >JAK2-S591L·AHRNYLESFF | 10    | 4     |
| >JAK2-S591L·KAHRNYSESF | 743   | >JAK2-S591L·KAHRNYLESF | 474   | 269   |
| >JAK2-S591L·KAHRNYSES  | 47    | >JAK2-S591L·KAHRNYLES  | 20    | 27    |
| >JAK2-S591L·KAHRNYSESF | 484   | >JAK2-S591L·KAHRNYLESF | 528   | 44    |
| >JAK2-S591L·KAHRNYSESF | 90    | >JAK2-S591L·KAHRNYLESF | 102   | 12    |
| >JAK2-S591L·KAHRNYSESF | 319   | >JAK2-S591L·KAHRNYLESF | 293   | 26    |
| >JAK2-S591L·KAHRNYSESF | 126   | >JAK2-S591L·KAHRNYLESF | 202   | 76    |
| >JAK2-S591L·KAHRNYSESF | 8     | >JAK2-S591L·KAHRNYLESF | 12    | 4     |
| >JAK2-S591L·KAHRNYSESF | 11    | >JAK2-S591L·KAHRNYLESF | 19    | 8     |
| >JAK2-S591L·KAHRNYSESF | 22    | >JAK2-S591L·KAHRNYLESF | 27    | 5     |
| >JAK2-S591L·KAHRNYSESF | 25    | >JAK2-S591L·KAHRNYLESF | 34    | 9     |

|                        |       |                        |       |       |
|------------------------|-------|------------------------|-------|-------|
| >JAK2-S591L·KAHRNYSESF | 164   | >JAK2-S591L·KAHRNYLESF | 147   | 17    |
| >JAK2-S591L·KAHRNYSESF | 130   | >JAK2-S591L·KAHRNYLESF | 139   | 9     |
| >JAK2-S591L·KAHRNYSESF | 41    | >JAK2-S591L·KAHRNYLESF | 39    | 2     |
| >JAK2-S591L·KAHRNYSESF | 46    | >JAK2-S591L·KAHRNYLESF | 38    | 8     |
| >JAK2-S591L·KAHRNYSESF | 135   | >JAK2-S591L·KAHRNYLESF | 305   | 170   |
| >JAK2-S591L·DKAHRNYSEF | 26    | >JAK2-S591L·DKAHRNYLES | 48    | 22    |
| >JAK2-S591L·LDKAHRNYS  | 10494 | >JAK2-S591L·LDKAHRNYL  | 456   | 10038 |
| >JAK2-S591L·VLDKAHRNYS | 14308 | >JAK2-S591L·VLDKAHRNYL | 210   | 14098 |
| >JAK2-S591L·VLDKAHRNYS | 2859  | >JAK2-S591L·VLDKAHRNYL | 29    | 2830  |
| >JAK2-S591L·VLDKAHRNYS | 16178 | >JAK2-S591L·VLDKAHRNYL | 228   | 15950 |
| >JAK2-S591L·VLDKAHRNYS | 11143 | >JAK2-S591L·VLDKAHRNYL | 71    | 11072 |
| >JAK2-S591L·VLDKAHRNYS | 7691  | >JAK2-S591L·VLDKAHRNYL | 26    | 7665  |
| >JAK2-T514M·RTNGVSDV   | 6430  | >JAK2-T514M·RMNGVSDV   | 194   | 6236  |
| >JAK2-T514M·RTNGVSDV   | 1701  | >JAK2-T514M·RMNGVSDV   | 31    | 1670  |
| >JAK2-T514M·RTNGVSDV   | 103   | >JAK2-T514M·RMNGVSDV   | 4     | 99    |
| >JAK2-T514M·RTNGVSDV   | 1204  | >JAK2-T514M·RMNGVSDV   | 175   | 1029  |
| >JAK2-T514M·RTNGVSDV   | 110   | >JAK2-T514M·RMNGVSDV   | 3     | 107   |
| >JAK2-T514M·RTNGVSDVP  | 7476  | >JAK2-T514M·RMNGVSDVF  | 117   | 7359  |
| >JAK2-T514M·RTNGVSDVP  | 7570  | >JAK2-T514M·RMNGVSDVF  | 78    | 7492  |
| >JAK2-T514M·RTNGVSDV   | 4897  | >JAK2-T514M·RMNGVSDV   | 12    | 4885  |
| >JAK2-T514M·RTNGVSDV   | 433   | >JAK2-T514M·RMNGVSDV   | 9     | 424   |
| >JAK2-T514M·RTNGVSDVP  | 14938 | >JAK2-T514M·RMNGVSDVF  | 497   | 14441 |
| >JAK2-T514M·RTNGVSDV   | 7281  | >JAK2-T514M·RMNGVSDV   | 13    | 7268  |
| >JAK2-T514M·RTNGVSDV   | 536   | >JAK2-T514M·RMNGVSDV   | 3     | 533   |
| >JAK2-T514M·RTNGVSDV   | 193   | >JAK2-T514M·RMNGVSDV   | 243   | 50    |
| >JAK2-T514M·RTNGVSDVP  | 177   | >JAK2-T514M·RMNGVSDVF  | 266   | 89    |
| >JAK2-T514M·RTNGVSDVP  | 316   | >JAK2-T514M·RMNGVSDVF  | 418   | 102   |
| >JAK2-T514M·RTNGVSDV   | 408   | >JAK2-T514M·RMNGVSDV   | 6498  | 6090  |
| >JAK2-T514M·RTNGVSDV   | 369   | >JAK2-T514M·RMNGVSDV   | 12815 | 12446 |
| >JAK2-T514M·FRTNGVSDV  | 4553  | >JAK2-T514M·FRMNGVSDV  | 496   | 4057  |
| >JAK2-T514M·FRTNGVSDV  | 405   | >JAK2-T514M·FRMNGVSDV  | 299   | 106   |
| >JAK2-T514M·FRTNGVSDV  | 300   | >JAK2-T514M·FRMNGVSDV  | 53    | 247   |
| >JAK2-T514M·FRTNGVSDVF | 2545  | >JAK2-T514M·FRMNGVSDV  | 495   | 2050  |
| >JAK2-T514M·FRTNGVSDV  | 966   | >JAK2-T514M·FRMNGVSDV  | 219   | 747   |
| >JAK2-T514M·FRTNGVSDVF | 1435  | >JAK2-T514M·FRMNGVSDV  | 314   | 1121  |
| >JAK2-T514M·FRTNGVSDV  | 2425  | >JAK2-T514M·FRMNGVSDV  | 124   | 2301  |
| >JAK2-T514M·LVFRTNGV   | 482   | >JAK2-T514M·LVFRMNGV   | 362   | 120   |
| >JAK2-T514M·LVFRTNGV   | 95    | >JAK2-T514M·LVFRMNGV   | 82    | 13    |
| >JAK2-T514M·LVFRTNGV   | 47    | >JAK2-T514M·LVFRMNGV   | 39    | 8     |
| >JAK2-T514M·LVFRTNGVSD | 71    | >JAK2-T514M·LVFRMNGVS  | 58    | 13    |
| >JAK2-T514M·LVFRTNGV   | 39    | >JAK2-T514M·LVFRMNGV   | 42    | 3     |
| >JAK2-T514M·LVFRTNGVSD | 409   | >JAK2-T514M·LVFRMNGVS  | 577   | 168   |
| >JAK2-T514M·LVFRTNGV   | 26    | >JAK2-T514M·LVFRMNGV   | 57    | 31    |

|                        |       |                       |       |       |
|------------------------|-------|-----------------------|-------|-------|
| >JAK2-T514N LVFRTNGVSD | 90    | >JAK2-T514N LVFRMNGVS | 180   | 90    |
| >JAK2-T514N LVFRTNGV   | 216   | >JAK2-T514N LVFRMNGV  | 509   | 293   |
| >JAK2-T514N LVFRTNGV   | 116   | >JAK2-T514N LVFRMNGV  | 254   | 138   |
| >JAK2-T514N LVFRTNGVSD | 240   | >JAK2-T514N LVFRMNGVS | 399   | 159   |
| >JAK2-T514N LVFRTNGV   | 9     | >JAK2-T514N LVFRMNGV  | 9     | 0     |
| >JAK2-T514N LVFRTNGVSD | 14    | >JAK2-T514N LVFRMNGVS | 12    | 2     |
| >JAK2-T514N LVFRTNGV   | 27    | >JAK2-T514N LVFRMNGV  | 16    | 11    |
| >JAK2-T514N LVFRTNGVSD | 241   | >JAK2-T514N LVFRMNGVS | 144   | 97    |
| >JAK2-T514N LVFRTNGV   | 94    | >JAK2-T514N LVFRMNGV  | 171   | 77    |
| >JAK2-T514N LVFRTNGVSD | 270   | >JAK2-T514N LVFRMNGVS | 272   | 2     |
| >JAK2-T514N LLVFRTNGV  | 156   | >JAK2-T514N LLVFRMNGV | 134   | 22    |
| >JAK2-T514N LLVFRTNGV  | 9     | >JAK2-T514N LLVFRMNGV | 11    | 2     |
| >JAK2-T514N LLVFRTNGV  | 5     | >JAK2-T514N LLVFRMNGV | 5     | 0     |
| >JAK2-T514N LLVFRTNGV  | 22    | >JAK2-T514N LLVFRMNGV | 16    | 6     |
| >JAK2-T514N LLVFRTNGV  | 9     | >JAK2-T514N LLVFRMNGV | 12    | 3     |
| >JAK2-T514N LLVFRTNGV  | 8     | >JAK2-T514N LLVFRMNGV | 16    | 8     |
| >JAK2-T514N LLVFRTNGV  | 26    | >JAK2-T514N LLVFRMNGV | 44    | 18    |
| >JAK2-T514N LLVFRTNGV  | 10    | >JAK2-T514N LLVFRMNGV | 217   | 207   |
| >JAK2-T514N LLVFRTNGV  | 3     | >JAK2-T514N LLVFRMNGV | 3     | 0     |
| >JAK2-T514N LLVFRTNGV  | 490   | >JAK2-T514N LLVFRMNGV | 388   | 102   |
| >JAK2-T514N NLLVFRTNGV | 74    | >JAK2-T514N NLLVFRMNG | 67    | 7     |
| >JAK2-T514N NLLVFRTNGV | 144   | >JAK2-T514N NLLVFRMNG | 164   | 20    |
| >JAK2-T514N NLLVFRTNGV | 21    | >JAK2-T514N NLLVFRMNG | 27    | 6     |
| >JAK2-T514N NLLVFRTNGV | 102   | >JAK2-T514N NLLVFRMNG | 88    | 14    |
| >JAK2-T514N NLLVFRTNGV | 19    | >JAK2-T514N NLLVFRMNG | 18    | 1     |
| >JAK2-T514N NLLVFRTNGV | 31    | >JAK2-T514N NLLVFRMNG | 28    | 3     |
| >JAK2-T514N NLLVFRTNGV | 25    | >JAK2-T514N NLLVFRMNG | 27    | 2     |
| >JAK2-T514N NLLVFRTNGV | 13    | >JAK2-T514N NLLVFRMNG | 23    | 10    |
| >JAK2-T514N NLLVFRTNGV | 7     | >JAK2-T514N NLLVFRMNG | 7     | 0     |
| >JAK2-T514N NLLVFRTNGV | 32    | >JAK2-T514N NLLVFRMNG | 23    | 9     |
| >JAK2-T514N KSNLLVFRT  | 2872  | >JAK2-T514N KSNLLVFRM | 287   | 2585  |
| >JAK2-T514N KSNLLVFRT  | 1343  | >JAK2-T514N KSNLLVFRM | 6     | 1337  |
| >JAK2-T514N KSNLLVFRT  | 10692 | >JAK2-T514N KSNLLVFRM | 321   | 10371 |
| >JAK2-T514N KSNLLVFRT  | 1282  | >JAK2-T514N KSNLLVFRM | 14    | 1268  |
| >JAK2-T514N KSNLLVFRT  | 8788  | >JAK2-T514N KSNLLVFRM | 99    | 8689  |
| >JAK2-T875N NTGEVVAV   | 331   | >JAK2-T875N NNGEVVAV  | 12360 | 12029 |
| >JAK2-T875N NTGEVVAV   | 202   | >JAK2-T875N NNGEVVAV  | 9916  | 9714  |
| >JAK2-T875N NTGEVVAV   | 30    | >JAK2-T875N NNGEVVAV  | 3557  | 3527  |
| >JAK2-T875N NTGEVVAV   | 229   | >JAK2-T875N NNGEVVAV  | 13850 | 13621 |
| >JAK2-T875N NTGEVVAV   | 374   | >JAK2-T875N NNGEVVAV  | 13059 | 12685 |
| >JAK2-T875N NTGEVVAVK  | 269   | >JAK2-T875N NNGEVVAVK | 17631 | 17362 |
| >JAK2-T875N NTGEVVAVKI | 216   | >JAK2-T875N NNGEVVAVK | 19213 | 18997 |
| >JAK2-T875N NTGEVVAVK  | 30    | >JAK2-T875N NNGEVVAVK | 1193  | 1163  |

|                        |     |                       |      |      |
|------------------------|-----|-----------------------|------|------|
| >JAK2-T875N NTGEVVAVKI | 22  | >JAK2-T875N NNGEVVAVK | 5252 | 5230 |
| >JAK2-T875N NTGEVVAV   | 18  | >JAK2-T875N NNGEVVAV  | 1118 | 1100 |
| >JAK2-T875N NTGEVVAV   | 13  | >JAK2-T875N NNGEVVAV  | 3040 | 3027 |
| >JAK2-T875N QDNTGEVV   | 497 | >JAK2-T875N QDNNGEVV  | 752  | 255  |
| >JAK2-T875N LQDNTGEVV, | 427 | >JAK2-T875N LQDNNGEVV | 479  | 52   |
| >JAK2-T875N LQDNTGEV   | 27  | >JAK2-T875N LQDNNGEV  | 60   | 33   |
| >JAK2-T875N LQDNTGEVV  | 51  | >JAK2-T875N LQDNNGEVV | 98   | 47   |
| >JAK2-T875N LQDNTGEVV, | 10  | >JAK2-T875N LQDNNGEVV | 14   | 4    |
| >JAK2-T875N LQDNTGEV   | 55  | >JAK2-T875N LQDNNGEV  | 71   | 16   |
| >JAK2-T875N LQDNTGEVV  | 66  | >JAK2-T875N LQDNNGEVV | 63   | 3    |
| >JAK2-T875N LQDNTGEVV, | 25  | >JAK2-T875N LQDNNGEVV | 24   | 1    |
| >JAK2-T875N LQDNTGEV   | 247 | >JAK2-T875N LQDNNGEV  | 211  | 36   |
| >JAK2-T875N LQDNTGEVV  | 207 | >JAK2-T875N LQDNNGEVV | 77   | 130  |
| >JAK2-T875N LQDNTGEVV, | 63  | >JAK2-T875N LQDNNGEVV | 38   | 25   |
| >JAK2-T875N LQDNTGEV   | 231 | >JAK2-T875N LQDNNGEV  | 681  | 450  |
| >JAK2-T875N LQDNTGEVV  | 254 | >JAK2-T875N LQDNNGEVV | 861  | 607  |
| >JAK2-T875N LQDNTGEVV, | 138 | >JAK2-T875N LQDNNGEVV | 290  | 152  |
| >JAK2-T875N LQDNTGEVV  | 488 | >JAK2-T875N LQDNNGEVV | 951  | 463  |
| >JAK2-T875N LQDNTGEVV, | 323 | >JAK2-T875N LQDNNGEVV | 502  | 179  |
| >JAK2-T875N PLQDNTGEV  | 369 | >JAK2-T875N PLQDNNGEV | 1817 | 1448 |
| >JAK2-T875N PLQDNTGEV  | 16  | >JAK2-T875N PLQDNNGEV | 35   | 19   |
| >JAK2-T875N PLQDNTGEV  | 23  | >JAK2-T875N PLQDNNGEV | 34   | 11   |
| >JAK2-T875N PLQDNTGEV  | 60  | >JAK2-T875N PLQDNNGEV | 181  | 121  |
| >JAK2-T875N PLQDNTGEV  | 81  | >JAK2-T875N PLQDNNGEV | 114  | 33   |
| >JAK2-T875N PLQDNTGEV  | 173 | >JAK2-T875N PLQDNNGEV | 462  | 289  |
| >JAK2-T875N PLQDNTGEV  | 175 | >JAK2-T875N PLQDNNGEV | 418  | 243  |
| >JAK2-T875N PLQDNTGEV  | 30  | >JAK2-T875N PLQDNNGEV | 212  | 182  |
| >JAK2-T875N PLQDNTGEV  | 45  | >JAK2-T875N PLQDNNGEV | 112  | 67   |
| >JAK2-T875N PLQDNTGEV  | 3   | >JAK2-T875N PLQDNNGEV | 5    | 2    |
| >JAK2-T875N PLQDNTGEV  | 8   | >JAK2-T875N PLQDNNGEV | 9    | 1    |
| >JAK2-T875N PLQDNTGEV  | 118 | >JAK2-T875N PLQDNNGEV | 179  | 61   |
| >JAK2-T875N DPLQDNTGE' | 132 | >JAK2-T875N DPLQDNNGE | 189  | 57   |
| >JAK2-T875N YDPLQDNTGI | 231 | >JAK2-T875N YDPLQDNNG | 479  | 248  |
| >JAK2-V567A EVGDYGQL   | 407 | >JAK2-V567A EAGDYGQL  | 6790 | 6383 |
| >JAK2-V567A EVGDYGQL   | 65  | >JAK2-V567A EAGDYGQL  | 196  | 131  |
| >JAK2-V567A REVDYGQL   | 7   | >JAK2-V567A REAGDYGQL | 8    | 1    |
| >JAK2-V567A REVDYGQL   | 319 | >JAK2-V567A REAGDYGQL | 932  | 613  |
| >JAK2-V567A REVDYGQL   | 51  | >JAK2-V567A REAGDYGQL | 97   | 46   |
| >JAK2-V567A RREVDYGQ   | 39  | >JAK2-V567A RREAGDYGQ | 28   | 11   |
| >JAK2-V567A RREVDYGQ   | 74  | >JAK2-V567A RREAGDYGQ | 73   | 1    |
| >JAK2-V567A RREVDYGQ   | 210 | >JAK2-V567A RREAGDYGQ | 232  | 22   |
| >JAK2-V567A RREVDYGQ   | 59  | >JAK2-V567A RREAGDYGQ | 53   | 6    |
| >JAK2-V567A RREVDYGQ   | 307 | >JAK2-V567A RREAGDYGQ | 450  | 143  |

|                         |       |                         |       |       |
|-------------------------|-------|-------------------------|-------|-------|
| >JAK2-V567A VRREVG DY   | 370   | >JAK2-V567A VRREAG DY   | 395   | 25    |
| >JAK2-V567A VRREVG DYG  | 337   | >JAK2-V567A VRREAG DYG  | 504   | 167   |
| >JAK2-V567A GVRREVG DY  | 352   | >JAK2-V567A GVRREAG DY  | 3707  | 3355  |
| >JAK2-V567A GVRREVG DY  | 1023  | >JAK2-V567A GVRREAG DY  | 436   | 587   |
| >JAK2-V567A GVRREVG DY  | 736   | >JAK2-V567A GVRREAG DY  | 274   | 462   |
| >JAK2-V567A KGVRREVG D' | 230   | >JAK2-V567A KGVRREAG D' | 332   | 102   |
| >JAK2-V567A FKGVRREVG I | 206   | >JAK2-V567A FKGVRREAG I | 221   | 15    |
| >JAK2-V567A KIFKGVRREV  | 487   | >JAK2-V567A KIFKGVRREA  | 2569  | 2082  |
| >JAK2-V567A KIFKGVRREV  | 109   | >JAK2-V567A KIFKGVRREA  | 781   | 672   |
| >JAK2-V567A KIFKGVRREV  | 13    | >JAK2-V567A KIFKGVRREA  | 702   | 689   |
| >JAK2-V567A KIFKGVRREV  | 57    | >JAK2-V567A KIFKGVRREA  | 3350  | 3293  |
| >JAK2-V567A KIFKGVRREV  | 23    | >JAK2-V567A KIFKGVRREA  | 4186  | 4163  |
| >JAK2-V567A KIFKGVRREV  | 282   | >JAK2-V567A KIFKGVRREA  | 140   | 142   |
| >JAK2-V567A KIFKGVRREV  | 267   | >JAK2-V567A KIFKGVRREA  | 1870  | 1603  |
| >JAK2-V617F VCGDENILV   | 5416  | >JAK2-V617F FCGDENILV   | 229   | 5187  |
| >JAK2-V617F VCGDENILV   | 1619  | >JAK2-V617F FCGDENILV   | 258   | 1361  |
| >JAK2-V617F VCGDENILV   | 3240  | >JAK2-V617F FCGDENILV   | 489   | 2751  |
| >JAK2-V617F VCGDENILV   | 405   | >JAK2-V617F FCGDENILV   | 41    | 364   |
| >JAK2-V617F CVCGDENILV  | 267   | >JAK2-V617F CFCGDENILV  | 5953  | 5686  |
| >JAK2-V617F CVCGDENILV  | 285   | >JAK2-V617F CFCGDENILV  | 6217  | 5932  |
| >JAK2-V617F CVCGDENI    | 10114 | >JAK2-V617F CFCGDENI    | 218   | 9896  |
| >JAK2-V617F CVCGDENIL   | 12056 | >JAK2-V617F CFCGDENIL   | 314   | 11742 |
| >JAK2-V617F CVCGDENI    | 478   | >JAK2-V617F CFCGDENI    | 4165  | 3687  |
| >JAK2-V617F KHLVLNYGVC  | 511   | >JAK2-V617F KHLVLNYGVC  | 12    | 499   |
| >JAK2-V617F VCVCGDENIL  | 3529  | >JAK2-V617F VCFCGDENIL' | 369   | 3160  |
| >JAK2-V617F VLNYGVCV    | 55    | >JAK2-V617F VLNYGVCF    | 15845 | 15790 |
| >JAK2-V617F VLNYGVCV    | 23    | >JAK2-V617F VLNYGVCF    | 3978  | 3955  |
| >JAK2-V617F VLNYGVCV    | 17    | >JAK2-V617F VLNYGVCF    | 7275  | 7258  |
| >JAK2-V617F VLNYGVCV    | 261   | >JAK2-V617F VLNYGVCF    | 6593  | 6332  |
| >JAK2-V617F VLNYGVCV    | 6     | >JAK2-V617F VLNYGVCF    | 3665  | 3659  |
| >JAK2-V617F VLNYGVCVC   | 101   | >JAK2-V617F VLNYGVCFC   | 36    | 65    |
| >JAK2-V617F VLNYGVCV    | 7     | >JAK2-V617F VLNYGVCF    | 11179 | 11172 |
| >JAK2-V617F VLNYGVCVC   | 791   | >JAK2-V617F VLNYGVCFC   | 361   | 430   |
| >JAK2-V617F VLNYGVCV    | 8     | >JAK2-V617F VLNYGVCF    | 11549 | 11541 |
| >JAK2-V617F VLNYGVCVC   | 1385  | >JAK2-V617F VLNYGVCFC   | 144   | 1241  |
| >JAK2-V617F VLNYGVCV    | 7     | >JAK2-V617F VLNYGVCF    | 11392 | 11385 |
| >JAK2-V617F VLNYGVCVC   | 662   | >JAK2-V617F VLNYGVCFC   | 135   | 527   |
| >JAK2-V617F VLNYGVCV    | 4     | >JAK2-V617F VLNYGVCF    | 5775  | 5771  |
| >JAK2-V617F VLNYGVCVC   | 44    | >JAK2-V617F VLNYGVCFC   | 24    | 20    |
| >JAK2-V617F VLNYGVCV    | 3936  | >JAK2-V617F VLNYGVCF    | 78    | 3858  |
| >JAK2-V617F VLNYGVCV    | 1763  | >JAK2-V617F VLNYGVCF    | 28    | 1735  |
| >JAK2-V617F LVLNYGVCV   | 94    | >JAK2-V617F LVLNYGVCF   | 18470 | 18376 |
| >JAK2-V617F LVLNYGVCV   | 39    | >JAK2-V617F LVLNYGVCF   | 1400  | 1361  |

|                         |       |                         |       |       |
|-------------------------|-------|-------------------------|-------|-------|
| >JAK2-V617F LVLNYGVCV   | 15    | >JAK2-V617F LVLNYGVCF   | 11191 | 11176 |
| >JAK2-V617F LVLNYGVCVC  | 734   | >JAK2-V617F LVLNYGVCFC  | 269   | 465   |
| >JAK2-V617F LVLNYGVCV   | 60    | >JAK2-V617F LVLNYGVCF   | 15775 | 15715 |
| >JAK2-V617F LVLNYGVCV   | 25    | >JAK2-V617F LVLNYGVCF   | 16052 | 16027 |
| >JAK2-V617F LVLNYGVCV   | 55    | >JAK2-V617F LVLNYGVCF   | 18354 | 18299 |
| >JAK2-V617F LVLNYGVCV   | 17    | >JAK2-V617F LVLNYGVCF   | 24728 | 24711 |
| >JAK2-V617F LVLNYGVCV   | 7593  | >JAK2-V617F LVLNYGVCF   | 200   | 7393  |
| >JAK2-V617F LVLNYGVCV   | 756   | >JAK2-V617F LVLNYGVCF   | 13    | 743   |
| >JAK2-V617F LVLNYGVCV   | 14345 | >JAK2-V617F LVLNYGVCF   | 374   | 13971 |
| >JAK2-V617F LVLNYGVCV   | 6305  | >JAK2-V617F LVLNYGVCF   | 385   | 5920  |
| >JAK2-V617F HLVLNYGVC\  | 454   | >JAK2-V617F HLVLNYGVCF  | 13099 | 12645 |
| >JAK2-V617F HLVLNYGVC\  | 497   | >JAK2-V617F HLVLNYGVCF  | 19912 | 19415 |
| >JAK2-V617F HLVLNYGVC\  | 57    | >JAK2-V617F HLVLNYGVCF  | 15189 | 15132 |
| >JAK2-V617F HLVLNYGVC\  | 17    | >JAK2-V617F HLVLNYGVCF  | 13683 | 13666 |
| >JAK2-V617F HLVLNYGVC\  | 54    | >JAK2-V617F HLVLNYGVCF  | 20557 | 20503 |
| >JAK2-V617F HLVLNYGVC\  | 263   | >JAK2-V617F HLVLNYGVCF  | 23346 | 23083 |
| >JAK2-V617F HLVLNYGVC\  | 12    | >JAK2-V617F HLVLNYGVCF  | 17128 | 17116 |
| >JAK2-V617F HLVLNYGVC\  | 694   | >JAK2-V617F HLVLNYGVCF  | 362   | 332   |
| >JAK2-V617F HLVLNYGVC\  | 8979  | >JAK2-V617F HLVLNYGVCF  | 384   | 8595  |
| >JAK2-V617F HLVLNYGVC\  | 2588  | >JAK2-V617F HLVLNYGVCF  | 72    | 2516  |
| >JAK2-V617I- VCGDENILV  | 405   | >JAK2-V617I- ICGDENILV  | 548   | 143   |
| >JAK2-V617I- CVCGDENILV | 634   | >JAK2-V617I- CICGDENILV | 358   | 276   |
| >JAK2-V617I- CVCGDENILV | 267   | >JAK2-V617I- CICGDENILV | 252   | 15    |
| >JAK2-V617I- CVCGDENILV | 285   | >JAK2-V617I- CICGDENILV | 93    | 192   |
| >JAK2-V617I- CVCGDENI   | 478   | >JAK2-V617I- CICGDENI   | 1792  | 1314  |
| >JAK2-V617I- KHLVLNYGVC | 511   | >JAK2-V617I- KHLVLNYGVC | 338   | 173   |
| >JAK2-V617I- VLNYGVCV   | 55    | >JAK2-V617I- VLNYGVCV   | 333   | 278   |
| >JAK2-V617I- VLNYGVCV   | 23    | >JAK2-V617I- VLNYGVCV   | 123   | 100   |
| >JAK2-V617I- VLNYGVCV   | 17    | >JAK2-V617I- VLNYGVCV   | 90    | 73    |
| >JAK2-V617I- VLNYGVCV   | 261   | >JAK2-V617I- VLNYGVCV   | 1549  | 1288  |
| >JAK2-V617I- VLNYGVCV   | 6     | >JAK2-V617I- VLNYGVCV   | 46    | 40    |
| >JAK2-V617I- VLNYGVCVC  | 101   | >JAK2-V617I- VLNYGVCVC  | 306   | 205   |
| >JAK2-V617I- VLNYGVCV   | 7     | >JAK2-V617I- VLNYGVCV   | 53    | 46    |
| >JAK2-V617I- VLNYGVCV   | 8     | >JAK2-V617I- VLNYGVCV   | 47    | 39    |
| >JAK2-V617I- VLNYGVCV   | 7     | >JAK2-V617I- VLNYGVCV   | 141   | 134   |
| >JAK2-V617I- VLNYGVCV   | 4     | >JAK2-V617I- VLNYGVCV   | 43    | 39    |
| >JAK2-V617I- VLNYGVCVC  | 44    | >JAK2-V617I- VLNYGVCVC  | 66    | 22    |
| >JAK2-V617I- LVLNYGVCV  | 94    | >JAK2-V617I- LVLNYGVCV  | 790   | 696   |
| >JAK2-V617I- LVLNYGVCV  | 39    | >JAK2-V617I- LVLNYGVCV  | 245   | 206   |
| >JAK2-V617I- LVLNYGVCV  | 15    | >JAK2-V617I- LVLNYGVCV  | 262   | 247   |
| >JAK2-V617I- LVLNYGVCV  | 60    | >JAK2-V617I- LVLNYGVCV  | 806   | 746   |
| >JAK2-V617I- LVLNYGVCV  | 25    | >JAK2-V617I- LVLNYGVCV  | 722   | 697   |
| >JAK2-V617I- LVLNYGVCV  | 55    | >JAK2-V617I- LVLNYGVCV  | 1082  | 1027  |

|                        |     |                        |       |       |
|------------------------|-----|------------------------|-------|-------|
| >JAK2-V617I-LVLNYGVCV  | 17  | >JAK2-V617I-LVLNYGVCV  | 2469  | 2452  |
| >JAK2-V617I-LVLNYGVCV  | 756 | >JAK2-V617I-LVLNYGVCV  | 464   | 292   |
| >JAK2-V617I-HLVLNYGVCV | 454 | >JAK2-V617I-HLVLNYGVCV | 804   | 350   |
| >JAK2-V617I-HLVLNYGVCV | 497 | >JAK2-V617I-HLVLNYGVCV | 1476  | 979   |
| >JAK2-V617I-HLVLNYGVCV | 57  | >JAK2-V617I-HLVLNYGVCV | 762   | 705   |
| >JAK2-V617I-HLVLNYGVCV | 17  | >JAK2-V617I-HLVLNYGVCV | 163   | 146   |
| >JAK2-V617I-HLVLNYGVCV | 54  | >JAK2-V617I-HLVLNYGVCV | 1495  | 1441  |
| >JAK2-V617I-HLVLNYGVCV | 263 | >JAK2-V617I-HLVLNYGVCV | 6074  | 5811  |
| >JAK2-V617I-HLVLNYGVCV | 12  | >JAK2-V617I-HLVLNYGVCV | 510   | 498   |
| >JAK2-Y813DYELLTENDM   | 98  | >JAK2-Y813DYELLTENDM   | 205   | 107   |
| >JAK2-Y813DYELLTENDML  | 69  | >JAK2-Y813DYELLTENDMI  | 108   | 39    |
| >JAK2-Y813DYELLTENDM   | 803 | >JAK2-Y813DYELLTENDM   | 224   | 579   |
| >JAK2-Y813DYELLTENDML  | 351 | >JAK2-Y813DYELLTENDMI  | 3102  | 2751  |
| >JAK2-Y813DYELLTENDML  | 468 | >JAK2-Y813DYELLTENDMI  | 2428  | 1960  |
| >JAK2-Y813DYELLTENDM   | 69  | >JAK2-Y813DYELLTENDM   | 10034 | 9965  |
| >JAK2-Y813DYELLTENDML  | 27  | >JAK2-Y813DYELLTENDMI  | 772   | 745   |
| >JAK2-Y813DRDLNSLFTPD  | 478 | >JAK2-Y813DRDLNSLFTPD  | 25663 | 25185 |
| >JAK2-Y813DFTPDIYELL   | 149 | >JAK2-Y813DFTPDIYELL   | 839   | 690   |
| >JAK2-Y813DFTPDIYELL   | 18  | >JAK2-Y813DFTPDIYELL   | 61    | 43    |
| >JAK2-Y813DFTPDIYELL   | 35  | >JAK2-Y813DFTPDIYELL   | 120   | 85    |
| >JAK2-Y813DFTPDIYELL   | 122 | >JAK2-Y813DFTPDIYELL   | 548   | 426   |
| >JAK2-Y813DFTPDIYELL   | 126 | >JAK2-Y813DFTPDIYELL   | 281   | 155   |
| >JAK2-Y813DFTPDIYELL   | 34  | >JAK2-Y813DFTPDIYELL   | 67    | 33    |
| >JAK2-Y813DFTPDIYELL   | 5   | >JAK2-Y813DFTPDIYELL   | 9     | 4     |
| >JAK2-Y813DFTPDIYELLT  | 63  | >JAK2-Y813DFTPDIYELLT  | 814   | 751   |
| >JAK2-Y813DFTPDIYELLTE | 161 | >JAK2-Y813DFTPDIYELLTE | 656   | 495   |
| >JAK2-Y813DLFTPDYEL    | 31  | >JAK2-Y813DLFTPDYEL    | 123   | 92    |
| >JAK2-Y813DLFTPDYELL   | 25  | >JAK2-Y813DLFTPDYELL   | 438   | 413   |
| >JAK2-Y813DSLFTPDYEL   | 14  | >JAK2-Y813DSLFTPDYEL   | 102   | 88    |
| >JAK2-Y813DSLFTPDYELL  | 178 | >JAK2-Y813DSLFTPDYELL  | 193   | 15    |
| >JAK2-Y813DSLFTPDYELLT | 151 | >JAK2-Y813DSLFTPDYELLT | 789   | 638   |
| >JAK2-Y813DSLFTPDYEL   | 8   | >JAK2-Y813DSLFTPDYEL   | 20    | 12    |
| >JAK2-Y813DSLFTPDYELL  | 11  | >JAK2-Y813DSLFTPDYELL  | 10    | 1     |
| >JAK2-Y813DSLFTPDYELLT | 406 | >JAK2-Y813DSLFTPDYELLT | 1189  | 783   |
| >JAK2-Y813DSLFTPDYEL   | 404 | >JAK2-Y813DSLFTPDYEL   | 899   | 495   |
| >JAK2-Y813DSLFTPDYELL  | 55  | >JAK2-Y813DSLFTPDYELL  | 146   | 91    |
| >JAK2-Y813DSLFTPDYELL  | 396 | >JAK2-Y813DSLFTPDYELL  | 677   | 281   |
| >JAK2-Y813DSLFTPDYEL   | 4   | >JAK2-Y813DSLFTPDYEL   | 10    | 6     |
| >JAK2-Y813DSLFTPDYELL  | 6   | >JAK2-Y813DSLFTPDYELL  | 15    | 9     |
| >JAK2-Y813DSLFTPDYELLT | 98  | >JAK2-Y813DSLFTPDYELLT | 298   | 200   |
| >JAK2-Y813DSLFTPDYEL   | 7   | >JAK2-Y813DSLFTPDYEL   | 56    | 49    |
| >JAK2-Y813DSLFTPDYELL  | 40  | >JAK2-Y813DSLFTPDYELL  | 91    | 51    |
| >JAK2-Y813DSLFTPDYEL   | 8   | >JAK2-Y813DSLFTPDYEL   | 13    | 5     |



|                        |      |                        |       |       |
|------------------------|------|------------------------|-------|-------|
| >JAK2-Y813DSLFTPDYELL  | 12   | >JAK2-Y813DSLFTPDELL   | 15    | 3     |
| >JAK2-Y813DSLFTPDYELLT | 222  | >JAK2-Y813DSLFTPDELLT  | 313   | 91    |
| >JAK2-Y813DSLFTPDYEL   | 6    | >JAK2-Y813DSLFTPDELL   | 21    | 15    |
| >JAK2-Y813DSLFTPDYELL  | 9    | >JAK2-Y813DSLFTPDELL   | 17    | 8     |
| >JAK2-Y813DSLFTPDYELLT | 75   | >JAK2-Y813DSLFTPDELLT  | 142   | 67    |
| >JAK2-Y813DSLFTPDYEL   | 80   | >JAK2-Y813DSLFTPDELL   | 1191  | 1111  |
| >JAK2-Y813DSLFTPDYEL   | 55   | >JAK2-Y813DSLFTPDELL   | 346   | 291   |
| >JAK2-Y813DNSLFTPDY    | 147  | >JAK2-Y813DNSLFTPDD    | 24907 | 24760 |
| >JAK2-Y813DNSLFTPDY    | 241  | >JAK2-Y813DNSLFTPDD    | 29844 | 29603 |
| >JAK2-Y813DNSLFTPDY    | 211  | >JAK2-Y813DNSLFTPDD    | 25548 | 25337 |
| >JAK2-Y813DNSLFTPDY    | 201  | >JAK2-Y813DNSLFTPDD    | 25482 | 25281 |
| >JAK2-Y813DNSLFTPDY    | 443  | >JAK2-Y813DNSLFTPDD    | 34779 | 34336 |
| >JAK2-Y931CYLPYGSLRDY  | 290  | >JAK2-Y931CCLPYGSLRDY  | 671   | 381   |
| >JAK2-Y931CYLPYGSLRDYI | 38   | >JAK2-Y931CCLPYGSLRDYI | 1539  | 1501  |
| >JAK2-Y931CYLPYGSLRDYI | 6    | >JAK2-Y931CCLPYGSLRDYI | 144   | 138   |
| >JAK2-Y931CYLPYGSLRDYI | 36   | >JAK2-Y931CCLPYGSLRDYI | 1024  | 988   |
| >JAK2-Y931CYLPYGSLRDYI | 50   | >JAK2-Y931CCLPYGSLRDYI | 1843  | 1793  |
| >JAK2-Y931CYLPYGSLRDYI | 12   | >JAK2-Y931CCLPYGSLRDYI | 754   | 742   |
| >JAK2-Y931CYLPYGSLRDYI | 35   | >JAK2-Y931CCLPYGSLRDYI | 1379  | 1344  |
| >JAK2-Y931CYLPYGSLRDYI | 18   | >JAK2-Y931CCLPYGSLRDYI | 1641  | 1623  |
| >JAK2-Y931CYLPYGSLRDYI | 61   | >JAK2-Y931CCLPYGSLRDYI | 1995  | 1934  |
| >JAK2-Y931CYLPYGSLRDYI | 6    | >JAK2-Y931CCLPYGSLRDYI | 231   | 225   |
| >JAK2-Y931CYLPYGSLRDY  | 433  | >JAK2-Y931CCLPYGSLRDY  | 604   | 171   |
| >JAK2-Y931CYLPYGSLR    | 114  | >JAK2-Y931CCLPYGSLR    | 541   | 427   |
| >JAK2-Y931CYLPYGSLRDYI | 434  | >JAK2-Y931CCLPYGSLRDYI | 1317  | 883   |
| >JAK2-Y931CYLPYGSLRDY  | 214  | >JAK2-Y931CCLPYGSLRDY  | 895   | 681   |
| >JAK2-Y931CYLPYGSLRDY  | 193  | >JAK2-Y931CCLPYGSLRDY  | 2395  | 2202  |
| >JAK2-Y931CYLPYGSLRDY  | 39   | >JAK2-Y931CCLPYGSLRDY  | 867   | 828   |
| >JAK2-Y931CYLPYGSLRDYI | 23   | >JAK2-Y931CCLPYGSLRDYI | 184   | 161   |
| >JAK2-Y931CYLPYGSLRDY  | 453  | >JAK2-Y931CCLPYGSLRDY  | 4866  | 4413  |
| >JAK2-Y931CEYLPYGSL    | 15   | >JAK2-Y931CECLPYGSL    | 17429 | 17414 |
| >JAK2-Y931CEYLPYGSLRD' | 200  | >JAK2-Y931CECLPYGSLRD' | 185   | 15    |
| >JAK2-Y931CEYLPYGSLRD' | 451  | >JAK2-Y931CECLPYGSLRD' | 345   | 106   |
| >JAK2-Y931CEYLPYGSLRD' | 107  | >JAK2-Y931CECLPYGSLRD' | 2184  | 2077  |
| >JAK2-Y931CEYLPYGSLR   | 138  | >JAK2-Y931CECLPYGSLR   | 3421  | 3283  |
| >JAK2-Y931CEYLPYGSLR   | 17   | >JAK2-Y931CECLPYGSLR   | 194   | 177   |
| >JAK2-Y931CEYLPYGSLR   | 115  | >JAK2-Y931CECLPYGSLR   | 608   | 493   |
| >JAK2-Y931CEYLPYGSL    | 3681 | >JAK2-Y931CECLPYGSL    | 332   | 3349  |
| >JAK2-Y931CEYLPYGSLR   | 57   | >JAK2-Y931CECLPYGSLR   | 452   | 395   |
| >JAK2-Y931CEYLPYGSL    | 347  | >JAK2-Y931CECLPYGSL    | 9165  | 8818  |
| >JAK2-Y931CEYLPYGSL    | 205  | >JAK2-Y931CECLPYGSL    | 26119 | 25914 |
| >JAK2-Y931CGRRNLKLIME  | 148  | >JAK2-Y931CGRRNLKLIME  | 7321  | 7173  |
| >JAK2-Y931CGRRNLKLIME  | 306  | >JAK2-Y931CGRRNLKLIME  | 5101  | 4795  |

|                         |     |                         |       |       |
|-------------------------|-----|-------------------------|-------|-------|
| >JAK2-Y931C GRRNLKLIME  | 287 | >JAK2-Y931C GRRNLKLIME  | 19535 | 19248 |
| >JAK2-Y931C GRRNLKLIME  | 192 | >JAK2-Y931C GRRNLKLIME  | 256   | 64    |
| >JAK2-Y931C GRRNLKLIME  | 90  | >JAK2-Y931C GRRNLKLIME  | 213   | 123   |
| >JAK2-Y931C MEYLPYGSL   | 51  | >JAK2-Y931C MECLPYGSL   | 871   | 820   |
| >JAK2-Y931C MEYLPYGSLR  | 258 | >JAK2-Y931C MECLPYGSLR  | 312   | 54    |
| >JAK2-Y931C MEYLPYGSLR  | 270 | >JAK2-Y931C MECLPYGSLR  | 395   | 125   |
| >JAK2-Y931C MEYLPYGSLR  | 327 | >JAK2-Y931C MECLPYGSLR  | 2015  | 1688  |
| >JAK2-Y931C MEYLPYGSL   | 122 | >JAK2-Y931C MECLPYGSL   | 322   | 200   |
| >JAK2-Y931C MEYLPYGSL   | 17  | >JAK2-Y931C MECLPYGSL   | 27    | 10    |
| >JAK2-Y931C MEYLPYGSL   | 69  | >JAK2-Y931C MECLPYGSL   | 710   | 641   |
| >JAK2-Y931C MEYLPYGS    | 178 | >JAK2-Y931C MECLPYGS    | 347   | 169   |
| >JAK2-Y931C MEYLPYGSLR  | 348 | >JAK2-Y931C MECLPYGSLR  | 2474  | 2126  |
| >JAK2-Y931C MEYLPYGSL   | 305 | >JAK2-Y931C MECLPYGSL   | 5473  | 5168  |
| >JAK2-Y931C MEYLPYGSL   | 20  | >JAK2-Y931C MECLPYGSL   | 228   | 208   |
| >JAK2-Y931C IMEYLPYGSL  | 136 | >JAK2-Y931C IMECLPYGSL  | 151   | 15    |
| >JAK2-Y931C IMEYLPYGSL  | 141 | >JAK2-Y931C IMECLPYGSL  | 193   | 52    |
| >JAK2-Y931C IMEYLPYGSL  | 327 | >JAK2-Y931C IMECLPYGSL  | 73    | 254   |
| >JAK2-Y931C IMEYLPYGSL  | 589 | >JAK2-Y931C IMECLPYGSL  | 161   | 428   |
| >JAK2-Y931C IMEYLPYGSL  | 502 | >JAK2-Y931C IMECLPYGSL  | 395   | 107   |
| >JAK2-Y931C IMEYLPYGSLI | 24  | >JAK2-Y931C IMECLPYGSLI | 40    | 16    |
| >JAK2-Y931C IMEYLPYGSLI | 182 | >JAK2-Y931C IMECLPYGSLI | 279   | 97    |
| >JAK2-Y931C IMEYLPYGSLI | 151 | >JAK2-Y931C IMECLPYGSLI | 328   | 177   |
| >JAK2-Y931C IMEYLPYGSLI | 249 | >JAK2-Y931C IMECLPYGSLI | 127   | 122   |
| >JAK2-Y931C LIMEYLPYGS  | 176 | >JAK2-Y931C LIMECLPYGSI | 621   | 445   |
| >JAK2-Y931C LIMEYLPYG   | 166 | >JAK2-Y931C LIMECLPYG   | 322   | 156   |
| >JAK2-Y931C LIMEYLPYGS  | 442 | >JAK2-Y931C LIMECLPYGS  | 686   | 244   |
| >JAK2-Y931C LIMEYLPYGS  | 60  | >JAK2-Y931C LIMECLPYGSI | 68    | 8     |
| >JAK2-Y931C LIMEYLPYG   | 137 | >JAK2-Y931C LIMECLPYG   | 294   | 157   |
| >JAK2-Y931C LIMEYLPYGS  | 730 | >JAK2-Y931C LIMECLPYGS  | 485   | 245   |
| >JAK2-Y931C LIMEYLPYGS  | 22  | >JAK2-Y931C LIMECLPYGSI | 30    | 8     |
| >JAK2-Y931C LIMEYLPYGS  | 14  | >JAK2-Y931C LIMECLPYGSI | 17    | 3     |
| >JAK2-Y931C LIMEYLPY    | 244 | >JAK2-Y931C LIMECLPY    | 304   | 60    |
| >JAK2-Y931C LIMEYLPYG   | 28  | >JAK2-Y931C LIMECLPYG   | 49    | 21    |
| >JAK2-Y931C LIMEYLPYGS  | 232 | >JAK2-Y931C LIMECLPYGS  | 249   | 17    |
| >JAK2-Y931C LIMEYLPYGS  | 19  | >JAK2-Y931C LIMECLPYGSI | 22    | 3     |
| >JAK2-Y931C LIMEYLPYG   | 109 | >JAK2-Y931C LIMECLPYG   | 1124  | 1015  |
| >JAK2-Y931C LIMEYLPYGS  | 269 | >JAK2-Y931C LIMECLPYGS  | 974   | 705   |
| >JAK2-Y931C LIMEYLPYGS  | 19  | >JAK2-Y931C LIMECLPYGSI | 57    | 38    |
| >JAK2-Y931C LIMEYLPYGS  | 154 | >JAK2-Y931C LIMECLPYGSI | 168   | 14    |
| >JAK2-Y931C LIMEYLPYGS  | 95  | >JAK2-Y931C LIMECLPYGSI | 88    | 7     |
| >JAK2-Y931C LIMEYLPYGS  | 27  | >JAK2-Y931C LIMECLPYGSI | 34    | 7     |
| >JAK2-Y931C LIMEYLPY    | 114 | >JAK2-Y931C LIMECLPY    | 212   | 98    |
| >JAK2-Y931C LIMEYLPY    | 309 | >JAK2-Y931C LIMECLPY    | 1952  | 1643  |

|                          |      |                          |       |       |
|--------------------------|------|--------------------------|-------|-------|
| >JAK2-Y931C LIMEYLPY     | 127  | >JAK2-Y931C LIMECLPY     | 289   | 162   |
| >JAK2-Y931C LIMEYLPY     | 24   | >JAK2-Y931C LIMECLPY     | 30    | 6     |
| >JAK2-Y931C LIMEYLPY     | 511  | >JAK2-Y931C LIMECLPY     | 189   | 322   |
| >JAK2-Y931C LIMEYLPY GSI | 59   | >JAK2-Y931C LIMECLPY GSI | 204   | 145   |
| >JAK2-Y931C LIMEYLPY     | 150  | >JAK2-Y931C LIMECLPY     | 316   | 166   |
| >JAK2-Y931C LIMEYLPY     | 44   | >JAK2-Y931C LIMECLPY     | 48    | 4     |
| >JAK2-Y931C LIMEYLPY     | 90   | >JAK2-Y931C LIMECLPY     | 183   | 93    |
| >JAK2-Y931C LIMEYLPY     | 134  | >JAK2-Y931C LIMECLPY     | 205   | 71    |
| >JAK2-Y931C LIMEYLPY     | 60   | >JAK2-Y931C LIMECLPY     | 67    | 7     |
| >JAK2-Y931C LIMEYLPY     | 217  | >JAK2-Y931C LIMECLPY     | 966   | 749   |
| >JAK2-Y931C KLIMEYLPYG   | 223  | >JAK2-Y931C KLIMECLPYG   | 194   | 29    |
| >JAK2-Y931C KLIMEYLPYG   | 496  | >JAK2-Y931C KLIMECLPYG   | 1323  | 827   |
| >JAK2-Y931C KLIMEYLPYG   | 699  | >JAK2-Y931C KLIMECLPYG   | 459   | 240   |
| >JAK2-Y931C KLIMEYLPYG   | 464  | >JAK2-Y931C KLIMECLPYG   | 1565  | 1101  |
| >JAK2-Y931C KLIMEYLPY    | 281  | >JAK2-Y931C KLIMECLPY    | 389   | 108   |
| >JAK2-Y931C KLIMEYLPY    | 160  | >JAK2-Y931C KLIMECLPY    | 504   | 344   |
| >JAK2-Y931C KLIMEYLPY    | 20   | >JAK2-Y931C KLIMECLPY    | 23    | 3     |
| >JAK2-Y931C KLIMEYLPY    | 305  | >JAK2-Y931C KLIMECLPY    | 139   | 166   |
| >JAK2-Y931C KLIMEYLPY    | 497  | >JAK2-Y931C KLIMECLPY    | 403   | 94    |
| >JAK2-Y931C KLIMEYLPY    | 10   | >JAK2-Y931C KLIMECLPY    | 15    | 5     |
| >JAK2-Y931C KLIMEYLPY    | 33   | >JAK2-Y931C KLIMECLPY    | 34    | 1     |
| >JAK2-Y931C KLIMEYLPY    | 13   | >JAK2-Y931C KLIMECLPY    | 46    | 33    |
| >JAK2-Y931C KLIMEYLPY    | 109  | >JAK2-Y931C KLIMECLPY    | 118   | 9     |
| >JAK2-Y931C LKLIMEYL     | 214  | >JAK2-Y931C LKLIMECL     | 262   | 48    |
| >JAK2-Y931C LKLIMEYLPY   | 10   | >JAK2-Y931C LKLIMECLPY   | 14    | 4     |
| >JAK2-Y931C NLKLIMEYL    | 18   | >JAK2-Y931C NLKLIMECL    | 117   | 99    |
| >JAK2-Y931C NLKLIMEYL    | 158  | >JAK2-Y931C NLKLIMECL    | 1364  | 1206  |
| >JAK2-Y931C NLKLIMEY     | 442  | >JAK2-Y931C NLKLIMEC     | 26097 | 25655 |
| >JAK2-Y931C NLKLIMEYLPY  | 113  | >JAK2-Y931C NLKLIMECLPY  | 185   | 72    |
| >JAK2-Y931C NLKLIMEYL    | 418  | >JAK2-Y931C NLKLIMECL    | 3414  | 2996  |
| >JAK2-Y931C NLKLIMEY     | 105  | >JAK2-Y931C NLKLIMEC     | 26599 | 26494 |
| >JAK2-Y931C NLKLIMEYLPY  | 109  | >JAK2-Y931C NLKLIMECLPY  | 161   | 52    |
| >JAK2-Y931C NLKLIMEYL    | 1936 | >JAK2-Y931C NLKLIMECL    | 427   | 1509  |
| >JAK2-Y931C NLKLIMEYLPY  | 150  | >JAK2-Y931C NLKLIMECLPY  | 154   | 4     |
| >JAK2-Y931C NLKLIMEYLPY  | 426  | >JAK2-Y931C NLKLIMECLPY  | 525   | 99    |
| >JAK2-Y931C RNLKLIMEY    | 16   | >JAK2-Y931C RNLKLIMEC    | 25057 | 25041 |
| >JAK2-Y931C RNLKLIMEY    | 106  | >JAK2-Y931C RNLKLIMEC    | 9422  | 9316  |
| >JAK2-Y931C RNLKLIMEY    | 229  | >JAK2-Y931C RNLKLIMEC    | 20041 | 19812 |
| >JAK2-Y931C RRNLKLIMEY   | 202  | >JAK2-Y931C RRNLKLIMEC   | 26942 | 26740 |
| >JAK2-Y931C RRNLKLIMEY   | 144  | >JAK2-Y931C RRNLKLIMEC   | 5874  | 5730  |
| >JAK2-Y931C RRNLKLIMEY   | 13   | >JAK2-Y931C RRNLKLIMEC   | 204   | 191   |
| >JAK2-Y931C RRNLKLIMEY   | 60   | >JAK2-Y931C RRNLKLIMEC   | 63    | 3     |
| >JAK2-Y931C RRNLKLIMEY   | 220  | >JAK2-Y931C RRNLKLIMEC   | 303   | 83    |

|                        |      |                        |      |      |
|------------------------|------|------------------------|------|------|
| >JAK2-Y931C RRNLKLIMEY | 64   | >JAK2-Y931C RRNLKLIMEC | 78   | 14   |
| >JAK2-Y931C RRNLKLIMEY | 178  | >JAK2-Y931C RRNLKLIMEC | 228  | 50   |
| >JAK2-Y931C RRNLKLIMEY | 36   | >JAK2-Y931C RRNLKLIMEC | 38   | 2    |
| >JAK3-A1090 ALGPQLDML  | 436  | >JAK3-A1090 SLGPQLDML  | 326  | 110  |
| >JAK3-A1090 ALGPQLDML  | 10   | >JAK3-A1090 SLGPQLDML  | 10   | 0    |
| >JAK3-A1090 ALGPQLDML  | 228  | >JAK3-A1090 SLGPQLDML  | 282  | 54   |
| >JAK3-A1090 ALGPQLDML  | 332  | >JAK3-A1090 SLGPQLDML  | 498  | 166  |
| >JAK3-A1090 ALGPQLDML  | 17   | >JAK3-A1090 SLGPQLDML  | 14   | 3    |
| >JAK3-A1090 ALGPQLDML  | 30   | >JAK3-A1090 SLGPQLDML  | 29   | 1    |
| >JAK3-A1090 ALGPQLDM   | 1160 | >JAK3-A1090 SLGPQLDM   | 405  | 755  |
| >JAK3-A1090 ALGPQLDML  | 24   | >JAK3-A1090 SLGPQLDML  | 14   | 10   |
| >JAK3-A1090 ALGPQLDML  | 132  | >JAK3-A1090 SLGPQLDML  | 285  | 153  |
| >JAK3-A1090 ALGPQLDM   | 74   | >JAK3-A1090 SLGPQLDM   | 113  | 39   |
| >JAK3-A1090 ALGPQLDML  | 6    | >JAK3-A1090 SLGPQLDML  | 7    | 1    |
| >JAK3-A1090 SALGPQLDM  | 390  | >JAK3-A1090 SSLGPQLDMI | 1432 | 1042 |
| >JAK3-A1090 SALGPQLDM  | 247  | >JAK3-A1090 SSLGPQLDM  | 22   | 225  |
| >JAK3-A1090 SALGPQLDM  | 528  | >JAK3-A1090 SSLGPQLDMI | 58   | 470  |
| >JAK3-A1090 SALGPQLDM  | 31   | >JAK3-A1090 SSLGPQLDMI | 7    | 24   |
| >JAK3-A1090 SALGPQLDM  | 232  | >JAK3-A1090 SSLGPQLDMI | 2576 | 2344 |
| >JAK3-A1090 SALGPQLDM  | 53   | >JAK3-A1090 SSLGPQLDMI | 45   | 8    |
| >JAK3-A1090 SALGPQLDM  | 14   | >JAK3-A1090 SSLGPQLDMI | 11   | 3    |
| >JAK3-A1090 SALGPQLDM  | 1248 | >JAK3-A1090 SSLGPQLDM  | 160  | 1088 |
| >JAK3-A1090 SALGPQLDM  | 1307 | >JAK3-A1090 SSLGPQLDMI | 156  | 1151 |
| >JAK3-A1090 SALGPQLDM  | 266  | >JAK3-A1090 SSLGPQLDMI | 1271 | 1005 |
| >JAK3-A1090 SALGPQLDM  | 375  | >JAK3-A1090 SSLGPQLDMI | 1071 | 696  |
| >JAK3-A1090 FSALGPQL   | 340  | >JAK3-A1090 FSSLGPQL   | 758  | 418  |
| >JAK3-A1090 FSALGPQLDM | 85   | >JAK3-A1090 FSSLGPQLDM | 163  | 78   |
| >JAK3-A1090 FSALGPQL   | 16   | >JAK3-A1090 FSSLGPQL   | 19   | 3    |
| >JAK3-A1090 FSALGPQLDM | 44   | >JAK3-A1090 FSSLGPQLDM | 53   | 9    |
| >JAK3-A1090 FSALGPQLDM | 89   | >JAK3-A1090 FSSLGPQLDM | 108  | 19   |
| >JAK3-A1090 FSALGPQL   | 98   | >JAK3-A1090 FSSLGPQL   | 693  | 595  |
| >JAK3-A1090 FSALGPQLDM | 432  | >JAK3-A1090 FSSLGPQLDM | 1012 | 580  |
| >JAK3-A1090 FSALGPQL   | 493  | >JAK3-A1090 FSSLGPQL   | 596  | 103  |
| >JAK3-A1090 FSALGPQLDM | 24   | >JAK3-A1090 FSSLGPQLDM | 20   | 4    |
| >JAK3-A1090 FSALGPQLDM | 356  | >JAK3-A1090 FSSLGPQLDM | 352  | 4    |
| >JAK3-A1090 FSALGPQL   | 484  | >JAK3-A1090 FSSLGPQL   | 961  | 477  |
| >JAK3-A1090 SFSALGPQL  | 357  | >JAK3-A1090 SFSSLGPQL  | 238  | 119  |
| >JAK3-A1090 SFSALGPQLD | 648  | >JAK3-A1090 SFSSLGPQLD | 487  | 161  |
| >JAK3-A1090 SFSALGPQL  | 533  | >JAK3-A1090 SFSSLGPQL  | 385  | 148  |
| >JAK3-A1090 PSFALGPQL  | 402  | >JAK3-A1090 PSFSSLGPQL | 1810 | 1408 |
| >JAK3-A1090 PSFALGPQL  | 662  | >JAK3-A1090 PSFSSLGPQL | 295  | 367  |
| >JAK3-A1090 RPSFALGPQ  | 321  | >JAK3-A1090 RPSFSSLGPQ | 351  | 30   |
| >JAK3-A1090 RPSFALGPQ  | 419  | >JAK3-A1090 RPSFSSLGPQ | 517  | 98   |

|                         |       |                         |       |       |
|-------------------------|-------|-------------------------|-------|-------|
| >JAK3-A1090 RPSFSALGPQ  | 31    | >JAK3-A1090 RPSFSSLGPQ  | 26    | 5     |
| >JAK3-A1090 QDRPSFSAL   | 295   | >JAK3-A1090 QDRPSFSSL   | 371   | 76    |
| >JAK3-A1090 QDRPSFSAL   | 542   | >JAK3-A1090 QDRPSFSSL   | 191   | 351   |
| >JAK3-A1090 SPQDRPSFSA  | 317   | >JAK3-A1090 SPQDRPSFSS  | 177   | 140   |
| >JAK3-A1090 SPQDRPSFSA  | 369   | >JAK3-A1090 SPQDRPSFSS  | 2061  | 1692  |
| >JAK3-A1090 SPQDRPSFSA  | 18    | >JAK3-A1090 SPQDRPSFSS  | 25    | 7     |
| >JAK3-A1090 SPQDRPSFSA  | 152   | >JAK3-A1090 SPQDRPSFSS  | 134   | 18    |
| >JAK3-A1090 SPQDRPSFSA  | 187   | >JAK3-A1090 SPQDRPSFSS  | 562   | 375   |
| >JAK3-A1090 SPQDRPSFSA  | 104   | >JAK3-A1090 SPQDRPSFSS  | 3482  | 3378  |
| >JAK3-A127C AILDLPVL    | 67    | >JAK3-A127C DILDLPVL    | 10492 | 10425 |
| >JAK3-A127C AILDLPVLEHL | 68    | >JAK3-A127C DILDLPVLEHL | 9052  | 8984  |
| >JAK3-A127C AILDLPVLEHL | 94    | >JAK3-A127C DILDLPVLEHL | 2765  | 2671  |
| >JAK3-A127C AILDLPVL    | 55    | >JAK3-A127C DILDLPVL    | 4785  | 4730  |
| >JAK3-A127C AILDLPVLEHL | 25    | >JAK3-A127C DILDLPVLEHL | 2261  | 2236  |
| >JAK3-A127C AILDLPVL    | 20    | >JAK3-A127C DILDLPVL    | 955   | 935   |
| >JAK3-A127C AILDLPVLEHL | 12    | >JAK3-A127C DILDLPVLEHL | 640   | 628   |
| >JAK3-A127C AILDLPVL    | 146   | >JAK3-A127C DILDLPVL    | 5363  | 5217  |
| >JAK3-A127C AILDLPVLEHL | 112   | >JAK3-A127C DILDLPVLEHL | 5038  | 4926  |
| >JAK3-A127C AILDLPVL    | 33    | >JAK3-A127C DILDLPVL    | 1163  | 1130  |
| >JAK3-A127C AILDLPVLEHL | 24    | >JAK3-A127C DILDLPVLEHL | 631   | 607   |
| >JAK3-A127C AILDLPVL    | 89    | >JAK3-A127C DILDLPVL    | 392   | 303   |
| >JAK3-A127C AILDLPVLEHL | 181   | >JAK3-A127C DILDLPVLEHL | 755   | 574   |
| >JAK3-A127C AILDLPVL    | 14    | >JAK3-A127C DILDLPVL    | 1115  | 1101  |
| >JAK3-A127C AILDLPVLEHL | 14    | >JAK3-A127C DILDLPVLEHL | 2000  | 1986  |
| >JAK3-A127C AILDLPVL    | 1940  | >JAK3-A127C DILDLPVL    | 90    | 1850  |
| >JAK3-A127C AILDLPVLEHL | 1733  | >JAK3-A127C DILDLPVLEHL | 83    | 1650  |
| >JAK3-A127C SAILDLPV    | 315   | >JAK3-A127C SDILDLPV    | 26404 | 26089 |
| >JAK3-A127C SAILDLPVL   | 221   | >JAK3-A127C SDILDLPVL   | 21393 | 21172 |
| >JAK3-A127C SAILDLPV    | 30    | >JAK3-A127C SDILDLPV    | 2565  | 2535  |
| >JAK3-A127C SAILDLPVL   | 235   | >JAK3-A127C SDILDLPVL   | 9811  | 9576  |
| >JAK3-A127C SAILDLPV    | 141   | >JAK3-A127C SDILDLPV    | 5036  | 4895  |
| >JAK3-A127C SAILDLPV    | 174   | >JAK3-A127C SDILDLPV    | 8064  | 7890  |
| >JAK3-A127C SAILDLPV    | 234   | >JAK3-A127C SDILDLPV    | 10193 | 9959  |
| >JAK3-A127C SAILDLPVL   | 14826 | >JAK3-A127C SDILDLPVL   | 387   | 14439 |
| >JAK3-A127C SAILDLPV    | 29176 | >JAK3-A127C SDILDLPV    | 124   | 29052 |
| >JAK3-A127C ASAILDLPV   | 6427  | >JAK3-A127C ASDILDLPV   | 112   | 6315  |
| >JAK3-A127C ASAILDLPV   | 425   | >JAK3-A127C ASDILDLPV   | 13417 | 12992 |
| >JAK3-A127C ASAILDLPV   | 143   | >JAK3-A127C ASDILDLPV   | 392   | 249   |
| >JAK3-A127C ASAILDLPVL  | 25    | >JAK3-A127C ASDILDLPVL  | 70    | 45    |
| >JAK3-A127C ASAILDLPVL  | 463   | >JAK3-A127C ASDILDLPVL  | 2114  | 1651  |
| >JAK3-A127C ASAILDLPVL  | 392   | >JAK3-A127C ASDILDLPVL  | 3411  | 3019  |
| >JAK3-A127C LASAILDLPV  | 386   | >JAK3-A127C LASDILDLPV  | 190   | 196   |
| >JAK3-A127C LASAILDL    | 451   | >JAK3-A127C LASDILDL    | 416   | 35    |

|                         |      |                         |       |       |
|-------------------------|------|-------------------------|-------|-------|
| >JAK3-A127C LASAILDLPV  | 67   | >JAK3-A127C LASDILDLPV  | 50    | 17    |
| >JAK3-A127C LASAILDLPVL | 172  | >JAK3-A127C LASDILDLPVL | 140   | 32    |
| >JAK3-A127C LASAILDLPV  | 155  | >JAK3-A127C LASDILDLPV  | 162   | 7     |
| >JAK3-A127C LASAILDLPV  | 67   | >JAK3-A127C LASDILDLPV  | 41    | 26    |
| >JAK3-A127C LASAILDLPVL | 454  | >JAK3-A127C LASDILDLPVL | 248   | 206   |
| >JAK3-A127C LASAILDLPV  | 1156 | >JAK3-A127C LASDILDLPV  | 434   | 722   |
| >JAK3-A127C LASAILDLPV  | 405  | >JAK3-A127C LASDILDLPV  | 57    | 348   |
| >JAK3-A127C LASAILDLPV  | 494  | >JAK3-A127C LASDILDLPV  | 1010  | 516   |
| >JAK3-A127C DLASAILDLPV | 273  | >JAK3-A127C DLASDILDLPV | 411   | 138   |
| >JAK3-A127C DLASAILDLPV | 231  | >JAK3-A127C DLASDILDLPV | 306   | 75    |
| >JAK3-A127C DLASAILDLPV | 104  | >JAK3-A127C DLASDILDLPV | 103   | 1     |
| >JAK3-A127C DLASAILDLPV | 528  | >JAK3-A127C DLASDILDLPV | 370   | 158   |
| >JAK3-A127C DLASAILDL   | 266  | >JAK3-A127C DLASDILD    | 547   | 281   |
| >JAK3-A127C DLASAILDLPV | 14   | >JAK3-A127C DLASDILDLPV | 16    | 2     |
| >JAK3-A127C DLASAILDLPV | 55   | >JAK3-A127C DLASDILDLPV | 63    | 8     |
| >JAK3-A127C DLASAILDL   | 90   | >JAK3-A127C DLASDILD    | 100   | 10    |
| >JAK3-A127C DLASAILDLPV | 12   | >JAK3-A127C DLASDILDLPV | 13    | 1     |
| >JAK3-A127C DLASAILDLPV | 81   | >JAK3-A127C DLASDILDLPV | 183   | 102   |
| >JAK3-A127C DLASAILDLPV | 84   | >JAK3-A127C DLASDILDLPV | 150   | 66    |
| >JAK3-A127C KDLASAIL    | 729  | >JAK3-A127C KDLASDIL    | 432   | 297   |
| >JAK3-A127C KDLASAIL    | 140  | >JAK3-A127C KDLASDIL    | 186   | 46    |
| >JAK3-A127C KDLASAILDL  | 163  | >JAK3-A127C KDLASDILD   | 324   | 161   |
| >JAK3-A127C RKDLASAIL   | 278  | >JAK3-A127C RKDLASDIL   | 1548  | 1270  |
| >JAK3-A127C LRKDLASAI   | 288  | >JAK3-A127C LRKDLASDI   | 912   | 624   |
| >JAK3-A127C LRKDLASAIL  | 425  | >JAK3-A127C LRKDLASDIL  | 963   | 538   |
| >JAK3-A127C LRKDLASAIL  | 155  | >JAK3-A127C LRKDLASDIL  | 436   | 281   |
| >JAK3-A127C LRKDLASAI   | 406  | >JAK3-A127C LRKDLASDI   | 1448  | 1042  |
| >JAK3-A127C LRKDLASAIL  | 239  | >JAK3-A127C LRKDLASDIL  | 1002  | 763   |
| >JAK3-A127C GLRKDLASAI  | 404  | >JAK3-A127C GLRKDLASDI  | 1724  | 1320  |
| >JAK3-A127C GLRKDLASAI  | 284  | >JAK3-A127C GLRKDLASDII | 329   | 45    |
| >JAK3-A127C GLRKDLASA   | 13   | >JAK3-A127C GLRKDLASD   | 12594 | 12581 |
| >JAK3-A127C GLRKDLASAI  | 278  | >JAK3-A127C GLRKDLASDI  | 1014  | 736   |
| >JAK3-A127C GLRKDLASAI  | 82   | >JAK3-A127C GLRKDLASDII | 335   | 253   |
| >JAK3-A127C GLRKDLASAI  | 425  | >JAK3-A127C GLRKDLASDI  | 2543  | 2118  |
| >JAK3-A127C GLRKDLASA   | 378  | >JAK3-A127C GLRKDLASD   | 20578 | 20200 |
| >JAK3-A127C GLRKDLASAI  | 114  | >JAK3-A127C GLRKDLASDI  | 871   | 757   |
| >JAK3-A127C GLRKDLASAI  | 162  | >JAK3-A127C GLRKDLASDII | 386   | 224   |
| >JAK3-A127C GLRKDLASA   | 30   | >JAK3-A127C GLRKDLASD   | 15928 | 15898 |
| >JAK3-A127C GLRKDLASAI  | 94   | >JAK3-A127C GLRKDLASDI  | 146   | 52    |
| >JAK3-A127C GLRKDLASAI  | 38   | >JAK3-A127C GLRKDLASDII | 126   | 88    |
| >JAK3-A127C FGLRKDLASA  | 384  | >JAK3-A127C FGLRKDLASD  | 1491  | 1107  |
| >JAK3-A572V AASLMSQV    | 365  | >JAK3-A572V VASLMSQV    | 520   | 155   |
| >JAK3-A572V AASLMSQV    | 247  | >JAK3-A572V VASLMSQV    | 285   | 38    |

|                        |      |                        |      |      |
|------------------------|------|------------------------|------|------|
| >JAK3-A572V AASLMSQVS\ | 169  | >JAK3-A572V VASLMSQVS\ | 618  | 449  |
| >JAK3-A572V AASLMSQVS\ | 300  | >JAK3-A572V VASLMSQVS\ | 631  | 331  |
| >JAK3-A572V AASLMSQVS\ | 354  | >JAK3-A572V VASLMSQVS\ | 426  | 72   |
| >JAK3-A572V AASLMSQVS\ | 141  | >JAK3-A572V VASLMSQVS\ | 121  | 20   |
| >JAK3-A572V AASLMSQVS\ | 46   | >JAK3-A572V VASLMSQVS\ | 65   | 19   |
| >JAK3-A572V AASLMSQVS\ | 1889 | >JAK3-A572V VASLMSQVS\ | 432  | 1457 |
| >JAK3-A572V AASLMSQVS\ | 74   | >JAK3-A572V VASLMSQVS\ | 54   | 20   |
| >JAK3-A572V AASLMSQVS\ | 188  | >JAK3-A572V VASLMSQVS\ | 271  | 83   |
| >JAK3-A572V AASLMSQVS\ | 147  | >JAK3-A572V VASLMSQVS\ | 210  | 63   |
| >JAK3-A572V AASLMSQVS\ | 13   | >JAK3-A572V VASLMSQVS\ | 15   | 2    |
| >JAK3-A572V AASLMSQVS\ | 38   | >JAK3-A572V VASLMSQVS\ | 42   | 4    |
| >JAK3-A572V AASLMSQVS\ | 137  | >JAK3-A572V VASLMSQVS\ | 343  | 206  |
| >JAK3-A572V EAASLMSQV  | 1049 | >JAK3-A572V EVASLMSQV  | 170  | 879  |
| >JAK3-A572V EAASLMSQV  | 1292 | >JAK3-A572V EVASLMSQV  | 153  | 1139 |
| >JAK3-A572V EAASLMSQV  | 3622 | >JAK3-A572V EVASLMSQV  | 183  | 3439 |
| >JAK3-A572V EAASLMSQ   | 5045 | >JAK3-A572V EVASLMSQ   | 252  | 4793 |
| >JAK3-A572V EAASLMSQV  | 4296 | >JAK3-A572V EVASLMSQV  | 216  | 4080 |
| >JAK3-A572V EAASLMSQV! | 79   | >JAK3-A572V EVASLMSQV! | 16   | 63   |
| >JAK3-A572V EAASLMSQV  | 2815 | >JAK3-A572V EVASLMSQV  | 121  | 2694 |
| >JAK3-A572V EAASLMSQV! | 69   | >JAK3-A572V EVASLMSQV! | 11   | 58   |
| >JAK3-A572V EAASLMSQ   | 3027 | >JAK3-A572V EVASLMSQ   | 111  | 2916 |
| >JAK3-A572V EAASLMSQV  | 427  | >JAK3-A572V EVASLMSQV  | 12   | 415  |
| >JAK3-A572V EAASLMSQV! | 20   | >JAK3-A572V EVASLMSQV! | 3    | 17   |
| >JAK3-A572V EAASLMSQV! | 2603 | >JAK3-A572V EVASLMSQV! | 283  | 2320 |
| >JAK3-A572V EAASLMSQV! | 1572 | >JAK3-A572V EVASLMSQV! | 211  | 1361 |
| >JAK3-A572V EAASLMSQV! | 239  | >JAK3-A572V EVASLMSQV! | 119  | 120  |
| >JAK3-A572V EAASLMSQ   | 265  | >JAK3-A572V EVASLMSQ   | 112  | 153  |
| >JAK3-A572V EAASLMSQV! | 42   | >JAK3-A572V EVASLMSQV! | 20   | 22   |
| >JAK3-A572V EAASLMSQV  | 5    | >JAK3-A572V EVASLMSQV  | 4    | 1    |
| >JAK3-A572V EAASLMSQV  | 5    | >JAK3-A572V EVASLMSQV  | 3    | 2    |
| >JAK3-A572V EAASLMSQV! | 538  | >JAK3-A572V EVASLMSQV! | 329  | 209  |
| >JAK3-A572V EAASLMSQV! | 347  | >JAK3-A572V EVASLMSQV! | 1176 | 829  |
| >JAK3-A572V EAASLMSQV! | 107  | >JAK3-A572V EVASLMSQV! | 1021 | 914  |
| >JAK3-A572V EAASLMSQV! | 25   | >JAK3-A572V EVASLMSQV! | 83   | 58   |
| >JAK3-A572V EAASLMSQV  | 334  | >JAK3-A572V EVASLMSQV  | 162  | 172  |
| >JAK3-A572V EAASLMSQV! | 423  | >JAK3-A572V EVASLMSQV! | 244  | 179  |
| >JAK3-A572V EAASLMSQV! | 208  | >JAK3-A572V EVASLMSQV! | 95   | 113  |
| >JAK3-A572V HKNCMESFLI | 381  | >JAK3-A572V HKNCMESFLI | 85   | 296  |
| >JAK3-A572V LEAASLMSQ\ | 23   | >JAK3-A572V LEVASLMSQ\ | 66   | 43   |
| >JAK3-A572V LEAASLMSQ  | 331  | >JAK3-A572V LEVASLMSQ  | 177  | 154  |
| >JAK3-A572V LEAASLMSQ\ | 202  | >JAK3-A572V LEVASLMSQ\ | 188  | 14   |
| >JAK3-A572V LEAASLMSQ\ | 227  | >JAK3-A572V LEVASLMSQ\ | 271  | 44   |
| >JAK3-A572V FLEAASLM   | 377  | >JAK3-A572V FLEVASLM   | 1394 | 1017 |

|                        |      |                        |      |      |
|------------------------|------|------------------------|------|------|
| >JAK3-A572V FLEAASLMSC | 23   | >JAK3-A572V FLEVASLMSC | 62   | 39   |
| >JAK3-A572V FLEAASLM   | 16   | >JAK3-A572V FLEVASLM   | 49   | 33   |
| >JAK3-A572V FLEAASLMS  | 331  | >JAK3-A572V FLEVASLMS  | 1767 | 1436 |
| >JAK3-A572V FLEAASLMSC | 3    | >JAK3-A572V FLEVASLMSC | 5    | 2    |
| >JAK3-A572V FLEAASLM   | 245  | >JAK3-A572V FLEVASLM   | 961  | 716  |
| >JAK3-A572V FLEAASLMSC | 5    | >JAK3-A572V FLEVASLMSC | 12   | 7    |
| >JAK3-A572V FLEAASLMSC | 17   | >JAK3-A572V FLEVASLMSC | 49   | 32   |
| >JAK3-A572V FLEAASLM   | 458  | >JAK3-A572V FLEVASLM   | 951  | 493  |
| >JAK3-A572V FLEAASLMSC | 4    | >JAK3-A572V FLEVASLMSC | 8    | 4    |
| >JAK3-A572V FLEAASLMSC | 7    | >JAK3-A572V FLEVASLMSC | 11   | 4    |
| >JAK3-A572V FLEAASLMSC | 10   | >JAK3-A572V FLEVASLMSC | 14   | 4    |
| >JAK3-A572V FLEAASLMSC | 23   | >JAK3-A572V FLEVASLMSC | 36   | 13   |
| >JAK3-A572V FLEAASLM   | 20   | >JAK3-A572V FLEVASLM   | 56   | 36   |
| >JAK3-A572V FLEAASLMSC | 16   | >JAK3-A572V FLEVASLMSC | 41   | 25   |
| >JAK3-A572V FLEAASLMSC | 2    | >JAK3-A572V FLEVASLMSC | 2    | 0    |
| >JAK3-A572V FLEAASLMSC | 242  | >JAK3-A572V FLEVASLMSC | 458  | 216  |
| >JAK3-A572V FLEAASLM   | 201  | >JAK3-A572V FLEVASLM   | 476  | 275  |
| >JAK3-A572V SFLEAASL   | 261  | >JAK3-A572V SFLEVASL   | 151  | 110  |
| >JAK3-A572V SFLEAASL   | 837  | >JAK3-A572V SFLEVASL   | 329  | 508  |
| >JAK3-A572V SFLEAASL   | 1428 | >JAK3-A572V SFLEVASL   | 310  | 1118 |
| >JAK3-A572V SFLEAASL   | 80   | >JAK3-A572V SFLEVASL   | 48   | 32   |
| >JAK3-A572V SFLEAASLM  | 73   | >JAK3-A572V SFLEVASLM  | 28   | 45   |
| >JAK3-A572V SFLEAASL   | 265  | >JAK3-A572V SFLEVASL   | 202  | 63   |
| >JAK3-A572V SFLEAASLM  | 476  | >JAK3-A572V SFLEVASLM  | 318  | 158  |
| >JAK3-A572V ESFLEAASL  | 139  | >JAK3-A572V ESFLEVASL  | 80   | 59   |
| >JAK3-A572V ESFLEAASL  | 15   | >JAK3-A572V ESFLEVASL  | 23   | 8    |
| >JAK3-A572V ESFLEAASLM | 17   | >JAK3-A572V ESFLEVASLM | 30   | 13   |
| >JAK3-A572V ESFLEAASLM | 138  | >JAK3-A572V ESFLEVASLM | 165  | 27   |
| >JAK3-A572V MESFLEAASL | 342  | >JAK3-A572V MESFLEVASL | 490  | 148  |
| >JAK3-A572V MESFLEAASL | 116  | >JAK3-A572V MESFLEVASL | 121  | 5    |
| >JAK3-A572V MESFLEAASL | 155  | >JAK3-A572V MESFLEVASL | 177  | 22   |
| >JAK3-A572V MESFLEAASL | 340  | >JAK3-A572V MESFLEVASL | 425  | 85   |
| >JAK3-A572V MESFLEAASL | 198  | >JAK3-A572V MESFLEVASL | 208  | 10   |
| >JAK3-A572V MESFLEAASL | 72   | >JAK3-A572V MESFLEVASL | 56   | 16   |
| >JAK3-A572V MESFLEAA   | 369  | >JAK3-A572V MESFLEVA   | 427  | 58   |
| >JAK3-A572V MESFLEAASL | 81   | >JAK3-A572V MESFLEVASL | 73   | 8    |
| >JAK3-A572V MESFLEAASL | 663  | >JAK3-A572V MESFLEVASL | 479  | 184  |
| >JAK3-A572V MESFLEAASL | 171  | >JAK3-A572V MESFLEVASL | 236  | 65   |
| >JAK3-A572V MESFLEAASL | 302  | >JAK3-A572V MESFLEVASL | 266  | 36   |
| >JAK3-A572V MESFLEAA   | 9    | >JAK3-A572V MESFLEVA   | 11   | 2    |
| >JAK3-A572V MESFLEAAS  | 66   | >JAK3-A572V MESFLEVAS  | 50   | 16   |
| >JAK3-A572V MESFLEAASL | 353  | >JAK3-A572V MESFLEVASL | 411  | 58   |
| >JAK3-A572V MESFLEAASL | 150  | >JAK3-A572V MESFLEVASL | 152  | 2    |



|                         |      |                        |      |      |
|-------------------------|------|------------------------|------|------|
| >JAK3-A572V MEFLEAASL   | 24   | >JAK3-A572V MESFLEVASL | 22   | 2    |
| >JAK3-A572V MEFLEAASL   | 63   | >JAK3-A572V MESFLEVASL | 49   | 14   |
| >JAK3-A572V CMESFLEA    | 1247 | >JAK3-A572V CMESFLEV   | 110  | 1137 |
| >JAK3-A572V CMESFLEA    | 465  | >JAK3-A572V CMESFLEV   | 75   | 390  |
| >JAK3-A572V CMESFLEAA   | 119  | >JAK3-A572V CMESFLEVA  | 469  | 350  |
| >JAK3-A572V CMESFLEAAS  | 77   | >JAK3-A572V CMESFLEVAS | 64   | 13   |
| >JAK3-A572V CMESFLEA    | 1050 | >JAK3-A572V CMESFLEV   | 204  | 846  |
| >JAK3-A572V CMESFLEAAS  | 875  | >JAK3-A572V CMESFLEVAS | 472  | 403  |
| >JAK3-A572V CMESFLEA    | 2240 | >JAK3-A572V CMESFLEV   | 162  | 2078 |
| >JAK3-A572V CMESFLEA    | 1315 | >JAK3-A572V CMESFLEV   | 22   | 1293 |
| >JAK3-A572V CMESFLEAA   | 375  | >JAK3-A572V CMESFLEVA  | 939  | 564  |
| >JAK3-A572V CMESFLEAAS  | 387  | >JAK3-A572V CMESFLEVAS | 202  | 185  |
| >JAK3-A572V CMESFLEA    | 3025 | >JAK3-A572V CMESFLEV   | 67   | 2958 |
| >JAK3-A572V CMESFLEAAS  | 332  | >JAK3-A572V CMESFLEVAS | 252  | 80   |
| >JAK3-A572V CMESFLEA    | 9790 | >JAK3-A572V CMESFLEV   | 367  | 9423 |
| >JAK3-A572V CMESFLEA    | 6742 | >JAK3-A572V CMESFLEV   | 368  | 6374 |
| >JAK3-A572V CMESFLEA    | 461  | >JAK3-A572V CMESFLEV   | 6    | 455  |
| >JAK3-A572V CMESFLEAAS  | 85   | >JAK3-A572V CMESFLEVAS | 57   | 28   |
| >JAK3-A572V NCMESFLEA   | 4945 | >JAK3-A572V NCMESFLEV  | 478  | 4467 |
| >JAK3-A572V NCMESFLEA   | 3491 | >JAK3-A572V NCMESFLEV  | 406  | 3085 |
| >JAK3-A572V NCMESFLEA   | 2382 | >JAK3-A572V NCMESFLEV  | 230  | 2152 |
| >JAK3-A572V NCMESFLEA   | 1042 | >JAK3-A572V NCMESFLEV  | 71   | 971  |
| >JAK3-A572V NCMESFLEA   | 416  | >JAK3-A572V NCMESFLEV  | 16   | 400  |
| >JAK3-A572V NCMESFLEA/  | 415  | >JAK3-A572V NCMESFLEV/ | 1572 | 1157 |
| >JAK3-A572V KNCMESFLEA/ | 2283 | >JAK3-A572V KNCMESFLEV | 347  | 1936 |
| >JAK3-A573V ASLMSQVSYF  | 280  | >JAK3-A573V VSLMSQVSYF | 850  | 570  |
| >JAK3-A573V ASLMSQVSY   | 193  | >JAK3-A573V VSLMSQVSY  | 738  | 545  |
| >JAK3-A573V ASLMSQVSYF  | 39   | >JAK3-A573V VSLMSQVSYF | 118  | 79   |
| >JAK3-A573V ASLMSQVSY   | 62   | >JAK3-A573V VSLMSQVSY  | 42   | 20   |
| >JAK3-A573V ASLMSQVSYF  | 14   | >JAK3-A573V VSLMSQVSYF | 27   | 13   |
| >JAK3-A573V ASLMSQVSYF  | 261  | >JAK3-A573V VSLMSQVSYF | 171  | 90   |
| >JAK3-A573V ASLMSQVSYF  | 40   | >JAK3-A573V VSLMSQVSYF | 61   | 21   |
| >JAK3-A573V ASLMSQVSY   | 131  | >JAK3-A573V VSLMSQVSY  | 176  | 45   |
| >JAK3-A573V ASLMSQVSY   | 8    | >JAK3-A573V VSLMSQVSY  | 8    | 0    |
| >JAK3-A573V ASLMSQVSY   | 3    | >JAK3-A573V VSLMSQVSY  | 3    | 0    |
| >JAK3-A573V ASLMSQVSYF  | 242  | >JAK3-A573V VSLMSQVSYF | 224  | 18   |
| >JAK3-A573V ASLMSQVSY   | 288  | >JAK3-A573V VSLMSQVSY  | 58   | 230  |
| >JAK3-A573V ASLMSQVSY   | 184  | >JAK3-A573V VSLMSQVSY  | 114  | 70   |
| >JAK3-A573V ASLMSQVSY   | 398  | >JAK3-A573V VSLMSQVSY  | 2985 | 2587 |
| >JAK3-A573V ASLMSQVSYF  | 89   | >JAK3-A573V VSLMSQVSYF | 494  | 405  |
| >JAK3-A573V ASLMSQVSYF  | 280  | >JAK3-A573V VSLMSQVSYF | 2213 | 1933 |
| >JAK3-A573V AASLMSQV    | 702  | >JAK3-A573V AVSLMSQV   | 117  | 585  |
| >JAK3-A573V AASLMSQV    | 365  | >JAK3-A573V AVSLMSQV   | 46   | 319  |

|                        |      |                        |     |      |
|------------------------|------|------------------------|-----|------|
| >JAK3-A573V AASLMSQV   | 1439 | >JAK3-A573V AVSLMSQV   | 228 | 1211 |
| >JAK3-A573V AASLMSQV   | 247  | >JAK3-A573V AVSLMSQV   | 15  | 232  |
| >JAK3-A573V AASLMSQVS\ | 1387 | >JAK3-A573V AVSLMSQVS\ | 269 | 1118 |
| >JAK3-A573V AASLMSQVS\ | 169  | >JAK3-A573V AVSLMSQVS\ | 58  | 111  |
| >JAK3-A573V AASLMSQVS\ | 300  | >JAK3-A573V AVSLMSQVS\ | 51  | 249  |
| >JAK3-A573V AASLMSQVS\ | 354  | >JAK3-A573V AVSLMSQVS\ | 222 | 132  |
| >JAK3-A573V AASLMSQVS\ | 141  | >JAK3-A573V AVSLMSQVS\ | 127 | 14   |
| >JAK3-A573V AASLMSQVS\ | 46   | >JAK3-A573V AVSLMSQVS\ | 25  | 21   |
| >JAK3-A573V AASLMSQVS\ | 74   | >JAK3-A573V AVSLMSQVS\ | 45  | 29   |
| >JAK3-A573V AASLMSQV   | 1691 | >JAK3-A573V AVSLMSQV   | 343 | 1348 |
| >JAK3-A573V AASLMSQVS\ | 188  | >JAK3-A573V AVSLMSQVS\ | 137 | 51   |
| >JAK3-A573V AASLMSQVS\ | 147  | >JAK3-A573V AVSLMSQVS\ | 692 | 545  |
| >JAK3-A573V AASLMSQVS\ | 13   | >JAK3-A573V AVSLMSQVS\ | 83  | 70   |
| >JAK3-A573V AASLMSQVS\ | 38   | >JAK3-A573V AVSLMSQVS\ | 30  | 8    |
| >JAK3-A573V AASLMSQVS\ | 137  | >JAK3-A573V AVSLMSQVS\ | 63  | 74   |
| >JAK3-A573V EAASLMSQV! | 79   | >JAK3-A573V EAVSLMSQV! | 143 | 64   |
| >JAK3-A573V EAASLMSQV! | 69   | >JAK3-A573V EAVSLMSQV! | 49  | 20   |
| >JAK3-A573V EAASLMSQV  | 427  | >JAK3-A573V EAVSLMSQV  | 69  | 358  |
| >JAK3-A573V EAASLMSQV! | 20   | >JAK3-A573V EAVSLMSQV! | 8   | 12   |
| >JAK3-A573V EAASLMSQV! | 2603 | >JAK3-A573V EAVSLMSQV! | 302 | 2301 |
| >JAK3-A573V EAASLMSQV! | 239  | >JAK3-A573V EAVSLMSQV! | 768 | 529  |
| >JAK3-A573V EAASLMSQ   | 265  | >JAK3-A573V EAVSLMSQ   | 605 | 340  |
| >JAK3-A573V EAASLMSQV! | 42   | >JAK3-A573V EAVSLMSQV! | 94  | 52   |
| >JAK3-A573V EAASLMSQV  | 5    | >JAK3-A573V EAVSLMSQV  | 8   | 3    |
| >JAK3-A573V EAASLMSQV  | 5    | >JAK3-A573V EAVSLMSQV  | 7   | 2    |
| >JAK3-A573V EAASLMSQV! | 347  | >JAK3-A573V EAVSLMSQV! | 267 | 80   |
| >JAK3-A573V EAASLMSQV! | 107  | >JAK3-A573V EAVSLMSQV! | 36  | 71   |
| >JAK3-A573V EAASLMSQV! | 25   | >JAK3-A573V EAVSLMSQV! | 27  | 2    |
| >JAK3-A573V EAASLMSQV  | 334  | >JAK3-A573V EAVSLMSQV  | 419 | 85   |
| >JAK3-A573V EAASLMSQV! | 423  | >JAK3-A573V EAVSLMSQV! | 493 | 70   |
| >JAK3-A573V EAASLMSQV! | 208  | >JAK3-A573V EAVSLMSQV! | 389 | 181  |
| >JAK3-A573V LEAASLMSQ\ | 23   | >JAK3-A573V LEAVSLMSQ\ | 16  | 7    |
| >JAK3-A573V LEAASLMSQ  | 331  | >JAK3-A573V LEAVSLMSQ  | 403 | 72   |
| >JAK3-A573V LEAASLMSQ\ | 202  | >JAK3-A573V LEAVSLMSQ\ | 261 | 59   |
| >JAK3-A573V LEAASLMSQ\ | 227  | >JAK3-A573V LEAVSLMSQ\ | 171 | 56   |
| >JAK3-A573V FLEAASLM   | 377  | >JAK3-A573V FLEAVSLM   | 140 | 237  |
| >JAK3-A573V FLEAASLMSC | 23   | >JAK3-A573V FLEAVSLMSC | 21  | 2    |
| >JAK3-A573V FLEAASLM   | 16   | >JAK3-A573V FLEAVSLM   | 12  | 4    |
| >JAK3-A573V FLEAASLMS  | 331  | >JAK3-A573V FLEAVSLMS  | 216 | 115  |
| >JAK3-A573V FLEAASLMSC | 3    | >JAK3-A573V FLEAVSLMSC | 3   | 0    |
| >JAK3-A573V FLEAASLM   | 245  | >JAK3-A573V FLEAVSLM   | 118 | 127  |
| >JAK3-A573V FLEAASLMSC | 5    | >JAK3-A573V FLEAVSLMSC | 5   | 0    |
| >JAK3-A573V FLEAASLMSC | 17   | >JAK3-A573V FLEAVSLMSC | 21  | 4    |

|                        |       |                        |     |       |
|------------------------|-------|------------------------|-----|-------|
| >JAK3-A573V FLEAASLM   | 458   | >JAK3-A573V FLEAVSLM   | 70  | 388   |
| >JAK3-A573V FLEAASLMSC | 4     | >JAK3-A573V FLEAVSLMSC | 2   | 2     |
| >JAK3-A573V FLEAASLM   | 607   | >JAK3-A573V FLEAVSLM   | 346 | 261   |
| >JAK3-A573V FLEAASLMSC | 7     | >JAK3-A573V FLEAVSLMSC | 7   | 0     |
| >JAK3-A573V FLEAASLMSC | 10    | >JAK3-A573V FLEAVSLMSC | 9   | 1     |
| >JAK3-A573V FLEAASLMSC | 23    | >JAK3-A573V FLEAVSLMSC | 29  | 6     |
| >JAK3-A573V FLEAASLM   | 20    | >JAK3-A573V FLEAVSLM   | 15  | 5     |
| >JAK3-A573V FLEAASLMSC | 16    | >JAK3-A573V FLEAVSLMSC | 22  | 6     |
| >JAK3-A573V FLEAASLMSC | 2     | >JAK3-A573V FLEAVSLMSC | 2   | 0     |
| >JAK3-A573V FLEAASLMSC | 242   | >JAK3-A573V FLEAVSLMSC | 307 | 65    |
| >JAK3-A573V FLEAASLM   | 201   | >JAK3-A573V FLEAVSLM   | 377 | 176   |
| >JAK3-A573V SFLEAASL   | 261   | >JAK3-A573V SFLEAVSL   | 342 | 81    |
| >JAK3-A573V SFLEAASL   | 80    | >JAK3-A573V SFLEAVSL   | 32  | 48    |
| >JAK3-A573V SFLEAASLM  | 73    | >JAK3-A573V SFLEAVSLM  | 180 | 107   |
| >JAK3-A573V SFLEAASL   | 265   | >JAK3-A573V SFLEAVSL   | 234 | 31    |
| >JAK3-A573V SFLEAASLM  | 476   | >JAK3-A573V SFLEAVSLM  | 445 | 31    |
| >JAK3-A573V ESFLEAASL  | 1206  | >JAK3-A573V ESFLEAVSL  | 209 | 997   |
| >JAK3-A573V ESFLEAASL  | 139   | >JAK3-A573V ESFLEAVSL  | 192 | 53    |
| >JAK3-A573V ESFLEAASL  | 15    | >JAK3-A573V ESFLEAVSL  | 34  | 19    |
| >JAK3-A573V ESFLEAASLM | 17    | >JAK3-A573V ESFLEAVSLM | 27  | 10    |
| >JAK3-A573V ESFLEAASLM | 138   | >JAK3-A573V ESFLEAVSLM | 221 | 83    |
| >JAK3-A573V MESFLEAA   | 4545  | >JAK3-A573V MESFLEAV   | 332 | 4213  |
| >JAK3-A573V MESFLEAASL | 342   | >JAK3-A573V MESFLEAVSL | 445 | 103   |
| >JAK3-A573V MESFLEAASL | 116   | >JAK3-A573V MESFLEAVSL | 134 | 18    |
| >JAK3-A573V MESFLEAA   | 3204  | >JAK3-A573V MESFLEAV   | 488 | 2716  |
| >JAK3-A573V MESFLEAA   | 570   | >JAK3-A573V MESFLEAV   | 237 | 333   |
| >JAK3-A573V MESFLEAASL | 764   | >JAK3-A573V MESFLEAVSL | 467 | 297   |
| >JAK3-A573V MESFLEAASL | 155   | >JAK3-A573V MESFLEAVSL | 147 | 8     |
| >JAK3-A573V MESFLEAASL | 340   | >JAK3-A573V MESFLEAVSL | 296 | 44    |
| >JAK3-A573V MESFLEAA   | 1680  | >JAK3-A573V MESFLEAV   | 41  | 1639  |
| >JAK3-A573V MESFLEAASL | 198   | >JAK3-A573V MESFLEAVSL | 93  | 105   |
| >JAK3-A573V MESFLEAASL | 72    | >JAK3-A573V MESFLEAVSL | 116 | 44    |
| >JAK3-A573V MESFLEAA   | 369   | >JAK3-A573V MESFLEAV   | 346 | 23    |
| >JAK3-A573V MESFLEAASL | 81    | >JAK3-A573V MESFLEAVSL | 59  | 22    |
| >JAK3-A573V MESFLEAASL | 663   | >JAK3-A573V MESFLEAVSL | 382 | 281   |
| >JAK3-A573V MESFLEAASL | 171   | >JAK3-A573V MESFLEAVSL | 146 | 25    |
| >JAK3-A573V MESFLEAASL | 626   | >JAK3-A573V MESFLEAVSL | 464 | 162   |
| >JAK3-A573V MESFLEAASL | 302   | >JAK3-A573V MESFLEAVSL | 361 | 59    |
| >JAK3-A573V MESFLEAA   | 9     | >JAK3-A573V MESFLEAV   | 24  | 15    |
| >JAK3-A573V MESFLEAAS  | 66    | >JAK3-A573V MESFLEAVS  | 108 | 42    |
| >JAK3-A573V MESFLEAASL | 353   | >JAK3-A573V MESFLEAVSL | 269 | 84    |
| >JAK3-A573V MESFLEAASL | 150   | >JAK3-A573V MESFLEAVSL | 196 | 46    |
| >JAK3-A573V MESFLEAA   | 11364 | >JAK3-A573V MESFLEAV   | 441 | 10923 |

|                        |      |                        |      |      |
|------------------------|------|------------------------|------|------|
| >JAK3-A573V MESHLEAASL | 24   | >JAK3-A573V MESHLEAVSL | 15   | 9    |
| >JAK3-A573V MESHLEAASL | 63   | >JAK3-A573V MESHLEAVSL | 38   | 25   |
| >JAK3-A573V CMESHLEAA  | 1675 | >JAK3-A573V CMESHLEAV  | 124  | 1551 |
| >JAK3-A573V CMESHLEAA  | 119  | >JAK3-A573V CMESHLEAV  | 21   | 98   |
| >JAK3-A573V CMESHLEAAS | 77   | >JAK3-A573V CMESHLEAVS | 98   | 21   |
| >JAK3-A573V CMESHLEAA  | 527  | >JAK3-A573V CMESHLEAV  | 95   | 432  |
| >JAK3-A573V CMESHLEAA  | 825  | >JAK3-A573V CMESHLEAV  | 70   | 755  |
| >JAK3-A573V CMESHLEAA  | 375  | >JAK3-A573V CMESHLEAV  | 8    | 367  |
| >JAK3-A573V CMESHLEAAS | 387  | >JAK3-A573V CMESHLEAVS | 426  | 39   |
| >JAK3-A573V CMESHLEAA  | 1392 | >JAK3-A573V CMESHLEAV  | 21   | 1371 |
| >JAK3-A573V CMESHLEAAS | 332  | >JAK3-A573V CMESHLEAVS | 462  | 130  |
| >JAK3-A573V CMESHLEAA  | 4319 | >JAK3-A573V CMESHLEAV  | 114  | 4205 |
| >JAK3-A573V CMESHLEAA  | 1322 | >JAK3-A573V CMESHLEAV  | 9    | 1313 |
| >JAK3-A573V CMESHLEAAS | 85   | >JAK3-A573V CMESHLEAVS | 103  | 18   |
| >JAK3-A573V NCMESHLEA/ | 2417 | >JAK3-A573V NCMESHLEA\ | 300  | 2117 |
| >JAK3-A573V NCMESHLEA/ | 1295 | >JAK3-A573V NCMESHLEA\ | 251  | 1044 |
| >JAK3-A573V NCMESHLEA/ | 1403 | >JAK3-A573V NCMESHLEA\ | 227  | 1176 |
| >JAK3-A573V NCMESHLEA/ | 777  | >JAK3-A573V NCMESHLEA\ | 148  | 629  |
| >JAK3-A573V NCMESHLEA/ | 8209 | >JAK3-A573V NCMESHLEA\ | 415  | 7794 |
| >JAK3-A573V NCMESHLEA/ | 3271 | >JAK3-A573V NCMESHLEA\ | 482  | 2789 |
| >JAK3-A573V NCMESHLEA/ | 415  | >JAK3-A573V NCMESHLEA\ | 16   | 399  |
| >JAK3-A593T MAGDSTMV   | 975  | >JAK3-A593T MTGDSTMV   | 323  | 652  |
| >JAK3-A593T MAGDSTMV   | 214  | >JAK3-A593T MTGDSTMV   | 71   | 143  |
| >JAK3-A593T MAGDSTMV   | 195  | >JAK3-A593T MTGDSTMV   | 63   | 132  |
| >JAK3-A593T MAGDSTMV   | 206  | >JAK3-A593T MTGDSTMV   | 141  | 65   |
| >JAK3-A593T MAGDSTMV   | 106  | >JAK3-A593T MTGDSTMV   | 28   | 78   |
| >JAK3-A593T MAGDSTMV   | 565  | >JAK3-A593T MTGDSTMV   | 115  | 450  |
| >JAK3-A593T MAGDSTMV   | 14   | >JAK3-A593T MTGDSTMV   | 11   | 3    |
| >JAK3-A593T MAGDSTMV(  | 1023 | >JAK3-A593T MTGDSTMV(  | 244  | 779  |
| >JAK3-A593T MAGDSTMV(  | 6321 | >JAK3-A593T MTGDSTMV(  | 230  | 6091 |
| >JAK3-A593T MAGDSTMV(  | 1639 | >JAK3-A593T MTGDSTMV(  | 415  | 1224 |
| >JAK3-A593T MAGDSTMV   | 54   | >JAK3-A593T MTGDSTMV   | 13   | 41   |
| >JAK3-A593T MAGDSTMV   | 43   | >JAK3-A593T MTGDSTMV   | 11   | 32   |
| >JAK3-A593T MAGDSTMV(  | 127  | >JAK3-A593T MTGDSTMV(  | 94   | 33   |
| >JAK3-A593T MAGDSTMV(  | 47   | >JAK3-A593T MTGDSTMV(  | 75   | 28   |
| >JAK3-A593T MAGDSTMV   | 5204 | >JAK3-A593T MTGDSTMV   | 492  | 4712 |
| >JAK3-A593T MAGDSTMV(  | 12   | >JAK3-A593T MTGDSTMV(  | 4    | 8    |
| >JAK3-A593T MAGDSTMV(  | 24   | >JAK3-A593T MTGDSTMV(  | 340  | 316  |
| >JAK3-A593T MAGDSTMV(  | 261  | >JAK3-A593T MTGDSTMV(  | 854  | 593  |
| >JAK3-A593T MAGDSTMV(  | 82   | >JAK3-A593T MTGDSTMV(  | 69   | 13   |
| >JAK3-A593T MAGDSTMV(  | 2383 | >JAK3-A593T MTGDSTMV(  | 139  | 2244 |
| >JAK3-A593T HLVLLHGVCN | 241  | >JAK3-A593T HLVLLHGVCN | 1696 | 1455 |
| >JAK3-A593T HLVLLHGVCN | 438  | >JAK3-A593T HLVLLHGVCN | 2333 | 1895 |

|                        |      |                        |      |      |
|------------------------|------|------------------------|------|------|
| >JAK3-A593T HLVLLHGVCN | 178  | >JAK3-A593T HLVLLHGVCN | 1215 | 1037 |
| >JAK3-A593T CMAGDSTM\  | 58   | >JAK3-A593T CMTGDSTM\  | 265  | 207  |
| >JAK3-A593T CMAGDSTM   | 315  | >JAK3-A593T CMTGDSTM   | 2086 | 1771 |
| >JAK3-A593T CMAGDSTM\  | 7    | >JAK3-A593T CMTGDSTM\  | 35   | 28   |
| >JAK3-A593T CMAGDSTM   | 319  | >JAK3-A593T CMTGDSTM   | 2293 | 1974 |
| >JAK3-A593T CMAGDSTM\  | 5    | >JAK3-A593T CMTGDSTM\  | 23   | 18   |
| >JAK3-A593T CMAGDSTM\  | 112  | >JAK3-A593T CMTGDSTM\  | 374  | 262  |
| >JAK3-A593T CMAGDSTM\  | 8    | >JAK3-A593T CMTGDSTM\  | 15   | 7    |
| >JAK3-A593T CMAGDSTM\  | 44   | >JAK3-A593T CMTGDSTM\  | 69   | 25   |
| >JAK3-A593T CMAGDSTM\  | 13   | >JAK3-A593T CMTGDSTM\  | 19   | 6    |
| >JAK3-A593T CMAGDSTM   | 307  | >JAK3-A593T CMTGDSTM   | 2277 | 1970 |
| >JAK3-A593T CMAGDSTM\  | 3    | >JAK3-A593T CMTGDSTM\  | 16   | 13   |
| >JAK3-A593T CMAGDSTM   | 224  | >JAK3-A593T CMTGDSTM   | 279  | 55   |
| >JAK3-A593T CMAGDSTM\  | 3    | >JAK3-A593T CMTGDSTM\  | 3    | 0    |
| >JAK3-A593T CMAGDSTM   | 297  | >JAK3-A593T CMTGDSTM   | 2798 | 2501 |
| >JAK3-A593T CMAGDSTM   | 138  | >JAK3-A593T CMTGDSTM   | 283  | 145  |
| >JAK3-A593T VCMAGDSTM  | 437  | >JAK3-A593T VCMTGDSTM  | 901  | 464  |
| >JAK3-A593T VCMAGDSTM  | 267  | >JAK3-A593T VCMTGDSTM  | 353  | 86   |
| >JAK3-A593T VCMAGDSTM  | 17   | >JAK3-A593T VCMTGDSTM  | 13   | 4    |
| >JAK3-A593T GVCMAGDST  | 583  | >JAK3-A593T GVCMTGDST  | 339  | 244  |
| >JAK3-A593T GVCMAGDST  | 160  | >JAK3-A593T GVCMTGDST  | 159  | 1    |
| >JAK3-A593T HGVCMAGD\$ | 54   | >JAK3-A593T HGVCMTGD\$ | 45   | 9    |
| >JAK3-A593T HGVCMAGD\$ | 109  | >JAK3-A593T HGVCMTGD\$ | 156  | 47   |
| >JAK3-A593T LLHGVCMA   | 311  | >JAK3-A593T LLHGVCMT   | 2518 | 2207 |
| >JAK3-A593T LLHGVCMA   | 136  | >JAK3-A593T LLHGVCMT   | 907  | 771  |
| >JAK3-A593T LLHGVCMA   | 24   | >JAK3-A593T LLHGVCMT   | 330  | 306  |
| >JAK3-A593T LLHGVCMA   | 8    | >JAK3-A593T LLHGVCMT   | 39   | 31   |
| >JAK3-A593T LLHGVCMA   | 44   | >JAK3-A593T LLHGVCMT   | 504  | 460  |
| >JAK3-A593T LLHGVCMA   | 4    | >JAK3-A593T LLHGVCMT   | 12   | 8    |
| >JAK3-A593T VLLHGVCMA  | 69   | >JAK3-A593T VLLHGVCMT  | 665  | 596  |
| >JAK3-A593T VLLHGVCMA  | 50   | >JAK3-A593T VLLHGVCMT  | 709  | 659  |
| >JAK3-A593T VLLHGVCMA  | 75   | >JAK3-A593T VLLHGVCMT  | 557  | 482  |
| >JAK3-A593T VLLHGVCMA  | 3    | >JAK3-A593T VLLHGVCMT  | 10   | 7    |
| >JAK3-A593T VLLHGVCMA  | 514  | >JAK3-A593T VLLHGVCMT  | 370  | 144  |
| >JAK3-A593T VLLHGVCMA  | 42   | >JAK3-A593T VLLHGVCMT  | 594  | 552  |
| >JAK3-A593T VLLHGVCMA  | 7    | >JAK3-A593T VLLHGVCMT  | 24   | 17   |
| >JAK3-A593T VLLHGVCMA  | 21   | >JAK3-A593T VLLHGVCMT  | 154  | 133  |
| >JAK3-A593T VLLHGVCMA  | 5    | >JAK3-A593T VLLHGVCMT  | 15   | 10   |
| >JAK3-G1101 GSRGCETHA  | 2449 | >JAK3-G1101 RSRGCETHA  | 32   | 2417 |
| >JAK3-G1101 GSRGCETHAF | 6710 | >JAK3-G1101 RSRGCETHAF | 259  | 6451 |
| >JAK3-G1101 GSRGCETHAF | 464  | >JAK3-G1101 RSRGCETHAF | 32   | 432  |
| >JAK3-G1101 GSRGCETHAF | 2519 | >JAK3-G1101 RSRGCETHAF | 129  | 2390 |
| >JAK3-G1101 GSRGCETHAF | 231  | >JAK3-G1101 RSRGCETHAF | 74   | 157  |

|                          |       |                          |      |       |
|--------------------------|-------|--------------------------|------|-------|
| >JAK3-G1101GSRGCETHAF    | 125   | >JAK3-G1101RSRGCETHAF    | 12   | 113   |
| >JAK3-G1101GSRGCETH      | 3010  | >JAK3-G1101RSRGCETH      | 62   | 2948  |
| >JAK3-G1101GSRGCETHAF    | 11    | >JAK3-G1101RSRGCETHAF    | 3    | 8     |
| >JAK3-G1101GSRGCETHAF    | 3930  | >JAK3-G1101RSRGCETHAF    | 176  | 3754  |
| >JAK3-G1101GSRGCETHAF    | 1311  | >JAK3-G1101RSRGCETHAF    | 104  | 1207  |
| >JAK3-G1101GSRGCETHAF    | 9193  | >JAK3-G1101RSRGCETHAF    | 197  | 8996  |
| >JAK3-G1101GSRGCETHAF    | 1366  | >JAK3-G1101RSRGCETHAF    | 267  | 1099  |
| >JAK3-G1101SGSRGCETHA    | 448   | >JAK3-G1101SRSRGCETHA    | 8468 | 8020  |
| >JAK3-G1101SGSRGCETHA    | 601   | >JAK3-G1101SRSRGCETHA    | 22   | 579   |
| >JAK3-G1101LGPQLDMLW     | 35026 | >JAK3-G1101LGPQLDMLW     | 231  | 34795 |
| >JAK3-G1101LWSGSRGC      | 306   | >JAK3-G1101LWSRSRGC      | 321  | 15    |
| >JAK3-G1101LWSGSRGCE     | 397   | >JAK3-G1101LWSRSRGC      | 441  | 44    |
| >JAK3-G1101LWSGSRGCE     | 287   | >JAK3-G1101LWSRSRGC      | 312  | 25    |
| >JAK3-G1101MLWSGSRGC     | 84    | >JAK3-G1101MLWSRSRGC     | 118  | 34    |
| >JAK3-G1101MLWSGSRG      | 239   | >JAK3-G1101MLWSRSRGC     | 1100 | 861   |
| >JAK3-G1101MLWSGSRGC     | 11    | >JAK3-G1101MLWSRSRGC     | 22   | 11    |
| >JAK3-G1101MLWSGSRGC     | 10    | >JAK3-G1101MLWSRSRGC     | 16   | 6     |
| >JAK3-G1101MLWSGSRGC     | 455   | >JAK3-G1101MLWSRSRGC     | 967  | 512   |
| >JAK3-G1101MLWSGSRGC     | 491   | >JAK3-G1101MLWSRSRGC     | 1626 | 1135  |
| >JAK3-G1101MLWSGSRGC     | 50    | >JAK3-G1101MLWSRSRGC     | 116  | 66    |
| >JAK3-G1101MLWSGSRGC     | 112   | >JAK3-G1101MLWSRSRGC     | 650  | 538   |
| >JAK3-G1101MLWSGSRGC     | 244   | >JAK3-G1101MLWSRSRGC     | 770  | 526   |
| >JAK3-G1101MLWSGSRGC     | 41    | >JAK3-G1101MLWSRSRGC     | 83   | 42    |
| >JAK3-G1101MLWSGSRGC     | 11    | >JAK3-G1101MLWSRSRGC     | 17   | 6     |
| >JAK3-G1101DMLWSGSR      | 914   | >JAK3-G1101DMLWSRSR      | 394  | 520   |
| >JAK3-G1101DMLWSGSR      | 24    | >JAK3-G1101DMLWSRSR      | 18   | 6     |
| >JAK3-G1101DMLWSGSR      | 166   | >JAK3-G1101DMLWSRSR      | 157  | 9     |
| >JAK3-G1101DMLWSGSR      | 517   | >JAK3-G1101DMLWSRSR      | 329  | 188   |
| >JAK3-G1101QLDMLWSG      | 1632  | >JAK3-G1101QLDMLWSRS     | 469  | 1163  |
| >JAK3-G1101PQLDMLWSC     | 30950 | >JAK3-G1101PQLDMLWSR     | 318  | 30632 |
| >JAK3-G62S-I GILPVYHSL   | 110   | >JAK3-G62S-I SILPVYHSL   | 56   | 54    |
| >JAK3-G62S-I GILPVYHSLFA | 253   | >JAK3-G62S-I SILPVYHSLFA | 112  | 141   |
| >JAK3-G62S-I GILPVYHSL   | 86    | >JAK3-G62S-I SILPVYHSL   | 75   | 11    |
| >JAK3-G62S-I GILPVYHSLFA | 623   | >JAK3-G62S-I SILPVYHSLFA | 470  | 153   |
| >JAK3-G62S-I GILPVYHSL   | 376   | >JAK3-G62S-I SILPVYHSL   | 273  | 103   |
| >JAK3-G62S-I GILPVYHSLFA | 450   | >JAK3-G62S-I SILPVYHSLFA | 339  | 111   |
| >JAK3-G62S-I GILPVYHSL   | 21    | >JAK3-G62S-I SILPVYHSL   | 13   | 8     |
| >JAK3-G62S-I GILPVYHSLFA | 32    | >JAK3-G62S-I SILPVYHSLFA | 20   | 12    |
| >JAK3-G62S-I GILPVYHSL   | 10    | >JAK3-G62S-I SILPVYHSL   | 6    | 4     |
| >JAK3-G62S-I GILPVYHSLFA | 103   | >JAK3-G62S-I SILPVYHSLFA | 45   | 58    |
| >JAK3-G62S-I GILPVYHSL   | 43    | >JAK3-G62S-I SILPVYHSL   | 78   | 35    |
| >JAK3-G62S-I GILPVYHSL   | 17    | >JAK3-G62S-I SILPVYHSL   | 11   | 6     |
| >JAK3-G62S-I GILPVYHSLFA | 72    | >JAK3-G62S-I SILPVYHSLFA | 36   | 36    |

|                                      |       |                                      |     |       |
|--------------------------------------|-------|--------------------------------------|-----|-------|
| >JAK3-G62S- <sup>1</sup> GILPVYHSL   | 327   | >JAK3-G62S- <sup>1</sup> SILPVYHSL   | 174 | 153   |
| >JAK3-G62S- <sup>1</sup> GILPVYHSL   | 7     | >JAK3-G62S- <sup>1</sup> SILPVYHSL   | 5   | 2     |
| >JAK3-G62S- <sup>1</sup> GILPVYHSLFA | 398   | >JAK3-G62S- <sup>1</sup> SILPVYHSLFA | 171 | 227   |
| >JAK3-G62S- <sup>1</sup> GILPVYHSLF  | 1471  | >JAK3-G62S- <sup>1</sup> SILPVYHSLF  | 485 | 986   |
| >JAK3-G62S- <sup>1</sup> GILPVYHSL   | 889   | >JAK3-G62S- <sup>1</sup> SILPVYHSL   | 338 | 551   |
| >JAK3-G62S- <sup>1</sup> GILPVYHSLF  | 541   | >JAK3-G62S- <sup>1</sup> SILPVYHSLF  | 271 | 270   |
| >JAK3-G62S- <sup>1</sup> GILPVYHSLFA | 583   | >JAK3-G62S- <sup>1</sup> SILPVYHSLFA | 94  | 489   |
| >JAK3-G62S- <sup>1</sup> GILPVYHSL   | 4457  | >JAK3-G62S- <sup>1</sup> SILPVYHSL   | 207 | 4250  |
| >JAK3-G62S- <sup>1</sup> GILPVYHSL   | 1314  | >JAK3-G62S- <sup>1</sup> SILPVYHSL   | 21  | 1293  |
| >JAK3-G62S- <sup>1</sup> GILPVYHSLFA | 5130  | >JAK3-G62S- <sup>1</sup> SILPVYHSLFA | 131 | 4999  |
| >JAK3-G62S- <sup>1</sup> GILPVYHSLF  | 608   | >JAK3-G62S- <sup>1</sup> SILPVYHSLF  | 203 | 405   |
| >JAK3-G62S- <sup>1</sup> GILPVYHSL   | 2227  | >JAK3-G62S- <sup>1</sup> SILPVYHSL   | 354 | 1873  |
| >JAK3-G62S- <sup>1</sup> SGILPVYHSLF | 1062  | >JAK3-G62S- <sup>1</sup> SSILPVYHSLF | 333 | 729   |
| >JAK3-G62S- <sup>1</sup> SGILPVYH    | 10347 | >JAK3-G62S- <sup>1</sup> SSILPVYH    | 473 | 9874  |
| >JAK3-G62S- <sup>1</sup> SGILPVYHSL  | 16483 | >JAK3-G62S- <sup>1</sup> SSILPVYHSL  | 138 | 16345 |
| >JAK3-G62S- <sup>1</sup> SGILPVYHSLF | 7560  | >JAK3-G62S- <sup>1</sup> SSILPVYHSLF | 32  | 7528  |
| >JAK3-G62S- <sup>1</sup> SGILPVYHSL  | 7087  | >JAK3-G62S- <sup>1</sup> SSILPVYHSL  | 292 | 6795  |
| >JAK3-G62S- <sup>1</sup> SGILPVYHSLF | 1774  | >JAK3-G62S- <sup>1</sup> SSILPVYHSLF | 297 | 1477  |
| >JAK3-G62S- <sup>1</sup> SGILPVYHSLF | 1085  | >JAK3-G62S- <sup>1</sup> SSILPVYHSLF | 56  | 1029  |
| >JAK3-G62S- <sup>1</sup> SGILPVYHSL  | 6725  | >JAK3-G62S- <sup>1</sup> SSILPVYHSL  | 23  | 6702  |
| >JAK3-G62S- <sup>1</sup> SGILPVYHSLF | 720   | >JAK3-G62S- <sup>1</sup> SSILPVYHSLF | 4   | 716   |
| >JAK3-G62S- <sup>1</sup> SGILPVYHSLF | 8004  | >JAK3-G62S- <sup>1</sup> SSILPVYHSLF | 186 | 7818  |
| >JAK3-G62S- <sup>1</sup> SGILPVYHSL  | 4654  | >JAK3-G62S- <sup>1</sup> SSILPVYHSL  | 191 | 4463  |
| >JAK3-G62S- <sup>1</sup> SGILPVYHSLF | 3345  | >JAK3-G62S- <sup>1</sup> SSILPVYHSLF | 142 | 3203  |
| >JAK3-G62S- <sup>1</sup> SGILPVYHSLF | 73    | >JAK3-G62S- <sup>1</sup> SSILPVYHSLF | 12  | 61    |
| >JAK3-G62S- <sup>1</sup> ASGILPVY    | 1346  | >JAK3-G62S- <sup>1</sup> ASSILPVY    | 229 | 1117  |
| >JAK3-G62S- <sup>1</sup> ASGILPVYHSL | 2278  | >JAK3-G62S- <sup>1</sup> ASSILPVYHSL | 496 | 1782  |
| >JAK3-G62S- <sup>1</sup> ASGILPVY    | 770   | >JAK3-G62S- <sup>1</sup> ASSILPVY    | 498 | 272   |
| >JAK3-G62S- <sup>1</sup> ASGILPVY    | 66    | >JAK3-G62S- <sup>1</sup> ASSILPVY    | 28  | 38    |
| >JAK3-G62S- <sup>1</sup> ASGILPVY    | 428   | >JAK3-G62S- <sup>1</sup> ASSILPVY    | 307 | 121   |
| >JAK3-G62S- <sup>1</sup> ASGILPVY    | 2265  | >JAK3-G62S- <sup>1</sup> ASSILPVY    | 449 | 1816  |
| >JAK3-G62S- <sup>1</sup> ASGILPVY    | 24    | >JAK3-G62S- <sup>1</sup> ASSILPVY    | 7   | 17    |
| >JAK3-G62S- <sup>1</sup> ASGILPVYHSL | 174   | >JAK3-G62S- <sup>1</sup> ASSILPVYHSL | 28  | 146   |
| >JAK3-G62S- <sup>1</sup> ASGILPVY    | 2866  | >JAK3-G62S- <sup>1</sup> ASSILPVY    | 472 | 2394  |
| >JAK3-G62S- <sup>1</sup> ASGILPVYHSL | 787   | >JAK3-G62S- <sup>1</sup> ASSILPVYHSL | 206 | 581   |
| >JAK3-G62S- <sup>1</sup> ASGILPVY    | 756   | >JAK3-G62S- <sup>1</sup> ASSILPVY    | 260 | 496   |
| >JAK3-G62S- <sup>1</sup> ASGILPVYH   | 437   | >JAK3-G62S- <sup>1</sup> ASSILPVYH   | 203 | 234   |
| >JAK3-G62S- <sup>1</sup> KASGILPV    | 144   | >JAK3-G62S- <sup>1</sup> KASSILPV    | 108 | 36    |
| >JAK3-G62S- <sup>1</sup> KASGILPV    | 114   | >JAK3-G62S- <sup>1</sup> KASSILPV    | 96  | 18    |
| >JAK3-G62S- <sup>1</sup> KASGILPV    | 71    | >JAK3-G62S- <sup>1</sup> KASSILPV    | 50  | 21    |
| >JAK3-G62S- <sup>1</sup> KASGILPV    | 18    | >JAK3-G62S- <sup>1</sup> KASSILPV    | 23  | 5     |
| >JAK3-G62S- <sup>1</sup> KASGILPV    | 126   | >JAK3-G62S- <sup>1</sup> KASSILPV    | 254 | 128   |
| >JAK3-G62S- <sup>1</sup> KASGILPV    | 231   | >JAK3-G62S- <sup>1</sup> KASSILPV    | 473 | 242   |

|                                                   |      |                                                   |     |      |
|---------------------------------------------------|------|---------------------------------------------------|-----|------|
| >JAK3-G62S- <sup>-1</sup> KASGILPV                | 83   | >JAK3-G62S- <sup>-1</sup> KASSILPV                | 335 | 252  |
| >JAK3-G62S- <sup>-1</sup> KASGILPVY               | 379  | >JAK3-G62S- <sup>-1</sup> KASSILPVY               | 488 | 109  |
| >JAK3-G62S- <sup>-1</sup> KASGILPV                | 511  | >JAK3-G62S- <sup>-1</sup> KASSILPV                | 315 | 196  |
| >JAK3-G62S- <sup>-1</sup> KASGILPVY               | 10   | >JAK3-G62S- <sup>-1</sup> KASSILPVY               | 6   | 4    |
| >JAK3-G62S- <sup>-1</sup> KASGILPVY               | 318  | >JAK3-G62S- <sup>-1</sup> KASSILPVY               | 224 | 94   |
| >JAK3-G62S- <sup>-1</sup> KASGILPVY               | 1492 | >JAK3-G62S- <sup>-1</sup> KASSILPVY               | 199 | 1293 |
| >JAK3-G62S- <sup>-1</sup> KASGILPVY               | 26   | >JAK3-G62S- <sup>-1</sup> KASSILPVY               | 35  | 9    |
| >JAK3-G62S- <sup>-1</sup> KASGILPVY               | 228  | >JAK3-G62S- <sup>-1</sup> KASSILPVY               | 220 | 8    |
| >JAK3-G62S- <sup>-1</sup> KASGILPVY               | 352  | >JAK3-G62S- <sup>-1</sup> KASSILPVY               | 819 | 467  |
| >JAK3-G62S- <sup>-1</sup> KASGILPVY               | 24   | >JAK3-G62S- <sup>-1</sup> KASSILPVY               | 24  | 0    |
| >JAK3-G62S- <sup>-1</sup> KASGILPVY               | 72   | >JAK3-G62S- <sup>-1</sup> KASSILPVY               | 33  | 39   |
| >JAK3-G62S- <sup>-1</sup> KASGILPVY               | 1482 | >JAK3-G62S- <sup>-1</sup> KASSILPVY               | 463 | 1019 |
| >JAK3-G62S- <sup>-1</sup> AKASGILPV               | 263  | >JAK3-G62S- <sup>-1</sup> AKASSILPV               | 565 | 302  |
| >JAK3-G62S- <sup>-1</sup> AKASGILPVY              | 494  | >JAK3-G62S- <sup>-1</sup> AKASSILPVY              | 670 | 176  |
| >JAK3-G62S- <sup>-1</sup> AKASGILPV               | 21   | >JAK3-G62S- <sup>-1</sup> AKASSILPV               | 7   | 14   |
| >JAK3-G62S- <sup>-1</sup> AKASGILPVY              | 8    | >JAK3-G62S- <sup>-1</sup> AKASSILPVY              | 4   | 4    |
| >JAK3-G62S- <sup>-1</sup> AKASGILPVY <sup>†</sup> | 199  | >JAK3-G62S- <sup>-1</sup> AKASSILPVY <sup>†</sup> | 85  | 114  |
| >JAK3-G62S- <sup>-1</sup> AAKASGILPV              | 69   | >JAK3-G62S- <sup>-1</sup> AAKASSILPV              | 64  | 5    |
| >JAK3-G62S- <sup>-1</sup> AAKASGILPV              | 455  | >JAK3-G62S- <sup>-1</sup> AAKASSILPV              | 512 | 57   |
| >JAK3-G62S- <sup>-1</sup> AAKASGIL                | 139  | >JAK3-G62S- <sup>-1</sup> AAKASSIL                | 64  | 75   |
| >JAK3-G62S- <sup>-1</sup> AAKASGILP               | 501  | >JAK3-G62S- <sup>-1</sup> AAKASSILP               | 118 | 383  |
| >JAK3-G62S- <sup>-1</sup> AAKASGILPV              | 17   | >JAK3-G62S- <sup>-1</sup> AAKASSILPV              | 10  | 7    |
| >JAK3-G62S- <sup>-1</sup> AAKASGILPV <sup>†</sup> | 110  | >JAK3-G62S- <sup>-1</sup> AAKASSILPV <sup>†</sup> | 54  | 56   |
| >JAK3-G62S- <sup>-1</sup> AAKASGILPV <sup>†</sup> | 136  | >JAK3-G62S- <sup>-1</sup> AAKASSILPV <sup>†</sup> | 102 | 34   |
| >JAK3-G62S- <sup>-1</sup> AAKASGILPV <sup>†</sup> | 93   | >JAK3-G62S- <sup>-1</sup> AAKASSILPV <sup>†</sup> | 77  | 16   |
| >JAK3-G62S- <sup>-1</sup> AAKASGIL                | 1359 | >JAK3-G62S- <sup>-1</sup> AAKASSIL                | 229 | 1130 |
| >JAK3-G62S- <sup>-1</sup> AAKASGILPV              | 399  | >JAK3-G62S- <sup>-1</sup> AAKASSILPV              | 235 | 164  |
| >JAK3-G62S- <sup>-1</sup> AAKASGILPV <sup>†</sup> | 114  | >JAK3-G62S- <sup>-1</sup> AAKASSILPV <sup>†</sup> | 79  | 35   |
| >JAK3-G62S- <sup>-1</sup> AAKASGIL                | 289  | >JAK3-G62S- <sup>-1</sup> AAKASSIL                | 76  | 213  |
| >JAK3-G62S- <sup>-1</sup> AAKASGILPV              | 774  | >JAK3-G62S- <sup>-1</sup> AAKASSILPV              | 424 | 350  |
| >JAK3-G62S- <sup>-1</sup> AAKASGILPV <sup>†</sup> | 17   | >JAK3-G62S- <sup>-1</sup> AAKASSILPV <sup>†</sup> | 16  | 1    |
| >JAK3-G62S- <sup>-1</sup> AAKASGILPV <sup>†</sup> | 380  | >JAK3-G62S- <sup>-1</sup> AAKASSILPV <sup>†</sup> | 386 | 6    |
| >JAK3-G62S- <sup>-1</sup> QAAKASGILP              | 486  | >JAK3-G62S- <sup>-1</sup> QAAKASSILP <sup>†</sup> | 347 | 139  |
| >JAK3-G62S- <sup>-1</sup> QAAKASGILP              | 177  | >JAK3-G62S- <sup>-1</sup> QAAKASSILP <sup>†</sup> | 151 | 26   |
| >JAK3-G62S- <sup>-1</sup> QAAKASGI                | 130  | >JAK3-G62S- <sup>-1</sup> QAAKASSI                | 167 | 37   |
| >JAK3-G62S- <sup>-1</sup> QAAKASGILP              | 25   | >JAK3-G62S- <sup>-1</sup> QAAKASSILP <sup>†</sup> | 22  | 3    |
| >JAK3-G62S- <sup>-1</sup> QAAKASGILP              | 34   | >JAK3-G62S- <sup>-1</sup> QAAKASSILP <sup>†</sup> | 33  | 1    |
| >JAK3-G62S- <sup>-1</sup> QAAKASGIL               | 1852 | >JAK3-G62S- <sup>-1</sup> QAAKASSIL               | 165 | 1687 |
| >JAK3-G62S- <sup>-1</sup> QAAKASGI                | 142  | >JAK3-G62S- <sup>-1</sup> QAAKASSI                | 54  | 88   |
| >JAK3-G62S- <sup>-1</sup> VQAAKASGI               | 78   | >JAK3-G62S- <sup>-1</sup> VQAAKASSI               | 66  | 12   |
| >JAK3-G62S- <sup>-1</sup> VQAAKASGI               | 77   | >JAK3-G62S- <sup>-1</sup> VQAAKASSI               | 70  | 7    |
| >JAK3-G62S- <sup>-1</sup> VQAAKASGI               | 1832 | >JAK3-G62S- <sup>-1</sup> VQAAKASSI               | 407 | 1425 |
| >JAK3-G62S- <sup>-1</sup> VQAAKASGIL              | 607  | >JAK3-G62S- <sup>-1</sup> VQAAKASSIL              | 261 | 346  |



|                          |      |                         |       |       |
|--------------------------|------|-------------------------|-------|-------|
| >JAK3-G62S-VQAAKASGI     | 578  | >JAK3-G62S-VQAAKASSI    | 73    | 505   |
| >JAK3-G62S-VQAAKASGIL    | 466  | >JAK3-G62S-VQAAKASSIL   | 45    | 421   |
| >JAK3-G62S-VQAAKASGIL    | 356  | >JAK3-G62S-VQAAKASSIL   | 80    | 276   |
| >JAK3-G62S-CVQAAKASGI    | 123  | >JAK3-G62S-CVQAAKASSI   | 84    | 39    |
| >JAK3-G62S-LCVQAAKASC    | 1335 | >JAK3-G62S-LCVQAAKASS   | 474   | 861   |
| >JAK3-I87T-v HIFSVEDAST  | 468  | >JAK3-I87T-n HTFSVEDAST | 952   | 484   |
| >JAK3-I87T-v HIFSVEDASTC | 195  | >JAK3-I87T-n HTFSVEDAST | 27    | 168   |
| >JAK3-I87T-v HIFSVEDA    | 272  | >JAK3-I87T-n HTFSVEDA   | 32    | 240   |
| >JAK3-I87T-v HIFSVEDAS   | 1662 | >JAK3-I87T-n HTFSVEDAS  | 175   | 1487  |
| >JAK3-I87T-v HIFSVEDASTC | 1302 | >JAK3-I87T-n HTFSVEDAST | 48    | 1254  |
| >JAK3-I87T-v DLSCWFPPSH  | 170  | >JAK3-I87T-n DLSCWFPPSH | 3813  | 3643  |
| >JAK3-I87T-v DLSCWFPPSH  | 268  | >JAK3-I87T-n DLSCWFPPSH | 5527  | 5259  |
| >JAK3-I87T-v DLSCWFPPSH  | 439  | >JAK3-I87T-n DLSCWFPPSH | 6803  | 6364  |
| >JAK3-I87T-v DLSCWFPPSH  | 167  | >JAK3-I87T-n DLSCWFPPSH | 2394  | 2227  |
| >JAK3-I87T-v FPPSHIFSV   | 37   | >JAK3-I87T-n FPPSHTFSV  | 41    | 4     |
| >JAK3-I87T-v FPPSHIFSV   | 80   | >JAK3-I87T-n FPPSHTFSV  | 211   | 131   |
| >JAK3-I87T-v FPPSHIFSV   | 361  | >JAK3-I87T-n FPPSHTFSV  | 1582  | 1221  |
| >JAK3-I87T-v FPPSHIFSV   | 359  | >JAK3-I87T-n FPPSHTFSV  | 353   | 6     |
| >JAK3-I87T-v FPPSHIFSV   | 271  | >JAK3-I87T-n FPPSHTFSV  | 152   | 119   |
| >JAK3-I87T-v FPPSHIFSV   | 349  | >JAK3-I87T-n FPPSHTFSV  | 64    | 285   |
| >JAK3-I87T-v FPPSHIFSV   | 567  | >JAK3-I87T-n FPPSHTFSV  | 478   | 89    |
| >JAK3-I87T-v FPPSHIFSV   | 1276 | >JAK3-I87T-n FPPSHTFSV  | 223   | 1053  |
| >JAK3-I87T-v FPPSHIFSV   | 165  | >JAK3-I87T-n FPPSHTFSV  | 165   | 0     |
| >JAK3-I87T-v FPPSHIFSV   | 470  | >JAK3-I87T-n FPPSHTFSV  | 426   | 44    |
| >JAK3-I87T-v FPPSHIFS    | 313  | >JAK3-I87T-n FPPSHTFS   | 447   | 134   |
| >JAK3-I87T-v FPPSHIFSV   | 12   | >JAK3-I87T-n FPPSHTFSV  | 13    | 1     |
| >JAK3-I87T-v FPPSHIFSV   | 292  | >JAK3-I87T-n FPPSHTFSVE | 406   | 114   |
| >JAK3-I87T-v FPPSHIFSV   | 32   | >JAK3-I87T-n FPPSHTFSV  | 126   | 94    |
| >JAK3-I87T-v FPPSHIFSV   | 397  | >JAK3-I87T-n FPPSHTFSV  | 387   | 10    |
| >JAK3-I87T-v WFPPSHIFSV  | 337  | >JAK3-I87T-n WFPPSHTFSV | 1046  | 709   |
| >JAK3-I87T-v WFPPSHIFSV  | 63   | >JAK3-I87T-n WFPPSHTFSV | 97    | 34    |
| >JAK3-I87T-v WFPPSHIF    | 76   | >JAK3-I87T-n WFPPSHTF   | 42    | 34    |
| >JAK3-I87T-v WFPPSHIF    | 158  | >JAK3-I87T-n WFPPSHTF   | 80    | 78    |
| >JAK3-I87T-v WFPPSHIF    | 5    | >JAK3-I87T-n WFPPSHTF   | 4     | 1     |
| >JAK3-I87T-v WFPPSHIFSV  | 80   | >JAK3-I87T-n WFPPSHTFSV | 95    | 15    |
| >JAK3-I87T-v WFPPSHIF    | 413  | >JAK3-I87T-n WFPPSHTF   | 273   | 140   |
| >JAK3-I87T-v WFPPSHIF    | 950  | >JAK3-I87T-n WFPPSHTF   | 387   | 563   |
| >JAK3-I87T-v WFPPSHIF    | 93   | >JAK3-I87T-n WFPPSHTF   | 386   | 293   |
| >JAK3-I87T-v WFPPSHIFSV  | 373  | >JAK3-I87T-n WFPPSHTFSV | 1040  | 667   |
| >JAK3-I87T-v WFPPSHIFSV  | 452  | >JAK3-I87T-n WFPPSHTFSV | 2627  | 2175  |
| >JAK3-I87T-v CWFPPSHIFS  | 289  | >JAK3-I87T-n CWFPPSHTFS | 249   | 40    |
| >JAK3-I87T-v CWFPPSHIFS  | 169  | >JAK3-I87T-n CWFPPSHTFS | 218   | 49    |
| >JAK3-I87T-v CWFPPSHI    | 317  | >JAK3-I87T-n CWFPPSHT   | 22108 | 21791 |

|                          |      |                         |       |       |
|--------------------------|------|-------------------------|-------|-------|
| >JAK3-I87T-v CWFPPSHIF   | 30   | >JAK3-I87T-n CWFPPSHTF  | 18    | 12    |
| >JAK3-I87T-v CWFPPSHIF   | 227  | >JAK3-I87T-n CWFPPSHTF  | 82    | 145   |
| >JAK3-I87T-v CWFPPSHI    | 32   | >JAK3-I87T-n CWFPPSHT   | 4390  | 4358  |
| >JAK3-I87T-v CWFPPSHIF   | 6    | >JAK3-I87T-n CWFPPSHTF  | 4     | 2     |
| >JAK3-I87T-v CWFPPSHIFS' | 162  | >JAK3-I87T-n CWFPPSHTFS | 109   | 53    |
| >JAK3-I87T-v CWFPPSHIF   | 108  | >JAK3-I87T-n CWFPPSHTF  | 71    | 37    |
| >JAK3-I87T-v CWFPPSHI    | 150  | >JAK3-I87T-n CWFPPSHT   | 364   | 214   |
| >JAK3-I87T-v CWFPPSHIF   | 116  | >JAK3-I87T-n CWFPPSHTF  | 76    | 40    |
| >JAK3-I87T-v CWFPPSHIFS  | 194  | >JAK3-I87T-n CWFPPSHTFS | 188   | 6     |
| >JAK3-I87T-v CWFPPSHIFS' | 69   | >JAK3-I87T-n CWFPPSHTFS | 80    | 11    |
| >JAK3-I87T-v CWFPPSHI    | 181  | >JAK3-I87T-n CWFPPSHT   | 32194 | 32013 |
| >JAK3-I87T-v SCWFPPSHIF  | 583  | >JAK3-I87T-n SCWFPPSHTF | 81    | 502   |
| >JAK3-I87T-v SCWFPPSHIF  | 111  | >JAK3-I87T-n SCWFPPSHTF | 116   | 5     |
| >JAK3-I87T-v SCWFPPSHI   | 45   | >JAK3-I87T-n SCWFPPSHT  | 21606 | 21561 |
| >JAK3-I87T-v LSCWFPPSHI  | 615  | >JAK3-I87T-n LSCWFPPSHT | 100   | 515   |
| >JAK3-I87T-v LSCWFPPSHI  | 589  | >JAK3-I87T-n LSCWFPPSHT | 267   | 322   |
| >JAK3-I87T-v LSCWFPPSHI  | 75   | >JAK3-I87T-n LSCWFPPSHT | 65    | 10    |
| >JAK3-I87T-v LSCWFPPSHI  | 123  | >JAK3-I87T-n LSCWFPPSHT | 6600  | 6477  |
| >JAK3-I87T-v LSCWFPPSHI  | 7    | >JAK3-I87T-n LSCWFPPSHT | 4     | 3     |
| >JAK3-I87T-v LSCWFPPSHI  | 410  | >JAK3-I87T-n LSCWFPPSHT | 191   | 219   |
| >JAK3-I87T-v LSCWFPPSHI  | 416  | >JAK3-I87T-n LSCWFPPSHT | 16735 | 16319 |
| >JAK3-I87T-v LSCWFPPSHI  | 32   | >JAK3-I87T-n LSCWFPPSHT | 28    | 4     |
| >JAK3-I87T-v LSCWFPPSHI  | 156  | >JAK3-I87T-n LSCWFPPSHT | 218   | 62    |
| >JAK3-I87T-v LSCWFPPSHI  | 160  | >JAK3-I87T-n LSCWFPPSHT | 1379  | 1219  |
| >JAK3-I87T-v LSCWFPPSHI  | 63   | >JAK3-I87T-n LSCWFPPSHT | 55    | 8     |
| >JAK3-I87T-v LSCWFPPSHI  | 13   | >JAK3-I87T-n LSCWFPPSHT | 218   | 205   |
| >JAK3-L1017 LYELFTYCDK   | 2493 | >JAK3-L1017 MYELFTYCDK  | 381   | 2112  |
| >JAK3-L1017 LYELFTYCDK   | 308  | >JAK3-L1017 MYELFTYCDK  | 103   | 205   |
| >JAK3-L1017 LYELFTYC     | 1351 | >JAK3-L1017 MYELFTYC    | 325   | 1026  |
| >JAK3-L1017 VLYELFTYC    | 758  | >JAK3-L1017 VMYELFTYC   | 52    | 706   |
| >JAK3-L1017 VLYELFTYC    | 152  | >JAK3-L1017 VMYELFTYC   | 116   | 36    |
| >JAK3-L1017 VLYELFTYC    | 131  | >JAK3-L1017 VMYELFTYC   | 189   | 58    |
| >JAK3-L1017 VLYELFTYC    | 37   | >JAK3-L1017 VMYELFTYC   | 31    | 6     |
| >JAK3-L1017 VLYELFTYC    | 30   | >JAK3-L1017 VMYELFTYC   | 22    | 8     |
| >JAK3-L1017 VLYELFTY     | 23   | >JAK3-L1017 VMYELFTY    | 15    | 8     |
| >JAK3-L1017 VLYELFTYC    | 2    | >JAK3-L1017 VMYELFTYC   | 2     | 0     |
| >JAK3-L1017 VLYELFTYCD   | 417  | >JAK3-L1017 VMYELFTYCD  | 251   | 166   |
| >JAK3-L1017 VLYELFTYCD   | 449  | >JAK3-L1017 VMYELFTYCD  | 274   | 175   |
| >JAK3-L1017 VLYELFTY     | 525  | >JAK3-L1017 VMYELFTY    | 314   | 211   |
| >JAK3-L1017 VLYELFTYC    | 27   | >JAK3-L1017 VMYELFTYC   | 19    | 8     |
| >JAK3-L1017 VLYELFTY     | 248  | >JAK3-L1017 VMYELFTY    | 218   | 30    |
| >JAK3-L1017 VLYELFTYC    | 19   | >JAK3-L1017 VMYELFTYC   | 17    | 2     |
| >JAK3-L1017 VLYELFTYC    | 93   | >JAK3-L1017 VMYELFTYC   | 62    | 31    |

|                         |      |                        |      |      |
|-------------------------|------|------------------------|------|------|
| >JAK3-L1017 VLYELFTY    | 34   | >JAK3-L1017 VMYELFTY   | 70   | 36   |
| >JAK3-L1017 VLYELFTYC   | 5    | >JAK3-L1017 VMYELFTYC  | 6    | 1    |
| >JAK3-L1017 VLYELFTYCDH | 128  | >JAK3-L1017 VMYELFTYCD | 249  | 121  |
| >JAK3-L1017 VLYELFTY    | 69   | >JAK3-L1017 VMYELFTY   | 61   | 8    |
| >JAK3-L1017 VLYELFTYCDH | 34   | >JAK3-L1017 VMYELFTYCD | 33   | 1    |
| >JAK3-L1017 VLYELFTY    | 445  | >JAK3-L1017 VMYELFTY   | 170  | 275  |
| >JAK3-L1017 VLYELFTYCDH | 62   | >JAK3-L1017 VMYELFTYCD | 23   | 39   |
| >JAK3-L1017 VLYELFTY    | 15   | >JAK3-L1017 VMYELFTY   | 8    | 7    |
| >JAK3-L1017 VLYELFTY    | 44   | >JAK3-L1017 VMYELFTY   | 15   | 29   |
| >JAK3-L1017 VLYELFTYCDH | 1320 | >JAK3-L1017 VMYELFTYCD | 329  | 991  |
| >JAK3-L1017 VLYELFTY    | 277  | >JAK3-L1017 VMYELFTY   | 146  | 131  |
| >JAK3-L1017 VLYELFTY    | 16   | >JAK3-L1017 VMYELFTY   | 22   | 6    |
| >JAK3-L1017 VLYELFTY    | 63   | >JAK3-L1017 VMYELFTY   | 39   | 24   |
| >JAK3-L1017 VLYELFTY    | 83   | >JAK3-L1017 VMYELFTY   | 62   | 21   |
| >JAK3-L1017 VLYELFTY    | 78   | >JAK3-L1017 VMYELFTY   | 9    | 69   |
| >JAK3-L1017 VLYELFTYCDH | 2758 | >JAK3-L1017 VMYELFTYCD | 375  | 2383 |
| >JAK3-L1017 VLYELFTY    | 59   | >JAK3-L1017 VMYELFTY   | 22   | 37   |
| >JAK3-L1017 VLYELFTY    | 222  | >JAK3-L1017 VMYELFTY   | 78   | 144  |
| >JAK3-L1017 VLYELFTY    | 2949 | >JAK3-L1017 VMYELFTY   | 252  | 2697 |
| >JAK3-L1017 VLYELFTY    | 175  | >JAK3-L1017 VMYELFTY   | 321  | 146  |
| >JAK3-L1017 QSDVWSFGV   | 139  | >JAK3-L1017 QSDVWSFGV  | 84   | 55   |
| >JAK3-L1017 QSDVWSFGV   | 369  | >JAK3-L1017 QSDVWSFGV  | 1797 | 1428 |
| >JAK3-L1017 QSDVWSFGV   | 1580 | >JAK3-L1017 QSDVWSFGV  | 268  | 1312 |
| >JAK3-L1017 VVLYELFT    | 646  | >JAK3-L1017 VVMYELFT   | 328  | 318  |
| >JAK3-L1017 VVLYELFTY   | 246  | >JAK3-L1017 VVMYELFTY  | 39   | 207  |
| >JAK3-L1017 VVLYELFTY   | 35   | >JAK3-L1017 VVMYELFTY  | 13   | 22   |
| >JAK3-L1017 VVLYELFTY   | 12   | >JAK3-L1017 VVMYELFTY  | 13   | 1    |
| >JAK3-L1017 VVLYELFTY   | 20   | >JAK3-L1017 VVMYELFTY  | 14   | 6    |
| >JAK3-L1017 VVLYELFTY   | 353  | >JAK3-L1017 VVMYELFTY  | 143  | 210  |
| >JAK3-L1017 VVLYELFTY   | 14   | >JAK3-L1017 VVMYELFTY  | 16   | 2    |
| >JAK3-L1017 VVLYELFTY   | 1230 | >JAK3-L1017 VVMYELFTY  | 164  | 1066 |
| >JAK3-L1017 VVLYELFTY   | 42   | >JAK3-L1017 VVMYELFTY  | 39   | 3    |
| >JAK3-L1017 VVLYELFTY   | 206  | >JAK3-L1017 VVMYELFTY  | 110  | 96   |
| >JAK3-L1017 VVLYELFTY   | 1269 | >JAK3-L1017 VVMYELFTY  | 355  | 914  |
| >JAK3-L1017 VVLYELFTY   | 123  | >JAK3-L1017 VVMYELFTY  | 102  | 21   |
| >JAK3-L1017 VVLYELFTY   | 1014 | >JAK3-L1017 VVMYELFTY  | 332  | 682  |
| >JAK3-L1017 VVLYELFTY   | 686  | >JAK3-L1017 VVMYELFTY  | 292  | 394  |
| >JAK3-L1017 GVVLYELFTY  | 258  | >JAK3-L1017 GVVMYELFTY | 144  | 114  |
| >JAK3-L1017 GVVLYELFTY  | 138  | >JAK3-L1017 GVVMYELFTY | 110  | 28   |
| >JAK3-L1017 GVVLYELFTY  | 184  | >JAK3-L1017 GVVMYELFTY | 169  | 15   |
| >JAK3-L1017 GVVLYELFTY  | 486  | >JAK3-L1017 GVVMYELFTY | 495  | 9    |
| >JAK3-L1017 GVVLYELFTY  | 571  | >JAK3-L1017 GVVMYELFTY | 363  | 208  |
| >JAK3-L1017 GVVLYELFTY  | 148  | >JAK3-L1017 GVVMYELFTY | 91   | 57   |

|                         |     |                        |     |     |
|-------------------------|-----|------------------------|-----|-----|
| >JAK3-L1017 FGVVLYEL    | 694 | >JAK3-L1017 FGVVMYEL   | 442 | 252 |
| >JAK3-L1017 FGVVLYELF   | 516 | >JAK3-L1017 FGVVMYELF  | 386 | 130 |
| >JAK3-L1017 FGVVLYEL    | 99  | >JAK3-L1017 FGVVMYEL   | 146 | 47  |
| >JAK3-L1017 FGVVLYEL    | 231 | >JAK3-L1017 FGVVMYEL   | 438 | 207 |
| >JAK3-L1017 FGVVLYELF   | 916 | >JAK3-L1017 FGVVMYELF  | 374 | 542 |
| >JAK3-L1017 FGVVLYELFT\ | 64  | >JAK3-L1017 FGVVMYELFT | 59  | 5   |
| >JAK3-L1017 FGVVLYELFT\ | 623 | >JAK3-L1017 FGVVMYELFT | 491 | 132 |
| >JAK3-L1017 FGVVLYELFT\ | 78  | >JAK3-L1017 FGVVMYELFT | 69  | 9   |
| >JAK3-L1017 FGVVLYELFT\ | 622 | >JAK3-L1017 FGVVMYELFT | 458 | 164 |
| >JAK3-L1017 FGVVLYELF   | 476 | >JAK3-L1017 FGVVMYELF  | 955 | 479 |
| >JAK3-L1017 FGVVLYELF   | 345 | >JAK3-L1017 FGVVMYELF  | 401 | 56  |
| >JAK3-L1017 FGVVLYELFT\ | 473 | >JAK3-L1017 FGVVMYELFT | 457 | 16  |
| >JAK3-L1017 SFGVVLYEL   | 264 | >JAK3-L1017 SFGVVMYEL  | 318 | 54  |
| >JAK3-L1017 SFGVVLYEL   | 351 | >JAK3-L1017 SFGVVMYEL  | 717 | 366 |
| >JAK3-L1017 SFGVVLYELF  | 512 | >JAK3-L1017 SFGVVMYELF | 264 | 248 |
| >JAK3-L1017 SFGVVLYEL   | 30  | >JAK3-L1017 SFGVVMYEL  | 40  | 10  |
| >JAK3-L1017 SFGVVLYELF  | 10  | >JAK3-L1017 SFGVVMYELF | 12  | 2   |
| >JAK3-L1017 SFGVVLYELF  | 539 | >JAK3-L1017 SFGVVMYELF | 141 | 398 |
| >JAK3-L1017 SFGVVLYEL   | 109 | >JAK3-L1017 SFGVVMYEL  | 181 | 72  |
| >JAK3-L1017 SFGVVLYELF  | 155 | >JAK3-L1017 SFGVVMYELF | 196 | 41  |
| >JAK3-L1017 WSFGVVLY    | 91  | >JAK3-L1017 WSFGVVMY   | 199 | 108 |
| >JAK3-L1017 WSFGVVLYEL  | 120 | >JAK3-L1017 WSFGVVMYE  | 189 | 69  |
| >JAK3-L1017 WSFGVVLYEL  | 178 | >JAK3-L1017 WSFGVVMYE  | 391 | 213 |
| >JAK3-L1017 WSFGVVLYEL  | 91  | >JAK3-L1017 WSFGVVMYE  | 127 | 36  |
| >JAK3-L1017 WSFGVVLYEL  | 463 | >JAK3-L1017 WSFGVVMYE  | 303 | 160 |
| >JAK3-L1017 WSFGVVLYEL  | 149 | >JAK3-L1017 WSFGVVMYE  | 124 | 25  |
| >JAK3-L1017 WSFGVVLY    | 12  | >JAK3-L1017 WSFGVVMY   | 28  | 16  |
| >JAK3-L1017 WSFGVVLYEL  | 295 | >JAK3-L1017 WSFGVVMYE  | 448 | 153 |
| >JAK3-L1017 WSFGVVLY    | 255 | >JAK3-L1017 WSFGVVMY   | 245 | 10  |
| >JAK3-L1017 WSFGVVLYEL  | 331 | >JAK3-L1017 WSFGVVMYE  | 377 | 46  |
| >JAK3-L1017 WSFGVVLYEL  | 445 | >JAK3-L1017 WSFGVVMYE  | 468 | 23  |
| >JAK3-L1017 WSFGVVLY    | 144 | >JAK3-L1017 WSFGVVMY   | 150 | 6   |
| >JAK3-L1017 WSFGVVLYEL  | 139 | >JAK3-L1017 WSFGVVMYE  | 96  | 43  |
| >JAK3-L1017 WSFGVVLYEL  | 608 | >JAK3-L1017 WSFGVVMYE  | 399 | 209 |
| >JAK3-L1017 WSFGVVLY    | 120 | >JAK3-L1017 WSFGVVMY   | 87  | 33  |
| >JAK3-L1017 WSFGVVLYEL  | 164 | >JAK3-L1017 WSFGVVMYE  | 181 | 17  |
| >JAK3-L1017 WSFGVVLY    | 61  | >JAK3-L1017 WSFGVVMY   | 27  | 34  |
| >JAK3-L1017 WSFGVVLYEL  | 434 | >JAK3-L1017 WSFGVVMYE  | 337 | 97  |
| >JAK3-L1017 WSFGVVLYEL  | 28  | >JAK3-L1017 WSFGVVMYE  | 25  | 3   |
| >JAK3-L1017 WSFGVVLY    | 6   | >JAK3-L1017 WSFGVVMY   | 6   | 0   |
| >JAK3-L1017 WSFGVVLYEL  | 29  | >JAK3-L1017 WSFGVVMYE  | 24  | 5   |
| >JAK3-L1017 WSFGVVLYEL  | 11  | >JAK3-L1017 WSFGVVMYE  | 14  | 3   |
| >JAK3-L1017 WSFGVVLY    | 510 | >JAK3-L1017 WSFGVVMY   | 356 | 154 |

|                         |      |                         |       |       |
|-------------------------|------|-------------------------|-------|-------|
| >JAK3-L1017 WSFGVVLY    | 109  | >JAK3-L1017 WSFGVVMY    | 85    | 24    |
| >JAK3-L1017 WSFGVVLYEL  | 264  | >JAK3-L1017 WSFGVVMYE   | 142   | 122   |
| >JAK3-L1017 WSFGVVLY    | 344  | >JAK3-L1017 WSFGVVMY    | 391   | 47    |
| >JAK3-L1017 WSFGVVLYEL  | 120  | >JAK3-L1017 WSFGVVMYE   | 134   | 14    |
| >JAK3-L1017 WSFGVVLY    | 70   | >JAK3-L1017 WSFGVVMY    | 201   | 131   |
| >JAK3-L1017 WSFGVVLYEL  | 139  | >JAK3-L1017 WSFGVVMYE   | 192   | 53    |
| >JAK3-L1017 WSFGVVLYEL  | 17   | >JAK3-L1017 WSFGVVMYE   | 19    | 2     |
| >JAK3-L1017 WSFGVVLY    | 33   | >JAK3-L1017 WSFGVVMY    | 73    | 40    |
| >JAK3-L1017 WSFGVVLYE   | 768  | >JAK3-L1017 WSFGVVMYE   | 481   | 287   |
| >JAK3-L1017 WSFGVVLYEL  | 324  | >JAK3-L1017 WSFGVVMYE   | 272   | 52    |
| >JAK3-L1017 WSFGVVLYEL  | 5    | >JAK3-L1017 WSFGVVMYE   | 4     | 1     |
| >JAK3-L1017 WSFGVVLY    | 52   | >JAK3-L1017 WSFGVVMY    | 75    | 23    |
| >JAK3-L1017 VWSFGVVLYI  | 260  | >JAK3-L1017 VWSFGVVM\   | 348   | 88    |
| >JAK3-L1017 VWSFGVVLYI  | 338  | >JAK3-L1017 VWSFGVVM\   | 480   | 142   |
| >JAK3-L1017 VWSFGVVL    | 312  | >JAK3-L1017 VWSFGVVM    | 3208  | 2896  |
| >JAK3-L1017 VWSFGVVLYI  | 105  | >JAK3-L1017 VWSFGVVM\   | 100   | 5     |
| >JAK3-L1017 VWSFGVVLY   | 17   | >JAK3-L1017 VWSFGVVM\   | 41    | 24    |
| >JAK3-L1017 VWSFGVVLY   | 56   | >JAK3-L1017 VWSFGVVM\   | 59    | 3     |
| >JAK3-L1017 VWSFGVVLY   | 499  | >JAK3-L1017 VWSFGVVM\   | 2208  | 1709  |
| >JAK3-L1017 VWSFGVVL    | 242  | >JAK3-L1017 VWSFGVVM    | 288   | 46    |
| >JAK3-L1017 VWSFGVVLY   | 383  | >JAK3-L1017 VWSFGVVM\   | 444   | 61    |
| >JAK3-L1017 VWSFGVVLYI  | 211  | >JAK3-L1017 VWSFGVVM\   | 218   | 7     |
| >JAK3-L1017 DVWSFGVVL   | 2701 | >JAK3-L1017 DVWSFGVVM   | 414   | 2287  |
| >JAK3-L1017 DVWSFGVVL   | 150  | >JAK3-L1017 DVWSFGVVM   | 84    | 66    |
| >JAK3-L1017 DVWSFGVVL   | 453  | >JAK3-L1017 DVWSFGVVM   | 677   | 224   |
| >JAK3-L1017 DVWSFGVVL   | 165  | >JAK3-L1017 DVWSFGVVM   | 214   | 49    |
| >JAK3-L1017 DVWSFGVVL   | 176  | >JAK3-L1017 DVWSFGVVM   | 255   | 79    |
| >JAK3-L1017 DVWSFGVVL   | 435  | >JAK3-L1017 DVWSFGVVM   | 672   | 237   |
| >JAK3-L1017 DVWSFGVVL   | 103  | >JAK3-L1017 DVWSFGVVM   | 150   | 47    |
| >JAK3-L1017 DVWSFGVVL   | 766  | >JAK3-L1017 DVWSFGVVM   | 105   | 661   |
| >JAK3-L1017 SDVWSFGVV   | 366  | >JAK3-L1017 SDVWSFGVV   | 863   | 497   |
| >JAK3-L1017 SDVWSFGVV   | 549  | >JAK3-L1017 SDVWSFGVV   | 490   | 59    |
| >JAK3-L527P LGHGSFTK    | 146  | >JAK3-L527P.PGHGSFTK    | 1153  | 1007  |
| >JAK3-L527P LGHGSFTKIYF | 70   | >JAK3-L527P.PGHGSFTKIYI | 2004  | 1934  |
| >JAK3-L527P LGHGSFTKIYF | 440  | >JAK3-L527P.PGHGSFTKIYI | 7353  | 6913  |
| >JAK3-L527P LGHGSFTKIY  | 478  | >JAK3-L527P.PGHGSFTKIY  | 4229  | 3751  |
| >JAK3-L527P LGHGSFTKIY  | 466  | >JAK3-L527P.PGHGSFTKIY  | 9041  | 8575  |
| >JAK3-L527P LGHGSFTKIYF | 89   | >JAK3-L527P.PGHGSFTKIYI | 130   | 41    |
| >JAK3-L527P LGHGSFTKI   | 326  | >JAK3-L527P.PGHGSFTKI   | 6686  | 6360  |
| >JAK3-L527P NLGHGSFTKI  | 249  | >JAK3-L527P.NPGHGSFTKI  | 23636 | 23387 |
| >JAK3-L527P NLGHGSFTKI  | 270  | >JAK3-L527P.NPGHGSFTKI  | 28970 | 28700 |
| >JAK3-L527P NLGHGSFTKI  | 181  | >JAK3-L527P.NPGHGSFTKI  | 21681 | 21500 |
| >JAK3-L527P NLGHGSFTKI  | 316  | >JAK3-L527P.NPGHGSFTKI  | 24573 | 24257 |

|                         |       |                        |       |       |
|-------------------------|-------|------------------------|-------|-------|
| >JAK3-L527P NLGHGSFTKI  | 361   | >JAK3-L527P NPGHGSFTKI | 24194 | 23833 |
| >JAK3-L527P NLGHGSFTKI  | 127   | >JAK3-L527P NPGHGSFTKI | 36023 | 35896 |
| >JAK3-L527P NLGHGSFTK   | 193   | >JAK3-L527P NPGHGSFTK  | 17562 | 17369 |
| >JAK3-L527P NLGHGSFTKI' | 248   | >JAK3-L527P NPGHGSFTKI | 3571  | 3323  |
| >JAK3-L527P NLGHGSFTKI' | 442   | >JAK3-L527P NPGHGSFTKI | 4829  | 4387  |
| >JAK3-L527P NLGHGSFTKI' | 36    | >JAK3-L527P NPGHGSFTKI | 1807  | 1771  |
| >JAK3-L527P NLGHGSFTKI' | 435   | >JAK3-L527P NPGHGSFTKI | 12837 | 12402 |
| >JAK3-L527P NLGHGSFTKI' | 66    | >JAK3-L527P NPGHGSFTKI | 695   | 629   |
| >JAK3-L527P NLGHGSFTKI' | 2643  | >JAK3-L527P NPGHGSFTKI | 35    | 2608  |
| >JAK3-L527P NLGHGSFTKI' | 24068 | >JAK3-L527P NPGHGSFTKI | 287   | 23781 |
| >JAK3-L527P NLGHGSFTKI' | 12542 | >JAK3-L527P NPGHGSFTKI | 392   | 12150 |
| >JAK3-L527P HENLGHGS    | 40    | >JAK3-L527P HENPGHGS   | 1438  | 1398  |
| >JAK3-L527P HENLGHGSF   | 626   | >JAK3-L527P HENPGHGSF  | 161   | 465   |
| >JAK3-L527P HENLGHGSF   | 1698  | >JAK3-L527P HENPGHGSF  | 443   | 1255  |
| >JAK3-L527P HENLGHGSF   | 21    | >JAK3-L527P HENPGHGSF  | 21    | 0     |
| >JAK3-L527P HENLGHGSF   | 78    | >JAK3-L527P HENPGHGSF  | 69    | 9     |
| >JAK3-L527P HENLGHGSF   | 85    | >JAK3-L527P HENPGHGSF  | 143   | 58    |
| >JAK3-L527P EWHENLGHG   | 49    | >JAK3-L527P EWHENPGHC  | 64    | 15    |
| >JAK3-L527P EWHENLGHG   | 300   | >JAK3-L527P EWHENPGHC  | 267   | 33    |
| >JAK3-L527P SLEWHENL    | 62    | >JAK3-L527P SLEWHENP   | 10718 | 10656 |
| >JAK3-L527P SLEWHENL    | 55    | >JAK3-L527P SLEWHENP   | 12871 | 12816 |
| >JAK3-L527P SLEWHENL    | 332   | >JAK3-L527P SLEWHENP   | 20459 | 20127 |
| >JAK3-L527P SLEWHENL    | 7     | >JAK3-L527P SLEWHENP   | 13834 | 13827 |
| >JAK3-L527P DSLEWHENL   | 428   | >JAK3-L527P DSLEWHENP  | 24095 | 23667 |
| >JAK3-L527P DSLEWHENL   | 18    | >JAK3-L527P DSLEWHENP  | 3269  | 3251  |
| >JAK3-M511 MTFHKIPADS   | 582   | >JAK3-M511 ITFHKIPADSL | 262   | 320   |
| >JAK3-M511 MTFHKIPA     | 361   | >JAK3-M511 ITFHKIPA    | 1734  | 1373  |
| >JAK3-M511 MTFHKIPADS   | 62    | >JAK3-M511 ITFHKIPADSL | 331   | 269   |
| >JAK3-M511 MTFHKIPA     | 205   | >JAK3-M511 ITFHKIPA    | 710   | 505   |
| >JAK3-M511 MTFHKIPADS   | 404   | >JAK3-M511 ITFHKIPADSL | 1352  | 948   |
| >JAK3-M511 MTFHKIPA     | 120   | >JAK3-M511 ITFHKIPA    | 433   | 313   |
| >JAK3-M511 MTFHKIPADS   | 103   | >JAK3-M511 ITFHKIPADSL | 372   | 269   |
| >JAK3-M511 MTFHKIPA     | 420   | >JAK3-M511 ITFHKIPA    | 999   | 579   |
| >JAK3-M511 MTFHKIPADS   | 120   | >JAK3-M511 ITFHKIPADSL | 295   | 175   |
| >JAK3-M511 MTFHKIPA     | 24    | >JAK3-M511 ITFHKIPA    | 139   | 115   |
| >JAK3-M511 MTFHKIPADS   | 36    | >JAK3-M511 ITFHKIPADSL | 64    | 28    |
| >JAK3-M511 MTFHKIPA     | 8     | >JAK3-M511 ITFHKIPA    | 116   | 108   |
| >JAK3-M511 MTFHKIPADS   | 10    | >JAK3-M511 ITFHKIPADSL | 193   | 183   |
| >JAK3-M511 MTFHKIPA     | 261   | >JAK3-M511 ITFHKIPA    | 3960  | 3699  |
| >JAK3-M511 MTFHKIPADS   | 155   | >JAK3-M511 ITFHKIPADSL | 2334  | 2179  |
| >JAK3-M511 MTFHKIPADS   | 235   | >JAK3-M511 ITFHKIPADSL | 319   | 84    |
| >JAK3-M511 MTFHKIPADS   | 4     | >JAK3-M511 ITFHKIPADSL | 4     | 0     |
| >JAK3-M511 MTFHKIPADS   | 65    | >JAK3-M511 ITFHKIPADSL | 48    | 17    |

|                       |     |                        |      |      |
|-----------------------|-----|------------------------|------|------|
| >JAK3-M511 MTFHKIPADS | 37  | >JAK3-M511 ITFHKIPADSL | 104  | 67   |
| >JAK3-M511 QMTFHKIPA  | 492 | >JAK3-M511 QITFHKIPA   | 4250 | 3758 |
| >JAK3-M511 QPQSQYQLS  | 216 | >JAK3-M511 QPQSQYQLS   | 966  | 750  |
| >JAK3-M511 QPQSQYQLS  | 215 | >JAK3-M511 QPQSQYQLS   | 8669 | 8454 |
| >JAK3-M511 SQMTFHKI   | 426 | >JAK3-M511 SQITFHKI    | 274  | 152  |
| >JAK3-M511 SQMTFHKI   | 306 | >JAK3-M511 SQITFHKI    | 1271 | 965  |
| >JAK3-M511 SQMTFHKIPA | 302 | >JAK3-M511 SQITFHKIPA  | 2197 | 1895 |
| >JAK3-M511 SQMTFHKI   | 250 | >JAK3-M511 SQITFHKI    | 1132 | 882  |
| >JAK3-M511 SQMTFHKIPA | 113 | >JAK3-M511 SQITFHKIPA  | 525  | 412  |
| >JAK3-M511 SQMTFHKI   | 304 | >JAK3-M511 SQITFHKI    | 727  | 423  |
| >JAK3-M511 SQMTFHKIPA | 164 | >JAK3-M511 SQITFHKIPA  | 552  | 388  |
| >JAK3-M511 SQMTFHKI   | 22  | >JAK3-M511 SQITFHKI    | 35   | 13   |
| >JAK3-M511 SQMTFHKIPA | 109 | >JAK3-M511 SQITFHKIPA  | 184  | 75   |
| >JAK3-M511 SQMTFHKI   | 367 | >JAK3-M511 SQITFHKI    | 1328 | 961  |
| >JAK3-M511 SQMTFHKI   | 49  | >JAK3-M511 SQITFHKI    | 91   | 42   |
| >JAK3-M511 SQMTFHKIP  | 236 | >JAK3-M511 SQITFHKIP   | 460  | 224  |
| >JAK3-M511 SQMTFHKIPA | 110 | >JAK3-M511 SQITFHKIPA  | 196  | 86   |
| >JAK3-M511 LSQMTFHK   | 18  | >JAK3-M511 LSQITFHK    | 29   | 11   |
| >JAK3-M511 LSQMTFHK   | 106 | >JAK3-M511 LSQITFHK    | 172  | 66   |
| >JAK3-M511 LSQMTFHK   | 65  | >JAK3-M511 LSQITFHK    | 71   | 6    |
| >JAK3-M511 LSQMTFHK   | 295 | >JAK3-M511 LSQITFHK    | 350  | 55   |
| >JAK3-M511 LSQMTFHKI  | 363 | >JAK3-M511 LSQITFHKI   | 239  | 124  |
| >JAK3-M511 LSQMTFHKI  | 289 | >JAK3-M511 LSQITFHKI   | 293  | 4    |
| >JAK3-M511 LSQMTFHKI  | 94  | >JAK3-M511 LSQITFHKI   | 106  | 12   |
| >JAK3-M511 LSQMTFHK   | 164 | >JAK3-M511 LSQITFHK    | 142  | 22   |
| >JAK3-M511 LSQMTFHKI  | 34  | >JAK3-M511 LSQITFHKI   | 29   | 5    |
| >JAK3-M511 QLSQMTFHK  | 143 | >JAK3-M511 QLSQITFHKI  | 94   | 49   |
| >JAK3-M511 QLSQMTFHK  | 91  | >JAK3-M511 QLSQITFHKI  | 81   | 10   |
| >JAK3-M511 QLSQMTFHK  | 187 | >JAK3-M511 QLSQITFHKI  | 87   | 100  |
| >JAK3-M511 QLSQMTFHK  | 264 | >JAK3-M511 QLSQITFHKI  | 197  | 67   |
| >JAK3-M511 QLSQMTFHK  | 264 | >JAK3-M511 QLSQITFHKI  | 185  | 79   |
| >JAK3-M511 QLSQMTFHK  | 118 | >JAK3-M511 QLSQITFHKI  | 76   | 42   |
| >JAK3-M511 QLSQMTFHK  | 9   | >JAK3-M511 QLSQITFHKI  | 11   | 2    |
| >JAK3-M511 QLSQMTFHK  | 69  | >JAK3-M511 QLSQITFHK   | 66   | 3    |
| >JAK3-M511 QLSQMTFHK  | 50  | >JAK3-M511 QLSQITFHK   | 60   | 10   |
| >JAK3-M511 QLSQMTFHK  | 261 | >JAK3-M511 QLSQITFHKI  | 175  | 86   |
| >JAK3-M511 QLSQMTFHK  | 122 | >JAK3-M511 QLSQITFHK   | 53   | 69   |
| >JAK3-M511 QLSQMTFHK  | 694 | >JAK3-M511 QLSQITFHKI  | 378  | 316  |
| >JAK3-M511 QLSQMTFHK  | 264 | >JAK3-M511 QLSQITFHK   | 148  | 116  |
| >JAK3-M511 YQLSQMTFH  | 162 | >JAK3-M511 YQLSQITFHKI | 197  | 35   |
| >JAK3-M511 YQLSQMTFH  | 47  | >JAK3-M511 YQLSQITFHKI | 41   | 6    |
| >JAK3-M511 YQLSQMTFH  | 203 | >JAK3-M511 YQLSQITFHKI | 172  | 31   |
| >JAK3-M511 YQLSQMTFH  | 138 | >JAK3-M511 YQLSQITFHKI | 135  | 3    |

|                      |      |                        |     |      |
|----------------------|------|------------------------|-----|------|
| >JAK3-M511 YQLSQMTF  | 21   | >JAK3-M511 YQLSQITF    | 19  | 2    |
| >JAK3-M511 YQLSQMTFH | 501  | >JAK3-M511 YQLSQITFH   | 398 | 103  |
| >JAK3-M511 YQLSQMTFH | 5    | >JAK3-M511 YQLSQITFHKI | 5   | 0    |
| >JAK3-M511 YQLSQMTFH | 52   | >JAK3-M511 YQLSQITFHKI | 24  | 28   |
| >JAK3-M511 YQLSQMTFH | 57   | >JAK3-M511 YQLSQITFHKI | 38  | 19   |
| >JAK3-M511 YQLSQMTFH | 147  | >JAK3-M511 YQLSQITFHKI | 76  | 71   |
| >JAK3-M511 YQLSQMTFH | 640  | >JAK3-M511 YQLSQITFHKI | 236 | 404  |
| >JAK3-M511 YQLSQMTFH | 108  | >JAK3-M511 YQLSQITFHK  | 106 | 2    |
| >JAK3-M511 YQLSQMTFH | 48   | >JAK3-M511 YQLSQITFHK  | 43  | 5    |
| >JAK3-M511 YQLSQMTF  | 273  | >JAK3-M511 YQLSQITF    | 402 | 129  |
| >JAK3-M511 YQLSQMTFH | 578  | >JAK3-M511 YQLSQITFHKI | 444 | 134  |
| >JAK3-M511 YQLSQMTF  | 53   | >JAK3-M511 YQLSQITF    | 106 | 53   |
| >JAK3-M511 YQLSQMTFH | 523  | >JAK3-M511 YQLSQITFHK  | 341 | 182  |
| >JAK3-M511 YQLSQMTF  | 42   | >JAK3-M511 YQLSQITF    | 46  | 4    |
| >JAK3-M511 YQLSQMTF  | 72   | >JAK3-M511 YQLSQITF    | 96  | 24   |
| >JAK3-M511 YQLSQMTF  | 2    | >JAK3-M511 YQLSQITF    | 2   | 0    |
| >JAK3-M511 YQLSQMTFH | 81   | >JAK3-M511 YQLSQITFH   | 56  | 25   |
| >JAK3-M511 YQLSQMTFH | 212  | >JAK3-M511 YQLSQITFHK  | 167 | 45   |
| >JAK3-M511 YQLSQMTFH | 16   | >JAK3-M511 YQLSQITFHKI | 16  | 0    |
| >JAK3-M511 YQLSQMTF  | 375  | >JAK3-M511 YQLSQITF    | 313 | 62   |
| >JAK3-M511 YQLSQMTFH | 505  | >JAK3-M511 YQLSQITFHKI | 331 | 174  |
| >JAK3-M511 YQLSQMTF  | 528  | >JAK3-M511 YQLSQITF    | 238 | 290  |
| >JAK3-M511 YQLSQMTF  | 203  | >JAK3-M511 YQLSQITF    | 192 | 11   |
| >JAK3-M511 YQLSQMTFH | 399  | >JAK3-M511 YQLSQITFHKI | 459 | 60   |
| >JAK3-M511 YQLSQMTFH | 257  | >JAK3-M511 YQLSQITFHKI | 237 | 20   |
| >JAK3-M511 YQLSQMTFH | 631  | >JAK3-M511 YQLSQITFHK  | 390 | 241  |
| >JAK3-M511 QYQLSQMTF | 196  | >JAK3-M511 QYQLSQITF   | 807 | 611  |
| >JAK3-M511 QYQLSQMTF | 34   | >JAK3-M511 QYQLSQITF   | 87  | 53   |
| >JAK3-M511 QYQLSQMTF | 78   | >JAK3-M511 QYQLSQITF   | 134 | 56   |
| >JAK3-M511 QYQLSQMTF | 5    | >JAK3-M511 QYQLSQITF   | 7   | 2    |
| >JAK3-M511 QYQLSQMTF | 184  | >JAK3-M511 QYQLSQITFH  | 231 | 47   |
| >JAK3-M511 QYQLSQMTF | 428  | >JAK3-M511 QYQLSQITFH  | 355 | 73   |
| >JAK3-M511 QYQLSQMTF | 445  | >JAK3-M511 QYQLSQITFH  | 679 | 234  |
| >JAK3-M511 QYQLSQMTF | 199  | >JAK3-M511 QYQLSQITFH  | 169 | 30   |
| >JAK3-M511 SQYQLSQM  | 306  | >JAK3-M511 SQYQLSQI    | 729 | 423  |
| >JAK3-M511 SQYQLSQM  | 941  | >JAK3-M511 SQYQLSQI    | 83  | 858  |
| >JAK3-M511 SQYQLSQM  | 188  | >JAK3-M511 SQYQLSQI    | 36  | 152  |
| >JAK3-M511 SQYQLSQM  | 1024 | >JAK3-M511 SQYQLSQI    | 115 | 909  |
| >JAK3-M511 SQYQLSQM  | 3081 | >JAK3-M511 SQYQLSQI    | 312 | 2769 |
| >JAK3-M511 SQYQLSQMT | 54   | >JAK3-M511 SQYQLSQITF  | 48  | 6    |
| >JAK3-M511 SQYQLSQM  | 39   | >JAK3-M511 SQYQLSQI    | 200 | 161  |
| >JAK3-M511 SQYQLSQMT | 27   | >JAK3-M511 SQYQLSQITF  | 30  | 3    |
| >JAK3-M511 SQYQLSQMT | 337  | >JAK3-M511 SQYQLSQITFI | 296 | 41   |



|                       |      |                        |       |       |
|-----------------------|------|------------------------|-------|-------|
| >JAK3-M511 SQYQLSQM   | 215  | >JAK3-M511 SQYQLSQI    | 1949  | 1734  |
| >JAK3-M511 SQYQLSQMT  | 56   | >JAK3-M511 SQYQLSQITF  | 73    | 17    |
| >JAK3-M511 SQYQLSQM   | 20   | >JAK3-M511 SQYQLSQI    | 73    | 53    |
| >JAK3-M511 SQYQLSQMT  | 2    | >JAK3-M511 SQYQLSQITF  | 3     | 1     |
| >JAK3-M511 SQYQLSQMT  | 231  | >JAK3-M511 SQYQLSQITFI | 170   | 61    |
| >JAK3-M511 SQYQLSQMT  | 241  | >JAK3-M511 SQYQLSQITF  | 330   | 89    |
| >JAK3-M511 SQYQLSQMT  | 300  | >JAK3-M511 SQYQLSQITF  | 564   | 264   |
| >JAK3-M511 SQYQLSQMT  | 232  | >JAK3-M511 SQYQLSQITF  | 514   | 282   |
| >JAK3-M511 SQYQLSQMT  | 613  | >JAK3-M511 SQYQLSQITF  | 409   | 204   |
| >JAK3-M511 SQYQLSQM   | 3078 | >JAK3-M511 SQYQLSQI    | 232   | 2846  |
| >JAK3-M511 SQYQLSQM   | 4176 | >JAK3-M511 SQYQLSQI    | 128   | 4048  |
| >JAK3-M511 QSQYQLSQM  | 78   | >JAK3-M511 QSQYQLSQI   | 3280  | 3202  |
| >JAK3-M511 QSQYQLSQM  | 156  | >JAK3-M511 QSQYQLSQIT  | 140   | 16    |
| >JAK3-M511 QSQYQLSQM  | 346  | >JAK3-M511 QSQYQLSQIT  | 503   | 157   |
| >JAK3-M511 QSQYQLSQM  | 41   | >JAK3-M511 QSQYQLSQIT  | 71    | 30    |
| >JAK3-M511 QSQYQLSQM  | 33   | >JAK3-M511 QSQYQLSQI   | 216   | 183   |
| >JAK3-M511 QSQYQLSQM  | 9    | >JAK3-M511 QSQYQLSQIT  | 9     | 0     |
| >JAK3-M511 QSQYQLSQM  | 226  | >JAK3-M511 QSQYQLSQIT  | 495   | 269   |
| >JAK3-M511 QSQYQLSQM  | 13   | >JAK3-M511 QSQYQLSQI   | 167   | 154   |
| >JAK3-M511 QSQYQLSQM  | 55   | >JAK3-M511 QSQYQLSQIT  | 108   | 53    |
| >JAK3-M511 QSQYQLSQM  | 981  | >JAK3-M511 QSQYQLSQI   | 33    | 948   |
| >JAK3-M511 PQSQYQLSQI | 472  | >JAK3-M511 PQSQYQLSQI  | 1191  | 719   |
| >JAK3-M576 MSQVSYRHL  | 348  | >JAK3-M576 KSQVSYRHL   | 586   | 238   |
| >JAK3-M576 MSQVSYRHL  | 704  | >JAK3-M576 KSQVSYRHL   | 126   | 578   |
| >JAK3-M576 MSQVSYRHL' | 479  | >JAK3-M576 KSQVSYRHLV  | 92    | 387   |
| >JAK3-M576 MSQVSYRHL' | 579  | >JAK3-M576 KSQVSYRHLV  | 106   | 473   |
| >JAK3-M576 MSQVSYRHL' | 257  | >JAK3-M576 KSQVSYRHLV  | 6777  | 6520  |
| >JAK3-M576 MSQVSYRHL  | 382  | >JAK3-M576 KSQVSYRHL   | 381   | 1     |
| >JAK3-M576 MSQVSYRHL' | 250  | >JAK3-M576 KSQVSYRHLV  | 276   | 26    |
| >JAK3-M576 MSQVSYRH   | 1096 | >JAK3-M576 KSQVSYRH    | 494   | 602   |
| >JAK3-M576 MSQVSYRHL  | 24   | >JAK3-M576 KSQVSYRHL   | 15    | 9     |
| >JAK3-M576 MSQVSYRHL' | 13   | >JAK3-M576 KSQVSYRHLV  | 8     | 5     |
| >JAK3-M576 MSQVSYRHL  | 1418 | >JAK3-M576 KSQVSYRHL   | 338   | 1080  |
| >JAK3-M576 MSQVSYRHL' | 396  | >JAK3-M576 KSQVSYRHLV  | 123   | 273   |
| >JAK3-M576 MSQVSYRHL  | 142  | >JAK3-M576 KSQVSYRHL   | 120   | 22    |
| >JAK3-M576 MSQVSYRHL' | 206  | >JAK3-M576 KSQVSYRHLV  | 193   | 13    |
| >JAK3-M576 LMSQVSYRHI | 17   | >JAK3-M576 LKSQVSYRHL' | 16774 | 16757 |
| >JAK3-M576 LMSQVSYRHI | 76   | >JAK3-M576 LKSQVSYRHL  | 13509 | 13433 |
| >JAK3-M576 LMSQVSYRHI | 3    | >JAK3-M576 LKSQVSYRHL' | 961   | 958   |
| >JAK3-M576 LMSQVSYRHI | 143  | >JAK3-M576 LKSQVSYRHL  | 19590 | 19447 |
| >JAK3-M576 LMSQVSYRHI | 6    | >JAK3-M576 LKSQVSYRHL' | 8197  | 8191  |
| >JAK3-M576 LMSQVSYRHI | 39   | >JAK3-M576 LKSQVSYRHL' | 5412  | 5373  |
| >JAK3-M576 LMSQVSYRHI | 25   | >JAK3-M576 LKSQVSYRHL  | 17019 | 16994 |

|                       |       |                        |       |       |
|-----------------------|-------|------------------------|-------|-------|
| >JAK3-M576 LMSQVSYRHI | 3     | >JAK3-M576 LKSQVSYRHL' | 3960  | 3957  |
| >JAK3-M576 LMSQVSYRHI | 127   | >JAK3-M576 LKSQVSYRHL  | 21164 | 21037 |
| >JAK3-M576 LMSQVSYRHI | 11    | >JAK3-M576 LKSQVSYRHL' | 13934 | 13923 |
| >JAK3-M576 LMSQVSYRHI | 94    | >JAK3-M576 LKSQVSYRHL  | 18919 | 18825 |
| >JAK3-M576 LMSQVSYRHI | 9     | >JAK3-M576 LKSQVSYRHL' | 6170  | 6161  |
| >JAK3-M576 LMSQVSYRHI | 303   | >JAK3-M576 LKSQVSYRHL  | 22958 | 22655 |
| >JAK3-M576 LMSQVSYRHI | 5     | >JAK3-M576 LKSQVSYRHL' | 13302 | 13297 |
| >JAK3-M576 LMSQVSYRHI | 14    | >JAK3-M576 LKSQVSYRHL  | 23189 | 23175 |
| >JAK3-M576 LMSQVSYRHI | 2     | >JAK3-M576 LKSQVSYRHL' | 1197  | 1195  |
| >JAK3-M576 LMSQVSYR   | 297   | >JAK3-M576 LKSQVSYR    | 20474 | 20177 |
| >JAK3-M576 LMSQVSYR   | 491   | >JAK3-M576 LKSQVSYR    | 23825 | 23334 |
| >JAK3-M576 LMSQVSYR   | 15    | >JAK3-M576 LKSQVSYR    | 5322  | 5307  |
| >JAK3-M576 LMSQVSYR   | 80    | >JAK3-M576 LKSQVSYR    | 5611  | 5531  |
| >JAK3-M576 LMSQVSYR   | 27    | >JAK3-M576 LKSQVSYR    | 359   | 332   |
| >JAK3-M576 LMSQVSYRHI | 448   | >JAK3-M576 LKSQVSYRHL' | 4923  | 4475  |
| >JAK3-M576 LMSQVSYRH  | 466   | >JAK3-M576 LKSQVSYRH   | 20004 | 19538 |
| >JAK3-M576 LMSQVSYRHI | 112   | >JAK3-M576 LKSQVSYRHL  | 12767 | 12655 |
| >JAK3-M576 LMSQVSYRHI | 186   | >JAK3-M576 LKSQVSYRHL  | 77    | 109   |
| >JAK3-M576 LMSQVSYRHI | 999   | >JAK3-M576 LKSQVSYRHL' | 495   | 504   |
| >JAK3-M576 LMSQVSYR   | 78    | >JAK3-M576 LKSQVSYR    | 690   | 612   |
| >JAK3-M576 MESFLEAASL | 116   | >JAK3-M576 MESFLEAASL  | 9424  | 9308  |
| >JAK3-M576 MESFLEAASL | 22080 | >JAK3-M576 MESFLEAASL  | 153   | 21927 |
| >JAK3-M576 MESFLEAASL | 155   | >JAK3-M576 MESFLEAASL  | 2909  | 2754  |
| >JAK3-M576 MESFLEAASL | 72    | >JAK3-M576 MESFLEAASL  | 7332  | 7260  |
| >JAK3-M576 MESFLEAASL | 302   | >JAK3-M576 MESFLEAASL  | 2879  | 2577  |
| >JAK3-M576 MESFLEAASL | 150   | >JAK3-M576 MESFLEAASL  | 12180 | 12030 |
| >JAK3-M576 MESFLEAASL | 63    | >JAK3-M576 MESFLEAASL  | 4091  | 4028  |
| >JAK3-M576 SLMSQVSYRH | 68    | >JAK3-M576 SLKSQVSYRH  | 4506  | 4438  |
| >JAK3-M576 SLMSQVSYR  | 411   | >JAK3-M576 SLKSQVSYR   | 6943  | 6532  |
| >JAK3-M576 SLMSQVSYRH | 9     | >JAK3-M576 SLKSQVSYRH  | 118   | 109   |
| >JAK3-M576 SLMSQVSYRH | 11    | >JAK3-M576 SLKSQVSYRH  | 31    | 20    |
| >JAK3-M576 SLMSQVSYRH | 354   | >JAK3-M576 SLKSQVSYRH  | 11001 | 10647 |
| >JAK3-M576 SLMSQVSYRH | 17    | >JAK3-M576 SLKSQVSYRH  | 586   | 569   |
| >JAK3-M576 SLMSQVSYRH | 27    | >JAK3-M576 SLKSQVSYRH  | 1065  | 1038  |
| >JAK3-M576 SLMSQVSYRH | 30    | >JAK3-M576 SLKSQVSYRH  | 1311  | 1281  |
| >JAK3-M576 SLMSQVSYRH | 98    | >JAK3-M576 SLKSQVSYRH  | 9660  | 9562  |
| >JAK3-M576 SLMSQVSYRH | 7     | >JAK3-M576 SLKSQVSYRH  | 35    | 28    |
| >JAK3-M576 SLMSQVSY   | 151   | >JAK3-M576 SLKSQVSY    | 1050  | 899   |
| >JAK3-M576 SLMSQVSYR  | 65    | >JAK3-M576 SLKSQVSYR   | 299   | 234   |
| >JAK3-M576 SLMSQVSY   | 121   | >JAK3-M576 SLKSQVSY    | 6454  | 6333  |
| >JAK3-M576 SLMSQVSYR  | 25    | >JAK3-M576 SLKSQVSYR   | 1069  | 1044  |
| >JAK3-M576 SLMSQVSY   | 321   | >JAK3-M576 SLKSQVSY    | 1991  | 1670  |
| >JAK3-M576 SLMSQVSY   | 103   | >JAK3-M576 SLKSQVSY    | 537   | 434   |

|                       |      |                       |      |      |
|-----------------------|------|-----------------------|------|------|
| >JAK3-M576 SLMSQVSYRF | 4997 | >JAK3-M576 SLKSQVSYRH | 345  | 4652 |
| >JAK3-M576 SLMSQVSY   | 41   | >JAK3-M576 SLKSQVSY   | 52   | 11   |
| >JAK3-M576 SLMSQVSYR  | 13   | >JAK3-M576 SLKSQVSYR  | 9    | 4    |
| >JAK3-M576 SLMSQVSY   | 369  | >JAK3-M576 SLKSQVSY   | 7171 | 6802 |
| >JAK3-M576 SLMSQVSYR  | 282  | >JAK3-M576 SLKSQVSYR  | 242  | 40   |
| >JAK3-M576 SLMSQVSYR  | 22   | >JAK3-M576 SLKSQVSYR  | 107  | 85   |
| >JAK3-M576 SLMSQVSY   | 99   | >JAK3-M576 SLKSQVSY   | 479  | 380  |
| >JAK3-M576 SLMSQVSYRF | 148  | >JAK3-M576 SLKSQVSYRH | 82   | 66   |
| >JAK3-M576 SLMSQVSY   | 43   | >JAK3-M576 SLKSQVSY   | 44   | 1    |
| >JAK3-M576 SLMSQVSYRF | 340  | >JAK3-M576 SLKSQVSYRH | 481  | 141  |
| >JAK3-M576 SLMSQVSY   | 43   | >JAK3-M576 SLKSQVSY   | 78   | 35   |
| >JAK3-M576 SLMSQVSY   | 18   | >JAK3-M576 SLKSQVSY   | 46   | 28   |
| >JAK3-M576 SLMSQVSYRF | 298  | >JAK3-M576 SLKSQVSYRH | 742  | 444  |
| >JAK3-M576 SLMSQVSY   | 353  | >JAK3-M576 SLKSQVSY   | 2348 | 1995 |
| >JAK3-M576 SLMSQVSYR  | 98   | >JAK3-M576 SLKSQVSYR  | 239  | 141  |
| >JAK3-M576 ASLMSQVSYF | 280  | >JAK3-M576 ASLKSQVSYR | 749  | 469  |
| >JAK3-M576 ASLMSQVSY  | 193  | >JAK3-M576 ASLKSQVSY  | 512  | 319  |
| >JAK3-M576 ASLMSQVSYF | 39   | >JAK3-M576 ASLKSQVSYR | 129  | 90   |
| >JAK3-M576 ASLMSQVSY  | 62   | >JAK3-M576 ASLKSQVSY  | 88   | 26   |
| >JAK3-M576 ASLMSQVSYF | 14   | >JAK3-M576 ASLKSQVSYR | 20   | 6    |
| >JAK3-M576 ASLMSQVSYF | 261  | >JAK3-M576 ASLKSQVSYR | 1167 | 906  |
| >JAK3-M576 ASLMSQVSYF | 40   | >JAK3-M576 ASLKSQVSYR | 101  | 61   |
| >JAK3-M576 ASLMSQVSY  | 131  | >JAK3-M576 ASLKSQVSY  | 156  | 25   |
| >JAK3-M576 ASLMSQVSY  | 8    | >JAK3-M576 ASLKSQVSY  | 7    | 1    |
| >JAK3-M576 ASLMSQVSY  | 3    | >JAK3-M576 ASLKSQVSY  | 4    | 1    |
| >JAK3-M576 ASLMSQVSYF | 242  | >JAK3-M576 ASLKSQVSYR | 654  | 412  |
| >JAK3-M576 ASLMSQVSY  | 288  | >JAK3-M576 ASLKSQVSY  | 276  | 12   |
| >JAK3-M576 ASLMSQVSY  | 184  | >JAK3-M576 ASLKSQVSY  | 127  | 57   |
| >JAK3-M576 ASLMSQVSY  | 2453 | >JAK3-M576 ASLKSQVSY  | 357  | 2096 |
| >JAK3-M576 ASLMSQVSY  | 398  | >JAK3-M576 ASLKSQVSY  | 331  | 67   |
| >JAK3-M576 ASLMSQVSYF | 89   | >JAK3-M576 ASLKSQVSYR | 87   | 2    |
| >JAK3-M576 ASLMSQVSYF | 280  | >JAK3-M576 ASLKSQVSYR | 256  | 24   |
| >JAK3-M576 AASLMSQV   | 365  | >JAK3-M576 AASLKSQV   | 1691 | 1326 |
| >JAK3-M576 AASLMSQV   | 247  | >JAK3-M576 AASLKSQV   | 516  | 269  |
| >JAK3-M576 AASLMSQVS' | 169  | >JAK3-M576 AASLKSQVSY | 527  | 358  |
| >JAK3-M576 AASLMSQVS' | 300  | >JAK3-M576 AASLKSQVSY | 698  | 398  |
| >JAK3-M576 AASLMSQVS' | 354  | >JAK3-M576 AASLKSQVSY | 858  | 504  |
| >JAK3-M576 AASLMSQVS' | 141  | >JAK3-M576 AASLKSQVSY | 287  | 146  |
| >JAK3-M576 AASLMSQVS' | 46   | >JAK3-M576 AASLKSQVSY | 52   | 6    |
| >JAK3-M576 AASLMSQVS' | 74   | >JAK3-M576 AASLKSQVSY | 198  | 124  |
| >JAK3-M576 AASLMSQVS' | 188  | >JAK3-M576 AASLKSQVSY | 272  | 84   |
| >JAK3-M576 AASLMSQVS' | 147  | >JAK3-M576 AASLKSQVSY | 216  | 69   |
| >JAK3-M576 AASLMSQVS' | 13   | >JAK3-M576 AASLKSQVSY | 13   | 0    |

|                       |       |                       |       |       |
|-----------------------|-------|-----------------------|-------|-------|
| >JAK3-M576IAASLMSQVS\ | 38    | >JAK3-M576IAASLKQVSY  | 59    | 21    |
| >JAK3-M576IAASLMSQVS\ | 137   | >JAK3-M576IAASLKQVSY  | 154   | 17    |
| >JAK3-M576IEAASLMSQV\ | 79    | >JAK3-M576IEAASLKQVVS | 310   | 231   |
| >JAK3-M576IEAASLMSQV\ | 69    | >JAK3-M576IEAASLKQVVS | 306   | 237   |
| >JAK3-M576IEAASLMSQV  | 427   | >JAK3-M576IEAASLKQV   | 15830 | 15403 |
| >JAK3-M576IEAASLMSQV\ | 20    | >JAK3-M576IEAASLKQVVS | 144   | 124   |
| >JAK3-M576IEAASLMSQV\ | 239   | >JAK3-M576IEAASLKQVVS | 358   | 119   |
| >JAK3-M576IEAASLMSQ   | 265   | >JAK3-M576IEAASLKQ    | 979   | 714   |
| >JAK3-M576IEAASLMSQV\ | 42    | >JAK3-M576IEAASLKQVVS | 55    | 13    |
| >JAK3-M576IEAASLMSQV  | 5     | >JAK3-M576IEAASLKQV   | 10    | 5     |
| >JAK3-M576IEAASLMSQV  | 5     | >JAK3-M576IEAASLKQV   | 14    | 9     |
| >JAK3-M576IEAASLMSQV\ | 347   | >JAK3-M576IEAASLKQVVS | 436   | 89    |
| >JAK3-M576IEAASLMSQV\ | 107   | >JAK3-M576IEAASLKQVVS | 477   | 370   |
| >JAK3-M576IEAASLMSQV\ | 25    | >JAK3-M576IEAASLKQVVS | 35    | 10    |
| >JAK3-M576IEAASLMSQV  | 334   | >JAK3-M576IEAASLKQV   | 817   | 483   |
| >JAK3-M576IEAASLMSQV\ | 423   | >JAK3-M576IEAASLKQVVS | 585   | 162   |
| >JAK3-M576IEAASLMSQV\ | 208   | >JAK3-M576IEAASLKQVVS | 209   | 1     |
| >JAK3-M576IEAASLMSQ\  | 23    | >JAK3-M576IEAASLKQV   | 17    | 6     |
| >JAK3-M576IEAASLMSQ   | 331   | >JAK3-M576IEAASLKQ    | 815   | 484   |
| >JAK3-M576IEAASLMSQ\  | 202   | >JAK3-M576IEAASLKQV   | 269   | 67    |
| >JAK3-M576IEAASLMSQ\  | 227   | >JAK3-M576IEAASLKQV   | 1508  | 1281  |
| >JAK3-M576IFLEAASLM   | 377   | >JAK3-M576IFLEAASLK   | 19556 | 19179 |
| >JAK3-M576IFLEAASLMSC | 23    | >JAK3-M576IFLEAASLKQ\ | 74    | 51    |
| >JAK3-M576IFLEAASLM   | 16    | >JAK3-M576IFLEAASLK   | 1773  | 1757  |
| >JAK3-M576IFLEAASLMS  | 331   | >JAK3-M576IFLEAASLKS  | 499   | 168   |
| >JAK3-M576IFLEAASLMSC | 3     | >JAK3-M576IFLEAASLKQ\ | 6     | 3     |
| >JAK3-M576IFLEAASLM   | 245   | >JAK3-M576IFLEAASLK   | 12160 | 11915 |
| >JAK3-M576IFLEAASLMSC | 5     | >JAK3-M576IFLEAASLKQ\ | 10    | 5     |
| >JAK3-M576IFLEAASLMSC | 17    | >JAK3-M576IFLEAASLKQ\ | 65    | 48    |
| >JAK3-M576IFLEAASLM   | 458   | >JAK3-M576IFLEAASLK   | 11832 | 11374 |
| >JAK3-M576IFLEAASLMSC | 4     | >JAK3-M576IFLEAASLKQ\ | 5     | 1     |
| >JAK3-M576IFLEAASLMSC | 7     | >JAK3-M576IFLEAASLKQ\ | 16    | 9     |
| >JAK3-M576IFLEAASLMSC | 10    | >JAK3-M576IFLEAASLKQ\ | 12    | 2     |
| >JAK3-M576IFLEAASLMSC | 23    | >JAK3-M576IFLEAASLKQ\ | 37    | 14    |
| >JAK3-M576IFLEAASLM   | 20    | >JAK3-M576IFLEAASLK   | 748   | 728   |
| >JAK3-M576IFLEAASLMSC | 16    | >JAK3-M576IFLEAASLKQ  | 68    | 52    |
| >JAK3-M576IFLEAASLMSC | 2     | >JAK3-M576IFLEAASLKQ\ | 2     | 0     |
| >JAK3-M576IFLEAASLM   | 20786 | >JAK3-M576IFLEAASLK   | 385   | 20401 |
| >JAK3-M576IFLEAASLM   | 23234 | >JAK3-M576IFLEAASLK   | 207   | 23027 |
| >JAK3-M576IFLEAASLMSC | 242   | >JAK3-M576IFLEAASLKQ\ | 586   | 344   |
| >JAK3-M576IFLEAASLM   | 201   | >JAK3-M576IFLEAASLK   | 11681 | 11480 |
| >JAK3-M576ISFLEAASLM  | 25389 | >JAK3-M576ISFLEAASLK  | 227   | 25162 |
| >JAK3-M576ISFLEAASLM  | 6245  | >JAK3-M576ISFLEAASLK  | 127   | 6118  |

|                        |       |                        |       |       |
|------------------------|-------|------------------------|-------|-------|
| >JAK3-M576ISFLEAASLM   | 73    | >JAK3-M576ISFLEAASLK   | 9813  | 9740  |
| >JAK3-M576ISFLEAASLM   | 476   | >JAK3-M576ISFLEAASLK   | 1701  | 1225  |
| >JAK3-M576IESFLEAASLM  | 35148 | >JAK3-M576IESFLEAASLK  | 147   | 35001 |
| >JAK3-M576IESFLEAASLM  | 21599 | >JAK3-M576IESFLEAASLK  | 17    | 21582 |
| >JAK3-M576IESFLEAASLM  | 17    | >JAK3-M576IESFLEAASLK  | 14647 | 14630 |
| >JAK3-M576IESFLEAASLM  | 138   | >JAK3-M576IESFLEAASLK  | 24164 | 24026 |
| >JAK3-P132T PVLEHLFA   | 5964  | >JAK3-P132T TVLEHLFA   | 299   | 5665  |
| >JAK3-P132T PVLEHLFA   | 648   | >JAK3-P132T TVLEHLFA   | 20    | 628   |
| >JAK3-P132T PVLEHLFAQ  | 1622  | >JAK3-P132T TVLEHLFAQ  | 64    | 1558  |
| >JAK3-P132T PVLEHLFA   | 1930  | >JAK3-P132T TVLEHLFA   | 388   | 1542  |
| >JAK3-P132T PVLEHLFAQH | 11031 | >JAK3-P132T TVLEHLFAQH | 395   | 10636 |
| >JAK3-P132T PVLEHLFAQ  | 1105  | >JAK3-P132T TVLEHLFAQ  | 251   | 854   |
| >JAK3-P132T PVLEHLFAQH | 2082  | >JAK3-P132T TVLEHLFAQH | 457   | 1625  |
| >JAK3-P132T PVLEHLFAQH | 767   | >JAK3-P132T TVLEHLFAQH | 38    | 729   |
| >JAK3-P132T PVLEHLFAQH | 1099  | >JAK3-P132T TVLEHLFAQH | 108   | 991   |
| >JAK3-P132T PVLEHLFAQH | 4178  | >JAK3-P132T TVLEHLFAQH | 45    | 4133  |
| >JAK3-P132T PVLEHLFA   | 1442  | >JAK3-P132T TVLEHLFA   | 29    | 1413  |
| >JAK3-P132T PVLEHLFAQ  | 4814  | >JAK3-P132T TVLEHLFAQ  | 97    | 4717  |
| >JAK3-P132T PVLEHLFAQH | 329   | >JAK3-P132T TVLEHLFAQH | 208   | 121   |
| >JAK3-P132T LPVLEHLF   | 19121 | >JAK3-P132T LTVLEHLF   | 473   | 18648 |
| >JAK3-P132T LPVLEHLF   | 13256 | >JAK3-P132T LTVLEHLF   | 5     | 13251 |
| >JAK3-P132T LPVLEHLFAQ | 23584 | >JAK3-P132T LTVLEHLFAQ | 262   | 23322 |
| >JAK3-P132T LPVLEHLF   | 25    | >JAK3-P132T LTVLEHLF   | 2895  | 2870  |
| >JAK3-P132T LPVLEHLFAQ | 164   | >JAK3-P132T LTVLEHLFAQ | 9983  | 9819  |
| >JAK3-P132T LPVLEHLF   | 34    | >JAK3-P132T LTVLEHLF   | 8602  | 8568  |
| >JAK3-P132T LPVLEHLFA  | 71    | >JAK3-P132T LTVLEHLFA  | 21418 | 21347 |
| >JAK3-P132T LPVLEHLF   | 20545 | >JAK3-P132T LTVLEHLF   | 344   | 20201 |
| >JAK3-P132T LPVLEHLF   | 15698 | >JAK3-P132T LTVLEHLF   | 56    | 15642 |
| >JAK3-P132T LPVLEHLF   | 11680 | >JAK3-P132T LTVLEHLF   | 362   | 11318 |
| >JAK3-P132T LPVLEHLFAQ | 11136 | >JAK3-P132T LTVLEHLFAQ | 394   | 10742 |
| >JAK3-P132T LPVLEHLF   | 62    | >JAK3-P132T LTVLEHLF   | 12837 | 12775 |
| >JAK3-P132T DLPVLEHL   | 618   | >JAK3-P132T DLTVEHL    | 326   | 292   |
| >JAK3-P132T LDLPVLEHL  | 1093  | >JAK3-P132T LDLTVEHL   | 132   | 961   |
| >JAK3-P132T ILDLPVLEHL | 201   | >JAK3-P132T ILDLTVLEHL | 108   | 93    |
| >JAK3-P132T ILDLPVLEHL | 88    | >JAK3-P132T ILDLTVLEHL | 87    | 1     |
| >JAK3-P132T ILDLPVLEHL | 338   | >JAK3-P132T ILDLTVLEHL | 299   | 39    |
| >JAK3-P132T ILDLPVLEHL | 657   | >JAK3-P132T ILDLTVLEHL | 466   | 191   |
| >JAK3-P132T ILDLPVLEHL | 8     | >JAK3-P132T ILDLTVLEHL | 11    | 3     |
| >JAK3-P132T ILDLPVLEHL | 47    | >JAK3-P132T ILDLTVLEHL | 27    | 20    |
| >JAK3-P132T ILDLPVLEHL | 23    | >JAK3-P132T ILDLTVLEHL | 17    | 6     |
| >JAK3-P132T ILDLPVLEHL | 46    | >JAK3-P132T ILDLTVLEHL | 29    | 17    |
| >JAK3-P132T ILDLPVLEHL | 18    | >JAK3-P132T ILDLTVLEHL | 16    | 2     |
| >JAK3-P132T AILDLPVL   | 67    | >JAK3-P132T AILDLTVL   | 101   | 34    |

|                         |      |                         |      |      |
|-------------------------|------|-------------------------|------|------|
| >JAK3-P132T AILDLPVLEHL | 68   | >JAK3-P132T AILDLTVEHL  | 58   | 10   |
| >JAK3-P132T AILDLPVL    | 636  | >JAK3-P132T AILDLTVL    | 180  | 456  |
| >JAK3-P132T AILDLPVLEHL | 94   | >JAK3-P132T AILDLTVEHL  | 41   | 53   |
| >JAK3-P132T AILDLPVL    | 1259 | >JAK3-P132T AILDLTVL    | 375  | 884  |
| >JAK3-P132T AILDLPVL    | 55   | >JAK3-P132T AILDLTVL    | 32   | 23   |
| >JAK3-P132T AILDLPVLEHL | 25   | >JAK3-P132T AILDLTVEHL  | 11   | 14   |
| >JAK3-P132T AILDLPVL    | 20   | >JAK3-P132T AILDLTVL    | 48   | 28   |
| >JAK3-P132T AILDLPVLEHL | 12   | >JAK3-P132T AILDLTVEHL  | 19   | 7    |
| >JAK3-P132T AILDLPVL    | 146  | >JAK3-P132T AILDLTVL    | 186  | 40   |
| >JAK3-P132T AILDLPVLEHL | 112  | >JAK3-P132T AILDLTVEHL  | 85   | 27   |
| >JAK3-P132T AILDLPVL    | 33   | >JAK3-P132T AILDLTVL    | 76   | 43   |
| >JAK3-P132T AILDLPVLEHL | 24   | >JAK3-P132T AILDLTVEHL  | 26   | 2    |
| >JAK3-P132T AILDLPVL    | 89   | >JAK3-P132T AILDLTVL    | 181  | 92   |
| >JAK3-P132T AILDLPVLEHL | 181  | >JAK3-P132T AILDLTVEHL  | 111  | 70   |
| >JAK3-P132T AILDLPVL    | 14   | >JAK3-P132T AILDLTVL    | 12   | 2    |
| >JAK3-P132T AILDLPVLEHL | 14   | >JAK3-P132T AILDLTVEHL  | 13   | 1    |
| >JAK3-P132T AILDLPVL    | 930  | >JAK3-P132T AILDLTVL    | 352  | 578  |
| >JAK3-P132T SAILDLPV    | 315  | >JAK3-P132T SAILDLTV    | 443  | 128  |
| >JAK3-P132T SAILDLPVL   | 221  | >JAK3-P132T SAILDLTVL   | 39   | 182  |
| >JAK3-P132T SAILDLPV    | 30   | >JAK3-P132T SAILDLTV    | 61   | 31   |
| >JAK3-P132T SAILDLPVL   | 235  | >JAK3-P132T SAILDLTVL   | 442  | 207  |
| >JAK3-P132T SAILDLPVL   | 141  | >JAK3-P132T SAILDLTVL   | 653  | 512  |
| >JAK3-P132T SAILDLPV    | 174  | >JAK3-P132T SAILDLTV    | 642  | 468  |
| >JAK3-P132T SAILDLPV    | 234  | >JAK3-P132T SAILDLTV    | 1038 | 804  |
| >JAK3-P132T ASAILDLPV   | 425  | >JAK3-P132T ASAILDLTV   | 2916 | 2491 |
| >JAK3-P132T ASAILDLPV   | 143  | >JAK3-P132T ASAILDLTV   | 79   | 64   |
| >JAK3-P132T ASAILDLPVL  | 25   | >JAK3-P132T ASAILDLTVL  | 28   | 3    |
| >JAK3-P132T ASAILDLPVL  | 463  | >JAK3-P132T ASAILDLTVL  | 915  | 452  |
| >JAK3-P132T ASAILDLPVL  | 392  | >JAK3-P132T ASAILDLTVL  | 173  | 219  |
| >JAK3-P132T LASAILDLPV  | 386  | >JAK3-P132T LASAILDLTV  | 493  | 107  |
| >JAK3-P132T LASAILDLP   | 2479 | >JAK3-P132T LASAILDLT   | 313  | 2166 |
| >JAK3-P132T LASAILDLPV  | 67   | >JAK3-P132T LASAILDLTV  | 87   | 20   |
| >JAK3-P132T LASAILDLPVL | 172  | >JAK3-P132T LASAILDLTVL | 81   | 91   |
| >JAK3-P132T LASAILDLPV  | 155  | >JAK3-P132T LASAILDLTV  | 148  | 7    |
| >JAK3-P132T LASAILDLPV  | 67   | >JAK3-P132T LASAILDLTV  | 107  | 40   |
| >JAK3-P132T LASAILDLPVL | 454  | >JAK3-P132T LASAILDLTVL | 763  | 309  |
| >JAK3-P132T LASAILDLPV  | 405  | >JAK3-P132T LASAILDLTV  | 161  | 244  |
| >JAK3-P132T LASAILDLPV  | 494  | >JAK3-P132T LASAILDLTV  | 725  | 231  |
| >JAK3-P132T DLASAILDLP  | 6414 | >JAK3-P132T DLASAILDLT  | 302  | 6112 |
| >JAK3-P132T DLASAILDLPV | 273  | >JAK3-P132T DLASAILDLTV | 575  | 302  |
| >JAK3-P132T DLASAILDLPV | 231  | >JAK3-P132T DLASAILDLTV | 385  | 154  |
| >JAK3-P132T DLASAILDLPV | 104  | >JAK3-P132T DLASAILDLTV | 77   | 27   |
| >JAK3-P132T DLASAILDLPV | 528  | >JAK3-P132T DLASAILDLTV | 327  | 201  |

|                         |       |                         |       |       |
|-------------------------|-------|-------------------------|-------|-------|
| >JAK3-P132T DLASAILDLPV | 14    | >JAK3-P132T DLASAILDLTV | 13    | 1     |
| >JAK3-P132T DLASAILDLPV | 55    | >JAK3-P132T DLASAILDLTV | 31    | 24    |
| >JAK3-P132T DLASAILDLPV | 12    | >JAK3-P132T DLASAILDLTV | 9     | 3     |
| >JAK3-P132T DLASAILDLPV | 81    | >JAK3-P132T DLASAILDLTV | 410   | 329   |
| >JAK3-P132T DLASAILDLPV | 84    | >JAK3-P132T DLASAILDLTV | 243   | 159   |
| >JAK3-P151R LPVGLSLK    | 22301 | >JAK3-P151R LRVGLSLK    | 83    | 22218 |
| >JAK3-P151R LPVGLSLK    | 326   | >JAK3-P151R LRVGLSLK    | 28391 | 28065 |
| >JAK3-P151R HRSDLVSGRL  | 3586  | >JAK3-P151R HRSDLVSGRL  | 136   | 3450  |
| >JAK3-P151R RLPVGLSL    | 303   | >JAK3-P151R RLRVGLSL    | 956   | 653   |
| >JAK3-P151R RLPVGLSL    | 82    | >JAK3-P151R RLRVGLSL    | 87    | 5     |
| >JAK3-P151R RLPVGLSL    | 234   | >JAK3-P151R RLRVGLSL    | 2265  | 2031  |
| >JAK3-P151R RLPVGLSL    | 44    | >JAK3-P151R RLRVGLSL    | 313   | 269   |
| >JAK3-P151R RLPVGLSL    | 334   | >JAK3-P151R RLRVGLSL    | 1178  | 844   |
| >JAK3-P151R RLPVGLSL    | 102   | >JAK3-P151R RLRVGLSL    | 1323  | 1221  |
| >JAK3-P151R RLPVGLSL    | 12    | >JAK3-P151R RLRVGLSL    | 18    | 6     |
| >JAK3-P151R RLPVGLSLK   | 49    | >JAK3-P151R RLRVGLSLK   | 28    | 21    |
| >JAK3-P151R RLPVGLSLK   | 408   | >JAK3-P151R RLRVGLSLK   | 818   | 410   |
| >JAK3-P151R RLPVGLSL    | 9565  | >JAK3-P151R RLRVGLSL    | 13    | 9552  |
| >JAK3-P151R RLPVGLSLK   | 667   | >JAK3-P151R RLRVGLSLK   | 4     | 663   |
| >JAK3-P151R RLPVGLSLKEC | 14695 | >JAK3-P151R RLRVGLSLKEC | 131   | 14564 |
| >JAK3-P151R RLPVGLSLK   | 1143  | >JAK3-P151R RLRVGLSLK   | 68    | 1075  |
| >JAK3-P151R RLPVGLSL    | 464   | >JAK3-P151R RLRVGLSL    | 1323  | 859   |
| >JAK3-P151R RLPVGLSL    | 3934  | >JAK3-P151R RLRVGLSL    | 33    | 3901  |
| >JAK3-P151R RLPVGLSL    | 1566  | >JAK3-P151R RLRVGLSL    | 126   | 1440  |
| >JAK3-P151R RLPVGLSL    | 2137  | >JAK3-P151R RLRVGLSL    | 159   | 1978  |
| >JAK3-P151R RLPVGLSL    | 6587  | >JAK3-P151R RLRVGLSL    | 87    | 6500  |
| >JAK3-P151R RLPVGLSLK   | 1194  | >JAK3-P151R RLRVGLSLK   | 476   | 718   |
| >JAK3-P151R GRPLVGLSLK  | 492   | >JAK3-P151R GRPLRVGLSLK | 770   | 278   |
| >JAK3-P151R GRPLVGLSL   | 491   | >JAK3-P151R GRPLRVGLSL  | 371   | 120   |
| >JAK3-P151R GRPLVGLS    | 1257  | >JAK3-P151R GRPLRVGLS   | 430   | 827   |
| >JAK3-P151R GRPLVGLSL   | 64    | >JAK3-P151R GRPLRVGLSL  | 33    | 31    |
| >JAK3-P151R GRPLVGLSLK  | 124   | >JAK3-P151R GRPLRVGLSLK | 70    | 54    |
| >JAK3-P151R GRPLVGLSL   | 293   | >JAK3-P151R GRPLRVGLSL  | 925   | 632   |
| >JAK3-P151R GRPLVGLSL   | 98    | >JAK3-P151R GRPLRVGLSL  | 60    | 38    |
| >JAK3-P151R GRPLVGLSL   | 13    | >JAK3-P151R GRPLRVGLSL  | 17    | 4     |
| >JAK3-P151R SGRLPVGLSL  | 842   | >JAK3-P151R SGRLRVGLSL  | 382   | 460   |
| >JAK3-P151R SGRLPVGLSLI | 19    | >JAK3-P151R SGRLRVGLSLI | 12    | 7     |
| >JAK3-P151R VSGRLPVGL   | 780   | >JAK3-P151R VSGRLRVGL   | 206   | 574   |
| >JAK3-P151R VSGRLPVGLS  | 287   | >JAK3-P151R VSGRLRVGLS  | 753   | 466   |
| >JAK3-P151R LVSGRLPV    | 334   | >JAK3-P151R LVSGRLRV    | 1906  | 1572  |
| >JAK3-P151R LVSGRLPV    | 169   | >JAK3-P151R LVSGRLRV    | 455   | 286   |
| >JAK3-P151R LVSGRLPVGL  | 306   | >JAK3-P151R LVSGRLRVGL  | 655   | 349   |
| >JAK3-P151R LVSGRLPV    | 38    | >JAK3-P151R LVSGRLRV    | 136   | 98    |

|                       |       |                       |       |       |
|-----------------------|-------|-----------------------|-------|-------|
| >JAK3-P151RLVSGRLPVGL | 278   | >JAK3-P151RLVSGRLRVGL | 991   | 713   |
| >JAK3-P151RLVSGRLPV   | 32    | >JAK3-P151RLVSGRLRV   | 262   | 230   |
| >JAK3-P151RLVSGRLPV   | 258   | >JAK3-P151RLVSGRLRV   | 436   | 178   |
| >JAK3-P151RLVSGRLPV   | 467   | >JAK3-P151RLVSGRLRV   | 2056  | 1589  |
| >JAK3-P151RLVSGRLPV   | 5     | >JAK3-P151RLVSGRLRV   | 6     | 1     |
| >JAK3-P151RLVSGRLPVGL | 45    | >JAK3-P151RLVSGRLRVGL | 126   | 81    |
| >JAK3-P151RLVSGRLPV   | 111   | >JAK3-P151RLVSGRLRV   | 520   | 409   |
| >JAK3-P151RLVSGRLPVGL | 190   | >JAK3-P151RLVSGRLRVGL | 1166  | 976   |
| >JAK3-P151RDLVSGRLPV  | 253   | >JAK3-P151RDLVSGRLRV  | 660   | 407   |
| >JAK3-P151RDLVSGRLPV  | 13    | >JAK3-P151RDLVSGRLRV  | 11    | 2     |
| >JAK3-P151RDLVSGRLPVG | 174   | >JAK3-P151RDLVSGRLRVC | 140   | 34    |
| >JAK3-P151RDLVSGRLP   | 28364 | >JAK3-P151RDLVSGRLR   | 75    | 28289 |
| >JAK3-P151RDLVSGRLP   | 32084 | >JAK3-P151RDLVSGRLR   | 106   | 31978 |
| >JAK3-P151RDLVSGRLPV  | 255   | >JAK3-P151RDLVSGRLRV  | 1375  | 1120  |
| >JAK3-P151RDLVSGRLPV  | 84    | >JAK3-P151RDLVSGRLRV  | 777   | 693   |
| >JAK3-P151RSDLVSGRLPV | 158   | >JAK3-P151RSDLVSGRLRV | 172   | 14    |
| >JAK3-P151RSDLVSGRLP  | 18135 | >JAK3-P151RSDLVSGRLR  | 31    | 18104 |
| >JAK3-P151RSDLVSGRLP  | 345   | >JAK3-P151RSDLVSGRLR  | 330   | 15    |
| >JAK3-P434RPTGTFLVGL  | 3190  | >JAK3-P434RRTGTFLVGL  | 257   | 2933  |
| >JAK3-P434RPTGTFLVGL  | 4393  | >JAK3-P434RRTGTFLVGL  | 320   | 4073  |
| >JAK3-P434RPTGTFLV    | 7567  | >JAK3-P434RRTGTFLV    | 139   | 7428  |
| >JAK3-P434RPTGTFLVGL  | 6270  | >JAK3-P434RRTGTFLVGL  | 194   | 6076  |
| >JAK3-P434RPTGTFLV    | 4116  | >JAK3-P434RRTGTFLV    | 184   | 3932  |
| >JAK3-P434RPTGTFLV    | 11205 | >JAK3-P434RRTGTFLV    | 268   | 10937 |
| >JAK3-P434RPTGTFLVGL  | 4413  | >JAK3-P434RRTGTFLVGL  | 39    | 4374  |
| >JAK3-P434RPTGTFLVGL  | 10144 | >JAK3-P434RRTGTFLVGL  | 14    | 10130 |
| >JAK3-P434RPTGTFLVGL  | 1877  | >JAK3-P434RRTGTFLVGL  | 227   | 1650  |
| >JAK3-P434RPTGTFLV    | 12388 | >JAK3-P434RRTGTFLV    | 150   | 12238 |
| >JAK3-P434RPTGTFLVGL  | 3088  | >JAK3-P434RRTGTFLVGL  | 67    | 3021  |
| >JAK3-P434RSPTGTFL    | 60    | >JAK3-P434RSRTGTFL    | 26026 | 25966 |
| >JAK3-P434RSPTGTFLV   | 465   | >JAK3-P434RSRTGTFLV   | 37490 | 37025 |
| >JAK3-P434RSPTGTFLVGI | 311   | >JAK3-P434RSRTGTFLVGI | 34733 | 34422 |
| >JAK3-P434RSPTGTFL    | 95    | >JAK3-P434RSRTGTFL    | 23128 | 23033 |
| >JAK3-P434RSPTGTFLV   | 466   | >JAK3-P434RSRTGTFLV   | 23975 | 23509 |
| >JAK3-P434RSPTGTFLVGI | 115   | >JAK3-P434RSRTGTFLVGI | 22338 | 22223 |
| >JAK3-P434RSPTGTFL    | 20998 | >JAK3-P434RSRTGTFL    | 80    | 20918 |
| >JAK3-P434RSPTGTFLV   | 20009 | >JAK3-P434RSRTGTFLV   | 112   | 19897 |
| >JAK3-P434RSPTGTFLVGI | 20477 | >JAK3-P434RSRTGTFLVGI | 54    | 20423 |
| >JAK3-P434RSPTGTFL    | 270   | >JAK3-P434RSRTGTFL    | 150   | 120   |
| >JAK3-P434RSPTGTFL    | 205   | >JAK3-P434RSRTGTFL    | 26685 | 26480 |
| >JAK3-P434RSPTGTFLV   | 476   | >JAK3-P434RSRTGTFLV   | 31767 | 31291 |
| >JAK3-P434RSPTGTFLV   | 64    | >JAK3-P434RSRTGTFLV   | 26312 | 26248 |
| >JAK3-P434RSPTGTFLV   | 431   | >JAK3-P434RSRTGTFLV   | 5454  | 5023  |



|                         |       |                         |       |       |
|-------------------------|-------|-------------------------|-------|-------|
| >JAK3-P434R SPTGTFLLV   | 23991 | >JAK3-P434R SRTGTFLLV   | 197   | 23794 |
| >JAK3-P434R SPTGTFLLVGI | 18989 | >JAK3-P434R SRTGTFLLVGI | 154   | 18835 |
| >JAK3-P434R SPTGTFLLV   | 19085 | >JAK3-P434R SRTGTFLLV   | 59    | 19026 |
| >JAK3-P434R SPTGTFLLVGI | 9919  | >JAK3-P434R SRTGTFLLVGI | 18    | 9901  |
| >JAK3-P434R DYKGCLIRRSF | 23665 | >JAK3-P434R DYKGCLIRRSF | 416   | 23249 |
| >JAK3-P434R DYKGCLIRRSF | 8357  | >JAK3-P434R DYKGCLIRRSF | 8     | 8349  |
| >JAK3-P434R DYKGCLIRRSF | 32190 | >JAK3-P434R DYKGCLIRRSF | 120   | 32070 |
| >JAK3-P434R RSPTGTFLLV  | 338   | >JAK3-P434R RSRTGTFLLV  | 2398  | 2060  |
| >JAK3-P434R RSPTGTFL    | 2975  | >JAK3-P434R RSRTGTFL    | 5     | 2970  |
| >JAK3-P434R RSPTGTFL    | 2393  | >JAK3-P434R RSRTGTFL    | 5     | 2388  |
| >JAK3-P434R RSPTGTFLLV  | 954   | >JAK3-P434R RSRTGTFLLV  | 4     | 950   |
| >JAK3-P434R RSPTGTFLLV  | 7175  | >JAK3-P434R RSRTGTFLLV  | 8     | 7167  |
| >JAK3-P434R RSPTGTFL    | 172   | >JAK3-P434R RSRTGTFL    | 538   | 366   |
| >JAK3-P434R RSPTGTFLLV  | 103   | >JAK3-P434R RSRTGTFLLV  | 851   | 748   |
| >JAK3-P434R RSPTGTFL    | 2174  | >JAK3-P434R RSRTGTFL    | 126   | 2048  |
| >JAK3-P434R RSPTGTFL    | 93    | >JAK3-P434R RSRTGTFL    | 4     | 89    |
| >JAK3-P434R RSPTGTFL    | 98    | >JAK3-P434R RSRTGTFL    | 3     | 95    |
| >JAK3-P434R RSPTGTFLLV  | 3667  | >JAK3-P434R RSRTGTFLLV  | 30    | 3637  |
| >JAK3-P434R RSPTGTFL    | 2655  | >JAK3-P434R RSRTGTFL    | 205   | 2450  |
| >JAK3-P434R RSPTGTFL    | 8     | >JAK3-P434R RSRTGTFL    | 4284  | 4276  |
| >JAK3-P434R RSPTGTFL    | 2     | >JAK3-P434R RSRTGTFL    | 242   | 240   |
| >JAK3-P434R RSPTGTFLLV  | 3     | >JAK3-P434R RSRTGTFLLV  | 603   | 600   |
| >JAK3-P434R RSPTGTFLLV  | 138   | >JAK3-P434R RSRTGTFLLV  | 15827 | 15689 |
| >JAK3-P434R RSPTGTFL    | 391   | >JAK3-P434R RSRTGTFL    | 85    | 306   |
| >JAK3-P434R RSPTGTFL    | 1797  | >JAK3-P434R RSRTGTFL    | 34    | 1763  |
| >JAK3-P434R RSPTGTFLLV  | 468   | >JAK3-P434R RSRTGTFLLV  | 182   | 286   |
| >JAK3-P434R RSPTGTFL    | 6422  | >JAK3-P434R RSRTGTFL    | 447   | 5975  |
| >JAK3-P434R RSPTGTFL    | 665   | >JAK3-P434R RSRTGTFL    | 132   | 533   |
| >JAK3-P434R RSPTGTFL    | 106   | >JAK3-P434R RSRTGTFL    | 146   | 40    |
| >JAK3-P434R RSPTGTFL    | 99    | >JAK3-P434R RSRTGTFL    | 104   | 5     |
| >JAK3-P434R RRSPTGTFL   | 15    | >JAK3-P434R RRSRTGTFL   | 15    | 0     |
| >JAK3-P434R RRSPTGTFL   | 47    | >JAK3-P434R RRSRTGTFL   | 35    | 12    |
| >JAK3-P434R RRSPTGTFL   | 170   | >JAK3-P434R RRSRTGTFL   | 141   | 29    |
| >JAK3-P434R RRSPTGTFL   | 171   | >JAK3-P434R RRSRTGTFL   | 139   | 32    |
| >JAK3-P434R RRSPTGTFL   | 120   | >JAK3-P434R RRSRTGTFL   | 58    | 62    |
| >JAK3-P434R RRSPTGTFL   | 77    | >JAK3-P434R RRSRTGTFL   | 43    | 34    |
| >JAK3-P434R RRSPTGTFL   | 25    | >JAK3-P434R RRSRTGTFL   | 20    | 5     |
| >JAK3-P434R RRSPTGTFL   | 68    | >JAK3-P434R RRSRTGTFL   | 47    | 21    |
| >JAK3-P434R RRSPTGTFL   | 177   | >JAK3-P434R RRSRTGTFL   | 447   | 270   |
| >JAK3-P434R RRSPTGTFL   | 871   | >JAK3-P434R RRSRTGTFL   | 207   | 664   |
| >JAK3-P434R RRSPTGTFL   | 27    | >JAK3-P434R RRSRTGTFL   | 24    | 3     |
| >JAK3-P434R RRSPTGTFL   | 37    | >JAK3-P434R RRSRTGTFL   | 19    | 18    |
| >JAK3-P434R RRSPTGTFL   | 39    | >JAK3-P434R RRSRTGTFL   | 35    | 4     |

|                         |       |                         |      |       |
|-------------------------|-------|-------------------------|------|-------|
| >JAK3-P434R RRSPTGTFL   | 14    | >JAK3-P434R RRSRTGTFL   | 22   | 8     |
| >JAK3-P434R RRSPTGTFL   | 28    | >JAK3-P434R RRSRTGTFL   | 25   | 3     |
| >JAK3-P434R RRSPTGTFL   | 19    | >JAK3-P434R RRSRTGTFL   | 25   | 6     |
| >JAK3-P434R RRSPTGTF    | 106   | >JAK3-P434R RRSRTGTF    | 181  | 75    |
| >JAK3-P434R IRRSPTGTF   | 8     | >JAK3-P434R IRRSRTGTF   | 19   | 11    |
| >JAK3-P434R IRRSPTGTFL  | 45    | >JAK3-P434R IRRSRTGTFL  | 74   | 29    |
| >JAK3-P434R IRRSPTGTFL  | 202   | >JAK3-P434R IRRSRTGTFL  | 366  | 164   |
| >JAK3-P434R IRRSPTGTFL  | 34    | >JAK3-P434R IRRSRTGTFL  | 24   | 10    |
| >JAK3-P434R IRRSPTGTFL  | 868   | >JAK3-P434R IRRSRTGTFL  | 372  | 496   |
| >JAK3-P434R IRRSPTGTF   | 62    | >JAK3-P434R IRRSRTGTF   | 237  | 175   |
| >JAK3-P434R IRRSPTGTF   | 584   | >JAK3-P434R IRRSRTGTF   | 492  | 92    |
| >JAK3-P434R IRRSPTGTFL  | 53    | >JAK3-P434R IRRSRTGTFL  | 42   | 11    |
| >JAK3-P434R IRRSPTGTFL  | 93    | >JAK3-P434R IRRSRTGTFL  | 81   | 12    |
| >JAK3-P434R IRRSPTGTF   | 524   | >JAK3-P434R IRRSRTGTF   | 73   | 451   |
| >JAK3-P434R IRRSPTGTFL  | 32    | >JAK3-P434R IRRSRTGTFL  | 28   | 4     |
| >JAK3-P434R IRRSPTGTFL  | 43    | >JAK3-P434R IRRSRTGTFL  | 16   | 27    |
| >JAK3-P434R LIRRSPTGTFL | 296   | >JAK3-P434R LIRRSRTGTFL | 1096 | 800   |
| >JAK3-P434R LIRRSPTGTFL | 201   | >JAK3-P434R LIRRSRTGTFL | 229  | 28    |
| >JAK3-P434R LIRRSPTG    | 86    | >JAK3-P434R LIRRSRTG    | 139  | 53    |
| >JAK3-P434R LIRRSPTGTFL | 39    | >JAK3-P434R LIRRSRTGTFL | 27   | 12    |
| >JAK3-P434R LIRRSPTGTFL | 930   | >JAK3-P434R LIRRSRTGTFL | 227  | 703   |
| >JAK3-P434R LIRRSPTGTF  | 56    | >JAK3-P434R LIRRSRTGTF  | 49   | 7     |
| >JAK3-P434R LIRRSPTGTF  | 363   | >JAK3-P434R LIRRSRTGTF  | 662  | 299   |
| >JAK3-P434R LIRRSPTGTF  | 37    | >JAK3-P434R LIRRSRTGTF  | 60   | 23    |
| >JAK3-P434R LIRRSPTGTFL | 295   | >JAK3-P434R LIRRSRTGTFL | 318  | 23    |
| >JAK3-P434R LIRRSPTGTF  | 69    | >JAK3-P434R LIRRSRTGTF  | 130  | 61    |
| >JAK3-P434R LIRRSPTGTF  | 68    | >JAK3-P434R LIRRSRTGTF  | 82   | 14    |
| >JAK3-P434R LIRRSPTGTFL | 415   | >JAK3-P434R LIRRSRTGTFL | 363  | 52    |
| >JAK3-P434R CLIRRSPTGT  | 224   | >JAK3-P434R CLIRRSRTGT  | 938  | 714   |
| >JAK3-P434R CLIRRSPTGTF | 480   | >JAK3-P434R CLIRRSRTGTF | 632  | 152   |
| >JAK3-P434R CLIRRSPTGTF | 845   | >JAK3-P434R CLIRRSRTGTF | 224  | 621   |
| >JAK3-P434R CLIRRSPTGTF | 204   | >JAK3-P434R CLIRRSRTGTF | 236  | 32    |
| >JAK3-P434R CLIRRSPTGTF | 177   | >JAK3-P434R CLIRRSRTGTF | 291  | 114   |
| >JAK3-P434R KGCLIRRSR   | 18017 | >JAK3-P434R KGCLIRRSR   | 67   | 17950 |
| >JAK3-P434R KGCLIRRSR   | 31040 | >JAK3-P434R KGCLIRRSR   | 173  | 30867 |
| >JAK3-Q501F QPQSQYQL    | 105   | >JAK3-Q501F HPQSQYQL    | 50   | 55    |
| >JAK3-Q501F QPQSQYQLS   | 216   | >JAK3-Q501F HPQSQYQLS   | 94   | 122   |
| >JAK3-Q501F QPQSQYQL    | 1661  | >JAK3-Q501F HPQSQYQL    | 141  | 1520  |
| >JAK3-Q501F QPQSQYQLS   | 976   | >JAK3-Q501F HPQSQYQLS   | 107  | 869   |
| >JAK3-Q501F QPQSQYQL    | 1655  | >JAK3-Q501F HPQSQYQL    | 376  | 1279  |
| >JAK3-Q501F QPQSQYQLS   | 215   | >JAK3-Q501F HPQSQYQLS   | 55   | 160   |
| >JAK3-Q501F QPQSQYQL    | 1491  | >JAK3-Q501F HPQSQYQL    | 137  | 1354  |
| >JAK3-Q501F QPQSQYQL    | 976   | >JAK3-Q501F HPQSQYQL    | 303  | 673   |

|                        |      |                        |      |      |
|------------------------|------|------------------------|------|------|
| >JAK3-Q501F QPQSQYQL   | 685  | >JAK3-Q501F HPQSQYQL   | 93   | 592  |
| >JAK3-Q501F QPQSQYQLSC | 2940 | >JAK3-Q501F HPQSQYQLSC | 391  | 2549 |
| >JAK3-Q501F LVQPQSQYQ  | 36   | >JAK3-Q501F LVHPQSQYQI | 30   | 6    |
| >JAK3-Q501F LVQPQSQY   | 1237 | >JAK3-Q501F LVHPQSQY   | 399  | 838  |
| >JAK3-Q501F LVQPQSQY   | 58   | >JAK3-Q501F LVHPQSQY   | 36   | 22   |
| >JAK3-Q501F LVQPQSQYQ  | 3749 | >JAK3-Q501F LVHPQSQYQ  | 84   | 3665 |
| >JAK3-Q501F LVQPQSQYQ  | 5055 | >JAK3-Q501F LVHPQSQYQI | 221  | 4834 |
| >JAK3-Q501F LVQPQSQYQ  | 6432 | >JAK3-Q501F LVHPQSQYQI | 222  | 6210 |
| >JAK3-Q501F LVQPQSQY   | 169  | >JAK3-Q501F LVHPQSQY   | 228  | 59   |
| >JAK3-Q501F LVQPQSQY   | 89   | >JAK3-Q501F LVHPQSQY   | 88   | 1    |
| >JAK3-Q501F LVQPQSQY   | 357  | >JAK3-Q501F LVHPQSQY   | 345  | 12   |
| >JAK3-Q501F LVQPQSQY   | 24   | >JAK3-Q501F LVHPQSQY   | 12   | 12   |
| >JAK3-Q501F LVQPQSQYQ  | 246  | >JAK3-Q501F LVHPQSQYQI | 88   | 158  |
| >JAK3-Q501F LVQPQSQY   | 407  | >JAK3-Q501F LVHPQSQY   | 236  | 171  |
| >JAK3-Q501F LVQPQSQY   | 471  | >JAK3-Q501F LVHPQSQY   | 1656 | 1185 |
| >JAK3-Q501F SLVQPQSQYC | 307  | >JAK3-Q501F SLVHPQSQYC | 240  | 67   |
| >JAK3-Q501F SLVQPQSQYC | 33   | >JAK3-Q501F SLVHPQSQYC | 28   | 5    |
| >JAK3-Q501F SLVQPQSQYC | 320  | >JAK3-Q501F SLVHPQSQYC | 146  | 174  |
| >JAK3-Q501F SLVQPQSQYC | 9    | >JAK3-Q501F SLVHPQSQYC | 15   | 6    |
| >JAK3-Q501F SLVQPQSQYC | 124  | >JAK3-Q501F SLVHPQSQYC | 77   | 47   |
| >JAK3-Q501F SLVQPQSQYC | 32   | >JAK3-Q501F SLVHPQSQYC | 48   | 16   |
| >JAK3-Q501F SLVQPQSQYC | 279  | >JAK3-Q501F SLVHPQSQYC | 555  | 276  |
| >JAK3-Q501F SLVQPQSQ   | 125  | >JAK3-Q501F SLVHPQSQ   | 373  | 248  |
| >JAK3-Q501F SLVQPQSQYC | 61   | >JAK3-Q501F SLVHPQSQYC | 163  | 102  |
| >JAK3-Q501F SLVQPQSQYC | 3    | >JAK3-Q501F SLVHPQSQYC | 5    | 2    |
| >JAK3-Q501F SLVQPQSQY  | 1609 | >JAK3-Q501F SLVHPQSQY  | 426  | 1183 |
| >JAK3-Q501F SLVQPQSQY  | 50   | >JAK3-Q501F SLVHPQSQY  | 118  | 68   |
| >JAK3-Q501F SLVQPQSQY  | 68   | >JAK3-Q501F SLVHPQSQY  | 43   | 25   |
| >JAK3-Q501F SLVQPQSQY  | 199  | >JAK3-Q501F SLVHPQSQY  | 144  | 55   |
| >JAK3-Q501F SLVQPQSQY  | 1024 | >JAK3-Q501F SLVHPQSQY  | 385  | 639  |
| >JAK3-Q501F SLVQPQSQY  | 116  | >JAK3-Q501F SLVHPQSQY  | 130  | 14   |
| >JAK3-Q501F SLVQPQSQY  | 28   | >JAK3-Q501F SLVHPQSQY  | 36   | 8    |
| >JAK3-Q501F SLVQPQSQY  | 414  | >JAK3-Q501F SLVHPQSQY  | 132  | 282  |
| >JAK3-Q501F SLVQPQSQY  | 122  | >JAK3-Q501F SLVHPQSQY  | 153  | 31   |
| >JAK3-Q501F SLVQPQSQY  | 17   | >JAK3-Q501F SLVHPQSQY  | 22   | 5    |
| >JAK3-Q501F SLVQPQSQY  | 836  | >JAK3-Q501F SLVHPQSQY  | 373  | 463  |
| >JAK3-Q501F SSLVQPQSQY | 834  | >JAK3-Q501F SSLVHPQSQY | 486  | 348  |
| >JAK3-Q501F SSLVQPQSQY | 547  | >JAK3-Q501F SSLVHPQSQY | 229  | 318  |
| >JAK3-Q501F SSLVQPQSQY | 79   | >JAK3-Q501F SSLVHPQSQY | 92   | 13   |
| >JAK3-Q501F SSLVQPQSQY | 180  | >JAK3-Q501F SSLVHPQSQY | 105  | 75   |
| >JAK3-Q501F SSLVQPQSQY | 4    | >JAK3-Q501F SSLVHPQSQY | 4    | 0    |
| >JAK3-Q501F SSLVQPQSQY | 558  | >JAK3-Q501F SSLVHPQSQY | 461  | 97   |
| >JAK3-Q501F SSLVQPQSQY | 28   | >JAK3-Q501F SSLVHPQSQY | 37   | 9    |

|                        |       |                        |       |       |
|------------------------|-------|------------------------|-------|-------|
| >JAK3-Q501F TSSLVQPQSC | 273   | >JAK3-Q501F TSSLVHPQSQ | 336   | 63    |
| >JAK3-Q501F TSSLVQPQSC | 333   | >JAK3-Q501F TSSLVHPQSQ | 217   | 116   |
| >JAK3-Q501F TSSLVQPQSC | 85    | >JAK3-Q501F TSSLVHPQSQ | 122   | 37    |
| >JAK3-Q501F TSSLVQPQSC | 463   | >JAK3-Q501F TSSLVHPQSQ | 367   | 96    |
| >JAK3-Q501F TSSLVQPQSC | 24    | >JAK3-Q501F TSSLVHPQSQ | 14    | 10    |
| >JAK3-Q501F TSSLVQPQSC | 86    | >JAK3-Q501F TSSLVHPQSQ | 177   | 91    |
| >JAK3-Q501F TSSLVQPQSC | 20    | >JAK3-Q501F TSSLVHPQSQ | 14    | 6     |
| >JAK3-Q501F HSPPTSSLVQ | 277   | >JAK3-Q501F HSPPTSSLVH | 536   | 259   |
| >JAK3-R657C REGADGSPPI | 152   | >JAK3-R657C QEGADGSPPI | 65    | 87    |
| >JAK3-R657C REGADGSPPI | 64    | >JAK3-R657C QEGADGSPPI | 177   | 113   |
| >JAK3-R657C REGADGSPPI | 45    | >JAK3-R657C QEGADGSPPI | 325   | 280   |
| >JAK3-R657C REGADGSPPI | 73    | >JAK3-R657C QEGADGSPPI | 772   | 699   |
| >JAK3-R657C REGADGSPPI | 300   | >JAK3-R657C QEGADGSPPI | 580   | 280   |
| >JAK3-R657C REGADGSPPI | 206   | >JAK3-R657C QEGADGSPPI | 1733  | 1527  |
| >JAK3-R657C REGADGSPPI | 302   | >JAK3-R657C QEGADGSPPI | 285   | 17    |
| >JAK3-R657C REGADGSPPI | 31    | >JAK3-R657C QEGADGSPPI | 191   | 160   |
| >JAK3-R657C AREGADGSP  | 22198 | >JAK3-R657C AQEGADGSP  | 353   | 21845 |
| >JAK3-R657C AREGADGSP  | 12857 | >JAK3-R657C AQEGADGSP  | 67    | 12790 |
| >JAK3-R657C AREGADGSP  | 7792  | >JAK3-R657C AQEGADGSP  | 252   | 7540  |
| >JAK3-R657C AREGADGSP  | 774   | >JAK3-R657C AQEGADGSP  | 191   | 583   |
| >JAK3-R657C NVSARKVLLA | 163   | >JAK3-R657C NVSARKVLLA | 17316 | 17153 |
| >JAK3-R657C NVSARKVLLA | 74    | >JAK3-R657C NVSARKVLLA | 17401 | 17327 |
| >JAK3-R657C NVSARKVLLA | 25    | >JAK3-R657C NVSARKVLLA | 4183  | 4158  |
| >JAK3-R657C VLLAREGA   | 340   | >JAK3-R657C VLLAQEGA   | 290   | 50    |
| >JAK3-R657C VLLAREGA   | 37    | >JAK3-R657C VLLAQEGA   | 17    | 20    |
| >JAK3-R657C VLLAREGA   | 542   | >JAK3-R657C VLLAQEGA   | 140   | 402   |
| >JAK3-R657C VLLAREGA   | 78    | >JAK3-R657C VLLAQEGA   | 31    | 47    |
| >JAK3-R657C VLLAREGA   | 470   | >JAK3-R657C VLLAQEGA   | 84    | 386   |
| >JAK3-R657C VLLAREGA   | 21    | >JAK3-R657C VLLAQEGA   | 17    | 4     |
| >JAK3-R657C KVLLAREGA  | 483   | >JAK3-R657C KVLLAQEGA  | 220   | 263   |
| >JAK3-R657C KVLLAREGA  | 499   | >JAK3-R657C KVLLAQEGA  | 1273  | 774   |
| >JAK3-R657C ARKVLLAR   | 157   | >JAK3-R657C ARKVLLAQ   | 2615  | 2458  |
| >JAK3-R657C SARKVLLAR  | 48    | >JAK3-R657C SARKVLLAQ  | 163   | 115   |
| >JAK3-R657C SARKVLLAR  | 55    | >JAK3-R657C SARKVLLAQ  | 15522 | 15467 |
| >JAK3-R657C SARKVLLAR  | 356   | >JAK3-R657C SARKVLLAQ  | 28119 | 27763 |
| >JAK3-R657C SARKVLLAR  | 389   | >JAK3-R657C SARKVLLAQ  | 23244 | 22855 |
| >JAK3-R657C VSARKVLLAR | 378   | >JAK3-R657C VSARKVLLAQ | 29612 | 29234 |
| >JAK3-R657C VSARKVLLAR | 107   | >JAK3-R657C VSARKVLLAQ | 21725 | 21618 |
| >JAK3-R657C VSARKVLLAR | 299   | >JAK3-R657C VSARKVLLAQ | 34262 | 33963 |
| >JAK3-R918C RARLDASR   | 50    | >JAK3-R918C CARLDASR   | 3683  | 3633  |
| >JAK3-R918C RARLDASRL  | 239   | >JAK3-R918C CARLDASRL  | 7821  | 7582  |
| >JAK3-R918C RARLDASRLL | 30    | >JAK3-R918C CARLDASRLL | 1179  | 1149  |
| >JAK3-R918C RARLDASRLI | 21    | >JAK3-R918C CARLDASRLI | 596   | 575   |

|                        |      |                        |       |       |
|------------------------|------|------------------------|-------|-------|
| >JAK3-R918C RARLDASR   | 40   | >JAK3-R918C CARLDASR   | 728   | 688   |
| >JAK3-R918C RARLDASR   | 1603 | >JAK3-R918C CARLDASR   | 244   | 1359  |
| >JAK3-R918C RARLDASRL  | 93   | >JAK3-R918C CARLDASRL  | 5550  | 5457  |
| >JAK3-R918C RARLDASRLI | 65   | >JAK3-R918C CARLDASRLI | 2675  | 2610  |
| >JAK3-R918C RARLDASRL  | 5    | >JAK3-R918C CARLDASRL  | 171   | 166   |
| >JAK3-R918C RARLDASRLL | 11   | >JAK3-R918C CARLDASRLL | 1014  | 1003  |
| >JAK3-R918C RARLDASRLI | 9    | >JAK3-R918C CARLDASRLI | 583   | 574   |
| >JAK3-R918C RARLDASRL  | 37   | >JAK3-R918C CARLDASRL  | 747   | 710   |
| >JAK3-R918C RARLDASRLI | 195  | >JAK3-R918C CARLDASRLI | 2709  | 2514  |
| >JAK3-R918C RARLDASRLI | 494  | >JAK3-R918C CARLDASRLI | 19507 | 19013 |
| >JAK3-R918C RARLDASRLI | 390  | >JAK3-R918C CARLDASRLI | 13925 | 13535 |
| >JAK3-R918C HRARLDASR  | 74   | >JAK3-R918C HCARLDASR  | 22060 | 21986 |
| >JAK3-R918C HRARLDASRL | 28   | >JAK3-R918C HCARLDASRL | 22155 | 22127 |
| >JAK3-R918C HRARLDASRL | 50   | >JAK3-R918C HCARLDASRL | 20872 | 20822 |
| >JAK3-R918C HRARLDASRL | 183  | >JAK3-R918C HCARLDASRL | 7446  | 7263  |
| >JAK3-R918C HRARLDASRL | 199  | >JAK3-R918C HCARLDASRL | 9792  | 9593  |
| >JAK3-R918C HRARLDASRL | 304  | >JAK3-R918C HCARLDASRL | 26768 | 26464 |
| >JAK3-R918C HRARLDASRL | 33   | >JAK3-R918C HCARLDASRL | 21237 | 21204 |
| >JAK3-R918C HRARLDASR  | 397  | >JAK3-R918C HCARLDASR  | 119   | 278   |
| >JAK3-R918C RHRARLDA   | 248  | >JAK3-R918C RHCARLDA   | 10361 | 10113 |
| >JAK3-R918C RHRARLDASF | 339  | >JAK3-R918C RHCARLDASF | 175   | 164   |
| >JAK3-R918C RHRARLDASF | 383  | >JAK3-R918C RHCARLDASF | 1745  | 1362  |
| >JAK3-R918C RHRARLDASF | 385  | >JAK3-R918C RHCARLDASF | 723   | 338   |
| >JAK3-R918C RHRARLDASF | 698  | >JAK3-R918C RHCARLDASF | 287   | 411   |
| >JAK3-R918C QRHRARLDA' | 202  | >JAK3-R918C QRHCARLDA' | 251   | 49    |
| >JAK3-R918C LQRHRARLD/ | 199  | >JAK3-R918C LQRHCARLD/ | 646   | 447   |
| >JAK3-R918C LQRHRARL   | 264  | >JAK3-R918C LQRHCARL   | 4250  | 3986  |
| >JAK3-R918C LQRHRARL   | 180  | >JAK3-R918C LQRHCARL   | 136   | 44    |
| >JAK3-R918C LQRHRARL   | 61   | >JAK3-R918C LQRHCARL   | 43    | 18    |
| >JAK3-R918C LQRHRARLD/ | 335  | >JAK3-R918C LQRHCARLD/ | 154   | 181   |
| >JAK3-R918C FLQRHRARL  | 127  | >JAK3-R918C FLQRHCARL  | 23    | 104   |
| >JAK3-R918C FLQRHRARLE | 1530 | >JAK3-R918C FLQRHCARLE | 408   | 1122  |
| >JAK3-R918C FLQRHRARL  | 20   | >JAK3-R918C FLQRHCARL  | 7     | 13    |
| >JAK3-R918C FLQRHRARLE | 1093 | >JAK3-R918C FLQRHCARLE | 434   | 659   |
| >JAK3-R918C FLQRHRARL  | 34   | >JAK3-R918C FLQRHCARL  | 9     | 25    |
| >JAK3-R918C FLQRHRARLE | 142  | >JAK3-R918C FLQRHCARLE | 56    | 86    |
| >JAK3-R918C FLQRHRARL  | 1511 | >JAK3-R918C FLQRHCARL  | 372   | 1139  |
| >JAK3-R918C FLQRHRARL  | 50   | >JAK3-R918C FLQRHCARL  | 20    | 30    |
| >JAK3-R918C FLQRHRARL  | 133  | >JAK3-R918C FLQRHCARL  | 28    | 105   |
| >JAK3-R918C FLQRHRARL  | 2118 | >JAK3-R918C FLQRHCARL  | 125   | 1993  |
| >JAK3-R918C FLQRHRARL  | 3    | >JAK3-R918C FLQRHCARL  | 2     | 1     |
| >JAK3-R918C FLQRHRARLE | 11   | >JAK3-R918C FLQRHCARLE | 14    | 3     |
| >JAK3-R918C FLQRHRAR   | 133  | >JAK3-R918C FLQRHCAR   | 145   | 12    |

|                        |       |                         |       |       |
|------------------------|-------|-------------------------|-------|-------|
| >JAK3-R918C FLQRHRAR   | 225   | >JAK3-R918C FLQRHRCAR   | 140   | 85    |
| >JAK3-R918C FLQRHRAR   | 1090  | >JAK3-R918C FLQRHRCAR   | 463   | 627   |
| >JAK3-R918C FLQRHRARL  | 20    | >JAK3-R918C FLQRHRCARL  | 30    | 10    |
| >JAK3-R918C FLQRHRARLC | 279   | >JAK3-R918C FLQRHRCARLC | 493   | 214   |
| >JAK3-R918C DFLQRHRAR  | 356   | >JAK3-R918C DFLQRHRCAR  | 124   | 232   |
| >JAK3-R918C DFLQRHRAR  | 9     | >JAK3-R918C DFLQRHRCAR  | 7     | 2     |
| >JAK3-R918C DFLQRHRAR  | 196   | >JAK3-R918C DFLQRHRCAR  | 36    | 160   |
| >JAK3-R918C RDFLQRHR   | 323   | >JAK3-R918C RDFLQRHRC   | 22485 | 22162 |
| >JAK3-R918C RDFLQRHRAI | 189   | >JAK3-R918C RDFLQRHCAI  | 126   | 63    |
| >JAK3-R918C RDFLQRHRA  | 458   | >JAK3-R918C RDFLQRHCA   | 211   | 247   |
| >JAK3-R918C RDFLQRHRAI | 258   | >JAK3-R918C RDFLQRHCAI  | 234   | 24    |
| >JAK3-R918C RDFLQRHRAI | 99    | >JAK3-R918C RDFLQRHCAI  | 97    | 2     |
| >JAK3-R918C RDFLQRHR   | 115   | >JAK3-R918C RDFLQRHRC   | 34806 | 34691 |
| >JAK3-R918C RDFLQRHRAI | 224   | >JAK3-R918C RDFLQRHCAI  | 90    | 134   |
| >JAK3-R918C CLRDFLQRHR | 215   | >JAK3-R918C CLRDFLQRHRC | 497   | 282   |
| >JAK3-R918C CLRDFLQRHR | 13    | >JAK3-R918C CLRDFLQRHRC | 34    | 21    |
| >JAK3-R918C CLRDFLQRHR | 428   | >JAK3-R918C CLRDFLQRHRC | 674   | 246   |
| >JAK3-R918C CLRDFLQRHR | 27    | >JAK3-R918C CLRDFLQRHRC | 18043 | 18016 |
| >JAK3-R918C CLRDFLQRHR | 166   | >JAK3-R918C CLRDFLQRHRC | 32328 | 32162 |
| >JAK3-R918C CLRDFLQRHR | 194   | >JAK3-R918C CLRDFLQRHRC | 36227 | 36033 |
| >JAK3-S493C SPPTSSLV   | 193   | >JAK3-S493C CPPTSSLV    | 1980  | 1787  |
| >JAK3-S493C SPPTSSLV   | 2020  | >JAK3-S493C CPPTSSLV    | 471   | 1549  |
| >JAK3-S493C SPPTSSLV   | 3896  | >JAK3-S493C CPPTSSLV    | 371   | 3525  |
| >JAK3-S493C SPPTSSLV   | 123   | >JAK3-S493C CPPTSSLV    | 33    | 90    |
| >JAK3-S493C HSPPTSSL   | 245   | >JAK3-S493C HCPPTSSL    | 1844  | 1599  |
| >JAK3-S493C HSPPTSSLV  | 36    | >JAK3-S493C HCPPTSSLV   | 284   | 248   |
| >JAK3-S493C HSPPTSSL   | 48    | >JAK3-S493C HCPPTSSL    | 17157 | 17109 |
| >JAK3-S493C HSPPTSSL   | 4     | >JAK3-S493C HCPPTSSL    | 2947  | 2943  |
| >JAK3-S493C HSPPTSSLV  | 5     | >JAK3-S493C HCPPTSSLV   | 547   | 542   |
| >JAK3-S493C HSPPTSSLVQ | 277   | >JAK3-S493C HCPPTSSLVQ  | 19413 | 19136 |
| >JAK3-S493C HSPPTSSLV  | 350   | >JAK3-S493C HCPPTSSLV   | 2053  | 1703  |
| >JAK3-S493C HSPPTSSL   | 68    | >JAK3-S493C HCPPTSSL    | 1602  | 1534  |
| >JAK3-S493C HSPPTSSLV  | 353   | >JAK3-S493C HCPPTSSLV   | 6835  | 6482  |
| >JAK3-S493C GHSPPTSSL  | 158   | >JAK3-S493C GHCPPTSSL   | 240   | 82    |
| >JAK3-S493C RGHPPTSSL' | 209   | >JAK3-S493C RGHCPTSSL'  | 204   | 5     |
| >JAK3-S493C RGHPPTSSL  | 208   | >JAK3-S493C RGHCPTSSL   | 275   | 67    |
| >JAK3-S493C RGHPPTSSL  | 341   | >JAK3-S493C RGHCPTSSL   | 411   | 70    |
| >JAK3-S493C RGHPPTSSL' | 176   | >JAK3-S493C RGHCPTSSL'  | 308   | 132   |
| >JAK3-S493C QRGHPPTSS  | 120   | >JAK3-S493C QRGHCPTSS   | 276   | 156   |
| >JAK3-S493C QRGHPPTSS  | 317   | >JAK3-S493C QRGHCPTSS   | 159   | 158   |
| >JAK3-S493C VQRGHSPPT  | 477   | >JAK3-S493C VQRGHCPPT   | 1406  | 929   |
| >JAK3-S789P LSDPTPGAL  | 13241 | >JAK3-S789P LPDPTPGAL   | 20    | 13221 |
| >JAK3-S789P LSDPTPGAL  | 34    | >JAK3-S789P LPDPTPGAL   | 21348 | 21314 |

|                        |       |                        |      |       |
|------------------------|-------|------------------------|------|-------|
| >JAK3-S789P LSDPTPGAL  | 5024  | >JAK3-S789P LPDPTPGAL  | 81   | 4943  |
| >JAK3-S789P LSDPTPGAL  | 2192  | >JAK3-S789P LPDPTPGAL  | 126  | 2066  |
| >JAK3-S789P LSDPTPGA   | 23220 | >JAK3-S789P LPDPTPGA   | 67   | 23153 |
| >JAK3-S789P LSDPTPGALA | 15575 | >JAK3-S789P LPDPTPGALA | 35   | 15540 |
| >JAK3-S789P LSDPTPGAL  | 119   | >JAK3-S789P LPDPTPGAL  | 7133 | 7014  |
| >JAK3-S789P LLSDPTPGA  | 37    | >JAK3-S789P LLPDPTPGA  | 92   | 55    |
| >JAK3-S789P LLSDPTPGAL | 120   | >JAK3-S789P LLPDPTPGAL | 296  | 176   |
| >JAK3-S789P LLSDPTPGA  | 46    | >JAK3-S789P LLPDPTPGA  | 395  | 349   |
| >JAK3-S789P LLSDPTPGAL | 20    | >JAK3-S789P LLPDPTPGAL | 56   | 36    |
| >JAK3-S789P LLSDPTPGAL | 29    | >JAK3-S789P LLPDPTPGAL | 210  | 181   |
| >JAK3-S789P LLSDPTPGA  | 11    | >JAK3-S789P LLPDPTPGA  | 27   | 16    |
| >JAK3-S789P LLSDPTPGAL | 17    | >JAK3-S789P LLPDPTPGAL | 38   | 21    |
| >JAK3-S789P LLSDPTPGAL | 12    | >JAK3-S789P LLPDPTPGAL | 28   | 16    |
| >JAK3-S789P LLSDPTPGA  | 20    | >JAK3-S789P LLPDPTPGA  | 23   | 3     |
| >JAK3-S789P LLSDPTPGAL | 159   | >JAK3-S789P LLPDPTPGAL | 135  | 24    |
| >JAK3-S789P LLSDPTPGA  | 6     | >JAK3-S789P LLPDPTPGA  | 6    | 0     |
| >JAK3-S789P LLSDPTPGAL | 6     | >JAK3-S789P LLPDPTPGAL | 6    | 0     |
| >JAK3-S789P LLSDPTPGAL | 19    | >JAK3-S789P LLPDPTPGAL | 17   | 2     |
| >JAK3-S789P LLSDPTPGA  | 28    | >JAK3-S789P LLPDPTPGA  | 91   | 63    |
| >JAK3-S789P LLSDPTPGAL | 18    | >JAK3-S789P LLPDPTPGAL | 46   | 28    |
| >JAK3-S789P LLSDPTPGAL | 126   | >JAK3-S789P LLPDPTPGAL | 387  | 261   |
| >JAK3-S789P LLSDPTPGA  | 18    | >JAK3-S789P LLPDPTPGA  | 24   | 6     |
| >JAK3-S789P LLSDPTPGAL | 98    | >JAK3-S789P LLPDPTPGAL | 119  | 21    |
| >JAK3-S789P LLSDPTPGAL | 121   | >JAK3-S789P LLPDPTPGAL | 148  | 27    |
| >JAK3-S789P LLSDPTPGA  | 5     | >JAK3-S789P LLPDPTPGA  | 19   | 14    |
| >JAK3-S789P LLSDPTPGAL | 32    | >JAK3-S789P LLPDPTPGAL | 142  | 110   |
| >JAK3-S789P LLSDPTPGAL | 87    | >JAK3-S789P LLPDPTPGAL | 366  | 279   |
| >JAK3-S789P LLSDPTPGA  | 2     | >JAK3-S789P LLPDPTPGA  | 3    | 1     |
| >JAK3-S789P LLSDPTPGAL | 4     | >JAK3-S789P LLPDPTPGAL | 5    | 1     |
| >JAK3-S789P LLSDPTPGAL | 4     | >JAK3-S789P LLPDPTPGAL | 6    | 2     |
| >JAK3-S789P LLSDPTPGAL | 10736 | >JAK3-S789P LLPDPTPGAL | 145  | 10591 |
| >JAK3-S789P ELLSDPTPGA | 354   | >JAK3-S789P ELLPDPTPGA | 944  | 590   |
| >JAK3-S789P ELLSDPTPGA | 288   | >JAK3-S789P ELLPDPTPGA | 479  | 191   |
| >JAK3-S789P ELLSDPTPGA | 662   | >JAK3-S789P ELLPDPTPGA | 460  | 202   |
| >JAK3-S789P ELLSDPTPGA | 49    | >JAK3-S789P ELLPDPTPGA | 45   | 4     |
| >JAK3-S789P ELLSDPTPGA | 37    | >JAK3-S789P ELLPDPTPGA | 34   | 3     |
| >JAK3-S789P ELLSDPTPGA | 346   | >JAK3-S789P ELLPDPTPGA | 253  | 93    |
| >JAK3-S789P ELLSDPTPGA | 248   | >JAK3-S789P ELLPDPTPGA | 177  | 71    |
| >JAK3-S789P ELLSDPTPGA | 89    | >JAK3-S789P ELLPDPTPGA | 61   | 28    |
| >JAK3-S789P ELLSDPTPGA | 389   | >JAK3-S789P ELLPDPTPGA | 254  | 135   |
| >JAK3-S789P ELLSDPTPGA | 25    | >JAK3-S789P ELLPDPTPGA | 22   | 3     |
| >JAK3-S789P ELLSDPTPGA | 71    | >JAK3-S789P ELLPDPTPGA | 65   | 6     |
| >JAK3-S789P ELLSDPTPGA | 62    | >JAK3-S789P ELLPDPTPGA | 31   | 31    |

|                          |      |                          |      |      |
|--------------------------|------|--------------------------|------|------|
| >JAK3-S789P ELLSDPTPGA   | 222  | >JAK3-S789P ELLPDPTPGA   | 99   | 123  |
| >JAK3-S789P ELLSDPTPGA   | 28   | >JAK3-S789P ELLPDPTPGA   | 34   | 6    |
| >JAK3-S789P ELLSDPTPGA   | 91   | >JAK3-S789P ELLPDPTPGA   | 111  | 20   |
| >JAK3-S789P YELLSDPT     | 60   | >JAK3-S789P YELLPDPT     | 127  | 67   |
| >JAK3-S789P YELLSDPTPG/  | 199  | >JAK3-S789P YELLPDPTPG/  | 446  | 247  |
| >JAK3-S789P YELLSDPTPG/  | 161  | >JAK3-S789P YELLPDPTPG/  | 372  | 211  |
| >JAK3-S789P YELLSDPT     | 150  | >JAK3-S789P YELLPDPT     | 211  | 61   |
| >JAK3-S789P YELLSDPTPG/  | 57   | >JAK3-S789P YELLPDPTPG/  | 61   | 4    |
| >JAK3-T435I- TGTFLLVGLSF | 262  | >JAK3-T435I- IGTFLLVGLSR | 890  | 628  |
| >JAK3-T435I- PTGTFLLV    | 5429 | >JAK3-T435I- PIGTFLLV    | 298  | 5131 |
| >JAK3-T435I- YKGLIRRSP   | 2259 | >JAK3-T435I- YKGLIRRSPI  | 70   | 2189 |
| >JAK3-T435I- SPTGTFL     | 60   | >JAK3-T435I- SPIGTFL     | 15   | 45   |
| >JAK3-T435I- SPTGTFLV    | 465  | >JAK3-T435I- SPIGTFLV    | 64   | 401  |
| >JAK3-T435I- SPTGTFLLVGI | 311  | >JAK3-T435I- SPIGTFLLVGL | 51   | 260  |
| >JAK3-T435I- SPTGTFLV    | 1720 | >JAK3-T435I- SPIGTFLV    | 393  | 1327 |
| >JAK3-T435I- SPTGTFLV    | 1307 | >JAK3-T435I- SPIGTFLV    | 386  | 921  |
| >JAK3-T435I- SPTGTFL     | 95   | >JAK3-T435I- SPIGTFL     | 59   | 36   |
| >JAK3-T435I- SPTGTFLV    | 466  | >JAK3-T435I- SPIGTFLV    | 304  | 162  |
| >JAK3-T435I- SPTGTFLLVGI | 115  | >JAK3-T435I- SPIGTFLLVGL | 80   | 35   |
| >JAK3-T435I- SPTGTFL     | 270  | >JAK3-T435I- SPIGTFL     | 37   | 233  |
| >JAK3-T435I- SPTGTFLLVGI | 1041 | >JAK3-T435I- SPIGTFLLVGL | 150  | 891  |
| >JAK3-T435I- SPTGTFL     | 205  | >JAK3-T435I- SPIGTFL     | 154  | 51   |
| >JAK3-T435I- SPTGTFLV    | 476  | >JAK3-T435I- SPIGTFLV    | 442  | 34   |
| >JAK3-T435I- SPTGTFLV    | 64   | >JAK3-T435I- SPIGTFLV    | 34   | 30   |
| >JAK3-T435I- SPTGTFLV    | 431  | >JAK3-T435I- SPIGTFLV    | 2319 | 1888 |
| >JAK3-T435I- SPTGTFL     | 1071 | >JAK3-T435I- SPIGTFL     | 381  | 690  |
| >JAK3-T435I- RSPTGTFLV   | 338  | >JAK3-T435I- RSPIGTFLV   | 285  | 53   |
| >JAK3-T435I- RSPTGTFL    | 172  | >JAK3-T435I- RSPIGTFL    | 356  | 184  |
| >JAK3-T435I- RSPTGTFLV   | 103  | >JAK3-T435I- RSPIGTFLV   | 110  | 7    |
| >JAK3-T435I- RSPTGTFL    | 93   | >JAK3-T435I- RSPIGTFL    | 36   | 57   |
| >JAK3-T435I- RSPTGTFL    | 98   | >JAK3-T435I- RSPIGTFL    | 21   | 77   |
| >JAK3-T435I- RSPTGTFL    | 8    | >JAK3-T435I- RSPIGTFL    | 12   | 4    |
| >JAK3-T435I- RSPTGTFL    | 2    | >JAK3-T435I- RSPIGTFL    | 2    | 0    |
| >JAK3-T435I- RSPTGTFLV   | 3    | >JAK3-T435I- RSPIGTFLV   | 3    | 0    |
| >JAK3-T435I- RSPTGTFLV(G | 138  | >JAK3-T435I- RSPIGTFLV(G | 110  | 28   |
| >JAK3-T435I- RSPTGTFL    | 391  | >JAK3-T435I- RSPIGTFL    | 437  | 46   |
| >JAK3-T435I- RSPTGTFLV   | 468  | >JAK3-T435I- RSPIGTFLV   | 189  | 279  |
| >JAK3-T435I- RSPTGTFL    | 106  | >JAK3-T435I- RSPIGTFL    | 100  | 6    |
| >JAK3-T435I- RSPTGTFL    | 99   | >JAK3-T435I- RSPIGTFL    | 85   | 14   |
| >JAK3-T435I- RRSPTGTFL   | 15   | >JAK3-T435I- RRSPIGTFL   | 26   | 11   |
| >JAK3-T435I- RRSPTGTFL   | 47   | >JAK3-T435I- RRSPIGTFL   | 152  | 105  |
| >JAK3-T435I- RRSPTGTFL   | 170  | >JAK3-T435I- RRSPIGTFL   | 403  | 233  |
| >JAK3-T435I- RRSPTGTFLV  | 171  | >JAK3-T435I- RRSPIGTFLV  | 362  | 191  |



|                          |      |                          |     |      |
|--------------------------|------|--------------------------|-----|------|
| >JAK3-T435I- RRSPTGTF    | 120  | >JAK3-T435I- RRSPIGTF    | 62  | 58   |
| >JAK3-T435I- RRSPTGTFL   | 77   | >JAK3-T435I- RRSPIGTFL   | 56  | 21   |
| >JAK3-T435I- RRSPTGTFL   | 25   | >JAK3-T435I- RRSPIGTFL   | 24  | 1    |
| >JAK3-T435I- RRSPTGTFL   | 68   | >JAK3-T435I- RRSPIGTFL   | 53  | 15   |
| >JAK3-T435I- RRSPTGTFL   | 177  | >JAK3-T435I- RRSPIGTFL   | 372 | 195  |
| >JAK3-T435I- RRSPTGTF    | 871  | >JAK3-T435I- RRSPIGTF    | 327 | 544  |
| >JAK3-T435I- RRSPTGTFL   | 27   | >JAK3-T435I- RRSPIGTFL   | 24  | 3    |
| >JAK3-T435I- RRSPTGTFL   | 37   | >JAK3-T435I- RRSPIGTFL   | 49  | 12   |
| >JAK3-T435I- RRSPTGTFL   | 39   | >JAK3-T435I- RRSPIGTFL   | 35  | 4    |
| >JAK3-T435I- RRSPTGTF    | 575  | >JAK3-T435I- RRSPIGTF    | 297 | 278  |
| >JAK3-T435I- RRSPTGTFL   | 14   | >JAK3-T435I- RRSPIGTFL   | 10  | 4    |
| >JAK3-T435I- RRSPTGTFL   | 28   | >JAK3-T435I- RRSPIGTFL   | 25  | 3    |
| >JAK3-T435I- RRSPTGTFL   | 19   | >JAK3-T435I- RRSPIGTFL   | 14  | 5    |
| >JAK3-T435I- RRSPTGTF    | 106  | >JAK3-T435I- RRSPIGTF    | 134 | 28   |
| >JAK3-T435I- IRRSPTGTF   | 8    | >JAK3-T435I- IRRSPIGTF   | 8   | 0    |
| >JAK3-T435I- IRRSPTGTFL  | 45   | >JAK3-T435I- IRRSPIGTFL  | 66  | 21   |
| >JAK3-T435I- IRRSPTGTFL  | 202  | >JAK3-T435I- IRRSPIGTFL  | 240 | 38   |
| >JAK3-T435I- IRRSPTGTFL  | 34   | >JAK3-T435I- IRRSPIGTFL  | 27  | 7    |
| >JAK3-T435I- IRRSPTGTF   | 62   | >JAK3-T435I- IRRSPIGTF   | 62  | 0    |
| >JAK3-T435I- IRRSPTGTF   | 584  | >JAK3-T435I- IRRSPIGTF   | 324 | 260  |
| >JAK3-T435I- IRRSPTGTFL  | 53   | >JAK3-T435I- IRRSPIGTFL  | 51  | 2    |
| >JAK3-T435I- IRRSPTGTFL  | 93   | >JAK3-T435I- IRRSPIGTFL  | 78  | 15   |
| >JAK3-T435I- IRRSPTGTF   | 524  | >JAK3-T435I- IRRSPIGTF   | 194 | 330  |
| >JAK3-T435I- IRRSPTGTFL  | 32   | >JAK3-T435I- IRRSPIGTFL  | 26  | 6    |
| >JAK3-T435I- IRRSPTGTFL  | 43   | >JAK3-T435I- IRRSPIGTFL  | 30  | 13   |
| >JAK3-T435I- LIRRSPTGTFL | 296  | >JAK3-T435I- LIRRSPIGTFL | 434 | 138  |
| >JAK3-T435I- LIRRSPTGTFL | 201  | >JAK3-T435I- LIRRSPIGTFL | 208 | 7    |
| >JAK3-T435I- LIRRSPTG    | 86   | >JAK3-T435I- LIRRSPIG    | 72  | 14   |
| >JAK3-T435I- LIRRSPTGT   | 2431 | >JAK3-T435I- LIRRSPIGT   | 235 | 2196 |
| >JAK3-T435I- LIRRSPTGTFL | 39   | >JAK3-T435I- LIRRSPIGTFL | 32  | 7    |
| >JAK3-T435I- LIRRSPTGTF  | 56   | >JAK3-T435I- LIRRSPIGTF  | 75  | 19   |
| >JAK3-T435I- LIRRSPTGTF  | 363  | >JAK3-T435I- LIRRSPIGTF  | 638 | 275  |
| >JAK3-T435I- LIRRSPTGTF  | 37   | >JAK3-T435I- LIRRSPIGTF  | 52  | 15   |
| >JAK3-T435I- LIRRSPTGTFL | 295  | >JAK3-T435I- LIRRSPIGTFL | 604 | 309  |
| >JAK3-T435I- LIRRSPTGTF  | 69   | >JAK3-T435I- LIRRSPIGTF  | 72  | 3    |
| >JAK3-T435I- LIRRSPTGTF  | 68   | >JAK3-T435I- LIRRSPIGTF  | 100 | 32   |
| >JAK3-T435I- LIRRSPTGTFL | 415  | >JAK3-T435I- LIRRSPIGTFL | 609 | 194  |
| >JAK3-T435I- CLIRRSPT    | 746  | >JAK3-T435I- CLIRRSPI    | 48  | 698  |
| >JAK3-T435I- CLIRRSPTGT  | 224  | >JAK3-T435I- CLIRRSPIGT  | 374 | 150  |
| >JAK3-T435I- CLIRRSPT    | 7676 | >JAK3-T435I- CLIRRSPI    | 310 | 7366 |
| >JAK3-T435I- CLIRRSPT    | 1907 | >JAK3-T435I- CLIRRSPI    | 199 | 1708 |
| >JAK3-T435I- CLIRRSPTGTF | 480  | >JAK3-T435I- CLIRRSPIGTF | 677 | 197  |
| >JAK3-T435I- CLIRRSPT    | 2362 | >JAK3-T435I- CLIRRSPI    | 98  | 2264 |

|                          |      |                          |      |      |
|--------------------------|------|--------------------------|------|------|
| >JAK3-T435I- CLIRRSPTGTF | 204  | >JAK3-T435I- CLIRRSPIGTF | 262  | 58   |
| >JAK3-T435I- CLIRRSPTGTF | 177  | >JAK3-T435I- CLIRRSPIGTF | 218  | 41   |
| >JAK3-T435I- GCLIRRSPT   | 7952 | >JAK3-T435I- GCLIRRSPI   | 413  | 7539 |
| >JAK3-V715I- VWEVFSGV    | 279  | >JAK3-V715I- IWEVFSGV    | 323  | 44   |
| >JAK3-V715I- TVWEVFSGV   | 20   | >JAK3-V715I- TIWEVFSGV   | 15   | 5    |
| >JAK3-V715I- TVWEVFSGV'  | 698  | >JAK3-V715I- TIWEVFSGVT  | 383  | 315  |
| >JAK3-V715I- TVWEVFSGV   | 205  | >JAK3-V715I- TIWEVFSGV   | 102  | 103  |
| >JAK3-V715I- TVWEVFSGV   | 26   | >JAK3-V715I- TIWEVFSGV   | 14   | 12   |
| >JAK3-V715I- TVWEVFSGV   | 5    | >JAK3-V715I- TIWEVFSGV   | 5    | 0    |
| >JAK3-V715I- TVWEVFSGV'  | 206  | >JAK3-V715I- TIWEVFSGVT  | 256  | 50   |
| >JAK3-V715I- TVWEVFSGV   | 3    | >JAK3-V715I- TIWEVFSGV   | 2    | 1    |
| >JAK3-V715I- TVWEVFSGV'  | 182  | >JAK3-V715I- TIWEVFSGVT  | 56   | 126  |
| >JAK3-V715I- TVWEVFSGV   | 19   | >JAK3-V715I- TIWEVFSGV   | 11   | 8    |
| >JAK3-V715I- TVWEVFSGV   | 8    | >JAK3-V715I- TIWEVFSGV   | 6    | 2    |
| >JAK3-V715I- TVWEVFSGV'  | 1088 | >JAK3-V715I- TIWEVFSGVT  | 404  | 684  |
| >JAK3-V715I- TVWEVFSGV   | 11   | >JAK3-V715I- TIWEVFSGV   | 5    | 6    |
| >JAK3-V715I- TVWEVFSGV   | 5    | >JAK3-V715I- TIWEVFSGV   | 3    | 2    |
| >JAK3-V715I- TVWEVFSGV'  | 130  | >JAK3-V715I- TIWEVFSGVT  | 410  | 280  |
| >JAK3-V715I- TVWEVFSGV'  | 412  | >JAK3-V715I- TIWEVFSGVT  | 491  | 79   |
| >JAK3-V715I- TVWEVFSGV   | 5    | >JAK3-V715I- TIWEVFSGV   | 8    | 3    |
| >JAK3-V715I- TVWEVFSGV'  | 233  | >JAK3-V715I- TIWEVFSGVT  | 1079 | 846  |
| >JAK3-V715I- TVWEVFSGV   | 3    | >JAK3-V715I- TIWEVFSGV   | 4    | 1    |
| >JAK3-V715I- TVWEVFSGV'  | 349  | >JAK3-V715I- TIWEVFSGVT  | 696  | 347  |
| >JAK3-V715I- TVWEVFSGV'  | 28   | >JAK3-V715I- TIWEVFSGVT  | 44   | 16   |
| >JAK3-V715I- TVWEVFSGV'  | 42   | >JAK3-V715I- TIWEVFSGVT  | 131  | 89   |
| >JAK3-V715I- TVWEVFSGV'  | 246  | >JAK3-V715I- TIWEVFSGVT  | 887  | 641  |
| >JAK3-V715I- EADKWGFGA   | 180  | >JAK3-V715I- EADKWGFGA   | 2301 | 2121 |
| >JAK3-V715I- EADKWGFGA   | 5    | >JAK3-V715I- EADKWGFGA   | 15   | 10   |
| >JAK3-V715I- ATVWEVFSG'  | 452  | >JAK3-V715I- ATIWEVFSGV  | 174  | 278  |
| >JAK3-V715I- ATVWEVFSG'  | 455  | >JAK3-V715I- ATIWEVFSGV  | 265  | 190  |
| >JAK3-V715I- ATVWEVFSG'  | 76   | >JAK3-V715I- ATIWEVFSGV  | 48   | 28   |
| >JAK3-V715I- ATVWEVFSG'  | 58   | >JAK3-V715I- ATIWEVFSGV  | 46   | 12   |
| >JAK3-V715I- ATVWEVFSG'  | 10   | >JAK3-V715I- ATIWEVFSGV  | 8    | 2    |
| >JAK3-V715I- ATVWEVFSG'  | 565  | >JAK3-V715I- ATIWEVFSGV  | 149  | 416  |
| >JAK3-V715I- ATVWEVFSG'  | 54   | >JAK3-V715I- ATIWEVFSGV  | 44   | 10   |
| >JAK3-V715I- ATVWEVFSG'  | 18   | >JAK3-V715I- ATIWEVFSGV  | 15   | 3    |
| >JAK3-V715I- ATVWEVFSG'  | 422  | >JAK3-V715I- ATIWEVFSGV  | 177  | 245  |
| >JAK3-V715I- ATVWEVFSG'  | 40   | >JAK3-V715I- ATIWEVFSGV  | 43   | 3    |
| >JAK3-V715I- ATVWEVFSG'  | 20   | >JAK3-V715I- ATIWEVFSGV  | 16   | 4    |
| >JAK3-V715I- ATVWEVFSG'  | 144  | >JAK3-V715I- ATIWEVFSGV  | 150  | 6    |
| >JAK3-V715I- ATVWEVFSG'  | 690  | >JAK3-V715I- ATIWEVFSGV  | 406  | 284  |
| >JAK3-V715I- GATVWEVFS'  | 218  | >JAK3-V715I- GATIWEVFSC  | 256  | 38   |
| >JAK3-V715I- GATVWEVFS'  | 624  | >JAK3-V715I- GATIWEVFSC  | 308  | 316  |

|                        |      |                        |      |      |
|------------------------|------|------------------------|------|------|
| >JAK3-V715I-GATVWEVFSI | 285  | >JAK3-V715I-GATIWEVFSC | 200  | 85   |
| >JAK3-V715I-GATVWEVFSI | 145  | >JAK3-V715I-GATIWEVFSC | 98   | 47   |
| >JAK3-V715I-GATVWEV    | 901  | >JAK3-V715I-GATIWEVF   | 474  | 427  |
| >JAK3-V715I-FGATVWEV   | 185  | >JAK3-V715I-FGATIWEV   | 147  | 38   |
| >JAK3-V715I-FGATVWEV   | 23   | >JAK3-V715I-FGATIWEV   | 13   | 10   |
| >JAK3-V715I-FGATVWEV   | 15   | >JAK3-V715I-FGATIWEV   | 14   | 1    |
| >JAK3-V715I-FGATVWEV   | 68   | >JAK3-V715I-FGATIWEV   | 113  | 45   |
| >JAK3-V715I-FGATVWEV   | 43   | >JAK3-V715I-FGATIWEV   | 68   | 25   |
| >JAK3-V715I-FGATVWEV   | 124  | >JAK3-V715I-FGATIWEV   | 80   | 44   |
| >JAK3-V715I-FGATVWEV   | 26   | >JAK3-V715I-FGATIWEV   | 17   | 9    |
| >JAK3-V715I-FGATVWEVF  | 380  | >JAK3-V715I-FGATIWEVF  | 671  | 291  |
| >JAK3-V715I-FGATVWEVF  | 449  | >JAK3-V715I-FGATIWEVF  | 430  | 19   |
| >JAK3-V715I-FGATVWEVF  | 221  | >JAK3-V715I-FGATIWEVF  | 161  | 60   |
| >JAK3-V715I-FGATVWEVF  | 381  | >JAK3-V715I-FGATIWEVF  | 1634 | 1253 |
| >JAK3-V715I-FGATVWEVF  | 291  | >JAK3-V715I-FGATIWEVF  | 238  | 53   |
| >JAK3-V715I-GFGATVWEV  | 323  | >JAK3-V715I-GFGATIWEV  | 307  | 16   |
| >JAK3-V715I-GFGATVWEV  | 45   | >JAK3-V715I-GFGATIWEV  | 32   | 13   |
| >JAK3-V715I-GFGATVWEV  | 203  | >JAK3-V715I-GFGATIWEV  | 161  | 42   |
| >JAK3-V715I-GFGATVWEV  | 29   | >JAK3-V715I-GFGATIWEV  | 28   | 1    |
| >JAK3-V715I-GFGATVWEV  | 32   | >JAK3-V715I-GFGATIWEV  | 21   | 11   |
| >JAK3-V715I-GFGATVWEV  | 538  | >JAK3-V715I-GFGATIWEVF | 394  | 144  |
| >JAK3-V715I-GFGATVWEV  | 412  | >JAK3-V715I-GFGATIWEV  | 372  | 40   |
| >JAK3-V715I-GFGATVWEV  | 19   | >JAK3-V715I-GFGATIWEVF | 22   | 3    |
| >JAK3-V715I-GFGATVWEV  | 759  | >JAK3-V715I-GFGATIWEVF | 382  | 377  |
| >JAK3-V715I-GFGATVWEV  | 124  | >JAK3-V715I-GFGATIWEVF | 109  | 15   |
| >JAK3-V715I-WGFGATVW   | 537  | >JAK3-V715I-WGFGATIWE  | 237  | 300  |
| >JAK3-V715I-WGFGATVW   | 35   | >JAK3-V715I-WGFGATIWE  | 29   | 6    |
| >JAK3-V715I-WGFGATVW   | 37   | >JAK3-V715I-WGFGATIWE  | 35   | 2    |
| >JAK3-V715I-WGFGATVW   | 32   | >JAK3-V715I-WGFGATIWE  | 28   | 4    |
| >JAK3-V715I-WGFGATVW   | 332  | >JAK3-V715I-WGFGATIWE  | 293  | 39   |
| >JAK3-V715I-WGFGATVW   | 150  | >JAK3-V715I-WGFGATIWE  | 202  | 52   |
| >JAK3-V715I-WGFGATVW   | 358  | >JAK3-V715I-WGFGATIWE  | 427  | 69   |
| >JAK3-V715I-WGFGATVW   | 128  | >JAK3-V715I-WGFGATIWE  | 158  | 30   |
| >JAK3-V715I-WGFGATVW   | 57   | >JAK3-V715I-WGFGATIW   | 101  | 44   |
| >JAK3-V715I-WGFGATVW   | 77   | >JAK3-V715I-WGFGATIWE  | 60   | 17   |
| >JAK3-V715I-WGFGATVW   | 134  | >JAK3-V715I-WGFGATIW   | 149  | 15   |
| >JAK3-V715I-WGFGATVW   | 73   | >JAK3-V715I-WGFGATIW   | 85   | 12   |
| >JAK3-V715I-WGFGATVW   | 58   | >JAK3-V715I-WGFGATIWE  | 52   | 6    |
| >JAK3-V715I-WGFGATVW   | 354  | >JAK3-V715I-WGFGATIW   | 554  | 200  |
| >JAK3-V715I-WGFGATVW   | 206  | >JAK3-V715I-WGFGATIW   | 172  | 34   |
| >JAK3-V715I-KWGFGATV   | 692  | >JAK3-V715I-KWGFGATIW  | 471  | 221  |
| >JAK3-V715I-KWGFGATV   | 2955 | >JAK3-V715I-KWGFGATI   | 223  | 2732 |
| >JAK3-V715I-KWGFGATV   | 4804 | >JAK3-V715I-KWGFGATI   | 316  | 4488 |

|                        |      |                         |       |       |
|------------------------|------|-------------------------|-------|-------|
| >JAK3-V715I-KWGFGATV   | 162  | >JAK3-V715I-KWGFGATI    | 154   | 8     |
| >JAK3-V715I-KWGFGATVV  | 342  | >JAK3-V715I-KWGFGATIW   | 319   | 23    |
| >JAK3-V715I-KWGFGATVV  | 102  | >JAK3-V715I-KWGFGATIW   | 96    | 6     |
| >JAK3-V715I-ADKWGFGAT  | 837  | >JAK3-V715I-ADKWGFGAT   | 415   | 422   |
| >JAK3-V722I-VTMPISAL   | 458  | >JAK3-V722I-ITMPISAL    | 242   | 216   |
| >JAK3-V722I-VTMPISALDP | 422  | >JAK3-V722I-ITMPISALDP/ | 234   | 188   |
| >JAK3-V722I-VTMPISAL   | 49   | >JAK3-V722I-ITMPISAL    | 25    | 24    |
| >JAK3-V722I-VTMPISALDP | 63   | >JAK3-V722I-ITMPISALDP/ | 31    | 32    |
| >JAK3-V722I-VTMPISAL   | 109  | >JAK3-V722I-ITMPISAL    | 78    | 31    |
| >JAK3-V722I-VTMPISALDP | 74   | >JAK3-V722I-ITMPISALDP/ | 55    | 19    |
| >JAK3-V722I-VTMPISAL   | 36   | >JAK3-V722I-ITMPISAL    | 33    | 3     |
| >JAK3-V722I-VTMPISALDP | 18   | >JAK3-V722I-ITMPISALDP/ | 16    | 2     |
| >JAK3-V722I-VTMPISAL   | 166  | >JAK3-V722I-ITMPISAL    | 198   | 32    |
| >JAK3-V722I-VTMPISAL   | 224  | >JAK3-V722I-ITMPISAL    | 151   | 73    |
| >JAK3-V722I-VTMPISAL   | 22   | >JAK3-V722I-ITMPISAL    | 14    | 8     |
| >JAK3-V722I-VTMPISALDP | 12   | >JAK3-V722I-ITMPISALDP/ | 9     | 3     |
| >JAK3-V722I-VTMPISAL   | 381  | >JAK3-V722I-ITMPISAL    | 308   | 73    |
| >JAK3-V722I-VTMPISALDP | 433  | >JAK3-V722I-ITMPISALDP/ | 342   | 91    |
| >JAK3-V722I-VTMPISAL   | 498  | >JAK3-V722I-ITMPISAL    | 234   | 264   |
| >JAK3-V722I-VTMPISAL   | 5    | >JAK3-V722I-ITMPISAL    | 4     | 1     |
| >JAK3-V722I-VTMPISAL   | 37   | >JAK3-V722I-ITMPISAL    | 67    | 30    |
| >JAK3-V722I-VTMPISAL   | 81   | >JAK3-V722I-ITMPISAL    | 50    | 31    |
| >JAK3-V722I-GVTMPISAL  | 1347 | >JAK3-V722I-GITMPISAL   | 383   | 964   |
| >JAK3-V722I-GVTMPISAL  | 559  | >JAK3-V722I-GITMPISAL   | 154   | 405   |
| >JAK3-V722I-GVTMPISAL  | 87   | >JAK3-V722I-GITMPISAL   | 356   | 269   |
| >JAK3-V722I-GATVWEVFSI | 218  | >JAK3-V722I-GATVWEVFSI  | 1102  | 884   |
| >JAK3-V722I-GATVWEVFSI | 285  | >JAK3-V722I-GATVWEVFSI  | 4821  | 4536  |
| >JAK3-V722I-GATVWEVFSI | 145  | >JAK3-V722I-GATVWEVFSI  | 12194 | 12049 |
| >JAK3-V722I-FSGVTMPISA | 844  | >JAK3-V722I-FSGITMPISA  | 457   | 387   |
| >JAK3-V722I-FSGVTMPI   | 460  | >JAK3-V722I-FSGITMPI    | 463   | 3     |
| >JAK3-V722I-FSGVTMPI   | 437  | >JAK3-V722I-FSGITMPI    | 430   | 7     |
| >JAK3-V722I-FSGVTMPISA | 457  | >JAK3-V722I-FSGITMPISAL | 842   | 385   |
| >JAK3-V722I-FSGVTMPI   | 595  | >JAK3-V722I-FSGITMPI    | 289   | 306   |
| >JAK3-V722I-FSGVTMPISA | 52   | >JAK3-V722I-FSGITMPISAL | 26    | 26    |
| >JAK3-V722I-FSGVTMPISA | 243  | >JAK3-V722I-FSGITMPISAL | 132   | 111   |
| >JAK3-V722I-FSGVTMPI   | 238  | >JAK3-V722I-FSGITMPI    | 468   | 230   |
| >JAK3-V722I-FSGVTMPISA | 377  | >JAK3-V722I-FSGITMPISA  | 269   | 108   |
| >JAK3-V722I-FSGVTMPISA | 355  | >JAK3-V722I-FSGITMPISAL | 421   | 66    |
| >JAK3-V722I-FSGVTMPI   | 63   | >JAK3-V722I-FSGITMPI    | 72    | 9     |
| >JAK3-V722I-VFSGVTMPI  | 556  | >JAK3-V722I-VFSGITMPI   | 150   | 406   |
| >JAK3-V722I-VFSGVTMPI  | 488  | >JAK3-V722I-VFSGITMPI   | 469   | 19    |
| >JAK3-V722I-VFSGVTMPI  | 66   | >JAK3-V722I-VFSGITMPI   | 91    | 25    |
| >JAK3-V722I-VFSGVTMPI  | 439  | >JAK3-V722I-VFSGITMPI   | 213   | 226   |

|                         |      |                         |      |      |
|-------------------------|------|-------------------------|------|------|
| >JAK3-V722I- EVFSGVTMPI | 64   | >JAK3-V722I- EVFSGITMPI | 55   | 9    |
| >JAK3-V722I- EVFSGVTMPI | 92   | >JAK3-V722I- EVFSGITMPI | 84   | 8    |
| >JAK3-V722I- EVFSGVTMPI | 427  | >JAK3-V722I- EVFSGITMPI | 389  | 38   |
| >JAK3-V722I- EVFSGVTM   | 190  | >JAK3-V722I- EVFSGITM   | 117  | 73   |
| >JAK3-V722I- EVFSGVTM   | 57   | >JAK3-V722I- EVFSGITM   | 44   | 13   |
| >JAK3-V722I- EVFSGVTM   | 49   | >JAK3-V722I- EVFSGITM   | 35   | 14   |
| >JAK3-V722I- EVFSGVTMPI | 30   | >JAK3-V722I- EVFSGITMPI | 42   | 12   |
| >JAK3-V722I- EVFSGVTM   | 81   | >JAK3-V722I- EVFSGITM   | 126  | 45   |
| >JAK3-V722I- EVFSGVTMPI | 11   | >JAK3-V722I- EVFSGITMPI | 11   | 0    |
| >JAK3-V722I- EVFSGVTM   | 44   | >JAK3-V722I- EVFSGITM   | 36   | 8    |
| >JAK3-V722I- EVFSGVTMPI | 6    | >JAK3-V722I- EVFSGITMPI | 6    | 0    |
| >JAK3-V722I- EVFSGVTM   | 87   | >JAK3-V722I- EVFSGITM   | 71   | 16   |
| >JAK3-V722I- WEVFSGV    | 169  | >JAK3-V722I- WEVFSGIT   | 166  | 3    |
| >JAK3-V722I- WEVFSGVTV  | 66   | >JAK3-V722I- WEVFSGITMI | 69   | 3    |
| >JAK3-V722I- WEVFSGVTV  | 84   | >JAK3-V722I- WEVFSGITM  | 176  | 92   |
| >JAK3-V722I- WEVFSGVTV  | 344  | >JAK3-V722I- WEVFSGITMI | 463  | 119  |
| >JAK3-V722I- WEVFSGVTV  | 11   | >JAK3-V722I- WEVFSGITM  | 8    | 3    |
| >JAK3-V722I- WEVFSGVTV  | 32   | >JAK3-V722I- WEVFSGITMI | 28   | 4    |
| >JAK3-V722I- WEVFSGVTV  | 658  | >JAK3-V722I- WEVFSGITM  | 383  | 275  |
| >JAK3-V722I- WEVFSGVTV  | 8    | >JAK3-V722I- WEVFSGITM  | 8    | 0    |
| >JAK3-V722I- WEVFSGVTV  | 8    | >JAK3-V722I- WEVFSGITMI | 8    | 0    |
| >JAK3-V722I- WEVFSGV    | 318  | >JAK3-V722I- WEVFSGIT   | 414  | 96   |
| >JAK3-V722I- WEVFSGVTV  | 229  | >JAK3-V722I- WEVFSGITM  | 140  | 89   |
| >JAK3-V722I- WEVFSGVTV  | 56   | >JAK3-V722I- WEVFSGITMI | 41   | 15   |
| >JAK3-V722I- WEVFSGVTV  | 61   | >JAK3-V722I- WEVFSGITM  | 73   | 12   |
| >JAK3-V722I- WEVFSGVTV  | 5    | >JAK3-V722I- WEVFSGITMI | 5    | 0    |
| >JAK3-V722I- VWEVFSGV   | 279  | >JAK3-V722I- VWEVFSGI   | 263  | 16   |
| >JAK3-V722I- TVWEVFSGV  | 20   | >JAK3-V722I- TVWEVFSGI  | 77   | 57   |
| >JAK3-V722I- TVWEVFSGV  | 205  | >JAK3-V722I- TVWEVFSGI  | 1300 | 1095 |
| >JAK3-V722I- TVWEVFSGV  | 26   | >JAK3-V722I- TVWEVFSGI  | 160  | 134  |
| >JAK3-V722I- TVWEVFSGV  | 5    | >JAK3-V722I- TVWEVFSGI  | 13   | 8    |
| >JAK3-V722I- TVWEVFSGV  | 206  | >JAK3-V722I- TVWEVFSGIT | 219  | 13   |
| >JAK3-V722I- TVWEVFSGV  | 3    | >JAK3-V722I- TVWEVFSGI  | 12   | 9    |
| >JAK3-V722I- TVWEVFSGV  | 182  | >JAK3-V722I- TVWEVFSGIT | 158  | 24   |
| >JAK3-V722I- TVWEVFSGV  | 19   | >JAK3-V722I- TVWEVFSGI  | 301  | 282  |
| >JAK3-V722I- TVWEVFSGV  | 8    | >JAK3-V722I- TVWEVFSGI  | 71   | 63   |
| >JAK3-V722I- TVWEVFSGV  | 11   | >JAK3-V722I- TVWEVFSGI  | 270  | 259  |
| >JAK3-V722I- TVWEVFSGV  | 5    | >JAK3-V722I- TVWEVFSGI  | 608  | 603  |
| >JAK3-V722I- TVWEVFSGV  | 517  | >JAK3-V722I- TVWEVFSGIT | 393  | 124  |
| >JAK3-V722I- TVWEVFSGV  | 130  | >JAK3-V722I- TVWEVFSGIT | 66   | 64   |
| >JAK3-V722I- TVWEVFSGV  | 3588 | >JAK3-V722I- TVWEVFSGI  | 484  | 3104 |
| >JAK3-V722I- TVWEVFSGV  | 412  | >JAK3-V722I- TVWEVFSGIT | 903  | 491  |
| >JAK3-V722I- TVWEVFSGV  | 5    | >JAK3-V722I- TVWEVFSGI  | 6    | 1    |

|                        |      |                        |      |      |
|------------------------|------|------------------------|------|------|
| >JAK3-V722I-TVWEVFSGV' | 233  | >JAK3-V722I-TVWEVFSGIT | 389  | 156  |
| >JAK3-V722I-TVWEVFSGV  | 3    | >JAK3-V722I-TVWEVFSGI  | 6    | 3    |
| >JAK3-V722I-TVWEVFSGV' | 349  | >JAK3-V722I-TVWEVFSGIT | 377  | 28   |
| >JAK3-V722I-TVWEVFSGV' | 28   | >JAK3-V722I-TVWEVFSGIT | 23   | 5    |
| >JAK3-V722I-TVWEVFSGV' | 42   | >JAK3-V722I-TVWEVFSGIT | 34   | 8    |
| >JAK3-V722I-TVWEVFSGV' | 246  | >JAK3-V722I-TVWEVFSGIT | 215  | 31   |
| >JAK3-V722I-TVWEVFSGV  | 4973 | >JAK3-V722I-TVWEVFSGI  | 129  | 4844 |
| >JAK3-V722I-ATVWEVFSG' | 452  | >JAK3-V722I-ATVWEVFSGI | 2025 | 1573 |
| >JAK3-V722I-ATVWEVFSG' | 455  | >JAK3-V722I-ATVWEVFSGI | 884  | 429  |
| >JAK3-V722I-ATVWEVFSG' | 76   | >JAK3-V722I-ATVWEVFSGI | 279  | 203  |
| >JAK3-V722I-ATVWEVFSG' | 58   | >JAK3-V722I-ATVWEVFSGI | 165  | 107  |
| >JAK3-V722I-ATVWEVFSG' | 10   | >JAK3-V722I-ATVWEVFSGI | 108  | 98   |
| >JAK3-V722I-ATVWEVFSG' | 54   | >JAK3-V722I-ATVWEVFSGI | 1842 | 1788 |
| >JAK3-V722I-ATVWEVFSG' | 18   | >JAK3-V722I-ATVWEVFSGI | 2731 | 2713 |
| >JAK3-V722I-ATVWEVFSG' | 422  | >JAK3-V722I-ATVWEVFSGI | 247  | 175  |
| >JAK3-V722I-ATVWEVFSG' | 1945 | >JAK3-V722I-ATVWEVFSGI | 212  | 1733 |
| >JAK3-V722I-ATVWEVFSG' | 40   | >JAK3-V722I-ATVWEVFSGI | 79   | 39   |
| >JAK3-V722I-ATVWEVFSG' | 20   | >JAK3-V722I-ATVWEVFSGI | 119  | 99   |
| >JAK3-V722I-ATVWEVFSG' | 144  | >JAK3-V722I-ATVWEVFSGI | 26   | 118  |
| >JAK3-V722I-ATVWEVFSG' | 849  | >JAK3-V722I-ATVWEVFSGI | 478  | 371  |
| >JAK3-V722I-ATVWEVFSG' | 827  | >JAK3-V722I-ATVWEVFSGI | 32   | 795  |
| >KDM5A-L12LLVSLQKL     | 413  | >KDM5A-L12FLVSLQKL     | 31   | 382  |
| >KDM5A-L12LLVSLQKLPV   | 41   | >KDM5A-L12FLVSLQKLPV   | 12   | 29   |
| >KDM5A-L12LLVSLQKL     | 33   | >KDM5A-L12FLVSLQKL     | 5    | 28   |
| >KDM5A-L12LLVSLQKLPV   | 26   | >KDM5A-L12FLVSLQKLPV   | 10   | 16   |
| >KDM5A-L12LLVSLQKL     | 80   | >KDM5A-L12FLVSLQKL     | 9    | 71   |
| >KDM5A-L12LLVSLQKLPV   | 24   | >KDM5A-L12FLVSLQKLPV   | 11   | 13   |
| >KDM5A-L12LLVSLQKL     | 469  | >KDM5A-L12FLVSLQKL     | 41   | 428  |
| >KDM5A-L12LLVSLQKLPV   | 86   | >KDM5A-L12FLVSLQKLPV   | 30   | 56   |
| >KDM5A-L12LLVSLQKL     | 34   | >KDM5A-L12FLVSLQKL     | 7    | 27   |
| >KDM5A-L12LLVSLQKLPV   | 10   | >KDM5A-L12FLVSLQKLPV   | 3    | 7    |
| >KDM5A-L12LLVSLQKL     | 159  | >KDM5A-L12FLVSLQKL     | 20   | 139  |
| >KDM5A-L12LLVSLQKLPV   | 41   | >KDM5A-L12FLVSLQKLPV   | 8    | 33   |
| >KDM5A-L12LLVSLQKL     | 135  | >KDM5A-L12FLVSLQKL     | 17   | 118  |
| >KDM5A-L12LLVSLQKLPV   | 23   | >KDM5A-L12FLVSLQKLPV   | 8    | 15   |
| >KDM5A-L12LLVSLQKL     | 401  | >KDM5A-L12FLVSLQKL     | 51   | 350  |
| >KDM5A-L12LLVSLQKLPV   | 187  | >KDM5A-L12FLVSLQKLPV   | 33   | 154  |
| >KDM5A-L12LLVSLQKL     | 4    | >KDM5A-L12FLVSLQKL     | 2    | 2    |
| >KDM5A-L12LLVSLQKLPV   | 3    | >KDM5A-L12FLVSLQKLPV   | 2    | 1    |
| >KDM5A-L12LLVSLQKLPVF  | 261  | >KDM5A-L12FLVSLQKLPVF  | 1337 | 1076 |
| >KDM5A-L12LLVSLQKLPVF  | 784  | >KDM5A-L12FLVSLQKLPVF  | 153  | 631  |
| >KDM5A-L12LLVSLQKLPV   | 1414 | >KDM5A-L12FLVSLQKLPV   | 188  | 1226 |
| >KDM5A-L12SLLVSLQKL    | 7745 | >KDM5A-L12SFLVSLQKL    | 244  | 7501 |

|                        |      |                        |       |       |
|------------------------|------|------------------------|-------|-------|
| >KDM5A-L12 SLLVSLQKL   | 144  | >KDM5A-L12 SFLVSLQKL   | 19031 | 18887 |
| >KDM5A-L12 SLLVSLQKLPV | 31   | >KDM5A-L12 SFLVSLQKLPV | 9196  | 9165  |
| >KDM5A-L12 SLLVSLQKL   | 122  | >KDM5A-L12 SFLVSLQKL   | 5295  | 5173  |
| >KDM5A-L12 SLLVSLQKLPV | 139  | >KDM5A-L12 SFLVSLQKLPV | 6112  | 5973  |
| >KDM5A-L12 SLLVSLQKL   | 373  | >KDM5A-L12 SFLVSLQKL   | 17404 | 17031 |
| >KDM5A-L12 SLLVSLQKLPV | 80   | >KDM5A-L12 SFLVSLQKLPV | 7728  | 7648  |
| >KDM5A-L12 SLLVSLQKL   | 229  | >KDM5A-L12 SFLVSLQKL   | 11713 | 11484 |
| >KDM5A-L12 SLLVSLQKLPV | 32   | >KDM5A-L12 SFLVSLQKLPV | 2253  | 2221  |
| >KDM5A-L12 SLLVSLQKL   | 13   | >KDM5A-L12 SFLVSLQKL   | 7986  | 7973  |
| >KDM5A-L12 SLLVSLQKLPV | 4    | >KDM5A-L12 SFLVSLQKLPV | 1752  | 1748  |
| >KDM5A-L12 SLLVSLQKL   | 26   | >KDM5A-L12 SFLVSLQKL   | 14501 | 14475 |
| >KDM5A-L12 SLLVSLQKLPV | 10   | >KDM5A-L12 SFLVSLQKLPV | 4468  | 4458  |
| >KDM5A-L12 SLLVSLQKL   | 9    | >KDM5A-L12 SFLVSLQKL   | 4229  | 4220  |
| >KDM5A-L12 SLLVSLQKLPV | 5    | >KDM5A-L12 SFLVSLQKLPV | 632   | 627   |
| >KDM5A-L12 SLLVSLQKL   | 41   | >KDM5A-L12 SFLVSLQKL   | 17669 | 17628 |
| >KDM5A-L12 SLLVSLQKLPV | 29   | >KDM5A-L12 SFLVSLQKLPV | 12686 | 12657 |
| >KDM5A-L12 SLLVSLQKL   | 3    | >KDM5A-L12 SFLVSLQKL   | 7947  | 7944  |
| >KDM5A-L12 SLLVSLQKLPV | 3    | >KDM5A-L12 SFLVSLQKLPV | 1870  | 1867  |
| >KDM5A-L12 SLLVSLQK    | 64   | >KDM5A-L12 SFLVSLQK    | 2101  | 2037  |
| >KDM5A-L12 SLLVSLQK    | 22   | >KDM5A-L12 SFLVSLQK    | 152   | 130   |
| >KDM5A-L12 SLLVSLQKL   | 9099 | >KDM5A-L12 SFLVSLQKL   | 66    | 9033  |
| >KDM5A-L12 SLLVSLQK    | 142  | >KDM5A-L12 SFLVSLQK    | 64    | 78    |
| >KDM5A-L12 SLLVSLQKLPV | 105  | >KDM5A-L12 SFLVSLQKLPV | 3056  | 2951  |
| >KDM5A-L12 SLLVSLQKL   | 861  | >KDM5A-L12 SFLVSLQKL   | 162   | 699   |
| >KDM5A-L12 SLLVSLQKLPV | 3316 | >KDM5A-L12 SFLVSLQKLPV | 475   | 2841  |
| >KDM5A-L12 RRPRLETILSL | 382  | >KDM5A-L12 RRPRLETILSF | 31    | 351   |
| >KDM5A-L12 RRPRLETILSL | 72   | >KDM5A-L12 RRPRLETILSF | 93    | 21    |
| >KDM5A-L12 RRPRLETILSL | 29   | >KDM5A-L12 RRPRLETILSF | 69    | 40    |
| >KDM5A-L12 RRPRLETILSL | 14   | >KDM5A-L12 RRPRLETILSF | 34    | 20    |
| >KDM5A-L12 LSELLVSLQK  | 121  | >KDM5A-L12 LSFLVSLQK   | 45    | 76    |
| >KDM5A-L12 LSELLVSLQK  | 18   | >KDM5A-L12 LSFLVSLQK   | 10    | 8     |
| >KDM5A-L12 LSELLVSLQK  | 61   | >KDM5A-L12 LSFLVSLQK   | 33    | 28    |
| >KDM5A-L12 LSELLVSLQK  | 786  | >KDM5A-L12 LSFLVSLQK   | 28    | 758   |
| >KDM5A-L12 LSELLVSLQKL | 1536 | >KDM5A-L12 LSFLVSLQKL  | 316   | 1220  |
| >KDM5A-L12 LSELLVSLQKL | 15   | >KDM5A-L12 LSFLVSLQKL  | 9     | 6     |
| >KDM5A-L12 LSELLVSLQKL | 448  | >KDM5A-L12 LSFLVSLQKL  | 288   | 160   |
| >KDM5A-L12 LSELLVSLQKL | 216  | >KDM5A-L12 LSFLVSLQKL  | 172   | 44    |
| >KDM5A-L12 LSELLVSLQK  | 858  | >KDM5A-L12 LSFLVSLQK   | 350   | 508   |
| >KDM5A-L12 LSELLVSLQKL | 705  | >KDM5A-L12 LSFLVSLQKL  | 459   | 246   |
| >KDM5A-L12 ILSLLVSL    | 377  | >KDM5A-L12 ILSFLVSL    | 396   | 19    |
| >KDM5A-L12 ILSLLVSL    | 79   | >KDM5A-L12 ILSFLVSL    | 41    | 38    |
| >KDM5A-L12 ILSLLVSLQKL | 436  | >KDM5A-L12 ILSFLVSLQKL | 207   | 229   |
| >KDM5A-L12 ILSLLVSL    | 11   | >KDM5A-L12 ILSFLVSL    | 6     | 5     |

|                        |     |                        |     |     |
|------------------------|-----|------------------------|-----|-----|
| >KDM5A-L12 ILSLLVSLQ   | 376 | >KDM5A-L12 ILSFLVSLQ   | 159 | 217 |
| >KDM5A-L12 ILSLLVSLQKL | 14  | >KDM5A-L12 ILSFLVSLQKL | 7   | 7   |
| >KDM5A-L12 ILSLLVSL    | 35  | >KDM5A-L12 ILSFLVSL    | 13  | 22  |
| >KDM5A-L12 ILSLLVSLQKL | 40  | >KDM5A-L12 ILSFLVSLQKL | 15  | 25  |
| >KDM5A-L12 ILSLLVSL    | 404 | >KDM5A-L12 ILSFLVSL    | 283 | 121 |
| >KDM5A-L12 ILSLLVSL    | 42  | >KDM5A-L12 ILSFLVSL    | 16  | 26  |
| >KDM5A-L12 ILSLLVSLQKL | 105 | >KDM5A-L12 ILSFLVSLQKL | 41  | 64  |
| >KDM5A-L12 ILSLLVSL    | 122 | >KDM5A-L12 ILSFLVSL    | 70  | 52  |
| >KDM5A-L12 ILSLLVSLQKL | 340 | >KDM5A-L12 ILSFLVSLQKL | 220 | 120 |
| >KDM5A-L12 ILSLLVSL    | 78  | >KDM5A-L12 ILSFLVSL    | 59  | 19  |
| >KDM5A-L12 ILSLLVSLQKL | 155 | >KDM5A-L12 ILSFLVSLQKL | 120 | 35  |
| >KDM5A-L12 ILSLLVSL    | 36  | >KDM5A-L12 ILSFLVSL    | 17  | 19  |
| >KDM5A-L12 ILSLLVSLQKL | 58  | >KDM5A-L12 ILSFLVSLQKL | 30  | 28  |
| >KDM5A-L12 ILSLLVSL    | 6   | >KDM5A-L12 ILSFLVSL    | 5   | 1   |
| >KDM5A-L12 ILSLLVSLQ   | 710 | >KDM5A-L12 ILSFLVSLQ   | 456 | 254 |
| >KDM5A-L12 ILSLLVSLQKL | 8   | >KDM5A-L12 ILSFLVSLQKL | 7   | 1   |
| >KDM5A-L12 ILSLLVSLQK  | 21  | >KDM5A-L12 ILSFLVSLQK  | 11  | 10  |
| >KDM5A-L12 ILSLLVSLQK  | 17  | >KDM5A-L12 ILSFLVSLQK  | 11  | 6   |
| >KDM5A-L12 ILSLLVSL    | 906 | >KDM5A-L12 ILSFLVSL    | 314 | 592 |
| >KDM5A-L12 ILSLLVSLQK  | 434 | >KDM5A-L12 ILSFLVSLQK  | 86  | 348 |
| >KDM5A-L12 ILSLLVSL    | 903 | >KDM5A-L12 ILSFLVSL    | 455 | 448 |
| >KDM5A-L12 TILSLLVSL   | 513 | >KDM5A-L12 TILSFLVSL   | 57  | 456 |
| >KDM5A-L12 TILSLLVSL   | 66  | >KDM5A-L12 TILSFLVSL   | 36  | 30  |
| >KDM5A-L12 TILSLLVSL   | 186 | >KDM5A-L12 TILSFLVSL   | 80  | 106 |
| >KDM5A-L12 TILSLLVSL   | 567 | >KDM5A-L12 TILSFLVSL   | 423 | 144 |
| >KDM5A-L12 TILSLLVSL   | 40  | >KDM5A-L12 TILSFLVSL   | 31  | 9   |
| >KDM5A-L12 TILSLLVSL   | 141 | >KDM5A-L12 TILSFLVSL   | 43  | 98  |
| >KDM5A-L12 TILSLLVSL   | 273 | >KDM5A-L12 TILSFLVSL   | 401 | 128 |
| >KDM5A-L12 TILSLLVSL   | 681 | >KDM5A-L12 TILSFLVSL   | 329 | 352 |
| >KDM5A-L12 TILSLLVSL   | 132 | >KDM5A-L12 TILSFLVSL   | 56  | 76  |
| >KDM5A-L12 TILSLLVSLQK | 89  | >KDM5A-L12 TILSFLVSLQK | 69  | 20  |
| >KDM5A-L12 TILSLLVSLQK | 13  | >KDM5A-L12 TILSFLVSLQK | 10  | 3   |
| >KDM5A-L12 TILSLLVSLQK | 463 | >KDM5A-L12 TILSFLVSLQK | 236 | 227 |
| >KDM5A-L12 TILSLLVSL   | 159 | >KDM5A-L12 TILSFLVSL   | 83  | 76  |
| >KDM5A-L12 TILSLLVSLQK | 189 | >KDM5A-L12 TILSFLVSLQK | 92  | 97  |
| >KDM5A-L12 TILSLLVSL   | 670 | >KDM5A-L12 TILSFLVSL   | 429 | 241 |
| >KDM5A-L12 TILSLLVSL   | 63  | >KDM5A-L12 TILSFLVSL   | 22  | 41  |
| >KDM5A-L12 ETILSLLV    | 797 | >KDM5A-L12 ETILSFLV    | 153 | 644 |
| >KDM5A-L12 ETILSLLVSL  | 249 | >KDM5A-L12 ETILSFLVSL  | 196 | 53  |
| >KDM5A-L12 ETILSLLVSL  | 37  | >KDM5A-L12 ETILSFLVSL  | 46  | 9   |
| >KDM5A-L12 ETILSLLVSL  | 338 | >KDM5A-L12 ETILSFLVSL  | 306 | 32  |
| >KDM5A-L12 ETILSLLV    | 305 | >KDM5A-L12 ETILSFLV    | 571 | 266 |
| >KDM5A-L12 ETILSLLVS   | 221 | >KDM5A-L12 ETILSFLVS   | 810 | 589 |



|                        |      |                        |       |       |
|------------------------|------|------------------------|-------|-------|
| >KDM5A-L12 ETILSLLVSL  | 4    | >KDM5A-L12 ETILSFLVSL  | 7     | 3     |
| >KDM5A-L12 ETILSLLVSLQ | 42   | >KDM5A-L12 ETILSFLVSLQ | 87    | 45    |
| >KDM5A-L12 ETILSLLVSL  | 32   | >KDM5A-L12 ETILSFLVSL  | 17    | 15    |
| >KDM5A-L12 ETILSLLVSLQ | 414  | >KDM5A-L12 ETILSFLVSLQ | 215   | 199   |
| >KDM5A-L12 ETILSLLVSLQ | 58   | >KDM5A-L12 ETILSFLVSLQ | 37    | 21    |
| >KDM5A-L12 ETILSLLV    | 7    | >KDM5A-L12 ETILSFLV    | 5     | 2     |
| >KDM5A-L12 ETILSLLVSL  | 137  | >KDM5A-L12 ETILSFLVSL  | 66    | 71    |
| >KDM5A-L12 ETILSLLV    | 7    | >KDM5A-L12 ETILSFLV    | 4     | 3     |
| >KDM5A-L12 ETILSLLVSL  | 38   | >KDM5A-L12 ETILSFLVSL  | 23    | 15    |
| >KDM5A-L12 ETILSLLVSL  | 21   | >KDM5A-L12 ETILSFLVSL  | 32    | 11    |
| >KDM5A-L12 ETILSLLVSL  | 463  | >KDM5A-L12 ETILSFLVSL  | 451   | 12    |
| >KDM5A-L12 LETILSLL    | 156  | >KDM5A-L12 LETILSFL    | 340   | 184   |
| >KDM5A-L12 LETILSLLV   | 12   | >KDM5A-L12 LETILSFLV   | 11    | 1     |
| >KDM5A-L12 LETILSLLVSL | 43   | >KDM5A-L12 LETILSFLVSL | 37    | 6     |
| >KDM5A-L12 LETILSLL    | 795  | >KDM5A-L12 LETILSFL    | 443   | 352   |
| >KDM5A-L12 LETILSLLVSL | 129  | >KDM5A-L12 LETILSFLVSL | 93    | 36    |
| >KDM5A-L12 LETILSLL    | 42   | >KDM5A-L12 LETILSFL    | 32    | 10    |
| >KDM5A-L12 LETILSLLV   | 342  | >KDM5A-L12 LETILSFLV   | 131   | 211   |
| >KDM5A-L12 LETILSLLVSL | 21   | >KDM5A-L12 LETILSFLVSL | 14    | 7     |
| >KDM5A-L12 LETILSLL    | 100  | >KDM5A-L12 LETILSFL    | 81    | 19    |
| >KDM5A-L12 LETILSLLV   | 139  | >KDM5A-L12 LETILSFLV   | 144   | 5     |
| >KDM5A-L12 LETILSLLVSL | 47   | >KDM5A-L12 LETILSFLVSL | 50    | 3     |
| >KDM5A-L12 LETILSLL    | 369  | >KDM5A-L12 LETILSFL    | 204   | 165   |
| >KDM5A-L12 LETILSLLV   | 26   | >KDM5A-L12 LETILSFLV   | 11    | 15    |
| >KDM5A-L12 LETILSLLVSL | 33   | >KDM5A-L12 LETILSFLVSL | 24    | 9     |
| >KDM5A-L12 LETILSLLV   | 1603 | >KDM5A-L12 LETILSFLV   | 483   | 1120  |
| >KDM5A-L12 RLETILSL    | 326  | >KDM5A-L12 RLETILSF    | 16585 | 16259 |
| >KDM5A-L12 RLETILSLL   | 420  | >KDM5A-L12 RLETILSFL   | 188   | 232   |
| >KDM5A-L12 RLETILSLLV  | 151  | >KDM5A-L12 RLETILSFLV  | 71    | 80    |
| >KDM5A-L12 RLETILSL    | 55   | >KDM5A-L12 RLETILSF    | 2308  | 2253  |
| >KDM5A-L12 RLETILSLL   | 9    | >KDM5A-L12 RLETILSFL   | 6     | 3     |
| >KDM5A-L12 RLETILSLLV  | 60   | >KDM5A-L12 RLETILSFLV  | 40    | 20    |
| >KDM5A-L12 RLETILSL    | 234  | >KDM5A-L12 RLETILSF    | 10360 | 10126 |
| >KDM5A-L12 RLETILSLL   | 58   | >KDM5A-L12 RLETILSFL   | 49    | 9     |
| >KDM5A-L12 RLETILSLLV  | 65   | >KDM5A-L12 RLETILSFLV  | 165   | 100   |
| >KDM5A-L12 RLETILSLL   | 726  | >KDM5A-L12 RLETILSFL   | 223   | 503   |
| >KDM5A-L12 RLETILSLLV  | 226  | >KDM5A-L12 RLETILSFLV  | 170   | 56    |
| >KDM5A-L12 RLETILSL    | 114  | >KDM5A-L12 RLETILSF    | 7907  | 7793  |
| >KDM5A-L12 RLETILSLL   | 346  | >KDM5A-L12 RLETILSFL   | 82    | 264   |
| >KDM5A-L12 RLETILSLLV  | 29   | >KDM5A-L12 RLETILSFLV  | 10    | 19    |
| >KDM5A-L12 RLETILSL    | 156  | >KDM5A-L12 RLETILSF    | 11898 | 11742 |
| >KDM5A-L12 RLETILSLL   | 232  | >KDM5A-L12 RLETILSFL   | 46    | 186   |
| >KDM5A-L12 RLETILSLLV  | 42   | >KDM5A-L12 RLETILSFLV  | 9     | 33    |

|                        |       |                        |      |       |
|------------------------|-------|------------------------|------|-------|
| >KDM5A-L12 RLETILSLL   | 2102  | >KDM5A-L12 RLETILSFL   | 457  | 1645  |
| >KDM5A-L12 RLETILSLLV  | 84    | >KDM5A-L12 RLETILSFLV  | 28   | 56    |
| >KDM5A-L12 RLETILSLLV  | 633   | >KDM5A-L12 RLETILSFLV  | 78   | 555   |
| >KDM5A-L12 RLETILSL    | 13    | >KDM5A-L12 RLETILSF    | 6480 | 6467  |
| >KDM5A-L12 RLETILSLL   | 28    | >KDM5A-L12 RLETILSFL   | 22   | 6     |
| >KDM5A-L12 RLETILSLLV  | 7     | >KDM5A-L12 RLETILSFLV  | 4    | 3     |
| >KDM5A-L12 RLETILSL    | 194   | >KDM5A-L12 RLETILSF    | 55   | 139   |
| >KDM5A-L12 RLETILSL    | 5977  | >KDM5A-L12 RLETILSF    | 399  | 5578  |
| >KDM5A-L12 RLETILSL    | 2546  | >KDM5A-L12 RLETILSF    | 164  | 2382  |
| >KDM5A-L12 RLETILSLL   | 48    | >KDM5A-L12 RLETILSFL   | 114  | 66    |
| >KDM5A-L12 RLETILSL    | 162   | >KDM5A-L12 RLETILSF    | 1189 | 1027  |
| >KDM5A-L12 RLETILSLL   | 137   | >KDM5A-L12 RLETILSFL   | 295  | 158   |
| >KDM5A-L12 PRLETILSL   | 654   | >KDM5A-L12 PRLETILSF   | 46   | 608   |
| >KDM5A-L12 PRLETILSL   | 263   | >KDM5A-L12 PRLETILSF   | 349  | 86    |
| >KDM5A-L12 PRLETILSLL  | 312   | >KDM5A-L12 PRLETILSFL  | 246  | 66    |
| >KDM5A-L12 PRLETILSLL  | 538   | >KDM5A-L12 PRLETILSFL  | 443  | 95    |
| >KDM5A-L12 PRLETILSL   | 89    | >KDM5A-L12 PRLETILSF   | 365  | 276   |
| >KDM5A-L12 PRLETILSLL  | 144   | >KDM5A-L12 PRLETILSFL  | 103  | 41    |
| >KDM5A-L12 RPRLETILSL  | 74    | >KDM5A-L12 RPRLETILSF  | 138  | 64    |
| >KDM5A-L12 RPRLETILSLL | 19    | >KDM5A-L12 RPRLETILSFL | 15   | 4     |
| >KDM5A-L12 RPRLETILSL  | 1753  | >KDM5A-L12 RPRLETILSF  | 65   | 1688  |
| >KDM5A-L12 RPRLETILSL  | 3296  | >KDM5A-L12 RPRLETILSF  | 379  | 2917  |
| >KDM5A-L12 RPRLETILSLL | 323   | >KDM5A-L12 RPRLETILSFL | 560  | 237   |
| >KDM5C-G91 LGVEVPEAQC  | 27515 | >KDM5C-G91 LEVEVPEAQC  | 393  | 27122 |
| >KDM5C-G91 LGVEVPEAQ   | 23566 | >KDM5C-G91 LEVEVPEAQ   | 139  | 23427 |
| >KDM5C-G91 LGVEVPEAQC  | 22672 | >KDM5C-G91 LEVEVPEAQC  | 90   | 22582 |
| >KDM5C-G91 LGVEVPEAQC  | 22196 | >KDM5C-G91 LEVEVPEAQC  | 33   | 22163 |
| >KDM5C-G91 LGVEVPEA    | 38819 | >KDM5C-G91 LEVEVPEA    | 379  | 38440 |
| >KDM5C-G91 LGVEVPEAQC  | 40185 | >KDM5C-G91 LEVEVPEAQC  | 487  | 39698 |
| >KDM5C-G91 LGVEVPEA    | 40012 | >KDM5C-G91 LEVEVPEA    | 208  | 39804 |
| >KDM5C-G91 LGVEVPEAQC  | 25698 | >KDM5C-G91 LEVEVPEAQC  | 31   | 25667 |
| >KDM5C-G91 QLGVEVPEA   | 489   | >KDM5C-G91 QLEVEVPEA   | 3408 | 2919  |
| >KDM5C-G91 QLGVEVPEA   | 276   | >KDM5C-G91 QLEVEVPEA   | 3328 | 3052  |
| >KDM5C-G91 QLGVEVPEA   | 59    | >KDM5C-G91 QLEVEVPEA   | 122  | 63    |
| >KDM5C-G91 RQLGVEVPEA  | 117   | >KDM5C-G91 RQLEVEVPEA  | 109  | 8     |
| >KDM5C-G91 RQLGVEVPEA  | 1081  | >KDM5C-G91 RQLEVEVPEA  | 395  | 686   |
| >KDM5C-G91 RQLGVEVPEA  | 204   | >KDM5C-G91 RQLEVEVPEA  | 83   | 121   |
| >KDM5C-G91 RQLGVEVPEA  | 353   | >KDM5C-G91 RQLEVEVPEA  | 155  | 198   |
| >KDM5C-G91 RQLGVEVPEA  | 663   | >KDM5C-G91 RQLEVEVPEA  | 248  | 415   |
| >KDM5C-G91 RQLGVEVPE   | 418   | >KDM5C-G91 RQLEVEVPE   | 417  | 1     |
| >KDM5C-G91 GRQLGVEVPI  | 475   | >KDM5C-G91 GRQLEVEVPE  | 1562 | 1087  |
| >KDM5C-G91 RGRQLGVEV   | 285   | >KDM5C-G91 RGRQLEVEV   | 877  | 592   |
| >KDM5C-G91 LERGRQLGV   | 769   | >KDM5C-G91 LERGRQLEV   | 346  | 423   |

|                       |       |                       |       |       |
|-----------------------|-------|-----------------------|-------|-------|
| >KDM5C-G91LERGRQLGV   | 567   | >KDM5C-G91LERGRQLEV   | 220   | 347   |
| >KDM5C-G91LERGRQLGVE  | 239   | >KDM5C-G91LERGRQLEVE  | 252   | 13    |
| >KDM5C-G91LERGRQLGV   | 239   | >KDM5C-G91LERGRQLEV   | 268   | 29    |
| >KDM5C-G91LERGRQLGVE  | 129   | >KDM5C-G91LERGRQLEVE  | 162   | 33    |
| >KDM5C-G91LLERGRQLGV  | 441   | >KDM5C-G91LLERGRQLEV  | 527   | 86    |
| >KDM5C-G91LLERGRQLGV  | 290   | >KDM5C-G91LLERGRQLEV  | 417   | 127   |
| >KDM5C-G91LLERGRQLGV  | 60    | >KDM5C-G91LLERGRQLEV  | 62    | 2     |
| >KDM5C-G91LLERGRQLGV  | 160   | >KDM5C-G91LLERGRQLEV  | 261   | 101   |
| >KDM5C-G91LLERGRQLGV  | 155   | >KDM5C-G91LLERGRQLEV  | 138   | 17    |
| >KDM5C-G91LLERGRQLGV  | 2     | >KDM5C-G91LLERGRQLEV  | 2     | 0     |
| >KDM5C-G91SLLERGRQLG  | 31    | >KDM5C-G91SLLERGRQLE' | 22    | 9     |
| >KDM5C-G91SLLERGRQLG  | 126   | >KDM5C-G91SLLERGRQLE' | 82    | 44    |
| >KDM5C-G91SLLERGRQLG  | 24    | >KDM5C-G91SLLERGRQLE' | 29    | 5     |
| >KDM5C-G91SLLERGRQLG  | 26    | >KDM5C-G91SLLERGRQLE' | 36    | 10    |
| >KDM5C-G91SLLERGRQLG  | 2     | >KDM5C-G91SLLERGRQLE' | 2     | 0     |
| >KDM5C-G91SLLERGRQLG  | 8     | >KDM5C-G91SLLERGRQLE' | 11    | 3     |
| >KDM5C-G91SLLERGRQLG  | 4     | >KDM5C-G91SLLERGRQLE' | 4     | 0     |
| >KDM5C-G91SLLERGRQLG  | 8     | >KDM5C-G91SLLERGRQLE' | 13    | 5     |
| >KDM5C-G91SLLERGRQLG  | 2     | >KDM5C-G91SLLERGRQLE' | 2     | 0     |
| >KDM5C-G91SLLERGRQLG  | 169   | >KDM5C-G91SLLERGRQLE' | 337   | 168   |
| >KDM5C-P14PDLERIRTL   | 423   | >KDM5C-P14LDLERIRTL   | 643   | 220   |
| >KDM5C-P14PPDLERIRTLL | 36595 | >KDM5C-P14PLDLERIRTLL | 357   | 36238 |
| >KDM5C-P14IWQLLQAGQ   | 8655  | >KDM5C-P14IWQLLQAGQ   | 277   | 8378  |
| >KDM5C-P14IWQLLQAGQ   | 1084  | >KDM5C-P14IWQLLQAGQ   | 398   | 686   |
| >KDM5C-P14QPPDLERIRTI | 406   | >KDM5C-P14QPLDLERIRTI | 25298 | 24892 |
| >KDM5C-P14GQPPDLERI   | 101   | >KDM5C-P14GQPLDLERI   | 381   | 280   |
| >KDM5C-P14QAGQPPDLEI  | 312   | >KDM5C-P14QAGQPLDLEI  | 451   | 139   |
| >KDM5C-P14LQAGQPPDL   | 534   | >KDM5C-P14LQAGQPLDL   | 473   | 61    |
| >KDM5C-P14LQAGQPPDLI  | 961   | >KDM5C-P14LQAGQPLDLE  | 439   | 522   |
| >KDM5C-P14LLQAGQPP    | 21434 | >KDM5C-P14LLQAGQPL    | 104   | 21330 |
| >KDM5C-P14LLQAGQPP    | 7509  | >KDM5C-P14LLQAGQPL    | 41    | 7468  |
| >KDM5C-P14LLQAGQPPDI  | 265   | >KDM5C-P14LLQAGQPLDL  | 98    | 167   |
| >KDM5C-P14LLQAGQPP    | 12308 | >KDM5C-P14LLQAGQPL    | 86    | 12222 |
| >KDM5C-P14LLQAGQPPDI  | 742   | >KDM5C-P14LLQAGQPLDL  | 226   | 516   |
| >KDM5C-P14LLQAGQPP    | 15577 | >KDM5C-P14LLQAGQPL    | 308   | 15269 |
| >KDM5C-P14LLQAGQPP    | 10521 | >KDM5C-P14LLQAGQPL    | 21    | 10500 |
| >KDM5C-P14LLQAGQPPDI  | 82    | >KDM5C-P14LLQAGQPLDL  | 161   | 79    |
| >KDM5C-P14LLQAGQPP    | 13344 | >KDM5C-P14LLQAGQPL    | 18    | 13326 |
| >KDM5C-P14LLQAGQPPDI  | 119   | >KDM5C-P14LLQAGQPLDL  | 191   | 72    |
| >KDM5C-P14LLQAGQPP    | 15793 | >KDM5C-P14LLQAGQPL    | 98    | 15695 |
| >KDM5C-P14LLQAGQPPDI  | 75    | >KDM5C-P14LLQAGQPLDL  | 248   | 173   |
| >KDM5C-P14LLQAGQPP    | 21676 | >KDM5C-P14LLQAGQPL    | 167   | 21509 |
| >KDM5C-P14LLQAGQPPDI  | 201   | >KDM5C-P14LLQAGQPLDL  | 518   | 317   |

|                       |       |                       |       |       |
|-----------------------|-------|-----------------------|-------|-------|
| >KDM5C-P14LLQAGQPP    | 5028  | >KDM5C-P14LLQAGQPL    | 3     | 5025  |
| >KDM5C-P14LLQAGQPPDI  | 5     | >KDM5C-P14LLQAGQPLDI  | 6     | 1     |
| >KDM5C-P14LLQAGQPP    | 2401  | >KDM5C-P14LLQAGQPL    | 147   | 2254  |
| >KDM5C-P14LLQAGQPP    | 11829 | >KDM5C-P14LLQAGQPL    | 372   | 11457 |
| >KDM5C-P14QLLQAGQPP   | 16156 | >KDM5C-P14QLLQAGQPL   | 264   | 15892 |
| >KDM5C-P14QLLQAGQPP   | 12746 | >KDM5C-P14QLLQAGQPL   | 212   | 12534 |
| >KDM5C-P14QLLQAGQPP   | 9711  | >KDM5C-P14QLLQAGQPL   | 35    | 9676  |
| >KDM5C-P14QLLQAGQPP   | 133   | >KDM5C-P14QLLQAGQPL   | 226   | 93    |
| >KDM5C-P14QLLQAGQPP   | 14770 | >KDM5C-P14QLLQAGQPL   | 102   | 14668 |
| >KDM5C-P14QLLQAGQPP   | 13630 | >KDM5C-P14QLLQAGQPL   | 56    | 13574 |
| >KDM5C-P14QLLQAGQPP   | 49    | >KDM5C-P14QLLQAGQPL   | 130   | 81    |
| >KDM5C-P14QLLQAGQPP   | 23160 | >KDM5C-P14QLLQAGQPL   | 134   | 23026 |
| >KDM5C-P14QLLQAGQPP   | 241   | >KDM5C-P14QLLQAGQPL   | 772   | 531   |
| >KDM5C-P14QLLQAGQPP   | 18330 | >KDM5C-P14QLLQAGQPL   | 15    | 18315 |
| >KDM5C-P14QLLQAGQPP   | 25    | >KDM5C-P14QLLQAGQPL   | 41    | 16    |
| >KDM5C-P14QLLQAGQPP   | 16873 | >KDM5C-P14QLLQAGQPL   | 480   | 16393 |
| >KDM5C-P14QLLQAGQPP   | 7307  | >KDM5C-P14QLLQAGQPL   | 142   | 7165  |
| >KDM5C-P14QLLQAGQPP   | 7033  | >KDM5C-P14QLLQAGQPL   | 315   | 6718  |
| >KDM5C-P14WQLLQAGQF   | 17689 | >KDM5C-P14WQLLQAGQF   | 420   | 17269 |
| >KDM5C-P14WQLLQAGQF   | 1751  | >KDM5C-P14WQLLQAGQF   | 61    | 1690  |
| >KDM5C-P14WQLLQAGQF   | 12784 | >KDM5C-P14WQLLQAGQF   | 35    | 12749 |
| >KDM5C-P14WQLLQAGQF   | 9253  | >KDM5C-P14WQLLQAGQF   | 90    | 9163  |
| >KDM5C-R17RPFDNEEK    | 4787  | >KDM5C-R17HPFDNEEK    | 359   | 4428  |
| >KDM5C-R17SGANLVQCN   | 446   | >KDM5C-R17SGANLVQCN   | 22283 | 21837 |
| >KDM5C-R17NTRPFDNEEK  | 450   | >KDM5C-R17NTHPFDNEEK  | 280   | 170   |
| >KDM5C-R17NTRPFDNEEK  | 110   | >KDM5C-R17NTHPFDNEEK  | 811   | 701   |
| >KDM5C-R17NTRPFDNEEK  | 33    | >KDM5C-R17NTHPFDNEEK  | 13    | 20    |
| >KDM5C-R17VQCNTNTRPF  | 1521  | >KDM5C-R17VQCNTNTRPF  | 262   | 1259  |
| >KDM5C-R17VQCNTNTRPF  | 3855  | >KDM5C-R17VQCNTNTRPF  | 467   | 3388  |
| >KDM5C-R17VQCNTNTRPF  | 43    | >KDM5C-R17VQCNTNTRPF  | 36    | 7     |
| >KDM5C-R17VQCNTNTRPF  | 690   | >KDM5C-R17VQCNTNTRPF  | 387   | 303   |
| >KDM5C-R17VQCNTNTRPF  | 5     | >KDM5C-R17VQCNTNTRPF  | 5     | 0     |
| >KDM5C-R17LVQCNTNTRPF | 4107  | >KDM5C-R17LVQCNTNTRPF | 146   | 3961  |
| >KDM5C-R17LVQCNTNTRPF | 2315  | >KDM5C-R17LVQCNTNTRPF | 360   | 1955  |
| >KDM5C-R17LVQCNTNTRPF | 1610  | >KDM5C-R17LVQCNTNTRPF | 419   | 1191  |
| >KDM5C-R17LVQCNTNTRPF | 277   | >KDM5C-R17LVQCNTNTRPF | 177   | 100   |
| >KDM5C-R17LVQCNTNTRPF | 42    | >KDM5C-R17LVQCNTNTRPF | 36    | 6     |
| >KDM5C-R17LVQCNTNTRPF | 595   | >KDM5C-R17LVQCNTNTRPF | 380   | 215   |
| >KDM5C-R17LVQCNTNTRPF | 161   | >KDM5C-R17LVQCNTNTRPF | 137   | 24    |
| >KDM5C-R17LVQCNTNTRPF | 692   | >KDM5C-R17LVQCNTNTRPF | 404   | 288   |
| >KDM5C-R17LVQCNTNTRPF | 106   | >KDM5C-R17LVQCNTNTRPF | 37    | 69    |
| >KDM5C-R17NLVQCNTNTR  | 408   | >KDM5C-R17NLVQCNTNTR  | 27593 | 27185 |
| >KDM5C-R17NLVQCNTNTR  | 90    | >KDM5C-R17NLVQCNTNTR  | 15002 | 14912 |

|                       |      |                       |       |       |
|-----------------------|------|-----------------------|-------|-------|
| >KDM5C-R17NLVQCNTRP   | 117  | >KDM5C-R17NLVQCNTHP   | 74    | 43    |
| >KDM5C-R17NLVQCNTRP   | 184  | >KDM5C-R17NLVQCNTHP   | 138   | 46    |
| >KDM5C-R17NLVQCNTRP   | 179  | >KDM5C-R17NLVQCNTHP   | 144   | 35    |
| >KDM5C-R17NLVQCNT     | 129  | >KDM5C-R17NLVQCNT     | 23399 | 23270 |
| >KDM5C-R17ANLVQCNT    | 73   | >KDM5C-R17ANLVQCNT    | 68    | 5     |
| >KDM5C-S12SPRPNPTSS   | 213  | >KDM5C-S12PPRPNPTSS   | 5125  | 4912  |
| >KDM5C-S12SPRPNPTSSP  | 7    | >KDM5C-S12PPRPNPTSSP  | 27    | 20    |
| >KDM5C-S12SPRPNPTSSP  | 250  | >KDM5C-S12PPRPNPTSSP  | 2956  | 2706  |
| >KDM5C-S12SPRPNPTSSP  | 411  | >KDM5C-S12PPRPNPTSSP  | 2522  | 2111  |
| >KDM5C-S12LLSSPRPNPT  | 221  | >KDM5C-S12LLSPPRPNPT  | 650   | 429   |
| >KDM5C-S12LLSSPRPNPT  | 129  | >KDM5C-S12LLSPPRPNPT  | 223   | 94    |
| >KDM5C-S12LLSSPRPNPT  | 176  | >KDM5C-S12LLSPPRPNPT  | 69    | 107   |
| >KDM5C-S12LLSSPRPNPT  | 334  | >KDM5C-S12LLSPPRPNPT  | 119   | 215   |
| >KDM5C-S12RLLSSPRPNP  | 361  | >KDM5C-S12RLLSPPRPNP  | 968   | 607   |
| >KDM5C-S12RLLSSPRPNP  | 111  | >KDM5C-S12RLLSPPRPNP  | 63    | 48    |
| >KDM5C-S12VPRLLSSPR   | 384  | >KDM5C-S12VPRLLSPPR   | 1643  | 1259  |
| >KDM5C-S12SVPRLLSSPR  | 229  | >KDM5C-S12SVPRLLSPPR  | 214   | 15    |
| >KDM5C-S12SVPRLLSSPR  | 120  | >KDM5C-S12SVPRLLSPPR  | 288   | 168   |
| >KDM5C-S12SVPRLLSSPR  | 332  | >KDM5C-S12SVPRLLSPPR  | 1223  | 891   |
| >KDM5C-S12SVPRLLSSPR  | 23   | >KDM5C-S12SVPRLLSPPR  | 46    | 23    |
| >KDM5C-S12SVPRLLSSPR  | 693  | >KDM5C-S12SVPRLLSPPR  | 341   | 352   |
| >KDM5C-S12VSVPRLLSSPF | 298  | >KDM5C-S12VSVPRLLSPPF | 331   | 33    |
| >KDM5C-S12VSVPRLLSSPF | 54   | >KDM5C-S12VSVPRLLSPPF | 67    | 13    |
| >KDM5C-S12VSVPRLLSSPF | 323  | >KDM5C-S12VSVPRLLSPPF | 542   | 219   |
| >KDM5C-S12VSVPRLLSS   | 358  | >KDM5C-S12VSVPRLLSP   | 2854  | 2496  |
| >KDM5C-S64SHEELICKM   | 1964 | >KDM5C-S64FHEELICKM   | 319   | 1645  |
| >KDM5C-S64FSHEELICK   | 247  | >KDM5C-S64FFHEELICK   | 5396  | 5149  |
| >KDM5C-S64FSHEELICK   | 226  | >KDM5C-S64FFHEELICK   | 698   | 472   |
| >KDM5C-S64FSHEELICKM  | 42   | >KDM5C-S64FFHEELICKM  | 25203 | 25161 |
| >KDM5C-S64FSHEELICKM  | 80   | >KDM5C-S64FFHEELICKM  | 7810  | 7730  |
| >KDM5C-S64YRRLRRYCVF  | 2224 | >KDM5C-S64YRRLRRYCVF  | 207   | 2017  |
| >KDM5C-S64YRRLRRYCVF  | 4698 | >KDM5C-S64YRRLRRYCVF  | 19    | 4679  |
| >KDM5C-S64YRRLRRYCVF  | 1480 | >KDM5C-S64YRRLRRYCVF  | 209   | 1271  |
| >KDM5C-S64YRRLRRYCVF  | 2878 | >KDM5C-S64YRRLRRYCVF  | 306   | 2572  |
| >KDM5C-S64YRRLRRYCVF  | 4500 | >KDM5C-S64YRRLRRYCVF  | 43    | 4457  |
| >KDM5C-S64VFSHEELI    | 927  | >KDM5C-S64VFFHEELI    | 142   | 785   |
| >KDM5C-S64CVFSHEELI   | 228  | >KDM5C-S64CVFFHEELI   | 274   | 46    |
| >KDM5C-S64CVFSHEEL    | 137  | >KDM5C-S64CVFFHEEL    | 180   | 43    |
| >KDM5C-S64CVFSHEELI   | 412  | >KDM5C-S64CVFFHEELI   | 533   | 121   |
| >KDM5C-S64CVFSHEELICK | 195  | >KDM5C-S64CVFFHEELICK | 198   | 3     |
| >KDM5C-S64CVFSHEELICK | 40   | >KDM5C-S64CVFFHEELICK | 38    | 2     |
| >KDM5C-S64CVFSHEELICK | 22   | >KDM5C-S64CVFFHEELICK | 16    | 6     |
| >KDM5C-S64CVFSHEEL    | 113  | >KDM5C-S64CVFFHEEL    | 48    | 65    |

|                        |       |                        |      |       |
|------------------------|-------|------------------------|------|-------|
| >KDM5C-S64 CVFSHEELI   | 146   | >KDM5C-S64 CVFFHEELI   | 50   | 96    |
| >KDM5C-S64 CVFSHEELI   | 61    | >KDM5C-S64 CVFFHEELI   | 95   | 34    |
| >KDM5C-S64 YCVFSHEEL   | 739   | >KDM5C-S64 YCVFFHEEL   | 237  | 502   |
| >KDM5C-S64 YCVFSHEEL   | 1003  | >KDM5C-S64 YCVFFHEEL   | 343  | 660   |
| >KDM5C-S64 YCVFSHEEL   | 563   | >KDM5C-S64 YCVFFHEEL   | 287  | 276   |
| >KDM5C-S64 RYCVFSHEEL  | 435   | >KDM5C-S64 RYCVFFHEEL  | 943  | 508   |
| >KDM5C-S64 RYCVFSHEEL  | 435   | >KDM5C-S64 RYCVFFHEEL  | 341  | 94    |
| >KDM5C-S64 RYCVFSHEELI | 218   | >KDM5C-S64 RYCVFFHEELI | 101  | 117   |
| >KDM5C-S64 RYCVFSHEEL  | 383   | >KDM5C-S64 RYCVFFHEEL  | 330  | 53    |
| >KDM5C-S64 RYCVFSHEELI | 77    | >KDM5C-S64 RYCVFFHEELI | 52   | 25    |
| >KDM5C-S64 RYCVFSHE    | 827   | >KDM5C-S64 RYCVFFHE    | 355  | 472   |
| >KDM5C-S64 RYCVFSHEE   | 363   | >KDM5C-S64 RYCVFFHEE   | 154  | 209   |
| >KDM5C-S64 RYCVFSHEEL  | 6     | >KDM5C-S64 RYCVFFHEEL  | 5    | 1     |
| >KDM5C-S64 RYCVFSHEELI | 9     | >KDM5C-S64 RYCVFFHEELI | 8    | 1     |
| >KDM5C-S64 RYCVFSHEEL  | 1536  | >KDM5C-S64 RYCVFFHEEL  | 268  | 1268  |
| >KDM5C-S64 RYCVFSHEELI | 1192  | >KDM5C-S64 RYCVFFHEELI | 462  | 730   |
| >KDM5C-S64 RRYCVFSH    | 66    | >KDM5C-S64 RRYCVFFH    | 194  | 128   |
| >KDM5C-S64 RRYCVFSHE   | 482   | >KDM5C-S64 RRYCVFFHE   | 1637 | 1155  |
| >KDM5C-S64 RRYCVFSHEE  | 9     | >KDM5C-S64 RRYCVFFHEE  | 15   | 6     |
| >KDM5C-S64 RRYCVFSH    | 21    | >KDM5C-S64 RRYCVFFH    | 20   | 1     |
| >KDM5C-S64 RRYCVFSHE   | 179   | >KDM5C-S64 RRYCVFFHE   | 96   | 83    |
| >KDM5C-S64 RRYCVFSHEE  | 272   | >KDM5C-S64 RRYCVFFHEE  | 106  | 166   |
| >KDM5C-S64 RRYCVFSHEE  | 24    | >KDM5C-S64 RRYCVFFHEE  | 15   | 9     |
| >KDM5C-S64 RRYCVFSH    | 72    | >KDM5C-S64 RRYCVFFH    | 82   | 10    |
| >KDM5C-S64 RRYCVFSHE   | 59    | >KDM5C-S64 RRYCVFFHE   | 64   | 5     |
| >KDM5C-S64 RRYCVFSHEE  | 73    | >KDM5C-S64 RRYCVFFHEE  | 47   | 26    |
| >KDM5C-S64 RRYCVFSHEE  | 15    | >KDM5C-S64 RRYCVFFHEE  | 13   | 2     |
| >KDM5C-S64 RRYCVFSHE   | 102   | >KDM5C-S64 RRYCVFFHE   | 280  | 178   |
| >KDM5C-S64 RRYCVFSHEE  | 535   | >KDM5C-S64 RRYCVFFHEE  | 187  | 348   |
| >KDM5C-S64 RRYCVFSHEE  | 12    | >KDM5C-S64 RRYCVFFHEE  | 10   | 2     |
| >KDM5C-S64 LRRYCVFS    | 2557  | >KDM5C-S64 LRRYCVFF    | 10   | 2547  |
| >KDM5C-S64 LRRYCVFSH   | 344   | >KDM5C-S64 LRRYCVFFH   | 909  | 565   |
| >KDM5C-S64 RLRRYCVFS   | 31317 | >KDM5C-S64 RLRRYCVFF   | 498  | 30819 |
| >KDM5C-S64 RLRRYCVFS   | 13    | >KDM5C-S64 RLRRYCVFF   | 33   | 20    |
| >KDM5C-S64 RLRRYCVFSH  | 101   | >KDM5C-S64 RLRRYCVFFH  | 40   | 61    |
| >KDM5C-S64 RLRRYCVFSH  | 238   | >KDM5C-S64 RLRRYCVFFH  | 177  | 61    |
| >KDM5C-S64 RLRRYCVFS   | 1468  | >KDM5C-S64 RLRRYCVFF   | 484  | 984   |
| >KDM5C-S64 RLRRYCVFSH  | 302   | >KDM5C-S64 RLRRYCVFFH  | 66   | 236   |
| >KDM5C-S64 RLRRYCVFSH  | 1905  | >KDM5C-S64 RLRRYCVFFH  | 457  | 1448  |
| >KDM5C-S64 RLRRYCVFS   | 9294  | >KDM5C-S64 RLRRYCVFF   | 49   | 9245  |
| >KDM5C-S64 RLRRYCVFS   | 1687  | >KDM5C-S64 RLRRYCVFF   | 8    | 1679  |
| >KDM5C-S64 RLRRYCVFSH  | 395   | >KDM5C-S64 RLRRYCVFFH  | 1027 | 632   |
| >KDM5C-S64 RLRRYCVFS   | 20522 | >KDM5C-S64 RLRRYCVFF   | 294  | 20228 |

|                        |       |                        |       |       |
|------------------------|-------|------------------------|-------|-------|
| >KDM5C-S64 RLRRYCVFS   | 12796 | >KDM5C-S64 RLRRYCVFF   | 179   | 12617 |
| >KDM5C-S64 RRLRRYCVFS  | 1576  | >KDM5C-S64 RRLRRYCVFF  | 5     | 1571  |
| >KDM5C-S64 RRLRRYCVFSI | 245   | >KDM5C-S64 RRLRRYCVFFI | 591   | 346   |
| >KDM5C-S64 RRLRRYCVFS  | 161   | >KDM5C-S64 RRLRRYCVFF  | 15    | 146   |
| >KDM5C-S64 RRLRRYCVFSI | 29    | >KDM5C-S64 RRLRRYCVFFI | 28    | 1     |
| >KDM5C-S64 RRLRRYCVFS  | 44    | >KDM5C-S64 RRLRRYCVFF  | 25    | 19    |
| >KDM5C-S64 RRLRRYCVFSI | 122   | >KDM5C-S64 RRLRRYCVFFI | 60    | 62    |
| >KDM5C-S64 RRLRRYCVFS  | 41    | >KDM5C-S64 RRLRRYCVFF  | 22    | 19    |
| >KDM5C-S64 RRLRRYCVFSI | 219   | >KDM5C-S64 RRLRRYCVFFI | 89    | 130   |
| >KDM6A-G7;GLLSSDNPQL   | 205   | >KDM6A-G7;DLLSSDNPQL   | 1724  | 1519  |
| >KDM6A-G7;GLLSSDNPQL   | 60    | >KDM6A-G7;DLLSSDNPQL   | 587   | 527   |
| >KDM6A-G7;GLLSSDNPQL   | 22    | >KDM6A-G7;DLLSSDNPQL   | 392   | 370   |
| >KDM6A-G7;GLLSSDNPQL   | 20    | >KDM6A-G7;DLLSSDNPQL   | 1922  | 1902  |
| >KDM6A-G7;GLLSSDNPQL   | 8     | >KDM6A-G7;DLLSSDNPQL   | 128   | 120   |
| >KDM6A-G7;GLLSSDNPQL   | 40    | >KDM6A-G7;DLLSSDNPQL   | 69    | 29    |
| >KDM6A-G7;GLLSSDNPQL   | 10    | >KDM6A-G7;DLLSSDNPQL   | 83    | 73    |
| >KDM6A-G7;GLLSSDNPQL   | 6681  | >KDM6A-G7;DLLSSDNPQL   | 357   | 6324  |
| >KDM6A-G7;PGLSSDNPQ    | 22768 | >KDM6A-G7;PDLLSSDNPQ   | 434   | 22334 |
| >KDM6A-G7;GDSKSPGLL    | 230   | >KDM6A-G7;GDSKSPDLL    | 375   | 145   |
| >KDM6A-L11 LPAFVRVV    | 40    | >KDM6A-L11 RPAFVRVV    | 13    | 27    |
| >KDM6A-L11 LPAFVRVVS   | 1150  | >KDM6A-L11 RPAFVRVVS   | 95    | 1055  |
| >KDM6A-L11 LPAFVRVVSA  | 1616  | >KDM6A-L11 RPAFVRVVSA  | 152   | 1464  |
| >KDM6A-L11 LPAFVRVVSA  | 3619  | >KDM6A-L11 RPAFVRVVSA  | 354   | 3265  |
| >KDM6A-L11 LPAFVRVVSA  | 256   | >KDM6A-L11 RPAFVRVVSA  | 1915  | 1659  |
| >KDM6A-L11 LPAFVRVV    | 421   | >KDM6A-L11 RPAFVRVV    | 8393  | 7972  |
| >KDM6A-L11 LPAFVRVV    | 33    | >KDM6A-L11 RPAFVRVV    | 2302  | 2269  |
| >KDM6A-L11 LPAFVRVVS   | 62    | >KDM6A-L11 RPAFVRVVS   | 2504  | 2442  |
| >KDM6A-L11 LPAFVRVVSA  | 27    | >KDM6A-L11 RPAFVRVVSA  | 182   | 155   |
| >KDM6A-L11 LPAFVRVVSA  | 90    | >KDM6A-L11 RPAFVRVVSA  | 2151  | 2061  |
| >KDM6A-L11 KLPAFVRV    | 20    | >KDM6A-L11 KRPAFVRV    | 19332 | 19312 |
| >KDM6A-L11 KLPAFVRVV   | 106   | >KDM6A-L11 KRPAFVRVV   | 19060 | 18954 |
| >KDM6A-L11 KLPAFVRVVS  | 135   | >KDM6A-L11 KRPAFVRVVS  | 22596 | 22461 |
| >KDM6A-L11 KLPAFVRV    | 15    | >KDM6A-L11 KRPAFVRV    | 12747 | 12732 |
| >KDM6A-L11 KLPAFVRVV   | 94    | >KDM6A-L11 KRPAFVRVV   | 14104 | 14010 |
| >KDM6A-L11 KLPAFVRVVS  | 86    | >KDM6A-L11 KRPAFVRVVS  | 19523 | 19437 |
| >KDM6A-L11 KLPAFVRV    | 8     | >KDM6A-L11 KRPAFVRV    | 14138 | 14130 |
| >KDM6A-L11 KLPAFVRVV   | 7     | >KDM6A-L11 KRPAFVRVV   | 12873 | 12866 |
| >KDM6A-L11 KLPAFVRVVS  | 14    | >KDM6A-L11 KRPAFVRVVS  | 15203 | 15189 |
| >KDM6A-L11 KLPAFVRV    | 22    | >KDM6A-L11 KRPAFVRV    | 8377  | 8355  |
| >KDM6A-L11 KLPAFVRVV   | 211   | >KDM6A-L11 KRPAFVRVV   | 13958 | 13747 |
| >KDM6A-L11 KLPAFVRVVS  | 200   | >KDM6A-L11 KRPAFVRVVS  | 18289 | 18089 |
| >KDM6A-L11 KLPAFVRV    | 3     | >KDM6A-L11 KRPAFVRV    | 6262  | 6259  |
| >KDM6A-L11 KLPAFVRVV   | 3     | >KDM6A-L11 KRPAFVRVV   | 7441  | 7438  |

|                        |       |                        |       |       |
|------------------------|-------|------------------------|-------|-------|
| >KDM6A-L11 KLPAFVRVVS  | 25    | >KDM6A-L11 KRPAFVRVVS  | 20006 | 19981 |
| >KDM6A-L11 KLPAFVRV    | 19    | >KDM6A-L11 KRPAFVRV    | 22290 | 22271 |
| >KDM6A-L11 KLPAFVRVV   | 30    | >KDM6A-L11 KRPAFVRVV   | 22916 | 22886 |
| >KDM6A-L11 KLPAFVRV    | 8     | >KDM6A-L11 KRPAFVRV    | 14862 | 14854 |
| >KDM6A-L11 KLPAFVRVV   | 19    | >KDM6A-L11 KRPAFVRVV   | 20217 | 20198 |
| >KDM6A-L11 KLPAFVRVVS  | 145   | >KDM6A-L11 KRPAFVRVVS  | 25027 | 24882 |
| >KDM6A-L11 KLPAFVRV    | 25    | >KDM6A-L11 KRPAFVRV    | 23971 | 23946 |
| >KDM6A-L11 KLPAFVRVV   | 77    | >KDM6A-L11 KRPAFVRVV   | 23858 | 23781 |
| >KDM6A-L11 KLPAFVRV    | 2     | >KDM6A-L11 KRPAFVRV    | 10945 | 10943 |
| >KDM6A-L11 KLPAFVRVV   | 4     | >KDM6A-L11 KRPAFVRVV   | 20840 | 20836 |
| >KDM6A-L11 KLPAFVRVVS  | 29    | >KDM6A-L11 KRPAFVRVVS  | 30373 | 30344 |
| >KDM6A-L11 KLPAFVRVV   | 358   | >KDM6A-L11 KRPAFVRVV   | 12182 | 11824 |
| >KDM6A-L11 KLPAFVRVVS  | 357   | >KDM6A-L11 KRPAFVRVVS  | 14111 | 13754 |
| >KDM6A-L11 KLPAFVRVV   | 83    | >KDM6A-L11 KRPAFVRVV   | 4375  | 4292  |
| >KDM6A-L11 KLPAFVRV    | 17872 | >KDM6A-L11 KRPAFVRV    | 288   | 17584 |
| >KDM6A-L11 KLPAFVRVV   | 10457 | >KDM6A-L11 KRPAFVRVV   | 74    | 10383 |
| >KDM6A-L11 KLPAFVRVV   | 16696 | >KDM6A-L11 KRPAFVRVV   | 127   | 16569 |
| >KDM6A-L11 WKLQLHELTK  | 95    | >KDM6A-L11 WKLQLHELTK  | 870   | 775   |
| >KDM6A-L11 WKLQLHELTK  | 31177 | >KDM6A-L11 WKLQLHELTK  | 383   | 30794 |
| >KDM6A-L11 TKLPAFVRV   | 412   | >KDM6A-L11 TKRPAFVRV   | 6572  | 6160  |
| >KDM6A-L11 TKLPAFVRV   | 255   | >KDM6A-L11 TKRPAFVRV   | 205   | 50    |
| >KDM6A-L11 TKLPAFVRVV  | 108   | >KDM6A-L11 TKRPAFVRVV  | 92    | 16    |
| >KDM6A-L11 TKLPAFVR    | 385   | >KDM6A-L11 TKRPAFVR    | 1309  | 924   |
| >KDM6A-L11 LTKLPAFV    | 348   | >KDM6A-L11 LTKRPAFV    | 285   | 63    |
| >KDM6A-L11 LTKLPAFV    | 1162  | >KDM6A-L11 LTKRPAFV    | 336   | 826   |
| >KDM6A-L11 LTKLPAFVRV  | 634   | >KDM6A-L11 LTKRPAFVRV  | 191   | 443   |
| >KDM6A-L11 LTKLPAFV    | 62    | >KDM6A-L11 LTKRPAFV    | 20    | 42    |
| >KDM6A-L11 LTKLPAFVR   | 1815  | >KDM6A-L11 LTKRPAFVR   | 413   | 1402  |
| >KDM6A-L11 LTKLPAFVRV  | 367   | >KDM6A-L11 LTKRPAFVRV  | 99    | 268   |
| >KDM6A-L11 LTKLPAFVRV' | 452   | >KDM6A-L11 LTKRPAFVRV  | 115   | 337   |
| >KDM6A-L11 LTKLPAFVR   | 17    | >KDM6A-L11 LTKRPAFVR   | 13    | 4     |
| >KDM6A-L11 LTKLPAFVR   | 101   | >KDM6A-L11 LTKRPAFVR   | 183   | 82    |
| >KDM6A-L11 LTKLPAFVR   | 40    | >KDM6A-L11 LTKRPAFVR   | 37    | 3     |
| >KDM6A-L11 LTKLPAFV    | 143   | >KDM6A-L11 LTKRPAFV    | 176   | 33    |
| >KDM6A-L11 LTKLPAFVRV  | 210   | >KDM6A-L11 LTKRPAFVRV  | 114   | 96    |
| >KDM6A-L11 LTKLPAFV    | 366   | >KDM6A-L11 LTKRPAFV    | 861   | 495   |
| >KDM6A-L11 LTKLPAFVRV  | 301   | >KDM6A-L11 LTKRPAFVRV  | 666   | 365   |
| >KDM6A-L11 LTKLPAFV    | 224   | >KDM6A-L11 LTKRPAFV    | 468   | 244   |
| >KDM6A-L11 LTKLPAFVRV  | 256   | >KDM6A-L11 LTKRPAFVRV  | 377   | 121   |
| >KDM6A-L11 LTKLPAFVRV' | 224   | >KDM6A-L11 LTKRPAFVRV  | 130   | 94    |
| >KDM6A-L11 ELTKLPAFV   | 127   | >KDM6A-L11 ELTKRPAFV   | 315   | 188   |
| >KDM6A-L11 ELTKLPAFVR' | 353   | >KDM6A-L11 ELTKRPAFVR' | 684   | 331   |
| >KDM6A-L11 ELTKLPAFV   | 206   | >KDM6A-L11 ELTKRPAFV   | 182   | 24    |



|                        |       |                        |       |       |
|------------------------|-------|------------------------|-------|-------|
| >KDM6A-L11 ELTKLPAFV   | 14    | >KDM6A-L11 ELTKRPAFV   | 27    | 13    |
| >KDM6A-L11 ELTKLPAFVR\ | 38    | >KDM6A-L11 ELTKRPAFVR' | 64    | 26    |
| >KDM6A-L11 ELTKLPAFV   | 62    | >KDM6A-L11 ELTKRPAFV   | 121   | 59    |
| >KDM6A-L11 ELTKLPAFVR\ | 355   | >KDM6A-L11 ELTKRPAFVR' | 522   | 167   |
| >KDM6A-L11 ELTKLPAFV   | 14    | >KDM6A-L11 ELTKRPAFV   | 22    | 8     |
| >KDM6A-L11 ELTKLPAFVR\ | 28    | >KDM6A-L11 ELTKRPAFVR' | 49    | 21    |
| >KDM6A-L11 ELTKLPAFV   | 15    | >KDM6A-L11 ELTKRPAFV   | 42    | 27    |
| >KDM6A-L11 ELTKLPAFVR\ | 78    | >KDM6A-L11 ELTKRPAFVR' | 163   | 85    |
| >KDM6A-L11 ELTKLPAFV   | 13    | >KDM6A-L11 ELTKRPAFV   | 13    | 0     |
| >KDM6A-L11 ELTKLPAFVR\ | 7     | >KDM6A-L11 ELTKRPAFVR' | 8     | 1     |
| >KDM6A-L11 ELTKLPAF    | 178   | >KDM6A-L11 ELTKRPAF    | 1068  | 890   |
| >KDM6A-L11 ELTKLPAFVR  | 118   | >KDM6A-L11 ELTKRPAFVR  | 341   | 223   |
| >KDM6A-L11 ELTKLPAFV   | 31    | >KDM6A-L11 ELTKRPAFV   | 116   | 85    |
| >KDM6A-L11 ELTKLPAFVR\ | 37    | >KDM6A-L11 ELTKRPAFVR' | 105   | 68    |
| >KDM6A-L11 ELTKLPAFV   | 33    | >KDM6A-L11 ELTKRPAFV   | 212   | 179   |
| >KDM6A-L11 ELTKLPAFVR\ | 82    | >KDM6A-L11 ELTKRPAFVR' | 245   | 163   |
| >KDM6A-L11 ELTKLPAF    | 4270  | >KDM6A-L11 ELTKRPAF    | 410   | 3860  |
| >KDM6A-L11 ELTKLPAFVR  | 335   | >KDM6A-L11 ELTKRPAFVR  | 221   | 114   |
| >KDM6A-L11 ELTKLPAFVR  | 156   | >KDM6A-L11 ELTKRPAFVR  | 239   | 83    |
| >KDM6A-L11 HELTKLPAFV  | 13    | >KDM6A-L11 HELTKRPAFV  | 15    | 2     |
| >KDM6A-L11 HELTKLPAF   | 96    | >KDM6A-L11 HELTKRPAF   | 59    | 37    |
| >KDM6A-L11 HELTKLPAF   | 17    | >KDM6A-L11 HELTKRPAF   | 20    | 3     |
| >KDM6A-L11 HELTKLPAF   | 179   | >KDM6A-L11 HELTKRPAF   | 364   | 185   |
| >KDM6A-L11 HELTKLPA    | 82    | >KDM6A-L11 HELTKRPA    | 203   | 121   |
| >KDM6A-L11 HELTKLPAF   | 54    | >KDM6A-L11 HELTKRPAF   | 70    | 16    |
| >KDM6A-L11 HELTKLPAF   | 268   | >KDM6A-L11 HELTKRPAF   | 611   | 343   |
| >KDM6A-L11 HELTKLPAF   | 168   | >KDM6A-L11 HELTKRPAF   | 498   | 330   |
| >KDM6A-L11 HELTKLPA    | 69    | >KDM6A-L11 HELTKRPA    | 103   | 34    |
| >KDM6A-L11 HELTKLPAF   | 14    | >KDM6A-L11 HELTKRPAF   | 42    | 28    |
| >KDM6A-L11 HELTKLPAFV  | 76    | >KDM6A-L11 HELTKRPAFV  | 232   | 156   |
| >KDM6A-L11 HELTKLPAFVI | 124   | >KDM6A-L11 HELTKRPAFVI | 102   | 22    |
| >KDM6A-L11 QLHELTKL    | 33    | >KDM6A-L11 QLHELTKR    | 12847 | 12814 |
| >KDM6A-L11 QLHELTKLPA  | 257   | >KDM6A-L11 QLHELTKRPA  | 1418  | 1161  |
| >KDM6A-L11 QLHELTKL    | 50    | >KDM6A-L11 QLHELTKR    | 15731 | 15681 |
| >KDM6A-L11 QLHELTKLPA  | 219   | >KDM6A-L11 QLHELTKRPA  | 578   | 359   |
| >KDM6A-L11 QLHELTKL    | 48    | >KDM6A-L11 QLHELTKR    | 15958 | 15910 |
| >KDM6A-L11 QLHELTKLPA  | 241   | >KDM6A-L11 QLHELTKRPA  | 377   | 136   |
| >KDM6A-L11 QLHELTKL    | 422   | >KDM6A-L11 QLHELTKR    | 25276 | 24854 |
| >KDM6A-L11 QLHELTKL    | 441   | >KDM6A-L11 QLHELTKR    | 21134 | 20693 |
| >KDM6A-L11 QLHELTKL    | 11    | >KDM6A-L11 QLHELTKR    | 13469 | 13458 |
| >KDM6A-L11 QLHELTKLPA  | 171   | >KDM6A-L11 QLHELTKRPA  | 652   | 481   |
| >KDM6A-L11 QLHELTKL    | 16466 | >KDM6A-L11 QLHELTKR    | 449   | 16017 |
| >KDM6A-L11 QLHELTKLPA  | 171   | >KDM6A-L11 QLHELTKRPA  | 193   | 22    |

|                        |       |                        |       |       |
|------------------------|-------|------------------------|-------|-------|
| >KDM6A-L11 QLHELTKL    | 36501 | >KDM6A-L11 QLHELTKR    | 417   | 36084 |
| >KDM6A-L11 QLHELTKLPA  | 196   | >KDM6A-L11 QLHELTKRPA  | 225   | 29    |
| >KDM6A-L11 QLHELTKLPA  | 403   | >KDM6A-L11 QLHELTKRPA  | 445   | 42    |
| >KDM6A-L11 QLHELTKLPA  | 75    | >KDM6A-L11 QLHELTKRPA  | 63    | 12    |
| >KDM6A-L11 QLHELTKL    | 31229 | >KDM6A-L11 QLHELTKR    | 170   | 31059 |
| >KDM6A-L11 LQLHELTKL   | 320   | >KDM6A-L11 LQLHELTKR   | 25355 | 25035 |
| >KDM6A-L11 LQLHELTKL   | 34    | >KDM6A-L11 LQLHELTKR   | 11599 | 11565 |
| >KDM6A-L11 LQLHELTKLP/ | 37    | >KDM6A-L11 LQLHELTKRP/ | 164   | 127   |
| >KDM6A-L11 LQLHELTKL   | 18695 | >KDM6A-L11 LQLHELTKR   | 305   | 18390 |
| >KDM6A-L11 LQLHELTKL   | 29    | >KDM6A-L11 LQLHELTKR   | 351   | 322   |
| >KDM6A-L11 LQLHELTKLP/ | 177   | >KDM6A-L11 LQLHELTKRP/ | 285   | 108   |
| >KDM6A-L11 KLQLHELTKL  | 140   | >KDM6A-L11 KLQLHELTKR  | 13211 | 13071 |
| >KDM6A-L11 KLQLHELTKL  | 216   | >KDM6A-L11 KLQLHELTKR  | 12608 | 12392 |
| >KDM6A-L11 KLQLHELTKL  | 456   | >KDM6A-L11 KLQLHELTKR  | 24586 | 24130 |
| >KDM6A-L11 KLQLHELTKL  | 148   | >KDM6A-L11 KLQLHELTKR  | 23266 | 23118 |
| >KDM6A-L11 KLQLHELTKL  | 40    | >KDM6A-L11 KLQLHELTKR  | 23138 | 23098 |
| >KDM6A-L11 KLQLHELTKL  | 10956 | >KDM6A-L11 KLQLHELTKR  | 38    | 10918 |
| >KDM6A-L11 KLQLHELTKL  | 427   | >KDM6A-L11 KLQLHELTKR  | 11548 | 11121 |
| >KDM6A-L11 KLQLHELTKL  | 27827 | >KDM6A-L11 KLQLHELTKR  | 102   | 27725 |
| >KDM6A-L97 LKLDLGLF    | 25    | >KDM6A-L97 IKLDLGLF    | 19    | 6     |
| >KDM6A-L97 LKLDLGLFSTK | 247   | >KDM6A-L97 IKLDLGLFSTK | 189   | 58    |
| >KDM6A-L97 ALKLDLGL    | 307   | >KDM6A-L97 AIKLDLGL    | 3168  | 2861  |
| >KDM6A-L97 ALKLDLGL    | 134   | >KDM6A-L97 AIKLDLGL    | 917   | 783   |
| >KDM6A-L97 ALKLDLGLFST | 199   | >KDM6A-L97 AIKLDLGLFST | 1726  | 1527  |
| >KDM6A-L97 ALKLDLGL    | 28    | >KDM6A-L97 AIKLDLGL    | 2772  | 2744  |
| >KDM6A-L97 ALKLDLGLFST | 294   | >KDM6A-L97 AIKLDLGLFST | 10109 | 9815  |
| >KDM6A-L97 VTVIRGLAGA  | 428   | >KDM6A-L97 VTVIRGLAGA  | 1410  | 982   |
| >KDM6A-L97 VTVIRGLAGA  | 6     | >KDM6A-L97 VTVIRGLAGA  | 14    | 8     |
| >KDM6A-L97 VTVIRGLAGA  | 387   | >KDM6A-L97 VTVIRGLAGA  | 855   | 468   |
| >KDM6A-L97 VTVIRGLAGA  | 2591  | >KDM6A-L97 VTVIRGLAGA  | 124   | 2467  |
| >KDM6A-L97 GALKLDLGL   | 441   | >KDM6A-L97 GAIKLDLGL   | 356   | 85    |
| >KDM6A-L97 GALKLDLGLF  | 284   | >KDM6A-L97 GAIKLDLGLF  | 237   | 47    |
| >KDM6A-L97 GLAGALKL    | 170   | >KDM6A-L97 GLAGAIKL    | 137   | 33    |
| >KDM6A-L97 GLAGALKL    | 14    | >KDM6A-L97 GLAGAIKL    | 12    | 2     |
| >KDM6A-L97 GLAGALKLDL  | 70    | >KDM6A-L97 GLAGAIKLDL  | 60    | 10    |
| >KDM6A-L97 GLAGALKLDL  | 310   | >KDM6A-L97 GLAGAIKLDL  | 308   | 2     |
| >KDM6A-L97 GLAGALKL    | 30    | >KDM6A-L97 GLAGAIKL    | 40    | 10    |
| >KDM6A-L97 GLAGALKLDL  | 453   | >KDM6A-L97 GLAGAIKLDL  | 414   | 39    |
| >KDM6A-L97 GLAGALKL    | 444   | >KDM6A-L97 GLAGAIKL    | 521   | 77    |
| >KDM6A-L97 GLAGALKL    | 47    | >KDM6A-L97 GLAGAIKL    | 25    | 22    |
| >KDM6A-L97 GLAGALKLDL  | 417   | >KDM6A-L97 GLAGAIKLDL  | 227   | 190   |
| >KDM6A-L97 GLAGALKL    | 141   | >KDM6A-L97 GLAGAIKL    | 85    | 56    |
| >KDM6A-L97 GLAGALKL    | 14    | >KDM6A-L97 GLAGAIKL    | 10    | 4     |

|                       |      |                       |      |      |
|-----------------------|------|-----------------------|------|------|
| >KDM6A-L97 GLAGALKLDL | 41   | >KDM6A-L97 GLAGAIKLDL | 32   | 9    |
| >KDM6A-L97 GLAGALKL   | 135  | >KDM6A-L97 GLAGAIKL   | 70   | 65   |
| >KDM6A-L97 GLAGALK    | 4    | >KDM6A-L97 GLAGAIK    | 3    | 1    |
| >KDM6A-L97 GLAGALKLDL | 7    | >KDM6A-L97 GLAGAIKLDL | 6    | 1    |
| >KDM6A-L97 RGLAGALK   | 362  | >KDM6A-L97 RGLAGAIK   | 1380 | 1018 |
| >KDM6A-L97 RGLAGALK   | 400  | >KDM6A-L97 RGLAGAIK   | 1418 | 1018 |
| >KDM6A-L97 RGLAGALK   | 33   | >KDM6A-L97 RGLAGAIK   | 45   | 12   |
| >KDM6A-L97 RGLAGALKL  | 22   | >KDM6A-L97 RGLAGAIKL  | 62   | 40   |
| >KDM6A-L97 RGLAGALKLD | 492  | >KDM6A-L97 RGLAGAIKLD | 807  | 315  |
| >KDM6A-L97 IRGLAGALKL | 64   | >KDM6A-L97 IRGLAGAIKL | 107  | 43   |
| >KDM6A-L97 IRGLAGALKL | 241  | >KDM6A-L97 IRGLAGAIKL | 523  | 282  |
| >KDM6A-L97 IRGLAGALKL | 100  | >KDM6A-L97 IRGLAGAIKL | 189  | 89   |
| >KDM6A-L97 VIRLAGALK  | 371  | >KDM6A-L97 VIRLAGAIK  | 323  | 48   |
| >KDM6A-L97 VIRLAGALK  | 49   | >KDM6A-L97 VIRLAGAIK  | 114  | 65   |
| >KDM6A-L97 VIRLAGALK  | 366  | >KDM6A-L97 VIRLAGAIK  | 917  | 551  |
| >KDM6A-L97 VIRLAGALK  | 15   | >KDM6A-L97 VIRLAGAIK  | 19   | 4    |
| >KDM6A-L97 VIRLAGALK  | 266  | >KDM6A-L97 VIRLAGAIK  | 1098 | 832  |
| >KDM6A-L97 VIRLAGAL   | 60   | >KDM6A-L97 VIRLAGAI   | 597  | 537  |
| >KDM6A-L97 VIRLAGALK  | 296  | >KDM6A-L97 VIRLAGAIKL | 649  | 353  |
| >KDM6A-L97 TVIRLAGAL  | 508  | >KDM6A-L97 TVIRLAGAI  | 341  | 167  |
| >KDM6A-L97 TVIRLAGALI | 197  | >KDM6A-L97 TVIRLAGAIK | 611  | 414  |
| >KDM6A-L97 TVIRLAGALI | 20   | >KDM6A-L97 TVIRLAGAIK | 33   | 13   |
| >KDM6A-L97 TVIRLAGAL  | 10   | >KDM6A-L97 TVIRLAGAI  | 38   | 28   |
| >KDM6A-L97 TVIRLAGALI | 135  | >KDM6A-L97 TVIRLAGAIK | 221  | 86   |
| >KDM6A-L97 TVIRLAGALI | 18   | >KDM6A-L97 TVIRLAGAIK | 48   | 30   |
| >KDM6A-L97 TVIRLAGAL  | 227  | >KDM6A-L97 TVIRLAGAI  | 113  | 114  |
| >KDM6A-L97 TVIRLAGAL  | 239  | >KDM6A-L97 TVIRLAGAI  | 148  | 91   |
| >KDM6A-R1C RRKGPFKTIK | 163  | >KDM6A-R1C GRKGPFKTIK | 6211 | 6048 |
| >KDM6A-R1C RRKGPFKTI  | 153  | >KDM6A-R1C GRKGPFKTI  | 1584 | 1431 |
| >KDM6A-R1C RRKGPFKTIK | 27   | >KDM6A-R1C GRKGPFKTIK | 340  | 313  |
| >KDM6A-R1C RRKGPFKTI  | 313  | >KDM6A-R1C GRKGPFKTI  | 2763 | 2450 |
| >KDM6A-R1C RRKGPFKTI  | 72   | >KDM6A-R1C GRKGPFKTI  | 513  | 441  |
| >KDM6A-R1C RRKGPFKTIK | 34   | >KDM6A-R1C GRKGPFKTIK | 283  | 249  |
| >KDM6A-R1C RRKGPFKTIK | 58   | >KDM6A-R1C GRKGPFKTIK | 413  | 355  |
| >KDM6A-R1C RRKGPFKTI  | 64   | >KDM6A-R1C GRKGPFKTI  | 898  | 834  |
| >KDM6A-R1C RRKGPFKTIK | 74   | >KDM6A-R1C GRKGPFKTIK | 2224 | 2150 |
| >KDM6A-R1C RRKGPFKTIK | 93   | >KDM6A-R1C GRKGPFKTIK | 1043 | 950  |
| >KDM6A-R1C RRKGPFKTI  | 110  | >KDM6A-R1C GRKGPFKTI  | 451  | 341  |
| >KDM6A-R1C RRKGPFKTIK | 72   | >KDM6A-R1C GRKGPFKTIK | 1240 | 1168 |
| >KDM6A-R1C RRKGPFKTIK | 117  | >KDM6A-R1C GRKGPFKTIK | 319  | 202  |
| >KDM6A-R1C RRRKGPFK   | 9909 | >KDM6A-R1C RGRKGPFK   | 289  | 9620 |
| >KDM6A-R1C RRRKGPFK   | 4    | >KDM6A-R1C RGRKGPFK   | 3    | 1    |
| >KDM6A-R1C RRRKGPFKTI | 156  | >KDM6A-R1C RGRKGPFKTI | 27   | 129  |

|                        |      |                        |       |       |
|------------------------|------|------------------------|-------|-------|
| >KDM6A-R1C RRRKGPFTII  | 14   | >KDM6A-R1C RGRKGPFTII  | 6     | 8     |
| >KDM6A-R1C RRRKGPFTI   | 52   | >KDM6A-R1C RGRKGPFTI   | 2292  | 2240  |
| >KDM6A-R1C RRRKGPFK    | 89   | >KDM6A-R1C RGRKGPFK    | 12569 | 12480 |
| >KDM6A-R1C RRRKGPFKT   | 216  | >KDM6A-R1C RGRKGPFKT   | 20591 | 20375 |
| >KDM6A-R1C RRRKGPFTI   | 25   | >KDM6A-R1C RGRKGPFTI   | 17819 | 17794 |
| >KDM6A-R1C RRRKGPFTII  | 67   | >KDM6A-R1C RGRKGPFTII  | 12985 | 12918 |
| >KDM6A-R1C RRRKGPFK    | 57   | >KDM6A-R1C RGRKGPFK    | 14834 | 14777 |
| >KDM6A-R1C RRRKGPFKT   | 67   | >KDM6A-R1C RGRKGPFKT   | 14225 | 14158 |
| >KDM6A-R1C RRRKGPFTI   | 27   | >KDM6A-R1C RGRKGPFTI   | 7943  | 7916  |
| >KDM6A-R1C RRRKGPFTII  | 53   | >KDM6A-R1C RGRKGPFTII  | 11166 | 11113 |
| >KDM6A-R1C RRRKGPFTI   | 33   | >KDM6A-R1C RGRKGPFTI   | 13038 | 13005 |
| >KDM6A-R1C RRRKGPFTII  | 82   | >KDM6A-R1C RGRKGPFTII  | 10594 | 10512 |
| >KDM6A-R1C ESTSSDNSGR  | 7    | >KDM6A-R1C ESTSSDNSGR  | 18837 | 18830 |
| >KDM6A-R1C GRRRKGPFK   | 11   | >KDM6A-R1C GRGRKGPFK   | 6903  | 6892  |
| >KDM6A-R1C GRRRKGPF    | 153  | >KDM6A-R1C GRGRKGPF    | 1464  | 1311  |
| >KDM6A-R1C GRRRKGPF    | 467  | >KDM6A-R1C GRGRKGPF    | 880   | 413   |
| >KDM6A-R1C GRRRKGPFT   | 266  | >KDM6A-R1C GRGRKGPFT   | 1108  | 842   |
| >KDM6A-R1C GRRRKGPFTI  | 337  | >KDM6A-R1C GRGRKGPFTI  | 3155  | 2818  |
| >KDM6A-R1C GRRRKGPFTII | 216  | >KDM6A-R1C GRGRKGPFTII | 1820  | 1604  |
| >KDM6A-R1C GRRRKGPFK   | 297  | >KDM6A-R1C GRGRKGPFK   | 1221  | 924   |
| >KDM6A-R1C GRRRKGPFKT  | 160  | >KDM6A-R1C GRGRKGPFKT  | 584   | 424   |
| >KDM6A-R1C SGRRRKGPFK  | 4    | >KDM6A-R1C SGRGRKGPFK  | 6     | 2     |
| >KDM6A-R1C SGRRRKGPF   | 119  | >KDM6A-R1C SGRGRKGPF   | 1082  | 963   |
| >KDM6A-R1C SSDNSGRRRK  | 371  | >KDM6A-R1C SSDNSGRGRK  | 452   | 81    |
| >KDM6A-R1C TSSDNSGRRF  | 95   | >KDM6A-R1C TSSDNSGRGF  | 77    | 18    |
| >KDM6A-R1C TSSDNSGRRF  | 81   | >KDM6A-R1C TSSDNSGRGF  | 97    | 16    |
| >KDM6A-R1C TSSDNSGRR   | 29   | >KDM6A-R1C TSSDNSGRG   | 29231 | 29202 |
| >KDM6A-R1C TSSDNSGRRF  | 87   | >KDM6A-R1C TSSDNSGRGF  | 68    | 19    |
| >KDM6A-R1C TSSDNSGRRF  | 173  | >KDM6A-R1C TSSDNSGRGF  | 107   | 66    |
| >KDM6A-R1C STSSDNSGRR  | 156  | >KDM6A-R1C STSSDNSGRG  | 32714 | 32558 |
| >KDM6A-R1C STSSDNSGRR  | 354  | >KDM6A-R1C STSSDNSGRG  | 699   | 345   |
| >KDM6A-R1C STSSDNSGRR  | 49   | >KDM6A-R1C STSSDNSGRG  | 35022 | 34973 |
| >KDM6A-R1C STSSDNSGRR  | 28   | >KDM6A-R1C STSSDNSGRG  | 26    | 2     |
| >KDM6A-R1C STSSDNSGRR  | 276  | >KDM6A-R1C STSSDNSGRG  | 13381 | 13105 |
| >KDM6A-R1C STSSDNSGRR  | 308  | >KDM6A-R1C STSSDNSGRG  | 514   | 206   |
| >KDR-A1065` ARLPLKWM   | 92   | >KDR-A1065` TRLPKWM    | 282   | 190   |
| >KDR-A1065` ARLPLKWMA  | 178  | >KDR-A1065` TRLPKWMA   | 622   | 444   |
| >KDR-A1065` ARLPLKWM   | 348  | >KDR-A1065` TRLPKWM    | 496   | 148   |
| >KDR-A1065` DARLPKWM   | 234  | >KDR-A1065` DTRLPKWM   | 8     | 226   |
| >KDR-A1065` DARLPKW    | 8609 | >KDR-A1065` DTRLPKW    | 385   | 8224  |
| >KDR-A1065` DARLPKWM   | 1423 | >KDR-A1065` DTRLPKWM   | 25    | 1398  |
| >KDR-A1065` DARLPKW    | 360  | >KDR-A1065` DTRLPKW    | 32    | 328   |
| >KDR-A1065` DARLPKWM   | 1722 | >KDR-A1065` DTRLPKWM   | 102   | 1620  |

|                         |      |                         |      |      |
|-------------------------|------|-------------------------|------|------|
| >KDR-A1065` DARLPLKW    | 405  | >KDR-A1065` DTRLPLKW    | 224  | 181  |
| >KDR-A1065` DARLPLKWM   | 1892 | >KDR-A1065` DTRLPLKWM   | 90   | 1802 |
| >KDR-A1065` KGDARLPLKV  | 336  | >KDR-A1065` KGDTRLPLKV  | 554  | 218  |
| >KDR-A1065` KGDARLPLKV  | 23   | >KDR-A1065` KGDTRLPLKV  | 38   | 15   |
| >KDR-A1065` RKG DARLPLK | 355  | >KDR-A1065` RKG DTRLPLK | 387  | 32   |
| >KDR-A1065` RKG DARLPL  | 75   | >KDR-A1065` RKG DTRLPL  | 39   | 36   |
| >KDR-A1065` RKG DARLPL  | 517  | >KDR-A1065` RKG DTRLPL  | 444  | 73   |
| >KDR-A1065` VRKGDARLPL  | 384  | >KDR-A1065` VRKGDTRLPL  | 171  | 213  |
| >KDR-A1065` VRKGDARLPL  | 361  | >KDR-A1065` VRKGDTRLPL  | 486  | 125  |
| >KDR-A1065` VRKGDARLPL  | 534  | >KDR-A1065` VRKGDTRLPL  | 435  | 99   |
| >KDR-A1065` VRKGDARLPL  | 303  | >KDR-A1065` VRKGDTRLPL  | 166  | 137  |
| >KDR-A1065` YVRKGDARL   | 79   | >KDR-A1065` YVRKGDTRL   | 129  | 50   |
| >KDR-A1065` YVRKGDARLF  | 179  | >KDR-A1065` YVRKGDTRLP  | 210  | 31   |
| >KDR-A1065` YVRKGDARLF  | 42   | >KDR-A1065` YVRKGDTRLP  | 73   | 31   |
| >KDR-A1065` YVRKGDAR    | 395  | >KDR-A1065` YVRKGDTR    | 577  | 182  |
| >KDR-A1065` YVRKGDAR    | 216  | >KDR-A1065` YVRKGDTR    | 309  | 93   |
| >KDR-A1065` YVRKGDAR    | 169  | >KDR-A1065` YVRKGDTR    | 149  | 20   |
| >KDR-A1065` YVRKGDARL   | 71   | >KDR-A1065` YVRKGDTRL   | 59   | 12   |
| >KDR-A1065` YVRKGDARLF  | 11   | >KDR-A1065` YVRKGDTRLP  | 11   | 0    |
| >KDR-A1065` YVRKGDARLF  | 501  | >KDR-A1065` YVRKGDTRLP  | 454  | 47   |
| >KDR-A1065` YVRKGDARLF  | 159  | >KDR-A1065` YVRKGDTRLP  | 195  | 36   |
| >KDR-A1065` YVRKGDARL   | 23   | >KDR-A1065` YVRKGDTRL   | 54   | 31   |
| >KDR-A1065` YVRKGDARLF  | 60   | >KDR-A1065` YVRKGDTRLP  | 69   | 9    |
| >KDR-A1065` YVRKGDARL   | 114  | >KDR-A1065` YVRKGDTRL   | 54   | 60   |
| >KDR-A1065` YVRKGDARLF  | 751  | >KDR-A1065` YVRKGDTRLP  | 427  | 324  |
| >KDR-A1065` DYVRKGDAR   | 104  | >KDR-A1065` DYVRKGDTR   | 111  | 7    |
| >KDR-A248G ARTELNVGID   | 102  | >KDR-A248G GRTELNVGID   | 390  | 288  |
| >KDR-A248G ARTELNVGI    | 71   | >KDR-A248G GRTELNVGI    | 78   | 7    |
| >KDR-A248G ARTELNVGID   | 336  | >KDR-A248G GRTELNVGID   | 369  | 33   |
| >KDR-A248G ARTELNVGI    | 117  | >KDR-A248G GRTELNVGI    | 66   | 51   |
| >KDR-A248G ARTELNVGID   | 269  | >KDR-A248G GRTELNVGID   | 153  | 116  |
| >KDR-A248G CTARTELNVG   | 116  | >KDR-A248G CTGRTELNVG   | 2102 | 1986 |
| >KDR-A248G CTARTELNVG   | 24   | >KDR-A248G CTGRTELNVG   | 44   | 20   |
| >KDR-A248G LNCTARTEL    | 234  | >KDR-A248G LNCTGRTEL    | 1806 | 1572 |
| >KDR-A248G VLNCTARTEL   | 423  | >KDR-A248G VLNCTGRTEL   | 641  | 218  |
| >KDR-A248G VLNCTART     | 181  | >KDR-A248G VLNCTGRT     | 394  | 213  |
| >KDR-A248G VLNCTART     | 271  | >KDR-A248G VLNCTGRT     | 645  | 374  |
| >KDR-A248G VLNCTARTEL   | 51   | >KDR-A248G VLNCTGRTEL   | 37   | 14   |
| >KDR-A248G VLNCTARTEL   | 104  | >KDR-A248G VLNCTGRTEL   | 103  | 1    |
| >KDR-A248G VLNCTARTEL   | 281  | >KDR-A248G VLNCTGRTEL   | 263  | 18   |
| >KDR-A248G VLNCTART     | 287  | >KDR-A248G VLNCTGRT     | 1749 | 1462 |
| >KDR-A248G VLNCTARTEL   | 15   | >KDR-A248G VLNCTGRTEL   | 15   | 0    |
| >KDR-A248G VLNCTARTEL   | 569  | >KDR-A248G VLNCTGRTEL   | 456  | 113  |

|                        |       |                        |       |       |
|------------------------|-------|------------------------|-------|-------|
| >KDR-A248G LVLNCTARTE  | 417   | >KDR-A248G LVLNCTGRTE  | 983   | 566   |
| >KDR-A248G LVLNCTARTE  | 385   | >KDR-A248G LVLNCTGRTE  | 968   | 583   |
| >KDR-A248G LVLNCTARTE  | 113   | >KDR-A248G LVLNCTGRTE  | 235   | 122   |
| >KDR-A248G LVLNCTARTE  | 51    | >KDR-A248G LVLNCTGRTE  | 99    | 48    |
| >KDR-A248G LVLNCTAR    | 40    | >KDR-A248G LVLNCTGR    | 141   | 101   |
| >KDR-A248G LVLNCTAR    | 254   | >KDR-A248G LVLNCTGR    | 719   | 465   |
| >KDR-A248G LVLNCTAR    | 150   | >KDR-A248G LVLNCTGR    | 157   | 7     |
| >KDR-A248G LVLNCTARTE  | 336   | >KDR-A248G LVLNCTGRTE  | 275   | 61    |
| >KDR-A248G LVLNCTAR    | 349   | >KDR-A248G LVLNCTGR    | 354   | 5     |
| >KDR-A248G KLVNCTA     | 144   | >KDR-A248G KLVNCTG     | 10039 | 9895  |
| >KDR-A248G KLVNCTART   | 370   | >KDR-A248G KLVNCTGRT   | 503   | 133   |
| >KDR-A248G KLVNCTA     | 174   | >KDR-A248G KLVNCTG     | 7615  | 7441  |
| >KDR-A248G KLVNCTA     | 153   | >KDR-A248G KLVNCTG     | 7580  | 7427  |
| >KDR-A248G KLVNCTA     | 345   | >KDR-A248G KLVNCTG     | 13024 | 12679 |
| >KDR-A248G KLVNCTA     | 47    | >KDR-A248G KLVNCTG     | 14578 | 14531 |
| >KDR-A248G KLVNCTAR    | 71    | >KDR-A248G KLVNCTGR    | 235   | 164   |
| >KDR-A248G KLVNCTAR    | 66    | >KDR-A248G KLVNCTGR    | 48    | 18    |
| >KDR-A352V AKYLGYP     | 389   | >KDR-A352V VKYLGYP     | 690   | 301   |
| >KDR-A352V AKYLGYP     | 299   | >KDR-A352V VKYLGYP     | 513   | 214   |
| >KDR-A352V AKYLGYPPE   | 23    | >KDR-A352V VKYLGYPPE   | 34    | 11    |
| >KDR-A352V AKYLGYPPE   | 314   | >KDR-A352V VKYLGYPPE   | 1427  | 1113  |
| >KDR-A352V ATVGERVRIP  | 1774  | >KDR-A352V ATVGERVRIP  | 246   | 1528  |
| >KDR-A352V ATVGERVRIP  | 11299 | >KDR-A352V ATVGERVRIP  | 130   | 11169 |
| >KDR-A352V ATVGERVRIP  | 399   | >KDR-A352V ATVGERVRIP  | 681   | 282   |
| >KDR-A352V ATVGERVRIP  | 324   | >KDR-A352V ATVGERVRIP  | 32    | 292   |
| >KDR-A352V ATVGERVRIP  | 7691  | >KDR-A352V ATVGERVRIP  | 497   | 7194  |
| >KDR-A352V IPAKYLG     | 25    | >KDR-A352V IPVKYL      | 24    | 1     |
| >KDR-A352V IPAKYLG     | 158   | >KDR-A352V IPVKYL      | 94    | 64    |
| >KDR-A352V IPAKYLGYP   | 906   | >KDR-A352V IPVKYL      | 407   | 499   |
| >KDR-A352V IPAKYLGYP   | 120   | >KDR-A352V IPVKYL      | 87    | 33    |
| >KDR-A352V IPAKYLG     | 118   | >KDR-A352V IPVKYL      | 211   | 93    |
| >KDR-A352V IPAKYLG     | 406   | >KDR-A352V IPVKYL      | 327   | 79    |
| >KDR-A352V RIPA KYLG   | 287   | >KDR-A352V RIPA KYLG   | 471   | 184   |
| >KDR-A352V RIPA KYLG   | 22    | >KDR-A352V RIPA KYLG   | 92    | 70    |
| >KDR-A352V RIPA KYLG   | 478   | >KDR-A352V RIPA KYLG   | 1349  | 871   |
| >KDR-A352V VRIPA KYLG  | 280   | >KDR-A352V VRIPA KYLG  | 378   | 98    |
| >KDR-A352V VRIPA KYLG  | 59    | >KDR-A352V VRIPA KYLG  | 59    | 0     |
| >KDR-A352V RVRIPA KY   | 404   | >KDR-A352V RVRIPA KY   | 397   | 7     |
| >KDR-A352V RVRIPA KYG` | 280   | >KDR-A352V RVRIPA KYG` | 316   | 36    |
| >KDR-A352V RVRIPA KY   | 483   | >KDR-A352V RVRIPA KY   | 846   | 363   |
| >KDR-A352V RVRIPA KYG` | 222   | >KDR-A352V RVRIPA KYG` | 366   | 144   |
| >KDR-A352V RVRIPA KY   | 14    | >KDR-A352V RVRIPA KY   | 15    | 1     |
| >KDR-A352V RVRIPA KYL  | 7     | >KDR-A352V RVRIPA KYL  | 6     | 1     |

|                        |      |                        |     |      |
|------------------------|------|------------------------|-----|------|
| >KDR-A352V·RVRIPAKYLG  | 19   | >KDR-A352V·RVRIPVKYLG  | 21  | 2    |
| >KDR-A352V·RVRIPAKYLG` | 10   | >KDR-A352V·RVRIPVKYLG` | 9   | 1    |
| >KDR-A352V·RVRIPAKY    | 205  | >KDR-A352V·RVRIPVKY    | 646 | 441  |
| >KDR-A352V·RVRIPAKYLG` | 73   | >KDR-A352V·RVRIPVKYLG` | 107 | 34   |
| >KDR-A352V·RVRIPAKYL   | 88   | >KDR-A352V·RVRIPVKYL   | 166 | 78   |
| >KDR-A352V·RVRIPAKYLG` | 187  | >KDR-A352V·RVRIPVKYLG` | 139 | 48   |
| >KDR-A352V·RVRIPAKY    | 909  | >KDR-A352V·RVRIPVKY    | 473 | 436  |
| >KDR-A352V·RVRIPAKY    | 5    | >KDR-A352V·RVRIPVKY    | 7   | 2    |
| >KDR-A352V·RVRIPAKYL   | 7    | >KDR-A352V·RVRIPVKYL   | 13  | 6    |
| >KDR-A352V·RVRIPAKYLG` | 4    | >KDR-A352V·RVRIPVKYLG` | 4   | 0    |
| >KDR-A352V·RVRIPAKYL   | 168  | >KDR-A352V·RVRIPVKYL   | 480 | 312  |
| >KDR-A352V·RVRIPAKYLG` | 129  | >KDR-A352V·RVRIPVKYLG` | 202 | 73   |
| >KDR-A352V·ERVRIPAKYL  | 170  | >KDR-A352V·ERVRIPVKYL  | 135 | 35   |
| >KDR-A352V·ERVRIPAKYL  | 572  | >KDR-A352V·ERVRIPVKYL  | 464 | 108  |
| >KDR-A352V·GERVRIPAK   | 263  | >KDR-A352V·GERVRIPVK   | 460 | 197  |
| >KDR-A352V·GERVRIPA    | 67   | >KDR-A352V·GERVRIPV    | 54  | 13   |
| >KDR-A352V·GERVRIPAKY  | 217  | >KDR-A352V·GERVRIPVKY  | 124 | 93   |
| >KDR-A352V·GERVRIPA    | 42   | >KDR-A352V·GERVRIPV    | 189 | 147  |
| >KDR-A352V·GERVRIPAKY  | 510  | >KDR-A352V·GERVRIPVKY  | 406 | 104  |
| >KDR-A352V·GERVRIPA    | 9058 | >KDR-A352V·GERVRIPV    | 349 | 8709 |
| >KDR-A352V·GERVRIPAK   | 135  | >KDR-A352V·GERVRIPVK   | 156 | 21   |
| >KDR-A352V·GERVRIPAKY  | 24   | >KDR-A352V·GERVRIPVKY  | 13  | 11   |
| >KDR-A352V·VGERVRIPAK  | 315  | >KDR-A352V·VGERVRIPVK  | 917 | 602  |
| >KDR-A352V·TVGERVRIPA  | 6529 | >KDR-A352V·TVGERVRIPV  | 258 | 6271 |
| >KDR-A352V·TVGERVRIPA  | 9304 | >KDR-A352V·TVGERVRIPV  | 135 | 9169 |
| >KDR-A352V·TVGERVRIPA  | 299  | >KDR-A352V·TVGERVRIPV  | 388 | 89   |
| >KDR-A352V·TVGERVRIPA  | 67   | >KDR-A352V·TVGERVRIPV  | 88  | 21   |
| >KDR-A352V·TVGERVRIPA  | 497  | >KDR-A352V·TVGERVRIPV  | 643 | 146  |
| >KDR-A352V·TVGERVRIPA  | 1137 | >KDR-A352V·TVGERVRIPV  | 85  | 1052 |
| >KDR-A352V·TVGERVRIPA  | 2079 | >KDR-A352V·TVGERVRIPV  | 79  | 2000 |
| >KDR-A973S·ASSGFVEEK   | 13   | >KDR-A973S·SSSGFVEEK   | 10  | 3    |
| >KDR-A973S·ASSGFVEEK   | 193  | >KDR-A973S·SSSGFVEEK   | 27  | 166  |
| >KDR-A973S·ASSGFVEEKSI | 40   | >KDR-A973S·SSSGFVEEKSI | 93  | 53   |
| >KDR-A973S·ASSGFVEEK   | 90   | >KDR-A973S·SSSGFVEEK   | 102 | 12   |
| >KDR-A973S·SASSGFVEEK  | 812  | >KDR-A973S·SSSSGFVEEK  | 308 | 504  |
| >KDR-A973S·SASSGFVEEK  | 19   | >KDR-A973S·SSSSGFVEEK  | 10  | 9    |
| >KDR-A973S·SASSGFVEEK  | 38   | >KDR-A973S·SSSSGFVEEK  | 31  | 7    |
| >KDR-A973S·SASSGFVEEK  | 150  | >KDR-A973S·SSSSGFVEEK  | 78  | 72   |
| >KDR-A973S·SSASSGFV    | 297  | >KDR-A973S·SSSSSGFV    | 717 | 420  |
| >KDR-A973S·SSASSGFVEEI | 12   | >KDR-A973S·SSSSSGFVEEK | 11  | 1    |
| >KDR-A973S·SSASSGFVEEI | 20   | >KDR-A973S·SSSSSGFVEEK | 39  | 19   |
| >KDR-A973S·SSASSGFV    | 26   | >KDR-A973S·SSSSSGFV    | 90  | 64   |
| >KDR-A973S·SSASSGFV    | 160  | >KDR-A973S·SSSSSGFV    | 890 | 730  |

|                                    |      |                        |      |      |
|------------------------------------|------|------------------------|------|------|
| >KDR-A973S-SSASSGFVEEI             | 88   | >KDR-A973S-SSSSSGFVEEH | 110  | 22   |
| >KDR-A973S-SSASSGFV                | 243  | >KDR-A973S-SSSSSGFV    | 578  | 335  |
| >KDR-A973S-QSSASSGFV               | 25   | >KDR-A973S-QSSSSSGFV   | 40   | 15   |
| >KDR-A973S-QSSASSGFV               | 429  | >KDR-A973S-QSSSSSGFV   | 507  | 78   |
| >KDR-A973S-QSSASSGF                | 100  | >KDR-A973S-QSSSSSGF    | 111  | 11   |
| >KDR-A973S-QSSASSGF                | 44   | >KDR-A973S-QSSSSSGF    | 20   | 24   |
| >KDR-A973S-QSSASSGF                | 4    | >KDR-A973S-QSSSSSGF    | 5    | 1    |
| >KDR-A973S-QSSASSGF                | 247  | >KDR-A973S-QSSSSSGF    | 470  | 223  |
| >KDR-A973S-QSSASSGF                | 315  | >KDR-A973S-QSSSSSGF    | 303  | 12   |
| >KDR-A973S-QSSASSGFV               | 1683 | >KDR-A973S-QSSSSSGFV   | 360  | 1323 |
| >KDR-A973S-SQSSASSGFV              | 486  | >KDR-A973S-SQSSSSSGFV  | 526  | 40   |
| >KDR-A973S-SQSSASSGFV              | 68   | >KDR-A973S-SQSSSSSGFV  | 71   | 3    |
| >KDR-A973S-SQSSASSGFV              | 49   | >KDR-A973S-SQSSSSSGFV  | 44   | 5    |
| >KDR-A973S-SQSSASSGF               | 334  | >KDR-A973S-SQSSSSSGF   | 640  | 306  |
| >KDR-A973S-SQSSASSGFV              | 384  | >KDR-A973S-SQSSSSSGFV  | 349  | 35   |
| >KDR-A973S-SQSSASSGFV              | 374  | >KDR-A973S-SQSSSSSGFV  | 359  | 15   |
| >KDR-A973S-SQSSASSGFV              | 75   | >KDR-A973S-SQSSSSSGFV  | 102  | 27   |
| >KDR-A973S-SQSSASSGFV              | 363  | >KDR-A973S-SQSSSSSGFV  | 462  | 99   |
| >KDR-A973S-SQSSASSG                | 321  | >KDR-A973S-SQSSSSSG    | 206  | 115  |
| >KDR-A973S-SQSSASSGF               | 24   | >KDR-A973S-SQSSSSSGF   | 22   | 2    |
| >KDR-A973S-SQSSASSGFV              | 334  | >KDR-A973S-SQSSSSSGFV  | 356  | 22   |
| >KDR-A973S-SQSSASSGF               | 52   | >KDR-A973S-SQSSSSSGF   | 32   | 20   |
| >KDR-A973S-SQSSASSGF               | 3    | >KDR-A973S-SQSSSSSGF   | 2    | 1    |
| >KDR-A973S-SQSSASSGFV              | 243  | >KDR-A973S-SQSSSSSGFV  | 99   | 144  |
| >KDR-A973S-SQSSASSGF               | 297  | >KDR-A973S-SQSSSSSGF   | 203  | 94   |
| >KDR-A973S-SSQSSASSGF <sup>1</sup> | 555  | >KDR-A973S-SSQSSSSSGF\ | 459  | 96   |
| >KDR-A973S-SSQSSASSGF              | 57   | >KDR-A973S-SSQSSSSSGF  | 40   | 17   |
| >KDR-A973S-SSQSSASSGF              | 492  | >KDR-A973S-SSQSSSSSGF  | 256  | 236  |
| >KDR-A973S-SSQSSASSGF              | 18   | >KDR-A973S-SSQSSSSSGF  | 11   | 7    |
| >KDR-A973S-SSQSSASSGF              | 4    | >KDR-A973S-SSQSSSSSGF  | 4    | 0    |
| >KDR-A973S-SSQSSASSG               | 252  | >KDR-A973S-SSQSSSSSG   | 307  | 55   |
| >KDR-A973S-SSQSSASSGF              | 25   | >KDR-A973S-SSQSSSSSGF  | 26   | 1    |
| >KDR-A973S-SSQSSASSGF <sup>1</sup> | 78   | >KDR-A973S-SSQSSSSSGF\ | 66   | 12   |
| >KDR-A973S-SSQSSASSGF <sup>1</sup> | 288  | >KDR-A973S-SSQSSSSSGF\ | 264  | 24   |
| >KDR-A973S-TSSQSSASSG              | 63   | >KDR-A973S-TSSQSSSSSGf | 60   | 3    |
| >KDR-A973S-TSSQSSASSG              | 51   | >KDR-A973S-TSSQSSSSSGf | 27   | 24   |
| >KDR-A973S-TSSQSSASSG              | 4    | >KDR-A973S-TSSQSSSSSGf | 3    | 1    |
| >KDR-A973S-TSSQSSASSG              | 432  | >KDR-A973S-TSSQSSSSSGf | 542  | 110  |
| >KDR-A973S-TSSQSSASSG              | 189  | >KDR-A973S-TSSQSSSSSGf | 197  | 8    |
| >KDR-A973S-TSSQSSASSG              | 25   | >KDR-A973S-TSSQSSSSSGf | 11   | 14   |
| >KDR-A973S-ITSSQSSAS               | 186  | >KDR-A973S-ITSSQSSSS   | 85   | 101  |
| >KDR-A973S-ITSSQSSASSE             | 135  | >KDR-A973S-ITSSQSSSSSG | 129  | 6    |
| >KDR-A973S-SITSSQSSA               | 231  | >KDR-A973S-SITSSQSSS   | 8889 | 8658 |



|                        |       |                        |       |       |
|------------------------|-------|------------------------|-------|-------|
| >KDR-A973S- SITSSQSSA  | 225   | >KDR-A973S- SITSSQSSS  | 11361 | 11136 |
| >KDR-D180N DSKKGFTIPSY | 86    | >KDR-D180N NSKKGFTIPSY | 423   | 337   |
| >KDR-D180N DSKKGFTIPSY | 250   | >KDR-D180N NSKKGFTIPSY | 1626  | 1376  |
| >KDR-D180N DSKKGFTIPSY | 115   | >KDR-D180N NSKKGFTIPSY | 616   | 501   |
| >KDR-D180N DSKKGFTIPSY | 140   | >KDR-D180N NSKKGFTIPSY | 88    | 52    |
| >KDR-D180N DSKKGFTIPSY | 723   | >KDR-D180N NSKKGFTIPSY | 88    | 635   |
| >KDR-D180N DSKKGFTIPSY | 950   | >KDR-D180N NSKKGFTIPSY | 240   | 710   |
| >KDR-D180N DSKKGFTIPSY | 735   | >KDR-D180N NSKKGFTIPSY | 239   | 496   |
| >KDR-D180N DSKKGFTIPSY | 407   | >KDR-D180N NSKKGFTIPSY | 118   | 289   |
| >KDR-D180N DSKKGFTI    | 1086  | >KDR-D180N NSKKGFTI    | 262   | 824   |
| >KDR-D180N WDSKKGFTI   | 265   | >KDR-D180N WNSKKGFTI   | 7299  | 7034  |
| >KDR-D180N WDSKKGFTI   | 60    | >KDR-D180N WNSKKGFTI   | 3055  | 2995  |
| >KDR-D180N SWDSKKGFTI  | 854   | >KDR-D180N SWNSKKGFTI  | 463   | 391   |
| >KDR-D180N SWDSKKGFT   | 968   | >KDR-D180N SWNSKKGFT   | 437   | 531   |
| >KDR-D180N SWDSKKGFT   | 349   | >KDR-D180N SWNSKKGFT   | 306   | 43    |
| >KDR-D180N SWDSKKGFT   | 104   | >KDR-D180N SWNSKKGFT   | 98    | 6     |
| >KDR-D180N SWDSKKGFTI  | 545   | >KDR-D180N SWNSKKGFTI  | 469   | 76    |
| >KDR-D180N ISWDSKKGFT  | 347   | >KDR-D180N ISWNSKKGFT  | 143   | 204   |
| >KDR-D180N ISWDSKKGFT  | 20    | >KDR-D180N ISWNSKKGFT  | 8     | 12    |
| >KDR-D180N ISWDSKKGFT  | 354   | >KDR-D180N ISWNSKKGFT  | 136   | 218   |
| >KDR-D180N ISWDSKKGFT  | 3     | >KDR-D180N ISWNSKKGFT  | 4     | 1     |
| >KDR-D180N ISWDSKKGFT  | 6     | >KDR-D180N ISWNSKKGFT  | 7     | 1     |
| >KDR-D180N ISWDSKKGFT  | 137   | >KDR-D180N ISWNSKKGFT  | 112   | 25    |
| >KDR-D180N ISWDSKKGFT  | 377   | >KDR-D180N ISWNSKKGFT  | 147   | 230   |
| >KDR-D180N ISWDSKKGFT  | 632   | >KDR-D180N ISWNSKKGFT  | 328   | 304   |
| >KDR-D180N ISWDSKKGFT  | 14    | >KDR-D180N ISWNSKKGFT  | 13    | 1     |
| >KDR-D180N RISWDSKK    | 73    | >KDR-D180N RISWNSKK    | 43    | 30    |
| >KDR-D180N RISWDSKK    | 34    | >KDR-D180N RISWNSKK    | 21    | 13    |
| >KDR-D180N RISWDSKK    | 720   | >KDR-D180N RISWNSKK    | 87    | 633   |
| >KDR-D180N RISWDSKKGFT | 396   | >KDR-D180N RISWNSKKGFT | 206   | 190   |
| >KDR-D180N RISWDSKK    | 895   | >KDR-D180N RISWNSKK    | 494   | 401   |
| >KDR-D180N RISWDSKKGFT | 761   | >KDR-D180N RISWNSKKGFT | 490   | 271   |
| >KDR-D180N RISWDSKKGFT | 102   | >KDR-D180N RISWNSKKGFT | 46    | 56    |
| >KDR-D180N RISWDSKKGFT | 225   | >KDR-D180N RISWNSKKGFT | 109   | 116   |
| >KDR-D180N NRISWDSKKC  | 178   | >KDR-D180N NRISWNSKKC  | 95    | 83    |
| >KDR-D180N NRISWDSK    | 506   | >KDR-D180N NRISWNSK    | 388   | 118   |
| >KDR-D180N NRISWDSKK   | 337   | >KDR-D180N NRISWNSKK   | 176   | 161   |
| >KDR-D180N NRISWDSKKC  | 736   | >KDR-D180N NRISWNSKKC  | 469   | 267   |
| >KDR-D180N GNRISWDSK   | 89    | >KDR-D180N GNRISWNSK   | 10    | 79    |
| >KDR-D180N GNRISWDSKI  | 394   | >KDR-D180N GNRISWNSKI  | 72    | 322   |
| >KDR-D717V DGNRNLTIR   | 6022  | >KDR-D717V VGNRNLTIR   | 484   | 5538  |
| >KDR-D717V KDGNRNLTIR  | 17762 | >KDR-D717V KVGNRNLTIR  | 257   | 17505 |
| >KDR-D717V KDGNRNLTIR  | 22934 | >KDR-D717V KVGNRNLTIR  | 242   | 22692 |

|                        |       |                        |       |       |
|------------------------|-------|------------------------|-------|-------|
| >KDR-D717V KDGNRNLTI   | 12685 | >KDR-D717V KVGNRNLTI   | 183   | 12502 |
| >KDR-D717V KDGNRNLTI   | 2695  | >KDR-D717V KVGNRNLTI   | 92    | 2603  |
| >KDR-D717V KDGNRNLTI   | 4680  | >KDR-D717V KVGNRNLTI   | 27    | 4653  |
| >KDR-D717V KDGNRNLTI   | 810   | >KDR-D717V KVGNRNLTI   | 8     | 802   |
| >KDR-D717V KDGNRNLTI   | 629   | >KDR-D717V KVGNRNLTI   | 140   | 489   |
| >KDR-D717V KDGNRNLTI   | 107   | >KDR-D717V KVGNRNLTI   | 33    | 74    |
| >KDR-D717V KDGNRNLTI   | 1527  | >KDR-D717V KVGNRNLTI   | 291   | 1236  |
| >KDR-D717V KDGNRNLTI   | 300   | >KDR-D717V KVGNRNLTI   | 24555 | 24255 |
| >KDR-D717V LVEDSGIVLKI | 30109 | >KDR-D717V LVEDSGIVLKI | 348   | 29761 |
| >KDR-D717V LVEDSGIVLKI | 28660 | >KDR-D717V LVEDSGIVLKI | 323   | 28337 |
| >KDR-D717V LVEDSGIVLKI | 28192 | >KDR-D717V LVEDSGIVLKI | 8     | 28184 |
| >KDR-D717V LKDGNRNL    | 4361  | >KDR-D717V LKVGNRNL    | 180   | 4181  |
| >KDR-D717V LKDGNRNLTI  | 3908  | >KDR-D717V LKVGNRNLTI  | 161   | 3747  |
| >KDR-D717V VLKDGNRNL   | 380   | >KDR-D717V VLKVGNRNL   | 2114  | 1734  |
| >KDR-D717V VLKDGNRNL   | 54    | >KDR-D717V VLKVGNRNL   | 687   | 633   |
| >KDR-D717V VLKDGNRNL   | 25    | >KDR-D717V VLKVGNRNL   | 210   | 185   |
| >KDR-D717V VLKDGNRNL   | 183   | >KDR-D717V VLKVGNRNL   | 1832  | 1649  |
| >KDR-D717V VLKDGNRNL   | 228   | >KDR-D717V VLKVGNRNL   | 1401  | 1173  |
| >KDR-D717V VLKDGNRNL   | 11    | >KDR-D717V VLKVGNRNL   | 221   | 210   |
| >KDR-D717V VLKDGNRNL   | 139   | >KDR-D717V VLKVGNRNL   | 2578  | 2439  |
| >KDR-D717V VLKDGNRNL   | 12    | >KDR-D717V VLKVGNRNL   | 122   | 110   |
| >KDR-D717V IVLKDGNR    | 407   | >KDR-D717V IVLKVGNR    | 73    | 334   |
| >KDR-D717V IVLKDGNR    | 1277  | >KDR-D717V IVLKVGNR    | 321   | 956   |
| >KDR-D717V IVLKDGNR    | 435   | >KDR-D717V IVLKVGNR    | 163   | 272   |
| >KDR-D717V IVLKDGNR    | 525   | >KDR-D717V IVLKVGNR    | 448   | 77    |
| >KDR-D717V DSGIVLKDGN  | 423   | >KDR-D717V DSGIVLKVGN  | 332   | 91    |
| >KDR-D717V DSGIVLKDGN  | 545   | >KDR-D717V DSGIVLKVGN  | 432   | 113   |
| >KDR-D717V VEDSGIVLKD  | 28444 | >KDR-D717V VEDSGIVLKV  | 258   | 28186 |
| >KDR-G1145 GEPSQRPTF   | 217   | >KDR-G1145 EEPSQRPTF   | 420   | 203   |
| >KDR-G1145 GEPSQRPTF   | 127   | >KDR-G1145 EEPSQRPTF   | 4545  | 4418  |
| >KDR-G1145 HGEPSQRPTF  | 206   | >KDR-G1145 HEEPSQRPTF  | 9056  | 8850  |
| >KDR-G1145 HGEPSQRPTF  | 35175 | >KDR-G1145 HEEPSQRPTF  | 414   | 34761 |
| >KDR-G1145 HGEPSQRPT   | 40034 | >KDR-G1145 HEEPSQRPT   | 390   | 39644 |
| >KDR-G1145 MYQTMLDCV   | 496   | >KDR-G1145 MYQTMLDCV   | 692   | 196   |
| >KDR-G1145 MYQTMLDCV   | 369   | >KDR-G1145 MYQTMLDCV   | 545   | 176   |
| >KDR-G1145 WHGEPQR     | 117   | >KDR-G1145 WHEEPSQR    | 365   | 248   |
| >KDR-G1145 WHGEPQR     | 2698  | >KDR-G1145 WHEEPSQR    | 323   | 2375  |
| >KDR-G1145 CWHGEPQR    | 33    | >KDR-G1145 CWHEEPSQR   | 34    | 1     |
| >KDR-G1145 MLDCWHGE    | 595   | >KDR-G1145 MLDCWHEE    | 478   | 117   |
| >KDR-G1145 MLDCWHGEI   | 326   | >KDR-G1145 MLDCWHEEF   | 94    | 232   |
| >KDR-G1145 MLDCWHGEI   | 56    | >KDR-G1145 MLDCWHEEF   | 57    | 1     |
| >KDR-G1145 MLDCWHGEI   | 118   | >KDR-G1145 MLDCWHEEF   | 109   | 9     |
| >KDR-G1145 MLDCWHGEI   | 91    | >KDR-G1145 MLDCWHEEF   | 75    | 16    |

|                         |       |                         |      |       |
|-------------------------|-------|-------------------------|------|-------|
| >KDR-G1145 TMLDCWHG     | 358   | >KDR-G1145 TMLDCWHE     | 1329 | 971   |
| >KDR-G1145 TMLDCWHGI    | 152   | >KDR-G1145 TMLDCWHEE    | 258  | 106   |
| >KDR-G1145 TMLDCWHGI    | 219   | >KDR-G1145 TMLDCWHEE    | 323  | 104   |
| >KDR-G873R GATHSEHR     | 606   | >KDR-G873R RATHSEHR     | 27   | 579   |
| >KDR-G873R GATHSEHR     | 220   | >KDR-G873R RATHSEHR     | 185  | 35    |
| >KDR-G873R GATHSEHRAI   | 3261  | >KDR-G873R RATHSEHRAI   | 257  | 3004  |
| >KDR-G873R GATHSEHRAI   | 1198  | >KDR-G873R RATHSEHRAI   | 27   | 1171  |
| >KDR-G873R GATHSEHRAI   | 602   | >KDR-G873R RATHSEHRAI   | 16   | 586   |
| >KDR-G873R GATHSEHRAI   | 3542  | >KDR-G873R RATHSEHRAI   | 76   | 3466  |
| >KDR-G873R GATHSEHRAI   | 1372  | >KDR-G873R RATHSEHRAI   | 463  | 909   |
| >KDR-G873R GATHSEHRAI   | 380   | >KDR-G873R RATHSEHRAI   | 283  | 97    |
| >KDR-G873R GATHSEHR     | 11102 | >KDR-G873R RATHSEHR     | 337  | 10765 |
| >KDR-G873R EGATHSEHR    | 72    | >KDR-G873R ERATHSEHR    | 323  | 251   |
| >KDR-G873R EGATHSEHR/   | 7406  | >KDR-G873R ERATHSEHRA   | 91   | 7315  |
| >KDR-G873R RTVAVKMLKI   | 23502 | >KDR-G873R RTVAVKMLKI   | 391  | 23111 |
| >KDR-G873R RTVAVKMLKI   | 11615 | >KDR-G873R RTVAVKMLKI   | 13   | 11602 |
| >KDR-G873R RTVAVKMLKI   | 31804 | >KDR-G873R RTVAVKMLKI   | 45   | 31759 |
| >KDR-G873R RTVAVKMLKI   | 35231 | >KDR-G873R RTVAVKMLKI   | 269  | 34962 |
| >KDR-G873R KEGATHSEHF   | 14510 | >KDR-G873R KERATHSEHR   | 342  | 14168 |
| >KDR-G873R KEGATHSEHF   | 710   | >KDR-G873R KERATHSEHR   | 187  | 523   |
| >KDR-G873R KEGATHSEHF   | 17    | >KDR-G873R KERATHSEHR   | 35   | 18    |
| >KDR-G873R KEGATHSEHF   | 66    | >KDR-G873R KERATHSEHR   | 171  | 105   |
| >KDR-G873R MLKEGATHS    | 105   | >KDR-G873R MLKERATHS    | 166  | 61    |
| >KDR-G873R MLKEGATHS    | 308   | >KDR-G873R MLKERATHS    | 1140 | 832   |
| >KDR-G873R MLKEGATHSI   | 413   | >KDR-G873R MLKERATHSE   | 1192 | 779   |
| >KDR-G873R MLKEGATHS    | 13561 | >KDR-G873R MLKERATHS    | 259  | 13302 |
| >KDR-G873R KMLKEGAT     | 276   | >KDR-G873R KMLKERAT     | 720  | 444   |
| >KDR-G873R KMLKEGATH    | 158   | >KDR-G873R KMLKERATH    | 258  | 100   |
| >KDR-G873R AVKMLKEG     | 18659 | >KDR-G873R AVKMLKER     | 17   | 18642 |
| >KDR-G873R TVAVKMLKEG   | 32104 | >KDR-G873R TVAVKMLKEF   | 490  | 31614 |
| >KDR-G873R TVAVKMLKEG   | 30964 | >KDR-G873R TVAVKMLKEF   | 20   | 30944 |
| >KDR-G873R TVAVKMLKEG   | 47    | >KDR-G873R TVAVKMLKEF   | 75   | 28    |
| >KDR-L1140 M LDCWHGEP   | 3353  | >KDR-L1140 M MDCWHGEP   | 396  | 2957  |
| >KDR-L1140 M MLDCWHGE   | 595   | >KDR-L1140 M MMDCWHGE   | 337  | 258   |
| >KDR-L1140 M MLDCWHGEI  | 326   | >KDR-L1140 M MMDCWHGE   | 175  | 151   |
| >KDR-L1140 M MLDCWHGEI  | 56    | >KDR-L1140 M MMDCWHGE   | 37   | 19    |
| >KDR-L1140 M MLDCWHGEI  | 118   | >KDR-L1140 M MMDCWHGE   | 74   | 44    |
| >KDR-L1140 M MLDCWHGEI  | 91    | >KDR-L1140 M MMDCWHGE   | 193  | 102   |
| >KDR-L1140 M YTTPEMYQTI | 465   | >KDR-L1140 M YTTPEMYQTI | 2742 | 2277  |
| >KDR-L1140 M YTTPEMYQTI | 58    | >KDR-L1140 M YTTPEMYQTI | 790  | 732   |
| >KDR-L1140 M YTTPEMYQTI | 156   | >KDR-L1140 M YTTPEMYQTI | 716  | 560   |
| >KDR-L1140 M YTTPEMYQTI | 440   | >KDR-L1140 M YTTPEMYQTI | 2487 | 2047  |
| >KDR-L1140 M YTTPEMYQTI | 108   | >KDR-L1140 M YTTPEMYQTI | 3829 | 3721  |

|                        |      |                        |      |      |
|------------------------|------|------------------------|------|------|
| >KDR-L1140M YTTPEMYQTI | 4045 | >KDR-L1140M YTTPEMYQTI | 277  | 3768 |
| >KDR-L1140M YTTPEMYQTI | 379  | >KDR-L1140M YTTPEMYQTI | 50   | 329  |
| >KDR-L1140M YTTPEMYQTI | 86   | >KDR-L1140M YTTPEMYQTI | 782  | 696  |
| >KDR-L1140M YTTPEMYQTI | 232  | >KDR-L1140M YTTPEMYQTI | 281  | 49   |
| >KDR-L1140M YTTPEMYQTI | 7    | >KDR-L1140M YTTPEMYQTI | 6    | 1    |
| >KDR-L1140M YTTPEMYQTI | 1536 | >KDR-L1140M YTTPEMYQTI | 495  | 1041 |
| >KDR-L1140M YTTPEMYQTI | 6    | >KDR-L1140M YTTPEMYQTI | 7    | 1    |
| >KDR-L1140M YTTPEMYQTI | 14   | >KDR-L1140M YTTPEMYQTI | 4    | 10   |
| >KDR-L1140M YTTPEMYQTI | 288  | >KDR-L1140M YTTPEMYQTI | 629  | 341  |
| >KDR-L1140M TMLDCWHGI  | 965  | >KDR-L1140M TMMDCWHC   | 301  | 664  |
| >KDR-L1140M TMLDCWHG   | 3561 | >KDR-L1140M TMMDCWHC   | 318  | 3243 |
| >KDR-L1140M TMLDCWHGI  | 2423 | >KDR-L1140M TMMDCWHC   | 159  | 2264 |
| >KDR-L1140M TMLDCWHGI  | 3507 | >KDR-L1140M TMMDCWHC   | 249  | 3258 |
| >KDR-L1140M TMLDCWHG   | 358  | >KDR-L1140M TMMDCWHC   | 197  | 161  |
| >KDR-L1140M TMLDCWHGI  | 560  | >KDR-L1140M TMMDCWHC   | 281  | 279  |
| >KDR-L1140M TMLDCWHGI  | 152  | >KDR-L1140M TMMDCWHC   | 81   | 71   |
| >KDR-L1140M TMLDCWHGI  | 219  | >KDR-L1140M TMMDCWHC   | 514  | 295  |
| >KDR-L1140M YQTMLDCW   | 234  | >KDR-L1140M YQTMMDCW   | 175  | 59   |
| >KDR-L1140M YQTMLDCW   | 162  | >KDR-L1140M YQTMMDCW   | 128  | 34   |
| >KDR-L1140M MYQTMLDC\  | 35   | >KDR-L1140M MYQTMMDC   | 65   | 30   |
| >KDR-L1140M MYQTMLDC\  | 306  | >KDR-L1140M MYQTMMDC   | 452  | 146  |
| >KDR-L1140M MYQTMLDC\  | 28   | >KDR-L1140M MYQTMMDC   | 37   | 9    |
| >KDR-L1140M MYQTMLDC\  | 496  | >KDR-L1140M MYQTMMDC   | 594  | 98   |
| >KDR-L1140M MYQTMLDC\  | 261  | >KDR-L1140M MYQTMMDC   | 160  | 101  |
| >KDR-L1140M MYQTMLDC\  | 325  | >KDR-L1140M MYQTMMDC   | 389  | 64   |
| >KDR-L1140M MYQTMLDC\  | 369  | >KDR-L1140M MYQTMMDC   | 344  | 25   |
| >KDR-L1140M EMYQTMLDC  | 620  | >KDR-L1140M EMYQTMMD   | 347  | 273  |
| >KDR-L1140M EMYQTMLDC  | 343  | >KDR-L1140M EMYQTMMD   | 268  | 75   |
| >KDR-L1140M EMYQTMLDC  | 185  | >KDR-L1140M EMYQTMMD   | 188  | 3    |
| >KDR-L1140M PEMYQTML   | 348  | >KDR-L1140M PEMYQTMM   | 2138 | 1790 |
| >KDR-L1140M PEMYQTMLC  | 96   | >KDR-L1140M PEMYQTMM   | 86   | 10   |
| >KDR-L1140M PEMYQTMLC  | 102  | >KDR-L1140M PEMYQTMM   | 108  | 6    |
| >KDR-L1140M PEMYQTMLC  | 223  | >KDR-L1140M PEMYQTMM   | 344  | 121  |
| >KDR-L1140M TPEMYQTML  | 1758 | >KDR-L1140M TPEMYQTM   | 128  | 1630 |
| >KDR-L1140M TTPEMYQTM  | 3419 | >KDR-L1140M TTPEMYQTM  | 323  | 3096 |
| >KDR-L1140M TTPEMYQTM  | 2763 | >KDR-L1140M TTPEMYQTM  | 412  | 2351 |
| >KDR-L1140M TTPEMYQTM  | 123  | >KDR-L1140M TTPEMYQTM  | 1059 | 936  |
| >KDR-L1140M TTPEMYQTM  | 2    | >KDR-L1140M TTPEMYQTM  | 3    | 1    |
| >KDR-L1140M TTPEMYQTM  | 163  | >KDR-L1140M TTPEMYQTM  | 435  | 272  |
| >KDR-L1140M TTPEMYQTM  | 117  | >KDR-L1140M TTPEMYQTM  | 22   | 95   |
| >KDR-P1210I PKFHYNAC   | 2623 | >KDR-P1210I LKFHYDNTAC | 280  | 2343 |
| >KDR-P1210I PKFHYNAC   | 5311 | >KDR-P1210I LKFHYDNT   | 317  | 4994 |
| >KDR-P1210I PKFHYNAC   | 594  | >KDR-P1210I LKFHYDNTA  | 35   | 559  |

|                        |       |                        |     |       |
|------------------------|-------|------------------------|-----|-------|
| >KDR-P1210I PKFHYNNTAC | 2267  | >KDR-P1210I LKFHYDNTAC | 184 | 2083  |
| >KDR-P1210I PKFHYNNTAC | 236   | >KDR-P1210I LKFHYDNTAC | 16  | 220   |
| >KDR-P1210I PKFHYNNTAC | 10181 | >KDR-P1210I LKFHYDNTAC | 296 | 9885  |
| >KDR-P1210I VCDPKFHY   | 595   | >KDR-P1210I VCDLKFHY   | 247 | 348   |
| >KDR-P1210I VCDPKFHY   | 205   | >KDR-P1210I VCDLKFHY   | 246 | 41    |
| >KDR-P1210I EVCDPKFH   | 220   | >KDR-P1210I EVCDLKFH   | 139 | 81    |
| >KDR-P1210I EVCDPKFHY  | 9     | >KDR-P1210I EVCDLKFHY  | 26  | 17    |
| >KDR-P1210I EVCDPKFHY  | 120   | >KDR-P1210I EVCDLKFHY  | 412 | 292   |
| >KDR-P1210I EVCDPKFHY  | 153   | >KDR-P1210I EVCDLKFHY  | 91  | 62    |
| >KDR-P1210I EVCDPKFHY  | 128   | >KDR-P1210I EVCDLKFHY  | 85  | 43    |
| >KDR-P1210I EVCDPKFHY  | 1724  | >KDR-P1210I EVCDLKFHY  | 213 | 1511  |
| >KDR-P1210I EEVCDPKFHY | 274   | >KDR-P1210I EEVCDLKFHY | 120 | 154   |
| >KDR-P1210I EEVCDPKF   | 409   | >KDR-P1210I EEVCDLKF   | 188 | 221   |
| >KDR-P1210I EEVCDPKFHY | 1866  | >KDR-P1210I EEVCDLKFHY | 422 | 1444  |
| >KDR-P1210I EEVCDPKFHY | 409   | >KDR-P1210I EEVCDLKFHY | 249 | 160   |
| >KDR-P1210I EEVCDPKF   | 59    | >KDR-P1210I EEVCDLKF   | 50  | 9     |
| >KDR-P1210I EEVCDPKFH  | 488   | >KDR-P1210I EEVCDLKFH  | 405 | 83    |
| >KDR-P1210I EEVCDPKFHY | 203   | >KDR-P1210I EEVCDLKFHY | 81  | 122   |
| >KDR-P1210I EEEVCDPKF  | 602   | >KDR-P1210I EEEVCDLKF  | 433 | 169   |
| >KDR-P1210I EEEVCDPKFH | 583   | >KDR-P1210I EEEVCDLKFH | 294 | 289   |
| >KDR-P1210I EEEVCDPKF  | 161   | >KDR-P1210I EEEVCDLKF  | 99  | 62    |
| >KDR-P1210I EEEVCDPKFH | 244   | >KDR-P1210I EEEVCDLKFH | 121 | 123   |
| >KDR-P1210I EEEEVCDP   | 8562  | >KDR-P1210I EEEEVCDL   | 473 | 8089  |
| >KDR-P1210I EEEEVCDP   | 11102 | >KDR-P1210I EEEEVCDL   | 292 | 10810 |
| >KDR-P1210I EEEEVCDPKF | 70    | >KDR-P1210I EEEEVCDLKF | 50  | 20    |
| >KDR-P1210I EEEEVCDPKF | 129   | >KDR-P1210I EEEEVCDLKF | 52  | 77    |
| >KDR-P1210I EEEEVCDPKF | 478   | >KDR-P1210I EEEEVCDLKF | 318 | 160   |
| >KDR-P1210I MEEEEVCDP  | 13726 | >KDR-P1210I MEEEEVCDL  | 142 | 13584 |
| >KDR-P1210I MEEEEVCDPI | 53    | >KDR-P1210I MEEEEVCDLH | 48  | 5     |
| >KDR-P1210I MEEEEVCDP  | 10924 | >KDR-P1210I MEEEEVCDL  | 228 | 10696 |
| >KDR-P1210I MEEEEVCDPI | 135   | >KDR-P1210I MEEEEVCDLH | 99  | 36    |
| >KDR-P1210I MEEEEVCDP  | 3565  | >KDR-P1210I MEEEEVCDL  | 18  | 3547  |
| >KDR-P1210I MEEEEVCDPI | 123   | >KDR-P1210I MEEEEVCDLH | 205 | 82    |
| >KDR-P1210I CMEEEEVCDI | 20771 | >KDR-P1210I CMEEEEVCDI | 344 | 20427 |
| >KDR-P1210I CMEEEEVCDI | 24164 | >KDR-P1210I CMEEEEVCDI | 66  | 24098 |
| >KDR-Q2R-w QSKVLLAV    | 333   | >KDR-Q2R-m RSKVLLAV    | 9   | 324   |
| >KDR-Q2R-w QSKVLLAVA   | 234   | >KDR-Q2R-m RSKVLLAVA   | 8   | 226   |
| >KDR-Q2R-w QSKVLLAVAL  | 1052  | >KDR-Q2R-m RSKVLLAVAL  | 18  | 1034  |
| >KDR-Q2R-w QSKVLLAVAL  | 6716  | >KDR-Q2R-m RSKVLLAVAL' | 310 | 6406  |
| >KDR-Q2R-w QSKVLLAVAL  | 1832  | >KDR-Q2R-m RSKVLLAVAL  | 251 | 1581  |
| >KDR-Q2R-w QSKVLLAVAL  | 930   | >KDR-Q2R-m RSKVLLAVAL  | 250 | 680   |
| >KDR-Q2R-w QSKVLLAV    | 3625  | >KDR-Q2R-m RSKVLLAV    | 118 | 3507  |
| >KDR-Q2R-w QSKVLLAVAL  | 59    | >KDR-Q2R-m RSKVLLAVAL  | 6   | 53    |

|                        |      |                        |       |       |
|------------------------|------|------------------------|-------|-------|
| >KDR-Q2R-w QSKVLLAVAL  | 9    | >KDR-Q2R-m RSKVLLAVAL' | 3     | 6     |
| >KDR-Q2R-w QSKVLLAVAL  | 58   | >KDR-Q2R-m RSKVLLAVAL' | 28    | 30    |
| >KDR-Q2R-w QSKVLLAVAL  | 27   | >KDR-Q2R-m RSKVLLAVAL' | 11    | 16    |
| >KDR-Q2R-w QSKVLLAV    | 2882 | >KDR-Q2R-m RSKVLLAV    | 188   | 2694  |
| >KDR-Q2R-w QSKVLLAVAL  | 2106 | >KDR-Q2R-m RSKVLLAVAL  | 296   | 1810  |
| >KDR-Q2R-w QSKVLLAVAL  | 580  | >KDR-Q2R-m RSKVLLAVAL' | 116   | 464   |
| >KDR-Q2R-w QSKVLLAVAL  | 5340 | >KDR-Q2R-m RSKVLLAVAL' | 217   | 5123  |
| >KDR-Q2R-w MQSKVLLA    | 425  | >KDR-Q2R-m MRSKVLLA    | 20182 | 19757 |
| >KDR-Q2R-w MQSKVLLAV   | 33   | >KDR-Q2R-m MRSKVLLAV   | 12426 | 12393 |
| >KDR-Q2R-w MQSKVLLAV/  | 395  | >KDR-Q2R-m MRSKVLLAV/  | 19106 | 18711 |
| >KDR-Q2R-w MQSKVLLA    | 126  | >KDR-Q2R-m MRSKVLLA    | 9649  | 9523  |
| >KDR-Q2R-w MQSKVLLAV   | 16   | >KDR-Q2R-m MRSKVLLAV   | 2166  | 2150  |
| >KDR-Q2R-w MQSKVLLAV/  | 22   | >KDR-Q2R-m MRSKVLLAV/  | 2945  | 2923  |
| >KDR-Q2R-w MQSKVLLA    | 75   | >KDR-Q2R-m MRSKVLLA    | 10059 | 9984  |
| >KDR-Q2R-w MQSKVLLAV   | 9    | >KDR-Q2R-m MRSKVLLAV   | 3245  | 3236  |
| >KDR-Q2R-w MQSKVLLAV/  | 266  | >KDR-Q2R-m MRSKVLLAV/  | 8949  | 8683  |
| >KDR-Q2R-w MQSKVLLAV/  | 195  | >KDR-Q2R-m MRSKVLLAV/  | 13220 | 13025 |
| >KDR-Q2R-w MQSKVLLA    | 26   | >KDR-Q2R-m MRSKVLLA    | 17945 | 17919 |
| >KDR-Q2R-w MQSKVLLAV   | 3    | >KDR-Q2R-m MRSKVLLAV   | 1573  | 1570  |
| >KDR-Q2R-w MQSKVLLAV/  | 10   | >KDR-Q2R-m MRSKVLLAV/  | 9515  | 9505  |
| >KDR-Q2R-w MQSKVLLAV   | 32   | >KDR-Q2R-m MRSKVLLAV   | 4220  | 4188  |
| >KDR-Q2R-w MQSKVLLAV   | 290  | >KDR-Q2R-m MRSKVLLAV   | 15356 | 15066 |
| >KDR-Q2R-w MQSKVLLAV   | 176  | >KDR-Q2R-m MRSKVLLAV   | 10146 | 9970  |
| >KDR-Q2R-w MQSKVLLAV   | 180  | >KDR-Q2R-m MRSKVLLAV   | 19738 | 19558 |
| >KDR-Q2R-w MQSKVLLAV/  | 174  | >KDR-Q2R-m MRSKVLLAV/  | 19570 | 19396 |
| >KDR-Q2R-w MQSKVLLAV/  | 112  | >KDR-Q2R-m MRSKVLLAV/  | 17315 | 17203 |
| >KDR-Q2R-w MQSKVLLAV   | 47   | >KDR-Q2R-m MRSKVLLAV   | 331   | 284   |
| >KDR-Q2R-w MQSKVLLAV/  | 16   | >KDR-Q2R-m MRSKVLLAV/  | 146   | 130   |
| >KDR-Q2R-w MQSKVLLAV   | 5168 | >KDR-Q2R-m MRSKVLLAV   | 293   | 4875  |
| >KDR-Q2R-w MQSKVLLAV/  | 3136 | >KDR-Q2R-m MRSKVLLAV/  | 88    | 3048  |
| >KDR-Q2R-w MQSKVLLAV   | 195  | >KDR-Q2R-m MRSKVLLAV   | 248   | 53    |
| >KDR-Q2R-w MQSKVLLAV/  | 9    | >KDR-Q2R-m MRSKVLLAV/  | 12    | 3     |
| >KDR-Q2R-w MQSKVLLAV/  | 193  | >KDR-Q2R-m MRSKVLLAV/  | 13281 | 13088 |
| >KDR-Q2R-w MQSKVLLAV/  | 62   | >KDR-Q2R-m MRSKVLLAV/  | 1056  | 994   |
| >KDR-Q2R-w MQSKVLLAV/  | 5175 | >KDR-Q2R-m MRSKVLLAV/  | 286   | 4889  |
| >KDR-Q2R-w MQSKVLLAV   | 8800 | >KDR-Q2R-m MRSKVLLAV   | 361   | 8439  |
| >KDR-Q2R-w MQSKVLLAV/  | 1870 | >KDR-Q2R-m MRSKVLLAV/  | 43    | 1827  |
| >KDR-R275L- RDLKTQSGSE | 481  | >KDR-R275L- LDLKTQSGSE | 936   | 455   |
| >KDR-R275L- RDLKTQSGSE | 409  | >KDR-R275L- LDLKTQSGSE | 1956  | 1547  |
| >KDR-R275L- RDLKTQSGSE | 53   | >KDR-R275L- LDLKTQSGSE | 75    | 22    |
| >KDR-R275L- SKHQHKKLV† | 1882 | >KDR-R275L- SKHQHKKLV† | 184   | 1698  |
| >KDR-R275L- SKHQHKKLV† | 421  | >KDR-R275L- SKHQHKKLV† | 27873 | 27452 |
| >KDR-R275L- KLVNRDLK   | 75   | >KDR-R275L- KLVNRDLK   | 112   | 37    |

|                        |      |                        |       |       |
|------------------------|------|------------------------|-------|-------|
| >KDR-R275L- KLVNRDLK   | 173  | >KDR-R275L- KLVNLDLK   | 120   | 53    |
| >KDR-R275L- KKLVNLDL   | 77   | >KDR-R275L- KKLVNLDL   | 62    | 15    |
| >KDR-R275L- KKLVNLDL   | 771  | >KDR-R275L- KKLVNLDL   | 436   | 335   |
| >KDR-R275L- HKKLVNRDLK | 392  | >KDR-R275L- HKKLVNRDLK | 486   | 94    |
| >KDR-R275L- QHKKLVNR   | 312  | >KDR-R275L- QHKKLVNL   | 32501 | 32189 |
| >KDR-R275L- HQHKKLVNR  | 17   | >KDR-R275L- HQHKKLVNL  | 6484  | 6467  |
| >KDR-R275L- HQHKKLVNR  | 1324 | >KDR-R275L- HQHKKLVNL  | 97    | 1227  |
| >KDR-R275L- HQHKKLVNR  | 293  | >KDR-R275L- HQHKKLVNLI | 201   | 92    |
| >KDR-R275L- HQHKKLVNR  | 63   | >KDR-R275L- HQHKKLVNL  | 23521 | 23458 |
| >KDR-R275L- KHQHKKLVN  | 172  | >KDR-R275L- KHQHKKLVN  | 14156 | 13984 |
| >KDR-R275L- KHQHKKLVN  | 119  | >KDR-R275L- KHQHKKLVN  | 24201 | 24082 |
| >KDR-S984T- SLSDVEEEEA | 46   | >KDR-S984T- SLTDVEEEEA | 124   | 78    |
| >KDR-S984T- SLSDVEEEEA | 407  | >KDR-S984T- SLTDVEEEEA | 847   | 440   |
| >KDR-S984T- SLSDVEEEEA | 28   | >KDR-S984T- SLTDVEEEEA | 36    | 8     |
| >KDR-S984T- SLSDVEEEEA | 440  | >KDR-S984T- SLTDVEEEEA | 583   | 143   |
| >KDR-S984T- SLSDVEEEEA | 24   | >KDR-S984T- SLTDVEEEEA | 22    | 2     |
| >KDR-S984T- SLSDVEEEEA | 7    | >KDR-S984T- SLTDVEEEEA | 7     | 0     |
| >KDR-S984T- EEKSLSDV   | 156  | >KDR-S984T- EEKSLTDV   | 125   | 31    |
| >KDR-S984T- VEEKSLSDV  | 151  | >KDR-S984T- VEEKSLTDV  | 250   | 99    |
| >KDR-S984T- VEEKSLSDV  | 27   | >KDR-S984T- VEEKSLTDV  | 29    | 2     |
| >KDR-S984T- FVEEKSLSDV | 89   | >KDR-S984T- FVEEKSLTDV | 111   | 22    |
| >KDR-S984T- FVEEKSLSDV | 169  | >KDR-S984T- FVEEKSLTDV | 168   | 1     |
| >KDR-S984T- FVEEKSLSDV | 261  | >KDR-S984T- FVEEKSLTDV | 290   | 29    |
| >KDR-S984T- FVEEKSLSDV | 212  | >KDR-S984T- FVEEKSLTDV | 274   | 62    |
| >KDR-S984T- FVEEKSLSDV | 7    | >KDR-S984T- FVEEKSLTDV | 7     | 0     |
| >KDR-T771R- TAVIAMFFW  | 429  | >KDR-T771R- RAVIAMFFW  | 420   | 9     |
| >KDR-T771R- TAVIAMFFW  | 169  | >KDR-T771R- RAVIAMFFW  | 141   | 28    |
| >KDR-T771R- TAVIAMFFW  | 47   | >KDR-T771R- RAVIAMFFW  | 22    | 25    |
| >KDR-T771R- TAVIAMFFW  | 460  | >KDR-T771R- RAVIAMFFW  | 958   | 498   |
| >KDR-T771R- TAVIAMFFW  | 33   | >KDR-T771R- RAVIAMFFW  | 1241  | 1208  |
| >KDR-T771R- TAVIAMFFW  | 116  | >KDR-T771R- RAVIAMFFW  | 1850  | 1734  |
| >KDR-T771R- TAVIAMFFW  | 58   | >KDR-T771R- RAVIAMFFW  | 1184  | 1126  |
| >KDR-T771R- TAVIAMFF   | 753  | >KDR-T771R- RAVIAMFF   | 65    | 688   |
| >KDR-T771R- TAVIAMFF   | 14   | >KDR-T771R- RAVIAMFF   | 3     | 11    |
| >KDR-T771R- TAVIAMFFW  | 11   | >KDR-T771R- RAVIAMFFW  | 5     | 6     |
| >KDR-T771R- TAVIAMFFW  | 78   | >KDR-T771R- RAVIAMFFW  | 6     | 72    |
| >KDR-T771R- TAVIAMFFW  | 357  | >KDR-T771R- RAVIAMFFW  | 18    | 339   |
| >KDR-T771R- TAVIAMFF   | 371  | >KDR-T771R- RAVIAMFF   | 1427  | 1056  |
| >KDR-T771R- TAVIAMFFW  | 96   | >KDR-T771R- RAVIAMFFW  | 428   | 332   |
| >KDR-T771R- TAVIAMFF   | 479  | >KDR-T771R- RAVIAMFF   | 97    | 382   |
| >KDR-T771R- TAVIAMFFW  | 36   | >KDR-T771R- RAVIAMFFW  | 31    | 5     |
| >KDR-T771R- TAVIAMFFW  | 1590 | >KDR-T771R- RAVIAMFFW  | 250   | 1340  |
| >KDR-T771R- TAVIAMFF   | 340  | >KDR-T771R- RAVIAMFF   | 20    | 320   |

|                        |       |                        |       |       |
|------------------------|-------|------------------------|-------|-------|
| >KDR-T771R-TAVIAMFFW   | 15    | >KDR-T771R-RAVIAMFFW   | 8     | 7     |
| >KDR-T771R-TAVIAMFFW   | 6937  | >KDR-T771R-RAVIAMFFW   | 270   | 6667  |
| >KDR-T771R-TAVIAMFFW   | 2530  | >KDR-T771R-RAVIAMFFW   | 75    | 2455  |
| >KDR-T771R-TAVIAMFFW   | 395   | >KDR-T771R-RAVIAMFFW   | 378   | 17    |
| >KDR-T771R-TAVIAMFFW   | 42    | >KDR-T771R-RAVIAMFFW   | 41    | 1     |
| >KDR-T771R-TAVIAMFFW   | 24    | >KDR-T771R-RAVIAMFFW   | 23    | 1     |
| >KDR-T771R-TAVIAMFF    | 1177  | >KDR-T771R-RAVIAMFF    | 205   | 972   |
| >KDR-T771R-TAVIAMFFW   | 2112  | >KDR-T771R-RAVIAMFFW   | 291   | 1821  |
| >KDR-T771R-TAVIAMFFW   | 298   | >KDR-T771R-RAVIAMFFW   | 1288  | 990   |
| >KDR-T771R-TAVIAMFFW   | 537   | >KDR-T771R-RAVIAMFFW   | 27    | 510   |
| >KDR-T771R-GTAVIAMFFV  | 40    | >KDR-T771R-GRAVIAMFFV  | 1842  | 1802  |
| >KDR-T771R-GTAVIAMFFV  | 232   | >KDR-T771R-GRAVIAMFFV  | 10232 | 10000 |
| >KDR-T771R-GTAVIAMFF   | 203   | >KDR-T771R-GRAVIAMFF   | 5762  | 5559  |
| >KDR-T771R-GTAVIAMFFV  | 150   | >KDR-T771R-GRAVIAMFFV  | 17075 | 16925 |
| >KDR-T771R-GTAVIAMF    | 1437  | >KDR-T771R-GRAVIAMF    | 192   | 1245  |
| >KDR-T771R-GTAVIAMFF   | 1196  | >KDR-T771R-GRAVIAMFF   | 162   | 1034  |
| >KDR-T771R-GTAVIAMF    | 8     | >KDR-T771R-GRAVIAMF    | 24190 | 24182 |
| >KDR-T771R-GTAVIAMFF   | 11    | >KDR-T771R-GRAVIAMFF   | 25745 | 25734 |
| >KDR-T771R-GTAVIAMFFV  | 11    | >KDR-T771R-GRAVIAMFFV  | 12295 | 12284 |
| >KDR-T771R-GTAVIAMFFV  | 68    | >KDR-T771R-GRAVIAMFFV  | 26307 | 26239 |
| >KDR-T771R-GTAVIAMF    | 17649 | >KDR-T771R-GRAVIAMF    | 88    | 17561 |
| >KDR-T771R-GTAVIAMFF   | 18268 | >KDR-T771R-GRAVIAMFF   | 123   | 18145 |
| >KDR-T771R-GTAVIAMFFV  | 18808 | >KDR-T771R-GRAVIAMFFV  | 74    | 18734 |
| >KDR-T771R-GTAVIAMFFV  | 42    | >KDR-T771R-GRAVIAMFFV  | 13395 | 13353 |
| >KDR-T771R-GTAVIAMF    | 341   | >KDR-T771R-GRAVIAMF    | 20926 | 20585 |
| >KDR-T771R-GTAVIAMFF   | 87    | >KDR-T771R-GRAVIAMFF   | 19118 | 19031 |
| >KDR-T771R-GTAVIAMFFV  | 13    | >KDR-T771R-GRAVIAMFFV  | 5994  | 5981  |
| >KDR-T771R-GTAVIAMF    | 77    | >KDR-T771R-GRAVIAMF    | 23415 | 23338 |
| >KDR-T771R-GTAVIAMFF   | 107   | >KDR-T771R-GRAVIAMFF   | 28228 | 28121 |
| >KDR-T771R-GTAVIAMFFV  | 221   | >KDR-T771R-GRAVIAMFFV  | 32871 | 32650 |
| >KDR-T771R-GTAVIAMFFV  | 18    | >KDR-T771R-GRAVIAMFFV  | 12825 | 12807 |
| >KDR-T771R-GTAVIAMF    | 185   | >KDR-T771R-GRAVIAMF    | 15159 | 14974 |
| >KDR-T771R-GTAVIAMFF   | 5     | >KDR-T771R-GRAVIAMFF   | 587   | 582   |
| >KDR-T771R-GTAVIAMFFV  | 480   | >KDR-T771R-GRAVIAMFFV  | 25907 | 25427 |
| >KDR-T771R-GTAVIAMFFV  | 19    | >KDR-T771R-GRAVIAMFFV  | 3125  | 3106  |
| >KDR-T771R-GTAVIAMFF   | 14291 | >KDR-T771R-GRAVIAMFF   | 187   | 14104 |
| >KDR-T771R-GTAVIAMFFV  | 6460  | >KDR-T771R-GRAVIAMFFV  | 53    | 6407  |
| >KDR-T771R-GTAVIAMFF   | 13744 | >KDR-T771R-GRAVIAMFF   | 19    | 13725 |
| >KDR-T771R-GTAVIAMFFV  | 2742  | >KDR-T771R-GRAVIAMFFV  | 6     | 2736  |
| >KDR-T771R-GTAVIAMFFV  | 399   | >KDR-T771R-GRAVIAMFFV  | 10292 | 9893  |
| >KDR-T771R-TNLEIIILVGT | 31976 | >KDR-T771R-TNLEIIILVGR | 115   | 31861 |
| >KDR-T771R-TNLEIIILVGT | 28871 | >KDR-T771R-TNLEIIILVGR | 243   | 28628 |
| >KDR-T771R-VGTAVIAMFF  | 382   | >KDR-T771R-VGRAVIAMFI  | 958   | 576   |



|                       |      |                       |      |      |
|-----------------------|------|-----------------------|------|------|
| >KDR-T771R-VGTAVIAMF  | 5633 | >KDR-T771R-VGRAVIAMF  | 325  | 5308 |
| >KDR-T771R-VGTAVIAMFF | 2142 | >KDR-T771R-VGRAVIAMFI | 385  | 1757 |
| >KDR-T771R-VGTAVIAMF  | 1412 | >KDR-T771R-VGRAVIAMF  | 175  | 1237 |
| >KDR-T771R-VGTAVIAMFF | 2519 | >KDR-T771R-VGRAVIAMFI | 351  | 2168 |
| >KDR-T771R-VGTAVIAMFF | 601  | >KDR-T771R-VGRAVIAMFI | 129  | 472  |
| >KDR-T771R-VGTAVIAM   | 477  | >KDR-T771R-VGRAVIAM   | 1936 | 1459 |
| >KDR-T771R-VGTAVIAMFF | 119  | >KDR-T771R-VGRAVIAMFI | 59   | 60   |
| >KDR-T771R-VGTAVIAMFF | 247  | >KDR-T771R-VGRAVIAMFI | 5343 | 5096 |
| >KDR-T771R-VGTAVIAMFF | 15   | >KDR-T771R-VGRAVIAMFI | 100  | 85   |
| >KDR-T771R-VGTAVIAMF  | 248  | >KDR-T771R-VGRAVIAMF  | 3476 | 3228 |
| >KDR-T771R-VGTAVIAMFF | 375  | >KDR-T771R-VGRAVIAMFI | 4544 | 4169 |
| >KDR-T771R-VGTAVIAMF  | 226  | >KDR-T771R-VGRAVIAMF  | 82   | 144  |
| >KDR-T771R-VGTAVIAMFF | 175  | >KDR-T771R-VGRAVIAMFI | 284  | 109  |
| >KDR-T771R-VGTAVIAMFF | 167  | >KDR-T771R-VGRAVIAMFI | 802  | 635  |
| >KDR-T771R-LVGTAVIAMF | 649  | >KDR-T771R-LVGRAVIAMF | 273  | 376  |
| >KDR-T771R-LVGTAVIAMF | 396  | >KDR-T771R-LVGRAVIAMF | 177  | 219  |
| >KDR-T771R-LVGTAVIAM  | 197  | >KDR-T771R-LVGRAVIAM  | 221  | 24   |
| >KDR-T771R-LVGTAVIAMF | 404  | >KDR-T771R-LVGRAVIAMF | 442  | 38   |
| >KDR-T771R-LVGTAVIAM  | 296  | >KDR-T771R-LVGRAVIAM  | 190  | 106  |
| >KDR-T771R-LVGTAVIAMF | 141  | >KDR-T771R-LVGRAVIAMF | 103  | 38   |
| >KDR-T771R-LVGTAVIAMF | 439  | >KDR-T771R-LVGRAVIAMF | 308  | 131  |
| >KDR-T771R-LVGTAVIAM  | 85   | >KDR-T771R-LVGRAVIAM  | 171  | 86   |
| >KDR-T771R-LVGTAVIAMF | 770  | >KDR-T771R-LVGRAVIAMF | 272  | 498  |
| >KDR-T771R-LVGTAVIAMF | 440  | >KDR-T771R-LVGRAVIAMF | 312  | 128  |
| >KDR-T771R-ILVGTAVI   | 389  | >KDR-T771R-ILVGRAVI   | 1209 | 820  |
| >KDR-T771R-ILVGTAVIAM | 258  | >KDR-T771R-ILVGRAVIAM | 627  | 369  |
| >KDR-T771R-ILVGTAVI   | 122  | >KDR-T771R-ILVGRAVI   | 237  | 115  |
| >KDR-T771R-ILVGTAVIA  | 420  | >KDR-T771R-ILVGRAVIA  | 433  | 13   |
| >KDR-T771R-ILVGTAVIAM | 118  | >KDR-T771R-ILVGRAVIAM | 216  | 98   |
| >KDR-T771R-ILVGTAVI   | 32   | >KDR-T771R-ILVGRAVI   | 66   | 34   |
| >KDR-T771R-ILVGTAVIA  | 193  | >KDR-T771R-ILVGRAVIA  | 155  | 38   |
| >KDR-T771R-ILVGTAVIAM | 271  | >KDR-T771R-ILVGRAVIAM | 468  | 197  |
| >KDR-T771R-ILVGTAVI   | 251  | >KDR-T771R-ILVGRAVI   | 524  | 273  |
| >KDR-T771R-ILVGTAVIAM | 239  | >KDR-T771R-ILVGRAVIAM | 1007 | 768  |
| >KDR-T771R-ILVGTAVI   | 12   | >KDR-T771R-ILVGRAVI   | 56   | 44   |
| >KDR-T771R-ILVGTAVIA  | 210  | >KDR-T771R-ILVGRAVIA  | 749  | 539  |
| >KDR-T771R-ILVGTAVIAM | 49   | >KDR-T771R-ILVGRAVIAM | 103  | 54   |
| >KDR-T771R-ILVGTAVIAM | 266  | >KDR-T771R-ILVGRAVIAM | 525  | 259  |
| >KDR-T771R-ILVGTAVI   | 47   | >KDR-T771R-ILVGRAVI   | 455  | 408  |
| >KDR-T771R-ILVGTAVI   | 105  | >KDR-T771R-ILVGRAVI   | 835  | 730  |
| >KDR-T771R-ILVGTAVIA  | 299  | >KDR-T771R-ILVGRAVIA  | 1299 | 1000 |
| >KDR-T771R-ILVGTAVI   | 64   | >KDR-T771R-ILVGRAVI   | 1459 | 1395 |
| >KDR-T771R-ILVGTAVIAM | 415  | >KDR-T771R-ILVGRAVIAM | 1319 | 904  |

|                        |       |                        |      |       |
|------------------------|-------|------------------------|------|-------|
| >KDR-T771R-ILVGTAVI    | 7     | >KDR-T771R-ILVGRAVI    | 10   | 3     |
| >KDR-T771R-ILVGTAVIA   | 14    | >KDR-T771R-ILVGRAVIA   | 19   | 5     |
| >KDR-T771R-ILVGTAVIAM  | 39    | >KDR-T771R-ILVGRAVIAM  | 43   | 4     |
| >KDR-T771R-ILVGTAVIAM  | 282   | >KDR-T771R-ILVGRAVIAM  | 734  | 452   |
| >KDR-T771R-ILVGTAVI    | 430   | >KDR-T771R-ILVGRAVI    | 1338 | 908   |
| >KDR-T771R-ILVGTAVIAM  | 470   | >KDR-T771R-ILVGRAVIAM  | 589  | 119   |
| >KDR-T771R-ILVGTAVIAM  | 234   | >KDR-T771R-ILVGRAVIAM  | 348  | 114   |
| >KDR-T771R-ILVGTAVIAM  | 122   | >KDR-T771R-ILVGRAVIAM  | 175  | 53    |
| >KDR-T771R-ILVGTAVIAM  | 340   | >KDR-T771R-ILVGRAVIAM  | 468  | 128   |
| >KDR-T771R-ILVGTAVIAM  | 172   | >KDR-T771R-ILVGRAVIAM  | 522  | 350   |
| >KDR-T771R-ILVGTAVIAM  | 60    | >KDR-T771R-ILVGRAVIAM  | 130  | 70    |
| >KDR-T771R-ILVGTAVIAM  | 84    | >KDR-T771R-ILVGRAVIAM  | 98   | 14    |
| >KDR-T771R-ILVGTAVIAM  | 149   | >KDR-T771R-ILVGRAVIAM  | 336  | 187   |
| >KDR-T771R-IILVGTAV    | 213   | >KDR-T771R-IILVGRAV    | 2200 | 1987  |
| >KDR-T771R-IILVGTAV    | 422   | >KDR-T771R-IILVGRAV    | 2679 | 2257  |
| >KDR-T771R-IILVGTAV    | 93    | >KDR-T771R-IILVGRAV    | 627  | 534   |
| >KDR-T771R-IILVGTAV    | 16    | >KDR-T771R-IILVGRAV    | 122  | 106   |
| >KDR-T771R-IILVGTAVI   | 181   | >KDR-T771R-IILVGRAVI   | 1017 | 836   |
| >KDR-T771R-IILVGTAVIAM | 377   | >KDR-T771R-IILVGRAVIAM | 758  | 381   |
| >KDR-T771R-IILVGTAV    | 12    | >KDR-T771R-IILVGRAV    | 40   | 28    |
| >KDR-T771R-IILVGTAVI   | 281   | >KDR-T771R-IILVGRAVI   | 3007 | 2726  |
| >KDR-T771R-IILVGTAV    | 95    | >KDR-T771R-IILVGRAV    | 1020 | 925   |
| >KDR-T771R-IILVGTAV    | 30    | >KDR-T771R-IILVGRAV    | 333  | 303   |
| >KDR-T771R-IILVGTAV    | 29    | >KDR-T771R-IILVGRAV    | 436  | 407   |
| >KDR-T771R-IILVGTAVI   | 91    | >KDR-T771R-IILVGRAVI   | 4759 | 4668  |
| >KDR-T771R-IILVGTAV    | 10    | >KDR-T771R-IILVGRAV    | 54   | 44    |
| >KDR-T771R-IILVGTAV    | 340   | >KDR-T771R-IILVGRAV    | 1716 | 1376  |
| >KDR-T771R-IILVGTAVIAM | 186   | >KDR-T771R-IILVGRAVIAM | 539  | 353   |
| >KDR-T771R-IIILVGTAV   | 258   | >KDR-T771R-IIILVGRAV   | 1649 | 1391  |
| >KDR-T771R-IIILVGTAV   | 203   | >KDR-T771R-IIILVGRA    | 446  | 243   |
| >KDR-T771R-IIILVGTAV   | 22    | >KDR-T771R-IIILVGRAV   | 136  | 114   |
| >KDR-T771R-IIILVGTAVI  | 177   | >KDR-T771R-IIILVGRAVI  | 518  | 341   |
| >KDR-T771R-IIILVGTAV   | 32    | >KDR-T771R-IIILVGRAV   | 212  | 180   |
| >KDR-T771R-IIILVGTAV   | 38    | >KDR-T771R-IIILVGRAV   | 70   | 32    |
| >KDR-T771R-IIILVGTAV   | 367   | >KDR-T771R-IIILVGRAV   | 3612 | 3245  |
| >KDR-T771R-IIILVGTAV   | 92    | >KDR-T771R-IIILVGRAV   | 1245 | 1153  |
| >KDR-T771R-IIILVGTAV   | 462   | >KDR-T771R-IIILVGRAV   | 1941 | 1479  |
| >KDR-T771R-EIILVGTAV   | 322   | >KDR-T771R-EIILVGRAV   | 631  | 309   |
| >KDR-T771R-EIILVGTAV   | 157   | >KDR-T771R-EIILVGRAV   | 334  | 177   |
| >KDR-T771R-EIILVGTAV   | 334   | >KDR-T771R-EIILVGRAV   | 570  | 236   |
| >KDR-T771R-EIILVGTAVI  | 143   | >KDR-T771R-EIILVGRAVI  | 334  | 191   |
| >KDR-T771R-EIILVGT     | 26875 | >KDR-T771R-EIILVGR     | 108  | 26767 |
| >KDR-T771R-EIILVGT     | 7581  | >KDR-T771R-EIILVGR     | 7    | 7574  |

|                       |       |                       |      |       |
|-----------------------|-------|-----------------------|------|-------|
| >KDR-T771R-EIILVGT    | 496   | >KDR-T771R-EIILVGR    | 8864 | 8368  |
| >KDR-T771R-EIILVGTA   | 175   | >KDR-T771R-EIILVGRA   | 101  | 74    |
| >KDR-T771R-EIILVGTAV  | 47    | >KDR-T771R-EIILVGRAV  | 82   | 35    |
| >KDR-T771R-EIILVGTAVI | 42    | >KDR-T771R-EIILVGRAVI | 45   | 3     |
| >KDR-T771R-EIILVGTAV  | 19    | >KDR-T771R-EIILVGRAV  | 60   | 41    |
| >KDR-T771R-EIILVGTAVI | 107   | >KDR-T771R-EIILVGRAVI | 368  | 261   |
| >KDR-T771R-EIILVGT    | 31832 | >KDR-T771R-EIILVGR    | 155  | 31677 |
| >KDR-T771R-LEIILVGTAV | 164   | >KDR-T771R-LEIILVGRAV | 115  | 49    |
| >KDR-T771R-LEIILVGTAV | 275   | >KDR-T771R-LEIILVGRAV | 1100 | 825   |
| >KDR-T771R-LEIILVGTAV | 82    | >KDR-T771R-LEIILVGRAV | 85   | 3     |
| >KDR-T771R-LEIILVGTAV | 44    | >KDR-T771R-LEIILVGRAV | 74   | 30    |
| >KDR-T771R-LEIILVGT   | 342   | >KDR-T771R-LEIILVGR   | 5007 | 4665  |
| >KDR-T771R-LEIILVGTAV | 122   | >KDR-T771R-LEIILVGRAV | 188  | 66    |
| >KDR-T771R-LEIILVGTA  | 173   | >KDR-T771R-LEIILVGRA  | 1180 | 1007  |
| >KDR-T771R-LEIILVGT   | 52    | >KDR-T771R-LEIILVGR   | 345  | 293   |
| >KDR-T771R-LEIILVGTAV | 12    | >KDR-T771R-LEIILVGRAV | 29   | 17    |
| >KDR-T771R-NLEIILVGT  | 24170 | >KDR-T771R-NLEIILVGR  | 337  | 23833 |
| >KDR-T771R-NLEIILVGT  | 23015 | >KDR-T771R-NLEIILVGR  | 257  | 22758 |
| >KDR-T771R-NLEIILVGT  | 32940 | >KDR-T771R-NLEIILVGR  | 93   | 32847 |
| >KDR-T771R-NLEIILVGT  | 32230 | >KDR-T771R-NLEIILVGR  | 212  | 32018 |
| >KDR-V1041 VVKICDFGL  | 3083  | >KDR-V1041 MVKICDFGL  | 487  | 2596  |
| >KDR-V1041 VVKICDFGL  | 1034  | >KDR-V1041 MVKICDFGL  | 262  | 772   |
| >KDR-V1041 VVKICDFGLA | 2944  | >KDR-V1041 MVKICDFGLA | 179  | 2765  |
| >KDR-V1041 VVKICDFGLA | 3087  | >KDR-V1041 MVKICDFGLA | 284  | 2803  |
| >KDR-V1041 VVKICDFGLA | 29    | >KDR-V1041 MVKICDFGLA | 12   | 17    |
| >KDR-V1041 VVKICDFGLA | 318   | >KDR-V1041 MVKICDFGLA | 64   | 254   |
| >KDR-V1041 VVKICDFGLA | 441   | >KDR-V1041 MVKICDFGLA | 25   | 416   |
| >KDR-V1041 VVKICDFGL  | 3928  | >KDR-V1041 MVKICDFGL  | 80   | 3848  |
| >KDR-V1041 VVKICDFGL  | 871   | >KDR-V1041 MVKICDFGL  | 373  | 498   |
| >KDR-V1041 VVKICDFGLA | 325   | >KDR-V1041 MVKICDFGLA | 101  | 224   |
| >KDR-V1041 NVVKICDFGL | 3217  | >KDR-V1041 NMVKICDFGI | 249  | 2968  |
| >KDR-V1041 NVVKICDFGL | 1388  | >KDR-V1041 NMVKICDFGI | 121  | 1267  |
| >KDR-V1041 NVVKICDFGL | 2283  | >KDR-V1041 NMVKICDFGI | 153  | 2130  |
| >KDR-V1041 NVVKICDFGL | 1708  | >KDR-V1041 NMVKICDFGI | 89   | 1619  |
| >KDR-V1041 NVVKICDFGL | 396   | >KDR-V1041 NMVKICDFGI | 214  | 182   |
| >KDR-V1041 NVVKICDFGL | 850   | >KDR-V1041 NMVKICDFGI | 449  | 401   |
| >KDR-V1041 NVVKICDFGL | 11628 | >KDR-V1041 NMVKICDFGI | 286  | 11342 |
| >KDR-V1041 NVVKICDFGL | 6594  | >KDR-V1041 NMVKICDFGI | 90   | 6504  |
| >KDR-V1041 NVVKICDFGL | 10125 | >KDR-V1041 NMVKICDFGI | 254  | 9871  |
| >KDR-V1041 NVVKICDFGL | 8293  | >KDR-V1041 NMVKICDFGI | 287  | 8006  |
| >KDR-V1041 NVVKICDFGL | 9968  | >KDR-V1041 NMVKICDFGI | 221  | 9747  |
| >KDR-V1041 NVVKICDFGL | 39    | >KDR-V1041 NMVKICDFGI | 1057 | 1018  |
| >KDR-V1041 NVVKICDF   | 3655  | >KDR-V1041 NMVKICDF   | 366  | 3289  |

|                        |      |                        |      |      |
|------------------------|------|------------------------|------|------|
| >KDR-V1041 INVVKICDF   | 3414 | >KDR-V1041 INMVKICDF   | 140  | 3274 |
| >KDR-V1041 ARNILLSEKN  | 1233 | >KDR-V1041 ARNILLSEKN  | 471  | 762  |
| >KDR-V1041 ARNILLSEKN  | 830  | >KDR-V1041 ARNILLSEKN  | 178  | 652  |
| >KDR-V1041 KNVVKICDF   | 559  | >KDR-V1041 KNMVKICDF   | 216  | 343  |
| >KDR-V1041 EKNVVKICDF  | 142  | >KDR-V1041 EKNMVKICDF  | 102  | 40   |
| >KDR-V1041 SEKNVVKI    | 40   | >KDR-V1041 SEKNMVKI    | 86   | 46   |
| >KDR-V1041 SEKNVVKICD  | 478  | >KDR-V1041 SEKNMVKICE  | 573  | 95   |
| >KDR-V1041 SEKNVVKICD  | 267  | >KDR-V1041 SEKNMVKICE  | 273  | 6    |
| >KDR-V1041 SEKNVVKI    | 435  | >KDR-V1041 SEKNMVKI    | 158  | 277  |
| >KDR-V1041 SEKNVVKICD  | 476  | >KDR-V1041 SEKNMVKICE  | 198  | 278  |
| >KDR-V1041 SEKNVVKICD  | 186  | >KDR-V1041 SEKNMVKICE  | 179  | 7    |
| >KDR-V1041 SEKNVVKICD  | 179  | >KDR-V1041 SEKNMVKICE  | 190  | 11   |
| >KDR-V1041 SEKNVVKI    | 89   | >KDR-V1041 SEKNMVKI    | 125  | 36   |
| >KDR-V1041 SEKNVVKIC   | 655  | >KDR-V1041 SEKNMVKIC   | 226  | 429  |
| >KDR-V1041 SEKNVVKICD  | 167  | >KDR-V1041 SEKNMVKICE  | 90   | 77   |
| >KDR-V1041 LSEKNVVKI   | 668  | >KDR-V1041 LSEKNMVKI   | 289  | 379  |
| >KDR-V1041 LSEKNVVKI   | 146  | >KDR-V1041 LSEKNMVKI   | 128  | 18   |
| >KDR-V1041 LLSEKNVV    | 146  | >KDR-V1041 LLSEKNMV    | 65   | 81   |
| >KDR-V1041 LLSEKNVV    | 11   | >KDR-V1041 LLSEKNMV    | 7    | 4    |
| >KDR-V1041 LLSEKNVVKI  | 82   | >KDR-V1041 LLSEKNMVKI  | 70   | 12   |
| >KDR-V1041 LLSEKNVV    | 11   | >KDR-V1041 LLSEKNMV    | 8    | 3    |
| >KDR-V1041 LLSEKNVVKI  | 98   | >KDR-V1041 LLSEKNMVKI  | 95   | 3    |
| >KDR-V1041 LLSEKNVV    | 195  | >KDR-V1041 LLSEKNMV    | 120  | 75   |
| >KDR-V1041 LLSEKNVV    | 7    | >KDR-V1041 LLSEKNMV    | 4    | 3    |
| >KDR-V1041 LLSEKNVVKI  | 10   | >KDR-V1041 LLSEKNMVKI  | 18   | 8    |
| >KDR-V1041 LLSEKNVVKIC | 445  | >KDR-V1041 LLSEKNMVKI  | 859  | 414  |
| >KDR-V1041 LLSEKNVV    | 9    | >KDR-V1041 LLSEKNMV    | 11   | 2    |
| >KDR-V1041 LLSEKNVVKI  | 16   | >KDR-V1041 LLSEKNMVKI  | 22   | 6    |
| >KDR-V1041 LLSEKNVV    | 14   | >KDR-V1041 LLSEKNMV    | 10   | 4    |
| >KDR-V1041 LLSEKNVVKI  | 38   | >KDR-V1041 LLSEKNMVKI  | 74   | 36   |
| >KDR-V1041 LLSEKNVV    | 10   | >KDR-V1041 LLSEKNMV    | 9    | 1    |
| >KDR-V1041 LLSEKNVVKI  | 26   | >KDR-V1041 LLSEKNMVKI  | 93   | 67   |
| >KDR-V1041 LLSEKNVV    | 2    | >KDR-V1041 LLSEKNMV    | 2    | 0    |
| >KDR-V1041 LLSEKNVVKI  | 5    | >KDR-V1041 LLSEKNMVKI  | 6    | 1    |
| >KDR-V1041 LLSEKNVVKIC | 107  | >KDR-V1041 LLSEKNMVKI  | 74   | 33   |
| >KDR-V1041 LLSEKNVVK   | 166  | >KDR-V1041 LLSEKNMVK   | 66   | 100  |
| >KDR-V1041 LLSEKNVVK   | 1101 | >KDR-V1041 LLSEKNMVK   | 284  | 817  |
| >KDR-V1041 ILLSEKNV    | 165  | >KDR-V1041 ILLSEKNM    | 4557 | 4392 |
| >KDR-V1041 ILLSEKNVV   | 358  | >KDR-V1041 ILLSEKNMV   | 112  | 246  |
| >KDR-V1041 ILLSEKNVVKI | 260  | >KDR-V1041 ILLSEKNMVKI | 227  | 33   |
| >KDR-V1041 ILLSEKNV    | 146  | >KDR-V1041 ILLSEKNM    | 2177 | 2031 |
| >KDR-V1041 ILLSEKNVV   | 182  | >KDR-V1041 ILLSEKNMV   | 67   | 115  |
| >KDR-V1041 ILLSEKNVVKI | 243  | >KDR-V1041 ILLSEKNMVKI | 195  | 48   |

|                        |       |                       |      |      |
|------------------------|-------|-----------------------|------|------|
| >KDR-V1041IILLSEKNV    | 180   | >KDR-V1041IILLSEKNM   | 7613 | 7433 |
| >KDR-V1041IILLSEKNVV   | 383   | >KDR-V1041IILLSEKNMV  | 234  | 149  |
| >KDR-V1041IILLSEKNVVKI | 476   | >KDR-V1041IILLSEKNMVK | 570  | 94   |
| >KDR-V1041IILLSEKNVV   | 652   | >KDR-V1041IILLSEKNMV  | 332  | 320  |
| >KDR-V1041IILLSEKNV    | 5     | >KDR-V1041IILLSEKNM   | 388  | 383  |
| >KDR-V1041IILLSEKNVV   | 6     | >KDR-V1041IILLSEKNMV  | 4    | 2    |
| >KDR-V1041IILLSEKNVVKI | 12    | >KDR-V1041IILLSEKNMVK | 15   | 3    |
| >KDR-V1041IILLSEKNV    | 23    | >KDR-V1041IILLSEKNM   | 2796 | 2773 |
| >KDR-V1041IILLSEKNVV   | 15    | >KDR-V1041IILLSEKNMV  | 23   | 8    |
| >KDR-V1041IILLSEKNVVKI | 51    | >KDR-V1041IILLSEKNMVK | 78   | 27   |
| >KDR-V1041IILLSEKNV    | 11    | >KDR-V1041IILLSEKNM   | 1950 | 1939 |
| >KDR-V1041IILLSEKNVV   | 17    | >KDR-V1041IILLSEKNMV  | 11   | 6    |
| >KDR-V1041IILLSEKNVVKI | 46    | >KDR-V1041IILLSEKNMVK | 62   | 16   |
| >KDR-V1041IILLSEKNV    | 7     | >KDR-V1041IILLSEKNM   | 854  | 847  |
| >KDR-V1041IILLSEKNVV   | 8     | >KDR-V1041IILLSEKNMV  | 9    | 1    |
| >KDR-V1041IILLSEKNVVKI | 38    | >KDR-V1041IILLSEKNMVK | 118  | 80   |
| >KDR-V1041IILLSEKNV    | 3     | >KDR-V1041IILLSEKNM   | 416  | 413  |
| >KDR-V1041IILLSEKNVV   | 5     | >KDR-V1041IILLSEKNMV  | 4    | 1    |
| >KDR-V1041IILLSEKNVVKI | 17    | >KDR-V1041IILLSEKNMVK | 22   | 5    |
| >KDR-V1041IILLSEKNVVK  | 57    | >KDR-V1041IILLSEKNMVK | 30   | 27   |
| >KDR-V1041IILLSEKNVVK  | 164   | >KDR-V1041IILLSEKNMVK | 61   | 103  |
| >KDR-V1041IILLSEKNV    | 856   | >KDR-V1041IILLSEKNM   | 213  | 643  |
| >KDR-V1041IILLSEKNVVKI | 472   | >KDR-V1041IILLSEKNMVK | 839  | 367  |
| >KDR-V1041INILLSEKNVV  | 2062  | >KDR-V1041INILLSEKNMV | 333  | 1729 |
| >KDR-V476L-VTNPYPCEEV  | 498   | >KDR-V476L-LTNPYPCEEV | 1254 | 756  |
| >KDR-V476L-VTNPYPCEEV  | 40    | >KDR-V476L-LTNPYPCEEV | 31   | 9    |
| >KDR-V476L-VTNPYPCEEV  | 507   | >KDR-V476L-LTNPYPCEEV | 361  | 146  |
| >KDR-V476L-VTNPYPCEEV  | 57    | >KDR-V476L-LTNPYPCEEV | 23   | 34   |
| >KDR-V476L-VTNPYPCEEV  | 8     | >KDR-V476L-LTNPYPCEEV | 8    | 0    |
| >KDR-V476L-VTNPYPCEEV  | 41    | >KDR-V476L-LTNPYPCEEV | 38   | 3    |
| >KDR-V476L-VTNPYPCEEV  | 11    | >KDR-V476L-LTNPYPCEEV | 12   | 1    |
| >KDR-V476L-VTNPYPCEEV  | 1859  | >KDR-V476L-LTNPYPCEEV | 475  | 1384 |
| >KDR-V476L-VTNPYPCEEV  | 2907  | >KDR-V476L-LTNPYPCEEV | 377  | 2530 |
| >KDR-V476L-SVTNPYP     | 3068  | >KDR-V476L-SLTNPYP    | 52   | 3016 |
| >KDR-V476L-SVTNPYP     | 6920  | >KDR-V476L-SLTNPYP    | 289  | 6631 |
| >KDR-V476L-SVTNPYP     | 10326 | >KDR-V476L-SLTNPYP    | 427  | 9899 |
| >KDR-V476L-SVTNPYP     | 6750  | >KDR-V476L-SLTNPYP    | 47   | 6703 |
| >KDR-V476L-CANEPSQAV   | 103   | >KDR-V476L-CANEPSQAV  | 1125 | 1022 |
| >KDR-V476L-CANEPSQAV   | 206   | >KDR-V476L-CANEPSQAV  | 2565 | 2359 |
| >KDR-V476L-CANEPSQAV   | 1773  | >KDR-V476L-CANEPSQAV  | 369  | 1404 |
| >KDR-V476L-VSVTNPYP    | 128   | >KDR-V476L-VSLTNPYP   | 76   | 52   |
| >KDR-V476L-AVSVTNPYP   | 136   | >KDR-V476L-AVSLTNPYP  | 124  | 12   |
| >KDR-V476L-AVSVTNPYP   | 368   | >KDR-V476L-AVSLTNPYP  | 285  | 83   |

|                         |      |                         |      |      |
|-------------------------|------|-------------------------|------|------|
| >KDR-V476L-AVSVTNPY     | 170  | >KDR-V476L-AVSLTNPY     | 136  | 34   |
| >KDR-V476L-AVSVTNPY     | 39   | >KDR-V476L-AVSLTNPY     | 80   | 41   |
| >KDR-V476L-AVSVTNPY     | 103  | >KDR-V476L-AVSLTNPY     | 146  | 43   |
| >KDR-V476L-AVSVTNPY     | 408  | >KDR-V476L-AVSLTNPY     | 396  | 12   |
| >KDR-V476L-AVSVTNPY     | 191  | >KDR-V476L-AVSLTNPY     | 203  | 12   |
| >KDR-V476L-AVSVTNPY     | 137  | >KDR-V476L-AVSLTNPY     | 195  | 58   |
| >KDR-V476L-QAVSVTNPY    | 89   | >KDR-V476L-QAVSLTNPY    | 65   | 24   |
| >KDR-V476L-QAVSVTNPY    | 138  | >KDR-V476L-QAVSLTNPY    | 77   | 61   |
| >KDR-V476L-QAVSVTNPY    | 365  | >KDR-V476L-QAVSLTNPY    | 211  | 154  |
| >KDR-V476L-QAVSVTNPY    | 302  | >KDR-V476L-QAVSLTNPY    | 424  | 122  |
| >KDR-V476L-QAVSVTNPY    | 322  | >KDR-V476L-QAVSLTNPY    | 891  | 569  |
| >KDR-V476L-QAVSVTNPY    | 127  | >KDR-V476L-QAVSLTNPY    | 116  | 11   |
| >KDR-V476L-QAVSVTNPY    | 95   | >KDR-V476L-QAVSLTNPY    | 91   | 4    |
| >KDR-V476L-QAVSVTNPY    | 393  | >KDR-V476L-QAVSLTNPY    | 149  | 244  |
| >KDR-V476L-QAVSVTNPY    | 11   | >KDR-V476L-QAVSLTNPY    | 11   | 0    |
| >KDR-V476L-QAVSVTNPY    | 49   | >KDR-V476L-QAVSLTNPY    | 68   | 19   |
| >KDR-V476L-SQAVSVTNPY   | 175  | >KDR-V476L-SQAVSLTNPY   | 344  | 169  |
| >KDR-V476L-SQAVSVTNPY   | 32   | >KDR-V476L-SQAVSLTNPY   | 34   | 2    |
| >KDR-V476L-SQAVSVTNPY   | 54   | >KDR-V476L-SQAVSLTNPY   | 67   | 13   |
| >KDR-V476L-SQAVSVTNPY   | 4    | >KDR-V476L-SQAVSLTNPY   | 5    | 1    |
| >KDR-V476L-PSQAVSVTNF   | 210  | >KDR-V476L-PSQAVSLTNP   | 96   | 114  |
| >KDR-V476L-PSQAVSVTNF   | 379  | >KDR-V476L-PSQAVSLTNP   | 404  | 25   |
| >KDR-V476L-EPSQAVSV     | 1800 | >KDR-V476L-EPSQAVSL     | 401  | 1399 |
| >KDR-V476L-EPSQAVSV     | 193  | >KDR-V476L-EPSQAVSL     | 1388 | 1195 |
| >KDR-V476L-EPSQAVSV     | 1256 | >KDR-V476L-EPSQAVSL     | 231  | 1025 |
| >KDR-V476L-EPSQAVSV     | 494  | >KDR-V476L-EPSQAVSL     | 62   | 432  |
| >KDR-V476L-EPSQAVSVT    | 98   | >KDR-V476L-EPSQAVSLT    | 548  | 450  |
| >KDR-V476L-EPSQAVSV     | 1859 | >KDR-V476L-EPSQAVSL     | 91   | 1768 |
| >KDR-V476L-EPSQAVSV     | 1098 | >KDR-V476L-EPSQAVSL     | 278  | 820  |
| >KDR-V476L-EPSQAVSV     | 3774 | >KDR-V476L-EPSQAVSL     | 405  | 3369 |
| >KDR-V476L-NEPSQAVSV    | 51   | >KDR-V476L-NEPSQAVSL    | 127  | 76   |
| >KDR-V476L-NEPSQAVSV    | 216  | >KDR-V476L-NEPSQAVSL    | 423  | 207  |
| >KIT-A599T-v AFGKVVEATA | 286  | >KIT-A599T-r TFGKVVEATA | 156  | 130  |
| >KIT-A599T-v AFGKVVEATA | 531  | >KIT-A599T-r TFGKVVEATA | 381  | 150  |
| >KIT-A599T-v GAFGKVVEA  | 1265 | >KIT-A599T-r GTFGKVVEA  | 430  | 835  |
| >KIT-A599T-v GAFGKVVEA  | 861  | >KIT-A599T-r GTFGKVVEA  | 213  | 648  |
| >KIT-A599T-v GAFGKVVEA  | 1193 | >KIT-A599T-r GTFGKVVEA  | 314  | 879  |
| >KIT-A599T-v LSFGKTLGAG | 459  | >KIT-A599T-r LSFGKTLGAG | 269  | 190  |
| >KIT-A599T-v TLGAGAFGK\ | 242  | >KIT-A599T-r TLGAGTFGK\ | 230  | 12   |
| >KIT-A599T-v TLGAGAFGK\ | 90   | >KIT-A599T-r TLGAGTFGK\ | 76   | 14   |
| >KIT-A599T-v TLGAGAFGK\ | 394  | >KIT-A599T-r TLGAGTFGK\ | 255  | 139  |
| >KIT-A599T-v TLGAGAFGK\ | 25   | >KIT-A599T-r TLGAGTFGK\ | 18   | 7    |
| >KIT-A599T-v TLGAGAFGK\ | 116  | >KIT-A599T-r TLGAGTFGK\ | 79   | 37   |

|                         |     |                         |     |     |
|-------------------------|-----|-------------------------|-----|-----|
| >KIT-A599T-ν TLGAGAFGK\ | 12  | >KIT-A599T-r TLGAGTFGKV | 9   | 3   |
| >KIT-A599T-ν TLGAGAFGK\ | 13  | >KIT-A599T-r TLGAGTFGKV | 13  | 0   |
| >KIT-A599T-ν TLGAGAFGK\ | 68  | >KIT-A599T-r TLGAGTFGKV | 38  | 30  |
| >KIT-A599T-ν TLGAGAFGK\ | 50  | >KIT-A599T-r TLGAGTFGKV | 41  | 9   |
| >KIT-A599T-ν TLGAGAFGK\ | 17  | >KIT-A599T-r TLGAGTFGKV | 15  | 2   |
| >KIT-A599T-ν TLGAGAFGK\ | 30  | >KIT-A599T-r TLGAGTFGKV | 31  | 1   |
| >KIT-A599T-ν TLGAGAFGK\ | 31  | >KIT-A599T-r TLGAGTFGKV | 24  | 7   |
| >KIT-A599T-ν TLGAGAFGK\ | 75  | >KIT-A599T-r TLGAGTFGKV | 59  | 16  |
| >KIT-A599T-ν TLGAGAFGK\ | 3   | >KIT-A599T-r TLGAGTFGKV | 3   | 0   |
| >KIT-A599T-ν TLGAGAFGK\ | 5   | >KIT-A599T-r TLGAGTFGKV | 5   | 0   |
| >KIT-A599T-ν TLGAGAFGK  | 67  | >KIT-A599T-r TLGAGTFGK  | 53  | 14  |
| >KIT-A599T-ν TLGAGAFGK  | 45  | >KIT-A599T-r TLGAGTFGK  | 26  | 19  |
| >KIT-A599T-ν TLGAGAFGK  | 631 | >KIT-A599T-r TLGAGTFGK  | 443 | 188 |
| >KIT-A599T-ν TLGAGAFGK\ | 905 | >KIT-A599T-r TLGAGTFGKV | 370 | 535 |
| >KIT-A599T-ν TLGAGAFGK\ | 212 | >KIT-A599T-r TLGAGTFGKV | 193 | 19  |
| >KIT-A599T-ν KTLGAGAFGk | 67  | >KIT-A599T-r KTLGAGTFGK | 77  | 10  |
| >KIT-A599T-ν KTLGAGAFGk | 41  | >KIT-A599T-r KTLGAGTFGK | 39  | 2   |
| >KIT-A599T-ν KTLGAGAFGk | 93  | >KIT-A599T-r KTLGAGTFGK | 85  | 8   |
| >KIT-A599T-ν KTLGAGAFGk | 365 | >KIT-A599T-r KTLGAGTFGK | 408 | 43  |
| >KIT-A599T-ν KTLGAGAFGk | 22  | >KIT-A599T-r KTLGAGTFGK | 16  | 6   |
| >KIT-A599T-ν KTLGAGAFGk | 19  | >KIT-A599T-r KTLGAGTFGK | 16  | 3   |
| >KIT-A599T-ν KTLGAGAF   | 587 | >KIT-A599T-r KTLGAGTF   | 326 | 261 |
| >KIT-A599T-ν KTLGAGAF   | 213 | >KIT-A599T-r KTLGAGTF   | 663 | 450 |
| >KIT-A599T-ν KTLGAGAFG  | 52  | >KIT-A599T-r KTLGAGTFG  | 351 | 299 |
| >KIT-A599T-ν KTLGAGAFGk | 8   | >KIT-A599T-r KTLGAGTFGK | 8   | 0   |
| >KIT-A599T-ν KTLGAGAFGk | 91  | >KIT-A599T-r KTLGAGTFGK | 159 | 68  |
| >KIT-A599T-ν KTLGAGAFGk | 152 | >KIT-A599T-r KTLGAGTFGK | 148 | 4   |
| >KIT-A599T-ν KTLGAGAF   | 13  | >KIT-A599T-r KTLGAGTF   | 9   | 4   |
| >KIT-A599T-ν KTLGAGAFGk | 431 | >KIT-A599T-r KTLGAGTFGK | 436 | 5   |
| >KIT-A599T-ν KTLGAGAFGk | 128 | >KIT-A599T-r KTLGAGTFGK | 194 | 66  |
| >KIT-A599T-ν KTLGAGAF   | 378 | >KIT-A599T-r KTLGAGTF   | 716 | 338 |
| >KIT-A599T-ν KTLGAGAF   | 155 | >KIT-A599T-r KTLGAGTF   | 213 | 58  |
| >KIT-A599T-ν KTLGAGAF   | 4   | >KIT-A599T-r KTLGAGTF   | 3   | 1   |
| >KIT-A599T-ν KTLGAGAFGk | 78  | >KIT-A599T-r KTLGAGTFGK | 92  | 14  |
| >KIT-A599T-ν KTLGAGAF   | 345 | >KIT-A599T-r KTLGAGTF   | 79  | 266 |
| >KIT-A599T-ν KTLGAGAF   | 78  | >KIT-A599T-r KTLGAGTF   | 29  | 49  |
| >KIT-A599T-ν KTLGAGAF   | 227 | >KIT-A599T-r KTLGAGTF   | 248 | 21  |
| >KIT-A599T-ν KTLGAGAFGk | 181 | >KIT-A599T-r KTLGAGTFGK | 104 | 77  |
| >KIT-A599T-ν KTLGAGAFGk | 813 | >KIT-A599T-r KTLGAGTFGK | 497 | 316 |
| >KIT-A599T-ν GKTLGAGAF  | 333 | >KIT-A599T-r GKTLGAGTF  | 626 | 293 |
| >KIT-A599T-ν FGKTLGAGAF | 241 | >KIT-A599T-r FGKTLGAGTF | 376 | 135 |
| >KIT-A599T-ν FGKTLGAGAF | 353 | >KIT-A599T-r FGKTLGAGTF | 576 | 223 |
| >KIT-A599T-ν FGKTLGAGAF | 408 | >KIT-A599T-r FGKTLGAGTF | 666 | 258 |

|                          |      |                          |      |      |
|--------------------------|------|--------------------------|------|------|
| >KIT-A599T-v FGKTLGAGAF  | 1411 | >KIT-A599T-r FGKTLGAGTF  | 415  | 996  |
| >KIT-A599T-v SFGKTLGAGA  | 17   | >KIT-A599T-r SFGKTLGAGT  | 11   | 6    |
| >KIT-A617S-v AMTVAVKML   | 276  | >KIT-A617S-r SMTVAVKML   | 316  | 40   |
| >KIT-A617S-v AMTVAVKML   | 326  | >KIT-A617S-r SMTVAVKML   | 399  | 73   |
| >KIT-A617S-v AMTVAVKML   | 131  | >KIT-A617S-r SMTVAVKML   | 98   | 33   |
| >KIT-A617S-v AMTVAVKM    | 672  | >KIT-A617S-r SMTVAVKM    | 229  | 443  |
| >KIT-A617S-v AMTVAVKML   | 115  | >KIT-A617S-r SMTVAVKML   | 43   | 72   |
| >KIT-A617S-v AMTVAVKM    | 207  | >KIT-A617S-r SMTVAVKM    | 302  | 95   |
| >KIT-A617S-v AMTVAVKML   | 20   | >KIT-A617S-r SMTVAVKML   | 27   | 7    |
| >KIT-A617S-v AMTVAVKML   | 30   | >KIT-A617S-r SMTVAVKML   | 37   | 7    |
| >KIT-A617S-v AMTVAVKML   | 15   | >KIT-A617S-r SMTVAVKML   | 12   | 3    |
| >KIT-A617S-v AMTVAVKML   | 155  | >KIT-A617S-r SMTVAVKML   | 263  | 108  |
| >KIT-A617S-v AMTVAVKML   | 474  | >KIT-A617S-r SMTVAVKML   | 369  | 105  |
| >KIT-A617S-v AMTVAVKML   | 337  | >KIT-A617S-r SMTVAVKML   | 122  | 215  |
| >KIT-A617S-v AMTVAVKM    | 245  | >KIT-A617S-r SMTVAVKM    | 588  | 343  |
| >KIT-A617S-v AMTVAVKML   | 278  | >KIT-A617S-r SMTVAVKML   | 643  | 365  |
| >KIT-A617S-v AMTVAVKML   | 669  | >KIT-A617S-r SMTVAVKML   | 218  | 451  |
| >KIT-A617S-v AAMTVAVK    | 225  | >KIT-A617S-r ASMTVAVK    | 92   | 133  |
| >KIT-A617S-v AAMTVAVKM   | 52   | >KIT-A617S-r ASMTVAVKM   | 37   | 15   |
| >KIT-A617S-v AAMTVAVK    | 19   | >KIT-A617S-r ASMTVAVK    | 9    | 10   |
| >KIT-A617S-v AAMTVAVKM   | 8    | >KIT-A617S-r ASMTVAVKM   | 6    | 2    |
| >KIT-A617S-v AAMTVAVK    | 114  | >KIT-A617S-r ASMTVAVK    | 44   | 70   |
| >KIT-A617S-v AAMTVAVKM   | 64   | >KIT-A617S-r ASMTVAVKM   | 28   | 36   |
| >KIT-A617S-v AAMTVAVKM   | 853  | >KIT-A617S-r ASMTVAVKM   | 411  | 442  |
| >KIT-A617S-v AAMTVAVKM   | 1533 | >KIT-A617S-r ASMTVAVKM   | 184  | 1349 |
| >KIT-A617S-v AAMTVAVKM   | 2745 | >KIT-A617S-r ASMTVAVKM   | 458  | 2287 |
| >KIT-A617S-v AAMTVAVK    | 199  | >KIT-A617S-r ASMTVAVK    | 208  | 9    |
| >KIT-A617S-v AAMTVAVKM   | 53   | >KIT-A617S-r ASMTVAVKM   | 55   | 2    |
| >KIT-A617S-v AAMTVAVKM   | 544  | >KIT-A617S-r ASMTVAVKM   | 276  | 268  |
| >KIT-A617S-v AAMTVAVKM   | 555  | >KIT-A617S-r ASMTVAVKM   | 286  | 269  |
| >KIT-A617S-v AAMTVAVKM   | 89   | >KIT-A617S-r ASMTVAVKM   | 16   | 73   |
| >KIT-A617S-v AAMTVAVKM   | 133  | >KIT-A617S-r ASMTVAVKM   | 19   | 114  |
| >KIT-A617S-v AAMTVAVKM   | 1716 | >KIT-A617S-r ASMTVAVKM   | 495  | 1221 |
| >KIT-A617S-v AAMTVAVKM   | 406  | >KIT-A617S-r ASMTVAVKM   | 43   | 363  |
| >KIT-A617S-v AAMTVAVK    | 1077 | >KIT-A617S-r ASMTVAVK    | 304  | 773  |
| >KIT-A617S-v AAMTVAVKM   | 528  | >KIT-A617S-r ASMTVAVKM   | 140  | 388  |
| >KIT-A617S-v TAYGLIKSDA/ | 449  | >KIT-A617S-r TAYGLIKSDA/ | 4280 | 3831 |
| >KIT-A617S-v DAAMTVAVK   | 14   | >KIT-A617S-r DASMTVAVK   | 24   | 10   |
| >KIT-A617S-v DAAMTVAV    | 30   | >KIT-A617S-r DASMTVAV    | 96   | 66   |
| >KIT-A617S-v DAAMTVAV    | 50   | >KIT-A617S-r DASMTVAV    | 232  | 182  |
| >KIT-A617S-v SDAAMTVAV   | 261  | >KIT-A617S-r SDASMTVAV   | 532  | 271  |
| >KIT-A617S-v SDAAMTVAV   | 258  | >KIT-A617S-r SDASMTVAV   | 259  | 1    |
| >KIT-A617S-v SDAAMTVAV   | 86   | >KIT-A617S-r SDASMTVAV   | 87   | 1    |



|                         |      |                         |       |       |
|-------------------------|------|-------------------------|-------|-------|
| >KIT-A617S-v KSDAAMTV   | 118  | >KIT-A617S-r KSDASMTV   | 155   | 37    |
| >KIT-A617S-v KSDAAMTVA  | 237  | >KIT-A617S-r KSDASMTVA' | 155   | 82    |
| >KIT-A617S-v KSDAAMTVA  | 51   | >KIT-A617S-r KSDASMTVA' | 37    | 14    |
| >KIT-A617S-v KSDAAMTVA  | 195  | >KIT-A617S-r KSDASMTVA' | 242   | 47    |
| >KIT-A617S-v KSDAAMTVA  | 351  | >KIT-A617S-r KSDASMTVA' | 431   | 80    |
| >KIT-A617S-v KSDAAMTV   | 60   | >KIT-A617S-r KSDASMTV   | 30    | 30    |
| >KIT-A617S-v KSDAAMTVA  | 2130 | >KIT-A617S-r KSDASMTVA  | 415   | 1715  |
| >KIT-A617S-v KSDAAMTVA  | 215  | >KIT-A617S-r KSDASMTVA' | 91    | 124   |
| >KIT-A617S-v IKSDAAMTV  | 274  | >KIT-A617S-r IKSDASMTV  | 229   | 45    |
| >KIT-A617S-v IKSDAAMTV  | 40   | >KIT-A617S-r IKSDASMTV  | 23    | 17    |
| >KIT-A617S-v IKSDAAMTV/ | 226  | >KIT-A617S-r IKSDASMTVA | 108   | 118   |
| >KIT-A617S-v IKSDAAMTV/ | 27   | >KIT-A617S-r IKSDASMTVA | 20    | 7     |
| >KIT-A617S-v LIKSDAAMTV | 76   | >KIT-A617S-r LIKSDASMTV | 55    | 21    |
| >KIT-A617S-v LIKSDAAMTV | 45   | >KIT-A617S-r LIKSDASMTV | 29    | 16    |
| >KIT-A617S-v LIKSDAAMTV | 107  | >KIT-A617S-r LIKSDASMTV | 92    | 15    |
| >KIT-A617S-v LIKSDAAMTV | 503  | >KIT-A617S-r LIKSDASMTV | 231   | 272   |
| >KIT-A617S-v LIKSDAAMTV | 6    | >KIT-A617S-r LIKSDASMTV | 6     | 0     |
| >KIT-A617S-v LIKSDAAMTV | 462  | >KIT-A617S-r LIKSDASMTV | 950   | 488   |
| >KIT-A617S-v LIKSDAAM   | 104  | >KIT-A617S-r LIKSDASM   | 106   | 2     |
| >KIT-A617S-v GLIKSDAAMT | 39   | >KIT-A617S-r GLIKSDASMT | 30    | 9     |
| >KIT-A617S-v GLIKSDAA   | 162  | >KIT-A617S-r GLIKSDAS   | 3477  | 3315  |
| >KIT-A617S-v GLIKSDAAM  | 396  | >KIT-A617S-r GLIKSDASM  | 400   | 4     |
| >KIT-A617S-v GLIKSDAAMT | 37   | >KIT-A617S-r GLIKSDASMT | 25    | 12    |
| >KIT-A617S-v GLIKSDAA   | 77   | >KIT-A617S-r GLIKSDAS   | 5884  | 5807  |
| >KIT-A617S-v GLIKSDAAMT | 8    | >KIT-A617S-r GLIKSDASMT | 7     | 1     |
| >KIT-A617S-v GLIKSDAAMT | 51   | >KIT-A617S-r GLIKSDASMT | 51    | 0     |
| >KIT-A617S-v GLIKSDAAMT | 9    | >KIT-A617S-r GLIKSDASMT | 8     | 1     |
| >KIT-A617S-v GLIKSDAA   | 48   | >KIT-A617S-r GLIKSDAS   | 5298  | 5250  |
| >KIT-A617S-v GLIKSDAAM  | 59   | >KIT-A617S-r GLIKSDASM  | 93    | 34    |
| >KIT-A617S-v GLIKSDAAMT | 3    | >KIT-A617S-r GLIKSDASMT | 3     | 0     |
| >KIT-A617S-v GLIKSDAA   | 483  | >KIT-A617S-r GLIKSDAS   | 13656 | 13173 |
| >KIT-A617S-v GLIKSDAAMT | 8    | >KIT-A617S-r GLIKSDASMT | 7     | 1     |
| >KIT-A617S-v GLIKSDAAMT | 159  | >KIT-A617S-r GLIKSDASMT | 105   | 54    |
| >KIT-A617S-v GLIKSDAA   | 247  | >KIT-A617S-r GLIKSDAS   | 12323 | 12076 |
| >KIT-A617S-v GLIKSDAAM  | 734  | >KIT-A617S-r GLIKSDASM  | 283   | 451   |
| >KIT-A617S-v GLIKSDAAMT | 4    | >KIT-A617S-r GLIKSDASMT | 3     | 1     |
| >KIT-A617S-v GLIKSDAAM  | 68   | >KIT-A617S-r GLIKSDASM  | 68    | 0     |
| >KIT-A617S-v GLIKSDAAM  | 334  | >KIT-A617S-r GLIKSDASM  | 667   | 333   |
| >KIT-A617S-v YGLIKSDAAM | 255  | >KIT-A617S-r YGLIKSDASM | 156   | 99    |
| >KIT-A617S-v YGLIKSDAAM | 590  | >KIT-A617S-r YGLIKSDASM | 173   | 417   |
| >KIT-A636V-v ALMSELKV   | 13   | >KIT-A636V-r VLMSELKV   | 13    | 0     |
| >KIT-A636V-v ALMSELKVL  | 93   | >KIT-A636V-r VLMSELKVL  | 131   | 38    |
| >KIT-A636V-v ALMSELKV   | 7    | >KIT-A636V-r VLMSELKV   | 10    | 3     |

|                         |      |                          |     |      |
|-------------------------|------|--------------------------|-----|------|
| >KIT-A636V-1 ALMSELKVL  | 16   | >KIT-A636V-1 VLMSELKVL   | 34  | 18   |
| >KIT-A636V-1 ALMSELKV   | 6    | >KIT-A636V-1 VLMSELKV    | 8   | 2    |
| >KIT-A636V-1 ALMSELKVL  | 18   | >KIT-A636V-1 VLMSELKVL   | 29  | 11   |
| >KIT-A636V-1 ALMSELKV   | 25   | >KIT-A636V-1 VLMSELKV    | 33  | 8    |
| >KIT-A636V-1 ALMSELKVL  | 476  | >KIT-A636V-1 VLMSELKVL   | 693 | 217  |
| >KIT-A636V-1 ALMSELKV   | 4    | >KIT-A636V-1 VLMSELKV    | 3   | 1    |
| >KIT-A636V-1 ALMSELKVL  | 41   | >KIT-A636V-1 VLMSELKVL   | 30  | 11   |
| >KIT-A636V-1 ALMSELKV   | 7    | >KIT-A636V-1 VLMSELKV    | 7   | 0    |
| >KIT-A636V-1 ALMSELKVL  | 31   | >KIT-A636V-1 VLMSELKVL   | 30  | 1    |
| >KIT-A636V-1 ALMSELKV   | 9    | >KIT-A636V-1 VLMSELKV    | 8   | 1    |
| >KIT-A636V-1 ALMSELKV   | 4    | >KIT-A636V-1 VLMSELKV    | 3   | 1    |
| >KIT-A636V-1 ALMSELKVL  | 39   | >KIT-A636V-1 VLMSELKVL   | 15  | 24   |
| >KIT-A636V-1 ALMSELKV   | 2    | >KIT-A636V-1 VLMSELKV    | 2   | 0    |
| >KIT-A636V-1 ALMSELKVL  | 10   | >KIT-A636V-1 VLMSELKVL   | 11  | 1    |
| >KIT-A636V-1 ALMSELKVLS | 293  | >KIT-A636V-1 VLMSELKVLS  | 312 | 19   |
| >KIT-A636V-1 ALMSELKVLS | 306  | >KIT-A636V-1 VLMSELKVLS  | 753 | 447  |
| >KIT-A636V-1 ALMSELKVLS | 200  | >KIT-A636V-1 VLMSELKVLS  | 745 | 545  |
| >KIT-A636V-1 ALMSELKVLS | 125  | >KIT-A636V-1 VLMSELKVLS  | 77  | 48   |
| >KIT-A636V-1 ALMSELKVLS | 115  | >KIT-A636V-1 VLMSELKVLS  | 72  | 43   |
| >KIT-A636V-1 ALMSELKVLS | 74   | >KIT-A636V-1 VLMSELKVLS  | 36  | 38   |
| >KIT-A636V-1 ALMSELKVLS | 48   | >KIT-A636V-1 VLMSELKVLS  | 54  | 6    |
| >KIT-A636V-1 ALMSELKVLS | 439  | >KIT-A636V-1 VLMSELKVLS  | 314 | 125  |
| >KIT-A636V-1 ALMSELKVL  | 216  | >KIT-A636V-1 VLMSELKVL   | 396 | 180  |
| >KIT-A636V-1 ALMSELKVLS | 25   | >KIT-A636V-1 VLMSELKVLS  | 37  | 12   |
| >KIT-A636V-1 ALMSELKVLS | 270  | >KIT-A636V-1 VLMSELKVLS  | 295 | 25   |
| >KIT-A636V-1 EALMSELK   | 743  | >KIT-A636V-1 EVLMSELK    | 173 | 570  |
| >KIT-A636V-1 EALMSELKVL | 3949 | >KIT-A636V-1 EVLMSELKVL  | 219 | 3730 |
| >KIT-A636V-1 EALMSELK   | 22   | >KIT-A636V-1 EVLMSELK    | 10  | 12   |
| >KIT-A636V-1 EALMSELKV  | 192  | >KIT-A636V-1 EVLMSELKV   | 69  | 123  |
| >KIT-A636V-1 KPSAHLTERE | 160  | >KIT-A636V-1 KPSAHLTERE  | 48  | 112  |
| >KIT-A636V-1 REALMSELKV | 131  | >KIT-A636V-1 REVLMSSELKV | 448 | 317  |
| >KIT-A636V-1 REALMSELKV | 58   | >KIT-A636V-1 REVLMSSELKV | 195 | 137  |
| >KIT-A636V-1 REALMSEL   | 16   | >KIT-A636V-1 REVLMSSEL   | 12  | 4    |
| >KIT-A636V-1 REALMSELKV | 589  | >KIT-A636V-1 REVLMSSELKV | 484 | 105  |
| >KIT-A636V-1 REALMSELKV | 30   | >KIT-A636V-1 REVLMSSELKV | 18  | 12   |
| >KIT-A636V-1 REALMSEL   | 25   | >KIT-A636V-1 REVLMSSEL   | 18  | 7    |
| >KIT-A636V-1 REALMSELKV | 131  | >KIT-A636V-1 REVLMSSELKV | 123 | 8    |
| >KIT-A636V-1 REALMSELKV | 74   | >KIT-A636V-1 REVLMSSELKV | 48  | 26   |
| >KIT-A636V-1 REALMSELKV | 566  | >KIT-A636V-1 REVLMSSELKV | 429 | 137  |
| >KIT-A636V-1 REALMSELKV | 425  | >KIT-A636V-1 REVLMSSELKV | 860 | 435  |
| >KIT-A636V-1 REALMSEL   | 279  | >KIT-A636V-1 REVLMSSEL   | 110 | 169  |
| >KIT-A636V-1 REALMSELK  | 146  | >KIT-A636V-1 REVLMSSELK  | 124 | 22   |
| >KIT-A636V-1 REALMSELKV | 41   | >KIT-A636V-1 REVLMSSELKV | 57  | 16   |

|                          |     |                          |       |       |
|--------------------------|-----|--------------------------|-------|-------|
| >KIT-A636V-1 REALMSELKV  | 10  | >KIT-A636V-r REVLMSSELKV | 8     | 2     |
| >KIT-A636V-1 REALMSEL    | 382 | >KIT-A636V-r REVLMSSEL   | 861   | 479   |
| >KIT-A636V-1 EREALMSEL   | 141 | >KIT-A636V-r EREVLMSSEL  | 557   | 416   |
| >KIT-A636V-1 EREALMSEL   | 257 | >KIT-A636V-r EREVLMSSEL  | 226   | 31    |
| >KIT-A636V-1 EREALMSEL   | 156 | >KIT-A636V-r EREVLMSSEL  | 94    | 62    |
| >KIT-A636V-1 TEREALMS    | 104 | >KIT-A636V-r TEREVLMS    | 234   | 130   |
| >KIT-A636V-1 TEREALMSEL  | 127 | >KIT-A636V-r TEREVLMSSEL | 88    | 39    |
| >KIT-A636V-1 TEREALMSE   | 177 | >KIT-A636V-r TEREVLMSSE  | 331   | 154   |
| >KIT-A636V-1 TEREALMSEL  | 267 | >KIT-A636V-r TEREVLMSSEL | 270   | 3     |
| >KIT-A636V-1 TEREALMSEL  | 45  | >KIT-A636V-r TEREVLMSSEL | 48    | 3     |
| >KIT-A636V-1 LTEREALM    | 135 | >KIT-A636V-r LTEREVLMS   | 365   | 230   |
| >KIT-A636V-1 LTEREALMSE  | 35  | >KIT-A636V-r LTEREVLMSSE | 47    | 12    |
| >KIT-A636V-1 LTEREALMSE  | 39  | >KIT-A636V-r LTEREVLMSSE | 63    | 24    |
| >KIT-A636V-1 HLTEREAL    | 34  | >KIT-A636V-r HLTEREVL    | 108   | 74    |
| >KIT-A636V-1 HLTEREALM   | 234 | >KIT-A636V-r HLTEREVLMS  | 362   | 128   |
| >KIT-A636V-1 HLTEREAL    | 179 | >KIT-A636V-r HLTEREVL    | 373   | 194   |
| >KIT-A636V-1 HLTEREAL    | 136 | >KIT-A636V-r HLTEREVL    | 275   | 139   |
| >KIT-A636V-1 HLTEREAL    | 339 | >KIT-A636V-r HLTEREVL    | 275   | 64    |
| >KIT-A636V-1 HLTEREAL    | 8   | >KIT-A636V-r HLTEREVL    | 12    | 4     |
| >KIT-A636V-1 HLTEREALM   | 57  | >KIT-A636V-r HLTEREVLMS  | 78    | 21    |
| >KIT-A636V-1 AHLTEREAL   | 274 | >KIT-A636V-r AHLTEREVL   | 566   | 292   |
| >KIT-A636V-1 AHLTEREAL   | 37  | >KIT-A636V-r AHLTEREVL   | 47    | 10    |
| >KIT-A636V-1 SAHLTEREALI | 452 | >KIT-A636V-r SAHLTEREVL  | 557   | 105   |
| >KIT-A814S-v ARDIKNDSNY  | 420 | >KIT-A814S-r SRDIKNDSNY  | 449   | 29    |
| >KIT-A814S-v ARDIKNDSNY  | 200 | >KIT-A814S-r SRDIKNDSNY  | 212   | 12    |
| >KIT-A814S-v LARDIKNDSN  | 241 | >KIT-A814S-r LSRDIKNDSN  | 73    | 168   |
| >KIT-A814S-v LARDIKNDSN  | 387 | >KIT-A814S-r LSRDIKNDSN  | 217   | 170   |
| >KIT-A814S-v LARDIKNDSN  | 317 | >KIT-A814S-r LSRDIKNDSN  | 157   | 160   |
| >KIT-A814S-v LARDIKNDSN  | 30  | >KIT-A814S-r LSRDIKNDSN  | 9     | 21    |
| >KIT-A814S-v LARDIKNDSN  | 176 | >KIT-A814S-r LSRDIKNDSN  | 1826  | 1650  |
| >KIT-A814S-v LARDIKNDSN  | 46  | >KIT-A814S-r LSRDIKNDSN  | 9     | 37    |
| >KIT-A814S-v CDFGLARDI   | 84  | >KIT-A814S-r CDFGLSRDI   | 234   | 150   |
| >KIT-A814S-v KICDFGLA    | 433 | >KIT-A814S-r KICDFGLS    | 10623 | 10190 |
| >KIT-A814S-v KICDFGLA    | 195 | >KIT-A814S-r KICDFGLS    | 6253  | 6058  |
| >KIT-A814S-v KICDFGLAR   | 53  | >KIT-A814S-r KICDFGLSR   | 48    | 5     |
| >KIT-A814S-v KICDFGLAR   | 30  | >KIT-A814S-r KICDFGLSR   | 52    | 22    |
| >KIT-A814S-v KICDFGLARD  | 109 | >KIT-A814S-r KICDFGLSRDI | 96    | 13    |
| >KIT-A814S-v KICDFGLAR   | 14  | >KIT-A814S-r KICDFGLSR   | 14    | 0     |
| >KIT-A814S-v TKICDFGLAR  | 408 | >KIT-A814S-r TKICDFGLSR  | 455   | 47    |
| >KIT-A814S-v ITKICDFGLAR | 16  | >KIT-A814S-r ITKICDFGLSR | 22    | 6     |
| >KIT-A814S-v ITKICDFGLAR | 79  | >KIT-A814S-r ITKICDFGLSR | 94    | 15    |
| >KIT-A814S-v ITKICDFGLAR | 70  | >KIT-A814S-r ITKICDFGLSR | 65    | 5     |
| >KIT-A814S-v ITKICDFGLAR | 189 | >KIT-A814S-r ITKICDFGLSR | 198   | 9     |

|                          |       |                          |       |       |
|--------------------------|-------|--------------------------|-------|-------|
| >KIT-A814T-v ARDIKNSNY   | 420   | >KIT-A814T-r TRDIKNSNY   | 551   | 131   |
| >KIT-A814T-v ARDIKNSNY   | 200   | >KIT-A814T-r TRDIKNSNY   | 698   | 498   |
| >KIT-A814T-v LARDIKNSDN  | 4440  | >KIT-A814T-r LTRDIKNSDN  | 161   | 4279  |
| >KIT-A814T-v LARDIKNSDN  | 1395  | >KIT-A814T-r LTRDIKNSDN  | 159   | 1236  |
| >KIT-A814T-v LARDIKNSDN  | 1945  | >KIT-A814T-r LTRDIKNSDN  | 339   | 1606  |
| >KIT-A814T-v LARDIKNSDN  | 241   | >KIT-A814T-r LTRDIKNSDN  | 69    | 172   |
| >KIT-A814T-v LARDIKNSDN  | 387   | >KIT-A814T-r LTRDIKNSDN  | 272   | 115   |
| >KIT-A814T-v LARDIKNSDN  | 317   | >KIT-A814T-r LTRDIKNSDN  | 530   | 213   |
| >KIT-A814T-v LARDIKNSDN  | 30    | >KIT-A814T-r LTRDIKNSDN  | 8     | 22    |
| >KIT-A814T-v LARDIKNSDN  | 176   | >KIT-A814T-r LTRDIKNSDN  | 3324  | 3148  |
| >KIT-A814T-v LARDIKNSDN  | 46    | >KIT-A814T-r LTRDIKNSDN  | 5     | 41    |
| >KIT-A814T-v CDFGLARDI   | 84    | >KIT-A814T-r CDFGLTRDI   | 132   | 48    |
| >KIT-A814T-v KICDFGLA    | 433   | >KIT-A814T-r KICDFGLT    | 4189  | 3756  |
| >KIT-A814T-v KICDFGLA    | 195   | >KIT-A814T-r KICDFGLT    | 2008  | 1813  |
| >KIT-A814T-v KICDFGLAR   | 53    | >KIT-A814T-r KICDFGLTR   | 68    | 15    |
| >KIT-A814T-v KICDFGLAR   | 30    | >KIT-A814T-r KICDFGLTR   | 45    | 15    |
| >KIT-A814T-v KICDFGLARD  | 109   | >KIT-A814T-r KICDFGLTRDI | 60    | 49    |
| >KIT-A814T-v KICDFGLAR   | 14    | >KIT-A814T-r KICDFGLTR   | 14    | 0     |
| >KIT-A814T-v TKICDFGLAR  | 408   | >KIT-A814T-r TKICDFGLTR  | 681   | 273   |
| >KIT-A814T-v ITKICDFGLAR | 16    | >KIT-A814T-r ITKICDFGLTR | 19    | 3     |
| >KIT-A814T-v ITKICDFGLAR | 79    | >KIT-A814T-r ITKICDFGLTR | 106   | 27    |
| >KIT-A814T-v ITKICDFGLAR | 70    | >KIT-A814T-r ITKICDFGLTR | 60    | 10    |
| >KIT-A814T-v ITKICDFGLAR | 189   | >KIT-A814T-r ITKICDFGLTR | 168   | 21    |
| >KIT-A829P-v ARLPVKWM    | 129   | >KIT-A829P-r PRLPVKWM    | 1929  | 1800  |
| >KIT-A829P-v ARLPVKWM    | 342   | >KIT-A829P-r PRLPVKWM    | 5177  | 4835  |
| >KIT-A829P-v NARLPVKWN   | 3693  | >KIT-A829P-r NPRLPVKWN   | 36    | 3657  |
| >KIT-A829P-v NARLPVKW    | 107   | >KIT-A829P-r NPRLPVKW    | 8251  | 8144  |
| >KIT-A829P-v NARLPVKWN   | 389   | >KIT-A829P-r NPRLPVKWN   | 21083 | 20694 |
| >KIT-A829P-v NARLPVKW    | 1470  | >KIT-A829P-r NPRLPVKW    | 138   | 1332  |
| >KIT-A829P-v NARLPVKWN   | 30587 | >KIT-A829P-r NPRLPVKWN   | 223   | 30364 |
| >KIT-A829P-v NARLPVKW    | 173   | >KIT-A829P-r NPRLPVKW    | 16897 | 16724 |
| >KIT-A829P-v NARLPVKW    | 5616  | >KIT-A829P-r NPRLPVKW    | 117   | 5499  |
| >KIT-A829P-v KGNARLPVK   | 258   | >KIT-A829P-r KGNPRLPVK   | 433   | 175   |
| >KIT-A829P-v KGNARLPV    | 287   | >KIT-A829P-r KGNPRLPV    | 408   | 121   |
| >KIT-A829P-v KGNARLPVK   | 17    | >KIT-A829P-r KGNPRLPVK   | 17    | 0     |
| >KIT-A829P-v KGNARLPVK   | 580   | >KIT-A829P-r KGNPRLPVK   | 433   | 147   |
| >KIT-A829P-v KGNARLPVK\  | 531   | >KIT-A829P-r KGNPRLPVK\  | 87    | 444   |
| >KIT-A829P-v KGNARLPVK\  | 1476  | >KIT-A829P-r KGNPRLPVK\  | 334   | 1142  |
| >KIT-A829P-v KGNARLPVK\  | 82    | >KIT-A829P-r KGNPRLPVK\  | 52    | 30    |
| >KIT-A829P-v KGNARLPVK\  | 18    | >KIT-A829P-r KGNPRLPVK\  | 19    | 1     |
| >KIT-A829P-v VKGNARLPV   | 245   | >KIT-A829P-r VKGNPRLPV   | 152   | 93    |
| >KIT-A829P-v VVKGNARLP\  | 360   | >KIT-A829P-r VVKGNPRLP\  | 300   | 60    |
| >KIT-A829P-v VVKGNARL    | 340   | >KIT-A829P-r VVKGNPRL    | 372   | 32    |

|                          |      |                          |       |       |
|--------------------------|------|--------------------------|-------|-------|
| >KIT-A829P-1 VVKGNARLP\  | 51   | >KIT-A829P-r VVKGNPRLP\  | 75    | 24    |
| >KIT-A829P-1 VVKGNARLP\  | 343  | >KIT-A829P-r VVKGNPRLP\  | 361   | 18    |
| >KIT-A829P-1 VVKGNARLP\  | 413  | >KIT-A829P-r VVKGNPRLP\  | 361   | 52    |
| >KIT-A829P-1 VVKGNARLP\  | 90   | >KIT-A829P-r VVKGNPRLP\  | 102   | 12    |
| >KIT-A829P-1 VVKGNARLP\  | 13   | >KIT-A829P-r VVKGNPRLP\  | 11    | 2     |
| >KIT-A829P-1 YVVKGNARL   | 634  | >KIT-A829P-r YVVKGNPRL   | 465   | 169   |
| >KIT-A829P-1 YVVKGNARLF  | 127  | >KIT-A829P-r YVVKGNPRLF  | 160   | 33    |
| >KIT-A829P-1 YVVKGNARL   | 213  | >KIT-A829P-r YVVKGNPRL   | 1422  | 1209  |
| >KIT-A829P-1 YVVKGNARLF  | 357  | >KIT-A829P-r YVVKGNPRLF  | 1130  | 773   |
| >KIT-A829P-1 YVVKGNARL   | 340  | >KIT-A829P-r YVVKGNPRL   | 1698  | 1358  |
| >KIT-A829P-1 YVVKGNARLF  | 27   | >KIT-A829P-r YVVKGNPRLF  | 61    | 34    |
| >KIT-A829P-1 YVVKGNARL   | 56   | >KIT-A829P-r YVVKGNPRL   | 37    | 19    |
| >KIT-A829P-1 YVVKGNARLF  | 8    | >KIT-A829P-r YVVKGNPRLF  | 10    | 2     |
| >KIT-A829P-1 YVVKGNARL   | 489  | >KIT-A829P-r YVVKGNPRL   | 357   | 132   |
| >KIT-A829P-1 YVVKGNARLF  | 74   | >KIT-A829P-r YVVKGNPRLF  | 50    | 24    |
| >KIT-A829P-1 YVVKGNARLF  | 234  | >KIT-A829P-r YVVKGNPRLF  | 317   | 83    |
| >KIT-A829P-1 YVVKGNARLF  | 90   | >KIT-A829P-r YVVKGNPRLF  | 76    | 14    |
| >KIT-A829P-1 YVVKGNARL   | 23   | >KIT-A829P-r YVVKGNPRL   | 20    | 3     |
| >KIT-A829P-1 YVVKGNARLF  | 6    | >KIT-A829P-r YVVKGNPRLF  | 7     | 1     |
| >KIT-A829P-1 YVVKGNARL   | 55   | >KIT-A829P-r YVVKGNPRL   | 68    | 13    |
| >KIT-A829P-1 YVVKGNAR    | 468  | >KIT-A829P-r YVVKGNPR    | 337   | 131   |
| >KIT-A829P-1 YVVKGNAR    | 426  | >KIT-A829P-r YVVKGNPR    | 467   | 41    |
| >KIT-A829P-1 YVVKGNAR    | 18   | >KIT-A829P-r YVVKGNPR    | 21    | 3     |
| >KIT-A829P-1 YVVKGNARL   | 110  | >KIT-A829P-r YVVKGNPRL   | 1883  | 1773  |
| >KIT-A829P-1 YVVKGNARLF  | 16   | >KIT-A829P-r YVVKGNPRLF  | 33    | 17    |
| >KIT-A829P-1 YVVKGNARL   | 250  | >KIT-A829P-r YVVKGNPRL   | 107   | 143   |
| >KIT-A829P-1 YVVKGNARLF  | 13   | >KIT-A829P-r YVVKGNPRLF  | 10    | 3     |
| >KIT-A829P-1 YVVKGNARL   | 56   | >KIT-A829P-r YVVKGNPRL   | 126   | 70    |
| >KIT-A829P-1 YVVKGNARL   | 144  | >KIT-A829P-r YVVKGNPRL   | 364   | 220   |
| >KIT-A829P-1 YVVKGNAR    | 1152 | >KIT-A829P-r YVVKGNPR    | 342   | 810   |
| >KIT-A829P-1 NYVVKGNAR   | 253  | >KIT-A829P-r NYVVKGNPR   | 824   | 571   |
| >KIT-A829P-1 NYVVKGNAR   | 309  | >KIT-A829P-r NYVVKGNPR   | 394   | 85    |
| >KIT-A829P-1 NYVVKGNAR   | 559  | >KIT-A829P-r NYVVKGNPR   | 273   | 286   |
| >KIT-A829P-1 NYVVKGNAR   | 170  | >KIT-A829P-r NYVVKGNPR   | 129   | 41    |
| >KIT-A829P-1 NYVVKGNAR   | 384  | >KIT-A829P-r NYVVKGNPR   | 98    | 286   |
| >KIT-A829P-1 SNYVVKGNA   | 129  | >KIT-A829P-r SNYVVKGNP   | 134   | 5     |
| >KIT-A829P-1 SNYVVKGNA   | 684  | >KIT-A829P-r SNYVVKGNP   | 460   | 224   |
| >KIT-A829P-1 DSNYVVKGN   | 965  | >KIT-A829P-r DSNYVVKGN   | 477   | 488   |
| >KIT-A829P-1 DSNYVVKGN   | 76   | >KIT-A829P-r DSNYVVKGN   | 62    | 14    |
| >KIT-A829P-1 DSNYVVKGN   | 27   | >KIT-A829P-r DSNYVVKGN   | 26    | 1     |
| >KIT-C809G-1 CDFGLARDI   | 1604 | >KIT-C809G-i GDFGLARDI   | 409   | 1195  |
| >KIT-C809G-1 CDFGLARDI   | 84   | >KIT-C809G-i GDFGLARDI   | 313   | 229   |
| >KIT-C809G-1 LLTHGRITKIC | 190  | >KIT-C809G-i LLTHGRITKIG | 11857 | 11667 |

|                                      |       |                                    |       |       |
|--------------------------------------|-------|------------------------------------|-------|-------|
| >KIT-C809G- $\backslash$ KICDFGLA    | 433   | >KIT-C809G- $\uparrow$ KIGDFGLA    | 701   | 268   |
| >KIT-C809G- $\backslash$ KICDFGLA    | 195   | >KIT-C809G- $\uparrow$ KIGDFGLA    | 554   | 359   |
| >KIT-C809G- $\backslash$ KICDFGLAR   | 53    | >KIT-C809G- $\uparrow$ KIGDFGLAR   | 171   | 118   |
| >KIT-C809G- $\backslash$ KICDFGLAR   | 30    | >KIT-C809G- $\uparrow$ KIGDFGLAR   | 94    | 64    |
| >KIT-C809G- $\backslash$ KICDFGLARD  | 109   | >KIT-C809G- $\uparrow$ KIGDFGLARD  | 131   | 22    |
| >KIT-C809G- $\backslash$ KICDFGLAR   | 14    | >KIT-C809G- $\uparrow$ KIGDFGLAR   | 14    | 0     |
| >KIT-C809G- $\backslash$ TKICDFGLAR  | 408   | >KIT-C809G- $\uparrow$ TKIGDFGLAR  | 1789  | 1381  |
| >KIT-C809G- $\backslash$ TKICDFGL    | 1151  | >KIT-C809G- $\uparrow$ TKIGDFGL    | 320   | 831   |
| >KIT-C809G- $\backslash$ ITKICDFGLA  | 819   | >KIT-C809G- $\uparrow$ ITKIGDFGLA  | 470   | 349   |
| >KIT-C809G- $\backslash$ ITKICDFGLAR | 16    | >KIT-C809G- $\uparrow$ ITKIGDFGLAR | 25    | 9     |
| >KIT-C809G- $\backslash$ ITKICDFGLAR | 79    | >KIT-C809G- $\uparrow$ ITKIGDFGLAR | 80    | 1     |
| >KIT-C809G- $\backslash$ ITKICDFGLAR | 70    | >KIT-C809G- $\uparrow$ ITKIGDFGLAR | 71    | 1     |
| >KIT-C809G- $\backslash$ ITKICDFGL   | 5     | >KIT-C809G- $\uparrow$ ITKIGDFGL   | 4     | 1     |
| >KIT-C809G- $\backslash$ ITKICDFGLAR | 189   | >KIT-C809G- $\uparrow$ ITKIGDFGLAR | 838   | 649   |
| >KIT-C809G- $\backslash$ RITKICDFGL  | 1001  | >KIT-C809G- $\uparrow$ RITKIGDFGL  | 443   | 558   |
| >KIT-C809G- $\backslash$ RITKICDF    | 237   | >KIT-C809G- $\uparrow$ RITKIGDF    | 852   | 615   |
| >KIT-C809G- $\backslash$ RITKICDF    | 228   | >KIT-C809G- $\uparrow$ RITKIGDF    | 164   | 64    |
| >KIT-C809G- $\backslash$ GRITKICDF   | 253   | >KIT-C809G- $\uparrow$ GRITKIGDF   | 1195  | 942   |
| >KIT-C809G- $\backslash$ GRITKICDFGL | 168   | >KIT-C809G- $\uparrow$ GRITKIGDFGI | 132   | 36    |
| >KIT-C809G- $\backslash$ GRITKICDF   | 484   | >KIT-C809G- $\uparrow$ GRITKIGDF   | 668   | 184   |
| >KIT-C809G- $\backslash$ GRITKICDFGL | 267   | >KIT-C809G- $\uparrow$ GRITKIGDFGI | 304   | 37    |
| >KIT-C809G- $\backslash$ GRITKICDF   | 315   | >KIT-C809G- $\uparrow$ GRITKIGDF   | 269   | 46    |
| >KIT-C809G- $\backslash$ GRITKICDFGL | 52    | >KIT-C809G- $\uparrow$ GRITKIGDFGI | 52    | 0     |
| >KIT-C809R- $\backslash$ CDFGLARDI   | 15288 | >KIT-C809R- $\uparrow$ RDFGLARDI   | 372   | 14916 |
| >KIT-C809R- $\backslash$ CDFGLARDI   | 2057  | >KIT-C809R- $\uparrow$ RDFGLARDI   | 336   | 1721  |
| >KIT-C809R- $\backslash$ CDFGLARDI   | 1604  | >KIT-C809R- $\uparrow$ RDFGLARDI   | 229   | 1375  |
| >KIT-C809R- $\backslash$ CDFGLARDI   | 84    | >KIT-C809R- $\uparrow$ RDFGLARDI   | 214   | 130   |
| >KIT-C809R- $\backslash$ LLTHGRITKIC | 190   | >KIT-C809R- $\uparrow$ LLTHGRITKIR | 12756 | 12566 |
| >KIT-C809R- $\backslash$ KICDFGLA    | 433   | >KIT-C809R- $\uparrow$ KIRDFGLA    | 232   | 201   |
| >KIT-C809R- $\backslash$ KICDFGLA    | 195   | >KIT-C809R- $\uparrow$ KIRDFGLA    | 1985  | 1790  |
| >KIT-C809R- $\backslash$ KICDFGLAR   | 1041  | >KIT-C809R- $\uparrow$ KIRDFGLAR   | 359   | 682   |
| >KIT-C809R- $\backslash$ KICDFGLAR   | 53    | >KIT-C809R- $\uparrow$ KIRDFGLAR   | 1588  | 1535  |
| >KIT-C809R- $\backslash$ KICDFGLA    | 1387  | >KIT-C809R- $\uparrow$ KIRDFGLA    | 7     | 1380  |
| >KIT-C809R- $\backslash$ KICDFGLAR   | 1934  | >KIT-C809R- $\uparrow$ KIRDFGLAR   | 8     | 1926  |
| >KIT-C809R- $\backslash$ KICDFGLARD  | 8619  | >KIT-C809R- $\uparrow$ KIRDFGLARD  | 266   | 8353  |
| >KIT-C809R- $\backslash$ KICDFGLARD  | 3284  | >KIT-C809R- $\uparrow$ KIRDFGLARD  | 17    | 3267  |
| >KIT-C809R- $\backslash$ KICDFGLAR   | 30    | >KIT-C809R- $\uparrow$ KIRDFGLAR   | 19    | 11    |
| >KIT-C809R- $\backslash$ KICDFGLARD  | 109   | >KIT-C809R- $\uparrow$ KIRDFGLARD  | 320   | 211   |
| >KIT-C809R- $\backslash$ KICDFGLAR   | 14    | >KIT-C809R- $\uparrow$ KIRDFGLAR   | 27    | 13    |
| >KIT-C809R- $\backslash$ TKICDFGLAR  | 408   | >KIT-C809R- $\uparrow$ TKIRDFGLAR  | 554   | 146   |
| >KIT-C809R- $\backslash$ ITKICDFGLA  | 819   | >KIT-C809R- $\uparrow$ ITKIRDFGLA  | 232   | 587   |
| >KIT-C809R- $\backslash$ ITKICDFGLAR | 1038  | >KIT-C809R- $\uparrow$ ITKIRDFGLAR | 419   | 619   |
| >KIT-C809R- $\backslash$ ITKICDFGLAR | 16    | >KIT-C809R- $\uparrow$ ITKIRDFGLAR | 15    | 1     |

|                         |       |                         |      |       |
|-------------------------|-------|-------------------------|------|-------|
| >KIT-C809R-νITKICDFGLAR | 79    | >KIT-C809R-rITKIRDFGLAR | 44   | 35    |
| >KIT-C809R-νITKICDFGLAR | 70    | >KIT-C809R-rITKIRDFGLAR | 63   | 7     |
| >KIT-C809R-νITKICDFGL   | 5     | >KIT-C809R-rITKIRDFGL   | 5    | 0     |
| >KIT-C809R-νITKICDFGLAR | 189   | >KIT-C809R-rITKIRDFGLAR | 496  | 307   |
| >KIT-C809R-νRITKICDF    | 237   | >KIT-C809R-rRITKIRDF    | 260  | 23    |
| >KIT-C809R-νRITKICDF    | 228   | >KIT-C809R-rRITKIRDF    | 120  | 108   |
| >KIT-C809R-νGRITKICDF   | 253   | >KIT-C809R-rGRITKIRDF   | 394  | 141   |
| >KIT-C809R-νGRITKICDF   | 898   | >KIT-C809R-rGRITKIRDF   | 477  | 421   |
| >KIT-C809R-νGRITKICDFGL | 168   | >KIT-C809R-rGRITKIRDFGL | 92   | 76    |
| >KIT-C809R-νGRITKICDF   | 484   | >KIT-C809R-rGRITKIRDF   | 356  | 128   |
| >KIT-C809R-νGRITKICDFGL | 267   | >KIT-C809R-rGRITKIRDFGL | 248  | 19    |
| >KIT-C809R-νGRITKICDF   | 315   | >KIT-C809R-rGRITKIRDF   | 106  | 209   |
| >KIT-C809R-νGRITKICDFGL | 52    | >KIT-C809R-rGRITKIRDFGL | 32   | 20    |
| >KIT-C809R-νHGRITKIC    | 3774  | >KIT-C809R-rHGRITKIR    | 402  | 3372  |
| >KIT-C809R-νHGRITKICDFC | 1069  | >KIT-C809R-rHGRITKIRDFC | 392  | 677   |
| >KIT-C809R-νHGRITKIC    | 22665 | >KIT-C809R-rHGRITKIR    | 389  | 22276 |
| >KIT-C809R-νHGRITKIC    | 35272 | >KIT-C809R-rHGRITKIR    | 296  | 34976 |
| >KIT-C809R-νTHGRITKIC   | 36553 | >KIT-C809R-rTHGRITKIR   | 487  | 36066 |
| >KIT-C809R-νLTHGRITKIC  | 24269 | >KIT-C809R-rLTHGRITKIR  | 108  | 24161 |
| >KIT-C809R-νLTHGRITKIC  | 27755 | >KIT-C809R-rLTHGRITKIR  | 405  | 27350 |
| >KIT-C809R-νLTHGRITKIC  | 35985 | >KIT-C809R-rLTHGRITKIR  | 81   | 35904 |
| >KIT-D327N-νDGENVDLIVE  | 525   | >KIT-D327N-rNGENVDLIVE  | 446  | 79    |
| >KIT-D327N-νNDGENVDLI   | 103   | >KIT-D327N-rNNGENVDLI   | 567  | 464   |
| >KIT-D327N-νNDGENVDLI   | 82    | >KIT-D327N-rNNGENVDLI   | 5536 | 5454  |
| >KIT-D327N-νFVNDGENV    | 98    | >KIT-D327N-rFVNNGENV    | 327  | 229   |
| >KIT-D327N-νFVNDGENVD   | 160   | >KIT-D327N-rFVNNGENVVD  | 620  | 460   |
| >KIT-D327N-νFVNDGENV    | 14    | >KIT-D327N-rFVNNGENV    | 44   | 30    |
| >KIT-D327N-νFVNDGENVD   | 218   | >KIT-D327N-rFVNNGENVVD  | 256  | 38    |
| >KIT-D327N-νFVNDGENVD   | 16    | >KIT-D327N-rFVNNGENVVD  | 53   | 37    |
| >KIT-D327N-νFVNDGENV    | 8     | >KIT-D327N-rFVNNGENV    | 12   | 4     |
| >KIT-D327N-νFVNDGENVD   | 21    | >KIT-D327N-rFVNNGENVVD  | 40   | 19    |
| >KIT-D327N-νFVNDGENV    | 18    | >KIT-D327N-rFVNNGENV    | 30   | 12    |
| >KIT-D327N-νFVNDGENVD   | 21    | >KIT-D327N-rFVNNGENVVD  | 56   | 35    |
| >KIT-D327N-νFVNDGENV    | 10    | >KIT-D327N-rFVNNGENV    | 16   | 6     |
| >KIT-D327N-νFVNDGENVD   | 65    | >KIT-D327N-rFVNNGENVVD  | 159  | 94    |
| >KIT-D327N-νFVNDGENV    | 64    | >KIT-D327N-rFVNNGENV    | 105  | 41    |
| >KIT-D327N-νFVNDGENVD   | 240   | >KIT-D327N-rFVNNGENVVD  | 476  | 236   |
| >KIT-D327N-νFVNDGENV    | 23    | >KIT-D327N-rFVNNGENV    | 35   | 12    |
| >KIT-D327N-νFVNDGENVD   | 277   | >KIT-D327N-rFVNNGENVVD  | 454  | 177   |
| >KIT-D327N-νFVNDGENV    | 36    | >KIT-D327N-rFVNNGENV    | 101  | 65    |
| >KIT-D327N-νFVNDGENVD   | 430   | >KIT-D327N-rFVNNGENVVD  | 1194 | 764   |
| >KIT-D327N-νFVNDGENV    | 3     | >KIT-D327N-rFVNNGENV    | 5    | 2     |
| >KIT-D327N-νFVNDGENVD   | 16    | >KIT-D327N-rFVNNGENVVD  | 94   | 78    |

|                         |       |                         |       |       |
|-------------------------|-------|-------------------------|-------|-------|
| >KIT-D327N- FVNDGENVD   | 49    | >KIT-D327N- FVNNGENVD   | 448   | 399   |
| >KIT-D327N- FVNDGENV    | 20    | >KIT-D327N- FVNNGENV    | 29    | 9     |
| >KIT-D327N- FVNDGENVD   | 36    | >KIT-D327N- FVNNGENVD   | 86    | 50    |
| >KIT-D327N- FVNDGENV    | 64    | >KIT-D327N- FVNNGENV    | 163   | 99    |
| >KIT-D327N- VVNDGENV    | 444   | >KIT-D327N- VVFNNGENV   | 165   | 279   |
| >KIT-D327N- TVFVNDGEN'  | 346   | >KIT-D327N- TVFVNNGEN'  | 277   | 69    |
| >KIT-D327N- TVFVNDGEN'  | 409   | >KIT-D327N- TVFVNNGEN'  | 573   | 164   |
| >KIT-D327N- TVFVNDGEN'  | 443   | >KIT-D327N- TVFVNNGEN'  | 245   | 198   |
| >KIT-D327N- TVFVNDGEN'  | 218   | >KIT-D327N- TVFVNNGEN'  | 165   | 53    |
| >KIT-D327N- TVFVNDGEN'  | 242   | >KIT-D327N- TVFVNNGEN'  | 120   | 122   |
| >KIT-D327N- TVFVNDGEN'  | 239   | >KIT-D327N- TVFVNNGEN'  | 44    | 195   |
| >KIT-D327N- TTVFVNDGE   | 589   | >KIT-D327N- TTVFVNNGE   | 401   | 188   |
| >KIT-D327N- TTVFVNDG    | 1460  | >KIT-D327N- TTVFVNNG    | 428   | 1032  |
| >KIT-D327N- TTVFVNDGEN' | 7     | >KIT-D327N- TTVFVNNGEN' | 6     | 1     |
| >KIT-D327N- TTVFVNDGEN' | 36    | >KIT-D327N- TTVFVNNGEN' | 27    | 9     |
| >KIT-D496V- DVGKTSAYFN  | 1515  | >KIT-D496V- VVGKTSAYFN  | 118   | 1397  |
| >KIT-D496V- DVGKTSAYFN  | 3679  | >KIT-D496V- VVGKTSAYFN  | 327   | 3352  |
| >KIT-D496V- DVGKTSAY    | 235   | >KIT-D496V- VVGKTSAY    | 3995  | 3760  |
| >KIT-D496V- DVGKTSAY    | 279   | >KIT-D496V- VVGKTSAY    | 12716 | 12437 |
| >KIT-D496V- DVGKTSAY    | 51    | >KIT-D496V- VVGKTSAY    | 571   | 520   |
| >KIT-D496V- DVGKTSAYF   | 211   | >KIT-D496V- VVGKTSAYF   | 2836  | 2625  |
| >KIT-D496V- DVGKTSAY    | 57    | >KIT-D496V- VVGKTSAY    | 765   | 708   |
| >KIT-D496V- DVGKTSAY    | 975   | >KIT-D496V- VVGKTSAY    | 164   | 811   |
| >KIT-D496V- DVGKTSAY    | 695   | >KIT-D496V- VVGKTSAY    | 58    | 637   |
| >KIT-D496V- DVGKTSAY    | 903   | >KIT-D496V- VVGKTSAY    | 18    | 885   |
| >KIT-D496V- DVGKTSAY    | 2487  | >KIT-D496V- VVGKTSAY    | 95    | 2392  |
| >KIT-D496V- DVGKTSAYF   | 3215  | >KIT-D496V- VVGKTSAYF   | 97    | 3118  |
| >KIT-D496V- DVGKTSAY    | 1043  | >KIT-D496V- VVGKTSAY    | 476   | 567   |
| >KIT-D496V- DVGKTSAYF   | 6625  | >KIT-D496V- VVGKTSAYF   | 159   | 6466  |
| >KIT-D496V- DVGKTSAY    | 408   | >KIT-D496V- VVGKTSAY    | 469   | 61    |
| >KIT-D496V- DVGKTSAYF   | 14775 | >KIT-D496V- VVGKTSAYF   | 411   | 14364 |
| >KIT-D496V- DVGKTSAYF   | 5030  | >KIT-D496V- VVGKTSAYF   | 212   | 4818  |
| >KIT-D496V- NDVGKTSAY   | 12932 | >KIT-D496V- NVVGKTSAY   | 181   | 12751 |
| >KIT-D496V- NDVGKTSAY   | 3641  | >KIT-D496V- NVVGKTSAY   | 8     | 3633  |
| >KIT-D496V- NDVGKTSAY   | 1838  | >KIT-D496V- NVVGKTSAY   | 4     | 1834  |
| >KIT-D496V- NDVGKTSAYF  | 8764  | >KIT-D496V- NVVGKTSAYF  | 17    | 8747  |
| >KIT-D496V- NDVGKTSAY   | 229   | >KIT-D496V- NVVGKTSAY   | 11    | 218   |
| >KIT-D496V- NDVGKTSAY   | 3972  | >KIT-D496V- NVVGKTSAY   | 103   | 3869  |
| >KIT-D496V- NDVGKTA     | 14835 | >KIT-D496V- NVVGKTA     | 129   | 14706 |
| >KIT-D496V- NDVGKTSAY   | 7217  | >KIT-D496V- NVVGKTSAY   | 263   | 6954  |
| >KIT-D496V- NDVGKTSAY   | 1739  | >KIT-D496V- NVVGKTSAY   | 114   | 1625  |
| >KIT-D496V- NDVGKTSAYF  | 17876 | >KIT-D496V- NVVGKTSAYF  | 448   | 17428 |
| >KIT-D496V- NDVGKTSAY   | 558   | >KIT-D496V- NVVGKTSAY   | 42    | 516   |



|                         |       |                          |      |       |
|-------------------------|-------|--------------------------|------|-------|
| >KIT-D496V-1 NDVGKTSAY  | 1421  | >KIT-D496V-1 NVVVGKTSAY  | 61   | 1360  |
| >KIT-D496V-1 YNDVGKTSAY | 3603  | >KIT-D496V-1 YNVVVGKTSAY | 204  | 3399  |
| >KIT-D496V-1 YNDVGKTSAY | 5324  | >KIT-D496V-1 YNVVVGKTSAY | 327  | 4997  |
| >KIT-D496V-1 YNDVGKTSAY | 215   | >KIT-D496V-1 YNVVVGKTSAY | 68   | 147   |
| >KIT-D496V-1 YNDVGKTSAY | 3871  | >KIT-D496V-1 YNVVVGKTSAY | 190  | 3681  |
| >KIT-D496V-1 YNDVGKTSAY | 2265  | >KIT-D496V-1 YNVVVGKTSAY | 63   | 2202  |
| >KIT-D496V-1 YNDVGKTSAY | 486   | >KIT-D496V-1 YNVVVGKTSAY | 151  | 335   |
| >KIT-D496V-1 YNDVGKTSAY | 2334  | >KIT-D496V-1 YNVVVGKTSAY | 479  | 1855  |
| >KIT-D496V-1 AYNDVGKTS/ | 198   | >KIT-D496V-1 AYNVVGKTS/  | 432  | 234   |
| >KIT-D496V-1 AYNDVGKTS/ | 62    | >KIT-D496V-1 AYNVVGKTS/  | 78   | 16    |
| >KIT-D496V-1 AYNDVGKTS/ | 167   | >KIT-D496V-1 AYNVVGKTS/  | 238  | 71    |
| >KIT-D496V-1 AYNDVGKTS/ | 907   | >KIT-D496V-1 AYNVVGKTS/  | 271  | 636   |
| >KIT-D496V-1 KAYNDVGKTS | 604   | >KIT-D496V-1 KAYNVVVGKTS | 422  | 182   |
| >KIT-D496V-1 KAYNDVGK   | 91    | >KIT-D496V-1 KAYNVVVGK   | 37   | 54    |
| >KIT-D496V-1 KAYNDVGK   | 79    | >KIT-D496V-1 KAYNVVVGK   | 23   | 56    |
| >KIT-D496V-1 KAYNDVGK   | 186   | >KIT-D496V-1 KAYNVVVGK   | 39   | 147   |
| >KIT-D496V-1 KAYNDVGK   | 858   | >KIT-D496V-1 KAYNVVVGK   | 152  | 706   |
| >KIT-D496V-1 KAYNDVGK   | 674   | >KIT-D496V-1 KAYNVVVGK   | 171  | 503   |
| >KIT-D496V-1 VECKAYNDV  | 225   | >KIT-D496V-1 VECKAYNVV   | 179  | 46    |
| >KIT-D496V-1 VECKAYNDV  | 844   | >KIT-D496V-1 VECKAYNVV   | 308  | 536   |
| >KIT-D496V-1 VECKAYNDV  | 1399  | >KIT-D496V-1 VECKAYNVV   | 325  | 1074  |
| >KIT-D496V-1 VECKAYNDV  | 221   | >KIT-D496V-1 VECKAYNVV   | 240  | 19    |
| >KIT-D496V-1 TVECKAYND  | 16396 | >KIT-D496V-1 TVECKAYNV   | 32   | 16364 |
| >KIT-D496V-1 TVECKAYND  | 21971 | >KIT-D496V-1 TVECKAYNV   | 229  | 21742 |
| >KIT-D496V-1 GTVECKAYN\ | 27334 | >KIT-D496V-1 GTVECKAYN\  | 474  | 26860 |
| >KIT-D496V-1 GTVECKAYN\ | 23123 | >KIT-D496V-1 GTVECKAYN\  | 327  | 22796 |
| >KIT-D496V-1 GTVECKAYN\ | 602   | >KIT-D496V-1 GTVECKAYN\  | 281  | 321   |
| >KIT-D496V-1 GTVECKAYN\ | 28283 | >KIT-D496V-1 GTVECKAYN\  | 151  | 28132 |
| >KIT-D496V-1 GTVECKAYN\ | 20161 | >KIT-D496V-1 GTVECKAYN\  | 56   | 20105 |
| >KIT-D496V-1 GTVECKAYN\ | 1009  | >KIT-D496V-1 GTVECKAYN\  | 372  | 637   |
| >KIT-D496V-1 GTVECKAYN\ | 26061 | >KIT-D496V-1 GTVECKAYN\  | 357  | 25704 |
| >KIT-D496V-1 GTVECKAYN\ | 36675 | >KIT-D496V-1 GTVECKAYN\  | 454  | 36221 |
| >KIT-D496V-1 GTVECKAYN\ | 25443 | >KIT-D496V-1 GTVECKAYN\  | 64   | 25379 |
| >KIT-D496V-1 GTVECKAYN\ | 585   | >KIT-D496V-1 GTVECKAYN\  | 238  | 347   |
| >KIT-D496V-1 GTVECKAYN\ | 2026  | >KIT-D496V-1 GTVECKAYN\  | 240  | 1786  |
| >KIT-D52N-w DEIRLLCTD   | 108   | >KIT-D52N-r NEIRLLCTD    | 458  | 350   |
| >KIT-D52N-w DEIRLLCT    | 2802  | >KIT-D52N-r NEIRLLCT     | 198  | 2604  |
| >KIT-D52N-w RVGDEIRL    | 330   | >KIT-D52N-r RVGNEIRL     | 1831 | 1501  |
| >KIT-D52N-w VRVGDEIRLL  | 259   | >KIT-D52N-r VRVGNEIRLL   | 245  | 14    |
| >KIT-D52N-w IVRVGDEI    | 609   | >KIT-D52N-r IVRVGNEI     | 59   | 550   |
| >KIT-D52N-w IVRVGDEIRL  | 1100  | >KIT-D52N-r IVRVGNEIRL   | 262  | 838   |
| >KIT-D52N-w IVRVGDEIRLL | 401   | >KIT-D52N-r IVRVGNEIRLL  | 171  | 230   |
| >KIT-D52N-w IVRVGDEIR   | 468   | >KIT-D52N-r IVRVGNEIR    | 190  | 278   |

|                          |       |                          |     |       |
|--------------------------|-------|--------------------------|-----|-------|
| >KIT-D52N-w IVRVGDEIR    | 983   | >KIT-D52N-r IVRVGNEIR    | 481 | 502   |
| >KIT-D52N-w IVRVGDEIRL   | 487   | >KIT-D52N-r IVRVGNEIRL   | 343 | 144   |
| >KIT-D52N-w IVRVGDEIRLL  | 623   | >KIT-D52N-r IVRVGNEIRLL  | 309 | 314   |
| >KIT-D52N-w LIVRVGDEI    | 462   | >KIT-D52N-r LIVRVGNEI    | 461 | 1     |
| >KIT-D52N-w LIVRVGDEI    | 330   | >KIT-D52N-r LIVRVGNEI    | 559 | 229   |
| >KIT-D52N-w LIVRVGDEIRL  | 225   | >KIT-D52N-r LIVRVGNEIRL  | 147 | 78    |
| >KIT-D52N-w LIVRVGDEIR   | 182   | >KIT-D52N-r LIVRVGNEIR   | 146 | 36    |
| >KIT-D52N-w DLIVRVGDEIF  | 112   | >KIT-D52N-r DLIVRVGNEIF  | 75  | 37    |
| >KIT-D52N-w DLIVRVGDEIF  | 201   | >KIT-D52N-r DLIVRVGNEIF  | 139 | 62    |
| >KIT-D52N-w SDLIVRVGDE   | 86    | >KIT-D52N-r SDLIVRVGNE   | 99  | 13    |
| >KIT-D52N-w SDLIVRVGDE   | 350   | >KIT-D52N-r SDLIVRVGNE   | 456 | 106   |
| >KIT-D52N-w SDLIVRVGDE   | 110   | >KIT-D52N-r SDLIVRVGNE   | 167 | 57    |
| >KIT-D572Y-\ DPTQLPYDH   | 289   | >KIT-D572Y-r YPTQLPYDH   | 38  | 251   |
| >KIT-D572Y-\ DPTQLPYDHf  | 1068  | >KIT-D572Y-r YPTQLPYDHf  | 73  | 995   |
| >KIT-D572Y-\ DPTQLPYDHf  | 46    | >KIT-D572Y-r YPTQLPYDHf  | 10  | 36    |
| >KIT-D572Y-\ DPTQLPYDHf  | 24    | >KIT-D572Y-r YPTQLPYDHf  | 9   | 15    |
| >KIT-D572Y-\ IDPTQLPY    | 1811  | >KIT-D572Y-r IYPTQLPY    | 50  | 1761  |
| >KIT-D572Y-\ IDPTQLPY    | 4935  | >KIT-D572Y-r IYPTQLPY    | 402 | 4533  |
| >KIT-D572Y-\ IDPTQLPY    | 6143  | >KIT-D572Y-r IYPTQLPY    | 376 | 5767  |
| >KIT-D572Y-\ IDPTQLPYDH  | 15244 | >KIT-D572Y-r IYPTQLPYDHf | 345 | 14899 |
| >KIT-D572Y-\ EINGNNYVYII | 21506 | >KIT-D572Y-r EINGNNYVYI' | 169 | 21337 |
| >KIT-D572Y-\ EINGNNYVYII | 21293 | >KIT-D572Y-r EINGNNYVYI' | 13  | 21280 |
| >KIT-D572Y-\ EINGNNYVYII | 24805 | >KIT-D572Y-r EINGNNYVYI' | 224 | 24581 |
| >KIT-D572Y-\ EINGNNYVYII | 28996 | >KIT-D572Y-r EINGNNYVYI' | 109 | 28887 |
| >KIT-D572Y-\ EINGNNYVYII | 17138 | >KIT-D572Y-r EINGNNYVYI' | 272 | 16866 |
| >KIT-D572Y-\ EINGNNYVYII | 23306 | >KIT-D572Y-r EINGNNYVYI' | 281 | 23025 |
| >KIT-D572Y-\ EINGNNYVYII | 31244 | >KIT-D572Y-r EINGNNYVYI' | 77  | 31167 |
| >KIT-D572Y-\ YIDPTQLPY   | 10    | >KIT-D572Y-r YIYPTQLPY   | 584 | 574   |
| >KIT-D572Y-\ YIDPTQLPY   | 6022  | >KIT-D572Y-r YIYPTQLPY   | 97  | 5925  |
| >KIT-D572Y-\ YIDPTQLPY   | 1790  | >KIT-D572Y-r YIYPTQLPY   | 81  | 1709  |
| >KIT-D572Y-\ YIDPTQLPY   | 1048  | >KIT-D572Y-r YIYPTQLPY   | 287 | 761   |
| >KIT-D572Y-\ YIDPTQLPY   | 7897  | >KIT-D572Y-r YIYPTQLPY   | 234 | 7663  |
| >KIT-D572Y-\ YIDPTQLPY   | 21    | >KIT-D572Y-r YIYPTQLPY   | 5   | 16    |
| >KIT-D572Y-\ YIDPTQLPYDI | 1438  | >KIT-D572Y-r YIYPTQLPYDI | 61  | 1377  |
| >KIT-D572Y-\ YIDPTQLPY   | 1117  | >KIT-D572Y-r YIYPTQLPY   | 311 | 806   |
| >KIT-D572Y-\ YIDPTQLPY   | 11    | >KIT-D572Y-r YIYPTQLPY   | 8   | 3     |
| >KIT-D572Y-\ YIDPTQLPY   | 137   | >KIT-D572Y-r YIYPTQLPY   | 28  | 109   |
| >KIT-D572Y-\ YIDPTQLPY   | 240   | >KIT-D572Y-r YIYPTQLPY   | 28  | 212   |
| >KIT-D572Y-\ YIDPTQLPY   | 1209  | >KIT-D572Y-r YIYPTQLPY   | 8   | 1201  |
| >KIT-D572Y-\ YIDPTQLPY   | 42    | >KIT-D572Y-r YIYPTQLPY   | 6   | 36    |
| >KIT-D572Y-\ YIDPTQLPY   | 61    | >KIT-D572Y-r YIYPTQLPY   | 21  | 40    |
| >KIT-D572Y-\ YIDPTQLPY   | 5848  | >KIT-D572Y-r YIYPTQLPY   | 251 | 5597  |
| >KIT-D572Y-\ YIDPTQLPY   | 750   | >KIT-D572Y-r YIYPTQLPY   | 83  | 667   |

|                          |      |                          |      |      |
|--------------------------|------|--------------------------|------|------|
| >KIT-D572Y-\ YIDPTQLPY   | 3078 | >KIT-D572Y-r YIYPTQLPY   | 492  | 2586 |
| >KIT-D572Y-\ YIDPTQLPY   | 116  | >KIT-D572Y-r YIYPTQLPY   | 34   | 82   |
| >KIT-D572Y-\ YIDPTQLPY   | 56   | >KIT-D572Y-r YIYPTQLPY   | 193  | 137  |
| >KIT-D572Y-\ VYIDPTQL    | 1501 | >KIT-D572Y-r VYIYPTQL    | 369  | 1132 |
| >KIT-D572Y-\ VYIDPTQLPY  | 495  | >KIT-D572Y-r VYIYPTQLPY  | 1363 | 868  |
| >KIT-D572Y-\ VYIDPTQL    | 216  | >KIT-D572Y-r VYIYPTQL    | 90   | 126  |
| >KIT-D572Y-\ VYIDPTQL    | 694  | >KIT-D572Y-r VYIYPTQL    | 300  | 394  |
| >KIT-D572Y-\ VYIDPTQL    | 43   | >KIT-D572Y-r VYIYPTQL    | 31   | 12   |
| >KIT-D572Y-\ VYIDPTQLPY  | 319  | >KIT-D572Y-r VYIYPTQLPY  | 237  | 82   |
| >KIT-D572Y-\ VYIDPTQLPY  | 33   | >KIT-D572Y-r VYIYPTQLPY  | 22   | 11   |
| >KIT-D572Y-\ VYIDPTQLPY  | 64   | >KIT-D572Y-r VYIYPTQLPY  | 39   | 25   |
| >KIT-D572Y-\ VYIDPTQLPY  | 32   | >KIT-D572Y-r VYIYPTQLPY  | 22   | 10   |
| >KIT-D572Y-\ VYIDPTQLPY  | 837  | >KIT-D572Y-r VYIYPTQLPY  | 298  | 539  |
| >KIT-D572Y-\ YVYIDPTQL   | 2494 | >KIT-D572Y-r YVYIYPTQL   | 73   | 2421 |
| >KIT-D572Y-\ YVYIDPTQL   | 193  | >KIT-D572Y-r YVYIYPTQL   | 32   | 161  |
| >KIT-D572Y-\ YVYIDPTQL   | 135  | >KIT-D572Y-r YVYIYPTQL   | 30   | 105  |
| >KIT-D572Y-\ YVYIDPTQL   | 24   | >KIT-D572Y-r YVYIYPTQL   | 12   | 12   |
| >KIT-D572Y-\ YVYIDPTQL   | 261  | >KIT-D572Y-r YVYIYPTQL   | 130  | 131  |
| >KIT-D572Y-\ YVYIDPTQ    | 1481 | >KIT-D572Y-r YVYIYPTQ    | 456  | 1025 |
| >KIT-D572Y-\ YVYIDPTQL   | 18   | >KIT-D572Y-r YVYIYPTQL   | 5    | 13   |
| >KIT-D572Y-\ YVYIDPTQL   | 71   | >KIT-D572Y-r YVYIYPTQL   | 57   | 14   |
| >KIT-D572Y-\ YVYIDPTQ    | 673  | >KIT-D572Y-r YVYIYPTQ    | 336  | 337  |
| >KIT-D572Y-\ YVYIDPTQL   | 16   | >KIT-D572Y-r YVYIYPTQL   | 9    | 7    |
| >KIT-D572Y-\ YVYIDPTQLPY | 492  | >KIT-D572Y-r YVYIYPTQLPY | 197  | 295  |
| >KIT-D572Y-\ YVYIDPTQLPY | 330  | >KIT-D572Y-r YVYIYPTQLPY | 144  | 186  |
| >KIT-D572Y-\ YVYIDPTQLPY | 387  | >KIT-D572Y-r YVYIYPTQLPY | 185  | 202  |
| >KIT-D572Y-\ YVYIDPTQLPY | 91   | >KIT-D572Y-r YVYIYPTQLPY | 132  | 41   |
| >KIT-D572Y-\ YVYIDPTQLPY | 6    | >KIT-D572Y-r YVYIYPTQLPY | 5    | 1    |
| >KIT-D572Y-\ YVYIDPTQLPY | 451  | >KIT-D572Y-r YVYIYPTQLPY | 304  | 147  |
| >KIT-D572Y-\ YVYIDPTQL   | 162  | >KIT-D572Y-r YVYIYPTQL   | 36   | 126  |
| >KIT-D572Y-\ YVYIDPTQLPY | 16   | >KIT-D572Y-r YVYIYPTQLPY | 9    | 7    |
| >KIT-D572Y-\ YVYIDPTQLPY | 63   | >KIT-D572Y-r YVYIYPTQLPY | 53   | 10   |
| >KIT-D572Y-\ YVYIDPTQLPY | 73   | >KIT-D572Y-r YVYIYPTQLPY | 72   | 1    |
| >KIT-D572Y-\ YVYIDPTQL   | 1334 | >KIT-D572Y-r YVYIYPTQL   | 465  | 869  |
| >KIT-D572Y-\ YVYIDPTQLPY | 53   | >KIT-D572Y-r YVYIYPTQLPY | 23   | 30   |
| >KIT-D572Y-\ YVYIDPTQL   | 27   | >KIT-D572Y-r YVYIYPTQL   | 8    | 19   |
| >KIT-D572Y-\ YVYIDPTQLPY | 7    | >KIT-D572Y-r YVYIYPTQLPY | 4    | 3    |
| >KIT-D572Y-\ YVYIDPTQLPY | 17   | >KIT-D572Y-r YVYIYPTQLPY | 16   | 1    |
| >KIT-D572Y-\ YVYIDPTQL   | 423  | >KIT-D572Y-r YVYIYPTQL   | 174  | 249  |
| >KIT-D572Y-\ YVYIDPTQLPY | 301  | >KIT-D572Y-r YVYIYPTQLPY | 165  | 136  |
| >KIT-D572Y-\ YVYIDPTQLPY | 645  | >KIT-D572Y-r YVYIYPTQLPY | 269  | 376  |
| >KIT-D572Y-\ NYVYIDPTQL  | 150  | >KIT-D572Y-r NYVYIYPTQL  | 208  | 58   |
| >KIT-D572Y-\ NYVYIDPTQL  | 825  | >KIT-D572Y-r NYVYIYPTQL  | 332  | 493  |

|                         |       |                         |     |       |
|-------------------------|-------|-------------------------|-----|-------|
| >KIT-D572Y-\ NYVYIDPTQL | 163   | >KIT-D572Y-r NYVYIYPTQL | 55  | 108   |
| >KIT-D572Y-\ NNYVYIDPTC | 602   | >KIT-D572Y-r NNYVYIYPTQ | 167 | 435   |
| >KIT-D572Y-\ GNNYVYID   | 26502 | >KIT-D572Y-r GNNYVYIY   | 331 | 26171 |
| >KIT-D572Y-\ GNNYVYID   | 34350 | >KIT-D572Y-r GNNYVYIY   | 255 | 34095 |
| >KIT-D572Y-\ NGNNYVYID  | 32049 | >KIT-D572Y-r NGNNYVYIY  | 129 | 31920 |
| >KIT-D572Y-\ NGNNYVYID  | 23219 | >KIT-D572Y-r NGNNYVYIY  | 382 | 22837 |
| >KIT-D572Y-\ NGNNYVYID  | 36960 | >KIT-D572Y-r NGNNYVYIY  | 129 | 36831 |
| >KIT-D572Y-\ INGNNYVYID | 30720 | >KIT-D572Y-r INGNNYVYIY | 446 | 30274 |
| >KIT-D579E-\ DHKWEFPR   | 218   | >KIT-D579E-r EHKWEFPR   | 681 | 463   |
| >KIT-D579E-\ DHKWEFPR   | 951   | >KIT-D579E-r EHKWEFPR   | 214 | 737   |
| >KIT-D579E-\ DHKWEFPR   | 346   | >KIT-D579E-r EHKWEFPR   | 95  | 251   |
| >KIT-D579E-\ DHKWEFPRN  | 1244  | >KIT-D579E-r EHKWEFPRN  | 331 | 913   |
| >KIT-D579E-\ YDHKWEFPR  | 9735  | >KIT-D579E-r YEHKWEFPR  | 176 | 9559  |
| >KIT-D579E-\ YDHKWEFPR  | 183   | >KIT-D579E-r YEHKWEFPR  | 66  | 117   |
| >KIT-D579E-\ YDHKWEFPR  | 658   | >KIT-D579E-r YEHKWEFPRI | 223 | 435   |
| >KIT-D579E-\ PYDHKWEF   | 147   | >KIT-D579E-r PYEHKWEF   | 58  | 89    |
| >KIT-D579E-\ PYDHKWEF   | 444   | >KIT-D579E-r PYEHKWEF   | 316 | 128   |
| >KIT-D579E-\ PYDHKWEF   | 61    | >KIT-D579E-r PYEHKWEF   | 46  | 15    |
| >KIT-D579E-\ PYDHKWEFPI | 67    | >KIT-D579E-r PYEHKWEFPI | 34  | 33    |
| >KIT-D579E-\ LPYDHKWEFI | 169   | >KIT-D579E-r LPYEHKWEFF | 211 | 42    |
| >KIT-D579E-\ LPYDHKWEFI | 170   | >KIT-D579E-r LPYEHKWEFF | 163 | 7     |
| >KIT-D579E-\ LPYDHKWEFI | 359   | >KIT-D579E-r LPYEHKWEFF | 485 | 126   |
| >KIT-D579E-\ LPYDHKWEF  | 175   | >KIT-D579E-r LPYEHKWEF  | 219 | 44    |
| >KIT-D579E-\ LPYDHKWEF  | 1030  | >KIT-D579E-r LPYEHKWEF  | 288 | 742   |
| >KIT-D579E-\ LPYDHKWEF  | 272   | >KIT-D579E-r LPYEHKWEF  | 225 | 47    |
| >KIT-D579E-\ LPYDHKWEF  | 162   | >KIT-D579E-r LPYEHKWEF  | 62  | 100   |
| >KIT-D579E-\ LPYDHKWEF  | 11    | >KIT-D579E-r LPYEHKWEF  | 9   | 2     |
| >KIT-D579E-\ LPYDHKWEFI | 212   | >KIT-D579E-r LPYEHKWEFF | 175 | 37    |
| >KIT-D579E-\ LPYDHKWEF  | 471   | >KIT-D579E-r LPYEHKWEF  | 531 | 60    |
| >KIT-D579E-\ LPYDHKWEF  | 18    | >KIT-D579E-r LPYEHKWEF  | 15  | 3     |
| >KIT-D579E-\ LPYDHKWEFI | 124   | >KIT-D579E-r LPYEHKWEFF | 156 | 32    |
| >KIT-D579E-\ LPYDHKWEF  | 67    | >KIT-D579E-r LPYEHKWEF  | 23  | 44    |
| >KIT-D579E-\ LPYDHKWEF  | 11    | >KIT-D579E-r LPYEHKWEF  | 10  | 1     |
| >KIT-D579E-\ LPYDHKWEFI | 96    | >KIT-D579E-r LPYEHKWEFF | 155 | 59    |
| >KIT-D579E-\ QLPYDHKWE  | 446   | >KIT-D579E-r QLPYEHKWEI | 314 | 132   |
| >KIT-D579E-\ TQLPYDHKW  | 34    | >KIT-D579E-r TQLPYEHKW  | 42  | 8     |
| >KIT-D579E-\ TQLPYDHK   | 118   | >KIT-D579E-r TQLPYEHK   | 101 | 17    |
| >KIT-D579E-\ TQLPYDHKW  | 67    | >KIT-D579E-r TQLPYEHKW  | 85  | 18    |
| >KIT-D579E-\ TQLPYDHKW  | 176   | >KIT-D579E-r TQLPYEHKW  | 132 | 44    |
| >KIT-D579E-\ TQLPYDHKW  | 23    | >KIT-D579E-r TQLPYEHKW  | 17  | 6     |
| >KIT-D579E-\ TQLPYDHKW  | 306   | >KIT-D579E-r TQLPYEHKW  | 528 | 222   |
| >KIT-D579E-\ TQLPYDHKW  | 199   | >KIT-D579E-r TQLPYEHKW  | 283 | 84    |
| >KIT-D579E-\ TQLPYDHKW  | 186   | >KIT-D579E-r TQLPYEHKW  | 172 | 14    |

|                          |      |                          |      |      |
|--------------------------|------|--------------------------|------|------|
| >KIT-D579E-\ TQLPYDHKW   | 129  | >KIT-D579E-r TQLPYEHKW   | 253  | 124  |
| >KIT-D579E-\ TQLPYDHKW   | 123  | >KIT-D579E-r TQLPYEHKW   | 409  | 286  |
| >KIT-D579E-\ PTQLPYDHKV  | 396  | >KIT-D579E-r PTQLPYEHKV  | 415  | 19   |
| >KIT-D579E-\ DPTQLPYDH   | 289  | >KIT-D579E-r DPTQLPYEH   | 91   | 198  |
| >KIT-D579E-\ DPTQLPYDH   | 46   | >KIT-D579E-r DPTQLPYEHK  | 53   | 7    |
| >KIT-D579E-\ DPTQLPYDH   | 24   | >KIT-D579E-r DPTQLPYEHK  | 26   | 2    |
| >KIT-D696G-\ DHAEAAALY   | 416  | >KIT-D696G-\ GHAEAAALY   | 73   | 343  |
| >KIT-D696G-\ QEDHAEAA    | 380  | >KIT-D696G-\ QEGHAEAA    | 1594 | 1214 |
| >KIT-D696G-\ QEDHAEAAAL  | 384  | >KIT-D696G-\ QEGHAEAAAL  | 6932 | 6548 |
| >KIT-D696G-\ QEDHAEAAAL  | 19   | >KIT-D696G-\ QEGHAEAAAL  | 102  | 83   |
| >KIT-D696G-\ QEDHAEAAAL` | 49   | >KIT-D696G-\ QEGHAEAAAL` | 194  | 145  |
| >KIT-D696G-\ QEDHAEAAAL` | 121  | >KIT-D696G-\ QEGHAEAAAL` | 143  | 22   |
| >KIT-D696G-\ QEDHAEAA    | 129  | >KIT-D696G-\ QEGHAEAA    | 19   | 110  |
| >KIT-D696G-\ KQEDHAEA    | 99   | >KIT-D696G-\ KQEGHAEA    | 192  | 93   |
| >KIT-D696G-\ KQEDHAEAA   | 49   | >KIT-D696G-\ KQEGHAEAA   | 113  | 64   |
| >KIT-D696G-\ KQEDHAEAA   | 260  | >KIT-D696G-\ KQEGHAEAA   | 270  | 10   |
| >KIT-D696G-\ KQEDHAEAA   | 334  | >KIT-D696G-\ KQEGHAEAA   | 410  | 76   |
| >KIT-D696G-\ KQEDHAEAA   | 497  | >KIT-D696G-\ KQEGHAEAA   | 934  | 437  |
| >KIT-D696G-\ KQEDHAEAA   | 418  | >KIT-D696G-\ KQEGHAEAA   | 769  | 351  |
| >KIT-D696G-\ KQEDHAEAA   | 121  | >KIT-D696G-\ KQEGHAEAA   | 83   | 38   |
| >KIT-D696G-\ KQEDHAEAA   | 245  | >KIT-D696G-\ KQEGHAEAA   | 190  | 55   |
| >KIT-D696G-\ KQEDHAEAA   | 912  | >KIT-D696G-\ KQEGHAEAA   | 222  | 690  |
| >KIT-D696G-\ SKQEDHAEA/  | 168  | >KIT-D696G-\ SKQEGHAEA/  | 170  | 2    |
| >KIT-D696G-\ SKQEDHAEA/  | 160  | >KIT-D696G-\ SKQEGHAEA/  | 82   | 78   |
| >KIT-D716N-\ DSTNEYMDM   | 604  | >KIT-D716N-\ NSTNEYMDM   | 160  | 444  |
| >KIT-D716N-\ DSTNEYMDM   | 255  | >KIT-D716N-\ NSTNEYMDM   | 137  | 118  |
| >KIT-D716N-\ CSDSTNEY    | 5    | >KIT-D716N-\ CSNSTNEY    | 21   | 16   |
| >KIT-D716N-\ CSDSTNEYM   | 195  | >KIT-D716N-\ CSNSTNEYM   | 8191 | 7996 |
| >KIT-D716N-\ CSDSTNEY    | 155  | >KIT-D716N-\ CSNSTNEY    | 28   | 127  |
| >KIT-D716N-\ CSDSTNEY    | 3187 | >KIT-D716N-\ CSNSTNEY    | 134  | 3053 |
| >KIT-D716N-\ CSDSTNEYMI  | 5949 | >KIT-D716N-\ CSNSTNEYMI  | 362  | 5587 |
| >KIT-D716N-\ CSDSTNEY    | 390  | >KIT-D716N-\ CSNSTNEY    | 177  | 213  |
| >KIT-D716N-\ CSDSTNEY    | 777  | >KIT-D716N-\ CSNSTNEY    | 488  | 289  |
| >KIT-D716N-\ CSDSTNEY    | 1922 | >KIT-D716N-\ CSNSTNEY    | 303  | 1619 |
| >KIT-D716N-\ CSDSTNEYM   | 305  | >KIT-D716N-\ CSNSTNEYM   | 56   | 249  |
| >KIT-D716N-\ CSDSTNEY    | 64   | >KIT-D716N-\ CSNSTNEY    | 87   | 23   |
| >KIT-D716N-\ CSDSTNEYM   | 337  | >KIT-D716N-\ CSNSTNEYM   | 164  | 173  |
| >KIT-D716N-\ CSDSTNEY    | 174  | >KIT-D716N-\ CSNSTNEY    | 384  | 210  |
| >KIT-D716N-\ SCSDSTNEY   | 222  | >KIT-D716N-\ SCSNSTNEY   | 166  | 56   |
| >KIT-D716N-\ SCSDSTNEY   | 492  | >KIT-D716N-\ SCSNSTNEY   | 280  | 212  |
| >KIT-D716N-\ SCSDSTNEY   | 476  | >KIT-D716N-\ SCSNSTNEY   | 711  | 235  |
| >KIT-D716N-\ SCSDSTNEY   | 234  | >KIT-D716N-\ SCSNSTNEY   | 108  | 126  |
| >KIT-D716N-\ SCSDSTNEYM  | 275  | >KIT-D716N-\ SCSNSTNEYM  | 349  | 74   |

|                         |      |                         |       |       |
|-------------------------|------|-------------------------|-------|-------|
| >KIT-D716N- SCSDSTNEY   | 124  | >KIT-D716N- SCSNSTNEY   | 116   | 8     |
| >KIT-D716N- SSCSDSTNEY  | 3635 | >KIT-D716N- SSCSNSTNEY  | 284   | 3351  |
| >KIT-D716N- SSCSDSTNEY  | 214  | >KIT-D716N- SSCSNSTNEY  | 168   | 46    |
| >KIT-D716N- SSCSDSTNEY  | 209  | >KIT-D716N- SSCSNSTNEY  | 152   | 57    |
| >KIT-D716N- SSCSDSTNEY  | 122  | >KIT-D716N- SSCSNSTNEY  | 183   | 61    |
| >KIT-D716N- SSCSDSTNEY  | 154  | >KIT-D716N- SSCSNSTNEY  | 236   | 82    |
| >KIT-D716N- SSCSDSTNEY  | 341  | >KIT-D716N- SSCSNSTNEY  | 233   | 108   |
| >KIT-D716N- SSCSDSTNEY  | 121  | >KIT-D716N- SSCSNSTNEY  | 99    | 22    |
| >KIT-D716N- SSCSDSTNEY  | 188  | >KIT-D716N- SSCSNSTNEY  | 95    | 93    |
| >KIT-D716N- SSCSDSTNEY  | 31   | >KIT-D716N- SSCSNSTNEY  | 15    | 16    |
| >KIT-D716N- SSCSDSTNEY  | 255  | >KIT-D716N- SSCSNSTNEY  | 108   | 147   |
| >KIT-D716N- SSCSDSTNEY  | 95   | >KIT-D716N- SSCSNSTNEY  | 50    | 45    |
| >KIT-D716N- SSCSDSTNEY  | 31   | >KIT-D716N- SSCSNSTNEY  | 40    | 9     |
| >KIT-D716N- SSCSDSTNEY  | 318  | >KIT-D716N- SSCSNSTNEY  | 314   | 4     |
| >KIT-D716N- ESSCSDSTNE' | 206  | >KIT-D716N- ESSCSNSTNE' | 125   | 81    |
| >KIT-D716N- ESSCSDSTNE' | 59   | >KIT-D716N- ESSCSNSTNE' | 64    | 5     |
| >KIT-D716N- ESSCSDSTNE' | 186  | >KIT-D716N- ESSCSNSTNE' | 118   | 68    |
| >KIT-D716N- ESSCSDSTNE' | 364  | >KIT-D716N- ESSCSNSTNE' | 307   | 57    |
| >KIT-D716N- ESSCSDSTNE' | 97   | >KIT-D716N- ESSCSNSTNE' | 81    | 16    |
| >KIT-D716N- ESSCSDSTNE' | 440  | >KIT-D716N- ESSCSNSTNE' | 393   | 47    |
| >KIT-D716N- ESSCSDSTNE' | 315  | >KIT-D716N- ESSCSNSTNE' | 126   | 189   |
| >KIT-D716N- ESSCSDSTNE' | 36   | >KIT-D716N- ESSCSNSTNE' | 43    | 7     |
| >KIT-D716N- ESSCSDSTNE' | 28   | >KIT-D716N- ESSCSNSTNE' | 43    | 15    |
| >KIT-D716N- ESSCSDSTNE' | 209  | >KIT-D716N- ESSCSNSTNE' | 108   | 101   |
| >KIT-D716N- KESSCSDST   | 224  | >KIT-D716N- KESSCSNST   | 195   | 29    |
| >KIT-D716N- KESSCSDSTN  | 556  | >KIT-D716N- KESSCSNSTN  | 474   | 82    |
| >KIT-D716N- KESSCSDST   | 412  | >KIT-D716N- KESSCSNST   | 506   | 94    |
| >KIT-D716N- HSKESSCSD   | 276  | >KIT-D716N- HSKESSCSN   | 82    | 194   |
| >KIT-D716N- HSKESSCSDS  | 635  | >KIT-D716N- HSKESSCSNS  | 141   | 494   |
| >KIT-D716N- HSKESSCSDS' | 606  | >KIT-D716N- HSKESSCSNS' | 97    | 509   |
| >KIT-D737N- DKRRSVRI    | 942  | >KIT-D737N- NKRRSVRI    | 188   | 754   |
| >KIT-D737N- DKRRSVRIGS' | 98   | >KIT-D737N- NKRRSVRIGS' | 20    | 78    |
| >KIT-D737N- ADKRRSVRI   | 3248 | >KIT-D737N- ANKRRSVRI   | 267   | 2981  |
| >KIT-D737N- ADKRRSVR    | 2025 | >KIT-D737N- ANKRRSVR    | 169   | 1856  |
| >KIT-D737N- ADKRRSVRI   | 1098 | >KIT-D737N- ANKRRSVRI   | 222   | 876   |
| >KIT-D737N- ADKRRSVRI   | 180  | >KIT-D737N- ANKRRSVRI   | 4580  | 4400  |
| >KIT-D737N- ADKRRSVRI   | 401  | >KIT-D737N- ANKRRSVRI   | 12160 | 11759 |
| >KIT-D737N- KADKRRSV    | 7664 | >KIT-D737N- KANKRRSV    | 163   | 7501  |
| >KIT-D737N- KADKRRSVR   | 9781 | >KIT-D737N- KANKRRSVR   | 435   | 9346  |
| >KIT-D737N- KADKRRSVRI  | 6018 | >KIT-D737N- KANKRRSVRI  | 108   | 5910  |
| >KIT-D737N- KADKRRSVR   | 52   | >KIT-D737N- KANKRRSVR   | 7     | 45    |
| >KIT-D737N- PTKADKRRSV  | 1482 | >KIT-D737N- PTKANKRRSV  | 437   | 1045  |
| >KIT-D737N- PTKADKRRSV  | 591  | >KIT-D737N- PTKANKRRSV  | 305   | 286   |

|                       |       |                       |      |       |
|-----------------------|-------|-----------------------|------|-------|
| >KIT-D737N-VPTKADKRRS | 359   | >KIT-D737N-VPTKANKRRS | 368  | 9     |
| >KIT-D737N-VPTKADKRRS | 73    | >KIT-D737N-VPTKANKRRS | 46   | 27    |
| >KIT-D737N-VVPTKADK   | 1679  | >KIT-D737N-VVPTKANK   | 453  | 1226  |
| >KIT-D737N-YVVPTKADK  | 909   | >KIT-D737N-YVVPTKANK  | 164  | 745   |
| >KIT-D737N-YVVPTKADK  | 2024  | >KIT-D737N-YVVPTKANK  | 400  | 1624  |
| >KIT-D737N-YVVPTKADKF | 1663  | >KIT-D737N-YVVPTKANKF | 471  | 1192  |
| >KIT-D737N-YVVPTKADKF | 774   | >KIT-D737N-YVVPTKANKF | 409  | 365   |
| >KIT-D737N-YVVPTKADK  | 54    | >KIT-D737N-YVVPTKANK  | 22   | 32    |
| >KIT-D737N-YVVPTKADKF | 37    | >KIT-D737N-YVVPTKANKF | 29   | 8     |
| >KIT-D737N-YVVPTKADKF | 25    | >KIT-D737N-YVVPTKANKF | 18   | 7     |
| >KIT-D737N-YVVPTKADKF | 532   | >KIT-D737N-YVVPTKANKF | 351  | 181   |
| >KIT-D737N-SYVVPTKADK | 1038  | >KIT-D737N-SYVVPTKANK | 224  | 814   |
| >KIT-D737N-SYVVPTKADK | 716   | >KIT-D737N-SYVVPTKANK | 268  | 448   |
| >KIT-D737N-SYVVPTKADK | 109   | >KIT-D737N-SYVVPTKANK | 72   | 37    |
| >KIT-D737N-VSYVVPTKAD | 73    | >KIT-D737N-VSYVVPTKAN | 41   | 32    |
| >KIT-D737N-VSYVVPTKAD | 43    | >KIT-D737N-VSYVVPTKAN | 18   | 25    |
| >KIT-D737N-VSYVVPTKAD | 1615  | >KIT-D737N-VSYVVPTKAN | 414  | 1201  |
| >KIT-D737N-VSYVVPTKAD | 1276  | >KIT-D737N-VSYVVPTKAN | 151  | 1125  |
| >KIT-D737N-VSYVVPTKAD | 273   | >KIT-D737N-VSYVVPTKAN | 145  | 128   |
| >KIT-D816A-DIKNDSNYV  | 7625  | >KIT-D816A-AIKNDSNYV  | 114  | 7511  |
| >KIT-D816A-DIKNDSNYVV | 2092  | >KIT-D816A-AIKNDSNYVV | 208  | 1884  |
| >KIT-D816A-DIKNDSNYV  | 2810  | >KIT-D816A-AIKNDSNYV  | 14   | 2796  |
| >KIT-D816A-DIKNDSNYVV | 2580  | >KIT-D816A-AIKNDSNYVV | 371  | 2209  |
| >KIT-D816A-DIKNDSNYV  | 12805 | >KIT-D816A-AIKNDSNYV  | 287  | 12518 |
| >KIT-D816A-DIKNDSNYV  | 6065  | >KIT-D816A-AIKNDSNYV  | 247  | 5818  |
| >KIT-D816A-DIKNDSNYV  | 5214  | >KIT-D816A-AIKNDSNYV  | 207  | 5007  |
| >KIT-D816A-DIKNDSNYVV | 4961  | >KIT-D816A-AIKNDSNYVV | 257  | 4704  |
| >KIT-D816A-DIKNDSNYV  | 1669  | >KIT-D816A-AIKNDSNYV  | 14   | 1655  |
| >KIT-D816A-DIKNDSNYVV | 2247  | >KIT-D816A-AIKNDSNYVV | 23   | 2224  |
| >KIT-D816A-DIKNDSNYVV | 9824  | >KIT-D816A-AIKNDSNYVV | 432  | 9392  |
| >KIT-D816A-DIKNDSNYVV | 7322  | >KIT-D816A-AIKNDSNYVV | 200  | 7122  |
| >KIT-D816A-DIKNDSNY   | 198   | >KIT-D816A-AIKNDSNY   | 5624 | 5426  |
| >KIT-D816A-DIKNDSNY   | 243   | >KIT-D816A-AIKNDSNY   | 660  | 417   |
| >KIT-D816A-DIKNDSNYV  | 9073  | >KIT-D816A-AIKNDSNYV  | 95   | 8978  |
| >KIT-D816A-DIKNDSNYVV | 12054 | >KIT-D816A-AIKNDSNYVV | 327  | 11727 |
| >KIT-D816A-DIKNDSNYVV | 1554  | >KIT-D816A-AIKNDSNYVV | 11   | 1543  |
| >KIT-D816A-DIKNDSNY   | 462   | >KIT-D816A-AIKNDSNY   | 70   | 392   |
| >KIT-D816A-DIKNDSNYVV | 291   | >KIT-D816A-AIKNDSNYVV | 3844 | 3553  |
| >KIT-D816A-DIKNDSNY   | 5119  | >KIT-D816A-AIKNDSNY   | 157  | 4962  |
| >KIT-D816A-DIKNDSNY   | 694   | >KIT-D816A-AIKNDSNY   | 475  | 219   |
| >KIT-D816A-RDIKNDSNYV | 4317  | >KIT-D816A-RAIKNDSNYV | 184  | 4133  |
| >KIT-D816A-RDIKNDSNYV | 19927 | >KIT-D816A-RAIKNDSNYV | 190  | 19737 |
| >KIT-D816A-RDIKNDSNYV | 9423  | >KIT-D816A-RAIKNDSNYV | 291  | 9132  |

|                          |       |                          |       |       |
|--------------------------|-------|--------------------------|-------|-------|
| >KIT-D816A-1 RDIKNDSDNY  | 8062  | >KIT-D816A-1 RAIKNDSDNY  | 372   | 7690  |
| >KIT-D816A-1 RDIKNDSDNY  | 1664  | >KIT-D816A-1 RAIKNDSDNY  | 121   | 1543  |
| >KIT-D816A-1 RDIKNDSDNY  | 3689  | >KIT-D816A-1 RAIKNDSDNY  | 151   | 3538  |
| >KIT-D816A-1 RDIKNDSDNY  | 924   | >KIT-D816A-1 RAIKNDSDNY  | 72    | 852   |
| >KIT-D816A-1 RDIKNDSDNYV | 4826  | >KIT-D816A-1 RAIKNDSDNYV | 494   | 4332  |
| >KIT-D816A-1 RDIKNDSDNY  | 2850  | >KIT-D816A-1 RAIKNDSDNY  | 5     | 2845  |
| >KIT-D816A-1 RDIKNDSDNY  | 6815  | >KIT-D816A-1 RAIKNDSDNY  | 196   | 6619  |
| >KIT-D816A-1 RDIKNDSDNYV | 394   | >KIT-D816A-1 RAIKNDSDNYV | 25698 | 25304 |
| >KIT-D816A-1 RDIKNDSDNY  | 19658 | >KIT-D816A-1 RAIKNDSDNY  | 117   | 19541 |
| >KIT-D816A-1 RDIKNDSDNY  | 1575  | >KIT-D816A-1 RAIKNDSDNY  | 302   | 1273  |
| >KIT-D816A-1 RDIKNDSDNYV | 299   | >KIT-D816A-1 RAIKNDSDNYV | 31534 | 31235 |
| >KIT-D816A-1 RDIKNDSDNYV | 87    | >KIT-D816A-1 RAIKNDSDNYV | 26678 | 26591 |
| >KIT-D816A-1 ARDIKNDSDNY | 420   | >KIT-D816A-1 ARAIKNDSDNY | 275   | 145   |
| >KIT-D816A-1 ARDIKNDSDNY | 2527  | >KIT-D816A-1 ARAIKNDSDNY | 362   | 2165  |
| >KIT-D816A-1 ARDIKNDSDNY | 200   | >KIT-D816A-1 ARAIKNDSDNY | 109   | 91    |
| >KIT-D816A-1 LARDIKNDSDN | 241   | >KIT-D816A-1 LARAIKNDSDN | 259   | 18    |
| >KIT-D816A-1 LARDIKNDSDN | 387   | >KIT-D816A-1 LARAIKNDSDN | 311   | 76    |
| >KIT-D816A-1 LARDIKNDSDN | 317   | >KIT-D816A-1 LARAIKNDSDN | 182   | 135   |
| >KIT-D816A-1 LARDIKNDSDN | 30    | >KIT-D816A-1 LARAIKNDSDN | 35    | 5     |
| >KIT-D816A-1 LARDIKNDSDN | 176   | >KIT-D816A-1 LARAIKNDSDN | 194   | 18    |
| >KIT-D816A-1 LARDIKNDSDN | 46    | >KIT-D816A-1 LARAIKNDSDN | 67    | 21    |
| >KIT-D816A-1 DFGLARDIK   | 2833  | >KIT-D816A-1 DFGLARAIK   | 310   | 2523  |
| >KIT-D816A-1 CDFGLARDI   | 2057  | >KIT-D816A-1 CDFGLARAI   | 320   | 1737  |
| >KIT-D816A-1 CDFGLARDI   | 84    | >KIT-D816A-1 CDFGLARAI   | 61    | 23    |
| >KIT-D816A-1 KICDFGLARD  | 15591 | >KIT-D816A-1 KICDFGLARA  | 418   | 15173 |
| >KIT-D816A-1 KICDFGLARD  | 13579 | >KIT-D816A-1 KICDFGLARA  | 117   | 13462 |
| >KIT-D816A-1 KICDFGLARD  | 17356 | >KIT-D816A-1 KICDFGLARA  | 331   | 17025 |
| >KIT-D816A-1 KICDFGLARD  | 1817  | >KIT-D816A-1 KICDFGLARA  | 335   | 1482  |
| >KIT-D816A-1 KICDFGLARD  | 16074 | >KIT-D816A-1 KICDFGLARA  | 179   | 15895 |
| >KIT-D816A-1 KICDFGLARD  | 997   | >KIT-D816A-1 KICDFGLARA  | 150   | 847   |
| >KIT-D816A-1 KICDFGLARD  | 25897 | >KIT-D816A-1 KICDFGLARA  | 286   | 25611 |
| >KIT-D816A-1 KICDFGLARD  | 109   | >KIT-D816A-1 KICDFGLARA  | 30    | 79    |
| >KIT-D816E-1 DIKNDSDNY   | 198   | >KIT-D816E-1 EIKNDSDNY   | 44    | 154   |
| >KIT-D816E-1 DIKNDSDNY   | 243   | >KIT-D816E-1 EIKNDSDNY   | 43    | 200   |
| >KIT-D816E-1 DIKNDSDNY   | 462   | >KIT-D816E-1 EIKNDSDNY   | 474   | 12    |
| >KIT-D816E-1 DIKNDSDNYVV | 291   | >KIT-D816E-1 EIKNDSDNYVV | 69    | 222   |
| >KIT-D816E-1 DIKNDSDNYV  | 512   | >KIT-D816E-1 EIKNDSDNYV  | 75    | 437   |
| >KIT-D816E-1 DIKNDSDNYVV | 1341  | >KIT-D816E-1 EIKNDSDNYVV | 228   | 1113  |
| >KIT-D816E-1 DIKNDSDNYV  | 677   | >KIT-D816E-1 EIKNDSDNYV  | 115   | 562   |
| >KIT-D816E-1 DIKNDSDNYVV | 1847  | >KIT-D816E-1 EIKNDSDNYVV | 492   | 1355  |
| >KIT-D816E-1 RDIKNDSDNY  | 3689  | >KIT-D816E-1 REIKNDSDNY  | 300   | 3389  |
| >KIT-D816E-1 RDIKNDSDNY  | 924   | >KIT-D816E-1 REIKNDSDNY  | 93    | 831   |
| >KIT-D816E-1 RDIKNDSDNYV | 11510 | >KIT-D816E-1 REIKNDSDNYV | 31    | 11479 |



|                         |       |                          |       |       |
|-------------------------|-------|--------------------------|-------|-------|
| >KIT-D816E-\ RDIKNSNYV  | 19185 | >KIT-D816E-r REIKNSNYV   | 180   | 19005 |
| >KIT-D816E-\ RDIKNSNYV  | 394   | >KIT-D816E-r REIKNSNYV   | 48    | 346   |
| >KIT-D816E-\ RDIKNSNY   | 8886  | >KIT-D816E-r REIKNSNY    | 120   | 8766  |
| >KIT-D816E-\ RDIKNSNYV  | 19056 | >KIT-D816E-r REIKNSNYV   | 151   | 18905 |
| >KIT-D816E-\ RDIKNSNYV  | 8885  | >KIT-D816E-r REIKNSNYV   | 107   | 8778  |
| >KIT-D816E-\ RDIKNSNYV  | 709   | >KIT-D816E-r REIKNSNYV   | 11    | 698   |
| >KIT-D816E-\ RDIKNSNYV  | 299   | >KIT-D816E-r REIKNSNYV   | 11733 | 11434 |
| >KIT-D816E-\ RDIKNSNYV  | 87    | >KIT-D816E-r REIKNSNYV   | 4074  | 3987  |
| >KIT-D816E-\ ARDIKNSNY  | 420   | >KIT-D816E-r AREIKNSNY   | 411   | 9     |
| >KIT-D816E-\ ARDIKNSNY  | 200   | >KIT-D816E-r AREIKNSNY   | 241   | 41    |
| >KIT-D816E-\ LARDIKNSN  | 241   | >KIT-D816E-r LAREIKNSN   | 342   | 101   |
| >KIT-D816E-\ LARDIKNSN  | 387   | >KIT-D816E-r LAREIKNSN   | 506   | 119   |
| >KIT-D816E-\ LARDIKNSN  | 317   | >KIT-D816E-r LAREIKNSN   | 260   | 57    |
| >KIT-D816E-\ LARDIKNSN  | 30    | >KIT-D816E-r LAREIKNSN   | 31    | 1     |
| >KIT-D816E-\ LARDIKNSN  | 176   | >KIT-D816E-r LAREIKNSN   | 126   | 50    |
| >KIT-D816E-\ LARDIKNSN  | 46    | >KIT-D816E-r LAREIKNSN   | 115   | 69    |
| >KIT-D816E-\ CDFGLARDI  | 970   | >KIT-D816E-r CDFGLAREI   | 371   | 599   |
| >KIT-D816E-\ CDFGLARDI  | 84    | >KIT-D816E-r CDFGLAREI   | 62    | 22    |
| >KIT-D816E-\ KICDFGLARD | 997   | >KIT-D816E-r KICDFGLAREI | 139   | 858   |
| >KIT-D816E-\ KICDFGLARD | 109   | >KIT-D816E-r KICDFGLAREI | 91    | 18    |
| >KIT-D816F-\ DIKNSNYV   | 17179 | >KIT-D816F-r FIKNSNYV    | 168   | 17011 |
| >KIT-D816F-\ DIKNSNYVV  | 8154  | >KIT-D816F-r FIKNSNYVV   | 117   | 8037  |
| >KIT-D816F-\ DIKNSNYV   | 7625  | >KIT-D816F-r FIKNSNYV    | 7     | 7618  |
| >KIT-D816F-\ DIKNSNYVV  | 2092  | >KIT-D816F-r FIKNSNYVV   | 28    | 2064  |
| >KIT-D816F-\ DIKNSNYV   | 2810  | >KIT-D816F-r FIKNSNYV    | 3     | 2807  |
| >KIT-D816F-\ DIKNSNYVV  | 2580  | >KIT-D816F-r FIKNSNYVV   | 58    | 2522  |
| >KIT-D816F-\ DIKNSNYV   | 12805 | >KIT-D816F-r FIKNSNYV    | 16    | 12789 |
| >KIT-D816F-\ DIKNSNYVV  | 6294  | >KIT-D816F-r FIKNSNYVV   | 69    | 6225  |
| >KIT-D816F-\ DIKNSNYV   | 6065  | >KIT-D816F-r FIKNSNYV    | 26    | 6039  |
| >KIT-D816F-\ DIKNSNYVV  | 7988  | >KIT-D816F-r FIKNSNYVV   | 55    | 7933  |
| >KIT-D816F-\ DIKNSNYV   | 5214  | >KIT-D816F-r FIKNSNYV    | 16    | 5198  |
| >KIT-D816F-\ DIKNSNYVV  | 4961  | >KIT-D816F-r FIKNSNYVV   | 24    | 4937  |
| >KIT-D816F-\ DIKNSNYV   | 9068  | >KIT-D816F-r FIKNSNYV    | 101   | 8967  |
| >KIT-D816F-\ DIKNSNYVV  | 12893 | >KIT-D816F-r FIKNSNYVV   | 348   | 12545 |
| >KIT-D816F-\ DIKNSNYV   | 6580  | >KIT-D816F-r FIKNSNYV    | 111   | 6469  |
| >KIT-D816F-\ DIKNSNYVV  | 8376  | >KIT-D816F-r FIKNSNYVV   | 305   | 8071  |
| >KIT-D816F-\ DIKNSNYV   | 1669  | >KIT-D816F-r FIKNSNYV    | 4     | 1665  |
| >KIT-D816F-\ DIKNSNYVV  | 2247  | >KIT-D816F-r FIKNSNYVV   | 6     | 2241  |
| >KIT-D816F-\ DIKNSNY    | 198   | >KIT-D816F-r FIKNSNY     | 211   | 13    |
| >KIT-D816F-\ DIKNSNY    | 243   | >KIT-D816F-r FIKNSNY     | 773   | 530   |
| >KIT-D816F-\ DIKNSNY    | 3414  | >KIT-D816F-r FIKNSNY     | 204   | 3210  |
| >KIT-D816F-\ DIKNSNYVV  | 1554  | >KIT-D816F-r FIKNSNYVV   | 483   | 1071  |
| >KIT-D816F-\ DIKNSNY    | 462   | >KIT-D816F-r FIKNSNY     | 222   | 240   |

|                          |       |                          |       |       |
|--------------------------|-------|--------------------------|-------|-------|
| >KIT-D816F-ν DIKNDSNYVV  | 291   | >KIT-D816F-r FIKNDSNYVV  | 210   | 81    |
| >KIT-D816F-ν DIKNDSNYV   | 512   | >KIT-D816F-r FIKNDSNYV   | 166   | 346   |
| >KIT-D816F-ν DIKNDSNYVV  | 1341  | >KIT-D816F-r FIKNDSNYVV  | 397   | 944   |
| >KIT-D816F-ν DIKNDSNYV   | 677   | >KIT-D816F-r FIKNDSNYV   | 444   | 233   |
| >KIT-D816F-ν DIKNDSNY    | 5119  | >KIT-D816F-r FIKNDSNY    | 98    | 5021  |
| >KIT-D816F-ν DIKNDSNY    | 694   | >KIT-D816F-r FIKNDSNY    | 62    | 632   |
| >KIT-D816F-ν DIKNDSNY    | 6201  | >KIT-D816F-r FIKNDSNY    | 219   | 5982  |
| >KIT-D816F-ν RDIKNDSNYV  | 19755 | >KIT-D816F-r RFIKNDSNYV  | 310   | 19445 |
| >KIT-D816F-ν RDIKNDSNY   | 5328  | >KIT-D816F-r RFIKNDSNY   | 71    | 5257  |
| >KIT-D816F-ν RDIKNDSNY   | 1664  | >KIT-D816F-r RFIKNDSNY   | 173   | 1491  |
| >KIT-D816F-ν RDIKNDSNY   | 3277  | >KIT-D816F-r RFIKNDSNY   | 190   | 3087  |
| >KIT-D816F-ν RDIKNDSNY   | 6909  | >KIT-D816F-r RFIKNDSNY   | 471   | 6438  |
| >KIT-D816F-ν RDIKNDSNYV  | 394   | >KIT-D816F-r RFIKNDSNYV  | 19621 | 19227 |
| >KIT-D816F-ν RDIKNDSNYV  | 17403 | >KIT-D816F-r RFIKNDSNYV  | 67    | 17336 |
| >KIT-D816F-ν RDIKNDSNYV  | 299   | >KIT-D816F-r RFIKNDSNYV  | 26017 | 25718 |
| >KIT-D816F-ν RDIKNDSNYV  | 87    | >KIT-D816F-r RFIKNDSNYV  | 19228 | 19141 |
| >KIT-D816F-ν TKICDFGLARI | 30785 | >KIT-D816F-r TKICDFGLARI | 304   | 30481 |
| >KIT-D816F-ν TKICDFGLARI | 22813 | >KIT-D816F-r TKICDFGLARI | 38    | 22775 |
| >KIT-D816F-ν ARDIKNDSNY  | 420   | >KIT-D816F-r ARFIKNDSNY  | 87    | 333   |
| >KIT-D816F-ν ARDIKNDSNY  | 2527  | >KIT-D816F-r ARFIKNDSNY  | 62    | 2465  |
| >KIT-D816F-ν ARDIKNDSNY  | 10209 | >KIT-D816F-r ARFIKNDSNY  | 449   | 9760  |
| >KIT-D816F-ν ARDIKNDSNY  | 200   | >KIT-D816F-r ARFIKNDSNY  | 36    | 164   |
| >KIT-D816F-ν LARDIKNDSN  | 241   | >KIT-D816F-r LARFIKNDSN' | 159   | 82    |
| >KIT-D816F-ν LARDIKNDSN  | 387   | >KIT-D816F-r LARFIKNDSN' | 558   | 171   |
| >KIT-D816F-ν LARDIKNDSN  | 317   | >KIT-D816F-r LARFIKNDSN' | 372   | 55    |
| >KIT-D816F-ν LARDIKNDSN  | 30    | >KIT-D816F-r LARFIKNDSN' | 48    | 18    |
| >KIT-D816F-ν LARDIKNDSN  | 176   | >KIT-D816F-r LARFIKNDSN' | 275   | 99    |
| >KIT-D816F-ν LARDIKNDSN  | 46    | >KIT-D816F-r LARFIKNDSN' | 39    | 7     |
| >KIT-D816F-ν DFGLARDIK   | 2833  | >KIT-D816F-r DFGLARFIK   | 150   | 2683  |
| >KIT-D816F-ν CDFGLARDI   | 970   | >KIT-D816F-r CDFGLARFI   | 40    | 930   |
| >KIT-D816F-ν CDFGLARDI   | 1651  | >KIT-D816F-r CDFGLARFI   | 301   | 1350  |
| >KIT-D816F-ν CDFGLARDI   | 84    | >KIT-D816F-r CDFGLARFI   | 39    | 45    |
| >KIT-D816F-ν ICDFGLARD   | 22037 | >KIT-D816F-r ICDFGLARF   | 178   | 21859 |
| >KIT-D816F-ν KICDFGLARD  | 1817  | >KIT-D816F-r KICDFGLARFI | 174   | 1643  |
| >KIT-D816F-ν KICDFGLARD  | 997   | >KIT-D816F-r KICDFGLARFI | 106   | 891   |
| >KIT-D816F-ν KICDFGLARD  | 3284  | >KIT-D816F-r KICDFGLARFI | 275   | 3009  |
| >KIT-D816F-ν KICDFGLARD  | 14521 | >KIT-D816F-r KICDFGLARF  | 132   | 14389 |
| >KIT-D816F-ν KICDFGLARD  | 109   | >KIT-D816F-r KICDFGLARFI | 329   | 220   |
| >KIT-D816F-ν KICDFGLARD  | 19581 | >KIT-D816F-r KICDFGLARF  | 207   | 19374 |
| >KIT-D816F-ν KICDFGLARD  | 19830 | >KIT-D816F-r KICDFGLARF  | 62    | 19768 |
| >KIT-D816F-ν KICDFGLARD  | 1636  | >KIT-D816F-r KICDFGLARFI | 461   | 1175  |
| >KIT-D816G-ν DIKNDSNYV   | 7625  | >KIT-D816G-ι GIKNDSNYV   | 214   | 7411  |
| >KIT-D816G-ν DIKNDSNYVV  | 2092  | >KIT-D816G-ι GIKNDSNYVV  | 229   | 1863  |

|                                      |      |                                      |       |       |
|--------------------------------------|------|--------------------------------------|-------|-------|
| >KIT-D816G- <sup>-</sup> DIKNDNSNYV  | 2810 | >KIT-D816G- <sup>-</sup> GIKNDNSNYV  | 21    | 2789  |
| >KIT-D816G- <sup>-</sup> DIKNDNSNYV  | 6065 | >KIT-D816G- <sup>-</sup> GIKNDNSNYV  | 452   | 5613  |
| >KIT-D816G- <sup>-</sup> DIKNDNSNYV  | 5214 | >KIT-D816G- <sup>-</sup> GIKNDNSNYV  | 101   | 5113  |
| >KIT-D816G- <sup>-</sup> DIKNDNSNYVV | 4961 | >KIT-D816G- <sup>-</sup> GIKNDNSNYVV | 131   | 4830  |
| >KIT-D816G- <sup>-</sup> DIKNDNSNYV  | 1669 | >KIT-D816G- <sup>-</sup> GIKNDNSNYV  | 50    | 1619  |
| >KIT-D816G- <sup>-</sup> DIKNDNSNYVV | 2247 | >KIT-D816G- <sup>-</sup> GIKNDNSNYVV | 81    | 2166  |
| >KIT-D816G- <sup>-</sup> DIKNDNSNYVV | 7322 | >KIT-D816G- <sup>-</sup> GIKNDNSNYVV | 329   | 6993  |
| >KIT-D816G- <sup>-</sup> DIKNDNSNY   | 198  | >KIT-D816G- <sup>-</sup> GIKNDNSNY   | 5939  | 5741  |
| >KIT-D816G- <sup>-</sup> DIKNDNSNY   | 243  | >KIT-D816G- <sup>-</sup> GIKNDNSNY   | 6652  | 6409  |
| >KIT-D816G- <sup>-</sup> DIKNDNSNYVV | 1554 | >KIT-D816G- <sup>-</sup> GIKNDNSNYVV | 45    | 1509  |
| >KIT-D816G- <sup>-</sup> DIKNDNSNY   | 462  | >KIT-D816G- <sup>-</sup> GIKNDNSNY   | 122   | 340   |
| >KIT-D816G- <sup>-</sup> DIKNDNSNYVV | 291  | >KIT-D816G- <sup>-</sup> GIKNDNSNYVV | 3891  | 3600  |
| >KIT-D816G- <sup>-</sup> DIKNDNSNY   | 5119 | >KIT-D816G- <sup>-</sup> GIKNDNSNY   | 316   | 4803  |
| >KIT-D816G- <sup>-</sup> DIKNDNSNY   | 694  | >KIT-D816G- <sup>-</sup> GIKNDNSNY   | 497   | 197   |
| >KIT-D816G- <sup>-</sup> RDIKNDNSNY  | 1664 | >KIT-D816G- <sup>-</sup> RGIKNDNSNY  | 149   | 1515  |
| >KIT-D816G- <sup>-</sup> RDIKNDNSNY  | 3689 | >KIT-D816G- <sup>-</sup> RGIKNDNSNY  | 397   | 3292  |
| >KIT-D816G- <sup>-</sup> RDIKNDNSNY  | 2850 | >KIT-D816G- <sup>-</sup> RGIKNDNSNY  | 56    | 2794  |
| >KIT-D816G- <sup>-</sup> RDIKNDNSNYV | 394  | >KIT-D816G- <sup>-</sup> RGIKNDNSNYV | 29630 | 29236 |
| >KIT-D816G- <sup>-</sup> RDIKNDNSNY  | 1575 | >KIT-D816G- <sup>-</sup> RGIKNDNSNY  | 493   | 1082  |
| >KIT-D816G- <sup>-</sup> RDIKNDNSNYV | 299  | >KIT-D816G- <sup>-</sup> RGIKNDNSNYV | 19779 | 19480 |
| >KIT-D816G- <sup>-</sup> RDIKNDNSNY  | 87   | >KIT-D816G- <sup>-</sup> RGIKNDNSNYV | 10542 | 10455 |
| >KIT-D816G- <sup>-</sup> ARDIKNDNSNY | 420  | >KIT-D816G- <sup>-</sup> ARGIKNDNSNY | 479   | 59    |
| >KIT-D816G- <sup>-</sup> ARDIKNDNSNY | 200  | >KIT-D816G- <sup>-</sup> ARGIKNDNSNY | 188   | 12    |
| >KIT-D816G- <sup>-</sup> LARDIKNDNSN | 241  | >KIT-D816G- <sup>-</sup> LARGIKNDNSN | 290   | 49    |
| >KIT-D816G- <sup>-</sup> LARDIKNDNSN | 387  | >KIT-D816G- <sup>-</sup> LARGIKNDNSN | 502   | 115   |
| >KIT-D816G- <sup>-</sup> LARDIKNDNSN | 317  | >KIT-D816G- <sup>-</sup> LARGIKNDNSN | 650   | 333   |
| >KIT-D816G- <sup>-</sup> LARDIKNDNSN | 30   | >KIT-D816G- <sup>-</sup> LARGIKNDNSN | 38    | 8     |
| >KIT-D816G- <sup>-</sup> LARDIKNDNSN | 176  | >KIT-D816G- <sup>-</sup> LARGIKNDNSN | 211   | 35    |
| >KIT-D816G- <sup>-</sup> LARDIKNDNSN | 46   | >KIT-D816G- <sup>-</sup> LARGIKNDNSN | 38    | 8     |
| >KIT-D816G- <sup>-</sup> CDFGLARDI   | 84   | >KIT-D816G- <sup>-</sup> CDFGLARGI   | 75    | 9     |
| >KIT-D816G- <sup>-</sup> KICDFGLARD  | 1817 | >KIT-D816G- <sup>-</sup> KICDFGLARG  | 324   | 1493  |
| >KIT-D816G- <sup>-</sup> KICDFGLARD  | 997  | >KIT-D816G- <sup>-</sup> KICDFGLARG  | 139   | 858   |
| >KIT-D816G- <sup>-</sup> KICDFGLARD  | 109  | >KIT-D816G- <sup>-</sup> KICDFGLARG  | 114   | 5     |
| >KIT-D816H- <sup>-</sup> DIKNDNSNYV  | 7625 | >KIT-D816H- <sup>-</sup> HIKNDNSNYV  | 185   | 7440  |
| >KIT-D816H- <sup>-</sup> DIKNDNSNYVV | 2092 | >KIT-D816H- <sup>-</sup> HIKNDNSNYVV | 378   | 1714  |
| >KIT-D816H- <sup>-</sup> DIKNDNSNYV  | 2810 | >KIT-D816H- <sup>-</sup> HIKNDNSNYV  | 36    | 2774  |
| >KIT-D816H- <sup>-</sup> DIKNDNSNYV  | 5214 | >KIT-D816H- <sup>-</sup> HIKNDNSNYV  | 282   | 4932  |
| >KIT-D816H- <sup>-</sup> DIKNDNSNYVV | 4961 | >KIT-D816H- <sup>-</sup> HIKNDNSNYVV | 333   | 4628  |
| >KIT-D816H- <sup>-</sup> DIKNDNSNYV  | 1669 | >KIT-D816H- <sup>-</sup> HIKNDNSNYV  | 79    | 1590  |
| >KIT-D816H- <sup>-</sup> DIKNDNSNYVV | 2247 | >KIT-D816H- <sup>-</sup> HIKNDNSNYVV | 126   | 2121  |
| >KIT-D816H- <sup>-</sup> DIKNDNSNYVV | 9824 | >KIT-D816H- <sup>-</sup> HIKNDNSNYVV | 265   | 9559  |
| >KIT-D816H- <sup>-</sup> DIKNDNSNY   | 198  | >KIT-D816H- <sup>-</sup> HIKNDNSNY   | 327   | 129   |
| >KIT-D816H- <sup>-</sup> DIKNDNSNY   | 243  | >KIT-D816H- <sup>-</sup> HIKNDNSNY   | 603   | 360   |

|                                      |       |                                      |       |       |
|--------------------------------------|-------|--------------------------------------|-------|-------|
| >KIT-D816H- <sup>v</sup> DIKNDNSNYV  | 9073  | >KIT-D816H- <sup>i</sup> HIKNDNSNYV  | 42    | 9031  |
| >KIT-D816H- <sup>v</sup> DIKNDNSNYVV | 12054 | >KIT-D816H- <sup>i</sup> HIKNDNSNYVV | 142   | 11912 |
| >KIT-D816H- <sup>v</sup> DIKNDNSNYVV | 1554  | >KIT-D816H- <sup>i</sup> HIKNDNSNYVV | 7     | 1547  |
| >KIT-D816H- <sup>v</sup> DIKNDNSNY   | 462   | >KIT-D816H- <sup>i</sup> HIKNDNSNY   | 108   | 354   |
| >KIT-D816H- <sup>v</sup> DIKNDNSNYVV | 7515  | >KIT-D816H- <sup>i</sup> HIKNDNSNYVV | 402   | 7113  |
| >KIT-D816H- <sup>v</sup> DIKNDNSNYVV | 291   | >KIT-D816H- <sup>i</sup> HIKNDNSNYVV | 333   | 42    |
| >KIT-D816H- <sup>v</sup> DIKNDNSNYV  | 512   | >KIT-D816H- <sup>i</sup> HIKNDNSNYV  | 258   | 254   |
| >KIT-D816H- <sup>v</sup> DIKNDNSNY   | 5119  | >KIT-D816H- <sup>i</sup> HIKNDNSNY   | 212   | 4907  |
| >KIT-D816H- <sup>v</sup> DIKNDNSNY   | 694   | >KIT-D816H- <sup>i</sup> HIKNDNSNY   | 140   | 554   |
| >KIT-D816H- <sup>v</sup> RDIKNDNSNY  | 1664  | >KIT-D816H- <sup>i</sup> RHIKNDNSNY  | 340   | 1324  |
| >KIT-D816H- <sup>v</sup> RDIKNDNSNY  | 924   | >KIT-D816H- <sup>i</sup> RHIKNDNSNY  | 28    | 896   |
| >KIT-D816H- <sup>v</sup> RDIKNDNSNYV | 5830  | >KIT-D816H- <sup>i</sup> RHIKNDNSNYV | 321   | 5509  |
| >KIT-D816H- <sup>v</sup> RDIKNDNSNYV | 4826  | >KIT-D816H- <sup>i</sup> RHIKNDNSNYV | 229   | 4597  |
| >KIT-D816H- <sup>v</sup> RDIKNDNSNYV | 10928 | >KIT-D816H- <sup>i</sup> RHIKNDNSNYV | 379   | 10549 |
| >KIT-D816H- <sup>v</sup> RDIKNDNSNYV | 394   | >KIT-D816H- <sup>i</sup> RHIKNDNSNYV | 16524 | 16130 |
| >KIT-D816H- <sup>v</sup> RDIKNDNSNYV | 299   | >KIT-D816H- <sup>i</sup> RHIKNDNSNYV | 22565 | 22266 |
| >KIT-D816H- <sup>v</sup> RDIKNDNSNYV | 87    | >KIT-D816H- <sup>i</sup> RHIKNDNSNYV | 14396 | 14309 |
| >KIT-D816H- <sup>v</sup> ARDIKNDNSNY | 420   | >KIT-D816H- <sup>i</sup> ARHIKNDNSNY | 606   | 186   |
| >KIT-D816H- <sup>v</sup> ARDIKNDNSNY | 2527  | >KIT-D816H- <sup>i</sup> ARHIKNDNSNY | 249   | 2278  |
| >KIT-D816H- <sup>v</sup> ARDIKNDNSNY | 200   | >KIT-D816H- <sup>i</sup> ARHIKNDNSNY | 89    | 111   |
| >KIT-D816H- <sup>v</sup> LARDIKNDNSN | 241   | >KIT-D816H- <sup>i</sup> LARHIKNDNSN | 172   | 69    |
| >KIT-D816H- <sup>v</sup> LARDIKNDNSN | 387   | >KIT-D816H- <sup>i</sup> LARHIKNDNSN | 359   | 28    |
| >KIT-D816H- <sup>v</sup> LARDIKNDNSN | 317   | >KIT-D816H- <sup>i</sup> LARHIKNDNSN | 86    | 231   |
| >KIT-D816H- <sup>v</sup> LARDIKNDNSN | 30    | >KIT-D816H- <sup>i</sup> LARHIKNDNSN | 32    | 2     |
| >KIT-D816H- <sup>v</sup> LARDIKNDNSN | 176   | >KIT-D816H- <sup>i</sup> LARHIKNDNSN | 192   | 16    |
| >KIT-D816H- <sup>v</sup> LARDIKNDNSN | 46    | >KIT-D816H- <sup>i</sup> LARHIKNDNSN | 49    | 3     |
| >KIT-D816H- <sup>v</sup> DFGLARDIK   | 2833  | >KIT-D816H- <sup>i</sup> DFGLARHIK   | 429   | 2404  |
| >KIT-D816H- <sup>v</sup> CDFGLARDI   | 1651  | >KIT-D816H- <sup>i</sup> CDFGLARHI   | 342   | 1309  |
| >KIT-D816H- <sup>v</sup> CDFGLARDI   | 84    | >KIT-D816H- <sup>i</sup> CDFGLARHI   | 105   | 21    |
| >KIT-D816H- <sup>v</sup> KICDFGLARD  | 1817  | >KIT-D816H- <sup>i</sup> KICDFGLARH  | 373   | 1444  |
| >KIT-D816H- <sup>v</sup> KICDFGLARD  | 997   | >KIT-D816H- <sup>i</sup> KICDFGLARH  | 261   | 736   |
| >KIT-D816H- <sup>v</sup> KICDFGLARD  | 109   | >KIT-D816H- <sup>i</sup> KICDFGLARH  | 260   | 151   |
| >KIT-D816H- <sup>v</sup> KICDFGLARD  | 1636  | >KIT-D816H- <sup>i</sup> KICDFGLARH  | 468   | 1168  |
| >KIT-D816I- <sup>v</sup> DIKNDNSNYV  | 7625  | >KIT-D816I- <sup>n</sup> IIKNDNSNYV  | 98    | 7527  |
| >KIT-D816I- <sup>v</sup> DIKNDNSNYVV | 2092  | >KIT-D816I- <sup>n</sup> IIKNDNSNYVV | 164   | 1928  |
| >KIT-D816I- <sup>v</sup> DIKNDNSNYV  | 2810  | >KIT-D816I- <sup>n</sup> IIKNDNSNYV  | 15    | 2795  |
| >KIT-D816I- <sup>v</sup> DIKNDNSNYVV | 2580  | >KIT-D816I- <sup>n</sup> IIKNDNSNYVV | 270   | 2310  |
| >KIT-D816I- <sup>v</sup> DIKNDNSNYV  | 12805 | >KIT-D816I- <sup>n</sup> IIKNDNSNYV  | 238   | 12567 |
| >KIT-D816I- <sup>v</sup> DIKNDNSNYV  | 6065  | >KIT-D816I- <sup>n</sup> IIKNDNSNYV  | 222   | 5843  |
| >KIT-D816I- <sup>v</sup> DIKNDNSNYVV | 7988  | >KIT-D816I- <sup>n</sup> IIKNDNSNYVV | 482   | 7506  |
| >KIT-D816I- <sup>v</sup> DIKNDNSNYV  | 5214  | >KIT-D816I- <sup>n</sup> IIKNDNSNYV  | 327   | 4887  |
| >KIT-D816I- <sup>v</sup> DIKNDNSNYVV | 4961  | >KIT-D816I- <sup>n</sup> IIKNDNSNYVV | 406   | 4555  |
| >KIT-D816I- <sup>v</sup> DIKNDNSNYV  | 1669  | >KIT-D816I- <sup>n</sup> IIKNDNSNYV  | 27    | 1642  |

|                         |       |                          |       |       |
|-------------------------|-------|--------------------------|-------|-------|
| >KIT-D816I-v DIKNDSNYVV | 2247  | >KIT-D816I-n IIKNDSNYVV  | 39    | 2208  |
| >KIT-D816I-v DIKNDSNYVV | 9824  | >KIT-D816I-n IIKNDSNYVV† | 264   | 9560  |
| >KIT-D816I-v DIKNDSNYVV | 7322  | >KIT-D816I-n IIKNDSNYVV† | 404   | 6918  |
| >KIT-D816I-v DIKNDSNY   | 198   | >KIT-D816I-n IIKNDSNY    | 8844  | 8646  |
| >KIT-D816I-v DIKNDSNY   | 243   | >KIT-D816I-n IIKNDSNY    | 2827  | 2584  |
| >KIT-D816I-v DIKNDSNYV  | 9073  | >KIT-D816I-n IIKNDSNYV   | 438   | 8635  |
| >KIT-D816I-v DIKNDSNYVV | 1554  | >KIT-D816I-n IIKNDSNYVV† | 26    | 1528  |
| >KIT-D816I-v DIKNDSNY   | 462   | >KIT-D816I-n IIKNDSNY    | 48    | 414   |
| >KIT-D816I-v DIKNDSNYVV | 291   | >KIT-D816I-n IIKNDSNYVV† | 815   | 524   |
| >KIT-D816I-v DIKNDSNY   | 5119  | >KIT-D816I-n IIKNDSNY    | 184   | 4935  |
| >KIT-D816I-v DIKNDSNY   | 694   | >KIT-D816I-n IIKNDSNY    | 296   | 398   |
| >KIT-D816I-v DIKNDSNY   | 6201  | >KIT-D816I-n IIKNDSNY    | 374   | 5827  |
| >KIT-D816I-v RDIKNDSNYV | 18079 | >KIT-D816I-n RIIKNDSNYV  | 434   | 17645 |
| >KIT-D816I-v RDIKNDSNYV | 19047 | >KIT-D816I-n RIIKNDSNYV\ | 401   | 18646 |
| >KIT-D816I-v RDIKNDSNYV | 11656 | >KIT-D816I-n RIIKNDSNYV  | 274   | 11382 |
| >KIT-D816I-v RDIKNDSNYV | 17908 | >KIT-D816I-n RIIKNDSNYV\ | 457   | 17451 |
| >KIT-D816I-v RDIKNDSNYV | 9423  | >KIT-D816I-n RIIKNDSNYV  | 59    | 9364  |
| >KIT-D816I-v RDIKNDSNYV | 16622 | >KIT-D816I-n RIIKNDSNYV\ | 170   | 16452 |
| >KIT-D816I-v RDIKNDSNYV | 9296  | >KIT-D816I-n RIIKNDSNYV  | 263   | 9033  |
| >KIT-D816I-v RDIKNDSNYV | 5754  | >KIT-D816I-n RIIKNDSNYV\ | 147   | 5607  |
| >KIT-D816I-v RDIKNDSNYV | 11839 | >KIT-D816I-n RIIKNDSNYV  | 31    | 11808 |
| >KIT-D816I-v RDIKNDSNYV | 14377 | >KIT-D816I-n RIIKNDSNYV\ | 64    | 14313 |
| >KIT-D816I-v RDIKNDSNYV | 11159 | >KIT-D816I-n RIIKNDSNYV  | 20    | 11139 |
| >KIT-D816I-v RDIKNDSNYV | 11037 | >KIT-D816I-n RIIKNDSNYV\ | 33    | 11004 |
| >KIT-D816I-v RDIKNDSNYV | 16471 | >KIT-D816I-n RIIKNDSNYV  | 120   | 16351 |
| >KIT-D816I-v RDIKNDSNYV | 19741 | >KIT-D816I-n RIIKNDSNYV\ | 408   | 19333 |
| >KIT-D816I-v RDIKNDSNYV | 22867 | >KIT-D816I-n RIIKNDSNYV  | 39    | 22828 |
| >KIT-D816I-v RDIKNDSNYV | 24162 | >KIT-D816I-n RIIKNDSNYV\ | 58    | 24104 |
| >KIT-D816I-v RDIKNDSNY  | 8062  | >KIT-D816I-n RIIKNDSNY   | 42    | 8020  |
| >KIT-D816I-v RDIKNDSNY  | 5328  | >KIT-D816I-n RIIKNDSNY   | 408   | 4920  |
| >KIT-D816I-v RDIKNDSNY  | 1664  | >KIT-D816I-n RIIKNDSNY   | 79    | 1585  |
| >KIT-D816I-v RDIKNDSNY  | 3277  | >KIT-D816I-n RIIKNDSNY   | 102   | 3175  |
| >KIT-D816I-v RDIKNDSNY  | 3689  | >KIT-D816I-n RIIKNDSNY   | 98    | 3591  |
| >KIT-D816I-v RDIKNDSNY  | 924   | >KIT-D816I-n RIIKNDSNY   | 252   | 672   |
| >KIT-D816I-v RDIKNDSNY  | 2850  | >KIT-D816I-n RIIKNDSNY   | 32    | 2818  |
| >KIT-D816I-v RDIKNDSNYV | 394   | >KIT-D816I-n RIIKNDSNYV\ | 33135 | 32741 |
| >KIT-D816I-v RDIKNDSNYV | 299   | >KIT-D816I-n RIIKNDSNYV  | 24656 | 24357 |
| >KIT-D816I-v RDIKNDSNYV | 87    | >KIT-D816I-n RIIKNDSNYV\ | 16389 | 16302 |
| >KIT-D816I-v ARDIKNDSNY | 420   | >KIT-D816I-n ARIIKNDSNY  | 205   | 215   |
| >KIT-D816I-v ARDIKNDSNY | 2527  | >KIT-D816I-n ARIIKNDSNY  | 235   | 2292  |
| >KIT-D816I-v ARDIKNDSNY | 200   | >KIT-D816I-n ARIIKNDSNY  | 39    | 161   |
| >KIT-D816I-v LARDIKNSDN | 241   | >KIT-D816I-n LARIIKNDSNY | 218   | 23    |
| >KIT-D816I-v LARDIKNSDN | 387   | >KIT-D816I-n LARIIKNDSNY | 855   | 468   |

|                              |       |                                |       |       |
|------------------------------|-------|--------------------------------|-------|-------|
| >KIT-D816I- $\nu$ LARDIKNDSN | 317   | >KIT-D816I- $\eta$ LARIKNDSNY  | 444   | 127   |
| >KIT-D816I- $\nu$ LARDIKNDSN | 30    | >KIT-D816I- $\eta$ LARIKNDSNY  | 25    | 5     |
| >KIT-D816I- $\nu$ LARDIKNDSN | 176   | >KIT-D816I- $\eta$ LARIKNDSNY  | 324   | 148   |
| >KIT-D816I- $\nu$ LARDIKNDSN | 46    | >KIT-D816I- $\eta$ LARIKNDSNY  | 87    | 41    |
| >KIT-D816I- $\nu$ CDFGLARDI  | 970   | >KIT-D816I- $\eta$ CDFGLARII   | 321   | 649   |
| >KIT-D816I- $\nu$ CDFGLARD   | 41836 | >KIT-D816I- $\eta$ CDFGLARI    | 305   | 41531 |
| >KIT-D816I- $\nu$ CDFGLARDI  | 1651  | >KIT-D816I- $\eta$ CDFGLARII   | 460   | 1191  |
| >KIT-D816I- $\nu$ CDFGLARD   | 22993 | >KIT-D816I- $\eta$ CDFGLARI    | 73    | 22920 |
| >KIT-D816I- $\nu$ CDFGLARDI  | 84    | >KIT-D816I- $\eta$ CDFGLARII   | 42    | 42    |
| >KIT-D816I- $\nu$ KICDFGLARD | 15591 | >KIT-D816I- $\eta$ KICDFGLARI  | 155   | 15436 |
| >KIT-D816I- $\nu$ KICDFGLARD | 13579 | >KIT-D816I- $\eta$ KICDFGLARI  | 66    | 13513 |
| >KIT-D816I- $\nu$ KICDFGLARD | 17356 | >KIT-D816I- $\eta$ KICDFGLARI  | 250   | 17106 |
| >KIT-D816I- $\nu$ KICDFGLARD | 16074 | >KIT-D816I- $\eta$ KICDFGLARI  | 48    | 16026 |
| >KIT-D816I- $\nu$ KICDFGLARD | 25897 | >KIT-D816I- $\eta$ KICDFGLARI  | 253   | 25644 |
| >KIT-D816I- $\nu$ KICDFGLARD | 14521 | >KIT-D816I- $\eta$ KICDFGLARI  | 257   | 14264 |
| >KIT-D816I- $\nu$ KICDFGLARD | 109   | >KIT-D816I- $\eta$ KICDFGLARII | 96    | 13    |
| >KIT-D816N- $\nu$ DIKNDSNYV  | 7625  | >KIT-D816N- $\eta$ NIKNDSNYV   | 355   | 7270  |
| >KIT-D816N- $\nu$ DIKNDSNYVV | 2092  | >KIT-D816N- $\eta$ NIKNDSNYVV  | 460   | 1632  |
| >KIT-D816N- $\nu$ DIKNDSNYV  | 2810  | >KIT-D816N- $\eta$ NIKNDSNYV   | 39    | 2771  |
| >KIT-D816N- $\nu$ DIKNDSNYV  | 1669  | >KIT-D816N- $\eta$ NIKNDSNYV   | 494   | 1175  |
| >KIT-D816N- $\nu$ DIKNDSNY   | 198   | >KIT-D816N- $\eta$ NIKNDSNY    | 1215  | 1017  |
| >KIT-D816N- $\nu$ DIKNDSNY   | 243   | >KIT-D816N- $\eta$ NIKNDSNY    | 1569  | 1326  |
| >KIT-D816N- $\nu$ DIKNDSNYVV | 1554  | >KIT-D816N- $\eta$ NIKNDSNYVV  | 326   | 1228  |
| >KIT-D816N- $\nu$ DIKNDSNY   | 462   | >KIT-D816N- $\eta$ NIKNDSNY    | 317   | 145   |
| >KIT-D816N- $\nu$ DIKNDSNYVV | 291   | >KIT-D816N- $\eta$ NIKNDSNYVV  | 324   | 33    |
| >KIT-D816N- $\nu$ DIKNDSNYV  | 512   | >KIT-D816N- $\eta$ NIKNDSNYV   | 261   | 251   |
| >KIT-D816N- $\nu$ DIKNDSNY   | 694   | >KIT-D816N- $\eta$ NIKNDSNY    | 212   | 482   |
| >KIT-D816N- $\nu$ RDIKNDSNY  | 1664  | >KIT-D816N- $\eta$ RNIKNDSNY   | 461   | 1203  |
| >KIT-D816N- $\nu$ RDIKNDSNY  | 924   | >KIT-D816N- $\eta$ RNIKNDSNY   | 230   | 694   |
| >KIT-D816N- $\nu$ RDIKNDSNYV | 394   | >KIT-D816N- $\eta$ RNIKNDSNYV  | 14520 | 14126 |
| >KIT-D816N- $\nu$ RDIKNDSNYV | 299   | >KIT-D816N- $\eta$ RNIKNDSNYV  | 10752 | 10453 |
| >KIT-D816N- $\nu$ RDIKNDSNYV | 87    | >KIT-D816N- $\eta$ RNIKNDSNYV  | 4079  | 3992  |
| >KIT-D816N- $\nu$ ARDIKNDSNY | 420   | >KIT-D816N- $\eta$ ARNIKNDSNY  | 483   | 63    |
| >KIT-D816N- $\nu$ ARDIKNDSNY | 2527  | >KIT-D816N- $\eta$ ARNIKNDSNY  | 374   | 2153  |
| >KIT-D816N- $\nu$ ARDIKNDSNY | 200   | >KIT-D816N- $\eta$ ARNIKNDSNY  | 102   | 98    |
| >KIT-D816N- $\nu$ LARDIKNDSN | 241   | >KIT-D816N- $\eta$ LARNIKNDSN  | 179   | 62    |
| >KIT-D816N- $\nu$ LARDIKNDSN | 387   | >KIT-D816N- $\eta$ LARNIKNDSN  | 394   | 7     |
| >KIT-D816N- $\nu$ LARDIKNDSN | 317   | >KIT-D816N- $\eta$ LARNIKNDSN  | 126   | 191   |
| >KIT-D816N- $\nu$ LARDIKNDSN | 30    | >KIT-D816N- $\eta$ LARNIKNDSN  | 57    | 27    |
| >KIT-D816N- $\nu$ LARDIKNDSN | 176   | >KIT-D816N- $\eta$ LARNIKNDSN  | 241   | 65    |
| >KIT-D816N- $\nu$ LARDIKNDSN | 46    | >KIT-D816N- $\eta$ LARNIKNDSN  | 28    | 18    |
| >KIT-D816N- $\nu$ CDFGLARDI  | 84    | >KIT-D816N- $\eta$ CDFGLARNI   | 72    | 12    |
| >KIT-D816N- $\nu$ KICDFGLARD | 997   | >KIT-D816N- $\eta$ KICDFGLARN  | 306   | 691   |

|                          |       |                          |       |       |
|--------------------------|-------|--------------------------|-------|-------|
| >KIT-D816N- KICDFGLARD   | 109   | >KIT-D816N- KICDFGLARN   | 98    | 11    |
| >KIT-D816V-1 DIKNDNSNYV  | 7625  | >KIT-D816V-i VIKNDNSNYV  | 231   | 7394  |
| >KIT-D816V-1 DIKNDNSNYVV | 2092  | >KIT-D816V-i VIKNDNSNYVV | 488   | 1604  |
| >KIT-D816V-1 DIKNDNSNYV  | 2810  | >KIT-D816V-i VIKNDNSNYV  | 18    | 2792  |
| >KIT-D816V-1 DIKNDNSNYV  | 12805 | >KIT-D816V-i VIKNDNSNYV  | 302   | 12503 |
| >KIT-D816V-1 DIKNDNSNYV  | 6065  | >KIT-D816V-i VIKNDNSNYV  | 183   | 5882  |
| >KIT-D816V-1 DIKNDNSNYVV | 7988  | >KIT-D816V-i VIKNDNSNYVV | 409   | 7579  |
| >KIT-D816V-1 DIKNDNSNYV  | 5214  | >KIT-D816V-i VIKNDNSNYV  | 211   | 5003  |
| >KIT-D816V-1 DIKNDNSNYVV | 4961  | >KIT-D816V-i VIKNDNSNYVV | 269   | 4692  |
| >KIT-D816V-1 DIKNDNSNYV  | 1669  | >KIT-D816V-i VIKNDNSNYV  | 19    | 1650  |
| >KIT-D816V-1 DIKNDNSNYVV | 2247  | >KIT-D816V-i VIKNDNSNYVV | 28    | 2219  |
| >KIT-D816V-1 DIKNDNSNYVV | 9824  | >KIT-D816V-i VIKNDNSNYVV | 418   | 9406  |
| >KIT-D816V-1 DIKNDNSNYVV | 7322  | >KIT-D816V-i VIKNDNSNYVV | 309   | 7013  |
| >KIT-D816V-1 DIKNDNSNY   | 198   | >KIT-D816V-i VIKNDNSNY   | 11840 | 11642 |
| >KIT-D816V-1 DIKNDNSNY   | 243   | >KIT-D816V-i VIKNDNSNY   | 1968  | 1725  |
| >KIT-D816V-1 DIKNDNSNYVV | 1554  | >KIT-D816V-i VIKNDNSNYVV | 54    | 1500  |
| >KIT-D816V-1 DIKNDNSNY   | 462   | >KIT-D816V-i VIKNDNSNY   | 46    | 416   |
| >KIT-D816V-1 DIKNDNSNYVV | 291   | >KIT-D816V-i VIKNDNSNYVV | 2283  | 1992  |
| >KIT-D816V-1 DIKNDNSNY   | 5119  | >KIT-D816V-i VIKNDNSNY   | 225   | 4894  |
| >KIT-D816V-1 DIKNDNSNY   | 694   | >KIT-D816V-i VIKNDNSNY   | 329   | 365   |
| >KIT-D816V-1 RDIKNDNSNYV | 11656 | >KIT-D816V-i RVIKNDNSNYV | 401   | 11255 |
| >KIT-D816V-1 RDIKNDNSNYV | 9423  | >KIT-D816V-i RVIKNDNSNYV | 94    | 9329  |
| >KIT-D816V-1 RDIKNDNSNYV | 16622 | >KIT-D816V-i RVIKNDNSNYV | 469   | 16153 |
| >KIT-D816V-1 RDIKNDNSNYV | 9296  | >KIT-D816V-i RVIKNDNSNYV | 278   | 9018  |
| >KIT-D816V-1 RDIKNDNSNYV | 5754  | >KIT-D816V-i RVIKNDNSNYV | 138   | 5616  |
| >KIT-D816V-1 RDIKNDNSNYV | 11839 | >KIT-D816V-i RVIKNDNSNYV | 95    | 11744 |
| >KIT-D816V-1 RDIKNDNSNYV | 14377 | >KIT-D816V-i RVIKNDNSNYV | 218   | 14159 |
| >KIT-D816V-1 RDIKNDNSNYV | 11159 | >KIT-D816V-i RVIKNDNSNYV | 40    | 11119 |
| >KIT-D816V-1 RDIKNDNSNYV | 11037 | >KIT-D816V-i RVIKNDNSNYV | 65    | 10972 |
| >KIT-D816V-1 RDIKNDNSNYV | 16471 | >KIT-D816V-i RVIKNDNSNYV | 348   | 16123 |
| >KIT-D816V-1 RDIKNDNSNYV | 22867 | >KIT-D816V-i RVIKNDNSNYV | 107   | 22760 |
| >KIT-D816V-1 RDIKNDNSNYV | 24162 | >KIT-D816V-i RVIKNDNSNYV | 167   | 23995 |
| >KIT-D816V-1 RDIKNDNSNY  | 8062  | >KIT-D816V-i RVIKNDNSNY  | 13    | 8049  |
| >KIT-D816V-1 RDIKNDNSNY  | 4826  | >KIT-D816V-i RVIKNDNSNY  | 226   | 4600  |
| >KIT-D816V-1 RDIKNDNSNY  | 5328  | >KIT-D816V-i RVIKNDNSNY  | 204   | 5124  |
| >KIT-D816V-1 RDIKNDNSNYV | 13759 | >KIT-D816V-i RVIKNDNSNYV | 260   | 13499 |
| >KIT-D816V-1 RDIKNDNSNY  | 1664  | >KIT-D816V-i RVIKNDNSNY  | 66    | 1598  |
| >KIT-D816V-1 RDIKNDNSNYV | 15570 | >KIT-D816V-i RVIKNDNSNYV | 179   | 15391 |
| >KIT-D816V-1 RDIKNDNSNY  | 3277  | >KIT-D816V-i RVIKNDNSNY  | 45    | 3232  |
| >KIT-D816V-1 RDIKNDNSNY  | 3689  | >KIT-D816V-i RVIKNDNSNY  | 107   | 3582  |
| >KIT-D816V-1 RDIKNDNSNY  | 924   | >KIT-D816V-i RVIKNDNSNY  | 298   | 626   |
| >KIT-D816V-1 RDIKNDNSNY  | 2850  | >KIT-D816V-i RVIKNDNSNY  | 13    | 2837  |
| >KIT-D816V-1 RDIKNDNSNYV | 394   | >KIT-D816V-i RVIKNDNSNYV | 30536 | 30142 |

|                         |       |                         |       |       |
|-------------------------|-------|-------------------------|-------|-------|
| >KIT-D816V-1 RDIKNDSNY  | 1575  | >KIT-D816V-i RVIKNDSNY  | 148   | 1427  |
| >KIT-D816V-1 RDIKNDSNYV | 299   | >KIT-D816V-i RVIKNDSNYV | 26148 | 25849 |
| >KIT-D816V-1 RDIKNDSNYV | 87    | >KIT-D816V-i RVIKNDSNYV | 18402 | 18315 |
| >KIT-D816V-1 ARDIKNDSNY | 420   | >KIT-D816V-i ARVIKNDSNY | 352   | 68    |
| >KIT-D816V-1 ARDIKNDSNY | 2527  | >KIT-D816V-i ARVIKNDSNY | 311   | 2216  |
| >KIT-D816V-1 ARDIKNDSNY | 200   | >KIT-D816V-i ARVIKNDSNY | 59    | 141   |
| >KIT-D816V-1 LARDIKNDSN | 241   | >KIT-D816V-i LARVIKNDSN | 247   | 6     |
| >KIT-D816V-1 LARDIKNDSN | 387   | >KIT-D816V-i LARVIKNDSN | 693   | 306   |
| >KIT-D816V-1 LARDIKNDSN | 317   | >KIT-D816V-i LARVIKNDSN | 231   | 86    |
| >KIT-D816V-1 LARDIKNDSN | 30    | >KIT-D816V-i LARVIKNDSN | 37    | 7     |
| >KIT-D816V-1 LARDIKNDSN | 176   | >KIT-D816V-i LARVIKNDSN | 309   | 133   |
| >KIT-D816V-1 LARDIKNDSN | 46    | >KIT-D816V-i LARVIKNDSN | 72    | 26    |
| >KIT-D816V-1 CDFGLARDI  | 970   | >KIT-D816V-i CDFGLARVI  | 378   | 592   |
| >KIT-D816V-1 CDFGLARDI  | 2057  | >KIT-D816V-i CDFGLARVI  | 450   | 1607  |
| >KIT-D816V-1 CDFGLARDI  | 1651  | >KIT-D816V-i CDFGLARVI  | 329   | 1322  |
| >KIT-D816V-1 CDFGLARD   | 22993 | >KIT-D816V-i CDFGLARV   | 141   | 22852 |
| >KIT-D816V-1 CDFGLARDI  | 84    | >KIT-D816V-i CDFGLARVI  | 47    | 37    |
| >KIT-D816V-1 ICDFGLARD  | 29870 | >KIT-D816V-i ICDFGLARV  | 395   | 29475 |
| >KIT-D816V-1 KICDFGLARD | 21510 | >KIT-D816V-i KICDFGLARV | 100   | 21410 |
| >KIT-D816V-1 KICDFGLARD | 15591 | >KIT-D816V-i KICDFGLARV | 81    | 15510 |
| >KIT-D816V-1 KICDFGLARD | 13579 | >KIT-D816V-i KICDFGLARV | 26    | 13553 |
| >KIT-D816V-1 KICDFGLARD | 17356 | >KIT-D816V-i KICDFGLARV | 78    | 17278 |
| >KIT-D816V-1 KICDFGLARD | 16074 | >KIT-D816V-i KICDFGLARV | 6     | 16068 |
| >KIT-D816V-1 KICDFGLARD | 997   | >KIT-D816V-i KICDFGLARV | 282   | 715   |
| >KIT-D816V-1 KICDFGLARD | 25536 | >KIT-D816V-i KICDFGLARV | 179   | 25357 |
| >KIT-D816V-1 KICDFGLARD | 26345 | >KIT-D816V-i KICDFGLARV | 474   | 25871 |
| >KIT-D816V-1 KICDFGLARD | 25897 | >KIT-D816V-i KICDFGLARV | 5     | 25892 |
| >KIT-D816V-1 KICDFGLARD | 109   | >KIT-D816V-i KICDFGLARV | 76    | 33    |
| >KIT-D816Y-1 DIKNDSNYV  | 17179 | >KIT-D816Y-r YIKNDSNYV  | 260   | 16919 |
| >KIT-D816Y-1 DIKNDSNYVV | 8154  | >KIT-D816Y-r YIKNDSNYVV | 138   | 8016  |
| >KIT-D816Y-1 DIKNDSNYV  | 7625  | >KIT-D816Y-r YIKNDSNYV  | 15    | 7610  |
| >KIT-D816Y-1 DIKNDSNYVV | 2092  | >KIT-D816Y-r YIKNDSNYVV | 41    | 2051  |
| >KIT-D816Y-1 DIKNDSNYV  | 2810  | >KIT-D816Y-r YIKNDSNYV  | 5     | 2805  |
| >KIT-D816Y-1 DIKNDSNYVV | 2580  | >KIT-D816Y-r YIKNDSNYVV | 74    | 2506  |
| >KIT-D816Y-1 DIKNDSNYV  | 12805 | >KIT-D816Y-r YIKNDSNYV  | 32    | 12773 |
| >KIT-D816Y-1 DIKNDSNYVV | 6294  | >KIT-D816Y-r YIKNDSNYVV | 95    | 6199  |
| >KIT-D816Y-1 DIKNDSNYV  | 6065  | >KIT-D816Y-r YIKNDSNYV  | 21    | 6044  |
| >KIT-D816Y-1 DIKNDSNYVV | 7988  | >KIT-D816Y-r YIKNDSNYVV | 44    | 7944  |
| >KIT-D816Y-1 DIKNDSNYV  | 5214  | >KIT-D816Y-r YIKNDSNYV  | 12    | 5202  |
| >KIT-D816Y-1 DIKNDSNYVV | 4961  | >KIT-D816Y-r YIKNDSNYVV | 19    | 4942  |
| >KIT-D816Y-1 DIKNDSNYV  | 9068  | >KIT-D816Y-r YIKNDSNYV  | 76    | 8992  |
| >KIT-D816Y-1 DIKNDSNYVV | 12893 | >KIT-D816Y-r YIKNDSNYVV | 248   | 12645 |
| >KIT-D816Y-1 DIKNDSNYV  | 6580  | >KIT-D816Y-r YIKNDSNYV  | 71    | 6509  |



|                          |       |                           |       |       |
|--------------------------|-------|---------------------------|-------|-------|
| >KIT-D816Y-\ DIKNDNSNYVV | 8376  | >KIT-D816Y-r YIKNDNSNYVV  | 145   | 8231  |
| >KIT-D816Y-\ DIKNDNSNYV  | 1669  | >KIT-D816Y-r YIKNDNSNYV   | 4     | 1665  |
| >KIT-D816Y-\ DIKNDNSNYVV | 2247  | >KIT-D816Y-r YIKNDNSNYVV  | 5     | 2242  |
| >KIT-D816Y-\ DIKNDNSNY   | 198   | >KIT-D816Y-r YIKNDNSNY    | 315   | 117   |
| >KIT-D816Y-\ DIKNDNSNY   | 243   | >KIT-D816Y-r YIKNDNSNY    | 225   | 18    |
| >KIT-D816Y-\ DIKNDNSNY   | 3414  | >KIT-D816Y-r YIKNDNSNY    | 163   | 3251  |
| >KIT-D816Y-\ DIKNDNSNYVV | 1554  | >KIT-D816Y-r YIKNDNSNYVV  | 57    | 1497  |
| >KIT-D816Y-\ DIKNDNSNY   | 462   | >KIT-D816Y-r YIKNDNSNY    | 167   | 295   |
| >KIT-D816Y-\ DIKNDNSNYVV | 291   | >KIT-D816Y-r YIKNDNSNYVV  | 204   | 87    |
| >KIT-D816Y-\ DIKNDNSNYV  | 512   | >KIT-D816Y-r YIKNDNSNYV   | 332   | 180   |
| >KIT-D816Y-\ DIKNDNSNYVV | 1341  | >KIT-D816Y-r YIKNDNSNYVV  | 344   | 997   |
| >KIT-D816Y-\ DIKNDNSNYV  | 677   | >KIT-D816Y-r YIKNDNSNYV   | 394   | 283   |
| >KIT-D816Y-\ DIKNDNSNY   | 5119  | >KIT-D816Y-r YIKNDNSNY    | 75    | 5044  |
| >KIT-D816Y-\ DIKNDNSNY   | 694   | >KIT-D816Y-r YIKNDNSNY    | 60    | 634   |
| >KIT-D816Y-\ DIKNDNSNY   | 6201  | >KIT-D816Y-r YIKNDNSNY    | 183   | 6018  |
| >KIT-D816Y-\ RDIKNDNSNYV | 28947 | >KIT-D816Y-r RYIKNDNSNYV  | 124   | 28823 |
| >KIT-D816Y-\ RDIKNDNSNYV | 28953 | >KIT-D816Y-r RYIKNDNSNYV  | 245   | 28708 |
| >KIT-D816Y-\ RDIKNDNSNY  | 28337 | >KIT-D816Y-r RYIKNDNSNY   | 405   | 27932 |
| >KIT-D816Y-\ RDIKNDNSNYV | 19755 | >KIT-D816Y-r RYIKNDNSNYV  | 91    | 19664 |
| >KIT-D816Y-\ RDIKNDNSNYV | 25486 | >KIT-D816Y-r RYIKNDNSNYV  | 345   | 25141 |
| >KIT-D816Y-\ RDIKNDNSNY  | 24153 | >KIT-D816Y-r RYIKNDNSNY   | 106   | 24047 |
| >KIT-D816Y-\ RDIKNDNSNYV | 22268 | >KIT-D816Y-r RYIKNDNSNYV  | 21    | 22247 |
| >KIT-D816Y-\ RDIKNDNSNYV | 23570 | >KIT-D816Y-r RYIKNDNSNYV  | 37    | 23533 |
| >KIT-D816Y-\ RDIKNDNSNY  | 8062  | >KIT-D816Y-r RYIKNDNSNY   | 404   | 7658  |
| >KIT-D816Y-\ RDIKNDNSNY  | 5328  | >KIT-D816Y-r RYIKNDNSNY   | 174   | 5154  |
| >KIT-D816Y-\ RDIKNDNSNYV | 13759 | >KIT-D816Y-r RYIKNDNSNYV  | 344   | 13415 |
| >KIT-D816Y-\ RDIKNDNSNY  | 1664  | >KIT-D816Y-r RYIKNDNSNY   | 81    | 1583  |
| >KIT-D816Y-\ RDIKNDNSNY  | 3277  | >KIT-D816Y-r RYIKNDNSNY   | 95    | 3182  |
| >KIT-D816Y-\ RDIKNDNSNY  | 924   | >KIT-D816Y-r RYIKNDNSNY   | 456   | 468   |
| >KIT-D816Y-\ RDIKNDNSNYV | 394   | >KIT-D816Y-r RYIKNDNSNYV  | 25824 | 25430 |
| >KIT-D816Y-\ RDIKNDNSNY  | 5824  | >KIT-D816Y-r RYIKNDNSNY   | 371   | 5453  |
| >KIT-D816Y-\ RDIKNDNSNYV | 17403 | >KIT-D816Y-r RYIKNDNSNYV  | 54    | 17349 |
| >KIT-D816Y-\ RDIKNDNSNYV | 299   | >KIT-D816Y-r RYIKNDNSNYV  | 25615 | 25316 |
| >KIT-D816Y-\ RDIKNDNSNYV | 87    | >KIT-D816Y-r RYIKNDNSNYV  | 18949 | 18862 |
| >KIT-D816Y-\ TKICDFGLARI | 30785 | >KIT-D816Y-r TKICDFGLAR\  | 77    | 30708 |
| >KIT-D816Y-\ TKICDFGLARI | 26344 | >KIT-D816Y-r TKICDFGLAR\  | 400   | 25944 |
| >KIT-D816Y-\ TKICDFGLARI | 22813 | >KIT-D816Y-r TKICDFGLAR\  | 177   | 22636 |
| >KIT-D816Y-\ ARDIKNDNSNY | 420   | >KIT-D816Y-r ARYIKNDNSNY  | 96    | 324   |
| >KIT-D816Y-\ ARDIKNDNSNY | 2527  | >KIT-D816Y-r ARYIKNDNSNY  | 78    | 2449  |
| >KIT-D816Y-\ ARDIKNDNSNY | 200   | >KIT-D816Y-r ARYIKNDNSNY  | 35    | 165   |
| >KIT-D816Y-\ LARDIKNDNSN | 241   | >KIT-D816Y-r LARYIKNDNSN` | 130   | 111   |
| >KIT-D816Y-\ LARDIKNDNSN | 387   | >KIT-D816Y-r LARYIKNDNSN` | 366   | 21    |
| >KIT-D816Y-\ LARDIKNDNSN | 317   | >KIT-D816Y-r LARYIKNDNSN` | 106   | 211   |

|                         |       |                          |      |       |
|-------------------------|-------|--------------------------|------|-------|
| >KIT-D816Y-\ LARDIKNDSN | 30    | >KIT-D816Y-r LARYIKNDSN  | 57   | 27    |
| >KIT-D816Y-\ LARDIKNDSN | 176   | >KIT-D816Y-r LARYIKNDSN  | 223  | 47    |
| >KIT-D816Y-\ LARDIKNDSN | 46    | >KIT-D816Y-r LARYIKNDSN  | 36   | 10    |
| >KIT-D816Y-\ DFGLARDIK  | 2833  | >KIT-D816Y-r DFGLARYIK   | 189  | 2644  |
| >KIT-D816Y-\ CDFGLARDI  | 970   | >KIT-D816Y-r CDFGLARYI   | 180  | 790   |
| >KIT-D816Y-\ CDFGLARD   | 38205 | >KIT-D816Y-r CDFGLARY    | 415  | 37790 |
| >KIT-D816Y-\ CDFGLARDI  | 84    | >KIT-D816Y-r CDFGLARYI   | 71   | 13    |
| >KIT-D816Y-\ ICDFGLARD  | 23535 | >KIT-D816Y-r ICDFGLARY   | 433  | 23102 |
| >KIT-D816Y-\ ICDFGLARD  | 29492 | >KIT-D816Y-r ICDFGLARY   | 328  | 29164 |
| >KIT-D816Y-\ ICDFGLARD  | 22037 | >KIT-D816Y-r ICDFGLARY   | 123  | 21914 |
| >KIT-D816Y-\ KICDFGLARD | 1817  | >KIT-D816Y-r KICDFGLARYI | 185  | 1632  |
| >KIT-D816Y-\ KICDFGLARD | 997   | >KIT-D816Y-r KICDFGLARYI | 40   | 957   |
| >KIT-D816Y-\ KICDFGLARD | 14395 | >KIT-D816Y-r KICDFGLARY  | 102  | 14293 |
| >KIT-D816Y-\ KICDFGLARD | 33996 | >KIT-D816Y-r KICDFGLARY  | 326  | 33670 |
| >KIT-D816Y-\ KICDFGLARD | 3284  | >KIT-D816Y-r KICDFGLARYI | 419  | 2865  |
| >KIT-D816Y-\ KICDFGLARD | 32006 | >KIT-D816Y-r KICDFGLARY  | 374  | 31632 |
| >KIT-D816Y-\ KICDFGLARD | 109   | >KIT-D816Y-r KICDFGLARYI | 267  | 158   |
| >KIT-D816Y-\ KICDFGLARD | 24872 | >KIT-D816Y-r KICDFGLARY  | 38   | 24834 |
| >KIT-D816Y-\ KICDFGLARD | 19581 | >KIT-D816Y-r KICDFGLARY  | 183  | 19398 |
| >KIT-D816Y-\ KICDFGLARD | 19830 | >KIT-D816Y-r KICDFGLARY  | 75   | 19755 |
| >KIT-D820A-\ DSNYVVKGN, | 965   | >KIT-D820A-i ASNYVVKGN,  | 38   | 927   |
| >KIT-D820A-\ DSNYVVKGN, | 76    | >KIT-D820A-i ASNYVVKGN,  | 4782 | 4706  |
| >KIT-D820A-\ DSNYVVKGN, | 27    | >KIT-D820A-i ASNYVVKGN,  | 324  | 297   |
| >KIT-D820A-\ NDSNYVVK   | 14884 | >KIT-D820A-i NASNYVVK    | 369  | 14515 |
| >KIT-D820A-\ NDSNYVVK   | 2931  | >KIT-D820A-i NASNYVVK    | 49   | 2882  |
| >KIT-D820A-\ KNDSNYVVK  | 5007  | >KIT-D820A-i KNASNYVVK   | 428  | 4579  |
| >KIT-D820A-\ IKNDSNYV   | 63    | >KIT-D820A-i IKNASNYV    | 35   | 28    |
| >KIT-D820A-\ IKNDSNYVV  | 26    | >KIT-D820A-i IKNASNYVV   | 15   | 11    |
| >KIT-D820A-\ IKNDSNYVVK | 83    | >KIT-D820A-i IKNASNYVVK  | 45   | 38    |
| >KIT-D820A-\ DIKNDSNY   | 198   | >KIT-D820A-i DIKNASNY    | 135  | 63    |
| >KIT-D820A-\ DIKNDSNY   | 243   | >KIT-D820A-i DIKNASNY    | 382  | 139   |
| >KIT-D820A-\ DIKNDSNYVV | 1554  | >KIT-D820A-i DIKNASNYVV  | 324  | 1230  |
| >KIT-D820A-\ DIKNDSNY   | 462   | >KIT-D820A-i DIKNASNY    | 584  | 122   |
| >KIT-D820A-\ DIKNDSNYVV | 291   | >KIT-D820A-i DIKNASNYVV  | 159  | 132   |
| >KIT-D820A-\ DIKNDSNYV  | 512   | >KIT-D820A-i DIKNASNYV   | 129  | 383   |
| >KIT-D820A-\ DIKNDSNYV  | 677   | >KIT-D820A-i DIKNASNYV   | 254  | 423   |
| >KIT-D820A-\ RDIKNDSNY  | 924   | >KIT-D820A-i RDIKNASNY   | 408  | 516   |
| >KIT-D820A-\ RDIKNDSNYV | 394   | >KIT-D820A-i RDIKNASNYV  | 405  | 11    |
| >KIT-D820A-\ RDIKNDSNY  | 1575  | >KIT-D820A-i RDIKNASNY   | 317  | 1258  |
| >KIT-D820A-\ RDIKNDSNYV | 709   | >KIT-D820A-i RDIKNASNYV  | 462  | 247   |
| >KIT-D820A-\ RDIKNDSNYV | 299   | >KIT-D820A-i RDIKNASNYV  | 143  | 156   |
| >KIT-D820A-\ RDIKNDSNYV | 87    | >KIT-D820A-i RDIKNASNYV  | 48   | 39    |
| >KIT-D820A-\ ARDIKNDSNY | 420   | >KIT-D820A-i ARDIKNASNY  | 644  | 224   |

|                         |       |                         |      |       |
|-------------------------|-------|-------------------------|------|-------|
| >KIT-D820A-1 ARDIKNSNY  | 200   | >KIT-D820A-1 ARDIKNASNY | 225  | 25    |
| >KIT-D820A-1 LARDIKND   | 7251  | >KIT-D820A-1 LARDIKNA   | 380  | 6871  |
| >KIT-D820A-1 LARDIKNSN  | 241   | >KIT-D820A-1 LARDIKNASN | 251  | 10    |
| >KIT-D820A-1 LARDIKNSN  | 387   | >KIT-D820A-1 LARDIKNASN | 294  | 93    |
| >KIT-D820A-1 LARDIKNSN  | 317   | >KIT-D820A-1 LARDIKNASN | 120  | 197   |
| >KIT-D820A-1 LARDIKNSN  | 30    | >KIT-D820A-1 LARDIKNASN | 20   | 10    |
| >KIT-D820A-1 LARDIKNSN  | 176   | >KIT-D820A-1 LARDIKNASN | 173  | 3     |
| >KIT-D820A-1 LARDIKNSN  | 46    | >KIT-D820A-1 LARDIKNASN | 21   | 25    |
| >KIT-D820A-1 GLARDIKND  | 13115 | >KIT-D820A-1 GLARDIKNA  | 262  | 12853 |
| >KIT-D820A-1 GLARDIKND  | 17998 | >KIT-D820A-1 GLARDIKNA  | 33   | 17965 |
| >KIT-D820A-1 GLARDIKND  | 20182 | >KIT-D820A-1 GLARDIKNA  | 489  | 19693 |
| >KIT-D820A-1 GLARDIKND  | 21096 | >KIT-D820A-1 GLARDIKNA  | 373  | 20723 |
| >KIT-D820A-1 GLARDIKND  | 17823 | >KIT-D820A-1 GLARDIKNA  | 37   | 17786 |
| >KIT-D820E-1 DSNYVVKGN, | 76    | >KIT-D820E-r ESNYVVKGN, | 221  | 145   |
| >KIT-D820E-1 DSNYVVKGN, | 27    | >KIT-D820E-r ESNYVVKGN, | 9    | 18    |
| >KIT-D820E-1 NDSNYVVKG  | 15821 | >KIT-D820E-r NESNYVVKG  | 96   | 15725 |
| >KIT-D820E-1 IKNSNYV    | 63    | >KIT-D820E-r IKNESNYV   | 50   | 13    |
| >KIT-D820E-1 IKNSNYVV   | 26    | >KIT-D820E-r IKNESNYVV  | 20   | 6     |
| >KIT-D820E-1 IKNSNYVVK  | 83    | >KIT-D820E-r IKNESNYVVK | 63   | 20    |
| >KIT-D820E-1 DIKNSNY    | 198   | >KIT-D820E-r DIKNESNY   | 216  | 18    |
| >KIT-D820E-1 DIKNSNY    | 243   | >KIT-D820E-r DIKNESNY   | 388  | 145   |
| >KIT-D820E-1 DIKNSNY    | 462   | >KIT-D820E-r DIKNESNY   | 672  | 210   |
| >KIT-D820E-1 DIKNSNYVV  | 291   | >KIT-D820E-r DIKNESNYVV | 294  | 3     |
| >KIT-D820E-1 RDIKNSNYV  | 394   | >KIT-D820E-r RDIKNESNYV | 439  | 45    |
| >KIT-D820E-1 RDIKNSNYV  | 299   | >KIT-D820E-r RDIKNESNYV | 234  | 65    |
| >KIT-D820E-1 RDIKNSNYV  | 87    | >KIT-D820E-r RDIKNESNYV | 79   | 8     |
| >KIT-D820E-1 ARDIKNSNY  | 420   | >KIT-D820E-r ARDIKNESNY | 1001 | 581   |
| >KIT-D820E-1 ARDIKNSNY  | 200   | >KIT-D820E-r ARDIKNESNY | 231  | 31    |
| >KIT-D820E-1 LARDIKNSN  | 241   | >KIT-D820E-r LARDIKNESN | 258  | 17    |
| >KIT-D820E-1 LARDIKNSN  | 387   | >KIT-D820E-r LARDIKNESN | 591  | 204   |
| >KIT-D820E-1 LARDIKNSN  | 317   | >KIT-D820E-r LARDIKNESN | 198  | 119   |
| >KIT-D820E-1 LARDIKNSN  | 30    | >KIT-D820E-r LARDIKNESN | 27   | 3     |
| >KIT-D820E-1 LARDIKNSN  | 176   | >KIT-D820E-r LARDIKNESN | 223  | 47    |
| >KIT-D820E-1 LARDIKNSN  | 46    | >KIT-D820E-r LARDIKNESN | 34   | 12    |
| >KIT-D820G-1 DSNYVVKGN, | 965   | >KIT-D820G-1 GSNYVVKGN, | 53   | 912   |
| >KIT-D820G-1 DSNYVVKGN, | 76    | >KIT-D820G-1 GSNYVVKGN, | 5010 | 4934  |
| >KIT-D820G-1 DSNYVVKGN, | 27    | >KIT-D820G-1 GSNYVVKGN, | 503  | 476   |
| >KIT-D820G-1 IKNSNYV    | 63    | >KIT-D820G-1 IKNGSNYV   | 120  | 57    |
| >KIT-D820G-1 IKNSNYVV   | 26    | >KIT-D820G-1 IKNGSNYVV  | 58   | 32    |
| >KIT-D820G-1 IKNSNYVVK  | 83    | >KIT-D820G-1 IKNGSNYVVK | 162  | 79    |
| >KIT-D820G-1 DIKNSNY    | 198   | >KIT-D820G-1 DIKNGSNY   | 114  | 84    |
| >KIT-D820G-1 DIKNSNY    | 243   | >KIT-D820G-1 DIKNGSNY   | 446  | 203   |
| >KIT-D820G-1 DIKNSNY    | 462   | >KIT-D820G-1 DIKNGSNY   | 415  | 47    |

|                                      |      |                                     |      |      |
|--------------------------------------|------|-------------------------------------|------|------|
| >KIT-D820G- <sup>-</sup> DIKNDNSNYVV | 291  | >KIT-D820G- <sub>-</sub> DIKNGSNYVV | 254  | 37   |
| >KIT-D820G- <sup>-</sup> DIKNDNSNYV  | 512  | >KIT-D820G- <sub>-</sub> DIKNGSNYV  | 319  | 193  |
| >KIT-D820G- <sup>-</sup> DIKNDNSNY   | 677  | >KIT-D820G- <sub>-</sub> DIKNGSNY   | 394  | 283  |
| >KIT-D820G- <sup>-</sup> DIKNDNSNY   | 694  | >KIT-D820G- <sub>-</sub> DIKNGSNY   | 222  | 472  |
| >KIT-D820G- <sup>-</sup> RDIKNDNSNY  | 924  | >KIT-D820G- <sub>-</sub> RDIKNGSNY  | 223  | 701  |
| >KIT-D820G- <sup>-</sup> RDIKNDNSNYV | 394  | >KIT-D820G- <sub>-</sub> RDIKNGSNYV | 337  | 57   |
| >KIT-D820G- <sup>-</sup> RDIKNDNSNY  | 1575 | >KIT-D820G- <sub>-</sub> RDIKNGSNY  | 298  | 1277 |
| >KIT-D820G- <sup>-</sup> RDIKNDNSNYV | 299  | >KIT-D820G- <sub>-</sub> RDIKNGSNYV | 550  | 251  |
| >KIT-D820G- <sup>-</sup> RDIKNDNSNY  | 87   | >KIT-D820G- <sub>-</sub> RDIKNGSNYV | 118  | 31   |
| >KIT-D820G- <sup>-</sup> ARDIKNDNSNY | 420  | >KIT-D820G- <sub>-</sub> ARDIKNGSNY | 658  | 238  |
| >KIT-D820G- <sup>-</sup> ARDIKNDNSNY | 200  | >KIT-D820G- <sub>-</sub> ARDIKNGSNY | 181  | 19   |
| >KIT-D820G- <sup>-</sup> LARDIKNDNSN | 241  | >KIT-D820G- <sub>-</sub> LARDIKNGSN | 275  | 34   |
| >KIT-D820G- <sup>-</sup> LARDIKNDNSN | 387  | >KIT-D820G- <sub>-</sub> LARDIKNGSN | 256  | 131  |
| >KIT-D820G- <sup>-</sup> LARDIKNDNSN | 317  | >KIT-D820G- <sub>-</sub> LARDIKNGSN | 133  | 184  |
| >KIT-D820G- <sup>-</sup> LARDIKNDNSN | 30   | >KIT-D820G- <sub>-</sub> LARDIKNGSN | 18   | 12   |
| >KIT-D820G- <sup>-</sup> LARDIKNDNSN | 176  | >KIT-D820G- <sub>-</sub> LARDIKNGSN | 331  | 155  |
| >KIT-D820G- <sup>-</sup> LARDIKNDNSN | 46   | >KIT-D820G- <sub>-</sub> LARDIKNGSN | 23   | 23   |
| >KIT-D820H- <sup>-</sup> DSNYVVKGN,  | 965  | >KIT-D820H- <sub>-</sub> HSNYVVKGN, | 23   | 942  |
| >KIT-D820H- <sup>-</sup> DSNYVVKGN,  | 76   | >KIT-D820H- <sub>-</sub> HSNYVVKGN, | 185  | 109  |
| >KIT-D820H- <sup>-</sup> DSNYVVKGN,  | 27   | >KIT-D820H- <sub>-</sub> HSNYVVKGN, | 32   | 5    |
| >KIT-D820H- <sup>-</sup> KNDSNYVVK   | 5007 | >KIT-D820H- <sub>-</sub> KNHSNYVVK  | 10   | 4997 |
| >KIT-D820H- <sup>-</sup> IKNDNSNYV   | 63   | >KIT-D820H- <sub>-</sub> IKNHSNYV   | 22   | 41   |
| >KIT-D820H- <sup>-</sup> IKNDNSNYVV  | 26   | >KIT-D820H- <sub>-</sub> IKNHSNYVV  | 12   | 14   |
| >KIT-D820H- <sup>-</sup> IKNDNSNYVVK | 83   | >KIT-D820H- <sub>-</sub> IKNHSNYVVK | 30   | 53   |
| >KIT-D820H- <sup>-</sup> DIKNDNSNY   | 198  | >KIT-D820H- <sub>-</sub> DIKNHSNY   | 93   | 105  |
| >KIT-D820H- <sup>-</sup> DIKNDNSNY   | 243  | >KIT-D820H- <sub>-</sub> DIKNHSNY   | 111  | 132  |
| >KIT-D820H- <sup>-</sup> DIKNDNSNY   | 462  | >KIT-D820H- <sub>-</sub> DIKNHSNY   | 1010 | 548  |
| >KIT-D820H- <sup>-</sup> DIKNDNSNYVV | 291  | >KIT-D820H- <sub>-</sub> DIKNHSNYVV | 252  | 39   |
| >KIT-D820H- <sup>-</sup> DIKNDNSNYV  | 512  | >KIT-D820H- <sub>-</sub> DIKNHSNYV  | 467  | 45   |
| >KIT-D820H- <sup>-</sup> DIKNDNSNYV  | 677  | >KIT-D820H- <sub>-</sub> DIKNHSNYV  | 343  | 334  |
| >KIT-D820H- <sup>-</sup> RDIKNDNSNY  | 924  | >KIT-D820H- <sub>-</sub> RDIKNHSNY  | 224  | 700  |
| >KIT-D820H- <sup>-</sup> RDIKNDNSNYV | 394  | >KIT-D820H- <sub>-</sub> RDIKNHSNYV | 243  | 151  |
| >KIT-D820H- <sup>-</sup> RDIKNDNSNY  | 1575 | >KIT-D820H- <sub>-</sub> RDIKNHSNY  | 337  | 1238 |
| >KIT-D820H- <sup>-</sup> RDIKNDNSNYV | 299  | >KIT-D820H- <sub>-</sub> RDIKNHSNYV | 453  | 154  |
| >KIT-D820H- <sup>-</sup> RDIKNDNSNY  | 87   | >KIT-D820H- <sub>-</sub> RDIKNHSNYV | 134  | 47   |
| >KIT-D820H- <sup>-</sup> ARDIKNDNSNY | 420  | >KIT-D820H- <sub>-</sub> ARDIKNHSNY | 581  | 161  |
| >KIT-D820H- <sup>-</sup> ARDIKNDNSNY | 200  | >KIT-D820H- <sub>-</sub> ARDIKNHSNY | 146  | 54   |
| >KIT-D820H- <sup>-</sup> LARDIKNDNSN | 1945 | >KIT-D820H- <sub>-</sub> LARDIKNHSN | 320  | 1625 |
| >KIT-D820H- <sup>-</sup> LARDIKNDNSN | 241  | >KIT-D820H- <sub>-</sub> LARDIKNHSN | 269  | 28   |
| >KIT-D820H- <sup>-</sup> LARDIKNDNSN | 387  | >KIT-D820H- <sub>-</sub> LARDIKNHSN | 222  | 165  |
| >KIT-D820H- <sup>-</sup> LARDIKNDNSN | 317  | >KIT-D820H- <sub>-</sub> LARDIKNHSN | 118  | 199  |
| >KIT-D820H- <sup>-</sup> LARDIKNDNSN | 30   | >KIT-D820H- <sub>-</sub> LARDIKNHSN | 21   | 9    |
| >KIT-D820H- <sup>-</sup> LARDIKNDNSN | 176  | >KIT-D820H- <sub>-</sub> LARDIKNHSN | 418  | 242  |

|                         |       |                         |      |       |
|-------------------------|-------|-------------------------|------|-------|
| >KIT-D820H-1 LARDIKNDSN | 46    | >KIT-D820H-1 LARDIKNHSN | 22   | 24    |
| >KIT-D820N-1 DSNYVVKGN, | 965   | >KIT-D820N-1 NSNYVVKGN, | 163  | 802   |
| >KIT-D820N-1 DSNYVVKGN, | 76    | >KIT-D820N-1 NSNYVVKGN, | 326  | 250   |
| >KIT-D820N-1 DSNYVVKGN, | 27    | >KIT-D820N-1 NSNYVVKGN, | 37   | 10    |
| >KIT-D820N-1 KNDSNYVVK  | 5007  | >KIT-D820N-1 KNNSNYVVK  | 85   | 4922  |
| >KIT-D820N-1 KNDSNYVVK  | 5817  | >KIT-D820N-1 KNNSNYVVK  | 405  | 5412  |
| >KIT-D820N-1 IKNDSNYV   | 63    | >KIT-D820N-1 IKNNSNYV   | 28   | 35    |
| >KIT-D820N-1 IKNDSNYVV  | 26    | >KIT-D820N-1 IKNNSNYVV  | 12   | 14    |
| >KIT-D820N-1 IKNDSNYVVK | 83    | >KIT-D820N-1 IKNNSNYVVK | 35   | 48    |
| >KIT-D820N-1 DIKNDSNY   | 198   | >KIT-D820N-1 DIKNNSNY   | 98   | 100   |
| >KIT-D820N-1 DIKNDSNY   | 243   | >KIT-D820N-1 DIKNNSNY   | 331  | 88    |
| >KIT-D820N-1 DIKNDSNY   | 462   | >KIT-D820N-1 DIKNNSNY   | 418  | 44    |
| >KIT-D820N-1 DIKNDSNYVV | 291   | >KIT-D820N-1 DIKNNSNYVV | 182  | 109   |
| >KIT-D820N-1 DIKNDSNYV  | 512   | >KIT-D820N-1 DIKNNSNYV  | 233  | 279   |
| >KIT-D820N-1 DIKNDSNYV  | 677   | >KIT-D820N-1 DIKNNSNYV  | 418  | 259   |
| >KIT-D820N-1 DIKNDSNY   | 694   | >KIT-D820N-1 DIKNNSNY   | 430  | 264   |
| >KIT-D820N-1 RDIKNDSNY  | 924   | >KIT-D820N-1 RDIKNNSNY  | 319  | 605   |
| >KIT-D820N-1 RDIKNDSNYV | 394   | >KIT-D820N-1 RDIKNNSNYV | 282  | 112   |
| >KIT-D820N-1 RDIKNDSNY  | 1575  | >KIT-D820N-1 RDIKNNSNY  | 483  | 1092  |
| >KIT-D820N-1 RDIKNDSNYV | 299   | >KIT-D820N-1 RDIKNNSNYV | 289  | 10    |
| >KIT-D820N-1 RDIKNDSNYV | 87    | >KIT-D820N-1 RDIKNNSNYV | 97   | 10    |
| >KIT-D820N-1 ARDIKNDSNY | 420   | >KIT-D820N-1 ARDIKNNSNY | 446  | 26    |
| >KIT-D820N-1 ARDIKNDSNY | 200   | >KIT-D820N-1 ARDIKNNSNY | 282  | 82    |
| >KIT-D820N-1 LARDIKNDSN | 241   | >KIT-D820N-1 LARDIKNNSN | 210  | 31    |
| >KIT-D820N-1 LARDIKNDSN | 387   | >KIT-D820N-1 LARDIKNNSN | 344  | 43    |
| >KIT-D820N-1 LARDIKNDSN | 317   | >KIT-D820N-1 LARDIKNNSN | 135  | 182   |
| >KIT-D820N-1 LARDIKNDSN | 30    | >KIT-D820N-1 LARDIKNNSN | 22   | 8     |
| >KIT-D820N-1 LARDIKNDSN | 176   | >KIT-D820N-1 LARDIKNNSN | 303  | 127   |
| >KIT-D820N-1 LARDIKNDSN | 46    | >KIT-D820N-1 LARDIKNNSN | 24   | 22    |
| >KIT-D820V-1 DSNYVVKGN, | 965   | >KIT-D820V-1 VSNYVVKGN, | 44   | 921   |
| >KIT-D820V-1 DSNYVVKGN, | 76    | >KIT-D820V-1 VSNYVVKGN, | 1468 | 1392  |
| >KIT-D820V-1 DSNYVVKGN, | 27    | >KIT-D820V-1 VSNYVVKGN, | 287  | 260   |
| >KIT-D820V-1 NDSNYVVK   | 14884 | >KIT-D820V-1 NVSNYVVK   | 63   | 14821 |
| >KIT-D820V-1 NDSNYVVK   | 2931  | >KIT-D820V-1 NVSNYVVK   | 38   | 2893  |
| >KIT-D820V-1 NDSNYVVKG  | 15528 | >KIT-D820V-1 NVSNYVVKGI | 123  | 15405 |
| >KIT-D820V-1 KNDSNYVVK  | 5007  | >KIT-D820V-1 KNVSNYVVK  | 406  | 4601  |
| >KIT-D820V-1 IKNDSNYV   | 63    | >KIT-D820V-1 IKNVSNYV   | 52   | 11    |
| >KIT-D820V-1 IKNDSNYVV  | 26    | >KIT-D820V-1 IKNVSNYVV  | 19   | 7     |
| >KIT-D820V-1 IKNDSNYVVK | 83    | >KIT-D820V-1 IKNVSNYVVK | 65   | 18    |
| >KIT-D820V-1 DIKNDSNY   | 198   | >KIT-D820V-1 DIKNVSNY   | 67   | 131   |
| >KIT-D820V-1 DIKNDSNY   | 243   | >KIT-D820V-1 DIKNVSNY   | 260  | 17    |
| >KIT-D820V-1 DIKNDSNY   | 462   | >KIT-D820V-1 DIKNVSNY   | 605  | 143   |
| >KIT-D820V-1 DIKNDSNYVV | 1700  | >KIT-D820V-1 DIKNVSNYVV | 406  | 1294  |

|                          |       |                         |     |       |
|--------------------------|-------|-------------------------|-----|-------|
| >KIT-D820V-1 DIKNDNSNYVV | 291   | >KIT-D820V-i DIKNVSNYVV | 81  | 210   |
| >KIT-D820V-1 DIKNDNSNYV  | 512   | >KIT-D820V-i DIKNVSNYV  | 63  | 449   |
| >KIT-D820V-1 DIKNDNSNY   | 677   | >KIT-D820V-i DIKNVSNY   | 369 | 308   |
| >KIT-D820V-1 RDIKNDNSNY  | 924   | >KIT-D820V-i RDIKNVSNY  | 217 | 707   |
| >KIT-D820V-1 RDIKNDNSNYV | 394   | >KIT-D820V-i RDIKNVSNYV | 251 | 143   |
| >KIT-D820V-1 RDIKNDNSNYV | 709   | >KIT-D820V-i RDIKNVSNYV | 203 | 506   |
| >KIT-D820V-1 RDIKNDNSNYV | 299   | >KIT-D820V-i RDIKNVSNYV | 265 | 34    |
| >KIT-D820V-1 RDIKNDNSNYV | 87    | >KIT-D820V-i RDIKNVSNYV | 68  | 19    |
| >KIT-D820V-1 ARDIKNDNSNY | 420   | >KIT-D820V-i ARDIKNVSNY | 718 | 298   |
| >KIT-D820V-1 ARDIKNDNSNY | 200   | >KIT-D820V-i ARDIKNVSNY | 202 | 2     |
| >KIT-D820V-1 LARDIKND    | 35937 | >KIT-D820V-i LARDIKNV   | 139 | 35798 |
| >KIT-D820V-1 LARDIKNDNSN | 241   | >KIT-D820V-i LARDIKNVSN | 288 | 47    |
| >KIT-D820V-1 LARDIKNDNSN | 387   | >KIT-D820V-i LARDIKNVSN | 201 | 186   |
| >KIT-D820V-1 LARDIKNDNSN | 317   | >KIT-D820V-i LARDIKNVSN | 104 | 213   |
| >KIT-D820V-1 LARDIKNDNSN | 30    | >KIT-D820V-i LARDIKNVSN | 20  | 10    |
| >KIT-D820V-1 LARDIKNDNSN | 176   | >KIT-D820V-i LARDIKNVSN | 295 | 119   |
| >KIT-D820V-1 LARDIKNDNSN | 46    | >KIT-D820V-i LARDIKNVSN | 25  | 21    |
| >KIT-D820V-1 GLARDIKND   | 25193 | >KIT-D820V-i GLARDIKNV  | 413 | 24780 |
| >KIT-D820V-1 GLARDIKND   | 13115 | >KIT-D820V-i GLARDIKNV  | 25  | 13090 |
| >KIT-D820V-1 GLARDIKND   | 17998 | >KIT-D820V-i GLARDIKNV  | 6   | 17992 |
| >KIT-D820V-1 GLARDIKND   | 20182 | >KIT-D820V-i GLARDIKNV  | 9   | 20173 |
| >KIT-D820V-1 GLARDIKND   | 22569 | >KIT-D820V-i GLARDIKNV  | 13  | 22556 |
| >KIT-D820V-1 GLARDIKND   | 21096 | >KIT-D820V-i GLARDIKNV  | 11  | 21085 |
| >KIT-D820V-1 GLARDIKND   | 26842 | >KIT-D820V-i GLARDIKNV  | 32  | 26810 |
| >KIT-D820V-1 GLARDIKND   | 17823 | >KIT-D820V-i GLARDIKNV  | 3   | 17820 |
| >KIT-D820Y-1 DSNYVVKGN   | 965   | >KIT-D820Y-r YSNYVVKGN  | 77  | 888   |
| >KIT-D820Y-1 DSNYVVKGN   | 76    | >KIT-D820Y-r YSNYVVKGN  | 373 | 297   |
| >KIT-D820Y-1 DSNYVVKGN   | 27    | >KIT-D820Y-r YSNYVVKGN  | 20  | 7     |
| >KIT-D820Y-1 NDSNYVVK    | 2931  | >KIT-D820Y-r NYSNYVVK   | 488 | 2443  |
| >KIT-D820Y-1 NDSNYVVK    | 20714 | >KIT-D820Y-r NYSNYVVK   | 369 | 20345 |
| >KIT-D820Y-1 KNDSNYVVK   | 11477 | >KIT-D820Y-r KNYSNYVVK  | 497 | 10980 |
| >KIT-D820Y-1 KNDSNYVVK   | 5007  | >KIT-D820Y-r KNYSNYVVK  | 75  | 4932  |
| >KIT-D820Y-1 KNDSNYVVK   | 5817  | >KIT-D820Y-r KNYSNYVVK  | 383 | 5434  |
| >KIT-D820Y-1 KNDSNYVV    | 12376 | >KIT-D820Y-r KNYSNYVV   | 221 | 12155 |
| >KIT-D820Y-1 KNDSNYVVK   | 13490 | >KIT-D820Y-r KNYSNYVVK  | 456 | 13034 |
| >KIT-D820Y-1 KNDSNYVVK   | 4126  | >KIT-D820Y-r KNYSNYVVK  | 238 | 3888  |
| >KIT-D820Y-1 IKNDNSNYV   | 63    | >KIT-D820Y-r IKNYSNYV   | 22  | 41    |
| >KIT-D820Y-1 IKNDNSNYVV  | 26    | >KIT-D820Y-r IKNYSNYVV  | 12  | 14    |
| >KIT-D820Y-1 IKNDNSNYVVK | 83    | >KIT-D820Y-r IKNYSNYVVK | 37  | 46    |
| >KIT-D820Y-1 DIKNDNSNY   | 198   | >KIT-D820Y-r DIKNYSNY   | 63  | 135   |
| >KIT-D820Y-1 DIKNDNSNY   | 243   | >KIT-D820Y-r DIKNYSNY   | 270 | 27    |
| >KIT-D820Y-1 DIKNDNSNY   | 462   | >KIT-D820Y-r DIKNYSNY   | 720 | 258   |
| >KIT-D820Y-1 DIKNDNSNYVV | 291   | >KIT-D820Y-r DIKNYSNYVV | 161 | 130   |

|                          |       |                         |      |       |
|--------------------------|-------|-------------------------|------|-------|
| >KIT-D820Y-\ DIKNDNSNYV  | 512   | >KIT-D820Y-r DIKNYSNYV  | 209  | 303   |
| >KIT-D820Y-\ DIKNDNSNYV  | 677   | >KIT-D820Y-r DIKNYSNYV  | 172  | 505   |
| >KIT-D820Y-\ RDIKNDNSNY  | 924   | >KIT-D820Y-r RDIKNYSNY  | 133  | 791   |
| >KIT-D820Y-\ RDIKNDNSNYV | 394   | >KIT-D820Y-r RDIKNYSNYV | 247  | 147   |
| >KIT-D820Y-\ RDIKNDNSNYV | 709   | >KIT-D820Y-r RDIKNYSNYV | 382  | 327   |
| >KIT-D820Y-\ RDIKNDNSNYV | 299   | >KIT-D820Y-r RDIKNYSNYV | 160  | 139   |
| >KIT-D820Y-\ RDIKNDNSNYV | 87    | >KIT-D820Y-r RDIKNYSNYV | 81   | 6     |
| >KIT-D820Y-\ ARDIKNDNSNY | 420   | >KIT-D820Y-r ARDIKNYSNY | 376  | 44    |
| >KIT-D820Y-\ ARDIKNDNSNY | 200   | >KIT-D820Y-r ARDIKNYSNY | 143  | 57    |
| >KIT-D820Y-\ LARDIKNDNSN | 1945  | >KIT-D820Y-r LARDIKNYSN | 349  | 1596  |
| >KIT-D820Y-\ LARDIKNDNSN | 241   | >KIT-D820Y-r LARDIKNYSN | 269  | 28    |
| >KIT-D820Y-\ LARDIKNDNSN | 387   | >KIT-D820Y-r LARDIKNYSN | 329  | 58    |
| >KIT-D820Y-\ LARDIKND    | 27122 | >KIT-D820Y-r LARDIKNY   | 325  | 26797 |
| >KIT-D820Y-\ LARDIKNDNSN | 317   | >KIT-D820Y-r LARDIKNYSN | 102  | 215   |
| >KIT-D820Y-\ LARDIKND    | 17090 | >KIT-D820Y-r LARDIKNY   | 23   | 17067 |
| >KIT-D820Y-\ LARDIKNDNSN | 30    | >KIT-D820Y-r LARDIKNYSN | 25   | 5     |
| >KIT-D820Y-\ LARDIKNDNSN | 176   | >KIT-D820Y-r LARDIKNYSN | 370  | 194   |
| >KIT-D820Y-\ LARDIKNDNSN | 46    | >KIT-D820Y-r LARDIKNYSN | 23   | 23    |
| >KIT-D820Y-\ FGLARDIKND  | 32630 | >KIT-D820Y-r FGLARDIKNY | 415  | 32215 |
| >KIT-D910Y-\ DPLKRPTF    | 1058  | >KIT-D910Y-r YPLKRPTF   | 23   | 1035  |
| >KIT-D910Y-\ DPLKRPTFKQ  | 4506  | >KIT-D910Y-r YPLKRPTFKQ | 68   | 4438  |
| >KIT-D910Y-\ DPLKRPTF    | 6554  | >KIT-D910Y-r YPLKRPTF   | 42   | 6512  |
| >KIT-D910Y-\ DPLKRPTFKQ  | 12201 | >KIT-D910Y-r YPLKRPTFKQ | 177  | 12024 |
| >KIT-D910Y-\ DPLKRPTF    | 327   | >KIT-D910Y-r YPLKRPTF   | 47   | 280   |
| >KIT-D910Y-\ DPLKRPTFKQ  | 373   | >KIT-D910Y-r YPLKRPTFKQ | 67   | 306   |
| >KIT-D910Y-\ DPLKRPTF    | 2701  | >KIT-D910Y-r YPLKRPTF   | 69   | 2632  |
| >KIT-D910Y-\ DPLKRPTF    | 470   | >KIT-D910Y-r YPLKRPTF   | 1393 | 923   |
| >KIT-D910Y-\ DPLKRPTF    | 260   | >KIT-D910Y-r YPLKRPTF   | 21   | 239   |
| >KIT-D910Y-\ DPLKRPTFKQ  | 589   | >KIT-D910Y-r YPLKRPTFKQ | 117  | 472   |
| >KIT-D910Y-\ DPLKRPTF    | 1686  | >KIT-D910Y-r YPLKRPTF   | 125  | 1561  |
| >KIT-D910Y-\ DPLKRPTFKQ  | 3894  | >KIT-D910Y-r YPLKRPTFKQ | 314  | 3580  |
| >KIT-D910Y-\ DPLKRPTFKQ  | 3825  | >KIT-D910Y-r YPLKRPTFKQ | 256  | 3569  |
| >KIT-D910Y-\ DPLKRPTF    | 3802  | >KIT-D910Y-r YPLKRPTF   | 134  | 3668  |
| >KIT-D910Y-\ DPLKRPTF    | 481   | >KIT-D910Y-r YPLKRPTF   | 92   | 389   |
| >KIT-D910Y-\ ADPLKRPTF   | 16241 | >KIT-D910Y-r AYPLKRPTF  | 112  | 16129 |
| >KIT-D910Y-\ ADPLKRPTF   | 15285 | >KIT-D910Y-r AYPLKRPTF  | 6    | 15279 |
| >KIT-D910Y-\ ADPLKRPTFK  | 10617 | >KIT-D910Y-r AYPLKRPTFK | 182  | 10435 |
| >KIT-D910Y-\ YDIMKTCWD   | 20167 | >KIT-D910Y-r YDIMKTCWD  | 173  | 19994 |
| >KIT-D910Y-\ DADPLKRPTF  | 838   | >KIT-D910Y-r DAYPLKRPTF | 61   | 777   |
| >KIT-D910Y-\ DADPLKRPTF  | 615   | >KIT-D910Y-r DAYPLKRPTF | 18   | 597   |
| >KIT-D910Y-\ DADPLKRPTF  | 2988  | >KIT-D910Y-r DAYPLKRPTF | 50   | 2938  |
| >KIT-D910Y-\ WDADPLKRP   | 632   | >KIT-D910Y-r WDAYPLKRP  | 485  | 147   |
| >KIT-D910Y-\ CWDADPLK    | 1011  | >KIT-D910Y-r CWDAYPLK   | 254  | 757   |

|                          |       |                          |     |       |
|--------------------------|-------|--------------------------|-----|-------|
| >KIT-D910Y-\ CWDADPLKR   | 22    | >KIT-D910Y-r CWDAYPLKR   | 16  | 6     |
| >KIT-D910Y-\ TCWDADPL    | 1521  | >KIT-D910Y-r TCWDAYPL    | 371 | 1150  |
| >KIT-D910Y-\ TCWDADPL    | 835   | >KIT-D910Y-r TCWDAYPL    | 94  | 741   |
| >KIT-D910Y-\ TCWDADPLK   | 37    | >KIT-D910Y-r TCWDAYPLKI  | 31  | 6     |
| >KIT-D910Y-\ KTCWDADPL   | 537   | >KIT-D910Y-r KTCWDAYPL   | 181 | 356   |
| >KIT-D910Y-\ KTCWDADPL   | 1025  | >KIT-D910Y-r KTCWDAYPL   | 213 | 812   |
| >KIT-D910Y-\ KTCWDADPL   | 646   | >KIT-D910Y-r KTCWDAYPLI  | 70  | 576   |
| >KIT-D910Y-\ KTCWDADPL   | 49    | >KIT-D910Y-r KTCWDAYPLI  | 19  | 30    |
| >KIT-D910Y-\ KTCWDADPL   | 119   | >KIT-D910Y-r KTCWDAYPLI  | 45  | 74    |
| >KIT-D910Y-\ KTCWDADPL   | 89    | >KIT-D910Y-r KTCWDAYPLI  | 24  | 65    |
| >KIT-D910Y-\ KTCWDADPL   | 119   | >KIT-D910Y-r KTCWDAYPLI  | 27  | 92    |
| >KIT-D910Y-\ KTCWDADPL   | 28    | >KIT-D910Y-r KTCWDAYPL   | 7   | 21    |
| >KIT-D910Y-\ KTCWDADPL   | 292   | >KIT-D910Y-r KTCWDAYPLI  | 160 | 132   |
| >KIT-D910Y-\ KTCWDADPL   | 25    | >KIT-D910Y-r KTCWDAYPL   | 9   | 16    |
| >KIT-D910Y-\ KTCWDADPL   | 769   | >KIT-D910Y-r KTCWDAYPLI  | 217 | 552   |
| >KIT-D910Y-\ KTCWDADPL   | 49    | >KIT-D910Y-r KTCWDAYPLI  | 20  | 29    |
| >KIT-D910Y-\ KTCWDADPL   | 114   | >KIT-D910Y-r KTCWDAYPL   | 129 | 15    |
| >KIT-D910Y-\ MKTCWDAD    | 25976 | >KIT-D910Y-r MKTCWDAY    | 426 | 25550 |
| >KIT-D910Y-\ MKTCWDAD    | 12417 | >KIT-D910Y-r MKTCWDAY    | 18  | 12399 |
| >KIT-D910Y-\ MKTCWDADI   | 170   | >KIT-D910Y-r MKTCWDAYF   | 55  | 115   |
| >KIT-D910Y-\ MKTCWDAD    | 14741 | >KIT-D910Y-r MKTCWDAY    | 49  | 14692 |
| >KIT-D910Y-\ MKTCWDADI   | 472   | >KIT-D910Y-r MKTCWDAYF   | 123 | 349   |
| >KIT-D910Y-\ MKTCWDAD    | 8448  | >KIT-D910Y-r MKTCWDAY    | 91  | 8357  |
| >KIT-D910Y-\ IMKTCWDAD   | 1219  | >KIT-D910Y-r IMKTCWDAY   | 175 | 1044  |
| >KIT-D910Y-\ IMKTCWDAD   | 60    | >KIT-D910Y-r IMKTCWDAY   | 24  | 36    |
| >KIT-D910Y-\ IMKTCWDAD   | 70    | >KIT-D910Y-r IMKTCWDAY   | 43  | 27    |
| >KIT-D910Y-\ IMKTCWDAD   | 544   | >KIT-D910Y-r IMKTCWDAY   | 258 | 286   |
| >KIT-D910Y-\ IMKTCWDAD   | 946   | >KIT-D910Y-r IMKTCWDAY   | 312 | 634   |
| >KIT-D910Y-\ IMKTCWDAD   | 551   | >KIT-D910Y-r IMKTCWDAY   | 90  | 461   |
| >KIT-D910Y-\ IMKTCWDAD   | 281   | >KIT-D910Y-r IMKTCWDAY   | 87  | 194   |
| >KIT-D910Y-\ IMKTCWDAD   | 24649 | >KIT-D910Y-r IMKTCWDAY   | 96  | 24553 |
| >KIT-D910Y-\ IMKTCWDAD   | 20537 | >KIT-D910Y-r IMKTCWDAY   | 16  | 20521 |
| >KIT-D910Y-\ IMKTCWDAD   | 15419 | >KIT-D910Y-r IMKTCWDAY   | 68  | 15351 |
| >KIT-D910Y-\ IMKTCWDAD   | 577   | >KIT-D910Y-r IMKTCWDAY   | 311 | 266   |
| >KIT-D910Y-\ IMKTCWDAD   | 26315 | >KIT-D910Y-r IMKTCWDAY   | 138 | 26177 |
| >KIT-D910Y-\ IMKTCWDAD   | 8654  | >KIT-D910Y-r IMKTCWDAY   | 18  | 8636  |
| >KIT-D910Y-\ IMKTCWDAD   | 180   | >KIT-D910Y-r IMKTCWDAY   | 58  | 122   |
| >KIT-D910Y-\ IMKTCWDAD   | 21657 | >KIT-D910Y-r IMKTCWDAY   | 146 | 21511 |
| >KIT-D910Y-\ DIMKTCWDA   | 31582 | >KIT-D910Y-r DIMKTCWDA   | 75  | 31507 |
| >KIT-D910Y-\ DIMKTCWDA   | 32205 | >KIT-D910Y-r DIMKTCWDA   | 292 | 31913 |
| >KIT-E270K-v ERQATLTI    | 2229  | >KIT-E270K-r KRQATLTI    | 324 | 1905  |
| >KIT-E270K-v ERQATLTI    | 1049  | >KIT-E270K-r KRQATLTI    | 99  | 950   |
| >KIT-E270K-v ERQATLTISSA | 3745  | >KIT-E270K-r KRQATLTISSA | 428 | 3317  |



|                          |       |                          |       |       |
|--------------------------|-------|--------------------------|-------|-------|
| >KIT-E270K-v ERQATLTI    | 1421  | >KIT-E270K-r KRQATLTI    | 25    | 1396  |
| >KIT-E270K-v ERQATLTIS   | 3396  | >KIT-E270K-r KRQATLTIS   | 143   | 3253  |
| >KIT-E270K-v ERQATLTISS  | 3586  | >KIT-E270K-r KRQATLTISS  | 170   | 3416  |
| >KIT-E270K-v ERQATLTISSA | 3980  | >KIT-E270K-r KRQATLTISSA | 173   | 3807  |
| >KIT-E270K-v ERQATLTI    | 3202  | >KIT-E270K-r KRQATLTI    | 363   | 2839  |
| >KIT-E270K-v ERQATLTISS  | 1624  | >KIT-E270K-r KRQATLTISS  | 223   | 1401  |
| >KIT-E270K-v YERQATLT    | 19    | >KIT-E270K-r YKRQATLT    | 12104 | 12085 |
| >KIT-E270K-v YERQATLTI   | 8     | >KIT-E270K-r YKRQATLTI   | 536   | 528   |
| >KIT-E270K-v YERQATLTI   | 340   | >KIT-E270K-r YKRQATLTI   | 13    | 327   |
| >KIT-E270K-v YERQATLTIS  | 7703  | >KIT-E270K-r YKRQATLTIS  | 251   | 7452  |
| >KIT-E270K-v YERQATLTISS | 8386  | >KIT-E270K-r YKRQATLTISS | 264   | 8122  |
| >KIT-E270K-v YERQATLTI   | 63    | >KIT-E270K-r YKRQATLTI   | 15976 | 15913 |
| >KIT-E270K-v YERQATLTISS | 198   | >KIT-E270K-r YKRQATLTISS | 19983 | 19785 |
| >KIT-E270K-v YERQATLTI   | 116   | >KIT-E270K-r YKRQATLTI   | 17871 | 17755 |
| >KIT-E270K-v YERQATLT    | 333   | >KIT-E270K-r YKRQATLT    | 30383 | 30050 |
| >KIT-E270K-v YERQATLTI   | 72    | >KIT-E270K-r YKRQATLTI   | 17627 | 17555 |
| >KIT-E270K-v YERQATLTISS | 263   | >KIT-E270K-r YKRQATLTISS | 27954 | 27691 |
| >KIT-E270K-v YERQATLT    | 485   | >KIT-E270K-r YKRQATLT    | 22210 | 21725 |
| >KIT-E270K-v YERQATLTI   | 3     | >KIT-E270K-r YKRQATLTI   | 609   | 606   |
| >KIT-E270K-v YERQATLTISS | 80    | >KIT-E270K-r YKRQATLTISS | 24980 | 24900 |
| >KIT-E270K-v NSWHHGDFI   | 26617 | >KIT-E270K-r NSWHHGDFI   | 86    | 26531 |
| >KIT-E270K-v NSWHHGDFI   | 14567 | >KIT-E270K-r NSWHHGDFI   | 352   | 14215 |
| >KIT-E270K-v NSWHHGDFI   | 20575 | >KIT-E270K-r NSWHHGDFI   | 233   | 20342 |
| >KIT-E270K-v NYERQATL    | 104   | >KIT-E270K-r NYKRQATL    | 75    | 29    |
| >KIT-E270K-v NYERQATLTI  | 58    | >KIT-E270K-r NYKRQATLTI  | 47    | 11    |
| >KIT-E270K-v NYERQATL    | 81    | >KIT-E270K-r NYKRQATL    | 50    | 31    |
| >KIT-E270K-v NYERQATLTI  | 34    | >KIT-E270K-r NYKRQATLTI  | 22    | 12    |
| >KIT-E270K-v FNYERQATL   | 28    | >KIT-E270K-r FNYKRQATL   | 30    | 2     |
| >KIT-E270K-v FNYERQATLT  | 214   | >KIT-E270K-r FNYKRQATLT  | 242   | 28    |
| >KIT-E270K-v FNYERQATLT  | 67    | >KIT-E270K-r FNYKRQATLT  | 102   | 35    |
| >KIT-E270K-v FNYERQATL   | 404   | >KIT-E270K-r FNYKRQATL   | 1163  | 759   |
| >KIT-E270K-v FNYERQATL   | 85    | >KIT-E270K-r FNYKRQATL   | 34    | 51    |
| >KIT-E270K-v FNYERQATLT  | 639   | >KIT-E270K-r FNYKRQATLT  | 256   | 383   |
| >KIT-E270K-v FNYERQATL   | 922   | >KIT-E270K-r FNYKRQATL   | 427   | 495   |
| >KIT-E270K-v FNYERQATL   | 474   | >KIT-E270K-r FNYKRQATL   | 345   | 129   |
| >KIT-E270K-v FNYERQATL   | 120   | >KIT-E270K-r FNYKRQATL   | 408   | 288   |
| >KIT-E270K-v FNYERQATLT  | 43    | >KIT-E270K-r FNYKRQATLT  | 49    | 6     |
| >KIT-E270K-v GDFNYERQA   | 404   | >KIT-E270K-r GDFNYKRQA   | 564   | 160   |
| >KIT-E270K-v GDFNYERQA   | 186   | >KIT-E270K-r GDFNYKRQA   | 226   | 40    |
| >KIT-E270K-v GDFNYERQA   | 332   | >KIT-E270K-r GDFNYKRQA   | 378   | 46    |
| >KIT-E270K-v HGDFNYER    | 300   | >KIT-E270K-r HGDFNYKR    | 144   | 156   |
| >KIT-E270K-v HHGDFNYER   | 413   | >KIT-E270K-r HHGDFNYKR   | 545   | 132   |
| >KIT-E270K-v HHGDFNYE    | 8587  | >KIT-E270K-r HHGDFNYK    | 65    | 8522  |

|                           |       |                          |       |       |
|---------------------------|-------|--------------------------|-------|-------|
| >KIT-E270K-v HHGDFNYER    | 14    | >KIT-E270K-r HHGDFNYKR   | 11    | 3     |
| >KIT-E270K-v WHHGDFNYE    | 103   | >KIT-E270K-r WHHGDFNYE   | 65    | 38    |
| >KIT-E270K-v SWHHGDFNY    | 11696 | >KIT-E270K-r SWHHGDFNY   | 51    | 11645 |
| >KIT-E270K-v SWHHGDFNY    | 55    | >KIT-E270K-r SWHHGDFNY   | 63    | 8     |
| >KIT-E270K-v SWHHGDFNY    | 2913  | >KIT-E270K-r SWHHGDFNY   | 36    | 2877  |
| >KIT-E270K-v SWHHGDFNY    | 13    | >KIT-E270K-r SWHHGDFNY   | 12    | 1     |
| >KIT-E270K-v SWHHGDFNY    | 429   | >KIT-E270K-r SWHHGDFNY   | 335   | 94    |
| >KIT-E338K-v EAFPKPEHQC   | 13352 | >KIT-E338K-r KAFPKPEHQC  | 370   | 12982 |
| >KIT-E338K-v EAFPKPEH     | 8759  | >KIT-E338K-r KAFPKPEH    | 335   | 8424  |
| >KIT-E338K-v EAFPKPEHQC   | 9     | >KIT-E338K-r KAFPKPEHQC  | 5     | 4     |
| >KIT-E338K-v EAFPKPEHQC   | 37    | >KIT-E338K-r KAFPKPEHQC  | 26    | 11    |
| >KIT-E338K-v EAFPKPEHQC   | 36    | >KIT-E338K-r KAFPKPEHQC  | 8     | 28    |
| >KIT-E338K-v EAFPKPEHQC   | 485   | >KIT-E338K-r KAFPKPEHQC  | 801   | 316   |
| >KIT-E338K-v EAFPKPEHQC   | 810   | >KIT-E338K-r KAFPKPEHQC  | 119   | 691   |
| >KIT-E338K-v VEYEAFFPK    | 126   | >KIT-E338K-r VEYKAFPK    | 421   | 295   |
| >KIT-E338K-v VEYEAFFPKPEI | 149   | >KIT-E338K-r VEYKAFPKPEI | 450   | 301   |
| >KIT-E338K-v VEYEAFFPKP   | 107   | >KIT-E338K-r VEYKAFPKP   | 178   | 71    |
| >KIT-E338K-v IVEYEAFFPK   | 38    | >KIT-E338K-r IVEYKAFPK   | 38    | 0     |
| >KIT-E338K-v IVEYEAFFPK   | 3325  | >KIT-E338K-r IVEYKAFPK   | 296   | 3029  |
| >KIT-E338K-v IVEYEAFFPK   | 77    | >KIT-E338K-r IVEYKAFPK   | 90    | 13    |
| >KIT-E338K-v LIVEYEAF     | 164   | >KIT-E338K-r LIVEYKAF    | 810   | 646   |
| >KIT-E338K-v LIVEYEAFPK   | 416   | >KIT-E338K-r LIVEYKAFPK  | 167   | 249   |
| >KIT-E338K-v LIVEYEAFPK   | 57    | >KIT-E338K-r LIVEYKAFPK  | 70    | 13    |
| >KIT-E338K-v LIVEYEAF     | 136   | >KIT-E338K-r LIVEYKAF    | 425   | 289   |
| >KIT-E338K-v LIVEYEAFPK   | 1371  | >KIT-E338K-r LIVEYKAFPK  | 486   | 885   |
| >KIT-E338K-v LIVEYEAFPK   | 49    | >KIT-E338K-r LIVEYKAFPK  | 128   | 79    |
| >KIT-E338K-v LIVEYEAF     | 109   | >KIT-E338K-r LIVEYKAF    | 162   | 53    |
| >KIT-E338K-v LIVEYEAF     | 75    | >KIT-E338K-r LIVEYKAF    | 62    | 13    |
| >KIT-E338K-v LIVEYEAF     | 749   | >KIT-E338K-r LIVEYKAF    | 450   | 299   |
| >KIT-E338K-v LIVEYEAF     | 148   | >KIT-E338K-r LIVEYKAF    | 353   | 205   |
| >KIT-E338K-v LIVEYEAF     | 489   | >KIT-E338K-r LIVEYKAF    | 208   | 281   |
| >KIT-E338K-v DLIVEYEAF    | 138   | >KIT-E338K-r DLIVEYKAF   | 391   | 253   |
| >KIT-E338K-v DLIVEYEAFPK  | 131   | >KIT-E338K-r DLIVEYKAFPK | 224   | 93    |
| >KIT-E338K-v DLIVEYEAF    | 446   | >KIT-E338K-r DLIVEYKAF   | 276   | 170   |
| >KIT-E338K-v NVDLIVEYE    | 25856 | >KIT-E338K-r NVDLIVEYK   | 116   | 25740 |
| >KIT-E338K-v NVDLIVEYE    | 6947  | >KIT-E338K-r NVDLIVEYK   | 28    | 6919  |
| >KIT-E338K-v ENVDLIVEYE   | 23754 | >KIT-E338K-r ENVDLIVEYK  | 173   | 23581 |
| >KIT-E338K-v ENVDLIVEYE/  | 112   | >KIT-E338K-r ENVDLIVEYK/ | 284   | 172   |
| >KIT-E53K-wi EIRLLCTDPG   | 15622 | >KIT-E53K-m KIRLLCTDPG   | 398   | 15224 |
| >KIT-E53K-wi EIRLLCTDPGF  | 2162  | >KIT-E53K-m KIRLLCTDPGF  | 410   | 1752  |
| >KIT-E53K-wi EIRLLCTDPGF  | 2262  | >KIT-E53K-m KIRLLCTDPGF  | 125   | 2137  |
| >KIT-E53K-wi DEIRLLCTD    | 108   | >KIT-E53K-m DKIRLLCTD    | 18418 | 18310 |
| >KIT-E53K-wi RVGDEIRL     | 330   | >KIT-E53K-m RVGDKIRL     | 389   | 59    |

|                          |       |                         |       |       |
|--------------------------|-------|-------------------------|-------|-------|
| >KIT-E53K-wi VRVGDEIRLL  | 259   | >KIT-E53K-m VRVGDKIRLL  | 233   | 26    |
| >KIT-E53K-wi VRVGDEIRLL  | 548   | >KIT-E53K-m VRVGDKIRLL  | 406   | 142   |
| >KIT-E53K-wi IVRVGDEIRL  | 1100  | >KIT-E53K-m IVRVGDKIRL  | 495   | 605   |
| >KIT-E53K-wi IVRVGDEIRLL | 401   | >KIT-E53K-m IVRVGDKIRLL | 169   | 232   |
| >KIT-E53K-wi IVRVGDEIR   | 468   | >KIT-E53K-m IVRVGDKIR   | 702   | 234   |
| >KIT-E53K-wi IVRVGDEIRL  | 487   | >KIT-E53K-m IVRVGDKIRL  | 429   | 58    |
| >KIT-E53K-wi IVRVGDEIRLL | 904   | >KIT-E53K-m IVRVGDKIRLL | 465   | 439   |
| >KIT-E53K-wi LIVRVGDEI   | 462   | >KIT-E53K-m LIVRVGDKI   | 1838  | 1376  |
| >KIT-E53K-wi LIVRVGDEI   | 330   | >KIT-E53K-m LIVRVGDKI   | 988   | 658   |
| >KIT-E53K-wi LIVRVGDEIRL | 225   | >KIT-E53K-m LIVRVGDKIRL | 268   | 43    |
| >KIT-E53K-wi LIVRVGDEIR  | 182   | >KIT-E53K-m LIVRVGDKIR  | 1367  | 1185  |
| >KIT-E53K-wi DLIVRVGDEIF | 112   | >KIT-E53K-m DLIVRVGDKIF | 157   | 45    |
| >KIT-E53K-wi DLIVRVGDEIF | 201   | >KIT-E53K-m DLIVRVGDKIF | 521   | 320   |
| >KIT-E53K-wi SDLIVRVGDE  | 86    | >KIT-E53K-m SDLIVRVGDK  | 168   | 82    |
| >KIT-E53K-wi SDLIVRVGDE  | 350   | >KIT-E53K-m SDLIVRVGDK  | 248   | 102   |
| >KIT-E53K-wi SDLIVRVGDE  | 110   | >KIT-E53K-m SDLIVRVGDK  | 123   | 13    |
| >KIT-E554A-v EVQWKVVEE   | 1717  | >KIT-E554A-r AVQWKVVEE  | 119   | 1598  |
| >KIT-E554A-v EVQWKVVEE   | 9423  | >KIT-E554A-r AVQWKVVEE  | 473   | 8950  |
| >KIT-E554A-v EVQWKVVEE   | 518   | >KIT-E554A-r AVQWKVVEE  | 78    | 440   |
| >KIT-E554A-v EVQWKVVEE   | 147   | >KIT-E554A-r AVQWKVVEE  | 6838  | 6691  |
| >KIT-E554A-v YEVQWKVVE   | 12118 | >KIT-E554A-r YAVQWKVVE  | 264   | 11854 |
| >KIT-E554A-v YEVQWKVV    | 10    | >KIT-E554A-r YAVQWKVV   | 10447 | 10437 |
| >KIT-E554A-v YEVQWKVVE   | 11    | >KIT-E554A-r YAVQWKVVE  | 3825  | 3814  |
| >KIT-E554A-v YEVQWKVV    | 1283  | >KIT-E554A-r YAVQWKVV   | 146   | 1137  |
| >KIT-E554A-v YEVQWKVVE   | 964   | >KIT-E554A-r YAVQWKVVE  | 99    | 865   |
| >KIT-E554A-v YEVQWKVV    | 1223  | >KIT-E554A-r YAVQWKVV   | 79    | 1144  |
| >KIT-E554A-v YEVQWKVVE   | 1241  | >KIT-E554A-r YAVQWKVVE  | 72    | 1169  |
| >KIT-E554A-v YEVQWKVV    | 1514  | >KIT-E554A-r YAVQWKVV   | 50    | 1464  |
| >KIT-E554A-v YEVQWKVVE   | 9152  | >KIT-E554A-r YAVQWKVVE  | 175   | 8977  |
| >KIT-E554A-v YEVQWKVV    | 10243 | >KIT-E554A-r YAVQWKVV   | 268   | 9975  |
| >KIT-E554A-v YEVQWKVVE   | 10350 | >KIT-E554A-r YAVQWKVVE  | 151   | 10199 |
| >KIT-E554A-v YEVQWKVV    | 373   | >KIT-E554A-r YAVQWKVV   | 23034 | 22661 |
| >KIT-E554A-v YEVQWKVVE   | 343   | >KIT-E554A-r YAVQWKVVE  | 23270 | 22927 |
| >KIT-E554A-v YEVQWKVV    | 307   | >KIT-E554A-r YAVQWKVV   | 22302 | 21995 |
| >KIT-E554A-v YEVQWKVVE   | 59    | >KIT-E554A-r YAVQWKVVE  | 19619 | 19560 |
| >KIT-E554A-v YEVQWKVV    | 169   | >KIT-E554A-r YAVQWKVV   | 26859 | 26690 |
| >KIT-E554A-v YEVQWKVVE   | 176   | >KIT-E554A-r YAVQWKVVE  | 31701 | 31525 |
| >KIT-E554A-v YEVQWKVVE   | 14030 | >KIT-E554A-r YAVQWKVVE  | 384   | 13646 |
| >KIT-E554A-v YEVQWKVVE   | 3     | >KIT-E554A-r YAVQWKVVE  | 2479  | 2476  |
| >KIT-E554A-v TYKYLQKPM\  | 3851  | >KIT-E554A-r TYKYLQKPM\ | 50    | 3801  |
| >KIT-E554A-v MYEVQWKV    | 5621  | >KIT-E554A-r MYAVQWKV   | 374   | 5247  |
| >KIT-E554A-v MYEVQWKV    | 652   | >KIT-E554A-r MYAVQWKV   | 161   | 491   |
| >KIT-E554A-v MYEVQWKV    | 246   | >KIT-E554A-r MYAVQWKV   | 63    | 183   |

|                        |       |                        |     |       |
|------------------------|-------|------------------------|-----|-------|
| >KIT-E554A-v MYEVQWKV' | 2129  | >KIT-E554A-r MYAVQWKV' | 452 | 1677  |
| >KIT-E554A-v MYEVQWKV  | 7231  | >KIT-E554A-r MYAVQWKV  | 344 | 6887  |
| >KIT-E554A-v MYEVQWKV  | 488   | >KIT-E554A-r MYAVQWKV  | 295 | 193   |
| >KIT-E554A-v PMYEVQWK\ | 17    | >KIT-E554A-r PMYAVQWK\ | 27  | 10    |
| >KIT-E554A-v PMYEVQWK\ | 18    | >KIT-E554A-r PMYAVQWK\ | 20  | 2     |
| >KIT-E554A-v PMYEVQWK\ | 48    | >KIT-E554A-r PMYAVQWK\ | 75  | 27    |
| >KIT-E554A-v PMYEVQWK\ | 33    | >KIT-E554A-r PMYAVQWK\ | 118 | 85    |
| >KIT-E554A-v PMYEVQWK\ | 1     | >KIT-E554A-r PMYAVQWK\ | 2   | 1     |
| >KIT-E554A-v PMYEVQWK\ | 4     | >KIT-E554A-r PMYAVQWK\ | 6   | 2     |
| >KIT-E554A-v PMYEVQWK\ | 5     | >KIT-E554A-r PMYAVQWK\ | 13  | 8     |
| >KIT-E554A-v PMYEVQWK\ | 97    | >KIT-E554A-r PMYAVQWK\ | 273 | 176   |
| >KIT-E554A-v PMYEVQWK\ | 4     | >KIT-E554A-r PMYAVQWK\ | 5   | 1     |
| >KIT-E554A-v PMYEVQWK\ | 11    | >KIT-E554A-r PMYAVQWK\ | 17  | 6     |
| >KIT-E554A-v PMYEVQWK\ | 3     | >KIT-E554A-r PMYAVQWK\ | 4   | 1     |
| >KIT-E554A-v PMYEVQWK\ | 54    | >KIT-E554A-r PMYAVQWK\ | 155 | 101   |
| >KIT-E554A-v PMYEVQWK\ | 2     | >KIT-E554A-r PMYAVQWK\ | 3   | 1     |
| >KIT-E554A-v PMYEVQWK\ | 10    | >KIT-E554A-r PMYAVQWK\ | 15  | 5     |
| >KIT-E554A-v PMYEVQWK  | 129   | >KIT-E554A-r PMYAVQWK  | 75  | 54    |
| >KIT-E554A-v PMYEVQWK\ | 145   | >KIT-E554A-r PMYAVQWK\ | 587 | 442   |
| >KIT-E554A-v KPMYEVQW  | 1456  | >KIT-E554A-r KPMYAVQW  | 185 | 1271  |
| >KIT-E554A-v KPMYEVQW\ | 157   | >KIT-E554A-r KPMYAVQW\ | 35  | 122   |
| >KIT-E554A-v KPMYEVQW\ | 136   | >KIT-E554A-r KPMYAVQW\ | 38  | 98    |
| >KIT-E554A-v KPMYEVQW  | 20    | >KIT-E554A-r KPMYAVQW  | 28  | 8     |
| >KIT-E554A-v KPMYEVQW\ | 68    | >KIT-E554A-r KPMYAVQW\ | 35  | 33    |
| >KIT-E554A-v KPMYEVQW  | 536   | >KIT-E554A-r KPMYAVQW  | 354 | 182   |
| >KIT-E554A-v KPMYEVQW  | 199   | >KIT-E554A-r KPMYAVQW  | 118 | 81    |
| >KIT-E554A-v KPMYEVQW  | 9     | >KIT-E554A-r KPMYAVQW  | 7   | 2     |
| >KIT-E554A-v LQKPMYEV  | 327   | >KIT-E554A-r LQKPMYAV  | 443 | 116   |
| >KIT-E554A-v LQKPMYEV  | 48    | >KIT-E554A-r LQKPMYAV  | 27  | 21    |
| >KIT-E554A-v LQKPMYEV  | 34    | >KIT-E554A-r LQKPMYAV  | 25  | 9     |
| >KIT-E554A-v LQKPMYEV  | 318   | >KIT-E554A-r LQKPMYAV  | 622 | 304   |
| >KIT-E554A-v LQKPMYEVQ | 243   | >KIT-E554A-r LQKPMYAVQ | 41  | 202   |
| >KIT-E554A-v LQKPMYEVQ | 415   | >KIT-E554A-r LQKPMYAVQ | 176 | 239   |
| >KIT-E554A-v LQKPMYEV  | 403   | >KIT-E554A-r LQKPMYAV  | 143 | 260   |
| >KIT-E554A-v LQKPMYEVQ | 230   | >KIT-E554A-r LQKPMYAVQ | 140 | 90    |
| >KIT-E554A-v LQKPMYEVQ | 247   | >KIT-E554A-r LQKPMYAVQ | 136 | 111   |
| >KIT-E554A-v LQKPMYEV  | 155   | >KIT-E554A-r LQKPMYAV  | 64  | 91    |
| >KIT-E554A-v LQKPMYEVQ | 225   | >KIT-E554A-r LQKPMYAVQ | 152 | 73    |
| >KIT-E554A-v LQKPMYEVQ | 692   | >KIT-E554A-r LQKPMYAVQ | 184 | 508   |
| >KIT-E554A-v LQKPMYEVQ | 168   | >KIT-E554A-r LQKPMYAVQ | 113 | 55    |
| >KIT-E554A-v LQKPMYEVQ | 230   | >KIT-E554A-r LQKPMYAVQ | 254 | 24    |
| >KIT-E554A-v YLQKPMYE  | 12946 | >KIT-E554A-r YLQKPMYA  | 18  | 12928 |
| >KIT-E554A-v YLQKPMYEV | 7     | >KIT-E554A-r YLQKPMYAV | 8   | 1     |

|                        |       |                         |     |       |
|------------------------|-------|-------------------------|-----|-------|
| >KIT-E554A-\YLQKPMYE   | 7212  | >KIT-E554A-r YLQKPMYA   | 39  | 7173  |
| >KIT-E554A-\YLQKPMYEV  | 5     | >KIT-E554A-r YLQKPMYAV  | 5   | 0     |
| >KIT-E554A-\YLQKPMYE   | 11322 | >KIT-E554A-r YLQKPMYA   | 14  | 11308 |
| >KIT-E554A-\YLQKPMYEV  | 7     | >KIT-E554A-r YLQKPMYAV  | 5   | 2     |
| >KIT-E554A-\YLQKPMYE   | 17843 | >KIT-E554A-r YLQKPMYA   | 292 | 17551 |
| >KIT-E554A-\YLQKPMYEV  | 13    | >KIT-E554A-r YLQKPMYAV  | 9   | 4     |
| >KIT-E554A-\YLQKPMYE   | 1672  | >KIT-E554A-r YLQKPMYA   | 4   | 1668  |
| >KIT-E554A-\YLQKPMYEV  | 1     | >KIT-E554A-r YLQKPMYAV  | 1   | 0     |
| >KIT-E554A-\YLQKPMYE   | 4671  | >KIT-E554A-r YLQKPMYA   | 9   | 4662  |
| >KIT-E554A-\YLQKPMYEV  | 2     | >KIT-E554A-r YLQKPMYAV  | 2   | 0     |
| >KIT-E554A-\YLQKPMYE   | 12443 | >KIT-E554A-r YLQKPMYA   | 30  | 12413 |
| >KIT-E554A-\YLQKPMYEV  | 6     | >KIT-E554A-r YLQKPMYAV  | 8   | 2     |
| >KIT-E554A-\YLQKPMYE   | 18519 | >KIT-E554A-r YLQKPMYA   | 60  | 18459 |
| >KIT-E554A-\YLQKPMYEV  | 3     | >KIT-E554A-r YLQKPMYAV  | 5   | 2     |
| >KIT-E554A-\YLQKPMYE   | 1697  | >KIT-E554A-r YLQKPMYA   | 5   | 1692  |
| >KIT-E554A-\YLQKPMYEV  | 2     | >KIT-E554A-r YLQKPMYAV  | 2   | 0     |
| >KIT-E554A-\YLQKPMYEV\ | 77    | >KIT-E554A-r YLQKPMYAV\ | 54  | 23    |
| >KIT-E554A-\YLQKPMYEV  | 93    | >KIT-E554A-r YLQKPMYAV  | 129 | 36    |
| >KIT-E554A-\YLQKPMYEV  | 55    | >KIT-E554A-r YLQKPMYAV  | 41  | 14    |
| >KIT-E554A-\YLQKPMYEV  | 1072  | >KIT-E554A-r YLQKPMYAV  | 332 | 740   |
| >KIT-E554A-\YLQKPMYEV\ | 124   | >KIT-E554A-r YLQKPMYAV\ | 64  | 60    |
| >KIT-E554A-\KYLQKPMYE\ | 100   | >KIT-E554A-r KYLQKPMYA\ | 100 | 0     |
| >KIT-E554A-\KYLQKPMYE\ | 307   | >KIT-E554A-r KYLQKPMYA\ | 826 | 519   |
| >KIT-E554A-\KYLQKPMYE  | 582   | >KIT-E554A-r KYLQKPMYA  | 245 | 337   |
| >KIT-E554A-\KYLQKPMYE\ | 28    | >KIT-E554A-r KYLQKPMYA\ | 62  | 34    |
| >KIT-E554A-\KYLQKPMYE\ | 360   | >KIT-E554A-r KYLQKPMYA\ | 453 | 93    |
| >KIT-E554A-\KYLQKPMYE  | 2165  | >KIT-E554A-r KYLQKPMYA  | 22  | 2143  |
| >KIT-E554A-\KYLQKPMYE\ | 471   | >KIT-E554A-r KYLQKPMYA\ | 303 | 168   |
| >KIT-E554A-\KYLQKPMYE\ | 1099  | >KIT-E554A-r KYLQKPMYA\ | 443 | 656   |
| >KIT-E554A-\KYLQKPMYE  | 82    | >KIT-E554A-r KYLQKPMYA  | 80  | 2     |
| >KIT-E554A-\KYLQKPMYE\ | 121   | >KIT-E554A-r KYLQKPMYA\ | 75  | 46    |
| >KIT-E554A-\KYLQKPMYE  | 331   | >KIT-E554A-r KYLQKPMYA  | 64  | 267   |
| >KIT-E554A-\KYLQKPMYE\ | 56    | >KIT-E554A-r KYLQKPMYA\ | 27  | 29    |
| >KIT-E554A-\KYLQKPMYE\ | 391   | >KIT-E554A-r KYLQKPMYA\ | 493 | 102   |
| >KIT-E554A-\YKYLQKPMYE | 499   | >KIT-E554A-r YKYLQKPMY/ | 899 | 400   |
| >KIT-E554A-\YKYLQKPMYE | 447   | >KIT-E554A-r YKYLQKPMY/ | 312 | 135   |
| >KIT-E554A-\YKYLQKPMYE | 121   | >KIT-E554A-r YKYLQKPMY/ | 127 | 6     |
| >KIT-E554A-\YKYLQKPMYE | 356   | >KIT-E554A-r YKYLQKPMY/ | 971 | 615   |
| >KIT-E554A-\YKYLQKPMYE | 365   | >KIT-E554A-r YKYLQKPMY/ | 892 | 527   |
| >KIT-E554A-\YKYLQKPMYE | 2189  | >KIT-E554A-r YKYLQKPMY/ | 194 | 1995  |
| >KIT-E554A-\YKYLQKPMYE | 39    | >KIT-E554A-r YKYLQKPMY/ | 21  | 18    |
| >KIT-E554A-\YKYLQKPMYE | 2296  | >KIT-E554A-r YKYLQKPMY/ | 255 | 2041  |
| >KIT-E554D-\EVQWKVVEE  | 147   | >KIT-E554D-r DVQWKVVEE  | 830 | 683   |

|                         |       |                        |       |       |
|-------------------------|-------|------------------------|-------|-------|
| >KIT-E554D-\ YEVDQWKVV  | 10    | >KIT-E554D-r YDVQWKVV  | 448   | 438   |
| >KIT-E554D-\ YEVDQWKVVE | 11    | >KIT-E554D-r YDVQWKVVE | 251   | 240   |
| >KIT-E554D-\ YEVDQWKVV  | 373   | >KIT-E554D-r YDVQWKVV  | 17378 | 17005 |
| >KIT-E554D-\ YEVDQWKVVE | 343   | >KIT-E554D-r YDVQWKVVE | 16715 | 16372 |
| >KIT-E554D-\ YEVDQWKVV  | 307   | >KIT-E554D-r YDVQWKVV  | 21449 | 21142 |
| >KIT-E554D-\ YEVDQWKVVE | 59    | >KIT-E554D-r YDVQWKVVE | 16311 | 16252 |
| >KIT-E554D-\ YEVDQWKVV  | 169   | >KIT-E554D-r YDVQWKVV  | 1237  | 1068  |
| >KIT-E554D-\ YEVDQWKVVE | 176   | >KIT-E554D-r YDVQWKVVE | 2103  | 1927  |
| >KIT-E554D-\ YEVDQWKVVE | 3     | >KIT-E554D-r YDVQWKVVE | 24    | 21    |
| >KIT-E554D-\ YEVDQWKVVE | 10260 | >KIT-E554D-r YDVQWKVVE | 262   | 9998  |
| >KIT-E554D-\ MYEVDQWKV  | 652   | >KIT-E554D-r MYDVQWKV  | 374   | 278   |
| >KIT-E554D-\ MYEVDQWKV  | 246   | >KIT-E554D-r MYDVQWKV  | 334   | 88    |
| >KIT-E554D-\ MYEVDQWKV  | 488   | >KIT-E554D-r MYDVQWKV  | 675   | 187   |
| >KIT-E554D-\ PMYEVDQWK\ | 17    | >KIT-E554D-r PMYDVQWK\ | 16    | 1     |
| >KIT-E554D-\ PMYEVDQWK\ | 18    | >KIT-E554D-r PMYDVQWK\ | 14    | 4     |
| >KIT-E554D-\ PMYEVDQWK\ | 48    | >KIT-E554D-r PMYDVQWK\ | 50    | 2     |
| >KIT-E554D-\ PMYEVDQWK\ | 33    | >KIT-E554D-r PMYDVQWK\ | 38    | 5     |
| >KIT-E554D-\ PMYEVDQWK\ | 1     | >KIT-E554D-r PMYDVQWK\ | 1     | 0     |
| >KIT-E554D-\ PMYEVDQWK\ | 4     | >KIT-E554D-r PMYDVQWK\ | 4     | 0     |
| >KIT-E554D-\ PMYEVDQWK\ | 5     | >KIT-E554D-r PMYDVQWK\ | 5     | 0     |
| >KIT-E554D-\ PMYEVDQWK\ | 97    | >KIT-E554D-r PMYDVQWK\ | 119   | 22    |
| >KIT-E554D-\ PMYEVDQWK\ | 4     | >KIT-E554D-r PMYDVQWK\ | 4     | 0     |
| >KIT-E554D-\ PMYEVDQWK\ | 11    | >KIT-E554D-r PMYDVQWK\ | 12    | 1     |
| >KIT-E554D-\ PMYEVDQWK\ | 3     | >KIT-E554D-r PMYDVQWK\ | 2     | 1     |
| >KIT-E554D-\ PMYEVDQWK\ | 54    | >KIT-E554D-r PMYDVQWK\ | 50    | 4     |
| >KIT-E554D-\ PMYEVDQWK\ | 2     | >KIT-E554D-r PMYDVQWK\ | 2     | 0     |
| >KIT-E554D-\ PMYEVDQWK\ | 10    | >KIT-E554D-r PMYDVQWK\ | 7     | 3     |
| >KIT-E554D-\ PMYEVDQWK  | 129   | >KIT-E554D-r PMYDVQWK  | 190   | 61    |
| >KIT-E554D-\ PMYEVDQWK\ | 145   | >KIT-E554D-r PMYDVQWK\ | 318   | 173   |
| >KIT-E554D-\ KPMYEVDQW  | 157   | >KIT-E554D-r KPMYDVQW  | 55    | 102   |
| >KIT-E554D-\ KPMYEVDQW  | 136   | >KIT-E554D-r KPMYDVQW  | 77    | 59    |
| >KIT-E554D-\ KPMYEVDQW  | 20    | >KIT-E554D-r KPMYDVQW  | 19    | 1     |
| >KIT-E554D-\ KPMYEVDQW  | 68    | >KIT-E554D-r KPMYDVQW  | 49    | 19    |
| >KIT-E554D-\ KPMYEVDQW  | 199   | >KIT-E554D-r KPMYDVQW  | 162   | 37    |
| >KIT-E554D-\ KPMYEVDQW  | 9     | >KIT-E554D-r KPMYDVQW  | 7     | 2     |
| >KIT-E554D-\ LQKPMYEV   | 327   | >KIT-E554D-r LQKPMYDV  | 2669  | 2342  |
| >KIT-E554D-\ LQKPMYEV   | 48    | >KIT-E554D-r LQKPMYDV  | 125   | 77    |
| >KIT-E554D-\ LQKPMYEV   | 34    | >KIT-E554D-r LQKPMYDV  | 286   | 252   |
| >KIT-E554D-\ LQKPMYEV   | 318   | >KIT-E554D-r LQKPMYDV  | 1591  | 1273  |
| >KIT-E554D-\ LQKPMYEVQ  | 243   | >KIT-E554D-r LQKPMYDVQ | 285   | 42    |
| >KIT-E554D-\ LQKPMYEVQ  | 415   | >KIT-E554D-r LQKPMYDVQ | 573   | 158   |
| >KIT-E554D-\ LQKPMYEV   | 403   | >KIT-E554D-r LQKPMYDV  | 1248  | 845   |
| >KIT-E554D-\ LQKPMYEVQ  | 230   | >KIT-E554D-r LQKPMYDVQ | 626   | 396   |

|                         |      |                         |       |       |
|-------------------------|------|-------------------------|-------|-------|
| >KIT-E554D-\ LQKPMYEVQ  | 247  | >KIT-E554D-r LQKPMYDVQ  | 189   | 58    |
| >KIT-E554D-\ LQKPMYEV   | 155  | >KIT-E554D-r LQKPMYDV   | 321   | 166   |
| >KIT-E554D-\ LQKPMYEVQ  | 225  | >KIT-E554D-r LQKPMYDVQ  | 423   | 198   |
| >KIT-E554D-\ LQKPMYEVQ  | 168  | >KIT-E554D-r LQKPMYDVQ  | 97    | 71    |
| >KIT-E554D-\ LQKPMYEVQ  | 230  | >KIT-E554D-r LQKPMYDVQ  | 162   | 68    |
| >KIT-E554D-\ YLQKPMYEV  | 7    | >KIT-E554D-r YLQKPMYDV  | 14    | 7     |
| >KIT-E554D-\ YLQKPMYEV  | 5    | >KIT-E554D-r YLQKPMYDV  | 22    | 17    |
| >KIT-E554D-\ YLQKPMYEV  | 7    | >KIT-E554D-r YLQKPMYDV  | 15    | 8     |
| >KIT-E554D-\ YLQKPMYEV  | 13   | >KIT-E554D-r YLQKPMYDV  | 60    | 47    |
| >KIT-E554D-\ YLQKPMYEV  | 1    | >KIT-E554D-r YLQKPMYDV  | 3     | 2     |
| >KIT-E554D-\ YLQKPMYEV  | 2    | >KIT-E554D-r YLQKPMYDV  | 3     | 1     |
| >KIT-E554D-\ YLQKPMYEV  | 6    | >KIT-E554D-r YLQKPMYDV  | 10    | 4     |
| >KIT-E554D-\ YLQKPMYEV  | 3    | >KIT-E554D-r YLQKPMYDV  | 11    | 8     |
| >KIT-E554D-\ YLQKPMYEV  | 2    | >KIT-E554D-r YLQKPMYDV  | 2     | 0     |
| >KIT-E554D-\ YLQKPMYEV( | 77   | >KIT-E554D-r YLQKPMYDV( | 211   | 134   |
| >KIT-E554D-\ YLQKPMYEV  | 93   | >KIT-E554D-r YLQKPMYDV  | 876   | 783   |
| >KIT-E554D-\ YLQKPMYEV  | 55   | >KIT-E554D-r YLQKPMYDV  | 381   | 326   |
| >KIT-E554D-\ YLQKPMYEV( | 124  | >KIT-E554D-r YLQKPMYDV( | 122   | 2     |
| >KIT-E554D-\ KYLQKPMYEV | 100  | >KIT-E554D-r KYLQKPMYD' | 879   | 779   |
| >KIT-E554D-\ KYLQKPMYEV | 307  | >KIT-E554D-r KYLQKPMYD' | 1133  | 826   |
| >KIT-E554D-\ KYLQKPMYEV | 28   | >KIT-E554D-r KYLQKPMYD' | 91    | 63    |
| >KIT-E554D-\ KYLQKPMYEV | 360  | >KIT-E554D-r KYLQKPMYD' | 334   | 26    |
| >KIT-E554D-\ KYLQKPMYEV | 471  | >KIT-E554D-r KYLQKPMYD' | 1229  | 758   |
| >KIT-E554D-\ KYLQKPMYEV | 82   | >KIT-E554D-r KYLQKPMYD  | 501   | 419   |
| >KIT-E554D-\ KYLQKPMYEV | 121  | >KIT-E554D-r KYLQKPMYD' | 144   | 23    |
| >KIT-E554D-\ KYLQKPMYEV | 331  | >KIT-E554D-r KYLQKPMYD  | 435   | 104   |
| >KIT-E554D-\ KYLQKPMYEV | 56   | >KIT-E554D-r KYLQKPMYD' | 111   | 55    |
| >KIT-E554D-\ KYLQKPMYEV | 391  | >KIT-E554D-r KYLQKPMYD' | 255   | 136   |
| >KIT-E554D-\ KYLQKPMYEV | 499  | >KIT-E554D-r KYLQKPMYD' | 834   | 335   |
| >KIT-E554D-\ KYLQKPMYEV | 447  | >KIT-E554D-r KYLQKPMYD' | 2942  | 2495  |
| >KIT-E554D-\ KYLQKPMYEV | 121  | >KIT-E554D-r KYLQKPMYD' | 880   | 759   |
| >KIT-E554D-\ KYLQKPMYEV | 356  | >KIT-E554D-r KYLQKPMYD' | 1289  | 933   |
| >KIT-E554D-\ KYLQKPMYEV | 365  | >KIT-E554D-r KYLQKPMYD' | 1327  | 962   |
| >KIT-E554D-\ KYLQKPMYEV | 39   | >KIT-E554D-r KYLQKPMYD' | 60    | 21    |
| >KIT-E554G-\ EVQWKVVEE  | 1717 | >KIT-E554G-r EVQWKVVEE  | 223   | 1494  |
| >KIT-E554G-\ EVQWKVVEE  | 518  | >KIT-E554G-r EVQWKVVEE  | 330   | 188   |
| >KIT-E554G-\ EVQWKVVEE  | 147  | >KIT-E554G-r EVQWKVVEE  | 11254 | 11107 |
| >KIT-E554G-\ YEVQWKVV   | 10   | >KIT-E554G-r YGVQWKVV   | 24921 | 24911 |
| >KIT-E554G-\ YEVQWKVVE  | 11   | >KIT-E554G-r YGVQWKVVE  | 4770  | 4759  |
| >KIT-E554G-\ YEVQWKVV   | 373  | >KIT-E554G-r YGVQWKVV   | 24573 | 24200 |
| >KIT-E554G-\ YEVQWKVVE  | 343  | >KIT-E554G-r YGVQWKVVE  | 24657 | 24314 |
| >KIT-E554G-\ YEVQWKVV   | 307  | >KIT-E554G-r YGVQWKVV   | 23655 | 23348 |
| >KIT-E554G-\ YEVQWKVVE  | 59   | >KIT-E554G-r YGVQWKVVE  | 22233 | 22174 |

|                        |      |                        |       |       |
|------------------------|------|------------------------|-------|-------|
| >KIT-E554G-\ YEVQWKVV  | 169  | >KIT-E554G-r YGVQWKVV  | 30303 | 30134 |
| >KIT-E554G-\ YEVQWKVVE | 176  | >KIT-E554G-r YGVQWKVVE | 33722 | 33546 |
| >KIT-E554G-\ YEVQWKVVE | 3    | >KIT-E554G-r YGVQWKVVE | 5547  | 5544  |
| >KIT-E554G-\ MYEVQWKV  | 652  | >KIT-E554G-r MYGVQWKV  | 297   | 355   |
| >KIT-E554G-\ MYEVQWKV  | 246  | >KIT-E554G-r MYGVQWKV  | 65    | 181   |
| >KIT-E554G-\ MYEVQWKV\ | 2129 | >KIT-E554G-r MYGVQWKV  | 464   | 1665  |
| >KIT-E554G-\ MYEVQWKV  | 488  | >KIT-E554G-r MYGVQWKV  | 869   | 381   |
| >KIT-E554G-\ PMYEVQWK\ | 17   | >KIT-E554G-r PMYGVQWK\ | 44    | 27    |
| >KIT-E554G-\ PMYEVQWK\ | 18   | >KIT-E554G-r PMYGVQWK\ | 26    | 8     |
| >KIT-E554G-\ PMYEVQWK\ | 48   | >KIT-E554G-r PMYGVQWK\ | 151   | 103   |
| >KIT-E554G-\ PMYEVQWK\ | 33   | >KIT-E554G-r PMYGVQWK\ | 209   | 176   |
| >KIT-E554G-\ PMYEVQWK\ | 1    | >KIT-E554G-r PMYGVQWK\ | 2     | 1     |
| >KIT-E554G-\ PMYEVQWK\ | 4    | >KIT-E554G-r PMYGVQWK\ | 5     | 1     |
| >KIT-E554G-\ PMYEVQWK\ | 5    | >KIT-E554G-r PMYGVQWK\ | 18    | 13    |
| >KIT-E554G-\ PMYEVQWK\ | 97   | >KIT-E554G-r PMYGVQWK\ | 346   | 249   |
| >KIT-E554G-\ PMYEVQWK\ | 4    | >KIT-E554G-r PMYGVQWK\ | 4     | 0     |
| >KIT-E554G-\ PMYEVQWK\ | 11   | >KIT-E554G-r PMYGVQWK\ | 15    | 4     |
| >KIT-E554G-\ PMYEVQWK\ | 3    | >KIT-E554G-r PMYGVQWK\ | 4     | 1     |
| >KIT-E554G-\ PMYEVQWK\ | 54   | >KIT-E554G-r PMYGVQWK\ | 111   | 57    |
| >KIT-E554G-\ PMYEVQWK\ | 2    | >KIT-E554G-r PMYGVQWK\ | 2     | 0     |
| >KIT-E554G-\ PMYEVQWK\ | 10   | >KIT-E554G-r PMYGVQWK\ | 10    | 0     |
| >KIT-E554G-\ PMYEVQWK  | 129  | >KIT-E554G-r PMYGVQWK  | 95    | 34    |
| >KIT-E554G-\ PMYEVQWK\ | 145  | >KIT-E554G-r PMYGVQWK\ | 1115  | 970   |
| >KIT-E554G-\ KPMYEVQW  | 1456 | >KIT-E554G-r KPMYGVQW  | 106   | 1350  |
| >KIT-E554G-\ KPMYEVQW\ | 157  | >KIT-E554G-r KPMYGVQW\ | 40    | 117   |
| >KIT-E554G-\ KPMYEVQW\ | 136  | >KIT-E554G-r KPMYGVQW\ | 40    | 96    |
| >KIT-E554G-\ KPMYEVQW  | 20   | >KIT-E554G-r KPMYGVQW  | 28    | 8     |
| >KIT-E554G-\ KPMYEVQW\ | 68   | >KIT-E554G-r KPMYGVQW\ | 69    | 1     |
| >KIT-E554G-\ KPMYEVQW  | 199  | >KIT-E554G-r KPMYGVQW  | 191   | 8     |
| >KIT-E554G-\ KPMYEVQW  | 9    | >KIT-E554G-r KPMYGVQW  | 8     | 1     |
| >KIT-E554G-\ QKPMYEVQV | 1466 | >KIT-E554G-r QKPMYGVQV | 476   | 990   |
| >KIT-E554G-\ LQKPMYEV  | 327  | >KIT-E554G-r LQKPMYGV  | 780   | 453   |
| >KIT-E554G-\ LQKPMYEV  | 48   | >KIT-E554G-r LQKPMYGV  | 32    | 16    |
| >KIT-E554G-\ LQKPMYEV  | 34   | >KIT-E554G-r LQKPMYGV  | 46    | 12    |
| >KIT-E554G-\ LQKPMYEV  | 318  | >KIT-E554G-r LQKPMYGV  | 631   | 313   |
| >KIT-E554G-\ LQKPMYEVQ | 243  | >KIT-E554G-r LQKPMYGVQ | 79    | 164   |
| >KIT-E554G-\ LQKPMYEVQ | 415  | >KIT-E554G-r LQKPMYGVQ | 300   | 115   |
| >KIT-E554G-\ LQKPMYEV  | 403  | >KIT-E554G-r LQKPMYGV  | 464   | 61    |
| >KIT-E554G-\ LQKPMYEVQ | 230  | >KIT-E554G-r LQKPMYGVQ | 322   | 92    |
| >KIT-E554G-\ LQKPMYEVQ | 247  | >KIT-E554G-r LQKPMYGVQ | 122   | 125   |
| >KIT-E554G-\ LQKPMYEV  | 155  | >KIT-E554G-r LQKPMYGV  | 507   | 352   |
| >KIT-E554G-\ LQKPMYEVQ | 225  | >KIT-E554G-r LQKPMYGVQ | 205   | 20    |
| >KIT-E554G-\ LQKPMYEVQ | 692  | >KIT-E554G-r LQKPMYGVQ | 482   | 210   |



|                        |      |                         |       |       |
|------------------------|------|-------------------------|-------|-------|
| >KIT-E554G-\LQKPMYEVQ  | 168  | >KIT-E554G-r LQKPMYGVQ  | 262   | 94    |
| >KIT-E554G-\LQKPMYEVQ  | 230  | >KIT-E554G-r LQKPMYGVQ  | 132   | 98    |
| >KIT-E554G-\YLQKPMYEV  | 7    | >KIT-E554G-r YLQKPMYGV  | 8     | 1     |
| >KIT-E554G-\YLQKPMYEV  | 5    | >KIT-E554G-r YLQKPMYGV  | 5     | 0     |
| >KIT-E554G-\YLQKPMYEV  | 7    | >KIT-E554G-r YLQKPMYGV  | 5     | 2     |
| >KIT-E554G-\YLQKPMYEV  | 13   | >KIT-E554G-r YLQKPMYGV  | 9     | 4     |
| >KIT-E554G-\YLQKPMYE   | 1672 | >KIT-E554G-r YLQKPMYG   | 220   | 1452  |
| >KIT-E554G-\YLQKPMYEV  | 1    | >KIT-E554G-r YLQKPMYGV  | 1     | 0     |
| >KIT-E554G-\YLQKPMYEV  | 2    | >KIT-E554G-r YLQKPMYGV  | 2     | 0     |
| >KIT-E554G-\YLQKPMYEV  | 6    | >KIT-E554G-r YLQKPMYGV  | 6     | 0     |
| >KIT-E554G-\YLQKPMYEV  | 3    | >KIT-E554G-r YLQKPMYGV  | 3     | 0     |
| >KIT-E554G-\YLQKPMYEV  | 2    | >KIT-E554G-r YLQKPMYGV  | 2     | 0     |
| >KIT-E554G-\YLQKPMYEV( | 77   | >KIT-E554G-r YLQKPMYGV( | 234   | 157   |
| >KIT-E554G-\YLQKPMYEV  | 93   | >KIT-E554G-r YLQKPMYGV  | 100   | 7     |
| >KIT-E554G-\YLQKPMYEV  | 55   | >KIT-E554G-r YLQKPMYGV  | 26    | 29    |
| >KIT-E554G-\YLQKPMYEV( | 1384 | >KIT-E554G-r YLQKPMYGV( | 470   | 914   |
| >KIT-E554G-\YLQKPMYEV( | 124  | >KIT-E554G-r YLQKPMYGV( | 75    | 49    |
| >KIT-E554G-\KYLQKPMYE\ | 100  | >KIT-E554G-r KYLQKPMYG' | 94    | 6     |
| >KIT-E554G-\KYLQKPMYE\ | 307  | >KIT-E554G-r KYLQKPMYG' | 288   | 19    |
| >KIT-E554G-\KYLQKPMYE\ | 28   | >KIT-E554G-r KYLQKPMYG' | 98    | 70    |
| >KIT-E554G-\KYLQKPMYE\ | 360  | >KIT-E554G-r KYLQKPMYG' | 417   | 57    |
| >KIT-E554G-\KYLQKPMYE  | 2165 | >KIT-E554G-r KYLQKPMYG  | 285   | 1880  |
| >KIT-E554G-\KYLQKPMYE\ | 471  | >KIT-E554G-r KYLQKPMYG' | 694   | 223   |
| >KIT-E554G-\KYLQKPMYE  | 82   | >KIT-E554G-r KYLQKPMYG  | 393   | 311   |
| >KIT-E554G-\KYLQKPMYE\ | 121  | >KIT-E554G-r KYLQKPMYG' | 140   | 19    |
| >KIT-E554G-\KYLQKPMYE\ | 652  | >KIT-E554G-r KYLQKPMYG' | 347   | 305   |
| >KIT-E554G-\KYLQKPMYE  | 331  | >KIT-E554G-r KYLQKPMYG  | 206   | 125   |
| >KIT-E554G-\KYLQKPMYE\ | 56   | >KIT-E554G-r KYLQKPMYG' | 84    | 28    |
| >KIT-E554G-\KYLQKPMYE\ | 391  | >KIT-E554G-r KYLQKPMYG' | 362   | 29    |
| >KIT-E554G-\YKYLQKPMYE | 499  | >KIT-E554G-r YKYLQKPMYC | 750   | 251   |
| >KIT-E554G-\YKYLQKPMYE | 447  | >KIT-E554G-r YKYLQKPMYC | 398   | 49    |
| >KIT-E554G-\YKYLQKPMYE | 121  | >KIT-E554G-r YKYLQKPMYC | 119   | 2     |
| >KIT-E554G-\YKYLQKPMYE | 356  | >KIT-E554G-r YKYLQKPMYC | 379   | 23    |
| >KIT-E554G-\YKYLQKPMYE | 365  | >KIT-E554G-r YKYLQKPMYC | 548   | 183   |
| >KIT-E554G-\YKYLQKPMYE | 39   | >KIT-E554G-r YKYLQKPMYC | 91    | 52    |
| >KIT-E554K-v EVQWKVVEE | 1717 | >KIT-E554K-r KVQWKVVEE  | 99    | 1618  |
| >KIT-E554K-v EVQWKVVEE | 518  | >KIT-E554K-r KVQWKVVEE  | 14    | 504   |
| >KIT-E554K-v EVQWKVVEE | 147  | >KIT-E554K-r KVQWKVVEE  | 8549  | 8402  |
| >KIT-E554K-v YEVQWKVV  | 10   | >KIT-E554K-r YKVQWKVV   | 5227  | 5217  |
| >KIT-E554K-v YEVQWKVVE | 11   | >KIT-E554K-r YKVQWKVVE  | 451   | 440   |
| >KIT-E554K-v YEVQWKVV  | 2442 | >KIT-E554K-r YKVQWKVV   | 77    | 2365  |
| >KIT-E554K-v YEVQWKVVE | 2100 | >KIT-E554K-r YKVQWKVVE  | 86    | 2014  |
| >KIT-E554K-v YEVQWKVV  | 373  | >KIT-E554K-r YKVQWKVV   | 21977 | 21604 |

|                         |      |                         |       |       |
|-------------------------|------|-------------------------|-------|-------|
| >KIT-E554K-v YEVQWKVVE  | 343  | >KIT-E554K-r YKVQWKVVE  | 22046 | 21703 |
| >KIT-E554K-v YEVQWKVV   | 921  | >KIT-E554K-r YKVQWKVV   | 288   | 633   |
| >KIT-E554K-v YEVQWKVVE  | 1307 | >KIT-E554K-r YKVQWKVVE  | 498   | 809   |
| >KIT-E554K-v YEVQWKVV   | 307  | >KIT-E554K-r YKVQWKVV   | 21980 | 21673 |
| >KIT-E554K-v YEVQWKVVE  | 59   | >KIT-E554K-r YKVQWKVVE  | 18197 | 18138 |
| >KIT-E554K-v YEVQWKVV   | 169  | >KIT-E554K-r YKVQWKVV   | 20929 | 20760 |
| >KIT-E554K-v YEVQWKVVE  | 176  | >KIT-E554K-r YKVQWKVVE  | 25154 | 24978 |
| >KIT-E554K-v YEVQWKVVE  | 3    | >KIT-E554K-r YKVQWKVVE  | 567   | 564   |
| >KIT-E554K-v TYKYLQKPM\ | 3851 | >KIT-E554K-r TYKYLQKPM\ | 6     | 3845  |
| >KIT-E554K-v TYKYLQKPM\ | 7127 | >KIT-E554K-r TYKYLQKPM\ | 60    | 7067  |
| >KIT-E554K-v TYKYLQKPM\ | 8225 | >KIT-E554K-r TYKYLQKPM\ | 274   | 7951  |
| >KIT-E554K-v TYKYLQKPM\ | 7834 | >KIT-E554K-r TYKYLQKPM\ | 88    | 7746  |
| >KIT-E554K-v MYEVQWKV   | 246  | >KIT-E554K-r MYKVQWKV   | 154   | 92    |
| >KIT-E554K-v MYEVQWKV   | 7797 | >KIT-E554K-r MYKVQWKV   | 67    | 7730  |
| >KIT-E554K-v MYEVQWKV\  | 4099 | >KIT-E554K-r MYKVQWKV\  | 18    | 4081  |
| >KIT-E554K-v MYEVQWKV   | 488  | >KIT-E554K-r MYKVQWKV   | 808   | 320   |
| >KIT-E554K-v PMYEVQWK\  | 17   | >KIT-E554K-r PMYKVQWK\  | 73    | 56    |
| >KIT-E554K-v PMYEVQWK\  | 18   | >KIT-E554K-r PMYKVQWK\  | 58    | 40    |
| >KIT-E554K-v PMYEVQWK\  | 48   | >KIT-E554K-r PMYKVQWK\  | 229   | 181   |
| >KIT-E554K-v PMYEVQWK\  | 33   | >KIT-E554K-r PMYKVQWK\  | 401   | 368   |
| >KIT-E554K-v PMYEVQWK\  | 1    | >KIT-E554K-r PMYKVQWK\  | 2     | 1     |
| >KIT-E554K-v PMYEVQWK\  | 4    | >KIT-E554K-r PMYKVQWK\  | 8     | 4     |
| >KIT-E554K-v PMYEVQWK\  | 5    | >KIT-E554K-r PMYKVQWK\  | 20    | 15    |
| >KIT-E554K-v PMYEVQWK\  | 97   | >KIT-E554K-r PMYKVQWK\  | 387   | 290   |
| >KIT-E554K-v PMYEVQWK\  | 4    | >KIT-E554K-r PMYKVQWK\  | 5     | 1     |
| >KIT-E554K-v PMYEVQWK\  | 11   | >KIT-E554K-r PMYKVQWK\  | 21    | 10    |
| >KIT-E554K-v PMYEVQWK\  | 3    | >KIT-E554K-r PMYKVQWK\  | 7     | 4     |
| >KIT-E554K-v PMYEVQWK\  | 54   | >KIT-E554K-r PMYKVQWK\  | 339   | 285   |
| >KIT-E554K-v PMYEVQWK\  | 2    | >KIT-E554K-r PMYKVQWK\  | 4     | 2     |
| >KIT-E554K-v PMYEVQWK\  | 10   | >KIT-E554K-r PMYKVQWK\  | 22    | 12    |
| >KIT-E554K-v PMYEVQWK   | 129  | >KIT-E554K-r PMYKVQWK   | 85    | 44    |
| >KIT-E554K-v PMYEVQWK\  | 145  | >KIT-E554K-r PMYKVQWK\  | 1271  | 1126  |
| >KIT-E554K-v KPMYEVQW   | 1456 | >KIT-E554K-r KPMYKVQW   | 187   | 1269  |
| >KIT-E554K-v KPMYEVQW\  | 157  | >KIT-E554K-r KPMYKVQW\  | 36    | 121   |
| >KIT-E554K-v KPMYEVQW\  | 136  | >KIT-E554K-r KPMYKVQW\  | 41    | 95    |
| >KIT-E554K-v KPMYEVQW\  | 2842 | >KIT-E554K-r KPMYKVQW\  | 342   | 2500  |
| >KIT-E554K-v KPMYEVQW   | 20   | >KIT-E554K-r KPMYKVQW   | 36    | 16    |
| >KIT-E554K-v KPMYEVQW\  | 68   | >KIT-E554K-r KPMYKVQW\  | 47    | 21    |
| >KIT-E554K-v KPMYEVQW   | 199  | >KIT-E554K-r KPMYKVQW   | 470   | 271   |
| >KIT-E554K-v KPMYEVQW   | 9    | >KIT-E554K-r KPMYKVQW   | 10    | 1     |
| >KIT-E554K-v LQKPMYEV   | 327  | >KIT-E554K-r LQKPMYKV   | 1329  | 1002  |
| >KIT-E554K-v LQKPMYEV   | 48   | >KIT-E554K-r LQKPMYKV   | 86    | 38    |
| >KIT-E554K-v LQKPMYEV   | 34   | >KIT-E554K-r LQKPMYKV   | 199   | 165   |

|                         |       |                         |      |       |
|-------------------------|-------|-------------------------|------|-------|
| >KIT-E554K-v LQKPMYEV   | 318   | >KIT-E554K-r LQKPMYKV   | 920  | 602   |
| >KIT-E554K-v LQKPMYEVQ  | 243   | >KIT-E554K-r LQKPMYKVQ  | 86   | 157   |
| >KIT-E554K-v LQKPMYEVQ  | 415   | >KIT-E554K-r LQKPMYKVQ  | 221  | 194   |
| >KIT-E554K-v LQKPMYEV   | 403   | >KIT-E554K-r LQKPMYKV   | 1913 | 1510  |
| >KIT-E554K-v LQKPMYEVQ  | 230   | >KIT-E554K-r LQKPMYKVQ  | 621  | 391   |
| >KIT-E554K-v LQKPMYEVQ  | 247   | >KIT-E554K-r LQKPMYKVQ  | 268  | 21    |
| >KIT-E554K-v LQKPMYEV   | 155   | >KIT-E554K-r LQKPMYKV   | 309  | 154   |
| >KIT-E554K-v LQKPMYEVQ  | 225   | >KIT-E554K-r LQKPMYKVQ  | 236  | 11    |
| >KIT-E554K-v LQKPMYEVQ  | 168   | >KIT-E554K-r LQKPMYKVQ  | 322  | 154   |
| >KIT-E554K-v LQKPMYEVQ  | 230   | >KIT-E554K-r LQKPMYKVQ  | 260  | 30    |
| >KIT-E554K-v YLQKPMYEV  | 7     | >KIT-E554K-r YLQKPMYKV  | 9    | 2     |
| >KIT-E554K-v YLQKPMYEV  | 5     | >KIT-E554K-r YLQKPMYKV  | 9    | 4     |
| >KIT-E554K-v YLQKPMYEV  | 7     | >KIT-E554K-r YLQKPMYKV  | 9    | 2     |
| >KIT-E554K-v YLQKPMYEV  | 13    | >KIT-E554K-r YLQKPMYKV  | 27   | 14    |
| >KIT-E554K-v YLQKPMYEV  | 1     | >KIT-E554K-r YLQKPMYKV  | 2    | 1     |
| >KIT-E554K-v YLQKPMYEV  | 2     | >KIT-E554K-r YLQKPMYKV  | 3    | 1     |
| >KIT-E554K-v YLQKPMYEV  | 6     | >KIT-E554K-r YLQKPMYKV  | 7    | 1     |
| >KIT-E554K-v YLQKPMYEV  | 3     | >KIT-E554K-r YLQKPMYKV  | 4    | 1     |
| >KIT-E554K-v YLQKPMYE   | 1697  | >KIT-E554K-r YLQKPMYK   | 332  | 1365  |
| >KIT-E554K-v YLQKPMYEV  | 2     | >KIT-E554K-r YLQKPMYKV  | 2    | 0     |
| >KIT-E554K-v YLQKPMYEVQ | 77    | >KIT-E554K-r YLQKPMYKVQ | 219  | 142   |
| >KIT-E554K-v YLQKPMYE   | 18511 | >KIT-E554K-r YLQKPMYK   | 81   | 18430 |
| >KIT-E554K-v YLQKPMYE   | 22474 | >KIT-E554K-r YLQKPMYK   | 30   | 22444 |
| >KIT-E554K-v YLQKPMYE   | 21695 | >KIT-E554K-r YLQKPMYK   | 423  | 21272 |
| >KIT-E554K-v YLQKPMYEV  | 93    | >KIT-E554K-r YLQKPMYKV  | 255  | 162   |
| >KIT-E554K-v YLQKPMYEV  | 55    | >KIT-E554K-r YLQKPMYKV  | 84   | 29    |
| >KIT-E554K-v YLQKPMYEVQ | 124   | >KIT-E554K-r YLQKPMYKVQ | 153  | 29    |
| >KIT-E554K-v KYLQKPMYEV | 100   | >KIT-E554K-r KYLQKPMYKV | 225  | 125   |
| >KIT-E554K-v KYLQKPMYEV | 307   | >KIT-E554K-r KYLQKPMYKV | 612  | 305   |
| >KIT-E554K-v KYLQKPMYE  | 20106 | >KIT-E554K-r KYLQKPMYK  | 420  | 19686 |
| >KIT-E554K-v KYLQKPMYE  | 27570 | >KIT-E554K-r KYLQKPMYK  | 154  | 27416 |
| >KIT-E554K-v KYLQKPMYE  | 8250  | >KIT-E554K-r KYLQKPMYK  | 342  | 7908  |
| >KIT-E554K-v KYLQKPMYE  | 582   | >KIT-E554K-r KYLQKPMYK  | 220  | 362   |
| >KIT-E554K-v KYLQKPMYEV | 28    | >KIT-E554K-r KYLQKPMYKV | 48   | 20    |
| >KIT-E554K-v KYLQKPMYEV | 360   | >KIT-E554K-r KYLQKPMYKV | 559  | 199   |
| >KIT-E554K-v KYLQKPMYE  | 2165  | >KIT-E554K-r KYLQKPMYK  | 5    | 2160  |
| >KIT-E554K-v KYLQKPMYEV | 471   | >KIT-E554K-r KYLQKPMYKV | 633  | 162   |
| >KIT-E554K-v KYLQKPMYE  | 6250  | >KIT-E554K-r KYLQKPMYK  | 49   | 6201  |
| >KIT-E554K-v KYLQKPMYE  | 82    | >KIT-E554K-r KYLQKPMYK  | 9    | 73    |
| >KIT-E554K-v KYLQKPMYEV | 121   | >KIT-E554K-r KYLQKPMYKV | 80   | 41    |
| >KIT-E554K-v KYLQKPMYE  | 331   | >KIT-E554K-r KYLQKPMYK  | 262  | 69    |
| >KIT-E554K-v KYLQKPMYEV | 56    | >KIT-E554K-r KYLQKPMYKV | 85   | 29    |
| >KIT-E554K-v KYLQKPMYEV | 391   | >KIT-E554K-r KYLQKPMYKV | 427  | 36    |

|                         |       |                         |       |       |
|-------------------------|-------|-------------------------|-------|-------|
| >KIT-E554K-v YKYLQKPMYE | 499   | >KIT-E554K-r YKYLQKPMYf | 1139  | 640   |
| >KIT-E554K-v YKYLQKPMYE | 447   | >KIT-E554K-r YKYLQKPMYf | 1754  | 1307  |
| >KIT-E554K-v YKYLQKPMYE | 121   | >KIT-E554K-r YKYLQKPMYf | 251   | 130   |
| >KIT-E554K-v YKYLQKPMYE | 356   | >KIT-E554K-r YKYLQKPMYf | 729   | 373   |
| >KIT-E554K-v YKYLQKPMYE | 365   | >KIT-E554K-r YKYLQKPMYf | 762   | 397   |
| >KIT-E554K-v YKYLQKPMYE | 2189  | >KIT-E554K-r YKYLQKPMYf | 199   | 1990  |
| >KIT-E554K-v YKYLQKPMYE | 39    | >KIT-E554K-r YKYLQKPMYf | 77    | 38    |
| >KIT-E561D-\ EEINGNNYVY | 76    | >KIT-E561D-r DEINGNNY\  | 100   | 24    |
| >KIT-E561D-\ EEINGNNY   | 230   | >KIT-E561D-r DEINGNNY   | 1257  | 1027  |
| >KIT-E561D-\ EEINGNNYVY | 179   | >KIT-E561D-r DEINGNNY\  | 897   | 718   |
| >KIT-E561D-\ EEINGNNY   | 19    | >KIT-E561D-r DEINGNNY   | 66    | 47    |
| >KIT-E561D-\ EEINGNNYVY | 134   | >KIT-E561D-r DEINGNNY\  | 505   | 371   |
| >KIT-E561D-\ EEINGNNYVY | 328   | >KIT-E561D-r DEINGNNY\  | 372   | 44    |
| >KIT-E561D-\ EEINGNNYV  | 241   | >KIT-E561D-r DEINGNNYV  | 2242  | 2001  |
| >KIT-E561D-\ EEINGNNY   | 278   | >KIT-E561D-r DEINGNNY   | 12    | 266   |
| >KIT-E561D-\ EEINGNNYV  | 8467  | >KIT-E561D-r DEINGNNYV  | 362   | 8105  |
| >KIT-E561D-\ EEINGNNYVY | 322   | >KIT-E561D-r DEINGNNY\  | 131   | 191   |
| >KIT-E561D-\ EEINGNNYVY | 5553  | >KIT-E561D-r DEINGNNY\  | 184   | 5369  |
| >KIT-E561D-\ EEINGNNYV  | 234   | >KIT-E561D-r DEINGNNYV  | 1590  | 1356  |
| >KIT-E561D-\ EEINGNNYVY | 59    | >KIT-E561D-r DEINGNNY\  | 278   | 219   |
| >KIT-E561D-\ EEINGNNYVY | 300   | >KIT-E561D-r DEINGNNY\  | 2769  | 2469  |
| >KIT-E561D-\ EEINGNNYVY | 466   | >KIT-E561D-r DEINGNNY\  | 3074  | 2608  |
| >KIT-E561D-\ EEINGNNY   | 70    | >KIT-E561D-r DEINGNNY   | 226   | 156   |
| >KIT-E561D-\ EEINGNNYV  | 488   | >KIT-E561D-r DEINGNNYV  | 2086  | 1598  |
| >KIT-E561D-\ EEINGNNYVY | 180   | >KIT-E561D-r DEINGNNY\  | 820   | 640   |
| >KIT-E561D-\ EEINGNNYVY | 190   | >KIT-E561D-r DEINGNNY\  | 849   | 659   |
| >KIT-E561D-\ EEINGNNYV  | 74    | >KIT-E561D-r DEINGNNYV  | 3139  | 3065  |
| >KIT-E561D-\ EEINGNNYVY | 97    | >KIT-E561D-r DEINGNNY\  | 5609  | 5512  |
| >KIT-E561D-\ EEINGNNYV  | 305   | >KIT-E561D-r DEINGNNYV  | 1336  | 1031  |
| >KIT-E561D-\ EEINGNNYVY | 63    | >KIT-E561D-r DEINGNNY\  | 242   | 179   |
| >KIT-E561D-\ VEEINGNNY\ | 328   | >KIT-E561D-r VDEINGNNY\ | 6817  | 6489  |
| >KIT-E561D-\ VEEINGNNY\ | 94    | >KIT-E561D-r VDEINGNNY\ | 5353  | 5259  |
| >KIT-E561D-\ VEEINGNNY\ | 377   | >KIT-E561D-r VDEINGNNY\ | 13987 | 13610 |
| >KIT-E561D-\ VEEINGNNY\ | 12596 | >KIT-E561D-r VDEINGNNY\ | 479   | 12117 |
| >KIT-E561D-\ VVEEINGNNY | 547   | >KIT-E561D-r VVDEINGNN\ | 364   | 183   |
| >KIT-E561D-\ VVEEINGNNY | 1737  | >KIT-E561D-r VVDEINGNN\ | 124   | 1613  |
| >KIT-E561D-\ VVEEINGNNY | 217   | >KIT-E561D-r VVDEINGNN\ | 73    | 144   |
| >KIT-E561D-\ VVEEINGNNY | 87    | >KIT-E561D-r VVDEINGNN\ | 18    | 69    |
| >KIT-E561D-\ VVEEINGNNY | 121   | >KIT-E561D-r VVDEINGNN\ | 8     | 113   |
| >KIT-E561D-\ VVEEINGNNY | 627   | >KIT-E561D-r VVDEINGNN\ | 51    | 576   |
| >KIT-E561D-\ VVEEINGNNY | 977   | >KIT-E561D-r VVDEINGNN\ | 27    | 950   |
| >KIT-E561D-\ VVEEINGNNY | 1150  | >KIT-E561D-r VVDEINGNN\ | 24    | 1126  |
| >KIT-E561D-\ VVEEINGNNY | 35    | >KIT-E561D-r VVDEINGNN\ | 21    | 14    |

|                           |      |                          |       |       |
|---------------------------|------|--------------------------|-------|-------|
| >KIT-E561D-\\ VVEEINGNNY  | 316  | >KIT-E561D-r VVDEINGNN`  | 293   | 23    |
| >KIT-E561D-\\ VVEEINGNNY  | 167  | >KIT-E561D-r VVDEINGNN`  | 171   | 4     |
| >KIT-E561D-\\ VVEEINGNNY  | 597  | >KIT-E561D-r VVDEINGNN`  | 28    | 569   |
| >KIT-E561D-\\ VVEEINGNNY  | 178  | >KIT-E561D-r VVDEINGNN`  | 65    | 113   |
| >KIT-E561D-\\ KVVVEEINGNN | 31   | >KIT-E561D-r KVVDEINGNN` | 44    | 13    |
| >KIT-E561D-\\ KVVVEEINGNN | 61   | >KIT-E561D-r KVVDEINGNN` | 289   | 228   |
| >KIT-E561D-\\ KVVVEEINGNN | 617  | >KIT-E561D-r KVVDEINGNN` | 262   | 355   |
| >KIT-E561D-\\ KVVVEEINGNN | 114  | >KIT-E561D-r KVVDEINGNN` | 72    | 42    |
| >KIT-E561D-\\ KVVVEEINGNN | 114  | >KIT-E561D-r KVVDEINGNN` | 179   | 65    |
| >KIT-E561D-\\ KVVVEEINGNN | 100  | >KIT-E561D-r KVVDEINGNN` | 67    | 33    |
| >KIT-E561D-\\ QWKVVEEI    | 577  | >KIT-E561D-r QWKVVEEI    | 412   | 165   |
| >KIT-E561D-\\ VQWKVVEEI   | 154  | >KIT-E561D-r VQWKVVEEI   | 94    | 60    |
| >KIT-E561D-\\ VQWKVVEEI   | 91   | >KIT-E561D-r VQWKVVEEI   | 132   | 41    |
| >KIT-E561D-\\ VQWKVVEEI   | 43   | >KIT-E561D-r VQWKVVEEI   | 57    | 14    |
| >KIT-E561D-\\ VQWKVVEEI   | 17   | >KIT-E561D-r VQWKVVEEI   | 28    | 11    |
| >KIT-E561D-\\ VQWKVVEEI   | 75   | >KIT-E561D-r VQWKVVEEI   | 68    | 7     |
| >KIT-E561D-\\ VQWKVVEEI   | 468  | >KIT-E561D-r VQWKVVEEI   | 986   | 518   |
| >KIT-E561D-\\ VQWKVVEEI   | 57   | >KIT-E561D-r VQWKVVEEI   | 130   | 73    |
| >KIT-E561D-\\ EVQWKVVEE   | 147  | >KIT-E561D-r EVQWKVVEE   | 312   | 165   |
| >KIT-E561D-\\ YEVQWKVVE   | 11   | >KIT-E561D-r YEVQWKVVD   | 9     | 2     |
| >KIT-E561D-\\ YEVQWKVVE   | 343  | >KIT-E561D-r YEVQWKVVD   | 633   | 290   |
| >KIT-E561D-\\ YEVQWKVVE   | 59   | >KIT-E561D-r YEVQWKVVD   | 73    | 14    |
| >KIT-E561D-\\ YEVQWKVVE   | 176  | >KIT-E561D-r YEVQWKVVD   | 137   | 39    |
| >KIT-E561D-\\ YEVQWKVVE   | 3    | >KIT-E561D-r YEVQWKVVD   | 3     | 0     |
| >KIT-E561K-v EEINGNNYVY   | 76   | >KIT-E561K-r KEINGNNYVY  | 186   | 110   |
| >KIT-E561K-v EEINGNNYV    | 2192 | >KIT-E561K-r KEINGNNYV   | 111   | 2081  |
| >KIT-E561K-v EEINGNNY     | 230  | >KIT-E561K-r KEINGNNY    | 8166  | 7936  |
| >KIT-E561K-v EEINGNNYVY   | 179  | >KIT-E561K-r KEINGNNYVY  | 7123  | 6944  |
| >KIT-E561K-v EEINGNNY     | 19   | >KIT-E561K-r KEINGNNY    | 1062  | 1043  |
| >KIT-E561K-v EEINGNNYVY   | 134  | >KIT-E561K-r KEINGNNYVY  | 5088  | 4954  |
| >KIT-E561K-v EEINGNNY     | 3378 | >KIT-E561K-r KEINGNNY    | 309   | 3069  |
| >KIT-E561K-v EEINGNNYVY   | 328  | >KIT-E561K-r KEINGNNYVY  | 120   | 208   |
| >KIT-E561K-v EEINGNNYV    | 241  | >KIT-E561K-r KEINGNNYV   | 15064 | 14823 |
| >KIT-E561K-v EEINGNNYVY   | 766  | >KIT-E561K-r KEINGNNYVY  | 180   | 586   |
| >KIT-E561K-v EEINGNNY     | 1411 | >KIT-E561K-r KEINGNNY    | 78    | 1333  |
| >KIT-E561K-v EEINGNNYVY   | 1311 | >KIT-E561K-r KEINGNNYVY  | 94    | 1217  |
| >KIT-E561K-v EEINGNNYVY   | 3853 | >KIT-E561K-r KEINGNNYVY  | 491   | 3362  |
| >KIT-E561K-v EEINGNNY     | 278  | >KIT-E561K-r KEINGNNY    | 838   | 560   |
| >KIT-E561K-v EEINGNNYVY   | 322  | >KIT-E561K-r KEINGNNYVY  | 1325  | 1003  |
| >KIT-E561K-v EEINGNNYV    | 234  | >KIT-E561K-r KEINGNNYV   | 40    | 194   |
| >KIT-E561K-v EEINGNNYVY   | 59   | >KIT-E561K-r KEINGNNYVY  | 15    | 44    |
| >KIT-E561K-v EEINGNNYV    | 595  | >KIT-E561K-r KEINGNNYV   | 83    | 512   |
| >KIT-E561K-v EEINGNNYVY   | 300  | >KIT-E561K-r KEINGNNYVY  | 47    | 253   |

|                          |       |                         |       |       |
|--------------------------|-------|-------------------------|-------|-------|
| >KIT-E561K-v EEINGNNYVY  | 466   | >KIT-E561K-r KEINGNNYVY | 906   | 440   |
| >KIT-E561K-v EEINGNNY    | 70    | >KIT-E561K-r KEINGNNY   | 153   | 83    |
| >KIT-E561K-v EEINGNNYV   | 488   | >KIT-E561K-r KEINGNNYV  | 1247  | 759   |
| >KIT-E561K-v EEINGNNYVY  | 180   | >KIT-E561K-r KEINGNNYVY | 373   | 193   |
| >KIT-E561K-v EEINGNNYVY  | 190   | >KIT-E561K-r KEINGNNYVY | 490   | 300   |
| >KIT-E561K-v EEINGNNYV   | 74    | >KIT-E561K-r KEINGNNYV  | 237   | 163   |
| >KIT-E561K-v EEINGNNYVY  | 97    | >KIT-E561K-r KEINGNNYVY | 375   | 278   |
| >KIT-E561K-v EEINGNNYV   | 305   | >KIT-E561K-r KEINGNNYV  | 23    | 282   |
| >KIT-E561K-v EEINGNNYVY  | 63    | >KIT-E561K-r KEINGNNYVY | 8     | 55    |
| >KIT-E561K-v VEEINGNNY\  | 328   | >KIT-E561K-r VKEINGNNY\ | 8159  | 7831  |
| >KIT-E561K-v VEEINGNNY\  | 694   | >KIT-E561K-r VKEINGNNY\ | 314   | 380   |
| >KIT-E561K-v VEEINGNNY   | 5289  | >KIT-E561K-r VKEINGNNY  | 275   | 5014  |
| >KIT-E561K-v VEEINGNNY\  | 5175  | >KIT-E561K-r VKEINGNNY\ | 360   | 4815  |
| >KIT-E561K-v VEEINGNNY\  | 94    | >KIT-E561K-r VKEINGNNY\ | 10057 | 9963  |
| >KIT-E561K-v VEEINGNNY\  | 377   | >KIT-E561K-r VKEINGNNY\ | 27738 | 27361 |
| >KIT-E561K-v PMYEVQWK\   | 19407 | >KIT-E561K-r PMYEVQWK\  | 110   | 19297 |
| >KIT-E561K-v VVEEINGNNY  | 217   | >KIT-E561K-r VVKEINGNNY | 309   | 92    |
| >KIT-E561K-v VVEEINGNNY  | 1025  | >KIT-E561K-r VVKEINGNNY | 31    | 994   |
| >KIT-E561K-v VVEEINGNNY  | 87    | >KIT-E561K-r VVKEINGNNY | 170   | 83    |
| >KIT-E561K-v VVEEINGNNY  | 121   | >KIT-E561K-r VVKEINGNNY | 252   | 131   |
| >KIT-E561K-v VVEEINGNNY  | 35    | >KIT-E561K-r VVKEINGNNY | 42    | 7     |
| >KIT-E561K-v VVEEINGNNY  | 11517 | >KIT-E561K-r VVKEINGNNY | 301   | 11216 |
| >KIT-E561K-v VVEEINGNNY  | 316   | >KIT-E561K-r VVKEINGNNY | 462   | 146   |
| >KIT-E561K-v VVEEINGNNY  | 167   | >KIT-E561K-r VVKEINGNNY | 116   | 51    |
| >KIT-E561K-v VVEEINGNNY  | 178   | >KIT-E561K-r VVKEINGNNY | 121   | 57    |
| >KIT-E561K-v KVVVEEINGNN | 31    | >KIT-E561K-r KVVKEINGNN | 62    | 31    |
| >KIT-E561K-v KVVVEEINGNN | 61    | >KIT-E561K-r KVVKEINGNN | 174   | 113   |
| >KIT-E561K-v KVVVEEINGNN | 114   | >KIT-E561K-r KVVKEINGNN | 110   | 4     |
| >KIT-E561K-v KVVVEEINGNN | 114   | >KIT-E561K-r KVVKEINGNN | 50    | 64    |
| >KIT-E561K-v KVVVEEINGNN | 100   | >KIT-E561K-r KVVKEINGNN | 190   | 90    |
| >KIT-E561K-v VQWKVVVEI   | 154   | >KIT-E561K-r VQWKVVKEI  | 43    | 111   |
| >KIT-E561K-v VQWKVVVEI   | 91    | >KIT-E561K-r VQWKVVKEI  | 573   | 482   |
| >KIT-E561K-v VQWKVVVEI   | 43    | >KIT-E561K-r VQWKVVKEI  | 314   | 271   |
| >KIT-E561K-v VQWKVVVEI   | 17    | >KIT-E561K-r VQWKVVKEI  | 67    | 50    |
| >KIT-E561K-v VQWKVVVEI   | 75    | >KIT-E561K-r VQWKVVKEI  | 442   | 367   |
| >KIT-E561K-v VQWKVVVEI   | 468   | >KIT-E561K-r VQWKVVKEI  | 1454  | 986   |
| >KIT-E561K-v VQWKVVVEI   | 57    | >KIT-E561K-r VQWKVVKEI  | 31    | 26    |
| >KIT-E561K-v EVQWKVVV    | 26782 | >KIT-E561K-r EVQWKVVV   | 365   | 26417 |
| >KIT-E561K-v EVQWKVVV    | 7397  | >KIT-E561K-r EVQWKVVV   | 33    | 7364  |
| >KIT-E561K-v EVQWKVVVE   | 147   | >KIT-E561K-r EVQWKVVVE  | 567   | 420   |
| >KIT-E561K-v YEVQWKVVV   | 11    | >KIT-E561K-r YEVQWKVVV  | 7     | 4     |
| >KIT-E561K-v YEVQWKVVV   | 343   | >KIT-E561K-r YEVQWKVVV  | 324   | 19    |
| >KIT-E561K-v YEVQWKVVV   | 59    | >KIT-E561K-r YEVQWKVVV  | 252   | 193   |

|                         |       |                         |       |       |
|-------------------------|-------|-------------------------|-------|-------|
| >KIT-E561K-v YEVQWKVVE  | 176   | >KIT-E561K-r YEVQWKVVK  | 184   | 8     |
| >KIT-E561K-v YEVQWKVVE  | 3     | >KIT-E561K-r YEVQWKVVK  | 4     | 1     |
| >KIT-E561K-v MYEVQWKV\  | 15128 | >KIT-E561K-r MYEVQWKV\  | 349   | 14779 |
| >KIT-E561K-v MYEVQWKV\  | 14772 | >KIT-E561K-r MYEVQWKV\  | 330   | 14442 |
| >KIT-E562A-v EINGNNYV   | 7303  | >KIT-E562A-r AINGNNYV   | 238   | 7065  |
| >KIT-E562A-v EINGNNYV   | 299   | >KIT-E562A-r AINGNNYV   | 13    | 286   |
| >KIT-E562A-v EINGNNYVYI | 1973  | >KIT-E562A-r AINGNNYVYI | 313   | 1660  |
| >KIT-E562A-v EINGNNYV   | 1089  | >KIT-E562A-r AINGNNYV   | 18    | 1071  |
| >KIT-E562A-v EINGNNYVYI | 985   | >KIT-E562A-r AINGNNYVYI | 176   | 809   |
| >KIT-E562A-v EINGNNYV   | 2776  | >KIT-E562A-r AINGNNYV   | 79    | 2697  |
| >KIT-E562A-v EINGNNYV   | 64    | >KIT-E562A-r AINGNNYV   | 8     | 56    |
| >KIT-E562A-v EINGNNYVYI | 229   | >KIT-E562A-r AINGNNYVYI | 24    | 205   |
| >KIT-E562A-v EINGNNYV   | 1535  | >KIT-E562A-r AINGNNYV   | 70    | 1465  |
| >KIT-E562A-v EINGNNYVYI | 3474  | >KIT-E562A-r AINGNNYVYI | 253   | 3221  |
| >KIT-E562A-v EINGNNYV   | 442   | >KIT-E562A-r AINGNNYV   | 36    | 406   |
| >KIT-E562A-v EINGNNYVYI | 4089  | >KIT-E562A-r AINGNNYVYI | 431   | 3658  |
| >KIT-E562A-v EINGNNYV   | 41    | >KIT-E562A-r AINGNNYV   | 32    | 9     |
| >KIT-E562A-v EINGNNYVYI | 257   | >KIT-E562A-r AINGNNYVYI | 277   | 20    |
| >KIT-E562A-v EINGNNYV   | 34    | >KIT-E562A-r AINGNNYV   | 4     | 30    |
| >KIT-E562A-v EINGNNYVYI | 1941  | >KIT-E562A-r AINGNNYVYI | 62    | 1879  |
| >KIT-E562A-v EINGNNYVY  | 7584  | >KIT-E562A-r AINGNNYVY  | 377   | 7207  |
| >KIT-E562A-v EINGNNYVY  | 203   | >KIT-E562A-r AINGNNYVY  | 9980  | 9777  |
| >KIT-E562A-v EINGNNYVY  | 17    | >KIT-E562A-r AINGNNYVY  | 261   | 244   |
| >KIT-E562A-v EINGNNYVY  | 425   | >KIT-E562A-r AINGNNYVY  | 9411  | 8986  |
| >KIT-E562A-v EINGNNYVY  | 218   | >KIT-E562A-r AINGNNYVY  | 65    | 153   |
| >KIT-E562A-v EINGNNYVYI | 12497 | >KIT-E562A-r AINGNNYVYI | 462   | 12035 |
| >KIT-E562A-v EINGNNYVY  | 70    | >KIT-E562A-r AINGNNYVY  | 14    | 56    |
| >KIT-E562A-v EINGNNYVY  | 1305  | >KIT-E562A-r AINGNNYVY  | 136   | 1169  |
| >KIT-E562A-v EINGNNYVYI | 1170  | >KIT-E562A-r AINGNNYVYI | 158   | 1012  |
| >KIT-E562A-v EINGNNYVY  | 340   | >KIT-E562A-r AINGNNYVY  | 10585 | 10245 |
| >KIT-E562A-v EINGNNYV   | 8     | >KIT-E562A-r AINGNNYV   | 134   | 126   |
| >KIT-E562A-v EINGNNYVYI | 101   | >KIT-E562A-r AINGNNYVYI | 1485  | 1384  |
| >KIT-E562A-v EINGNNYV   | 11    | >KIT-E562A-r AINGNNYV   | 833   | 822   |
| >KIT-E562A-v EINGNNYVYI | 36    | >KIT-E562A-r AINGNNYVYI | 2378  | 2342  |
| >KIT-E562A-v EINGNNYVY  | 515   | >KIT-E562A-r AINGNNYVY  | 108   | 407   |
| >KIT-E562A-v EINGNNYVY  | 168   | >KIT-E562A-r AINGNNYVY  | 853   | 685   |
| >KIT-E562A-v EINGNNYVY  | 1173  | >KIT-E562A-r AINGNNYVY  | 308   | 865   |
| >KIT-E562A-v EINGNNYVY  | 81    | >KIT-E562A-r AINGNNYVY  | 82    | 1     |
| >KIT-E562A-v EEINGNNYVY | 76    | >KIT-E562A-r EAINGNNYV\ | 18983 | 18907 |
| >KIT-E562A-v EEINGNNY   | 2719  | >KIT-E562A-r EAINGNNY   | 42    | 2677  |
| >KIT-E562A-v EEINGNNY   | 230   | >KIT-E562A-r EAINGNNY   | 14    | 216   |
| >KIT-E562A-v EEINGNNYVY | 179   | >KIT-E562A-r EAINGNNYV\ | 12    | 167   |
| >KIT-E562A-v EEINGNNY   | 19    | >KIT-E562A-r EAINGNNY   | 11    | 8     |

|                         |       |                         |       |       |
|-------------------------|-------|-------------------------|-------|-------|
| >KIT-E562A-v EEINGNNYVY | 134   | >KIT-E562A-r EAINGNNYVY | 66    | 68    |
| >KIT-E562A-v EEINGNNYVY | 328   | >KIT-E562A-r EAINGNNYVY | 123   | 205   |
| >KIT-E562A-v EEINGNNY   | 9107  | >KIT-E562A-r EAINGNNY   | 288   | 8819  |
| >KIT-E562A-v EEINGNNYVY | 13984 | >KIT-E562A-r EAINGNNYVY | 250   | 13734 |
| >KIT-E562A-v EEINGNNYV  | 241   | >KIT-E562A-r EAINGNNYV  | 7     | 234   |
| >KIT-E562A-v EEINGNNYVY | 1081  | >KIT-E562A-r EAINGNNYVY | 9     | 1072  |
| >KIT-E562A-v EEINGNNYV  | 1490  | >KIT-E562A-r EAINGNNYV  | 7     | 1483  |
| >KIT-E562A-v EEINGNNYVY | 4644  | >KIT-E562A-r EAINGNNYVY | 22    | 4622  |
| >KIT-E562A-v EEINGNNYVY | 766   | >KIT-E562A-r EAINGNNYVY | 369   | 397   |
| >KIT-E562A-v EEINGNNY   | 278   | >KIT-E562A-r EAINGNNY   | 18142 | 17864 |
| >KIT-E562A-v EEINGNNYVY | 322   | >KIT-E562A-r EAINGNNYVY | 29619 | 29297 |
| >KIT-E562A-v EEINGNNY   | 5187  | >KIT-E562A-r EAINGNNY   | 92    | 5095  |
| >KIT-E562A-v EEINGNNYV  | 234   | >KIT-E562A-r EAINGNNYV  | 19834 | 19600 |
| >KIT-E562A-v EEINGNNYVY | 59    | >KIT-E562A-r EAINGNNYVY | 17988 | 17929 |
| >KIT-E562A-v EEINGNNYVY | 300   | >KIT-E562A-r EAINGNNYVY | 37641 | 37341 |
| >KIT-E562A-v EEINGNNYVY | 466   | >KIT-E562A-r EAINGNNYVY | 24500 | 24034 |
| >KIT-E562A-v EEINGNNY   | 70    | >KIT-E562A-r EAINGNNY   | 21319 | 21249 |
| >KIT-E562A-v EEINGNNYV  | 488   | >KIT-E562A-r EAINGNNYV  | 34484 | 33996 |
| >KIT-E562A-v EEINGNNYVY | 180   | >KIT-E562A-r EAINGNNYVY | 24349 | 24169 |
| >KIT-E562A-v EEINGNNYVY | 190   | >KIT-E562A-r EAINGNNYVY | 30877 | 30687 |
| >KIT-E562A-v EEINGNNYV  | 74    | >KIT-E562A-r EAINGNNYV  | 25941 | 25867 |
| >KIT-E562A-v EEINGNNYVY | 97    | >KIT-E562A-r EAINGNNYVY | 29421 | 29324 |
| >KIT-E562A-v EEINGNNYV  | 305   | >KIT-E562A-r EAINGNNYV  | 32201 | 31896 |
| >KIT-E562A-v EEINGNNYVY | 63    | >KIT-E562A-r EAINGNNYVY | 26311 | 26248 |
| >KIT-E562A-v VEEINGNNYV | 328   | >KIT-E562A-r VEAINGNNYV | 161   | 167   |
| >KIT-E562A-v VEEINGNNYV | 694   | >KIT-E562A-r VEAINGNNYV | 132   | 562   |
| >KIT-E562A-v VEEINGNNY  | 821   | >KIT-E562A-r VEAINGNNY  | 349   | 472   |
| >KIT-E562A-v VEEINGNNYV | 94    | >KIT-E562A-r VEAINGNNYV | 45    | 49    |
| >KIT-E562A-v VEEINGNNYV | 377   | >KIT-E562A-r VEAINGNNYV | 472   | 95    |
| >KIT-E562A-v VVEEINGNNY | 217   | >KIT-E562A-r VVEAINGNNY | 198   | 19    |
| >KIT-E562A-v VVEEINGNNY | 87    | >KIT-E562A-r VVEAINGNNY | 202   | 115   |
| >KIT-E562A-v VVEEINGNNY | 121   | >KIT-E562A-r VVEAINGNNY | 576   | 455   |
| >KIT-E562A-v VVEEINGNNY | 35    | >KIT-E562A-r VVEAINGNNY | 91    | 56    |
| >KIT-E562A-v VVEEINGNNY | 316   | >KIT-E562A-r VVEAINGNNY | 229   | 87    |
| >KIT-E562A-v VVEEINGNNY | 167   | >KIT-E562A-r VVEAINGNNY | 133   | 34    |
| >KIT-E562A-v VVEEINGNNY | 178   | >KIT-E562A-r VVEAINGNNY | 75    | 103   |
| >KIT-E562A-v KVVEEINGNN | 31    | >KIT-E562A-r KVVEAINGNN | 30    | 1     |
| >KIT-E562A-v KVVEEINGNN | 61    | >KIT-E562A-r KVVEAINGNN | 38    | 23    |
| >KIT-E562A-v KVVEEINGNN | 114   | >KIT-E562A-r KVVEAINGNN | 100   | 14    |
| >KIT-E562A-v KVVEEINGNN | 114   | >KIT-E562A-r KVVEAINGNN | 156   | 42    |
| >KIT-E562A-v KVVEEINGNN | 100   | >KIT-E562A-r KVVEAINGNN | 48    | 52    |
| >KIT-E562A-v KVVEEINGNN | 1540  | >KIT-E562A-r KVVEAINGNN | 484   | 1056  |
| >KIT-E562A-v QWKVVEEI   | 577   | >KIT-E562A-r QWKVVEAI   | 236   | 341   |



|                         |       |                         |       |       |
|-------------------------|-------|-------------------------|-------|-------|
| >KIT-E562A-v VQWKVVEEI  | 154   | >KIT-E562A-r VQWKVVEAI  | 278   | 124   |
| >KIT-E562A-v VQWKVVEE   | 16373 | >KIT-E562A-r VQWKVVEA   | 163   | 16210 |
| >KIT-E562A-v VQWKVVEEI  | 91    | >KIT-E562A-r VQWKVVEAI  | 190   | 99    |
| >KIT-E562A-v VQWKVVEE   | 6877  | >KIT-E562A-r VQWKVVEA   | 95    | 6782  |
| >KIT-E562A-v VQWKVVEEI  | 43    | >KIT-E562A-r VQWKVVEAI  | 26    | 17    |
| >KIT-E562A-v VQWKVVEE   | 14142 | >KIT-E562A-r VQWKVVEA   | 114   | 14028 |
| >KIT-E562A-v VQWKVVEEI  | 17    | >KIT-E562A-r VQWKVVEAI  | 19    | 2     |
| >KIT-E562A-v VQWKVVEE   | 18797 | >KIT-E562A-r VQWKVVEA   | 295   | 18502 |
| >KIT-E562A-v VQWKVVEEI  | 75    | >KIT-E562A-r VQWKVVEAI  | 215   | 140   |
| >KIT-E562A-v VQWKVVEE   | 468   | >KIT-E562A-r VQWKVVEA   | 124   | 344   |
| >KIT-E562A-v VQWKVVEEI  | 2782  | >KIT-E562A-r VQWKVVEAI  | 232   | 2550  |
| >KIT-E562A-v VQWKVVEE   | 57    | >KIT-E562A-r VQWKVVEA   | 24    | 33    |
| >KIT-E562A-v VQWKVVEEI  | 1825  | >KIT-E562A-r VQWKVVEAI  | 299   | 1526  |
| >KIT-E562A-v EVQWKVVEE  | 518   | >KIT-E562A-r EVQWKVVEA  | 167   | 351   |
| >KIT-E562A-v EVQWKVVEE  | 18353 | >KIT-E562A-r EVQWKVVEA  | 125   | 18228 |
| >KIT-E562A-v EVQWKVVEE  | 147   | >KIT-E562A-r EVQWKVVEA  | 125   | 22    |
| >KIT-E562A-v YEVQWKVVE  | 11    | >KIT-E562A-r YEVQWKVVE  | 15    | 4     |
| >KIT-E562A-v YEVQWKVVE  | 343   | >KIT-E562A-r YEVQWKVVE  | 129   | 214   |
| >KIT-E562A-v YEVQWKVVE  | 1307  | >KIT-E562A-r YEVQWKVVE  | 221   | 1086  |
| >KIT-E562A-v YEVQWKVVE  | 59    | >KIT-E562A-r YEVQWKVVE  | 27    | 32    |
| >KIT-E562A-v YEVQWKVVE  | 1019  | >KIT-E562A-r YEVQWKVVE  | 441   | 578   |
| >KIT-E562A-v YEVQWKVVE  | 176   | >KIT-E562A-r YEVQWKVVE  | 161   | 15    |
| >KIT-E562A-v YEVQWKVVE  | 4334  | >KIT-E562A-r YEVQWKVVE  | 302   | 4032  |
| >KIT-E562A-v YEVQWKVVE  | 3     | >KIT-E562A-r YEVQWKVVE  | 3     | 0     |
| >KIT-E562K-v EINGNNYV   | 7303  | >KIT-E562K-r KINGNNYV   | 103   | 7200  |
| >KIT-E562K-v EINGNNYV   | 299   | >KIT-E562K-r KINGNNYV   | 15    | 284   |
| >KIT-E562K-v EINGNNYVYI | 1973  | >KIT-E562K-r KINGNNYVYI | 303   | 1670  |
| >KIT-E562K-v EINGNNYV   | 1089  | >KIT-E562K-r KINGNNYV   | 20    | 1069  |
| >KIT-E562K-v EINGNNYVYI | 985   | >KIT-E562K-r KINGNNYVYI | 178   | 807   |
| >KIT-E562K-v EINGNNYV   | 2776  | >KIT-E562K-r KINGNNYV   | 55    | 2721  |
| >KIT-E562K-v EINGNNYV   | 64    | >KIT-E562K-r KINGNNYV   | 8     | 56    |
| >KIT-E562K-v EINGNNYVYI | 229   | >KIT-E562K-r KINGNNYVYI | 22    | 207   |
| >KIT-E562K-v EINGNNYV   | 1535  | >KIT-E562K-r KINGNNYV   | 35    | 1500  |
| >KIT-E562K-v EINGNNYVYI | 3474  | >KIT-E562K-r KINGNNYVYI | 102   | 3372  |
| >KIT-E562K-v EINGNNYV   | 442   | >KIT-E562K-r KINGNNYV   | 30    | 412   |
| >KIT-E562K-v EINGNNYVYI | 4089  | >KIT-E562K-r KINGNNYVYI | 347   | 3742  |
| >KIT-E562K-v EINGNNYV   | 41    | >KIT-E562K-r KINGNNYV   | 29    | 12    |
| >KIT-E562K-v EINGNNYVYI | 257   | >KIT-E562K-r KINGNNYVYI | 227   | 30    |
| >KIT-E562K-v EINGNNYV   | 34    | >KIT-E562K-r KINGNNYV   | 7     | 27    |
| >KIT-E562K-v EINGNNYVYI | 1941  | >KIT-E562K-r KINGNNYVYI | 255   | 1686  |
| >KIT-E562K-v EINGNNYVY  | 7584  | >KIT-E562K-r KINGNNYVY  | 490   | 7094  |
| >KIT-E562K-v EINGNNYVY  | 203   | >KIT-E562K-r KINGNNYVY  | 17117 | 16914 |
| >KIT-E562K-v EINGNNYVY  | 17    | >KIT-E562K-r KINGNNYVY  | 1733  | 1716  |

|                         |       |                         |       |       |
|-------------------------|-------|-------------------------|-------|-------|
| >KIT-E562K-v EINGNNYVY  | 425   | >KIT-E562K-r KINGNNYVY  | 9943  | 9518  |
| >KIT-E562K-v EINGNNYVY  | 218   | >KIT-E562K-r KINGNNYVY  | 79    | 139   |
| >KIT-E562K-v EINGNNYV   | 15394 | >KIT-E562K-r KINGNNYV   | 244   | 15150 |
| >KIT-E562K-v EINGNNYVYI | 12497 | >KIT-E562K-r KINGNNYVYI | 73    | 12424 |
| >KIT-E562K-v EINGNNYVY  | 70    | >KIT-E562K-r KINGNNYVY  | 8     | 62    |
| >KIT-E562K-v EINGNNYVY  | 1305  | >KIT-E562K-r KINGNNYVY  | 23    | 1282  |
| >KIT-E562K-v EINGNNYVYI | 1170  | >KIT-E562K-r KINGNNYVYI | 29    | 1141  |
| >KIT-E562K-v EINGNNYVY  | 340   | >KIT-E562K-r KINGNNYVY  | 13426 | 13086 |
| >KIT-E562K-v EINGNNYV   | 8     | >KIT-E562K-r KINGNNYV   | 630   | 622   |
| >KIT-E562K-v EINGNNYVYI | 101   | >KIT-E562K-r KINGNNYVYI | 4077  | 3976  |
| >KIT-E562K-v EINGNNYV   | 11    | >KIT-E562K-r KINGNNYV   | 1362  | 1351  |
| >KIT-E562K-v EINGNNYVYI | 36    | >KIT-E562K-r KINGNNYVYI | 3341  | 3305  |
| >KIT-E562K-v EINGNNYVY  | 8360  | >KIT-E562K-r KINGNNYVY  | 320   | 8040  |
| >KIT-E562K-v EINGNNYVY  | 515   | >KIT-E562K-r KINGNNYVY  | 128   | 387   |
| >KIT-E562K-v EINGNNYVY  | 168   | >KIT-E562K-r KINGNNYVY  | 1591  | 1423  |
| >KIT-E562K-v EINGNNYVY  | 15281 | >KIT-E562K-r KINGNNYVY  | 163   | 15118 |
| >KIT-E562K-v EINGNNYVYI | 17789 | >KIT-E562K-r KINGNNYVYI | 402   | 17387 |
| >KIT-E562K-v EINGNNYVY  | 81    | >KIT-E562K-r KINGNNYVY  | 46    | 35    |
| >KIT-E562K-v EEINGNNYVY | 76    | >KIT-E562K-r EKINGNNYVY | 4201  | 4125  |
| >KIT-E562K-v EEINGNNY   | 230   | >KIT-E562K-r EKINGNNY   | 152   | 78    |
| >KIT-E562K-v EEINGNNYVY | 179   | >KIT-E562K-r EKINGNNYVY | 122   | 57    |
| >KIT-E562K-v EEINGNNY   | 19    | >KIT-E562K-r EKINGNNY   | 25    | 6     |
| >KIT-E562K-v EEINGNNYVY | 134   | >KIT-E562K-r EKINGNNYVY | 188   | 54    |
| >KIT-E562K-v EEINGNNYVY | 328   | >KIT-E562K-r EKINGNNYVY | 218   | 110   |
| >KIT-E562K-v EEINGNNYV  | 241   | >KIT-E562K-r EKINGNNYV  | 140   | 101   |
| >KIT-E562K-v EEINGNNY   | 1411  | >KIT-E562K-r EKINGNNY   | 22    | 1389  |
| >KIT-E562K-v EEINGNNYVY | 1311  | >KIT-E562K-r EKINGNNYVY | 26    | 1285  |
| >KIT-E562K-v EEINGNNYVY | 3853  | >KIT-E562K-r EKINGNNYVY | 150   | 3703  |
| >KIT-E562K-v EEINGNNY   | 278   | >KIT-E562K-r EKINGNNY   | 17078 | 16800 |
| >KIT-E562K-v EEINGNNYVY | 322   | >KIT-E562K-r EKINGNNYVY | 22499 | 22177 |
| >KIT-E562K-v EEINGNNYV  | 234   | >KIT-E562K-r EKINGNNYV  | 19379 | 19145 |
| >KIT-E562K-v EEINGNNYVY | 59    | >KIT-E562K-r EKINGNNYVY | 15898 | 15839 |
| >KIT-E562K-v EEINGNNYVY | 300   | >KIT-E562K-r EKINGNNYVY | 31556 | 31256 |
| >KIT-E562K-v EEINGNNYVY | 466   | >KIT-E562K-r EKINGNNYVY | 18165 | 17699 |
| >KIT-E562K-v EEINGNNY   | 70    | >KIT-E562K-r EKINGNNY   | 12105 | 12035 |
| >KIT-E562K-v EEINGNNYV  | 488   | >KIT-E562K-r EKINGNNYV  | 27299 | 26811 |
| >KIT-E562K-v EEINGNNYVY | 180   | >KIT-E562K-r EKINGNNYVY | 15945 | 15765 |
| >KIT-E562K-v EEINGNNYVY | 190   | >KIT-E562K-r EKINGNNYVY | 22138 | 21948 |
| >KIT-E562K-v EEINGNNYV  | 74    | >KIT-E562K-r EKINGNNYV  | 23175 | 23101 |
| >KIT-E562K-v EEINGNNYVY | 97    | >KIT-E562K-r EKINGNNYVY | 25226 | 25129 |
| >KIT-E562K-v EEINGNNYV  | 305   | >KIT-E562K-r EKINGNNYV  | 26256 | 25951 |
| >KIT-E562K-v EEINGNNYVY | 63    | >KIT-E562K-r EKINGNNYVY | 17908 | 17845 |
| >KIT-E562K-v MYEVQWKV\  | 15137 | >KIT-E562K-r MYEVQWKV\  | 221   | 14916 |

|                         |       |                         |      |       |
|-------------------------|-------|-------------------------|------|-------|
| >KIT-E562K-v MYEVQWKV\  | 15263 | >KIT-E562K-r MYEVQWKV\  | 465  | 14798 |
| >KIT-E562K-v VEEINGNNY\ | 328   | >KIT-E562K-r VEKINGNNY\ | 483  | 155   |
| >KIT-E562K-v VEEINGNNY\ | 694   | >KIT-E562K-r VEKINGNNY\ | 276  | 418   |
| >KIT-E562K-v VEEINGNNY\ | 7607  | >KIT-E562K-r VEKINGNNY\ | 484  | 7123  |
| >KIT-E562K-v VEEINGNNY\ | 94    | >KIT-E562K-r VEKINGNNY\ | 82   | 12    |
| >KIT-E562K-v VEEINGNNY\ | 377   | >KIT-E562K-r VEKINGNNY\ | 1285 | 908   |
| >KIT-E562K-v VVEEINGNNY | 217   | >KIT-E562K-r VVEKINGNNY | 559  | 342   |
| >KIT-E562K-v VVEEINGNNY | 87    | >KIT-E562K-r VVEKINGNNY | 471  | 384   |
| >KIT-E562K-v VVEEINGNNY | 121   | >KIT-E562K-r VVEKINGNNY | 1268 | 1147  |
| >KIT-E562K-v VVEEINGNNY | 35    | >KIT-E562K-r VVEKINGNNY | 244  | 209   |
| >KIT-E562K-v VVEEINGNNY | 316   | >KIT-E562K-r VVEKINGNNY | 174  | 142   |
| >KIT-E562K-v VVEEINGNNY | 167   | >KIT-E562K-r VVEKINGNNY | 438  | 271   |
| >KIT-E562K-v VVEEINGNNY | 178   | >KIT-E562K-r VVEKINGNNY | 74   | 104   |
| >KIT-E562K-v KVVEEINGNN | 31    | >KIT-E562K-r KVVEKINGNN | 43   | 12    |
| >KIT-E562K-v KVVEEINGNN | 61    | >KIT-E562K-r KVVEKINGNN | 25   | 36    |
| >KIT-E562K-v KVVEEINGNN | 114   | >KIT-E562K-r KVVEKINGNN | 132  | 18    |
| >KIT-E562K-v KVVEEINGNN | 114   | >KIT-E562K-r KVVEKINGNN | 103  | 11    |
| >KIT-E562K-v KVVEEINGNN | 100   | >KIT-E562K-r KVVEKINGNN | 48   | 52    |
| >KIT-E562K-v VQWKVVEEI  | 154   | >KIT-E562K-r VQWKVVEKI  | 296  | 142   |
| >KIT-E562K-v VQWKVVEEI  | 91    | >KIT-E562K-r VQWKVVEKI  | 381  | 290   |
| >KIT-E562K-v VQWKVVEEI  | 43    | >KIT-E562K-r VQWKVVEKI  | 150  | 107   |
| >KIT-E562K-v VQWKVVEEI  | 17    | >KIT-E562K-r VQWKVVEKI  | 37   | 20    |
| >KIT-E562K-v VQWKVVEEI  | 75    | >KIT-E562K-r VQWKVVEKI  | 153  | 78    |
| >KIT-E562K-v VQWKVVEE   | 27519 | >KIT-E562K-r VQWKVVEK   | 125  | 27394 |
| >KIT-E562K-v VQWKVVEE   | 12697 | >KIT-E562K-r VQWKVVEK   | 333  | 12364 |
| >KIT-E562K-v VQWKVVEEI  | 468   | >KIT-E562K-r VQWKVVEKI  | 517  | 49    |
| >KIT-E562K-v VQWKVVEE   | 2782  | >KIT-E562K-r VQWKVVEK   | 267  | 2515  |
| >KIT-E562K-v VQWKVVEEI  | 57    | >KIT-E562K-r VQWKVVEKI  | 121  | 64    |
| >KIT-E562K-v VQWKVVEEI  | 587   | >KIT-E562K-r VQWKVVEKI  | 403  | 184   |
| >KIT-E562K-v EVQWKVVEE  | 26594 | >KIT-E562K-r EVQWKVVEK  | 186  | 26408 |
| >KIT-E562K-v EVQWKVVEE  | 4114  | >KIT-E562K-r EVQWKVVEK  | 16   | 4098  |
| >KIT-E562K-v EVQWKVVEE  | 147   | >KIT-E562K-r EVQWKVVEK  | 254  | 107   |
| >KIT-E562K-v YEVQWKVVE  | 11    | >KIT-E562K-r YEVQWKVVE  | 15   | 4     |
| >KIT-E562K-v YEVQWKVVE  | 343   | >KIT-E562K-r YEVQWKVVE  | 579  | 236   |
| >KIT-E562K-v YEVQWKVVE  | 59    | >KIT-E562K-r YEVQWKVVE  | 86   | 27    |
| >KIT-E562K-v YEVQWKVVE  | 176   | >KIT-E562K-r YEVQWKVVE  | 633  | 457   |
| >KIT-E562K-v YEVQWKVVE  | 3     | >KIT-E562K-r YEVQWKVVE  | 3    | 0     |
| >KIT-E562V-v EINGNNYV   | 7303  | >KIT-E562V-r VINGNNYV   | 317  | 6986  |
| >KIT-E562V-v EINGNNYV   | 299   | >KIT-E562V-r VINGNNYV   | 21   | 278   |
| >KIT-E562V-v EINGNNYV   | 1089  | >KIT-E562V-r VINGNNYV   | 24   | 1065  |
| >KIT-E562V-v EINGNNYVYI | 985   | >KIT-E562V-r VINGNNYVYI | 383  | 602   |
| >KIT-E562V-v EINGNNYV   | 2776  | >KIT-E562V-r VINGNNYV   | 93   | 2683  |
| >KIT-E562V-v EINGNNYV   | 64    | >KIT-E562V-r VINGNNYV   | 7    | 57    |

|                         |       |                         |       |       |
|-------------------------|-------|-------------------------|-------|-------|
| >KIT-E562V-v EINGNNYVYI | 229   | >KIT-E562V-r VINGNNYVYI | 19    | 210   |
| >KIT-E562V-v EINGNNYV   | 1535  | >KIT-E562V-r VINGNNYV   | 69    | 1466  |
| >KIT-E562V-v EINGNNYVYI | 3474  | >KIT-E562V-r VINGNNYVYI | 252   | 3222  |
| >KIT-E562V-v EINGNNYV   | 442   | >KIT-E562V-r VINGNNYV   | 39    | 403   |
| >KIT-E562V-v EINGNNYVYI | 4089  | >KIT-E562V-r VINGNNYVYI | 454   | 3635  |
| >KIT-E562V-v EINGNNYV   | 41    | >KIT-E562V-r VINGNNYV   | 12    | 29    |
| >KIT-E562V-v EINGNNYVYI | 257   | >KIT-E562V-r VINGNNYVYI | 85    | 172   |
| >KIT-E562V-v EINGNNYV   | 34    | >KIT-E562V-r VINGNNYV   | 4     | 30    |
| >KIT-E562V-v EINGNNYVYI | 1941  | >KIT-E562V-r VINGNNYVYI | 62    | 1879  |
| >KIT-E562V-v EINGNNYVY  | 203   | >KIT-E562V-r VINGNNYVY  | 15378 | 15175 |
| >KIT-E562V-v EINGNNYVY  | 17    | >KIT-E562V-r VINGNNYVY  | 998   | 981   |
| >KIT-E562V-v EINGNNYVY  | 425   | >KIT-E562V-r VINGNNYVY  | 10486 | 10061 |
| >KIT-E562V-v EINGNNYVY  | 218   | >KIT-E562V-r VINGNNYVY  | 39    | 179   |
| >KIT-E562V-v EINGNNYVY  | 70    | >KIT-E562V-r VINGNNYVY  | 10    | 60    |
| >KIT-E562V-v EINGNNYVY  | 340   | >KIT-E562V-r VINGNNYVY  | 7736  | 7396  |
| >KIT-E562V-v EINGNNYV   | 8     | >KIT-E562V-r VINGNNYV   | 141   | 133   |
| >KIT-E562V-v EINGNNYVYI | 101   | >KIT-E562V-r VINGNNYVYI | 1843  | 1742  |
| >KIT-E562V-v EINGNNYV   | 11    | >KIT-E562V-r VINGNNYV   | 1060  | 1049  |
| >KIT-E562V-v EINGNNYVYI | 36    | >KIT-E562V-r VINGNNYVYI | 2990  | 2954  |
| >KIT-E562V-v EINGNNYVY  | 515   | >KIT-E562V-r VINGNNYVY  | 129   | 386   |
| >KIT-E562V-v EINGNNYVY  | 710   | >KIT-E562V-r VINGNNYVY  | 380   | 330   |
| >KIT-E562V-v EINGNNYVY  | 168   | >KIT-E562V-r VINGNNYVY  | 336   | 168   |
| >KIT-E562V-v EINGNNYVY  | 81    | >KIT-E562V-r VINGNNYVY  | 103   | 22    |
| >KIT-E562V-v EEINGNNYVY | 76    | >KIT-E562V-r EVINGNNYVY | 16471 | 16395 |
| >KIT-E562V-v EEINGNNYV  | 2192  | >KIT-E562V-r EVINGNNYV  | 91    | 2101  |
| >KIT-E562V-v EEINGNNYVY | 9380  | >KIT-E562V-r EVINGNNYVY | 479   | 8901  |
| >KIT-E562V-v EEINGNNYV  | 13381 | >KIT-E562V-r EVINGNNYV  | 494   | 12887 |
| >KIT-E562V-v EEINGNNYV  | 15060 | >KIT-E562V-r EVINGNNYV  | 436   | 14624 |
| >KIT-E562V-v EEINGNNYV  | 19375 | >KIT-E562V-r EVINGNNYV  | 289   | 19086 |
| >KIT-E562V-v EEINGNNY   | 6881  | >KIT-E562V-r EVINGNNY   | 134   | 6747  |
| >KIT-E562V-v EEINGNNYVY | 6941  | >KIT-E562V-r EVINGNNYVY | 144   | 6797  |
| >KIT-E562V-v EEINGNNY   | 2719  | >KIT-E562V-r EVINGNNY   | 9     | 2710  |
| >KIT-E562V-v EEINGNNYV  | 14194 | >KIT-E562V-r EVINGNNYV  | 54    | 14140 |
| >KIT-E562V-v EEINGNNYVY | 6133  | >KIT-E562V-r EVINGNNYVY | 412   | 5721  |
| >KIT-E562V-v EEINGNNYVY | 15801 | >KIT-E562V-r EVINGNNYVY | 92    | 15709 |
| >KIT-E562V-v EEINGNNY   | 230   | >KIT-E562V-r EVINGNNY   | 3     | 227   |
| >KIT-E562V-v EEINGNNYV  | 8391  | >KIT-E562V-r EVINGNNYV  | 36    | 8355  |
| >KIT-E562V-v EEINGNNYVY | 179   | >KIT-E562V-r EVINGNNYVY | 3     | 176   |
| >KIT-E562V-v EEINGNNYVY | 9026  | >KIT-E562V-r EVINGNNYVY | 39    | 8987  |
| >KIT-E562V-v EEINGNNY   | 19    | >KIT-E562V-r EVINGNNY   | 3     | 16    |
| >KIT-E562V-v EEINGNNYV  | 4399  | >KIT-E562V-r EVINGNNYV  | 399   | 4000  |
| >KIT-E562V-v EEINGNNYVY | 134   | >KIT-E562V-r EVINGNNYVY | 10    | 124   |
| >KIT-E562V-v EEINGNNY   | 5545  | >KIT-E562V-r EVINGNNY   | 199   | 5346  |

|                         |       |                         |       |       |
|-------------------------|-------|-------------------------|-------|-------|
| >KIT-E562V-v EEINGNNY   | 3378  | >KIT-E562V-r EVINGNNY   | 314   | 3064  |
| >KIT-E562V-v EEINGNNYVY | 328   | >KIT-E562V-r EVINGNNYVY | 117   | 211   |
| >KIT-E562V-v EEINGNNY   | 9107  | >KIT-E562V-r EVINGNNY   | 111   | 8996  |
| >KIT-E562V-v EEINGNNYVY | 13984 | >KIT-E562V-r EVINGNNYVY | 188   | 13796 |
| >KIT-E562V-v EEINGNNYV  | 241   | >KIT-E562V-r EVINGNNYV  | 5     | 236   |
| >KIT-E562V-v EEINGNNYVY | 1081  | >KIT-E562V-r EVINGNNYVY | 6     | 1075  |
| >KIT-E562V-v EEINGNNYV  | 1490  | >KIT-E562V-r EVINGNNYV  | 5     | 1485  |
| >KIT-E562V-v EEINGNNYVY | 4644  | >KIT-E562V-r EVINGNNYVY | 9     | 4635  |
| >KIT-E562V-v EEINGNNYVY | 766   | >KIT-E562V-r EVINGNNYVY | 248   | 518   |
| >KIT-E562V-v EEINGNNYVY | 1422  | >KIT-E562V-r EVINGNNYVY | 462   | 960   |
| >KIT-E562V-v EEINGNNY   | 278   | >KIT-E562V-r EVINGNNY   | 17190 | 16912 |
| >KIT-E562V-v EEINGNNYVY | 322   | >KIT-E562V-r EVINGNNYVY | 30312 | 29990 |
| >KIT-E562V-v EEINGNNY   | 5187  | >KIT-E562V-r EVINGNNY   | 399   | 4788  |
| >KIT-E562V-v EEINGNNYV  | 234   | >KIT-E562V-r EVINGNNYV  | 20553 | 20319 |
| >KIT-E562V-v EEINGNNYVY | 59    | >KIT-E562V-r EVINGNNYVY | 20521 | 20462 |
| >KIT-E562V-v EEINGNNYVY | 300   | >KIT-E562V-r EVINGNNYVY | 40081 | 39781 |
| >KIT-E562V-v EEINGNNYVY | 466   | >KIT-E562V-r EVINGNNYVY | 26135 | 25669 |
| >KIT-E562V-v EEINGNNY   | 70    | >KIT-E562V-r EVINGNNY   | 28715 | 28645 |
| >KIT-E562V-v EEINGNNYV  | 488   | >KIT-E562V-r EVINGNNYV  | 39115 | 38627 |
| >KIT-E562V-v EEINGNNYVY | 180   | >KIT-E562V-r EVINGNNYVY | 27142 | 26962 |
| >KIT-E562V-v EEINGNNYVY | 190   | >KIT-E562V-r EVINGNNYVY | 36829 | 36639 |
| >KIT-E562V-v EEINGNNYV  | 74    | >KIT-E562V-r EVINGNNYV  | 35450 | 35376 |
| >KIT-E562V-v EEINGNNYVY | 97    | >KIT-E562V-r EVINGNNYVY | 34722 | 34625 |
| >KIT-E562V-v EEINGNNYV  | 305   | >KIT-E562V-r EVINGNNYV  | 33637 | 33332 |
| >KIT-E562V-v EEINGNNYVY | 63    | >KIT-E562V-r EVINGNNYVY | 29851 | 29788 |
| >KIT-E562V-v MYEVQWKV\  | 2831  | >KIT-E562V-r MYEVQWKV\  | 266   | 2565  |
| >KIT-E562V-v VEEINGNNY\ | 328   | >KIT-E562V-r VEVINGNNY\ | 508   | 180   |
| >KIT-E562V-v VEEINGNNY\ | 694   | >KIT-E562V-r VEVINGNNY\ | 387   | 307   |
| >KIT-E562V-v VEEINGNNY  | 821   | >KIT-E562V-r VEVINGNNY  | 155   | 666   |
| >KIT-E562V-v VEEINGNNY\ | 94    | >KIT-E562V-r VEVINGNNY\ | 26    | 68    |
| >KIT-E562V-v VEEINGNNY  | 1549  | >KIT-E562V-r VEVINGNNY  | 339   | 1210  |
| >KIT-E562V-v VEEINGNNY\ | 1190  | >KIT-E562V-r VEVINGNNY\ | 256   | 934   |
| >KIT-E562V-v VEEINGNNY\ | 377   | >KIT-E562V-r VEVINGNNY\ | 621   | 244   |
| >KIT-E562V-v VVEEINGNNY | 217   | >KIT-E562V-r VVEEINGNNY | 634   | 417   |
| >KIT-E562V-v VVEEINGNNY | 87    | >KIT-E562V-r VVEEINGNNY | 416   | 329   |
| >KIT-E562V-v VVEEINGNNY | 121   | >KIT-E562V-r VVEEINGNNY | 1797  | 1676  |
| >KIT-E562V-v VVEEINGNNY | 35    | >KIT-E562V-r VVEEINGNNY | 274   | 239   |
| >KIT-E562V-v VVEEINGNNY | 316   | >KIT-E562V-r VVEEINGNNY | 186   | 130   |
| >KIT-E562V-v VVEEINGNNY | 167   | >KIT-E562V-r VVEEINGNNY | 411   | 244   |
| >KIT-E562V-v VVEEINGNNY | 178   | >KIT-E562V-r VVEEINGNNY | 248   | 70    |
| >KIT-E562V-v KVVEEINGNN | 31    | >KIT-E562V-r KVVEEINGNN | 49    | 18    |
| >KIT-E562V-v KVVEEINGNN | 61    | >KIT-E562V-r KVVEEINGNN | 45    | 16    |
| >KIT-E562V-v KVVEEINGNN | 617   | >KIT-E562V-r KVVEEINGNN | 485   | 132   |

|                         |       |                         |     |       |
|-------------------------|-------|-------------------------|-----|-------|
| >KIT-E562V-v KVVEEINGNN | 114   | >KIT-E562V-r KVVEVINGNN | 89  | 25    |
| >KIT-E562V-v KVVEEINGNN | 114   | >KIT-E562V-r KVVEVINGNN | 69  | 45    |
| >KIT-E562V-v KVVEEINGNN | 100   | >KIT-E562V-r KVVEVINGNN | 162 | 62    |
| >KIT-E562V-v VQWKVVEEI  | 154   | >KIT-E562V-r VQWKVVEVI  | 245 | 91    |
| >KIT-E562V-v VQWKVVEE   | 16373 | >KIT-E562V-r VQWKVVEV   | 19  | 16354 |
| >KIT-E562V-v VQWKVVEEI  | 91    | >KIT-E562V-r VQWKVVEVI  | 399 | 308   |
| >KIT-E562V-v VQWKVVEE   | 22486 | >KIT-E562V-r VQWKVVEV   | 326 | 22160 |
| >KIT-E562V-v VQWKVVEE   | 22812 | >KIT-E562V-r VQWKVVEV   | 351 | 22461 |
| >KIT-E562V-v VQWKVVEE   | 6877  | >KIT-E562V-r VQWKVVEV   | 11  | 6866  |
| >KIT-E562V-v VQWKVVEEI  | 43    | >KIT-E562V-r VQWKVVEVI  | 112 | 69    |
| >KIT-E562V-v VQWKVVEE   | 14142 | >KIT-E562V-r VQWKVVEV   | 5   | 14137 |
| >KIT-E562V-v VQWKVVEEI  | 17    | >KIT-E562V-r VQWKVVEVI  | 39  | 22    |
| >KIT-E562V-v VQWKVVEE   | 18373 | >KIT-E562V-r VQWKVVEV   | 62  | 18311 |
| >KIT-E562V-v VQWKVVEE   | 18797 | >KIT-E562V-r VQWKVVEV   | 12  | 18785 |
| >KIT-E562V-v VQWKVVEEI  | 75    | >KIT-E562V-r VQWKVVEVI  | 190 | 115   |
| >KIT-E562V-v VQWKVVEE   | 22769 | >KIT-E562V-r VQWKVVEV   | 119 | 22650 |
| >KIT-E562V-v VQWKVVEE   | 35293 | >KIT-E562V-r VQWKVVEV   | 120 | 35173 |
| >KIT-E562V-v VQWKVVEEI  | 468   | >KIT-E562V-r VQWKVVEVI  | 438 | 30    |
| >KIT-E562V-v VQWKVVEE   | 2782  | >KIT-E562V-r VQWKVVEV   | 38  | 2744  |
| >KIT-E562V-v VQWKVVEEI  | 57    | >KIT-E562V-r VQWKVVEVI  | 39  | 18    |
| >KIT-E562V-v EVQWKVVEE  | 28973 | >KIT-E562V-r EVQWKVVEV  | 125 | 28848 |
| >KIT-E562V-v EVQWKVVEE  | 26172 | >KIT-E562V-r EVQWKVVEV  | 360 | 25812 |
| >KIT-E562V-v EVQWKVVEE  | 32981 | >KIT-E562V-r EVQWKVVEV  | 31  | 32950 |
| >KIT-E562V-v EVQWKVVEE  | 518   | >KIT-E562V-r EVQWKVVEV  | 439 | 79    |
| >KIT-E562V-v EVQWKVVEE  | 18353 | >KIT-E562V-r EVQWKVVEV  | 15  | 18338 |
| >KIT-E562V-v EVQWKVVEE  | 16605 | >KIT-E562V-r EVQWKVVEV  | 31  | 16574 |
| >KIT-E562V-v EVQWKVVEE  | 147   | >KIT-E562V-r EVQWKVVEV  | 630 | 483   |
| >KIT-E562V-v YEVQWKVVE  | 18948 | >KIT-E562V-r YEVQWKVVE  | 79  | 18869 |
| >KIT-E562V-v YEVQWKVVE  | 11    | >KIT-E562V-r YEVQWKVVE  | 13  | 2     |
| >KIT-E562V-v YEVQWKVVE  | 25616 | >KIT-E562V-r YEVQWKVVE  | 150 | 25466 |
| >KIT-E562V-v YEVQWKVVE  | 32126 | >KIT-E562V-r YEVQWKVVE  | 125 | 32001 |
| >KIT-E562V-v YEVQWKVVE  | 343   | >KIT-E562V-r YEVQWKVVE  | 325 | 18    |
| >KIT-E562V-v YEVQWKVVE  | 1307  | >KIT-E562V-r YEVQWKVVE  | 268 | 1039  |
| >KIT-E562V-v YEVQWKVVE  | 59    | >KIT-E562V-r YEVQWKVVE  | 40  | 19    |
| >KIT-E562V-v YEVQWKVVE  | 1019  | >KIT-E562V-r YEVQWKVVE  | 206 | 813   |
| >KIT-E562V-v YEVQWKVVE  | 176   | >KIT-E562V-r YEVQWKVVE  | 203 | 27    |
| >KIT-E562V-v YEVQWKVVE  | 27487 | >KIT-E562V-r YEVQWKVVE  | 439 | 27048 |
| >KIT-E562V-v YEVQWKVVE  | 3     | >KIT-E562V-r YEVQWKVVE  | 4   | 1     |
| >KIT-E720K-v EYMDMKPG\  | 2469  | >KIT-E720K-r KYMDMKPG\  | 211 | 2258  |
| >KIT-E720K-v EYMDMKPG\  | 3567  | >KIT-E720K-r KYMDMKPG\  | 472 | 3095  |
| >KIT-E720K-v EYMDMKPG\  | 4175  | >KIT-E720K-r KYMDMKPG\  | 318 | 3857  |
| >KIT-E720K-v EYMDMKPG\  | 356   | >KIT-E720K-r KYMDMKPG\  | 34  | 322   |
| >KIT-E720K-v EYMDMKPG\  | 3558  | >KIT-E720K-r KYMDMKPG\  | 492 | 3066  |

|                            |       |                            |       |       |
|----------------------------|-------|----------------------------|-------|-------|
| >KIT-E720K-v EYMDMKPG\     | 182   | >KIT-E720K-r KYMDMKPG\     | 5063  | 4881  |
| >KIT-E720K-v EYMDMKPG\     | 168   | >KIT-E720K-r KYMDMKPG\     | 9635  | 9467  |
| >KIT-E720K-v EYMDMKPG\     | 310   | >KIT-E720K-r KYMDMKPG\     | 6343  | 6033  |
| >KIT-E720K-v EYMDMKPG\     | 348   | >KIT-E720K-r KYMDMKPG\     | 149   | 199   |
| >KIT-E720K-v EYMDMKPG\     | 15931 | >KIT-E720K-r KYMDMKPG\     | 414   | 15517 |
| >KIT-E720K-v EYMDMKPG\     | 806   | >KIT-E720K-r KYMDMKPG\     | 58    | 748   |
| >KIT-E720K-v EYMDMKPG\     | 9133  | >KIT-E720K-r KYMDMKPG\     | 498   | 8635  |
| >KIT-E720K-v EYMDMKPG\     | 106   | >KIT-E720K-r KYMDMKPG\     | 5548  | 5442  |
| >KIT-E720K-v EYMDMKPG\     | 2327  | >KIT-E720K-r KYMDMKPG\     | 365   | 1962  |
| >KIT-E720K-v EYMDMKPG\     | 1800  | >KIT-E720K-r KYMDMKPG\     | 237   | 1563  |
| >KIT-E720K-v NEYMDMKPG\    | 293   | >KIT-E720K-r NKYMDMKPG\    | 20293 | 20000 |
| >KIT-E720K-v NEYMDMKPG\    | 9     | >KIT-E720K-r NKYMDMKPG\    | 560   | 551   |
| >KIT-E720K-v NEYMDMKPG\    | 33    | >KIT-E720K-r NKYMDMKPG\    | 14248 | 14215 |
| >KIT-E720K-v STNEYMDMKPG\  | 9     | >KIT-E720K-r STNKYMDMKPG\  | 9     | 0     |
| >KIT-E720K-v STNEYMDMKPG\  | 235   | >KIT-E720K-r STNKYMDMKPG\  | 455   | 220   |
| >KIT-E720K-v STNEYMDMKPG\  | 1120  | >KIT-E720K-r STNKYMDMKPG\  | 493   | 627   |
| >KIT-E720K-v STNEYMDMKPG\  | 756   | >KIT-E720K-r STNKYMDMKPG\  | 424   | 332   |
| >KIT-E720K-v STNEYMDMKPG\  | 17    | >KIT-E720K-r STNKYMDMKPG\  | 19    | 2     |
| >KIT-E720K-v STNEYMDMKPG\  | 284   | >KIT-E720K-r STNKYMDMKPG\  | 2242  | 1958  |
| >KIT-E720K-v STNEYMDMKPG\  | 126   | >KIT-E720K-r STNKYMDMKPG\  | 231   | 105   |
| >KIT-E720K-v STNEYMDMKPG\  | 91    | >KIT-E720K-r STNKYMDMKPG\  | 89    | 2     |
| >KIT-E720K-v DSTNEYMDMKPG\ | 255   | >KIT-E720K-r DSTNKYMDMKPG\ | 360   | 105   |
| >KIT-E720K-v CSDSTNEY      | 5     | >KIT-E720K-r CSDSTNKY      | 7     | 2     |
| >KIT-E720K-v CSDSTNEYM     | 195   | >KIT-E720K-r CSDSTNKYM     | 3442  | 3247  |
| >KIT-E720K-v CSDSTNEY      | 155   | >KIT-E720K-r CSDSTNKY      | 153   | 2     |
| >KIT-E720K-v CSDSTNEY      | 390   | >KIT-E720K-r CSDSTNKY      | 242   | 148   |
| >KIT-E720K-v CSDSTNEYM     | 305   | >KIT-E720K-r CSDSTNKYM     | 3897  | 3592  |
| >KIT-E720K-v CSDSTNEY      | 64    | >KIT-E720K-r CSDSTNKY      | 68    | 4     |
| >KIT-E720K-v CSDSTNEYM     | 337   | >KIT-E720K-r CSDSTNKYM     | 552   | 215   |
| >KIT-E720K-v CSDSTNEY      | 174   | >KIT-E720K-r CSDSTNKY      | 113   | 61    |
| >KIT-E720K-v SCSDSTNEY     | 222   | >KIT-E720K-r SCSDSTNKY     | 228   | 6     |
| >KIT-E720K-v SCSDSTNEY     | 492   | >KIT-E720K-r SCSDSTNKY     | 1266  | 774   |
| >KIT-E720K-v SCSDSTNEY     | 476   | >KIT-E720K-r SCSDSTNKY     | 2371  | 1895  |
| >KIT-E720K-v SCSDSTNEY     | 234   | >KIT-E720K-r SCSDSTNKY     | 168   | 66    |
| >KIT-E720K-v SCSDSTNEYM    | 275   | >KIT-E720K-r SCSDSTNKYM    | 311   | 36    |
| >KIT-E720K-v SCSDSTNEY     | 124   | >KIT-E720K-r SCSDSTNKY     | 767   | 643   |
| >KIT-E720K-v SSCSDSTNEY    | 214   | >KIT-E720K-r SSCSDSTNKY    | 370   | 156   |
| >KIT-E720K-v SSCSDSTNE     | 21745 | >KIT-E720K-r SSCSDSTNK     | 29    | 21716 |
| >KIT-E720K-v SSCSDSTNEY    | 209   | >KIT-E720K-r SSCSDSTNKY    | 279   | 70    |
| >KIT-E720K-v SSCSDSTNEY    | 122   | >KIT-E720K-r SSCSDSTNKY    | 157   | 35    |
| >KIT-E720K-v SSCSDSTNEYI   | 154   | >KIT-E720K-r SSCSDSTNKYI   | 303   | 149   |
| >KIT-E720K-v SSCSDSTNEY    | 341   | >KIT-E720K-r SSCSDSTNKY    | 290   | 51    |
| >KIT-E720K-v SSCSDSTNE     | 22022 | >KIT-E720K-r SSCSDSTNK     | 402   | 21620 |

|                          |       |                          |       |       |
|--------------------------|-------|--------------------------|-------|-------|
| >KIT-E720K-v SSCSDSTNEY  | 121   | >KIT-E720K-r SSCSDSTNKY  | 449   | 328   |
| >KIT-E720K-v SSCSDSTNEY  | 188   | >KIT-E720K-r SSCSDSTNKY  | 444   | 256   |
| >KIT-E720K-v SSCSDSTNEY  | 31    | >KIT-E720K-r SSCSDSTNKY  | 25    | 6     |
| >KIT-E720K-v SSCSDSTNEYI | 255   | >KIT-E720K-r SSCSDSTNKYI | 118   | 137   |
| >KIT-E720K-v SSCSDSTNEY  | 95    | >KIT-E720K-r SSCSDSTNKY  | 80    | 15    |
| >KIT-E720K-v SSCSDSTNEYI | 31    | >KIT-E720K-r SSCSDSTNKYI | 40    | 9     |
| >KIT-E720K-v SSCSDSTNE   | 7709  | >KIT-E720K-r SSCSDSTNK   | 302   | 7407  |
| >KIT-E720K-v SSCSDSTNEYI | 318   | >KIT-E720K-r SSCSDSTNKYI | 383   | 65    |
| >KIT-E720K-v ESSCSDSTNE' | 206   | >KIT-E720K-r ESSCSDSTNK' | 349   | 143   |
| >KIT-E720K-v ESSCSDSTNE  | 33139 | >KIT-E720K-r ESSCSDSTNK  | 113   | 33026 |
| >KIT-E720K-v ESSCSDSTNE' | 699   | >KIT-E720K-r ESSCSDSTNK' | 270   | 429   |
| >KIT-E720K-v ESSCSDSTNE' | 59    | >KIT-E720K-r ESSCSDSTNK' | 86    | 27    |
| >KIT-E720K-v ESSCSDSTNE' | 186   | >KIT-E720K-r ESSCSDSTNK' | 239   | 53    |
| >KIT-E720K-v ESSCSDSTNE' | 364   | >KIT-E720K-r ESSCSDSTNK' | 352   | 12    |
| >KIT-E720K-v ESSCSDSTNE  | 17619 | >KIT-E720K-r ESSCSDSTNK  | 44    | 17575 |
| >KIT-E720K-v ESSCSDSTNE' | 97    | >KIT-E720K-r ESSCSDSTNK' | 136   | 39    |
| >KIT-E720K-v ESSCSDSTNE' | 440   | >KIT-E720K-r ESSCSDSTNK' | 1834  | 1394  |
| >KIT-E720K-v ESSCSDSTNE' | 315   | >KIT-E720K-r ESSCSDSTNK' | 620   | 305   |
| >KIT-E720K-v ESSCSDSTNE' | 36    | >KIT-E720K-r ESSCSDSTNK' | 28    | 8     |
| >KIT-E720K-v ESSCSDSTNE' | 28    | >KIT-E720K-r ESSCSDSTNK' | 81    | 53    |
| >KIT-E720K-v ESSCSDSTNE' | 209   | >KIT-E720K-r ESSCSDSTNK' | 154   | 55    |
| >KIT-E73K-wi ETNENKQNE'  | 4605  | >KIT-E73K-m KTNENKQNE'   | 455   | 4150  |
| >KIT-E73K-wi ETNENKQNE'  | 418   | >KIT-E73K-m KTNENKQNE'   | 10522 | 10104 |
| >KIT-E73K-wi ETNENKQNE'  | 471   | >KIT-E73K-m KTNENKQNE'   | 10375 | 9904  |
| >KIT-E73K-wi ETNENKQNE'  | 173   | >KIT-E73K-m KTNENKQNE'   | 4046  | 3873  |
| >KIT-E73K-wi ETNENKQNE'  | 6895  | >KIT-E73K-m KTNENKQNE'   | 143   | 6752  |
| >KIT-E73K-wi ETNENKQNE'  | 4463  | >KIT-E73K-m KTNENKQNE'   | 103   | 4360  |
| >KIT-E73K-wi ETNENKQNE'  | 26    | >KIT-E73K-m KTNENKQNE'   | 4162  | 4136  |
| >KIT-E73K-wi ETNENKQNE'  | 27    | >KIT-E73K-m KTNENKQNE'   | 4299  | 4272  |
| >KIT-E73K-wi ETNENKQNE'  | 69    | >KIT-E73K-m KTNENKQNE'   | 11    | 58    |
| >KIT-E73K-wi ETNENKQNE'  | 4522  | >KIT-E73K-m KTNENKQNE'   | 122   | 4400  |
| >KIT-E73K-wi ETNENKQNE'  | 484   | >KIT-E73K-m KTNENKQNE'   | 43    | 441   |
| >KIT-E73K-wi ETNENKQNE'  | 320   | >KIT-E73K-m KTNENKQNE'   | 12    | 308   |
| >KIT-E73K-wi ETNENKQNE'  | 1214  | >KIT-E73K-m KTNENKQNE'   | 139   | 1075  |
| >KIT-E73K-wi DETNENKQN   | 491   | >KIT-E73K-m DKTNENKQN    | 20643 | 20152 |
| >KIT-E73K-wi DETNENKQN   | 96    | >KIT-E73K-m DKTNENKQN    | 9517  | 9421  |
| >KIT-E73K-wi DETNENKQN   | 140   | >KIT-E73K-m DKTNENKQN    | 15356 | 15216 |
| >KIT-E73K-wi FVKWTFEILD  | 26907 | >KIT-E73K-m FVKWTFEILD   | 320   | 26587 |
| >KIT-E73K-wi FVKWTFEILD  | 15540 | >KIT-E73K-m FVKWTFEILD   | 125   | 15415 |
| >KIT-E73K-wi EILDETNENK  | 1552  | >KIT-E73K-m EILDKTNENK   | 492   | 1060  |
| >KIT-E73K-wi EILDETNENK  | 506   | >KIT-E73K-m EILDKTNENK   | 473   | 33    |
| >KIT-E73K-wi EILDETNENK  | 190   | >KIT-E73K-m EILDKTNENK   | 247   | 57    |
| >KIT-E73K-wi FEILDETN    | 1594  | >KIT-E73K-m FEILDKTN     | 156   | 1438  |



|                          |       |                          |       |       |
|--------------------------|-------|--------------------------|-------|-------|
| >KIT-E73K-wi WTFEILDET   | 80    | >KIT-E73K-m WTFEILDKT    | 302   | 222   |
| >KIT-E73K-wi WTFEILDET   | 50    | >KIT-E73K-m WTFEILDKT    | 290   | 240   |
| >KIT-E73K-wi WTFEILDET   | 274   | >KIT-E73K-m WTFEILDKT    | 765   | 491   |
| >KIT-E73K-wi WTFEILDE    | 26502 | >KIT-E73K-m WTFEILDK     | 95    | 26407 |
| >KIT-E73K-wi WTFEILDE    | 4449  | >KIT-E73K-m WTFEILDK     | 16    | 4433  |
| >KIT-E73K-wi WTFEILDET   | 19    | >KIT-E73K-m WTFEILDKT    | 46    | 27    |
| >KIT-E73K-wi WTFEILDET   | 317   | >KIT-E73K-m WTFEILDKT    | 570   | 253   |
| >KIT-E73K-wi WTFEILDET   | 359   | >KIT-E73K-m WTFEILDKT    | 276   | 83    |
| >KIT-E73K-wi KWTFEILDE   | 3158  | >KIT-E73K-m KWTFEILDK    | 33    | 3125  |
| >KIT-E73K-wi KWTFEILDE   | 323   | >KIT-E73K-m KWTFEILDK    | 308   | 15    |
| >KIT-E73K-wi KWTFEILDETI | 239   | >KIT-E73K-m KWTFEILDKT   | 259   | 20    |
| >KIT-E73K-wi VKWTFEILDE  | 3128  | >KIT-E73K-m VKWTFEILDK   | 336   | 2792  |
| >KIT-E761K-v ELALDLEDL   | 11426 | >KIT-E761K-r KLALDLEDL   | 282   | 11144 |
| >KIT-E761K-v ELALDLEDLL  | 2965  | >KIT-E761K-r KLALDLEDLL  | 271   | 2694  |
| >KIT-E761K-v ELALDLEDL   | 336   | >KIT-E761K-r KLALDLEDL   | 16    | 320   |
| >KIT-E761K-v ELALDLEDLL  | 68    | >KIT-E761K-r KLALDLEDLL  | 16    | 52    |
| >KIT-E761K-v ELALDLEDL   | 3503  | >KIT-E761K-r KLALDLEDL   | 94    | 3409  |
| >KIT-E761K-v ELALDLEDL   | 7171  | >KIT-E761K-r KLALDLEDL   | 190   | 6981  |
| >KIT-E761K-v ELALDLEDLL  | 2635  | >KIT-E761K-r KLALDLEDLL  | 227   | 2408  |
| >KIT-E761K-v ELALDLEDL   | 4727  | >KIT-E761K-r KLALDLEDL   | 164   | 4563  |
| >KIT-E761K-v ELALDLEDLL  | 4066  | >KIT-E761K-r KLALDLEDLL  | 140   | 3926  |
| >KIT-E761K-v ELALDLEDL   | 2405  | >KIT-E761K-r KLALDLEDL   | 123   | 2282  |
| >KIT-E761K-v ELALDLEDLL  | 892   | >KIT-E761K-r KLALDLEDLL  | 52    | 840   |
| >KIT-E761K-v ELALDLEDL   | 407   | >KIT-E761K-r KLALDLEDL   | 184   | 223   |
| >KIT-E761K-v ELALDLEDLL  | 484   | >KIT-E761K-r KLALDLEDLL  | 234   | 250   |
| >KIT-E761K-v ELALDLEDL   | 250   | >KIT-E761K-r KLALDLEDL   | 38    | 212   |
| >KIT-E761K-v ELALDLEDLL  | 221   | >KIT-E761K-r KLALDLEDLL  | 43    | 178   |
| >KIT-E761K-v ELALDLEDL   | 467   | >KIT-E761K-r KLALDLEDL   | 14759 | 14292 |
| >KIT-E761K-v DELALDLEDLI | 176   | >KIT-E761K-r DKLALDLEDLI | 9937  | 9761  |
| >KIT-E761K-v DELALDLED   | 72    | >KIT-E761K-r DKLALDLED   | 14959 | 14887 |
| >KIT-E761K-v DELALDLEDLI | 84    | >KIT-E761K-r DKLALDLEDLI | 13604 | 13520 |
| >KIT-E761K-v DVTPAIMEDI  | 10807 | >KIT-E761K-r DVTPAIMEDI  | 64    | 10743 |
| >KIT-E761K-v MEDDELAL    | 285   | >KIT-E761K-r MEDDKLAL    | 204   | 81    |
| >KIT-E761K-v MEDDELAL    | 541   | >KIT-E761K-r MEDDKLAL    | 473   | 68    |
| >KIT-E761K-v MEDDELAL    | 138   | >KIT-E761K-r MEDDKLAL    | 235   | 97    |
| >KIT-E761K-v MEDDELAL    | 20    | >KIT-E761K-r MEDDKLAL    | 17    | 3     |
| >KIT-E761K-v MEDDELALDI  | 424   | >KIT-E761K-r MEDDKLALDI  | 391   | 33    |
| >KIT-E761K-v MEDDELALDI  | 381   | >KIT-E761K-r MEDDKLALDI  | 574   | 193   |
| >KIT-E761K-v IMEDDELAL   | 433   | >KIT-E761K-r IMEDDKLAL   | 1390  | 957   |
| >KIT-E761K-v IMEDDELA    | 291   | >KIT-E761K-r IMEDDKLA    | 2230  | 1939  |
| >KIT-E761K-v IMEDDELAL   | 95    | >KIT-E761K-r IMEDDKLAL   | 281   | 186   |
| >KIT-E761K-v IMEDDELAL   | 498   | >KIT-E761K-r IMEDDKLAL   | 745   | 247   |
| >KIT-E761K-v IMEDDELAL   | 81    | >KIT-E761K-r IMEDDKLAL   | 98    | 17    |

|                          |       |                          |       |       |
|--------------------------|-------|--------------------------|-------|-------|
| >KIT-E761K-v IMEDDELALD  | 468   | >KIT-E761K-r IMEDDKLALD  | 785   | 317   |
| >KIT-E761K-v IMEDDELAL   | 51    | >KIT-E761K-r IMEDDKLAL   | 138   | 87    |
| >KIT-E761K-v IMEDDELALD  | 361   | >KIT-E761K-r IMEDDKLALD  | 791   | 430   |
| >KIT-E761K-v IMEDDELA    | 40    | >KIT-E761K-r IMEDDKLA    | 74    | 34    |
| >KIT-E761K-v IMEDDELAL   | 7     | >KIT-E761K-r IMEDDKLAL   | 7     | 0     |
| >KIT-E761K-v IMEDDELALD  | 11    | >KIT-E761K-r IMEDDKLALD  | 16    | 5     |
| >KIT-E761K-v AIMEDDEL    | 135   | >KIT-E761K-r AIMEDDKL    | 694   | 559   |
| >KIT-E761K-v AIMEDDELA   | 269   | >KIT-E761K-r AIMEDDKLA   | 2667  | 2398  |
| >KIT-E761K-v AIMEDDELAL  | 69    | >KIT-E761K-r AIMEDDKLAL  | 146   | 77    |
| >KIT-E761K-v AIMEDDEL    | 17    | >KIT-E761K-r AIMEDDKL    | 77    | 60    |
| >KIT-E761K-v AIMEDDELA   | 135   | >KIT-E761K-r AIMEDDKLA   | 2596  | 2461  |
| >KIT-E761K-v AIMEDDELAL  | 25    | >KIT-E761K-r AIMEDDKLAL  | 59    | 34    |
| >KIT-E761K-v AIMEDDELAL  | 195   | >KIT-E761K-r AIMEDDKLAL  | 172   | 23    |
| >KIT-E761K-v AIMEDDEL    | 69    | >KIT-E761K-r AIMEDDKL    | 324   | 255   |
| >KIT-E761K-v AIMEDDELA   | 90    | >KIT-E761K-r AIMEDDKLA   | 706   | 616   |
| >KIT-E761K-v AIMEDDELAL  | 172   | >KIT-E761K-r AIMEDDKLAL  | 249   | 77    |
| >KIT-E761K-v AIMEDDEL    | 189   | >KIT-E761K-r AIMEDDKL    | 577   | 388   |
| >KIT-E761K-v AIMEDDELAL  | 145   | >KIT-E761K-r AIMEDDKLAL  | 273   | 128   |
| >KIT-E761K-v AIMEDDEL    | 168   | >KIT-E761K-r AIMEDDKL    | 606   | 438   |
| >KIT-E761K-v AIMEDDELAL  | 102   | >KIT-E761K-r AIMEDDKLAL  | 284   | 182   |
| >KIT-E761K-v AIMEDDEL    | 413   | >KIT-E761K-r AIMEDDKL    | 1155  | 742   |
| >KIT-E761K-v AIMEDDEL    | 452   | >KIT-E761K-r AIMEDDKL    | 1129  | 677   |
| >KIT-E761K-v AIMEDDELAL  | 367   | >KIT-E761K-r AIMEDDKLAL  | 1252  | 885   |
| >KIT-E761K-v AIMEDDEL    | 77    | >KIT-E761K-r AIMEDDKL    | 245   | 168   |
| >KIT-E761K-v AIMEDDELA   | 494   | >KIT-E761K-r AIMEDDKLA   | 1964  | 1470  |
| >KIT-E761K-v AIMEDDELAL  | 53    | >KIT-E761K-r AIMEDDKLAL  | 89    | 36    |
| >KIT-E761K-v TPAIMEDDEL  | 348   | >KIT-E761K-r TPAIMEDDKL  | 144   | 204   |
| >KIT-E761K-v VTPAIMEDDE  | 34965 | >KIT-E761K-r VTPAIMEDDD  | 231   | 34734 |
| >KIT-E761K-v VTPAIMEDDE  | 31146 | >KIT-E761K-r VTPAIMEDDD  | 213   | 30933 |
| >KIT-E761K-v VTPAIMEDDE  | 142   | >KIT-E761K-r VTPAIMEDDD  | 280   | 138   |
| >KIT-E761K-v VTPAIMEDDE  | 6     | >KIT-E761K-r VTPAIMEDDD  | 4     | 2     |
| >KIT-E839K-v ESIFNCVY    | 195   | >KIT-E839K-r KSIFNCVY    | 16508 | 16313 |
| >KIT-E839K-v ESIFNCVYTF  | 87    | >KIT-E839K-r KSIFNCVYTF  | 2170  | 2083  |
| >KIT-E839K-v ESIFNCVY    | 11    | >KIT-E839K-r KSIFNCVY    | 694   | 683   |
| >KIT-E839K-v ESIFNCVYTF  | 7     | >KIT-E839K-r KSIFNCVYTF  | 362   | 355   |
| >KIT-E839K-v ESIFNCVY    | 464   | >KIT-E839K-r KSIFNCVY    | 32    | 432   |
| >KIT-E839K-v ESIFNCVY    | 9829  | >KIT-E839K-r KSIFNCVY    | 269   | 9560  |
| >KIT-E839K-v ESIFNCVYTF  | 81    | >KIT-E839K-r KSIFNCVYTF  | 7     | 74    |
| >KIT-E839K-v ESIFNCVY    | 74    | >KIT-E839K-r KSIFNCVY    | 4851  | 4777  |
| >KIT-E839K-v ESIFNCVYT   | 486   | >KIT-E839K-r KSIFNCVYT   | 14314 | 13828 |
| >KIT-E839K-v ESIFNCVYTFE | 124   | >KIT-E839K-r KSIFNCVYTFE | 7696  | 7572  |
| >KIT-E839K-v ESIFNCVYT   | 135   | >KIT-E839K-r KSIFNCVYT   | 11193 | 11058 |
| >KIT-E839K-v ESIFNCVY    | 246   | >KIT-E839K-r KSIFNCVY    | 78    | 168   |

|                          |       |                          |       |       |
|--------------------------|-------|--------------------------|-------|-------|
| >KIT-E839K-v ESIFNCVYTF  | 535   | >KIT-E839K-r KSIFNCVYTF  | 115   | 420   |
| >KIT-E839K-v ESIFNCVY    | 550   | >KIT-E839K-r KSIFNCVY    | 60    | 490   |
| >KIT-E839K-v ESIFNCVYTF  | 98    | >KIT-E839K-r KSIFNCVYTF  | 12    | 86    |
| >KIT-E839K-v ESIFNCVY    | 28    | >KIT-E839K-r KSIFNCVY    | 4     | 24    |
| >KIT-E839K-v ESIFNCVYTF  | 11    | >KIT-E839K-r KSIFNCVYTF  | 3     | 8     |
| >KIT-E839K-v ESIFNCVY    | 470   | >KIT-E839K-r KSIFNCVY    | 3885  | 3415  |
| >KIT-E839K-v ESIFNCVYTF  | 4035  | >KIT-E839K-r KSIFNCVYTF  | 107   | 3928  |
| >KIT-E839K-v ESIFNCVY    | 4913  | >KIT-E839K-r KSIFNCVY    | 31    | 4882  |
| >KIT-E839K-v ESIFNCVYTF  | 1218  | >KIT-E839K-r KSIFNCVYTF  | 15    | 1203  |
| >KIT-E839K-v ESIFNCVY    | 1129  | >KIT-E839K-r KSIFNCVY    | 357   | 772   |
| >KIT-E839K-v ESIFNCVYTF  | 569   | >KIT-E839K-r KSIFNCVYTF  | 51    | 518   |
| >KIT-E839K-v PESIFNCVY   | 2640  | >KIT-E839K-r PKSIFNCVY   | 97    | 2543  |
| >KIT-E839K-v PESIFNCVYTF | 852   | >KIT-E839K-r PKSIFNCVYTF | 28    | 824   |
| >KIT-E839K-v PESIFNCVY   | 415   | >KIT-E839K-r PKSIFNCVY   | 16171 | 15756 |
| >KIT-E839K-v PESIFNCVYTF | 57    | >KIT-E839K-r PKSIFNCVYTF | 8097  | 8040  |
| >KIT-E839K-v ARLPVKWM/A  | 2674  | >KIT-E839K-r ARLPVKWM/A  | 38    | 2636  |
| >KIT-E839K-v ARLPVKWM/A  | 13062 | >KIT-E839K-r ARLPVKWM/A  | 477   | 12585 |
| >KIT-E839K-v APESIFNCVY  | 540   | >KIT-E839K-r APKSIFNCVY  | 250   | 290   |
| >KIT-E839K-v APESIFNCV   | 3488  | >KIT-E839K-r APKSIFNCV   | 180   | 3308  |
| >KIT-E839K-v APESIFNCVY  | 3447  | >KIT-E839K-r APKSIFNCVY  | 325   | 3122  |
| >KIT-E839K-v APESIFNCVY  | 117   | >KIT-E839K-r APKSIFNCVY  | 237   | 120   |
| >KIT-E839K-v APESIFNCV   | 904   | >KIT-E839K-r APKSIFNCV   | 454   | 450   |
| >KIT-E839K-v APESIFNCVY  | 57    | >KIT-E839K-r APKSIFNCVY  | 91    | 34    |
| >KIT-E839K-v APESIFNCVY  | 81    | >KIT-E839K-r APKSIFNCVY  | 834   | 753   |
| >KIT-E839K-v MAPESIFNCV  | 127   | >KIT-E839K-r MAPKSIFNCV  | 408   | 281   |
| >KIT-E839K-v MAPESIFNCV  | 155   | >KIT-E839K-r MAPKSIFNCV  | 1158  | 1003  |
| >KIT-E839K-v MAPESIFNCV  | 343   | >KIT-E839K-r MAPKSIFNCV  | 1229  | 886   |
| >KIT-E839K-v MAPESIFNCV  | 78    | >KIT-E839K-r MAPKSIFNCV  | 379   | 301   |
| >KIT-E839K-v MAPESIFNCV  | 22    | >KIT-E839K-r MAPKSIFNCV  | 58    | 36    |
| >KIT-E839K-v MAPESIFNCV  | 274   | >KIT-E839K-r MAPKSIFNCV  | 1424  | 1150  |
| >KIT-E839K-v MAPESIFNCV  | 292   | >KIT-E839K-r MAPKSIFNCV  | 271   | 21    |
| >KIT-E839K-v MAPESIFNCV  | 279   | >KIT-E839K-r MAPKSIFNCV  | 197   | 82    |
| >KIT-E839K-v MAPESIFNCV  | 110   | >KIT-E839K-r MAPKSIFNCV  | 221   | 111   |
| >KIT-E839K-v MAPESIFNCV  | 27    | >KIT-E839K-r MAPKSIFNCV  | 56    | 29    |
| >KIT-E839K-v MAPESIFNCV  | 397   | >KIT-E839K-r MAPKSIFNCV  | 482   | 85    |
| >KIT-E839K-v MAPESIFNC   | 32    | >KIT-E839K-r MAPKSIFNC   | 38    | 6     |
| >KIT-E839K-v MAPESIFNCV  | 10    | >KIT-E839K-r MAPKSIFNCV  | 13    | 3     |
| >KIT-E839K-v MAPESIFNCV  | 276   | >KIT-E839K-r MAPKSIFNCV  | 358   | 82    |
| >KIT-E839K-v WMAPESIFN/  | 20    | >KIT-E839K-r WMAPKSIFN/  | 21    | 1     |
| >KIT-E839K-v WMAPESIFN/  | 4     | >KIT-E839K-r WMAPKSIFN/  | 4     | 0     |
| >KIT-E839K-v WMAPESIFN/  | 6     | >KIT-E839K-r WMAPKSIFN/  | 5     | 1     |
| >KIT-E839K-v WMAPESIFN/  | 8     | >KIT-E839K-r WMAPKSIFN/  | 10    | 2     |
| >KIT-E839K-v WMAPESIFN/  | 25    | >KIT-E839K-r WMAPKSIFN/  | 30    | 5     |

|                         |       |                         |     |       |
|-------------------------|-------|-------------------------|-----|-------|
| >KIT-E839K-v WMAPESIFN  | 6     | >KIT-E839K-r WMAPKSIFN  | 6   | 0     |
| >KIT-E839K-v WMAPESIFN  | 128   | >KIT-E839K-r WMAPKSIFN  | 215 | 87    |
| >KIT-E839K-v WMAPESIFN  | 5     | >KIT-E839K-r WMAPKSIFN  | 5   | 0     |
| >KIT-E839K-v WMAPESIFN  | 90    | >KIT-E839K-r WMAPKSIFN  | 139 | 49    |
| >KIT-E839K-v WMAPESIFN  | 6     | >KIT-E839K-r WMAPKSIFN  | 6   | 0     |
| >KIT-E839K-v WMAPESIFN  | 34    | >KIT-E839K-r WMAPKSIFN  | 47  | 13    |
| >KIT-E839K-v WMAPESIFN  | 3     | >KIT-E839K-r WMAPKSIFN  | 3   | 0     |
| >KIT-E839K-v WMAPESIFN  | 12    | >KIT-E839K-r WMAPKSIFN  | 16  | 4     |
| >KIT-E839K-v WMAPESIFN  | 2     | >KIT-E839K-r WMAPKSIFN  | 2   | 0     |
| >KIT-E839K-v WMAPESIF   | 225   | >KIT-E839K-r WMAPKSIF   | 510 | 285   |
| >KIT-E839K-v WMAPESIFN  | 113   | >KIT-E839K-r WMAPKSIFN  | 70  | 43    |
| >KIT-E839K-v WMAPESIFN  | 313   | >KIT-E839K-r WMAPKSIFN  | 459 | 146   |
| >KIT-E839K-v WMAPESIF   | 49    | >KIT-E839K-r WMAPKSIF   | 47  | 2     |
| >KIT-E839K-v WMAPESIF   | 58    | >KIT-E839K-r WMAPKSIF   | 49  | 9     |
| >KIT-E839K-v WMAPESIF   | 5     | >KIT-E839K-r WMAPKSIF   | 8   | 3     |
| >KIT-E839K-v WMAPESIFN  | 184   | >KIT-E839K-r WMAPKSIFN  | 311 | 127   |
| >KIT-E839K-v WMAPESIF   | 335   | >KIT-E839K-r WMAPKSIF   | 275 | 60    |
| >KIT-E839K-v WMAPESIF   | 53    | >KIT-E839K-r WMAPKSIF   | 198 | 145   |
| >KIT-E839K-v KWMAPESI   | 441   | >KIT-E839K-r KWMAPKSI   | 876 | 435   |
| >KIT-E839K-v KWMAPESI   | 415   | >KIT-E839K-r KWMAPKSI   | 593 | 178   |
| >KIT-E839K-v KWMAPESIF  | 353   | >KIT-E839K-r KWMAPKSIF  | 313 | 40    |
| >KIT-E839K-v KWMAPESI   | 127   | >KIT-E839K-r KWMAPKSI   | 272 | 145   |
| >KIT-E839K-v KWMAPESIF  | 28    | >KIT-E839K-r KWMAPKSIF  | 44  | 16    |
| >KIT-E839K-v KWMAPESIF  | 69    | >KIT-E839K-r KWMAPKSIF  | 78  | 9     |
| >KIT-E839K-v KWMAPESIF  | 141   | >KIT-E839K-r KWMAPKSIF  | 75  | 66    |
| >KIT-E839K-v KWMAPESIFI | 547   | >KIT-E839K-r KWMAPKSIFI | 447 | 100   |
| >KIT-E839K-v KWMAPESI   | 39    | >KIT-E839K-r KWMAPKSI   | 36  | 3     |
| >KIT-E839K-v KWMAPESIF  | 122   | >KIT-E839K-r KWMAPKSIF  | 84  | 38    |
| >KIT-E839K-v KWMAPESIFI | 126   | >KIT-E839K-r KWMAPKSIFI | 115 | 11    |
| >KIT-E839K-v VKWMAPESI  | 911   | >KIT-E839K-r VKWMAPKSI  | 168 | 743   |
| >KIT-E839K-v VKWMAPESI  | 19    | >KIT-E839K-r VKWMAPKSI  | 11  | 8     |
| >KIT-E839K-v VKWMAPESIF | 2     | >KIT-E839K-r VKWMAPKSIF | 2   | 0     |
| >KIT-E839K-v PVKWMAPE   | 11158 | >KIT-E839K-r PVKWMAPE   | 30  | 11128 |
| >KIT-E839K-v LPVKWMAPE  | 216   | >KIT-E839K-r LPVKWMAPE  | 147 | 69    |
| >KIT-E839K-v LPVKWMAPE  | 473   | >KIT-E839K-r LPVKWMAPE  | 803 | 330   |
| >KIT-E839K-v LPVKWMAPE  | 96    | >KIT-E839K-r LPVKWMAPE  | 99  | 3     |
| >KIT-E839K-v LPVKWMAPE  | 32    | >KIT-E839K-r LPVKWMAPE  | 51  | 19    |
| >KIT-E839K-v LPVKWMAPE  | 48    | >KIT-E839K-r LPVKWMAPE  | 57  | 9     |
| >KIT-E839K-v LPVKWMAPE  | 122   | >KIT-E839K-r LPVKWMAPE  | 44  | 78    |
| >KIT-E839K-v RLPVKWMAF  | 12943 | >KIT-E839K-r RLPVKWMAF  | 51  | 12892 |
| >KIT-E839K-v RLPVKWMAF  | 34963 | >KIT-E839K-r RLPVKWMAF  | 412 | 34551 |
| >KIT-E839K-v RLPVKWMAF  | 12621 | >KIT-E839K-r RLPVKWMAF  | 56  | 12565 |
| >KIT-E839K-v RLPVKWMAF  | 10264 | >KIT-E839K-r RLPVKWMAF  | 187 | 10077 |

|                           |       |                          |       |       |
|---------------------------|-------|--------------------------|-------|-------|
| >KIT-E925G-\\ IEKQISEST   | 410   | >KIT-E925G-r IGKQISEST   | 40574 | 40164 |
| >KIT-E925G-\\ IEKQISEST   | 132   | >KIT-E925G-r IGKQISEST   | 33337 | 33205 |
| >KIT-E925G-\\ QLIKQISEST  | 407   | >KIT-E925G-r QLIGKQISEST | 504   | 97    |
| >KIT-E925G-\\ QLIKQISEST  | 444   | >KIT-E925G-r QLIGKQISEST | 381   | 63    |
| >KIT-E925G-\\ VQLIEKQI    | 685   | >KIT-E925G-r VQLIGKQI    | 438   | 247   |
| >KIT-E925G-\\ QIVQLIEK    | 223   | >KIT-E925G-r QIVQLIGK    | 381   | 158   |
| >KIT-E925G-\\ QIVQLIEK    | 211   | >KIT-E925G-r QIVQLIGK    | 347   | 136   |
| >KIT-E925G-\\ KQIVQLIEKQI | 193   | >KIT-E925G-r KQIVQLIGKQ  | 122   | 71    |
| >KIT-E925G-\\ KQIVQLIEK   | 543   | >KIT-E925G-r KQIVQLIGK   | 473   | 70    |
| >KIT-E925G-\\ KQIVQLIEK   | 38    | >KIT-E925G-r KQIVQLIGK   | 59    | 21    |
| >KIT-E925G-\\ KQIVQLIEK   | 58    | >KIT-E925G-r KQIVQLIGK   | 92    | 34    |
| >KIT-E925G-\\ KQIVQLIEK   | 152   | >KIT-E925G-r KQIVQLIGK   | 441   | 289   |
| >KIT-E925G-\\ KQIVQLIEKQI | 268   | >KIT-E925G-r KQIVQLIGKQ  | 165   | 103   |
| >KIT-E925G-\\ KQIVQLIEK   | 1193  | >KIT-E925G-r KQIVQLIGK   | 443   | 750   |
| >KIT-E925G-\\ KQIVQLIEKQI | 355   | >KIT-E925G-r KQIVQLIGKQ  | 326   | 29    |
| >KIT-E925G-\\ TFKQIVQLIEK | 72    | >KIT-E925G-r TFKQIVQLIGK | 112   | 40    |
| >KIT-E925G-\\ TFKQIVQLIEK | 337   | >KIT-E925G-r TFKQIVQLIGK | 804   | 467   |
| >KIT-F469L-m PFGKLVVQSS   | 23525 | >KIT-F469L-n PLGKLVVQSS  | 443   | 23082 |
| >KIT-F469L-m VQTLNSSGPF   | 586   | >KIT-F469L-n VQTLNSSGPF  | 113   | 473   |
| >KIT-F469L-m VQTLNSSGPF   | 94    | >KIT-F469L-n VQTLNSSGPF  | 1227  | 1133  |
| >KIT-F469L-m VQTLNSSGPF   | 245   | >KIT-F469L-n VQTLNSSGPF  | 3189  | 2944  |
| >KIT-F469L-m VQTLNSSGPF   | 5     | >KIT-F469L-n VQTLNSSGPF  | 75    | 70    |
| >KIT-F469L-m PFGKLVV      | 347   | >KIT-F469L-n PPLGKLVV    | 2166  | 1819  |
| >KIT-F469L-m SGPPFGKL     | 521   | >KIT-F469L-n SGPPLGKL    | 297   | 224   |
| >KIT-F469L-m SGPPFGKLV    | 892   | >KIT-F469L-n SGPPLGKLV   | 357   | 535   |
| >KIT-F469L-m SGPPFGKL     | 71    | >KIT-F469L-n SGPPLGKL    | 3412  | 3341  |
| >KIT-F469L-m SGPPFGKLV    | 13    | >KIT-F469L-n SGPPLGKLV   | 60    | 47    |
| >KIT-F469L-m SGPPFGKLVV   | 202   | >KIT-F469L-n SGPPLGKLVV  | 587   | 385   |
| >KIT-F469L-m SSGPPFGK     | 390   | >KIT-F469L-n SSGPPLGK    | 474   | 84    |
| >KIT-F469L-m SSGPPFGK     | 13    | >KIT-F469L-n SSGPPLGK    | 25    | 12    |
| >KIT-F469L-m SSGPPFGKL    | 385   | >KIT-F469L-n SSGPPLGKL   | 100   | 285   |
| >KIT-F469L-m SSGPPFGKL    | 152   | >KIT-F469L-n SSGPPLGKL   | 897   | 745   |
| >KIT-F469L-m SSGPPFGKLV   | 325   | >KIT-F469L-n SSGPPLGKLV  | 1279  | 954   |
| >KIT-F469L-m SSGPPFGKL    | 252   | >KIT-F469L-n SSGPPLGKL   | 350   | 98    |
| >KIT-F469L-m SSGPPFGK     | 121   | >KIT-F469L-n SSGPPLGK    | 299   | 178   |
| >KIT-F469L-m SSGPPFGKL    | 46    | >KIT-F469L-n SSGPPLGKL   | 56    | 10    |
| >KIT-F469L-m NSSGPPFGK    | 38    | >KIT-F469L-n NSSGPPLGK   | 89    | 51    |
| >KIT-F469L-m NSSGPPFGK    | 115   | >KIT-F469L-n NSSGPPLGK   | 763   | 648   |
| >KIT-F469L-m NSSGPPFGKL   | 267   | >KIT-F469L-n NSSGPPLGKL  | 706   | 439   |
| >KIT-F469L-m NSSGPPFGKL   | 131   | >KIT-F469L-n NSSGPPLGKL  | 279   | 148   |
| >KIT-F469L-m NSSGPPFGKL   | 972   | >KIT-F469L-n NSSGPPLGKL  | 491   | 481   |
| >KIT-F469L-m NSSGPPFGKL   | 946   | >KIT-F469L-n NSSGPPLGKL  | 487   | 459   |
| >KIT-F469L-m LNSSGPPF     | 215   | >KIT-F469L-n LNSSGPPL    | 3627  | 3412  |

|                         |       |                         |      |       |
|-------------------------|-------|-------------------------|------|-------|
| >KIT-F469L-m LNSSGPPF   | 42    | >KIT-F469L-n LNSSGPPL   | 1168 | 1126  |
| >KIT-F469L-m TLNSSGPPF  | 15312 | >KIT-F469L-n TLNSSGPPL  | 183  | 15129 |
| >KIT-F469L-m TLNSSGPPF  | 6508  | >KIT-F469L-n TLNSSGPPL  | 51   | 6457  |
| >KIT-F469L-m TLNSSGPPF  | 2282  | >KIT-F469L-n TLNSSGPPL  | 25   | 2257  |
| >KIT-F469L-m TLNSSGPPF  | 4413  | >KIT-F469L-n TLNSSGPPL  | 42   | 4371  |
| >KIT-F469L-m TLNSSGPPF  | 13262 | >KIT-F469L-n TLNSSGPPL  | 139  | 13123 |
| >KIT-F469L-m TLNSSGPPF  | 10601 | >KIT-F469L-n TLNSSGPPL  | 28   | 10573 |
| >KIT-F469L-m TLNSSGPPF  | 16249 | >KIT-F469L-n TLNSSGPPL  | 347  | 15902 |
| >KIT-F469L-m TLNSSGPPF  | 4194  | >KIT-F469L-n TLNSSGPPL  | 13   | 4181  |
| >KIT-F469L-m TLNSSGPPFG | 45    | >KIT-F469L-n TLNSSGPPLG | 45   | 0     |
| >KIT-F469L-m TLNSSGPPFG | 21    | >KIT-F469L-n TLNSSGPPLG | 29   | 8     |
| >KIT-F469L-m TLNSSGPPFG | 293   | >KIT-F469L-n TLNSSGPPLG | 950  | 657   |
| >KIT-F469L-m TLNSSGPPF  | 12644 | >KIT-F469L-n TLNSSGPPL  | 437  | 12207 |
| >KIT-F469L-m TLNSSGPPF  | 31    | >KIT-F469L-n TLNSSGPPL  | 244  | 213   |
| >KIT-F469L-m TLNSSGPPF  | 55    | >KIT-F469L-n TLNSSGPPL  | 1103 | 1048  |
| >KIT-F469L-m TLNSSGPPF  | 9     | >KIT-F469L-n TLNSSGPPL  | 218  | 209   |
| >KIT-F469L-m TLNSSGPPF  | 382   | >KIT-F469L-n TLNSSGPPL  | 3237 | 2855  |
| >KIT-F469L-m QTLNSSGPPF | 9059  | >KIT-F469L-n QTLNSSGPPL | 209  | 8850  |
| >KIT-F469L-m QTLNSSGPPF | 124   | >KIT-F469L-n QTLNSSGPPL | 1171 | 1047  |
| >KIT-F469L-m QTLNSSGPPF | 3336  | >KIT-F469L-n QTLNSSGPPL | 345  | 2991  |
| >KIT-F469L-m QTLNSSGPPF | 105   | >KIT-F469L-n QTLNSSGPPL | 560  | 455   |
| >KIT-F469L-m QTLNSSGPPF | 1532  | >KIT-F469L-n QTLNSSGPPL | 21   | 1511  |
| >KIT-F469L-m QTLNSSGPPF | 82    | >KIT-F469L-n QTLNSSGPPL | 2166 | 2084  |
| >KIT-F469L-m QTLNSSGPPF | 369   | >KIT-F469L-n QTLNSSGPPL | 5438 | 5069  |
| >KIT-F469L-m QTLNSSGPPF | 12    | >KIT-F469L-n QTLNSSGPPL | 305  | 293   |
| >KIT-F469L-m QTLNSSGPPF | 4     | >KIT-F469L-n QTLNSSGPPL | 6    | 2     |
| >KIT-F469L-m QTLNSSGPPF | 195   | >KIT-F469L-n QTLNSSGPPL | 1825 | 1630  |
| >KIT-F469L-m QTLNSSGPPF | 15324 | >KIT-F469L-n QTLNSSGPPL | 295  | 15029 |
| >KIT-F504L-m YFNFAFKG   | 12611 | >KIT-F504L-n YLNFAFKG   | 393  | 12218 |
| >KIT-F504L-m YFNFAFKGNM | 6172  | >KIT-F504L-n YLNFAFKGNM | 118  | 6054  |
| >KIT-F504L-m YFNFAFKGNM | 2252  | >KIT-F504L-n YLNFAFKGNM | 256  | 1996  |
| >KIT-F504L-m YFNFAFKGNM | 666   | >KIT-F504L-n YLNFAFKGNM | 388  | 278   |
| >KIT-F504L-m YNDVGKTSAN | 486   | >KIT-F504L-n YNDVGKTSAN | 3216 | 2730  |
| >KIT-F504L-m AYFNFAFK   | 286   | >KIT-F504L-n AYLNFAFK   | 1624 | 1338  |
| >KIT-F504L-m AYFNFAFK   | 21    | >KIT-F504L-n AYLNFAFK   | 43   | 22    |
| >KIT-F504L-m AYFNFAFK   | 237   | >KIT-F504L-n AYLNFAFK   | 168  | 69    |
| >KIT-F504L-m AYFNFAFKG  | 628   | >KIT-F504L-n AYLNFAFKG  | 368  | 260   |
| >KIT-F504L-m AYFNFAFK   | 7     | >KIT-F504L-n AYLNFAFK   | 9    | 2     |
| >KIT-F504L-m AYFNFAFK   | 20    | >KIT-F504L-n AYLNFAFK   | 38   | 18    |
| >KIT-F504L-m AYFNFAFK   | 345   | >KIT-F504L-n AYLNFAFK   | 765  | 420   |
| >KIT-F504L-m AYFNFAFK   | 75    | >KIT-F504L-n AYLNFAFK   | 1853 | 1778  |
| >KIT-F504L-m AYFNFAFK   | 81    | >KIT-F504L-n AYLNFAFK   | 127  | 46    |
| >KIT-F504L-m AYFNFAFK   | 58    | >KIT-F504L-n AYLNFAFK   | 93   | 35    |

|                          |     |                          |      |      |
|--------------------------|-----|--------------------------|------|------|
| >KIT-F504L-m SAYFNFAFK   | 33  | >KIT-F504L-n SAYLNFAFK   | 43   | 10   |
| >KIT-F504L-m SAYFNFAFK   | 7   | >KIT-F504L-n SAYLNFAFK   | 9    | 2    |
| >KIT-F504L-m SAYFNFAFK   | 9   | >KIT-F504L-n SAYLNFAFK   | 14   | 5    |
| >KIT-F504L-m SAYFNFAFK   | 23  | >KIT-F504L-n SAYLNFAFK   | 34   | 11   |
| >KIT-F504L-m SAYFNFAF    | 112 | >KIT-F504L-n SAYLNFAF    | 325  | 213  |
| >KIT-F504L-m SAYFNFAFK   | 3   | >KIT-F504L-n SAYLNFAFK   | 8    | 5    |
| >KIT-F504L-m SAYFNFAF    | 94  | >KIT-F504L-n SAYLNFAF    | 163  | 69   |
| >KIT-F504L-m SAYFNFAF    | 15  | >KIT-F504L-n SAYLNFAF    | 22   | 7    |
| >KIT-F504L-m SAYFNFAF    | 10  | >KIT-F504L-n SAYLNFAF    | 9    | 1    |
| >KIT-F504L-m SAYFNFAF    | 36  | >KIT-F504L-n SAYLNFAF    | 34   | 2    |
| >KIT-F504L-m SAYFNFAFK   | 89  | >KIT-F504L-n SAYLNFAFK   | 144  | 55   |
| >KIT-F504L-m TSAYFNFA    | 446 | >KIT-F504L-n TSAYLNFA    | 533  | 87   |
| >KIT-F504L-m TSAYFNFAFK  | 15  | >KIT-F504L-n TSAYLNFAFK  | 23   | 8    |
| >KIT-F504L-m TSAYFNFAFK  | 10  | >KIT-F504L-n TSAYLNFAFK  | 16   | 6    |
| >KIT-F504L-m TSAYFNFAFK  | 69  | >KIT-F504L-n TSAYLNFAFK  | 155  | 86   |
| >KIT-F504L-m TSAYFNFAFK  | 92  | >KIT-F504L-n TSAYLNFAFK  | 208  | 116  |
| >KIT-F504L-m TSAYFNFAF   | 20  | >KIT-F504L-n TSAYLNFAF   | 35   | 15   |
| >KIT-F504L-m TSAYFNFAF   | 392 | >KIT-F504L-n TSAYLNFAF   | 936  | 544  |
| >KIT-F504L-m TSAYFNFAFK  | 3   | >KIT-F504L-n TSAYLNFAFK  | 4    | 1    |
| >KIT-F504L-m TSAYFNFA    | 10  | >KIT-F504L-n TSAYLNFA    | 14   | 4    |
| >KIT-F504L-m TSAYFNFAF   | 246 | >KIT-F504L-n TSAYLNFAF   | 177  | 69   |
| >KIT-F504L-m TSAYFNFAF   | 18  | >KIT-F504L-n TSAYLNFAF   | 57   | 39   |
| >KIT-F504L-m TSAYFNFAF   | 25  | >KIT-F504L-n TSAYLNFAF   | 25   | 0    |
| >KIT-F504L-m TSAYFNFAF   | 62  | >KIT-F504L-n TSAYLNFAF   | 58   | 4    |
| >KIT-F504L-m TSAYFNFAF   | 71  | >KIT-F504L-n TSAYLNFAF   | 62   | 9    |
| >KIT-F504L-m TSAYFNFAF   | 54  | >KIT-F504L-n TSAYLNFAF   | 281  | 227  |
| >KIT-F504L-m TSAYFNFAF   | 108 | >KIT-F504L-n TSAYLNFAF   | 118  | 10   |
| >KIT-F504L-m TSAYFNFAFK  | 122 | >KIT-F504L-n TSAYLNFAFK  | 191  | 69   |
| >KIT-F504L-m KTSAYFNFA   | 417 | >KIT-F504L-n KTSAYLNFA   | 186  | 231  |
| >KIT-F504L-m KTSAYFNFA   | 17  | >KIT-F504L-n KTSAYLNFA   | 10   | 7    |
| >KIT-F504L-m KTSAYFNFA   | 131 | >KIT-F504L-n KTSAYLNFA   | 49   | 82   |
| >KIT-F504L-m KTSAYFNFA   | 10  | >KIT-F504L-n KTSAYLNFA   | 15   | 5    |
| >KIT-F504L-m KTSAYFNFAFI | 29  | >KIT-F504L-n KTSAYLNFAFI | 31   | 2    |
| >KIT-F504L-m KTSAYFNFAFI | 6   | >KIT-F504L-n KTSAYLNFAFI | 7    | 1    |
| >KIT-F504L-m KTSAYFNF    | 266 | >KIT-F504L-n KTSAYLNF    | 814  | 548  |
| >KIT-F504L-m KTSAYFNFAF  | 39  | >KIT-F504L-n KTSAYLNFAF  | 167  | 128  |
| >KIT-F504L-m KTSAYFNFA   | 9   | >KIT-F504L-n KTSAYLNFA   | 11   | 2    |
| >KIT-F504L-m KTSAYFNFAFI | 3   | >KIT-F504L-n KTSAYLNFAFI | 4    | 1    |
| >KIT-F504L-m KTSAYFNF    | 499 | >KIT-F504L-n KTSAYLNF    | 3903 | 3404 |
| >KIT-F504L-m KTSAYFNFAFI | 7   | >KIT-F504L-n KTSAYLNFAFI | 9    | 2    |
| >KIT-F504L-m KTSAYFNF    | 31  | >KIT-F504L-n KTSAYLNF    | 45   | 14   |
| >KIT-F504L-m KTSAYFNFAF  | 12  | >KIT-F504L-n KTSAYLNFAF  | 14   | 2    |
| >KIT-F504L-m KTSAYFNFAFI | 18  | >KIT-F504L-n KTSAYLNFAFI | 31   | 13   |

|                         |       |                         |      |       |
|-------------------------|-------|-------------------------|------|-------|
| >KIT-F504L-m KTSAYFNFA  | 112   | >KIT-F504L-n KTSAYLNFA  | 512  | 400   |
| >KIT-F504L-m KTSAYFNF   | 471   | >KIT-F504L-n KTSAYLNF   | 366  | 105   |
| >KIT-F504L-m KTSAYFNFAF | 93    | >KIT-F504L-n KTSAYLNFAF | 127  | 34    |
| >KIT-F504L-m KTSAYFNF   | 38    | >KIT-F504L-n KTSAYLNF   | 42   | 4     |
| >KIT-F504L-m KTSAYFNFAF | 16    | >KIT-F504L-n KTSAYLNFAF | 37   | 21    |
| >KIT-F504L-m KTSAYFNF   | 5     | >KIT-F504L-n KTSAYLNF   | 3    | 2     |
| >KIT-F504L-m KTSAYFNFAF | 6     | >KIT-F504L-n KTSAYLNFAF | 5    | 1     |
| >KIT-F504L-m KTSAYFNF   | 211   | >KIT-F504L-n KTSAYLNF   | 305  | 94    |
| >KIT-F504L-m KTSAYFNFAF | 320   | >KIT-F504L-n KTSAYLNFAF | 490  | 170   |
| >KIT-F504L-m KTSAYFNF   | 14    | >KIT-F504L-n KTSAYLNF   | 17   | 3     |
| >KIT-F504L-m KTSAYFNFAF | 16    | >KIT-F504L-n KTSAYLNFAF | 17   | 1     |
| >KIT-F504L-m KTSAYFNFA  | 148   | >KIT-F504L-n KTSAYLNFA  | 680  | 532   |
| >KIT-F504L-m KTSAYFNFAF | 27    | >KIT-F504L-n KTSAYLNFAF | 79   | 52    |
| >KIT-F504L-m KTSAYFNFAF | 433   | >KIT-F504L-n KTSAYLNFAF | 858  | 425   |
| >KIT-F504L-m KTSAYFNF   | 379   | >KIT-F504L-n KTSAYLNF   | 278  | 101   |
| >KIT-F504L-m KTSAYFNFAF | 38    | >KIT-F504L-n KTSAYLNFAF | 37   | 1     |
| >KIT-F504L-m KTSAYFNFAF | 237   | >KIT-F504L-n KTSAYLNFAF | 246  | 9     |
| >KIT-F504L-m KTSAYFNFAF | 119   | >KIT-F504L-n KTSAYLNFAF | 220  | 101   |
| >KIT-F504L-m KTSAYFNFAF | 145   | >KIT-F504L-n KTSAYLNFAF | 350  | 205   |
| >KIT-F504L-m GKTSAYFNF  | 271   | >KIT-F504L-n GKTSAYLNF  | 1880 | 1609  |
| >KIT-F504L-m GKTSAYFNF  | 10    | >KIT-F504L-n GKTSAYLNF  | 7    | 3     |
| >KIT-F504L-m GKTSAYFNFA | 7     | >KIT-F504L-n GKTSAYLNFA | 9    | 2     |
| >KIT-F504L-m VGKTSAYF   | 229   | >KIT-F504L-n VGKTSAYL   | 5708 | 5479  |
| >KIT-F504L-m VGKTSAYFNF | 171   | >KIT-F504L-n VGKTSAYLNF | 133  | 38    |
| >KIT-F504L-m VGKTSAYF   | 219   | >KIT-F504L-n VGKTSAYL   | 3438 | 3219  |
| >KIT-F504L-m VGKTSAYFNF | 463   | >KIT-F504L-n VGKTSAYLNF | 333  | 130   |
| >KIT-F504L-m DVGKTSAYF  | 211   | >KIT-F504L-n DVGKTSAYL  | 1905 | 1694  |
| >KIT-F504L-m DVGKTSAYF  | 10464 | >KIT-F504L-n DVGKTSAYL  | 96   | 10368 |
| >KIT-F584L-m FPRNRLSF   | 8     | >KIT-F584L-n LPRNRLSF   | 8    | 0     |
| >KIT-F584L-m FPRNRLSFGK | 113   | >KIT-F584L-n LPRNRLSFGK | 180  | 67    |
| >KIT-F584L-m FPRNRLSF   | 20    | >KIT-F584L-n LPRNRLSF   | 39   | 19    |
| >KIT-F584L-m FPRNRLSFG  | 148   | >KIT-F584L-n LPRNRLSFG  | 495  | 347   |
| >KIT-F584L-m FPRNRLSF   | 24    | >KIT-F584L-n LPRNRLSF   | 53   | 29    |
| >KIT-F584L-m FPRNRLSF   | 52    | >KIT-F584L-n LPRNRLSF   | 128  | 76    |
| >KIT-F584L-m FPRNRLSF   | 237   | >KIT-F584L-n LPRNRLSF   | 569  | 332   |
| >KIT-F584L-m FPRNRLSFG  | 145   | >KIT-F584L-n LPRNRLSFG  | 674  | 529   |
| >KIT-F584L-m FPRNRLSFGK | 59    | >KIT-F584L-n LPRNRLSFGK | 703  | 644   |
| >KIT-F584L-m FPRNRLSFGK | 30    | >KIT-F584L-n LPRNRLSFGK | 154  | 124   |
| >KIT-F584L-m FPRNRLSF   | 164   | >KIT-F584L-n LPRNRLSF   | 635  | 471   |
| >KIT-F584L-m EFPRNRLSF  | 479   | >KIT-F584L-n ELPRNRLSF  | 5065 | 4586  |
| >KIT-F584L-m EFPRNRLSF  | 14    | >KIT-F584L-n ELPRNRLSF  | 2657 | 2643  |
| >KIT-F584L-m EFPRNRLSFG | 524   | >KIT-F584L-n ELPRNRLSFG | 296  | 228   |
| >KIT-F584L-m EFPRNRLSF  | 348   | >KIT-F584L-n ELPRNRLSF  | 2163 | 1815  |



|                         |       |                         |      |       |
|-------------------------|-------|-------------------------|------|-------|
| >KIT-F584L-m TQLPYDHKW  | 10931 | >KIT-F584L-n TQLPYDHKW  | 85   | 10846 |
| >KIT-F584L-m TQLPYDHKW  | 14825 | >KIT-F584L-n TQLPYDHKW  | 356  | 14469 |
| >KIT-F584L-m TQLPYDHKW  | 34    | >KIT-F584L-n TQLPYDHKW  | 12   | 22    |
| >KIT-F584L-m TQLPYDHKW  | 8585  | >KIT-F584L-n TQLPYDHKW  | 209  | 8376  |
| >KIT-F584L-m TQLPYDHKW  | 11133 | >KIT-F584L-n TQLPYDHKW  | 295  | 10838 |
| >KIT-F584L-m TQLPYDHKW  | 67    | >KIT-F584L-n TQLPYDHKW  | 1708 | 1641  |
| >KIT-F584L-m TQLPYDHKW  | 176   | >KIT-F584L-n TQLPYDHKW  | 3498 | 3322  |
| >KIT-F584L-m TQLPYDHKW  | 23    | >KIT-F584L-n TQLPYDHKW  | 516  | 493   |
| >KIT-F584L-m TQLPYDHKW  | 199   | >KIT-F584L-n TQLPYDHKW  | 2852 | 2653  |
| >KIT-F584L-m TQLPYDHKW  | 1095  | >KIT-F584L-n TQLPYDHKW  | 36   | 1059  |
| >KIT-F584L-m WEFPRNRLSF | 117   | >KIT-F584L-n WELPRNRLSF | 289  | 172   |
| >KIT-F584L-m WEFPRNRLSF | 337   | >KIT-F584L-n WELPRNRLSF | 659  | 322   |
| >KIT-F584L-m WEFPRNRLSF | 147   | >KIT-F584L-n WELPRNRLSF | 1072 | 925   |
| >KIT-F584L-m WEFPRNRLSF | 10    | >KIT-F584L-n WELPRNRLSF | 32   | 22    |
| >KIT-F584L-m WEFPRNRL   | 202   | >KIT-F584L-n WELPRNRL   | 511  | 309   |
| >KIT-F584L-m WEFPRNRL   | 45    | >KIT-F584L-n WELPRNRL   | 267  | 222   |
| >KIT-F584L-m WEFPRNRL   | 89    | >KIT-F584L-n WELPRNRL   | 183  | 94    |
| >KIT-F584L-m WEFPRNRLSF | 493   | >KIT-F584L-n WELPRNRLSF | 1379 | 886   |
| >KIT-F584L-m WEFPRNRL   | 276   | >KIT-F584L-n WELPRNRL   | 154  | 122   |
| >KIT-F584L-m WEFPRNRLSF | 49    | >KIT-F584L-n WELPRNRLSF | 46   | 3     |
| >KIT-F584L-m WEFPRNRLSF | 498   | >KIT-F584L-n WELPRNRLSF | 1098 | 600   |
| >KIT-F584L-m KWEFPRNRLS | 477   | >KIT-F584L-n KWELPRNRLS | 1596 | 1119  |
| >KIT-F584L-m KWEFPRNRLS | 162   | >KIT-F584L-n KWELPRNRLS | 182  | 20    |
| >KIT-F584L-m KWEFPRNR   | 137   | >KIT-F584L-n KWELPRNR   | 244  | 107   |
| >KIT-F584L-m KWEFPRNR   | 13    | >KIT-F584L-n KWELPRNR   | 13   | 0     |
| >KIT-F584L-m KWEFPRNR   | 395   | >KIT-F584L-n KWELPRNR   | 505  | 110   |
| >KIT-F584L-m KWEFPRNRL  | 154   | >KIT-F584L-n KWELPRNRL  | 175  | 21    |
| >KIT-F584L-m KWEFPRNRLS | 82    | >KIT-F584L-n KWELPRNRLS | 95   | 13    |
| >KIT-F584L-m HKWEFPRNR  | 220   | >KIT-F584L-n HKWELPRNR  | 652  | 432   |
| >KIT-F584L-m HKWEFPRNR  | 59    | >KIT-F584L-n HKWELPRNR  | 153  | 94    |
| >KIT-F584L-m HKWEFPRNR  | 238   | >KIT-F584L-n HKWELPRNR  | 225  | 13    |
| >KIT-F584L-m HKWEFPRNR  | 33    | >KIT-F584L-n HKWELPRNR  | 74   | 41    |
| >KIT-F584L-m DHKWEFPR   | 218   | >KIT-F584L-n DHKWELPR   | 930  | 712   |
| >KIT-F584L-m DHKWEFPR   | 346   | >KIT-F584L-n DHKWELPR   | 686  | 340   |
| >KIT-F584L-m YDHKWEFPR  | 183   | >KIT-F584L-n YDHWELPR   | 137  | 46    |
| >KIT-F584L-m PYDHKWEL   | 147   | >KIT-F584L-n PYDHWEL    | 1386 | 1239  |
| >KIT-F584L-m PYDHKWEL   | 444   | >KIT-F584L-n PYDHWEL    | 1702 | 1258  |
| >KIT-F584L-m PYDHKWEL   | 61    | >KIT-F584L-n PYDHWEL    | 268  | 207   |
| >KIT-F584L-m PYDHKWELPI | 67    | >KIT-F584L-n PYDHWELPI  | 70   | 3     |
| >KIT-F584L-m LPYDHKWELF | 169   | >KIT-F584L-n LPYDHWELF  | 1284 | 1115  |
| >KIT-F584L-m LPYDHKWELF | 170   | >KIT-F584L-n LPYDHWELF  | 711  | 541   |
| >KIT-F584L-m LPYDHKWELF | 359   | >KIT-F584L-n LPYDHWELF  | 1134 | 775   |
| >KIT-F584L-m LPYDHKWEL  | 175   | >KIT-F584L-n LPYDHWEL   | 38   | 137   |

|                         |       |                          |       |       |
|-------------------------|-------|--------------------------|-------|-------|
| >KIT-F584L-v LPYDHKWEF  | 1030  | >KIT-F584L-n LPYDHKWEL   | 245   | 785   |
| >KIT-F584L-v LPYDHKWEF  | 272   | >KIT-F584L-n LPYDHKWEL   | 4450  | 4178  |
| >KIT-F584L-v LPYDHKWEF  | 162   | >KIT-F584L-n LPYDHKWEL   | 1746  | 1584  |
| >KIT-F584L-v LPYDHKWEF  | 11    | >KIT-F584L-n LPYDHKWEL   | 55    | 44    |
| >KIT-F584L-v LPYDHKWEFI | 212   | >KIT-F584L-n LPYDHKWELFI | 273   | 61    |
| >KIT-F584L-v LPYDHKWEF  | 11169 | >KIT-F584L-n LPYDHKWEL   | 452   | 10717 |
| >KIT-F584L-v LPYDHKWEF  | 471   | >KIT-F584L-n LPYDHKWEL   | 307   | 164   |
| >KIT-F584L-v LPYDHKWEF  | 18    | >KIT-F584L-n LPYDHKWEL   | 53    | 35    |
| >KIT-F584L-v LPYDHKWEFI | 124   | >KIT-F584L-n LPYDHKWELFI | 460   | 336   |
| >KIT-F584L-v LPYDHKWEF  | 67    | >KIT-F584L-n LPYDHKWEL   | 1007  | 940   |
| >KIT-F584L-v LPYDHKWEF  | 11    | >KIT-F584L-n LPYDHKWEL   | 67    | 56    |
| >KIT-F584L-v LPYDHKWEFI | 96    | >KIT-F584L-n LPYDHKWELFI | 80    | 16    |
| >KIT-F584L-v QLPYDHKWE  | 13740 | >KIT-F584L-n QLPYDHKWE   | 241   | 13499 |
| >KIT-F584L-v QLPYDHKWE  | 7688  | >KIT-F584L-n QLPYDHKWE   | 280   | 7408  |
| >KIT-F584L-v QLPYDHKWE  | 6452  | >KIT-F584L-n QLPYDHKWE   | 40    | 6412  |
| >KIT-F584L-v QLPYDHKWE  | 446   | >KIT-F584L-n QLPYDHKWE   | 5142  | 4696  |
| >KIT-F584S-v FPRNRLSF   | 8     | >KIT-F584S-n SPRNRLSF    | 7     | 1     |
| >KIT-F584S-v FPRNRLSFGK | 113   | >KIT-F584S-n SPRNRLSFGK  | 134   | 21    |
| >KIT-F584S-v FPRNRLSF   | 20    | >KIT-F584S-n SPRNRLSF    | 39    | 19    |
| >KIT-F584S-v FPRNRLSFG  | 148   | >KIT-F584S-n SPRNRLSFG   | 450   | 302   |
| >KIT-F584S-v FPRNRLSF   | 24    | >KIT-F584S-n SPRNRLSF    | 158   | 134   |
| >KIT-F584S-v FPRNRLSF   | 52    | >KIT-F584S-n SPRNRLSF    | 788   | 736   |
| >KIT-F584S-v FPRNRLSF   | 237   | >KIT-F584S-n SPRNRLSF    | 5075  | 4838  |
| >KIT-F584S-v FPRNRLSFG  | 145   | >KIT-F584S-n SPRNRLSFG   | 10426 | 10281 |
| >KIT-F584S-v FPRNRLSFGK | 59    | >KIT-F584S-n SPRNRLSFGK  | 1944  | 1885  |
| >KIT-F584S-v FPRNRLSFGK | 30    | >KIT-F584S-n SPRNRLSFGK  | 5358  | 5328  |
| >KIT-F584S-v FPRNRLSF   | 164   | >KIT-F584S-n SPRNRLSF    | 4229  | 4065  |
| >KIT-F584S-v EFPRNRLSF  | 479   | >KIT-F584S-n ESPRNRLSF   | 5177  | 4698  |
| >KIT-F584S-v EFPRNRLSF  | 14    | >KIT-F584S-n ESPRNRLSF   | 3958  | 3944  |
| >KIT-F584S-v EFPRNRLSF  | 5756  | >KIT-F584S-n ESPRNRLSF   | 462   | 5294  |
| >KIT-F584S-v EFPRNRLSF  | 5020  | >KIT-F584S-n ESPRNRLSF   | 424   | 4596  |
| >KIT-F584S-v EFPRNRLSFG | 524   | >KIT-F584S-n ESPRNRLSFG  | 76    | 448   |
| >KIT-F584S-v EFPRNRLSF  | 3910  | >KIT-F584S-n ESPRNRLSF   | 438   | 3472  |
| >KIT-F584S-v EFPRNRLSF  | 348   | >KIT-F584S-n ESPRNRLSF   | 8114  | 7766  |
| >KIT-F584S-v TQLPYDHKW  | 34    | >KIT-F584S-n TQLPYDHKW   | 220   | 186   |
| >KIT-F584S-v TQLPYDHKW  | 67    | >KIT-F584S-n TQLPYDHKW   | 26054 | 25987 |
| >KIT-F584S-v TQLPYDHKW  | 176   | >KIT-F584S-n TQLPYDHKW   | 20732 | 20556 |
| >KIT-F584S-v TQLPYDHKW  | 23    | >KIT-F584S-n TQLPYDHKW   | 9728  | 9705  |
| >KIT-F584S-v TQLPYDHKW  | 199   | >KIT-F584S-n TQLPYDHKW   | 12458 | 12259 |
| >KIT-F584S-v WEFPRNRLSF | 117   | >KIT-F584S-n WESPRNRLSF  | 624   | 507   |
| >KIT-F584S-v WEFPRNRLSF | 337   | >KIT-F584S-n WESPRNRLSF  | 1151  | 814   |
| >KIT-F584S-v WEFPRNRLSF | 147   | >KIT-F584S-n WESPRNRLSF  | 399   | 252   |
| >KIT-F584S-v WEFPRNRLSF | 10    | >KIT-F584S-n WESPRNRLSF  | 52    | 42    |

|                          |      |                          |       |       |
|--------------------------|------|--------------------------|-------|-------|
| >KIT-F584S-v WEFPRNRL    | 202  | >KIT-F584S-n WESPRNRL    | 1219  | 1017  |
| >KIT-F584S-v WEFPRNRL    | 45   | >KIT-F584S-n WESPRNRL    | 183   | 138   |
| >KIT-F584S-v WEFPRNRL    | 89   | >KIT-F584S-n WESPRNRL    | 461   | 372   |
| >KIT-F584S-v WEFPRNRLSF  | 493  | >KIT-F584S-n WESPRNRLSF  | 812   | 319   |
| >KIT-F584S-v WEFPRNRLSF  | 645  | >KIT-F584S-n WESPRNRLSF  | 175   | 470   |
| >KIT-F584S-v WEFPRNRL    | 276  | >KIT-F584S-n WESPRNRL    | 1902  | 1626  |
| >KIT-F584S-v WEFPRNRLSF  | 49   | >KIT-F584S-n WESPRNRLSF  | 106   | 57    |
| >KIT-F584S-v WEFPRNRLSF  | 498  | >KIT-F584S-n WESPRNRLSF  | 3370  | 2872  |
| >KIT-F584S-v KWEFPRNRL   | 477  | >KIT-F584S-n KWESPRNRL   | 376   | 101   |
| >KIT-F584S-v KWEFPRNRL   | 162  | >KIT-F584S-n KWESPRNRL   | 60    | 102   |
| >KIT-F584S-v KWEFPRNR    | 137  | >KIT-F584S-n KWESPRNR    | 143   | 6     |
| >KIT-F584S-v KWEFPRNR    | 13   | >KIT-F584S-n KWESPRNR    | 15    | 2     |
| >KIT-F584S-v KWEFPRNR    | 395  | >KIT-F584S-n KWESPRNR    | 413   | 18    |
| >KIT-F584S-v KWEFPRNRL   | 154  | >KIT-F584S-n KWESPRNRL   | 135   | 19    |
| >KIT-F584S-v KWEFPRNRL   | 82   | >KIT-F584S-n KWESPRNRL   | 71    | 11    |
| >KIT-F584S-v HKWEFPRNR   | 220  | >KIT-F584S-n HKWESPRNR   | 101   | 119   |
| >KIT-F584S-v HKWEFPRNR   | 59   | >KIT-F584S-n HKWESPRNR   | 29    | 30    |
| >KIT-F584S-v HKWEFPRNR   | 238  | >KIT-F584S-n HKWESPRNR   | 410   | 172   |
| >KIT-F584S-v HKWEFPRNR   | 656  | >KIT-F584S-n HKWESPRNR   | 492   | 164   |
| >KIT-F584S-v HKWEFPRNR   | 33   | >KIT-F584S-n HKWESPRNR   | 170   | 137   |
| >KIT-F584S-v DHKWEFPR    | 218  | >KIT-F584S-n DHKWESPR    | 632   | 414   |
| >KIT-F584S-v DHKWEFPR    | 346  | >KIT-F584S-n DHKWESPR    | 2260  | 1914  |
| >KIT-F584S-v YDHKWEFPR   | 183  | >KIT-F584S-n YDHWESPR    | 813   | 630   |
| >KIT-F584S-v PYDHWESPR   | 147  | >KIT-F584S-n PYDHWESPR   | 23004 | 22857 |
| >KIT-F584S-v PYDHWESPR   | 444  | >KIT-F584S-n PYDHWESPR   | 18576 | 18132 |
| >KIT-F584S-v PYDHWESPR   | 61   | >KIT-F584S-n PYDHWESPR   | 9229  | 9168  |
| >KIT-F584S-v PYDHWESPR   | 67   | >KIT-F584S-n PYDHWESPR   | 261   | 194   |
| >KIT-F584S-v LPYDHWESPR  | 169  | >KIT-F584S-n LPYDHWESPR  | 797   | 628   |
| >KIT-F584S-v LPYDHWESPR  | 170  | >KIT-F584S-n LPYDHWESPR  | 402   | 232   |
| >KIT-F584S-v LPYDHWESPR  | 359  | >KIT-F584S-n LPYDHWESPR  | 703   | 344   |
| >KIT-F584S-v LPYDHWESPR  | 175  | >KIT-F584S-n LPYDHWESPR  | 14207 | 14032 |
| >KIT-F584S-v LPYDHWESPR  | 272  | >KIT-F584S-n LPYDHWESPR  | 22885 | 22613 |
| >KIT-F584S-v LPYDHWESPR  | 162  | >KIT-F584S-n LPYDHWESPR  | 9357  | 9195  |
| >KIT-F584S-v LPYDHWESPR  | 11   | >KIT-F584S-n LPYDHWESPR  | 273   | 262   |
| >KIT-F584S-v LPYDHWESPR  | 212  | >KIT-F584S-n LPYDHWESPR  | 261   | 49    |
| >KIT-F584S-v LPYDHWESPR  | 471  | >KIT-F584S-n LPYDHWESPR  | 6218  | 5747  |
| >KIT-F584S-v LPYDHWESPR  | 18   | >KIT-F584S-n LPYDHWESPR  | 4663  | 4645  |
| >KIT-F584S-v LPYDHWESPR  | 2431 | >KIT-F584S-n LPYDHWESPR  | 249   | 2182  |
| >KIT-F584S-v LPYDHWESPR  | 124  | >KIT-F584S-n LPYDHWESPR  | 250   | 126   |
| >KIT-F584S-v LPYDHWESPR  | 67   | >KIT-F584S-n LPYDHWESPR  | 9869  | 9802  |
| >KIT-F584S-v LPYDHWESPR  | 11   | >KIT-F584S-n LPYDHWESPR  | 5321  | 5310  |
| >KIT-F584S-v LPYDHWESPR  | 96   | >KIT-F584S-n LPYDHWESPR  | 204   | 108   |
| >KIT-F584S-v QLPYDHWESPR | 446  | >KIT-F584S-n QLPYDHWESPR | 21412 | 20966 |

|                          |       |                         |      |       |
|--------------------------|-------|-------------------------|------|-------|
| >KIT-F591L-m FGKTLGAGAF  | 241   | >KIT-F591L-n LGKTLGAGAF | 201  | 40    |
| >KIT-F591L-m FGKTLGAGAF  | 353   | >KIT-F591L-n LGKTLGAGAF | 2573 | 2220  |
| >KIT-F591L-m FGKTLGAGAF  | 408   | >KIT-F591L-n LGKTLGAGAF | 902  | 494   |
| >KIT-F591L-m SFGKTLGA    | 14695 | >KIT-F591L-n SLGKTLGA   | 172  | 14523 |
| >KIT-F591L-m SFGKTLGAGA  | 14910 | >KIT-F591L-n SLGKTLGAGA | 141  | 14769 |
| >KIT-F591L-m SFGKTLGA    | 17348 | >KIT-F591L-n SLGKTLGA   | 75   | 17273 |
| >KIT-F591L-m SFGKTLGAGA  | 16948 | >KIT-F591L-n SLGKTLGAGA | 55   | 16893 |
| >KIT-F591L-m SFGKTLGA    | 20403 | >KIT-F591L-n SLGKTLGA   | 269  | 20134 |
| >KIT-F591L-m SFGKTLGAGA  | 18475 | >KIT-F591L-n SLGKTLGAGA | 160  | 18315 |
| >KIT-F591L-m SFGKTLGA    | 14012 | >KIT-F591L-n SLGKTLGA   | 41   | 13971 |
| >KIT-F591L-m SFGKTLGAGA  | 15176 | >KIT-F591L-n SLGKTLGAGA | 57   | 15119 |
| >KIT-F591L-m SFGKTLGA    | 21915 | >KIT-F591L-n SLGKTLGA   | 26   | 21889 |
| >KIT-F591L-m SFGKTLGAGA  | 23077 | >KIT-F591L-n SLGKTLGAGA | 41   | 23036 |
| >KIT-F591L-m SFGKTLGAGA  | 17    | >KIT-F591L-n SLGKTLGAGA | 3038 | 3021  |
| >KIT-F591L-m SFGKTLGAGA  | 1913  | >KIT-F591L-n SLGKTLGAGA | 73   | 1840  |
| >KIT-F591L-m SFGKTLGAGA  | 544   | >KIT-F591L-n SLGKTLGAGA | 116  | 428   |
| >KIT-F591L-m KWEFPRNRLS  | 477   | >KIT-F591L-n KWEFPRNRLS | 5896 | 5419  |
| >KIT-F591L-m KWEFPRNRLS  | 162   | >KIT-F591L-n KWEFPRNRLS | 1921 | 1759  |
| >KIT-F591L-m KWEFPRNRLS  | 82    | >KIT-F591L-n KWEFPRNRLS | 64   | 18    |
| >KIT-F591L-m LSFSGKTLGA  | 411   | >KIT-F591L-n LSLGKTLGA  | 1296 | 885   |
| >KIT-F591L-m LSFSGKTLGAG | 459   | >KIT-F591L-n LSLGKTLGAG | 1371 | 912   |
| >KIT-F591L-m RLSFGKTL    | 152   | >KIT-F591L-n RLSLGKTL   | 347  | 195   |
| >KIT-F591L-m RLSFGKTLGA  | 167   | >KIT-F591L-n RLSLGKTLGA | 132  | 35    |
| >KIT-F591L-m RLSFGKTL    | 74    | >KIT-F591L-n RLSLGKTL   | 259  | 185   |
| >KIT-F591L-m RLSFGKTLGA  | 123   | >KIT-F591L-n RLSLGKTLGA | 84   | 39    |
| >KIT-F591L-m RLSFGKTL    | 89    | >KIT-F591L-n RLSLGKTL   | 280  | 191   |
| >KIT-F591L-m RLSFGKTLGA  | 339   | >KIT-F591L-n RLSLGKTLGA | 816  | 477   |
| >KIT-F591L-m RLSFGKTL    | 321   | >KIT-F591L-n RLSLGKTL   | 578  | 257   |
| >KIT-F591L-m RLSFGKTL    | 396   | >KIT-F591L-n RLSLGKTL   | 494  | 98    |
| >KIT-F591L-m RLSFGKTLGA  | 496   | >KIT-F591L-n RLSLGKTLGA | 648  | 152   |
| >KIT-F591L-m RLSFGKTL    | 20    | >KIT-F591L-n RLSLGKTL   | 31   | 11    |
| >KIT-F591L-m RLSFGKTLGA  | 36    | >KIT-F591L-n RLSLGKTLGA | 50   | 14    |
| >KIT-F591L-m RLSFGKTL    | 136   | >KIT-F591L-n RLSLGKTL   | 441  | 305   |
| >KIT-F591L-m NRLSFGKTL   | 127   | >KIT-F591L-n NRSLGKTL   | 371  | 244   |
| >KIT-F591L-m NRLSFGKTL   | 187   | >KIT-F591L-n NRSLGKTL   | 179  | 8     |
| >KIT-F591L-m NRLSFGKTL   | 133   | >KIT-F591L-n NRSLGKTL   | 156  | 23    |
| >KIT-F591L-m NRLSFGKTL   | 303   | >KIT-F591L-n NRSLGKTL   | 399  | 96    |
| >KIT-F591L-m NRLSFGKTL   | 199   | >KIT-F591L-n NRSLGKTL   | 216  | 17    |
| >KIT-F591L-m RNRLSFGK    | 6     | >KIT-F591L-n RNRLSLGK   | 6    | 0     |
| >KIT-F591L-m RNRLSFGKTL  | 134   | >KIT-F591L-n RNRLSLGKTL | 222  | 88    |
| >KIT-F591L-m RNRLSFGKTL  | 438   | >KIT-F591L-n RNRLSLGKTL | 1097 | 659   |
| >KIT-F591L-m PRNRLSFGK   | 360   | >KIT-F591L-n PRNRLSLGK  | 490  | 130   |
| >KIT-F591L-m PRNRLSFGKT  | 738   | >KIT-F591L-n PRNRLSLGKT | 434  | 304   |

|                         |       |                         |      |       |
|-------------------------|-------|-------------------------|------|-------|
| >KIT-F591L-m FPRNRLSF   | 8     | >KIT-F591L-n FPRNRLSL   | 8    | 0     |
| >KIT-F591L-m FPRNRLSFGK | 113   | >KIT-F591L-n FPRNRLSLGK | 121  | 8     |
| >KIT-F591L-m FPRNRLSF   | 20    | >KIT-F591L-n FPRNRLSL   | 12   | 8     |
| >KIT-F591L-m FPRNRLSFG  | 148   | >KIT-F591L-n FPRNRLSLG  | 234  | 86    |
| >KIT-F591L-m FPRNRLSF   | 24    | >KIT-F591L-n FPRNRLSL   | 898  | 874   |
| >KIT-F591L-m FPRNRLSF   | 52    | >KIT-F591L-n FPRNRLSL   | 1002 | 950   |
| >KIT-F591L-m FPRNRLSF   | 237   | >KIT-F591L-n FPRNRLSL   | 923  | 686   |
| >KIT-F591L-m FPRNRLSFG  | 145   | >KIT-F591L-n FPRNRLSLG  | 38   | 107   |
| >KIT-F591L-m FPRNRLSFGK | 59    | >KIT-F591L-n FPRNRLSLGK | 96   | 37    |
| >KIT-F591L-m FPRNRLSFGK | 30    | >KIT-F591L-n FPRNRLSLGK | 44   | 14    |
| >KIT-F591L-m FPRNRLSF   | 164   | >KIT-F591L-n FPRNRLSL   | 2339 | 2175  |
| >KIT-F591L-m EFPRNRLSF  | 479   | >KIT-F591L-n EFPRNRLSL  | 2997 | 2518  |
| >KIT-F591L-m EFPRNRLSF  | 14    | >KIT-F591L-n EFPRNRLSL  | 154  | 140   |
| >KIT-F591L-m EFPRNRLSF  | 348   | >KIT-F591L-n EFPRNRLSL  | 207  | 141   |
| >KIT-F591L-m WEFPRNRLSF | 117   | >KIT-F591L-n WEFPRNRLSL | 44   | 73    |
| >KIT-F591L-m WEFPRNRLSF | 337   | >KIT-F591L-n WEFPRNRLSL | 831  | 494   |
| >KIT-F591L-m WEFPRNRLSF | 147   | >KIT-F591L-n WEFPRNRLSL | 3419 | 3272  |
| >KIT-F591L-m WEFPRNRLSF | 10    | >KIT-F591L-n WEFPRNRLSL | 128  | 118   |
| >KIT-F591L-m WEFPRNRLSF | 4024  | >KIT-F591L-n WEFPRNRLSL | 167  | 3857  |
| >KIT-F591L-m WEFPRNRLSF | 772   | >KIT-F591L-n WEFPRNRLSL | 173  | 599   |
| >KIT-F591L-m WEFPRNRLSF | 493   | >KIT-F591L-n WEFPRNRLSL | 144  | 349   |
| >KIT-F591L-m WEFPRNRLSF | 49    | >KIT-F591L-n WEFPRNRLSL | 31   | 18    |
| >KIT-F591L-m WEFPRNRLSF | 498   | >KIT-F591L-n WEFPRNRLSL | 292  | 206   |
| >KIT-G470R-i GKLVVQSSI  | 600   | >KIT-G470R-i RKLVVQSSI  | 297  | 303   |
| >KIT-G470R-i GKLVVQSS   | 4196  | >KIT-G470R-i RKLVVQSS   | 376  | 3820  |
| >KIT-G470R-i GKLVVQSSI  | 150   | >KIT-G470R-i RKLVVQSSI  | 15   | 135   |
| >KIT-G470R-i GKLVVQSSI  | 1495  | >KIT-G470R-i RKLVVQSSI  | 85   | 1410  |
| >KIT-G470R-i FGKLVVQSSI | 1622  | >KIT-G470R-i FRKLVVQSSI | 267  | 1355  |
| >KIT-G470R-i FGKLVVQSSI | 4901  | >KIT-G470R-i FRKLVVQSSI | 236  | 4665  |
| >KIT-G470R-i FGKLVVQSSI | 31033 | >KIT-G470R-i FRKLVVQSSI | 258  | 30775 |
| >KIT-G470R-i QTLNSSGPPF | 22675 | >KIT-G470R-i QTLNSSGPPF | 108  | 22567 |
| >KIT-G470R-i QTLNSSGPPF | 991   | >KIT-G470R-i QTLNSSGPPF | 318  | 673   |
| >KIT-G470R-i QTLNSSGPPF | 19825 | >KIT-G470R-i QTLNSSGPPF | 42   | 19783 |
| >KIT-G470R-i QTLNSSGPPF | 33527 | >KIT-G470R-i QTLNSSGPPF | 212  | 33315 |
| >KIT-G470R-i QTLNSSGPPF | 27167 | >KIT-G470R-i QTLNSSGPPF | 22   | 27145 |
| >KIT-G470R-i QTLNSSGPPF | 10931 | >KIT-G470R-i QTLNSSGPPF | 138  | 10793 |
| >KIT-G470R-i QTLNSSGPPF | 35802 | >KIT-G470R-i QTLNSSGPPF | 383  | 35419 |
| >KIT-G470R-i PPFGKLVV   | 347   | >KIT-G470R-i PPFKLVV    | 754  | 407   |
| >KIT-G470R-i GPPFGKLV   | 2515  | >KIT-G470R-i GPPFRKLV   | 284  | 2231  |
| >KIT-G470R-i GPPFGKLVV  | 2604  | >KIT-G470R-i GPPFRKLVV  | 81   | 2523  |
| >KIT-G470R-i GPPFGKLVVC | 3045  | >KIT-G470R-i GPPFRKLVVC | 279  | 2766  |
| >KIT-G470R-i SGPPFGKLVV | 893   | >KIT-G470R-i SGPPFRKLVV | 345  | 548   |
| >KIT-G470R-i SGPPFGKL   | 71    | >KIT-G470R-i SGPPFRKL   | 80   | 9     |

|                         |       |                         |      |       |
|-------------------------|-------|-------------------------|------|-------|
| >KIT-G470R-1 SGPPFGKLV  | 13    | >KIT-G470R-1 SGPPFRKLV  | 26   | 13    |
| >KIT-G470R-1 SGPPFGKLVV | 202   | >KIT-G470R-1 SGPPFRKLVV | 317  | 115   |
| >KIT-G470R-1 SSGPPFGK   | 390   | >KIT-G470R-1 SSGPPFRK   | 306  | 84    |
| >KIT-G470R-1 SSGPPFGK   | 13    | >KIT-G470R-1 SSGPPFRK   | 16   | 3     |
| >KIT-G470R-1 SSGPPFGKL  | 385   | >KIT-G470R-1 SSGPPFRKL  | 321  | 64    |
| >KIT-G470R-1 SSGPPFGKL  | 152   | >KIT-G470R-1 SSGPPFRKL  | 81   | 71    |
| >KIT-G470R-1 SSGPPFGKLV | 325   | >KIT-G470R-1 SSGPPFRKLV | 378  | 53    |
| >KIT-G470R-1 SSGPPFGKL  | 252   | >KIT-G470R-1 SSGPPFRKL  | 657  | 405   |
| >KIT-G470R-1 SSGPPFGK   | 121   | >KIT-G470R-1 SSGPPFRK   | 93   | 28    |
| >KIT-G470R-1 SSGPPFGKL  | 46    | >KIT-G470R-1 SSGPPFRKL  | 72   | 26    |
| >KIT-G470R-1 NSSGPPFGK  | 38    | >KIT-G470R-1 NSSGPPFRK  | 45   | 7     |
| >KIT-G470R-1 NSSGPPFG   | 33762 | >KIT-G470R-1 NSSGPPFR   | 163  | 33599 |
| >KIT-G470R-1 NSSGPPFG   | 24842 | >KIT-G470R-1 NSSGPPFR   | 20   | 24822 |
| >KIT-G470R-1 NSSGPPFGK  | 115   | >KIT-G470R-1 NSSGPPFRK  | 146  | 31    |
| >KIT-G470R-1 NSSGPPFGKL | 267   | >KIT-G470R-1 NSSGPPFRKL | 1211 | 944   |
| >KIT-G470R-1 NSSGPPFGKL | 131   | >KIT-G470R-1 NSSGPPFRKL | 55   | 76    |
| >KIT-G470R-1 NSSGPPFGK  | 777   | >KIT-G470R-1 NSSGPPFRK  | 397  | 380   |
| >KIT-G470R-1 LNSSGPPFG  | 39275 | >KIT-G470R-1 LNSSGPPFR  | 320  | 38955 |
| >KIT-G470R-1 TLNSSGPPFG | 45    | >KIT-G470R-1 TLNSSGPPFR | 41   | 4     |
| >KIT-G470R-1 TLNSSGPPFG | 33229 | >KIT-G470R-1 TLNSSGPPFR | 376  | 32853 |
| >KIT-G470R-1 TLNSSGPPFG | 21    | >KIT-G470R-1 TLNSSGPPFR | 21   | 0     |
| >KIT-G470R-1 TLNSSGPPFG | 33540 | >KIT-G470R-1 TLNSSGPPFR | 328  | 33212 |
| >KIT-G470R-1 TLNSSGPPFG | 992   | >KIT-G470R-1 TLNSSGPPFR | 480  | 512   |
| >KIT-G470R-1 TLNSSGPPFG | 37765 | >KIT-G470R-1 TLNSSGPPFR | 287  | 37478 |
| >KIT-G470R-1 TLNSSGPPFG | 293   | >KIT-G470R-1 TLNSSGPPFR | 349  | 56    |
| >KIT-G470R-1 TLNSSGPPFG | 20516 | >KIT-G470R-1 TLNSSGPPFR | 94   | 20422 |
| >KIT-G498S-1 GKTSAYFNF  | 271   | >KIT-G498S-r SKTSAYFNF  | 50   | 221   |
| >KIT-G498S-1 GKTSAYFNF  | 10    | >KIT-G498S-r SKTSAYFNF  | 6    | 4     |
| >KIT-G498S-1 GKTSAYFNFA | 7     | >KIT-G498S-r SKTSAYFNFA | 4    | 3     |
| >KIT-G498S-1 VGKTSAYFNF | 729   | >KIT-G498S-r VSKTSAYFNF | 37   | 692   |
| >KIT-G498S-1 VGKTSAYF   | 759   | >KIT-G498S-r VSKTSAYF   | 157  | 602   |
| >KIT-G498S-1 VGKTSAYF   | 229   | >KIT-G498S-r VSKTSAYF   | 17   | 212   |
| >KIT-G498S-1 VGKTSAYFNF | 171   | >KIT-G498S-r VSKTSAYFNF | 15   | 156   |
| >KIT-G498S-1 VGKTSAYF   | 219   | >KIT-G498S-r VSKTSAYF   | 4    | 215   |
| >KIT-G498S-1 VGKTSAYFNF | 463   | >KIT-G498S-r VSKTSAYFNF | 5    | 458   |
| >KIT-G498S-1 VGKTSAYF   | 5132  | >KIT-G498S-r VSKTSAYF   | 174  | 4958  |
| >KIT-G498S-1 VGKTSAYFNF | 7892  | >KIT-G498S-r VSKTSAYFNF | 402  | 7490  |
| >KIT-G498S-1 VGKTSAYF   | 9018  | >KIT-G498S-r VSKTSAYF   | 183  | 8835  |
| >KIT-G498S-1 VGKTSAYFNF | 9483  | >KIT-G498S-r VSKTSAYFNF | 247  | 9236  |
| >KIT-G498S-1 VGKTSAYF   | 10188 | >KIT-G498S-r VSKTSAYF   | 188  | 10000 |
| >KIT-G498S-1 VGKTSAYFNF | 7432  | >KIT-G498S-r VSKTSAYFNF | 232  | 7200  |
| >KIT-G498S-1 VGKTSAYFNF | 1883  | >KIT-G498S-r VSKTSAYFNF | 117  | 1766  |
| >KIT-G498S-1 DVGKTSAY   | 235   | >KIT-G498S-r DVSKTSAY   | 127  | 108   |

|                            |       |                           |      |       |
|----------------------------|-------|---------------------------|------|-------|
| >KIT-G498S-\\ DVGKTSAY     | 279   | >KIT-G498S-r DVSKTSAY     | 24   | 255   |
| >KIT-G498S-\\ DVGKTSAYF    | 1751  | >KIT-G498S-r DVSKTSAYF    | 101  | 1650  |
| >KIT-G498S-\\ DVGKTSAY     | 51    | >KIT-G498S-r DVSKTSAY     | 48   | 3     |
| >KIT-G498S-\\ DVGKTSAYF    | 211   | >KIT-G498S-r DVSKTSAYF    | 218  | 7     |
| >KIT-G498S-\\ DVGKTSAY     | 57    | >KIT-G498S-r DVSKTSAY     | 505  | 448   |
| >KIT-G498S-\\ DVGKTSAY     | 695   | >KIT-G498S-r DVSKTSAY     | 206  | 489   |
| >KIT-G498S-\\ DVGKTSAY     | 2983  | >KIT-G498S-r DVSKTSAY     | 363  | 2620  |
| >KIT-G498S-\\ DVGKTSAY     | 408   | >KIT-G498S-r DVSKTSAY     | 80   | 328   |
| >KIT-G498S-\\ DVGKTSAY     | 3023  | >KIT-G498S-r DVSKTSAY     | 183  | 2840  |
| >KIT-G498S-\\ NDVGKTSAY    | 229   | >KIT-G498S-r NDVSKTSAY    | 619  | 390   |
| >KIT-G498S-\\ NDVGKTSAY    | 1421  | >KIT-G498S-r NDVSKTSAY    | 366  | 1055  |
| >KIT-G498S-\\ YNDVGKTSAY   | 1202  | >KIT-G498S-r YNDVSKTSAY   | 461  | 741   |
| >KIT-G498S-\\ YNDVGKTSAY   | 215   | >KIT-G498S-r YNDVSKTSAY   | 354  | 139   |
| >KIT-G498S-\\ YNDVGKTSAY   | 486   | >KIT-G498S-r YNDVSKTSAY   | 597  | 111   |
| >KIT-G498S-\\ AYNDVGKTSAY  | 198   | >KIT-G498S-r AYNDVSKTSAY  | 208  | 10    |
| >KIT-G498S-\\ AYNDVGKTSAY  | 62    | >KIT-G498S-r AYNDVSKTSAY  | 46   | 16    |
| >KIT-G498S-\\ AYNDVGKTSAY  | 167   | >KIT-G498S-r AYNDVSKTSAY  | 103  | 64    |
| >KIT-G498S-\\ KAYNDVGKTSAY | 604   | >KIT-G498S-r KAYNDVSKTSAY | 416  | 188   |
| >KIT-G498S-\\ KAYNDVGK     | 91    | >KIT-G498S-r KAYNDVSK     | 65   | 26    |
| >KIT-G498S-\\ KAYNDVGK     | 79    | >KIT-G498S-r KAYNDVSK     | 44   | 35    |
| >KIT-G498S-\\ KAYNDVGK     | 186   | >KIT-G498S-r KAYNDVSK     | 52   | 134   |
| >KIT-G498S-\\ KAYNDVGK     | 858   | >KIT-G498S-r KAYNDVSK     | 414  | 444   |
| >KIT-G565R-\\ VQWKVVEEII   | 19269 | >KIT-G565R-i VQWKVVEEII   | 76   | 19193 |
| >KIT-G565R-\\ VQWKVVEEII   | 4752  | >KIT-G565R-i VQWKVVEEII   | 378  | 4374  |
| >KIT-G565R-\\ VQWKVVEEII   | 33678 | >KIT-G565R-i VQWKVVEEII   | 207  | 33471 |
| >KIT-G565R-\\ INGNNYVYI    | 163   | >KIT-G565R-i INRNNYVYI    | 1152 | 989   |
| >KIT-G565R-\\ INGNNYVYI    | 141   | >KIT-G565R-i INRNNYVYI    | 166  | 25    |
| >KIT-G565R-\\ INGNNYVY     | 382   | >KIT-G565R-i INRNNYVY     | 828  | 446   |
| >KIT-G565R-\\ INGNNYVYI    | 12481 | >KIT-G565R-i INRNNYVYI    | 69   | 12412 |
| >KIT-G565R-\\ INGNNYVY     | 256   | >KIT-G565R-i INRNNYVY     | 287  | 31    |
| >KIT-G565R-\\ INGNNYVY     | 1137  | >KIT-G565R-i INRNNYVY     | 371  | 766   |
| >KIT-G565R-\\ INGNNYVY     | 1070  | >KIT-G565R-i INRNNYVY     | 70   | 1000  |
| >KIT-G565R-\\ INGNNYVYI    | 2532  | >KIT-G565R-i INRNNYVYI    | 238  | 2294  |
| >KIT-G565R-\\ EINGNNYV     | 299   | >KIT-G565R-i EINRNNYV     | 1103 | 804   |
| >KIT-G565R-\\ EINGNNYV     | 64    | >KIT-G565R-i EINRNNYV     | 199  | 135   |
| >KIT-G565R-\\ EINGNNYVYI   | 229   | >KIT-G565R-i EINRNNYVYI   | 597  | 368   |
| >KIT-G565R-\\ EINGNNYV     | 442   | >KIT-G565R-i EINRNNYV     | 1583 | 1141  |
| >KIT-G565R-\\ EINGNNYV     | 41    | >KIT-G565R-i EINRNNYV     | 186  | 145   |
| >KIT-G565R-\\ EINGNNYVYI   | 257   | >KIT-G565R-i EINRNNYVYI   | 1155 | 898   |
| >KIT-G565R-\\ EINGNNYV     | 34    | >KIT-G565R-i EINRNNYV     | 156  | 122   |
| >KIT-G565R-\\ EINGNNYVY    | 203   | >KIT-G565R-i EINRNNYVY    | 936  | 733   |
| >KIT-G565R-\\ EINGNNYVY    | 17    | >KIT-G565R-i EINRNNYVY    | 31   | 14    |
| >KIT-G565R-\\ EINGNNYVY    | 425   | >KIT-G565R-i EINRNNYVY    | 1578 | 1153  |

|                         |      |                         |      |      |
|-------------------------|------|-------------------------|------|------|
| >KIT-G565R-1 EINGNNYVY  | 218  | >KIT-G565R-1 EINRNNYVY  | 800  | 582  |
| >KIT-G565R-1 EINGNNYVY  | 70   | >KIT-G565R-1 EINRNNYVY  | 93   | 23   |
| >KIT-G565R-1 EINGNNYVY  | 340  | >KIT-G565R-1 EINRNNYVY  | 355  | 15   |
| >KIT-G565R-1 EINGNNYV   | 8    | >KIT-G565R-1 EINRNNYV   | 11   | 3    |
| >KIT-G565R-1 EINGNNYVYI | 101  | >KIT-G565R-1 EINRNNYVYI | 120  | 19   |
| >KIT-G565R-1 EINGNNYV   | 11   | >KIT-G565R-1 EINRNNYV   | 18   | 7    |
| >KIT-G565R-1 EINGNNYVYI | 36   | >KIT-G565R-1 EINRNNYVYI | 48   | 12   |
| >KIT-G565R-1 EINGNNYVY  | 168  | >KIT-G565R-1 EINRNNYVY  | 390  | 222  |
| >KIT-G565R-1 EINGNNYVY  | 1173 | >KIT-G565R-1 EINRNNYVY  | 230  | 943  |
| >KIT-G565R-1 EINGNNYVY  | 81   | >KIT-G565R-1 EINRNNYVY  | 231  | 150  |
| >KIT-G565R-1 EEINGNNYV  | 837  | >KIT-G565R-1 EEINRNNYV  | 206  | 631  |
| >KIT-G565R-1 EEINGNNYVY | 76   | >KIT-G565R-1 EEINRNNYVY | 40   | 36   |
| >KIT-G565R-1 EEINGNNY   | 230  | >KIT-G565R-1 EEINRNNY   | 428  | 198  |
| >KIT-G565R-1 EEINGNNYVY | 179  | >KIT-G565R-1 EEINRNNYVY | 415  | 236  |
| >KIT-G565R-1 EEINGNNY   | 19   | >KIT-G565R-1 EEINRNNY   | 24   | 5    |
| >KIT-G565R-1 EEINGNNYVY | 134  | >KIT-G565R-1 EEINRNNYVY | 153  | 19   |
| >KIT-G565R-1 EEINGNNYVY | 328  | >KIT-G565R-1 EEINRNNYVY | 448  | 120  |
| >KIT-G565R-1 EEINGNNYV  | 241  | >KIT-G565R-1 EEINRNNYV  | 660  | 419  |
| >KIT-G565R-1 EEINGNNY   | 278  | >KIT-G565R-1 EEINRNNY   | 639  | 361  |
| >KIT-G565R-1 EEINGNNYVY | 322  | >KIT-G565R-1 EEINRNNYVY | 393  | 71   |
| >KIT-G565R-1 EEINGNNYV  | 234  | >KIT-G565R-1 EEINRNNYV  | 3307 | 3073 |
| >KIT-G565R-1 EEINGNNYVY | 59   | >KIT-G565R-1 EEINRNNYVY | 337  | 278  |
| >KIT-G565R-1 EEINGNNYVY | 300  | >KIT-G565R-1 EEINRNNYVY | 581  | 281  |
| >KIT-G565R-1 EEINGNNYVY | 466  | >KIT-G565R-1 EEINRNNYVY | 402  | 64   |
| >KIT-G565R-1 EEINGNNY   | 70   | >KIT-G565R-1 EEINRNNY   | 106  | 36   |
| >KIT-G565R-1 EEINGNNYV  | 488  | >KIT-G565R-1 EEINRNNYV  | 526  | 38   |
| >KIT-G565R-1 EEINGNNYVY | 180  | >KIT-G565R-1 EEINRNNYVY | 120  | 60   |
| >KIT-G565R-1 EEINGNNYVY | 190  | >KIT-G565R-1 EEINRNNYVY | 202  | 12   |
| >KIT-G565R-1 EEINGNNYV  | 74   | >KIT-G565R-1 EEINRNNYV  | 214  | 140  |
| >KIT-G565R-1 EEINGNNYVY | 97   | >KIT-G565R-1 EEINRNNYVY | 213  | 116  |
| >KIT-G565R-1 EEINGNNYV  | 305  | >KIT-G565R-1 EEINRNNYV  | 423  | 118  |
| >KIT-G565R-1 EEINGNNYVY | 63   | >KIT-G565R-1 EEINRNNYVY | 81   | 18   |
| >KIT-G565R-1 VEEINGNNYV | 328  | >KIT-G565R-1 VEEINRNNYV | 115  | 213  |
| >KIT-G565R-1 VEEINGNNYV | 94   | >KIT-G565R-1 VEEINRNNYV | 101  | 7    |
| >KIT-G565R-1 VEEINGNNYV | 377  | >KIT-G565R-1 VEEINRNNYV | 1347 | 970  |
| >KIT-G565R-1 VVEEINGNNY | 217  | >KIT-G565R-1 VVEEINRNNY | 273  | 56   |
| >KIT-G565R-1 VVEEINGNNY | 87   | >KIT-G565R-1 VVEEINRNNY | 158  | 71   |
| >KIT-G565R-1 VVEEINGNNY | 121  | >KIT-G565R-1 VVEEINRNNY | 180  | 59   |
| >KIT-G565R-1 VVEEINGNNY | 35   | >KIT-G565R-1 VVEEINRNNY | 58   | 23   |
| >KIT-G565R-1 VVEEINGNNY | 316  | >KIT-G565R-1 VVEEINRNNY | 491  | 175  |
| >KIT-G565R-1 VVEEINGNNY | 167  | >KIT-G565R-1 VVEEINRNNY | 388  | 221  |
| >KIT-G565R-1 VVEEINGNNY | 178  | >KIT-G565R-1 VVEEINRNNY | 685  | 507  |
| >KIT-G565R-1 KVVEEINGNN | 31   | >KIT-G565R-1 KVVEEINRNN | 28   | 3    |



|                          |       |                          |     |       |
|--------------------------|-------|--------------------------|-----|-------|
| >KIT-G565R-1 KVVVEEINGNN | 61    | >KIT-G565R-1 KVVVEEINRNN | 146 | 85    |
| >KIT-G565R-1 KVVVEEINGNN | 114   | >KIT-G565R-1 KVVVEEINRNN | 75  | 39    |
| >KIT-G565R-1 KVVVEEING   | 22701 | >KIT-G565R-1 KVVVEEINR   | 119 | 22582 |
| >KIT-G565R-1 KVVVEEING   | 40630 | >KIT-G565R-1 KVVVEEINR   | 268 | 40362 |
| >KIT-G565R-1 KVVVEEINGNN | 114   | >KIT-G565R-1 KVVVEEINRNN | 226 | 112   |
| >KIT-G565R-1 KVVVEEINGNN | 100   | >KIT-G565R-1 KVVVEEINRNN | 197 | 97    |
| >KIT-G565R-1 KVVVEEING   | 27549 | >KIT-G565R-1 KVVVEEINR   | 45  | 27504 |
| >KIT-G565R-1 QWKVVEEINI  | 27224 | >KIT-G565R-1 QWKVVEEINI  | 69  | 27155 |
| >KIT-G596D-1 GAGAFGKV    | 7843  | >KIT-G596D-1 DAGAFGKV    | 259 | 7584  |
| >KIT-G596D-1 LGAGAFGKV   | 13579 | >KIT-G596D-1 LDAGAFGKV   | 119 | 13460 |
| >KIT-G596D-1 LGAGAFGKV   | 18398 | >KIT-G596D-1 LDAGAFGKV   | 373 | 18025 |
| >KIT-G596D-1 TLGAGAFGK\  | 242   | >KIT-G596D-1 TLDAGAFGK\  | 161 | 81    |
| >KIT-G596D-1 TLGAGAFGK\  | 1042  | >KIT-G596D-1 TLDAGAFGK\  | 403 | 639   |
| >KIT-G596D-1 TLGAGAFGK\  | 90    | >KIT-G596D-1 TLDAGAFGK\  | 123 | 33    |
| >KIT-G596D-1 TLGAGAFGK\  | 394   | >KIT-G596D-1 TLDAGAFGK\  | 336 | 58    |
| >KIT-G596D-1 TLGAGAFGK\  | 25    | >KIT-G596D-1 TLDAGAFGK\  | 37  | 12    |
| >KIT-G596D-1 TLGAGAFGK\  | 116   | >KIT-G596D-1 TLDAGAFGK\  | 300 | 184   |
| >KIT-G596D-1 TLGAGAFGK\  | 1058  | >KIT-G596D-1 TLDAGAFGK\  | 365 | 693   |
| >KIT-G596D-1 TLGAGAFGK\  | 12    | >KIT-G596D-1 TLDAGAFGK\  | 7   | 5     |
| >KIT-G596D-1 TLGAGAFGK\  | 13    | >KIT-G596D-1 TLDAGAFGK\  | 7   | 6     |
| >KIT-G596D-1 TLGAGAFGK\  | 68    | >KIT-G596D-1 TLDAGAFGK\  | 33  | 35    |
| >KIT-G596D-1 TLGAGAFGK\  | 50    | >KIT-G596D-1 TLDAGAFGK\  | 27  | 23    |
| >KIT-G596D-1 TLGAGAFGK\  | 17    | >KIT-G596D-1 TLDAGAFGK\  | 10  | 7     |
| >KIT-G596D-1 TLGAGAFGK\  | 30    | >KIT-G596D-1 TLDAGAFGK\  | 15  | 15    |
| >KIT-G596D-1 TLGAGAFGK\  | 31    | >KIT-G596D-1 TLDAGAFGK\  | 21  | 10    |
| >KIT-G596D-1 TLGAGAFGK\  | 75    | >KIT-G596D-1 TLDAGAFGK\  | 47  | 28    |
| >KIT-G596D-1 TLGAGAFGK\  | 3     | >KIT-G596D-1 TLDAGAFGK\  | 4   | 1     |
| >KIT-G596D-1 TLGAGAFGK\  | 5     | >KIT-G596D-1 TLDAGAFGK\  | 7   | 2     |
| >KIT-G596D-1 TLGAGAFGK   | 67    | >KIT-G596D-1 TLDAGAFGK   | 102 | 35    |
| >KIT-G596D-1 TLGAGAFGK   | 45    | >KIT-G596D-1 TLDAGAFGK   | 56  | 11    |
| >KIT-G596D-1 TLGAGAFGK\  | 212   | >KIT-G596D-1 TLDAGAFGK\  | 45  | 167   |
| >KIT-G596D-1 TLGAGAFGK\  | 1383  | >KIT-G596D-1 TLDAGAFGK\  | 480 | 903   |
| >KIT-G596D-1 KTLGAGAFGk  | 1001  | >KIT-G596D-1 KTLDAGAFGk  | 488 | 513   |
| >KIT-G596D-1 KTLGAGAFGk  | 67    | >KIT-G596D-1 KTLDAGAFGk  | 39  | 28    |
| >KIT-G596D-1 KTLGAGAFGk  | 41    | >KIT-G596D-1 KTLDAGAFGk  | 25  | 16    |
| >KIT-G596D-1 KTLGAGAFGk  | 1382  | >KIT-G596D-1 KTLDAGAFGk  | 342 | 1040  |
| >KIT-G596D-1 KTLGAGAFGk  | 93    | >KIT-G596D-1 KTLDAGAFGk  | 60  | 33    |
| >KIT-G596D-1 KTLGAGAFGk  | 365   | >KIT-G596D-1 KTLDAGAFGk  | 162 | 203   |
| >KIT-G596D-1 KTLGAGAFGk  | 22    | >KIT-G596D-1 KTLDAGAFGk  | 24  | 2     |
| >KIT-G596D-1 KTLGAGAFGk  | 19    | >KIT-G596D-1 KTLDAGAFGk  | 16  | 3     |
| >KIT-G596D-1 KTLGAGAF    | 213   | >KIT-G596D-1 KTLDAGAF    | 383 | 170   |
| >KIT-G596D-1 KTLGAGAFG   | 52    | >KIT-G596D-1 KTLDAGAFG   | 41  | 11    |
| >KIT-G596D-1 KTLGAGAFGk  | 8     | >KIT-G596D-1 KTLDAGAFGk  | 8   | 0     |

|                                                  |       |                                                   |      |       |
|--------------------------------------------------|-------|---------------------------------------------------|------|-------|
| >KIT-G596D- <sup>1</sup> KTLGAGAFGk              | 91    | >KIT-G596D- <sup>1</sup> KTLDAGAFGk               | 80   | 11    |
| >KIT-G596D- <sup>1</sup> KTLGAGAFGk              | 152   | >KIT-G596D- <sup>1</sup> KTLDAGAFGk               | 256  | 104   |
| >KIT-G596D- <sup>1</sup> KTLGAGAF                | 13    | >KIT-G596D- <sup>1</sup> KTLDAGAF                 | 30   | 17    |
| >KIT-G596D- <sup>1</sup> KTLGAGAFGk              | 431   | >KIT-G596D- <sup>1</sup> KTLDAGAFGk               | 534  | 103   |
| >KIT-G596D- <sup>1</sup> KTLGAGAFGk              | 128   | >KIT-G596D- <sup>1</sup> KTLDAGAFGk               | 36   | 92    |
| >KIT-G596D- <sup>1</sup> KTLGAGAF                | 378   | >KIT-G596D- <sup>1</sup> KTLDAGAF                 | 335  | 43    |
| >KIT-G596D- <sup>1</sup> KTLGAGAF                | 155   | >KIT-G596D- <sup>1</sup> KTLDAGAF                 | 88   | 67    |
| >KIT-G596D- <sup>1</sup> KTLGAGAF                | 4     | >KIT-G596D- <sup>1</sup> KTLDAGAF                 | 5    | 1     |
| >KIT-G596D- <sup>1</sup> KTLGAGAFGk              | 78    | >KIT-G596D- <sup>1</sup> KTLDAGAFGk               | 69   | 9     |
| >KIT-G596D- <sup>1</sup> KTLGAGAF                | 345   | >KIT-G596D- <sup>1</sup> KTLDAGAF                 | 817  | 472   |
| >KIT-G596D- <sup>1</sup> KTLGAGAF                | 78    | >KIT-G596D- <sup>1</sup> KTLDAGAF                 | 118  | 40    |
| >KIT-G596D- <sup>1</sup> KTLGAGAF                | 227   | >KIT-G596D- <sup>1</sup> KTLDAGAF                 | 248  | 21    |
| >KIT-G596D- <sup>1</sup> KTLGAGAFGk              | 181   | >KIT-G596D- <sup>1</sup> KTLDAGAFGk               | 203  | 22    |
| >KIT-G596D- <sup>1</sup> KTLGAGAFGk              | 565   | >KIT-G596D- <sup>1</sup> KTLDAGAFGk               | 420  | 145   |
| >KIT-G596D- <sup>1</sup> GKTLGAGAF               | 333   | >KIT-G596D- <sup>1</sup> GKTLDAGAF                | 353  | 20    |
| >KIT-G596D- <sup>1</sup> FGKTLGAGAF              | 241   | >KIT-G596D- <sup>1</sup> FGKTLDAGAF               | 482  | 241   |
| >KIT-G596D- <sup>1</sup> FGKTLGAGAF              | 353   | >KIT-G596D- <sup>1</sup> FGKTLDAGAF               | 1081 | 728   |
| >KIT-G596D- <sup>1</sup> FGKTLGAGAF              | 408   | >KIT-G596D- <sup>1</sup> FGKTLDAGAF               | 949  | 541   |
| >KIT-G596D- <sup>1</sup> SFGKTLGAGA              | 17    | >KIT-G596D- <sup>1</sup> SFGKTLDAGA               | 17   | 0     |
| >KIT-G596D- <sup>1</sup> LSFGKTLGA               | 411   | >KIT-G596D- <sup>1</sup> LSFGKTLDA                | 2396 | 1985  |
| >KIT-G596D- <sup>1</sup> LSFGKTLGAG              | 459   | >KIT-G596D- <sup>1</sup> LSFGKTLDAG               | 866  | 407   |
| >KIT-G596D- <sup>1</sup> RLSFGKTLGA              | 167   | >KIT-G596D- <sup>1</sup> RLSFGKTLDA               | 575  | 408   |
| >KIT-G596D- <sup>1</sup> RLSFGKTLGA              | 123   | >KIT-G596D- <sup>1</sup> RLSFGKTLDA               | 396  | 273   |
| >KIT-G596D- <sup>1</sup> RLSFGKTLGA              | 339   | >KIT-G596D- <sup>1</sup> RLSFGKTLDA               | 2907 | 2568  |
| >KIT-G596D- <sup>1</sup> RLSFGKTLGA              | 496   | >KIT-G596D- <sup>1</sup> RLSFGKTLDA               | 1423 | 927   |
| >KIT-G596D- <sup>1</sup> RLSFGKTLGA              | 36    | >KIT-G596D- <sup>1</sup> RLSFGKTLDA               | 115  | 79    |
| >KIT-G658E- <sup>1</sup> GACTIGGPTL <sup>1</sup> | 6879  | >KIT-G658E- <sup>1</sup> rEACTIGGPTL <sup>1</sup> | 32   | 6847  |
| >KIT-G658E- <sup>1</sup> GACTIGGPTL <sup>1</sup> | 15786 | >KIT-G658E- <sup>1</sup> rEACTIGGPTL <sup>1</sup> | 449  | 15337 |
| >KIT-G658E- <sup>1</sup> LGACTIGGPT              | 21262 | >KIT-G658E- <sup>1</sup> rLEACTIGGPTI             | 127  | 21135 |
| >KIT-G658E- <sup>1</sup> LGACTIGGPT              | 21229 | >KIT-G658E- <sup>1</sup> rLEACTIGGPTI             | 18   | 21211 |
| >KIT-G658E- <sup>1</sup> LGACTIGGPT              | 30414 | >KIT-G658E- <sup>1</sup> rLEACTIGGPTI             | 68   | 30346 |
| >KIT-G658E- <sup>1</sup> LLGACTIGGP <sup>1</sup> | 408   | >KIT-G658E- <sup>1</sup> rLLEACTIGGP <sup>1</sup> | 1089 | 681   |
| >KIT-G658E- <sup>1</sup> NLLGACTI                | 240   | >KIT-G658E- <sup>1</sup> rNLLEACTI                | 81   | 159   |
| >KIT-G658E- <sup>1</sup> NLLGACTI                | 343   | >KIT-G658E- <sup>1</sup> rNLLEACTI                | 244  | 99    |
| >KIT-G658E- <sup>1</sup> NLLGACTI                | 262   | >KIT-G658E- <sup>1</sup> rNLLEACTI                | 123  | 139   |
| >KIT-G658E- <sup>1</sup> NLLGACTI                | 160   | >KIT-G658E- <sup>1</sup> rNLLEACTI                | 42   | 118   |
| >KIT-G658E- <sup>1</sup> NLLGACTI                | 19    | >KIT-G658E- <sup>1</sup> rNLLEACTI                | 10   | 9     |
| >KIT-G658E- <sup>1</sup> NLLGACTI                | 35    | >KIT-G658E- <sup>1</sup> rNLLEACTI                | 11   | 24    |
| >KIT-G658E- <sup>1</sup> NLLGACTI                | 30    | >KIT-G658E- <sup>1</sup> rNLLEACTI                | 20   | 10    |
| >KIT-G658E- <sup>1</sup> NLLGACTI                | 16    | >KIT-G658E- <sup>1</sup> rNLLEACTI                | 9    | 7     |
| >KIT-G658E- <sup>1</sup> NLLGACTI                | 15    | >KIT-G658E- <sup>1</sup> rNLLEACTI                | 21   | 6     |
| >KIT-G658E- <sup>1</sup> NLLGACTI                | 305   | >KIT-G658E- <sup>1</sup> rNLLEACTI                | 72   | 233   |
| >KIT-G658E- <sup>1</sup> VNLLGACTI               | 473   | >KIT-G658E- <sup>1</sup> rVNLLGACTI               | 562  | 89    |

|                          |       |                           |       |       |
|--------------------------|-------|---------------------------|-------|-------|
| >KIT-G658E-\ VNLLGACTI   | 677   | >KIT-G658E-r VNLLEACTI    | 180   | 497   |
| >KIT-G658E-\ IVNLLGACTI  | 387   | >KIT-G658E-r IVNLLLEACTI  | 439   | 52    |
| >KIT-G658E-\ IVNLLGACTI  | 356   | >KIT-G658E-r IVNLLLEACTI  | 249   | 107   |
| >KIT-G658E-\ NIVNLLGA    | 188   | >KIT-G658E-r NIVNLLLEA    | 332   | 144   |
| >KIT-G658E-\ NIVNLLGACT  | 305   | >KIT-G658E-r NIVNLLLEACTI | 510   | 205   |
| >KIT-G658E-\ NIVNLLGA    | 135   | >KIT-G658E-r NIVNLLLEA    | 138   | 3     |
| >KIT-G658E-\ NIVNLLGACT  | 224   | >KIT-G658E-r NIVNLLLEACTI | 189   | 35    |
| >KIT-G658E-\ NIVNLLGACT  | 347   | >KIT-G658E-r NIVNLLLEACTI | 465   | 118   |
| >KIT-G658E-\ HMNIVNLLG,  | 450   | >KIT-G658E-r HMNIVNLLLE/  | 524   | 74    |
| >KIT-G658E-\ HMNIVNLLG,  | 160   | >KIT-G658E-r HMNIVNLLLE/  | 226   | 66    |
| >KIT-G658E-\ HMNIVNLLG,  | 74    | >KIT-G658E-r HMNIVNLLLE/  | 78    | 4     |
| >KIT-G658E-\ HMNIVNLLG,  | 346   | >KIT-G658E-r HMNIVNLLLE/  | 152   | 194   |
| >KIT-G658E-\ HMNIVNLLG,  | 469   | >KIT-G658E-r HMNIVNLLLE/  | 715   | 246   |
| >KIT-G658E-\ HMNIVNLLG,  | 270   | >KIT-G658E-r HMNIVNLLLE/  | 285   | 15    |
| >KIT-G658E-\ HMNIVNLLG,  | 158   | >KIT-G658E-r HMNIVNLLLE/  | 111   | 47    |
| >KIT-G664R-\ GPTLVITEY   | 60    | >KIT-G664R-r RPTLVITEY    | 31    | 29    |
| >KIT-G664R-\ GPTLVITEY   | 310   | >KIT-G664R-r RPTLVITEY    | 662   | 352   |
| >KIT-G664R-\ GPTLVITEY   | 31    | >KIT-G664R-r RPTLVITEY    | 13    | 18    |
| >KIT-G664R-\ GGPTLVIT    | 486   | >KIT-G664R-r GRPTLVIT     | 18320 | 17834 |
| >KIT-G664R-\ GGPTLVITE   | 242   | >KIT-G664R-r GRPTLVITE    | 15846 | 15604 |
| >KIT-G664R-\ GGPTLVITEY  | 303   | >KIT-G664R-r GRPTLVITEY   | 13545 | 13242 |
| >KIT-G664R-\ GGPTLVITEY  | 25918 | >KIT-G664R-r GRPTLVITEY   | 127   | 25791 |
| >KIT-G664R-\ IGGPTLVI    | 14269 | >KIT-G664R-r IGRPTLVI     | 174   | 14095 |
| >KIT-G664R-\ IGGPTLVITEY | 475   | >KIT-G664R-r IGRPTLVITEY  | 539   | 64    |
| >KIT-G664R-\ IGGPTLVITEY | 1109  | >KIT-G664R-r IGRPTLVITEY  | 346   | 763   |
| >KIT-G664R-\ IGGPTLVITEY | 2476  | >KIT-G664R-r IGRPTLVITEY  | 242   | 2234  |
| >KIT-G664R-\ IGGPTLVITEY | 818   | >KIT-G664R-r IGRPTLVITEY  | 30    | 788   |
| >KIT-G664R-\ IGGPTLVITEY | 582   | >KIT-G664R-r IGRPTLVITEY  | 48    | 534   |
| >KIT-G664R-\ IGGPTLVI    | 225   | >KIT-G664R-r IGRPTLVI     | 335   | 110   |
| >KIT-G664R-\ TIGGPTLV    | 242   | >KIT-G664R-r TIGRPTLV     | 457   | 215   |
| >KIT-G664R-\ TIGGPTLV    | 77    | >KIT-G664R-r TIGRPTLV     | 307   | 230   |
| >KIT-G664R-\ TIGGPTLV    | 189   | >KIT-G664R-r TIGRPTLV     | 831   | 642   |
| >KIT-G664R-\ TIGGPTLV    | 14    | >KIT-G664R-r TIGRPTLV     | 46    | 32    |
| >KIT-G664R-\ TIGGPTLVI   | 333   | >KIT-G664R-r TIGRPTLVI    | 777   | 444   |
| >KIT-G664R-\ TIGGPTLV    | 153   | >KIT-G664R-r TIGRPTLV     | 399   | 246   |
| >KIT-G664R-\ TIGGPTLV    | 186   | >KIT-G664R-r TIGRPTLV     | 307   | 121   |
| >KIT-G664R-\ CTIGGPTLV   | 88    | >KIT-G664R-r CTIGRPTLV    | 108   | 20    |
| >KIT-G664R-\ CTIGGPTLV   | 365   | >KIT-G664R-r CTIGRPTLV    | 802   | 437   |
| >KIT-G664R-\ CTIGGPTL    | 73    | >KIT-G664R-r CTIGRPTL     | 195   | 122   |
| >KIT-G664R-\ CTIGGPTLV   | 15    | >KIT-G664R-r CTIGRPTLV    | 30    | 15    |
| >KIT-G664R-\ CTIGGPTLVI  | 248   | >KIT-G664R-r CTIGRPTLVI   | 614   | 366   |
| >KIT-G664R-\ CTIGGPTL    | 18    | >KIT-G664R-r CTIGRPTL     | 34    | 16    |
| >KIT-G664R-\ CTIGGPTLVI  | 170   | >KIT-G664R-r CTIGRPTLVI   | 317   | 147   |

|                         |       |                          |     |       |
|-------------------------|-------|--------------------------|-----|-------|
| >KIT-G664R-\ CTIGGPTLVI | 205   | >KIT-G664R-i CTIGRPTLVI  | 503 | 298   |
| >KIT-G664R-\ CTIGGPTLVI | 873   | >KIT-G664R-i CTIGRPTLVI  | 434 | 439   |
| >KIT-G664R-\ CTIGGPTL   | 68    | >KIT-G664R-i CTIGRPTL    | 93  | 25    |
| >KIT-G664R-\ CTIGGPTLVI | 40    | >KIT-G664R-i CTIGRPTLVI  | 34  | 6     |
| >KIT-G664R-\ ACTIGGPTLV | 375   | >KIT-G664R-i ACTIGRPTLV  | 431 | 56    |
| >KIT-G664R-\ LGACTIGG   | 40610 | >KIT-G664R-i LGACTIGR    | 469 | 40141 |
| >KIT-G664R-\ LGACTIGG   | 36044 | >KIT-G664R-i LGACTIGR    | 346 | 35698 |
| >KIT-G664R-\ LLGACTIGGP | 408   | >KIT-G664R-i LLGACTIGRP  | 555 | 147   |
| >KIT-G664R-\ LLGACTIGG  | 17722 | >KIT-G664R-i LLGACTIGR   | 47  | 17675 |
| >KIT-G664R-\ NLLGACTIGG | 19184 | >KIT-G664R-i NLLGACTIGR  | 297 | 18887 |
| >KIT-G664R-\ NLLGACTIGG | 24552 | >KIT-G664R-i NLLGACTIGR  | 98  | 24454 |
| >KIT-G664R-\ NLLGACTIGG | 24667 | >KIT-G664R-i NLLGACTIGR  | 250 | 24417 |
| >KIT-G664R-\ NLLGACTIGG | 35279 | >KIT-G664R-i NLLGACTIGR  | 184 | 35095 |
| >KIT-G664R-\ NLLGACTIGG | 28636 | >KIT-G664R-i NLLGACTIGR  | 108 | 28528 |
| >KIT-G961S-\ GSTASSSQPL | 1418  | >KIT-G961S-r SSTASSSQPL  | 223 | 1195  |
| >KIT-G961S-\ GSTASSSQPL | 507   | >KIT-G961S-r SSTASSSQPL  | 170 | 337   |
| >KIT-G961S-\ GSTASSSQPL | 7     | >KIT-G961S-r SSTASSSQPL  | 6   | 1     |
| >KIT-G961S-\ GSTASSSQPL | 28    | >KIT-G961S-r SSTASSSQPLL | 19  | 9     |
| >KIT-G961S-\ GSTASSSQPL | 866   | >KIT-G961S-r SSTASSSQPLL | 499 | 367   |
| >KIT-G961S-\ GSTASSSQPL | 198   | >KIT-G961S-r SSTASSSQPL  | 47  | 151   |
| >KIT-G961S-\ GSTASSSQPL | 37    | >KIT-G961S-r SSTASSSQPLL | 13  | 24    |
| >KIT-G961S-\ GSTASSSQPL | 464   | >KIT-G961S-r SSTASSSQPL  | 154 | 310   |
| >KIT-G961S-\ GSTASSSQPL | 67    | >KIT-G961S-r SSTASSSQPLL | 69  | 2     |
| >KIT-G961S-\ GSTASSSQPL | 227   | >KIT-G961S-r SSTASSSQPL  | 147 | 80    |
| >KIT-G961S-\ GSTASSSQPL | 1337  | >KIT-G961S-r SSTASSSQPLL | 234 | 1103  |
| >KIT-G961S-\ VGSTASSSQP | 1444  | >KIT-G961S-r VSSTASSSQPL | 82  | 1362  |
| >KIT-G961S-\ VGSTASSSQP | 2290  | >KIT-G961S-r VSSTASSSQPL | 7   | 2283  |
| >KIT-G961S-\ VGSTASSSQP | 8458  | >KIT-G961S-r VSSTASSSQPL | 175 | 8283  |
| >KIT-G961S-\ VGSTASSSQ  | 4084  | >KIT-G961S-r VSSTASSSQ   | 288 | 3796  |
| >KIT-G961S-\ SVGSTASSS  | 772   | >KIT-G961S-r SVSSTASSS   | 188 | 584   |
| >KIT-G961S-\ RINSVGST   | 572   | >KIT-G961S-r RINSVSST    | 197 | 375   |
| >KIT-G961S-\ RINSVGSTA  | 44    | >KIT-G961S-r RINSVSSTA   | 20  | 24    |
| >KIT-G961S-\ RINSVGSTA  | 247   | >KIT-G961S-r RINSVSSTA   | 214 | 33    |
| >KIT-G961S-\ RINSVGSTA  | 719   | >KIT-G961S-r RINSVSSTA   | 169 | 550   |
| >KIT-G961S-\ RINSVGSTA  | 322   | >KIT-G961S-r RINSVSSTA   | 376 | 54    |
| >KIT-G961S-\ VRINSVGST  | 3771  | >KIT-G961S-r VRINSVSST   | 321 | 3450  |
| >KIT-G961S-\ VRINSVGSTA | 391   | >KIT-G961S-r VRINSVSSTA  | 159 | 232   |
| >KIT-G961S-\ VRINSVGSTA | 1317  | >KIT-G961S-r VRINSVSSTA  | 341 | 976   |
| >KIT-G961S-\ VRINSVGSTA | 493   | >KIT-G961S-r VRINSVSSTA  | 981 | 488   |
| >KIT-G961S-\ SVRINSVG   | 124   | >KIT-G961S-r SVRINSVS    | 116 | 8     |
| >KIT-G961S-\ SVRINSVGS  | 87    | >KIT-G961S-r SVRINSVSS   | 21  | 66    |
| >KIT-G961S-\ SVRINSVGST | 115   | >KIT-G961S-r SVRINSVSST  | 68  | 47    |
| >KIT-G961S-\ SVRINSVGST | 12    | >KIT-G961S-r SVRINSVSSTA | 7   | 5     |

|                          |      |                          |      |      |
|--------------------------|------|--------------------------|------|------|
| >KIT-G961S-\ HSVRINSVG   | 966  | >KIT-G961S-r HSVRINSVS   | 448  | 518  |
| >KIT-H580Y-\ HKWEFPRNR   | 6299 | >KIT-H580Y-r YKWEFPRNR   | 403  | 5896 |
| >KIT-H580Y-\ HKWEFPRNR   | 220  | >KIT-H580Y-r YKWEFPRNR   | 51   | 169  |
| >KIT-H580Y-\ HKWEFPRNR   | 59   | >KIT-H580Y-r YKWEFPRNR   | 15   | 44   |
| >KIT-H580Y-\ HKWEFPRNR   | 238  | >KIT-H580Y-r YKWEFPRNR   | 2206 | 1968 |
| >KIT-H580Y-\ HKWEFPRNR   | 33   | >KIT-H580Y-r YKWEFPRNR   | 95   | 62   |
| >KIT-H580Y-\ DHKWEFPR    | 4621 | >KIT-H580Y-r DYKWEFPR    | 66   | 4555 |
| >KIT-H580Y-\ DHKWEFPRN   | 2518 | >KIT-H580Y-r DYKWEFPRN   | 254  | 2264 |
| >KIT-H580Y-\ DHKWEFPR    | 218  | >KIT-H580Y-r DYKWEFPR    | 6    | 212  |
| >KIT-H580Y-\ DHKWEFPR    | 951  | >KIT-H580Y-r DYKWEFPR    | 169  | 782  |
| >KIT-H580Y-\ DHKWEFPR    | 346  | >KIT-H580Y-r DYKWEFPR    | 18   | 328  |
| >KIT-H580Y-\ DHKWEFPRN   | 1244 | >KIT-H580Y-r DYKWEFPRN   | 49   | 1195 |
| >KIT-H580Y-\ YIDPTQLPYDI | 5583 | >KIT-H580Y-r YIDPTQLPYD` | 18   | 5565 |
| >KIT-H580Y-\ YIDPTQLPYDI | 1438 | >KIT-H580Y-r YIDPTQLPYD` | 23   | 1415 |
| >KIT-H580Y-\ YIDPTQLPYDI | 8876 | >KIT-H580Y-r YIDPTQLPYD` | 15   | 8861 |
| >KIT-H580Y-\ YIDPTQLPYDI | 4967 | >KIT-H580Y-r YIDPTQLPYD` | 317  | 4650 |
| >KIT-H580Y-\ YIDPTQLPYDI | 3241 | >KIT-H580Y-r YIDPTQLPYD` | 33   | 3208 |
| >KIT-H580Y-\ YDHKWEFPR   | 741  | >KIT-H580Y-r YDYKWEFPR   | 221  | 520  |
| >KIT-H580Y-\ YDHKWEFPR   | 183  | >KIT-H580Y-r YDYKWEFPR   | 92   | 91   |
| >KIT-H580Y-\ YDHKWEFPR   | 658  | >KIT-H580Y-r YDYKWEFPRI  | 301  | 357  |
| >KIT-H580Y-\ PYDHKWEF    | 147  | >KIT-H580Y-r PYDYKWEF    | 114  | 33   |
| >KIT-H580Y-\ PYDHKWEF    | 444  | >KIT-H580Y-r PYDYKWEF    | 430  | 14   |
| >KIT-H580Y-\ PYDHKWEF    | 61   | >KIT-H580Y-r PYDYKWEF    | 85   | 24   |
| >KIT-H580Y-\ PYDHKWEFPI  | 67   | >KIT-H580Y-r PYDYKWEFFI  | 86   | 19   |
| >KIT-H580Y-\ LPYDHKWEFI  | 169  | >KIT-H580Y-r LPYDYKWEFF  | 136  | 33   |
| >KIT-H580Y-\ LPYDHKWEFI  | 170  | >KIT-H580Y-r LPYDYKWEFF  | 102  | 68   |
| >KIT-H580Y-\ LPYDHKWEFI  | 359  | >KIT-H580Y-r LPYDYKWEFF  | 241  | 118  |
| >KIT-H580Y-\ LPYDHKWEF   | 175  | >KIT-H580Y-r LPYDYKWEF   | 433  | 258  |
| >KIT-H580Y-\ LPYDHKWEF   | 272  | >KIT-H580Y-r LPYDYKWEF   | 174  | 98   |
| >KIT-H580Y-\ LPYDHKWEF   | 162  | >KIT-H580Y-r LPYDYKWEF   | 117  | 45   |
| >KIT-H580Y-\ LPYDHKWEF   | 11   | >KIT-H580Y-r LPYDYKWEF   | 12   | 1    |
| >KIT-H580Y-\ LPYDHKWEFI  | 212  | >KIT-H580Y-r LPYDYKWEFF  | 234  | 22   |
| >KIT-H580Y-\ LPYDHKWEF   | 471  | >KIT-H580Y-r LPYDYKWEF   | 382  | 89   |
| >KIT-H580Y-\ LPYDHKWEF   | 18   | >KIT-H580Y-r LPYDYKWEF   | 13   | 5    |
| >KIT-H580Y-\ LPYDHKWEFI  | 124  | >KIT-H580Y-r LPYDYKWEFF  | 95   | 29   |
| >KIT-H580Y-\ LPYDHKWEF   | 67   | >KIT-H580Y-r LPYDYKWEF   | 51   | 16   |
| >KIT-H580Y-\ LPYDHKWEF   | 11   | >KIT-H580Y-r LPYDYKWEF   | 12   | 1    |
| >KIT-H580Y-\ LPYDHKWEFI  | 96   | >KIT-H580Y-r LPYDYKWEFF  | 90   | 6    |
| >KIT-H580Y-\ QLPYDHWKE   | 446  | >KIT-H580Y-r QLPYDYKWEI  | 182  | 264  |
| >KIT-H580Y-\ TQLPYDHWK   | 34   | >KIT-H580Y-r TQLPYDYKWI  | 26   | 8    |
| >KIT-H580Y-\ TQLPYDHWK   | 118  | >KIT-H580Y-r TQLPYDYK    | 23   | 95   |
| >KIT-H580Y-\ TQLPYDHWK   | 67   | >KIT-H580Y-r TQLPYDYKWI  | 56   | 11   |
| >KIT-H580Y-\ TQLPYDHWK   | 176  | >KIT-H580Y-r TQLPYDYKWI  | 182  | 6    |

|                          |       |                          |      |       |
|--------------------------|-------|--------------------------|------|-------|
| >KIT-H580Y-\ TQLPYDHK    | 969   | >KIT-H580Y-r TQLPYDYK    | 208  | 761   |
| >KIT-H580Y-\ TQLPYDHW    | 23    | >KIT-H580Y-r TQLPYDYKW   | 18   | 5     |
| >KIT-H580Y-\ TQLPYDHW    | 306   | >KIT-H580Y-r TQLPYDYKW   | 714  | 408   |
| >KIT-H580Y-\ TQLPYDHW    | 199   | >KIT-H580Y-r TQLPYDYKW   | 182  | 17    |
| >KIT-H580Y-\ TQLPYDHW    | 186   | >KIT-H580Y-r TQLPYDYKW   | 207  | 21    |
| >KIT-H580Y-\ TQLPYDHW    | 129   | >KIT-H580Y-r TQLPYDYKW   | 229  | 100   |
| >KIT-H580Y-\ TQLPYDHW    | 123   | >KIT-H580Y-r TQLPYDYKW   | 218  | 95    |
| >KIT-H580Y-\ TQLPYDHW    | 526   | >KIT-H580Y-r TQLPYDYKW   | 126  | 400   |
| >KIT-H580Y-\ PTQLPYDHK   | 1617  | >KIT-H580Y-r PTQLPYDYK   | 131  | 1486  |
| >KIT-H580Y-\ PTQLPYDH    | 10776 | >KIT-H580Y-r PTQLPYDY    | 157  | 10619 |
| >KIT-H580Y-\ PTQLPYDHW   | 396   | >KIT-H580Y-r PTQLPYDYKV  | 644  | 248   |
| >KIT-H580Y-\ DPTQLPYDH   | 289   | >KIT-H580Y-r DPTQLPYDY   | 26   | 263   |
| >KIT-H580Y-\ DPTQLPYDH   | 13305 | >KIT-H580Y-r DPTQLPYDY   | 191  | 13114 |
| >KIT-H580Y-\ DPTQLPYDH   | 46    | >KIT-H580Y-r DPTQLPYDYK  | 27   | 19    |
| >KIT-H580Y-\ DPTQLPYDH   | 24    | >KIT-H580Y-r DPTQLPYDYK  | 31   | 7     |
| >KIT-H697Y-\ HAEAAALYKNL | 1728  | >KIT-H697Y-r YAEAAALYKNL | 236  | 1492  |
| >KIT-H697Y-\ HAEAAALYK   | 243   | >KIT-H697Y-r YAEAAALYK   | 188  | 55    |
| >KIT-H697Y-\ HAEAAALYK   | 56    | >KIT-H697Y-r YAEAAALYK   | 1331 | 1275  |
| >KIT-H697Y-\ HAEAAALYK   | 97    | >KIT-H697Y-r YAEAAALYK   | 63   | 34    |
| >KIT-H697Y-\ HAEAAALYKNL | 881   | >KIT-H697Y-r YAEAAALYKNL | 336  | 545   |
| >KIT-H697Y-\ HAEAAALYKNL | 3579  | >KIT-H697Y-r YAEAAALYKNL | 389  | 3190  |
| >KIT-H697Y-\ HAEAAALYKNL | 1288  | >KIT-H697Y-r YAEAAALYKNL | 99   | 1189  |
| >KIT-H697Y-\ DHAEAAALYKN | 22803 | >KIT-H697Y-r DYAEAAALYKN | 213  | 22590 |
| >KIT-H697Y-\ DHAEAAALY   | 416   | >KIT-H697Y-r DYAEAAALY   | 36   | 380   |
| >KIT-H697Y-\ DHAEAAALY   | 1585  | >KIT-H697Y-r DYAEAAALY   | 445  | 1140  |
| >KIT-H697Y-\ DHAEAAALYK  | 526   | >KIT-H697Y-r DYAEAAALYK  | 72   | 454   |
| >KIT-H697Y-\ DHAEAAALY   | 1261  | >KIT-H697Y-r DYAEAAALY   | 195  | 1066  |
| >KIT-H697Y-\ DHAEAAALYK  | 7901  | >KIT-H697Y-r DYAEAAALYK  | 299  | 7602  |
| >KIT-H697Y-\ DSFICKQED   | 17368 | >KIT-H697Y-r DSFICKQED   | 354  | 17014 |
| >KIT-H697Y-\ DSFICKQED   | 11022 | >KIT-H697Y-r DSFICKQED   | 269  | 10753 |
| >KIT-H697Y-\ QEDHAEAA    | 380   | >KIT-H697Y-r QEDYAEAA    | 146  | 234   |
| >KIT-H697Y-\ QEDHAEAA    | 540   | >KIT-H697Y-r QEDYAEAA    | 289  | 251   |
| >KIT-H697Y-\ QEDHAEAA    | 384   | >KIT-H697Y-r QEDYAEAA    | 576  | 192   |
| >KIT-H697Y-\ QEDHAEAA    | 19    | >KIT-H697Y-r QEDYAEAA    | 14   | 5     |
| >KIT-H697Y-\ QEDHAEAA    | 49    | >KIT-H697Y-r QEDYAEAA    | 41   | 8     |
| >KIT-H697Y-\ QEDHAEAA    | 121   | >KIT-H697Y-r QEDYAEAA    | 86   | 35    |
| >KIT-H697Y-\ QEDHAEAA    | 129   | >KIT-H697Y-r QEDYAEAA    | 70   | 59    |
| >KIT-H697Y-\ QEDHAEAA    | 1425  | >KIT-H697Y-r QEDYAEAA    | 460  | 965   |
| >KIT-H697Y-\ KQEDHAEAA   | 99    | >KIT-H697Y-r KQEDYAEAA   | 39   | 60    |
| >KIT-H697Y-\ KQEDHAEAA   | 49    | >KIT-H697Y-r KQEDYAEAA   | 26   | 23    |
| >KIT-H697Y-\ KQEDHAEAA   | 260   | >KIT-H697Y-r KQEDYAEAA   | 142  | 118   |
| >KIT-H697Y-\ KQEDHAEAA   | 334   | >KIT-H697Y-r KQEDYAEAA   | 371  | 37    |
| >KIT-H697Y-\ KQEDHAEAA   | 497   | >KIT-H697Y-r KQEDYAEAA   | 354  | 143   |

|                          |       |                          |     |       |
|--------------------------|-------|--------------------------|-----|-------|
| >KIT-H697Y-\ KQEDHAEAA   | 418   | >KIT-H697Y-r KQEDYAEAAI  | 265 | 153   |
| >KIT-H697Y-\ KQEDHAEAA   | 121   | >KIT-H697Y-r KQEDYAEAAI  | 75  | 46    |
| >KIT-H697Y-\ KQEDHAEAA   | 245   | >KIT-H697Y-r KQEDYAEAAI  | 230 | 15    |
| >KIT-H697Y-\ SKQEDHAEA/  | 168   | >KIT-H697Y-r SKQEDYAEAA/ | 141 | 27    |
| >KIT-H697Y-\ SKQEDHAEA/  | 160   | >KIT-H697Y-r SKQEDYAEAA/ | 183 | 23    |
| >KIT-H697Y-\ FICSKQEDHA  | 1374  | >KIT-H697Y-r FICSKQEDYA  | 172 | 1202  |
| >KIT-H697Y-\ FICSKQEDHA  | 2628  | >KIT-H697Y-r FICSKQEDYA  | 312 | 2316  |
| >KIT-H697Y-\ FICSKQEDH   | 20234 | >KIT-H697Y-r FICSKQEDY   | 441 | 19793 |
| >KIT-H697Y-\ FICSKQEDH   | 8997  | >KIT-H697Y-r FICSKQEDY   | 55  | 8942  |
| >KIT-H697Y-\ FICSKQEDH   | 17898 | >KIT-H697Y-r FICSKQEDY   | 497 | 17401 |
| >KIT-H697Y-\ SFICSKQEDH  | 23133 | >KIT-H697Y-r SFICSKQEDY  | 322 | 22811 |
| >KIT-H697Y-\ SFICSKQEDH  | 14054 | >KIT-H697Y-r SFICSKQEDY  | 234 | 13820 |
| >KIT-H802Y-\ HGRITKICDF  | 1297  | >KIT-H802Y-r YGRITKICDF  | 283 | 1014  |
| >KIT-H802Y-\ HGRITKICDF  | 595   | >KIT-H802Y-r YGRITKICDF  | 217 | 378   |
| >KIT-H802Y-\ THGRITKI    | 8178  | >KIT-H802Y-r TYGRITKI    | 53  | 8125  |
| >KIT-H802Y-\ THGRITKI    | 9596  | >KIT-H802Y-r TYGRITKI    | 156 | 9440  |
| >KIT-H802Y-\ THGRITKICDF | 4348  | >KIT-H802Y-r TYGRITKICDF | 62  | 4286  |
| >KIT-H802Y-\ THGRITKI    | 7193  | >KIT-H802Y-r TYGRITKI    | 133 | 7060  |
| >KIT-H802Y-\ THGRITKICDF | 4413  | >KIT-H802Y-r TYGRITKICDF | 104 | 4309  |
| >KIT-H802Y-\ THGRITKI    | 15094 | >KIT-H802Y-r TYGRITKI    | 15  | 15079 |
| >KIT-H802Y-\ THGRITKICDF | 5435  | >KIT-H802Y-r TYGRITKICDF | 7   | 5428  |
| >KIT-H802Y-\ DLAARNILLT\ | 10986 | >KIT-H802Y-r DLAARNILLT\ | 352 | 10634 |
| >KIT-H802Y-\ DLAARNILLT\ | 7440  | >KIT-H802Y-r DLAARNILLT\ | 63  | 7377  |
| >KIT-H802Y-\ DLAARNILLT\ | 15265 | >KIT-H802Y-r DLAARNILLT\ | 107 | 15158 |
| >KIT-H802Y-\ DLAARNILLT\ | 8738  | >KIT-H802Y-r DLAARNILLT\ | 207 | 8531  |
| >KIT-H802Y-\ DLAARNILLT\ | 17020 | >KIT-H802Y-r DLAARNILLT\ | 228 | 16792 |
| >KIT-H802Y-\ LTHGRITKI   | 4219  | >KIT-H802Y-r LTYGRITKI   | 417 | 3802  |
| >KIT-H802Y-\ LTHGRITKI   | 2562  | >KIT-H802Y-r LTYGRITKI   | 380 | 2182  |
| >KIT-H802Y-\ LTHGRITKI   | 318   | >KIT-H802Y-r LTYGRITKI   | 48  | 270   |
| >KIT-H802Y-\ LTHGRITKI   | 3117  | >KIT-H802Y-r LTYGRITKI   | 283 | 2834  |
| >KIT-H802Y-\ LTHGRITKI   | 957   | >KIT-H802Y-r LTYGRITKI   | 81  | 876   |
| >KIT-H802Y-\ LTHGRITKI   | 1897  | >KIT-H802Y-r LTYGRITKI   | 209 | 1688  |
| >KIT-H802Y-\ LTHGRITK    | 119   | >KIT-H802Y-r LTYGRITK    | 34  | 85    |
| >KIT-H802Y-\ LTHGRITK    | 68    | >KIT-H802Y-r LTYGRITK    | 16  | 52    |
| >KIT-H802Y-\ LTHGRITK    | 8     | >KIT-H802Y-r LTYGRITK    | 40  | 32    |
| >KIT-H802Y-\ LTHGRITK    | 438   | >KIT-H802Y-r LTYGRITK    | 165 | 273   |
| >KIT-H802Y-\ LTHGRITKI   | 821   | >KIT-H802Y-r LTYGRITKI   | 149 | 672   |
| >KIT-H802Y-\ LTHGRITK    | 98    | >KIT-H802Y-r LTYGRITK    | 20  | 78    |
| >KIT-H802Y-\ LTHGRITKI   | 617   | >KIT-H802Y-r LTYGRITKI   | 355 | 262   |
| >KIT-H802Y-\ LTHGRITKI   | 27    | >KIT-H802Y-r LTYGRITKI   | 10  | 17    |
| >KIT-H802Y-\ LTHGRITKI   | 441   | >KIT-H802Y-r LTYGRITKI   | 95  | 346   |
| >KIT-H802Y-\ LTHGRITKI   | 27    | >KIT-H802Y-r LTYGRITKI   | 14  | 13    |
| >KIT-H802Y-\ LLTHGRITKI  | 424   | >KIT-H802Y-r LLTYGRITKI  | 161 | 263   |

|                          |       |                           |     |       |
|--------------------------|-------|---------------------------|-----|-------|
| >KIT-H802Y-\ LLTHGRITKI  | 174   | >KIT-H802Y-r LLLTYGRITKI  | 111 | 63    |
| >KIT-H802Y-\ LLTHGRITKI  | 184   | >KIT-H802Y-r LLLTYGRITKI  | 390 | 206   |
| >KIT-H802Y-\ LLTHGRITKI  | 176   | >KIT-H802Y-r LLLTYGRITKI  | 349 | 173   |
| >KIT-H802Y-\ LLTHGRITKI  | 6     | >KIT-H802Y-r LLLTYGRITKI  | 10  | 4     |
| >KIT-H802Y-\ LLTHGRITKIC | 190   | >KIT-H802Y-r LLLTYGRITKIC | 484 | 294   |
| >KIT-H802Y-\ LLTHGRITK   | 78    | >KIT-H802Y-r LLLTYGRITK   | 124 | 46    |
| >KIT-H802Y-\ LLTHGRITK   | 350   | >KIT-H802Y-r LLLTYGRITK   | 447 | 97    |
| >KIT-H802Y-\ LLTHGRITK   | 1140  | >KIT-H802Y-r LLLTYGRITK   | 359 | 781   |
| >KIT-H802Y-\ ILLTHGRI    | 269   | >KIT-H802Y-r ILLTYGRI     | 40  | 229   |
| >KIT-H802Y-\ ILLTHGRI    | 943   | >KIT-H802Y-r ILLTYGRI     | 222 | 721   |
| >KIT-H802Y-\ ILLTHGRITKI | 225   | >KIT-H802Y-r ILLTYGRITKI  | 99  | 126   |
| >KIT-H802Y-\ ILLTHGRITKI | 269   | >KIT-H802Y-r ILLTYGRITKI  | 185 | 84    |
| >KIT-H802Y-\ ILLTHGRI    | 165   | >KIT-H802Y-r ILLTYGRI     | 149 | 16    |
| >KIT-H802Y-\ ILLTHGRITKI | 43    | >KIT-H802Y-r ILLTYGRITKI  | 63  | 20    |
| >KIT-H802Y-\ ILLTHGRITKI | 425   | >KIT-H802Y-r ILLTYGRITKI  | 288 | 137   |
| >KIT-H802Y-\ ILLTHGRI    | 14    | >KIT-H802Y-r ILLTYGRI     | 9   | 5     |
| >KIT-H802Y-\ ILLTHGRITKI | 16    | >KIT-H802Y-r ILLTYGRITKI  | 9   | 7     |
| >KIT-H802Y-\ ILLTHGRI    | 365   | >KIT-H802Y-r ILLTYGRI     | 157 | 208   |
| >KIT-H802Y-\ ILLTHGRITKI | 164   | >KIT-H802Y-r ILLTYGRITKI  | 107 | 57    |
| >KIT-H802Y-\ ILLTHGRI    | 545   | >KIT-H802Y-r ILLTYGRI     | 204 | 341   |
| >KIT-H802Y-\ ILLTHGRITKI | 160   | >KIT-H802Y-r ILLTYGRITKI  | 88  | 72    |
| >KIT-H802Y-\ ILLTHGRI    | 1157  | >KIT-H802Y-r ILLTYGRI     | 315 | 842   |
| >KIT-H802Y-\ ILLTHGRITKI | 262   | >KIT-H802Y-r ILLTYGRITKI  | 118 | 144   |
| >KIT-H802Y-\ ILLTHGRI    | 61    | >KIT-H802Y-r ILLTYGRI     | 35  | 26    |
| >KIT-H802Y-\ ILLTHGRITKI | 39    | >KIT-H802Y-r ILLTYGRITKI  | 24  | 15    |
| >KIT-H802Y-\ ILLTHGRITK  | 18    | >KIT-H802Y-r ILLTYGRITK   | 19  | 1     |
| >KIT-H802Y-\ ILLTHGRITK  | 91    | >KIT-H802Y-r ILLTYGRITK   | 79  | 12    |
| >KIT-H802Y-\ ILLTHGRITK  | 209   | >KIT-H802Y-r ILLTYGRITK   | 234 | 25    |
| >KIT-H802Y-\ NILLTHGRITK | 430   | >KIT-H802Y-r NILLTYGRITK  | 304 | 126   |
| >KIT-H802Y-\ NILLTHGR    | 589   | >KIT-H802Y-r NILLTYGR     | 360 | 229   |
| >KIT-H802Y-\ NILLTHGR    | 121   | >KIT-H802Y-r NILLTYGR     | 72  | 49    |
| >KIT-H802Y-\ NILLTHGR    | 85    | >KIT-H802Y-r NILLTYGR     | 93  | 8     |
| >KIT-H802Y-\ NILLTHGRI   | 692   | >KIT-H802Y-r NILLTYGRI    | 396 | 296   |
| >KIT-H802Y-\ NILLTHGR    | 71    | >KIT-H802Y-r NILLTYGR     | 47  | 24    |
| >KIT-H802Y-\ RNILLTHGR   | 118   | >KIT-H802Y-r RNILLTYGR    | 48  | 70    |
| >KIT-H802Y-\ RNILLTHGR   | 37    | >KIT-H802Y-r RNILLTYGR    | 20  | 17    |
| >KIT-H802Y-\ ARNILLTH    | 21234 | >KIT-H802Y-r ARNILLTY     | 473 | 20761 |
| >KIT-H802Y-\ ARNILLTHGR  | 255   | >KIT-H802Y-r ARNILLTYGR   | 128 | 127   |
| >KIT-H802Y-\ ARNILLTH    | 4195  | >KIT-H802Y-r ARNILLTY     | 204 | 3991  |
| >KIT-H802Y-\ ARNILLTH    | 274   | >KIT-H802Y-r ARNILLTY     | 146 | 128   |
| >KIT-H802Y-\ ARNILLTHGR  | 99    | >KIT-H802Y-r ARNILLTYGR   | 99  | 0     |
| >KIT-H802Y-\ ARNILLTHGR  | 227   | >KIT-H802Y-r ARNILLTYGRI  | 173 | 54    |
| >KIT-H802Y-\ ARNILLTH    | 2217  | >KIT-H802Y-r ARNILLTY     | 491 | 1726  |



|                         |       |                          |     |       |
|-------------------------|-------|--------------------------|-----|-------|
| >KIT-H802Y-\ARNILLTHGR  | 323   | >KIT-H802Y-r ARNILLTYGRI | 240 | 83    |
| >KIT-H802Y-\AARNILLTH   | 14631 | >KIT-H802Y-r AARNILLTY   | 117 | 14514 |
| >KIT-H802Y-\AARNILLTH   | 383   | >KIT-H802Y-r AARNILLTY   | 41  | 342   |
| >KIT-H802Y-\AARNILLTHG  | 347   | >KIT-H802Y-r AARNILLTYG  | 169 | 178   |
| >KIT-H802Y-\AARNILLTHG  | 127   | >KIT-H802Y-r AARNILLTYGI | 155 | 28    |
| >KIT-H802Y-\AARNILLTH   | 14029 | >KIT-H802Y-r AARNILLTY   | 164 | 13865 |
| >KIT-H802Y-\AARNILLTHG  | 32    | >KIT-H802Y-r AARNILLTYGI | 23  | 9     |
| >KIT-H802Y-\AARNILLTH   | 17574 | >KIT-H802Y-r AARNILLTY   | 83  | 17491 |
| >KIT-H802Y-\AARNILLTH   | 7801  | >KIT-H802Y-r AARNILLTY   | 121 | 7680  |
| >KIT-H802Y-\AARNILLTH   | 5421  | >KIT-H802Y-r AARNILLTY   | 75  | 5346  |
| >KIT-H802Y-\AARNILLTH   | 1773  | >KIT-H802Y-r AARNILLTY   | 5   | 1768  |
| >KIT-H802Y-\AARNILLTH   | 3399  | >KIT-H802Y-r AARNILLTY   | 294 | 3105  |
| >KIT-H802Y-\AARNILLTH   | 278   | >KIT-H802Y-r AARNILLTY   | 21  | 257   |
| >KIT-H802Y-\LAARNILLTH  | 23149 | >KIT-H802Y-r LAARNILLTY  | 244 | 22905 |
| >KIT-H802Y-\LAARNILLTH  | 16068 | >KIT-H802Y-r LAARNILLTY  | 105 | 15963 |
| >KIT-H802Y-\LAARNILLTH  | 8001  | >KIT-H802Y-r LAARNILLTY  | 124 | 7877  |
| >KIT-H802Y-\LAARNILLTH  | 7013  | >KIT-H802Y-r LAARNILLTY  | 200 | 6813  |
| >KIT-H802Y-\LAARNILLTH  | 6021  | >KIT-H802Y-r LAARNILLTY  | 16  | 6005  |
| >KIT-H802Y-\LAARNILLTH  | 1610  | >KIT-H802Y-r LAARNILLTY  | 30  | 1580  |
| >KIT-H802Y-\LAARNILLTH  | 12596 | >KIT-H802Y-r LAARNILLTY  | 74  | 12522 |
| >KIT-H802Y-\LAARNILLTH  | 30031 | >KIT-H802Y-r LAARNILLTY  | 192 | 29839 |
| >KIT-I538M-\IIVMILTYKYL | 187   | >KIT-I538M-r MIVMILTYKY  | 467 | 280   |
| >KIT-I538M-\IIVMILTYKYL | 1256  | >KIT-I538M-r MIVMILTYKY  | 473 | 783   |
| >KIT-I538M-\IIVMILTYKYL | 251   | >KIT-I538M-r MIVMILTYKY  | 74  | 177   |
| >KIT-I538M-\IIVMILTYKYL | 239   | >KIT-I538M-r MIVMILTYKY  | 74  | 165   |
| >KIT-I538M-\IIVMILTYKYL | 193   | >KIT-I538M-r MIVMILTYKY  | 80  | 113   |
| >KIT-I538M-\IIVMILTYKYL | 231   | >KIT-I538M-r MIVMILTYKY  | 94  | 137   |
| >KIT-I538M-\IIVMILTYKYL | 281   | >KIT-I538M-r MIVMILTYKY  | 77  | 204   |
| >KIT-I538M-\IIVMILTYK   | 71    | >KIT-I538M-r MIVMILTYK   | 62  | 9     |
| >KIT-I538M-\IIVMILTYKY  | 504   | >KIT-I538M-r MIVMILTYKY  | 497 | 7     |
| >KIT-I538M-\IIVMILTYK   | 21    | >KIT-I538M-r MIVMILTYK   | 14  | 7     |
| >KIT-I538M-\IIVMILTYKY  | 311   | >KIT-I538M-r MIVMILTYKY  | 220 | 91    |
| >KIT-I538M-\IIVMILTY    | 4537  | >KIT-I538M-r MIVMILTY    | 401 | 4136  |
| >KIT-I538M-\IIVMILTYKY  | 504   | >KIT-I538M-r MIVMILTYKY  | 204 | 300   |
| >KIT-I538M-\IIVMILTY    | 195   | >KIT-I538M-r MIVMILTY    | 81  | 114   |
| >KIT-I538M-\IIVMILTYKY  | 222   | >KIT-I538M-r MIVMILTYKY  | 94  | 128   |
| >KIT-I538M-\IIVMILTY    | 25    | >KIT-I538M-r MIVMILTY    | 13  | 12    |
| >KIT-I538M-\IIVMILTYKY  | 73    | >KIT-I538M-r MIVMILTYKY  | 79  | 6     |
| >KIT-I538M-\IIVMILTYK   | 1607  | >KIT-I538M-r MIVMILTYK   | 239 | 1368  |
| >KIT-I538M-\IIVMILTY    | 131   | >KIT-I538M-r MIVMILTY    | 169 | 38    |
| >KIT-I538M-\IIVMILTYKY  | 53    | >KIT-I538M-r MIVMILTYKY  | 59  | 6     |
| >KIT-I538M-\IIVMILTYK   | 75    | >KIT-I538M-r MIVMILTYK   | 28  | 47    |
| >KIT-I538M-\IIVMILTYK   | 621   | >KIT-I538M-r MIVMILTYK   | 211 | 410   |

|                          |      |                         |      |      |
|--------------------------|------|-------------------------|------|------|
| >KIT-I538M-\ IIVMILTY    | 1639 | >KIT-I538M-r MIVMILTY   | 168  | 1471 |
| >KIT-I538M-\ IIVMILTYK   | 15   | >KIT-I538M-r MIVMILTYK  | 4    | 11   |
| >KIT-I538M-\ IIVMILTYKY  | 453  | >KIT-I538M-r MIVMILTYKY | 82   | 371  |
| >KIT-I538M-\ IIVMILTYKYL | 1760 | >KIT-I538M-r MIVMILTYKY | 77   | 1683 |
| >KIT-I538M-\ IIVMILTY    | 55   | >KIT-I538M-r MIVMILTY   | 45   | 10   |
| >KIT-I538M-\ IIVMILTYKY  | 58   | >KIT-I538M-r MIVMILTYKY | 45   | 13   |
| >KIT-I538M-\ IIVMILTY    | 211  | >KIT-I538M-r MIVMILTY   | 117  | 94   |
| >KIT-I538M-\ IIVMILTY    | 595  | >KIT-I538M-r MIVMILTY   | 464  | 131  |
| >KIT-I538M-\ IIVMILTY    | 69   | >KIT-I538M-r MIVMILTY   | 55   | 14   |
| >KIT-I538M-\ IIVMILTYKY  | 326  | >KIT-I538M-r MIVMILTYKY | 241  | 85   |
| >KIT-I538M-\ IIVMILTY    | 396  | >KIT-I538M-r MIVMILTY   | 51   | 345  |
| >KIT-I538M-\ IIVMILTY    | 135  | >KIT-I538M-r MIVMILTY   | 59   | 76   |
| >KIT-I538M-\ IIVMILTYKY  | 303  | >KIT-I538M-r MIVMILTYKY | 112  | 191  |
| >KIT-I538M-\ IIVMILTYK   | 511  | >KIT-I538M-r MIVMILTYK  | 293  | 218  |
| >KIT-I538M-\ CIIVMILTYK  | 33   | >KIT-I538M-r CMIVMILTYK | 23   | 10   |
| >KIT-I538M-\ CIIVMILTYK  | 19   | >KIT-I538M-r CMIVMILTYK | 21   | 2    |
| >KIT-I538M-\ CIIVMILTY   | 98   | >KIT-I538M-r CMIVMILTY  | 904  | 806  |
| >KIT-I538M-\ CIIVMILTYKY | 132  | >KIT-I538M-r CMIVMILTYK | 1078 | 946  |
| >KIT-I538M-\ CIIVMILTY   | 19   | >KIT-I538M-r CMIVMILTY  | 8    | 11   |
| >KIT-I538M-\ CIIVMILTYKY | 14   | >KIT-I538M-r CMIVMILTYK | 7    | 7    |
| >KIT-I538M-\ CIIVMILTY   | 312  | >KIT-I538M-r CMIVMILTY  | 65   | 247  |
| >KIT-I538M-\ CIIVMILTYKY | 91   | >KIT-I538M-r CMIVMILTYK | 24   | 67   |
| >KIT-I538M-\ CIIVMILTYK  | 368  | >KIT-I538M-r CMIVMILTYK | 271  | 97   |
| >KIT-I538M-\ CIIVMILTYK  | 9    | >KIT-I538M-r CMIVMILTYK | 15   | 6    |
| >KIT-I538M-\ CIIVMILTY   | 51   | >KIT-I538M-r CMIVMILTY  | 27   | 24   |
| >KIT-I538M-\ CIIVMILTYKY | 69   | >KIT-I538M-r CMIVMILTYK | 37   | 32   |
| >KIT-I538M-\ CIIVMILTY   | 352  | >KIT-I538M-r CMIVMILTY  | 66   | 286  |
| >KIT-I538M-\ CIIVMILTYKY | 2353 | >KIT-I538M-r CMIVMILTYK | 306  | 2047 |
| >KIT-I538M-\ CIIVMILTY   | 2328 | >KIT-I538M-r CMIVMILTY  | 51   | 2277 |
| >KIT-I538M-\ CIIVMILTYKY | 4900 | >KIT-I538M-r CMIVMILTYK | 176  | 4724 |
| >KIT-I538M-\ CIIVMILTY   | 371  | >KIT-I538M-r CMIVMILTY  | 173  | 198  |
| >KIT-I538M-\ CIIVMILTY   | 576  | >KIT-I538M-r CMIVMILTY  | 241  | 335  |
| >KIT-I538M-\ CIIVMILTY   | 1068 | >KIT-I538M-r CMIVMILTY  | 301  | 767  |
| >KIT-I538M-\ CIIVMILTY   | 155  | >KIT-I538M-r CMIVMILTY  | 945  | 790  |
| >KIT-I538M-\ CIIVMILTYKY | 351  | >KIT-I538M-r CMIVMILTYK | 2033 | 1682 |
| >KIT-I538M-\ CIIVMILTY   | 163  | >KIT-I538M-r CMIVMILTY  | 199  | 36   |
| >KIT-I538M-\ CIIVMILTYKY | 84   | >KIT-I538M-r CMIVMILTYK | 100  | 16   |
| >KIT-I538M-\ CIIVMILTYK  | 907  | >KIT-I538M-r CMIVMILTYK | 491  | 416  |
| >KIT-I538M-\ MCIIVMIL    | 1367 | >KIT-I538M-r MCMIVMIL   | 441  | 926  |
| >KIT-I538M-\ MCIIVMILTYK | 1392 | >KIT-I538M-r MCMIVMILT' | 218  | 1174 |
| >KIT-I538M-\ MCIIVMILTYK | 595  | >KIT-I538M-r MCMIVMILT' | 139  | 456  |
| >KIT-I538M-\ MCIIVMILTY  | 77   | >KIT-I538M-r MCMIVMILT' | 60   | 17   |
| >KIT-I538M-\ MCIIVMILTYK | 717  | >KIT-I538M-r MCMIVMILT' | 230  | 487  |

|                          |      |                        |     |     |
|--------------------------|------|------------------------|-----|-----|
| >KIT-I538M-\ MCIIVMILTY  | 222  | >KIT-I538M-r MCMIVMILT | 137 | 85  |
| >KIT-I538M-\ MCIIVMILTYf | 255  | >KIT-I538M-r MCMIVMILT | 156 | 99  |
| >KIT-I538M-\ MCIIVMILTYf | 71   | >KIT-I538M-r MCMIVMILT | 79  | 8   |
| >KIT-I538M-\ MCIIVMIL    | 271  | >KIT-I538M-r MCMIVMIL  | 161 | 110 |
| >KIT-I538M-\ MCIIVMILTY  | 35   | >KIT-I538M-r MCMIVMILT | 34  | 1   |
| >KIT-I538M-\ MCIIVMILTY  | 348  | >KIT-I538M-r MCMIVMILT | 343 | 5   |
| >KIT-I538M-\ MCIIVMILTY  | 193  | >KIT-I538M-r MCMIVMILT | 390 | 197 |
| >KIT-I538M-\ MMCIIVMI    | 38   | >KIT-I538M-r MMCMIVMI  | 30  | 8   |
| >KIT-I538M-\ MMCIIVMIL   | 58   | >KIT-I538M-r MMCMIVMII | 39  | 19  |
| >KIT-I538M-\ MMCIIVMILT  | 299  | >KIT-I538M-r MMCMIVMII | 236 | 63  |
| >KIT-I538M-\ MMCIIVMI    | 25   | >KIT-I538M-r MMCMIVMI  | 31  | 6   |
| >KIT-I538M-\ MMCIIVMIL   | 38   | >KIT-I538M-r MMCMIVMII | 39  | 1   |
| >KIT-I538M-\ MMCIIVMILT  | 308  | >KIT-I538M-r MMCMIVMII | 230 | 78  |
| >KIT-I538M-\ MMCIIVMI    | 32   | >KIT-I538M-r MMCMIVMI  | 20  | 12  |
| >KIT-I538M-\ MMCIIVMIL   | 33   | >KIT-I538M-r MMCMIVMII | 17  | 16  |
| >KIT-I538M-\ MMCIIVMILT  | 338  | >KIT-I538M-r MMCMIVMII | 290 | 48  |
| >KIT-I538M-\ MMCIIVMI    | 359  | >KIT-I538M-r MMCMIVMI  | 258 | 101 |
| >KIT-I538M-\ MMCIIVMILT  | 500  | >KIT-I538M-r MMCMIVMII | 489 | 11  |
| >KIT-I538M-\ MMCIIVMI    | 4    | >KIT-I538M-r MMCMIVMI  | 4   | 0   |
| >KIT-I538M-\ MMCIIVMIL   | 12   | >KIT-I538M-r MMCMIVMII | 12  | 0   |
| >KIT-I538M-\ MMCIIVMILT  | 94   | >KIT-I538M-r MMCMIVMII | 92  | 2   |
| >KIT-I538M-\ MMCIIVMI    | 487  | >KIT-I538M-r MMCMIVMI  | 403 | 84  |
| >KIT-I538M-\ MMCIIVMIL   | 390  | >KIT-I538M-r MMCMIVMII | 284 | 106 |
| >KIT-I538M-\ MMCIIVMI    | 79   | >KIT-I538M-r MMCMIVMI  | 91  | 12  |
| >KIT-I538M-\ MMCIIVMIL   | 140  | >KIT-I538M-r MMCMIVMII | 142 | 2   |
| >KIT-I538M-\ MMCIIVMI    | 273  | >KIT-I538M-r MMCMIVMI  | 160 | 113 |
| >KIT-I538M-\ MMCIIVMIL   | 255  | >KIT-I538M-r MMCMIVMII | 131 | 124 |
| >KIT-I538M-\ MMCIIVMI    | 12   | >KIT-I538M-r MMCMIVMI  | 9   | 3   |
| >KIT-I538M-\ MMCIIVMIL   | 7    | >KIT-I538M-r MMCMIVMII | 6   | 1   |
| >KIT-I538M-\ MMCIIVMILT  | 312  | >KIT-I538M-r MMCMIVMII | 211 | 101 |
| >KIT-I538M-\ MMCIIVMILT  | 205  | >KIT-I538M-r MMCMIVMII | 140 | 65  |
| >KIT-I538M-\ MMCIIVMILT  | 198  | >KIT-I538M-r MMCMIVMII | 93  | 105 |
| >KIT-I538M-\ MMCIIVMILT  | 7    | >KIT-I538M-r MMCMIVMII | 8   | 1   |
| >KIT-I538M-\ MMCIIVMILT  | 33   | >KIT-I538M-r MMCMIVMII | 34  | 1   |
| >KIT-I538M-\ MMCIIVMI    | 223  | >KIT-I538M-r MMCMIVMI  | 120 | 103 |
| >KIT-I538M-\ MMCIIVMIL   | 705  | >KIT-I538M-r MMCMIVMII | 328 | 377 |
| >KIT-I538M-\ MMCIIVMILT  | 288  | >KIT-I538M-r MMCMIVMII | 151 | 137 |
| >KIT-I538M-\ MMCIIVMILT  | 671  | >KIT-I538M-r MMCMIVMII | 417 | 254 |
| >KIT-I538M-\ MMCIIVMILT  | 11   | >KIT-I538M-r MMCMIVMII | 10  | 1   |
| >KIT-I538M-\ MMCIIVMIL   | 705  | >KIT-I538M-r MMCMIVMII | 312 | 393 |
| >KIT-I538M-\ MMCIIVMIL   | 1022 | >KIT-I538M-r MMCMIVMII | 466 | 556 |
| >KIT-I538M-\ MMCIIVMILT  | 52   | >KIT-I538M-r MMCMIVMII | 39  | 13  |
| >KIT-I538M-\ MMCIIVMI    | 521  | >KIT-I538M-r MMCMIVMI  | 225 | 296 |

|                         |      |                        |     |      |
|-------------------------|------|------------------------|-----|------|
| >KIT-I538M-\ MMCIIVMIL  | 191  | >KIT-I538M-r MMCMIVMII | 65  | 126  |
| >KIT-I538M-\ MMCIIVMILT | 35   | >KIT-I538M-r MMCMIVMII | 18  | 17   |
| >KIT-I538M-\ MMCIIVMILT | 56   | >KIT-I538M-r MMCMIVMII | 72  | 16   |
| >KIT-I538M-\ MMCIIVMILT | 63   | >KIT-I538M-r MMCMIVMII | 49  | 14   |
| >KIT-I538M-\ MMCIIVMIL  | 214  | >KIT-I538M-r MMCMIVMII | 120 | 94   |
| >KIT-I538M-\ MMCIIVMIL  | 559  | >KIT-I538M-r MMCMIVMII | 278 | 281  |
| >KIT-I538M-\ GMMCIIVM   | 1528 | >KIT-I538M-r GMMCMIVM  | 294 | 1234 |
| >KIT-I538M-\ GMMCIIVM   | 22   | >KIT-I538M-r GMMCMIVM  | 28  | 6    |
| >KIT-I538M-\ GMMCIIVMI  | 8    | >KIT-I538M-r GMMCMIVM  | 9   | 1    |
| >KIT-I538M-\ GMMCIIVMII | 44   | >KIT-I538M-r GMMCMIVM  | 33  | 11   |
| >KIT-I538M-\ GMMCIIVMII | 33   | >KIT-I538M-r GMMCMIVM  | 37  | 4    |
| >KIT-I538M-\ GMMCIIVM   | 43   | >KIT-I538M-r GMMCMIVM  | 106 | 63   |
| >KIT-I538M-\ GMMCIIVMI  | 5    | >KIT-I538M-r GMMCMIVM  | 12  | 7    |
| >KIT-I538M-\ GMMCIIVMII | 19   | >KIT-I538M-r GMMCMIVM  | 24  | 5    |
| >KIT-I538M-\ GMMCIIVMII | 42   | >KIT-I538M-r GMMCMIVM  | 124 | 82   |
| >KIT-I538M-\ GMMCIIVM   | 96   | >KIT-I538M-r GMMCMIVM  | 114 | 18   |
| >KIT-I538M-\ GMMCIIVMI  | 8    | >KIT-I538M-r GMMCMIVM  | 9   | 1    |
| >KIT-I538M-\ GMMCIIVMII | 55   | >KIT-I538M-r GMMCMIVM  | 57  | 2    |
| >KIT-I538M-\ GMMCIIVMII | 74   | >KIT-I538M-r GMMCMIVM  | 87  | 13   |
| >KIT-I538M-\ GMMCIIVM   | 272  | >KIT-I538M-r GMMCMIVM  | 334 | 62   |
| >KIT-I538M-\ GMMCIIVMI  | 45   | >KIT-I538M-r GMMCMIVM  | 54  | 9    |
| >KIT-I538M-\ GMMCIIVMII | 205  | >KIT-I538M-r GMMCMIVM  | 219 | 14   |
| >KIT-I538M-\ GMMCIIVMII | 471  | >KIT-I538M-r GMMCMIVM  | 536 | 65   |
| >KIT-I538M-\ GMMCIIVM   | 21   | >KIT-I538M-r GMMCMIVM  | 66  | 45   |
| >KIT-I538M-\ GMMCIIVMI  | 3    | >KIT-I538M-r GMMCMIVM  | 4   | 1    |
| >KIT-I538M-\ GMMCIIVMII | 8    | >KIT-I538M-r GMMCMIVM  | 13  | 5    |
| >KIT-I538M-\ GMMCIIVMII | 48   | >KIT-I538M-r GMMCMIVM  | 92  | 44   |
| >KIT-I538M-\ GMMCIIVM   | 11   | >KIT-I538M-r GMMCMIVM  | 15  | 4    |
| >KIT-I538M-\ GMMCIIVMI  | 4    | >KIT-I538M-r GMMCMIVM  | 5   | 1    |
| >KIT-I538M-\ GMMCIIVMII | 4    | >KIT-I538M-r GMMCMIVM  | 4   | 0    |
| >KIT-I538M-\ GMMCIIVMII | 113  | >KIT-I538M-r GMMCMIVM  | 161 | 48   |
| >KIT-I538M-\ GMMCIIVM   | 303  | >KIT-I538M-r GMMCMIVM  | 802 | 499  |
| >KIT-I538M-\ GMMCIIVMI  | 22   | >KIT-I538M-r GMMCMIVM  | 29  | 7    |
| >KIT-I538M-\ GMMCIIVMII | 30   | >KIT-I538M-r GMMCMIVM  | 36  | 6    |
| >KIT-I538M-\ GMMCIIVM   | 67   | >KIT-I538M-r GMMCMIVM  | 299 | 232  |
| >KIT-I538M-\ GMMCIIVMI  | 10   | >KIT-I538M-r GMMCMIVM  | 17  | 7    |
| >KIT-I538M-\ GMMCIIVMII | 10   | >KIT-I538M-r GMMCMIVM  | 15  | 5    |
| >KIT-I538M-\ GMMCIIVM   | 375  | >KIT-I538M-r GMMCMIVM  | 654 | 279  |
| >KIT-I538M-\ GMMCIIVMI  | 39   | >KIT-I538M-r GMMCMIVM  | 28  | 11   |
| >KIT-I538M-\ GMMCIIVMII | 17   | >KIT-I538M-r GMMCMIVM  | 14  | 3    |
| >KIT-I538M-\ GMMCIIVMI  | 30   | >KIT-I538M-r GMMCMIVM  | 52  | 22   |
| >KIT-I538M-\ GMMCIIVMII | 134  | >KIT-I538M-r GMMCMIVM  | 197 | 63   |
| >KIT-I538M-\ GMMCIIVM   | 72   | >KIT-I538M-r GMMCMIVM  | 65  | 7    |

|                         |      |                           |      |      |
|-------------------------|------|---------------------------|------|------|
| >KIT-I538M-\ GMMCIIVMII | 664  | >KIT-I538M-r GMMCMIVM     | 413  | 251  |
| >KIT-I538M-\ GMMCIIVM   | 61   | >KIT-I538M-r GMMCMIVM     | 78   | 17   |
| >KIT-I538M-\ GMMCIIVMI  | 157  | >KIT-I538M-r GMMCMIVM     | 163  | 6    |
| >KIT-I538M-\ GMMCIIVMII | 76   | >KIT-I538M-r GMMCMIVM     | 66   | 10   |
| >KIT-I538M-\ GMMCIIVMII | 530  | >KIT-I538M-r GMMCMIVM     | 464  | 66   |
| >KIT-I538M-\ GMMCIIVMII | 168  | >KIT-I538M-r GMMCMIVM     | 304  | 136  |
| >KIT-I538M-\ GMMCIIVMI  | 106  | >KIT-I538M-r GMMCMIVM     | 86   | 20   |
| >KIT-I538M-\ GMMCIIVMII | 329  | >KIT-I538M-r GMMCMIVM     | 216  | 113  |
| >KIT-I538M-\ AGMMCIIVM  | 679  | >KIT-I538M-r AGMMCMIVM    | 222  | 457  |
| >KIT-I538M-\ VAGMMCIIVI | 704  | >KIT-I538M-r VAGMMCMIVM   | 475  | 229  |
| >KIT-I538M-\ IVAGMMCIIV | 372  | >KIT-I538M-r IVAGMMCMIVM  | 270  | 102  |
| >KIT-I538M-\ IVAGMMCI   | 283  | >KIT-I538M-r IVAGMMCMIVM  | 1211 | 928  |
| >KIT-I538M-\ IVAGMMCII  | 296  | >KIT-I538M-r IVAGMMCMIVM  | 138  | 158  |
| >KIT-I538M-\ IVAGMMCIIV | 597  | >KIT-I538M-r IVAGMMCMIVM  | 317  | 280  |
| >KIT-I538M-\ IVAGMMCI   | 313  | >KIT-I538M-r IVAGMMCMIVM  | 2999 | 2686 |
| >KIT-I538M-\ IVAGMMCII  | 172  | >KIT-I538M-r IVAGMMCMIVM  | 129  | 43   |
| >KIT-I538M-\ IVAGMMCIIV | 210  | >KIT-I538M-r IVAGMMCMIVM  | 90   | 120  |
| >KIT-I538M-\ IVAGMMCI   | 330  | >KIT-I538M-r IVAGMMCMIVM  | 1716 | 1386 |
| >KIT-I538M-\ IVAGMMCII  | 462  | >KIT-I538M-r IVAGMMCMIVM  | 175  | 287  |
| >KIT-I538M-\ IVAGMMCIIV | 185  | >KIT-I538M-r IVAGMMCMIVM  | 125  | 60   |
| >KIT-I538M-\ IVAGMMCII  | 2697 | >KIT-I538M-r IVAGMMCMIVM  | 465  | 2232 |
| >KIT-I538M-\ IVAGMMCIIV | 282  | >KIT-I538M-r IVAGMMCMIVM  | 305  | 23   |
| >KIT-I538M-\ IVAGMMCIIV | 395  | >KIT-I538M-r IVAGMMCMIVM  | 342  | 53   |
| >KIT-I538M-\ IVAGMMCII  | 264  | >KIT-I538M-r IVAGMMCMIVM  | 109  | 155  |
| >KIT-I538M-\ IVAGMMCIIV | 10   | >KIT-I538M-r IVAGMMCMIVM  | 7    | 3    |
| >KIT-I538M-\ IVAGMMCI   | 3235 | >KIT-I538M-r IVAGMMCMIVM  | 52   | 3183 |
| >KIT-I538M-\ IVAGMMCIIV | 81   | >KIT-I538M-r IVAGMMCMIVM  | 38   | 43   |
| >KIT-I538M-\ IVAGMMCI   | 68   | >KIT-I538M-r IVAGMMCMIVM  | 1398 | 1330 |
| >KIT-I538M-\ IVAGMMCII  | 280  | >KIT-I538M-r IVAGMMCMIVM  | 78   | 202  |
| >KIT-I538M-\ IVAGMMCIIV | 264  | >KIT-I538M-r IVAGMMCMIVM  | 168  | 96   |
| >KIT-I538M-\ IVAGMMCIIV | 760  | >KIT-I538M-r IVAGMMCMIVM  | 465  | 295  |
| >KIT-I538M-\ IVAGMMCIIV | 835  | >KIT-I538M-r IVAGMMCMIVM  | 350  | 485  |
| >KIT-I538M-\ IVAGMMCIIV | 289  | >KIT-I538M-r IVAGMMCMIVM  | 393  | 104  |
| >KIT-I538M-\ IVAGMMCIIV | 75   | >KIT-I538M-r IVAGMMCMIVM  | 41   | 34   |
| >KIT-I538M-\ VIVAGMMCI  | 284  | >KIT-I538M-r VIVAGMMCMIVM | 2600 | 2316 |
| >KIT-I538M-\ VIVAGMMCII | 82   | >KIT-I538M-r VIVAGMMCMIVM | 36   | 46   |
| >KIT-I538M-\ VIVAGMMCI  | 160  | >KIT-I538M-r VIVAGMMCMIVM | 985  | 825  |
| >KIT-I538M-\ VIVAGMMCII | 42   | >KIT-I538M-r VIVAGMMCMIVM | 43   | 1    |
| >KIT-I538M-\ VIVAGMMCII | 1445 | >KIT-I538M-r VIVAGMMCMIVM | 252  | 1193 |
| >KIT-I538M-\ VIVAGMMCII | 307  | >KIT-I538M-r VIVAGMMCMIVM | 413  | 106  |
| >KIT-I538M-\ VIVAGMMCII | 202  | >KIT-I538M-r VIVAGMMCMIVM | 261  | 59   |
| >KIT-I538M-\ VIVAGMMCII | 442  | >KIT-I538M-r VIVAGMMCMIVM | 217  | 225  |
| >KIT-I538M-\ VIVAGMMCII | 12   | >KIT-I538M-r VIVAGMMCMIVM | 9    | 3    |

|                         |       |                         |       |       |
|-------------------------|-------|-------------------------|-------|-------|
| >KIT-I538M-\ VIVAGMMCI  | 1252  | >KIT-I538M-r VIVAGMMCI  | 27    | 1225  |
| >KIT-I538M-\ FVIVAGMMC  | 550   | >KIT-I538M-r FVIVAGMMC  | 251   | 299   |
| >KIT-I538M-\ FVIVAGMMC  | 202   | >KIT-I538M-r FVIVAGMMC  | 391   | 189   |
| >KIT-I538M-\ FVIVAGMMC  | 411   | >KIT-I538M-r FVIVAGMMC  | 222   | 189   |
| >KIT-I538M-\ FVIVAGMMC  | 150   | >KIT-I538M-r FVIVAGMMC  | 743   | 593   |
| >KIT-I538M-\ FVIVAGMMC  | 97    | >KIT-I538M-r FVIVAGMMC  | 75    | 22    |
| >KIT-I538M-\ FVIVAGMMC  | 67    | >KIT-I538M-r FVIVAGMMC  | 174   | 107   |
| >KIT-I538M-\ FVIVAGMMC  | 22    | >KIT-I538M-r FVIVAGMMC  | 16    | 6     |
| >KIT-I538M-\ FVIVAGMMC  | 1488  | >KIT-I538M-r FVIVAGMMC  | 323   | 1165  |
| >KIT-I538M-\ FVIVAGMMC  | 580   | >KIT-I538M-r FVIVAGMMC  | 326   | 254   |
| >KIT-I538M-\ FVIVAGMMC  | 1194  | >KIT-I538M-r FVIVAGMMC  | 35    | 1159  |
| >KIT-I538M-\ FVIVAGMMC  | 211   | >KIT-I538M-r FVIVAGMMC  | 1886  | 1675  |
| >KIT-I538M-\ FVIVAGMMC  | 103   | >KIT-I538M-r FVIVAGMMC  | 43    | 60    |
| >KIT-I538M-\ FVIVAGMMC  | 255   | >KIT-I538M-r FVIVAGMMC  | 551   | 296   |
| >KIT-I538M-\ FVIVAGMMC  | 365   | >KIT-I538M-r FVIVAGMMC  | 55    | 310   |
| >KIT-I538M-\ FVIVAGMMC  | 3946  | >KIT-I538M-r FVIVAGMMC  | 353   | 3593  |
| >KIT-I538M-\ FVIVAGMMC  | 9841  | >KIT-I538M-r FVIVAGMMC  | 209   | 9632  |
| >KIT-I571R-w YIDPTQLPY  | 10    | >KIT-I571R-r YRDPTQLPY  | 213   | 203   |
| >KIT-I571R-w YIDPTQLPY  | 21    | >KIT-I571R-r YRDPTQLPY  | 187   | 166   |
| >KIT-I571R-w YIDPTQLPY  | 11    | >KIT-I571R-r YRDPTQLPY  | 134   | 123   |
| >KIT-I571R-w YIDPTQLPY  | 137   | >KIT-I571R-r YRDPTQLPY  | 8906  | 8769  |
| >KIT-I571R-w YIDPTQLPY  | 240   | >KIT-I571R-r YRDPTQLPY  | 2054  | 1814  |
| >KIT-I571R-w YIDPTQLPY  | 1209  | >KIT-I571R-r YRDPTQLPY  | 133   | 1076  |
| >KIT-I571R-w YIDPTQLPY  | 42    | >KIT-I571R-r YRDPTQLPY  | 11593 | 11551 |
| >KIT-I571R-w YIDPTQLPY  | 17095 | >KIT-I571R-r YRDPTQLPY  | 380   | 16715 |
| >KIT-I571R-w YIDPTQLPY  | 61    | >KIT-I571R-r YRDPTQLPY  | 1471  | 1410  |
| >KIT-I571R-w YIDPTQLPY  | 116   | >KIT-I571R-r YRDPTQLPY  | 3197  | 3081  |
| >KIT-I571R-w YIDPTQLPY  | 56    | >KIT-I571R-r YRDPTQLPY  | 407   | 351   |
| >KIT-I571R-w EEINGNNYVY | 76    | >KIT-I571R-r EEINGNNYVY | 28115 | 28039 |
| >KIT-I571R-w EEINGNNYVY | 25743 | >KIT-I571R-r EEINGNNYVY | 36    | 25707 |
| >KIT-I571R-w EEINGNNYVY | 59    | >KIT-I571R-r EEINGNNYVY | 9704  | 9645  |
| >KIT-I571R-w EEINGNNYVY | 300   | >KIT-I571R-r EEINGNNYVY | 6915  | 6615  |
| >KIT-I571R-w EEINGNNYVY | 190   | >KIT-I571R-r EEINGNNYVY | 833   | 643   |
| >KIT-I571R-w EEINGNNYVY | 97    | >KIT-I571R-r EEINGNNYVY | 1132  | 1035  |
| >KIT-I571R-w EEINGNNYVY | 63    | >KIT-I571R-r EEINGNNYVY | 13195 | 13132 |
| >KIT-I571R-w EEINGNNYVY | 33195 | >KIT-I571R-r EEINGNNYVY | 172   | 33023 |
| >KIT-I571R-w VYIDPTQLPY | 495   | >KIT-I571R-r VYRDPTQLPY | 569   | 74    |
| >KIT-I571R-w VYIDPTQL   | 216   | >KIT-I571R-r VYRDPTQL   | 1717  | 1501  |
| >KIT-I571R-w VYIDPTQL   | 43    | >KIT-I571R-r VYRDPTQL   | 231   | 188   |
| >KIT-I571R-w VYIDPTQLPY | 319   | >KIT-I571R-r VYRDPTQLPY | 5589  | 5270  |
| >KIT-I571R-w VYIDPTQLPY | 33    | >KIT-I571R-r VYRDPTQLPY | 115   | 82    |
| >KIT-I571R-w VYIDPTQLPY | 6777  | >KIT-I571R-r VYRDPTQLPY | 60    | 6717  |
| >KIT-I571R-w VYIDPTQLPY | 64    | >KIT-I571R-r VYRDPTQLPY | 271   | 207   |

|                          |       |                         |       |       |
|--------------------------|-------|-------------------------|-------|-------|
| >KIT-I571R-w VYIDPTQLPY  | 32    | >KIT-I571R-r VYRDPTQLPY | 102   | 70    |
| >KIT-I571R-w VYIDPTQLPY  | 840   | >KIT-I571R-r VYRDPTQLPY | 439   | 401   |
| >KIT-I571R-w YVYIDPTQL   | 193   | >KIT-I571R-r YVYRDPTQL  | 224   | 31    |
| >KIT-I571R-w YVYIDPTQL   | 135   | >KIT-I571R-r YVYRDPTQL  | 150   | 15    |
| >KIT-I571R-w YVYIDPTQL   | 24    | >KIT-I571R-r YVYRDPTQL  | 27    | 3     |
| >KIT-I571R-w YVYIDPTQL   | 261   | >KIT-I571R-r YVYRDPTQL  | 263   | 2     |
| >KIT-I571R-w YVYIDPTQL   | 18    | >KIT-I571R-r YVYRDPTQL  | 17    | 1     |
| >KIT-I571R-w YVYIDPTQL   | 71    | >KIT-I571R-r YVYRDPTQL  | 109   | 38    |
| >KIT-I571R-w YVYIDPTQL   | 720   | >KIT-I571R-r YVYRDPTQL  | 482   | 238   |
| >KIT-I571R-w YVYIDPTQ    | 673   | >KIT-I571R-r YVYRDPTQ   | 425   | 248   |
| >KIT-I571R-w YVYIDPTQL   | 16    | >KIT-I571R-r YVYRDPTQL  | 11    | 5     |
| >KIT-I571R-w YVYIDPTQLP) | 492   | >KIT-I571R-r YVYRDPTQLP | 213   | 279   |
| >KIT-I571R-w YVYIDPTQLP) | 330   | >KIT-I571R-r YVYRDPTQLP | 191   | 139   |
| >KIT-I571R-w YVYIDPTQLP) | 387   | >KIT-I571R-r YVYRDPTQLP | 587   | 200   |
| >KIT-I571R-w YVYIDPTQLP) | 91    | >KIT-I571R-r YVYRDPTQLP | 18    | 73    |
| >KIT-I571R-w YVYIDPTQLP) | 6     | >KIT-I571R-r YVYRDPTQLP | 7     | 1     |
| >KIT-I571R-w YVYIDPTQLP) | 451   | >KIT-I571R-r YVYRDPTQLP | 393   | 58    |
| >KIT-I571R-w YVYIDPTQL   | 162   | >KIT-I571R-r YVYRDPTQL  | 188   | 26    |
| >KIT-I571R-w YVYIDPTQLP) | 16    | >KIT-I571R-r YVYRDPTQLP | 11    | 5     |
| >KIT-I571R-w YVYIDPTQLP) | 63    | >KIT-I571R-r YVYRDPTQLP | 49    | 14    |
| >KIT-I571R-w YVYIDPTQLP) | 73    | >KIT-I571R-r YVYRDPTQLP | 60    | 13    |
| >KIT-I571R-w YVYIDPTQLP) | 53    | >KIT-I571R-r YVYRDPTQLP | 20    | 33    |
| >KIT-I571R-w YVYIDPTQL   | 27    | >KIT-I571R-r YVYRDPTQL  | 308   | 281   |
| >KIT-I571R-w YVYIDPTQLP) | 7     | >KIT-I571R-r YVYRDPTQLP | 17    | 10    |
| >KIT-I571R-w YVYIDPTQLP) | 17    | >KIT-I571R-r YVYRDPTQLP | 19    | 2     |
| >KIT-I571R-w YVYIDPTQLP) | 1053  | >KIT-I571R-r YVYRDPTQLP | 330   | 723   |
| >KIT-I571R-w YVYIDPTQL   | 423   | >KIT-I571R-r YVYRDPTQL  | 225   | 198   |
| >KIT-I571R-w YVYIDPTQLP) | 301   | >KIT-I571R-r YVYRDPTQLP | 180   | 121   |
| >KIT-I571R-w YVYIDPTQLP) | 645   | >KIT-I571R-r YVYRDPTQLP | 248   | 397   |
| >KIT-I571R-w NYVYIDPTQL  | 150   | >KIT-I571R-r NYVYRDPTQI | 242   | 92    |
| >KIT-I571R-w NYVYIDPTQL  | 163   | >KIT-I571R-r NYVYRDPTQI | 264   | 101   |
| >KIT-I571R-w NNYVYIDPTC  | 602   | >KIT-I571R-r NNYVYRDPTC | 458   | 144   |
| >KIT-I571R-w NGNNYVYI    | 17544 | >KIT-I571R-r NGNNYVYR   | 43    | 17501 |
| >KIT-I571R-w NGNNYVYI    | 33169 | >KIT-I571R-r NGNNYVYR   | 120   | 33049 |
| >KIT-I571R-w NGNNYVYI    | 32840 | >KIT-I571R-r NGNNYVYR   | 104   | 32736 |
| >KIT-I571R-w INGNNYVYI   | 163   | >KIT-I571R-r INGNNYVYR  | 28876 | 28713 |
| >KIT-I571R-w INGNNYVYI   | 141   | >KIT-I571R-r INGNNYVYR  | 11507 | 11366 |
| >KIT-I571R-w INGNNYVYI   | 19901 | >KIT-I571R-r INGNNYVYR  | 100   | 19801 |
| >KIT-I571R-w INGNNYVYI   | 28720 | >KIT-I571R-r INGNNYVYR  | 44    | 28676 |
| >KIT-I571R-w EINGNNYVYI  | 229   | >KIT-I571R-r EINGNNYVYF | 22063 | 21834 |
| >KIT-I571R-w EINGNNYVYI  | 257   | >KIT-I571R-r EINGNNYVYF | 22908 | 22651 |
| >KIT-I571R-w EINGNNYVYI  | 16851 | >KIT-I571R-r EINGNNYVYF | 67    | 16784 |
| >KIT-I571R-w EINGNNYVYI  | 14047 | >KIT-I571R-r EINGNNYVYF | 47    | 14000 |

|                         |       |                         |       |       |
|-------------------------|-------|-------------------------|-------|-------|
| >KIT-I571R-w EINGNNYVYI | 15246 | >KIT-I571R-r EINGNNYVYF | 11    | 15235 |
| >KIT-I571R-w EINGNNYVYI | 101   | >KIT-I571R-r EINGNNYVYF | 22803 | 22702 |
| >KIT-I571R-w EINGNNYVYI | 36    | >KIT-I571R-r EINGNNYVYF | 11730 | 11694 |
| >KIT-I571R-w EINGNNYVYI | 24837 | >KIT-I571R-r EINGNNYVYF | 24    | 24813 |
| >KIT-I653T-w IVNLLGACTI | 387   | >KIT-I653T-r TVNLLGACTI | 647   | 260   |
| >KIT-I653T-w IVNLLGACTI | 356   | >KIT-I653T-r TVNLLGACTI | 915   | 559   |
| >KIT-I653T-w NIVNLLGA   | 188   | >KIT-I653T-r NTVNLLGA   | 991   | 803   |
| >KIT-I653T-w NIVNLLGACT | 305   | >KIT-I653T-r NTVNLLGACT | 1413  | 1108  |
| >KIT-I653T-w NIVNLLGA   | 135   | >KIT-I653T-r NTVNLLGA   | 496   | 361   |
| >KIT-I653T-w NIVNLLGACT | 224   | >KIT-I653T-r NTVNLLGACT | 590   | 366   |
| >KIT-I653T-w NIVNLLGA   | 895   | >KIT-I653T-r NTVNLLGA   | 95    | 800   |
| >KIT-I653T-w NIVNLLGACT | 1206  | >KIT-I653T-r NTVNLLGACT | 180   | 1026  |
| >KIT-I653T-w NIVNLLGACT | 686   | >KIT-I653T-r NTVNLLGACT | 74    | 612   |
| >KIT-I653T-w NIVNLLGA   | 1266  | >KIT-I653T-r NTVNLLGA   | 244   | 1022  |
| >KIT-I653T-w NIVNLLGACT | 347   | >KIT-I653T-r NTVNLLGACT | 82    | 265   |
| >KIT-I653T-w NIVNLLGACT | 16959 | >KIT-I653T-r NTVNLLGACT | 343   | 16616 |
| >KIT-I653T-w NIVNLLGACT | 13586 | >KIT-I653T-r NTVNLLGACT | 224   | 13362 |
| >KIT-I653T-w VLSYLGNHMI | 36    | >KIT-I653T-r VLSYLGNHMI | 841   | 805   |
| >KIT-I653T-w VLSYLGNHMI | 48    | >KIT-I653T-r VLSYLGNHMI | 783   | 735   |
| >KIT-I653T-w VLSYLGNHMI | 201   | >KIT-I653T-r VLSYLGNHMI | 3570  | 3369  |
| >KIT-I653T-w VLSYLGNHMI | 217   | >KIT-I653T-r VLSYLGNHMI | 7640  | 7423  |
| >KIT-I653T-w VLSYLGNHMI | 294   | >KIT-I653T-r VLSYLGNHMI | 5795  | 5501  |
| >KIT-I653T-w VLSYLGNHMI | 73    | >KIT-I653T-r VLSYLGNHMI | 785   | 712   |
| >KIT-I653T-w HMNIVNLL   | 410   | >KIT-I653T-r HMNTVNLL   | 218   | 192   |
| >KIT-I653T-w HMNIVNLL   | 11    | >KIT-I653T-r HMNTVNLL   | 8     | 3     |
| >KIT-I653T-w HMNIVNLLG, | 450   | >KIT-I653T-r HMNTVNLLG  | 330   | 120   |
| >KIT-I653T-w HMNIVNLL   | 48    | >KIT-I653T-r HMNTVNLL   | 30    | 18    |
| >KIT-I653T-w HMNIVNLLG, | 160   | >KIT-I653T-r HMNTVNLLG  | 120   | 40    |
| >KIT-I653T-w HMNIVNLL   | 41    | >KIT-I653T-r HMNTVNLL   | 55    | 14    |
| >KIT-I653T-w HMNIVNLLG, | 74    | >KIT-I653T-r HMNTVNLLG  | 103   | 29    |
| >KIT-I653T-w HMNIVNLLG, | 346   | >KIT-I653T-r HMNTVNLLG  | 513   | 167   |
| >KIT-I653T-w HMNIVNLL   | 187   | >KIT-I653T-r HMNTVNLL   | 72    | 115   |
| >KIT-I653T-w HMNIVNLLG, | 469   | >KIT-I653T-r HMNTVNLLG  | 200   | 269   |
| >KIT-I653T-w HMNIVNLL   | 116   | >KIT-I653T-r HMNTVNLL   | 157   | 41    |
| >KIT-I653T-w HMNIVNLLG, | 270   | >KIT-I653T-r HMNTVNLLG  | 354   | 84    |
| >KIT-I653T-w HMNIVNLL   | 45    | >KIT-I653T-r HMNTVNLL   | 46    | 1     |
| >KIT-I653T-w HMNIVNLLG, | 158   | >KIT-I653T-r HMNTVNLLG  | 163   | 5     |
| >KIT-I653T-w HMNIVNLL   | 1238  | >KIT-I653T-r HMNTVNLL   | 467   | 771   |
| >KIT-I653T-w HMNIVNLL   | 434   | >KIT-I653T-r HMNTVNLL   | 91    | 343   |
| >KIT-I653T-w NHMNIVNLL  | 242   | >KIT-I653T-r NHMNTVNLL  | 1908  | 1666  |
| >KIT-I653T-w NHMNIVNL   | 988   | >KIT-I653T-r NHMNTVNL   | 449   | 539   |
| >KIT-I653T-w NHMNIVNL   | 361   | >KIT-I653T-r NHMNTVNL   | 345   | 16    |
| >KIT-I653T-w NHMNIVNLL  | 171   | >KIT-I653T-r NHMNTVNLL  | 157   | 14    |



|                        |      |                        |      |      |
|------------------------|------|------------------------|------|------|
| >KIT-I653T-w NHMNIVNL  | 15   | >KIT-I653T-r NHMNTVNL  | 10   | 5    |
| >KIT-I653T-w NHMNIVNLL | 9    | >KIT-I653T-r NHMNTVNLL | 7    | 2    |
| >KIT-I653T-w YLGNHMNI  | 45   | >KIT-I653T-r YLGNHMNT  | 803  | 758  |
| >KIT-I653T-w YLGNHMNIV | 27   | >KIT-I653T-r YLGNHMNTV | 12   | 15   |
| >KIT-I653T-w YLGNHMNIV | 23   | >KIT-I653T-r YLGNHMNTV | 25   | 2    |
| >KIT-I653T-w YLGNHMNI  | 22   | >KIT-I653T-r YLGNHMNT  | 355  | 333  |
| >KIT-I653T-w YLGNHMNIV | 5    | >KIT-I653T-r YLGNHMNTV | 5    | 0    |
| >KIT-I653T-w YLGNHMNIV | 6    | >KIT-I653T-r YLGNHMNTV | 6    | 0    |
| >KIT-I653T-w YLGNHMNI  | 9    | >KIT-I653T-r YLGNHMNT  | 77   | 68   |
| >KIT-I653T-w YLGNHMNIV | 3    | >KIT-I653T-r YLGNHMNTV | 3    | 0    |
| >KIT-I653T-w YLGNHMNIV | 10   | >KIT-I653T-r YLGNHMNTV | 11   | 1    |
| >KIT-I653T-w YLGNHMNI  | 205  | >KIT-I653T-r YLGNHMNT  | 2411 | 2206 |
| >KIT-I653T-w YLGNHMNIV | 26   | >KIT-I653T-r YLGNHMNTV | 11   | 15   |
| >KIT-I653T-w YLGNHMNIV | 111  | >KIT-I653T-r YLGNHMNTV | 128  | 17   |
| >KIT-I653T-w YLGNHMNI  | 5    | >KIT-I653T-r YLGNHMNT  | 54   | 49   |
| >KIT-I653T-w YLGNHMNIV | 4    | >KIT-I653T-r YLGNHMNTV | 2    | 2    |
| >KIT-I653T-w YLGNHMNIV | 5    | >KIT-I653T-r YLGNHMNTV | 5    | 0    |
| >KIT-I653T-w YLGNHMNI  | 6    | >KIT-I653T-r YLGNHMNT  | 258  | 252  |
| >KIT-I653T-w YLGNHMNIV | 3    | >KIT-I653T-r YLGNHMNTV | 2    | 1    |
| >KIT-I653T-w YLGNHMNIV | 4    | >KIT-I653T-r YLGNHMNTV | 4    | 0    |
| >KIT-I653T-w YLGNHMNI  | 15   | >KIT-I653T-r YLGNHMNT  | 307  | 292  |
| >KIT-I653T-w YLGNHMNIV | 8    | >KIT-I653T-r YLGNHMNTV | 6    | 2    |
| >KIT-I653T-w YLGNHMNIV | 12   | >KIT-I653T-r YLGNHMNTV | 11   | 1    |
| >KIT-I653T-w YLGNHMNI  | 33   | >KIT-I653T-r YLGNHMNT  | 1279 | 1246 |
| >KIT-I653T-w YLGNHMNIV | 14   | >KIT-I653T-r YLGNHMNTV | 5    | 9    |
| >KIT-I653T-w YLGNHMNIV | 20   | >KIT-I653T-r YLGNHMNTV | 14   | 6    |
| >KIT-I653T-w YLGNHMNI  | 4    | >KIT-I653T-r YLGNHMNT  | 12   | 8    |
| >KIT-I653T-w YLGNHMNIV | 2    | >KIT-I653T-r YLGNHMNTV | 2    | 0    |
| >KIT-I653T-w YLGNHMNIV | 2    | >KIT-I653T-r YLGNHMNTV | 2    | 0    |
| >KIT-I653T-w YLGNHMNIV | 736  | >KIT-I653T-r YLGNHMNTV | 186  | 550  |
| >KIT-I653T-w SYLGNHMNI | 14   | >KIT-I653T-r SYLGNHMNT | 4028 | 4014 |
| >KIT-I653T-w SYLGNHMNI | 177  | >KIT-I653T-r SYLGNHMNT | 15   | 162  |
| >KIT-I653T-w SYLGNHMNI | 1302 | >KIT-I653T-r SYLGNHMNT | 189  | 1113 |
| >KIT-I653T-w SYLGNHMNI | 1601 | >KIT-I653T-r SYLGNHMNT | 476  | 1125 |
| >KIT-I653T-w SYLGNHMNI | 497  | >KIT-I653T-r SYLGNHMNT | 101  | 396  |
| >KIT-I653T-w SYLGNHMNI | 31   | >KIT-I653T-r SYLGNHMNT | 6958 | 6927 |
| >KIT-I653T-w SYLGNHMNI | 92   | >KIT-I653T-r SYLGNHMNT | 8470 | 8378 |
| >KIT-I653T-w SYLGNHMNI | 4    | >KIT-I653T-r SYLGNHMNT | 84   | 80   |
| >KIT-I653T-w SYLGNHMNI | 45   | >KIT-I653T-r SYLGNHMNT | 16   | 29   |
| >KIT-I653T-w SYLGNHMNI | 76   | >KIT-I653T-r SYLGNHMNT | 2054 | 1978 |
| >KIT-I653T-w SYLGNHMNI | 333  | >KIT-I653T-r SYLGNHMNT | 3609 | 3276 |
| >KIT-I653T-w SYLGNHMNI | 143  | >KIT-I653T-r SYLGNHMNT | 290  | 147  |
| >KIT-I653T-w SYLGNHMNI | 364  | >KIT-I653T-r SYLGNHMNT | 1414 | 1050 |

|                          |       |                          |       |       |
|--------------------------|-------|--------------------------|-------|-------|
| >KIT-I653T-w SYLGNHMNI   | 53    | >KIT-I653T-r SYLGNHMNT   | 53    | 0     |
| >KIT-I653T-w LSYLGNHMN   | 440   | >KIT-I653T-r LSYLGNHMN   | 411   | 29    |
| >KIT-I653T-w LSYLGNHMN   | 724   | >KIT-I653T-r LSYLGNHMN   | 398   | 326   |
| >KIT-I653T-w LSYLGNHMN   | 1068  | >KIT-I653T-r LSYLGNHMN   | 232   | 836   |
| >KIT-I653T-w LSYLGNHMN   | 131   | >KIT-I653T-r LSYLGNHMN   | 1250  | 1119  |
| >KIT-I653T-w LSYLGNHMN   | 951   | >KIT-I653T-r LSYLGNHMN   | 346   | 605   |
| >KIT-I653T-w LSYLGNHMN   | 349   | >KIT-I653T-r LSYLGNHMN   | 8245  | 7896  |
| >KIT-I653T-w LSYLGNHMN   | 16    | >KIT-I653T-r LSYLGNHMN   | 823   | 807   |
| >KIT-I653T-w LSYLGNHMN   | 332   | >KIT-I653T-r LSYLGNHMN   | 63    | 269   |
| >KIT-I653T-w LSYLGNHMN   | 216   | >KIT-I653T-r LSYLGNHMN   | 15517 | 15301 |
| >KIT-I653T-w LSYLGNHMN   | 237   | >KIT-I653T-r LSYLGNHMN   | 2970  | 2733  |
| >KIT-I653T-w LSYLGNHMN   | 288   | >KIT-I653T-r LSYLGNHMN   | 201   | 87    |
| >KIT-I653T-w LSYLGNHMN   | 39    | >KIT-I653T-r LSYLGNHMN   | 16275 | 16236 |
| >KIT-I653T-w LSYLGNHMN   | 738   | >KIT-I653T-r LSYLGNHMN   | 427   | 311   |
| >KIT-I748T-w IERDVTPAI   | 21    | >KIT-I748T-r TERDVTPAI   | 18    | 3     |
| >KIT-I748T-w IERDVTPAIM  | 461   | >KIT-I748T-r TERDVTPAIM  | 2941  | 2480  |
| >KIT-I748T-w IERDVTPAI   | 196   | >KIT-I748T-r TERDVTPAI   | 345   | 149   |
| >KIT-I748T-w IERDVTPAI   | 170   | >KIT-I748T-r TERDVTPAI   | 270   | 100   |
| >KIT-I748T-w IERDVTPA    | 250   | >KIT-I748T-r TERDVTPA    | 151   | 99    |
| >KIT-I748T-w IERDVTPAI   | 202   | >KIT-I748T-r TERDVTPAI   | 127   | 75    |
| >KIT-I748T-w IERDVTPA    | 598   | >KIT-I748T-r TERDVTPA    | 86    | 512   |
| >KIT-I748T-w IERDVTPAI   | 5     | >KIT-I748T-r TERDVTPAI   | 6     | 1     |
| >KIT-I748T-w IERDVTPAIM  | 324   | >KIT-I748T-r TERDVTPAIM  | 233   | 91    |
| >KIT-I748T-w YIERDVTPA   | 74    | >KIT-I748T-r YTERDVTPA   | 773   | 699   |
| >KIT-I748T-w YIERDVTPAI  | 363   | >KIT-I748T-r YTERDVTPAI  | 1035  | 672   |
| >KIT-I748T-w YIERDVTPA   | 160   | >KIT-I748T-r YTERDVTPA   | 529   | 369   |
| >KIT-I748T-w YIERDVTPAI  | 206   | >KIT-I748T-r YTERDVTPAI  | 232   | 26    |
| >KIT-I748T-w YIERDVTPAI  | 134   | >KIT-I748T-r YTERDVTPAI  | 544   | 410   |
| >KIT-I748T-w YIERDVTPAI  | 309   | >KIT-I748T-r YTERDVTPAI  | 1933  | 1624  |
| >KIT-I748T-w YIERDVTPA   | 119   | >KIT-I748T-r YTERDVTPA   | 4593  | 4474  |
| >KIT-I748T-w YIERDVTPAI  | 78    | >KIT-I748T-r YTERDVTPAI  | 2634  | 2556  |
| >KIT-I748T-w YIERDVTPAIM | 2419  | >KIT-I748T-r YTERDVTPAIM | 302   | 2117  |
| >KIT-I748T-w YIERDVTPAI  | 674   | >KIT-I748T-r YTERDVTPAI  | 212   | 462   |
| >KIT-I748T-w YIERDVTPAIM | 12287 | >KIT-I748T-r YTERDVTPAIM | 75    | 12212 |
| >KIT-I748T-w YIERDVTPAIM | 11829 | >KIT-I748T-r YTERDVTPAIM | 272   | 11557 |
| >KIT-I748T-w YIERDVTPAIM | 612   | >KIT-I748T-r YTERDVTPAIM | 14    | 598   |
| >KIT-I748T-w KRRSVRIGSYI | 35    | >KIT-I748T-r KRRSVRIGSYI | 777   | 742   |
| >KIT-I748T-w KRRSVRIGSYI | 91    | >KIT-I748T-r KRRSVRIGSYI | 1610  | 1519  |
| >KIT-I748T-w KRRSVRIGSYI | 212   | >KIT-I748T-r KRRSVRIGSYI | 2153  | 1941  |
| >KIT-I748T-w KRRSVRIGSYI | 434   | >KIT-I748T-r KRRSVRIGSYI | 2614  | 2180  |
| >KIT-I748T-w KRRSVRIGSYI | 32    | >KIT-I748T-r KRRSVRIGSYI | 101   | 69    |
| >KIT-I748T-w KRRSVRIGSYI | 69    | >KIT-I748T-r KRRSVRIGSYI | 2248  | 2179  |
| >KIT-I748T-w SYIERDVTPAI | 14    | >KIT-I748T-r SYTERDVTPA  | 28    | 14    |

|                          |      |                          |       |       |
|--------------------------|------|--------------------------|-------|-------|
| >KIT-I748T-w SYIERDVTPAI | 434  | >KIT-I748T-r SYTERDVTPA  | 2226  | 1792  |
| >KIT-I748T-w SYIERDVTPAI | 366  | >KIT-I748T-r SYTERDVTPA  | 3001  | 2635  |
| >KIT-I748T-w SYIERDVTPAI | 472  | >KIT-I748T-r SYTERDVTPA  | 1431  | 959   |
| >KIT-I748T-w SYIERDVTPAI | 19   | >KIT-I748T-r SYTERDVTPA  | 36    | 17    |
| >KIT-I748T-w RIGSYIERDV  | 176  | >KIT-I748T-r RIGSYTERDV  | 336   | 160   |
| >KIT-I748T-w RIGSYIERDV  | 171  | >KIT-I748T-r RIGSYTERDV  | 258   | 87    |
| >KIT-I748T-w RIGSYIER    | 403  | >KIT-I748T-r RIGSYTER    | 888   | 485   |
| >KIT-I748T-w RIGSYIER    | 14   | >KIT-I748T-r RIGSYTER    | 13    | 1     |
| >KIT-I748T-w RIGSYIER    | 54   | >KIT-I748T-r RIGSYTER    | 61    | 7     |
| >KIT-I748T-w SVRIGSYIER  | 162  | >KIT-I748T-r SVRIGSYTER  | 401   | 239   |
| >KIT-I748T-w SVRIGSYI    | 9    | >KIT-I748T-r SVRIGSYT    | 123   | 114   |
| >KIT-I748T-w SVRIGSYIER  | 16   | >KIT-I748T-r SVRIGSYTER  | 53    | 37    |
| >KIT-I748T-w SVRIGSYIER  | 32   | >KIT-I748T-r SVRIGSYTER  | 65    | 33    |
| >KIT-I748T-w SVRIGSYIER  | 185  | >KIT-I748T-r SVRIGSYTER  | 469   | 284   |
| >KIT-I748T-w SVRIGSYIER  | 57   | >KIT-I748T-r SVRIGSYTER  | 87    | 30    |
| >KIT-I748T-w SVRIGSYI    | 310  | >KIT-I748T-r SVRIGSYT    | 36282 | 35972 |
| >KIT-I748T-w RSVRIGSYIER | 186  | >KIT-I748T-r RSVRIGSYTEF | 477   | 291   |
| >KIT-I748T-w RSVRIGSYI   | 114  | >KIT-I748T-r RSVRIGSYT   | 2517  | 2403  |
| >KIT-I748T-w RSVRIGSYIER | 437  | >KIT-I748T-r RSVRIGSYTEF | 1868  | 1431  |
| >KIT-I748T-w RSVRIGSYIER | 11   | >KIT-I748T-r RSVRIGSYTEF | 10    | 1     |
| >KIT-I748T-w RSVRIGSYIER | 119  | >KIT-I748T-r RSVRIGSYTEF | 109   | 10    |
| >KIT-I748T-w RSVRIGSYI   | 228  | >KIT-I748T-r RSVRIGSYT   | 4288  | 4060  |
| >KIT-I748T-w RSVRIGSYI   | 18   | >KIT-I748T-r RSVRIGSYT   | 1410  | 1392  |
| >KIT-I748T-w RSVRIGSYI   | 36   | >KIT-I748T-r RSVRIGSYT   | 8169  | 8133  |
| >KIT-I748T-w RSVRIGSYI   | 12   | >KIT-I748T-r RSVRIGSYT   | 72    | 60    |
| >KIT-I748T-w RSVRIGSYIER | 401  | >KIT-I748T-r RSVRIGSYTEF | 792   | 391   |
| >KIT-I748T-w RSVRIGSYI   | 11   | >KIT-I748T-r RSVRIGSYT   | 18230 | 18219 |
| >KIT-I748T-w RRSVRIGSYI  | 219  | >KIT-I748T-r RRSVRIGSYT  | 4039  | 3820  |
| >KIT-I748T-w RRSVRIGSYI  | 21   | >KIT-I748T-r RRSVRIGSYT  | 75    | 54    |
| >KIT-I748T-w RRSVRIGSYI  | 63   | >KIT-I748T-r RRSVRIGSYT  | 113   | 50    |
| >KIT-I748T-w RRSVRIGSYIE | 606  | >KIT-I748T-r RRSVRIGSYTE | 441   | 165   |
| >KIT-I748T-w RRSVRIGSYI  | 34   | >KIT-I748T-r RRSVRIGSYT  | 76    | 42    |
| >KIT-I817L-w IKNDSNYV    | 63   | >KIT-I817L-m LKNDSNYV    | 91    | 28    |
| >KIT-I817L-w IKNDSNYVV   | 26   | >KIT-I817L-m LKNDSNYVV   | 35    | 9     |
| >KIT-I817L-w IKNDSNYVVK  | 83   | >KIT-I817L-m LKNDSNYVVK  | 115   | 32    |
| >KIT-I817L-w DIKNDSNYVV  | 2092 | >KIT-I817L-m DLKNDSNYVA  | 257   | 1835  |
| >KIT-I817L-w DIKNDSNYV   | 6065 | >KIT-I817L-m DLKNDSNYV   | 483   | 5582  |
| >KIT-I817L-w DIKNDSNYV   | 5214 | >KIT-I817L-m DLKNDSNYV   | 166   | 5048  |
| >KIT-I817L-w DIKNDSNYVV  | 4961 | >KIT-I817L-m DLKNDSNYVA  | 220   | 4741  |
| >KIT-I817L-w DIKNDSNYV   | 6580 | >KIT-I817L-m DLKNDSNYV   | 226   | 6354  |
| >KIT-I817L-w DIKNDSNYV   | 1669 | >KIT-I817L-m DLKNDSNYV   | 33    | 1636  |
| >KIT-I817L-w DIKNDSNYVV  | 2247 | >KIT-I817L-m DLKNDSNYVA  | 50    | 2197  |
| >KIT-I817L-w DIKNDSNY    | 198  | >KIT-I817L-m DLKNDSNY    | 1028  | 830   |

|                         |      |                          |      |      |
|-------------------------|------|--------------------------|------|------|
| >KIT-I817L-w DIKNDSNY   | 243  | >KIT-I817L-m DLKNDSNY    | 1942 | 1699 |
| >KIT-I817L-w DIKNDSNY   | 462  | >KIT-I817L-m DLKNDSNY    | 373  | 89   |
| >KIT-I817L-w DIKNDSNYVV | 291  | >KIT-I817L-m DLKNDSNYV\  | 1090 | 799  |
| >KIT-I817L-w DIKNDSNY   | 694  | >KIT-I817L-m DLKNDSNY    | 144  | 550  |
| >KIT-I817L-w KICDFGLARD | 109  | >KIT-I817L-m KICDFGLARD  | 283  | 174  |
| >KIT-I817L-w RDIKNDSNYV | 394  | >KIT-I817L-m RDLKNDSNY\  | 423  | 29   |
| >KIT-I817L-w RDIKNDSNYV | 299  | >KIT-I817L-m RDLKNDSNY\  | 231  | 68   |
| >KIT-I817L-w RDIKNDSNYV | 87   | >KIT-I817L-m RDLKNDSNY\  | 68   | 19   |
| >KIT-I817L-w ARDIKNDSNY | 420  | >KIT-I817L-m ARDLKNDSN\  | 358  | 62   |
| >KIT-I817L-w ARDIKNDSNY | 200  | >KIT-I817L-m ARDLKNDSN\  | 152  | 48   |
| >KIT-I817L-w LARDIKNDSN | 241  | >KIT-I817L-m LARDLKNDSM  | 440  | 199  |
| >KIT-I817L-w LARDIKNDSN | 387  | >KIT-I817L-m LARDLKNDSM  | 264  | 123  |
| >KIT-I817L-w LARDIKNDSN | 317  | >KIT-I817L-m LARDLKNDSM  | 340  | 23   |
| >KIT-I817L-w LARDIKNDSN | 30   | >KIT-I817L-m LARDLKNDSM  | 23   | 7    |
| >KIT-I817L-w LARDIKNDSN | 176  | >KIT-I817L-m LARDLKNDSM  | 188  | 12   |
| >KIT-I817L-w LARDIKNDSN | 46   | >KIT-I817L-m LARDLKNDSM  | 49   | 3    |
| >KIT-I817L-w DFGLARDIK  | 2833 | >KIT-I817L-m DFGLARDLK   | 472  | 2361 |
| >KIT-I817L-w CDFGLARDI  | 84   | >KIT-I817L-m CDFGLARDL   | 873  | 789  |
| >KIT-I817V-w IKNDSNYV   | 63   | >KIT-I817V-r VKNDSNYV    | 152  | 89   |
| >KIT-I817V-w IKNDSNYVV  | 26   | >KIT-I817V-r VKNDSNYVV   | 61   | 35   |
| >KIT-I817V-w IKNDSNYVVK | 83   | >KIT-I817V-r VKNDSNYVVI  | 196  | 113  |
| >KIT-I817V-w DIKNDSNY   | 198  | >KIT-I817V-r DVKNDSNY    | 58   | 140  |
| >KIT-I817V-w DIKNDSNY   | 243  | >KIT-I817V-r DVKNDSNY    | 54   | 189  |
| >KIT-I817V-w DIKNDSNY   | 462  | >KIT-I817V-r DVKNDSNY    | 377  | 85   |
| >KIT-I817V-w DIKNDSNYVV | 291  | >KIT-I817V-r DVKNDSNYV'  | 113  | 178  |
| >KIT-I817V-w DIKNDSNYV  | 512  | >KIT-I817V-r DVKNDSNYV   | 115  | 397  |
| >KIT-I817V-w DIKNDSNYV  | 677  | >KIT-I817V-r DVKNDSNYV   | 396  | 281  |
| >KIT-I817V-w KICDFGLARD | 2732 | >KIT-I817V-r KICDFGLARD' | 439  | 2293 |
| >KIT-I817V-w KICDFGLARD | 1817 | >KIT-I817V-r KICDFGLARD' | 466  | 1351 |
| >KIT-I817V-w KICDFGLARD | 997  | >KIT-I817V-r KICDFGLARD' | 90   | 907  |
| >KIT-I817V-w KICDFGLARD | 5150 | >KIT-I817V-r KICDFGLARD' | 61   | 5089 |
| >KIT-I817V-w KICDFGLARD | 109  | >KIT-I817V-r KICDFGLARD' | 1139 | 1030 |
| >KIT-I817V-w RDIKNDSNYV | 394  | >KIT-I817V-r RDVKNDSNY'  | 728  | 334  |
| >KIT-I817V-w RDIKNDSNYV | 299  | >KIT-I817V-r RDVKNDSNY'  | 491  | 192  |
| >KIT-I817V-w RDIKNDSNYV | 87   | >KIT-I817V-r RDVKNDSNY'  | 130  | 43   |
| >KIT-I817V-w ARDIKNDSNY | 420  | >KIT-I817V-r ARDVKNDSN   | 495  | 75   |
| >KIT-I817V-w ARDIKNDSNY | 200  | >KIT-I817V-r ARDVKNDSN   | 248  | 48   |
| >KIT-I817V-w LARDIKNDSN | 241  | >KIT-I817V-r LARDVKNDSI  | 362  | 121  |
| >KIT-I817V-w LARDIKNDSN | 387  | >KIT-I817V-r LARDVKNDSI  | 282  | 105  |
| >KIT-I817V-w LARDIKNDSN | 317  | >KIT-I817V-r LARDVKNDSI  | 362  | 45   |
| >KIT-I817V-w LARDIKNDSN | 30   | >KIT-I817V-r LARDVKNDSI  | 39   | 9    |
| >KIT-I817V-w LARDIKNDSN | 176  | >KIT-I817V-r LARDVKNDSI  | 203  | 27   |
| >KIT-I817V-w LARDIKNDSN | 46   | >KIT-I817V-r LARDVKNDSI  | 50   | 4    |

|                               |      |                                |      |      |
|-------------------------------|------|--------------------------------|------|------|
| >KIT-I817V- $\nu$ CDFGLARDI   | 84   | >KIT-I817V- $\eta$ CDFGLARDV   | 163  | 79   |
| >KIT-I841V- $\nu$ IFNCVYTF    | 19   | >KIT-I841V- $\eta$ VFNCVYTF    | 20   | 1    |
| >KIT-I841V- $\nu$ IFNCVYTF    | 57   | >KIT-I841V- $\eta$ VFNCVYTF    | 90   | 33   |
| >KIT-I841V- $\nu$ IFNCVYTF    | 35   | >KIT-I841V- $\eta$ VFNCVYTF    | 27   | 8    |
| >KIT-I841V- $\nu$ IFNCVYTF    | 281  | >KIT-I841V- $\eta$ VFNCVYTF    | 629  | 348  |
| >KIT-I841V- $\nu$ IFNCVYTF    | 463  | >KIT-I841V- $\eta$ VFNCVYTF    | 613  | 150  |
| >KIT-I841V- $\nu$ SIFNCVYTF   | 483  | >KIT-I841V- $\eta$ SVFNCVYTF   | 299  | 184  |
| >KIT-I841V- $\nu$ SIFNCVYT    | 214  | >KIT-I841V- $\eta$ SVFNCVYT    | 422  | 208  |
| >KIT-I841V- $\nu$ SIFNCVYTFES | 237  | >KIT-I841V- $\eta$ SVFNCVYTFE  | 453  | 216  |
| >KIT-I841V- $\nu$ SIFNCVYT    | 411  | >KIT-I841V- $\eta$ SVFNCVYT    | 945  | 534  |
| >KIT-I841V- $\nu$ SIFNCVYTFES | 354  | >KIT-I841V- $\eta$ SVFNCVYTFE  | 819  | 465  |
| >KIT-I841V- $\nu$ SIFNCVYT    | 286  | >KIT-I841V- $\eta$ SVFNCVYT    | 255  | 31   |
| >KIT-I841V- $\nu$ SIFNCVYT    | 199  | >KIT-I841V- $\eta$ SVFNCVYT    | 730  | 531  |
| >KIT-I841V- $\nu$ SIFNCVYTF   | 422  | >KIT-I841V- $\eta$ SVFNCVYTF   | 1458 | 1036 |
| >KIT-I841V- $\nu$ SIFNCVYTF   | 72   | >KIT-I841V- $\eta$ SVFNCVYTF   | 42   | 30   |
| >KIT-I841V- $\nu$ SIFNCVYTF   | 585  | >KIT-I841V- $\eta$ SVFNCVYTF   | 497  | 88   |
| >KIT-I841V- $\nu$ SIFNCVYTF   | 662  | >KIT-I841V- $\eta$ SVFNCVYTF   | 146  | 516  |
| >KIT-I841V- $\nu$ SIFNCVYTF   | 505  | >KIT-I841V- $\eta$ SVFNCVYTF   | 235  | 270  |
| >KIT-I841V- $\nu$ SIFNCVYTF   | 6    | >KIT-I841V- $\eta$ SVFNCVYTF   | 6    | 0    |
| >KIT-I841V- $\nu$ SIFNCVYT    | 754  | >KIT-I841V- $\eta$ SVFNCVYT    | 142  | 612  |
| >KIT-I841V- $\nu$ SIFNCVYTFES | 404  | >KIT-I841V- $\eta$ SVFNCVYTFE  | 72   | 332  |
| >KIT-I841V- $\nu$ SIFNCVYTF   | 53   | >KIT-I841V- $\eta$ SVFNCVYTF   | 58   | 5    |
| >KIT-I841V- $\nu$ SIFNCVYTF   | 16   | >KIT-I841V- $\eta$ SVFNCVYTF   | 22   | 6    |
| >KIT-I841V- $\nu$ SIFNCVYTF   | 276  | >KIT-I841V- $\eta$ SVFNCVYTF   | 62   | 214  |
| >KIT-I841V- $\nu$ SIFNCVYTF   | 310  | >KIT-I841V- $\eta$ SVFNCVYTF   | 88   | 222  |
| >KIT-I841V- $\nu$ SIFNCVYTF   | 40   | >KIT-I841V- $\eta$ SVFNCVYTF   | 13   | 27   |
| >KIT-I841V- $\nu$ SIFNCVYTF   | 149  | >KIT-I841V- $\eta$ SVFNCVYTF   | 148  | 1    |
| >KIT-I841V- $\nu$ LPVKWMAPE   | 1157 | >KIT-I841V- $\eta$ LPVKWMAPE   | 392  | 765  |
| >KIT-I841V- $\nu$ LPVKWMAPE   | 216  | >KIT-I841V- $\eta$ LPVKWMAPE   | 202  | 14   |
| >KIT-I841V- $\nu$ LPVKWMAPE   | 96   | >KIT-I841V- $\eta$ LPVKWMAPE   | 186  | 90   |
| >KIT-I841V- $\nu$ LPVKWMAPE   | 32   | >KIT-I841V- $\eta$ LPVKWMAPE   | 217  | 185  |
| >KIT-I841V- $\nu$ LPVKWMAPE   | 122  | >KIT-I841V- $\eta$ LPVKWMAPE   | 34   | 88   |
| >KIT-I841V- $\nu$ ESIFNCVY    | 195  | >KIT-I841V- $\eta$ ESVFNCVY    | 374  | 179  |
| >KIT-I841V- $\nu$ ESIFNCVYTF  | 87   | >KIT-I841V- $\eta$ ESVFNCVYTF  | 143  | 56   |
| >KIT-I841V- $\nu$ ESIFNCVY    | 11   | >KIT-I841V- $\eta$ ESVFNCVY    | 16   | 5    |
| >KIT-I841V- $\nu$ ESIFNCVYTF  | 7    | >KIT-I841V- $\eta$ ESVFNCVYTF  | 10   | 3    |
| >KIT-I841V- $\nu$ ESIFNCVY    | 464  | >KIT-I841V- $\eta$ ESVFNCVY    | 803  | 339  |
| >KIT-I841V- $\nu$ ESIFNCVYTF  | 81   | >KIT-I841V- $\eta$ ESVFNCVYTF  | 139  | 58   |
| >KIT-I841V- $\nu$ ESIFNCVY    | 74   | >KIT-I841V- $\eta$ ESVFNCVY    | 143  | 69   |
| >KIT-I841V- $\nu$ ESIFNCVYT   | 486  | >KIT-I841V- $\eta$ ESVFNCVYT   | 1066 | 580  |
| >KIT-I841V- $\nu$ ESIFNCVYTFE | 124  | >KIT-I841V- $\eta$ ESVFNCVYTFE | 249  | 125  |
| >KIT-I841V- $\nu$ ESIFNCVYT   | 135  | >KIT-I841V- $\eta$ ESVFNCVYT   | 270  | 135  |
| >KIT-I841V- $\nu$ ESIFNCVY    | 246  | >KIT-I841V- $\eta$ ESVFNCVY    | 481  | 235  |

|                               |     |                                |     |     |
|-------------------------------|-----|--------------------------------|-----|-----|
| >KIT-I841V- $\nu$ ESIFNCVYTF  | 98  | >KIT-I841V- $\eta$ ESVFNCVYTF  | 137 | 39  |
| >KIT-I841V- $\nu$ ESIFNCVY    | 28  | >KIT-I841V- $\eta$ ESVFNCVY    | 27  | 1   |
| >KIT-I841V- $\nu$ ESIFNCVYTF  | 11  | >KIT-I841V- $\eta$ ESVFNCVYTF  | 11  | 0   |
| >KIT-I841V- $\nu$ ESIFNCVY    | 470 | >KIT-I841V- $\eta$ ESVFNCVY    | 405 | 65  |
| >KIT-I841V- $\nu$ PESIFNCVYTF | 852 | >KIT-I841V- $\eta$ PESVFNCVYTF | 449 | 403 |
| >KIT-I841V- $\nu$ PESIFNCVY   | 415 | >KIT-I841V- $\eta$ PESVFNCVY   | 418 | 3   |
| >KIT-I841V- $\nu$ PESIFNCVYTF | 57  | >KIT-I841V- $\eta$ PESVFNCVYTF | 55  | 2   |
| >KIT-I841V- $\nu$ APESIFNCVY  | 117 | >KIT-I841V- $\eta$ APESVFNCVY  | 127 | 10  |
| >KIT-I841V- $\nu$ APESIFNCVY  | 57  | >KIT-I841V- $\eta$ APESVFNCVY  | 42  | 15  |
| >KIT-I841V- $\nu$ APESIFNCVY  | 81  | >KIT-I841V- $\eta$ APESVFNCVY  | 82  | 1   |
| >KIT-I841V- $\nu$ MAPESIFNCV  | 127 | >KIT-I841V- $\eta$ MAPESVFNC'  | 127 | 0   |
| >KIT-I841V- $\nu$ MAPESIFNCV  | 155 | >KIT-I841V- $\eta$ MAPESVFNC'  | 124 | 31  |
| >KIT-I841V- $\nu$ MAPESIFNCV  | 343 | >KIT-I841V- $\eta$ MAPESVFNC'  | 265 | 78  |
| >KIT-I841V- $\nu$ MAPESIFNCV  | 78  | >KIT-I841V- $\eta$ MAPESVFNC'  | 122 | 44  |
| >KIT-I841V- $\nu$ MAPESIFNCV  | 22  | >KIT-I841V- $\eta$ MAPESVFNC'  | 25  | 3   |
| >KIT-I841V- $\nu$ MAPESIFNCV  | 274 | >KIT-I841V- $\eta$ MAPESVFNC'  | 292 | 18  |
| >KIT-I841V- $\nu$ MAPESIFNCV  | 292 | >KIT-I841V- $\eta$ MAPESVFNC'  | 236 | 56  |
| >KIT-I841V- $\nu$ MAPESIFNCV  | 279 | >KIT-I841V- $\eta$ MAPESVFNC'  | 185 | 94  |
| >KIT-I841V- $\nu$ MAPESIFNCV  | 110 | >KIT-I841V- $\eta$ MAPESVFNC'  | 113 | 3   |
| >KIT-I841V- $\nu$ MAPESIFNCV  | 27  | >KIT-I841V- $\eta$ MAPESVFNC'  | 24  | 3   |
| >KIT-I841V- $\nu$ MAPESIFNCV  | 397 | >KIT-I841V- $\eta$ MAPESVFNC'  | 372 | 25  |
| >KIT-I841V- $\nu$ MAPESIFNC   | 32  | >KIT-I841V- $\eta$ MAPESVFNC   | 75  | 43  |
| >KIT-I841V- $\nu$ MAPESIFNCV  | 10  | >KIT-I841V- $\eta$ MAPESVFNC'  | 14  | 4   |
| >KIT-I841V- $\nu$ MAPESIFNCV  | 276 | >KIT-I841V- $\eta$ MAPESVFNC'  | 460 | 184 |
| >KIT-I841V- $\nu$ WMAPESIFN'  | 20  | >KIT-I841V- $\eta$ WMAPESVFN   | 22  | 2   |
| >KIT-I841V- $\nu$ WMAPESIFN   | 653 | >KIT-I841V- $\eta$ WMAPESVFN   | 312 | 341 |
| >KIT-I841V- $\nu$ WMAPESIFN'  | 4   | >KIT-I841V- $\eta$ WMAPESVFN   | 4   | 0   |
| >KIT-I841V- $\nu$ WMAPESIFN'  | 6   | >KIT-I841V- $\eta$ WMAPESVFN   | 6   | 0   |
| >KIT-I841V- $\nu$ WMAPESIFN'  | 8   | >KIT-I841V- $\eta$ WMAPESVFN   | 8   | 0   |
| >KIT-I841V- $\nu$ WMAPESIFN'  | 25  | >KIT-I841V- $\eta$ WMAPESVFN   | 30  | 5   |
| >KIT-I841V- $\nu$ WMAPESIFN'  | 6   | >KIT-I841V- $\eta$ WMAPESVFN   | 5   | 1   |
| >KIT-I841V- $\nu$ WMAPESIFN'  | 128 | >KIT-I841V- $\eta$ WMAPESVFN   | 139 | 11  |
| >KIT-I841V- $\nu$ WMAPESIFN'  | 5   | >KIT-I841V- $\eta$ WMAPESVFN   | 5   | 0   |
| >KIT-I841V- $\nu$ WMAPESIFN'  | 90  | >KIT-I841V- $\eta$ WMAPESVFN   | 92  | 2   |
| >KIT-I841V- $\nu$ WMAPESIFN'  | 6   | >KIT-I841V- $\eta$ WMAPESVFN   | 5   | 1   |
| >KIT-I841V- $\nu$ WMAPESIFN'  | 34  | >KIT-I841V- $\eta$ WMAPESVFN   | 31  | 3   |
| >KIT-I841V- $\nu$ WMAPESIFN'  | 3   | >KIT-I841V- $\eta$ WMAPESVFN   | 3   | 0   |
| >KIT-I841V- $\nu$ WMAPESIFN'  | 12  | >KIT-I841V- $\eta$ WMAPESVFN   | 15  | 3   |
| >KIT-I841V- $\nu$ WMAPESIFN'  | 2   | >KIT-I841V- $\eta$ WMAPESVFN   | 2   | 0   |
| >KIT-I841V- $\nu$ WMAPESIF    | 225 | >KIT-I841V- $\eta$ WMAPESVF    | 99  | 126 |
| >KIT-I841V- $\nu$ WMAPESIFN'  | 113 | >KIT-I841V- $\eta$ WMAPESVFN   | 103 | 10  |
| >KIT-I841V- $\nu$ WMAPESIFN'  | 313 | >KIT-I841V- $\eta$ WMAPESVFN   | 403 | 90  |
| >KIT-I841V- $\nu$ WMAPESIF    | 49  | >KIT-I841V- $\eta$ WMAPESVF    | 28  | 21  |

|                          |       |                         |      |       |
|--------------------------|-------|-------------------------|------|-------|
| >KIT-I841V-w WMAPESIF    | 58    | >KIT-I841V-r WMAPESVF   | 54   | 4     |
| >KIT-I841V-w WMAPESIF    | 5     | >KIT-I841V-r WMAPESVF   | 5    | 0     |
| >KIT-I841V-w WMAPESIFN   | 184   | >KIT-I841V-r WMAPESVFN  | 136  | 48    |
| >KIT-I841V-w WMAPESIF    | 335   | >KIT-I841V-r WMAPESVF   | 169  | 166   |
| >KIT-I841V-w WMAPESIF    | 53    | >KIT-I841V-r WMAPESVF   | 42   | 11    |
| >KIT-I841V-w KWMAPESI    | 441   | >KIT-I841V-r KWMAPESV   | 4984 | 4543  |
| >KIT-I841V-w KWMAPESI    | 2014  | >KIT-I841V-r KWMAPESV   | 419  | 1595  |
| >KIT-I841V-w KWMAPESI    | 415   | >KIT-I841V-r KWMAPESV   | 3823 | 3408  |
| >KIT-I841V-w KWMAPESIF   | 353   | >KIT-I841V-r KWMAPESVF  | 305  | 48    |
| >KIT-I841V-w KWMAPESI    | 127   | >KIT-I841V-r KWMAPESV   | 2525 | 2398  |
| >KIT-I841V-w KWMAPESIF   | 28    | >KIT-I841V-r KWMAPESVF  | 14   | 14    |
| >KIT-I841V-w KWMAPESIF   | 69    | >KIT-I841V-r KWMAPESVF  | 70   | 1     |
| >KIT-I841V-w KWMAPESIF   | 141   | >KIT-I841V-r KWMAPESVF  | 149  | 8     |
| >KIT-I841V-w KWMAPESIFI  | 547   | >KIT-I841V-r KWMAPESVF  | 484  | 63    |
| >KIT-I841V-w KWMAPESI    | 39    | >KIT-I841V-r KWMAPESV   | 40   | 1     |
| >KIT-I841V-w KWMAPESIF   | 122   | >KIT-I841V-r KWMAPESVF  | 125  | 3     |
| >KIT-I841V-w KWMAPESIFI  | 126   | >KIT-I841V-r KWMAPESVF  | 134  | 8     |
| >KIT-I841V-w VKWMAPESI   | 3964  | >KIT-I841V-r VKWMAPESV  | 330  | 3634  |
| >KIT-I841V-w VKWMAPESI   | 19    | >KIT-I841V-r VKWMAPESV  | 22   | 3     |
| >KIT-I841V-w VKWMAPESII  | 2     | >KIT-I841V-r VKWMAPESV  | 2    | 0     |
| >KIT-I957T-w RINSVGSTA   | 44    | >KIT-I957T-r RTNSVGSTA  | 353  | 309   |
| >KIT-I957T-w RINSVGSTA   | 247   | >KIT-I957T-r RTNSVGSTA  | 1116 | 869   |
| >KIT-I957T-w RINSVGSTA   | 719   | >KIT-I957T-r RTNSVGSTA  | 140  | 579   |
| >KIT-I957T-w RINSVGSTAS! | 1417  | >KIT-I957T-r RTNSVGSTAS | 329  | 1088  |
| >KIT-I957T-w RINSVGSTA   | 322   | >KIT-I957T-r RTNSVGSTA  | 10   | 312   |
| >KIT-I957T-w RINSVGSTAS! | 5116  | >KIT-I957T-r RTNSVGSTAS | 291  | 4825  |
| >KIT-I957T-w VRINSVGSTA  | 391   | >KIT-I957T-r VRTNSVGSTA | 1202 | 811   |
| >KIT-I957T-w VRINSVGSTA  | 493   | >KIT-I957T-r VRTNSVGSTA | 1953 | 1460  |
| >KIT-I957T-w SVRINSVG    | 124   | >KIT-I957T-r SVRTNSVG   | 67   | 57    |
| >KIT-I957T-w SVRINSVGS   | 87    | >KIT-I957T-r SVRTNSVGS  | 57   | 30    |
| >KIT-I957T-w SVRINSVGST  | 115   | >KIT-I957T-r SVRTNSVGST | 81   | 34    |
| >KIT-I957T-w SVRINSVGST, | 12    | >KIT-I957T-r SVRTNSVGST | 10   | 2     |
| >KIT-I957T-w HSVRINSV    | 1122  | >KIT-I957T-r HSVRTNSV   | 414  | 708   |
| >KIT-I957T-w HSVRINSV    | 19    | >KIT-I957T-r HSVRTNSV   | 75   | 56    |
| >KIT-I957T-w HSVRINSV    | 370   | >KIT-I957T-r HSVRTNSV   | 258  | 112   |
| >KIT-I957T-w VVDHSVRINS  | 236   | >KIT-I957T-r VVDHSVRTN! | 291  | 55    |
| >KIT-I957T-w VVDHSVRINS  | 74    | >KIT-I957T-r VVDHSVRTN! | 89   | 15    |
| >KIT-I957T-w VVDHSVRINS  | 89    | >KIT-I957T-r VVDHSVRTN! | 140  | 51    |
| >KIT-I957T-w VVDHSVRINS  | 387   | >KIT-I957T-r VVDHSVRTN! | 348  | 39    |
| >KIT-I957T-w VVDHSVRINS  | 304   | >KIT-I957T-r VVDHSVRTN! | 354  | 50    |
| >KIT-I957T-w VVDHSVRINS  | 70    | >KIT-I957T-r VVDHSVRTN! | 84   | 14    |
| >KIT-K509I-w FKGNNKEQI   | 7332  | >KIT-K509I-r FIGNNKEQI  | 44   | 7288  |
| >KIT-K509I-w FKGNNKEQI   | 20123 | >KIT-K509I-r FIGNNKEQI  | 58   | 20065 |

|                          |       |                          |       |       |
|--------------------------|-------|--------------------------|-------|-------|
| >KIT-K509I-w KTSAYFNFAFI | 20670 | >KIT-K509I-r KTSAYFNFAFI | 177   | 20493 |
| >KIT-K509I-w KTSAYFNFAFI | 5801  | >KIT-K509I-r KTSAYFNFAFI | 13    | 5788  |
| >KIT-K509I-w KTSAYFNFAFI | 17192 | >KIT-K509I-r KTSAYFNFAFI | 74    | 17118 |
| >KIT-K509I-w KTSAYFNFAFI | 6255  | >KIT-K509I-r KTSAYFNFAFI | 11    | 6244  |
| >KIT-K509I-w KTSAYFNFAFI | 29    | >KIT-K509I-r KTSAYFNFAFI | 7214  | 7185  |
| >KIT-K509I-w KTSAYFNFAFI | 6     | >KIT-K509I-r KTSAYFNFAFI | 3579  | 3573  |
| >KIT-K509I-w KTSAYFNFAFI | 3     | >KIT-K509I-r KTSAYFNFAFI | 8     | 5     |
| >KIT-K509I-w KTSAYFNFAFI | 7     | >KIT-K509I-r KTSAYFNFAFI | 572   | 565   |
| >KIT-K509I-w KTSAYFNFAFI | 12618 | >KIT-K509I-r KTSAYFNFAFI | 264   | 12354 |
| >KIT-K509I-w KTSAYFNFAFI | 18    | >KIT-K509I-r KTSAYFNFAFI | 14496 | 14478 |
| >KIT-K509I-w KTSAYFNFAFI | 17407 | >KIT-K509I-r KTSAYFNFAFI | 30    | 17377 |
| >KIT-K509I-w KTSAYFNFAFI | 9180  | >KIT-K509I-r KTSAYFNFAFI | 48    | 9132  |
| >KIT-K509I-w KTSAYFNFAFI | 13308 | >KIT-K509I-r KTSAYFNFAFI | 49    | 13259 |
| >KIT-K509I-w KTSAYFNFAFI | 433   | >KIT-K509I-r KTSAYFNFAFI | 12    | 421   |
| >KIT-K509I-w KTSAYFNFAFI | 2897  | >KIT-K509I-r KTSAYFNFAFI | 133   | 2764  |
| >KIT-K509I-w KTSAYFNFAFI | 119   | >KIT-K509I-r KTSAYFNFAFI | 1221  | 1102  |
| >KIT-K509I-w KTSAYFNFAFI | 145   | >KIT-K509I-r KTSAYFNFAFI | 14711 | 14566 |
| >KIT-K509I-w KTSAYFNFAFI | 34016 | >KIT-K509I-r KTSAYFNFAFI | 22    | 33994 |
| >KIT-K509I-w AFIGNNKEQ   | 974   | >KIT-K509I-r AFIGNNKEQ   | 208   | 766   |
| >KIT-K509I-w FAFKGNKEC   | 318   | >KIT-K509I-r FAFKGNKEC   | 365   | 47    |
| >KIT-K509I-w FAFKGNKEC   | 409   | >KIT-K509I-r FAFKGNKEC   | 419   | 10    |
| >KIT-K509I-w FAFKGNKEC   | 344   | >KIT-K509I-r FAFKGNKEC   | 260   | 84    |
| >KIT-K509I-w FAFKGNK     | 251   | >KIT-K509I-r FAFKGNK     | 238   | 13    |
| >KIT-K509I-w FAFKGNK     | 20    | >KIT-K509I-r FAFKGNK     | 17    | 3     |
| >KIT-K509I-w FAFKGNKEC   | 95    | >KIT-K509I-r FAFKGNKEC   | 95    | 0     |
| >KIT-K509I-w FAFKGNKEC   | 395   | >KIT-K509I-r FAFKGNKEC   | 433   | 38    |
| >KIT-K509I-w FAFKGNKEC   | 1202  | >KIT-K509I-r FAFKGNKEC   | 287   | 915   |
| >KIT-K509I-w FAFKGNKEC   | 41    | >KIT-K509I-r FAFKGNKEC   | 47    | 6     |
| >KIT-K509I-w NFAFIGNKK   | 750   | >KIT-K509I-r NFAFIGNKK   | 77    | 673   |
| >KIT-K509I-w FNFAFIGNKK  | 993   | >KIT-K509I-r FNFAFIGNKK  | 210   | 783   |
| >KIT-K509I-w YFNFAFIGNN  | 829   | >KIT-K509I-r YFNFAFIGNN  | 479   | 350   |
| >KIT-K509I-w YFNFAFIGNN  | 827   | >KIT-K509I-r YFNFAFIGNN  | 454   | 373   |
| >KIT-K509I-w YFNFAFIGNN  | 666   | >KIT-K509I-r YFNFAFIGNN  | 186   | 480   |
| >KIT-K509I-w AYFNFAFK    | 976   | >KIT-K509I-r AYFNFAFK    | 51    | 925   |
| >KIT-K509I-w AYFNFAFK    | 28791 | >KIT-K509I-r AYFNFAFK    | 220   | 28571 |
| >KIT-K509I-w AYFNFAFK    | 16933 | >KIT-K509I-r AYFNFAFK    | 229   | 16704 |
| >KIT-K509I-w AYFNFAFK    | 17624 | >KIT-K509I-r AYFNFAFK    | 261   | 17363 |
| >KIT-K509I-w AYFNFAFK    | 286   | >KIT-K509I-r AYFNFAFK    | 20319 | 20033 |
| >KIT-K509I-w AYFNFAFK    | 21    | >KIT-K509I-r AYFNFAFK    | 16609 | 16588 |
| >KIT-K509I-w AYFNFAFK    | 1065  | >KIT-K509I-r AYFNFAFK    | 141   | 924   |
| >KIT-K509I-w AYFNFAFK    | 3076  | >KIT-K509I-r AYFNFAFK    | 129   | 2947  |
| >KIT-K509I-w AYFNFAFK    | 237   | >KIT-K509I-r AYFNFAFK    | 5     | 232   |
| >KIT-K509I-w AYFNFAFK    | 7     | >KIT-K509I-r AYFNFAFK    | 56    | 49    |



|                         |       |                         |       |       |
|-------------------------|-------|-------------------------|-------|-------|
| >KIT-K509I-w AYFNFAFK   | 20    | >KIT-K509I-r AYFNFAFI   | 2547  | 2527  |
| >KIT-K509I-w AYFNFAFK   | 10412 | >KIT-K509I-r AYFNFAFI   | 200   | 10212 |
| >KIT-K509I-w AYFNFAFK   | 345   | >KIT-K509I-r AYFNFAFI   | 8934  | 8589  |
| >KIT-K509I-w AYFNFAFK   | 75    | >KIT-K509I-r AYFNFAFI   | 24530 | 24455 |
| >KIT-K509I-w AYFNFAFK   | 81    | >KIT-K509I-r AYFNFAFI   | 824   | 743   |
| >KIT-K509I-w AYFNFAFK   | 58    | >KIT-K509I-r AYFNFAFI   | 8375  | 8317  |
| >KIT-K509I-w AYFNFAFK   | 3572  | >KIT-K509I-r AYFNFAFI   | 209   | 3363  |
| >KIT-K509I-w AYFNFAFK   | 763   | >KIT-K509I-r AYFNFAFI   | 169   | 594   |
| >KIT-K509I-w SAYFNFAFK  | 5448  | >KIT-K509I-r SAYFNFAFI  | 6     | 5442  |
| >KIT-K509I-w SAYFNFAFK  | 3175  | >KIT-K509I-r SAYFNFAFI  | 54    | 3121  |
| >KIT-K509I-w SAYFNFAFK  | 26201 | >KIT-K509I-r SAYFNFAFI  | 313   | 25888 |
| >KIT-K509I-w SAYFNFAFK  | 16034 | >KIT-K509I-r SAYFNFAFI  | 353   | 15681 |
| >KIT-K509I-w SAYFNFAFK  | 17207 | >KIT-K509I-r SAYFNFAFI  | 153   | 17054 |
| >KIT-K509I-w SAYFNFAFK  | 8665  | >KIT-K509I-r SAYFNFAFI  | 69    | 8596  |
| >KIT-K509I-w SAYFNFAFK  | 17225 | >KIT-K509I-r SAYFNFAFI  | 134   | 17091 |
| >KIT-K509I-w SAYFNFAFK  | 33    | >KIT-K509I-r SAYFNFAFI  | 13259 | 13226 |
| >KIT-K509I-w SAYFNFAFK  | 7     | >KIT-K509I-r SAYFNFAFI  | 6736  | 6729  |
| >KIT-K509I-w SAYFNFAFK  | 9     | >KIT-K509I-r SAYFNFAFI  | 151   | 142   |
| >KIT-K509I-w SAYFNFAFK  | 23    | >KIT-K509I-r SAYFNFAFI  | 5263  | 5240  |
| >KIT-K509I-w SAYFNFAFK  | 3     | >KIT-K509I-r SAYFNFAFI  | 1667  | 1664  |
| >KIT-K509I-w SAYFNFAFK  | 8471  | >KIT-K509I-r SAYFNFAFI  | 14    | 8457  |
| >KIT-K509I-w SAYFNFAFK  | 8131  | >KIT-K509I-r SAYFNFAFI  | 42    | 8089  |
| >KIT-K509I-w SAYFNFAFK  | 13690 | >KIT-K509I-r SAYFNFAFI  | 411   | 13279 |
| >KIT-K509I-w SAYFNFAFK  | 7510  | >KIT-K509I-r SAYFNFAFI  | 217   | 7293  |
| >KIT-K509I-w SAYFNFAFK  | 89    | >KIT-K509I-r SAYFNFAFI  | 1026  | 937   |
| >KIT-K509I-w SAYFNFAFK  | 32687 | >KIT-K509I-r SAYFNFAFI  | 18    | 32669 |
| >KIT-K509I-w TSAYFNFAFK | 1029  | >KIT-K509I-r TSAYFNFAFI | 317   | 712   |
| >KIT-K509I-w TSAYFNFAFK | 30157 | >KIT-K509I-r TSAYFNFAFI | 313   | 29844 |
| >KIT-K509I-w TSAYFNFAFK | 15    | >KIT-K509I-r TSAYFNFAFI | 7616  | 7601  |
| >KIT-K509I-w TSAYFNFAFK | 10    | >KIT-K509I-r TSAYFNFAFI | 22711 | 22701 |
| >KIT-K509I-w TSAYFNFAFK | 69    | >KIT-K509I-r TSAYFNFAFI | 2057  | 1988  |
| >KIT-K509I-w TSAYFNFAFK | 92    | >KIT-K509I-r TSAYFNFAFI | 5259  | 5167  |
| >KIT-K509I-w TSAYFNFAFK | 3     | >KIT-K509I-r TSAYFNFAFI | 3583  | 3580  |
| >KIT-K509I-w TSAYFNFAFK | 6423  | >KIT-K509I-r TSAYFNFAFI | 11    | 6412  |
| >KIT-K509I-w TSAYFNFAFK | 8677  | >KIT-K509I-r TSAYFNFAFI | 94    | 8583  |
| >KIT-K509I-w TSAYFNFAFK | 2127  | >KIT-K509I-r TSAYFNFAFI | 21    | 2106  |
| >KIT-K509I-w TSAYFNFAFK | 4513  | >KIT-K509I-r TSAYFNFAFI | 181   | 4332  |
| >KIT-K509I-w TSAYFNFAFK | 122   | >KIT-K509I-r TSAYFNFAFI | 1291  | 1169  |
| >KIT-K509I-w TSAYFNFAFK | 28744 | >KIT-K509I-r TSAYFNFAFI | 50    | 28694 |
| >KIT-K550I-w KPMYEVQWV  | 157   | >KIT-K550I-r IPMYEVQWK  | 903   | 746   |
| >KIT-K550I-w KPMYEVQWV  | 136   | >KIT-K550I-r IPMYEVQWK  | 246   | 110   |
| >KIT-K550I-w KPMYEVQWV  | 1774  | >KIT-K550I-r IPMYEVQWK  | 186   | 1588  |
| >KIT-K550I-w KPMYEVQWV  | 20    | >KIT-K550I-r IPMYEVQW   | 9     | 11    |

|                         |       |                         |       |       |
|-------------------------|-------|-------------------------|-------|-------|
| >KIT-K550I-w KPMYEVQWI  | 68    | >KIT-K550I-r IPMYEVQWK  | 26    | 42    |
| >KIT-K550I-w KPMYEVQWI  | 2437  | >KIT-K550I-r IPMYEVQWK  | 221   | 2216  |
| >KIT-K550I-w KPMYEVQW   | 199   | >KIT-K550I-r IPMYEVQW   | 1260  | 1061  |
| >KIT-K550I-w KPMYEVQW   | 9     | >KIT-K550I-r IPMYEVQW   | 4     | 5     |
| >KIT-K550I-w QKPMYEVQV  | 7919  | >KIT-K550I-r QIPMYEVQW  | 234   | 7685  |
| >KIT-K550I-w QKPMYEVQV  | 6217  | >KIT-K550I-r QIPMYEVQW  | 67    | 6150  |
| >KIT-K550I-w QKPMYEVQV  | 10452 | >KIT-K550I-r QIPMYEVQW  | 241   | 10211 |
| >KIT-K550I-w QKPMYEVQV  | 9151  | >KIT-K550I-r QIPMYEVQW  | 15    | 9136  |
| >KIT-K550I-w QKPMYEVQV  | 10571 | >KIT-K550I-r QIPMYEVQW  | 66    | 10505 |
| >KIT-K550I-w QKPMYEVQV  | 9791  | >KIT-K550I-r QIPMYEVQW  | 71    | 9720  |
| >KIT-K550I-w QKPMYEVQV  | 6829  | >KIT-K550I-r QIPMYEVQW  | 144   | 6685  |
| >KIT-K550I-w VMILTYKYLQ | 4034  | >KIT-K550I-r VMILTYKYLQ | 62    | 3972  |
| >KIT-K550I-w VMILTYKYLQ | 21948 | >KIT-K550I-r VMILTYKYLQ | 461   | 21487 |
| >KIT-K550I-w VMILTYKYLQ | 13850 | >KIT-K550I-r VMILTYKYLQ | 59    | 13791 |
| >KIT-K550I-w VMILTYKYLQ | 11036 | >KIT-K550I-r VMILTYKYLQ | 33    | 11003 |
| >KIT-K550I-w VMILTYKYLQ | 21829 | >KIT-K550I-r VMILTYKYLQ | 229   | 21600 |
| >KIT-K550I-w VMILTYKYLQ | 17807 | >KIT-K550I-r VMILTYKYLQ | 212   | 17595 |
| >KIT-K550I-w VMILTYKYLQ | 10872 | >KIT-K550I-r VMILTYKYLQ | 84    | 10788 |
| >KIT-K550I-w VMILTYKYLQ | 110   | >KIT-K550I-r VMILTYKYLQ | 18789 | 18679 |
| >KIT-K550I-w VMILTYKYLQ | 24    | >KIT-K550I-r VMILTYKYLQ | 18278 | 18254 |
| >KIT-K550I-w VMILTYKYLQ | 3110  | >KIT-K550I-r VMILTYKYLQ | 380   | 2730  |
| >KIT-K550I-w VMILTYKYLQ | 1865  | >KIT-K550I-r VMILTYKYLQ | 335   | 1530  |
| >KIT-K550I-w LQKPMYEV   | 976   | >KIT-K550I-r LQIPMYEV   | 28    | 948   |
| >KIT-K550I-w LQKPMYEV   | 327   | >KIT-K550I-r LQIPMYEV   | 24    | 303   |
| >KIT-K550I-w LQKPMYEV   | 48    | >KIT-K550I-r LQIPMYEV   | 27    | 21    |
| >KIT-K550I-w LQKPMYEV   | 34    | >KIT-K550I-r LQIPMYEV   | 4     | 30    |
| >KIT-K550I-w LQKPMYEV   | 1276  | >KIT-K550I-r LQIPMYEV   | 60    | 1216  |
| >KIT-K550I-w LQKPMYEV   | 2105  | >KIT-K550I-r LQIPMYEV   | 55    | 2050  |
| >KIT-K550I-w LQKPMYEV   | 7259  | >KIT-K550I-r LQIPMYEV   | 379   | 6880  |
| >KIT-K550I-w LQKPMYEV   | 318   | >KIT-K550I-r LQIPMYEV   | 68    | 250   |
| >KIT-K550I-w LQKPMYEVQ  | 243   | >KIT-K550I-r LQIPMYEVQ\ | 6865  | 6622  |
| >KIT-K550I-w LQKPMYEVQ  | 415   | >KIT-K550I-r LQIPMYEVQ\ | 1805  | 1390  |
| >KIT-K550I-w LQKPMYEV   | 403   | >KIT-K550I-r LQIPMYEV   | 393   | 10    |
| >KIT-K550I-w LQKPMYEVQ  | 230   | >KIT-K550I-r LQIPMYEVQ  | 226   | 4     |
| >KIT-K550I-w LQKPMYEVQ  | 247   | >KIT-K550I-r LQIPMYEVQ\ | 246   | 1     |
| >KIT-K550I-w LQKPMYEV   | 155   | >KIT-K550I-r LQIPMYEV   | 96    | 59    |
| >KIT-K550I-w LQKPMYEVQ  | 225   | >KIT-K550I-r LQIPMYEVQ\ | 166   | 59    |
| >KIT-K550I-w LQKPMYEVQ  | 692   | >KIT-K550I-r LQIPMYEVQ\ | 195   | 497   |
| >KIT-K550I-w LQKPMYEVQ  | 1285  | >KIT-K550I-r LQIPMYEVQ\ | 42    | 1243  |
| >KIT-K550I-w LQKPMYEV   | 1298  | >KIT-K550I-r LQIPMYEV   | 259   | 1039  |
| >KIT-K550I-w LQKPMYEVQ  | 168   | >KIT-K550I-r LQIPMYEVQ\ | 24    | 144   |
| >KIT-K550I-w LQKPMYEVQ  | 230   | >KIT-K550I-r LQIPMYEVQ\ | 234   | 4     |
| >KIT-K550I-w YLQKPMYEV  | 7     | >KIT-K550I-r YLQIPMYEV  | 8     | 1     |

|                          |      |                         |     |     |
|--------------------------|------|-------------------------|-----|-----|
| >KIT-K550I-w YLQKPMYEV   | 5    | >KIT-K550I-r YLQIPMYEV  | 5   | 0   |
| >KIT-K550I-w YLQKPMYEV   | 7    | >KIT-K550I-r YLQIPMYEV  | 9   | 2   |
| >KIT-K550I-w YLQKPMYEV   | 13   | >KIT-K550I-r YLQIPMYEV  | 27  | 14  |
| >KIT-K550I-w YLQKPMYEV   | 1    | >KIT-K550I-r YLQIPMYEV  | 1   | 0   |
| >KIT-K550I-w YLQKPMYEV   | 2    | >KIT-K550I-r YLQIPMYEV  | 3   | 1   |
| >KIT-K550I-w YLQKPMYEV   | 6    | >KIT-K550I-r YLQIPMYEV  | 6   | 0   |
| >KIT-K550I-w YLQKPMYEV   | 3    | >KIT-K550I-r YLQIPMYEV  | 5   | 2   |
| >KIT-K550I-w YLQKPMYEV   | 2    | >KIT-K550I-r YLQIPMYEV  | 2   | 0   |
| >KIT-K550I-w YLQKPMYEV(  | 77   | >KIT-K550I-r YLQIPMYEVC | 61  | 16  |
| >KIT-K550I-w YLQKPMYEV   | 93   | >KIT-K550I-r YLQIPMYEV  | 98  | 5   |
| >KIT-K550I-w YLQKPMYEV   | 55   | >KIT-K550I-r YLQIPMYEV  | 68  | 13  |
| >KIT-K550I-w YLQKPMYEV(  | 124  | >KIT-K550I-r YLQIPMYEVC | 65  | 59  |
| >KIT-K550I-w KYLQKPMYEV  | 100  | >KIT-K550I-r KYLQIPMYEV | 54  | 46  |
| >KIT-K550I-w KYLQKPMYEV  | 307  | >KIT-K550I-r KYLQIPMYEV | 135 | 172 |
| >KIT-K550I-w KYLQKPMY    | 159  | >KIT-K550I-r KYLQIPMY   | 42  | 117 |
| >KIT-K550I-w KYLQKPMYEV  | 582  | >KIT-K550I-r KYLQIPMYE  | 249 | 333 |
| >KIT-K550I-w KYLQKPMYEV  | 28   | >KIT-K550I-r KYLQIPMYEV | 19  | 9   |
| >KIT-K550I-w KYLQKPMYEV  | 360  | >KIT-K550I-r KYLQIPMYEV | 220 | 140 |
| >KIT-K550I-w KYLQKPMY    | 89   | >KIT-K550I-r KYLQIPMY   | 35  | 54  |
| >KIT-K550I-w KYLQKPMYEV  | 471  | >KIT-K550I-r KYLQIPMYEV | 527 | 56  |
| >KIT-K550I-w KYLQKPMY    | 93   | >KIT-K550I-r KYLQIPMY   | 48  | 45  |
| >KIT-K550I-w KYLQKPMYEV  | 1099 | >KIT-K550I-r KYLQIPMYEV | 454 | 645 |
| >KIT-K550I-w KYLQKPMY    | 160  | >KIT-K550I-r KYLQIPMY   | 45  | 115 |
| >KIT-K550I-w KYLQKPMYEV  | 82   | >KIT-K550I-r KYLQIPMYE  | 44  | 38  |
| >KIT-K550I-w KYLQKPMYEV  | 121  | >KIT-K550I-r KYLQIPMYEV | 79  | 42  |
| >KIT-K550I-w KYLQKPMYEV  | 652  | >KIT-K550I-r KYLQIPMYEV | 304 | 348 |
| >KIT-K550I-w KYLQKPMYEV  | 331  | >KIT-K550I-r KYLQIPMYE  | 135 | 196 |
| >KIT-K550I-w KYLQKPMYEV  | 56   | >KIT-K550I-r KYLQIPMYEV | 67  | 11  |
| >KIT-K550I-w KYLQKPMYEV  | 391  | >KIT-K550I-r KYLQIPMYEV | 221 | 170 |
| >KIT-K550I-w YKYLQKPMYEV | 499  | >KIT-K550I-r YKYLQIPMYE | 630 | 131 |
| >KIT-K550I-w YKYLQKPMYEV | 447  | >KIT-K550I-r YKYLQIPMYE | 83  | 364 |
| >KIT-K550I-w YKYLQKPMYEV | 121  | >KIT-K550I-r YKYLQIPMYE | 36  | 85  |
| >KIT-K550I-w YKYLQKPMYEV | 356  | >KIT-K550I-r YKYLQIPMYE | 132 | 224 |
| >KIT-K550I-w YKYLQKPMYEV | 365  | >KIT-K550I-r YKYLQIPMYE | 135 | 230 |
| >KIT-K550I-w YKYLQKPMY   | 153  | >KIT-K550I-r YKYLQIPMY  | 71  | 82  |
| >KIT-K550I-w YKYLQKPM    | 8    | >KIT-K550I-r YKYLQIPM   | 6   | 2   |
| >KIT-K550I-w YKYLQKPMY   | 9    | >KIT-K550I-r YKYLQIPMY  | 6   | 3   |
| >KIT-K550I-w YKYLQKPMYEV | 39   | >KIT-K550I-r YKYLQIPMYE | 28  | 11  |
| >KIT-K550I-w YKYLQKPM    | 1148 | >KIT-K550I-r YKYLQIPM   | 493 | 655 |
| >KIT-K550I-w YKYLQKPM    | 633  | >KIT-K550I-r YKYLQIPM   | 113 | 520 |
| >KIT-K550I-w TYKYLQKPM   | 498  | >KIT-K550I-r TYKYLQIPM  | 802 | 304 |
| >KIT-K550I-w TYKYLQKPM\  | 100  | >KIT-K550I-r TYKYLQIPMY | 123 | 23  |
| >KIT-K550I-w TYKYLQKPM   | 711  | >KIT-K550I-r TYKYLQIPM  | 89  | 622 |

|                          |       |                          |       |       |
|--------------------------|-------|--------------------------|-------|-------|
| >KIT-K550I-w TYKYLQKPM\  | 348   | >KIT-K550I-r TYKYLQIPMY  | 80    | 268   |
| >KIT-K550I-w LTYKYLQK    | 1428  | >KIT-K550I-r LTYKYLQI    | 19    | 1409  |
| >KIT-K550I-w LTYKYLQKPM  | 695   | >KIT-K550I-r LTYKYLQIPM' | 393   | 302   |
| >KIT-K550I-w LTYKYLQK    | 20159 | >KIT-K550I-r LTYKYLQI    | 467   | 19692 |
| >KIT-K550I-w LTYKYLQK    | 18147 | >KIT-K550I-r LTYKYLQI    | 172   | 17975 |
| >KIT-K550I-w LTYKYLQK    | 19197 | >KIT-K550I-r LTYKYLQI    | 344   | 18853 |
| >KIT-K550I-w LTYKYLQK    | 14702 | >KIT-K550I-r LTYKYLQI    | 93    | 14609 |
| >KIT-K550I-w LTYKYLQK    | 38    | >KIT-K550I-r LTYKYLQI    | 13539 | 13501 |
| >KIT-K550I-w LTYKYLQKPM  | 422   | >KIT-K550I-r LTYKYLQIPM' | 300   | 122   |
| >KIT-K550I-w LTYKYLQK    | 15    | >KIT-K550I-r LTYKYLQI    | 14756 | 14741 |
| >KIT-K550I-w LTYKYLQKPM  | 765   | >KIT-K550I-r LTYKYLQIPM' | 450   | 315   |
| >KIT-K550I-w LTYKYLQKPM  | 559   | >KIT-K550I-r LTYKYLQIPM' | 165   | 394   |
| >KIT-K550I-w LTYKYLQKPM  | 117   | >KIT-K550I-r LTYKYLQIPM  | 77    | 40    |
| >KIT-K550I-w LTYKYLQKPM  | 73    | >KIT-K550I-r LTYKYLQIPM' | 15    | 58    |
| >KIT-K550I-w LTYKYLQKPM  | 1329  | >KIT-K550I-r LTYKYLQIPM  | 453   | 876   |
| >KIT-K550I-w LTYKYLQKPM  | 29    | >KIT-K550I-r LTYKYLQIPM' | 27    | 2     |
| >KIT-K550I-w LTYKYLQK    | 36    | >KIT-K550I-r LTYKYLQI    | 1094  | 1058  |
| >KIT-K550I-w LTYKYLQKPM  | 74    | >KIT-K550I-r LTYKYLQIPM' | 66    | 8     |
| >KIT-K550I-w LTYKYLQK    | 200   | >KIT-K550I-r LTYKYLQI    | 9840  | 9640  |
| >KIT-K550I-w LTYKYLQK    | 39    | >KIT-K550I-r LTYKYLQI    | 15391 | 15352 |
| >KIT-K550I-w LTYKYLQKPM  | 612   | >KIT-K550I-r LTYKYLQIPM' | 434   | 178   |
| >KIT-K550I-w LTYKYLQK    | 12561 | >KIT-K550I-r LTYKYLQI    | 148   | 12413 |
| >KIT-K550I-w LTYKYLQKPM  | 522   | >KIT-K550I-r LTYKYLQIPM  | 149   | 373   |
| >KIT-K550I-w LTYKYLQKPM  | 607   | >KIT-K550I-r LTYKYLQIPM' | 287   | 320   |
| >KIT-K550I-w LTYKYLQKPM  | 198   | >KIT-K550I-r LTYKYLQIPM  | 119   | 79    |
| >KIT-K550I-w LTYKYLQKPM  | 149   | >KIT-K550I-r LTYKYLQIPM' | 84    | 65    |
| >KIT-K550I-w LTYKYLQKPM  | 59    | >KIT-K550I-r LTYKYLQIPM  | 54    | 5     |
| >KIT-K550I-w LTYKYLQKPM  | 95    | >KIT-K550I-r LTYKYLQIPM' | 54    | 41    |
| >KIT-K550I-w LTYKYLQK    | 2993  | >KIT-K550I-r LTYKYLQI    | 14    | 2979  |
| >KIT-K550I-w LTYKYLQKPM  | 6     | >KIT-K550I-r LTYKYLQIPM  | 7     | 1     |
| >KIT-K550I-w LTYKYLQKPM  | 4     | >KIT-K550I-r LTYKYLQIPM' | 4     | 0     |
| >KIT-K550I-w LTYKYLQK    | 16710 | >KIT-K550I-r LTYKYLQI    | 115   | 16595 |
| >KIT-K550I-w LTYKYLQKPM  | 867   | >KIT-K550I-r LTYKYLQIPM  | 218   | 649   |
| >KIT-K550I-w LTYKYLQKPM  | 576   | >KIT-K550I-r LTYKYLQIPM' | 260   | 316   |
| >KIT-K550I-w LTYKYLQKPM  | 488   | >KIT-K550I-r LTYKYLQIPM  | 206   | 282   |
| >KIT-K550I-w LTYKYLQKPM  | 37    | >KIT-K550I-r LTYKYLQIPM  | 24    | 13    |
| >KIT-K550I-w LTYKYLQKPM  | 6     | >KIT-K550I-r LTYKYLQIPM' | 7     | 1     |
| >KIT-K550I-w LTYKYLQK    | 247   | >KIT-K550I-r LTYKYLQI    | 3120  | 2873  |
| >KIT-K550I-w LTYKYLQK    | 26609 | >KIT-K550I-r LTYKYLQI    | 9     | 26600 |
| >KIT-K550I-w ILTYKYLQKPM | 554   | >KIT-K550I-r ILTYKYLQIPM | 371   | 183   |
| >KIT-K550I-w ILTYKYLQK   | 21627 | >KIT-K550I-r ILTYKYLQI   | 263   | 21364 |
| >KIT-K550I-w ILTYKYLQK   | 15773 | >KIT-K550I-r ILTYKYLQI   | 102   | 15671 |
| >KIT-K550I-w ILTYKYLQK   | 20066 | >KIT-K550I-r ILTYKYLQI   | 377   | 19689 |

|                         |       |                         |       |       |
|-------------------------|-------|-------------------------|-------|-------|
| >KIT-K550I-w ILTYKYLQK  | 9554  | >KIT-K550I-r ILTYKYLQI  | 46    | 9508  |
| >KIT-K550I-w ILTYKYLQK  | 60    | >KIT-K550I-r ILTYKYLQI  | 18197 | 18137 |
| >KIT-K550I-w ILTYKYLQK  | 94    | >KIT-K550I-r ILTYKYLQI  | 24771 | 24677 |
| >KIT-K550I-w MILTYKYLQK | 11637 | >KIT-K550I-r MILTYKYLQI | 371   | 11266 |
| >KIT-K550I-w MILTYKYLQK | 15231 | >KIT-K550I-r MILTYKYLQI | 450   | 14781 |
| >KIT-K550I-w MILTYKYLQK | 12114 | >KIT-K550I-r MILTYKYLQI | 302   | 11812 |
| >KIT-K550I-w MILTYKYLQK | 11187 | >KIT-K550I-r MILTYKYLQI | 136   | 11051 |
| >KIT-K550I-w MILTYKYLQK | 13166 | >KIT-K550I-r MILTYKYLQI | 51    | 13115 |
| >KIT-K550I-w MILTYKYLQK | 16180 | >KIT-K550I-r MILTYKYLQI | 252   | 15928 |
| >KIT-K550I-w MILTYKYLQK | 18    | >KIT-K550I-r MILTYKYLQI | 4136  | 4118  |
| >KIT-K550I-w MILTYKYLQK | 18    | >KIT-K550I-r MILTYKYLQI | 22328 | 22310 |
| >KIT-K550I-w MILTYKYLQK | 32    | >KIT-K550I-r MILTYKYLQI | 643   | 611   |
| >KIT-K550I-w MILTYKYLQK | 209   | >KIT-K550I-r MILTYKYLQI | 6927  | 6718  |
| >KIT-K550I-w MILTYKYLQK | 161   | >KIT-K550I-r MILTYKYLQI | 26674 | 26513 |
| >KIT-K550I-w MILTYKYLQK | 12974 | >KIT-K550I-r MILTYKYLQI | 96    | 12878 |
| >KIT-K550I-w MILTYKYLQK | 260   | >KIT-K550I-r MILTYKYLQI | 20270 | 20010 |
| >KIT-K550N-1 KPMYEVQWI  | 2133  | >KIT-K550N-1 NPMYEVQWI  | 167   | 1966  |
| >KIT-K550N-1 KPMYEVQWI  | 157   | >KIT-K550N-1 NPMYEVQWI  | 665   | 508   |
| >KIT-K550N-1 KPMYEVQWI  | 136   | >KIT-K550N-1 NPMYEVQWI  | 571   | 435   |
| >KIT-K550N-1 KPMYEVQW   | 20    | >KIT-K550N-1 NPMYEVQW   | 11    | 9     |
| >KIT-K550N-1 KPMYEVQWI  | 68    | >KIT-K550N-1 NPMYEVQWI  | 44    | 24    |
| >KIT-K550N-1 KPMYEVQW   | 199   | >KIT-K550N-1 NPMYEVQW   | 12142 | 11943 |
| >KIT-K550N-1 KPMYEVQW   | 9     | >KIT-K550N-1 NPMYEVQW   | 7     | 2     |
| >KIT-K550N-1 VMILTYKYLQ | 110   | >KIT-K550N-1 VMILTYKYLQ | 18088 | 17978 |
| >KIT-K550N-1 VMILTYKYLQ | 24    | >KIT-K550N-1 VMILTYKYLQ | 18042 | 18018 |
| >KIT-K550N-1 LQKPMYEV   | 976   | >KIT-K550N-1 LQNPMYEV   | 90    | 886   |
| >KIT-K550N-1 LQKPMYEV   | 327   | >KIT-K550N-1 LQNPMYEV   | 30    | 297   |
| >KIT-K550N-1 LQKPMYEV   | 48    | >KIT-K550N-1 LQNPMYEV   | 25    | 23    |
| >KIT-K550N-1 LQKPMYEV   | 34    | >KIT-K550N-1 LQNPMYEV   | 10    | 24    |
| >KIT-K550N-1 LQKPMYEV   | 1276  | >KIT-K550N-1 LQNPMYEV   | 60    | 1216  |
| >KIT-K550N-1 LQKPMYEV   | 2105  | >KIT-K550N-1 LQNPMYEV   | 217   | 1888  |
| >KIT-K550N-1 LQKPMYEV   | 7259  | >KIT-K550N-1 LQNPMYEV   | 274   | 6985  |
| >KIT-K550N-1 LQKPMYEV   | 318   | >KIT-K550N-1 LQNPMYEV   | 71    | 247   |
| >KIT-K550N-1 LQKPMYEVQ  | 243   | >KIT-K550N-1 LQNPMYEVQ  | 3544  | 3301  |
| >KIT-K550N-1 LQKPMYEVQ  | 415   | >KIT-K550N-1 LQNPMYEVQ  | 681   | 266   |
| >KIT-K550N-1 LQKPMYEV   | 403   | >KIT-K550N-1 LQNPMYEV   | 730   | 327   |
| >KIT-K550N-1 LQKPMYEVQ  | 230   | >KIT-K550N-1 LQNPMYEVQ  | 392   | 162   |
| >KIT-K550N-1 LQKPMYEVQ  | 247   | >KIT-K550N-1 LQNPMYEVQ  | 419   | 172   |
| >KIT-K550N-1 LQKPMYEV   | 155   | >KIT-K550N-1 LQNPMYEV   | 197   | 42    |
| >KIT-K550N-1 LQKPMYEVQ  | 225   | >KIT-K550N-1 LQNPMYEVQ  | 299   | 74    |
| >KIT-K550N-1 LQKPMYEVQ  | 1285  | >KIT-K550N-1 LQNPMYEVQ  | 54    | 1231  |
| >KIT-K550N-1 LQKPMYEVQ  | 168   | >KIT-K550N-1 LQNPMYEVQ  | 30    | 138   |
| >KIT-K550N-1 LQKPMYEVQ  | 230   | >KIT-K550N-1 LQNPMYEVQ  | 291   | 61    |

|                          |      |                          |      |      |
|--------------------------|------|--------------------------|------|------|
| >KIT-K550N-1 YLQKPMYEV   | 7    | >KIT-K550N-1 YLQNPMYEV   | 7    | 0    |
| >KIT-K550N-1 YLQKPMYEV   | 5    | >KIT-K550N-1 YLQNPMYEV   | 5    | 0    |
| >KIT-K550N-1 YLQKPMYEV   | 7    | >KIT-K550N-1 YLQNPMYEV   | 5    | 2    |
| >KIT-K550N-1 YLQKPMYEV   | 13   | >KIT-K550N-1 YLQNPMYEV   | 8    | 5    |
| >KIT-K550N-1 YLQKPMYEV   | 1    | >KIT-K550N-1 YLQNPMYEV   | 1    | 0    |
| >KIT-K550N-1 YLQKPMYEV(  | 999  | >KIT-K550N-1 YLQNPMYEV(  | 385  | 614  |
| >KIT-K550N-1 YLQKPMYEV   | 2    | >KIT-K550N-1 YLQNPMYEV   | 2    | 0    |
| >KIT-K550N-1 YLQKPMYEV   | 6    | >KIT-K550N-1 YLQNPMYEV   | 5    | 1    |
| >KIT-K550N-1 YLQKPMYEV   | 3    | >KIT-K550N-1 YLQNPMYEV   | 3    | 0    |
| >KIT-K550N-1 YLQKPMYEV   | 2    | >KIT-K550N-1 YLQNPMYEV   | 1    | 1    |
| >KIT-K550N-1 YLQKPMYEV(  | 77   | >KIT-K550N-1 YLQNPMYEV(  | 36   | 41   |
| >KIT-K550N-1 YLQKPMYEV   | 93   | >KIT-K550N-1 YLQNPMYEV   | 55   | 38   |
| >KIT-K550N-1 YLQKPMYEV   | 55   | >KIT-K550N-1 YLQNPMYEV   | 48   | 7    |
| >KIT-K550N-1 YLQKPMYEV(  | 124  | >KIT-K550N-1 YLQNPMYEV(  | 126  | 2    |
| >KIT-K550N-1 KYLQKPMYEV  | 100  | >KIT-K550N-1 KYLQNPMYEV  | 41   | 59   |
| >KIT-K550N-1 KYLQKPMYEV  | 1424 | >KIT-K550N-1 KYLQNPMYEV  | 330  | 1094 |
| >KIT-K550N-1 KYLQKPMYEV  | 307  | >KIT-K550N-1 KYLQNPMYEV  | 196  | 111  |
| >KIT-K550N-1 KYLQKPMY    | 159  | >KIT-K550N-1 KYLQNPMY    | 65   | 94   |
| >KIT-K550N-1 KYLQKPMYEV  | 582  | >KIT-K550N-1 KYLQNPMYEV  | 240  | 342  |
| >KIT-K550N-1 KYLQKPMYEV  | 28   | >KIT-K550N-1 KYLQNPMYEV  | 17   | 11   |
| >KIT-K550N-1 KYLQKPMYEV  | 360  | >KIT-K550N-1 KYLQNPMYEV  | 206  | 154  |
| >KIT-K550N-1 KYLQKPMY    | 89   | >KIT-K550N-1 KYLQNPMY    | 45   | 44   |
| >KIT-K550N-1 KYLQKPMY    | 846  | >KIT-K550N-1 KYLQNPMY    | 456  | 390  |
| >KIT-K550N-1 KYLQKPMYEV  | 471  | >KIT-K550N-1 KYLQNPMYEV  | 381  | 90   |
| >KIT-K550N-1 KYLQKPMY    | 93   | >KIT-K550N-1 KYLQNPMY    | 54   | 39   |
| >KIT-K550N-1 KYLQKPMY    | 160  | >KIT-K550N-1 KYLQNPMY    | 137  | 23   |
| >KIT-K550N-1 KYLQKPMYEV  | 82   | >KIT-K550N-1 KYLQNPMYEV  | 61   | 21   |
| >KIT-K550N-1 KYLQKPMYEV  | 121  | >KIT-K550N-1 KYLQNPMYEV  | 99   | 22   |
| >KIT-K550N-1 KYLQKPMYEV  | 652  | >KIT-K550N-1 KYLQNPMYEV  | 255  | 397  |
| >KIT-K550N-1 KYLQKPMYEV  | 331  | >KIT-K550N-1 KYLQNPMYEV  | 216  | 115  |
| >KIT-K550N-1 KYLQKPMYEV  | 56   | >KIT-K550N-1 KYLQNPMYEV  | 37   | 19   |
| >KIT-K550N-1 KYLQKPMYEV  | 391  | >KIT-K550N-1 KYLQNPMYEV  | 303  | 88   |
| >KIT-K550N-1 YKYLQKPMYEV | 499  | >KIT-K550N-1 YKYLQNPMYEV | 1065 | 566  |
| >KIT-K550N-1 YKYLQKPMYEV | 447  | >KIT-K550N-1 YKYLQNPMYEV | 195  | 252  |
| >KIT-K550N-1 YKYLQKPMYEV | 121  | >KIT-K550N-1 YKYLQNPMYEV | 90   | 31   |
| >KIT-K550N-1 YKYLQKPMYEV | 356  | >KIT-K550N-1 YKYLQNPMYEV | 257  | 99   |
| >KIT-K550N-1 YKYLQKPMYEV | 365  | >KIT-K550N-1 YKYLQNPMYEV | 314  | 51   |
| >KIT-K550N-1 YKYLQKPMY   | 153  | >KIT-K550N-1 YKYLQNPMY   | 72   | 81   |
| >KIT-K550N-1 YKYLQKPM    | 8    | >KIT-K550N-1 YKYLQNPM    | 7    | 1    |
| >KIT-K550N-1 YKYLQKPMY   | 9    | >KIT-K550N-1 YKYLQNPMY   | 7    | 2    |
| >KIT-K550N-1 YKYLQKPMYEV | 39   | >KIT-K550N-1 YKYLQNPMYEV | 26   | 13   |
| >KIT-K550N-1 YKYLQKPM    | 633  | >KIT-K550N-1 YKYLQNPM    | 125  | 508  |
| >KIT-K550N-1 YKYLQKPM    | 1249 | >KIT-K550N-1 YKYLQNPM    | 386  | 863  |

|                          |      |                         |       |       |
|--------------------------|------|-------------------------|-------|-------|
| >KIT-K550N-1 TYKYLQKPM   | 498  | >KIT-K550N-1 TYKYLQNP   | 42    | 456   |
| >KIT-K550N-1 TYKYLQKPM\  | 100  | >KIT-K550N-1 TYKYLQNP   | 83    | 17    |
| >KIT-K550N-1 TYKYLQKPM   | 711  | >KIT-K550N-1 TYKYLQNP   | 252   | 459   |
| >KIT-K550N-1 TYKYLQKPM\  | 348  | >KIT-K550N-1 TYKYLQNP   | 146   | 202   |
| >KIT-K550N-1 LTYKYLQKPM  | 695  | >KIT-K550N-1 LTYKYLQNP  | 259   | 436   |
| >KIT-K550N-1 LTYKYLQK    | 38   | >KIT-K550N-1 LTYKYLQN   | 13148 | 13110 |
| >KIT-K550N-1 LTYKYLQKPM  | 422  | >KIT-K550N-1 LTYKYLQNP  | 405   | 17    |
| >KIT-K550N-1 LTYKYLQK    | 15   | >KIT-K550N-1 LTYKYLQN   | 13389 | 13374 |
| >KIT-K550N-1 LTYKYLQKPM  | 559  | >KIT-K550N-1 LTYKYLQNP  | 394   | 165   |
| >KIT-K550N-1 LTYKYLQKPM  | 117  | >KIT-K550N-1 LTYKYLQNP  | 48    | 69    |
| >KIT-K550N-1 LTYKYLQKPM  | 73   | >KIT-K550N-1 LTYKYLQNP  | 39    | 34    |
| >KIT-K550N-1 LTYKYLQKPM  | 1329 | >KIT-K550N-1 LTYKYLQNP  | 188   | 1141  |
| >KIT-K550N-1 LTYKYLQKPM  | 29   | >KIT-K550N-1 LTYKYLQNP  | 23    | 6     |
| >KIT-K550N-1 LTYKYLQK    | 36   | >KIT-K550N-1 LTYKYLQN   | 10420 | 10384 |
| >KIT-K550N-1 LTYKYLQKPM  | 74   | >KIT-K550N-1 LTYKYLQNP  | 62    | 12    |
| >KIT-K550N-1 LTYKYLQK    | 200  | >KIT-K550N-1 LTYKYLQN   | 11357 | 11157 |
| >KIT-K550N-1 LTYKYLQK    | 39   | >KIT-K550N-1 LTYKYLQN   | 9685  | 9646  |
| >KIT-K550N-1 LTYKYLQKPM  | 612  | >KIT-K550N-1 LTYKYLQNP  | 408   | 204   |
| >KIT-K550N-1 LTYKYLQKPM  | 522  | >KIT-K550N-1 LTYKYLQNP  | 187   | 335   |
| >KIT-K550N-1 LTYKYLQKPM  | 607  | >KIT-K550N-1 LTYKYLQNP  | 295   | 312   |
| >KIT-K550N-1 LTYKYLQKPM  | 198  | >KIT-K550N-1 LTYKYLQNP  | 113   | 85    |
| >KIT-K550N-1 LTYKYLQKPM  | 149  | >KIT-K550N-1 LTYKYLQNP  | 86    | 63    |
| >KIT-K550N-1 LTYKYLQKPM  | 59   | >KIT-K550N-1 LTYKYLQNP  | 57    | 2     |
| >KIT-K550N-1 LTYKYLQKPM  | 95   | >KIT-K550N-1 LTYKYLQNP  | 47    | 48    |
| >KIT-K550N-1 LTYKYLQKPM  | 6    | >KIT-K550N-1 LTYKYLQNP  | 10    | 4     |
| >KIT-K550N-1 LTYKYLQKPM  | 4    | >KIT-K550N-1 LTYKYLQNP  | 4     | 0     |
| >KIT-K550N-1 LTYKYLQKPM  | 867  | >KIT-K550N-1 LTYKYLQNP  | 457   | 410   |
| >KIT-K550N-1 LTYKYLQKPM  | 576  | >KIT-K550N-1 LTYKYLQNP  | 408   | 168   |
| >KIT-K550N-1 LTYKYLQKPM  | 488  | >KIT-K550N-1 LTYKYLQNP  | 191   | 297   |
| >KIT-K550N-1 LTYKYLQKPM  | 37   | >KIT-K550N-1 LTYKYLQNP  | 32    | 5     |
| >KIT-K550N-1 LTYKYLQKPM  | 6    | >KIT-K550N-1 LTYKYLQNP  | 6     | 0     |
| >KIT-K550N-1 LTYKYLQK    | 247  | >KIT-K550N-1 LTYKYLQN   | 4703  | 4456  |
| >KIT-K550N-1 ILTYKYLQKPM | 554  | >KIT-K550N-1 ILTYKYLQNP | 273   | 281   |
| >KIT-K550N-1 ILTYKYLQKPM | 1356 | >KIT-K550N-1 ILTYKYLQNP | 219   | 1137  |
| >KIT-K550N-1 ILTYKYLQK   | 60   | >KIT-K550N-1 ILTYKYLQN  | 17360 | 17300 |
| >KIT-K550N-1 ILTYKYLQK   | 94   | >KIT-K550N-1 ILTYKYLQN  | 24776 | 24682 |
| >KIT-K550N-1 MILTYKYLQK  | 18   | >KIT-K550N-1 MILTYKYLQN | 6397  | 6379  |
| >KIT-K550N-1 MILTYKYLQK  | 18   | >KIT-K550N-1 MILTYKYLQN | 24961 | 24943 |
| >KIT-K550N-1 MILTYKYLQK  | 32   | >KIT-K550N-1 MILTYKYLQN | 8491  | 8459  |
| >KIT-K550N-1 MILTYKYLQK  | 209  | >KIT-K550N-1 MILTYKYLQN | 8721  | 8512  |
| >KIT-K550N-1 MILTYKYLQK  | 161  | >KIT-K550N-1 MILTYKYLQN | 28329 | 28168 |
| >KIT-K550N-1 MILTYKYLQK  | 260  | >KIT-K550N-1 MILTYKYLQN | 11544 | 11284 |
| >KIT-K550R-1 KPMYEVQW    | 1456 | >KIT-K550R-1 RPMYEVQW   | 375   | 1081  |

|                         |      |                         |      |      |
|-------------------------|------|-------------------------|------|------|
| >KIT-K550R-v KPMYEVQWf  | 157  | >KIT-K550R-r RPMYEVQWf  | 75   | 82   |
| >KIT-K550R-v KPMYEVQWf  | 136  | >KIT-K550R-r RPMYEVQWf  | 48   | 88   |
| >KIT-K550R-v KPMYEVQW   | 20   | >KIT-K550R-r RPMYEVQW   | 50   | 30   |
| >KIT-K550R-v KPMYEVQWf  | 68   | >KIT-K550R-r RPMYEVQWf  | 49   | 19   |
| >KIT-K550R-v KPMYEVQW   | 199  | >KIT-K550R-r RPMYEVQW   | 267  | 68   |
| >KIT-K550R-v KPMYEVQW   | 9    | >KIT-K550R-r RPMYEVQW   | 12   | 3    |
| >KIT-K550R-v VMILTYKYLQ | 110  | >KIT-K550R-r VMILTYKYLQ | 1693 | 1583 |
| >KIT-K550R-v VMILTYKYLQ | 24   | >KIT-K550R-r VMILTYKYLQ | 441  | 417  |
| >KIT-K550R-v VMILTYKYLQ | 832  | >KIT-K550R-r VMILTYKYLQ | 42   | 790  |
| >KIT-K550R-v VMILTYKYLQ | 7878 | >KIT-K550R-r VMILTYKYLQ | 379  | 7499 |
| >KIT-K550R-v VMILTYKYLQ | 3291 | >KIT-K550R-r VMILTYKYLQ | 163  | 3128 |
| >KIT-K550R-v LQKPMYEV   | 327  | >KIT-K550R-r LQRPMYEV   | 625  | 298  |
| >KIT-K550R-v LQKPMYEV   | 48   | >KIT-K550R-r LQRPMYEV   | 104  | 56   |
| >KIT-K550R-v LQKPMYEV   | 34   | >KIT-K550R-r LQRPMYEV   | 41   | 7    |
| >KIT-K550R-v LQKPMYEV   | 318  | >KIT-K550R-r LQRPMYEV   | 204  | 114  |
| >KIT-K550R-v LQKPMYEVQ  | 243  | >KIT-K550R-r LQRPMYEVQ  | 44   | 199  |
| >KIT-K550R-v LQKPMYEVQ  | 415  | >KIT-K550R-r LQRPMYEVQ  | 781  | 366  |
| >KIT-K550R-v LQKPMYEV   | 403  | >KIT-K550R-r LQRPMYEV   | 386  | 17   |
| >KIT-K550R-v LQKPMYEVQ  | 230  | >KIT-K550R-r LQRPMYEVQ  | 234  | 4    |
| >KIT-K550R-v LQKPMYEVQ  | 247  | >KIT-K550R-r LQRPMYEVQ  | 243  | 4    |
| >KIT-K550R-v LQKPMYEV   | 155  | >KIT-K550R-r LQRPMYEV   | 66   | 89   |
| >KIT-K550R-v LQKPMYEVQ  | 225  | >KIT-K550R-r LQRPMYEVQ  | 107  | 118  |
| >KIT-K550R-v LQKPMYEVQ  | 692  | >KIT-K550R-r LQRPMYEVQ  | 156  | 536  |
| >KIT-K550R-v LQKPMYEVQ  | 168  | >KIT-K550R-r LQRPMYEVQ  | 228  | 60   |
| >KIT-K550R-v LQKPMYEVQ  | 230  | >KIT-K550R-r LQRPMYEVQ  | 187  | 43   |
| >KIT-K550R-v YLQKPMYEV  | 7    | >KIT-K550R-r YLQRPMYEV  | 8    | 1    |
| >KIT-K550R-v YLQKPMYEV  | 5    | >KIT-K550R-r YLQRPMYEV  | 6    | 1    |
| >KIT-K550R-v YLQKPMYEV  | 7    | >KIT-K550R-r YLQRPMYEV  | 7    | 0    |
| >KIT-K550R-v YLQKPMYEV  | 13   | >KIT-K550R-r YLQRPMYEV  | 14   | 1    |
| >KIT-K550R-v YLQKPMYEV  | 1    | >KIT-K550R-r YLQRPMYEV  | 1    | 0    |
| >KIT-K550R-v YLQKPMYEV  | 2    | >KIT-K550R-r YLQRPMYEV  | 2    | 0    |
| >KIT-K550R-v YLQKPMYEV  | 6    | >KIT-K550R-r YLQRPMYEV  | 7    | 1    |
| >KIT-K550R-v YLQKPMYEV  | 3    | >KIT-K550R-r YLQRPMYEV  | 3    | 0    |
| >KIT-K550R-v YLQKPMYEV  | 2    | >KIT-K550R-r YLQRPMYEV  | 1    | 1    |
| >KIT-K550R-v YLQKPMYEV( | 77   | >KIT-K550R-r YLQRPMYEV( | 42   | 35   |
| >KIT-K550R-v YLQKPMYEV  | 93   | >KIT-K550R-r YLQRPMYEV  | 82   | 11   |
| >KIT-K550R-v YLQKPMYEV  | 55   | >KIT-K550R-r YLQRPMYEV  | 69   | 14   |
| >KIT-K550R-v YLQKPMYEV( | 124  | >KIT-K550R-r YLQRPMYEV( | 231  | 107  |
| >KIT-K550R-v YLQKPMYEV( | 721  | >KIT-K550R-r YLQRPMYEV( | 231  | 490  |
| >KIT-K550R-v KYLQKPMYEV | 100  | >KIT-K550R-r KYLQRPMYEV | 115  | 15   |
| >KIT-K550R-v KYLQKPMYEV | 307  | >KIT-K550R-r KYLQRPMYEV | 347  | 40   |
| >KIT-K550R-v KYLQKPMY   | 159  | >KIT-K550R-r KYLQRPMY   | 107  | 52   |
| >KIT-K550R-v KYLQKPMYEV | 28   | >KIT-K550R-r KYLQRPMYEV | 27   | 1    |



|                         |      |                         |      |      |
|-------------------------|------|-------------------------|------|------|
| >KIT-K550R-v KYLQKPMYE\ | 360  | >KIT-K550R-r KYLQRPMYE\ | 331  | 29   |
| >KIT-K550R-v KYLQKPMY   | 89   | >KIT-K550R-r KYLQRPMY   | 73   | 16   |
| >KIT-K550R-v KYLQKPMY   | 846  | >KIT-K550R-r KYLQRPMY   | 287  | 559  |
| >KIT-K550R-v KYLQKPMYE\ | 471  | >KIT-K550R-r KYLQRPMYE\ | 269  | 202  |
| >KIT-K550R-v KYLQKPMY   | 93   | >KIT-K550R-r KYLQRPMY   | 88   | 5    |
| >KIT-K550R-v KYLQKPMY   | 160  | >KIT-K550R-r KYLQRPMY   | 135  | 25   |
| >KIT-K550R-v KYLQKPMYE  | 82   | >KIT-K550R-r KYLQRPMYE  | 63   | 19   |
| >KIT-K550R-v KYLQKPMYE\ | 121  | >KIT-K550R-r KYLQRPMYE\ | 104  | 17   |
| >KIT-K550R-v KYLQKPMYE\ | 652  | >KIT-K550R-r KYLQRPMYE\ | 380  | 272  |
| >KIT-K550R-v KYLQKPMYE  | 331  | >KIT-K550R-r KYLQRPMYE  | 257  | 74   |
| >KIT-K550R-v KYLQKPMYE\ | 56   | >KIT-K550R-r KYLQRPMYE\ | 75   | 19   |
| >KIT-K550R-v KYLQKPMYE\ | 391  | >KIT-K550R-r KYLQRPMYE\ | 345  | 46   |
| >KIT-K550R-v YKYLQKPMYE | 499  | >KIT-K550R-r YKYLQRPMYE | 572  | 73   |
| >KIT-K550R-v YKYLQKPMYE | 447  | >KIT-K550R-r YKYLQRPMYE | 413  | 34   |
| >KIT-K550R-v YKYLQKPMYE | 121  | >KIT-K550R-r YKYLQRPMYE | 204  | 83   |
| >KIT-K550R-v YKYLQKPMYE | 356  | >KIT-K550R-r YKYLQRPMYE | 633  | 277  |
| >KIT-K550R-v YKYLQKPMYE | 365  | >KIT-K550R-r YKYLQRPMYE | 280  | 85   |
| >KIT-K550R-v YKYLQKPMY  | 153  | >KIT-K550R-r YKYLQRPMY  | 89   | 64   |
| >KIT-K550R-v YKYLQKPM   | 8    | >KIT-K550R-r YKYLQRPM   | 7    | 1    |
| >KIT-K550R-v YKYLQKPMY  | 9    | >KIT-K550R-r YKYLQRPMY  | 5    | 4    |
| >KIT-K550R-v YKYLQKPMYE | 39   | >KIT-K550R-r YKYLQRPMYE | 24   | 15   |
| >KIT-K550R-v YKYLQKPM   | 633  | >KIT-K550R-r YKYLQRPM   | 499  | 134  |
| >KIT-K550R-v YKYLQKPM   | 1249 | >KIT-K550R-r YKYLQRPM   | 331  | 918  |
| >KIT-K550R-v TYKYLQKPM  | 498  | >KIT-K550R-r TYKYLQRPM  | 189  | 309  |
| >KIT-K550R-v TYKYLQKPM\ | 100  | >KIT-K550R-r TYKYLQRPM\ | 99   | 1    |
| >KIT-K550R-v TYKYLQKPM  | 711  | >KIT-K550R-r TYKYLQRPM  | 371  | 340  |
| >KIT-K550R-v TYKYLQKPM\ | 1411 | >KIT-K550R-r TYKYLQRPM\ | 463  | 948  |
| >KIT-K550R-v TYKYLQKPM\ | 348  | >KIT-K550R-r TYKYLQRPM\ | 288  | 60   |
| >KIT-K550R-v LTYKYLQK   | 1428 | >KIT-K550R-r LTYKYLQR   | 462  | 966  |
| >KIT-K550R-v LTYKYLQKP  | 2226 | >KIT-K550R-r LTYKYLQRP  | 477  | 1749 |
| >KIT-K550R-v LTYKYLQKPM | 695  | >KIT-K550R-r LTYKYLQRPM | 390  | 305  |
| >KIT-K550R-v LTYKYLQK   | 38   | >KIT-K550R-r LTYKYLQR   | 217  | 179  |
| >KIT-K550R-v LTYKYLQKPM | 422  | >KIT-K550R-r LTYKYLQRPM | 299  | 123  |
| >KIT-K550R-v LTYKYLQK   | 15   | >KIT-K550R-r LTYKYLQR   | 108  | 93   |
| >KIT-K550R-v LTYKYLQKPM | 559  | >KIT-K550R-r LTYKYLQRPM | 395  | 164  |
| >KIT-K550R-v LTYKYLQKPM | 117  | >KIT-K550R-r LTYKYLQRPM | 94   | 23   |
| >KIT-K550R-v LTYKYLQKPM | 73   | >KIT-K550R-r LTYKYLQRPM | 46   | 27   |
| >KIT-K550R-v LTYKYLQKPM | 29   | >KIT-K550R-r LTYKYLQRPM | 23   | 6    |
| >KIT-K550R-v LTYKYLQK   | 36   | >KIT-K550R-r LTYKYLQR   | 3789 | 3753 |
| >KIT-K550R-v LTYKYLQKPM | 74   | >KIT-K550R-r LTYKYLQRPM | 53   | 21   |
| >KIT-K550R-v LTYKYLQK   | 200  | >KIT-K550R-r LTYKYLQR   | 16   | 184  |
| >KIT-K550R-v LTYKYLQK   | 3826 | >KIT-K550R-r LTYKYLQR   | 179  | 3647 |
| >KIT-K550R-v LTYKYLQK   | 39   | >KIT-K550R-r LTYKYLQR   | 18   | 21   |

|                          |       |                          |       |       |
|--------------------------|-------|--------------------------|-------|-------|
| >KIT-K550R-v LTYKYLQKPM  | 612   | >KIT-K550R-r LTYKYLQRPM  | 423   | 189   |
| >KIT-K550R-v LTYKYLQKPM  | 522   | >KIT-K550R-r LTYKYLQRPM  | 454   | 68    |
| >KIT-K550R-v LTYKYLQKPM  | 607   | >KIT-K550R-r LTYKYLQRPM  | 493   | 114   |
| >KIT-K550R-v LTYKYLQKPM  | 198   | >KIT-K550R-r LTYKYLQRPM  | 130   | 68    |
| >KIT-K550R-v LTYKYLQKPM  | 149   | >KIT-K550R-r LTYKYLQRPM  | 104   | 45    |
| >KIT-K550R-v LTYKYLQKPM  | 59    | >KIT-K550R-r LTYKYLQRPM  | 103   | 44    |
| >KIT-K550R-v LTYKYLQKPM  | 95    | >KIT-K550R-r LTYKYLQRPM  | 62    | 33    |
| >KIT-K550R-v LTYKYLQKPM  | 6     | >KIT-K550R-r LTYKYLQRPM  | 7     | 1     |
| >KIT-K550R-v LTYKYLQKPM  | 4     | >KIT-K550R-r LTYKYLQRPM  | 4     | 0     |
| >KIT-K550R-v LTYKYLQKPM  | 626   | >KIT-K550R-r LTYKYLQRPM  | 466   | 160   |
| >KIT-K550R-v LTYKYLQKPM  | 576   | >KIT-K550R-r LTYKYLQRPM  | 471   | 105   |
| >KIT-K550R-v LTYKYLQKPM  | 488   | >KIT-K550R-r LTYKYLQRPM  | 371   | 117   |
| >KIT-K550R-v LTYKYLQKPM  | 37    | >KIT-K550R-r LTYKYLQRPM  | 40    | 3     |
| >KIT-K550R-v LTYKYLQKPM  | 6     | >KIT-K550R-r LTYKYLQRPM  | 6     | 0     |
| >KIT-K550R-v LTYKYLQK    | 247   | >KIT-K550R-r LTYKYLQR    | 337   | 90    |
| >KIT-K550R-v LTYKYLQK    | 4627  | >KIT-K550R-r LTYKYLQR    | 369   | 4258  |
| >KIT-K550R-v ILTYKYLQKPM | 554   | >KIT-K550R-r ILTYKYLQRPM | 494   | 60    |
| >KIT-K550R-v ILTYKYLQK   | 60    | >KIT-K550R-r ILTYKYLQR   | 711   | 651   |
| >KIT-K550R-v ILTYKYLQK   | 94    | >KIT-K550R-r ILTYKYLQR   | 2864  | 2770  |
| >KIT-K550R-v ILTYKYLQK   | 1906  | >KIT-K550R-r ILTYKYLQR   | 72    | 1834  |
| >KIT-K550R-v ILTYKYLQK   | 5142  | >KIT-K550R-r ILTYKYLQR   | 201   | 4941  |
| >KIT-K550R-v ILTYKYLQK   | 1309  | >KIT-K550R-r ILTYKYLQR   | 298   | 1011  |
| >KIT-K550R-v ILTYKYLQK   | 8672  | >KIT-K550R-r ILTYKYLQR   | 355   | 8317  |
| >KIT-K550R-v MILTYKYLQK  | 18    | >KIT-K550R-r MILTYKYLQR  | 161   | 143   |
| >KIT-K550R-v MILTYKYLQK  | 18    | >KIT-K550R-r MILTYKYLQR  | 133   | 115   |
| >KIT-K550R-v MILTYKYLQK  | 32    | >KIT-K550R-r MILTYKYLQR  | 2258  | 2226  |
| >KIT-K550R-v MILTYKYLQK  | 209   | >KIT-K550R-r MILTYKYLQR  | 15    | 194   |
| >KIT-K550R-v MILTYKYLQK  | 1994  | >KIT-K550R-r MILTYKYLQR  | 127   | 1867  |
| >KIT-K550R-v MILTYKYLQK  | 161   | >KIT-K550R-r MILTYKYLQR  | 49    | 112   |
| >KIT-K550R-v MILTYKYLQK  | 260   | >KIT-K550R-r MILTYKYLQR  | 40    | 220   |
| >KIT-K558E-v KVVEEINGNN  | 2548  | >KIT-K558E-r EVVEEINGNN  | 102   | 2446  |
| >KIT-K558E-v KVVEEINGN   | 16785 | >KIT-K558E-r EVVEEINGN   | 295   | 16490 |
| >KIT-K558E-v KVVEEINGNN  | 1519  | >KIT-K558E-r EVVEEINGNN  | 8     | 1511  |
| >KIT-K558E-v KVVEEINGN   | 9526  | >KIT-K558E-r EVVEEINGN   | 146   | 9380  |
| >KIT-K558E-v KVVEEINGNN  | 13843 | >KIT-K558E-r EVVEEINGNN  | 362   | 13481 |
| >KIT-K558E-v KVVEEINGNN  | 31    | >KIT-K558E-r EVVEEINGNN  | 2     | 29    |
| >KIT-K558E-v KVVEEINGNN  | 61    | >KIT-K558E-r EVVEEINGNN  | 3     | 58    |
| >KIT-K558E-v KVVEEINGNN  | 114   | >KIT-K558E-r EVVEEINGNN  | 1792  | 1678  |
| >KIT-K558E-v KVVEEINGNN  | 11760 | >KIT-K558E-r EVVEEINGNN  | 255   | 11505 |
| >KIT-K558E-v KVVEEINGNN  | 114   | >KIT-K558E-r EVVEEINGNN  | 4757  | 4643  |
| >KIT-K558E-v KVVEEINGNN  | 100   | >KIT-K558E-r EVVEEINGNN  | 2986  | 2886  |
| >KIT-K558E-v KVVEEINGNN  | 3442  | >KIT-K558E-r EVVEEINGNN  | 265   | 3177  |
| >KIT-K558E-v LQKPMYEVQ   | 243   | >KIT-K558E-r LQKPMYEVQ   | 15024 | 14781 |

|                        |      |                        |       |       |
|------------------------|------|------------------------|-------|-------|
| >KIT-K558E-v LQKPMYEVQ | 415  | >KIT-K558E-r LQKPMYEVQ | 15369 | 14954 |
| >KIT-K558E-v QWKVVEEI  | 577  | >KIT-K558E-r QWEVVEEI  | 403   | 174   |
| >KIT-K558E-v VQWKVVEEI | 154  | >KIT-K558E-r VQWEVVEEI | 103   | 51    |
| >KIT-K558E-v VQWKVVEEI | 91   | >KIT-K558E-r VQWEVVEEI | 20    | 71    |
| >KIT-K558E-v VQWKVVEEI | 531  | >KIT-K558E-r VQWEVVEEI | 182   | 349   |
| >KIT-K558E-v VQWKVVEEI | 43   | >KIT-K558E-r VQWEVVEEI | 9     | 34    |
| >KIT-K558E-v VQWKVVEEI | 17   | >KIT-K558E-r VQWEVVEEI | 4     | 13    |
| >KIT-K558E-v VQWKVVEEI | 1073 | >KIT-K558E-r VQWEVVEEI | 74    | 999   |
| >KIT-K558E-v VQWKVVEEI | 75   | >KIT-K558E-r VQWEVVEEI | 21    | 54    |
| >KIT-K558E-v VQWKVVEEI | 1557 | >KIT-K558E-r VQWEVVEEI | 161   | 1396  |
| >KIT-K558E-v VQWKVVEEI | 468  | >KIT-K558E-r VQWEVVEEI | 224   | 244   |
| >KIT-K558E-v VQWKVVEEI | 57   | >KIT-K558E-r VQWEVVEEI | 87    | 30    |
| >KIT-K558E-v VQWKVVEEI | 587  | >KIT-K558E-r VQWEVVEEI | 374   | 213   |
| >KIT-K558E-v EVQWKVVEE | 147  | >KIT-K558E-r EVQWEVVEE | 64    | 83    |
| >KIT-K558E-v YEYQWKVV  | 10   | >KIT-K558E-r YEYQWEVV  | 76    | 66    |
| >KIT-K558E-v YEYQWKVVE | 11   | >KIT-K558E-r YEYQWEVVE | 17    | 6     |
| >KIT-K558E-v YEYQWKVV  | 1283 | >KIT-K558E-r YEYQWEVV  | 355   | 928   |
| >KIT-K558E-v YEYQWKVV  | 373  | >KIT-K558E-r YEYQWEVV  | 693   | 320   |
| >KIT-K558E-v YEYQWKVVE | 343  | >KIT-K558E-r YEYQWEVVE | 533   | 190   |
| >KIT-K558E-v YEYQWKVV  | 307  | >KIT-K558E-r YEYQWEVV  | 98    | 209   |
| >KIT-K558E-v YEYQWKVVE | 59   | >KIT-K558E-r YEYQWEVVE | 60    | 1     |
| >KIT-K558E-v YEYQWKVV  | 169  | >KIT-K558E-r YEYQWEVV  | 161   | 8     |
| >KIT-K558E-v YEYQWKVVE | 176  | >KIT-K558E-r YEYQWEVVE | 146   | 30    |
| >KIT-K558E-v YEYQWKVV  | 749  | >KIT-K558E-r YEYQWEVV  | 420   | 329   |
| >KIT-K558E-v YEYQWKVV  | 1044 | >KIT-K558E-r YEYQWEVV  | 416   | 628   |
| >KIT-K558E-v YEYQWKVVE | 3    | >KIT-K558E-r YEYQWEVVE | 3     | 0     |
| >KIT-K558E-v MYEVQWKV  | 652  | >KIT-K558E-r MYEVQWEV  | 288   | 364   |
| >KIT-K558E-v MYEVQWKV  | 246  | >KIT-K558E-r MYEVQWEV  | 110   | 136   |
| >KIT-K558E-v MYEVQWKV  | 488  | >KIT-K558E-r MYEVQWEV  | 415   | 73    |
| >KIT-K558E-v PMYEVQWK\ | 17   | >KIT-K558E-r PMYEVQWE\ | 10    | 7     |
| >KIT-K558E-v PMYEVQWK\ | 18   | >KIT-K558E-r PMYEVQWE\ | 8     | 10    |
| >KIT-K558E-v PMYEVQWK\ | 48   | >KIT-K558E-r PMYEVQWE\ | 26    | 22    |
| >KIT-K558E-v PMYEVQWK\ | 33   | >KIT-K558E-r PMYEVQWE\ | 13    | 20    |
| >KIT-K558E-v PMYEVQWK\ | 1    | >KIT-K558E-r PMYEVQWE\ | 1     | 0     |
| >KIT-K558E-v PMYEVQWK\ | 4    | >KIT-K558E-r PMYEVQWE\ | 2     | 2     |
| >KIT-K558E-v PMYEVQWK\ | 5    | >KIT-K558E-r PMYEVQWE\ | 4     | 1     |
| >KIT-K558E-v PMYEVQWK\ | 97   | >KIT-K558E-r PMYEVQWE\ | 43    | 54    |
| >KIT-K558E-v PMYEVQWK\ | 4    | >KIT-K558E-r PMYEVQWE\ | 4     | 0     |
| >KIT-K558E-v PMYEVQWK\ | 11   | >KIT-K558E-r PMYEVQWE\ | 7     | 4     |
| >KIT-K558E-v PMYEVQWK\ | 3    | >KIT-K558E-r PMYEVQWE\ | 2     | 1     |
| >KIT-K558E-v PMYEVQWK\ | 54   | >KIT-K558E-r PMYEVQWE\ | 12    | 42    |
| >KIT-K558E-v PMYEVQWK\ | 2    | >KIT-K558E-r PMYEVQWE\ | 2     | 0     |
| >KIT-K558E-v PMYEVQWK\ | 10   | >KIT-K558E-r PMYEVQWE\ | 8     | 2     |

|                         |      |                         |       |       |
|-------------------------|------|-------------------------|-------|-------|
| >KIT-K558E-v PMYEVQWK   | 129  | >KIT-K558E-r PMYEVQWE   | 19897 | 19768 |
| >KIT-K558E-v PMYEVQWK\  | 145  | >KIT-K558E-r PMYEVQWE\  | 100   | 45    |
| >KIT-K558E-v KPMYEVQWf  | 157  | >KIT-K558E-r KPMYEVQWf  | 172   | 15    |
| >KIT-K558E-v KPMYEVQWf  | 136  | >KIT-K558E-r KPMYEVQWf  | 202   | 66    |
| >KIT-K558E-v KPMYEVQWf  | 68   | >KIT-K558E-r KPMYEVQWf  | 60    | 8     |
| >KIT-K558N-1 KVVVEINGNN | 1519 | >KIT-K558N-f NVVVEINGNN | 48    | 1471  |
| >KIT-K558N-1 KVVVEINGNN | 31   | >KIT-K558N-f NVVVEINGNN | 17    | 14    |
| >KIT-K558N-1 KVVVEINGNN | 61   | >KIT-K558N-f NVVVEINGNN | 23    | 38    |
| >KIT-K558N-1 KVVVEINGNN | 114  | >KIT-K558N-f NVVVEINGNN | 1266  | 1152  |
| >KIT-K558N-1 KVVVEINGNN | 114  | >KIT-K558N-f NVVVEINGNN | 1122  | 1008  |
| >KIT-K558N-1 KVVVEINGNN | 100  | >KIT-K558N-f NVVVEINGNN | 5465  | 5365  |
| >KIT-K558N-1 LQKPMYEVQ  | 243  | >KIT-K558N-f LQKPMYEVQ  | 13646 | 13403 |
| >KIT-K558N-1 LQKPMYEVQ  | 415  | >KIT-K558N-f LQKPMYEVQ  | 17073 | 16658 |
| >KIT-K558N-1 VQWKVVEEI  | 154  | >KIT-K558N-f VQWNVVEEI  | 159   | 5     |
| >KIT-K558N-1 VQWKVVEEI  | 91   | >KIT-K558N-f VQWNVVEEI  | 59    | 32    |
| >KIT-K558N-1 VQWKVVEEI  | 43   | >KIT-K558N-f VQWNVVEEI  | 29    | 14    |
| >KIT-K558N-1 VQWKVVEEI  | 17   | >KIT-K558N-f VQWNVVEEI  | 9     | 8     |
| >KIT-K558N-1 VQWKVVEEI  | 1073 | >KIT-K558N-f VQWNVVEEI  | 273   | 800   |
| >KIT-K558N-1 VQWKVVEEI  | 75   | >KIT-K558N-f VQWNVVEEI  | 44    | 31    |
| >KIT-K558N-1 VQWKVVEEI  | 468  | >KIT-K558N-f VQWNVVEEI  | 111   | 357   |
| >KIT-K558N-1 VQWKVVEEI  | 57   | >KIT-K558N-f VQWNVVEEI  | 40    | 17    |
| >KIT-K558N-1 EVQWKVVEE  | 518  | >KIT-K558N-f EVQWNVVEE  | 284   | 234   |
| >KIT-K558N-1 EVQWKVVEE  | 766  | >KIT-K558N-f EVQWNVVEE  | 425   | 341   |
| >KIT-K558N-1 EVQWKVVEE  | 147  | >KIT-K558N-f EVQWNVVEE  | 48    | 99    |
| >KIT-K558N-1 YEVQWKVV   | 10   | >KIT-K558N-f YEVQWNVV   | 20    | 10    |
| >KIT-K558N-1 YEVQWKVVE  | 11   | >KIT-K558N-f YEVQWNVVE  | 21    | 10    |
| >KIT-K558N-1 YEVQWKVV   | 1283 | >KIT-K558N-f YEVQWNVV   | 253   | 1030  |
| >KIT-K558N-1 YEVQWKVVE  | 964  | >KIT-K558N-f YEVQWNVVE  | 424   | 540   |
| >KIT-K558N-1 YEVQWKVV   | 373  | >KIT-K558N-f YEVQWNVV   | 565   | 192   |
| >KIT-K558N-1 YEVQWKVVE  | 343  | >KIT-K558N-f YEVQWNVVE  | 447   | 104   |
| >KIT-K558N-1 YEVQWKVV   | 921  | >KIT-K558N-f YEVQWNVV   | 198   | 723   |
| >KIT-K558N-1 YEVQWKVV   | 307  | >KIT-K558N-f YEVQWNVV   | 139   | 168   |
| >KIT-K558N-1 YEVQWKVVE  | 59   | >KIT-K558N-f YEVQWNVVE  | 43    | 16    |
| >KIT-K558N-1 YEVQWKVV   | 169  | >KIT-K558N-f YEVQWNVV   | 89    | 80    |
| >KIT-K558N-1 YEVQWKVVE  | 176  | >KIT-K558N-f YEVQWNVVE  | 101   | 75    |
| >KIT-K558N-1 YEVQWKVV   | 749  | >KIT-K558N-f YEVQWNVV   | 416   | 333   |
| >KIT-K558N-1 YEVQWKVV   | 1044 | >KIT-K558N-f YEVQWNVV   | 294   | 750   |
| >KIT-K558N-1 YEVQWKVVE  | 1020 | >KIT-K558N-f YEVQWNVVE  | 479   | 541   |
| >KIT-K558N-1 YEVQWKVVE  | 3    | >KIT-K558N-f YEVQWNVVE  | 3     | 0     |
| >KIT-K558N-1 MYEVQWKV   | 246  | >KIT-K558N-f MYEVQWNV   | 265   | 19    |
| >KIT-K558N-1 MYEVQWKV   | 488  | >KIT-K558N-f MYEVQWNV   | 489   | 1     |
| >KIT-K558N-1 PMYEVQWK\  | 17   | >KIT-K558N-f PMYEVQWN'  | 14    | 3     |
| >KIT-K558N-1 PMYEVQWK\  | 18   | >KIT-K558N-f PMYEVQWN'  | 12    | 6     |

|                          |      |                          |       |       |
|--------------------------|------|--------------------------|-------|-------|
| >KIT-K558N-1 PMYEVQWK\   | 48   | >KIT-K558N-1 PMYEVQWN'   | 24    | 24    |
| >KIT-K558N-1 PMYEVQWK\   | 805  | >KIT-K558N-1 PMYEVQWN'   | 492   | 313   |
| >KIT-K558N-1 PMYEVQWK\   | 33   | >KIT-K558N-1 PMYEVQWN'   | 23    | 10    |
| >KIT-K558N-1 PMYEVQWK    | 510  | >KIT-K558N-1 PMYEVQWN    | 413   | 97    |
| >KIT-K558N-1 PMYEVQWK\   | 1    | >KIT-K558N-1 PMYEVQWN'   | 1     | 0     |
| >KIT-K558N-1 PMYEVQWK\   | 4    | >KIT-K558N-1 PMYEVQWN'   | 3     | 1     |
| >KIT-K558N-1 PMYEVQWK\   | 5    | >KIT-K558N-1 PMYEVQWN'   | 4     | 1     |
| >KIT-K558N-1 PMYEVQWK\   | 97   | >KIT-K558N-1 PMYEVQWN'   | 32    | 65    |
| >KIT-K558N-1 PMYEVQWK\   | 4    | >KIT-K558N-1 PMYEVQWN'   | 4     | 0     |
| >KIT-K558N-1 PMYEVQWK\   | 11   | >KIT-K558N-1 PMYEVQWN'   | 8     | 3     |
| >KIT-K558N-1 PMYEVQWK\   | 3    | >KIT-K558N-1 PMYEVQWN'   | 2     | 1     |
| >KIT-K558N-1 PMYEVQWK\   | 54   | >KIT-K558N-1 PMYEVQWN'   | 25    | 29    |
| >KIT-K558N-1 PMYEVQWK\   | 2    | >KIT-K558N-1 PMYEVQWN'   | 2     | 0     |
| >KIT-K558N-1 PMYEVQWK\   | 10   | >KIT-K558N-1 PMYEVQWN'   | 8     | 2     |
| >KIT-K558N-1 PMYEVQWK    | 129  | >KIT-K558N-1 PMYEVQWN    | 19477 | 19348 |
| >KIT-K558N-1 PMYEVQWK\   | 145  | >KIT-K558N-1 PMYEVQWN'   | 73    | 72    |
| >KIT-K558N-1 KPMYEVQW\   | 157  | >KIT-K558N-1 KPMYEVQW\   | 401   | 244   |
| >KIT-K558N-1 KPMYEVQW\   | 136  | >KIT-K558N-1 KPMYEVQW\   | 88    | 48    |
| >KIT-K558N-1 KPMYEVQW\   | 68   | >KIT-K558N-1 KPMYEVQW\   | 88    | 20    |
| >KIT-K558Q-1 KVVVEEINGN\ | 1519 | >KIT-K558Q-1 QVVVEEINGN\ | 84    | 1435  |
| >KIT-K558Q-1 KVVVEEINGN\ | 31   | >KIT-K558Q-1 QVVVEEINGN\ | 8     | 23    |
| >KIT-K558Q-1 KVVVEEINGN\ | 61   | >KIT-K558Q-1 QVVVEEINGN\ | 14    | 47    |
| >KIT-K558Q-1 KVVVEEINGN\ | 617  | >KIT-K558Q-1 QVVVEEINGN\ | 273   | 344   |
| >KIT-K558Q-1 KVVVEEINGN\ | 114  | >KIT-K558Q-1 QVVVEEINGN\ | 661   | 547   |
| >KIT-K558Q-1 KVVVEEINGN\ | 114  | >KIT-K558Q-1 QVVVEEINGN\ | 724   | 610   |
| >KIT-K558Q-1 KVVVEEINGN\ | 100  | >KIT-K558Q-1 QVVVEEINGN\ | 1097  | 997   |
| >KIT-K558Q-1 LQKPMYEVQ   | 243  | >KIT-K558Q-1 LQKPMYEVQ   | 10356 | 10113 |
| >KIT-K558Q-1 LQKPMYEVQ   | 415  | >KIT-K558Q-1 LQKPMYEVQ   | 11755 | 11340 |
| >KIT-K558Q-1 QWKVVEEI    | 611  | >KIT-K558Q-1 QWQVVEEI    | 90    | 521   |
| >KIT-K558Q-1 QWKVVEEI    | 577  | >KIT-K558Q-1 QWQVVEEI    | 276   | 301   |
| >KIT-K558Q-1 VQWKVVEEI   | 154  | >KIT-K558Q-1 VQWQVVEEI   | 100   | 54    |
| >KIT-K558Q-1 VQWKVVEEI   | 91   | >KIT-K558Q-1 VQWQVVEEI   | 89    | 2     |
| >KIT-K558Q-1 VQWKVVEEI   | 43   | >KIT-K558Q-1 VQWQVVEEI   | 40    | 3     |
| >KIT-K558Q-1 VQWKVVEEI   | 17   | >KIT-K558Q-1 VQWQVVEEI   | 11    | 6     |
| >KIT-K558Q-1 VQWKVVEEI   | 75   | >KIT-K558Q-1 VQWQVVEEI   | 62    | 13    |
| >KIT-K558Q-1 VQWKVVEEI   | 468  | >KIT-K558Q-1 VQWQVVEEI   | 261   | 207   |
| >KIT-K558Q-1 VQWKVVEEI   | 57   | >KIT-K558Q-1 VQWQVVEEI   | 119   | 62    |
| >KIT-K558Q-1 VQWKVVEEI   | 587  | >KIT-K558Q-1 VQWQVVEEI   | 439   | 148   |
| >KIT-K558Q-1 EVQWKVVEE   | 518  | >KIT-K558Q-1 EVQWQVVEE   | 436   | 82    |
| >KIT-K558Q-1 EVQWKVVEE   | 147  | >KIT-K558Q-1 EVQWQVVEE   | 67    | 80    |
| >KIT-K558Q-1 YEVQWKVV    | 10   | >KIT-K558Q-1 YEVQWQVV    | 30    | 20    |
| >KIT-K558Q-1 YEVQWKVVE   | 11   | >KIT-K558Q-1 YEVQWQVVE   | 13    | 2     |
| >KIT-K558Q-1 YEVQWKVV    | 1283 | >KIT-K558Q-1 YEVQWQVV    | 403   | 880   |

|                        |      |                        |       |       |
|------------------------|------|------------------------|-------|-------|
| >KIT-K558Q-1YEVQWKVV   | 1223 | >KIT-K558Q-iYEVQWQVV   | 447   | 776   |
| >KIT-K558Q-1YEVQWKVV   | 1514 | >KIT-K558Q-iYEVQWQVV   | 360   | 1154  |
| >KIT-K558Q-1YEVQWKVV   | 373  | >KIT-K558Q-iYEVQWQVV   | 299   | 74    |
| >KIT-K558Q-1YEVQWKVVE  | 343  | >KIT-K558Q-iYEVQWQVVE  | 419   | 76    |
| >KIT-K558Q-1YEVQWKVV   | 921  | >KIT-K558Q-iYEVQWQVV   | 371   | 550   |
| >KIT-K558Q-1YEVQWKVV   | 307  | >KIT-K558Q-iYEVQWQVV   | 142   | 165   |
| >KIT-K558Q-1YEVQWKVVE  | 59   | >KIT-K558Q-iYEVQWQVVE  | 70    | 11    |
| >KIT-K558Q-1YEVQWKVV   | 169  | >KIT-K558Q-iYEVQWQVV   | 85    | 84    |
| >KIT-K558Q-1YEVQWKVVE  | 176  | >KIT-K558Q-iYEVQWQVVE  | 101   | 75    |
| >KIT-K558Q-1YEVQWKVV   | 749  | >KIT-K558Q-iYEVQWQVV   | 256   | 493   |
| >KIT-K558Q-1YEVQWKVVE  | 1020 | >KIT-K558Q-iYEVQWQVVE  | 392   | 628   |
| >KIT-K558Q-1YEVQWKVVE  | 3    | >KIT-K558Q-iYEVQWQVVE  | 3     | 0     |
| >KIT-K558Q-1MYEVQWKV   | 652  | >KIT-K558Q-iMYEVQWQV   | 231   | 421   |
| >KIT-K558Q-1MYEVQWKV   | 246  | >KIT-K558Q-iMYEVQWQV   | 141   | 105   |
| >KIT-K558Q-1MYEVQWKV   | 488  | >KIT-K558Q-iMYEVQWQV   | 509   | 21    |
| >KIT-K558Q-1PMYEVQWK\  | 17   | >KIT-K558Q-iPMYEVQWQ'  | 14    | 3     |
| >KIT-K558Q-1PMYEVQWK\  | 18   | >KIT-K558Q-iPMYEVQWQ'  | 12    | 6     |
| >KIT-K558Q-1PMYEVQWK\  | 48   | >KIT-K558Q-iPMYEVQWQ'  | 28    | 20    |
| >KIT-K558Q-1PMYEVQWK\  | 33   | >KIT-K558Q-iPMYEVQWQ'  | 24    | 9     |
| >KIT-K558Q-1PMYEVQWK   | 510  | >KIT-K558Q-iPMYEVQWQ   | 142   | 368   |
| >KIT-K558Q-1PMYEVQWK\  | 1    | >KIT-K558Q-iPMYEVQWQ'  | 1     | 0     |
| >KIT-K558Q-1PMYEVQWK\  | 4    | >KIT-K558Q-iPMYEVQWQ'  | 2     | 2     |
| >KIT-K558Q-1PMYEVQWK\  | 5    | >KIT-K558Q-iPMYEVQWQ'  | 5     | 0     |
| >KIT-K558Q-1PMYEVQWK\  | 97   | >KIT-K558Q-iPMYEVQWQ'  | 36    | 61    |
| >KIT-K558Q-1PMYEVQWK\  | 4    | >KIT-K558Q-iPMYEVQWQ'  | 4     | 0     |
| >KIT-K558Q-1PMYEVQWK\  | 11   | >KIT-K558Q-iPMYEVQWQ'  | 6     | 5     |
| >KIT-K558Q-1PMYEVQWK\  | 3    | >KIT-K558Q-iPMYEVQWQ'  | 2     | 1     |
| >KIT-K558Q-1PMYEVQWK\  | 54   | >KIT-K558Q-iPMYEVQWQ'  | 13    | 41    |
| >KIT-K558Q-1PMYEVQWK   | 1802 | >KIT-K558Q-iPMYEVQWQ   | 137   | 1665  |
| >KIT-K558Q-1PMYEVQWK\  | 2    | >KIT-K558Q-iPMYEVQWQ'  | 2     | 0     |
| >KIT-K558Q-1PMYEVQWK\  | 10   | >KIT-K558Q-iPMYEVQWQ'  | 6     | 4     |
| >KIT-K558Q-1PMYEVQWK   | 129  | >KIT-K558Q-iPMYEVQWQ   | 18369 | 18240 |
| >KIT-K558Q-1PMYEVQWK\  | 145  | >KIT-K558Q-iPMYEVQWQ'  | 61    | 84    |
| >KIT-K558Q-1KPMYEVQW\  | 157  | >KIT-K558Q-iKPMYEVQW\  | 324   | 167   |
| >KIT-K558Q-1KPMYEVQW\  | 136  | >KIT-K558Q-iKPMYEVQW\  | 89    | 47    |
| >KIT-K558Q-1KPMYEVQW\  | 68   | >KIT-K558Q-iKPMYEVQW\  | 92    | 24    |
| >KIT-K558R-vKVVEEINGNN | 31   | >KIT-K558R-rRVVEEINGNN | 20    | 11    |
| >KIT-K558R-vKVVEEINGNN | 61   | >KIT-K558R-rRVVEEINGNN | 58    | 3     |
| >KIT-K558R-vKVVEEINGNN | 114  | >KIT-K558R-rRVVEEINGNN | 189   | 75    |
| >KIT-K558R-vKVVEEINGNN | 114  | >KIT-K558R-rRVVEEINGNN | 85    | 29    |
| >KIT-K558R-vKVVEEINGNN | 1251 | >KIT-K558R-rRVVEEINGNN | 441   | 810   |
| >KIT-K558R-vKVVEEINGNN | 100  | >KIT-K558R-rRVVEEINGNN | 39    | 61    |
| >KIT-K558R-vLQKPMYEVQ  | 243  | >KIT-K558R-rLQKPMYEVQ  | 8042  | 7799  |

|                        |      |                        |      |      |
|------------------------|------|------------------------|------|------|
| >KIT-K558R-v LQKPMYEVQ | 415  | >KIT-K558R-r LQKPMYEVQ | 32   | 383  |
| >KIT-K558R-v QWKVVEEI  | 577  | >KIT-K558R-r QWRVVEEI  | 355  | 222  |
| >KIT-K558R-v VQWKVVEEI | 154  | >KIT-K558R-r VQWRVVEEI | 96   | 58   |
| >KIT-K558R-v VQWKVVEEI | 91   | >KIT-K558R-r VQWRVVEEI | 119  | 28   |
| >KIT-K558R-v VQWKVVEEI | 43   | >KIT-K558R-r VQWRVVEEI | 49   | 6    |
| >KIT-K558R-v VQWKVVEEI | 17   | >KIT-K558R-r VQWRVVEEI | 14   | 3    |
| >KIT-K558R-v VQWKVVEEI | 75   | >KIT-K558R-r VQWRVVEEI | 112  | 37   |
| >KIT-K558R-v VQWKVVEEI | 468  | >KIT-K558R-r VQWRVVEEI | 264  | 204  |
| >KIT-K558R-v VQWKVVEEI | 57   | >KIT-K558R-r VQWRVVEEI | 56   | 1    |
| >KIT-K558R-v EVQWKVVEE | 518  | >KIT-K558R-r EVQWRVVEE | 392  | 126  |
| >KIT-K558R-v EVQWKVVEE | 147  | >KIT-K558R-r EVQWRVVEE | 147  | 0    |
| >KIT-K558R-v YEVQWKVV  | 10   | >KIT-K558R-r YEVQWRVV  | 15   | 5    |
| >KIT-K558R-v YEVQWKVVE | 11   | >KIT-K558R-r YEVQWRVVE | 11   | 0    |
| >KIT-K558R-v YEVQWKVV  | 373  | >KIT-K558R-r YEVQWRVV  | 242  | 131  |
| >KIT-K558R-v YEVQWKVVE | 343  | >KIT-K558R-r YEVQWRVVE | 312  | 31   |
| >KIT-K558R-v YEVQWKVV  | 307  | >KIT-K558R-r YEVQWRVV  | 265  | 42   |
| >KIT-K558R-v YEVQWKVVE | 59   | >KIT-K558R-r YEVQWRVVE | 62   | 3    |
| >KIT-K558R-v YEVQWKVV  | 169  | >KIT-K558R-r YEVQWRVV  | 97   | 72   |
| >KIT-K558R-v YEVQWKVVE | 176  | >KIT-K558R-r YEVQWRVVE | 118  | 58   |
| >KIT-K558R-v YEVQWKVV  | 749  | >KIT-K558R-r YEVQWRVV  | 443  | 306  |
| >KIT-K558R-v YEVQWKVVE | 1044 | >KIT-K558R-r YEVQWRVVE | 282  | 762  |
| >KIT-K558R-v YEVQWKVV  | 1020 | >KIT-K558R-r YEVQWRVV  | 294  | 726  |
| >KIT-K558R-v YEVQWKVVE | 3    | >KIT-K558R-r YEVQWRVVE | 3    | 0    |
| >KIT-K558R-v MYEVQWKV  | 652  | >KIT-K558R-r MYEVQWRV  | 411  | 241  |
| >KIT-K558R-v MYEVQWKV  | 246  | >KIT-K558R-r MYEVQWRV  | 454  | 208  |
| >KIT-K558R-v MYEVQWKV  | 488  | >KIT-K558R-r MYEVQWRV  | 536  | 48   |
| >KIT-K558R-v PMYEVQWK\ | 17   | >KIT-K558R-r PMYEVQWR\ | 15   | 2    |
| >KIT-K558R-v PMYEVQWK\ | 18   | >KIT-K558R-r PMYEVQWR\ | 18   | 0    |
| >KIT-K558R-v PMYEVQWK\ | 48   | >KIT-K558R-r PMYEVQWR\ | 43   | 5    |
| >KIT-K558R-v PMYEVQWK\ | 33   | >KIT-K558R-r PMYEVQWR\ | 33   | 0    |
| >KIT-K558R-v PMYEVQWK\ | 1    | >KIT-K558R-r PMYEVQWR\ | 1    | 0    |
| >KIT-K558R-v PMYEVQWK\ | 4    | >KIT-K558R-r PMYEVQWR\ | 3    | 1    |
| >KIT-K558R-v PMYEVQWK\ | 5    | >KIT-K558R-r PMYEVQWR\ | 5    | 0    |
| >KIT-K558R-v PMYEVQWK\ | 97   | >KIT-K558R-r PMYEVQWR\ | 93   | 4    |
| >KIT-K558R-v PMYEVQWK\ | 4    | >KIT-K558R-r PMYEVQWR\ | 4    | 0    |
| >KIT-K558R-v PMYEVQWK\ | 11   | >KIT-K558R-r PMYEVQWR\ | 13   | 2    |
| >KIT-K558R-v PMYEVQWK\ | 3    | >KIT-K558R-r PMYEVQWR\ | 2    | 1    |
| >KIT-K558R-v PMYEVQWK\ | 54   | >KIT-K558R-r PMYEVQWR\ | 67   | 13   |
| >KIT-K558R-v PMYEVQWK\ | 2    | >KIT-K558R-r PMYEVQWR\ | 2    | 0    |
| >KIT-K558R-v PMYEVQWK\ | 10   | >KIT-K558R-r PMYEVQWR\ | 12   | 2    |
| >KIT-K558R-v PMYEVQWK  | 129  | >KIT-K558R-r PMYEVQWR  | 2643 | 2514 |
| >KIT-K558R-v PMYEVQWK  | 5023 | >KIT-K558R-r PMYEVQWR  | 408  | 4615 |
| >KIT-K558R-v PMYEVQWK  | 5110 | >KIT-K558R-r PMYEVQWR  | 298  | 4812 |

|                         |      |                         |      |      |
|-------------------------|------|-------------------------|------|------|
| >KIT-K558R-v PMYEVQWK\  | 145  | >KIT-K558R-r PMYEVQWR\  | 191  | 46   |
| >KIT-K558R-v PMYEVQWK   | 2483 | >KIT-K558R-r PMYEVQWR   | 157  | 2326 |
| >KIT-K558R-v KPMYEVQWF\ | 157  | >KIT-K558R-r KPMYEVQWF\ | 1257 | 1100 |
| >KIT-K558R-v KPMYEVQWF  | 136  | >KIT-K558R-r KPMYEVQWF  | 53   | 83   |
| >KIT-K558R-v KPMYEVQWF\ | 68   | >KIT-K558R-r KPMYEVQWF\ | 92   | 24   |
| >KIT-K558R-v KPMYEVQWF  | 3245 | >KIT-K558R-r KPMYEVQWF  | 163  | 3082 |
| >KIT-K581Q-1 KWEFPRNRL\ | 477  | >KIT-K581Q-i QWEFPRNRL  | 1118 | 641  |
| >KIT-K581Q-1 KWEFPRNRL\ | 162  | >KIT-K581Q-i QWEFPRNRL  | 263  | 101  |
| >KIT-K581Q-1 KWEFPRNR   | 137  | >KIT-K581Q-i QWEFPRNR   | 2650 | 2513 |
| >KIT-K581Q-1 KWEFPRNR   | 13   | >KIT-K581Q-i QWEFPRNR   | 30   | 17   |
| >KIT-K581Q-1 KWEFPRNR   | 395  | >KIT-K581Q-i QWEFPRNR   | 988  | 593  |
| >KIT-K581Q-1 KWEFPRNRL  | 154  | >KIT-K581Q-i QWEFPRNRL  | 398  | 244  |
| >KIT-K581Q-1 KWEFPRNRL\ | 82   | >KIT-K581Q-i QWEFPRNRL  | 251  | 169  |
| >KIT-K581Q-1 HKWEFPRNR  | 6299 | >KIT-K581Q-i HQWEFPRNR  | 407  | 5892 |
| >KIT-K581Q-1 HKWEFPRNR  | 2412 | >KIT-K581Q-i HQWEFPRNR  | 23   | 2389 |
| >KIT-K581Q-1 HKWEFPRNR  | 1022 | >KIT-K581Q-i HQWEFPRNR  | 275  | 747  |
| >KIT-K581Q-1 HKWEFPRNR  | 220  | >KIT-K581Q-i HQWEFPRNR  | 245  | 25   |
| >KIT-K581Q-1 HKWEFPRNR  | 59   | >KIT-K581Q-i HQWEFPRNR  | 63   | 4    |
| >KIT-K581Q-1 HKWEFPRNR  | 1126 | >KIT-K581Q-i HQWEFPRNR  | 276  | 850  |
| >KIT-K581Q-1 HKWEFPRNR  | 238  | >KIT-K581Q-i HQWEFPRNR  | 235  | 3    |
| >KIT-K581Q-1 HKWEFPRNR  | 656  | >KIT-K581Q-i HQWEFPRNR  | 173  | 483  |
| >KIT-K581Q-1 HKWEFPRNR  | 1413 | >KIT-K581Q-i HQWEFPRNR  | 164  | 1249 |
| >KIT-K581Q-1 HKWEFPRNR  | 33   | >KIT-K581Q-i HQWEFPRNR  | 20   | 13   |
| >KIT-K581Q-1 DHKWEFPR   | 218  | >KIT-K581Q-i DHKWEFPR   | 434  | 216  |
| >KIT-K581Q-1 DHKWEFPR   | 346  | >KIT-K581Q-i DHKWEFPR   | 459  | 113  |
| >KIT-K581Q-1 YDHKWEFPR  | 183  | >KIT-K581Q-i YDHQWEFPR  | 174  | 9    |
| >KIT-K581Q-1 PYDHKWEF   | 147  | >KIT-K581Q-i PYDHQWEF   | 191  | 44   |
| >KIT-K581Q-1 PYDHKWEF   | 444  | >KIT-K581Q-i PYDHQWEF   | 441  | 3    |
| >KIT-K581Q-1 PYDHKWEF   | 61   | >KIT-K581Q-i PYDHQWEF   | 34   | 27   |
| >KIT-K581Q-1 PYDHKWEFPI | 67   | >KIT-K581Q-i PYDHQWEFP  | 53   | 14   |
| >KIT-K581Q-1 LPYDHKWEFI | 169  | >KIT-K581Q-i LPYDHQWEF  | 304  | 135  |
| >KIT-K581Q-1 LPYDHKWEFI | 170  | >KIT-K581Q-i LPYDHQWEF  | 159  | 11   |
| >KIT-K581Q-1 LPYDHKWEFI | 359  | >KIT-K581Q-i LPYDHQWEF  | 326  | 33   |
| >KIT-K581Q-1 LPYDHKWEF  | 175  | >KIT-K581Q-i LPYDHQWEF  | 497  | 322  |
| >KIT-K581Q-1 LPYDHKWEF  | 272  | >KIT-K581Q-i LPYDHQWEF  | 134  | 138  |
| >KIT-K581Q-1 LPYDHKWEF  | 162  | >KIT-K581Q-i LPYDHQWEF  | 208  | 46   |
| >KIT-K581Q-1 LPYDHKWEF  | 11   | >KIT-K581Q-i LPYDHQWEF  | 8    | 3    |
| >KIT-K581Q-1 LPYDHKWEFI | 212  | >KIT-K581Q-i LPYDHQWEF  | 108  | 104  |
| >KIT-K581Q-1 LPYDHKWEF  | 471  | >KIT-K581Q-i LPYDHQWEF  | 226  | 245  |
| >KIT-K581Q-1 LPYDHKWEF  | 18   | >KIT-K581Q-i LPYDHQWEF  | 18   | 0    |
| >KIT-K581Q-1 LPYDHKWEFI | 1344 | >KIT-K581Q-i LPYDHQWEF  | 460  | 884  |
| >KIT-K581Q-1 LPYDHKWEFI | 124  | >KIT-K581Q-i LPYDHQWEF  | 144  | 20   |
| >KIT-K581Q-1 LPYDHKWEF  | 67   | >KIT-K581Q-i LPYDHQWEF  | 26   | 41   |



|                         |      |                         |       |       |
|-------------------------|------|-------------------------|-------|-------|
| >KIT-K581Q-1 LPYDHKWEF  | 11   | >KIT-K581Q-1 LPYDHQWEF  | 8     | 3     |
| >KIT-K581Q-1 LPYDHKWEFI | 96   | >KIT-K581Q-1 LPYDHQWEF  | 107   | 11    |
| >KIT-K581Q-1 QLPYDHKWE  | 446  | >KIT-K581Q-1 QLPYDHQWE  | 200   | 246   |
| >KIT-K581Q-1 TQLPYDHKW  | 34   | >KIT-K581Q-1 TQLPYDHQW  | 23    | 11    |
| >KIT-K581Q-1 TQLPYDHK   | 118  | >KIT-K581Q-1 TQLPYDHQ   | 26416 | 26298 |
| >KIT-K581Q-1 TQLPYDHKW  | 67   | >KIT-K581Q-1 TQLPYDHQW  | 67    | 0     |
| >KIT-K581Q-1 TQLPYDHKW  | 176  | >KIT-K581Q-1 TQLPYDHQW  | 102   | 74    |
| >KIT-K581Q-1 TQLPYDHKW  | 559  | >KIT-K581Q-1 TQLPYDHQW  | 316   | 243   |
| >KIT-K581Q-1 TQLPYDHKW  | 23   | >KIT-K581Q-1 TQLPYDHQW  | 18    | 5     |
| >KIT-K581Q-1 TQLPYDHKW  | 306  | >KIT-K581Q-1 TQLPYDHQW  | 165   | 141   |
| >KIT-K581Q-1 TQLPYDHKW  | 199  | >KIT-K581Q-1 TQLPYDHQW  | 223   | 24    |
| >KIT-K581Q-1 TQLPYDHKW  | 186  | >KIT-K581Q-1 TQLPYDHQW  | 153   | 33    |
| >KIT-K581Q-1 TQLPYDHKW  | 129  | >KIT-K581Q-1 TQLPYDHQW  | 55    | 74    |
| >KIT-K581Q-1 TQLPYDHKW  | 123  | >KIT-K581Q-1 TQLPYDHQW  | 74    | 49    |
| >KIT-K581Q-1 PTQLPYDHKV | 396  | >KIT-K581Q-1 PTQLPYDHQV | 274   | 122   |
| >KIT-K581Q-1 DPTQLPYDHC | 46   | >KIT-K581Q-1 DPTQLPYDHC | 44    | 2     |
| >KIT-K581Q-1 DPTQLPYDHC | 24   | >KIT-K581Q-1 DPTQLPYDHC | 20    | 4     |
| >KIT-K581R-1 KWEFPRNRL  | 477  | >KIT-K581R-1 RWEFPRNRL  | 353   | 124   |
| >KIT-K581R-1 KWEFPRNRL  | 162  | >KIT-K581R-1 RWEFPRNRL  | 43    | 119   |
| >KIT-K581R-1 KWEFPRNR   | 137  | >KIT-K581R-1 RWEFPRNR   | 126   | 11    |
| >KIT-K581R-1 KWEFPRNR   | 13   | >KIT-K581R-1 RWEFPRNR   | 17    | 4     |
| >KIT-K581R-1 KWEFPRNR   | 395  | >KIT-K581R-1 RWEFPRNR   | 682   | 287   |
| >KIT-K581R-1 KWEFPRNRL  | 154  | >KIT-K581R-1 RWEFPRNRL  | 267   | 113   |
| >KIT-K581R-1 KWEFPRNRL  | 82   | >KIT-K581R-1 RWEFPRNRL  | 146   | 64    |
| >KIT-K581R-1 HKWEFPRNR  | 220  | >KIT-K581R-1 HRWEFPRNR  | 1105  | 885   |
| >KIT-K581R-1 HKWEFPRNR  | 59   | >KIT-K581R-1 HRWEFPRNR  | 442   | 383   |
| >KIT-K581R-1 HKWEFPRN   | 9867 | >KIT-K581R-1 HRWEFPRN   | 210   | 9657  |
| >KIT-K581R-1 HKWEFPRNR  | 1126 | >KIT-K581R-1 HRWEFPRNR  | 18    | 1108  |
| >KIT-K581R-1 HKWEFPRNR  | 238  | >KIT-K581R-1 HRWEFPRNR  | 13    | 225   |
| >KIT-K581R-1 HKWEFPRNR  | 5172 | >KIT-K581R-1 HRWEFPRNR  | 61    | 5111  |
| >KIT-K581R-1 HKWEFPRNR  | 656  | >KIT-K581R-1 HRWEFPRNR  | 232   | 424   |
| >KIT-K581R-1 HKWEFPRN   | 1873 | >KIT-K581R-1 HRWEFPRN   | 153   | 1720  |
| >KIT-K581R-1 HKWEFPRN   | 8880 | >KIT-K581R-1 HRWEFPRN   | 413   | 8467  |
| >KIT-K581R-1 HKWEFPRNR  | 4996 | >KIT-K581R-1 HRWEFPRNR  | 154   | 4842  |
| >KIT-K581R-1 HKWEFPRNR  | 5961 | >KIT-K581R-1 HRWEFPRNR  | 113   | 5848  |
| >KIT-K581R-1 HKWEFPRNR  | 9455 | >KIT-K581R-1 HRWEFPRNR  | 282   | 9173  |
| >KIT-K581R-1 HKWEFPRNR  | 7166 | >KIT-K581R-1 HRWEFPRNR  | 160   | 7006  |
| >KIT-K581R-1 HKWEFPRNR  | 33   | >KIT-K581R-1 HRWEFPRNR  | 26    | 7     |
| >KIT-K581R-1 DHKWEFPR   | 218  | >KIT-K581R-1 DHRWEFPR   | 186   | 32    |
| >KIT-K581R-1 DHKWEFPR   | 346  | >KIT-K581R-1 DHRWEFPR   | 538   | 192   |
| >KIT-K581R-1 YDHKWEFPR  | 183  | >KIT-K581R-1 YDHRWEFPR  | 524   | 341   |
| >KIT-K581R-1 PYDHKWEF   | 147  | >KIT-K581R-1 PYDHRWEF   | 129   | 18    |
| >KIT-K581R-1 PYDHKWEF   | 444  | >KIT-K581R-1 PYDHRWEF   | 356   | 88    |

|                         |       |                         |       |       |
|-------------------------|-------|-------------------------|-------|-------|
| >KIT-K581R-v PYDHKWEF   | 61    | >KIT-K581R-r PYDHRWEF   | 52    | 9     |
| >KIT-K581R-v PYDHKWEFPI | 67    | >KIT-K581R-r PYDHRWEFPI | 72    | 5     |
| >KIT-K581R-v LPYDHKWEFI | 169   | >KIT-K581R-r LPYDHRWEFI | 125   | 44    |
| >KIT-K581R-v LPYDHKWEFI | 170   | >KIT-K581R-r LPYDHRWEFI | 99    | 71    |
| >KIT-K581R-v LPYDHKWEFI | 359   | >KIT-K581R-r LPYDHRWEFI | 252   | 107   |
| >KIT-K581R-v LPYDHKWEF  | 175   | >KIT-K581R-r LPYDHRWEF  | 33    | 142   |
| >KIT-K581R-v LPYDHKWEF  | 1030  | >KIT-K581R-r LPYDHRWEF  | 417   | 613   |
| >KIT-K581R-v LPYDHKWEF  | 272   | >KIT-K581R-r LPYDHRWEF  | 112   | 160   |
| >KIT-K581R-v LPYDHKWEF  | 162   | >KIT-K581R-r LPYDHRWEF  | 126   | 36    |
| >KIT-K581R-v LPYDHKWEF  | 11    | >KIT-K581R-r LPYDHRWEF  | 10    | 1     |
| >KIT-K581R-v LPYDHKWEFI | 212   | >KIT-K581R-r LPYDHRWEFI | 188   | 24    |
| >KIT-K581R-v LPYDHKWEF  | 471   | >KIT-K581R-r LPYDHRWEF  | 746   | 275   |
| >KIT-K581R-v LPYDHKWEF  | 18    | >KIT-K581R-r LPYDHRWEF  | 24    | 6     |
| >KIT-K581R-v LPYDHKWEFI | 124   | >KIT-K581R-r LPYDHRWEFI | 113   | 11    |
| >KIT-K581R-v LPYDHKWEF  | 67    | >KIT-K581R-r LPYDHRWEF  | 25    | 42    |
| >KIT-K581R-v LPYDHKWEF  | 11    | >KIT-K581R-r LPYDHRWEF  | 9     | 2     |
| >KIT-K581R-v LPYDHKWEFI | 96    | >KIT-K581R-r LPYDHRWEFI | 118   | 22    |
| >KIT-K581R-v QLPYDHKWE  | 446   | >KIT-K581R-r QLPYDHRWE  | 342   | 104   |
| >KIT-K581R-v TQLPYDHW   | 34    | >KIT-K581R-r TQLPYDHRW  | 31    | 3     |
| >KIT-K581R-v TQLPYDHW   | 118   | >KIT-K581R-r TQLPYDHR   | 3194  | 3076  |
| >KIT-K581R-v TQLPYDHW   | 67    | >KIT-K581R-r TQLPYDHRW  | 54    | 13    |
| >KIT-K581R-v TQLPYDHW   | 176   | >KIT-K581R-r TQLPYDHRW  | 149   | 27    |
| >KIT-K581R-v TQLPYDHW   | 969   | >KIT-K581R-r TQLPYDHR   | 42    | 927   |
| >KIT-K581R-v TQLPYDHW   | 559   | >KIT-K581R-r TQLPYDHRW  | 330   | 229   |
| >KIT-K581R-v TQLPYDHW   | 23    | >KIT-K581R-r TQLPYDHRW  | 20    | 3     |
| >KIT-K581R-v TQLPYDHW   | 306   | >KIT-K581R-r TQLPYDHRW  | 206   | 100   |
| >KIT-K581R-v TQLPYDHW   | 199   | >KIT-K581R-r TQLPYDHRW  | 207   | 8     |
| >KIT-K581R-v TQLPYDHW   | 186   | >KIT-K581R-r TQLPYDHRW  | 181   | 5     |
| >KIT-K581R-v TQLPYDHW   | 129   | >KIT-K581R-r TQLPYDHRW  | 112   | 17    |
| >KIT-K581R-v TQLPYDHW   | 123   | >KIT-K581R-r TQLPYDHRW  | 169   | 46    |
| >KIT-K581R-v TQLPYDHW   | 3030  | >KIT-K581R-r TQLPYDHR   | 193   | 2837  |
| >KIT-K581R-v PTQLPYDHW  | 396   | >KIT-K581R-r PTQLPYDHRV | 302   | 94    |
| >KIT-K581R-v DPTQLPYDHF | 46    | >KIT-K581R-r DPTQLPYDHF | 45    | 1     |
| >KIT-K581R-v DPTQLPYDHF | 24    | >KIT-K581R-r DPTQLPYDHF | 30    | 6     |
| >KIT-K642E-v KVLSYLGNH  | 1336  | >KIT-K642E-r EVLSYLGNH  | 14    | 1322  |
| >KIT-K642E-v KVLSYLGNHM | 147   | >KIT-K642E-r EVLSYLGNHM | 5     | 142   |
| >KIT-K642E-v KVLSYLGNHM | 1663  | >KIT-K642E-r EVLSYLGNHM | 40    | 1623  |
| >KIT-K642E-v KVLSYLGNHM | 201   | >KIT-K642E-r EVLSYLGNHM | 15774 | 15573 |
| >KIT-K642E-v KVLSYLGNH  | 497   | >KIT-K642E-r EVLSYLGNH  | 13570 | 13073 |
| >KIT-K642E-v KVLSYLGNHM | 3093  | >KIT-K642E-r EVLSYLGNHM | 26    | 3067  |
| >KIT-K642E-v LKVSYLGNH  | 12371 | >KIT-K642E-r LEVLSYLGNH | 412   | 11959 |
| >KIT-K642E-v LKVSYLGNH  | 19    | >KIT-K642E-r LEVLSYLGNH | 753   | 734   |
| >KIT-K642E-v LKVSYLGNH  | 22188 | >KIT-K642E-r LEVLSYLGNH | 309   | 21879 |

|                           |       |                          |      |       |
|---------------------------|-------|--------------------------|------|-------|
| >KIT-K642E-v LKVLVSYLGNH  | 20152 | >KIT-K642E-r LEVLSYLGNH  | 158  | 19994 |
| >KIT-K642E-v LKVLVSYLGNH  | 23964 | >KIT-K642E-r LEVLSYLGNH  | 266  | 23698 |
| >KIT-K642E-v ELKVLVSYL    | 445   | >KIT-K642E-r ELEVLSYL    | 380  | 65    |
| >KIT-K642E-v ELKVLVSYL    | 221   | >KIT-K642E-r ELEVLSYL    | 178  | 43    |
| >KIT-K642E-v ELKVLVSYL    | 285   | >KIT-K642E-r ELEVLSYL    | 7178 | 6893  |
| >KIT-K642E-v SELKVLVSY    | 122   | >KIT-K642E-r SELEVLSY    | 133  | 11    |
| >KIT-K642E-v SELKVLVSYL   | 14    | >KIT-K642E-r SELEVLSYL   | 11   | 3     |
| >KIT-K642E-v SELKVLVSYL   | 365   | >KIT-K642E-r SELEVLSYL   | 41   | 324   |
| >KIT-K642E-v SELKVLVSYL   | 1355  | >KIT-K642E-r SELEVLSYL   | 82   | 1273  |
| >KIT-K642E-v SELKVLVSYL   | 1596  | >KIT-K642E-r SELEVLSYL   | 234  | 1362  |
| >KIT-K642E-v SELKVLVSY    | 102   | >KIT-K642E-r SELEVLSY    | 262  | 160   |
| >KIT-K642E-v SELKVLVSY    | 361   | >KIT-K642E-r SELEVLSY    | 498  | 137   |
| >KIT-K642E-v SELKVLVSY    | 22    | >KIT-K642E-r SELEVLSY    | 10   | 12    |
| >KIT-K642E-v SELKVLVSYL   | 427   | >KIT-K642E-r SELEVLSYL   | 105  | 322   |
| >KIT-K642E-v SELKVLVSYL   | 54    | >KIT-K642E-r SELEVLSYL   | 36   | 18    |
| >KIT-K642E-v SELKVLVSYL   | 97    | >KIT-K642E-r SELEVLSYL   | 63   | 34    |
| >KIT-K642E-v SELKVLVSY    | 171   | >KIT-K642E-r SELEVLSY    | 148  | 23    |
| >KIT-K642E-v SELKVLVSY    | 54    | >KIT-K642E-r SELEVLSY    | 34   | 20    |
| >KIT-K642E-v SELKVLVSYL   | 151   | >KIT-K642E-r SELEVLSYL   | 78   | 73    |
| >KIT-K642E-v SELKVLVSYLG  | 270   | >KIT-K642E-r SELEVLSYLG  | 268  | 2     |
| >KIT-K642E-v SELKVLVSYLG  | 276   | >KIT-K642E-r SELEVLSYLG  | 364  | 88    |
| >KIT-K642E-v SELKVLVSYL   | 437   | >KIT-K642E-r SELEVLSYL   | 1482 | 1045  |
| >KIT-K642E-v SELKVLVSYL   | 10    | >KIT-K642E-r SELEVLSYL   | 8    | 2     |
| >KIT-K642E-v MSELKVLVSY   | 11    | >KIT-K642E-r MSELEVLSY   | 13   | 2     |
| >KIT-K642E-v MSELKVLVSY   | 246   | >KIT-K642E-r MSELEVLSY   | 226  | 20    |
| >KIT-K642E-v MSELKVLVSY   | 4     | >KIT-K642E-r MSELEVLSY   | 5    | 1     |
| >KIT-K642E-v MSELKVLVSYL  | 32    | >KIT-K642E-r MSELEVLSYL  | 51   | 19    |
| >KIT-K642E-v MSELKVLVSY   | 738   | >KIT-K642E-r MSELEVLSY   | 174  | 564   |
| >KIT-K642E-v MSELKVLVSYL  | 665   | >KIT-K642E-r MSELEVLSYL  | 313  | 352   |
| >KIT-K642E-v MSELKVLVSY   | 485   | >KIT-K642E-r MSELEVLSY   | 515  | 30    |
| >KIT-K642E-v MSELKVLVSYL  | 106   | >KIT-K642E-r MSELEVLSYL  | 164  | 58    |
| >KIT-K642E-v LMSELKVLVSY  | 472   | >KIT-K642E-r LMSELEVLSY  | 418  | 54    |
| >KIT-K642E-v LMSELKVL     | 384   | >KIT-K642E-r LMSELEVL    | 67   | 317   |
| >KIT-K642E-v LMSELKVLVSYI | 22    | >KIT-K642E-r LMSELEVLSYI | 14   | 8     |
| >KIT-K642E-v LMSELKVL     | 28    | >KIT-K642E-r LMSELEVL    | 6    | 22    |
| >KIT-K642E-v LMSELKVLVLS  | 576   | >KIT-K642E-r LMSELEVLS   | 205  | 371   |
| >KIT-K642E-v LMSELKVLVSYI | 3     | >KIT-K642E-r LMSELEVLSYI | 2    | 1     |
| >KIT-K642E-v LMSELKVL     | 53    | >KIT-K642E-r LMSELEVL    | 41   | 12    |
| >KIT-K642E-v LMSELKVLVSYI | 11    | >KIT-K642E-r LMSELEVLSYI | 9    | 2     |
| >KIT-K642E-v LMSELKVL     | 735   | >KIT-K642E-r LMSELEVL    | 110  | 625   |
| >KIT-K642E-v LMSELKVLVSYI | 31    | >KIT-K642E-r LMSELEVLSYI | 20   | 11    |
| >KIT-K642E-v LMSELKVL     | 19    | >KIT-K642E-r LMSELEVL    | 9    | 10    |
| >KIT-K642E-v LMSELKVLVSYI | 3     | >KIT-K642E-r LMSELEVLSYI | 3    | 0     |

|                          |     |                          |     |     |
|--------------------------|-----|--------------------------|-----|-----|
| >KIT-K642E-v LMSELKVL    | 53  | >KIT-K642E-r LMSELEVL    | 14  | 39  |
| >KIT-K642E-v LMSELKVLSYI | 8   | >KIT-K642E-r LMSELEVLSYI | 5   | 3   |
| >KIT-K642E-v LMSELKVL    | 116 | >KIT-K642E-r LMSELEVL    | 34  | 82  |
| >KIT-K642E-v LMSELKVLSYI | 12  | >KIT-K642E-r LMSELEVLSYI | 9   | 3   |
| >KIT-K642E-v LMSELKVL    | 104 | >KIT-K642E-r LMSELEVL    | 20  | 84  |
| >KIT-K642E-v LMSELKVLSYI | 8   | >KIT-K642E-r LMSELEVLSYI | 5   | 3   |
| >KIT-K642E-v LMSELKVL    | 6   | >KIT-K642E-r LMSELEVL    | 4   | 2   |
| >KIT-K642E-v LMSELKVLSYI | 3   | >KIT-K642E-r LMSELEVLSYI | 2   | 1   |
| >KIT-K642E-v LMSELKVLSY  | 243 | >KIT-K642E-r LMSELEVLSY  | 187 | 56  |
| >KIT-K642E-v LMSELKVLSY  | 465 | >KIT-K642E-r LMSELEVLSY  | 677 | 212 |
| >KIT-K642E-v LMSELKVLSY  | 131 | >KIT-K642E-r LMSELEVLSY  | 98  | 33  |
| >KIT-K642E-v LMSELKVL    | 357 | >KIT-K642E-r LMSELEVL    | 246 | 111 |
| >KIT-K642E-v LMSELKVLSY  | 44  | >KIT-K642E-r LMSELEVLSY  | 46  | 2   |
| >KIT-K642E-v LMSELKVLSYI | 435 | >KIT-K642E-r LMSELEVLSYI | 532 | 97  |
| >KIT-K642E-v LMSELKVL    | 289 | >KIT-K642E-r LMSELEVL    | 302 | 13  |
| >KIT-K642E-v LMSELKVLSY  | 30  | >KIT-K642E-r LMSELEVLSY  | 19  | 11  |
| >KIT-K642E-v LMSELKVLSYI | 347 | >KIT-K642E-r LMSELEVLSYI | 284 | 63  |
| >KIT-K642E-v LMSELKVLSY  | 349 | >KIT-K642E-r LMSELEVLSY  | 372 | 23  |
| >KIT-K642E-v LMSELKVLSY  | 908 | >KIT-K642E-r LMSELEVLSY  | 367 | 541 |
| >KIT-K642E-v LMSELKVLSY  | 254 | >KIT-K642E-r LMSELEVLSY  | 138 | 116 |
| >KIT-K642E-v ALMSELKV    | 13  | >KIT-K642E-r ALMSELEV    | 8   | 5   |
| >KIT-K642E-v ALMSELKVL   | 93  | >KIT-K642E-r ALMSELEVL   | 19  | 74  |
| >KIT-K642E-v ALMSELKV    | 7   | >KIT-K642E-r ALMSELEV    | 3   | 4   |
| >KIT-K642E-v ALMSELKVL   | 16  | >KIT-K642E-r ALMSELEVL   | 3   | 13  |
| >KIT-K642E-v ALMSELKVLS  | 650 | >KIT-K642E-r ALMSELEVLS  | 215 | 435 |
| >KIT-K642E-v ALMSELKV    | 6   | >KIT-K642E-r ALMSELEV    | 5   | 1   |
| >KIT-K642E-v ALMSELKVL   | 18  | >KIT-K642E-r ALMSELEVL   | 12  | 6   |
| >KIT-K642E-v ALMSELKV    | 25  | >KIT-K642E-r ALMSELEV    | 10  | 15  |
| >KIT-K642E-v ALMSELKVL   | 476 | >KIT-K642E-r ALMSELEVL   | 28  | 448 |
| >KIT-K642E-v ALMSELKV    | 4   | >KIT-K642E-r ALMSELEV    | 2   | 2   |
| >KIT-K642E-v ALMSELKVL   | 41  | >KIT-K642E-r ALMSELEVL   | 10  | 31  |
| >KIT-K642E-v ALMSELKV    | 7   | >KIT-K642E-r ALMSELEV    | 5   | 2   |
| >KIT-K642E-v ALMSELKVL   | 31  | >KIT-K642E-r ALMSELEVL   | 8   | 23  |
| >KIT-K642E-v ALMSELKV    | 9   | >KIT-K642E-r ALMSELEV    | 7   | 2   |
| >KIT-K642E-v ALMSELKVL   | 539 | >KIT-K642E-r ALMSELEVL   | 65  | 474 |
| >KIT-K642E-v ALMSELKV    | 4   | >KIT-K642E-r ALMSELEV    | 3   | 1   |
| >KIT-K642E-v ALMSELKVL   | 39  | >KIT-K642E-r ALMSELEVL   | 6   | 33  |
| >KIT-K642E-v ALMSELKV    | 2   | >KIT-K642E-r ALMSELEV    | 2   | 0   |
| >KIT-K642E-v ALMSELKVL   | 10  | >KIT-K642E-r ALMSELEVL   | 6   | 4   |
| >KIT-K642E-v ALMSELKVLS  | 293 | >KIT-K642E-r ALMSELEVLS  | 447 | 154 |
| >KIT-K642E-v ALMSELKVLS  | 306 | >KIT-K642E-r ALMSELEVLS  | 232 | 74  |
| >KIT-K642E-v ALMSELKVLS  | 200 | >KIT-K642E-r ALMSELEVLS  | 114 | 86  |
| >KIT-K642E-v ALMSELKVLS  | 125 | >KIT-K642E-r ALMSELEVLS  | 80  | 45  |

|                         |       |                         |      |       |
|-------------------------|-------|-------------------------|------|-------|
| >KIT-K642E-v ALMSELKVLS | 115   | >KIT-K642E-r ALMSELEVL` | 88   | 27    |
| >KIT-K642E-v ALMSELKVLS | 592   | >KIT-K642E-r ALMSELEVL` | 405  | 187   |
| >KIT-K642E-v ALMSELKVLS | 74    | >KIT-K642E-r ALMSELEVL` | 44   | 30    |
| >KIT-K642E-v ALMSELKVL  | 1124  | >KIT-K642E-r ALMSELEVL  | 355  | 769   |
| >KIT-K642E-v ALMSELKVLS | 48    | >KIT-K642E-r ALMSELEVL` | 40   | 8     |
| >KIT-K642E-v ALMSELKVLS | 439   | >KIT-K642E-r ALMSELEVL` | 523  | 84    |
| >KIT-K642E-v ALMSELKVL  | 216   | >KIT-K642E-r ALMSELEVL  | 371  | 155   |
| >KIT-K642E-v ALMSELKVLS | 25    | >KIT-K642E-r ALMSELEVL` | 23   | 2     |
| >KIT-K642E-v ALMSELKVLS | 270   | >KIT-K642E-r ALMSELEVL` | 510  | 240   |
| >KIT-K642E-v EALMSELK   | 22    | >KIT-K642E-r EALMSELE   | 5870 | 5848  |
| >KIT-K642E-v EALMSELKV  | 192   | >KIT-K642E-r EALMSELEV  | 113  | 79    |
| >KIT-K642E-v REALMSELKV | 131   | >KIT-K642E-r REALMSELEV | 55   | 76    |
| >KIT-K642E-v REALMSELKV | 58    | >KIT-K642E-r REALMSELEV | 185  | 127   |
| >KIT-K642E-v REALMSELKV | 30    | >KIT-K642E-r REALMSELEV | 12   | 18    |
| >KIT-K642E-v REALMSELKV | 131   | >KIT-K642E-r REALMSELEV | 94   | 37    |
| >KIT-K642E-v REALMSELKV | 74    | >KIT-K642E-r REALMSELEV | 71   | 3     |
| >KIT-K642E-v REALMSELKV | 566   | >KIT-K642E-r REALMSELEV | 256  | 310   |
| >KIT-K642E-v REALMSELKV | 425   | >KIT-K642E-r REALMSELEV | 199  | 226   |
| >KIT-K642E-v REALMSELK  | 146   | >KIT-K642E-r REALMSELE  | 203  | 57    |
| >KIT-K642E-v REALMSELKV | 41    | >KIT-K642E-r REALMSELEV | 72   | 31    |
| >KIT-K642E-v REALMSELKV | 10    | >KIT-K642E-r REALMSELEV | 7    | 3     |
| >KIT-K735M- KADKRRSVR   | 52    | >KIT-K735M- MADKRRSVR   | 81   | 29    |
| >KIT-K735M- KADKRRSVR   | 6523  | >KIT-K735M- MADKRRSVR   | 204  | 6319  |
| >KIT-K735M- KADKRRSVR   | 3984  | >KIT-K735M- MADKRRSVR   | 61   | 3923  |
| >KIT-K735M- KADKRRSV    | 4438  | >KIT-K735M- MADKRRSV    | 467  | 3971  |
| >KIT-K735M- TKADKRRSVR  | 23483 | >KIT-K735M- TMADKRRSV   | 463  | 23020 |
| >KIT-K735M- TKADKRRSV   | 14755 | >KIT-K735M- TMADKRRSV   | 74   | 14681 |
| >KIT-K735M- TKADKRRSVR  | 18152 | >KIT-K735M- TMADKRRSV   | 116  | 18036 |
| >KIT-K735M- TKADKRRSV   | 11346 | >KIT-K735M- TMADKRRSV   | 11   | 11335 |
| >KIT-K735M- TKADKRRSVR  | 17406 | >KIT-K735M- TMADKRRSV   | 45   | 17361 |
| >KIT-K735M- TKADKRRSV   | 18204 | >KIT-K735M- TMADKRRSV   | 33   | 18171 |
| >KIT-K735M- TKADKRRSVR  | 22233 | >KIT-K735M- TMADKRRSV   | 112  | 22121 |
| >KIT-K735M- TKADKRRSV   | 22591 | >KIT-K735M- TMADKRRSV   | 488  | 22103 |
| >KIT-K735M- TKADKRRSV   | 22625 | >KIT-K735M- TMADKRRSV   | 142  | 22483 |
| >KIT-K735M- TKADKRRSV   | 23464 | >KIT-K735M- TMADKRRSV   | 327  | 23137 |
| >KIT-K735M- TKADKRRSV   | 11258 | >KIT-K735M- TMADKRRSV   | 3    | 11255 |
| >KIT-K735M- TKADKRRSVR  | 25468 | >KIT-K735M- TMADKRRSV   | 19   | 25449 |
| >KIT-K735M- TKADKRRSVR  | 1400  | >KIT-K735M- TMADKRRSV   | 68   | 1332  |
| >KIT-K735M- TKADKRRSVR  | 7563  | >KIT-K735M- TMADKRRSV   | 97   | 7466  |
| >KIT-K735M- TKADKRRSV   | 4537  | >KIT-K735M- TMADKRRSV   | 273  | 4264  |
| >KIT-K735M- TKADKRRSVR  | 4380  | >KIT-K735M- TMADKRRSV   | 413  | 3967  |
| >KIT-K735M- KPGVSYVVPT  | 38135 | >KIT-K735M- KPGVSYVVPT  | 486  | 37649 |
| >KIT-K735M- KPGVSYVVPT  | 21394 | >KIT-K735M- KPGVSYVVPT  | 172  | 21222 |

|                         |       |                         |       |       |
|-------------------------|-------|-------------------------|-------|-------|
| >KIT-K735M- KPGVSYVVPT  | 16823 | >KIT-K735M- KPGVSYVVPT  | 431   | 16392 |
| >KIT-K735M- VPTKADKRRS  | 359   | >KIT-K735M- VPTMADKRR   | 1583  | 1224  |
| >KIT-K735M- VPTKADKRRS  | 73    | >KIT-K735M- VPTMADKRR   | 69    | 4     |
| >KIT-K735M- VVPTKADK    | 1679  | >KIT-K735M- VVPTMADK    | 433   | 1246  |
| >KIT-K735M- VVPTKADKR   | 1407  | >KIT-K735M- VVPTMADKR   | 370   | 1037  |
| >KIT-K735M- YVVPTKADK   | 909   | >KIT-K735M- YVVPTMADK   | 124   | 785   |
| >KIT-K735M- YVVPTKADK   | 54    | >KIT-K735M- YVVPTMADK   | 27    | 27    |
| >KIT-K735M- YVVPTKADKF  | 37    | >KIT-K735M- YVVPTMADK   | 10    | 27    |
| >KIT-K735M- YVVPTKADKF  | 25    | >KIT-K735M- YVVPTMADK   | 18    | 7     |
| >KIT-K735M- SYVVPTKADK  | 1038  | >KIT-K735M- SYVVPTMADK  | 336   | 702   |
| >KIT-K735M- SYVVPTKADK  | 716   | >KIT-K735M- SYVVPTMADK  | 487   | 229   |
| >KIT-K735M- SYVVPTKADK  | 109   | >KIT-K735M- SYVVPTMADK  | 74    | 35    |
| >KIT-K735M- VSYVVPTK    | 1427  | >KIT-K735M- VSYVVPTM    | 16    | 1411  |
| >KIT-K735M- VSYVVPTK    | 47    | >KIT-K735M- VSYVVPTM    | 16083 | 16036 |
| >KIT-K735M- VSYVVPTKAD  | 73    | >KIT-K735M- VSYVVPTMAI  | 55    | 18    |
| >KIT-K735M- VSYVVPTK    | 15    | >KIT-K735M- VSYVVPTM    | 16699 | 16684 |
| >KIT-K735M- VSYVVPTKAD  | 43    | >KIT-K735M- VSYVVPTMAI  | 20    | 23    |
| >KIT-K735M- VSYVVPTK    | 266   | >KIT-K735M- VSYVVPTM    | 6375  | 6109  |
| >KIT-K735M- VSYVVPTK    | 166   | >KIT-K735M- VSYVVPTM    | 20813 | 20647 |
| >KIT-K735M- VSYVVPTKAD  | 273   | >KIT-K735M- VSYVVPTMAI  | 177   | 96    |
| >KIT-K735M- VSYVVPTK    | 3125  | >KIT-K735M- VSYVVPTM    | 126   | 2999  |
| >KIT-K735M- VSYVVPTK    | 5897  | >KIT-K735M- VSYVVPTM    | 6     | 5891  |
| >KIT-K735M- VSYVVPTK    | 11909 | >KIT-K735M- VSYVVPTM    | 26    | 11883 |
| >KIT-K735M- VSYVVPTK    | 27249 | >KIT-K735M- VSYVVPTM    | 308   | 26941 |
| >KIT-K735M- GVSYVVPTK   | 171   | >KIT-K735M- GVSYVVPTM   | 19037 | 18866 |
| >KIT-K735M- GVSYVVPTK   | 16    | >KIT-K735M- GVSYVVPTM   | 18515 | 18499 |
| >KIT-K735M- GVSYVVPTK   | 150   | >KIT-K735M- GVSYVVPTM   | 6926  | 6776  |
| >KIT-K735M- GVSYVVPTK   | 81    | >KIT-K735M- GVSYVVPTM   | 18029 | 17948 |
| >KIT-K735M- GVSYVVPTK   | 8825  | >KIT-K735M- GVSYVVPTM   | 44    | 8781  |
| >KIT-K786N-1 KNCIHRDLAA | 56    | >KIT-K786N-1 NNCIHRDLAA | 1802  | 1746  |
| >KIT-K786N-1 KNCIHRDLAA | 312   | >KIT-K786N-1 NNCIHRDLAA | 2582  | 2270  |
| >KIT-K786N-1 SKNCIHRDL  | 164   | >KIT-K786N-1 SNNCIHRDL  | 9175  | 9011  |
| >KIT-K786N-1 VAKGMAFLA  | 184   | >KIT-K786N-1 VAKGMAFLA  | 24769 | 24585 |
| >KIT-K786N-1 VAKGMAFLA  | 25    | >KIT-K786N-1 VAKGMAFLA  | 7920  | 7895  |
| >KIT-K786N-1 ASKNCIHR   | 2034  | >KIT-K786N-1 ASNNCIHR   | 210   | 1824  |
| >KIT-K786N-1 ASKNCIHR   | 224   | >KIT-K786N-1 ASNNCIHR   | 3867  | 3643  |
| >KIT-K786N-1 ASKNCIHRDL | 190   | >KIT-K786N-1 ASNNCIHRDL | 3342  | 3152  |
| >KIT-K786N-1 ASKNCIHR   | 13    | >KIT-K786N-1 ASNNCIHR   | 16    | 3     |
| >KIT-K786N-1 ASKNCIHR   | 746   | >KIT-K786N-1 ASNNCIHR   | 345   | 401   |
| >KIT-K786N-1 ASKNCIHRDL | 399   | >KIT-K786N-1 ASNNCIHRDL | 492   | 93    |
| >KIT-K786N-1 ASKNCIHR   | 168   | >KIT-K786N-1 ASNNCIHR   | 156   | 12    |
| >KIT-K786N-1 LASKNCIHR  | 431   | >KIT-K786N-1 LASNNCIHR  | 248   | 183   |
| >KIT-K786N-1 LASKNCIHR  | 63    | >KIT-K786N-1 LASNNCIHR  | 53    | 10    |

|                          |       |                          |       |       |
|--------------------------|-------|--------------------------|-------|-------|
| >KIT-K786N-1 FLASKNCI    | 35    | >KIT-K786N-1 FLASNCCI    | 18    | 17    |
| >KIT-K786N-1 FLASKNCI    | 4     | >KIT-K786N-1 FLASNCCI    | 3     | 1     |
| >KIT-K786N-1 FLASKNCIHR1 | 128   | >KIT-K786N-1 FLASNCCIHR  | 116   | 12    |
| >KIT-K786N-1 FLASKNCI    | 11    | >KIT-K786N-1 FLASNCCI    | 8     | 3     |
| >KIT-K786N-1 FLASKNCI    | 150   | >KIT-K786N-1 FLASNCCI    | 62    | 88    |
| >KIT-K786N-1 FLASKNCI    | 26    | >KIT-K786N-1 FLASNCCI    | 15    | 11    |
| >KIT-K786N-1 FLASKNCI    | 18    | >KIT-K786N-1 FLASNCCI    | 7     | 11    |
| >KIT-K786N-1 FLASKNCI    | 17    | >KIT-K786N-1 FLASNCCI    | 13    | 4     |
| >KIT-K786N-1 FLASKNCI    | 26    | >KIT-K786N-1 FLASNCCI    | 10    | 16    |
| >KIT-K786N-1 FLASKNCI    | 7     | >KIT-K786N-1 FLASNCCI    | 5     | 2     |
| >KIT-K786N-1 FLASKNCIHR1 | 196   | >KIT-K786N-1 FLASNCCIHR  | 102   | 94    |
| >KIT-K786N-1 FLASKNCIHR  | 470   | >KIT-K786N-1 FLASNCCIHR  | 566   | 96    |
| >KIT-K786N-1 FLASKNCIHR  | 49    | >KIT-K786N-1 FLASNCCIHR  | 29    | 20    |
| >KIT-K786N-1 FLASKNCI    | 1069  | >KIT-K786N-1 FLASNCCI    | 407   | 662   |
| >KIT-K786N-1 FLASKNCI    | 233   | >KIT-K786N-1 FLASNCCI    | 2455  | 2222  |
| >KIT-K786N-1 FLASKNCIHR  | 188   | >KIT-K786N-1 FLASNCCIHR  | 159   | 29    |
| >KIT-K786N-1 AFLASKNCI   | 104   | >KIT-K786N-1 AFLASNCCI   | 42    | 62    |
| >KIT-K786N-1 AFLASKNCIHI | 19    | >KIT-K786N-1 AFLASNCCIHI | 23    | 4     |
| >KIT-K786N-1 AFLASKNCIHI | 522   | >KIT-K786N-1 AFLASNCCIHI | 438   | 84    |
| >KIT-K786N-1 AFLASKNCIHI | 97    | >KIT-K786N-1 AFLASNCCIHI | 100   | 3     |
| >KIT-K786N-1 MAFLASKNCI  | 241   | >KIT-K786N-1 MAFLASNCC   | 675   | 434   |
| >KIT-K786N-1 MAFLASKNCI  | 987   | >KIT-K786N-1 MAFLASNCC   | 436   | 551   |
| >KIT-K786N-1 MAFLASKNCI  | 714   | >KIT-K786N-1 MAFLASNCC   | 242   | 472   |
| >KIT-K786N-1 MAFLASKNCI  | 417   | >KIT-K786N-1 MAFLASNCC   | 244   | 173   |
| >KIT-K786N-1 MAFLASKNCI  | 237   | >KIT-K786N-1 MAFLASNCC   | 97    | 140   |
| >KIT-K786N-1 MAFLASKNCI  | 642   | >KIT-K786N-1 MAFLASNCC   | 376   | 266   |
| >KIT-K786N-1 GMAFLASKN   | 42    | >KIT-K786N-1 GMAFLASN    | 15    | 27    |
| >KIT-K786N-1 GMAFLASKN   | 118   | >KIT-K786N-1 GMAFLASN    | 52    | 66    |
| >KIT-K786N-1 GMAFLASKN   | 471   | >KIT-K786N-1 GMAFLASN    | 395   | 76    |
| >KIT-K786N-1 GMAFLASKN   | 129   | >KIT-K786N-1 GMAFLASN    | 59    | 70    |
| >KIT-K786N-1 GMAFLASKN   | 90    | >KIT-K786N-1 GMAFLASN    | 69    | 21    |
| >KIT-K786N-1 GMAFLASK    | 53    | >KIT-K786N-1 GMAFLASN    | 17265 | 17212 |
| >KIT-K786N-1 GMAFLASK    | 20    | >KIT-K786N-1 GMAFLASN    | 19796 | 19776 |
| >KIT-K786N-1 GMAFLASK    | 390   | >KIT-K786N-1 GMAFLASN    | 24117 | 23727 |
| >KIT-K786N-1 KGMAFLASK   | 109   | >KIT-K786N-1 KGMAFLASN   | 20089 | 19980 |
| >KIT-K786N-1 KGMAFLASK   | 23    | >KIT-K786N-1 KGMAFLASN   | 16871 | 16848 |
| >KIT-K786N-1 KGMAFLASK   | 12    | >KIT-K786N-1 KGMAFLASN   | 5462  | 5450  |
| >KIT-K786N-1 KGMAFLASK   | 171   | >KIT-K786N-1 KGMAFLASN   | 13016 | 12845 |
| >KIT-K786N-1 KGMAFLASK   | 406   | >KIT-K786N-1 KGMAFLASN   | 13234 | 12828 |
| >KIT-K818R-1 IKNDSNYV    | 63    | >KIT-K818R-r IRNDSNYV    | 373   | 310   |
| >KIT-K818R-1 IKNDSNYVV   | 26    | >KIT-K818R-r IRNDSNYVV   | 209   | 183   |
| >KIT-K818R-1 IKNDSNYVVK  | 83    | >KIT-K818R-r IRNDSNYVVK  | 542   | 459   |
| >KIT-K818R-1 IKNDSNYVVK  | 16892 | >KIT-K818R-r IRNDSNYVVK  | 323   | 16569 |

|                          |       |                          |       |       |
|--------------------------|-------|--------------------------|-------|-------|
| >KIT-K818R-v DIKNDSNY    | 198   | >KIT-K818R-r DIRNDSNY    | 534   | 336   |
| >KIT-K818R-v DIKNDSNY    | 243   | >KIT-K818R-r DIRNDSNY    | 158   | 85    |
| >KIT-K818R-v DIKNDSNY    | 1903  | >KIT-K818R-r DIRNDSNY    | 143   | 1760  |
| >KIT-K818R-v DIKNDSNYVV  | 1554  | >KIT-K818R-r DIRNDSNYVV  | 354   | 1200  |
| >KIT-K818R-v DIKNDSNY    | 462   | >KIT-K818R-r DIRNDSNY    | 831   | 369   |
| >KIT-K818R-v DIKNDSNYVV  | 291   | >KIT-K818R-r DIRNDSNYVV  | 733   | 442   |
| >KIT-K818R-v DIKNDSNY    | 694   | >KIT-K818R-r DIRNDSNY    | 468   | 226   |
| >KIT-K818R-v RDIKNDSNYV  | 394   | >KIT-K818R-r RDIRNDSNYV  | 470   | 76    |
| >KIT-K818R-v RDIKNDSNYV  | 299   | >KIT-K818R-r RDIRNDSNYV  | 289   | 10    |
| >KIT-K818R-v RDIKNDSNYV  | 87    | >KIT-K818R-r RDIRNDSNYV  | 83    | 4     |
| >KIT-K818R-v ARDIKNDSNY  | 420   | >KIT-K818R-r ARDIRNDSNY  | 387   | 33    |
| >KIT-K818R-v ARDIKNDSNY  | 200   | >KIT-K818R-r ARDIRNDSNY  | 119   | 81    |
| >KIT-K818R-v LARDIKNDSN  | 241   | >KIT-K818R-r LARDIRNDSN  | 175   | 66    |
| >KIT-K818R-v LARDIKNDSN  | 387   | >KIT-K818R-r LARDIRNDSN  | 303   | 84    |
| >KIT-K818R-v LARDIKNDSN  | 317   | >KIT-K818R-r LARDIRNDSN  | 192   | 125   |
| >KIT-K818R-v LARDIKNDSN  | 30    | >KIT-K818R-r LARDIRNDSN  | 32    | 2     |
| >KIT-K818R-v LARDIKNDSN  | 176   | >KIT-K818R-r LARDIRNDSN  | 151   | 25    |
| >KIT-K818R-v LARDIKNDSN  | 46    | >KIT-K818R-r LARDIRNDSN  | 50    | 4     |
| >KIT-K818R-v DFGLARDIK   | 2833  | >KIT-K818R-r DFGLARDIR   | 92    | 2741  |
| >KIT-K918E-v KQIVQLIEKQI | 193   | >KIT-K918E-r EQIVQLIEKQI | 2968  | 2775  |
| >KIT-K918E-v KQIVQLIEK   | 38    | >KIT-K918E-r EQIVQLIEK   | 854   | 816   |
| >KIT-K918E-v KQIVQLIEK   | 58    | >KIT-K918E-r EQIVQLIEK   | 12209 | 12151 |
| >KIT-K918E-v KQIVQLIEK   | 152   | >KIT-K918E-r EQIVQLIEK   | 10265 | 10113 |
| >KIT-K918E-v KQIVQLIEKQI | 268   | >KIT-K918E-r EQIVQLIEKQI | 2535  | 2267  |
| >KIT-K918E-v KQIVQLIEKQI | 355   | >KIT-K918E-r EQIVQLIEKQI | 4610  | 4255  |
| >KIT-K918E-v FKQIVQLI    | 1879  | >KIT-K918E-r FEQIVQLI    | 4     | 1875  |
| >KIT-K918E-v FKQIVQLI    | 437   | >KIT-K918E-r FEQIVQLI    | 8127  | 7690  |
| >KIT-K918E-v FKQIVQLI    | 21611 | >KIT-K918E-r FEQIVQLI    | 235   | 21376 |
| >KIT-K918E-v FKQIVQLI    | 28639 | >KIT-K918E-r FEQIVQLI    | 218   | 28421 |
| >KIT-K918E-v FKQIVQLI    | 671   | >KIT-K918E-r FEQIVQLI    | 17    | 654   |
| >KIT-K918E-v TFKQIVQLI   | 369   | >KIT-K918E-r TFEQIVQLI   | 534   | 165   |
| >KIT-K918E-v TFKQIVQLI   | 147   | >KIT-K918E-r TFEQIVQLI   | 385   | 238   |
| >KIT-K918E-v TFKQIVQL    | 137   | >KIT-K918E-r TFEQIVQL    | 229   | 92    |
| >KIT-K918E-v TFKQIVQLI   | 350   | >KIT-K918E-r TFEQIVQLI   | 608   | 258   |
| >KIT-K918E-v TFKQIVQLIEK | 72    | >KIT-K918E-r TFEQIVQLIEK | 8022  | 7950  |
| >KIT-K918E-v TFKQIVQLIEK | 337   | >KIT-K918E-r TFEQIVQLIEK | 4925  | 4588  |
| >KIT-K918E-v PTFKQIVQL   | 2685  | >KIT-K918E-r PTFEQIVQL   | 182   | 2503  |
| >KIT-K918E-v PTFKQIVQLI  | 3367  | >KIT-K918E-r PTFEQIVQLI  | 395   | 2972  |
| >KIT-K918E-v PTFKQIVQL   | 441   | >KIT-K918E-r PTFEQIVQL   | 225   | 216   |
| >KIT-K918E-v PTFKQIVQLI  | 352   | >KIT-K918E-r PTFEQIVQLI  | 207   | 145   |
| >KIT-K918E-v PTFKQIVQL   | 359   | >KIT-K918E-r PTFEQIVQL   | 139   | 220   |
| >KIT-K918E-v RPTFKQIVQL  | 461   | >KIT-K918E-r RPTFEQIVQL  | 923   | 462   |
| >KIT-K918E-v RPTFKQIV    | 110   | >KIT-K918E-r RPTFEQIV    | 686   | 576   |



|                          |       |                          |       |       |
|--------------------------|-------|--------------------------|-------|-------|
| >KIT-K918E-v RPTFKQIVQL  | 97    | >KIT-K918E-r RPTFEQIVQL  | 658   | 561   |
| >KIT-K918E-v RPTFKQIVQLI | 408   | >KIT-K918E-r RPTFEQIVQLI | 1448  | 1040  |
| >KIT-K918E-v KRPTFKQIVQ  | 398   | >KIT-K918E-r KRPTFEQIVQ  | 547   | 149   |
| >KIT-K918E-v KRPTFKQI    | 60    | >KIT-K918E-r KRPTFEQI    | 88    | 28    |
| >KIT-K918E-v KRPTFKQIV   | 118   | >KIT-K918E-r KRPTFEQIV   | 219   | 101   |
| >KIT-K918E-v KRPTFKQIVQ  | 40    | >KIT-K918E-r KRPTFEQIVQ  | 51    | 11    |
| >KIT-K918E-v KRPTFKQIVQ  | 54    | >KIT-K918E-r KRPTFEQIVQ  | 86    | 32    |
| >KIT-K918E-v LKRPTFKQI   | 247   | >KIT-K918E-r LKRPTFEQI   | 981   | 734   |
| >KIT-K918E-v LKRPTFKQ    | 827   | >KIT-K918E-r LKRPTFEQ    | 428   | 399   |
| >KIT-K918E-v LKRPTFKQI   | 15    | >KIT-K918E-r LKRPTFEQI   | 29    | 14    |
| >KIT-K918E-v LKRPTFKQIV  | 16    | >KIT-K918E-r LKRPTFEQIV  | 15    | 1     |
| >KIT-K918E-v LKRPTFKQIVC | 330   | >KIT-K918E-r LKRPTFEQIVC | 321   | 9     |
| >KIT-K918E-v LKRPTFKQI   | 556   | >KIT-K918E-r LKRPTFEQI   | 492   | 64    |
| >KIT-K918E-v PLKRPTFKQI  | 1159  | >KIT-K918E-r PLKRPTFEQI  | 434   | 725   |
| >KIT-K918E-v PLKRPTFKQIV | 26    | >KIT-K918E-r PLKRPTFEQIV | 24    | 2     |
| >KIT-K918E-v PLKRPTFK    | 219   | >KIT-K918E-r PLKRPTFE    | 20688 | 20469 |
| >KIT-K918E-v PLKRPTFK    | 80    | >KIT-K918E-r PLKRPTFE    | 14281 | 14201 |
| >KIT-K918E-v DPLKRPTFKQ  | 373   | >KIT-K918E-r DPLKRPTFEQ  | 781   | 408   |
| >KIT-L576F-v LPYDHKWEF   | 945   | >KIT-L576F-n FPYDHKWEF   | 448   | 497   |
| >KIT-L576F-v LPYDHKWEFI  | 169   | >KIT-L576F-n FPYDHKWEFI  | 1053  | 884   |
| >KIT-L576F-v LPYDHKWEFI  | 170   | >KIT-L576F-n FPYDHKWEFI  | 82    | 88    |
| >KIT-L576F-v LPYDHKWEFI  | 359   | >KIT-L576F-n FPYDHKWEFI  | 82    | 277   |
| >KIT-L576F-v LPYDHKWEF   | 175   | >KIT-L576F-n FPYDHKWEF   | 137   | 38    |
| >KIT-L576F-v LPYDHKWEF   | 1030  | >KIT-L576F-n FPYDHKWEF   | 325   | 705   |
| >KIT-L576F-v LPYDHKWEF   | 272   | >KIT-L576F-n FPYDHKWEF   | 157   | 115   |
| >KIT-L576F-v LPYDHKWEF   | 162   | >KIT-L576F-n FPYDHKWEF   | 150   | 12    |
| >KIT-L576F-v LPYDHKWEF   | 11    | >KIT-L576F-n FPYDHKWEF   | 8     | 3     |
| >KIT-L576F-v LPYDHKWEFI  | 212   | >KIT-L576F-n FPYDHKWEFI  | 86    | 126   |
| >KIT-L576F-v LPYDHKWEF   | 471   | >KIT-L576F-n FPYDHKWEF   | 405   | 66    |
| >KIT-L576F-v LPYDHKWEF   | 18    | >KIT-L576F-n FPYDHKWEF   | 10    | 8     |
| >KIT-L576F-v LPYDHKWE    | 1757  | >KIT-L576F-n FPYDHKWE    | 457   | 1300  |
| >KIT-L576F-v LPYDHKWEF   | 2431  | >KIT-L576F-n FPYDHKWEF   | 389   | 2042  |
| >KIT-L576F-v LPYDHKWEFI  | 1344  | >KIT-L576F-n FPYDHKWEFI  | 158   | 1186  |
| >KIT-L576F-v LPYDHKWEFI  | 124   | >KIT-L576F-n FPYDHKWEFI  | 36    | 88    |
| >KIT-L576F-v LPYDHKWEF   | 67    | >KIT-L576F-n FPYDHKWEF   | 41    | 26    |
| >KIT-L576F-v LPYDHKWEF   | 11    | >KIT-L576F-n FPYDHKWEF   | 7     | 4     |
| >KIT-L576F-v LPYDHKWEFI  | 96    | >KIT-L576F-n FPYDHKWEFI  | 70    | 26    |
| >KIT-L576F-v QLPYDHKWE   | 1418  | >KIT-L576F-n QFPYDHKWE   | 79    | 1339  |
| >KIT-L576F-v QLPYDHKWE   | 1361  | >KIT-L576F-n QFPYDHKWE   | 99    | 1262  |
| >KIT-L576F-v QLPYDHKW    | 10657 | >KIT-L576F-n QFPYDHKW    | 147   | 10510 |
| >KIT-L576F-v QLPYDHKWE   | 446   | >KIT-L576F-n QFPYDHKWE   | 8     | 438   |
| >KIT-L576F-v NNYVYIDPTC  | 4549  | >KIT-L576F-n NNYVYIDPTC  | 319   | 4230  |
| >KIT-L576F-v TQLPYDHKW   | 34    | >KIT-L576F-n TQFPYDHKW   | 30    | 4     |

|                         |      |                         |       |       |
|-------------------------|------|-------------------------|-------|-------|
| >KIT-L576F-m TQLPYDHK   | 118  | >KIT-L576F-n TQFPYDHK   | 39    | 79    |
| >KIT-L576F-m TQLPYDHKW  | 67   | >KIT-L576F-n TQFPYDHKW  | 74    | 7     |
| >KIT-L576F-m TQLPYDHKW  | 176  | >KIT-L576F-n TQFPYDHKW  | 304   | 128   |
| >KIT-L576F-m TQLPYDHK   | 969  | >KIT-L576F-n TQFPYDHK   | 278   | 691   |
| >KIT-L576F-m TQLPYDHK   | 5528 | >KIT-L576F-n TQFPYDHK   | 416   | 5112  |
| >KIT-L576F-m TQLPYDHKW  | 559  | >KIT-L576F-n TQFPYDHKW  | 83    | 476   |
| >KIT-L576F-m TQLPYDHKW  | 1139 | >KIT-L576F-n TQFPYDHKW  | 479   | 660   |
| >KIT-L576F-m TQLPYDHKW  | 23   | >KIT-L576F-n TQFPYDHKW  | 7     | 16    |
| >KIT-L576F-m TQLPYDHKW  | 306  | >KIT-L576F-n TQFPYDHKW  | 133   | 173   |
| >KIT-L576F-m TQLPYDHKW  | 199  | >KIT-L576F-n TQFPYDHKW  | 73    | 126   |
| >KIT-L576F-m TQLPYDHKW  | 967  | >KIT-L576F-n TQFPYDHKW  | 467   | 500   |
| >KIT-L576F-m TQLPYDHKW  | 186  | >KIT-L576F-n TQFPYDHKW  | 83    | 103   |
| >KIT-L576F-m TQLPYDHKW  | 129  | >KIT-L576F-n TQFPYDHKW  | 80    | 49    |
| >KIT-L576F-m TQLPYDHKW  | 123  | >KIT-L576F-n TQFPYDHKW  | 128   | 5     |
| >KIT-L576F-m TQLPYDHKW  | 526  | >KIT-L576F-n TQFPYDHKW  | 52    | 474   |
| >KIT-L576F-m PTQLPYDHKV | 396  | >KIT-L576F-n PTQFPYDHKV | 436   | 40    |
| >KIT-L576F-m DPTQLPYDH  | 289  | >KIT-L576F-n DPTQFPYDH  | 283   | 6     |
| >KIT-L576F-m DPTQLPYDH† | 46   | >KIT-L576F-n DPTQFPYDH† | 44    | 2     |
| >KIT-L576F-m DPTQLPYDH† | 24   | >KIT-L576F-n DPTQFPYDH† | 16    | 8     |
| >KIT-L576F-m YIDPTQLPY  | 10   | >KIT-L576F-n YIDPTQFPY  | 14    | 4     |
| >KIT-L576F-m YIDPTQLPY  | 2325 | >KIT-L576F-n YIDPTQFPY  | 243   | 2082  |
| >KIT-L576F-m YIDPTQLPY  | 21   | >KIT-L576F-n YIDPTQFPY  | 27    | 6     |
| >KIT-L576F-m YIDPTQLPY  | 1117 | >KIT-L576F-n YIDPTQFPY  | 306   | 811   |
| >KIT-L576F-m YIDPTQLPY  | 11   | >KIT-L576F-n YIDPTQFPY  | 47    | 36    |
| >KIT-L576F-m YIDPTQLPY  | 137  | >KIT-L576F-n YIDPTQFPY  | 283   | 146   |
| >KIT-L576F-m YIDPTQLPY  | 240  | >KIT-L576F-n YIDPTQFPY  | 307   | 67    |
| >KIT-L576F-m YIDPTQLPY  | 42   | >KIT-L576F-n YIDPTQFPY  | 63    | 21    |
| >KIT-L576F-m YIDPTQLPY  | 61   | >KIT-L576F-n YIDPTQFPY  | 38    | 23    |
| >KIT-L576F-m YIDPTQLPY  | 750  | >KIT-L576F-n YIDPTQFPY  | 299   | 451   |
| >KIT-L576F-m YIDPTQLPY  | 116  | >KIT-L576F-n YIDPTQFPY  | 41    | 75    |
| >KIT-L576F-m YIDPTQLPY  | 56   | >KIT-L576F-n YIDPTQFPY  | 24    | 32    |
| >KIT-L576F-m VYIDPTQLPY | 495  | >KIT-L576F-n VYIDPTQFPY | 871   | 376   |
| >KIT-L576F-m VYIDPTQL   | 216  | >KIT-L576F-n VYIDPTQF   | 23    | 193   |
| >KIT-L576F-m VYIDPTQL   | 694  | >KIT-L576F-n VYIDPTQF   | 142   | 552   |
| >KIT-L576F-m VYIDPTQL   | 43   | >KIT-L576F-n VYIDPTQF   | 12    | 31    |
| >KIT-L576F-m VYIDPTQLPY | 319  | >KIT-L576F-n VYIDPTQFPY | 149   | 170   |
| >KIT-L576F-m VYIDPTQL   | 8256 | >KIT-L576F-n VYIDPTQF   | 457   | 7799  |
| >KIT-L576F-m VYIDPTQLPY | 33   | >KIT-L576F-n VYIDPTQFPY | 28    | 5     |
| >KIT-L576F-m VYIDPTQLPY | 64   | >KIT-L576F-n VYIDPTQFPY | 29    | 35    |
| >KIT-L576F-m VYIDPTQLPY | 32   | >KIT-L576F-n VYIDPTQFPY | 70    | 38    |
| >KIT-L576F-m YVYIDPTQL  | 193  | >KIT-L576F-n YVYIDPTQF  | 15551 | 15358 |
| >KIT-L576F-m YVYIDPTQL  | 135  | >KIT-L576F-n YVYIDPTQF  | 6660  | 6525  |
| >KIT-L576F-m YVYIDPTQL  | 24   | >KIT-L576F-n YVYIDPTQF  | 2277  | 2253  |

|                          |      |                          |       |      |
|--------------------------|------|--------------------------|-------|------|
| >KIT-L576F-m YVYIDPTQL   | 261  | >KIT-L576F-n YVYIDPTQF   | 3305  | 3044 |
| >KIT-L576F-m YVYIDPTQL   | 18   | >KIT-L576F-n YVYIDPTQF   | 1741  | 1723 |
| >KIT-L576F-m YVYIDPTQL   | 71   | >KIT-L576F-n YVYIDPTQF   | 9672  | 9601 |
| >KIT-L576F-m YVYIDPTQL   | 16   | >KIT-L576F-n YVYIDPTQF   | 9815  | 9799 |
| >KIT-L576F-m YVYIDPTQLP\ | 492  | >KIT-L576F-n YVYIDPTQFP\ | 608   | 116  |
| >KIT-L576F-m YVYIDPTQLP\ | 330  | >KIT-L576F-n YVYIDPTQFP\ | 159   | 171  |
| >KIT-L576F-m YVYIDPTQLP\ | 387  | >KIT-L576F-n YVYIDPTQFP\ | 718   | 331  |
| >KIT-L576F-m YVYIDPTQLP\ | 91   | >KIT-L576F-n YVYIDPTQFP\ | 70    | 21   |
| >KIT-L576F-m YVYIDPTQL   | 7326 | >KIT-L576F-n YVYIDPTQF   | 121   | 7205 |
| >KIT-L576F-m YVYIDPTQLP\ | 6    | >KIT-L576F-n YVYIDPTQFP\ | 6     | 0    |
| >KIT-L576F-m YVYIDPTQLP\ | 517  | >KIT-L576F-n YVYIDPTQFP\ | 179   | 338  |
| >KIT-L576F-m YVYIDPTQLP\ | 451  | >KIT-L576F-n YVYIDPTQFP\ | 104   | 347  |
| >KIT-L576F-m YVYIDPTQL   | 162  | >KIT-L576F-n YVYIDPTQF   | 10043 | 9881 |
| >KIT-L576F-m YVYIDPTQLP\ | 16   | >KIT-L576F-n YVYIDPTQFP\ | 26    | 10   |
| >KIT-L576F-m YVYIDPTQL   | 6282 | >KIT-L576F-n YVYIDPTQF   | 267   | 6015 |
| >KIT-L576F-m YVYIDPTQLP\ | 63   | >KIT-L576F-n YVYIDPTQFP\ | 79    | 16   |
| >KIT-L576F-m YVYIDPTQL   | 4392 | >KIT-L576F-n YVYIDPTQF   | 400   | 3992 |
| >KIT-L576F-m YVYIDPTQLP\ | 73   | >KIT-L576F-n YVYIDPTQFP\ | 80    | 7    |
| >KIT-L576F-m YVYIDPTQL   | 1334 | >KIT-L576F-n YVYIDPTQF   | 62    | 1272 |
| >KIT-L576F-m YVYIDPTQLP\ | 53   | >KIT-L576F-n YVYIDPTQFP\ | 79    | 26   |
| >KIT-L576F-m YVYIDPTQL   | 27   | >KIT-L576F-n YVYIDPTQF   | 6     | 21   |
| >KIT-L576F-m YVYIDPTQLP\ | 7    | >KIT-L576F-n YVYIDPTQFP\ | 8     | 1    |
| >KIT-L576F-m YVYIDPTQL   | 1902 | >KIT-L576F-n YVYIDPTQF   | 88    | 1814 |
| >KIT-L576F-m YVYIDPTQLP\ | 17   | >KIT-L576F-n YVYIDPTQFP\ | 14    | 3    |
| >KIT-L576F-m YVYIDPTQL   | 423  | >KIT-L576F-n YVYIDPTQF   | 83    | 340  |
| >KIT-L576F-m YVYIDPTQLP\ | 301  | >KIT-L576F-n YVYIDPTQFP\ | 307   | 6    |
| >KIT-L576F-m YVYIDPTQLP\ | 645  | >KIT-L576F-n YVYIDPTQFP\ | 337   | 308  |
| >KIT-L576F-m YVYIDPTQLP\ | 949  | >KIT-L576F-n YVYIDPTQFP\ | 381   | 568  |
| >KIT-L576F-m NYVYIDPTQL  | 150  | >KIT-L576F-n NYVYIDPTQF  | 4562  | 4412 |
| >KIT-L576F-m NYVYIDPTQL  | 825  | >KIT-L576F-n NYVYIDPTQF  | 49    | 776  |
| >KIT-L576F-m NYVYIDPTQL  | 2081 | >KIT-L576F-n NYVYIDPTQF  | 102   | 1979 |
| >KIT-L576F-m NYVYIDPTQL  | 163  | >KIT-L576F-n NYVYIDPTQF  | 30    | 133  |
| >KIT-L576F-m NYVYIDPTQL  | 4205 | >KIT-L576F-n NYVYIDPTQF  | 354   | 3851 |
| >KIT-L576P-v LPYDHKWEF   | 169  | >KIT-L576P-n PPYDHKWEF   | 3588  | 3419 |
| >KIT-L576P-v LPYDHKWEF   | 170  | >KIT-L576P-n PPYDHKWEF   | 779   | 609  |
| >KIT-L576P-v LPYDHKWEF   | 359  | >KIT-L576P-n PPYDHKWEF   | 5983  | 5624 |
| >KIT-L576P-v LPYDHKWEF   | 175  | >KIT-L576P-n PPYDHKWEF   | 3882  | 3707 |
| >KIT-L576P-v LPYDHKWEF   | 272  | >KIT-L576P-n PPYDHKWEF   | 2579  | 2307 |
| >KIT-L576P-v LPYDHKWEF   | 162  | >KIT-L576P-n PPYDHKWEF   | 2318  | 2156 |
| >KIT-L576P-v LPYDHKWEF   | 11   | >KIT-L576P-n PPYDHKWEF   | 107   | 96   |
| >KIT-L576P-v LPYDHKWEF   | 212  | >KIT-L576P-n PPYDHKWEF   | 4618  | 4406 |
| >KIT-L576P-v LPYDHKWEF   | 471  | >KIT-L576P-n PPYDHKWEF   | 8389  | 7918 |
| >KIT-L576P-v LPYDHKWEF   | 18   | >KIT-L576P-n PPYDHKWEF   | 85    | 67   |

|                         |       |                         |       |       |
|-------------------------|-------|-------------------------|-------|-------|
| >KIT-L576P-v LPYDHKWEFI | 124   | >KIT-L576P-n PPYDHKWEFI | 3099  | 2975  |
| >KIT-L576P-v LPYDHKWEF  | 67    | >KIT-L576P-n PPYDHKWEF  | 601   | 534   |
| >KIT-L576P-v LPYDHKWEF  | 11    | >KIT-L576P-n PPYDHKWEF  | 124   | 113   |
| >KIT-L576P-v LPYDHKWEFI | 96    | >KIT-L576P-n PPYDHKWEFI | 98    | 2     |
| >KIT-L576P-v QLPYDHKWE  | 446   | >KIT-L576P-n QPPYDHKWE  | 3601  | 3155  |
| >KIT-L576P-v QLPYDHKW   | 25381 | >KIT-L576P-n QPPYDHKW   | 124   | 25257 |
| >KIT-L576P-v QLPYDHKW   | 10180 | >KIT-L576P-n QPPYDHKW   | 48    | 10132 |
| >KIT-L576P-v TQLPYDHKW  | 34    | >KIT-L576P-n TQPPYDHKW  | 178   | 144   |
| >KIT-L576P-v TQLPYDHK   | 118   | >KIT-L576P-n TQPPYDHK   | 1346  | 1228  |
| >KIT-L576P-v TQLPYDHKW  | 67    | >KIT-L576P-n TQPPYDHKW  | 319   | 252   |
| >KIT-L576P-v TQLPYDHKW  | 176   | >KIT-L576P-n TQPPYDHKW  | 120   | 56    |
| >KIT-L576P-v TQLPYDHKW  | 23    | >KIT-L576P-n TQPPYDHKW  | 209   | 186   |
| >KIT-L576P-v TQLPYDHKW  | 306   | >KIT-L576P-n TQPPYDHKW  | 4953  | 4647  |
| >KIT-L576P-v TQLPYDHKW  | 199   | >KIT-L576P-n TQPPYDHKW  | 3788  | 3589  |
| >KIT-L576P-v TQLPYDHKW  | 186   | >KIT-L576P-n TQPPYDHKW  | 2083  | 1897  |
| >KIT-L576P-v TQLPYDHKW  | 129   | >KIT-L576P-n TQPPYDHKW  | 8626  | 8497  |
| >KIT-L576P-v TQLPYDHKW  | 123   | >KIT-L576P-n TQPPYDHKW  | 2123  | 2000  |
| >KIT-L576P-v PTQLPYDHKV | 396   | >KIT-L576P-n PTQPPYDHKV | 64    | 332   |
| >KIT-L576P-v PTQLPYDHKV | 751   | >KIT-L576P-n PTQPPYDHKV | 167   | 584   |
| >KIT-L576P-v DPTQLPYDH  | 289   | >KIT-L576P-n DPTQPPYDH  | 623   | 334   |
| >KIT-L576P-v DPTQLPYDH  | 46    | >KIT-L576P-n DPTQPPYDHI | 69    | 23    |
| >KIT-L576P-v DPTQLPYDH  | 24    | >KIT-L576P-n DPTQPPYDHI | 37    | 13    |
| >KIT-L576P-v YIDPTQLPY  | 10    | >KIT-L576P-n YIDPTQPPY  | 36    | 26    |
| >KIT-L576P-v YIDPTQLPY  | 21    | >KIT-L576P-n YIDPTQPPY  | 77    | 56    |
| >KIT-L576P-v YIDPTQLPY  | 1117  | >KIT-L576P-n YIDPTQPPY  | 219   | 898   |
| >KIT-L576P-v YIDPTQLPY  | 11    | >KIT-L576P-n YIDPTQPPY  | 869   | 858   |
| >KIT-L576P-v YIDPTQLPY  | 137   | >KIT-L576P-n YIDPTQPPY  | 202   | 65    |
| >KIT-L576P-v YIDPTQLPY  | 240   | >KIT-L576P-n YIDPTQPPY  | 507   | 267   |
| >KIT-L576P-v YIDPTQLPY  | 42    | >KIT-L576P-n YIDPTQPPY  | 71    | 29    |
| >KIT-L576P-v YIDPTQLPY  | 61    | >KIT-L576P-n YIDPTQPPY  | 54    | 7     |
| >KIT-L576P-v YIDPTQLPY  | 116   | >KIT-L576P-n YIDPTQPPY  | 152   | 36    |
| >KIT-L576P-v YIDPTQLPY  | 56    | >KIT-L576P-n YIDPTQPPY  | 161   | 105   |
| >KIT-L576P-v VYIDPTQLPY | 495   | >KIT-L576P-n VYIDPTQPPY | 376   | 119   |
| >KIT-L576P-v VYIDPTQL   | 216   | >KIT-L576P-n VYIDPTQP   | 14428 | 14212 |
| >KIT-L576P-v VYIDPTQL   | 43    | >KIT-L576P-n VYIDPTQP   | 9313  | 9270  |
| >KIT-L576P-v VYIDPTQLPY | 319   | >KIT-L576P-n VYIDPTQPPY | 64    | 255   |
| >KIT-L576P-v VYIDPTQLPY | 33    | >KIT-L576P-n VYIDPTQPPY | 73    | 40    |
| >KIT-L576P-v VYIDPTQLPY | 64    | >KIT-L576P-n VYIDPTQPPY | 45    | 19    |
| >KIT-L576P-v VYIDPTQLPY | 32    | >KIT-L576P-n VYIDPTQPPY | 703   | 671   |
| >KIT-L576P-v YVYIDPTQL  | 193   | >KIT-L576P-n YVYIDPTQP  | 21947 | 21754 |
| >KIT-L576P-v YVYIDPTQL  | 135   | >KIT-L576P-n YVYIDPTQP  | 13211 | 13076 |
| >KIT-L576P-v YVYIDPTQL  | 24    | >KIT-L576P-n YVYIDPTQP  | 5673  | 5649  |
| >KIT-L576P-v YVYIDPTQL  | 261   | >KIT-L576P-n YVYIDPTQP  | 15791 | 15530 |

|                          |       |                          |       |       |
|--------------------------|-------|--------------------------|-------|-------|
| >KIT-L576P-v YVYIDPTQL   | 18    | >KIT-L576P-n YVYIDPTQP   | 7320  | 7302  |
| >KIT-L576P-v YVYIDPTQL   | 71    | >KIT-L576P-n YVYIDPTQP   | 14148 | 14077 |
| >KIT-L576P-v YVYIDPTQL   | 16    | >KIT-L576P-n YVYIDPTQP   | 19934 | 19918 |
| >KIT-L576P-v YVYIDPTQLP) | 492   | >KIT-L576P-n YVYIDPTQPP' | 1030  | 538   |
| >KIT-L576P-v YVYIDPTQLP) | 330   | >KIT-L576P-n YVYIDPTQPP' | 776   | 446   |
| >KIT-L576P-v YVYIDPTQLP) | 387   | >KIT-L576P-n YVYIDPTQPP' | 500   | 113   |
| >KIT-L576P-v YVYIDPTQLP) | 91    | >KIT-L576P-n YVYIDPTQPP' | 30    | 61    |
| >KIT-L576P-v YVYIDPTQLP) | 6     | >KIT-L576P-n YVYIDPTQPP' | 7     | 1     |
| >KIT-L576P-v YVYIDPTQLP) | 517   | >KIT-L576P-n YVYIDPTQPP' | 153   | 364   |
| >KIT-L576P-v YVYIDPTQLP) | 451   | >KIT-L576P-n YVYIDPTQPP' | 373   | 78    |
| >KIT-L576P-v YVYIDPTQL   | 162   | >KIT-L576P-n YVYIDPTQP   | 12927 | 12765 |
| >KIT-L576P-v YVYIDPTQLP) | 16    | >KIT-L576P-n YVYIDPTQPP' | 157   | 141   |
| >KIT-L576P-v YVYIDPTQLP) | 63    | >KIT-L576P-n YVYIDPTQPP' | 69    | 6     |
| >KIT-L576P-v YVYIDPTQLP) | 73    | >KIT-L576P-n YVYIDPTQPP' | 103   | 30    |
| >KIT-L576P-v YVYIDPTQLP) | 53    | >KIT-L576P-n YVYIDPTQPP' | 62    | 9     |
| >KIT-L576P-v YVYIDPTQL   | 27    | >KIT-L576P-n YVYIDPTQP   | 17487 | 17460 |
| >KIT-L576P-v YVYIDPTQLP) | 7     | >KIT-L576P-n YVYIDPTQPP' | 8     | 1     |
| >KIT-L576P-v YVYIDPTQLP) | 17    | >KIT-L576P-n YVYIDPTQPP' | 15    | 2     |
| >KIT-L576P-v YVYIDPTQL   | 423   | >KIT-L576P-n YVYIDPTQP   | 15392 | 14969 |
| >KIT-L576P-v YVYIDPTQLP) | 301   | >KIT-L576P-n YVYIDPTQPP' | 365   | 64    |
| >KIT-L576P-v NYVYIDPTQL  | 150   | >KIT-L576P-n NYVYIDPTQP  | 22895 | 22745 |
| >KIT-L576P-v NYVYIDPTQL  | 163   | >KIT-L576P-n NYVYIDPTQP  | 13375 | 13212 |
| >KIT-L589P-v LSF GKTLGA  | 411   | >KIT-L589P-n PSFGKTLGA   | 14035 | 13624 |
| >KIT-L589P-v LSF GKTLGAG | 459   | >KIT-L589P-n PSFGKTLGAG  | 14654 | 14195 |
| >KIT-L589P-v RLSFGKTL    | 152   | >KIT-L589P-n RPSFGKTL    | 31361 | 31209 |
| >KIT-L589P-v RLSFGKTLGA  | 167   | >KIT-L589P-n RPSFGKTLGA  | 24918 | 24751 |
| >KIT-L589P-v RLSFGKTL    | 74    | >KIT-L589P-n RPSFGKTL    | 22520 | 22446 |
| >KIT-L589P-v RLSFGKTLGA  | 123   | >KIT-L589P-n RPSFGKTLGA  | 20509 | 20386 |
| >KIT-L589P-v RLSFGKTL    | 89    | >KIT-L589P-n RPSFGKTL    | 27581 | 27492 |
| >KIT-L589P-v RLSFGKTLGA  | 339   | >KIT-L589P-n RPSFGKTLGA  | 28844 | 28505 |
| >KIT-L589P-v RLSFGKTL    | 321   | >KIT-L589P-n RPSFGKTL    | 24505 | 24184 |
| >KIT-L589P-v RLSFGKTL    | 396   | >KIT-L589P-n RPSFGKTL    | 26107 | 25711 |
| >KIT-L589P-v RLSFGKTLGA  | 496   | >KIT-L589P-n RPSFGKTLGA  | 25198 | 24702 |
| >KIT-L589P-v RLSFGKTL    | 20    | >KIT-L589P-n RPSFGKTL    | 34049 | 34029 |
| >KIT-L589P-v RLSFGKTLGA  | 36    | >KIT-L589P-n RPSFGKTLGA  | 35404 | 35368 |
| >KIT-L589P-v RLSFGKTL    | 136   | >KIT-L589P-n RPSFGKTL    | 14098 | 13962 |
| >KIT-L589P-v RLSFGKTL    | 10082 | >KIT-L589P-n RPSFGKTL    | 15    | 10067 |
| >KIT-L589P-v NR LSF GKTL | 127   | >KIT-L589P-n NRPSFGKTL   | 902   | 775   |
| >KIT-L589P-v NR LSF GKTL | 187   | >KIT-L589P-n NRPSFGKTL   | 3672  | 3485  |
| >KIT-L589P-v NR LSF GKTL | 133   | >KIT-L589P-n NRPSFGKTL   | 2037  | 1904  |
| >KIT-L589P-v NR LSF GKTL | 303   | >KIT-L589P-n NRPSFGKTL   | 751   | 448   |
| >KIT-L589P-v NR LSF GKTL | 199   | >KIT-L589P-n NRPSFGKTL   | 391   | 192   |
| >KIT-L589P-v RN R LSF GK | 6     | >KIT-L589P-n RN RPSFGK   | 5     | 1     |

|                         |       |                         |       |       |
|-------------------------|-------|-------------------------|-------|-------|
| >KIT-L589P-v RNRLSFGKTL | 134   | >KIT-L589P-n RNRPSFGKTL | 56    | 78    |
| >KIT-L589P-v RNRLSFGKTL | 1026  | >KIT-L589P-n RNRPSFGKTL | 473   | 553   |
| >KIT-L589P-v RNRLSFGKTL | 438   | >KIT-L589P-n RNRPSFGKTL | 184   | 254   |
| >KIT-L589P-v RNRLSFGKTL | 1866  | >KIT-L589P-n RNRPSFGKTL | 311   | 1555  |
| >KIT-L589P-v PRNRLSFGK  | 360   | >KIT-L589P-n PRNRPSFGK  | 1624  | 1264  |
| >KIT-L589P-v FPRNRLSF   | 1070  | >KIT-L589P-n FPRNRPSF   | 332   | 738   |
| >KIT-L589P-v FPRNRLSF   | 8     | >KIT-L589P-n FPRNRPSF   | 10    | 2     |
| >KIT-L589P-v FPRNRLSFGK | 113   | >KIT-L589P-n FPRNRPSFGK | 158   | 45    |
| >KIT-L589P-v FPRNRLSF   | 20    | >KIT-L589P-n FPRNRPSF   | 27    | 7     |
| >KIT-L589P-v FPRNRLSFG  | 148   | >KIT-L589P-n FPRNRPSFG  | 181   | 33    |
| >KIT-L589P-v FPRNRLSF   | 24    | >KIT-L589P-n FPRNRPSF   | 25    | 1     |
| >KIT-L589P-v FPRNRLSF   | 52    | >KIT-L589P-n FPRNRPSF   | 49    | 3     |
| >KIT-L589P-v FPRNRLSF   | 237   | >KIT-L589P-n FPRNRPSF   | 360   | 123   |
| >KIT-L589P-v FPRNRLSFG  | 145   | >KIT-L589P-n FPRNRPSFG  | 477   | 332   |
| >KIT-L589P-v FPRNRLSFGK | 59    | >KIT-L589P-n FPRNRPSFGK | 99    | 40    |
| >KIT-L589P-v FPRNRLSFGK | 30    | >KIT-L589P-n FPRNRPSFGK | 61    | 31    |
| >KIT-L589P-v FPRNRLSF   | 164   | >KIT-L589P-n FPRNRPSF   | 609   | 445   |
| >KIT-L589P-v EFPRNRLSF  | 479   | >KIT-L589P-n EFPRNRPSF  | 796   | 317   |
| >KIT-L589P-v EFPRNRLSF  | 14    | >KIT-L589P-n EFPRNRPSF  | 29    | 15    |
| >KIT-L589P-v EFPRNRLSF  | 348   | >KIT-L589P-n EFPRNRPSF  | 1111  | 763   |
| >KIT-L589P-v WEFPRNRLSF | 117   | >KIT-L589P-n WEFPRNRPSI | 157   | 40    |
| >KIT-L589P-v WEFPRNRLSF | 337   | >KIT-L589P-n WEFPRNRPSI | 1060  | 723   |
| >KIT-L589P-v WEFPRNRLSF | 147   | >KIT-L589P-n WEFPRNRPSI | 135   | 12    |
| >KIT-L589P-v WEFPRNRLSF | 10    | >KIT-L589P-n WEFPRNRPSI | 9     | 1     |
| >KIT-L589P-v WEFPRNRL   | 202   | >KIT-L589P-n WEFPRNRP   | 6488  | 6286  |
| >KIT-L589P-v WEFPRNRLS  | 1921  | >KIT-L589P-n WEFPRNRPS  | 238   | 1683  |
| >KIT-L589P-v WEFPRNRL   | 45    | >KIT-L589P-n WEFPRNRP   | 8564  | 8519  |
| >KIT-L589P-v WEFPRNRL   | 89    | >KIT-L589P-n WEFPRNRP   | 2336  | 2247  |
| >KIT-L589P-v WEFPRNRLS  | 969   | >KIT-L589P-n WEFPRNRPS  | 258   | 711   |
| >KIT-L589P-v WEFPRNRLSF | 493   | >KIT-L589P-n WEFPRNRPSI | 600   | 107   |
| >KIT-L589P-v WEFPRNRL   | 276   | >KIT-L589P-n WEFPRNRP   | 18977 | 18701 |
| >KIT-L589P-v WEFPRNRLSF | 49    | >KIT-L589P-n WEFPRNRPSI | 31    | 18    |
| >KIT-L589P-v WEFPRNRLSF | 498   | >KIT-L589P-n WEFPRNRPSI | 1083  | 585   |
| >KIT-L589P-v KWEFPRNRLS | 477   | >KIT-L589P-n KWEFPRNRP  | 538   | 61    |
| >KIT-L589P-v KWEFPRNRLS | 162   | >KIT-L589P-n KWEFPRNRP  | 210   | 48    |
| >KIT-L589P-v KWEFPRNRL  | 154   | >KIT-L589P-n KWEFPRNRP  | 429   | 275   |
| >KIT-L589P-v KWEFPRNRLS | 82    | >KIT-L589P-n KWEFPRNRP  | 99    | 17    |
| >KIT-L589P-v HKWEFPRNR  | 59    | >KIT-L589P-n HKWEFPRNR  | 2222  | 2163  |
| >KIT-L589P-v HKWEFPRNR  | 238   | >KIT-L589P-n HKWEFPRNR  | 14767 | 14529 |
| >KIT-L647P-v YLGNHMNIV  | 28981 | >KIT-L647P-n YPGNHMNIV  | 246   | 28735 |
| >KIT-L647P-v YLGNHMNI   | 45    | >KIT-L647P-n YPGNHMNI   | 22391 | 22346 |
| >KIT-L647P-v YLGNHMNIV  | 27    | >KIT-L647P-n YPGNHMNIV  | 17441 | 17414 |
| >KIT-L647P-v YLGNHMNIV  | 23    | >KIT-L647P-n YPGNHMNIV  | 21130 | 21107 |

|                          |       |                          |       |       |
|--------------------------|-------|--------------------------|-------|-------|
| >KIT-L647P-v YLGNHMNI    | 22    | >KIT-L647P-n YPGNHMNI    | 25927 | 25905 |
| >KIT-L647P-v YLGNHMNIV   | 5     | >KIT-L647P-n YPGNHMNIV   | 15669 | 15664 |
| >KIT-L647P-v YLGNHMNIV   | 6     | >KIT-L647P-n YPGNHMNIV   | 17956 | 17950 |
| >KIT-L647P-v YLGNHMNI    | 9     | >KIT-L647P-n YPGNHMNI    | 16178 | 16169 |
| >KIT-L647P-v YLGNHMNIV   | 3     | >KIT-L647P-n YPGNHMNIV   | 10107 | 10104 |
| >KIT-L647P-v YLGNHMNIV   | 10    | >KIT-L647P-n YPGNHMNIV   | 18300 | 18290 |
| >KIT-L647P-v YLGNHMNI    | 205   | >KIT-L647P-n YPGNHMNI    | 20497 | 20292 |
| >KIT-L647P-v YLGNHMNIV   | 26    | >KIT-L647P-n YPGNHMNIV   | 7578  | 7552  |
| >KIT-L647P-v YLGNHMNIV   | 111   | >KIT-L647P-n YPGNHMNIV   | 18605 | 18494 |
| >KIT-L647P-v YLGNHMNI    | 5     | >KIT-L647P-n YPGNHMNI    | 13760 | 13755 |
| >KIT-L647P-v YLGNHMNIV   | 4     | >KIT-L647P-n YPGNHMNIV   | 11197 | 11193 |
| >KIT-L647P-v YLGNHMNIV   | 5     | >KIT-L647P-n YPGNHMNIV   | 11134 | 11129 |
| >KIT-L647P-v YLGNHMNI    | 6     | >KIT-L647P-n YPGNHMNI    | 18213 | 18207 |
| >KIT-L647P-v YLGNHMNIV   | 3     | >KIT-L647P-n YPGNHMNIV   | 11857 | 11854 |
| >KIT-L647P-v YLGNHMNIV   | 4     | >KIT-L647P-n YPGNHMNIV   | 15976 | 15972 |
| >KIT-L647P-v YLGNHMNI    | 15    | >KIT-L647P-n YPGNHMNI    | 22180 | 22165 |
| >KIT-L647P-v YLGNHMNIV   | 8     | >KIT-L647P-n YPGNHMNIV   | 18468 | 18460 |
| >KIT-L647P-v YLGNHMNIV   | 12    | >KIT-L647P-n YPGNHMNIV   | 19518 | 19506 |
| >KIT-L647P-v YLGNHMNI    | 33    | >KIT-L647P-n YPGNHMNI    | 22921 | 22888 |
| >KIT-L647P-v YLGNHMNIV   | 14    | >KIT-L647P-n YPGNHMNIV   | 21645 | 21631 |
| >KIT-L647P-v YLGNHMNIV   | 20    | >KIT-L647P-n YPGNHMNIV   | 22107 | 22087 |
| >KIT-L647P-v YLGNHMNI    | 4     | >KIT-L647P-n YPGNHMNI    | 25975 | 25971 |
| >KIT-L647P-v YLGNHMNIV   | 2     | >KIT-L647P-n YPGNHMNIV   | 13179 | 13177 |
| >KIT-L647P-v YLGNHMNIV   | 2     | >KIT-L647P-n YPGNHMNIV   | 17140 | 17138 |
| >KIT-L647P-v YLGNHMNI    | 22792 | >KIT-L647P-n YPGNHMNI    | 233   | 22559 |
| >KIT-L647P-v YLGNHMNIV   | 21235 | >KIT-L647P-n YPGNHMNIV   | 106   | 21129 |
| >KIT-L647P-v YLGNHMNIV   | 14693 | >KIT-L647P-n YPGNHMNIV   | 72    | 14621 |
| >KIT-L647P-v YLGNHMNIV   | 16901 | >KIT-L647P-n YPGNHMNIV   | 484   | 16417 |
| >KIT-L647P-v YLGNHMNI    | 28651 | >KIT-L647P-n YPGNHMNI    | 367   | 28284 |
| >KIT-L647P-v YLGNHMNIV   | 24401 | >KIT-L647P-n YPGNHMNIV   | 104   | 24297 |
| >KIT-L647P-v LMSELKVLSYI | 22    | >KIT-L647P-n LMSELKVLSYI | 13468 | 13446 |
| >KIT-L647P-v LMSELKVLSYI | 3     | >KIT-L647P-n LMSELKVLSYI | 242   | 239   |
| >KIT-L647P-v LMSELKVLSYI | 11    | >KIT-L647P-n LMSELKVLSYI | 1391  | 1380  |
| >KIT-L647P-v LMSELKVLSYI | 31    | >KIT-L647P-n LMSELKVLSYI | 3948  | 3917  |
| >KIT-L647P-v LMSELKVLSYI | 3     | >KIT-L647P-n LMSELKVLSYI | 617   | 614   |
| >KIT-L647P-v LMSELKVLSYI | 8     | >KIT-L647P-n LMSELKVLSYI | 6224  | 6216  |
| >KIT-L647P-v LMSELKVLSYI | 12    | >KIT-L647P-n LMSELKVLSYI | 5525  | 5513  |
| >KIT-L647P-v LMSELKVLSYI | 8     | >KIT-L647P-n LMSELKVLSYI | 14161 | 14153 |
| >KIT-L647P-v LMSELKVLSYI | 3     | >KIT-L647P-n LMSELKVLSYI | 3656  | 3653  |
| >KIT-L647P-v LMSELKVLSYI | 435   | >KIT-L647P-n LMSELKVLSYI | 7273  | 6838  |
| >KIT-L647P-v LMSELKVLSYI | 347   | >KIT-L647P-n LMSELKVLSYI | 6303  | 5956  |
| >KIT-L647P-v SYLGNHMNI   | 14    | >KIT-L647P-n SYPGNHMNI   | 1316  | 1302  |
| >KIT-L647P-v SYLGNHMNI   | 177   | >KIT-L647P-n SYPGNHMNI   | 6182  | 6005  |

|                         |      |                         |      |      |
|-------------------------|------|-------------------------|------|------|
| >KIT-L647P-v SYLGNHMNI\ | 497  | >KIT-L647P-n SYPGNHMNI' | 1085 | 588  |
| >KIT-L647P-v SYLGNHMNI  | 31   | >KIT-L647P-n SYPGNHMNI  | 150  | 119  |
| >KIT-L647P-v SYLGNHMNI  | 92   | >KIT-L647P-n SYPGNHMNI  | 60   | 32   |
| >KIT-L647P-v SYLGNHMN   | 305  | >KIT-L647P-n SYPGNHMN   | 260  | 45   |
| >KIT-L647P-v SYLGNHMNI  | 4    | >KIT-L647P-n SYPGNHMNI  | 4    | 0    |
| >KIT-L647P-v SYLGNHMNI\ | 45   | >KIT-L647P-n SYPGNHMNI' | 36   | 9    |
| >KIT-L647P-v SYLGNHMNI\ | 614  | >KIT-L647P-n SYPGNHMNI' | 496  | 118  |
| >KIT-L647P-v SYLGNHMNI  | 76   | >KIT-L647P-n SYPGNHMNI  | 2209 | 2133 |
| >KIT-L647P-v SYLGNHMNI  | 333  | >KIT-L647P-n SYPGNHMNI  | 349  | 16   |
| >KIT-L647P-v SYLGNHMNI\ | 143  | >KIT-L647P-n SYPGNHMNI' | 114  | 29   |
| >KIT-L647P-v SYLGNHMNI  | 364  | >KIT-L647P-n SYPGNHMNI  | 1655 | 1291 |
| >KIT-L647P-v SYLGNHMNI\ | 53   | >KIT-L647P-n SYPGNHMNI' | 71   | 18   |
| >KIT-L647P-v LSYLGNHM   | 425  | >KIT-L647P-n LSYPGNHM   | 2037 | 1612 |
| >KIT-L647P-v LSYLGNHMN  | 440  | >KIT-L647P-n LSYPGNHMN  | 803  | 363  |
| >KIT-L647P-v LSYLGNHMN  | 996  | >KIT-L647P-n LSYPGNHMN  | 439  | 557  |
| >KIT-L647P-v LSYLGNHMN  | 724  | >KIT-L647P-n LSYPGNHMN  | 312  | 412  |
| >KIT-L647P-v LSYLGNHMN  | 1068 | >KIT-L647P-n LSYPGNHMN  | 259  | 809  |
| >KIT-L647P-v LSYLGNHMN  | 927  | >KIT-L647P-n LSYPGNHMN  | 454  | 473  |
| >KIT-L647P-v LSYLGNHMN  | 131  | >KIT-L647P-n LSYPGNHMN  | 105  | 26   |
| >KIT-L647P-v LSYLGNHMN  | 1200 | >KIT-L647P-n LSYPGNHMN  | 381  | 819  |
| >KIT-L647P-v LSYLGNHMN  | 951  | >KIT-L647P-n LSYPGNHMN  | 472  | 479  |
| >KIT-L647P-v LSYLGNHM   | 186  | >KIT-L647P-n LSYPGNHM   | 92   | 94   |
| >KIT-L647P-v LSYLGNHM   | 222  | >KIT-L647P-n LSYPGNHM   | 58   | 164  |
| >KIT-L647P-v LSYLGNHMN  | 349  | >KIT-L647P-n LSYPGNHMN  | 123  | 226  |
| >KIT-L647P-v LSYLGNHMN  | 905  | >KIT-L647P-n LSYPGNHMN  | 265  | 640  |
| >KIT-L647P-v LSYLGNHM   | 13   | >KIT-L647P-n LSYPGNHM   | 11   | 2    |
| >KIT-L647P-v LSYLGNHMN  | 16   | >KIT-L647P-n LSYPGNHMN  | 13   | 3    |
| >KIT-L647P-v LSYLGNHMN  | 332  | >KIT-L647P-n LSYPGNHMN  | 105  | 227  |
| >KIT-L647P-v LSYLGNHM   | 211  | >KIT-L647P-n LSYPGNHM   | 72   | 139  |
| >KIT-L647P-v LSYLGNHMN  | 216  | >KIT-L647P-n LSYPGNHMN  | 48   | 168  |
| >KIT-L647P-v LSYLGNHM   | 337  | >KIT-L647P-n LSYPGNHM   | 106  | 231  |
| >KIT-L647P-v LSYLGNHMN  | 1013 | >KIT-L647P-n LSYPGNHMN  | 389  | 624  |
| >KIT-L647P-v LSYLGNHM   | 59   | >KIT-L647P-n LSYPGNHM   | 132  | 73   |
| >KIT-L647P-v LSYLGNHMN  | 237  | >KIT-L647P-n LSYPGNHMN  | 617  | 380  |
| >KIT-L647P-v LSYLGNHMN  | 288  | >KIT-L647P-n LSYPGNHMN  | 138  | 150  |
| >KIT-L647P-v LSYLGNHM   | 204  | >KIT-L647P-n LSYPGNHM   | 31   | 173  |
| >KIT-L647P-v LSYLGNHMN  | 39   | >KIT-L647P-n LSYPGNHMN  | 48   | 9    |
| >KIT-L647P-v LSYLGNHMN  | 738  | >KIT-L647P-n LSYPGNHMN  | 165  | 573  |
| >KIT-L647P-v VLSYLGNHM  | 100  | >KIT-L647P-n VLSYPGNHM  | 1011 | 911  |
| >KIT-L647P-v VLSYLGNHMI | 36   | >KIT-L647P-n VLSYPGNHM  | 144  | 108  |
| >KIT-L647P-v VLSYLGNHMI | 48   | >KIT-L647P-n VLSYPGNHM  | 77   | 29   |
| >KIT-L647P-v VLSYLGNHMI | 201  | >KIT-L647P-n VLSYPGNHM  | 124  | 77   |
| >KIT-L647P-v VLSYLGNHMI | 217  | >KIT-L647P-n VLSYPGNHM  | 244  | 27   |



|                          |       |                           |       |       |
|--------------------------|-------|---------------------------|-------|-------|
| >KIT-L647P-v VLSYLGNHMI  | 294   | >KIT-L647P-n VLSYPGNHM    | 607   | 313   |
| >KIT-L647P-v VLSYLGNHMI  | 73    | >KIT-L647P-n VLSYPGNHM    | 69    | 4     |
| >KIT-L647P-v VLSYLGNHM   | 112   | >KIT-L647P-n VLSYPGNHM    | 169   | 57    |
| >KIT-L647P-v VLSYLGNHM   | 608   | >KIT-L647P-n VLSYPGNHM    | 267   | 341   |
| >KIT-L647P-v KVLSYLGNHM  | 147   | >KIT-L647P-n KVLSYPGNHM   | 304   | 157   |
| >KIT-L647P-v KVLSYLGNHM  | 201   | >KIT-L647P-n KVLSYPGNHM   | 203   | 2     |
| >KIT-L647P-v KVLSYLGNH   | 497   | >KIT-L647P-n KVLSYPGNH    | 1623  | 1126  |
| >KIT-L647P-v LKVLSYLGNH  | 19    | >KIT-L647P-n LKVLSYPGNH   | 16    | 3     |
| >KIT-L647P-v ELKVLSYL    | 445   | >KIT-L647P-n ELKVLSYP     | 14293 | 13848 |
| >KIT-L647P-v ELKVLSYL    | 221   | >KIT-L647P-n ELKVLSYP     | 25329 | 25108 |
| >KIT-L647P-v ELKVLSYL    | 285   | >KIT-L647P-n ELKVLSYP     | 12588 | 12303 |
| >KIT-L647P-v SELKVLSYL   | 14    | >KIT-L647P-n SELKVLSYP    | 1645  | 1631  |
| >KIT-L647P-v SELKVLSYL   | 365   | >KIT-L647P-n SELKVLSYP    | 16822 | 16457 |
| >KIT-L647P-v SELKVLSYL   | 427   | >KIT-L647P-n SELKVLSYP    | 11060 | 10633 |
| >KIT-L647P-v SELKVLSYL   | 54    | >KIT-L647P-n SELKVLSYP    | 8361  | 8307  |
| >KIT-L647P-v SELKVLSYL   | 97    | >KIT-L647P-n SELKVLSYP    | 4053  | 3956  |
| >KIT-L647P-v SELKVLSYL   | 151   | >KIT-L647P-n SELKVLSYP    | 3509  | 3358  |
| >KIT-L647P-v SELKVLSYLG  | 270   | >KIT-L647P-n SELKVLSYPG   | 420   | 150   |
| >KIT-L647P-v SELKVLSYLG  | 276   | >KIT-L647P-n SELKVLSYPG   | 292   | 16    |
| >KIT-L647P-v SELKVLSYL   | 437   | >KIT-L647P-n SELKVLSYP    | 12216 | 11779 |
| >KIT-L647P-v SELKVLSYL   | 10    | >KIT-L647P-n SELKVLSYP    | 1142  | 1132  |
| >KIT-L647P-v MSELKVLSYL  | 32    | >KIT-L647P-n MSELKVLSYP   | 16664 | 16632 |
| >KIT-L647P-v MSELKVLSYL  | 106   | >KIT-L647P-n MSELKVLSYP   | 13062 | 12956 |
| >KIT-L813P-v LARDIKNDSN  | 241   | >KIT-L813P-n PARDIKNDSN   | 1162  | 921   |
| >KIT-L813P-v LARDIKNDSN  | 387   | >KIT-L813P-n PARDIKNDSN   | 10791 | 10404 |
| >KIT-L813P-v LARDIKNDSN  | 317   | >KIT-L813P-n PARDIKNDSN   | 3855  | 3538  |
| >KIT-L813P-v LARDIKNDSN  | 30    | >KIT-L813P-n PARDIKNDSN   | 2823  | 2793  |
| >KIT-L813P-v LARDIKNDSN  | 176   | >KIT-L813P-n PARDIKNDSN   | 4669  | 4493  |
| >KIT-L813P-v LARDIKNDSN  | 46    | >KIT-L813P-n PARDIKNDSN   | 3125  | 3079  |
| >KIT-L813P-v GRITKICDFGL | 168   | >KIT-L813P-n GRITKICDFGF  | 3941  | 3773  |
| >KIT-L813P-v GRITKICDFGL | 267   | >KIT-L813P-n GRITKICDFGF  | 7430  | 7163  |
| >KIT-L813P-v GRITKICDFGL | 52    | >KIT-L813P-n GRITKICDFGF  | 8359  | 8307  |
| >KIT-L813P-v FGLARDIKN   | 26630 | >KIT-L813P-n FGPARDIKN    | 316   | 26314 |
| >KIT-L813P-v CDFGLARDI   | 84    | >KIT-L813P-n CDFGPARDI    | 183   | 99    |
| >KIT-L813P-v KICDFGLA    | 433   | >KIT-L813P-n KICDFGPA     | 253   | 180   |
| >KIT-L813P-v KICDFGLA    | 195   | >KIT-L813P-n KICDFGPA     | 68    | 127   |
| >KIT-L813P-v KICDFGLA    | 922   | >KIT-L813P-n KICDFGPA     | 469   | 453   |
| >KIT-L813P-v KICDFGLAR   | 53    | >KIT-L813P-n KICDFGPAPAR  | 157   | 104   |
| >KIT-L813P-v KICDFGLAR   | 30    | >KIT-L813P-n KICDFGPAPAR  | 21    | 9     |
| >KIT-L813P-v KICDFGLARD  | 109   | >KIT-L813P-n KICDFGPARD   | 221   | 112   |
| >KIT-L813P-v KICDFGLAR   | 14    | >KIT-L813P-n KICDFGPAPAR  | 26    | 12    |
| >KIT-L813P-v TKICDFGLAR  | 408   | >KIT-L813P-n TKICDFGPAPAR | 428   | 20    |
| >KIT-L813P-v ITKICDFGLA  | 819   | >KIT-L813P-n ITKICDFGPA   | 360   | 459   |

|                         |       |                         |       |       |
|-------------------------|-------|-------------------------|-------|-------|
| >KIT-L813P-vITKICDFGLAR | 16    | >KIT-L813P-nITKICDFGPAR | 13    | 3     |
| >KIT-L813P-vITKICDFGLAR | 79    | >KIT-L813P-nITKICDFGPAR | 90    | 11    |
| >KIT-L813P-vITKICDFGLAR | 70    | >KIT-L813P-nITKICDFGPAR | 54    | 16    |
| >KIT-L813P-vITKICDFGL   | 5     | >KIT-L813P-nITKICDFGP   | 8504  | 8499  |
| >KIT-L813P-vITKICDFGLAR | 189   | >KIT-L813P-nITKICDFGPAR | 384   | 195   |
| >KIT-L813P-vRITKICDFGLA | 988   | >KIT-L813P-nRITKICDFGPA | 366   | 622   |
| >KIT-L859P-vLWELFSLG    | 408   | >KIT-L859P-nPWELFSLG    | 1482  | 1074  |
| >KIT-L859P-vLWELFSLGSSI | 340   | >KIT-L859P-nPWELFSLGSS  | 1307  | 967   |
| >KIT-L859P-vFLWELFSL    | 32360 | >KIT-L859P-nFPWELFSL    | 36    | 32324 |
| >KIT-L859P-vFLWELFSL    | 6     | >KIT-L859P-nFPWELFSL    | 859   | 853   |
| >KIT-L859P-vFLWELFSLG   | 106   | >KIT-L859P-nFPWELFSLG   | 20799 | 20693 |
| >KIT-L859P-vFLWELFSLGS  | 79    | >KIT-L859P-nFPWELFSLGS  | 22504 | 22425 |
| >KIT-L859P-vFLWELFSLGS! | 46    | >KIT-L859P-nFPWELFSLGS  | 19751 | 19705 |
| >KIT-L859P-vFLWELFSL    | 3     | >KIT-L859P-nFPWELFSL    | 1402  | 1399  |
| >KIT-L859P-vFLWELFSLG   | 38    | >KIT-L859P-nFPWELFSLG   | 23609 | 23571 |
| >KIT-L859P-vFLWELFSLGS  | 204   | >KIT-L859P-nFPWELFSLGS  | 24161 | 23957 |
| >KIT-L859P-vFLWELFSLGS! | 79    | >KIT-L859P-nFPWELFSLGS  | 25639 | 25560 |
| >KIT-L859P-vFLWELFSL    | 6     | >KIT-L859P-nFPWELFSL    | 13917 | 13911 |
| >KIT-L859P-vFLWELFSLG   | 243   | >KIT-L859P-nFPWELFSLG   | 23479 | 23236 |
| >KIT-L859P-vFLWELFSLGS  | 221   | >KIT-L859P-nFPWELFSLGS  | 23645 | 23424 |
| >KIT-L859P-vFLWELFSLGS! | 45    | >KIT-L859P-nFPWELFSLGS  | 20644 | 20599 |
| >KIT-L859P-vFLWELFSL    | 4     | >KIT-L859P-nFPWELFSL    | 102   | 98    |
| >KIT-L859P-vFLWELFSLG   | 154   | >KIT-L859P-nFPWELFSLG   | 12438 | 12284 |
| >KIT-L859P-vFLWELFSLGS  | 165   | >KIT-L859P-nFPWELFSLGS  | 6212  | 6047  |
| >KIT-L859P-vFLWELFSLGS! | 72    | >KIT-L859P-nFPWELFSLGS  | 10045 | 9973  |
| >KIT-L859P-vFLWELFSL    | 1     | >KIT-L859P-nFPWELFSL    | 535   | 534   |
| >KIT-L859P-vFLWELFSLG   | 12    | >KIT-L859P-nFPWELFSLG   | 19155 | 19143 |
| >KIT-L859P-vFLWELFSLGS  | 6     | >KIT-L859P-nFPWELFSLGS  | 13793 | 13787 |
| >KIT-L859P-vFLWELFSLGS! | 9     | >KIT-L859P-nFPWELFSLGS  | 16432 | 16423 |
| >KIT-L859P-vFLWELFSL    | 2     | >KIT-L859P-nFPWELFSL    | 4169  | 4167  |
| >KIT-L859P-vFLWELFSLG   | 443   | >KIT-L859P-nFPWELFSLG   | 20487 | 20044 |
| >KIT-L859P-vFLWELFSLGS  | 110   | >KIT-L859P-nFPWELFSLGS  | 19949 | 19839 |
| >KIT-L859P-vFLWELFSLGS! | 248   | >KIT-L859P-nFPWELFSLGS  | 20784 | 20536 |
| >KIT-L859P-vFLWELFSL    | 3     | >KIT-L859P-nFPWELFSL    | 2078  | 2075  |
| >KIT-L859P-vFLWELFSLG   | 110   | >KIT-L859P-nFPWELFSLG   | 21579 | 21469 |
| >KIT-L859P-vFLWELFSLGS  | 36    | >KIT-L859P-nFPWELFSLGS  | 17318 | 17282 |
| >KIT-L859P-vFLWELFSLGS! | 110   | >KIT-L859P-nFPWELFSLGS  | 23341 | 23231 |
| >KIT-L859P-vFLWELFSL    | 2     | >KIT-L859P-nFPWELFSL    | 7959  | 7957  |
| >KIT-L859P-vFLWELFSL    | 1     | >KIT-L859P-nFPWELFSL    | 3318  | 3317  |
| >KIT-L859P-vFLWELFSLG   | 51    | >KIT-L859P-nFPWELFSLG   | 35282 | 35231 |
| >KIT-L859P-vFLWELFSLGS  | 20    | >KIT-L859P-nFPWELFSLGS  | 32503 | 32483 |
| >KIT-L859P-vFLWELFSLGS! | 31    | >KIT-L859P-nFPWELFSLGS  | 33181 | 33150 |
| >KIT-L859P-vFLWELFSL    | 17    | >KIT-L859P-nFPWELFSL    | 53    | 36    |

|                          |       |                          |      |       |
|--------------------------|-------|--------------------------|------|-------|
| >KIT-L859P-v FLWELFSL    | 11970 | >KIT-L859P-n FPWELFSL    | 30   | 11940 |
| >KIT-L859P-v FLWELFSL    | 181   | >KIT-L859P-n FPWELFSL    | 1324 | 1143  |
| >KIT-L859P-v FLWELFSL    | 753   | >KIT-L859P-n FPWELFSL    | 11   | 742   |
| >KIT-L859P-v FLWELFSLG   | 9103  | >KIT-L859P-n FPWELFSLG   | 79   | 9024  |
| >KIT-L859P-v FLWELFSLGS! | 5823  | >KIT-L859P-n FPWELFSLGS  | 59   | 5764  |
| >KIT-L859P-v FLWELFSL    | 597   | >KIT-L859P-n FPWELFSL    | 50   | 547   |
| >KIT-L859P-v FLWELFSL    | 19249 | >KIT-L859P-n FPWELFSL    | 70   | 19179 |
| >KIT-L859P-v FLWELFSL    | 7488  | >KIT-L859P-n FPWELFSL    | 10   | 7478  |
| >KIT-L859P-v FLWELFSL    | 12728 | >KIT-L859P-n FPWELFSL    | 14   | 12714 |
| >KIT-L859P-v FLWELFSLG   | 1026  | >KIT-L859P-n FPWELFSLG   | 6    | 1020  |
| >KIT-L859P-v FLWELFSLGS  | 24638 | >KIT-L859P-n FPWELFSLGS  | 458  | 24180 |
| >KIT-L859P-v FLWELFSLGS! | 3118  | >KIT-L859P-n FPWELFSLGS  | 9    | 3109  |
| >KIT-L859P-v FLWELFSL    | 16683 | >KIT-L859P-n FPWELFSL    | 386  | 16297 |
| >KIT-L859P-v FLWELFSL    | 12688 | >KIT-L859P-n FPWELFSL    | 33   | 12655 |
| >KIT-L859P-v ESDVWSYGIF  | 463   | >KIT-L859P-n ESDVWSYGIF  | 4089 | 3626  |
| >KIT-L859P-v ESDVWSYGIF  | 37    | >KIT-L859P-n ESDVWSYGIF  | 6379 | 6342  |
| >KIT-L859P-v IFLWELFSL   | 366   | >KIT-L859P-n IFPWELFSL   | 699  | 333   |
| >KIT-L859P-v IFLWELFSL   | 176   | >KIT-L859P-n IFPWELFSL   | 955  | 779   |
| >KIT-L859P-v IFLWELFSL   | 241   | >KIT-L859P-n IFPWELFSL   | 2232 | 1991  |
| >KIT-L859P-v IFLWELFSL   | 88    | >KIT-L859P-n IFPWELFSL   | 513  | 425   |
| >KIT-L859P-v IFLWELFSL   | 182   | >KIT-L859P-n IFPWELFSL   | 88   | 94    |
| >KIT-L859P-v IFLWELFSL   | 29    | >KIT-L859P-n IFPWELFSL   | 19   | 10    |
| >KIT-L859P-v IFLWELFSL   | 18909 | >KIT-L859P-n IFPWELFSL   | 84   | 18825 |
| >KIT-L859P-v IFLWELFSL   | 80    | >KIT-L859P-n IFPWELFSL   | 93   | 13    |
| >KIT-L859P-v IFLWELFSL   | 103   | >KIT-L859P-n IFPWELFSL   | 252  | 149   |
| >KIT-L859P-v GIFLWELFSL  | 28    | >KIT-L859P-n GIFPWELFSL  | 19   | 9     |
| >KIT-L859P-v GIFLWELFSL  | 20    | >KIT-L859P-n GIFPWELFSL  | 13   | 7     |
| >KIT-L859P-v GIFLWELFSL  | 83    | >KIT-L859P-n GIFPWELFSL  | 52   | 31    |
| >KIT-L859P-v GIFLWELFSL  | 79    | >KIT-L859P-n GIFPWELFSL  | 50   | 29    |
| >KIT-L859P-v GIFLWELFSL  | 28    | >KIT-L859P-n GIFPWELFSL  | 8    | 20    |
| >KIT-L859P-v GIFLWELFSL  | 167   | >KIT-L859P-n GIFPWELFSL  | 51   | 116   |
| >KIT-L859P-v GIFLWELFSL  | 42    | >KIT-L859P-n GIFPWELFSL  | 15   | 27    |
| >KIT-L859P-v GIFLWELFSL  | 28    | >KIT-L859P-n GIFPWELFSL  | 5    | 23    |
| >KIT-L859P-v GIFLWELF    | 184   | >KIT-L859P-n GIFPWELF    | 81   | 103   |
| >KIT-L859P-v GIFLWELFSL  | 304   | >KIT-L859P-n GIFPWELFSL  | 326  | 22    |
| >KIT-L859P-v GIFLWELF    | 1197  | >KIT-L859P-n GIFPWELF    | 392  | 805   |
| >KIT-L859P-v GIFLWELF    | 3285  | >KIT-L859P-n GIFPWELF    | 478  | 2807  |
| >KIT-L859P-v YGIFLWEL    | 131   | >KIT-L859P-n YGIFPWEL    | 877  | 746   |
| >KIT-L859P-v YGIFLWELFSI | 193   | >KIT-L859P-n YGIFPWELFSI | 563  | 370   |
| >KIT-L859P-v YGIFLWEL    | 62    | >KIT-L859P-n YGIFPWEL    | 269  | 207   |
| >KIT-L859P-v YGIFLWELFSI | 44    | >KIT-L859P-n YGIFPWELFSI | 61   | 17    |
| >KIT-L859P-v YGIFLWELF   | 326   | >KIT-L859P-n YGIFPWELF   | 787  | 461   |
| >KIT-L859P-v YGIFLWELF   | 211   | >KIT-L859P-n YGIFPWELF   | 416  | 205   |

|                         |      |                         |      |      |
|-------------------------|------|-------------------------|------|------|
| >KIT-L859P-v YGIFLWELF  | 60   | >KIT-L859P-n YGIFPWELF  | 52   | 8    |
| >KIT-L859P-v SYGIFLWEL  | 318  | >KIT-L859P-n SYGIFPWEL  | 1799 | 1481 |
| >KIT-L859P-v SYGIFLWEL  | 547  | >KIT-L859P-n SYGIFPWEL  | 489  | 58   |
| >KIT-L859P-v SYGIFLWEL  | 275  | >KIT-L859P-n SYGIFPWEL  | 187  | 88   |
| >KIT-L859P-v SYGIFLWELF | 41   | >KIT-L859P-n SYGIFPWELF | 35   | 6    |
| >KIT-L859P-v SYGIFLWEL  | 126  | >KIT-L859P-n SYGIFPWEL  | 86   | 40   |
| >KIT-L859P-v SYGIFLWELF | 162  | >KIT-L859P-n SYGIFPWELF | 157  | 5    |
| >KIT-L859P-v SYGIFLWEL  | 6    | >KIT-L859P-n SYGIFPWEL  | 7    | 1    |
| >KIT-L859P-v SYGIFLWELF | 8    | >KIT-L859P-n SYGIFPWELF | 9    | 1    |
| >KIT-L859P-v SYGIFLWELF | 286  | >KIT-L859P-n SYGIFPWELF | 154  | 132  |
| >KIT-L859P-v SYGIFLWEL  | 65   | >KIT-L859P-n SYGIFPWEL  | 162  | 97   |
| >KIT-L859P-v SYGIFLWELF | 18   | >KIT-L859P-n SYGIFPWELF | 23   | 5    |
| >KIT-L859P-v SYGIFLWEL  | 152  | >KIT-L859P-n SYGIFPWEL  | 124  | 28   |
| >KIT-L859P-v SYGIFLWELF | 375  | >KIT-L859P-n SYGIFPWELF | 140  | 235  |
| >KIT-L859P-v WSYGIFLWEL | 153  | >KIT-L859P-n WSYGIFPWEI | 207  | 54   |
| >KIT-L859P-v WSYGIFLWEL | 286  | >KIT-L859P-n WSYGIFPWEI | 557  | 271  |
| >KIT-L859P-v WSYGIFLWEL | 114  | >KIT-L859P-n WSYGIFPWEI | 211  | 97   |
| >KIT-L859P-v WSYGIFLWEL | 62   | >KIT-L859P-n WSYGIFPWEI | 105  | 43   |
| >KIT-L859P-v WSYGIFLWEL | 104  | >KIT-L859P-n WSYGIFPWEI | 88   | 16   |
| >KIT-L859P-v WSYGIFLWEL | 159  | >KIT-L859P-n WSYGIFPWEI | 211  | 52   |
| >KIT-L859P-v WSYGIFLWEL | 101  | >KIT-L859P-n WSYGIFPWEI | 193  | 92   |
| >KIT-L859P-v WSYGIFLWEL | 123  | >KIT-L859P-n WSYGIFPWEI | 826  | 703  |
| >KIT-L859P-v WSYGIFLWEL | 80   | >KIT-L859P-n WSYGIFPWEI | 70   | 10   |
| >KIT-L859P-v WSYGIFLWEL | 216  | >KIT-L859P-n WSYGIFPWEI | 265  | 49   |
| >KIT-L859P-v WSYGIFLWEL | 582  | >KIT-L859P-n WSYGIFPWEI | 477  | 105  |
| >KIT-L859P-v WSYGIFLWEL | 66   | >KIT-L859P-n WSYGIFPWEI | 57   | 9    |
| >KIT-L859P-v WSYGIFLW   | 4    | >KIT-L859P-n WSYGIFPW   | 4    | 0    |
| >KIT-L859P-v WSYGIFLWEL | 23   | >KIT-L859P-n WSYGIFPWEI | 23   | 0    |
| >KIT-L859P-v WSYGIFLWEL | 8    | >KIT-L859P-n WSYGIFPWEI | 8    | 0    |
| >KIT-L859P-v WSYGIFLW   | 3659 | >KIT-L859P-n WSYGIFPW   | 471  | 3188 |
| >KIT-L859P-v WSYGIFLWEL | 256  | >KIT-L859P-n WSYGIFPWEI | 329  | 73   |
| >KIT-L859P-v WSYGIFLWEL | 577  | >KIT-L859P-n WSYGIFPWEI | 282  | 295  |
| >KIT-L859P-v WSYGIFLW   | 97   | >KIT-L859P-n WSYGIFPW   | 158  | 61   |
| >KIT-L859P-v WSYGIFLW   | 32   | >KIT-L859P-n WSYGIFPW   | 32   | 0    |
| >KIT-L859P-v WSYGIFLWEL | 178  | >KIT-L859P-n WSYGIFPWEI | 239  | 61   |
| >KIT-L859P-v WSYGIFLW   | 9    | >KIT-L859P-n WSYGIFPW   | 10   | 1    |
| >KIT-L859P-v WSYGIFLWEL | 429  | >KIT-L859P-n WSYGIFPWEI | 410  | 19   |
| >KIT-L859P-v WSYGIFLWEL | 44   | >KIT-L859P-n WSYGIFPWEI | 85   | 41   |
| >KIT-L859P-v WSYGIFLWEL | 304  | >KIT-L859P-n WSYGIFPWEI | 422  | 118  |
| >KIT-L859P-v WSYGIFLWEL | 387  | >KIT-L859P-n WSYGIFPWEI | 278  | 109  |
| >KIT-L859P-v WSYGIFLW   | 137  | >KIT-L859P-n WSYGIFPW   | 681  | 544  |
| >KIT-L859P-v WSYGIFLWE  | 288  | >KIT-L859P-n WSYGIFPWE  | 540  | 252  |
| >KIT-L859P-v WSYGIFLWEL | 69   | >KIT-L859P-n WSYGIFPWEI | 36   | 33   |

|                         |     |                          |       |       |
|-------------------------|-----|--------------------------|-------|-------|
| >KIT-L859P-v WSYGIFLWEL | 5   | >KIT-L859P-n WSYGIFPWEI  | 5     | 0     |
| >KIT-L859P-v WSYGIFLW   | 25  | >KIT-L859P-n WSYGIFPW    | 31    | 6     |
| >KIT-L859P-v WSYGIFLW   | 43  | >KIT-L859P-n WSYGIFPW    | 49    | 6     |
| >KIT-L859P-v VWSYGIFLWI | 187 | >KIT-L859P-n VWSYGIFPW   | 467   | 280   |
| >KIT-L859P-v VWSYGIFLWI | 441 | >KIT-L859P-n VWSYGIFPW   | 1191  | 750   |
| >KIT-L859P-v VWSYGIFLW  | 200 | >KIT-L859P-n VWSYGIFPW   | 622   | 422   |
| >KIT-L859P-v VWSYGIFLWI | 309 | >KIT-L859P-n VWSYGIFPW   | 287   | 22    |
| >KIT-L859P-v VWSYGIFLW  | 103 | >KIT-L859P-n VWSYGIFPW   | 334   | 231   |
| >KIT-L859P-v VWSYGIFLWI | 421 | >KIT-L859P-n VWSYGIFPW   | 390   | 31    |
| >KIT-L859P-v VWSYGIFL   | 406 | >KIT-L859P-n VWSYGIFP    | 18644 | 18238 |
| >KIT-L859P-v VWSYGIFLW  | 266 | >KIT-L859P-n VWSYGIFPW   | 647   | 381   |
| >KIT-L859P-v VWSYGIFLWI | 60  | >KIT-L859P-n VWSYGIFPW   | 86    | 26    |
| >KIT-L859P-v VWSYGIFLW  | 196 | >KIT-L859P-n VWSYGIFPW   | 769   | 573   |
| >KIT-L859P-v VWSYGIFLW  | 295 | >KIT-L859P-n VWSYGIFPW   | 271   | 24    |
| >KIT-L859P-v VWSYGIFLWI | 460 | >KIT-L859P-n VWSYGIFPW   | 961   | 501   |
| >KIT-L859P-v VWSYGIFL   | 53  | >KIT-L859P-n VWSYGIFP    | 148   | 95    |
| >KIT-L859P-v VWSYGIFLW  | 207 | >KIT-L859P-n VWSYGIFPW   | 192   | 15    |
| >KIT-L859P-v VWSYGIFLWI | 71  | >KIT-L859P-n VWSYGIFPW   | 73    | 2     |
| >KIT-L859P-v DVWSYGIFL  | 452 | >KIT-L859P-n DVWSYGIFP   | 19416 | 18964 |
| >KIT-L859P-v DVWSYGIFL  | 15  | >KIT-L859P-n DVWSYGIFP   | 5787  | 5772  |
| >KIT-M351I-\ MNRTFTDK   | 36  | >KIT-M351I-r INRTFTDK    | 283   | 247   |
| >KIT-M351I-\ MNRTFTDKV  | 492 | >KIT-M351I-r INRTFTDKW   | 331   | 161   |
| >KIT-M351I-\ MNRTFTDKV  | 38  | >KIT-M351I-r INRTFTDKW   | 408   | 370   |
| >KIT-M351I-\ YMNRTFTDK  | 72  | >KIT-M351I-r YINRTFTDK   | 181   | 109   |
| >KIT-M351I-\ YMNRTFTDK  | 108 | >KIT-M351I-r YINRTFTDK   | 97    | 11    |
| >KIT-M351I-\ YMNRTFTDK  | 446 | >KIT-M351I-r YINRTFTDK   | 2351  | 1905  |
| >KIT-M351I-\ YMNRTFTDK  | 700 | >KIT-M351I-r YINRTFTDK   | 207   | 493   |
| >KIT-M351I-\ YMNRTFTDK  | 86  | >KIT-M351I-r YINRTFTDK   | 3336  | 3250  |
| >KIT-M351I-\ YMNRTFTDK' | 218 | >KIT-M351I-r YINRTFTDKW  | 4193  | 3975  |
| >KIT-M351I-\ YMNRTFTDK' | 312 | >KIT-M351I-r YINRTFTDKW  | 624   | 312   |
| >KIT-M351I-\ YMNRTFTDK' | 19  | >KIT-M351I-r YINRTFTDKW  | 29    | 10    |
| >KIT-M351I-\ YMNRTFTDK' | 151 | >KIT-M351I-r YINRTFTDKW  | 179   | 28    |
| >KIT-M351I-\ YMNRTFTDK' | 112 | >KIT-M351I-r YINRTFTDKW  | 554   | 442   |
| >KIT-M351I-\ IYMNRTFTDK | 169 | >KIT-M351I-r IYINRTFTDK  | 742   | 573   |
| >KIT-M351I-\ IYMNRTFTDK | 45  | >KIT-M351I-r IYINRTFTDKV | 35    | 10    |
| >KIT-M351I-\ IYMNRTFTD  | 368 | >KIT-M351I-r IYINRTFTD   | 603   | 235   |
| >KIT-M351I-\ IYMNRTFTDK | 43  | >KIT-M351I-r IYINRTFTDKV | 65    | 22    |
| >KIT-M351I-\ IYMNRTFTDK | 8   | >KIT-M351I-r IYINRTFTDKV | 13    | 5     |
| >KIT-M351I-\ IYMNRTFTDK | 400 | >KIT-M351I-r IYINRTFTDK  | 1128  | 728   |
| >KIT-M351I-\ IYMNRTFTDK | 463 | >KIT-M351I-r IYINRTFTDK  | 1131  | 668   |
| >KIT-M351I-\ IYMNRTFTDK | 237 | >KIT-M351I-r IYINRTFTDKV | 883   | 646   |
| >KIT-M351I-\ IYMNRTFTDK | 396 | >KIT-M351I-r IYINRTFTDKV | 296   | 100   |
| >KIT-M351I-\ IYMNRTFTDK | 335 | >KIT-M351I-r IYINRTFTDK  | 585   | 250   |

|                         |      |                         |     |      |
|-------------------------|------|-------------------------|-----|------|
| >KIT-M351I-\\IYMNRTFTDK | 264  | >KIT-M351I-r IYINRTFTDK | 390 | 126  |
| >KIT-M351I-\\WIYMNRTFTD | 175  | >KIT-M351I-r WIYINRTFTD | 261 | 86   |
| >KIT-M351I-\\WIYMNRTFTD | 105  | >KIT-M351I-r WIYINRTFTD | 157 | 52   |
| >KIT-M351I-\\WIYMNRTF   | 83   | >KIT-M351I-r WIYINRTF   | 182 | 99   |
| >KIT-M351I-\\WIYMNRTF   | 159  | >KIT-M351I-r WIYINRTF   | 189 | 30   |
| >KIT-M351I-\\WIYMNRTF   | 24   | >KIT-M351I-r WIYINRTF   | 49  | 25   |
| >KIT-M351I-\\WIYMNRTF   | 68   | >KIT-M351I-r WIYINRTF   | 57  | 11   |
| >KIT-M351I-\\WIYMNRTF   | 139  | >KIT-M351I-r WIYINRTF   | 195 | 56   |
| >KIT-M351I-\\QWIYMNRTF  | 48   | >KIT-M351I-r QWIYINRTF  | 44  | 4    |
| >KIT-M351I-\\QWIYMNRTF  | 123  | >KIT-M351I-r QWIYINRTF  | 100 | 23   |
| >KIT-M351I-\\QWIYMNRTF  | 104  | >KIT-M351I-r QWIYINRTF  | 63  | 41   |
| >KIT-M351I-\\QWIYMNRTF  | 518  | >KIT-M351I-r QWIYINRTF  | 223 | 295  |
| >KIT-M351I-\\QWIYMNRT   | 429  | >KIT-M351I-r QWIYINRT   | 409 | 20   |
| >KIT-M351I-\\QWIYMNRTF  | 159  | >KIT-M351I-r QWIYINRTF  | 151 | 8    |
| >KIT-M351I-\\QWIYMNRTF  | 419  | >KIT-M351I-r QWIYINRTFT | 692 | 273  |
| >KIT-M351I-\\QQWIYMNRT  | 249  | >KIT-M351I-r QQWIYINRTF | 361 | 112  |
| >KIT-M351I-\\QQWIYMNRT  | 17   | >KIT-M351I-r QQWIYINR   | 19  | 2    |
| >KIT-M351I-\\QQWIYMNRT  | 138  | >KIT-M351I-r QQWIYINRTF | 103 | 35   |
| >KIT-M351I-\\QQWIYMNRT  | 197  | >KIT-M351I-r QQWIYINRTF | 207 | 10   |
| >KIT-M351I-\\QQWIYMNRT  | 278  | >KIT-M351I-r QQWIYINR   | 444 | 166  |
| >KIT-M351I-\\QQWIYMNRT  | 5    | >KIT-M351I-r QQWIYINRTF | 4   | 1    |
| >KIT-M351I-\\QQWIYMNRT  | 936  | >KIT-M351I-r QQWIYINR   | 498 | 438  |
| >KIT-M351I-\\QQWIYMNRT  | 36   | >KIT-M351I-r QQWIYINR   | 32  | 4    |
| >KIT-M351I-\\HQQWIYMNI  | 182  | >KIT-M351I-r HQQWIYINR  | 358 | 176  |
| >KIT-M351I-\\HQQWIYMNI  | 469  | >KIT-M351I-r HQQWIYINRT | 648 | 179  |
| >KIT-M351I-\\HQQWIYMNI  | 10   | >KIT-M351I-r HQQWIYINR  | 10  | 0    |
| >KIT-M351I-\\HQQWIYMNI  | 63   | >KIT-M351I-r HQQWIYINRT | 54  | 9    |
| >KIT-M351I-\\HQQWIYMNI  | 137  | >KIT-M351I-r HQQWIYINR  | 218 | 81   |
| >KIT-M351I-\\HQQWIYMNI  | 182  | >KIT-M351I-r HQQWIYINR  | 293 | 111  |
| >KIT-M351I-\\HQQWIYMNI  | 137  | >KIT-M351I-r HQQWIYINRT | 178 | 41   |
| >KIT-M351I-\\HQQWIYMNI  | 21   | >KIT-M351I-r HQQWIYINRT | 27  | 6    |
| >KIT-M351I-\\HQQWIYMNI  | 729  | >KIT-M351I-r HQQWIYINR  | 474 | 255  |
| >KIT-M351I-\\HQQWIYMNI  | 229  | >KIT-M351I-r HQQWIYINRT | 212 | 17   |
| >KIT-M351I-\\HQQWIYMNI  | 23   | >KIT-M351I-r HQQWIYINR  | 24  | 1    |
| >KIT-M351I-\\EHQQWIYMF  | 495  | >KIT-M351I-r EHQQWIYINF | 698 | 203  |
| >KIT-M351I-\\EHQQWIYMF  | 151  | >KIT-M351I-r EHQQWIYINF | 145 | 6    |
| >KIT-M351I-\\PEHQQWIYV  | 1854 | >KIT-M351I-r PEHQQWIYI  | 38  | 1816 |
| >KIT-M351I-\\PEHQQWIYV  | 544  | >KIT-M351I-r PEHQQWIYI  | 461 | 83   |
| >KIT-M351I-\\PEHQQWIYV  | 526  | >KIT-M351I-r PEHQQWIYI  | 34  | 492  |
| >KIT-M351I-\\PEHQQWIYV  | 163  | >KIT-M351I-r PEHQQWIYIN | 179 | 16   |
| >KIT-M351I-\\KPEHQQWIYI | 246  | >KIT-M351I-r KPEHQQWIYI | 909 | 663  |
| >KIT-M541L- MILTYKYL    | 8    | >KIT-M541L- LILTYKYL    | 20  | 12   |
| >KIT-M541L- MILTYKYL    | 78   | >KIT-M541L- LILTYKYL    | 350 | 272  |

|                       |      |                        |      |      |
|-----------------------|------|------------------------|------|------|
| >KIT-M541L-MILTYKYL   | 95   | >KIT-M541L-LILTYKYL    | 426  | 331  |
| >KIT-M541L-MILTYKYL   | 84   | >KIT-M541L-LILTYKYL    | 302  | 218  |
| >KIT-M541L-MILTYKYL   | 18   | >KIT-M541L-LILTYKYL    | 40   | 22   |
| >KIT-M541L-MILTYKYL   | 499  | >KIT-M541L-LILTYKYL    | 823  | 324  |
| >KIT-M541L-MILTYKYL   | 208  | >KIT-M541L-LILTYKYL    | 479  | 271  |
| >KIT-M541L-MILTYKYL   | 52   | >KIT-M541L-LILTYKYL    | 87   | 35   |
| >KIT-M541L-MILTYKYLQK | 18   | >KIT-M541L-LILTYKYLQK  | 27   | 9    |
| >KIT-M541L-MILTYKYLQK | 18   | >KIT-M541L-LILTYKYLQK  | 25   | 7    |
| >KIT-M541L-MILTYKYLQK | 32   | >KIT-M541L-LILTYKYLQK  | 185  | 153  |
| >KIT-M541L-MILTYKYLQK | 209  | >KIT-M541L-LILTYKYLQK  | 615  | 406  |
| >KIT-M541L-MILTYKYLQK | 161  | >KIT-M541L-LILTYKYLQK  | 1146 | 985  |
| >KIT-M541L-MILTYKYL   | 178  | >KIT-M541L-LILTYKYL    | 1427 | 1249 |
| >KIT-M541L-MILTYKYL   | 211  | >KIT-M541L-LILTYKYL    | 785  | 574  |
| >KIT-M541L-MILTYKYLQK | 260  | >KIT-M541L-LILTYKYLQK  | 862  | 602  |
| >KIT-M541L-VMILTYKYL  | 36   | >KIT-M541L-VLILTYKYL   | 315  | 279  |
| >KIT-M541L-VMILTYKYL  | 310  | >KIT-M541L-VLILTYKYL   | 333  | 23   |
| >KIT-M541L-VMILTYKYL  | 124  | >KIT-M541L-VLILTYKYL   | 198  | 74   |
| >KIT-M541L-VMILTYKYL  | 14   | >KIT-M541L-VLILTYKYL   | 20   | 6    |
| >KIT-M541L-VMILTYKYL  | 57   | >KIT-M541L-VLILTYKYL   | 82   | 25   |
| >KIT-M541L-VMILTYKYL  | 137  | >KIT-M541L-VLILTYKYL   | 157  | 20   |
| >KIT-M541L-VMILTYKYL  | 189  | >KIT-M541L-VLILTYKYL   | 344  | 155  |
| >KIT-M541L-VMILTYKYL  | 31   | >KIT-M541L-VLILTYKYL   | 20   | 11   |
| >KIT-M541L-VMILTYKYLQ | 110  | >KIT-M541L-VLILTYKYLQK | 132  | 22   |
| >KIT-M541L-VMILTYKYLQ | 24   | >KIT-M541L-VLILTYKYLQK | 61   | 37   |
| >KIT-M541L-VMILTYKY   | 9    | >KIT-M541L-VLILTYKY    | 19   | 10   |
| >KIT-M541L-VMILTYKY   | 35   | >KIT-M541L-VLILTYKY    | 105  | 70   |
| >KIT-M541L-VMILTYKY   | 190  | >KIT-M541L-VLILTYKY    | 166  | 24   |
| >KIT-M541L-VMILTYKY   | 167  | >KIT-M541L-VLILTYKY    | 612  | 445  |
| >KIT-M541L-VMILTYKY   | 43   | >KIT-M541L-VLILTYKY    | 555  | 512  |
| >KIT-M541L-VMILTYKYL  | 104  | >KIT-M541L-VLILTYKYL   | 911  | 807  |
| >KIT-M541L-VMILTYKY   | 233  | >KIT-M541L-VLILTYKY    | 841  | 608  |
| >KIT-M541L-IVAGMMCIIV | 1309 | >KIT-M541L-IVAGMMCIIV  | 162  | 1147 |
| >KIT-M541L-IVAGMMCIIV | 1462 | >KIT-M541L-IVAGMMCIIV  | 295  | 1167 |
| >KIT-M541L-IVAGMMCIIV | 2651 | >KIT-M541L-IVAGMMCIIV  | 57   | 2594 |
| >KIT-M541L-IVAGMMCIIV | 81   | >KIT-M541L-IVAGMMCIIV  | 792  | 711  |
| >KIT-M541L-IVAGMMCIIV | 2116 | >KIT-M541L-IVAGMMCIIV  | 274  | 1842 |
| >KIT-M541L-IVAGMMCIIV | 289  | >KIT-M541L-IVAGMMCIIV  | 3991 | 3702 |
| >KIT-M541L-IVAGMMCIIV | 75   | >KIT-M541L-IVAGMMCIIV  | 527  | 452  |
| >KIT-M541L-IVMILTYKYL | 293  | >KIT-M541L-IVLILTYKYL  | 794  | 501  |
| >KIT-M541L-IVMILTYKYL | 105  | >KIT-M541L-IVLILTYKYL  | 322  | 217  |
| >KIT-M541L-IVMILTYKYL | 139  | >KIT-M541L-IVLILTYKYL  | 452  | 313  |
| >KIT-M541L-IVMILTYKYL | 187  | >KIT-M541L-IVLILTYKYL  | 259  | 72   |
| >KIT-M541L-IVMILTYKYL | 363  | >KIT-M541L-IVLILTYKYL  | 158  | 205  |

|                         |     |                         |      |      |
|-------------------------|-----|-------------------------|------|------|
| >KIT-M541L-·IVMILTYKYL  | 321 | >KIT-M541L-·IVLILTYKYL  | 972  | 651  |
| >KIT-M541L-·IVMILTYK    | 45  | >KIT-M541L-·IVLILTYK    | 84   | 39   |
| >KIT-M541L-·IVMILTYK    | 9   | >KIT-M541L-·IVLILTYK    | 16   | 7    |
| >KIT-M541L-·IVMILTYKY   | 30  | >KIT-M541L-·IVLILTYKY   | 200  | 170  |
| >KIT-M541L-·IVMILTYKY   | 8   | >KIT-M541L-·IVLILTYKY   | 7    | 1    |
| >KIT-M541L-·IVMILTYK    | 141 | >KIT-M541L-·IVLILTYK    | 114  | 27   |
| >KIT-M541L-·IVMILTYKY   | 16  | >KIT-M541L-·IVLILTYKY   | 25   | 9    |
| >KIT-M541L-·IVMILTYK    | 36  | >KIT-M541L-·IVLILTYK    | 49   | 13   |
| >KIT-M541L-·IVMILTYKY   | 86  | >KIT-M541L-·IVLILTYKY   | 192  | 106  |
| >KIT-M541L-·IVMILTYK    | 14  | >KIT-M541L-·IVLILTYK    | 73   | 59   |
| >KIT-M541L-·IVMILTYKY   | 316 | >KIT-M541L-·IVLILTYKY   | 2356 | 2040 |
| >KIT-M541L-·IVMILTYKY   | 10  | >KIT-M541L-·IVLILTYKY   | 9    | 1    |
| >KIT-M541L-·IVMILTYKY   | 61  | >KIT-M541L-·IVLILTYKY   | 66   | 5    |
| >KIT-M541L-·IVMILTYKY   | 92  | >KIT-M541L-·IVLILTYKY   | 174  | 82   |
| >KIT-M541L-·IVMILTYKY   | 250 | >KIT-M541L-·IVLILTYKY   | 895  | 645  |
| >KIT-M541L-·IVMILTYKY   | 253 | >KIT-M541L-·IVLILTYKY   | 301  | 48   |
| >KIT-M541L-·IVMILTYKY   | 378 | >KIT-M541L-·IVLILTYKY   | 955  | 577  |
| >KIT-M541L-·IVMILTYK    | 559 | >KIT-M541L-·IVLILTYK    | 368  | 191  |
| >KIT-M541L-·IIVMILTYKYL | 187 | >KIT-M541L-·IIVLILTYKYL | 260  | 73   |
| >KIT-M541L-·IIVMILTYKYL | 251 | >KIT-M541L-·IIVLILTYKYL | 269  | 18   |
| >KIT-M541L-·IIVMILTYKYL | 239 | >KIT-M541L-·IIVLILTYKYL | 476  | 237  |
| >KIT-M541L-·IIVMILTYKYL | 193 | >KIT-M541L-·IIVLILTYKYL | 243  | 50   |
| >KIT-M541L-·IIVMILTYKYL | 231 | >KIT-M541L-·IIVLILTYKYL | 707  | 476  |
| >KIT-M541L-·IIVMILTYKYL | 281 | >KIT-M541L-·IIVLILTYKYL | 919  | 638  |
| >KIT-M541L-·IIVMILTYK   | 71  | >KIT-M541L-·IIVLILTYK   | 94   | 23   |
| >KIT-M541L-·IIVMILTYK   | 21  | >KIT-M541L-·IIVLILTYK   | 27   | 6    |
| >KIT-M541L-·IIVMILTYKY  | 311 | >KIT-M541L-·IIVLILTYKY  | 522  | 211  |
| >KIT-M541L-·IIVMILTY    | 195 | >KIT-M541L-·IIVLILTY    | 255  | 60   |
| >KIT-M541L-·IIVMILTYKY  | 222 | >KIT-M541L-·IIVLILTYKY  | 276  | 54   |
| >KIT-M541L-·IIVMILTY    | 25  | >KIT-M541L-·IIVLILTY    | 25   | 0    |
| >KIT-M541L-·IIVMILTYKY  | 73  | >KIT-M541L-·IIVLILTYKY  | 77   | 4    |
| >KIT-M541L-·IIVMILTY    | 131 | >KIT-M541L-·IIVLILTY    | 314  | 183  |
| >KIT-M541L-·IIVMILTYKY  | 53  | >KIT-M541L-·IIVLILTYKY  | 51   | 2    |
| >KIT-M541L-·IIVMILTYK   | 75  | >KIT-M541L-·IIVLILTYK   | 150  | 75   |
| >KIT-M541L-·IIVMILTYK   | 15  | >KIT-M541L-·IIVLILTYK   | 24   | 9    |
| >KIT-M541L-·IIVMILTYKY  | 453 | >KIT-M541L-·IIVLILTYKY  | 864  | 411  |
| >KIT-M541L-·IIVMILTY    | 55  | >KIT-M541L-·IIVLILTY    | 78   | 23   |
| >KIT-M541L-·IIVMILTYKY  | 58  | >KIT-M541L-·IIVLILTYKY  | 94   | 36   |
| >KIT-M541L-·IIVMILTY    | 211 | >KIT-M541L-·IIVLILTY    | 520  | 309  |
| >KIT-M541L-·IIVMILTY    | 69  | >KIT-M541L-·IIVLILTY    | 116  | 47   |
| >KIT-M541L-·IIVMILTYKY  | 326 | >KIT-M541L-·IIVLILTYKY  | 530  | 204  |
| >KIT-M541L-·IIVMILTY    | 396 | >KIT-M541L-·IIVLILTY    | 574  | 178  |
| >KIT-M541L-·IIVMILTY    | 135 | >KIT-M541L-·IIVLILTY    | 166  | 31   |



|                         |     |                         |      |     |
|-------------------------|-----|-------------------------|------|-----|
| >KIT-M541L- IIVMILTYKY  | 303 | >KIT-M541L- IIVLILTYKY  | 372  | 69  |
| >KIT-M541L- CIIVMILTYK  | 33  | >KIT-M541L- CIIVLILTYK  | 41   | 8   |
| >KIT-M541L- CIIVMILTYK  | 19  | >KIT-M541L- CIIVLILTYK  | 24   | 5   |
| >KIT-M541L- CIIVMILTY   | 98  | >KIT-M541L- CIIVLILTY   | 126  | 28  |
| >KIT-M541L- CIIVMILTYKY | 132 | >KIT-M541L- CIIVLILTYKY | 155  | 23  |
| >KIT-M541L- CIIVMILTY   | 19  | >KIT-M541L- CIIVLILTY   | 22   | 3   |
| >KIT-M541L- CIIVMILTYKY | 14  | >KIT-M541L- CIIVLILTYKY | 15   | 1   |
| >KIT-M541L- CIIVMILTY   | 312 | >KIT-M541L- CIIVLILTY   | 359  | 47  |
| >KIT-M541L- CIIVMILTYKY | 91  | >KIT-M541L- CIIVLILTYKY | 98   | 7   |
| >KIT-M541L- CIIVMILTYK  | 368 | >KIT-M541L- CIIVLILTYK  | 514  | 146 |
| >KIT-M541L- CIIVMILTYK  | 9   | >KIT-M541L- CIIVLILTYK  | 11   | 2   |
| >KIT-M541L- CIIVMILTY   | 51  | >KIT-M541L- CIIVLILTY   | 29   | 22  |
| >KIT-M541L- CIIVMILTYKY | 69  | >KIT-M541L- CIIVLILTYKY | 48   | 21  |
| >KIT-M541L- CIIVMILTY   | 352 | >KIT-M541L- CIIVLILTY   | 317  | 35  |
| >KIT-M541L- CIIVMILTY   | 371 | >KIT-M541L- CIIVLILTY   | 591  | 220 |
| >KIT-M541L- CIIVMILTY   | 155 | >KIT-M541L- CIIVLILTY   | 162  | 7   |
| >KIT-M541L- CIIVMILTYKY | 351 | >KIT-M541L- CIIVLILTYKY | 352  | 1   |
| >KIT-M541L- CIIVMILTY   | 163 | >KIT-M541L- CIIVLILTY   | 162  | 1   |
| >KIT-M541L- CIIVMILTYKY | 84  | >KIT-M541L- CIIVLILTYKY | 82   | 2   |
| >KIT-M541L- MCIIVMILTY  | 77  | >KIT-M541L- MCIIVLILTY  | 247  | 170 |
| >KIT-M541L- MCIIVMILTY  | 222 | >KIT-M541L- MCIIVLILTY  | 358  | 136 |
| >KIT-M541L- MCIIVMILTYK | 255 | >KIT-M541L- MCIIVLILTYK | 331  | 76  |
| >KIT-M541L- MCIIVMILTYK | 71  | >KIT-M541L- MCIIVLILTYK | 88   | 17  |
| >KIT-M541L- MCIIVMIL    | 271 | >KIT-M541L- MCIIVLIL    | 1215 | 944 |
| >KIT-M541L- MCIIVMILTY  | 35  | >KIT-M541L- MCIIVLILTY  | 42   | 7   |
| >KIT-M541L- MCIIVMILTY  | 348 | >KIT-M541L- MCIIVLILTY  | 631  | 283 |
| >KIT-M541L- MCIIVMILTY  | 193 | >KIT-M541L- MCIIVLILTY  | 192  | 1   |
| >KIT-M541L- MMCIIVMI    | 38  | >KIT-M541L- MMCIIVLI    | 33   | 5   |
| >KIT-M541L- MMCIIVMIL   | 58  | >KIT-M541L- MMCIIVLIL   | 56   | 2   |
| >KIT-M541L- MMCIIVMILT  | 299 | >KIT-M541L- MMCIIVLILT  | 153  | 146 |
| >KIT-M541L- MMCIIVMI    | 25  | >KIT-M541L- MMCIIVLI    | 18   | 7   |
| >KIT-M541L- MMCIIVMIL   | 38  | >KIT-M541L- MMCIIVLIL   | 63   | 25  |
| >KIT-M541L- MMCIIVMILT  | 308 | >KIT-M541L- MMCIIVLILT  | 203  | 105 |
| >KIT-M541L- MMCIIVMI    | 32  | >KIT-M541L- MMCIIVLI    | 31   | 1   |
| >KIT-M541L- MMCIIVMIL   | 33  | >KIT-M541L- MMCIIVLIL   | 91   | 58  |
| >KIT-M541L- MMCIIVMILT  | 338 | >KIT-M541L- MMCIIVLILT  | 205  | 133 |
| >KIT-M541L- MMCIIVMI    | 359 | >KIT-M541L- MMCIIVLI    | 316  | 43  |
| >KIT-M541L- MMCIIVMILT  | 500 | >KIT-M541L- MMCIIVLILT  | 270  | 230 |
| >KIT-M541L- MMCIIVMI    | 4   | >KIT-M541L- MMCIIVLI    | 6    | 2   |
| >KIT-M541L- MMCIIVMIL   | 12  | >KIT-M541L- MMCIIVLIL   | 14   | 2   |
| >KIT-M541L- MMCIIVMILT  | 94  | >KIT-M541L- MMCIIVLILT  | 68   | 26  |
| >KIT-M541L- MMCIIVMI    | 487 | >KIT-M541L- MMCIIVLI    | 501  | 14  |
| >KIT-M541L- MMCIIVMIL   | 390 | >KIT-M541L- MMCIIVLIL   | 778  | 388 |

|                       |     |                        |     |     |
|-----------------------|-----|------------------------|-----|-----|
| >KIT-M541L-MMCIIVMI   | 79  | >KIT-M541L-MMCIIVLI    | 112 | 33  |
| >KIT-M541L-MMCIIVMIL  | 140 | >KIT-M541L-MMCIIVLIL   | 161 | 21  |
| >KIT-M541L-MMCIIVMI   | 273 | >KIT-M541L-MMCIIVLI    | 498 | 225 |
| >KIT-M541L-MMCIIVMIL  | 255 | >KIT-M541L-MMCIIVLIL   | 558 | 303 |
| >KIT-M541L-MMCIIVMI   | 12  | >KIT-M541L-MMCIIVLI    | 14  | 2   |
| >KIT-M541L-MMCIIVMIL  | 7   | >KIT-M541L-MMCIIVLIL   | 11  | 4   |
| >KIT-M541L-MMCIIVMILT | 312 | >KIT-M541L-MMCIIVLILT  | 242 | 70  |
| >KIT-M541L-MMCIIVMILT | 205 | >KIT-M541L-MMCIIVLILTY | 235 | 30  |
| >KIT-M541L-MMCIIVMILT | 198 | >KIT-M541L-MMCIIVLILTY | 232 | 34  |
| >KIT-M541L-MMCIIVMILT | 7   | >KIT-M541L-MMCIIVLILTY | 7   | 0   |
| >KIT-M541L-MMCIIVMILT | 33  | >KIT-M541L-MMCIIVLILTY | 34  | 1   |
| >KIT-M541L-MMCIIVMI   | 223 | >KIT-M541L-MMCIIVLI    | 289 | 66  |
| >KIT-M541L-MMCIIVMILT | 288 | >KIT-M541L-MMCIIVLILTY | 282 | 6   |
| >KIT-M541L-MMCIIVMILT | 11  | >KIT-M541L-MMCIIVLILTY | 7   | 4   |
| >KIT-M541L-MMCIIVMILT | 52  | >KIT-M541L-MMCIIVLILTY | 48  | 4   |
| >KIT-M541L-MMCIIVMIL  | 191 | >KIT-M541L-MMCIIVLIL   | 353 | 162 |
| >KIT-M541L-MMCIIVMILT | 35  | >KIT-M541L-MMCIIVLILTY | 41  | 6   |
| >KIT-M541L-MMCIIVMILT | 56  | >KIT-M541L-MMCIIVLILTY | 43  | 13  |
| >KIT-M541L-MMCIIVMILT | 63  | >KIT-M541L-MMCIIVLILTY | 65  | 2   |
| >KIT-M541L-MMCIIVMIL  | 214 | >KIT-M541L-MMCIIVLIL   | 242 | 28  |
| >KIT-M541L-GMMCIIVM   | 22  | >KIT-M541L-GMMCIIVL    | 11  | 11  |
| >KIT-M541L-GMMCIIVMI  | 8   | >KIT-M541L-GMMCIIVLI   | 8   | 0   |
| >KIT-M541L-GMMCIIVMII | 44  | >KIT-M541L-GMMCIIVLIL  | 54  | 10  |
| >KIT-M541L-GMMCIIVMII | 33  | >KIT-M541L-GMMCIIVLIL  | 30  | 3   |
| >KIT-M541L-GMMCIIVM   | 43  | >KIT-M541L-GMMCIIVL    | 7   | 36  |
| >KIT-M541L-GMMCIIVMI  | 5   | >KIT-M541L-GMMCIIVLI   | 4   | 1   |
| >KIT-M541L-GMMCIIVMII | 19  | >KIT-M541L-GMMCIIVLIL  | 26  | 7   |
| >KIT-M541L-GMMCIIVMII | 42  | >KIT-M541L-GMMCIIVLIL  | 32  | 10  |
| >KIT-M541L-GMMCIIVM   | 96  | >KIT-M541L-GMMCIIVL    | 16  | 80  |
| >KIT-M541L-GMMCIIVMI  | 8   | >KIT-M541L-GMMCIIVLI   | 7   | 1   |
| >KIT-M541L-GMMCIIVMII | 55  | >KIT-M541L-GMMCIIVLIL  | 66  | 11  |
| >KIT-M541L-GMMCIIVMII | 74  | >KIT-M541L-GMMCIIVLIL  | 63  | 11  |
| >KIT-M541L-GMMCIIVM   | 272 | >KIT-M541L-GMMCIIVL    | 42  | 230 |
| >KIT-M541L-GMMCIIVMI  | 45  | >KIT-M541L-GMMCIIVLI   | 34  | 11  |
| >KIT-M541L-GMMCIIVMII | 205 | >KIT-M541L-GMMCIIVLIL  | 257 | 52  |
| >KIT-M541L-GMMCIIVMII | 471 | >KIT-M541L-GMMCIIVLIL  | 316 | 155 |
| >KIT-M541L-GMMCIIVM   | 21  | >KIT-M541L-GMMCIIVL    | 5   | 16  |
| >KIT-M541L-GMMCIIVMI  | 3   | >KIT-M541L-GMMCIIVLI   | 4   | 1   |
| >KIT-M541L-GMMCIIVMII | 8   | >KIT-M541L-GMMCIIVLIL  | 10  | 2   |
| >KIT-M541L-GMMCIIVMII | 48  | >KIT-M541L-GMMCIIVLIL  | 34  | 14  |
| >KIT-M541L-GMMCIIVM   | 11  | >KIT-M541L-GMMCIIVL    | 3   | 8   |
| >KIT-M541L-GMMCIIVMI  | 4   | >KIT-M541L-GMMCIIVLI   | 4   | 0   |
| >KIT-M541L-GMMCIIVMII | 4   | >KIT-M541L-GMMCIIVLIL  | 5   | 1   |

|                        |      |                         |      |      |
|------------------------|------|-------------------------|------|------|
| >KIT-M541L-GMMCIIVMII  | 113  | >KIT-M541L-GMMCIIVLII   | 66   | 47   |
| >KIT-M541L-GMMCIIVM    | 303  | >KIT-M541L-GMMCIIVL     | 29   | 274  |
| >KIT-M541L-GMMCIIVMI   | 22   | >KIT-M541L-GMMCIIVLI    | 29   | 7    |
| >KIT-M541L-GMMCIIVMII  | 30   | >KIT-M541L-GMMCIIVLII   | 37   | 7    |
| >KIT-M541L-GMMCIIVMII  | 511  | >KIT-M541L-GMMCIIVLII   | 409  | 102  |
| >KIT-M541L-GMMCIIVM    | 67   | >KIT-M541L-GMMCIIVL     | 9    | 58   |
| >KIT-M541L-GMMCIIVMI   | 10   | >KIT-M541L-GMMCIIVLI    | 12   | 2    |
| >KIT-M541L-GMMCIIVMII  | 10   | >KIT-M541L-GMMCIIVLII   | 15   | 5    |
| >KIT-M541L-GMMCIIVM    | 375  | >KIT-M541L-GMMCIIVL     | 17   | 358  |
| >KIT-M541L-GMMCIIVMI   | 39   | >KIT-M541L-GMMCIIVLI    | 41   | 2    |
| >KIT-M541L-GMMCIIVMII  | 17   | >KIT-M541L-GMMCIIVLII   | 26   | 9    |
| >KIT-M541L-GMMCIIVM    | 1184 | >KIT-M541L-GMMCIIVL     | 269  | 915  |
| >KIT-M541L-GMMCIIVMI   | 30   | >KIT-M541L-GMMCIIVLI    | 45   | 15   |
| >KIT-M541L-GMMCIIVMII  | 134  | >KIT-M541L-GMMCIIVLII   | 137  | 3    |
| >KIT-M541L-GMMCIIVM    | 72   | >KIT-M541L-GMMCIIVL     | 216  | 144  |
| >KIT-M541L-GMMCIIVM    | 61   | >KIT-M541L-GMMCIIVL     | 134  | 73   |
| >KIT-M541L-GMMCIIVMI   | 157  | >KIT-M541L-GMMCIIVLI    | 383  | 226  |
| >KIT-M541L-GMMCIIVMII  | 76   | >KIT-M541L-GMMCIIVLII   | 133  | 57   |
| >KIT-M541L-GMMCIIVM    | 1345 | >KIT-M541L-GMMCIIVL     | 250  | 1095 |
| >KIT-M541L-GMMCIIVM    | 1661 | >KIT-M541L-GMMCIIVL     | 253  | 1408 |
| >KIT-M541L-GMMCIIVMI   | 642  | >KIT-M541L-GMMCIIVLI    | 351  | 291  |
| >KIT-M541L-GMMCIIVMII  | 168  | >KIT-M541L-GMMCIIVLII   | 200  | 32   |
| >KIT-M541L-GMMCIIVMI   | 106  | >KIT-M541L-GMMCIIVLI    | 110  | 4    |
| >KIT-M541L-GMMCIIVMII  | 329  | >KIT-M541L-GMMCIIVLII   | 1306 | 977  |
| >KIT-M541L-GMMCIIVMII  | 1527 | >KIT-M541L-GMMCIIVLII   | 335  | 1192 |
| >KIT-M552I-\ MYEVQWKV  | 246  | >KIT-M552I-r IYEVQWKV   | 911  | 665  |
| >KIT-M552I-\ MYEVQWKV  | 488  | >KIT-M552I-r IYEVQWKV   | 2608 | 2120 |
| >KIT-M552I-\ PMYEVQWK\ | 17   | >KIT-M552I-r PIYEVQWKV  | 168  | 151  |
| >KIT-M552I-\ PMYEVQWK\ | 18   | >KIT-M552I-r PIYEVQWKV  | 169  | 151  |
| >KIT-M552I-\ PMYEVQWK\ | 48   | >KIT-M552I-r PIYEVQWKV  | 687  | 639  |
| >KIT-M552I-\ PMYEVQWK\ | 33   | >KIT-M552I-r PIYEVQWKV  | 109  | 76   |
| >KIT-M552I-\ PMYEVQWK\ | 1    | >KIT-M552I-r PIYEVQWKV  | 2    | 1    |
| >KIT-M552I-\ PMYEVQWK\ | 4    | >KIT-M552I-r PIYEVQWKV\ | 26   | 22   |
| >KIT-M552I-\ PMYEVQWK\ | 5    | >KIT-M552I-r PIYEVQWKV  | 133  | 128  |
| >KIT-M552I-\ PMYEVQWK\ | 97   | >KIT-M552I-r PIYEVQWKV\ | 1775 | 1678 |
| >KIT-M552I-\ PMYEVQWK\ | 4    | >KIT-M552I-r PIYEVQWKV  | 6    | 2    |
| >KIT-M552I-\ PMYEVQWK\ | 11   | >KIT-M552I-r PIYEVQWKV\ | 73   | 62   |
| >KIT-M552I-\ PMYEVQWK\ | 3    | >KIT-M552I-r PIYEVQWKV  | 16   | 13   |
| >KIT-M552I-\ PMYEVQWK\ | 54   | >KIT-M552I-r PIYEVQWKV\ | 965  | 911  |
| >KIT-M552I-\ PMYEVQWK\ | 2    | >KIT-M552I-r PIYEVQWKV  | 5    | 3    |
| >KIT-M552I-\ PMYEVQWK\ | 10   | >KIT-M552I-r PIYEVQWKV\ | 68   | 58   |
| >KIT-M552I-\ PMYEVQWK  | 129  | >KIT-M552I-r PIYEVQWK   | 401  | 272  |
| >KIT-M552I-\ PMYEVQWK\ | 145  | >KIT-M552I-r PIYEVQWKV  | 56   | 89   |

|                          |      |                          |     |      |
|--------------------------|------|--------------------------|-----|------|
| >KIT-M552I-\ ILTYKYLQKPI | 1356 | >KIT-M552I-r ILTYKYLQKPI | 337 | 1019 |
| >KIT-M552I-\ ILTYKYLQKPI | 1862 | >KIT-M552I-r ILTYKYLQKPI | 155 | 1707 |
| >KIT-M552I-\ ILTYKYLQKPI | 2329 | >KIT-M552I-r ILTYKYLQKPI | 318 | 2011 |
| >KIT-M552I-\ KPMYEVQW\   | 157  | >KIT-M552I-r KPIYEVQW\   | 788 | 631  |
| >KIT-M552I-\ KPMYEVQW\   | 136  | >KIT-M552I-r KPIYEVQW\   | 684 | 548  |
| >KIT-M552I-\ KPMYEVQW    | 20   | >KIT-M552I-r KPIYEVQW    | 25  | 5    |
| >KIT-M552I-\ KPMYEVQW\   | 68   | >KIT-M552I-r KPIYEVQW\   | 138 | 70   |
| >KIT-M552I-\ KPMYEVQW    | 199  | >KIT-M552I-r KPIYEVQW    | 243 | 44   |
| >KIT-M552I-\ KPMYEVQW    | 9    | >KIT-M552I-r KPIYEVQW    | 8   | 1    |
| >KIT-M552I-\ LQKPMYEV    | 327  | >KIT-M552I-r LQKPIYEV    | 108 | 219  |
| >KIT-M552I-\ LQKPMYEV    | 48   | >KIT-M552I-r LQKPIYEV    | 34  | 14   |
| >KIT-M552I-\ LQKPMYEV    | 34   | >KIT-M552I-r LQKPIYEV    | 18  | 16   |
| >KIT-M552I-\ LQKPMYEV    | 1276 | >KIT-M552I-r LQKPIYEV    | 369 | 907  |
| >KIT-M552I-\ LQKPMYEV    | 318  | >KIT-M552I-r LQKPIYEV    | 178 | 140  |
| >KIT-M552I-\ LQKPMYEVQ   | 243  | >KIT-M552I-r LQKPIYEVQM  | 286 | 43   |
| >KIT-M552I-\ LQKPMYEVQ   | 415  | >KIT-M552I-r LQKPIYEVQM  | 319 | 96   |
| >KIT-M552I-\ LQKPMYEV    | 403  | >KIT-M552I-r LQKPIYEV    | 473 | 70   |
| >KIT-M552I-\ LQKPMYEVQ   | 230  | >KIT-M552I-r LQKPIYEVQ   | 354 | 124  |
| >KIT-M552I-\ LQKPMYEVQ   | 247  | >KIT-M552I-r LQKPIYEVQM  | 369 | 122  |
| >KIT-M552I-\ LQKPMYEV    | 155  | >KIT-M552I-r LQKPIYEV    | 123 | 32   |
| >KIT-M552I-\ LQKPMYEVQ   | 225  | >KIT-M552I-r LQKPIYEVQM  | 273 | 48   |
| >KIT-M552I-\ LQKPMYEVQ   | 168  | >KIT-M552I-r LQKPIYEVQM  | 206 | 38   |
| >KIT-M552I-\ LQKPMYEVQ   | 230  | >KIT-M552I-r LQKPIYEVQM  | 581 | 351  |
| >KIT-M552I-\ YLQKPMYEV   | 7    | >KIT-M552I-r YLQKPIYEV   | 7   | 0    |
| >KIT-M552I-\ YLQKPMYEV   | 5    | >KIT-M552I-r YLQKPIYEV   | 5   | 0    |
| >KIT-M552I-\ YLQKPMYEV   | 7    | >KIT-M552I-r YLQKPIYEV   | 6   | 1    |
| >KIT-M552I-\ YLQKPMYEV   | 13   | >KIT-M552I-r YLQKPIYEV   | 14  | 1    |
| >KIT-M552I-\ YLQKPMYEV   | 1    | >KIT-M552I-r YLQKPIYEV   | 1   | 0    |
| >KIT-M552I-\ YLQKPMYEV(  | 999  | >KIT-M552I-r YLQKPIYEVQ  | 299 | 700  |
| >KIT-M552I-\ YLQKPMYEV   | 2    | >KIT-M552I-r YLQKPIYEV   | 2   | 0    |
| >KIT-M552I-\ YLQKPMYEV   | 6    | >KIT-M552I-r YLQKPIYEV   | 5   | 1    |
| >KIT-M552I-\ YLQKPMYEV   | 3    | >KIT-M552I-r YLQKPIYEV   | 2   | 1    |
| >KIT-M552I-\ YLQKPMYEV   | 2    | >KIT-M552I-r YLQKPIYEV   | 1   | 1    |
| >KIT-M552I-\ YLQKPMYEV(  | 77   | >KIT-M552I-r YLQKPIYEVQ  | 41  | 36   |
| >KIT-M552I-\ YLQKPMYEV   | 93   | >KIT-M552I-r YLQKPIYEV   | 121 | 28   |
| >KIT-M552I-\ YLQKPMYEV   | 55   | >KIT-M552I-r YLQKPIYEV   | 91  | 36   |
| >KIT-M552I-\ YLQKPMYEV(  | 124  | >KIT-M552I-r YLQKPIYEVQ' | 196 | 72   |
| >KIT-M552I-\ KYLQKPMYEV\ | 100  | >KIT-M552I-r KYLQKPIYEV  | 35  | 65   |
| >KIT-M552I-\ KYLQKPMYEV\ | 307  | >KIT-M552I-r KYLQKPIYEV  | 137 | 170  |
| >KIT-M552I-\ KYLQKPMY    | 159  | >KIT-M552I-r KYLQKPIY    | 913 | 754  |
| >KIT-M552I-\ KYLQKPMYEV\ | 28   | >KIT-M552I-r KYLQKPIYEV  | 38  | 10   |
| >KIT-M552I-\ KYLQKPMYEV\ | 360  | >KIT-M552I-r KYLQKPIYEV( | 539 | 179  |
| >KIT-M552I-\ KYLQKPMY    | 89   | >KIT-M552I-r KYLQKPIY    | 265 | 176  |

|                         |      |                          |      |      |
|-------------------------|------|--------------------------|------|------|
| >KIT-M552I-\ KYLQKPMYE\ | 471  | >KIT-M552I-r KYLQKPIYEV  | 564  | 93   |
| >KIT-M552I-\ KYLQKPMY   | 93   | >KIT-M552I-r KYLQKPIY    | 93   | 0    |
| >KIT-M552I-\ KYLQKPMY   | 160  | >KIT-M552I-r KYLQKPIY    | 200  | 40   |
| >KIT-M552I-\ KYLQKPMYE  | 82   | >KIT-M552I-r KYLQKPIYE   | 95   | 13   |
| >KIT-M552I-\ KYLQKPMYE\ | 121  | >KIT-M552I-r KYLQKPIYEV\ | 104  | 17   |
| >KIT-M552I-\ KYLQKPMYE  | 331  | >KIT-M552I-r KYLQKPIYE   | 530  | 199  |
| >KIT-M552I-\ KYLQKPMYE\ | 56   | >KIT-M552I-r KYLQKPIYEV  | 70   | 14   |
| >KIT-M552I-\ KYLQKPMYE\ | 391  | >KIT-M552I-r KYLQKPIYEV\ | 455  | 64   |
| >KIT-M552I-\ YKYLQKPMYE | 499  | >KIT-M552I-r YKYLQKPIYEV | 684  | 185  |
| >KIT-M552I-\ YKYLQKPMYE | 447  | >KIT-M552I-r YKYLQKPIYEV | 365  | 82   |
| >KIT-M552I-\ YKYLQKPMYE | 121  | >KIT-M552I-r YKYLQKPIYEV | 81   | 40   |
| >KIT-M552I-\ YKYLQKPMYE | 356  | >KIT-M552I-r YKYLQKPIYEV | 233  | 123  |
| >KIT-M552I-\ YKYLQKPMYE | 365  | >KIT-M552I-r YKYLQKPIYEV | 158  | 207  |
| >KIT-M552I-\ YKYLQKPMY  | 153  | >KIT-M552I-r YKYLQKPIY   | 694  | 541  |
| >KIT-M552I-\ YKYLQKPM   | 8    | >KIT-M552I-r YKYLQKPI    | 16   | 8    |
| >KIT-M552I-\ YKYLQKPMY  | 9    | >KIT-M552I-r YKYLQKPIY   | 8    | 1    |
| >KIT-M552I-\ YKYLQKPMYE | 39   | >KIT-M552I-r YKYLQKPIYEV | 34   | 5    |
| >KIT-M552I-\ YKYLQKPM   | 1249 | >KIT-M552I-r YKYLQKPI    | 76   | 1173 |
| >KIT-M552I-\ TYKYLQKPM  | 498  | >KIT-M552I-r TYKYLQKPI   | 36   | 462  |
| >KIT-M552I-\ TYKYLQKPM\ | 100  | >KIT-M552I-r TYKYLQKPIY  | 119  | 19   |
| >KIT-M552I-\ TYKYLQKPM  | 711  | >KIT-M552I-r TYKYLQKPI   | 228  | 483  |
| >KIT-M552I-\ TYKYLQKPM\ | 348  | >KIT-M552I-r TYKYLQKPIY  | 402  | 54   |
| >KIT-M552I-\ LTYKYLQKPM | 3271 | >KIT-M552I-r LTYKYLQKPI  | 129  | 3142 |
| >KIT-M552I-\ LTYKYLQKPM | 2361 | >KIT-M552I-r LTYKYLQKPI  | 321  | 2040 |
| >KIT-M552I-\ LTYKYLQKPM | 422  | >KIT-M552I-r LTYKYLQKPIY | 739  | 317  |
| >KIT-M552I-\ LTYKYLQKPM | 117  | >KIT-M552I-r LTYKYLQKPI  | 5826 | 5709 |
| >KIT-M552I-\ LTYKYLQKPM | 73   | >KIT-M552I-r LTYKYLQKPIY | 80   | 7    |
| >KIT-M552I-\ LTYKYLQKPM | 29   | >KIT-M552I-r LTYKYLQKPIY | 80   | 51   |
| >KIT-M552I-\ LTYKYLQKPM | 74   | >KIT-M552I-r LTYKYLQKPIY | 74   | 0    |
| >KIT-M552I-\ LTYKYLQKPM | 3254 | >KIT-M552I-r LTYKYLQKPI  | 345  | 2909 |
| >KIT-M552I-\ LTYKYLQKPM | 5130 | >KIT-M552I-r LTYKYLQKPI  | 412  | 4718 |
| >KIT-M552I-\ LTYKYLQKPM | 522  | >KIT-M552I-r LTYKYLQKPI  | 284  | 238  |
| >KIT-M552I-\ LTYKYLQKPM | 198  | >KIT-M552I-r LTYKYLQKPI  | 2367 | 2169 |
| >KIT-M552I-\ LTYKYLQKPM | 149  | >KIT-M552I-r LTYKYLQKPIY | 185  | 36   |
| >KIT-M552I-\ LTYKYLQKPM | 59   | >KIT-M552I-r LTYKYLQKPI  | 193  | 134  |
| >KIT-M552I-\ LTYKYLQKPM | 95   | >KIT-M552I-r LTYKYLQKPIY | 67   | 28   |
| >KIT-M552I-\ LTYKYLQKPM | 6    | >KIT-M552I-r LTYKYLQKPI  | 19   | 13   |
| >KIT-M552I-\ LTYKYLQKPM | 4    | >KIT-M552I-r LTYKYLQKPIY | 5    | 1    |
| >KIT-M552I-\ LTYKYLQKPM | 576  | >KIT-M552I-r LTYKYLQKPIY | 272  | 304  |
| >KIT-M552I-\ LTYKYLQKPM | 488  | >KIT-M552I-r LTYKYLQKPI  | 1014 | 526  |
| >KIT-M552I-\ LTYKYLQKPM | 37   | >KIT-M552I-r LTYKYLQKPI  | 926  | 889  |
| >KIT-M552I-\ LTYKYLQKPM | 6    | >KIT-M552I-r LTYKYLQKPIY | 9    | 3    |
| >KIT-M552K- MYEVQWKV    | 246  | >KIT-M552K- KYEVQWKV     | 504  | 258  |

|                         |       |                         |       |       |
|-------------------------|-------|-------------------------|-------|-------|
| >KIT-M552K- MYEVQWKV    | 488   | >KIT-M552K- KYEVQWKV    | 379   | 109   |
| >KIT-M552K- PMYEVQWKV   | 17    | >KIT-M552K- PKYEVQWKV   | 17006 | 16989 |
| >KIT-M552K- PMYEVQWKV   | 18    | >KIT-M552K- PKYEVQWKV   | 8972  | 8954  |
| >KIT-M552K- PMYEVQWKV   | 48    | >KIT-M552K- PKYEVQWKV   | 16651 | 16603 |
| >KIT-M552K- PMYEVQWKV   | 33    | >KIT-M552K- PKYEVQWKV   | 6208  | 6175  |
| >KIT-M552K- PMYEVQWKV   | 1     | >KIT-M552K- PKYEVQWKV   | 100   | 99    |
| >KIT-M552K- PMYEVQWKV   | 4     | >KIT-M552K- PKYEVQWKV   | 1624  | 1620  |
| >KIT-M552K- PMYEVQWKV   | 5     | >KIT-M552K- PKYEVQWKV   | 8994  | 8989  |
| >KIT-M552K- PMYEVQWKV   | 97    | >KIT-M552K- PKYEVQWKV   | 15172 | 15075 |
| >KIT-M552K- PMYEVQWKV   | 4     | >KIT-M552K- PKYEVQWKV   | 148   | 144   |
| >KIT-M552K- PMYEVQWKV   | 11    | >KIT-M552K- PKYEVQWKV   | 2948  | 2937  |
| >KIT-M552K- PMYEVQWKV   | 3     | >KIT-M552K- PKYEVQWKV   | 8876  | 8873  |
| >KIT-M552K- PMYEVQWKV   | 54    | >KIT-M552K- PKYEVQWKV   | 15443 | 15389 |
| >KIT-M552K- PMYEVQWKV   | 2     | >KIT-M552K- PKYEVQWKV   | 2226  | 2224  |
| >KIT-M552K- PMYEVQWKV   | 10    | >KIT-M552K- PKYEVQWKV   | 10115 | 10105 |
| >KIT-M552K- PMYEVQWK    | 129   | >KIT-M552K- PKYEVQWK    | 19525 | 19396 |
| >KIT-M552K- PMYEVQWKV   | 145   | >KIT-M552K- PKYEVQWKV   | 8402  | 8257  |
| >KIT-M552K- ILTYKYLQKPK | 19756 | >KIT-M552K- ILTYKYLQKPK | 184   | 19572 |
| >KIT-M552K- KPMYEVQWV   | 157   | >KIT-M552K- KPKYEVQWK   | 607   | 450   |
| >KIT-M552K- KPMYEVQWV   | 136   | >KIT-M552K- KPKYEVQWK   | 1326  | 1190  |
| >KIT-M552K- KPMYEVQW    | 20    | >KIT-M552K- KPKYEVQW    | 180   | 160   |
| >KIT-M552K- KPMYEVQWV   | 68    | >KIT-M552K- KPKYEVQWK   | 375   | 307   |
| >KIT-M552K- KPMYEVQW    | 199   | >KIT-M552K- KPKYEVQW    | 5759  | 5560  |
| >KIT-M552K- KPMYEVQW    | 9     | >KIT-M552K- KPKYEVQW    | 37    | 28    |
| >KIT-M552K- LQKPMYEV    | 327   | >KIT-M552K- LQKPKYEV    | 1241  | 914   |
| >KIT-M552K- LQKPMYEV    | 48    | >KIT-M552K- LQKPKYEV    | 174   | 126   |
| >KIT-M552K- LQKPMYEV    | 34    | >KIT-M552K- LQKPKYEV    | 163   | 129   |
| >KIT-M552K- LQKPMYEV    | 318   | >KIT-M552K- LQKPKYEV    | 690   | 372   |
| >KIT-M552K- LQKPMYEVQ   | 243   | >KIT-M552K- LQKPKYEVQV  | 272   | 29    |
| >KIT-M552K- LQKPMYEVQ   | 415   | >KIT-M552K- LQKPKYEVQV  | 422   | 7     |
| >KIT-M552K- LQKPMYEV    | 403   | >KIT-M552K- LQKPKYEV    | 1019  | 616   |
| >KIT-M552K- LQKPMYEVQ   | 230   | >KIT-M552K- LQKPKYEVQ   | 498   | 268   |
| >KIT-M552K- LQKPMYEVQ   | 247   | >KIT-M552K- LQKPKYEVQV  | 401   | 154   |
| >KIT-M552K- LQKPMYEV    | 155   | >KIT-M552K- LQKPKYEV    | 254   | 99    |
| >KIT-M552K- LQKPMYEVQ   | 225   | >KIT-M552K- LQKPKYEVQV  | 271   | 46    |
| >KIT-M552K- LQKPMYEVQ   | 168   | >KIT-M552K- LQKPKYEVQV  | 338   | 170   |
| >KIT-M552K- LQKPMYEVQ   | 230   | >KIT-M552K- LQKPKYEVQV  | 512   | 282   |
| >KIT-M552K- YLQKPMYEV   | 7     | >KIT-M552K- YLQKPKYEV   | 14    | 7     |
| >KIT-M552K- YLQKPMYEV   | 5     | >KIT-M552K- YLQKPKYEV   | 32    | 27    |
| >KIT-M552K- YLQKPMYEV   | 7     | >KIT-M552K- YLQKPKYEV   | 91    | 84    |
| >KIT-M552K- YLQKPMYEV   | 13    | >KIT-M552K- YLQKPKYEV   | 162   | 149   |
| >KIT-M552K- YLQKPMYEV   | 1     | >KIT-M552K- YLQKPKYEV   | 2     | 1     |
| >KIT-M552K- YLQKPMYEV   | 2     | >KIT-M552K- YLQKPKYEV   | 3     | 1     |

|                        |       |                        |       |       |
|------------------------|-------|------------------------|-------|-------|
| >KIT-M552K-YLQKPMYEV   | 6     | >KIT-M552K-YLQKPKYEV   | 8     | 2     |
| >KIT-M552K-YLQKPMYEV   | 3     | >KIT-M552K-YLQKPKYEV   | 4     | 1     |
| >KIT-M552K-YLQKPMYEV   | 2     | >KIT-M552K-YLQKPKYEV   | 2     | 0     |
| >KIT-M552K-YLQKPMYEV\  | 77    | >KIT-M552K-YLQKPKYEVQ  | 109   | 32    |
| >KIT-M552K-YLQKPMYEV   | 93    | >KIT-M552K-YLQKPKYEV   | 540   | 447   |
| >KIT-M552K-YLQKPMYEV   | 55    | >KIT-M552K-YLQKPKYEV   | 302   | 247   |
| >KIT-M552K-YLQKPMYEV\  | 124   | >KIT-M552K-YLQKPKYEVQ  | 462   | 338   |
| >KIT-M552K-KYLQKPMYEV  | 100   | >KIT-M552K-KYLQKPKYEV  | 259   | 159   |
| >KIT-M552K-KYLQKPMYEV  | 307   | >KIT-M552K-KYLQKPKYEV  | 1053  | 746   |
| >KIT-M552K-KYLQKPMY    | 159   | >KIT-M552K-KYLQKPKY    | 472   | 313   |
| >KIT-M552K-KYLQKPMYEV  | 28    | >KIT-M552K-KYLQKPKYEV  | 92    | 64    |
| >KIT-M552K-KYLQKPMYEV  | 360   | >KIT-M552K-KYLQKPKYEV  | 734   | 374   |
| >KIT-M552K-KYLQKPMY    | 89    | >KIT-M552K-KYLQKPKY    | 210   | 121   |
| >KIT-M552K-KYLQKPMYEV  | 471   | >KIT-M552K-KYLQKPKYEV  | 1370  | 899   |
| >KIT-M552K-KYLQKPMY    | 93    | >KIT-M552K-KYLQKPKY    | 123   | 30    |
| >KIT-M552K-KYLQKPMY    | 160   | >KIT-M552K-KYLQKPKY    | 695   | 535   |
| >KIT-M552K-KYLQKPMYEV  | 82    | >KIT-M552K-KYLQKPKYEV  | 318   | 236   |
| >KIT-M552K-KYLQKPMYEV  | 121   | >KIT-M552K-KYLQKPKYEV  | 186   | 65    |
| >KIT-M552K-KYLQKPMYEV  | 331   | >KIT-M552K-KYLQKPKYEV  | 439   | 108   |
| >KIT-M552K-KYLQKPMYEV  | 56    | >KIT-M552K-KYLQKPKYEV  | 116   | 60    |
| >KIT-M552K-KYLQKPMYEV  | 391   | >KIT-M552K-KYLQKPKYEV  | 536   | 145   |
| >KIT-M552K-YKYLQKPMYEV | 499   | >KIT-M552K-YKYLQKPKYEV | 698   | 199   |
| >KIT-M552K-YKYLQKPMYEV | 447   | >KIT-M552K-YKYLQKPKYEV | 2048  | 1601  |
| >KIT-M552K-YKYLQKPMYEV | 121   | >KIT-M552K-YKYLQKPKYEV | 196   | 75    |
| >KIT-M552K-YKYLQKPMYEV | 356   | >KIT-M552K-YKYLQKPKYEV | 589   | 233   |
| >KIT-M552K-YKYLQKPMYEV | 365   | >KIT-M552K-YKYLQKPKYEV | 440   | 75    |
| >KIT-M552K-YKYLQKPMY   | 153   | >KIT-M552K-YKYLQKPKY   | 314   | 161   |
| >KIT-M552K-YKYLQKPM    | 8     | >KIT-M552K-YKYLQKPK    | 118   | 110   |
| >KIT-M552K-YKYLQKPMY   | 9     | >KIT-M552K-YKYLQKPKY   | 13    | 4     |
| >KIT-M552K-YKYLQKPMYEV | 39    | >KIT-M552K-YKYLQKPKYEV | 57    | 18    |
| >KIT-M552K-TYKYLQKPM   | 498   | >KIT-M552K-TYKYLQKPK   | 27449 | 26951 |
| >KIT-M552K-TYKYLQKPM\  | 100   | >KIT-M552K-TYKYLQKPKY  | 101   | 1     |
| >KIT-M552K-TYKYLQKPM   | 711   | >KIT-M552K-TYKYLQKPK   | 10    | 701   |
| >KIT-M552K-TYKYLQKPM\  | 348   | >KIT-M552K-TYKYLQKPKY  | 401   | 53    |
| >KIT-M552K-TYKYLQKPM   | 11684 | >KIT-M552K-TYKYLQKPK   | 147   | 11537 |
| >KIT-M552K-TYKYLQKPM   | 13982 | >KIT-M552K-TYKYLQKPK   | 388   | 13594 |
| >KIT-M552K-LTYKYLQKPM  | 22994 | >KIT-M552K-LTYKYLQKPK  | 87    | 22907 |
| >KIT-M552K-LTYKYLQKPM  | 422   | >KIT-M552K-LTYKYLQKPK\ | 411   | 11    |
| >KIT-M552K-LTYKYLQKPM  | 34359 | >KIT-M552K-LTYKYLQKPK  | 56    | 34303 |
| >KIT-M552K-LTYKYLQKPM  | 117   | >KIT-M552K-LTYKYLQKPK  | 19953 | 19836 |
| >KIT-M552K-LTYKYLQKPM  | 73    | >KIT-M552K-LTYKYLQKPK\ | 82    | 9     |
| >KIT-M552K-LTYKYLQKPM  | 29    | >KIT-M552K-LTYKYLQKPK\ | 43    | 14    |
| >KIT-M552K-LTYKYLQKPM  | 2412  | >KIT-M552K-LTYKYLQKPK  | 34    | 2378  |

|                         |       |                         |       |       |
|-------------------------|-------|-------------------------|-------|-------|
| >KIT-M552K- LTYKYLQKPM  | 74    | >KIT-M552K- LTYKYLQKPK` | 81    | 7     |
| >KIT-M552K- LTYKYLQKPM  | 31163 | >KIT-M552K- LTYKYLQKPK  | 385   | 30778 |
| >KIT-M552K- LTYKYLQKPM  | 198   | >KIT-M552K- LTYKYLQKPK  | 14242 | 14044 |
| >KIT-M552K- LTYKYLQKPM  | 149   | >KIT-M552K- LTYKYLQKPK` | 442   | 293   |
| >KIT-M552K- LTYKYLQKPM  | 59    | >KIT-M552K- LTYKYLQKPK  | 1693  | 1634  |
| >KIT-M552K- LTYKYLQKPM  | 95    | >KIT-M552K- LTYKYLQKPK` | 165   | 70    |
| >KIT-M552K- LTYKYLQKPM  | 6     | >KIT-M552K- LTYKYLQKPK  | 4982  | 4976  |
| >KIT-M552K- LTYKYLQKPM  | 4     | >KIT-M552K- LTYKYLQKPK` | 4     | 0     |
| >KIT-M552K- LTYKYLQKPM  | 576   | >KIT-M552K- LTYKYLQKPK` | 453   | 123   |
| >KIT-M552K- LTYKYLQKPM  | 488   | >KIT-M552K- LTYKYLQKPK  | 18010 | 17522 |
| >KIT-M552K- LTYKYLQKPM  | 37    | >KIT-M552K- LTYKYLQKPK  | 10933 | 10896 |
| >KIT-M552K- LTYKYLQKPM  | 6     | >KIT-M552K- LTYKYLQKPK` | 13    | 7     |
| >KIT-M552K- LTYKYLQKPM  | 7864  | >KIT-M552K- LTYKYLQKPK  | 341   | 7523  |
| >KIT-M552L- MYEVQWKV    | 246   | >KIT-M552L- LYEVQWKV    | 385   | 139   |
| >KIT-M552L- MYEVQWKV    | 488   | >KIT-M552L- LYEVQWKV    | 1733  | 1245  |
| >KIT-M552L- PMYEVQWK\   | 17    | >KIT-M552L- PLYEVQWKV   | 19    | 2     |
| >KIT-M552L- PMYEVQWK\   | 18    | >KIT-M552L- PLYEVQWKV   | 15    | 3     |
| >KIT-M552L- PMYEVQWK\   | 48    | >KIT-M552L- PLYEVQWKV   | 57    | 9     |
| >KIT-M552L- PMYEVQWK\   | 33    | >KIT-M552L- PLYEVQWKV   | 49    | 16    |
| >KIT-M552L- PMYEVQWK\   | 1     | >KIT-M552L- PLYEVQWKV   | 1     | 0     |
| >KIT-M552L- PMYEVQWK\   | 4     | >KIT-M552L- PLYEVQWKV'  | 4     | 0     |
| >KIT-M552L- PMYEVQWK\   | 5     | >KIT-M552L- PLYEVQWKV   | 7     | 2     |
| >KIT-M552L- PMYEVQWK\   | 97    | >KIT-M552L- PLYEVQWKV'  | 139   | 42    |
| >KIT-M552L- PMYEVQWK\   | 4     | >KIT-M552L- PLYEVQWKV   | 4     | 0     |
| >KIT-M552L- PMYEVQWK\   | 11    | >KIT-M552L- PLYEVQWKV'  | 12    | 1     |
| >KIT-M552L- PMYEVQWK\   | 3     | >KIT-M552L- PLYEVQWKV   | 3     | 0     |
| >KIT-M552L- PMYEVQWK\   | 54    | >KIT-M552L- PLYEVQWKV'  | 68    | 14    |
| >KIT-M552L- PMYEVQWK\   | 2     | >KIT-M552L- PLYEVQWKV   | 2     | 0     |
| >KIT-M552L- PMYEVQWK\   | 10    | >KIT-M552L- PLYEVQWKV'  | 8     | 2     |
| >KIT-M552L- PMYEVQWK    | 129   | >KIT-M552L- PLYEVQWK    | 158   | 29    |
| >KIT-M552L- PMYEVQWK\   | 145   | >KIT-M552L- PLYEVQWKV   | 202   | 57    |
| >KIT-M552L- ILTYKYLQKPM | 1356  | >KIT-M552L- ILTYKYLQKPL | 99    | 1257  |
| >KIT-M552L- ILTYKYLQKPM | 1862  | >KIT-M552L- ILTYKYLQKPL | 300   | 1562  |
| >KIT-M552L- ILTYKYLQKPM | 2329  | >KIT-M552L- ILTYKYLQKPL | 60    | 2269  |
| >KIT-M552L- ILTYKYLQKPM | 793   | >KIT-M552L- ILTYKYLQKPL | 366   | 427   |
| >KIT-M552L- KPMYEVQW\   | 157   | >KIT-M552L- KPLYEVQWK\  | 1635  | 1478  |
| >KIT-M552L- KPMYEVQW\   | 136   | >KIT-M552L- KPLYEVQWK\  | 1083  | 947   |
| >KIT-M552L- KPMYEVQW    | 20    | >KIT-M552L- KPLYEVQW    | 32    | 12    |
| >KIT-M552L- KPMYEVQW\   | 68    | >KIT-M552L- KPLYEVQWK\  | 201   | 133   |
| >KIT-M552L- KPMYEVQW    | 199   | >KIT-M552L- KPLYEVQW    | 551   | 352   |
| >KIT-M552L- KPMYEVQW    | 9     | >KIT-M552L- KPLYEVQW    | 7     | 2     |
| >KIT-M552L- LQKPMYEV    | 327   | >KIT-M552L- LQKPLYEV    | 186   | 141   |
| >KIT-M552L- LQKPMYEV    | 48    | >KIT-M552L- LQKPLYEV    | 46    | 2     |



|                         |     |                         |     |     |
|-------------------------|-----|-------------------------|-----|-----|
| >KIT-M552L- LQKPMYEV    | 34  | >KIT-M552L- LQKPLYEV    | 21  | 13  |
| >KIT-M552L- LQKPMYEV    | 318 | >KIT-M552L- LQKPLYEV    | 372 | 54  |
| >KIT-M552L- LQKPMYEVQ   | 243 | >KIT-M552L- LQKPLYEVQV  | 312 | 69  |
| >KIT-M552L- LQKPMYEVQ   | 415 | >KIT-M552L- LQKPLYEVQV  | 423 | 8   |
| >KIT-M552L- LQKPMYEV    | 403 | >KIT-M552L- LQKPLYEV    | 385 | 18  |
| >KIT-M552L- LQKPMYEVQ   | 230 | >KIT-M552L- LQKPLYEVQ   | 218 | 12  |
| >KIT-M552L- LQKPMYEVQ   | 247 | >KIT-M552L- LQKPLYEVQV  | 289 | 42  |
| >KIT-M552L- LQKPMYEV    | 155 | >KIT-M552L- LQKPLYEV    | 156 | 1   |
| >KIT-M552L- LQKPMYEVQ   | 225 | >KIT-M552L- LQKPLYEVQV  | 276 | 51  |
| >KIT-M552L- LQKPMYEVQ   | 168 | >KIT-M552L- LQKPLYEVQV  | 287 | 119 |
| >KIT-M552L- LQKPMYEVQ   | 230 | >KIT-M552L- LQKPLYEVQV  | 309 | 79  |
| >KIT-M552L- YLQKPMYEV   | 7   | >KIT-M552L- YLQKPLYEV   | 7   | 0   |
| >KIT-M552L- YLQKPMYEV   | 5   | >KIT-M552L- YLQKPLYEV   | 4   | 1   |
| >KIT-M552L- YLQKPMYEV   | 7   | >KIT-M552L- YLQKPLYEV   | 6   | 1   |
| >KIT-M552L- YLQKPMYEV   | 13  | >KIT-M552L- YLQKPLYEV   | 9   | 4   |
| >KIT-M552L- YLQKPMYEV   | 1   | >KIT-M552L- YLQKPLYEV   | 1   | 0   |
| >KIT-M552L- YLQKPMYEVQ  | 999 | >KIT-M552L- YLQKPLYEVQ  | 499 | 500 |
| >KIT-M552L- YLQKPMYEV   | 2   | >KIT-M552L- YLQKPLYEV   | 2   | 0   |
| >KIT-M552L- YLQKPMYEV   | 6   | >KIT-M552L- YLQKPLYEV   | 5   | 1   |
| >KIT-M552L- YLQKPMYEV   | 3   | >KIT-M552L- YLQKPLYEV   | 2   | 1   |
| >KIT-M552L- YLQKPMYEV   | 2   | >KIT-M552L- YLQKPLYEV   | 1   | 1   |
| >KIT-M552L- YLQKPMYEVQ  | 77  | >KIT-M552L- YLQKPLYEVQ  | 62  | 15  |
| >KIT-M552L- YLQKPMYEV   | 93  | >KIT-M552L- YLQKPLYEV   | 259 | 166 |
| >KIT-M552L- YLQKPMYEV   | 55  | >KIT-M552L- YLQKPLYEV   | 88  | 33  |
| >KIT-M552L- YLQKPMYEVQ  | 124 | >KIT-M552L- YLQKPLYEVQ  | 233 | 109 |
| >KIT-M552L- KYLQKPMYEV  | 100 | >KIT-M552L- KYLQKPLYEV  | 66  | 34  |
| >KIT-M552L- KYLQKPMYEV  | 307 | >KIT-M552L- KYLQKPLYEV  | 211 | 96  |
| >KIT-M552L- KYLQKPMY    | 159 | >KIT-M552L- KYLQKPLY    | 619 | 460 |
| >KIT-M552L- KYLQKPMYEV  | 28  | >KIT-M552L- KYLQKPLYEV  | 34  | 6   |
| >KIT-M552L- KYLQKPMYEV  | 360 | >KIT-M552L- KYLQKPLYEVQ | 481 | 121 |
| >KIT-M552L- KYLQKPMY    | 89  | >KIT-M552L- KYLQKPLY    | 34  | 55  |
| >KIT-M552L- KYLQKPMYEV  | 471 | >KIT-M552L- KYLQKPLYEV  | 606 | 135 |
| >KIT-M552L- KYLQKPMY    | 93  | >KIT-M552L- KYLQKPLY    | 95  | 2   |
| >KIT-M552L- KYLQKPMY    | 160 | >KIT-M552L- KYLQKPLY    | 32  | 128 |
| >KIT-M552L- KYLQKPMYEV  | 82  | >KIT-M552L- KYLQKPLYE   | 75  | 7   |
| >KIT-M552L- KYLQKPMYEV  | 121 | >KIT-M552L- KYLQKPLYEVQ | 97  | 24  |
| >KIT-M552L- KYLQKPMYEV  | 652 | >KIT-M552L- KYLQKPLYEV  | 492 | 160 |
| >KIT-M552L- KYLQKPMYEV  | 331 | >KIT-M552L- KYLQKPLYE   | 391 | 60  |
| >KIT-M552L- KYLQKPMYEV  | 56  | >KIT-M552L- KYLQKPLYEV  | 57  | 1   |
| >KIT-M552L- KYLQKPMYEV  | 391 | >KIT-M552L- KYLQKPLYEVQ | 377 | 14  |
| >KIT-M552L- YKYLQKPMYEV | 499 | >KIT-M552L- YKYLQKPLYEV | 397 | 102 |
| >KIT-M552L- YKYLQKPMYEV | 447 | >KIT-M552L- YKYLQKPLYEV | 262 | 185 |
| >KIT-M552L- YKYLQKPMYEV | 121 | >KIT-M552L- YKYLQKPLYEV | 92  | 29  |

|                       |      |                        |      |      |
|-----------------------|------|------------------------|------|------|
| >KIT-M552L-YKYLQKPMYE | 356  | >KIT-M552L-YKYLQKPLYE\ | 276  | 80   |
| >KIT-M552L-YKYLQKPMYE | 365  | >KIT-M552L-YKYLQKPLYE\ | 197  | 168  |
| >KIT-M552L-YKYLQKPMY  | 153  | >KIT-M552L-YKYLQKPLY   | 54   | 99   |
| >KIT-M552L-YKYLQKPM   | 8    | >KIT-M552L-YKYLQKPL    | 11   | 3    |
| >KIT-M552L-YKYLQKPMY  | 9    | >KIT-M552L-YKYLQKPLY   | 16   | 7    |
| >KIT-M552L-YKYLQKPMYE | 39   | >KIT-M552L-YKYLQKPLYE\ | 49   | 10   |
| >KIT-M552L-YKYLQKPM   | 633  | >KIT-M552L-YKYLQKPL    | 119  | 514  |
| >KIT-M552L-YKYLQKPM   | 3890 | >KIT-M552L-YKYLQKPL    | 412  | 3478 |
| >KIT-M552L-TYKYLQKPM  | 498  | >KIT-M552L-TYKYLQKPL   | 119  | 379  |
| >KIT-M552L-TYKYLQKPM\ | 100  | >KIT-M552L-TYKYLQKPLY  | 71   | 29   |
| >KIT-M552L-TYKYLQKPM\ | 348  | >KIT-M552L-TYKYLQKPLY  | 216  | 132  |
| >KIT-M552L-LTYKYLQKPM | 695  | >KIT-M552L-LTYKYLQKPLY | 370  | 325  |
| >KIT-M552L-LTYKYLQKPM | 2361 | >KIT-M552L-LTYKYLQKPL  | 374  | 1987 |
| >KIT-M552L-LTYKYLQKPM | 422  | >KIT-M552L-LTYKYLQKPLY | 203  | 219  |
| >KIT-M552L-LTYKYLQKPM | 765  | >KIT-M552L-LTYKYLQKPLY | 358  | 407  |
| >KIT-M552L-LTYKYLQKPM | 559  | >KIT-M552L-LTYKYLQKPLY | 455  | 104  |
| >KIT-M552L-LTYKYLQKPM | 117  | >KIT-M552L-LTYKYLQKPL  | 1211 | 1094 |
| >KIT-M552L-LTYKYLQKPM | 73   | >KIT-M552L-LTYKYLQKPLY | 147  | 74   |
| >KIT-M552L-LTYKYLQKPM | 29   | >KIT-M552L-LTYKYLQKPLY | 18   | 11   |
| >KIT-M552L-LTYKYLQKPM | 74   | >KIT-M552L-LTYKYLQKPLY | 77   | 3    |
| >KIT-M552L-LTYKYLQKPM | 612  | >KIT-M552L-LTYKYLQKPLY | 487  | 125  |
| >KIT-M552L-LTYKYLQKPM | 522  | >KIT-M552L-LTYKYLQKPL  | 393  | 129  |
| >KIT-M552L-LTYKYLQKPM | 607  | >KIT-M552L-LTYKYLQKPLY | 155  | 452  |
| >KIT-M552L-LTYKYLQKPM | 198  | >KIT-M552L-LTYKYLQKPL  | 994  | 796  |
| >KIT-M552L-LTYKYLQKPM | 149  | >KIT-M552L-LTYKYLQKPLY | 252  | 103  |
| >KIT-M552L-LTYKYLQKPM | 59   | >KIT-M552L-LTYKYLQKPL  | 129  | 70   |
| >KIT-M552L-LTYKYLQKPM | 95   | >KIT-M552L-LTYKYLQKPLY | 184  | 89   |
| >KIT-M552L-LTYKYLQKPM | 6    | >KIT-M552L-LTYKYLQKPL  | 7    | 1    |
| >KIT-M552L-LTYKYLQKPM | 4    | >KIT-M552L-LTYKYLQKPLY | 4    | 0    |
| >KIT-M552L-LTYKYLQKPM | 576  | >KIT-M552L-LTYKYLQKPLY | 230  | 346  |
| >KIT-M552L-LTYKYLQKPM | 488  | >KIT-M552L-LTYKYLQKPL  | 322  | 166  |
| >KIT-M552L-LTYKYLQKPM | 37   | >KIT-M552L-LTYKYLQKPL  | 351  | 314  |
| >KIT-M552L-LTYKYLQKPM | 6    | >KIT-M552L-LTYKYLQKPLY | 7    | 1    |
| >KIT-M552T-MYEVQWKV   | 246  | >KIT-M552T-TYEVQWKV    | 680  | 434  |
| >KIT-M552T-MYEVQWKV   | 488  | >KIT-M552T-TYEVQWKV    | 2329 | 1841 |
| >KIT-M552T-PMYEVQWK\  | 17   | >KIT-M552T-PTYEVQWKV   | 975  | 958  |
| >KIT-M552T-PMYEVQWK\  | 18   | >KIT-M552T-PTYEVQWKV   | 750  | 732  |
| >KIT-M552T-PMYEVQWK\  | 48   | >KIT-M552T-PTYEVQWKV   | 3500 | 3452 |
| >KIT-M552T-PMYEVQWK\  | 33   | >KIT-M552T-PTYEVQWKV   | 518  | 485  |
| >KIT-M552T-PMYEVQWK\  | 1    | >KIT-M552T-PTYEVQWKV   | 4    | 3    |
| >KIT-M552T-PMYEVQWK\  | 4    | >KIT-M552T-PTYEVQWKV   | 74   | 70   |
| >KIT-M552T-PMYEVQWK\  | 5    | >KIT-M552T-PTYEVQWKV   | 638  | 633  |
| >KIT-M552T-PMYEVQWK\  | 97   | >KIT-M552T-PTYEVQWKV   | 4097 | 4000 |

|                        |      |                        |      |      |
|------------------------|------|------------------------|------|------|
| >KIT-M552T- PMYEVQWK\  | 4    | >KIT-M552T- PTYEVQWKV  | 10   | 6    |
| >KIT-M552T- PMYEVQWK\  | 11   | >KIT-M552T- PTYEVQWKV  | 272  | 261  |
| >KIT-M552T- PMYEVQWK\  | 3    | >KIT-M552T- PTYEVQWKV  | 511  | 508  |
| >KIT-M552T- PMYEVQWK\  | 54   | >KIT-M552T- PTYEVQWKV  | 4761 | 4707 |
| >KIT-M552T- PMYEVQWK\  | 2    | >KIT-M552T- PTYEVQWKV  | 39   | 37   |
| >KIT-M552T- PMYEVQWK\  | 10   | >KIT-M552T- PTYEVQWKV  | 1073 | 1063 |
| >KIT-M552T- PMYEVQWK   | 129  | >KIT-M552T- PTYEVQWK   | 578  | 449  |
| >KIT-M552T- PMYEVQWK   | 1471 | >KIT-M552T- PTYEVQWK   | 491  | 980  |
| >KIT-M552T- PMYEVQWK   | 3061 | >KIT-M552T- PTYEVQWK   | 280  | 2781 |
| >KIT-M552T- PMYEVQWK\  | 2625 | >KIT-M552T- PTYEVQWKV  | 76   | 2549 |
| >KIT-M552T- PMYEVQWK\  | 145  | >KIT-M552T- PTYEVQWKV  | 20   | 125  |
| >KIT-M552T- KPMYEVQW\  | 157  | >KIT-M552T- KPTYEVQWK' | 880  | 723  |
| >KIT-M552T- KPMYEVQW\  | 136  | >KIT-M552T- KPTYEVQWK' | 1071 | 935  |
| >KIT-M552T- KPMYEVQW   | 20   | >KIT-M552T- KPTYEVQW   | 27   | 7    |
| >KIT-M552T- KPMYEVQW\  | 68   | >KIT-M552T- KPTYEVQWK' | 330  | 262  |
| >KIT-M552T- KPMYEVQW   | 199  | >KIT-M552T- KPTYEVQW   | 614  | 415  |
| >KIT-M552T- KPMYEVQW   | 9    | >KIT-M552T- KPTYEVQW   | 12   | 3    |
| >KIT-M552T- LQKPMYEV   | 327  | >KIT-M552T- LQKPTYEV   | 357  | 30   |
| >KIT-M552T- LQKPMYEV   | 48   | >KIT-M552T- LQKPTYEV   | 56   | 8    |
| >KIT-M552T- LQKPMYEV   | 34   | >KIT-M552T- LQKPTYEV   | 28   | 6    |
| >KIT-M552T- LQKPMYEV   | 318  | >KIT-M552T- LQKPTYEV   | 305  | 13   |
| >KIT-M552T- LQKPMYEVQ  | 243  | >KIT-M552T- LQKPTYEVQV | 138  | 105  |
| >KIT-M552T- LQKPMYEVQ  | 415  | >KIT-M552T- LQKPTYEVQV | 579  | 164  |
| >KIT-M552T- LQKPMYEV   | 403  | >KIT-M552T- LQKPTYEV   | 291  | 112  |
| >KIT-M552T- LQKPMYEVQ  | 230  | >KIT-M552T- LQKPTYEVQ  | 187  | 43   |
| >KIT-M552T- LQKPMYEVQ  | 247  | >KIT-M552T- LQKPTYEVQV | 241  | 6    |
| >KIT-M552T- LQKPMYEV   | 155  | >KIT-M552T- LQKPTYEV   | 47   | 108  |
| >KIT-M552T- LQKPMYEVQ  | 1640 | >KIT-M552T- LQKPTYEVQ  | 360  | 1280 |
| >KIT-M552T- LQKPMYEVQ  | 225  | >KIT-M552T- LQKPTYEVQV | 79   | 146  |
| >KIT-M552T- LQKPMYEVQ  | 1131 | >KIT-M552T- LQKPTYEVQV | 432  | 699  |
| >KIT-M552T- LQKPMYEVQ  | 692  | >KIT-M552T- LQKPTYEVQV | 423  | 269  |
| >KIT-M552T- LQKPMYEVQ  | 168  | >KIT-M552T- LQKPTYEVQV | 266  | 98   |
| >KIT-M552T- LQKPMYEVQ  | 230  | >KIT-M552T- LQKPTYEVQV | 363  | 133  |
| >KIT-M552T- YLQKPMYEV  | 7    | >KIT-M552T- YLQKPTYEV  | 7    | 0    |
| >KIT-M552T- YLQKPMYEV  | 5    | >KIT-M552T- YLQKPTYEV  | 5    | 0    |
| >KIT-M552T- YLQKPMYEV  | 7    | >KIT-M552T- YLQKPTYEV  | 8    | 1    |
| >KIT-M552T- YLQKPMYEV  | 13   | >KIT-M552T- YLQKPTYEV  | 25   | 12   |
| >KIT-M552T- YLQKPMYEV  | 1    | >KIT-M552T- YLQKPTYEV  | 1    | 0    |
| >KIT-M552T- YLQKPMYEV  | 2    | >KIT-M552T- YLQKPTYEV  | 2    | 0    |
| >KIT-M552T- YLQKPMYEV  | 6    | >KIT-M552T- YLQKPTYEV  | 6    | 0    |
| >KIT-M552T- YLQKPMYEV  | 3    | >KIT-M552T- YLQKPTYEV  | 2    | 1    |
| >KIT-M552T- YLQKPMYEV  | 2    | >KIT-M552T- YLQKPTYEV  | 2    | 0    |
| >KIT-M552T- YLQKPMYEV\ | 77   | >KIT-M552T- YLQKPTYEVQ | 58   | 19   |

|                         |      |                         |       |       |
|-------------------------|------|-------------------------|-------|-------|
| >KIT-M552T- YLQKPMYEV   | 93   | >KIT-M552T- YLQKPTYEV   | 114   | 21    |
| >KIT-M552T- YLQKPMYEV   | 55   | >KIT-M552T- YLQKPTYEV   | 55    | 0     |
| >KIT-M552T- YLQKPMYEVQ  | 124  | >KIT-M552T- YLQKPTYEVQ  | 268   | 144   |
| >KIT-M552T- YLQKPMYEVQ  | 721  | >KIT-M552T- YLQKPTYEVQ  | 430   | 291   |
| >KIT-M552T- KYLQKPMYEV  | 100  | >KIT-M552T- KYLQKPTYEV  | 106   | 6     |
| >KIT-M552T- KYLQKPMYEV  | 307  | >KIT-M552T- KYLQKPTYEV  | 238   | 69    |
| >KIT-M552T- KYLQKPMY    | 159  | >KIT-M552T- KYLQKPTY    | 325   | 166   |
| >KIT-M552T- KYLQKPMYEV  | 28   | >KIT-M552T- KYLQKPTYEV  | 47    | 19    |
| >KIT-M552T- KYLQKPMYEV  | 360  | >KIT-M552T- KYLQKPTYEV  | 724   | 364   |
| >KIT-M552T- KYLQKPMY    | 89   | >KIT-M552T- KYLQKPTY    | 187   | 98    |
| >KIT-M552T- KYLQKPMYEV  | 471  | >KIT-M552T- KYLQKPTYEV  | 885   | 414   |
| >KIT-M552T- KYLQKPMY    | 93   | >KIT-M552T- KYLQKPTY    | 87    | 6     |
| >KIT-M552T- KYLQKPMY    | 160  | >KIT-M552T- KYLQKPTY    | 352   | 192   |
| >KIT-M552T- KYLQKPMYE   | 82   | >KIT-M552T- KYLQKPTYE   | 327   | 245   |
| >KIT-M552T- KYLQKPMYEV  | 121  | >KIT-M552T- KYLQKPTYEV  | 168   | 47    |
| >KIT-M552T- KYLQKPMYE   | 331  | >KIT-M552T- KYLQKPTYE   | 604   | 273   |
| >KIT-M552T- KYLQKPMYEV  | 56   | >KIT-M552T- KYLQKPTYEV  | 96    | 40    |
| >KIT-M552T- KYLQKPMYEV  | 391  | >KIT-M552T- KYLQKPTYEV  | 411   | 20    |
| >KIT-M552T- YKYLQKPMYEV | 499  | >KIT-M552T- YKYLQKPTYEV | 452   | 47    |
| >KIT-M552T- YKYLQKPMYEV | 447  | >KIT-M552T- YKYLQKPTYEV | 459   | 12    |
| >KIT-M552T- YKYLQKPMYEV | 121  | >KIT-M552T- YKYLQKPTYEV | 103   | 18    |
| >KIT-M552T- YKYLQKPMYEV | 356  | >KIT-M552T- YKYLQKPTYEV | 246   | 110   |
| >KIT-M552T- YKYLQKPMYEV | 365  | >KIT-M552T- YKYLQKPTYEV | 222   | 143   |
| >KIT-M552T- YKYLQKPMY   | 153  | >KIT-M552T- YKYLQKPTY   | 337   | 184   |
| >KIT-M552T- YKYLQKPM    | 8    | >KIT-M552T- YKYLQKPT    | 540   | 532   |
| >KIT-M552T- YKYLQKPMY   | 9    | >KIT-M552T- YKYLQKPTY   | 6     | 3     |
| >KIT-M552T- YKYLQKPMYEV | 39   | >KIT-M552T- YKYLQKPTYEV | 31    | 8     |
| >KIT-M552T- TYKYLQKPM   | 498  | >KIT-M552T- TYKYLQKPT   | 12905 | 12407 |
| >KIT-M552T- TYKYLQKPM   | 100  | >KIT-M552T- TYKYLQKPTY  | 155   | 55    |
| >KIT-M552T- TYKYLQKPM   | 348  | >KIT-M552T- TYKYLQKPTY  | 628   | 280   |
| >KIT-M552T- LTYKYLQKPM  | 422  | >KIT-M552T- LTYKYLQKPT  | 536   | 114   |
| >KIT-M552T- LTYKYLQKPM  | 117  | >KIT-M552T- LTYKYLQKPT  | 16239 | 16122 |
| >KIT-M552T- LTYKYLQKPM  | 73   | >KIT-M552T- LTYKYLQKPT  | 59    | 14    |
| >KIT-M552T- LTYKYLQKPM  | 29   | >KIT-M552T- LTYKYLQKPT  | 46    | 17    |
| >KIT-M552T- LTYKYLQKPM  | 74   | >KIT-M552T- LTYKYLQKPT  | 70    | 4     |
| >KIT-M552T- LTYKYLQKPM  | 198  | >KIT-M552T- LTYKYLQKPT  | 10988 | 10790 |
| >KIT-M552T- LTYKYLQKPM  | 149  | >KIT-M552T- LTYKYLQKPT  | 88    | 61    |
| >KIT-M552T- LTYKYLQKPM  | 59   | >KIT-M552T- LTYKYLQKPT  | 4870  | 4811  |
| >KIT-M552T- LTYKYLQKPM  | 95   | >KIT-M552T- LTYKYLQKPT  | 67    | 28    |
| >KIT-M552T- LTYKYLQKPM  | 6    | >KIT-M552T- LTYKYLQKPT  | 845   | 839   |
| >KIT-M552T- LTYKYLQKPM  | 4    | >KIT-M552T- LTYKYLQKPT  | 4     | 0     |
| >KIT-M552T- LTYKYLQKPM  | 1582 | >KIT-M552T- LTYKYLQKPT  | 357   | 1225  |
| >KIT-M552T- LTYKYLQKPM  | 626  | >KIT-M552T- LTYKYLQKPT  | 305   | 321   |

|                         |       |                         |       |       |
|-------------------------|-------|-------------------------|-------|-------|
| >KIT-M552T- LTYKYLQKPM  | 576   | >KIT-M552T- LTYKYLQKPT  | 218   | 358   |
| >KIT-M552T- LTYKYLQKPM  | 488   | >KIT-M552T- LTYKYLQKPT  | 13453 | 12965 |
| >KIT-M552T- LTYKYLQKPM  | 37    | >KIT-M552T- LTYKYLQKPT  | 6922  | 6885  |
| >KIT-M552T- LTYKYLQKPM  | 6     | >KIT-M552T- LTYKYLQKPT  | 8     | 2     |
| >KIT-M552T- LTYKYLQKPM  | 1700  | >KIT-M552T- LTYKYLQKPT  | 262   | 1438  |
| >KIT-M552V- MYEVQWKV    | 246   | >KIT-M552V- VYEVQWKV    | 705   | 459   |
| >KIT-M552V- MYEVQWKV    | 488   | >KIT-M552V- VYEVQWKV    | 2202  | 1714  |
| >KIT-M552V- PMYEVQWKV   | 17    | >KIT-M552V- PVYEVQWKV   | 334   | 317   |
| >KIT-M552V- PMYEVQWKV   | 18    | >KIT-M552V- PVYEVQWKV   | 400   | 382   |
| >KIT-M552V- PMYEVQWKV   | 48    | >KIT-M552V- PVYEVQWKV   | 1511  | 1463  |
| >KIT-M552V- PMYEVQWKV   | 33    | >KIT-M552V- PVYEVQWKV   | 110   | 77    |
| >KIT-M552V- PMYEVQWKV   | 1     | >KIT-M552V- PVYEVQWKV   | 4     | 3     |
| >KIT-M552V- PMYEVQWKV   | 4     | >KIT-M552V- PVYEVQWKV   | 60    | 56    |
| >KIT-M552V- PMYEVQWKV   | 5     | >KIT-M552V- PVYEVQWKV   | 310   | 305   |
| >KIT-M552V- PMYEVQWKV   | 97    | >KIT-M552V- PVYEVQWKV   | 2714  | 2617  |
| >KIT-M552V- PMYEVQWKV   | 4     | >KIT-M552V- PVYEVQWKV   | 8     | 4     |
| >KIT-M552V- PMYEVQWKV   | 11    | >KIT-M552V- PVYEVQWKV   | 153   | 142   |
| >KIT-M552V- PMYEVQWKV   | 3     | >KIT-M552V- PVYEVQWKV   | 37    | 34    |
| >KIT-M552V- PMYEVQWKV   | 54    | >KIT-M552V- PVYEVQWKV   | 1567  | 1513  |
| >KIT-M552V- PMYEVQWKV   | 2     | >KIT-M552V- PVYEVQWKV   | 8     | 6     |
| >KIT-M552V- PMYEVQWKV   | 10    | >KIT-M552V- PVYEVQWKV   | 170   | 160   |
| >KIT-M552V- PMYEVQWK    | 129   | >KIT-M552V- PVYEVQWK    | 440   | 311   |
| >KIT-M552V- PMYEVQWKV   | 2625  | >KIT-M552V- PVYEVQWKV   | 130   | 2495  |
| >KIT-M552V- PMYEVQWKV   | 145   | >KIT-M552V- PVYEVQWKV   | 33    | 112   |
| >KIT-M552V- ILTYKYLQKPM | 4843  | >KIT-M552V- ILTYKYLQKPV | 252   | 4591  |
| >KIT-M552V- ILTYKYLQKPM | 1356  | >KIT-M552V- ILTYKYLQKPV | 63    | 1293  |
| >KIT-M552V- ILTYKYLQKPM | 1862  | >KIT-M552V- ILTYKYLQKPV | 29    | 1833  |
| >KIT-M552V- ILTYKYLQKPM | 5129  | >KIT-M552V- ILTYKYLQKPV | 53    | 5076  |
| >KIT-M552V- ILTYKYLQKPM | 6101  | >KIT-M552V- ILTYKYLQKPV | 106   | 5995  |
| >KIT-M552V- ILTYKYLQKPM | 9287  | >KIT-M552V- ILTYKYLQKPV | 59    | 9228  |
| >KIT-M552V- ILTYKYLQKPM | 14397 | >KIT-M552V- ILTYKYLQKPV | 338   | 14059 |
| >KIT-M552V- ILTYKYLQKPM | 2329  | >KIT-M552V- ILTYKYLQKPV | 6     | 2323  |
| >KIT-M552V- KPMYEVQWV   | 157   | >KIT-M552V- KPVYEVQWK   | 1253  | 1096  |
| >KIT-M552V- KPMYEVQWV   | 136   | >KIT-M552V- KPVYEVQWK   | 736   | 600   |
| >KIT-M552V- KPMYEVQW    | 20    | >KIT-M552V- KPVYEVQW    | 25    | 5     |
| >KIT-M552V- KPMYEVQWV   | 68    | >KIT-M552V- KPVYEVQWK   | 250   | 182   |
| >KIT-M552V- KPMYEVQW    | 199   | >KIT-M552V- KPVYEVQW    | 524   | 325   |
| >KIT-M552V- KPMYEVQW    | 9     | >KIT-M552V- KPVYEVQW    | 9     | 0     |
| >KIT-M552V- LQKPMYEV    | 327   | >KIT-M552V- LQKPVYEV    | 209   | 118   |
| >KIT-M552V- LQKPMYEV    | 48    | >KIT-M552V- LQKPVYEV    | 34    | 14    |
| >KIT-M552V- LQKPMYEV    | 34    | >KIT-M552V- LQKPVYEV    | 20    | 14    |
| >KIT-M552V- LQKPMYEV    | 1276  | >KIT-M552V- LQKPVYEV    | 251   | 1025  |
| >KIT-M552V- LQKPMYEV    | 318   | >KIT-M552V- LQKPVYEV    | 363   | 45    |

|                        |     |                        |     |     |
|------------------------|-----|------------------------|-----|-----|
| >KIT-M552V-LQKPMYEVQ   | 243 | >KIT-M552V-LQKPVYEVQ\  | 305 | 62  |
| >KIT-M552V-LQKPMYEVQ   | 415 | >KIT-M552V-LQKPVYEVQ\  | 395 | 20  |
| >KIT-M552V-LQKPMYEV    | 403 | >KIT-M552V-LQKPVYEV    | 328 | 75  |
| >KIT-M552V-LQKPMYEVQ   | 230 | >KIT-M552V-LQKPVYEVQ   | 257 | 27  |
| >KIT-M552V-LQKPMYEVQ   | 247 | >KIT-M552V-LQKPVYEVQ\  | 281 | 34  |
| >KIT-M552V-LQKPMYEV    | 155 | >KIT-M552V-LQKPVYEV    | 107 | 48  |
| >KIT-M552V-LQKPMYEVQ   | 225 | >KIT-M552V-LQKPVYEVQ\  | 223 | 2   |
| >KIT-M552V-LQKPMYEVQ   | 935 | >KIT-M552V-LQKPVYEVQ\  | 434 | 501 |
| >KIT-M552V-LQKPMYEVQ   | 168 | >KIT-M552V-LQKPVYEVQ\  | 220 | 52  |
| >KIT-M552V-LQKPMYEVQ   | 230 | >KIT-M552V-LQKPVYEVQ\  | 474 | 244 |
| >KIT-M552V-YLQKPMYEV   | 7   | >KIT-M552V-YLQKPVYEV   | 7   | 0   |
| >KIT-M552V-YLQKPMYEV   | 5   | >KIT-M552V-YLQKPVYEV   | 5   | 0   |
| >KIT-M552V-YLQKPMYEV   | 7   | >KIT-M552V-YLQKPVYEV   | 5   | 2   |
| >KIT-M552V-YLQKPMYEV   | 13  | >KIT-M552V-YLQKPVYEV   | 26  | 13  |
| >KIT-M552V-YLQKPMYEV   | 1   | >KIT-M552V-YLQKPVYEV   | 1   | 0   |
| >KIT-M552V-YLQKPMYEV(\ | 999 | >KIT-M552V-YLQKPVYEV\  | 247 | 752 |
| >KIT-M552V-YLQKPMYEV   | 2   | >KIT-M552V-YLQKPVYEV   | 2   | 0   |
| >KIT-M552V-YLQKPMYEV   | 6   | >KIT-M552V-YLQKPVYEV   | 5   | 1   |
| >KIT-M552V-YLQKPMYEV   | 3   | >KIT-M552V-YLQKPVYEV   | 2   | 1   |
| >KIT-M552V-YLQKPMYEV   | 2   | >KIT-M552V-YLQKPVYEV   | 2   | 0   |
| >KIT-M552V-YLQKPMYEV(\ | 77  | >KIT-M552V-YLQKPVYEV\  | 62  | 15  |
| >KIT-M552V-YLQKPMYEV   | 93  | >KIT-M552V-YLQKPVYEV   | 187 | 94  |
| >KIT-M552V-YLQKPMYEV   | 55  | >KIT-M552V-YLQKPVYEV   | 87  | 32  |
| >KIT-M552V-YLQKPMYEV(\ | 124 | >KIT-M552V-YLQKPVYEV\  | 175 | 51  |
| >KIT-M552V-YLQKPMYEV(\ | 721 | >KIT-M552V-YLQKPVYEV\  | 327 | 394 |
| >KIT-M552V-KYLQKPMYEV  | 100 | >KIT-M552V-KYLQKPVYEV  | 45  | 55  |
| >KIT-M552V-KYLQKPMYEV  | 307 | >KIT-M552V-KYLQKPVYEV  | 139 | 168 |
| >KIT-M552V-KYLQKPMY    | 159 | >KIT-M552V-KYLQKPVY    | 346 | 187 |
| >KIT-M552V-KYLQKPMYEV  | 28  | >KIT-M552V-KYLQKPVYEV  | 29  | 1   |
| >KIT-M552V-KYLQKPMYEV  | 360 | >KIT-M552V-KYLQKPVYEV  | 399 | 39  |
| >KIT-M552V-KYLQKPMY    | 89  | >KIT-M552V-KYLQKPVY    | 296 | 207 |
| >KIT-M552V-KYLQKPMYEV  | 471 | >KIT-M552V-KYLQKPVYEV  | 795 | 324 |
| >KIT-M552V-KYLQKPMY    | 93  | >KIT-M552V-KYLQKPVY    | 85  | 8   |
| >KIT-M552V-KYLQKPMY    | 160 | >KIT-M552V-KYLQKPVY    | 427 | 267 |
| >KIT-M552V-KYLQKPMYEV  | 82  | >KIT-M552V-KYLQKPVYEV  | 68  | 14  |
| >KIT-M552V-KYLQKPMYEV  | 121 | >KIT-M552V-KYLQKPVYEV  | 150 | 29  |
| >KIT-M552V-KYLQKPMYEV  | 331 | >KIT-M552V-KYLQKPVYEV  | 450 | 119 |
| >KIT-M552V-KYLQKPMYEV  | 56  | >KIT-M552V-KYLQKPVYEV  | 72  | 16  |
| >KIT-M552V-KYLQKPMYEV  | 391 | >KIT-M552V-KYLQKPVYEV  | 462 | 71  |
| >KIT-M552V-YKYLQKPMYEV | 499 | >KIT-M552V-YKYLQKPVYEV | 594 | 95  |
| >KIT-M552V-YKYLQKPMYEV | 447 | >KIT-M552V-YKYLQKPVYEV | 515 | 68  |
| >KIT-M552V-YKYLQKPMYEV | 121 | >KIT-M552V-YKYLQKPVYEV | 80  | 41  |
| >KIT-M552V-YKYLQKPMYEV | 356 | >KIT-M552V-YKYLQKPVYEV | 229 | 127 |

|                        |       |                         |       |       |
|------------------------|-------|-------------------------|-------|-------|
| >KIT-M552V- YKYLQKPMYE | 365   | >KIT-M552V- YKYLQKPVYE' | 229   | 136   |
| >KIT-M552V- YKYLQKPMY  | 153   | >KIT-M552V- YKYLQKPVY   | 802   | 649   |
| >KIT-M552V- YKYLQKPM   | 8     | >KIT-M552V- YKYLQKPV    | 20    | 12    |
| >KIT-M552V- YKYLQKPMY  | 9     | >KIT-M552V- YKYLQKPVY   | 6     | 3     |
| >KIT-M552V- YKYLQKPMYE | 39    | >KIT-M552V- YKYLQKPVYE' | 29    | 10    |
| >KIT-M552V- TYKYLQKPM  | 498   | >KIT-M552V- TYKYLQKPV   | 498   | 0     |
| >KIT-M552V- TYKYLQKPM\ | 100   | >KIT-M552V- TYKYLQKPVY  | 122   | 22    |
| >KIT-M552V- TYKYLQKPM  | 711   | >KIT-M552V- TYKYLQKPV   | 434   | 277   |
| >KIT-M552V- TYKYLQKPM\ | 348   | >KIT-M552V- TYKYLQKPVY  | 610   | 262   |
| >KIT-M552V- LTYKYLQKPM | 1924  | >KIT-M552V- LTYKYLQKPV  | 484   | 1440  |
| >KIT-M552V- LTYKYLQKPM | 3707  | >KIT-M552V- LTYKYLQKPV  | 202   | 3505  |
| >KIT-M552V- LTYKYLQKPM | 2361  | >KIT-M552V- LTYKYLQKPV  | 27    | 2334  |
| >KIT-M552V- LTYKYLQKPM | 14779 | >KIT-M552V- LTYKYLQKPV  | 309   | 14470 |
| >KIT-M552V- LTYKYLQKPM | 18115 | >KIT-M552V- LTYKYLQKPV  | 112   | 18003 |
| >KIT-M552V- LTYKYLQKPM | 422   | >KIT-M552V- LTYKYLQKPV' | 654   | 232   |
| >KIT-M552V- LTYKYLQKPM | 117   | >KIT-M552V- LTYKYLQKPV  | 8201  | 8084  |
| >KIT-M552V- LTYKYLQKPM | 73    | >KIT-M552V- LTYKYLQKPV' | 58    | 15    |
| >KIT-M552V- LTYKYLQKPM | 29    | >KIT-M552V- LTYKYLQKPV' | 79    | 50    |
| >KIT-M552V- LTYKYLQKPM | 74    | >KIT-M552V- LTYKYLQKPV' | 70    | 4     |
| >KIT-M552V- LTYKYLQKPM | 5130  | >KIT-M552V- LTYKYLQKPV  | 130   | 5000  |
| >KIT-M552V- LTYKYLQKPM | 522   | >KIT-M552V- LTYKYLQKPV  | 47    | 475   |
| >KIT-M552V- LTYKYLQKPM | 198   | >KIT-M552V- LTYKYLQKPV  | 2662  | 2464  |
| >KIT-M552V- LTYKYLQKPM | 149   | >KIT-M552V- LTYKYLQKPV' | 69    | 80    |
| >KIT-M552V- LTYKYLQKPM | 59    | >KIT-M552V- LTYKYLQKPV  | 260   | 201   |
| >KIT-M552V- LTYKYLQKPM | 95    | >KIT-M552V- LTYKYLQKPV' | 68    | 27    |
| >KIT-M552V- LTYKYLQKPM | 6     | >KIT-M552V- LTYKYLQKPV  | 94    | 88    |
| >KIT-M552V- LTYKYLQKPM | 4     | >KIT-M552V- LTYKYLQKPV' | 4     | 0     |
| >KIT-M552V- LTYKYLQKPM | 576   | >KIT-M552V- LTYKYLQKPV' | 215   | 361   |
| >KIT-M552V- LTYKYLQKPM | 488   | >KIT-M552V- LTYKYLQKPV  | 1683  | 1195  |
| >KIT-M552V- LTYKYLQKPM | 37    | >KIT-M552V- LTYKYLQKPV  | 685   | 648   |
| >KIT-M552V- LTYKYLQKPM | 6     | >KIT-M552V- LTYKYLQKPV' | 9     | 3     |
| >KIT-M651V- HMNIVNLL   | 410   | >KIT-M651V- HVNIVNLL    | 7089  | 6679  |
| >KIT-M651V- HMNIVNLL   | 11    | >KIT-M651V- HVNIVNLL    | 160   | 149   |
| >KIT-M651V- HMNIVNLLG, | 450   | >KIT-M651V- HVNIVNLLGA  | 4588  | 4138  |
| >KIT-M651V- HMNIVNLL   | 48    | >KIT-M651V- HVNIVNLL    | 992   | 944   |
| >KIT-M651V- HMNIVNLLG, | 160   | >KIT-M651V- HVNIVNLLGA  | 1252  | 1092  |
| >KIT-M651V- HMNIVNLL   | 41    | >KIT-M651V- HVNIVNLL    | 5518  | 5477  |
| >KIT-M651V- HMNIVNLLG, | 74    | >KIT-M651V- HVNIVNLLGA  | 7223  | 7149  |
| >KIT-M651V- HMNIVNLLG, | 346   | >KIT-M651V- HVNIVNLLGA  | 13557 | 13211 |
| >KIT-M651V- HMNIVNLL   | 187   | >KIT-M651V- HVNIVNLL    | 11932 | 11745 |
| >KIT-M651V- HMNIVNLLG, | 469   | >KIT-M651V- HVNIVNLLGA  | 13322 | 12853 |
| >KIT-M651V- HMNIVNLL   | 116   | >KIT-M651V- HVNIVNLL    | 7991  | 7875  |
| >KIT-M651V- HMNIVNLLG, | 270   | >KIT-M651V- HVNIVNLLGA  | 10941 | 10671 |

|                        |      |                        |       |       |
|------------------------|------|------------------------|-------|-------|
| >KIT-M651V- HMNIVNLL   | 45   | >KIT-M651V- HVNIVNLL   | 4815  | 4770  |
| >KIT-M651V- HMNIVNLLG, | 158  | >KIT-M651V- HVNIVNLLGA | 10900 | 10742 |
| >KIT-M651V- HMNIVNLLG, | 1639 | >KIT-M651V- HVNIVNLLGA | 396   | 1243  |
| >KIT-M651V- HMNIVNLL   | 1537 | >KIT-M651V- HVNIVNLL   | 41    | 1496  |
| >KIT-M651V- HMNIVNLL   | 434  | >KIT-M651V- HVNIVNLL   | 5078  | 4644  |
| >KIT-M651V- LKVLSYLGNI | 19   | >KIT-M651V- LKVLSYLGNI | 73    | 54    |
| >KIT-M651V- NHMIVNLL   | 242  | >KIT-M651V- NHVIVNLL   | 1256  | 1014  |
| >KIT-M651V- NHMIVNL    | 361  | >KIT-M651V- NHVIVNL    | 1023  | 662   |
| >KIT-M651V- NHMIVNLL   | 171  | >KIT-M651V- NHVIVNLL   | 480   | 309   |
| >KIT-M651V- NHMIVNL    | 15   | >KIT-M651V- NHVIVNL    | 51    | 36    |
| >KIT-M651V- NHMIVNLL   | 9    | >KIT-M651V- NHVIVNLL   | 19    | 10    |
| >KIT-M651V- LGNHMIVNI  | 604  | >KIT-M651V- LGNHVIVNI  | 442   | 162   |
| >KIT-M651V- YLGNHMNI   | 45   | >KIT-M651V- YLGNHVNI   | 42    | 3     |
| >KIT-M651V- YLGNHMNI   | 27   | >KIT-M651V- YLGNHVNI   | 21    | 6     |
| >KIT-M651V- YLGNHMNI   | 23   | >KIT-M651V- YLGNHVNI   | 22    | 1     |
| >KIT-M651V- YLGNHMNI   | 22   | >KIT-M651V- YLGNHVNI   | 17    | 5     |
| >KIT-M651V- YLGNHMNI   | 5    | >KIT-M651V- YLGNHVNI   | 5     | 0     |
| >KIT-M651V- YLGNHMNI   | 6    | >KIT-M651V- YLGNHVNI   | 6     | 0     |
| >KIT-M651V- YLGNHMNI   | 9    | >KIT-M651V- YLGNHVNI   | 14    | 5     |
| >KIT-M651V- YLGNHMNI   | 3    | >KIT-M651V- YLGNHVNI   | 3     | 0     |
| >KIT-M651V- YLGNHMNI   | 10   | >KIT-M651V- YLGNHVNI   | 10    | 0     |
| >KIT-M651V- YLGNHMNI   | 205  | >KIT-M651V- YLGNHVNI   | 245   | 40    |
| >KIT-M651V- YLGNHMNI   | 26   | >KIT-M651V- YLGNHVNI   | 40    | 14    |
| >KIT-M651V- YLGNHMNI   | 111  | >KIT-M651V- YLGNHVNI   | 156   | 45    |
| >KIT-M651V- YLGNHMNI   | 5    | >KIT-M651V- YLGNHVNI   | 3     | 2     |
| >KIT-M651V- YLGNHMNI   | 4    | >KIT-M651V- YLGNHVNI   | 2     | 2     |
| >KIT-M651V- YLGNHMNI   | 5    | >KIT-M651V- YLGNHVNI   | 3     | 2     |
| >KIT-M651V- YLGNHMNI   | 6    | >KIT-M651V- YLGNHVNI   | 5     | 1     |
| >KIT-M651V- YLGNHMNI   | 3    | >KIT-M651V- YLGNHVNI   | 2     | 1     |
| >KIT-M651V- YLGNHMNI   | 4    | >KIT-M651V- YLGNHVNI   | 4     | 0     |
| >KIT-M651V- YLGNHMNI   | 15   | >KIT-M651V- YLGNHVNI   | 11    | 4     |
| >KIT-M651V- YLGNHMNI   | 8    | >KIT-M651V- YLGNHVNI   | 6     | 2     |
| >KIT-M651V- YLGNHMNI   | 12   | >KIT-M651V- YLGNHVNI   | 8     | 4     |
| >KIT-M651V- YLGNHMNI   | 33   | >KIT-M651V- YLGNHVNI   | 13    | 20    |
| >KIT-M651V- YLGNHMNI   | 14   | >KIT-M651V- YLGNHVNI   | 3     | 11    |
| >KIT-M651V- YLGNHMNI   | 20   | >KIT-M651V- YLGNHVNI   | 6     | 14    |
| >KIT-M651V- YLGNHMNI   | 4    | >KIT-M651V- YLGNHVNI   | 3     | 1     |
| >KIT-M651V- YLGNHMNI   | 2    | >KIT-M651V- YLGNHVNI   | 2     | 0     |
| >KIT-M651V- YLGNHMNI   | 2    | >KIT-M651V- YLGNHVNI   | 2     | 0     |
| >KIT-M651V- SYLGNHMNI  | 14   | >KIT-M651V- SYLGNHVNI  | 11    | 3     |
| >KIT-M651V- SYLGNHMNI  | 177  | >KIT-M651V- SYLGNHVNI  | 209   | 32    |
| >KIT-M651V- SYLGNHMNI  | 497  | >KIT-M651V- SYLGNHVNI  | 327   | 170   |
| >KIT-M651V- SYLGNHMNI  | 31   | >KIT-M651V- SYLGNHVNI  | 40    | 9     |



|                       |      |                       |      |      |
|-----------------------|------|-----------------------|------|------|
| >KIT-M651V-SYLGNHMNI  | 92   | >KIT-M651V-SYLGNHVNI  | 114  | 22   |
| >KIT-M651V-SYLGNHMN   | 305  | >KIT-M651V-SYLGNHVN   | 476  | 171  |
| >KIT-M651V-SYLGNHMNI  | 4    | >KIT-M651V-SYLGNHVNI  | 5    | 1    |
| >KIT-M651V-SYLGNHMNI  | 45   | >KIT-M651V-SYLGNHVNIV | 43   | 2    |
| >KIT-M651V-SYLGNHMNI  | 76   | >KIT-M651V-SYLGNHVNI  | 343  | 267  |
| >KIT-M651V-SYLGNHMNI  | 598  | >KIT-M651V-SYLGNHVNI  | 197  | 401  |
| >KIT-M651V-SYLGNHMNI  | 333  | >KIT-M651V-SYLGNHVNI  | 366  | 33   |
| >KIT-M651V-SYLGNHMNI  | 143  | >KIT-M651V-SYLGNHVNIV | 464  | 321  |
| >KIT-M651V-SYLGNHMNI  | 364  | >KIT-M651V-SYLGNHVNI  | 465  | 101  |
| >KIT-M651V-SYLGNHMNI  | 53   | >KIT-M651V-SYLGNHVNIV | 70   | 17   |
| >KIT-M651V-LSYLGNHM   | 425  | >KIT-M651V-LSYLGNHV   | 528  | 103  |
| >KIT-M651V-LSYLGNHMN  | 440  | >KIT-M651V-LSYLGNHVNI | 591  | 151  |
| >KIT-M651V-LSYLGNHMN  | 131  | >KIT-M651V-LSYLGNHVNI | 318  | 187  |
| >KIT-M651V-LSYLGNHM   | 186  | >KIT-M651V-LSYLGNHV   | 2519 | 2333 |
| >KIT-M651V-LSYLGNHM   | 222  | >KIT-M651V-LSYLGNHV   | 761  | 539  |
| >KIT-M651V-LSYLGNHMN  | 349  | >KIT-M651V-LSYLGNHVNI | 323  | 26   |
| >KIT-M651V-LSYLGNHM   | 13   | >KIT-M651V-LSYLGNHV   | 324  | 311  |
| >KIT-M651V-LSYLGNHMN  | 16   | >KIT-M651V-LSYLGNHVNI | 15   | 1    |
| >KIT-M651V-LSYLGNHMN  | 332  | >KIT-M651V-LSYLGNHVNI | 563  | 231  |
| >KIT-M651V-LSYLGNHM   | 211  | >KIT-M651V-LSYLGNHV   | 7588 | 7377 |
| >KIT-M651V-LSYLGNHMN  | 216  | >KIT-M651V-LSYLGNHVNI | 528  | 312  |
| >KIT-M651V-LSYLGNHM   | 337  | >KIT-M651V-LSYLGNHV   | 1428 | 1091 |
| >KIT-M651V-LSYLGNHM   | 59   | >KIT-M651V-LSYLGNHV   | 1072 | 1013 |
| >KIT-M651V-LSYLGNHMN  | 237  | >KIT-M651V-LSYLGNHVNI | 244  | 7    |
| >KIT-M651V-LSYLGNHMN  | 288  | >KIT-M651V-LSYLGNHVNI | 544  | 256  |
| >KIT-M651V-LSYLGNHM   | 204  | >KIT-M651V-LSYLGNHV   | 528  | 324  |
| >KIT-M651V-LSYLGNHMN  | 39   | >KIT-M651V-LSYLGNHVNI | 88   | 49   |
| >KIT-M651V-VLSYLGNHM  | 8072 | >KIT-M651V-VLSYLGNHV  | 420  | 7652 |
| >KIT-M651V-VLSYLGNHM  | 100  | >KIT-M651V-VLSYLGNHV  | 7    | 93   |
| >KIT-M651V-VLSYLGNHMI | 36   | >KIT-M651V-VLSYLGNHVN | 26   | 10   |
| >KIT-M651V-VLSYLGNHM  | 1219 | >KIT-M651V-VLSYLGNHV  | 18   | 1201 |
| >KIT-M651V-VLSYLGNHMI | 48   | >KIT-M651V-VLSYLGNHVN | 101  | 53   |
| >KIT-M651V-VLSYLGNHM  | 3462 | >KIT-M651V-VLSYLGNHV  | 195  | 3267 |
| >KIT-M651V-VLSYLGNHM  | 3968 | >KIT-M651V-VLSYLGNHV  | 41   | 3927 |
| >KIT-M651V-VLSYLGNHMI | 201  | >KIT-M651V-VLSYLGNHVN | 173  | 28   |
| >KIT-M651V-VLSYLGNHM  | 1808 | >KIT-M651V-VLSYLGNHV  | 19   | 1789 |
| >KIT-M651V-VLSYLGNHMI | 217  | >KIT-M651V-VLSYLGNHVN | 228  | 11   |
| >KIT-M651V-VLSYLGNHM  | 2636 | >KIT-M651V-VLSYLGNHV  | 17   | 2619 |
| >KIT-M651V-VLSYLGNHMI | 294  | >KIT-M651V-VLSYLGNHVN | 247  | 47   |
| >KIT-M651V-VLSYLGNHM  | 9576 | >KIT-M651V-VLSYLGNHV  | 388  | 9188 |
| >KIT-M651V-VLSYLGNHM  | 3355 | >KIT-M651V-VLSYLGNHV  | 7    | 3348 |
| >KIT-M651V-VLSYLGNHMI | 73   | >KIT-M651V-VLSYLGNHVN | 85   | 12   |
| >KIT-M651V-VLSYLGNHM  | 112  | >KIT-M651V-VLSYLGNHV  | 1732 | 1620 |

|                         |       |                         |      |       |
|-------------------------|-------|-------------------------|------|-------|
| >KIT-M651V-KVLSYLGNNH   | 5200  | >KIT-M651V-KVLSYLGNNHV  | 493  | 4707  |
| >KIT-M651V-KVLSYLGNNH   | 1255  | >KIT-M651V-KVLSYLGNNHV  | 270  | 985   |
| >KIT-M651V-KVLSYLGNNH   | 4490  | >KIT-M651V-KVLSYLGNNHV  | 212  | 4278  |
| >KIT-M651V-KVLSYLGNNH   | 594   | >KIT-M651V-KVLSYLGNNHV  | 56   | 538   |
| >KIT-M651V-KVLSYLGNNH   | 3390  | >KIT-M651V-KVLSYLGNNHV  | 31   | 3359  |
| >KIT-M651V-KVLSYLGNNH   | 4238  | >KIT-M651V-KVLSYLGNNHV  | 85   | 4153  |
| >KIT-M651V-KVLSYLGNNH   | 7113  | >KIT-M651V-KVLSYLGNNHV  | 50   | 7063  |
| >KIT-M651V-KVLSYLGNNH   | 17479 | >KIT-M651V-KVLSYLGNNHV  | 115  | 17364 |
| >KIT-M651V-KVLSYLGNNH   | 147   | >KIT-M651V-KVLSYLGNNHV  | 3745 | 3598  |
| >KIT-M651V-KVLSYLGNNH   | 201   | >KIT-M651V-KVLSYLGNNHV  | 126  | 75    |
| >KIT-M651V-KVLSYLGNNH   | 3093  | >KIT-M651V-KVLSYLGNNHV  | 205  | 2888  |
| >KIT-M724I-\ MKPGVSYV   | 427   | >KIT-M724I-r IKPGVSYV   | 1509 | 1082  |
| >KIT-M724I-\ MKPGVSYV   | 118   | >KIT-M724I-r IKPGVSYV   | 271  | 153   |
| >KIT-M724I-\ MKPGVSYVV  | 325   | >KIT-M724I-r IKPGVSYVV  | 798  | 473   |
| >KIT-M724I-\ MKPGVSYV   | 61    | >KIT-M724I-r IKPGVSYV   | 3136 | 3075  |
| >KIT-M724I-\ MKPGVSYVV  | 56    | >KIT-M724I-r IKPGVSYVV  | 2652 | 2596  |
| >KIT-M724I-\ DMKPGVSYV  | 432   | >KIT-M724I-r DIKPGVSYVV | 3031 | 2599  |
| >KIT-M724I-\ DMKPGVSYV  | 10    | >KIT-M724I-r DIKPGVSYV  | 81   | 71    |
| >KIT-M724I-\ DMKPGVSYV  | 18    | >KIT-M724I-r DIKPGVSYV  | 979  | 961   |
| >KIT-M724I-\ DMKPGVSYV  | 83    | >KIT-M724I-r DIKPGVSYVV | 3199 | 3116  |
| >KIT-M724I-\ DMKPGVSYV  | 189   | >KIT-M724I-r DIKPGVSYV  | 7333 | 7144  |
| >KIT-M724I-\ DMKPGVSYV  | 186   | >KIT-M724I-r DIKPGVSYVV | 6543 | 6357  |
| >KIT-M724I-\ DMKPGVSYV  | 66    | >KIT-M724I-r DIKPGVSYV  | 3254 | 3188  |
| >KIT-M724I-\ DMKPGVSYV  | 284   | >KIT-M724I-r DIKPGVSYVV | 6447 | 6163  |
| >KIT-M724I-\ DMKPGVSYV  | 43    | >KIT-M724I-r DIKPGVSYV  | 1379 | 1336  |
| >KIT-M724I-\ DMKPGVSYV  | 110   | >KIT-M724I-r DIKPGVSYVV | 3867 | 3757  |
| >KIT-M724I-\ DMKPGVSYV  | 4     | >KIT-M724I-r DIKPGVSYV  | 73   | 69    |
| >KIT-M724I-\ DMKPGVSYV  | 15    | >KIT-M724I-r DIKPGVSYVV | 494  | 479   |
| >KIT-M724I-\ DMKPGVSY   | 1077  | >KIT-M724I-r DIKPGVSY   | 278  | 799   |
| >KIT-M724I-\ DMKPGVSY   | 4955  | >KIT-M724I-r DIKPGVSY   | 415  | 4540  |
| >KIT-M724I-\ DMKPGVSY   | 1678  | >KIT-M724I-r DIKPGVSY   | 278  | 1400  |
| >KIT-M724I-\ DMKPGVSY   | 203   | >KIT-M724I-r DIKPGVSY   | 1542 | 1339  |
| >KIT-M724I-\ DMKPGVSY   | 148   | >KIT-M724I-r DIKPGVSY   | 653  | 505   |
| >KIT-M724I-\ DMKPGVSYV  | 991   | >KIT-M724I-r DIKPGVSYV  | 147  | 844   |
| >KIT-M724I-\ DMKPGVSYV  | 912   | >KIT-M724I-r DIKPGVSYV  | 416  | 496   |
| >KIT-M724I-\ DMKPGVSY   | 99    | >KIT-M724I-r DIKPGVSY   | 718  | 619   |
| >KIT-M724I-\ DMKPGVSY   | 54    | >KIT-M724I-r DIKPGVSY   | 359  | 305   |
| >KIT-M724I-\ DMKPGVSY   | 94    | >KIT-M724I-r DIKPGVSY   | 3437 | 3343  |
| >KIT-M724I-\ CSDSTNEYMI | 2736  | >KIT-M724I-r CSDSTNEYMI | 98   | 2638  |
| >KIT-M724I-\ MDMKPGVS\  | 133   | >KIT-M724I-r MDIKPGVS\  | 235  | 102   |
| >KIT-M724I-\ MDMKPGVS\  | 414   | >KIT-M724I-r MDIKPGVS\  | 596  | 182   |
| >KIT-M724I-\ MDMKPGVS\  | 355   | >KIT-M724I-r MDIKPGVS\  | 915  | 560   |
| >KIT-M724I-\ MDMKPGVS\  | 43    | >KIT-M724I-r MDIKPGVS\  | 90   | 47    |

|                        |      |                         |     |      |
|------------------------|------|-------------------------|-----|------|
| >KIT-M724I-\ MDMKPGVS\ | 358  | >KIT-M724I-r MDIKPGVSY  | 908 | 550  |
| >KIT-M724I-\ MDMKPGVS\ | 201  | >KIT-M724I-r MDIKPGVSY\ | 586 | 385  |
| >KIT-M724I-\ MDMKPGVS\ | 360  | >KIT-M724I-r MDIKPGVSY  | 179 | 181  |
| >KIT-M724I-\ MDMKPGVS\ | 431  | >KIT-M724I-r MDIKPGVSY\ | 301 | 130  |
| >KIT-M724I-\ YMDMKPGV\ | 466  | >KIT-M724I-r YMDIKPGVSY | 566 | 100  |
| >KIT-M724I-\ YMDMKPGV  | 16   | >KIT-M724I-r YMDIKPGV   | 19  | 3    |
| >KIT-M724I-\ YMDMKPGV\ | 13   | >KIT-M724I-r YMDIKPGVSY | 16  | 3    |
| >KIT-M724I-\ YMDMKPGV  | 73   | >KIT-M724I-r YMDIKPGV   | 56  | 17   |
| >KIT-M724I-\ YMDMKPGV\ | 14   | >KIT-M724I-r YMDIKPGVSY | 14  | 0    |
| >KIT-M724I-\ YMDMKPGV  | 16   | >KIT-M724I-r YMDIKPGV   | 22  | 6    |
| >KIT-M724I-\ YMDMKPGV\ | 4    | >KIT-M724I-r YMDIKPGVSY | 5   | 1    |
| >KIT-M724I-\ YMDMKPGV  | 22   | >KIT-M724I-r YMDIKPGV   | 26  | 4    |
| >KIT-M724I-\ YMDMKPGV\ | 27   | >KIT-M724I-r YMDIKPGVSY | 33  | 6    |
| >KIT-M724I-\ YMDMKPGV  | 1    | >KIT-M724I-r YMDIKPGV   | 1   | 0    |
| >KIT-M724I-\ YMDMKPGV\ | 348  | >KIT-M724I-r YMDIKPGVS  | 334 | 14   |
| >KIT-M724I-\ YMDMKPGV\ | 357  | >KIT-M724I-r YMDIKPGVSY | 353 | 4    |
| >KIT-M724I-\ YMDMKPGV\ | 1    | >KIT-M724I-r YMDIKPGVSY | 1   | 0    |
| >KIT-M724I-\ YMDMKPGV  | 4    | >KIT-M724I-r YMDIKPGV   | 4   | 0    |
| >KIT-M724I-\ YMDMKPGV\ | 3    | >KIT-M724I-r YMDIKPGVSY | 3   | 0    |
| >KIT-M724I-\ YMDMKPGV  | 4    | >KIT-M724I-r YMDIKPGV   | 4   | 0    |
| >KIT-M724I-\ YMDMKPGV\ | 4    | >KIT-M724I-r YMDIKPGVSY | 4   | 0    |
| >KIT-M724I-\ YMDMKPGV  | 4    | >KIT-M724I-r YMDIKPGV   | 4   | 0    |
| >KIT-M724I-\ YMDMKPGV\ | 3    | >KIT-M724I-r YMDIKPGVSY | 3   | 0    |
| >KIT-M724I-\ YMDMKPGV  | 2    | >KIT-M724I-r YMDIKPGV   | 2   | 0    |
| >KIT-M724I-\ YMDMKPGV\ | 2    | >KIT-M724I-r YMDIKPGVSY | 3   | 1    |
| >KIT-M724I-\ YMDMKPGV\ | 90   | >KIT-M724I-r YMDIKPGVSY | 128 | 38   |
| >KIT-M724I-\ YMDMKPGV  | 176  | >KIT-M724I-r YMDIKPGV   | 103 | 73   |
| >KIT-M724I-\ YMDMKPGV\ | 239  | >KIT-M724I-r YMDIKPGVSY | 163 | 76   |
| >KIT-M724I-\ YMDMKPGV\ | 185  | >KIT-M724I-r YMDIKPGVSY | 208 | 23   |
| >KIT-M724I-\ YMDMKPGV\ | 140  | >KIT-M724I-r YMDIKPGVSY | 251 | 111  |
| >KIT-M724I-\ YMDMKPGV\ | 77   | >KIT-M724I-r YMDIKPGVSY | 86  | 9    |
| >KIT-M724I-\ YMDMKPGV\ | 144  | >KIT-M724I-r YMDIKPGVSY | 288 | 144  |
| >KIT-M724I-\ YMDMKPGV\ | 489  | >KIT-M724I-r YMDIKPGVSY | 343 | 146  |
| >KIT-M724I-\ YMDMKPGV\ | 549  | >KIT-M724I-r YMDIKPGVSY | 219 | 330  |
| >KIT-M724I-\ EYMDMKPG\ | 356  | >KIT-M724I-r EYMDIKPGV  | 448 | 92   |
| >KIT-M724I-\ EYMDMKPG\ | 182  | >KIT-M724I-r EYMDIKPGVS | 202 | 20   |
| >KIT-M724I-\ EYMDMKPG\ | 168  | >KIT-M724I-r EYMDIKPGVS | 196 | 28   |
| >KIT-M724I-\ EYMDMKPG\ | 310  | >KIT-M724I-r EYMDIKPGVS | 430 | 120  |
| >KIT-M724I-\ EYMDMKPG\ | 348  | >KIT-M724I-r EYMDIKPGVS | 286 | 62   |
| >KIT-M724I-\ EYMDMKPG\ | 806  | >KIT-M724I-r EYMDIKPGVS | 478 | 328  |
| >KIT-M724I-\ EYMDMKPG\ | 1465 | >KIT-M724I-r EYMDIKPGV  | 121 | 1344 |
| >KIT-M724I-\ EYMDMKPG\ | 106  | >KIT-M724I-r EYMDIKPGV  | 34  | 72   |
| >KIT-M724I-\ NEYMDMKPG | 293  | >KIT-M724I-r NEYMDIKPG  | 599 | 306  |

|                          |       |                          |      |       |
|--------------------------|-------|--------------------------|------|-------|
| >KIT-M724I-\ NEYMDMKPC   | 9     | >KIT-M724I-r NEYMDIKPG\  | 9    | 0     |
| >KIT-M724I-\ NEYMDMKPC   | 33    | >KIT-M724I-r NEYMDIKPG\  | 42   | 9     |
| >KIT-M724I-\ STNEYMDMK   | 9     | >KIT-M724I-r STNEYMDIK   | 9    | 0     |
| >KIT-M724I-\ STNEYMDM    | 235   | >KIT-M724I-r STNEYMDI    | 4775 | 4540  |
| >KIT-M724I-\ STNEYMDMK   | 17    | >KIT-M724I-r STNEYMDIK   | 41   | 24    |
| >KIT-M724I-\ STNEYMDM    | 2561  | >KIT-M724I-r STNEYMDI    | 165  | 2396  |
| >KIT-M724I-\ STNEYMDM    | 284   | >KIT-M724I-r STNEYMDI    | 128  | 156   |
| >KIT-M724I-\ STNEYMDM    | 126   | >KIT-M724I-r STNEYMDI    | 1079 | 953   |
| >KIT-M724I-\ STNEYMDMK   | 91    | >KIT-M724I-r STNEYMDIK   | 93   | 2     |
| >KIT-M724I-\ STNEYMDM    | 4600  | >KIT-M724I-r STNEYMDI    | 165  | 4435  |
| >KIT-M724I-\ DSTNEYMDM   | 255   | >KIT-M724I-r DSTNEYMDIK  | 616  | 361   |
| >KIT-M724I-\ SDSTNEYMDI  | 4685  | >KIT-M724I-r SDSTNEYMDI  | 426  | 4259  |
| >KIT-M724I-\ SDSTNEYMDI  | 1650  | >KIT-M724I-r SDSTNEYMDI  | 57   | 1593  |
| >KIT-N486D- KHNGTVECK/   | 80    | >KIT-N486D-  KHDGTVECK/  | 2283 | 2203  |
| >KIT-N486D- FKHNGTVEC    | 335   | >KIT-N486D-  FKHDGTVEC   | 998  | 663   |
| >KIT-N486D- FKHNGTVECK   | 208   | >KIT-N486D-  FKHDGTVECK  | 498  | 290   |
| >KIT-N486D- FKHNGTVECK   | 355   | >KIT-N486D-  FKHDGTVECK  | 977  | 622   |
| >KIT-N486D- AFKHNGTV     | 283   | >KIT-N486D-  AFKHDGTV    | 2091 | 1808  |
| >KIT-N486D- AFKHNGTVEC   | 88    | >KIT-N486D-  AFKHDGTVEC  | 381  | 293   |
| >KIT-N486D- SAFKHNGTV    | 302   | >KIT-N486D-  SAFKHDGTV   | 747  | 445   |
| >KIT-N486D- SAFKHNGTV    | 282   | >KIT-N486D-  SAFKHDGTV   | 546  | 264   |
| >KIT-N486D- SAFKHNGTV    | 179   | >KIT-N486D-  SAFKHDGTV   | 308  | 129   |
| >KIT-N486D- SAFKHNGTV    | 138   | >KIT-N486D-  SAFKHDGTV   | 2718 | 2580  |
| >KIT-N486D- SAFKHNGTV    | 387   | >KIT-N486D-  SAFKHDGTV   | 319  | 68    |
| >KIT-N486D- SSAFKHNGTV   | 94    | >KIT-N486D-  SSAFKHDGTV  | 236  | 142   |
| >KIT-N486D- SSAFKHNGTV   | 56    | >KIT-N486D-  SSAFKHDGTV  | 122  | 66    |
| >KIT-N486D- DSSAFKHNGT   | 738   | >KIT-N486D-  DSSAFKHDGT  | 470  | 268   |
| >KIT-N486D- DSSAFKHNGT   | 102   | >KIT-N486D-  DSSAFKHDGT  | 173  | 71    |
| >KIT-N486D- DSSAFKHNGT   | 281   | >KIT-N486D-  DSSAFKHDGT  | 1262 | 981   |
| >KIT-N495I-v NDVGKTSAY   | 229   | >KIT-N495I-n IDVGKTSAY   | 683  | 454   |
| >KIT-N495I-v NDVGKTSAY   | 4327  | >KIT-N495I-n IDVGKTSAY   | 431  | 3896  |
| >KIT-N495I-v YNDVGKTSAY  | 1319  | >KIT-N495I-n YIDVGKTSAY  | 189  | 1130  |
| >KIT-N495I-v YNDVGKTSAY  | 19197 | >KIT-N495I-n YIDVGKTSAY  | 200  | 18997 |
| >KIT-N495I-v YNDVGKTSAY  | 26434 | >KIT-N495I-n YIDVGKTSAY  | 110  | 26324 |
| >KIT-N495I-v YNDVGKTSAY  | 5657  | >KIT-N495I-n YIDVGKTSAY  | 238  | 5419  |
| >KIT-N495I-v YNDVGKTSAY  | 803   | >KIT-N495I-n YIDVGKTSAY  | 430  | 373   |
| >KIT-N495I-v YNDVGKTSAY  | 215   | >KIT-N495I-n YIDVGKTSAY  | 66   | 149   |
| >KIT-N495I-v YNDVGKTSAY  | 6796  | >KIT-N495I-n YIDVGKTSAY  | 331  | 6465  |
| >KIT-N495I-v YNDVGKTSAY  | 486   | >KIT-N495I-n YIDVGKTSAY  | 449  | 37    |
| >KIT-N495I-v YNDVGKTSAY  | 2334  | >KIT-N495I-n YIDVGKTSAY  | 370  | 1964  |
| >KIT-N495I-v AYNDVGKTSAY | 2767  | >KIT-N495I-n AYIDVGKTSAY | 97   | 2670  |
| >KIT-N495I-v AYNDVGKTSAY | 198   | >KIT-N495I-n AYIDVGKTSAY | 34   | 164   |
| >KIT-N495I-v AYNDVGKTSAY | 62    | >KIT-N495I-n AYIDVGKTSAY | 119  | 57    |

|                         |       |                         |      |       |
|-------------------------|-------|-------------------------|------|-------|
| >KIT-N495I-v AYNDVGKTS/ | 167   | >KIT-N495I-n AYIDVGKTS/ | 138  | 29    |
| >KIT-N495I-v KAYNDVGK   | 91    | >KIT-N495I-n KAYIDVGK   | 149  | 58    |
| >KIT-N495I-v KAYNDVGK   | 79    | >KIT-N495I-n KAYIDVGK   | 136  | 57    |
| >KIT-N495I-v KAYNDVGK   | 186   | >KIT-N495I-n KAYIDVGK   | 276  | 90    |
| >KIT-N495I-v CKAYNDVGK  | 1339  | >KIT-N495I-n CKAYIDVGK  | 413  | 926   |
| >KIT-N495I-v VECKAYNDV  | 225   | >KIT-N495I-n VECKAYIDV  | 677  | 452   |
| >KIT-N495I-v VECKAYNDV  | 1483  | >KIT-N495I-n VECKAYIDV  | 349  | 1134  |
| >KIT-N495I-v VECKAYNDV  | 844   | >KIT-N495I-n VECKAYIDV  | 186  | 658   |
| >KIT-N495I-v VECKAYNDV  | 221   | >KIT-N495I-n VECKAYIDV  | 161  | 60    |
| >KIT-N495I-v TVECKAYN   | 17925 | >KIT-N495I-n TVECKAYI   | 111  | 17814 |
| >KIT-N495I-v GTVECKAYN  | 24176 | >KIT-N495I-n GTVECKAYI  | 278  | 23898 |
| >KIT-N495I-v GTVECKAYN  | 20285 | >KIT-N495I-n GTVECKAYI  | 450  | 19835 |
| >KIT-N495I-v GTVECKAYN  | 19515 | >KIT-N495I-n GTVECKAYI  | 197  | 19318 |
| >KIT-N495I-v GTVECKAYN  | 11513 | >KIT-N495I-n GTVECKAYI  | 292  | 11221 |
| >KIT-N495I-v GTVECKAYN  | 3757  | >KIT-N495I-n GTVECKAYI  | 284  | 3473  |
| >KIT-N495I-v GTVECKAYN  | 35456 | >KIT-N495I-n GTVECKAYI  | 283  | 35173 |
| >KIT-N512D- NKEQIHPHTL  | 438   | >KIT-N512D- DKEQIHPHTL  | 1706 | 1268  |
| >KIT-N512D- NKEQIHPHTL  | 75    | >KIT-N512D- DKEQIHPHTL  | 980  | 905   |
| >KIT-N512D- NNKEQIHPHT  | 332   | >KIT-N512D- NDKEQIHPHT  | 1337 | 1005  |
| >KIT-N512D- FAFKGNKKEC  | 318   | >KIT-N512D- FAFKGNKKEC  | 367  | 49    |
| >KIT-N512D- FAFKGNKKEC  | 409   | >KIT-N512D- FAFKGNKKEC  | 361  | 48    |
| >KIT-N512D- FAFKGNKKEC  | 344   | >KIT-N512D- FAFKGNKKEC  | 403  | 59    |
| >KIT-N512D- FAFKGNK     | 251   | >KIT-N512D- FAFKGNK     | 1117 | 866   |
| >KIT-N512D- FAFKGNK     | 20    | >KIT-N512D- FAFKGNK     | 38   | 18    |
| >KIT-N512D- FAFKGNKKEC  | 95    | >KIT-N512D- FAFKGNKKEC  | 144  | 49    |
| >KIT-N512D- FAFKGNKKEC  | 395   | >KIT-N512D- FAFKGNKKEC  | 600  | 205   |
| >KIT-N512D- FAFKGNKKEC  | 41    | >KIT-N512D- FAFKGNKKEC  | 34   | 7     |
| >KIT-N564H- INGNNYVYI   | 163   | >KIT-N564H- IHGNNYVYI   | 1281 | 1118  |
| >KIT-N564H- INGNNYVYI   | 141   | >KIT-N564H- IHGNNYVYI   | 534  | 393   |
| >KIT-N564H- INGNNYVY    | 382   | >KIT-N564H- IHGNNYVY    | 329  | 53    |
| >KIT-N564H- INGNNYVY    | 256   | >KIT-N564H- IHGNNYVY    | 193  | 63    |
| >KIT-N564H- INGNNYVY    | 1070  | >KIT-N564H- IHGNNYVY    | 169  | 901   |
| >KIT-N564H- INGNNYVYI   | 2532  | >KIT-N564H- IHGNNYVYI   | 498  | 2034  |
| >KIT-N564H- EINGNNYV    | 299   | >KIT-N564H- EIHGNNYV    | 916  | 617   |
| >KIT-N564H- EINGNNYV    | 64    | >KIT-N564H- EIHGNNYV    | 60   | 4     |
| >KIT-N564H- EINGNNYVYI  | 229   | >KIT-N564H- EIHGNNYVYI  | 221  | 8     |
| >KIT-N564H- EINGNNYV    | 442   | >KIT-N564H- EIHGNNYV    | 1033 | 591   |
| >KIT-N564H- EINGNNYV    | 41    | >KIT-N564H- EIHGNNYV    | 325  | 284   |
| >KIT-N564H- EINGNNYVYI  | 257   | >KIT-N564H- EIHGNNYVYI  | 2084 | 1827  |
| >KIT-N564H- EINGNNYV    | 34    | >KIT-N564H- EIHGNNYV    | 32   | 2     |
| >KIT-N564H- EINGNNYVY   | 203   | >KIT-N564H- EIHGNNYVY   | 69   | 134   |
| >KIT-N564H- EINGNNYVY   | 17    | >KIT-N564H- EIHGNNYVY   | 8    | 9     |
| >KIT-N564H- EINGNNYVY   | 425   | >KIT-N564H- EIHGNNYVY   | 42   | 383   |

|                         |      |                         |     |     |
|-------------------------|------|-------------------------|-----|-----|
| >KIT-N564H-· EINGNNYVY  | 218  | >KIT-N564H-· EIHGNNYVY  | 185 | 33  |
| >KIT-N564H-· EINGNNYVY  | 70   | >KIT-N564H-· EIHGNNYVY  | 157 | 87  |
| >KIT-N564H-· EINGNNYVY  | 340  | >KIT-N564H-· EIHGNNYVY  | 374 | 34  |
| >KIT-N564H-· EINGNNYV   | 8    | >KIT-N564H-· EIHGNNYV   | 8   | 0   |
| >KIT-N564H-· EINGNNYVYI | 101  | >KIT-N564H-· EIHGNNYVYI | 212 | 111 |
| >KIT-N564H-· EINGNNYV   | 11   | >KIT-N564H-· EIHGNNYV   | 35  | 24  |
| >KIT-N564H-· EINGNNYVYI | 36   | >KIT-N564H-· EIHGNNYVYI | 133 | 97  |
| >KIT-N564H-· EINGNNYVY  | 710  | >KIT-N564H-· EIHGNNYVY  | 326 | 384 |
| >KIT-N564H-· EINGNNYVY  | 168  | >KIT-N564H-· EIHGNNYVY  | 248 | 80  |
| >KIT-N564H-· EINGNNYVY  | 81   | >KIT-N564H-· EIHGNNYVY  | 235 | 154 |
| >KIT-N564H-· EEINGNNY   | 611  | >KIT-N564H-· EEIHGNNY   | 295 | 316 |
| >KIT-N564H-· EEINGNNYVY | 76   | >KIT-N564H-· EEIHGNNYVY | 47  | 29  |
| >KIT-N564H-· EEINGNNY   | 230  | >KIT-N564H-· EEIHGNNY   | 144 | 86  |
| >KIT-N564H-· EEINGNNYVY | 179  | >KIT-N564H-· EEIHGNNYVY | 143 | 36  |
| >KIT-N564H-· EEINGNNY   | 19   | >KIT-N564H-· EEIHGNNY   | 50  | 31  |
| >KIT-N564H-· EEINGNNYVY | 134  | >KIT-N564H-· EEIHGNNYVY | 277 | 143 |
| >KIT-N564H-· EEINGNNYVY | 328  | >KIT-N564H-· EEIHGNNYVY | 410 | 82  |
| >KIT-N564H-· EEINGNNYV  | 241  | >KIT-N564H-· EEIHGNNYV  | 103 | 138 |
| >KIT-N564H-· EEINGNNYVY | 1081 | >KIT-N564H-· EEIHGNNYVY | 474 | 607 |
| >KIT-N564H-· EEINGNNY   | 278  | >KIT-N564H-· EEIHGNNY   | 563 | 285 |
| >KIT-N564H-· EEINGNNYVY | 322  | >KIT-N564H-· EEIHGNNYVY | 197 | 125 |
| >KIT-N564H-· EEINGNNYV  | 234  | >KIT-N564H-· EEIHGNNYV  | 286 | 52  |
| >KIT-N564H-· EEINGNNYVY | 59   | >KIT-N564H-· EEIHGNNYVY | 63  | 4   |
| >KIT-N564H-· EEINGNNYVY | 300  | >KIT-N564H-· EEIHGNNYVY | 484 | 184 |
| >KIT-N564H-· EEINGNNYVY | 466  | >KIT-N564H-· EEIHGNNYVY | 302 | 164 |
| >KIT-N564H-· EEINGNNY   | 70   | >KIT-N564H-· EEIHGNNY   | 58  | 12  |
| >KIT-N564H-· EEINGNNYV  | 488  | >KIT-N564H-· EEIHGNNYV  | 376 | 112 |
| >KIT-N564H-· EEINGNNYVY | 180  | >KIT-N564H-· EEIHGNNYVY | 109 | 71  |
| >KIT-N564H-· EEINGNNYVY | 190  | >KIT-N564H-· EEIHGNNYVY | 158 | 32  |
| >KIT-N564H-· EEINGNNYV  | 74   | >KIT-N564H-· EEIHGNNYV  | 107 | 33  |
| >KIT-N564H-· EEINGNNYVY | 97   | >KIT-N564H-· EEIHGNNYVY | 138 | 41  |
| >KIT-N564H-· EEINGNNYV  | 305  | >KIT-N564H-· EEIHGNNYV  | 552 | 247 |
| >KIT-N564H-· EEINGNNYVY | 63   | >KIT-N564H-· EEIHGNNYVY | 90  | 27  |
| >KIT-N564H-· VEEINGNNYV | 328  | >KIT-N564H-· VEEIHGNNYV | 377 | 49  |
| >KIT-N564H-· VEEINGNNYV | 94   | >KIT-N564H-· VEEIHGNNYV | 90  | 4   |
| >KIT-N564H-· VEEINGNNYV | 377  | >KIT-N564H-· VEEIHGNNYV | 171 | 206 |
| >KIT-N564H-· VVEEINGNNY | 217  | >KIT-N564H-· VVEEIHGNNY | 304 | 87  |
| >KIT-N564H-· VVEEINGNNY | 87   | >KIT-N564H-· VVEEIHGNNY | 112 | 25  |
| >KIT-N564H-· VVEEINGNNY | 121  | >KIT-N564H-· VVEEIHGNNY | 102 | 19  |
| >KIT-N564H-· VVEEINGNNY | 35   | >KIT-N564H-· VVEEIHGNNY | 33  | 2   |
| >KIT-N564H-· VVEEINGNNY | 316  | >KIT-N564H-· VVEEIHGNNY | 392 | 76  |
| >KIT-N564H-· VVEEINGNNY | 167  | >KIT-N564H-· VVEEIHGNNY | 185 | 18  |
| >KIT-N564H-· VVEEINGNNY | 178  | >KIT-N564H-· VVEEIHGNNY | 121 | 57  |

|                         |      |                         |      |      |
|-------------------------|------|-------------------------|------|------|
| >KIT-N564H- KVVVEEINGNM | 31   | >KIT-N564H- KVVVEEIHGNM | 18   | 13   |
| >KIT-N564H- KVVVEEINGNM | 61   | >KIT-N564H- KVVVEEIHGNM | 128  | 67   |
| >KIT-N564H- KVVVEEINGNM | 617  | >KIT-N564H- KVVVEEIHGNM | 307  | 310  |
| >KIT-N564H- KVVVEEINGNM | 114  | >KIT-N564H- KVVVEEIHGNM | 111  | 3    |
| >KIT-N564H- KVVVEEINGNM | 114  | >KIT-N564H- KVVVEEIHGNM | 76   | 38   |
| >KIT-N564H- KVVVEEINGNM | 100  | >KIT-N564H- KVVVEEIHGNM | 59   | 41   |
| >KIT-N564H- VQWKVVEEII  | 4046 | >KIT-N564H- VQWKVVEEII  | 412  | 3634 |
| >KIT-N564K- INGNNYVYI   | 163  | >KIT-N564K- IKGNNYVYI   | 1432 | 1269 |
| >KIT-N564K- INGNNYVYI   | 141  | >KIT-N564K- IKGNNYVYI   | 1618 | 1477 |
| >KIT-N564K- INGNNYVY    | 382  | >KIT-N564K- IKGNNYVY    | 1268 | 886  |
| >KIT-N564K- INGNNYVY    | 256  | >KIT-N564K- IKGNNYVY    | 267  | 11   |
| >KIT-N564K- INGNNYVY    | 1070 | >KIT-N564K- IKGNNYVY    | 11   | 1059 |
| >KIT-N564K- INGNNYVYI   | 2532 | >KIT-N564K- IKGNNYVYI   | 42   | 2490 |
| >KIT-N564K- EVQWKVVEE   | 7536 | >KIT-N564K- EVQWKVVEE   | 23   | 7513 |
| >KIT-N564K- EINGNNYV    | 299  | >KIT-N564K- EIKGNNYV    | 2345 | 2046 |
| >KIT-N564K- EINGNNYV    | 64   | >KIT-N564K- EIKGNNYV    | 1758 | 1694 |
| >KIT-N564K- EINGNNYVYI  | 229  | >KIT-N564K- EIKGNNYVYI  | 4229 | 4000 |
| >KIT-N564K- EINGNNYV    | 442  | >KIT-N564K- EIKGNNYV    | 9930 | 9488 |
| >KIT-N564K- EINGNNYV    | 41   | >KIT-N564K- EIKGNNYV    | 2283 | 2242 |
| >KIT-N564K- EINGNNYVYI  | 257  | >KIT-N564K- EIKGNNYVYI  | 7911 | 7654 |
| >KIT-N564K- EINGNNYV    | 34   | >KIT-N564K- EIKGNNYV    | 135  | 101  |
| >KIT-N564K- EINGNNYVY   | 203  | >KIT-N564K- EIKGNNYVY   | 91   | 112  |
| >KIT-N564K- EINGNNYVY   | 17   | >KIT-N564K- EIKGNNYVY   | 18   | 1    |
| >KIT-N564K- EINGNNYVY   | 425  | >KIT-N564K- EIKGNNYVY   | 796  | 371  |
| >KIT-N564K- EINGNNYVY   | 218  | >KIT-N564K- EIKGNNYVY   | 609  | 391  |
| >KIT-N564K- EINGNNYVY   | 70   | >KIT-N564K- EIKGNNYVY   | 152  | 82   |
| >KIT-N564K- EINGNNYVY   | 340  | >KIT-N564K- EIKGNNYVY   | 1071 | 731  |
| >KIT-N564K- EINGNNYV    | 8    | >KIT-N564K- EIKGNNYV    | 25   | 17   |
| >KIT-N564K- EINGNNYVYI  | 101  | >KIT-N564K- EIKGNNYVYI  | 271  | 170  |
| >KIT-N564K- EINGNNYV    | 11   | >KIT-N564K- EIKGNNYV    | 121  | 110  |
| >KIT-N564K- EINGNNYVYI  | 36   | >KIT-N564K- EIKGNNYVYI  | 410  | 374  |
| >KIT-N564K- EINGNNYVY   | 515  | >KIT-N564K- EIKGNNYVY   | 338  | 177  |
| >KIT-N564K- EINGNNYVY   | 710  | >KIT-N564K- EIKGNNYVY   | 408  | 302  |
| >KIT-N564K- EINGNNYVY   | 168  | >KIT-N564K- EIKGNNYVY   | 1105 | 937  |
| >KIT-N564K- EINGNNYVY   | 81   | >KIT-N564K- EIKGNNYVY   | 163  | 82   |
| >KIT-N564K- EEINGNNY    | 611  | >KIT-N564K- EEIKGNNY    | 288  | 323  |
| >KIT-N564K- EEINGNNYVY  | 76   | >KIT-N564K- EEIKGNNYVY  | 67   | 9    |
| >KIT-N564K- EEINGNNY    | 230  | >KIT-N564K- EEIKGNNY    | 245  | 15   |
| >KIT-N564K- EEINGNNYVY  | 179  | >KIT-N564K- EEIKGNNYVY  | 154  | 25   |
| >KIT-N564K- EEINGNNY    | 19   | >KIT-N564K- EEIKGNNY    | 16   | 3    |
| >KIT-N564K- EEINGNNYVY  | 134  | >KIT-N564K- EEIKGNNYVY  | 115  | 19   |
| >KIT-N564K- EEINGNNYVY  | 328  | >KIT-N564K- EEIKGNNYVY  | 318  | 10   |
| >KIT-N564K- EEINGNNYV   | 241  | >KIT-N564K- EEIKGNNYV   | 391  | 150  |

|                         |       |                         |     |       |
|-------------------------|-------|-------------------------|-----|-------|
| >KIT-N564K-\ EEINGNNY   | 278   | >KIT-N564K-r EEIKGNNY   | 290 | 12    |
| >KIT-N564K-\ EEINGNNYVY | 322   | >KIT-N564K-r EEIKGNNYVY | 225 | 97    |
| >KIT-N564K-\ EEINGNNYV  | 234   | >KIT-N564K-r EEIKGNNYV  | 459 | 225   |
| >KIT-N564K-\ EEINGNNYVY | 59    | >KIT-N564K-r EEIKGNNYVY | 100 | 41    |
| >KIT-N564K-\ EEINGNNYVY | 300   | >KIT-N564K-r EEIKGNNYVY | 460 | 160   |
| >KIT-N564K-\ EEINGNNYVY | 466   | >KIT-N564K-r EEIKGNNYVY | 621 | 155   |
| >KIT-N564K-\ EEINGNNY   | 70    | >KIT-N564K-r EEIKGNNY   | 96  | 26    |
| >KIT-N564K-\ EEINGNNYV  | 488   | >KIT-N564K-r EEIKGNNYV  | 621 | 133   |
| >KIT-N564K-\ EEINGNNYVY | 180   | >KIT-N564K-r EEIKGNNYVY | 166 | 14    |
| >KIT-N564K-\ EEINGNNYVY | 190   | >KIT-N564K-r EEIKGNNYVY | 249 | 59    |
| >KIT-N564K-\ EEINGNNYV  | 74    | >KIT-N564K-r EEIKGNNYV  | 86  | 12    |
| >KIT-N564K-\ EEINGNNYVY | 97    | >KIT-N564K-r EEIKGNNYVY | 124 | 27    |
| >KIT-N564K-\ EEINGNNYV  | 305   | >KIT-N564K-r EEIKGNNYV  | 341 | 36    |
| >KIT-N564K-\ EEINGNNYVY | 63    | >KIT-N564K-r EEIKGNNYVY | 64  | 1     |
| >KIT-N564K-\ VEEINGNNYV | 328   | >KIT-N564K-r VEEIKGNNYV | 349 | 21    |
| >KIT-N564K-\ VEEINGNNYV | 94    | >KIT-N564K-r VEEIKGNNYV | 234 | 140   |
| >KIT-N564K-\ VEEINGNNYV | 377   | >KIT-N564K-r VEEIKGNNYV | 659 | 282   |
| >KIT-N564K-\ VVEEINGNNY | 217   | >KIT-N564K-r VVEEIKGNNY | 536 | 319   |
| >KIT-N564K-\ VVEEINGNNY | 87    | >KIT-N564K-r VVEEIKGNNY | 195 | 108   |
| >KIT-N564K-\ VVEEINGNNY | 121   | >KIT-N564K-r VVEEIKGNNY | 189 | 68    |
| >KIT-N564K-\ VVEEINGNNY | 35    | >KIT-N564K-r VVEEIKGNNY | 44  | 9     |
| >KIT-N564K-\ VVEEINGNNY | 316   | >KIT-N564K-r VVEEIKGNNY | 334 | 18    |
| >KIT-N564K-\ VVEEINGNNY | 167   | >KIT-N564K-r VVEEIKGNNY | 317 | 150   |
| >KIT-N564K-\ VVEEINGNNY | 178   | >KIT-N564K-r VVEEIKGNNY | 242 | 64    |
| >KIT-N564K-\ KVVEEINGNN | 31    | >KIT-N564K-r KVVEEIKGNN | 47  | 16    |
| >KIT-N564K-\ KVVEEINGNN | 61    | >KIT-N564K-r KVVEEIKGNN | 106 | 45    |
| >KIT-N564K-\ KVVEEINGNN | 114   | >KIT-N564K-r KVVEEIKGNN | 304 | 190   |
| >KIT-N564K-\ KVVEEINGNN | 114   | >KIT-N564K-r KVVEEIKGNN | 154 | 40    |
| >KIT-N564K-\ KVVEEINGNN | 100   | >KIT-N564K-r KVVEEIKGNN | 53  | 47    |
| >KIT-N564S-\ INGNNYVYI  | 163   | >KIT-N564S-r ISGNNYVYI  | 11  | 152   |
| >KIT-N564S-\ INGNNYVYI  | 141   | >KIT-N564S-r ISGNNYVYI  | 99  | 42    |
| >KIT-N564S-\ INGNNYVY   | 382   | >KIT-N564S-r ISGNNYVY   | 139 | 243   |
| >KIT-N564S-\ INGNNYVY   | 256   | >KIT-N564S-r ISGNNYVY   | 30  | 226   |
| >KIT-N564S-\ INGNNYVY   | 1137  | >KIT-N564S-r ISGNNYVY   | 165 | 972   |
| >KIT-N564S-\ INGNNYVY   | 1070  | >KIT-N564S-r ISGNNYVY   | 182 | 888   |
| >KIT-N564S-\ INGNNYVY   | 21065 | >KIT-N564S-r ISGNNYVY   | 39  | 21026 |
| >KIT-N564S-\ INGNNYVYI  | 1990  | >KIT-N564S-r ISGNNYVYI  | 96  | 1894  |
| >KIT-N564S-\ EINGNNYV   | 299   | >KIT-N564S-r EISGNNYV   | 148 | 151   |
| >KIT-N564S-\ EINGNNYVYI | 985   | >KIT-N564S-r EISGNNYVYI | 454 | 531   |
| >KIT-N564S-\ EINGNNYV   | 64    | >KIT-N564S-r EISGNNYV   | 157 | 93    |
| >KIT-N564S-\ EINGNNYVYI | 229   | >KIT-N564S-r EISGNNYVYI | 525 | 296   |
| >KIT-N564S-\ EINGNNYV   | 442   | >KIT-N564S-r EISGNNYV   | 548 | 106   |
| >KIT-N564S-\ EINGNNYV   | 41    | >KIT-N564S-r EISGNNYV   | 41  | 0     |



|                         |     |                         |      |     |
|-------------------------|-----|-------------------------|------|-----|
| >KIT-N564S-\ EINGNNYVYI | 257 | >KIT-N564S-r EISGNNYVYI | 256  | 1   |
| >KIT-N564S-\ EINGNNYV   | 34  | >KIT-N564S-r EISGNNYV   | 27   | 7   |
| >KIT-N564S-\ EINGNNYVY  | 203 | >KIT-N564S-r EISGNNYVY  | 189  | 14  |
| >KIT-N564S-\ EINGNNYVY  | 17  | >KIT-N564S-r EISGNNYVY  | 18   | 1   |
| >KIT-N564S-\ EINGNNYVY  | 425 | >KIT-N564S-r EISGNNYVY  | 1160 | 735 |
| >KIT-N564S-\ EINGNNYVY  | 218 | >KIT-N564S-r EISGNNYVY  | 131  | 87  |
| >KIT-N564S-\ EINGNNYVY  | 70  | >KIT-N564S-r EISGNNYVY  | 73   | 3   |
| >KIT-N564S-\ EINGNNYVY  | 340 | >KIT-N564S-r EISGNNYVY  | 209  | 131 |
| >KIT-N564S-\ EINGNNYV   | 8   | >KIT-N564S-r EISGNNYV   | 7    | 1   |
| >KIT-N564S-\ EINGNNYVYI | 101 | >KIT-N564S-r EISGNNYVYI | 48   | 53  |
| >KIT-N564S-\ EINGNNYV   | 11  | >KIT-N564S-r EISGNNYV   | 16   | 5   |
| >KIT-N564S-\ EINGNNYVYI | 36  | >KIT-N564S-r EISGNNYVYI | 55   | 19  |
| >KIT-N564S-\ EINGNNYVY  | 168 | >KIT-N564S-r EISGNNYVY  | 106  | 62  |
| >KIT-N564S-\ EINGNNYVY  | 81  | >KIT-N564S-r EISGNNYVY  | 69   | 12  |
| >KIT-N564S-\ EEINGNNYVY | 76  | >KIT-N564S-r EEISGNNYVY | 93   | 17  |
| >KIT-N564S-\ EEINGNNY   | 230 | >KIT-N564S-r EEISGNNY   | 101  | 129 |
| >KIT-N564S-\ EEINGNNYVY | 179 | >KIT-N564S-r EEISGNNYVY | 76   | 103 |
| >KIT-N564S-\ EEINGNNY   | 19  | >KIT-N564S-r EEISGNNY   | 19   | 0   |
| >KIT-N564S-\ EEINGNNYVY | 134 | >KIT-N564S-r EEISGNNYVY | 150  | 16  |
| >KIT-N564S-\ EEINGNNYVY | 328 | >KIT-N564S-r EEISGNNYVY | 432  | 104 |
| >KIT-N564S-\ EEINGNNYV  | 241 | >KIT-N564S-r EEISGNNYV  | 190  | 51  |
| >KIT-N564S-\ EEINGNNY   | 278 | >KIT-N564S-r EEISGNNY   | 294  | 16  |
| >KIT-N564S-\ EEINGNNYVY | 322 | >KIT-N564S-r EEISGNNYVY | 258  | 64  |
| >KIT-N564S-\ EEINGNNYV  | 234 | >KIT-N564S-r EEISGNNYV  | 209  | 25  |
| >KIT-N564S-\ EEINGNNYVY | 59  | >KIT-N564S-r EEISGNNYVY | 53   | 6   |
| >KIT-N564S-\ EEINGNNYVY | 300 | >KIT-N564S-r EEISGNNYVY | 674  | 374 |
| >KIT-N564S-\ EEINGNNYVY | 466 | >KIT-N564S-r EEISGNNYVY | 568  | 102 |
| >KIT-N564S-\ EEINGNNY   | 70  | >KIT-N564S-r EEISGNNY   | 61   | 9   |
| >KIT-N564S-\ EEINGNNYV  | 488 | >KIT-N564S-r EEISGNNYV  | 430  | 58  |
| >KIT-N564S-\ EEINGNNYVY | 180 | >KIT-N564S-r EEISGNNYVY | 177  | 3   |
| >KIT-N564S-\ EEINGNNYVY | 190 | >KIT-N564S-r EEISGNNYVY | 175  | 15  |
| >KIT-N564S-\ EEINGNNYV  | 74  | >KIT-N564S-r EEISGNNYV  | 72   | 2   |
| >KIT-N564S-\ EEINGNNYVY | 97  | >KIT-N564S-r EEISGNNYVY | 102  | 5   |
| >KIT-N564S-\ EEINGNNYV  | 305 | >KIT-N564S-r EEISGNNYV  | 365  | 60  |
| >KIT-N564S-\ EEINGNNYVY | 63  | >KIT-N564S-r EEISGNNYVY | 56   | 7   |
| >KIT-N564S-\ VEEINGNNYV | 328 | >KIT-N564S-r VEEISGNNYV | 286  | 42  |
| >KIT-N564S-\ VEEINGNNYV | 94  | >KIT-N564S-r VEEISGNNYV | 134  | 40  |
| >KIT-N564S-\ VEEINGNNYV | 377 | >KIT-N564S-r VEEISGNNYV | 291  | 86  |
| >KIT-N564S-\ VVEEINGNNY | 547 | >KIT-N564S-r VVEEISGNNY | 437  | 110 |
| >KIT-N564S-\ VVEEINGNNY | 217 | >KIT-N564S-r VVEEISGNNY | 140  | 77  |
| >KIT-N564S-\ VVEEINGNNY | 87  | >KIT-N564S-r VVEEISGNNY | 65   | 22  |
| >KIT-N564S-\ VVEEINGNNY | 121 | >KIT-N564S-r VVEEISGNNY | 96   | 25  |
| >KIT-N564S-\ VVEEINGNNY | 627 | >KIT-N564S-r VVEEISGNNY | 445  | 182 |

|                          |     |                          |     |     |
|--------------------------|-----|--------------------------|-----|-----|
| >KIT-N564S-\ VVEEINGNNY  | 35  | >KIT-N564S-r VVEEISGNNY  | 28  | 7   |
| >KIT-N564S-\ VVEEINGNNY  | 316 | >KIT-N564S-r VVEEISGNNY  | 340 | 24  |
| >KIT-N564S-\ VVEEINGNNY  | 167 | >KIT-N564S-r VVEEISGNNY  | 154 | 13  |
| >KIT-N564S-\ VVEEINGNNY  | 597 | >KIT-N564S-r VVEEISGNNY  | 425 | 172 |
| >KIT-N564S-\ VVEEINGNNY  | 178 | >KIT-N564S-r VVEEISGNNY  | 106 | 72  |
| >KIT-N564S-\ KVVVEEINGNN | 31  | >KIT-N564S-r KVVVEEISGNN | 29  | 2   |
| >KIT-N564S-\ KVVVEEINGNN | 61  | >KIT-N564S-r KVVVEEISGNN | 70  | 9   |
| >KIT-N564S-\ KVVVEEINGNN | 114 | >KIT-N564S-r KVVVEEISGNN | 122 | 8   |
| >KIT-N564S-\ KVVVEEINGNN | 114 | >KIT-N564S-r KVVVEEISGNN | 103 | 11  |
| >KIT-N564S-\ KVVVEEINGNN | 100 | >KIT-N564S-r KVVVEEISGNN | 33  | 67  |
| >KIT-N566D- INGNNYVYI    | 163 | >KIT-N566D- INGDNVYI     | 691 | 528 |
| >KIT-N566D- INGNNYVYI    | 141 | >KIT-N566D- INGDNVYI     | 179 | 38  |
| >KIT-N566D- INGNNYVY     | 382 | >KIT-N566D- INGDNVY      | 253 | 129 |
| >KIT-N566D- INGNNYVY     | 256 | >KIT-N566D- INGDNVY      | 358 | 102 |
| >KIT-N566D- EINGNNYV     | 299 | >KIT-N566D- EINGDNVY     | 400 | 101 |
| >KIT-N566D- EINGNNYV     | 64  | >KIT-N566D- EINGDNVY     | 142 | 78  |
| >KIT-N566D- EINGNNYVYI   | 229 | >KIT-N566D- EINGDNVYI    | 341 | 112 |
| >KIT-N566D- EINGNNYV     | 442 | >KIT-N566D- EINGDNVY     | 309 | 133 |
| >KIT-N566D- EINGNNYV     | 41  | >KIT-N566D- EINGDNVY     | 77  | 36  |
| >KIT-N566D- EINGNNYVYI   | 257 | >KIT-N566D- EINGDNVYI    | 308 | 51  |
| >KIT-N566D- EINGNNYV     | 34  | >KIT-N566D- EINGDNVY     | 53  | 19  |
| >KIT-N566D- EINGNNYVY    | 203 | >KIT-N566D- EINGDNVY     | 640 | 437 |
| >KIT-N566D- EINGNNYVY    | 17  | >KIT-N566D- EINGDNVY     | 12  | 5   |
| >KIT-N566D- EINGNNYVY    | 425 | >KIT-N566D- EINGDNVY     | 424 | 1   |
| >KIT-N566D- EINGNNYVY    | 218 | >KIT-N566D- EINGDNVY     | 347 | 129 |
| >KIT-N566D- EINGNNYVY    | 70  | >KIT-N566D- EINGDNVY     | 66  | 4   |
| >KIT-N566D- EINGNNYVY    | 340 | >KIT-N566D- EINGDNVY     | 603 | 263 |
| >KIT-N566D- EINGNNYV     | 8   | >KIT-N566D- EINGDNVY     | 10  | 2   |
| >KIT-N566D- EINGNNYVYI   | 101 | >KIT-N566D- EINGDNVYI    | 109 | 8   |
| >KIT-N566D- EINGNNYV     | 11  | >KIT-N566D- EINGDNVY     | 35  | 24  |
| >KIT-N566D- EINGNNYVYI   | 36  | >KIT-N566D- EINGDNVYI    | 43  | 7   |
| >KIT-N566D- EINGNNYVY    | 168 | >KIT-N566D- EINGDNVY     | 183 | 15  |
| >KIT-N566D- EINGNNYVY    | 81  | >KIT-N566D- EINGDNVY     | 140 | 59  |
| >KIT-N566D- EEINGNNYVY   | 76  | >KIT-N566D- EEINGDNVY    | 106 | 30  |
| >KIT-N566D- EEINGNNY     | 230 | >KIT-N566D- EEINGDNY     | 193 | 37  |
| >KIT-N566D- EEINGNNYVY   | 179 | >KIT-N566D- EEINGDNVY    | 149 | 30  |
| >KIT-N566D- EEINGNNY     | 19  | >KIT-N566D- EEINGDNY     | 116 | 97  |
| >KIT-N566D- EEINGNNYVY   | 134 | >KIT-N566D- EEINGDNVY    | 202 | 68  |
| >KIT-N566D- EEINGNNYVY   | 328 | >KIT-N566D- EEINGDNVY    | 523 | 195 |
| >KIT-N566D- EEINGNNYV    | 241 | >KIT-N566D- EEINGDNYV    | 388 | 147 |
| >KIT-N566D- EEINGNNY     | 278 | >KIT-N566D- EEINGDNY     | 433 | 155 |
| >KIT-N566D- EEINGNNYVY   | 322 | >KIT-N566D- EEINGDNVY    | 830 | 508 |
| >KIT-N566D- EEINGNNYV    | 234 | >KIT-N566D- EEINGDNYV    | 416 | 182 |

|                         |      |                         |     |      |
|-------------------------|------|-------------------------|-----|------|
| >KIT-N566D- EEINGNNYVY  | 59   | >KIT-N566D- EEINGDNYVY  | 81  | 22   |
| >KIT-N566D- EEINGNNYVY  | 300  | >KIT-N566D- EEINGDNYVY  | 489 | 189  |
| >KIT-N566D- EEINGNNYVY  | 466  | >KIT-N566D- EEINGDNYVY  | 323 | 143  |
| >KIT-N566D- EEINGNNY    | 70   | >KIT-N566D- EEINGDNY    | 59  | 11   |
| >KIT-N566D- EEINGNNYV   | 488  | >KIT-N566D- EEINGDNYV   | 502 | 14   |
| >KIT-N566D- EEINGNNYVY  | 180  | >KIT-N566D- EEINGDNYVY  | 138 | 42   |
| >KIT-N566D- EEINGNNYVY  | 190  | >KIT-N566D- EEINGDNYVY  | 190 | 0    |
| >KIT-N566D- EEINGNNYV   | 74   | >KIT-N566D- EEINGDNYV   | 172 | 98   |
| >KIT-N566D- EEINGNNYVY  | 97   | >KIT-N566D- EEINGDNYVY  | 167 | 70   |
| >KIT-N566D- EEINGNNYV   | 305  | >KIT-N566D- EEINGDNYV   | 672 | 367  |
| >KIT-N566D- EEINGNNYVY  | 63   | >KIT-N566D- EEINGDNYVY  | 84  | 21   |
| >KIT-N566D- VEEINGNNYV  | 328  | >KIT-N566D- VEEINGDNYV  | 453 | 125  |
| >KIT-N566D- VEEINGNNYV  | 94   | >KIT-N566D- VEEINGDNYV  | 160 | 66   |
| >KIT-N566D- VEEINGNNYV  | 377  | >KIT-N566D- VEEINGDNYV  | 456 | 79   |
| >KIT-N566D- VVEEINGNNY  | 217  | >KIT-N566D- VVEEINGDNY  | 444 | 227  |
| >KIT-N566D- VVEEINGNNY  | 87   | >KIT-N566D- VVEEINGDNY  | 133 | 46   |
| >KIT-N566D- VVEEINGNNY  | 121  | >KIT-N566D- VVEEINGDNY  | 227 | 106  |
| >KIT-N566D- VVEEINGNNY  | 35   | >KIT-N566D- VVEEINGDNY  | 50  | 15   |
| >KIT-N566D- VVEEINGNNY  | 316  | >KIT-N566D- VVEEINGDNY  | 654 | 338  |
| >KIT-N566D- VVEEINGNNY  | 167  | >KIT-N566D- VVEEINGDNY  | 276 | 109  |
| >KIT-N566D- VVEEINGNNY  | 178  | >KIT-N566D- VVEEINGDNY  | 268 | 90   |
| >KIT-N566D- KVVEEINGNM  | 31   | >KIT-N566D- KVVEEINGDN  | 28  | 3    |
| >KIT-N566D- KVVEEINGNM  | 61   | >KIT-N566D- KVVEEINGDN  | 314 | 253  |
| >KIT-N566D- KVVEEINGNM  | 114  | >KIT-N566D- KVVEEINGDN  | 236 | 122  |
| >KIT-N566D- KVVEEINGNM  | 114  | >KIT-N566D- KVVEEINGDN  | 168 | 54   |
| >KIT-N566D- KVVEEINGNM  | 100  | >KIT-N566D- KVVEEINGDN  | 105 | 5    |
| >KIT-N566S-\ NNYVYIDPT  | 3114 | >KIT-N566S-r SNYVYIDPT  | 301 | 2813 |
| >KIT-N566S-\ NNYVYIDPTC | 602  | >KIT-N566S-r SNYVYIDPTQ | 108 | 494  |
| >KIT-N566S-\ INGNNYVYI  | 163  | >KIT-N566S-r INGSNYVYI  | 31  | 132  |
| >KIT-N566S-\ INGNNYVYI  | 141  | >KIT-N566S-r INGSNYVYI  | 132 | 9    |
| >KIT-N566S-\ INGNNYVY   | 382  | >KIT-N566S-r INGSNYVY   | 305 | 77   |
| >KIT-N566S-\ INGNNYVY   | 256  | >KIT-N566S-r INGSNYVY   | 179 | 77   |
| >KIT-N566S-\ EINGNNYV   | 299  | >KIT-N566S-r EINGSNYV   | 203 | 96   |
| >KIT-N566S-\ EINGNNYV   | 1089 | >KIT-N566S-r EINGSNYV   | 483 | 606  |
| >KIT-N566S-\ EINGNNYV   | 64   | >KIT-N566S-r EINGSNYV   | 79  | 15   |
| >KIT-N566S-\ EINGNNYVYI | 229  | >KIT-N566S-r EINGSNYVYI | 391 | 162  |
| >KIT-N566S-\ EINGNNYV   | 442  | >KIT-N566S-r EINGSNYV   | 263 | 179  |
| >KIT-N566S-\ EINGNNYV   | 41   | >KIT-N566S-r EINGSNYV   | 47  | 6    |
| >KIT-N566S-\ EINGNNYVYI | 257  | >KIT-N566S-r EINGSNYVYI | 487 | 230  |
| >KIT-N566S-\ EINGNNYV   | 34   | >KIT-N566S-r EINGSNYV   | 34  | 0    |
| >KIT-N566S-\ EINGNNYVY  | 203  | >KIT-N566S-r EINGSNYVY  | 443 | 240  |
| >KIT-N566S-\ EINGNNYVY  | 17   | >KIT-N566S-r EINGSNYVY  | 25  | 8    |
| >KIT-N566S-\ EINGNNYVY  | 425  | >KIT-N566S-r EINGSNYVY  | 173 | 252  |

|                         |      |                         |     |     |
|-------------------------|------|-------------------------|-----|-----|
| >KIT-N566S-\ EINGNNYVY  | 218  | >KIT-N566S-r EINGSNYVY  | 486 | 268 |
| >KIT-N566S-\ EINGNNYVY  | 70   | >KIT-N566S-r EINGSNYVY  | 104 | 34  |
| >KIT-N566S-\ EINGNNYVY  | 340  | >KIT-N566S-r EINGSNYVY  | 169 | 171 |
| >KIT-N566S-\ EINGNNYV   | 8    | >KIT-N566S-r EINGSNYV   | 8   | 0   |
| >KIT-N566S-\ EINGNNYVYI | 101  | >KIT-N566S-r EINGSNYVYI | 76  | 25  |
| >KIT-N566S-\ EINGNNYV   | 11   | >KIT-N566S-r EINGSNYV   | 11  | 0   |
| >KIT-N566S-\ EINGNNYVYI | 36   | >KIT-N566S-r EINGSNYVYI | 37  | 1   |
| >KIT-N566S-\ EINGNNYVY  | 515  | >KIT-N566S-r EINGSNYVY  | 237 | 278 |
| >KIT-N566S-\ EINGNNYVY  | 710  | >KIT-N566S-r EINGSNYVY  | 487 | 223 |
| >KIT-N566S-\ EINGNNYVY  | 168  | >KIT-N566S-r EINGSNYVY  | 187 | 19  |
| >KIT-N566S-\ EINGNNYVY  | 1173 | >KIT-N566S-r EINGSNYVY  | 296 | 877 |
| >KIT-N566S-\ EINGNNYVY  | 81   | >KIT-N566S-r EINGSNYVY  | 108 | 27  |
| >KIT-N566S-\ EEINGNNYV  | 837  | >KIT-N566S-r EEINGSNYV  | 212 | 625 |
| >KIT-N566S-\ EEINGNNYVY | 76   | >KIT-N566S-r EEINGSNYVY | 36  | 40  |
| >KIT-N566S-\ EEINGNNY   | 230  | >KIT-N566S-r EEINGSNY   | 187 | 43  |
| >KIT-N566S-\ EEINGNNYVY | 179  | >KIT-N566S-r EEINGSNYVY | 240 | 61  |
| >KIT-N566S-\ EEINGNNY   | 19   | >KIT-N566S-r EEINGSNY   | 48  | 29  |
| >KIT-N566S-\ EEINGNNYVY | 134  | >KIT-N566S-r EEINGSNYVY | 149 | 15  |
| >KIT-N566S-\ EEINGNNYVY | 328  | >KIT-N566S-r EEINGSNYVY | 357 | 29  |
| >KIT-N566S-\ EEINGNNYV  | 241  | >KIT-N566S-r EEINGSNYV  | 244 | 3   |
| >KIT-N566S-\ EEINGNNYVY | 766  | >KIT-N566S-r EEINGSNYVY | 348 | 418 |
| >KIT-N566S-\ EEINGNNY   | 278  | >KIT-N566S-r EEINGSNY   | 202 | 76  |
| >KIT-N566S-\ EEINGNNYVY | 322  | >KIT-N566S-r EEINGSNYVY | 554 | 232 |
| >KIT-N566S-\ EEINGNNYV  | 234  | >KIT-N566S-r EEINGSNYV  | 300 | 66  |
| >KIT-N566S-\ EEINGNNYVY | 59   | >KIT-N566S-r EEINGSNYVY | 66  | 7   |
| >KIT-N566S-\ EEINGNNYVY | 300  | >KIT-N566S-r EEINGSNYVY | 380 | 80  |
| >KIT-N566S-\ EEINGNNY   | 809  | >KIT-N566S-r EEINGSNY   | 452 | 357 |
| >KIT-N566S-\ EEINGNNYVY | 466  | >KIT-N566S-r EEINGSNYVY | 113 | 353 |
| >KIT-N566S-\ EEINGNNY   | 70   | >KIT-N566S-r EEINGSNY   | 59  | 11  |
| >KIT-N566S-\ EEINGNNYV  | 488  | >KIT-N566S-r EEINGSNYV  | 475 | 13  |
| >KIT-N566S-\ EEINGNNYVY | 180  | >KIT-N566S-r EEINGSNYVY | 73  | 107 |
| >KIT-N566S-\ EEINGNNYVY | 190  | >KIT-N566S-r EEINGSNYVY | 182 | 8   |
| >KIT-N566S-\ EEINGNNYV  | 74   | >KIT-N566S-r EEINGSNYV  | 63  | 11  |
| >KIT-N566S-\ EEINGNNYVY | 97   | >KIT-N566S-r EEINGSNYVY | 90  | 7   |
| >KIT-N566S-\ EEINGNNYV  | 305  | >KIT-N566S-r EEINGSNYV  | 120 | 185 |
| >KIT-N566S-\ EEINGNNYVY | 63   | >KIT-N566S-r EEINGSNYVY | 41  | 22  |
| >KIT-N566S-\ VEEINGNNY\ | 328  | >KIT-N566S-r VEEINGSNYV | 161 | 167 |
| >KIT-N566S-\ VEEINGNNY\ | 94   | >KIT-N566S-r VEEINGSNYV | 98  | 4   |
| >KIT-N566S-\ VEEINGNNY\ | 377  | >KIT-N566S-r VEEINGSNYV | 735 | 358 |
| >KIT-N566S-\ VVEEINGNNY | 547  | >KIT-N566S-r VVEEINGSNY | 327 | 220 |
| >KIT-N566S-\ VVEEINGNNY | 217  | >KIT-N566S-r VVEEINGSNY | 153 | 64  |
| >KIT-N566S-\ VVEEINGNNY | 87   | >KIT-N566S-r VVEEINGSNY | 48  | 39  |
| >KIT-N566S-\ VVEEINGNNY | 121  | >KIT-N566S-r VVEEINGSNY | 77  | 44  |

|                         |      |                          |       |       |
|-------------------------|------|--------------------------|-------|-------|
| >KIT-N566S-\ VVEEINGNNY | 627  | >KIT-N566S-r VVEEINGSNY  | 344   | 283   |
| >KIT-N566S-\ VVEEINGNNY | 35   | >KIT-N566S-r VVEEINGSNY  | 25    | 10    |
| >KIT-N566S-\ VVEEINGNNY | 316  | >KIT-N566S-r VVEEINGSNY  | 228   | 88    |
| >KIT-N566S-\ VVEEINGNNY | 167  | >KIT-N566S-r VVEEINGSNY  | 161   | 6     |
| >KIT-N566S-\ VVEEINGNNY | 597  | >KIT-N566S-r VVEEINGSNY  | 470   | 127   |
| >KIT-N566S-\ VVEEINGNNY | 178  | >KIT-N566S-r VVEEINGSNY  | 177   | 1     |
| >KIT-N566S-\ KVVVEEINGN | 3761 | >KIT-N566S-r KVVVEEINGS  | 277   | 3484  |
| >KIT-N566S-\ KVVVEEINGN | 31   | >KIT-N566S-r KVVVEEINGSN | 21    | 10    |
| >KIT-N566S-\ KVVVEEINGN | 61   | >KIT-N566S-r KVVVEEINGSN | 127   | 66    |
| >KIT-N566S-\ KVVVEEINGN | 114  | >KIT-N566S-r KVVVEEINGSN | 105   | 9     |
| >KIT-N566S-\ KVVVEEINGN | 114  | >KIT-N566S-r KVVVEEINGSN | 92    | 22    |
| >KIT-N566S-\ KVVVEEINGN | 100  | >KIT-N566S-r KVVVEEINGSN | 25    | 75    |
| >KIT-N567H-\ NYVYIDPTQL | 150  | >KIT-N567H-\ HYVYIDPTQL  | 188   | 38    |
| >KIT-N567H-\ NYVYIDPTQL | 163  | >KIT-N567H-\ HYVYIDPTQL  | 51    | 112   |
| >KIT-N567H-\ NNYVYIDPTC | 8981 | >KIT-N567H-\ NHYVYIDPTC  | 271   | 8710  |
| >KIT-N567H-\ NNYVYIDPTC | 1965 | >KIT-N567H-\ NHYVYIDPTC  | 61    | 1904  |
| >KIT-N567H-\ NNYVYIDPTC | 2688 | >KIT-N567H-\ NHYVYIDPTC  | 30    | 2658  |
| >KIT-N567H-\ INGNNYVYI  | 163  | >KIT-N567H-\ INGNHYVYI   | 19936 | 19773 |
| >KIT-N567H-\ INGNNYVYI  | 141  | >KIT-N567H-\ INGNHYVYI   | 66    | 75    |
| >KIT-N567H-\ INGNNYVY   | 382  | >KIT-N567H-\ INGNHYVY    | 179   | 203   |
| >KIT-N567H-\ INGNNYVY   | 256  | >KIT-N567H-\ INGNHYVY    | 623   | 367   |
| >KIT-N567H-\ EINGNNYV   | 299  | >KIT-N567H-\ EINGNHVY    | 361   | 62    |
| >KIT-N567H-\ EINGNNYV   | 64   | >KIT-N567H-\ EINGNHVY    | 18    | 46    |
| >KIT-N567H-\ EINGNNYVYI | 229  | >KIT-N567H-\ EINGNHVYVI  | 183   | 46    |
| >KIT-N567H-\ EINGNNYV   | 442  | >KIT-N567H-\ EINGNHVY    | 145   | 297   |
| >KIT-N567H-\ EINGNNYV   | 41   | >KIT-N567H-\ EINGNHVY    | 16    | 25    |
| >KIT-N567H-\ EINGNNYVYI | 257  | >KIT-N567H-\ EINGNHVYVI  | 723   | 466   |
| >KIT-N567H-\ EINGNNYV   | 34   | >KIT-N567H-\ EINGNHVY    | 9     | 25    |
| >KIT-N567H-\ EINGNNYVY  | 203  | >KIT-N567H-\ EINGNHVY    | 268   | 65    |
| >KIT-N567H-\ EINGNNYVY  | 17   | >KIT-N567H-\ EINGNHVY    | 10    | 7     |
| >KIT-N567H-\ EINGNNYVY  | 425  | >KIT-N567H-\ EINGNHVY    | 558   | 133   |
| >KIT-N567H-\ EINGNNYVY  | 218  | >KIT-N567H-\ EINGNHVY    | 56    | 162   |
| >KIT-N567H-\ EINGNNYVY  | 70   | >KIT-N567H-\ EINGNHVY    | 132   | 62    |
| >KIT-N567H-\ EINGNNYVY  | 340  | >KIT-N567H-\ EINGNHVY    | 273   | 67    |
| >KIT-N567H-\ EINGNNYV   | 8    | >KIT-N567H-\ EINGNHVY    | 8     | 0     |
| >KIT-N567H-\ EINGNNYVYI | 101  | >KIT-N567H-\ EINGNHVYVI  | 158   | 57    |
| >KIT-N567H-\ EINGNNYV   | 11   | >KIT-N567H-\ EINGNHVY    | 7     | 4     |
| >KIT-N567H-\ EINGNNYVYI | 36   | >KIT-N567H-\ EINGNHVYVI  | 36    | 0     |
| >KIT-N567H-\ EINGNNYVY  | 515  | >KIT-N567H-\ EINGNHVY    | 369   | 146   |
| >KIT-N567H-\ EINGNNYVY  | 168  | >KIT-N567H-\ EINGNHVY    | 217   | 49    |
| >KIT-N567H-\ EINGNNYVY  | 81   | >KIT-N567H-\ EINGNHVY    | 60    | 21    |
| >KIT-N567H-\ EEINGNNY   | 611  | >KIT-N567H-\ EEINGNHVY   | 453   | 158   |
| >KIT-N567H-\ EEINGNNYVY | 76   | >KIT-N567H-\ EEINGNHVY   | 73    | 3     |

|                        |      |                         |     |      |
|------------------------|------|-------------------------|-----|------|
| >KIT-N567H- EEINGNNY   | 230  | >KIT-N567H- EEINGNHY    | 116 | 114  |
| >KIT-N567H- EEINGNNYVY | 179  | >KIT-N567H- EEINGNHVYVY | 106 | 73   |
| >KIT-N567H- EEINGNNY   | 19   | >KIT-N567H- EEINGNHY    | 82  | 63   |
| >KIT-N567H- EEINGNNYVY | 134  | >KIT-N567H- EEINGNHVYVY | 224 | 90   |
| >KIT-N567H- EEINGNNYVY | 328  | >KIT-N567H- EEINGNHVYVY | 427 | 99   |
| >KIT-N567H- EEINGNNYV  | 241  | >KIT-N567H- EEINGNHVY   | 135 | 106  |
| >KIT-N567H- EEINGNNYV  | 1490 | >KIT-N567H- EEINGNHVY   | 172 | 1318 |
| >KIT-N567H- EEINGNNY   | 278  | >KIT-N567H- EEINGNHY    | 227 | 51   |
| >KIT-N567H- EEINGNNYVY | 322  | >KIT-N567H- EEINGNHVYVY | 333 | 11   |
| >KIT-N567H- EEINGNNYV  | 234  | >KIT-N567H- EEINGNHVY   | 47  | 187  |
| >KIT-N567H- EEINGNNYVY | 59   | >KIT-N567H- EEINGNHVYVY | 36  | 23   |
| >KIT-N567H- EEINGNNYVY | 300  | >KIT-N567H- EEINGNHVYVY | 313 | 13   |
| >KIT-N567H- EEINGNNYVY | 466  | >KIT-N567H- EEINGNHVYVY | 836 | 370  |
| >KIT-N567H- EEINGNNY   | 70   | >KIT-N567H- EEINGNHY    | 73  | 3    |
| >KIT-N567H- EEINGNNYV  | 488  | >KIT-N567H- EEINGNHVY   | 189 | 299  |
| >KIT-N567H- EEINGNNYVY | 180  | >KIT-N567H- EEINGNHVYVY | 335 | 155  |
| >KIT-N567H- EEINGNNYVY | 190  | >KIT-N567H- EEINGNHVYVY | 133 | 57   |
| >KIT-N567H- EEINGNNYV  | 74   | >KIT-N567H- EEINGNHVY   | 31  | 43   |
| >KIT-N567H- EEINGNNYVY | 97   | >KIT-N567H- EEINGNHVYVY | 57  | 40   |
| >KIT-N567H- EEINGNNYV  | 305  | >KIT-N567H- EEINGNHVY   | 386 | 81   |
| >KIT-N567H- EEINGNNYVY | 63   | >KIT-N567H- EEINGNHVYVY | 50  | 13   |
| >KIT-N567H- VEEINGNNYV | 328  | >KIT-N567H- VEEINGNHVY  | 248 | 80   |
| >KIT-N567H- VEEINGNNYV | 94   | >KIT-N567H- VEEINGNHVY  | 61  | 33   |
| >KIT-N567H- VEEINGNNYV | 377  | >KIT-N567H- VEEINGNHVY  | 325 | 52   |
| >KIT-N567H- VVEEINGNNY | 547  | >KIT-N567H- VVEEINGNHY  | 215 | 332  |
| >KIT-N567H- VVEEINGNNY | 217  | >KIT-N567H- VVEEINGNHY  | 182 | 35   |
| >KIT-N567H- VVEEINGNNY | 87   | >KIT-N567H- VVEEINGNHY  | 55  | 32   |
| >KIT-N567H- VVEEINGNNY | 121  | >KIT-N567H- VVEEINGNHY  | 34  | 87   |
| >KIT-N567H- VVEEINGNNY | 627  | >KIT-N567H- VVEEINGNHY  | 183 | 444  |
| >KIT-N567H- VVEEINGNNY | 977  | >KIT-N567H- VVEEINGNHY  | 261 | 716  |
| >KIT-N567H- VVEEINGNNY | 1150 | >KIT-N567H- VVEEINGNHY  | 171 | 979  |
| >KIT-N567H- VVEEINGNNY | 35   | >KIT-N567H- VVEEINGNHY  | 12  | 23   |
| >KIT-N567H- VVEEINGNNY | 316  | >KIT-N567H- VVEEINGNHY  | 447 | 131  |
| >KIT-N567H- VVEEINGNNY | 167  | >KIT-N567H- VVEEINGNHY  | 115 | 52   |
| >KIT-N567H- VVEEINGNNY | 597  | >KIT-N567H- VVEEINGNHY  | 135 | 462  |
| >KIT-N567H- VVEEINGNNY | 178  | >KIT-N567H- VVEEINGNHY  | 121 | 57   |
| >KIT-N567H- KVVEEINGNN | 31   | >KIT-N567H- KVVEEINGNFI | 23  | 8    |
| >KIT-N567H- KVVEEINGNN | 61   | >KIT-N567H- KVVEEINGNFI | 245 | 184  |
| >KIT-N567H- KVVEEINGNN | 617  | >KIT-N567H- KVVEEINGNFI | 380 | 237  |
| >KIT-N567H- KVVEEINGNN | 114  | >KIT-N567H- KVVEEINGNFI | 77  | 37   |
| >KIT-N567H- KVVEEINGNN | 114  | >KIT-N567H- KVVEEINGNFI | 80  | 34   |
| >KIT-N567H- KVVEEINGNN | 1251 | >KIT-N567H- KVVEEINGNFI | 238 | 1013 |
| >KIT-N567H- KVVEEINGNN | 100  | >KIT-N567H- KVVEEINGNFI | 130 | 30   |

|                         |       |                         |       |       |
|-------------------------|-------|-------------------------|-------|-------|
| >KIT-N567K-1 NYVYIDPTQL | 150   | >KIT-N567K-1 KYVYIDPTQL | 42    | 108   |
| >KIT-N567K-1 NYVYIDPTQL | 163   | >KIT-N567K-1 KYVYIDPTQL | 68    | 95    |
| >KIT-N567K-1 NYVYIDPTQL | 10861 | >KIT-N567K-1 KYVYIDPTQL | 424   | 10437 |
| >KIT-N567K-1 NYVYIDPT   | 1816  | >KIT-N567K-1 KYVYIDPT   | 197   | 1619  |
| >KIT-N567K-1 NYVYIDPTQ  | 2688  | >KIT-N567K-1 KYVYIDPTQ  | 479   | 2209  |
| >KIT-N567K-1 NNYVYIDPTC | 4549  | >KIT-N567K-1 NKYVYIDPTQ | 85    | 4464  |
| >KIT-N567K-1 NNYVYIDPTC | 2688  | >KIT-N567K-1 NKYVYIDPTQ | 224   | 2464  |
| >KIT-N567K-1 INGNNYVYI  | 163   | >KIT-N567K-1 INGNKYVYI  | 28208 | 28045 |
| >KIT-N567K-1 INGNNYVYI  | 141   | >KIT-N567K-1 INGNKYVYI  | 76    | 65    |
| >KIT-N567K-1 INGNNYVY   | 382   | >KIT-N567K-1 INGNKYVY   | 979   | 597   |
| >KIT-N567K-1 INGNNYVY   | 256   | >KIT-N567K-1 INGNKYVY   | 502   | 246   |
| >KIT-N567K-1 EINGNNYV   | 299   | >KIT-N567K-1 EINGNKYV   | 2932  | 2633  |
| >KIT-N567K-1 EINGNNYV   | 64    | >KIT-N567K-1 EINGNKYV   | 100   | 36    |
| >KIT-N567K-1 EINGNNYVYI | 229   | >KIT-N567K-1 EINGNKYVYI | 371   | 142   |
| >KIT-N567K-1 EINGNNYV   | 442   | >KIT-N567K-1 EINGNKYV   | 1141  | 699   |
| >KIT-N567K-1 EINGNNYV   | 41    | >KIT-N567K-1 EINGNKYV   | 133   | 92    |
| >KIT-N567K-1 EINGNNYVYI | 257   | >KIT-N567K-1 EINGNKYVYI | 678   | 421   |
| >KIT-N567K-1 EINGNNYV   | 34    | >KIT-N567K-1 EINGNKYV   | 61    | 27    |
| >KIT-N567K-1 EINGNNYVY  | 203   | >KIT-N567K-1 EINGNKYVY  | 611   | 408   |
| >KIT-N567K-1 EINGNNYVY  | 17    | >KIT-N567K-1 EINGNKYVY  | 44    | 27    |
| >KIT-N567K-1 EINGNNYVY  | 425   | >KIT-N567K-1 EINGNKYVY  | 1606  | 1181  |
| >KIT-N567K-1 EINGNNYVY  | 218   | >KIT-N567K-1 EINGNKYVY  | 476   | 258   |
| >KIT-N567K-1 EINGNNYVY  | 70    | >KIT-N567K-1 EINGNKYVY  | 147   | 77    |
| >KIT-N567K-1 EINGNNYVY  | 340   | >KIT-N567K-1 EINGNKYVY  | 637   | 297   |
| >KIT-N567K-1 EINGNNYV   | 8     | >KIT-N567K-1 EINGNKYV   | 22    | 14    |
| >KIT-N567K-1 EINGNNYVYI | 101   | >KIT-N567K-1 EINGNKYVYI | 172   | 71    |
| >KIT-N567K-1 EINGNNYV   | 11    | >KIT-N567K-1 EINGNKYV   | 35    | 24    |
| >KIT-N567K-1 EINGNNYVYI | 36    | >KIT-N567K-1 EINGNKYVYI | 101   | 65    |
| >KIT-N567K-1 EINGNNYVY  | 168   | >KIT-N567K-1 EINGNKYVY  | 684   | 516   |
| >KIT-N567K-1 EINGNNYVY  | 81    | >KIT-N567K-1 EINGNKYVY  | 47    | 34    |
| >KIT-N567K-1 EEINGNNYV  | 837   | >KIT-N567K-1 EEINGNKYV  | 342   | 495   |
| >KIT-N567K-1 EEINGNNYVY | 76    | >KIT-N567K-1 EEINGNKYVY | 60    | 16    |
| >KIT-N567K-1 EEINGNNY   | 230   | >KIT-N567K-1 EEINGNKY   | 529   | 299   |
| >KIT-N567K-1 EEINGNNYVY | 179   | >KIT-N567K-1 EEINGNKYVY | 385   | 206   |
| >KIT-N567K-1 EEINGNNY   | 19    | >KIT-N567K-1 EEINGNKY   | 231   | 212   |
| >KIT-N567K-1 EEINGNNYVY | 134   | >KIT-N567K-1 EEINGNKYVY | 581   | 447   |
| >KIT-N567K-1 EEINGNNYVY | 328   | >KIT-N567K-1 EEINGNKYVY | 724   | 396   |
| >KIT-N567K-1 EEINGNNYV  | 241   | >KIT-N567K-1 EEINGNKYV  | 4436  | 4195  |
| >KIT-N567K-1 EEINGNNY   | 278   | >KIT-N567K-1 EEINGNKY   | 196   | 82    |
| >KIT-N567K-1 EEINGNNYVY | 322   | >KIT-N567K-1 EEINGNKYVY | 513   | 191   |
| >KIT-N567K-1 EEINGNNYV  | 234   | >KIT-N567K-1 EEINGNKYV  | 519   | 285   |
| >KIT-N567K-1 EEINGNNYVY | 59    | >KIT-N567K-1 EEINGNKYVY | 109   | 50    |
| >KIT-N567K-1 EEINGNNYVY | 300   | >KIT-N567K-1 EEINGNKYVY | 504   | 204   |

|                         |       |                         |       |       |
|-------------------------|-------|-------------------------|-------|-------|
| >KIT-N567K-\ EEINGNNYVY | 466   | >KIT-N567K-r EEINGNKYVY | 1073  | 607   |
| >KIT-N567K-\ EEINGNNY   | 70    | >KIT-N567K-r EEINGNKY   | 80    | 10    |
| >KIT-N567K-\ EEINGNNYV  | 488   | >KIT-N567K-r EEINGNKYV  | 197   | 291   |
| >KIT-N567K-\ EEINGNNYVY | 180   | >KIT-N567K-r EEINGNKYVY | 442   | 262   |
| >KIT-N567K-\ EEINGNNYVY | 190   | >KIT-N567K-r EEINGNKYVY | 159   | 31    |
| >KIT-N567K-\ EEINGNNYV  | 74    | >KIT-N567K-r EEINGNKYV  | 115   | 41    |
| >KIT-N567K-\ EEINGNNYVY | 97    | >KIT-N567K-r EEINGNKYVY | 135   | 38    |
| >KIT-N567K-\ EEINGNNYV  | 305   | >KIT-N567K-r EEINGNKYV  | 789   | 484   |
| >KIT-N567K-\ EEINGNNYVY | 63    | >KIT-N567K-r EEINGNKYVY | 102   | 39    |
| >KIT-N567K-\ VEEINGNNYV | 328   | >KIT-N567K-r VEEINGNKYV | 166   | 162   |
| >KIT-N567K-\ VEEINGNNYV | 94    | >KIT-N567K-r VEEINGNKYV | 76    | 18    |
| >KIT-N567K-\ VEEINGNNYV | 377   | >KIT-N567K-r VEEINGNKYV | 364   | 13    |
| >KIT-N567K-\ VVEEINGNNY | 217   | >KIT-N567K-r VVEEINGNKY | 1233  | 1016  |
| >KIT-N567K-\ VVEEINGNNY | 87    | >KIT-N567K-r VVEEINGNKY | 427   | 340   |
| >KIT-N567K-\ VVEEINGNNY | 121   | >KIT-N567K-r VVEEINGNKY | 171   | 50    |
| >KIT-N567K-\ VVEEINGNNY | 35    | >KIT-N567K-r VVEEINGNKY | 61    | 26    |
| >KIT-N567K-\ VVEEINGNN  | 27999 | >KIT-N567K-r VVEEINGNK  | 400   | 27599 |
| >KIT-N567K-\ VVEEINGNNY | 316   | >KIT-N567K-r VVEEINGNKY | 267   | 49    |
| >KIT-N567K-\ VVEEINGNN  | 27242 | >KIT-N567K-r VVEEINGNK  | 276   | 26966 |
| >KIT-N567K-\ VVEEINGNNY | 167   | >KIT-N567K-r VVEEINGNKY | 974   | 807   |
| >KIT-N567K-\ VVEEINGNNY | 178   | >KIT-N567K-r VVEEINGNKY | 636   | 458   |
| >KIT-N567K-\ KVVEEINGNN | 29410 | >KIT-N567K-r KVVEEINGNK | 468   | 28942 |
| >KIT-N567K-\ KVVEEINGNN | 35649 | >KIT-N567K-r KVVEEINGNK | 466   | 35183 |
| >KIT-N567K-\ KVVEEINGNN | 31    | >KIT-N567K-r KVVEEINGNK | 54    | 23    |
| >KIT-N567K-\ KVVEEINGNN | 61    | >KIT-N567K-r KVVEEINGNK | 480   | 419   |
| >KIT-N567K-\ KVVEEINGNN | 11488 | >KIT-N567K-r KVVEEINGNK | 99    | 11389 |
| >KIT-N567K-\ KVVEEINGNN | 114   | >KIT-N567K-r KVVEEINGNK | 86    | 28    |
| >KIT-N567K-\ KVVEEINGNN | 114   | >KIT-N567K-r KVVEEINGNK | 431   | 317   |
| >KIT-N567K-\ KVVEEINGNN | 100   | >KIT-N567K-r KVVEEINGNK | 95    | 5     |
| >KIT-N567S-\ NYVYIDPTQL | 150   | >KIT-N567S-r SYVYIDPTQL | 27    | 123   |
| >KIT-N567S-\ NYVYIDPTQL | 163   | >KIT-N567S-r SYVYIDPTQL | 63    | 100   |
| >KIT-N567S-\ NNYVYIDPTC | 602   | >KIT-N567S-r NSYVYIDPTQ | 358   | 244   |
| >KIT-N567S-\ NNYVYIDPTC | 19539 | >KIT-N567S-r NSYVYIDPTQ | 68    | 19471 |
| >KIT-N567S-\ INGNNYVYI  | 163   | >KIT-N567S-r INGNSYVYI  | 15535 | 15372 |
| >KIT-N567S-\ INGNNYVYI  | 141   | >KIT-N567S-r INGNSYVYI  | 303   | 162   |
| >KIT-N567S-\ INGNNYVY   | 382   | >KIT-N567S-r INGNSYVY   | 469   | 87    |
| >KIT-N567S-\ INGNNYVY   | 256   | >KIT-N567S-r INGNSYVY   | 356   | 100   |
| >KIT-N567S-\ INGNNYVY   | 1137  | >KIT-N567S-r INGNSYVY   | 462   | 675   |
| >KIT-N567S-\ INGNNYVY   | 1070  | >KIT-N567S-r INGNSYVY   | 486   | 584   |
| >KIT-N567S-\ EINGNNYV   | 299   | >KIT-N567S-r EINGNSYV   | 401   | 102   |
| >KIT-N567S-\ EINGNNYV   | 1089  | >KIT-N567S-r EINGNSYV   | 356   | 733   |
| >KIT-N567S-\ EINGNNYV   | 64    | >KIT-N567S-r EINGNSYV   | 34    | 30    |
| >KIT-N567S-\ EINGNNYVYI | 229   | >KIT-N567S-r EINGNSYVYI | 219   | 10    |



|                         |      |                         |      |     |
|-------------------------|------|-------------------------|------|-----|
| >KIT-N567S-\ EINGNNYV   | 442  | >KIT-N567S-r EINGNSYV   | 207  | 235 |
| >KIT-N567S-\ EINGNNYV   | 41   | >KIT-N567S-r EINGNSYV   | 20   | 21  |
| >KIT-N567S-\ EINGNNYVYI | 257  | >KIT-N567S-r EINGNSYVYI | 204  | 53  |
| >KIT-N567S-\ EINGNNYV   | 34   | >KIT-N567S-r EINGNSYV   | 17   | 17  |
| >KIT-N567S-\ EINGNNYVY  | 203  | >KIT-N567S-r EINGNSYVY  | 70   | 133 |
| >KIT-N567S-\ EINGNNYVY  | 17   | >KIT-N567S-r EINGNSYVY  | 26   | 9   |
| >KIT-N567S-\ EINGNNYVY  | 425  | >KIT-N567S-r EINGNSYVY  | 1044 | 619 |
| >KIT-N567S-\ EINGNNYVY  | 218  | >KIT-N567S-r EINGNSYVY  | 108  | 110 |
| >KIT-N567S-\ EINGNNYVY  | 70   | >KIT-N567S-r EINGNSYVY  | 93   | 23  |
| >KIT-N567S-\ EINGNNYVY  | 340  | >KIT-N567S-r EINGNSYVY  | 379  | 39  |
| >KIT-N567S-\ EINGNNYV   | 8    | >KIT-N567S-r EINGNSYV   | 8    | 0   |
| >KIT-N567S-\ EINGNNYVYI | 101  | >KIT-N567S-r EINGNSYVYI | 86   | 15  |
| >KIT-N567S-\ EINGNNYV   | 11   | >KIT-N567S-r EINGNSYV   | 11   | 0   |
| >KIT-N567S-\ EINGNNYVYI | 36   | >KIT-N567S-r EINGNSYVYI | 32   | 4   |
| >KIT-N567S-\ EINGNNYVY  | 515  | >KIT-N567S-r EINGNSYVY  | 205  | 310 |
| >KIT-N567S-\ EINGNNYVY  | 168  | >KIT-N567S-r EINGNSYVY  | 84   | 84  |
| >KIT-N567S-\ EINGNNYVY  | 1173 | >KIT-N567S-r EINGNSYVY  | 233  | 940 |
| >KIT-N567S-\ EINGNNYVY  | 81   | >KIT-N567S-r EINGNSYVY  | 61   | 20  |
| >KIT-N567S-\ EEINGNNY   | 611  | >KIT-N567S-r EEINGNSY   | 197  | 414 |
| >KIT-N567S-\ EEINGNNYVY | 76   | >KIT-N567S-r EEINGNSYVY | 71   | 5   |
| >KIT-N567S-\ EEINGNNY   | 230  | >KIT-N567S-r EEINGNSY   | 266  | 36  |
| >KIT-N567S-\ EEINGNNYVY | 179  | >KIT-N567S-r EEINGNSYVY | 179  | 0   |
| >KIT-N567S-\ EEINGNNY   | 19   | >KIT-N567S-r EEINGNSY   | 32   | 13  |
| >KIT-N567S-\ EEINGNNYVY | 134  | >KIT-N567S-r EEINGNSYVY | 295  | 161 |
| >KIT-N567S-\ EEINGNNYVY | 328  | >KIT-N567S-r EEINGNSYVY | 548  | 220 |
| >KIT-N567S-\ EEINGNNYV  | 241  | >KIT-N567S-r EEINGNSYV  | 364  | 123 |
| >KIT-N567S-\ EEINGNNYVY | 766  | >KIT-N567S-r EEINGNSYVY | 343  | 423 |
| >KIT-N567S-\ EEINGNNY   | 278  | >KIT-N567S-r EEINGNSY   | 77   | 201 |
| >KIT-N567S-\ EEINGNNYVY | 322  | >KIT-N567S-r EEINGNSYVY | 256  | 66  |
| >KIT-N567S-\ EEINGNNYV  | 234  | >KIT-N567S-r EEINGNSYV  | 180  | 54  |
| >KIT-N567S-\ EEINGNNYVY | 59   | >KIT-N567S-r EEINGNSYVY | 49   | 10  |
| >KIT-N567S-\ EEINGNNYVY | 300  | >KIT-N567S-r EEINGNSYVY | 288  | 12  |
| >KIT-N567S-\ EEINGNNYVY | 466  | >KIT-N567S-r EEINGNSYVY | 762  | 296 |
| >KIT-N567S-\ EEINGNNY   | 70   | >KIT-N567S-r EEINGNSY   | 66   | 4   |
| >KIT-N567S-\ EEINGNNYV  | 488  | >KIT-N567S-r EEINGNSYV  | 336  | 152 |
| >KIT-N567S-\ EEINGNNYVY | 180  | >KIT-N567S-r EEINGNSYVY | 334  | 154 |
| >KIT-N567S-\ EEINGNNYVY | 190  | >KIT-N567S-r EEINGNSYVY | 142  | 48  |
| >KIT-N567S-\ EEINGNNYV  | 74   | >KIT-N567S-r EEINGNSYV  | 73   | 1   |
| >KIT-N567S-\ EEINGNNYVY | 97   | >KIT-N567S-r EEINGNSYVY | 73   | 24  |
| >KIT-N567S-\ EEINGNNYV  | 305  | >KIT-N567S-r EEINGNSYV  | 176  | 129 |
| >KIT-N567S-\ EEINGNNYVY | 63   | >KIT-N567S-r EEINGNSYVY | 52   | 11  |
| >KIT-N567S-\ VEEINGNNYV | 328  | >KIT-N567S-r VEEINGNSYV | 327  | 1   |
| >KIT-N567S-\ VEEINGNNY  | 821  | >KIT-N567S-r VEEINGNSY  | 159  | 662 |

|                         |       |                          |      |       |
|-------------------------|-------|--------------------------|------|-------|
| >KIT-N567S-1 VEEINGNNYV | 94    | >KIT-N567S-r VEEINGNSYV  | 66   | 28    |
| >KIT-N567S-1 VEEINGNNYV | 377   | >KIT-N567S-r VEEINGNSYV  | 236  | 141   |
| >KIT-N567S-1 VVEEINGNNY | 217   | >KIT-N567S-r VVEEINGNSY  | 331  | 114   |
| >KIT-N567S-1 VVEEINGNNY | 1025  | >KIT-N567S-r VVEEINGNSY  | 447  | 578   |
| >KIT-N567S-1 VVEEINGNNY | 87    | >KIT-N567S-r VVEEINGNSY  | 95   | 8     |
| >KIT-N567S-1 VVEEINGNNY | 121   | >KIT-N567S-r VVEEINGNSY  | 69   | 52    |
| >KIT-N567S-1 VVEEINGNNY | 35    | >KIT-N567S-r VVEEINGNSY  | 21   | 14    |
| >KIT-N567S-1 VVEEINGNNY | 316   | >KIT-N567S-r VVEEINGNSY  | 432  | 116   |
| >KIT-N567S-1 VVEEINGNNY | 167   | >KIT-N567S-r VVEEINGNSY  | 199  | 32    |
| >KIT-N567S-1 VVEEINGNNY | 178   | >KIT-N567S-r VVEEINGNSY  | 498  | 320   |
| >KIT-N567S-1 KVVEEINGNM | 2548  | >KIT-N567S-r KVVEEINGNS  | 375  | 2173  |
| >KIT-N567S-1 KVVEEINGNM | 31    | >KIT-N567S-r KVVEEINGNS  | 34   | 3     |
| >KIT-N567S-1 KVVEEINGNM | 61    | >KIT-N567S-r KVVEEINGNS  | 82   | 21    |
| >KIT-N567S-1 KVVEEINGNM | 114   | >KIT-N567S-r KVVEEINGNS  | 51   | 63    |
| >KIT-N567S-1 KVVEEINGNM | 114   | >KIT-N567S-r KVVEEINGNS  | 321  | 207   |
| >KIT-N567S-1 KVVEEINGNM | 1251  | >KIT-N567S-r KVVEEINGNS  | 257  | 994   |
| >KIT-N567S-1 KVVEEINGNM | 100   | >KIT-N567S-r KVVEEINGNS  | 76   | 24    |
| >KIT-N567S-1 KVVEEINGNM | 1540  | >KIT-N567S-r KVVEEINGNS  | 287  | 1253  |
| >KIT-N655K-1 NLLGACTI   | 240   | >KIT-N655K-r KLLGACTI    | 29   | 211   |
| >KIT-N655K-1 NLLGACTI   | 343   | >KIT-N655K-r KLLGACTI    | 214  | 129   |
| >KIT-N655K-1 NLLGACTI   | 262   | >KIT-N655K-r KLLGACTI    | 90   | 172   |
| >KIT-N655K-1 NLLGACTI   | 160   | >KIT-N655K-r KLLGACTI    | 28   | 132   |
| >KIT-N655K-1 NLLGACTI   | 19    | >KIT-N655K-r KLLGACTI    | 5    | 14    |
| >KIT-N655K-1 NLLGACTI   | 35    | >KIT-N655K-r KLLGACTI    | 13   | 22    |
| >KIT-N655K-1 NLLGACTI   | 30    | >KIT-N655K-r KLLGACTI    | 8    | 22    |
| >KIT-N655K-1 NLLGACTI   | 16    | >KIT-N655K-r KLLGACTI    | 9    | 7     |
| >KIT-N655K-1 NLLGACTI   | 15    | >KIT-N655K-r KLLGACTI    | 6    | 9     |
| >KIT-N655K-1 NLLGACTI   | 681   | >KIT-N655K-r KLLGACTI    | 12   | 669   |
| >KIT-N655K-1 NLLGACTI   | 305   | >KIT-N655K-r KLLGACTI    | 5482 | 5177  |
| >KIT-N655K-1 VNLLGACTI  | 473   | >KIT-N655K-r VKLLGACTI   | 257  | 216   |
| >KIT-N655K-1 VNLLGACTI  | 5613  | >KIT-N655K-r VKLLGACTI   | 221  | 5392  |
| >KIT-N655K-1 SYLGNHMNI\ | 26316 | >KIT-N655K-r SYLGNHMNI\  | 230  | 26086 |
| >KIT-N655K-1 SYLGNHMNI\ | 614   | >KIT-N655K-r SYLGNHMNI\  | 288  | 326   |
| >KIT-N655K-1 SYLGNHMNI\ | 6438  | >KIT-N655K-r SYLGNHMNI\  | 14   | 6424  |
| >KIT-N655K-1 SYLGNHMNI\ | 5663  | >KIT-N655K-r SYLGNHMNI\  | 80   | 5583  |
| >KIT-N655K-1 IVNLLGACTI | 4188  | >KIT-N655K-r IVKLLGACTI  | 246  | 3942  |
| >KIT-N655K-1 IVNLLGACTI | 387   | >KIT-N655K-r IVKLLGACTI  | 2317 | 1930  |
| >KIT-N655K-1 IVNLLGACTI | 356   | >KIT-N655K-r IVKLLGACTI  | 1575 | 1219  |
| >KIT-N655K-1 NIVNLLGA   | 188   | >KIT-N655K-r NIVKLLGA    | 359  | 171   |
| >KIT-N655K-1 NIVNLLGACT | 305   | >KIT-N655K-r NIVKLLGACTI | 585  | 280   |
| >KIT-N655K-1 NIVNLLGA   | 135   | >KIT-N655K-r NIVKLLGA    | 302  | 167   |
| >KIT-N655K-1 NIVNLLGACT | 224   | >KIT-N655K-r NIVKLLGACTI | 458  | 234   |
| >KIT-N655K-1 NIVNLLGACT | 347   | >KIT-N655K-r NIVKLLGACTI | 442  | 95    |

|                         |       |                         |      |       |
|-------------------------|-------|-------------------------|------|-------|
| >KIT-N655K-1 HMNIVNLL   | 410   | >KIT-N655K-1 HMNIVKLL   | 2796 | 2386  |
| >KIT-N655K-1 HMNIVNLL   | 11    | >KIT-N655K-1 HMNIVKLL   | 83   | 72    |
| >KIT-N655K-1 HMNIVNLLG/ | 450   | >KIT-N655K-1 HMNIVKLLG/ | 948  | 498   |
| >KIT-N655K-1 HMNIVNLL   | 48    | >KIT-N655K-1 HMNIVKLL   | 153  | 105   |
| >KIT-N655K-1 HMNIVNLLG/ | 160   | >KIT-N655K-1 HMNIVKLLG/ | 234  | 74    |
| >KIT-N655K-1 HMNIVNLL   | 41    | >KIT-N655K-1 HMNIVKLL   | 66   | 25    |
| >KIT-N655K-1 HMNIVNLLG/ | 74    | >KIT-N655K-1 HMNIVKLLG/ | 132  | 58    |
| >KIT-N655K-1 HMNIVNLLG/ | 346   | >KIT-N655K-1 HMNIVKLLG/ | 530  | 184   |
| >KIT-N655K-1 HMNIVNLL   | 187   | >KIT-N655K-1 HMNIVKLL   | 1063 | 876   |
| >KIT-N655K-1 HMNIVNLLG/ | 469   | >KIT-N655K-1 HMNIVKLLG/ | 1381 | 912   |
| >KIT-N655K-1 HMNIVNLL   | 116   | >KIT-N655K-1 HMNIVKLL   | 302  | 186   |
| >KIT-N655K-1 HMNIVNLLG/ | 270   | >KIT-N655K-1 HMNIVKLLG/ | 387  | 117   |
| >KIT-N655K-1 HMNIVNLL   | 45    | >KIT-N655K-1 HMNIVKLL   | 81   | 36    |
| >KIT-N655K-1 HMNIVNLLG/ | 158   | >KIT-N655K-1 HMNIVKLLG/ | 233  | 75    |
| >KIT-N655K-1 HMNIVNLL   | 434   | >KIT-N655K-1 HMNIVKLL   | 1980 | 1546  |
| >KIT-N655K-1 NHMNIVNLL  | 1025  | >KIT-N655K-1 NHMNIVKLL  | 271  | 754   |
| >KIT-N655K-1 NHMNIVNLL  | 242   | >KIT-N655K-1 NHMNIVKLL  | 3045 | 2803  |
| >KIT-N655K-1 NHMNIVNL   | 361   | >KIT-N655K-1 NHMNIVKL   | 179  | 182   |
| >KIT-N655K-1 NHMNIVNLL  | 171   | >KIT-N655K-1 NHMNIVKLL  | 281  | 110   |
| >KIT-N655K-1 NHMNIVNL   | 15    | >KIT-N655K-1 NHMNIVKL   | 26   | 11    |
| >KIT-N655K-1 NHMNIVNLL  | 9     | >KIT-N655K-1 NHMNIVKLL  | 29   | 20    |
| >KIT-N655K-1 YLGNHMNIV/ | 23    | >KIT-N655K-1 YLGNHMNIV/ | 29   | 6     |
| >KIT-N655K-1 YLGNHMNIV/ | 6     | >KIT-N655K-1 YLGNHMNIV/ | 8    | 2     |
| >KIT-N655K-1 YLGNHMNIV/ | 10    | >KIT-N655K-1 YLGNHMNIV/ | 15   | 5     |
| >KIT-N655K-1 YLGNHMNIV/ | 111   | >KIT-N655K-1 YLGNHMNIV/ | 158  | 47    |
| >KIT-N655K-1 YLGNHMNIV/ | 5     | >KIT-N655K-1 YLGNHMNIV/ | 5    | 0     |
| >KIT-N655K-1 YLGNHMNIV/ | 4     | >KIT-N655K-1 YLGNHMNIV/ | 5    | 1     |
| >KIT-N655K-1 YLGNHMNIV/ | 12    | >KIT-N655K-1 YLGNHMNIV/ | 12   | 0     |
| >KIT-N655K-1 YLGNHMNIV/ | 20    | >KIT-N655K-1 YLGNHMNIV/ | 26   | 6     |
| >KIT-N655K-1 YLGNHMNIV/ | 2     | >KIT-N655K-1 YLGNHMNIV/ | 2    | 0     |
| >KIT-N655K-1 YLGNHMNIV/ | 21126 | >KIT-N655K-1 YLGNHMNIV/ | 62   | 21064 |
| >KIT-N655K-1 YLGNHMNIV/ | 35138 | >KIT-N655K-1 YLGNHMNIV/ | 252  | 34886 |
| >KIT-N655K-1 YLGNHMNIV/ | 33153 | >KIT-N655K-1 YLGNHMNIV/ | 414  | 32739 |
| >KIT-N819Y-1 KNDSNYVVK  | 5007  | >KIT-N819Y-1 KYDSNYVVK  | 267  | 4740  |
| >KIT-N819Y-1 KNDSNYVVK  | 5817  | >KIT-N819Y-1 KYDSNYVVK  | 361  | 5456  |
| >KIT-N819Y-1 KNDSNYVVK  | 4126  | >KIT-N819Y-1 KYDSNYVVK  | 68   | 4058  |
| >KIT-N819Y-1 KNDSNYVV   | 28064 | >KIT-N819Y-1 KYDSNYVV   | 441  | 27623 |
| >KIT-N819Y-1 IKNDSNYV   | 840   | >KIT-N819Y-1 IKYDSNYV   | 360  | 480   |
| >KIT-N819Y-1 IKNDSNYV   | 1263  | >KIT-N819Y-1 IKYDSNYV   | 242  | 1021  |
| >KIT-N819Y-1 IKNDSNYV   | 878   | >KIT-N819Y-1 IKYDSNYV   | 90   | 788   |
| >KIT-N819Y-1 IKNDSNYVV  | 1670  | >KIT-N819Y-1 IKYDSNYVV  | 205  | 1465  |
| >KIT-N819Y-1 IKNDSNYV   | 1522  | >KIT-N819Y-1 IKYDSNYV   | 292  | 1230  |
| >KIT-N819Y-1 IKNDSNYV   | 63    | >KIT-N819Y-1 IKYDSNYV   | 12   | 51    |

|                         |       |                          |      |       |
|-------------------------|-------|--------------------------|------|-------|
| >KIT-N819Y-1 IKNDSNYVV  | 26    | >KIT-N819Y-r IKYDSNYVV   | 6    | 20    |
| >KIT-N819Y-1 IKNDSNYVVK | 83    | >KIT-N819Y-r IKYDSNYVVK  | 16   | 67    |
| >KIT-N819Y-1 DIKNDSNY   | 198   | >KIT-N819Y-r DIKYDSNY    | 401  | 203   |
| >KIT-N819Y-1 DIKNDSNY   | 243   | >KIT-N819Y-r DIKYDSNY    | 97   | 146   |
| >KIT-N819Y-1 DIKNDSNY   | 462   | >KIT-N819Y-r DIKYDSNY    | 358  | 104   |
| >KIT-N819Y-1 DIKNDSNYVV | 291   | >KIT-N819Y-r DIKYDSNYVV  | 129  | 162   |
| >KIT-N819Y-1 DIKNDSNYV  | 512   | >KIT-N819Y-r DIKYDSNYV   | 166  | 346   |
| >KIT-N819Y-1 RDIKNDSNYV | 394   | >KIT-N819Y-r RDIKYDSNYV  | 187  | 207   |
| >KIT-N819Y-1 RDIKNDSNY  | 1575  | >KIT-N819Y-r RDIKYDSNY   | 327  | 1248  |
| >KIT-N819Y-1 RDIKNDSNYV | 709   | >KIT-N819Y-r RDIKYDSNYV  | 273  | 436   |
| >KIT-N819Y-1 RDIKNDSNYV | 299   | >KIT-N819Y-r RDIKYDSNYV  | 192  | 107   |
| >KIT-N819Y-1 RDIKNDSNYV | 87    | >KIT-N819Y-r RDIKYDSNYV  | 54   | 33    |
| >KIT-N819Y-1 ARDIKNDSNY | 420   | >KIT-N819Y-r ARDIKYDSNY  | 640  | 220   |
| >KIT-N819Y-1 ARDIKNDSNY | 200   | >KIT-N819Y-r ARDIKYDSNY  | 215  | 15    |
| >KIT-N819Y-1 LARDIKNDSN | 1395  | >KIT-N819Y-r LARDIKYDSN' | 474  | 921   |
| >KIT-N819Y-1 LARDIKNDSN | 241   | >KIT-N819Y-r LARDIKYDSN' | 202  | 39    |
| >KIT-N819Y-1 LARDIKNDSN | 387   | >KIT-N819Y-r LARDIKYDSN' | 309  | 78    |
| >KIT-N819Y-1 LARDIKNDSN | 317   | >KIT-N819Y-r LARDIKYDSN' | 268  | 49    |
| >KIT-N819Y-1 LARDIKNDSN | 30    | >KIT-N819Y-r LARDIKYDSN' | 18   | 12    |
| >KIT-N819Y-1 LARDIKNDSN | 176   | >KIT-N819Y-r LARDIKYDSN' | 115  | 61    |
| >KIT-N819Y-1 LARDIKNDSN | 46    | >KIT-N819Y-r LARDIKYDSN' | 43   | 3     |
| >KIT-N819Y-1 GLARDIKN   | 23296 | >KIT-N819Y-r GLARDIKY    | 165  | 23131 |
| >KIT-N819Y-1 GLARDIKN   | 30946 | >KIT-N819Y-r GLARDIKY    | 391  | 30555 |
| >KIT-N819Y-1 GLARDIKN   | 37475 | >KIT-N819Y-r GLARDIKY    | 453  | 37022 |
| >KIT-N819Y-1 FGLARDIKN  | 23439 | >KIT-N819Y-r FGLARDIKY   | 311  | 23128 |
| >KIT-N819Y-1 FGLARDIKN  | 23773 | >KIT-N819Y-r FGLARDIKY   | 281  | 23492 |
| >KIT-N819Y-1 FGLARDIKN  | 20102 | >KIT-N819Y-r FGLARDIKY   | 132  | 19970 |
| >KIT-N819Y-1 DFGLARDIKN | 29183 | >KIT-N819Y-r DFGLARDIKY  | 144  | 29039 |
| >KIT-N822D-1 NYVVKGNAR  | 253   | >KIT-N822D-r DYVVKGNAR   | 1320 | 1067  |
| >KIT-N822D-1 NYVVKGNAR  | 309   | >KIT-N822D-r DYVVKGNAR   | 2878 | 2569  |
| >KIT-N822D-1 NYVVKGNAR  | 170   | >KIT-N822D-r DYVVKGNAR   | 35   | 135   |
| >KIT-N822D-1 NYVVKGNAR  | 384   | >KIT-N822D-r DYVVKGNAR   | 1681 | 1297  |
| >KIT-N822D-1 SNYVVKGNAI | 129   | >KIT-N822D-r SDYVVKGNAI  | 2574 | 2445  |
| >KIT-N822D-1 DSNYVVKGN, | 76    | >KIT-N822D-r DSDYVVKGN,  | 292  | 216   |
| >KIT-N822D-1 DSNYVVKGN, | 27    | >KIT-N822D-r DSDYVVKGN,  | 161  | 134   |
| >KIT-N822D-1 IKNDSNYV   | 63    | >KIT-N822D-r IKNDSYDV    | 277  | 214   |
| >KIT-N822D-1 IKNDSNYVV  | 26    | >KIT-N822D-r IKNDSYDVV   | 113  | 87    |
| >KIT-N822D-1 IKNDSNYVVK | 83    | >KIT-N822D-r IKNDSYDVVK  | 182  | 99    |
| >KIT-N822D-1 DIKNDSNY   | 198   | >KIT-N822D-r DIKNDSYD    | 469  | 271   |
| >KIT-N822D-1 DIKNDSNY   | 243   | >KIT-N822D-r DIKNDSYD    | 625  | 382   |
| >KIT-N822D-1 DIKNDSNY   | 462   | >KIT-N822D-r DIKNDSYD    | 543  | 81    |
| >KIT-N822D-1 DIKNDSNYVV | 291   | >KIT-N822D-r DIKNDSYDVV  | 382  | 91    |
| >KIT-N822D-1 RDIKNDSNYV | 394   | >KIT-N822D-r RDIKNDSYDV  | 580  | 186   |

|                        |      |                        |     |      |
|------------------------|------|------------------------|-----|------|
| >KIT-N822D- RDIKNSNYV  | 299  | >KIT-N822D- RDIKNSDYV  | 200 | 99   |
| >KIT-N822D- RDIKNSNYV  | 87   | >KIT-N822D- RDIKNSDYV  | 86  | 1    |
| >KIT-N822D- ARDIKNSNY  | 420  | >KIT-N822D- ARDIKNSDY  | 582 | 162  |
| >KIT-N822D- ARDIKNSNY  | 200  | >KIT-N822D- ARDIKNSDY  | 296 | 96   |
| >KIT-N822D- LARDIKNSN  | 241  | >KIT-N822D- LARDIKNSD  | 229 | 12   |
| >KIT-N822D- LARDIKNSN  | 387  | >KIT-N822D- LARDIKNSD  | 470 | 83   |
| >KIT-N822D- LARDIKNSN  | 317  | >KIT-N822D- LARDIKNSD  | 526 | 209  |
| >KIT-N822D- LARDIKNSN  | 30   | >KIT-N822D- LARDIKNSD  | 99  | 69   |
| >KIT-N822D- LARDIKNSN  | 176  | >KIT-N822D- LARDIKNSD  | 170 | 6    |
| >KIT-N822D- LARDIKNSN  | 46   | >KIT-N822D- LARDIKNSD  | 86  | 40   |
| >KIT-N822H- NYVVKGNAR  | 253  | >KIT-N822H- HYVVKGNAR  | 343 | 90   |
| >KIT-N822H- NYVVKGNAR  | 309  | >KIT-N822H- HYVVKGNAR  | 88  | 221  |
| >KIT-N822H- NYVVKGNAR  | 559  | >KIT-N822H- HYVVKGNAR  | 46  | 513  |
| >KIT-N822H- NYVVKGNAR  | 170  | >KIT-N822H- HYVVKGNAR  | 79  | 91   |
| >KIT-N822H- NYVVKGNAR  | 384  | >KIT-N822H- HYVVKGNAR  | 53  | 331  |
| >KIT-N822H- SNYVVKGNAI | 129  | >KIT-N822H- SHYVVKGNAI | 354 | 225  |
| >KIT-N822H- SNYVVKGNAI | 3607 | >KIT-N822H- SHYVVKGNAI | 105 | 3502 |
| >KIT-N822H- SNYVVKGNAI | 7589 | >KIT-N822H- SHYVVKGNAI | 164 | 7425 |
| >KIT-N822H- DSNYVVKGN, | 76   | >KIT-N822H- DSHYVVKGN, | 79  | 3    |
| >KIT-N822H- DSNYVVKGN, | 27   | >KIT-N822H- DSHYVVKGN, | 28  | 1    |
| >KIT-N822H- IKNSNYV    | 878  | >KIT-N822H- IKNSHYV    | 191 | 687  |
| >KIT-N822H- IKNSNYV    | 1522 | >KIT-N822H- IKNSHYV    | 223 | 1299 |
| >KIT-N822H- IKNSNYV    | 63   | >KIT-N822H- IKNSHYV    | 68  | 5    |
| >KIT-N822H- IKNSNYVV   | 26   | >KIT-N822H- IKNSHYVV   | 18  | 8    |
| >KIT-N822H- IKNSNYVVK  | 83   | >KIT-N822H- IKNSHYVVK  | 69  | 14   |
| >KIT-N822H- DIKNSNYV   | 1669 | >KIT-N822H- DIKNSHYV   | 126 | 1543 |
| >KIT-N822H- DIKNSNY    | 198  | >KIT-N822H- DIKNSHY    | 209 | 11   |
| >KIT-N822H- DIKNSNY    | 243  | >KIT-N822H- DIKNSHY    | 121 | 122  |
| >KIT-N822H- DIKNSNY    | 462  | >KIT-N822H- DIKNSHY    | 257 | 205  |
| >KIT-N822H- DIKNSNYVV  | 291  | >KIT-N822H- DIKNSHYVV  | 295 | 4    |
| >KIT-N822H- DIKNSNYV   | 512  | >KIT-N822H- DIKNSHYV   | 274 | 238  |
| >KIT-N822H- DIKNSNYV   | 677  | >KIT-N822H- DIKNSHYV   | 111 | 566  |
| >KIT-N822H- RDIKNSNY   | 3689 | >KIT-N822H- RDIKNSHY   | 463 | 3226 |
| >KIT-N822H- RDIKNSNYV  | 394  | >KIT-N822H- RDIKNSHYV  | 404 | 10   |
| >KIT-N822H- RDIKNSNYV  | 299  | >KIT-N822H- RDIKNSHYV  | 229 | 70   |
| >KIT-N822H- RDIKNSNYV  | 87   | >KIT-N822H- RDIKNSHYV  | 125 | 38   |
| >KIT-N822H- ARDIKNSNY  | 420  | >KIT-N822H- ARDIKNSHY  | 595 | 175  |
| >KIT-N822H- ARDIKNSNY  | 200  | >KIT-N822H- ARDIKNSHY  | 166 | 34   |
| >KIT-N822H- LARDIKNSN  | 241  | >KIT-N822H- LARDIKNSH  | 165 | 76   |
| >KIT-N822H- LARDIKNSN  | 387  | >KIT-N822H- LARDIKNSH  | 113 | 274  |
| >KIT-N822H- LARDIKNSN  | 317  | >KIT-N822H- LARDIKNSH  | 389 | 72   |
| >KIT-N822H- LARDIKNSN  | 30   | >KIT-N822H- LARDIKNSH  | 36  | 6    |
| >KIT-N822H- LARDIKNSN  | 176  | >KIT-N822H- LARDIKNSH  | 338 | 162  |

|                         |       |                         |     |       |
|-------------------------|-------|-------------------------|-----|-------|
| >KIT-N822H-LARDIKNDSN   | 46    | >KIT-N822H-LARDIKNSH    | 56  | 10    |
| >KIT-N822I-v NYVVKGNA   | 253   | >KIT-N822I-n IYVVKGNA   | 324 | 71    |
| >KIT-N822I-v NYVVKGNA   | 309   | >KIT-N822I-n IYVVKGNA   | 250 | 59    |
| >KIT-N822I-v NYVVKGNA   | 559   | >KIT-N822I-n IYVVKGNA   | 93  | 466   |
| >KIT-N822I-v NYVVKGNA   | 170   | >KIT-N822I-n IYVVKGNA   | 214 | 44    |
| >KIT-N822I-v NYVVKGNA   | 384   | >KIT-N822I-n IYVVKGNA   | 216 | 168   |
| >KIT-N822I-v SNYVVKGNA  | 129   | >KIT-N822I-n SIYVVKGNA  | 130 | 1     |
| >KIT-N822I-v SNYVVKGNA  | 14005 | >KIT-N822I-n SIYVVKGNA  | 114 | 13891 |
| >KIT-N822I-v SNYVVKGNA  | 18285 | >KIT-N822I-n SIYVVKGNA  | 369 | 17916 |
| >KIT-N822I-v SNYVVKGNA  | 26692 | >KIT-N822I-n SIYVVKGNA  | 140 | 26552 |
| >KIT-N822I-v SNYVVKGNA  | 18862 | >KIT-N822I-n SIYVVKGNA  | 447 | 18415 |
| >KIT-N822I-v SNYVVKGNA  | 684   | >KIT-N822I-n SIYVVKGNA  | 41  | 643   |
| >KIT-N822I-v SNYVVKGNA  | 1059  | >KIT-N822I-n SIYVVKGNA  | 254 | 805   |
| >KIT-N822I-v SNYVVKGNA  | 1257  | >KIT-N822I-n SIYVVKGNA  | 16  | 1241  |
| >KIT-N822I-v GLARDIKNDS | 6882  | >KIT-N822I-n GLARDIKNDS | 43  | 6839  |
| >KIT-N822I-v GLARDIKNDS | 16992 | >KIT-N822I-n GLARDIKNDS | 40  | 16952 |
| >KIT-N822I-v GLARDIKNDS | 14777 | >KIT-N822I-n GLARDIKNDS | 104 | 14673 |
| >KIT-N822I-v GLARDIKNDS | 18226 | >KIT-N822I-n GLARDIKNDS | 65  | 18161 |
| >KIT-N822I-v GLARDIKNDS | 18864 | >KIT-N822I-n GLARDIKNDS | 119 | 18745 |
| >KIT-N822I-v GLARDIKNDS | 15198 | >KIT-N822I-n GLARDIKNDS | 53  | 15145 |
| >KIT-N822I-v DSNYVVKGNA | 76    | >KIT-N822I-n DSIVVVKGNA | 68  | 8     |
| >KIT-N822I-v DSNYVVKGNA | 27    | >KIT-N822I-n DSIVVVKGNA | 12  | 15    |
| >KIT-N822I-v IKNDSNYV   | 878   | >KIT-N822I-n IKNDSIYV   | 155 | 723   |
| >KIT-N822I-v IKNDSNYVV  | 1670  | >KIT-N822I-n IKNDSIYVV  | 207 | 1463  |
| >KIT-N822I-v IKNDSNYV   | 1522  | >KIT-N822I-n IKNDSIYV   | 444 | 1078  |
| >KIT-N822I-v IKNDSNYVV  | 2771  | >KIT-N822I-n IKNDSIYVV  | 480 | 2291  |
| >KIT-N822I-v IKNDSNYV   | 63    | >KIT-N822I-n IKNDSIYV   | 66  | 3     |
| >KIT-N822I-v IKNDSNYVV  | 26    | >KIT-N822I-n IKNDSIYVV  | 28  | 2     |
| >KIT-N822I-v IKNDSNYVVK | 83    | >KIT-N822I-n IKNDSIYVVK | 113 | 30    |
| >KIT-N822I-v DIKNDSNY   | 198   | >KIT-N822I-n DIKNDSIY   | 230 | 32    |
| >KIT-N822I-v DIKNDSNY   | 243   | >KIT-N822I-n DIKNDSIY   | 516 | 273   |
| >KIT-N822I-v DIKNDSNY   | 462   | >KIT-N822I-n DIKNDSIY   | 438 | 24    |
| >KIT-N822I-v DIKNDSNYVV | 291   | >KIT-N822I-n DIKNDSIYVV | 203 | 88    |
| >KIT-N822I-v DIKNDSNYV  | 677   | >KIT-N822I-n DIKNDSIYV  | 353 | 324   |
| >KIT-N822I-v RDIKNDSNYV | 394   | >KIT-N822I-n RDIKNDSIYV | 344 | 50    |
| >KIT-N822I-v RDIKNDSNY  | 1575  | >KIT-N822I-n RDIKNDSIY  | 317 | 1258  |
| >KIT-N822I-v RDIKNDSN   | 36270 | >KIT-N822I-n RDIKNDSI   | 212 | 36058 |
| >KIT-N822I-v RDIKNDSNYV | 709   | >KIT-N822I-n RDIKNDSIYV | 352 | 357   |
| >KIT-N822I-v RDIKNDSN   | 25311 | >KIT-N822I-n RDIKNDSI   | 121 | 25190 |
| >KIT-N822I-v RDIKNDSNYV | 299   | >KIT-N822I-n RDIKNDSIYV | 299 | 0     |
| >KIT-N822I-v RDIKNDSNYV | 87    | >KIT-N822I-n RDIKNDSIYV | 62  | 25    |
| >KIT-N822I-v ARDIKNDSNY | 420   | >KIT-N822I-n ARDIKNDSIY | 589 | 169   |
| >KIT-N822I-v ARDIKNDSNY | 200   | >KIT-N822I-n ARDIKNDSIY | 145 | 55    |

|                          |       |                          |      |       |
|--------------------------|-------|--------------------------|------|-------|
| >KIT-N822I-v LARDIKNDSN  | 241   | >KIT-N822I-n LARDIKNDSIY | 156  | 85    |
| >KIT-N822I-v LARDIKNDSN  | 387   | >KIT-N822I-n LARDIKNDSIY | 309  | 78    |
| >KIT-N822I-v LARDIKNDSN  | 317   | >KIT-N822I-n LARDIKNDSIY | 277  | 40    |
| >KIT-N822I-v LARDIKNDSN  | 30    | >KIT-N822I-n LARDIKNDSIY | 66   | 36    |
| >KIT-N822I-v LARDIKNDSN  | 176   | >KIT-N822I-n LARDIKNDSIY | 93   | 83    |
| >KIT-N822I-v LARDIKNDSN  | 46    | >KIT-N822I-n LARDIKNDSIY | 17   | 29    |
| >KIT-N822K-1 NYVVKG NAR  | 253   | >KIT-N822K-f KYVVKG NARI | 63   | 190   |
| >KIT-N822K-1 NYVVKG NAR  | 309   | >KIT-N822K-f KYVVKG NARI | 118  | 191   |
| >KIT-N822K-1 NYVVKG NAR  | 559   | >KIT-N822K-f KYVVKG NAR  | 19   | 540   |
| >KIT-N822K-1 NYVVKG NAR  | 170   | >KIT-N822K-f KYVVKG NAR  | 4193 | 4023  |
| >KIT-N822K-1 NYVVKG NAR  | 384   | >KIT-N822K-f KYVVKG NAR  | 29   | 355   |
| >KIT-N822K-1 SNYVVKGNAI  | 129   | >KIT-N822K-f SKYVVKGNAF  | 957  | 828   |
| >KIT-N822K-1 SNYVVKGNAI  | 10253 | >KIT-N822K-f SKYVVKGNAF  | 398  | 9855  |
| >KIT-N822K-1 SNYVVKGNAI  | 8357  | >KIT-N822K-f SKYVVKGNAF  | 288  | 8069  |
| >KIT-N822K-1 DSNYVVKG N. | 76    | >KIT-N822K-f DSKYVVKG N. | 46   | 30    |
| >KIT-N822K-1 DSNYVVKG N. | 27    | >KIT-N822K-f DSKYVVKG N. | 55   | 28    |
| >KIT-N822K-1 IKNDSNYV    | 63    | >KIT-N822K-f IKNDSKYV    | 92   | 29    |
| >KIT-N822K-1 IKNDSNYVV   | 26    | >KIT-N822K-f IKNDSKYVV   | 72   | 46    |
| >KIT-N822K-1 IKNDSNYVVK  | 83    | >KIT-N822K-f IKNDSKYVVK  | 219  | 136   |
| >KIT-N822K-1 DIKNDSNY    | 198   | >KIT-N822K-f DIKNDSKY    | 163  | 35    |
| >KIT-N822K-1 DIKNDSNY    | 243   | >KIT-N822K-f DIKNDSKY    | 572  | 329   |
| >KIT-N822K-1 DIKNDSNY    | 462   | >KIT-N822K-f DIKNDSKY    | 536  | 74    |
| >KIT-N822K-1 DIKNDSNYVV  | 291   | >KIT-N822K-f DIKNDSKYVV  | 703  | 412   |
| >KIT-N822K-1 RDIKNDSNYV  | 394   | >KIT-N822K-f RDIKNDSKYV  | 752  | 358   |
| >KIT-N822K-1 RDIKNDSNYV  | 299   | >KIT-N822K-f RDIKNDSKYV  | 446  | 147   |
| >KIT-N822K-1 RDIKNDSNYV  | 87    | >KIT-N822K-f RDIKNDSKYV  | 91   | 4     |
| >KIT-N822K-1 ARDIKNDSNY  | 420   | >KIT-N822K-f ARDIKNDSKY  | 375  | 45    |
| >KIT-N822K-1 ARDIKNDSNY  | 200   | >KIT-N822K-f ARDIKNDSKY  | 141  | 59    |
| >KIT-N822K-1 LARDIKNDSN  | 8488  | >KIT-N822K-f LARDIKNDSK  | 29   | 8459  |
| >KIT-N822K-1 LARDIKNDSN  | 241   | >KIT-N822K-f LARDIKNDSK  | 176  | 65    |
| >KIT-N822K-1 LARDIKNDSN  | 387   | >KIT-N822K-f LARDIKNDSK  | 740  | 353   |
| >KIT-N822K-1 LARDIKNDSN  | 317   | >KIT-N822K-f LARDIKNDSK  | 722  | 405   |
| >KIT-N822K-1 LARDIKNDSN  | 30    | >KIT-N822K-f LARDIKNDSK  | 30   | 0     |
| >KIT-N822K-1 LARDIKNDSN  | 176   | >KIT-N822K-f LARDIKNDSK  | 160  | 16    |
| >KIT-N822K-1 LARDIKNDSN  | 46    | >KIT-N822K-f LARDIKNDSK  | 26   | 20    |
| >KIT-N822S-1 NYVVKG NAR  | 253   | >KIT-N822S-r SYVVKG NARI | 40   | 213   |
| >KIT-N822S-1 NYVVKG NAR  | 309   | >KIT-N822S-r SYVVKG NARI | 117  | 192   |
| >KIT-N822S-1 NYVVKG NAR  | 559   | >KIT-N822S-r SYVVKG NAR  | 88   | 471   |
| >KIT-N822S-1 NYVVKG NAR  | 170   | >KIT-N822S-r SYVVKG NAR  | 965  | 795   |
| >KIT-N822S-1 NYVVKG NAR  | 384   | >KIT-N822S-r SYVVKG NAR  | 286  | 98    |
| >KIT-N822S-1 SNYVVKGNAI  | 129   | >KIT-N822S-r SSYVVKGNAF  | 80   | 49    |
| >KIT-N822S-1 SNYVVKGNAI  | 18862 | >KIT-N822S-r SSYVVKGNAF  | 370  | 18492 |
| >KIT-N822S-1 SNYVVKGNAI  | 684   | >KIT-N822S-r SSYVVKGNAF  | 32   | 652   |

|                          |       |                          |     |       |
|--------------------------|-------|--------------------------|-----|-------|
| >KIT-N822S-\ SNYVVKGNAI  | 1059  | >KIT-N822S-r SSYVVKGNAF  | 484 | 575   |
| >KIT-N822S-\ SNYVVKGNAI  | 1257  | >KIT-N822S-r SSYVVKGNAF  | 15  | 1242  |
| >KIT-N822S-\ SNYVVKGNAI  | 11148 | >KIT-N822S-r SSYVVKGNAF  | 20  | 11128 |
| >KIT-N822S-\ SNYVVKGNAI  | 1436  | >KIT-N822S-r SSYVVKGNAF  | 60  | 1376  |
| >KIT-N822S-\ SNYVVKGNAI  | 1344  | >KIT-N822S-r SSYVVKGNAF  | 92  | 1252  |
| >KIT-N822S-\ DSNYVVKGN.  | 76    | >KIT-N822S-r DSSYVVKGN/  | 92  | 16    |
| >KIT-N822S-\ DSNYVVKGN.  | 27    | >KIT-N822S-r DSSYVVKGN/  | 17  | 10    |
| >KIT-N822S-\ IKNDSNYV    | 878   | >KIT-N822S-r IKNDSSYV    | 442 | 436   |
| >KIT-N822S-\ IKNDSNYV    | 63    | >KIT-N822S-r IKNDSSYV    | 36  | 27    |
| >KIT-N822S-\ IKNDSNYVV   | 26    | >KIT-N822S-r IKNDSSYVV   | 18  | 8     |
| >KIT-N822S-\ IKNDSNYVVK  | 83    | >KIT-N822S-r IKNDSSYVVK  | 52  | 31    |
| >KIT-N822S-\ DIKNDSDNY   | 2232  | >KIT-N822S-r DIKNDSSY    | 202 | 2030  |
| >KIT-N822S-\ DIKNDSDNY   | 198   | >KIT-N822S-r DIKNDSSY    | 55  | 143   |
| >KIT-N822S-\ DIKNDSDNY   | 243   | >KIT-N822S-r DIKNDSSY    | 285 | 42    |
| >KIT-N822S-\ DIKNDSDNY   | 462   | >KIT-N822S-r DIKNDSSY    | 216 | 246   |
| >KIT-N822S-\ DIKNDSDNYVV | 291   | >KIT-N822S-r DIKNDSSYVV  | 214 | 77    |
| >KIT-N822S-\ DIKNDSDNY   | 694   | >KIT-N822S-r DIKNDSSY    | 341 | 353   |
| >KIT-N822S-\ RDIKNDSDNY  | 3689  | >KIT-N822S-r RDIKNDSSY   | 490 | 3199  |
| >KIT-N822S-\ RDIKNDSDNYV | 394   | >KIT-N822S-r RDIKNDSSYV  | 346 | 48    |
| >KIT-N822S-\ RDIKNDSDNYV | 709   | >KIT-N822S-r RDIKNDSSYV  | 459 | 250   |
| >KIT-N822S-\ RDIKNDSDNYV | 299   | >KIT-N822S-r RDIKNDSSYV  | 309 | 10    |
| >KIT-N822S-\ RDIKNDSDNYV | 87    | >KIT-N822S-r RDIKNDSSYV  | 75  | 12    |
| >KIT-N822S-\ ARDIKNDSDNY | 420   | >KIT-N822S-r ARDIKNDSSY  | 550 | 130   |
| >KIT-N822S-\ ARDIKNDSDNY | 200   | >KIT-N822S-r ARDIKNDSSY  | 251 | 51    |
| >KIT-N822S-\ LARDIKNDSDN | 241   | >KIT-N822S-r LARDIKNDSS' | 106 | 135   |
| >KIT-N822S-\ LARDIKNDSDN | 387   | >KIT-N822S-r LARDIKNDSS' | 120 | 267   |
| >KIT-N822S-\ LARDIKNDSDN | 317   | >KIT-N822S-r LARDIKNDSS' | 155 | 162   |
| >KIT-N822S-\ LARDIKNDSDN | 30    | >KIT-N822S-r LARDIKNDSS' | 29  | 1     |
| >KIT-N822S-\ LARDIKNDSDN | 176   | >KIT-N822S-r LARDIKNDSS' | 75  | 101   |
| >KIT-N822S-\ LARDIKNDSDN | 46    | >KIT-N822S-r LARDIKNDSS' | 24  | 22    |
| >KIT-N822T-\ NYVVKGNAR   | 253   | >KIT-N822T-r TYVVKGNARI  | 161 | 92    |
| >KIT-N822T-\ NYVVKGNAR   | 309   | >KIT-N822T-r TYVVKGNARI  | 174 | 135   |
| >KIT-N822T-\ NYVVKGNAR   | 559   | >KIT-N822T-r TYVVKGNAR   | 118 | 441   |
| >KIT-N822T-\ NYVVKGNAR   | 170   | >KIT-N822T-r TYVVKGNAR   | 264 | 94    |
| >KIT-N822T-\ NYVVKGNAR   | 384   | >KIT-N822T-r TYVVKGNAR   | 327 | 57    |
| >KIT-N822T-\ SNYVVKGNAI  | 129   | >KIT-N822T-r STYVVKGNAF  | 153 | 24    |
| >KIT-N822T-\ SNYVVKGNAI  | 18862 | >KIT-N822T-r STYVVKGNAF  | 151 | 18711 |
| >KIT-N822T-\ SNYVVKGNAI  | 684   | >KIT-N822T-r STYVVKGNAF  | 40  | 644   |
| >KIT-N822T-\ SNYVVKGNAI  | 1059  | >KIT-N822T-r STYVVKGNAF  | 350 | 709   |
| >KIT-N822T-\ SNYVVKGNAI  | 1257  | >KIT-N822T-r STYVVKGNAF  | 7   | 1250  |
| >KIT-N822T-\ SNYVVKGNA   | 10860 | >KIT-N822T-r STYVVKGNA   | 222 | 10638 |
| >KIT-N822T-\ SNYVVKGNAI  | 7352  | >KIT-N822T-r STYVVKGNAF  | 87  | 7265  |
| >KIT-N822T-\ SNYVVKGNAI  | 12536 | >KIT-N822T-r STYVVKGNAF  | 279 | 12257 |



|                         |       |                         |     |       |
|-------------------------|-------|-------------------------|-----|-------|
| >KIT-N822T-1 SNYVVKGNAI | 11148 | >KIT-N822T-r STYVVKGNAF | 14  | 11134 |
| >KIT-N822T-1 SNYVVKGNAI | 1436  | >KIT-N822T-r STYVVKGNAF | 21  | 1415  |
| >KIT-N822T-1 SNYVVKGNAI | 8927  | >KIT-N822T-r STYVVKGNAF | 433 | 8494  |
| >KIT-N822T-1 SNYVVKGNAI | 1344  | >KIT-N822T-r STYVVKGNAF | 80  | 1264  |
| >KIT-N822T-1 DSNYVVKGN. | 76    | >KIT-N822T-r DSTYVVKGN/ | 66  | 10    |
| >KIT-N822T-1 DSNYVVKGN. | 27    | >KIT-N822T-r DSTYVVKGN/ | 19  | 8     |
| >KIT-N822T-1 IKNDSNYV   | 63    | >KIT-N822T-r IKNDSTYV   | 43  | 20    |
| >KIT-N822T-1 IKNDSNYVV  | 26    | >KIT-N822T-r IKNDSTYVV  | 23  | 3     |
| >KIT-N822T-1 IKNDSNYVVK | 83    | >KIT-N822T-r IKNDSTYVVK | 64  | 19    |
| >KIT-N822T-1 DIKNDSNY   | 2232  | >KIT-N822T-r DIKNDSTY   | 497 | 1735  |
| >KIT-N822T-1 DIKNDSNY   | 198   | >KIT-N822T-r DIKNDSTY   | 198 | 0     |
| >KIT-N822T-1 DIKNDSNY   | 243   | >KIT-N822T-r DIKNDSTY   | 415 | 172   |
| >KIT-N822T-1 DIKNDSNY   | 462   | >KIT-N822T-r DIKNDSTY   | 380 | 82    |
| >KIT-N822T-1 DIKNDSNYVV | 291   | >KIT-N822T-r DIKNDSTYVV | 278 | 13    |
| >KIT-N822T-1 DIKNDSNY   | 694   | >KIT-N822T-r DIKNDSTY   | 387 | 307   |
| >KIT-N822T-1 RDIKNDSNYV | 394   | >KIT-N822T-r RDIKNDSTYV | 417 | 23    |
| >KIT-N822T-1 RDIKNDSNY  | 1575  | >KIT-N822T-r RDIKNDSTY  | 224 | 1351  |
| >KIT-N822T-1 RDIKNDSNYV | 709   | >KIT-N822T-r RDIKNDSTYV | 312 | 397   |
| >KIT-N822T-1 RDIKNDSNYV | 299   | >KIT-N822T-r RDIKNDSTYV | 264 | 35    |
| >KIT-N822T-1 RDIKNDSNYV | 87    | >KIT-N822T-r RDIKNDSTYV | 56  | 31    |
| >KIT-N822T-1 ARDIKNDSNY | 420   | >KIT-N822T-r ARDIKNDSTY | 735 | 315   |
| >KIT-N822T-1 ARDIKNDSNY | 200   | >KIT-N822T-r ARDIKNDSTY | 187 | 13    |
| >KIT-N822T-1 LARDIKNDSN | 241   | >KIT-N822T-r LARDIKNDST | 140 | 101   |
| >KIT-N822T-1 LARDIKNDSN | 387   | >KIT-N822T-r LARDIKNDST | 160 | 227   |
| >KIT-N822T-1 LARDIKNDSN | 317   | >KIT-N822T-r LARDIKNDST | 224 | 93    |
| >KIT-N822T-1 LARDIKNDSN | 30    | >KIT-N822T-r LARDIKNDST | 19  | 11    |
| >KIT-N822T-1 LARDIKNDSN | 176   | >KIT-N822T-r LARDIKNDST | 43  | 133   |
| >KIT-N822T-1 LARDIKNDSN | 46    | >KIT-N822T-r LARDIKNDST | 15  | 31    |
| >KIT-N822Y-1 NYVVKGNAR  | 253   | >KIT-N822Y-r YVVKGNARI  | 200 | 53    |
| >KIT-N822Y-1 NYVVKGNAR  | 309   | >KIT-N822Y-r YVVKGNARI  | 22  | 287   |
| >KIT-N822Y-1 NYVVKGNAR  | 559   | >KIT-N822Y-r YVVKGNAR   | 218 | 341   |
| >KIT-N822Y-1 NYVVKGNAR  | 170   | >KIT-N822Y-r YVVKGNAR   | 150 | 20    |
| >KIT-N822Y-1 NYVVKGNAR  | 384   | >KIT-N822Y-r YVVKGNAR   | 221 | 163   |
| >KIT-N822Y-1 SNYVVKGNAI | 129   | >KIT-N822Y-r SYVVKGNAF  | 200 | 71    |
| >KIT-N822Y-1 SNYVVKGNAI | 8370  | >KIT-N822Y-r SYVVKGNAF  | 9   | 8361  |
| >KIT-N822Y-1 SNYVVKGNAI | 24228 | >KIT-N822Y-r SYVVKGNAF  | 263 | 23965 |
| >KIT-N822Y-1 SNYVVKGNAI | 23949 | >KIT-N822Y-r SYVVKGNAF  | 34  | 23915 |
| >KIT-N822Y-1 SNYVVKGNAI | 684   | >KIT-N822Y-r SYVVKGNAF  | 51  | 633   |
| >KIT-N822Y-1 SNYVVKGNAI | 1059  | >KIT-N822Y-r SYVVKGNAF  | 95  | 964   |
| >KIT-N822Y-1 SNYVVKGNAI | 4098  | >KIT-N822Y-r SYVVKGNAF  | 119 | 3979  |
| >KIT-N822Y-1 GLARDIKNDS | 27798 | >KIT-N822Y-r GLARDIKNDS | 194 | 27604 |
| >KIT-N822Y-1 GLARDIKNDS | 19813 | >KIT-N822Y-r GLARDIKNDS | 360 | 19453 |
| >KIT-N822Y-1 DSNYVVKGN. | 76    | >KIT-N822Y-r DSYVVKGN/  | 35  | 41    |

|                         |       |                         |     |       |
|-------------------------|-------|-------------------------|-----|-------|
| >KIT-N822Y-1 DSNYVVKGN. | 27    | >KIT-N822Y-r DSYVVKGN/  | 10  | 17    |
| >KIT-N822Y-1 IKNDSNYV   | 840   | >KIT-N822Y-r IKNDSYYV   | 483 | 357   |
| >KIT-N822Y-1 IKNDSNYV   | 878   | >KIT-N822Y-r IKNDSYYV   | 177 | 701   |
| >KIT-N822Y-1 IKNDSNYV   | 63    | >KIT-N822Y-r IKNDSYYV   | 56  | 7     |
| >KIT-N822Y-1 IKNDSNYVV  | 26    | >KIT-N822Y-r IKNDSYYVV  | 14  | 12    |
| >KIT-N822Y-1 IKNDSNYVVK | 83    | >KIT-N822Y-r IKNDSYYVVK | 49  | 34    |
| >KIT-N822Y-1 DIKNSNY    | 198   | >KIT-N822Y-r DIKNSYY    | 70  | 128   |
| >KIT-N822Y-1 DIKNSNY    | 243   | >KIT-N822Y-r DIKNSYY    | 153 | 90    |
| >KIT-N822Y-1 DIKNSNY    | 462   | >KIT-N822Y-r DIKNSYY    | 148 | 314   |
| >KIT-N822Y-1 DIKNSNYVV  | 291   | >KIT-N822Y-r DIKNSYYVV  | 233 | 58    |
| >KIT-N822Y-1 DIKNSNYV   | 512   | >KIT-N822Y-r DIKNSYYV   | 102 | 410   |
| >KIT-N822Y-1 DIKNSNYV   | 677   | >KIT-N822Y-r DIKNSYYV   | 249 | 428   |
| >KIT-N822Y-1 RDIKNSNYV  | 394   | >KIT-N822Y-r RDIKNSYYV  | 344 | 50    |
| >KIT-N822Y-1 RDIKNSNYV  | 299   | >KIT-N822Y-r RDIKNSYYV  | 125 | 174   |
| >KIT-N822Y-1 RDIKNSNYV  | 87    | >KIT-N822Y-r RDIKNSYYV  | 74  | 13    |
| >KIT-N822Y-1 ARDIKNSNY  | 420   | >KIT-N822Y-r ARDIKNSYY  | 258 | 162   |
| >KIT-N822Y-1 ARDIKNSNY  | 200   | >KIT-N822Y-r ARDIKNSYY  | 141 | 59    |
| >KIT-N822Y-1 LARDIKNSN  | 1395  | >KIT-N822Y-r LARDIKNSY' | 322 | 1073  |
| >KIT-N822Y-1 LARDIKNSN  | 241   | >KIT-N822Y-r LARDIKNSY' | 80  | 161   |
| >KIT-N822Y-1 LARDIKNSN  | 19492 | >KIT-N822Y-r LARDIKNSY  | 275 | 19217 |
| >KIT-N822Y-1 LARDIKNSN  | 387   | >KIT-N822Y-r LARDIKNSY' | 240 | 147   |
| >KIT-N822Y-1 LARDIKNSN  | 317   | >KIT-N822Y-r LARDIKNSY' | 404 | 87    |
| >KIT-N822Y-1 LARDIKNSN  | 17631 | >KIT-N822Y-r LARDIKNSY  | 99  | 17532 |
| >KIT-N822Y-1 LARDIKNSN  | 30    | >KIT-N822Y-r LARDIKNSY' | 35  | 5     |
| >KIT-N822Y-1 LARDIKNSN  | 176   | >KIT-N822Y-r LARDIKNSY' | 200 | 24    |
| >KIT-N822Y-1 LARDIKNSN  | 46    | >KIT-N822Y-r LARDIKNSY' | 21  | 25    |
| >KIT-P31L-wi PGEPSPPSI  | 2178  | >KIT-P31L-mi LGEPSPPSI  | 51  | 2127  |
| >KIT-P31L-wi SPGEPSPPSI | 25774 | >KIT-P31L-mi SLGEPSPPSI | 285 | 25489 |
| >KIT-P31L-wi SPGEPSPPSI | 18969 | >KIT-P31L-mi SLGEPSPPSI | 99  | 18870 |
| >KIT-P31L-wi SPGEPSPPSI | 13460 | >KIT-P31L-mi SLGEPSPPSI | 43  | 13417 |
| >KIT-P31L-wi SPGEPSPPS  | 24756 | >KIT-P31L-mi SLGEPSPPS  | 81  | 24675 |
| >KIT-P31L-wi SPGEPSPPSI | 9021  | >KIT-P31L-mi SLGEPSPPSI | 3   | 9018  |
| >KIT-P31L-wi SPGEPSPPSI | 18533 | >KIT-P31L-mi SLGEPSPPSI | 15  | 18518 |
| >KIT-P31L-wi SPGEPSPPS  | 22868 | >KIT-P31L-mi SLGEPSPPS  | 357 | 22511 |
| >KIT-P31L-wi SPGEPSPPSI | 15227 | >KIT-P31L-mi SLGEPSPPSI | 7   | 15220 |
| >KIT-P31L-wi SPGEPSPPSI | 23344 | >KIT-P31L-mi SLGEPSPPSI | 22  | 23322 |
| >KIT-P31L-wi SPGEPSPPSI | 24755 | >KIT-P31L-mi SLGEPSPPSI | 7   | 24748 |
| >KIT-P31L-wi SPGEPSPPSI | 367   | >KIT-P31L-mi SLGEPSPPSI | 115 | 252   |
| >KIT-P31L-wi QTGSSQPSVS | 10388 | >KIT-P31L-mi QTGSSQPSVS | 386 | 10002 |
| >KIT-P31L-wi QTGSSQPSVS | 14368 | >KIT-P31L-mi QTGSSQPSVS | 340 | 14028 |
| >KIT-P31L-wi QTGSSQPSVS | 19664 | >KIT-P31L-mi QTGSSQPSVS | 77  | 19587 |
| >KIT-P31L-wi QTGSSQPSVS | 23375 | >KIT-P31L-mi QTGSSQPSVS | 490 | 22885 |
| >KIT-P31L-wi QTGSSQPSVS | 24602 | >KIT-P31L-mi QTGSSQPSVS | 470 | 24132 |

|                         |       |                          |       |       |
|-------------------------|-------|--------------------------|-------|-------|
| >KIT-P31L-wi VSPGEPSPPS | 918   | >KIT-P31L-mi VSLGEPSPPSI | 21    | 897   |
| >KIT-P31L-wi VSPGEPSPPS | 12002 | >KIT-P31L-mi VSLGEPSPPSI | 307   | 11695 |
| >KIT-P31L-wi VSPGEPSPPS | 22    | >KIT-P31L-mi VSLGEPSPPSI | 6971  | 6949  |
| >KIT-P31L-wi VSPGEPSPPS | 82    | >KIT-P31L-mi VSLGEPSPPSI | 44    | 38    |
| >KIT-P31L-wi SSQPSVSP   | 7748  | >KIT-P31L-mi SSQPSVSL    | 429   | 7319  |
| >KIT-P31L-wi SSQPSVSP   | 10327 | >KIT-P31L-mi SSQPSVSL    | 8     | 10319 |
| >KIT-P31L-wi SSQPSVSP   | 29980 | >KIT-P31L-mi SSQPSVSL    | 407   | 29573 |
| >KIT-P31L-wi SSQPSVSP   | 11220 | >KIT-P31L-mi SSQPSVSL    | 52    | 11168 |
| >KIT-P31L-wi GSSQPSVSP  | 16946 | >KIT-P31L-mi GSSQPSVSL   | 27    | 16919 |
| >KIT-P31L-wi GSSQPSVSP  | 10461 | >KIT-P31L-mi GSSQPSVSL   | 129   | 10332 |
| >KIT-P31L-wi GSSQPSVSP  | 22979 | >KIT-P31L-mi GSSQPSVSL   | 270   | 22709 |
| >KIT-P31L-wi TGSSQPSVSP | 19883 | >KIT-P31L-mi TGSSQPSVSL  | 416   | 19467 |
| >KIT-P456S-v LPVDVQTL   | 192   | >KIT-P456S-n LSVDVQTL    | 21127 | 20935 |
| >KIT-P456S-v LPVDVQTL   | 15328 | >KIT-P456S-n LSVDVQTL    | 16    | 15312 |
| >KIT-P456S-v LPVDVQTL   | 34    | >KIT-P456S-n LSVDVQTL    | 3870  | 3836  |
| >KIT-P456S-v LPVDVQTL   | 241   | >KIT-P456S-n LSVDVQTL    | 15625 | 15384 |
| >KIT-P456S-v LPVDVQTL   | 56    | >KIT-P456S-n LSVDVQTL    | 11256 | 11200 |
| >KIT-P456S-v LPVDVQTLN  | 262   | >KIT-P456S-n LSVDVQTLN   | 22508 | 22246 |
| >KIT-P456S-v LPVDVQTLNS | 372   | >KIT-P456S-n LSVDVQTLNS  | 26282 | 25910 |
| >KIT-P456S-v LPVDVQTLNS | 47    | >KIT-P456S-n LSVDVQTLNS  | 14488 | 14441 |
| >KIT-P456S-v LPVDVQTL   | 19679 | >KIT-P456S-n LSVDVQTL    | 164   | 19515 |
| >KIT-P456S-v LPVDVQTL   | 113   | >KIT-P456S-n LSVDVQTL    | 12645 | 12532 |
| >KIT-P456S-v LPVDVQTL   | 114   | >KIT-P456S-n LSVDVQTL    | 13995 | 13881 |
| >KIT-P456S-v VLPVDVQTL  | 1242  | >KIT-P456S-n VLSVDVQTL   | 471   | 771   |
| >KIT-P456S-v VLPVDVQTL  | 365   | >KIT-P456S-n VLSVDVQTL   | 35    | 330   |
| >KIT-P456S-v VLPVDVQTL  | 168   | >KIT-P456S-n VLSVDVQTL   | 57    | 111   |
| >KIT-P456S-v VLPVDVQTL  | 16    | >KIT-P456S-n VLSVDVQTL   | 18    | 2     |
| >KIT-P456S-v VLPVDVQTL  | 40    | >KIT-P456S-n VLSVDVQTL   | 17    | 23    |
| >KIT-P456S-v VLPVDVQTL  | 29    | >KIT-P456S-n VLSVDVQTL   | 22    | 7     |
| >KIT-P456S-v VLPVDVQTL  | 50    | >KIT-P456S-n VLSVDVQTL   | 11    | 39    |
| >KIT-P456S-v VLPVDVQT   | 129   | >KIT-P456S-n VLSVDVQT    | 77    | 52    |
| >KIT-P456S-v VLPVDVQTL  | 4     | >KIT-P456S-n VLSVDVQTL   | 3     | 1     |
| >KIT-P456S-v SVLPVDVQTL | 680   | >KIT-P456S-n SVLSVDVQTL  | 233   | 447   |
| >KIT-P456S-v SVLPVDVQTL | 705   | >KIT-P456S-n SVLSVDVQTL  | 388   | 317   |
| >KIT-P456S-v SVLPVDVQTL | 431   | >KIT-P456S-n SVLSVDVQTL  | 642   | 211   |
| >KIT-P456S-v SVLPVDVQTL | 56    | >KIT-P456S-n SVLSVDVQTL  | 67    | 11    |
| >KIT-P456S-v SVLPVDVQTL | 279   | >KIT-P456S-n SVLSVDVQTL  | 388   | 109   |
| >KIT-P456S-v SVLPVDVQTL | 38    | >KIT-P456S-n SVLSVDVQTL  | 46    | 8     |
| >KIT-P456S-v SVLPVDVQTL | 55    | >KIT-P456S-n SVLSVDVQTL  | 146   | 91    |
| >KIT-P456S-v SVLPVDVQTL | 200   | >KIT-P456S-n SVLSVDVQTL  | 118   | 82    |
| >KIT-P456S-v ASVLPVDVQT | 908   | >KIT-P456S-n ASVLSVDVQT  | 330   | 578   |
| >KIT-P456S-v ASVLPVDVQT | 197   | >KIT-P456S-n ASVLSVDVQT  | 335   | 138   |
| >KIT-P456S-v ASVLPVDVQT | 781   | >KIT-P456S-n ASVLSVDVQT  | 462   | 319   |

|                         |       |                         |     |       |
|-------------------------|-------|-------------------------|-----|-------|
| >KIT-P456S-v ASVLPVDVQT | 14    | >KIT-P456S-n ASVLSVDVQT | 8   | 6     |
| >KIT-P456S-v SASVLPVDV  | 922   | >KIT-P456S-n SASVLSVDV  | 418 | 504   |
| >KIT-P456S-v CSASVLPV   | 424   | >KIT-P456S-n CSASVLSV   | 453 | 29    |
| >KIT-P456S-v CSASVLPV   | 514   | >KIT-P456S-n CSASVLSV   | 497 | 17    |
| >KIT-P456S-v CSASVLPV   | 29    | >KIT-P456S-n CSASVLSV   | 53  | 24    |
| >KIT-P456S-v CSASVLPV   | 349   | >KIT-P456S-n CSASVLSV   | 131 | 218   |
| >KIT-P456S-v RCSASVLPV  | 221   | >KIT-P456S-n RCSASVLSV  | 492 | 271   |
| >KIT-P456S-v RCSASVLPV  | 424   | >KIT-P456S-n RCSASVLSV  | 474 | 50    |
| >KIT-P456S-v QRCSASVLPV | 202   | >KIT-P456S-n QRCSASVLSV | 229 | 27    |
| >KIT-P456S-v QRCSASVLPV | 319   | >KIT-P456S-n QRCSASVLSV | 578 | 259   |
| >KIT-P456S-v EQRCSASVLP | 165   | >KIT-P456S-n EQRCSASVLS | 245 | 80    |
| >KIT-P456S-v EQRCSASVLP | 16    | >KIT-P456S-n EQRCSASVLS | 16  | 0     |
| >KIT-P551L-v PMYEVQWK\  | 17    | >KIT-P551L-n LMYEVQWK\  | 6   | 11    |
| >KIT-P551L-v PMYEVQWK\  | 8027  | >KIT-P551L-n LMYEVQWK\  | 254 | 7773  |
| >KIT-P551L-v PMYEVQWK\  | 18    | >KIT-P551L-n LMYEVQWK\  | 3   | 15    |
| >KIT-P551L-v PMYEVQWK\  | 3112  | >KIT-P551L-n LMYEVQWK\  | 135 | 2977  |
| >KIT-P551L-v PMYEVQWK\  | 48    | >KIT-P551L-n LMYEVQWK\  | 4   | 44    |
| >KIT-P551L-v PMYEVQWK\  | 805   | >KIT-P551L-n LMYEVQWK\  | 40  | 765   |
| >KIT-P551L-v PMYEVQWK\  | 33    | >KIT-P551L-n LMYEVQWK\  | 4   | 29    |
| >KIT-P551L-v PMYEVQWK   | 510   | >KIT-P551L-n LMYEVQWK   | 26  | 484   |
| >KIT-P551L-v PMYEVQWK\  | 1     | >KIT-P551L-n LMYEVQWK\  | 1   | 0     |
| >KIT-P551L-v PMYEVQWK\  | 4     | >KIT-P551L-n LMYEVQWK\  | 2   | 2     |
| >KIT-P551L-v PMYEVQWK\  | 1490  | >KIT-P551L-n LMYEVQWK\  | 74  | 1416  |
| >KIT-P551L-v PMYEVQWK\  | 5     | >KIT-P551L-n LMYEVQWK\  | 2   | 3     |
| >KIT-P551L-v PMYEVQWK\  | 97    | >KIT-P551L-n LMYEVQWK\  | 6   | 91    |
| >KIT-P551L-v PMYEVQWK\  | 4     | >KIT-P551L-n LMYEVQWK\  | 3   | 1     |
| >KIT-P551L-v PMYEVQWK\  | 11    | >KIT-P551L-n LMYEVQWK\  | 5   | 6     |
| >KIT-P551L-v PMYEVQWK\  | 3     | >KIT-P551L-n LMYEVQWK\  | 2   | 1     |
| >KIT-P551L-v PMYEVQWK\  | 54    | >KIT-P551L-n LMYEVQWK\  | 9   | 45    |
| >KIT-P551L-v PMYEVQWK   | 1802  | >KIT-P551L-n LMYEVQWK   | 31  | 1771  |
| >KIT-P551L-v PMYEVQWK\  | 2     | >KIT-P551L-n LMYEVQWK\  | 1   | 1     |
| >KIT-P551L-v PMYEVQWK\  | 10    | >KIT-P551L-n LMYEVQWK\  | 3   | 7     |
| >KIT-P551L-v PMYEVQWK\  | 9551  | >KIT-P551L-n LMYEVQWK\  | 407 | 9144  |
| >KIT-P551L-v PMYEVQWK   | 129   | >KIT-P551L-n LMYEVQWK   | 34  | 95    |
| >KIT-P551L-v PMYEVQWK   | 1471  | >KIT-P551L-n LMYEVQWK   | 75  | 1396  |
| >KIT-P551L-v PMYEVQWK   | 5023  | >KIT-P551L-n LMYEVQWK   | 276 | 4747  |
| >KIT-P551L-v PMYEVQWK   | 3061  | >KIT-P551L-n LMYEVQWK   | 125 | 2936  |
| >KIT-P551L-v PMYEVQWK\  | 2625  | >KIT-P551L-n LMYEVQWK\  | 274 | 2351  |
| >KIT-P551L-v PMYEVQWK\  | 145   | >KIT-P551L-n LMYEVQWK\  | 14  | 131   |
| >KIT-P551L-v PMYEVQWK\  | 3758  | >KIT-P551L-n LMYEVQWK\  | 352 | 3406  |
| >KIT-P551L-v PMYEVQWK\  | 1327  | >KIT-P551L-n LMYEVQWK\  | 68  | 1259  |
| >KIT-P551L-v KPMYEVQWf  | 3851  | >KIT-P551L-n KLMYEVQWf  | 7   | 3844  |
| >KIT-P551L-v KPMYEVQWf  | 17953 | >KIT-P551L-n KLMYEVQWf  | 36  | 17917 |

|                          |       |                          |       |       |
|--------------------------|-------|--------------------------|-------|-------|
| >KIT-P551L-v KPMYEVQWf   | 6541  | >KIT-P551L-n KLMYEVQWk   | 12    | 6529  |
| >KIT-P551L-v KPMYEVQWf   | 19421 | >KIT-P551L-n KLMYEVQWk   | 30    | 19391 |
| >KIT-P551L-v KPMYEVQWf   | 12322 | >KIT-P551L-n KLMYEVQWk   | 41    | 12281 |
| >KIT-P551L-v KPMYEVQWf   | 13209 | >KIT-P551L-n KLMYEVQWk   | 13    | 13196 |
| >KIT-P551L-v KPMYEVQWf   | 2861  | >KIT-P551L-n KLMYEVQWk   | 54    | 2807  |
| >KIT-P551L-v KPMYEVQWf   | 8089  | >KIT-P551L-n KLMYEVQWk   | 44    | 8045  |
| >KIT-P551L-v KPMYEVQWf   | 4123  | >KIT-P551L-n KLMYEVQWk   | 2     | 4121  |
| >KIT-P551L-v KPMYEVQWf   | 17531 | >KIT-P551L-n KLMYEVQWk   | 9     | 17522 |
| >KIT-P551L-v KPMYEVQWf   | 5545  | >KIT-P551L-n KLMYEVQWk   | 3     | 5542  |
| >KIT-P551L-v KPMYEVQWf   | 16673 | >KIT-P551L-n KLMYEVQWk   | 12    | 16661 |
| >KIT-P551L-v KPMYEVQWf   | 5395  | >KIT-P551L-n KLMYEVQWk   | 6     | 5389  |
| >KIT-P551L-v KPMYEVQWf   | 20220 | >KIT-P551L-n KLMYEVQWk   | 25    | 20195 |
| >KIT-P551L-v KPMYEVQWf   | 9677  | >KIT-P551L-n KLMYEVQWk   | 2     | 9675  |
| >KIT-P551L-v KPMYEVQWf   | 18831 | >KIT-P551L-n KLMYEVQWk   | 15    | 18816 |
| >KIT-P551L-v KPMYEVQWf   | 15909 | >KIT-P551L-n KLMYEVQWk   | 2     | 15907 |
| >KIT-P551L-v KPMYEVQWf   | 27962 | >KIT-P551L-n KLMYEVQWk   | 13    | 27949 |
| >KIT-P551L-v KPMYEVQWf   | 11558 | >KIT-P551L-n KLMYEVQWk   | 50    | 11508 |
| >KIT-P551L-v KPMYEVQWf   | 8109  | >KIT-P551L-n KLMYEVQWk   | 116   | 7993  |
| >KIT-P551L-v KPMYEVQWf   | 12395 | >KIT-P551L-n KLMYEVQWk   | 204   | 12191 |
| >KIT-P551L-v KPMYEVQW    | 2056  | >KIT-P551L-n KLMYEVQW    | 13    | 2043  |
| >KIT-P551L-v KPMYEVQWf   | 9927  | >KIT-P551L-n KLMYEVQWk   | 125   | 9802  |
| >KIT-P551L-v KPMYEVQWf   | 157   | >KIT-P551L-n KLMYEVQWk   | 28027 | 27870 |
| >KIT-P551L-v KPMYEVQWf   | 136   | >KIT-P551L-n KLMYEVQWk   | 17712 | 17576 |
| >KIT-P551L-v KPMYEVQWf   | 2311  | >KIT-P551L-n KLMYEVQWk   | 305   | 2006  |
| >KIT-P551L-v KPMYEVQW    | 2672  | >KIT-P551L-n KLMYEVQW    | 97    | 2575  |
| >KIT-P551L-v KPMYEVQW    | 20    | >KIT-P551L-n KLMYEVQW    | 11512 | 11492 |
| >KIT-P551L-v KPMYEVQWf   | 68    | >KIT-P551L-n KLMYEVQWk   | 22698 | 22630 |
| >KIT-P551L-v KPMYEVQW    | 536   | >KIT-P551L-n KLMYEVQW    | 100   | 436   |
| >KIT-P551L-v KPMYEVQW    | 199   | >KIT-P551L-n KLMYEVQW    | 17    | 182   |
| >KIT-P551L-v KPMYEVQW    | 9     | >KIT-P551L-n KLMYEVQW    | 1922  | 1913  |
| >KIT-P551L-v MILTYKYLQKf | 7074  | >KIT-P551L-n MILTYKYLQKf | 284   | 6790  |
| >KIT-P551L-v MILTYKYLQKf | 19768 | >KIT-P551L-n MILTYKYLQKf | 52    | 19716 |
| >KIT-P551L-v MILTYKYLQKf | 9849  | >KIT-P551L-n MILTYKYLQKf | 53    | 9796  |
| >KIT-P551L-v MILTYKYLQKf | 10331 | >KIT-P551L-n MILTYKYLQKf | 88    | 10243 |
| >KIT-P551L-v MILTYKYLQKf | 11974 | >KIT-P551L-n MILTYKYLQKf | 32    | 11942 |
| >KIT-P551L-v MILTYKYLQKf | 22847 | >KIT-P551L-n MILTYKYLQKf | 302   | 22545 |
| >KIT-P551L-v MILTYKYLQKf | 21805 | >KIT-P551L-n MILTYKYLQKf | 24    | 21781 |
| >KIT-P551L-v MILTYKYLQKf | 15759 | >KIT-P551L-n MILTYKYLQKf | 213   | 15546 |
| >KIT-P551L-v MILTYKYLQKf | 8933  | >KIT-P551L-n MILTYKYLQKf | 141   | 8792  |
| >KIT-P551L-v QKPMYEVQV   | 1466  | >KIT-P551L-n QKLMYEVQV   | 127   | 1339  |
| >KIT-P551L-v QKPMYEVQV   | 2477  | >KIT-P551L-n QKLMYEVQV   | 302   | 2175  |
| >KIT-P551L-v QKPMYEVQV   | 2802  | >KIT-P551L-n QKLMYEVQV   | 169   | 2633  |
| >KIT-P551L-v LQKPMYEV    | 327   | >KIT-P551L-n LQKLMYEV    | 443   | 116   |

|                          |      |                          |      |      |
|--------------------------|------|--------------------------|------|------|
| >KIT-P551L-v LQKPMYEV    | 48   | >KIT-P551L-n LQKLMYEV    | 130  | 82   |
| >KIT-P551L-v LQKPMYEV    | 34   | >KIT-P551L-n LQKLMYEV    | 71   | 37   |
| >KIT-P551L-v LQKPMYEV    | 318  | >KIT-P551L-n LQKLMYEV    | 2979 | 2661 |
| >KIT-P551L-v LQKPMYEVQ   | 243  | >KIT-P551L-n LQKLMYEVQ'  | 523  | 280  |
| >KIT-P551L-v LQKPMYEVQ   | 415  | >KIT-P551L-n LQKLMYEVQ'  | 724  | 309  |
| >KIT-P551L-v LQKPMYEV    | 403  | >KIT-P551L-n LQKLMYEV    | 1080 | 677  |
| >KIT-P551L-v LQKPMYEVQ   | 230  | >KIT-P551L-n LQKLMYEVQ   | 758  | 528  |
| >KIT-P551L-v LQKPMYEVQ   | 247  | >KIT-P551L-n LQKLMYEVQ'  | 725  | 478  |
| >KIT-P551L-v LQKPMYEV    | 155  | >KIT-P551L-n LQKLMYEV    | 517  | 362  |
| >KIT-P551L-v LQKPMYEVQ   | 225  | >KIT-P551L-n LQKLMYEVQ'  | 539  | 314  |
| >KIT-P551L-v LQKPMYEVQ   | 168  | >KIT-P551L-n LQKLMYEVQ'  | 323  | 155  |
| >KIT-P551L-v LQKPMYEVQ   | 230  | >KIT-P551L-n LQKLMYEVQ'  | 380  | 150  |
| >KIT-P551L-v YLQKPMYEV   | 7    | >KIT-P551L-n YLQKLMYEV   | 6    | 1    |
| >KIT-P551L-v YLQKPMYEV   | 5    | >KIT-P551L-n YLQKLMYEV   | 2    | 3    |
| >KIT-P551L-v YLQKPMYEV   | 7    | >KIT-P551L-n YLQKLMYEV   | 5    | 2    |
| >KIT-P551L-v YLQKPMYEV   | 13   | >KIT-P551L-n YLQKLMYEV   | 10   | 3    |
| >KIT-P551L-v YLQKPMYEV   | 1    | >KIT-P551L-n YLQKLMYEV   | 2    | 1    |
| >KIT-P551L-v YLQKPMYEV   | 2    | >KIT-P551L-n YLQKLMYEV   | 2    | 0    |
| >KIT-P551L-v YLQKPMYEV   | 6    | >KIT-P551L-n YLQKLMYEV   | 6    | 0    |
| >KIT-P551L-v YLQKPMYEV   | 3    | >KIT-P551L-n YLQKLMYEV   | 3    | 0    |
| >KIT-P551L-v YLQKPMYEV   | 2    | >KIT-P551L-n YLQKLMYEV   | 2    | 0    |
| >KIT-P551L-v YLQKPMYEV(  | 77   | >KIT-P551L-n YLQKLMYEV(  | 136  | 59   |
| >KIT-P551L-v YLQKPMYEV   | 93   | >KIT-P551L-n YLQKLMYEV   | 168  | 75   |
| >KIT-P551L-v YLQKPMYEV   | 55   | >KIT-P551L-n YLQKLMYEV   | 136  | 81   |
| >KIT-P551L-v YLQKPMYEV(  | 124  | >KIT-P551L-n YLQKLMYEV(  | 252  | 128  |
| >KIT-P551L-v YLQKPMYEV(  | 721  | >KIT-P551L-n YLQKLMYEV(  | 366  | 355  |
| >KIT-P551L-v KYLQKPMYEV\ | 100  | >KIT-P551L-n KYLQKLMYEV  | 124  | 24   |
| >KIT-P551L-v KYLQKPMYEV\ | 307  | >KIT-P551L-n KYLQKLMYEV  | 168  | 139  |
| >KIT-P551L-v KYLQKPMY    | 159  | >KIT-P551L-n KYLQKLMY    | 60   | 99   |
| >KIT-P551L-v KYLQKPMYEV  | 582  | >KIT-P551L-n KYLQKLMYEV  | 182  | 400  |
| >KIT-P551L-v KYLQKPMYEV\ | 28   | >KIT-P551L-n KYLQKLMYEV  | 13   | 15   |
| >KIT-P551L-v KYLQKPMYEV\ | 360  | >KIT-P551L-n KYLQKLMYEV  | 270  | 90   |
| >KIT-P551L-v KYLQKPMY    | 89   | >KIT-P551L-n KYLQKLMY    | 39   | 50   |
| >KIT-P551L-v KYLQKPMYEV\ | 471  | >KIT-P551L-n KYLQKLMYEV  | 474  | 3    |
| >KIT-P551L-v KYLQKPMY    | 93   | >KIT-P551L-n KYLQKLMY    | 159  | 66   |
| >KIT-P551L-v KYLQKPMY    | 160  | >KIT-P551L-n KYLQKLMY    | 17   | 143  |
| >KIT-P551L-v KYLQKPMYEV  | 82   | >KIT-P551L-n KYLQKLMYEV  | 119  | 37   |
| >KIT-P551L-v KYLQKPMYEV\ | 121  | >KIT-P551L-n KYLQKLMYEV\ | 150  | 29   |
| >KIT-P551L-v KYLQKPMYEV\ | 652  | >KIT-P551L-n KYLQKLMYEV\ | 343  | 309  |
| >KIT-P551L-v KYLQKPMYEV  | 331  | >KIT-P551L-n KYLQKLMYEV  | 382  | 51   |
| >KIT-P551L-v KYLQKPMYEV\ | 56   | >KIT-P551L-n KYLQKLMYEV\ | 101  | 45   |
| >KIT-P551L-v KYLQKPMYEV\ | 391  | >KIT-P551L-n KYLQKLMYEV\ | 487  | 96   |
| >KIT-P551L-v YKYLQKPM    | 3767 | >KIT-P551L-n YKYLQKLM    | 366  | 3401 |

|                         |       |                         |      |       |
|-------------------------|-------|-------------------------|------|-------|
| >KIT-P551L-v YKYLQKPMYE | 499   | >KIT-P551L-n YKYLQKLMYE | 195  | 304   |
| >KIT-P551L-v YKYLQKPMYE | 447   | >KIT-P551L-n YKYLQKLMYE | 412  | 35    |
| >KIT-P551L-v YKYLQKPMYE | 121   | >KIT-P551L-n YKYLQKLMYE | 189  | 68    |
| >KIT-P551L-v YKYLQKPMYE | 356   | >KIT-P551L-n YKYLQKLMYE | 468  | 112   |
| >KIT-P551L-v YKYLQKPMYE | 365   | >KIT-P551L-n YKYLQKLMYE | 531  | 166   |
| >KIT-P551L-v YKYLQKPMY  | 153   | >KIT-P551L-n YKYLQKLMY  | 30   | 123   |
| >KIT-P551L-v YKYLQKPMY  | 9184  | >KIT-P551L-n YKYLQKLMY  | 432  | 8752  |
| >KIT-P551L-v YKYLQKPM   | 8     | >KIT-P551L-n YKYLQKLM   | 21   | 13    |
| >KIT-P551L-v YKYLQKPMY  | 9     | >KIT-P551L-n YKYLQKLMY  | 7    | 2     |
| >KIT-P551L-v YKYLQKPMYE | 39    | >KIT-P551L-n YKYLQKLMYE | 42   | 3     |
| >KIT-P551L-v TYKYLQKPM  | 498   | >KIT-P551L-n TYKYLQKLM  | 4861 | 4363  |
| >KIT-P551L-v TYKYLQKP   | 20634 | >KIT-P551L-n TYKYLQKL   | 490  | 20144 |
| >KIT-P551L-v TYKYLQKP   | 11740 | >KIT-P551L-n TYKYLQKL   | 46   | 11694 |
| >KIT-P551L-v TYKYLQKPM\ | 100   | >KIT-P551L-n TYKYLQKLMY | 37   | 63    |
| >KIT-P551L-v TYKYLQKPM\ | 348   | >KIT-P551L-n TYKYLQKLMY | 526  | 178   |
| >KIT-P551L-v TYKYLQKPM\ | 3910  | >KIT-P551L-n TYKYLQKLMY | 208  | 3702  |
| >KIT-P551L-v TYKYLQKP   | 12563 | >KIT-P551L-n TYKYLQKL   | 439  | 12124 |
| >KIT-P551L-v LTYKYLQKP  | 2226  | >KIT-P551L-n LTYKYLQKL  | 40   | 2186  |
| >KIT-P551L-v LTYKYLQKPM | 695   | >KIT-P551L-n LTYKYLQKLM | 93   | 602   |
| >KIT-P551L-v LTYKYLQKP  | 11922 | >KIT-P551L-n LTYKYLQKL  | 114  | 11808 |
| >KIT-P551L-v LTYKYLQKP  | 16540 | >KIT-P551L-n LTYKYLQKL  | 294  | 16246 |
| >KIT-P551L-v LTYKYLQKP  | 16952 | >KIT-P551L-n LTYKYLQKL  | 358  | 16594 |
| >KIT-P551L-v LTYKYLQKP  | 14253 | >KIT-P551L-n LTYKYLQKL  | 88   | 14165 |
| >KIT-P551L-v LTYKYLQKP  | 30204 | >KIT-P551L-n LTYKYLQKL  | 328  | 29876 |
| >KIT-P551L-v LTYKYLQKPM | 422   | >KIT-P551L-n LTYKYLQKLM | 197  | 225   |
| >KIT-P551L-v LTYKYLQKPM | 765   | >KIT-P551L-n LTYKYLQKLM | 282  | 483   |
| >KIT-P551L-v LTYKYLQKPM | 117   | >KIT-P551L-n LTYKYLQKLM | 576  | 459   |
| >KIT-P551L-v LTYKYLQKPM | 73    | >KIT-P551L-n LTYKYLQKLM | 224  | 151   |
| >KIT-P551L-v LTYKYLQKPM | 29    | >KIT-P551L-n LTYKYLQKLM | 14   | 15    |
| >KIT-P551L-v LTYKYLQKPM | 74    | >KIT-P551L-n LTYKYLQKLM | 220  | 146   |
| >KIT-P551L-v LTYKYLQKP  | 16135 | >KIT-P551L-n LTYKYLQKL  | 392  | 15743 |
| >KIT-P551L-v LTYKYLQKPM | 607   | >KIT-P551L-n LTYKYLQKLM | 38   | 569   |
| >KIT-P551L-v LTYKYLQKPM | 198   | >KIT-P551L-n LTYKYLQKLM | 1927 | 1729  |
| >KIT-P551L-v LTYKYLQKPM | 149   | >KIT-P551L-n LTYKYLQKLM | 116  | 33    |
| >KIT-P551L-v LTYKYLQKP  | 6720  | >KIT-P551L-n LTYKYLQKL  | 290  | 6430  |
| >KIT-P551L-v LTYKYLQKPM | 59    | >KIT-P551L-n LTYKYLQKLM | 309  | 250   |
| >KIT-P551L-v LTYKYLQKPM | 95    | >KIT-P551L-n LTYKYLQKLM | 82   | 13    |
| >KIT-P551L-v LTYKYLQKP  | 5809  | >KIT-P551L-n LTYKYLQKL  | 8    | 5801  |
| >KIT-P551L-v LTYKYLQKPM | 6     | >KIT-P551L-n LTYKYLQKLM | 10   | 4     |
| >KIT-P551L-v LTYKYLQKPM | 4     | >KIT-P551L-n LTYKYLQKLM | 4    | 0     |
| >KIT-P551L-v LTYKYLQKPM | 626   | >KIT-P551L-n LTYKYLQKLM | 432  | 194   |
| >KIT-P551L-v LTYKYLQKPM | 867   | >KIT-P551L-n LTYKYLQKLM | 291  | 576   |
| >KIT-P551L-v LTYKYLQKPM | 576   | >KIT-P551L-n LTYKYLQKLM | 361  | 215   |

|                         |       |                         |     |       |
|-------------------------|-------|-------------------------|-----|-------|
| >KIT-P551L-v LTYKYLQKP  | 13344 | >KIT-P551L-n LTYKYLQKL  | 235 | 13109 |
| >KIT-P551L-v LTYKYLQKPM | 488   | >KIT-P551L-n LTYKYLQKLM | 145 | 343   |
| >KIT-P551L-v LTYKYLQKP  | 5137  | >KIT-P551L-n LTYKYLQKL  | 38  | 5099  |
| >KIT-P551L-v LTYKYLQKPM | 37    | >KIT-P551L-n LTYKYLQKLM | 23  | 14    |
| >KIT-P551L-v LTYKYLQKPM | 6     | >KIT-P551L-n LTYKYLQKLM | 6   | 0     |
| >KIT-P551L-v LTYKYLQKP  | 16763 | >KIT-P551L-n LTYKYLQKL  | 70  | 16693 |
| >KIT-P551L-v ILTYKYLQKP | 14954 | >KIT-P551L-n ILTYKYLQKL | 118 | 14836 |
| >KIT-P551L-v ILTYKYLQKP | 13073 | >KIT-P551L-n ILTYKYLQKL | 222 | 12851 |
| >KIT-P551L-v ILTYKYLQKP | 17059 | >KIT-P551L-n ILTYKYLQKL | 223 | 16836 |
| >KIT-P551L-v ILTYKYLQKP | 20904 | >KIT-P551L-n ILTYKYLQKL | 418 | 20486 |
| >KIT-P551L-v ILTYKYLQKP | 14217 | >KIT-P551L-n ILTYKYLQKL | 9   | 14208 |
| >KIT-P551S-v PMYEVQWK\  | 17    | >KIT-P551S-n SMYEVQWK\  | 6   | 11    |
| >KIT-P551S-v PMYEVQWK\  | 8027  | >KIT-P551S-n SMYEVQWK\  | 177 | 7850  |
| >KIT-P551S-v PMYEVQWK\  | 18    | >KIT-P551S-n SMYEVQWK\  | 4   | 14    |
| >KIT-P551S-v PMYEVQWK\  | 3112  | >KIT-P551S-n SMYEVQWK\  | 127 | 2985  |
| >KIT-P551S-v PMYEVQWK\  | 48    | >KIT-P551S-n SMYEVQWK\  | 5   | 43    |
| >KIT-P551S-v PMYEVQWK\  | 805   | >KIT-P551S-n SMYEVQWK\  | 32  | 773   |
| >KIT-P551S-v PMYEVQWK\  | 33    | >KIT-P551S-n SMYEVQWK\  | 4   | 29    |
| >KIT-P551S-v PMYEVQWK   | 510   | >KIT-P551S-n SMYEVQWK   | 24  | 486   |
| >KIT-P551S-v PMYEVQWK\  | 1     | >KIT-P551S-n SMYEVQWK\  | 1   | 0     |
| >KIT-P551S-v PMYEVQWK\  | 4     | >KIT-P551S-n SMYEVQWK\  | 2   | 2     |
| >KIT-P551S-v PMYEVQWK\  | 1490  | >KIT-P551S-n SMYEVQWK\  | 67  | 1423  |
| >KIT-P551S-v PMYEVQWK\  | 5     | >KIT-P551S-n SMYEVQWK\  | 2   | 3     |
| >KIT-P551S-v PMYEVQWK\  | 97    | >KIT-P551S-n SMYEVQWK\  | 8   | 89    |
| >KIT-P551S-v PMYEVQWK   | 4787  | >KIT-P551S-n SMYEVQWK   | 206 | 4581  |
| >KIT-P551S-v PMYEVQWK\  | 4     | >KIT-P551S-n SMYEVQWK\  | 3   | 1     |
| >KIT-P551S-v PMYEVQWK\  | 11    | >KIT-P551S-n SMYEVQWK\  | 4   | 7     |
| >KIT-P551S-v PMYEVQWK\  | 3     | >KIT-P551S-n SMYEVQWK\  | 3   | 0     |
| >KIT-P551S-v PMYEVQWK\  | 54    | >KIT-P551S-n SMYEVQWK\  | 27  | 27    |
| >KIT-P551S-v PMYEVQWK   | 1802  | >KIT-P551S-n SMYEVQWK   | 50  | 1752  |
| >KIT-P551S-v PMYEVQWK\  | 2     | >KIT-P551S-n SMYEVQWK\  | 1   | 1     |
| >KIT-P551S-v PMYEVQWK\  | 10    | >KIT-P551S-n SMYEVQWK\  | 3   | 7     |
| >KIT-P551S-v PMYEVQWK   | 129   | >KIT-P551S-n SMYEVQWK   | 33  | 96    |
| >KIT-P551S-v PMYEVQWK   | 1471  | >KIT-P551S-n SMYEVQWK   | 14  | 1457  |
| >KIT-P551S-v PMYEVQWK   | 5023  | >KIT-P551S-n SMYEVQWK   | 215 | 4808  |
| >KIT-P551S-v PMYEVQWK   | 3061  | >KIT-P551S-n SMYEVQWK   | 113 | 2948  |
| >KIT-P551S-v PMYEVQWK\  | 2625  | >KIT-P551S-n SMYEVQWK\  | 112 | 2513  |
| >KIT-P551S-v PMYEVQWK\  | 145   | >KIT-P551S-n SMYEVQWK\  | 7   | 138   |
| >KIT-P551S-v PMYEVQWK\  | 2777  | >KIT-P551S-n SMYEVQWK\  | 252 | 2525  |
| >KIT-P551S-v PMYEVQWK\  | 1327  | >KIT-P551S-n SMYEVQWK\  | 215 | 1112  |
| >KIT-P551S-v KPMYEVQWf  | 3851  | >KIT-P551S-n KSMYEVQWf  | 206 | 3645  |
| >KIT-P551S-v KPMYEVQWf  | 2861  | >KIT-P551S-n KSMYEVQWf  | 392 | 2469  |
| >KIT-P551S-v KPMYEVQWf  | 11558 | >KIT-P551S-n KSMYEVQWf  | 166 | 11392 |



|                        |       |                         |       |       |
|------------------------|-------|-------------------------|-------|-------|
| >KIT-P551S-v KPMYEVQWI | 8109  | >KIT-P551S-n KSMYEVQWf  | 30    | 8079  |
| >KIT-P551S-v KPMYEVQWI | 12395 | >KIT-P551S-n KSMYEVQWf  | 32    | 12363 |
| >KIT-P551S-v KPMYEVQWI | 16550 | >KIT-P551S-n KSMYEVQWf  | 436   | 16114 |
| >KIT-P551S-v KPMYEVQW  | 2056  | >KIT-P551S-n KSMYEVQW   | 19    | 2037  |
| >KIT-P551S-v KPMYEVQWI | 9927  | >KIT-P551S-n KSMYEVQWf  | 175   | 9752  |
| >KIT-P551S-v KPMYEVQWI | 157   | >KIT-P551S-n KSMYEVQWf  | 21854 | 21697 |
| >KIT-P551S-v KPMYEVQWI | 136   | >KIT-P551S-n KSMYEVQWf  | 22064 | 21928 |
| >KIT-P551S-v KPMYEVQWI | 2311  | >KIT-P551S-n KSMYEVQWf  | 208   | 2103  |
| >KIT-P551S-v KPMYEVQW  | 2672  | >KIT-P551S-n KSMYEVQW   | 7     | 2665  |
| >KIT-P551S-v KPMYEVQWI | 23610 | >KIT-P551S-n KSMYEVQWf  | 199   | 23411 |
| >KIT-P551S-v KPMYEVQWI | 22879 | >KIT-P551S-n KSMYEVQWf  | 141   | 22738 |
| >KIT-P551S-v KPMYEVQW  | 20    | >KIT-P551S-n KSMYEVQW   | 1656  | 1636  |
| >KIT-P551S-v KPMYEVQWI | 68    | >KIT-P551S-n KSMYEVQWf  | 18008 | 17940 |
| >KIT-P551S-v KPMYEVQW  | 536   | >KIT-P551S-n KSMYEVQW   | 30    | 506   |
| >KIT-P551S-v KPMYEVQW  | 199   | >KIT-P551S-n KSMYEVQW   | 8     | 191   |
| >KIT-P551S-v KPMYEVQWI | 18295 | >KIT-P551S-n KSMYEVQWf  | 165   | 18130 |
| >KIT-P551S-v KPMYEVQWI | 15354 | >KIT-P551S-n KSMYEVQWf  | 184   | 15170 |
| >KIT-P551S-v KPMYEVQW  | 9     | >KIT-P551S-n KSMYEVQW   | 605   | 596   |
| >KIT-P551S-v KPMYEVQWI | 5341  | >KIT-P551S-n KSMYEVQWf  | 288   | 5053  |
| >KIT-P551S-v QKPMYEVQV | 1466  | >KIT-P551S-n QKSMYEVQV  | 230   | 1236  |
| >KIT-P551S-v QKPMYEVQV | 2802  | >KIT-P551S-n QKSMYEVQV  | 427   | 2375  |
| >KIT-P551S-v LQKPMYEV  | 327   | >KIT-P551S-n LQKSMYEV   | 220   | 107   |
| >KIT-P551S-v LQKPMYEV  | 48    | >KIT-P551S-n LQKSMYEV   | 34    | 14    |
| >KIT-P551S-v LQKPMYEV  | 34    | >KIT-P551S-n LQKSMYEV   | 59    | 25    |
| >KIT-P551S-v LQKPMYEV  | 318   | >KIT-P551S-n LQKSMYEV   | 816   | 498   |
| >KIT-P551S-v LQKPMYEVQ | 243   | >KIT-P551S-n LQKSMYEVQ' | 409   | 166   |
| >KIT-P551S-v LQKPMYEVQ | 415   | >KIT-P551S-n LQKSMYEVQ' | 348   | 67    |
| >KIT-P551S-v LQKPMYEV  | 403   | >KIT-P551S-n LQKSMYEV   | 342   | 61    |
| >KIT-P551S-v LQKPMYEVQ | 230   | >KIT-P551S-n LQKSMYEVQ  | 239   | 9     |
| >KIT-P551S-v LQKPMYEVQ | 247   | >KIT-P551S-n LQKSMYEVQ' | 260   | 13    |
| >KIT-P551S-v LQKPMYEV  | 155   | >KIT-P551S-n LQKSMYEV   | 57    | 98    |
| >KIT-P551S-v LQKPMYEVQ | 225   | >KIT-P551S-n LQKSMYEVQ' | 95    | 130   |
| >KIT-P551S-v LQKPMYEVQ | 168   | >KIT-P551S-n LQKSMYEVQ' | 121   | 47    |
| >KIT-P551S-v LQKPMYEVQ | 230   | >KIT-P551S-n LQKSMYEVQ' | 192   | 38    |
| >KIT-P551S-v YLQKPMYEV | 7     | >KIT-P551S-n YLQKSMYEV  | 7     | 0     |
| >KIT-P551S-v YLQKPMYEV | 5     | >KIT-P551S-n YLQKSMYEV  | 3     | 2     |
| >KIT-P551S-v YLQKPMYEV | 7     | >KIT-P551S-n YLQKSMYEV  | 4     | 3     |
| >KIT-P551S-v YLQKPMYEV | 13    | >KIT-P551S-n YLQKSMYEV  | 8     | 5     |
| >KIT-P551S-v YLQKPMYEV | 1     | >KIT-P551S-n YLQKSMYEV  | 2     | 1     |
| >KIT-P551S-v YLQKPMYEV | 2     | >KIT-P551S-n YLQKSMYEV  | 2     | 0     |
| >KIT-P551S-v YLQKPMYEV | 6     | >KIT-P551S-n YLQKSMYEV  | 6     | 0     |
| >KIT-P551S-v YLQKPMYEV | 3     | >KIT-P551S-n YLQKSMYEV  | 4     | 1     |
| >KIT-P551S-v YLQKPMYEV | 2     | >KIT-P551S-n YLQKSMYEV  | 2     | 0     |

|                         |      |                         |     |      |
|-------------------------|------|-------------------------|-----|------|
| >KIT-P551S-v YLQKPMYEV( | 77   | >KIT-P551S-n YLQKSMYEV( | 67  | 10   |
| >KIT-P551S-v YLQKPMYEV  | 93   | >KIT-P551S-n YLQKSMYEV  | 242 | 149  |
| >KIT-P551S-v YLQKPMYEV  | 55   | >KIT-P551S-n YLQKSMYEV  | 184 | 129  |
| >KIT-P551S-v YLQKPMYEV( | 124  | >KIT-P551S-n YLQKSMYEV( | 75  | 49   |
| >KIT-P551S-v YLQKPMYEV( | 721  | >KIT-P551S-n YLQKSMYEV( | 362 | 359  |
| >KIT-P551S-v KYLQKPMYEV | 100  | >KIT-P551S-n KYLQKSMYEV | 211 | 111  |
| >KIT-P551S-v KYLQKPMYEV | 307  | >KIT-P551S-n KYLQKSMYEV | 204 | 103  |
| >KIT-P551S-v KYLQKPMY   | 159  | >KIT-P551S-n KYLQKSMY   | 98  | 61   |
| >KIT-P551S-v KYLQKPMYE  | 582  | >KIT-P551S-n KYLQKSMYE  | 267 | 315  |
| >KIT-P551S-v KYLQKPMYEV | 28   | >KIT-P551S-n KYLQKSMYEV | 18  | 10   |
| >KIT-P551S-v KYLQKPMYEV | 360  | >KIT-P551S-n KYLQKSMYEV | 273 | 87   |
| >KIT-P551S-v KYLQKPMY   | 89   | >KIT-P551S-n KYLQKSMY   | 146 | 57   |
| >KIT-P551S-v KYLQKPMYEV | 471  | >KIT-P551S-n KYLQKSMYEV | 209 | 262  |
| >KIT-P551S-v KYLQKPMY   | 93   | >KIT-P551S-n KYLQKSMY   | 87  | 6    |
| >KIT-P551S-v KYLQKPMY   | 160  | >KIT-P551S-n KYLQKSMY   | 104 | 56   |
| >KIT-P551S-v KYLQKPMYE  | 82   | >KIT-P551S-n KYLQKSMYE  | 93  | 11   |
| >KIT-P551S-v KYLQKPMYEV | 121  | >KIT-P551S-n KYLQKSMYEV | 127 | 6    |
| >KIT-P551S-v KYLQKPMYE  | 331  | >KIT-P551S-n KYLQKSMYE  | 550 | 219  |
| >KIT-P551S-v KYLQKPMYEV | 56   | >KIT-P551S-n KYLQKSMYEV | 109 | 53   |
| >KIT-P551S-v KYLQKPMYEV | 391  | >KIT-P551S-n KYLQKSMYEV | 515 | 124  |
| >KIT-P551S-v YKYLQKPMYE | 499  | >KIT-P551S-n YKYLQKSMYE | 182 | 317  |
| >KIT-P551S-v YKYLQKPMYE | 447  | >KIT-P551S-n YKYLQKSMYE | 533 | 86   |
| >KIT-P551S-v YKYLQKPMYE | 121  | >KIT-P551S-n YKYLQKSMYE | 209 | 88   |
| >KIT-P551S-v YKYLQKPMYE | 356  | >KIT-P551S-n YKYLQKSMYE | 667 | 311  |
| >KIT-P551S-v YKYLQKPMYE | 365  | >KIT-P551S-n YKYLQKSMYE | 421 | 56   |
| >KIT-P551S-v YKYLQKPMY  | 153  | >KIT-P551S-n YKYLQKSMY  | 335 | 182  |
| >KIT-P551S-v YKYLQKPMY  | 1903 | >KIT-P551S-n YKYLQKSMY  | 241 | 1662 |
| >KIT-P551S-v YKYLQKPM   | 8    | >KIT-P551S-n YKYLQKSM   | 7   | 1    |
| >KIT-P551S-v YKYLQKPMY  | 9    | >KIT-P551S-n YKYLQKSMY  | 5   | 4    |
| >KIT-P551S-v YKYLQKPMYE | 39   | >KIT-P551S-n YKYLQKSMYE | 23  | 16   |
| >KIT-P551S-v YKYLQKPMY  | 1728 | >KIT-P551S-n YKYLQKSMY  | 42  | 1686 |
| >KIT-P551S-v TYKYLQKPM  | 498  | >KIT-P551S-n TYKYLQKSM  | 341 | 157  |
| >KIT-P551S-v TYKYLQKPM\ | 100  | >KIT-P551S-n TYKYLQKSM\ | 106 | 6    |
| >KIT-P551S-v TYKYLQKPM\ | 348  | >KIT-P551S-n TYKYLQKSM\ | 141 | 207  |
| >KIT-P551S-v LTYKYLQKPM | 695  | >KIT-P551S-n LTYKYLQKSM | 481 | 214  |
| >KIT-P551S-v LTYKYLQKPM | 422  | >KIT-P551S-n LTYKYLQKSM | 304 | 118  |
| >KIT-P551S-v LTYKYLQKPM | 559  | >KIT-P551S-n LTYKYLQKSM | 388 | 171  |
| >KIT-P551S-v LTYKYLQKPM | 117  | >KIT-P551S-n LTYKYLQKSM | 223 | 106  |
| >KIT-P551S-v LTYKYLQKPM | 73   | >KIT-P551S-n LTYKYLQKSM | 73  | 0    |
| >KIT-P551S-v LTYKYLQKPM | 29   | >KIT-P551S-n LTYKYLQKSM | 39  | 10   |
| >KIT-P551S-v LTYKYLQKPM | 74   | >KIT-P551S-n LTYKYLQKSM | 92  | 18   |
| >KIT-P551S-v LTYKYLQKPM | 612  | >KIT-P551S-n LTYKYLQKSM | 332 | 280  |
| >KIT-P551S-v LTYKYLQKPM | 607  | >KIT-P551S-n LTYKYLQKSM | 387 | 220  |

|                         |       |                         |     |       |
|-------------------------|-------|-------------------------|-----|-------|
| >KIT-P551S-v LTYKYLQKPM | 198   | >KIT-P551S-n LTYKYLQKSM | 294 | 96    |
| >KIT-P551S-v LTYKYLQKPM | 149   | >KIT-P551S-n LTYKYLQKSM | 119 | 30    |
| >KIT-P551S-v LTYKYLQKPM | 59    | >KIT-P551S-n LTYKYLQKSM | 70  | 11    |
| >KIT-P551S-v LTYKYLQKPM | 95    | >KIT-P551S-n LTYKYLQKSM | 50  | 45    |
| >KIT-P551S-v LTYKYLQKPM | 6     | >KIT-P551S-n LTYKYLQKSM | 7   | 1     |
| >KIT-P551S-v LTYKYLQKPM | 4     | >KIT-P551S-n LTYKYLQKSM | 4   | 0     |
| >KIT-P551S-v LTYKYLQKPM | 626   | >KIT-P551S-n LTYKYLQKSM | 477 | 149   |
| >KIT-P551S-v LTYKYLQKPM | 867   | >KIT-P551S-n LTYKYLQKSM | 375 | 492   |
| >KIT-P551S-v LTYKYLQKPM | 488   | >KIT-P551S-n LTYKYLQKSM | 432 | 56    |
| >KIT-P551S-v LTYKYLQKPM | 37    | >KIT-P551S-n LTYKYLQKSM | 24  | 13    |
| >KIT-P551S-v LTYKYLQKPM | 6     | >KIT-P551S-n LTYKYLQKSM | 2   | 4     |
| >KIT-P551T-v PMYEVQWK\  | 17    | >KIT-P551T-r TMYEVQWK\  | 7   | 10    |
| >KIT-P551T-v PMYEVQWK\  | 8027  | >KIT-P551T-r TMYEVQWK\  | 329 | 7698  |
| >KIT-P551T-v PMYEVQWK\  | 18    | >KIT-P551T-r TMYEVQWK\  | 4   | 14    |
| >KIT-P551T-v PMYEVQWK\  | 3112  | >KIT-P551T-r TMYEVQWK\  | 264 | 2848  |
| >KIT-P551T-v PMYEVQWK\  | 48    | >KIT-P551T-r TMYEVQWK\  | 5   | 43    |
| >KIT-P551T-v PMYEVQWK\  | 805   | >KIT-P551T-r TMYEVQWK\  | 42  | 763   |
| >KIT-P551T-v PMYEVQWK\  | 33    | >KIT-P551T-r TMYEVQWK\  | 5   | 28    |
| >KIT-P551T-v PMYEVQWK   | 510   | >KIT-P551T-r TMYEVQWK   | 102 | 408   |
| >KIT-P551T-v PMYEVQWK\  | 1     | >KIT-P551T-r TMYEVQWK\  | 1   | 0     |
| >KIT-P551T-v PMYEVQWK\  | 4     | >KIT-P551T-r TMYEVQWK\  | 2   | 2     |
| >KIT-P551T-v PMYEVQWK\  | 1490  | >KIT-P551T-r TMYEVQWK\  | 346 | 1144  |
| >KIT-P551T-v PMYEVQWK\  | 5     | >KIT-P551T-r TMYEVQWK\  | 2   | 3     |
| >KIT-P551T-v PMYEVQWK\  | 97    | >KIT-P551T-r TMYEVQWK\  | 12  | 85    |
| >KIT-P551T-v PMYEVQWK\  | 4     | >KIT-P551T-r TMYEVQWK\  | 3   | 1     |
| >KIT-P551T-v PMYEVQWK\  | 11    | >KIT-P551T-r TMYEVQWK\  | 6   | 5     |
| >KIT-P551T-v PMYEVQWK\  | 3     | >KIT-P551T-r TMYEVQWK\  | 2   | 1     |
| >KIT-P551T-v PMYEVQWK\  | 54    | >KIT-P551T-r TMYEVQWK\  | 22  | 32    |
| >KIT-P551T-v PMYEVQWK   | 1802  | >KIT-P551T-r TMYEVQWK   | 233 | 1569  |
| >KIT-P551T-v PMYEVQWK\  | 2     | >KIT-P551T-r TMYEVQWK\  | 2   | 0     |
| >KIT-P551T-v PMYEVQWK\  | 10    | >KIT-P551T-r TMYEVQWK\  | 4   | 6     |
| >KIT-P551T-v PMYEVQWK   | 129   | >KIT-P551T-r TMYEVQWK   | 33  | 96    |
| >KIT-P551T-v PMYEVQWK   | 1471  | >KIT-P551T-r TMYEVQWK   | 21  | 1450  |
| >KIT-P551T-v PMYEVQWK   | 5023  | >KIT-P551T-r TMYEVQWK   | 287 | 4736  |
| >KIT-P551T-v PMYEVQWK   | 3061  | >KIT-P551T-r TMYEVQWK   | 37  | 3024  |
| >KIT-P551T-v PMYEVQWK\  | 2625  | >KIT-P551T-r TMYEVQWK\  | 42  | 2583  |
| >KIT-P551T-v PMYEVQWK\  | 145   | >KIT-P551T-r TMYEVQWK\  | 6   | 139   |
| >KIT-P551T-v PMYEVQWK\  | 2777  | >KIT-P551T-r TMYEVQWK\  | 174 | 2603  |
| >KIT-P551T-v PMYEVQWK\  | 1327  | >KIT-P551T-r TMYEVQWK\  | 429 | 898   |
| >KIT-P551T-v KPMYEVQWf  | 3851  | >KIT-P551T-r KTMYEVQWf  | 35  | 3816  |
| >KIT-P551T-v KPMYEVQWf  | 6541  | >KIT-P551T-r KTMYEVQWf  | 104 | 6437  |
| >KIT-P551T-v KPMYEVQWf  | 12322 | >KIT-P551T-r KTMYEVQWf  | 302 | 12020 |
| >KIT-P551T-v KPMYEVQWf  | 13209 | >KIT-P551T-r KTMYEVQWf  | 310 | 12899 |

|                        |       |                         |       |       |
|------------------------|-------|-------------------------|-------|-------|
| >KIT-P551T-v KPMYEVQWf | 2861  | >KIT-P551T-r KTM YEVQWf | 59    | 2802  |
| >KIT-P551T-v KPMYEVQWf | 8089  | >KIT-P551T-r KTM YEVQWf | 193   | 7896  |
| >KIT-P551T-v KPMYEVQWf | 4123  | >KIT-P551T-r KTM YEVQWf | 34    | 4089  |
| >KIT-P551T-v KPMYEVQWf | 5545  | >KIT-P551T-r KTM YEVQWf | 42    | 5503  |
| >KIT-P551T-v KPMYEVQWf | 5395  | >KIT-P551T-r KTM YEVQWf | 87    | 5308  |
| >KIT-P551T-v KPMYEVQWf | 9677  | >KIT-P551T-r KTM YEVQWf | 117   | 9560  |
| >KIT-P551T-v KPMYEVQWf | 15909 | >KIT-P551T-r KTM YEVQWf | 203   | 15706 |
| >KIT-P551T-v KPMYEVQWf | 11558 | >KIT-P551T-r KTM YEVQWf | 105   | 11453 |
| >KIT-P551T-v KPMYEVQWf | 8109  | >KIT-P551T-r KTM YEVQWf | 22    | 8087  |
| >KIT-P551T-v KPMYEVQWf | 12395 | >KIT-P551T-r KTM YEVQWf | 19    | 12376 |
| >KIT-P551T-v KPMYEVQWf | 16550 | >KIT-P551T-r KTM YEVQWf | 212   | 16338 |
| >KIT-P551T-v KPMYEVQWf | 14711 | >KIT-P551T-r KTM YEVQWf | 261   | 14450 |
| >KIT-P551T-v KPMYEVQW  | 2056  | >KIT-P551T-r KTM YEVQW  | 8     | 2048  |
| >KIT-P551T-v KPMYEVQWf | 9927  | >KIT-P551T-r KTM YEVQWf | 57    | 9870  |
| >KIT-P551T-v KPMYEVQWf | 17884 | >KIT-P551T-r KTM YEVQWf | 302   | 17582 |
| >KIT-P551T-v KPMYEVQWf | 11115 | >KIT-P551T-r KTM YEVQWf | 116   | 10999 |
| >KIT-P551T-v KPMYEVQWf | 11662 | >KIT-P551T-r KTM YEVQWf | 164   | 11498 |
| >KIT-P551T-v KPMYEVQWf | 2133  | >KIT-P551T-r KTM YEVQWf | 152   | 1981  |
| >KIT-P551T-v KPMYEVQWf | 157   | >KIT-P551T-r KTM YEVQWf | 22453 | 22296 |
| >KIT-P551T-v KPMYEVQWf | 136   | >KIT-P551T-r KTM YEVQWf | 19778 | 19642 |
| >KIT-P551T-v KPMYEVQW  | 2672  | >KIT-P551T-r KTM YEVQW  | 7     | 2665  |
| >KIT-P551T-v KPMYEVQWf | 23610 | >KIT-P551T-r KTM YEVQWf | 122   | 23488 |
| >KIT-P551T-v KPMYEVQWf | 22879 | >KIT-P551T-r KTM YEVQWf | 85    | 22794 |
| >KIT-P551T-v KPMYEVQW  | 20    | >KIT-P551T-r KTM YEVQW  | 3075  | 3055  |
| >KIT-P551T-v KPMYEVQWf | 68    | >KIT-P551T-r KTM YEVQWf | 15959 | 15891 |
| >KIT-P551T-v KPMYEVQW  | 536   | >KIT-P551T-r KTM YEVQW  | 31    | 505   |
| >KIT-P551T-v KPMYEVQW  | 199   | >KIT-P551T-r KTM YEVQW  | 8     | 191   |
| >KIT-P551T-v KPMYEVQWf | 18295 | >KIT-P551T-r KTM YEVQWf | 295   | 18000 |
| >KIT-P551T-v KPMYEVQWf | 15354 | >KIT-P551T-r KTM YEVQWf | 79    | 15275 |
| >KIT-P551T-v KPMYEVQW  | 9     | >KIT-P551T-r KTM YEVQW  | 597   | 588   |
| >KIT-P551T-v KPMYEVQWf | 5341  | >KIT-P551T-r KTM YEVQWf | 207   | 5134  |
| >KIT-P551T-v QKPMYEVQV | 2802  | >KIT-P551T-r QKTM YEVQV | 432   | 2370  |
| >KIT-P551T-v LQKPMYEV  | 327   | >KIT-P551T-r LQKTM YEV  | 432   | 105   |
| >KIT-P551T-v LQKPMYEV  | 48    | >KIT-P551T-r LQKTM YEV  | 57    | 9     |
| >KIT-P551T-v LQKPMYEV  | 34    | >KIT-P551T-r LQKTM YEV  | 66    | 32    |
| >KIT-P551T-v LQKPMYEV  | 318   | >KIT-P551T-r LQKTM YEV  | 1442  | 1124  |
| >KIT-P551T-v LQKPMYEVQ | 243   | >KIT-P551T-r LQKTM YEVQ | 355   | 112   |
| >KIT-P551T-v LQKPMYEVQ | 415   | >KIT-P551T-r LQKTM YEVQ | 622   | 207   |
| >KIT-P551T-v LQKPMYEV  | 403   | >KIT-P551T-r LQKTM YEV  | 798   | 395   |
| >KIT-P551T-v LQKPMYEVQ | 230   | >KIT-P551T-r LQKTM YEVQ | 580   | 350   |
| >KIT-P551T-v LQKPMYEVQ | 247   | >KIT-P551T-r LQKTM YEVQ | 546   | 299   |
| >KIT-P551T-v LQKPMYEV  | 155   | >KIT-P551T-r LQKTM YEV  | 105   | 50    |
| >KIT-P551T-v LQKPMYEVQ | 225   | >KIT-P551T-r LQKTM YEVQ | 161   | 64    |

|                          |      |                            |     |      |
|--------------------------|------|----------------------------|-----|------|
| >KIT-P551T-v LQKPMYEVQ   | 168  | >KIT-P551T-r LQKTMYEVC     | 204 | 36   |
| >KIT-P551T-v LQKPMYEVQ   | 230  | >KIT-P551T-r LQKTMYEVC     | 502 | 272  |
| >KIT-P551T-v YLQKPMYEV   | 7    | >KIT-P551T-r YLQKTMYEVC    | 7   | 0    |
| >KIT-P551T-v YLQKPMYEV   | 5    | >KIT-P551T-r YLQKTMYEVC    | 3   | 2    |
| >KIT-P551T-v YLQKPMYEV   | 7    | >KIT-P551T-r YLQKTMYEVC    | 5   | 2    |
| >KIT-P551T-v YLQKPMYEV   | 13   | >KIT-P551T-r YLQKTMYEVC    | 10  | 3    |
| >KIT-P551T-v YLQKPMYEV   | 1    | >KIT-P551T-r YLQKTMYEVC    | 1   | 0    |
| >KIT-P551T-v YLQKPMYEV   | 2    | >KIT-P551T-r YLQKTMYEVC    | 2   | 0    |
| >KIT-P551T-v YLQKPMYEV   | 6    | >KIT-P551T-r YLQKTMYEVC    | 5   | 1    |
| >KIT-P551T-v YLQKPMYEV   | 3    | >KIT-P551T-r YLQKTMYEVC    | 3   | 0    |
| >KIT-P551T-v YLQKPMYEV   | 2    | >KIT-P551T-r YLQKTMYEVC    | 2   | 0    |
| >KIT-P551T-v YLQKPMYEV   | 77   | >KIT-P551T-r YLQKTMYEVC    | 80  | 3    |
| >KIT-P551T-v YLQKPMYEV   | 93   | >KIT-P551T-r YLQKTMYEVC    | 532 | 439  |
| >KIT-P551T-v YLQKPMYEV   | 55   | >KIT-P551T-r YLQKTMYEVC    | 113 | 58   |
| >KIT-P551T-v YLQKPMYEV   | 124  | >KIT-P551T-r YLQKTMYEVC    | 107 | 17   |
| >KIT-P551T-v YLQKPMYEV   | 721  | >KIT-P551T-r YLQKTMYEVC    | 290 | 431  |
| >KIT-P551T-v KYLQKPMYEV  | 3003 | >KIT-P551T-r KYLQKTMYEVC   | 476 | 2527 |
| >KIT-P551T-v KYLQKPMYEV  | 100  | >KIT-P551T-r KYLQKTMYEVC   | 159 | 59   |
| >KIT-P551T-v KYLQKPMYEV  | 307  | >KIT-P551T-r KYLQKTMYEVC   | 163 | 144  |
| >KIT-P551T-v KYLQKPMY    | 159  | >KIT-P551T-r KYLQKTMYEVC   | 118 | 41   |
| >KIT-P551T-v KYLQKPMYEV  | 582  | >KIT-P551T-r KYLQKTMYEVC   | 133 | 449  |
| >KIT-P551T-v KYLQKPMYEV  | 28   | >KIT-P551T-r KYLQKTMYEVC   | 13  | 15   |
| >KIT-P551T-v KYLQKPMYEV  | 360  | >KIT-P551T-r KYLQKTMYEVC   | 224 | 136  |
| >KIT-P551T-v KYLQKPMY    | 89   | >KIT-P551T-r KYLQKTMYEVC   | 151 | 62   |
| >KIT-P551T-v KYLQKPMYEV  | 471  | >KIT-P551T-r KYLQKTMYEVC   | 224 | 247  |
| >KIT-P551T-v KYLQKPMY    | 93   | >KIT-P551T-r KYLQKTMYEVC   | 208 | 115  |
| >KIT-P551T-v KYLQKPMY    | 160  | >KIT-P551T-r KYLQKTMYEVC   | 98  | 62   |
| >KIT-P551T-v KYLQKPMYEV  | 82   | >KIT-P551T-r KYLQKTMYEVC   | 39  | 43   |
| >KIT-P551T-v KYLQKPMYEV  | 121  | >KIT-P551T-r KYLQKTMYEVC   | 83  | 38   |
| >KIT-P551T-v KYLQKPMYEV  | 331  | >KIT-P551T-r KYLQKTMYEVC   | 642 | 311  |
| >KIT-P551T-v KYLQKPMYEV  | 56   | >KIT-P551T-r KYLQKTMYEVC   | 87  | 31   |
| >KIT-P551T-v KYLQKPMYEV  | 391  | >KIT-P551T-r KYLQKTMYEVC   | 602 | 211  |
| >KIT-P551T-v YKYLQKPMYEV | 499  | >KIT-P551T-r YKYLQKTMYEVC  | 200 | 299  |
| >KIT-P551T-v YKYLQKPMYEV | 447  | >KIT-P551T-r YKYLQKTMYEVC  | 420 | 27   |
| >KIT-P551T-v YKYLQKPMYEV | 121  | >KIT-P551T-r YKYLQKTMYEVC  | 191 | 70   |
| >KIT-P551T-v YKYLQKPMYEV | 356  | >KIT-P551T-r YKYLQKTMYEVC  | 529 | 173  |
| >KIT-P551T-v YKYLQKPMYEV | 365  | >KIT-P551T-r YKYLQKTMYEVC  | 407 | 42   |
| >KIT-P551T-v YKYLQKPMY   | 153  | >KIT-P551T-r YKYLQKTMYEVC  | 475 | 322  |
| >KIT-P551T-v YKYLQKPM    | 8    | >KIT-P551T-r YKYLQKTMYEVC  | 9   | 1    |
| >KIT-P551T-v YKYLQKPMY   | 9    | >KIT-P551T-r YKYLQKTMYEVC  | 6   | 3    |
| >KIT-P551T-v YKYLQKPMYEV | 39   | >KIT-P551T-r YKYLQKTMYEVC  | 27  | 12   |
| >KIT-P551T-v YKYLQKPMY   | 1728 | >KIT-P551T-r YKYLQKTMYEVC  | 302 | 1426 |
| >KIT-P551T-v TYKYLQKPM   | 498  | >KIT-P551T-r TYKYLQKTMYEVC | 130 | 368  |

|                         |       |                         |       |       |
|-------------------------|-------|-------------------------|-------|-------|
| >KIT-P551T-v TYKYLQKPM\ | 100   | >KIT-P551T-r TYKYLQKTM\ | 78    | 22    |
| >KIT-P551T-v TYKYLQKPM\ | 348   | >KIT-P551T-r TYKYLQKTM\ | 279   | 69    |
| >KIT-P551T-v LTYKYLQKPM | 422   | >KIT-P551T-r LTYKYLQKTM | 329   | 93    |
| >KIT-P551T-v LTYKYLQKPM | 117   | >KIT-P551T-r LTYKYLQKTM | 225   | 108   |
| >KIT-P551T-v LTYKYLQKPM | 73    | >KIT-P551T-r LTYKYLQKTM | 202   | 129   |
| >KIT-P551T-v LTYKYLQKPM | 29    | >KIT-P551T-r LTYKYLQKTM | 45    | 16    |
| >KIT-P551T-v LTYKYLQKPM | 74    | >KIT-P551T-r LTYKYLQKTM | 258   | 184   |
| >KIT-P551T-v LTYKYLQKPM | 612   | >KIT-P551T-r LTYKYLQKTM | 417   | 195   |
| >KIT-P551T-v LTYKYLQKPM | 607   | >KIT-P551T-r LTYKYLQKTM | 494   | 113   |
| >KIT-P551T-v LTYKYLQKPM | 198   | >KIT-P551T-r LTYKYLQKTM | 497   | 299   |
| >KIT-P551T-v LTYKYLQKPM | 149   | >KIT-P551T-r LTYKYLQKTM | 136   | 13    |
| >KIT-P551T-v LTYKYLQKPM | 59    | >KIT-P551T-r LTYKYLQKTM | 98    | 39    |
| >KIT-P551T-v LTYKYLQKPM | 95    | >KIT-P551T-r LTYKYLQKTM | 60    | 35    |
| >KIT-P551T-v LTYKYLQKPM | 6     | >KIT-P551T-r LTYKYLQKTM | 5     | 1     |
| >KIT-P551T-v LTYKYLQKPM | 4     | >KIT-P551T-r LTYKYLQKTM | 4     | 0     |
| >KIT-P551T-v LTYKYLQKPM | 744   | >KIT-P551T-r LTYKYLQKTM | 355   | 389   |
| >KIT-P551T-v LTYKYLQKPM | 626   | >KIT-P551T-r LTYKYLQKTM | 497   | 129   |
| >KIT-P551T-v LTYKYLQKPM | 867   | >KIT-P551T-r LTYKYLQKTM | 258   | 609   |
| >KIT-P551T-v LTYKYLQKPM | 488   | >KIT-P551T-r LTYKYLQKTM | 358   | 130   |
| >KIT-P551T-v LTYKYLQKPM | 37    | >KIT-P551T-r LTYKYLQKTM | 25    | 12    |
| >KIT-P551T-v LTYKYLQKPM | 6     | >KIT-P551T-r LTYKYLQKTM | 3     | 3     |
| >KIT-P551T-v ILTYKYLQKP | 14217 | >KIT-P551T-r ILTYKYLQKT | 345   | 13872 |
| >KIT-P577K-v PYDHKWEF   | 147   | >KIT-P577K-r KYDHKWEF   | 52    | 95    |
| >KIT-P577K-v PYDHKWEF   | 444   | >KIT-P577K-r KYDHKWEF   | 106   | 338   |
| >KIT-P577K-v PYDHKWEF   | 61    | >KIT-P577K-r KYDHKWEF   | 10    | 51    |
| >KIT-P577K-v PYDHKWEFPI | 1152  | >KIT-P577K-r KYDHKWEFPI | 52    | 1100  |
| >KIT-P577K-v PYDHKWEFPI | 67    | >KIT-P577K-r KYDHKWEFPI | 12    | 55    |
| >KIT-P577K-v LPYDHKWEFI | 169   | >KIT-P577K-r LKYDHKWEFI | 288   | 119   |
| >KIT-P577K-v LPYDHKWEFI | 170   | >KIT-P577K-r LKYDHKWEFI | 592   | 422   |
| >KIT-P577K-v LPYDHKWEFI | 359   | >KIT-P577K-r LKYDHKWEFI | 680   | 321   |
| >KIT-P577K-v LPYDHKWEF  | 175   | >KIT-P577K-r LKYDHKWEF  | 24147 | 23972 |
| >KIT-P577K-v LPYDHKWEF  | 272   | >KIT-P577K-r LKYDHKWEF  | 5     | 267   |
| >KIT-P577K-v LPYDHKWEFI | 8964  | >KIT-P577K-r LKYDHKWEFI | 216   | 8748  |
| >KIT-P577K-v LPYDHKWEF  | 162   | >KIT-P577K-r LKYDHKWEF  | 555   | 393   |
| >KIT-P577K-v LPYDHKWEF  | 11    | >KIT-P577K-r LKYDHKWEF  | 3996  | 3985  |
| >KIT-P577K-v LPYDHKWEFI | 212   | >KIT-P577K-r LKYDHKWEFI | 19689 | 19477 |
| >KIT-P577K-v LPYDHKWEF  | 471   | >KIT-P577K-r LKYDHKWEF  | 22467 | 21996 |
| >KIT-P577K-v LPYDHKWEF  | 18    | >KIT-P577K-r LKYDHKWEF  | 7925  | 7907  |
| >KIT-P577K-v LPYDHKWEFI | 124   | >KIT-P577K-r LKYDHKWEFI | 22727 | 22603 |
| >KIT-P577K-v LPYDHKWEF  | 67    | >KIT-P577K-r LKYDHKWEF  | 9321  | 9254  |
| >KIT-P577K-v LPYDHKWEF  | 11    | >KIT-P577K-r LKYDHKWEF  | 3707  | 3696  |
| >KIT-P577K-v LPYDHKWEFI | 96    | >KIT-P577K-r LKYDHKWEFI | 112   | 16    |
| >KIT-P577K-v NYVYIDPTQL | 25854 | >KIT-P577K-r NYVYIDPTQL | 118   | 25736 |

|                         |       |                         |      |       |
|-------------------------|-------|-------------------------|------|-------|
| >KIT-P577K-v QLPYDHKWE  | 446   | >KIT-P577K-r QLKYDHKWE  | 4414 | 3968  |
| >KIT-P577K-v QLPYDHKWE  | 979   | >KIT-P577K-r QLKYDHKWE  | 99   | 880   |
| >KIT-P577K-v TQLPYDHKW  | 34    | >KIT-P577K-r TQLKYDHKW  | 99   | 65    |
| >KIT-P577K-v TQLPYDHK   | 118   | >KIT-P577K-r TQLKYDHK   | 193  | 75    |
| >KIT-P577K-v TQLPYDHKW  | 67    | >KIT-P577K-r TQLKYDHKW  | 91   | 24    |
| >KIT-P577K-v TQLPYDHKW  | 176   | >KIT-P577K-r TQLKYDHKW  | 328  | 152   |
| >KIT-P577K-v TQLPYDHKW  | 23    | >KIT-P577K-r TQLKYDHKW  | 21   | 2     |
| >KIT-P577K-v TQLPYDHKW  | 306   | >KIT-P577K-r TQLKYDHKW  | 2321 | 2015  |
| >KIT-P577K-v TQLPYDHKW  | 199   | >KIT-P577K-r TQLKYDHKW  | 181  | 18    |
| >KIT-P577K-v TQLPYDHKW  | 186   | >KIT-P577K-r TQLKYDHKW  | 624  | 438   |
| >KIT-P577K-v TQLPYDHKW  | 129   | >KIT-P577K-r TQLKYDHKW  | 545  | 416   |
| >KIT-P577K-v TQLPYDHKW  | 123   | >KIT-P577K-r TQLKYDHKW  | 136  | 13    |
| >KIT-P577K-v PTQLPYDHKV | 396   | >KIT-P577K-r PTQLKYDHKV | 858  | 462   |
| >KIT-P577K-v DPTQLPYDH  | 289   | >KIT-P577K-r DPTQLKYDH  | 786  | 497   |
| >KIT-P577K-v DPTQLPYDH  | 46    | >KIT-P577K-r DPTQLKYDH  | 48   | 2     |
| >KIT-P577K-v DPTQLPYDH  | 24    | >KIT-P577K-r DPTQLKYDH  | 21   | 3     |
| >KIT-P577K-v YIDPTQLPY  | 10    | >KIT-P577K-r YIDPTQLKY  | 16   | 6     |
| >KIT-P577K-v YIDPTQLP   | 27059 | >KIT-P577K-r YIDPTQLK   | 155  | 26904 |
| >KIT-P577K-v YIDPTQLPY  | 1048  | >KIT-P577K-r YIDPTQLKY  | 268  | 780   |
| >KIT-P577K-v YIDPTQLPY  | 21    | >KIT-P577K-r YIDPTQLKY  | 32   | 11    |
| >KIT-P577K-v YIDPTQLP   | 34638 | >KIT-P577K-r YIDPTQLK   | 476  | 34162 |
| >KIT-P577K-v YIDPTQLPY  | 11    | >KIT-P577K-r YIDPTQLKY  | 15   | 4     |
| >KIT-P577K-v YIDPTQLPY  | 137   | >KIT-P577K-r YIDPTQLKY  | 3694 | 3557  |
| >KIT-P577K-v YIDPTQLPY  | 240   | >KIT-P577K-r YIDPTQLKY  | 844  | 604   |
| >KIT-P577K-v YIDPTQLPY  | 42    | >KIT-P577K-r YIDPTQLKY  | 45   | 3     |
| >KIT-P577K-v YIDPTQLPY  | 61    | >KIT-P577K-r YIDPTQLKY  | 851  | 790   |
| >KIT-P577K-v YIDPTQLPY  | 750   | >KIT-P577K-r YIDPTQLKY  | 345  | 405   |
| >KIT-P577K-v YIDPTQLPY  | 116   | >KIT-P577K-r YIDPTQLKY  | 621  | 505   |
| >KIT-P577K-v YIDPTQLPY  | 56    | >KIT-P577K-r YIDPTQLKY  | 25   | 31    |
| >KIT-P577K-v VYIDPTQLPY | 495   | >KIT-P577K-r VYIDPTQLKY | 326  | 169   |
| >KIT-P577K-v VYIDPTQLP  | 27976 | >KIT-P577K-r VYIDPTQLK  | 409  | 27567 |
| >KIT-P577K-v VYIDPTQLPY | 319   | >KIT-P577K-r VYIDPTQLKY | 834  | 515   |
| >KIT-P577K-v VYIDPTQLPY | 33    | >KIT-P577K-r VYIDPTQLKY | 31   | 2     |
| >KIT-P577K-v VYIDPTQLPY | 64    | >KIT-P577K-r VYIDPTQLKY | 38   | 26    |
| >KIT-P577K-v VYIDPTQLPY | 32    | >KIT-P577K-r VYIDPTQLKY | 45   | 13    |
| >KIT-P577K-v YVYIDPTQLP | 23316 | >KIT-P577K-r YVYIDPTQLK | 77   | 23239 |
| >KIT-P577K-v YVYIDPTQLP | 492   | >KIT-P577K-r YVYIDPTQLK | 451  | 41    |
| >KIT-P577K-v YVYIDPTQLP | 31723 | >KIT-P577K-r YVYIDPTQLK | 36   | 31687 |
| >KIT-P577K-v YVYIDPTQLP | 330   | >KIT-P577K-r YVYIDPTQLK | 803  | 473   |
| >KIT-P577K-v YVYIDPTQLP | 387   | >KIT-P577K-r YVYIDPTQLK | 134  | 253   |
| >KIT-P577K-v YVYIDPTQLP | 91    | >KIT-P577K-r YVYIDPTQLK | 284  | 193   |
| >KIT-P577K-v YVYIDPTQLP | 6     | >KIT-P577K-r YVYIDPTQLK | 6    | 0     |
| >KIT-P577K-v YVYIDPTQLP | 517   | >KIT-P577K-r YVYIDPTQLK | 328  | 189   |

|                          |       |                          |       |       |
|--------------------------|-------|--------------------------|-------|-------|
| >KIT-P577K-v YVYIDPTQLP  | 19543 | >KIT-P577K-r YVYIDPTQLK  | 10    | 19533 |
| >KIT-P577K-v YVYIDPTQLP) | 451   | >KIT-P577K-r YVYIDPTQLK) | 476   | 25    |
| >KIT-P577K-v YVYIDPTQLP) | 16    | >KIT-P577K-r YVYIDPTQLK) | 19    | 3     |
| >KIT-P577K-v YVYIDPTQLP) | 63    | >KIT-P577K-r YVYIDPTQLK) | 357   | 294   |
| >KIT-P577K-v YVYIDPTQLP) | 73    | >KIT-P577K-r YVYIDPTQLK) | 137   | 64    |
| >KIT-P577K-v YVYIDPTQLP) | 53    | >KIT-P577K-r YVYIDPTQLK) | 227   | 174   |
| >KIT-P577K-v YVYIDPTQLP) | 7     | >KIT-P577K-r YVYIDPTQLK) | 7     | 0     |
| >KIT-P577K-v YVYIDPTQLP) | 17    | >KIT-P577K-r YVYIDPTQLK) | 58    | 41    |
| >KIT-P577K-v YVYIDPTQLP) | 301   | >KIT-P577K-r YVYIDPTQLK) | 92    | 209   |
| >KIT-P577K-v YVYIDPTQLP) | 949   | >KIT-P577K-r YVYIDPTQLK) | 385   | 564   |
| >KIT-P577L-v PYDHKWEF    | 147   | >KIT-P577L-n LYDHKWEF    | 92    | 55    |
| >KIT-P577L-v PYDHKWEF    | 444   | >KIT-P577L-n LYDHKWEF    | 171   | 273   |
| >KIT-P577L-v PYDHKWEF    | 61    | >KIT-P577L-n LYDHKWEF    | 10    | 51    |
| >KIT-P577L-v PYDHKWEFP)  | 1152  | >KIT-P577L-n LYDHKWEFP)  | 159   | 993   |
| >KIT-P577L-v PYDHKWEFP)  | 1990  | >KIT-P577L-n LYDHKWEFP)  | 213   | 1777  |
| >KIT-P577L-v PYDHKWEFP)  | 67    | >KIT-P577L-n LYDHKWEFP)  | 53    | 14    |
| >KIT-P577L-v LPYDHKWEF   | 23703 | >KIT-P577L-n LLYDHKWEF   | 317   | 23386 |
| >KIT-P577L-v LPYDHKWEF   | 28841 | >KIT-P577L-n LLYDHKWEF   | 76    | 28765 |
| >KIT-P577L-v LPYDHKWEF   | 15074 | >KIT-P577L-n LLYDHKWEF   | 25    | 15049 |
| >KIT-P577L-v LPYDHKWEF   | 15176 | >KIT-P577L-n LLYDHKWEF   | 6     | 15170 |
| >KIT-P577L-v LPYDHKWEFF) | 25512 | >KIT-P577L-n LLYDHKWEFF) | 120   | 25392 |
| >KIT-P577L-v LPYDHKWEFF) | 25425 | >KIT-P577L-n LLYDHKWEFF) | 136   | 25289 |
| >KIT-P577L-v LPYDHKWEF   | 22275 | >KIT-P577L-n LLYDHKWEF   | 247   | 22028 |
| >KIT-P577L-v LPYDHKWE    | 36915 | >KIT-P577L-n LLYDHKWE    | 221   | 36694 |
| >KIT-P577L-v LPYDHKWEF   | 31572 | >KIT-P577L-n LLYDHKWEF   | 6     | 31566 |
| >KIT-P577L-v LPYDHKWEFF) | 36833 | >KIT-P577L-n LLYDHKWEFF) | 256   | 36577 |
| >KIT-P577L-v LPYDHKWEFF) | 35169 | >KIT-P577L-n LLYDHKWEFF) | 42    | 35127 |
| >KIT-P577L-v LPYDHKWEFF) | 18077 | >KIT-P577L-n LLYDHKWEFF) | 187   | 17890 |
| >KIT-P577L-v LPYDHKWEFF) | 12846 | >KIT-P577L-n LLYDHKWEFF) | 310   | 12536 |
| >KIT-P577L-v LPYDHKWEF   | 945   | >KIT-P577L-n LLYDHKWEF   | 132   | 813   |
| >KIT-P577L-v LPYDHKWEF   | 4075  | >KIT-P577L-n LLYDHKWEF   | 384   | 3691  |
| >KIT-P577L-v LPYDHKWEF   | 4195  | >KIT-P577L-n LLYDHKWEF   | 215   | 3980  |
| >KIT-P577L-v LPYDHKWEFF) | 169   | >KIT-P577L-n LLYDHKWEFF) | 9     | 160   |
| >KIT-P577L-v LPYDHKWEFF) | 170   | >KIT-P577L-n LLYDHKWEFF) | 34    | 136   |
| >KIT-P577L-v LPYDHKWEFF) | 359   | >KIT-P577L-n LLYDHKWEFF) | 58    | 301   |
| >KIT-P577L-v LPYDHKWEF   | 175   | >KIT-P577L-n LLYDHKWEF   | 20941 | 20766 |
| >KIT-P577L-v LPYDHKWEF   | 11035 | >KIT-P577L-n LLYDHKWEF   | 88    | 10947 |
| >KIT-P577L-v LPYDHKWEF   | 272   | >KIT-P577L-n LLYDHKWEF   | 41    | 231   |
| >KIT-P577L-v LPYDHKWEF   | 6819  | >KIT-P577L-n LLYDHKWEF   | 307   | 6512  |
| >KIT-P577L-v LPYDHKWEF   | 162   | >KIT-P577L-n LLYDHKWEF   | 4544  | 4382  |
| >KIT-P577L-v LPYDHKWEF   | 11    | >KIT-P577L-n LLYDHKWEF   | 651   | 640   |
| >KIT-P577L-v LPYDHKWEFF) | 212   | >KIT-P577L-n LLYDHKWEFF) | 12887 | 12675 |
| >KIT-P577L-v LPYDHKWEF   | 471   | >KIT-P577L-n LLYDHKWEF   | 24468 | 23997 |



|                         |       |                         |       |       |
|-------------------------|-------|-------------------------|-------|-------|
| >KIT-P577L-v LPYDHKWEF  | 18    | >KIT-P577L-n LLYDHKWEF  | 12483 | 12465 |
| >KIT-P577L-v LPYDHKWEFF | 124   | >KIT-P577L-n LLYDHKWEFF | 23919 | 23795 |
| >KIT-P577L-v LPYDHKWEF  | 67    | >KIT-P577L-n LLYDHKWEF  | 4910  | 4843  |
| >KIT-P577L-v LPYDHKWEF  | 11    | >KIT-P577L-n LLYDHKWEF  | 7728  | 7717  |
| >KIT-P577L-v LPYDHKWEFF | 96    | >KIT-P577L-n LLYDHKWEFF | 51    | 45    |
| >KIT-P577L-v NYVYIDPTQL | 11888 | >KIT-P577L-n NYVYIDPTQL | 103   | 11785 |
| >KIT-P577L-v NYVYIDPTQL | 11425 | >KIT-P577L-n NYVYIDPTQL | 75    | 11350 |
| >KIT-P577L-v QLPYDHKWE  | 446   | >KIT-P577L-n QLLYDHKWE  | 642   | 196   |
| >KIT-P577L-v QLPYDHKWE  | 1326  | >KIT-P577L-n QLLYDHKWE  | 370   | 956   |
| >KIT-P577L-v QLPYDHKWE  | 979   | >KIT-P577L-n QLLYDHKWE  | 74    | 905   |
| >KIT-P577L-v TQLPYDHKW  | 34    | >KIT-P577L-n TQLLYDHKW  | 134   | 100   |
| >KIT-P577L-v TQLPYDHK   | 118   | >KIT-P577L-n TQLLYDHK   | 134   | 16    |
| >KIT-P577L-v TQLPYDHKW  | 67    | >KIT-P577L-n TQLLYDHKW  | 209   | 142   |
| >KIT-P577L-v TQLPYDHKW  | 176   | >KIT-P577L-n TQLLYDHKW  | 762   | 586   |
| >KIT-P577L-v TQLPYDHKW  | 23    | >KIT-P577L-n TQLLYDHKW  | 50    | 27    |
| >KIT-P577L-v TQLPYDHKW  | 306   | >KIT-P577L-n TQLLYDHKW  | 2118  | 1812  |
| >KIT-P577L-v TQLPYDHKW  | 199   | >KIT-P577L-n TQLLYDHKW  | 176   | 23    |
| >KIT-P577L-v TQLPYDHKW  | 186   | >KIT-P577L-n TQLLYDHKW  | 1640  | 1454  |
| >KIT-P577L-v TQLPYDHKW  | 129   | >KIT-P577L-n TQLLYDHKW  | 874   | 745   |
| >KIT-P577L-v TQLPYDHKW  | 123   | >KIT-P577L-n TQLLYDHKW  | 250   | 127   |
| >KIT-P577L-v PTQLPYDHKV | 396   | >KIT-P577L-n PTQLLYDHKV | 1119  | 723   |
| >KIT-P577L-v DPTQLPYDH  | 289   | >KIT-P577L-n DPTQLLYDH  | 422   | 133   |
| >KIT-P577L-v DPTQLPYDH  | 46    | >KIT-P577L-n DPTQLLYDH  | 48    | 2     |
| >KIT-P577L-v DPTQLPYDH  | 24    | >KIT-P577L-n DPTQLLYDH  | 12    | 12    |
| >KIT-P577L-v IDPTQLPY   | 1811  | >KIT-P577L-n IDPTQLLY   | 364   | 1447  |
| >KIT-P577L-v YIDPTQLPY  | 10    | >KIT-P577L-n YIDPTQLLY  | 8     | 2     |
| >KIT-P577L-v YIDPTQLP   | 20813 | >KIT-P577L-n YIDPTQLL   | 74    | 20739 |
| >KIT-P577L-v YIDPTQLP   | 12922 | >KIT-P577L-n YIDPTQLL   | 57    | 12865 |
| >KIT-P577L-v YIDPTQLP   | 9067  | >KIT-P577L-n YIDPTQLL   | 27    | 9040  |
| >KIT-P577L-v YIDPTQLP   | 7750  | >KIT-P577L-n YIDPTQLL   | 20    | 7730  |
| >KIT-P577L-v YIDPTQLP   | 20594 | >KIT-P577L-n YIDPTQLL   | 102   | 20492 |
| >KIT-P577L-v YIDPTQLP   | 12234 | >KIT-P577L-n YIDPTQLL   | 32    | 12202 |
| >KIT-P577L-v YIDPTQLP   | 22619 | >KIT-P577L-n YIDPTQLL   | 86    | 22533 |
| >KIT-P577L-v YIDPTQLP   | 11399 | >KIT-P577L-n YIDPTQLL   | 7     | 11392 |
| >KIT-P577L-v YIDPTQLPY  | 21    | >KIT-P577L-n YIDPTQLLY  | 11    | 10    |
| >KIT-P577L-v YIDPTQLP   | 16969 | >KIT-P577L-n YIDPTQLL   | 302   | 16667 |
| >KIT-P577L-v YIDPTQLPY  | 11    | >KIT-P577L-n YIDPTQLLY  | 5     | 6     |
| >KIT-P577L-v YIDPTQLPY  | 137   | >KIT-P577L-n YIDPTQLLY  | 1950  | 1813  |
| >KIT-P577L-v YIDPTQLPY  | 240   | >KIT-P577L-n YIDPTQLLY  | 1165  | 925   |
| >KIT-P577L-v YIDPTQLPY  | 42    | >KIT-P577L-n YIDPTQLLY  | 128   | 86    |
| >KIT-P577L-v YIDPTQLPY  | 61    | >KIT-P577L-n YIDPTQLLY  | 922   | 861   |
| >KIT-P577L-v YIDPTQLPY  | 750   | >KIT-P577L-n YIDPTQLLY  | 139   | 611   |
| >KIT-P577L-v YIDPTQLPY  | 3078  | >KIT-P577L-n YIDPTQLLY  | 261   | 2817  |

|                         |       |                          |      |       |
|-------------------------|-------|--------------------------|------|-------|
| >KIT-P577L-v YIDPTQLPY  | 116   | >KIT-P577L-n YIDPTQLLY   | 1460 | 1344  |
| >KIT-P577L-v YIDPTQLPY  | 56    | >KIT-P577L-n YIDPTQLLY   | 25   | 31    |
| >KIT-P577L-v VYIDPTQLP  | 10773 | >KIT-P577L-n VYIDPTQLL   | 484  | 10289 |
| >KIT-P577L-v VYIDPTQLPY | 495   | >KIT-P577L-n VYIDPTQLLY  | 213  | 282   |
| >KIT-P577L-v VYIDPTQLP  | 12091 | >KIT-P577L-n VYIDPTQLL   | 110  | 11981 |
| >KIT-P577L-v VYIDPTQLPY | 2323  | >KIT-P577L-n VYIDPTQLLY  | 397  | 1926  |
| >KIT-P577L-v VYIDPTQLP  | 8283  | >KIT-P577L-n VYIDPTQLL   | 274  | 8009  |
| >KIT-P577L-v VYIDPTQLP  | 8028  | >KIT-P577L-n VYIDPTQLL   | 27   | 8001  |
| >KIT-P577L-v VYIDPTQLPY | 319   | >KIT-P577L-n VYIDPTQLLY  | 1572 | 1253  |
| >KIT-P577L-v VYIDPTQLPY | 33    | >KIT-P577L-n VYIDPTQLLY  | 24   | 9     |
| >KIT-P577L-v VYIDPTQLPY | 64    | >KIT-P577L-n VYIDPTQLLY  | 22   | 42    |
| >KIT-P577L-v VYIDPTQLPY | 32    | >KIT-P577L-n VYIDPTQLLY  | 11   | 21    |
| >KIT-P577L-v YVYIDPTQLP | 1068  | >KIT-P577L-n YVYIDPTQLLY | 490  | 578   |
| >KIT-P577L-v YVYIDPTQLP | 12533 | >KIT-P577L-n YVYIDPTQLL  | 229  | 12304 |
| >KIT-P577L-v YVYIDPTQLP | 5620  | >KIT-P577L-n YVYIDPTQLL  | 30   | 5590  |
| >KIT-P577L-v YVYIDPTQLP | 7422  | >KIT-P577L-n YVYIDPTQLL  | 67   | 7355  |
| >KIT-P577L-v YVYIDPTQLP | 9819  | >KIT-P577L-n YVYIDPTQLL  | 124  | 9695  |
| >KIT-P577L-v YVYIDPTQLP | 5722  | >KIT-P577L-n YVYIDPTQLL  | 17   | 5705  |
| >KIT-P577L-v YVYIDPTQLP | 21754 | >KIT-P577L-n YVYIDPTQLL  | 362  | 21392 |
| >KIT-P577L-v YVYIDPTQLP | 15053 | >KIT-P577L-n YVYIDPTQLL  | 58   | 14995 |
| >KIT-P577L-v YVYIDPTQLP | 13890 | >KIT-P577L-n YVYIDPTQLL  | 12   | 13878 |
| >KIT-P577L-v YVYIDPTQLP | 492   | >KIT-P577L-n YVYIDPTQLLY | 273  | 219   |
| >KIT-P577L-v YVYIDPTQLP | 330   | >KIT-P577L-n YVYIDPTQLLY | 337  | 7     |
| >KIT-P577L-v YVYIDPTQLP | 387   | >KIT-P577L-n YVYIDPTQLLY | 974  | 587   |
| >KIT-P577L-v YVYIDPTQLP | 91    | >KIT-P577L-n YVYIDPTQLLY | 469  | 378   |
| >KIT-P577L-v YVYIDPTQLP | 6     | >KIT-P577L-n YVYIDPTQLLY | 5    | 1     |
| >KIT-P577L-v YVYIDPTQLP | 517   | >KIT-P577L-n YVYIDPTQLLY | 302  | 215   |
| >KIT-P577L-v YVYIDPTQLP | 451   | >KIT-P577L-n YVYIDPTQLLY | 194  | 257   |
| >KIT-P577L-v YVYIDPTQLP | 22625 | >KIT-P577L-n YVYIDPTQLL  | 119  | 22506 |
| >KIT-P577L-v YVYIDPTQLP | 9906  | >KIT-P577L-n YVYIDPTQLL  | 83   | 9823  |
| >KIT-P577L-v YVYIDPTQLP | 16    | >KIT-P577L-n YVYIDPTQLLY | 9    | 7     |
| >KIT-P577L-v YVYIDPTQLP | 63    | >KIT-P577L-n YVYIDPTQLLY | 227  | 164   |
| >KIT-P577L-v YVYIDPTQLP | 73    | >KIT-P577L-n YVYIDPTQLLY | 176  | 103   |
| >KIT-P577L-v YVYIDPTQLP | 53    | >KIT-P577L-n YVYIDPTQLLY | 241  | 188   |
| >KIT-P577L-v YVYIDPTQLP | 18560 | >KIT-P577L-n YVYIDPTQLL  | 91   | 18469 |
| >KIT-P577L-v YVYIDPTQLP | 7     | >KIT-P577L-n YVYIDPTQLLY | 10   | 3     |
| >KIT-P577L-v YVYIDPTQLP | 17    | >KIT-P577L-n YVYIDPTQLLY | 62   | 45    |
| >KIT-P577L-v YVYIDPTQLP | 1053  | >KIT-P577L-n YVYIDPTQLLY | 401  | 652   |
| >KIT-P577L-v YVYIDPTQLP | 301   | >KIT-P577L-n YVYIDPTQLLY | 38   | 263   |
| >KIT-P577L-v YVYIDPTQLP | 949   | >KIT-P577L-n YVYIDPTQLLY | 251  | 698   |
| >KIT-P577S-v PYDHKWEF   | 147   | >KIT-P577S-n SYDHKWEF    | 168  | 21    |
| >KIT-P577S-v PYDHKWEF   | 444   | >KIT-P577S-n SYDHKWEF    | 218  | 226   |
| >KIT-P577S-v PYDHKWEF   | 61    | >KIT-P577S-n SYDHKWEF    | 10   | 51    |

|                         |       |                         |       |       |
|-------------------------|-------|-------------------------|-------|-------|
| >KIT-P577S-v PYDHKWEFPI | 1152  | >KIT-P577S-n SYDHKWEFPI | 140   | 1012  |
| >KIT-P577S-v PYDHKWEFPI | 1990  | >KIT-P577S-n SYDHKWEFPI | 256   | 1734  |
| >KIT-P577S-v PYDHKWEFPI | 67    | >KIT-P577S-n SYDHKWEFPI | 30    | 37    |
| >KIT-P577S-v LPYDHKWEFI | 12846 | >KIT-P577S-n LSYDHKWEFF | 67    | 12779 |
| >KIT-P577S-v LPYDHKWEF  | 945   | >KIT-P577S-n LSYDHKWEF  | 225   | 720   |
| >KIT-P577S-v LPYDHKWEFI | 169   | >KIT-P577S-n LSYDHKWEFF | 7     | 162   |
| >KIT-P577S-v LPYDHKWEFI | 170   | >KIT-P577S-n LSYDHKWEFF | 41    | 129   |
| >KIT-P577S-v LPYDHKWEFI | 359   | >KIT-P577S-n LSYDHKWEFF | 16    | 343   |
| >KIT-P577S-v LPYDHKWEF  | 175   | >KIT-P577S-n LSYDHKWEF  | 22109 | 21934 |
| >KIT-P577S-v LPYDHKWEF  | 11035 | >KIT-P577S-n LSYDHKWEF  | 195   | 10840 |
| >KIT-P577S-v LPYDHKWEF  | 272   | >KIT-P577S-n LSYDHKWEF  | 31    | 241   |
| >KIT-P577S-v LPYDHKWEF  | 6819  | >KIT-P577S-n LSYDHKWEF  | 4     | 6815  |
| >KIT-P577S-v LPYDHKWEF  | 162   | >KIT-P577S-n LSYDHKWEF  | 932   | 770   |
| >KIT-P577S-v LPYDHKWEF  | 11    | >KIT-P577S-n LSYDHKWEF  | 319   | 308   |
| >KIT-P577S-v LPYDHKWEFI | 212   | >KIT-P577S-n LSYDHKWEFF | 10605 | 10393 |
| >KIT-P577S-v LPYDHKWEF  | 471   | >KIT-P577S-n LSYDHKWEF  | 20540 | 20069 |
| >KIT-P577S-v LPYDHKWEF  | 18    | >KIT-P577S-n LSYDHKWEF  | 3547  | 3529  |
| >KIT-P577S-v LPYDHKWEFI | 124   | >KIT-P577S-n LSYDHKWEFF | 18994 | 18870 |
| >KIT-P577S-v LPYDHKWEF  | 18594 | >KIT-P577S-n LSYDHKWEF  | 264   | 18330 |
| >KIT-P577S-v LPYDHKWEF  | 14125 | >KIT-P577S-n LSYDHKWEF  | 35    | 14090 |
| >KIT-P577S-v LPYDHKWEF  | 67    | >KIT-P577S-n LSYDHKWEF  | 8366  | 8299  |
| >KIT-P577S-v LPYDHKWEF  | 11    | >KIT-P577S-n LSYDHKWEF  | 3435  | 3424  |
| >KIT-P577S-v LPYDHKWEFI | 4333  | >KIT-P577S-n LSYDHKWEFF | 243   | 4090  |
| >KIT-P577S-v LPYDHKWEFI | 96    | >KIT-P577S-n LSYDHKWEFF | 123   | 27    |
| >KIT-P577S-v QLPYDHKWE  | 446   | >KIT-P577S-n QLSYDHKWE  | 2410  | 1964  |
| >KIT-P577S-v QLPYDHKWE  | 979   | >KIT-P577S-n QLSYDHKWE  | 152   | 827   |
| >KIT-P577S-v QLPYDHKWE  | 1971  | >KIT-P577S-n QLSYDHKWE  | 395   | 1576  |
| >KIT-P577S-v TQLPYDHKW  | 34    | >KIT-P577S-n TQLSYDHKW  | 70    | 36    |
| >KIT-P577S-v TQLPYDHK   | 118   | >KIT-P577S-n TQLSYDHK   | 99    | 19    |
| >KIT-P577S-v TQLPYDHKW  | 67    | >KIT-P577S-n TQLSYDHKW  | 59    | 8     |
| >KIT-P577S-v TQLPYDHKW  | 176   | >KIT-P577S-n TQLSYDHKW  | 397   | 221   |
| >KIT-P577S-v TQLPYDHKW  | 23    | >KIT-P577S-n TQLSYDHKW  | 12    | 11    |
| >KIT-P577S-v TQLPYDHKW  | 306   | >KIT-P577S-n TQLSYDHKW  | 1604  | 1298  |
| >KIT-P577S-v TQLPYDHKW  | 199   | >KIT-P577S-n TQLSYDHKW  | 245   | 46    |
| >KIT-P577S-v TQLPYDHKW  | 186   | >KIT-P577S-n TQLSYDHKW  | 987   | 801   |
| >KIT-P577S-v TQLPYDHKW  | 129   | >KIT-P577S-n TQLSYDHKW  | 327   | 198   |
| >KIT-P577S-v TQLPYDHKW  | 123   | >KIT-P577S-n TQLSYDHKW  | 84    | 39    |
| >KIT-P577S-v PTQLPYDHKV | 396   | >KIT-P577S-n PTQLSYDHKV | 343   | 53    |
| >KIT-P577S-v DPTQLPYDH  | 289   | >KIT-P577S-n DPTQLSYDH  | 123   | 166   |
| >KIT-P577S-v DPTQLPYDH  | 46    | >KIT-P577S-n DPTQLSYDH  | 45    | 1     |
| >KIT-P577S-v DPTQLPYDH  | 24    | >KIT-P577S-n DPTQLSYDH  | 11    | 13    |
| >KIT-P577S-v YIDPTQLPY  | 10    | >KIT-P577S-n YIDPTQLSY  | 14    | 4     |
| >KIT-P577S-v YIDPTQLPY  | 1048  | >KIT-P577S-n YIDPTQLSY  | 96    | 952   |

|                           |       |                           |     |       |
|---------------------------|-------|---------------------------|-----|-------|
| >KIT-P577S-v YIDPTQLPY    | 21    | >KIT-P577S-n YIDPTQLSY    | 29  | 8     |
| >KIT-P577S-v YIDPTQLPY    | 1117  | >KIT-P577S-n YIDPTQLSY    | 420 | 697   |
| >KIT-P577S-v YIDPTQLPY    | 11    | >KIT-P577S-n YIDPTQLSY    | 13  | 2     |
| >KIT-P577S-v YIDPTQLPY    | 137   | >KIT-P577S-n YIDPTQLSY    | 214 | 77    |
| >KIT-P577S-v YIDPTQLPY    | 240   | >KIT-P577S-n YIDPTQLSY    | 415 | 175   |
| >KIT-P577S-v YIDPTQLPY    | 42    | >KIT-P577S-n YIDPTQLSY    | 37  | 5     |
| >KIT-P577S-v YIDPTQLPY    | 61    | >KIT-P577S-n YIDPTQLSY    | 226 | 165   |
| >KIT-P577S-v YIDPTQLPY    | 750   | >KIT-P577S-n YIDPTQLSY    | 181 | 569   |
| >KIT-P577S-v YIDPTQLPY    | 116   | >KIT-P577S-n YIDPTQLSY    | 150 | 34    |
| >KIT-P577S-v YIDPTQLPY    | 56    | >KIT-P577S-n YIDPTQLSY    | 30  | 26    |
| >KIT-P577S-v VYIDPTQLPY   | 495   | >KIT-P577S-n VYIDPTQLSY   | 551 | 56    |
| >KIT-P577S-v VYIDPTQLPY   | 319   | >KIT-P577S-n VYIDPTQLSY   | 520 | 201   |
| >KIT-P577S-v VYIDPTQLPY   | 33    | >KIT-P577S-n VYIDPTQLSY   | 46  | 13    |
| >KIT-P577S-v VYIDPTQLPY   | 64    | >KIT-P577S-n VYIDPTQLSY   | 48  | 16    |
| >KIT-P577S-v VYIDPTQLPY   | 32    | >KIT-P577S-n VYIDPTQLSY   | 34  | 2     |
| >KIT-P577S-v VYVYIDPTQLPY | 492   | >KIT-P577S-n VYVYIDPTQLSY | 456 | 36    |
| >KIT-P577S-v VYVYIDPTQLPY | 330   | >KIT-P577S-n VYVYIDPTQLSY | 638 | 308   |
| >KIT-P577S-v VYVYIDPTQLPY | 387   | >KIT-P577S-n VYVYIDPTQLSY | 65  | 322   |
| >KIT-P577S-v VYVYIDPTQLPY | 91    | >KIT-P577S-n VYVYIDPTQLSY | 159 | 68    |
| >KIT-P577S-v VYVYIDPTQLPY | 6     | >KIT-P577S-n VYVYIDPTQLSY | 6   | 0     |
| >KIT-P577S-v VYVYIDPTQLPY | 517   | >KIT-P577S-n VYVYIDPTQLSY | 191 | 326   |
| >KIT-P577S-v VYVYIDPTQLPY | 451   | >KIT-P577S-n VYVYIDPTQLSY | 437 | 14    |
| >KIT-P577S-v VYVYIDPTQLPY | 16    | >KIT-P577S-n VYVYIDPTQLSY | 17  | 1     |
| >KIT-P577S-v VYVYIDPTQLPY | 63    | >KIT-P577S-n VYVYIDPTQLSY | 66  | 3     |
| >KIT-P577S-v VYVYIDPTQLPY | 73    | >KIT-P577S-n VYVYIDPTQLSY | 90  | 17    |
| >KIT-P577S-v VYVYIDPTQLPY | 53    | >KIT-P577S-n VYVYIDPTQLSY | 62  | 9     |
| >KIT-P577S-v VYVYIDPTQLPY | 7     | >KIT-P577S-n VYVYIDPTQLSY | 6   | 1     |
| >KIT-P577S-v VYVYIDPTQLPY | 17    | >KIT-P577S-n VYVYIDPTQLSY | 31  | 14    |
| >KIT-P577S-v VYVYIDPTQLPY | 1053  | >KIT-P577S-n VYVYIDPTQLSY | 467 | 586   |
| >KIT-P577S-v VYVYIDPTQLPY | 301   | >KIT-P577S-n VYVYIDPTQLSY | 81  | 220   |
| >KIT-P627L-v PSAHLTEREA   | 5354  | >KIT-P627L-n LSAHLTEREA   | 240 | 5114  |
| >KIT-P627L-v PSAHLTER     | 2530  | >KIT-P627L-n LSAHLTER     | 68  | 2462  |
| >KIT-P627L-v PSAHLTER     | 838   | >KIT-P627L-n LSAHLTER     | 28  | 810   |
| >KIT-P627L-v PSAHLTEREA   | 4459  | >KIT-P627L-n LSAHLTEREA   | 201 | 4258  |
| >KIT-P627L-v PSAHLTEREA   | 5702  | >KIT-P627L-n LSAHLTEREA   | 468 | 5234  |
| >KIT-P627L-v PSAHLTEREA   | 12401 | >KIT-P627L-n LSAHLTEREA   | 221 | 12180 |
| >KIT-P627L-v PSAHLTER     | 2502  | >KIT-P627L-n LSAHLTER     | 477 | 2025  |
| >KIT-P627L-v PSAHLTEREA   | 7622  | >KIT-P627L-n LSAHLTEREA   | 294 | 7328  |
| >KIT-P627L-v KPSAHLTEREA  | 23117 | >KIT-P627L-n KLSAHLTEREA  | 317 | 22800 |
| >KIT-P627L-v KPSAHLTER    | 31831 | >KIT-P627L-n KLSAHLTER    | 311 | 31520 |
| >KIT-P627L-v KPSAHLTEREA  | 20859 | >KIT-P627L-n KLSAHLTEREA  | 56  | 20803 |
| >KIT-P627L-v KPSAHLTEREA  | 14368 | >KIT-P627L-n KLSAHLTEREA  | 41  | 14327 |
| >KIT-P627L-v KPSAHLTEREA  | 27868 | >KIT-P627L-n KLSAHLTEREA  | 189 | 27679 |

|                          |       |                          |       |       |
|--------------------------|-------|--------------------------|-------|-------|
| >KIT-P627L-v KPSAHLTERE, | 35541 | >KIT-P627L-n KLSAHLTERE/ | 86    | 35455 |
| >KIT-P627L-v KPSAHLTER   | 15991 | >KIT-P627L-n KLSAHLTER   | 69    | 15922 |
| >KIT-P627L-v KPSAHLTER   | 339   | >KIT-P627L-n KLSAHLTER   | 9     | 330   |
| >KIT-P627L-v KPSAHLTERE, | 160   | >KIT-P627L-n KLSAHLTERE/ | 21612 | 21452 |
| >KIT-P627L-v KPSAHLTER   | 381   | >KIT-P627L-n KLSAHLTER   | 97    | 284   |
| >KIT-P627L-v AMTVAVKMI   | 18217 | >KIT-P627L-n AMTVAVKMI   | 187   | 18030 |
| >KIT-P627L-v AMTVAVKMI   | 16701 | >KIT-P627L-n AMTVAVKMI   | 298   | 16403 |
| >KIT-P627L-v AMTVAVKMI   | 19969 | >KIT-P627L-n AMTVAVKMI   | 309   | 19660 |
| >KIT-P627L-v AMTVAVKMI   | 18032 | >KIT-P627L-n AMTVAVKMI   | 125   | 17907 |
| >KIT-P627L-v AMTVAVKMI   | 22181 | >KIT-P627L-n AMTVAVKMI   | 13    | 22168 |
| >KIT-P627L-v LKPSAHLTER  | 761   | >KIT-P627L-n LKLSAHLTER  | 78    | 683   |
| >KIT-P627L-v MLKPSAHL    | 14    | >KIT-P627L-n MLKLSAHL    | 27    | 13    |
| >KIT-P627L-v MLKPSAHLT   | 252   | >KIT-P627L-n MLKLSAHLT   | 831   | 579   |
| >KIT-P627L-v MLKPSAHL    | 9     | >KIT-P627L-n MLKLSAHL    | 19    | 10    |
| >KIT-P627L-v MLKPSAHLT   | 42    | >KIT-P627L-n MLKLSAHLT   | 217   | 175   |
| >KIT-P627L-v MLKPSAHL    | 416   | >KIT-P627L-n MLKLSAHL    | 1505  | 1089  |
| >KIT-P627L-v MLKPSAHL    | 154   | >KIT-P627L-n MLKLSAHL    | 779   | 625   |
| >KIT-P627L-v MLKPSAHL    | 72    | >KIT-P627L-n MLKLSAHL    | 211   | 139   |
| >KIT-P627L-v MLKPSAHL    | 3     | >KIT-P627L-n MLKLSAHL    | 9     | 6     |
| >KIT-P627L-v MLKPSAHLT   | 11    | >KIT-P627L-n MLKLSAHLT   | 107   | 96    |
| >KIT-P627L-v MLKPSAHLTE  | 361   | >KIT-P627L-n MLKLSAHLTE  | 628   | 267   |
| >KIT-P627L-v MLKPSAHL    | 93    | >KIT-P627L-n MLKLSAHL    | 216   | 123   |
| >KIT-P627L-v MLKPSAHLTE  | 11    | >KIT-P627L-n MLKLSAHLTE  | 12    | 1     |
| >KIT-P627L-v MLKPSAHLTE  | 163   | >KIT-P627L-n MLKLSAHLTE  | 85    | 78    |
| >KIT-P627L-v MLKPSAHLTE  | 53    | >KIT-P627L-n MLKLSAHLTE  | 51    | 2     |
| >KIT-P627L-v MLKPSAHL    | 127   | >KIT-P627L-n MLKLSAHL    | 42    | 85    |
| >KIT-P627L-v MLKPSAHL    | 128   | >KIT-P627L-n MLKLSAHL    | 262   | 134   |
| >KIT-P627L-v MLKPSAHL    | 276   | >KIT-P627L-n MLKLSAHL    | 858   | 582   |
| >KIT-P627L-v MLKPSAHL    | 233   | >KIT-P627L-n MLKLSAHL    | 2026  | 1793  |
| >KIT-P627L-v KMLKPSAHL   | 758   | >KIT-P627L-n KMLKLSAHL   | 141   | 617   |
| >KIT-P627L-v KMLKPSAHL   | 42    | >KIT-P627L-n KMLKLSAHL   | 22    | 20    |
| >KIT-P627L-v KMLKPSAHL   | 126   | >KIT-P627L-n KMLKLSAHL   | 20    | 106   |
| >KIT-P627L-v KMLKPSAHL   | 261   | >KIT-P627L-n KMLKLSAHL   | 104   | 157   |
| >KIT-P627L-v KMLKPSAHLT  | 563   | >KIT-P627L-n KMLKLSAHLT  | 395   | 168   |
| >KIT-P627L-v KMLKPSAHL   | 32    | >KIT-P627L-n KMLKLSAHL   | 17    | 15    |
| >KIT-P627L-v KMLKPSAHL   | 5     | >KIT-P627L-n KMLKLSAHL   | 7     | 2     |
| >KIT-P627L-v KMLKPSAHLT  | 44    | >KIT-P627L-n KMLKLSAHLT  | 98    | 54    |
| >KIT-P627L-v KMLKPSAHL   | 5     | >KIT-P627L-n KMLKLSAHL   | 5     | 0     |
| >KIT-P627L-v KMLKPSAHLT  | 285   | >KIT-P627L-n KMLKLSAHLT  | 248   | 37    |
| >KIT-P627L-v KMLKPSAHL   | 10    | >KIT-P627L-n KMLKLSAHL   | 7     | 3     |
| >KIT-P627L-v KMLKPSAHLT  | 169   | >KIT-P627L-n KMLKLSAHLT  | 104   | 65    |
| >KIT-P627L-v KMLKPSAHL   | 31    | >KIT-P627L-n KMLKLSAHL   | 26    | 5     |
| >KIT-P627L-v KMLKPSAHL   | 22    | >KIT-P627L-n KMLKLSAHL   | 18    | 4     |

|                         |       |                         |       |       |
|-------------------------|-------|-------------------------|-------|-------|
| >KIT-P627L-v KMLKPSAHLT | 215   | >KIT-P627L-n KMLKLSAHLT | 423   | 208   |
| >KIT-P627L-v KMLKPSAH   | 202   | >KIT-P627L-n KMLKLSAH   | 291   | 89    |
| >KIT-P627L-v KMLKPSAHL  | 181   | >KIT-P627L-n KMLKLSAHL  | 142   | 39    |
| >KIT-P627L-v KMLKPSAH   | 987   | >KIT-P627L-n KMLKLSAH   | 355   | 632   |
| >KIT-P627L-v KMLKPSAHL  | 866   | >KIT-P627L-n KMLKLSAHL  | 412   | 454   |
| >KIT-P627L-v KMLKPSAHL  | 207   | >KIT-P627L-n KMLKLSAHL  | 74    | 133   |
| >KIT-P627L-v KMLKPSAHLT | 840   | >KIT-P627L-n KMLKLSAHLT | 471   | 369   |
| >KIT-P627L-v KMLKPSAHL  | 170   | >KIT-P627L-n KMLKLSAHL  | 126   | 44    |
| >KIT-P627L-v KMLKPSAH   | 99    | >KIT-P627L-n KMLKLSAH   | 187   | 88    |
| >KIT-P627L-v KMLKPSAHL  | 26    | >KIT-P627L-n KMLKLSAHL  | 69    | 43    |
| >KIT-P627L-v KMLKPSAHL  | 106   | >KIT-P627L-n KMLKLSAHL  | 288   | 182   |
| >KIT-P627L-v KMLKPSAHL  | 323   | >KIT-P627L-n KMLKLSAHL  | 503   | 180   |
| >KIT-P627L-v KMLKPSAHL  | 691   | >KIT-P627L-n KMLKLSAHL  | 200   | 491   |
| >KIT-P627L-v VKMLKPSAH  | 260   | >KIT-P627L-n VKMLKLSAH  | 606   | 346   |
| >KIT-P627L-v VKMLKPSAHI | 64    | >KIT-P627L-n VKMLKLSAHI | 130   | 66    |
| >KIT-P627L-v AVKMLKPS   | 294   | >KIT-P627L-n AVKMLKLS   | 731   | 437   |
| >KIT-P627L-v AVKMLKPSA  | 13    | >KIT-P627L-n AVKMLKLSA  | 20    | 7     |
| >KIT-P627L-v AVKMLKPSAI | 28    | >KIT-P627L-n AVKMLKLSAI | 32    | 4     |
| >KIT-P627L-v AVKMLKPSAI | 611   | >KIT-P627L-n AVKMLKLSAI | 450   | 161   |
| >KIT-P627L-v VAVKMLKP   | 15589 | >KIT-P627L-n VAVKMLKL   | 42    | 15547 |
| >KIT-P627L-v TVAVKMLKP  | 15469 | >KIT-P627L-n TVAVKMLKL  | 201   | 15268 |
| >KIT-P627L-v TVAVKMLKPS | 408   | >KIT-P627L-n TVAVKMLKLS | 237   | 171   |
| >KIT-P627L-v MTVAVKMLK  | 17043 | >KIT-P627L-n MTVAVKMLK  | 92    | 16951 |
| >KIT-P627L-v MTVAVKMLK  | 65    | >KIT-P627L-n MTVAVKMLK  | 175   | 110   |
| >KIT-P627L-v MTVAVKMLK  | 11250 | >KIT-P627L-n MTVAVKMLK  | 240   | 11010 |
| >KIT-P627L-v MTVAVKMLK  | 5867  | >KIT-P627L-n MTVAVKMLK  | 11    | 5856  |
| >KIT-P627L-v MTVAVKMLK  | 13392 | >KIT-P627L-n MTVAVKMLK  | 146   | 13246 |
| >KIT-P627L-v MTVAVKMLK  | 15269 | >KIT-P627L-n MTVAVKMLK  | 333   | 14936 |
| >KIT-P627L-v MTVAVKMLK  | 17672 | >KIT-P627L-n MTVAVKMLK  | 309   | 17363 |
| >KIT-Q556H- QWKVVEEI    | 611   | >KIT-Q556H- HWKVVEEI    | 234   | 377   |
| >KIT-Q556H- VQWKVVEEI   | 154   | >KIT-Q556H- VHWKVVEEI   | 207   | 53    |
| >KIT-Q556H- VQWKVVEEI   | 91    | >KIT-Q556H- VHWKVVEEI   | 12534 | 12443 |
| >KIT-Q556H- VQWKVVEEI   | 43    | >KIT-Q556H- VHWKVVEEI   | 12054 | 12011 |
| >KIT-Q556H- VQWKVVEEI   | 17    | >KIT-Q556H- VHWKVVEEI   | 1634  | 1617  |
| >KIT-Q556H- VQWKVVEEI   | 75    | >KIT-Q556H- VHWKVVEEI   | 7139  | 7064  |
| >KIT-Q556H- VQWKVVEEI   | 468   | >KIT-Q556H- VHWKVVEEI   | 5403  | 4935  |
| >KIT-Q556H- VQWKVVEEI   | 57    | >KIT-Q556H- VHWKVVEEI   | 619   | 562   |
| >KIT-Q556H- KYLQKPMYEA  | 360   | >KIT-Q556H- KYLQKPMYEA  | 635   | 275   |
| >KIT-Q556H- KYLQKPMYEA  | 121   | >KIT-Q556H- KYLQKPMYEA  | 710   | 589   |
| >KIT-Q556H- KYLQKPMYEA  | 391   | >KIT-Q556H- KYLQKPMYEA  | 651   | 260   |
| >KIT-Q556H- EVQWKVVEE   | 766   | >KIT-Q556H- EVHWKVVEE   | 317   | 449   |
| >KIT-Q556H- EVQWKVVEE   | 147   | >KIT-Q556H- EVHWKVVEE   | 192   | 45    |
| >KIT-Q556H- YEVQWKVV    | 10    | >KIT-Q556H- YEVHWKVV    | 9     | 1     |

|                        |      |                        |     |      |
|------------------------|------|------------------------|-----|------|
| >KIT-Q556H- YEVDQWKVVE | 11   | >KIT-Q556H- YEVHWKVVE  | 11  | 0    |
| >KIT-Q556H- YEVDQWKVV  | 373  | >KIT-Q556H- YEVHWKV    | 816 | 443  |
| >KIT-Q556H- YEVDQWKVVE | 343  | >KIT-Q556H- YEVHWKVVE  | 893 | 550  |
| >KIT-Q556H- YEVDQWKVV  | 307  | >KIT-Q556H- YEVHWKV    | 184 | 123  |
| >KIT-Q556H- YEVDQWKVVE | 59   | >KIT-Q556H- YEVHWKVVE  | 46  | 13   |
| >KIT-Q556H- YEVDQWKVV  | 169  | >KIT-Q556H- YEVHWKV    | 207 | 38   |
| >KIT-Q556H- YEVDQWKVVE | 176  | >KIT-Q556H- YEVHWKVVE  | 208 | 32   |
| >KIT-Q556H- YEVDQWKVVE | 3    | >KIT-Q556H- YEVHWKVVE  | 4   | 1    |
| >KIT-Q556H- MYEVDQWKV  | 1294 | >KIT-Q556H- MYEVHWKV   | 494 | 800  |
| >KIT-Q556H- MYEVDQWKV  | 246  | >KIT-Q556H- MYEVHWKV   | 298 | 52   |
| >KIT-Q556H- MYEVDQWKV  | 488  | >KIT-Q556H- MYEVHWKV   | 403 | 85   |
| >KIT-Q556H- PMYEVDQWK\ | 17   | >KIT-Q556H- PMYEVHWK\  | 35  | 18   |
| >KIT-Q556H- PMYEVDQWK\ | 18   | >KIT-Q556H- PMYEVHWK\  | 32  | 14   |
| >KIT-Q556H- PMYEVDQWK\ | 48   | >KIT-Q556H- PMYEVHWK\  | 46  | 2    |
| >KIT-Q556H- PMYEVDQWK\ | 33   | >KIT-Q556H- PMYEVHWK\  | 34  | 1    |
| >KIT-Q556H- PMYEVDQWK  | 510  | >KIT-Q556H- PMYEVHWK   | 257 | 253  |
| >KIT-Q556H- PMYEVDQWK\ | 1    | >KIT-Q556H- PMYEVHWK\  | 1   | 0    |
| >KIT-Q556H- PMYEVDQWK\ | 4    | >KIT-Q556H- PMYEVHWK\  | 3   | 1    |
| >KIT-Q556H- PMYEVDQWK\ | 5    | >KIT-Q556H- PMYEVHWK\  | 8   | 3    |
| >KIT-Q556H- PMYEVDQWK\ | 97   | >KIT-Q556H- PMYEVHWK\  | 123 | 26   |
| >KIT-Q556H- PMYEVDQWK\ | 4    | >KIT-Q556H- PMYEVHWK\  | 4   | 0    |
| >KIT-Q556H- PMYEVDQWK\ | 11   | >KIT-Q556H- PMYEVHWK\  | 14  | 3    |
| >KIT-Q556H- PMYEVDQWK\ | 3    | >KIT-Q556H- PMYEVHWK\  | 4   | 1    |
| >KIT-Q556H- PMYEVDQWK\ | 54   | >KIT-Q556H- PMYEVHWK\  | 95  | 41   |
| >KIT-Q556H- PMYEVDQWK\ | 2    | >KIT-Q556H- PMYEVHWK\  | 2   | 0    |
| >KIT-Q556H- PMYEVDQWK\ | 10   | >KIT-Q556H- PMYEVHWK\  | 11  | 1    |
| >KIT-Q556H- PMYEVDQWK  | 129  | >KIT-Q556H- PMYEVHWK   | 103 | 26   |
| >KIT-Q556H- PMYEVDQWK  | 1471 | >KIT-Q556H- PMYEVHWK   | 356 | 1115 |
| >KIT-Q556H- PMYEVDQWK\ | 145  | >KIT-Q556H- PMYEVHWK\  | 73  | 72   |
| >KIT-Q556H- KPMYEVDQWf | 157  | >KIT-Q556H- KPMYEVHWf  | 140 | 17   |
| >KIT-Q556H- KPMYEVDQWf | 136  | >KIT-Q556H- KPMYEVHWf  | 84  | 52   |
| >KIT-Q556H- KPMYEVDQW  | 20   | >KIT-Q556H- KPMYEVHW   | 19  | 1    |
| >KIT-Q556H- KPMYEVDQWf | 68   | >KIT-Q556H- KPMYEVHWf  | 52  | 16   |
| >KIT-Q556H- KPMYEVDQW  | 536  | >KIT-Q556H- KPMYEVHW   | 471 | 65   |
| >KIT-Q556H- KPMYEVDQW  | 199  | >KIT-Q556H- KPMYEVHW   | 134 | 65   |
| >KIT-Q556H- KPMYEVDQW  | 9    | >KIT-Q556H- KPMYEVHW   | 9   | 0    |
| >KIT-Q556H- LQKPMYEVQ  | 243  | >KIT-Q556H- LQKPMYEVH' | 266 | 23   |
| >KIT-Q556H- LQKPMYEVQ  | 415  | >KIT-Q556H- LQKPMYEVH' | 164 | 251  |
| >KIT-Q556H- LQKPMYEVQ  | 230  | >KIT-Q556H- LQKPMYEVH  | 111 | 119  |
| >KIT-Q556H- LQKPMYEVQ  | 247  | >KIT-Q556H- LQKPMYEVH' | 85  | 162  |
| >KIT-Q556H- LQKPMYEVQ  | 1640 | >KIT-Q556H- LQKPMYEVH  | 344 | 1296 |
| >KIT-Q556H- LQKPMYEVQ  | 225  | >KIT-Q556H- LQKPMYEVH' | 156 | 69   |
| >KIT-Q556H- LQKPMYEVQ  | 168  | >KIT-Q556H- LQKPMYEVH' | 231 | 63   |

|                          |       |                          |       |       |
|--------------------------|-------|--------------------------|-------|-------|
| >KIT-Q556H- LQKPMYEVQ    | 230   | >KIT-Q556H- LQKPMYEVH'   | 215   | 15    |
| >KIT-Q556H- YLQKPMYEVQ   | 77    | >KIT-Q556H- YLQKPMYEVH   | 6656  | 6579  |
| >KIT-Q556H- YLQKPMYEVQ   | 124   | >KIT-Q556H- YLQKPMYEVH   | 216   | 92    |
| >KIT-Q556P-1 VQWKVVVEEI  | 154   | >KIT-Q556P-1 VPWKVVVEEI  | 1047  | 893   |
| >KIT-Q556P-1 VQWKVVVEEI  | 23048 | >KIT-Q556P-1 VPWKVVVEEI  | 90    | 22958 |
| >KIT-Q556P-1 VQWKVVVEEI  | 91    | >KIT-Q556P-1 VPWKVVVEEI  | 13652 | 13561 |
| >KIT-Q556P-1 VQWKVVVEEI  | 43    | >KIT-Q556P-1 VPWKVVVEEI  | 10444 | 10401 |
| >KIT-Q556P-1 VQWKVVVEEI  | 17    | >KIT-Q556P-1 VPWKVVVEEI  | 2821  | 2804  |
| >KIT-Q556P-1 VQWKVVVEEI  | 75    | >KIT-Q556P-1 VPWKVVVEEI  | 11296 | 11221 |
| >KIT-Q556P-1 VQWKVVVEEI  | 468   | >KIT-Q556P-1 VPWKVVVEEI  | 10743 | 10275 |
| >KIT-Q556P-1 VQWKVVVEEI  | 57    | >KIT-Q556P-1 VPWKVVVEEI  | 3745  | 3688  |
| >KIT-Q556P-1 VQWKVVVEEI  | 16409 | >KIT-Q556P-1 VPWKVVVEEI  | 104   | 16305 |
| >KIT-Q556P-1 VQWKVVVEEI  | 13566 | >KIT-Q556P-1 VPWKVVVEEI  | 65    | 13501 |
| >KIT-Q556P-1 KYLQKPMYEV\ | 360   | >KIT-Q556P-1 KYLQKPMYEV\ | 598   | 238   |
| >KIT-Q556P-1 KYLQKPMYEV\ | 121   | >KIT-Q556P-1 KYLQKPMYEV\ | 5411  | 5290  |
| >KIT-Q556P-1 KYLQKPMYEV\ | 391   | >KIT-Q556P-1 KYLQKPMYEV\ | 410   | 19    |
| >KIT-Q556P-1 EVQWKVVVEE  | 766   | >KIT-Q556P-1 EVPWKVVVEEI | 85    | 681   |
| >KIT-Q556P-1 EVQWKVVVEE  | 147   | >KIT-Q556P-1 EVPWKVVVEEI | 318   | 171   |
| >KIT-Q556P-1 YEVQWKVV    | 10    | >KIT-Q556P-1 YEVPWKVV    | 24    | 14    |
| >KIT-Q556P-1 YEVQWKVVE   | 11    | >KIT-Q556P-1 YEVPWKVVEI  | 15    | 4     |
| >KIT-Q556P-1 YEVQWKVV    | 1283  | >KIT-Q556P-1 YEVPWKVV    | 497   | 786   |
| >KIT-Q556P-1 YEVQWKVVE   | 964   | >KIT-Q556P-1 YEVPWKVVEI  | 363   | 601   |
| >KIT-Q556P-1 YEVQWKVV    | 373   | >KIT-Q556P-1 YEVPWKVV    | 355   | 18    |
| >KIT-Q556P-1 YEVQWKVVE   | 343   | >KIT-Q556P-1 YEVPWKVVEI  | 305   | 38    |
| >KIT-Q556P-1 YEVQWKVV    | 307   | >KIT-Q556P-1 YEVPWKVV    | 361   | 54    |
| >KIT-Q556P-1 YEVQWKVVE   | 59    | >KIT-Q556P-1 YEVPWKVVEI  | 77    | 18    |
| >KIT-Q556P-1 YEVQWKVV    | 169   | >KIT-Q556P-1 YEVPWKVV    | 336   | 167   |
| >KIT-Q556P-1 YEVQWKVVE   | 176   | >KIT-Q556P-1 YEVPWKVVEI  | 291   | 115   |
| >KIT-Q556P-1 YEVQWKVVE   | 3     | >KIT-Q556P-1 YEVPWKVVEI  | 5     | 2     |
| >KIT-Q556P-1 MYEVQWKV    | 246   | >KIT-Q556P-1 MYEVPWKV    | 518   | 272   |
| >KIT-Q556P-1 MYEVQWKV    | 488   | >KIT-Q556P-1 MYEVPWKV    | 286   | 202   |
| >KIT-Q556P-1 PMYEVQWK\   | 17    | >KIT-Q556P-1 PMYEVPWK\   | 14    | 3     |
| >KIT-Q556P-1 PMYEVQWK\   | 18    | >KIT-Q556P-1 PMYEVPWK\   | 42    | 24    |
| >KIT-Q556P-1 PMYEVQWK\   | 48    | >KIT-Q556P-1 PMYEVPWK\   | 18    | 30    |
| >KIT-Q556P-1 PMYEVQWK\   | 805   | >KIT-Q556P-1 PMYEVPWK\   | 434   | 371   |
| >KIT-Q556P-1 PMYEVQWK\   | 33    | >KIT-Q556P-1 PMYEVPWK\   | 69    | 36    |
| >KIT-Q556P-1 PMYEVQWK    | 510   | >KIT-Q556P-1 PMYEVPWK    | 250   | 260   |
| >KIT-Q556P-1 PMYEVQWK\   | 1     | >KIT-Q556P-1 PMYEVPWK\   | 1     | 0     |
| >KIT-Q556P-1 PMYEVQWK\   | 4     | >KIT-Q556P-1 PMYEVPWK\   | 2     | 2     |
| >KIT-Q556P-1 PMYEVQWK\   | 5     | >KIT-Q556P-1 PMYEVPWK\   | 4     | 1     |
| >KIT-Q556P-1 PMYEVQWK\   | 97    | >KIT-Q556P-1 PMYEVPWK\   | 89    | 8     |
| >KIT-Q556P-1 PMYEVQWK\   | 4     | >KIT-Q556P-1 PMYEVPWK\   | 4     | 0     |
| >KIT-Q556P-1 PMYEVQWK\   | 11    | >KIT-Q556P-1 PMYEVPWK\   | 12    | 1     |



|                         |       |                         |       |       |
|-------------------------|-------|-------------------------|-------|-------|
| >KIT-Q556P-1 PMYEVQWK\  | 3     | >KIT-Q556P-1 PMYEVQWK\  | 2     | 1     |
| >KIT-Q556P-1 PMYEVQWK\  | 54    | >KIT-Q556P-1 PMYEVQWK\  | 46    | 8     |
| >KIT-Q556P-1 PMYEVQWK\  | 2     | >KIT-Q556P-1 PMYEVQWK\  | 3     | 1     |
| >KIT-Q556P-1 PMYEVQWK\  | 10    | >KIT-Q556P-1 PMYEVQWK\  | 12    | 2     |
| >KIT-Q556P-1 PMYEVQWK   | 129   | >KIT-Q556P-1 PMYEVQWK   | 88    | 41    |
| >KIT-Q556P-1 PMYEVQWK\  | 145   | >KIT-Q556P-1 PMYEVQWK\  | 98    | 47    |
| >KIT-Q556P-1 KPMYEVQW   | 1456  | >KIT-Q556P-1 KPMYEVQW   | 280   | 1176  |
| >KIT-Q556P-1 KPMYEVQW\  | 157   | >KIT-Q556P-1 KPMYEVQW\  | 315   | 158   |
| >KIT-Q556P-1 KPMYEVQW\  | 136   | >KIT-Q556P-1 KPMYEVQW\  | 134   | 2     |
| >KIT-Q556P-1 KPMYEVQW   | 20    | >KIT-Q556P-1 KPMYEVQW   | 20    | 0     |
| >KIT-Q556P-1 KPMYEVQW\  | 68    | >KIT-Q556P-1 KPMYEVQW\  | 56    | 12    |
| >KIT-Q556P-1 KPMYEVQW   | 199   | >KIT-Q556P-1 KPMYEVQW   | 736   | 537   |
| >KIT-Q556P-1 KPMYEVQW   | 9     | >KIT-Q556P-1 KPMYEVQW   | 10    | 1     |
| >KIT-Q556P-1 QKPMYEVQV  | 1466  | >KIT-Q556P-1 QKPMYEVQV  | 311   | 1155  |
| >KIT-Q556P-1 LQKPMYEVQ  | 243   | >KIT-Q556P-1 LQKPMYEVQ\ | 111   | 132   |
| >KIT-Q556P-1 LQKPMYEVQ  | 415   | >KIT-Q556P-1 LQKPMYEVQ\ | 402   | 13    |
| >KIT-Q556P-1 LQKPMYEVQ  | 230   | >KIT-Q556P-1 LQKPMYEVQ  | 674   | 444   |
| >KIT-Q556P-1 LQKPMYEVQ  | 247   | >KIT-Q556P-1 LQKPMYEVQ\ | 69    | 178   |
| >KIT-Q556P-1 LQKPMYEVQ  | 225   | >KIT-Q556P-1 LQKPMYEVQ\ | 58    | 167   |
| >KIT-Q556P-1 LQKPMYEVQ  | 168   | >KIT-Q556P-1 LQKPMYEVQ\ | 259   | 91    |
| >KIT-Q556P-1 LQKPMYEVQ  | 230   | >KIT-Q556P-1 LQKPMYEVQ\ | 280   | 50    |
| >KIT-Q556P-1 YLQKPMYEV\ | 77    | >KIT-Q556P-1 YLQKPMYEV\ | 4505  | 4428  |
| >KIT-Q556P-1 YLQKPMYEV\ | 1384  | >KIT-Q556P-1 YLQKPMYEV\ | 442   | 942   |
| >KIT-Q556P-1 YLQKPMYEV\ | 124   | >KIT-Q556P-1 YLQKPMYEV\ | 142   | 18    |
| >KIT-R586I-w RNRLSFGK   | 6     | >KIT-R586I-r INRLSFGK   | 64    | 58    |
| >KIT-R586I-w RNRLSFGKTL | 134   | >KIT-R586I-r INRLSFGKTL | 3777  | 3643  |
| >KIT-R586I-w RNRLSFGKTL | 438   | >KIT-R586I-r INRLSFGKTL | 606   | 168   |
| >KIT-R586I-w PRNRLSFGK  | 19614 | >KIT-R586I-r PINRLSFGK  | 231   | 19383 |
| >KIT-R586I-w PRNRLSFGK  | 360   | >KIT-R586I-r PINRLSFGK  | 23397 | 23037 |
| >KIT-R586I-w LPYDHKWEF\ | 169   | >KIT-R586I-r LPYDHKWEF\ | 20493 | 20324 |
| >KIT-R586I-w LPYDHKWEF\ | 170   | >KIT-R586I-r LPYDHKWEF\ | 21467 | 21297 |
| >KIT-R586I-w LPYDHKWEF\ | 359   | >KIT-R586I-r LPYDHKWEF\ | 35176 | 34817 |
| >KIT-R586I-w LPYDHKWEF\ | 14343 | >KIT-R586I-r LPYDHKWEF\ | 240   | 14103 |
| >KIT-R586I-w LPYDHKWEF\ | 13734 | >KIT-R586I-r LPYDHKWEF\ | 96    | 13638 |
| >KIT-R586I-w LPYDHKWEF\ | 212   | >KIT-R586I-r LPYDHKWEF\ | 53    | 159   |
| >KIT-R586I-w LPYDHKWEF\ | 6975  | >KIT-R586I-r LPYDHKWEF\ | 43    | 6932  |
| >KIT-R586I-w LPYDHKWEF\ | 3719  | >KIT-R586I-r LPYDHKWEF\ | 24    | 3695  |
| >KIT-R586I-w LPYDHKWEF\ | 124   | >KIT-R586I-r LPYDHKWEF\ | 15    | 109   |
| >KIT-R586I-w LPYDHKWEF\ | 4822  | >KIT-R586I-r LPYDHKWEF\ | 158   | 4664  |
| >KIT-R586I-w LPYDHKWEF\ | 96    | >KIT-R586I-r LPYDHKWEF\ | 24912 | 24816 |
| >KIT-R586I-w FPRNRLSF   | 1070  | >KIT-R586I-r FPINRLSF   | 13    | 1057  |
| >KIT-R586I-w FPRNRLSFGK | 3047  | >KIT-R586I-r FPINRLSFGK | 388   | 2659  |
| >KIT-R586I-w FPRNRLSF   | 8     | >KIT-R586I-r FPINRLSF   | 18    | 10    |

|                         |      |                          |      |      |
|-------------------------|------|--------------------------|------|------|
| >KIT-R586I-w FPRNRLSFGK | 113  | >KIT-R586I-r FPINRLSFGKT | 3189 | 3076 |
| >KIT-R586I-w FPRNRLSF   | 20   | >KIT-R586I-r FPINRLSF    | 87   | 67   |
| >KIT-R586I-w FPRNRLSFG  | 148  | >KIT-R586I-r FPINRLSFG   | 1363 | 1215 |
| >KIT-R586I-w FPRNRLSF   | 24   | >KIT-R586I-r FPINRLSF    | 43   | 19   |
| >KIT-R586I-w FPRNRLSF   | 52   | >KIT-R586I-r FPINRLSF    | 16   | 36   |
| >KIT-R586I-w FPRNRLSF   | 237  | >KIT-R586I-r FPINRLSF    | 21   | 216  |
| >KIT-R586I-w FPRNRLSF   | 1065 | >KIT-R586I-r FPINRLSF    | 415  | 650  |
| >KIT-R586I-w FPRNRLSFG  | 145  | >KIT-R586I-r FPINRLSFG   | 54   | 91   |
| >KIT-R586I-w FPRNRLSFGK | 59   | >KIT-R586I-r FPINRLSFGK  | 30   | 29   |
| >KIT-R586I-w FPRNRLSFGK | 30   | >KIT-R586I-r FPINRLSFGKT | 16   | 14   |
| >KIT-R586I-w FPRNRLSF   | 1658 | >KIT-R586I-r FPINRLSF    | 90   | 1568 |
| >KIT-R586I-w FPRNRLSF   | 164  | >KIT-R586I-r FPINRLSF    | 14   | 150  |
| >KIT-R586I-w EFPRNRLSF  | 479  | >KIT-R586I-r EFPINRLSF   | 1001 | 522  |
| >KIT-R586I-w EFPRNRLSF  | 14   | >KIT-R586I-r EFPINRLSF   | 26   | 12   |
| >KIT-R586I-w EFPRNRLSFG | 524  | >KIT-R586I-r EFPINRLSFGK | 414  | 110  |
| >KIT-R586I-w EFPRNRLSF  | 348  | >KIT-R586I-r EFPINRLSF   | 265  | 83   |
| >KIT-R586I-w WEFPRNRLSF | 117  | >KIT-R586I-r WEFPINRLSF  | 135  | 18   |
| >KIT-R586I-w WEFPRNRLSF | 337  | >KIT-R586I-r WEFPINRLSF  | 343  | 6    |
| >KIT-R586I-w WEFPRNRLSF | 147  | >KIT-R586I-r WEFPINRLSF  | 190  | 43   |
| >KIT-R586I-w WEFPRNRLSF | 10   | >KIT-R586I-r WEFPINRLSF  | 11   | 1    |
| >KIT-R586I-w WEFPRNRL   | 202  | >KIT-R586I-r WEFPINRL    | 68   | 134  |
| >KIT-R586I-w WEFPRNRLS  | 1921 | >KIT-R586I-r WEFPINRLS   | 312  | 1609 |
| >KIT-R586I-w WEFPRNRL   | 45   | >KIT-R586I-r WEFPINRL    | 15   | 30   |
| >KIT-R586I-w WEFPRNRLSF | 772  | >KIT-R586I-r WEFPINRLSF  | 322  | 450  |
| >KIT-R586I-w WEFPRNRL   | 89   | >KIT-R586I-r WEFPINRL    | 48   | 41   |
| >KIT-R586I-w WEFPRNRLS  | 969  | >KIT-R586I-r WEFPINRLS   | 347  | 622  |
| >KIT-R586I-w WEFPRNRLSF | 493  | >KIT-R586I-r WEFPINRLSF  | 407  | 86   |
| >KIT-R586I-w WEFPRNRL   | 276  | >KIT-R586I-r WEFPINRL    | 41   | 235  |
| >KIT-R586I-w WEFPRNRLSF | 49   | >KIT-R586I-r WEFPINRLSF  | 17   | 32   |
| >KIT-R586I-w WEFPRNRLSF | 498  | >KIT-R586I-r WEFPINRLSF  | 304  | 194  |
| >KIT-R586I-w KWEFPRNRLS | 477  | >KIT-R586I-r KWEFPINRLS  | 446  | 31   |
| >KIT-R586I-w KWEFPRNRLS | 162  | >KIT-R586I-r KWEFPINRLS  | 125  | 37   |
| >KIT-R586I-w KWEFPRNR   | 137  | >KIT-R586I-r KWEFPINR    | 110  | 27   |
| >KIT-R586I-w KWEFPRNR   | 13   | >KIT-R586I-r KWEFPINR    | 10   | 3    |
| >KIT-R586I-w KWEFPRNR   | 395  | >KIT-R586I-r KWEFPINR    | 423  | 28   |
| >KIT-R586I-w KWEFPRNRL  | 154  | >KIT-R586I-r KWEFPINRL   | 168  | 14   |
| >KIT-R586I-w KWEFPRNRLS | 82   | >KIT-R586I-r KWEFPINRLS  | 81   | 1    |
| >KIT-R586I-w HKWEFPRNR  | 1022 | >KIT-R586I-r HKWEFPINR   | 417  | 605  |
| >KIT-R586I-w HKWEFPRNR  | 220  | >KIT-R586I-r HKWEFPINR   | 111  | 109  |
| >KIT-R586I-w HKWEFPRNR  | 59   | >KIT-R586I-r HKWEFPINRL  | 51   | 8    |
| >KIT-R586I-w HKWEFPRNR  | 238  | >KIT-R586I-r HKWEFPINRL  | 141  | 97   |
| >KIT-R586I-w HKWEFPRNR  | 656  | >KIT-R586I-r HKWEFPINRL  | 295  | 361  |
| >KIT-R586I-w HKWEFPRNR  | 33   | >KIT-R586I-r HKWEFPINR   | 17   | 16   |

|                         |       |                         |       |       |
|-------------------------|-------|-------------------------|-------|-------|
| >KIT-R586I-w DHKWEFPR   | 218   | >KIT-R586I-r DHKWEFPI   | 23302 | 23084 |
| >KIT-R586I-w DHKWEFPR   | 346   | >KIT-R586I-r DHKWEFPI   | 34245 | 33899 |
| >KIT-R586I-w DHKWEFPRN  | 1244  | >KIT-R586I-r DHKWEFPINF | 495   | 749   |
| >KIT-R586I-w YDHKWEFPR  | 9238  | >KIT-R586I-r YDHKWEFPI  | 244   | 8994  |
| >KIT-R586I-w YDHKWEFPR  | 9735  | >KIT-R586I-r YDHKWEFPI  | 25    | 9710  |
| >KIT-R586I-w YDHKWEFPR  | 183   | >KIT-R586I-r YDHKWEFPI  | 33654 | 33471 |
| >KIT-R586I-w YDHKWEFPR  | 658   | >KIT-R586I-r YDHKWEFPIN | 242   | 416   |
| >KIT-R586I-w YDHKWEFPR  | 25530 | >KIT-R586I-r YDHKWEFPI  | 174   | 25356 |
| >KIT-R586I-w PYDHKWEFPI | 67    | >KIT-R586I-r PYDHKWEFPI | 28728 | 28661 |
| >KIT-R634W- REALMSEL    | 2262  | >KIT-R634W- WEALMSEL    | 257   | 2005  |
| >KIT-R634W- REALMSELKV  | 131   | >KIT-R634W- WEALMSELK'  | 33    | 98    |
| >KIT-R634W- REALMSELKV  | 58    | >KIT-R634W- WEALMSELK'  | 19    | 39    |
| >KIT-R634W- REALMSEL    | 2615  | >KIT-R634W- WEALMSEL    | 50    | 2565  |
| >KIT-R634W- REALMSELKV  | 2970  | >KIT-R634W- WEALMSELK'  | 65    | 2905  |
| >KIT-R634W- REALMSEL    | 16    | >KIT-R634W- WEALMSEL    | 24    | 8     |
| >KIT-R634W- REALMSELKV  | 589   | >KIT-R634W- WEALMSELK'  | 463   | 126   |
| >KIT-R634W- REALMSELKV  | 30    | >KIT-R634W- WEALMSELK'  | 44    | 14    |
| >KIT-R634W- REALMSEL    | 25    | >KIT-R634W- WEALMSEL    | 36    | 11    |
| >KIT-R634W- REALMSELKV  | 131   | >KIT-R634W- WEALMSELK'  | 335   | 204   |
| >KIT-R634W- REALMSELKV  | 74    | >KIT-R634W- WEALMSELK'  | 93    | 19    |
| >KIT-R634W- REALMSELKV  | 425   | >KIT-R634W- WEALMSELK'  | 3459  | 3034  |
| >KIT-R634W- REALMSEL    | 279   | >KIT-R634W- WEALMSEL    | 69    | 210   |
| >KIT-R634W- REALMSELK   | 146   | >KIT-R634W- WEALMSELK   | 126   | 20    |
| >KIT-R634W- REALMSELKV  | 41    | >KIT-R634W- WEALMSELK'  | 26    | 15    |
| >KIT-R634W- REALMSELKV  | 10    | >KIT-R634W- WEALMSELK'  | 8     | 2     |
| >KIT-R634W- REALMSEL    | 382   | >KIT-R634W- WEALMSEL    | 5479  | 5097  |
| >KIT-R634W- EREALMSEL   | 141   | >KIT-R634W- EWEALMSEL   | 6761  | 6620  |
| >KIT-R634W- EREALMSEL   | 257   | >KIT-R634W- EWEALMSEL   | 19069 | 18812 |
| >KIT-R634W- EREALMSEL   | 156   | >KIT-R634W- EWEALMSEL   | 30454 | 30298 |
| >KIT-R634W- EREALMSELK  | 19258 | >KIT-R634W- EWEALMSELI  | 412   | 18846 |
| >KIT-R634W- EREALMSEL   | 35431 | >KIT-R634W- EWEALMSEL   | 266   | 35165 |
| >KIT-R634W- MLKPSAHLTE  | 361   | >KIT-R634W- MLKPSAHLTE  | 18695 | 18334 |
| >KIT-R634W- MLKPSAHLTE  | 11    | >KIT-R634W- MLKPSAHLTE  | 10161 | 10150 |
| >KIT-R634W- MLKPSAHLTE  | 163   | >KIT-R634W- MLKPSAHLTE  | 28153 | 27990 |
| >KIT-R634W- MLKPSAHLTE  | 53    | >KIT-R634W- MLKPSAHLTE  | 20771 | 20718 |
| >KIT-R634W- MLKPSAHLTE  | 19495 | >KIT-R634W- MLKPSAHLTE  | 15    | 19480 |
| >KIT-R634W- MLKPSAHLTE  | 23171 | >KIT-R634W- MLKPSAHLTE  | 172   | 22999 |
| >KIT-R634W- MLKPSAHLTE  | 22141 | >KIT-R634W- MLKPSAHLTE  | 198   | 21943 |
| >KIT-R634W- MLKPSAHLTE  | 31546 | >KIT-R634W- MLKPSAHLTE  | 399   | 31147 |
| >KIT-R634W- TEREALMS    | 104   | >KIT-R634W- TEWEALMS    | 127   | 23    |
| >KIT-R634W- TEREALMSEL  | 127   | >KIT-R634W- TEWEALMSE   | 23    | 104   |
| >KIT-R634W- TEREALMS    | 1434  | >KIT-R634W- TEWEALMS    | 317   | 1117  |
| >KIT-R634W- TEREALMSE   | 177   | >KIT-R634W- TEWEALMSE   | 40    | 137   |

|                        |       |                        |       |       |
|------------------------|-------|------------------------|-------|-------|
| >KIT-R634W- TEREALMSEL | 965   | >KIT-R634W- TEWEALMSE  | 208   | 757   |
| >KIT-R634W- TEREALMSEL | 267   | >KIT-R634W- TEWEALMSE  | 137   | 130   |
| >KIT-R634W- TEREALMSEL | 2769  | >KIT-R634W- TEWEALMSE  | 299   | 2470  |
| >KIT-R634W- TEREALMSEL | 45    | >KIT-R634W- TEWEALMSE  | 14    | 31    |
| >KIT-R634W- LTEREALM   | 135   | >KIT-R634W- LTEWEALM   | 43    | 92    |
| >KIT-R634W- LTEREALMSE | 35    | >KIT-R634W- LTEWEALMSI | 13    | 22    |
| >KIT-R634W- LTEREALMSE | 743   | >KIT-R634W- LTEWEALMSI | 300   | 443   |
| >KIT-R634W- LTEREALM   | 2037  | >KIT-R634W- LTEWEALM   | 133   | 1904  |
| >KIT-R634W- LTEREALMSE | 39    | >KIT-R634W- LTEWEALMSI | 38    | 1     |
| >KIT-R634W- LTEREALMSE | 1067  | >KIT-R634W- LTEWEALMSI | 421   | 646   |
| >KIT-R634W- HLTEREAL   | 1229  | >KIT-R634W- HLTEWEAL   | 117   | 1112  |
| >KIT-R634W- HLTEREALM  | 1739  | >KIT-R634W- HLTEWEALM  | 109   | 1630  |
| >KIT-R634W- HLTEREAL   | 34    | >KIT-R634W- HLTEWEAL   | 20    | 14    |
| >KIT-R634W- HLTEREALM  | 234   | >KIT-R634W- HLTEWEALM  | 126   | 108   |
| >KIT-R634W- HLTEREAL   | 821   | >KIT-R634W- HLTEWEAL   | 260   | 561   |
| >KIT-R634W- HLTEREAL   | 1404  | >KIT-R634W- HLTEWEAL   | 94    | 1310  |
| >KIT-R634W- HLTEREAL   | 179   | >KIT-R634W- HLTEWEAL   | 12    | 167   |
| >KIT-R634W- HLTEREALM  | 1368  | >KIT-R634W- HLTEWEALM  | 43    | 1325  |
| >KIT-R634W- HLTEREAL   | 136   | >KIT-R634W- HLTEWEAL   | 22    | 114   |
| >KIT-R634W- HLTEREALM  | 1030  | >KIT-R634W- HLTEWEALM  | 64    | 966   |
| >KIT-R634W- HLTEREAL   | 339   | >KIT-R634W- HLTEWEAL   | 35    | 304   |
| >KIT-R634W- HLTEREALM  | 2003  | >KIT-R634W- HLTEWEALM  | 101   | 1902  |
| >KIT-R634W- HLTEREAL   | 3128  | >KIT-R634W- HLTEWEAL   | 147   | 2981  |
| >KIT-R634W- HLTEREALM  | 5870  | >KIT-R634W- HLTEWEALM  | 292   | 5578  |
| >KIT-R634W- HLTEREAL   | 8     | >KIT-R634W- HLTEWEAL   | 6     | 2     |
| >KIT-R634W- HLTEREALM  | 57    | >KIT-R634W- HLTEWEALM  | 6     | 51    |
| >KIT-R634W- HLTEREALMS | 2604  | >KIT-R634W- HLTEWEALM  | 405   | 2199  |
| >KIT-R634W- AHLTEREAL  | 274   | >KIT-R634W- AHLTEWEAL  | 398   | 124   |
| >KIT-R634W- AHLTEREAL  | 37    | >KIT-R634W- AHLTEWEAL  | 32    | 5     |
| >KIT-R634W- AHLTEREALM | 609   | >KIT-R634W- AHLTEWEALM | 262   | 347   |
| >KIT-R634W- SAHLTEREAL | 452   | >KIT-R634W- SAHLTEWEAL | 554   | 102   |
| >KIT-R634W- PSAHLTER   | 25690 | >KIT-R634W- PSAHLTEW   | 471   | 25219 |
| >KIT-R634W- PSAHLTER   | 22118 | >KIT-R634W- PSAHLTEW   | 293   | 21825 |
| >KIT-R634W- KPSAHLTER  | 339   | >KIT-R634W- KPSAHLTEW  | 21922 | 21583 |
| >KIT-R634W- KPSAHLTER  | 11793 | >KIT-R634W- KPSAHLTEW  | 123   | 11670 |
| >KIT-R634W- KPSAHLTERE | 160   | >KIT-R634W- KPSAHLTEWE | 652   | 492   |
| >KIT-R634W- KPSAHLTER  | 24893 | >KIT-R634W- KPSAHLTEW  | 71    | 24822 |
| >KIT-R634W- KPSAHLTER  | 22464 | >KIT-R634W- KPSAHLTEW  | 452   | 22012 |
| >KIT-R634W- KPSAHLTER  | 20948 | >KIT-R634W- KPSAHLTEW  | 13    | 20935 |
| >KIT-R634W- KPSAHLTER  | 34291 | >KIT-R634W- KPSAHLTEW  | 402   | 33889 |
| >KIT-R634W- KPSAHLTER  | 381   | >KIT-R634W- KPSAHLTEW  | 32406 | 32025 |
| >KIT-R634W- LKPSAHLTER | 761   | >KIT-R634W- LKPSAHLTEW | 280   | 481   |
| >KIT-R634W- LKPSAHLTER | 24104 | >KIT-R634W- LKPSAHLTEW | 158   | 23946 |

|                          |      |                          |       |       |
|--------------------------|------|--------------------------|-------|-------|
| >KIT-R796G-1 RNILLTHGR   | 118  | >KIT-R796G-1 GNILLTHGR   | 2303  | 2185  |
| >KIT-R796G-1 RNILLTHGR   | 37   | >KIT-R796G-1 GNILLTHGR   | 461   | 424   |
| >KIT-R796G-1 ARNILLTHGR  | 255  | >KIT-R796G-1 AGNILLTHGR  | 561   | 306   |
| >KIT-R796G-1 ARNILLTH    | 274  | >KIT-R796G-1 AGNILLTH    | 23122 | 22848 |
| >KIT-R796G-1 ARNILLTHGR  | 99   | >KIT-R796G-1 AGNILLTHGR  | 26416 | 26317 |
| >KIT-R796G-1 ARNILLTHGR  | 227  | >KIT-R796G-1 AGNILLTHGR  | 22458 | 22231 |
| >KIT-R796G-1 ARNILLTHGR  | 323  | >KIT-R796G-1 AGNILLTHGR  | 32998 | 32675 |
| >KIT-R796G-1 KNCIHRDLAA  | 56   | >KIT-R796G-1 KNCIHRDLAA  | 18955 | 18899 |
| >KIT-R796G-1 KNCIHRDLAA  | 312  | >KIT-R796G-1 KNCIHRDLAA  | 31338 | 31026 |
| >KIT-R796G-1 AARNILLT    | 238  | >KIT-R796G-1 AAGNILLT    | 14784 | 14546 |
| >KIT-R796G-1 AARNILLTH   | 383  | >KIT-R796G-1 AAGNILLTH   | 15143 | 14760 |
| >KIT-R796G-1 AARNILLTHG  | 347  | >KIT-R796G-1 AAGNILLTHG  | 15225 | 14878 |
| >KIT-R796G-1 AARNILLTHG  | 127  | >KIT-R796G-1 AAGNILLTHG  | 13559 | 13432 |
| >KIT-R796G-1 AARNILLTHG  | 32   | >KIT-R796G-1 AAGNILLTHG  | 164   | 132   |
| >KIT-R796G-1 AARNILLTHG  | 500  | >KIT-R796G-1 AAGNILLTHG  | 326   | 174   |
| >KIT-R796G-1 AARNILLTH   | 278  | >KIT-R796G-1 AAGNILLTH   | 4051  | 3773  |
| >KIT-R796G-1 LAARNILL    | 663  | >KIT-R796G-1 LAAGNILL    | 191   | 472   |
| >KIT-R796G-1 LAARNILL    | 1877 | >KIT-R796G-1 LAAGNILL    | 405   | 1472  |
| >KIT-R796G-1 LAARNILL    | 1759 | >KIT-R796G-1 LAAGNILL    | 489   | 1270  |
| >KIT-R796G-1 LAARNILL    | 446  | >KIT-R796G-1 LAAGNILL    | 951   | 505   |
| >KIT-R796G-1 DLAARNILL   | 228  | >KIT-R796G-1 DLAAGNILL   | 233   | 5     |
| >KIT-R796G-1 DLAARNILLT  | 1287 | >KIT-R796G-1 DLAAGNILLT  | 396   | 891   |
| >KIT-R796G-1 DLAARNILL   | 1798 | >KIT-R796G-1 DLAAGNILL   | 324   | 1474  |
| >KIT-R796G-1 DLAARNILL   | 2806 | >KIT-R796G-1 DLAAGNILL   | 475   | 2331  |
| >KIT-R796G-1 DLAARNIL    | 478  | >KIT-R796G-1 DLAAGNIL    | 300   | 178   |
| >KIT-R796G-1 DLAARNILL   | 158  | >KIT-R796G-1 DLAAGNILL   | 69    | 89    |
| >KIT-R796G-1 DLAARNILL   | 1185 | >KIT-R796G-1 DLAAGNILL   | 451   | 734   |
| >KIT-R796G-1 RDLAARNIL   | 162  | >KIT-R796G-1 RDLAAGNIL   | 167   | 5     |
| >KIT-R796G-1 RDLAARNI    | 23   | >KIT-R796G-1 RDLAAGNI    | 36    | 13    |
| >KIT-R796G-1 RDLAARNI    | 102  | >KIT-R796G-1 RDLAAGNI    | 39    | 63    |
| >KIT-R796G-1 HRDLAARNIL  | 51   | >KIT-R796G-1 HRDLAAGNIL  | 34    | 17    |
| >KIT-R796G-1 HRDLAARNIL  | 431  | >KIT-R796G-1 HRDLAAGNIL  | 572   | 141   |
| >KIT-R796G-1 HRDLAARNIL  | 30   | >KIT-R796G-1 HRDLAAGNIL  | 36    | 6     |
| >KIT-R796G-1 HRDLAARNIL  | 50   | >KIT-R796G-1 HRDLAAGNIL  | 37    | 13    |
| >KIT-R796G-1 HRDLAARNIL  | 272  | >KIT-R796G-1 HRDLAAGNIL  | 325   | 53    |
| >KIT-R796G-1 HRDLAARNIL  | 51   | >KIT-R796G-1 HRDLAAGNIL  | 85    | 34    |
| >KIT-R796G-1 IHRDLAARNII | 529  | >KIT-R796G-1 IHRDLAAGNII | 367   | 162   |
| >KIT-R796G-1 CIHRDLAAR   | 121  | >KIT-R796G-1 CIHRDLAAG   | 23249 | 23128 |
| >KIT-R796G-1 CIHRDLAAR   | 323  | >KIT-R796G-1 CIHRDLAAG   | 39453 | 39130 |
| >KIT-R796G-1 NCIHRDLAAR  | 444  | >KIT-R796G-1 NCIHRDLAAG  | 33262 | 32818 |
| >KIT-R804W- RITKICDFGL   | 648  | >KIT-R804W- WITKICDFGL   | 474   | 174   |
| >KIT-R804W- RITKICDFGLA  | 988  | >KIT-R804W- WITKICDFGL   | 476   | 512   |
| >KIT-R804W- RITKICDFGL   | 959  | >KIT-R804W- WITKICDFGL   | 195   | 764   |

|                         |       |                         |       |       |
|-------------------------|-------|-------------------------|-------|-------|
| >KIT-R804W- RITKICDF    | 237   | >KIT-R804W- WITKICDF    | 14981 | 14744 |
| >KIT-R804W- RITKICDFGLA | 5422  | >KIT-R804W- WITKICDFGL  | 291   | 5131  |
| >KIT-R804W- RITKICDF    | 228   | >KIT-R804W- WITKICDF    | 451   | 223   |
| >KIT-R804W- GRITKICDF   | 21119 | >KIT-R804W- GWITKICDF   | 148   | 20971 |
| >KIT-R804W- GRITKICDF   | 253   | >KIT-R804W- GWITKICDF   | 4469  | 4216  |
| >KIT-R804W- GRITKICDFGL | 168   | >KIT-R804W- GWITKICDFG  | 16875 | 16707 |
| >KIT-R804W- GRITKICDF   | 484   | >KIT-R804W- GWITKICDF   | 21152 | 20668 |
| >KIT-R804W- GRITKICDFGL | 267   | >KIT-R804W- GWITKICDFG  | 15589 | 15322 |
| >KIT-R804W- GRITKICDF   | 315   | >KIT-R804W- GWITKICDF   | 31076 | 30761 |
| >KIT-R804W- GRITKICDFGL | 52    | >KIT-R804W- GWITKICDFG  | 16759 | 16707 |
| >KIT-R804W- AARNILLTHG  | 127   | >KIT-R804W- AARNILLTHG  | 3121  | 2994  |
| >KIT-R804W- AARNILLTHG  | 32    | >KIT-R804W- AARNILLTHG  | 18821 | 18789 |
| >KIT-R804W- AARNILLTHG  | 11330 | >KIT-R804W- AARNILLTHG  | 9     | 11321 |
| >KIT-R804W- AARNILLTHG  | 23118 | >KIT-R804W- AARNILLTHG  | 70    | 23048 |
| >KIT-R804W- AARNILLTHG  | 22994 | >KIT-R804W- AARNILLTHG  | 215   | 22779 |
| >KIT-R804W- LTHGRITKI   | 318   | >KIT-R804W- LTHGWITKI   | 168   | 150   |
| >KIT-R804W- LTHGRITKI   | 957   | >KIT-R804W- LTHGWITKI   | 33    | 924   |
| >KIT-R804W- LTHGRITKI   | 1897  | >KIT-R804W- LTHGWITKI   | 121   | 1776  |
| >KIT-R804W- LTHGRITK    | 119   | >KIT-R804W- LTHGWITK    | 156   | 37    |
| >KIT-R804W- LTHGRITK    | 68    | >KIT-R804W- LTHGWITK    | 44    | 24    |
| >KIT-R804W- LTHGRITK    | 8     | >KIT-R804W- LTHGWITK    | 12    | 4     |
| >KIT-R804W- LTHGRITK    | 438   | >KIT-R804W- LTHGWITK    | 409   | 29    |
| >KIT-R804W- LTHGRITKI   | 821   | >KIT-R804W- LTHGWITKI   | 338   | 483   |
| >KIT-R804W- LTHGRITK    | 98    | >KIT-R804W- LTHGWITK    | 143   | 45    |
| >KIT-R804W- LTHGRITKI   | 617   | >KIT-R804W- LTHGWITKI   | 89    | 528   |
| >KIT-R804W- LTHGRITKI   | 27    | >KIT-R804W- LTHGWITKI   | 43    | 16    |
| >KIT-R804W- LTHGRITKI   | 441   | >KIT-R804W- LTHGWITKI   | 135   | 306   |
| >KIT-R804W- LTHGRITK    | 1753  | >KIT-R804W- LTHGWITK    | 403   | 1350  |
| >KIT-R804W- LTHGRITKI   | 27    | >KIT-R804W- LTHGWITKI   | 22    | 5     |
| >KIT-R804W- LLTHGRITKI  | 424   | >KIT-R804W- LLTHGWITKI  | 275   | 149   |
| >KIT-R804W- LLTHGRITKI  | 174   | >KIT-R804W- LLTHGWITKI  | 177   | 3     |
| >KIT-R804W- LLTHGRITKI  | 184   | >KIT-R804W- LLTHGWITKI  | 22    | 162   |
| >KIT-R804W- LLTHGRITKI  | 612   | >KIT-R804W- LLTHGWITKI  | 141   | 471   |
| >KIT-R804W- LLTHGRITKI  | 176   | >KIT-R804W- LLTHGWITKI  | 21    | 155   |
| >KIT-R804W- LLTHGRITKI  | 3670  | >KIT-R804W- LLTHGWITKI  | 468   | 3202  |
| >KIT-R804W- LLTHGRIT    | 764   | >KIT-R804W- LLTHGWIT    | 41    | 723   |
| >KIT-R804W- LLTHGRITKI  | 6     | >KIT-R804W- LLTHGWITKI  | 5     | 1     |
| >KIT-R804W- LLTHGRITKIC | 190   | >KIT-R804W- LLTHGWITKIC | 160   | 30    |
| >KIT-R804W- LLTHGRITK   | 78    | >KIT-R804W- LLTHGWITK   | 94    | 16    |
| >KIT-R804W- LLTHGRITK   | 350   | >KIT-R804W- LLTHGWITK   | 241   | 109   |
| >KIT-R804W- ILLTHGRI    | 269   | >KIT-R804W- ILLTHGWI    | 1278  | 1009  |
| >KIT-R804W- ILLTHGRI    | 943   | >KIT-R804W- ILLTHGWI    | 169   | 774   |
| >KIT-R804W- ILLTHGRIT   | 12735 | >KIT-R804W- ILLTHGWIT   | 462   | 12273 |

|                         |       |                         |       |       |
|-------------------------|-------|-------------------------|-------|-------|
| >KIT-R804W- ILLTHGRITKI | 225   | >KIT-R804W- ILLTHGWITKI | 29    | 196   |
| >KIT-R804W- ILLTHGRI    | 1084  | >KIT-R804W- ILLTHGWI    | 278   | 806   |
| >KIT-R804W- ILLTHGRITKI | 269   | >KIT-R804W- ILLTHGWITKI | 78    | 191   |
| >KIT-R804W- ILLTHGRI    | 165   | >KIT-R804W- ILLTHGWI    | 65    | 100   |
| >KIT-R804W- ILLTHGRITKI | 43    | >KIT-R804W- ILLTHGWITKI | 28    | 15    |
| >KIT-R804W- ILLTHGRI    | 1603  | >KIT-R804W- ILLTHGWI    | 277   | 1326  |
| >KIT-R804W- ILLTHGRIT   | 15640 | >KIT-R804W- ILLTHGWIT   | 224   | 15416 |
| >KIT-R804W- ILLTHGRITKI | 425   | >KIT-R804W- ILLTHGWITKI | 58    | 367   |
| >KIT-R804W- ILLTHGRI    | 14    | >KIT-R804W- ILLTHGWI    | 9     | 5     |
| >KIT-R804W- ILLTHGRIT   | 3594  | >KIT-R804W- ILLTHGWIT   | 94    | 3500  |
| >KIT-R804W- ILLTHGRITKI | 16    | >KIT-R804W- ILLTHGWITKI | 5     | 11    |
| >KIT-R804W- ILLTHGRI    | 365   | >KIT-R804W- ILLTHGWI    | 202   | 163   |
| >KIT-R804W- ILLTHGRIT   | 12501 | >KIT-R804W- ILLTHGWIT   | 221   | 12280 |
| >KIT-R804W- ILLTHGRITKI | 164   | >KIT-R804W- ILLTHGWITKI | 21    | 143   |
| >KIT-R804W- ILLTHGRI    | 545   | >KIT-R804W- ILLTHGWI    | 100   | 445   |
| >KIT-R804W- ILLTHGRITKI | 160   | >KIT-R804W- ILLTHGWITKI | 21    | 139   |
| >KIT-R804W- ILLTHGRI    | 1157  | >KIT-R804W- ILLTHGWI    | 381   | 776   |
| >KIT-R804W- ILLTHGRITKI | 262   | >KIT-R804W- ILLTHGWITKI | 26    | 236   |
| >KIT-R804W- ILLTHGRI    | 61    | >KIT-R804W- ILLTHGWI    | 21    | 40    |
| >KIT-R804W- ILLTHGRIT   | 6205  | >KIT-R804W- ILLTHGWIT   | 79    | 6126  |
| >KIT-R804W- ILLTHGRITKI | 39    | >KIT-R804W- ILLTHGWITKI | 8     | 31    |
| >KIT-R804W- ILLTHGRITK  | 18    | >KIT-R804W- ILLTHGWITK  | 27    | 9     |
| >KIT-R804W- ILLTHGRITK  | 91    | >KIT-R804W- ILLTHGWITK  | 60    | 31    |
| >KIT-R804W- ILLTHGRITK  | 209   | >KIT-R804W- ILLTHGWITK  | 216   | 7     |
| >KIT-R804W- NILLTHGRITK | 430   | >KIT-R804W- NILLTHGWITK | 486   | 56    |
| >KIT-R804W- NILLTHGR    | 121   | >KIT-R804W- NILLTHGW    | 28868 | 28747 |
| >KIT-R804W- NILLTHGR    | 85    | >KIT-R804W- NILLTHGW    | 26378 | 26293 |
| >KIT-R804W- NILLTHGRI   | 692   | >KIT-R804W- NILLTHGWI   | 493   | 199   |
| >KIT-R804W- NILLTHGR    | 71    | >KIT-R804W- NILLTHGW    | 21547 | 21476 |
| >KIT-R804W- RNILLTHGR   | 118   | >KIT-R804W- RNILLTHGW   | 20042 | 19924 |
| >KIT-R804W- RNILLTHGR   | 24436 | >KIT-R804W- RNILLTHGW   | 472   | 23964 |
| >KIT-R804W- RNILLTHGR   | 21340 | >KIT-R804W- RNILLTHGW   | 25    | 21315 |
| >KIT-R804W- RNILLTHGR   | 37    | >KIT-R804W- RNILLTHGW   | 15895 | 15858 |
| >KIT-R804W- ARNILLTHGR  | 255   | >KIT-R804W- ARNILLTHGM  | 26998 | 26743 |
| >KIT-R804W- ARNILLTHGR  | 99    | >KIT-R804W- ARNILLTHGM  | 569   | 470   |
| >KIT-R804W- ARNILLTHGR  | 227   | >KIT-R804W- ARNILLTHGM  | 399   | 172   |
| >KIT-R804W- ARNILLTHGR  | 323   | >KIT-R804W- ARNILLTHGM  | 161   | 162   |
| >KIT-R956Q-1 RINSVGSTA  | 44    | >KIT-R956Q-1 QINSVGSTA  | 195   | 151   |
| >KIT-R956Q-1 RINSVGSTA  | 247   | >KIT-R956Q-1 QINSVGSTA  | 2298  | 2051  |
| >KIT-R956Q-1 RINSVGSTA  | 322   | >KIT-R956Q-1 QINSVGSTA  | 1520  | 1198  |
| >KIT-R956Q-1 VRINSVGST  | 23553 | >KIT-R956Q-1 VQINSVGST  | 434   | 23119 |
| >KIT-R956Q-1 VRINSVGSTA | 11734 | >KIT-R956Q-1 VQINSVGSTA | 434   | 11300 |
| >KIT-R956Q-1 VRINSVGSTA | 25013 | >KIT-R956Q-1 VQINSVGSTA | 434   | 24579 |

|                          |       |                         |       |       |
|--------------------------|-------|-------------------------|-------|-------|
| >KIT-R956Q-1 VRINSVGSTA  | 17965 | >KIT-R956Q-1 VQINSVGSTA | 127   | 17838 |
| >KIT-R956Q-1 VRINSVGSTA  | 20647 | >KIT-R956Q-1 VQINSVGSTA | 483   | 20164 |
| >KIT-R956Q-1 VRINSVGSTA  | 391   | >KIT-R956Q-1 VQINSVGSTA | 73    | 318   |
| >KIT-R956Q-1 VRINSVGSTA  | 1317  | >KIT-R956Q-1 VQINSVGSTA | 319   | 998   |
| >KIT-R956Q-1 VRINSVGSTA  | 493   | >KIT-R956Q-1 VQINSVGSTA | 19556 | 19063 |
| >KIT-R956Q-1 RQKPVVDHS'  | 11    | >KIT-R956Q-1 RQKPVVDHS' | 3955  | 3944  |
| >KIT-R956Q-1 RQKPVVDHS'  | 1334  | >KIT-R956Q-1 RQKPVVDHS' | 178   | 1156  |
| >KIT-R956Q-1 RQKPVVDHS'  | 104   | >KIT-R956Q-1 RQKPVVDHS' | 400   | 296   |
| >KIT-R956Q-1 SVRINSVG    | 124   | >KIT-R956Q-1 SVQINSVG   | 11139 | 11015 |
| >KIT-R956Q-1 SVRINSVGS   | 87    | >KIT-R956Q-1 SVQINSVGS  | 10275 | 10188 |
| >KIT-R956Q-1 SVRINSVGST  | 115   | >KIT-R956Q-1 SVQINSVGST | 10805 | 10690 |
| >KIT-R956Q-1 SVRINSVGST, | 12    | >KIT-R956Q-1 SVQINSVGST | 3052  | 3040  |
| >KIT-R956Q-1 HSVRINSV    | 19    | >KIT-R956Q-1 HSVQINSV   | 20    | 1     |
| >KIT-R956Q-1 HSVRINSV    | 677   | >KIT-R956Q-1 HSVQINSV   | 335   | 342   |
| >KIT-R956Q-1 HSVRINSV    | 370   | >KIT-R956Q-1 HSVQINSV   | 336   | 34    |
| >KIT-R956Q-1 VDHSVRINSV  | 1179  | >KIT-R956Q-1 VDHSVQINSV | 371   | 808   |
| >KIT-R956Q-1 VVDHSVRINS  | 236   | >KIT-R956Q-1 VVDHSVQINS | 213   | 23    |
| >KIT-R956Q-1 VVDHSVRINS  | 74    | >KIT-R956Q-1 VVDHSVQINS | 39    | 35    |
| >KIT-R956Q-1 VVDHSVRI    | 705   | >KIT-R956Q-1 VVDHSVQI   | 459   | 246   |
| >KIT-R956Q-1 VVDHSVRINS  | 89    | >KIT-R956Q-1 VVDHSVQINS | 55    | 34    |
| >KIT-R956Q-1 VVDHSVRINS  | 387   | >KIT-R956Q-1 VVDHSVQINS | 162   | 225   |
| >KIT-R956Q-1 VVDHSVRINS  | 304   | >KIT-R956Q-1 VVDHSVQINS | 108   | 196   |
| >KIT-R956Q-1 VVDHSVRINS  | 991   | >KIT-R956Q-1 VVDHSVQINS | 302   | 689   |
| >KIT-R956Q-1 VVDHSVRINS  | 70    | >KIT-R956Q-1 VVDHSVQINS | 23    | 47    |
| >KIT-R956Q-1 KPVVDHSVRI  | 1979  | >KIT-R956Q-1 KPVVDHSVQI | 452   | 1527  |
| >KIT-S476I-w SSIDSSAFK   | 119   | >KIT-S476I-m ISIDSSAFK  | 74    | 45    |
| >KIT-S476I-w SSIDSSAFK   | 6     | >KIT-S476I-m ISIDSSAFK  | 8     | 2     |
| >KIT-S476I-w SSIDSSAF    | 347   | >KIT-S476I-m ISIDSSAF   | 4607  | 4260  |
| >KIT-S476I-w SSIDSSAF    | 19    | >KIT-S476I-m ISIDSSAF   | 132   | 113   |
| >KIT-S476I-w SSIDSSAFK   | 8     | >KIT-S476I-m ISIDSSAFK  | 14    | 6     |
| >KIT-S476I-w SSIDSSAFK   | 175   | >KIT-S476I-m ISIDSSAFK  | 220   | 45    |
| >KIT-S476I-w SSIDSSAFK   | 7     | >KIT-S476I-m ISIDSSAFK  | 6     | 1     |
| >KIT-S476I-w SSIDSSAF    | 28    | >KIT-S476I-m ISIDSSAF   | 29    | 1     |
| >KIT-S476I-w SSIDSSAF    | 10    | >KIT-S476I-m ISIDSSAF   | 5     | 5     |
| >KIT-S476I-w SSIDSSAF    | 4     | >KIT-S476I-m ISIDSSAF   | 3     | 1     |
| >KIT-S476I-w SSIDSSAFKH  | 31    | >KIT-S476I-m ISIDSSAFKH | 10    | 21    |
| >KIT-S476I-w SSIDSSAF    | 172   | >KIT-S476I-m ISIDSSAF   | 82    | 90    |
| >KIT-S476I-w SSIDSSAF    | 905   | >KIT-S476I-m ISIDSSAF   | 330   | 575   |
| >KIT-S476I-w SSIDSSAF    | 601   | >KIT-S476I-m ISIDSSAF   | 53    | 548   |
| >KIT-S476I-w SSIDSSAF    | 279   | >KIT-S476I-m ISIDSSAF   | 168   | 111   |
| >KIT-S476I-w SSIDSSAFK   | 157   | >KIT-S476I-m ISIDSSAFK  | 670   | 513   |
| >KIT-S476I-w QSSIDSSAFK  | 141   | >KIT-S476I-m QSIDSSAFK  | 45    | 96    |
| >KIT-S476I-w QSSIDSSAFK  | 18    | >KIT-S476I-m QSIDSSAFK  | 21    | 3     |



|                          |       |                         |      |       |
|--------------------------|-------|-------------------------|------|-------|
| >KIT-S476I-w QSSIDSSAFK  | 119   | >KIT-S476I-m QISIDSSAFK | 270  | 151   |
| >KIT-S476I-w QSSIDSSAFK  | 404   | >KIT-S476I-m QISIDSSAFK | 379  | 25    |
| >KIT-S476I-w QSSIDSSAFK  | 13    | >KIT-S476I-m QISIDSSAFK | 12   | 1     |
| >KIT-S476I-w QSSIDSSAF   | 102   | >KIT-S476I-m QISIDSSAF  | 102  | 0     |
| >KIT-S476I-w QSSIDSSAF   | 3254  | >KIT-S476I-m QISIDSSAF  | 405  | 2849  |
| >KIT-S476I-w QSSIDSSAF   | 22    | >KIT-S476I-m QISIDSSAF  | 136  | 114   |
| >KIT-S476I-w QSSIDSSAF   | 7     | >KIT-S476I-m QISIDSSAF  | 2100 | 2093  |
| >KIT-S476I-w QSSIDSSAF   | 81    | >KIT-S476I-m QISIDSSAF  | 150  | 69    |
| >KIT-S476I-w QSSIDSSAF   | 37    | >KIT-S476I-m QISIDSSAF  | 668  | 631   |
| >KIT-S476I-w QSSIDSSAFK  | 387   | >KIT-S476I-m QISIDSSAFK | 4378 | 3991  |
| >KIT-S476I-w VQSSIDSSA   | 477   | >KIT-S476I-m VQSIDSSA   | 305  | 172   |
| >KIT-S476I-w VQSSIDSSA   | 469   | >KIT-S476I-m VQSIDSSA   | 62   | 407   |
| >KIT-S476I-w VQSSIDSSAF  | 213   | >KIT-S476I-m VQSIDSSAFK | 470  | 257   |
| >KIT-S476I-w VQSSIDSSAF  | 33    | >KIT-S476I-m VQSIDSSAFK | 33   | 0     |
| >KIT-S476I-w VQSSIDSSAF  | 538   | >KIT-S476I-m VQSIDSSAFK | 311  | 227   |
| >KIT-S476I-w VQSSIDSSAF  | 580   | >KIT-S476I-m VQSIDSSAFK | 312  | 268   |
| >KIT-S476I-w VQSSIDSSA   | 576   | >KIT-S476I-m VQSIDSSA   | 297  | 279   |
| >KIT-S476I-w VQSSIDSSAF  | 32    | >KIT-S476I-m VQSIDSSAF  | 26   | 6     |
| >KIT-S476I-w VQSSIDSSAF  | 176   | >KIT-S476I-m VQSIDSSAF  | 123  | 53    |
| >KIT-S476I-w VQSSIDSSA   | 548   | >KIT-S476I-m VQSIDSSA   | 338  | 210   |
| >KIT-S476I-w VQSSIDSSAF  | 3     | >KIT-S476I-m VQSIDSSAF  | 2    | 1     |
| >KIT-S476I-w VVQSSIDSSAI | 300   | >KIT-S476I-m VVQSIDSSAF | 2157 | 1857  |
| >KIT-S476I-w VVQSSIDSSAI | 60    | >KIT-S476I-m VVQSIDSSAF | 109  | 49    |
| >KIT-S476I-w VVQSSIDSSAI | 278   | >KIT-S476I-m VVQSIDSSAF | 497  | 219   |
| >KIT-S476I-w VVQSSIDSSAI | 82    | >KIT-S476I-m VVQSIDSSAF | 326  | 244   |
| >KIT-S476I-w VVQSSIDSSAI | 191   | >KIT-S476I-m VVQSIDSSAF | 104  | 87    |
| >KIT-S476I-w VVQSSIDSSAI | 224   | >KIT-S476I-m VVQSIDSSAF | 339  | 115   |
| >KIT-S476I-w VVQSSIDSSAI | 65    | >KIT-S476I-m VVQSIDSSAF | 254  | 189   |
| >KIT-S476I-w LVVQSSIDSSA | 602   | >KIT-S476I-m LVVQSIDSSA | 407  | 195   |
| >KIT-S476I-w LVVQSSIDSSA | 1020  | >KIT-S476I-m LVVQSIDSSA | 284  | 736   |
| >KIT-S476I-w KLVVQSSI    | 559   | >KIT-S476I-m KLVVQISI   | 128  | 431   |
| >KIT-S476I-w KLVVQSSI    | 82    | >KIT-S476I-m KLVVQISI   | 94   | 12    |
| >KIT-S476I-w KLVVQSSI    | 27    | >KIT-S476I-m KLVVQISI   | 60   | 33    |
| >KIT-S476I-w KLVVQSSI    | 342   | >KIT-S476I-m KLVVQISI   | 160  | 182   |
| >KIT-S476I-w KLVVQSSI    | 70    | >KIT-S476I-m KLVVQISI   | 27   | 43    |
| >KIT-S476I-w KLVVQSSI    | 54    | >KIT-S476I-m KLVVQISI   | 49   | 5     |
| >KIT-S476I-w KLVVQSSI    | 212   | >KIT-S476I-m KLVVQISI   | 99   | 113   |
| >KIT-S476I-w KLVVQSSI    | 48    | >KIT-S476I-m KLVVQISI   | 34   | 14    |
| >KIT-S476I-w KLVVQSSI    | 154   | >KIT-S476I-m KLVVQISI   | 109  | 45    |
| >KIT-S476I-w GKLVVQSSI   | 150   | >KIT-S476I-m GKLVVQISI  | 403  | 253   |
| >KIT-S476I-w PFGKLVVQS   | 9895  | >KIT-S476I-m PFGKLVVQI  | 303  | 9592  |
| >KIT-S476I-w PPFGKLVVQS  | 20399 | >KIT-S476I-m PPFGKLVVQI | 41   | 20358 |
| >KIT-S590N-r SFGKTLGAGA  | 17    | >KIT-S590N-r NFGKTLGAG/ | 30   | 13    |

|                         |      |                         |       |       |
|-------------------------|------|-------------------------|-------|-------|
| >KIT-S590N-\ LSGKTLGA   | 411  | >KIT-S590N-r LNFGKTLGA  | 22726 | 22315 |
| >KIT-S590N-\ LSGKTLGAG  | 459  | >KIT-S590N-r LNFGKTLGAC | 22986 | 22527 |
| >KIT-S590N-\ RLSFGKTL   | 152  | >KIT-S590N-r RLNFGKTL   | 330   | 178   |
| >KIT-S590N-\ RLSFGKTLGA | 167  | >KIT-S590N-r RLNFGKTLGA | 734   | 567   |
| >KIT-S590N-\ RLSFGKTL   | 74   | >KIT-S590N-r RLNFGKTL   | 50    | 24    |
| >KIT-S590N-\ RLSFGKTLGA | 123  | >KIT-S590N-r RLNFGKTLGA | 254   | 131   |
| >KIT-S590N-\ RLSFGKTL   | 89   | >KIT-S590N-r RLNFGKTL   | 36    | 53    |
| >KIT-S590N-\ RLSFGKTLGA | 339  | >KIT-S590N-r RLNFGKTLGA | 131   | 208   |
| >KIT-S590N-\ RLSFGKTL   | 321  | >KIT-S590N-r RLNFGKTL   | 223   | 98    |
| >KIT-S590N-\ RLSFGKTL   | 396  | >KIT-S590N-r RLNFGKTL   | 344   | 52    |
| >KIT-S590N-\ RLSFGKTLGA | 496  | >KIT-S590N-r RLNFGKTLGA | 450   | 46    |
| >KIT-S590N-\ RLSFGKTL   | 20   | >KIT-S590N-r RLNFGKTL   | 24    | 4     |
| >KIT-S590N-\ RLSFGKTLGA | 36   | >KIT-S590N-r RLNFGKTLGA | 44    | 8     |
| >KIT-S590N-\ RLSFGKTL   | 136  | >KIT-S590N-r RLNFGKTL   | 66    | 70    |
| >KIT-S590N-\ NRLSGKTL   | 127  | >KIT-S590N-r NRLNFGKTL  | 186   | 59    |
| >KIT-S590N-\ NRLSGKTL   | 187  | >KIT-S590N-r NRLNFGKTL  | 157   | 30    |
| >KIT-S590N-\ NRLSGKTL   | 133  | >KIT-S590N-r NRLNFGKTL  | 275   | 142   |
| >KIT-S590N-\ NRLSGKTL   | 303  | >KIT-S590N-r NRLNFGKTL  | 366   | 63    |
| >KIT-S590N-\ NRLSGKTL   | 199  | >KIT-S590N-r NRLNFGKTL  | 121   | 78    |
| >KIT-S590N-\ RNRLSGK    | 6    | >KIT-S590N-r RNRLNFGK   | 8     | 2     |
| >KIT-S590N-\ RNRLSGKTL  | 134  | >KIT-S590N-r RNRLNFGKTL | 186   | 52    |
| >KIT-S590N-\ RNRLSGKTL  | 438  | >KIT-S590N-r RNRLNFGKTL | 888   | 450   |
| >KIT-S590N-\ PRNRLSGK   | 360  | >KIT-S590N-r PRNRLNFGK  | 335   | 25    |
| >KIT-S590N-\ FPRNRLSF   | 1070 | >KIT-S590N-r FPRNRLNF   | 343   | 727   |
| >KIT-S590N-\ FPRNRLSF   | 8    | >KIT-S590N-r FPRNRLNF   | 12    | 4     |
| >KIT-S590N-\ FPRNRLSGK  | 113  | >KIT-S590N-r FPRNRLNFGK | 149   | 36    |
| >KIT-S590N-\ FPRNRLSF   | 20   | >KIT-S590N-r FPRNRLNF   | 57    | 37    |
| >KIT-S590N-\ FPRNRLSFG  | 148  | >KIT-S590N-r FPRNRLNFG  | 215   | 67    |
| >KIT-S590N-\ FPRNRLSF   | 24   | >KIT-S590N-r FPRNRLNF   | 53    | 29    |
| >KIT-S590N-\ FPRNRLSF   | 52   | >KIT-S590N-r FPRNRLNF   | 144   | 92    |
| >KIT-S590N-\ FPRNRLSF   | 237  | >KIT-S590N-r FPRNRLNF   | 202   | 35    |
| >KIT-S590N-\ FPRNRLSFG  | 145  | >KIT-S590N-r FPRNRLNFG  | 44    | 101   |
| >KIT-S590N-\ FPRNRLSGK  | 59   | >KIT-S590N-r FPRNRLNFGK | 67    | 8     |
| >KIT-S590N-\ FPRNRLSGK  | 30   | >KIT-S590N-r FPRNRLNFGK | 21    | 9     |
| >KIT-S590N-\ FPRNRLSF   | 164  | >KIT-S590N-r FPRNRLNF   | 206   | 42    |
| >KIT-S590N-\ EFPRNRLSF  | 657  | >KIT-S590N-r EFPRNRLNF  | 219   | 438   |
| >KIT-S590N-\ EFPRNRLSF  | 479  | >KIT-S590N-r EFPRNRLNF  | 497   | 18    |
| >KIT-S590N-\ EFPRNRLSF  | 14   | >KIT-S590N-r EFPRNRLNF  | 18    | 4     |
| >KIT-S590N-\ EFPRNRLSFG | 524  | >KIT-S590N-r EFPRNRLNFG | 401   | 123   |
| >KIT-S590N-\ EFPRNRLSF  | 348  | >KIT-S590N-r EFPRNRLNF  | 599   | 251   |
| >KIT-S590N-\ WEFPRNRLSF | 117  | >KIT-S590N-r WEFPRNRLN  | 248   | 131   |
| >KIT-S590N-\ WEFPRNRLSF | 337  | >KIT-S590N-r WEFPRNRLN  | 368   | 31    |
| >KIT-S590N-\ WEFPRNRLSF | 147  | >KIT-S590N-r WEFPRNRLN  | 739   | 592   |

|                         |       |                         |       |       |
|-------------------------|-------|-------------------------|-------|-------|
| >KIT-S590N-v WEFPRNRLSF | 10    | >KIT-S590N-r WEFPRNRLN  | 14    | 4     |
| >KIT-S590N-v WEFPRNRLSF | 493   | >KIT-S590N-r WEFPRNRLN  | 872   | 379   |
| >KIT-S590N-v WEFPRNRLSF | 49    | >KIT-S590N-r WEFPRNRLN  | 121   | 72    |
| >KIT-S590N-v WEFPRNRLSF | 498   | >KIT-S590N-r WEFPRNRLN  | 680   | 182   |
| >KIT-S590N-v KWEFPRNRLS | 477   | >KIT-S590N-r KWEFPRNRLI | 214   | 263   |
| >KIT-S590N-v KWEFPRNRLS | 162   | >KIT-S590N-r KWEFPRNRLI | 207   | 45    |
| >KIT-S590N-v KWEFPRNRLS | 82    | >KIT-S590N-r KWEFPRNRLI | 210   | 128   |
| >KIT-S639P-v SELKVLSY   | 122   | >KIT-S639P-n PELKVLSY   | 3440  | 3318  |
| >KIT-S639P-v SELKVLSYL  | 14    | >KIT-S639P-n PELKVLSYL  | 98    | 84    |
| >KIT-S639P-v SELKVLSYL  | 365   | >KIT-S639P-n PELKVLSYL  | 12499 | 12134 |
| >KIT-S639P-v SELKVLSY   | 102   | >KIT-S639P-n PELKVLSY   | 2615  | 2513  |
| >KIT-S639P-v SELKVLSY   | 361   | >KIT-S639P-n PELKVLSY   | 1475  | 1114  |
| >KIT-S639P-v SELKVLSY   | 22    | >KIT-S639P-n PELKVLSY   | 64    | 42    |
| >KIT-S639P-v SELKVLSYL  | 427   | >KIT-S639P-n PELKVLSYL  | 1820  | 1393  |
| >KIT-S639P-v SELKVLSYL  | 54    | >KIT-S639P-n PELKVLSYL  | 712   | 658   |
| >KIT-S639P-v SELKVLSYL  | 97    | >KIT-S639P-n PELKVLSYL  | 2187  | 2090  |
| >KIT-S639P-v SELKVLSY   | 171   | >KIT-S639P-n PELKVLSY   | 1607  | 1436  |
| >KIT-S639P-v SELKVLSY   | 54    | >KIT-S639P-n PELKVLSY   | 435   | 381   |
| >KIT-S639P-v SELKVLSYL  | 151   | >KIT-S639P-n PELKVLSYL  | 1589  | 1438  |
| >KIT-S639P-v SELKVLSYLG | 270   | >KIT-S639P-n PELKVLSYLG | 6465  | 6195  |
| >KIT-S639P-v SELKVLSYLG | 276   | >KIT-S639P-n PELKVLSYLG | 7906  | 7630  |
| >KIT-S639P-v SELKVLSYL  | 437   | >KIT-S639P-n PELKVLSYL  | 14174 | 13737 |
| >KIT-S639P-v SELKVLSYL  | 10    | >KIT-S639P-n PELKVLSYL  | 71    | 61    |
| >KIT-S639P-v MSELKVLSYL | 26160 | >KIT-S639P-n MPELKVLSYL | 192   | 25968 |
| >KIT-S639P-v MSELKVLSY  | 11    | >KIT-S639P-n MPELKVLSY  | 11529 | 11518 |
| >KIT-S639P-v MSELKVLSY  | 246   | >KIT-S639P-n MPELKVLSY  | 1706  | 1460  |
| >KIT-S639P-v MSELKVLSYL | 17969 | >KIT-S639P-n MPELKVLSYL | 87    | 17882 |
| >KIT-S639P-v MSELKVLSY  | 4     | >KIT-S639P-n MPELKVLSY  | 5123  | 5119  |
| >KIT-S639P-v MSELKVLSYL | 32    | >KIT-S639P-n MPELKVLSYL | 19912 | 19880 |
| >KIT-S639P-v MSELKVLSY  | 738   | >KIT-S639P-n MPELKVLSY  | 12    | 726   |
| >KIT-S639P-v MSELKVLSYL | 28600 | >KIT-S639P-n MPELKVLSYL | 244   | 28356 |
| >KIT-S639P-v MSELKVLSY  | 5571  | >KIT-S639P-n MPELKVLSY  | 18    | 5553  |
| >KIT-S639P-v MSELKVLSYL | 14260 | >KIT-S639P-n MPELKVLSYL | 358   | 13902 |
| >KIT-S639P-v MSELKVLS   | 27307 | >KIT-S639P-n MPELKVLS   | 263   | 27044 |
| >KIT-S639P-v MSELKVLSYL | 21928 | >KIT-S639P-n MPELKVLSYL | 198   | 21730 |
| >KIT-S639P-v MSELKVLSYL | 21171 | >KIT-S639P-n MPELKVLSYL | 267   | 20904 |
| >KIT-S639P-v MSELKVLSY  | 485   | >KIT-S639P-n MPELKVLSY  | 5971  | 5486  |
| >KIT-S639P-v MSELKVLSYL | 106   | >KIT-S639P-n MPELKVLSYL | 15484 | 15378 |
| >KIT-S639P-v MSELKVLSY  | 6596  | >KIT-S639P-n MPELKVLSY  | 38    | 6558  |
| >KIT-S639P-v MSELKVLSY  | 12586 | >KIT-S639P-n MPELKVLSY  | 66    | 12520 |
| >KIT-S639P-v LMSELKVLSY | 472   | >KIT-S639P-n LMPELKVLSY | 1642  | 1170  |
| >KIT-S639P-v LMSELKVL   | 384   | >KIT-S639P-n LMPELKVL   | 992   | 608   |
| >KIT-S639P-v LMSELKVLSY | 22    | >KIT-S639P-n LMPELKVLSY | 41    | 19    |

|                          |      |                          |      |      |
|--------------------------|------|--------------------------|------|------|
| >KIT-S639P-v LMSELKVL    | 28   | >KIT-S639P-n LMPELKVL    | 267  | 239  |
| >KIT-S639P-v LMSELKVLSYI | 3    | >KIT-S639P-n LMPELKVLSYI | 11   | 8    |
| >KIT-S639P-v LMSELKVL    | 53   | >KIT-S639P-n LMPELKVL    | 173  | 120  |
| >KIT-S639P-v LMSELKVLSYI | 11   | >KIT-S639P-n LMPELKVLSYI | 22   | 11   |
| >KIT-S639P-v LMSELKVLSYI | 31   | >KIT-S639P-n LMPELKVLSYI | 31   | 0    |
| >KIT-S639P-v LMSELKVL    | 19   | >KIT-S639P-n LMPELKVL    | 17   | 2    |
| >KIT-S639P-v LMSELKVLSYI | 3    | >KIT-S639P-n LMPELKVLSYI | 3    | 0    |
| >KIT-S639P-v LMSELKVL    | 53   | >KIT-S639P-n LMPELKVL    | 146  | 93   |
| >KIT-S639P-v LMSELKVLSYI | 8    | >KIT-S639P-n LMPELKVLSYI | 16   | 8    |
| >KIT-S639P-v LMSELKVL    | 116  | >KIT-S639P-n LMPELKVL    | 142  | 26   |
| >KIT-S639P-v LMSELKVLSYI | 12   | >KIT-S639P-n LMPELKVLSYI | 12   | 0    |
| >KIT-S639P-v LMSELKVL    | 104  | >KIT-S639P-n LMPELKVL    | 814  | 710  |
| >KIT-S639P-v LMSELKVLSYI | 8    | >KIT-S639P-n LMPELKVLSYI | 30   | 22   |
| >KIT-S639P-v LMSELKVL    | 6    | >KIT-S639P-n LMPELKVL    | 9    | 3    |
| >KIT-S639P-v LMSELKVLSYI | 3    | >KIT-S639P-n LMPELKVLSYI | 3    | 0    |
| >KIT-S639P-v LMSELKVLSYI | 243  | >KIT-S639P-n LMPELKVLSYI | 543  | 300  |
| >KIT-S639P-v LMSELKVLSYI | 465  | >KIT-S639P-n LMPELKVLSYI | 1147 | 682  |
| >KIT-S639P-v LMSELKVLSYI | 131  | >KIT-S639P-n LMPELKVLSYI | 672  | 541  |
| >KIT-S639P-v LMSELKVL    | 357  | >KIT-S639P-n LMPELKVL    | 2520 | 2163 |
| >KIT-S639P-v LMSELKVLSYI | 44   | >KIT-S639P-n LMPELKVLSYI | 81   | 37   |
| >KIT-S639P-v LMSELKVLSYI | 435  | >KIT-S639P-n LMPELKVLSYI | 2723 | 2288 |
| >KIT-S639P-v LMSELKVL    | 289  | >KIT-S639P-n LMPELKVL    | 1801 | 1512 |
| >KIT-S639P-v LMSELKVLSYI | 30   | >KIT-S639P-n LMPELKVLSYI | 201  | 171  |
| >KIT-S639P-v LMSELKVLSYI | 347  | >KIT-S639P-n LMPELKVLSYI | 1814 | 1467 |
| >KIT-S639P-v LMSELKVLSYI | 349  | >KIT-S639P-n LMPELKVLSYI | 5222 | 4873 |
| >KIT-S639P-v LMSELKVLSYI | 4472 | >KIT-S639P-n LMPELKVLSYI | 21   | 4451 |
| >KIT-S639P-v LMSELKVLSYI | 254  | >KIT-S639P-n LMPELKVLSYI | 1384 | 1130 |
| >KIT-S639P-v ALMSELKV    | 13   | >KIT-S639P-n ALMPELKV    | 15   | 2    |
| >KIT-S639P-v ALMSELKVL   | 93   | >KIT-S639P-n ALMPELKVL   | 119  | 26   |
| >KIT-S639P-v ALMSELKV    | 7    | >KIT-S639P-n ALMPELKV    | 9    | 2    |
| >KIT-S639P-v ALMSELKVL   | 16   | >KIT-S639P-n ALMPELKVL   | 18   | 2    |
| >KIT-S639P-v ALMSELKV    | 6    | >KIT-S639P-n ALMPELKV    | 7    | 1    |
| >KIT-S639P-v ALMSELKVL   | 18   | >KIT-S639P-n ALMPELKVL   | 18   | 0    |
| >KIT-S639P-v ALMSELKV    | 25   | >KIT-S639P-n ALMPELKV    | 16   | 9    |
| >KIT-S639P-v ALMSELKVL   | 476  | >KIT-S639P-n ALMPELKVL   | 150  | 326  |
| >KIT-S639P-v ALMSELKV    | 4    | >KIT-S639P-n ALMPELKV    | 3    | 1    |
| >KIT-S639P-v ALMSELKVL   | 41   | >KIT-S639P-n ALMPELKVL   | 33   | 8    |
| >KIT-S639P-v ALMSELKV    | 7    | >KIT-S639P-n ALMPELKV    | 7    | 0    |
| >KIT-S639P-v ALMSELKVL   | 31   | >KIT-S639P-n ALMPELKVL   | 19   | 12   |
| >KIT-S639P-v ALMSELKV    | 9    | >KIT-S639P-n ALMPELKV    | 8    | 1    |
| >KIT-S639P-v ALMSELKVL   | 539  | >KIT-S639P-n ALMPELKVL   | 291  | 248  |
| >KIT-S639P-v ALMSELKV    | 4    | >KIT-S639P-n ALMPELKV    | 5    | 1    |
| >KIT-S639P-v ALMSELKVL   | 39   | >KIT-S639P-n ALMPELKVL   | 37   | 2    |

|                         |       |                         |      |       |
|-------------------------|-------|-------------------------|------|-------|
| >KIT-S639P-v ALMSELKV   | 2     | >KIT-S639P-n ALMPELKV   | 2    | 0     |
| >KIT-S639P-v ALMSELKVL  | 10    | >KIT-S639P-n ALMPELKVL  | 5    | 5     |
| >KIT-S639P-v ALMSELKVLS | 1320  | >KIT-S639P-n ALMPELKVLS | 480  | 840   |
| >KIT-S639P-v ALMSELKVLS | 293   | >KIT-S639P-n ALMPELKVLS | 323  | 30    |
| >KIT-S639P-v ALMSELKVLS | 306   | >KIT-S639P-n ALMPELKVLS | 294  | 12    |
| >KIT-S639P-v ALMSELKVLS | 200   | >KIT-S639P-n ALMPELKVLS | 517  | 317   |
| >KIT-S639P-v ALMSELKVLS | 125   | >KIT-S639P-n ALMPELKVLS | 90   | 35    |
| >KIT-S639P-v ALMSELKVLS | 115   | >KIT-S639P-n ALMPELKVLS | 168  | 53    |
| >KIT-S639P-v ALMSELKVLS | 74    | >KIT-S639P-n ALMPELKVLS | 96   | 22    |
| >KIT-S639P-v ALMSELKVLS | 48    | >KIT-S639P-n ALMPELKVLS | 46   | 2     |
| >KIT-S639P-v ALMSELKVLS | 439   | >KIT-S639P-n ALMPELKVLS | 449  | 10    |
| >KIT-S639P-v ALMSELKVL  | 216   | >KIT-S639P-n ALMPELKVL  | 459  | 243   |
| >KIT-S639P-v ALMSELKVLS | 25    | >KIT-S639P-n ALMPELKVLS | 34   | 9     |
| >KIT-S639P-v ALMSELKVLS | 270   | >KIT-S639P-n ALMPELKVLS | 46   | 224   |
| >KIT-S639P-v EALMSELK   | 22    | >KIT-S639P-n EALMPELK   | 55   | 33    |
| >KIT-S639P-v EALMSELKV  | 192   | >KIT-S639P-n EALMPELKV  | 47   | 145   |
| >KIT-S639P-v REALMSELKV | 131   | >KIT-S639P-n REALMPELKV | 753  | 622   |
| >KIT-S639P-v REALMSELKV | 58    | >KIT-S639P-n REALMPELKV | 125  | 67    |
| >KIT-S639P-v REALMSEL   | 16    | >KIT-S639P-n REALMPEL   | 17   | 1     |
| >KIT-S639P-v REALMSELKV | 30    | >KIT-S639P-n REALMPELKV | 41   | 11    |
| >KIT-S639P-v REALMSEL   | 25    | >KIT-S639P-n REALMPEL   | 26   | 1     |
| >KIT-S639P-v REALMSELKV | 131   | >KIT-S639P-n REALMPELKV | 155  | 24    |
| >KIT-S639P-v REALMSELKV | 74    | >KIT-S639P-n REALMPELKV | 89   | 15    |
| >KIT-S639P-v REALMSELKV | 425   | >KIT-S639P-n REALMPELKV | 386  | 39    |
| >KIT-S639P-v REALMSEL   | 279   | >KIT-S639P-n REALMPEL   | 263  | 16    |
| >KIT-S639P-v REALMSELK  | 146   | >KIT-S639P-n REALMPELK  | 200  | 54    |
| >KIT-S639P-v REALMSELKV | 41    | >KIT-S639P-n REALMPELKV | 51   | 10    |
| >KIT-S639P-v REALMSELKV | 10    | >KIT-S639P-n REALMPELKV | 14   | 4     |
| >KIT-S639P-v REALMSEL   | 382   | >KIT-S639P-n REALMPEL   | 170  | 212   |
| >KIT-S639P-v EREALMSEL  | 141   | >KIT-S639P-n EREALMPEL  | 185  | 44    |
| >KIT-S639P-v EREALMSEL  | 257   | >KIT-S639P-n EREALMPEL  | 251  | 6     |
| >KIT-S639P-v EREALMSEL  | 156   | >KIT-S639P-n EREALMPEL  | 198  | 42    |
| >KIT-S639P-v TEREALMS   | 104   | >KIT-S639P-n TEREALMP   | 125  | 21    |
| >KIT-S639P-v TEREALMSEL | 127   | >KIT-S639P-n TEREALMPEL | 244  | 117   |
| >KIT-S639P-v TEREALMSE  | 177   | >KIT-S639P-n TEREALMPE  | 93   | 84    |
| >KIT-S639P-v TEREALMSEL | 267   | >KIT-S639P-n TEREALMPEL | 276  | 9     |
| >KIT-S639P-v TEREALMSEL | 45    | >KIT-S639P-n TEREALMPEL | 49   | 4     |
| >KIT-S639P-v LTEREALMSE | 35    | >KIT-S639P-n LTEREALMPE | 47   | 12    |
| >KIT-S639P-v LTEREALMSE | 743   | >KIT-S639P-n LTEREALMPE | 473  | 270   |
| >KIT-S639P-v LTEREALMSE | 39    | >KIT-S639P-n LTEREALMPE | 398  | 359   |
| >KIT-S709F-v HSKESSCS   | 435   | >KIT-S709F-n HFKESSCS   | 1415 | 980   |
| >KIT-S709F-v HSKESSCSD  | 276   | >KIT-S709F-n HFKESSCSD  | 601  | 325   |
| >KIT-S709F-v EAALYKNLLH | 21327 | >KIT-S709F-n EAALYKNLLH | 261  | 21066 |

|                         |       |                         |      |       |
|-------------------------|-------|-------------------------|------|-------|
| >KIT-S709F-v LLHKSCESS  | 45    | >KIT-S709F-n LLHFKESSC  | 180  | 135   |
| >KIT-S709F-v LYKNLLHS   | 17622 | >KIT-S709F-n LYKNLLHF   | 24   | 17598 |
| >KIT-S709F-v LYKNLLHSK  | 656   | >KIT-S709F-n LYKNLLHFK  | 496  | 160   |
| >KIT-S709F-v LYKNLLHS   | 10576 | >KIT-S709F-n LYKNLLHF   | 86   | 10490 |
| >KIT-S709F-v LYKNLLHS   | 3334  | >KIT-S709F-n LYKNLLHF   | 6    | 3328  |
| >KIT-S709F-v LYKNLLHSK  | 11    | >KIT-S709F-n LYKNLLHFK  | 6    | 5     |
| >KIT-S709F-v LYKNLLHSK  | 45    | >KIT-S709F-n LYKNLLHFK  | 10   | 35    |
| >KIT-S709F-v LYKNLLHSK  | 551   | >KIT-S709F-n LYKNLLHFK  | 96   | 455   |
| >KIT-S709F-v LYKNLLHS   | 23658 | >KIT-S709F-n LYKNLLHF   | 478  | 23180 |
| >KIT-S709F-v LYKNLLHSK  | 825   | >KIT-S709F-n LYKNLLHFK  | 190  | 635   |
| >KIT-S709F-v LYKNLLHS   | 6293  | >KIT-S709F-n LYKNLLHF   | 328  | 5965  |
| >KIT-S709F-v ALYKNLLHS  | 275   | >KIT-S709F-n ALYKNLLHF  | 218  | 57    |
| >KIT-S709F-v ALYKNLLHSK | 388   | >KIT-S709F-n ALYKNLLHFK | 245  | 143   |
| >KIT-S709F-v ALYKNLLHS  | 229   | >KIT-S709F-n ALYKNLLHF  | 537  | 308   |
| >KIT-S709F-v ALYKNLLHSK | 54    | >KIT-S709F-n ALYKNLLHFK | 79   | 25    |
| >KIT-S709F-v ALYKNLLHSK | 15    | >KIT-S709F-n ALYKNLLHFK | 10   | 5     |
| >KIT-S709F-v ALYKNLLHSK | 27    | >KIT-S709F-n ALYKNLLHFK | 14   | 13    |
| >KIT-S709F-v ALYKNLLHS  | 28648 | >KIT-S709F-n ALYKNLLHF  | 196  | 28452 |
| >KIT-S709F-v ALYKNLLHS  | 22124 | >KIT-S709F-n ALYKNLLHF  | 349  | 21775 |
| >KIT-S709F-v ALYKNLLHS  | 25996 | >KIT-S709F-n ALYKNLLHF  | 419  | 25577 |
| >KIT-S709F-v ALYKNLLHS  | 13121 | >KIT-S709F-n ALYKNLLHF  | 346  | 12775 |
| >KIT-S709F-v ALYKNLLHSK | 83    | >KIT-S709F-n ALYKNLLHFK | 31   | 52    |
| >KIT-S709F-v ALYKNLLHSK | 299   | >KIT-S709F-n ALYKNLLHFK | 52   | 247   |
| >KIT-S709F-v ALYKNLLHS  | 23675 | >KIT-S709F-n ALYKNLLHF  | 359  | 23316 |
| >KIT-S709F-v ALYKNLLHS  | 5457  | >KIT-S709F-n ALYKNLLHF  | 27   | 5430  |
| >KIT-S709F-v ALYKNLLHS  | 6439  | >KIT-S709F-n ALYKNLLHF  | 10   | 6429  |
| >KIT-S709F-v ALYKNLLHS  | 20155 | >KIT-S709F-n ALYKNLLHF  | 51   | 20104 |
| >KIT-S709F-v ALYKNLLHSK | 1888  | >KIT-S709F-n ALYKNLLHFK | 410  | 1478  |
| >KIT-S709F-v ALYKNLLHSK | 424   | >KIT-S709F-n ALYKNLLHFK | 321  | 103   |
| >KIT-S709F-v AALYKNLLHS | 1346  | >KIT-S709F-n AALYKNLLHF | 407  | 939   |
| >KIT-S709F-v AALYKNLLHS | 42    | >KIT-S709F-n AALYKNLLHF | 18   | 24    |
| >KIT-S709F-v AALYKNLLHS | 38    | >KIT-S709F-n AALYKNLLHF | 17   | 21    |
| >KIT-S709F-v AALYKNLLHS | 924   | >KIT-S709F-n AALYKNLLHF | 147  | 777   |
| >KIT-S709F-v AALYKNLLHS | 17487 | >KIT-S709F-n AALYKNLLHF | 466  | 17021 |
| >KIT-S709F-v AALYKNLLHS | 14282 | >KIT-S709F-n AALYKNLLHF | 62   | 14220 |
| >KIT-S709F-v AALYKNLLHS | 11754 | >KIT-S709F-n AALYKNLLHF | 8    | 11746 |
| >KIT-S709F-v AALYKNLLHS | 21273 | >KIT-S709F-n AALYKNLLHF | 498  | 20775 |
| >KIT-S709F-v AALYKNLLHS | 217   | >KIT-S709F-n AALYKNLLHF | 182  | 35    |
| >KIT-S854P-v SYGIFLWEL  | 318   | >KIT-S854P-n PYGIFLWEL  | 6252 | 5934  |
| >KIT-S854P-v SYGIFLWEL  | 275   | >KIT-S854P-n PYGIFLWEL  | 113  | 162   |
| >KIT-S854P-v SYGIFLWELF | 41    | >KIT-S854P-n PYGIFLWELF | 57   | 16    |
| >KIT-S854P-v SYGIFLWEL  | 126   | >KIT-S854P-n PYGIFLWEL  | 285  | 159   |
| >KIT-S854P-v SYGIFLWELF | 162   | >KIT-S854P-n PYGIFLWELF | 315  | 153   |

|                         |       |                         |       |       |
|-------------------------|-------|-------------------------|-------|-------|
| >KIT-S854P-v SYGIFLWEL  | 6     | >KIT-S854P-n PYGIFLWEL  | 20    | 14    |
| >KIT-S854P-v SYGIFLWELF | 8     | >KIT-S854P-n PYGIFLWELF | 39    | 31    |
| >KIT-S854P-v SYGIFLWELF | 286   | >KIT-S854P-n PYGIFLWELF | 714   | 428   |
| >KIT-S854P-v SYGIFLWEL  | 65    | >KIT-S854P-n PYGIFLWEL  | 281   | 216   |
| >KIT-S854P-v SYGIFLWELF | 18    | >KIT-S854P-n PYGIFLWELF | 79    | 61    |
| >KIT-S854P-v SYGIFLWEL  | 152   | >KIT-S854P-n PYGIFLWEL  | 2726  | 2574  |
| >KIT-S854P-v SYGIFLWELF | 375   | >KIT-S854P-n PYGIFLWELF | 3592  | 3217  |
| >KIT-S854P-v WSYGIFLWEL | 153   | >KIT-S854P-n WPYGIFLWEL | 4454  | 4301  |
| >KIT-S854P-v WSYGIFLWEL | 31037 | >KIT-S854P-n WPYGIFLWEL | 426   | 30611 |
| >KIT-S854P-v WSYGIFLWEL | 286   | >KIT-S854P-n WPYGIFLWEL | 3141  | 2855  |
| >KIT-S854P-v WSYGIFLWEL | 114   | >KIT-S854P-n WPYGIFLWEL | 1599  | 1485  |
| >KIT-S854P-v WSYGIFLWEL | 62    | >KIT-S854P-n WPYGIFLWEL | 254   | 192   |
| >KIT-S854P-v WSYGIFLWEL | 104   | >KIT-S854P-n WPYGIFLWEL | 1077  | 973   |
| >KIT-S854P-v WSYGIFLWEL | 159   | >KIT-S854P-n WPYGIFLWEL | 495   | 336   |
| >KIT-S854P-v WSYGIFLWEL | 101   | >KIT-S854P-n WPYGIFLWEL | 535   | 434   |
| >KIT-S854P-v WSYGIFLWEL | 123   | >KIT-S854P-n WPYGIFLWEL | 5086  | 4963  |
| >KIT-S854P-v WSYGIFLWEL | 80    | >KIT-S854P-n WPYGIFLWEL | 143   | 63    |
| >KIT-S854P-v WSYGIFLWEL | 216   | >KIT-S854P-n WPYGIFLWEL | 10588 | 10372 |
| >KIT-S854P-v WSYGIFLWEL | 66    | >KIT-S854P-n WPYGIFLWEL | 611   | 545   |
| >KIT-S854P-v WSYGIFLW   | 4     | >KIT-S854P-n WPYGIFLW   | 1075  | 1071  |
| >KIT-S854P-v WSYGIFLWEL | 23    | >KIT-S854P-n WPYGIFLWEL | 15980 | 15957 |
| >KIT-S854P-v WSYGIFLWEL | 8     | >KIT-S854P-n WPYGIFLWEL | 11358 | 11350 |
| >KIT-S854P-v WSYGIFLW   | 3659  | >KIT-S854P-n WPYGIFLW   | 63    | 3596  |
| >KIT-S854P-v WSYGIFLWEL | 256   | >KIT-S854P-n WPYGIFLWEL | 11    | 245   |
| >KIT-S854P-v WSYGIFLWEL | 577   | >KIT-S854P-n WPYGIFLWEL | 47    | 530   |
| >KIT-S854P-v WSYGIFLW   | 97    | >KIT-S854P-n WPYGIFLW   | 7     | 90    |
| >KIT-S854P-v WSYGIFLWEL | 2423  | >KIT-S854P-n WPYGIFLWEL | 20    | 2403  |
| >KIT-S854P-v WSYGIFLW   | 11623 | >KIT-S854P-n WPYGIFLW   | 24    | 11599 |
| >KIT-S854P-v WSYGIFLWE  | 14321 | >KIT-S854P-n WPYGIFLWE  | 245   | 14076 |
| >KIT-S854P-v WSYGIFLWEL | 23171 | >KIT-S854P-n WPYGIFLWEL | 327   | 22844 |
| >KIT-S854P-v WSYGIFLW   | 32    | >KIT-S854P-n WPYGIFLW   | 2790  | 2758  |
| >KIT-S854P-v WSYGIFLWEL | 178   | >KIT-S854P-n WPYGIFLWEL | 17380 | 17202 |
| >KIT-S854P-v WSYGIFLW   | 9     | >KIT-S854P-n WPYGIFLW   | 1277  | 1268  |
| >KIT-S854P-v WSYGIFLWEL | 429   | >KIT-S854P-n WPYGIFLWEL | 20493 | 20064 |
| >KIT-S854P-v WSYGIFLWEL | 44    | >KIT-S854P-n WPYGIFLWEL | 17063 | 17019 |
| >KIT-S854P-v WSYGIFLWEL | 304   | >KIT-S854P-n WPYGIFLWEL | 5627  | 5323  |
| >KIT-S854P-v WSYGIFLWEL | 387   | >KIT-S854P-n WPYGIFLWEL | 6321  | 5934  |
| >KIT-S854P-v WSYGIFLW   | 137   | >KIT-S854P-n WPYGIFLW   | 5524  | 5387  |
| >KIT-S854P-v WSYGIFLWE  | 288   | >KIT-S854P-n WPYGIFLWE  | 5629  | 5341  |
| >KIT-S854P-v WSYGIFLWEL | 69    | >KIT-S854P-n WPYGIFLWEL | 10581 | 10512 |
| >KIT-S854P-v WSYGIFLWEL | 5     | >KIT-S854P-n WPYGIFLWEL | 37    | 32    |
| >KIT-S854P-v WSYGIFLW   | 25    | >KIT-S854P-n WPYGIFLW   | 3     | 22    |
| >KIT-S854P-v WSYGIFLWEL | 4185  | >KIT-S854P-n WPYGIFLWEL | 25    | 4160  |

|                         |       |                         |       |       |
|-------------------------|-------|-------------------------|-------|-------|
| >KIT-S854P-v WSYGIFLWEI | 1731  | >KIT-S854P-n WPYGIFLWEI | 12    | 1719  |
| >KIT-S854P-v WSYGIFLW   | 43    | >KIT-S854P-n WPYGIFLW   | 34    | 9     |
| >KIT-S854P-v VWSYGIFLWI | 187   | >KIT-S854P-n VWPYGIFLWI | 1115  | 928   |
| >KIT-S854P-v VWSYGIFLWI | 441   | >KIT-S854P-n VWPYGIFLWI | 514   | 73    |
| >KIT-S854P-v VWSYGIFLW  | 200   | >KIT-S854P-n VWPYGIFLW  | 162   | 38    |
| >KIT-S854P-v VWSYGIFLWI | 309   | >KIT-S854P-n VWPYGIFLWI | 238   | 71    |
| >KIT-S854P-v VWSYGIFL   | 1136  | >KIT-S854P-n VWPYGIFL   | 460   | 676   |
| >KIT-S854P-v VWSYGIFLW  | 103   | >KIT-S854P-n VWPYGIFLW  | 48    | 55    |
| >KIT-S854P-v VWSYGIFLWI | 421   | >KIT-S854P-n VWPYGIFLWI | 164   | 257   |
| >KIT-S854P-v VWSYGIFL   | 406   | >KIT-S854P-n VWPYGIFL   | 59    | 347   |
| >KIT-S854P-v VWSYGIFLW  | 266   | >KIT-S854P-n VWPYGIFLW  | 44    | 222   |
| >KIT-S854P-v VWSYGIFLWI | 60    | >KIT-S854P-n VWPYGIFLWI | 14    | 46    |
| >KIT-S854P-v VWSYGIFLW  | 196   | >KIT-S854P-n VWPYGIFLW  | 10776 | 10580 |
| >KIT-S854P-v VWSYGIFL   | 6820  | >KIT-S854P-n VWPYGIFL   | 122   | 6698  |
| >KIT-S854P-v VWSYGIFLW  | 16346 | >KIT-S854P-n VWPYGIFLW  | 291   | 16055 |
| >KIT-S854P-v VWSYGIFLWI | 9391  | >KIT-S854P-n VWPYGIFLWI | 69    | 9322  |
| >KIT-S854P-v VWSYGIFLW  | 295   | >KIT-S854P-n VWPYGIFLW  | 2918  | 2623  |
| >KIT-S854P-v VWSYGIFLWI | 460   | >KIT-S854P-n VWPYGIFLWI | 366   | 94    |
| >KIT-S854P-v VWSYGIFL   | 53    | >KIT-S854P-n VWPYGIFL   | 72    | 19    |
| >KIT-S854P-v VWSYGIFLW  | 207   | >KIT-S854P-n VWPYGIFLW  | 298   | 91    |
| >KIT-S854P-v VWSYGIFLWI | 71    | >KIT-S854P-n VWPYGIFLWI | 98    | 27    |
| >KIT-S854P-v DVWSYGIF   | 230   | >KIT-S854P-n DVWPYGIF   | 485   | 255   |
| >KIT-S854P-v DVWSYGIFL  | 452   | >KIT-S854P-n DVWPYGIFL  | 256   | 196   |
| >KIT-S854P-v DVWSYGIFL  | 15    | >KIT-S854P-n DVWPYGIFL  | 19    | 4     |
| >KIT-S854P-v DVWSYGIFLV | 1776  | >KIT-S854P-n DVWPYGIFLV | 435   | 1341  |
| >KIT-S854P-v DVWSYGIF   | 167   | >KIT-S854P-n DVWPYGIF   | 167   | 0     |
| >KIT-S854P-v DVWSYGIFLV | 1753  | >KIT-S854P-n DVWPYGIFLV | 490   | 1263  |
| >KIT-S854P-v SDVWSYGIF  | 823   | >KIT-S854P-n SDVWPYGIF  | 378   | 445   |
| >KIT-S854P-v SDVWSYGI   | 77    | >KIT-S854P-n SDVWPYGI   | 126   | 49    |
| >KIT-S854P-v SDVWSYGI   | 92    | >KIT-S854P-n SDVWPYGI   | 244   | 152   |
| >KIT-S854P-v ESDVWSYGIF | 274   | >KIT-S854P-n ESDVWPYGIF | 866   | 592   |
| >KIT-S854P-v ESDVWSYGIF | 463   | >KIT-S854P-n ESDVWPYGIF | 411   | 52    |
| >KIT-S854P-v ESDVWSYGI  | 161   | >KIT-S854P-n ESDVWPYGI  | 387   | 226   |
| >KIT-S854P-v ESDVWSYGI  | 12    | >KIT-S854P-n ESDVWPYGI  | 16    | 4     |
| >KIT-S854P-v ESDVWSYGIF | 37    | >KIT-S854P-n ESDVWPYGIF | 47    | 10    |
| >KIT-S854P-v ESDVWSYGIF | 282   | >KIT-S854P-n ESDVWPYGIF | 844   | 562   |
| >KIT-S854P-v FESDVWSYGI | 12    | >KIT-S854P-n FESDVWPYGI | 27    | 15    |
| >KIT-S854P-v FESDVWSYGI | 261   | >KIT-S854P-n FESDVWPYGI | 936   | 675   |
| >KIT-S854P-v FESDVWSYGI | 331   | >KIT-S854P-n FESDVWPYGI | 385   | 54    |
| >KIT-S854P-v FESDVWSYGI | 455   | >KIT-S854P-n FESDVWPYGI | 274   | 181   |
| >KIT-S854P-v FESDVWSY   | 232   | >KIT-S854P-n FESDVWPY   | 141   | 91    |
| >KIT-S854P-v FESDVWSY   | 275   | >KIT-S854P-n FESDVWPY   | 219   | 56    |
| >KIT-S854P-v FESDVWSY   | 292   | >KIT-S854P-n FESDVWPY   | 325   | 33    |



|                          |      |                          |      |      |
|--------------------------|------|--------------------------|------|------|
| >KIT-S854P-v FESDVWSYGI  | 193  | >KIT-S854P-n FESDVWPYGI  | 380  | 187  |
| >KIT-S854P-v FESDVWSY    | 9    | >KIT-S854P-n FESDVWPY    | 7    | 2    |
| >KIT-S854P-v FESDVWSYGI  | 35   | >KIT-S854P-n FESDVWPYGI  | 38   | 3    |
| >KIT-S854P-v FESDVWSY    | 430  | >KIT-S854P-n FESDVWPY    | 115  | 315  |
| >KIT-S854P-v FESDVWSYGI  | 21   | >KIT-S854P-n FESDVWPYGI  | 22   | 1    |
| >KIT-S854P-v FESDVWSYGI  | 137  | >KIT-S854P-n FESDVWPYGI  | 151  | 14   |
| >KIT-S854P-v FESDVWSYGI  | 370  | >KIT-S854P-n FESDVWPYGI  | 411  | 41   |
| >KIT-S854P-v FESDVWSY    | 197  | >KIT-S854P-n FESDVWPY    | 315  | 118  |
| >KIT-S854P-v FESDVWSY    | 78   | >KIT-S854P-n FESDVWPY    | 88   | 10   |
| >KIT-S854P-v FESDVWSYGI  | 150  | >KIT-S854P-n FESDVWPYGI  | 203  | 53   |
| >KIT-S854P-v FESDVWSYG   | 997  | >KIT-S854P-n FESDVWPYG   | 415  | 582  |
| >KIT-S854P-v FESDVWSYGI  | 12   | >KIT-S854P-n FESDVWPYGI  | 7    | 5    |
| >KIT-S854P-v FESDVWSYGI  | 72   | >KIT-S854P-n FESDVWPYGI  | 69   | 3    |
| >KIT-S854P-v TFESDVWSYCI | 397  | >KIT-S854P-n TFESDVWPYCI | 276  | 121  |
| >KIT-S854P-v TFESDVWSY   | 67   | >KIT-S854P-n TFESDVWPY   | 43   | 24   |
| >KIT-S854P-v TFESDVWSY   | 66   | >KIT-S854P-n TFESDVWPY   | 202  | 136  |
| >KIT-S854P-v TFESDVWSY   | 380  | >KIT-S854P-n TFESDVWPY   | 298  | 82   |
| >KIT-S854P-v TFESDVWSY   | 1754 | >KIT-S854P-n TFESDVWPY   | 356  | 1398 |
| >KIT-S854P-v TFESDVWSY   | 76   | >KIT-S854P-n TFESDVWPY   | 134  | 58   |
| >KIT-S854P-v YTFESDVWSY  | 67   | >KIT-S854P-n YTFESDVWPY  | 59   | 8    |
| >KIT-S854P-v YTFESDVWSY  | 333  | >KIT-S854P-n YTFESDVWPY  | 177  | 156  |
| >KIT-S854P-v YTFESDVWSY  | 326  | >KIT-S854P-n YTFESDVWPY  | 290  | 36   |
| >KIT-S854P-v YTFESDVWSY  | 244  | >KIT-S854P-n YTFESDVWPY  | 151  | 93   |
| >KIT-S854P-v YTFESDVWSY  | 20   | >KIT-S854P-n YTFESDVWPY  | 60   | 40   |
| >KIT-S854P-v YTFESDVWSY  | 234  | >KIT-S854P-n YTFESDVWPY  | 279  | 45   |
| >KIT-S854P-v YTFESDVWSY  | 27   | >KIT-S854P-n YTFESDVWPY  | 18   | 9    |
| >KIT-S854P-v YTFESDVWSY  | 49   | >KIT-S854P-n YTFESDVWPY  | 40   | 9    |
| >KIT-S854P-v YTFESDVWSY  | 25   | >KIT-S854P-n YTFESDVWPY  | 19   | 6    |
| >KIT-S854P-v YTFESDVWSY  | 38   | >KIT-S854P-n YTFESDVWPY  | 49   | 11   |
| >KIT-S854P-v YTFESDVWSY  | 397  | >KIT-S854P-n YTFESDVWPY  | 409  | 12   |
| >KIT-S854P-v YTFESDVWS   | 224  | >KIT-S854P-n YTFESDVWP   | 957  | 733  |
| >KIT-S854P-v YTFESDVWSY  | 91   | >KIT-S854P-n YTFESDVWPY  | 48   | 43   |
| >KIT-S854P-v YTFESDVWS   | 173  | >KIT-S854P-n YTFESDVWP   | 4634 | 4461 |
| >KIT-S854P-v YTFESDVWSY  | 273  | >KIT-S854P-n YTFESDVWPY  | 1059 | 786  |
| >KIT-S854P-v YTFESDVWSY  | 49   | >KIT-S854P-n YTFESDVWPY  | 49   | 0    |
| >KIT-S854P-v YTFESDVWSY  | 48   | >KIT-S854P-n YTFESDVWPY  | 45   | 3    |
| >KIT-S854P-v YTFESDVWSY  | 108  | >KIT-S854P-n YTFESDVWPY  | 70   | 38   |
| >KIT-S854P-v YTFESDVWSY  | 13   | >KIT-S854P-n YTFESDVWPY  | 13   | 0    |
| >KIT-S854P-v YTFESDVWS   | 206  | >KIT-S854P-n YTFESDVWP   | 1523 | 1317 |
| >KIT-S854P-v YTFESDVWSY  | 3    | >KIT-S854P-n YTFESDVWPY  | 3    | 0    |
| >KIT-S854P-v YTFESDVWSY  | 332  | >KIT-S854P-n YTFESDVWPY  | 150  | 182  |
| >KIT-S854P-v YTFESDVWSY  | 104  | >KIT-S854P-n YTFESDVWPY  | 115  | 11   |
| >KIT-S854P-v YTFESDVWSY  | 79   | >KIT-S854P-n YTFESDVWPY  | 150  | 71   |

|                          |       |                          |       |       |
|--------------------------|-------|--------------------------|-------|-------|
| >KIT-S854P-v YTFESDVWSY  | 34    | >KIT-S854P-n YTFESDVWPy  | 73    | 39    |
| >KIT-S854P-v YTFESDVWSY  | 323   | >KIT-S854P-n YTFESDVWPy  | 3018  | 2695  |
| >KIT-S854P-v YTFESDVWSY  | 55    | >KIT-S854P-n YTFESDVWPy  | 41    | 14    |
| >KIT-S854P-v VYTFESDVWf  | 271   | >KIT-S854P-n VYTFESDVWf  | 689   | 418   |
| >KIT-S854P-v VYTFESDVWf  | 79    | >KIT-S854P-n VYTFESDVWf  | 62    | 17    |
| >KIT-S854P-v VYTFESDVWf  | 28    | >KIT-S854P-n VYTFESDVWf  | 57    | 29    |
| >KIT-S854P-v VYTFESDVWf  | 49    | >KIT-S854P-n VYTFESDVWf  | 47    | 2     |
| >KIT-S854P-v VYTFESDVWf  | 114   | >KIT-S854P-n VYTFESDVWf  | 177   | 63    |
| >KIT-S864F-v SLGSSPYPGM  | 816   | >KIT-S864F-n FLGSSPYPGM  | 114   | 702   |
| >KIT-S864F-v SLGSSPYPG   | 4757  | >KIT-S864F-n FLGSSPYPG   | 264   | 4493  |
| >KIT-S864F-v SLGSSPYPG   | 2011  | >KIT-S864F-n FLGSSPYPG   | 81    | 1930  |
| >KIT-S864F-v SLGSSPYPGM  | 82    | >KIT-S864F-n FLGSSPYPGM  | 22    | 60    |
| >KIT-S864F-v SLGSSPYPGM  | 426   | >KIT-S864F-n FLGSSPYPGM  | 119   | 307   |
| >KIT-S864F-v SLGSSPYPGM  | 2485  | >KIT-S864F-n FLGSSPYPGM  | 332   | 2153  |
| >KIT-S864F-v SLGSSPYPG   | 1795  | >KIT-S864F-n FLGSSPYPG   | 246   | 1549  |
| >KIT-S864F-v SLGSSPYPG   | 934   | >KIT-S864F-n FLGSSPYPG   | 116   | 818   |
| >KIT-S864F-v SLGSSPYPGM  | 26    | >KIT-S864F-n FLGSSPYPGM  | 6     | 20    |
| >KIT-S864F-v SLGSSPYPG   | 1999  | >KIT-S864F-n FLGSSPYPG   | 283   | 1716  |
| >KIT-S864F-v SLGSSPYPGM  | 237   | >KIT-S864F-n FLGSSPYPGM  | 24    | 213   |
| >KIT-S864F-v SLGSSPYPGM  | 59    | >KIT-S864F-n FLGSSPYPGM  | 23    | 36    |
| >KIT-S864F-v SLGSSPYPGM  | 241   | >KIT-S864F-n FLGSSPYPGM  | 12    | 229   |
| >KIT-S864F-v SLGSSPYPGM  | 72    | >KIT-S864F-n FLGSSPYPGM  | 7     | 65    |
| >KIT-S864F-v SLGSSPYPGM  | 999   | >KIT-S864F-n FLGSSPYPGM  | 317   | 682   |
| >KIT-S864F-v SLGSSPYPGM  | 869   | >KIT-S864F-n FLGSSPYPGM  | 471   | 398   |
| >KIT-S864F-v SLGSSPYPGM  | 1575  | >KIT-S864F-n FLGSSPYPGM  | 448   | 1127  |
| >KIT-S864F-v FSLGSSPYPGI | 332   | >KIT-S864F-n FFLGSSPYPGI | 1695  | 1363  |
| >KIT-S864F-v FSLGSSPYPGI | 180   | >KIT-S864F-n FFLGSSPYPGI | 1047  | 867   |
| >KIT-S864F-v FSLGSSPYPGI | 15180 | >KIT-S864F-n FFLGSSPYPGI | 226   | 14954 |
| >KIT-S864F-v FSLGSSPY    | 148   | >KIT-S864F-n FFLGSSPY    | 2676  | 2528  |
| >KIT-S864F-v FSLGSSPYPGI | 324   | >KIT-S864F-n FFLGSSPYPGI | 6144  | 5820  |
| >KIT-S864F-v FSLGSSPY    | 492   | >KIT-S864F-n FFLGSSPY    | 2542  | 2050  |
| >KIT-S864F-v FSLGSSPY    | 27    | >KIT-S864F-n FFLGSSPY    | 8     | 19    |
| >KIT-S864F-v FSLGSSPYPGI | 5260  | >KIT-S864F-n FFLGSSPYPGI | 439   | 4821  |
| >KIT-S864F-v FSLGSSPY    | 320   | >KIT-S864F-n FFLGSSPY    | 1265  | 945   |
| >KIT-S864F-v FSLGSSPYPGI | 42    | >KIT-S864F-n FFLGSSPYPGI | 1050  | 1008  |
| >KIT-S864F-v FSLGSSPY    | 45    | >KIT-S864F-n FFLGSSPY    | 183   | 138   |
| >KIT-S864F-v FSLGSSPY    | 49    | >KIT-S864F-n FFLGSSPY    | 15    | 34    |
| >KIT-S864F-v FSLGSSPY    | 15    | >KIT-S864F-n FFLGSSPY    | 329   | 314   |
| >KIT-S864F-v FSLGSSPYPGI | 221   | >KIT-S864F-n FFLGSSPYPGI | 2831  | 2610  |
| >KIT-S864F-v FSLGSSPY    | 3     | >KIT-S864F-n FFLGSSPY    | 7374  | 7371  |
| >KIT-S864F-v FSLGSSPYPGI | 7     | >KIT-S864F-n FFLGSSPYPGI | 17354 | 17347 |
| >KIT-S864F-v FSLGSSPY    | 17    | >KIT-S864F-n FFLGSSPY    | 24    | 7     |
| >KIT-S864F-v FSLGSSPYPGI | 433   | >KIT-S864F-n FFLGSSPYPGI | 730   | 297   |

|                          |       |                          |       |       |
|--------------------------|-------|--------------------------|-------|-------|
| >KIT-S864F-v FSLGSSPY    | 468   | >KIT-S864F-n FFLGSSPY    | 14542 | 14074 |
| >KIT-S864F-v FSLGSSPYPGI | 299   | >KIT-S864F-n FFLGSSPYPGI | 14656 | 14357 |
| >KIT-S864F-v FSLGSSPY    | 118   | >KIT-S864F-n FFLGSSPY    | 12210 | 12092 |
| >KIT-S864F-v FSLGSSPYPGI | 129   | >KIT-S864F-n FFLGSSPYPGI | 3975  | 3846  |
| >KIT-S864F-v SYGIFLWELFS | 21843 | >KIT-S864F-n SYGIFLWELFF | 63    | 21780 |
| >KIT-S864F-v SYGIFLWELFS | 7437  | >KIT-S864F-n SYGIFLWELFF | 32    | 7405  |
| >KIT-S864F-v SYGIFLWELFS | 1227  | >KIT-S864F-n SYGIFLWELFF | 7     | 1220  |
| >KIT-S864F-v SYGIFLWELFS | 9083  | >KIT-S864F-n SYGIFLWELFF | 247   | 8836  |
| >KIT-S864F-v SYGIFLWELFS | 10400 | >KIT-S864F-n SYGIFLWELFF | 279   | 10121 |
| >KIT-S864F-v SYGIFLWELFS | 1793  | >KIT-S864F-n SYGIFLWELFF | 117   | 1676  |
| >KIT-S864F-v LFLSLGSSPY  | 18    | >KIT-S864F-n LFFLGSSPY   | 9     | 9     |
| >KIT-S864F-v LFLSLGSSPY  | 227   | >KIT-S864F-n LFFLGSSPY   | 202   | 25    |
| >KIT-S864F-v LFLSLGSSPY  | 103   | >KIT-S864F-n LFFLGSSPY   | 66    | 37    |
| >KIT-S864F-v LFLSLGSSPY  | 68    | >KIT-S864F-n LFFLGSSPY   | 22    | 46    |
| >KIT-S864F-v LFLSLGSSPY  | 1679  | >KIT-S864F-n LFFLGSSPY   | 208   | 1471  |
| >KIT-S864F-v LFLSLGSSPY  | 32    | >KIT-S864F-n LFFLGSSPY   | 33    | 1     |
| >KIT-S864F-v LFLSLGSSPY  | 226   | >KIT-S864F-n LFFLGSSPY   | 57    | 169   |
| >KIT-S864F-v ELFLSLGSSPY | 296   | >KIT-S864F-n ELFFLGSSPY  | 123   | 173   |
| >KIT-S864F-v ELFLSLGSSPY | 143   | >KIT-S864F-n ELFFLGSSPY  | 182   | 39    |
| >KIT-S864F-v ELFLSLGSSPY | 110   | >KIT-S864F-n ELFFLGSSPY  | 612   | 502   |
| >KIT-S864F-v ELFLSLGSSPY | 180   | >KIT-S864F-n ELFFLGSSPY  | 110   | 70    |
| >KIT-S864F-v ELFLSLGSSPY | 367   | >KIT-S864F-n ELFFLGSSPY  | 171   | 196   |
| >KIT-S864F-v ELFLSLGSSPY | 203   | >KIT-S864F-n ELFFLGSSPY  | 112   | 91    |
| >KIT-S864F-v ELFLSLGSSPY | 37    | >KIT-S864F-n ELFFLGSSPY  | 46    | 9     |
| >KIT-S864F-v ELFLSLGSSPY | 15    | >KIT-S864F-n ELFFLGSSPY  | 22    | 7     |
| >KIT-S864F-v ELFLSLGSSPY | 17    | >KIT-S864F-n ELFFLGSSPY  | 57    | 40    |
| >KIT-S864F-v WELFSLGSSP  | 363   | >KIT-S864F-n WELFFLGSSP  | 264   | 99    |
| >KIT-S864F-v WELFSLGSSP  | 623   | >KIT-S864F-n WELFFLGSSP  | 290   | 333   |
| >KIT-S864F-v WELFSLGSSP  | 152   | >KIT-S864F-n WELFFLGSSP  | 268   | 116   |
| >KIT-S864F-v WELFSLGSSP  | 132   | >KIT-S864F-n WELFFLGSSP  | 149   | 17    |
| >KIT-S864F-v WELFSLGSSP  | 83    | >KIT-S864F-n WELFFLGSSP  | 98    | 15    |
| >KIT-S864F-v WELFSLGS    | 422   | >KIT-S864F-n WELFFLGS    | 87    | 335   |
| >KIT-S864F-v WELFSLGSS   | 247   | >KIT-S864F-n WELFFLGSS   | 40    | 207   |
| >KIT-S864F-v WELFSLGSSP  | 5     | >KIT-S864F-n WELFFLGSSP  | 4     | 1     |
| >KIT-S864F-v WELFSLGSSP  | 213   | >KIT-S864F-n WELFFLGSSP  | 212   | 1     |
| >KIT-S864F-v WELFSLGS    | 563   | >KIT-S864F-n WELFFLGS    | 171   | 392   |
| >KIT-S864F-v WELFSLGSS   | 638   | >KIT-S864F-n WELFFLGSS   | 176   | 462   |
| >KIT-S864F-v WELFSLGSSP  | 714   | >KIT-S864F-n WELFFLGSSP  | 317   | 397   |
| >KIT-S864F-v WELFSLGSSP  | 260   | >KIT-S864F-n WELFFLGSSP  | 161   | 99    |
| >KIT-S864F-v WELFSLGSS   | 290   | >KIT-S864F-n WELFFLGSS   | 129   | 161   |
| >KIT-S864F-v WELFSLGSSP  | 282   | >KIT-S864F-n WELFFLGSSP  | 164   | 118   |
| >KIT-S864F-v LWELFSLG    | 408   | >KIT-S864F-n LWELFFLG    | 312   | 96    |
| >KIT-S864F-v LWELFSLGS   | 789   | >KIT-S864F-n LWELFFLGS   | 462   | 327   |

|                          |      |                          |     |      |
|--------------------------|------|--------------------------|-----|------|
| >KIT-S864F-v LWELFSLGSSI | 340  | >KIT-S864F-n LWELFFLGSSI | 259 | 81   |
| >KIT-S864F-v FLWELFSL    | 6    | >KIT-S864F-n FLWELFFL    | 6   | 0    |
| >KIT-S864F-v FLWELFSLG   | 106  | >KIT-S864F-n FLWELFFLG   | 21  | 85   |
| >KIT-S864F-v FLWELFSLGS  | 79   | >KIT-S864F-n FLWELFFLGS  | 46  | 33   |
| >KIT-S864F-v FLWELFSLGS! | 46   | >KIT-S864F-n FLWELFFLGS! | 26  | 20   |
| >KIT-S864F-v FLWELFSL    | 3    | >KIT-S864F-n FLWELFFL    | 2   | 1    |
| >KIT-S864F-v FLWELFSLG   | 38   | >KIT-S864F-n FLWELFFLG   | 18  | 20   |
| >KIT-S864F-v FLWELFSLGS  | 204  | >KIT-S864F-n FLWELFFLGS  | 133 | 71   |
| >KIT-S864F-v FLWELFSLGS! | 79   | >KIT-S864F-n FLWELFFLGS! | 51  | 28   |
| >KIT-S864F-v FLWELFSL    | 6    | >KIT-S864F-n FLWELFFL    | 9   | 3    |
| >KIT-S864F-v FLWELFSLG   | 243  | >KIT-S864F-n FLWELFFLG   | 926 | 683  |
| >KIT-S864F-v FLWELFSLGS  | 221  | >KIT-S864F-n FLWELFFLGS  | 198 | 23   |
| >KIT-S864F-v FLWELFSLGS! | 45   | >KIT-S864F-n FLWELFFLGS! | 81  | 36   |
| >KIT-S864F-v FLWELFSL    | 4    | >KIT-S864F-n FLWELFFL    | 3   | 1    |
| >KIT-S864F-v FLWELFSLG   | 154  | >KIT-S864F-n FLWELFFLG   | 37  | 117  |
| >KIT-S864F-v FLWELFSLGS  | 165  | >KIT-S864F-n FLWELFFLGS  | 100 | 65   |
| >KIT-S864F-v FLWELFSLGS! | 72   | >KIT-S864F-n FLWELFFLGS! | 55  | 17   |
| >KIT-S864F-v FLWELFSL    | 1    | >KIT-S864F-n FLWELFFL    | 1   | 0    |
| >KIT-S864F-v FLWELFSLG   | 12   | >KIT-S864F-n FLWELFFLG   | 5   | 7    |
| >KIT-S864F-v FLWELFSLGS  | 6    | >KIT-S864F-n FLWELFFLGS  | 5   | 1    |
| >KIT-S864F-v FLWELFSLGS! | 9    | >KIT-S864F-n FLWELFFLGS! | 5   | 4    |
| >KIT-S864F-v FLWELFSL    | 2    | >KIT-S864F-n FLWELFFL    | 2   | 0    |
| >KIT-S864F-v FLWELFSLG   | 443  | >KIT-S864F-n FLWELFFLG   | 59  | 384  |
| >KIT-S864F-v FLWELFSLGS  | 110  | >KIT-S864F-n FLWELFFLGS  | 82  | 28   |
| >KIT-S864F-v FLWELFSLGS! | 248  | >KIT-S864F-n FLWELFFLGS! | 133 | 115  |
| >KIT-S864F-v FLWELFSL    | 3    | >KIT-S864F-n FLWELFFL    | 3   | 0    |
| >KIT-S864F-v FLWELFSLG   | 110  | >KIT-S864F-n FLWELFFLG   | 21  | 89   |
| >KIT-S864F-v FLWELFSLGS  | 36   | >KIT-S864F-n FLWELFFLGS  | 27  | 9    |
| >KIT-S864F-v FLWELFSLGS! | 110  | >KIT-S864F-n FLWELFFLGS! | 72  | 38   |
| >KIT-S864F-v FLWELFSL    | 2    | >KIT-S864F-n FLWELFFL    | 2   | 0    |
| >KIT-S864F-v FLWELFSLGS  | 554  | >KIT-S864F-n FLWELFFLGS  | 371 | 183  |
| >KIT-S864F-v FLWELFSL    | 1    | >KIT-S864F-n FLWELFFL    | 2   | 1    |
| >KIT-S864F-v FLWELFSLG   | 51   | >KIT-S864F-n FLWELFFLG   | 20  | 31   |
| >KIT-S864F-v FLWELFSLGS  | 20   | >KIT-S864F-n FLWELFFLGS  | 14  | 6    |
| >KIT-S864F-v FLWELFSLGS! | 31   | >KIT-S864F-n FLWELFFLGS! | 27  | 4    |
| >KIT-S864F-v FLWELFSL    | 932  | >KIT-S864F-n FLWELFFL    | 286 | 646  |
| >KIT-S864F-v FLWELFSL    | 17   | >KIT-S864F-n FLWELFFL    | 9   | 8    |
| >KIT-S864F-v FLWELFSL    | 181  | >KIT-S864F-n FLWELFFL    | 710 | 529  |
| >KIT-S864F-v FLWELFSLG   | 1026 | >KIT-S864F-n FLWELFFLG   | 279 | 747  |
| >KIT-S864F-v FLWELFSLGS  | 4917 | >KIT-S864F-n FLWELFFLGS  | 292 | 4625 |
| >KIT-S864F-v IFLWELFSL   | 833  | >KIT-S864F-n IFLWELFFL   | 347 | 486  |
| >KIT-S864F-v IFLWELFSL   | 366  | >KIT-S864F-n IFLWELFFL   | 109 | 257  |
| >KIT-S864F-v IFLWELFSL   | 176  | >KIT-S864F-n IFLWELFFL   | 65  | 111  |

|                          |       |                          |      |       |
|--------------------------|-------|--------------------------|------|-------|
| >KIT-S864F-v IFLWELFSL   | 241   | >KIT-S864F-n IFLWELFFL   | 121  | 120   |
| >KIT-S864F-v IFLWELFSL   | 1162  | >KIT-S864F-n IFLWELFFL   | 183  | 979   |
| >KIT-S864F-v IFLWELFSL   | 1488  | >KIT-S864F-n IFLWELFFL   | 380  | 1108  |
| >KIT-S864F-v IFLWELFS    | 14537 | >KIT-S864F-n IFLWELFF    | 41   | 14496 |
| >KIT-S864F-v IFLWELFSL   | 88    | >KIT-S864F-n IFLWELFFL   | 77   | 11    |
| >KIT-S864F-v IFLWELFS    | 9158  | >KIT-S864F-n IFLWELFF    | 56   | 9102  |
| >KIT-S864F-v IFLWELFSL   | 182   | >KIT-S864F-n IFLWELFFL   | 88   | 94    |
| >KIT-S864F-v IFLWELFS    | 8798  | >KIT-S864F-n IFLWELFF    | 16   | 8782  |
| >KIT-S864F-v IFLWELFSL   | 29    | >KIT-S864F-n IFLWELFFL   | 28   | 1     |
| >KIT-S864F-v IFLWELFS    | 5228  | >KIT-S864F-n IFLWELFF    | 66   | 5162  |
| >KIT-S864F-v IFLWELFS    | 7960  | >KIT-S864F-n IFLWELFF    | 308  | 7652  |
| >KIT-S864F-v IFLWELFSL   | 80    | >KIT-S864F-n IFLWELFFL   | 101  | 21    |
| >KIT-S864F-v IFLWELFS    | 596   | >KIT-S864F-n IFLWELFF    | 262  | 334   |
| >KIT-S864F-v IFLWELFSL   | 103   | >KIT-S864F-n IFLWELFFL   | 51   | 52    |
| >KIT-S864F-v GIFLWELFSL  | 28    | >KIT-S864F-n GIFLWELFFL  | 21   | 7     |
| >KIT-S864F-v GIFLWELFSL  | 20    | >KIT-S864F-n GIFLWELFFL  | 20   | 0     |
| >KIT-S864F-v GIFLWELFSL  | 83    | >KIT-S864F-n GIFLWELFFL  | 166  | 83    |
| >KIT-S864F-v GIFLWELFSL  | 79    | >KIT-S864F-n GIFLWELFFL  | 94   | 15    |
| >KIT-S864F-v GIFLWELFSL  | 28    | >KIT-S864F-n GIFLWELFFL  | 19   | 9     |
| >KIT-S864F-v GIFLWELFSL  | 167   | >KIT-S864F-n GIFLWELFFL  | 115  | 52    |
| >KIT-S864F-v GIFLWELFSL  | 42    | >KIT-S864F-n GIFLWELFFL  | 19   | 23    |
| >KIT-S864F-v GIFLWELFSL  | 28    | >KIT-S864F-n GIFLWELFFL  | 39   | 11    |
| >KIT-S864F-v GIFLWELFS   | 5301  | >KIT-S864F-n GIFLWELFF   | 51   | 5250  |
| >KIT-S864F-v GIFLWELFSL  | 304   | >KIT-S864F-n GIFLWELFFL  | 2520 | 2216  |
| >KIT-S864F-v GIFLWELFS   | 13798 | >KIT-S864F-n GIFLWELFF   | 272  | 13526 |
| >KIT-S864F-v YGIFLWELFSL | 193   | >KIT-S864F-n YGIFLWELFFL | 71   | 122   |
| >KIT-S864F-v YGIFLWELFSL | 44    | >KIT-S864F-n YGIFLWELFFL | 29   | 15    |
| >KIT-S864F-v YGIFLWELFS  | 15909 | >KIT-S864F-n YGIFLWELFF  | 208  | 15701 |
| >KIT-S864F-v YGIFLWELFSL | 999   | >KIT-S864F-n YGIFLWELFFL | 408  | 591   |
| >KIT-S864F-v YGIFLWELFS  | 17233 | >KIT-S864F-n YGIFLWELFF  | 79   | 17154 |
| >KIT-S868G-v SPYPGMPV    | 496   | >KIT-S868G-r GPYPGMPV    | 2789 | 2293  |
| >KIT-S868G-v SPYPGMPV    | 46    | >KIT-S868G-r GPYPGMPV    | 1380 | 1334  |
| >KIT-S868G-v SPYPGMPV    | 23    | >KIT-S868G-r GPYPGMPV    | 64   | 41    |
| >KIT-S868G-v SPYPGMPV    | 467   | >KIT-S868G-r GPYPGMPV    | 913  | 446   |
| >KIT-S868G-v SPYPGMPV    | 53    | >KIT-S868G-r GPYPGMPV    | 92   | 39    |
| >KIT-S868G-v SPYPGMPV    | 745   | >KIT-S868G-r GPYPGMPV    | 238  | 507   |
| >KIT-S868G-v SSPYPGMPV   | 3284  | >KIT-S868G-r SGPYPGMPV   | 304  | 2980  |
| >KIT-S868G-v SSPYPGMPV   | 14    | >KIT-S868G-r SGPYPGMPV   | 115  | 101   |
| >KIT-S868G-v SSPYPGMPV   | 12    | >KIT-S868G-r SGPYPGMPV   | 417  | 405   |
| >KIT-S868G-v FLWELFSLGS! | 46    | >KIT-S868G-r FLWELFSLGS! | 288  | 242   |
| >KIT-S868G-v FLWELFSLGS! | 79    | >KIT-S868G-r FLWELFSLGS! | 158  | 79    |
| >KIT-S868G-v FLWELFSLGS! | 45    | >KIT-S868G-r FLWELFSLGS! | 204  | 159   |
| >KIT-S868G-v FLWELFSLGS! | 72    | >KIT-S868G-r FLWELFSLGS! | 320  | 248   |

|                          |     |                          |      |      |
|--------------------------|-----|--------------------------|------|------|
| >KIT-S868G-\ FLWELFSLGS! | 9   | >KIT-S868G-r FLWELFSLGS! | 18   | 9    |
| >KIT-S868G-\ FLWELFSLGS! | 248 | >KIT-S868G-r FLWELFSLGS! | 518  | 270  |
| >KIT-S868G-\ FLWELFSLGS! | 110 | >KIT-S868G-r FLWELFSLGS! | 293  | 183  |
| >KIT-S868G-\ FLWELFSLGS! | 31  | >KIT-S868G-r FLWELFSLGS! | 144  | 113  |
| >KIT-S868G-\ GSSPYPGMP!  | 204 | >KIT-S868G-r GSGPYPGMP   | 1728 | 1524 |
| >KIT-S868G-\ GSSPYPGM    | 24  | >KIT-S868G-r GSGPYPGM    | 112  | 88   |
| >KIT-S868G-\ SLGSSPYPGM  | 82  | >KIT-S868G-r SLGSSPYPGM  | 61   | 21   |
| >KIT-S868G-\ SLGSSPYPGM  | 426 | >KIT-S868G-r SLGSSPYPGM  | 487  | 61   |
| >KIT-S868G-\ SLGSSPYPGM  | 26  | >KIT-S868G-r SLGSSPYPGM  | 18   | 8    |
| >KIT-S868G-\ SLGSSPYPGM  | 237 | >KIT-S868G-r SLGSSPYPGM  | 235  | 2    |
| >KIT-S868G-\ SLGSSPYPGM  | 59  | >KIT-S868G-r SLGSSPYPGM  | 41   | 18   |
| >KIT-S868G-\ SLGSSPYPGM  | 241 | >KIT-S868G-r SLGSSPYPGM  | 217  | 24   |
| >KIT-S868G-\ SLGSSPYPGM  | 72  | >KIT-S868G-r SLGSSPYPGM  | 35   | 37   |
| >KIT-S868G-\ FSLGSSPYPGI | 332 | >KIT-S868G-r FSLGSSPYPG  | 637  | 305  |
| >KIT-S868G-\ FSLGSSPYPGI | 180 | >KIT-S868G-r FSLGSSPYPG  | 264  | 84   |
| >KIT-S868G-\ FSLGSSPY    | 148 | >KIT-S868G-r FSLGSSPY    | 183  | 35   |
| >KIT-S868G-\ FSLGSSPYPGI | 324 | >KIT-S868G-r FSLGSSPYPG  | 292  | 32   |
| >KIT-S868G-\ FSLGSSPY    | 492 | >KIT-S868G-r FSLGSSPY    | 443  | 49   |
| >KIT-S868G-\ FSLGSSPY    | 27  | >KIT-S868G-r FSLGSSPY    | 26   | 1    |
| >KIT-S868G-\ FSLGSSPY    | 320 | >KIT-S868G-r FSLGSSPY    | 251  | 69   |
| >KIT-S868G-\ FSLGSSPYPGI | 42  | >KIT-S868G-r FSLGSSPYPG  | 93   | 51   |
| >KIT-S868G-\ FSLGSSPY    | 45  | >KIT-S868G-r FSLGSSPY    | 60   | 15   |
| >KIT-S868G-\ FSLGSSPY    | 49  | >KIT-S868G-r FSLGSSPY    | 53   | 4    |
| >KIT-S868G-\ FSLGSSPY    | 15  | >KIT-S868G-r FSLGSSPY    | 73   | 58   |
| >KIT-S868G-\ FSLGSSPYPGI | 221 | >KIT-S868G-r FSLGSSPYPG  | 306  | 85   |
| >KIT-S868G-\ FSLGSSPY    | 3   | >KIT-S868G-r FSLGSSPY    | 4    | 1    |
| >KIT-S868G-\ FSLGSSPYPGI | 7   | >KIT-S868G-r FSLGSSPYPG  | 7    | 0    |
| >KIT-S868G-\ FSLGSSPY    | 17  | >KIT-S868G-r FSLGSSPY    | 29   | 12   |
| >KIT-S868G-\ FSLGSSPYPGI | 433 | >KIT-S868G-r FSLGSSPYPG  | 735  | 302  |
| >KIT-S868G-\ FSLGSSPY    | 468 | >KIT-S868G-r FSLGSSPY    | 1597 | 1129 |
| >KIT-S868G-\ FSLGSSPYPGI | 299 | >KIT-S868G-r FSLGSSPYPG  | 604  | 305  |
| >KIT-S868G-\ FSLGSSPY    | 118 | >KIT-S868G-r FSLGSSPY    | 99   | 19   |
| >KIT-S868G-\ FSLGSSPYPGI | 129 | >KIT-S868G-r FSLGSSPYPG  | 143  | 14   |
| >KIT-S868G-\ LFLGSSPY    | 18  | >KIT-S868G-r LFLGSSPY    | 16   | 2    |
| >KIT-S868G-\ LFLGSSPY    | 227 | >KIT-S868G-r LFLGSSPY    | 128  | 99   |
| >KIT-S868G-\ LFLGSSPY    | 103 | >KIT-S868G-r LFLGSSPY    | 150  | 47   |
| >KIT-S868G-\ LFLGSSPY    | 68  | >KIT-S868G-r LFLGSSPY    | 116  | 48   |
| >KIT-S868G-\ LFLGSSPY    | 32  | >KIT-S868G-r LFLGSSPY    | 58   | 26   |
| >KIT-S868G-\ LFLGSSPY    | 226 | >KIT-S868G-r LFLGSSPY    | 2585 | 2359 |
| >KIT-S868G-\ ELFLGSSPY   | 296 | >KIT-S868G-r ELFLGSSPY   | 789  | 493  |
| >KIT-S868G-\ ELFLGSSPY   | 143 | >KIT-S868G-r ELFLGSSPY   | 209  | 66   |
| >KIT-S868G-\ ELFLGSSPY   | 110 | >KIT-S868G-r ELFLGSSPY   | 124  | 14   |
| >KIT-S868G-\ ELFLGSSPY   | 180 | >KIT-S868G-r ELFLGSSPY   | 211  | 31   |

|                          |     |                         |      |      |
|--------------------------|-----|-------------------------|------|------|
| >KIT-S868G-\ ELFSLGSSPY  | 367 | >KIT-S868G-r ELFSLGSGPY | 171  | 196  |
| >KIT-S868G-\ ELFSLGSSPY  | 203 | >KIT-S868G-r ELFSLGSGPY | 1877 | 1674 |
| >KIT-S868G-\ ELFSLGSSPY  | 37  | >KIT-S868G-r ELFSLGSGPY | 46   | 9    |
| >KIT-S868G-\ ELFSLGSSPY  | 15  | >KIT-S868G-r ELFSLGSGPY | 19   | 4    |
| >KIT-S868G-\ ELFSLGSSPY  | 17  | >KIT-S868G-r ELFSLGSGPY | 167  | 150  |
| >KIT-S868G-\ WELFSLGSSP  | 363 | >KIT-S868G-r WELFSLGSGF | 335  | 28   |
| >KIT-S868G-\ WELFSLGSSP  | 152 | >KIT-S868G-r WELFSLGSGF | 207  | 55   |
| >KIT-S868G-\ WELFSLGSSP  | 132 | >KIT-S868G-r WELFSLGSGF | 184  | 52   |
| >KIT-S868G-\ WELFSLGSSP  | 83  | >KIT-S868G-r WELFSLGSGF | 413  | 330  |
| >KIT-S868G-\ WELFSLGSS   | 247 | >KIT-S868G-r WELFSLGSG  | 2250 | 2003 |
| >KIT-S868G-\ WELFSLGSSP  | 5   | >KIT-S868G-r WELFSLGSGF | 6    | 1    |
| >KIT-S868G-\ WELFSLGSSP  | 213 | >KIT-S868G-r WELFSLGSGF | 381  | 168  |
| >KIT-S868G-\ WELFSLGSSP  | 260 | >KIT-S868G-r WELFSLGSGF | 1600 | 1340 |
| >KIT-S868G-\ WELFSLGSS   | 290 | >KIT-S868G-r WELFSLGSG  | 528  | 238  |
| >KIT-S868G-\ WELFSLGSSP  | 282 | >KIT-S868G-r WELFSLGSGF | 432  | 150  |
| >KIT-S868G-\ LWELFSLGSSI | 340 | >KIT-S868G-r LWELFSLGSG | 549  | 209  |
| >KIT-T574I-w TQLPYDHKW   | 34  | >KIT-T574I-r IQLPYDHKWE | 21   | 13   |
| >KIT-T574I-w TQLPYDHK    | 118 | >KIT-T574I-r IQLPYDHK   | 293  | 175  |
| >KIT-T574I-w TQLPYDHKW   | 67  | >KIT-T574I-r IQLPYDHKWE | 62   | 5    |
| >KIT-T574I-w TQLPYDHKW   | 176 | >KIT-T574I-r IQLPYDHKWE | 243  | 67   |
| >KIT-T574I-w TQLPYDHKW   | 559 | >KIT-T574I-r IQLPYDHKWE | 243  | 316  |
| >KIT-T574I-w TQLPYDHKW   | 23  | >KIT-T574I-r IQLPYDHKWE | 7    | 16   |
| >KIT-T574I-w TQLPYDHKW   | 306 | >KIT-T574I-r IQLPYDHKW  | 39   | 267  |
| >KIT-T574I-w TQLPYDHKW   | 199 | >KIT-T574I-r IQLPYDHKWE | 139  | 60   |
| >KIT-T574I-w TQLPYDHKW   | 186 | >KIT-T574I-r IQLPYDHKW  | 70   | 116  |
| >KIT-T574I-w TQLPYDHKW   | 129 | >KIT-T574I-r IQLPYDHKW  | 27   | 102  |
| >KIT-T574I-w TQLPYDHKW   | 123 | >KIT-T574I-r IQLPYDHKW  | 72   | 51   |
| >KIT-T574I-w TQLPYDHKW   | 526 | >KIT-T574I-r IQLPYDHKW  | 35   | 491  |
| >KIT-T574I-w PTQLPYDHKV  | 396 | >KIT-T574I-r PIQLPYDHKV | 9635 | 9239 |
| >KIT-T574I-w DPTQLPYDH   | 289 | >KIT-T574I-r DPIQLPYDH  | 179  | 110  |
| >KIT-T574I-w DPTQLPYDH   | 46  | >KIT-T574I-r DPIQLPYDHK | 39   | 7    |
| >KIT-T574I-w DPTQLPYDH   | 24  | >KIT-T574I-r DPIQLPYDHK | 14   | 10   |
| >KIT-T574I-w YIDPTQLPY   | 10  | >KIT-T574I-r YIDPIQLPY  | 10   | 0    |
| >KIT-T574I-w YIDPTQLPY   | 21  | >KIT-T574I-r YIDPIQLPY  | 14   | 7    |
| >KIT-T574I-w YIDPTQLPY   | 11  | >KIT-T574I-r YIDPIQLPY  | 6    | 5    |
| >KIT-T574I-w YIDPTQLPY   | 137 | >KIT-T574I-r YIDPIQLPY  | 320  | 183  |
| >KIT-T574I-w YIDPTQLPY   | 240 | >KIT-T574I-r YIDPIQLPY  | 732  | 492  |
| >KIT-T574I-w YIDPTQLPY   | 42  | >KIT-T574I-r YIDPIQLPY  | 178  | 136  |
| >KIT-T574I-w YIDPTQLPY   | 61  | >KIT-T574I-r YIDPIQLPY  | 51   | 10   |
| >KIT-T574I-w YIDPTQLPY   | 116 | >KIT-T574I-r YIDPIQLPY  | 73   | 43   |
| >KIT-T574I-w YIDPTQLPY   | 56  | >KIT-T574I-r YIDPIQLPY  | 92   | 36   |
| >KIT-T574I-w VYIDPTQLPY  | 495 | >KIT-T574I-r VYIDPIQLPY | 761  | 266  |
| >KIT-T574I-w VYIDPTQL    | 216 | >KIT-T574I-r VYIDPIQL   | 182  | 34   |

|                          |       |                          |      |       |
|--------------------------|-------|--------------------------|------|-------|
| >KIT-T574I-w VYIDPTQL    | 43    | >KIT-T574I-r VYIDPIQL    | 26   | 17    |
| >KIT-T574I-w VYIDPTQLPY  | 319   | >KIT-T574I-r VYIDPIQLPY  | 187  | 132   |
| >KIT-T574I-w VYIDPTQLPY  | 33    | >KIT-T574I-r VYIDPIQLPY  | 24   | 9     |
| >KIT-T574I-w VYIDPTQLPY  | 64    | >KIT-T574I-r VYIDPIQLPY  | 62   | 2     |
| >KIT-T574I-w VYIDPTQLPY  | 32    | >KIT-T574I-r VYIDPIQLPY  | 71   | 39    |
| >KIT-T574I-w VYIDPTQL    | 962   | >KIT-T574I-r VYIDPIQL    | 447  | 515   |
| >KIT-T574I-w YVYIDPTQL   | 193   | >KIT-T574I-r YVYIDPIQL   | 101  | 92    |
| >KIT-T574I-w YVYIDPTQL   | 135   | >KIT-T574I-r YVYIDPIQL   | 454  | 319   |
| >KIT-T574I-w YVYIDPTQL   | 24    | >KIT-T574I-r YVYIDPIQL   | 109  | 85    |
| >KIT-T574I-w YVYIDPTQL   | 261   | >KIT-T574I-r YVYIDPIQL   | 275  | 14    |
| >KIT-T574I-w YVYIDPTQL   | 18    | >KIT-T574I-r YVYIDPIQL   | 10   | 8     |
| >KIT-T574I-w YVYIDPTQL   | 1225  | >KIT-T574I-r YVYIDPIQL   | 444  | 781   |
| >KIT-T574I-w YVYIDPTQL   | 71    | >KIT-T574I-r YVYIDPIQL   | 34   | 37    |
| >KIT-T574I-w YVYIDPTQL   | 720   | >KIT-T574I-r YVYIDPIQL   | 439  | 281   |
| >KIT-T574I-w YVYIDPTQL   | 16    | >KIT-T574I-r YVYIDPIQL   | 18   | 2     |
| >KIT-T574I-w YVYIDPTQLPY | 492   | >KIT-T574I-r YVYIDPIQLPY | 396  | 96    |
| >KIT-T574I-w YVYIDPTQLPY | 330   | >KIT-T574I-r YVYIDPIQLPY | 207  | 123   |
| >KIT-T574I-w YVYIDPTQLPY | 387   | >KIT-T574I-r YVYIDPIQLPY | 605  | 218   |
| >KIT-T574I-w YVYIDPTQLPY | 91    | >KIT-T574I-r YVYIDPIQLPY | 85   | 6     |
| >KIT-T574I-w YVYIDPTQLPY | 6     | >KIT-T574I-r YVYIDPIQLPY | 5    | 1     |
| >KIT-T574I-w YVYIDPTQLPY | 517   | >KIT-T574I-r YVYIDPIQLPY | 432  | 85    |
| >KIT-T574I-w YVYIDPTQLPY | 451   | >KIT-T574I-r YVYIDPIQLPY | 342  | 109   |
| >KIT-T574I-w YVYIDPTQL   | 162   | >KIT-T574I-r YVYIDPIQL   | 70   | 92    |
| >KIT-T574I-w YVYIDPTQLPY | 16    | >KIT-T574I-r YVYIDPIQLPY | 12   | 4     |
| >KIT-T574I-w YVYIDPTQLPY | 63    | >KIT-T574I-r YVYIDPIQLPY | 87   | 24    |
| >KIT-T574I-w YVYIDPTQLPY | 73    | >KIT-T574I-r YVYIDPIQLPY | 105  | 32    |
| >KIT-T574I-w YVYIDPTQLPY | 53    | >KIT-T574I-r YVYIDPIQLPY | 98   | 45    |
| >KIT-T574I-w YVYIDPTQL   | 27    | >KIT-T574I-r YVYIDPIQL   | 46   | 19    |
| >KIT-T574I-w YVYIDPTQLPY | 7     | >KIT-T574I-r YVYIDPIQLPY | 8    | 1     |
| >KIT-T574I-w YVYIDPTQLPY | 17    | >KIT-T574I-r YVYIDPIQLPY | 16   | 1     |
| >KIT-T574I-w YVYIDPTQL   | 423   | >KIT-T574I-r YVYIDPIQL   | 2991 | 2568  |
| >KIT-T574I-w YVYIDPTQLPY | 301   | >KIT-T574I-r YVYIDPIQLPY | 540  | 239   |
| >KIT-T574I-w NYVYIDPT    | 11404 | >KIT-T574I-r NYVYIDPI    | 65   | 11339 |
| >KIT-T574I-w NYVYIDPTQL  | 150   | >KIT-T574I-r NYVYIDPIQL  | 2713 | 2563  |
| >KIT-T574I-w NYVYIDPT    | 14710 | >KIT-T574I-r NYVYIDPI    | 149  | 14561 |
| >KIT-T574I-w NYVYIDPT    | 9233  | >KIT-T574I-r NYVYIDPI    | 156  | 9077  |
| >KIT-T574I-w NYVYIDPTQL  | 163   | >KIT-T574I-r NYVYIDPIQL  | 116  | 47    |
| >KIT-T574I-w NYVYIDPT    | 6901  | >KIT-T574I-r NYVYIDPI    | 430  | 6471  |
| >KIT-T574I-w NNYVYIDPT   | 3114  | >KIT-T574I-r NNYVYIDPI   | 373  | 2741  |
| >KIT-T574I-w NNYVYIDPT   | 11087 | >KIT-T574I-r NNYVYIDPI   | 70   | 11017 |
| >KIT-T594I-w TLGAGAFGKV  | 242   | >KIT-T594I-r ILGAGAFGKV  | 124  | 118   |
| >KIT-T594I-w TLGAGAFGKV  | 90    | >KIT-T594I-r ILGAGAFGKV  | 54   | 36    |
| >KIT-T594I-w TLGAGAFGKV  | 394   | >KIT-T594I-r ILGAGAFGKV  | 228  | 166   |



|                         |      |                         |      |      |
|-------------------------|------|-------------------------|------|------|
| >KIT-T594I-w TLGAGAFGK\ | 25   | >KIT-T594I-r ILGAGAFGKV | 22   | 3    |
| >KIT-T594I-w TLGAGAFGK\ | 116  | >KIT-T594I-r ILGAGAFGKV | 67   | 49   |
| >KIT-T594I-w TLGAGAFGK\ | 12   | >KIT-T594I-r ILGAGAFGKV | 5    | 7    |
| >KIT-T594I-w TLGAGAFGK\ | 13   | >KIT-T594I-r ILGAGAFGKV | 5    | 8    |
| >KIT-T594I-w TLGAGAFGK\ | 68   | >KIT-T594I-r ILGAGAFGKV | 33   | 35   |
| >KIT-T594I-w TLGAGAFGK\ | 50   | >KIT-T594I-r ILGAGAFGKV | 26   | 24   |
| >KIT-T594I-w TLGAGAFGK\ | 17   | >KIT-T594I-r ILGAGAFGKV | 11   | 6    |
| >KIT-T594I-w TLGAGAFGK\ | 30   | >KIT-T594I-r ILGAGAFGKV | 21   | 9    |
| >KIT-T594I-w TLGAGAFGK\ | 31   | >KIT-T594I-r ILGAGAFGKV | 10   | 21   |
| >KIT-T594I-w TLGAGAFGK\ | 75   | >KIT-T594I-r ILGAGAFGKV | 20   | 55   |
| >KIT-T594I-w TLGAGAFGK  | 1848 | >KIT-T594I-r ILGAGAFGK  | 415  | 1433 |
| >KIT-T594I-w TLGAGAFGK\ | 3    | >KIT-T594I-r ILGAGAFGKV | 2    | 1    |
| >KIT-T594I-w TLGAGAFGK\ | 5    | >KIT-T594I-r ILGAGAFGKV | 3    | 2    |
| >KIT-T594I-w TLGAGAFGK  | 67   | >KIT-T594I-r ILGAGAFGK  | 45   | 22   |
| >KIT-T594I-w TLGAGAFGK  | 45   | >KIT-T594I-r ILGAGAFGK  | 83   | 38   |
| >KIT-T594I-w TLGAGAFGK\ | 212  | >KIT-T594I-r ILGAGAFGKV | 2253 | 2041 |
| >KIT-T594I-w KTLGAGAFGk | 1521 | >KIT-T594I-r KILGAGAFGK | 335  | 1186 |
| >KIT-T594I-w KTLGAGAFGk | 1316 | >KIT-T594I-r KILGAGAFGK | 345  | 971  |
| >KIT-T594I-w KTLGAGAFGk | 1001 | >KIT-T594I-r KILGAGAFGK | 126  | 875  |
| >KIT-T594I-w KTLGAGAFGk | 67   | >KIT-T594I-r KILGAGAFGK | 23   | 44   |
| >KIT-T594I-w KTLGAGAFGk | 41   | >KIT-T594I-r KILGAGAFGK | 12   | 29   |
| >KIT-T594I-w KTLGAGAFGk | 1382 | >KIT-T594I-r KILGAGAFGK | 325  | 1057 |
| >KIT-T594I-w KTLGAGAFGk | 93   | >KIT-T594I-r KILGAGAFGK | 19   | 74   |
| >KIT-T594I-w KTLGAGAFGk | 1333 | >KIT-T594I-r KILGAGAFGK | 96   | 1237 |
| >KIT-T594I-w KTLGAGAFGk | 365  | >KIT-T594I-r KILGAGAFGK | 13   | 352  |
| >KIT-T594I-w KTLGAGAFGk | 22   | >KIT-T594I-r KILGAGAFGK | 18   | 4    |
| >KIT-T594I-w KTLGAGAFGk | 19   | >KIT-T594I-r KILGAGAFGK | 42   | 23   |
| >KIT-T594I-w KTLGAGAF   | 213  | >KIT-T594I-r KILGAGAF   | 1589 | 1376 |
| >KIT-T594I-w KTLGAGAFG  | 52   | >KIT-T594I-r KILGAGAFG  | 264  | 212  |
| >KIT-T594I-w KTLGAGAFGk | 8    | >KIT-T594I-r KILGAGAFGK | 18   | 10   |
| >KIT-T594I-w KTLGAGAFGk | 91   | >KIT-T594I-r KILGAGAFGK | 468  | 377  |
| >KIT-T594I-w KTLGAGAFGk | 152  | >KIT-T594I-r KILGAGAFGK | 124  | 28   |
| >KIT-T594I-w KTLGAGAF   | 13   | >KIT-T594I-r KILGAGAF   | 32   | 19   |
| >KIT-T594I-w KTLGAGAFGk | 431  | >KIT-T594I-r KILGAGAFGK | 1535 | 1104 |
| >KIT-T594I-w KTLGAGAFGk | 128  | >KIT-T594I-r KILGAGAFGK | 621  | 493  |
| >KIT-T594I-w KTLGAGAF   | 378  | >KIT-T594I-r KILGAGAF   | 302  | 76   |
| >KIT-T594I-w KTLGAGAF   | 155  | >KIT-T594I-r KILGAGAF   | 330  | 175  |
| >KIT-T594I-w KTLGAGAF   | 4    | >KIT-T594I-r KILGAGAF   | 135  | 131  |
| >KIT-T594I-w KTLGAGAFGk | 78   | >KIT-T594I-r KILGAGAFGK | 9825 | 9747 |
| >KIT-T594I-w KTLGAGAF   | 345  | >KIT-T594I-r KILGAGAF   | 6219 | 5874 |
| >KIT-T594I-w KTLGAGAF   | 78   | >KIT-T594I-r KILGAGAF   | 1457 | 1379 |
| >KIT-T594I-w KTLGAGAF   | 227  | >KIT-T594I-r KILGAGAF   | 4686 | 4459 |
| >KIT-T594I-w KTLGAGAFGk | 181  | >KIT-T594I-r KILGAGAFGK | 5810 | 5629 |

|                          |       |                          |      |       |
|--------------------------|-------|--------------------------|------|-------|
| >KIT-T594I-w KTLGAGAFGK  | 902   | >KIT-T594I-r KILGAGAFGK  | 201  | 701   |
| >KIT-T594I-w KTLGAGAFGK  | 1085  | >KIT-T594I-r KILGAGAFGK  | 251  | 834   |
| >KIT-T594I-w FPRNRLSFGK  | 113   | >KIT-T594I-r FPRNRLSFGK  | 22   | 91    |
| >KIT-T594I-w FPRNRLSFGK  | 1108  | >KIT-T594I-r FPRNRLSFGK  | 59   | 1049  |
| >KIT-T594I-w FPRNRLSFGK  | 8795  | >KIT-T594I-r FPRNRLSFGK  | 224  | 8571  |
| >KIT-T594I-w FPRNRLSFGK  | 30    | >KIT-T594I-r FPRNRLSFGK  | 43   | 13    |
| >KIT-T594I-w GKTLGAGAF   | 333   | >KIT-T594I-r GKILGAGAF   | 74   | 259   |
| >KIT-T594I-w FGKTLGAGAF  | 241   | >KIT-T594I-r FGKILGAGAF  | 245  | 4     |
| >KIT-T594I-w FGKTLGAGAF  | 353   | >KIT-T594I-r FGKILGAGAF  | 383  | 30    |
| >KIT-T594I-w FGKTLGAGAF  | 408   | >KIT-T594I-r FGKILGAGAF  | 1026 | 618   |
| >KIT-T594I-w SFGKTLGAGA  | 17    | >KIT-T594I-r SFGKILGAGA  | 15   | 2     |
| >KIT-T594I-w LSFSGKTLGA  | 411   | >KIT-T594I-r LSFSGKILGA  | 292  | 119   |
| >KIT-T594I-w LSFSGKTLGAG | 459   | >KIT-T594I-r LSFSGKILGAG | 301  | 158   |
| >KIT-T594I-w RLSFGKTLGA  | 819   | >KIT-T594I-r RLSFGKILGA  | 329  | 490   |
| >KIT-T594I-w RLSFGKTL    | 152   | >KIT-T594I-r RLSFGKIL    | 243  | 91    |
| >KIT-T594I-w RLSFGKTLGA  | 167   | >KIT-T594I-r RLSFGKILGA  | 150  | 17    |
| >KIT-T594I-w RLSFGKTL    | 74    | >KIT-T594I-r RLSFGKIL    | 226  | 152   |
| >KIT-T594I-w RLSFGKTLGA  | 123   | >KIT-T594I-r RLSFGKILGA  | 105  | 18    |
| >KIT-T594I-w RLSFGKTL    | 89    | >KIT-T594I-r RLSFGKIL    | 588  | 499   |
| >KIT-T594I-w RLSFGKTLGA  | 339   | >KIT-T594I-r RLSFGKILGA  | 105  | 234   |
| >KIT-T594I-w RLSFGKTL    | 321   | >KIT-T594I-r RLSFGKIL    | 1064 | 743   |
| >KIT-T594I-w RLSFGKTL    | 396   | >KIT-T594I-r RLSFGKIL    | 1091 | 695   |
| >KIT-T594I-w RLSFGKTLGA  | 496   | >KIT-T594I-r RLSFGKILGA  | 295  | 201   |
| >KIT-T594I-w RLSFGKTL    | 20    | >KIT-T594I-r RLSFGKIL    | 88   | 68    |
| >KIT-T594I-w RLSFGKTLGA  | 36    | >KIT-T594I-r RLSFGKILGA  | 26   | 10    |
| >KIT-T594I-w RLSFGKTL    | 136   | >KIT-T594I-r RLSFGKIL    | 1144 | 1008  |
| >KIT-T594I-w NRLSFGKTL   | 127   | >KIT-T594I-r NRLSFGKIL   | 159  | 32    |
| >KIT-T594I-w NRLSFGKTL   | 3087  | >KIT-T594I-r NRLSFGKIL   | 229  | 2858  |
| >KIT-T594I-w NRLSFGKTL   | 187   | >KIT-T594I-r NRLSFGKIL   | 434  | 247   |
| >KIT-T594I-w NRLSFGKTL   | 133   | >KIT-T594I-r NRLSFGKIL   | 138  | 5     |
| >KIT-T594I-w NRLSFGKTL   | 303   | >KIT-T594I-r NRLSFGKIL   | 557  | 254   |
| >KIT-T594I-w NRLSFGKTL   | 199   | >KIT-T594I-r NRLSFGKIL   | 281  | 82    |
| >KIT-T594I-w RNRLSFGKTL  | 1791  | >KIT-T594I-r RNRLSFGKIL  | 55   | 1736  |
| >KIT-T594I-w RNRLSFGKTL  | 134   | >KIT-T594I-r RNRLSFGKIL  | 192  | 58    |
| >KIT-T594I-w RNRLSFGKTL  | 1026  | >KIT-T594I-r RNRLSFGKIL  | 222  | 804   |
| >KIT-T594I-w RNRLSFGKTL  | 438   | >KIT-T594I-r RNRLSFGKIL  | 489  | 51    |
| >KIT-T594I-w RNRLSFGKTL  | 35817 | >KIT-T594I-r RNRLSFGKIL  | 211  | 35606 |
| >KIT-T670E-v TEYCCYGDLL  | 127   | >KIT-T670E-n EEYCCYGDLL  | 187  | 60    |
| >KIT-T670E-v TEYCCYGDLL  | 46    | >KIT-T670E-n EEYCCYGDLL  | 63   | 17    |
| >KIT-T670E-v TEYCCYGDLL  | 44    | >KIT-T670E-n EEYCCYGDLL  | 96   | 52    |
| >KIT-T670E-v TEYCCYGDLL  | 231   | >KIT-T670E-n EEYCCYGDLL  | 301  | 70    |
| >KIT-T670E-v TEYCCYGDLL  | 271   | >KIT-T670E-n EEYCCYGDLL  | 690  | 419   |
| >KIT-T670E-v TEYCCYGDLL  | 183   | >KIT-T670E-n EEYCCYGDLL  | 236  | 53    |

|                          |       |                          |       |       |
|--------------------------|-------|--------------------------|-------|-------|
| >KIT-T670E-v TEYCCYGDLL  | 586   | >KIT-T670E-n EEYCCYGDLL  | 270   | 316   |
| >KIT-T670E-v TEYCCYGDL   | 765   | >KIT-T670E-n EEYCCYGDL   | 243   | 522   |
| >KIT-T670E-v TEYCCYGDLL  | 395   | >KIT-T670E-n EEYCCYGDLL  | 145   | 250   |
| >KIT-T670E-v TEYCCYGDL   | 47    | >KIT-T670E-n EEYCCYGDL   | 242   | 195   |
| >KIT-T670E-v TEYCCYGDLL  | 46    | >KIT-T670E-n EEYCCYGDLL  | 335   | 289   |
| >KIT-T670E-v ITEYCCYGDL  | 16644 | >KIT-T670E-n IEEYCCYGDL  | 197   | 16447 |
| >KIT-T670E-v ITEYCCYGDLL | 8470  | >KIT-T670E-n IEEYCCYGDLL | 85    | 8385  |
| >KIT-T670E-v ITEYCCYGDLL | 404   | >KIT-T670E-n IEEYCCYGDLL | 26253 | 25849 |
| >KIT-T670E-v ITEYCCYGDL  | 14566 | >KIT-T670E-n IEEYCCYGDL  | 16    | 14550 |
| >KIT-T670E-v ITEYCCYGDL  | 19689 | >KIT-T670E-n IEEYCCYGDL  | 46    | 19643 |
| >KIT-T670E-v ITEYCCYGDL  | 14864 | >KIT-T670E-n IEEYCCYGDL  | 216   | 14648 |
| >KIT-T670E-v ITEYCCYGDL  | 13400 | >KIT-T670E-n IEEYCCYGDL  | 205   | 13195 |
| >KIT-T670E-v ITEYCCYGDLL | 83    | >KIT-T670E-n IEEYCCYGDLL | 22837 | 22754 |
| >KIT-T670E-v ITEYCCYGDLL | 22    | >KIT-T670E-n IEEYCCYGDLL | 4157  | 4135  |
| >KIT-T670E-v ITEYCCYGDLL | 18727 | >KIT-T670E-n IEEYCCYGDLL | 75    | 18652 |
| >KIT-T670E-v VITEYCCYDI  | 496   | >KIT-T670E-n VIEEYCCYDI  | 1800  | 1304  |
| >KIT-T670E-v VITEYCCYDI  | 169   | >KIT-T670E-n VIEEYCCYDI  | 689   | 520   |
| >KIT-T670E-v LVITEYCCY   | 1217  | >KIT-T670E-n LVIEEYCCY   | 238   | 979   |
| >KIT-T670E-v LVITEYCCY   | 36    | >KIT-T670E-n LVIEEYCCY   | 31    | 5     |
| >KIT-T670E-v LVITEYCCY   | 296   | >KIT-T670E-n LVIEEYCCY   | 323   | 27    |
| >KIT-T670E-v LVITEYCCY   | 149   | >KIT-T670E-n LVIEEYCCY   | 100   | 49    |
| >KIT-T670E-v LVITEYCCY   | 302   | >KIT-T670E-n LVIEEYCCY   | 550   | 248   |
| >KIT-T670E-v LVITEYCCY   | 365   | >KIT-T670E-n LVIEEYCCY   | 196   | 169   |
| >KIT-T670E-v TLVITEYCCY  | 369   | >KIT-T670E-n TLVIEEYCCY  | 651   | 282   |
| >KIT-T670E-v TLVITEYC    | 225   | >KIT-T670E-n TLVIEEYC    | 621   | 396   |
| >KIT-T670E-v TLVITEYC    | 414   | >KIT-T670E-n TLVIEEYC    | 855   | 441   |
| >KIT-T670E-v TLVITEYCCY  | 472   | >KIT-T670E-n TLVIEEYCCY  | 1066  | 594   |
| >KIT-T670E-v TLVITEYCCY  | 99    | >KIT-T670E-n TLVIEEYCCY  | 183   | 84    |
| >KIT-T670E-v PTLVITEY    | 186   | >KIT-T670E-n PTLVIEEY    | 366   | 180   |
| >KIT-T670E-v PTLVITEYCCY | 461   | >KIT-T670E-n PTLVIEEYCCY | 962   | 501   |
| >KIT-T670E-v GPTLVITEY   | 60    | >KIT-T670E-n GPTLVIEEY   | 158   | 98    |
| >KIT-T670E-v GPTLVITEY   | 310   | >KIT-T670E-n GPTLVIEEY   | 297   | 13    |
| >KIT-T670E-v GPTLVITEY   | 31    | >KIT-T670E-n GPTLVIEEY   | 98    | 67    |
| >KIT-T670E-v GGPTLVIT    | 486   | >KIT-T670E-n GGPTLVIE    | 385   | 101   |
| >KIT-T670E-v GGPTLVITE   | 242   | >KIT-T670E-n GGPTLVIEE   | 609   | 367   |
| >KIT-T670E-v GGPTLVITEY  | 303   | >KIT-T670E-n GGPTLVIEEY  | 340   | 37    |
| >KIT-T670E-v IGGPTLVITEY | 475   | >KIT-T670E-n IGGPTLVIEEY | 531   | 56    |
| >KIT-T670I-w TEYCCYGDL   | 842   | >KIT-T670I-r IEYCCYGDL   | 352   | 490   |
| >KIT-T670I-w TEYCCYGDL   | 127   | >KIT-T670I-r IEYCCYGDL   | 109   | 18    |
| >KIT-T670I-w TEYCCYGDLL  | 46    | >KIT-T670I-r IEYCCYGDLL  | 40    | 6     |
| >KIT-T670I-w TEYCCYGDL   | 771   | >KIT-T670I-r IEYCCYGDL   | 474   | 297   |
| >KIT-T670I-w TEYCCYGDL   | 44    | >KIT-T670I-r IEYCCYGDL   | 29    | 15    |
| >KIT-T670I-w TEYCCYGDLL  | 231   | >KIT-T670I-r IEYCCYGDLL  | 151   | 80    |

|                          |       |                           |       |       |
|--------------------------|-------|---------------------------|-------|-------|
| >KIT-T670I-w TEYCCYGDL   | 271   | >KIT-T670I-r IEYCCYGDL    | 580   | 309   |
| >KIT-T670I-w TEYCCYGDLL  | 183   | >KIT-T670I-r IEYCCYGDLL   | 162   | 21    |
| >KIT-T670I-w TEYCCYGDLL  | 395   | >KIT-T670I-r IEYCCYGDLL   | 507   | 112   |
| >KIT-T670I-w TEYCCYGDL   | 47    | >KIT-T670I-r IEYCCYGDL    | 20    | 27    |
| >KIT-T670I-w TEYCCYGDLL  | 46    | >KIT-T670I-r IEYCCYGDLL   | 66    | 20    |
| >KIT-T670I-w ITEYCCYGDL  | 679   | >KIT-T670I-r IIEYCCYGDL   | 130   | 549   |
| >KIT-T670I-w ITEYCCYGDLL | 404   | >KIT-T670I-r IIEYCCYGDLL  | 16436 | 16032 |
| >KIT-T670I-w ITEYCCYGDL  | 83    | >KIT-T670I-r IIEYCCYGDL   | 6570  | 6487  |
| >KIT-T670I-w ITEYCCYGDL  | 22    | >KIT-T670I-r IIEYCCYGDL   | 1004  | 982   |
| >KIT-T670I-w CTIGGPTLVIT | 4523  | >KIT-T670I-r CTIGGPTLVII  | 177   | 4346  |
| >KIT-T670I-w CTIGGPTLVIT | 9102  | >KIT-T670I-r CTIGGPTLVII  | 457   | 8645  |
| >KIT-T670I-w CTIGGPTLVIT | 18219 | >KIT-T670I-r CTIGGPTLVII  | 12    | 18207 |
| >KIT-T670I-w VITEYCCYGD  | 496   | >KIT-T670I-r VIIEYCCYGD   | 104   | 392   |
| >KIT-T670I-w VITEYCCYGD  | 1264  | >KIT-T670I-r VIIEYCCYGD   | 196   | 1068  |
| >KIT-T670I-w VITEYCCYGD  | 1539  | >KIT-T670I-r VIIEYCCYGD   | 434   | 1105  |
| >KIT-T670I-w VITEYCCYGD  | 169   | >KIT-T670I-r VIIEYCCYGD   | 226   | 57    |
| >KIT-T670I-w VITEYCCY    | 3273  | >KIT-T670I-r VIIEYCCY     | 136   | 3137  |
| >KIT-T670I-w VITEYCCY    | 746   | >KIT-T670I-r VIIEYCCY     | 241   | 505   |
| >KIT-T670I-w VITEYCCY    | 2108  | >KIT-T670I-r VIIEYCCY     | 148   | 1960  |
| >KIT-T670I-w LVITEYCCY   | 36    | >KIT-T670I-r LVIIIEYCCY   | 291   | 255   |
| >KIT-T670I-w LVITEYCCY   | 296   | >KIT-T670I-r LVIIIEYCCY   | 238   | 58    |
| >KIT-T670I-w LVITEYCCY   | 149   | >KIT-T670I-r LVIIIEYCCY   | 160   | 11    |
| >KIT-T670I-w LVITEYCCY   | 302   | >KIT-T670I-r LVIIIEYCCY   | 819   | 517   |
| >KIT-T670I-w LVITEYCCY   | 365   | >KIT-T670I-r LVIIIEYCCY   | 535   | 170   |
| >KIT-T670I-w TLVITEYCCY  | 369   | >KIT-T670I-r TLVIIIEYCCY  | 1000  | 631   |
| >KIT-T670I-w TLVITEYC    | 225   | >KIT-T670I-r TLVIIIEYC    | 126   | 99    |
| >KIT-T670I-w TLVITEYC    | 414   | >KIT-T670I-r TLVIIIEYC    | 257   | 157   |
| >KIT-T670I-w TLVITEYCCY  | 472   | >KIT-T670I-r TLVIIIEYCCY  | 507   | 35    |
| >KIT-T670I-w TLVITEYCCY  | 99    | >KIT-T670I-r TLVIIIEYCCY  | 94    | 5     |
| >KIT-T670I-w PTLVITEY    | 766   | >KIT-T670I-r PTLVIIIEY    | 312   | 454   |
| >KIT-T670I-w PTLVITEY    | 186   | >KIT-T670I-r PTLVIIIEY    | 196   | 10    |
| >KIT-T670I-w PTLVITEYCCY | 461   | >KIT-T670I-r PTLVIIIEYCCY | 685   | 224   |
| >KIT-T670I-w GPTLVITEY   | 60    | >KIT-T670I-r GPTLVIIIEY   | 41    | 19    |
| >KIT-T670I-w GPTLVITEY   | 310   | >KIT-T670I-r GPTLVIIIEY   | 272   | 38    |
| >KIT-T670I-w GPTLVITEY   | 31    | >KIT-T670I-r GPTLVIIIEY   | 31    | 0     |
| >KIT-T670I-w GPTLVITEY   | 1158  | >KIT-T670I-r GPTLVIIIEY   | 467   | 691   |
| >KIT-T670I-w GGPTLVIT    | 486   | >KIT-T670I-r GGPTLVII     | 62    | 424   |
| >KIT-T670I-w GGPTLVITE   | 242   | >KIT-T670I-r GGPTLVIIIE   | 305   | 63    |
| >KIT-T670I-w GGPTLVITEY  | 303   | >KIT-T670I-r GGPTLVIIIEY  | 175   | 128   |
| >KIT-T670I-w IGGPTLVITEY | 475   | >KIT-T670I-r IGGPTLVIIIEY | 512   | 37    |
| >KIT-T670I-w IGGPTLVIT   | 34717 | >KIT-T670I-r IGGPTLVII    | 224   | 34493 |
| >KIT-T670I-w TIGGPTLVIT  | 1781  | >KIT-T670I-r TIGGPTLVII   | 359   | 1422  |
| >KIT-T753A-v TPAIMEDDEL  | 348   | >KIT-T753A-r APAIMEDDEL   | 914   | 566   |

|                          |       |                          |      |       |
|--------------------------|-------|--------------------------|------|-------|
| >KIT-T753A-v VTPAIMEDDE  | 142   | >KIT-T753A-r VAPAIMEDDI  | 846  | 704   |
| >KIT-T753A-v VTPAIMEDDE  | 6     | >KIT-T753A-r VAPAIMEDDI  | 53   | 47    |
| >KIT-T753A-v ERDVTPAI    | 270   | >KIT-T753A-r ERDVAPAI    | 357  | 87    |
| >KIT-T753A-v ERDVTPAIM   | 67    | >KIT-T753A-r ERDVAPAIM   | 121  | 54    |
| >KIT-T753A-v IERDVTPAI   | 21    | >KIT-T753A-r IERDVAPAI   | 31   | 10    |
| >KIT-T753A-v IERDVTPAIM  | 461   | >KIT-T753A-r IERDVAPAIM  | 711  | 250   |
| >KIT-T753A-v IERDVTPAI   | 196   | >KIT-T753A-r IERDVAPAI   | 157  | 39    |
| >KIT-T753A-v IERDVTPAI   | 170   | >KIT-T753A-r IERDVAPAI   | 106  | 64    |
| >KIT-T753A-v IERDVTPA    | 250   | >KIT-T753A-r IERDVAPA    | 753  | 503   |
| >KIT-T753A-v IERDVTPAI   | 202   | >KIT-T753A-r IERDVAPAI   | 332  | 130   |
| >KIT-T753A-v IERDVTPA    | 598   | >KIT-T753A-r IERDVAPA    | 458  | 140   |
| >KIT-T753A-v IERDVTPAI   | 5     | >KIT-T753A-r IERDVAPAI   | 7    | 2     |
| >KIT-T753A-v IERDVTPAIM  | 324   | >KIT-T753A-r IERDVAPAIM  | 472  | 148   |
| >KIT-T753A-v YIERDVTPA   | 74    | >KIT-T753A-r YIERDVAPA   | 77   | 3     |
| >KIT-T753A-v YIERDVTPAI  | 363   | >KIT-T753A-r YIERDVAPAI  | 1177 | 814   |
| >KIT-T753A-v YIERDVTPA   | 160   | >KIT-T753A-r YIERDVAPA   | 135  | 25    |
| >KIT-T753A-v YIERDVTPAI  | 206   | >KIT-T753A-r YIERDVAPAI  | 488  | 282   |
| >KIT-T753A-v YIERDVTPAI  | 134   | >KIT-T753A-r YIERDVAPAI  | 119  | 15    |
| >KIT-T753A-v YIERDVTPAI  | 309   | >KIT-T753A-r YIERDVAPAI  | 273  | 36    |
| >KIT-T753A-v YIERDVTPA   | 119   | >KIT-T753A-r YIERDVAPA   | 76   | 43    |
| >KIT-T753A-v YIERDVTPAI  | 78    | >KIT-T753A-r YIERDVAPAI  | 93   | 15    |
| >KIT-T753A-v SYIERDVTPAI | 14    | >KIT-T753A-r SYIERDVAPAI | 20   | 6     |
| >KIT-T753A-v SYIERDVTPAI | 434   | >KIT-T753A-r SYIERDVAPAI | 524  | 90    |
| >KIT-T753A-v SYIERDVTPAI | 366   | >KIT-T753A-r SYIERDVAPAI | 986  | 620   |
| >KIT-T753A-v SYIERDVTPAI | 472   | >KIT-T753A-r SYIERDVAPAI | 839  | 367   |
| >KIT-T753A-v SYIERDVTPAI | 19    | >KIT-T753A-r SYIERDVAPAI | 28   | 9     |
| >KIT-T801I-w THGRITKICDF | 1372  | >KIT-T801I-r IHGRITKICDF | 223  | 1149  |
| >KIT-T801I-w LTHGRITKI   | 318   | >KIT-T801I-r LIHGRITKI   | 35   | 283   |
| >KIT-T801I-w LTHGRITKI   | 957   | >KIT-T801I-r LIHGRITKI   | 196  | 761   |
| >KIT-T801I-w LTHGRITKI   | 1897  | >KIT-T801I-r LIHGRITKI   | 24   | 1873  |
| >KIT-T801I-w LTHGRITK    | 119   | >KIT-T801I-r LIHGRITK    | 88   | 31    |
| >KIT-T801I-w LTHGRITK    | 68    | >KIT-T801I-r LIHGRITK    | 151  | 83    |
| >KIT-T801I-w LTHGRITK    | 8     | >KIT-T801I-r LIHGRITK    | 21   | 13    |
| >KIT-T801I-w LTHGRITK    | 438   | >KIT-T801I-r LIHGRITK    | 1443 | 1005  |
| >KIT-T801I-w LTHGRITK    | 98    | >KIT-T801I-r LIHGRITK    | 437  | 339   |
| >KIT-T801I-w LTHGRITKI   | 27    | >KIT-T801I-r LIHGRITKI   | 6317 | 6290  |
| >KIT-T801I-w LTHGRITKI   | 441   | >KIT-T801I-r LIHGRITKI   | 9358 | 8917  |
| >KIT-T801I-w LTHGRITKI   | 27    | >KIT-T801I-r LIHGRITKI   | 2687 | 2660  |
| >KIT-T801I-w RDLAARNILLI | 21868 | >KIT-T801I-r RDLAARNILLI | 387  | 21481 |
| >KIT-T801I-w RDLAARNILLI | 826   | >KIT-T801I-r RDLAARNILLI | 416  | 410   |
| >KIT-T801I-w RDLAARNILLI | 3089  | >KIT-T801I-r RDLAARNILLI | 50   | 3039  |
| >KIT-T801I-w RDLAARNILLI | 2643  | >KIT-T801I-r RDLAARNILLI | 37   | 2606  |
| >KIT-T801I-w LLTHGRITKI  | 424   | >KIT-T801I-r LLIHGRITKI  | 233  | 191   |

|                          |      |                          |     |     |
|--------------------------|------|--------------------------|-----|-----|
| >KIT-T801I-w LLTHGRITKI  | 174  | >KIT-T801I-r LLIHGRITKI  | 71  | 103 |
| >KIT-T801I-w LLTHGRITKI  | 184  | >KIT-T801I-r LLIHGRITKI  | 57  | 127 |
| >KIT-T801I-w LLTHGRITKI  | 612  | >KIT-T801I-r LLIHGRITKI  | 137 | 475 |
| >KIT-T801I-w LLTHGRITKI  | 176  | >KIT-T801I-r LLIHGRITKI  | 255 | 79  |
| >KIT-T801I-w LLTHGRITKI  | 6    | >KIT-T801I-r LLIHGRITKI  | 7   | 1   |
| >KIT-T801I-w LLTHGRITKIC | 190  | >KIT-T801I-r LLIHGRITKIC | 298 | 108 |
| >KIT-T801I-w LLTHGRITK   | 78   | >KIT-T801I-r LLIHGRITK   | 66  | 12  |
| >KIT-T801I-w LLTHGRITK   | 1184 | >KIT-T801I-r LLIHGRITK   | 350 | 834 |
| >KIT-T801I-w LLTHGRITK   | 350  | >KIT-T801I-r LLIHGRITK   | 231 | 119 |
| >KIT-T801I-w ILLTHGRI    | 269  | >KIT-T801I-r ILLIHGRI    | 328 | 59  |
| >KIT-T801I-w ILLTHGRITKI | 225  | >KIT-T801I-r ILLIHGRITKI | 457 | 232 |
| >KIT-T801I-w ILLTHGRITKI | 269  | >KIT-T801I-r ILLIHGRITKI | 433 | 164 |
| >KIT-T801I-w ILLTHGRI    | 165  | >KIT-T801I-r ILLIHGRI    | 278 | 113 |
| >KIT-T801I-w ILLTHGRITKI | 43   | >KIT-T801I-r ILLIHGRITKI | 84  | 41  |
| >KIT-T801I-w ILLTHGRITKI | 425  | >KIT-T801I-r ILLIHGRITKI | 540 | 115 |
| >KIT-T801I-w ILLTHGRI    | 14   | >KIT-T801I-r ILLIHGRI    | 12  | 2   |
| >KIT-T801I-w ILLTHGRITKI | 16   | >KIT-T801I-r ILLIHGRITKI | 13  | 3   |
| >KIT-T801I-w ILLTHGRI    | 365  | >KIT-T801I-r ILLIHGRI    | 991 | 626 |
| >KIT-T801I-w ILLTHGRITKI | 164  | >KIT-T801I-r ILLIHGRITKI | 440 | 276 |
| >KIT-T801I-w ILLTHGRI    | 545  | >KIT-T801I-r ILLIHGRI    | 415 | 130 |
| >KIT-T801I-w ILLTHGRITKI | 160  | >KIT-T801I-r ILLIHGRITKI | 128 | 32  |
| >KIT-T801I-w ILLTHGRITKI | 262  | >KIT-T801I-r ILLIHGRITKI | 610 | 348 |
| >KIT-T801I-w ILLTHGRI    | 61   | >KIT-T801I-r ILLIHGRI    | 65  | 4   |
| >KIT-T801I-w ILLTHGRITKI | 39   | >KIT-T801I-r ILLIHGRITKI | 41  | 2   |
| >KIT-T801I-w ILLTHGRITK  | 18   | >KIT-T801I-r ILLIHGRITK  | 24  | 6   |
| >KIT-T801I-w ILLTHGRITK  | 91   | >KIT-T801I-r ILLIHGRITK  | 85  | 6   |
| >KIT-T801I-w ILLTHGRITK  | 209  | >KIT-T801I-r ILLIHGRITK  | 286 | 77  |
| >KIT-T801I-w NILLTHGRITK | 430  | >KIT-T801I-r NILLIHGRITK | 358 | 72  |
| >KIT-T801I-w NILLTHGR    | 589  | >KIT-T801I-r NILLIHGR    | 251 | 338 |
| >KIT-T801I-w NILLTHGR    | 121  | >KIT-T801I-r NILLIHGR    | 48  | 73  |
| >KIT-T801I-w NILLTHGR    | 85   | >KIT-T801I-r NILLIHGR    | 47  | 38  |
| >KIT-T801I-w NILLTHGRITK | 563  | >KIT-T801I-r NILLIHGRITK | 239 | 324 |
| >KIT-T801I-w NILLTHGR    | 71   | >KIT-T801I-r NILLIHGR    | 60  | 11  |
| >KIT-T801I-w RNILLTHGR   | 118  | >KIT-T801I-r RNILLIHGR   | 82  | 36  |
| >KIT-T801I-w RNILLTHGR   | 37   | >KIT-T801I-r RNILLIHGR   | 57  | 20  |
| >KIT-T801I-w ARNILLTHGR  | 255  | >KIT-T801I-r ARNILLIHGR  | 322 | 67  |
| >KIT-T801I-w ARNILLTH    | 274  | >KIT-T801I-r ARNILLIH    | 470 | 196 |
| >KIT-T801I-w ARNILLTHGR  | 99   | >KIT-T801I-r ARNILLIHGR  | 102 | 3   |
| >KIT-T801I-w ARNILLTHGR  | 227  | >KIT-T801I-r ARNILLIHGRI | 188 | 39  |
| >KIT-T801I-w ARNILLTHGR  | 323  | >KIT-T801I-r ARNILLIHGRI | 189 | 134 |
| >KIT-T801I-w AARNILLT    | 238  | >KIT-T801I-r AARNILLI    | 14  | 224 |
| >KIT-T801I-w AARNILLTH   | 383  | >KIT-T801I-r AARNILLIH   | 584 | 201 |
| >KIT-T801I-w AARNILLTHG  | 347  | >KIT-T801I-r AARNILLIHG  | 72  | 275 |

|                         |       |                          |      |       |
|-------------------------|-------|--------------------------|------|-------|
| >KIT-T801I-w AARNILLTHG | 127   | >KIT-T801I-r AARNILLIHGF | 179  | 52    |
| >KIT-T801I-w AARNILLTHG | 32    | >KIT-T801I-r AARNILLIHGF | 34   | 2     |
| >KIT-T801I-w AARNILLTH  | 278   | >KIT-T801I-r AARNILLIH   | 403  | 125   |
| >KIT-T801I-w AARNILLT   | 36687 | >KIT-T801I-r AARNILLI    | 376  | 36311 |
| >KIT-T801I-w LAARNILLT  | 8711  | >KIT-T801I-r LAARNILLI   | 266  | 8445  |
| >KIT-T801I-w LAARNILLT  | 9106  | >KIT-T801I-r LAARNILLI   | 55   | 9051  |
| >KIT-T801I-w LAARNILLT  | 32948 | >KIT-T801I-r LAARNILLI   | 131  | 32817 |
| >KIT-T801I-w DLAARNILLT | 1287  | >KIT-T801I-r DLAARNILLI  | 205  | 1082  |
| >KIT-T801I-w DLAARNILLT | 1037  | >KIT-T801I-r DLAARNILLI  | 242  | 795   |
| >KIT-T801I-w DLAARNILLT | 2569  | >KIT-T801I-r DLAARNILLI  | 328  | 2241  |
| >KIT-T96M-v YTCTNKHGL   | 7551  | >KIT-T96M-r YMCTNKHGL    | 154  | 7397  |
| >KIT-T96M-v YTCTNKHGL   | 2670  | >KIT-T96M-r YMCTNKHGL    | 21   | 2649  |
| >KIT-T96M-v YTCTNKHGL   | 6071  | >KIT-T96M-r YMCTNKHGL    | 90   | 5981  |
| >KIT-T96M-v YTCTNKHGL   | 2159  | >KIT-T96M-r YMCTNKHGL    | 152  | 2007  |
| >KIT-T96M-v YTCTNKHGL   | 189   | >KIT-T96M-r YMCTNKHGL    | 3    | 186   |
| >KIT-T96M-v YTCTNKHGL   | 1590  | >KIT-T96M-r YMCTNKHGL    | 11   | 1579  |
| >KIT-T96M-v YTCTNKHGL   | 6696  | >KIT-T96M-r YMCTNKHGL    | 53   | 6643  |
| >KIT-T96M-v YTCTNKHGL   | 8072  | >KIT-T96M-r YMCTNKHGL    | 10   | 8062  |
| >KIT-T96M-v YTCTNKHGL   | 156   | >KIT-T96M-r YMCTNKHGL    | 2    | 154   |
| >KIT-T96M-v YTCTNKHGL   | 237   | >KIT-T96M-r YMCTNKHGL    | 8567 | 8330  |
| >KIT-T96M-v YTCTNKHGL   | 193   | >KIT-T96M-r YMCTNKHGL    | 7458 | 7265  |
| >KIT-T96M-v YTCTNKHGL   | 497   | >KIT-T96M-r YMCTNKHGL    | 3698 | 3201  |
| >KIT-T96M-v YTCTNKHGL   | 38    | >KIT-T96M-r YMCTNKHGL    | 4449 | 4411  |
| >KIT-T96M-v YTCTNKHGL   | 2303  | >KIT-T96M-r YMCTNKHGL    | 94   | 2209  |
| >KIT-T96M-v KAEATNTGKY  | 12312 | >KIT-T96M-r KAEATNTGKY   | 53   | 12259 |
| >KIT-T96M-v KAEATNTGKY  | 16358 | >KIT-T96M-r KAEATNTGKY   | 375  | 15983 |
| >KIT-T96M-v KYTCTNKHGL  | 16    | >KIT-T96M-r KYMCTNKHG    | 8    | 8     |
| >KIT-T96M-v KYTCTNKHGL  | 1256  | >KIT-T96M-r KYMCTNKHG    | 425  | 831   |
| >KIT-T96M-v KYTCTNKHGL  | 2130  | >KIT-T96M-r KYMCTNKHG    | 443  | 1687  |
| >KIT-T96M-v KYTCTNKHGL  | 49    | >KIT-T96M-r KYMCTNKHG    | 13   | 36    |
| >KIT-T96M-v KYTCTNKHGL  | 1938  | >KIT-T96M-r KYMCTNKHG    | 478  | 1460  |
| >KIT-T96M-v GKYTCTNK    | 291   | >KIT-T96M-r GKYMCTNK     | 362  | 71    |
| >KIT-T96M-v GKYTCTNKHG  | 160   | >KIT-T96M-r GKYMCTNKH    | 152  | 8     |
| >KIT-T96M-v GKYTCTNKHG  | 173   | >KIT-T96M-r GKYMCTNKH    | 532  | 359   |
| >KIT-T96M-v NTGKYTCTNK  | 429   | >KIT-T96M-r NTGKYMCTN    | 349  | 80    |
| >KIT-T96M-v NTGKYTCTNK  | 128   | >KIT-T96M-r NTGKYMCTN    | 140  | 12    |
| >KIT-T96M-v NTGKYTCTNK  | 146   | >KIT-T96M-r NTGKYMCTN    | 61   | 85    |
| >KIT-T96M-v ATNTGKYT    | 9369  | >KIT-T96M-r ATNTGKYM     | 37   | 9332  |
| >KIT-T96M-v AEATNTGKYT  | 1556  | >KIT-T96M-r AEATNTGKYM   | 94   | 1462  |
| >KIT-T96M-v AEATNTGKYT  | 1225  | >KIT-T96M-r AEATNTGKYM   | 180  | 1045  |
| >KIT-T96M-v AEATNTGKYT  | 181   | >KIT-T96M-r AEATNTGKYM   | 180  | 1     |
| >KIT-T96M-v AEATNTGKYT  | 353   | >KIT-T96M-r AEATNTGKYM   | 33   | 320   |
| >KIT-T96M-v AEATNTGKYT  | 123   | >KIT-T96M-r AEATNTGKYM   | 125  | 2     |

|                                      |      |                                      |     |      |
|--------------------------------------|------|--------------------------------------|-----|------|
| >KIT-V399I- <del>v</del> VNAAIAFNV   | 247  | >KIT-V399I- <del>r</del> INAAIAFNV   | 111 | 136  |
| >KIT-V399I- <del>v</del> VNAAIAFNVY  | 142  | >KIT-V399I- <del>r</del> INAAIAFNVY\ | 68  | 74   |
| >KIT-V399I- <del>v</del> VNAAIAFNVY  | 410  | >KIT-V399I- <del>r</del> INAAIAFNVY  | 384 | 26   |
| >KIT-V399I- <del>v</del> VNAAIAFNV   | 70   | >KIT-V399I- <del>r</del> INAAIAFNV   | 43  | 27   |
| >KIT-V399I- <del>v</del> VNAAIAFNVY  | 42   | >KIT-V399I- <del>r</del> INAAIAFNVY\ | 26  | 16   |
| >KIT-V399I- <del>v</del> VNAAIAFNVY  | 341  | >KIT-V399I- <del>r</del> INAAIAFNVY  | 526 | 185  |
| >KIT-V399I- <del>v</del> VNAAIAFNVY  | 800  | >KIT-V399I- <del>r</del> INAAIAFNVY  | 388 | 412  |
| >KIT-V399I- <del>v</del> DVNAAIAFN\  | 1047 | >KIT-V399I- <del>r</del> DINAAIAFNV  | 316 | 731  |
| >KIT-V399I- <del>v</del> DVNAAIAFN\  | 608  | >KIT-V399I- <del>r</del> DINAAIAFNV  | 200 | 408  |
| >KIT-V399I- <del>v</del> DVNAAIAFN\  | 84   | >KIT-V399I- <del>r</del> DINAAIAFNV  | 34  | 50   |
| >KIT-V399I- <del>v</del> DVNAAIAFN\  | 379  | >KIT-V399I- <del>r</del> DINAAIAFNV  | 139 | 240  |
| >KIT-V399I- <del>v</del> DVNAAIAFN\  | 275  | >KIT-V399I- <del>r</del> DINAAIAFNV  | 572 | 297  |
| >KIT-V399I- <del>v</del> DVNAAIAFN\  | 112  | >KIT-V399I- <del>r</del> DINAAIAFNV  | 349 | 237  |
| >KIT-V399I- <del>v</del> DVNAAIAF    | 75   | >KIT-V399I- <del>r</del> DINAAIAF    | 356 | 281  |
| >KIT-V399I- <del>v</del> DVNAAIAFN\  | 23   | >KIT-V399I- <del>r</del> DINAAIAFNV  | 75  | 52   |
| >KIT-V399I- <del>v</del> DVNAAIAFN\  | 276  | >KIT-V399I- <del>r</del> DINAAIAFNV  | 794 | 518  |
| >KIT-V399I- <del>v</del> DVNAAIAFN\  | 143  | >KIT-V399I- <del>r</del> DINAAIAFNV  | 172 | 29   |
| >KIT-V399I- <del>v</del> DVNAAIAFN\  | 356  | >KIT-V399I- <del>r</del> DINAAIAFNV  | 872 | 516  |
| >KIT-V399I- <del>v</del> DVNAAIAFN\  | 19   | >KIT-V399I- <del>r</del> DINAAIAFNV  | 28  | 9    |
| >KIT-V399I- <del>v</del> DVNAAIAFN\  | 7    | >KIT-V399I- <del>r</del> DINAAIAFNV  | 10  | 3    |
| >KIT-V399I- <del>v</del> DVNAAIAF    | 81   | >KIT-V399I- <del>r</del> DINAAIAF    | 230 | 149  |
| >KIT-V399I- <del>v</del> DVNAAIAFN\  | 208  | >KIT-V399I- <del>r</del> DINAAIAFNV  | 598 | 390  |
| >KIT-V399I- <del>v</del> DVNAAIAFN\  | 416  | >KIT-V399I- <del>r</del> DINAAIAFNV  | 367 | 49   |
| >KIT-V399I- <del>v</del> TYTFLVSNSD\ | 24   | >KIT-V399I- <del>r</del> TYTFLVSNSDI | 4   | 20   |
| >KIT-V399I- <del>v</del> TYTFLVSNSD\ | 5883 | >KIT-V399I- <del>r</del> TYTFLVSNSDI | 376 | 5507 |
| >KIT-V399I- <del>v</del> TYTFLVSNSD\ | 3732 | >KIT-V399I- <del>r</del> TYTFLVSNSDI | 351 | 3381 |
| >KIT-V399I- <del>v</del> TYTFLVSNSD\ | 1659 | >KIT-V399I- <del>r</del> TYTFLVSNSDI | 63  | 1596 |
| >KIT-V399I- <del>v</del> SDVNAAIAF   | 457  | >KIT-V399I- <del>r</del> SDINAAIAF   | 283 | 174  |
| >KIT-V399I- <del>v</del> SDVNAAIAFN  | 55   | >KIT-V399I- <del>r</del> SDINAAIAFN\ | 39  | 16   |
| >KIT-V399I- <del>v</del> NSDVNAAIAF  | 108  | >KIT-V399I- <del>r</del> NSDINAAIAF  | 60  | 48   |
| >KIT-V399I- <del>v</del> NSDVNAAI    | 555  | >KIT-V399I- <del>r</del> NSDINAAI    | 477 | 78   |
| >KIT-V399I- <del>v</del> SNSDVNAAI   | 275  | >KIT-V399I- <del>r</del> SNSDINAAI   | 139 | 136  |
| >KIT-V399I- <del>v</del> SNSDVNAAIA  | 349  | >KIT-V399I- <del>r</del> SNSDINAAIAI | 330 | 19   |
| >KIT-V399I- <del>v</del> VSNSDVNAAI  | 57   | >KIT-V399I- <del>r</del> VSNSDINAAI  | 97  | 40   |
| >KIT-V399I- <del>v</del> LVSNSDVNA\  | 257  | >KIT-V399I- <del>r</del> LVSNSDINAA  | 232 | 25   |
| >KIT-V399I- <del>v</del> LVSNSDVNA\  | 689  | >KIT-V399I- <del>r</del> LVSNSDINAA  | 433 | 256  |
| >KIT-V399I- <del>v</del> LVSNSDVNA\  | 340  | >KIT-V399I- <del>r</del> LVSNSDINAA  | 335 | 5    |
| >KIT-V399I- <del>v</del> LVSNSDVNA\  | 1091 | >KIT-V399I- <del>r</del> LVSNSDINAA  | 427 | 664  |
| >KIT-V399I- <del>v</del> LVSNSDVNA\  | 340  | >KIT-V399I- <del>r</del> LVSNSDINAA  | 346 | 6    |
| >KIT-V399I- <del>v</del> LVSNSDVNA\  | 96   | >KIT-V399I- <del>r</del> LVSNSDINAA  | 114 | 18   |
| >KIT-V399I- <del>v</del> FLVSNSDV    | 33   | >KIT-V399I- <del>r</del> FLVSNSDI    | 110 | 77   |
| >KIT-V399I- <del>v</del> FLVSNSDVNA  | 141  | >KIT-V399I- <del>r</del> FLVSNSDINA  | 73  | 68   |
| >KIT-V399I- <del>v</del> FLVSNSDVNA  | 65   | >KIT-V399I- <del>r</del> FLVSNSDINA  | 56  | 9    |



|                         |      |                         |      |      |
|-------------------------|------|-------------------------|------|------|
| >KIT-V399I-м FLVSNSDV   | 6    | >KIT-V399I-н FLVSNSDI   | 13   | 7    |
| >KIT-V399I-м FLVSNSDVNA | 24   | >KIT-V399I-н FLVSNSDINA | 18   | 6    |
| >KIT-V399I-м FLVSNSDVNA | 5    | >KIT-V399I-н FLVSNSDINA | 4    | 1    |
| >KIT-V399I-м FLVSNSDV   | 3    | >KIT-V399I-н FLVSNSDI   | 7    | 4    |
| >KIT-V399I-м FLVSNSDVNA | 40   | >KIT-V399I-н FLVSNSDINA | 39   | 1    |
| >KIT-V399I-м FLVSNSDVNA | 4    | >KIT-V399I-н FLVSNSDINA | 4    | 0    |
| >KIT-V399I-м FLVSNSDV   | 17   | >KIT-V399I-н FLVSNSDI   | 82   | 65   |
| >KIT-V399I-м FLVSNSDVNA | 127  | >KIT-V399I-н FLVSNSDINA | 79   | 48   |
| >KIT-V399I-м FLVSNSDVNA | 24   | >KIT-V399I-н FLVSNSDINA | 19   | 5    |
| >KIT-V399I-м FLVSNSDV   | 3    | >KIT-V399I-н FLVSNSDI   | 17   | 14   |
| >KIT-V399I-м FLVSNSDVNA | 25   | >KIT-V399I-н FLVSNSDINA | 28   | 3    |
| >KIT-V399I-м FLVSNSDVNA | 8    | >KIT-V399I-н FLVSNSDINA | 9    | 1    |
| >KIT-V399I-м FLVSNSDV   | 5    | >KIT-V399I-н FLVSNSDI   | 13   | 8    |
| >KIT-V399I-м FLVSNSDVNA | 13   | >KIT-V399I-н FLVSNSDINA | 14   | 1    |
| >KIT-V399I-м FLVSNSDVNA | 6    | >KIT-V399I-н FLVSNSDINA | 6    | 0    |
| >KIT-V399I-м FLVSNSDV   | 8    | >KIT-V399I-н FLVSNSDI   | 67   | 59   |
| >KIT-V399I-м FLVSNSDVNA | 30   | >KIT-V399I-н FLVSNSDINA | 30   | 0    |
| >KIT-V399I-м FLVSNSDVNA | 56   | >KIT-V399I-н FLVSNSDINA | 58   | 2    |
| >KIT-V399I-м FLVSNSDV   | 10   | >KIT-V399I-н FLVSNSDI   | 271  | 261  |
| >KIT-V399I-м FLVSNSDVNA | 287  | >KIT-V399I-н FLVSNSDINA | 367  | 80   |
| >KIT-V399I-м FLVSNSDVNA | 120  | >KIT-V399I-н FLVSNSDINA | 157  | 37   |
| >KIT-V399I-м FLVSNSDV   | 2    | >KIT-V399I-н FLVSNSDI   | 6    | 4    |
| >KIT-V399I-м FLVSNSDVNA | 6    | >KIT-V399I-н FLVSNSDINA | 7    | 1    |
| >KIT-V399I-м FLVSNSDVNA | 7    | >KIT-V399I-н FLVSNSDINA | 6    | 1    |
| >KIT-V399I-м FLVSNSDV   | 469  | >KIT-V399I-н FLVSNSDI   | 340  | 129  |
| >KIT-V399I-м FLVSNSDVNA | 538  | >KIT-V399I-н FLVSNSDINA | 471  | 67   |
| >KIT-V399I-м TFLVSNSDV  | 132  | >KIT-V399I-н TFLVSNSDI  | 10   | 122  |
| >KIT-V399I-м TFLVSNSDV  | 4710 | >KIT-V399I-н TFLVSNSDI  | 281  | 4429 |
| >KIT-V399I-м YTFLVSNSDV | 2596 | >KIT-V399I-н YTFLVSNSDI | 374  | 2222 |
| >KIT-V399I-м YTFLVSNSDV | 251  | >KIT-V399I-н YTFLVSNSDI | 1448 | 1197 |
| >KIT-V399I-м YTFLVSNSDV | 118  | >KIT-V399I-н YTFLVSNSDI | 236  | 118  |
| >KIT-V399I-м YTFLVSNSDV | 43   | >KIT-V399I-н YTFLVSNSDI | 145  | 102  |
| >KIT-V399I-м YTFLVSNSDV | 85   | >KIT-V399I-н YTFLVSNSDI | 266  | 181  |
| >KIT-V399I-м YTFLVSNSDV | 42   | >KIT-V399I-н YTFLVSNSDI | 604  | 562  |
| >KIT-V399I-м YTFLVSNSDV | 185  | >KIT-V399I-н YTFLVSNSDI | 2107 | 1922 |
| >KIT-V399I-м YTFLVSNSDV | 54   | >KIT-V399I-н YTFLVSNSDI | 1534 | 1480 |
| >KIT-V399I-м YTFLVSNSDV | 70   | >KIT-V399I-н YTFLVSNSDI | 7760 | 7690 |
| >KIT-V399I-м YTFLVSNSDV | 1293 | >KIT-V399I-н YTFLVSNSDI | 143  | 1150 |
| >KIT-V399I-м YTFLVSNSDV | 43   | >KIT-V399I-н YTFLVSNSDI | 103  | 60   |
| >KIT-V399I-м YTFLVSNSDV | 54   | >KIT-V399I-н YTFLVSNSDI | 353  | 299  |
| >KIT-V399I-м YTFLVSNSDV | 327  | >KIT-V399I-н YTFLVSNSDI | 273  | 54   |
| >KIT-V399I-м YTFLVSNSDV | 162  | >KIT-V399I-н YTFLVSNSDI | 35   | 127  |
| >KIT-V399I-м YTFLVSNSDV | 732  | >KIT-V399I-н YTFLVSNSDI | 458  | 274  |

|                         |       |                          |      |       |
|-------------------------|-------|--------------------------|------|-------|
| >KIT-V399I-w YTFVLSNSDV | 96    | >KIT-V399I-r YTFVLSNSDI  | 124  | 28    |
| >KIT-V399I-w YTFVLSNSDV | 145   | >KIT-V399I-r YTFVLSNSDIN | 154  | 9     |
| >KIT-V399I-w YTFVLSNSDV | 1634  | >KIT-V399I-r YTFVLSNSDI  | 38   | 1596  |
| >KIT-V457M- EQRCASVLP   | 3380  | >KIT-V457M- EQRCASVLP    | 55   | 3325  |
| >KIT-V457M- EQRCASVLP   | 165   | >KIT-V457M- EQRCASVLP    | 36   | 129   |
| >KIT-V457M- EQRCASVLP   | 16    | >KIT-V457M- EQRCASVLP    | 7    | 9     |
| >KIT-V457M- LPVDVQTL    | 192   | >KIT-V457M- LPMDVQTL     | 31   | 161   |
| >KIT-V457M- LPVDVQTL    | 34    | >KIT-V457M- LPMDVQTL     | 37   | 3     |
| >KIT-V457M- LPVDVQTL    | 590   | >KIT-V457M- LPMDVQTL     | 136  | 454   |
| >KIT-V457M- LPVDVQTL    | 241   | >KIT-V457M- LPMDVQTL     | 203  | 38    |
| >KIT-V457M- LPVDVQTL    | 56    | >KIT-V457M- LPMDVQTL     | 42   | 14    |
| >KIT-V457M- LPVDVQTLN   | 262   | >KIT-V457M- LPMDVQTLN    | 230  | 32    |
| >KIT-V457M- LPVDVQTLNS  | 372   | >KIT-V457M- LPMDVQTLN    | 83   | 289   |
| >KIT-V457M- LPVDVQTLNS  | 47    | >KIT-V457M- LPMDVQTLN    | 42   | 5     |
| >KIT-V457M- LPVDVQTL    | 113   | >KIT-V457M- LPMDVQTL     | 213  | 100   |
| >KIT-V457M- LPVDVQTL    | 114   | >KIT-V457M- LPMDVQTL     | 113  | 1     |
| >KIT-V457M- VLPVDVQTL   | 365   | >KIT-V457M- VLPMDVQTL    | 425  | 60    |
| >KIT-V457M- VLPVDVQTL   | 168   | >KIT-V457M- VLPMDVQTL    | 65   | 103   |
| >KIT-V457M- VLPVDVQTL   | 16    | >KIT-V457M- VLPMDVQTL    | 8    | 8     |
| >KIT-V457M- VLPVDVQTL   | 40    | >KIT-V457M- VLPMDVQTL    | 40   | 0     |
| >KIT-V457M- VLPVDVQTL   | 29    | >KIT-V457M- VLPMDVQTL    | 23   | 6     |
| >KIT-V457M- VLPVDVQTL   | 50    | >KIT-V457M- VLPMDVQTL    | 55   | 5     |
| >KIT-V457M- VLPVDVQTL   | 129   | >KIT-V457M- VLPMDVQTL    | 62   | 67    |
| >KIT-V457M- VLPVDVQTL   | 4     | >KIT-V457M- VLPMDVQTL    | 3    | 1     |
| >KIT-V457M- VLPVDVQTL   | 507   | >KIT-V457M- VLPMDVQTL    | 147  | 360   |
| >KIT-V457M- SVLPVDVQTL  | 431   | >KIT-V457M- SVLPMDVQTL   | 401  | 30    |
| >KIT-V457M- SVLPVDVQTL  | 56    | >KIT-V457M- SVLPMDVQTL   | 184  | 128   |
| >KIT-V457M- SVLPVDVQTL  | 279   | >KIT-V457M- SVLPMDVQTL   | 446  | 167   |
| >KIT-V457M- SVLPVDVQTL  | 38    | >KIT-V457M- SVLPMDVQTL   | 96   | 58    |
| >KIT-V457M- SVLPVDVQTL  | 55    | >KIT-V457M- SVLPMDVQTL   | 29   | 26    |
| >KIT-V457M- SVLPVDVQTL  | 200   | >KIT-V457M- SVLPMDVQTL   | 164  | 36    |
| >KIT-V457M- SVLPVDVQTL  | 633   | >KIT-V457M- SVLPMDVQTL   | 174  | 459   |
| >KIT-V457M- ASVLPVDVQ   | 1209  | >KIT-V457M- ASVLPMDVQ    | 203  | 1006  |
| >KIT-V457M- ASVLPVDVQ   | 197   | >KIT-V457M- ASVLPMDVQ    | 85   | 112   |
| >KIT-V457M- ASVLPVDVQ   | 14    | >KIT-V457M- ASVLPMDVQ    | 11   | 3     |
| >KIT-V457M- CSASVLPV    | 424   | >KIT-V457M- CSASVLP      | 3513 | 3089  |
| >KIT-V457M- CSASVLPV    | 12583 | >KIT-V457M- CSASVLP      | 237  | 12346 |
| >KIT-V457M- CSASVLPV    | 29    | >KIT-V457M- CSASVLP      | 2047 | 2018  |
| >KIT-V457M- CSASVLPV    | 4437  | >KIT-V457M- CSASVLP      | 174  | 4263  |
| >KIT-V457M- CSASVLPV    | 5598  | >KIT-V457M- CSASVLP      | 89   | 5509  |
| >KIT-V457M- CSASVLPV    | 2231  | >KIT-V457M- CSASVLP      | 450  | 1781  |
| >KIT-V457M- CSASVLPV    | 4270  | >KIT-V457M- CSASVLP      | 212  | 4058  |
| >KIT-V457M- CSASVLPV    | 349   | >KIT-V457M- CSASVLP      | 123  | 226   |

|                          |      |                          |      |      |
|--------------------------|------|--------------------------|------|------|
| >KIT-V457M- RCSASVLPV    | 221  | >KIT-V457M- RCSASVLPV    | 365  | 144  |
| >KIT-V457M- RCSASVLPV    | 424  | >KIT-V457M- RCSASVLPV    | 93   | 331  |
| >KIT-V457M- RCSASVLPV    | 4272 | >KIT-V457M- RCSASVLPV    | 314  | 3958 |
| >KIT-V457M- QRCSASVLPV   | 202  | >KIT-V457M- QRCSASVLPV   | 61   | 141  |
| >KIT-V457M- QRCSASVLPV   | 1693 | >KIT-V457M- QRCSASVLPV   | 469  | 1224 |
| >KIT-V457M- QRCSASVLPV   | 319  | >KIT-V457M- QRCSASVLPV   | 96   | 223  |
| >KIT-V489A-1 VECKAYNDV   | 225  | >KIT-V489A-1 VECKAYNDV   | 504  | 279  |
| >KIT-V489A-1 VECKAYNDV   | 844  | >KIT-V489A-1 VECKAYNDV   | 263  | 581  |
| >KIT-V489A-1 VECKAYNDV   | 1399 | >KIT-V489A-1 VECKAYNDV   | 42   | 1357 |
| >KIT-V489A-1 VECKAYNDV   | 6094 | >KIT-V489A-1 VECKAYNDV   | 456  | 5638 |
| >KIT-V489A-1 VECKAYNDV   | 221  | >KIT-V489A-1 VECKAYNDV   | 43   | 178  |
| >KIT-V489A-1 DSSAFKHNGT  | 102  | >KIT-V489A-1 DSSAFKHNGT  | 1239 | 1137 |
| >KIT-V489A-1 DSSAFKHNGT  | 281  | >KIT-V489A-1 DSSAFKHNGT  | 5102 | 4821 |
| >KIT-V489A-1 GTVECKAYNE  | 1696 | >KIT-V489A-1 GTVECKAYNE  | 380  | 1316 |
| >KIT-V489A-1 GTVECKAYNE  | 837  | >KIT-V489A-1 GTVECKAYNE  | 318  | 519  |
| >KIT-V489A-1 GTVECKAYNE  | 1185 | >KIT-V489A-1 GTVECKAYNE  | 262  | 923  |
| >KIT-V489A-1 GTVECKAYNE  | 983  | >KIT-V489A-1 GTVECKAYNE  | 456  | 527  |
| >KIT-V489A-1 GTVECKAY    | 148  | >KIT-V489A-1 GTVECKAY    | 725  | 577  |
| >KIT-V489A-1 GTVECKAY    | 190  | >KIT-V489A-1 GTVECKAY    | 136  | 54   |
| >KIT-V489A-1 GTVECKAY    | 269  | >KIT-V489A-1 GTVECKAY    | 78   | 191  |
| >KIT-V489A-1 GTVECKAYNE  | 585  | >KIT-V489A-1 GTVECKAYNE  | 194  | 391  |
| >KIT-V489A-1 GTVECKAY    | 14   | >KIT-V489A-1 GTVECKAY    | 32   | 18   |
| >KIT-V489A-1 GTVECKAY    | 2154 | >KIT-V489A-1 GTVECKAY    | 490  | 1664 |
| >KIT-V489A-1 NGTVECKAY   | 1139 | >KIT-V489A-1 NGTVECKAY   | 472  | 667  |
| >KIT-V489A-1 KHNGTVECKA  | 80   | >KIT-V489A-1 KHNGTVECKA  | 93   | 13   |
| >KIT-V489A-1 FKHNGTVEC   | 335  | >KIT-V489A-1 FKHNGTVEC   | 836  | 501  |
| >KIT-V489A-1 FKHNGTVECK  | 208  | >KIT-V489A-1 FKHNGTVECK  | 372  | 164  |
| >KIT-V489A-1 FKHNGTVECK  | 355  | >KIT-V489A-1 FKHNGTVECK  | 390  | 35   |
| >KIT-V489A-1 AFKHNGTV    | 283  | >KIT-V489A-1 AFKHNGTV    | 144  | 139  |
| >KIT-V489A-1 AFKHNGTVEC  | 88   | >KIT-V489A-1 AFKHNGTVEC  | 99   | 11   |
| >KIT-V489A-1 SAFKHNGTV   | 302  | >KIT-V489A-1 SAFKHNGTV   | 2296 | 1994 |
| >KIT-V489A-1 SAFKHNGTV   | 282  | >KIT-V489A-1 SAFKHNGTV   | 8332 | 8050 |
| >KIT-V489A-1 SAFKHNGTV   | 179  | >KIT-V489A-1 SAFKHNGTV   | 2944 | 2765 |
| >KIT-V489A-1 SAFKHNGTV   | 138  | >KIT-V489A-1 SAFKHNGTV   | 4454 | 4316 |
| >KIT-V489A-1 SAFKHNGTV   | 387  | >KIT-V489A-1 SAFKHNGTV   | 3813 | 3426 |
| >KIT-V489A-1 SSAFEKHNGTV | 94   | >KIT-V489A-1 SSAFEKHNGTV | 708  | 614  |
| >KIT-V489A-1 SSAFEKHNGTV | 56   | >KIT-V489A-1 SSAFEKHNGTV | 239  | 183  |
| >KIT-V50M-v RVGDEIRL     | 4594 | >KIT-V50M-n RMGDEIRL     | 164  | 4430 |
| >KIT-V50M-v RVGDEIRLL    | 5557 | >KIT-V50M-n RMGDEIRLL    | 245  | 5312 |
| >KIT-V50M-v RVGDEIRL     | 2591 | >KIT-V50M-n RMGDEIRL     | 82   | 2509 |
| >KIT-V50M-v RVGDEIRLL    | 774  | >KIT-V50M-n RMGDEIRLL    | 21   | 753  |
| >KIT-V50M-v RVGDEIRLL    | 2112 | >KIT-V50M-n RMGDEIRLL    | 63   | 2049 |
| >KIT-V50M-v RVGDEIRL     | 694  | >KIT-V50M-n RMGDEIRL     | 8    | 686  |

|                         |       |                         |       |       |
|-------------------------|-------|-------------------------|-------|-------|
| >KIT-V50M-v RVGDEIRLL   | 832   | >KIT-V50M-n RMGDEIRLL   | 7     | 825   |
| >KIT-V50M-v RVGDEIRLLC  | 7078  | >KIT-V50M-n RMGDEIRLLC  | 150   | 6928  |
| >KIT-V50M-v RVGDEIRLLC† | 12961 | >KIT-V50M-n RMGDEIRLLC  | 332   | 12629 |
| >KIT-V50M-v RVGDEIRL    | 5745  | >KIT-V50M-n RMGDEIRL    | 25    | 5720  |
| >KIT-V50M-v RVGDEIRLL   | 7492  | >KIT-V50M-n RMGDEIRLL   | 42    | 7450  |
| >KIT-V50M-v RVGDEIRL    | 5168  | >KIT-V50M-n RMGDEIRL    | 45    | 5123  |
| >KIT-V50M-v RVGDEIRLL   | 8790  | >KIT-V50M-n RMGDEIRLL   | 105   | 8685  |
| >KIT-V50M-v RVGDEIRL    | 6312  | >KIT-V50M-n RMGDEIRL    | 98    | 6214  |
| >KIT-V50M-v RVGDEIRLL   | 10638 | >KIT-V50M-n RMGDEIRLL   | 218   | 10420 |
| >KIT-V50M-v RVGDEIRL    | 330   | >KIT-V50M-n RMGDEIRL    | 6     | 324   |
| >KIT-V50M-v RVGDEIRLL   | 865   | >KIT-V50M-n RMGDEIRLL   | 9     | 856   |
| >KIT-V50M-v RVGDEIRLLC  | 9339  | >KIT-V50M-n RMGDEIRLLC  | 125   | 9214  |
| >KIT-V50M-v HPGKSDLIVR' | 3014  | >KIT-V50M-n HPGKSDLIVR' | 295   | 2719  |
| >KIT-V50M-v HPGKSDLIVR' | 997   | >KIT-V50M-n HPGKSDLIVR' | 159   | 838   |
| >KIT-V50M-v HPGKSDLIVR' | 3509  | >KIT-V50M-n HPGKSDLIVR' | 67    | 3442  |
| >KIT-V50M-v HPGKSDLIVR' | 1520  | >KIT-V50M-n HPGKSDLIVR' | 297   | 1223  |
| >KIT-V50M-v VRVGDEIRL   | 1193  | >KIT-V50M-n VRMGDEIRL   | 178   | 1015  |
| >KIT-V50M-v VRVGDEIRLL  | 259   | >KIT-V50M-n VRMGDEIRLL  | 147   | 112   |
| >KIT-V50M-v VRVGDEIRL   | 1618  | >KIT-V50M-n VRMGDEIRL   | 406   | 1212  |
| >KIT-V50M-v VRVGDEIRLL  | 548   | >KIT-V50M-n VRMGDEIRLL  | 270   | 278   |
| >KIT-V50M-v IVRVGDEIRLL | 401   | >KIT-V50M-n IVRMGDEIRL  | 371   | 30    |
| >KIT-V50M-v IVRVGDEIR   | 468   | >KIT-V50M-n IVRMGDEIR   | 429   | 39    |
| >KIT-V50M-v IVRVGDEIR   | 648   | >KIT-V50M-n IVRMGDEIR   | 499   | 149   |
| >KIT-V50M-v IVRVGDEIRL  | 487   | >KIT-V50M-n IVRMGDEIRL  | 359   | 128   |
| >KIT-V50M-v IVRVGDEIRLL | 623   | >KIT-V50M-n IVRMGDEIRL  | 460   | 163   |
| >KIT-V50M-v LIVRVGDEI   | 462   | >KIT-V50M-n LIVRMGDEI   | 1247  | 785   |
| >KIT-V50M-v LIVRVGDEI   | 330   | >KIT-V50M-n LIVRMGDEI   | 2434  | 2104  |
| >KIT-V50M-v LIVRVGDEIRL | 225   | >KIT-V50M-n LIVRMGDEIR  | 126   | 99    |
| >KIT-V50M-v LIVRVGDEIR  | 182   | >KIT-V50M-n LIVRMGDEIR  | 308   | 126   |
| >KIT-V50M-v DLIVRVGDEIF | 112   | >KIT-V50M-n DLIVRMGDEI  | 80    | 32    |
| >KIT-V50M-v DLIVRVGDEIF | 201   | >KIT-V50M-n DLIVRMGDEI  | 225   | 24    |
| >KIT-V50M-v SDLIVRVGDE  | 86    | >KIT-V50M-n SDLIVRMGDE  | 90    | 4     |
| >KIT-V50M-v SDLIVRVGDE  | 350   | >KIT-V50M-n SDLIVRMGDE  | 261   | 89    |
| >KIT-V50M-v SDLIVRVGDE  | 110   | >KIT-V50M-n SDLIVRMGDE  | 83    | 27    |
| >KIT-V50M-v KSDLIVRV    | 790   | >KIT-V50M-n KSDLIVRM    | 21    | 769   |
| >KIT-V50M-v KSDLIVRV    | 8534  | >KIT-V50M-n KSDLIVRM    | 267   | 8267  |
| >KIT-V50M-v KSDLIVRV    | 2969  | >KIT-V50M-n KSDLIVRM    | 145   | 2824  |
| >KIT-V50M-v GKSDLIVRV   | 318   | >KIT-V50M-n GKSDLIVRM   | 20854 | 20536 |
| >KIT-V530I-v VIVAGMMCI  | 576   | >KIT-V530I-n IIVAGMMCI  | 341   | 235   |
| >KIT-V530I-v VIVAGMMCI  | 808   | >KIT-V530I-n IIVAGMMCI  | 426   | 382   |
| >KIT-V530I-v VIVAGMMCI  | 284   | >KIT-V530I-n IIVAGMMCI  | 204   | 80    |
| >KIT-V530I-v VIVAGMMCI  | 695   | >KIT-V530I-n IIVAGMMCI  | 295   | 400   |
| >KIT-V530I-v VIVAGMMCI  | 82    | >KIT-V530I-n IIVAGMMCI  | 63    | 19    |

|                           |      |                           |      |      |
|---------------------------|------|---------------------------|------|------|
| >KIT-V530I-va VIVAGMMCI   | 160  | >KIT-V530I-ri IIVAGMMCI   | 120  | 40   |
| >KIT-V530I-va VIVAGMMCI   | 42   | >KIT-V530I-ri IIVAGMMCI\  | 36   | 6    |
| >KIT-V530I-va VIVAGMMCI   | 307  | >KIT-V530I-ri IIVAGMMCI\  | 359  | 52   |
| >KIT-V530I-va VIVAGMMCI   | 202  | >KIT-V530I-ri IIVAGMMCI\  | 395  | 193  |
| >KIT-V530I-va VIVAGMMCI   | 442  | >KIT-V530I-ri IIVAGMMCI   | 615  | 173  |
| >KIT-V530I-va VIVAGMMCI   | 12   | >KIT-V530I-ri IIVAGMMCI\  | 15   | 3    |
| >KIT-V530I-va FVIVAGMMC   | 627  | >KIT-V530I-ri FIIVAGMMCI  | 254  | 373  |
| >KIT-V530I-va FVIVAGMMC   | 550  | >KIT-V530I-ri FIIVAGMMCI  | 285  | 265  |
| >KIT-V530I-va FVIVAGMMC   | 202  | >KIT-V530I-ri FIIVAGMMCI  | 134  | 68   |
| >KIT-V530I-va FVIVAGMMC   | 411  | >KIT-V530I-ri FIIVAGMMCI  | 172  | 239  |
| >KIT-V530I-va FVIVAGMMC   | 150  | >KIT-V530I-ri FIIVAGMMCI  | 95   | 55   |
| >KIT-V530I-va FVIVAGMMC   | 97   | >KIT-V530I-ri FIIVAGMMCI  | 41   | 56   |
| >KIT-V530I-va FVIVAGMM    | 202  | >KIT-V530I-ri FIIVAGMM    | 251  | 49   |
| >KIT-V530I-va FVIVAGMMC   | 67   | >KIT-V530I-ri FIIVAGMMCI  | 67   | 0    |
| >KIT-V530I-va FVIVAGMMC   | 22   | >KIT-V530I-ri FIIVAGMMCI  | 27   | 5    |
| >KIT-V530I-va FVIVAGMMC   | 1071 | >KIT-V530I-ri FIIVAGMMCI  | 357  | 714  |
| >KIT-V530I-va FVIVAGMMC   | 1292 | >KIT-V530I-ri FIIVAGMMCI  | 370  | 922  |
| >KIT-V530I-va FVIVAGMMC   | 580  | >KIT-V530I-ri FIIVAGMMCI  | 184  | 396  |
| >KIT-V530I-va FVIVAGMM    | 79   | >KIT-V530I-ri FIIVAGMM    | 203  | 124  |
| >KIT-V530I-va FVIVAGMM    | 87   | >KIT-V530I-ri FIIVAGMM    | 360  | 273  |
| >KIT-V530I-va FVIVAGMMC   | 211  | >KIT-V530I-ri FIIVAGMMCI  | 447  | 236  |
| >KIT-V530I-va FVIVAGMMC   | 103  | >KIT-V530I-ri FIIVAGMMCI  | 454  | 351  |
| >KIT-V530I-va FVIVAGMM    | 238  | >KIT-V530I-ri FIIVAGMM    | 483  | 245  |
| >KIT-V530I-va FVIVAGMMC   | 255  | >KIT-V530I-ri FIIVAGMMCI  | 501  | 246  |
| >KIT-V530I-va FVIVAGMMC   | 365  | >KIT-V530I-ri FIIVAGMMCI  | 671  | 306  |
| >KIT-V530I-va FVIVAGMM    | 314  | >KIT-V530I-ri FIIVAGMM    | 1301 | 987  |
| >KIT-V530I-va FVIVAGMM    | 418  | >KIT-V530I-ri FIIVAGMM    | 5377 | 4959 |
| >KIT-V530I-va TLFTPLLIGFV | 15   | >KIT-V530I-ri TLFTPLLIGFI | 49   | 34   |
| >KIT-V530I-va TLFTPLLIGFV | 15   | >KIT-V530I-ri TLFTPLLIGFI | 76   | 61   |
| >KIT-V530I-va TLFTPLLIGFV | 9    | >KIT-V530I-ri TLFTPLLIGFI | 26   | 17   |
| >KIT-V530I-va TLFTPLLIGFV | 44   | >KIT-V530I-ri TLFTPLLIGFI | 374  | 330  |
| >KIT-V530I-va TLFTPLLIGFV | 3    | >KIT-V530I-ri TLFTPLLIGFI | 10   | 7    |
| >KIT-V530I-va TLFTPLLIGFV | 12   | >KIT-V530I-ri TLFTPLLIGFI | 153  | 141  |
| >KIT-V530I-va TLFTPLLIGFV | 8    | >KIT-V530I-ri TLFTPLLIGFI | 65   | 57   |
| >KIT-V530I-va TLFTPLLIGFV | 20   | >KIT-V530I-ri TLFTPLLIGFI | 1282 | 1262 |
| >KIT-V530I-va TLFTPLLIGFV | 4    | >KIT-V530I-ri TLFTPLLIGFI | 64   | 60   |
| >KIT-V530I-va TLFTPLLIGFV | 23   | >KIT-V530I-ri TLFTPLLIGFI | 62   | 39   |
| >KIT-V530I-va TLFTPLLIGFV | 52   | >KIT-V530I-ri TLFTPLLIGFI | 426  | 374  |
| >KIT-V530I-va GFVIVAGMM   | 185  | >KIT-V530I-ri GFIIIVAGMM  | 296  | 111  |
| >KIT-V530I-va IGFVIVAGM   | 161  | >KIT-V530I-ri IGFIIVAGM   | 246  | 85   |
| >KIT-V530I-va IGFVIVAGM   | 247  | >KIT-V530I-ri IGFIIVAGM   | 105  | 142  |
| >KIT-V530I-va IGFVIVAGM   | 232  | >KIT-V530I-ri IGFIIVAGM   | 304  | 72   |
| >KIT-V530I-va IGFVIVAGMM  | 490  | >KIT-V530I-ri IGFIIVAGMM  | 336  | 154  |

|                               |     |                                    |     |     |
|-------------------------------|-----|------------------------------------|-----|-----|
| >KIT-V530I- $\nu$ LIGFVIVA    | 475 | >KIT-V530I- $\pi$ LIGFIIVA         | 756 | 281 |
| >KIT-V530I- $\nu$ LIGFVIVAGM  | 409 | >KIT-V530I- $\pi$ LIGFIIVAGM       | 738 | 329 |
| >KIT-V530I- $\nu$ LIGFVIVAGM  | 508 | >KIT-V530I- $\pi$ LIGFIIVAGM $\pi$ | 455 | 53  |
| >KIT-V530I- $\nu$ LLIGFVIV    | 15  | >KIT-V530I- $\pi$ LLIGFIIV         | 13  | 2   |
| >KIT-V530I- $\nu$ LLIGFVIVA   | 34  | >KIT-V530I- $\pi$ LLIGFIIVA        | 28  | 6   |
| >KIT-V530I- $\nu$ LLIGFVIVAG  | 496 | >KIT-V530I- $\pi$ LLIGFIIVAG       | 483 | 13  |
| >KIT-V530I- $\nu$ LLIGFVIVAGM | 43  | >KIT-V530I- $\pi$ LLIGFIIVAGM      | 39  | 4   |
| >KIT-V530I- $\nu$ LLIGFVIV    | 13  | >KIT-V530I- $\pi$ LLIGFIIV         | 19  | 6   |
| >KIT-V530I- $\nu$ LLIGFVIVA   | 51  | >KIT-V530I- $\pi$ LLIGFIIVA        | 47  | 4   |
| >KIT-V530I- $\nu$ LLIGFVIVAGM | 42  | >KIT-V530I- $\pi$ LLIGFIIVAGM      | 40  | 2   |
| >KIT-V530I- $\nu$ LLIGFVIV    | 7   | >KIT-V530I- $\pi$ LLIGFIIV         | 7   | 0   |
| >KIT-V530I- $\nu$ LLIGFVIVA   | 18  | >KIT-V530I- $\pi$ LLIGFIIVA        | 23  | 5   |
| >KIT-V530I- $\nu$ LLIGFVIVAGM | 30  | >KIT-V530I- $\pi$ LLIGFIIVAGM      | 33  | 3   |
| >KIT-V530I- $\nu$ LLIGFVIV    | 10  | >KIT-V530I- $\pi$ LLIGFIIV         | 9   | 1   |
| >KIT-V530I- $\nu$ LLIGFVIVA   | 188 | >KIT-V530I- $\pi$ LLIGFIIVA        | 94  | 94  |
| >KIT-V530I- $\nu$ LLIGFVIVAGM | 194 | >KIT-V530I- $\pi$ LLIGFIIVAGM      | 149 | 45  |
| >KIT-V530I- $\nu$ LLIGFVIV    | 3   | >KIT-V530I- $\pi$ LLIGFIIV         | 3   | 0   |
| >KIT-V530I- $\nu$ LLIGFVIVA   | 5   | >KIT-V530I- $\pi$ LLIGFIIVA        | 5   | 0   |
| >KIT-V530I- $\nu$ LLIGFVIVAG  | 154 | >KIT-V530I- $\pi$ LLIGFIIVAG       | 180 | 26  |
| >KIT-V530I- $\nu$ LLIGFVIVAGM | 8   | >KIT-V530I- $\pi$ LLIGFIIVAGM      | 6   | 2   |
| >KIT-V530I- $\nu$ LLIGFVIV    | 4   | >KIT-V530I- $\pi$ LLIGFIIV         | 4   | 0   |
| >KIT-V530I- $\nu$ LLIGFVIVA   | 66  | >KIT-V530I- $\pi$ LLIGFIIVA        | 54  | 12  |
| >KIT-V530I- $\nu$ LLIGFVIVAGM | 65  | >KIT-V530I- $\pi$ LLIGFIIVAGM      | 63  | 2   |
| >KIT-V530I- $\nu$ LLIGFVIV    | 7   | >KIT-V530I- $\pi$ LLIGFIIV         | 7   | 0   |
| >KIT-V530I- $\nu$ LLIGFVIVA   | 60  | >KIT-V530I- $\pi$ LLIGFIIVA        | 59  | 1   |
| >KIT-V530I- $\nu$ LLIGFVIVAGM | 240 | >KIT-V530I- $\pi$ LLIGFIIVAGM      | 225 | 15  |
| >KIT-V530I- $\nu$ LLIGFVIV    | 11  | >KIT-V530I- $\pi$ LLIGFIIV         | 13  | 2   |
| >KIT-V530I- $\nu$ LLIGFVIVA   | 463 | >KIT-V530I- $\pi$ LLIGFIIVA        | 587 | 124 |
| >KIT-V530I- $\nu$ LLIGFVIVAGM | 46  | >KIT-V530I- $\pi$ LLIGFIIVAGM      | 62  | 16  |
| >KIT-V530I- $\nu$ LLIGFVIV    | 2   | >KIT-V530I- $\pi$ LLIGFIIV         | 2   | 0   |
| >KIT-V530I- $\nu$ LLIGFVIVA   | 4   | >KIT-V530I- $\pi$ LLIGFIIVA        | 3   | 1   |
| >KIT-V530I- $\nu$ LLIGFVIVAG  | 804 | >KIT-V530I- $\pi$ LLIGFIIVAG       | 487 | 317 |
| >KIT-V530I- $\nu$ LLIGFVIVAGM | 7   | >KIT-V530I- $\pi$ LLIGFIIVAGM      | 5   | 2   |
| >KIT-V530I- $\nu$ LLIGFVIVAGM | 112 | >KIT-V530I- $\pi$ LLIGFIIVAGM      | 130 | 18  |
| >KIT-V530I- $\nu$ LLIGFVIVAGM | 438 | >KIT-V530I- $\pi$ LLIGFIIVAGM      | 634 | 196 |
| >KIT-V530I- $\nu$ LLIGFVIVAGM | 96  | >KIT-V530I- $\pi$ LLIGFIIVAGM      | 112 | 16  |
| >KIT-V530I- $\nu$ PLLIGFVIV   | 290 | >KIT-V530I- $\pi$ PLLIGFIIV        | 326 | 36  |
| >KIT-V530I- $\nu$ PLLIGFVI    | 53  | >KIT-V530I- $\pi$ PLLIGFII         | 138 | 85  |
| >KIT-V530I- $\nu$ PLLIGFVIV   | 25  | >KIT-V530I- $\pi$ PLLIGFIIV        | 23  | 2   |
| >KIT-V530I- $\nu$ PLLIGFVIVA  | 186 | >KIT-V530I- $\pi$ PLLIGFIIVA       | 154 | 32  |
| >KIT-V530I- $\nu$ PLLIGFVIV   | 292 | >KIT-V530I- $\pi$ PLLIGFIIV        | 324 | 32  |
| >KIT-V530I- $\nu$ PLLIGFVI    | 83  | >KIT-V530I- $\pi$ PLLIGFII         | 99  | 16  |
| >KIT-V530I- $\nu$ PLLIGFVIV   | 14  | >KIT-V530I- $\pi$ PLLIGFIIV        | 14  | 0   |

|                                  |     |                               |       |       |
|----------------------------------|-----|-------------------------------|-------|-------|
| >KIT-V530I- $\omega$ PLLIGFVIVA  | 217 | >KIT-V530I- $\pi$ PLLIGFIIVA  | 212   | 5     |
| >KIT-V530I- $\omega$ PLLIGFVI    | 234 | >KIT-V530I- $\pi$ PLLIGFII    | 389   | 155   |
| >KIT-V530I- $\omega$ PLLIGFVIV   | 50  | >KIT-V530I- $\pi$ PLLIGFIIV   | 64    | 14    |
| >KIT-V530I- $\omega$ PLLIGFVI    | 155 | >KIT-V530I- $\pi$ PLLIGFII    | 219   | 64    |
| >KIT-V530I- $\omega$ PLLIGFVIV   | 10  | >KIT-V530I- $\pi$ PLLIGFIIV   | 11    | 1     |
| >KIT-V530I- $\omega$ PLLIGFVIVA  | 145 | >KIT-V530I- $\pi$ PLLIGFIIVA  | 122   | 23    |
| >KIT-V530I- $\omega$ TPLLIGFV    | 389 | >KIT-V530I- $\pi$ TPLLIGFI    | 109   | 280   |
| >KIT-V530I- $\omega$ TPLLIGFV    | 436 | >KIT-V530I- $\pi$ TPLLIGFI    | 177   | 259   |
| >KIT-V530I- $\omega$ TPLLIGFV    | 127 | >KIT-V530I- $\pi$ TPLLIGFI    | 522   | 395   |
| >KIT-V530I- $\omega$ TPLLIGFVIV  | 384 | >KIT-V530I- $\pi$ TPLLIGFIIV  | 325   | 59    |
| >KIT-V530I- $\omega$ TPLLIGFVIV  | 82  | >KIT-V530I- $\pi$ TPLLIGFIIV  | 93    | 11    |
| >KIT-V530I- $\omega$ TPLLIGFVI   | 343 | >KIT-V530I- $\pi$ TPLLIGFII   | 201   | 142   |
| >KIT-V530I- $\omega$ TPLLIGFVI   | 115 | >KIT-V530I- $\pi$ TPLLIGFII   | 102   | 13    |
| >KIT-V530I- $\omega$ TPLLIGFV    | 459 | >KIT-V530I- $\pi$ TPLLIGFI    | 2125  | 1666  |
| >KIT-V530I- $\omega$ TPLLIGFVI   | 121 | >KIT-V530I- $\pi$ TPLLIGFII   | 119   | 2     |
| >KIT-V530I- $\omega$ TPLLIGFVIV  | 45  | >KIT-V530I- $\pi$ TPLLIGFIIV  | 47    | 2     |
| >KIT-V530I- $\omega$ TPLLIGFVIVA | 19  | >KIT-V530I- $\pi$ TPLLIGFIIVA | 17    | 2     |
| >KIT-V530I- $\omega$ TPLLIGFV    | 473 | >KIT-V530I- $\pi$ TPLLIGFI    | 49    | 424   |
| >KIT-V530I- $\omega$ FTPLLIGFV   | 408 | >KIT-V530I- $\pi$ FTPLLIGFI   | 31    | 377   |
| >KIT-V530I- $\omega$ FTPLLIGFV   | 452 | >KIT-V530I- $\pi$ FTPLLIGFI   | 2494  | 2042  |
| >KIT-V530I- $\omega$ FTPLLIGFV   | 78  | >KIT-V530I- $\pi$ FTPLLIGFI   | 218   | 140   |
| >KIT-V530I- $\omega$ FTPLLIGFVI  | 381 | >KIT-V530I- $\pi$ FTPLLIGFII  | 440   | 59    |
| >KIT-V530I- $\omega$ FTPLLIGFVIV | 346 | >KIT-V530I- $\pi$ FTPLLIGFIIV | 520   | 174   |
| >KIT-V530I- $\omega$ FTPLLIGFV   | 40  | >KIT-V530I- $\pi$ FTPLLIGFI   | 194   | 154   |
| >KIT-V530I- $\omega$ FTPLLIGFVIV | 141 | >KIT-V530I- $\pi$ FTPLLIGFIIV | 177   | 36    |
| >KIT-V530I- $\omega$ FTPLLIGFV   | 12  | >KIT-V530I- $\pi$ FTPLLIGFI   | 102   | 90    |
| >KIT-V530I- $\omega$ FTPLLIGFVI  | 147 | >KIT-V530I- $\pi$ FTPLLIGFII  | 148   | 1     |
| >KIT-V530I- $\omega$ FTPLLIGFVIV | 22  | >KIT-V530I- $\pi$ FTPLLIGFIIV | 23    | 1     |
| >KIT-V530I- $\omega$ FTPLLIGFV   | 28  | >KIT-V530I- $\pi$ FTPLLIGFI   | 426   | 398   |
| >KIT-V530I- $\omega$ FTPLLIGFVIV | 178 | >KIT-V530I- $\pi$ FTPLLIGFIIV | 157   | 21    |
| >KIT-V530I- $\omega$ FTPLLIGFV   | 68  | >KIT-V530I- $\pi$ FTPLLIGFI   | 2665  | 2597  |
| >KIT-V530I- $\omega$ FTPLLIGFVIV | 192 | >KIT-V530I- $\pi$ FTPLLIGFIIV | 176   | 16    |
| >KIT-V530I- $\omega$ FTPLLIGFV   | 307 | >KIT-V530I- $\pi$ FTPLLIGFI   | 13048 | 12741 |
| >KIT-V530I- $\omega$ FTPLLIGFVIV | 158 | >KIT-V530I- $\pi$ FTPLLIGFIIV | 203   | 45    |
| >KIT-V530I- $\omega$ FTPLLIGFV   | 5   | >KIT-V530I- $\pi$ FTPLLIGFI   | 8     | 3     |
| >KIT-V530I- $\omega$ FTPLLIGFVI  | 98  | >KIT-V530I- $\pi$ FTPLLIGFII  | 126   | 28    |
| >KIT-V530I- $\omega$ FTPLLIGFVIV | 13  | >KIT-V530I- $\pi$ FTPLLIGFIIV | 20    | 7     |
| >KIT-V530I- $\omega$ FTPLLIGFV   | 136 | >KIT-V530I- $\pi$ FTPLLIGFI   | 1119  | 983   |
| >KIT-V530I- $\omega$ FTPLLIGFVIV | 504 | >KIT-V530I- $\pi$ FTPLLIGFIIV | 386   | 118   |
| >KIT-V530I- $\omega$ FTPLLIGFV   | 3   | >KIT-V530I- $\pi$ FTPLLIGFI   | 2     | 1     |
| >KIT-V530I- $\omega$ FTPLLIGFVI  | 3   | >KIT-V530I- $\pi$ FTPLLIGFII  | 2     | 1     |
| >KIT-V530I- $\omega$ FTPLLIGFVIV | 3   | >KIT-V530I- $\pi$ FTPLLIGFIIV | 3     | 0     |
| >KIT-V530I- $\omega$ FTPLLIGFVI  | 238 | >KIT-V530I- $\pi$ FTPLLIGFII  | 175   | 63    |

|                          |       |                          |       |       |
|--------------------------|-------|--------------------------|-------|-------|
| >KIT-V530I-w FTPLLIGFV   | 3882  | >KIT-V530I-r FTPLLIGFI   | 59    | 3823  |
| >KIT-V530I-w FTPLLIGFVI  | 61    | >KIT-V530I-r FTPLLIGFII  | 69    | 8     |
| >KIT-V530I-w LFTPLLIGFV  | 296   | >KIT-V530I-r LFTPLLIGFI  | 11703 | 11407 |
| >KIT-V530I-w LFTPLLIGFV  | 1779  | >KIT-V530I-r LFTPLLIGFI  | 44    | 1735  |
| >KIT-V530I-w LFTPLLIGFVI | 49    | >KIT-V530I-r LFTPLLIGFII | 114   | 65    |
| >KIT-V530I-w LFTPLLIGFV  | 453   | >KIT-V530I-r LFTPLLIGFI  | 927   | 474   |
| >KIT-V555E-v VQWKVVEEI   | 154   | >KIT-V555E-r EQWKVVEEI   | 122   | 32    |
| >KIT-V555E-v VQWKVVEEI   | 91    | >KIT-V555E-r EQWKVVEEI   | 2195  | 2104  |
| >KIT-V555E-v VQWKVVEEI   | 43    | >KIT-V555E-r EQWKVVEEI   | 405   | 362   |
| >KIT-V555E-v VQWKVVEEI   | 17    | >KIT-V555E-r EQWKVVEEI   | 181   | 164   |
| >KIT-V555E-v VQWKVVEEI   | 75    | >KIT-V555E-r EQWKVVEEI   | 943   | 868   |
| >KIT-V555E-v VQWKVVEEI   | 468   | >KIT-V555E-r EQWKVVEEI   | 920   | 452   |
| >KIT-V555E-v VQWKVVEEI   | 57    | >KIT-V555E-r EQWKVVEEI   | 299   | 242   |
| >KIT-V555E-v EVQWKVVEE   | 8145  | >KIT-V555E-r EEQWKVVEE   | 49    | 8096  |
| >KIT-V555E-v EVQWKVVEE   | 147   | >KIT-V555E-r EEQWKVVEE   | 14532 | 14385 |
| >KIT-V555E-v EVQWKVVEE   | 32205 | >KIT-V555E-r EEQWKVVEE   | 153   | 32052 |
| >KIT-V555E-v EVQWKVVEE   | 21804 | >KIT-V555E-r EEQWKVVEE   | 156   | 21648 |
| >KIT-V555E-v EVQWKVVEE   | 31478 | >KIT-V555E-r EEQWKVVEE   | 485   | 30993 |
| >KIT-V555E-v EVQWKVVEE   | 24124 | >KIT-V555E-r EEQWKVVEE   | 116   | 24008 |
| >KIT-V555E-v YKYLQKPMYE  | 499   | >KIT-V555E-r YKYLQKPMYE  | 26725 | 26226 |
| >KIT-V555E-v YKYLQKPMYE  | 447   | >KIT-V555E-r YKYLQKPMYE  | 26147 | 25700 |
| >KIT-V555E-v YKYLQKPMYE  | 121   | >KIT-V555E-r YKYLQKPMYE  | 25526 | 25405 |
| >KIT-V555E-v YKYLQKPMYE  | 356   | >KIT-V555E-r YKYLQKPMYE  | 25286 | 24930 |
| >KIT-V555E-v YKYLQKPMYE  | 365   | >KIT-V555E-r YKYLQKPMYE  | 35651 | 35286 |
| >KIT-V555E-v YKYLQKPMYE  | 39    | >KIT-V555E-r YKYLQKPMYE  | 2658  | 2619  |
| >KIT-V555E-v YEVQWKVV    | 10    | >KIT-V555E-r YEEQWKVV    | 16    | 6     |
| >KIT-V555E-v YEVQWKVVE   | 11    | >KIT-V555E-r YEEQWKVVE   | 9     | 2     |
| >KIT-V555E-v YEVQWKVV    | 373   | >KIT-V555E-r YEEQWKVV    | 1693  | 1320  |
| >KIT-V555E-v YEVQWKVVE   | 343   | >KIT-V555E-r YEEQWKVVE   | 1557  | 1214  |
| >KIT-V555E-v YEVQWKVV    | 307   | >KIT-V555E-r YEEQWKVV    | 383   | 76    |
| >KIT-V555E-v YEVQWKVVE   | 59    | >KIT-V555E-r YEEQWKVVE   | 62    | 3     |
| >KIT-V555E-v YEVQWKVV    | 169   | >KIT-V555E-r YEEQWKVV    | 768   | 599   |
| >KIT-V555E-v YEVQWKVVE   | 176   | >KIT-V555E-r YEEQWKVVE   | 1124  | 948   |
| >KIT-V555E-v YEVQWKVVE   | 3     | >KIT-V555E-r YEEQWKVVE   | 6     | 3     |
| >KIT-V555E-v MYEVQWKV    | 652   | >KIT-V555E-r MYEEQWKV    | 142   | 510   |
| >KIT-V555E-v MYEVQWKV    | 246   | >KIT-V555E-r MYEEQWKV    | 212   | 34    |
| >KIT-V555E-v MYEVQWKV    | 488   | >KIT-V555E-r MYEEQWKV    | 506   | 18    |
| >KIT-V555E-v PMYEVQWK\   | 17    | >KIT-V555E-r PMYEEQWK\   | 39    | 22    |
| >KIT-V555E-v PMYEVQWK\   | 18    | >KIT-V555E-r PMYEEQWK\   | 33    | 15    |
| >KIT-V555E-v PMYEVQWK\   | 48    | >KIT-V555E-r PMYEEQWK\   | 112   | 64    |
| >KIT-V555E-v PMYEVQWK\   | 33    | >KIT-V555E-r PMYEEQWK\   | 106   | 73    |
| >KIT-V555E-v PMYEVQWK\   | 1     | >KIT-V555E-r PMYEEQWK\   | 2     | 1     |
| >KIT-V555E-v PMYEVQWK\   | 4     | >KIT-V555E-r PMYEEQWK\   | 3     | 1     |



|                         |     |                         |       |       |
|-------------------------|-----|-------------------------|-------|-------|
| >KIT-V555E-v PMYEVQWK\  | 5   | >KIT-V555E-r PMYEEQWK\  | 8     | 3     |
| >KIT-V555E-v PMYEVQWK\  | 97  | >KIT-V555E-r PMYEEQWK\  | 97    | 0     |
| >KIT-V555E-v PMYEVQWK\  | 4   | >KIT-V555E-r PMYEEQWK\  | 4     | 0     |
| >KIT-V555E-v PMYEVQWK\  | 11  | >KIT-V555E-r PMYEEQWK\  | 11    | 0     |
| >KIT-V555E-v PMYEVQWK\  | 3   | >KIT-V555E-r PMYEEQWK\  | 3     | 0     |
| >KIT-V555E-v PMYEVQWK\  | 54  | >KIT-V555E-r PMYEEQWK\  | 49    | 5     |
| >KIT-V555E-v PMYEVQWK\  | 2   | >KIT-V555E-r PMYEEQWK\  | 2     | 0     |
| >KIT-V555E-v PMYEVQWK\  | 10  | >KIT-V555E-r PMYEEQWK\  | 10    | 0     |
| >KIT-V555E-v PMYEVQWK   | 129 | >KIT-V555E-r PMYEEQWK   | 616   | 487   |
| >KIT-V555E-v PMYEVQWK\  | 145 | >KIT-V555E-r PMYEEQWK\  | 464   | 319   |
| >KIT-V555E-v KPMYEVQWf  | 157 | >KIT-V555E-r KPMYEEQWf  | 684   | 527   |
| >KIT-V555E-v KPMYEVQWf  | 136 | >KIT-V555E-r KPMYEEQWf  | 203   | 67    |
| >KIT-V555E-v KPMYEVQW   | 20  | >KIT-V555E-r KPMYEEQW   | 23    | 3     |
| >KIT-V555E-v KPMYEVQWf  | 68  | >KIT-V555E-r KPMYEEQWf  | 248   | 180   |
| >KIT-V555E-v KPMYEVQW   | 536 | >KIT-V555E-r KPMYEEQW   | 396   | 140   |
| >KIT-V555E-v KPMYEVQW   | 199 | >KIT-V555E-r KPMYEEQW   | 213   | 14    |
| >KIT-V555E-v KPMYEVQW   | 9   | >KIT-V555E-r KPMYEEQW   | 18    | 9     |
| >KIT-V555E-v LQKPMYEV   | 327 | >KIT-V555E-r LQKPMYEE   | 25732 | 25405 |
| >KIT-V555E-v LQKPMYEV   | 48  | >KIT-V555E-r LQKPMYEE   | 19501 | 19453 |
| >KIT-V555E-v LQKPMYEV   | 34  | >KIT-V555E-r LQKPMYEE   | 19431 | 19397 |
| >KIT-V555E-v LQKPMYEV   | 318 | >KIT-V555E-r LQKPMYEE   | 35345 | 35027 |
| >KIT-V555E-v LQKPMYEVQ  | 243 | >KIT-V555E-r LQKPMYEEQ' | 494   | 251   |
| >KIT-V555E-v LQKPMYEVQ  | 415 | >KIT-V555E-r LQKPMYEEQ' | 632   | 217   |
| >KIT-V555E-v LQKPMYEV   | 403 | >KIT-V555E-r LQKPMYEE   | 4255  | 3852  |
| >KIT-V555E-v LQKPMYEVQ  | 230 | >KIT-V555E-r LQKPMYEEQ  | 913   | 683   |
| >KIT-V555E-v LQKPMYEVQ  | 247 | >KIT-V555E-r LQKPMYEEQ' | 326   | 79    |
| >KIT-V555E-v LQKPMYEV   | 155 | >KIT-V555E-r LQKPMYEE   | 6732  | 6577  |
| >KIT-V555E-v LQKPMYEVQ  | 225 | >KIT-V555E-r LQKPMYEEQ' | 602   | 377   |
| >KIT-V555E-v LQKPMYEVQ  | 168 | >KIT-V555E-r LQKPMYEEQ' | 278   | 110   |
| >KIT-V555E-v LQKPMYEVQ  | 230 | >KIT-V555E-r LQKPMYEEQ' | 69    | 161   |
| >KIT-V555E-v YLQKPMYEV  | 7   | >KIT-V555E-r YLQKPMYEE  | 9219  | 9212  |
| >KIT-V555E-v YLQKPMYEV  | 5   | >KIT-V555E-r YLQKPMYEE  | 4430  | 4425  |
| >KIT-V555E-v YLQKPMYEV  | 7   | >KIT-V555E-r YLQKPMYEE  | 14534 | 14527 |
| >KIT-V555E-v YLQKPMYEV  | 13  | >KIT-V555E-r YLQKPMYEE  | 15135 | 15122 |
| >KIT-V555E-v YLQKPMYEV  | 1   | >KIT-V555E-r YLQKPMYEE  | 2730  | 2729  |
| >KIT-V555E-v YLQKPMYEV  | 2   | >KIT-V555E-r YLQKPMYEE  | 3504  | 3502  |
| >KIT-V555E-v YLQKPMYEV  | 6   | >KIT-V555E-r YLQKPMYEE  | 13780 | 13774 |
| >KIT-V555E-v YLQKPMYEV  | 3   | >KIT-V555E-r YLQKPMYEE  | 21107 | 21104 |
| >KIT-V555E-v YLQKPMYEV  | 2   | >KIT-V555E-r YLQKPMYEE  | 2627  | 2625  |
| >KIT-V555E-v YLQKPMYEV( | 77  | >KIT-V555E-r YLQKPMYEE( | 28    | 49    |
| >KIT-V555E-v YLQKPMYEV  | 93  | >KIT-V555E-r YLQKPMYEE  | 19876 | 19783 |
| >KIT-V555E-v YLQKPMYEV  | 55  | >KIT-V555E-r YLQKPMYEE  | 18618 | 18563 |
| >KIT-V555E-v YLQKPMYEV( | 124 | >KIT-V555E-r YLQKPMYEE( | 250   | 126   |

|                          |      |                         |       |       |
|--------------------------|------|-------------------------|-------|-------|
| >KIT-V555E-v YLQKPMYEV   | 721  | >KIT-V555E-r YLQKPMYEEC | 448   | 273   |
| >KIT-V555E-v KYLQKPMYEV  | 100  | >KIT-V555E-r KYLQKPMYEE | 27501 | 27401 |
| >KIT-V555E-v KYLQKPMYEV  | 307  | >KIT-V555E-r KYLQKPMYEE | 25470 | 25163 |
| >KIT-V555E-v KYLQKPMYEV  | 28   | >KIT-V555E-r KYLQKPMYEE | 553   | 525   |
| >KIT-V555E-v KYLQKPMYEV  | 360  | >KIT-V555E-r KYLQKPMYEE | 207   | 153   |
| >KIT-V555E-v KYLQKPMYEV  | 471  | >KIT-V555E-r KYLQKPMYEE | 6921  | 6450  |
| >KIT-V555E-v KYLQKPMYEV  | 121  | >KIT-V555E-r KYLQKPMYEE | 270   | 149   |
| >KIT-V555E-v KYLQKPMYEV  | 56   | >KIT-V555E-r KYLQKPMYEE | 3531  | 3475  |
| >KIT-V555E-v KYLQKPMYEV  | 391  | >KIT-V555E-r KYLQKPMYEE | 402   | 11    |
| >KIT-V559A-v VVEEINGNNY  | 217  | >KIT-V559A-r AVEEINGNNY | 114   | 103   |
| >KIT-V559A-v VVEEINGNNY  | 87   | >KIT-V559A-r AVEEINGNNY | 79    | 8     |
| >KIT-V559A-v VVEEINGNNY  | 121  | >KIT-V559A-r AVEEINGNNY | 167   | 46    |
| >KIT-V559A-v VVEEINGNNY  | 35   | >KIT-V559A-r AVEEINGNNY | 33    | 2     |
| >KIT-V559A-v VVEEINGNNY  | 316  | >KIT-V559A-r AVEEINGNNY | 388   | 72    |
| >KIT-V559A-v VVEEINGNNY  | 167  | >KIT-V559A-r AVEEINGNNY | 178   | 11    |
| >KIT-V559A-v VVEEINGNNY  | 597  | >KIT-V559A-r AVEEINGNNY | 483   | 114   |
| >KIT-V559A-v VVEEINGNNY  | 178  | >KIT-V559A-r AVEEINGNNY | 528   | 350   |
| >KIT-V559A-v KVVVEEINGNN | 31   | >KIT-V559A-r KAVEEINGNN | 457   | 426   |
| >KIT-V559A-v KVVVEEINGNN | 61   | >KIT-V559A-r KAVEEINGNN | 647   | 586   |
| >KIT-V559A-v KVVVEEINGNN | 114  | >KIT-V559A-r KAVEEINGNN | 216   | 102   |
| >KIT-V559A-v KVVVEEINGNN | 114  | >KIT-V559A-r KAVEEINGNN | 2158  | 2044  |
| >KIT-V559A-v KVVVEEINGNN | 1057 | >KIT-V559A-r KAVEEINGNN | 215   | 842   |
| >KIT-V559A-v KVVVEEINGNN | 100  | >KIT-V559A-r KAVEEINGNN | 16    | 84    |
| >KIT-V559A-v QWKVVEEI    | 611  | >KIT-V559A-r QWKAVEEI   | 462   | 149   |
| >KIT-V559A-v VQWKVVEEI   | 154  | >KIT-V559A-r VQWKAVEEI  | 270   | 116   |
| >KIT-V559A-v VQWKVVEEI   | 91   | >KIT-V559A-r VQWKAVEEI  | 123   | 32    |
| >KIT-V559A-v VQWKVVEEI   | 43   | >KIT-V559A-r VQWKAVEEI  | 40    | 3     |
| >KIT-V559A-v VQWKVVEEI   | 17   | >KIT-V559A-r VQWKAVEEI  | 73    | 56    |
| >KIT-V559A-v VQWKVVEEI   | 75   | >KIT-V559A-r VQWKAVEEI  | 192   | 117   |
| >KIT-V559A-v VQWKVVEEI   | 468  | >KIT-V559A-r VQWKAVEEI  | 1888  | 1420  |
| >KIT-V559A-v VQWKVVEEI   | 57   | >KIT-V559A-r VQWKAVEEI  | 37    | 20    |
| >KIT-V559A-v EVQWKVVEE   | 147  | >KIT-V559A-r EVQWKAVEE  | 120   | 27    |
| >KIT-V559A-v YEVQWKVV    | 10   | >KIT-V559A-r YEVQWKAV   | 12    | 2     |
| >KIT-V559A-v YEVQWKVVE   | 11   | >KIT-V559A-r YEVQWKAVE  | 10    | 1     |
| >KIT-V559A-v YEVQWKVV    | 1283 | >KIT-V559A-r YEVQWKAV   | 378   | 905   |
| >KIT-V559A-v YEVQWKVV    | 373  | >KIT-V559A-r YEVQWKAV   | 143   | 230   |
| >KIT-V559A-v YEVQWKVVE   | 343  | >KIT-V559A-r YEVQWKAVE  | 286   | 57    |
| >KIT-V559A-v YEVQWKVV    | 307  | >KIT-V559A-r YEVQWKAV   | 216   | 91    |
| >KIT-V559A-v YEVQWKVVE   | 59   | >KIT-V559A-r YEVQWKAVE  | 78    | 19    |
| >KIT-V559A-v YEVQWKVV    | 169  | >KIT-V559A-r YEVQWKAV   | 172   | 3     |
| >KIT-V559A-v YEVQWKVVE   | 176  | >KIT-V559A-r YEVQWKAVE  | 240   | 64    |
| >KIT-V559A-v YEVQWKVV    | 749  | >KIT-V559A-r YEVQWKAV   | 450   | 299   |
| >KIT-V559A-v YEVQWKVVE   | 3    | >KIT-V559A-r YEVQWKAVE  | 3     | 0     |

|                          |      |                          |      |      |
|--------------------------|------|--------------------------|------|------|
| >KIT-V559A-1 MYEVQWKV    | 246  | >KIT-V559A-1 MYEVQWKA    | 1510 | 1264 |
| >KIT-V559A-1 MYEVQWKV    | 488  | >KIT-V559A-1 MYEVQWKA    | 547  | 59   |
| >KIT-V559A-1 PMYEVQWK\   | 17   | >KIT-V559A-1 PMYEVQWK/   | 128  | 111  |
| >KIT-V559A-1 PMYEVQWK\   | 18   | >KIT-V559A-1 PMYEVQWK/   | 178  | 160  |
| >KIT-V559A-1 PMYEVQWK\   | 48   | >KIT-V559A-1 PMYEVQWK/   | 436  | 388  |
| >KIT-V559A-1 PMYEVQWK\   | 805  | >KIT-V559A-1 PMYEVQWK/   | 381  | 424  |
| >KIT-V559A-1 PMYEVQWK\   | 33   | >KIT-V559A-1 PMYEVQWK/   | 411  | 378  |
| >KIT-V559A-1 PMYEVQWK\   | 1    | >KIT-V559A-1 PMYEVQWK/   | 3    | 2    |
| >KIT-V559A-1 PMYEVQWK\   | 4    | >KIT-V559A-1 PMYEVQWK/   | 3    | 1    |
| >KIT-V559A-1 PMYEVQWK\   | 5    | >KIT-V559A-1 PMYEVQWK/   | 49   | 44   |
| >KIT-V559A-1 PMYEVQWK\   | 97   | >KIT-V559A-1 PMYEVQWK/   | 60   | 37   |
| >KIT-V559A-1 PMYEVQWK\   | 4    | >KIT-V559A-1 PMYEVQWK/   | 7    | 3    |
| >KIT-V559A-1 PMYEVQWK\   | 11   | >KIT-V559A-1 PMYEVQWK/   | 11   | 0    |
| >KIT-V559A-1 PMYEVQWK\   | 3    | >KIT-V559A-1 PMYEVQWK/   | 40   | 37   |
| >KIT-V559A-1 PMYEVQWK\   | 54   | >KIT-V559A-1 PMYEVQWK/   | 49   | 5    |
| >KIT-V559A-1 PMYEVQWK\   | 2    | >KIT-V559A-1 PMYEVQWK/   | 9    | 7    |
| >KIT-V559A-1 PMYEVQWK\   | 10   | >KIT-V559A-1 PMYEVQWK/   | 9    | 1    |
| >KIT-V559A-1 PMYEVQWK\   | 145  | >KIT-V559A-1 PMYEVQWK/   | 3113 | 2968 |
| >KIT-V559A-1 KPMYEVQW\   | 157  | >KIT-V559A-1 KPMYEVQW/   | 1475 | 1318 |
| >KIT-V559A-1 KPMYEVQW\   | 136  | >KIT-V559A-1 KPMYEVQW/   | 54   | 82   |
| >KIT-V559A-1 KPMYEVQW\   | 68   | >KIT-V559A-1 KPMYEVQW/   | 30   | 38   |
| >KIT-V559D-1 VVEEINGNN\  | 217  | >KIT-V559D-1 DVEEINGNN\  | 4786 | 4569 |
| >KIT-V559D-1 VVEEINGNN\  | 87   | >KIT-V559D-1 DVEEINGNN\  | 5904 | 5817 |
| >KIT-V559D-1 VVEEINGNN\  | 121  | >KIT-V559D-1 DVEEINGNN\  | 5286 | 5165 |
| >KIT-V559D-1 VVEEINGNN\  | 35   | >KIT-V559D-1 DVEEINGNN\  | 3019 | 2984 |
| >KIT-V559D-1 VVEEINGNN\  | 1992 | >KIT-V559D-1 DVEEINGNN\  | 152  | 1840 |
| >KIT-V559D-1 VVEEINGNN\  | 316  | >KIT-V559D-1 DVEEINGNN\  | 1303 | 987  |
| >KIT-V559D-1 VVEEINGNN\  | 167  | >KIT-V559D-1 DVEEINGNN\  | 28   | 139  |
| >KIT-V559D-1 VVEEINGNN\  | 597  | >KIT-V559D-1 DVEEINGNN\  | 29   | 568  |
| >KIT-V559D-1 VVEEINGNN\  | 178  | >KIT-V559D-1 DVEEINGNN\  | 4299 | 4121 |
| >KIT-V559D-1 KVVEEINGNN\ | 31   | >KIT-V559D-1 KDVEEINGNN\ | 6828 | 6797 |
| >KIT-V559D-1 KVVEEINGNN\ | 61   | >KIT-V559D-1 KDVEEINGNN\ | 1666 | 1605 |
| >KIT-V559D-1 KVVEEINGNN\ | 114  | >KIT-V559D-1 KDVEEINGNN\ | 2753 | 2639 |
| >KIT-V559D-1 KVVEEINGNN\ | 114  | >KIT-V559D-1 KDVEEINGNN\ | 6728 | 6614 |
| >KIT-V559D-1 KVVEEINGNN\ | 100  | >KIT-V559D-1 KDVEEINGNN\ | 9951 | 9851 |
| >KIT-V559D-1 VQWKVVEEI   | 154  | >KIT-V559D-1 VQWKDVEEI   | 759  | 605  |
| >KIT-V559D-1 VQWKVVEEI   | 91   | >KIT-V559D-1 VQWKDVEEI   | 136  | 45   |
| >KIT-V559D-1 VQWKVVEEI   | 43   | >KIT-V559D-1 VQWKDVEEI   | 52   | 9    |
| >KIT-V559D-1 VQWKVVEEI   | 17   | >KIT-V559D-1 VQWKDVEEI   | 65   | 48   |
| >KIT-V559D-1 VQWKVVEEI   | 75   | >KIT-V559D-1 VQWKDVEEI   | 398  | 323  |
| >KIT-V559D-1 VQWKVVEEI   | 468  | >KIT-V559D-1 VQWKDVEEI   | 2101 | 1633 |
| >KIT-V559D-1 VQWKVVEEI   | 57   | >KIT-V559D-1 VQWKDVEEI   | 44   | 13   |
| >KIT-V559D-1 EVQWKVVEE   | 147  | >KIT-V559D-1 EVQWKDVEE   | 686  | 539  |

|                         |      |                         |       |       |
|-------------------------|------|-------------------------|-------|-------|
| >KIT-V559D-1 YEVQWKVV   | 10   | >KIT-V559D-i YEVQWKDV   | 30    | 20    |
| >KIT-V559D-1 YEVQWKVVE  | 11   | >KIT-V559D-i YEVQWKDVE  | 14    | 3     |
| >KIT-V559D-1 YEVQWKVV   | 373  | >KIT-V559D-i YEVQWKDV   | 1890  | 1517  |
| >KIT-V559D-1 YEVQWKVVE  | 343  | >KIT-V559D-i YEVQWKDVE  | 960   | 617   |
| >KIT-V559D-1 YEVQWKVV   | 307  | >KIT-V559D-i YEVQWKDV   | 857   | 550   |
| >KIT-V559D-1 YEVQWKVVE  | 59   | >KIT-V559D-i YEVQWKDVE  | 76    | 17    |
| >KIT-V559D-1 YEVQWKVV   | 169  | >KIT-V559D-i YEVQWKDV   | 517   | 348   |
| >KIT-V559D-1 YEVQWKVVE  | 176  | >KIT-V559D-i YEVQWKDVE  | 234   | 58    |
| >KIT-V559D-1 YEVQWKVVE  | 3    | >KIT-V559D-i YEVQWKDVE  | 4     | 1     |
| >KIT-V559D-1 MYEVQWKV   | 246  | >KIT-V559D-i MYEVQWKD   | 3153  | 2907  |
| >KIT-V559D-1 MYEVQWKV   | 488  | >KIT-V559D-i MYEVQWKD   | 2317  | 1829  |
| >KIT-V559D-1 PMYEVQWK\  | 17   | >KIT-V559D-i PMYEVQWKI  | 21069 | 21052 |
| >KIT-V559D-1 PMYEVQWK\  | 18   | >KIT-V559D-i PMYEVQWKI  | 14365 | 14347 |
| >KIT-V559D-1 PMYEVQWK\  | 48   | >KIT-V559D-i PMYEVQWKI  | 21410 | 21362 |
| >KIT-V559D-1 PMYEVQWK\  | 33   | >KIT-V559D-i PMYEVQWKI  | 25008 | 24975 |
| >KIT-V559D-1 PMYEVQWK\  | 1    | >KIT-V559D-i PMYEVQWKI  | 236   | 235   |
| >KIT-V559D-1 PMYEVQWK\  | 4    | >KIT-V559D-i PMYEVQWKI  | 7     | 3     |
| >KIT-V559D-1 PMYEVQWK\  | 5    | >KIT-V559D-i PMYEVQWKI  | 11331 | 11326 |
| >KIT-V559D-1 PMYEVQWK\  | 97   | >KIT-V559D-i PMYEVQWKI  | 223   | 126   |
| >KIT-V559D-1 PMYEVQWK\  | 4    | >KIT-V559D-i PMYEVQWKI  | 3052  | 3048  |
| >KIT-V559D-1 PMYEVQWK\  | 11   | >KIT-V559D-i PMYEVQWKI  | 13    | 2     |
| >KIT-V559D-1 PMYEVQWK\  | 3    | >KIT-V559D-i PMYEVQWKI  | 19045 | 19042 |
| >KIT-V559D-1 PMYEVQWK\  | 54   | >KIT-V559D-i PMYEVQWKI  | 173   | 119   |
| >KIT-V559D-1 PMYEVQWK\  | 2    | >KIT-V559D-i PMYEVQWKI  | 9276  | 9274  |
| >KIT-V559D-1 PMYEVQWK\  | 10   | >KIT-V559D-i PMYEVQWKI  | 11    | 1     |
| >KIT-V559D-1 PMYEVQWK\  | 145  | >KIT-V559D-i PMYEVQWKI  | 19052 | 18907 |
| >KIT-V559D-1 KPMYEVQW\  | 157  | >KIT-V559D-i KPMYEVQW\  | 8589  | 8432  |
| >KIT-V559D-1 KPMYEVQW\  | 136  | >KIT-V559D-i KPMYEVQW\  | 674   | 538   |
| >KIT-V559D-1 KPMYEVQW\  | 68   | >KIT-V559D-i KPMYEVQW\  | 2010  | 1942  |
| >KIT-V559F-v VVEEINGNNY | 547  | >KIT-V559F-r FVEEINGNNY | 392   | 155   |
| >KIT-V559F-v VVEEINGNNY | 1737 | >KIT-V559F-r FVEEINGNNY | 109   | 1628  |
| >KIT-V559F-v VVEEINGNNY | 217  | >KIT-V559F-r FVEEINGNNY | 10    | 207   |
| >KIT-V559F-v VVEEINGNNY | 1025 | >KIT-V559F-r FVEEINGNNY | 44    | 981   |
| >KIT-V559F-v VVEEINGNNY | 87   | >KIT-V559F-r FVEEINGNNY | 9     | 78    |
| >KIT-V559F-v VVEEINGNNY | 121  | >KIT-V559F-r FVEEINGNNY | 19    | 102   |
| >KIT-V559F-v VVEEINGNNY | 627  | >KIT-V559F-r FVEEINGNNY | 58    | 569   |
| >KIT-V559F-v VVEEINGNNY | 977  | >KIT-V559F-r FVEEINGNNY | 153   | 824   |
| >KIT-V559F-v VVEEINGNNY | 1150 | >KIT-V559F-r FVEEINGNNY | 291   | 859   |
| >KIT-V559F-v VVEEINGNNY | 35   | >KIT-V559F-r FVEEINGNNY | 7     | 28    |
| >KIT-V559F-v VVEEINGNNY | 888  | >KIT-V559F-r FVEEINGNNY | 480   | 408   |
| >KIT-V559F-v VVEEINGNNY | 316  | >KIT-V559F-r FVEEINGNNY | 818   | 502   |
| >KIT-V559F-v VVEEINGNNY | 167  | >KIT-V559F-r FVEEINGNNY | 12    | 155   |
| >KIT-V559F-v VVEEINGNNY | 597  | >KIT-V559F-r FVEEINGNNY | 16    | 581   |

|                         |      |                         |       |       |
|-------------------------|------|-------------------------|-------|-------|
| >KIT-V559F-v VVEEINGNNY | 178  | >KIT-V559F-r FVEEINGNNY | 391   | 213   |
| >KIT-V559F-v VVEEINGNNY | 1318 | >KIT-V559F-r FVEEINGNNY | 206   | 1112  |
| >KIT-V559F-v KVVEEINGNN | 31   | >KIT-V559F-r KFVEEINGNN | 1307  | 1276  |
| >KIT-V559F-v KVVEEINGNN | 61   | >KIT-V559F-r KFVEEINGNN | 775   | 714   |
| >KIT-V559F-v KVVEEINGNN | 617  | >KIT-V559F-r KFVEEINGNN | 208   | 409   |
| >KIT-V559F-v KVVEEINGNN | 114  | >KIT-V559F-r KFVEEINGNN | 332   | 218   |
| >KIT-V559F-v KVVEEINGNN | 114  | >KIT-V559F-r KFVEEINGNN | 642   | 528   |
| >KIT-V559F-v KVVEEINGNN | 100  | >KIT-V559F-r KFVEEINGNN | 12098 | 11998 |
| >KIT-V559F-v QKPMYEVQV  | 2477 | >KIT-V559F-r QKPMYEVQV  | 57    | 2420  |
| >KIT-V559F-v QWKVVEEI   | 577  | >KIT-V559F-r QWKVVEEI   | 450   | 127   |
| >KIT-V559F-v VQWKVVEEI  | 154  | >KIT-V559F-r VQWKVVEEI  | 215   | 61    |
| >KIT-V559F-v VQWKVVEEI  | 91   | >KIT-V559F-r VQWKVVEEI  | 54    | 37    |
| >KIT-V559F-v VQWKVVEEI  | 531  | >KIT-V559F-r VQWKVVEEI  | 253   | 278   |
| >KIT-V559F-v VQWKVVEEI  | 43   | >KIT-V559F-r VQWKVVEEI  | 42    | 1     |
| >KIT-V559F-v VQWKVVEEI  | 17   | >KIT-V559F-r VQWKVVEEI  | 23    | 6     |
| >KIT-V559F-v VQWKVVEEI  | 75   | >KIT-V559F-r VQWKVVEEI  | 255   | 180   |
| >KIT-V559F-v VQWKVVEEI  | 468  | >KIT-V559F-r VQWKVVEEI  | 265   | 203   |
| >KIT-V559F-v VQWKVVEEI  | 57   | >KIT-V559F-r VQWKVVEEI  | 25    | 32    |
| >KIT-V559F-v VQWKVVEEI  | 587  | >KIT-V559F-r VQWKVVEEI  | 466   | 121   |
| >KIT-V559F-v EVQWKVVEE  | 147  | >KIT-V559F-r EVQWKVVEE  | 72    | 75    |
| >KIT-V559F-v YEVQWKVV   | 10   | >KIT-V559F-r YEVQWKV    | 9     | 1     |
| >KIT-V559F-v YEVQWKVVE  | 11   | >KIT-V559F-r YEVQWKVVE  | 10    | 1     |
| >KIT-V559F-v YEVQWKVV   | 1283 | >KIT-V559F-r YEVQWKV    | 120   | 1163  |
| >KIT-V559F-v YEVQWKVV   | 1223 | >KIT-V559F-r YEVQWKV    | 365   | 858   |
| >KIT-V559F-v YEVQWKVV   | 373  | >KIT-V559F-r YEVQWKV    | 511   | 138   |
| >KIT-V559F-v YEVQWKVVE  | 343  | >KIT-V559F-r YEVQWKVVE  | 201   | 142   |
| >KIT-V559F-v YEVQWKVV   | 307  | >KIT-V559F-r YEVQWKV    | 363   | 56    |
| >KIT-V559F-v YEVQWKVVE  | 59   | >KIT-V559F-r YEVQWKVVE  | 56    | 3     |
| >KIT-V559F-v YEVQWKVV   | 169  | >KIT-V559F-r YEVQWKV    | 195   | 26    |
| >KIT-V559F-v YEVQWKVVE  | 176  | >KIT-V559F-r YEVQWKVVE  | 106   | 70    |
| >KIT-V559F-v YEVQWKVV   | 1440 | >KIT-V559F-r YEVQWKV    | 455   | 985   |
| >KIT-V559F-v YEVQWKVVE  | 1020 | >KIT-V559F-r YEVQWKVVE  | 489   | 531   |
| >KIT-V559F-v YEVQWKVVE  | 3    | >KIT-V559F-r YEVQWKVVE  | 3     | 0     |
| >KIT-V559F-v MYEVQWKV   | 3884 | >KIT-V559F-r MYEVQWKV   | 368   | 3516  |
| >KIT-V559F-v MYEVQWKV   | 1294 | >KIT-V559F-r MYEVQWKV   | 29    | 1265  |
| >KIT-V559F-v MYEVQWKV   | 2207 | >KIT-V559F-r MYEVQWKV   | 186   | 2021  |
| >KIT-V559F-v MYEVQWKV   | 246  | >KIT-V559F-r MYEVQWKV   | 13    | 233   |
| >KIT-V559F-v MYEVQWKV   | 488  | >KIT-V559F-r MYEVQWKV   | 886   | 398   |
| >KIT-V559F-v MYEVQWKV   | 1362 | >KIT-V559F-r MYEVQWKV   | 230   | 1132  |
| >KIT-V559F-v PMYEVQWK   | 17   | >KIT-V559F-r PMYEVQWK   | 9111  | 9094  |
| >KIT-V559F-v PMYEVQWK   | 18   | >KIT-V559F-r PMYEVQWK   | 2570  | 2552  |
| >KIT-V559F-v PMYEVQWK   | 48   | >KIT-V559F-r PMYEVQWK   | 11868 | 11820 |
| >KIT-V559F-v PMYEVQWK   | 805  | >KIT-V559F-r PMYEVQWK   | 430   | 375   |

|                           |       |                          |       |       |
|---------------------------|-------|--------------------------|-------|-------|
| >KIT-V559F-v PMYEVQWK\    | 33    | >KIT-V559F-r PMYEVQWKf   | 2615  | 2582  |
| >KIT-V559F-v PMYEVQWK\    | 1     | >KIT-V559F-r PMYEVQWKf   | 15    | 14    |
| >KIT-V559F-v PMYEVQWK\    | 4     | >KIT-V559F-r PMYEVQWKf   | 2     | 2     |
| >KIT-V559F-v PMYEVQWK\    | 5     | >KIT-V559F-r PMYEVQWKf   | 3166  | 3161  |
| >KIT-V559F-v PMYEVQWK\    | 97    | >KIT-V559F-r PMYEVQWKf   | 55    | 42    |
| >KIT-V559F-v PMYEVQWK\    | 4     | >KIT-V559F-r PMYEVQWKf   | 533   | 529   |
| >KIT-V559F-v PMYEVQWK\    | 11    | >KIT-V559F-r PMYEVQWKf   | 7     | 4     |
| >KIT-V559F-v PMYEVQWK\    | 3     | >KIT-V559F-r PMYEVQWKf   | 6034  | 6031  |
| >KIT-V559F-v PMYEVQWK\    | 54    | >KIT-V559F-r PMYEVQWKf   | 16    | 38    |
| >KIT-V559F-v PMYEVQWK\    | 2     | >KIT-V559F-r PMYEVQWKf   | 1207  | 1205  |
| >KIT-V559F-v PMYEVQWK\    | 10    | >KIT-V559F-r PMYEVQWKf   | 8     | 2     |
| >KIT-V559F-v PMYEVQWK\    | 9953  | >KIT-V559F-r PMYEVQWKf   | 149   | 9804  |
| >KIT-V559F-v PMYEVQWK\    | 18410 | >KIT-V559F-r PMYEVQWKf   | 335   | 18075 |
| >KIT-V559F-v PMYEVQWK\    | 5917  | >KIT-V559F-r PMYEVQWKf   | 226   | 5691  |
| >KIT-V559F-v PMYEVQWK\    | 3175  | >KIT-V559F-r PMYEVQWKf   | 288   | 2887  |
| >KIT-V559F-v PMYEVQWK\    | 145   | >KIT-V559F-r PMYEVQWKf   | 13631 | 13486 |
| >KIT-V559F-v PMYEVQWK\    | 3758  | >KIT-V559F-r PMYEVQWKf   | 88    | 3670  |
| >KIT-V559F-v KPMYEVQWf\   | 157   | >KIT-V559F-r KPMYEVQWf   | 198   | 41    |
| >KIT-V559F-v KPMYEVQWf\   | 136   | >KIT-V559F-r KPMYEVQWf   | 826   | 690   |
| >KIT-V559F-v KPMYEVQWf\   | 6014  | >KIT-V559F-r KPMYEVQWf   | 177   | 5837  |
| >KIT-V559F-v KPMYEVQWf\   | 68    | >KIT-V559F-r KPMYEVQWf   | 2323  | 2255  |
| >KIT-V559F-v KPMYEVQWf\   | 14054 | >KIT-V559F-r KPMYEVQWf   | 311   | 13743 |
| >KIT-V559F-v KPMYEVQWf\   | 8427  | >KIT-V559F-r KPMYEVQWf   | 185   | 8242  |
| >KIT-V559G-1 VVEEINGNN\   | 217   | >KIT-V559G-i GVEEINGNN\  | 192   | 25    |
| >KIT-V559G-1 VVEEINGNN\   | 87    | >KIT-V559G-i GVEEINGNN\  | 242   | 155   |
| >KIT-V559G-1 VVEEINGNN\   | 121   | >KIT-V559G-i GVEEINGNN\  | 310   | 189   |
| >KIT-V559G-1 VVEEINGNN\   | 627   | >KIT-V559G-i GVEEINGNN\  | 332   | 295   |
| >KIT-V559G-1 VVEEINGNN\   | 35    | >KIT-V559G-i GVEEINGNN\  | 113   | 78    |
| >KIT-V559G-1 VVEEINGNN\   | 316   | >KIT-V559G-i GVEEINGNN\  | 645   | 329   |
| >KIT-V559G-1 VVEEINGNN\   | 167   | >KIT-V559G-i GVEEINGNN\  | 1048  | 881   |
| >KIT-V559G-1 VVEEINGNN\   | 178   | >KIT-V559G-i GVEEINGNN\  | 2972  | 2794  |
| >KIT-V559G-1 KVVVEEINGNN\ | 31    | >KIT-V559G-i KGVEEINGNN\ | 9358  | 9327  |
| >KIT-V559G-1 KVVVEEINGNN\ | 61    | >KIT-V559G-i KGVEEINGNN\ | 2417  | 2356  |
| >KIT-V559G-1 KVVVEEINGNN\ | 114   | >KIT-V559G-i KGVEEINGNN\ | 245   | 131   |
| >KIT-V559G-1 KVVVEEINGNN\ | 114   | >KIT-V559G-i KGVEEINGNN\ | 4884  | 4770  |
| >KIT-V559G-1 KVVVEEINGNN\ | 100   | >KIT-V559G-i KGVEEINGNN\ | 646   | 546   |
| >KIT-V559G-1 QWKVVEEI     | 611   | >KIT-V559G-i QWKGVVEEI   | 334   | 277   |
| >KIT-V559G-1 VQWKVVEEI    | 154   | >KIT-V559G-i VQWKGVEEI   | 648   | 494   |
| >KIT-V559G-1 VQWKVVEEI    | 91    | >KIT-V559G-i VQWKGVEEI   | 109   | 18    |
| >KIT-V559G-1 VQWKVVEEI    | 43    | >KIT-V559G-i VQWKGVEEI   | 35    | 8     |
| >KIT-V559G-1 VQWKVVEEI    | 17    | >KIT-V559G-i VQWKGVEEI   | 37    | 20    |
| >KIT-V559G-1 VQWKVVEEI    | 75    | >KIT-V559G-i VQWKGVEEI   | 150   | 75    |
| >KIT-V559G-1 VQWKVVEEI    | 468   | >KIT-V559G-i VQWKGVEEI   | 1420  | 952   |

|                          |     |                          |       |       |
|--------------------------|-----|--------------------------|-------|-------|
| >KIT-V559G-1 VQWKVVEEI   | 57  | >KIT-V559G-1 VQWKGVVEEI  | 41    | 16    |
| >KIT-V559G-1 EVQWKVVEE   | 147 | >KIT-V559G-1 EVQWKGVVEE  | 269   | 122   |
| >KIT-V559G-1 YEVDQWKVV   | 10  | >KIT-V559G-1 YEVDQWKGV   | 19    | 9     |
| >KIT-V559G-1 YEVDQWKVVE  | 11  | >KIT-V559G-1 YEVDQWKGVE  | 12    | 1     |
| >KIT-V559G-1 YEVDQWKVV   | 373 | >KIT-V559G-1 YEVDQWKGV   | 881   | 508   |
| >KIT-V559G-1 YEVDQWKVVE  | 343 | >KIT-V559G-1 YEVDQWKGVE  | 525   | 182   |
| >KIT-V559G-1 YEVDQWKVV   | 307 | >KIT-V559G-1 YEVDQWKGV   | 386   | 79    |
| >KIT-V559G-1 YEVDQWKVVE  | 59  | >KIT-V559G-1 YEVDQWKGVE  | 79    | 20    |
| >KIT-V559G-1 YEVDQWKVV   | 169 | >KIT-V559G-1 YEVDQWKGV   | 472   | 303   |
| >KIT-V559G-1 YEVDQWKVVE  | 176 | >KIT-V559G-1 YEVDQWKGVE  | 222   | 46    |
| >KIT-V559G-1 YEVDQWKVVE  | 3   | >KIT-V559G-1 YEVDQWKGVE  | 4     | 1     |
| >KIT-V559G-1 MYEVDQWKV   | 246 | >KIT-V559G-1 MYEVDQWKG   | 2899  | 2653  |
| >KIT-V559G-1 MYEVDQWKV   | 488 | >KIT-V559G-1 MYEVDQWKG   | 1607  | 1119  |
| >KIT-V559G-1 PMYEVDQWKL  | 17  | >KIT-V559G-1 PMYEVDQWKL  | 16191 | 16174 |
| >KIT-V559G-1 PMYEVDQWKL  | 18  | >KIT-V559G-1 PMYEVDQWKL  | 6032  | 6014  |
| >KIT-V559G-1 PMYEVDQWKL  | 48  | >KIT-V559G-1 PMYEVDQWKL  | 15097 | 15049 |
| >KIT-V559G-1 PMYEVDQWKL  | 805 | >KIT-V559G-1 PMYEVDQWKL  | 339   | 466   |
| >KIT-V559G-1 PMYEVDQWKL  | 33  | >KIT-V559G-1 PMYEVDQWKL  | 17127 | 17094 |
| >KIT-V559G-1 PMYEVDQWKL  | 1   | >KIT-V559G-1 PMYEVDQWKL  | 37    | 36    |
| >KIT-V559G-1 PMYEVDQWKL  | 4   | >KIT-V559G-1 PMYEVDQWKL  | 3     | 1     |
| >KIT-V559G-1 PMYEVDQWKL  | 5   | >KIT-V559G-1 PMYEVDQWKL  | 5214  | 5209  |
| >KIT-V559G-1 PMYEVDQWKL  | 97  | >KIT-V559G-1 PMYEVDQWKL  | 64    | 33    |
| >KIT-V559G-1 PMYEVDQWKL  | 4   | >KIT-V559G-1 PMYEVDQWKL  | 380   | 376   |
| >KIT-V559G-1 PMYEVDQWKL  | 11  | >KIT-V559G-1 PMYEVDQWKL  | 8     | 3     |
| >KIT-V559G-1 PMYEVDQWKL  | 3   | >KIT-V559G-1 PMYEVDQWKL  | 13425 | 13422 |
| >KIT-V559G-1 PMYEVDQWKL  | 54  | >KIT-V559G-1 PMYEVDQWKL  | 22    | 32    |
| >KIT-V559G-1 PMYEVDQWKL  | 2   | >KIT-V559G-1 PMYEVDQWKL  | 4005  | 4003  |
| >KIT-V559G-1 PMYEVDQWKL  | 10  | >KIT-V559G-1 PMYEVDQWKL  | 7     | 3     |
| >KIT-V559G-1 PMYEVDQWKL  | 145 | >KIT-V559G-1 PMYEVDQWKL  | 17317 | 17172 |
| >KIT-V559G-1 KPMYEVDQWKL | 157 | >KIT-V559G-1 KPMYEVDQWKL | 8607  | 8450  |
| >KIT-V559G-1 KPMYEVDQWKL | 136 | >KIT-V559G-1 KPMYEVDQWKL | 596   | 460   |
| >KIT-V559G-1 KPMYEVDQWKL | 68  | >KIT-V559G-1 KPMYEVDQWKL | 1704  | 1636  |
| >KIT-V559I-1 VVEEINGNNY  | 217 | >KIT-V559I-1 VVEEINGNNY' | 103   | 114   |
| >KIT-V559I-1 VVEEINGNNY  | 87  | >KIT-V559I-1 VVEEINGNNY' | 76    | 11    |
| >KIT-V559I-1 VVEEINGNNY  | 121 | >KIT-V559I-1 VVEEINGNNY' | 147   | 26    |
| >KIT-V559I-1 VVEEINGNNY  | 35  | >KIT-V559I-1 VVEEINGNNY' | 50    | 15    |
| >KIT-V559I-1 VVEEINGNNY  | 316 | >KIT-V559I-1 VVEEINGNNY' | 260   | 56    |
| >KIT-V559I-1 VVEEINGNNY  | 167 | >KIT-V559I-1 VVEEINGNNY' | 89    | 78    |
| >KIT-V559I-1 VVEEINGNNY  | 178 | >KIT-V559I-1 VVEEINGNNY' | 307   | 129   |
| >KIT-V559I-1 KVVEEINGNN  | 31  | >KIT-V559I-1 KVVEEINGNN' | 99    | 68    |
| >KIT-V559I-1 KVVEEINGNN  | 61  | >KIT-V559I-1 KVVEEINGNN' | 198   | 137   |
| >KIT-V559I-1 KVVEEINGNN  | 114 | >KIT-V559I-1 KVVEEINGNN' | 141   | 27    |
| >KIT-V559I-1 KVVEEINGNN  | 114 | >KIT-V559I-1 KVVEEINGNN' | 299   | 185   |

|                              |      |                               |     |      |
|------------------------------|------|-------------------------------|-----|------|
| >KIT-V559I- $\nu$ KVVVEINGNN | 100  | >KIT-V559I- $\pi$ KIVEEINGNN' | 323 | 223  |
| >KIT-V559I- $\nu$ VQWKVVEEI  | 154  | >KIT-V559I- $\pi$ VQWKIVEEI   | 166 | 12   |
| >KIT-V559I- $\nu$ VQWKVVEEI  | 91   | >KIT-V559I- $\pi$ VQWKIVEEI   | 65  | 26   |
| >KIT-V559I- $\nu$ VQWKVVEEI  | 531  | >KIT-V559I- $\pi$ VQWKIVEEI   | 177 | 354  |
| >KIT-V559I- $\nu$ VQWKVVEEI  | 43   | >KIT-V559I- $\pi$ VQWKIVEEI   | 42  | 1    |
| >KIT-V559I- $\nu$ VQWKVVEEI  | 17   | >KIT-V559I- $\pi$ VQWKIVEEI   | 40  | 23   |
| >KIT-V559I- $\nu$ VQWKVVEEI  | 75   | >KIT-V559I- $\pi$ VQWKIVEEI   | 173 | 98   |
| >KIT-V559I- $\nu$ VQWKVVEEI  | 468  | >KIT-V559I- $\pi$ VQWKIVEEI   | 250 | 218  |
| >KIT-V559I- $\nu$ VQWKVVEEI  | 57   | >KIT-V559I- $\pi$ VQWKIVEEI   | 62  | 5    |
| >KIT-V559I- $\nu$ VQWKVVEEI  | 587  | >KIT-V559I- $\pi$ VQWKIVEEI   | 453 | 134  |
| >KIT-V559I- $\nu$ EVQWKVVEE  | 147  | >KIT-V559I- $\pi$ EVQWKIVEEI  | 133 | 14   |
| >KIT-V559I- $\nu$ YEVQWKVV   | 10   | >KIT-V559I- $\pi$ YEVQWKIV    | 9   | 1    |
| >KIT-V559I- $\nu$ YEVQWKVVE  | 11   | >KIT-V559I- $\pi$ YEVQWKIVEE  | 11  | 0    |
| >KIT-V559I- $\nu$ YEVQWKVV   | 373  | >KIT-V559I- $\pi$ YEVQWKIV    | 453 | 80   |
| >KIT-V559I- $\nu$ YEVQWKVVE  | 343  | >KIT-V559I- $\pi$ YEVQWKIVEE  | 289 | 54   |
| >KIT-V559I- $\nu$ YEVQWKVV   | 307  | >KIT-V559I- $\pi$ YEVQWKIV    | 249 | 58   |
| >KIT-V559I- $\nu$ YEVQWKVVE  | 59   | >KIT-V559I- $\pi$ YEVQWKIVEE  | 53  | 6    |
| >KIT-V559I- $\nu$ YEVQWKVV   | 169  | >KIT-V559I- $\pi$ YEVQWKIV    | 213 | 44   |
| >KIT-V559I- $\nu$ YEVQWKVVE  | 176  | >KIT-V559I- $\pi$ YEVQWKIVEE  | 137 | 39   |
| >KIT-V559I- $\nu$ YEVQWKVVE  | 3    | >KIT-V559I- $\pi$ YEVQWKIVEE  | 3   | 0    |
| >KIT-V559I- $\nu$ MYEVQWKV   | 1294 | >KIT-V559I- $\pi$ MYEVQWKI    | 100 | 1194 |
| >KIT-V559I- $\nu$ MYEVQWKV   | 2207 | >KIT-V559I- $\pi$ MYEVQWKI    | 319 | 1888 |
| >KIT-V559I- $\nu$ MYEVQWKV   | 246  | >KIT-V559I- $\pi$ MYEVQWKI    | 20  | 226  |
| >KIT-V559I- $\nu$ MYEVQWKV   | 488  | >KIT-V559I- $\pi$ MYEVQWKI    | 490 | 2    |
| >KIT-V559I- $\nu$ PMYEVQWK\  | 17   | >KIT-V559I- $\pi$ PMYEVQWKI   | 50  | 33   |
| >KIT-V559I- $\nu$ PMYEVQWK\  | 18   | >KIT-V559I- $\pi$ PMYEVQWKI   | 72  | 54   |
| >KIT-V559I- $\nu$ PMYEVQWK\  | 48   | >KIT-V559I- $\pi$ PMYEVQWKI   | 296 | 248  |
| >KIT-V559I- $\nu$ PMYEVQWK\  | 33   | >KIT-V559I- $\pi$ PMYEVQWKI   | 249 | 216  |
| >KIT-V559I- $\nu$ PMYEVQWK\  | 1    | >KIT-V559I- $\pi$ PMYEVQWKI   | 2   | 1    |
| >KIT-V559I- $\nu$ PMYEVQWK\  | 4    | >KIT-V559I- $\pi$ PMYEVQWKI   | 6   | 2    |
| >KIT-V559I- $\nu$ PMYEVQWK\  | 5    | >KIT-V559I- $\pi$ PMYEVQWKI   | 14  | 9    |
| >KIT-V559I- $\nu$ PMYEVQWK\  | 97   | >KIT-V559I- $\pi$ PMYEVQWKI   | 113 | 16   |
| >KIT-V559I- $\nu$ PMYEVQWK\  | 4    | >KIT-V559I- $\pi$ PMYEVQWKI   | 6   | 2    |
| >KIT-V559I- $\nu$ PMYEVQWK\  | 11   | >KIT-V559I- $\pi$ PMYEVQWKI   | 13  | 2    |
| >KIT-V559I- $\nu$ PMYEVQWK\  | 3    | >KIT-V559I- $\pi$ PMYEVQWKI   | 12  | 9    |
| >KIT-V559I- $\nu$ PMYEVQWK\  | 54   | >KIT-V559I- $\pi$ PMYEVQWKI   | 90  | 36   |
| >KIT-V559I- $\nu$ PMYEVQWK\  | 2    | >KIT-V559I- $\pi$ PMYEVQWKI   | 9   | 7    |
| >KIT-V559I- $\nu$ PMYEVQWK\  | 10   | >KIT-V559I- $\pi$ PMYEVQWKI   | 12  | 2    |
| >KIT-V559I- $\nu$ PMYEVQWK\  | 3175 | >KIT-V559I- $\pi$ PMYEVQWKI   | 448 | 2727 |
| >KIT-V559I- $\nu$ PMYEVQWK\  | 145  | >KIT-V559I- $\pi$ PMYEVQWKI   | 853 | 708  |
| >KIT-V559I- $\nu$ KPMYEVQW†  | 157  | >KIT-V559I- $\pi$ KPMYEVQW†   | 181 | 24   |
| >KIT-V559I- $\nu$ KPMYEVQW†  | 136  | >KIT-V559I- $\pi$ KPMYEVQW†   | 289 | 153  |
| >KIT-V559I- $\nu$ KPMYEVQW†  | 68   | >KIT-V559I- $\pi$ KPMYEVQW†   | 388 | 320  |



|                          |      |                         |      |      |
|--------------------------|------|-------------------------|------|------|
| >KIT-V560A-1 VEEINGNNY\  | 328  | >KIT-V560A-r AEEINGNNY\ | 753  | 425  |
| >KIT-V560A-1 VEEINGNNY\  | 94   | >KIT-V560A-r AEEINGNNY\ | 511  | 417  |
| >KIT-V560A-1 VEEINGNNY\  | 1431 | >KIT-V560A-r AEEINGNNY\ | 76   | 1355 |
| >KIT-V560A-1 VEEINGNNY   | 1549 | >KIT-V560A-r AEEINGNNY  | 328  | 1221 |
| >KIT-V560A-1 VEEINGNNY\  | 1190 | >KIT-V560A-r AEEINGNNY\ | 248  | 942  |
| >KIT-V560A-1 VEEINGNNY\  | 2164 | >KIT-V560A-r AEEINGNNY\ | 151  | 2013 |
| >KIT-V560A-1 VEEINGNNY\  | 7198 | >KIT-V560A-r AEEINGNNY\ | 364  | 6834 |
| >KIT-V560A-1 VEEINGNNY\  | 377  | >KIT-V560A-r AEEINGNNY\ | 55   | 322  |
| >KIT-V560A-1 VVEEINGNNY  | 217  | >KIT-V560A-r VAEEINGNNY | 1007 | 790  |
| >KIT-V560A-1 VVEEINGNNY  | 87   | >KIT-V560A-r VAEEINGNNY | 486  | 399  |
| >KIT-V560A-1 VVEEINGNNY  | 121  | >KIT-V560A-r VAEEINGNNY | 655  | 534  |
| >KIT-V560A-1 VVEEINGNNY  | 35   | >KIT-V560A-r VAEEINGNNY | 670  | 635  |
| >KIT-V560A-1 VVEEINGNNY  | 316  | >KIT-V560A-r VAEEINGNNY | 329  | 13   |
| >KIT-V560A-1 VVEEINGNNY  | 167  | >KIT-V560A-r VAEEINGNNY | 801  | 634  |
| >KIT-V560A-1 VVEEINGNNY  | 178  | >KIT-V560A-r VAEEINGNNY | 2693 | 2515 |
| >KIT-V560A-1 VVEEINGNNY  | 2581 | >KIT-V560A-r VAEEINGNNY | 374  | 2207 |
| >KIT-V560A-1 KPMYEVQW\   | 136  | >KIT-V560A-r KPMYEVQW\  | 456  | 320  |
| >KIT-V560A-1 KVVVEEINGNN | 31   | >KIT-V560A-r KVAEEINGNN | 84   | 53   |
| >KIT-V560A-1 KVVVEEINGNN | 61   | >KIT-V560A-r KVAEEINGNN | 589  | 528  |
| >KIT-V560A-1 KVVVEEINGNN | 617  | >KIT-V560A-r KVAEEINGNN | 468  | 149  |
| >KIT-V560A-1 KVVVEEINGNN | 114  | >KIT-V560A-r KVAEEINGNN | 33   | 81   |
| >KIT-V560A-1 KVVVEEINGNN | 114  | >KIT-V560A-r KVAEEINGNN | 61   | 53   |
| >KIT-V560A-1 KVVVEEINGNN | 100  | >KIT-V560A-r KVAEEINGNN | 316  | 216  |
| >KIT-V560A-1 VQWKVVEEI   | 154  | >KIT-V560A-r VQWKVAEEI  | 114  | 40   |
| >KIT-V560A-1 VQWKVVEEI   | 91   | >KIT-V560A-r VQWKVAEEI  | 352  | 261  |
| >KIT-V560A-1 VQWKVVEEI   | 43   | >KIT-V560A-r VQWKVAEEI  | 49   | 6    |
| >KIT-V560A-1 VQWKVVEEI   | 17   | >KIT-V560A-r VQWKVAEEI  | 54   | 37   |
| >KIT-V560A-1 VQWKVVEEI   | 75   | >KIT-V560A-r VQWKVAEEI  | 241  | 166  |
| >KIT-V560A-1 VQWKVVEEI   | 468  | >KIT-V560A-r VQWKVAEEI  | 506  | 38   |
| >KIT-V560A-1 VQWKVVEEI   | 57   | >KIT-V560A-r VQWKVAEEI  | 91   | 34   |
| >KIT-V560A-1 EVQWKVVEE   | 147  | >KIT-V560A-r EVQWKVAEE  | 110  | 37   |
| >KIT-V560A-1 YEVQWKVV    | 10   | >KIT-V560A-r YEVQWKVA   | 64   | 54   |
| >KIT-V560A-1 YEVQWKVVE   | 11   | >KIT-V560A-r YEVQWKVAE  | 11   | 0    |
| >KIT-V560A-1 YEVQWKVV    | 373  | >KIT-V560A-r YEVQWKVA   | 871  | 498  |
| >KIT-V560A-1 YEVQWKVVE   | 1194 | >KIT-V560A-r YEVQWKVAE  | 384  | 810  |
| >KIT-V560A-1 YEVQWKVVE   | 343  | >KIT-V560A-r YEVQWKVAE  | 347  | 4    |
| >KIT-V560A-1 YEVQWKVV    | 307  | >KIT-V560A-r YEVQWKVA   | 7975 | 7668 |
| >KIT-V560A-1 YEVQWKVVE   | 59   | >KIT-V560A-r YEVQWKVAE  | 34   | 25   |
| >KIT-V560A-1 YEVQWKVV    | 169  | >KIT-V560A-r YEVQWKVA   | 193  | 24   |
| >KIT-V560A-1 YEVQWKVVE   | 176  | >KIT-V560A-r YEVQWKVAE  | 270  | 94   |
| >KIT-V560A-1 YEVQWKVV    | 749  | >KIT-V560A-r YEVQWKVA   | 138  | 611  |
| >KIT-V560A-1 YEVQWKVVE   | 3    | >KIT-V560A-r YEVQWKVAE  | 4    | 1    |
| >KIT-V560A-1 PMYEVQWK\   | 4    | >KIT-V560A-r PMYEVQWK\  | 30   | 26   |

|                         |       |                         |       |       |
|-------------------------|-------|-------------------------|-------|-------|
| >KIT-V560A-1 PMYEVQWK\  | 97    | >KIT-V560A-r PMYEVQWK\  | 1191  | 1094  |
| >KIT-V560A-1 PMYEVQWK\  | 11    | >KIT-V560A-r PMYEVQWK\  | 117   | 106   |
| >KIT-V560A-1 PMYEVQWK\  | 54    | >KIT-V560A-r PMYEVQWK\  | 1595  | 1541  |
| >KIT-V560A-1 PMYEVQWK\  | 10    | >KIT-V560A-r PMYEVQWK\  | 222   | 212   |
| >KIT-V560D-1 VEEINGNNY\ | 328   | >KIT-V560D-i DEEINGNNY\ | 372   | 44    |
| >KIT-V560D-1 VEEINGNNY  | 821   | >KIT-V560D-i DEEINGNNY  | 38    | 783   |
| >KIT-V560D-1 VEEINGNNY\ | 94    | >KIT-V560D-i DEEINGNNY\ | 11    | 83    |
| >KIT-V560D-1 VEEINGNNY\ | 377   | >KIT-V560D-i DEEINGNNY\ | 6111  | 5734  |
| >KIT-V560D-1 VVEEINGNNY | 217   | >KIT-V560D-i VDEEINGNNY | 8716  | 8499  |
| >KIT-V560D-1 VVEEINGNNY | 87    | >KIT-V560D-i VDEEINGNNY | 7738  | 7651  |
| >KIT-V560D-1 VVEEINGNNY | 121   | >KIT-V560D-i VDEEINGNNY | 12266 | 12145 |
| >KIT-V560D-1 VVEEINGNNY | 35    | >KIT-V560D-i VDEEINGNNY | 18014 | 17979 |
| >KIT-V560D-1 VVEEINGNNY | 316   | >KIT-V560D-i VDEEINGNNY | 1500  | 1184  |
| >KIT-V560D-1 VVEEINGNNY | 167   | >KIT-V560D-i VDEEINGNNY | 14837 | 14670 |
| >KIT-V560D-1 VVEEINGNNY | 178   | >KIT-V560D-i VDEEINGNNY | 6653  | 6475  |
| >KIT-V560D-1 KPMYEVQWf  | 136   | >KIT-V560D-i KPMYEVQWf  | 18174 | 18038 |
| >KIT-V560D-1 KVVEEINGNN | 18836 | >KIT-V560D-i KVDEEINGNN | 317   | 18519 |
| >KIT-V560D-1 KVVEEINGNN | 31    | >KIT-V560D-i KVDEEINGNN | 4391  | 4360  |
| >KIT-V560D-1 KVVEEINGNN | 61    | >KIT-V560D-i KVDEEINGNN | 2930  | 2869  |
| >KIT-V560D-1 KVVEEINGNN | 114   | >KIT-V560D-i KVDEEINGNN | 164   | 50    |
| >KIT-V560D-1 KVVEEINGNN | 114   | >KIT-V560D-i KVDEEINGNN | 137   | 23    |
| >KIT-V560D-1 KVVEEINGNN | 100   | >KIT-V560D-i KVDEEINGNN | 1415  | 1315  |
| >KIT-V560D-1 VQWKVVEEI  | 154   | >KIT-V560D-i VQWKVDEEI  | 892   | 738   |
| >KIT-V560D-1 VQWKVVEEI  | 91    | >KIT-V560D-i VQWKVDEEI  | 451   | 360   |
| >KIT-V560D-1 VQWKVVEEI  | 43    | >KIT-V560D-i VQWKVDEEI  | 131   | 88    |
| >KIT-V560D-1 VQWKVVEEI  | 17    | >KIT-V560D-i VQWKVDEEI  | 149   | 132   |
| >KIT-V560D-1 VQWKVVEEI  | 75    | >KIT-V560D-i VQWKVDEEI  | 235   | 160   |
| >KIT-V560D-1 VQWKVVEEI  | 468   | >KIT-V560D-i VQWKVDEEI  | 1741  | 1273  |
| >KIT-V560D-1 VQWKVVEEI  | 57    | >KIT-V560D-i VQWKVDEEI  | 282   | 225   |
| >KIT-V560D-1 EVQWKVVEE  | 147   | >KIT-V560D-i EVQWKVDEE  | 938   | 791   |
| >KIT-V560D-1 YEVQWKVV   | 10    | >KIT-V560D-i YEVQWKVD   | 600   | 590   |
| >KIT-V560D-1 YEVQWKVVE  | 11    | >KIT-V560D-i YEVQWKVDE  | 24    | 13    |
| >KIT-V560D-1 YEVQWKVV   | 373   | >KIT-V560D-i YEVQWKVD   | 1276  | 903   |
| >KIT-V560D-1 YEVQWKVVE  | 343   | >KIT-V560D-i YEVQWKVDE  | 723   | 380   |
| >KIT-V560D-1 YEVQWKVV   | 307   | >KIT-V560D-i YEVQWKVD   | 13729 | 13422 |
| >KIT-V560D-1 YEVQWKVVE  | 59    | >KIT-V560D-i YEVQWKVDE  | 63    | 4     |
| >KIT-V560D-1 YEVQWKVV   | 169   | >KIT-V560D-i YEVQWKVD   | 5149  | 4980  |
| >KIT-V560D-1 YEVQWKVVE  | 176   | >KIT-V560D-i YEVQWKVDE  | 272   | 96    |
| >KIT-V560D-1 YEVQWKVVE  | 3     | >KIT-V560D-i YEVQWKVDE  | 5     | 2     |
| >KIT-V560D-1 PMYEVQWK\  | 4     | >KIT-V560D-i PMYEVQWK\  | 2956  | 2952  |
| >KIT-V560D-1 PMYEVQWK\  | 97    | >KIT-V560D-i PMYEVQWK\  | 19759 | 19662 |
| >KIT-V560D-1 PMYEVQWK\  | 11    | >KIT-V560D-i PMYEVQWK\  | 11411 | 11400 |
| >KIT-V560D-1 PMYEVQWK\  | 54    | >KIT-V560D-i PMYEVQWK\  | 23657 | 23603 |

|                          |       |                         |       |       |
|--------------------------|-------|-------------------------|-------|-------|
| >KIT-V560D-ı PMYEVQWK\   | 10    | >KIT-V560D-i PMYEVQWK\  | 20232 | 20222 |
| >KIT-V560E-ı VEEINGNNY\  | 328   | >KIT-V560E-r EEEINGNNY\ | 258   | 70    |
| >KIT-V560E-ı VEEINGNNY\  | 94    | >KIT-V560E-r EEEINGNNY\ | 151   | 57    |
| >KIT-V560E-ı VEEINGNNY\  | 1431  | >KIT-V560E-r EEEINGNNY\ | 287   | 1144  |
| >KIT-V560E-ı VEEINGNNY\  | 1190  | >KIT-V560E-r EEEINGNNY\ | 386   | 804   |
| >KIT-V560E-ı VEEINGNNY\  | 377   | >KIT-V560E-r EEEINGNNY\ | 2107  | 1730  |
| >KIT-V560E-ı VVEEINGNNY  | 16605 | >KIT-V560E-r VEEEINGNNY | 165   | 16440 |
| >KIT-V560E-ı VVEEINGNNY  | 217   | >KIT-V560E-r VEEEINGNNY | 7217  | 7000  |
| >KIT-V560E-ı VVEEINGNNY  | 87    | >KIT-V560E-r VEEEINGNNY | 2775  | 2688  |
| >KIT-V560E-ı VVEEINGNNY  | 121   | >KIT-V560E-r VEEEINGNNY | 6449  | 6328  |
| >KIT-V560E-ı VVEEINGNNY  | 35    | >KIT-V560E-r VEEEINGNNY | 11243 | 11208 |
| >KIT-V560E-ı VVEEINGNNY  | 316   | >KIT-V560E-r VEEEINGNNY | 837   | 521   |
| >KIT-V560E-ı VVEEINGNNY  | 167   | >KIT-V560E-r VEEEINGNNY | 17754 | 17587 |
| >KIT-V560E-ı VVEEINGNNY  | 178   | >KIT-V560E-r VEEEINGNNY | 3379  | 3201  |
| >KIT-V560E-ı VVEEINGNNY  | 21295 | >KIT-V560E-r VEEEINGNNY | 291   | 21004 |
| >KIT-V560E-ı VVEEINGNNY  | 29507 | >KIT-V560E-r VEEEINGNNY | 225   | 29282 |
| >KIT-V560E-ı KPMYEVQW\   | 136   | >KIT-V560E-r KPMYEVQW\  | 11273 | 11137 |
| >KIT-V560E-ı KVVVEEINGNN | 31    | >KIT-V560E-r KVEEEINGNN | 1679  | 1648  |
| >KIT-V560E-ı KVVVEEINGNN | 61    | >KIT-V560E-r KVEEEINGNN | 2083  | 2022  |
| >KIT-V560E-ı KVVVEEINGNN | 114   | >KIT-V560E-r KVEEEINGNN | 125   | 11    |
| >KIT-V560E-ı KVVVEEINGNN | 114   | >KIT-V560E-r KVEEEINGNN | 402   | 288   |
| >KIT-V560E-ı KVVVEEINGNN | 100   | >KIT-V560E-r KVEEEINGNN | 1177  | 1077  |
| >KIT-V560E-ı VQWKVVEEI   | 154   | >KIT-V560E-r VQWKVVEEI  | 519   | 365   |
| >KIT-V560E-ı VQWKVVEEI   | 91    | >KIT-V560E-r VQWKVVEEI  | 485   | 394   |
| >KIT-V560E-ı VQWKVVEEI   | 43    | >KIT-V560E-r VQWKVVEEI  | 216   | 173   |
| >KIT-V560E-ı VQWKVVEEI   | 17    | >KIT-V560E-r VQWKVVEEI  | 92    | 75    |
| >KIT-V560E-ı VQWKVVEEI   | 75    | >KIT-V560E-r VQWKVVEEI  | 247   | 172   |
| >KIT-V560E-ı VQWKVVEEI   | 468   | >KIT-V560E-r VQWKVVEEI  | 1966  | 1498  |
| >KIT-V560E-ı VQWKVVEEI   | 57    | >KIT-V560E-r VQWKVVEEI  | 148   | 91    |
| >KIT-V560E-ı EVQWKVVEE   | 147   | >KIT-V560E-r EVQWKVVEE  | 728   | 581   |
| >KIT-V560E-ı YEVQWKVV    | 10    | >KIT-V560E-r YEVQWKVE   | 327   | 317   |
| >KIT-V560E-ı YEVQWKVV    | 11    | >KIT-V560E-r YEVQWKVEE  | 16    | 5     |
| >KIT-V560E-ı YEVQWKVV    | 373   | >KIT-V560E-r YEVQWKVE   | 1890  | 1517  |
| >KIT-V560E-ı YEVQWKVVE   | 343   | >KIT-V560E-r YEVQWKVEE  | 905   | 562   |
| >KIT-V560E-ı YEVQWKVV    | 307   | >KIT-V560E-r YEVQWKVE   | 11311 | 11004 |
| >KIT-V560E-ı YEVQWKVVE   | 59    | >KIT-V560E-r YEVQWKVEE  | 61    | 2     |
| >KIT-V560E-ı YEVQWKVV    | 169   | >KIT-V560E-r YEVQWKVE   | 3851  | 3682  |
| >KIT-V560E-ı YEVQWKVVE   | 176   | >KIT-V560E-r YEVQWKVEE  | 255   | 79    |
| >KIT-V560E-ı YEVQWKVVE   | 3     | >KIT-V560E-r YEVQWKVEE  | 5     | 2     |
| >KIT-V560E-ı PMYEVQWK\   | 4     | >KIT-V560E-r PMYEVQWK\  | 3213  | 3209  |
| >KIT-V560E-ı PMYEVQWK\   | 97    | >KIT-V560E-r PMYEVQWK\  | 18086 | 17989 |
| >KIT-V560E-ı PMYEVQWK\   | 11    | >KIT-V560E-r PMYEVQWK\  | 11013 | 11002 |
| >KIT-V560E-ı PMYEVQWK\   | 54    | >KIT-V560E-r PMYEVQWK\  | 22629 | 22575 |

|                          |     |                         |       |       |
|--------------------------|-----|-------------------------|-------|-------|
| >KIT-V560E-v PMYEVQWK\   | 10  | >KIT-V560E-r PMYEVQWK\  | 15788 | 15778 |
| >KIT-V560G-1 VEEINGNNY\  | 328 | >KIT-V560G-i GEEINGNNY\ | 561   | 233   |
| >KIT-V560G-1 VEEINGNNY\  | 94  | >KIT-V560G-i GEEINGNNY\ | 701   | 607   |
| >KIT-V560G-1 VEEINGNNY\  | 377 | >KIT-V560G-i GEEINGNNY\ | 296   | 81    |
| >KIT-V560G-1 VVEEINGNNY  | 217 | >KIT-V560G-i VGEEINGNN\ | 3150  | 2933  |
| >KIT-V560G-1 VVEEINGNNY  | 87  | >KIT-V560G-i VGEEINGNN\ | 3426  | 3339  |
| >KIT-V560G-1 VVEEINGNNY  | 121 | >KIT-V560G-i VGEEINGNN\ | 5637  | 5516  |
| >KIT-V560G-1 VVEEINGNNY  | 35  | >KIT-V560G-i VGEEINGNN\ | 8584  | 8549  |
| >KIT-V560G-1 VVEEINGNNY  | 316 | >KIT-V560G-i VGEEINGNN\ | 584   | 268   |
| >KIT-V560G-1 VVEEINGNNY  | 167 | >KIT-V560G-i VGEEINGNN\ | 8141  | 7974  |
| >KIT-V560G-1 VVEEINGNNY  | 178 | >KIT-V560G-i VGEEINGNN\ | 4761  | 4583  |
| >KIT-V560G-1 KPMYEVQWf   | 136 | >KIT-V560G-i KPMYEVQWf  | 15381 | 15245 |
| >KIT-V560G-1 KVVVEEINGNN | 31  | >KIT-V560G-i KVGEEINGNN | 465   | 434   |
| >KIT-V560G-1 KVVVEEINGNN | 61  | >KIT-V560G-i KVGEEINGNN | 158   | 97    |
| >KIT-V560G-1 KVVVEEINGNN | 114 | >KIT-V560G-i KVGEEINGNN | 107   | 7     |
| >KIT-V560G-1 KVVVEEINGNN | 114 | >KIT-V560G-i KVGEEINGNN | 32    | 82    |
| >KIT-V560G-1 KVVVEEINGNN | 100 | >KIT-V560G-i KVGEEINGNN | 2345  | 2245  |
| >KIT-V560G-1 VQWKVVEEI   | 154 | >KIT-V560G-i VQWKVGEEI  | 672   | 518   |
| >KIT-V560G-1 VQWKVVEEI   | 91  | >KIT-V560G-i VQWKVGEEI  | 689   | 598   |
| >KIT-V560G-1 VQWKVVEEI   | 43  | >KIT-V560G-i VQWKVGEEI  | 100   | 57    |
| >KIT-V560G-1 VQWKVVEEI   | 17  | >KIT-V560G-i VQWKVGEEI  | 48    | 31    |
| >KIT-V560G-1 VQWKVVEEI   | 75  | >KIT-V560G-i VQWKVGEEI  | 262   | 187   |
| >KIT-V560G-1 VQWKVVEEI   | 468 | >KIT-V560G-i VQWKVGEEI  | 2090  | 1622  |
| >KIT-V560G-1 VQWKVVEEI   | 57  | >KIT-V560G-i VQWKVGEEI  | 45    | 12    |
| >KIT-V560G-1 EVQWKVVEE   | 147 | >KIT-V560G-i EVQWKVGEE  | 353   | 206   |
| >KIT-V560G-1 YEVQWKVV    | 10  | >KIT-V560G-i YEVQWKVG   | 539   | 529   |
| >KIT-V560G-1 YEVQWKVVE   | 11  | >KIT-V560G-i YEVQWKVGE  | 18    | 7     |
| >KIT-V560G-1 YEVQWKVV    | 373 | >KIT-V560G-i YEVQWKVG   | 6745  | 6372  |
| >KIT-V560G-1 YEVQWKVVE   | 343 | >KIT-V560G-i YEVQWKVGE  | 459   | 116   |
| >KIT-V560G-1 YEVQWKVV    | 307 | >KIT-V560G-i YEVQWKVG   | 15682 | 15375 |
| >KIT-V560G-1 YEVQWKVVE   | 59  | >KIT-V560G-i YEVQWKVGE  | 41    | 18    |
| >KIT-V560G-1 YEVQWKVV    | 169 | >KIT-V560G-i YEVQWKVG   | 5728  | 5559  |
| >KIT-V560G-1 YEVQWKVVE   | 176 | >KIT-V560G-i YEVQWKVGE  | 223   | 47    |
| >KIT-V560G-1 YEVQWKVVE   | 3   | >KIT-V560G-i YEVQWKVGE  | 4     | 1     |
| >KIT-V560G-1 PMYEVQWK\   | 4   | >KIT-V560G-i PMYEVQWK\  | 870   | 866   |
| >KIT-V560G-1 PMYEVQWK\   | 97  | >KIT-V560G-i PMYEVQWK\  | 13890 | 13793 |
| >KIT-V560G-1 PMYEVQWK\   | 11  | >KIT-V560G-i PMYEVQWK\  | 4796  | 4785  |
| >KIT-V560G-1 PMYEVQWK\   | 54  | >KIT-V560G-i PMYEVQWK\  | 20200 | 20146 |
| >KIT-V560G-1 PMYEVQWK\   | 10  | >KIT-V560G-i PMYEVQWK\  | 14221 | 14211 |
| >KIT-V569A-1 VYIDPTQLPY  | 495 | >KIT-V569A-f AYIDPTQLPY | 752   | 257   |
| >KIT-V569A-1 VYIDPTQL    | 216 | >KIT-V569A-f AYIDPTQL   | 1453  | 1237  |
| >KIT-V569A-1 VYIDPTQL    | 43  | >KIT-V569A-f AYIDPTQL   | 31    | 12    |
| >KIT-V569A-1 VYIDPTQLPY  | 319 | >KIT-V569A-f AYIDPTQLPY | 86    | 233   |

|                          |      |                          |      |      |
|--------------------------|------|--------------------------|------|------|
| >KIT-V569A-1 VYIDPTQLPY  | 33   | >KIT-V569A-1 AYIDPTQLPY  | 28   | 5    |
| >KIT-V569A-1 VYIDPTQLPY  | 64   | >KIT-V569A-1 AYIDPTQLPY  | 80   | 16   |
| >KIT-V569A-1 VYIDPTQLPY  | 32   | >KIT-V569A-1 AYIDPTQLPY  | 87   | 55   |
| >KIT-V569A-1 VYIDPTQL    | 962  | >KIT-V569A-1 AYIDPTQL    | 384  | 578  |
| >KIT-V569A-1 VVYIDPTQL   | 1082 | >KIT-V569A-1 YAYIDPTQL   | 184  | 898  |
| >KIT-V569A-1 VVYIDPTQL   | 193  | >KIT-V569A-1 YAYIDPTQL   | 2056 | 1863 |
| >KIT-V569A-1 VVYIDPTQL   | 135  | >KIT-V569A-1 YAYIDPTQL   | 738  | 603  |
| >KIT-V569A-1 VVYIDPTQL   | 24   | >KIT-V569A-1 YAYIDPTQL   | 221  | 197  |
| >KIT-V569A-1 VVYIDPTQL   | 261  | >KIT-V569A-1 YAYIDPTQL   | 1431 | 1170 |
| >KIT-V569A-1 VVYIDPTQL   | 18   | >KIT-V569A-1 YAYIDPTQL   | 79   | 61   |
| >KIT-V569A-1 VVYIDPTQL   | 71   | >KIT-V569A-1 YAYIDPTQL   | 914  | 843  |
| >KIT-V569A-1 VVYIDPTQL   | 16   | >KIT-V569A-1 YAYIDPTQL   | 143  | 127  |
| >KIT-V569A-1 VVYIDPTQLP\ | 492  | >KIT-V569A-1 YAYIDPTQLP\ | 3339 | 2847 |
| >KIT-V569A-1 VVYIDPTQLP\ | 330  | >KIT-V569A-1 YAYIDPTQLP\ | 1833 | 1503 |
| >KIT-V569A-1 VVYIDPTQLP\ | 387  | >KIT-V569A-1 YAYIDPTQLP\ | 5535 | 5148 |
| >KIT-V569A-1 VVYIDPTQLP\ | 91   | >KIT-V569A-1 YAYIDPTQLP\ | 3046 | 2955 |
| >KIT-V569A-1 VVYIDPTQLP\ | 6    | >KIT-V569A-1 YAYIDPTQLP\ | 11   | 5    |
| >KIT-V569A-1 VVYIDPTQLP\ | 451  | >KIT-V569A-1 YAYIDPTQLP\ | 878  | 427  |
| >KIT-V569A-1 VVYIDPTQL   | 162  | >KIT-V569A-1 YAYIDPTQL   | 524  | 362  |
| >KIT-V569A-1 VVYIDPTQLP\ | 16   | >KIT-V569A-1 YAYIDPTQLP\ | 139  | 123  |
| >KIT-V569A-1 VVYIDPTQLP\ | 63   | >KIT-V569A-1 YAYIDPTQLP\ | 82   | 19   |
| >KIT-V569A-1 VVYIDPTQLP\ | 73   | >KIT-V569A-1 YAYIDPTQLP\ | 154  | 81   |
| >KIT-V569A-1 VVYIDPTQL   | 1334 | >KIT-V569A-1 YAYIDPTQL   | 348  | 986  |
| >KIT-V569A-1 VVYIDPTQLP\ | 53   | >KIT-V569A-1 YAYIDPTQLP\ | 14   | 39   |
| >KIT-V569A-1 VVYIDPTQL   | 27   | >KIT-V569A-1 YAYIDPTQL   | 7    | 20   |
| >KIT-V569A-1 VVYIDPTQLP\ | 7    | >KIT-V569A-1 YAYIDPTQLP\ | 3    | 4    |
| >KIT-V569A-1 VVYIDPTQ    | 1950 | >KIT-V569A-1 YAYIDPTQ    | 418  | 1532 |
| >KIT-V569A-1 VVYIDPTQL   | 1902 | >KIT-V569A-1 YAYIDPTQL   | 425  | 1477 |
| >KIT-V569A-1 VVYIDPTQLP\ | 17   | >KIT-V569A-1 YAYIDPTQLP\ | 9    | 8    |
| >KIT-V569A-1 VVYIDPTQLP\ | 906  | >KIT-V569A-1 YAYIDPTQLP\ | 97   | 809  |
| >KIT-V569A-1 VVYIDPTQLP\ | 2852 | >KIT-V569A-1 YAYIDPTQLP\ | 214  | 2638 |
| >KIT-V569A-1 VVYIDPTQLP\ | 1053 | >KIT-V569A-1 YAYIDPTQLP\ | 186  | 867  |
| >KIT-V569A-1 VVYIDPTQL   | 423  | >KIT-V569A-1 YAYIDPTQL   | 773  | 350  |
| >KIT-V569A-1 VVYIDPTQLP\ | 301  | >KIT-V569A-1 YAYIDPTQLP\ | 616  | 315  |
| >KIT-V569A-1 VVEEINGNNY  | 217  | >KIT-V569A-1 VVEEINGNNY  | 1599 | 1382 |
| >KIT-V569A-1 VVEEINGNNY  | 87   | >KIT-V569A-1 VVEEINGNNY  | 966  | 879  |
| >KIT-V569A-1 VVEEINGNNY  | 121  | >KIT-V569A-1 VVEEINGNNY  | 5102 | 4981 |
| >KIT-V569A-1 VVEEINGNNY  | 35   | >KIT-V569A-1 VVEEINGNNY  | 5570 | 5535 |
| >KIT-V569A-1 VVEEINGNNY  | 167  | >KIT-V569A-1 VVEEINGNNY  | 2056 | 1889 |
| >KIT-V569A-1 NYVYIDPTQL  | 150  | >KIT-V569A-1 NYAYIDPTQL  | 93   | 57   |
| >KIT-V569A-1 NYVYIDPTQL  | 163  | >KIT-V569A-1 NYAYIDPTQL  | 95   | 68   |
| >KIT-V569A-1 INGNNYVYI   | 163  | >KIT-V569A-1 INGNNYAYI   | 131  | 32   |
| >KIT-V569A-1 INGNNYVYI   | 141  | >KIT-V569A-1 INGNNYAYI   | 112  | 29   |

|                         |      |                         |       |       |
|-------------------------|------|-------------------------|-------|-------|
| >KIT-V569A-1 INGNNYVY   | 382  | >KIT-V569A-r INGNNYAY   | 151   | 231   |
| >KIT-V569A-1 INGNNYVY   | 256  | >KIT-V569A-r INGNNYAY   | 172   | 84    |
| >KIT-V569A-1 EINGNNYV   | 299  | >KIT-V569A-r EINGNNYA   | 2838  | 2539  |
| >KIT-V569A-1 EINGNNYVYI | 985  | >KIT-V569A-r EINGNNYAYI | 450   | 535   |
| >KIT-V569A-1 EINGNNYV   | 64   | >KIT-V569A-r EINGNNYA   | 3184  | 3120  |
| >KIT-V569A-1 EINGNNYVYI | 229  | >KIT-V569A-r EINGNNYAYI | 181   | 48    |
| >KIT-V569A-1 EINGNNYV   | 442  | >KIT-V569A-r EINGNNYA   | 12961 | 12519 |
| >KIT-V569A-1 EINGNNYV   | 41   | >KIT-V569A-r EINGNNYA   | 2261  | 2220  |
| >KIT-V569A-1 EINGNNYVYI | 257  | >KIT-V569A-r EINGNNYAYI | 160   | 97    |
| >KIT-V569A-1 EINGNNYV   | 34   | >KIT-V569A-r EINGNNYA   | 5195  | 5161  |
| >KIT-V569A-1 EINGNNYVY  | 763  | >KIT-V569A-r EINGNNYAY  | 176   | 587   |
| >KIT-V569A-1 EINGNNYVY  | 203  | >KIT-V569A-r EINGNNYAY  | 54    | 149   |
| >KIT-V569A-1 EINGNNYVY  | 17   | >KIT-V569A-r EINGNNYAY  | 8     | 9     |
| >KIT-V569A-1 EINGNNYVY  | 425  | >KIT-V569A-r EINGNNYAY  | 97    | 328   |
| >KIT-V569A-1 EINGNNYVY  | 218  | >KIT-V569A-r EINGNNYAY  | 77    | 141   |
| >KIT-V569A-1 EINGNNYVY  | 70   | >KIT-V569A-r EINGNNYAY  | 58    | 12    |
| >KIT-V569A-1 EINGNNYVY  | 1305 | >KIT-V569A-r EINGNNYAY  | 358   | 947   |
| >KIT-V569A-1 EINGNNYVY  | 340  | >KIT-V569A-r EINGNNYAY  | 341   | 1     |
| >KIT-V569A-1 EINGNNYV   | 8    | >KIT-V569A-r EINGNNYA   | 29    | 21    |
| >KIT-V569A-1 EINGNNYVYI | 101  | >KIT-V569A-r EINGNNYAYI | 63    | 38    |
| >KIT-V569A-1 EINGNNYV   | 11   | >KIT-V569A-r EINGNNYA   | 285   | 274   |
| >KIT-V569A-1 EINGNNYVYI | 36   | >KIT-V569A-r EINGNNYAYI | 18    | 18    |
| >KIT-V569A-1 EINGNNYVY  | 710  | >KIT-V569A-r EINGNNYAY  | 327   | 383   |
| >KIT-V569A-1 EINGNNYVY  | 168  | >KIT-V569A-r EINGNNYAY  | 34    | 134   |
| >KIT-V569A-1 EINGNNYVY  | 1173 | >KIT-V569A-r EINGNNYAY  | 347   | 826   |
| >KIT-V569A-1 EINGNNYVY  | 81   | >KIT-V569A-r EINGNNYAY  | 65    | 16    |
| >KIT-V569A-1 EEINGNNYVY | 76   | >KIT-V569A-r EEINGNNYAY | 56    | 20    |
| >KIT-V569A-1 EEINGNNYVY | 179  | >KIT-V569A-r EEINGNNYAY | 84    | 95    |
| >KIT-V569A-1 EEINGNNYVY | 134  | >KIT-V569A-r EEINGNNYAY | 41    | 93    |
| >KIT-V569A-1 EEINGNNYVY | 328  | >KIT-V569A-r EEINGNNYAY | 311   | 17    |
| >KIT-V569A-1 EEINGNNYV  | 241  | >KIT-V569A-r EEINGNNYA  | 2943  | 2702  |
| >KIT-V569A-1 EEINGNNYVY | 322  | >KIT-V569A-r EEINGNNYAY | 191   | 131   |
| >KIT-V569A-1 EEINGNNYV  | 234  | >KIT-V569A-r EEINGNNYA  | 6031  | 5797  |
| >KIT-V569A-1 EEINGNNYVY | 59   | >KIT-V569A-r EEINGNNYAY | 80    | 21    |
| >KIT-V569A-1 EEINGNNYVY | 300  | >KIT-V569A-r EEINGNNYAY | 827   | 527   |
| >KIT-V569A-1 EEINGNNYVY | 466  | >KIT-V569A-r EEINGNNYAY | 148   | 318   |
| >KIT-V569A-1 EEINGNNYV  | 488  | >KIT-V569A-r EEINGNNYA  | 1047  | 559   |
| >KIT-V569A-1 EEINGNNYVY | 180  | >KIT-V569A-r EEINGNNYAY | 89    | 91    |
| >KIT-V569A-1 EEINGNNYVY | 190  | >KIT-V569A-r EEINGNNYAY | 215   | 25    |
| >KIT-V569A-1 EEINGNNYV  | 74   | >KIT-V569A-r EEINGNNYA  | 19    | 55    |
| >KIT-V569A-1 EEINGNNYVY | 97   | >KIT-V569A-r EEINGNNYAY | 119   | 22    |
| >KIT-V569A-1 EEINGNNYV  | 305  | >KIT-V569A-r EEINGNNYA  | 7844  | 7539  |
| >KIT-V569A-1 EEINGNNYVY | 63   | >KIT-V569A-r EEINGNNYAY | 62    | 1     |

|                          |     |                          |       |       |
|--------------------------|-----|--------------------------|-------|-------|
| >KIT-V569A-1 VEEINGNNYV  | 328 | >KIT-V569A-1 VEEINGNNYA  | 6666  | 6338  |
| >KIT-V569A-1 VEEINGNNYV  | 94  | >KIT-V569A-1 VEEINGNNYA  | 47    | 47    |
| >KIT-V569A-1 VEEINGNNYV  | 377 | >KIT-V569A-1 VEEINGNNYA  | 6782  | 6405  |
| >KIT-V569G-1 VYIDPTQLPY  | 495 | >KIT-V569G-1 GYIDPTQLPY  | 1689  | 1194  |
| >KIT-V569G-1 VYIDPTQL    | 216 | >KIT-V569G-1 GYIDPTQL    | 671   | 455   |
| >KIT-V569G-1 VYIDPTQL    | 43  | >KIT-V569G-1 GYIDPTQL    | 54    | 11    |
| >KIT-V569G-1 VYIDPTQLPY  | 319 | >KIT-V569G-1 GYIDPTQLPY  | 1307  | 988   |
| >KIT-V569G-1 VYIDPTQLPY  | 33  | >KIT-V569G-1 GYIDPTQLPY  | 34    | 1     |
| >KIT-V569G-1 VYIDPTQLPY  | 64  | >KIT-V569G-1 GYIDPTQLPY  | 145   | 81    |
| >KIT-V569G-1 VYIDPTQLPY  | 32  | >KIT-V569G-1 GYIDPTQLPY  | 577   | 545   |
| >KIT-V569G-1 YVYIDPTQL   | 193 | >KIT-V569G-1 YGYIDPTQL   | 14007 | 13814 |
| >KIT-V569G-1 YVYIDPTQL   | 135 | >KIT-V569G-1 YGYIDPTQL   | 2478  | 2343  |
| >KIT-V569G-1 YVYIDPTQL   | 24  | >KIT-V569G-1 YGYIDPTQL   | 6676  | 6652  |
| >KIT-V569G-1 YVYIDPTQL   | 261 | >KIT-V569G-1 YGYIDPTQL   | 8818  | 8557  |
| >KIT-V569G-1 YVYIDPTQL   | 18  | >KIT-V569G-1 YGYIDPTQL   | 1003  | 985   |
| >KIT-V569G-1 YVYIDPTQL   | 71  | >KIT-V569G-1 YGYIDPTQL   | 3228  | 3157  |
| >KIT-V569G-1 YVYIDPTQL   | 16  | >KIT-V569G-1 YGYIDPTQL   | 4296  | 4280  |
| >KIT-V569G-1 YVYIDPTQLP' | 492 | >KIT-V569G-1 YGYIDPTQLP' | 9921  | 9429  |
| >KIT-V569G-1 YVYIDPTQLP' | 330 | >KIT-V569G-1 YGYIDPTQLP' | 10111 | 9781  |
| >KIT-V569G-1 YVYIDPTQLP' | 387 | >KIT-V569G-1 YGYIDPTQLP' | 16956 | 16569 |
| >KIT-V569G-1 YVYIDPTQLP' | 91  | >KIT-V569G-1 YGYIDPTQLP' | 19405 | 19314 |
| >KIT-V569G-1 YVYIDPTQLP' | 6   | >KIT-V569G-1 YGYIDPTQLP' | 21    | 15    |
| >KIT-V569G-1 YVYIDPTQLP' | 451 | >KIT-V569G-1 YGYIDPTQLP' | 11242 | 10791 |
| >KIT-V569G-1 YVYIDPTQL   | 162 | >KIT-V569G-1 YGYIDPTQL   | 9377  | 9215  |
| >KIT-V569G-1 YVYIDPTQLP' | 16  | >KIT-V569G-1 YGYIDPTQLP' | 562   | 546   |
| >KIT-V569G-1 YVYIDPTQLP' | 63  | >KIT-V569G-1 YGYIDPTQLP' | 144   | 81    |
| >KIT-V569G-1 YVYIDPTQLP' | 73  | >KIT-V569G-1 YGYIDPTQLP' | 133   | 60    |
| >KIT-V569G-1 YVYIDPTQLP' | 53  | >KIT-V569G-1 YGYIDPTQLP' | 85    | 32    |
| >KIT-V569G-1 YVYIDPTQL   | 27  | >KIT-V569G-1 YGYIDPTQL   | 219   | 192   |
| >KIT-V569G-1 YVYIDPTQLP' | 7   | >KIT-V569G-1 YGYIDPTQLP' | 15    | 8     |
| >KIT-V569G-1 YVYIDPTQLP' | 17  | >KIT-V569G-1 YGYIDPTQLP' | 24    | 7     |
| >KIT-V569G-1 YVYIDPTQL   | 423 | >KIT-V569G-1 YGYIDPTQL   | 1467  | 1044  |
| >KIT-V569G-1 YVYIDPTQLP' | 301 | >KIT-V569G-1 YGYIDPTQLP' | 946   | 645   |
| >KIT-V569G-1 VVEEINGNNY  | 217 | >KIT-V569G-1 VVEEINGNNY  | 15538 | 15321 |
| >KIT-V569G-1 VVEEINGNNY  | 87  | >KIT-V569G-1 VVEEINGNNY  | 20676 | 20589 |
| >KIT-V569G-1 VVEEINGNNY  | 121 | >KIT-V569G-1 VVEEINGNNY  | 22364 | 22243 |
| >KIT-V569G-1 VVEEINGNNY  | 35  | >KIT-V569G-1 VVEEINGNNY  | 31108 | 31073 |
| >KIT-V569G-1 VVEEINGNNY  | 167 | >KIT-V569G-1 VVEEINGNNY  | 16072 | 15905 |
| >KIT-V569G-1 NYVYIDPTQL  | 150 | >KIT-V569G-1 NYGYIDPTQL  | 1057  | 907   |
| >KIT-V569G-1 NYVYIDPTQL  | 163 | >KIT-V569G-1 NYGYIDPTQL  | 91    | 72    |
| >KIT-V569G-1 INGNNYVYI   | 163 | >KIT-V569G-1 INGNNYGYI   | 771   | 608   |
| >KIT-V569G-1 INGNNYVYI   | 141 | >KIT-V569G-1 INGNNYGYI   | 316   | 175   |
| >KIT-V569G-1 INGNNYVY    | 382 | >KIT-V569G-1 INGNNYGY    | 281   | 101   |

|                         |     |                         |       |       |
|-------------------------|-----|-------------------------|-------|-------|
| >KIT-V569G-1 INGNNYVY   | 256 | >KIT-V569G-1 INGNNYGY   | 209   | 47    |
| >KIT-V569G-1 EINGNNYV   | 299 | >KIT-V569G-1 EINGNNYG   | 19897 | 19598 |
| >KIT-V569G-1 EINGNNYV   | 64  | >KIT-V569G-1 EINGNNYG   | 22204 | 22140 |
| >KIT-V569G-1 EINGNNYVYI | 229 | >KIT-V569G-1 EINGNNYGYI | 421   | 192   |
| >KIT-V569G-1 EINGNNYV   | 442 | >KIT-V569G-1 EINGNNYG   | 26091 | 25649 |
| >KIT-V569G-1 EINGNNYV   | 41  | >KIT-V569G-1 EINGNNYG   | 22061 | 22020 |
| >KIT-V569G-1 EINGNNYVYI | 257 | >KIT-V569G-1 EINGNNYGYI | 1002  | 745   |
| >KIT-V569G-1 EINGNNYV   | 34  | >KIT-V569G-1 EINGNNYG   | 30926 | 30892 |
| >KIT-V569G-1 EINGNNYVY  | 203 | >KIT-V569G-1 EINGNNYGY  | 35    | 168   |
| >KIT-V569G-1 EINGNNYVY  | 17  | >KIT-V569G-1 EINGNNYGY  | 14    | 3     |
| >KIT-V569G-1 EINGNNYVY  | 425 | >KIT-V569G-1 EINGNNYGY  | 38    | 387   |
| >KIT-V569G-1 EINGNNYVY  | 218 | >KIT-V569G-1 EINGNNYGY  | 163   | 55    |
| >KIT-V569G-1 EINGNNYVY  | 70  | >KIT-V569G-1 EINGNNYGY  | 79    | 9     |
| >KIT-V569G-1 EINGNNYVY  | 340 | >KIT-V569G-1 EINGNNYGY  | 288   | 52    |
| >KIT-V569G-1 EINGNNYV   | 8   | >KIT-V569G-1 EINGNNYG   | 3140  | 3132  |
| >KIT-V569G-1 EINGNNYVYI | 101 | >KIT-V569G-1 EINGNNYGYI | 85    | 16    |
| >KIT-V569G-1 EINGNNYV   | 11  | >KIT-V569G-1 EINGNNYG   | 12528 | 12517 |
| >KIT-V569G-1 EINGNNYVYI | 36  | >KIT-V569G-1 EINGNNYGYI | 32    | 4     |
| >KIT-V569G-1 EINGNNYVY  | 168 | >KIT-V569G-1 EINGNNYGY  | 419   | 251   |
| >KIT-V569G-1 EINGNNYVY  | 81  | >KIT-V569G-1 EINGNNYGY  | 123   | 42    |
| >KIT-V569G-1 EEINGNNYVY | 76  | >KIT-V569G-1 EEINGNNYGY | 43    | 33    |
| >KIT-V569G-1 EEINGNNYVY | 179 | >KIT-V569G-1 EEINGNNYGY | 142   | 37    |
| >KIT-V569G-1 EEINGNNYVY | 134 | >KIT-V569G-1 EEINGNNYGY | 20    | 114   |
| >KIT-V569G-1 EEINGNNYVY | 328 | >KIT-V569G-1 EEINGNNYGY | 397   | 69    |
| >KIT-V569G-1 EEINGNNYV  | 241 | >KIT-V569G-1 EEINGNNYG  | 17683 | 17442 |
| >KIT-V569G-1 EEINGNNYVY | 322 | >KIT-V569G-1 EEINGNNYGY | 926   | 604   |
| >KIT-V569G-1 EEINGNNYV  | 234 | >KIT-V569G-1 EEINGNNYG  | 14379 | 14145 |
| >KIT-V569G-1 EEINGNNYVY | 59  | >KIT-V569G-1 EEINGNNYGY | 92    | 33    |
| >KIT-V569G-1 EEINGNNYVY | 300 | >KIT-V569G-1 EEINGNNYGY | 764   | 464   |
| >KIT-V569G-1 EEINGNNYVY | 466 | >KIT-V569G-1 EEINGNNYGY | 317   | 149   |
| >KIT-V569G-1 EEINGNNYV  | 488 | >KIT-V569G-1 EEINGNNYG  | 2824  | 2336  |
| >KIT-V569G-1 EEINGNNYVY | 180 | >KIT-V569G-1 EEINGNNYGY | 177   | 3     |
| >KIT-V569G-1 EEINGNNYVY | 190 | >KIT-V569G-1 EEINGNNYGY | 342   | 152   |
| >KIT-V569G-1 EEINGNNYV  | 74  | >KIT-V569G-1 EEINGNNYG  | 889   | 815   |
| >KIT-V569G-1 EEINGNNYVY | 97  | >KIT-V569G-1 EEINGNNYGY | 238   | 141   |
| >KIT-V569G-1 EEINGNNYV  | 305 | >KIT-V569G-1 EEINGNNYG  | 18971 | 18666 |
| >KIT-V569G-1 EEINGNNYVY | 63  | >KIT-V569G-1 EEINGNNYGY | 81    | 18    |
| >KIT-V569G-1 VEEINGNNYV | 328 | >KIT-V569G-1 VEEINGNNYC | 18313 | 17985 |
| >KIT-V569G-1 VEEINGNNYV | 94  | >KIT-V569G-1 VEEINGNNYC | 151   | 57    |
| >KIT-V569G-1 VEEINGNNYV | 377 | >KIT-V569G-1 VEEINGNNYC | 28444 | 28067 |
| >KIT-V569I-1 VYIDPTQLPY | 495 | >KIT-V569I-1 YIDPTQLPY  | 903   | 408   |
| >KIT-V569I-1 VYIDPTQL   | 216 | >KIT-V569I-1 YIDPTQL    | 160   | 56    |
| >KIT-V569I-1 VYIDPTQL   | 694 | >KIT-V569I-1 YIDPTQL    | 432   | 262   |



|                                |     |                               |      |      |
|--------------------------------|-----|-------------------------------|------|------|
| >KIT-V569I- $\mu$ VYIDPTQL     | 43  | >KIT-V569I- $\pi$ IYIDPTQL    | 53   | 10   |
| >KIT-V569I- $\mu$ VYIDPTQLPY   | 319 | >KIT-V569I- $\pi$ IYIDPTQLPY  | 438  | 119  |
| >KIT-V569I- $\mu$ VYIDPTQLPY   | 33  | >KIT-V569I- $\pi$ IYIDPTQLPY  | 25   | 8    |
| >KIT-V569I- $\mu$ VYIDPTQLPY   | 64  | >KIT-V569I- $\pi$ IYIDPTQLPY  | 59   | 5    |
| >KIT-V569I- $\mu$ VYIDPTQLPY   | 32  | >KIT-V569I- $\pi$ IYIDPTQLPY  | 52   | 20   |
| >KIT-V569I- $\mu$ VYIDPTQLPY   | 837 | >KIT-V569I- $\pi$ IYIDPTQLPY  | 403  | 434  |
| >KIT-V569I- $\mu$ VYVYIDPTQL   | 193 | >KIT-V569I- $\pi$ YIYIDPTQL   | 95   | 98   |
| >KIT-V569I- $\mu$ VYVYIDPTQL   | 135 | >KIT-V569I- $\pi$ YIYIDPTQL   | 53   | 82   |
| >KIT-V569I- $\mu$ VYVYIDPTQL   | 24  | >KIT-V569I- $\pi$ YIYIDPTQL   | 13   | 11   |
| >KIT-V569I- $\mu$ VYVYIDPTQL   | 261 | >KIT-V569I- $\pi$ YIYIDPTQL   | 318  | 57   |
| >KIT-V569I- $\mu$ VYVYIDPTQL   | 18  | >KIT-V569I- $\pi$ YIYIDPTQL   | 8    | 10   |
| >KIT-V569I- $\mu$ VYVYIDPTQL   | 71  | >KIT-V569I- $\pi$ YIYIDPTQL   | 23   | 48   |
| >KIT-V569I- $\mu$ VYVYIDPTQL   | 720 | >KIT-V569I- $\pi$ YIYIDPTQL   | 295  | 425  |
| >KIT-V569I- $\mu$ VYVYIDPTQ    | 673 | >KIT-V569I- $\pi$ YIYIDPTQ    | 189  | 484  |
| >KIT-V569I- $\mu$ VYVYIDPTQL   | 16  | >KIT-V569I- $\pi$ YIYIDPTQL   | 8    | 8    |
| >KIT-V569I- $\mu$ VYVYIDPTQLPY | 492 | >KIT-V569I- $\pi$ YIYIDPTQLPY | 466  | 26   |
| >KIT-V569I- $\mu$ VYVYIDPTQLPY | 330 | >KIT-V569I- $\pi$ YIYIDPTQLPY | 629  | 299  |
| >KIT-V569I- $\mu$ VYVYIDPTQLPY | 387 | >KIT-V569I- $\pi$ YIYIDPTQLPY | 915  | 528  |
| >KIT-V569I- $\mu$ VYVYIDPTQLPY | 91  | >KIT-V569I- $\pi$ YIYIDPTQLPY | 398  | 307  |
| >KIT-V569I- $\mu$ VYVYIDPTQLPY | 6   | >KIT-V569I- $\pi$ YIYIDPTQLPY | 7    | 1    |
| >KIT-V569I- $\mu$ VYVYIDPTQLPY | 451 | >KIT-V569I- $\pi$ YIYIDPTQLPY | 1211 | 760  |
| >KIT-V569I- $\mu$ VYVYIDPTQL   | 162 | >KIT-V569I- $\pi$ YIYIDPTQL   | 363  | 201  |
| >KIT-V569I- $\mu$ VYVYIDPTQLPY | 16  | >KIT-V569I- $\pi$ YIYIDPTQLPY | 30   | 14   |
| >KIT-V569I- $\mu$ VYVYIDPTQLPY | 63  | >KIT-V569I- $\pi$ YIYIDPTQLPY | 61   | 2    |
| >KIT-V569I- $\mu$ VYVYIDPTQLPY | 73  | >KIT-V569I- $\pi$ YIYIDPTQLPY | 62   | 11   |
| >KIT-V569I- $\mu$ VYVYIDPTQLPY | 53  | >KIT-V569I- $\pi$ YIYIDPTQLPY | 37   | 16   |
| >KIT-V569I- $\mu$ VYVYIDPTQL   | 27  | >KIT-V569I- $\pi$ YIYIDPTQL   | 130  | 103  |
| >KIT-V569I- $\mu$ VYVYIDPTQLPY | 7   | >KIT-V569I- $\pi$ YIYIDPTQLPY | 15   | 8    |
| >KIT-V569I- $\mu$ VYVYIDPTQLPY | 17  | >KIT-V569I- $\pi$ YIYIDPTQLPY | 39   | 22   |
| >KIT-V569I- $\mu$ VYVYIDPTQL   | 423 | >KIT-V569I- $\pi$ YIYIDPTQL   | 1576 | 1153 |
| >KIT-V569I- $\mu$ VYVYIDPTQLPY | 301 | >KIT-V569I- $\pi$ YIYIDPTQLPY | 1123 | 822  |
| >KIT-V569I- $\mu$ VVEEINGNNY   | 217 | >KIT-V569I- $\pi$ VVEEINGNNY  | 737  | 520  |
| >KIT-V569I- $\mu$ VVEEINGNNY   | 87  | >KIT-V569I- $\pi$ VVEEINGNNY  | 557  | 470  |
| >KIT-V569I- $\mu$ VVEEINGNNY   | 121 | >KIT-V569I- $\pi$ VVEEINGNNY  | 1644 | 1523 |
| >KIT-V569I- $\mu$ VVEEINGNNY   | 35  | >KIT-V569I- $\pi$ VVEEINGNNY  | 4716 | 4681 |
| >KIT-V569I- $\mu$ VVEEINGNNY   | 167 | >KIT-V569I- $\pi$ VVEEINGNNY  | 857  | 690  |
| >KIT-V569I- $\mu$ NYVYIDPTQL   | 150 | >KIT-V569I- $\pi$ NYIYIDPTQL  | 69   | 81   |
| >KIT-V569I- $\mu$ NYVYIDPTQL   | 163 | >KIT-V569I- $\pi$ NYIYIDPTQL  | 66   | 97   |
| >KIT-V569I- $\mu$ INGNNYVYI    | 163 | >KIT-V569I- $\pi$ INGNNYIYI   | 143  | 20   |
| >KIT-V569I- $\mu$ INGNNYVYI    | 141 | >KIT-V569I- $\pi$ INGNNYIYI   | 144  | 3    |
| >KIT-V569I- $\mu$ INGNNYVY     | 382 | >KIT-V569I- $\pi$ INGNNYIY    | 323  | 59   |
| >KIT-V569I- $\mu$ INGNNYVY     | 256 | >KIT-V569I- $\pi$ INGNNYIY    | 274  | 18   |
| >KIT-V569I- $\mu$ EINGNNYV     | 299 | >KIT-V569I- $\pi$ EINGNNYI    | 1216 | 917  |

|                              |     |                                |      |      |
|------------------------------|-----|--------------------------------|------|------|
| >KIT-V569I- $\nu$ EINGNNYV   | 64  | >KIT-V569I- $\eta$ EINGNNYI    | 930  | 866  |
| >KIT-V569I- $\nu$ EINGNNYVYI | 229 | >KIT-V569I- $\eta$ EINGNNYIYI  | 245  | 16   |
| >KIT-V569I- $\nu$ EINGNNYV   | 442 | >KIT-V569I- $\eta$ EINGNNYI    | 8901 | 8459 |
| >KIT-V569I- $\nu$ EINGNNYV   | 41  | >KIT-V569I- $\eta$ EINGNNYI    | 775  | 734  |
| >KIT-V569I- $\nu$ EINGNNYVYI | 257 | >KIT-V569I- $\eta$ EINGNNYIYI  | 279  | 22   |
| >KIT-V569I- $\nu$ EINGNNYV   | 34  | >KIT-V569I- $\eta$ EINGNNYI    | 4255 | 4221 |
| >KIT-V569I- $\nu$ EINGNNYVY  | 203 | >KIT-V569I- $\eta$ EINGNNYIY   | 255  | 52   |
| >KIT-V569I- $\nu$ EINGNNYVY  | 17  | >KIT-V569I- $\eta$ EINGNNYIY   | 24   | 7    |
| >KIT-V569I- $\nu$ EINGNNYVY  | 425 | >KIT-V569I- $\eta$ EINGNNYIY   | 617  | 192  |
| >KIT-V569I- $\nu$ EINGNNYVY  | 218 | >KIT-V569I- $\eta$ EINGNNYIY   | 203  | 15   |
| >KIT-V569I- $\nu$ EINGNNYVY  | 70  | >KIT-V569I- $\eta$ EINGNNYIY   | 74   | 4    |
| >KIT-V569I- $\nu$ EINGNNYVY  | 340 | >KIT-V569I- $\eta$ EINGNNYIY   | 318  | 22   |
| >KIT-V569I- $\nu$ EINGNNYV   | 8   | >KIT-V569I- $\eta$ EINGNNYI    | 15   | 7    |
| >KIT-V569I- $\nu$ EINGNNYVYI | 101 | >KIT-V569I- $\eta$ EINGNNYIYI  | 82   | 19   |
| >KIT-V569I- $\nu$ EINGNNYV   | 11  | >KIT-V569I- $\eta$ EINGNNYI    | 46   | 35   |
| >KIT-V569I- $\nu$ EINGNNYVYI | 36  | >KIT-V569I- $\eta$ EINGNNYIYI  | 30   | 6    |
| >KIT-V569I- $\nu$ EINGNNYVY  | 168 | >KIT-V569I- $\eta$ EINGNNYIY   | 285  | 117  |
| >KIT-V569I- $\nu$ EINGNNYVY  | 81  | >KIT-V569I- $\eta$ EINGNNYIY   | 74   | 7    |
| >KIT-V569I- $\nu$ EEINGNNYV  | 837 | >KIT-V569I- $\eta$ EEINGNNYI   | 122  | 715  |
| >KIT-V569I- $\nu$ EEINGNNYVY | 76  | >KIT-V569I- $\eta$ EEINGNNYIYI | 79   | 3    |
| >KIT-V569I- $\nu$ EEINGNNYVY | 179 | >KIT-V569I- $\eta$ EEINGNNYIY  | 251  | 72   |
| >KIT-V569I- $\nu$ EEINGNNYVY | 134 | >KIT-V569I- $\eta$ EEINGNNYIY  | 191  | 57   |
| >KIT-V569I- $\nu$ EEINGNNYVY | 328 | >KIT-V569I- $\eta$ EEINGNNYIY  | 236  | 92   |
| >KIT-V569I- $\nu$ EEINGNNYV  | 241 | >KIT-V569I- $\eta$ EEINGNNYI   | 1422 | 1181 |
| >KIT-V569I- $\nu$ EEINGNNYVY | 322 | >KIT-V569I- $\eta$ EEINGNNYIY  | 541  | 219  |
| >KIT-V569I- $\nu$ EEINGNNYV  | 234 | >KIT-V569I- $\eta$ EEINGNNYI   | 96   | 138  |
| >KIT-V569I- $\nu$ EEINGNNYVY | 59  | >KIT-V569I- $\eta$ EEINGNNYIYI | 43   | 16   |
| >KIT-V569I- $\nu$ EEINGNNYV  | 595 | >KIT-V569I- $\eta$ EEINGNNYI   | 416  | 179  |
| >KIT-V569I- $\nu$ EEINGNNYVY | 300 | >KIT-V569I- $\eta$ EEINGNNYIYI | 228  | 72   |
| >KIT-V569I- $\nu$ EEINGNNYVY | 466 | >KIT-V569I- $\eta$ EEINGNNYIY  | 528  | 62   |
| >KIT-V569I- $\nu$ EEINGNNYV  | 488 | >KIT-V569I- $\eta$ EEINGNNYI   | 354  | 134  |
| >KIT-V569I- $\nu$ EEINGNNYVY | 180 | >KIT-V569I- $\eta$ EEINGNNYIY  | 160  | 20   |
| >KIT-V569I- $\nu$ EEINGNNYVY | 190 | >KIT-V569I- $\eta$ EEINGNNYIYI | 155  | 35   |
| >KIT-V569I- $\nu$ EEINGNNYV  | 74  | >KIT-V569I- $\eta$ EEINGNNYI   | 231  | 157  |
| >KIT-V569I- $\nu$ EEINGNNYVY | 97  | >KIT-V569I- $\eta$ EEINGNNYIYI | 79   | 18   |
| >KIT-V569I- $\nu$ EEINGNNYV  | 305 | >KIT-V569I- $\eta$ EEINGNNYI   | 86   | 219  |
| >KIT-V569I- $\nu$ EEINGNNYVY | 63  | >KIT-V569I- $\eta$ EEINGNNYIYI | 63   | 0    |
| >KIT-V569I- $\nu$ VEEINGNNYV | 328 | >KIT-V569I- $\eta$ VEEINGNNYI  | 56   | 272  |
| >KIT-V569I- $\nu$ VEEINGNNYV | 94  | >KIT-V569I- $\eta$ VEEINGNNYI' | 111  | 17   |
| >KIT-V569I- $\nu$ VEEINGNNYV | 377 | >KIT-V569I- $\eta$ VEEINGNNYI  | 36   | 341  |
| >KIT-V643A- $\nu$ VLSYLGNHM  | 100 | >KIT-V643A- $\tau$ ALSYLGNHM   | 46   | 54   |
| >KIT-V643A- $\nu$ VLSYLGNHMI | 36  | >KIT-V643A- $\tau$ ALSYLGNHMI  | 19   | 17   |
| >KIT-V643A- $\nu$ VLSYLGNHMI | 48  | >KIT-V643A- $\tau$ ALSYLGNHMI  | 35   | 13   |

|                         |      |                         |      |      |
|-------------------------|------|-------------------------|------|------|
| >KIT-V643A-1 VLSYLGNHMI | 201  | >KIT-V643A-1 ALSYLGNHMI | 268  | 67   |
| >KIT-V643A-1 VLSYLGNHMI | 217  | >KIT-V643A-1 ALSYLGNHMI | 267  | 50   |
| >KIT-V643A-1 VLSYLGNHMI | 294  | >KIT-V643A-1 ALSYLGNHMI | 298  | 4    |
| >KIT-V643A-1 VLSYLGNHMI | 73   | >KIT-V643A-1 ALSYLGNHMI | 72   | 1    |
| >KIT-V643A-1 VLSYLGNHMI | 1352 | >KIT-V643A-1 ALSYLGNHMI | 281  | 1071 |
| >KIT-V643A-1 VLSYLGNHM  | 112  | >KIT-V643A-1 ALSYLGNHM  | 81   | 31   |
| >KIT-V643A-1 VLSYLGNHM  | 608  | >KIT-V643A-1 ALSYLGNHM  | 367  | 241  |
| >KIT-V643A-1 KVLSYLGNHM | 147  | >KIT-V643A-1 KALSYLGNHM | 2053 | 1906 |
| >KIT-V643A-1 KVLSYLGNHM | 201  | >KIT-V643A-1 KALSYLGNHM | 817  | 616  |
| >KIT-V643A-1 KVLSYLGNH  | 497  | >KIT-V643A-1 KALSYLGNH  | 1179 | 682  |
| >KIT-V643A-1 KVLSYLGNHM | 968  | >KIT-V643A-1 KALSYLGNHM | 224  | 744  |
| >KIT-V643A-1 KVLSYLGNHM | 765  | >KIT-V643A-1 KALSYLGNHM | 68   | 697  |
| >KIT-V643A-1 KVLSYLGNHM | 1113 | >KIT-V643A-1 KALSYLGNHM | 175  | 938  |
| >KIT-V643A-1 LKLSYLGNH  | 19   | >KIT-V643A-1 LKALSYLGNH | 22   | 3    |
| >KIT-V643A-1 ELKVLSYL   | 445  | >KIT-V643A-1 ELKALSYL   | 128  | 317  |
| >KIT-V643A-1 ELKVLSYL   | 853  | >KIT-V643A-1 ELKALSYL   | 265  | 588  |
| >KIT-V643A-1 ELKVLSYL   | 221  | >KIT-V643A-1 ELKALSYL   | 79   | 142  |
| >KIT-V643A-1 ELKVLSYL   | 285  | >KIT-V643A-1 ELKALSYL   | 328  | 43   |
| >KIT-V643A-1 SELKVLSY   | 122  | >KIT-V643A-1 SELKALSY   | 52   | 70   |
| >KIT-V643A-1 SELKVLSYL  | 14   | >KIT-V643A-1 SELKALSYL  | 16   | 2    |
| >KIT-V643A-1 SELKVLSYL  | 2711 | >KIT-V643A-1 SELKALSYL  | 110  | 2601 |
| >KIT-V643A-1 SELKVLSYL  | 365  | >KIT-V643A-1 SELKALSYL  | 450  | 85   |
| >KIT-V643A-1 SELKVLSY   | 102  | >KIT-V643A-1 SELKALSY   | 191  | 89   |
| >KIT-V643A-1 SELKVLSY   | 361  | >KIT-V643A-1 SELKALSY   | 303  | 58   |
| >KIT-V643A-1 SELKVLSY   | 22   | >KIT-V643A-1 SELKALSY   | 18   | 4    |
| >KIT-V643A-1 SELKVLSYL  | 427  | >KIT-V643A-1 SELKALSYL  | 237  | 190  |
| >KIT-V643A-1 SELKVLSYL  | 54   | >KIT-V643A-1 SELKALSYL  | 54   | 0    |
| >KIT-V643A-1 SELKVLSYL  | 97   | >KIT-V643A-1 SELKALSYL  | 73   | 24   |
| >KIT-V643A-1 SELKVLSY   | 171  | >KIT-V643A-1 SELKALSY   | 179  | 8    |
| >KIT-V643A-1 SELKVLSY   | 54   | >KIT-V643A-1 SELKALSY   | 47   | 7    |
| >KIT-V643A-1 SELKVLSYL  | 151  | >KIT-V643A-1 SELKALSYL  | 175  | 24   |
| >KIT-V643A-1 SELKVLSYLG | 270  | >KIT-V643A-1 SELKALSYLG | 406  | 136  |
| >KIT-V643A-1 SELKVLSYLG | 276  | >KIT-V643A-1 SELKALSYLG | 288  | 12   |
| >KIT-V643A-1 SELKVLSYL  | 437  | >KIT-V643A-1 SELKALSYL  | 1003 | 566  |
| >KIT-V643A-1 SELKVLSYL  | 10   | >KIT-V643A-1 SELKALSYL  | 12   | 2    |
| >KIT-V643A-1 MSELKVLSY  | 11   | >KIT-V643A-1 MSELKALSY  | 9    | 2    |
| >KIT-V643A-1 MSELKVLSY  | 246  | >KIT-V643A-1 MSELKALSY  | 97   | 149  |
| >KIT-V643A-1 MSELKVLSY  | 4    | >KIT-V643A-1 MSELKALSY  | 4    | 0    |
| >KIT-V643A-1 MSELKVLSYL | 32   | >KIT-V643A-1 MSELKALSYL | 16   | 16   |
| >KIT-V643A-1 MSELKVLSY  | 738  | >KIT-V643A-1 MSELKALSY  | 488  | 250  |
| >KIT-V643A-1 MSELKVLSY  | 485  | >KIT-V643A-1 MSELKALSY  | 195  | 290  |
| >KIT-V643A-1 MSELKVLSYL | 106  | >KIT-V643A-1 MSELKALSYL | 85   | 21   |
| >KIT-V643A-1 MSELKVLSY  | 909  | >KIT-V643A-1 MSELKALSY  | 465  | 444  |

|                          |     |                          |     |     |
|--------------------------|-----|--------------------------|-----|-----|
| >KIT-V643A-1 LMSELKVLSY  | 472 | >KIT-V643A-r LMSELKALSY  | 398 | 74  |
| >KIT-V643A-1 LMSELKVL    | 384 | >KIT-V643A-r LMSELKAL    | 151 | 233 |
| >KIT-V643A-1 LMSELKVLSYI | 22  | >KIT-V643A-r LMSELKALSYI | 22  | 0   |
| >KIT-V643A-1 LMSELKVL    | 28  | >KIT-V643A-r LMSELKAL    | 10  | 18  |
| >KIT-V643A-1 LMSELKVL    | 576 | >KIT-V643A-r LMSELKALS   | 325 | 251 |
| >KIT-V643A-1 LMSELKVLSYI | 3   | >KIT-V643A-r LMSELKALSYI | 3   | 0   |
| >KIT-V643A-1 LMSELKVL    | 53  | >KIT-V643A-r LMSELKAL    | 19  | 34  |
| >KIT-V643A-1 LMSELKVLSYI | 11  | >KIT-V643A-r LMSELKALSYI | 7   | 4   |
| >KIT-V643A-1 LMSELKVL    | 735 | >KIT-V643A-r LMSELKAL    | 177 | 558 |
| >KIT-V643A-1 LMSELKVLSYI | 31  | >KIT-V643A-r LMSELKALSYI | 29  | 2   |
| >KIT-V643A-1 LMSELKVL    | 19  | >KIT-V643A-r LMSELKAL    | 11  | 8   |
| >KIT-V643A-1 LMSELKVLSYI | 3   | >KIT-V643A-r LMSELKALSYI | 4   | 1   |
| >KIT-V643A-1 LMSELKVL    | 53  | >KIT-V643A-r LMSELKAL    | 25  | 28  |
| >KIT-V643A-1 LMSELKVLSYI | 8   | >KIT-V643A-r LMSELKALSYI | 8   | 0   |
| >KIT-V643A-1 LMSELKVL    | 116 | >KIT-V643A-r LMSELKAL    | 135 | 19  |
| >KIT-V643A-1 LMSELKVLSYI | 12  | >KIT-V643A-r LMSELKALSYI | 15  | 3   |
| >KIT-V643A-1 LMSELKVL    | 104 | >KIT-V643A-r LMSELKAL    | 71  | 33  |
| >KIT-V643A-1 LMSELKVLSYI | 8   | >KIT-V643A-r LMSELKALSYI | 6   | 2   |
| >KIT-V643A-1 LMSELKVL    | 6   | >KIT-V643A-r LMSELKAL    | 6   | 0   |
| >KIT-V643A-1 LMSELKVLSYI | 3   | >KIT-V643A-r LMSELKALSYI | 2   | 1   |
| >KIT-V643A-1 LMSELKVLSY  | 243 | >KIT-V643A-r LMSELKALSY  | 136 | 107 |
| >KIT-V643A-1 LMSELKVLSY  | 465 | >KIT-V643A-r LMSELKALSY  | 573 | 108 |
| >KIT-V643A-1 LMSELKVLSY  | 131 | >KIT-V643A-r LMSELKALSY  | 107 | 24  |
| >KIT-V643A-1 LMSELKVL    | 357 | >KIT-V643A-r LMSELKAL    | 327 | 30  |
| >KIT-V643A-1 LMSELKVLSY  | 44  | >KIT-V643A-r LMSELKALSY  | 46  | 2   |
| >KIT-V643A-1 LMSELKVLSYI | 435 | >KIT-V643A-r LMSELKALSYI | 296 | 139 |
| >KIT-V643A-1 LMSELKVLSY  | 711 | >KIT-V643A-r LMSELKALSY  | 459 | 252 |
| >KIT-V643A-1 LMSELKVL    | 289 | >KIT-V643A-r LMSELKAL    | 213 | 76  |
| >KIT-V643A-1 LMSELKVLSY  | 30  | >KIT-V643A-r LMSELKALSY  | 52  | 22  |
| >KIT-V643A-1 LMSELKVLSYI | 347 | >KIT-V643A-r LMSELKALSYI | 342 | 5   |
| >KIT-V643A-1 LMSELKVLSY  | 349 | >KIT-V643A-r LMSELKALSY  | 167 | 182 |
| >KIT-V643A-1 LMSELKVLSY  | 254 | >KIT-V643A-r LMSELKALSY  | 164 | 90  |
| >KIT-V643A-1 ALMSELKV    | 13  | >KIT-V643A-r ALMSELKA    | 61  | 48  |
| >KIT-V643A-1 ALMSELKVL   | 93  | >KIT-V643A-r ALMSELKAL   | 43  | 50  |
| >KIT-V643A-1 ALMSELKV    | 7   | >KIT-V643A-r ALMSELKA    | 32  | 25  |
| >KIT-V643A-1 ALMSELKVL   | 16  | >KIT-V643A-r ALMSELKAL   | 6   | 10  |
| >KIT-V643A-1 ALMSELKVL   | 650 | >KIT-V643A-r ALMSELKALS  | 429 | 221 |
| >KIT-V643A-1 ALMSELKV    | 6   | >KIT-V643A-r ALMSELKA    | 24  | 18  |
| >KIT-V643A-1 ALMSELKVL   | 18  | >KIT-V643A-r ALMSELKAL   | 8   | 10  |
| >KIT-V643A-1 ALMSELKV    | 25  | >KIT-V643A-r ALMSELKA    | 281 | 256 |
| >KIT-V643A-1 ALMSELKVL   | 476 | >KIT-V643A-r ALMSELKAL   | 93  | 383 |
| >KIT-V643A-1 ALMSELKV    | 4   | >KIT-V643A-r ALMSELKA    | 100 | 96  |
| >KIT-V643A-1 ALMSELKVL   | 41  | >KIT-V643A-r ALMSELKAL   | 18  | 23  |

|                         |      |                         |      |      |
|-------------------------|------|-------------------------|------|------|
| >KIT-V643A-1 ALMSELKV   | 7    | >KIT-V643A-r ALMSELKA   | 321  | 314  |
| >KIT-V643A-1 ALMSELKVL  | 31   | >KIT-V643A-r ALMSELKAL  | 14   | 17   |
| >KIT-V643A-1 ALMSELKV   | 9    | >KIT-V643A-r ALMSELKA   | 202  | 193  |
| >KIT-V643A-1 ALMSELKV   | 4    | >KIT-V643A-r ALMSELKA   | 292  | 288  |
| >KIT-V643A-1 ALMSELKVL  | 39   | >KIT-V643A-r ALMSELKAL  | 28   | 11   |
| >KIT-V643A-1 ALMSELKV   | 2    | >KIT-V643A-r ALMSELKA   | 10   | 8    |
| >KIT-V643A-1 ALMSELKVL  | 10   | >KIT-V643A-r ALMSELKAL  | 6    | 4    |
| >KIT-V643A-1 ALMSELKVLS | 293  | >KIT-V643A-r ALMSELKALS | 282  | 11   |
| >KIT-V643A-1 ALMSELKVLS | 306  | >KIT-V643A-r ALMSELKALS | 340  | 34   |
| >KIT-V643A-1 ALMSELKVLS | 200  | >KIT-V643A-r ALMSELKALS | 467  | 267  |
| >KIT-V643A-1 ALMSELKVLS | 125  | >KIT-V643A-r ALMSELKALS | 75   | 50   |
| >KIT-V643A-1 ALMSELKVLS | 115  | >KIT-V643A-r ALMSELKALS | 98   | 17   |
| >KIT-V643A-1 ALMSELKVLS | 74   | >KIT-V643A-r ALMSELKALS | 67   | 7    |
| >KIT-V643A-1 ALMSELKVL  | 1005 | >KIT-V643A-r ALMSELKAL  | 458  | 547  |
| >KIT-V643A-1 ALMSELKVLS | 48   | >KIT-V643A-r ALMSELKALS | 58   | 10   |
| >KIT-V643A-1 ALMSELKVLS | 439  | >KIT-V643A-r ALMSELKALS | 326  | 113  |
| >KIT-V643A-1 ALMSELKVL  | 216  | >KIT-V643A-r ALMSELKAL  | 97   | 119  |
| >KIT-V643A-1 ALMSELKVLS | 25   | >KIT-V643A-r ALMSELKALS | 29   | 4    |
| >KIT-V643A-1 ALMSELKVLS | 270  | >KIT-V643A-r ALMSELKALS | 202  | 68   |
| >KIT-V643A-1 EALMSELKV  | 192  | >KIT-V643A-r EALMSELKA  | 6026 | 5834 |
| >KIT-V643A-1 REALMSELKV | 131  | >KIT-V643A-r REALMSELKA | 5056 | 4925 |
| >KIT-V643A-1 REALMSELKV | 58   | >KIT-V643A-r REALMSELKA | 69   | 11   |
| >KIT-V643A-1 REALMSELKV | 30   | >KIT-V643A-r REALMSELKA | 20   | 10   |
| >KIT-V643A-1 REALMSELKV | 131  | >KIT-V643A-r REALMSELKA | 276  | 145  |
| >KIT-V643A-1 REALMSELKV | 74   | >KIT-V643A-r REALMSELKA | 54   | 20   |
| >KIT-V643A-1 REALMSELKV | 425  | >KIT-V643A-r REALMSELKA | 119  | 306  |
| >KIT-V643A-1 REALMSELKV | 41   | >KIT-V643A-r REALMSELKA | 999  | 958  |
| >KIT-V643A-1 REALMSELKV | 10   | >KIT-V643A-r REALMSELKA | 8    | 2    |
| >KIT-V654A-1 VNLLGACTI  | 473  | >KIT-V654A-r ANLLGACTI  | 1152 | 679  |
| >KIT-V654A-1 VNLLGACTI  | 677  | >KIT-V654A-r ANLLGACTI  | 381  | 296  |
| >KIT-V654A-1 IVNLLGACTI | 387  | >KIT-V654A-r IANLLGACTI | 3543 | 3156 |
| >KIT-V654A-1 IVNLLGACTI | 1204 | >KIT-V654A-r IANLLGACTI | 139  | 1065 |
| >KIT-V654A-1 IVNLLGACTI | 356  | >KIT-V654A-r IANLLGACTI | 338  | 18   |
| >KIT-V654A-1 LSYLGNHMN  | 440  | >KIT-V654A-r LSYLGNHMN  | 2000 | 1560 |
| >KIT-V654A-1 LSYLGNHMN  | 332  | >KIT-V654A-r LSYLGNHMN  | 4582 | 4250 |
| >KIT-V654A-1 LSYLGNHMN  | 288  | >KIT-V654A-r LSYLGNHMN  | 2281 | 1993 |
| >KIT-V654A-1 NIVNLLGA   | 188  | >KIT-V654A-r NIANLLGA   | 62   | 126  |
| >KIT-V654A-1 NIVNLLGACT | 305  | >KIT-V654A-r NIANLLGACT | 107  | 198  |
| >KIT-V654A-1 NIVNLLGA   | 135  | >KIT-V654A-r NIANLLGA   | 190  | 55   |
| >KIT-V654A-1 NIVNLLGACT | 224  | >KIT-V654A-r NIANLLGACT | 286  | 62   |
| >KIT-V654A-1 NIVNLLGA   | 895  | >KIT-V654A-r NIANLLGA   | 247  | 648  |
| >KIT-V654A-1 NIVNLLGACT | 686  | >KIT-V654A-r NIANLLGACT | 184  | 502  |
| >KIT-V654A-1 NIVNLLGACT | 347  | >KIT-V654A-r NIANLLGACT | 173  | 174  |

|                         |     |                         |       |       |
|-------------------------|-----|-------------------------|-------|-------|
| >KIT-V654A-1 HMNIVNLL   | 410 | >KIT-V654A-r HMNIANLL   | 1232  | 822   |
| >KIT-V654A-1 HMNIVNLL   | 11  | >KIT-V654A-r HMNIANLL   | 12    | 1     |
| >KIT-V654A-1 HMNIVNLLG, | 450 | >KIT-V654A-r HMNIANLLG, | 353   | 97    |
| >KIT-V654A-1 HMNIVNLL   | 48  | >KIT-V654A-r HMNIANLL   | 93    | 45    |
| >KIT-V654A-1 HMNIVNLLG, | 160 | >KIT-V654A-r HMNIANLLG, | 122   | 38    |
| >KIT-V654A-1 HMNIVNLL   | 41  | >KIT-V654A-r HMNIANLL   | 261   | 220   |
| >KIT-V654A-1 HMNIVNLLG, | 74  | >KIT-V654A-r HMNIANLLG, | 199   | 125   |
| >KIT-V654A-1 HMNIVNLLG, | 346 | >KIT-V654A-r HMNIANLLG, | 1168  | 822   |
| >KIT-V654A-1 HMNIVNLL   | 187 | >KIT-V654A-r HMNIANLL   | 337   | 150   |
| >KIT-V654A-1 HMNIVNLLG, | 469 | >KIT-V654A-r HMNIANLLG, | 463   | 6     |
| >KIT-V654A-1 HMNIVNLL   | 116 | >KIT-V654A-r HMNIANLL   | 319   | 203   |
| >KIT-V654A-1 HMNIVNLLG, | 270 | >KIT-V654A-r HMNIANLLG, | 401   | 131   |
| >KIT-V654A-1 HMNIVNLL   | 45  | >KIT-V654A-r HMNIANLL   | 60    | 15    |
| >KIT-V654A-1 HMNIVNLLG, | 158 | >KIT-V654A-r HMNIANLLG, | 103   | 55    |
| >KIT-V654A-1 HMNIVNLL   | 434 | >KIT-V654A-r HMNIANLL   | 371   | 63    |
| >KIT-V654A-1 NHMNIVNLL  | 242 | >KIT-V654A-r NHMNIANLL  | 787   | 545   |
| >KIT-V654A-1 NHMNIVNL   | 361 | >KIT-V654A-r NHMNIANL   | 307   | 54    |
| >KIT-V654A-1 NHMNIVNLL  | 171 | >KIT-V654A-r NHMNIANLL  | 160   | 11    |
| >KIT-V654A-1 NHMNIVNL   | 15  | >KIT-V654A-r NHMNIANL   | 15    | 0     |
| >KIT-V654A-1 NHMNIVNLL  | 9   | >KIT-V654A-r NHMNIANLL  | 7     | 2     |
| >KIT-V654A-1 YLGNHMNIV  | 27  | >KIT-V654A-r YLGNHMNIA  | 172   | 145   |
| >KIT-V654A-1 YLGNHMNIV  | 23  | >KIT-V654A-r YLGNHMNIA  | 22    | 1     |
| >KIT-V654A-1 YLGNHMNIV  | 5   | >KIT-V654A-r YLGNHMNIA  | 18    | 13    |
| >KIT-V654A-1 YLGNHMNIV  | 6   | >KIT-V654A-r YLGNHMNIA  | 5     | 1     |
| >KIT-V654A-1 YLGNHMNIV  | 3   | >KIT-V654A-r YLGNHMNIA  | 7     | 4     |
| >KIT-V654A-1 YLGNHMNIV  | 10  | >KIT-V654A-r YLGNHMNIA  | 6     | 4     |
| >KIT-V654A-1 YLGNHMNIV  | 26  | >KIT-V654A-r YLGNHMNIA  | 213   | 187   |
| >KIT-V654A-1 YLGNHMNIV  | 111 | >KIT-V654A-r YLGNHMNIA  | 103   | 8     |
| >KIT-V654A-1 YLGNHMNIV  | 4   | >KIT-V654A-r YLGNHMNIA  | 84    | 80    |
| >KIT-V654A-1 YLGNHMNIV  | 5   | >KIT-V654A-r YLGNHMNIA  | 5     | 0     |
| >KIT-V654A-1 YLGNHMNIV  | 3   | >KIT-V654A-r YLGNHMNIA  | 22    | 19    |
| >KIT-V654A-1 YLGNHMNIV  | 4   | >KIT-V654A-r YLGNHMNIA  | 4     | 0     |
| >KIT-V654A-1 YLGNHMNIV  | 8   | >KIT-V654A-r YLGNHMNIA  | 121   | 113   |
| >KIT-V654A-1 YLGNHMNIV  | 12  | >KIT-V654A-r YLGNHMNIA  | 13    | 1     |
| >KIT-V654A-1 YLGNHMNIV  | 14  | >KIT-V654A-r YLGNHMNIA  | 2359  | 2345  |
| >KIT-V654A-1 YLGNHMNIV  | 20  | >KIT-V654A-r YLGNHMNIA  | 16    | 4     |
| >KIT-V654A-1 YLGNHMNIV  | 2   | >KIT-V654A-r YLGNHMNIA  | 13    | 11    |
| >KIT-V654A-1 YLGNHMNIV  | 2   | >KIT-V654A-r YLGNHMNIA  | 2     | 0     |
| >KIT-V654A-1 SYLGNHMNI  | 177 | >KIT-V654A-r SYLGNHMNI/ | 4733  | 4556  |
| >KIT-V654A-1 SYLGNHMNI  | 497 | >KIT-V654A-r SYLGNHMNI/ | 15726 | 15229 |
| >KIT-V654A-1 SYLGNHMNI  | 45  | >KIT-V654A-r SYLGNHMNI/ | 410   | 365   |
| >KIT-V654A-1 SYLGNHMNI  | 781 | >KIT-V654A-r SYLGNHMNI/ | 455   | 326   |
| >KIT-V654A-1 SYLGNHMNI  | 143 | >KIT-V654A-r SYLGNHMNI/ | 376   | 233   |

|                         |       |                          |       |       |
|-------------------------|-------|--------------------------|-------|-------|
| >KIT-V654A-v SYLGNHMNI  | 53    | >KIT-V654A-r SYLGNHMNI/  | 121   | 68    |
| >KIT-V654E-v VNLLGACTI  | 473   | >KIT-V654E-r ENLLGACTI   | 371   | 102   |
| >KIT-V654E-v IVNLLGAC   | 39767 | >KIT-V654E-r IENLLGAC    | 205   | 39562 |
| >KIT-V654E-v IVNLLGACTI | 2788  | >KIT-V654E-r IENLLGACTI  | 9     | 2779  |
| >KIT-V654E-v IVNLLGACTI | 387   | >KIT-V654E-r IENLLGACTI  | 7308  | 6921  |
| >KIT-V654E-v IVNLLGACTI | 28651 | >KIT-V654E-r IENLLGACTI  | 83    | 28568 |
| >KIT-V654E-v IVNLLGACTI | 356   | >KIT-V654E-r IENLLGACTI  | 6647  | 6291  |
| >KIT-V654E-v LSYLGNHMN  | 440   | >KIT-V654E-r LSYLGNHMN   | 7659  | 7219  |
| >KIT-V654E-v LSYLGNHMN  | 332   | >KIT-V654E-r LSYLGNHMN   | 7325  | 6993  |
| >KIT-V654E-v LSYLGNHMN  | 288   | >KIT-V654E-r LSYLGNHMN   | 4947  | 4659  |
| >KIT-V654E-v NIVNLLGA   | 188   | >KIT-V654E-r NIENLLGA    | 3050  | 2862  |
| >KIT-V654E-v NIVNLLGACT | 305   | >KIT-V654E-r NIENLLGACTI | 3885  | 3580  |
| >KIT-V654E-v NIVNLLGA   | 135   | >KIT-V654E-r NIENLLGA    | 2406  | 2271  |
| >KIT-V654E-v NIVNLLGACT | 224   | >KIT-V654E-r NIENLLGACTI | 3508  | 3284  |
| >KIT-V654E-v NIVNLLGACT | 347   | >KIT-V654E-r NIENLLGACTI | 3638  | 3291  |
| >KIT-V654E-v HMNIVNLL   | 410   | >KIT-V654E-r HMNIENLL    | 1793  | 1383  |
| >KIT-V654E-v HMNIVNLLG/ | 755   | >KIT-V654E-r HMNIENLLG/  | 366   | 389   |
| >KIT-V654E-v HMNIVNLL   | 11    | >KIT-V654E-r HMNIENLL    | 14    | 3     |
| >KIT-V654E-v HMNIVNLLG/ | 450   | >KIT-V654E-r HMNIENLLG/  | 393   | 57    |
| >KIT-V654E-v HMNIVNLL   | 48    | >KIT-V654E-r HMNIENLL    | 306   | 258   |
| >KIT-V654E-v HMNIVNLLG/ | 160   | >KIT-V654E-r HMNIENLLG/  | 121   | 39    |
| >KIT-V654E-v HMNIVNLL   | 41    | >KIT-V654E-r HMNIENLL    | 362   | 321   |
| >KIT-V654E-v HMNIVNLLG/ | 74    | >KIT-V654E-r HMNIENLLG/  | 180   | 106   |
| >KIT-V654E-v HMNIVNLLG/ | 346   | >KIT-V654E-r HMNIENLLG/  | 1326  | 980   |
| >KIT-V654E-v HMNIVNLL   | 187   | >KIT-V654E-r HMNIENLL    | 497   | 310   |
| >KIT-V654E-v HMNIVNLLG/ | 469   | >KIT-V654E-r HMNIENLLG/  | 378   | 91    |
| >KIT-V654E-v HMNIVNLL   | 116   | >KIT-V654E-r HMNIENLL    | 610   | 494   |
| >KIT-V654E-v HMNIVNLLG/ | 270   | >KIT-V654E-r HMNIENLLG/  | 601   | 331   |
| >KIT-V654E-v HMNIVNLL   | 45    | >KIT-V654E-r HMNIENLL    | 78    | 33    |
| >KIT-V654E-v HMNIVNLLG/ | 158   | >KIT-V654E-r HMNIENLLG/  | 112   | 46    |
| >KIT-V654E-v HMNIVNLL   | 434   | >KIT-V654E-r HMNIENLL    | 1287  | 853   |
| >KIT-V654E-v NHMNIENLL  | 242   | >KIT-V654E-r NHMNIENLL   | 1438  | 1196  |
| >KIT-V654E-v NHMNIENL   | 361   | >KIT-V654E-r NHMNIENL    | 284   | 77    |
| >KIT-V654E-v NHMNIENLL  | 171   | >KIT-V654E-r NHMNIENLL   | 117   | 54    |
| >KIT-V654E-v NHMNIENL   | 15    | >KIT-V654E-r NHMNIENL    | 64    | 49    |
| >KIT-V654E-v NHMNIENLL  | 9     | >KIT-V654E-r NHMNIENLL   | 17    | 8     |
| >KIT-V654E-v YLGNHMNIV  | 27    | >KIT-V654E-r YLGNHMNIE   | 19348 | 19321 |
| >KIT-V654E-v YLGNHMNIV/ | 23    | >KIT-V654E-r YLGNHMNIE/  | 31    | 8     |
| >KIT-V654E-v YLGNHMNIV  | 5     | >KIT-V654E-r YLGNHMNIE   | 3764  | 3759  |
| >KIT-V654E-v YLGNHMNIV/ | 6     | >KIT-V654E-r YLGNHMNIE/  | 5     | 1     |
| >KIT-V654E-v YLGNHMNIV  | 3     | >KIT-V654E-r YLGNHMNIE   | 6149  | 6146  |
| >KIT-V654E-v YLGNHMNIV/ | 10    | >KIT-V654E-r YLGNHMNIE/  | 11    | 1     |
| >KIT-V654E-v YLGNHMNIV  | 26    | >KIT-V654E-r YLGNHMNIE   | 18291 | 18265 |

|                         |      |                          |       |       |
|-------------------------|------|--------------------------|-------|-------|
| >KIT-V654E-v YLGNHMNIV  | 111  | >KIT-V654E-r YLGNHMNIEI  | 112   | 1     |
| >KIT-V654E-v YLGNHMNIV  | 4    | >KIT-V654E-r YLGNHMNIE   | 13169 | 13165 |
| >KIT-V654E-v YLGNHMNIV  | 5    | >KIT-V654E-r YLGNHMNIEI  | 5     | 0     |
| >KIT-V654E-v YLGNHMNIV  | 3    | >KIT-V654E-r YLGNHMNIE   | 8082  | 8079  |
| >KIT-V654E-v YLGNHMNIV  | 4    | >KIT-V654E-r YLGNHMNIEI  | 5     | 1     |
| >KIT-V654E-v YLGNHMNIV  | 8    | >KIT-V654E-r YLGNHMNIE   | 16746 | 16738 |
| >KIT-V654E-v YLGNHMNIV  | 12   | >KIT-V654E-r YLGNHMNIEI  | 15    | 3     |
| >KIT-V654E-v YLGNHMNIV  | 14   | >KIT-V654E-r YLGNHMNIE   | 25374 | 25360 |
| >KIT-V654E-v YLGNHMNIV  | 20   | >KIT-V654E-r YLGNHMNIEI  | 20    | 0     |
| >KIT-V654E-v YLGNHMNIV  | 2    | >KIT-V654E-r YLGNHMNIE   | 6682  | 6680  |
| >KIT-V654E-v YLGNHMNIV  | 2    | >KIT-V654E-r YLGNHMNIEI  | 3     | 1     |
| >KIT-V654E-v SYLGNHMNI  | 177  | >KIT-V654E-r SYLGNHMNIEI | 20208 | 20031 |
| >KIT-V654E-v SYLGNHMNI  | 497  | >KIT-V654E-r SYLGNHMNIEI | 35733 | 35236 |
| >KIT-V654E-v SYLGNHMNI  | 45   | >KIT-V654E-r SYLGNHMNIEI | 921   | 876   |
| >KIT-V654E-v SYLGNHMNI  | 614  | >KIT-V654E-r SYLGNHMNIEI | 369   | 245   |
| >KIT-V654E-v SYLGNHMNI  | 143  | >KIT-V654E-r SYLGNHMNIEI | 8724  | 8581  |
| >KIT-V654E-v SYLGNHMNI  | 53   | >KIT-V654E-r SYLGNHMNIEI | 3454  | 3401  |
| >KIT-V825A-v VKGNARLPV  | 245  | >KIT-V825A-r AKGNARLPV   | 142   | 103   |
| >KIT-V825A-v VVKGNARLP  | 360  | >KIT-V825A-r VAKGNARLP   | 1303  | 943   |
| >KIT-V825A-v VVKGNARL   | 340  | >KIT-V825A-r VAKGNARL    | 4715  | 4375  |
| >KIT-V825A-v VVKGNARLP  | 51   | >KIT-V825A-r VAKGNARLP   | 1009  | 958   |
| >KIT-V825A-v VVKGNARLP  | 343  | >KIT-V825A-r VAKGNARLP   | 2752  | 2409  |
| >KIT-V825A-v VVKGNARLP  | 413  | >KIT-V825A-r VAKGNARLP   | 2341  | 1928  |
| >KIT-V825A-v VVKGNARLP  | 90   | >KIT-V825A-r VAKGNARLP   | 265   | 175   |
| >KIT-V825A-v VVKGNARLP  | 13   | >KIT-V825A-r VAKGNARLP   | 32    | 19    |
| >KIT-V825A-v VVKGNARL   | 671  | >KIT-V825A-r VAKGNARL    | 47    | 624   |
| >KIT-V825A-v RDIKNDSNYV | 394  | >KIT-V825A-r RDIKNDSNYV  | 499   | 105   |
| >KIT-V825A-v RDIKNDSNYV | 87   | >KIT-V825A-r RDIKNDSNYV  | 2550  | 2463  |
| >KIT-V825A-v YVVKGNARL  | 634  | >KIT-V825A-r YVAKGNARL   | 180   | 454   |
| >KIT-V825A-v YVVKGNARLF | 127  | >KIT-V825A-r YVAKGNARLF  | 37    | 90    |
| >KIT-V825A-v YVVKGNARL  | 213  | >KIT-V825A-r YVAKGNARL   | 40    | 173   |
| >KIT-V825A-v YVVKGNARLF | 357  | >KIT-V825A-r YVAKGNARLF  | 76    | 281   |
| >KIT-V825A-v YVVKGNARL  | 340  | >KIT-V825A-r YVAKGNARL   | 125   | 215   |
| >KIT-V825A-v YVVKGNARLF | 27   | >KIT-V825A-r YVAKGNARLF  | 13    | 14    |
| >KIT-V825A-v YVVKGNARL  | 56   | >KIT-V825A-r YVAKGNARL   | 79    | 23    |
| >KIT-V825A-v YVVKGNARLF | 8    | >KIT-V825A-r YVAKGNARLF  | 9     | 1     |
| >KIT-V825A-v YVVKGNARL  | 489  | >KIT-V825A-r YVAKGNARL   | 376   | 113   |
| >KIT-V825A-v YVVKGNARLF | 74   | >KIT-V825A-r YVAKGNARLF  | 57    | 17    |
| >KIT-V825A-v YVVKGNARLF | 234  | >KIT-V825A-r YVAKGNARLF  | 226   | 8     |
| >KIT-V825A-v YVVKGNARLF | 90   | >KIT-V825A-r YVAKGNARLF  | 26    | 64    |
| >KIT-V825A-v YVVKGNARL  | 3108 | >KIT-V825A-r YVAKGNARL   | 338   | 2770  |
| >KIT-V825A-v YVVKGNARLF | 1045 | >KIT-V825A-r YVAKGNARLF  | 133   | 912   |
| >KIT-V825A-v YVVKGNARL  | 23   | >KIT-V825A-r YVAKGNARL   | 12    | 11    |



|                          |      |                          |     |      |
|--------------------------|------|--------------------------|-----|------|
| >KIT-V825A-1 YVVKGNARLF  | 6    | >KIT-V825A-r YVAKGNARLF  | 4   | 2    |
| >KIT-V825A-1 YVVKGNARL   | 55   | >KIT-V825A-r YVAKGNARL   | 324 | 269  |
| >KIT-V825A-1 YVVKGNAR    | 468  | >KIT-V825A-r YVAKGNAR    | 465 | 3    |
| >KIT-V825A-1 YVVKGNAR    | 426  | >KIT-V825A-r YVAKGNAR    | 501 | 75   |
| >KIT-V825A-1 YVVKGNAR    | 18   | >KIT-V825A-r YVAKGNAR    | 11  | 7    |
| >KIT-V825A-1 YVVKGNARL   | 110  | >KIT-V825A-r YVAKGNARL   | 31  | 79   |
| >KIT-V825A-1 YVVKGNARLF  | 16   | >KIT-V825A-r YVAKGNARLF  | 9   | 7    |
| >KIT-V825A-1 YVVKGNARL   | 250  | >KIT-V825A-r YVAKGNARL   | 144 | 106  |
| >KIT-V825A-1 YVVKGNARLF  | 13   | >KIT-V825A-r YVAKGNARLF  | 9   | 4    |
| >KIT-V825A-1 YVVKGNARL   | 2202 | >KIT-V825A-r YVAKGNARL   | 230 | 1972 |
| >KIT-V825A-1 YVVKGNARLF  | 506  | >KIT-V825A-r YVAKGNARLF  | 97  | 409  |
| >KIT-V825A-1 YVVKGNARL   | 56   | >KIT-V825A-r YVAKGNARL   | 175 | 119  |
| >KIT-V825A-1 YVVKGNARL   | 144  | >KIT-V825A-r YVAKGNARL   | 124 | 20   |
| >KIT-V825A-1 NYVVKGNAR   | 253  | >KIT-V825A-r NYVAKGNAR   | 67  | 186  |
| >KIT-V825A-1 NYVVKGNAR   | 309  | >KIT-V825A-r NYVAKGNAR   | 223 | 86   |
| >KIT-V825A-1 NYVVKGNAR   | 170  | >KIT-V825A-r NYVAKGNAR   | 235 | 65   |
| >KIT-V825A-1 NYVVKGNAR   | 384  | >KIT-V825A-r NYVAKGNAR   | 87  | 297  |
| >KIT-V825A-1 SNYVVKGNAL  | 129  | >KIT-V825A-r SNYVAKGNAL  | 81  | 48   |
| >KIT-V825A-1 DSNYVVKGN.  | 76   | >KIT-V825A-r DSNYVAKGN.  | 115 | 39   |
| >KIT-V825A-1 DSNYVVKGN.  | 27   | >KIT-V825A-r DSNYVAKGN.  | 25  | 2    |
| >KIT-V825A-1 IKNDSNYVV   | 26   | >KIT-V825A-r IKNDSNYVA   | 155 | 129  |
| >KIT-V825A-1 IKNDSNYVVK  | 83   | >KIT-V825A-r IKNDSNYVAK  | 57  | 26   |
| >KIT-V825A-1 DIKNDNSNYVV | 291  | >KIT-V825A-r DIKNDNSNYVA | 270 | 21   |
| >KIT-V825I-v VVKGNARLPV  | 245  | >KIT-V825I-r VIKGNARLPV  | 86  | 159  |
| >KIT-V825I-v VVKGNARLP\  | 360  | >KIT-V825I-r VIKGNARLPV  | 187 | 173  |
| >KIT-V825I-v VVKGNARL    | 340  | >KIT-V825I-r VIKGNARL    | 99  | 241  |
| >KIT-V825I-v VVKGNARLP\  | 51   | >KIT-V825I-r VIKGNARLPV  | 18  | 33   |
| >KIT-V825I-v VVKGNARLP\  | 343  | >KIT-V825I-r VIKGNARLPV  | 311 | 32   |
| >KIT-V825I-v VVKGNARLP\  | 413  | >KIT-V825I-r VIKGNARLPV  | 841 | 428  |
| >KIT-V825I-v VVKGNARLP\  | 90   | >KIT-V825I-r VIKGNARLPV  | 248 | 158  |
| >KIT-V825I-v VVKGNARLP\  | 13   | >KIT-V825I-r VIKGNARLPV  | 31  | 18   |
| >KIT-V825I-v RDIKNDNSNYV | 394  | >KIT-V825I-r RDIKNDNSNYV | 342 | 52   |
| >KIT-V825I-v RDIKNDNSNYV | 709  | >KIT-V825I-r RDIKNDNSNYV | 151 | 558  |
| >KIT-V825I-v RDIKNDNSNYV | 87   | >KIT-V825I-r RDIKNDNSNYV | 51  | 36   |
| >KIT-V825I-v YVVKGNARL   | 634  | >KIT-V825I-r YVIKGNARL   | 123 | 511  |
| >KIT-V825I-v YVVKGNARLF  | 127  | >KIT-V825I-r YVIKGNARLP' | 30  | 97   |
| >KIT-V825I-v YVVKGNARL   | 213  | >KIT-V825I-r YVIKGNARL   | 126 | 87   |
| >KIT-V825I-v YVVKGNARLF  | 357  | >KIT-V825I-r YVIKGNARLP' | 226 | 131  |
| >KIT-V825I-v YVVKGNARL   | 340  | >KIT-V825I-r YVIKGNARL   | 172 | 168  |
| >KIT-V825I-v YVVKGNARLF  | 27   | >KIT-V825I-r YVIKGNARLP' | 15  | 12   |
| >KIT-V825I-v YVVKGNARL   | 56   | >KIT-V825I-r YVIKGNARL   | 34  | 22   |
| >KIT-V825I-v YVVKGNARLF  | 8    | >KIT-V825I-r YVIKGNARLP' | 6   | 2    |
| >KIT-V825I-v YVVKGNARL   | 489  | >KIT-V825I-r YVIKGNARL   | 316 | 173  |

|                               |      |                                 |     |      |
|-------------------------------|------|---------------------------------|-----|------|
| >KIT-V825I- $\nu$ YVVKGNARLF  | 74   | >KIT-V825I- $\eta$ YVIKGNARLP'  | 50  | 24   |
| >KIT-V825I- $\nu$ YVVKGNARLF  | 234  | >KIT-V825I- $\eta$ YVIKGNARLP'  | 79  | 155  |
| >KIT-V825I- $\nu$ YVVKGNARLF  | 90   | >KIT-V825I- $\eta$ YVIKGNARLP'  | 65  | 25   |
| >KIT-V825I- $\nu$ YVVKGNARL   | 23   | >KIT-V825I- $\eta$ YVIKGNARL    | 18  | 5    |
| >KIT-V825I- $\nu$ YVVKGNARLF  | 6    | >KIT-V825I- $\eta$ YVIKGNARLP'  | 6   | 0    |
| >KIT-V825I- $\nu$ YVVKGNARL   | 672  | >KIT-V825I- $\eta$ YVIKGNARL    | 308 | 364  |
| >KIT-V825I- $\nu$ YVVKGNARL   | 55   | >KIT-V825I- $\eta$ YVIKGNARL    | 20  | 35   |
| >KIT-V825I- $\nu$ YVVKGNAR    | 468  | >KIT-V825I- $\eta$ YVIKGNAR     | 233 | 235  |
| >KIT-V825I- $\nu$ YVVKGNAR    | 426  | >KIT-V825I- $\eta$ YVIKGNAR     | 195 | 231  |
| >KIT-V825I- $\nu$ YVVKGNAR    | 18   | >KIT-V825I- $\eta$ YVIKGNAR     | 13  | 5    |
| >KIT-V825I- $\nu$ YVVKGNARL   | 110  | >KIT-V825I- $\eta$ YVIKGNARL    | 59  | 51   |
| >KIT-V825I- $\nu$ YVVKGNARLF  | 16   | >KIT-V825I- $\eta$ YVIKGNARLP'  | 11  | 5    |
| >KIT-V825I- $\nu$ YVVKGNARL   | 250  | >KIT-V825I- $\eta$ YVIKGNARL    | 191 | 59   |
| >KIT-V825I- $\nu$ YVVKGNARLF  | 13   | >KIT-V825I- $\eta$ YVIKGNARLP'  | 10  | 3    |
| >KIT-V825I- $\nu$ YVVKGNARLF  | 506  | >KIT-V825I- $\eta$ YVIKGNARLP'  | 472 | 34   |
| >KIT-V825I- $\nu$ YVVKGNARLF  | 866  | >KIT-V825I- $\eta$ YVIKGNARLP'  | 385 | 481  |
| >KIT-V825I- $\nu$ YVVKGNARL   | 56   | >KIT-V825I- $\eta$ YVIKGNARL    | 63  | 7    |
| >KIT-V825I- $\nu$ YVVKGNARL   | 144  | >KIT-V825I- $\eta$ YVIKGNARL    | 217 | 73   |
| >KIT-V825I- $\nu$ NYVVKGNAR   | 253  | >KIT-V825I- $\eta$ NYVIKGNARL   | 423 | 170  |
| >KIT-V825I- $\nu$ NYVVKGNAR   | 309  | >KIT-V825I- $\eta$ NYVIKGNARL   | 289 | 20   |
| >KIT-V825I- $\nu$ NYVVKGNAR   | 170  | >KIT-V825I- $\eta$ NYVIKGNAR    | 249 | 79   |
| >KIT-V825I- $\nu$ NYVVKGNAR   | 384  | >KIT-V825I- $\eta$ NYVIKGNAR    | 171 | 213  |
| >KIT-V825I- $\nu$ SNYVVKGNAL  | 129  | >KIT-V825I- $\eta$ SNYVIKGNAR   | 101 | 28   |
| >KIT-V825I- $\nu$ SNYVVKGNAL  | 684  | >KIT-V825I- $\eta$ SNYVIKGNAR   | 490 | 194  |
| >KIT-V825I- $\nu$ DSNYVVKGN.  | 76   | >KIT-V825I- $\eta$ DSNYVIKGNAL  | 67  | 9    |
| >KIT-V825I- $\nu$ DSNYVVKGN.  | 27   | >KIT-V825I- $\eta$ DSNYVIKGNAL  | 27  | 0    |
| >KIT-V825I- $\nu$ IKNDSNYVV   | 26   | >KIT-V825I- $\eta$ IKNDSNYVI    | 21  | 5    |
| >KIT-V825I- $\nu$ IKNDSNYVVK  | 83   | >KIT-V825I- $\eta$ IKNDSNYVIK   | 104 | 21   |
| >KIT-V825I- $\nu$ DIKNDNSNYVV | 291  | >KIT-V825I- $\eta$ DIKNDNSNYVII | 319 | 28   |
| >KIT-V950A- $\nu$ VVDH5VRINS  | 236  | >KIT-V950A- $\tau$ AVDH5VRINS   | 155 | 81   |
| >KIT-V950A- $\nu$ VVDH5VRINS  | 74   | >KIT-V950A- $\tau$ AVDH5VRINS   | 54  | 20   |
| >KIT-V950A- $\nu$ VVDH5VRINS  | 89   | >KIT-V950A- $\tau$ AVDH5VRINS   | 114 | 25   |
| >KIT-V950A- $\nu$ VVDH5VRINS  | 387  | >KIT-V950A- $\tau$ AVDH5VRINS   | 392 | 5    |
| >KIT-V950A- $\nu$ VVDH5VRINS  | 304  | >KIT-V950A- $\tau$ AVDH5VRINS   | 286 | 18   |
| >KIT-V950A- $\nu$ VVDH5VRINS  | 70   | >KIT-V950A- $\tau$ AVDH5VRINS   | 69  | 1    |
| >KIT-V950A- $\nu$ KPVDH5V     | 100  | >KIT-V950A- $\tau$ KPVDH5V      | 26  | 74   |
| >KIT-V950A- $\nu$ QKPVDH5V    | 1653 | >KIT-V950A- $\tau$ QKPAVDH5V    | 455 | 1198 |
| >KIT-V950A- $\nu$ RQKPVDH5'   | 555  | >KIT-V950A- $\tau$ RQKPAVDH5'   | 486 | 69   |
| >KIT-V950A- $\nu$ RQKPVDH5'   | 304  | >KIT-V950A- $\tau$ RQKPAVDH5'   | 114 | 190  |
| >KIT-V950A- $\nu$ RQKPVDH5'   | 718  | >KIT-V950A- $\tau$ RQKPAVDH5'   | 308 | 410  |
| >KIT-V950A- $\nu$ RQKPVDH5'   | 11   | >KIT-V950A- $\tau$ RQKPAVDH5'   | 14  | 3    |
| >KIT-V950A- $\nu$ RQKPVDH5    | 896  | >KIT-V950A- $\tau$ RQKPAVDH5    | 440 | 456  |
| >KIT-V950A- $\nu$ RQKPVDH5'   | 139  | >KIT-V950A- $\tau$ RQKPAVDH5'   | 93  | 46   |

|                         |       |                         |       |       |
|-------------------------|-------|-------------------------|-------|-------|
| >KIT-V950A-1 RQKPVDH    | 171   | >KIT-V950A-r RQKPAVDH   | 145   | 26    |
| >KIT-V950A-1 RQKPVDHS'  | 133   | >KIT-V950A-r RQKPAVDHS' | 85    | 48    |
| >KIT-V950A-1 RQKPVDHS'  | 104   | >KIT-V950A-r RQKPAVDHS' | 71    | 33    |
| >KIT-V950A-1 RQKPVDHS'  | 540   | >KIT-V950A-r RQKPAVDHS' | 436   | 104   |
| >KIT-V950A-1 SPNRQKPV   | 89    | >KIT-V950A-r SPNRQKPA   | 353   | 264   |
| >KIT-V950A-1 SPNRQKPVV  | 221   | >KIT-V950A-r SPNRQKPAV  | 59    | 162   |
| >KIT-V950A-1 SPNRQKPV   | 802   | >KIT-V950A-r SPNRQKPA   | 162   | 640   |
| >KIT-V950A-1 SPNRQKPVV  | 778   | >KIT-V950A-r SPNRQKPAV  | 265   | 513   |
| >KIT-V950A-1 CSPNRQKPV  | 192   | >KIT-V950A-r CSPNRQKPA  | 237   | 45    |
| >KIT-V950A-1 CSPNRQKPV\ | 167   | >KIT-V950A-r CSPNRQKPA\ | 192   | 25    |
| >KIT-W557C-YLQKPMYEV(   | 3867  | >KIT-W557C-YLQKPMYEV(   | 27    | 3840  |
| >KIT-W557C-YLQKPMYEV(   | 11914 | >KIT-W557C-YLQKPMYEV(   | 186   | 11728 |
| >KIT-W557C-YLQKPMYEV(   | 2218  | >KIT-W557C-YLQKPMYEV(   | 10    | 2208  |
| >KIT-W557C-YLQKPMYEV(   | 124   | >KIT-W557C-YLQKPMYEV(   | 25112 | 24988 |
| >KIT-W557C-VQWKVVEEI    | 154   | >KIT-W557C-VQCKVVEEI    | 556   | 402   |
| >KIT-W557C-VQWKVVEEI    | 91    | >KIT-W557C-VQCKVVEEI    | 2590  | 2499  |
| >KIT-W557C-VQWKVVEEI    | 43    | >KIT-W557C-VQCKVVEEI    | 68    | 25    |
| >KIT-W557C-VQWKVVEEI    | 17    | >KIT-W557C-VQCKVVEEI    | 208   | 191   |
| >KIT-W557C-VQWKVVEEI    | 75    | >KIT-W557C-VQCKVVEEI    | 5546  | 5471  |
| >KIT-W557C-VQWKVVEEI    | 468   | >KIT-W557C-VQCKVVEEI    | 3652  | 3184  |
| >KIT-W557C-VQWKVVEEI    | 57    | >KIT-W557C-VQCKVVEEI    | 665   | 608   |
| >KIT-W557C-EVQWKVVEE    | 147   | >KIT-W557C-EVQCKVVEEI   | 344   | 197   |
| >KIT-W557C-YEVQWKVV     | 10    | >KIT-W557C-YEVQCKVV     | 10    | 0     |
| >KIT-W557C-YEVQWKVVE    | 11    | >KIT-W557C-YEVQCKVVEE   | 14    | 3     |
| >KIT-W557C-YEVQWKVV     | 373   | >KIT-W557C-YEVQCKVV     | 320   | 53    |
| >KIT-W557C-YEVQWKVVE    | 343   | >KIT-W557C-YEVQCKVVEE   | 213   | 130   |
| >KIT-W557C-YEVQWKVV     | 307   | >KIT-W557C-YEVQCKVV     | 205   | 102   |
| >KIT-W557C-YEVQWKVVE    | 59    | >KIT-W557C-YEVQCKVVEE   | 30    | 29    |
| >KIT-W557C-YEVQWKVV     | 169   | >KIT-W557C-YEVQCKVV     | 275   | 106   |
| >KIT-W557C-YEVQWKVVE    | 1019  | >KIT-W557C-YEVQCKVVEE   | 370   | 649   |
| >KIT-W557C-YEVQWKVVE    | 176   | >KIT-W557C-YEVQCKVVEE   | 137   | 39    |
| >KIT-W557C-YEVQWKVV     | 1044  | >KIT-W557C-YEVQCKVV     | 335   | 709   |
| >KIT-W557C-YEVQWKVVE    | 3     | >KIT-W557C-YEVQCKVVEE   | 4     | 1     |
| >KIT-W557C-MYEVQWKV     | 246   | >KIT-W557C-MYEVQCKV     | 1216  | 970   |
| >KIT-W557C-MYEVQWKV     | 488   | >KIT-W557C-MYEVQCKV     | 1099  | 611   |
| >KIT-W557C-MYEVQWKV\    | 1362  | >KIT-W557C-MYEVQCKVV    | 492   | 870   |
| >KIT-W557C-PMYEVQWK\    | 17    | >KIT-W557C-PMYEVQCKV    | 225   | 208   |
| >KIT-W557C-PMYEVQWK\    | 18    | >KIT-W557C-PMYEVQCKV    | 83    | 65    |
| >KIT-W557C-PMYEVQWK\    | 48    | >KIT-W557C-PMYEVQCKV    | 84    | 36    |
| >KIT-W557C-PMYEVQWK\    | 33    | >KIT-W557C-PMYEVQCKV    | 1014  | 981   |
| >KIT-W557C-PMYEVQWK\    | 1     | >KIT-W557C-PMYEVQCKV    | 2     | 1     |
| >KIT-W557C-PMYEVQWK\    | 4     | >KIT-W557C-PMYEVQCKV    | 7     | 3     |
| >KIT-W557C-PMYEVQWK\    | 5     | >KIT-W557C-PMYEVQCKV    | 40    | 35    |

|                        |      |                        |       |       |
|------------------------|------|------------------------|-------|-------|
| >KIT-W557C- PMYEVQWK\  | 97   | >KIT-W557C- PMYEVQCKV  | 204   | 107   |
| >KIT-W557C- PMYEVQWK\  | 4    | >KIT-W557C- PMYEVQCKV  | 5     | 1     |
| >KIT-W557C- PMYEVQWK\  | 11   | >KIT-W557C- PMYEVQCKV  | 21    | 10    |
| >KIT-W557C- PMYEVQWK\  | 3    | >KIT-W557C- PMYEVQCKV  | 6     | 3     |
| >KIT-W557C- PMYEVQWK\  | 54   | >KIT-W557C- PMYEVQCKV  | 69    | 15    |
| >KIT-W557C- PMYEVQWK\  | 2    | >KIT-W557C- PMYEVQCKV  | 3     | 1     |
| >KIT-W557C- PMYEVQWK\  | 10   | >KIT-W557C- PMYEVQCKV  | 11    | 1     |
| >KIT-W557C- PMYEVQWK   | 129  | >KIT-W557C- PMYEVQCK   | 269   | 140   |
| >KIT-W557C- PMYEVQWK\  | 145  | >KIT-W557C- PMYEVQCKV  | 1009  | 864   |
| >KIT-W557C- KPMYEVQW\  | 157  | >KIT-W557C- KPMYEVQCK' | 133   | 24    |
| >KIT-W557C- KPMYEVQW\  | 136  | >KIT-W557C- KPMYEVQCK' | 273   | 137   |
| >KIT-W557C- KPMYEVQW   | 20   | >KIT-W557C- KPMYEVQC   | 14929 | 14909 |
| >KIT-W557C- KPMYEVQW\  | 68   | >KIT-W557C- KPMYEVQCK' | 86    | 18    |
| >KIT-W557C- KPMYEVQW   | 199  | >KIT-W557C- KPMYEVQC   | 21845 | 21646 |
| >KIT-W557C- KPMYEVQW   | 9    | >KIT-W557C- KPMYEVQC   | 9370  | 9361  |
| >KIT-W557C- LQKPMYEVQ  | 243  | >KIT-W557C- LQKPMYEVQ  | 371   | 128   |
| >KIT-W557C- LQKPMYEVQ  | 415  | >KIT-W557C- LQKPMYEVQ  | 632   | 217   |
| >KIT-W557C- LQKPMYEVQ  | 247  | >KIT-W557C- LQKPMYEVQ  | 5057  | 4810  |
| >KIT-W557C- LQKPMYEVQ  | 225  | >KIT-W557C- LQKPMYEVQ  | 2461  | 2236  |
| >KIT-W557C- LQKPMYEVQ  | 1131 | >KIT-W557C- LQKPMYEVQ  | 383   | 748   |
| >KIT-W557C- LQKPMYEVQ  | 168  | >KIT-W557C- LQKPMYEVQ  | 29910 | 29742 |
| >KIT-W557C- LQKPMYEVQ  | 230  | >KIT-W557C- LQKPMYEVQ  | 27811 | 27581 |
| >KIT-W557F- YLQKPMYEV\ | 3867 | >KIT-W557F- YLQKPMYEV\ | 312   | 3555  |
| >KIT-W557F- YLQKPMYEV\ | 2218 | >KIT-W557F- YLQKPMYEV\ | 380   | 1838  |
| >KIT-W557F- YLQKPMYEV\ | 2486 | >KIT-W557F- YLQKPMYEV\ | 141   | 2345  |
| >KIT-W557F- YLQKPMYEV\ | 3200 | >KIT-W557F- YLQKPMYEV\ | 94    | 3106  |
| >KIT-W557F- YLQKPMYEV\ | 1384 | >KIT-W557F- YLQKPMYEV\ | 84    | 1300  |
| >KIT-W557F- YLQKPMYEV\ | 3432 | >KIT-W557F- YLQKPMYEV\ | 31    | 3401  |
| >KIT-W557F- YLQKPMYEV\ | 124  | >KIT-W557F- YLQKPMYEV\ | 299   | 175   |
| >KIT-W557F- VQWKVVVEI  | 154  | >KIT-W557F- VQFKVVVEI  | 141   | 13    |
| >KIT-W557F- VQWKVVVEI  | 91   | >KIT-W557F- VQFKVVVEI  | 173   | 82    |
| >KIT-W557F- VQWKVVVEI  | 531  | >KIT-W557F- VQFKVVVEI  | 70    | 461   |
| >KIT-W557F- VQWKVVVEI  | 2176 | >KIT-W557F- VQFKVVVEI  | 253   | 1923  |
| >KIT-W557F- VQWKVVVEI  | 43   | >KIT-W557F- VQFKVVVEI  | 22    | 21    |
| >KIT-W557F- VQWKVVVEI  | 17   | >KIT-W557F- VQFKVVVEI  | 24    | 7     |
| >KIT-W557F- VQWKVVVEI  | 75   | >KIT-W557F- VQFKVVVEI  | 200   | 125   |
| >KIT-W557F- VQWKVVVEI  | 468  | >KIT-W557F- VQFKVVVEI  | 190   | 278   |
| >KIT-W557F- VQWKVVVEI  | 2556 | >KIT-W557F- VQFKVVVEI  | 389   | 2167  |
| >KIT-W557F- VQWKVVVEI  | 57   | >KIT-W557F- VQFKVVVEI  | 32    | 25    |
| >KIT-W557F- VQWKVVVEI  | 587  | >KIT-W557F- VQFKVVVEI  | 164   | 423   |
| >KIT-W557F- EVQWKVVEE  | 766  | >KIT-W557F- EVQFKVVVEI | 494   | 272   |
| >KIT-W557F- EVQWKVVEE  | 147  | >KIT-W557F- EVQFKVVVEI | 660   | 513   |
| >KIT-W557F- YEVQWKVV   | 10   | >KIT-W557F- YEVQFKVV   | 9     | 1     |

|                        |      |                         |      |      |
|------------------------|------|-------------------------|------|------|
| >KIT-W557F- YEVDQWKVVE | 11   | >KIT-W557F- YEVDQFKVVEE | 9    | 2    |
| >KIT-W557F- YEVDQWKVV  | 373  | >KIT-W557F- YEVDQFKVV   | 110  | 263  |
| >KIT-W557F- YEVDQWKVVE | 1194 | >KIT-W557F- YEVDQFKVVE  | 279  | 915  |
| >KIT-W557F- YEVDQWKVVE | 343  | >KIT-W557F- YEVDQFKVVEE | 119  | 224  |
| >KIT-W557F- YEVDQWKVV  | 307  | >KIT-W557F- YEVDQFKVV   | 91   | 216  |
| >KIT-W557F- YEVDQWKVVE | 59   | >KIT-W557F- YEVDQFKVVEE | 22   | 37   |
| >KIT-W557F- YEVDQWKVV  | 169  | >KIT-W557F- YEVDQFKVV   | 143  | 26   |
| >KIT-W557F- YEVDQWKVVE | 176  | >KIT-W557F- YEVDQFKVVEE | 105  | 71   |
| >KIT-W557F- YEVDQWKVV  | 749  | >KIT-W557F- YEVDQFKVV   | 359  | 390  |
| >KIT-W557F- YEVDQWKVV  | 1044 | >KIT-W557F- YEVDQFKVV   | 140  | 904  |
| >KIT-W557F- YEVDQWKVVE | 3    | >KIT-W557F- YEVDQFKVVEE | 4    | 1    |
| >KIT-W557F- MYEVDQWKV  | 246  | >KIT-W557F- MYEVDQFKV   | 186  | 60   |
| >KIT-W557F- MYEVDQWKV  | 2129 | >KIT-W557F- MYEVDQFKVV  | 240  | 1889 |
| >KIT-W557F- MYEVDQWKV  | 488  | >KIT-W557F- MYEVDQFKV   | 1312 | 824  |
| >KIT-W557F- PMYEVDQWK  | 17   | >KIT-W557F- PMYEVDQFKV  | 21   | 4    |
| >KIT-W557F- PMYEVDQWK  | 18   | >KIT-W557F- PMYEVDQFKV  | 21   | 3    |
| >KIT-W557F- PMYEVDQWK  | 48   | >KIT-W557F- PMYEVDQFKV  | 58   | 10   |
| >KIT-W557F- PMYEVDQWK  | 805  | >KIT-W557F- PMYEVDQFKV  | 368  | 437  |
| >KIT-W557F- PMYEVDQWK  | 33   | >KIT-W557F- PMYEVDQFKV  | 60   | 27   |
| >KIT-W557F- PMYEVDQWK  | 510  | >KIT-W557F- PMYEVDQFK   | 405  | 105  |
| >KIT-W557F- PMYEVDQWK  | 1    | >KIT-W557F- PMYEVDQFKV  | 1    | 0    |
| >KIT-W557F- PMYEVDQWK  | 4    | >KIT-W557F- PMYEVDQFKV  | 4    | 0    |
| >KIT-W557F- PMYEVDQWK  | 5    | >KIT-W557F- PMYEVDQFKV  | 9    | 4    |
| >KIT-W557F- PMYEVDQWK  | 97   | >KIT-W557F- PMYEVDQFKV  | 62   | 35   |
| >KIT-W557F- PMYEVDQWK  | 4    | >KIT-W557F- PMYEVDQFKV  | 4    | 0    |
| >KIT-W557F- PMYEVDQWK  | 11   | >KIT-W557F- PMYEVDQFKV  | 15   | 4    |
| >KIT-W557F- PMYEVDQWK  | 3    | >KIT-W557F- PMYEVDQFKV  | 3    | 0    |
| >KIT-W557F- PMYEVDQWK  | 54   | >KIT-W557F- PMYEVDQFKV  | 45   | 9    |
| >KIT-W557F- PMYEVDQWK  | 2    | >KIT-W557F- PMYEVDQFKV  | 2    | 0    |
| >KIT-W557F- PMYEVDQWK  | 10   | >KIT-W557F- PMYEVDQFKV  | 9    | 1    |
| >KIT-W557F- PMYEVDQWK  | 129  | >KIT-W557F- PMYEVDQFK   | 56   | 73   |
| >KIT-W557F- PMYEVDQWK  | 1471 | >KIT-W557F- PMYEVDQFK   | 177  | 1294 |
| >KIT-W557F- PMYEVDQWK  | 145  | >KIT-W557F- PMYEVDQFKV  | 153  | 8    |
| >KIT-W557F- KPMYEVDQW  | 1456 | >KIT-W557F- KPMYEVDQF   | 140  | 1316 |
| >KIT-W557F- KPMYEVDQW  | 157  | >KIT-W557F- KPMYEVDQFK  | 80   | 77   |
| >KIT-W557F- KPMYEVDQW  | 136  | >KIT-W557F- KPMYEVDQFK  | 197  | 61   |
| >KIT-W557F- KPMYEVDQW  | 5031 | >KIT-W557F- KPMYEVDQF   | 56   | 4975 |
| >KIT-W557F- KPMYEVDQW  | 3350 | >KIT-W557F- KPMYEVDQF   | 112  | 3238 |
| >KIT-W557F- KPMYEVDQW  | 20   | >KIT-W557F- KPMYEVDQF   | 142  | 122  |
| >KIT-W557F- KPMYEVDQW  | 68   | >KIT-W557F- KPMYEVDQFK  | 54   | 14   |
| >KIT-W557F- KPMYEVDQW  | 199  | >KIT-W557F- KPMYEVDQF   | 8155 | 7956 |
| >KIT-W557F- KPMYEVDQW  | 9615 | >KIT-W557F- KPMYEVDQF   | 304  | 9311 |
| >KIT-W557F- KPMYEVDQW  | 9    | >KIT-W557F- KPMYEVDQF   | 66   | 57   |

|                        |      |                         |       |       |
|------------------------|------|-------------------------|-------|-------|
| >KIT-W557F- QKPMYEVQV  | 1466 | >KIT-W557F- QKPMYEVQF   | 17    | 1449  |
| >KIT-W557F- LQKPMYEVQ  | 243  | >KIT-W557F- LQKPMYEVQ   | 36    | 207   |
| >KIT-W557F- LQKPMYEVQ  | 415  | >KIT-W557F- LQKPMYEVQ   | 116   | 299   |
| >KIT-W557F- LQKPMYEVQ  | 247  | >KIT-W557F- LQKPMYEVQ   | 35    | 212   |
| >KIT-W557F- LQKPMYEVQ  | 225  | >KIT-W557F- LQKPMYEVQ   | 5     | 220   |
| >KIT-W557F- LQKPMYEVQ  | 1131 | >KIT-W557F- LQKPMYEVQ   | 477   | 654   |
| >KIT-W557F- LQKPMYEVQ  | 168  | >KIT-W557F- LQKPMYEVQ   | 7835  | 7667  |
| >KIT-W557F- LQKPMYEVQ  | 230  | >KIT-W557F- LQKPMYEVQ   | 7889  | 7659  |
| >KIT-W557G- YLQKPMYEVQ | 124  | >KIT-W557G- YLQKPMYEVQ  | 25635 | 25511 |
| >KIT-W557G- VQWKVVEEI  | 154  | >KIT-W557G- VQGKVVVEI   | 667   | 513   |
| >KIT-W557G- VQWKVVEEI  | 91   | >KIT-W557G- VQGKVVVEI   | 3117  | 3026  |
| >KIT-W557G- VQWKVVEEI  | 43   | >KIT-W557G- VQGKVVVEI   | 204   | 161   |
| >KIT-W557G- VQWKVVEEI  | 17   | >KIT-W557G- VQGKVVVEI   | 198   | 181   |
| >KIT-W557G- VQWKVVEEI  | 75   | >KIT-W557G- VQGKVVVEI   | 1268  | 1193  |
| >KIT-W557G- VQWKVVEEI  | 468  | >KIT-W557G- VQGKVVVEI   | 4554  | 4086  |
| >KIT-W557G- VQWKVVEEI  | 57   | >KIT-W557G- VQGKVVVEI   | 1051  | 994   |
| >KIT-W557G- EVQWKVVEE  | 147  | >KIT-W557G- EVQGKVVVEI  | 699   | 552   |
| >KIT-W557G- YEVQWKVV   | 10   | >KIT-W557G- YEVQGKVV    | 3     | 7     |
| >KIT-W557G- YEVQWKVVE  | 11   | >KIT-W557G- YEVQGKVVVEI | 16    | 5     |
| >KIT-W557G- YEVQWKVV   | 373  | >KIT-W557G- YEVQGKVV    | 256   | 117   |
| >KIT-W557G- YEVQWKVVE  | 343  | >KIT-W557G- YEVQGKVVVEI | 226   | 117   |
| >KIT-W557G- YEVQWKVV   | 307  | >KIT-W557G- YEVQGKVV    | 98    | 209   |
| >KIT-W557G- YEVQWKVVE  | 59   | >KIT-W557G- YEVQGKVVVEI | 19    | 40    |
| >KIT-W557G- YEVQWKVV   | 169  | >KIT-W557G- YEVQGKVV    | 333   | 164   |
| >KIT-W557G- YEVQWKVVE  | 176  | >KIT-W557G- YEVQGKVVVEI | 182   | 6     |
| >KIT-W557G- YEVQWKVV   | 1044 | >KIT-W557G- YEVQGKVV    | 50    | 994   |
| >KIT-W557G- YEVQWKVVE  | 3    | >KIT-W557G- YEVQGKVVVEI | 4     | 1     |
| >KIT-W557G- MYEVQWKV   | 246  | >KIT-W557G- MYEVQGKV    | 938   | 692   |
| >KIT-W557G- MYEVQWKV   | 488  | >KIT-W557G- MYEVQGKV    | 1579  | 1091  |
| >KIT-W557G- PMYEVQWKV  | 17   | >KIT-W557G- PMYEVQGKV   | 1866  | 1849  |
| >KIT-W557G- PMYEVQWKV  | 18   | >KIT-W557G- PMYEVQGKV   | 261   | 243   |
| >KIT-W557G- PMYEVQWKV  | 48   | >KIT-W557G- PMYEVQGKV   | 52    | 4     |
| >KIT-W557G- PMYEVQWKV  | 33   | >KIT-W557G- PMYEVQGKV   | 4533  | 4500  |
| >KIT-W557G- PMYEVQWKV  | 1    | >KIT-W557G- PMYEVQGKV   | 2     | 1     |
| >KIT-W557G- PMYEVQWKV  | 4    | >KIT-W557G- PMYEVQGKV   | 5     | 1     |
| >KIT-W557G- PMYEVQWKV  | 5    | >KIT-W557G- PMYEVQGKV   | 228   | 223   |
| >KIT-W557G- PMYEVQWKV  | 97   | >KIT-W557G- PMYEVQGKV   | 218   | 121   |
| >KIT-W557G- PMYEVQWKV  | 4    | >KIT-W557G- PMYEVQGKV   | 10    | 6     |
| >KIT-W557G- PMYEVQWKV  | 11   | >KIT-W557G- PMYEVQGKV   | 20    | 9     |
| >KIT-W557G- PMYEVQWKV  | 3    | >KIT-W557G- PMYEVQGKV   | 58    | 55    |
| >KIT-W557G- PMYEVQWKV  | 54   | >KIT-W557G- PMYEVQGKV   | 215   | 161   |
| >KIT-W557G- PMYEVQWKV  | 2    | >KIT-W557G- PMYEVQGKV   | 7     | 5     |
| >KIT-W557G- PMYEVQWKV  | 10   | >KIT-W557G- PMYEVQGKV   | 16    | 6     |

|                       |       |                       |       |       |
|-----------------------|-------|-----------------------|-------|-------|
| >KIT-W557G-PMYEVQWK   | 129   | >KIT-W557G-PMYEVQGK   | 169   | 40    |
| >KIT-W557G-PMYEVQWK\  | 145   | >KIT-W557G-PMYEVQGKV  | 1798  | 1653  |
| >KIT-W557G-KPMYEVQWI  | 157   | >KIT-W557G-KPMYEVQGK  | 126   | 31    |
| >KIT-W557G-KPMYEVQWI  | 136   | >KIT-W557G-KPMYEVQGK  | 92    | 44    |
| >KIT-W557G-KPMYEVQW   | 20    | >KIT-W557G-KPMYEVQG   | 18663 | 18643 |
| >KIT-W557G-KPMYEVQWI  | 68    | >KIT-W557G-KPMYEVQGK  | 60    | 8     |
| >KIT-W557G-KPMYEVQW   | 199   | >KIT-W557G-KPMYEVQG   | 22278 | 22079 |
| >KIT-W557G-KPMYEVQW   | 9     | >KIT-W557G-KPMYEVQG   | 13130 | 13121 |
| >KIT-W557G-LQKPMYEVQ  | 243   | >KIT-W557G-LQKPMYEVQ  | 277   | 34    |
| >KIT-W557G-LQKPMYEVQ  | 415   | >KIT-W557G-LQKPMYEVQ  | 1025  | 610   |
| >KIT-W557G-LQKPMYEVQ  | 247   | >KIT-W557G-LQKPMYEVQ  | 734   | 487   |
| >KIT-W557G-LQKPMYEVQ  | 225   | >KIT-W557G-LQKPMYEVQ  | 5393  | 5168  |
| >KIT-W557G-LQKPMYEVQ  | 168   | >KIT-W557G-LQKPMYEVQ  | 31949 | 31781 |
| >KIT-W557G-LQKPMYEVQ  | 230   | >KIT-W557G-LQKPMYEVQ  | 25589 | 25359 |
| >KIT-W557R-YLQKPMYEVQ | 21001 | >KIT-W557R-YLQKPMYEVQ | 124   | 20877 |
| >KIT-W557R-YLQKPMYEVQ | 30056 | >KIT-W557R-YLQKPMYEVQ | 261   | 29795 |
| >KIT-W557R-YLQKPMYEVQ | 28231 | >KIT-W557R-YLQKPMYEVQ | 182   | 28049 |
| >KIT-W557R-YLQKPMYEVQ | 124   | >KIT-W557R-YLQKPMYEVQ | 25210 | 25086 |
| >KIT-W557R-YLQKPMYEVQ | 33608 | >KIT-W557R-YLQKPMYEVQ | 448   | 33160 |
| >KIT-W557R-VQWKVVEEI  | 154   | >KIT-W557R-VQRKVVEEI  | 739   | 585   |
| >KIT-W557R-VQWKVVEEI  | 91    | >KIT-W557R-VQRKVVEEI  | 10349 | 10258 |
| >KIT-W557R-VQWKVVEEI  | 43    | >KIT-W557R-VQRKVVEEI  | 457   | 414   |
| >KIT-W557R-VQWKVVEEI  | 17    | >KIT-W557R-VQRKVVEEI  | 1875  | 1858  |
| >KIT-W557R-VQWKVVEEI  | 75    | >KIT-W557R-VQRKVVEEI  | 10930 | 10855 |
| >KIT-W557R-VQWKVVEEI  | 468   | >KIT-W557R-VQRKVVEEI  | 9306  | 8838  |
| >KIT-W557R-VQWKVVEEI  | 57    | >KIT-W557R-VQRKVVEEI  | 104   | 47    |
| >KIT-W557R-EVQWKVVEE  | 147   | >KIT-W557R-EVQRKVVEEI | 994   | 847   |
| >KIT-W557R-YEVQWKVV   | 10    | >KIT-W557R-YEVQRKVV   | 14    | 4     |
| >KIT-W557R-YEVQWKVVE  | 11    | >KIT-W557R-YEVQRKVVEE | 10    | 1     |
| >KIT-W557R-YEVQWKVV   | 373   | >KIT-W557R-YEVQRKVV   | 682   | 309   |
| >KIT-W557R-YEVQWKVVE  | 343   | >KIT-W557R-YEVQRKVVEE | 736   | 393   |
| >KIT-W557R-YEVQWKVV   | 307   | >KIT-W557R-YEVQRKVV   | 651   | 344   |
| >KIT-W557R-YEVQWKVVE  | 59    | >KIT-W557R-YEVQRKVVEE | 78    | 19    |
| >KIT-W557R-YEVQWKVV   | 169   | >KIT-W557R-YEVQRKVV   | 541   | 372   |
| >KIT-W557R-YEVQWKVVE  | 176   | >KIT-W557R-YEVQRKVVEE | 292   | 116   |
| >KIT-W557R-YEVQWKVV   | 1044  | >KIT-W557R-YEVQRKVV   | 317   | 727   |
| >KIT-W557R-YEVQWKVVE  | 3     | >KIT-W557R-YEVQRKVVEE | 4     | 1     |
| >KIT-W557R-MYEVQWKV   | 246   | >KIT-W557R-MYEVQRKV   | 1565  | 1319  |
| >KIT-W557R-MYEVQWKV   | 488   | >KIT-W557R-MYEVQRKV   | 1145  | 657   |
| >KIT-W557R-PMYEVQWK\  | 17    | >KIT-W557R-PMYEVQRKV  | 2404  | 2387  |
| >KIT-W557R-PMYEVQWK\  | 18    | >KIT-W557R-PMYEVQRKV  | 443   | 425   |
| >KIT-W557R-PMYEVQWK\  | 48    | >KIT-W557R-PMYEVQRKV  | 157   | 109   |
| >KIT-W557R-PMYEVQWK\  | 33    | >KIT-W557R-PMYEVQRKV  | 7052  | 7019  |

|                       |       |                       |       |       |
|-----------------------|-------|-----------------------|-------|-------|
| >KIT-W557R-PMYEVQWK\  | 1     | >KIT-W557R-PMYEVQRKV  | 3     | 2     |
| >KIT-W557R-PMYEVQWK\  | 4     | >KIT-W557R-PMYEVQRKV  | 12    | 8     |
| >KIT-W557R-PMYEVQWK\  | 5     | >KIT-W557R-PMYEVQRKV  | 245   | 240   |
| >KIT-W557R-PMYEVQWK\  | 97    | >KIT-W557R-PMYEVQRKV  | 549   | 452   |
| >KIT-W557R-PMYEVQWK\  | 4     | >KIT-W557R-PMYEVQRKV  | 13    | 9     |
| >KIT-W557R-PMYEVQWK\  | 11    | >KIT-W557R-PMYEVQRKV  | 45    | 34    |
| >KIT-W557R-PMYEVQWK\  | 3     | >KIT-W557R-PMYEVQRKV  | 57    | 54    |
| >KIT-W557R-PMYEVQWK\  | 54    | >KIT-W557R-PMYEVQRKV  | 466   | 412   |
| >KIT-W557R-PMYEVQWK\  | 2     | >KIT-W557R-PMYEVQRKV  | 8     | 6     |
| >KIT-W557R-PMYEVQWK\  | 10    | >KIT-W557R-PMYEVQRKV  | 17    | 7     |
| >KIT-W557R-PMYEVQWK   | 129   | >KIT-W557R-PMYEVQRK   | 135   | 6     |
| >KIT-W557R-PMYEVQWK\  | 145   | >KIT-W557R-PMYEVQRKV  | 4498  | 4353  |
| >KIT-W557R-KPMYEVQW\  | 157   | >KIT-W557R-KPMYEVQRK  | 110   | 47    |
| >KIT-W557R-KPMYEVQW\  | 136   | >KIT-W557R-KPMYEVQRK  | 79    | 57    |
| >KIT-W557R-KPMYEVQW   | 20    | >KIT-W557R-KPMYEVQR   | 18466 | 18446 |
| >KIT-W557R-KPMYEVQW\  | 68    | >KIT-W557R-KPMYEVQRK  | 52    | 16    |
| >KIT-W557R-KPMYEVQW   | 199   | >KIT-W557R-KPMYEVQR   | 22507 | 22308 |
| >KIT-W557R-KPMYEVQW   | 9     | >KIT-W557R-KPMYEVQR   | 16854 | 16845 |
| >KIT-W557R-KPMYEVQW   | 30967 | >KIT-W557R-KPMYEVQR   | 131   | 30836 |
| >KIT-W557R-LQKPMYEVQ  | 243   | >KIT-W557R-LQKPMYEVQ  | 236   | 7     |
| >KIT-W557R-LQKPMYEVQ  | 28890 | >KIT-W557R-LQKPMYEVQ  | 207   | 28683 |
| >KIT-W557R-LQKPMYEVQ  | 415   | >KIT-W557R-LQKPMYEVQ  | 597   | 182   |
| >KIT-W557R-LQKPMYEVQ  | 247   | >KIT-W557R-LQKPMYEVQ  | 7282  | 7035  |
| >KIT-W557R-LQKPMYEVQ  | 225   | >KIT-W557R-LQKPMYEVQ  | 515   | 290   |
| >KIT-W557R-LQKPMYEVQ  | 168   | >KIT-W557R-LQKPMYEVQ  | 32401 | 32233 |
| >KIT-W557R-LQKPMYEVQ  | 230   | >KIT-W557R-LQKPMYEVQ  | 25319 | 25089 |
| >KIT-W557S-YLQKPMYEV\ | 3867  | >KIT-W557S-YLQKPMYEV\ | 389   | 3478  |
| >KIT-W557S-YLQKPMYEV\ | 2218  | >KIT-W557S-YLQKPMYEV\ | 165   | 2053  |
| >KIT-W557S-YLQKPMYEV\ | 124   | >KIT-W557S-YLQKPMYEV\ | 24367 | 24243 |
| >KIT-W557S-VQWKVVEEI  | 154   | >KIT-W557S-VQSKVVEEI  | 470   | 316   |
| >KIT-W557S-VQWKVVEEI  | 91    | >KIT-W557S-VQSKVVEEI  | 1353  | 1262  |
| >KIT-W557S-VQWKVVEEI  | 531   | >KIT-W557S-VQSKVVEEI  | 98    | 433   |
| >KIT-W557S-VQWKVVEEI  | 2176  | >KIT-W557S-VQSKVVEEI  | 386   | 1790  |
| >KIT-W557S-VQWKVVEEI  | 43    | >KIT-W557S-VQSKVVEEI  | 51    | 8     |
| >KIT-W557S-VQWKVVEEI  | 17    | >KIT-W557S-VQSKVVEEI  | 333   | 316   |
| >KIT-W557S-VQWKVVEEI  | 75    | >KIT-W557S-VQSKVVEEI  | 1481  | 1406  |
| >KIT-W557S-VQWKVVEEI  | 468   | >KIT-W557S-VQSKVVEEI  | 3739  | 3271  |
| >KIT-W557S-VQWKVVEEI  | 57    | >KIT-W557S-VQSKVVEEI  | 236   | 179   |
| >KIT-W557S-EVQWKVVEE  | 147   | >KIT-W557S-EVQSKVVEEI | 473   | 326   |
| >KIT-W557S-YEVQWKVV   | 10    | >KIT-W557S-YEVQSKVV   | 7     | 3     |
| >KIT-W557S-YEVQWKVVE  | 11    | >KIT-W557S-YEVQSKVVEE | 10    | 1     |
| >KIT-W557S-YEVQWKVV   | 373   | >KIT-W557S-YEVQSKVV   | 517   | 144   |
| >KIT-W557S-YEVQWKVVE  | 343   | >KIT-W557S-YEVQSKVVEE | 401   | 58    |



|                          |      |                          |       |       |
|--------------------------|------|--------------------------|-------|-------|
| >KIT-W557S- YEVDQWKVV    | 307  | >KIT-W557S- YEVDQSKVV    | 161   | 146   |
| >KIT-W557S- YEVDQWKVVE   | 59   | >KIT-W557S- YEVDQSKVVEE  | 24    | 35    |
| >KIT-W557S- YEVDQWKVV    | 169  | >KIT-W557S- YEVDQSKVV    | 371   | 202   |
| >KIT-W557S- YEVDQWKVVE   | 176  | >KIT-W557S- YEVDQSKVVEE  | 177   | 1     |
| >KIT-W557S- YEVDQWKVV    | 1044 | >KIT-W557S- YEVDQSKVV    | 55    | 989   |
| >KIT-W557S- YEVDQWKVVE   | 3    | >KIT-W557S- YEVDQSKVVEE  | 4     | 1     |
| >KIT-W557S- MYEVDQWKV    | 246  | >KIT-W557S- MYEVDQSKV    | 835   | 589   |
| >KIT-W557S- MYEVDQWKV    | 488  | >KIT-W557S- MYEVDQSKV    | 1640  | 1152  |
| >KIT-W557S- PMYEVDQWK\   | 17   | >KIT-W557S- PMYEVDQSKV   | 409   | 392   |
| >KIT-W557S- PMYEVDQWK\   | 18   | >KIT-W557S- PMYEVDQSKV   | 67    | 49    |
| >KIT-W557S- PMYEVDQWK\   | 48   | >KIT-W557S- PMYEVDQSKV   | 21    | 27    |
| >KIT-W557S- PMYEVDQWK\   | 33   | >KIT-W557S- PMYEVDQSKV   | 1661  | 1628  |
| >KIT-W557S- PMYEVDQWK\   | 1    | >KIT-W557S- PMYEVDQSKV   | 2     | 1     |
| >KIT-W557S- PMYEVDQWK\   | 4    | >KIT-W557S- PMYEVDQSKV'  | 5     | 1     |
| >KIT-W557S- PMYEVDQWK\   | 5    | >KIT-W557S- PMYEVDQSKV   | 63    | 58    |
| >KIT-W557S- PMYEVDQWK\   | 97   | >KIT-W557S- PMYEVDQSKV'  | 100   | 3     |
| >KIT-W557S- PMYEVDQWK\   | 4    | >KIT-W557S- PMYEVDQSKV   | 6     | 2     |
| >KIT-W557S- PMYEVDQWK\   | 11   | >KIT-W557S- PMYEVDQSKV'  | 15    | 4     |
| >KIT-W557S- PMYEVDQWK\   | 3    | >KIT-W557S- PMYEVDQSKV   | 9     | 6     |
| >KIT-W557S- PMYEVDQWK\   | 54   | >KIT-W557S- PMYEVDQSKV'  | 42    | 12    |
| >KIT-W557S- PMYEVDQWK\   | 2    | >KIT-W557S- PMYEVDQSKV   | 3     | 1     |
| >KIT-W557S- PMYEVDQWK\   | 10   | >KIT-W557S- PMYEVDQSKV'  | 11    | 1     |
| >KIT-W557S- PMYEVDQWK    | 129  | >KIT-W557S- PMYEVDQSK    | 115   | 14    |
| >KIT-W557S- PMYEVDQWK\   | 145  | >KIT-W557S- PMYEVDQSKV   | 1476  | 1331  |
| >KIT-W557S- KPMYEVDQW\   | 157  | >KIT-W557S- KPMYEVDQSK'  | 67    | 90    |
| >KIT-W557S- KPMYEVDQW\   | 136  | >KIT-W557S- KPMYEVDQSK'  | 90    | 46    |
| >KIT-W557S- KPMYEVDQW    | 20   | >KIT-W557S- KPMYEVDQS    | 18881 | 18861 |
| >KIT-W557S- KPMYEVDQW\   | 68   | >KIT-W557S- KPMYEVDQSK'  | 39    | 29    |
| >KIT-W557S- KPMYEVDQW    | 199  | >KIT-W557S- KPMYEVDQS    | 22356 | 22157 |
| >KIT-W557S- KPMYEVDQW    | 9    | >KIT-W557S- KPMYEVDQS    | 16595 | 16586 |
| >KIT-W557S- LQKPMYEVQ    | 243  | >KIT-W557S- LQKPMYEVQ    | 87    | 156   |
| >KIT-W557S- LQKPMYEVQ    | 415  | >KIT-W557S- LQKPMYEVQ    | 712   | 297   |
| >KIT-W557S- LQKPMYEVQ    | 247  | >KIT-W557S- LQKPMYEVQ    | 3285  | 3038  |
| >KIT-W557S- LQKPMYEVQ    | 225  | >KIT-W557S- LQKPMYEVQ    | 2240  | 2015  |
| >KIT-W557S- LQKPMYEVQ    | 1131 | >KIT-W557S- LQKPMYEVQ    | 173   | 958   |
| >KIT-W557S- LQKPMYEVQ    | 168  | >KIT-W557S- LQKPMYEVQ    | 32538 | 32370 |
| >KIT-W557S- LQKPMYEVQ    | 230  | >KIT-W557S- LQKPMYEVQ    | 26659 | 26429 |
| >KIT-Y418N-\ YDRLVNGM    | 157  | >KIT-Y418N-r NDRLVNGM    | 1226  | 1069  |
| >KIT-Y418N-\ YDRLVNGML   | 266  | >KIT-Y418N-r NDRLVNGML   | 5033  | 4767  |
| >KIT-Y418N-\ YDRLVNGM    | 45   | >KIT-Y418N-r NDRLVNGM    | 1343  | 1298  |
| >KIT-Y418N-\ TYDRLVNGM   | 265  | >KIT-Y418N-r TNDRLVNGM   | 21296 | 21031 |
| >KIT-Y418N-\ TYDRLVNGM   | 34   | >KIT-Y418N-r TNDRLVNGM   | 23234 | 23200 |
| >KIT-Y418N-\ YVNTKPEILTY | 176  | >KIT-Y418N-r YVNTKPEILT\ | 19191 | 19015 |

|                          |      |                         |       |       |
|--------------------------|------|-------------------------|-------|-------|
| >KIT-Y418N-1 YVNTKPEILTY | 338  | >KIT-Y418N-r YVNTKPEILT | 20408 | 20070 |
| >KIT-Y418N-1 YVNTKPEILTY | 95   | >KIT-Y418N-r YVNTKPEILT | 26362 | 26267 |
| >KIT-Y418N-1 YVNTKPEILTY | 16   | >KIT-Y418N-r YVNTKPEILT | 14582 | 14566 |
| >KIT-Y418N-1 YVNTKPEILTY | 471  | >KIT-Y418N-r YVNTKPEILT | 26820 | 26349 |
| >KIT-Y418N-1 YVNTKPEILTY | 12   | >KIT-Y418N-r YVNTKPEILT | 18940 | 18928 |
| >KIT-Y418N-1 YVNTKPEILTY | 188  | >KIT-Y418N-r YVNTKPEILT | 16783 | 16595 |
| >KIT-Y418N-1 YVNTKPEILTY | 78   | >KIT-Y418N-r YVNTKPEILT | 18026 | 17948 |
| >KIT-Y418N-1 YVNTKPEILTY | 84   | >KIT-Y418N-r YVNTKPEILT | 14957 | 14873 |
| >KIT-Y418N-1 YVNTKPEILTY | 290  | >KIT-Y418N-r YVNTKPEILT | 17157 | 16867 |
| >KIT-Y418N-1 YVNTKPEILTY | 328  | >KIT-Y418N-r YVNTKPEILT | 32178 | 31850 |
| >KIT-Y418N-1 LTYDRLVNGM  | 161  | >KIT-Y418N-r LTNDRLVNGI | 3045  | 2884  |
| >KIT-Y418N-1 LTYDRLVNGM  | 480  | >KIT-Y418N-r LTNDRLVNGI | 4110  | 3630  |
| >KIT-Y418N-1 LTYDRLVNGM  | 280  | >KIT-Y418N-r LTNDRLVNGI | 367   | 87    |
| >KIT-Y418N-1 LTYDRLVNGM  | 217  | >KIT-Y418N-r LTNDRLVNGI | 579   | 362   |
| >KIT-Y418N-1 LTYDRLVNGM  | 313  | >KIT-Y418N-r LTNDRLVNGI | 1680  | 1367  |
| >KIT-Y418N-1 LTYDRLVNGM  | 381  | >KIT-Y418N-r LTNDRLVNGI | 2967  | 2586  |
| >KIT-Y418N-1 LTYDRLVNGM  | 107  | >KIT-Y418N-r LTNDRLVNGI | 1116  | 1009  |
| >KIT-Y418N-1 LTYDRLVNGM  | 458  | >KIT-Y418N-r LTNDRLVNGI | 1992  | 1534  |
| >KIT-Y418N-1 LTYDRLVNGM  | 59   | >KIT-Y418N-r LTNDRLVNGI | 439   | 380   |
| >KIT-Y418N-1 LTYDRLVNGM  | 42   | >KIT-Y418N-r LTNDRLVNGI | 182   | 140   |
| >KIT-Y418N-1 LTYDRLVNGM  | 377  | >KIT-Y418N-r LTNDRLVNGI | 630   | 253   |
| >KIT-Y418N-1 LTYDRLVNGM  | 231  | >KIT-Y418N-r LTNDRLVNGI | 1504  | 1273  |
| >KIT-Y418N-1 LTYDRLVNGM  | 230  | >KIT-Y418N-r LTNDRLVNGI | 1534  | 1304  |
| >KIT-Y418N-1 LTYDRLVNGM  | 448  | >KIT-Y418N-r LTNDRLVNGI | 1094  | 646   |
| >KIT-Y418N-1 LTYDRLVNGM  | 6    | >KIT-Y418N-r LTNDRLVNGI | 26    | 20    |
| >KIT-Y418N-1 LTYDRLVNGM  | 10   | >KIT-Y418N-r LTNDRLVNGI | 51    | 41    |
| >KIT-Y418N-1 LTYDRLVNGM  | 387  | >KIT-Y418N-r LTNDRLVNGI | 939   | 552   |
| >KIT-Y418N-1 LTYDRLVNGM  | 257  | >KIT-Y418N-r LTNDRLVNGI | 553   | 296   |
| >KIT-Y418N-1 LTYDRLVNGM  | 21   | >KIT-Y418N-r LTNDRLVNGI | 35    | 14    |
| >KIT-Y418N-1 LTYDRLVNGM  | 29   | >KIT-Y418N-r LTNDRLVNGI | 97    | 68    |
| >KIT-Y418N-1 LTYDRLVNGM  | 64   | >KIT-Y418N-r LTNDRLVNGI | 653   | 589   |
| >KIT-Y418N-1 ILTYDRLV    | 419  | >KIT-Y418N-r ILTNDRLV   | 594   | 175   |
| >KIT-Y418N-1 ILTYDRLV    | 70   | >KIT-Y418N-r ILTNDRLV   | 167   | 97    |
| >KIT-Y418N-1 ILTYDRLVNGI | 481  | >KIT-Y418N-r ILTNDRLVNG | 649   | 168   |
| >KIT-Y418N-1 ILTYDRLV    | 100  | >KIT-Y418N-r ILTNDRLV   | 92    | 8     |
| >KIT-Y418N-1 ILTYDRLV    | 147  | >KIT-Y418N-r ILTNDRLV   | 29    | 118   |
| >KIT-Y418N-1 ILTYDRLV    | 303  | >KIT-Y418N-r ILTNDRLV   | 96    | 207   |
| >KIT-Y418N-1 ILTYDRLV    | 100  | >KIT-Y418N-r ILTNDRLV   | 28    | 72    |
| >KIT-Y418N-1 ILTYDRLV    | 1278 | >KIT-Y418N-r ILTNDRLV   | 380   | 898   |
| >KIT-Y418N-1 ILTYDRLV    | 8    | >KIT-Y418N-r ILTNDRLV   | 3     | 5     |
| >KIT-Y418N-1 ILTYDRLVNGI | 490  | >KIT-Y418N-r ILTNDRLVNG | 78    | 412   |
| >KIT-Y418N-1 EILTYDRL    | 418  | >KIT-Y418N-r EILTNDRL   | 479   | 61    |
| >KIT-Y418N-1 EILTYDRLV   | 359  | >KIT-Y418N-r EILTNDRLV  | 447   | 88    |

|                          |      |                          |       |       |
|--------------------------|------|--------------------------|-------|-------|
| >KIT-Y418N-1 EILTYDRL    | 344  | >KIT-Y418N-r EILTNDRL    | 697   | 353   |
| >KIT-Y418N-1 EILTYDRLV   | 203  | >KIT-Y418N-r EILTNDRLV   | 594   | 391   |
| >KIT-Y418N-1 PEILTYDRLV  | 328  | >KIT-Y418N-r PEILTNDRLV  | 868   | 540   |
| >KIT-Y418N-1 PEILTYDRL   | 410  | >KIT-Y418N-r PEILTNDRL   | 706   | 296   |
| >KIT-Y418N-1 PEILTYDRLV  | 322  | >KIT-Y418N-r PEILTNDRLV  | 447   | 125   |
| >KIT-Y418N-1 KPEILTYDR   | 40   | >KIT-Y418N-r KPEILTNDR   | 324   | 284   |
| >KIT-Y418N-1 TKPEILTY    | 410  | >KIT-Y418N-r TKPEILTN    | 20827 | 20417 |
| >KIT-Y418N-1 TKPEILTYDR  | 442  | >KIT-Y418N-r TKPEILTNDR  | 3235  | 2793  |
| >KIT-Y418N-1 NTKPEILTY   | 312  | >KIT-Y418N-r NTKPEILTN   | 20459 | 20147 |
| >KIT-Y418N-1 NTKPEILTY   | 183  | >KIT-Y418N-r NTKPEILTN   | 21051 | 20868 |
| >KIT-Y418N-1 NTKPEILTY   | 266  | >KIT-Y418N-r NTKPEILTN   | 33158 | 32892 |
| >KIT-Y418N-1 NTKPEILTY   | 104  | >KIT-Y418N-r NTKPEILTN   | 23904 | 23800 |
| >KIT-Y418N-1 NTKPEILTYDF | 172  | >KIT-Y418N-r NTKPEILTNDI | 815   | 643   |
| >KIT-Y418N-1 NTKPEILTYDF | 87   | >KIT-Y418N-r NTKPEILTNDI | 218   | 131   |
| >KIT-Y418N-1 NTKPEILTYDF | 38   | >KIT-Y418N-r NTKPEILTNDI | 50    | 12    |
| >KIT-Y418N-1 NTKPEILTY   | 189  | >KIT-Y418N-r NTKPEILTN   | 24598 | 24409 |
| >KIT-Y418N-1 NTKPEILTY   | 199  | >KIT-Y418N-r NTKPEILTN   | 18262 | 18063 |
| >KIT-Y418N-1 NTKPEILTY   | 10   | >KIT-Y418N-r NTKPEILTN   | 10022 | 10012 |
| >KIT-Y418N-1 NTKPEILTY   | 205  | >KIT-Y418N-r NTKPEILTN   | 13146 | 12941 |
| >KIT-Y418N-1 NTKPEILTYDF | 293  | >KIT-Y418N-r NTKPEILTNDI | 1381  | 1088  |
| >KIT-Y553C-v YEVQWKVV    | 10   | >KIT-Y553C-r CEVQWKVV    | 120   | 110   |
| >KIT-Y553C-v YEVQWKVVE   | 11   | >KIT-Y553C-r CEVQWKVVE   | 31    | 20    |
| >KIT-Y553C-v YEVQWKVV    | 373  | >KIT-Y553C-r CEVQWKVV    | 1740  | 1367  |
| >KIT-Y553C-v YEVQWKVVE   | 343  | >KIT-Y553C-r CEVQWKVVE   | 1606  | 1263  |
| >KIT-Y553C-v YEVQWKVV    | 307  | >KIT-Y553C-r CEVQWKVV    | 2161  | 1854  |
| >KIT-Y553C-v YEVQWKVVE   | 59   | >KIT-Y553C-r CEVQWKVVE   | 467   | 408   |
| >KIT-Y553C-v YEVQWKVV    | 169  | >KIT-Y553C-r CEVQWKVV    | 363   | 194   |
| >KIT-Y553C-v YEVQWKVVE   | 176  | >KIT-Y553C-r CEVQWKVVE   | 381   | 205   |
| >KIT-Y553C-v YEVQWKVV    | 749  | >KIT-Y553C-r CEVQWKVV    | 167   | 582   |
| >KIT-Y553C-v YEVQWKVVE   | 2890 | >KIT-Y553C-r CEVQWKVVE   | 442   | 2448  |
| >KIT-Y553C-v YEVQWKVVE   | 3    | >KIT-Y553C-r CEVQWKVVE   | 12    | 9     |
| >KIT-Y553C-v MYEVQWKV    | 246  | >KIT-Y553C-r MCEVQWKV    | 24522 | 24276 |
| >KIT-Y553C-v MYEVQWKV    | 488  | >KIT-Y553C-r MCEVQWKV    | 31667 | 31179 |
| >KIT-Y553C-v LTYKYLQKPM  | 422  | >KIT-Y553C-r LTYKYLQKPM  | 20700 | 20278 |
| >KIT-Y553C-v LTYKYLQKPM  | 73   | >KIT-Y553C-r LTYKYLQKPM  | 25576 | 25503 |
| >KIT-Y553C-v LTYKYLQKPM  | 29   | >KIT-Y553C-r LTYKYLQKPM  | 21107 | 21078 |
| >KIT-Y553C-v LTYKYLQKPM  | 74   | >KIT-Y553C-r LTYKYLQKPM  | 20283 | 20209 |
| >KIT-Y553C-v LTYKYLQKPM  | 149  | >KIT-Y553C-r LTYKYLQKPM  | 17080 | 16931 |
| >KIT-Y553C-v LTYKYLQKPM  | 95   | >KIT-Y553C-r LTYKYLQKPM  | 8512  | 8417  |
| >KIT-Y553C-v LTYKYLQKPM  | 4    | >KIT-Y553C-r LTYKYLQKPM  | 2589  | 2585  |
| >KIT-Y553C-v LTYKYLQKPM  | 6    | >KIT-Y553C-r LTYKYLQKPM  | 2151  | 2145  |
| >KIT-Y553C-v PMYEVQWK\   | 17   | >KIT-Y553C-r PMCEVQWK\   | 173   | 156   |
| >KIT-Y553C-v PMYEVQWK\   | 18   | >KIT-Y553C-r PMCEVQWK\   | 122   | 104   |

|                         |     |                         |      |      |
|-------------------------|-----|-------------------------|------|------|
| >KIT-Y553C-v PMYEVQWK\  | 48  | >KIT-Y553C-r PMCEVQWK\  | 977  | 929  |
| >KIT-Y553C-v PMYEVQWK\  | 33  | >KIT-Y553C-r PMCEVQWK\  | 339  | 306  |
| >KIT-Y553C-v PMYEVQWK\  | 1   | >KIT-Y553C-r PMCEVQWK\  | 2    | 1    |
| >KIT-Y553C-v PMYEVQWK\  | 4   | >KIT-Y553C-r PMCEVQWK\  | 14   | 10   |
| >KIT-Y553C-v PMYEVQWK\  | 5   | >KIT-Y553C-r PMCEVQWK\  | 92   | 87   |
| >KIT-Y553C-v PMYEVQWK\  | 97  | >KIT-Y553C-r PMCEVQWK\  | 887  | 790  |
| >KIT-Y553C-v PMYEVQWK\  | 4   | >KIT-Y553C-r PMCEVQWK\  | 8    | 4    |
| >KIT-Y553C-v PMYEVQWK\  | 11  | >KIT-Y553C-r PMCEVQWK\  | 91   | 80   |
| >KIT-Y553C-v PMYEVQWK\  | 3   | >KIT-Y553C-r PMCEVQWK\  | 5    | 2    |
| >KIT-Y553C-v PMYEVQWK\  | 54  | >KIT-Y553C-r PMCEVQWK\  | 314  | 260  |
| >KIT-Y553C-v PMYEVQWK\  | 2   | >KIT-Y553C-r PMCEVQWK\  | 3    | 1    |
| >KIT-Y553C-v PMYEVQWK\  | 10  | >KIT-Y553C-r PMCEVQWK\  | 31   | 21   |
| >KIT-Y553C-v PMYEVQWK   | 129 | >KIT-Y553C-r PMCEVQWK   | 3109 | 2980 |
| >KIT-Y553C-v PMYEVQWK\  | 145 | >KIT-Y553C-r PMCEVQWK\  | 3360 | 3215 |
| >KIT-Y553C-v KPMYEVQWI  | 157 | >KIT-Y553C-r KPMCEVQWI  | 81   | 76   |
| >KIT-Y553C-v KPMYEVQWI  | 136 | >KIT-Y553C-r KPMCEVQWI  | 116  | 20   |
| >KIT-Y553C-v KPMYEVQW   | 20  | >KIT-Y553C-r KPMCEVQW   | 27   | 7    |
| >KIT-Y553C-v KPMYEVQWI  | 68  | >KIT-Y553C-r KPMCEVQWI  | 106  | 38   |
| >KIT-Y553C-v KPMYEVQW   | 199 | >KIT-Y553C-r KPMCEVQW   | 438  | 239  |
| >KIT-Y553C-v KPMYEVQW   | 9   | >KIT-Y553C-r KPMCEVQW   | 10   | 1    |
| >KIT-Y553C-v LQKPMYEV   | 327 | >KIT-Y553C-r LQKPMCEV   | 1239 | 912  |
| >KIT-Y553C-v LQKPMYEV   | 48  | >KIT-Y553C-r LQKPMCEV   | 72   | 24   |
| >KIT-Y553C-v LQKPMYEV   | 34  | >KIT-Y553C-r LQKPMCEV   | 64   | 30   |
| >KIT-Y553C-v LQKPMYEV   | 318 | >KIT-Y553C-r LQKPMCEV   | 184  | 134  |
| >KIT-Y553C-v LQKPMYEVQ  | 243 | >KIT-Y553C-r LQKPMCEVQ  | 623  | 380  |
| >KIT-Y553C-v LQKPMYEVQ  | 415 | >KIT-Y553C-r LQKPMCEVQ  | 1085 | 670  |
| >KIT-Y553C-v LQKPMYEV   | 403 | >KIT-Y553C-r LQKPMCEV   | 215  | 188  |
| >KIT-Y553C-v LQKPMYEVQ  | 230 | >KIT-Y553C-r LQKPMCEVQ  | 198  | 32   |
| >KIT-Y553C-v LQKPMYEVQ  | 247 | >KIT-Y553C-r LQKPMCEVQ  | 268  | 21   |
| >KIT-Y553C-v LQKPMYEV   | 155 | >KIT-Y553C-r LQKPMCEV   | 264  | 109  |
| >KIT-Y553C-v LQKPMYEVQ  | 225 | >KIT-Y553C-r LQKPMCEVQ  | 407  | 182  |
| >KIT-Y553C-v LQKPMYEVQ  | 168 | >KIT-Y553C-r LQKPMCEVQ  | 763  | 595  |
| >KIT-Y553C-v LQKPMYEVQ  | 230 | >KIT-Y553C-r LQKPMCEVQ  | 281  | 51   |
| >KIT-Y553C-v YLQKPMYEV  | 7   | >KIT-Y553C-r YLQKPMCEV  | 12   | 5    |
| >KIT-Y553C-v YLQKPMYEV  | 5   | >KIT-Y553C-r YLQKPMCEV  | 20   | 15   |
| >KIT-Y553C-v YLQKPMYEV  | 7   | >KIT-Y553C-r YLQKPMCEV  | 8    | 1    |
| >KIT-Y553C-v YLQKPMYEV  | 13  | >KIT-Y553C-r YLQKPMCEV  | 15   | 2    |
| >KIT-Y553C-v YLQKPMYEV  | 1   | >KIT-Y553C-r YLQKPMCEV  | 2    | 1    |
| >KIT-Y553C-v YLQKPMYEV  | 2   | >KIT-Y553C-r YLQKPMCEV  | 4    | 2    |
| >KIT-Y553C-v YLQKPMYEV  | 6   | >KIT-Y553C-r YLQKPMCEV  | 6    | 0    |
| >KIT-Y553C-v YLQKPMYEV  | 3   | >KIT-Y553C-r YLQKPMCEV  | 6    | 3    |
| >KIT-Y553C-v YLQKPMYEV  | 2   | >KIT-Y553C-r YLQKPMCEV  | 1    | 1    |
| >KIT-Y553C-v YLQKPMYEV\ | 77  | >KIT-Y553C-r YLQKPMCEV\ | 66   | 11   |

|                            |      |                            |       |       |
|----------------------------|------|----------------------------|-------|-------|
| >KIT-Y553C-v YLQKPMYEV     | 93   | >KIT-Y553C-r YLQKPMCEV     | 961   | 868   |
| >KIT-Y553C-v YLQKPMYEV     | 55   | >KIT-Y553C-r YLQKPMCEV     | 90    | 35    |
| >KIT-Y553C-v YLQKPMYEV\    | 124  | >KIT-Y553C-r YLQKPMCEV\    | 152   | 28    |
| >KIT-Y553C-v KYLQKPMYEV    | 100  | >KIT-Y553C-r KYLQKPMCEV    | 227   | 127   |
| >KIT-Y553C-v KYLQKPMYEV\   | 307  | >KIT-Y553C-r KYLQKPMCEV\   | 251   | 56    |
| >KIT-Y553C-v KYLQKPMY      | 159  | >KIT-Y553C-r KYLQKPMC      | 749   | 590   |
| >KIT-Y553C-v KYLQKPMYEV    | 28   | >KIT-Y553C-r KYLQKPMCEV    | 97    | 69    |
| >KIT-Y553C-v KYLQKPMYEV\   | 360  | >KIT-Y553C-r KYLQKPMCEV\   | 1156  | 796   |
| >KIT-Y553C-v KYLQKPMY      | 89   | >KIT-Y553C-r KYLQKPMC      | 20757 | 20668 |
| >KIT-Y553C-v KYLQKPMYEV    | 471  | >KIT-Y553C-r KYLQKPMCEV    | 410   | 61    |
| >KIT-Y553C-v KYLQKPMY      | 93   | >KIT-Y553C-r KYLQKPMC      | 14217 | 14124 |
| >KIT-Y553C-v KYLQKPMY      | 160  | >KIT-Y553C-r KYLQKPMC      | 26393 | 26233 |
| >KIT-Y553C-v KYLQKPMYEV    | 82   | >KIT-Y553C-r KYLQKPMCE     | 2114  | 2032  |
| >KIT-Y553C-v KYLQKPMYEV\   | 121  | >KIT-Y553C-r KYLQKPMCEV\   | 344   | 223   |
| >KIT-Y553C-v KYLQKPMY      | 1537 | >KIT-Y553C-r KYLQKPMC      | 471   | 1066  |
| >KIT-Y553C-v KYLQKPMYEV    | 331  | >KIT-Y553C-r KYLQKPMCE     | 1181  | 850   |
| >KIT-Y553C-v KYLQKPMYEV\   | 56   | >KIT-Y553C-r KYLQKPMCEV\   | 202   | 146   |
| >KIT-Y553C-v KYLQKPMYEV\   | 391  | >KIT-Y553C-r KYLQKPMCEV\   | 338   | 53    |
| >KIT-Y553C-v YKYLQKPMYEV   | 499  | >KIT-Y553C-r YKYLQKPMCEV   | 362   | 137   |
| >KIT-Y553C-v YKYLQKPMYEV   | 447  | >KIT-Y553C-r YKYLQKPMCEV   | 810   | 363   |
| >KIT-Y553C-v YKYLQKPMYEV   | 121  | >KIT-Y553C-r YKYLQKPMCEV   | 140   | 19    |
| >KIT-Y553C-v YKYLQKPMYEV   | 356  | >KIT-Y553C-r YKYLQKPMCEV   | 219   | 137   |
| >KIT-Y553C-v YKYLQKPMYEV   | 365  | >KIT-Y553C-r YKYLQKPMCEV   | 162   | 203   |
| >KIT-Y553C-v YKYLQKPMY     | 153  | >KIT-Y553C-r YKYLQKPMC     | 24794 | 24641 |
| >KIT-Y553C-v YKYLQKPMY     | 9    | >KIT-Y553C-r YKYLQKPMC     | 2555  | 2546  |
| >KIT-Y553C-v YKYLQKPMYEV   | 39   | >KIT-Y553C-r YKYLQKPMCEV   | 43    | 4     |
| >KIT-Y553C-v TYKYLQKPMYEV  | 100  | >KIT-Y553C-r TYKYLQKPMCEV  | 25993 | 25893 |
| >KIT-Y553C-v TYKYLQKPMYEV\ | 348  | >KIT-Y553C-r TYKYLQKPMCEV\ | 24391 | 24043 |
| >KIT-Y553N-v YEVQWKVV      | 10   | >KIT-Y553N-r NEVQWKVV      | 50    | 40    |
| >KIT-Y553N-v YEVQWKVVE     | 11   | >KIT-Y553N-r NEVQWKVVE     | 8     | 3     |
| >KIT-Y553N-v YEVQWKVV      | 373  | >KIT-Y553N-r NEVQWKVV      | 376   | 3     |
| >KIT-Y553N-v YEVQWKVVE     | 343  | >KIT-Y553N-r NEVQWKVVE     | 341   | 2     |
| >KIT-Y553N-v YEVQWKVV      | 307  | >KIT-Y553N-r NEVQWKVV      | 3987  | 3680  |
| >KIT-Y553N-v YEVQWKVVE     | 59   | >KIT-Y553N-r NEVQWKVVE     | 1360  | 1301  |
| >KIT-Y553N-v YEVQWKVV      | 169  | >KIT-Y553N-r NEVQWKVV      | 915   | 746   |
| >KIT-Y553N-v YEVQWKVVE     | 176  | >KIT-Y553N-r NEVQWKVVE     | 883   | 707   |
| >KIT-Y553N-v YEVQWKVV      | 749  | >KIT-Y553N-r NEVQWKVV      | 199   | 550   |
| >KIT-Y553N-v YEVQWKVVE     | 3    | >KIT-Y553N-r NEVQWKVVE     | 11    | 8     |
| >KIT-Y553N-v MYEVQWKV      | 246  | >KIT-Y553N-r MNEVQWKV      | 25124 | 24878 |
| >KIT-Y553N-v MYEVQWKV      | 488  | >KIT-Y553N-r MNEVQWKV      | 31324 | 30836 |
| >KIT-Y553N-v LTYKYLQKPM    | 422  | >KIT-Y553N-r LTYKYLQKPM    | 16312 | 15890 |
| >KIT-Y553N-v LTYKYLQKPM    | 73   | >KIT-Y553N-r LTYKYLQKPM    | 23215 | 23142 |
| >KIT-Y553N-v LTYKYLQKPM    | 29   | >KIT-Y553N-r LTYKYLQKPM    | 18828 | 18799 |

|                         |     |                         |       |       |
|-------------------------|-----|-------------------------|-------|-------|
| >KIT-Y553N-1 LTYKYLQKPM | 74  | >KIT-Y553N-r LTYKYLQKPM | 16483 | 16409 |
| >KIT-Y553N-1 LTYKYLQKPM | 149 | >KIT-Y553N-r LTYKYLQKPM | 17767 | 17618 |
| >KIT-Y553N-1 LTYKYLQKPM | 95  | >KIT-Y553N-r LTYKYLQKPM | 13637 | 13542 |
| >KIT-Y553N-1 LTYKYLQKPM | 4   | >KIT-Y553N-r LTYKYLQKPM | 4072  | 4068  |
| >KIT-Y553N-1 LTYKYLQKPM | 6   | >KIT-Y553N-r LTYKYLQKPM | 1255  | 1249  |
| >KIT-Y553N-1 PMYEVQWK1  | 17  | >KIT-Y553N-r PMNEVQWK'  | 94    | 77    |
| >KIT-Y553N-1 PMYEVQWK1  | 18  | >KIT-Y553N-r PMNEVQWK'  | 40    | 22    |
| >KIT-Y553N-1 PMYEVQWK1  | 48  | >KIT-Y553N-r PMNEVQWK'  | 133   | 85    |
| >KIT-Y553N-1 PMYEVQWK1  | 33  | >KIT-Y553N-r PMNEVQWK'  | 403   | 370   |
| >KIT-Y553N-1 PMYEVQWK1  | 1   | >KIT-Y553N-r PMNEVQWK'  | 2     | 1     |
| >KIT-Y553N-1 PMYEVQWK1  | 4   | >KIT-Y553N-r PMNEVQWK'  | 12    | 8     |
| >KIT-Y553N-1 PMYEVQWK1  | 5   | >KIT-Y553N-r PMNEVQWK'  | 10    | 5     |
| >KIT-Y553N-1 PMYEVQWK1  | 97  | >KIT-Y553N-r PMNEVQWK'  | 217   | 120   |
| >KIT-Y553N-1 PMYEVQWK1  | 4   | >KIT-Y553N-r PMNEVQWK'  | 5     | 1     |
| >KIT-Y553N-1 PMYEVQWK1  | 11  | >KIT-Y553N-r PMNEVQWK'  | 34    | 23    |
| >KIT-Y553N-1 PMYEVQWK1  | 3   | >KIT-Y553N-r PMNEVQWK'  | 2     | 1     |
| >KIT-Y553N-1 PMYEVQWK1  | 54  | >KIT-Y553N-r PMNEVQWK'  | 59    | 5     |
| >KIT-Y553N-1 PMYEVQWK1  | 2   | >KIT-Y553N-r PMNEVQWK'  | 2     | 0     |
| >KIT-Y553N-1 PMYEVQWK1  | 10  | >KIT-Y553N-r PMNEVQWK'  | 21    | 11    |
| >KIT-Y553N-1 PMYEVQWK   | 129 | >KIT-Y553N-r PMNEVQWK   | 972   | 843   |
| >KIT-Y553N-1 PMYEVQWK1  | 145 | >KIT-Y553N-r PMNEVQWK'  | 758   | 613   |
| >KIT-Y553N-1 KPMYEVQW1  | 157 | >KIT-Y553N-r KPMNEVQW'  | 108   | 49    |
| >KIT-Y553N-1 KPMYEVQW1  | 136 | >KIT-Y553N-r KPMNEVQW'  | 127   | 9     |
| >KIT-Y553N-1 KPMYEVQW   | 20  | >KIT-Y553N-r KPMNEVQW   | 23    | 3     |
| >KIT-Y553N-1 KPMYEVQW1  | 68  | >KIT-Y553N-r KPMNEVQW'  | 137   | 69    |
| >KIT-Y553N-1 KPMYEVQW   | 199 | >KIT-Y553N-r KPMNEVQW   | 336   | 137   |
| >KIT-Y553N-1 KPMYEVQW   | 9   | >KIT-Y553N-r KPMNEVQW   | 10    | 1     |
| >KIT-Y553N-1 LQKPMYEV   | 327 | >KIT-Y553N-r LQKPMNEV   | 556   | 229   |
| >KIT-Y553N-1 LQKPMYEV   | 48  | >KIT-Y553N-r LQKPMNEV   | 63    | 15    |
| >KIT-Y553N-1 LQKPMYEV   | 34  | >KIT-Y553N-r LQKPMNEV   | 68    | 34    |
| >KIT-Y553N-1 LQKPMYEV   | 318 | >KIT-Y553N-r LQKPMNEV   | 838   | 520   |
| >KIT-Y553N-1 LQKPMYEVQ  | 243 | >KIT-Y553N-r LQKPMNEVQ  | 338   | 95    |
| >KIT-Y553N-1 LQKPMYEVQ  | 415 | >KIT-Y553N-r LQKPMNEVQ  | 918   | 503   |
| >KIT-Y553N-1 LQKPMYEV   | 403 | >KIT-Y553N-r LQKPMNEV   | 413   | 10    |
| >KIT-Y553N-1 LQKPMYEVQ  | 230 | >KIT-Y553N-r LQKPMNEVQ  | 182   | 48    |
| >KIT-Y553N-1 LQKPMYEVQ  | 247 | >KIT-Y553N-r LQKPMNEVQ  | 262   | 15    |
| >KIT-Y553N-1 LQKPMYEV   | 155 | >KIT-Y553N-r LQKPMNEV   | 228   | 73    |
| >KIT-Y553N-1 LQKPMYEVQ  | 225 | >KIT-Y553N-r LQKPMNEVQ  | 353   | 128   |
| >KIT-Y553N-1 LQKPMYEVQ  | 168 | >KIT-Y553N-r LQKPMNEVQ  | 541   | 373   |
| >KIT-Y553N-1 LQKPMYEVQ  | 230 | >KIT-Y553N-r LQKPMNEVQ  | 305   | 75    |
| >KIT-Y553N-1 YLQKPMYEV  | 7   | >KIT-Y553N-r YLQKPMNEV  | 14    | 7     |
| >KIT-Y553N-1 YLQKPMYEV  | 5   | >KIT-Y553N-r YLQKPMNEV  | 9     | 4     |
| >KIT-Y553N-1 YLQKPMYEV  | 7   | >KIT-Y553N-r YLQKPMNEV  | 6     | 1     |

|                          |     |                           |       |       |
|--------------------------|-----|---------------------------|-------|-------|
| >KIT-Y553N-1 YLQKPMYEV   | 13  | >KIT-Y553N-r YLQKPMNEV    | 20    | 7     |
| >KIT-Y553N-1 YLQKPMYEV   | 1   | >KIT-Y553N-r YLQKPMNEV    | 2     | 1     |
| >KIT-Y553N-1 YLQKPMYEV   | 2   | >KIT-Y553N-r YLQKPMNEV    | 4     | 2     |
| >KIT-Y553N-1 YLQKPMYEV   | 6   | >KIT-Y553N-r YLQKPMNEV    | 10    | 4     |
| >KIT-Y553N-1 YLQKPMYEV   | 3   | >KIT-Y553N-r YLQKPMNEV    | 23    | 20    |
| >KIT-Y553N-1 YLQKPMYEV   | 2   | >KIT-Y553N-r YLQKPMNEV    | 2     | 0     |
| >KIT-Y553N-1 YLQKPMYEV   | 77  | >KIT-Y553N-r YLQKPMNEV    | 140   | 63    |
| >KIT-Y553N-1 YLQKPMYEV   | 93  | >KIT-Y553N-r YLQKPMNEV    | 363   | 270   |
| >KIT-Y553N-1 YLQKPMYEV   | 55  | >KIT-Y553N-r YLQKPMNEV    | 136   | 81    |
| >KIT-Y553N-1 YLQKPMYEV   | 124 | >KIT-Y553N-r YLQKPMNEV    | 168   | 44    |
| >KIT-Y553N-1 KYLQKPMYEV  | 100 | >KIT-Y553N-r KYLQKPMNEV   | 759   | 659   |
| >KIT-Y553N-1 KYLQKPMYEV  | 307 | >KIT-Y553N-r KYLQKPMNEV   | 1308  | 1001  |
| >KIT-Y553N-1 KYLQKPMY    | 159 | >KIT-Y553N-r KYLQKPMN     | 1219  | 1060  |
| >KIT-Y553N-1 KYLQKPMYEV  | 28  | >KIT-Y553N-r KYLQKPMNEV   | 35    | 7     |
| >KIT-Y553N-1 KYLQKPMYEV  | 360 | >KIT-Y553N-r KYLQKPMNEV   | 1061  | 701   |
| >KIT-Y553N-1 KYLQKPMY    | 89  | >KIT-Y553N-r KYLQKPMN     | 18229 | 18140 |
| >KIT-Y553N-1 KYLQKPMYEV  | 471 | >KIT-Y553N-r KYLQKPMNEV   | 455   | 16    |
| >KIT-Y553N-1 KYLQKPMY    | 93  | >KIT-Y553N-r KYLQKPMN     | 10932 | 10839 |
| >KIT-Y553N-1 KYLQKPMY    | 160 | >KIT-Y553N-r KYLQKPMN     | 24754 | 24594 |
| >KIT-Y553N-1 KYLQKPMYEV  | 82  | >KIT-Y553N-r KYLQKPMNEV   | 852   | 770   |
| >KIT-Y553N-1 KYLQKPMYEV  | 121 | >KIT-Y553N-r KYLQKPMNEV   | 177   | 56    |
| >KIT-Y553N-1 KYLQKPMYEV  | 331 | >KIT-Y553N-r KYLQKPMNEV   | 1312  | 981   |
| >KIT-Y553N-1 KYLQKPMYEV  | 56  | >KIT-Y553N-r KYLQKPMNEV   | 130   | 74    |
| >KIT-Y553N-1 KYLQKPMYEV  | 391 | >KIT-Y553N-r KYLQKPMNEV   | 676   | 285   |
| >KIT-Y553N-1 YKYLQKPMYEV | 499 | >KIT-Y553N-r YKYLQKPMNEV  | 446   | 53    |
| >KIT-Y553N-1 YKYLQKPMYEV | 447 | >KIT-Y553N-r YKYLQKPMNEV  | 813   | 366   |
| >KIT-Y553N-1 YKYLQKPMYEV | 121 | >KIT-Y553N-r YKYLQKPMNEV  | 475   | 354   |
| >KIT-Y553N-1 YKYLQKPMYEV | 356 | >KIT-Y553N-r YKYLQKPMNEV  | 1008  | 652   |
| >KIT-Y553N-1 YKYLQKPMYEV | 365 | >KIT-Y553N-r YKYLQKPMNEV  | 711   | 346   |
| >KIT-Y553N-1 YKYLQKPMY   | 153 | >KIT-Y553N-r YKYLQKPMN    | 23652 | 23499 |
| >KIT-Y553N-1 YKYLQKPMY   | 9   | >KIT-Y553N-r YKYLQKPMN    | 4561  | 4552  |
| >KIT-Y553N-1 YKYLQKPMYEV | 39  | >KIT-Y553N-r YKYLQKPMNEV  | 37    | 2     |
| >KIT-Y553N-1 TYKYLQKPMY  | 100 | >KIT-Y553N-r TYKYLQKPMNEV | 27049 | 26949 |
| >KIT-Y553N-1 TYKYLQKPMY  | 348 | >KIT-Y553N-r TYKYLQKPMNEV | 22975 | 22627 |
| >KIT-Y553V-1 YEVQWKVV    | 10  | >KIT-Y553V-r VEVQWKVV     | 72    | 62    |
| >KIT-Y553V-1 YEVQWKVVE   | 11  | >KIT-Y553V-r VEVQWKVVE    | 15    | 4     |
| >KIT-Y553V-1 YEVQWKVV    | 373 | >KIT-Y553V-r VEVQWKVV     | 2563  | 2190  |
| >KIT-Y553V-1 YEVQWKVVE   | 343 | >KIT-Y553V-r VEVQWKVVE    | 2307  | 1964  |
| >KIT-Y553V-1 YEVQWKVV    | 307 | >KIT-Y553V-r VEVQWKVV     | 1687  | 1380  |
| >KIT-Y553V-1 YEVQWKVVE   | 59  | >KIT-Y553V-r VEVQWKVVE    | 437   | 378   |
| >KIT-Y553V-1 YEVQWKVV    | 169 | >KIT-Y553V-r VEVQWKVV     | 461   | 292   |
| >KIT-Y553V-1 YEVQWKVVE   | 176 | >KIT-Y553V-r VEVQWKVVE    | 583   | 407   |
| >KIT-Y553V-1 YEVQWKVVE   | 3   | >KIT-Y553V-r VEVQWKVVE    | 7     | 4     |

|                         |       |                         |       |       |
|-------------------------|-------|-------------------------|-------|-------|
| >KIT-Y553V-v MYEVQWKV   | 6123  | >KIT-Y553V-r MVEVQWKV   | 148   | 5975  |
| >KIT-Y553V-v MYEVQWKV   | 652   | >KIT-Y553V-r MVEVQWKV   | 32    | 620   |
| >KIT-Y553V-v MYEVQWKV   | 246   | >KIT-Y553V-r MVEVQWKV   | 20465 | 20219 |
| >KIT-Y553V-v MYEVQWKV   | 7231  | >KIT-Y553V-r MVEVQWKV   | 161   | 7070  |
| >KIT-Y553V-v MYEVQWKV   | 488   | >KIT-Y553V-r MVEVQWKV   | 26703 | 26215 |
| >KIT-Y553V-v LTYKYLQKPM | 1338  | >KIT-Y553V-r LTYKYLQKPM | 118   | 1220  |
| >KIT-Y553V-v LTYKYLQKPM | 22122 | >KIT-Y553V-r LTYKYLQKPM | 271   | 21851 |
| >KIT-Y553V-v LTYKYLQKPM | 21800 | >KIT-Y553V-r LTYKYLQKPM | 496   | 21304 |
| >KIT-Y553V-v LTYKYLQKPM | 19696 | >KIT-Y553V-r LTYKYLQKPM | 163   | 19533 |
| >KIT-Y553V-v LTYKYLQKPM | 14128 | >KIT-Y553V-r LTYKYLQKPM | 95    | 14033 |
| >KIT-Y553V-v LTYKYLQKPM | 12383 | >KIT-Y553V-r LTYKYLQKPM | 12    | 12371 |
| >KIT-Y553V-v LTYKYLQKPM | 20943 | >KIT-Y553V-r LTYKYLQKPM | 49    | 20894 |
| >KIT-Y553V-v LTYKYLQKPM | 26292 | >KIT-Y553V-r LTYKYLQKPM | 26    | 26266 |
| >KIT-Y553V-v LTYKYLQKPM | 422   | >KIT-Y553V-r LTYKYLQKPM | 17051 | 16629 |
| >KIT-Y553V-v LTYKYLQKPM | 73    | >KIT-Y553V-r LTYKYLQKPM | 10481 | 10408 |
| >KIT-Y553V-v LTYKYLQKPM | 29    | >KIT-Y553V-r LTYKYLQKPM | 15166 | 15137 |
| >KIT-Y553V-v LTYKYLQKPM | 74    | >KIT-Y553V-r LTYKYLQKPM | 7622  | 7548  |
| >KIT-Y553V-v LTYKYLQKPM | 9916  | >KIT-Y553V-r LTYKYLQKPM | 16    | 9900  |
| >KIT-Y553V-v LTYKYLQKPM | 149   | >KIT-Y553V-r LTYKYLQKPM | 8478  | 8329  |
| >KIT-Y553V-v LTYKYLQKPM | 95    | >KIT-Y553V-r LTYKYLQKPM | 1136  | 1041  |
| >KIT-Y553V-v LTYKYLQKPM | 4     | >KIT-Y553V-r LTYKYLQKPM | 139   | 135   |
| >KIT-Y553V-v LTYKYLQKPM | 6     | >KIT-Y553V-r LTYKYLQKPM | 116   | 110   |
| >KIT-Y553V-v PMYEVQWK\  | 17    | >KIT-Y553V-r PMYEVQWK\  | 111   | 94    |
| >KIT-Y553V-v PMYEVQWK\  | 18    | >KIT-Y553V-r PMYEVQWK\  | 43    | 25    |
| >KIT-Y553V-v PMYEVQWK\  | 48    | >KIT-Y553V-r PMYEVQWK\  | 322   | 274   |
| >KIT-Y553V-v PMYEVQWK\  | 33    | >KIT-Y553V-r PMYEVQWK\  | 56    | 23    |
| >KIT-Y553V-v PMYEVQWK\  | 1     | >KIT-Y553V-r PMYEVQWK\  | 2     | 1     |
| >KIT-Y553V-v PMYEVQWK\  | 4     | >KIT-Y553V-r PMYEVQWK\  | 14    | 10    |
| >KIT-Y553V-v PMYEVQWK\  | 5     | >KIT-Y553V-r PMYEVQWK\  | 10    | 5     |
| >KIT-Y553V-v PMYEVQWK\  | 97    | >KIT-Y553V-r PMYEVQWK\  | 248   | 151   |
| >KIT-Y553V-v PMYEVQWK\  | 4     | >KIT-Y553V-r PMYEVQWK\  | 5     | 1     |
| >KIT-Y553V-v PMYEVQWK\  | 11    | >KIT-Y553V-r PMYEVQWK\  | 43    | 32    |
| >KIT-Y553V-v PMYEVQWK\  | 3     | >KIT-Y553V-r PMYEVQWK\  | 4     | 1     |
| >KIT-Y553V-v PMYEVQWK\  | 54    | >KIT-Y553V-r PMYEVQWK\  | 184   | 130   |
| >KIT-Y553V-v PMYEVQWK\  | 2     | >KIT-Y553V-r PMYEVQWK\  | 3     | 1     |
| >KIT-Y553V-v PMYEVQWK\  | 10    | >KIT-Y553V-r PMYEVQWK\  | 22    | 12    |
| >KIT-Y553V-v PMYEVQWK   | 129   | >KIT-Y553V-r PMYEVQWK   | 3804  | 3675  |
| >KIT-Y553V-v PMYEVQWK\  | 145   | >KIT-Y553V-r PMYEVQWK\  | 631   | 486   |
| >KIT-Y553V-v KPMYEVQWI  | 157   | >KIT-Y553V-r KPMYEVQWI  | 108   | 49    |
| >KIT-Y553V-v KPMYEVQWI  | 136   | >KIT-Y553V-r KPMYEVQWI  | 141   | 5     |
| >KIT-Y553V-v KPMYEVQW   | 20    | >KIT-Y553V-r KPMYEVQW   | 25    | 5     |
| >KIT-Y553V-v KPMYEVQWI  | 68    | >KIT-Y553V-r KPMYEVQWI  | 375   | 307   |
| >KIT-Y553V-v KPMYEVQW   | 536   | >KIT-Y553V-r KPMYEVQW   | 362   | 174   |



|                          |       |                          |       |       |
|--------------------------|-------|--------------------------|-------|-------|
| >KIT-Y553V-v KPMYEVQW    | 199   | >KIT-Y553V-r KPMVEVQW    | 101   | 98    |
| >KIT-Y553V-v KPMYEVQW    | 9     | >KIT-Y553V-r KPMVEVQW    | 9     | 0     |
| >KIT-Y553V-v LQKPMYEV    | 327   | >KIT-Y553V-r LQKPMVEV    | 690   | 363   |
| >KIT-Y553V-v LQKPMYEV    | 48    | >KIT-Y553V-r LQKPMVEV    | 37    | 11    |
| >KIT-Y553V-v LQKPMYEV    | 34    | >KIT-Y553V-r LQKPMVEV    | 33    | 1     |
| >KIT-Y553V-v LQKPMYEV    | 318   | >KIT-Y553V-r LQKPMVEV    | 214   | 104   |
| >KIT-Y553V-v LQKPMYEVQ   | 243   | >KIT-Y553V-r LQKPMVEVQ   | 406   | 163   |
| >KIT-Y553V-v LQKPMYEVQ   | 415   | >KIT-Y553V-r LQKPMVEVQ   | 802   | 387   |
| >KIT-Y553V-v LQKPMYEV    | 403   | >KIT-Y553V-r LQKPMVEV    | 236   | 167   |
| >KIT-Y553V-v LQKPMYEVQ   | 230   | >KIT-Y553V-r LQKPMVEVQ   | 125   | 105   |
| >KIT-Y553V-v LQKPMYEVQ   | 247   | >KIT-Y553V-r LQKPMVEVQ   | 214   | 33    |
| >KIT-Y553V-v LQKPMYEV    | 155   | >KIT-Y553V-r LQKPMVEV    | 111   | 44    |
| >KIT-Y553V-v LQKPMYEVQ   | 225   | >KIT-Y553V-r LQKPMVEVQ   | 408   | 183   |
| >KIT-Y553V-v LQKPMYEVQ   | 692   | >KIT-Y553V-r LQKPMVEVQ   | 497   | 195   |
| >KIT-Y553V-v LQKPMYEVQ   | 168   | >KIT-Y553V-r LQKPMVEVQ   | 266   | 98    |
| >KIT-Y553V-v LQKPMYEVQ   | 230   | >KIT-Y553V-r LQKPMVEVQ   | 312   | 82    |
| >KIT-Y553V-v YLQKPMYEV   | 7     | >KIT-Y553V-r YLQKPMVEV   | 10    | 3     |
| >KIT-Y553V-v YLQKPMYEV   | 5     | >KIT-Y553V-r YLQKPMVEV   | 13    | 8     |
| >KIT-Y553V-v YLQKPMYEV   | 7     | >KIT-Y553V-r YLQKPMVEV   | 8     | 1     |
| >KIT-Y553V-v YLQKPMYEV   | 13    | >KIT-Y553V-r YLQKPMVEV   | 17    | 4     |
| >KIT-Y553V-v YLQKPMYEV   | 1     | >KIT-Y553V-r YLQKPMVEV   | 2     | 1     |
| >KIT-Y553V-v YLQKPMYEV   | 2     | >KIT-Y553V-r YLQKPMVEV   | 4     | 2     |
| >KIT-Y553V-v YLQKPMYEV   | 6     | >KIT-Y553V-r YLQKPMVEV   | 6     | 0     |
| >KIT-Y553V-v YLQKPMYEV   | 3     | >KIT-Y553V-r YLQKPMVEV   | 8     | 5     |
| >KIT-Y553V-v YLQKPMYEV   | 2     | >KIT-Y553V-r YLQKPMVEV   | 2     | 0     |
| >KIT-Y553V-v YLQKPMYEV(\ | 77    | >KIT-Y553V-r YLQKPMVEV(\ | 56    | 21    |
| >KIT-Y553V-v YLQKPMYEV   | 93    | >KIT-Y553V-r YLQKPMVEV   | 324   | 231   |
| >KIT-Y553V-v YLQKPMYEV   | 55    | >KIT-Y553V-r YLQKPMVEV   | 98    | 43    |
| >KIT-Y553V-v YLQKPMYEV(\ | 124   | >KIT-Y553V-r YLQKPMVEV(\ | 158   | 34    |
| >KIT-Y553V-v KYLQKPMY    | 25799 | >KIT-Y553V-r KYLQKPMV    | 378   | 25421 |
| >KIT-Y553V-v KYLQKPMY(\  | 100   | >KIT-Y553V-r KYLQKPMVE(\ | 318   | 218   |
| >KIT-Y553V-v KYLQKPMY    | 23620 | >KIT-Y553V-r KYLQKPMV    | 352   | 23268 |
| >KIT-Y553V-v KYLQKPMY(\  | 307   | >KIT-Y553V-r KYLQKPMVE(\ | 606   | 299   |
| >KIT-Y553V-v KYLQKPMY    | 159   | >KIT-Y553V-r KYLQKPMV    | 79    | 80    |
| >KIT-Y553V-v KYLQKPMY(\  | 28    | >KIT-Y553V-r KYLQKPMVE(\ | 26    | 2     |
| >KIT-Y553V-v KYLQKPMY(\  | 360   | >KIT-Y553V-r KYLQKPMVE(\ | 647   | 287   |
| >KIT-Y553V-v KYLQKPMY    | 89    | >KIT-Y553V-r KYLQKPMV    | 14486 | 14397 |
| >KIT-Y553V-v KYLQKPMY    | 846   | >KIT-Y553V-r KYLQKPMV    | 375   | 471   |
| >KIT-Y553V-v KYLQKPMY(\  | 471   | >KIT-Y553V-r KYLQKPMVE(\ | 532   | 61    |
| >KIT-Y553V-v KYLQKPMY    | 93    | >KIT-Y553V-r KYLQKPMV    | 4729  | 4636  |
| >KIT-Y553V-v KYLQKPMY    | 160   | >KIT-Y553V-r KYLQKPMV    | 22850 | 22690 |
| >KIT-Y553V-v KYLQKPMYE   | 82    | >KIT-Y553V-r KYLQKPMVE   | 1113  | 1031  |
| >KIT-Y553V-v KYLQKPMY(\  | 121   | >KIT-Y553V-r KYLQKPMVE(\ | 199   | 78    |

|                          |       |                          |       |       |
|--------------------------|-------|--------------------------|-------|-------|
| >KIT-Y553V-v KYLQKPMY    | 1537  | >KIT-Y553V-r KYLQKPMV    | 253   | 1284  |
| >KIT-Y553V-v KYLQKPMYE   | 331   | >KIT-Y553V-r KYLQKPMVE   | 1024  | 693   |
| >KIT-Y553V-v KYLQKPMYE\  | 56    | >KIT-Y553V-r KYLQKPMVE\  | 217   | 161   |
| >KIT-Y553V-v KYLQKPMYE\  | 391   | >KIT-Y553V-r KYLQKPMVE\  | 601   | 210   |
| >KIT-Y553V-v YKYLQKPMY   | 4383  | >KIT-Y553V-r YKYLQKPMV   | 318   | 4065  |
| >KIT-Y553V-v YKYLQKPMYE  | 499   | >KIT-Y553V-r YKYLQKPMVI  | 733   | 234   |
| >KIT-Y553V-v YKYLQKPMYE  | 447   | >KIT-Y553V-r YKYLQKPMVI  | 632   | 185   |
| >KIT-Y553V-v YKYLQKPMY   | 24899 | >KIT-Y553V-r YKYLQKPMV   | 421   | 24478 |
| >KIT-Y553V-v YKYLQKPMYE  | 121   | >KIT-Y553V-r YKYLQKPMVI  | 212   | 91    |
| >KIT-Y553V-v YKYLQKPMY   | 23687 | >KIT-Y553V-r YKYLQKPMV   | 380   | 23307 |
| >KIT-Y553V-v YKYLQKPMYE  | 356   | >KIT-Y553V-r YKYLQKPMVI  | 455   | 99    |
| >KIT-Y553V-v YKYLQKPMY   | 34716 | >KIT-Y553V-r YKYLQKPMV   | 446   | 34270 |
| >KIT-Y553V-v YKYLQKPMYE  | 365   | >KIT-Y553V-r YKYLQKPMVI  | 288   | 77    |
| >KIT-Y553V-v YKYLQKPMY   | 153   | >KIT-Y553V-r YKYLQKPMV   | 21070 | 20917 |
| >KIT-Y553V-v YKYLQKPMY   | 9     | >KIT-Y553V-r YKYLQKPMV   | 95    | 86    |
| >KIT-Y553V-v YKYLQKPMYE  | 39    | >KIT-Y553V-r YKYLQKPMVI  | 26    | 13    |
| >KIT-Y553V-v TYKYLQKPM\  | 100   | >KIT-Y553V-r TYKYLQKPM\  | 19599 | 19499 |
| >KIT-Y553V-v TYKYLQKPM\  | 348   | >KIT-Y553V-r TYKYLQKPM\  | 14101 | 13753 |
| >KIT-Y568C-v YVYIDPTQL   | 193   | >KIT-Y568C-r CVYIDPTQL   | 8035  | 7842  |
| >KIT-Y568C-v YVYIDPTQL   | 135   | >KIT-Y568C-r CVYIDPTQL   | 2146  | 2011  |
| >KIT-Y568C-v YVYIDPTQL   | 24    | >KIT-Y568C-r CVYIDPTQL   | 619   | 595   |
| >KIT-Y568C-v YVYIDPTQL   | 261   | >KIT-Y568C-r CVYIDPTQL   | 6721  | 6460  |
| >KIT-Y568C-v YVYIDPTQL   | 18    | >KIT-Y568C-r CVYIDPTQL   | 1296  | 1278  |
| >KIT-Y568C-v YVYIDPTQL   | 71    | >KIT-Y568C-r CVYIDPTQL   | 4784  | 4713  |
| >KIT-Y568C-v YVYIDPTQL   | 16    | >KIT-Y568C-r CVYIDPTQL   | 1357  | 1341  |
| >KIT-Y568C-v YVYIDPTQLP\ | 492   | >KIT-Y568C-r CVYIDPTQLP\ | 455   | 37    |
| >KIT-Y568C-v YVYIDPTQLP\ | 330   | >KIT-Y568C-r CVYIDPTQLP\ | 305   | 25    |
| >KIT-Y568C-v YVYIDPTQLP\ | 387   | >KIT-Y568C-r CVYIDPTQLP\ | 9595  | 9208  |
| >KIT-Y568C-v YVYIDPTQLP\ | 91    | >KIT-Y568C-r CVYIDPTQLP\ | 660   | 569   |
| >KIT-Y568C-v YVYIDPTQLP\ | 6     | >KIT-Y568C-r CVYIDPTQLP\ | 13    | 7     |
| >KIT-Y568C-v YVYIDPTQLP\ | 517   | >KIT-Y568C-r CVYIDPTQLP\ | 256   | 261   |
| >KIT-Y568C-v YVYIDPTQLP\ | 451   | >KIT-Y568C-r CVYIDPTQLP\ | 2284  | 1833  |
| >KIT-Y568C-v YVYIDPTQL   | 162   | >KIT-Y568C-r CVYIDPTQL   | 4681  | 4519  |
| >KIT-Y568C-v YVYIDPTQLP\ | 16    | >KIT-Y568C-r CVYIDPTQLP\ | 67    | 51    |
| >KIT-Y568C-v YVYIDPTQLP\ | 63    | >KIT-Y568C-r CVYIDPTQLP\ | 415   | 352   |
| >KIT-Y568C-v YVYIDPTQLP\ | 73    | >KIT-Y568C-r CVYIDPTQLP\ | 1131  | 1058  |
| >KIT-Y568C-v YVYIDPTQLP\ | 53    | >KIT-Y568C-r CVYIDPTQLP\ | 412   | 359   |
| >KIT-Y568C-v YVYIDPTQL   | 27    | >KIT-Y568C-r CVYIDPTQL   | 1753  | 1726  |
| >KIT-Y568C-v YVYIDPTQLP\ | 7     | >KIT-Y568C-r CVYIDPTQLP\ | 63    | 56    |
| >KIT-Y568C-v YVYIDPTQLP\ | 17    | >KIT-Y568C-r CVYIDPTQLP\ | 61    | 44    |
| >KIT-Y568C-v YVYIDPTQL   | 423   | >KIT-Y568C-r CVYIDPTQL   | 8585  | 8162  |
| >KIT-Y568C-v YVYIDPTQLP\ | 301   | >KIT-Y568C-r CVYIDPTQLP\ | 4535  | 4234  |
| >KIT-Y568C-v YVYIDPTQLP\ | 949   | >KIT-Y568C-r CVYIDPTQLP\ | 376   | 573   |

|                          |      |                          |       |       |
|--------------------------|------|--------------------------|-------|-------|
| >KIT-Y568C-v YVYIDPTQL   | 1462 | >KIT-Y568C-r CVYIDPTQL   | 279   | 1183  |
| >KIT-Y568C-v NYVYIDPTQL  | 150  | >KIT-Y568C-r NCVYIDPTQL  | 21854 | 21704 |
| >KIT-Y568C-v NYVYIDPTQL  | 163  | >KIT-Y568C-r NCVYIDPTQL  | 23915 | 23752 |
| >KIT-Y568C-v KVVVEEINGNM | 31   | >KIT-Y568C-r KVVVEEINGNM | 13198 | 13167 |
| >KIT-Y568C-v KVVVEEINGNM | 61   | >KIT-Y568C-r KVVVEEINGNM | 25387 | 25326 |
| >KIT-Y568C-v KVVVEEINGNM | 114  | >KIT-Y568C-r KVVVEEINGNM | 22495 | 22381 |
| >KIT-Y568C-v KVVVEEINGNM | 114  | >KIT-Y568C-r KVVVEEINGNM | 26097 | 25983 |
| >KIT-Y568C-v KVVVEEINGNM | 100  | >KIT-Y568C-r KVVVEEINGNM | 18819 | 18719 |
| >KIT-Y568C-v INGNNYVYI   | 163  | >KIT-Y568C-r INGNNCVYI   | 1863  | 1700  |
| >KIT-Y568C-v INGNNYVYI   | 141  | >KIT-Y568C-r INGNNCVYI   | 1603  | 1462  |
| >KIT-Y568C-v INGNNYVY    | 382  | >KIT-Y568C-r INGNNCVY    | 3013  | 2631  |
| >KIT-Y568C-v INGNNYVY    | 256  | >KIT-Y568C-r INGNNCVY    | 1071  | 815   |
| >KIT-Y568C-v EINGNNYV    | 299  | >KIT-Y568C-r EINGNNCV    | 2435  | 2136  |
| >KIT-Y568C-v EINGNNYV    | 64   | >KIT-Y568C-r EINGNNCV    | 1028  | 964   |
| >KIT-Y568C-v EINGNNYVYI  | 229  | >KIT-Y568C-r EINGNNCVYI  | 531   | 302   |
| >KIT-Y568C-v EINGNNYV    | 442  | >KIT-Y568C-r EINGNNCV    | 1268  | 826   |
| >KIT-Y568C-v EINGNNYV    | 41   | >KIT-Y568C-r EINGNNCV    | 257   | 216   |
| >KIT-Y568C-v EINGNNYVYI  | 257  | >KIT-Y568C-r EINGNNCVYI  | 416   | 159   |
| >KIT-Y568C-v EINGNNYV    | 34   | >KIT-Y568C-r EINGNNCV    | 164   | 130   |
| >KIT-Y568C-v EINGNNYVY   | 763  | >KIT-Y568C-r EINGNNCVY   | 338   | 425   |
| >KIT-Y568C-v EINGNNYVY   | 203  | >KIT-Y568C-r EINGNNCVY   | 99    | 104   |
| >KIT-Y568C-v EINGNNYVY   | 17   | >KIT-Y568C-r EINGNNCVY   | 78    | 61    |
| >KIT-Y568C-v EINGNNYVY   | 425  | >KIT-Y568C-r EINGNNCVY   | 1339  | 914   |
| >KIT-Y568C-v EINGNNYVY   | 218  | >KIT-Y568C-r EINGNNCVY   | 4159  | 3941  |
| >KIT-Y568C-v EINGNNYVY   | 70   | >KIT-Y568C-r EINGNNCVY   | 1209  | 1139  |
| >KIT-Y568C-v EINGNNYVY   | 340  | >KIT-Y568C-r EINGNNCVY   | 917   | 577   |
| >KIT-Y568C-v EINGNNYV    | 8    | >KIT-Y568C-r EINGNNCV    | 23    | 15    |
| >KIT-Y568C-v EINGNNYVYI  | 101  | >KIT-Y568C-r EINGNNCVYI  | 67    | 34    |
| >KIT-Y568C-v EINGNNYV    | 11   | >KIT-Y568C-r EINGNNCV    | 134   | 123   |
| >KIT-Y568C-v EINGNNYVYI  | 36   | >KIT-Y568C-r EINGNNCVYI  | 81    | 45    |
| >KIT-Y568C-v EINGNNYVY   | 515  | >KIT-Y568C-r EINGNNCVY   | 207   | 308   |
| >KIT-Y568C-v EINGNNYVY   | 168  | >KIT-Y568C-r EINGNNCVY   | 654   | 486   |
| >KIT-Y568C-v EINGNNYVY   | 81   | >KIT-Y568C-r EINGNNCVY   | 1174  | 1093  |
| >KIT-Y568C-v EEINGNNYVY  | 76   | >KIT-Y568C-r EEINGNNCVY  | 60    | 16    |
| >KIT-Y568C-v EEINGNNY    | 230  | >KIT-Y568C-r EEINGNNC    | 26057 | 25827 |
| >KIT-Y568C-v EEINGNNYVY  | 179  | >KIT-Y568C-r EEINGNNCVY  | 496   | 317   |
| >KIT-Y568C-v EEINGNNY    | 19   | >KIT-Y568C-r EEINGNNC    | 15635 | 15616 |
| >KIT-Y568C-v EEINGNNYVY  | 134  | >KIT-Y568C-r EEINGNNCVY  | 232   | 98    |
| >KIT-Y568C-v EEINGNNYVY  | 328  | >KIT-Y568C-r EEINGNNCVY  | 861   | 533   |
| >KIT-Y568C-v EEINGNNYV   | 241  | >KIT-Y568C-r EEINGNNCV   | 3610  | 3369  |
| >KIT-Y568C-v EEINGNNYVY  | 766  | >KIT-Y568C-r EEINGNNCVY  | 433   | 333   |
| >KIT-Y568C-v EEINGNNY    | 278  | >KIT-Y568C-r EEINGNNC    | 17899 | 17621 |
| >KIT-Y568C-v EEINGNNYVY  | 322  | >KIT-Y568C-r EEINGNNCVY  | 3901  | 3579  |

|                          |     |                          |       |       |
|--------------------------|-----|--------------------------|-------|-------|
| >KIT-Y568C-v EEINGNNYV   | 234 | >KIT-Y568C-r EEINGNNCV   | 736   | 502   |
| >KIT-Y568C-v EEINGNNYVY  | 59  | >KIT-Y568C-r EEINGNNCVY  | 104   | 45    |
| >KIT-Y568C-v EEINGNNYV   | 595 | >KIT-Y568C-r EEINGNNCV   | 364   | 231   |
| >KIT-Y568C-v EEINGNNYVY  | 300 | >KIT-Y568C-r EEINGNNCVY  | 320   | 20    |
| >KIT-Y568C-v EEINGNNYVY  | 466 | >KIT-Y568C-r EEINGNNCVY  | 3311  | 2845  |
| >KIT-Y568C-v EEINGNNY    | 70  | >KIT-Y568C-r EEINGNNC    | 3002  | 2932  |
| >KIT-Y568C-v EEINGNNYV   | 488 | >KIT-Y568C-r EEINGNNCV   | 851   | 363   |
| >KIT-Y568C-v EEINGNNYVY  | 180 | >KIT-Y568C-r EEINGNNCVY  | 1050  | 870   |
| >KIT-Y568C-v EEINGNNYVY  | 190 | >KIT-Y568C-r EEINGNNCVY  | 276   | 86    |
| >KIT-Y568C-v EEINGNNYV   | 74  | >KIT-Y568C-r EEINGNNCV   | 31    | 43    |
| >KIT-Y568C-v EEINGNNYVY  | 97  | >KIT-Y568C-r EEINGNNCVY  | 107   | 10    |
| >KIT-Y568C-v EEINGNNYV   | 305 | >KIT-Y568C-r EEINGNNCV   | 317   | 12    |
| >KIT-Y568C-v EEINGNNYVY  | 63  | >KIT-Y568C-r EEINGNNCVY  | 61    | 2     |
| >KIT-Y568C-v VEEINGNNYV  | 328 | >KIT-Y568C-r VEEINGNNCV  | 292   | 36    |
| >KIT-Y568C-v VEEINGNNYV  | 94  | >KIT-Y568C-r VEEINGNNCV  | 395   | 301   |
| >KIT-Y568C-v VEEINGNNYV  | 377 | >KIT-Y568C-r VEEINGNNCV  | 217   | 160   |
| >KIT-Y568C-v VVEEINGNNY  | 217 | >KIT-Y568C-r VVEEINGNNC  | 1360  | 1143  |
| >KIT-Y568C-v VVEEINGNNY  | 87  | >KIT-Y568C-r VVEEINGNNC  | 1033  | 946   |
| >KIT-Y568C-v VVEEINGNNY  | 121 | >KIT-Y568C-r VVEEINGNNC  | 2283  | 2162  |
| >KIT-Y568C-v VVEEINGNNY  | 35  | >KIT-Y568C-r VVEEINGNNC  | 228   | 193   |
| >KIT-Y568C-v VVEEINGNNY  | 316 | >KIT-Y568C-r VVEEINGNNC  | 28842 | 28526 |
| >KIT-Y568C-v VVEEINGNNY  | 167 | >KIT-Y568C-r VVEEINGNNC  | 1243  | 1076  |
| >KIT-Y568C-v VVEEINGNNY  | 178 | >KIT-Y568C-r VVEEINGNNC  | 25835 | 25657 |
| >KIT-Y568D-v YVYIDPTQL   | 193 | >KIT-Y568D-r DVYIDPTQL   | 20412 | 20219 |
| >KIT-Y568D-v YVYIDPTQL   | 135 | >KIT-Y568D-r DVYIDPTQL   | 10700 | 10565 |
| >KIT-Y568D-v YVYIDPTQL   | 24  | >KIT-Y568D-r DVYIDPTQL   | 7778  | 7754  |
| >KIT-Y568D-v YVYIDPTQL   | 261 | >KIT-Y568D-r DVYIDPTQL   | 19178 | 18917 |
| >KIT-Y568D-v YVYIDPTQL   | 18  | >KIT-Y568D-r DVYIDPTQL   | 4660  | 4642  |
| >KIT-Y568D-v YVYIDPTQL   | 71  | >KIT-Y568D-r DVYIDPTQL   | 5558  | 5487  |
| >KIT-Y568D-v YVYIDPTQL   | 16  | >KIT-Y568D-r DVYIDPTQL   | 5338  | 5322  |
| >KIT-Y568D-v YVYIDPTQLP' | 492 | >KIT-Y568D-r DVYIDPTQLP' | 6180  | 5688  |
| >KIT-Y568D-v YVYIDPTQLP' | 330 | >KIT-Y568D-r DVYIDPTQLP' | 6955  | 6625  |
| >KIT-Y568D-v YVYIDPTQLP' | 387 | >KIT-Y568D-r DVYIDPTQLP' | 1478  | 1091  |
| >KIT-Y568D-v YVYIDPTQLP' | 745 | >KIT-Y568D-r DVYIDPTQLP' | 467   | 278   |
| >KIT-Y568D-v YVYIDPTQLP' | 91  | >KIT-Y568D-r DVYIDPTQLP' | 82    | 9     |
| >KIT-Y568D-v YVYIDPTQLP' | 6   | >KIT-Y568D-r DVYIDPTQLP' | 30    | 24    |
| >KIT-Y568D-v YVYIDPTQLP' | 451 | >KIT-Y568D-r DVYIDPTQLP' | 609   | 158   |
| >KIT-Y568D-v YVYIDPTQL   | 162 | >KIT-Y568D-r DVYIDPTQL   | 291   | 129   |
| >KIT-Y568D-v YVYIDPTQLP' | 16  | >KIT-Y568D-r DVYIDPTQLP' | 717   | 701   |
| >KIT-Y568D-v YVYIDPTQLP' | 63  | >KIT-Y568D-r DVYIDPTQLP' | 2326  | 2263  |
| >KIT-Y568D-v YVYIDPTQLP' | 73  | >KIT-Y568D-r DVYIDPTQLP' | 763   | 690   |
| >KIT-Y568D-v YVYIDPTQLP' | 53  | >KIT-Y568D-r DVYIDPTQLP' | 2139  | 2086  |
| >KIT-Y568D-v YVYIDPTQL   | 27  | >KIT-Y568D-r DVYIDPTQL   | 5333  | 5306  |

|                          |     |                          |       |       |
|--------------------------|-----|--------------------------|-------|-------|
| >KIT-Y568D-\ YVYIDPTQLP\ | 7   | >KIT-Y568D-r DVYIDPTQLP' | 544   | 537   |
| >KIT-Y568D-\ YVYIDPTQLP\ | 17  | >KIT-Y568D-r DVYIDPTQLP' | 51    | 34    |
| >KIT-Y568D-\ YVYIDPTQL   | 423 | >KIT-Y568D-r DVYIDPTQL   | 14575 | 14152 |
| >KIT-Y568D-\ YVYIDPTQLP\ | 301 | >KIT-Y568D-r DVYIDPTQLP' | 7754  | 7453  |
| >KIT-Y568D-\ NYVYIDPTQL  | 150 | >KIT-Y568D-r NDVYIDPTQL  | 24608 | 24458 |
| >KIT-Y568D-\ NYVYIDPTQL  | 163 | >KIT-Y568D-r NDVYIDPTQL  | 26499 | 26336 |
| >KIT-Y568D-\ KVVVEEINGNM | 31  | >KIT-Y568D-r KVVVEEINGNM | 24650 | 24619 |
| >KIT-Y568D-\ KVVVEEINGNM | 61  | >KIT-Y568D-r KVVVEEINGNM | 30465 | 30404 |
| >KIT-Y568D-\ KVVVEEINGNM | 114 | >KIT-Y568D-r KVVVEEINGNM | 24682 | 24568 |
| >KIT-Y568D-\ KVVVEEINGNM | 114 | >KIT-Y568D-r KVVVEEINGNM | 26031 | 25917 |
| >KIT-Y568D-\ KVVVEEINGNM | 100 | >KIT-Y568D-r KVVVEEINGNM | 20863 | 20763 |
| >KIT-Y568D-\ INGNNYVYI   | 163 | >KIT-Y568D-r INGNNDVYI   | 971   | 808   |
| >KIT-Y568D-\ INGNNYVYI   | 141 | >KIT-Y568D-r INGNNDVYI   | 3729  | 3588  |
| >KIT-Y568D-\ INGNNYVY    | 382 | >KIT-Y568D-r INGNNDVY    | 2848  | 2466  |
| >KIT-Y568D-\ INGNNYVY    | 256 | >KIT-Y568D-r INGNNDVY    | 673   | 417   |
| >KIT-Y568D-\ EINGNNYV    | 299 | >KIT-Y568D-r EINGNNDV    | 4353  | 4054  |
| >KIT-Y568D-\ EINGNNYV    | 64  | >KIT-Y568D-r EINGNNDV    | 2338  | 2274  |
| >KIT-Y568D-\ EINGNNYVYI  | 229 | >KIT-Y568D-r EINGNNDVYI  | 832   | 603   |
| >KIT-Y568D-\ EINGNNYV    | 442 | >KIT-Y568D-r EINGNNDV    | 4641  | 4199  |
| >KIT-Y568D-\ EINGNNYV    | 41  | >KIT-Y568D-r EINGNNDV    | 1754  | 1713  |
| >KIT-Y568D-\ EINGNNYVYI  | 257 | >KIT-Y568D-r EINGNNDVYI  | 918   | 661   |
| >KIT-Y568D-\ EINGNNYV    | 34  | >KIT-Y568D-r EINGNNDV    | 210   | 176   |
| >KIT-Y568D-\ EINGNNYVY   | 203 | >KIT-Y568D-r EINGNNDVY   | 501   | 298   |
| >KIT-Y568D-\ EINGNNYVY   | 17  | >KIT-Y568D-r EINGNNDVY   | 17    | 0     |
| >KIT-Y568D-\ EINGNNYVY   | 425 | >KIT-Y568D-r EINGNNDVY   | 1156  | 731   |
| >KIT-Y568D-\ EINGNNYVY   | 218 | >KIT-Y568D-r EINGNNDVY   | 2972  | 2754  |
| >KIT-Y568D-\ EINGNNYVY   | 70  | >KIT-Y568D-r EINGNNDVY   | 442   | 372   |
| >KIT-Y568D-\ EINGNNYVY   | 340 | >KIT-Y568D-r EINGNNDVY   | 768   | 428   |
| >KIT-Y568D-\ EINGNNYV    | 8   | >KIT-Y568D-r EINGNNDV    | 51    | 43    |
| >KIT-Y568D-\ EINGNNYVYI  | 101 | >KIT-Y568D-r EINGNNDVYI  | 403   | 302   |
| >KIT-Y568D-\ EINGNNYV    | 11  | >KIT-Y568D-r EINGNNDV    | 152   | 141   |
| >KIT-Y568D-\ EINGNNYVYI  | 36  | >KIT-Y568D-r EINGNNDVYI  | 267   | 231   |
| >KIT-Y568D-\ EINGNNYVY   | 168 | >KIT-Y568D-r EINGNNDVY   | 298   | 130   |
| >KIT-Y568D-\ EINGNNYVY   | 81  | >KIT-Y568D-r EINGNNDVY   | 799   | 718   |
| >KIT-Y568D-\ EEINGNNYVY  | 76  | >KIT-Y568D-r EEINGNNDV\  | 273   | 197   |
| >KIT-Y568D-\ EEINGNNY    | 230 | >KIT-Y568D-r EEINGNND    | 28952 | 28722 |
| >KIT-Y568D-\ EEINGNNYVY  | 179 | >KIT-Y568D-r EEINGNNDV\  | 207   | 28    |
| >KIT-Y568D-\ EEINGNNY    | 19  | >KIT-Y568D-r EEINGNND    | 21005 | 20986 |
| >KIT-Y568D-\ EEINGNNYVY  | 134 | >KIT-Y568D-r EEINGNNDV\  | 239   | 105   |
| >KIT-Y568D-\ EEINGNNYVY  | 328 | >KIT-Y568D-r EEINGNNDV\  | 1895  | 1567  |
| >KIT-Y568D-\ EEINGNNYV   | 241 | >KIT-Y568D-r EEINGNNDV   | 7513  | 7272  |
| >KIT-Y568D-\ EEINGNNY    | 278 | >KIT-Y568D-r EEINGNND    | 14782 | 14504 |
| >KIT-Y568D-\ EEINGNNYVY  | 322 | >KIT-Y568D-r EEINGNNDV\  | 1819  | 1497  |

|                          |     |                          |       |       |
|--------------------------|-----|--------------------------|-------|-------|
| >KIT-Y568D-\ EEINGNNYV   | 234 | >KIT-Y568D-r EEINGNNDV   | 604   | 370   |
| >KIT-Y568D-\ EEINGNNYVY  | 59  | >KIT-Y568D-r EEINGNNDV\  | 105   | 46    |
| >KIT-Y568D-\ EEINGNNYVY  | 300 | >KIT-Y568D-r EEINGNNDV\  | 579   | 279   |
| >KIT-Y568D-\ EEINGNNYVY  | 466 | >KIT-Y568D-r EEINGNNDV\  | 2098  | 1632  |
| >KIT-Y568D-\ EEINGNNY    | 70  | >KIT-Y568D-r EEINGNND    | 1895  | 1825  |
| >KIT-Y568D-\ EEINGNNYV   | 488 | >KIT-Y568D-r EEINGNNDV   | 901   | 413   |
| >KIT-Y568D-\ EEINGNNYVY  | 180 | >KIT-Y568D-r EEINGNNDV\  | 916   | 736   |
| >KIT-Y568D-\ EEINGNNYVY  | 190 | >KIT-Y568D-r EEINGNNDV\  | 239   | 49    |
| >KIT-Y568D-\ EEINGNNYV   | 74  | >KIT-Y568D-r EEINGNNDV   | 99    | 25    |
| >KIT-Y568D-\ EEINGNNYVY  | 97  | >KIT-Y568D-r EEINGNNDV\  | 327   | 230   |
| >KIT-Y568D-\ EEINGNNYV   | 305 | >KIT-Y568D-r EEINGNNDV   | 293   | 12    |
| >KIT-Y568D-\ EEINGNNYVY  | 63  | >KIT-Y568D-r EEINGNNDV\  | 106   | 43    |
| >KIT-Y568D-\ VEEINGNNY\  | 328 | >KIT-Y568D-r VEEINGNND\  | 769   | 441   |
| >KIT-Y568D-\ VEEINGNNY\  | 94  | >KIT-Y568D-r VEEINGNND\  | 546   | 452   |
| >KIT-Y568D-\ VEEINGNNY\  | 377 | >KIT-Y568D-r VEEINGNND\  | 595   | 218   |
| >KIT-Y568D-\ VVEEINGNNY  | 217 | >KIT-Y568D-r VVEEINGNNE  | 3476  | 3259  |
| >KIT-Y568D-\ VVEEINGNNY  | 87  | >KIT-Y568D-r VVEEINGNNE  | 2003  | 1916  |
| >KIT-Y568D-\ VVEEINGNNY  | 121 | >KIT-Y568D-r VVEEINGNNE  | 3409  | 3288  |
| >KIT-Y568D-\ VVEEINGNNY  | 35  | >KIT-Y568D-r VVEEINGNNE  | 170   | 135   |
| >KIT-Y568D-\ VVEEINGNNY  | 316 | >KIT-Y568D-r VVEEINGNNE  | 29292 | 28976 |
| >KIT-Y568D-\ VVEEINGNNY  | 167 | >KIT-Y568D-r VVEEINGNNE  | 2201  | 2034  |
| >KIT-Y568D-\ VVEEINGNNY  | 178 | >KIT-Y568D-r VVEEINGNNE  | 25884 | 25706 |
| >KIT-Y568S-v YVYIDPTQL   | 193 | >KIT-Y568S-n SVYIDPTQL   | 2461  | 2268  |
| >KIT-Y568S-v YVYIDPTQL   | 135 | >KIT-Y568S-n SVYIDPTQL   | 762   | 627   |
| >KIT-Y568S-v YVYIDPTQL   | 24  | >KIT-Y568S-n SVYIDPTQL   | 171   | 147   |
| >KIT-Y568S-v YVYIDPTQL   | 261 | >KIT-Y568S-n SVYIDPTQL   | 2760  | 2499  |
| >KIT-Y568S-v YVYIDPTQL   | 18  | >KIT-Y568S-n SVYIDPTQL   | 140   | 122   |
| >KIT-Y568S-v YVYIDPTQL   | 71  | >KIT-Y568S-n SVYIDPTQL   | 252   | 181   |
| >KIT-Y568S-v YVYIDPTQL   | 16  | >KIT-Y568S-n SVYIDPTQL   | 129   | 113   |
| >KIT-Y568S-v YVYIDPTQLP\ | 492 | >KIT-Y568S-n SVYIDPTQLP\ | 217   | 275   |
| >KIT-Y568S-v YVYIDPTQLP\ | 330 | >KIT-Y568S-n SVYIDPTQLP\ | 48    | 282   |
| >KIT-Y568S-v YVYIDPTQLP\ | 387 | >KIT-Y568S-n SVYIDPTQLP\ | 4277  | 3890  |
| >KIT-Y568S-v YVYIDPTQLP\ | 91  | >KIT-Y568S-n SVYIDPTQLP\ | 221   | 130   |
| >KIT-Y568S-v YVYIDPTQLP\ | 6   | >KIT-Y568S-n SVYIDPTQLP\ | 11    | 5     |
| >KIT-Y568S-v YVYIDPTQLP\ | 517 | >KIT-Y568S-n SVYIDPTQLP\ | 176   | 341   |
| >KIT-Y568S-v YVYIDPTQLP\ | 451 | >KIT-Y568S-n SVYIDPTQLP\ | 1240  | 789   |
| >KIT-Y568S-v YVYIDPTQL   | 162 | >KIT-Y568S-n SVYIDPTQL   | 677   | 515   |
| >KIT-Y568S-v YVYIDPTQLP\ | 16  | >KIT-Y568S-n SVYIDPTQLP\ | 27    | 11    |
| >KIT-Y568S-v YVYIDPTQLP\ | 63  | >KIT-Y568S-n SVYIDPTQLP\ | 105   | 42    |
| >KIT-Y568S-v YVYIDPTQLP\ | 73  | >KIT-Y568S-n SVYIDPTQLP\ | 221   | 148   |
| >KIT-Y568S-v YVYIDPTQLP\ | 53  | >KIT-Y568S-n SVYIDPTQLP\ | 319   | 266   |
| >KIT-Y568S-v YVYIDPTQL   | 27  | >KIT-Y568S-n SVYIDPTQL   | 201   | 174   |
| >KIT-Y568S-v YVYIDPTQLP\ | 7   | >KIT-Y568S-n SVYIDPTQLP\ | 19    | 12    |

|                          |       |                          |       |       |
|--------------------------|-------|--------------------------|-------|-------|
| >KIT-Y568S-v YVYIDPTQLP\ | 17    | >KIT-Y568S-n SVYIDPTQLP\ | 76    | 59    |
| >KIT-Y568S-v YVYIDPTQL   | 423   | >KIT-Y568S-n SVYIDPTQL   | 1089  | 666   |
| >KIT-Y568S-v YVYIDPTQLP\ | 301   | >KIT-Y568S-n SVYIDPTQLP\ | 553   | 252   |
| >KIT-Y568S-v NYVYIDPTQL  | 150   | >KIT-Y568S-n NSVYIDPTQL  | 21072 | 20922 |
| >KIT-Y568S-v NYVYIDPTQL  | 163   | >KIT-Y568S-n NSVYIDPTQL  | 22269 | 22106 |
| >KIT-Y568S-v NYVYIDPT    | 6901  | >KIT-Y568S-n NSVYIDPT    | 417   | 6484  |
| >KIT-Y568S-v NYVYIDPTQL  | 26736 | >KIT-Y568S-n NSVYIDPTQL  | 459   | 26277 |
| >KIT-Y568S-v KVVVEEINGNM | 31    | >KIT-Y568S-n KVVVEEINGNM | 10594 | 10563 |
| >KIT-Y568S-v KVVVEEINGNM | 61    | >KIT-Y568S-n KVVVEEINGNM | 22806 | 22745 |
| >KIT-Y568S-v KVVVEEINGNM | 114   | >KIT-Y568S-n KVVVEEINGNM | 17964 | 17850 |
| >KIT-Y568S-v KVVVEEINGNM | 114   | >KIT-Y568S-n KVVVEEINGNM | 25192 | 25078 |
| >KIT-Y568S-v KVVVEEINGNM | 100   | >KIT-Y568S-n KVVVEEINGNM | 16625 | 16525 |
| >KIT-Y568S-v INGNNYVYI   | 163   | >KIT-Y568S-n INGNNSVYI   | 576   | 413   |
| >KIT-Y568S-v INGNNYVYI   | 141   | >KIT-Y568S-n INGNNSVYI   | 1722  | 1581  |
| >KIT-Y568S-v INGNNYVY    | 382   | >KIT-Y568S-n INGNNSVY    | 1676  | 1294  |
| >KIT-Y568S-v INGNNYVY    | 256   | >KIT-Y568S-n INGNNSVY    | 323   | 67    |
| >KIT-Y568S-v INGNNYVY    | 1137  | >KIT-Y568S-n INGNNSVY    | 464   | 673   |
| >KIT-Y568S-v EINGNNYV    | 299   | >KIT-Y568S-n EINGNNSV    | 1224  | 925   |
| >KIT-Y568S-v EINGNNYV    | 64    | >KIT-Y568S-n EINGNNSV    | 422   | 358   |
| >KIT-Y568S-v EINGNNYVYI  | 229   | >KIT-Y568S-n EINGNNSVYI  | 384   | 155   |
| >KIT-Y568S-v EINGNNYV    | 442   | >KIT-Y568S-n EINGNNSV    | 2596  | 2154  |
| >KIT-Y568S-v EINGNNYV    | 41    | >KIT-Y568S-n EINGNNSV    | 316   | 275   |
| >KIT-Y568S-v EINGNNYVYI  | 257   | >KIT-Y568S-n EINGNNSVYI  | 313   | 56    |
| >KIT-Y568S-v EINGNNYV    | 34    | >KIT-Y568S-n EINGNNSV    | 36    | 2     |
| >KIT-Y568S-v EINGNNYVY   | 763   | >KIT-Y568S-n EINGNNSVY   | 145   | 618   |
| >KIT-Y568S-v EINGNNYVY   | 203   | >KIT-Y568S-n EINGNNSVY   | 43    | 160   |
| >KIT-Y568S-v EINGNNYVY   | 17    | >KIT-Y568S-n EINGNNSVY   | 12    | 5     |
| >KIT-Y568S-v EINGNNYVY   | 425   | >KIT-Y568S-n EINGNNSVY   | 297   | 128   |
| >KIT-Y568S-v EINGNNYVY   | 218   | >KIT-Y568S-n EINGNNSVY   | 1617  | 1399  |
| >KIT-Y568S-v EINGNNYVY   | 70    | >KIT-Y568S-n EINGNNSVY   | 145   | 75    |
| >KIT-Y568S-v EINGNNYVY   | 340   | >KIT-Y568S-n EINGNNSVY   | 328   | 12    |
| >KIT-Y568S-v EINGNNYV    | 8     | >KIT-Y568S-n EINGNNSV    | 12    | 4     |
| >KIT-Y568S-v EINGNNYVYI  | 101   | >KIT-Y568S-n EINGNNSVYI  | 139   | 38    |
| >KIT-Y568S-v EINGNNYV    | 11    | >KIT-Y568S-n EINGNNSV    | 26    | 15    |
| >KIT-Y568S-v EINGNNYVYI  | 36    | >KIT-Y568S-n EINGNNSVYI  | 53    | 17    |
| >KIT-Y568S-v EINGNNYVY   | 515   | >KIT-Y568S-n EINGNNSVY   | 265   | 250   |
| >KIT-Y568S-v EINGNNYVY   | 710   | >KIT-Y568S-n EINGNNSVY   | 164   | 546   |
| >KIT-Y568S-v EINGNNYVY   | 168   | >KIT-Y568S-n EINGNNSVY   | 263   | 95    |
| >KIT-Y568S-v EINGNNYVY   | 81    | >KIT-Y568S-n EINGNNSVY   | 413   | 332   |
| >KIT-Y568S-v EEINGNNYVY  | 76    | >KIT-Y568S-n EEINGNNSVY  | 82    | 6     |
| >KIT-Y568S-v EEINGNNY    | 230   | >KIT-Y568S-n EEINGNNS    | 21623 | 21393 |
| >KIT-Y568S-v EEINGNNYVY  | 179   | >KIT-Y568S-n EEINGNNSVY  | 159   | 20    |
| >KIT-Y568S-v EEINGNNY    | 19    | >KIT-Y568S-n EEINGNNS    | 13282 | 13263 |

|                         |      |                          |       |       |
|-------------------------|------|--------------------------|-------|-------|
| >KIT-Y568S-v EEINGNNYVY | 134  | >KIT-Y568S-n EEINGNNSVY  | 80    | 54    |
| >KIT-Y568S-v EEINGNNYVY | 328  | >KIT-Y568S-n EEINGNNSVY  | 598   | 270   |
| >KIT-Y568S-v EEINGNNYV  | 241  | >KIT-Y568S-n EEINGNNSV   | 1011  | 770   |
| >KIT-Y568S-v EEINGNNYVY | 766  | >KIT-Y568S-n EEINGNNSVY  | 386   | 380   |
| >KIT-Y568S-v EEINGNNYVY | 1422 | >KIT-Y568S-n EEINGNNSVY  | 445   | 977   |
| >KIT-Y568S-v EEINGNNY   | 278  | >KIT-Y568S-n EEINGNNS    | 15630 | 15352 |
| >KIT-Y568S-v EEINGNNYVY | 322  | >KIT-Y568S-n EEINGNNSVY  | 891   | 569   |
| >KIT-Y568S-v EEINGNNYV  | 234  | >KIT-Y568S-n EEINGNNSV   | 180   | 54    |
| >KIT-Y568S-v EEINGNNYVY | 59   | >KIT-Y568S-n EEINGNNSVY  | 71    | 12    |
| >KIT-Y568S-v EEINGNNYV  | 595  | >KIT-Y568S-n EEINGNNSV   | 158   | 437   |
| >KIT-Y568S-v EEINGNNYVY | 300  | >KIT-Y568S-n EEINGNNSVY  | 302   | 2     |
| >KIT-Y568S-v EEINGNNYVY | 466  | >KIT-Y568S-n EEINGNNSVY  | 688   | 222   |
| >KIT-Y568S-v EEINGNNY   | 70   | >KIT-Y568S-n EEINGNNS    | 2275  | 2205  |
| >KIT-Y568S-v EEINGNNYV  | 488  | >KIT-Y568S-n EEINGNNSV   | 1015  | 527   |
| >KIT-Y568S-v EEINGNNYVY | 180  | >KIT-Y568S-n EEINGNNSVY  | 269   | 89    |
| >KIT-Y568S-v EEINGNNYVY | 190  | >KIT-Y568S-n EEINGNNSVY  | 236   | 46    |
| >KIT-Y568S-v EEINGNNYV  | 74   | >KIT-Y568S-n EEINGNNSV   | 61    | 13    |
| >KIT-Y568S-v EEINGNNYVY | 97   | >KIT-Y568S-n EEINGNNSVY  | 161   | 64    |
| >KIT-Y568S-v EEINGNNYV  | 305  | >KIT-Y568S-n EEINGNNSV   | 162   | 143   |
| >KIT-Y568S-v EEINGNNYVY | 63   | >KIT-Y568S-n EEINGNNSVY  | 48    | 15    |
| >KIT-Y568S-v VEEINGNNYV | 328  | >KIT-Y568S-n VEEINGNNSV  | 428   | 100   |
| >KIT-Y568S-v VEEINGNNYV | 94   | >KIT-Y568S-n VEEINGNNSV  | 275   | 181   |
| >KIT-Y568S-v VEEINGNNYV | 377  | >KIT-Y568S-n VEEINGNNSV  | 294   | 83    |
| >KIT-Y568S-v VVEEINGNNY | 217  | >KIT-Y568S-n VVEEINGNNS  | 633   | 416   |
| >KIT-Y568S-v VVEEINGNNY | 87   | >KIT-Y568S-n VVEEINGNNS  | 185   | 98    |
| >KIT-Y568S-v VVEEINGNNY | 121  | >KIT-Y568S-n VVEEINGNNS  | 684   | 563   |
| >KIT-Y568S-v VVEEINGNNY | 35   | >KIT-Y568S-n VVEEINGNNS  | 42    | 7     |
| >KIT-Y568S-v VVEEINGNNY | 316  | >KIT-Y568S-n VVEEINGNNS  | 25802 | 25486 |
| >KIT-Y568S-v VVEEINGNNY | 167  | >KIT-Y568S-n VVEEINGNNS  | 500   | 333   |
| >KIT-Y568S-v VVEEINGNNY | 178  | >KIT-Y568S-n VVEEINGNNS  | 24782 | 24604 |
| >KIT-Y570D-v YIDPTQLPY  | 10   | >KIT-Y570D-r DIDPTQLPY   | 30    | 20    |
| >KIT-Y570D-v YIDPTQLPY  | 21   | >KIT-Y570D-r DIDPTQLPY   | 169   | 148   |
| >KIT-Y570D-v YIDPTQLPY  | 11   | >KIT-Y570D-r DIDPTQLPY   | 818   | 807   |
| >KIT-Y570D-v YIDPTQLPY  | 137  | >KIT-Y570D-r DIDPTQLPY   | 9419  | 9282  |
| >KIT-Y570D-v YIDPTQLPY  | 240  | >KIT-Y570D-r DIDPTQLPY   | 3843  | 3603  |
| >KIT-Y570D-v YIDPTQLPY  | 42   | >KIT-Y570D-r DIDPTQLPY   | 8052  | 8010  |
| >KIT-Y570D-v YIDPTQLPY  | 61   | >KIT-Y570D-r DIDPTQLPY   | 473   | 412   |
| >KIT-Y570D-v YIDPTQLPY  | 116  | >KIT-Y570D-r DIDPTQLPY   | 5147  | 5031  |
| >KIT-Y570D-v YIDPTQLPY  | 56   | >KIT-Y570D-r DIDPTQLPY   | 206   | 150   |
| >KIT-Y570D-v VYIDPTQLPY | 495  | >KIT-Y570D-r VIDIDPTQLPY | 14481 | 13986 |
| >KIT-Y570D-v VYIDPTQL   | 216  | >KIT-Y570D-r VIDIDPTQL   | 23085 | 22869 |
| >KIT-Y570D-v VYIDPTQL   | 43   | >KIT-Y570D-r VIDIDPTQL   | 26341 | 26298 |
| >KIT-Y570D-v VYIDPTQLPY | 319  | >KIT-Y570D-r VIDIDPTQLPY | 6450  | 6131  |



|                          |      |                          |       |       |
|--------------------------|------|--------------------------|-------|-------|
| >KIT-Y570D-\ VYIDPTQLPY  | 33   | >KIT-Y570D-r VVIDPTQLPY  | 1698  | 1665  |
| >KIT-Y570D-\ VYIDPTQLPY  | 64   | >KIT-Y570D-r VVIDPTQLPY  | 804   | 740   |
| >KIT-Y570D-\ VYIDPTQLPY  | 32   | >KIT-Y570D-r VVIDPTQLPY  | 1215  | 1183  |
| >KIT-Y570D-\ VEEINGNNYV  | 94   | >KIT-Y570D-r VEEINGNNYV  | 6685  | 6591  |
| >KIT-Y570D-\ YVYIDPTQLP' | 1068 | >KIT-Y570D-r YVDIDPTQLP' | 12    | 1056  |
| >KIT-Y570D-\ YVYIDPTQL   | 193  | >KIT-Y570D-r YVDIDPTQL   | 826   | 633   |
| >KIT-Y570D-\ YVYIDPTQL   | 135  | >KIT-Y570D-r YVDIDPTQL   | 765   | 630   |
| >KIT-Y570D-\ YVYIDPTQL   | 24   | >KIT-Y570D-r YVDIDPTQL   | 1901  | 1877  |
| >KIT-Y570D-\ YVYIDPTQL   | 261  | >KIT-Y570D-r YVDIDPTQL   | 812   | 551   |
| >KIT-Y570D-\ YVYIDPTQL   | 18   | >KIT-Y570D-r YVDIDPTQL   | 95    | 77    |
| >KIT-Y570D-\ YVYIDPTQL   | 71   | >KIT-Y570D-r YVDIDPTQL   | 329   | 258   |
| >KIT-Y570D-\ YVYIDPTQL   | 16   | >KIT-Y570D-r YVDIDPTQL   | 89    | 73    |
| >KIT-Y570D-\ YVYIDPTQLP' | 492  | >KIT-Y570D-r YVDIDPTQLP' | 10160 | 9668  |
| >KIT-Y570D-\ YVYIDPTQLP' | 330  | >KIT-Y570D-r YVDIDPTQLP' | 2841  | 2511  |
| >KIT-Y570D-\ YVYIDPTQLP' | 387  | >KIT-Y570D-r YVDIDPTQLP' | 1258  | 871   |
| >KIT-Y570D-\ YVYIDPTQLP' | 91   | >KIT-Y570D-r YVDIDPTQLP' | 5296  | 5205  |
| >KIT-Y570D-\ YVYIDPTQLP' | 6    | >KIT-Y570D-r YVDIDPTQLP' | 29    | 23    |
| >KIT-Y570D-\ YVYIDPTQLP' | 451  | >KIT-Y570D-r YVDIDPTQLP' | 9025  | 8574  |
| >KIT-Y570D-\ YVYIDPTQL   | 162  | >KIT-Y570D-r YVDIDPTQL   | 571   | 409   |
| >KIT-Y570D-\ YVYIDPTQLP' | 16   | >KIT-Y570D-r YVDIDPTQLP' | 27    | 11    |
| >KIT-Y570D-\ YVYIDPTQLP' | 63   | >KIT-Y570D-r YVDIDPTQLP' | 1137  | 1074  |
| >KIT-Y570D-\ YVYIDPTQLP' | 73   | >KIT-Y570D-r YVDIDPTQLP' | 931   | 858   |
| >KIT-Y570D-\ YVYIDPTQLP' | 53   | >KIT-Y570D-r YVDIDPTQLP' | 3651  | 3598  |
| >KIT-Y570D-\ YVYIDPTQL   | 27   | >KIT-Y570D-r YVDIDPTQL   | 1660  | 1633  |
| >KIT-Y570D-\ YVYIDPTQLP' | 7    | >KIT-Y570D-r YVDIDPTQLP' | 185   | 178   |
| >KIT-Y570D-\ YVYIDPTQLP' | 17   | >KIT-Y570D-r YVDIDPTQLP' | 40    | 23    |
| >KIT-Y570D-\ YVYIDPTQL   | 423  | >KIT-Y570D-r YVDIDPTQL   | 3342  | 2919  |
| >KIT-Y570D-\ YVYIDPTQLP' | 301  | >KIT-Y570D-r YVDIDPTQLP' | 1905  | 1604  |
| >KIT-Y570D-\ YVYIDPTQLP' | 949  | >KIT-Y570D-r YVDIDPTQLP' | 214   | 735   |
| >KIT-Y570D-\ NYVYIDPTQL  | 150  | >KIT-Y570D-r NYVDIDPTQL  | 578   | 428   |
| >KIT-Y570D-\ NYVYIDPTQL  | 163  | >KIT-Y570D-r NYVDIDPTQL  | 231   | 68    |
| >KIT-Y570D-\ INGNNYVYI   | 163  | >KIT-Y570D-r INGNNYVDI   | 7793  | 7630  |
| >KIT-Y570D-\ INGNNYVYI   | 141  | >KIT-Y570D-r INGNNYVDI   | 576   | 435   |
| >KIT-Y570D-\ INGNNYVY    | 382  | >KIT-Y570D-r INGNNYVD    | 26976 | 26594 |
| >KIT-Y570D-\ INGNNYVY    | 256  | >KIT-Y570D-r INGNNYVD    | 33047 | 32791 |
| >KIT-Y570D-\ EINGNNYVYI  | 229  | >KIT-Y570D-r EINGNNYVDI  | 5136  | 4907  |
| >KIT-Y570D-\ EINGNNYVYI  | 257  | >KIT-Y570D-r EINGNNYVDI  | 4520  | 4263  |
| >KIT-Y570D-\ EINGNNYVY   | 203  | >KIT-Y570D-r EINGNNYVD   | 21730 | 21527 |
| >KIT-Y570D-\ EINGNNYVY   | 17   | >KIT-Y570D-r EINGNNYVD   | 22344 | 22327 |
| >KIT-Y570D-\ EINGNNYVY   | 425  | >KIT-Y570D-r EINGNNYVD   | 34486 | 34061 |
| >KIT-Y570D-\ EINGNNYVY   | 218  | >KIT-Y570D-r EINGNNYVD   | 25307 | 25089 |
| >KIT-Y570D-\ EINGNNYVY   | 70   | >KIT-Y570D-r EINGNNYVD   | 27976 | 27906 |
| >KIT-Y570D-\ EINGNNYVY   | 340  | >KIT-Y570D-r EINGNNYVD   | 18308 | 17968 |

|                         |      |                          |       |       |
|-------------------------|------|--------------------------|-------|-------|
| >KIT-Y570D-v EINGNNYVYI | 101  | >KIT-Y570D-r EINGNNYVDI  | 1770  | 1669  |
| >KIT-Y570D-v EINGNNYVYI | 36   | >KIT-Y570D-r EINGNNYVDI  | 404   | 368   |
| >KIT-Y570D-v EINGNNYVY  | 168  | >KIT-Y570D-r EINGNNYVD   | 21602 | 21434 |
| >KIT-Y570D-v EINGNNYVY  | 81   | >KIT-Y570D-r EINGNNYVD   | 31066 | 30985 |
| >KIT-Y570D-v EEINGNNYVY | 76   | >KIT-Y570D-r EEINGNNYVCE | 225   | 149   |
| >KIT-Y570D-v EEINGNNYVY | 179  | >KIT-Y570D-r EEINGNNYVCE | 25055 | 24876 |
| >KIT-Y570D-v EEINGNNYVY | 134  | >KIT-Y570D-r EEINGNNYVCE | 27717 | 27583 |
| >KIT-Y570D-v EEINGNNYVY | 328  | >KIT-Y570D-r EEINGNNYVCE | 33186 | 32858 |
| >KIT-Y570D-v EEINGNNYVY | 322  | >KIT-Y570D-r EEINGNNYVCE | 27910 | 27588 |
| >KIT-Y570D-v EEINGNNYVY | 59   | >KIT-Y570D-r EEINGNNYVCE | 119   | 60    |
| >KIT-Y570D-v EEINGNNYVY | 300  | >KIT-Y570D-r EEINGNNYVCE | 458   | 158   |
| >KIT-Y570D-v EEINGNNYVY | 466  | >KIT-Y570D-r EEINGNNYVCE | 25413 | 24947 |
| >KIT-Y570D-v EEINGNNYVY | 180  | >KIT-Y570D-r EEINGNNYVCE | 20470 | 20290 |
| >KIT-Y570D-v EEINGNNYVY | 190  | >KIT-Y570D-r EEINGNNYVCE | 325   | 135   |
| >KIT-Y570D-v EEINGNNYVY | 97   | >KIT-Y570D-r EEINGNNYVCE | 148   | 51    |
| >KIT-Y570D-v EEINGNNYVY | 63   | >KIT-Y570D-r EEINGNNYVCE | 45    | 18    |
| >KIT-Y570F-v YIDPTQLPY  | 10   | >KIT-Y570F-n FIDPTQLPY   | 9     | 1     |
| >KIT-Y570F-v YIDPTQLPY  | 21   | >KIT-Y570F-n FIDPTQLPY   | 21    | 0     |
| >KIT-Y570F-v YIDPTQLPY  | 11   | >KIT-Y570F-n FIDPTQLPY   | 39    | 28    |
| >KIT-Y570F-v YIDPTQLPY  | 137  | >KIT-Y570F-n FIDPTQLPY   | 208   | 71    |
| >KIT-Y570F-v YIDPTQLPY  | 240  | >KIT-Y570F-n FIDPTQLPY   | 285   | 45    |
| >KIT-Y570F-v YIDPTQLPY  | 42   | >KIT-Y570F-n FIDPTQLPY   | 111   | 69    |
| >KIT-Y570F-v YIDPTQLPY  | 61   | >KIT-Y570F-n FIDPTQLPY   | 81    | 20    |
| >KIT-Y570F-v YIDPTQLPY  | 116  | >KIT-Y570F-n FIDPTQLPY   | 423   | 307   |
| >KIT-Y570F-v YIDPTQLPY  | 56   | >KIT-Y570F-n FIDPTQLPY   | 62    | 6     |
| >KIT-Y570F-v VYIDPTQLPY | 495  | >KIT-Y570F-n VFIDPTQLPY  | 869   | 374   |
| >KIT-Y570F-v VYIDPTQL   | 216  | >KIT-Y570F-n VFIDPTQL    | 595   | 379   |
| >KIT-Y570F-v VYIDPTQL   | 43   | >KIT-Y570F-n VFIDPTQL    | 1081  | 1038  |
| >KIT-Y570F-v VYIDPTQLPY | 319  | >KIT-Y570F-n VFIDPTQLPY  | 952   | 633   |
| >KIT-Y570F-v VYIDPTQLPY | 33   | >KIT-Y570F-n VFIDPTQLPY  | 52    | 19    |
| >KIT-Y570F-v VYIDPTQLPY | 64   | >KIT-Y570F-n VFIDPTQLPY  | 180   | 116   |
| >KIT-Y570F-v VYIDPTQLPY | 32   | >KIT-Y570F-n VFIDPTQLPY  | 62    | 30    |
| >KIT-Y570F-v VYIDPTQLPY | 1343 | >KIT-Y570F-n VFIDPTQLPY  | 270   | 1073  |
| >KIT-Y570F-v VYIDPTQLPY | 840  | >KIT-Y570F-n VFIDPTQLPY  | 212   | 628   |
| >KIT-Y570F-v VEEINGNNYV | 94   | >KIT-Y570F-n VEEINGNNYV  | 101   | 7     |
| >KIT-Y570F-v VEEINGNNYV | 7318 | >KIT-Y570F-n VEEINGNNYV  | 318   | 7000  |
| >KIT-Y570F-v YVYIDPTQL  | 193  | >KIT-Y570F-n YVFIDPTQL   | 120   | 73    |
| >KIT-Y570F-v YVYIDPTQL  | 135  | >KIT-Y570F-n YVFIDPTQL   | 65    | 70    |
| >KIT-Y570F-v YVYIDPTQL  | 24   | >KIT-Y570F-n YVFIDPTQL   | 45    | 21    |
| >KIT-Y570F-v YVYIDPTQL  | 261  | >KIT-Y570F-n YVFIDPTQL   | 240   | 21    |
| >KIT-Y570F-v YVYIDPTQL  | 18   | >KIT-Y570F-n YVFIDPTQL   | 23    | 5     |
| >KIT-Y570F-v YVYIDPTQL  | 71   | >KIT-Y570F-n YVFIDPTQL   | 93    | 22    |
| >KIT-Y570F-v YVYIDPTQL  | 16   | >KIT-Y570F-n YVFIDPTQL   | 20    | 4     |

|                          |       |                          |       |       |
|--------------------------|-------|--------------------------|-------|-------|
| >KIT-Y570F-v YVYIDPTQLP\ | 492   | >KIT-Y570F-n YVFIDPTQLP\ | 1155  | 663   |
| >KIT-Y570F-v YVYIDPTQLP\ | 330   | >KIT-Y570F-n YVFIDPTQLP\ | 328   | 2     |
| >KIT-Y570F-v YVYIDPTQLP\ | 387   | >KIT-Y570F-n YVFIDPTQLP\ | 209   | 178   |
| >KIT-Y570F-v YVYIDPTQLP\ | 91    | >KIT-Y570F-n YVFIDPTQLP\ | 730   | 639   |
| >KIT-Y570F-v YVYIDPTQLP\ | 6     | >KIT-Y570F-n YVFIDPTQLP\ | 6     | 0     |
| >KIT-Y570F-v YVYIDPTQLP\ | 517   | >KIT-Y570F-n YVFIDPTQLP\ | 392   | 125   |
| >KIT-Y570F-v YVYIDPTQ    | 1016  | >KIT-Y570F-n YVFIDPTQ    | 497   | 519   |
| >KIT-Y570F-v YVYIDPTQLP\ | 451   | >KIT-Y570F-n YVFIDPTQLP\ | 217   | 234   |
| >KIT-Y570F-v YVYIDPTQL   | 1295  | >KIT-Y570F-n YVFIDPTQL   | 312   | 983   |
| >KIT-Y570F-v YVYIDPTQL   | 162   | >KIT-Y570F-n YVFIDPTQL   | 313   | 151   |
| >KIT-Y570F-v YVYIDPTQLP\ | 16    | >KIT-Y570F-n YVFIDPTQLP\ | 16    | 0     |
| >KIT-Y570F-v YVYIDPTQLP\ | 63    | >KIT-Y570F-n YVFIDPTQLP\ | 64    | 1     |
| >KIT-Y570F-v YVYIDPTQLP\ | 73    | >KIT-Y570F-n YVFIDPTQLP\ | 87    | 14    |
| >KIT-Y570F-v YVYIDPTQLP\ | 53    | >KIT-Y570F-n YVFIDPTQLP\ | 37    | 16    |
| >KIT-Y570F-v YVYIDPTQL   | 27    | >KIT-Y570F-n YVFIDPTQL   | 66    | 39    |
| >KIT-Y570F-v YVYIDPTQLP\ | 7     | >KIT-Y570F-n YVFIDPTQLP\ | 12    | 5     |
| >KIT-Y570F-v YVYIDPTQLP\ | 17    | >KIT-Y570F-n YVFIDPTQLP\ | 17    | 0     |
| >KIT-Y570F-v YVYIDPTQL   | 423   | >KIT-Y570F-n YVFIDPTQL   | 173   | 250   |
| >KIT-Y570F-v YVYIDPTQLP\ | 301   | >KIT-Y570F-n YVFIDPTQLP\ | 126   | 175   |
| >KIT-Y570F-v YVYIDPTQLP\ | 949   | >KIT-Y570F-n YVFIDPTQLP\ | 252   | 697   |
| >KIT-Y570F-v NYVYIDPTQL  | 150   | >KIT-Y570F-n NYVFIDPTQL  | 188   | 38    |
| >KIT-Y570F-v NYVYIDPTQL  | 163   | >KIT-Y570F-n NYVFIDPTQL  | 150   | 13    |
| >KIT-Y570F-v NNYVYIDPTC  | 602   | >KIT-Y570F-n NNYVFIDPTC  | 390   | 212   |
| >KIT-Y570F-v INGNNYVYI   | 163   | >KIT-Y570F-n INGNNYVFI   | 376   | 213   |
| >KIT-Y570F-v INGNNYVYI   | 141   | >KIT-Y570F-n INGNNYVFI   | 463   | 322   |
| >KIT-Y570F-v INGNNYVY    | 21615 | >KIT-Y570F-n INGNNYVF    | 477   | 21138 |
| >KIT-Y570F-v INGNNYVY    | 382   | >KIT-Y570F-n INGNNYVF    | 10330 | 9948  |
| >KIT-Y570F-v INGNNYVY    | 256   | >KIT-Y570F-n INGNNYVF    | 14943 | 14687 |
| >KIT-Y570F-v INGNNYVY    | 1070  | >KIT-Y570F-n INGNNYVF    | 266   | 804   |
| >KIT-Y570F-v EINGNNYVYI  | 229   | >KIT-Y570F-n EINGNNYVFI  | 606   | 377   |
| >KIT-Y570F-v EINGNNYVYI  | 257   | >KIT-Y570F-n EINGNNYVFI  | 550   | 293   |
| >KIT-Y570F-v EINGNNYVY   | 203   | >KIT-Y570F-n EINGNNYVF   | 1745  | 1542  |
| >KIT-Y570F-v EINGNNYVY   | 17    | >KIT-Y570F-n EINGNNYVF   | 51    | 34    |
| >KIT-Y570F-v EINGNNYVY   | 425   | >KIT-Y570F-n EINGNNYVF   | 2908  | 2483  |
| >KIT-Y570F-v EINGNNYVY   | 218   | >KIT-Y570F-n EINGNNYVF   | 5567  | 5349  |
| >KIT-Y570F-v EINGNNYVY   | 70    | >KIT-Y570F-n EINGNNYVF   | 7858  | 7788  |
| >KIT-Y570F-v EINGNNYVY   | 1305  | >KIT-Y570F-n EINGNNYVF   | 85    | 1220  |
| >KIT-Y570F-v EINGNNYVY   | 340   | >KIT-Y570F-n EINGNNYVF   | 5067  | 4727  |
| >KIT-Y570F-v EINGNNYVYI  | 101   | >KIT-Y570F-n EINGNNYVFI  | 236   | 135   |
| >KIT-Y570F-v EINGNNYVYI  | 36    | >KIT-Y570F-n EINGNNYVFI  | 49    | 13    |
| >KIT-Y570F-v EINGNNYVY   | 168   | >KIT-Y570F-n EINGNNYVF   | 296   | 128   |
| >KIT-Y570F-v EINGNNYVY   | 81    | >KIT-Y570F-n EINGNNYVF   | 3679  | 3598  |
| >KIT-Y570F-v EEINGNNYVY  | 76    | >KIT-Y570F-n EEINGNNYVF  | 24    | 52    |

|                          |       |                          |       |       |
|--------------------------|-------|--------------------------|-------|-------|
| >KIT-Y570F-v EEINGNNYVY  | 179   | >KIT-Y570F-n EEINGNNYVF  | 408   | 229   |
| >KIT-Y570F-v EEINGNNYVY  | 134   | >KIT-Y570F-n EEINGNNYVF  | 1286  | 1152  |
| >KIT-Y570F-v EEINGNNYVY  | 328   | >KIT-Y570F-n EEINGNNYVF  | 12658 | 12330 |
| >KIT-Y570F-v EEINGNNYVY  | 1311  | >KIT-Y570F-n EEINGNNYVF  | 312   | 999   |
| >KIT-Y570F-v EEINGNNYVY  | 322   | >KIT-Y570F-n EEINGNNYVF  | 1559  | 1237  |
| >KIT-Y570F-v EEINGNNYVY  | 59    | >KIT-Y570F-n EEINGNNYVF  | 58    | 1     |
| >KIT-Y570F-v EEINGNNYVY  | 300   | >KIT-Y570F-n EEINGNNYVF  | 224   | 76    |
| >KIT-Y570F-v EEINGNNYVY  | 466   | >KIT-Y570F-n EEINGNNYVF  | 232   | 234   |
| >KIT-Y570F-v EEINGNNYVY  | 180   | >KIT-Y570F-n EEINGNNYVF  | 265   | 85    |
| >KIT-Y570F-v EEINGNNYVY  | 190   | >KIT-Y570F-n EEINGNNYVF  | 163   | 27    |
| >KIT-Y570F-v EEINGNNYVY  | 97    | >KIT-Y570F-n EEINGNNYVF  | 84    | 13    |
| >KIT-Y570F-v EEINGNNYVY  | 63    | >KIT-Y570F-n EEINGNNYVF  | 55    | 8     |
| >KIT-Y672S-v YCCYGDLLNF  | 399   | >KIT-Y672S-n SCCYGDLLNF  | 1574  | 1175  |
| >KIT-Y672S-v YCCYGDLLNF  | 476   | >KIT-Y672S-n SCCYGDLLNF  | 1156  | 680   |
| >KIT-Y672S-v EYCCYGDLLN  | 106   | >KIT-Y672S-n ESCCYGDLLN  | 10315 | 10209 |
| >KIT-Y672S-v EYCCYGDLLN  | 460   | >KIT-Y672S-n ESCCYGDLLN  | 14285 | 13825 |
| >KIT-Y672S-v EYCCYGDL    | 155   | >KIT-Y672S-n ESCCYGDL    | 23232 | 23077 |
| >KIT-Y672S-v EYCCYGDLL   | 236   | >KIT-Y672S-n ESCCYGDLL   | 24383 | 24147 |
| >KIT-Y672S-v EYCCYGDLLN  | 27    | >KIT-Y672S-n ESCCYGDLLN  | 14798 | 14771 |
| >KIT-Y672S-v EYCCYGDLLN  | 132   | >KIT-Y672S-n ESCCYGDLLN  | 30    | 102   |
| >KIT-Y672S-v EYCCYGDLLN  | 457   | >KIT-Y672S-n ESCCYGDLLN  | 155   | 302   |
| >KIT-Y672S-v EYCCYGDLLN  | 21929 | >KIT-Y672S-n ESCCYGDLLN  | 58    | 21871 |
| >KIT-Y672S-v EYCCYGDL    | 392   | >KIT-Y672S-n ESCCYGDL    | 12688 | 12296 |
| >KIT-Y672S-v EYCCYGDLL   | 294   | >KIT-Y672S-n ESCCYGDLL   | 9601  | 9307  |
| >KIT-Y672S-v EYCCYGDLLN  | 233   | >KIT-Y672S-n ESCCYGDLLN  | 6975  | 6742  |
| >KIT-Y672S-v IGGPTLVITEY | 475   | >KIT-Y672S-n IGGPTLVITES | 31414 | 30939 |
| >KIT-Y672S-v TEYCCYGDL   | 127   | >KIT-Y672S-n TESCCYGDL   | 1372  | 1245  |
| >KIT-Y672S-v TEYCCYGDLL  | 46    | >KIT-Y672S-n TESCCYGDLL  | 430   | 384   |
| >KIT-Y672S-v TEYCCYGDL   | 44    | >KIT-Y672S-n TESCCYGDL   | 52    | 8     |
| >KIT-Y672S-v TEYCCYGDLL  | 231   | >KIT-Y672S-n TESCCYGDLL  | 1172  | 941   |
| >KIT-Y672S-v TEYCCYGDL   | 271   | >KIT-Y672S-n TESCCYGDL   | 1064  | 793   |
| >KIT-Y672S-v TEYCCYGDLL  | 183   | >KIT-Y672S-n TESCCYGDLL  | 327   | 144   |
| >KIT-Y672S-v TEYCCYGDLL  | 395   | >KIT-Y672S-n TESCCYGDLL  | 2814  | 2419  |
| >KIT-Y672S-v TEYCCYGDL   | 47    | >KIT-Y672S-n TESCCYGDL   | 431   | 384   |
| >KIT-Y672S-v TEYCCYGDLL  | 46    | >KIT-Y672S-n TESCCYGDLL  | 59    | 13    |
| >KIT-Y672S-v ITEYCCYGDLL | 404   | >KIT-Y672S-n ITESCCYGDLL | 416   | 12    |
| >KIT-Y672S-v ITEYCCYGDLL | 83    | >KIT-Y672S-n ITESCCYGDLL | 37    | 46    |
| >KIT-Y672S-v ITEYCCYGDLL | 22    | >KIT-Y672S-n ITESCCYGDLL | 16    | 6     |
| >KIT-Y672S-v VITEYCCYGDI | 496   | >KIT-Y672S-n VITESCCYGDI | 2121  | 1625  |
| >KIT-Y672S-v VITEYCCYGDI | 169   | >KIT-Y672S-n VITESCCYGDI | 209   | 40    |
| >KIT-Y672S-v LVITEYCCY   | 36    | >KIT-Y672S-n LVITESCCY   | 86    | 50    |
| >KIT-Y672S-v LVITEYCCY   | 296   | >KIT-Y672S-n LVITESCCY   | 391   | 95    |
| >KIT-Y672S-v LVITEYCCY   | 149   | >KIT-Y672S-n LVITESCCY   | 69    | 80    |

|                          |     |                          |       |       |
|--------------------------|-----|--------------------------|-------|-------|
| >KIT-Y672S-v LVITEYCCY   | 302 | >KIT-Y672S-n LVITESCCY   | 469   | 167   |
| >KIT-Y672S-v LVITEYCCY   | 365 | >KIT-Y672S-n LVITESCCY   | 131   | 234   |
| >KIT-Y672S-v TLVITEYCCY  | 369 | >KIT-Y672S-n TLVITESCCY  | 870   | 501   |
| >KIT-Y672S-v TLVITEYC    | 225 | >KIT-Y672S-n TLVITESC    | 1343  | 1118  |
| >KIT-Y672S-v TLVITEYC    | 414 | >KIT-Y672S-n TLVITESC    | 543   | 129   |
| >KIT-Y672S-v TLVITEYCCY  | 472 | >KIT-Y672S-n TLVITESCCY  | 522   | 50    |
| >KIT-Y672S-v TLVITEYCCY  | 99  | >KIT-Y672S-n TLVITESCCY  | 232   | 133   |
| >KIT-Y672S-v TLVITEYCCY  | 800 | >KIT-Y672S-n TLVITESCCY  | 405   | 395   |
| >KIT-Y672S-v PTLVITEY    | 186 | >KIT-Y672S-n PTLVITES    | 21649 | 21463 |
| >KIT-Y672S-v PTLVITEYCCY | 461 | >KIT-Y672S-n PTLVITESCCY | 617   | 156   |
| >KIT-Y672S-v GPTLVITEY   | 60  | >KIT-Y672S-n GPTLVITES   | 10341 | 10281 |
| >KIT-Y672S-v GPTLVITEY   | 310 | >KIT-Y672S-n GPTLVITES   | 24171 | 23861 |
| >KIT-Y672S-v GPTLVITEY   | 31  | >KIT-Y672S-n GPTLVITES   | 13798 | 13767 |
| >KIT-Y672S-v GGPTLVITEY  | 303 | >KIT-Y672S-n GGPTLVITES  | 3832  | 3529  |
| >KIT-Y823C-v YVVKGNARLF  | 127 | >KIT-Y823C-r CVVKGNARLF  | 3531  | 3404  |
| >KIT-Y823C-v YVVKGNARL   | 213 | >KIT-Y823C-r CVVKGNARL   | 2815  | 2602  |
| >KIT-Y823C-v YVVKGNARLF  | 357 | >KIT-Y823C-r CVVKGNARLF  | 2825  | 2468  |
| >KIT-Y823C-v YVVKGNARL   | 340 | >KIT-Y823C-r CVVKGNARL   | 5230  | 4890  |
| >KIT-Y823C-v YVVKGNARLF  | 27  | >KIT-Y823C-r CVVKGNARLF  | 519   | 492   |
| >KIT-Y823C-v YVVKGNARL   | 56  | >KIT-Y823C-r CVVKGNARL   | 4162  | 4106  |
| >KIT-Y823C-v YVVKGNARLF  | 8   | >KIT-Y823C-r CVVKGNARLF  | 175   | 167   |
| >KIT-Y823C-v YVVKGNARL   | 489 | >KIT-Y823C-r CVVKGNARL   | 12339 | 11850 |
| >KIT-Y823C-v YVVKGNARLF  | 74  | >KIT-Y823C-r CVVKGNARLF  | 4336  | 4262  |
| >KIT-Y823C-v YVVKGNARLF  | 234 | >KIT-Y823C-r CVVKGNARLF  | 4169  | 3935  |
| >KIT-Y823C-v YVVKGNARLF  | 90  | >KIT-Y823C-r CVVKGNARLF  | 7416  | 7326  |
| >KIT-Y823C-v YVVKGNARL   | 23  | >KIT-Y823C-r CVVKGNARL   | 4899  | 4876  |
| >KIT-Y823C-v YVVKGNARLF  | 6   | >KIT-Y823C-r CVVKGNARLF  | 694   | 688   |
| >KIT-Y823C-v YVVKGNARL   | 55  | >KIT-Y823C-r CVVKGNARL   | 362   | 307   |
| >KIT-Y823C-v YVVKGNAR    | 468 | >KIT-Y823C-r CVVKGNAR    | 479   | 11    |
| >KIT-Y823C-v YVVKGNAR    | 426 | >KIT-Y823C-r CVVKGNAR    | 1186  | 760   |
| >KIT-Y823C-v YVVKGNAR    | 18  | >KIT-Y823C-r CVVKGNAR    | 105   | 87    |
| >KIT-Y823C-v YVVKGNARL   | 110 | >KIT-Y823C-r CVVKGNARL   | 357   | 247   |
| >KIT-Y823C-v YVVKGNARLF  | 16  | >KIT-Y823C-r CVVKGNARLF  | 27    | 11    |
| >KIT-Y823C-v YVVKGNARL   | 250 | >KIT-Y823C-r CVVKGNARL   | 7679  | 7429  |
| >KIT-Y823C-v YVVKGNARLF  | 13  | >KIT-Y823C-r CVVKGNARLF  | 501   | 488   |
| >KIT-Y823C-v YVVKGNARL   | 56  | >KIT-Y823C-r CVVKGNARL   | 1730  | 1674  |
| >KIT-Y823C-v YVVKGNARL   | 144 | >KIT-Y823C-r CVVKGNARL   | 4009  | 3865  |
| >KIT-Y823C-v NYVVKGNAR   | 253 | >KIT-Y823C-r NCVVKGNAR   | 27222 | 26969 |
| >KIT-Y823C-v NYVVKGNAR   | 309 | >KIT-Y823C-r NCVVKGNAR   | 24038 | 23729 |
| >KIT-Y823C-v NYVVKGNAR   | 170 | >KIT-Y823C-r NCVVKGNAR   | 3289  | 3119  |
| >KIT-Y823C-v NYVVKGNAR   | 384 | >KIT-Y823C-r NCVVKGNAR   | 7343  | 6959  |
| >KIT-Y823C-v LARDIKNDSN  | 241 | >KIT-Y823C-r LARDIKNDSN  | 31886 | 31645 |
| >KIT-Y823C-v LARDIKNDSN  | 387 | >KIT-Y823C-r LARDIKNDSN  | 19520 | 19133 |

|                         |     |                         |       |       |
|-------------------------|-----|-------------------------|-------|-------|
| >KIT-Y823C-v LARDIKNDSN | 317 | >KIT-Y823C-r LARDIKNDSN | 14725 | 14408 |
| >KIT-Y823C-v LARDIKNDSN | 30  | >KIT-Y823C-r LARDIKNDSN | 13048 | 13018 |
| >KIT-Y823C-v LARDIKNDSN | 176 | >KIT-Y823C-r LARDIKNDSN | 18746 | 18570 |
| >KIT-Y823C-v LARDIKNDSN | 46  | >KIT-Y823C-r LARDIKNDSN | 9567  | 9521  |
| >KIT-Y823C-v SNYVVKGNAI | 129 | >KIT-Y823C-r SNCVVKGNAI | 9696  | 9567  |
| >KIT-Y823C-v DSNYVVKGN. | 76  | >KIT-Y823C-r DSNCVVKGN. | 107   | 31    |
| >KIT-Y823C-v DSNYVVKGN. | 27  | >KIT-Y823C-r DSNCVVKGN. | 57    | 30    |
| >KIT-Y823C-v IKNDSNYV   | 63  | >KIT-Y823C-r IKNDSNCV   | 81    | 18    |
| >KIT-Y823C-v IKNDSNYVV  | 26  | >KIT-Y823C-r IKNDSNCVV  | 33    | 7     |
| >KIT-Y823C-v IKNDSNYVVK | 83  | >KIT-Y823C-r IKNDSNCVVK | 112   | 29    |
| >KIT-Y823C-v DIKNDSNY   | 198 | >KIT-Y823C-r DIKNDSNC   | 17490 | 17292 |
| >KIT-Y823C-v DIKNDSNY   | 243 | >KIT-Y823C-r DIKNDSNC   | 31095 | 30852 |
| >KIT-Y823C-v DIKNDSNY   | 462 | >KIT-Y823C-r DIKNDSNC   | 32544 | 32082 |
| >KIT-Y823C-v DIKNDSNYVV | 291 | >KIT-Y823C-r DIKNDSNCVV | 300   | 9     |
| >KIT-Y823C-v RDIKNDSNYV | 394 | >KIT-Y823C-r RDIKNDSNCV | 713   | 319   |
| >KIT-Y823C-v RDIKNDSNYV | 299 | >KIT-Y823C-r RDIKNDSNCV | 478   | 179   |
| >KIT-Y823C-v RDIKNDSNYV | 87  | >KIT-Y823C-r RDIKNDSNCV | 122   | 35    |
| >KIT-Y823C-v ARDIKNDSNY | 420 | >KIT-Y823C-r ARDIKNDSNC | 32341 | 31921 |
| >KIT-Y823C-v ARDIKNDSNY | 200 | >KIT-Y823C-r ARDIKNDSNC | 5929  | 5729  |
| >KIT-Y823D-v YVVKGNARLF | 127 | >KIT-Y823D-r DVVKGNARLI | 14755 | 14628 |
| >KIT-Y823D-v YVVKGNARL  | 213 | >KIT-Y823D-r DVVKGNARL  | 16474 | 16261 |
| >KIT-Y823D-v YVVKGNARLF | 357 | >KIT-Y823D-r DVVKGNARLI | 16083 | 15726 |
| >KIT-Y823D-v YVVKGNARL  | 340 | >KIT-Y823D-r DVVKGNARL  | 16498 | 16158 |
| >KIT-Y823D-v YVVKGNARLF | 27  | >KIT-Y823D-r DVVKGNARLI | 6395  | 6368  |
| >KIT-Y823D-v YVVKGNARL  | 56  | >KIT-Y823D-r DVVKGNARL  | 16100 | 16044 |
| >KIT-Y823D-v YVVKGNARLF | 8   | >KIT-Y823D-r DVVKGNARLI | 3187  | 3179  |
| >KIT-Y823D-v YVVKGNARL  | 489 | >KIT-Y823D-r DVVKGNARL  | 19248 | 18759 |
| >KIT-Y823D-v YVVKGNARLF | 74  | >KIT-Y823D-r DVVKGNARLI | 9874  | 9800  |
| >KIT-Y823D-v YVVKGNARLF | 234 | >KIT-Y823D-r DVVKGNARLI | 10362 | 10128 |
| >KIT-Y823D-v YVVKGNARLF | 90  | >KIT-Y823D-r DVVKGNARLI | 7793  | 7703  |
| >KIT-Y823D-v YVVKGNARL  | 23  | >KIT-Y823D-r DVVKGNARL  | 11512 | 11489 |
| >KIT-Y823D-v YVVKGNARLF | 6   | >KIT-Y823D-r DVVKGNARLI | 3476  | 3470  |
| >KIT-Y823D-v YVVKGNARL  | 672 | >KIT-Y823D-r DVVKGNARL  | 416   | 256   |
| >KIT-Y823D-v YVVKGNARL  | 55  | >KIT-Y823D-r DVVKGNARL  | 47    | 8     |
| >KIT-Y823D-v YVVKGNAR   | 468 | >KIT-Y823D-r DVVKGNAR   | 4690  | 4222  |
| >KIT-Y823D-v YVVKGNAR   | 426 | >KIT-Y823D-r DVVKGNAR   | 72    | 354   |
| >KIT-Y823D-v YVVKGNAR   | 18  | >KIT-Y823D-r DVVKGNAR   | 25    | 7     |
| >KIT-Y823D-v YVVKGNARL  | 110 | >KIT-Y823D-r DVVKGNARL  | 167   | 57    |
| >KIT-Y823D-v YVVKGNARLF | 16  | >KIT-Y823D-r DVVKGNARLI | 21    | 5     |
| >KIT-Y823D-v YVVKGNARL  | 250 | >KIT-Y823D-r DVVKGNARL  | 605   | 355   |
| >KIT-Y823D-v YVVKGNARLF | 13  | >KIT-Y823D-r DVVKGNARLI | 19    | 6     |
| >KIT-Y823D-v YVVKGNARL  | 56  | >KIT-Y823D-r DVVKGNARL  | 4703  | 4647  |
| >KIT-Y823D-v YVVKGNARL  | 144 | >KIT-Y823D-r DVVKGNARL  | 8304  | 8160  |

|                         |     |                         |       |       |
|-------------------------|-----|-------------------------|-------|-------|
| >KIT-Y823D-\ NYVVKGNAR  | 253 | >KIT-Y823D-r NDVVKGNAR  | 30175 | 29922 |
| >KIT-Y823D-\ NYVVKGNAR  | 309 | >KIT-Y823D-r NDVVKGNAR  | 26237 | 25928 |
| >KIT-Y823D-\ NYVVKGNAR  | 170 | >KIT-Y823D-r NDVVKGNAR  | 15284 | 15114 |
| >KIT-Y823D-\ NYVVKGNAR  | 384 | >KIT-Y823D-r NDVVKGNAR  | 18012 | 17628 |
| >KIT-Y823D-\ LARDIKNDSN | 241 | >KIT-Y823D-r LARDIKNDSN | 33819 | 33578 |
| >KIT-Y823D-\ LARDIKNDSN | 387 | >KIT-Y823D-r LARDIKNDSN | 21933 | 21546 |
| >KIT-Y823D-\ LARDIKNDSN | 317 | >KIT-Y823D-r LARDIKNDSN | 26960 | 26643 |
| >KIT-Y823D-\ LARDIKNDSN | 30  | >KIT-Y823D-r LARDIKNDSN | 16494 | 16464 |
| >KIT-Y823D-\ LARDIKNDSN | 176 | >KIT-Y823D-r LARDIKNDSN | 23359 | 23183 |
| >KIT-Y823D-\ LARDIKNDSN | 46  | >KIT-Y823D-r LARDIKNDSN | 14853 | 14807 |
| >KIT-Y823D-\ SNYVVKGNAI | 129 | >KIT-Y823D-r SNDVVKGNA  | 8214  | 8085  |
| >KIT-Y823D-\ DSNYVVKGN. | 76  | >KIT-Y823D-r DSNDVVKGN  | 58    | 18    |
| >KIT-Y823D-\ DSNYVVKGN. | 27  | >KIT-Y823D-r DSNDVVKGN  | 45    | 18    |
| >KIT-Y823D-\ IKNDSNYV   | 63  | >KIT-Y823D-r IKNDSNDV   | 127   | 64    |
| >KIT-Y823D-\ IKNDSNYVV  | 26  | >KIT-Y823D-r IKNDSNDVV  | 118   | 92    |
| >KIT-Y823D-\ IKNDSNYVVK | 83  | >KIT-Y823D-r IKNDSNDVVK | 364   | 281   |
| >KIT-Y823D-\ DIKNDSNY   | 198 | >KIT-Y823D-r DIKNDSND   | 20617 | 20419 |
| >KIT-Y823D-\ DIKNDSNY   | 243 | >KIT-Y823D-r DIKNDSND   | 35188 | 34945 |
| >KIT-Y823D-\ DIKNDSNY   | 462 | >KIT-Y823D-r DIKNDSND   | 34024 | 33562 |
| >KIT-Y823D-\ DIKNDSNYVV | 291 | >KIT-Y823D-r DIKNDSNDV\ | 356   | 65    |
| >KIT-Y823D-\ RDIKNDSNYV | 394 | >KIT-Y823D-r RDIKNDSND\ | 907   | 513   |
| >KIT-Y823D-\ RDIKNDSNYV | 299 | >KIT-Y823D-r RDIKNDSND\ | 353   | 54    |
| >KIT-Y823D-\ RDIKNDSNYV | 87  | >KIT-Y823D-r RDIKNDSND\ | 119   | 32    |
| >KIT-Y823D-\ ARDIKNDSNY | 420 | >KIT-Y823D-r ARDIKNDSNE | 32498 | 32078 |
| >KIT-Y823D-\ ARDIKNDSNY | 200 | >KIT-Y823D-r ARDIKNDSNE | 11212 | 11012 |
| >KIT-Y823N-\ YVVKGNARLF | 127 | >KIT-Y823N-r NVVKGNARL  | 3973  | 3846  |
| >KIT-Y823N-\ YVVKGNARL  | 213 | >KIT-Y823N-r NVVKGNARL  | 2816  | 2603  |
| >KIT-Y823N-\ YVVKGNARLF | 357 | >KIT-Y823N-r NVVKGNARL  | 2920  | 2563  |
| >KIT-Y823N-\ YVVKGNARL  | 340 | >KIT-Y823N-r NVVKGNARL  | 4917  | 4577  |
| >KIT-Y823N-\ YVVKGNARLF | 27  | >KIT-Y823N-r NVVKGNARL  | 443   | 416   |
| >KIT-Y823N-\ YVVKGNARL  | 56  | >KIT-Y823N-r NVVKGNARL  | 2683  | 2627  |
| >KIT-Y823N-\ YVVKGNARLF | 8   | >KIT-Y823N-r NVVKGNARL  | 87    | 79    |
| >KIT-Y823N-\ YVVKGNARL  | 489 | >KIT-Y823N-r NVVKGNARL  | 11712 | 11223 |
| >KIT-Y823N-\ YVVKGNARLF | 74  | >KIT-Y823N-r NVVKGNARL  | 4001  | 3927  |
| >KIT-Y823N-\ YVVKGNARLF | 234 | >KIT-Y823N-r NVVKGNARL  | 3232  | 2998  |
| >KIT-Y823N-\ YVVKGNARLF | 90  | >KIT-Y823N-r NVVKGNARL  | 5114  | 5024  |
| >KIT-Y823N-\ YVVKGNARL  | 23  | >KIT-Y823N-r NVVKGNARL  | 6272  | 6249  |
| >KIT-Y823N-\ YVVKGNARLF | 6   | >KIT-Y823N-r NVVKGNARL  | 871   | 865   |
| >KIT-Y823N-\ YVVKGNARL  | 55  | >KIT-Y823N-r NVVKGNARL  | 261   | 206   |
| >KIT-Y823N-\ YVVKGNAR   | 468 | >KIT-Y823N-r NVVKGNAR   | 1240  | 772   |
| >KIT-Y823N-\ YVVKGNAR   | 426 | >KIT-Y823N-r NVVKGNAR   | 415   | 11    |
| >KIT-Y823N-\ YVVKGNAR   | 18  | >KIT-Y823N-r NVVKGNAR   | 36    | 18    |
| >KIT-Y823N-\ YVVKGNARL  | 110 | >KIT-Y823N-r NVVKGNARL  | 76    | 34    |

|                          |      |                         |       |       |
|--------------------------|------|-------------------------|-------|-------|
| >KIT-Y823N-1 YVVKGNARLF  | 16   | >KIT-Y823N-r NVVKGNARLF | 14    | 2     |
| >KIT-Y823N-1 YVVKGNARL   | 250  | >KIT-Y823N-r NVVKGNARL  | 539   | 289   |
| >KIT-Y823N-1 YVVKGNARLF  | 13   | >KIT-Y823N-r NVVKGNARLF | 18    | 5     |
| >KIT-Y823N-1 YVVKGNARL   | 56   | >KIT-Y823N-r NVVKGNARL  | 3486  | 3430  |
| >KIT-Y823N-1 YVVKGNARL   | 144  | >KIT-Y823N-r NVVKGNARL  | 3762  | 3618  |
| >KIT-Y823N-1 NYVVKGNAR   | 253  | >KIT-Y823N-r NNVVKGNAR  | 22538 | 22285 |
| >KIT-Y823N-1 NYVVKGNAR   | 309  | >KIT-Y823N-r NNVVKGNAR  | 25116 | 24807 |
| >KIT-Y823N-1 NYVVKGNAR   | 170  | >KIT-Y823N-r NNVVKGNAR  | 8405  | 8235  |
| >KIT-Y823N-1 NYVVKGNAR   | 384  | >KIT-Y823N-r NNVVKGNAR  | 11831 | 11447 |
| >KIT-Y823N-1 LARDIKNDSN  | 241  | >KIT-Y823N-r LARDIKNDSN | 29972 | 29731 |
| >KIT-Y823N-1 LARDIKNDSN  | 387  | >KIT-Y823N-r LARDIKNDSN | 19906 | 19519 |
| >KIT-Y823N-1 LARDIKNDSN  | 317  | >KIT-Y823N-r LARDIKNDSN | 21779 | 21462 |
| >KIT-Y823N-1 LARDIKNDSN  | 30   | >KIT-Y823N-r LARDIKNDSN | 13251 | 13221 |
| >KIT-Y823N-1 LARDIKNDSN  | 176  | >KIT-Y823N-r LARDIKNDSN | 20781 | 20605 |
| >KIT-Y823N-1 LARDIKNDSN  | 46   | >KIT-Y823N-r LARDIKNDSN | 7014  | 6968  |
| >KIT-Y823N-1 SNYVVKGNAI  | 129  | >KIT-Y823N-r SNNVVKGNA  | 5066  | 4937  |
| >KIT-Y823N-1 DSNYVVKGN.  | 76   | >KIT-Y823N-r DSNNVVKGN  | 94    | 18    |
| >KIT-Y823N-1 DSNYVVKGN.  | 27   | >KIT-Y823N-r DSNNVVKGN  | 51    | 24    |
| >KIT-Y823N-1 IKNDSNYV    | 63   | >KIT-Y823N-r IKNDSNNV   | 57    | 6     |
| >KIT-Y823N-1 IKNDSNYVV   | 26   | >KIT-Y823N-r IKNDSNNVV  | 28    | 2     |
| >KIT-Y823N-1 IKNDSNYVVK  | 83   | >KIT-Y823N-r IKNDSNNVVK | 117   | 34    |
| >KIT-Y823N-1 DIKNDSNY    | 198  | >KIT-Y823N-r DIKNDSNN   | 18487 | 18289 |
| >KIT-Y823N-1 DIKNDSNY    | 243  | >KIT-Y823N-r DIKNDSNN   | 30080 | 29837 |
| >KIT-Y823N-1 DIKNDSNY    | 462  | >KIT-Y823N-r DIKNDSNN   | 30073 | 29611 |
| >KIT-Y823N-1 DIKNDSNYVV  | 291  | >KIT-Y823N-r DIKNDSNNV  | 274   | 17    |
| >KIT-Y823N-1 RDIKNDSNYV  | 394  | >KIT-Y823N-r RDIKNDSNN  | 740   | 346   |
| >KIT-Y823N-1 RDIKNDSNYV  | 299  | >KIT-Y823N-r RDIKNDSNN  | 310   | 11    |
| >KIT-Y823N-1 RDIKNDSNYV  | 87   | >KIT-Y823N-r RDIKNDSNN  | 172   | 85    |
| >KIT-Y823N-1 ARDIKNDSNY  | 420  | >KIT-Y823N-r ARDIKNDSNN | 31575 | 31155 |
| >KIT-Y823N-1 ARDIKNDSNY  | 200  | >KIT-Y823N-r ARDIKNDSNN | 7577  | 7377  |
| >KLF6-E12G-1 ELQIVHET    | 1552 | >KLF6-E12G-1 GLQIVHET   | 232   | 1320  |
| >KLF6-E12G-1 ELQIVHET    | 903  | >KLF6-E12G-1 GLQIVHET   | 116   | 787   |
| >KLF6-E12G-1 ELQIVHETGY  | 1046 | >KLF6-E12G-1 GLQIVHETGY | 352   | 694   |
| >KLF6-E12G-1 ELQIVHETGYI | 1128 | >KLF6-E12G-1 GLQIVHETGY | 320   | 808   |
| >KLF6-E12G-1 ELQIVHETGY  | 582  | >KLF6-E12G-1 GLQIVHETGY | 477   | 105   |
| >KLF6-E12G-1 QELQIVHET   | 116  | >KLF6-E12G-1 QGLQIVHET  | 24290 | 24174 |
| >KLF6-E12G-1 QELQIVHET   | 423  | >KLF6-E12G-1 QGLQIVHET  | 25555 | 25132 |
| >KLF6-E12G-1 QELQIVHETG  | 49   | >KLF6-E12G-1 QGLQIVHETC | 12383 | 12334 |
| >KLF6-E12G-1 QELQIVHET   | 138  | >KLF6-E12G-1 QGLQIVHET  | 36646 | 36508 |
| >KLF6-E12G-1 QELQIVHETG  | 445  | >KLF6-E12G-1 QGLQIVHETC | 20553 | 20108 |
| >KLF6-E12G-1 QELQIVHETG  | 77   | >KLF6-E12G-1 QGLQIVHETC | 28834 | 28757 |
| >KLF6-E12G-1 QELQIVHET   | 24   | >KLF6-E12G-1 QGLQIVHET  | 34141 | 34117 |
| >KLF6-E12G-1 QELQIVHET   | 204  | >KLF6-E12G-1 QGLQIVHET  | 34055 | 33851 |



|                        |     |                        |      |     |
|------------------------|-----|------------------------|------|-----|
| >KLF6-E12G- SIFQELQI   | 601 | >KLF6-E12G- SIFQGLQI   | 498  | 103 |
| >KLF6-E12G- SIFQELQIV  | 135 | >KLF6-E12G- SIFQGLQIV  | 84   | 51  |
| >KLF6-E12G- SIFQELQI   | 396 | >KLF6-E12G- SIFQGLQI   | 555  | 159 |
| >KLF6-E12G- SIFQELQIV  | 79  | >KLF6-E12G- SIFQGLQIV  | 128  | 49  |
| >KLF6-E12G- SIFQELQI   | 488 | >KLF6-E12G- SIFQGLQI   | 174  | 314 |
| >KLF6-E12G- SIFQELQIV  | 33  | >KLF6-E12G- SIFQGLQIV  | 14   | 19  |
| >KLF6-E12G- SIFQELQI   | 440 | >KLF6-E12G- SIFQGLQI   | 239  | 201 |
| >KLF6-E12G- SIFQELQIV  | 33  | >KLF6-E12G- SIFQGLQIV  | 14   | 19  |
| >KLF6-E12G- SIFQELQI   | 62  | >KLF6-E12G- SIFQGLQI   | 27   | 35  |
| >KLF6-E12G- SIFQELQIV  | 14  | >KLF6-E12G- SIFQGLQIV  | 7    | 7   |
| >KLF6-E12G- SIFQELQIV  | 126 | >KLF6-E12G- SIFQGLQIV  | 82   | 44  |
| >KLF6-E12G- SIFQELQI   | 106 | >KLF6-E12G- SIFQGLQI   | 59   | 47  |
| >KLF6-E12G- SIFQELQIV  | 14  | >KLF6-E12G- SIFQGLQIV  | 9    | 5   |
| >KLF6-E12G- SIFQELQI   | 120 | >KLF6-E12G- SIFQGLQI   | 52   | 68  |
| >KLF6-E12G- SIFQELQIV  | 5   | >KLF6-E12G- SIFQGLQIV  | 3    | 2   |
| >KLF6-E12G- SIFQELQI   | 154 | >KLF6-E12G- SIFQGLQI   | 131  | 23  |
| >KLF6-E12G- SIFQELQIV  | 932 | >KLF6-E12G- SIFQGLQIV  | 236  | 696 |
| >KLF6-E12G- SIFQELQI   | 548 | >KLF6-E12G- SIFQGLQI   | 191  | 357 |
| >KLF6-E12G- CSIFQELQI  | 360 | >KLF6-E12G- CSIFQGLQI  | 110  | 250 |
| >KLF6-E12G- CSIFQELQI  | 387 | >KLF6-E12G- CSIFQGLQI  | 899  | 512 |
| >KLF6-E12G- CSIFQELQI  | 47  | >KLF6-E12G- CSIFQGLQI  | 26   | 21  |
| >KLF6-E12G- MCSIFQEL   | 147 | >KLF6-E12G- MCSIFQGL   | 374  | 227 |
| >KLF6-E12G- MCSIFQELQI | 400 | >KLF6-E12G- MCSIFQGLQI | 816  | 416 |
| >KLF6-E12G- MCSIFQEL   | 461 | >KLF6-E12G- MCSIFQGL   | 552  | 91  |
| >KLF6-E12G- PMCSIFQEL  | 122 | >KLF6-E12G- PMCSIFQGL  | 209  | 87  |
| >KLF6-E12G- PMCSIFQEL  | 118 | >KLF6-E12G- PMCSIFQGL  | 118  | 0   |
| >KLF6-E12G- PMCSIFQELQ | 367 | >KLF6-E12G- PMCSIFQGLC | 261  | 106 |
| >KLF6-E12G- PMCSIFQEL  | 61  | >KLF6-E12G- PMCSIFQGL  | 89   | 28  |
| >KLF6-E12G- LPMCSIFQEL | 15  | >KLF6-E12G- LPMCSIFQGL | 89   | 74  |
| >KLF6-E12G- LPMCSIFQEL | 554 | >KLF6-E12G- LPMCSIFQGL | 309  | 245 |
| >KLF6-E12G- LPMCSIFQEL | 62  | >KLF6-E12G- LPMCSIFQGL | 55   | 7   |
| >KLF6-E12G- LPMCSIFQEL | 477 | >KLF6-E12G- LPMCSIFQGL | 1098 | 621 |
| >KLF6-E12G- LPMCSIFQEL | 76  | >KLF6-E12G- LPMCSIFQGL | 177  | 101 |
| >KLF6-E12G- LPMCSIFQEL | 98  | >KLF6-E12G- LPMCSIFQGL | 161  | 63  |
| >KLF6-E12G- LPMCSIFQE  | 207 | >KLF6-E12G- LPMCSIFQG  | 66   | 141 |
| >KLF6-E12G- LPMCSIFQEL | 561 | >KLF6-E12G- LPMCSIFQGL | 464  | 97  |
| >KLF6-E12G- LPMCSIFQEL | 514 | >KLF6-E12G- LPMCSIFQGL | 225  | 289 |
| >KLF6-E12G- LPMCSIFQEL | 67  | >KLF6-E12G- LPMCSIFQGL | 465  | 398 |
| >KLF6-E12G- VLPMCSIFQE | 105 | >KLF6-E12G- VLPMCSIFQG | 204  | 99  |
| >KLF6-E12G- VLPMCSIFQE | 41  | >KLF6-E12G- VLPMCSIFQG | 59   | 18  |
| >KLF6-E12G- VLPMCSIFQE | 126 | >KLF6-E12G- VLPMCSIFQG | 100  | 26  |
| >KLF6-E12G- VLPMCSIFQE | 222 | >KLF6-E12G- VLPMCSIFQG | 138  | 84  |
| >KLF6-E12G- VLPMCSIFQE | 32  | >KLF6-E12G- VLPMCSIFQG | 30   | 2   |

|                        |       |                        |      |       |
|------------------------|-------|------------------------|------|-------|
| >KLF6-E12G-VLPMCSIFQE  | 158   | >KLF6-E12G-VLPMCSIFQG  | 116  | 42    |
| >KLF6-E12G-VLPMCSIFQE  | 40    | >KLF6-E12G-VLPMCSIFQG  | 46   | 6     |
| >KLF6-E12G-VLPMCSIFQE  | 108   | >KLF6-E12G-VLPMCSIFQG  | 55   | 53    |
| >KLF6-E12G-VLPMCSIFQE  | 5     | >KLF6-E12G-VLPMCSIFQG  | 5    | 0     |
| >KLF6-E12G-VLPMCSIFQE  | 28    | >KLF6-E12G-VLPMCSIFQG  | 22   | 6     |
| >KLF6-K124RKFTSDPIGEVI | 568   | >KLF6-K124RFTSDPIGEVI  | 110  | 458   |
| >KLF6-K124RKFTSDPIGEVI | 256   | >KLF6-K124RFTSDPIGEVI  | 656  | 400   |
| >KLF6-K124RAKFTSDPI    | 8     | >KLF6-K124RARFTSDPI    | 52   | 44    |
| >KLF6-K124RAKFTSDPIGEV | 31    | >KLF6-K124RARFTSDPIGEV | 237  | 206   |
| >KLF6-K124RAKFTSDPI    | 9441  | >KLF6-K124RARFTSDPI    | 102  | 9339  |
| >KLF6-K124RAKFTSDPIGEV | 14305 | >KLF6-K124RARFTSDPIGEV | 346  | 13959 |
| >KLF6-K124RAKFTSDPIG   | 5425  | >KLF6-K124RARFTSDPIG   | 392  | 5033  |
| >KLF6-K124RAKFTSDPI    | 457   | >KLF6-K124RARFTSDPI    | 1600 | 1143  |
| >KLF6-K124RDSSEELSPTAF | 1850  | >KLF6-K124RDSSEELSPTAF | 59   | 1791  |
| >KLF6-K124RDSSEELSPTAF | 135   | >KLF6-K124RDSSEELSPTAF | 35   | 100   |
| >KLF6-K124RTAKFTSDPI   | 352   | >KLF6-K124RTARFTSDPI   | 50   | 302   |
| >KLF6-K124RTAKFTSDPI   | 306   | >KLF6-K124RTARFTSDPI   | 988  | 682   |
| >KLF6-K124RPTAKFTSDPI  | 683   | >KLF6-K124RPTARFTSDPI  | 393  | 290   |
| >KLF6-K124RPTAKFTSDPI  | 529   | >KLF6-K124RPTARFTSDPI  | 273  | 256   |
| >KLF6-K124RSPTAKFTSDPI | 847   | >KLF6-K124RSPTARFTSDPI | 448  | 399   |
| >KLF6-K124RSPTAKFTSDPI | 43    | >KLF6-K124RSPTARFTSDPI | 28   | 15    |
| >KLF6-K124RSPTAKFTSDPI | 694   | >KLF6-K124RSPTARFTSDPI | 475  | 219   |
| >KLF6-K124RSPTAKFTSDPI | 562   | >KLF6-K124RSPTARFTSDPI | 474  | 88    |
| >KLF6-K124RLSPTAKFT    | 932   | >KLF6-K124RLSPTARFT    | 247  | 685   |
| >KLF6-K124RLSPTAKFTS   | 463   | >KLF6-K124RLSPTARFTS   | 153  | 310   |
| >KLF6-K124RELSPTAKF    | 491   | >KLF6-K124RELSPTARF    | 813  | 322   |
| >KLF6-K124REELSPTAKFT  | 429   | >KLF6-K124REELSPTARFT  | 879  | 450   |
| >KLF6-K124REELSPTAKF   | 979   | >KLF6-K124REELSPTARF   | 473  | 506   |
| >KLF6-K124REELSPTAKF   | 320   | >KLF6-K124REELSPTARF   | 649  | 329   |
| >KLF6-K124REELSPTAKF   | 422   | >KLF6-K124REELSPTARF   | 1367 | 945   |
| >KLF6-K124REELSPTAKF   | 211   | >KLF6-K124REELSPTARF   | 233  | 22    |
| >KLF6-K124REELSPTAKF   | 115   | >KLF6-K124REELSPTARF   | 102  | 13    |
| >KLF6-K124REELSPTAKFTS | 238   | >KLF6-K124REELSPTARFTS | 173  | 65    |
| >KLF6-K124REELSPTAKF   | 325   | >KLF6-K124REELSPTARF   | 551  | 226   |
| >KLF6-K124RSEELSPTAKFT | 114   | >KLF6-K124RSEELSPTARFT | 181  | 67    |
| >KLF6-K124RSEELSPTAKF  | 65    | >KLF6-K124RSEELSPTARF  | 88   | 23    |
| >KLF6-K124RSEELSPTAKF  | 92    | >KLF6-K124RSEELSPTARF  | 145  | 53    |
| >KLF6-K124RSEELSPTAKFT | 179   | >KLF6-K124RSEELSPTARFT | 140  | 39    |
| >KLF6-K124RSEELSPTAKF  | 380   | >KLF6-K124RSEELSPTARF  | 862  | 482   |
| >KLF6-K124RSSEELSPTAK  | 91    | >KLF6-K124RSSEELSPTAR  | 1196 | 1105  |
| >KLF6-K124RSSEELSPTAK  | 838   | >KLF6-K124RSSEELSPTAR  | 247  | 591   |
| >KLF6-K124RSSEELSPTAKF | 7     | >KLF6-K124RSSEELSPTARF | 6    | 1     |
| >KLF6-K124RSSEELSPTAKF | 273   | >KLF6-K124RSSEELSPTARF | 357  | 84    |

|                          |       |                          |       |       |
|--------------------------|-------|--------------------------|-------|-------|
| >KLF6-K124R SSEELSPTAKF  | 57    | >KLF6-K124R SSEELSPTARF  | 39    | 18    |
| >KLF6-K124R SSEELSPTAK   | 437   | >KLF6-K124R SSEELSPTAR   | 755   | 318   |
| >KLF6-S77F-v SELKISS     | 730   | >KLF6-S77F-r FELKISS     | 320   | 410   |
| >KLF6-S77F-v IILAREKKEES | 24936 | >KLF6-S77F-r IILAREKKEEF | 440   | 24496 |
| >KLF6-S77F-v EESELKIS    | 739   | >KLF6-S77F-r EEFELKIS    | 494   | 245   |
| >KLF6-S77F-v EESELKISS   | 1060  | >KLF6-S77F-r EEFELKISS   | 139   | 921   |
| >KLF6-S77F-v EESELKISS   | 1684  | >KLF6-S77F-r EEFELKISS   | 167   | 1517  |
| >KLF6-S77F-v EESELKIS    | 2285  | >KLF6-S77F-r EEFELKIS    | 352   | 1933  |
| >KLF6-S77F-v EESELKISS   | 2354  | >KLF6-S77F-r EEFELKISS   | 368   | 1986  |
| >KLF6-S77F-v EESELKISS   | 204   | >KLF6-S77F-r EEFELKISS   | 283   | 79    |
| >KLF6-S77F-v EESELKISS   | 708   | >KLF6-S77F-r EEFELKISS   | 366   | 342   |
| >KLF6-S77F-v KEESELKI    | 1305  | >KLF6-S77F-r KEEFELKI    | 453   | 852   |
| >KLF6-S77F-v KEESELKI    | 232   | >KLF6-S77F-r KEEFELKI    | 179   | 53    |
| >KLF6-S77F-v REKKEESEL   | 426   | >KLF6-S77F-r REKKEEFEL   | 74    | 352   |
| >KLF6-S77F-v REKKEESELKI | 540   | >KLF6-S77F-r REKKEEFELKI | 300   | 240   |
| >KLF6-S77F-v REKKEESEL   | 82    | >KLF6-S77F-r REKKEEFEL   | 43    | 39    |
| >KLF6-S77F-v REKKEESELKI | 279   | >KLF6-S77F-r REKKEEFELKI | 173   | 106   |
| >KLF6-S77F-v REKKEESEL   | 94    | >KLF6-S77F-r REKKEEFEL   | 32    | 62    |
| >KLF6-S77F-v REKKEESELKI | 10    | >KLF6-S77F-r REKKEEFELKI | 8     | 2     |
| >KLF6-S77F-v LAREKKEES   | 26985 | >KLF6-S77F-r LAREKKEEF   | 282   | 26703 |
| >KLF6-S77F-v LAREKKEES   | 17599 | >KLF6-S77F-r LAREKKEEF   | 21    | 17578 |
| >KLF6-S77F-v LAREKKEESEL | 91    | >KLF6-S77F-r LAREKKEEFEL | 118   | 27    |
| >KLF6-S77F-v ILAREKKEES  | 21098 | >KLF6-S77F-r ILAREKKEEF  | 161   | 20937 |
| >KLF6-S77F-v ILAREKKEES  | 2054  | >KLF6-S77F-r ILAREKKEEF  | 101   | 1953  |
| >KLF6-S77F-v ILAREKKEES  | 240   | >KLF6-S77F-r ILAREKKEEF  | 17    | 223   |
| >KLF6-S77F-v ILAREKKEES  | 951   | >KLF6-S77F-r ILAREKKEEF  | 258   | 693   |
| >KLF6-S77F-v ILAREKKEES  | 6898  | >KLF6-S77F-r ILAREKKEEF  | 336   | 6562  |
| >KLF6-S77F-v ILAREKKEES  | 5595  | >KLF6-S77F-r ILAREKKEEF  | 105   | 5490  |
| >KLF6-S77F-v ILAREKKEES  | 6907  | >KLF6-S77F-r ILAREKKEEF  | 207   | 6700  |
| >KLF6-S77F-v ILAREKKEES  | 3259  | >KLF6-S77F-r ILAREKKEEF  | 68    | 3191  |
| >KLF6-S77F-v ILAREKKEES  | 4978  | >KLF6-S77F-r ILAREKKEEF  | 365   | 4613  |
| >KLF6-S77F-v ILAREKKEES  | 1057  | >KLF6-S77F-r ILAREKKEEF  | 62    | 995   |
| >KLF6-S77F-v ILAREKKEES  | 18619 | >KLF6-S77F-r ILAREKKEEF  | 72    | 18547 |
| >KLF6-S77F-v ILAREKKEES  | 10732 | >KLF6-S77F-r ILAREKKEEF  | 156   | 10576 |
| >KLF6-S77F-v ILAREKKEES  | 5900  | >KLF6-S77F-r ILAREKKEEF  | 441   | 5459  |
| >KLF6-S77F-v ILAREKKEES  | 16677 | >KLF6-S77F-r ILAREKKEEF  | 9     | 16668 |
| >KLF6-S77F-v ILAREKKEES  | 18    | >KLF6-S77F-r ILAREKKEEF  | 1284  | 1266  |
| >KLF6-S77F-v ILAREKKEES  | 389   | >KLF6-S77F-r ILAREKKEEF  | 18518 | 18129 |
| >KLF6-S77F-v ILAREKKEES  | 89    | >KLF6-S77F-r ILAREKKEEF  | 12843 | 12754 |
| >KLF6-S77F-v ILAREKKEES  | 249   | >KLF6-S77F-r ILAREKKEEF  | 25408 | 25159 |
| >KLF6-S77F-v ILAREKKEES  | 6980  | >KLF6-S77F-r ILAREKKEEF  | 57    | 6923  |
| >KLF6-S77F-v ILAREKKEES  | 7984  | >KLF6-S77F-r ILAREKKEEF  | 378   | 7606  |
| >KLF6-S77F-v ILAREKKEES  | 125   | >KLF6-S77F-r ILAREKKEEF  | 9638  | 9513  |

|                         |      |                         |       |       |
|-------------------------|------|-------------------------|-------|-------|
| >KLLK2-P237S LPEKPAVY   | 181  | >KLLK2-P237S LSEKPAVY   | 17385 | 17204 |
| >KLLK2-P237S ALPEKPAV   | 52   | >KLLK2-P237S ALSEKPAV   | 28    | 24    |
| >KLLK2-P237S ALPEKPAV   | 85   | >KLLK2-P237S ALSEKPAV   | 14    | 71    |
| >KLLK2-P237S ALPEKPAVYT | 554  | >KLLK2-P237S ALSEKPAVYT | 139   | 415   |
| >KLLK2-P237S ALPEKPAV   | 13   | >KLLK2-P237S ALSEKPAV   | 7     | 6     |
| >KLLK2-P237S ALPEKPAVYT | 669  | >KLLK2-P237S ALSEKPAVYT | 210   | 459   |
| >KLLK2-P237S ALPEKPAV   | 54   | >KLLK2-P237S ALSEKPAV   | 56    | 2     |
| >KLLK2-P237S ALPEKPAV   | 3    | >KLLK2-P237S ALSEKPAV   | 3     | 0     |
| >KLLK2-P237S ALPEKPAVYT | 28   | >KLLK2-P237S ALSEKPAVYT | 31    | 3     |
| >KLLK2-P237S ALPEKPAV   | 15   | >KLLK2-P237S ALSEKPAV   | 8     | 7     |
| >KLLK2-P237S ALPEKPAV   | 7    | >KLLK2-P237S ALSEKPAV   | 6     | 1     |
| >KLLK2-P237S ALPEKPAVYT | 409  | >KLLK2-P237S ALSEKPAVYT | 301   | 108   |
| >KLLK2-P237S ALPEKPAV   | 20   | >KLLK2-P237S ALSEKPAV   | 6     | 14    |
| >KLLK2-P237S ALPEKPAVYT | 2131 | >KLLK2-P237S ALSEKPAVYT | 382   | 1749  |
| >KLLK2-P237S ALPEKPAV   | 3    | >KLLK2-P237S ALSEKPAV   | 2     | 1     |
| >KLLK2-P237S ALPEKPAVYT | 42   | >KLLK2-P237S ALSEKPAVYT | 29    | 13    |
| >KLLK2-P237S ALPEKPAVYT | 360  | >KLLK2-P237S ALSEKPAVYT | 238   | 122   |
| >KLLK2-P237S ALPEKPAVYT | 508  | >KLLK2-P237S ALSEKPAVYT | 90    | 418   |
| >KLLK2-P237S ALPEKPAVYT | 613  | >KLLK2-P237S ALSEKPAVYT | 57    | 556   |
| >KLLK2-P237S ALPEKPAVY  | 709  | >KLLK2-P237S ALSEKPAVY  | 95    | 614   |
| >KLLK2-P237S ALPEKPAVY  | 497  | >KLLK2-P237S ALSEKPAVY  | 113   | 384   |
| >KLLK2-P237S CALPEKPAVY | 707  | >KLLK2-P237S CALSEKPAVY | 443   | 264   |
| >KLLK2-P237S CALPEKPAVY | 50   | >KLLK2-P237S CALSEKPAVY | 265   | 215   |
| >KLLK2-P237S WGPEPCALP  | 432  | >KLLK2-P237S WGPEPCALS  | 1428  | 996   |
| >KLLK2-P57S-1 PQWVLTAH  | 2567 | >KLLK2-P57S-1 SQWVLTAH  | 350   | 2217  |
| >KLLK2-P57S-1 PQWVLTA   | 9175 | >KLLK2-P57S-1 SQWVLTA   | 260   | 8915  |
| >KLLK2-P57S-1 PQWVLTAH  | 8772 | >KLLK2-P57S-1 SQWVLTAH  | 177   | 8595  |
| >KLLK2-P57S-1 PQWVLTA   | 1228 | >KLLK2-P57S-1 SQWVLTA   | 29    | 1199  |
| >KLLK2-P57S-1 PQWVLTAH  | 4372 | >KLLK2-P57S-1 SQWVLTAH  | 69    | 4303  |
| >KLLK2-P57S-1 PQWVLTAH  | 7910 | >KLLK2-P57S-1 SQWVLTAH  | 367   | 7543  |
| >KLLK2-P57S-1 PQWVLTAH  | 4739 | >KLLK2-P57S-1 SQWVLTAH  | 140   | 4599  |
| >KLLK2-P57S-1 PQWVLTAH  | 8669 | >KLLK2-P57S-1 SQWVLTAH  | 491   | 8178  |
| >KLLK2-P57S-1 PQWVLTA   | 1519 | >KLLK2-P57S-1 SQWVLTA   | 257   | 1262  |
| >KLLK2-P57S-1 PQWVLTAH  | 878  | >KLLK2-P57S-1 SQWVLTAH  | 193   | 685   |
| >KLLK2-P57S-1 PQWVLTAH  | 481  | >KLLK2-P57S-1 SQWVLTAH  | 55    | 426   |
| >KLLK2-P57S-1 PQWVLTAH  | 1789 | >KLLK2-P57S-1 SQWVLTAH  | 38    | 1751  |
| >KLLK2-P57S-1 PQWVLTAH  | 2758 | >KLLK2-P57S-1 SQWVLTAH  | 124   | 2634  |
| >KLLK2-P57S-1 HPQWVLTA  | 33   | >KLLK2-P57S-1 HSQWVLTA  | 16459 | 16426 |
| >KLLK2-P57S-1 HPQWVLTA  | 197  | >KLLK2-P57S-1 HSQWVLTA  | 12252 | 12055 |
| >KLLK2-P57S-1 HPQWVLTA  | 55   | >KLLK2-P57S-1 HSQWVLTA  | 7170  | 7115  |
| >KLLK2-P57S-1 HPQWVLTA  | 80   | >KLLK2-P57S-1 HSQWVLTA  | 21866 | 21786 |
| >KLLK2-P57S-1 HPQWVLTA  | 12   | >KLLK2-P57S-1 HSQWVLTA  | 9744  | 9732  |
| >KLLK2-P57S-1 LVHPQWVLT | 141  | >KLLK2-P57S-1 LVHSQWVLT | 134   | 7     |

|                         |      |                         |     |     |
|-------------------------|------|-------------------------|-----|-----|
| >KLLK2-P57S-1 LVHPQWVL  | 314  | >KLLK2-P57S-1 LVHSQWVL  | 651 | 337 |
| >KLLK2-P57S-1 LVHPQWVLT | 71   | >KLLK2-P57S-1 LVHSQWVLT | 195 | 124 |
| >KLLK2-P57S-1 LVHPQWVL  | 385  | >KLLK2-P57S-1 LVHSQWVL  | 569 | 184 |
| >KLLK2-P57S-1 LVHPQWVL  | 41   | >KLLK2-P57S-1 LVHSQWVL  | 90  | 49  |
| >KLLK2-P57S-1 LVHPQWVLT | 167  | >KLLK2-P57S-1 LVHSQWVLT | 497 | 330 |
| >KLLK2-P57S-1 LVHPQWVL  | 471  | >KLLK2-P57S-1 LVHSQWVL  | 601 | 130 |
| >KLLK2-P57S-1 LVHPQWVLT | 321  | >KLLK2-P57S-1 LVHSQWVLT | 631 | 310 |
| >KLLK2-P57S-1 LVHPQWVLT | 46   | >KLLK2-P57S-1 LVHSQWVLT | 62  | 16  |
| >KLLK2-P57S-1 LVHPQWVLT | 135  | >KLLK2-P57S-1 LVHSQWVLT | 202 | 67  |
| >KLLK2-P57S-1 VLVHPQWV  | 82   | >KLLK2-P57S-1 VLVHSQWV  | 63  | 19  |
| >KLLK2-P57S-1 VLVHPQWVL | 168  | >KLLK2-P57S-1 VLVHSQWVL | 98  | 70  |
| >KLLK2-P57S-1 VLVHPQWVL | 289  | >KLLK2-P57S-1 VLVHSQWVL | 196 | 93  |
| >KLLK2-P57S-1 VLVHPQWV  | 48   | >KLLK2-P57S-1 VLVHSQWV  | 15  | 33  |
| >KLLK2-P57S-1 VLVHPQWVL | 91   | >KLLK2-P57S-1 VLVHSQWVL | 22  | 69  |
| >KLLK2-P57S-1 VLVHPQWVL | 1143 | >KLLK2-P57S-1 VLVHSQWVL | 470 | 673 |
| >KLLK2-P57S-1 VLVHPQWV  | 13   | >KLLK2-P57S-1 VLVHSQWV  | 8   | 5   |
| >KLLK2-P57S-1 VLVHPQWVL | 580  | >KLLK2-P57S-1 VLVHSQWVL | 151 | 429 |
| >KLLK2-P57S-1 VLVHPQWVL | 98   | >KLLK2-P57S-1 VLVHSQWVL | 45  | 53  |
| >KLLK2-P57S-1 VLVHPQWV  | 86   | >KLLK2-P57S-1 VLVHSQWV  | 30  | 56  |
| >KLLK2-P57S-1 VLVHPQWVL | 127  | >KLLK2-P57S-1 VLVHSQWVL | 66  | 61  |
| >KLLK2-P57S-1 VLVHPQWVL | 556  | >KLLK2-P57S-1 VLVHSQWVL | 341 | 215 |
| >KLLK2-P57S-1 VLVHPQWV  | 3    | >KLLK2-P57S-1 VLVHSQWV  | 4   | 1   |
| >KLLK2-P57S-1 VLVHPQWVL | 6    | >KLLK2-P57S-1 VLVHSQWVL | 11  | 5   |
| >KLLK2-P57S-1 VLVHPQWVL | 433  | >KLLK2-P57S-1 VLVHSQWVL | 856 | 423 |
| >KLLK2-P57S-1 VLVHPQWVL | 11   | >KLLK2-P57S-1 VLVHSQWVL | 19  | 8   |
| >KLLK2-P57S-1 VLVHPQWV  | 19   | >KLLK2-P57S-1 VLVHSQWV  | 13  | 6   |
| >KLLK2-P57S-1 VLVHPQWVL | 11   | >KLLK2-P57S-1 VLVHSQWVL | 7   | 4   |
| >KLLK2-P57S-1 VLVHPQWVL | 75   | >KLLK2-P57S-1 VLVHSQWVL | 45  | 30  |
| >KLLK2-P57S-1 VLVHPQWV  | 10   | >KLLK2-P57S-1 VLVHSQWV  | 9   | 1   |
| >KLLK2-P57S-1 VLVHPQWVL | 29   | >KLLK2-P57S-1 VLVHSQWVL | 23  | 6   |
| >KLLK2-P57S-1 VLVHPQWVL | 69   | >KLLK2-P57S-1 VLVHSQWVL | 54  | 15  |
| >KLLK2-P57S-1 VLVHPQWV  | 29   | >KLLK2-P57S-1 VLVHSQWV  | 21  | 8   |
| >KLLK2-P57S-1 VLVHPQWVL | 102  | >KLLK2-P57S-1 VLVHSQWVL | 56  | 46  |
| >KLLK2-P57S-1 VLVHPQWV  | 2    | >KLLK2-P57S-1 VLVHSQWV  | 2   | 0   |
| >KLLK2-P57S-1 VLVHPQWVL | 5    | >KLLK2-P57S-1 VLVHSQWVL | 4   | 1   |
| >KLLK2-P57S-1 VLVHPQWVL | 123  | >KLLK2-P57S-1 VLVHSQWVL | 112 | 11  |
| >KLLK2-P57S-1 VLVHPQWVL | 9    | >KLLK2-P57S-1 VLVHSQWVL | 7   | 2   |
| >KLLK2-P57S-1 VLVHPQWVL | 527  | >KLLK2-P57S-1 VLVHSQWVL | 232 | 295 |
| >KLLK2-P57S-1 GVLVHPQWV | 282  | >KLLK2-P57S-1 GVLVHSQWV | 340 | 58  |
| >KLLK2-P57S-1 GVLVHPQWV | 660  | >KLLK2-P57S-1 GVLVHSQWV | 71  | 589 |
| >KLLK2-P57S-1 GVLVHPQWV | 49   | >KLLK2-P57S-1 GVLVHSQWV | 116 | 67  |
| >KLLK2-P57S-1 GVLVHPQWV | 356  | >KLLK2-P57S-1 GVLVHSQWV | 690 | 334 |
| >KLLK2-P57S-1 GVLVHPQWV | 502  | >KLLK2-P57S-1 GVLVHSQWV | 285 | 217 |

|                        |       |                         |      |       |
|------------------------|-------|-------------------------|------|-------|
| >KLN2-P57S-1 GVLVHPQWV | 387   | >KLN2-P57S-1 GVLVHSQWV  | 225  | 162   |
| >KLN2-P57S-1 GVLVHPQWV | 118   | >KLN2-P57S-1 GVLVHSQWV  | 81   | 37    |
| >KLN2-P57S-1 GVLVHPQWV | 44    | >KLN2-P57S-1 GVLVHSQWV  | 31   | 13    |
| >KLN2-P57S-1 GVLVHPQWV | 483   | >KLN2-P57S-1 GVLVHSQWV  | 394  | 89    |
| >KLN2-P57S-1 GVLVHPQW  | 91    | >KLN2-P57S-1 GVLVHSQW   | 51   | 40    |
| >KLN2-P57S-1 GVLVHPQW  | 63    | >KLN2-P57S-1 GVLVHSQW   | 98   | 35    |
| >KLN2-P57S-1 GGVLVHPQM | 106   | >KLN2-P57S-1 GGVLVHSQM  | 264  | 158   |
| >KLN2-P57S-1 GGVLVHPQM | 4769  | >KLN2-P57S-1 GGVLVHSQM  | 164  | 4605  |
| >KLN2-P57S-1 CGGVLVHPQ | 73    | >KLN2-P57S-1 CGGVLVHSQ  | 97   | 24    |
| >KLN2-P57S-1 HCGGVLVHP | 465   | >KLN2-P57S-1 HCGGVLVHS  | 862  | 397   |
| >KRAS-A11P- GAGGVGKSA  | 23096 | >KRAS-A11P- GPGGVGKSA   | 285  | 22811 |
| >KRAS-A11P- MTEYKLVVV  | 78    | >KRAS-A11P- MTEYKLVVV   | 7068 | 6990  |
| >KRAS-A11P- VVGAGGVGK  | 326   | >KRAS-A11P- VVGPGGVGK   | 530  | 204   |
| >KRAS-A11P- VVGAGGVGK  | 89    | >KRAS-A11P- VVGPGGVGK   | 83   | 6     |
| >KRAS-A11P- VVGAGGV    | 117   | >KRAS-A11P- VVGPGGV     | 183  | 66    |
| >KRAS-A11P- VVGAGGV    | 68    | >KRAS-A11P- VVGPGGV     | 248  | 180   |
| >KRAS-A11P- VVGAGGV    | 139   | >KRAS-A11P- VVGPGGV     | 41   | 98    |
| >KRAS-A11P- VVGAGGV    | 23    | >KRAS-A11P- VVGPGGV     | 29   | 6     |
| >KRAS-A11P- VVGAGGVG   | 76    | >KRAS-A11P- VVGPGGVG    | 105  | 29    |
| >KRAS-A11P- VVGAGGVG   | 101   | >KRAS-A11P- VVGPGGVG    | 131  | 30    |
| >KRAS-A11P- VVGAGGVG   | 203   | >KRAS-A11P- VVGPGGVG    | 152  | 51    |
| >KRAS-A11P- VVGAGGV    | 191   | >KRAS-A11P- VVGPGGV     | 150  | 41    |
| >KRAS-A11P- LVVVGAGGV  | 180   | >KRAS-A11P- LVVVGPGGV   | 101  | 79    |
| >KRAS-A11P- LVVVGAGGV  | 55    | >KRAS-A11P- LVVVGPGGV   | 331  | 276   |
| >KRAS-A11P- LVVVGAGGV  | 1068  | >KRAS-A11P- LVVVGPGGV   | 363  | 705   |
| >KRAS-A11P- LVVVGAGGV  | 75    | >KRAS-A11P- LVVVGPGGV   | 125  | 50    |
| >KRAS-A11P- LVVVGAGGV  | 572   | >KRAS-A11P- LVVVGPGGV   | 467  | 105   |
| >KRAS-A11P- LVVVGAGGV  | 284   | >KRAS-A11P- LVVVGPGGV   | 489  | 205   |
| >KRAS-A11P- LVVVGAGGV  | 154   | >KRAS-A11P- LVVVGPGGV   | 194  | 40    |
| >KRAS-A11P- LVVVGAGGV  | 159   | >KRAS-A11P- LVVVGPGGV   | 332  | 173   |
| >KRAS-A11P- KLVVVGAGG  | 392   | >KRAS-A11P- KLVVVGPGG   | 265  | 127   |
| >KRAS-A11P- KLVVVGAGG  | 35    | >KRAS-A11P- KLVVVGPGG   | 16   | 19    |
| >KRAS-A11P- KLVVVGAGG  | 661   | >KRAS-A11P- KLVVVGPGG   | 352  | 309   |
| >KRAS-A11P- KLVVVGAGG  | 6     | >KRAS-A11P- KLVVVGPGG   | 4    | 2     |
| >KRAS-A11P- KLVVVGAGG  | 17    | >KRAS-A11P- KLVVVGPGG   | 21   | 4     |
| >KRAS-A11P- KLVVVGAGG  | 14    | >KRAS-A11P- KLVVVGPGG   | 12   | 2     |
| >KRAS-A11P- KLVVVGAGG  | 121   | >KRAS-A11P- KLVVVGPGG   | 99   | 22    |
| >KRAS-A11P- KLVVVGAGG  | 6     | >KRAS-A11P- KLVVVGPGG   | 7    | 1     |
| >KRAS-A11P- YKLVVVGAG  | 423   | >KRAS-A11P- YKLVVVGPG   | 843  | 420   |
| >KRAS-A11P- YKLVVVGAG  | 220   | >KRAS-A11P- YKLVVVGPG   | 131  | 89    |
| >KRAS-A11P- YKLVVVGAG  | 423   | >KRAS-A11P- YKLVVVGPG   | 1347 | 924   |
| >KRAS-A11P- TEYKLVVVG  | 303   | >KRAS-A11P- TEYKLVVVGPG | 638  | 335   |
| >KRAS-A11P- TEYKLVVVG  | 68    | >KRAS-A11P- TEYKLVVVGPG | 858  | 790   |

|                        |       |                        |     |       |
|------------------------|-------|------------------------|-----|-------|
| >KRAS-A11V-MTEYKLVVVC  | 2436  | >KRAS-A11V-MTEYKLVVVC  | 176 | 2260  |
| >KRAS-A11V-MTEYKLVVVC  | 78    | >KRAS-A11V-MTEYKLVVVC  | 14  | 64    |
| >KRAS-A11V-MTEYKLVVVC  | 5963  | >KRAS-A11V-MTEYKLVVVC  | 282 | 5681  |
| >KRAS-A11V-VVGAGGVGK   | 326   | >KRAS-A11V-VVGAGGVGK   | 958 | 632   |
| >KRAS-A11V-VVGAGGVGK   | 89    | >KRAS-A11V-VVGAGGVGK   | 194 | 105   |
| >KRAS-A11V-VVVGAGGV    | 117   | >KRAS-A11V-VVVGAGGV    | 54  | 63    |
| >KRAS-A11V-VVVGAGGV    | 68    | >KRAS-A11V-VVVGAGGV    | 52  | 16    |
| >KRAS-A11V-VVVGAGGV    | 139   | >KRAS-A11V-VVVGAGGV    | 23  | 116   |
| >KRAS-A11V-VVVGAGGV    | 707   | >KRAS-A11V-VVVGAGGV    | 221 | 486   |
| >KRAS-A11V-VVVGAGGV    | 23    | >KRAS-A11V-VVVGAGGV    | 23  | 0     |
| >KRAS-A11V-VVVGAGGVG   | 76    | >KRAS-A11V-VVVGAGGVG   | 85  | 9     |
| >KRAS-A11V-VVVGAGGVG   | 101   | >KRAS-A11V-VVVGAGGVG   | 144 | 43    |
| >KRAS-A11V-VVVGAGGVG   | 203   | >KRAS-A11V-VVVGAGGVG   | 115 | 88    |
| >KRAS-A11V-VVVGAGGV    | 191   | >KRAS-A11V-VVVGAGGV    | 92  | 99    |
| >KRAS-A11V-LVVVGAGGV   | 180   | >KRAS-A11V-LVVVGAGGV   | 38  | 142   |
| >KRAS-A11V-LVVVGAGGV   | 55    | >KRAS-A11V-LVVVGAGGV   | 34  | 21    |
| >KRAS-A11V-LVVVGAGGV   | 1068  | >KRAS-A11V-LVVVGAGGV   | 198 | 870   |
| >KRAS-A11V-LVVVGAGGV   | 75    | >KRAS-A11V-LVVVGAGGV   | 35  | 40    |
| >KRAS-A11V-LVVVGAGGV   | 284   | >KRAS-A11V-LVVVGAGGV   | 320 | 36    |
| >KRAS-A11V-LVVVGAGGV   | 154   | >KRAS-A11V-LVVVGAGGV   | 86  | 68    |
| >KRAS-A11V-LVVVGAGGV   | 159   | >KRAS-A11V-LVVVGAGGV   | 211 | 52    |
| >KRAS-A11V-KLVVVGAGG'  | 392   | >KRAS-A11V-KLVVVGAGG'  | 309 | 83    |
| >KRAS-A11V-KLVVVGAGG'  | 35    | >KRAS-A11V-KLVVVGAGG'  | 21  | 14    |
| >KRAS-A11V-KLVVVGAGG'  | 661   | >KRAS-A11V-KLVVVGAGG'  | 241 | 420   |
| >KRAS-A11V-KLVVVGAGG'  | 6     | >KRAS-A11V-KLVVVGAGG'  | 3   | 3     |
| >KRAS-A11V-KLVVVGAGG'  | 17    | >KRAS-A11V-KLVVVGAGG'  | 13  | 4     |
| >KRAS-A11V-KLVVVGAGG'  | 14    | >KRAS-A11V-KLVVVGAGG'  | 10  | 4     |
| >KRAS-A11V-KLVVVGAGG'  | 121   | >KRAS-A11V-KLVVVGAGG'  | 57  | 64    |
| >KRAS-A11V-KLVVVGAGG'  | 6     | >KRAS-A11V-KLVVVGAGG'  | 5   | 1     |
| >KRAS-A11V-YKLVVVGAG   | 1077  | >KRAS-A11V-YKLVVVGAG   | 125 | 952   |
| >KRAS-A11V-YKLVVVGAGC  | 423   | >KRAS-A11V-YKLVVVGAGC  | 406 | 17    |
| >KRAS-A11V-YKLVVVGAG   | 1649  | >KRAS-A11V-YKLVVVGAG   | 40  | 1609  |
| >KRAS-A11V-YKLVVVGAGC  | 220   | >KRAS-A11V-YKLVVVGAGC  | 118 | 102   |
| >KRAS-A11V-YKLVVVGAG   | 3551  | >KRAS-A11V-YKLVVVGAG   | 60  | 3491  |
| >KRAS-A11V-YKLVVVGAGC  | 662   | >KRAS-A11V-YKLVVVGAGC  | 329 | 333   |
| >KRAS-A11V-YKLVVVGAG   | 423   | >KRAS-A11V-YKLVVVGAG   | 85  | 338   |
| >KRAS-A11V-YKLVVVGAG   | 14621 | >KRAS-A11V-YKLVVVGAG   | 287 | 14334 |
| >KRAS-A11V-TEYKLVVVGAG | 691   | >KRAS-A11V-TEYKLVVVGAG | 20  | 671   |
| >KRAS-A11V-TEYKLVVVGAG | 303   | >KRAS-A11V-TEYKLVVVGAG | 147 | 156   |
| >KRAS-A11V-TEYKLVVVGAG | 556   | >KRAS-A11V-TEYKLVVVGAG | 449 | 107   |
| >KRAS-A11V-TEYKLVVVGAG | 68    | >KRAS-A11V-TEYKLVVVGAG | 203 | 135   |
| >KRAS-A11V-TEYKLVVVGAG | 1012  | >KRAS-A11V-TEYKLVVVGAG | 43  | 969   |
| >KRAS-A146F AKTRQGVDD  | 19    | >KRAS-A146F PKTRQGVDD  | 165 | 146   |

|                         |       |                         |       |       |
|-------------------------|-------|-------------------------|-------|-------|
| >KRAS-A146F SAKTRQGV    | 318   | >KRAS-A146F SPKTRQGV    | 15294 | 14976 |
| >KRAS-A146F SAKTRQGV    | 16999 | >KRAS-A146F SPKTRQGV    | 315   | 16684 |
| >KRAS-A146F SAKTRQGV    | 572   | >KRAS-A146F SPKTRQGV    | 160   | 412   |
| >KRAS-A146F TSAKTRQGV   | 42    | >KRAS-A146F TSPKTRQGV   | 173   | 131   |
| >KRAS-A146F TSAKTRQGV   | 451   | >KRAS-A146F TSPKTRQGV   | 6546  | 6095  |
| >KRAS-A146F TSAKTRQGV   | 11793 | >KRAS-A146F TSPKTRQGV   | 197   | 11596 |
| >KRAS-A146F ETSKTRQGV   | 13    | >KRAS-A146F ETSPKTRQGV  | 31    | 18    |
| >KRAS-A146F ETSKTRQGV   | 18    | >KRAS-A146F ETSPKTRQGV  | 23    | 5     |
| >KRAS-A146F IETSAKTRQG\ | 243   | >KRAS-A146F IETSPKTRQG\ | 1344  | 1101  |
| >KRAS-A146F IETSAKTRQG\ | 263   | >KRAS-A146F IETSPKTRQG\ | 474   | 211   |
| >KRAS-A146F IETSAKTRQG\ | 97    | >KRAS-A146F IETSPKTRQG\ | 159   | 62    |
| >KRAS-A146F FIETSAKTR   | 144   | >KRAS-A146F FIETSPKTR   | 451   | 307   |
| >KRAS-A146F PFIETSAKTR  | 280   | >KRAS-A146F PFIETSPKTR  | 337   | 57    |
| >KRAS-A146F IPFIETSAK   | 301   | >KRAS-A146F IPFIETSPK   | 435   | 134   |
| >KRAS-A146F IPFIETSA    | 38    | >KRAS-A146F IPFIETSP    | 1308  | 1270  |
| >KRAS-A146F IPFIETSAKTR | 312   | >KRAS-A146F IPFIETSPKTR | 217   | 95    |
| >KRAS-A146F GIPFIETSAK  | 154   | >KRAS-A146F GIPFIETSPK  | 95    | 59    |
| >KRAS-A146F GIPFIETSAK  | 72    | >KRAS-A146F GIPFIETSPK  | 49    | 23    |
| >KRAS-A146F GIPFIETSAK  | 152   | >KRAS-A146F GIPFIETSPK  | 101   | 51    |
| >KRAS-A146F YGIPFIETSAK | 290   | >KRAS-A146F YGIPFIETSPK | 260   | 30    |
| >KRAS-A146\ AKTRQGVDD   | 19    | >KRAS-A146\ TKTRQGVDD   | 53    | 34    |
| >KRAS-A146\ SAKTRQGV    | 318   | >KRAS-A146\ STKTRQGV    | 46    | 272   |
| >KRAS-A146\ SAKTRQGV    | 3462  | >KRAS-A146\ STKTRQGV    | 468   | 2994  |
| >KRAS-A146\ TSAKTRQGV   | 42    | >KRAS-A146\ TSTKTRQGV   | 215   | 173   |
| >KRAS-A146\ TSAKTRQGV   | 451   | >KRAS-A146\ TSTKTRQGV   | 2515  | 2064  |
| >KRAS-A146\ ETSKTRQGV   | 13    | >KRAS-A146\ ETSTKTRQGV  | 19    | 6     |
| >KRAS-A146\ ETSKTRQGV   | 18    | >KRAS-A146\ ETSTKTRQGV  | 38    | 20    |
| >KRAS-A146\ IETSAKTRQG\ | 243   | >KRAS-A146\ IETSTKTRQG\ | 234   | 9     |
| >KRAS-A146\ IETSAKTRQG\ | 263   | >KRAS-A146\ IETSTKTRQG\ | 356   | 93    |
| >KRAS-A146\ IETSAKTRQG\ | 97    | >KRAS-A146\ IETSTKTRQG\ | 142   | 45    |
| >KRAS-A146\ FIETSAKTR   | 144   | >KRAS-A146\ FIETSTKTR   | 104   | 40    |
| >KRAS-A146\ FIETSAKTR   | 727   | >KRAS-A146\ FIETSTKTR   | 317   | 410   |
| >KRAS-A146\ PFIETSAKTR  | 280   | >KRAS-A146\ PFIETSTKTR  | 189   | 91    |
| >KRAS-A146\ IPFIETSA    | 519   | >KRAS-A146\ IPFIETST    | 446   | 73    |
| >KRAS-A146\ IPFIETSAK   | 301   | >KRAS-A146\ IPFIETSTK   | 892   | 591   |
| >KRAS-A146\ IPFIETSA    | 38    | >KRAS-A146\ IPFIETST    | 575   | 537   |
| >KRAS-A146\ IPFIETSAKTR | 312   | >KRAS-A146\ IPFIETSTKTR | 230   | 82    |
| >KRAS-A146\ GIPFIETSAK  | 154   | >KRAS-A146\ GIPFIETSTK  | 134   | 20    |
| >KRAS-A146\ GIPFIETSAK  | 72    | >KRAS-A146\ GIPFIETSTK  | 59    | 13    |
| >KRAS-A146\ GIPFIETSAK  | 152   | >KRAS-A146\ GIPFIETSTK  | 126   | 26    |
| >KRAS-A146\ YGIPFIETSAK | 290   | >KRAS-A146\ YGIPFIETSTK | 160   | 130   |
| >KRAS-A146\ AKTRQGVDD   | 19    | >KRAS-A146\ VKTRQGVDD   | 23    | 4     |
| >KRAS-A146\ SAKTRQGV    | 2197  | >KRAS-A146\ SVKTRQGV    | 251   | 1946  |



|                        |       |                        |       |       |
|------------------------|-------|------------------------|-------|-------|
| >KRAS-A146\SAKTRQGV    | 1792  | >KRAS-A146\SVKTRQGV    | 108   | 1684  |
| >KRAS-A146\SAKTRQGV    | 318   | >KRAS-A146\SVKTRQGV    | 76    | 242   |
| >KRAS-A146\SYGIPFIETSA | 4791  | >KRAS-A146\SYGIPFIETSV | 359   | 4432  |
| >KRAS-A146\SYGIPFIETSA | 2620  | >KRAS-A146\SYGIPFIETSV | 422   | 2198  |
| >KRAS-A146\SYGIPFIETSA | 1902  | >KRAS-A146\SYGIPFIETSV | 333   | 1569  |
| >KRAS-A146\TSAKTRQGV   | 42    | >KRAS-A146\TSVKTRQGV   | 129   | 87    |
| >KRAS-A146\TSAKTRQGV   | 451   | >KRAS-A146\TSVKTRQGV   | 823   | 372   |
| >KRAS-A146\ETSAKTRQGV  | 13    | >KRAS-A146\ETSVKTRQGV  | 26    | 13    |
| >KRAS-A146\ETSAKTRQGV  | 18    | >KRAS-A146\ETSVKTRQGV  | 40    | 22    |
| >KRAS-A146\IETSAKTRQG' | 243   | >KRAS-A146\IETSVKTRQG' | 152   | 91    |
| >KRAS-A146\IETSAKTRQG' | 263   | >KRAS-A146\IETSVKTRQG' | 251   | 12    |
| >KRAS-A146\IETSAKTRQG' | 97    | >KRAS-A146\IETSVKTRQG' | 71    | 26    |
| >KRAS-A146\FIETSAKTR   | 144   | >KRAS-A146\FIETSVKTR   | 194   | 50    |
| >KRAS-A146\PFIETSAKTR  | 280   | >KRAS-A146\PFIETSVKTR  | 209   | 71    |
| >KRAS-A146\IPFIETSAK   | 301   | >KRAS-A146\IPFIETSVK   | 1390  | 1089  |
| >KRAS-A146\IPFIETSA    | 5108  | >KRAS-A146\IPFIETSV    | 376   | 4732  |
| >KRAS-A146\IPFIETSA    | 38    | >KRAS-A146\IPFIETSV    | 177   | 139   |
| >KRAS-A146\IPFIETSAKTR | 312   | >KRAS-A146\IPFIETSVKTR | 312   | 0     |
| >KRAS-A146\GIPFIETSA   | 1815  | >KRAS-A146\GIPFIETSV   | 134   | 1681  |
| >KRAS-A146\GIPFIETSA   | 930   | >KRAS-A146\GIPFIETSV   | 78    | 852   |
| >KRAS-A146\GIPFIETSA   | 10587 | >KRAS-A146\GIPFIETSV   | 488   | 10099 |
| >KRAS-A146\GIPFIETSA   | 9162  | >KRAS-A146\GIPFIETSV   | 258   | 8904  |
| >KRAS-A146\GIPFIETSA   | 6265  | >KRAS-A146\GIPFIETSV   | 44    | 6221  |
| >KRAS-A146\GIPFIETSAK  | 154   | >KRAS-A146\GIPFIETSVK  | 240   | 86    |
| >KRAS-A146\GIPFIETSAK  | 72    | >KRAS-A146\GIPFIETSVK  | 106   | 34    |
| >KRAS-A146\GIPFIETSAK  | 152   | >KRAS-A146\GIPFIETSVK  | 291   | 139   |
| >KRAS-A146\YGIPFIETSA  | 1704  | >KRAS-A146\YGIPFIETSV  | 292   | 1412  |
| >KRAS-A146\YGIPFIETSA  | 3906  | >KRAS-A146\YGIPFIETSV  | 193   | 3713  |
| >KRAS-A146\YGIPFIETSA  | 7819  | >KRAS-A146\YGIPFIETSV  | 78    | 7741  |
| >KRAS-A146\YGIPFIETSAK | 290   | >KRAS-A146\YGIPFIETSVK | 287   | 3     |
| >KRAS-A18D·ALTIQLIQ    | 273   | >KRAS-A18D·DLTIQLIQ    | 9273  | 9000  |
| >KRAS-A18D·SALTIQLI    | 10957 | >KRAS-A18D·SDLTIQLI    | 228   | 10729 |
| >KRAS-A18D·SALTIQLI    | 741   | >KRAS-A18D·SDLTIQLI    | 39    | 702   |
| >KRAS-A18D·SALTIQLI    | 127   | >KRAS-A18D·SDLTIQLI    | 1815  | 1688  |
| >KRAS-A18D·SALTIQLI    | 20587 | >KRAS-A18D·SDLTIQLI    | 33    | 20554 |
| >KRAS-A18D·KSALTIQLI   | 239   | >KRAS-A18D·KSDLTIQLI   | 4143  | 3904  |
| >KRAS-A18D·KSALTIQL    | 276   | >KRAS-A18D·KSDLTIQL    | 708   | 432   |
| >KRAS-A18D·KSALTIQL    | 7     | >KRAS-A18D·KSDLTIQL    | 15    | 8     |
| >KRAS-A18D·KSALTIQLI   | 42    | >KRAS-A18D·KSDLTIQLI   | 91    | 49    |
| >KRAS-A18D·KSALTIQL    | 35    | >KRAS-A18D·KSDLTIQL    | 147   | 112   |
| >KRAS-A18D·KSALTIQLI   | 24    | >KRAS-A18D·KSDLTIQLI   | 94    | 70    |
| >KRAS-A18D·KSALTIQL    | 335   | >KRAS-A18D·KSDLTIQL    | 10711 | 10376 |
| >KRAS-A18D·KSALTIQLI   | 73    | >KRAS-A18D·KSDLTIQLI   | 388   | 315   |

|                        |       |                        |       |       |
|------------------------|-------|------------------------|-------|-------|
| >KRAS-A18D·KSALTIQL    | 241   | >KRAS-A18D·KSDLTIQL    | 1030  | 789   |
| >KRAS-A18D·KSALTIQLI   | 35    | >KRAS-A18D·KSDLTIQLI   | 100   | 65    |
| >KRAS-A18D·GKSALTIQL   | 414   | >KRAS-A18D·GKSDLTIQL   | 1144  | 730   |
| >KRAS-A18T·ALTIQLIQ    | 273   | >KRAS-A18T·TLTIQLIQ    | 1457  | 1184  |
| >KRAS-A18T·SALTIQLI    | 711   | >KRAS-A18T·STLTIQLI    | 442   | 269   |
| >KRAS-A18T·SALTIQLI    | 1391  | >KRAS-A18T·STLTIQLI    | 391   | 1000  |
| >KRAS-A18T·SALTIQLI    | 2287  | >KRAS-A18T·STLTIQLI    | 418   | 1869  |
| >KRAS-A18T·SALTIQLI    | 4584  | >KRAS-A18T·STLTIQLI    | 174   | 4410  |
| >KRAS-A18T·SALTIQLI    | 1505  | >KRAS-A18T·STLTIQLI    | 155   | 1350  |
| >KRAS-A18T·SALTIQLI    | 736   | >KRAS-A18T·STLTIQLI    | 132   | 604   |
| >KRAS-A18T·SALTIQLIQNH | 5792  | >KRAS-A18T·STLTIQLIQNH | 365   | 5427  |
| >KRAS-A18T·SALTIQLI    | 127   | >KRAS-A18T·STLTIQLI    | 27    | 100   |
| >KRAS-A18T·KSALTIQLI   | 239   | >KRAS-A18T·KSTLTIQLI   | 184   | 55    |
| >KRAS-A18T·KSALTIQL    | 276   | >KRAS-A18T·KSTLTIQL    | 519   | 243   |
| >KRAS-A18T·KSALTIQL    | 7     | >KRAS-A18T·KSTLTIQL    | 11    | 4     |
| >KRAS-A18T·KSALTIQLI   | 42    | >KRAS-A18T·KSTLTIQLI   | 62    | 20    |
| >KRAS-A18T·KSALTIQL    | 35    | >KRAS-A18T·KSTLTIQL    | 65    | 30    |
| >KRAS-A18T·KSALTIQLI   | 24    | >KRAS-A18T·KSTLTIQLI   | 46    | 22    |
| >KRAS-A18T·KSALTIQL    | 335   | >KRAS-A18T·KSTLTIQL    | 1469  | 1134  |
| >KRAS-A18T·KSALTIQLI   | 73    | >KRAS-A18T·KSTLTIQLI   | 57    | 16    |
| >KRAS-A18T·KSALTIQL    | 770   | >KRAS-A18T·KSTLTIQL    | 371   | 399   |
| >KRAS-A18T·KSALTIQL    | 241   | >KRAS-A18T·KSTLTIQL    | 531   | 290   |
| >KRAS-A18T·KSALTIQLI   | 35    | >KRAS-A18T·KSTLTIQLI   | 60    | 25    |
| >KRAS-A18T·GKSALTIQL   | 414   | >KRAS-A18T·GKSTLTIQL   | 820   | 406   |
| >KRAS-A18T·GKSALTIQLI  | 765   | >KRAS-A18T·GKSTLTIQLI  | 335   | 430   |
| >KRAS-A18T·GVGKSALTI   | 931   | >KRAS-A18T·GVGKSTLTI   | 268   | 663   |
| >KRAS-A18T·VGAGGVGKS   | 1249  | >KRAS-A18T·VGAGGVGKS   | 319   | 930   |
| >KRAS-A59E·AGQEEYSAM   | 1842  | >KRAS-A59E·EGQEEYSAM   | 242   | 1600  |
| >KRAS-A59E·TAGQEEYSAM  | 56    | >KRAS-A59E·TEGQEEYSAM  | 2772  | 2716  |
| >KRAS-A59E·TAGQEEYSAM  | 33132 | >KRAS-A59E·TEGQEEYSAM  | 480   | 32652 |
| >KRAS-A59E·TAGQEEYSA   | 23019 | >KRAS-A59E·TEGQEEYSA   | 25    | 22994 |
| >KRAS-A59E·TAGQEEYSAM  | 31826 | >KRAS-A59E·TEGQEEYSAM  | 113   | 31713 |
| >KRAS-A59E·ETCLLDILDTA | 107   | >KRAS-A59E·ETCLLDILDTE | 14893 | 14786 |
| >KRAS-A59E·DTAGQEEY    | 387   | >KRAS-A59E·DTEGQEEY    | 82    | 305   |
| >KRAS-A59E·DTAGQEEY    | 94    | >KRAS-A59E·DTEGQEEY    | 937   | 843   |
| >KRAS-A59E·DTAGQEEYSA  | 491   | >KRAS-A59E·DTEGQEEYSA  | 2998  | 2507  |
| >KRAS-A59E·DTAGQEEY    | 28    | >KRAS-A59E·DTEGQEEY    | 2178  | 2150  |
| >KRAS-A59E·DTAGQEEYSA  | 20    | >KRAS-A59E·DTEGQEEYSA  | 399   | 379   |
| >KRAS-A59E·DTAGQEEY    | 8     | >KRAS-A59E·DTEGQEEY    | 135   | 127   |
| >KRAS-A59E·DTAGQEEYSA  | 6     | >KRAS-A59E·DTEGQEEYSA  | 111   | 105   |
| >KRAS-A59E·DTAGQEEYSA  | 223   | >KRAS-A59E·DTEGQEEYSA  | 699   | 476   |
| >KRAS-A59E·DTAGQEEY    | 245   | >KRAS-A59E·DTEGQEEY    | 1822  | 1577  |
| >KRAS-A59E·DTAGQEEY    | 89    | >KRAS-A59E·DTEGQEEY    | 1797  | 1708  |

|                         |      |                         |       |       |
|-------------------------|------|-------------------------|-------|-------|
| >KRAS-A59E- DTAGQEEYS   | 408  | >KRAS-A59E- DTEGQEEYS   | 12336 | 11928 |
| >KRAS-A59E- DTAGQEEYS/  | 389  | >KRAS-A59E- DTEGQEEYSA  | 11843 | 11454 |
| >KRAS-A59E- DTAGQEEYS/  | 449  | >KRAS-A59E- DTEGQEEYSA  | 1402  | 953   |
| >KRAS-A59E- ILDTAGQEEY  | 135  | >KRAS-A59E- ILDTEGQEEY  | 204   | 69    |
| >KRAS-A59E- ILDTAGQEEY  | 349  | >KRAS-A59E- ILDTEGQEEY  | 687   | 338   |
| >KRAS-A59E- ILDTAGQEEY  | 463  | >KRAS-A59E- ILDTEGQEEY  | 330   | 133   |
| >KRAS-A59E- DILDTAGQEE  | 150  | >KRAS-A59E- DILDTEGQEE  | 162   | 12    |
| >KRAS-A59E- DILDTAGQEE  | 183  | >KRAS-A59E- DILDTEGQEE  | 420   | 237   |
| >KRAS-A59E- LLDILDTA    | 318  | >KRAS-A59E- LLDILDTE    | 7678  | 7360  |
| >KRAS-A59E- LLDILDTA    | 45   | >KRAS-A59E- LLDILDTE    | 8855  | 8810  |
| >KRAS-A59E- LLDILDTA    | 149  | >KRAS-A59E- LLDILDTE    | 13457 | 13308 |
| >KRAS-A59E- LLDILDTA    | 42   | >KRAS-A59E- LLDILDTE    | 14858 | 14816 |
| >KRAS-A59E- LLDILDTA    | 36   | >KRAS-A59E- LLDILDTE    | 13838 | 13802 |
| >KRAS-A59E- LLDILDTAGQ  | 401  | >KRAS-A59E- LLDILDTEGQ  | 740   | 339   |
| >KRAS-A59E- CLLDILDTA   | 48   | >KRAS-A59E- CLLDILDTE   | 14513 | 14465 |
| >KRAS-A59E- CLLDILDTA   | 69   | >KRAS-A59E- CLLDILDTE   | 2013  | 1944  |
| >KRAS-A59E- CLLDILDTA   | 89   | >KRAS-A59E- CLLDILDTE   | 11012 | 10923 |
| >KRAS-A59E- CLLDILDTA   | 23   | >KRAS-A59E- CLLDILDTE   | 6361  | 6338  |
| >KRAS-A59E- CLLDILDTA   | 10   | >KRAS-A59E- CLLDILDTE   | 4913  | 4903  |
| >KRAS-A59E- CLLDILDTA   | 11   | >KRAS-A59E- CLLDILDTE   | 5612  | 5601  |
| >KRAS-A59E- CLLDILDTA   | 39   | >KRAS-A59E- CLLDILDTE   | 14907 | 14868 |
| >KRAS-A59E- CLLDILDTA   | 7    | >KRAS-A59E- CLLDILDTE   | 9799  | 9792  |
| >KRAS-A59E- CLLDILDTAGC | 479  | >KRAS-A59E- CLLDILDTEGC | 704   | 225   |
| >KRAS-A59E- CLLDILDTA   | 13   | >KRAS-A59E- CLLDILDTE   | 8066  | 8053  |
| >KRAS-A59E- CLLDILDTAGC | 138  | >KRAS-A59E- CLLDILDTEGC | 292   | 154   |
| >KRAS-A59G- TAGQEEYSAM  | 56   | >KRAS-A59G- TGGQEEYSAM  | 1073  | 1017  |
| >KRAS-A59G- ETCLLDILDTA | 107  | >KRAS-A59G- ETCLLDILDTG | 5167  | 5060  |
| >KRAS-A59G- DTAGQEEY    | 387  | >KRAS-A59G- DTGGQEEY    | 1795  | 1408  |
| >KRAS-A59G- DTAGQEEY    | 94   | >KRAS-A59G- DTGGQEEY    | 613   | 519   |
| >KRAS-A59G- DTAGQEEYS/  | 491  | >KRAS-A59G- DTGGQEEYS/  | 2038  | 1547  |
| >KRAS-A59G- DTAGQEEY    | 28   | >KRAS-A59G- DTGGQEEY    | 2889  | 2861  |
| >KRAS-A59G- DTAGQEEYS/  | 20   | >KRAS-A59G- DTGGQEEYS/  | 489   | 469   |
| >KRAS-A59G- DTAGQEEY    | 8    | >KRAS-A59G- DTGGQEEY    | 28    | 20    |
| >KRAS-A59G- DTAGQEEYS/  | 6    | >KRAS-A59G- DTGGQEEYS/  | 19    | 13    |
| >KRAS-A59G- DTAGQEEY    | 1082 | >KRAS-A59G- DTGGQEEY    | 279   | 803   |
| >KRAS-A59G- DTAGQEEYS/  | 223  | >KRAS-A59G- DTGGQEEYS/  | 82    | 141   |
| >KRAS-A59G- DTAGQEEY    | 245  | >KRAS-A59G- DTGGQEEY    | 633   | 388   |
| >KRAS-A59G- DTAGQEEY    | 89   | >KRAS-A59G- DTGGQEEY    | 1984  | 1895  |
| >KRAS-A59G- DTAGQEEYS   | 408  | >KRAS-A59G- DTGGQEEYS   | 9752  | 9344  |
| >KRAS-A59G- DTAGQEEYS/  | 389  | >KRAS-A59G- DTGGQEEYS/  | 9521  | 9132  |
| >KRAS-A59G- DTAGQEEYS/  | 449  | >KRAS-A59G- DTGGQEEYS/  | 2891  | 2442  |
| >KRAS-A59G- ILDTAGQEEY  | 135  | >KRAS-A59G- ILDTGGQEEY  | 300   | 165   |
| >KRAS-A59G- ILDTAGQEEY  | 349  | >KRAS-A59G- ILDTGGQEEY  | 391   | 42    |

|                        |       |                        |       |       |
|------------------------|-------|------------------------|-------|-------|
| >KRAS-A59G-ILDTAGQEEY  | 463   | >KRAS-A59G-ILDTGGQEEY  | 322   | 141   |
| >KRAS-A59G-ILDTAGQEEY  | 504   | >KRAS-A59G-ILDTGGQEEY  | 246   | 258   |
| >KRAS-A59G-DILDTAGQEE  | 150   | >KRAS-A59G-DILDTGGQEE  | 183   | 33    |
| >KRAS-A59G-DILDTAGQEE  | 183   | >KRAS-A59G-DILDTGGQEE  | 185   | 2     |
| >KRAS-A59G-LLDILDTA    | 318   | >KRAS-A59G-LLDILDTG    | 3789  | 3471  |
| >KRAS-A59G-LLDILDTA    | 45    | >KRAS-A59G-LLDILDTG    | 2775  | 2730  |
| >KRAS-A59G-LLDILDTA    | 149   | >KRAS-A59G-LLDILDTG    | 9015  | 8866  |
| >KRAS-A59G-LLDILDTA    | 42    | >KRAS-A59G-LLDILDTG    | 7856  | 7814  |
| >KRAS-A59G-LLDILDTA    | 36    | >KRAS-A59G-LLDILDTG    | 13111 | 13075 |
| >KRAS-A59G-LLDILDTAGQ  | 401   | >KRAS-A59G-LLDILDTGGQ  | 2332  | 1931  |
| >KRAS-A59G-CLLDILDTA   | 48    | >KRAS-A59G-CLLDILDTG   | 9062  | 9014  |
| >KRAS-A59G-CLLDILDTA   | 69    | >KRAS-A59G-CLLDILDTG   | 899   | 830   |
| >KRAS-A59G-CLLDILDTA   | 89    | >KRAS-A59G-CLLDILDTG   | 6286  | 6197  |
| >KRAS-A59G-CLLDILDTA   | 23    | >KRAS-A59G-CLLDILDTG   | 2696  | 2673  |
| >KRAS-A59G-CLLDILDTA   | 10    | >KRAS-A59G-CLLDILDTG   | 1022  | 1012  |
| >KRAS-A59G-CLLDILDTA   | 11    | >KRAS-A59G-CLLDILDTG   | 2092  | 2081  |
| >KRAS-A59G-CLLDILDTA   | 39    | >KRAS-A59G-CLLDILDTG   | 8750  | 8711  |
| >KRAS-A59G-CLLDILDTA   | 7     | >KRAS-A59G-CLLDILDTG   | 5494  | 5487  |
| >KRAS-A59G-CLLDILDTAGC | 479   | >KRAS-A59G-CLLDILDTGGC | 2070  | 1591  |
| >KRAS-A59G-CLLDILDTA   | 13    | >KRAS-A59G-CLLDILDTG   | 7540  | 7527  |
| >KRAS-A59G-CLLDILDTAGC | 138   | >KRAS-A59G-CLLDILDTGGC | 762   | 624   |
| >KRAS-A59T-AGQEEYSAM   | 1842  | >KRAS-A59T-TGQEEYSAM   | 493   | 1349  |
| >KRAS-A59T-TAGQEEYSAM  | 5120  | >KRAS-A59T-TTGQEEYSAM  | 71    | 5049  |
| >KRAS-A59T-TAGQEEYSAM  | 5722  | >KRAS-A59T-TTGQEEYSAM  | 225   | 5497  |
| >KRAS-A59T-TAGQEEYSAM  | 56    | >KRAS-A59T-TTGQEEYSAM  | 19    | 37    |
| >KRAS-A59T-TAGQEEYSAM  | 11397 | >KRAS-A59T-TTGQEEYSAM  | 341   | 11056 |
| >KRAS-A59T-ETCLLDILDTA | 107   | >KRAS-A59T-ETCLLDILDTT | 1516  | 1409  |
| >KRAS-A59T-DTAGQEEY    | 387   | >KRAS-A59T-DTTGQEEY    | 1392  | 1005  |
| >KRAS-A59T-DTAGQEEY    | 94    | >KRAS-A59T-DTTGQEEY    | 253   | 159   |
| >KRAS-A59T-DTAGQEEYS/  | 491   | >KRAS-A59T-DTTGQEEYSA  | 1194  | 703   |
| >KRAS-A59T-DTAGQEEY    | 28    | >KRAS-A59T-DTTGQEEY    | 121   | 93    |
| >KRAS-A59T-DTAGQEEYS/  | 20    | >KRAS-A59T-DTTGQEEYSA  | 54    | 34    |
| >KRAS-A59T-DTAGQEEY    | 8     | >KRAS-A59T-DTTGQEEY    | 13    | 5     |
| >KRAS-A59T-DTAGQEEYS/  | 6     | >KRAS-A59T-DTTGQEEYSA  | 10    | 4     |
| >KRAS-A59T-DTAGQEEYS/  | 223   | >KRAS-A59T-DTTGQEEYSA  | 188   | 35    |
| >KRAS-A59T-DTAGQEEY    | 245   | >KRAS-A59T-DTTGQEEY    | 498   | 253   |
| >KRAS-A59T-DTAGQEEY    | 89    | >KRAS-A59T-DTTGQEEY    | 309   | 220   |
| >KRAS-A59T-DTAGQEEYS   | 408   | >KRAS-A59T-DTTGQEEYS   | 2458  | 2050  |
| >KRAS-A59T-DTAGQEEYS/  | 389   | >KRAS-A59T-DTTGQEEYSA  | 2266  | 1877  |
| >KRAS-A59T-DTAGQEEYS/  | 449   | >KRAS-A59T-DTTGQEEYSA  | 884   | 435   |
| >KRAS-A59T-ILDTAGQEEY  | 135   | >KRAS-A59T-ILDTTGQEEY  | 113   | 22    |
| >KRAS-A59T-ILDTAGQEEY: | 734   | >KRAS-A59T-ILDTTGQEEY: | 453   | 281   |
| >KRAS-A59T-ILDTAGQEEY  | 571   | >KRAS-A59T-ILDTTGQEEY  | 422   | 149   |

|                         |       |                        |      |      |
|-------------------------|-------|------------------------|------|------|
| >KRAS-A59T- ILDTAGQEEY  | 349   | >KRAS-A59T- ILDTTGQEEY | 415  | 66   |
| >KRAS-A59T- ILDTAGQEEY  | 463   | >KRAS-A59T- ILDTTGQEEY | 313  | 150  |
| >KRAS-A59T- DILDTAGQEE  | 849   | >KRAS-A59T- DILDTTGQEE | 419  | 430  |
| >KRAS-A59T- DILDTAGQEE  | 150   | >KRAS-A59T- DILDTTGQEE | 82   | 68   |
| >KRAS-A59T- DILDTAGQEE  | 183   | >KRAS-A59T- DILDTTGQEE | 185  | 2    |
| >KRAS-A59T- LLDILDTA    | 318   | >KRAS-A59T- LLDILDTT   | 1347 | 1029 |
| >KRAS-A59T- LLDILDTA    | 45    | >KRAS-A59T- LLDILDTT   | 265  | 220  |
| >KRAS-A59T- LLDILDTA    | 149   | >KRAS-A59T- LLDILDTT   | 1918 | 1769 |
| >KRAS-A59T- LLDILDTA    | 42    | >KRAS-A59T- LLDILDTT   | 566  | 524  |
| >KRAS-A59T- LLDILDTA    | 36    | >KRAS-A59T- LLDILDTT   | 390  | 354  |
| >KRAS-A59T- LLDILDTAGQ  | 401   | >KRAS-A59T- LLDILDTTGQ | 432  | 31   |
| >KRAS-A59T- CLLDILDTA   | 48    | >KRAS-A59T- CLLDILDTT  | 308  | 260  |
| >KRAS-A59T- CLLDILDTA   | 69    | >KRAS-A59T- CLLDILDTT  | 326  | 257  |
| >KRAS-A59T- CLLDILDTA   | 89    | >KRAS-A59T- CLLDILDTT  | 825  | 736  |
| >KRAS-A59T- CLLDILDTA   | 23    | >KRAS-A59T- CLLDILDTT  | 115  | 92   |
| >KRAS-A59T- CLLDILDTA   | 10    | >KRAS-A59T- CLLDILDTT  | 56   | 46   |
| >KRAS-A59T- CLLDILDTA   | 11    | >KRAS-A59T- CLLDILDTT  | 130  | 119  |
| >KRAS-A59T- CLLDILDTA   | 39    | >KRAS-A59T- CLLDILDTT  | 612  | 573  |
| >KRAS-A59T- CLLDILDTA   | 7     | >KRAS-A59T- CLLDILDTT  | 33   | 26   |
| >KRAS-A59T- CLLDILDTAGC | 479   | >KRAS-A59T- CLLDILDTTG | 1068 | 589  |
| >KRAS-A59T- CLLDILDTA   | 13    | >KRAS-A59T- CLLDILDTT  | 117  | 104  |
| >KRAS-A59T- CLLDILDTAGC | 138   | >KRAS-A59T- CLLDILDTTG | 179  | 41   |
| >KRAS-C80Y- CVFAINNT    | 10087 | >KRAS-C80Y- YVFAINNT   | 327  | 9760 |
| >KRAS-C80Y- CVFAINNT    | 1541  | >KRAS-C80Y- YVFAINNT   | 59   | 1482 |
| >KRAS-C80Y- CVFAINNT    | 2794  | >KRAS-C80Y- YVFAINNT   | 236  | 2558 |
| >KRAS-C80Y- CVFAINNT    | 5668  | >KRAS-C80Y- YVFAINNT   | 109  | 5559 |
| >KRAS-C80Y- CVFAINNTKS  | 5224  | >KRAS-C80Y- YVFAINNTKS | 235  | 4989 |
| >KRAS-C80Y- CVFAINNTK   | 126   | >KRAS-C80Y- YVFAINNTK  | 133  | 7    |
| >KRAS-C80Y- CVFAINNTK   | 33    | >KRAS-C80Y- YVFAINNTK  | 28   | 5    |
| >KRAS-C80Y- CVFAINNTKS  | 1306  | >KRAS-C80Y- YVFAINNTKS | 432  | 874  |
| >KRAS-C80Y- CVFAINNTKS  | 176   | >KRAS-C80Y- YVFAINNTKS | 112  | 64   |
| >KRAS-C80Y- CVFAINNTKS  | 6889  | >KRAS-C80Y- YVFAINNTKS | 181  | 6708 |
| >KRAS-C80Y- CVFAINNTKS  | 4030  | >KRAS-C80Y- YVFAINNTKS | 274  | 3756 |
| >KRAS-C80Y- CVFAINNTKS  | 3475  | >KRAS-C80Y- YVFAINNTKS | 304  | 3171 |
| >KRAS-C80Y- CVFAINNTK   | 44    | >KRAS-C80Y- YVFAINNTK  | 57   | 13   |
| >KRAS-C80Y- CVFAINNTK   | 1846  | >KRAS-C80Y- YVFAINNTK  | 480  | 1366 |
| >KRAS-C80Y- CVFAINNTKS  | 35    | >KRAS-C80Y- YVFAINNTKS | 11   | 24   |
| >KRAS-C80Y- CVFAINNTK   | 6     | >KRAS-C80Y- YVFAINNTK  | 2    | 4    |
| >KRAS-C80Y- CVFAINNT    | 127   | >KRAS-C80Y- YVFAINNT   | 45   | 82   |
| >KRAS-C80Y- CVFAINNTKS  | 369   | >KRAS-C80Y- YVFAINNTKS | 42   | 327  |
| >KRAS-C80Y- CVFAINNTKS  | 1122  | >KRAS-C80Y- YVFAINNTKS | 46   | 1076 |
| >KRAS-C80Y- CVFAINNTKS  | 43    | >KRAS-C80Y- YVFAINNTKS | 7    | 36   |
| >KRAS-C80Y- CVFAINNTKS  | 577   | >KRAS-C80Y- YVFAINNTKS | 27   | 550  |

|                         |       |                         |     |       |
|-------------------------|-------|-------------------------|-----|-------|
| >KRAS-C80Y- CVFAINNTKS  | 301   | >KRAS-C80Y- YVFAINNTKSI | 40  | 261   |
| >KRAS-C80Y- CVFAINNTKS  | 520   | >KRAS-C80Y- YVFAINNTKSI | 27  | 493   |
| >KRAS-C80Y- CVFAINNTKS  | 1362  | >KRAS-C80Y- YVFAINNTKSI | 86  | 1276  |
| >KRAS-C80Y- LCVFAINNTK  | 2166  | >KRAS-C80Y- LYVFAINNTK  | 170 | 1996  |
| >KRAS-C80Y- LCVFAINNTK  | 1584  | >KRAS-C80Y- LYVFAINNTK  | 341 | 1243  |
| >KRAS-C80Y- QYMRTGEGF   | 1901  | >KRAS-C80Y- QYMRTGEGF   | 485 | 1416  |
| >KRAS-C80Y- QYMRTGEGF   | 792   | >KRAS-C80Y- QYMRTGEGF   | 164 | 628   |
| >KRAS-C80Y- QYMRTGEGF   | 14614 | >KRAS-C80Y- QYMRTGEGF   | 24  | 14590 |
| >KRAS-C80Y- QYMRTGEGF   | 24573 | >KRAS-C80Y- QYMRTGEGF   | 465 | 24108 |
| >KRAS-C80Y- QYMRTGEGF   | 26323 | >KRAS-C80Y- QYMRTGEGF   | 41  | 26282 |
| >KRAS-C80Y- QYMRTGEGF   | 34701 | >KRAS-C80Y- QYMRTGEGF   | 140 | 34561 |
| >KRAS-C80Y- FLCVFAINNT  | 147   | >KRAS-C80Y- FLYVFAINNT  | 51  | 96    |
| >KRAS-C80Y- FLCVFAINNT  | 106   | >KRAS-C80Y- FLYVFAINNT  | 28  | 78    |
| >KRAS-C80Y- FLCVFAINNTI | 1142  | >KRAS-C80Y- FLYVFAINNTI | 432 | 710   |
| >KRAS-C80Y- FLCVFAINNT  | 50    | >KRAS-C80Y- FLYVFAINNT  | 16  | 34    |
| >KRAS-C80Y- FLCVFAINNT  | 152   | >KRAS-C80Y- FLYVFAINNT  | 75  | 77    |
| >KRAS-C80Y- FLCVFAIN    | 4127  | >KRAS-C80Y- FLYVFAIN    | 378 | 3749  |
| >KRAS-C80Y- FLCVFAINN   | 3572  | >KRAS-C80Y- FLYVFAINN   | 250 | 3322  |
| >KRAS-C80Y- FLCVFAINNT  | 176   | >KRAS-C80Y- FLYVFAINNT  | 14  | 162   |
| >KRAS-C80Y- FLCVFAINNTI | 3710  | >KRAS-C80Y- FLYVFAINNTI | 289 | 3421  |
| >KRAS-C80Y- FLCVFAINNT  | 4789  | >KRAS-C80Y- FLYVFAINNT  | 209 | 4580  |
| >KRAS-C80Y- FLCVFAINNT  | 2075  | >KRAS-C80Y- FLYVFAINNT  | 44  | 2031  |
| >KRAS-C80Y- FLCVFAINNT  | 61    | >KRAS-C80Y- FLYVFAINNT  | 11  | 50    |
| >KRAS-C80Y- FLCVFAINNTI | 1494  | >KRAS-C80Y- FLYVFAINNTI | 106 | 1388  |
| >KRAS-C80Y- FLCVFAINNTI | 745   | >KRAS-C80Y- FLYVFAINNTI | 53  | 692   |
| >KRAS-C80Y- FLCVFAINNTI | 410   | >KRAS-C80Y- FLYVFAINNTI | 129 | 281   |
| >KRAS-C80Y- FLCVFAINNTI | 95    | >KRAS-C80Y- FLYVFAINNTI | 27  | 68    |
| >KRAS-C80Y- GFLCVFAI    | 67    | >KRAS-C80Y- GFLYVFAI    | 102 | 35    |
| >KRAS-C80Y- GFLCVFAI    | 41    | >KRAS-C80Y- GFLYVFAI    | 48  | 7     |
| >KRAS-C80Y- GFLCVFAI    | 1867  | >KRAS-C80Y- GFLYVFAI    | 115 | 1752  |
| >KRAS-C80Y- EGFLCVFA    | 177   | >KRAS-C80Y- EGFLYVFA    | 177 | 0     |
| >KRAS-C80Y- EGFLCVFAI   | 52    | >KRAS-C80Y- EGFLYVFAI   | 95  | 43    |
| >KRAS-C80Y- EGFLCVFAI   | 3348  | >KRAS-C80Y- EGFLYVFAI   | 344 | 3004  |
| >KRAS-C80Y- GEGFLCVFAI  | 84    | >KRAS-C80Y- GEGFLYVFAI  | 65  | 19    |
| >KRAS-C80Y- GEGFLCVF    | 1507  | >KRAS-C80Y- GEGFLYVF    | 232 | 1275  |
| >KRAS-C80Y- GEGFLCVF    | 605   | >KRAS-C80Y- GEGFLYVF    | 193 | 412   |
| >KRAS-C80Y- GEGFLCVFAI  | 427   | >KRAS-C80Y- GEGFLYVFAI  | 756 | 329   |
| >KRAS-C80Y- GEGFLCVF    | 190   | >KRAS-C80Y- GEGFLYVF    | 111 | 79    |
| >KRAS-C80Y- GEGFLCVFA   | 201   | >KRAS-C80Y- GEGFLYVFA   | 151 | 50    |
| >KRAS-C80Y- GEGFLCVFAI  | 98    | >KRAS-C80Y- GEGFLYVFAI  | 68  | 30    |
| >KRAS-C80Y- GEGFLCVFAI  | 374   | >KRAS-C80Y- GEGFLYVFAI  | 829 | 455   |
| >KRAS-C80Y- GEGFLCVF    | 359   | >KRAS-C80Y- GEGFLYVF    | 162 | 197   |
| >KRAS-C80Y- GEGFLCVFAI  | 305   | >KRAS-C80Y- GEGFLYVFAI  | 388 | 83    |

|                        |       |                        |     |       |
|------------------------|-------|------------------------|-----|-------|
| >KRAS-C80Y- GEGFLCVFA  | 13    | >KRAS-C80Y- GEGFLYVFA  | 10  | 3     |
| >KRAS-C80Y- GEGFLCVF   | 607   | >KRAS-C80Y- GEGFLYVF   | 228 | 379   |
| >KRAS-C80Y- GEGFLCVFAI | 35    | >KRAS-C80Y- GEGFLYVFAI | 9   | 26    |
| >KRAS-C80Y- RTGEGFLC   | 19466 | >KRAS-C80Y- RTGEGFLY   | 75  | 19391 |
| >KRAS-C80Y- RTGEGFLCV  | 908   | >KRAS-C80Y- RTGEGFLYV  | 105 | 803   |
| >KRAS-C80Y- RTGEGFLCV  | 1798  | >KRAS-C80Y- RTGEGFLYV  | 188 | 1610  |
| >KRAS-C80Y- RTGEGFLCV  | 35    | >KRAS-C80Y- RTGEGFLYV  | 6   | 29    |
| >KRAS-C80Y- RTGEGFLCVF | 217   | >KRAS-C80Y- RTGEGFLYVF | 124 | 93    |
| >KRAS-C80Y- RTGEGFLCV  | 78    | >KRAS-C80Y- RTGEGFLYV  | 5   | 73    |
| >KRAS-C80Y- RTGEGFLCV  | 450   | >KRAS-C80Y- RTGEGFLYV  | 83  | 367   |
| >KRAS-C80Y- RTGEGFLCV  | 51    | >KRAS-C80Y- RTGEGFLYV  | 17  | 34    |
| >KRAS-C80Y- RTGEGFLCV  | 2060  | >KRAS-C80Y- RTGEGFLYV  | 280 | 1780  |
| >KRAS-C80Y- RTGEGFLCV  | 386   | >KRAS-C80Y- RTGEGFLYV  | 51  | 335   |
| >KRAS-C80Y- RTGEGFLC   | 20764 | >KRAS-C80Y- RTGEGFLY   | 414 | 20350 |
| >KRAS-C80Y- RTGEGFLC   | 19872 | >KRAS-C80Y- RTGEGFLY   | 99  | 19773 |
| >KRAS-C80Y- RTGEGFLCVF | 196   | >KRAS-C80Y- RTGEGFLYVF | 51  | 145   |
| >KRAS-C80Y- RTGEGFLCVF | 753   | >KRAS-C80Y- RTGEGFLYVF | 231 | 522   |
| >KRAS-C80Y- RTGEGFLC   | 24803 | >KRAS-C80Y- RTGEGFLY   | 238 | 24565 |
| >KRAS-C80Y- RTGEGFLC   | 17145 | >KRAS-C80Y- RTGEGFLY   | 15  | 17130 |
| >KRAS-C80Y- RTGEGFLCV  | 2512  | >KRAS-C80Y- RTGEGFLYV  | 194 | 2318  |
| >KRAS-C80Y- RTGEGFLCVF | 359   | >KRAS-C80Y- RTGEGFLYVF | 70  | 289   |
| >KRAS-C80Y- RTGEGFLC   | 14944 | >KRAS-C80Y- RTGEGFLY   | 61  | 14883 |
| >KRAS-C80Y- RTGEGFLCVF | 42    | >KRAS-C80Y- RTGEGFLYVF | 18  | 24    |
| >KRAS-C80Y- RTGEGFLCV  | 613   | >KRAS-C80Y- RTGEGFLYV  | 19  | 594   |
| >KRAS-C80Y- RTGEGFLC   | 19361 | >KRAS-C80Y- RTGEGFLY   | 4   | 19357 |
| >KRAS-C80Y- RTGEGFLC   | 18725 | >KRAS-C80Y- RTGEGFLY   | 310 | 18415 |
| >KRAS-C80Y- RTGEGFLCVF | 55    | >KRAS-C80Y- RTGEGFLYVF | 76  | 21    |
| >KRAS-C80Y- RTGEGFLCVF | 252   | >KRAS-C80Y- RTGEGFLYVF | 237 | 15    |
| >KRAS-C80Y- RTGEGFLC   | 7647  | >KRAS-C80Y- RTGEGFLY   | 6   | 7641  |
| >KRAS-C80Y- RTGEGFLCV  | 2792  | >KRAS-C80Y- RTGEGFLYV  | 251 | 2541  |
| >KRAS-C80Y- RTGEGFLCVF | 7     | >KRAS-C80Y- RTGEGFLYVF | 6   | 1     |
| >KRAS-C80Y- RTGEGFLCVF | 944   | >KRAS-C80Y- RTGEGFLYVF | 315 | 629   |
| >KRAS-C80Y- RTGEGFLC   | 9488  | >KRAS-C80Y- RTGEGFLY   | 89  | 9399  |
| >KRAS-C80Y- RTGEGFLCVF | 33    | >KRAS-C80Y- RTGEGFLYVF | 23  | 10    |
| >KRAS-C80Y- RTGEGFLCV  | 2185  | >KRAS-C80Y- RTGEGFLYV  | 195 | 1990  |
| >KRAS-C80Y- RTGEGFLCVF | 494   | >KRAS-C80Y- RTGEGFLYVF | 80  | 414   |
| >KRAS-C80Y- RTGEGFLC   | 7664  | >KRAS-C80Y- RTGEGFLY   | 54  | 7610  |
| >KRAS-C80Y- RTGEGFLCVF | 37    | >KRAS-C80Y- RTGEGFLYVF | 50  | 13    |
| >KRAS-C80Y- RTGEGFLC   | 37941 | >KRAS-C80Y- RTGEGFLY   | 498 | 37443 |
| >KRAS-C80Y- MRTGEGFLC\ | 2128  | >KRAS-C80Y- MRTGEGFLY\ | 376 | 1752  |
| >KRAS-C80Y- MRTGEGFLC  | 20427 | >KRAS-C80Y- MRTGEGFLY  | 24  | 20403 |
| >KRAS-C80Y- MRTGEGFLC  | 26639 | >KRAS-C80Y- MRTGEGFLY  | 308 | 26331 |
| >KRAS-C80Y- MRTGEGFLC\ | 111   | >KRAS-C80Y- MRTGEGFLY\ | 104 | 7     |

|                        |       |                        |      |       |
|------------------------|-------|------------------------|------|-------|
| >KRAS-C80Y- MRTGEGFLC  | 5254  | >KRAS-C80Y- MRTGEGFLY  | 213  | 5041  |
| >KRAS-C80Y- MRTGEGFLC\ | 207   | >KRAS-C80Y- MRTGEGFLY\ | 219  | 12    |
| >KRAS-C80Y- MRTGEGFLC\ | 284   | >KRAS-C80Y- MRTGEGFLY\ | 110  | 174   |
| >KRAS-C80Y- MRTGEGFLC\ | 354   | >KRAS-C80Y- MRTGEGFLY\ | 223  | 131   |
| >KRAS-C80Y- MRTGEGFLC  | 1932  | >KRAS-C80Y- MRTGEGFLY  | 16   | 1916  |
| >KRAS-C80Y- MRTGEGFLC\ | 16    | >KRAS-C80Y- MRTGEGFLY\ | 15   | 1     |
| >KRAS-C80Y- MRTGEGFLC  | 38207 | >KRAS-C80Y- MRTGEGFLY  | 276  | 37931 |
| >KRAS-C80Y- YMRTGEGFLC | 150   | >KRAS-C80Y- YMRTGEGFLY | 49   | 101   |
| >KRAS-C80Y- YMRTGEGFLC | 191   | >KRAS-C80Y- YMRTGEGFLY | 33   | 158   |
| >KRAS-C80Y- YMRTGEGFLC | 10    | >KRAS-C80Y- YMRTGEGFLY | 4    | 6     |
| >KRAS-C80Y- YMRTGEGFLC | 69    | >KRAS-C80Y- YMRTGEGFLY | 20   | 49    |
| >KRAS-C80Y- YMRTGEGFLC | 230   | >KRAS-C80Y- YMRTGEGFLY | 5816 | 5586  |
| >KRAS-C80Y- YMRTGEGFLC | 8     | >KRAS-C80Y- YMRTGEGFLY | 2    | 6     |
| >KRAS-C80Y- YMRTGEGFLC | 12    | >KRAS-C80Y- YMRTGEGFLY | 5    | 7     |
| >KRAS-C80Y- YMRTGEGFLC | 10    | >KRAS-C80Y- YMRTGEGFLY | 7    | 3     |
| >KRAS-C80Y- YMRTGEGFLC | 31    | >KRAS-C80Y- YMRTGEGFLY | 9    | 22    |
| >KRAS-C80Y- YMRTGEGFLC | 36    | >KRAS-C80Y- YMRTGEGFLY | 1395 | 1359  |
| >KRAS-C80Y- YMRTGEGFLC | 2     | >KRAS-C80Y- YMRTGEGFLY | 2    | 0     |
| >KRAS-C80Y- YMRTGEGFLC | 27520 | >KRAS-C80Y- YMRTGEGFLY | 101  | 27419 |
| >KRAS-C80Y- YMRTGEGFLC | 1538  | >KRAS-C80Y- YMRTGEGFLY | 193  | 1345  |
| >KRAS-C80Y- YMRTGEGFLC | 31366 | >KRAS-C80Y- YMRTGEGFLY | 367  | 30999 |
| >KRAS-C80Y- YMRTGEGFLC | 23794 | >KRAS-C80Y- YMRTGEGFLY | 20   | 23774 |
| >KRAS-C80Y- YMRTGEGFLC | 11758 | >KRAS-C80Y- YMRTGEGFLY | 61   | 11697 |
| >KRAS-C80Y- YMRTGEGFLC | 606   | >KRAS-C80Y- YMRTGEGFLY | 453  | 153   |
| >KRAS-C80Y- YMRTGEGFLC | 6668  | >KRAS-C80Y- YMRTGEGFLY | 23   | 6645  |
| >KRAS-C80Y- YMRTGEGFLC | 4681  | >KRAS-C80Y- YMRTGEGFLY | 28   | 4653  |
| >KRAS-C80Y- YMRTGEGFLC | 126   | >KRAS-C80Y- YMRTGEGFLY | 84   | 42    |
| >KRAS-C80Y- YMRTGEGFLC | 19682 | >KRAS-C80Y- YMRTGEGFLY | 117  | 19565 |
| >KRAS-C80Y- YMRTGEGFLC | 23610 | >KRAS-C80Y- YMRTGEGFLY | 215  | 23395 |
| >KRAS-D69N- DQYMRTGEC  | 135   | >KRAS-D69N- NQYMRTGEC  | 49   | 86    |
| >KRAS-D69N- DQYMRTGEC  | 5997  | >KRAS-D69N- NQYMRTGEC  | 192  | 5805  |
| >KRAS-D69N- DQYMRTGEC  | 247   | >KRAS-D69N- NQYMRTGEC  | 48   | 199   |
| >KRAS-D69N- DQYMRTGEC  | 222   | >KRAS-D69N- NQYMRTGEC  | 63   | 159   |
| >KRAS-D69N- DQYMRTGEC  | 69    | >KRAS-D69N- NQYMRTGEC  | 13   | 56    |
| >KRAS-D69N- RDQYMRTGE  | 1141  | >KRAS-D69N- RNQYMRTGE  | 247  | 894   |
| >KRAS-D69N- AMRDQYMR   | 166   | >KRAS-D69N- AMRNQYMR   | 515  | 349   |
| >KRAS-D69N- AMRDQYMR   | 18    | >KRAS-D69N- AMRNQYMR   | 148  | 130   |
| >KRAS-D69N- AMRDQYMR   | 156   | >KRAS-D69N- AMRNQYMR   | 77   | 79    |
| >KRAS-D69N- AMRDQYMR   | 80    | >KRAS-D69N- AMRNQYMR   | 58   | 22    |
| >KRAS-D69N- AMRDQYMR   | 128   | >KRAS-D69N- AMRNQYMR   | 97   | 31    |
| >KRAS-D69N- AMRDQYMR   | 13    | >KRAS-D69N- AMRNQYMR   | 9    | 4     |
| >KRAS-D69N- AMRDQYMR   | 249   | >KRAS-D69N- AMRNQYMR   | 336  | 87    |
| >KRAS-D69N- AMRDQYMR   | 860   | >KRAS-D69N- AMRNQYMR   | 294  | 566   |



|                      |      |                      |     |      |
|----------------------|------|----------------------|-----|------|
| >KRAS-D69N-AMRDQYMR  | 470  | >KRAS-D69N-AMRNQYMR  | 690 | 220  |
| >KRAS-D69N-SAMRDQYM  | 52   | >KRAS-D69N-SAMRNQYM  | 22  | 30   |
| >KRAS-D69N-SAMRDQYMI | 7361 | >KRAS-D69N-SAMRNQYMI | 305 | 7056 |
| >KRAS-D69N-SAMRDQYMI | 142  | >KRAS-D69N-SAMRNQYMI | 99  | 43   |
| >KRAS-D69N-SAMRDQYMI | 38   | >KRAS-D69N-SAMRNQYMI | 17  | 21   |
| >KRAS-D69N-SAMRDQYMI | 27   | >KRAS-D69N-SAMRNQYMI | 14  | 13   |
| >KRAS-D69N-SAMRDQYMI | 183  | >KRAS-D69N-SAMRNQYMI | 134 | 49   |
| >KRAS-D69N-YSAMRDQY  | 37   | >KRAS-D69N-YSAMRNQY  | 29  | 8    |
| >KRAS-D69N-YSAMRDQYM | 322  | >KRAS-D69N-YSAMRNQYM | 205 | 117  |
| >KRAS-D69N-YSAMRDQY  | 308  | >KRAS-D69N-YSAMRNQY  | 120 | 188  |
| >KRAS-D69N-YSAMRDQY  | 352  | >KRAS-D69N-YSAMRNQY  | 370 | 18   |
| >KRAS-D69N-YSAMRDQY  | 130  | >KRAS-D69N-YSAMRNQY  | 93  | 37   |
| >KRAS-D69N-YSAMRDQY  | 365  | >KRAS-D69N-YSAMRNQY  | 170 | 195  |
| >KRAS-D69N-YSAMRDQYM | 173  | >KRAS-D69N-YSAMRNQYM | 57  | 116  |
| >KRAS-D69N-YSAMRDQY  | 322  | >KRAS-D69N-YSAMRNQY  | 226 | 96   |
| >KRAS-D69N-YSAMRDQYM | 7    | >KRAS-D69N-YSAMRNQYM | 6   | 1    |
| >KRAS-D69N-YSAMRDQY  | 170  | >KRAS-D69N-YSAMRNQY  | 112 | 58   |
| >KRAS-D69N-YSAMRDQYM | 402  | >KRAS-D69N-YSAMRNQYM | 323 | 79   |
| >KRAS-D69N-YSAMRDQY  | 626  | >KRAS-D69N-YSAMRNQY  | 119 | 507  |
| >KRAS-D69N-YSAMRDQYM | 736  | >KRAS-D69N-YSAMRNQYM | 178 | 558  |
| >KRAS-D69N-YSAMRDQY  | 8    | >KRAS-D69N-YSAMRNQY  | 6   | 2    |
| >KRAS-D69N-YSAMRDQYM | 11   | >KRAS-D69N-YSAMRNQYM | 10  | 1    |
| >KRAS-D69N-YSAMRDQY  | 156  | >KRAS-D69N-YSAMRNQY  | 310 | 154  |
| >KRAS-D69N-YSAMRDQY  | 466  | >KRAS-D69N-YSAMRNQY  | 888 | 422  |
| >KRAS-D69N-YSAMRDQYM | 367  | >KRAS-D69N-YSAMRNQYM | 890 | 523  |
| >KRAS-D69N-YSAMRDQYM | 440  | >KRAS-D69N-YSAMRNQYM | 66  | 374  |
| >KRAS-D69N-YSAMRDQY  | 236  | >KRAS-D69N-YSAMRNQY  | 33  | 203  |
| >KRAS-D69N-YSAMRDQYM | 77   | >KRAS-D69N-YSAMRNQYM | 24  | 53   |
| >KRAS-D69N-YSAMRDQY  | 444  | >KRAS-D69N-YSAMRNQY  | 345 | 99   |
| >KRAS-D69N-EYSAMRDQY | 133  | >KRAS-D69N-EYSAMRNQY | 47  | 86   |
| >KRAS-D69N-EYSAMRDQY | 1588 | >KRAS-D69N-EYSAMRNQY | 388 | 1200 |
| >KRAS-D69N-EYSAMRDQY | 1133 | >KRAS-D69N-EYSAMRNQY | 380 | 753  |
| >KRAS-D69N-EYSAMRDQY | 538  | >KRAS-D69N-EYSAMRNQY | 236 | 302  |
| >KRAS-D69N-EYSAMRDQY | 28   | >KRAS-D69N-EYSAMRNQY | 23  | 5    |
| >KRAS-D69N-EYSAMRDQY | 14   | >KRAS-D69N-EYSAMRNQY | 11  | 3    |
| >KRAS-D69N-EYSAMRDQY | 380  | >KRAS-D69N-EYSAMRNQY | 197 | 183  |
| >KRAS-D69N-EYSAMRDQY | 37   | >KRAS-D69N-EYSAMRNQY | 27  | 10   |
| >KRAS-D69N-EEYSAMRDQ | 105  | >KRAS-D69N-EEYSAMRNQ | 89  | 16   |
| >KRAS-D69N-EEYSAMRDQ | 49   | >KRAS-D69N-EEYSAMRNQ | 38  | 11   |
| >KRAS-D69N-EEYSAMRDQ | 296  | >KRAS-D69N-EEYSAMRNQ | 239 | 57   |
| >KRAS-D69N-EEYSAMRDQ | 237  | >KRAS-D69N-EEYSAMRNQ | 164 | 73   |
| >KRAS-D69N-EEYSAMRDQ | 322  | >KRAS-D69N-EEYSAMRNQ | 185 | 137  |
| >KRAS-D69N-EEYSAMRDQ | 562  | >KRAS-D69N-EEYSAMRNQ | 415 | 147  |

|                        |       |                        |       |       |
|------------------------|-------|------------------------|-------|-------|
| >KRAS-D69N-EEYSAMRDQ   | 64    | >KRAS-D69N-EEYSAMRNQ   | 48    | 16    |
| >KRAS-D69N-EEYSAMRDQ   | 126   | >KRAS-D69N-EEYSAMRNQ   | 124   | 2     |
| >KRAS-D69N-QEEYSAMRD   | 734   | >KRAS-D69N-QEEYSAMRN   | 486   | 248   |
| >KRAS-D69N-QEEYSAMRD   | 423   | >KRAS-D69N-QEEYSAMRN   | 412   | 11    |
| >KRAS-D92Y-DIHHYREQI   | 19209 | >KRAS-D92Y-YIHHYREQI   | 280   | 18929 |
| >KRAS-D92Y-DIHHYREQI   | 14028 | >KRAS-D92Y-YIHHYREQI   | 161   | 13867 |
| >KRAS-D92Y-DIHHYREQI   | 15683 | >KRAS-D92Y-YIHHYREQI   | 127   | 15556 |
| >KRAS-D92Y-DIHHYREQI   | 19129 | >KRAS-D92Y-YIHHYREQI   | 90    | 19039 |
| >KRAS-D92Y-DIHHYREQIK  | 3596  | >KRAS-D92Y-YIHHYREQIK  | 146   | 3450  |
| >KRAS-D92Y-DIHHYREQIKI | 1954  | >KRAS-D92Y-YIHHYREQIKF | 176   | 1778  |
| >KRAS-D92Y-DIHHYREQIKI | 69    | >KRAS-D92Y-YIHHYREQIKF | 489   | 420   |
| >KRAS-D92Y-DIHHYREQIKI | 44    | >KRAS-D92Y-YIHHYREQIKF | 31    | 13    |
| >KRAS-D92Y-DIHHYREQI   | 156   | >KRAS-D92Y-YIHHYREQI   | 124   | 32    |
| >KRAS-D92Y-DIHHYREQIKI | 719   | >KRAS-D92Y-YIHHYREQIKF | 151   | 568   |
| >KRAS-D92Y-EDIHHYREQI  | 24606 | >KRAS-D92Y-EYIHHYREQI  | 35    | 24571 |
| >KRAS-D92Y-EDIHHYREQI  | 135   | >KRAS-D92Y-EYIHHYREQI  | 20270 | 20135 |
| >KRAS-D92Y-FAINNTKSFEI | 19088 | >KRAS-D92Y-FAINNTKSFEI | 63    | 19025 |
| >KRAS-D92Y-FAINNTKSFEI | 19182 | >KRAS-D92Y-FAINNTKSFEI | 24    | 19158 |
| >KRAS-D92Y-FAINNTKSFEI | 9448  | >KRAS-D92Y-FAINNTKSFEI | 124   | 9324  |
| >KRAS-D92Y-FAINNTKSFEI | 20360 | >KRAS-D92Y-FAINNTKSFEI | 119   | 20241 |
| >KRAS-D92Y-FAINNTKSFEI | 20518 | >KRAS-D92Y-FAINNTKSFEI | 47    | 20471 |
| >KRAS-D92Y-FAINNTKSFEI | 17695 | >KRAS-D92Y-FAINNTKSFEI | 10    | 17685 |
| >KRAS-D92Y-FAINNTKSFEI | 6612  | >KRAS-D92Y-FAINNTKSFEI | 11    | 6601  |
| >KRAS-D92Y-FAINNTKSFEI | 10286 | >KRAS-D92Y-FAINNTKSFEI | 111   | 10175 |
| >KRAS-D92Y-FAINNTKSFEI | 20747 | >KRAS-D92Y-FAINNTKSFEI | 83    | 20664 |
| >KRAS-D92Y-FAINNTKSFEI | 19332 | >KRAS-D92Y-FAINNTKSFEI | 414   | 18918 |
| >KRAS-D92Y-FAINNTKSFEI | 35259 | >KRAS-D92Y-FAINNTKSFEI | 133   | 35126 |
| >KRAS-D92Y-FEDIHHYR    | 1240  | >KRAS-D92Y-FEYIHHYR    | 483   | 757   |
| >KRAS-D92Y-FEDIHHYREQ  | 32    | >KRAS-D92Y-FEYIHHYREQI | 8     | 24    |
| >KRAS-D92Y-FEDIHHYR    | 4919  | >KRAS-D92Y-FEYIHHYR    | 185   | 4734  |
| >KRAS-D92Y-FEDIHHYR    | 4886  | >KRAS-D92Y-FEYIHHYR    | 477   | 4409  |
| >KRAS-D92Y-FEDIHHYR    | 1207  | >KRAS-D92Y-FEYIHHYR    | 55    | 1152  |
| >KRAS-D92Y-FEDIHHYR    | 2414  | >KRAS-D92Y-FEYIHHYR    | 154   | 2260  |
| >KRAS-D92Y-FEDIHHYREQ  | 4178  | >KRAS-D92Y-FEYIHHYREQI | 427   | 3751  |
| >KRAS-D92Y-FEDIHHYREQ  | 243   | >KRAS-D92Y-FEYIHHYREQI | 113   | 130   |
| >KRAS-D92Y-FEDIHHYREQ  | 661   | >KRAS-D92Y-FEYIHHYREQI | 53    | 608   |
| >KRAS-D92Y-FEDIHHYREQ  | 24    | >KRAS-D92Y-FEYIHHYREQI | 6     | 18    |
| >KRAS-D92Y-FEDIHHYR    | 296   | >KRAS-D92Y-FEYIHHYR    | 37    | 259   |
| >KRAS-D92Y-SFEDIHHY    | 41    | >KRAS-D92Y-SFEYIHHY    | 31    | 10    |
| >KRAS-D92Y-SFEDIHHY    | 75    | >KRAS-D92Y-SFEYIHHY    | 47    | 28    |
| >KRAS-D92Y-SFEDIHHYR   | 7     | >KRAS-D92Y-SFEYIHHYR   | 6     | 1     |
| >KRAS-D92Y-SFEDIHHYR   | 29    | >KRAS-D92Y-SFEYIHHYR   | 43    | 14    |
| >KRAS-D92Y-SFEDIHHYR   | 34    | >KRAS-D92Y-SFEYIHHYR   | 15    | 19    |

|                        |      |                        |     |      |
|------------------------|------|------------------------|-----|------|
| >KRAS-D92Y-SFEDIHHY    | 212  | >KRAS-D92Y-SFEYIHHY    | 85  | 127  |
| >KRAS-D92Y-SFEDIHHY    | 822  | >KRAS-D92Y-SFEYIHHY    | 231 | 591  |
| >KRAS-D92Y-SFEDIHHYR   | 10   | >KRAS-D92Y-SFEYIHHYR   | 13  | 3    |
| >KRAS-D92Y-SFEDIHHYR   | 742  | >KRAS-D92Y-SFEYIHHYR   | 471 | 271  |
| >KRAS-D92Y-KSFEDIHHY   | 555  | >KRAS-D92Y-KSFEYIHHY   | 156 | 399  |
| >KRAS-D92Y-KSFEDIHHYR  | 1629 | >KRAS-D92Y-KSFEYIHHYR  | 188 | 1441 |
| >KRAS-D92Y-KSFEDIHHY   | 188  | >KRAS-D92Y-KSFEYIHHY   | 50  | 138  |
| >KRAS-D92Y-KSFEDIHHYR  | 144  | >KRAS-D92Y-KSFEYIHHYR  | 67  | 77   |
| >KRAS-D92Y-KSFEDIHHY   | 121  | >KRAS-D92Y-KSFEYIHHY   | 164 | 43   |
| >KRAS-D92Y-KSFEDIHHY   | 164  | >KRAS-D92Y-KSFEYIHHY   | 89  | 75   |
| >KRAS-D92Y-KSFEDIHHY   | 1722 | >KRAS-D92Y-KSFEYIHHY   | 186 | 1536 |
| >KRAS-D92Y-KSFEDIHHYR  | 237  | >KRAS-D92Y-KSFEYIHHYR  | 52  | 185  |
| >KRAS-D92Y-KSFEDIHHY   | 7    | >KRAS-D92Y-KSFEYIHHY   | 8   | 1    |
| >KRAS-D92Y-KSFEDIHH    | 1224 | >KRAS-D92Y-KSFEYIHH    | 131 | 1093 |
| >KRAS-D92Y-KSFEDIHHY   | 985  | >KRAS-D92Y-KSFEYIHHY   | 85  | 900  |
| >KRAS-D92Y-KSFEDIHHYR  | 5    | >KRAS-D92Y-KSFEYIHHYR  | 3   | 2    |
| >KRAS-D92Y-KSFEDIHHYRI | 1738 | >KRAS-D92Y-KSFEYIHHYRI | 406 | 1332 |
| >KRAS-D92Y-KSFEDIHHY   | 766  | >KRAS-D92Y-KSFEYIHHY   | 437 | 329  |
| >KRAS-D92Y-KSFEDIHHYR  | 339  | >KRAS-D92Y-KSFEYIHHYR  | 163 | 176  |
| >KRAS-D92Y-KSFEDIHHYR  | 46   | >KRAS-D92Y-KSFEYIHHYR  | 17  | 29   |
| >KRAS-D92Y-KSFEDIHHY   | 87   | >KRAS-D92Y-KSFEYIHHY   | 40  | 47   |
| >KRAS-D92Y-KSFEDIHHY   | 80   | >KRAS-D92Y-KSFEYIHHY   | 51  | 29   |
| >KRAS-D92Y-KSFEDIHHY   | 36   | >KRAS-D92Y-KSFEYIHHY   | 12  | 24   |
| >KRAS-D92Y-KSFEDIHH    | 358  | >KRAS-D92Y-KSFEYIHH    | 133 | 225  |
| >KRAS-D92Y-KSFEDIHHY   | 5    | >KRAS-D92Y-KSFEYIHHY   | 3   | 2    |
| >KRAS-D92Y-KSFEDIHHY   | 44   | >KRAS-D92Y-KSFEYIHHY   | 41  | 3    |
| >KRAS-D92Y-KSFEDIHH    | 783  | >KRAS-D92Y-KSFEYIHH    | 466 | 317  |
| >KRAS-D92Y-KSFEDIHHY   | 12   | >KRAS-D92Y-KSFEYIHHY   | 11  | 1    |
| >KRAS-D92Y-KSFEDIHHY   | 502  | >KRAS-D92Y-KSFEYIHHY   | 165 | 337  |
| >KRAS-D92Y-KSFEDIHHYR  | 1095 | >KRAS-D92Y-KSFEYIHHYR  | 293 | 802  |
| >KRAS-D92Y-KSFEDIHH    | 1152 | >KRAS-D92Y-KSFEYIHH    | 368 | 784  |
| >KRAS-D92Y-KSFEDIHHY   | 277  | >KRAS-D92Y-KSFEYIHHY   | 202 | 75   |
| >KRAS-D92Y-KSFEDIHHYR  | 80   | >KRAS-D92Y-KSFEYIHHYR  | 74  | 6    |
| >KRAS-D92Y-KSFEDIHHYR  | 12   | >KRAS-D92Y-KSFEYIHHYR  | 11  | 1    |
| >KRAS-D92Y-TKSFEDIHHYF | 57   | >KRAS-D92Y-TKSFEDIHHYF | 50  | 7    |
| >KRAS-D92Y-TKSFEDIHHY  | 265  | >KRAS-D92Y-TKSFEDIHHY  | 53  | 212  |
| >KRAS-D92Y-TKSFEDIHHYF | 144  | >KRAS-D92Y-TKSFEDIHHYF | 131 | 13   |
| >KRAS-D92Y-NTKSFEDIHH` | 31   | >KRAS-D92Y-NTKSFEDIHH` | 36  | 5    |
| >KRAS-D92Y-NTKSFEDIHH` | 600  | >KRAS-D92Y-NTKSFEDIHH` | 179 | 421  |
| >KRAS-D92Y-NTKSFEDIHH` | 45   | >KRAS-D92Y-NTKSFEDIHH` | 28  | 17   |
| >KRAS-D92Y-NTKSFEDIHH` | 282  | >KRAS-D92Y-NTKSFEDIHH` | 155 | 127  |
| >KRAS-D92Y-NTKSFEDI    | 977  | >KRAS-D92Y-NTKSFEDI    | 44  | 933  |
| >KRAS-D92Y-NTKSFEDIHH` | 444  | >KRAS-D92Y-NTKSFEDIHH` | 136 | 308  |

|                          |       |                          |       |       |
|--------------------------|-------|--------------------------|-------|-------|
| >KRAS-D92Y- NTKSFEDIHH`  | 915   | >KRAS-D92Y- NTKSFHEYIHH` | 266   | 649   |
| >KRAS-D92Y- NTKSFEDIHH`  | 314   | >KRAS-D92Y- NTKSFHEYIHH` | 260   | 54    |
| >KRAS-D92Y- NTKSFEDI     | 979   | >KRAS-D92Y- NTKSFHEYI    | 467   | 512   |
| >KRAS-D92Y- NNTKSFEDI    | 7191  | >KRAS-D92Y- NNTKSFHEYI   | 393   | 6798  |
| >KRAS-D92Y- INNTKSFED    | 26226 | >KRAS-D92Y- INNTKSFHEY   | 250   | 25976 |
| >KRAS-D92Y- INNTKSFED    | 32093 | >KRAS-D92Y- INNTKSFHEY   | 173   | 31920 |
| >KRAS-D92Y- AINNTKSFED   | 3415  | >KRAS-D92Y- AINNTKSFHEYI | 231   | 3184  |
| >KRAS-D92Y- AINNTKSFED   | 757   | >KRAS-D92Y- AINNTKSFHEYI | 123   | 634   |
| >KRAS-D92Y- AINNTKSFED   | 3269  | >KRAS-D92Y- AINNTKSFHEYI | 279   | 2990  |
| >KRAS-D92Y- AINNTKSFED   | 2040  | >KRAS-D92Y- AINNTKSFHEYI | 71    | 1969  |
| >KRAS-D92Y- AINNTKSFED   | 18143 | >KRAS-D92Y- AINNTKSFHEY  | 297   | 17846 |
| >KRAS-D92Y- AINNTKSFED   | 27935 | >KRAS-D92Y- AINNTKSFHEY  | 95    | 27840 |
| >KRAS-D92Y- AINNTKSFED   | 31225 | >KRAS-D92Y- AINNTKSFHEY  | 356   | 30869 |
| >KRAS-D92Y- AINNTKSFED   | 26070 | >KRAS-D92Y- AINNTKSFHEY  | 166   | 25904 |
| >KRAS-D92Y- AINNTKSFED   | 21037 | >KRAS-D92Y- AINNTKSFHEY  | 195   | 20842 |
| >KRAS-D92Y- AINNTKSFED   | 30019 | >KRAS-D92Y- AINNTKSFHEY  | 81    | 29938 |
| >KRAS-E31Q- EYDPTIEDSY   | 498   | >KRAS-E31Q- QYDPTIEDSY   | 3564  | 3066  |
| >KRAS-E31Q- EYDPTIEDSY   | 364   | >KRAS-E31Q- QYDPTIEDSY   | 285   | 79    |
| >KRAS-E31Q- EYDPTIEDSYF  | 91    | >KRAS-E31Q- QYDPTIEDSYI  | 853   | 762   |
| >KRAS-E31Q- EYDPTIEDSYF  | 147   | >KRAS-E31Q- QYDPTIEDSYI  | 1455  | 1308  |
| >KRAS-E31Q- EYDPTIEDSYF  | 46    | >KRAS-E31Q- QYDPTIEDSYI  | 35    | 11    |
| >KRAS-E31Q- DEYDPTIEDS\` | 1530  | >KRAS-E31Q- DQYDPTIEDS   | 166   | 1364  |
| >KRAS-E31Q- DEYDPTIEDS\` | 2250  | >KRAS-E31Q- DQYDPTIEDS   | 113   | 2137  |
| >KRAS-E31Q- DEYDPTIED    | 149   | >KRAS-E31Q- DQYDPTIED    | 9810  | 9661  |
| >KRAS-E31Q- DEYDPTIEDS\` | 8     | >KRAS-E31Q- DQYDPTIEDS   | 232   | 224   |
| >KRAS-E31Q- DEYDPTIEDS\` | 1025  | >KRAS-E31Q- DQYDPTIEDS   | 401   | 624   |
| >KRAS-E31Q- DEYDPTIEDS\` | 490   | >KRAS-E31Q- DQYDPTIEDS   | 11959 | 11469 |
| >KRAS-E31Q- DEYDPTIEDS\` | 380   | >KRAS-E31Q- DQYDPTIEDS   | 13907 | 13527 |
| >KRAS-E31Q- VDEYDPTI     | 221   | >KRAS-E31Q- VDQYDPTI     | 330   | 109   |
| >KRAS-E31Q- FVDEYDPT     | 318   | >KRAS-E31Q- FVDQYDPT     | 2143  | 1825  |
| >KRAS-E31Q- FVDEYDPTI    | 12    | >KRAS-E31Q- FVDQYDPTI    | 46    | 34    |
| >KRAS-E31Q- FVDEYDPTI    | 178   | >KRAS-E31Q- FVDQYDPTI    | 782   | 604   |
| >KRAS-E31Q- FVDEYDPT     | 24    | >KRAS-E31Q- FVDQYDPT     | 113   | 89    |
| >KRAS-E31Q- FVDEYDPTI    | 4     | >KRAS-E31Q- FVDQYDPTI    | 12    | 8     |
| >KRAS-E31Q- FVDEYDPT     | 374   | >KRAS-E31Q- FVDQYDPT     | 1919  | 1545  |
| >KRAS-E31Q- FVDEYDPTI    | 6     | >KRAS-E31Q- FVDQYDPTI    | 26    | 20    |
| >KRAS-E31Q- FVDEYDPTI    | 16    | >KRAS-E31Q- FVDQYDPTI    | 146   | 130   |
| >KRAS-E31Q- FVDEYDPTI    | 14    | >KRAS-E31Q- FVDQYDPTI    | 42    | 28    |
| >KRAS-E31Q- FVDEYDPTI    | 138   | >KRAS-E31Q- FVDQYDPTI    | 1761  | 1623  |
| >KRAS-E31Q- FVDEYDPTI    | 34    | >KRAS-E31Q- FVDQYDPTI    | 103   | 69    |
| >KRAS-E31Q- FVDEYDPTI    | 19    | >KRAS-E31Q- FVDQYDPTI    | 148   | 129   |
| >KRAS-E31Q- HFVDEYDPTI   | 294   | >KRAS-E31Q- HFVDQYDPTI   | 240   | 54    |
| >KRAS-E31Q- NHFVDEYDPTI  | 575   | >KRAS-E31Q- NHFVDQYDPTI  | 348   | 227   |

|                       |      |                       |      |      |
|-----------------------|------|-----------------------|------|------|
| >KRAS-E31Q-NHFVDEYDP  | 326  | >KRAS-E31Q-NHFVDQYDP  | 280  | 46   |
| >KRAS-E31Q-IQNHFVDEY  | 69   | >KRAS-E31Q-IQNHFVDQY  | 155  | 86   |
| >KRAS-E31Q-IQNHFVDEY  | 65   | >KRAS-E31Q-IQNHFVDQY  | 71   | 6    |
| >KRAS-E31Q-IQNHFVDE   | 1735 | >KRAS-E31Q-IQNHFVDQ   | 459  | 1276 |
| >KRAS-E31Q-IQNHFVDEY  | 5    | >KRAS-E31Q-IQNHFVDQY  | 8    | 3    |
| >KRAS-E31Q-LIQNHFVDEY | 91   | >KRAS-E31Q-LIQNHFVDQY | 101  | 10   |
| >KRAS-E31Q-LIQNHFVDEY | 342  | >KRAS-E31Q-LIQNHFVDQY | 800  | 458  |
| >KRAS-E31Q-QLIQNHFVDE | 42   | >KRAS-E31Q-QLIQNHFVDC | 38   | 4    |
| >KRAS-E31Q-QLIQNHFVDE | 51   | >KRAS-E31Q-QLIQNHFVDC | 39   | 12   |
| >KRAS-E31Q-QLIQNHFVDE | 328  | >KRAS-E31Q-QLIQNHFVDC | 678  | 350  |
| >KRAS-E31Q-QLIQNHFVDE | 188  | >KRAS-E31Q-QLIQNHFVDC | 399  | 211  |
| >KRAS-E31Q-QLIQNHFVDE | 124  | >KRAS-E31Q-QLIQNHFVDC | 138  | 14   |
| >KRAS-E31Q-QLIQNHFVDE | 158  | >KRAS-E31Q-QLIQNHFVDC | 154  | 4    |
| >KRAS-E31Q-QLIQNHFVDE | 345  | >KRAS-E31Q-QLIQNHFVDC | 558  | 213  |
| >KRAS-E31Q-QLIQNHFVDE | 286  | >KRAS-E31Q-QLIQNHFVDC | 809  | 523  |
| >KRAS-E62D-EEYSAMRDQ  | 105  | >KRAS-E62D-DEYSAMRDQ  | 146  | 41   |
| >KRAS-E62D-EEYSAMRDQ  | 49   | >KRAS-E62D-DEYSAMRDQ  | 83   | 34   |
| >KRAS-E62D-EEYSAMRDQ  | 296  | >KRAS-E62D-DEYSAMRDQ  | 1203 | 907  |
| >KRAS-E62D-EEYSAMRD   | 7838 | >KRAS-E62D-DEYSAMRD   | 267  | 7571 |
| >KRAS-E62D-EEYSAMRDQ  | 4127 | >KRAS-E62D-DEYSAMRDQ  | 89   | 4038 |
| >KRAS-E62D-EEYSAMRDQ  | 237  | >KRAS-E62D-DEYSAMRDQ  | 111  | 126  |
| >KRAS-E62D-EEYSAMRDQ  | 625  | >KRAS-E62D-DEYSAMRDQ  | 19   | 606  |
| >KRAS-E62D-EEYSAMRDQ  | 322  | >KRAS-E62D-DEYSAMRDQ  | 1555 | 1233 |
| >KRAS-E62D-EEYSAMRDQ  | 64   | >KRAS-E62D-DEYSAMRDQ  | 182  | 118  |
| >KRAS-E62D-EEYSAMRDQ  | 126  | >KRAS-E62D-DEYSAMRDQ  | 600  | 474  |
| >KRAS-E62D-QEEYSAMRD  | 423  | >KRAS-E62D-QDEYSAMRD  | 6159 | 5736 |
| >KRAS-E62D-GQEEYSAM   | 497  | >KRAS-E62D-GQDEYSAM   | 83   | 414  |
| >KRAS-E62D-GQEEYSAMR  | 385  | >KRAS-E62D-GQDEYSAMR  | 1245 | 860  |
| >KRAS-E62D-GQEEYSAM   | 347  | >KRAS-E62D-GQDEYSAM   | 159  | 188  |
| >KRAS-E62D-TAGQEEYSAM | 56   | >KRAS-E62D-TAGQDEYSAM | 60   | 4    |
| >KRAS-E62D-DTAGQEEY   | 387  | >KRAS-E62D-DTAGQDEY   | 339  | 48   |
| >KRAS-E62D-DTAGQEEY   | 94   | >KRAS-E62D-DTAGQDEY   | 111  | 17   |
| >KRAS-E62D-DTAGQEEYS/ | 491  | >KRAS-E62D-DTAGQDEYS/ | 633  | 142  |
| >KRAS-E62D-DTAGQEEY   | 28   | >KRAS-E62D-DTAGQDEY   | 27   | 1    |
| >KRAS-E62D-DTAGQEEYS/ | 20   | >KRAS-E62D-DTAGQDEYS/ | 13   | 7    |
| >KRAS-E62D-DTAGQEEY   | 8    | >KRAS-E62D-DTAGQDEY   | 8    | 0    |
| >KRAS-E62D-DTAGQEEYS/ | 6    | >KRAS-E62D-DTAGQDEYS/ | 6    | 0    |
| >KRAS-E62D-DTAGQEEYS/ | 223  | >KRAS-E62D-DTAGQDEYS/ | 248  | 25   |
| >KRAS-E62D-DTAGQEEY   | 245  | >KRAS-E62D-DTAGQDEY   | 246  | 1    |
| >KRAS-E62D-DTAGQEEY   | 539  | >KRAS-E62D-DTAGQDEY   | 374  | 165  |
| >KRAS-E62D-DTAGQEEY   | 89   | >KRAS-E62D-DTAGQDEY   | 101  | 12   |
| >KRAS-E62D-DTAGQEEYS  | 408  | >KRAS-E62D-DTAGQDEYS  | 98   | 310  |
| >KRAS-E62D-DTAGQEEYS/ | 389  | >KRAS-E62D-DTAGQDEYS/ | 178  | 211  |

|                        |       |                        |       |       |
|------------------------|-------|------------------------|-------|-------|
| >KRAS-E62D- DTAGQEEY   | 1067  | >KRAS-E62D- DTAGQDEY   | 351   | 716   |
| >KRAS-E62D- DTAGQEEYS/ | 449   | >KRAS-E62D- DTAGQDEYS/ | 300   | 149   |
| >KRAS-E62D- ILDTAGQEEY | 135   | >KRAS-E62D- ILDTAGQDEY | 106   | 29    |
| >KRAS-E62D- ILDTAGQEEY | 349   | >KRAS-E62D- ILDTAGQDEY | 334   | 15    |
| >KRAS-E62D- ILDTAGQEEY | 463   | >KRAS-E62D- ILDTAGQDEY | 694   | 231   |
| >KRAS-E62D- DILDTAGQEE | 150   | >KRAS-E62D- DILDTAGQDE | 144   | 6     |
| >KRAS-E62D- DILDTAGQEE | 183   | >KRAS-E62D- DILDTAGQDE | 295   | 112   |
| >KRAS-E63K- EYSAMRDQY  | 1845  | >KRAS-E63K- KYSAMRDQY  | 114   | 1731  |
| >KRAS-E63K- EYSAMRDQY  | 133   | >KRAS-E63K- KYSAMRDQY  | 11    | 122   |
| >KRAS-E63K- EYSAMRDQY  | 2863  | >KRAS-E63K- KYSAMRDQY  | 420   | 2443  |
| >KRAS-E63K- EYSAMRDQY  | 1385  | >KRAS-E63K- KYSAMRDQY  | 138   | 1247  |
| >KRAS-E63K- EYSAMRDQY  | 1060  | >KRAS-E63K- KYSAMRDQY  | 499   | 561   |
| >KRAS-E63K- EYSAMRDQY  | 15784 | >KRAS-E63K- KYSAMRDQY  | 379   | 15405 |
| >KRAS-E63K- EYSAMRDQY  | 1133  | >KRAS-E63K- KYSAMRDQY  | 88    | 1045  |
| >KRAS-E63K- EYSAMRDQY  | 538   | >KRAS-E63K- KYSAMRDQY  | 12    | 526   |
| >KRAS-E63K- EYSAMRDQY  | 28    | >KRAS-E63K- KYSAMRDQY  | 1162  | 1134  |
| >KRAS-E63K- EYSAMRDQY  | 14    | >KRAS-E63K- KYSAMRDQY  | 1339  | 1325  |
| >KRAS-E63K- EYSAMRDQY  | 380   | >KRAS-E63K- KYSAMRDQY  | 174   | 206   |
| >KRAS-E63K- EYSAMRDQY  | 37    | >KRAS-E63K- KYSAMRDQY  | 13    | 24    |
| >KRAS-E63K- EYSAMRDQY  | 3323  | >KRAS-E63K- KYSAMRDQY  | 373   | 2950  |
| >KRAS-E63K- EEYSAMRDQ  | 105   | >KRAS-E63K- EKYSAMRDQ  | 10531 | 10426 |
| >KRAS-E63K- EEYSAMRDQ  | 49    | >KRAS-E63K- EKYSAMRDQ  | 4387  | 4338  |
| >KRAS-E63K- EEYSAMRDQ  | 296   | >KRAS-E63K- EKYSAMRDQ  | 225   | 71    |
| >KRAS-E63K- EEYSAMRDQ  | 651   | >KRAS-E63K- EKYSAMRDQ  | 496   | 155   |
| >KRAS-E63K- EEYSAMRDQ  | 1650  | >KRAS-E63K- EKYSAMRDQ  | 63    | 1587  |
| >KRAS-E63K- EEYSAMRDQ  | 1604  | >KRAS-E63K- EKYSAMRDQ  | 56    | 1548  |
| >KRAS-E63K- EEYSAMRDQ  | 237   | >KRAS-E63K- EKYSAMRDQ  | 19622 | 19385 |
| >KRAS-E63K- EEYSAMRDQ  | 322   | >KRAS-E63K- EKYSAMRDQ  | 10992 | 10670 |
| >KRAS-E63K- EEYSAMRDQ  | 64    | >KRAS-E63K- EKYSAMRDQ  | 6453  | 6389  |
| >KRAS-E63K- EEYSAMRDQ  | 126   | >KRAS-E63K- EKYSAMRDQ  | 20063 | 19937 |
| >KRAS-E63K- QEEYSAMR   | 509   | >KRAS-E63K- QEKYSAMR   | 257   | 252   |
| >KRAS-E63K- QEEYSAMRD  | 423   | >KRAS-E63K- QEKYSAMRD  | 1355  | 932   |
| >KRAS-E63K- GQEEYSAM   | 497   | >KRAS-E63K- GQEKYSAM   | 3468  | 2971  |
| >KRAS-E63K- GQEEYSAMR  | 385   | >KRAS-E63K- GQEKYSAMR  | 224   | 161   |
| >KRAS-E63K- GQEEYSAM   | 658   | >KRAS-E63K- GQEKYSAM   | 473   | 185   |
| >KRAS-E63K- GQEEYSAM   | 347   | >KRAS-E63K- GQEKYSAM   | 1113  | 766   |
| >KRAS-E63K- TAGQEEYSAM | 56    | >KRAS-E63K- TAGQEKYSAM | 69    | 13    |
| >KRAS-E63K- DTAGQEEY   | 387   | >KRAS-E63K- DTAGQEKY   | 1067  | 680   |
| >KRAS-E63K- DTAGQEEY   | 94    | >KRAS-E63K- DTAGQEKY   | 44    | 50    |
| >KRAS-E63K- DTAGQEEYS/ | 491   | >KRAS-E63K- DTAGQEKYS/ | 458   | 33    |
| >KRAS-E63K- DTAGQEEY   | 28    | >KRAS-E63K- DTAGQEKY   | 31    | 3     |
| >KRAS-E63K- DTAGQEEYS/ | 20    | >KRAS-E63K- DTAGQEKYS/ | 20    | 0     |
| >KRAS-E63K- DTAGQEEY   | 8     | >KRAS-E63K- DTAGQEKY   | 10    | 2     |

|                        |       |                        |      |       |
|------------------------|-------|------------------------|------|-------|
| >KRAS-E63K- DTAGQEEYS/ | 6     | >KRAS-E63K- DTAGQEKYS/ | 9    | 3     |
| >KRAS-E63K- DTAGQEEYS/ | 223   | >KRAS-E63K- DTAGQEKYS/ | 131  | 92    |
| >KRAS-E63K- DTAGQEEY   | 245   | >KRAS-E63K- DTAGQEKY   | 307  | 62    |
| >KRAS-E63K- DTAGQEEY   | 89    | >KRAS-E63K- DTAGQEKY   | 179  | 90    |
| >KRAS-E63K- DTAGQEEYS  | 408   | >KRAS-E63K- DTAGQEKYS  | 6262 | 5854  |
| >KRAS-E63K- DTAGQEEYS/ | 389   | >KRAS-E63K- DTAGQEKYS/ | 779  | 390   |
| >KRAS-E63K- DTAGQEEYS/ | 449   | >KRAS-E63K- DTAGQEKYS/ | 856  | 407   |
| >KRAS-E63K- DTAGQEEY   | 898   | >KRAS-E63K- DTAGQEKY   | 480  | 418   |
| >KRAS-E63K- ILDTAGQEEY | 135   | >KRAS-E63K- ILDTAGQEKY | 183  | 48    |
| >KRAS-E63K- ILDTAGQEEY | 571   | >KRAS-E63K- ILDTAGQEKY | 428  | 143   |
| >KRAS-E63K- ILDTAGQEEY | 349   | >KRAS-E63K- ILDTAGQEKY | 320  | 29    |
| >KRAS-E63K- ILDTAGQEEY | 463   | >KRAS-E63K- ILDTAGQEKY | 1077 | 614   |
| >KRAS-E63K- ILDTAGQEEY | 504   | >KRAS-E63K- ILDTAGQEKY | 479  | 25    |
| >KRAS-E63K- DILDTAGQEE | 35029 | >KRAS-E63K- DILDTAGQEK | 430  | 34599 |
| >KRAS-E63K- DILDTAGQEE | 150   | >KRAS-E63K- DILDTAGQEK | 192  | 42    |
| >KRAS-E63K- DILDTAGQEE | 183   | >KRAS-E63K- DILDTAGQEK | 189  | 6     |
| >KRAS-E63K- DILDTAGQEE | 30193 | >KRAS-E63K- DILDTAGQEK | 314  | 29879 |
| >KRAS-G12A- GGVGKSALTI | 2287  | >KRAS-G12A- AGVGKSALTI | 462  | 1825  |
| >KRAS-G12A- AGGVGKSALT | 8132  | >KRAS-G12A- AAGVGKSALT | 444  | 7688  |
| >KRAS-G12A- AGGVGKSALT | 1153  | >KRAS-G12A- AAGVGKSALT | 225  | 928   |
| >KRAS-G12A- TEYKLVVGA  | 3297  | >KRAS-G12A- TEYKLVVGA  | 300  | 2997  |
| >KRAS-G12A- TEYKLVVGA  | 3172  | >KRAS-G12A- TEYKLVVGA  | 80   | 3092  |
| >KRAS-G12A- TEYKLVVGA  | 2108  | >KRAS-G12A- TEYKLVVGA  | 22   | 2086  |
| >KRAS-G12A- TEYKLVVGA  | 1689  | >KRAS-G12A- TEYKLVVGA  | 139  | 1550  |
| >KRAS-G12A- VVGAGGVGK  | 326   | >KRAS-G12A- VVGAAGVGK  | 415  | 89    |
| >KRAS-G12A- VVGAGGVGK  | 89    | >KRAS-G12A- VVGAAGVGK  | 76   | 13    |
| >KRAS-G12A- VVVGAGGV   | 1957  | >KRAS-G12A- VVVGAAAGV  | 491  | 1466  |
| >KRAS-G12A- VVVGAGGV   | 117   | >KRAS-G12A- VVVGAAAGV  | 61   | 56    |
| >KRAS-G12A- VVVGAGGV   | 68    | >KRAS-G12A- VVVGAAAGV  | 18   | 50    |
| >KRAS-G12A- VVVGAGGV   | 139   | >KRAS-G12A- VVVGAAAGV  | 60   | 79    |
| >KRAS-G12A- VVVGAGGV   | 707   | >KRAS-G12A- VVVGAAAGV  | 241  | 466   |
| >KRAS-G12A- VVVGAGGV   | 2371  | >KRAS-G12A- VVVGAAAGV  | 213  | 2158  |
| >KRAS-G12A- VVVGAGGV   | 23    | >KRAS-G12A- VVVGAAAGV  | 8    | 15    |
| >KRAS-G12A- VVVGAGGVG  | 76    | >KRAS-G12A- VVVGAAAGVG | 69   | 7     |
| >KRAS-G12A- VVVGAGGVG  | 101   | >KRAS-G12A- VVVGAAAGVG | 66   | 35    |
| >KRAS-G12A- VVVGAGGVG  | 203   | >KRAS-G12A- VVVGAAAGVG | 108  | 95    |
| >KRAS-G12A- VVVGAGGV   | 191   | >KRAS-G12A- VVVGAAAGV  | 63   | 128   |
| >KRAS-G12A- VVVGAGGV   | 649   | >KRAS-G12A- VVVGAAAGV  | 170  | 479   |
| >KRAS-G12A- LVVVGAGGV  | 180   | >KRAS-G12A- LVVVGAAAGV | 62   | 118   |
| >KRAS-G12A- LVVVGAGGV  | 55    | >KRAS-G12A- LVVVGAAAGV | 10   | 45    |
| >KRAS-G12A- LVVVGAGGV  | 1068  | >KRAS-G12A- LVVVGAAAGV | 265  | 803   |
| >KRAS-G12A- LVVVGAGGV  | 3578  | >KRAS-G12A- LVVVGAAAGV | 425  | 3153  |
| >KRAS-G12A- LVVVGAGGV  | 3213  | >KRAS-G12A- LVVVGAAAGV | 278  | 2935  |

|                       |       |                        |     |       |
|-----------------------|-------|------------------------|-----|-------|
| >KRAS-G12A·LVVVGAGGV  | 75    | >KRAS-G12A·LVVVGAAAGV  | 9   | 66    |
| >KRAS-G12A·LVVVGAGGV  | 572   | >KRAS-G12A·LVVVGAAAGV  | 414 | 158   |
| >KRAS-G12A·LVVVGAGGV  | 284   | >KRAS-G12A·LVVVGAAAGV  | 155 | 129   |
| >KRAS-G12A·LVVVGAGGV  | 154   | >KRAS-G12A·LVVVGAAAGV  | 54  | 100   |
| >KRAS-G12A·LVVVGAGGV  | 159   | >KRAS-G12A·LVVVGAAAGV  | 48  | 111   |
| >KRAS-G12A·KLVVVGAGG  | 1541  | >KRAS-G12A·KLVVVGAAAG  | 492 | 1049  |
| >KRAS-G12A·KLVVVGAG   | 4828  | >KRAS-G12A·KLVVVGAA    | 367 | 4461  |
| >KRAS-G12A·KLVVVGAGG  | 392   | >KRAS-G12A·KLVVVGAAAG  | 132 | 260   |
| >KRAS-G12A·KLVVVGAG   | 4844  | >KRAS-G12A·KLVVVGAA    | 38  | 4806  |
| >KRAS-G12A·KLVVVGAGG  | 35    | >KRAS-G12A·KLVVVGAAAG  | 28  | 7     |
| >KRAS-G12A·KLVVVGAG   | 11214 | >KRAS-G12A·KLVVVGAA    | 412 | 10802 |
| >KRAS-G12A·KLVVVGAGG  | 661   | >KRAS-G12A·KLVVVGAAAG  | 274 | 387   |
| >KRAS-G12A·KLVVVGAG   | 4834  | >KRAS-G12A·KLVVVGAA    | 59  | 4775  |
| >KRAS-G12A·KLVVVGAGG  | 6     | >KRAS-G12A·KLVVVGAAAG  | 3   | 3     |
| >KRAS-G12A·KLVVVGAG   | 13314 | >KRAS-G12A·KLVVVGAA    | 425 | 12889 |
| >KRAS-G12A·KLVVVGAGG  | 17    | >KRAS-G12A·KLVVVGAAAG  | 6   | 11    |
| >KRAS-G12A·KLVVVGAG   | 14961 | >KRAS-G12A·KLVVVGAA    | 427 | 14534 |
| >KRAS-G12A·KLVVVGAGG  | 14    | >KRAS-G12A·KLVVVGAAAG  | 9   | 5     |
| >KRAS-G12A·KLVVVGAGG  | 121   | >KRAS-G12A·KLVVVGAAAG  | 15  | 106   |
| >KRAS-G12A·KLVVVGAGG  | 6     | >KRAS-G12A·KLVVVGAAAG  | 4   | 2     |
| >KRAS-G12A·YKLVVVGAGC | 423   | >KRAS-G12A·YKLVVVGAAAC | 116 | 307   |
| >KRAS-G12A·YKLVVVGAGC | 220   | >KRAS-G12A·YKLVVVGAAAC | 84  | 136   |
| >KRAS-G12A·YKLVVVGAGC | 662   | >KRAS-G12A·YKLVVVGAAAC | 216 | 446   |
| >KRAS-G12A·YKLVVVGAG  | 5121  | >KRAS-G12A·YKLVVVGAA   | 452 | 4669  |
| >KRAS-G12A·YKLVVVGAGC | 696   | >KRAS-G12A·YKLVVVGAAAC | 177 | 519   |
| >KRAS-G12C·TEYKLVVGA  | 3172  | >KRAS-G12C·TEYKLVVGA   | 474 | 2698  |
| >KRAS-G12C·TEYKLVVGA  | 1689  | >KRAS-G12C·TEYKLVVGA   | 137 | 1552  |
| >KRAS-G12C·VVGAGGVGK  | 326   | >KRAS-G12C·VVGACGVGK   | 302 | 24    |
| >KRAS-G12C·VVGAGGVGK  | 89    | >KRAS-G12C·VVGACGVGK   | 75  | 14    |
| >KRAS-G12C·VVVGAGGV   | 117   | >KRAS-G12C·VVVGACGV    | 142 | 25    |
| >KRAS-G12C·VVVGAGGV   | 68    | >KRAS-G12C·VVVGACGV    | 24  | 44    |
| >KRAS-G12C·VVVGAGGV   | 139   | >KRAS-G12C·VVVGACGV    | 75  | 64    |
| >KRAS-G12C·VVVGAGGV   | 707   | >KRAS-G12C·VVVGACGV    | 151 | 556   |
| >KRAS-G12C·VVVGAGGV   | 2371  | >KRAS-G12C·VVVGACGV    | 303 | 2068  |
| >KRAS-G12C·VVVGAGGV   | 23    | >KRAS-G12C·VVVGACGV    | 7   | 16    |
| >KRAS-G12C·VVVGAGGVG  | 76    | >KRAS-G12C·VVVGACGVG   | 72  | 4     |
| >KRAS-G12C·VVVGAGGVG  | 101   | >KRAS-G12C·VVVGACGVG   | 74  | 27    |
| >KRAS-G12C·VVVGAGGVG  | 203   | >KRAS-G12C·VVVGACGVG   | 223 | 20    |
| >KRAS-G12C·VVVGAGGV   | 191   | >KRAS-G12C·VVVGACGV    | 169 | 22    |
| >KRAS-G12C·VVVGAGGV   | 649   | >KRAS-G12C·VVVGACGV    | 445 | 204   |
| >KRAS-G12C·LVVVGAGGV  | 180   | >KRAS-G12C·LVVVGACGV   | 283 | 103   |
| >KRAS-G12C·LVVVGAGGV  | 55    | >KRAS-G12C·LVVVGACGV   | 14  | 41    |
| >KRAS-G12C·LVVVGAGGV  | 1068  | >KRAS-G12C·LVVVGACGV   | 147 | 921   |



|                       |      |                       |      |      |
|-----------------------|------|-----------------------|------|------|
| >KRAS-G12C·LVVVGAGGV  | 2712 | >KRAS-G12C·LVVVGACGV  | 174  | 2538 |
| >KRAS-G12C·LVVVGAGGV  | 3213 | >KRAS-G12C·LVVVGACGV  | 361  | 2852 |
| >KRAS-G12C·LVVVGAGGV  | 75   | >KRAS-G12C·LVVVGACGV  | 7    | 68   |
| >KRAS-G12C·LVVVGAGGV  | 572  | >KRAS-G12C·LVVVGACGV  | 435  | 137  |
| >KRAS-G12C·LVVVGAGGV  | 284  | >KRAS-G12C·LVVVGACGV  | 216  | 68   |
| >KRAS-G12C·LVVVGAGGV  | 154  | >KRAS-G12C·LVVVGACGV  | 212  | 58   |
| >KRAS-G12C·LVVVGAGGV  | 159  | >KRAS-G12C·LVVVGACGV  | 83   | 76   |
| >KRAS-G12C·KLVVVGAGG' | 392  | >KRAS-G12C·KLVVVGACG\ | 190  | 202  |
| >KRAS-G12C·KLVVVGAGG' | 35   | >KRAS-G12C·KLVVVGACG\ | 42   | 7    |
| >KRAS-G12C·KLVVVGAGG' | 661  | >KRAS-G12C·KLVVVGACG\ | 283  | 378  |
| >KRAS-G12C·KLVVVGAG   | 4834 | >KRAS-G12C·KLVVVGAC   | 182  | 4652 |
| >KRAS-G12C·KLVVVGAGG' | 6    | >KRAS-G12C·KLVVVGACG\ | 3    | 3    |
| >KRAS-G12C·KLVVVGAGG' | 17   | >KRAS-G12C·KLVVVGACG\ | 7    | 10   |
| >KRAS-G12C·KLVVVGAGG' | 14   | >KRAS-G12C·KLVVVGACG\ | 6    | 8    |
| >KRAS-G12C·KLVVVGAGG' | 121  | >KRAS-G12C·KLVVVGACG\ | 14   | 107  |
| >KRAS-G12C·KLVVVGAGG' | 6    | >KRAS-G12C·KLVVVGACG\ | 4    | 2    |
| >KRAS-G12C·YKLVVVGAGC | 423  | >KRAS-G12C·YKLVVVGACC | 192  | 231  |
| >KRAS-G12C·YKLVVVGAGC | 220  | >KRAS-G12C·YKLVVVGACC | 61   | 159  |
| >KRAS-G12C·YKLVVVGAGC | 662  | >KRAS-G12C·YKLVVVGACC | 104  | 558  |
| >KRAS-G12C·YKLVVVGAGC | 3921 | >KRAS-G12C·YKLVVVGACC | 459  | 3462 |
| >KRAS-G12C·YKLVVVGAGC | 696  | >KRAS-G12C·YKLVVVGACC | 169  | 527  |
| >KRAS-G12D·AGGVGKSALT | 8128 | >KRAS-G12D·ADGVGKSALT | 85   | 8043 |
| >KRAS-G12D·TEYKLVVGA  | 3297 | >KRAS-G12D·TEYKLVVGA  | 402  | 2895 |
| >KRAS-G12D·VVGAGGVGK  | 326  | >KRAS-G12D·VVGADGVGK  | 1224 | 898  |
| >KRAS-G12D·VVGAGGVGK  | 89   | >KRAS-G12D·VVGADGVGK  | 154  | 65   |
| >KRAS-G12D·VVVGAGGV   | 117  | >KRAS-G12D·VVVGADGV   | 405  | 288  |
| >KRAS-G12D·VVVGAGGV   | 68   | >KRAS-G12D·VVVGADGV   | 38   | 30   |
| >KRAS-G12D·VVVGAGGV   | 139  | >KRAS-G12D·VVVGADGV   | 169  | 30   |
| >KRAS-G12D·VVVGAGGV   | 707  | >KRAS-G12D·VVVGADGV   | 238  | 469  |
| >KRAS-G12D·VVVGAGGV   | 23   | >KRAS-G12D·VVVGADGV   | 22   | 1    |
| >KRAS-G12D·VVVGAGGVG  | 76   | >KRAS-G12D·VVVGADGVG  | 403  | 327  |
| >KRAS-G12D·VVVGAGGVG  | 101  | >KRAS-G12D·VVVGADGVG  | 106  | 5    |
| >KRAS-G12D·VVVGAGGVG  | 203  | >KRAS-G12D·VVVGADGVG  | 102  | 101  |
| >KRAS-G12D·VVVGAGGV   | 191  | >KRAS-G12D·VVVGADGV   | 94   | 97   |
| >KRAS-G12D·LVVVGAGGV  | 180  | >KRAS-G12D·LVVVGADGV  | 500  | 320  |
| >KRAS-G12D·LVVVGAGGV  | 55   | >KRAS-G12D·LVVVGADGV  | 16   | 39   |
| >KRAS-G12D·LVVVGAGGV  | 75   | >KRAS-G12D·LVVVGADGV  | 63   | 12   |
| >KRAS-G12D·LVVVGAGGV  | 284  | >KRAS-G12D·LVVVGADGV  | 249  | 35   |
| >KRAS-G12D·LVVVGAGGV  | 154  | >KRAS-G12D·LVVVGADGV  | 117  | 37   |
| >KRAS-G12D·LVVVGAGGV  | 159  | >KRAS-G12D·LVVVGADGV  | 255  | 96   |
| >KRAS-G12D·KLVVVGAGG' | 392  | >KRAS-G12D·KLVVVGADG' | 222  | 170  |
| >KRAS-G12D·KLVVVGAGG' | 35   | >KRAS-G12D·KLVVVGADG' | 78   | 43   |
| >KRAS-G12D·KLVVVGAGG' | 661  | >KRAS-G12D·KLVVVGADG' | 331  | 330  |

|                       |       |                       |      |       |
|-----------------------|-------|-----------------------|------|-------|
| >KRAS-G12D·KLVVVGAGG' | 6     | >KRAS-G12D·KLVVVGADG' | 6    | 0     |
| >KRAS-G12D·KLVVVGAGG' | 17    | >KRAS-G12D·KLVVVGADG' | 10   | 7     |
| >KRAS-G12D·KLVVVGAGG' | 14    | >KRAS-G12D·KLVVVGADG' | 9    | 5     |
| >KRAS-G12D·KLVVVGAGG' | 121   | >KRAS-G12D·KLVVVGADG' | 46   | 75    |
| >KRAS-G12D·KLVVVGAGG' | 6     | >KRAS-G12D·KLVVVGADG' | 8    | 2     |
| >KRAS-G12D·YKLVVVGAGC | 423   | >KRAS-G12D·YKLVVVGADC | 186  | 237   |
| >KRAS-G12D·YKLVVVGAGC | 220   | >KRAS-G12D·YKLVVVGADC | 165  | 55    |
| >KRAS-G12D·YKLVVVGAGC | 662   | >KRAS-G12D·YKLVVVGADC | 217  | 445   |
| >KRAS-G12E·AGGVGKSA   | 38995 | >KRAS-G12E·AEGVGKSA   | 464  | 38531 |
| >KRAS-G12E·AGGVGKSALT | 22776 | >KRAS-G12E·AEGVGKSALT | 130  | 22646 |
| >KRAS-G12E·AGGVGKSAL  | 21974 | >KRAS-G12E·AEGVGKSAL  | 43   | 21931 |
| >KRAS-G12E·AGGVGKSALT | 23796 | >KRAS-G12E·AEGVGKSALT | 103  | 23693 |
| >KRAS-G12E·AGGVGKSAL  | 34000 | >KRAS-G12E·AEGVGKSAL  | 124  | 33876 |
| >KRAS-G12E·AGGVGKSALT | 37816 | >KRAS-G12E·AEGVGKSALT | 378  | 37438 |
| >KRAS-G12E·AGGVGKSA   | 26406 | >KRAS-G12E·AEGVGKSA   | 14   | 26392 |
| >KRAS-G12E·AGGVGKSAL  | 37934 | >KRAS-G12E·AEGVGKSAL  | 156  | 37778 |
| >KRAS-G12E·AGGVGKSALT | 27460 | >KRAS-G12E·AEGVGKSALT | 268  | 27192 |
| >KRAS-G12E·AGGVGKSALT | 35913 | >KRAS-G12E·AEGVGKSALT | 77   | 35836 |
| >KRAS-G12E·AGGVGKSAL  | 31907 | >KRAS-G12E·AEGVGKSAL  | 101  | 31806 |
| >KRAS-G12E·AGGVGKSALT | 25797 | >KRAS-G12E·AEGVGKSALT | 18   | 25779 |
| >KRAS-G12E·VVGAGGVGK  | 326   | >KRAS-G12E·VVGAEVVGK  | 1134 | 808   |
| >KRAS-G12E·VVGAGGVGK  | 89    | >KRAS-G12E·VVGAEVVGK  | 113  | 24    |
| >KRAS-G12E·VVVGAGGV   | 117   | >KRAS-G12E·VVVGAEGV   | 383  | 266   |
| >KRAS-G12E·VVVGAGGV   | 68    | >KRAS-G12E·VVVGAEGV   | 42   | 26    |
| >KRAS-G12E·VVVGAGGV   | 139   | >KRAS-G12E·VVVGAEGV   | 87   | 52    |
| >KRAS-G12E·VVVGAGGV   | 707   | >KRAS-G12E·VVVGAEGV   | 263  | 444   |
| >KRAS-G12E·VVVGAGGV   | 23    | >KRAS-G12E·VVVGAEGV   | 12   | 11    |
| >KRAS-G12E·VVVGAGGVG  | 76    | >KRAS-G12E·VVVGAEGVG  | 200  | 124   |
| >KRAS-G12E·VVVGAGGVG  | 101   | >KRAS-G12E·VVVGAEGVG  | 78   | 23    |
| >KRAS-G12E·VVVGAGGVG  | 203   | >KRAS-G12E·VVVGAEGVG  | 103  | 100   |
| >KRAS-G12E·VVVGAGGV   | 191   | >KRAS-G12E·VVVGAEGV   | 110  | 81    |
| >KRAS-G12E·LVVVGAGGV  | 180   | >KRAS-G12E·LVVVGAEV   | 404  | 224   |
| >KRAS-G12E·LVVVGAGGV  | 55    | >KRAS-G12E·LVVVGAEV   | 13   | 42    |
| >KRAS-G12E·LVVVGAGGV  | 1068  | >KRAS-G12E·LVVVGAEV   | 335  | 733   |
| >KRAS-G12E·LVVVGAGGV  | 75    | >KRAS-G12E·LVVVGAEV   | 22   | 53    |
| >KRAS-G12E·LVVVGAGGV  | 284   | >KRAS-G12E·LVVVGAEV   | 233  | 51    |
| >KRAS-G12E·LVVVGAGGV  | 154   | >KRAS-G12E·LVVVGAEV   | 59   | 95    |
| >KRAS-G12E·LVVVGAGGV  | 159   | >KRAS-G12E·LVVVGAEV   | 140  | 19    |
| >KRAS-G12E·KLVVVGAGG' | 392   | >KRAS-G12E·KLVVVGAEV\ | 134  | 258   |
| >KRAS-G12E·KLVVVGAGG' | 35    | >KRAS-G12E·KLVVVGAEV\ | 57   | 22    |
| >KRAS-G12E·KLVVVGAGG' | 661   | >KRAS-G12E·KLVVVGAEV\ | 334  | 327   |
| >KRAS-G12E·KLVVVGAGG' | 6     | >KRAS-G12E·KLVVVGAEV\ | 4    | 2     |
| >KRAS-G12E·KLVVVGAGG' | 17    | >KRAS-G12E·KLVVVGAEV\ | 9    | 8     |

|                         |       |                         |     |       |
|-------------------------|-------|-------------------------|-----|-------|
| >KRAS-G12E- KLVVVGAGG\  | 14    | >KRAS-G12E- KLVVVGAEG\  | 9   | 5     |
| >KRAS-G12E- KLVVVGAGG\  | 121   | >KRAS-G12E- KLVVVGAEG\  | 20  | 101   |
| >KRAS-G12E- KLVVVGAGG\  | 6     | >KRAS-G12E- KLVVVGAEG\  | 5   | 1     |
| >KRAS-G12E- YKLVVVGAGC  | 423   | >KRAS-G12E- YKLVVVGAECC | 164 | 259   |
| >KRAS-G12E- YKLVVVGAGC  | 220   | >KRAS-G12E- YKLVVVGAECC | 98  | 122   |
| >KRAS-G12E- YKLVVVGAGC  | 662   | >KRAS-G12E- YKLVVVGAECC | 240 | 422   |
| >KRAS-G12E- YKLVVVGAGC  | 696   | >KRAS-G12E- YKLVVVGAECC | 233 | 463   |
| >KRAS-G12F- AGGVGKSALT  | 21011 | >KRAS-G12F- AFGVGKSALT  | 438 | 20573 |
| >KRAS-G12F- TEYKLVVVGAG | 4607  | >KRAS-G12F- TEYKLVVVGAG | 138 | 4469  |
| >KRAS-G12F- TEYKLVVVGAG | 11873 | >KRAS-G12F- TEYKLVVVGAG | 213 | 11660 |
| >KRAS-G12F- TEYKLVVVGAG | 20054 | >KRAS-G12F- TEYKLVVVGAG | 78  | 19976 |
| >KRAS-G12F- TEYKLVVVGAG | 3297  | >KRAS-G12F- TEYKLVVVGAG | 9   | 3288  |
| >KRAS-G12F- TEYKLVVVGAG | 12960 | >KRAS-G12F- TEYKLVVVGAG | 171 | 12789 |
| >KRAS-G12F- TEYKLVVVGAG | 3172  | >KRAS-G12F- TEYKLVVVGAG | 64  | 3108  |
| >KRAS-G12F- TEYKLVVVGAG | 6833  | >KRAS-G12F- TEYKLVVVGAG | 273 | 6560  |
| >KRAS-G12F- TEYKLVVVGAG | 5927  | >KRAS-G12F- TEYKLVVVGAG | 127 | 5800  |
| >KRAS-G12F- TEYKLVVVGAG | 1689  | >KRAS-G12F- TEYKLVVVGAG | 32  | 1657  |
| >KRAS-G12F- GAGGVGKSA   | 7777  | >KRAS-G12F- GAFGVGKSAI  | 325 | 7452  |
| >KRAS-G12F- VVGAGGVGK   | 326   | >KRAS-G12F- VVGAFGVGK   | 250 | 76    |
| >KRAS-G12F- VVGAGGVGK   | 89    | >KRAS-G12F- VVGAFGVGK   | 26  | 63    |
| >KRAS-G12F- VVVGAGGV    | 1957  | >KRAS-G12F- VVVGAFGV    | 251 | 1706  |
| >KRAS-G12F- VVVGAGGV    | 117   | >KRAS-G12F- VVVGAFGV    | 94  | 23    |
| >KRAS-G12F- VVVGAGGV    | 68    | >KRAS-G12F- VVVGAFGV    | 6   | 62    |
| >KRAS-G12F- VVVGAGGV    | 139   | >KRAS-G12F- VVVGAFGV    | 29  | 110   |
| >KRAS-G12F- VVVGAGGV    | 2897  | >KRAS-G12F- VVVGAFGV    | 306 | 2591  |
| >KRAS-G12F- VVVGAGGV    | 707   | >KRAS-G12F- VVVGAFGV    | 60  | 647   |
| >KRAS-G12F- VVVGAGGV    | 2371  | >KRAS-G12F- VVVGAFGV    | 80  | 2291  |
| >KRAS-G12F- VVVGAGGV    | 23    | >KRAS-G12F- VVVGAFGV    | 6   | 17    |
| >KRAS-G12F- VVVGAGGVG   | 76    | >KRAS-G12F- VVVGAFGVG   | 77  | 1     |
| >KRAS-G12F- VVVGAGGVG   | 101   | >KRAS-G12F- VVVGAFGVG   | 43  | 58    |
| >KRAS-G12F- VVVGAGGVG   | 203   | >KRAS-G12F- VVVGAFGVG   | 73  | 130   |
| >KRAS-G12F- VVVGAGGV    | 191   | >KRAS-G12F- VVVGAFGV    | 37  | 154   |
| >KRAS-G12F- VVVGAGGV    | 649   | >KRAS-G12F- VVVGAFGV    | 69  | 580   |
| >KRAS-G12F- LVVVGAGGV   | 3498  | >KRAS-G12F- LVVVGAFGV   | 389 | 3109  |
| >KRAS-G12F- LVVVGAGGV   | 180   | >KRAS-G12F- LVVVGAFGV   | 252 | 72    |
| >KRAS-G12F- LVVVGAGGV   | 55    | >KRAS-G12F- LVVVGAFGV   | 5   | 50    |
| >KRAS-G12F- LVVVGAGGV   | 1068  | >KRAS-G12F- LVVVGAFGV   | 87  | 981   |
| >KRAS-G12F- LVVVGAGGV   | 3578  | >KRAS-G12F- LVVVGAFGV   | 174 | 3404  |
| >KRAS-G12F- LVVVGAGGV   | 2712  | >KRAS-G12F- LVVVGAFGV   | 62  | 2650  |
| >KRAS-G12F- LVVVGAGGV   | 3213  | >KRAS-G12F- LVVVGAFGV   | 67  | 3146  |
| >KRAS-G12F- LVVVGAGGV   | 75    | >KRAS-G12F- LVVVGAFGV   | 6   | 69    |
| >KRAS-G12F- LVVVGAGGV\  | 572   | >KRAS-G12F- LVVVGAFGV\  | 123 | 449   |
| >KRAS-G12F- LVVVGAGGV\  | 284   | >KRAS-G12F- LVVVGAFGV\  | 103 | 181   |

|                         |       |                         |     |       |
|-------------------------|-------|-------------------------|-----|-------|
| >KRAS-G12F-LVVVGAGGV    | 154   | >KRAS-G12F-LVVVGAFGV    | 42  | 112   |
| >KRAS-G12F-LVVVGAGGV    | 159   | >KRAS-G12F-LVVVGAFGV    | 18  | 141   |
| >KRAS-G12F-KLVVVGAGG\   | 1541  | >KRAS-G12F-KLVVVGAFG\   | 121 | 1420  |
| >KRAS-G12F-KLVVVGAGG\   | 392   | >KRAS-G12F-KLVVVGAFG\   | 80  | 312   |
| >KRAS-G12F-KLVVVGAGG\   | 35    | >KRAS-G12F-KLVVVGAFG\   | 79  | 44    |
| >KRAS-G12F-KLVVVGAGG\   | 661   | >KRAS-G12F-KLVVVGAFG\   | 95  | 566   |
| >KRAS-G12F-KLVVVGAGG\   | 6     | >KRAS-G12F-KLVVVGAFG\   | 3   | 3     |
| >KRAS-G12F-KLVVVGAGG\   | 17    | >KRAS-G12F-KLVVVGAFG\   | 4   | 13    |
| >KRAS-G12F-KLVVVGAGG\   | 14    | >KRAS-G12F-KLVVVGAFG\   | 6   | 8     |
| >KRAS-G12F-KLVVVGAGG\   | 121   | >KRAS-G12F-KLVVVGAFG\   | 7   | 114   |
| >KRAS-G12F-KLVVVGAGG\   | 6     | >KRAS-G12F-KLVVVGAFG\   | 3   | 3     |
| >KRAS-G12F-KLVVVGAG     | 15079 | >KRAS-G12F-KLVVVGAF     | 122 | 14957 |
| >KRAS-G12F-KLVVVGAG     | 5603  | >KRAS-G12F-KLVVVGAF     | 82  | 5521  |
| >KRAS-G12F-KLVVVGAG     | 15848 | >KRAS-G12F-KLVVVGAF     | 86  | 15762 |
| >KRAS-G12F-YKLVVVGAGC   | 423   | >KRAS-G12F-YKLVVVGAFc   | 54  | 369   |
| >KRAS-G12F-YKLVVVGAGC   | 220   | >KRAS-G12F-YKLVVVGAFc   | 46  | 174   |
| >KRAS-G12F-YKLVVVGAGC   | 2437  | >KRAS-G12F-YKLVVVGAFc   | 323 | 2114  |
| >KRAS-G12F-YKLVVVGAGC   | 662   | >KRAS-G12F-YKLVVVGAFc   | 62  | 600   |
| >KRAS-G12F-YKLVVVGAGC   | 5066  | >KRAS-G12F-YKLVVVGAFc   | 285 | 4781  |
| >KRAS-G12F-YKLVVVGAGC   | 1887  | >KRAS-G12F-YKLVVVGAFc   | 461 | 1426  |
| >KRAS-G12F-YKLVVVGAG    | 5121  | >KRAS-G12F-YKLVVVGAF    | 4   | 5117  |
| >KRAS-G12F-YKLVVVGAGC   | 696   | >KRAS-G12F-YKLVVVGAFc   | 245 | 451   |
| >KRAS-G12F-EYKLVVVGAC   | 35770 | >KRAS-G12F-EYKLVVVGAF   | 87  | 35683 |
| >KRAS-G12F-EYKLVVVGAC   | 30803 | >KRAS-G12F-EYKLVVVGAF   | 134 | 30669 |
| >KRAS-G12F-EYKLVVVGAC   | 11844 | >KRAS-G12F-EYKLVVVGAF   | 35  | 11809 |
| >KRAS-G12F-EYKLVVVGAC   | 26658 | >KRAS-G12F-EYKLVVVGAF   | 418 | 26240 |
| >KRAS-G12I-I-GGVGKSALTI | 2287  | >KRAS-G12I-I-GGVGKSALTI | 247 | 2040  |
| >KRAS-G12I-I-TEYKLVVGA  | 4607  | >KRAS-G12I-I-TEYKLVVGA  | 6   | 4601  |
| >KRAS-G12I-I-TEYKLVVGA  | 3297  | >KRAS-G12I-I-TEYKLVVGA  | 193 | 3104  |
| >KRAS-G12I-I-TEYKLVVGA  | 12960 | >KRAS-G12I-I-TEYKLVVGA  | 77  | 12883 |
| >KRAS-G12I-I-TEYKLVVGA  | 3172  | >KRAS-G12I-I-TEYKLVVGA  | 55  | 3117  |
| >KRAS-G12I-I-TEYKLVVGA  | 2108  | >KRAS-G12I-I-TEYKLVVGA  | 423 | 1685  |
| >KRAS-G12I-I-TEYKLVVGA  | 1689  | >KRAS-G12I-I-TEYKLVVGA  | 4   | 1685  |
| >KRAS-G12I-I-VVGAGGVGK  | 326   | >KRAS-G12I-I-VVGAGGVGK  | 316 | 10    |
| >KRAS-G12I-I-VVGAGGVGK  | 89    | >KRAS-G12I-I-VVGAGGVGK  | 48  | 41    |
| >KRAS-G12I-I-VVGAGGV    | 117   | >KRAS-G12I-I-VVGAGGV    | 93  | 24    |
| >KRAS-G12I-I-VVGAGGV    | 68    | >KRAS-G12I-I-VVGAGGV    | 13  | 55    |
| >KRAS-G12I-I-VVGAGGV    | 139   | >KRAS-G12I-I-VVGAGGV    | 26  | 113   |
| >KRAS-G12I-I-VVGAGGV    | 707   | >KRAS-G12I-I-VVGAGGV    | 81  | 626   |
| >KRAS-G12I-I-VVGAGGV    | 2371  | >KRAS-G12I-I-VVGAGGV    | 231 | 2140  |
| >KRAS-G12I-I-VVGAGGV    | 23    | >KRAS-G12I-I-VVGAGGV    | 6   | 17    |
| >KRAS-G12I-I-VVGAGGVG   | 76    | >KRAS-G12I-I-VVGAGGVG   | 51  | 25    |
| >KRAS-G12I-I-VVGAGGVG   | 101   | >KRAS-G12I-I-VVGAGGVG   | 47  | 54    |

|                          |       |                         |     |       |
|--------------------------|-------|-------------------------|-----|-------|
| >KRAS-G12I-I VVVGAGGVG   | 203   | >KRAS-G12I-I VVVGAIQVGI | 37  | 166   |
| >KRAS-G12I-I VVVGAGGV    | 191   | >KRAS-G12I-I VVVGAIQV   | 81  | 110   |
| >KRAS-G12I-I VVVGAGGV    | 649   | >KRAS-G12I-I VVVGAIQV   | 232 | 417   |
| >KRAS-G12I-I LVVVGAGGV   | 180   | >KRAS-G12I-I LVVVGAIQV  | 410 | 230   |
| >KRAS-G12I-I LVVVGAGGV   | 55    | >KRAS-G12I-I LVVVGAIQV  | 15  | 40    |
| >KRAS-G12I-I LVVVGAGGV   | 1068  | >KRAS-G12I-I LVVVGAIQV  | 265 | 803   |
| >KRAS-G12I-I LVVVGAGGV   | 2712  | >KRAS-G12I-I LVVVGAIQV  | 292 | 2420  |
| >KRAS-G12I-I LVVVGAGGV   | 75    | >KRAS-G12I-I LVVVGAIQV  | 12  | 63    |
| >KRAS-G12I-I LVVVGAGGV   | 572   | >KRAS-G12I-I LVVVGAIQVC | 239 | 333   |
| >KRAS-G12I-I LVVVGAGGV   | 284   | >KRAS-G12I-I LVVVGAIQVC | 132 | 152   |
| >KRAS-G12I-I LVVVGAGGV   | 154   | >KRAS-G12I-I LVVVGAIQV  | 146 | 8     |
| >KRAS-G12I-I LVVVGAGGV   | 159   | >KRAS-G12I-I LVVVGAIQV  | 56  | 103   |
| >KRAS-G12I-I KLVVVGAGG   | 1541  | >KRAS-G12I-I KLVVVGAIQV | 271 | 1270  |
| >KRAS-G12I-I KLVVVGAG    | 4828  | >KRAS-G12I-I KLVVVGAI   | 228 | 4600  |
| >KRAS-G12I-I KLVVVGAGG   | 392   | >KRAS-G12I-I KLVVVGAIQV | 151 | 241   |
| >KRAS-G12I-I KLVVVGAG    | 4844  | >KRAS-G12I-I KLVVVGAI   | 31  | 4813  |
| >KRAS-G12I-I KLVVVGAGG   | 35    | >KRAS-G12I-I KLVVVGAIQV | 55  | 20    |
| >KRAS-G12I-I KLVVVGAG    | 11214 | >KRAS-G12I-I KLVVVGAI   | 304 | 10910 |
| >KRAS-G12I-I KLVVVGAGG   | 661   | >KRAS-G12I-I KLVVVGAIQV | 140 | 521   |
| >KRAS-G12I-I KLVVVGAG    | 4834  | >KRAS-G12I-I KLVVVGAI   | 16  | 4818  |
| >KRAS-G12I-I KLVVVGAGG   | 6     | >KRAS-G12I-I KLVVVGAIQV | 4   | 2     |
| >KRAS-G12I-I KLVVVGAG    | 13314 | >KRAS-G12I-I KLVVVGAI   | 81  | 13233 |
| >KRAS-G12I-I KLVVVGAGG   | 17    | >KRAS-G12I-I KLVVVGAIQV | 7   | 10    |
| >KRAS-G12I-I KLVVVGAG    | 14961 | >KRAS-G12I-I KLVVVGAI   | 220 | 14741 |
| >KRAS-G12I-I KLVVVGAGG   | 14    | >KRAS-G12I-I KLVVVGAIQV | 8   | 6     |
| >KRAS-G12I-I KLVVVGAGG   | 121   | >KRAS-G12I-I KLVVVGAIQV | 31  | 90    |
| >KRAS-G12I-I KLVVVGAG    | 24283 | >KRAS-G12I-I KLVVVGAI   | 427 | 23856 |
| >KRAS-G12I-I KLVVVGAGG   | 6     | >KRAS-G12I-I KLVVVGAIQV | 4   | 2     |
| >KRAS-G12I-I KLVVVGAG    | 15079 | >KRAS-G12I-I KLVVVGAI   | 203 | 14876 |
| >KRAS-G12I-I YKLVVVGAG   | 23203 | >KRAS-G12I-I YKLVVVGAI  | 215 | 22988 |
| >KRAS-G12I-I YKLVVVGAGC  | 423   | >KRAS-G12I-I YKLVVVGAIQ | 159 | 264   |
| >KRAS-G12I-I YKLVVVGAGC  | 220   | >KRAS-G12I-I YKLVVVGAIQ | 87  | 133   |
| >KRAS-G12I-I YKLVVVGAGC  | 662   | >KRAS-G12I-I YKLVVVGAIQ | 133 | 529   |
| >KRAS-G12I-I YKLVVVGAG   | 5121  | >KRAS-G12I-I YKLVVVGAI  | 75  | 5046  |
| >KRAS-G12I-I YKLVVVGAGC  | 696   | >KRAS-G12I-I YKLVVVGAIQ | 149 | 547   |
| >KRAS-G12I-I YKLVVVGAG   | 15897 | >KRAS-G12I-I YKLVVVGAI  | 380 | 15517 |
| >KRAS-G12I-I YKLVVVGAG   | 24531 | >KRAS-G12I-I YKLVVVGAI  | 492 | 24039 |
| >KRAS-G12I-I EYKLVVVGAGC | 23315 | >KRAS-G12I-I EYKLVVVGAI | 125 | 23190 |
| >KRAS-G12I-I EYKLVVVGAGC | 11844 | >KRAS-G12I-I EYKLVVVGAI | 181 | 11663 |
| >KRAS-G12L- AGGVGKSAL    | 23353 | >KRAS-G12L- ALGVGKSAL   | 180 | 23173 |
| >KRAS-G12L- AGGVGKSALT   | 22027 | >KRAS-G12L- ALGVGKSALT  | 89  | 21938 |
| >KRAS-G12L- AGGVGKSAL    | 24185 | >KRAS-G12L- ALGVGKSAL   | 312 | 23873 |
| >KRAS-G12L- AGGVGKSALT   | 23215 | >KRAS-G12L- ALGVGKSALT  | 149 | 23066 |

|                       |       |                       |     |       |
|-----------------------|-------|-----------------------|-----|-------|
| >KRAS-G12L-AGGVGKSAL  | 22520 | >KRAS-G12L-ALGVGKSAL  | 362 | 22158 |
| >KRAS-G12L-AGGVGKSALT | 19709 | >KRAS-G12L-ALGVGKSALT | 105 | 19604 |
| >KRAS-G12L-AGGVGKSA   | 32262 | >KRAS-G12L-ALGVGKSA   | 43  | 32219 |
| >KRAS-G12L-AGGVGKSAL  | 24721 | >KRAS-G12L-ALGVGKSAL  | 8   | 24713 |
| >KRAS-G12L-AGGVGKSALT | 33841 | >KRAS-G12L-ALGVGKSALT | 138 | 33703 |
| >KRAS-G12L-AGGVGKSALT | 28889 | >KRAS-G12L-ALGVGKSALT | 15  | 28874 |
| >KRAS-G12L-TEYKLVVGA  | 4607  | >KRAS-G12L-TEYKLVVGA  | 40  | 4567  |
| >KRAS-G12L-TEYKLVVGA  | 3297  | >KRAS-G12L-TEYKLVVGA  | 43  | 3254  |
| >KRAS-G12L-TEYKLVVGA  | 19286 | >KRAS-G12L-TEYKLVVGA  | 82  | 19204 |
| >KRAS-G12L-TEYKLVVGA  | 12960 | >KRAS-G12L-TEYKLVVGA  | 28  | 12932 |
| >KRAS-G12L-TEYKLVVGA  | 3172  | >KRAS-G12L-TEYKLVVGA  | 33  | 3139  |
| >KRAS-G12L-TEYKLVVGA  | 1689  | >KRAS-G12L-TEYKLVVGA  | 10  | 1679  |
| >KRAS-G12L-VVGAGGVGK  | 326   | >KRAS-G12L-VVGALGVGK  | 416 | 90    |
| >KRAS-G12L-VVGAGGVGK  | 89    | >KRAS-G12L-VVGALGVGK  | 51  | 38    |
| >KRAS-G12L-VVGAGGV    | 117   | >KRAS-G12L-VVGALGV    | 70  | 47    |
| >KRAS-G12L-VVGAGGV    | 68    | >KRAS-G12L-VVGALGV    | 11  | 57    |
| >KRAS-G12L-VVGAGGV    | 139   | >KRAS-G12L-VVGALGV    | 54  | 85    |
| >KRAS-G12L-VVGAGGV    | 707   | >KRAS-G12L-VVGALGV    | 139 | 568   |
| >KRAS-G12L-VVGAGGV    | 2371  | >KRAS-G12L-VVGALGV    | 398 | 1973  |
| >KRAS-G12L-VVGAGGV    | 23    | >KRAS-G12L-VVGALGV    | 7   | 16    |
| >KRAS-G12L-VVGAGGVG   | 76    | >KRAS-G12L-VVGALGVG   | 81  | 5     |
| >KRAS-G12L-VVGAGGVG   | 101   | >KRAS-G12L-VVGALGVG   | 53  | 48    |
| >KRAS-G12L-VVGAGGVG   | 203   | >KRAS-G12L-VVGALGVG   | 126 | 77    |
| >KRAS-G12L-VVGAGGV    | 191   | >KRAS-G12L-VVGALGV    | 221 | 30    |
| >KRAS-G12L-VVGAGGV    | 649   | >KRAS-G12L-VVGALGV    | 304 | 345   |
| >KRAS-G12L-LVVVGAGGV  | 180   | >KRAS-G12L-LVVVGALGV  | 294 | 114   |
| >KRAS-G12L-LVVVGAGGV  | 55    | >KRAS-G12L-LVVVGALGV  | 14  | 41    |
| >KRAS-G12L-LVVVGAGGV  | 1068  | >KRAS-G12L-LVVVGALGV  | 480 | 588   |
| >KRAS-G12L-LVVVGAGGV  | 2712  | >KRAS-G12L-LVVVGALGV  | 452 | 2260  |
| >KRAS-G12L-LVVVGAGGV  | 75    | >KRAS-G12L-LVVVGALGV  | 15  | 60    |
| >KRAS-G12L-LVVVGAGGV  | 572   | >KRAS-G12L-LVVVGALGV  | 243 | 329   |
| >KRAS-G12L-LVVVGAGGV  | 284   | >KRAS-G12L-LVVVGALGV  | 263 | 21    |
| >KRAS-G12L-LVVVGAGGV  | 154   | >KRAS-G12L-LVVVGALGV  | 473 | 319   |
| >KRAS-G12L-LVVVGAGGV  | 159   | >KRAS-G12L-LVVVGALGV  | 102 | 57    |
| >KRAS-G12L-KLVVVGAGG  | 1541  | >KRAS-G12L-KLVVVGALG  | 243 | 1298  |
| >KRAS-G12L-KLVVVGAG   | 4828  | >KRAS-G12L-KLVVVGAL   | 83  | 4745  |
| >KRAS-G12L-KLVVVGAGG  | 392   | >KRAS-G12L-KLVVVGALG  | 120 | 272   |
| >KRAS-G12L-KLVVVGAG   | 4844  | >KRAS-G12L-KLVVVGAL   | 50  | 4794  |
| >KRAS-G12L-KLVVVGAGG  | 35    | >KRAS-G12L-KLVVVGALG  | 34  | 1     |
| >KRAS-G12L-KLVVVGAG   | 11214 | >KRAS-G12L-KLVVVGAL   | 259 | 10955 |
| >KRAS-G12L-KLVVVGAGG  | 661   | >KRAS-G12L-KLVVVGALG  | 120 | 541   |
| >KRAS-G12L-KLVVVGAG   | 4834  | >KRAS-G12L-KLVVVGAL   | 17  | 4817  |
| >KRAS-G12L-KLVVVGAGG  | 6     | >KRAS-G12L-KLVVVGALG  | 4   | 2     |

|                         |       |                        |     |       |
|-------------------------|-------|------------------------|-----|-------|
| >KRAS-G12L- KLVVVGAG    | 13314 | >KRAS-G12L- KLVVVGAL   | 75  | 13239 |
| >KRAS-G12L- KLVVVGAGG'  | 17    | >KRAS-G12L- KLVVVGALG\ | 11  | 6     |
| >KRAS-G12L- KLVVVGAG    | 14961 | >KRAS-G12L- KLVVVGAL   | 155 | 14806 |
| >KRAS-G12L- KLVVVGAGG'  | 14    | >KRAS-G12L- KLVVVGALG\ | 8   | 6     |
| >KRAS-G12L- KLVVVGAGG'  | 121   | >KRAS-G12L- KLVVVGALG\ | 41  | 80    |
| >KRAS-G12L- KLVVVGAG    | 24283 | >KRAS-G12L- KLVVVGAL   | 80  | 24203 |
| >KRAS-G12L- KLVVVGAGG'  | 6     | >KRAS-G12L- KLVVVGALG\ | 4   | 2     |
| >KRAS-G12L- YKLVVVGAGC  | 423   | >KRAS-G12L- YKLVVVGALC | 150 | 273   |
| >KRAS-G12L- YKLVVVGAGC  | 220   | >KRAS-G12L- YKLVVVGALC | 126 | 94    |
| >KRAS-G12L- YKLVVVGAGC  | 662   | >KRAS-G12L- YKLVVVGALC | 176 | 486   |
| >KRAS-G12L- YKLVVVGAG   | 5121  | >KRAS-G12L- YKLVVVGAL  | 42  | 5079  |
| >KRAS-G12L- YKLVVVGAGC  | 696   | >KRAS-G12L- YKLVVVGALC | 138 | 558   |
| >KRAS-G12L- YKLVVVGAG   | 15897 | >KRAS-G12L- YKLVVVGAL  | 26  | 15871 |
| >KRAS-G12L- EYKLVVVGAGC | 23315 | >KRAS-G12L- EYKLVVVGAL | 469 | 22846 |
| >KRAS-G12L- EYKLVVVGAGC | 11844 | >KRAS-G12L- EYKLVVVGAL | 167 | 11677 |
| >KRAS-G12N VVGAGGVGK    | 326   | >KRAS-G12N VVGANGVGK   | 443 | 117   |
| >KRAS-G12N VVGAGGVGK    | 89    | >KRAS-G12N VVGANGVGK   | 82  | 7     |
| >KRAS-G12N VVGAGGV      | 1957  | >KRAS-G12N VVGANGV     | 471 | 1486  |
| >KRAS-G12N VVGAGGV      | 117   | >KRAS-G12N VVGANGV     | 132 | 15    |
| >KRAS-G12N VVGAGGV      | 68    | >KRAS-G12N VVGANGV     | 29  | 39    |
| >KRAS-G12N VVGAGGV      | 139   | >KRAS-G12N VVGANGV     | 166 | 27    |
| >KRAS-G12N VVGAGGV      | 707   | >KRAS-G12N VVGANGV     | 446 | 261   |
| >KRAS-G12N VVGAGGV      | 23    | >KRAS-G12N VVGANGV     | 14  | 9     |
| >KRAS-G12N VVGAGGVG     | 76    | >KRAS-G12N VVGANGVG    | 89  | 13    |
| >KRAS-G12N VVGAGGVG     | 101   | >KRAS-G12N VVGANGVG    | 78  | 23    |
| >KRAS-G12N VVGAGGVG     | 203   | >KRAS-G12N VVGANGVG    | 108 | 95    |
| >KRAS-G12N VVGAGGV      | 191   | >KRAS-G12N VVGANGV     | 62  | 129   |
| >KRAS-G12N VVGAGGV      | 649   | >KRAS-G12N VVGANGV     | 399 | 250   |
| >KRAS-G12N LVVVGAGGV    | 180   | >KRAS-G12N LVVVGANGV   | 186 | 6     |
| >KRAS-G12N LVVVGAGGV    | 55    | >KRAS-G12N LVVVGANGV   | 14  | 41    |
| >KRAS-G12N LVVVGAGGV    | 75    | >KRAS-G12N LVVVGANGV   | 26  | 49    |
| >KRAS-G12N LVVVGAGGV\   | 572   | >KRAS-G12N LVVVGANGV\  | 466 | 106   |
| >KRAS-G12N LVVVGAGGV\   | 284   | >KRAS-G12N LVVVGANGV\  | 178 | 106   |
| >KRAS-G12N LVVVGAGGV    | 154   | >KRAS-G12N LVVVGANGV   | 77  | 77    |
| >KRAS-G12N LVVVGAGGV    | 159   | >KRAS-G12N LVVVGANGV   | 118 | 41    |
| >KRAS-G12N KLVVVGAGG'   | 392   | >KRAS-G12N KLVVVGANG'  | 199 | 193   |
| >KRAS-G12N KLVVVGAGG'   | 35    | >KRAS-G12N KLVVVGANG'  | 47  | 12    |
| >KRAS-G12N KLVVVGAGG'   | 661   | >KRAS-G12N KLVVVGANG'  | 386 | 275   |
| >KRAS-G12N KLVVVGAGG'   | 6     | >KRAS-G12N KLVVVGANG'  | 6   | 0     |
| >KRAS-G12N KLVVVGAGG'   | 17    | >KRAS-G12N KLVVVGANG'  | 8   | 9     |
| >KRAS-G12N KLVVVGAGG'   | 14    | >KRAS-G12N KLVVVGANG'  | 10  | 4     |
| >KRAS-G12N KLVVVGAGG'   | 121   | >KRAS-G12N KLVVVGANG'  | 40  | 81    |
| >KRAS-G12N KLVVVGAGG'   | 6     | >KRAS-G12N KLVVVGANG'  | 5   | 1     |

|                       |       |                       |     |       |
|-----------------------|-------|-----------------------|-----|-------|
| >KRAS-G12N YKLVVVGAGC | 423   | >KRAS-G12N YKLVVVGANC | 175 | 248   |
| >KRAS-G12N YKLVVVGAGC | 220   | >KRAS-G12N YKLVVVGANC | 221 | 1     |
| >KRAS-G12N YKLVVVGAGC | 662   | >KRAS-G12N YKLVVVGANC | 348 | 314   |
| >KRAS-G12N YKLVVVGAGC | 696   | >KRAS-G12N YKLVVVGANC | 151 | 545   |
| >KRAS-G12R·GGVGKSAL   | 7093  | >KRAS-G12R·RGVGKSAL   | 243 | 6850  |
| >KRAS-G12R·GGVGKSALTI | 2287  | >KRAS-G12R·RGVGKSALTI | 53  | 2234  |
| >KRAS-G12R·AGGVGKSAL  | 24511 | >KRAS-G12R·ARGVGKSAL  | 48  | 24463 |
| >KRAS-G12R·AGGVGKSALT | 32893 | >KRAS-G12R·ARGVGKSALT | 284 | 32609 |
| >KRAS-G12R·TEYKLVVGA  | 39434 | >KRAS-G12R·TEYKLVVGA  | 421 | 39013 |
| >KRAS-G12R·TEYKLVVGA  | 3297  | >KRAS-G12R·TEYKLVVGA  | 364 | 2933  |
| >KRAS-G12R·GAGGVGKSA  | 7777  | >KRAS-G12R·GARGVGKSA  | 409 | 7368  |
| >KRAS-G12R·VVGAGGVGK  | 326   | >KRAS-G12R·VVGARGVGK  | 170 | 156   |
| >KRAS-G12R·VVGAGGVGK  | 89    | >KRAS-G12R·VVGARGVGK  | 71  | 18    |
| >KRAS-G12R·VVVGAGGV   | 117   | >KRAS-G12R·VVVGARGV   | 375 | 258   |
| >KRAS-G12R·VVVGAGGV   | 68    | >KRAS-G12R·VVVGARGV   | 171 | 103   |
| >KRAS-G12R·VVVGAGGV   | 139   | >KRAS-G12R·VVVGARGV   | 371 | 232   |
| >KRAS-G12R·VVVGAGGV   | 23    | >KRAS-G12R·VVVGARGV   | 27  | 4     |
| >KRAS-G12R·VVVGAGGVG  | 76    | >KRAS-G12R·VVVGARGVG  | 68  | 8     |
| >KRAS-G12R·VVVGAGGVG  | 101   | >KRAS-G12R·VVVGARGVG  | 74  | 27    |
| >KRAS-G12R·VVVGAGGVG  | 203   | >KRAS-G12R·VVVGARGVG  | 152 | 51    |
| >KRAS-G12R·VVVGAGGV   | 191   | >KRAS-G12R·VVVGARGV   | 255 | 64    |
| >KRAS-G12R·LVVVGAGGV  | 180   | >KRAS-G12R·LVVVGARGV  | 497 | 317   |
| >KRAS-G12R·LVVVGAGGV  | 55    | >KRAS-G12R·LVVVGARGV  | 123 | 68    |
| >KRAS-G12R·LVVVGAGGV  | 75    | >KRAS-G12R·LVVVGARGV  | 131 | 56    |
| >KRAS-G12R·LVVVGAGGV  | 284   | >KRAS-G12R·LVVVGARGV  | 373 | 89    |
| >KRAS-G12R·LVVVGAGGV  | 154   | >KRAS-G12R·LVVVGARGV  | 912 | 758   |
| >KRAS-G12R·LVVVGAGGV  | 159   | >KRAS-G12R·LVVVGARGV  | 616 | 457   |
| >KRAS-G12R·KLVVVGAGG  | 392   | >KRAS-G12R·KLVVVGARG  | 538 | 146   |
| >KRAS-G12R·KLVVVGAGG  | 35    | >KRAS-G12R·KLVVVGARG  | 63  | 28    |
| >KRAS-G12R·KLVVVGAGG  | 6     | >KRAS-G12R·KLVVVGARG  | 6   | 0     |
| >KRAS-G12R·KLVVVGAGG  | 17    | >KRAS-G12R·KLVVVGARG  | 22  | 5     |
| >KRAS-G12R·KLVVVGAGG  | 14    | >KRAS-G12R·KLVVVGARG  | 21  | 7     |
| >KRAS-G12R·KLVVVGAGG  | 121   | >KRAS-G12R·KLVVVGARG  | 147 | 26    |
| >KRAS-G12R·KLVVVGAGG  | 6     | >KRAS-G12R·KLVVVGARG  | 7   | 1     |
| >KRAS-G12R·KLVVVGAG   | 15037 | >KRAS-G12R·KLVVVGAR   | 37  | 15000 |
| >KRAS-G12R·KLVVVGAG   | 35568 | >KRAS-G12R·KLVVVGAR   | 297 | 35271 |
| >KRAS-G12R·YKLVVVGAGC | 423   | >KRAS-G12R·YKLVVVGARC | 647 | 224   |
| >KRAS-G12R·YKLVVVGAGC | 220   | >KRAS-G12R·YKLVVVGARC | 242 | 22    |
| >KRAS-G12R·YKLVVVGAG  | 5121  | >KRAS-G12R·YKLVVVGAR  | 396 | 4725  |
| >KRAS-G12R·YKLVVVGAGC | 696   | >KRAS-G12R·YKLVVVGARC | 223 | 473   |
| >KRAS-G12R·EYKLVVVGAC | 24345 | >KRAS-G12R·EYKLVVVGAR | 269 | 24076 |
| >KRAS-G12R·EYKLVVVGAC | 33748 | >KRAS-G12R·EYKLVVVGAR | 200 | 33548 |
| >KRAS-G12S·AGGVGKSAL  | 15310 | >KRAS-G12S·ASGVGKSAL  | 159 | 15151 |



|                       |       |                       |     |       |
|-----------------------|-------|-----------------------|-----|-------|
| >KRAS-G12S-AGGVGKSALT | 8132  | >KRAS-G12S-ASGVGKSALT | 84  | 8048  |
| >KRAS-G12S-AGGVGKSALT | 1153  | >KRAS-G12S-ASGVGKSALT | 53  | 1100  |
| >KRAS-G12S-TEYKLVVGA  | 3297  | >KRAS-G12S-TEYKLVVGA  | 416 | 2881  |
| >KRAS-G12S-TEYKLVVGA  | 3172  | >KRAS-G12S-TEYKLVVGA  | 372 | 2800  |
| >KRAS-G12S-VVGAGGVGK  | 326   | >KRAS-G12S-VVGASGVGK  | 196 | 130   |
| >KRAS-G12S-VVGAGGVGK  | 89    | >KRAS-G12S-VVGASGVGK  | 35  | 54    |
| >KRAS-G12S-VVVGAGGV   | 117   | >KRAS-G12S-VVVGASGV   | 45  | 72    |
| >KRAS-G12S-VVVGAGGV   | 68    | >KRAS-G12S-VVVGASGV   | 22  | 46    |
| >KRAS-G12S-VVVGAGGV   | 139   | >KRAS-G12S-VVVGASGV   | 72  | 67    |
| >KRAS-G12S-VVVGAGGV   | 707   | >KRAS-G12S-VVVGASGV   | 229 | 478   |
| >KRAS-G12S-VVVGAGGV   | 2371  | >KRAS-G12S-VVVGASGV   | 400 | 1971  |
| >KRAS-G12S-VVVGAGGV   | 23    | >KRAS-G12S-VVVGASGV   | 8   | 15    |
| >KRAS-G12S-VVVGAGGVG  | 76    | >KRAS-G12S-VVVGASGVG  | 65  | 11    |
| >KRAS-G12S-VVVGAGGVG  | 101   | >KRAS-G12S-VVVGASGVG  | 46  | 55    |
| >KRAS-G12S-VVVGAGGVG  | 203   | >KRAS-G12S-VVVGASGVG  | 64  | 139   |
| >KRAS-G12S-VVVGAGGV   | 191   | >KRAS-G12S-VVVGASGV   | 75  | 116   |
| >KRAS-G12S-VVVGAGGV   | 649   | >KRAS-G12S-VVVGASGV   | 355 | 294   |
| >KRAS-G12S-LVVVGAGGV  | 180   | >KRAS-G12S-LVVVGASGV  | 57  | 123   |
| >KRAS-G12S-LVVVGAGGV  | 55    | >KRAS-G12S-LVVVGASGV  | 16  | 39    |
| >KRAS-G12S-LVVVGAGGV  | 1068  | >KRAS-G12S-LVVVGASGV  | 480 | 588   |
| >KRAS-G12S-LVVVGAGGV  | 75    | >KRAS-G12S-LVVVGASGV  | 12  | 63    |
| >KRAS-G12S-LVVVGAGGV  | 572   | >KRAS-G12S-LVVVGASGV  | 273 | 299   |
| >KRAS-G12S-LVVVGAGGV  | 284   | >KRAS-G12S-LVVVGASGV  | 151 | 133   |
| >KRAS-G12S-LVVVGAGGV  | 154   | >KRAS-G12S-LVVVGASGV  | 106 | 48    |
| >KRAS-G12S-LVVVGAGGV  | 159   | >KRAS-G12S-LVVVGASGV  | 136 | 23    |
| >KRAS-G12S-KLVVVGAGG  | 392   | >KRAS-G12S-KLVVVGASG  | 122 | 270   |
| >KRAS-G12S-KLVVVGAGG  | 35    | >KRAS-G12S-KLVVVGASG  | 24  | 11    |
| >KRAS-G12S-KLVVVGAGG  | 661   | >KRAS-G12S-KLVVVGASG  | 277 | 384   |
| >KRAS-G12S-KLVVVGAGG  | 6     | >KRAS-G12S-KLVVVGASG  | 4   | 2     |
| >KRAS-G12S-KLVVVGAGG  | 17    | >KRAS-G12S-KLVVVGASG  | 8   | 9     |
| >KRAS-G12S-KLVVVGAGG  | 14    | >KRAS-G12S-KLVVVGASG  | 9   | 5     |
| >KRAS-G12S-KLVVVGAGG  | 121   | >KRAS-G12S-KLVVVGASG  | 27  | 94    |
| >KRAS-G12S-KLVVVGAGG  | 6     | >KRAS-G12S-KLVVVGASG  | 4   | 2     |
| >KRAS-G12S-YKLVVVGAGC | 423   | >KRAS-G12S-YKLVVVGASC | 187 | 236   |
| >KRAS-G12S-YKLVVVGAGC | 220   | >KRAS-G12S-YKLVVVGASC | 125 | 95    |
| >KRAS-G12S-YKLVVVGAGC | 662   | >KRAS-G12S-YKLVVVGASC | 263 | 399   |
| >KRAS-G12S-YKLVVVGAGC | 696   | >KRAS-G12S-YKLVVVGASC | 86  | 610   |
| >KRAS-G12V-GGVGKSALTI | 2287  | >KRAS-G12V-VGVGKSALTI | 461 | 1826  |
| >KRAS-G12V-AGGVGKSAL  | 10826 | >KRAS-G12V-AVGVGKSAL  | 453 | 10373 |
| >KRAS-G12V-TEYKLVVGA  | 4607  | >KRAS-G12V-TEYKLVVGA  | 18  | 4589  |
| >KRAS-G12V-TEYKLVVGA  | 3297  | >KRAS-G12V-TEYKLVVGA  | 123 | 3174  |
| >KRAS-G12V-TEYKLVVGA  | 12960 | >KRAS-G12V-TEYKLVVGA  | 156 | 12804 |
| >KRAS-G12V-TEYKLVVGA  | 3172  | >KRAS-G12V-TEYKLVVGA  | 71  | 3101  |

|                       |       |                       |     |       |
|-----------------------|-------|-----------------------|-----|-------|
| >KRAS-G12V·TEYKLVVVG  | 2108  | >KRAS-G12V·TEYKLVVVG  | 91  | 2017  |
| >KRAS-G12V·TEYKLVVVG  | 1689  | >KRAS-G12V·TEYKLVVVG  | 8   | 1681  |
| >KRAS-G12V·VVGAGGVGK  | 326   | >KRAS-G12V·VVGAVGVGK  | 203 | 123   |
| >KRAS-G12V·VVGAGGVGK  | 89    | >KRAS-G12V·VVGAVGVGK  | 42  | 47    |
| >KRAS-G12V·VVVGAGGV   | 1957  | >KRAS-G12V·VVVGAVGV   | 473 | 1484  |
| >KRAS-G12V·VVVGAGGV   | 117   | >KRAS-G12V·VVVGAVGV   | 72  | 45    |
| >KRAS-G12V·VVVGAGGV   | 68    | >KRAS-G12V·VVVGAVGV   | 15  | 53    |
| >KRAS-G12V·VVVGAGGV   | 139   | >KRAS-G12V·VVVGAVGV   | 34  | 105   |
| >KRAS-G12V·VVVGAGGV   | 707   | >KRAS-G12V·VVVGAVGV   | 86  | 621   |
| >KRAS-G12V·VVVGAGGV   | 2371  | >KRAS-G12V·VVVGAVGV   | 199 | 2172  |
| >KRAS-G12V·VVVGAGGV   | 23    | >KRAS-G12V·VVVGAVGV   | 6   | 17    |
| >KRAS-G12V·VVVGAGGVG  | 76    | >KRAS-G12V·VVVGAVGVG  | 63  | 13    |
| >KRAS-G12V·VVVGAGGVG  | 101   | >KRAS-G12V·VVVGAVGVG  | 40  | 61    |
| >KRAS-G12V·VVVGAGGVG  | 203   | >KRAS-G12V·VVVGAVGVG  | 58  | 145   |
| >KRAS-G12V·VVVGAGGV   | 191   | >KRAS-G12V·VVVGAVGV   | 60  | 131   |
| >KRAS-G12V·VVVGAGGV   | 649   | >KRAS-G12V·VVVGAVGV   | 301 | 348   |
| >KRAS-G12V·LVVVGAGGV  | 180   | >KRAS-G12V·LVVVGAVGV  | 330 | 150   |
| >KRAS-G12V·LVVVGAGGV  | 55    | >KRAS-G12V·LVVVGAVGV  | 14  | 41    |
| >KRAS-G12V·LVVVGAGGV  | 1068  | >KRAS-G12V·LVVVGAVGV  | 324 | 744   |
| >KRAS-G12V·LVVVGAGGV  | 2712  | >KRAS-G12V·LVVVGAVGV  | 308 | 2404  |
| >KRAS-G12V·LVVVGAGGV  | 75    | >KRAS-G12V·LVVVGAVGV  | 11  | 64    |
| >KRAS-G12V·LVVVGAGGV  | 572   | >KRAS-G12V·LVVVGAVGV  | 270 | 302   |
| >KRAS-G12V·LVVVGAGGV  | 284   | >KRAS-G12V·LVVVGAVGV  | 125 | 159   |
| >KRAS-G12V·LVVVGAGGV  | 154   | >KRAS-G12V·LVVVGAVGV  | 70  | 84    |
| >KRAS-G12V·LVVVGAGGV  | 159   | >KRAS-G12V·LVVVGAVGV  | 84  | 75    |
| >KRAS-G12V·KLVVVGAG   | 20564 | >KRAS-G12V·KLVVVGAV   | 163 | 20401 |
| >KRAS-G12V·KLVVVGAG   | 4828  | >KRAS-G12V·KLVVVGAV   | 50  | 4778  |
| >KRAS-G12V·KLVVVGAGG\ | 392   | >KRAS-G12V·KLVVVGAVG\ | 221 | 171   |
| >KRAS-G12V·KLVVVGAG   | 4844  | >KRAS-G12V·KLVVVGAV   | 9   | 4835  |
| >KRAS-G12V·KLVVVGAGG\ | 35    | >KRAS-G12V·KLVVVGAVG\ | 59  | 24    |
| >KRAS-G12V·KLVVVGAG   | 11214 | >KRAS-G12V·KLVVVGAV   | 37  | 11177 |
| >KRAS-G12V·KLVVVGAGG\ | 661   | >KRAS-G12V·KLVVVGAVG\ | 241 | 420   |
| >KRAS-G12V·KLVVVGAG   | 4834  | >KRAS-G12V·KLVVVGAV   | 3   | 4831  |
| >KRAS-G12V·KLVVVGAGG\ | 6     | >KRAS-G12V·KLVVVGAVG\ | 4   | 2     |
| >KRAS-G12V·KLVVVGAG   | 13314 | >KRAS-G12V·KLVVVGAV   | 10  | 13304 |
| >KRAS-G12V·KLVVVGAGG\ | 17    | >KRAS-G12V·KLVVVGAVG\ | 7   | 10    |
| >KRAS-G12V·KLVVVGAG   | 14961 | >KRAS-G12V·KLVVVGAV   | 16  | 14945 |
| >KRAS-G12V·KLVVVGAGG\ | 14    | >KRAS-G12V·KLVVVGAVG\ | 8   | 6     |
| >KRAS-G12V·KLVVVGAG   | 25902 | >KRAS-G12V·KLVVVGAV   | 134 | 25768 |
| >KRAS-G12V·KLVVVGAGG\ | 121   | >KRAS-G12V·KLVVVGAVG\ | 24  | 97    |
| >KRAS-G12V·KLVVVGAG   | 24283 | >KRAS-G12V·KLVVVGAV   | 7   | 24276 |
| >KRAS-G12V·KLVVVGAGG\ | 6     | >KRAS-G12V·KLVVVGAVG\ | 4   | 2     |
| >KRAS-G12V·YKLVVVGAG  | 16618 | >KRAS-G12V·YKLVVVGAV  | 240 | 16378 |

|                        |       |                        |     |       |
|------------------------|-------|------------------------|-----|-------|
| >KRAS-G12V·YKLVVVGAGC  | 423   | >KRAS-G12V·YKLVVVGAVC  | 151 | 272   |
| >KRAS-G12V·YKLVVVGAG   | 17397 | >KRAS-G12V·YKLVVVGAV   | 72  | 17325 |
| >KRAS-G12V·YKLVVVGAGC  | 220   | >KRAS-G12V·YKLVVVGAVC  | 99  | 121   |
| >KRAS-G12V·YKLVVVGAGC  | 662   | >KRAS-G12V·YKLVVVGAVC  | 142 | 520   |
| >KRAS-G12V·YKLVVVGAG   | 5121  | >KRAS-G12V·YKLVVVGAV   | 97  | 5024  |
| >KRAS-G12V·YKLVVVGAGC  | 696   | >KRAS-G12V·YKLVVVGAVC  | 94  | 602   |
| >KRAS-G12V·YKLVVVGAG   | 15897 | >KRAS-G12V·YKLVVVGAV   | 465 | 15432 |
| >KRAS-G12W·AGGVGKSALT  | 21011 | >KRAS-G12W·AWGVGKSAL   | 359 | 20652 |
| >KRAS-G12W·AGGVGKSAL   | 37476 | >KRAS-G12W·AWGVGKSAL   | 257 | 37219 |
| >KRAS-G12W·TEYKLVVVGAG | 4607  | >KRAS-G12W·TEYKLVVVGAG | 185 | 4422  |
| >KRAS-G12W·TEYKLVVVGAG | 3297  | >KRAS-G12W·TEYKLVVVGAG | 35  | 3262  |
| >KRAS-G12W·TEYKLVVVGAG | 3172  | >KRAS-G12W·TEYKLVVVGAG | 470 | 2702  |
| >KRAS-G12W·TEYKLVVVGAG | 6833  | >KRAS-G12W·TEYKLVVVGAG | 72  | 6761  |
| >KRAS-G12W·TEYKLVVVGAG | 5927  | >KRAS-G12W·TEYKLVVVGAG | 50  | 5877  |
| >KRAS-G12W·TEYKLVVVGAG | 1689  | >KRAS-G12W·TEYKLVVVGAG | 93  | 1596  |
| >KRAS-G12W·TEYKLVVVGAG | 28093 | >KRAS-G12W·TEYKLVVVGAG | 54  | 28039 |
| >KRAS-G12W·GAGGVGKSA   | 7777  | >KRAS-G12W·GAWGVGKSA   | 473 | 7304  |
| >KRAS-G12W·GAGGVGKSA   | 9745  | >KRAS-G12W·GAWGVGKSA   | 337 | 9408  |
| >KRAS-G12W·VVGAGGVGK   | 326   | >KRAS-G12W·VVGAWGVGI   | 274 | 52    |
| >KRAS-G12W·VVGAGGVGK   | 89    | >KRAS-G12W·VVGAWGVGI   | 34  | 55    |
| >KRAS-G12W·VVVGAGGV    | 6096  | >KRAS-G12W·VVVGAWGV    | 488 | 5608  |
| >KRAS-G12W·VVVGAGGV    | 1957  | >KRAS-G12W·VVVGAWGV    | 419 | 1538  |
| >KRAS-G12W·VVVGAGGV    | 117   | >KRAS-G12W·VVVGAWGV    | 112 | 5     |
| >KRAS-G12W·VVVGAGGV    | 68    | >KRAS-G12W·VVVGAWGV    | 7   | 61    |
| >KRAS-G12W·VVVGAGGV    | 139   | >KRAS-G12W·VVVGAWGV    | 17  | 122   |
| >KRAS-G12W·VVVGAGGV    | 2897  | >KRAS-G12W·VVVGAWGV    | 193 | 2704  |
| >KRAS-G12W·VVVGAGGV    | 707   | >KRAS-G12W·VVVGAWGV    | 35  | 672   |
| >KRAS-G12W·VVVGAGGV    | 2371  | >KRAS-G12W·VVVGAWGV    | 76  | 2295  |
| >KRAS-G12W·VVVGAGGV    | 23    | >KRAS-G12W·VVVGAWGV    | 6   | 17    |
| >KRAS-G12W·VVVGAGGVG   | 76    | >KRAS-G12W·VVVGAWGVG   | 117 | 41    |
| >KRAS-G12W·VVVGAGGVG   | 101   | >KRAS-G12W·VVVGAWGVG   | 77  | 24    |
| >KRAS-G12W·VVVGAGGVG   | 203   | >KRAS-G12W·VVVGAWGVG   | 119 | 84    |
| >KRAS-G12W·VVVGAGGV    | 191   | >KRAS-G12W·VVVGAWGV    | 54  | 137   |
| >KRAS-G12W·VVVGAGGV    | 649   | >KRAS-G12W·VVVGAWGV    | 117 | 532   |
| >KRAS-G12W·LVVVGAGGV   | 3498  | >KRAS-G12W·LVVVGAWGV   | 419 | 3079  |
| >KRAS-G12W·LVVVGAGGV   | 180   | >KRAS-G12W·LVVVGAWGV   | 151 | 29    |
| >KRAS-G12W·LVVVGAGGV   | 55    | >KRAS-G12W·LVVVGAWGV   | 4   | 51    |
| >KRAS-G12W·LVVVGAGGV   | 1068  | >KRAS-G12W·LVVVGAWGV   | 27  | 1041  |
| >KRAS-G12W·LVVVGAGGV   | 3578  | >KRAS-G12W·LVVVGAWGV   | 40  | 3538  |
| >KRAS-G12W·LVVVGAGGV   | 2712  | >KRAS-G12W·LVVVGAWGV   | 31  | 2681  |
| >KRAS-G12W·LVVVGAGGV   | 3213  | >KRAS-G12W·LVVVGAWGV   | 39  | 3174  |
| >KRAS-G12W·LVVVGAGGV   | 75    | >KRAS-G12W·LVVVGAWGV   | 4   | 71    |
| >KRAS-G12W·LVVVGAGGV   | 572   | >KRAS-G12W·LVVVGAWGV   | 223 | 349   |

|                        |       |                        |     |       |
|------------------------|-------|------------------------|-----|-------|
| >KRAS-G12W LVVVGAGGV   | 284   | >KRAS-G12W LVVVGAWGV   | 211 | 73    |
| >KRAS-G12W LVVVGAGGV   | 154   | >KRAS-G12W LVVVGAWGV   | 53  | 101   |
| >KRAS-G12W LVVVGAGGV   | 159   | >KRAS-G12W LVVVGAWGV   | 16  | 143   |
| >KRAS-G12W KLVVVGAGG'  | 1541  | >KRAS-G12W KLVVVGAWG   | 101 | 1440  |
| >KRAS-G12W KLVVVGAGG'  | 392   | >KRAS-G12W KLVVVGAWG   | 111 | 281   |
| >KRAS-G12W KLVVVGAGG'  | 35    | >KRAS-G12W KLVVVGAWG   | 65  | 30    |
| >KRAS-G12W KLVVVGAGG'  | 661   | >KRAS-G12W KLVVVGAWG   | 70  | 591   |
| >KRAS-G12W KLVVVGAGG'  | 6     | >KRAS-G12W KLVVVGAWG   | 2   | 4     |
| >KRAS-G12W KLVVVGAGG'  | 17    | >KRAS-G12W KLVVVGAWG   | 5   | 12    |
| >KRAS-G12W KLVVVGAGG'  | 14    | >KRAS-G12W KLVVVGAWG   | 5   | 9     |
| >KRAS-G12W KLVVVGAGG'  | 121   | >KRAS-G12W KLVVVGAWG   | 9   | 112   |
| >KRAS-G12W KLVVVGAGG'  | 6     | >KRAS-G12W KLVVVGAWG   | 3   | 3     |
| >KRAS-G12W KLVVVGAG    | 15079 | >KRAS-G12W KLVVVGAW    | 413 | 14666 |
| >KRAS-G12W KLVVVGAG    | 24473 | >KRAS-G12W KLVVVGAW    | 225 | 24248 |
| >KRAS-G12W KLVVVGAG    | 20544 | >KRAS-G12W KLVVVGAW    | 33  | 20511 |
| >KRAS-G12W YKLVVVGAGC  | 423   | >KRAS-G12W YKLVVVGAW   | 41  | 382   |
| >KRAS-G12W YKLVVVGAGC  | 220   | >KRAS-G12W YKLVVVGAW   | 24  | 196   |
| >KRAS-G12W YKLVVVGAGC  | 2437  | >KRAS-G12W YKLVVVGAW   | 157 | 2280  |
| >KRAS-G12W YKLVVVGAGC  | 662   | >KRAS-G12W YKLVVVGAW   | 42  | 620   |
| >KRAS-G12W YKLVVVGAGC  | 5066  | >KRAS-G12W YKLVVVGAW   | 172 | 4894  |
| >KRAS-G12W YKLVVVGAGC  | 3921  | >KRAS-G12W YKLVVVGAW   | 174 | 3747  |
| >KRAS-G12W YKLVVVGAGC  | 1887  | >KRAS-G12W YKLVVVGAW   | 415 | 1472  |
| >KRAS-G12W YKLVVVGAG   | 5121  | >KRAS-G12W YKLVVVGAW   | 158 | 4963  |
| >KRAS-G12W YKLVVVGAGC  | 696   | >KRAS-G12W YKLVVVGAW   | 231 | 465   |
| >KRAS-G12W YKLVVVGAGC  | 3285  | >KRAS-G12W YKLVVVGAW   | 454 | 2831  |
| >KRAS-G12W YKLVVVGAG   | 27422 | >KRAS-G12W YKLVVVGAW   | 41  | 27381 |
| >KRAS-G12W EYKLVVVGAC  | 35770 | >KRAS-G12W EYKLVVVGAV  | 486 | 35284 |
| >KRAS-G12W EYKLVVVGAC  | 11844 | >KRAS-G12W EYKLVVVGAV  | 214 | 11630 |
| >KRAS-G12Y- GGVGKSALTI | 2287  | >KRAS-G12Y- YGVGKSALTI | 183 | 2104  |
| >KRAS-G12Y- AGGVGKSAL  | 7548  | >KRAS-G12Y- AYGVGKSAL  | 16  | 7532  |
| >KRAS-G12Y- AGGVGKSALT | 10208 | >KRAS-G12Y- AYGVGKSALT | 21  | 10187 |
| >KRAS-G12Y- AGGVGKSALT | 22504 | >KRAS-G12Y- AYGVGKSALT | 311 | 22193 |
| >KRAS-G12Y- AGGVGKSAL  | 21694 | >KRAS-G12Y- AYGVGKSAL  | 54  | 21640 |
| >KRAS-G12Y- AGGVGKSALT | 21011 | >KRAS-G12Y- AYGVGKSALT | 18  | 20993 |
| >KRAS-G12Y- TEYKLVVGA  | 4607  | >KRAS-G12Y- TEYKLVVGA  | 258 | 4349  |
| >KRAS-G12Y- TEYKLVVGA  | 11873 | >KRAS-G12Y- TEYKLVVGA  | 184 | 11689 |
| >KRAS-G12Y- TEYKLVVGA  | 20054 | >KRAS-G12Y- TEYKLVVGA  | 340 | 19714 |
| >KRAS-G12Y- TEYKLVVGA  | 3297  | >KRAS-G12Y- TEYKLVVGA  | 9   | 3288  |
| >KRAS-G12Y- TEYKLVVGA  | 6833  | >KRAS-G12Y- TEYKLVVGA  | 287 | 6546  |
| >KRAS-G12Y- TEYKLVVGA  | 5927  | >KRAS-G12Y- TEYKLVVGA  | 148 | 5779  |
| >KRAS-G12Y- TEYKLVVGA  | 34308 | >KRAS-G12Y- TEYKLVVGA  | 306 | 34002 |
| >KRAS-G12Y- GAGGVGKSA  | 7777  | >KRAS-G12Y- GAYGVGKSAI | 137 | 7640  |
| >KRAS-G12Y- GAGGVGKSA  | 9745  | >KRAS-G12Y- GAYGVGKSAI | 403 | 9342  |

|                       |       |                       |     |       |
|-----------------------|-------|-----------------------|-----|-------|
| >KRAS-G12Y-VVGAGGVGK  | 326   | >KRAS-G12Y-VVGAYGVGK  | 303 | 23    |
| >KRAS-G12Y-VVGAGGVGK  | 89    | >KRAS-G12Y-VVGAYGVGK  | 45  | 44    |
| >KRAS-G12Y-VVVGAGGV   | 1957  | >KRAS-G12Y-VVVGAYGV   | 249 | 1708  |
| >KRAS-G12Y-VVVGAGGV   | 117   | >KRAS-G12Y-VVVGAYGV   | 97  | 20    |
| >KRAS-G12Y-VVVGAGGV   | 68    | >KRAS-G12Y-VVVGAYGV   | 16  | 52    |
| >KRAS-G12Y-VVVGAGGV   | 139   | >KRAS-G12Y-VVVGAYGV   | 35  | 104   |
| >KRAS-G12Y-VVVGAGGV   | 2897  | >KRAS-G12Y-VVVGAYGV   | 279 | 2618  |
| >KRAS-G12Y-VVVGAGGV   | 707   | >KRAS-G12Y-VVVGAYGV   | 112 | 595   |
| >KRAS-G12Y-VVVGAGGV   | 2371  | >KRAS-G12Y-VVVGAYGV   | 112 | 2259  |
| >KRAS-G12Y-VVVGAGGV   | 23    | >KRAS-G12Y-VVVGAYGV   | 8   | 15    |
| >KRAS-G12Y-VVVGAGGVG  | 76    | >KRAS-G12Y-VVVGAYGVG  | 86  | 10    |
| >KRAS-G12Y-VVVGAGGVG  | 101   | >KRAS-G12Y-VVVGAYGVG  | 57  | 44    |
| >KRAS-G12Y-VVVGAGGVG  | 203   | >KRAS-G12Y-VVVGAYGVG  | 82  | 121   |
| >KRAS-G12Y-VVVGAGGV   | 191   | >KRAS-G12Y-VVVGAYGV   | 31  | 160   |
| >KRAS-G12Y-VVVGAGGV   | 649   | >KRAS-G12Y-VVVGAYGV   | 173 | 476   |
| >KRAS-G12Y-LVVVGAGGV  | 3498  | >KRAS-G12Y-LVVVGAYGV  | 316 | 3182  |
| >KRAS-G12Y-LVVVGAGGV  | 180   | >KRAS-G12Y-LVVVGAYGV  | 258 | 78    |
| >KRAS-G12Y-LVVVGAGGV  | 55    | >KRAS-G12Y-LVVVGAYGV  | 9   | 46    |
| >KRAS-G12Y-LVVVGAGGV  | 1068  | >KRAS-G12Y-LVVVGAYGV  | 108 | 960   |
| >KRAS-G12Y-LVVVGAGGV  | 3578  | >KRAS-G12Y-LVVVGAYGV  | 98  | 3480  |
| >KRAS-G12Y-LVVVGAGGV  | 2712  | >KRAS-G12Y-LVVVGAYGV  | 232 | 2480  |
| >KRAS-G12Y-LVVVGAGGV  | 3213  | >KRAS-G12Y-LVVVGAYGV  | 100 | 3113  |
| >KRAS-G12Y-LVVVGAGGV  | 75    | >KRAS-G12Y-LVVVGAYGV  | 12  | 63    |
| >KRAS-G12Y-LVVVGAGGV  | 572   | >KRAS-G12Y-LVVVGAYGV  | 203 | 369   |
| >KRAS-G12Y-LVVVGAGGV  | 284   | >KRAS-G12Y-LVVVGAYGV  | 138 | 146   |
| >KRAS-G12Y-LVVVGAGGV  | 154   | >KRAS-G12Y-LVVVGAYGV  | 27  | 127   |
| >KRAS-G12Y-LVVVGAGGV  | 159   | >KRAS-G12Y-LVVVGAYGV  | 51  | 108   |
| >KRAS-G12Y-KLVVVGAGG\ | 1541  | >KRAS-G12Y-KLVVVGAYG\ | 138 | 1403  |
| >KRAS-G12Y-KLVVVGAGG\ | 392   | >KRAS-G12Y-KLVVVGAYG\ | 66  | 326   |
| >KRAS-G12Y-KLVVVGAGG\ | 35    | >KRAS-G12Y-KLVVVGAYG\ | 65  | 30    |
| >KRAS-G12Y-KLVVVGAGG\ | 661   | >KRAS-G12Y-KLVVVGAYG\ | 77  | 584   |
| >KRAS-G12Y-KLVVVGAGG\ | 6     | >KRAS-G12Y-KLVVVGAYG\ | 3   | 3     |
| >KRAS-G12Y-KLVVVGAGG\ | 17    | >KRAS-G12Y-KLVVVGAYG\ | 4   | 13    |
| >KRAS-G12Y-KLVVVGAGG\ | 14    | >KRAS-G12Y-KLVVVGAYG\ | 7   | 7     |
| >KRAS-G12Y-KLVVVGAGG\ | 121   | >KRAS-G12Y-KLVVVGAYG\ | 8   | 113   |
| >KRAS-G12Y-KLVVVGAGG\ | 6     | >KRAS-G12Y-KLVVVGAYG\ | 4   | 2     |
| >KRAS-G12Y-KLVVVGAG   | 19546 | >KRAS-G12Y-KLVVVGAY   | 403 | 19143 |
| >KRAS-G12Y-KLVVVGAG   | 26416 | >KRAS-G12Y-KLVVVGAY   | 251 | 26165 |
| >KRAS-G12Y-KLVVVGAG   | 21549 | >KRAS-G12Y-KLVVVGAY   | 30  | 21519 |
| >KRAS-G12Y-KLVVVGAG   | 26418 | >KRAS-G12Y-KLVVVGAY   | 81  | 26337 |
| >KRAS-G12Y-KLVVVGAG   | 5603  | >KRAS-G12Y-KLVVVGAY   | 90  | 5513  |
| >KRAS-G12Y-KLVVVGAG   | 30099 | >KRAS-G12Y-KLVVVGAY   | 271 | 29828 |
| >KRAS-G12Y-KLVVVGAG   | 15848 | >KRAS-G12Y-KLVVVGAY   | 329 | 15519 |

|                       |       |                       |     |       |
|-----------------------|-------|-----------------------|-----|-------|
| >KRAS-G12Y-KLVVVGAG   | 36437 | >KRAS-G12Y-KLVVVGAY   | 190 | 36247 |
| >KRAS-G12Y-YKLVVVGAGC | 423   | >KRAS-G12Y-YKLVVVGAYC | 116 | 307   |
| >KRAS-G12Y-YKLVVVGAGC | 220   | >KRAS-G12Y-YKLVVVGAYC | 54  | 166   |
| >KRAS-G12Y-YKLVVVGAGC | 2437  | >KRAS-G12Y-YKLVVVGAYC | 264 | 2173  |
| >KRAS-G12Y-YKLVVVGAGC | 662   | >KRAS-G12Y-YKLVVVGAYC | 122 | 540   |
| >KRAS-G12Y-YKLVVVGAGC | 5066  | >KRAS-G12Y-YKLVVVGAYC | 357 | 4709  |
| >KRAS-G12Y-YKLVVVGAG  | 32075 | >KRAS-G12Y-YKLVVVGAY  | 388 | 31687 |
| >KRAS-G12Y-YKLVVVGAG  | 5121  | >KRAS-G12Y-YKLVVVGAY  | 8   | 5113  |
| >KRAS-G12Y-YKLVVVGAGC | 696   | >KRAS-G12Y-YKLVVVGAYC | 165 | 531   |
| >KRAS-G12Y-YKLVVVGAG  | 38060 | >KRAS-G12Y-YKLVVVGAY  | 264 | 37796 |
| >KRAS-G12Y-EYKLVVVGAC | 17935 | >KRAS-G12Y-EYKLVVVGAY | 157 | 17778 |
| >KRAS-G12Y-EYKLVVVGAC | 20949 | >KRAS-G12Y-EYKLVVVGAY | 292 | 20657 |
| >KRAS-G12Y-EYKLVVVGAC | 26658 | >KRAS-G12Y-EYKLVVVGAY | 124 | 26534 |
| >KRAS-G12Y-EYKLVVVGAC | 27605 | >KRAS-G12Y-EYKLVVVGAY | 68  | 27537 |
| >KRAS-G12Y-EYKLVVVGAC | 24729 | >KRAS-G12Y-EYKLVVVGAY | 47  | 24682 |
| >KRAS-G13A-GVGKSALTI  | 931   | >KRAS-G13A-AVGKSALTI  | 175 | 756   |
| >KRAS-G13A-GGVGKSAL   | 7093  | >KRAS-G13A-GAVGKSAL   | 164 | 6929  |
| >KRAS-G13A-GGVGKSALTI | 2287  | >KRAS-G13A-GAVGKSALTI | 43  | 2244  |
| >KRAS-G13A-AGGVGKSALT | 1153  | >KRAS-G13A-AGAVGKSALT | 359 | 794   |
| >KRAS-G13A-VVGAGGVGK  | 326   | >KRAS-G13A-VVGAGAVGK  | 210 | 116   |
| >KRAS-G13A-VVGAGGVGK  | 89    | >KRAS-G13A-VVGAGAVGK  | 87  | 2     |
| >KRAS-G13A-VVVGAGGV   | 117   | >KRAS-G13A-VVVGAGAV   | 101 | 16    |
| >KRAS-G13A-VVVGAGGV   | 68    | >KRAS-G13A-VVVGAGAV   | 39  | 29    |
| >KRAS-G13A-VVVGAGGV   | 139   | >KRAS-G13A-VVVGAGAV   | 112 | 27    |
| >KRAS-G13A-VVVGAGGV   | 23    | >KRAS-G13A-VVVGAGAV   | 28  | 5     |
| >KRAS-G13A-VVVGAGGVG  | 76    | >KRAS-G13A-VVVGAGAVG  | 111 | 35    |
| >KRAS-G13A-VVVGAGGVG  | 101   | >KRAS-G13A-VVVGAGAVG  | 127 | 26    |
| >KRAS-G13A-VVVGAGGVG  | 203   | >KRAS-G13A-VVVGAGAVG  | 200 | 3     |
| >KRAS-G13A-VVVGAGGV   | 191   | >KRAS-G13A-VVVGAGAV   | 189 | 2     |
| >KRAS-G13A-LVVVGAGGV  | 180   | >KRAS-G13A-LVVVGAGAV  | 169 | 11    |
| >KRAS-G13A-LVVVGAGG   | 9304  | >KRAS-G13A-LVVVGAGA   | 212 | 9092  |
| >KRAS-G13A-LVVVGAGGV  | 55    | >KRAS-G13A-LVVVGAGAV  | 44  | 11    |
| >KRAS-G13A-LVVVGAGGV  | 75    | >KRAS-G13A-LVVVGAGAV  | 187 | 112   |
| >KRAS-G13A-LVVVGAGGV  | 284   | >KRAS-G13A-LVVVGAGAV  | 159 | 125   |
| >KRAS-G13A-LVVVGAGGV  | 154   | >KRAS-G13A-LVVVGAGAV  | 213 | 59    |
| >KRAS-G13A-LVVVGAGGV  | 159   | >KRAS-G13A-LVVVGAGAV  | 250 | 91    |
| >KRAS-G13A-KLVVVGAGG  | 4751  | >KRAS-G13A-KLVVVGAGA  | 286 | 4465  |
| >KRAS-G13A-KLVVVGAGG  | 392   | >KRAS-G13A-KLVVVGAGA  | 337 | 55    |
| >KRAS-G13A-KLVVVGAGG  | 5824  | >KRAS-G13A-KLVVVGAGA  | 45  | 5779  |
| >KRAS-G13A-KLVVVGAGG  | 35    | >KRAS-G13A-KLVVVGAGA  | 35  | 0     |
| >KRAS-G13A-KLVVVGAGG  | 9366  | >KRAS-G13A-KLVVVGAGA  | 263 | 9103  |
| >KRAS-G13A-KLVVVGAGG  | 3432  | >KRAS-G13A-KLVVVGAGA  | 33  | 3399  |
| >KRAS-G13A-KLVVVGAGG  | 6     | >KRAS-G13A-KLVVVGAGA  | 6   | 0     |

|                       |       |                       |      |       |
|-----------------------|-------|-----------------------|------|-------|
| >KRAS-G13A·KLVVVGAGG  | 8199  | >KRAS-G13A·KLVVVGAGA  | 120  | 8079  |
| >KRAS-G13A·KLVVVGAGG' | 17    | >KRAS-G13A·KLVVVGAGA' | 15   | 2     |
| >KRAS-G13A·KLVVVGAGG  | 10982 | >KRAS-G13A·KLVVVGAGA  | 134  | 10848 |
| >KRAS-G13A·KLVVVGAGG' | 14    | >KRAS-G13A·KLVVVGAGA' | 25   | 11    |
| >KRAS-G13A·KLVVVGAGG' | 121   | >KRAS-G13A·KLVVVGAGA' | 259  | 138   |
| >KRAS-G13A·KLVVVGAGG  | 19686 | >KRAS-G13A·KLVVVGAGA  | 116  | 19570 |
| >KRAS-G13A·KLVVVGAGG' | 6     | >KRAS-G13A·KLVVVGAGA' | 9    | 3     |
| >KRAS-G13A·YKLVVVGAGC | 423   | >KRAS-G13A·YKLVVVGAG/ | 331  | 92    |
| >KRAS-G13A·YKLVVVGAGC | 220   | >KRAS-G13A·YKLVVVGAG/ | 235  | 15    |
| >KRAS-G13A·YKLVVVGAGC | 696   | >KRAS-G13A·YKLVVVGAG/ | 110  | 586   |
| >KRAS-G13A·YKLVVVGAGC | 3285  | >KRAS-G13A·YKLVVVGAG/ | 272  | 3013  |
| >KRAS-G13C·GVGKSALTI  | 1770  | >KRAS-G13C·CVGKSALTI  | 113  | 1657  |
| >KRAS-G13C·AGGVGKSALT | 1153  | >KRAS-G13C·AGCVGKSALT | 393  | 760   |
| >KRAS-G13C·VVGAGGVGK  | 326   | >KRAS-G13C·VVGAGCVGK  | 280  | 46    |
| >KRAS-G13C·VVGAGGVGK  | 89    | >KRAS-G13C·VVGAGCVGK  | 105  | 16    |
| >KRAS-G13C·VVVGAGGV   | 117   | >KRAS-G13C·VVVGAGCV   | 884  | 767   |
| >KRAS-G13C·VVVGAGGV   | 68    | >KRAS-G13C·VVVGAGCV   | 224  | 156   |
| >KRAS-G13C·VVVGAGGV   | 139   | >KRAS-G13C·VVVGAGCV   | 478  | 339   |
| >KRAS-G13C·VVVGAGGV   | 707   | >KRAS-G13C·VVVGAGCV   | 408  | 299   |
| >KRAS-G13C·VVVGAGGV   | 23    | >KRAS-G13C·VVVGAGCV   | 53   | 30    |
| >KRAS-G13C·VVVGAGGVG  | 76    | >KRAS-G13C·VVVGAGCVG  | 99   | 23    |
| >KRAS-G13C·VVVGAGGVG  | 101   | >KRAS-G13C·VVVGAGCVG  | 84   | 17    |
| >KRAS-G13C·VVVGAGGVG  | 203   | >KRAS-G13C·VVVGAGCVG  | 270  | 67    |
| >KRAS-G13C·VVVGAGGV   | 191   | >KRAS-G13C·VVVGAGCV   | 666  | 475   |
| >KRAS-G13C·LVVVGAGGV  | 180   | >KRAS-G13C·LVVVGAGCV  | 1255 | 1075  |
| >KRAS-G13C·LVVVGAGGV  | 55    | >KRAS-G13C·LVVVGAGCV  | 387  | 332   |
| >KRAS-G13C·LVVVGAGGV  | 75    | >KRAS-G13C·LVVVGAGCV  | 483  | 408   |
| >KRAS-G13C·LVVVGAGGV/ | 284   | >KRAS-G13C·LVVVGAGCV/ | 156  | 128   |
| >KRAS-G13C·LVVVGAGGV  | 154   | >KRAS-G13C·LVVVGAGCV  | 767  | 613   |
| >KRAS-G13C·LVVVGAGGV  | 159   | >KRAS-G13C·LVVVGAGCV  | 2355 | 2196  |
| >KRAS-G13C·KLVVVGAGG' | 392   | >KRAS-G13C·KLVVVGAGC' | 796  | 404   |
| >KRAS-G13C·KLVVVGAGG' | 35    | >KRAS-G13C·KLVVVGAGC' | 107  | 72    |
| >KRAS-G13C·KLVVVGAGG  | 3432  | >KRAS-G13C·KLVVVGAGC  | 117  | 3315  |
| >KRAS-G13C·KLVVVGAGG' | 6     | >KRAS-G13C·KLVVVGAGC' | 17   | 11    |
| >KRAS-G13C·KLVVVGAGG' | 17    | >KRAS-G13C·KLVVVGAGC' | 27   | 10    |
| >KRAS-G13C·KLVVVGAGG' | 14    | >KRAS-G13C·KLVVVGAGC' | 15   | 1     |
| >KRAS-G13C·KLVVVGAGG' | 121   | >KRAS-G13C·KLVVVGAGC' | 184  | 63    |
| >KRAS-G13C·KLVVVGAGG' | 6     | >KRAS-G13C·KLVVVGAGC' | 18   | 12    |
| >KRAS-G13C·YKLVVVGAGC | 423   | >KRAS-G13C·YKLVVVGAGC | 1533 | 1110  |
| >KRAS-G13C·YKLVVVGAGC | 220   | >KRAS-G13C·YKLVVVGAGC | 912  | 692   |
| >KRAS-G13C·YKLVVVGAGC | 696   | >KRAS-G13C·YKLVVVGAGC | 475  | 221   |
| >KRAS-G13D·GVGKSALTIQ | 7997  | >KRAS-G13D·DVGKSALTIQ | 377  | 7620  |
| >KRAS-G13D·GGVGKSALTI | 6835  | >KRAS-G13D·GDVGKSALTI | 83   | 6752  |

|                       |       |                       |      |       |
|-----------------------|-------|-----------------------|------|-------|
| >KRAS-G13D·VVGAGGVGK  | 326   | >KRAS-G13D·VVGAGDVGK  | 1537 | 1211  |
| >KRAS-G13D·VVGAGGVGK  | 89    | >KRAS-G13D·VVGAGDVGK  | 252  | 163   |
| >KRAS-G13D·VVVGAGGV   | 117   | >KRAS-G13D·VVVGAGDV   | 684  | 567   |
| >KRAS-G13D·VVVGAGGV   | 68    | >KRAS-G13D·VVVGAGDV   | 566  | 498   |
| >KRAS-G13D·VVVGAGGV   | 139   | >KRAS-G13D·VVVGAGDV   | 1106 | 967   |
| >KRAS-G13D·VVVGAGGV   | 23    | >KRAS-G13D·VVVGAGDV   | 59   | 36    |
| >KRAS-G13D·VVVGAGGVG  | 76    | >KRAS-G13D·VVVGAGDVG  | 424  | 348   |
| >KRAS-G13D·VVVGAGGVG  | 101   | >KRAS-G13D·VVVGAGDVG  | 223  | 122   |
| >KRAS-G13D·VVVGAGGVG  | 203   | >KRAS-G13D·VVVGAGDVG  | 252  | 49    |
| >KRAS-G13D·VVVGAGGV   | 191   | >KRAS-G13D·VVVGAGDV   | 1192 | 1001  |
| >KRAS-G13D·LVVVGAGGV  | 180   | >KRAS-G13D·LVVVGAGDV  | 927  | 747   |
| >KRAS-G13D·LVVVGAGGV  | 55    | >KRAS-G13D·LVVVGAGDV  | 1288 | 1233  |
| >KRAS-G13D·LVVVGAGGV  | 75    | >KRAS-G13D·LVVVGAGDV  | 315  | 240   |
| >KRAS-G13D·LVVVGAGGV  | 284   | >KRAS-G13D·LVVVGAGDV  | 191  | 93    |
| >KRAS-G13D·LVVVGAGGV  | 154   | >KRAS-G13D·LVVVGAGDV  | 1815 | 1661  |
| >KRAS-G13D·LVVVGAGGV  | 159   | >KRAS-G13D·LVVVGAGDV  | 2708 | 2549  |
| >KRAS-G13D·KLVVVGAGG' | 392   | >KRAS-G13D·KLVVVGAGD' | 1131 | 739   |
| >KRAS-G13D·KLVVVGAGG' | 35    | >KRAS-G13D·KLVVVGAGD' | 86   | 51    |
| >KRAS-G13D·KLVVVGAGG' | 6     | >KRAS-G13D·KLVVVGAGD' | 35   | 29    |
| >KRAS-G13D·KLVVVGAGG' | 17    | >KRAS-G13D·KLVVVGAGD' | 90   | 73    |
| >KRAS-G13D·KLVVVGAGG' | 14    | >KRAS-G13D·KLVVVGAGD' | 30   | 16    |
| >KRAS-G13D·KLVVVGAGG' | 121   | >KRAS-G13D·KLVVVGAGD' | 908  | 787   |
| >KRAS-G13D·KLVVVGAGG' | 6     | >KRAS-G13D·KLVVVGAGD' | 11   | 5     |
| >KRAS-G13D·YKLVVVGAGG | 423   | >KRAS-G13D·YKLVVVGAGD | 2388 | 1965  |
| >KRAS-G13D·YKLVVVGAGG | 220   | >KRAS-G13D·YKLVVVGAGD | 1484 | 1264  |
| >KRAS-G13E·GVGKSALTI  | 10637 | >KRAS-G13E·EVGKSALTI  | 121  | 10516 |
| >KRAS-G13E·GVGKSALTIQ | 7997  | >KRAS-G13E·EVGKSALTIQ | 65   | 7932  |
| >KRAS-G13E·GGVGKSALTI | 20660 | >KRAS-G13E·GEVGKSALTI | 97   | 20563 |
| >KRAS-G13E·GGVGKSAL   | 19859 | >KRAS-G13E·GEVGKSAL   | 9    | 19850 |
| >KRAS-G13E·GGVGKSAL   | 37081 | >KRAS-G13E·GEVGKSAL   | 116  | 36965 |
| >KRAS-G13E·GGVGKSALTI | 35104 | >KRAS-G13E·GEVGKSALTI | 163  | 34941 |
| >KRAS-G13E·GGVGKSALTI | 29343 | >KRAS-G13E·GEVGKSALTI | 42   | 29301 |
| >KRAS-G13E·VVGAGGVGK  | 326   | >KRAS-G13E·VVGAGEVGK  | 774  | 448   |
| >KRAS-G13E·VVGAGGVGK  | 89    | >KRAS-G13E·VVGAGEVGK  | 151  | 62    |
| >KRAS-G13E·VVVGAGGV   | 117   | >KRAS-G13E·VVVGAGEV   | 190  | 73    |
| >KRAS-G13E·VVVGAGGV   | 68    | >KRAS-G13E·VVVGAGEV   | 57   | 11    |
| >KRAS-G13E·VVVGAGGV   | 139   | >KRAS-G13E·VVVGAGEV   | 106  | 33    |
| >KRAS-G13E·VVVGAGGV   | 707   | >KRAS-G13E·VVVGAGEV   | 472  | 235   |
| >KRAS-G13E·VVVGAGGV   | 23    | >KRAS-G13E·VVVGAGEV   | 15   | 8     |
| >KRAS-G13E·VVVGAGGVG  | 76    | >KRAS-G13E·VVVGAGEVG  | 331  | 255   |
| >KRAS-G13E·VVVGAGGVG  | 101   | >KRAS-G13E·VVVGAGEVG  | 255  | 154   |
| >KRAS-G13E·VVVGAGGVG  | 203   | >KRAS-G13E·VVVGAGEVG  | 420  | 217   |
| >KRAS-G13E·VVVGAGGV   | 191   | >KRAS-G13E·VVVGAGEV   | 147  | 44    |



|                           |       |                           |      |       |
|---------------------------|-------|---------------------------|------|-------|
| >KRAS-G13E-LVVVGAGGV      | 180   | >KRAS-G13E-LVVVGAGEV      | 205  | 25    |
| >KRAS-G13E-LVVVGAGGV      | 55    | >KRAS-G13E-LVVVGAGEV      | 69   | 14    |
| >KRAS-G13E-LVVVGAGGV      | 75    | >KRAS-G13E-LVVVGAGEV      | 51   | 24    |
| >KRAS-G13E-LVVVGAGGV      | 284   | >KRAS-G13E-LVVVGAGEV      | 178  | 106   |
| >KRAS-G13E-LVVVGAGGV      | 154   | >KRAS-G13E-LVVVGAGEV      | 149  | 5     |
| >KRAS-G13E-LVVVGAGGV      | 159   | >KRAS-G13E-LVVVGAGEV      | 377  | 218   |
| >KRAS-G13E-KLVVVGAGG'     | 392   | >KRAS-G13E-KLVVVGAGE\     | 460  | 68    |
| >KRAS-G13E-KLVVVGAGG'     | 35    | >KRAS-G13E-KLVVVGAGE\     | 43   | 8     |
| >KRAS-G13E-KLVVVGAGG'     | 6     | >KRAS-G13E-KLVVVGAGE\     | 6    | 0     |
| >KRAS-G13E-KLVVVGAGG'     | 17    | >KRAS-G13E-KLVVVGAGE\     | 23   | 6     |
| >KRAS-G13E-KLVVVGAGG'     | 14    | >KRAS-G13E-KLVVVGAGE\     | 15   | 1     |
| >KRAS-G13E-KLVVVGAGG'     | 121   | >KRAS-G13E-KLVVVGAGE\     | 263  | 142   |
| >KRAS-G13E-KLVVVGAGG'     | 6     | >KRAS-G13E-KLVVVGAGE\     | 6    | 0     |
| >KRAS-G13E-YKLVVVGAGG'    | 423   | >KRAS-G13E-YKLVVVGAGE\    | 469  | 46    |
| >KRAS-G13E-YKLVVVGAGG'    | 220   | >KRAS-G13E-YKLVVVGAGE\    | 220  | 0     |
| >KRAS-G13E-YKLVVVGAGG'    | 696   | >KRAS-G13E-YKLVVVGAGE\    | 286  | 410   |
| >KRAS-G13I-I GVGKSALTI    | 931   | >KRAS-G13I-I IGVKSALTI    | 469  | 462   |
| >KRAS-G13I-I GGVGKSAL     | 8920  | >KRAS-G13I-I GIVGKSAL     | 477  | 8443  |
| >KRAS-G13I-I GGVGKSALTI   | 16470 | >KRAS-G13I-I GIVGKSALTI   | 328  | 16142 |
| >KRAS-G13I-I GGVGKSAL     | 22247 | >KRAS-G13I-I GIVGKSAL     | 256  | 21991 |
| >KRAS-G13I-I GGVGKSALTI   | 16334 | >KRAS-G13I-I GIVGKSALTI   | 392  | 15942 |
| >KRAS-G13I-I EYKLVVVGAGG' | 14570 | >KRAS-G13I-I EYKLVVVGAGG' | 499  | 14071 |
| >KRAS-G13I-I VVGAGGVGK    | 326   | >KRAS-G13I-I VVGAGIVGK    | 152  | 174   |
| >KRAS-G13I-I VVGAGGVGK    | 89    | >KRAS-G13I-I VVGAGIVGK    | 43   | 46    |
| >KRAS-G13I-I VVVGAGGV     | 117   | >KRAS-G13I-I VVVGAGIV     | 311  | 194   |
| >KRAS-G13I-I VVVGAGGV     | 68    | >KRAS-G13I-I VVVGAGIV     | 183  | 115   |
| >KRAS-G13I-I VVVGAGGV     | 139   | >KRAS-G13I-I VVVGAGIV     | 589  | 450   |
| >KRAS-G13I-I VVVGAGGV     | 23    | >KRAS-G13I-I VVVGAGIV     | 47   | 24    |
| >KRAS-G13I-I VVVGAGGVG    | 76    | >KRAS-G13I-I VVVGAGIVG†   | 91   | 15    |
| >KRAS-G13I-I VVVGAGGVG    | 101   | >KRAS-G13I-I VVVGAGIVG†   | 91   | 10    |
| >KRAS-G13I-I VVVGAGGVG    | 203   | >KRAS-G13I-I VVVGAGIVG†   | 343  | 140   |
| >KRAS-G13I-I VVVGAGGV     | 191   | >KRAS-G13I-I VVVGAGIV     | 805  | 614   |
| >KRAS-G13I-I LVVVGAGGV    | 180   | >KRAS-G13I-I LVVVGAGIV    | 432  | 252   |
| >KRAS-G13I-I LVVVGAGG     | 9304  | >KRAS-G13I-I LVVVGAGI     | 147  | 9157  |
| >KRAS-G13I-I LVVVGAGGV    | 55    | >KRAS-G13I-I LVVVGAGIV    | 322  | 267   |
| >KRAS-G13I-I LVVVGAGGV    | 75    | >KRAS-G13I-I LVVVGAGIV    | 374  | 299   |
| >KRAS-G13I-I LVVVGAGGV\   | 572   | >KRAS-G13I-I LVVVGAGIVC   | 398  | 174   |
| >KRAS-G13I-I LVVVGAGGV\   | 284   | >KRAS-G13I-I LVVVGAGIVC   | 176  | 108   |
| >KRAS-G13I-I LVVVGAGG     | 12829 | >KRAS-G13I-I LVVVGAGI     | 462  | 12367 |
| >KRAS-G13I-I LVVVGAGGV    | 154   | >KRAS-G13I-I LVVVGAGIV    | 1041 | 887   |
| >KRAS-G13I-I LVVVGAGGV    | 159   | >KRAS-G13I-I LVVVGAGIV    | 1230 | 1071  |
| >KRAS-G13I-I KLVVVGAGG    | 4751  | >KRAS-G13I-I KLVVVGAGI    | 191  | 4560  |
| >KRAS-G13I-I KLVVVGAGG'   | 392   | >KRAS-G13I-I KLVVVGAGIV   | 726  | 334   |

|                         |       |                         |      |       |
|-------------------------|-------|-------------------------|------|-------|
| >KRAS-G13I-I KLVVVGAGG  | 5824  | >KRAS-G13I-I KLVVVGAGI  | 40   | 5784  |
| >KRAS-G13I-I KLVVVGAGG' | 35    | >KRAS-G13I-I KLVVVGAGIV | 72   | 37    |
| >KRAS-G13I-I KLVVVGAGG  | 9366  | >KRAS-G13I-I KLVVVGAGI  | 176  | 9190  |
| >KRAS-G13I-I KLVVVGAGG  | 3432  | >KRAS-G13I-I KLVVVGAGI  | 11   | 3421  |
| >KRAS-G13I-I KLVVVGAGG' | 6     | >KRAS-G13I-I KLVVVGAGIV | 22   | 16    |
| >KRAS-G13I-I KLVVVGAGG  | 8199  | >KRAS-G13I-I KLVVVGAGI  | 34   | 8165  |
| >KRAS-G13I-I KLVVVGAGG' | 17    | >KRAS-G13I-I KLVVVGAGIV | 29   | 12    |
| >KRAS-G13I-I KLVVVGAGG  | 10982 | >KRAS-G13I-I KLVVVGAGI  | 74   | 10908 |
| >KRAS-G13I-I KLVVVGAGG' | 14    | >KRAS-G13I-I KLVVVGAGIV | 27   | 13    |
| >KRAS-G13I-I KLVVVGAGG' | 121   | >KRAS-G13I-I KLVVVGAGIV | 474  | 353   |
| >KRAS-G13I-I KLVVVGAGG  | 19686 | >KRAS-G13I-I KLVVVGAGI  | 98   | 19588 |
| >KRAS-G13I-I KLVVVGAGG' | 6     | >KRAS-G13I-I KLVVVGAGIV | 14   | 8     |
| >KRAS-G13I-I YKLVVVGAGC | 27443 | >KRAS-G13I-I YKLVVVGAGI | 451  | 26992 |
| >KRAS-G13I-I YKLVVVGAGC | 423   | >KRAS-G13I-I YKLVVVGAGI | 1197 | 774   |
| >KRAS-G13I-I YKLVVVGAGC | 220   | >KRAS-G13I-I YKLVVVGAGI | 997  | 777   |
| >KRAS-G13I-I YKLVVVGAGC | 6435  | >KRAS-G13I-I YKLVVVGAGI | 96   | 6339  |
| >KRAS-G13I-I YKLVVVGAGC | 696   | >KRAS-G13I-I YKLVVVGAGI | 319  | 377   |
| >KRAS-G13N GVGKSALTIQ   | 7997  | >KRAS-G13N NVGKSALTIQ   | 360  | 7637  |
| >KRAS-G13N VVGAGGVGK    | 326   | >KRAS-G13N VVGAGNVGK    | 344  | 18    |
| >KRAS-G13N VVGAGGVGK    | 89    | >KRAS-G13N VVGAGNVGK    | 91   | 2     |
| >KRAS-G13N VVVGAGGV     | 117   | >KRAS-G13N VVVGAGNV     | 160  | 43    |
| >KRAS-G13N VVVGAGGV     | 68    | >KRAS-G13N VVVGAGNV     | 172  | 104   |
| >KRAS-G13N VVVGAGGV     | 139   | >KRAS-G13N VVVGAGNV     | 325  | 186   |
| >KRAS-G13N VVVGAGGV     | 23    | >KRAS-G13N VVVGAGNV     | 29   | 6     |
| >KRAS-G13N VVVGAGGVG    | 76    | >KRAS-G13N VVVGAGNVG    | 102  | 26    |
| >KRAS-G13N VVVGAGGVG    | 101   | >KRAS-G13N VVVGAGNVG    | 118  | 17    |
| >KRAS-G13N VVVGAGGVG    | 203   | >KRAS-G13N VVVGAGNVG    | 222  | 19    |
| >KRAS-G13N VVVGAGGV     | 191   | >KRAS-G13N VVVGAGNV     | 240  | 49    |
| >KRAS-G13N LVVVGAGGV    | 180   | >KRAS-G13N LVVVGAGNV    | 238  | 58    |
| >KRAS-G13N LVVVGAGGV    | 55    | >KRAS-G13N LVVVGAGNV    | 292  | 237   |
| >KRAS-G13N LVVVGAGGV    | 75    | >KRAS-G13N LVVVGAGNV    | 149  | 74    |
| >KRAS-G13N LVVVGAGGV/   | 284   | >KRAS-G13N LVVVGAGNV/   | 155  | 129   |
| >KRAS-G13N LVVVGAGGV    | 154   | >KRAS-G13N LVVVGAGNV    | 258  | 104   |
| >KRAS-G13N LVVVGAGGV    | 159   | >KRAS-G13N LVVVGAGNV    | 274  | 115   |
| >KRAS-G13N KLVVVGAGG'   | 392   | >KRAS-G13N KLVVVGAGN'   | 471  | 79    |
| >KRAS-G13N KLVVVGAGG'   | 35    | >KRAS-G13N KLVVVGAGN'   | 42   | 7     |
| >KRAS-G13N KLVVVGAGG'   | 6     | >KRAS-G13N KLVVVGAGN'   | 11   | 5     |
| >KRAS-G13N KLVVVGAGG'   | 17    | >KRAS-G13N KLVVVGAGN'   | 31   | 14    |
| >KRAS-G13N KLVVVGAGG'   | 14    | >KRAS-G13N KLVVVGAGN'   | 18   | 4     |
| >KRAS-G13N KLVVVGAGG'   | 121   | >KRAS-G13N KLVVVGAGN'   | 253  | 132   |
| >KRAS-G13N KLVVVGAGG'   | 6     | >KRAS-G13N KLVVVGAGN'   | 8    | 2     |
| >KRAS-G13N YKLVVVGAGC   | 423   | >KRAS-G13N YKLVVVGAGI   | 1251 | 828   |
| >KRAS-G13N YKLVVVGAGC   | 220   | >KRAS-G13N YKLVVVGAGI   | 482  | 262   |

|                       |       |                       |     |       |
|-----------------------|-------|-----------------------|-----|-------|
| >KRAS-G13N YKLVVVGAGC | 696   | >KRAS-G13N YKLVVVGAGI | 309 | 387   |
| >KRAS-G13R·GVGKSALTI  | 7082  | >KRAS-G13R·RVGKSALTI  | 228 | 6854  |
| >KRAS-G13R·GVGKSALTI  | 931   | >KRAS-G13R·RVGKSALTI  | 32  | 899   |
| >KRAS-G13R·GVGKSALTIQ | 2938  | >KRAS-G13R·RVGKSALTIQ | 164 | 2774  |
| >KRAS-G13R·GVGKSALTI  | 3659  | >KRAS-G13R·RVGKSALTI  | 103 | 3556  |
| >KRAS-G13R·GVGKSALTIQ | 3750  | >KRAS-G13R·RVGKSALTIQ | 154 | 3596  |
| >KRAS-G13R·GVGKSALTI  | 1770  | >KRAS-G13R·RVGKSALTI  | 156 | 1614  |
| >KRAS-G13R·GGVGKSAL   | 24066 | >KRAS-G13R·GRVGKSAL   | 305 | 23761 |
| >KRAS-G13R·GGVGKSALTI | 25754 | >KRAS-G13R·GRVGKSALTI | 67  | 25687 |
| >KRAS-G13R·GGVGKSAL   | 10361 | >KRAS-G13R·GRVGKSAL   | 180 | 10181 |
| >KRAS-G13R·EYKLVVVGAC | 22681 | >KRAS-G13R·EYKLVVVGAC | 274 | 22407 |
| >KRAS-G13R·EYKLVVVGAC | 13124 | >KRAS-G13R·EYKLVVVGAC | 13  | 13111 |
| >KRAS-G13R·EYKLVVVGAC | 33720 | >KRAS-G13R·EYKLVVVGAC | 55  | 33665 |
| >KRAS-G13R·EYKLVVVGAC | 33699 | >KRAS-G13R·EYKLVVVGAC | 134 | 33565 |
| >KRAS-G13R·AGGVGKSA   | 14619 | >KRAS-G13R·AGRVGKSA   | 304 | 14315 |
| >KRAS-G13R·AGGVGKSALT | 11556 | >KRAS-G13R·AGRVGKSALT | 101 | 11455 |
| >KRAS-G13R·AGGVGKSAL  | 10826 | >KRAS-G13R·AGRVGKSAL  | 203 | 10623 |
| >KRAS-G13R·AGGVGKSAL  | 5873  | >KRAS-G13R·AGRVGKSAL  | 472 | 5401  |
| >KRAS-G13R·VVGAGGVGK  | 326   | >KRAS-G13R·VVGAGRVGK  | 177 | 149   |
| >KRAS-G13R·VVGAGGVGK  | 89    | >KRAS-G13R·VVGAGRVGK  | 71  | 18    |
| >KRAS-G13R·VVVGAGGV   | 117   | >KRAS-G13R·VVVGAGRV   | 339 | 222   |
| >KRAS-G13R·VVVGAGGV   | 68    | >KRAS-G13R·VVVGAGRV   | 301 | 233   |
| >KRAS-G13R·VVVGAGGV   | 139   | >KRAS-G13R·VVVGAGRV   | 204 | 65    |
| >KRAS-G13R·VVVGAGGV   | 23    | >KRAS-G13R·VVVGAGRV   | 23  | 0     |
| >KRAS-G13R·VVVGAGGVG  | 76    | >KRAS-G13R·VVVGAGRVG  | 123 | 47    |
| >KRAS-G13R·VVVGAGGVG  | 101   | >KRAS-G13R·VVVGAGRVG  | 206 | 105   |
| >KRAS-G13R·VVVGAGGVG  | 203   | >KRAS-G13R·VVVGAGRVG  | 367 | 164   |
| >KRAS-G13R·VVVGAGGV   | 191   | >KRAS-G13R·VVVGAGRV   | 418 | 227   |
| >KRAS-G13R·LVVVGAGGV  | 180   | >KRAS-G13R·LVVVGAGRV  | 431 | 251   |
| >KRAS-G13R·LVVVGAGGV  | 55    | >KRAS-G13R·LVVVGAGRV  | 309 | 254   |
| >KRAS-G13R·LVVVGAGGV  | 75    | >KRAS-G13R·LVVVGAGRV  | 62  | 13    |
| >KRAS-G13R·LVVVGAGG   | 24403 | >KRAS-G13R·LVVVGAGR   | 454 | 23949 |
| >KRAS-G13R·LVVVGAGG   | 30683 | >KRAS-G13R·LVVVGAGR   | 58  | 30625 |
| >KRAS-G13R·LVVVGAGGV  | 284   | >KRAS-G13R·LVVVGAGRV  | 173 | 111   |
| >KRAS-G13R·LVVVGAGGV  | 154   | >KRAS-G13R·LVVVGAGRV  | 297 | 143   |
| >KRAS-G13R·LVVVGAGGV  | 159   | >KRAS-G13R·LVVVGAGRV  | 803 | 644   |
| >KRAS-G13R·KLVVVGAGG  | 392   | >KRAS-G13R·KLVVVGAGR  | 613 | 221   |
| >KRAS-G13R·KLVVVGAGG  | 35    | >KRAS-G13R·KLVVVGAGR  | 89  | 54    |
| >KRAS-G13R·KLVVVGAGG  | 6     | >KRAS-G13R·KLVVVGAGR  | 7   | 1     |
| >KRAS-G13R·KLVVVGAGG  | 17    | >KRAS-G13R·KLVVVGAGR  | 51  | 34    |
| >KRAS-G13R·KLVVVGAGG  | 14    | >KRAS-G13R·KLVVVGAGR  | 25  | 11    |
| >KRAS-G13R·KLVVVGAGG  | 121   | >KRAS-G13R·KLVVVGAGR  | 344 | 223   |
| >KRAS-G13R·KLVVVGAGG  | 6     | >KRAS-G13R·KLVVVGAGR  | 6   | 0     |

|                       |       |                       |      |       |
|-----------------------|-------|-----------------------|------|-------|
| >KRAS-G13R·KLVVVGAGG  | 15957 | >KRAS-G13R·KLVVVGAGR  | 33   | 15924 |
| >KRAS-G13R·KLVVVGAGG  | 36193 | >KRAS-G13R·KLVVVGAGR  | 324  | 35869 |
| >KRAS-G13R·YKLVVVGAGC | 423   | >KRAS-G13R·YKLVVVGAGF | 1425 | 1002  |
| >KRAS-G13R·YKLVVVGAGC | 220   | >KRAS-G13R·YKLVVVGAGF | 304  | 84    |
| >KRAS-G13S·GVGKSALTI  | 931   | >KRAS-G13S·SVGKSALTI  | 237  | 694   |
| >KRAS-G13S·GVGKSALTI  | 1770  | >KRAS-G13S·SVGKSALTI  | 427  | 1343  |
| >KRAS-G13S·GGVGKSAL   | 7093  | >KRAS-G13S·GSVGKSAL   | 19   | 7074  |
| >KRAS-G13S·GGVGKSALTI | 2287  | >KRAS-G13S·GSVGKSALTI | 11   | 2276  |
| >KRAS-G13S·GGVGKSALTI | 12759 | >KRAS-G13S·GSVGKSALTI | 118  | 12641 |
| >KRAS-G13S·VVGAGGVGK  | 326   | >KRAS-G13S·VVGAGSVGK  | 139  | 187   |
| >KRAS-G13S·VVGAGGVGK  | 89    | >KRAS-G13S·VVGAGSVGK  | 60   | 29    |
| >KRAS-G13S·VVVGAGGV   | 117   | >KRAS-G13S·VVVGAGSV   | 80   | 37    |
| >KRAS-G13S·VVVGAGGV   | 68    | >KRAS-G13S·VVVGAGSV   | 51   | 17    |
| >KRAS-G13S·VVVGAGGV   | 139   | >KRAS-G13S·VVVGAGSV   | 142  | 3     |
| >KRAS-G13S·VVVGAGGV   | 23    | >KRAS-G13S·VVVGAGSV   | 14   | 9     |
| >KRAS-G13S·VVVGAGGVG  | 76    | >KRAS-G13S·VVVGAGSVG  | 55   | 21    |
| >KRAS-G13S·VVVGAGGVG  | 101   | >KRAS-G13S·VVVGAGSVG  | 80   | 21    |
| >KRAS-G13S·VVVGAGGVG  | 203   | >KRAS-G13S·VVVGAGSVG  | 149  | 54    |
| >KRAS-G13S·VVVGAGGV   | 191   | >KRAS-G13S·VVVGAGSV   | 237  | 46    |
| >KRAS-G13S·LVVVGAGGV  | 180   | >KRAS-G13S·LVVVGAGSV  | 141  | 39    |
| >KRAS-G13S·LVVVGAGGV  | 55    | >KRAS-G13S·LVVVGAGSV  | 54   | 1     |
| >KRAS-G13S·LVVVGAGGV  | 75    | >KRAS-G13S·LVVVGAGSV  | 59   | 16    |
| >KRAS-G13S·LVVVGAGGV\ | 572   | >KRAS-G13S·LVVVGAGSV\ | 429  | 143   |
| >KRAS-G13S·LVVVGAGGV\ | 284   | >KRAS-G13S·LVVVGAGSV\ | 189  | 95    |
| >KRAS-G13S·LVVVGAGGV  | 154   | >KRAS-G13S·LVVVGAGSV  | 226  | 72    |
| >KRAS-G13S·LVVVGAGGV  | 159   | >KRAS-G13S·LVVVGAGSV  | 306  | 147   |
| >KRAS-G13S·KLVVVGAGG\ | 392   | >KRAS-G13S·KLVVVGAGS\ | 248  | 144   |
| >KRAS-G13S·KLVVVGAGG\ | 35    | >KRAS-G13S·KLVVVGAGS\ | 27   | 8     |
| >KRAS-G13S·KLVVVGAGG\ | 6     | >KRAS-G13S·KLVVVGAGS\ | 7    | 1     |
| >KRAS-G13S·KLVVVGAGG\ | 17    | >KRAS-G13S·KLVVVGAGS\ | 19   | 2     |
| >KRAS-G13S·KLVVVGAGG\ | 14    | >KRAS-G13S·KLVVVGAGS\ | 18   | 4     |
| >KRAS-G13S·KLVVVGAGG\ | 121   | >KRAS-G13S·KLVVVGAGS\ | 213  | 92    |
| >KRAS-G13S·KLVVVGAGG\ | 6     | >KRAS-G13S·KLVVVGAGS\ | 6    | 0     |
| >KRAS-G13S·YKLVVVGAGC | 423   | >KRAS-G13S·YKLVVVGAGS | 357  | 66    |
| >KRAS-G13S·YKLVVVGAGC | 220   | >KRAS-G13S·YKLVVVGAGS | 267  | 47    |
| >KRAS-G13S·YKLVVVGAGC | 696   | >KRAS-G13S·YKLVVVGAGS | 152  | 544   |
| >KRAS-G13V·GGVGKSALTI | 16334 | >KRAS-G13V·GVVGKSALTI | 327  | 16007 |
| >KRAS-G13V·GGVGKSALTI | 2287  | >KRAS-G13V·GVVGKSALTI | 424  | 1863  |
| >KRAS-G13V·VVGAGGVGK  | 326   | >KRAS-G13V·VVGAGVVGK  | 194  | 132   |
| >KRAS-G13V·VVGAGGVGK  | 89    | >KRAS-G13V·VVGAGVVGK  | 52   | 37    |
| >KRAS-G13V·VVVGAGGV   | 117   | >KRAS-G13V·VVVGAGVV   | 360  | 243   |
| >KRAS-G13V·VVVGAGGV   | 68    | >KRAS-G13V·VVVGAGVV   | 167  | 99    |
| >KRAS-G13V·VVVGAGGV   | 139   | >KRAS-G13V·VVVGAGVV   | 257  | 118   |

|                       |       |                       |      |       |
|-----------------------|-------|-----------------------|------|-------|
| >KRAS-G13V·VVVGAGGV   | 23    | >KRAS-G13V·VVVGAGVV   | 32   | 9     |
| >KRAS-G13V·VVVGAGGVG  | 76    | >KRAS-G13V·VVVGAGVVG  | 101  | 25    |
| >KRAS-G13V·VVVGAGGVG  | 101   | >KRAS-G13V·VVVGAGVVG  | 93   | 8     |
| >KRAS-G13V·VVVGAGGVG  | 203   | >KRAS-G13V·VVVGAGVVG  | 312  | 109   |
| >KRAS-G13V·VVVGAGGV   | 191   | >KRAS-G13V·VVVGAGVV   | 456  | 265   |
| >KRAS-G13V·LVVVGAGG   | 15460 | >KRAS-G13V·LVVVGAGV   | 101  | 15359 |
| >KRAS-G13V·LVVVGAGGV  | 180   | >KRAS-G13V·LVVVGAGVV  | 513  | 333   |
| >KRAS-G13V·LVVVGAGG   | 9304  | >KRAS-G13V·LVVVGAGV   | 25   | 9279  |
| >KRAS-G13V·LVVVGAGGV  | 55    | >KRAS-G13V·LVVVGAGVV  | 287  | 232   |
| >KRAS-G13V·LVVVGAGG   | 24657 | >KRAS-G13V·LVVVGAGV   | 200  | 24457 |
| >KRAS-G13V·LVVVGAGG   | 32001 | >KRAS-G13V·LVVVGAGV   | 19   | 31982 |
| >KRAS-G13V·LVVVGAGGV  | 75    | >KRAS-G13V·LVVVGAGVV  | 239  | 164   |
| >KRAS-G13V·LVVVGAGGV\ | 572   | >KRAS-G13V·LVVVGAGVV\ | 455  | 117   |
| >KRAS-G13V·LVVVGAGGV\ | 284   | >KRAS-G13V·LVVVGAGVV\ | 190  | 94    |
| >KRAS-G13V·LVVVGAGG   | 12829 | >KRAS-G13V·LVVVGAGV   | 98   | 12731 |
| >KRAS-G13V·LVVVGAGGV  | 154   | >KRAS-G13V·LVVVGAGVV  | 647  | 493   |
| >KRAS-G13V·LVVVGAGG   | 18119 | >KRAS-G13V·LVVVGAGV   | 154  | 17965 |
| >KRAS-G13V·LVVVGAGGV  | 159   | >KRAS-G13V·LVVVGAGVV  | 1087 | 928   |
| >KRAS-G13V·KLVVVGAGG  | 21158 | >KRAS-G13V·KLVVVGAGV  | 116  | 21042 |
| >KRAS-G13V·KLVVVGAGG  | 4751  | >KRAS-G13V·KLVVVGAGV  | 35   | 4716  |
| >KRAS-G13V·KLVVVGAGG\ | 392   | >KRAS-G13V·KLVVVGAGV\ | 633  | 241   |
| >KRAS-G13V·KLVVVGAGG  | 5824  | >KRAS-G13V·KLVVVGAGV  | 11   | 5813  |
| >KRAS-G13V·KLVVVGAGG\ | 35    | >KRAS-G13V·KLVVVGAGV\ | 69   | 34    |
| >KRAS-G13V·KLVVVGAGG  | 9366  | >KRAS-G13V·KLVVVGAGV  | 25   | 9341  |
| >KRAS-G13V·KLVVVGAGG  | 3432  | >KRAS-G13V·KLVVVGAGV  | 3    | 3429  |
| >KRAS-G13V·KLVVVGAGG\ | 6     | >KRAS-G13V·KLVVVGAGV\ | 9    | 3     |
| >KRAS-G13V·KLVVVGAGG  | 8199  | >KRAS-G13V·KLVVVGAGV  | 7    | 8192  |
| >KRAS-G13V·KLVVVGAGG\ | 17    | >KRAS-G13V·KLVVVGAGV\ | 24   | 7     |
| >KRAS-G13V·KLVVVGAGG  | 10982 | >KRAS-G13V·KLVVVGAGV  | 7    | 10975 |
| >KRAS-G13V·KLVVVGAGG\ | 14    | >KRAS-G13V·KLVVVGAGV\ | 24   | 10    |
| >KRAS-G13V·KLVVVGAGG  | 23960 | >KRAS-G13V·KLVVVGAGV  | 23   | 23937 |
| >KRAS-G13V·KLVVVGAGG\ | 121   | >KRAS-G13V·KLVVVGAGV\ | 281  | 160   |
| >KRAS-G13V·KLVVVGAGG  | 19686 | >KRAS-G13V·KLVVVGAGV  | 4    | 19682 |
| >KRAS-G13V·KLVVVGAGG\ | 6     | >KRAS-G13V·KLVVVGAGV\ | 11   | 5     |
| >KRAS-G13V·YKLVVVGAGC | 17386 | >KRAS-G13V·YKLVVVGAG\ | 259  | 17127 |
| >KRAS-G13V·YKLVVVGAGC | 423   | >KRAS-G13V·YKLVVVGAG\ | 1182 | 759   |
| >KRAS-G13V·YKLVVVGAGC | 16719 | >KRAS-G13V·YKLVVVGAG\ | 50   | 16669 |
| >KRAS-G13V·YKLVVVGAGC | 220   | >KRAS-G13V·YKLVVVGAG\ | 503  | 283   |
| >KRAS-G13V·YKLVVVGAGC | 21323 | >KRAS-G13V·YKLVVVGAG\ | 164  | 21159 |
| >KRAS-G13V·YKLVVVGAGC | 6435  | >KRAS-G13V·YKLVVVGAG\ | 140  | 6295  |
| >KRAS-G13V·YKLVVVGAGC | 696   | >KRAS-G13V·YKLVVVGAG\ | 206  | 490   |
| >KRAS-G13V·YKLVVVGAGC | 3285  | >KRAS-G13V·YKLVVVGAG\ | 361  | 2924  |
| >KRAS-G15D·GKSALTIQL  | 414   | >KRAS-G15D·DKSALTIQL  | 453  | 39    |

|                        |       |                        |     |       |
|------------------------|-------|------------------------|-----|-------|
| >KRAS-G15D·VGKSALTIQLI | 15155 | >KRAS-G15D·VDKSALTIQLI | 171 | 14984 |
| >KRAS-G15D·VGKSALTI    | 11071 | >KRAS-G15D·VDKSALTI    | 106 | 10965 |
| >KRAS-G15D·VGKSALTIQLI | 11759 | >KRAS-G15D·VDKSALTIQLI | 120 | 11639 |
| >KRAS-G15D·VVGAGGVGK   | 326   | >KRAS-G15D·VVGAGGVDK   | 651 | 325   |
| >KRAS-G15D·VVGAGGVGK   | 89    | >KRAS-G15D·VVGAGGVDK   | 205 | 116   |
| >KRAS-G15D·VVVGAGGVG   | 76    | >KRAS-G15D·VVVGAGGVD   | 187 | 111   |
| >KRAS-G15D·VVVGAGGVG   | 101   | >KRAS-G15D·VVVGAGGVD   | 132 | 31    |
| >KRAS-G15D·VVVGAGGVG   | 203   | >KRAS-G15D·VVVGAGGVD   | 412 | 209   |
| >KRAS-G15D·LVVVGAGGV   | 284   | >KRAS-G15D·LVVVGAGGV   | 564 | 280   |
| >KRAS-G15S·GKSALTIQL   | 960   | >KRAS-G15S·SKSALTIQL   | 323 | 637   |
| >KRAS-G15S·GKSALTIQLI  | 907   | >KRAS-G15S·SKSALTIQLI  | 313 | 594   |
| >KRAS-G15S·GKSALTIQL   | 414   | >KRAS-G15S·SKSALTIQL   | 68  | 346   |
| >KRAS-G15S·VGKSALTI    | 2725  | >KRAS-G15S·VSKSALTI    | 229 | 2496  |
| >KRAS-G15S·VGKSALTIQLI | 3129  | >KRAS-G15S·VSKSALTIQLI | 210 | 2919  |
| >KRAS-G15S·VGKSALTI    | 5003  | >KRAS-G15S·VSKSALTI    | 38  | 4965  |
| >KRAS-G15S·VGKSALTIQL  | 5862  | >KRAS-G15S·VSKSALTIQL  | 36  | 5826  |
| >KRAS-G15S·VGKSALTIQLI | 17511 | >KRAS-G15S·VSKSALTIQLI | 387 | 17124 |
| >KRAS-G15S·VGKSALTI    | 15780 | >KRAS-G15S·VSKSALTI    | 410 | 15370 |
| >KRAS-G15S·VGKSALTIQL  | 6745  | >KRAS-G15S·VSKSALTIQL  | 233 | 6512  |
| >KRAS-G15S·VGKSALTIQLI | 5596  | >KRAS-G15S·VSKSALTIQLI | 203 | 5393  |
| >KRAS-G15S·VGKSALTIQ   | 5707  | >KRAS-G15S·VSKSALTIQ   | 440 | 5267  |
| >KRAS-G15S·VGKSALTIQL  | 6291  | >KRAS-G15S·VSKSALTIQL  | 348 | 5943  |
| >KRAS-G15S·VGKSALTIQLI | 2128  | >KRAS-G15S·VSKSALTIQLI | 146 | 1982  |
| >KRAS-G15S·VGKSALTI    | 1912  | >KRAS-G15S·VSKSALTI    | 93  | 1819  |
| >KRAS-G15S·VGKSALTIQLI | 2698  | >KRAS-G15S·VSKSALTIQLI | 162 | 2536  |
| >KRAS-G15S·GVGKSALTI   | 2042  | >KRAS-G15S·GVSKSALTI   | 440 | 1602  |
| >KRAS-G15S·VVGAGGVGK   | 326   | >KRAS-G15S·VVGAGGVSK   | 185 | 141   |
| >KRAS-G15S·VVGAGGVGK   | 89    | >KRAS-G15S·VVGAGGVSK   | 64  | 25    |
| >KRAS-G15S·VVVGAGGVG   | 76    | >KRAS-G15S·VVVGAGGVVS  | 61  | 15    |
| >KRAS-G15S·VVVGAGGVG   | 101   | >KRAS-G15S·VVVGAGGVVS  | 54  | 47    |
| >KRAS-G15S·VVVGAGGVG   | 203   | >KRAS-G15S·VVVGAGGVVS  | 259 | 56    |
| >KRAS-G15S·LVVVGAGGV   | 572   | >KRAS-G15S·LVVVGAGGV   | 419 | 153   |
| >KRAS-G15S·LVVVGAGGV   | 284   | >KRAS-G15S·LVVVGAGGV   | 327 | 43    |
| >KRAS-G60A·GQEEYSAM    | 497   | >KRAS-G60A·AQEEYSAM    | 153 | 344   |
| >KRAS-G60A·GQEEYSAMR   | 385   | >KRAS-G60A·AQEEYSAMR   | 183 | 202   |
| >KRAS-G60A·GQEEYSAM    | 562   | >KRAS-G60A·AQEEYSAM    | 231 | 331   |
| >KRAS-G60A·GQEEYSAM    | 658   | >KRAS-G60A·AQEEYSAM    | 90  | 568   |
| >KRAS-G60A·GQEEYSAM    | 347   | >KRAS-G60A·AQEEYSAM    | 72  | 275   |
| >KRAS-G60A·AGQEEYSAM   | 21181 | >KRAS-G60A·AAQEEYSAM   | 223 | 20958 |
| >KRAS-G60A·AGQEEYSAM   | 2893  | >KRAS-G60A·AAQEEYSAM   | 361 | 2532  |
| >KRAS-G60A·AGQEEYSAM   | 12431 | >KRAS-G60A·AAQEEYSAM   | 432 | 11999 |
| >KRAS-G60A·AGQEEYSAM   | 1842  | >KRAS-G60A·AAQEEYSAM   | 121 | 1721  |
| >KRAS-G60A·TAGQEEYSAM  | 56    | >KRAS-G60A·TAAQEEYSAM  | 6   | 50    |

|                        |       |                        |     |       |
|------------------------|-------|------------------------|-----|-------|
| >KRAS-G60A·DTAGQEEY    | 387   | >KRAS-G60A·DTAAQEEY    | 224 | 163   |
| >KRAS-G60A·DTAGQEEY    | 94    | >KRAS-G60A·DTAAQEEY    | 212 | 118   |
| >KRAS-G60A·DTAGQEEYSA  | 491   | >KRAS-G60A·DTAAQEEYSA  | 970 | 479   |
| >KRAS-G60A·DTAGQEEY    | 28    | >KRAS-G60A·DTAAQEEY    | 63  | 35    |
| >KRAS-G60A·DTAGQEEYSA  | 20    | >KRAS-G60A·DTAAQEEYSA  | 34  | 14    |
| >KRAS-G60A·DTAGQEEY    | 8     | >KRAS-G60A·DTAAQEEY    | 11  | 3     |
| >KRAS-G60A·DTAGQEEYSA  | 6     | >KRAS-G60A·DTAAQEEYSA  | 8   | 2     |
| >KRAS-G60A·DTAGQEEYSA  | 223   | >KRAS-G60A·DTAAQEEYSA  | 333 | 110   |
| >KRAS-G60A·DTAGQEEY    | 245   | >KRAS-G60A·DTAAQEEY    | 466 | 221   |
| >KRAS-G60A·DTAGQEEY    | 89    | >KRAS-G60A·DTAAQEEY    | 71  | 18    |
| >KRAS-G60A·DTAGQEEYS   | 408   | >KRAS-G60A·DTAAQEEYS   | 258 | 150   |
| >KRAS-G60A·DTAGQEEYSA  | 613   | >KRAS-G60A·DTAAQEEYSA  | 191 | 422   |
| >KRAS-G60A·DTAGQEEYSA  | 389   | >KRAS-G60A·DTAAQEEYSA  | 272 | 117   |
| >KRAS-G60A·DTAGQEEYSA  | 666   | >KRAS-G60A·DTAAQEEYSA  | 420 | 246   |
| >KRAS-G60A·DTAGQEEYSA  | 449   | >KRAS-G60A·DTAAQEEYSA  | 419 | 30    |
| >KRAS-G60A·ILDTAGQEEY  | 135   | >KRAS-G60A·ILDTAQEEY   | 106 | 29    |
| >KRAS-G60A·ILDTAGQEEY  | 349   | >KRAS-G60A·ILDTAQEEY   | 278 | 71    |
| >KRAS-G60A·ILDTAGQEEY  | 463   | >KRAS-G60A·ILDTAQEEY   | 457 | 6     |
| >KRAS-G60A·DILDTAGQEE  | 150   | >KRAS-G60A·DILDTAQEE   | 131 | 19    |
| >KRAS-G60A·DILDTAGQEE  | 183   | >KRAS-G60A·DILDTAQEE   | 248 | 65    |
| >KRAS-G60A·LLDILDTAG   | 5618  | >KRAS-G60A·LLDILDTA    | 278 | 5340  |
| >KRAS-G60A·LLDILDTAG   | 7958  | >KRAS-G60A·LLDILDTA    | 220 | 7738  |
| >KRAS-G60A·LLDILDTAG   | 11030 | >KRAS-G60A·LLDILDTA    | 148 | 10882 |
| >KRAS-G60A·LLDILDTAG   | 19534 | >KRAS-G60A·LLDILDTA    | 91  | 19443 |
| >KRAS-G60A·LLDILDTAGQ  | 401   | >KRAS-G60A·LLDILDTAQ   | 775 | 374   |
| >KRAS-G60A·CLLDILDTAG  | 2990  | >KRAS-G60A·CLLDILDTA   | 143 | 2847  |
| >KRAS-G60A·CLLDILDTAG  | 4093  | >KRAS-G60A·CLLDILDTA   | 77  | 4016  |
| >KRAS-G60A·CLLDILDTAG  | 10134 | >KRAS-G60A·CLLDILDTA   | 207 | 9927  |
| >KRAS-G60A·CLLDILDTAG  | 6482  | >KRAS-G60A·CLLDILDTA   | 119 | 6363  |
| >KRAS-G60A·CLLDILDTAG  | 3093  | >KRAS-G60A·CLLDILDTA   | 51  | 3042  |
| >KRAS-G60A·CLLDILDTAG  | 4659  | >KRAS-G60A·CLLDILDTA   | 60  | 4599  |
| >KRAS-G60A·CLLDILDTAG  | 12191 | >KRAS-G60A·CLLDILDTA   | 187 | 12004 |
| >KRAS-G60A·CLLDILDTAG  | 10208 | >KRAS-G60A·CLLDILDTA   | 83  | 10125 |
| >KRAS-G60A·CLLDILDTAGC | 479   | >KRAS-G60A·CLLDILDTAAC | 933 | 454   |
| >KRAS-G60A·CLLDILDTAG  | 11181 | >KRAS-G60A·CLLDILDTA   | 41  | 11140 |
| >KRAS-G60A·CLLDILDTAGC | 138   | >KRAS-G60A·CLLDILDTAAC | 243 | 105   |
| >KRAS-H27L·NHFVDEYDPTI | 294   | >KRAS-H27L·NLFVDEYDPTI | 291 | 3     |
| >KRAS-H27L·NHFVDEYDPTI | 21655 | >KRAS-H27L·NLFVDEYDPT  | 117 | 21538 |
| >KRAS-H27L·NHFVDEYDPTI | 22559 | >KRAS-H27L·NLFVDEYDPT  | 251 | 22308 |
| >KRAS-H27L·NHFVDEYDPTI | 17571 | >KRAS-H27L·NLFVDEYDPT  | 174 | 17397 |
| >KRAS-H27L·NHFVDEYDPTI | 18377 | >KRAS-H27L·NLFVDEYDPT  | 41  | 18336 |
| >KRAS-H27L·NHFVDEYDPTI | 16420 | >KRAS-H27L·NLFVDEYDPT  | 26  | 16394 |
| >KRAS-H27L·NHFVDEYDPTI | 19291 | >KRAS-H27L·NLFVDEYDPT  | 49  | 19242 |

|                        |       |                        |       |       |
|------------------------|-------|------------------------|-------|-------|
| >KRAS-H27L- NHFVDEYDPT | 21198 | >KRAS-H27L- NLFVDEYDPT | 350   | 20848 |
| >KRAS-H27L- NHFVDEYDPT | 32566 | >KRAS-H27L- NLFVDEYDPT | 69    | 32497 |
| >KRAS-H27L- NHFVDEYDPT | 326   | >KRAS-H27L- NLFVDEYDPT | 11748 | 11422 |
| >KRAS-H27L- IQNHVFDEY  | 69    | >KRAS-H27L- IQNLFVDEY  | 317   | 248   |
| >KRAS-H27L- IQNHVFDEY  | 65    | >KRAS-H27L- IQNLFVDEY  | 150   | 85    |
| >KRAS-H27L- IQNHVFDEY  | 5     | >KRAS-H27L- IQNLFVDEY  | 23    | 18    |
| >KRAS-H27L- LIQNHVFDEY | 680   | >KRAS-H27L- LIQNLFVDEY | 432   | 248   |
| >KRAS-H27L- LIQNHVFDEY | 91    | >KRAS-H27L- LIQNLFVDEY | 142   | 51    |
| >KRAS-H27L- LIQNHVFDEY | 342   | >KRAS-H27L- LIQNLFVDEY | 339   | 3     |
| >KRAS-H27L- QLIQNHFV   | 42    | >KRAS-H27L- QLIQNLFV   | 23    | 19    |
| >KRAS-H27L- QLIQNHFV   | 10    | >KRAS-H27L- QLIQNLFV   | 14    | 4     |
| >KRAS-H27L- QLIQNHFV   | 25    | >KRAS-H27L- QLIQNLFV   | 17    | 8     |
| >KRAS-H27L- QLIQNHFV   | 23    | >KRAS-H27L- QLIQNLFV   | 11    | 12    |
| >KRAS-H27L- QLIQNHFV   | 4     | >KRAS-H27L- QLIQNLFV   | 6     | 2     |
| >KRAS-H27L- QLIQNHFV   | 6     | >KRAS-H27L- QLIQNLFV   | 8     | 2     |
| >KRAS-H27L- QLIQNHFV   | 15    | >KRAS-H27L- QLIQNLFV   | 17    | 2     |
| >KRAS-H27L- QLIQNHFV   | 15    | >KRAS-H27L- QLIQNLFV   | 29    | 14    |
| >KRAS-H27L- QLIQNHFV   | 3     | >KRAS-H27L- QLIQNLFV   | 4     | 1     |
| >KRAS-H27L- QLIQNHFVDE | 42    | >KRAS-H27L- QLIQNLFVDE | 14    | 28    |
| >KRAS-H27L- QLIQNHFVDE | 51    | >KRAS-H27L- QLIQNLFVDE | 69    | 18    |
| >KRAS-H27L- QLIQNHFVDE | 328   | >KRAS-H27L- QLIQNLFVDE | 317   | 11    |
| >KRAS-H27L- QLIQNHFV   | 92    | >KRAS-H27L- QLIQNLFV   | 296   | 204   |
| >KRAS-H27L- QLIQNHFV   | 41    | >KRAS-H27L- QLIQNLFV   | 99    | 58    |
| >KRAS-H27L- QLIQNHFVDE | 188   | >KRAS-H27L- QLIQNLFVDE | 253   | 65    |
| >KRAS-H27L- QLIQNHFVDE | 124   | >KRAS-H27L- QLIQNLFVDE | 178   | 54    |
| >KRAS-H27L- QLIQNHFVDE | 158   | >KRAS-H27L- QLIQNLFVDE | 262   | 104   |
| >KRAS-H27L- QLIQNHFVDE | 345   | >KRAS-H27L- QLIQNLFVDE | 793   | 448   |
| >KRAS-H27L- QLIQNHFVDE | 286   | >KRAS-H27L- QLIQNLFVDE | 443   | 157   |
| >KRAS-H27L- IQLIQNHFV  | 208   | >KRAS-H27L- IQLIQNLFV  | 423   | 215   |
| >KRAS-H27L- IQLIQNHFV  | 69    | >KRAS-H27L- IQLIQNLFV  | 102   | 33    |
| >KRAS-H27L- IQLIQNHFV  | 113   | >KRAS-H27L- IQLIQNLFV  | 636   | 523   |
| >KRAS-H27L- IQLIQNHF   | 430   | >KRAS-H27L- IQLIQNLF   | 466   | 36    |
| >KRAS-H27L- IQLIQNHFV  | 6     | >KRAS-H27L- IQLIQNLFV  | 7     | 1     |
| >KRAS-H27L- IQLIQNHFV  | 26    | >KRAS-H27L- IQLIQNLFV  | 79    | 53    |
| >KRAS-H27L- IQLIQNHFV  | 52    | >KRAS-H27L- IQLIQNLFV  | 646   | 594   |
| >KRAS-H27L- IQLIQNHFV  | 30    | >KRAS-H27L- IQLIQNLFV  | 61    | 31    |
| >KRAS-H27L- IQLIQNHFV  | 133   | >KRAS-H27L- IQLIQNLFV  | 1548  | 1415  |
| >KRAS-H27L- IQLIQNHFV  | 217   | >KRAS-H27L- IQLIQNLFV  | 1871  | 1654  |
| >KRAS-H27L- IQLIQNHF   | 128   | >KRAS-H27L- IQLIQNLF   | 528   | 400   |
| >KRAS-H27L- IQLIQNHF   | 6     | >KRAS-H27L- IQLIQNLF   | 7     | 1     |
| >KRAS-H27L- IQLIQNHFV  | 509   | >KRAS-H27L- IQLIQNLFV  | 262   | 247   |
| >KRAS-H27L- TIQLIQNHFV | 608   | >KRAS-H27L- TIQLIQNLFV | 392   | 216   |
| >KRAS-H27L- TIQLIQNHFV | 838   | >KRAS-H27L- TIQLIQNLFV | 360   | 478   |



|                                    |       |                                    |      |       |
|------------------------------------|-------|------------------------------------|------|-------|
| >KRAS-H27L-TIQLIQNHFV              | 244   | >KRAS-H27L-TIQLIQNLFV              | 1301 | 1057  |
| >KRAS-H27L-TIQLIQNHFV              | 51    | >KRAS-H27L-TIQLIQNLFV              | 179  | 128   |
| >KRAS-H27L-TIQLIQNHFV              | 231   | >KRAS-H27L-TIQLIQNLFV              | 762  | 531   |
| >KRAS-H27L-LTIQLIQNHFV             | 177   | >KRAS-H27L-LTIQLIQNLFV             | 228  | 51    |
| >KRAS-H27L-LTIQLIQNH               | 16053 | >KRAS-H27L-LTIQLIQNL               | 347  | 15706 |
| >KRAS-H27L-LTIQLIQNHFV             | 52    | >KRAS-H27L-LTIQLIQNLFV             | 175  | 123   |
| >KRAS-H27L-LTIQLIQNHFV             | 144   | >KRAS-H27L-LTIQLIQNLFV             | 236  | 92    |
| >KRAS-H27L-LTIQLIQNHFV             | 20    | >KRAS-H27L-LTIQLIQNLFV             | 23   | 3     |
| >KRAS-H27L-LTIQLIQNHFV             | 24    | >KRAS-H27L-LTIQLIQNLFV             | 54   | 30    |
| >KRAS-H27L-LTIQLIQNHFV             | 247   | >KRAS-H27L-LTIQLIQNLFV             | 1055 | 808   |
| >KRAS-H27L-LTIQLIQNHFV             | 95    | >KRAS-H27L-LTIQLIQNLFV             | 171  | 76    |
| >KRAS-H27L-LTIQLIQNHFV             | 18    | >KRAS-H27L-LTIQLIQNLFV             | 70   | 52    |
| >KRAS-H27L-LTIQLIQNHF              | 289   | >KRAS-H27L-LTIQLIQNLF              | 454  | 165   |
| >KRAS-H27L-LTIQLIQNH               | 246   | >KRAS-H27L-LTIQLIQNL               | 35   | 211   |
| >KRAS-H27L-LTIQLIQNHF              | 8     | >KRAS-H27L-LTIQLIQNLF              | 35   | 27    |
| >KRAS-H27L-LTIQLIQNHFV             | 322   | >KRAS-H27L-LTIQLIQNLFV             | 1083 | 761   |
| >KRAS-H27L-LTIQLIQNH               | 887   | >KRAS-H27L-LTIQLIQNL               | 187  | 700   |
| >KRAS-H27L-LTIQLIQNHF              | 347   | >KRAS-H27L-LTIQLIQNLF              | 314  | 33    |
| >KRAS-H27L-LTIQLIQNH               | 20919 | >KRAS-H27L-LTIQLIQNL               | 351  | 20568 |
| >KRAS-H27L-LTIQLIQNHFV             | 13    | >KRAS-H27L-LTIQLIQNLFV             | 35   | 22    |
| >KRAS-H27L-LTIQLIQNHFV             | 18    | >KRAS-H27L-LTIQLIQNLFV             | 48   | 30    |
| >KRAS-H27L-LTIQLIQNHF              | 69    | >KRAS-H27L-LTIQLIQNLF              | 306  | 237   |
| >KRAS-H27L-LTIQLIQNHF              | 218   | >KRAS-H27L-LTIQLIQNLF              | 358  | 140   |
| >KRAS-H27L-LTIQLIQNH               | 391   | >KRAS-H27L-LTIQLIQNL               | 11   | 380   |
| >KRAS-H27L-LTIQLIQNHF              | 8     | >KRAS-H27L-LTIQLIQNLF              | 8    | 0     |
| >KRAS-H27L-LTIQLIQNHFV             | 296   | >KRAS-H27L-LTIQLIQNLFV             | 160  | 136   |
| >KRAS-H27L-LTIQLIQNHF              | 324   | >KRAS-H27L-LTIQLIQNLF              | 376  | 52    |
| >KRAS-H27L-LTIQLIQNHF              | 27    | >KRAS-H27L-LTIQLIQNLF              | 30   | 3     |
| >KRAS-H27L-LTIQLIQNH               | 12485 | >KRAS-H27L-LTIQLIQNL               | 380  | 12105 |
| >KRAS-H27L-LTIQLIQNHF              | 668   | >KRAS-H27L-LTIQLIQNLF              | 122  | 546   |
| >KRAS-H27L-LTIQLIQNHFV             | 270   | >KRAS-H27L-LTIQLIQNLFV             | 567  | 297   |
| >KRAS-H27L-LTIQLIQNHF              | 45    | >KRAS-H27L-LTIQLIQNLF              | 24   | 21    |
| >KRAS-H27L-ALTIQLIQNH              | 20593 | >KRAS-H27L-ALTIQLIQNL              | 282  | 20311 |
| >KRAS-H27L-ALTIQLIQNH              | 21022 | >KRAS-H27L-ALTIQLIQNL              | 277  | 20745 |
| >KRAS-H27L-ALTIQLIQNH              | 16806 | >KRAS-H27L-ALTIQLIQNL              | 48   | 16758 |
| >KRAS-H27L-ALTIQLIQNH              | 25626 | >KRAS-H27L-ALTIQLIQNL              | 248  | 25378 |
| >KRAS-H27L-ALTIQLIQNH              | 19115 | >KRAS-H27L-ALTIQLIQNL              | 24   | 19091 |
| >KRAS-H27L-ALTIQLIQNH              | 5798  | >KRAS-H27L-ALTIQLIQNL              | 3    | 5795  |
| >KRAS-K117 <sup>↑</sup> LVGNKCDL   | 772   | >KRAS-K117 <sup>↑</sup> LVGNKCDL   | 458  | 314   |
| >KRAS-K117 <sup>↑</sup> LVGNKCDLPS | 796   | >KRAS-K117 <sup>↑</sup> LVGNKCDLPS | 476  | 320   |
| >KRAS-K117 <sup>↑</sup> VLVGNKCDL  | 1676  | >KRAS-K117 <sup>↑</sup> VLVGNKCDL  | 296  | 1380  |
| >KRAS-K117 <sup>↑</sup> VLVGNKCDL  | 51    | >KRAS-K117 <sup>↑</sup> VLVGNKCDL  | 34   | 17    |
| >KRAS-K117 <sup>↑</sup> VLVGNKCDL  | 371   | >KRAS-K117 <sup>↑</sup> VLVGNKCDL  | 102  | 269   |

|                         |      |                         |       |       |
|-------------------------|------|-------------------------|-------|-------|
| >KRAS-K117↑VLVGNKCDL    | 217  | >KRAS-K117↑VLVGNKCDL    | 131   | 86    |
| >KRAS-K117↑VLVGNKCDL    | 1095 | >KRAS-K117↑VLVGNKCDL    | 345   | 750   |
| >KRAS-K117↑VLVGNKCDL    | 3    | >KRAS-K117↑VLVGNKCDL    | 3     | 0     |
| >KRAS-K117↑MVLVGNKCD    | 352  | >KRAS-K117↑MVLVGNKCD    | 275   | 77    |
| >KRAS-K117↑VPMVLVGNK    | 89   | >KRAS-K117↑VPMVLVGNK    | 111   | 22    |
| >KRAS-K117↑DVPMVLVGN    | 131  | >KRAS-K117↑DVPMVLVGN    | 28794 | 28663 |
| >KRAS-K5N-v KLVVVGAGG'  | 392  | >KRAS-K5N-r NLVVVGAGG   | 938   | 546   |
| >KRAS-K5N-v KLVVVGAGG'  | 35   | >KRAS-K5N-r NLVVVGAGG   | 52    | 17    |
| >KRAS-K5N-v KLVVVGAGG'  | 6    | >KRAS-K5N-r NLVVVGAGG   | 26    | 20    |
| >KRAS-K5N-v KLVVVGAGG'  | 17   | >KRAS-K5N-r NLVVVGAGG   | 73    | 56    |
| >KRAS-K5N-v KLVVVGAGG'  | 14   | >KRAS-K5N-r NLVVVGAGG   | 75    | 61    |
| >KRAS-K5N-v KLVVVGAGG'  | 121  | >KRAS-K5N-r NLVVVGAGG   | 137   | 16    |
| >KRAS-K5N-v KLVVVGAGG'  | 6    | >KRAS-K5N-r NLVVVGAGG   | 17    | 11    |
| >KRAS-K5N-v KLVVVGAGG'  | 4690 | >KRAS-K5N-r NLVVVGAGG   | 142   | 4548  |
| >KRAS-K5N-v YKLVVVGAGG' | 423  | >KRAS-K5N-r YNLVVVGAGG' | 2150  | 1727  |
| >KRAS-K5N-v YKLVVVGAGG' | 220  | >KRAS-K5N-r YNLVVVGAGG' | 683   | 463   |
| >KRAS-K5N-v YKLVVVGAGG' | 1887 | >KRAS-K5N-r YNLVVVGAGG' | 480   | 1407  |
| >KRAS-K5N-v YKLVVVGAG   | 423  | >KRAS-K5N-r YNLVVVGA    | 12682 | 12259 |
| >KRAS-K5N-v TEYKLVVV    | 39   | >KRAS-K5N-r TEYNLVVV    | 72    | 33    |
| >KRAS-K5N-v TEYKLVVV    | 259  | >KRAS-K5N-r TEYNLVVV    | 239   | 20    |
| >KRAS-K5N-v TEYKLVVV    | 231  | >KRAS-K5N-r TEYNLVVV    | 111   | 120   |
| >KRAS-K5N-v TEYKLVVV    | 65   | >KRAS-K5N-r TEYNLVVV    | 44    | 21    |
| >KRAS-K5N-v TEYKLVVVG   | 303  | >KRAS-K5N-r TEYNLVVVG   | 479   | 176   |
| >KRAS-K5N-v TEYKLVVV    | 93   | >KRAS-K5N-r TEYNLVVV    | 62    | 31    |
| >KRAS-K5N-v TEYKLVVVG   | 68   | >KRAS-K5N-r TEYNLVVVG   | 110   | 42    |
| >KRAS-K5N-v TEYKLVVV    | 81   | >KRAS-K5N-r TEYNLVVV    | 129   | 48    |
| >KRAS-K5N-v MTEYKLVVV   | 616  | >KRAS-K5N-r MTEYNLVVV   | 289   | 327   |
| >KRAS-K5N-v MTEYKLVVV   | 1955 | >KRAS-K5N-r MTEYNLVVV   | 470   | 1485  |
| >KRAS-K5N-v MTEYKLVV    | 144  | >KRAS-K5N-r MTEYNLVV    | 56    | 88    |
| >KRAS-K5N-v MTEYKLVVV   | 43   | >KRAS-K5N-r MTEYNLVVV   | 22    | 21    |
| >KRAS-K5N-v MTEYKLVVVG  | 78   | >KRAS-K5N-r MTEYNLVVVG  | 44    | 34    |
| >KRAS-L19F-↓LTIQLIQNHFA | 177  | >KRAS-L19F-↓FTIQLIQNHFA | 19    | 158   |
| >KRAS-L19F-↓LTIQLIQNHFA | 52   | >KRAS-L19F-↓FTIQLIQNHFA | 7     | 45    |
| >KRAS-L19F-↓LTIQLIQNHFA | 144  | >KRAS-L19F-↓FTIQLIQNHFA | 15    | 129   |
| >KRAS-L19F-↓LTIQLIQNHFA | 20   | >KRAS-L19F-↓FTIQLIQNHFA | 5     | 15    |
| >KRAS-L19F-↓LTIQLIQNHFA | 24   | >KRAS-L19F-↓FTIQLIQNHFA | 5     | 19    |
| >KRAS-L19F-↓LTIQLIQNHFA | 247  | >KRAS-L19F-↓FTIQLIQNHFA | 18    | 229   |
| >KRAS-L19F-↓LTIQLIQNHFA | 95   | >KRAS-L19F-↓FTIQLIQNHFA | 15    | 80    |
| >KRAS-L19F-↓LTIQLIQNHFA | 18   | >KRAS-L19F-↓FTIQLIQNHFA | 6     | 12    |
| >KRAS-L19F-↓LTIQLIQNH   | 289  | >KRAS-L19F-↓FTIQLIQNH   | 97    | 192   |
| >KRAS-L19F-↓LTIQLIQNH   | 3570 | >KRAS-L19F-↓FTIQLIQNH   | 133   | 3437  |
| >KRAS-L19F-↓LTIQLIQNH   | 246  | >KRAS-L19F-↓FTIQLIQNH   | 64    | 182   |
| >KRAS-L19F-↓LTIQLIQNH   | 8    | >KRAS-L19F-↓FTIQLIQNH   | 5     | 3     |

|                          |      |                          |       |       |
|--------------------------|------|--------------------------|-------|-------|
| >KRAS-L19F-1 LTIQLIQNHFA | 322  | >KRAS-L19F-1 FTIQLIQNHFA | 95    | 227   |
| >KRAS-L19F-1 LTIQLIQNH   | 887  | >KRAS-L19F-1 FTIQLIQNH   | 428   | 459   |
| >KRAS-L19F-1 LTIQLIQNHFA | 347  | >KRAS-L19F-1 FTIQLIQNHFA | 180   | 167   |
| >KRAS-L19F-1 LTIQLIQNHFA | 13   | >KRAS-L19F-1 FTIQLIQNHFA | 6     | 7     |
| >KRAS-L19F-1 LTIQLIQNHFA | 18   | >KRAS-L19F-1 FTIQLIQNHFA | 5     | 13    |
| >KRAS-L19F-1 LTIQLIQNHFA | 69   | >KRAS-L19F-1 FTIQLIQNHFA | 82    | 13    |
| >KRAS-L19F-1 LTIQLIQNHFA | 218  | >KRAS-L19F-1 FTIQLIQNHFA | 101   | 117   |
| >KRAS-L19F-1 LTIQLIQNH   | 391  | >KRAS-L19F-1 FTIQLIQNH   | 506   | 115   |
| >KRAS-L19F-1 LTIQLIQNHFA | 8    | >KRAS-L19F-1 FTIQLIQNHFA | 10    | 2     |
| >KRAS-L19F-1 LTIQLIQNHFA | 296  | >KRAS-L19F-1 FTIQLIQNHFA | 403   | 107   |
| >KRAS-L19F-1 LTIQLIQNHFA | 324  | >KRAS-L19F-1 FTIQLIQNHFA | 1650  | 1326  |
| >KRAS-L19F-1 LTIQLIQNHFA | 27   | >KRAS-L19F-1 FTIQLIQNHFA | 35    | 8     |
| >KRAS-L19F-1 LTIQLIQNHFA | 668  | >KRAS-L19F-1 FTIQLIQNHFA | 451   | 217   |
| >KRAS-L19F-1 LTIQLIQNHFA | 270  | >KRAS-L19F-1 FTIQLIQNHFA | 201   | 69    |
| >KRAS-L19F-1 LTIQLIQNHFA | 45   | >KRAS-L19F-1 FTIQLIQNHFA | 57    | 12    |
| >KRAS-L19F-1 ALTIQLIQ    | 273  | >KRAS-L19F-1 AFTIQLIQ    | 31088 | 30815 |
| >KRAS-L19F-1 ALTIQLIQNHI | 4243 | >KRAS-L19F-1 AFTIQLIQNHI | 27    | 4216  |
| >KRAS-L19F-1 VGAGGVGKS   | 6432 | >KRAS-L19F-1 VGAGGVGKS   | 418   | 6014  |
| >KRAS-L19F-1 VGAGGVGKS   | 1249 | >KRAS-L19F-1 VGAGGVGKS   | 185   | 1064  |
| >KRAS-L19F-1 SALTQLI     | 1505 | >KRAS-L19F-1 SAFTQLI     | 56    | 1449  |
| >KRAS-L19F-1 SALTQLI     | 127  | >KRAS-L19F-1 SAFTQLI     | 37    | 90    |
| >KRAS-L19F-1 KSALTQLI    | 239  | >KRAS-L19F-1 KSAFTQLI    | 107   | 132   |
| >KRAS-L19F-1 KSALTQL     | 276  | >KRAS-L19F-1 KSAFTQL     | 91    | 185   |
| >KRAS-L19F-1 KSALTQLI    | 762  | >KRAS-L19F-1 KSAFTQLI    | 204   | 558   |
| >KRAS-L19F-1 KSALTQL     | 7    | >KRAS-L19F-1 KSAFTQL     | 6     | 1     |
| >KRAS-L19F-1 KSALTQLI    | 42   | >KRAS-L19F-1 KSAFTQLI    | 30    | 12    |
| >KRAS-L19F-1 KSALTQL     | 35   | >KRAS-L19F-1 KSAFTQL     | 36    | 1     |
| >KRAS-L19F-1 KSALTQLI    | 24   | >KRAS-L19F-1 KSAFTQLI    | 24    | 0     |
| >KRAS-L19F-1 KSALTQL     | 335  | >KRAS-L19F-1 KSAFTQL     | 304   | 31    |
| >KRAS-L19F-1 KSALTQLI    | 73   | >KRAS-L19F-1 KSAFTQLI    | 110   | 37    |
| >KRAS-L19F-1 KSALTQLI    | 610  | >KRAS-L19F-1 KSAFTQLI    | 203   | 407   |
| >KRAS-L19F-1 KSALTQL     | 241  | >KRAS-L19F-1 KSAFTQL     | 163   | 78    |
| >KRAS-L19F-1 KSALTQLI    | 35   | >KRAS-L19F-1 KSAFTQLI    | 28    | 7     |
| >KRAS-L19F-1 GKSALTQL    | 960  | >KRAS-L19F-1 GKSAFTQL    | 263   | 697   |
| >KRAS-L19F-1 GKSALTQLI   | 907  | >KRAS-L19F-1 GKSAFTQLI   | 331   | 576   |
| >KRAS-L19F-1 GKSALTQL    | 414  | >KRAS-L19F-1 GKSAFTQL    | 318   | 96    |
| >KRAS-L19F-1 GKSALTQL    | 721  | >KRAS-L19F-1 GKSAFTQL    | 421   | 300   |
| >KRAS-L19F-1 GVGKSALTI   | 3701 | >KRAS-L19F-1 GVGKSAFTI   | 457   | 3244  |
| >KRAS-L231-v LIQNHVDEY   | 680  | >KRAS-L231-r IIQNHVDEY   | 487   | 193   |
| >KRAS-L231-v LIQNHVDEY   | 91   | >KRAS-L231-r IIQNHVDEY   | 176   | 85    |
| >KRAS-L231-v LIQNHVDEY   | 704  | >KRAS-L231-r IIQNHVDEY   | 474   | 230   |
| >KRAS-L231-v LIQNHVDEY   | 342  | >KRAS-L231-r IIQNHVDEY   | 325   | 17    |
| >KRAS-L231-v QLIQNHFA    | 42   | >KRAS-L231-r QIIQNHFA    | 493   | 451   |

|                          |      |                         |      |      |
|--------------------------|------|-------------------------|------|------|
| >KRAS-L23I-v QLIQNHFV    | 10   | >KRAS-L23I-r QIIQNHFV   | 101  | 91   |
| >KRAS-L23I-v QLIQNHFV    | 25   | >KRAS-L23I-r QIIQNHFV   | 206  | 181  |
| >KRAS-L23I-v QLIQNHFV    | 23   | >KRAS-L23I-r QIIQNHFV   | 32   | 9    |
| >KRAS-L23I-v QLIQNHFV    | 4    | >KRAS-L23I-r QIIQNHFV   | 40   | 36   |
| >KRAS-L23I-v QLIQNHFV    | 6    | >KRAS-L23I-r QIIQNHFV   | 197  | 191  |
| >KRAS-L23I-v QLIQNHFV    | 15   | >KRAS-L23I-r QIIQNHFV   | 283  | 268  |
| >KRAS-L23I-v QLIQNHFV    | 15   | >KRAS-L23I-r QIIQNHFV   | 737  | 722  |
| >KRAS-L23I-v QLIQNHFV    | 3    | >KRAS-L23I-r QIIQNHFV   | 13   | 10   |
| >KRAS-L23I-v QLIQNHFVDE  | 1761 | >KRAS-L23I-r QIIQNHFVDE | 430  | 1331 |
| >KRAS-L23I-v QLIQNHFVDE  | 42   | >KRAS-L23I-r QIIQNHFVDE | 7    | 35   |
| >KRAS-L23I-v QLIQNHFVDE  | 51   | >KRAS-L23I-r QIIQNHFVDE | 69   | 18   |
| >KRAS-L23I-v QLIQNHFVDE  | 328  | >KRAS-L23I-r QIIQNHFVDE | 399  | 71   |
| >KRAS-L23I-v QLIQNHFV    | 92   | >KRAS-L23I-r QIIQNHFV   | 22   | 70   |
| >KRAS-L23I-v QLIQNHFV    | 41   | >KRAS-L23I-r QIIQNHFV   | 15   | 26   |
| >KRAS-L23I-v QLIQNHFVDE  | 188  | >KRAS-L23I-r QIIQNHFVDE | 490  | 302  |
| >KRAS-L23I-v QLIQNHFVDE  | 124  | >KRAS-L23I-r QIIQNHFVDE | 261  | 137  |
| >KRAS-L23I-v QLIQNHFVDE  | 158  | >KRAS-L23I-r QIIQNHFVDE | 823  | 665  |
| >KRAS-L23I-v QLIQNHFVDE  | 345  | >KRAS-L23I-r QIIQNHFVDE | 1326 | 981  |
| >KRAS-L23I-v QLIQNHFVDE  | 286  | >KRAS-L23I-r QIIQNHFVDE | 215  | 71   |
| >KRAS-L23I-v QLIQNHFVDE  | 1728 | >KRAS-L23I-r QIIQNHFVDE | 494  | 1234 |
| >KRAS-L23I-v IQLIQNHFV   | 208  | >KRAS-L23I-r IQIINHFV   | 690  | 482  |
| >KRAS-L23I-v IQLIQNHFV   | 69   | >KRAS-L23I-r IQIINHFV   | 88   | 19   |
| >KRAS-L23I-v IQLIQNHFV   | 113  | >KRAS-L23I-r IQIINHFV   | 38   | 75   |
| >KRAS-L23I-v IQLIQNHFV   | 834  | >KRAS-L23I-r IQIINHFV   | 126  | 708  |
| >KRAS-L23I-v IQLIQNHF    | 430  | >KRAS-L23I-r IQIINHF    | 341  | 89   |
| >KRAS-L23I-v IQLIQNHFV   | 6    | >KRAS-L23I-r IQIINHFV   | 5    | 1    |
| >KRAS-L23I-v IQLIQNHFV   | 26   | >KRAS-L23I-r IQIINHFV   | 111  | 85   |
| >KRAS-L23I-v IQLIQNHFV   | 52   | >KRAS-L23I-r IQIINHFV   | 103  | 51   |
| >KRAS-L23I-v IQLIQNHFV   | 30   | >KRAS-L23I-r IQIINHFV   | 278  | 248  |
| >KRAS-L23I-v IQLIQNHFV   | 133  | >KRAS-L23I-r IQIINHFV   | 5353 | 5220 |
| >KRAS-L23I-v IQLIQNHFV   | 217  | >KRAS-L23I-r IQIINHFV   | 311  | 94   |
| >KRAS-L23I-v IQLIQNHF    | 723  | >KRAS-L23I-r IQIINHF    | 401  | 322  |
| >KRAS-L23I-v IQLIQNHF    | 128  | >KRAS-L23I-r IQIINHF    | 50   | 78   |
| >KRAS-L23I-v IQLIQNHF    | 6    | >KRAS-L23I-r IQIINHF    | 6    | 0    |
| >KRAS-L23I-v IQLIQNHFV   | 509  | >KRAS-L23I-r IQIINHFV   | 461  | 48   |
| >KRAS-L23I-v TIQLIQNHFV  | 749  | >KRAS-L23I-r TIQIINHFV  | 283  | 466  |
| >KRAS-L23I-v TIQLIQNHFV  | 549  | >KRAS-L23I-r TIQIINHFV  | 279  | 270  |
| >KRAS-L23I-v TIQLIQNHFV  | 244  | >KRAS-L23I-r TIQIINHFV  | 542  | 298  |
| >KRAS-L23I-v TIQLIQNHFV  | 51   | >KRAS-L23I-r TIQIINHFV  | 26   | 25   |
| >KRAS-L23I-v TIQLIQNHFV  | 1038 | >KRAS-L23I-r TIQIINHFV  | 390  | 648  |
| >KRAS-L23I-v TIQLIQNHFV  | 231  | >KRAS-L23I-r TIQIINHFV  | 165  | 66   |
| >KRAS-L23I-v LTIQLIQNHFV | 177  | >KRAS-L23I-r LTIQIINHFV | 131  | 46   |
| >KRAS-L23I-v LTIQLIQNHFV | 52   | >KRAS-L23I-r LTIQIINHFV | 28   | 24   |

|                          |      |                          |      |      |
|--------------------------|------|--------------------------|------|------|
| >KRAS-L23I-v LTIQLIQNHF\ | 144  | >KRAS-L23I-r LTIQIIQNHFV | 101  | 43   |
| >KRAS-L23I-v LTIQLIQNHF\ | 20   | >KRAS-L23I-r LTIQIIQNHFV | 17   | 3    |
| >KRAS-L23I-v LTIQLIQNHF\ | 24   | >KRAS-L23I-r LTIQIIQNHFV | 22   | 2    |
| >KRAS-L23I-v LTIQLIQNHF\ | 247  | >KRAS-L23I-r LTIQIIQNHFV | 199  | 48   |
| >KRAS-L23I-v LTIQLIQNHF\ | 95   | >KRAS-L23I-r LTIQIIQNHFV | 92   | 3    |
| >KRAS-L23I-v LTIQLIQNHF\ | 18   | >KRAS-L23I-r LTIQIIQNHFV | 15   | 3    |
| >KRAS-L23I-v LTIQLIQNHF  | 289  | >KRAS-L23I-r LTIQIIQNHF  | 263  | 26   |
| >KRAS-L23I-v LTIQLIQNH   | 246  | >KRAS-L23I-r LTIQIIQNH   | 239  | 7    |
| >KRAS-L23I-v LTIQLIQNHF  | 8    | >KRAS-L23I-r LTIQIIQNHF  | 10   | 2    |
| >KRAS-L23I-v LTIQLIQNHF\ | 322  | >KRAS-L23I-r LTIQIIQNHFV | 320  | 2    |
| >KRAS-L23I-v LTIQLIQNHF  | 347  | >KRAS-L23I-r LTIQIIQNHF  | 593  | 246  |
| >KRAS-L23I-v LTIQLIQNHF\ | 13   | >KRAS-L23I-r LTIQIIQNHFV | 9    | 4    |
| >KRAS-L23I-v LTIQLIQNHF\ | 18   | >KRAS-L23I-r LTIQIIQNHFV | 16   | 2    |
| >KRAS-L23I-v LTIQLIQNHF  | 69   | >KRAS-L23I-r LTIQIIQNHF  | 87   | 18   |
| >KRAS-L23I-v LTIQLIQNHF  | 218  | >KRAS-L23I-r LTIQIIQNHF  | 219  | 1    |
| >KRAS-L23I-v LTIQLIQNH   | 391  | >KRAS-L23I-r LTIQIIQNH   | 808  | 417  |
| >KRAS-L23I-v LTIQLIQNHF  | 8    | >KRAS-L23I-r LTIQIIQNHF  | 8    | 0    |
| >KRAS-L23I-v LTIQLIQNHF\ | 296  | >KRAS-L23I-r LTIQIIQNHFV | 490  | 194  |
| >KRAS-L23I-v LTIQLIQNHF  | 324  | >KRAS-L23I-r LTIQIIQNHF  | 251  | 73   |
| >KRAS-L23I-v LTIQLIQNHF  | 27   | >KRAS-L23I-r LTIQIIQNHF  | 31   | 4    |
| >KRAS-L23I-v LTIQLIQNHF\ | 270  | >KRAS-L23I-r LTIQIIQNHFV | 266  | 4    |
| >KRAS-L23I-v LTIQLIQNHF  | 45   | >KRAS-L23I-r LTIQIIQNHF  | 60   | 15   |
| >KRAS-L23I-v ALTIQLIQ    | 273  | >KRAS-L23I-r ALTIQIIQ    | 188  | 85   |
| >KRAS-L23I-v SALTIQLI    | 127  | >KRAS-L23I-r SALTIQII    | 129  | 2    |
| >KRAS-L23I-v KSALTIQL    | 1192 | >KRAS-L23I-r KSALTIQI    | 397  | 795  |
| >KRAS-L23I-v KSALTIQLI   | 239  | >KRAS-L23I-r KSALTIQII   | 421  | 182  |
| >KRAS-L23I-v KSALTIQL    | 276  | >KRAS-L23I-r KSALTIQI    | 97   | 179  |
| >KRAS-L23I-v KSALTIQLI   | 762  | >KRAS-L23I-r KSALTIQII   | 460  | 302  |
| >KRAS-L23I-v KSALTIQL    | 7    | >KRAS-L23I-r KSALTIQI    | 24   | 17   |
| >KRAS-L23I-v KSALTIQLI   | 42   | >KRAS-L23I-r KSALTIQII   | 66   | 24   |
| >KRAS-L23I-v KSALTIQL    | 35   | >KRAS-L23I-r KSALTIQI    | 21   | 14   |
| >KRAS-L23I-v KSALTIQLI   | 24   | >KRAS-L23I-r KSALTIQII   | 25   | 1    |
| >KRAS-L23I-v KSALTIQL    | 335  | >KRAS-L23I-r KSALTIQI    | 1411 | 1076 |
| >KRAS-L23I-v KSALTIQLI   | 73   | >KRAS-L23I-r KSALTIQII   | 272  | 199  |
| >KRAS-L23I-v KSALTIQL    | 241  | >KRAS-L23I-r KSALTIQI    | 24   | 217  |
| >KRAS-L23I-v KSALTIQLI   | 35   | >KRAS-L23I-r KSALTIQII   | 32   | 3    |
| >KRAS-L23I-v GKSALTIQLI  | 907  | >KRAS-L23I-r GKSALTIQII  | 328  | 579  |
| >KRAS-L23I-v GKSALTIQL   | 414  | >KRAS-L23I-r GKSALTIQI   | 4965 | 4551 |
| >KRAS-L23I-v GKSALTIQL   | 3424 | >KRAS-L23I-r GKSALTIQI   | 389  | 3035 |
| >KRAS-M72I- MRTGEGFLC\   | 111  | >KRAS-M72I- IRTGEGFLCV\  | 124  | 13   |
| >KRAS-M72I- MRTGEGFL     | 391  | >KRAS-M72I- IRTGEGFL     | 681  | 290  |
| >KRAS-M72I- MRTGEGFLC\   | 207  | >KRAS-M72I- IRTGEGFLCV   | 411  | 204  |
| >KRAS-M72I- MRTGEGFLC\   | 284  | >KRAS-M72I- IRTGEGFLCV\  | 500  | 216  |

|                        |      |                        |       |      |
|------------------------|------|------------------------|-------|------|
| >KRAS-M72I-MRTGEGFLC\  | 354  | >KRAS-M72I-IRTGEGFLCV  | 283   | 71   |
| >KRAS-M72I-MRTGEGFL    | 52   | >KRAS-M72I-IRTGEGFL    | 898   | 846  |
| >KRAS-M72I-MRTGEGFLC\  | 16   | >KRAS-M72I-IRTGEGFLCV\ | 118   | 102  |
| >KRAS-M72I-YMRTGEGFLC\ | 150  | >KRAS-M72I-YIRTGEGFLC\ | 1302  | 1152 |
| >KRAS-M72I-YMRTGEGFL   | 131  | >KRAS-M72I-YIRTGEGFL   | 1861  | 1730 |
| >KRAS-M72I-YMRTGEGFLC\ | 191  | >KRAS-M72I-YIRTGEGFLC\ | 2303  | 2112 |
| >KRAS-M72I-YMRTGEGFL   | 28   | >KRAS-M72I-YIRTGEGFL   | 559   | 531  |
| >KRAS-M72I-YMRTGEGFLC\ | 10   | >KRAS-M72I-YIRTGEGFLC\ | 88    | 78   |
| >KRAS-M72I-YMRTGEGFLC\ | 69   | >KRAS-M72I-YIRTGEGFLC\ | 158   | 89   |
| >KRAS-M72I-YMRTGEGFL   | 50   | >KRAS-M72I-YIRTGEGFL   | 2487  | 2437 |
| >KRAS-M72I-YMRTGEGFLC\ | 230  | >KRAS-M72I-YIRTGEGFLC\ | 5631  | 5401 |
| >KRAS-M72I-YMRTGEGFLC\ | 8    | >KRAS-M72I-YIRTGEGFLC\ | 238   | 230  |
| >KRAS-M72I-YMRTGEGFL   | 200  | >KRAS-M72I-YIRTGEGFL   | 10156 | 9956 |
| >KRAS-M72I-YMRTGEGFLC\ | 12   | >KRAS-M72I-YIRTGEGFLC\ | 1015  | 1003 |
| >KRAS-M72I-YMRTGEGFL   | 145  | >KRAS-M72I-YIRTGEGFL   | 4435  | 4290 |
| >KRAS-M72I-YMRTGEGFLC\ | 10   | >KRAS-M72I-YIRTGEGFLC\ | 142   | 132  |
| >KRAS-M72I-YMRTGEGFLC\ | 31   | >KRAS-M72I-YIRTGEGFLC\ | 1676  | 1645 |
| >KRAS-M72I-YMRTGEGFL   | 8    | >KRAS-M72I-YIRTGEGFL   | 311   | 303  |
| >KRAS-M72I-YMRTGEGFLC\ | 36   | >KRAS-M72I-YIRTGEGFLC\ | 1376  | 1340 |
| >KRAS-M72I-YMRTGEGFLC\ | 2    | >KRAS-M72I-YIRTGEGFLC\ | 9     | 7    |
| >KRAS-M72I-YMRTGEGF    | 35   | >KRAS-M72I-YIRTGEGF    | 111   | 76   |
| >KRAS-M72I-YMRTGEGF    | 20   | >KRAS-M72I-YIRTGEGF    | 105   | 85   |
| >KRAS-M72I-YMRTGEGFL   | 448  | >KRAS-M72I-YIRTGEGFL   | 3377  | 2929 |
| >KRAS-M72I-YMRTGEGF    | 5    | >KRAS-M72I-YIRTGEGF    | 99    | 94   |
| >KRAS-M72I-YMRTGEGFLC\ | 126  | >KRAS-M72I-YIRTGEGFLC\ | 2866  | 2740 |
| >KRAS-M72I-YMRTGEGF    | 55   | >KRAS-M72I-YIRTGEGF    | 110   | 55   |
| >KRAS-M72I-EEYSAMRDQ   | 49   | >KRAS-M72I-EEYSAMRDQ   | 8     | 41   |
| >KRAS-M72I-EEYSAMRDQ   | 795  | >KRAS-M72I-EEYSAMRDQ   | 445   | 350  |
| >KRAS-M72I-EEYSAMRDQ   | 126  | >KRAS-M72I-EEYSAMRDQ   | 190   | 64   |
| >KRAS-M72I-EEYSAMRDQ   | 834  | >KRAS-M72I-EEYSAMRDQ   | 266   | 568  |
| >KRAS-M72I-EEYSAMRDQ   | 733  | >KRAS-M72I-EEYSAMRDQ   | 58    | 675  |
| >KRAS-M72I-QYMRTGEGF   | 16   | >KRAS-M72I-QYIRTGEGFL  | 18    | 2    |
| >KRAS-M72I-QYMRTGEGF   | 175  | >KRAS-M72I-QYIRTGEGF   | 147   | 28   |
| >KRAS-M72I-QYMRTGEGF   | 259  | >KRAS-M72I-QYIRTGEGFL  | 480   | 221  |
| >KRAS-M72I-QYMRTGEGF   | 184  | >KRAS-M72I-QYIRTGEGF   | 289   | 105  |
| >KRAS-M72I-QYMRTGEGF   | 159  | >KRAS-M72I-QYIRTGEGFL  | 558   | 399  |
| >KRAS-M72I-QYMRTGEGF   | 5    | >KRAS-M72I-QYIRTGEGF   | 7     | 2    |
| >KRAS-M72I-QYMRTGEGF   | 9    | >KRAS-M72I-QYIRTGEGFL  | 15    | 6    |
| >KRAS-M72I-QYMRTGEGF   | 3076 | >KRAS-M72I-QYIRTGEGF   | 478   | 2598 |
| >KRAS-M72I-QYMRTGEGF   | 210  | >KRAS-M72I-QYIRTGEGF   | 402   | 192  |
| >KRAS-M72I-QYMRTGEGF   | 117  | >KRAS-M72I-QYIRTGEGFL  | 294   | 177  |
| >KRAS-M72I-DQYMRTGEG   | 135  | >KRAS-M72I-DQYIRTGEGF  | 171   | 36   |
| >KRAS-M72I-DQYMRTGEG   | 247  | >KRAS-M72I-DQYIRTGEGF  | 577   | 330  |

|                         |      |                         |      |      |
|-------------------------|------|-------------------------|------|------|
| >KRAS-M72I- DQYMRTGEC   | 222  | >KRAS-M72I- DQYIRTGEGF  | 239  | 17   |
| >KRAS-M72I- DQYMRTGEC   | 69   | >KRAS-M72I- DQYIRTGEGF  | 136  | 67   |
| >KRAS-M72I- AMRDQYMR'   | 166  | >KRAS-M72I- AMRDQYIRT   | 811  | 645  |
| >KRAS-M72I- AMRDQYMR'   | 18   | >KRAS-M72I- AMRDQYIRT   | 27   | 9    |
| >KRAS-M72I- AMRDQYMR    | 156  | >KRAS-M72I- AMRDQYIR    | 129  | 27   |
| >KRAS-M72I- AMRDQYMR'   | 80   | >KRAS-M72I- AMRDQYIRT   | 127  | 47   |
| >KRAS-M72I- AMRDQYMR'   | 128  | >KRAS-M72I- AMRDQYIRT   | 145  | 17   |
| >KRAS-M72I- AMRDQYMR    | 13   | >KRAS-M72I- AMRDQYIR    | 12   | 1    |
| >KRAS-M72I- AMRDQYMR    | 249  | >KRAS-M72I- AMRDQYIR    | 712  | 463  |
| >KRAS-M72I- AMRDQYMR    | 470  | >KRAS-M72I- AMRDQYIR    | 361  | 109  |
| >KRAS-M72I- SAMRDQYM    | 52   | >KRAS-M72I- SAMRDQYI    | 81   | 29   |
| >KRAS-M72I- SAMRDQYMI   | 142  | >KRAS-M72I- SAMRDQYIR   | 348  | 206  |
| >KRAS-M72I- SAMRDQYMI   | 38   | >KRAS-M72I- SAMRDQYIR   | 42   | 4    |
| >KRAS-M72I- SAMRDQYMI   | 27   | >KRAS-M72I- SAMRDQYIR   | 65   | 38   |
| >KRAS-M72I- SAMRDQYM    | 4087 | >KRAS-M72I- SAMRDQYI    | 231  | 3856 |
| >KRAS-M72I- SAMRDQYMI   | 183  | >KRAS-M72I- SAMRDQYIR   | 179  | 4    |
| >KRAS-M72I- SAMRDQYM    | 2914 | >KRAS-M72I- SAMRDQYI    | 81   | 2833 |
| >KRAS-M72I- YSAMRDQYN   | 322  | >KRAS-M72I- YSAMRDQYIF  | 626  | 304  |
| >KRAS-M72I- YSAMRDQYN   | 173  | >KRAS-M72I- YSAMRDQYIF  | 370  | 197  |
| >KRAS-M72I- YSAMRDQYN   | 7    | >KRAS-M72I- YSAMRDQYIF  | 10   | 3    |
| >KRAS-M72I- YSAMRDQYN   | 5416 | >KRAS-M72I- YSAMRDQYI   | 416  | 5000 |
| >KRAS-M72I- YSAMRDQYN   | 402  | >KRAS-M72I- YSAMRDQYI   | 5412 | 5010 |
| >KRAS-M72I- YSAMRDQYN   | 11   | >KRAS-M72I- YSAMRDQYI   | 44   | 33   |
| >KRAS-M72I- YSAMRDQYN   | 367  | >KRAS-M72I- YSAMRDQYI   | 500  | 133  |
| >KRAS-M72I- YSAMRDQYN   | 440  | >KRAS-M72I- YSAMRDQYI   | 1168 | 728  |
| >KRAS-M72I- YSAMRDQYN   | 77   | >KRAS-M72I- YSAMRDQYI   | 1346 | 1269 |
| >KRAS-M72I- YSAMRDQYN   | 1246 | >KRAS-M72I- YSAMRDQYI   | 51   | 1195 |
| >KRAS-M72I- EYSAMRDQY   | 133  | >KRAS-M72I- EYSAMRDQY   | 16   | 117  |
| >KRAS-M72I- EYSAMRDQY   | 1385 | >KRAS-M72I- EYSAMRDQY   | 102  | 1283 |
| >KRAS-M72I- EYSAMRDQY   | 28   | >KRAS-M72I- EYSAMRDQY   | 52   | 24   |
| >KRAS-M72I- EYSAMRDQY   | 14   | >KRAS-M72I- EYSAMRDQY   | 26   | 12   |
| >KRAS-M72I- EYSAMRDQY   | 37   | >KRAS-M72I- EYSAMRDQY   | 33   | 4    |
| >KRAS-P34S- PTIEDSYRKQ\ | 6808 | >KRAS-P34S- STIEDSYRKQ\ | 407  | 6401 |
| >KRAS-P34S- PTIEDSYRKQ\ | 4837 | >KRAS-P34S- STIEDSYRKQ\ | 312  | 4525 |
| >KRAS-P34S- PTIEDSYRKQ\ | 1612 | >KRAS-P34S- STIEDSYRKQ\ | 95   | 1517 |
| >KRAS-P34S- PTIEDSYRKQ\ | 5396 | >KRAS-P34S- STIEDSYRKQ\ | 487  | 4909 |
| >KRAS-P34S- PTIEDSYRKQ\ | 3021 | >KRAS-P34S- STIEDSYRKQ\ | 103  | 2918 |
| >KRAS-P34S- PTIEDSYR    | 6934 | >KRAS-P34S- STIEDSYR    | 45   | 6889 |
| >KRAS-P34S- PTIEDSYRK   | 539  | >KRAS-P34S- STIEDSYRK   | 10   | 529  |
| >KRAS-P34S- PTIEDSYR    | 1979 | >KRAS-P34S- STIEDSYR    | 43   | 1936 |
| >KRAS-P34S- PTIEDSYR    | 781  | >KRAS-P34S- STIEDSYR    | 245  | 536  |
| >KRAS-P34S- PTIEDSYR    | 105  | >KRAS-P34S- STIEDSYR    | 4    | 101  |
| >KRAS-P34S- PTIEDSYRK   | 891  | >KRAS-P34S- STIEDSYRK   | 23   | 868  |

|                         |       |                         |       |       |
|-------------------------|-------|-------------------------|-------|-------|
| >KRAS-P34S- PTIEDSYRKQ\ | 1459  | >KRAS-P34S- STIEDSYRKQ\ | 30    | 1429  |
| >KRAS-P34S- PTIEDSYRKQ\ | 626   | >KRAS-P34S- STIEDSYRKQ\ | 22    | 604   |
| >KRAS-P34S- PTIEDSYR    | 4759  | >KRAS-P34S- STIEDSYR    | 205   | 4554  |
| >KRAS-P34S- PTIEDSYRK   | 794   | >KRAS-P34S- STIEDSYRK   | 61    | 733   |
| >KRAS-P34S- PTIEDSYR    | 1190  | >KRAS-P34S- STIEDSYR    | 357   | 833   |
| >KRAS-P34S- DPTIEDSYRK  | 16926 | >KRAS-P34S- DSTIEDSYRK  | 424   | 16502 |
| >KRAS-P34S- DPTIEDSY    | 5841  | >KRAS-P34S- DSTIEDSY    | 358   | 5483  |
| >KRAS-P34S- DPTIEDSYR   | 485   | >KRAS-P34S- DSTIEDSYR   | 82    | 403   |
| >KRAS-P34S- DPTIEDSYR   | 198   | >KRAS-P34S- DSTIEDSYR   | 11    | 187   |
| >KRAS-P34S- DPTIEDSYRK  | 1558  | >KRAS-P34S- DSTIEDSYRK  | 193   | 1365  |
| >KRAS-P34S- DPTIEDSY    | 27    | >KRAS-P34S- DSTIEDSY    | 558   | 531   |
| >KRAS-P34S- DPTIEDSY    | 316   | >KRAS-P34S- DSTIEDSY    | 15564 | 15248 |
| >KRAS-P34S- YDPTIEDSY   | 1529  | >KRAS-P34S- YDSTIEDSY   | 203   | 1326  |
| >KRAS-P34S- EYDPTIEDSY  | 526   | >KRAS-P34S- EYDSTIEDSY  | 193   | 333   |
| >KRAS-P34S- EYDPTIEDSY  | 498   | >KRAS-P34S- EYDSTIEDSY  | 711   | 213   |
| >KRAS-P34S- EYDPTIEDSY  | 364   | >KRAS-P34S- EYDSTIEDSY  | 237   | 127   |
| >KRAS-P34S- EYDPTIEDSYF | 91    | >KRAS-P34S- EYDSTIEDSYR | 76    | 15    |
| >KRAS-P34S- EYDPTIEDSYF | 147   | >KRAS-P34S- EYDSTIEDSYR | 60    | 87    |
| >KRAS-P34S- EYDPTIEDSYF | 46    | >KRAS-P34S- EYDSTIEDSYR | 61    | 15    |
| >KRAS-P34S- DEYDPTIEDS\ | 1478  | >KRAS-P34S- DEYDSTIEDS\ | 232   | 1246  |
| >KRAS-P34S- DEYDPTIE    | 590   | >KRAS-P34S- DEYDSTIE    | 266   | 324   |
| >KRAS-P34S- DEYDPTIED   | 149   | >KRAS-P34S- DEYDSTIED   | 66    | 83    |
| >KRAS-P34S- DEYDPTIEDS\ | 8     | >KRAS-P34S- DEYDSTIEDS\ | 6     | 2     |
| >KRAS-P34S- DEYDPTIEDS\ | 490   | >KRAS-P34S- DEYDSTIEDS\ | 486   | 4     |
| >KRAS-P34S- DEYDPTIEDS\ | 380   | >KRAS-P34S- DEYDSTIEDS\ | 163   | 217   |
| >KRAS-P34S- VDEYDPTI    | 221   | >KRAS-P34S- VDEYDSTI    | 147   | 74    |
| >KRAS-P34S- FVDEYDPT    | 318   | >KRAS-P34S- FVDEYDST    | 777   | 459   |
| >KRAS-P34S- FVDEYDPTI   | 12    | >KRAS-P34S- FVDEYDSTI   | 27    | 15    |
| >KRAS-P34S- FVDEYDPTI   | 178   | >KRAS-P34S- FVDEYDSTI   | 64    | 114   |
| >KRAS-P34S- FVDEYDPTI   | 860   | >KRAS-P34S- FVDEYDSTI   | 141   | 719   |
| >KRAS-P34S- FVDEYDPT    | 24    | >KRAS-P34S- FVDEYDST    | 42    | 18    |
| >KRAS-P34S- FVDEYDPTI   | 4     | >KRAS-P34S- FVDEYDSTI   | 7     | 3     |
| >KRAS-P34S- FVDEYDPT    | 374   | >KRAS-P34S- FVDEYDST    | 470   | 96    |
| >KRAS-P34S- FVDEYDPTI   | 6     | >KRAS-P34S- FVDEYDSTI   | 9     | 3     |
| >KRAS-P34S- FVDEYDPTI   | 16    | >KRAS-P34S- FVDEYDSTI   | 15    | 1     |
| >KRAS-P34S- FVDEYDPTI   | 14    | >KRAS-P34S- FVDEYDSTI   | 88    | 74    |
| >KRAS-P34S- FVDEYDPTI   | 138   | >KRAS-P34S- FVDEYDSTI   | 725   | 587   |
| >KRAS-P34S- FVDEYDPTI   | 34    | >KRAS-P34S- FVDEYDSTI   | 62    | 28    |
| >KRAS-P34S- FVDEYDPTI   | 19    | >KRAS-P34S- FVDEYDSTI   | 124   | 105   |
| >KRAS-P34S- FVDEYDPTI   | 787   | >KRAS-P34S- FVDEYDSTI   | 447   | 340   |
| >KRAS-P34S- HFVDEYDPTI  | 294   | >KRAS-P34S- HFVDEYDSTI  | 223   | 71    |
| >KRAS-P34S- NHFVDEYDPTI | 326   | >KRAS-P34S- NHFVDEYDSTI | 273   | 53    |
| >KRAS-P34S- NHFVDEYDPTI | 775   | >KRAS-P34S- NHFVDEYDSTI | 388   | 387   |



|                        |       |                        |       |       |
|------------------------|-------|------------------------|-------|-------|
| >KRAS-Q22K·QLIQNHFV    | 42    | >KRAS-Q22K·KLIQNHFV    | 11    | 31    |
| >KRAS-Q22K·QLIQNHFV    | 10    | >KRAS-Q22K·KLIQNHFV    | 5     | 5     |
| >KRAS-Q22K·QLIQNHFV    | 25    | >KRAS-Q22K·KLIQNHFV    | 7     | 18    |
| >KRAS-Q22K·QLIQNHFV    | 23    | >KRAS-Q22K·KLIQNHFV    | 8     | 15    |
| >KRAS-Q22K·QLIQNHFV    | 4     | >KRAS-Q22K·KLIQNHFV    | 2     | 2     |
| >KRAS-Q22K·QLIQNHFV    | 6     | >KRAS-Q22K·KLIQNHFV    | 3     | 3     |
| >KRAS-Q22K·QLIQNHFV    | 15    | >KRAS-Q22K·KLIQNHFV    | 6     | 9     |
| >KRAS-Q22K·QLIQNHFV    | 15    | >KRAS-Q22K·KLIQNHFV    | 6     | 9     |
| >KRAS-Q22K·QLIQNHFV    | 3     | >KRAS-Q22K·KLIQNHFV    | 2     | 1     |
| >KRAS-Q22K·QLIQNHFVDE  | 42    | >KRAS-Q22K·KLIQNHFVDE  | 263   | 221   |
| >KRAS-Q22K·QLIQNHFVDE  | 51    | >KRAS-Q22K·KLIQNHFVDE  | 99    | 48    |
| >KRAS-Q22K·QLIQNHFVDE  | 328   | >KRAS-Q22K·KLIQNHFVDE  | 56    | 272   |
| >KRAS-Q22K·QLIQNHFVDE  | 2122  | >KRAS-Q22K·KLIQNHFVDE  | 202   | 1920  |
| >KRAS-Q22K·QLIQNHFV    | 92    | >KRAS-Q22K·KLIQNHFV    | 2736  | 2644  |
| >KRAS-Q22K·QLIQNHFV    | 41    | >KRAS-Q22K·KLIQNHFV    | 535   | 494   |
| >KRAS-Q22K·QLIQNHFVDE  | 188   | >KRAS-Q22K·KLIQNHFVDE  | 35    | 153   |
| >KRAS-Q22K·QLIQNHFVDE  | 124   | >KRAS-Q22K·KLIQNHFVDE  | 91    | 33    |
| >KRAS-Q22K·QLIQNHFVDE  | 158   | >KRAS-Q22K·KLIQNHFVDE  | 710   | 552   |
| >KRAS-Q22K·QLIQNHFVDE  | 345   | >KRAS-Q22K·KLIQNHFVDE  | 135   | 210   |
| >KRAS-Q22K·QLIQNHFVDE  | 1599  | >KRAS-Q22K·KLIQNHFVDE  | 207   | 1392  |
| >KRAS-Q22K·QLIQNHFVDE  | 286   | >KRAS-Q22K·KLIQNHFVDE  | 2213  | 1927  |
| >KRAS-Q22K·QLIQNHFVDE  | 10644 | >KRAS-Q22K·KLIQNHFVDE  | 469   | 10175 |
| >KRAS-Q22K·IQLIQNHFV   | 208   | >KRAS-Q22K·IKLIQNHFV   | 287   | 79    |
| >KRAS-Q22K·IQLIQNHFV   | 69    | >KRAS-Q22K·IKLIQNHFV   | 14735 | 14666 |
| >KRAS-Q22K·IQLIQNHFV   | 113   | >KRAS-Q22K·IKLIQNHFV   | 4552  | 4439  |
| >KRAS-Q22K·IQLIQNHF    | 430   | >KRAS-Q22K·IKLIQNHF    | 20582 | 20152 |
| >KRAS-Q22K·IQLIQNHFV   | 6     | >KRAS-Q22K·IKLIQNHFV   | 1241  | 1235  |
| >KRAS-Q22K·IQLIQNHFV   | 26    | >KRAS-Q22K·IKLIQNHFV   | 1074  | 1048  |
| >KRAS-Q22K·IQLIQNHFV   | 52    | >KRAS-Q22K·IKLIQNHFV   | 6309  | 6257  |
| >KRAS-Q22K·IQLIQNHFV   | 30    | >KRAS-Q22K·IKLIQNHFV   | 1898  | 1868  |
| >KRAS-Q22K·IQLIQNHFV   | 133   | >KRAS-Q22K·IKLIQNHFV   | 7662  | 7529  |
| >KRAS-Q22K·IQLIQNHFV   | 217   | >KRAS-Q22K·IKLIQNHFV   | 2478  | 2261  |
| >KRAS-Q22K·IQLIQNHF    | 128   | >KRAS-Q22K·IKLIQNHF    | 13167 | 13039 |
| >KRAS-Q22K·IQLIQNHF    | 6     | >KRAS-Q22K·IKLIQNHF    | 6     | 0     |
| >KRAS-Q22K·IQLIQNHFV   | 509   | >KRAS-Q22K·IKLIQNHFV   | 466   | 43    |
| >KRAS-Q22K·TIQLIQNHFV  | 608   | >KRAS-Q22K·TIKLIQNHFV  | 308   | 300   |
| >KRAS-Q22K·TIQLIQNHFV  | 244   | >KRAS-Q22K·TIKLIQNHFV  | 4809  | 4565  |
| >KRAS-Q22K·TIQLIQNHFV  | 51    | >KRAS-Q22K·TIKLIQNHFV  | 133   | 82    |
| >KRAS-Q22K·TIQLIQNHFV  | 7843  | >KRAS-Q22K·TIKLIQNHFV  | 330   | 7513  |
| >KRAS-Q22K·TIQLIQNHFV  | 231   | >KRAS-Q22K·TIKLIQNHFV  | 798   | 567   |
| >KRAS-Q22K·LTIQLIQNHFV | 177   | >KRAS-Q22K·LTIKLIQNHFV | 163   | 14    |
| >KRAS-Q22K·LTIQLIQNHFV | 52    | >KRAS-Q22K·LTIKLIQNHFV | 44    | 8     |
| >KRAS-Q22K·LTIQLIQNHFV | 144   | >KRAS-Q22K·LTIKLIQNHFV | 141   | 3     |

|                        |       |                        |      |       |
|------------------------|-------|------------------------|------|-------|
| >KRAS-Q22K·LTIQLIQNHF\ | 20    | >KRAS-Q22K·LTIKLIQNHFV | 22   | 2     |
| >KRAS-Q22K·LTIQLIQNHF\ | 24    | >KRAS-Q22K·LTIKLIQNHFV | 42   | 18    |
| >KRAS-Q22K·LTIQLIQNHF\ | 247   | >KRAS-Q22K·LTIKLIQNHFV | 225  | 22    |
| >KRAS-Q22K·LTIQLIQNHF\ | 95    | >KRAS-Q22K·LTIKLIQNHFV | 112  | 17    |
| >KRAS-Q22K·LTIQLIQNHF\ | 18    | >KRAS-Q22K·LTIKLIQNHFV | 45   | 27    |
| >KRAS-Q22K·LTIQLIQNHF  | 289   | >KRAS-Q22K·LTIKLIQNHF  | 316  | 27    |
| >KRAS-Q22K·LTIQLIQNH   | 246   | >KRAS-Q22K·LTIKLIQNH   | 564  | 318   |
| >KRAS-Q22K·LTIQLIQNHF  | 8     | >KRAS-Q22K·LTIKLIQNHF  | 12   | 4     |
| >KRAS-Q22K·LTIQLIQNHF\ | 322   | >KRAS-Q22K·LTIKLIQNHFV | 599  | 277   |
| >KRAS-Q22K·LTIQLIQNHF  | 347   | >KRAS-Q22K·LTIKLIQNHF  | 1119 | 772   |
| >KRAS-Q22K·LTIQLIQNHF\ | 13    | >KRAS-Q22K·LTIKLIQNHFV | 14   | 1     |
| >KRAS-Q22K·LTIQLIQNHF\ | 18    | >KRAS-Q22K·LTIKLIQNHFV | 22   | 4     |
| >KRAS-Q22K·LTIQLIQNHF  | 69    | >KRAS-Q22K·LTIKLIQNHF  | 84   | 15    |
| >KRAS-Q22K·LTIQLIQNHF  | 218   | >KRAS-Q22K·LTIKLIQNHF  | 133  | 85    |
| >KRAS-Q22K·LTIQLIQNH   | 391   | >KRAS-Q22K·LTIKLIQNH   | 1292 | 901   |
| >KRAS-Q22K·LTIQLIQNHF  | 8     | >KRAS-Q22K·LTIKLIQNHF  | 11   | 3     |
| >KRAS-Q22K·LTIQLIQNHF\ | 296   | >KRAS-Q22K·LTIKLIQNHFV | 729  | 433   |
| >KRAS-Q22K·LTIQLIQNHF  | 324   | >KRAS-Q22K·LTIKLIQNHF  | 299  | 25    |
| >KRAS-Q22K·LTIQLIQNHF  | 27    | >KRAS-Q22K·LTIKLIQNHF  | 34   | 7     |
| >KRAS-Q22K·LTIQLIQNHF\ | 270   | >KRAS-Q22K·LTIKLIQNHFV | 322  | 52    |
| >KRAS-Q22K·LTIQLIQNHF  | 45    | >KRAS-Q22K·LTIKLIQNHF  | 44   | 1     |
| >KRAS-Q22K·ALTIQLIQ    | 273   | >KRAS-Q22K·ALTIKLIQ    | 479  | 206   |
| >KRAS-Q22K·SALTIQLI    | 127   | >KRAS-Q22K·SALTIKLI    | 130  | 3     |
| >KRAS-Q22K·KSALTIQLI   | 1635  | >KRAS-Q22K·KSALTIKLI   | 268  | 1367  |
| >KRAS-Q22K·KSALTIQLI   | 239   | >KRAS-Q22K·KSALTIKLI   | 602  | 363   |
| >KRAS-Q22K·KSALTIQL    | 276   | >KRAS-Q22K·KSALTIKL    | 390  | 114   |
| >KRAS-Q22K·KSALTIQL    | 7     | >KRAS-Q22K·KSALTIKL    | 10   | 3     |
| >KRAS-Q22K·KSALTIQLI   | 42    | >KRAS-Q22K·KSALTIKLI   | 43   | 1     |
| >KRAS-Q22K·KSALTIQL    | 35    | >KRAS-Q22K·KSALTIKL    | 98   | 63    |
| >KRAS-Q22K·KSALTIQLI   | 24    | >KRAS-Q22K·KSALTIKLI   | 87   | 63    |
| >KRAS-Q22K·KSALTIQL    | 335   | >KRAS-Q22K·KSALTIKL    | 458  | 123   |
| >KRAS-Q22K·KSALTIQLI   | 73    | >KRAS-Q22K·KSALTIKLI   | 102  | 29    |
| >KRAS-Q22K·KSALTIQL    | 241   | >KRAS-Q22K·KSALTIKL    | 291  | 50    |
| >KRAS-Q22K·KSALTIQLI   | 35    | >KRAS-Q22K·KSALTIKLI   | 24   | 11    |
| >KRAS-Q22K·GKSALTIQL   | 414   | >KRAS-Q22K·GKSALTIKL   | 1677 | 1263  |
| >KRAS-Q22K·GVGKSALTIQ  | 32201 | >KRAS-Q22K·GVGKSALTIK  | 326  | 31875 |
| >KRAS-Q22R·QLIQNHFV    | 42    | >KRAS-Q22R·RLIQNHFV    | 16   | 26    |
| >KRAS-Q22R·QLIQNHFV    | 10    | >KRAS-Q22R·RLIQNHFV    | 7    | 3     |
| >KRAS-Q22R·QLIQNHFV    | 25    | >KRAS-Q22R·RLIQNHFV    | 7    | 18    |
| >KRAS-Q22R·QLIQNHFV    | 23    | >KRAS-Q22R·RLIQNHFV    | 11   | 12    |
| >KRAS-Q22R·QLIQNHFV    | 4     | >KRAS-Q22R·RLIQNHFV    | 2    | 2     |
| >KRAS-Q22R·QLIQNHFV    | 6     | >KRAS-Q22R·RLIQNHFV    | 3    | 3     |
| >KRAS-Q22R·QLIQNHFV    | 15    | >KRAS-Q22R·RLIQNHFV    | 7    | 8     |

|                        |      |                        |       |       |
|------------------------|------|------------------------|-------|-------|
| >KRAS-Q22R·QLIQNHFV    | 15   | >KRAS-Q22R·RLIQNHFV    | 8     | 7     |
| >KRAS-Q22R·QLIQNHFV    | 3    | >KRAS-Q22R·RLIQNHFV    | 2     | 1     |
| >KRAS-Q22R·QLIQNHFVDE  | 42   | >KRAS-Q22R·RLIQNHFVDE  | 184   | 142   |
| >KRAS-Q22R·QLIQNHFVDE  | 51   | >KRAS-Q22R·RLIQNHFVDE  | 98    | 47    |
| >KRAS-Q22R·QLIQNHFVDE  | 328  | >KRAS-Q22R·RLIQNHFVDE  | 104   | 224   |
| >KRAS-Q22R·QLIQNHFVDE  | 2122 | >KRAS-Q22R·RLIQNHFVDE  | 182   | 1940  |
| >KRAS-Q22R·QLIQNHFV    | 92   | >KRAS-Q22R·RLIQNHFV    | 1919  | 1827  |
| >KRAS-Q22R·QLIQNHFV    | 41   | >KRAS-Q22R·RLIQNHFV    | 401   | 360   |
| >KRAS-Q22R·QLIQNHFVDE  | 188  | >KRAS-Q22R·RLIQNHFVDE  | 27    | 161   |
| >KRAS-Q22R·QLIQNHFVDE  | 124  | >KRAS-Q22R·RLIQNHFVDE  | 58    | 66    |
| >KRAS-Q22R·QLIQNHFVDE  | 158  | >KRAS-Q22R·RLIQNHFVDE  | 619   | 461   |
| >KRAS-Q22R·QLIQNHFVDE  | 345  | >KRAS-Q22R·RLIQNHFVDE  | 86    | 259   |
| >KRAS-Q22R·QLIQNHFVDE  | 1599 | >KRAS-Q22R·RLIQNHFVDE  | 81    | 1518  |
| >KRAS-Q22R·QLIQNHFVDE  | 286  | >KRAS-Q22R·RLIQNHFVDE  | 1010  | 724   |
| >KRAS-Q22R·IQLIQNHFV   | 208  | >KRAS-Q22R·IRLIQNHFV   | 336   | 128   |
| >KRAS-Q22R·IQLIQNHFV   | 69   | >KRAS-Q22R·IRLIQNHFV   | 17936 | 17867 |
| >KRAS-Q22R·IQLIQNHFV   | 113  | >KRAS-Q22R·IRLIQNHFV   | 8841  | 8728  |
| >KRAS-Q22R·IQLIQNHF    | 430  | >KRAS-Q22R·IRLIQNHF    | 25547 | 25117 |
| >KRAS-Q22R·IQLIQNHFV   | 6    | >KRAS-Q22R·IRLIQNHFV   | 5227  | 5221  |
| >KRAS-Q22R·IQLIQNHFV   | 26   | >KRAS-Q22R·IRLIQNHFV   | 3069  | 3043  |
| >KRAS-Q22R·IQLIQNHFV   | 52   | >KRAS-Q22R·IRLIQNHFV   | 11086 | 11034 |
| >KRAS-Q22R·IQLIQNHFV   | 30   | >KRAS-Q22R·IRLIQNHFV   | 5156  | 5126  |
| >KRAS-Q22R·IQLIQNHFV   | 133  | >KRAS-Q22R·IRLIQNHFV   | 12786 | 12653 |
| >KRAS-Q22R·IQLIQNHFV   | 217  | >KRAS-Q22R·IRLIQNHFV   | 4500  | 4283  |
| >KRAS-Q22R·IQLIQNHF    | 128  | >KRAS-Q22R·IRLIQNHF    | 16651 | 16523 |
| >KRAS-Q22R·IQLIQNHF    | 6    | >KRAS-Q22R·IRLIQNHF    | 30    | 24    |
| >KRAS-Q22R·IQLIQNHF    | 6901 | >KRAS-Q22R·IRLIQNHF    | 394   | 6507  |
| >KRAS-Q22R·IQLIQNHFV   | 8291 | >KRAS-Q22R·IRLIQNHFV   | 375   | 7916  |
| >KRAS-Q22R·TIQLIQNHFV  | 244  | >KRAS-Q22R·TIRLIQNHFV  | 4083  | 3839  |
| >KRAS-Q22R·TIQLIQNHFV  | 51   | >KRAS-Q22R·TIRLIQNHFV  | 98    | 47    |
| >KRAS-Q22R·TIQLIQNHFV  | 7843 | >KRAS-Q22R·TIRLIQNHFV  | 50    | 7793  |
| >KRAS-Q22R·TIQLIQNHFV  | 231  | >KRAS-Q22R·TIRLIQNHFV  | 918   | 687   |
| >KRAS-Q22R·LTIQLIQNHF\ | 177  | >KRAS-Q22R·LTIRLIQNHFV | 244   | 67    |
| >KRAS-Q22R·LTIQLIQNHF\ | 52   | >KRAS-Q22R·LTIRLIQNHFV | 70    | 18    |
| >KRAS-Q22R·LTIQLIQNHF\ | 144  | >KRAS-Q22R·LTIRLIQNHFV | 145   | 1     |
| >KRAS-Q22R·LTIQLIQNHF\ | 20   | >KRAS-Q22R·LTIRLIQNHFV | 23    | 3     |
| >KRAS-Q22R·LTIQLIQNHF\ | 24   | >KRAS-Q22R·LTIRLIQNHFV | 33    | 9     |
| >KRAS-Q22R·LTIQLIQNHF\ | 247  | >KRAS-Q22R·LTIRLIQNHFV | 184   | 63    |
| >KRAS-Q22R·LTIQLIQNHF\ | 95   | >KRAS-Q22R·LTIRLIQNHFV | 158   | 63    |
| >KRAS-Q22R·LTIQLIQNHF\ | 18   | >KRAS-Q22R·LTIRLIQNHFV | 25    | 7     |
| >KRAS-Q22R·LTIQLIQNHF  | 289  | >KRAS-Q22R·LTIRLIQNHF  | 393   | 104   |
| >KRAS-Q22R·LTIQLIQNH   | 246  | >KRAS-Q22R·LTIRLIQNH   | 264   | 18    |
| >KRAS-Q22R·LTIQLIQNHF  | 8    | >KRAS-Q22R·LTIRLIQNHF  | 9     | 1     |

|                        |       |                         |       |       |
|------------------------|-------|-------------------------|-------|-------|
| >KRAS-Q22R·LTIQLIQNHFV | 322   | >KRAS-Q22R·LTIRLIQNHFV  | 330   | 8     |
| >KRAS-Q22R·LTIQLIQNHF  | 347   | >KRAS-Q22R·LTIRLIQNHF   | 1575  | 1228  |
| >KRAS-Q22R·LTIQLIQNHFV | 13    | >KRAS-Q22R·LTIRLIQNHFV  | 12    | 1     |
| >KRAS-Q22R·LTIQLIQNHFV | 18    | >KRAS-Q22R·LTIRLIQNHFV  | 26    | 8     |
| >KRAS-Q22R·LTIQLIQNHF  | 69    | >KRAS-Q22R·LTIRLIQNHF   | 103   | 34    |
| >KRAS-Q22R·LTIQLIQNHF  | 218   | >KRAS-Q22R·LTIRLIQNHF   | 166   | 52    |
| >KRAS-Q22R·LTIQLIQNH   | 391   | >KRAS-Q22R·LTIRLIQNH    | 2248  | 1857  |
| >KRAS-Q22R·LTIQLIQNHF  | 8     | >KRAS-Q22R·LTIRLIQNHF   | 14    | 6     |
| >KRAS-Q22R·LTIQLIQNHFV | 296   | >KRAS-Q22R·LTIRLIQNHFV  | 1141  | 845   |
| >KRAS-Q22R·LTIQLIQNHF  | 324   | >KRAS-Q22R·LTIRLIQNHF   | 197   | 127   |
| >KRAS-Q22R·LTIQLIQNHF  | 27    | >KRAS-Q22R·LTIRLIQNHF   | 26    | 1     |
| >KRAS-Q22R·LTIQLIQNHFV | 270   | >KRAS-Q22R·LTIRLIQNHFV  | 519   | 249   |
| >KRAS-Q22R·LTIQLIQNHF  | 45    | >KRAS-Q22R·LTIRLIQNHF   | 30    | 15    |
| >KRAS-Q22R·ALTIQLIQ    | 273   | >KRAS-Q22R·ALTIRLIQ     | 373   | 100   |
| >KRAS-Q22R·SALTIQLI    | 741   | >KRAS-Q22R·SALTIRLI     | 426   | 315   |
| >KRAS-Q22R·SALTIQLI    | 127   | >KRAS-Q22R·SALTIRLI     | 127   | 0     |
| >KRAS-Q22R·KSALTIQLI   | 239   | >KRAS-Q22R·KSALTIRLI    | 327   | 88    |
| >KRAS-Q22R·KSALTIQL    | 276   | >KRAS-Q22R·KSALTIRL     | 496   | 220   |
| >KRAS-Q22R·KSALTIQL    | 7     | >KRAS-Q22R·KSALTIRL     | 8     | 1     |
| >KRAS-Q22R·KSALTIQLI   | 42    | >KRAS-Q22R·KSALTIRLI    | 77    | 35    |
| >KRAS-Q22R·KSALTIQL    | 35    | >KRAS-Q22R·KSALTIRL     | 97    | 62    |
| >KRAS-Q22R·KSALTIQLI   | 24    | >KRAS-Q22R·KSALTIRLI    | 126   | 102   |
| >KRAS-Q22R·KSALTIQL    | 335   | >KRAS-Q22R·KSALTIRL     | 314   | 21    |
| >KRAS-Q22R·KSALTIQLI   | 73    | >KRAS-Q22R·KSALTIRLI    | 70    | 3     |
| >KRAS-Q22R·KSALTIQL    | 241   | >KRAS-Q22R·KSALTIRL     | 366   | 125   |
| >KRAS-Q22R·KSALTIQLI   | 35    | >KRAS-Q22R·KSALTIRLI    | 26    | 9     |
| >KRAS-Q22R·GKSALTIQL   | 414   | >KRAS-Q22R·GKSALTIRL    | 1020  | 606   |
| >KRAS-Q22R·GKSALTIQL   | 800   | >KRAS-Q22R·GKSALTIRL    | 473   | 327   |
| >KRAS-Q22R·VGKSALTIQ   | 20794 | >KRAS-Q22R·VGKSALTIR    | 316   | 20478 |
| >KRAS-Q61E·QEEYSAMR    | 2046  | >KRAS-Q61E·EEEYSAMR     | 168   | 1878  |
| >KRAS-Q61E·QEEYSAMRD   | 722   | >KRAS-Q61E·EEEYSAMRDC   | 315   | 407   |
| >KRAS-Q61E·QEEYSAMRD   | 423   | >KRAS-Q61E·EEEYSAMRDC   | 499   | 76    |
| >KRAS-Q61E·GQEEYSAM    | 497   | >KRAS-Q61E·GEEEYSAM     | 16619 | 16122 |
| >KRAS-Q61E·GQEEYSAMR   | 385   | >KRAS-Q61E·GEEEYSAMR    | 10970 | 10585 |
| >KRAS-Q61E·GQEEYSAM    | 347   | >KRAS-Q61E·GEEEYSAM     | 3284  | 2937  |
| >KRAS-Q61E·GQEEYSAM    | 3638  | >KRAS-Q61E·GEEEYSAM     | 44    | 3594  |
| >KRAS-Q61E·GQEEYSAM    | 12764 | >KRAS-Q61E·GEEEYSAM     | 236   | 12528 |
| >KRAS-Q61E·CLLDILDTAGC | 479   | >KRAS-Q61E·CLLDILDTAGEC | 6428  | 5949  |
| >KRAS-Q61E·CLLDILDTAGC | 138   | >KRAS-Q61E·CLLDILDTAGEC | 6100  | 5962  |
| >KRAS-Q61E·TAGQEEYSAM  | 56    | >KRAS-Q61E·TAGEEEYSAM   | 45    | 11    |
| >KRAS-Q61E·DTAGQEEY    | 387   | >KRAS-Q61E·DTAGEEY      | 628   | 241   |
| >KRAS-Q61E·DTAGQEEY    | 94    | >KRAS-Q61E·DTAGEEY      | 185   | 91    |
| >KRAS-Q61E·DTAGQEEYSA  | 491   | >KRAS-Q61E·DTAGEEYSA    | 685   | 194   |

|                        |     |                        |       |       |
|------------------------|-----|------------------------|-------|-------|
| >KRAS-Q61E-DTAGQEEY    | 28  | >KRAS-Q61E-DTAGEEY     | 55    | 27    |
| >KRAS-Q61E-DTAGQEEYS/  | 20  | >KRAS-Q61E-DTAGEEEYSA  | 22    | 2     |
| >KRAS-Q61E-DTAGQEEY    | 8   | >KRAS-Q61E-DTAGEEY     | 9     | 1     |
| >KRAS-Q61E-DTAGQEEYS/  | 6   | >KRAS-Q61E-DTAGEEEYSA  | 6     | 0     |
| >KRAS-Q61E-DTAGQEEYS/  | 223 | >KRAS-Q61E-DTAGEEEYSA  | 364   | 141   |
| >KRAS-Q61E-DTAGQEEY    | 245 | >KRAS-Q61E-DTAGEEY     | 570   | 325   |
| >KRAS-Q61E-DTAGQEEY    | 89  | >KRAS-Q61E-DTAGEEY     | 96    | 7     |
| >KRAS-Q61E-DTAGQEEYS   | 408 | >KRAS-Q61E-DTAGEEEYS   | 1018  | 610   |
| >KRAS-Q61E-DTAGQEEYS/  | 613 | >KRAS-Q61E-DTAGEEEYSA  | 364   | 249   |
| >KRAS-Q61E-DTAGQEEYS/  | 389 | >KRAS-Q61E-DTAGEEEYSA  | 720   | 331   |
| >KRAS-Q61E-DTAGQEEYS/  | 449 | >KRAS-Q61E-DTAGEEEYSA  | 536   | 87    |
| >KRAS-Q61E-ILDITAGQEEY | 135 | >KRAS-Q61E-ILDITAGEEY  | 173   | 38    |
| >KRAS-Q61E-ILDITAGQEEY | 349 | >KRAS-Q61E-ILDITAGEEY  | 538   | 189   |
| >KRAS-Q61E-ILDITAGQEEY | 463 | >KRAS-Q61E-ILDITAGEEY  | 795   | 332   |
| >KRAS-Q61E-DILITAGQEE  | 150 | >KRAS-Q61E-DILITAGEE`  | 199   | 49    |
| >KRAS-Q61E-DILITAGQEE  | 183 | >KRAS-Q61E-DILITAGEE`  | 348   | 165   |
| >KRAS-Q61E-LLDILITAGQ  | 401 | >KRAS-Q61E-LLDILITAG   | 12124 | 11723 |
| >KRAS-Q61H QEEYSAMR    | 509 | >KRAS-Q61H HEEYSAMR    | 320   | 189   |
| >KRAS-Q61H QEEYSAMRD   | 734 | >KRAS-Q61H HEEYSAMRD   | 358   | 376   |
| >KRAS-Q61H QEEYSAMRD   | 423 | >KRAS-Q61H HEEYSAMRD   | 1382  | 959   |
| >KRAS-Q61H GQEEYSAM    | 497 | >KRAS-Q61H GHEEYSAM    | 23893 | 23396 |
| >KRAS-Q61H GQEEYSAMR   | 385 | >KRAS-Q61H GHEEYSAMR   | 8603  | 8218  |
| >KRAS-Q61H GQEEYSAM    | 347 | >KRAS-Q61H GHEEYSAM    | 157   | 190   |
| >KRAS-Q61H CLLDILITAG  | 479 | >KRAS-Q61H CLLDILITAG  | 8172  | 7693  |
| >KRAS-Q61H CLLDILITAG  | 138 | >KRAS-Q61H CLLDILITAG  | 8703  | 8565  |
| >KRAS-Q61H TAGQEEYSAM  | 56  | >KRAS-Q61H TAGHEEYSAM  | 57    | 1     |
| >KRAS-Q61H DTAGQEEY    | 387 | >KRAS-Q61H DTAGHEEY    | 466   | 79    |
| >KRAS-Q61H DTAGQEEY    | 94  | >KRAS-Q61H DTAGHEEY    | 65    | 29    |
| >KRAS-Q61H DTAGQEEYS/  | 491 | >KRAS-Q61H DTAGHEEYSA  | 237   | 254   |
| >KRAS-Q61H DTAGQEEY    | 28  | >KRAS-Q61H DTAGHEEY    | 26    | 2     |
| >KRAS-Q61H DTAGQEEYS/  | 20  | >KRAS-Q61H DTAGHEEYSA  | 16    | 4     |
| >KRAS-Q61H DTAGQEEY    | 8   | >KRAS-Q61H DTAGHEEY    | 5     | 3     |
| >KRAS-Q61H DTAGQEEYS/  | 6   | >KRAS-Q61H DTAGHEEYSA  | 4     | 2     |
| >KRAS-Q61H DTAGQEEYS/  | 223 | >KRAS-Q61H DTAGHEEYSA  | 411   | 188   |
| >KRAS-Q61H DTAGQEEY    | 245 | >KRAS-Q61H DTAGHEEY    | 122   | 123   |
| >KRAS-Q61H DTAGQEEY    | 89  | >KRAS-Q61H DTAGHEEY    | 66    | 23    |
| >KRAS-Q61H DTAGQEEYS   | 408 | >KRAS-Q61H DTAGHEEYS   | 365   | 43    |
| >KRAS-Q61H DTAGQEEYS/  | 613 | >KRAS-Q61H DTAGHEEYSA  | 405   | 208   |
| >KRAS-Q61H DTAGQEEYS/  | 389 | >KRAS-Q61H DTAGHEEYSA  | 392   | 3     |
| >KRAS-Q61H DTAGQEEYS/  | 666 | >KRAS-Q61H DTAGHEEYSA  | 427   | 239   |
| >KRAS-Q61H DTAGQEEYS/  | 449 | >KRAS-Q61H DTAGHEEYSA  | 410   | 39    |
| >KRAS-Q61H ILITAGQEEY  | 135 | >KRAS-Q61H ILITAGHEEY  | 104   | 31    |
| >KRAS-Q61H ILITAGQEEY: | 734 | >KRAS-Q61H ILITAGHEEY: | 442   | 292   |

|                       |       |                        |       |       |
|-----------------------|-------|------------------------|-------|-------|
| >KRAS-Q61H ILDTAGQEEY | 571   | >KRAS-Q61H ILDTAGHEEY  | 399   | 172   |
| >KRAS-Q61H ILDTAGQEEY | 349   | >KRAS-Q61H ILDTAGHEEY  | 328   | 21    |
| >KRAS-Q61H ILDTAGQEEY | 463   | >KRAS-Q61H ILDTAGHEEY  | 206   | 257   |
| >KRAS-Q61H ILDTAGQEEY | 504   | >KRAS-Q61H ILDTAGHEEY  | 403   | 101   |
| >KRAS-Q61H DILDTAGQEE | 150   | >KRAS-Q61H DILDTAGHEE  | 118   | 32    |
| >KRAS-Q61H DILDTAGQEE | 183   | >KRAS-Q61H DILDTAGHEE  | 120   | 63    |
| >KRAS-Q61H LLDILDTAGQ | 401   | >KRAS-Q61H LLDILDTAGH  | 15735 | 15334 |
| >KRAS-Q61K·QEEYSAMRD  | 423   | >KRAS-Q61K·KEEYSAMRD   | 1146  | 723   |
| >KRAS-Q61K·QEEYSAMR   | 3059  | >KRAS-Q61K·KEEYSAMR    | 470   | 2589  |
| >KRAS-Q61K·GQEEYSAM   | 497   | >KRAS-Q61K·GKEEYSAM    | 18666 | 18169 |
| >KRAS-Q61K·GQEEYSAMR  | 385   | >KRAS-Q61K·GKEEYSAMR   | 12307 | 11922 |
| >KRAS-Q61K·GQEEYSAM   | 347   | >KRAS-Q61K·GKEEYSAM    | 1249  | 902   |
| >KRAS-Q61K·CLLDILDTAG | 479   | >KRAS-Q61K·CLLDILDTAGH | 3331  | 2852  |
| >KRAS-Q61K·CLLDILDTAG | 138   | >KRAS-Q61K·CLLDILDTAGH | 1684  | 1546  |
| >KRAS-Q61K·CLLDILDTAG | 27746 | >KRAS-Q61K·CLLDILDTAGH | 308   | 27438 |
| >KRAS-Q61K·TAGQEEYSAM | 56    | >KRAS-Q61K·TAGKEEYSAM  | 53    | 3     |
| >KRAS-Q61K·DTAGQEEY   | 387   | >KRAS-Q61K·DTAGKEEY    | 1068  | 681   |
| >KRAS-Q61K·DTAGQEEY   | 94    | >KRAS-Q61K·DTAGKEEY    | 158   | 64    |
| >KRAS-Q61K·DTAGQEEYSA | 491   | >KRAS-Q61K·DTAGKEEYSA  | 576   | 85    |
| >KRAS-Q61K·DTAGQEEY   | 28    | >KRAS-Q61K·DTAGKEEY    | 60    | 32    |
| >KRAS-Q61K·DTAGQEEYSA | 20    | >KRAS-Q61K·DTAGKEEYSA  | 27    | 7     |
| >KRAS-Q61K·DTAGQEEY   | 8     | >KRAS-Q61K·DTAGKEEY    | 15    | 7     |
| >KRAS-Q61K·DTAGQEEYSA | 6     | >KRAS-Q61K·DTAGKEEYSA  | 8     | 2     |
| >KRAS-Q61K·DTAGQEEYSA | 223   | >KRAS-Q61K·DTAGKEEYSA  | 119   | 104   |
| >KRAS-Q61K·DTAGQEEY   | 245   | >KRAS-Q61K·DTAGKEEY    | 616   | 371   |
| >KRAS-Q61K·DTAGQEEY   | 89    | >KRAS-Q61K·DTAGKEEY    | 123   | 34    |
| >KRAS-Q61K·DTAGQEEYS  | 408   | >KRAS-Q61K·DTAGKEEYS   | 466   | 58    |
| >KRAS-Q61K·DTAGQEEYSA | 613   | >KRAS-Q61K·DTAGKEEYSA  | 455   | 158   |
| >KRAS-Q61K·DTAGQEEYSA | 389   | >KRAS-Q61K·DTAGKEEYSA  | 454   | 65    |
| >KRAS-Q61K·DTAGQEEYSA | 449   | >KRAS-Q61K·DTAGKEEYSA  | 1195  | 746   |
| >KRAS-Q61K·ILDTAGQEEY | 135   | >KRAS-Q61K·ILDTAGKEEY  | 212   | 77    |
| >KRAS-Q61K·ILDTAGQEEY | 571   | >KRAS-Q61K·ILDTAGKEEY  | 499   | 72    |
| >KRAS-Q61K·ILDTAGQEEY | 349   | >KRAS-Q61K·ILDTAGKEEY  | 561   | 212   |
| >KRAS-Q61K·ILDTAGQEEY | 463   | >KRAS-Q61K·ILDTAGKEEY  | 1609  | 1146  |
| >KRAS-Q61K·DILDTAGQEE | 150   | >KRAS-Q61K·DILDTAGKEE' | 328   | 178   |
| >KRAS-Q61K·DILDTAGQEE | 183   | >KRAS-Q61K·DILDTAGKEE' | 352   | 169   |
| >KRAS-Q61K·DILDTAGQ   | 8084  | >KRAS-Q61K·DILDTAGK    | 191   | 7893  |
| >KRAS-Q61K·LLDILDTAGQ | 401   | >KRAS-Q61K·LLDILDTAGK  | 4614  | 4213  |
| >KRAS-Q61L·QEEYSAMRD  | 734   | >KRAS-Q61L·LEEYSAMRDC  | 233   | 501   |
| >KRAS-Q61L·QEEYSAMRD  | 423   | >KRAS-Q61L·LEEYSAMRDC  | 2834  | 2411  |
| >KRAS-Q61L·GQEEYSAM   | 6727  | >KRAS-Q61L·GLEEYSAM    | 158   | 6569  |
| >KRAS-Q61L·GQEEYSAM   | 497   | >KRAS-Q61L·GLEEYSAM    | 2825  | 2328  |
| >KRAS-Q61L·GQEEYSAM   | 9183  | >KRAS-Q61L·GLEEYSAM    | 239   | 8944  |

|                        |       |                        |      |       |
|------------------------|-------|------------------------|------|-------|
| >KRAS-Q61L-GQEEYSAM    | 5763  | >KRAS-Q61L-GLEEYSAM    | 114  | 5649  |
| >KRAS-Q61L-GQEEYSAM    | 29319 | >KRAS-Q61L-GLEEYSAM    | 175  | 29144 |
| >KRAS-Q61L-GQEEYSAMR   | 385   | >KRAS-Q61L-GLEEYSAMR   | 513  | 128   |
| >KRAS-Q61L-GQEEYSAM    | 347   | >KRAS-Q61L-GLEEYSAM    | 7030 | 6683  |
| >KRAS-Q61L-CLLDILDTAGC | 6354  | >KRAS-Q61L-CLLDILDTAGL | 26   | 6328  |
| >KRAS-Q61L-CLLDILDTAGC | 731   | >KRAS-Q61L-CLLDILDTAGL | 27   | 704   |
| >KRAS-Q61L-CLLDILDTAGC | 3796  | >KRAS-Q61L-CLLDILDTAGL | 81   | 3715  |
| >KRAS-Q61L-CLLDILDTAGC | 1926  | >KRAS-Q61L-CLLDILDTAGL | 31   | 1895  |
| >KRAS-Q61L-CLLDILDTAGC | 835   | >KRAS-Q61L-CLLDILDTAGL | 8    | 827   |
| >KRAS-Q61L-CLLDILDTAGC | 1277  | >KRAS-Q61L-CLLDILDTAGL | 6    | 1271  |
| >KRAS-Q61L-CLLDILDTAGC | 3176  | >KRAS-Q61L-CLLDILDTAGL | 31   | 3145  |
| >KRAS-Q61L-CLLDILDTAGC | 479   | >KRAS-Q61L-CLLDILDTAGL | 2    | 477   |
| >KRAS-Q61L-CLLDILDTAGC | 138   | >KRAS-Q61L-CLLDILDTAGL | 5    | 133   |
| >KRAS-Q61L-TAGQEEYSAM  | 56    | >KRAS-Q61L-TAGLEEYSAM  | 65   | 9     |
| >KRAS-Q61L-DTAGQEEY    | 387   | >KRAS-Q61L-DTAGLEEY    | 355  | 32    |
| >KRAS-Q61L-DTAGQEEY    | 94    | >KRAS-Q61L-DTAGLEEY    | 55   | 39    |
| >KRAS-Q61L-DTAGQEEYS/  | 491   | >KRAS-Q61L-DTAGLEEYSA  | 353  | 138   |
| >KRAS-Q61L-DTAGQEEY    | 28    | >KRAS-Q61L-DTAGLEEY    | 30   | 2     |
| >KRAS-Q61L-DTAGQEEYS/  | 20    | >KRAS-Q61L-DTAGLEEYSA  | 31   | 11    |
| >KRAS-Q61L-DTAGQEEY    | 8     | >KRAS-Q61L-DTAGLEEY    | 6    | 2     |
| >KRAS-Q61L-DTAGQEEYS/  | 6     | >KRAS-Q61L-DTAGLEEYSA  | 8    | 2     |
| >KRAS-Q61L-DTAGQEEYS/  | 223   | >KRAS-Q61L-DTAGLEEYSA  | 152  | 71    |
| >KRAS-Q61L-DTAGQEEY    | 245   | >KRAS-Q61L-DTAGLEEY    | 179  | 66    |
| >KRAS-Q61L-DTAGQEEY    | 89    | >KRAS-Q61L-DTAGLEEY    | 61   | 28    |
| >KRAS-Q61L-DTAGQEEYS   | 408   | >KRAS-Q61L-DTAGLEEYS   | 114  | 294   |
| >KRAS-Q61L-DTAGQEEYS/  | 613   | >KRAS-Q61L-DTAGLEEYSA  | 151  | 462   |
| >KRAS-Q61L-DTAGQEEYS/  | 389   | >KRAS-Q61L-DTAGLEEYSA  | 168  | 221   |
| >KRAS-Q61L-DTAGQEEYS/  | 666   | >KRAS-Q61L-DTAGLEEYSA  | 401  | 265   |
| >KRAS-Q61L-DTAGQEEYS/  | 449   | >KRAS-Q61L-DTAGLEEYSA  | 480  | 31    |
| >KRAS-Q61L-DTAGQEEYS/  | 805   | >KRAS-Q61L-DTAGLEEYSA  | 278  | 527   |
| >KRAS-Q61L-ILDTAGQEEY  | 135   | >KRAS-Q61L-ILDTAGLEEY  | 54   | 81    |
| >KRAS-Q61L-ILDTAGQEEY  | 349   | >KRAS-Q61L-ILDTAGLEEY  | 261  | 88    |
| >KRAS-Q61L-ILDTAGQEEY  | 463   | >KRAS-Q61L-ILDTAGLEEY  | 103  | 360   |
| >KRAS-Q61L-DILDTAGQ    | 12736 | >KRAS-Q61L-DILDTAGL    | 165  | 12571 |
| >KRAS-Q61L-DILDTAGQEE  | 849   | >KRAS-Q61L-DILDTAGLEE\ | 407  | 442   |
| >KRAS-Q61L-DILDTAGQEE  | 150   | >KRAS-Q61L-DILDTAGLEE\ | 60   | 90    |
| >KRAS-Q61L-DILDTAGQEE  | 183   | >KRAS-Q61L-DILDTAGLEE\ | 146  | 37    |
| >KRAS-Q61L-DILDTAGQ    | 1563  | >KRAS-Q61L-DILDTAGL    | 17   | 1546  |
| >KRAS-Q61L-LDILDTAGQ   | 16524 | >KRAS-Q61L-LDILDTAGL   | 384  | 16140 |
| >KRAS-Q61L-LLDILDTAGQ  | 13423 | >KRAS-Q61L-LLDILDTAGL  | 168  | 13255 |
| >KRAS-Q61L-LLDILDTAGQ  | 10881 | >KRAS-Q61L-LLDILDTAGL  | 60   | 10821 |
| >KRAS-Q61L-LLDILDTAGQ  | 10500 | >KRAS-Q61L-LLDILDTAGL  | 107  | 10393 |
| >KRAS-Q61L-LLDILDTAGQ  | 16137 | >KRAS-Q61L-LLDILDTAGL  | 329  | 15808 |

|                        |       |                         |       |       |
|------------------------|-------|-------------------------|-------|-------|
| >KRAS-Q61L-LLDILDTAGQ  | 2409  | >KRAS-Q61L-LLDILDTAGL   | 21    | 2388  |
| >KRAS-Q61L-LLDILDTAGQ  | 6198  | >KRAS-Q61L-LLDILDTAGL   | 30    | 6168  |
| >KRAS-Q61L-LLDILDTAGQ  | 3175  | >KRAS-Q61L-LLDILDTAGL   | 24    | 3151  |
| >KRAS-Q61L-LLDILDTAGQ  | 13067 | >KRAS-Q61L-LLDILDTAGL   | 91    | 12976 |
| >KRAS-Q61L-LLDILDTAGQ  | 401   | >KRAS-Q61L-LLDILDTAGL   | 8     | 393   |
| >KRAS-Q61P-QEEYSAMRD   | 423   | >KRAS-Q61P-PEEYSAMRD    | 4511  | 4088  |
| >KRAS-Q61P-GQEEYSAM    | 497   | >KRAS-Q61P-GPEEYSAM     | 23788 | 23291 |
| >KRAS-Q61P-GQEEYSAMR   | 385   | >KRAS-Q61P-GPEEYSAMR    | 10224 | 9839  |
| >KRAS-Q61P-GQEEYSAM    | 21659 | >KRAS-Q61P-GPEEYSAM     | 102   | 21557 |
| >KRAS-Q61P-GQEEYSAM    | 5425  | >KRAS-Q61P-GPEEYSAM     | 51    | 5374  |
| >KRAS-Q61P-GQEEYSAM    | 347   | >KRAS-Q61P-GPEEYSAM     | 1098  | 751   |
| >KRAS-Q61P-CLLDILDTAGC | 479   | >KRAS-Q61P-CLLDILDTAGF  | 4926  | 4447  |
| >KRAS-Q61P-CLLDILDTAGC | 138   | >KRAS-Q61P-CLLDILDTAGF  | 6838  | 6700  |
| >KRAS-Q61P-TAGQEEYSAM  | 56    | >KRAS-Q61P-TAGPEEYSAM   | 63    | 7     |
| >KRAS-Q61P-DTAGQEEY    | 387   | >KRAS-Q61P-DTAGPEEY     | 1046  | 659   |
| >KRAS-Q61P-DTAGQEEY    | 94    | >KRAS-Q61P-DTAGPEEY     | 356   | 262   |
| >KRAS-Q61P-DTAGQEEYSA  | 491   | >KRAS-Q61P-DTAGPEEYSA   | 895   | 404   |
| >KRAS-Q61P-DTAGQEEY    | 28    | >KRAS-Q61P-DTAGPEEY     | 121   | 93    |
| >KRAS-Q61P-DTAGQEEYSA  | 20    | >KRAS-Q61P-DTAGPEEYSA   | 34    | 14    |
| >KRAS-Q61P-DTAGQEEY    | 8     | >KRAS-Q61P-DTAGPEEY     | 7     | 1     |
| >KRAS-Q61P-DTAGQEEYSA  | 6     | >KRAS-Q61P-DTAGPEEYSA   | 5     | 1     |
| >KRAS-Q61P-DTAGQEEY    | 1082  | >KRAS-Q61P-DTAGPEEY     | 213   | 869   |
| >KRAS-Q61P-DTAGQEEYSA  | 223   | >KRAS-Q61P-DTAGPEEYSA   | 77    | 146   |
| >KRAS-Q61P-DTAGQEEY    | 245   | >KRAS-Q61P-DTAGPEEY     | 239   | 6     |
| >KRAS-Q61P-DTAGQEEY    | 89    | >KRAS-Q61P-DTAGPEEY     | 119   | 30    |
| >KRAS-Q61P-DTAGQEEYS   | 408   | >KRAS-Q61P-DTAGPEEYS    | 65    | 343   |
| >KRAS-Q61P-DTAGQEEYSA  | 613   | >KRAS-Q61P-DTAGPEEYSA   | 144   | 469   |
| >KRAS-Q61P-DTAGQEEYSA  | 389   | >KRAS-Q61P-DTAGPEEYSA   | 123   | 266   |
| >KRAS-Q61P-DTAGQEEYSA  | 666   | >KRAS-Q61P-DTAGPEEYSA   | 207   | 459   |
| >KRAS-Q61P-DTAGQEEYSA  | 449   | >KRAS-Q61P-DTAGPEEYSA   | 643   | 194   |
| >KRAS-Q61P-DTAGQEEYSA  | 805   | >KRAS-Q61P-DTAGPEEYSA   | 284   | 521   |
| >KRAS-Q61P-ILDITAGQEEY | 135   | >KRAS-Q61P-ILDITAGPEEY  | 91    | 44    |
| >KRAS-Q61P-ILDITAGQEEY | 734   | >KRAS-Q61P-ILDITAGPEEYS | 437   | 297   |
| >KRAS-Q61P-ILDITAGQEEY | 571   | >KRAS-Q61P-ILDITAGPEEY  | 273   | 298   |
| >KRAS-Q61P-ILDITAGQEEY | 349   | >KRAS-Q61P-ILDITAGPEEY  | 461   | 112   |
| >KRAS-Q61P-ILDITAGQEEY | 463   | >KRAS-Q61P-ILDITAGPEEY  | 365   | 98    |
| >KRAS-Q61P-DILDTAGQEE  | 150   | >KRAS-Q61P-DILDTAGPEE'  | 181   | 31    |
| >KRAS-Q61P-DILDTAGQEE  | 183   | >KRAS-Q61P-DILDTAGPEE'  | 162   | 21    |
| >KRAS-Q61P-LLDILDTAGQ  | 401   | >KRAS-Q61P-LLDILDTAGP   | 13302 | 12901 |
| >KRAS-Q61R-QEEYSAMRD   | 423   | >KRAS-Q61R-REEYSAMRD    | 545   | 122   |
| >KRAS-Q61R-GQEEYSAM    | 497   | >KRAS-Q61R-GREEYSAM     | 23610 | 23113 |
| >KRAS-Q61R-GQEEYSAMR   | 385   | >KRAS-Q61R-GREEYSAMR    | 15846 | 15461 |
| >KRAS-Q61R-GQEEYSAM    | 347   | >KRAS-Q61R-GREEYSAM     | 306   | 41    |



|                         |       |                         |       |       |
|-------------------------|-------|-------------------------|-------|-------|
| >KRAS-Q61R·CLLDILDTAGC  | 479   | >KRAS-Q61R·CLLDILDTAGF  | 6628  | 6149  |
| >KRAS-Q61R·CLLDILDTAGC  | 138   | >KRAS-Q61R·CLLDILDTAGF  | 5372  | 5234  |
| >KRAS-Q61R·CLLDILDTAGC  | 24335 | >KRAS-Q61R·CLLDILDTAGF  | 470   | 23865 |
| >KRAS-Q61R·CLLDILDTAGC  | 15438 | >KRAS-Q61R·CLLDILDTAGF  | 230   | 15208 |
| >KRAS-Q61R·CLLDILDTAGC  | 8819  | >KRAS-Q61R·CLLDILDTAGF  | 120   | 8699  |
| >KRAS-Q61R·TAGQEEYSAN   | 56    | >KRAS-Q61R·TAGREEYSAN   | 61    | 5     |
| >KRAS-Q61R·DTAGQEEY     | 387   | >KRAS-Q61R·DTAGREEY     | 838   | 451   |
| >KRAS-Q61R·DTAGQEEY     | 94    | >KRAS-Q61R·DTAGREEY     | 130   | 36    |
| >KRAS-Q61R·DTAGQEEYSA   | 491   | >KRAS-Q61R·DTAGREEYSA   | 531   | 40    |
| >KRAS-Q61R·DTAGQEEY     | 28    | >KRAS-Q61R·DTAGREEY     | 38    | 10    |
| >KRAS-Q61R·DTAGQEEYSA   | 20    | >KRAS-Q61R·DTAGREEYSA   | 22    | 2     |
| >KRAS-Q61R·DTAGQEEY     | 8     | >KRAS-Q61R·DTAGREEY     | 15    | 7     |
| >KRAS-Q61R·DTAGQEEYSA   | 6     | >KRAS-Q61R·DTAGREEYSA   | 10    | 4     |
| >KRAS-Q61R·DTAGQEEY     | 1082  | >KRAS-Q61R·DTAGREEY     | 480   | 602   |
| >KRAS-Q61R·DTAGQEEYSA   | 223   | >KRAS-Q61R·DTAGREEYSA   | 120   | 103   |
| >KRAS-Q61R·DTAGQEEY     | 245   | >KRAS-Q61R·DTAGREEY     | 484   | 239   |
| >KRAS-Q61R·DTAGQEEY     | 89    | >KRAS-Q61R·DTAGREEY     | 62    | 27    |
| >KRAS-Q61R·DTAGQEEYS    | 408   | >KRAS-Q61R·DTAGREEYS    | 614   | 206   |
| >KRAS-Q61R·DTAGQEEYSA   | 613   | >KRAS-Q61R·DTAGREEYSA   | 364   | 249   |
| >KRAS-Q61R·DTAGQEEYSA   | 389   | >KRAS-Q61R·DTAGREEYSA   | 519   | 130   |
| >KRAS-Q61R·DTAGQEEYSA   | 449   | >KRAS-Q61R·DTAGREEYSA   | 1084  | 635   |
| >KRAS-Q61R·ILDITAGQEEY  | 135   | >KRAS-Q61R·ILDITAGREEY  | 181   | 46    |
| >KRAS-Q61R·ILDITAGQEEY  | 571   | >KRAS-Q61R·ILDITAGREEY  | 499   | 72    |
| >KRAS-Q61R·ILDITAGQEEY  | 349   | >KRAS-Q61R·ILDITAGREEY  | 488   | 139   |
| >KRAS-Q61R·ILDITAGQEEY  | 463   | >KRAS-Q61R·ILDITAGREEY  | 1310  | 847   |
| >KRAS-Q61R·DILDTAGQEE   | 150   | >KRAS-Q61R·DILDTAGREE'  | 207   | 57    |
| >KRAS-Q61R·DILDTAGQEE   | 183   | >KRAS-Q61R·DILDTAGREE'  | 283   | 100   |
| >KRAS-Q61R·DILDTAGQ     | 15309 | >KRAS-Q61R·DILDTAGR     | 67    | 15242 |
| >KRAS-Q61R·DILDTAGQ     | 8084  | >KRAS-Q61R·DILDTAGR     | 49    | 8035  |
| >KRAS-Q61R·DILDTAGQ     | 20152 | >KRAS-Q61R·DILDTAGR     | 361   | 19791 |
| >KRAS-Q61R·LLDILDTAGQ   | 401   | >KRAS-Q61R·LLDILDTAGR   | 10970 | 10569 |
| >KRAS-R164C(RKHKEKMSK   | 27    | >KRAS-R164C(QKHKEKMSK   | 1698  | 1671  |
| >KRAS-R164C(RKHKEKMSK   | 85    | >KRAS-R164C(QKHKEKMSK   | 493   | 408   |
| >KRAS-R164C(IRKHKEKMSK  | 983   | >KRAS-R164C(IQKHKEKMSK  | 112   | 871   |
| >KRAS-R164C(IRKHKEKM    | 533   | >KRAS-R164C(IQKHKEKM    | 88    | 445   |
| >KRAS-R164C(IRKHKEKMSK  | 1407  | >KRAS-R164C(IQKHKEKMSK  | 283   | 1124  |
| >KRAS-R164C(DAFYTLVREIF | 22    | >KRAS-R164C(DAFYTLVREIC | 5416  | 5394  |
| >KRAS-R164C(DAFYTLVREIF | 4     | >KRAS-R164C(DAFYTLVREIC | 313   | 309   |
| >KRAS-R164C(EIRKHKEKM   | 319   | >KRAS-R164C(EIQKHKEKM   | 475   | 156   |
| >KRAS-R164C(EIRKHKEKMS  | 283   | >KRAS-R164C(EIQKHKEKMS  | 11039 | 10756 |
| >KRAS-R164C(EIRKHKEK    | 507   | >KRAS-R164C(EIQKHKEK    | 271   | 236   |
| >KRAS-R164C(EIRKHKEKMS  | 266   | >KRAS-R164C(EIQKHKEKMS  | 148   | 118   |
| >KRAS-R164C(EIRKHKEKM   | 249   | >KRAS-R164C(EIQKHKEKM   | 2373  | 2124  |

|                         |     |                         |       |       |
|-------------------------|-----|-------------------------|-------|-------|
| >KRAS-R164C REIRKHKEKM  | 447 | >KRAS-R164C REIQKHKEKM  | 284   | 163   |
| >KRAS-R164C REIRKHKEKM  | 33  | >KRAS-R164C REIQKHKEKM  | 45    | 12    |
| >KRAS-R164C LVREIRKHK   | 495 | >KRAS-R164C LVREIQKHK   | 445   | 50    |
| >KRAS-R164C LVREIRKHK   | 5   | >KRAS-R164C LVREIQKHK   | 6     | 1     |
| >KRAS-R164C LVREIRKHKEI | 5   | >KRAS-R164C LVREIQKHKEI | 6     | 1     |
| >KRAS-R164C LVREIRKHK   | 284 | >KRAS-R164C LVREIQKHK   | 1117  | 833   |
| >KRAS-R164C TLVREIRK    | 211 | >KRAS-R164C TLVREIQK    | 247   | 36    |
| >KRAS-R164C TLVREIRK    | 236 | >KRAS-R164C TLVREIQK    | 159   | 77    |
| >KRAS-R164C TLVREIRK    | 705 | >KRAS-R164C TLVREIQK    | 402   | 303   |
| >KRAS-R164C YTLVREIRK   | 68  | >KRAS-R164C YTLVREIQK   | 51    | 17    |
| >KRAS-R164C YTLVREIRKHK | 324 | >KRAS-R164C YTLVREIQKHI | 398   | 74    |
| >KRAS-R164C YTLVREIRK   | 372 | >KRAS-R164C YTLVREIQK   | 264   | 108   |
| >KRAS-R164C YTLVREIRKHK | 159 | >KRAS-R164C YTLVREIQKHI | 253   | 94    |
| >KRAS-R164C YTLVREIR    | 80  | >KRAS-R164C YTLVREIQ    | 13842 | 13762 |
| >KRAS-R164C YTLVREIR    | 72  | >KRAS-R164C YTLVREIQ    | 15806 | 15734 |
| >KRAS-R164C YTLVREIR    | 17  | >KRAS-R164C YTLVREIQ    | 3320  | 3303  |
| >KRAS-R164C YTLVREIRK   | 82  | >KRAS-R164C YTLVREIQK   | 46    | 36    |
| >KRAS-R164C YTLVREIRKHK | 93  | >KRAS-R164C YTLVREIQKHI | 97    | 4     |
| >KRAS-R164C YTLVREIRKH  | 534 | >KRAS-R164C YTLVREIQKH  | 324   | 210   |
| >KRAS-R164C YTLVREIRK   | 350 | >KRAS-R164C YTLVREIQK   | 337   | 13    |
| >KRAS-R164C YTLVREIRKHK | 676 | >KRAS-R164C YTLVREIQKHI | 372   | 304   |
| >KRAS-R164C FYTLVREIR   | 44  | >KRAS-R164C FYTLVREIQ   | 12757 | 12713 |
| >KRAS-R164C FYTLVREIR   | 63  | >KRAS-R164C FYTLVREIQ   | 8879  | 8816  |
| >KRAS-R164C FYTLVREIR   | 207 | >KRAS-R164C FYTLVREIQ   | 23010 | 22803 |
| >KRAS-R164C AFYTLVREIRK | 276 | >KRAS-R164C AFYTLVREIQK | 304   | 28    |
| >KRAS-R164C AFYTLVREIRK | 235 | >KRAS-R164C AFYTLVREIQK | 176   | 59    |
| >KRAS-R164C AFYTLVREIRK | 279 | >KRAS-R164C AFYTLVREIQK | 201   | 78    |
| >KRAS-R164C AFYTLVREIR  | 10  | >KRAS-R164C AFYTLVREIQ  | 5378  | 5368  |
| >KRAS-R164C AFYTLVREIRK | 439 | >KRAS-R164C AFYTLVREIQK | 420   | 19    |
| >KRAS-R164C AFYTLVREIR  | 108 | >KRAS-R164C AFYTLVREIQ  | 13422 | 13314 |
| >KRAS-R164C AFYTLVREIR  | 99  | >KRAS-R164C AFYTLVREIQ  | 27735 | 27636 |
| >KRAS-R164C AFYTLVREIR  | 237 | >KRAS-R164C AFYTLVREIQ  | 14200 | 13963 |
| >KRAS-S17G- SALTIQLI    | 741 | >KRAS-S17G- GALTIQLI    | 242   | 499   |
| >KRAS-S17G- SALTIQLI    | 127 | >KRAS-S17G- GALTIQLI    | 746   | 619   |
| >KRAS-S17G- KSALTIQLI   | 239 | >KRAS-S17G- KGALTIQLI   | 3567  | 3328  |
| >KRAS-S17G- KSALTIQL    | 276 | >KRAS-S17G- KGALTIQL    | 12317 | 12041 |
| >KRAS-S17G- KSALTIQL    | 7   | >KRAS-S17G- KGALTIQL    | 1541  | 1534  |
| >KRAS-S17G- KSALTIQLI   | 42  | >KRAS-S17G- KGALTIQLI   | 10221 | 10179 |
| >KRAS-S17G- KSALTIQL    | 35  | >KRAS-S17G- KGALTIQL    | 1906  | 1871  |
| >KRAS-S17G- KSALTIQLI   | 24  | >KRAS-S17G- KGALTIQLI   | 1137  | 1113  |
| >KRAS-S17G- KSALTIQL    | 335 | >KRAS-S17G- KGALTIQL    | 13868 | 13533 |
| >KRAS-S17G- KSALTIQLI   | 73  | >KRAS-S17G- KGALTIQLI   | 3088  | 3015  |
| >KRAS-S17G- KSALTIQL    | 241 | >KRAS-S17G- KGALTIQL    | 4623  | 4382  |

|                          |      |                          |       |       |
|--------------------------|------|--------------------------|-------|-------|
| >KRAS-S17G- KSALTIQLI    | 35   | >KRAS-S17G- KGALTIQLI    | 476   | 441   |
| >KRAS-S17G- GKSALTIQL    | 414  | >KRAS-S17G- GKGALTIQL    | 4617  | 4203  |
| >KRAS-S17N- SALTIQLI     | 736  | >KRAS-S17N- NALTIQLI     | 306   | 430   |
| >KRAS-S17N- SALTIQLI     | 127  | >KRAS-S17N- NALTIQLI     | 915   | 788   |
| >KRAS-S17N- KSALTIQLI    | 239  | >KRAS-S17N- KNALTIQLI    | 4850  | 4611  |
| >KRAS-S17N- KSALTIQL     | 276  | >KRAS-S17N- KNALTIQL     | 6223  | 5947  |
| >KRAS-S17N- KSALTIQL     | 7    | >KRAS-S17N- KNALTIQL     | 12133 | 12126 |
| >KRAS-S17N- KSALTIQLI    | 42   | >KRAS-S17N- KNALTIQLI    | 20317 | 20275 |
| >KRAS-S17N- KSALTIQL     | 35   | >KRAS-S17N- KNALTIQL     | 8687  | 8652  |
| >KRAS-S17N- KSALTIQLI    | 24   | >KRAS-S17N- KNALTIQLI    | 7812  | 7788  |
| >KRAS-S17N- KSALTIQL     | 335  | >KRAS-S17N- KNALTIQL     | 25235 | 24900 |
| >KRAS-S17N- KSALTIQLI    | 73   | >KRAS-S17N- KNALTIQLI    | 6937  | 6864  |
| >KRAS-S17N- KSALTIQL     | 241  | >KRAS-S17N- KNALTIQL     | 4413  | 4172  |
| >KRAS-S17N- KSALTIQLI    | 35   | >KRAS-S17N- KNALTIQLI    | 376   | 341   |
| >KRAS-S17N- GKSALTIQL    | 414  | >KRAS-S17N- GKNALTIQL    | 836   | 422   |
| >KRAS-S17N- GKSALTIQL    | 721  | >KRAS-S17N- GKNALTIQL    | 460   | 261   |
| >KRAS-S17N- GVGKSALTI    | 931  | >KRAS-S17N- GVGKNALTI    | 406   | 525   |
| >KRAS-T35I-ᵛ TIEDSYRKQV  | 37   | >KRAS-T35I-r IIEDSYRKQV  | 13    | 24    |
| >KRAS-T35I-ᵛ TIEDSYRKQV' | 57   | >KRAS-T35I-r IIEDSYRKQV\ | 19    | 38    |
| >KRAS-T35I-ᵛ TIEDSYRK    | 78   | >KRAS-T35I-r IIEDSYRK    | 178   | 100   |
| >KRAS-T35I-ᵛ TIEDSYRK    | 230  | >KRAS-T35I-r IIEDSYRK    | 624   | 394   |
| >KRAS-T35I-ᵛ PTIEDSYRKQ\ | 3021 | >KRAS-T35I-r PIIEDSYRKQV | 96    | 2925  |
| >KRAS-T35I-ᵛ PTIEDSYR    | 105  | >KRAS-T35I-r PIIEDSYR    | 531   | 426   |
| >KRAS-T35I-ᵛ PTIEDSYR    | 1190 | >KRAS-T35I-r PIIEDSYR    | 244   | 946   |
| >KRAS-T35I-ᵛ QNHFVDEYD   | 6632 | >KRAS-T35I-r QNHFVDEYD   | 379   | 6253  |
| >KRAS-T35I-ᵛ DPTIEDSYR   | 485  | >KRAS-T35I-r DPIIEDSYR   | 457   | 28    |
| >KRAS-T35I-ᵛ DPTIEDSYR   | 198  | >KRAS-T35I-r DPIIEDSYR   | 180   | 18    |
| >KRAS-T35I-ᵛ DPTIEDSY    | 27   | >KRAS-T35I-r DPIIEDSY    | 18    | 9     |
| >KRAS-T35I-ᵛ DPTIEDSY    | 316  | >KRAS-T35I-r DPIIEDSY    | 187   | 129   |
| >KRAS-T35I-ᵛ EYDPTIEDSY  | 498  | >KRAS-T35I-r EYDPIIEDSY  | 343   | 155   |
| >KRAS-T35I-ᵛ EYDPTIEDSY  | 364  | >KRAS-T35I-r EYDPIIEDSY  | 389   | 25    |
| >KRAS-T35I-ᵛ EYDPTIEDSYF | 91   | >KRAS-T35I-r EYDPIIEDSYR | 46    | 45    |
| >KRAS-T35I-ᵛ EYDPTIEDSYF | 147  | >KRAS-T35I-r EYDPIIEDSYR | 85    | 62    |
| >KRAS-T35I-ᵛ EYDPTIEDSYF | 46   | >KRAS-T35I-r EYDPIIEDSYR | 35    | 11    |
| >KRAS-T35I-ᵛ DEYDPTIE    | 590  | >KRAS-T35I-r DEYDPIIE    | 337   | 253   |
| >KRAS-T35I-ᵛ DEYDPTIED   | 149  | >KRAS-T35I-r DEYDPIIED   | 76    | 73    |
| >KRAS-T35I-ᵛ DEYDPTIEDS\ | 8    | >KRAS-T35I-r DEYDPIIEDSY | 8     | 0     |
| >KRAS-T35I-ᵛ DEYDPTIEDS\ | 490  | >KRAS-T35I-r DEYDPIIEDSY | 460   | 30    |
| >KRAS-T35I-ᵛ DEYDPTIEDS\ | 380  | >KRAS-T35I-r DEYDPIIEDSY | 320   | 60    |
| >KRAS-T35I-ᵛ VDEYDPTI    | 221  | >KRAS-T35I-r VDEYDPII    | 262   | 41    |
| >KRAS-T35I-ᵛ FVDEYDPT    | 318  | >KRAS-T35I-r FVDEYDPI    | 25    | 293   |
| >KRAS-T35I-ᵛ FVDEYDPTI   | 12   | >KRAS-T35I-r FVDEYDPII   | 19    | 7     |
| >KRAS-T35I-ᵛ FVDEYDPT    | 946  | >KRAS-T35I-r FVDEYDPI    | 34    | 912   |

|                          |       |                         |       |       |
|--------------------------|-------|-------------------------|-------|-------|
| >KRAS-T35I-v FVDEYDPTI   | 178   | >KRAS-T35I-r FVDEYDPII  | 387   | 209   |
| >KRAS-T35I-v FVDEYDPT    | 4528  | >KRAS-T35I-r FVDEYDPI   | 336   | 4192  |
| >KRAS-T35I-v FVDEYDPT    | 24    | >KRAS-T35I-r FVDEYDPI   | 5     | 19    |
| >KRAS-T35I-v FVDEYDPTI   | 4     | >KRAS-T35I-r FVDEYDPII  | 9     | 5     |
| >KRAS-T35I-v FVDEYDPT    | 374   | >KRAS-T35I-r FVDEYDPI   | 17    | 357   |
| >KRAS-T35I-v FVDEYDPTI   | 6     | >KRAS-T35I-r FVDEYDPII  | 43    | 37    |
| >KRAS-T35I-v FVDEYDPT    | 2719  | >KRAS-T35I-r FVDEYDPI   | 45    | 2674  |
| >KRAS-T35I-v FVDEYDPTI   | 16    | >KRAS-T35I-r FVDEYDPII  | 66    | 50    |
| >KRAS-T35I-v FVDEYDPT    | 1826  | >KRAS-T35I-r FVDEYDPI   | 79    | 1747  |
| >KRAS-T35I-v FVDEYDPTI   | 14    | >KRAS-T35I-r FVDEYDPII  | 38    | 24    |
| >KRAS-T35I-v FVDEYDPTI   | 138   | >KRAS-T35I-r FVDEYDPII  | 1219  | 1081  |
| >KRAS-T35I-v FVDEYDPT    | 4606  | >KRAS-T35I-r FVDEYDPI   | 491   | 4115  |
| >KRAS-T35I-v FVDEYDPTI   | 34    | >KRAS-T35I-r FVDEYDPII  | 211   | 177   |
| >KRAS-T35I-v FVDEYDPT    | 5767  | >KRAS-T35I-r FVDEYDPI   | 262   | 5505  |
| >KRAS-T35I-v FVDEYDPT    | 731   | >KRAS-T35I-r FVDEYDPI   | 22    | 709   |
| >KRAS-T35I-v FVDEYDPTI   | 19    | >KRAS-T35I-r FVDEYDPII  | 87    | 68    |
| >KRAS-T35I-v HFVDEYDPT   | 19765 | >KRAS-T35I-r HFVDEYDPI  | 427   | 19338 |
| >KRAS-T35I-v HFVDEYDPT   | 11019 | >KRAS-T35I-r HFVDEYDPI  | 271   | 10748 |
| >KRAS-T35I-v HFVDEYDPTI  | 294   | >KRAS-T35I-r HFVDEYDPII | 878   | 584   |
| >KRAS-T35I-v HFVDEYDPT   | 1545  | >KRAS-T35I-r HFVDEYDPI  | 392   | 1153  |
| >KRAS-T35I-v NHFVDEYDPT  | 7871  | >KRAS-T35I-r NHFVDEYDPI | 425   | 7446  |
| >KRAS-T35I-v NHFVDEYDPTI | 326   | >KRAS-T35I-r NHFVDEYDPI | 378   | 52    |
| >KRAS-T74P- RTGEGFLCV    | 35    | >KRAS-T74P- RPEGFLCV    | 6590  | 6555  |
| >KRAS-T74P- RTGEGFLCVF   | 217   | >KRAS-T74P- RPEGFLCVF   | 10794 | 10577 |
| >KRAS-T74P- RTGEGFLCV    | 78    | >KRAS-T74P- RPEGFLCV    | 10600 | 10522 |
| >KRAS-T74P- RTGEGFLCV    | 450   | >KRAS-T74P- RPEGFLCV    | 15698 | 15248 |
| >KRAS-T74P- RTGEGFLCV    | 51    | >KRAS-T74P- RPEGFLCV    | 7053  | 7002  |
| >KRAS-T74P- RTGEGFLCV    | 386   | >KRAS-T74P- RPEGFLCV    | 16516 | 16130 |
| >KRAS-T74P- RTGEGFLCVF   | 196   | >KRAS-T74P- RPEGFLCVF   | 4306  | 4110  |
| >KRAS-T74P- RTGEGFLCVF   | 359   | >KRAS-T74P- RPEGFLCVF   | 16962 | 16603 |
| >KRAS-T74P- RTGEGFLCVF   | 42    | >KRAS-T74P- RPEGFLCVF   | 9995  | 9953  |
| >KRAS-T74P- RTGEGFLCV    | 19478 | >KRAS-T74P- RPEGFLCV    | 195   | 19283 |
| >KRAS-T74P- RTGEGFLCVF   | 26678 | >KRAS-T74P- RPEGFLCVF   | 212   | 26466 |
| >KRAS-T74P- RTGEGFLCVF   | 55    | >KRAS-T74P- RPEGFLCVF   | 2332  | 2277  |
| >KRAS-T74P- RTGEGFLCVF   | 252   | >KRAS-T74P- RPEGFLCVF   | 630   | 378   |
| >KRAS-T74P- RTGEGFLCVF   | 7     | >KRAS-T74P- RPEGFLCVF   | 11659 | 11652 |
| >KRAS-T74P- RTGEGFLCVF   | 29105 | >KRAS-T74P- RPEGFLCVF   | 286   | 28819 |
| >KRAS-T74P- RTGEGFLCVF   | 33    | >KRAS-T74P- RPEGFLCVF   | 14881 | 14848 |
| >KRAS-T74P- RTGEGFLCVF   | 494   | >KRAS-T74P- RPEGFLCVF   | 17132 | 16638 |
| >KRAS-T74P- RTGEGFLCVF   | 37    | >KRAS-T74P- RPEGFLCVF   | 9736  | 9699  |
| >KRAS-T74P- MRTGEGFLC    | 111   | >KRAS-T74P- MRPEGFLC    | 251   | 140   |
| >KRAS-T74P- MRTGEGFL     | 391   | >KRAS-T74P- MRPEGFL     | 3078  | 2687  |
| >KRAS-T74P- MRTGEGFLC    | 207   | >KRAS-T74P- MRPEGFLC    | 1491  | 1284  |

|                         |      |                         |      |      |
|-------------------------|------|-------------------------|------|------|
| >KRAS-T74P- MRTGEGFLC\  | 284  | >KRAS-T74P- MRPGEGFLC\  | 2317 | 2033 |
| >KRAS-T74P- MRTGEGFLC\  | 354  | >KRAS-T74P- MRPGEGFLC\  | 708  | 354  |
| >KRAS-T74P- MRTGEGFL    | 52   | >KRAS-T74P- MRPGEGFL    | 220  | 168  |
| >KRAS-T74P- MRTGEGFLC\  | 16   | >KRAS-T74P- MRPGEGFLC\  | 40   | 24   |
| >KRAS-T74P- YMRTGEGFLC\ | 150  | >KRAS-T74P- YMRPGEGFLC\ | 131  | 19   |
| >KRAS-T74P- YMRTGEGFL   | 131  | >KRAS-T74P- YMRPGEGFL   | 99   | 32   |
| >KRAS-T74P- YMRTGEGFLC\ | 191  | >KRAS-T74P- YMRPGEGFLC\ | 136  | 55   |
| >KRAS-T74P- YMRTGEGFL   | 28   | >KRAS-T74P- YMRPGEGFL   | 18   | 10   |
| >KRAS-T74P- YMRTGEGFLC\ | 10   | >KRAS-T74P- YMRPGEGFLC\ | 7    | 3    |
| >KRAS-T74P- YMRTGEGFL   | 1417 | >KRAS-T74P- YMRPGEGFL   | 408  | 1009 |
| >KRAS-T74P- YMRTGEGFLC\ | 69   | >KRAS-T74P- YMRPGEGFLC\ | 30   | 39   |
| >KRAS-T74P- YMRTGEGFL   | 50   | >KRAS-T74P- YMRPGEGFL   | 17   | 33   |
| >KRAS-T74P- YMRTGEGFLC\ | 230  | >KRAS-T74P- YMRPGEGFLC\ | 86   | 144  |
| >KRAS-T74P- YMRTGEGFLC\ | 8    | >KRAS-T74P- YMRPGEGFLC\ | 4    | 4    |
| >KRAS-T74P- YMRTGEGFL   | 200  | >KRAS-T74P- YMRPGEGFL   | 82   | 118  |
| >KRAS-T74P- YMRTGEGFLC\ | 12   | >KRAS-T74P- YMRPGEGFLC\ | 9    | 3    |
| >KRAS-T74P- YMRTGEGFL   | 145  | >KRAS-T74P- YMRPGEGFL   | 41   | 104  |
| >KRAS-T74P- YMRTGEGFLC\ | 10   | >KRAS-T74P- YMRPGEGFLC\ | 7    | 3    |
| >KRAS-T74P- YMRTGEGFLC\ | 31   | >KRAS-T74P- YMRPGEGFLC\ | 19   | 12   |
| >KRAS-T74P- YMRTGEGFL   | 8    | >KRAS-T74P- YMRPGEGFL   | 3    | 5    |
| >KRAS-T74P- YMRTGEGFLC\ | 36   | >KRAS-T74P- YMRPGEGFLC\ | 10   | 26   |
| >KRAS-T74P- YMRTGEGFLC\ | 2    | >KRAS-T74P- YMRPGEGFLC\ | 2    | 0    |
| >KRAS-T74P- YMRTGEGF    | 923  | >KRAS-T74P- YMRPGEGF    | 446  | 477  |
| >KRAS-T74P- YMRTGEGF    | 35   | >KRAS-T74P- YMRPGEGF    | 29   | 6    |
| >KRAS-T74P- YMRTGEGFL   | 1200 | >KRAS-T74P- YMRPGEGFL   | 356  | 844  |
| >KRAS-T74P- YMRTGEGFLC\ | 606  | >KRAS-T74P- YMRPGEGFLC\ | 276  | 330  |
| >KRAS-T74P- YMRTGEGF    | 20   | >KRAS-T74P- YMRPGEGF    | 15   | 5    |
| >KRAS-T74P- YMRTGEGFL   | 448  | >KRAS-T74P- YMRPGEGFL   | 321  | 127  |
| >KRAS-T74P- YMRTGEGF    | 5    | >KRAS-T74P- YMRPGEGF    | 6    | 1    |
| >KRAS-T74P- YMRTGEGFL   | 547  | >KRAS-T74P- YMRPGEGFL   | 410  | 137  |
| >KRAS-T74P- YMRTGEGFLC\ | 126  | >KRAS-T74P- YMRPGEGFLC\ | 109  | 17   |
| >KRAS-T74P- YMRTGEGF    | 55   | >KRAS-T74P- YMRPGEGF    | 14   | 41   |
| >KRAS-T74P- YMRTGEGFL   | 2968 | >KRAS-T74P- YMRPGEGFL   | 200  | 2768 |
| >KRAS-T74P- QYMRTGEGF   | 16   | >KRAS-T74P- QYMRPGEGF   | 277  | 261  |
| >KRAS-T74P- QYMRTGEGF   | 175  | >KRAS-T74P- QYMRPGEGF   | 1541 | 1366 |
| >KRAS-T74P- QYMRTGEGF   | 259  | >KRAS-T74P- QYMRPGEGF   | 418  | 159  |
| >KRAS-T74P- QYMRTGEGF   | 184  | >KRAS-T74P- QYMRPGEGF   | 475  | 291  |
| >KRAS-T74P- QYMRTGEGF   | 159  | >KRAS-T74P- QYMRPGEGF   | 330  | 171  |
| >KRAS-T74P- QYMRTGEGF   | 5    | >KRAS-T74P- QYMRPGEGF   | 5    | 0    |
| >KRAS-T74P- QYMRTGEGF   | 9    | >KRAS-T74P- QYMRPGEGF   | 9    | 0    |
| >KRAS-T74P- QYMRTGEGF   | 820  | >KRAS-T74P- QYMRPGEGF   | 361  | 459  |
| >KRAS-T74P- QYMRTGEGF   | 210  | >KRAS-T74P- QYMRPGEGF   | 375  | 165  |
| >KRAS-T74P- QYMRTGEGF   | 117  | >KRAS-T74P- QYMRPGEGF   | 71   | 46   |

|                         |      |                         |      |      |
|-------------------------|------|-------------------------|------|------|
| >KRAS-T74P- DQYMRTGEC   | 135  | >KRAS-T74P- DQYMRPGEC   | 326  | 191  |
| >KRAS-T74P- DQYMRTGEC   | 247  | >KRAS-T74P- DQYMRPGEC   | 663  | 416  |
| >KRAS-T74P- DQYMRTGEC   | 222  | >KRAS-T74P- DQYMRPGEC   | 238  | 16   |
| >KRAS-T74P- DQYMRTGEC   | 69   | >KRAS-T74P- DQYMRPGEC   | 69   | 0    |
| >KRAS-T74P- AMRDQYMR'   | 166  | >KRAS-T74P- AMRDQYMR    | 6600 | 6434 |
| >KRAS-T74P- AMRDQYMR'   | 18   | >KRAS-T74P- AMRDQYMR    | 2230 | 2212 |
| >KRAS-T74P- AMRDQYMR'   | 80   | >KRAS-T74P- AMRDQYMR    | 127  | 47   |
| >KRAS-T74P- AMRDQYMR'   | 128  | >KRAS-T74P- AMRDQYMR    | 53   | 75   |
| >KRAS-V14I-1 YKLVVVGAGC | 1376 | >KRAS-V14I-1 YKLVVVGAGC | 240  | 1136 |
| >KRAS-V14I-1 YKLVVVGAGC | 423  | >KRAS-V14I-1 YKLVVVGAGC | 2186 | 1763 |
| >KRAS-V14I-1 YKLVVVGAGC | 220  | >KRAS-V14I-1 YKLVVVGAGC | 2205 | 1985 |
| >KRAS-V14I-1 YKLVVVGAGC | 696  | >KRAS-V14I-1 YKLVVVGAGC | 469  | 227  |
| >KRAS-V14I-1 VVGAGGVGK  | 326  | >KRAS-V14I-1 VVGAGGIGK  | 191  | 135  |
| >KRAS-V14I-1 VVGAGGVGK  | 89   | >KRAS-V14I-1 VVGAGGIGK  | 50   | 39   |
| >KRAS-V14I-1 VVGAGGV    | 117  | >KRAS-V14I-1 VVGAGGI    | 839  | 722  |
| >KRAS-V14I-1 VVGAGGV    | 68   | >KRAS-V14I-1 VVGAGGI    | 394  | 326  |
| >KRAS-V14I-1 VVGAGGV    | 139  | >KRAS-V14I-1 VVGAGGI    | 2106 | 1967 |
| >KRAS-V14I-1 VVGAGGV    | 23   | >KRAS-V14I-1 VVGAGGI    | 3598 | 3575 |
| >KRAS-V14I-1 VVGAGGVG   | 76   | >KRAS-V14I-1 VVGAGGIGI  | 61   | 15   |
| >KRAS-V14I-1 VVGAGGVG   | 101  | >KRAS-V14I-1 VVGAGGIGI  | 69   | 32   |
| >KRAS-V14I-1 VVGAGGVG   | 203  | >KRAS-V14I-1 VVGAGGIGI  | 187  | 16   |
| >KRAS-V14I-1 VVGAGGV    | 191  | >KRAS-V14I-1 VVGAGGI    | 1042 | 851  |
| >KRAS-V14I-1 LVVVGAGGV  | 180  | >KRAS-V14I-1 LVVVGAGGI  | 976  | 796  |
| >KRAS-V14I-1 LVVVGAGGV  | 55   | >KRAS-V14I-1 LVVVGAGGI  | 441  | 386  |
| >KRAS-V14I-1 LVVVGAGGV  | 75   | >KRAS-V14I-1 LVVVGAGGI  | 9036 | 8961 |
| >KRAS-V14I-1 LVVVGAGGV  | 572  | >KRAS-V14I-1 LVVVGAGGIC | 372  | 200  |
| >KRAS-V14I-1 LVVVGAGGV  | 284  | >KRAS-V14I-1 LVVVGAGGIC | 348  | 64   |
| >KRAS-V14I-1 LVVVGAGGV  | 154  | >KRAS-V14I-1 LVVVGAGGI  | 932  | 778  |
| >KRAS-V14I-1 LVVVGAGGV  | 159  | >KRAS-V14I-1 LVVVGAGGI  | 846  | 687  |
| >KRAS-V14I-1 KLVVVGAGG' | 392  | >KRAS-V14I-1 KLVVVGAGGI | 843  | 451  |
| >KRAS-V14I-1 KLVVVGAGG' | 35   | >KRAS-V14I-1 KLVVVGAGGI | 111  | 76   |
| >KRAS-V14I-1 KLVVVGAGG' | 6    | >KRAS-V14I-1 KLVVVGAGGI | 41   | 35   |
| >KRAS-V14I-1 KLVVVGAGG' | 17   | >KRAS-V14I-1 KLVVVGAGGI | 143  | 126  |
| >KRAS-V14I-1 KLVVVGAGG' | 14   | >KRAS-V14I-1 KLVVVGAGGI | 220  | 206  |
| >KRAS-V14I-1 KLVVVGAGG' | 121  | >KRAS-V14I-1 KLVVVGAGGI | 3214 | 3093 |
| >KRAS-V14I-1 KLVVVGAGG' | 6    | >KRAS-V14I-1 KLVVVGAGGI | 331  | 325  |
| >KRAS-V45I-1 VIDGETCLL  | 144  | >KRAS-V45I-1 IIDGETCLL  | 65   | 79   |
| >KRAS-V45I-1 VIDGETCLL  | 476  | >KRAS-V45I-1 IIDGETCLL  | 332  | 144  |
| >KRAS-V45I-1 VIDGETCLL  | 84   | >KRAS-V45I-1 IIDGETCLL  | 109  | 25   |
| >KRAS-V45I-1 VIDGETCL   | 360  | >KRAS-V45I-1 IIDGETCL   | 704  | 344  |
| >KRAS-V45I-1 VIDGETCLL  | 137  | >KRAS-V45I-1 IIDGETCLL  | 271  | 134  |
| >KRAS-V45I-1 VIDGETCLL  | 265  | >KRAS-V45I-1 IIDGETCLL  | 267  | 2    |
| >KRAS-V45I-1 VIDGETCL   | 136  | >KRAS-V45I-1 IIDGETCL   | 186  | 50   |

|                          |       |                           |      |       |
|--------------------------|-------|---------------------------|------|-------|
| >KRAS-V45I-I VIDGETCLL   | 17    | >KRAS-V45I-I IIDGETCLL    | 21   | 4     |
| >KRAS-V45I-I VVIDGETCLL  | 148   | >KRAS-V45I-I VIIDGETCLL   | 102  | 46    |
| >KRAS-V45I-I VVIDGETCLL  | 518   | >KRAS-V45I-I VIIDGETCLL   | 279  | 239   |
| >KRAS-V45I-I VVIDGETCL   | 346   | >KRAS-V45I-I VIIDGETCL    | 366  | 20    |
| >KRAS-V45I-I VVIDGETCLL  | 639   | >KRAS-V45I-I VIIDGETCLL   | 181  | 458   |
| >KRAS-V45I-I VVIDGETCL   | 1479  | >KRAS-V45I-I VIIDGETCL    | 490  | 989   |
| >KRAS-V45I-I VVIDGETCLL  | 1037  | >KRAS-V45I-I VIIDGETCLL   | 337  | 700   |
| >KRAS-V45I-I VVIDGETC    | 1417  | >KRAS-V45I-I VIIDGETC     | 464  | 953   |
| >KRAS-V45I-I VVIDGETCL   | 72    | >KRAS-V45I-I VIIDGETCL    | 23   | 49    |
| >KRAS-V45I-I VVIDGETCLL  | 17    | >KRAS-V45I-I VIIDGETCLL   | 8    | 9     |
| >KRAS-V45I-I TIEDSYRKQV' | 57    | >KRAS-V45I-I TIEDSYRKQVI  | 4047 | 3990  |
| >KRAS-V45I-I KQVVIDGETC  | 185   | >KRAS-V45I-I KQVIIIDGETCI | 209  | 24    |
| >KRAS-V45I-I KQVVIDGETC  | 222   | >KRAS-V45I-I KQVIIIDGETCI | 341  | 119   |
| >KRAS-V45I-I KQVVIDGETC  | 458   | >KRAS-V45I-I KQVIIIDGETCI | 413  | 45    |
| >KRAS-V45I-I RKQVVIDG    | 644   | >KRAS-V45I-I RKQVIIIDG    | 393  | 251   |
| >KRAS-V45I-I SYRKQVVI    | 43    | >KRAS-V45I-I SYRKQVII     | 187  | 144   |
| >KRAS-V45I-I SYRKQVVI    | 407   | >KRAS-V45I-I SYRKQVII     | 551  | 144   |
| >KRAS-V45I-I SYRKQVVI    | 19    | >KRAS-V45I-I SYRKQVII     | 38   | 19    |
| >KRAS-V45I-I SYRKQVVI    | 13    | >KRAS-V45I-I SYRKQVII     | 11   | 2     |
| >KRAS-V45I-I SYRKQVVID   | 605   | >KRAS-V45I-I SYRKQVIIID   | 327  | 278   |
| >KRAS-V45I-I SYRKQVVIDG  | 267   | >KRAS-V45I-I SYRKQVIIIDG  | 185  | 82    |
| >KRAS-V45I-I DSYRKQVV    | 14346 | >KRAS-V45I-I DSYRKQVI     | 403  | 13943 |
| >KRAS-V45I-I DSYRKQVVI   | 362   | >KRAS-V45I-I DSYRKQVII    | 538  | 176   |
| >KRAS-V45I-I EDSYRKQVVI  | 510   | >KRAS-V45I-I EDSYRKQVII   | 423  | 87    |
| >KRAS-V45I-I IEDSYRKQVV  | 145   | >KRAS-V45I-I IEDSYRKQVI   | 25   | 120   |
| >KRAS-V45I-I IEDSYRKQVV  | 47    | >KRAS-V45I-I IEDSYRKQVII  | 43   | 4     |
| >KRAS-V45I-I IEDSYRKQVV  | 227   | >KRAS-V45I-I IEDSYRKQVII  | 228  | 1     |
| >KRAS-V45I-I IEDSYRKQVV  | 755   | >KRAS-V45I-I IEDSYRKQVI   | 83   | 672   |
| >KRAS-V45I-I IEDSYRKQVV  | 51    | >KRAS-V45I-I IEDSYRKQVII  | 35   | 16    |
| >KRAS-V7M-I VVVGAGGV     | 1957  | >KRAS-V7M-I MVVGAGGV      | 215  | 1742  |
| >KRAS-V7M-I VVVGAGGV     | 117   | >KRAS-V7M-I MVVGAGGV      | 28   | 89    |
| >KRAS-V7M-I VVVGAGGV     | 68    | >KRAS-V7M-I MVVGAGGV      | 21   | 47    |
| >KRAS-V7M-I VVVGAGGV     | 139   | >KRAS-V7M-I MVVGAGGV      | 71   | 68    |
| >KRAS-V7M-I VVVGAGGV     | 23    | >KRAS-V7M-I MVVGAGGV      | 13   | 10    |
| >KRAS-V7M-I VVVGAGGVG    | 76    | >KRAS-V7M-I MVVGAGGVG     | 40   | 36    |
| >KRAS-V7M-I VVVGAGGVG    | 101   | >KRAS-V7M-I MVVGAGGVG     | 67   | 34    |
| >KRAS-V7M-I VVVGAGGVG    | 2803  | >KRAS-V7M-I MVVGAGGVG     | 225  | 2578  |
| >KRAS-V7M-I VVVGAGGVG    | 203   | >KRAS-V7M-I MVVGAGGVG     | 12   | 191   |
| >KRAS-V7M-I VVVGAGGV     | 191   | >KRAS-V7M-I MVVGAGGV      | 7    | 184   |
| >KRAS-V7M-I VVVGAGGV     | 649   | >KRAS-V7M-I MVVGAGGV      | 26   | 623   |
| >KRAS-V7M-I LVVVGAGGV    | 3498  | >KRAS-V7M-I LMVVGAGGV     | 294  | 3204  |
| >KRAS-V7M-I LVVVGAGGV    | 180   | >KRAS-V7M-I LMVVGAGGV     | 11   | 169   |
| >KRAS-V7M-I LVVVGAGGV    | 55    | >KRAS-V7M-I LMVVGAGGV     | 27   | 28    |

|                        |       |                        |      |       |
|------------------------|-------|------------------------|------|-------|
| >KRAS-V7M-LVVVGAGGV    | 1068  | >KRAS-V7M-LMVVGAGGV    | 7    | 1061  |
| >KRAS-V7M-LVVVGAGGV    | 3578  | >KRAS-V7M-LMVVGAGGV    | 23   | 3555  |
| >KRAS-V7M-LVVVGAGGV    | 2712  | >KRAS-V7M-LMVVGAGGV    | 27   | 2685  |
| >KRAS-V7M-LVVVGAGGV    | 3213  | >KRAS-V7M-LMVVGAGGV    | 48   | 3165  |
| >KRAS-V7M-LVVVGAGGV    | 75    | >KRAS-V7M-LMVVGAGGV    | 4    | 71    |
| >KRAS-V7M-LVVVGAGGV    | 1183  | >KRAS-V7M-LMVVGAGGV    | 299  | 884   |
| >KRAS-V7M-LVVVGAGGV    | 284   | >KRAS-V7M-LMVVGAGGV    | 1346 | 1062  |
| >KRAS-V7M-LVVVGAGGV    | 154   | >KRAS-V7M-LMVVGAGGV    | 3420 | 3266  |
| >KRAS-V7M-LVVVGAGGV    | 159   | >KRAS-V7M-LMVVGAGGV    | 831  | 672   |
| >KRAS-V7M-KLVVVGAGG'   | 1541  | >KRAS-V7M-KLMVVGAGC    | 90   | 1451  |
| >KRAS-V7M-KLVVVGAGG'   | 392   | >KRAS-V7M-KLMVVGAGC    | 52   | 340   |
| >KRAS-V7M-KLVVVGAGG'   | 35    | >KRAS-V7M-KLMVVGAGC    | 12   | 23    |
| >KRAS-V7M-KLVVVGAGG'   | 661   | >KRAS-V7M-KLMVVGAGC    | 192  | 469   |
| >KRAS-V7M-KLVVVGAGG'   | 6     | >KRAS-V7M-KLMVVGAGC    | 3    | 3     |
| >KRAS-V7M-KLVVVGAGG'   | 17    | >KRAS-V7M-KLMVVGAGC    | 5    | 12    |
| >KRAS-V7M-KLVVVGAGG'   | 14    | >KRAS-V7M-KLMVVGAGC    | 9    | 5     |
| >KRAS-V7M-KLVVVGAGG'   | 121   | >KRAS-V7M-KLMVVGAGC    | 5    | 116   |
| >KRAS-V7M-KLVVVGAGG'   | 6     | >KRAS-V7M-KLMVVGAGC    | 5    | 1     |
| >KRAS-V7M-YKLVVVGAGC   | 423   | >KRAS-V7M-YKLMVVGAG    | 356  | 67    |
| >KRAS-V7M-YKLVVVGAGC   | 220   | >KRAS-V7M-YKLMVVGAG    | 106  | 114   |
| >KRAS-V7M-YKLVVVGAGC   | 662   | >KRAS-V7M-YKLMVVGAG    | 478  | 184   |
| >KRAS-V7M-YKLVVVGAG    | 423   | >KRAS-V7M-YKLMVVGAG    | 322  | 101   |
| >KRAS-V7M-TEYKLVVV     | 39    | >KRAS-V7M-TEYKLMVV     | 36   | 3     |
| >KRAS-V7M-TEYKLVVV     | 259   | >KRAS-V7M-TEYKLMVV     | 238  | 21    |
| >KRAS-V7M-TEYKLVVV     | 231   | >KRAS-V7M-TEYKLMVV     | 206  | 25    |
| >KRAS-V7M-TEYKLVVV     | 65    | >KRAS-V7M-TEYKLMVV     | 51   | 14    |
| >KRAS-V7M-TEYKLVVVG    | 303   | >KRAS-V7M-TEYKLMVVG    | 282  | 21    |
| >KRAS-V7M-TEYKLVVV     | 93    | >KRAS-V7M-TEYKLMVV     | 98   | 5     |
| >KRAS-V7M-TEYKLVVVG    | 68    | >KRAS-V7M-TEYKLMVVG    | 76   | 8     |
| >KRAS-V7M-TEYKLVVV     | 81    | >KRAS-V7M-TEYKLMVV     | 132  | 51    |
| >KRAS-V7M-TEYKLVVVG    | 1012  | >KRAS-V7M-TEYKLMVVG    | 412  | 600   |
| >KRAS-V7M-MTEYKLVV     | 144   | >KRAS-V7M-MTEYKLMV     | 89   | 55    |
| >KRAS-V7M-MTEYKLVVV    | 43    | >KRAS-V7M-MTEYKLMVV    | 32   | 11    |
| >KRAS-V7M-MTEYKLVVVC   | 78    | >KRAS-V7M-MTEYKLMVV    | 99   | 21    |
| >KRAS-V7M-MTEYKLVV     | 1994  | >KRAS-V7M-MTEYKLMV     | 370  | 1624  |
| >KRAS-V7M-MTEYKLVVV    | 923   | >KRAS-V7M-MTEYKLMVV    | 279  | 644   |
| >KTN1-E113†ERKKKKEKKQK | 15899 | >KTN1-E113†KRKKKKEKKQK | 423  | 15476 |
| >KTN1-E113†ERKKKKEKK   | 4137  | >KTN1-E113†KRKKKKEKK   | 353  | 3784  |
| >KTN1-E113†RERKKKKEK   | 186   | >KTN1-E113†RKRKKKKEK   | 29   | 157   |
| >KTN1-E113†RERKKKKEKK  | 1153  | >KTN1-E113†RKRKKKKEKK  | 213  | 940   |
| >KTN1-E113†RERKKKKEKKQ | 432   | >KTN1-E113†RKRKKKKEKKQ | 63   | 369   |
| >KTN1-E113†NVVETSSSVR  | 29144 | >KTN1-E113†NVVETSSSVR  | 254  | 28890 |
| >KTN1-E113†NVVETSSSVR  | 6879  | >KTN1-E113†NVVETSSSVR  | 23   | 6856  |



|                        |       |                        |     |       |
|------------------------|-------|------------------------|-----|-------|
| >KTN1-E113†SVRERKKK    | 442   | >KTN1-E113†SVRKRKKK    | 257 | 185   |
| >KTN1-E113†SVRERKKK    | 5     | >KTN1-E113†SVRKRKKK    | 4   | 1     |
| >KTN1-E113†SVRERKKKEK  | 6     | >KTN1-E113†SVRKRKKKEK  | 5   | 1     |
| >KTN1-E113†SVRERKKKEK  | 17    | >KTN1-E113†SVRKRKKKEK  | 11  | 6     |
| >KTN1-E113†SSVRERKK    | 239   | >KTN1-E113†SSVRKRKK    | 231 | 8     |
| >KTN1-E113†SSVRERKKK   | 398   | >KTN1-E113†SSVRKRKKK   | 367 | 31    |
| >KTN1-E113†SSVRERKKKE  | 471   | >KTN1-E113†SSVRKRKKKE  | 446 | 25    |
| >KTN1-E113†SSVRERKK    | 915   | >KTN1-E113†SSVRKRKK    | 319 | 596   |
| >KTN1-E113†SSVRERKKK   | 608   | >KTN1-E113†SSVRKRKKK   | 170 | 438   |
| >KTN1-E113†SSVRERKKKE  | 740   | >KTN1-E113†SSVRKRKKKE  | 331 | 409   |
| >KTN1-E113†SSSVRERK    | 47    | >KTN1-E113†SSSVRKRK    | 77  | 30    |
| >KTN1-E113†SSSVRERKK   | 152   | >KTN1-E113†SSSVRKRKK   | 166 | 14    |
| >KTN1-E113†SSSVRERKKK  | 96    | >KTN1-E113†SSSVRKRKKK  | 112 | 16    |
| >KTN1-E113†SSSVRERK    | 1329  | >KTN1-E113†SSSVRKRK    | 324 | 1005  |
| >KTN1-E113†SSSVRERKK   | 1052  | >KTN1-E113†SSSVRKRKK   | 442 | 610   |
| >KTN1-E113†SSSVRERKKK  | 589   | >KTN1-E113†SSSVRKRKKK  | 250 | 339   |
| >KTN1-E113†SSSVRERKKK  | 920   | >KTN1-E113†SSSVRKRKKK  | 314 | 606   |
| >KTN1-E113†SSSVRERK    | 312   | >KTN1-E113†SSSVRKRK    | 937 | 625   |
| >KTN1-E113†SSSVRERK    | 360   | >KTN1-E113†SSSVRKRK    | 314 | 46    |
| >KTN1-E113†SSSVRERKK   | 494   | >KTN1-E113†SSSVRKRKK   | 309 | 185   |
| >KTN1-E113†TSSSVRERK   | 784   | >KTN1-E113†TSSSVRKRK   | 451 | 333   |
| >KTN1-E113†TSSSVRERK   | 31    | >KTN1-E113†TSSSVRKRK   | 59  | 28    |
| >KTN1-E113†TSSSVRERKK  | 106   | >KTN1-E113†TSSSVRKRKK  | 91  | 15    |
| >KTN1-E113†TSSSVRERKKI | 76    | >KTN1-E113†TSSSVRKRKKI | 90  | 14    |
| >KTN1-E113†TSSSVRER    | 107   | >KTN1-E113†TSSSVRKR    | 131 | 24    |
| >KTN1-E113†TSSSVRER    | 10    | >KTN1-E113†TSSSVRKR    | 16  | 6     |
| >KTN1-E113†TSSSVRERK   | 8     | >KTN1-E113†TSSSVRKRK   | 31  | 23    |
| >KTN1-E113†TSSSVRERKK  | 113   | >KTN1-E113†TSSSVRKRKK  | 126 | 13    |
| >KTN1-E113†TSSSVRERKKI | 46    | >KTN1-E113†TSSSVRKRKKI | 80  | 34    |
| >KTN1-E113†ETSSSVRE    | 26146 | >KTN1-E113†ETSSSVRK    | 143 | 26003 |
| >KTN1-E113†ETSSSVRERK  | 95    | >KTN1-E113†ETSSSVRKRK  | 205 | 110   |
| >KTN1-E113†ETSSSVRER   | 270   | >KTN1-E113†ETSSSVRKR   | 495 | 225   |
| >KTN1-E113†ETSSSVRE    | 740   | >KTN1-E113†ETSSSVRK    | 4   | 736   |
| >KTN1-E113†ETSSSVRER   | 3     | >KTN1-E113†ETSSSVRKR   | 4   | 1     |
| >KTN1-E113†ETSSSVRERK  | 12    | >KTN1-E113†ETSSSVRKRK  | 45  | 33    |
| >KTN1-E113†ETSSSVRERKI | 9     | >KTN1-E113†ETSSSVRKRKI | 11  | 2     |
| >KTN1-E113†ETSSSVRE    | 13129 | >KTN1-E113†ETSSSVRK    | 310 | 12819 |
| >KTN1-E113†ETSSSVRER   | 458   | >KTN1-E113†ETSSSVRKR   | 731 | 273   |
| >KTN1-E113†VVETSSSVRE  | 34166 | >KTN1-E113†VVETSSSVRK  | 125 | 34041 |
| >KTN1-E113†VVETSSSVRE  | 450   | >KTN1-E113†VVETSSSVRK  | 601 | 151   |
| >KTN1-K908†KAHVQEVA    | 229   | >KTN1-K908†RAHVQEVA    | 203 | 26    |
| >KTN1-K908†KAHVQEVAQ   | 833   | >KTN1-K908†RAHVQEVAQ   | 349 | 484   |
| >KTN1-K908†LKAHVQEV    | 61    | >KTN1-K908†LRAHVQEV    | 312 | 251   |

|                         |      |                         |     |      |
|-------------------------|------|-------------------------|-----|------|
| >KTN1-K908F SLKAHVQEV   | 55   | >KTN1-K908F SLRAHVQEV   | 91  | 36   |
| >KTN1-K908F SLKAHVQEV   | 9    | >KTN1-K908F SLRAHVQEV   | 17  | 8    |
| >KTN1-K908F SLKAHVQEV   | 2    | >KTN1-K908F SLRAHVQEV   | 3   | 1    |
| >KTN1-K908F SLKAHVQEV   | 320  | >KTN1-K908F SLRAHVQEV   | 460 | 140  |
| >KTN1-K908F SLKAHVQEV   | 4    | >KTN1-K908F SLRAHVQEV   | 3   | 1    |
| >KTN1-K908F SLKAHVQEV/  | 589  | >KTN1-K908F SLRAHVQEV/  | 261 | 328  |
| >KTN1-K908F SLKAHVQEV   | 24   | >KTN1-K908F SLRAHVQEV   | 29  | 5    |
| >KTN1-K908F SLKAHVQEV   | 20   | >KTN1-K908F SLRAHVQEV   | 12  | 8    |
| >KTN1-K908F SLKAHVQEV   | 472  | >KTN1-K908F SLRAHVQEV   | 452 | 20   |
| >KTN1-K908F SLKAHVQEV   | 2    | >KTN1-K908F SLRAHVQEV   | 2   | 0    |
| >KTN1-K908F SLKAHVQEV/  | 81   | >KTN1-K908F SLRAHVQEV/  | 57  | 24   |
| >KTN1-K908F SLKAHVQEV   | 555  | >KTN1-K908F SLRAHVQEV   | 71  | 484  |
| >KTN1-K908F SLKAHVQEV/  | 1579 | >KTN1-K908F SLRAHVQEV/  | 310 | 1269 |
| >KTN1-K908F SLKAHVQEV   | 51   | >KTN1-K908F SLRAHVQEV   | 62  | 11   |
| >KTN1-K908F ESLKAHVQEV  | 232  | >KTN1-K908F ESLRAHVQEV  | 144 | 88   |
| >KTN1-K908F ESLKAHVQEV  | 13   | >KTN1-K908F ESLRAHVQEV  | 14  | 1    |
| >KTN1-K908F NESLKAHV    | 171  | >KTN1-K908F NESLRAHV    | 308 | 137  |
| >KTN1-K908F NESLKAHVQEV | 40   | >KTN1-K908F NESLRAHVQEV | 29  | 11   |
| >KTN1-K908F NESLKAHVQ   | 351  | >KTN1-K908F NESLRAHVQ   | 262 | 89   |
| >KTN1-K908F NESLKAHVQEV | 398  | >KTN1-K908F NESLRAHVQEV | 326 | 72   |
| >KTN1-K908F NESLKAHVQEV | 147  | >KTN1-K908F NESLRAHVQEV | 152 | 5    |
| >KTN1-K908F NESLKAHVQEV | 308  | >KTN1-K908F NESLRAHVQEV | 158 | 150  |
| >KTN1-K908F EENESLKAHV  | 63   | >KTN1-K908F EENESLRAHV  | 90  | 27   |
| >KTN1-K908F EENESLKA    | 22   | >KTN1-K908F EENESLRA    | 20  | 2    |
| >KTN1-K908F EENESLKAHV  | 385  | >KTN1-K908F EENESLRAHV  | 317 | 68   |
| >KTN1-K908F QEENESLKAHV | 408  | >KTN1-K908F QEENESLRAHV | 503 | 95   |
| >KTN1-K908F QEENESLKA   | 200  | >KTN1-K908F QEENESLRA   | 173 | 27   |
| >KTN1-K908F QEENESLKAHV | 416  | >KTN1-K908F QEENESLRAHV | 191 | 225  |
| >KTN1-P226F PLIHATTYI   | 992  | >KTN1-P226F RLIHATTYI   | 16  | 976  |
| >KTN1-P226F PLIHATTYIPL | 1213 | >KTN1-P226F RLIHATTYIPL | 19  | 1194 |
| >KTN1-P226F PLIHATTYI   | 46   | >KTN1-P226F RLIHATTYI   | 5   | 41   |
| >KTN1-P226F PLIHATTYIPL | 126  | >KTN1-P226F RLIHATTYIPL | 9   | 117  |
| >KTN1-P226F PLIHATTYI   | 54   | >KTN1-P226F RLIHATTYI   | 3   | 51   |
| >KTN1-P226F PLIHATTYIPL | 359  | >KTN1-P226F RLIHATTYIPL | 7   | 352  |
| >KTN1-P226F PLIHATTYI   | 1054 | >KTN1-P226F RLIHATTYI   | 15  | 1039 |
| >KTN1-P226F PLIHATTYIPL | 1219 | >KTN1-P226F RLIHATTYIPL | 20  | 1199 |
| >KTN1-P226F PLIHATTYI   | 223  | >KTN1-P226F RLIHATTYI   | 10  | 213  |
| >KTN1-P226F PLIHATTYIPL | 474  | >KTN1-P226F RLIHATTYIPL | 18  | 456  |
| >KTN1-P226F PLIHATTYI   | 480  | >KTN1-P226F RLIHATTYI   | 7   | 473  |
| >KTN1-P226F PLIHATTYIPL | 521  | >KTN1-P226F RLIHATTYIPL | 9   | 512  |
| >KTN1-P226F PLIHATTYI   | 438  | >KTN1-P226F RLIHATTYI   | 42  | 396  |
| >KTN1-P226F PLIHATTYIPL | 660  | >KTN1-P226F RLIHATTYIPL | 48  | 612  |
| >KTN1-P226F PLIHATTYI   | 741  | >KTN1-P226F RLIHATTYI   | 213 | 528  |

|                         |       |                         |       |       |
|-------------------------|-------|-------------------------|-------|-------|
| >KTN1-P226F PLIHATTYI   | 195   | >KTN1-P226F RLIHATTYI   | 25    | 170   |
| >KTN1-P226F PLIHATTYIPL | 132   | >KTN1-P226F RLIHATTYIPL | 16    | 116   |
| >KTN1-P226F PLIHATTY    | 10416 | >KTN1-P226F RLIHATTY    | 149   | 10267 |
| >KTN1-P226F PLIHATTY    | 94    | >KTN1-P226F RLIHATTY    | 74    | 20    |
| >KTN1-P226F PLIHATTYI   | 12513 | >KTN1-P226F RLIHATTYI   | 317   | 12196 |
| >KTN1-P226F PLIHATTYIPL | 10031 | >KTN1-P226F RLIHATTYIPL | 165   | 9866  |
| >KTN1-P226F PLIHATTY    | 1214  | >KTN1-P226F RLIHATTY    | 160   | 1054  |
| >KTN1-P226F PLIHATTY    | 4183  | >KTN1-P226F RLIHATTY    | 31    | 4152  |
| >KTN1-P226F PLIHATTYI   | 5008  | >KTN1-P226F RLIHATTYI   | 65    | 4943  |
| >KTN1-P226F PLIHATTYIPL | 4333  | >KTN1-P226F RLIHATTYIPL | 63    | 4270  |
| >KTN1-P226F PLIHATTY    | 2189  | >KTN1-P226F RLIHATTY    | 33    | 2156  |
| >KTN1-P226F PLIHATTY    | 624   | >KTN1-P226F RLIHATTY    | 40    | 584   |
| >KTN1-P226F PLIHATTYI   | 10641 | >KTN1-P226F RLIHATTYI   | 332   | 10309 |
| >KTN1-P226F PLIHATTYIPL | 5265  | >KTN1-P226F RLIHATTYIPL | 107   | 5158  |
| >KTN1-P226F PLIHATTY    | 771   | >KTN1-P226F RLIHATTY    | 348   | 423   |
| >KTN1-P226F PLIHATTY    | 571   | >KTN1-P226F RLIHATTY    | 22    | 549   |
| >KTN1-P226F PLIHATTYI   | 5104  | >KTN1-P226F RLIHATTYI   | 124   | 4980  |
| >KTN1-P226F PLIHATTYIPL | 1271  | >KTN1-P226F RLIHATTYIPL | 47    | 1224  |
| >KTN1-P226F PLIHATTY    | 8482  | >KTN1-P226F RLIHATTY    | 12    | 8470  |
| >KTN1-P226F PLIHATTYIPL | 22150 | >KTN1-P226F RLIHATTYIPL | 463   | 21687 |
| >KTN1-P226F PLIHATTYI   | 18523 | >KTN1-P226F RLIHATTYI   | 406   | 18117 |
| >KTN1-P226F PLIHATTY    | 2384  | >KTN1-P226F RLIHATTY    | 212   | 2172  |
| >KTN1-P226F PLIHATTYI   | 13089 | >KTN1-P226F RLIHATTYI   | 448   | 12641 |
| >KTN1-P226F EPLIHATTYI  | 1066  | >KTN1-P226F ERLIHATTYI  | 378   | 688   |
| >KTN1-P226F EPLIHATTYI  | 55    | >KTN1-P226F ERLIHATTYI  | 5524  | 5469  |
| >KTN1-P226F EPLIHATTY   | 3782  | >KTN1-P226F ERLIHATTY   | 294   | 3488  |
| >KTN1-P226F EPLIHATTYI  | 30861 | >KTN1-P226F ERLIHATTYI  | 300   | 30561 |
| >KTN1-P226F EPLIHATT    | 460   | >KTN1-P226F ERLIHATT    | 23037 | 22577 |
| >KTN1-P226F EPLIHATTY   | 9     | >KTN1-P226F ERLIHATTY   | 2448  | 2439  |
| >KTN1-P226F EPLIHATTY   | 82    | >KTN1-P226F ERLIHATTY   | 23735 | 23653 |
| >KTN1-P226F EPLIHATTY   | 171   | >KTN1-P226F ERLIHATTY   | 15395 | 15224 |
| >KTN1-P226F EPLIHATTY   | 128   | >KTN1-P226F ERLIHATTY   | 19433 | 19305 |
| >KTN1-P226F DEPLIHAT    | 1881  | >KTN1-P226F DERLIHAT    | 219   | 1662  |
| >KTN1-P226F DEPLIHATTYI | 11    | >KTN1-P226F DERLIHATTYI | 20    | 9     |
| >KTN1-P226F DEPLIHAT    | 273   | >KTN1-P226F DERLIHAT    | 28    | 245   |
| >KTN1-P226F DEPLIHATT   | 423   | >KTN1-P226F DERLIHATT   | 33    | 390   |
| >KTN1-P226F DEPLIHATTY  | 101   | >KTN1-P226F DERLIHATTY  | 80    | 21    |
| >KTN1-P226F DEPLIHATTYI | 770   | >KTN1-P226F DERLIHATTYI | 67    | 703   |
| >KTN1-P226F DEPLIHATTY  | 294   | >KTN1-P226F DERLIHATTY  | 290   | 4     |
| >KTN1-P226F DEPLIHATTYI | 723   | >KTN1-P226F DERLIHATTYI | 250   | 473   |
| >KTN1-P226F FVDEPLIHA   | 48    | >KTN1-P226F FVDERLIHA   | 37    | 11    |
| >KTN1-P226F FVDEPLIHA   | 966   | >KTN1-P226F FVDERLIHA   | 428   | 538   |
| >KTN1-P226F FVDEPLIHA   | 554   | >KTN1-P226F FVDERLIHA   | 195   | 359   |

|                        |       |                        |       |       |
|------------------------|-------|------------------------|-------|-------|
| >KTN1-P226FVDEPLIHA    | 6     | >KTN1-P226FVDERLIHA    | 6     | 0     |
| >KTN1-P226FVDEPLIHAT   | 104   | >KTN1-P226FVDERLIHAT   | 203   | 99    |
| >KTN1-P226FVDEPLIHAT   | 54    | >KTN1-P226FVDERLIHAT   | 46    | 8     |
| >KTN1-P226FVDEPLIHA    | 13    | >KTN1-P226FVDERLIHA    | 44    | 31    |
| >KTN1-P226FVDEPLIHAT   | 27    | >KTN1-P226FVDERLIHAT   | 77    | 50    |
| >KTN1-P226FVDEPLIHAT   | 73    | >KTN1-P226FVDERLIHAT   | 195   | 122   |
| >KTN1-P226FVDEPLIHA    | 117   | >KTN1-P226FVDERLIHA    | 120   | 3     |
| >KTN1-P226FVDEPLIHA    | 41    | >KTN1-P226FVDERLIHA    | 59    | 18    |
| >KTN1-P226FVDEPLIHA    | 125   | >KTN1-P226FVDERLIHA    | 103   | 22    |
| >KTN1-P226FVDEPLIHAT   | 324   | >KTN1-P226FVDERLIHAT   | 397   | 73    |
| >KTN1-P226FVDEPLIHA    | 17    | >KTN1-P226FVDERLIHA    | 295   | 278   |
| >KTN1-P226FVDEPLIHAT   | 59    | >KTN1-P226FVDERLIHAT   | 474   | 415   |
| >KTN1-P226FVDEPLIHAT   | 175   | >KTN1-P226FVDERLIHAT   | 1330  | 1155  |
| >KTN1-P226FVDEPLI      | 123   | >KTN1-P226FVDERLI      | 414   | 291   |
| >KTN1-P226FNVFVDEPL    | 484   | >KTN1-P226FNVFVDERL    | 1182  | 698   |
| >KTN1-P226FNVFVDEPL    | 484   | >KTN1-P226FNVFVDERL    | 3879  | 3395  |
| >KTN1-P226FNVFVDEPLI   | 359   | >KTN1-P226FNVFVDERLI   | 636   | 277   |
| >KTN1-P226FNVFVDEPL    | 52    | >KTN1-P226FNVFVDERL    | 120   | 68    |
| >KTN1-P226FNVFVDEPLI   | 255   | >KTN1-P226FNVFVDERLI   | 439   | 184   |
| >KTN1-P226FENVFVDEP    | 22188 | >KTN1-P226FENVFVDER    | 12    | 22176 |
| >KTN1-P226FENVFVDEPL   | 21    | >KTN1-P226FENVFVDERL   | 79    | 58    |
| >KTN1-P226FTENFVDEPL   | 201   | >KTN1-P226FTENFVDERL   | 669   | 468   |
| >KTN1-P226FTENFVDEPL   | 13    | >KTN1-P226FTENFVDERL   | 10    | 3     |
| >KTN1-P226FTENFVDEP    | 40800 | >KTN1-P226FTENFVDER    | 351   | 40449 |
| >KTN1-P226FTENFVDEPL   | 141   | >KTN1-P226FTENFVDERL   | 578   | 437   |
| >KTN1-P226FTENFVDEPL   | 127   | >KTN1-P226FTENFVDERL   | 536   | 409   |
| >KTN1-P226FTENFVDEPL   | 216   | >KTN1-P226FTENFVDERL   | 394   | 178   |
| >KTN1-P226FTENFVDEPL   | 385   | >KTN1-P226FTENFVDERL   | 439   | 54    |
| >KTN1-P226FTENFVDEPL   | 18    | >KTN1-P226FTENFVDERL   | 58    | 40    |
| >KTN1-P226FTENFVDEP    | 33628 | >KTN1-P226FTENFVDER    | 208   | 33420 |
| >KTN1-P226FTENFVDEP    | 19    | >KTN1-P226FTENFVDER    | 74    | 55    |
| >KTN1-P226FTENFVDEP    | 345   | >KTN1-P226FTENFVDER    | 348   | 3     |
| >KTN1-P226FTENFVDEP    | 425   | >KTN1-P226FTENFVDER    | 77    | 348   |
| >KTN1-P226FTENFVDEP    | 17772 | >KTN1-P226FTENFVDER    | 441   | 17331 |
| >KTN1-P226FTENFVDEP    | 35066 | >KTN1-P226FTENFVDER    | 489   | 34577 |
| >KTN1-T131€TESSEKETMS  | 271   | >KTN1-T131€PESSEKETMS  | 3394  | 3123  |
| >KTN1-T131€TESSEKETM   | 382   | >KTN1-T131€PESSEKETM   | 3557  | 3175  |
| >KTN1-T131€TESSEKETMS  | 131   | >KTN1-T131€PESSEKETMS  | 1034  | 903   |
| >KTN1-T131€ETESSEKETM  | 349   | >KTN1-T131€EPESSEKETM  | 17416 | 17067 |
| >KTN1-T131€ETESSEKETM  | 475   | >KTN1-T131€EPESSEKETM  | 23990 | 23515 |
| >KTN1-T131€VSPETESSEK  | 116   | >KTN1-T131€VSPEPESSEK  | 130   | 14    |
| >KTN1-T131€VSPETESSEK  | 491   | >KTN1-T131€VSPEPESSEK  | 365   | 126   |
| >KTN1-T131€DVSPETESSEI | 36    | >KTN1-T131€DVSPEPESSEI | 72    | 36    |

|                         |       |                         |       |       |
|-------------------------|-------|-------------------------|-------|-------|
| >LCK-P331S-1PSGIKLTINK  | 3024  | >LCK-P331S-1SSGIKLTINK  | 205   | 2819  |
| >LCK-P331S-1PSGIKLTINK  | 1049  | >LCK-P331S-1SSGIKLTINK  | 34    | 1015  |
| >LCK-P331S-1PSGIKLTINKL | 10094 | >LCK-P331S-1SSGIKLTINKL | 470   | 9624  |
| >LCK-P331S-1PSGIKLTINK  | 3825  | >LCK-P331S-1SSGIKLTINK  | 215   | 3610  |
| >LCK-P331S-1PSGIKLT     | 1293  | >LCK-P331S-1SSGIKLT     | 51    | 1242  |
| >LCK-P331S-1TPSGIKLTINK | 8851  | >LCK-P331S-1TSSGIKLTINK | 129   | 8722  |
| >LCK-P331S-1TPSGIKLTINK | 4064  | >LCK-P331S-1TSSGIKLTINK | 13    | 4051  |
| >LCK-P331S-1TPSGIKLTINK | 16476 | >LCK-P331S-1TSSGIKLTINK | 477   | 15999 |
| >LCK-P331S-1TPSGIKLT    | 10839 | >LCK-P331S-1TSSGIKLT    | 134   | 10705 |
| >LCK-P331S-1TPSGIKLTINK | 1006  | >LCK-P331S-1TSSGIKLTINK | 40    | 966   |
| >LCK-P331S-1TPSGIKLT    | 8958  | >LCK-P331S-1TSSGIKLT    | 309   | 8649  |
| >LCK-P331S-1TPSGIKLT    | 44    | >LCK-P331S-1TSSGIKLT    | 5558  | 5514  |
| >LCK-P331S-1TPSGIKLT    | 6774  | >LCK-P331S-1TSSGIKLT    | 328   | 6446  |
| >LCK-P331S-1TPSGIKLTINK | 5589  | >LCK-P331S-1TSSGIKLTINK | 457   | 5132  |
| >LCK-P331S-1TPSGIKLT    | 5621  | >LCK-P331S-1TSSGIKLT    | 125   | 5496  |
| >LCK-P331S-1KTPSGIKLT   | 696   | >LCK-P331S-1KTSSGIKLT   | 176   | 520   |
| >LCK-P331S-1KTPSGIKLT   | 1022  | >LCK-P331S-1KTSSGIKLT   | 324   | 698   |
| >LCK-P331S-1KTPSGIKLT   | 1566  | >LCK-P331S-1KTSSGIKLT   | 156   | 1410  |
| >LCK-P331S-1KTPSGIKL    | 402   | >LCK-P331S-1KTSSGIKL    | 425   | 23    |
| >LCK-P331S-1KTPSGIKLT   | 23    | >LCK-P331S-1KTSSGIKLT   | 21    | 2     |
| >LCK-P331S-1KTPSGIKL    | 71    | >LCK-P331S-1KTSSGIKL    | 6     | 65    |
| >LCK-P331S-1KTPSGIKLT   | 263   | >LCK-P331S-1KTSSGIKLT   | 15    | 248   |
| >LCK-P331S-1KTPSGIKLT   | 6426  | >LCK-P331S-1KTSSGIKLT   | 67    | 6359  |
| >LCK-P331S-1KTPSGIKL    | 5     | >LCK-P331S-1KTSSGIKL    | 844   | 839   |
| >LCK-P331S-1KTPSGIKLT   | 21    | >LCK-P331S-1KTSSGIKLT   | 6063  | 6042  |
| >LCK-P331S-1KTPSGIKLT   | 6     | >LCK-P331S-1KTSSGIKLT   | 759   | 753   |
| >LCK-P331S-1KTPSGIKLTIN | 175   | >LCK-P331S-1KTSSGIKLTIN | 14593 | 14418 |
| >LCK-P331S-1KTPSGIKLT   | 729   | >LCK-P331S-1KTSSGIKLT   | 126   | 603   |
| >LCK-P331S-1KTPSGIKL    | 336   | >LCK-P331S-1KTSSGIKL    | 238   | 98    |
| >LCK-P331S-1KTPSGIKLT   | 130   | >LCK-P331S-1KTSSGIKLT   | 106   | 24    |
| >LCK-P331S-1LKTSSGIKL   | 38    | >LCK-P331S-1LKTSSGIKL   | 16    | 22    |
| >LCK-P331S-1LKTSSGIKLT  | 123   | >LCK-P331S-1LKTSSGIKLT  | 60    | 63    |
| >LCK-P331S-1FLKTSSGI    | 658   | >LCK-P331S-1FLKTSSGI    | 462   | 196   |
| >LCK-P331S-1FLKTSSGI    | 50    | >LCK-P331S-1FLKTSSGI    | 14    | 36    |
| >LCK-P331S-1FLKTSSGIKL  | 34    | >LCK-P331S-1FLKTSSGIKL  | 23    | 11    |
| >LCK-P331S-1FLKTSSGI    | 4     | >LCK-P331S-1FLKTSSGI    | 3     | 1     |
| >LCK-P331S-1FLKTSSGIKL  | 88    | >LCK-P331S-1FLKTSSGIKL  | 78    | 10    |
| >LCK-P331S-1FLKTSSGIKLT | 49    | >LCK-P331S-1FLKTSSGIKLT | 19    | 30    |
| >LCK-P331S-1FLKTSSGI    | 1057  | >LCK-P331S-1FLKTSSGI    | 368   | 689   |
| >LCK-P331S-1FLKTSSGI    | 32    | >LCK-P331S-1FLKTSSGI    | 84    | 52    |
| >LCK-P331S-1FLKTSSGIKL  | 157   | >LCK-P331S-1FLKTSSGIKL  | 300   | 143   |
| >LCK-P331S-1FLKTSSGI    | 47    | >LCK-P331S-1FLKTSSGI    | 26    | 21    |
| >LCK-P331S-1FLKTSSGIKL  | 227   | >LCK-P331S-1FLKTSSGIKL  | 155   | 72    |

|                          |      |                          |      |      |
|--------------------------|------|--------------------------|------|------|
| >LCK-P331S-1 FLKTPSGI    | 12   | >LCK-P331S-I FLKTSSGI    | 9    | 3    |
| >LCK-P331S-1 FLKTPSGIKL  | 9    | >LCK-P331S-I FLKTSSGIKL  | 8    | 1    |
| >LCK-P331S-1 FLKTPSGIKLT | 252  | >LCK-P331S-I FLKTSSGIKLT | 191  | 61   |
| >LCK-P331S-1 FLKTPSGIK   | 205  | >LCK-P331S-I FLKTSSGIK   | 166  | 39   |
| >LCK-P331S-1 FLKTPSGIK   | 1639 | >LCK-P331S-I FLKTSSGIK   | 427  | 1212 |
| >LCK-P331S-1 FLKTPSGI    | 1656 | >LCK-P331S-I FLKTSSGI    | 387  | 1269 |
| >LCK-P331S-1 FLKTPSGI    | 495  | >LCK-P331S-I FLKTSSGI    | 388  | 107  |
| >LCK-P331S-1 FLKTPSGIKL  | 292  | >LCK-P331S-I FLKTSSGIKL  | 370  | 78   |
| >LCK-P331S-1 FLKTPSGI    | 836  | >LCK-P331S-I FLKTSSGI    | 417  | 419  |
| >LCK-P331S-1 FLKTPSGIKL  | 527  | >LCK-P331S-I FLKTSSGIKL  | 238  | 289  |
| >LCK-P331S-1 DFLKTPSGI   | 778  | >LCK-P331S-I DFLKTSSGI   | 401  | 377  |
| >LCK-P331S-1 VDFLKTPSGI  | 259  | >LCK-P331S-I VDFLKTSSGI  | 107  | 152  |
| >LCK-P331S-1 VDFLKTPSGI  | 287  | >LCK-P331S-I VDFLKTSSGI  | 572  | 285  |
| >LCK-P331S-1 VDFLKTPSGI  | 118  | >LCK-P331S-I VDFLKTSSGI  | 85   | 33   |
| >LCK-P331S-1 SLVDFLKTSPC | 843  | >LCK-P331S-I SLVDFLKTSSC | 474  | 369  |
| >LCK-P331S-1 SLVDFLKTTP  | 3866 | >LCK-P331S-I SLVDFLKTTS  | 487  | 3379 |
| >LCK-P331S-1 SLVDFLKTTP  | 1367 | >LCK-P331S-I SLVDFLKTTS  | 240  | 1127 |
| >LCK-P331S-1 SLVDFLKTTP  | 2324 | >LCK-P331S-I SLVDFLKTTS  | 231  | 2093 |
| >LCK-P331S-1 SLVDFLKTTPS | 494  | >LCK-P331S-I SLVDFLKTSS  | 255  | 239  |
| >LHFP-H55N·HDESRQMM'     | 59   | >LHFP-H55N·NDESRQMM'     | 123  | 64   |
| >LHFP-H55N·HDESRQMM'     | 85   | >LHFP-H55N·NDESRQMM'     | 193  | 108  |
| >LHFP-H55N·VHDESRQMM     | 126  | >LHFP-H55N·VNDESRQMM     | 7302 | 7176 |
| >LHFP-H55N·GTFRRCSYPV    | 19   | >LHFP-H55N·GTFRRCSYPV    | 228  | 209  |
| >LHFP-H55N·GTFRRCSYPV    | 443  | >LHFP-H55N·GTFRRCSYPV    | 1965 | 1522 |
| >LHFP-H55N·PVDHESRQM     | 189  | >LHFP-H55N·PVNDESRQM     | 221  | 32   |
| >LHFP-H55N·YPVDHESRQI'   | 1503 | >LHFP-H55N·YPVNDESRQI'   | 416  | 1087 |
| >LHFP-H55N·YPVDHESR      | 702  | >LHFP-H55N·YPVNDESR      | 457  | 245  |
| >LHFP-H55N·YPVDHESRQI'   | 37   | >LHFP-H55N·YPVNDESRQI'   | 56   | 19   |
| >LHFP-H55N·YPVDHESR      | 325  | >LHFP-H55N·YPVNDESR      | 475  | 150  |
| >LHFP-H55N·YPVDHESRQ     | 186  | >LHFP-H55N·YPVNDESRQ     | 273  | 87   |
| >LHFP-H55N·YPVDHESRQI'   | 36   | >LHFP-H55N·YPVNDESRQI'   | 40   | 4    |
| >LHFP-H55N·YPVDHESRQI'   | 13   | >LHFP-H55N·YPVNDESRQI'   | 13   | 0    |
| >LHFP-H55N·YPVDHESRQI'   | 94   | >LHFP-H55N·YPVNDESRQI'   | 89   | 5    |
| >LHFP-H55N·YPVDHESRQI'   | 146  | >LHFP-H55N·YPVNDESRQI'   | 142  | 4    |
| >LHFP-H55N·YPVDHESRQI'   | 339  | >LHFP-H55N·YPVNDESRQI'   | 184  | 155  |
| >LHFP-H55N·YPVDHESRQI'   | 482  | >LHFP-H55N·YPVNDESRQI'   | 1221 | 739  |
| >LHFP-H55N·SYPVHDESRC    | 72   | >LHFP-H55N·SYPVNDESRC    | 46   | 26   |
| >LHFP-H55N·SYPVHDESR     | 163  | >LHFP-H55N·SYPVNDESR     | 186  | 23   |
| >LHFP-H55N·CSYPVHDESR    | 371  | >LHFP-H55N·CSYPVNDESR    | 371  | 0    |
| >LHFP-H55N·CSYPVHDESR    | 26   | >LHFP-H55N·CSYPVNDESR    | 16   | 10   |
| >LHFP-H55N·RCSYPVHDES    | 350  | >LHFP-H55N·RCSYPVNDES    | 619  | 269  |
| >LHFP-H55N·RCSYPVH       | 351  | >LHFP-H55N·RCSYPVN       | 3587 | 3236 |
| >LHFP-H55N·RCSYPVHDE     | 342  | >LHFP-H55N·RCSYPVNDE     | 748  | 406  |

|                          |      |                          |      |      |
|--------------------------|------|--------------------------|------|------|
| >LHFP-H55N· RRCSYPVH     | 178  | >LHFP-H55N· RRCSYPVN     | 366  | 188  |
| >LHFP-H55N· RRCSYPVHDE   | 486  | >LHFP-H55N· RRCSYPVNDE   | 522  | 36   |
| >LHFP-H55N· FRRCSYPVH    | 27   | >LHFP-H55N· FRRCSYPVN    | 412  | 385  |
| >LIFR-F1068L GSPCSINSRQ  | 104  | >LIFR-F1068L GSPCSINSRQ  | 1027 | 923  |
| >LIFR-F1068L GSPCSINSRQ  | 36   | >LIFR-F1068L GSPCSINSRQ  | 17   | 19   |
| >LIFR-F1068L RQFLIPPK    | 63   | >LIFR-F1068L RQLLIPPK    | 230  | 167  |
| >LIFR-F1068L RQFLIPPK    | 15   | >LIFR-F1068L RQLLIPPK    | 29   | 14   |
| >LIFR-F1068L RQFLIPPK    | 12   | >LIFR-F1068L RQLLIPPK    | 17   | 5    |
| >LIFR-F1068L RQFLIPPK    | 34   | >LIFR-F1068L RQLLIPPK    | 72   | 38   |
| >LIFR-F1068L RQFLIPPK    | 61   | >LIFR-F1068L RQLLIPPK    | 326  | 265  |
| >LIFR-F1068L RQFLIPPK    | 26   | >LIFR-F1068L RQLLIPPK    | 53   | 27   |
| >LIFR-F1068L RQFLIPPK    | 187  | >LIFR-F1068L RQLLIPPK    | 328  | 141  |
| >LIFR-F1068L RQFLIPPK    | 150  | >LIFR-F1068L RQLLIPPK    | 303  | 153  |
| >LIFR-F1068L SRQFLIPPK   | 71   | >LIFR-F1068L SRQLLIPPK   | 47   | 24   |
| >LIFR-F1068L SRQFLIPPKD  | 651  | >LIFR-F1068L SRQLLIPPKD  | 343  | 308  |
| >LIFR-F1068L SRQFLIPPK   | 344  | >LIFR-F1068L SRQLLIPPK   | 508  | 164  |
| >LIFR-F1068L SRQFLIPPK   | 18   | >LIFR-F1068L SRQLLIPPK   | 26   | 8    |
| >LIFR-F1068L NSRQFLIPPK  | 192  | >LIFR-F1068L NSRQLLIPPK  | 428  | 236  |
| >LIFR-F1068L NSRQFLIPPK  | 7    | >LIFR-F1068L NSRQLLIPPK  | 10   | 3    |
| >LIFR-F1068L INSRQFLIPPK | 423  | >LIFR-F1068L INSRQLLIPPK | 538  | 115  |
| >LIFR-F1068L SINSRQFLI   | 177  | >LIFR-F1068L SINSRQLLI   | 1717 | 1540 |
| >LIFR-F1068L SINSRQFL    | 60   | >LIFR-F1068L SINSRQLL    | 222  | 162  |
| >LIFR-F1068L SINSRQFLI   | 83   | >LIFR-F1068L SINSRQLLI   | 896  | 813  |
| >LIFR-F1068L SINSRQFL    | 350  | >LIFR-F1068L SINSRQLL    | 481  | 131  |
| >LIFR-F1068L SINSRQFLI   | 183  | >LIFR-F1068L SINSRQLLI   | 212  | 29   |
| >LIFR-F1068L SINSRQFLI   | 338  | >LIFR-F1068L SINSRQLLI   | 1516 | 1178 |
| >LIFR-F1068L SINSRQFL    | 447  | >LIFR-F1068L SINSRQLL    | 3071 | 2624 |
| >LIFR-F1068L SINSRQFLI   | 340  | >LIFR-F1068L SINSRQLLI   | 2829 | 2489 |
| >LIFR-F1068L SINSRQFL    | 93   | >LIFR-F1068L SINSRQLL    | 150  | 57   |
| >LIFR-F1068L SINSRQFLI   | 269  | >LIFR-F1068L SINSRQLLI   | 905  | 636  |
| >LIFR-F1068L SINSRQFLI   | 456  | >LIFR-F1068L SINSRQLLI   | 5444 | 4988 |
| >LIFR-F1068L CSINSRQFL   | 1109 | >LIFR-F1068L CSINSRQLL   | 234  | 875  |
| >LIFR-F1068L CSINSRQFLI  | 488  | >LIFR-F1068L CSINSRQLLI  | 1742 | 1254 |
| >LIFR-F1068L CSINSRQF    | 47   | >LIFR-F1068L CSINSRQL    | 1256 | 1209 |
| >LIFR-F1068L CSINSRQFL   | 310  | >LIFR-F1068L CSINSRQLL   | 450  | 140  |
| >LIFR-F1068L CSINSRQF    | 8    | >LIFR-F1068L CSINSRQL    | 69   | 61   |
| >LIFR-F1068L CSINSRQFL   | 198  | >LIFR-F1068L CSINSRQLL   | 355  | 157  |
| >LIFR-F1068L CSINSRQF    | 307  | >LIFR-F1068L CSINSRQL    | 5702 | 5395 |
| >LIFR-F1068L CSINSRQFLI  | 188  | >LIFR-F1068L CSINSRQLLI  | 258  | 70   |
| >LIFR-F1068L CSINSRQF    | 3828 | >LIFR-F1068L CSINSRQL    | 133  | 3695 |
| >LIFR-F1068L CSINSRQFL   | 109  | >LIFR-F1068L CSINSRQLL   | 159  | 50   |
| >LIFR-F1068L CSINSRQFLI  | 685  | >LIFR-F1068L CSINSRQLLI  | 161  | 524  |
| >LIFR-F1068L SPCSINSRQF  | 68   | >LIFR-F1068L SPCSINSRQL  | 89   | 21   |

|                          |      |                          |       |       |
|--------------------------|------|--------------------------|-------|-------|
| >LIFR-F1068L SPCSINSRQFI | 8    | >LIFR-F1068L SPCSINSRQLI | 40    | 32    |
| >LIFR-F1068L SPCSINSRQF  | 420  | >LIFR-F1068L SPCSINSRQL  | 231   | 189   |
| >LIFR-F1068L SPCSINSRQF  | 437  | >LIFR-F1068L SPCSINSRQL  | 4121  | 3684  |
| >LIFR-I135N- IPDTPEILNL  | 69   | >LIFR-I135N- NPDTPEILNL  | 1008  | 939   |
| >LIFR-I135N- IPDTPEIL    | 1840 | >LIFR-I135N- NPDTPEIL    | 152   | 1688  |
| >LIFR-I135N- IPDTPEIL    | 317  | >LIFR-I135N- NPDTPEIL    | 653   | 336   |
| >LIFR-I135N- IPDTPEILNLS | 396  | >LIFR-I135N- NPDTPEILNLS | 2416  | 2020  |
| >LIFR-I135N- LIPDTPEILNL | 304  | >LIFR-I135N- LNPDTPEILNI | 8543  | 8239  |
| >LIFR-I135N- LIPDTPEI    | 273  | >LIFR-I135N- LNPDTPEI    | 19164 | 18891 |
| >LIFR-I135N- LIPDTPEILNL | 366  | >LIFR-I135N- LNPDTPEILNI | 19317 | 18951 |
| >LIFR-I135N- LIPDTPEI    | 137  | >LIFR-I135N- LNPDTPEI    | 13731 | 13594 |
| >LIFR-I135N- LIPDTPEI    | 62   | >LIFR-I135N- LNPDTPEI    | 10835 | 10773 |
| >LIFR-I135N- LIPDTPEIL   | 321  | >LIFR-I135N- LNPDTPEIL   | 17301 | 16980 |
| >LIFR-I135N- LIPDTPEILNL | 163  | >LIFR-I135N- LNPDTPEILNI | 15251 | 15088 |
| >LIFR-I135N- LIPDTPEI    | 35   | >LIFR-I135N- LNPDTPEI    | 20851 | 20816 |
| >LIFR-I135N- LIPDTPEIL   | 85   | >LIFR-I135N- LNPDTPEIL   | 22494 | 22409 |
| >LIFR-I135N- LIPDTPEILNL | 21   | >LIFR-I135N- LNPDTPEILNI | 17704 | 17683 |
| >LIFR-I135N- LIPDTPEIL   | 180  | >LIFR-I135N- LNPDTPEIL   | 595   | 415   |
| >LIFR-I135N- LIPDTPEILNL | 95   | >LIFR-I135N- LNPDTPEILNI | 250   | 155   |
| >LIFR-I135N- FTLNEQNVSL  | 316  | >LIFR-I135N- FTLNEQNVSL  | 21582 | 21266 |
| >LIFR-I135N- FTLNEQNVSL  | 223  | >LIFR-I135N- FTLNEQNVSL  | 16009 | 15786 |
| >LIFR-I135N- FTLNEQNVSL  | 248  | >LIFR-I135N- FTLNEQNVSL  | 17985 | 17737 |
| >LIFR-I135N- FTLNEQNVSL  | 53   | >LIFR-I135N- FTLNEQNVSL  | 14558 | 14505 |
| >LIFR-I135N- FTLNEQNVSL  | 68   | >LIFR-I135N- FTLNEQNVSL  | 10489 | 10421 |
| >LIFR-I135N- FTLNEQNVSL  | 225  | >LIFR-I135N- FTLNEQNVSL  | 19390 | 19165 |
| >LIFR-I135N- FTLNEQNVSL  | 301  | >LIFR-I135N- FTLNEQNVSL  | 17867 | 17566 |
| >LIFR-I135N- FTLNEQNVSL  | 103  | >LIFR-I135N- FTLNEQNVSL  | 15308 | 15205 |
| >LIFR-I135N- FTLNEQNVSL  | 316  | >LIFR-I135N- FTLNEQNVSL  | 10896 | 10580 |
| >LIFR-I135N- FTLNEQNVSL  | 36   | >LIFR-I135N- FTLNEQNVSL  | 424   | 388   |
| >LIFR-I135N- FTLNEQNVSL  | 22   | >LIFR-I135N- FTLNEQNVSL  | 28595 | 28573 |
| >LIFR-I135N- SLIPDTPEI   | 12   | >LIFR-I135N- SLNPDTPEI   | 24    | 12    |
| >LIFR-I135N- SLIPDTPEIL  | 109  | >LIFR-I135N- SLNPDTPEIL  | 832   | 723   |
| >LIFR-I135N- SLIPDTPEI   | 20   | >LIFR-I135N- SLNPDTPEI   | 32    | 12    |
| >LIFR-I135N- SLIPDTPEIL  | 24   | >LIFR-I135N- SLNPDTPEIL  | 54    | 30    |
| >LIFR-I135N- SLIPDTPEI   | 12   | >LIFR-I135N- SLNPDTPEI   | 14    | 2     |
| >LIFR-I135N- SLIPDTPEIL  | 54   | >LIFR-I135N- SLNPDTPEIL  | 146   | 92    |
| >LIFR-I135N- SLIPDTPEI   | 22   | >LIFR-I135N- SLNPDTPEI   | 139   | 117   |
| >LIFR-I135N- SLIPDTPEIL  | 226  | >LIFR-I135N- SLNPDTPEIL  | 2062  | 1836  |
| >LIFR-I135N- SLIPDTPEI   | 7    | >LIFR-I135N- SLNPDTPEI   | 6     | 1     |
| >LIFR-I135N- SLIPDTPEIL  | 20   | >LIFR-I135N- SLNPDTPEIL  | 19    | 1     |
| >LIFR-I135N- SLIPDTPEI   | 7    | >LIFR-I135N- SLNPDTPEI   | 15    | 8     |
| >LIFR-I135N- SLIPDTPEIL  | 11   | >LIFR-I135N- SLNPDTPEIL  | 29    | 18    |
| >LIFR-I135N- SLIPDTPEI   | 6    | >LIFR-I135N- SLNPDTPEI   | 6     | 0     |



|                          |      |                          |       |       |
|--------------------------|------|--------------------------|-------|-------|
| >LIFR-I135N- SLIPDTPEIL  | 19   | >LIFR-I135N- SLNPDTPEIL  | 17    | 2     |
| >LIFR-I135N- SLIPDTPEI   | 58   | >LIFR-I135N- SLNPDTPEI   | 19    | 39    |
| >LIFR-I135N- SLIPDTPEIL  | 234  | >LIFR-I135N- SLNPDTPEIL  | 61    | 173   |
| >LIFR-I135N- SLIPDTPEI   | 5    | >LIFR-I135N- SLNPDTPEI   | 4     | 1     |
| >LIFR-I135N- SLIPDTPEIL  | 8    | >LIFR-I135N- SLNPDTPEIL  | 8     | 0     |
| >LIFR-I135N- SLIPDTPEI   | 222  | >LIFR-I135N- SLNPDTPEI   | 405   | 183   |
| >LIFR-I135N- VSLIPDTPEI  | 24   | >LIFR-I135N- VSLNPDTPEI  | 63    | 39    |
| >LIFR-I135N- VSLIPDTPEIL | 25   | >LIFR-I135N- VSLNPDTPEIL | 63    | 38    |
| >LIFR-I135N- VSLIPDTPEIL | 395  | >LIFR-I135N- VSLNPDTPEIL | 123   | 272   |
| >LIFR-I135N- NVSLIPDTPEI | 60   | >LIFR-I135N- NVSLNPDTPE  | 268   | 208   |
| >LIFR-I135N- NVSLIPDTPEI | 383  | >LIFR-I135N- NVSLNPDTPE  | 499   | 116   |
| >LIFR-I135N- NEQNVSLI    | 20   | >LIFR-I135N- NEQNVSLN    | 3456  | 3436  |
| >LIFR-I135N- NEQNVSLIPD  | 264  | >LIFR-I135N- NEQNVSLNPI  | 380   | 116   |
| >LIFR-I135N- NEQNVSLI    | 224  | >LIFR-I135N- NEQNVSLN    | 33189 | 32965 |
| >LIFR-I135N- LNEQNVSLI   | 428  | >LIFR-I135N- LNEQNVSLN   | 31599 | 31171 |
| >LIFR-I135N- TLNEQNVSLI  | 145  | >LIFR-I135N- TLNEQNVSLN  | 20735 | 20590 |
| >LIFR-I135N- TLNEQNVSLI  | 68   | >LIFR-I135N- TLNEQNVSLN  | 17767 | 17699 |
| >LIFR-I135N- TLNEQNVSLI  | 17   | >LIFR-I135N- TLNEQNVSLN  | 6555  | 6538  |
| >LIFR-I135N- TLNEQNVSLI  | 33   | >LIFR-I135N- TLNEQNVSLN  | 19739 | 19706 |
| >LIFR-I135N- TLNEQNVSLI  | 74   | >LIFR-I135N- TLNEQNVSLN  | 18037 | 17963 |
| >LIFR-I135N- TLNEQNVSLI  | 148  | >LIFR-I135N- TLNEQNVSLN  | 22567 | 22419 |
| >LIFR-I135N- TLNEQNVSLI  | 12   | >LIFR-I135N- TLNEQNVSLN  | 7834  | 7822  |
| >LIFR-R302H- KIRNISVSA   | 2281 | >LIFR-R302H- KIHNISVSA   | 386   | 1895  |
| >LIFR-R302H- KIRNISVSA   | 242  | >LIFR-R302H- KIHNISVSA   | 113   | 129   |
| >LIFR-R302H- KIRNISVSA   | 1472 | >LIFR-R302H- KIHNISVSA   | 324   | 1148  |
| >LIFR-R302H- KIRNISVS    | 32   | >LIFR-R302H- KIHNISVS    | 328   | 296   |
| >LIFR-R302H- KIRNISVSA   | 4    | >LIFR-R302H- KIHNISVSA   | 10    | 6     |
| >LIFR-R302H- KIRNISVSAS  | 16   | >LIFR-R302H- KIHNISVSAS  | 133   | 117   |
| >LIFR-R302H- KIRNISVSASS | 8    | >LIFR-R302H- KIHNISVSASS | 45    | 37    |
| >LIFR-R302H- KIRNISVSA   | 108  | >LIFR-R302H- KIHNISVSA   | 28    | 80    |
| >LIFR-R302H- KIRNISVSASS | 1225 | >LIFR-R302H- KIHNISVSASS | 285   | 940   |
| >LIFR-R302H- IKIRNISV    | 22   | >LIFR-R302H- IKIHNISV    | 14    | 8     |
| >LIFR-R302H- IKIRNISVS   | 186  | >LIFR-R302H- IKIHNISVS   | 109   | 77    |
| >LIFR-R302H- IKIRNISVSA  | 35   | >LIFR-R302H- IKIHNISVSA  | 25    | 10    |
| >LIFR-R302H- IKIRNISVSAS | 86   | >LIFR-R302H- IKIHNISVSAS | 63    | 23    |
| >LIFR-R302H- AIKIRNISV   | 153  | >LIFR-R302H- AIKIHNISV   | 37    | 116   |
| >LIFR-R302H- AIKIRNISVSA | 711  | >LIFR-R302H- AIKIHNISVSA | 288   | 423   |
| >LIFR-R302H- AIKIRNISV   | 36   | >LIFR-R302H- AIKIHNISV   | 36    | 0     |
| >LIFR-R302H- AIKIRNISV   | 23   | >LIFR-R302H- AIKIHNISV   | 27    | 4     |
| >LIFR-R302H- AIKIRNISVSA | 22   | >LIFR-R302H- AIKIHNISVSA | 24    | 2     |
| >LIFR-R302H- AIKIRNISV   | 134  | >LIFR-R302H- AIKIHNISV   | 377   | 243   |
| >LIFR-R302H- AIKIRNISVSA | 405  | >LIFR-R302H- AIKIHNISVSA | 809   | 404   |
| >LIFR-R302H- VAIKIRNISV  | 495  | >LIFR-R302H- VAIKIHNISV  | 549   | 54    |

|                                      |       |                                      |       |       |
|--------------------------------------|-------|--------------------------------------|-------|-------|
| >LIFR-R302H·NVAIKIRNI                | 4976  | >LIFR-R302H·NVAIKIHNI                | 353   | 4623  |
| >LIFR-R302H·NVAIKIRNISV              | 859   | >LIFR-R302H·NVAIKIHNISV              | 206   | 653   |
| >LIFR-R302H·NVAIKIRNI                | 739   | >LIFR-R302H·NVAIKIHNI                | 216   | 523   |
| >LIFR-R302H·NVAIKIRNISV              | 177   | >LIFR-R302H·NVAIKIHNISV              | 76    | 101   |
| >LIFR-R302H·NVAIKIRNISV              | 354   | >LIFR-R302H·NVAIKIHNISV              | 101   | 253   |
| >LIFR-R302H·NVAIKIRNISV              | 505   | >LIFR-R302H·NVAIKIHNISV              | 122   | 383   |
| >LIFR-R302H·NVAIKIRNI                | 163   | >LIFR-R302H·NVAIKIHNI                | 12    | 151   |
| >LIFR-R302H·NVAIKIRNISV              | 28    | >LIFR-R302H·NVAIKIHNISV              | 14    | 14    |
| >LIFR-R302H·NVAIKIRNI                | 3973  | >LIFR-R302H·NVAIKIHNI                | 106   | 3867  |
| >LIFR-R302H·NVAIKIRNISV              | 151   | >LIFR-R302H·NVAIKIHNISV              | 25    | 126   |
| >LIFR-R302H·ENVAIKIR                 | 68    | >LIFR-R302H·ENVAIKIH                 | 13361 | 13293 |
| >LIFR-R302H·ENVAIKIRNI               | 1157  | >LIFR-R302H·ENVAIKIHNI               | 158   | 999   |
| >LIFR-R302H·GENVAIKIRNI              | 23    | >LIFR-R302H·GENVAIKIHN               | 18    | 5     |
| >LIFR-R302H·GENVAIKIRNI              | 1041  | >LIFR-R302H·GENVAIKIHN               | 298   | 743   |
| >LIFR-R302H·GENVAIKIRNI              | 181   | >LIFR-R302H·GENVAIKIHN               | 132   | 49    |
| >LIFR-R302H·GENVAIKIRNI              | 309   | >LIFR-R302H·GENVAIKIHN               | 329   | 20    |
| >LIFR-R302H·GENVAIKIRNI              | 16    | >LIFR-R302H·GENVAIKIHN               | 11    | 5     |
| >LPP-I601L- <del>v</del> RIRVLTAKA   | 937   | >LPP-I601L- <del>n</del> RLRVLTAKA   | 72    | 865   |
| >LPP-I601L- <del>v</del> RIRVLTAKA   | 11445 | >LPP-I601L- <del>n</del> RLRVLTAKA   | 205   | 11240 |
| >LPP-I601L- <del>v</del> RIRVLTAK    | 53    | >LPP-I601L- <del>n</del> RLRVLTAK    | 37    | 16    |
| >LPP-I601L- <del>v</del> RIRVLTAK    | 464   | >LPP-I601L- <del>n</del> RLRVLTAK    | 1500  | 1036  |
| >LPP-I601L- <del>v</del> RIRVLTAK    | 3     | >LPP-I601L- <del>n</del> RLRVLTAK    | 4     | 1     |
| >LPP-I601L- <del>v</del> RIRVLTAKA   | 5     | >LPP-I601L- <del>n</del> RLRVLTAKA   | 8     | 3     |
| >LPP-I601L- <del>v</del> RIRVLTAKAS  | 28    | >LPP-I601L- <del>n</del> RLRVLTAKAS  | 72    | 44    |
| >LPP-I601L- <del>v</del> RIRVLTAKAST | 20    | >LPP-I601L- <del>n</del> RLRVLTAKAS  | 48    | 28    |
| >LPP-I601L- <del>v</del> RIRVLTAK    | 32    | >LPP-I601L- <del>n</del> RLRVLTAK    | 36    | 4     |
| >LPP-I601L- <del>v</del> ILCKTCNSARI | 227   | >LPP-I601L- <del>n</del> ILCKTCNSARI | 63    | 164   |
| >LPP-I601L- <del>v</del> ILCKTCNSARI | 168   | >LPP-I601L- <del>n</del> ILCKTCNSARI | 343   | 175   |
| >LPP-I601L- <del>v</del> ILCKTCNSARI | 54    | >LPP-I601L- <del>n</del> ILCKTCNSARI | 57    | 3     |
| >LPP-I601L- <del>v</del> ILCKTCNSARI | 45    | >LPP-I601L- <del>n</del> ILCKTCNSARI | 13    | 32    |
| >LPP-I601L- <del>v</del> ARIRVLTA    | 366   | >LPP-I601L- <del>n</del> ARLRVLTA    | 214   | 152   |
| >LPP-I601L- <del>v</del> ARIRVLTAK   | 46    | >LPP-I601L- <del>n</del> ARLRVLTAK   | 33    | 13    |
| >LPP-I601L- <del>v</del> ARIRVLTAKA  | 195   | >LPP-I601L- <del>n</del> ARLRVLTAKA  | 276   | 81    |
| >LPP-I601L- <del>v</del> ARIRVLTAK   | 197   | >LPP-I601L- <del>n</del> ARLRVLTAK   | 188   | 9     |
| >LPP-I601L- <del>v</del> SARIRVLTAK  | 237   | >LPP-I601L- <del>n</del> SARLRVLTAK  | 196   | 41    |
| >LPP-I601L- <del>v</del> SARIRVLTAK  | 131   | >LPP-I601L- <del>n</del> SARLRVLTAK  | 104   | 27    |
| >LPP-I601L- <del>v</del> SARIRVLT    | 403   | >LPP-I601L- <del>n</del> SARLRVLT    | 474   | 71    |
| >LPP-I601L- <del>v</del> SARIRVLTA   | 11    | >LPP-I601L- <del>n</del> SARLRVLTA   | 12    | 1     |
| >LPP-I601L- <del>v</del> SARIRVLTAK  | 6     | >LPP-I601L- <del>n</del> SARLRVLTAK  | 6     | 0     |
| >LPP-I601L- <del>v</del> SARIRVLTAK/ | 20    | >LPP-I601L- <del>n</del> SARLRVLTAK/ | 22    | 2     |
| >LPP-I601L- <del>v</del> SARIRVLTAK  | 472   | >LPP-I601L- <del>n</del> SARLRVLTAK  | 401   | 71    |
| >LPP-I601L- <del>v</del> SARIRVLTA   | 56    | >LPP-I601L- <del>n</del> SARLRVLTA   | 63    | 7     |
| >LPP-I601L- <del>v</del> SARIRVLTAK/ | 465   | >LPP-I601L- <del>n</del> SARLRVLTAK/ | 544   | 79    |

|                               |       |                               |       |       |
|-------------------------------|-------|-------------------------------|-------|-------|
| >LPP-I601L- $\nu$ NSARIRVLTAI | 134   | >LPP-I601L- $\eta$ NSARLRVLT  | 156   | 22    |
| >LPP-I601L- $\nu$ NSARIRVLTAI | 11    | >LPP-I601L- $\eta$ NSARLRVLT  | 23    | 12    |
| >LPP-I601L- $\nu$ NSARIRVL    | 343   | >LPP-I601L- $\eta$ NSARLRVL   | 1157  | 814   |
| >LPP-I601L- $\nu$ NSARIRVLT   | 166   | >LPP-I601L- $\eta$ NSARLRVLT  | 1017  | 851   |
| >LPP-I601L- $\nu$ NSARIRVL    | 291   | >LPP-I601L- $\eta$ NSARLRVL   | 616   | 325   |
| >LPP-I601L- $\nu$ TCNSARIRV   | 377   | >LPP-I601L- $\eta$ TCNSARLRV  | 1434  | 1057  |
| >LPP-I601L- $\nu$ KTCNSARIR   | 664   | >LPP-I601L- $\eta$ KTCNSARLR  | 149   | 515   |
| >LPP-I601L- $\nu$ KTCNSARI    | 133   | >LPP-I601L- $\eta$ KTCNSARL   | 358   | 225   |
| >LPP-I601L- $\nu$ KTCNSARIR   | 822   | >LPP-I601L- $\eta$ KTCNSARLR  | 482   | 340   |
| >LPP-I601L- $\nu$ KTCNSARIRV  | 100   | >LPP-I601L- $\eta$ KTCNSARLRV | 108   | 8     |
| >LPP-I601L- $\nu$ KTCNSARIRV  | 464   | >LPP-I601L- $\eta$ KTCNSARLRV | 427   | 37    |
| >LPP-I601L- $\nu$ KTCNSARIR   | 53    | >LPP-I601L- $\eta$ KTCNSARLR  | 23    | 30    |
| >LPP-I601L- $\nu$ KTCNSARI    | 56    | >LPP-I601L- $\eta$ KTCNSARL   | 131   | 75    |
| >LPP-I601L- $\nu$ KTCNSARIRV  | 161   | >LPP-I601L- $\eta$ KTCNSARLRV | 190   | 29    |
| >LPP-I601L- $\nu$ KTCNSARIR   | 605   | >LPP-I601L- $\eta$ KTCNSARLR  | 137   | 468   |
| >LPP-I601L- $\nu$ KTCNSARIRV  | 397   | >LPP-I601L- $\eta$ KTCNSARLRV | 1414  | 1017  |
| >LPP-I601L- $\nu$ KTCNSARI    | 8     | >LPP-I601L- $\eta$ KTCNSARL   | 4     | 4     |
| >LPP-I601L- $\nu$ KTCNSARIRV  | 111   | >LPP-I601L- $\eta$ KTCNSARLRV | 53    | 58    |
| >LPP-I601L- $\nu$ KTCNSARIRV  | 9     | >LPP-I601L- $\eta$ KTCNSARLRV | 9     | 0     |
| >LPP-I601L- $\nu$ KTCNSARIRV  | 169   | >LPP-I601L- $\eta$ KTCNSARLRV | 109   | 60    |
| >LPP-I601L- $\nu$ KTCNSARIR   | 657   | >LPP-I601L- $\eta$ KTCNSARLR  | 391   | 266   |
| >LPP-I601L- $\nu$ KTCNSARI    | 25    | >LPP-I601L- $\eta$ KTCNSARL   | 156   | 131   |
| >LPP-I601L- $\nu$ KTCNSARIRV  | 144   | >LPP-I601L- $\eta$ KTCNSARLRV | 143   | 1     |
| >MALT1-E79. ETTDEIPFSF        | 155   | >MALT1-E79. KTTDEIPFSF        | 5016  | 4861  |
| >MALT1-E79. ETTDEIPF          | 37    | >MALT1-E79. KTTDEIPF          | 10575 | 10538 |
| >MALT1-E79. ETTDEIPFSF        | 133   | >MALT1-E79. KTTDEIPFSF        | 4762  | 4629  |
| >MALT1-E79. ETTDEIPF          | 6     | >MALT1-E79. KTTDEIPF          | 349   | 343   |
| >MALT1-E79. ETTDEIPFS         | 101   | >MALT1-E79. KTTDEIPFS         | 8357  | 8256  |
| >MALT1-E79. ETTDEIPFSF        | 10    | >MALT1-E79. KTTDEIPFSF        | 574   | 564   |
| >MALT1-E79. ETTDEIPFSFS       | 179   | >MALT1-E79. KTTDEIPFSFS       | 11266 | 11087 |
| >MALT1-E79. ETTDEIPF          | 2524  | >MALT1-E79. KTTDEIPF          | 66    | 2458  |
| >MALT1-E79. ETTDEIPFSF        | 596   | >MALT1-E79. KTTDEIPFSF        | 26    | 570   |
| >MALT1-E79. ETTDEIPFSFS       | 418   | >MALT1-E79. KTTDEIPFSFS       | 14832 | 14414 |
| >MALT1-E79. ETTDEIPFSFS       | 129   | >MALT1-E79. KTTDEIPFSFS       | 8162  | 8033  |
| >MALT1-E79. ETTDEIPF          | 2647  | >MALT1-E79. KTTDEIPF          | 243   | 2404  |
| >MALT1-E79. ETTDEIPFSF        | 2809  | >MALT1-E79. KTTDEIPFSF        | 265   | 2544  |
| >MALT1-E79. ETTDEIPF          | 41    | >MALT1-E79. KTTDEIPF          | 7     | 34    |
| >MALT1-E79. ETTDEIPFSF        | 26    | >MALT1-E79. KTTDEIPFSF        | 6     | 20    |
| >MALT1-E79. ETTDEIPF          | 289   | >MALT1-E79. KTTDEIPF          | 3006  | 2717  |
| >MALT1-E79. ETTDEIPFSF        | 8493  | >MALT1-E79. KTTDEIPFSF        | 169   | 8324  |
| >MALT1-E79. ETTDEIPF          | 10987 | >MALT1-E79. KTTDEIPF          | 60    | 10927 |
| >MALT1-E79. ETTDEIPFSF        | 1656  | >MALT1-E79. KTTDEIPFSF        | 18    | 1638  |
| >MALT1-E79. ETTDEIPFS         | 2525  | >MALT1-E79. KTTDEIPFS         | 387   | 2138  |

|                        |       |                        |       |       |
|------------------------|-------|------------------------|-------|-------|
| >MALT1-E79.ETTDEIPFSF  | 291   | >MALT1-E79.KTTDEIPFSF  | 40    | 251   |
| >MALT1-E79.ETTDEIPFSFS | 1628  | >MALT1-E79.KTTDEIPFSFS | 242   | 1386  |
| >MALT1-E79.ETTDEIPFSF  | 46    | >MALT1-E79.KTTDEIPFSF  | 18    | 28    |
| >MALT1-E79.VETTDEIPF   | 321   | >MALT1-E79.VKTTDEIPF   | 7     | 314   |
| >MALT1-E79.VETTDEIPFSF | 344   | >MALT1-E79.VKTTDEIPFSF | 9     | 335   |
| >MALT1-E79.VETTDEIPF   | 258   | >MALT1-E79.VKTTDEIPF   | 18822 | 18564 |
| >MALT1-E79.VETTDEIPFSF | 131   | >MALT1-E79.VKTTDEIPFSF | 16272 | 16141 |
| >MALT1-E79.VETTDEIPF   | 98    | >MALT1-E79.VKTTDEIPF   | 18464 | 18366 |
| >MALT1-E79.VETTDEIPFSF | 162   | >MALT1-E79.VKTTDEIPFSF | 20044 | 19882 |
| >MALT1-E79.VETTDEIPFSF | 303   | >MALT1-E79.VKTTDEIPFSF | 22074 | 21771 |
| >MALT1-E79.VETTDEIPFSF | 268   | >MALT1-E79.VKTTDEIPFSF | 26091 | 25823 |
| >MALT1-E79.VPVETTDEI   | 604   | >MALT1-E79.VPVKTTDEI   | 180   | 424   |
| >MALT1-E79.VPVETTDEIPF | 1095  | >MALT1-E79.VPVKTTDEIPF | 314   | 781   |
| >MALT1-E79.VPVETTDEI   | 399   | >MALT1-E79.VPVKTTDEI   | 199   | 200   |
| >MALT1-E79.VPVETTDEIPF | 178   | >MALT1-E79.VPVKTTDEIPF | 105   | 73    |
| >MALT1-E79.VPVETTDEIPF | 353   | >MALT1-E79.VPVKTTDEIPF | 229   | 124   |
| >MALT1-E79.VPVETTDEI   | 160   | >MALT1-E79.VPVKTTDEI   | 533   | 373   |
| >MALT1-E79.VPVETTDEIPF | 7     | >MALT1-E79.VPVKTTDEIPF | 10    | 3     |
| >MALT1-E79.VPVETTDEI   | 79    | >MALT1-E79.VPVKTTDEI   | 161   | 82    |
| >MALT1-E79.VPVETTDEI   | 194   | >MALT1-E79.VPVKTTDEI   | 245   | 51    |
| >MALT1-E79.VPVETTDEIPF | 95    | >MALT1-E79.VPVKTTDEIPF | 118   | 23    |
| >MALT1-E79.VPVETTDEIPF | 70    | >MALT1-E79.VPVKTTDEIPF | 79    | 9     |
| >MALT1-E79.VPVETTDEIPF | 42    | >MALT1-E79.VPVKTTDEIPF | 65    | 23    |
| >MALT1-E79.NVPVETTDEI  | 439   | >MALT1-E79.NVPVKTTDEI  | 532   | 93    |
| >MALT1-E79.SNVPVETTDE  | 668   | >MALT1-E79.SNVPVKTTDE  | 497   | 171   |
| >MALT1-E79.RSNVPVETT   | 724   | >MALT1-E79.RSNVPVKTT   | 188   | 536   |
| >MALT1-E79.SRSNVPVE    | 12962 | >MALT1-E79.SRSNVPVK    | 413   | 12549 |
| >MALT1-E79.FSRSNVPVE   | 5887  | >MALT1-E79.FSRSNVPVK   | 12    | 5875  |
| >MALT1-E79.FSRSNVPVE   | 4262  | >MALT1-E79.FSRSNVPVK   | 441   | 3821  |
| >MALT1-E79.HFSRSNVPVE  | 8966  | >MALT1-E79.HFSRSNVPVK  | 18    | 8948  |
| >MAML2-M5MYKAGPSA      | 10    | >MAML2-M5VYKAGPSA      | 105   | 95    |
| >MAML2-M5MYKAGPSAQ     | 185   | >MAML2-M5VYKAGPSAQ     | 2395  | 2210  |
| >MAML2-M5MYKAGPSAQ     | 146   | >MAML2-M5VYKAGPSAQ     | 2581  | 2435  |
| >MAML2-M5MYKAGPSAQ     | 380   | >MAML2-M5VYKAGPSAQ     | 4597  | 4217  |
| >MAML2-M5YMYKAGPSA     | 19    | >MAML2-M5YVYKAGPSA     | 323   | 304   |
| >MAML2-M5YMYKAGPSA     | 63    | >MAML2-M5YVYKAGPSA     | 1603  | 1540  |
| >MAML2-M5YMYKAGPS      | 74    | >MAML2-M5YVYKAGPS      | 1694  | 1620  |
| >MAML2-M5YMYKAGPSA     | 9     | >MAML2-M5YVYKAGPSA     | 58    | 49    |
| >MAML2-M5YMYKAGPSA     | 316   | >MAML2-M5YVYKAGPSAC    | 3301  | 2985  |
| >MAML2-M5YMYKAGPS      | 445   | >MAML2-M5YVYKAGPS      | 1086  | 641   |
| >MAML2-M5YMYKAGPSA     | 17    | >MAML2-M5YVYKAGPSA     | 15    | 2     |
| >MAML2-M5YMYKAGPS      | 36    | >MAML2-M5YVYKAGPS      | 5083  | 5047  |
| >MAML2-M5YMYKAGPSA     | 3     | >MAML2-M5YVYKAGPSA     | 76    | 73    |

|                     |      |                      |       |       |
|---------------------|------|----------------------|-------|-------|
| >MAML2-M5 YMYKAGPSA | 21   | >MAML2-M5 YVYKAGPSAC | 1964  | 1943  |
| >MAML2-M5 YMYKAGPSA | 27   | >MAML2-M5 YVYKAGPSAC | 2581  | 2554  |
| >MAML2-M5 YMYKAGPSA | 10   | >MAML2-M5 YVYKAGPSA  | 1640  | 1630  |
| >MAML2-M5 YMYKAGPSA | 390  | >MAML2-M5 YVYKAGPSAC | 14339 | 13949 |
| >MAML2-M5 YMYKAGPS  | 306  | >MAML2-M5 YVYKAGPS   | 10754 | 10448 |
| >MAML2-M5 YMYKAGPSA | 5    | >MAML2-M5 YVYKAGPSA  | 36    | 31    |
| >MAML2-M5 YMYKAGPSA | 72   | >MAML2-M5 YVYKAGPSAC | 5567  | 5495  |
| >MAML2-M5 YMYKAGPSA | 252  | >MAML2-M5 YVYKAGPSAC | 10545 | 10293 |
| >MAML2-M5 YMYKAGPSA | 45   | >MAML2-M5 YVYKAGPSA  | 4144  | 4099  |
| >MAML2-M5 YMYKAGPS  | 486  | >MAML2-M5 YVYKAGPS   | 16413 | 15927 |
| >MAML2-M5 YMYKAGPSA | 5    | >MAML2-M5 YVYKAGPSA  | 47    | 42    |
| >MAML2-M5 YMYKAGPSA | 19   | >MAML2-M5 YVYKAGPSAC | 2003  | 1984  |
| >MAML2-M5 YMYKAGPSA | 155  | >MAML2-M5 YVYKAGPSAC | 11524 | 11369 |
| >MAML2-M5 YMYKAGPSA | 308  | >MAML2-M5 YVYKAGPSA  | 66    | 242   |
| >MAML2-M5 YMYKAGPS  | 468  | >MAML2-M5 YVYKAGPS   | 4580  | 4112  |
| >MAML2-M5 YMYKAGPSA | 55   | >MAML2-M5 YVYKAGPSA  | 284   | 229   |
| >MAML2-M5 YMYKAGPSA | 112  | >MAML2-M5 YVYKAGPSAC | 938   | 826   |
| >MAML2-M5 YMYKAGPSA | 131  | >MAML2-M5 YVYKAGPSAC | 927   | 796   |
| >MAML2-M5 YMYKAGPSA | 141  | >MAML2-M5 YVYKAGPSAC | 1143  | 1002  |
| >MAML2-M5 YMYKAGPSA | 19   | >MAML2-M5 YVYKAGPSA  | 1094  | 1075  |
| >MAML2-M5 YMYKAGPSA | 45   | >MAML2-M5 YVYKAGPSAC | 1601  | 1556  |
| >MAML2-M5 SGQSKVMAN | 359  | >MAML2-M5 SGQSKVMAN  | 5217  | 4858  |
| >MAML2-M5 NYMYKAGPS | 298  | >MAML2-M5 NYVYKAGPSA | 920   | 622   |
| >MAML2-M5 ANYMYKAGP | 222  | >MAML2-M5 ANYVYKAGP  | 357   | 135   |
| >MAML2-M5 MANYMYKA  | 52   | >MAML2-M5 MANYVYKA   | 27    | 25    |
| >MAML2-M5 MANYMYKA  | 1035 | >MAML2-M5 MANYVYKAG  | 386   | 649   |
| >MAML2-M5 MANYMYKA  | 47   | >MAML2-M5 MANYVYKA   | 88    | 41    |
| >MAML2-M5 MANYMYKA  | 288  | >MAML2-M5 MANYVYKAG  | 557   | 269   |
| >MAML2-M5 VMANYMYKA | 13   | >MAML2-M5 VMANYVYKA  | 13    | 0     |
| >MAML2-M5 VMANYMYKA | 6    | >MAML2-M5 VMANYVYKA  | 6     | 0     |
| >MAML2-M5 VMANYMYKA | 7    | >MAML2-M5 VMANYVYKA  | 5     | 2     |
| >MAML2-M5 VMANYMYKA | 63   | >MAML2-M5 VMANYVYKA  | 119   | 56    |
| >MAML2-M5 VMANYMYK  | 405  | >MAML2-M5 VMANYVYK   | 195   | 210   |
| >MAML2-M5 VMANYMYKA | 8    | >MAML2-M5 VMANYVYKA  | 4     | 4     |
| >MAML2-M5 VMANYMYKA | 20   | >MAML2-M5 VMANYVYKA  | 14    | 6     |
| >MAML2-M5 VMANYMYKA | 27   | >MAML2-M5 VMANYVYKA  | 15    | 12    |
| >MAML2-M5 VMANYMYKA | 48   | >MAML2-M5 VMANYVYKA  | 6     | 42    |
| >MAML2-M5 VMANYMYK  | 505  | >MAML2-M5 VMANYVYK   | 401   | 104   |
| >MAML2-M5 VMANYMYKA | 15   | >MAML2-M5 VMANYVYKA  | 10    | 5     |
| >MAML2-M5 VMANYMYK  | 29   | >MAML2-M5 VMANYVYK   | 33    | 4     |
| >MAML2-M5 VMANYMYK  | 6    | >MAML2-M5 VMANYVYK   | 8     | 2     |
| >MAML2-M5 VMANYMYK  | 39   | >MAML2-M5 VMANYVYK   | 41    | 2     |
| >MAML2-M5 VMANYMYK  | 101  | >MAML2-M5 VMANYVYK   | 103   | 2     |

|                     |      |                     |      |      |
|---------------------|------|---------------------|------|------|
| >MAML2-M5 VMANYMYK  | 541  | >MAML2-M5 VMANYVYK  | 415  | 126  |
| >MAML2-M5 KVMANYMYI | 400  | >MAML2-M5 KVMANYVYK | 362  | 38   |
| >MAML2-M5 KVMANYMYI | 89   | >MAML2-M5 KVMANYVYK | 98   | 9    |
| >MAML2-M5 KVMANYMYI | 171  | >MAML2-M5 KVMANYVYK | 173  | 2    |
| >MAML2-M5 KVMANYMYI | 113  | >MAML2-M5 KVMANYVYK | 122  | 9    |
| >MAML2-M5 KVMANYMYI | 522  | >MAML2-M5 KVMANYVYK | 215  | 307  |
| >MAML2-M5 KVMANYMYI | 446  | >MAML2-M5 KVMANYVYK | 297  | 149  |
| >MAML2-M5 KVMANYMYI | 1293 | >MAML2-M5 KVMANYVYK | 346  | 947  |
| >MAML2-M5 KVMANYMY  | 125  | >MAML2-M5 KVMANYVY  | 203  | 78   |
| >MAML2-M5 KVMANYMYI | 25   | >MAML2-M5 KVMANYVYK | 28   | 3    |
| >MAML2-M5 KVMANYMY  | 20   | >MAML2-M5 KVMANYVY  | 34   | 14   |
| >MAML2-M5 KVMANYMYI | 6    | >MAML2-M5 KVMANYVYK | 7    | 1    |
| >MAML2-M5 KVMANYMY  | 302  | >MAML2-M5 KVMANYVY  | 214  | 88   |
| >MAML2-M5 KVMANYMY  | 27   | >MAML2-M5 KVMANYVY  | 83   | 56   |
| >MAML2-M5 KVMANYMY  | 186  | >MAML2-M5 KVMANYVY  | 211  | 25   |
| >MAML2-M5 KVMANYMYI | 3    | >MAML2-M5 KVMANYVYK | 4    | 1    |
| >MAML2-M5 KVMANYMYI | 48   | >MAML2-M5 KVMANYVYK | 63   | 15   |
| >MAML2-M5 KVMANYMYI | 197  | >MAML2-M5 KVMANYVYK | 330  | 133  |
| >MAML2-M5 KVMANYMY  | 23   | >MAML2-M5 KVMANYVY  | 23   | 0    |
| >MAML2-M5 KVMANYMYI | 12   | >MAML2-M5 KVMANYVYK | 9    | 3    |
| >MAML2-M5 KVMANYMY  | 72   | >MAML2-M5 KVMANYVY  | 38   | 34   |
| >MAML2-M5 KVMANYMYI | 865  | >MAML2-M5 KVMANYVYK | 344  | 521  |
| >MAML2-M5 KVMANYMYI | 59   | >MAML2-M5 KVMANYVYK | 58   | 1    |
| >MAML2-M5 KVMANYMY  | 20   | >MAML2-M5 KVMANYVY  | 40   | 20   |
| >MAML2-M5 KVMANYMY  | 132  | >MAML2-M5 KVMANYVY  | 80   | 52   |
| >MAML2-M5 KVMANYMY  | 137  | >MAML2-M5 KVMANYVY  | 98   | 39   |
| >MAML2-M5 KVMANYMY  | 58   | >MAML2-M5 KVMANYVY  | 62   | 4    |
| >MAML2-M5 KVMANYMY  | 977  | >MAML2-M5 KVMANYVY  | 369  | 608  |
| >MAML2-M5 KVMANYMY  | 64   | >MAML2-M5 KVMANYVY  | 35   | 29   |
| >MAML2-M5 KVMANYMY  | 652  | >MAML2-M5 KVMANYVY  | 278  | 374  |
| >MAML2-M5 KVMANYMY  | 273  | >MAML2-M5 KVMANYVY  | 408  | 135  |
| >MAML2-M5 KVMANYMYI | 277  | >MAML2-M5 KVMANYVYK | 360  | 83   |
| >MAML2-M5 KVMANYMYI | 27   | >MAML2-M5 KVMANYVYK | 23   | 4    |
| >MAML2-M5 SKVMANYM\ | 401  | >MAML2-M5 SKVMANYVY | 862  | 461  |
| >MAML2-M5 SKVMANYM\ | 70   | >MAML2-M5 SKVMANYVY | 207  | 137  |
| >MAML2-M5 SKVMANYM\ | 437  | >MAML2-M5 SKVMANYVY | 1716 | 1279 |
| >MAML2-M5 SKVMANYM\ | 164  | >MAML2-M5 SKVMANYVY | 147  | 17   |
| >MAML2-M5 SKVMANYM  | 56   | >MAML2-M5 SKVMANYV  | 256  | 200  |
| >MAML2-M5 SKVMANYM\ | 14   | >MAML2-M5 SKVMANYVY | 10   | 4    |
| >MAML2-M5 SKVMANYM\ | 381  | >MAML2-M5 SKVMANYVY | 384  | 3    |
| >MAML2-M5 SKVMANYM\ | 1489 | >MAML2-M5 SKVMANYVY | 426  | 1063 |
| >MAML2-M5 QSKVMANYN | 328  | >MAML2-M5 QSKVMANYV | 734  | 406  |
| >MAML2-M5 QSKVMANYN | 38   | >MAML2-M5 QSKVMANYV | 61   | 23   |

|                       |       |                      |       |       |
|-----------------------|-------|----------------------|-------|-------|
| >MAML2-M5 QSKVMANYN   | 166   | >MAML2-M5 QSKVMANYV  | 213   | 47    |
| >MAML2-M5 QSKVMANYN   | 214   | >MAML2-M5 QSKVMANYV  | 124   | 90    |
| >MAML2-M5 QSKVMANYN   | 5     | >MAML2-M5 QSKVMANYV  | 5     | 0     |
| >MAML2-M5 QSKVMANYN   | 26    | >MAML2-M5 QSKVMANYV  | 48    | 22    |
| >MAML2-M5 QSKVMANYN   | 90    | >MAML2-M5 QSKVMANYV  | 63    | 27    |
| >MAML2-M5 QSKVMANYN   | 100   | >MAML2-M5 QSKVMANYV  | 97    | 3     |
| >MAML2-M5 QSKVMANYN   | 497   | >MAML2-M5 QSKVMANYV  | 183   | 314   |
| >MAML2-M5 QSKVMANYN   | 459   | >MAML2-M5 QSKVMANYV  | 281   | 178   |
| >MAML2-M5 QSKVMANYN   | 108   | >MAML2-M5 QSKVMANYV  | 6796  | 6688  |
| >MAML2-M5 QSKVMANYN   | 20    | >MAML2-M5 QSKVMANYV  | 19    | 1     |
| >MAML2-M5 QSKVMANYN   | 31    | >MAML2-M5 QSKVMANYV  | 862   | 831   |
| >MAML2-M5 QSKVMANYN   | 52    | >MAML2-M5 QSKVMANYV  | 85    | 33    |
| >MAML2-M5 QSKVMANYN   | 414   | >MAML2-M5 QSKVMANYV  | 470   | 56    |
| >MAML2-M5 GQSKVMANY   | 858   | >MAML2-M5 GQSKVMANY  | 184   | 674   |
| >MAML2-M5 GQSKVMANY   | 5970  | >MAML2-M5 GQSKVMANY  | 326   | 5644  |
| >MAML2-M5 GQSKVMANY   | 10522 | >MAML2-M5 GQSKVMANY  | 330   | 10192 |
| >MAML2-M5 GQSKVMANY   | 8333  | >MAML2-M5 GQSKVMANY  | 211   | 8122  |
| >MAML2-M5 GQSKVMANY   | 11983 | >MAML2-M5 GQSKVMANY  | 160   | 11823 |
| >MAML2-M5 GQSKVMANY   | 348   | >MAML2-M5 GQSKVMANY  | 1081  | 733   |
| >MAML2-M5 GQSKVMANY   | 32    | >MAML2-M5 GQSKVMANY  | 31    | 1     |
| >MAML2-M5 GQSKVMANY   | 321   | >MAML2-M5 GQSKVMANY  | 4263  | 3942  |
| >MAML2-M5 GQSKVMANY   | 76    | >MAML2-M5 GQSKVMANY  | 54    | 22    |
| >MAML2-M5 GQSKVMANY   | 432   | >MAML2-M5 GQSKVMANY  | 1652  | 1220  |
| >MAML2-M5 GQSKVMANY   | 73    | >MAML2-M5 GQSKVMANY  | 49    | 24    |
| >MAML2-M8 MPSSLSTAVQI | 78    | >MAML2-M8 VPSLSTAVQN | 96    | 18    |
| >MAML2-M8 MPSSLSTAV   | 453   | >MAML2-M8 VPSLSTAV   | 11888 | 11435 |
| >MAML2-M8 MPSSLSTAV   | 22    | >MAML2-M8 VPSLSTAV   | 41    | 19    |
| >MAML2-M8 MPSSLSTAVQ  | 438   | >MAML2-M8 VPSLSTAVQ  | 1697  | 1259  |
| >MAML2-M8 MPSSLSTAVQI | 40    | >MAML2-M8 VPSLSTAVQN | 94    | 54    |
| >MAML2-M8 MPSSLSTAV   | 29    | >MAML2-M8 VPSLSTAV   | 350   | 321   |
| >MAML2-M8 MPSSLSTAVQ  | 41    | >MAML2-M8 VPSLSTAVQ  | 684   | 643   |
| >MAML2-M8 MPSSLSTAVQI | 13    | >MAML2-M8 VPSLSTAVQN | 72    | 59    |
| >MAML2-M8 MPSSLSTAV   | 230   | >MAML2-M8 VPSLSTAV   | 600   | 370   |
| >MAML2-M8 MPSSLSTAVQI | 419   | >MAML2-M8 VPSLSTAVQN | 1271  | 852   |
| >MAML2-M8 MPSSLSTAV   | 235   | >MAML2-M8 VPSLSTAV   | 2621  | 2386  |
| >MAML2-M8 MPSSLSTAVQI | 72    | >MAML2-M8 VPSLSTAVQN | 1059  | 987   |
| >MAML2-M8 MPSSLSTAV   | 16    | >MAML2-M8 VPSLSTAV   | 689   | 673   |
| >MAML2-M8 RMPSLSTAV   | 41    | >MAML2-M8 RVPSLSTAV  | 1357  | 1316  |
| >MAML2-M8 RMPSLSTA    | 318   | >MAML2-M8 RVPSLSTA   | 5536  | 5218  |
| >MAML2-M8 RMPSLSTAV   | 9     | >MAML2-M8 RVPSLSTAV  | 209   | 200   |
| >MAML2-M8 RMPSLSTA    | 10    | >MAML2-M8 RVPSLSTA   | 223   | 213   |
| >MAML2-M8 RMPSLSTAV   | 3     | >MAML2-M8 RVPSLSTAV  | 25    | 22    |
| >MAML2-M8 RMPSLSTA    | 203   | >MAML2-M8 RVPSLSTA   | 343   | 140   |

|                      |      |                      |       |       |
|----------------------|------|----------------------|-------|-------|
| >MAML2-M8RMPSLSTAV   | 17   | >MAML2-M8RVPSLSTAV   | 29    | 12    |
| >MAML2-M8RMPSLSTA    | 32   | >MAML2-M8RVPSLSTA    | 4156  | 4124  |
| >MAML2-M8RMPSLSTAV   | 3    | >MAML2-M8RVPSLSTAV   | 190   | 187   |
| >MAML2-M8RMPSLSTA    | 235  | >MAML2-M8RVPSLSTA    | 11224 | 10989 |
| >MAML2-M8RMPSLSTAV   | 13   | >MAML2-M8RVPSLSTAV   | 2941  | 2928  |
| >MAML2-M8RMPSLSTA    | 123  | >MAML2-M8RVPSLSTA    | 9869  | 9746  |
| >MAML2-M8RMPSLSTAV   | 10   | >MAML2-M8RVPSLSTAV   | 761   | 751   |
| >MAML2-M8RMPSLSTAV   | 49   | >MAML2-M8RVPSLSTAV   | 6696  | 6647  |
| >MAML2-M8RMPSLSTA    | 46   | >MAML2-M8RVPSLSTA    | 5292  | 5246  |
| >MAML2-M8RMPSLSTAV   | 4    | >MAML2-M8RVPSLSTAV   | 192   | 188   |
| >MAML2-M8RMPSLSTAV   | 73   | >MAML2-M8RVPSLSTAV   | 103   | 30    |
| >MAML2-M8RMPSLSTAV   | 3436 | >MAML2-M8RVPSLSTAV   | 154   | 3282  |
| >MAML2-M8RMPSLSTAV   | 270  | >MAML2-M8RVPSLSTAV   | 3446  | 3176  |
| >MAML2-M8RMPSLSTAV   | 93   | >MAML2-M8RVPSLSTAV   | 3298  | 3205  |
| >MAML2-M8RMPSLSTAV   | 499  | >MAML2-M8RVPSLSTAV   | 296   | 203   |
| >MAML2-M8SLLSTSHGTR\ | 318  | >MAML2-M8SLLSTSHGTR\ | 20    | 298   |
| >MAML2-M8SLLSTSHGTR\ | 581  | >MAML2-M8SLLSTSHGTR\ | 28    | 553   |
| >MAML2-M8SLLSTSHGTR\ | 728  | >MAML2-M8SLLSTSHGTR\ | 12    | 716   |
| >MAML2-M8SLLSTSHGTR\ | 1937 | >MAML2-M8SLLSTSHGTR\ | 59    | 1878  |
| >MAML2-M8SLLSTSHGTR\ | 19   | >MAML2-M8SLLSTSHGTR\ | 2     | 17    |
| >MAML2-M8SLLSTSHGTR\ | 170  | >MAML2-M8SLLSTSHGTR\ | 7     | 163   |
| >MAML2-M8SLLSTSHGTR\ | 47   | >MAML2-M8SLLSTSHGTR\ | 4     | 43    |
| >MAML2-M8SLLSTSHGTR\ | 327  | >MAML2-M8SLLSTSHGTR\ | 8     | 319   |
| >MAML2-M8SLLSTSHGTR\ | 22   | >MAML2-M8SLLSTSHGTR\ | 2     | 20    |
| >MAML2-M8SLLSTSHGTR\ | 770  | >MAML2-M8SLLSTSHGTR\ | 65    | 705   |
| >MAML2-M8SLLSTSHGTR\ | 244  | >MAML2-M8SLLSTSHGTR\ | 1771  | 1527  |
| >MAML2-M8SLLSTSHGTR\ | 353  | >MAML2-M8SLLSTSHGTR\ | 1372  | 1019  |
| >MAML2-M8SLLSTSHGTR\ | 121  | >MAML2-M8SLLSTSHGTR\ | 2100  | 1979  |
| >MAML2-M8TRMPSLSTAV  | 495  | >MAML2-M8TRVPSLSTAV  | 1737  | 1242  |
| >MAML2-M8TRMPSLSTAV  | 127  | >MAML2-M8TRVPSLSTAV  | 299   | 172   |
| >MAML2-M8TRMPSLSTAV  | 46   | >MAML2-M8TRVPSLSTAV  | 154   | 108   |
| >MAML2-M8GTRMP SLS   | 236  | >MAML2-M8GTRVPSLS    | 285   | 49    |
| >MAML2-M8GTRMP SLST  | 104  | >MAML2-M8GTRVPSLST   | 119   | 15    |
| >MAML2-M8GTRMP SLSTA | 13   | >MAML2-M8GTRVPSLSTA  | 15    | 2     |
| >MAML2-M8GTRMP SLSTA | 42   | >MAML2-M8GTRVPSLSTA' | 48    | 6     |
| >MAML2-M8GTRMP SLST  | 439  | >MAML2-M8GTRVPSLST   | 673   | 234   |
| >MAML2-M8GTRMP SLSTA | 227  | >MAML2-M8GTRVPSLSTA  | 316   | 89    |
| >MAML2-M8GTRMP SLSTA | 129  | >MAML2-M8GTRVPSLSTA' | 184   | 55    |
| >MAML2-M8GTRMP SLST  | 204  | >MAML2-M8GTRVPSLST   | 300   | 96    |
| >MAML2-M8GTRMP SLSTA | 21   | >MAML2-M8GTRVPSLSTA' | 27    | 6     |
| >MAML2-M8SHGTRMP SL  | 512  | >MAML2-M8SHGTRVPSL   | 376   | 136   |
| >MAML2-M8TSHGTRMP S  | 90   | >MAML2-M8TSHGTRVPS   | 356   | 266   |
| >MAML2-M8TSHGTRMP SI | 69   | >MAML2-M8TSHGTRVPSL  | 108   | 39    |



|                      |       |                      |      |       |
|----------------------|-------|----------------------|------|-------|
| >MAML2-M8TSHGTRMP5I  | 35    | >MAML2-M8TSHGTRVPSL  | 44   | 9     |
| >MAML2-M8TSHGTRMP5I  | 371   | >MAML2-M8TSHGTRVPSL  | 292  | 79    |
| >MAML2-M8STSHGTRM    | 6680  | >MAML2-M8STSHGTRV    | 90   | 6590  |
| >MAML2-M8STSHGTRM    | 20915 | >MAML2-M8STSHGTRV    | 244  | 20671 |
| >MAML2-M8STSHGTRMP5I | 498   | >MAML2-M8STSHGTRVPS  | 1088 | 590   |
| >MAML2-M8STSHGTRMP5I | 815   | >MAML2-M8STSHGTRVPS  | 437  | 378   |
| >MAML2-M8STSHGTRM    | 2506  | >MAML2-M8STSHGTRV    | 31   | 2475  |
| >MAML2-M8STSHGTRM    | 3484  | >MAML2-M8STSHGTRV    | 388  | 3096  |
| >MAML2-M8STSHGTRMP5I | 492   | >MAML2-M8STSHGTRVPS  | 883  | 391   |
| >MAML2-M8STSHGTRM    | 11    | >MAML2-M8STSHGTRV    | 535  | 524   |
| >MAML2-M8STSHGTRMP5I | 11    | >MAML2-M8STSHGTRVPS  | 14   | 3     |
| >MAML2-M8STSHGTRM    | 160   | >MAML2-M8STSHGTRV    | 2722 | 2562  |
| >MAML2-M8STSHGTRMP5I | 95    | >MAML2-M8STSHGTRVPS  | 183  | 88    |
| >MAML2-M8STSHGTRM    | 466   | >MAML2-M8STSHGTRV    | 1401 | 935   |
| >MAML2-M8STSHGTRMP5I | 107   | >MAML2-M8STSHGTRVPS  | 117  | 10    |
| >MAML2-M8LSTSHGTRM   | 464   | >MAML2-M8LSTSHGTRV   | 1506 | 1042  |
| >MAML2-M8LSTSHGTRM   | 14    | >MAML2-M8LSTSHGTRV   | 972  | 958   |
| >MAML2-M8LSTSHGTRM   | 135   | >MAML2-M8LSTSHGTRV   | 466  | 331   |
| >MAML2-M8LSTSHGTRM   | 11    | >MAML2-M8LSTSHGTRV   | 172  | 161   |
| >MAML2-M8LLSTSHGTRM  | 140   | >MAML2-M8LLSTSHGTRV  | 32   | 108   |
| >MAML2-M8LLSTSHGTRM  | 1295  | >MAML2-M8LLSTSHGTRV  | 64   | 1231  |
| >MAML2-M8LLSTSHGTRM  | 1143  | >MAML2-M8LLSTSHGTRV  | 11   | 1132  |
| >MAML2-M8LLSTSHGTRM  | 6994  | >MAML2-M8LLSTSHGTRV  | 103  | 6891  |
| >MAML2-M8LLSTSHGTRM  | 7028  | >MAML2-M8LLSTSHGTRV  | 44   | 6984  |
| >MAML2-M8LLSTSHGTRM  | 8009  | >MAML2-M8LLSTSHGTRV  | 84   | 7925  |
| >MAML2-M8LLSTSHGTRM  | 67    | >MAML2-M8LLSTSHGTRV  | 2    | 65    |
| >MAML2-M8LLSTSHGTRM  | 175   | >MAML2-M8LLSTSHGTRV  | 2777 | 2602  |
| >MAML2-M8LLSTSHGTRM  | 461   | >MAML2-M8LLSTSHGTRV  | 1535 | 1074  |
| >MAML2-M8LLSTSHGTRM  | 100   | >MAML2-M8LLSTSHGTRV  | 3667 | 3567  |
| >MAP2K4-A2ASRQGYDV   | 241   | >MAP2K4-A2TSRQGYDV   | 1541 | 1300  |
| >MAP2K4-A2SASRQGYDVI | 2333  | >MAP2K4-A2STSRQGYDVI | 350  | 1983  |
| >MAP2K4-A2SASRQGYDVI | 1618  | >MAP2K4-A2STSRQGYDVI | 329  | 1289  |
| >MAP2K4-A2SASRQGYDV  | 2240  | >MAP2K4-A2STSRQGYDV  | 348  | 1892  |
| >MAP2K4-A2SASRQGYDVI | 2063  | >MAP2K4-A2STSRQGYDVI | 317  | 1746  |
| >MAP2K4-A2YMAPERIDPS | 35    | >MAP2K4-A2YMAPERIDPS | 179  | 144   |
| >MAP2K4-A2YMAPERIDPS | 28    | >MAP2K4-A2YMAPERIDPS | 159  | 131   |
| >MAP2K4-A2YMAPERIDPS | 18    | >MAP2K4-A2YMAPERIDPS | 158  | 140   |
| >MAP2K4-A2YMAPERIDPS | 25    | >MAP2K4-A2YMAPERIDPS | 136  | 111   |
| >MAP2K4-A2YMAPERIDPS | 27    | >MAP2K4-A2YMAPERIDPS | 137  | 110   |
| >MAP2K4-A2YMAPERIDPS | 76    | >MAP2K4-A2YMAPERIDPS | 726  | 650   |
| >MAP2K4-A2YMAPERIDPS | 14    | >MAP2K4-A2YMAPERIDPS | 75   | 61    |
| >MAP2K4-A2YMAPERIDPS | 53    | >MAP2K4-A2YMAPERIDPS | 281  | 228   |
| >MAP2K4-A2YMAPERIDPS | 3     | >MAP2K4-A2YMAPERIDPS | 8    | 5     |

|                       |      |                       |       |       |
|-----------------------|------|-----------------------|-------|-------|
| >MAP2K4-A2 PSASRQGY   | 181  | >MAP2K4-A2 PSTSRQGY   | 345   | 164   |
| >MAP2K4-A2 DPSASRQGY  | 120  | >MAP2K4-A2 DPSTSRQGY  | 155   | 35    |
| >MAP2K4-A2 RIDPSASRQG | 427  | >MAP2K4-A2 RIDPSTSRQG | 354   | 73    |
| >MAP2K4-A2 RIDPSASR   | 208  | >MAP2K4-A2 RIDPSTSR   | 170   | 38    |
| >MAP2K4-A2 RIDPSASRQG | 716  | >MAP2K4-A2 RIDPSTSRQG | 432   | 284   |
| >MAP2K4-A2 RIDPSASRQG | 15   | >MAP2K4-A2 RIDPSTSRQG | 21    | 6     |
| >MAP2K4-A2 RIDPSASRQG | 242  | >MAP2K4-A2 RIDPSTSRQG | 343   | 101   |
| >MAP2K4-A2 RIDPSASR   | 381  | >MAP2K4-A2 RIDPSTSR   | 273   | 108   |
| >MAP2K4-A2 ERIDPSASR  | 329  | >MAP2K4-A2 ERIDPSTSR  | 423   | 94    |
| >MAP2K4-K3 KWNSVFDQL  | 448  | >MAP2K4-K3 NWNSVFDQL  | 1119  | 671   |
| >MAP2K4-K3 KWNSVFDQL  | 217  | >MAP2K4-K3 NWNSVFDQL  | 458   | 241   |
| >MAP2K4-K3 KWNSVFDQL  | 22   | >MAP2K4-K3 NWNSVFDQL  | 43    | 21    |
| >MAP2K4-K3 KWNSVFDQ   | 389  | >MAP2K4-K3 NWNSVFDQ   | 4544  | 4155  |
| >MAP2K4-K3 KWNSVFDQL  | 410  | >MAP2K4-K3 NWNSVFDQL  | 5229  | 4819  |
| >MAP2K4-K3 KWNSVFDQL  | 337  | >MAP2K4-K3 NWNSVFDQL  | 416   | 79    |
| >MAP2K4-K3 KWNSVFDQ   | 297  | >MAP2K4-K3 NWNSVFDQ   | 1066  | 769   |
| >MAP2K4-K3 KWNSVFDQL  | 71   | >MAP2K4-K3 NWNSVFDQL  | 307   | 236   |
| >MAP2K4-K3 KWNSVFDQL  | 274  | >MAP2K4-K3 NWNSVFDQL  | 985   | 711   |
| >MAP2K4-K3 PKWNSVFDQ  | 208  | >MAP2K4-K3 PNWNSVFDQ  | 5446  | 5238  |
| >MAP2K4-K3 ELATGRFPYP | 332  | >MAP2K4-K3 ELATGRFPYP | 21370 | 21038 |
| >MAP2K4-K3 ELATGRFPYP | 173  | >MAP2K4-K3 ELATGRFPYP | 24500 | 24327 |
| >MAP2K4-K3 ELATGRFPYP | 21   | >MAP2K4-K3 ELATGRFPYP | 6666  | 6645  |
| >MAP2K4-K3 YPKWNSVFD  | 136  | >MAP2K4-K3 YPNWNSVFD  | 82    | 54    |
| >MAP2K4-K3 YPKWNSVFD  | 3852 | >MAP2K4-K3 YPNWNSVFD  | 460   | 3392  |
| >MAP2K4-K3 YPKWNSVF   | 31   | >MAP2K4-K3 YPNWNSVF   | 23    | 8     |
| >MAP2K4-K3 YPKWNSVFD  | 51   | >MAP2K4-K3 YPNWNSVFD  | 39    | 12    |
| >MAP2K4-K3 YPKWNSVF   | 378  | >MAP2K4-K3 YPNWNSVF   | 6764  | 6386  |
| >MAP2K4-K3 YPKWNSVFD  | 249  | >MAP2K4-K3 YPNWNSVFD  | 4870  | 4621  |
| >MAP2K4-K3 YPKWNSVF   | 430  | >MAP2K4-K3 YPNWNSVF   | 853   | 423   |
| >MAP2K4-K3 YPKWNSVF   | 87   | >MAP2K4-K3 YPNWNSVF   | 124   | 37    |
| >MAP2K4-K3 YPKWNSVF   | 14   | >MAP2K4-K3 YPNWNSVF   | 7     | 7     |
| >MAP2K4-K3 YPKWNSVFD  | 3670 | >MAP2K4-K3 YPNWNSVFD  | 492   | 3178  |
| >MAP2K4-K3 YPKWNSVFD  | 227  | >MAP2K4-K3 YPNWNSVFD  | 42    | 185   |
| >MAP2K4-K3 YPKWNSVF   | 5617 | >MAP2K4-K3 YPNWNSVF   | 366   | 5251  |
| >MAP2K4-K3 YPKWNSVFD  | 2020 | >MAP2K4-K3 YPNWNSVFD  | 117   | 1903  |
| >MAP2K4-K3 YPKWNSVF   | 747  | >MAP2K4-K3 YPNWNSVF   | 54    | 693   |
| >MAP2K4-K3 YPKWNSVFD  | 1467 | >MAP2K4-K3 YPNWNSVFD  | 109   | 1358  |
| >MAP2K4-K3 YPKWNSVFD  | 2078 | >MAP2K4-K3 YPNWNSVFD  | 348   | 1730  |
| >MAP2K4-K3 YPKWNSVFD  | 1200 | >MAP2K4-K3 YPNWNSVFD  | 352   | 848   |
| >MAP2K4-K3 YPKWNSVF   | 604  | >MAP2K4-K3 YPNWNSVF   | 81    | 523   |
| >MAP2K4-K3 YPKWNSVF   | 270  | >MAP2K4-K3 YPNWNSVF   | 36    | 234   |
| >MAP2K4-K3 YPKWNSVFD  | 1212 | >MAP2K4-K3 YPNWNSVFD  | 188   | 1024  |
| >MAP2K4-K3 PYPKWNSVF  | 116  | >MAP2K4-K3 PYPNWNSVF  | 195   | 79    |

|                       |      |                       |       |       |
|-----------------------|------|-----------------------|-------|-------|
| >MAP2K4-K3 PYPKWNSVF  | 110  | >MAP2K4-K3 PYPNWNSVF  | 86    | 24    |
| >MAP2K4-K3 PYPKWNSVF  | 31   | >MAP2K4-K3 PYPNWNSVF  | 39    | 8     |
| >MAP2K4-K3 PYPKWNSVF  | 13   | >MAP2K4-K3 PYPNWNSVF  | 15    | 2     |
| >MAP2K4-K3 FPYPKWNSV  | 230  | >MAP2K4-K3 FPYPNWNSV  | 24    | 206   |
| >MAP2K4-K3 FPYPKWNSVI | 110  | >MAP2K4-K3 FPYPNWNSV  | 32    | 78    |
| >MAP2K4-K3 FPYPKWNSV  | 148  | >MAP2K4-K3 FPYPNWNSV  | 85    | 63    |
| >MAP2K4-K3 FPYPKWNSV  | 909  | >MAP2K4-K3 FPYPNWNSV  | 352   | 557   |
| >MAP2K4-K3 FPYPKWNSV  | 1065 | >MAP2K4-K3 FPYPNWNSV  | 416   | 649   |
| >MAP2K4-K3 FPYPKWNSV  | 784  | >MAP2K4-K3 FPYPNWNSV  | 166   | 618   |
| >MAP2K4-K3 FPYPKWNSV  | 21   | >MAP2K4-K3 FPYPNWNSV  | 31    | 10    |
| >MAP2K4-K3 FPYPKWNSVI | 270  | >MAP2K4-K3 FPYPNWNSV  | 619   | 349   |
| >MAP2K4-K3 FPYPKWNSV  | 111  | >MAP2K4-K3 FPYPNWNSV  | 2537  | 2426  |
| >MAP2K4-K3 FPYPKWNSVI | 72   | >MAP2K4-K3 FPYPNWNSV  | 37    | 35    |
| >MAP2K4-K3 FPYPKWNSVI | 19   | >MAP2K4-K3 FPYPNWNSV  | 11    | 8     |
| >MAP2K4-K3 FPYPKWNS   | 1078 | >MAP2K4-K3 FPYPNWNS   | 256   | 822   |
| >MAP2K4-K3 FPYPKWNSV  | 355  | >MAP2K4-K3 FPYPNWNSV  | 89    | 266   |
| >MAP2K4-K3 FPYPKWNSVI | 22   | >MAP2K4-K3 FPYPNWNSV  | 16    | 6     |
| >MAP2K4-K3 FPYPKWNSV  | 1097 | >MAP2K4-K3 FPYPNWNSV  | 179   | 918   |
| >MAP2K4-K3 FPYPKWNSVI | 397  | >MAP2K4-K3 FPYPNWNSV  | 123   | 274   |
| >MAP2K4-K3 FPYPKWNSV  | 25   | >MAP2K4-K3 FPYPNWNSV  | 24    | 1     |
| >MAP2K4-K3 FPYPKWNSV  | 560  | >MAP2K4-K3 FPYPNWNSV  | 296   | 264   |
| >MAP2K4-K3 FPYPKWNSVI | 173  | >MAP2K4-K3 FPYPNWNSV  | 98    | 75    |
| >MAP2K4-K3 FPYPKWNS   | 55   | >MAP2K4-K3 FPYPNWNS   | 40    | 15    |
| >MAP2K4-K3 FPYPKWNSV  | 6    | >MAP2K4-K3 FPYPNWNSV  | 5     | 1     |
| >MAP2K4-K3 FPYPKWNSVI | 365  | >MAP2K4-K3 FPYPNWNSV  | 663   | 298   |
| >MAP2K4-K3 FPYPKWNSVI | 48   | >MAP2K4-K3 FPYPNWNSV  | 26    | 22    |
| >MAP2K4-K3 FPYPKWNSVI | 18   | >MAP2K4-K3 FPYPNWNSV  | 34    | 16    |
| >MAP2K4-K3 FPYPKWNSV  | 612  | >MAP2K4-K3 FPYPNWNSV  | 434   | 178   |
| >MAP2K4-K3 FPYPKWNSVI | 7    | >MAP2K4-K3 FPYPNWNSV  | 6     | 1     |
| >MAP2K4-K3 RFPYPKWNS\ | 198  | >MAP2K4-K3 RFPYPNWNS\ | 144   | 54    |
| >MAP2K4-K3 RFPYPKWNS\ | 69   | >MAP2K4-K3 RFPYPNWNS\ | 55    | 14    |
| >MAP2K4-K3 RFPYPKWNS\ | 574  | >MAP2K4-K3 RFPYPNWNS\ | 284   | 290   |
| >MAP2K4-K3 RFPYPKWNS\ | 6    | >MAP2K4-K3 RFPYPNWNS\ | 6     | 0     |
| >MAP2K4-K3 RFPYPKWNS\ | 1119 | >MAP2K4-K3 RFPYPNWNS\ | 493   | 626   |
| >MAP2K4-K3 RFPYPKWNS\ | 72   | >MAP2K4-K3 RFPYPNWNS\ | 59    | 13    |
| >MAP2K4-K3 RFPYPKWNS\ | 39   | >MAP2K4-K3 RFPYPNWNS\ | 26    | 13    |
| >MAP2K4-K3 GRFPYPKWN  | 381  | >MAP2K4-K3 GRFPYPNWN  | 295   | 86    |
| >MAP2K4-K3 GRFPYPKWN  | 176  | >MAP2K4-K3 GRFPYPNWN  | 209   | 33    |
| >MAP2K4-K3 GRFPYPKWN  | 187  | >MAP2K4-K3 GRFPYPNWN  | 85    | 102   |
| >MAP2K4-K3 GRFPYPKWN  | 47   | >MAP2K4-K3 GRFPYPNWN  | 30    | 17    |
| >MAP2K4-K3 GRFPYPKW   | 48   | >MAP2K4-K3 GRFPYPNW   | 51    | 3     |
| >MAP2K4-K3 TGRFPYPK   | 15   | >MAP2K4-K3 TGRFPYPN   | 5258  | 5243  |
| >MAP2K4-K3 ATGRFPYPK  | 267  | >MAP2K4-K3 ATGRFPYPN  | 20587 | 20320 |

|                        |       |                        |       |       |
|------------------------|-------|------------------------|-------|-------|
| >MAP2K4-K3 ATGRFPYPK   | 11    | >MAP2K4-K3 ATGRFPYPN   | 6187  | 6176  |
| >MAP2K4-K3 ATGRFPYPK   | 18    | >MAP2K4-K3 ATGRFPYPN   | 5707  | 5689  |
| >MAP2K4-K3 ATGRFPYPK   | 51    | >MAP2K4-K3 ATGRFPYPN   | 9551  | 9500  |
| >MAP2K4-K3 ATGRFPYPK   | 491   | >MAP2K4-K3 ATGRFPYPN   | 786   | 295   |
| >MAP2K4-K3 ATGRFPYPKV  | 414   | >MAP2K4-K3 ATGRFPYPNV  | 396   | 18    |
| >MAP2K4-K3 ATGRFPYPKV  | 28    | >MAP2K4-K3 ATGRFPYPNV  | 27    | 1     |
| >MAP2K4-K3 ATGRFPYPKV  | 100   | >MAP2K4-K3 ATGRFPYPNV  | 172   | 72    |
| >MAP2K4-K3 ATGRFPYPKV  | 38    | >MAP2K4-K3 ATGRFPYPNV  | 46    | 8     |
| >MAP2K4-K3 ATGRFPYPK   | 60    | >MAP2K4-K3 ATGRFPYPN   | 482   | 422   |
| >MAP2K4-K3 LATGRFPYPK  | 323   | >MAP2K4-K3 LATGRFPYPN  | 26028 | 25705 |
| >MAP2K4-K3 LATGRFPYPK  | 42    | >MAP2K4-K3 LATGRFPYPN  | 31207 | 31165 |
| >MAP2K4-K3 LATGRFPYPK  | 222   | >MAP2K4-K3 LATGRFPYPN  | 14055 | 13833 |
| >MAP2K4-K3 LATGRFPYPK  | 207   | >MAP2K4-K3 LATGRFPYPN  | 9406  | 9199  |
| >MAP2K4-K3 LATGRFPYPK  | 71    | >MAP2K4-K3 LATGRFPYPN  | 28130 | 28059 |
| >MAP2K4-K3 LATGRFPYPK' | 61    | >MAP2K4-K3 LATGRFPYPN  | 56    | 5     |
| >MAP2K4-K3 LATGRFPYPK' | 69    | >MAP2K4-K3 LATGRFPYPN  | 42    | 27    |
| >MAP2K4-K3 LATGRFPYPK' | 72    | >MAP2K4-K3 LATGRFPYPN  | 134   | 62    |
| >MAP2K4-K3 LATGRFPYPK' | 17    | >MAP2K4-K3 LATGRFPYPN  | 20    | 3     |
| >MAP2K4-K3 LATGRFPYPK' | 49    | >MAP2K4-K3 LATGRFPYPN  | 41    | 8     |
| >MAP2K4-K3 LATGRFPYPK' | 47    | >MAP2K4-K3 LATGRFPYPN  | 68    | 21    |
| >MAP2K4-N2 NILLDRSGNI  | 780   | >MAP2K4-N2 IILLDRSGNI  | 414   | 366   |
| >MAP2K4-N2 NILLDRSGNIK | 1470  | >MAP2K4-N2 IILLDRSGNIK | 236   | 1234  |
| >MAP2K4-N2 KIIHRDIKPSN | 18188 | >MAP2K4-N2 KIIHRDIKPSI | 101   | 18087 |
| >MAP2K4-N2 KIIHRDIKPSN | 7245  | >MAP2K4-N2 KIIHRDIKPSI | 378   | 6867  |
| >MAP2K4-N2 KIIHRDIKPSN | 11225 | >MAP2K4-N2 KIIHRDIKPSI | 72    | 11153 |
| >MAP2K4-N2 KPSNILLDR   | 195   | >MAP2K4-N2 KPSIILLDR   | 212   | 17    |
| >MAP2K4-N2 IKPSNILL    | 163   | >MAP2K4-N2 IKPSIILL    | 244   | 81    |
| >MAP2K4-N2 DIKPSNILLDR | 54    | >MAP2K4-N2 DIKPSIILLDR | 45    | 9     |
| >MAP2K4-N2 DIKPSNILLDR | 144   | >MAP2K4-N2 DIKPSIILLDR | 147   | 3     |
| >MAP2K4-N2 RDIKPSNI    | 159   | >MAP2K4-N2 RDIKPSII    | 70    | 89    |
| >MAP2K4-N2 RDIKPSNIL   | 783   | >MAP2K4-N2 RDIKPSIIL   | 480   | 303   |
| >MAP2K4-N2 RDIKPSNI    | 273   | >MAP2K4-N2 RDIKPSII    | 157   | 116   |
| >MAP2K4-N2 HRDIKPSNIL  | 74    | >MAP2K4-N2 HRDIKPSIIL  | 41    | 33    |
| >MAP2K4-N2 HRDIKPSNIL  | 74    | >MAP2K4-N2 HRDIKPSIIL  | 43    | 31    |
| >MAP2K4-N2 HRDIKPSNILL | 117   | >MAP2K4-N2 HRDIKPSIILL | 95    | 22    |
| >MAP2K4-N2 HRDIKPSNIL  | 225   | >MAP2K4-N2 HRDIKPSIIL  | 92    | 133   |
| >MAP2K4-N2 HRDIKPSNIL  | 496   | >MAP2K4-N2 HRDIKPSIIL  | 171   | 325   |
| >MAP2K4-N2 HRDIKPSNILL | 84    | >MAP2K4-N2 HRDIKPSIILL | 47    | 37    |
| >MAP2K4-N2 IHRDIKPSNIL | 391   | >MAP2K4-N2 IHRDIKPSIIL | 407   | 16    |
| >MAP2K4-N2 IIHRDIKPSNI | 168   | >MAP2K4-N2 IIHRDIKPSII | 301   | 133   |
| >MAP2K4-N2 IIHRDIKPSN  | 19595 | >MAP2K4-N2 IIHRDIKPSI  | 331   | 19264 |
| >MAP2K4-N2 IIHRDIKPSN  | 21263 | >MAP2K4-N2 IIHRDIKPSI  | 311   | 20952 |
| >MAP2K4-N2 IIHRDIKPSN  | 8476  | >MAP2K4-N2 IIHRDIKPSI  | 444   | 8032  |

|                       |       |                       |       |       |
|-----------------------|-------|-----------------------|-------|-------|
| >MAP2K4-Q1EQKQLLMDL   | 25211 | >MAP2K4-Q1ELKQLLMDL   | 200   | 25011 |
| >MAP2K4-Q1EQKQLLMDLI  | 17887 | >MAP2K4-Q1ELKQLLMDLE  | 27    | 17860 |
| >MAP2K4-Q1EQKQLLMDL   | 4209  | >MAP2K4-Q1ELKQLLMDL   | 185   | 4024  |
| >MAP2K4-Q1RIRSTVDEKEK | 295   | >MAP2K4-Q1RIRSTVDEKEL | 77    | 218   |
| >MAP2K4-Q1KEQKQLLM    | 52    | >MAP2K4-Q1KELKQLLM    | 30    | 22    |
| >MAP2K4-Q1KEQKQLLMD   | 1306  | >MAP2K4-Q1KELKQLLMDL  | 393   | 913   |
| >MAP2K4-Q1KEQKQLLM    | 1099  | >MAP2K4-Q1KELKQLLM    | 444   | 655   |
| >MAP2K4-Q1KEQKQLLM    | 144   | >MAP2K4-Q1KELKQLLM    | 50    | 94    |
| >MAP2K4-Q1KEQKQLLMD   | 126   | >MAP2K4-Q1KELKQLLMDL  | 218   | 92    |
| >MAP2K4-Q1KEQKQLLM    | 1831  | >MAP2K4-Q1KELKQLLM    | 124   | 1707  |
| >MAP2K4-Q1KEQKQLLMD   | 48    | >MAP2K4-Q1KELKQLLMDL  | 30    | 18    |
| >MAP2K4-Q1KEQKQLLMD   | 585   | >MAP2K4-Q1KELKQLLMDL  | 223   | 362   |
| >MAP2K4-Q1DEKEQKQL    | 155   | >MAP2K4-Q1DEKELKQL    | 184   | 29    |
| >MAP2K4-Q1DEKEQKQLL   | 149   | >MAP2K4-Q1DEKELKQLL   | 77    | 72    |
| >MAP2K4-Q1DEKEQKQLLM  | 339   | >MAP2K4-Q1DEKELKQLLM  | 189   | 150   |
| >MAP2K4-Q1DEKEQKQL    | 136   | >MAP2K4-Q1DEKELKQL    | 39    | 97    |
| >MAP2K4-Q1DEKEQKQLL   | 112   | >MAP2K4-Q1DEKELKQLL   | 29    | 83    |
| >MAP2K4-Q1DEKEQKQLLM  | 738   | >MAP2K4-Q1DEKELKQLLM  | 260   | 478   |
| >MAP2K4-Q1TVDEKEQK    | 201   | >MAP2K4-Q1TVDEKELK    | 83    | 118   |
| >MAP2K4-Q1TVDEKEQK    | 397   | >MAP2K4-Q1TVDEKELK    | 235   | 162   |
| >MAP2K4-Q1STVDEKEQK   | 64    | >MAP2K4-Q1STVDEKELK   | 42    | 22    |
| >MAP2K4-Q1STVDEKEQ    | 4593  | >MAP2K4-Q1STVDEKEL    | 306   | 4287  |
| >MAP2K4-Q1STVDEKEQKC  | 308   | >MAP2K4-Q1STVDEKELKQ  | 135   | 173   |
| >MAP2K4-Q1STVDEKEQK   | 47    | >MAP2K4-Q1STVDEKELK   | 30    | 17    |
| >MAP2K4-Q1STVDEKEQ    | 9234  | >MAP2K4-Q1STVDEKEL    | 45    | 9189  |
| >MAP2K4-Q1STVDEKEQKC  | 25    | >MAP2K4-Q1STVDEKELKQ  | 29    | 4     |
| >MAP2K4-Q1STVDEKEQKC  | 571   | >MAP2K4-Q1STVDEKELKQ  | 364   | 207   |
| >MAP2K4-Q1STVDEKEQK   | 234   | >MAP2K4-Q1STVDEKELK   | 278   | 44    |
| >MAP2K4-Q1RSTVDEKEQK  | 333   | >MAP2K4-Q1RSTVDEKELK  | 143   | 190   |
| >MAP2K4-Q1RSTVDEKEQ   | 7917  | >MAP2K4-Q1RSTVDEKEL   | 29    | 7888  |
| >MAP2K4-R1RSSDCPYIV   | 485   | >MAP2K4-R1WSSDCPYIV   | 359   | 126   |
| >MAP2K4-R1RSSDCPYIV   | 497   | >MAP2K4-R1WSSDCPYIV   | 196   | 301   |
| >MAP2K4-R1RSSDCPYI    | 275   | >MAP2K4-R1WSSDCPYI    | 14831 | 14556 |
| >MAP2K4-R1RSSDCPYIVQI | 54    | >MAP2K4-R1WSSDCPYIVC  | 8357  | 8303  |
| >MAP2K4-R1RSSDCPYI    | 5290  | >MAP2K4-R1WSSDCPYI    | 228   | 5062  |
| >MAP2K4-R1RSSDCPYIV   | 973   | >MAP2K4-R1WSSDCPYIV   | 30    | 943   |
| >MAP2K4-R1RSSDCPYIVQI | 205   | >MAP2K4-R1WSSDCPYIVC  | 347   | 142   |
| >MAP2K4-R1RSSDCPYIVQI | 18    | >MAP2K4-R1WSSDCPYIVC  | 31    | 13    |
| >MAP2K4-R1RSSDCPYI    | 29    | >MAP2K4-R1WSSDCPYI    | 626   | 597   |
| >MAP2K4-R1RSSDCPYIVQI | 3     | >MAP2K4-R1WSSDCPYIVC  | 5     | 2     |
| >MAP2K4-R1RSSDCPYIVQI | 2654  | >MAP2K4-R1WSSDCPYIVC  | 131   | 2523  |
| >MAP2K4-R1RSSDCPYIVQI | 100   | >MAP2K4-R1WSSDCPYIVC  | 992   | 892   |
| >MAP2K4-R1RSSDCPYI    | 41    | >MAP2K4-R1WSSDCPYI    | 1169  | 1128  |

|                        |       |                       |       |       |
|------------------------|-------|-----------------------|-------|-------|
| >MAP2K4-R1 RSSDCPYIVQI | 15    | >MAP2K4-R1 WSSDCPYIVC | 76    | 61    |
| >MAP2K4-R1 RSSDCPYIVQI | 447   | >MAP2K4-R1 WSSDCPYIVC | 1361  | 914   |
| >MAP2K4-R1 RSSDCPYI    | 290   | >MAP2K4-R1 WSSDCPYI   | 844   | 554   |
| >MAP2K4-R1 RSSDCPYIV   | 555   | >MAP2K4-R1 WSSDCPYIV  | 283   | 272   |
| >MAP2K4-R1 RSSDCPYIVQI | 45    | >MAP2K4-R1 WSSDCPYIVC | 37    | 8     |
| >MAP2K4-R1 RSSDCPYI    | 17    | >MAP2K4-R1 WSSDCPYI   | 75    | 58    |
| >MAP2K4-R1 MRSSDCPYI   | 16849 | >MAP2K4-R1 MWSSDCPYI  | 250   | 16599 |
| >MAP2K4-R1 MRSSDCPYIV  | 24237 | >MAP2K4-R1 MWSSDCPYI  | 285   | 23952 |
| >MAP2K4-R1 MRSSDCPYI   | 18190 | >MAP2K4-R1 MWSSDCPYI  | 64    | 18126 |
| >MAP2K4-R1 MRSSDCPY    | 1111  | >MAP2K4-R1 MWSSDCPY   | 60    | 1051  |
| >MAP2K4-R1 MRSSDCPY    | 449   | >MAP2K4-R1 MWSSDCPY   | 87    | 362   |
| >MAP2K4-R1 MRSSDCPY    | 28    | >MAP2K4-R1 MWSSDCPY   | 719   | 691   |
| >MAP2K4-R1 MRSSDCPYI   | 326   | >MAP2K4-R1 MWSSDCPYI  | 6997  | 6671  |
| >MAP2K4-R1 MRSSDCPYIV  | 292   | >MAP2K4-R1 MWSSDCPYI  | 5169  | 4877  |
| >MAP2K4-R1 MRSSDCPYIV  | 451   | >MAP2K4-R1 MWSSDCPYI  | 18089 | 17638 |
| >MAP2K4-R1 MRSSDCPY    | 230   | >MAP2K4-R1 MWSSDCPY   | 79    | 151   |
| >MAP2K4-R1 MRSSDCPYIV  | 342   | >MAP2K4-R1 MWSSDCPYI  | 12293 | 11951 |
| >MAP2K4-R1 MRSSDCPY    | 57    | >MAP2K4-R1 MWSSDCPY   | 2710  | 2653  |
| >MAP2K4-R1 MRSSDCPYI   | 333   | >MAP2K4-R1 MWSSDCPYI  | 10489 | 10156 |
| >MAP2K4-R1 MRSSDCPY    | 26587 | >MAP2K4-R1 MWSSDCPY   | 141   | 26446 |
| >MAP2K4-R1 MRSSDCPYI   | 13128 | >MAP2K4-R1 MWSSDCPYI  | 23    | 13105 |
| >MAP2K4-R1 MRSSDCPYIV  | 18636 | >MAP2K4-R1 MWSSDCPYI  | 69    | 18567 |
| >MAP2K4-R1 MRSSDCPYIV  | 22346 | >MAP2K4-R1 MWSSDCPYI  | 217   | 22129 |
| >MAP2K4-R1 QLLMDLDVV   | 31032 | >MAP2K4-R1 QLLMDLDVV  | 309   | 30723 |
| >MAP2K4-R1 VMRSSDCPYI  | 371   | >MAP2K4-R1 VMWSSDCPY  | 32    | 339   |
| >MAP2K4-R1 VMRSSDCPYI  | 394   | >MAP2K4-R1 VMWSSDCPY  | 9     | 385   |
| >MAP2K4-R1 VMRSSDCPYI  | 226   | >MAP2K4-R1 VMWSSDCPY  | 54    | 172   |
| >MAP2K4-R1 VMRSSDCPYI  | 246   | >MAP2K4-R1 VMWSSDCPY  | 45    | 201   |
| >MAP2K4-R1 VMRSSDCPYI  | 233   | >MAP2K4-R1 VMWSSDCPY  | 89    | 144   |
| >MAP2K4-R1 VMRSSDCPYI  | 17    | >MAP2K4-R1 VMWSSDCPY  | 34    | 17    |
| >MAP2K4-R1 VMRSSDCPYI  | 2124  | >MAP2K4-R1 VMWSSDCPY  | 169   | 1955  |
| >MAP2K4-R1 VMRSSDCPYI  | 2042  | >MAP2K4-R1 VMWSSDCPY  | 71    | 1971  |
| >MAP2K4-R1 VMRSSDCPY   | 13533 | >MAP2K4-R1 VMWSSDCPY  | 382   | 13151 |
| >MAP2K4-R1 VMRSSDCPYI  | 38    | >MAP2K4-R1 VMWSSDCPY  | 2     | 36    |
| >MAP2K4-R1 VMRSSDCPYI  | 15    | >MAP2K4-R1 VMWSSDCPY  | 2     | 13    |
| >MAP2K4-R1 VMRSSDCPYI  | 252   | >MAP2K4-R1 VMWSSDCPY  | 9     | 243   |
| >MAP2K4-R1 VMRSSDCPYI  | 14    | >MAP2K4-R1 VMWSSDCPY  | 3     | 11    |
| >MAP2K4-R1 VMRSSDCPYI  | 108   | >MAP2K4-R1 VMWSSDCPY  | 5     | 103   |
| >MAP2K4-R1 VMRSSDCPYI  | 29    | >MAP2K4-R1 VMWSSDCPY  | 4     | 25    |
| >MAP2K4-R1 VMRSSDCPYI  | 422   | >MAP2K4-R1 VMWSSDCPY  | 3     | 419   |
| >MAP2K4-R1 VMRSSDCPYI  | 88    | >MAP2K4-R1 VMWSSDCPY  | 2     | 86    |
| >MAP2K4-R1 VMRSSDCPYI  | 22    | >MAP2K4-R1 VMWSSDCPY  | 7     | 15    |
| >MAP2K4-R1 VMRSSDCPYI  | 5     | >MAP2K4-R1 VMWSSDCPY  | 2     | 3     |

|                       |       |                      |       |       |
|-----------------------|-------|----------------------|-------|-------|
| >MAP2K4-R1 VMRSSDCPY  | 305   | >MAP2K4-R1 VMWSSDCPY | 31    | 274   |
| >MAP2K4-R1 VMRSSDCPY  | 452   | >MAP2K4-R1 VMWSSDCPY | 13196 | 12744 |
| >MAP2K4-R1 VMRSSDCPYI | 120   | >MAP2K4-R1 VMWSSDCPY | 10090 | 9970  |
| >MAP2K4-R1 VMRSSDCPY  | 86    | >MAP2K4-R1 VMWSSDCPY | 27    | 59    |
| >MAP2K4-R1 VMRSSDCPY  | 22    | >MAP2K4-R1 VMWSSDCPY | 26    | 4     |
| >MAP2K4-R1 VMRSSDCPYI | 490   | >MAP2K4-R1 VMWSSDCPY | 1764  | 1274  |
| >MAP2K4-R1 VMRSSDCPY  | 21    | >MAP2K4-R1 VMWSSDCPY | 21    | 0     |
| >MAP2K4-R1 VMRSSDCPY  | 5     | >MAP2K4-R1 VMWSSDCPY | 3     | 2     |
| >MAP2K4-R1 VMRSSDCPYI | 62    | >MAP2K4-R1 VMWSSDCPY | 36    | 26    |
| >MAP2K4-R1 VMRSSDCPYI | 48    | >MAP2K4-R1 VMWSSDCPY | 29    | 19    |
| >MAP2K4-R1 VMRSSDCPY  | 18    | >MAP2K4-R1 VMWSSDCPY | 20    | 2     |
| >MAP2K4-R1 VMRSSDCPY  | 188   | >MAP2K4-R1 VMWSSDCPY | 16    | 172   |
| >MAP2K4-R1 VMRSSDCPYI | 1404  | >MAP2K4-R1 VMWSSDCPY | 498   | 906   |
| >MAP2K4-R1 VVMRSSDCP' | 213   | >MAP2K4-R1 VVMWSSDCF | 58    | 155   |
| >MAP2K4-R1 VVMRSSDCP' | 529   | >MAP2K4-R1 VVMWSSDCF | 298   | 231   |
| >MAP2K4-R1 VVMRSSDCP' | 451   | >MAP2K4-R1 VVMWSSDCF | 200   | 251   |
| >MAP2K4-R1 VVMRSSDCP' | 37    | >MAP2K4-R1 VVMWSSDCF | 17    | 20    |
| >MAP2K4-R1 VVMRSSDCP' | 380   | >MAP2K4-R1 VVMWSSDCF | 61    | 319   |
| >MAP2K4-R1 VVMRSSDCP' | 1299  | >MAP2K4-R1 VVMWSSDCF | 249   | 1050  |
| >MAP2K4-R1 VVMRSSDCP' | 67    | >MAP2K4-R1 VVMWSSDCF | 20    | 47    |
| >MAP2K4-R1 VVMRSSDCP' | 834   | >MAP2K4-R1 VVMWSSDCF | 274   | 560   |
| >MAP2K4-R1 VVMRSSDCP' | 433   | >MAP2K4-R1 VVMWSSDCF | 225   | 208   |
| >MAP2K4-R1 VVMRSSDCP' | 159   | >MAP2K4-R1 VVMWSSDCF | 256   | 97    |
| >MAP2K4-R1 VVMRSSDCP' | 244   | >MAP2K4-R1 VVMWSSDCF | 143   | 101   |
| >MAP2K4-R1 VVMRSSDCP' | 46    | >MAP2K4-R1 VVMWSSDCF | 43    | 3     |
| >MAP2K4-R1 VVMRSSDCP' | 621   | >MAP2K4-R1 VVMWSSDCF | 100   | 521   |
| >MAP2K4-R1 VVMRSSDCP' | 49    | >MAP2K4-R1 VVMWSSDCF | 60    | 11    |
| >MAP2K4-R1 VVMRSSDCP' | 156   | >MAP2K4-R1 VVMWSSDCF | 261   | 105   |
| >MAP2K4-R1 VVMRSSDCP' | 144   | >MAP2K4-R1 VVMWSSDCF | 455   | 311   |
| >MAP2K4-R1 VVMRSSDCP' | 56    | >MAP2K4-R1 VVMWSSDCF | 29    | 27    |
| >MAP2K4-R1 DVVMRSSDC  | 476   | >MAP2K4-R1 DVVMWSSDC | 595   | 119   |
| >MAP2K4-R1 DVVMRSSDC  | 27    | >MAP2K4-R1 DVVMWSSDC | 15    | 12    |
| >MAP2K4-R1 DVVMRSSDC  | 29    | >MAP2K4-R1 DVVMWSSDC | 10    | 19    |
| >MAP2K4-R1 DVVMRSSDC  | 86    | >MAP2K4-R1 DVVMWSSDC | 177   | 91    |
| >MAP2K4-R1 DVVMRSSDC  | 2097  | >MAP2K4-R1 DVVMWSSDC | 381   | 1716  |
| >MAP2K4-R1 DVVMRSSDC  | 480   | >MAP2K4-R1 DVVMWSSDC | 509   | 29    |
| >MAP2K4-R1 DVVMRSSDC  | 725   | >MAP2K4-R1 DVVMWSSDC | 446   | 279   |
| >MAP2K4-R1 DVVMRSSDC  | 94    | >MAP2K4-R1 DVVMWSSDC | 34    | 60    |
| >MAP2K4-R1 MDLDVVMR   | 263   | >MAP2K4-R1 MDLDVVMW  | 29654 | 29391 |
| >MAP2K4-R1 MDLDVVMR   | 18614 | >MAP2K4-R1 MDLDVVMW  | 338   | 18276 |
| >MAP2K4-R1 MDLDVVMR   | 33919 | >MAP2K4-R1 MDLDVVMW  | 266   | 33653 |
| >MAP2K4-R1 MDLDVVMR   | 27666 | >MAP2K4-R1 MDLDVVMW  | 48    | 27618 |
| >MAP2K4-R1 LMDLDVVMF  | 420   | >MAP2K4-R1 LMDLDVVMW | 374   | 46    |

|                       |       |                       |       |       |
|-----------------------|-------|-----------------------|-------|-------|
| >MAP2K4-R1 LMDLDVVMF  | 2046  | >MAP2K4-R1 LMDLDVVMV  | 203   | 1843  |
| >MAP2K4-R1 LMDLDVVMF  | 23291 | >MAP2K4-R1 LMDLDVVMV  | 111   | 23180 |
| >MAP2K4-R1 LMDLDVVMF  | 29612 | >MAP2K4-R1 LMDLDVVMV  | 98    | 29514 |
| >MAP2K4-R1 LLMDLDVVM  | 261   | >MAP2K4-R1 LLMDLDVVM  | 138   | 123   |
| >MAP2K4-R1 LLMDLDVVM  | 88    | >MAP2K4-R1 LLMDLDVVM  | 52    | 36    |
| >MAP2K4-R1 LLMDLDVVM  | 279   | >MAP2K4-R1 LLMDLDVVM  | 147   | 132   |
| >MAP2K4-R1 LLMDLDVVM  | 980   | >MAP2K4-R1 LLMDLDVVM  | 359   | 621   |
| >MAP2K4-R1 LLMDLDVVM  | 161   | >MAP2K4-R1 LLMDLDVVM  | 163   | 2     |
| >MAP2K4-R1 LLMDLDVVM  | 33    | >MAP2K4-R1 LLMDLDVVM  | 24    | 9     |
| >MAP2K4-R1 LLMDLDVVM  | 448   | >MAP2K4-R1 LLMDLDVVM  | 30935 | 30487 |
| >MAP2K4-R1 LLMDLDVVM  | 111   | >MAP2K4-R1 LLMDLDVVM  | 20527 | 20416 |
| >MAP2K4-R1 LLMDLDVVM  | 240   | >MAP2K4-R1 LLMDLDVVM  | 20404 | 20164 |
| >MAP2K4-R1 LLMDLDVVM  | 31    | >MAP2K4-R1 LLMDLDVVM  | 21637 | 21606 |
| >MAP2K4-R1 LLMDLDVVM  | 25209 | >MAP2K4-R1 LLMDLDVVM  | 203   | 25006 |
| >MAP2K4-R1 LLMDLDVVM  | 22367 | >MAP2K4-R1 LLMDLDVVM  | 74    | 22293 |
| >MAP2K4-R1 LLMDLDVVM  | 27328 | >MAP2K4-R1 LLMDLDVVM  | 55    | 27273 |
| >MAP2K4-R1 LLMDLDVVM  | 298   | >MAP2K4-R1 LLMDLDVVM  | 23191 | 22893 |
| >MAP2K4-R2 RIDPSASRQG | 427   | >MAP2K4-R2 GIDPSASRQG | 1035  | 608   |
| >MAP2K4-R2 RIDPSASR   | 208   | >MAP2K4-R2 GIDPSASR   | 3319  | 3111  |
| >MAP2K4-R2 RIDPSASRQG | 15    | >MAP2K4-R2 GIDPSASRQG | 187   | 172   |
| >MAP2K4-R2 RIDPSASRQG | 242   | >MAP2K4-R2 GIDPSASRQG | 303   | 61    |
| >MAP2K4-R2 RIDPSASR   | 381   | >MAP2K4-R2 GIDPSASR   | 12669 | 12288 |
| >MAP2K4-R2 ERIDPSASR  | 329   | >MAP2K4-R2 EGIDPSASR  | 97    | 232   |
| >MAP2K4-R2 MAPERIDPS  | 363   | >MAP2K4-R2 MAPEGIDPS  | 137   | 226   |
| >MAP2K4-R2 YMAPERIDPS | 35    | >MAP2K4-R2 YMAPEGIDPS | 26    | 9     |
| >MAP2K4-R2 YMAPERIDPS | 28    | >MAP2K4-R2 YMAPEGIDPS | 15    | 13    |
| >MAP2K4-R2 YMAPERIDPS | 18    | >MAP2K4-R2 YMAPEGIDPS | 11    | 7     |
| >MAP2K4-R2 YMAPERIDPS | 25    | >MAP2K4-R2 YMAPEGIDPS | 16    | 9     |
| >MAP2K4-R2 YMAPERIDPS | 298   | >MAP2K4-R2 YMAPEGIDPS | 89    | 209   |
| >MAP2K4-R2 YMAPERIDPS | 27    | >MAP2K4-R2 YMAPEGIDPS | 10    | 17    |
| >MAP2K4-R2 YMAPERIDPS | 1177  | >MAP2K4-R2 YMAPEGIDPS | 395   | 782   |
| >MAP2K4-R2 YMAPERIDPS | 76    | >MAP2K4-R2 YMAPEGIDPS | 22    | 54    |
| >MAP2K4-R2 YMAPERIDPS | 799   | >MAP2K4-R2 YMAPEGIDPS | 231   | 568   |
| >MAP2K4-R2 YMAPERIDPS | 14    | >MAP2K4-R2 YMAPEGIDPS | 8     | 6     |
| >MAP2K4-R2 YMAPERIDPS | 53    | >MAP2K4-R2 YMAPEGIDPS | 19    | 34    |
| >MAP2K4-R2 YMAPERIDPS | 114   | >MAP2K4-R2 YMAPEGIDPS | 100   | 14    |
| >MAP2K4-R2 YMAPERIDPS | 3     | >MAP2K4-R2 YMAPEGIDPS | 3     | 0     |
| >MAP2K4-R2 YMAPERIDPS | 607   | >MAP2K4-R2 YMAPEGIDPS | 367   | 240   |
| >MAP2K4-R2 PYMAPERI   | 403   | >MAP2K4-R2 PYMAPEGI   | 1580  | 1177  |
| >MAP2K4-R2 PYMAPERI   | 487   | >MAP2K4-R2 PYMAPEGI   | 1283  | 796   |
| >MAP2K4-R2 PYMAPERI   | 163   | >MAP2K4-R2 PYMAPEGI   | 153   | 10    |
| >MAP2K4-R2 RPYMAPERI  | 26    | >MAP2K4-R2 RPYMAPEGI  | 83    | 57    |
| >MAP2K4-R2 RPYMAPERI  | 264   | >MAP2K4-R2 RPYMAPEGI  | 261   | 3     |



|                        |       |                        |       |       |
|------------------------|-------|------------------------|-------|-------|
| >MAP2K4-R2 RPYMAPERI   | 495   | >MAP2K4-R2 RPYMAPEGI   | 944   | 449   |
| >MAP2K4-R2 RPYMAPER    | 188   | >MAP2K4-R2 RPYMAPEG    | 34570 | 34382 |
| >MAP2K4-R2 RPYMAPERI   | 161   | >MAP2K4-R2 RPYMAPEGI   | 163   | 2     |
| >MAP2K4-S1 SFDKFKYKV   | 278   | >MAP2K4-S1 LFDKFKYKV   | 376   | 98    |
| >MAP2K4-S1 SFDKFKYK    | 118   | >MAP2K4-S1 LFDKFKYK    | 119   | 1     |
| >MAP2K4-S1 SFDKFKYKVY  | 25    | >MAP2K4-S1 LFDKFKYKVY  | 25    | 0     |
| >MAP2K4-S1 SFDKFKYK    | 435   | >MAP2K4-S1 LFDKFKYK    | 596   | 161   |
| >MAP2K4-S1 SFDKFKYKVY  | 219   | >MAP2K4-S1 LFDKFKYKVY  | 239   | 20    |
| >MAP2K4-S1 SFDKFKYK    | 220   | >MAP2K4-S1 LFDKFKYK    | 906   | 686   |
| >MAP2K4-S1 SFDKFKYKVY  | 489   | >MAP2K4-S1 LFDKFKYKVY  | 1931  | 1442  |
| >MAP2K4-S1 SFDKFKYK    | 114   | >MAP2K4-S1 LFDKFKYK    | 156   | 42    |
| >MAP2K4-S1 SFDKFKYKV   | 335   | >MAP2K4-S1 LFDKFKYKV   | 721   | 386   |
| >MAP2K4-S1 TSFDKFKYKV  | 2229  | >MAP2K4-S1 TLFDKFKYKV  | 22    | 2207  |
| >MAP2K4-S1 TSFDKFKYKV  | 789   | >MAP2K4-S1 TLFDKFKYKV  | 22    | 767   |
| >MAP2K4-S1 TSFDKFKYKV  | 467   | >MAP2K4-S1 TLFDKFKYKV  | 11    | 456   |
| >MAP2K4-S1 TSFDKFKYKV  | 915   | >MAP2K4-S1 TLFDKFKYKV  | 101   | 814   |
| >MAP2K4-S1 TSFDKFKYK   | 22564 | >MAP2K4-S1 TLFDKFKYK   | 358   | 22206 |
| >MAP2K4-S1 TSFDKFKYKV  | 224   | >MAP2K4-S1 TLFDKFKYKV  | 2     | 222   |
| >MAP2K4-S1 TSFDKFKYKV  | 7696  | >MAP2K4-S1 TLFDKFKYKV  | 5     | 7691  |
| >MAP2K4-S1 TSFDKFKYKV  | 3203  | >MAP2K4-S1 TLFDKFKYKV  | 6     | 3197  |
| >MAP2K4-S1 TSFDKFKYKV  | 14556 | >MAP2K4-S1 TLFDKFKYKV  | 5     | 14551 |
| >MAP2K4-S1 TSFDKFKYK   | 33225 | >MAP2K4-S1 TLFDKFKYK   | 144   | 33081 |
| >MAP2K4-S1 TSFDKFKYKV  | 2791  | >MAP2K4-S1 TLFDKFKYKV  | 2     | 2789  |
| >MAP2K4-S1 TSFDKFKYK   | 76    | >MAP2K4-S1 TLFDKFKYK   | 33    | 43    |
| >MAP2K4-S1 TSFDKFKYK   | 2269  | >MAP2K4-S1 TLFDKFKYK   | 264   | 2005  |
| >MAP2K4-S1 TSFDKFKYK   | 5     | >MAP2K4-S1 TLFDKFKYK   | 7     | 2     |
| >MAP2K4-S1 TSFDKFKYK   | 21    | >MAP2K4-S1 TLFDKFKYK   | 56    | 35    |
| >MAP2K4-S1 TSFDKFKYKV\ | 41    | >MAP2K4-S1 TLFDKFKYKV\ | 138   | 97    |
| >MAP2K4-S1 TSFDKFKYK   | 232   | >MAP2K4-S1 TLFDKFKYK   | 1050  | 818   |
| >MAP2K4-S1 TSFDKFKYK   | 16    | >MAP2K4-S1 TLFDKFKYK   | 9     | 7     |
| >MAP2K4-S1 TSFDKFKYKV\ | 25    | >MAP2K4-S1 TLFDKFKYKV\ | 13    | 12    |
| >MAP2K4-S1 TSFDKFKYK   | 120   | >MAP2K4-S1 TLFDKFKYK   | 878   | 758   |
| >MAP2K4-S1 TSFDKFKYK   | 21    | >MAP2K4-S1 TLFDKFKYK   | 31    | 10    |
| >MAP2K4-S1 TSFDKFKYKV\ | 22    | >MAP2K4-S1 TLFDKFKYKV\ | 36    | 14    |
| >MAP2K4-S1 TSFDKFKYK   | 17    | >MAP2K4-S1 TLFDKFKYK   | 21    | 4     |
| >MAP2K4-S1 TSFDKFKYK   | 792   | >MAP2K4-S1 TLFDKFKYK   | 495   | 297   |
| >MAP2K4-S1 TSFDKFKYK   | 281   | >MAP2K4-S1 TLFDKFKYK   | 217   | 64    |
| >MAP2K4-S1 TSFDKFKYK   | 4     | >MAP2K4-S1 TLFDKFKYK   | 12    | 8     |
| >MAP2K4-S1 TSFDKFKYK   | 76    | >MAP2K4-S1 TLFDKFKYK   | 280   | 204   |
| >MAP2K4-S1 TSFDKFKYKV\ | 83    | >MAP2K4-S1 TLFDKFKYKV\ | 362   | 279   |
| >MAP2K4-S1 TSFDKFKYKV  | 61    | >MAP2K4-S1 TLFDKFKYKV  | 412   | 351   |
| >MAP2K4-S1 TSFDKFKYKV  | 87    | >MAP2K4-S1 TLFDKFKYKV  | 44    | 43    |
| >MAP2K4-S1 TSFDKFKYK   | 705   | >MAP2K4-S1 TLFDKFKYK   | 85    | 620   |

|                        |       |                       |       |       |
|------------------------|-------|-----------------------|-------|-------|
| >MAP2K4-S1 TSFDKFYKYV\ | 1389  | >MAP2K4-S1 TLFDFYKYV\ | 161   | 1228  |
| >MAP2K4-S1 TSFDKFYKY   | 702   | >MAP2K4-S1 TLFDFYKY   | 263   | 439   |
| >MAP2K4-S1 TSFDKFYKYV\ | 173   | >MAP2K4-S1 TLFDFYKYV\ | 100   | 73    |
| >MAP2K4-S1 TSFDKFYKY   | 9661  | >MAP2K4-S1 TLFDFYKY   | 355   | 9306  |
| >MAP2K4-S1 TSFDKFYKYV\ | 7346  | >MAP2K4-S1 TLFDFYKYV\ | 234   | 7112  |
| >MAP2K4-S1 TSFDKFYKY   | 429   | >MAP2K4-S1 TLFDFYKY   | 642   | 213   |
| >MAP2K4-S1 TSFDKFYKYV\ | 229   | >MAP2K4-S1 TLFDFYKYV\ | 339   | 110   |
| >MAP2K4-S1 TSFDKFYKY   | 8     | >MAP2K4-S1 TLFDFYKY   | 1700  | 1692  |
| >MAP2K4-S1 TSFDKFYKYV\ | 9     | >MAP2K4-S1 TLFDFYKYV\ | 3685  | 3676  |
| >MAP2K4-S1 TSFDKFYKY   | 408   | >MAP2K4-S1 TLFDFYKY   | 14837 | 14429 |
| >MAP2K4-S1 TSFDKFYKYV\ | 459   | >MAP2K4-S1 TLFDFYKYV\ | 14979 | 14520 |
| >MAP2K4-S1 TSFDKFYKY   | 59    | >MAP2K4-S1 TLFDFYKY   | 1456  | 1397  |
| >MAP2K4-S1 TSFDKFYKYV\ | 36    | >MAP2K4-S1 TLFDFYKYV\ | 760   | 724   |
| >MAP2K4-S1 TSFDKFYK    | 66    | >MAP2K4-S1 TLFDFYK    | 630   | 564   |
| >MAP2K4-S1 TSFDKFYKY   | 247   | >MAP2K4-S1 TLFDFYKY   | 3503  | 3256  |
| >MAP2K4-S1 TSFDKFYK    | 315   | >MAP2K4-S1 TLFDFYK    | 65    | 250   |
| >MAP2K4-S1 CWICMELMS   | 6931  | >MAP2K4-S1 CWICMELMS  | 272   | 6659  |
| >MAP2K4-S1 CWICMELMS   | 12336 | >MAP2K4-S1 CWICMELMS  | 132   | 12204 |
| >MAP2K4-S1 CWICMELMS   | 16068 | >MAP2K4-S1 CWICMELMS  | 140   | 15928 |
| >MAP2K4-S1 CWICMELMS   | 7798  | >MAP2K4-S1 CWICMELMS  | 44    | 7754  |
| >MAP2K4-S1 CWICMELMS   | 748   | >MAP2K4-S1 CWICMELMS  | 206   | 542   |
| >MAP2K4-S1 STSFDKFY    | 229   | >MAP2K4-S1 STLFDFY    | 6343  | 6114  |
| >MAP2K4-S1 STSFDKFYKY  | 27    | >MAP2K4-S1 STLFDFYKY  | 131   | 104   |
| >MAP2K4-S1 STSFDKFYKY\ | 246   | >MAP2K4-S1 STLFDFYKY\ | 1081  | 835   |
| >MAP2K4-S1 STSFDKFYKY\ | 453   | >MAP2K4-S1 STLFDFYKY\ | 1642  | 1189  |
| >MAP2K4-S1 STSFDKFYKY\ | 512   | >MAP2K4-S1 STLFDFYKY\ | 119   | 393   |
| >MAP2K4-S1 STSFDKFYKY\ | 102   | >MAP2K4-S1 STLFDFYKY\ | 14    | 88    |
| >MAP2K4-S1 STSFDKFYKY\ | 1457  | >MAP2K4-S1 STLFDFYKY\ | 285   | 1172  |
| >MAP2K4-S1 STSFDKFYKY\ | 337   | >MAP2K4-S1 STLFDFYKY\ | 52    | 285   |
| >MAP2K4-S1 STSFDKFYKY\ | 707   | >MAP2K4-S1 STLFDFYKY\ | 486   | 221   |
| >MAP2K4-S1 STSFDKFYK   | 106   | >MAP2K4-S1 STLFDFYK   | 134   | 28    |
| >MAP2K4-S1 STSFDKFYKY  | 288   | >MAP2K4-S1 STLFDFYKY  | 203   | 85    |
| >MAP2K4-S1 STSFDKFY    | 97    | >MAP2K4-S1 STLFDFY    | 123   | 26    |
| >MAP2K4-S1 STSFDKFYK   | 6     | >MAP2K4-S1 STLFDFYK   | 6     | 0     |
| >MAP2K4-S1 STSFDKFYKY  | 16    | >MAP2K4-S1 STLFDFYKY  | 23    | 7     |
| >MAP2K4-S1 STSFDKFYKY  | 495   | >MAP2K4-S1 STLFDFYKY  | 467   | 28    |
| >MAP2K4-S1 STSFDKFY    | 106   | >MAP2K4-S1 STLFDFY    | 46    | 60    |
| >MAP2K4-S1 STSFDKFYKY  | 247   | >MAP2K4-S1 STLFDFYKY  | 92    | 155   |
| >MAP2K4-S1 STSFDKFY    | 42    | >MAP2K4-S1 STLFDFY    | 31    | 11    |
| >MAP2K4-S1 STSFDKFYKY  | 62    | >MAP2K4-S1 STLFDFYKY  | 115   | 53    |
| >MAP2K4-S1 STSFDKFYK   | 127   | >MAP2K4-S1 STLFDFYK   | 51    | 76    |
| >MAP2K4-S1 STSFDKFY    | 21    | >MAP2K4-S1 STLFDFY    | 41    | 20    |
| >MAP2K4-S1 STSFDKFYKY  | 18    | >MAP2K4-S1 STLFDFYKY  | 23    | 5     |

|                         |     |                         |      |      |
|-------------------------|-----|-------------------------|------|------|
| >MAP2K4-S1 STSFDKFKY    | 28  | >MAP2K4-S1 STLFDKFKY    | 18   | 10   |
| >MAP2K4-S1 STSFDKFKY    | 90  | >MAP2K4-S1 STLFDKFKY    | 441  | 351  |
| >MAP2K4-S1 STSFDKFKY    | 5   | >MAP2K4-S1 STLFDKFKY    | 12   | 7    |
| >MAP2K4-S1 STSFDKFKYKY  | 333 | >MAP2K4-S1 STLFDKFKYKY  | 872  | 539  |
| >MAP2K4-S1 STSFDKFKYKY\ | 20  | >MAP2K4-S1 STLFDKFKYKY\ | 61   | 41   |
| >MAP2K4-S1 STSFDKFKYKY\ | 59  | >MAP2K4-S1 STLFDKFKYKY\ | 12   | 47   |
| >MAP2K4-S1 STSFDKFKY    | 196 | >MAP2K4-S1 STLFDKFKY    | 100  | 96   |
| >MAP2K4-S1 STSFDKFKYKY  | 131 | >MAP2K4-S1 STLFDKFKYKY  | 69   | 62   |
| >MAP2K4-S1 STSFDKFKY    | 41  | >MAP2K4-S1 STLFDKFKY    | 19   | 22   |
| >MAP2K4-S1 STSFDKFKYKY  | 49  | >MAP2K4-S1 STLFDKFKYKY  | 21   | 28   |
| >MAP2K4-S1 STSFDKFKYKY  | 36  | >MAP2K4-S1 STLFDKFKYKY  | 95   | 59   |
| >MAP2K4-S1 STSFDKFKYKY\ | 369 | >MAP2K4-S1 STLFDKFKYKY\ | 342  | 27   |
| >MAP2K4-S1 STSFDKFKY    | 327 | >MAP2K4-S1 STLFDKFKY    | 1607 | 1280 |
| >MAP2K4-S1 STSFDKFKY    | 612 | >MAP2K4-S1 STLFDKFKY    | 465  | 147  |
| >MAP2K4-S1 STSFDKFKY    | 63  | >MAP2K4-S1 STLFDKFKY    | 48   | 15   |
| >MAP2K4-S1 STSFDKFKYKY  | 178 | >MAP2K4-S1 STLFDKFKYKY  | 144  | 34   |
| >MAP2K4-S1 STSFDKFKYKY\ | 605 | >MAP2K4-S1 STLFDKFKYKY\ | 481  | 124  |
| >MAP2K4-S1 MSTSFDFKFKY  | 412 | >MAP2K4-S1 MSTLFDKFKY   | 596  | 184  |
| >MAP2K4-S1 MSTSFDFKFKY  | 180 | >MAP2K4-S1 MSTLFDKFKY   | 222  | 42   |
| >MAP2K4-S1 MSTSFDFKFKY  | 156 | >MAP2K4-S1 MSTLFDKFKY   | 192  | 36   |
| >MAP2K4-S1 MSTSFDFKFKY  | 10  | >MAP2K4-S1 MSTLFDKFKY   | 11   | 1    |
| >MAP2K4-S1 MSTSFDFKFKY  | 434 | >MAP2K4-S1 MSTLFDKFKY   | 615  | 181  |
| >MAP2K4-S1 MSTSFDFKFKY  | 376 | >MAP2K4-S1 MSTLFDKFKY   | 1700 | 1324 |
| >MAP2K4-S1 MSTSFDFKFKY  | 54  | >MAP2K4-S1 MSTLFDKFKY   | 132  | 78   |
| >MAP2K4-S1 MSTSFDFKFKY  | 26  | >MAP2K4-S1 MSTLFDKFKY   | 41   | 15   |
| >MAP2K4-S1 MSTSFDFKFKY  | 92  | >MAP2K4-S1 MSTLFDKFKY   | 121  | 29   |
| >MAP2K4-S1 MSTSFDFKFKY  | 26  | >MAP2K4-S1 MSTLFDKFKY   | 149  | 123  |
| >MAP2K4-S1 MSTSFDFKFKY  | 20  | >MAP2K4-S1 MSTLFDKFKY   | 72   | 52   |
| >MAP2K4-S1 MSTSFDFKFKY  | 101 | >MAP2K4-S1 MSTLFDKFKY   | 57   | 44   |
| >MAP2K4-S1 MSTSFDFKFKY  | 56  | >MAP2K4-S1 MSTLFDKFKY   | 186  | 130  |
| >MAP2K4-S1 MSTSFDFKFKY  | 5   | >MAP2K4-S1 MSTLFDKFKY   | 7    | 2    |
| >MAP2K4-S1 MSTSFDFKFKY  | 117 | >MAP2K4-S1 MSTLFDKFKY   | 286  | 169  |
| >MAP2K4-S1 MSTSFDFKF    | 57  | >MAP2K4-S1 MSTLFDKF     | 380  | 323  |
| >MAP2K4-S1 MSTSFDFKFKY  | 110 | >MAP2K4-S1 MSTLFDKFKY   | 976  | 866  |
| >MAP2K4-S1 MSTSFDFKFKY  | 181 | >MAP2K4-S1 MSTLFDKFKY   | 900  | 719  |
| >MAP2K4-S1 MSTSFDFKF    | 11  | >MAP2K4-S1 MSTLFDKF     | 15   | 4    |
| >MAP2K4-S1 MSTSFDFKFKY  | 9   | >MAP2K4-S1 MSTLFDKFKY   | 9    | 0    |
| >MAP2K4-S1 MSTSFDFKFKY  | 9   | >MAP2K4-S1 MSTLFDKFKY   | 9    | 0    |
| >MAP2K4-S1 MSTSFDFKF    | 195 | >MAP2K4-S1 MSTLFDKF     | 307  | 112  |
| >MAP2K4-S1 MSTSFDFKFKY  | 134 | >MAP2K4-S1 MSTLFDKFKY   | 286  | 152  |
| >MAP2K4-S1 MSTSFDFKFKY  | 102 | >MAP2K4-S1 MSTLFDKFKY   | 165  | 63   |
| >MAP2K4-S1 MSTSFDFKF    | 397 | >MAP2K4-S1 MSTLFDKF     | 702  | 305  |
| >MAP2K4-S1 MSTSFDFKFKY  | 97  | >MAP2K4-S1 MSTLFDKFKY   | 149  | 52   |

|                       |     |                       |      |     |
|-----------------------|-----|-----------------------|------|-----|
| >MAP2K4-S1 MSTSFDFKYK | 226 | >MAP2K4-S1 MSTLFDKFYK | 346  | 120 |
| >MAP2K4-S1 MSTSFDFK   | 42  | >MAP2K4-S1 MSTLFDKF   | 78   | 36  |
| >MAP2K4-S1 MSTSFDFKY  | 161 | >MAP2K4-S1 MSTLFDKFY  | 560  | 399 |
| >MAP2K4-S1 MSTSFDFKYK | 123 | >MAP2K4-S1 MSTLFDKFYK | 287  | 164 |
| >MAP2K4-S1 MSTSFDFK   | 65  | >MAP2K4-S1 MSTLFDKF   | 121  | 56  |
| >MAP2K4-S1 MSTSFDFKY  | 18  | >MAP2K4-S1 MSTLFDKFY  | 90   | 72  |
| >MAP2K4-S1 MSTSFDFKYK | 31  | >MAP2K4-S1 MSTLFDKFYK | 126  | 95  |
| >MAP2K4-S1 MSTSFDFK   | 149 | >MAP2K4-S1 MSTLFDKF   | 237  | 88  |
| >MAP2K4-S1 MSTSFDFKYK | 429 | >MAP2K4-S1 MSTLFDKFYK | 652  | 223 |
| >MAP2K4-S1 LMSTSFDFKY | 96  | >MAP2K4-S1 LMSTLFDKFY | 167  | 71  |
| >MAP2K4-S1 LMSTSFDFK  | 667 | >MAP2K4-S1 LMSTLFDKF  | 427  | 240 |
| >MAP2K4-S1 LMSTSFDK   | 65  | >MAP2K4-S1 LMSTLFDK   | 97   | 32  |
| >MAP2K4-S1 LMSTSFDFKY | 45  | >MAP2K4-S1 LMSTLFDKFY | 53   | 8   |
| >MAP2K4-S1 LMSTSFDK   | 37  | >MAP2K4-S1 LMSTLFDK   | 42   | 5   |
| >MAP2K4-S1 LMSTSFDFKY | 13  | >MAP2K4-S1 LMSTLFDKFY | 13   | 0   |
| >MAP2K4-S1 LMSTSFDFK  | 150 | >MAP2K4-S1 LMSTLFDKF  | 93   | 57  |
| >MAP2K4-S1 LMSTSFDFKY | 17  | >MAP2K4-S1 LMSTLFDKFY | 22   | 5   |
| >MAP2K4-S1 LMSTSFDFKY | 66  | >MAP2K4-S1 LMSTLFDKFY | 124  | 58  |
| >MAP2K4-S1 LMSTSFDFKY | 60  | >MAP2K4-S1 LMSTLFDKFY | 47   | 13  |
| >MAP2K4-S1 LMSTSFDK   | 493 | >MAP2K4-S1 LMSTLFDK   | 680  | 187 |
| >MAP2K4-S1 LMSTSFDFKY | 77  | >MAP2K4-S1 LMSTLFDKFY | 101  | 24  |
| >MAP2K4-S1 LMSTSFDFKY | 822 | >MAP2K4-S1 LMSTLFDKFY | 315  | 507 |
| >MAP2K4-S1 LMSTSFDFK  | 94  | >MAP2K4-S1 LMSTLFDKF  | 143  | 49  |
| >MAP2K4-S1 LMSTSFDFKY | 78  | >MAP2K4-S1 LMSTLFDKFY | 108  | 30  |
| >MAP2K4-S1 LMSTSFDFKY | 340 | >MAP2K4-S1 LMSTLFDKFY | 1124 | 784 |
| >MAP2K4-S1 LMSTSFDFK  | 7   | >MAP2K4-S1 LMSTLFDKF  | 34   | 27  |
| >MAP2K4-S1 LMSTSFDFKY | 14  | >MAP2K4-S1 LMSTLFDKFY | 60   | 46  |
| >MAP2K4-S1 LMSTSFDFKY | 381 | >MAP2K4-S1 LMSTLFDKFY | 435  | 54  |
| >MAP2K4-S1 LMSTSFDFK  | 190 | >MAP2K4-S1 LMSTLFDKF  | 462  | 272 |
| >MAP2K4-S1 LMSTSFDFKY | 495 | >MAP2K4-S1 LMSTLFDKFY | 265  | 230 |
| >MAP2K4-S1 ELMSTSFDK  | 162 | >MAP2K4-S1 ELMSTLFDK  | 270  | 108 |
| >MAP2K4-S1 ELMSTSFDK  | 114 | >MAP2K4-S1 ELMSTLFDK  | 130  | 16  |
| >MAP2K4-S1 ELMSTSFDFK | 639 | >MAP2K4-S1 ELMSTLFDKF | 360  | 279 |
| >MAP2K4-S1 ELMSTSFDFK | 168 | >MAP2K4-S1 ELMSTLFDKF | 175  | 7   |
| >MAP2K4-S1 ELMSTSFDFK | 270 | >MAP2K4-S1 ELMSTLFDKF | 51   | 219 |
| >MAP2K4-S1 ELMSTSFDFK | 56  | >MAP2K4-S1 ELMSTLFDKF | 17   | 39  |
| >MAP2K4-S1 ELMSTSFDFK | 157 | >MAP2K4-S1 ELMSTLFDKF | 180  | 23  |
| >MAP2K4-S1 ELMSTSFDFK | 150 | >MAP2K4-S1 ELMSTLFDKF | 193  | 43  |
| >MAP2K4-S1 ELMSTSFDK  | 22  | >MAP2K4-S1 ELMSTLFDK  | 20   | 2   |
| >MAP2K4-S1 ELMSTSFDFK | 122 | >MAP2K4-S1 ELMSTLFDKF | 171  | 49  |
| >MAP2K4-S1 ELMSTSFDFK | 369 | >MAP2K4-S1 ELMSTLFDKF | 474  | 105 |
| >MAP2K4-S1 ELMSTSFDFK | 346 | >MAP2K4-S1 ELMSTLFDKF | 724  | 378 |
| >MAP2K4-S1 ELMSTSFDFK | 354 | >MAP2K4-S1 ELMSTLFDKF | 1221 | 867 |

|                        |       |                        |       |       |
|------------------------|-------|------------------------|-------|-------|
| >MAP2K4-S1 ELMSTSFDFK  | 119   | >MAP2K4-S1 ELMSTLFDKF  | 279   | 160   |
| >MAP2K4-S1 ELMSTSFDFK  | 82    | >MAP2K4-S1 ELMSTLFDKF  | 209   | 127   |
| >MAP2K4-S1 ELMSTSFDFK  | 263   | >MAP2K4-S1 ELMSTLFDKF  | 513   | 250   |
| >MAP2K4-S1 ELMSTSFDFK  | 2468  | >MAP2K4-S1 ELMSTLFDKF  | 388   | 2080  |
| >MAP2K4-S1 MELMSTSF    | 151   | >MAP2K4-S1 MELMSTLF    | 37    | 114   |
| >MAP2K4-S1 MELMSTSF    | 90    | >MAP2K4-S1 MELMSTLFD   | 227   | 137   |
| >MAP2K4-S1 MELMSTSF    | 44    | >MAP2K4-S1 MELMSTLFDI  | 42    | 2     |
| >MAP2K4-S1 MELMSTSF    | 142   | >MAP2K4-S1 MELMSTLF    | 1017  | 875   |
| >MAP2K4-S1 MELMSTSF    | 6     | >MAP2K4-S1 MELMSTLF    | 15    | 9     |
| >MAP2K4-S1 MELMSTSF    | 19    | >MAP2K4-S1 MELMSTLFDI  | 39    | 20    |
| >MAP2K4-S1 MELMSTSF    | 10    | >MAP2K4-S1 MELMSTLF    | 18    | 8     |
| >MAP2K4-S1 MELMSTSF    | 38    | >MAP2K4-S1 MELMSTLFDI  | 23    | 15    |
| >MAP2K4-S1 MELMSTSF    | 393   | >MAP2K4-S1 MELMSTLF    | 1152  | 759   |
| >MAP2K4-S1 MELMSTSF    | 234   | >MAP2K4-S1 MELMSTLF    | 172   | 62    |
| >MAP2K4-S1 MELMSTSF    | 162   | >MAP2K4-S1 MELMSTLFDI  | 115   | 47    |
| >MAP2K4-S1 MELMSTSF    | 64    | >MAP2K4-S1 MELMSTLF    | 100   | 36    |
| >MAP2K4-S1 MELMSTSF    | 240   | >MAP2K4-S1 MELMSTLFDI  | 160   | 80    |
| >MAP2K4-S1 MELMSTSF    | 143   | >MAP2K4-S1 MELMSTLF    | 170   | 27    |
| >MAP2K4-S1 MELMSTSF    | 333   | >MAP2K4-S1 MELMSTLFDI  | 373   | 40    |
| >MAP2K4-S1 MELMSTSF    | 40    | >MAP2K4-S1 MELMSTLF    | 27    | 13    |
| >MAP2K4-S1 MELMSTSF    | 483   | >MAP2K4-S1 MELMSTLFD   | 253   | 230   |
| >MAP2K4-S1 MELMSTSF    | 36    | >MAP2K4-S1 MELMSTLFDI  | 28    | 8     |
| >MAP2K4-S1 MELMSTSF    | 25    | >MAP2K4-S1 MELMSTLFDI  | 29    | 4     |
| >MAP2K4-S1 CMELMSTS    | 23536 | >MAP2K4-S1 CMELMSTL    | 303   | 23233 |
| >MAP2K4-S1 CMELMSTS    | 306   | >MAP2K4-S1 CMELMSTLFI  | 253   | 53    |
| >MAP2K4-S1 CMELMSTS    | 232   | >MAP2K4-S1 CMELMSTLF   | 1490  | 1258  |
| >MAP2K4-S1 ICMELMSTS   | 7973  | >MAP2K4-S1 ICMELMSTL   | 218   | 7755  |
| >MAP2K4-S1 ICMELMSTS   | 181   | >MAP2K4-S1 ICMELMSTLF  | 998   | 817   |
| >MAP2K4-S1 ICMELMSTS   | 54    | >MAP2K4-S1 ICMELMSTLF  | 221   | 167   |
| >MAP2K4-S1 ICMELMSTS   | 242   | >MAP2K4-S1 ICMELMSTLF  | 604   | 362   |
| >MAP2K4-S1 ICMELMSTS   | 523   | >MAP2K4-S1 ICMELMSTL   | 25    | 498   |
| >MAP2K4-S1 WICMELMST   | 11032 | >MAP2K4-S1 WICMELMST   | 135   | 10897 |
| >MAP2K4-S1 WICMELMST   | 6001  | >MAP2K4-S1 WICMELMST   | 190   | 5811  |
| >MAP2K4-S1 WICMELMST   | 8059  | >MAP2K4-S1 WICMELMST   | 243   | 7816  |
| >MAP2K4-S1 WICMELMST   | 13974 | >MAP2K4-S1 WICMELMST   | 385   | 13589 |
| >MAP2K4-S1 WICMELMST   | 14078 | >MAP2K4-S1 WICMELMST   | 98    | 13980 |
| >MAP2K4-S1 WICMELMST   | 75    | >MAP2K4-S1 WICMELMST   | 316   | 241   |
| >MAP2K4-S1 WICMELMST   | 127   | >MAP2K4-S1 WICMELMST   | 577   | 450   |
| >MAP2K4-S1 WICMELMST   | 372   | >MAP2K4-S1 WICMELMST   | 928   | 556   |
| >MAP2K4-S1 WICMELMST   | 480   | >MAP2K4-S1 WICMELMST   | 1218  | 738   |
| >MAP2K4-S1 WICMELMST   | 400   | >MAP2K4-S1 WICMELMST   | 182   | 218   |
| >MAP2K4-S2 SGQLVDSI    | 359   | >MAP2K4-S2 NGQLVDSI    | 2254  | 1895  |
| >MAP2K4-S2 ISGQLVDSIAK | 163   | >MAP2K4-S2 INGQLVDSIAI | 10828 | 10665 |

|                                  |     |                                   |       |       |
|----------------------------------|-----|-----------------------------------|-------|-------|
| >MAP2K4-S2 ISGQLVDSI             | 466 | >MAP2K4-S2 INGQLVDSI              | 9689  | 9223  |
| >MAP2K4-S2 ISGQLVDSI             | 328 | >MAP2K4-S2 INGQLVDSI              | 16862 | 16534 |
| >MAP2K4-S2 ISGQLVDSI             | 81  | >MAP2K4-S2 INGQLVDSI              | 1812  | 1731  |
| >MAP2K4-S2 GISGQLVDSI            | 360 | >MAP2K4-S2 GINGQLVDSI             | 1292  | 932   |
| >MAP2K4-S2 GISGQLVDSI            | 402 | >MAP2K4-S2 GINGQLVDSI             | 874   | 472   |
| >MAP2K4-S2 GISGQLVDSI/           | 650 | >MAP2K4-S2 GINGQLVDSI             | 480   | 170   |
| >MAP2K4-S2 GISGQLVDSI            | 767 | >MAP2K4-S2 GINGQLVDSI             | 332   | 435   |
| >MAP2K4-S2 GISGQLVDSI            | 510 | >MAP2K4-S2 GINGQLVDSI             | 255   | 255   |
| >MAP2K4-S2 FGISGQLV              | 445 | >MAP2K4-S2 FGINGQLV               | 950   | 505   |
| >MAP2K4-S2 FGISGQLVDS            | 470 | >MAP2K4-S2 FGINGQLVDS             | 870   | 400   |
| >MAP2K4-S2 FGISGQLV              | 120 | >MAP2K4-S2 FGINGQLV               | 101   | 19    |
| >MAP2K4-S2 FGISGQLVDS            | 306 | >MAP2K4-S2 FGINGQLVDS             | 238   | 68    |
| >MAP2K4-S2 FGISGQLV              | 374 | >MAP2K4-S2 FGINGQLV               | 330   | 44    |
| >MAP2K4-S2 CDFGISGQL             | 474 | >MAP2K4-S2 CDFGINGQL              | 756   | 282   |
| >MAP2K4-S2 CDFGISGQLV            | 86  | >MAP2K4-S2 CDFGINGQLV             | 116   | 30    |
| >MAP2K4-S2 KLCDFGISGQ            | 121 | >MAP2K4-S2 KLCDFGINGC             | 133   | 12    |
| >MAP2K4-S2 KLCDFGISGQ            | 17  | >MAP2K4-S2 KLCDFGINGC             | 20    | 3     |
| >MAP2K4-S2 KLCDFGISGQ            | 50  | >MAP2K4-S2 KLCDFGINGC             | 90    | 40    |
| >MAP2K4-S2 KLCDFGISGQ            | 448 | >MAP2K4-S2 KLCDFGINGC             | 687   | 239   |
| >MAP2K4-S2 KLCDFGISG             | 360 | >MAP2K4-S2 KLCDFGING              | 681   | 321   |
| >MAP2K4-S2 KLCDFGISGQ            | 192 | >MAP2K4-S2 KLCDFGINGC             | 385   | 193   |
| >MAP2K4-S2 KLCDFGISGQ            | 7   | >MAP2K4-S2 KLCDFGINGC             | 10    | 3     |
| >MAP2K4-S2 KLCDFGISGQ            | 324 | >MAP2K4-S2 KLCDFGINGC             | 558   | 234   |
| >MAP2K4-S2 KLCDFGISGQ            | 134 | >MAP2K4-S2 KLCDFGINGC             | 209   | 75    |
| >MAP2K4-S2 KLCDFGISGQ            | 423 | >MAP2K4-S2 KLCDFGINGC             | 802   | 379   |
| >MAP2K4-S2 KLCDFGISGQ            | 51  | >MAP2K4-S2 KLCDFGINGC             | 115   | 64    |
| >MAP2K4-S2 KLCDFGISGQ            | 6   | >MAP2K4-S2 KLCDFGINGC             | 8     | 2     |
| >MAP2K4-S2 KLCDFGISGQ            | 452 | >MAP2K4-S2 KLCDFGINGC             | 696   | 244   |
| >MDM2-M4 <sup>!</sup> MACFTCAK   | 32  | >MDM2-M4 <sup>!</sup> IACFTCAK    | 83    | 51    |
| >MDM2-M4 <sup>!</sup> MACFTCAKK  | 58  | >MDM2-M4 <sup>!</sup> IACFTCAKK   | 169   | 111   |
| >MDM2-M4 <sup>!</sup> MACFTCAKKI | 111 | >MDM2-M4 <sup>!</sup> IACFTCAKKLk | 289   | 178   |
| >MDM2-M4 <sup>!</sup> MACFTCAK   | 50  | >MDM2-M4 <sup>!</sup> IACFTCAK    | 316   | 266   |
| >MDM2-M4 <sup>!</sup> MACFTCAKK  | 158 | >MDM2-M4 <sup>!</sup> IACFTCAKK   | 880   | 722   |
| >MDM2-M4 <sup>!</sup> MACFTCAKKI | 137 | >MDM2-M4 <sup>!</sup> IACFTCAKKLk | 838   | 701   |
| >MDM2-M4 <sup>!</sup> MACFTCAK   | 260 | >MDM2-M4 <sup>!</sup> IACFTCAK    | 1214  | 954   |
| >MDM2-M4 <sup>!</sup> MACFTCAKK  | 463 | >MDM2-M4 <sup>!</sup> IACFTCAKK   | 2349  | 1886  |
| >MDM2-M4 <sup>!</sup> MACFTCAK   | 10  | >MDM2-M4 <sup>!</sup> IACFTCAK    | 69    | 59    |
| >MDM2-M4 <sup>!</sup> MACFTCAKK  | 7   | >MDM2-M4 <sup>!</sup> IACFTCAKK   | 38    | 31    |
| >MDM2-M4 <sup>!</sup> MACFTCAKKI | 16  | >MDM2-M4 <sup>!</sup> IACFTCAKKLk | 132   | 116   |
| >MDM2-M4 <sup>!</sup> MACFTCAKKI | 62  | >MDM2-M4 <sup>!</sup> IACFTCAKKL  | 72    | 10    |
| >MDM2-M4 <sup>!</sup> LMACFTCA   | 41  | >MDM2-M4 <sup>!</sup> LIACFTCA    | 772   | 731   |
| >MDM2-M4 <sup>!</sup> LMACFTCAKk | 205 | >MDM2-M4 <sup>!</sup> LIACFTCAKKL | 2120  | 1915  |
| >MDM2-M4 <sup>!</sup> LMACFTCA   | 9   | >MDM2-M4 <sup>!</sup> LIACFTCA    | 66    | 57    |

|                                  |      |                                   |      |      |
|----------------------------------|------|-----------------------------------|------|------|
| >MDM2-M4 <sup>ε</sup> LMACFTCAK† | 14   | >MDM2-M4 <sup>ε</sup> LIACFTCAKKL | 86   | 72   |
| >MDM2-M4 <sup>ε</sup> LMACFTCA   | 10   | >MDM2-M4 <sup>ε</sup> LIACFTCA    | 101  | 91   |
| >MDM2-M4 <sup>ε</sup> LMACFTCAK† | 26   | >MDM2-M4 <sup>ε</sup> LIACFTCAKKL | 293  | 267  |
| >MDM2-M4 <sup>ε</sup> LMACFTCA   | 89   | >MDM2-M4 <sup>ε</sup> LIACFTCA    | 201  | 112  |
| >MDM2-M4 <sup>ε</sup> LMACFTCA   | 79   | >MDM2-M4 <sup>ε</sup> LIACFTCA    | 2453 | 2374 |
| >MDM2-M4 <sup>ε</sup> LMACFTCAK† | 38   | >MDM2-M4 <sup>ε</sup> LIACFTCAKKL | 909  | 871  |
| >MDM2-M4 <sup>ε</sup> LMACFTCA   | 76   | >MDM2-M4 <sup>ε</sup> LIACFTCA    | 4430 | 4354 |
| >MDM2-M4 <sup>ε</sup> LMACFTCAK† | 53   | >MDM2-M4 <sup>ε</sup> LIACFTCAKKL | 2461 | 2408 |
| >MDM2-M4 <sup>ε</sup> LMACFTCA   | 96   | >MDM2-M4 <sup>ε</sup> LIACFTCA    | 3007 | 2911 |
| >MDM2-M4 <sup>ε</sup> LMACFTCAK† | 225  | >MDM2-M4 <sup>ε</sup> LIACFTCAKKL | 4535 | 4310 |
| >MDM2-M4 <sup>ε</sup> LMACFTCA   | 124  | >MDM2-M4 <sup>ε</sup> LIACFTCA    | 5084 | 4960 |
| >MDM2-M4 <sup>ε</sup> LMACFTCAK† | 58   | >MDM2-M4 <sup>ε</sup> LIACFTCAKKL | 1939 | 1881 |
| >MDM2-M4 <sup>ε</sup> LMACFTCA   | 36   | >MDM2-M4 <sup>ε</sup> LIACFTCA    | 1570 | 1534 |
| >MDM2-M4 <sup>ε</sup> LMACFTCAK† | 19   | >MDM2-M4 <sup>ε</sup> LIACFTCAKKL | 528  | 509  |
| >MDM2-M4 <sup>ε</sup> LMACFTCAK  | 70   | >MDM2-M4 <sup>ε</sup> LIACFTCAK   | 153  | 83   |
| >MDM2-M4 <sup>ε</sup> LMACFTCAK† | 25   | >MDM2-M4 <sup>ε</sup> LIACFTCAKK  | 34   | 9    |
| >MDM2-M4 <sup>ε</sup> LMACFTCAK  | 31   | >MDM2-M4 <sup>ε</sup> LIACFTCAK   | 41   | 10   |
| >MDM2-M4 <sup>ε</sup> LMACFTCAK† | 40   | >MDM2-M4 <sup>ε</sup> LIACFTCAKK  | 36   | 4    |
| >MDM2-M4 <sup>ε</sup> LMACFTCAK  | 485  | >MDM2-M4 <sup>ε</sup> LIACFTCAK   | 332  | 153  |
| >MDM2-M4 <sup>ε</sup> LMACFTCAK  | 415  | >MDM2-M4 <sup>ε</sup> LIACFTCAK   | 2152 | 1737 |
| >MDM2-M4 <sup>ε</sup> LMACFTCAK† | 390  | >MDM2-M4 <sup>ε</sup> LIACFTCAKK  | 676  | 286  |
| >MDM2-M4 <sup>ε</sup> LMACFTCAK  | 50   | >MDM2-M4 <sup>ε</sup> LIACFTCAK   | 23   | 27   |
| >MDM2-M4 <sup>ε</sup> LMACFTCAK† | 27   | >MDM2-M4 <sup>ε</sup> LIACFTCAKK  | 14   | 13   |
| >MDM2-M4 <sup>ε</sup> LMACFTCA   | 2043 | >MDM2-M4 <sup>ε</sup> LIACFTCA    | 315  | 1728 |
| >MDM2-M4 <sup>ε</sup> LMACFTCA   | 489  | >MDM2-M4 <sup>ε</sup> LIACFTCA    | 4772 | 4283 |
| >MDM2-M4 <sup>ε</sup> LMACFTCA   | 271  | >MDM2-M4 <sup>ε</sup> LIACFTCA    | 6018 | 5747 |
| >MDM2-M4 <sup>ε</sup> LMACFTCAK  | 106  | >MDM2-M4 <sup>ε</sup> LIACFTCAK   | 2282 | 2176 |
| >MDM2-M4 <sup>ε</sup> LMACFTCAK† | 61   | >MDM2-M4 <sup>ε</sup> LIACFTCAKKL | 1679 | 1618 |
| >MDM2-M4 <sup>ε</sup> LMACFTCAK† | 255  | >MDM2-M4 <sup>ε</sup> LIACFTCAKK  | 1109 | 854  |
| >MDM2-M4 <sup>ε</sup> LMACFTCAK  | 130  | >MDM2-M4 <sup>ε</sup> LIACFTCAK   | 187  | 57   |
| >MDM2-M4 <sup>ε</sup> HLMACFTC   | 391  | >MDM2-M4 <sup>ε</sup> HLIACFTC    | 1866 | 1475 |
| >MDM2-M4 <sup>ε</sup> HLMACFTCA  | 17   | >MDM2-M4 <sup>ε</sup> HLIACFTCA   | 51   | 34   |
| >MDM2-M4 <sup>ε</sup> HLMACFTC   | 220  | >MDM2-M4 <sup>ε</sup> HLIACFTC    | 807  | 587  |
| >MDM2-M4 <sup>ε</sup> HLMACFTCA  | 5    | >MDM2-M4 <sup>ε</sup> HLIACFTCA   | 13   | 8    |
| >MDM2-M4 <sup>ε</sup> HLMACFTCA  | 14   | >MDM2-M4 <sup>ε</sup> HLIACFTCA   | 29   | 15   |
| >MDM2-M4 <sup>ε</sup> HLMACFTC   | 132  | >MDM2-M4 <sup>ε</sup> HLIACFTC    | 285  | 153  |
| >MDM2-M4 <sup>ε</sup> HLMACFTCA  | 16   | >MDM2-M4 <sup>ε</sup> HLIACFTCA   | 27   | 11   |
| >MDM2-M4 <sup>ε</sup> HLMACFTC   | 287  | >MDM2-M4 <sup>ε</sup> HLIACFTC    | 591  | 304  |
| >MDM2-M4 <sup>ε</sup> HLMACFTC   | 66   | >MDM2-M4 <sup>ε</sup> HLIACFTC    | 146  | 80   |
| >MDM2-M4 <sup>ε</sup> HLMACFTCA  | 101  | >MDM2-M4 <sup>ε</sup> HLIACFTCA   | 263  | 162  |
| >MDM2-M4 <sup>ε</sup> HLMACFTC   | 118  | >MDM2-M4 <sup>ε</sup> HLIACFTC    | 4369 | 4251 |
| >MDM2-M4 <sup>ε</sup> HLMACFTCA  | 130  | >MDM2-M4 <sup>ε</sup> HLIACFTCA   | 6780 | 6650 |
| >MDM2-M4 <sup>ε</sup> HLMACFTC   | 27   | >MDM2-M4 <sup>ε</sup> HLIACFTC    | 44   | 17   |

|                                  |     |                                   |       |       |
|----------------------------------|-----|-----------------------------------|-------|-------|
| >MDM2-M4 <sup>!</sup> HLMACFTCA  | 40  | >MDM2-M4 <sup>!</sup> HLIACFTCA   | 72    | 32    |
| >MDM2-M4 <sup>!</sup> HLMACFTCAI | 16  | >MDM2-M4 <sup>!</sup> HLIACFTCAK  | 32    | 16    |
| >MDM2-M4 <sup>!</sup> HLMACFTCAI | 29  | >MDM2-M4 <sup>!</sup> HLIACFTCAK† | 51    | 22    |
| >MDM2-M4 <sup>!</sup> HLMACFTCAI | 33  | >MDM2-M4 <sup>!</sup> HLIACFTCAK  | 78    | 45    |
| >MDM2-M4 <sup>!</sup> HLMACFTCAI | 51  | >MDM2-M4 <sup>!</sup> HLIACFTCAK† | 194   | 143   |
| >MDM2-M4 <sup>!</sup> HLMACFTCAI | 93  | >MDM2-M4 <sup>!</sup> HLIACFTCAK  | 237   | 144   |
| >MDM2-M4 <sup>!</sup> HLMACFTCAI | 373 | >MDM2-M4 <sup>!</sup> HLIACFTCAK† | 1034  | 661   |
| >MDM2-M4 <sup>!</sup> HLMACFTCAI | 84  | >MDM2-M4 <sup>!</sup> HLIACFTCAK  | 242   | 158   |
| >MDM2-M4 <sup>!</sup> HLMACFTCAI | 184 | >MDM2-M4 <sup>!</sup> HLIACFTCAK† | 439   | 255   |
| >MDM2-M4 <sup>!</sup> HLMACFTCAI | 25  | >MDM2-M4 <sup>!</sup> HLIACFTCAK  | 27    | 2     |
| >MDM2-M4 <sup>!</sup> HLMACFTCAI | 107 | >MDM2-M4 <sup>!</sup> HLIACFTCAK† | 91    | 16    |
| >MDM2-M4 <sup>!</sup> HLMACFTCA  | 226 | >MDM2-M4 <sup>!</sup> HLIACFTCA   | 426   | 200   |
| >MDM2-M4 <sup>!</sup> HLMACFTCA  | 471 | >MDM2-M4 <sup>!</sup> HLIACFTCA   | 2194  | 1723  |
| >MDM2-M4 <sup>!</sup> HLMACFTCAI | 91  | >MDM2-M4 <sup>!</sup> HLIACFTCAK  | 205   | 114   |
| >MDM2-M4 <sup>!</sup> HLMACFTCAI | 39  | >MDM2-M4 <sup>!</sup> HLIACFTCAK  | 52    | 13    |
| >MDM2-M4 <sup>!</sup> HLMACFTCAI | 280 | >MDM2-M4 <sup>!</sup> HLIACFTCAK† | 387   | 107   |
| >MDM2-M4 <sup>!</sup> KTGHLMACF  | 55  | >MDM2-M4 <sup>!</sup> KTGHLIACF   | 410   | 355   |
| >MDM2-M4 <sup>!</sup> KTGHLMACF  | 151 | >MDM2-M4 <sup>!</sup> KTGHLIACF   | 110   | 41    |
| >MDM2-M4 <sup>!</sup> KTGHLMACF  | 427 | >MDM2-M4 <sup>!</sup> KTGHLIACF   | 317   | 110   |
| >MDM2-M4 <sup>!</sup> KTGHLMACF  | 348 | >MDM2-M4 <sup>!</sup> KTGHLIACF   | 245   | 103   |
| >MDM2-M4 <sup>!</sup> KTGHLMACF  | 8   | >MDM2-M4 <sup>!</sup> KTGHLIACF   | 17    | 9     |
| >MDM2-M4 <sup>!</sup> KTGHLMACF  | 88  | >MDM2-M4 <sup>!</sup> KTGHLIACF   | 58    | 30    |
| >MDM2-M4 <sup>!</sup> KTGHLMACF  | 66  | >MDM2-M4 <sup>!</sup> KTGHLIACF   | 212   | 146   |
| >MDM2-M4 <sup>!</sup> GKTGHLMAC  | 100 | >MDM2-M4 <sup>!</sup> GKTGHLIACF  | 114   | 14    |
| >MDM2-M4 <sup>!</sup> HGKTGHLM   | 475 | >MDM2-M4 <sup>!</sup> HGKTGHLI    | 157   | 318   |
| >MDM2-M4 <sup>!</sup> HGKTGHLM   | 57  | >MDM2-M4 <sup>!</sup> HGKTGHLIA   | 40    | 17    |
| >MDM2-M4 <sup>!</sup> IVHGKTGHLM | 275 | >MDM2-M4 <sup>!</sup> IVHGKTGHLI  | 8152  | 7877  |
| >MDM2-M4 <sup>!</sup> IVHGKTGHLM | 546 | >MDM2-M4 <sup>!</sup> IVHGKTGHLI  | 181   | 365   |
| >MDM2-M4 <sup>!</sup> IVHGKTGHLM | 116 | >MDM2-M4 <sup>!</sup> IVHGKTGHLI/ | 87    | 29    |
| >MDM2-W3 <sup>;</sup> NWLPEDKGK  | 101 | >MDM2-W3 <sup>;</sup> NGLPEDKGK   | 5627  | 5526  |
| >MDM2-W3 <sup>;</sup> NWLPEDKGK  | 443 | >MDM2-W3 <sup>;</sup> NGLPEDKGKI  | 10925 | 10482 |
| >MDM2-W3 <sup>;</sup> ALRENWLPEI | 364 | >MDM2-W3 <sup>;</sup> ALRENGLPED  | 428   | 64    |
| >MDM2-W3 <sup>;</sup> ALRENWLPE  | 244 | >MDM2-W3 <sup>;</sup> ALRENGLPE   | 1269  | 1025  |
| >MDM2-W3 <sup>;</sup> ALRENWLPEI | 56  | >MDM2-W3 <sup>;</sup> ALRENGLPED  | 84    | 28    |
| >MDM2-W3 <sup>;</sup> CWALRENWI  | 510 | >MDM2-W3 <sup>;</sup> CWALRENGL   | 198   | 312   |
| >MDM2-W3 <sup>;</sup> CWALRENW   | 347 | >MDM2-W3 <sup>;</sup> CWALRENG    | 11622 | 11275 |
| >MDM2-W3 <sup>;</sup> CWALRENWI  | 290 | >MDM2-W3 <sup>;</sup> CWALRENGL   | 673   | 383   |
| >MDM2-W3 <sup>;</sup> CWALRENWI  | 473 | >MDM2-W3 <sup>;</sup> CWALRENGL   | 360   | 113   |
| >MDM2-W3 <sup>;</sup> RCWALRENV  | 104 | >MDM2-W3 <sup>;</sup> RCWALRENG   | 7311  | 7207  |
| >MDM2-W3 <sup>;</sup> RCWALRENV  | 290 | >MDM2-W3 <sup>;</sup> RCWALRENG   | 24434 | 24144 |
| >MDM2-W3 <sup>;</sup> RCWALRENV  | 103 | >MDM2-W3 <sup>;</sup> RCWALRENG   | 21969 | 21866 |
| >MDM2-W3 <sup>;</sup> NRCWALREN  | 44  | >MDM2-W3 <sup>;</sup> NRCWALREN   | 50    | 6     |
| >MDM2-W3 <sup>;</sup> NRCWALREN  | 316 | >MDM2-W3 <sup>;</sup> NRCWALREN   | 28861 | 28545 |



|                       |      |                       |       |       |
|-----------------------|------|-----------------------|-------|-------|
| >MDM2-Y28 YQAGESDTD   | 490  | >MDM2-Y28 HQAGESDTD   | 2985  | 2495  |
| >MDM2-Y28 YQAGESDTD   | 21   | >MDM2-Y28 HQAGESDTD   | 386   | 365   |
| >MDM2-Y28 YQAGESDTD   | 380  | >MDM2-Y28 HQAGESDTD   | 1443  | 1063  |
| >MDM2-Y28 YQAGESDTD   | 1055 | >MDM2-Y28 HQAGESDTD   | 398   | 657   |
| >MDM2-Y28 YQAGESDTD   | 37   | >MDM2-Y28 HQAGESDTD   | 62    | 25    |
| >MDM2-Y28 YQAGESDTD   | 86   | >MDM2-Y28 HQAGESDTD   | 182   | 96    |
| >MDM2-Y28 YQAGESDTD   | 7    | >MDM2-Y28 HQAGESDTD   | 26    | 19    |
| >MDM2-Y28 YQAGESDTD   | 105  | >MDM2-Y28 HQAGESDTD   | 198   | 93    |
| >MDM2-Y28 YQAGESDTD   | 258  | >MDM2-Y28 HQAGESDTD   | 409   | 151   |
| >MDM2-Y28 YQAGESDTD   | 733  | >MDM2-Y28 HQAGESDTD   | 232   | 501   |
| >MDM2-Y28 VYQAGESDT   | 353  | >MDM2-Y28 VHQAGESDT   | 18388 | 18035 |
| >MDM2-Y28 YQVTVYQA    | 182  | >MDM2-Y28 YQVTVHQA    | 672   | 490   |
| >MDM2-Y28 YQVTVYQA    | 139  | >MDM2-Y28 YQVTVHQA    | 338   | 199   |
| >MDM2-Y28 YQVTVYQA    | 84   | >MDM2-Y28 YQVTVHQA    | 115   | 31    |
| >MDM2-Y28 YQVTVYQA    | 9    | >MDM2-Y28 YQVTVHQA    | 13    | 4     |
| >MDM2-Y28 YQVTVYQAG   | 347  | >MDM2-Y28 YQVTVHQAG   | 934   | 587   |
| >MDM2-Y28 YQVTVYQAG   | 414  | >MDM2-Y28 YQVTVHQAG   | 692   | 278   |
| >MDM2-Y28 YQVTVYQA    | 219  | >MDM2-Y28 YQVTVHQA    | 235   | 16    |
| >MDM2-Y28 YQVTVYQAG   | 678  | >MDM2-Y28 YQVTVHQAG   | 415   | 263   |
| >MDM2-Y28 YQVTVYQA    | 205  | >MDM2-Y28 YQVTVHQA    | 276   | 71    |
| >MDM2-Y28 VYQVTVYQA   | 553  | >MDM2-Y28 VYQVTVHQA   | 391   | 162   |
| >MDM2-Y28 EVYQVTVYQ   | 356  | >MDM2-Y28 EVYQVTVHQ   | 604   | 248   |
| >MDM2-Y28 EVYQVTVY    | 67   | >MDM2-Y28 EVYQVTVH    | 3570  | 3503  |
| >MDM2-Y28 EVYQVTVY    | 14   | >MDM2-Y28 EVYQVTVH    | 1430  | 1416  |
| >MDM2-Y28 EVYQVTVY    | 6    | >MDM2-Y28 EVYQVTVH    | 288   | 282   |
| >MDM2-Y28 EVYQVTVYQ   | 478  | >MDM2-Y28 EVYQVTVHQ   | 409   | 69    |
| >MDM2-Y28 EVYQVTVY    | 31   | >MDM2-Y28 EVYQVTVH    | 1416  | 1385  |
| >MDM2-Y28 EVYQVTVY    | 462  | >MDM2-Y28 EVYQVTVH    | 15876 | 15414 |
| >MDM2-Y28 EVYQVTVY    | 24   | >MDM2-Y28 EVYQVTVH    | 159   | 135   |
| >MDM2-Y28 EVYQVTVYQ   | 10   | >MDM2-Y28 EVYQVTVHQ   | 49    | 39    |
| >MDM2-Y28 EVYQVTVYQ   | 180  | >MDM2-Y28 EVYQVTVHQ   | 688   | 508   |
| >MDM2-Y28 EVYQVTVYQ   | 37   | >MDM2-Y28 EVYQVTVHQ   | 37    | 0     |
| >MDM2-Y28 EVYQVTVYQ   | 132  | >MDM2-Y28 EVYQVTVHQ   | 801   | 669   |
| >MDM2-Y28 EVYQVTVYQ   | 10   | >MDM2-Y28 EVYQVTVHQ   | 8     | 2     |
| >MDM2-Y28 EVYQVTVY    | 133  | >MDM2-Y28 EVYQVTVH    | 8127  | 7994  |
| >MDM2-Y28 EVYQVTVY    | 397  | >MDM2-Y28 EVYQVTVH    | 17628 | 17231 |
| >MDM2-Y28 EVYQVTVY    | 35   | >MDM2-Y28 EVYQVTVH    | 1111  | 1076  |
| >MDM2-Y28 EVYQVTVY    | 109  | >MDM2-Y28 EVYQVTVH    | 28565 | 28456 |
| >MDM2-Y28 DEVYQVTVY   | 246  | >MDM2-Y28 DEVYQVTVH   | 16462 | 16216 |
| >MDM2-Y28 DEVYQVTVY   | 7    | >MDM2-Y28 DEVYQVTVH   | 87    | 80    |
| >MDM2-Y28 DEVYQVTVY   | 77   | >MDM2-Y28 DEVYQVTVH   | 68    | 9     |
| >MDM4-S36' SAPVVRPK   | 294  | >MDM4-S36' LAPVVRPK   | 2255  | 1961  |
| >MDM4-S36' SAPVVRPKDA | 783  | >MDM4-S36' LAPVVRPKDA | 152   | 631   |

|                        |       |                        |      |       |
|------------------------|-------|------------------------|------|-------|
| >MDM4-S36' ISAPVVRPKD, | 6010  | >MDM4-S36' ILAPVVRPKD, | 32   | 5978  |
| >MDM4-S36' ISAPVVRPKD, | 20193 | >MDM4-S36' ILAPVVRPKD, | 290  | 19903 |
| >MDM4-S36' ISAPVVRPKD, | 23947 | >MDM4-S36' ILAPVVRPKD, | 454  | 23493 |
| >MDM4-S36' ISAPVVRPKD, | 32109 | >MDM4-S36' ILAPVVRPKD, | 80   | 32029 |
| >MDM4-S36' ISAPVVRPK   | 132   | >MDM4-S36' ILAPVVRPK   | 44   | 88    |
| >MDM4-S36' ISAPVVRPK   | 23    | >MDM4-S36' ILAPVVRPK   | 65   | 42    |
| >MDM4-S36' ISAPVVRPK   | 241   | >MDM4-S36' ILAPVVRPK   | 1664 | 1423  |
| >MDM4-S36' ISAPVVRPK   | 109   | >MDM4-S36' ILAPVVRPK   | 520  | 411   |
| >MDM4-S36' ISAPVVRPK   | 380   | >MDM4-S36' ILAPVVRPK   | 6784 | 6404  |
| >MDM4-S36' TISAPVVRPK  | 56    | >MDM4-S36' TILAPVVRPK  | 39   | 17    |
| >MDM4-S36' TISAPVVR    | 341   | >MDM4-S36' TILAPVVR    | 285  | 56    |
| >MDM4-S36' TISAPVVRPK  | 21    | >MDM4-S36' TILAPVVRPK  | 29   | 8     |
| >MDM4-S36' TISAPVVRPK  | 817   | >MDM4-S36' TILAPVVRPK  | 271  | 546   |
| >MDM4-S36' TISAPVVR    | 438   | >MDM4-S36' TILAPVVR    | 156  | 282   |
| >MDM4-S36' TISAPVVR    | 28    | >MDM4-S36' TILAPVVR    | 94   | 66    |
| >MDM4-S36' TISAPVVRPK  | 33    | >MDM4-S36' TILAPVVRPK  | 118  | 85    |
| >MDM4-S36' TISAPVVR    | 178   | >MDM4-S36' TILAPVVR    | 81   | 97    |
| >MDM4-S36' RTISAPVV    | 321   | >MDM4-S36' RTILAPVV    | 997  | 676   |
| >MDM4-S36' RTISAPVV    | 120   | >MDM4-S36' RTILAPVV    | 148  | 28    |
| >MDM4-S36' RTISAPVV    | 124   | >MDM4-S36' RTILAPVV    | 501  | 377   |
| >MDM4-S36' RTISAPVV    | 474   | >MDM4-S36' RTILAPVV    | 1628 | 1154  |
| >MDM4-S36' RTISAPVVRPI | 102   | >MDM4-S36' RTILAPVVRPI | 186  | 84    |
| >MDM4-S36' RTISAPVVR   | 176   | >MDM4-S36' RTILAPVVR   | 246  | 70    |
| >MDM4-S36' RTISAPVVRPI | 17    | >MDM4-S36' RTILAPVVRPI | 19   | 2     |
| >MDM4-S36' RTISAPVV    | 104   | >MDM4-S36' RTILAPVV    | 176  | 72    |
| >MDM4-S36' RTISAPVVR   | 337   | >MDM4-S36' RTILAPVVR   | 482  | 145   |
| >MDM4-S36' RTISAPVVRPI | 6     | >MDM4-S36' RTILAPVVRPI | 6    | 0     |
| >MDM4-S36' RTISAPVVR   | 13    | >MDM4-S36' RTILAPVVR   | 24   | 11    |
| >MDM4-S36' RTISAPVVRPI | 60    | >MDM4-S36' RTILAPVVRPI | 142  | 82    |
| >MDM4-S36' RTISAPVV    | 390   | >MDM4-S36' RTILAPVV    | 415  | 25    |
| >MDM4-S36' RTISAPVVR   | 35    | >MDM4-S36' RTILAPVVR   | 75   | 40    |
| >MDM4-S36' RTISAPVVRPI | 155   | >MDM4-S36' RTILAPVVRPI | 350  | 195   |
| >MDM4-S36' RTISAPVV    | 249   | >MDM4-S36' RTILAPVV    | 680  | 431   |
| >MDM4-S36' RTISAPVV    | 473   | >MDM4-S36' RTILAPVV    | 2615 | 2142  |
| >MDM4-S36' RTISAPVV    | 27    | >MDM4-S36' RTILAPVV    | 27   | 0     |
| >MDM4-S36' RTISAPVV    | 249   | >MDM4-S36' RTILAPVV    | 458  | 209   |
| >MDM4-S36' RTISAPVVRPI | 446   | >MDM4-S36' RTILAPVVRPI | 696  | 250   |
| >MDM4-S36' RTISAPVVR   | 95    | >MDM4-S36' RTILAPVVR   | 81   | 14    |
| >MDM4-S36' RTISAPVV    | 432   | >MDM4-S36' RTILAPVV    | 818  | 386   |
| >MDM4-S36' RRTISAPV    | 334   | >MDM4-S36' RRTILAPV    | 1084 | 750   |
| >MDM4-S36' RRTISAPVV   | 326   | >MDM4-S36' RRTILAPVV   | 1340 | 1014  |
| >MDM4-S36' RRTISAPV    | 77    | >MDM4-S36' RRTILAPV    | 32   | 45    |
| >MDM4-S36' RRTISAPVV   | 243   | >MDM4-S36' RRTILAPVV   | 59   | 184   |

|                         |       |                        |      |       |
|-------------------------|-------|------------------------|------|-------|
| >MDM4-S36` RRTISAPVVR   | 20    | >MDM4-S36` RRTILAPVVR  | 16   | 4     |
| >MDM4-S36` RRTISAPVVRI  | 1063  | >MDM4-S36` RRTILAPVVRI | 423  | 640   |
| >MDM4-S36` RRTISAPV     | 22    | >MDM4-S36` RRTILAPV    | 11   | 11    |
| >MDM4-S36` RRTISAPVV    | 80    | >MDM4-S36` RRTILAPVV   | 35   | 45    |
| >MDM4-S36` RRTISAPVVR   | 97    | >MDM4-S36` RRTILAPVVR  | 84   | 13    |
| >MDM4-S36` RRTISAPVVRI  | 598   | >MDM4-S36` RRTILAPVVRI | 257  | 341   |
| >MDM4-S36` RRTISAPV     | 197   | >MDM4-S36` RRTILAPV    | 38   | 159   |
| >MDM4-S36` RRTISAPVV    | 142   | >MDM4-S36` RRTILAPVV   | 34   | 108   |
| >MDM4-S36` RRTISAPVVR   | 54    | >MDM4-S36` RRTILAPVVR  | 36   | 18    |
| >MDM4-S36` RRTISAPVVR   | 282   | >MDM4-S36` RRTILAPVVR  | 137  | 145   |
| >MDM4-S36` CRRTISAPV    | 399   | >MDM4-S36` CRRTILAPV   | 797  | 398   |
| >MDM4-S36` CRRTISAPVV   | 457   | >MDM4-S36` CRRTILAPVV  | 1063 | 606   |
| >MDM4-S36` CRRTISAPVV   | 567   | >MDM4-S36` CRRTILAPVV  | 349  | 218   |
| >MDM4-S36` CRRTISAPVV   | 579   | >MDM4-S36` CRRTILAPVV  | 297  | 282   |
| >MDM4-S36` CRRTISAPVVI  | 413   | >MDM4-S36` CRRTILAPVVI | 540  | 127   |
| >MDM4-S36` PDCRRTISAPV  | 516   | >MDM4-S36` PDCRRTILAPV | 471  | 45    |
| >MDM4-S36` VPDCRRTIS    | 39605 | >MDM4-S36` VPDCRRTIL   | 481  | 39124 |
| >MDM4-S36` VPDCRRTIS    | 5706  | >MDM4-S36` VPDCRRTIL   | 17   | 5689  |
| >MDM4-S36` VPDCRRTIS    | 10112 | >MDM4-S36` VPDCRRTIL   | 411  | 9701  |
| >MDM4-S36` VPDCRRTISA   | 88    | >MDM4-S36` VPDCRRTILA  | 103  | 15    |
| >MDM4-S36` DVPDCRRTIS   | 184   | >MDM4-S36` DVPDCRRTIL  | 153  | 31    |
| >MDM4-T16` TSEHKCIHSR   | 274   | >MDM4-T16` SSEHKCIHSR  | 120  | 154   |
| >MDM4-T16` TSEHKCIHSR   | 528   | >MDM4-T16` SSEHKCIHSR  | 207  | 321   |
| >MDM4-T16` LPTSEHKCIH   | 375   | >MDM4-T16` LPSSEHKCIH  | 480  | 105   |
| >MDM4-T16` LPTSEHKCI    | 152   | >MDM4-T16` LPSSEHKCI   | 129  | 23    |
| >MDM4-T16` TLPTSEHKC    | 173   | >MDM4-T16` TLPSEHKC    | 79   | 94    |
| >MDM4-T16` TLPTSEHKCI   | 543   | >MDM4-T16` TLPSEHKCI   | 356  | 187   |
| >MDM4-T16` PTLPTSEHK    | 351   | >MDM4-T16` PTLPSSEHK   | 476  | 125   |
| >MDM4-T16` PTLPTSEHKCI  | 234   | >MDM4-T16` PTLPSSEHKCI | 246  | 12    |
| >MDM4-T16` IPTLPTSEH    | 119   | >MDM4-T16` IPTLPSSEH   | 137  | 18    |
| >MDS2-S49G` SCSVLNSSPAI | 145   | >MDS2-S49G` GCSVLNSSPA | 143  | 2     |
| >MDS2-S49G` RLSCSVLNS   | 246   | >MDS2-S49G` RLGCSVLNS  | 1922 | 1676  |
| >MDS2-S49G` QRLSCSVL    | 62    | >MDS2-S49G` QRLGCSVL   | 398  | 336   |
| >MDS2-S49G` QRLSCSVL    | 591   | >MDS2-S49G` QRLGCSVL   | 450  | 141   |
| >MDS2-S49G` QRLSCSVL    | 53    | >MDS2-S49G` QRLGCSVL   | 47   | 6     |
| >MDS2-S49G` LQRLSCSV    | 217   | >MDS2-S49G` LQRLGCSV   | 284  | 67    |
| >MDS2-S49G` LQRLSCSV    | 150   | >MDS2-S49G` LQRLGCSV   | 145  | 5     |
| >MDS2-S49G` LQRLSCSV    | 352   | >MDS2-S49G` LQRLGCSV   | 1046 | 694   |
| >MDS2-S49G` LQRLSCSV    | 108   | >MDS2-S49G` LQRLGCSV   | 126  | 18    |
| >MDS2-S49G` LQRLSCSVL   | 44    | >MDS2-S49G` LQRLGCSVL  | 47   | 3     |
| >MDS2-S49G` LQRLSCSV    | 31    | >MDS2-S49G` LQRLGCSV   | 76   | 45    |
| >MDS2-S49G` LQRLSCSVL   | 10    | >MDS2-S49G` LQRLGCSVL  | 26   | 16    |
| >MDS2-S49G` LQRLSCSVLN  | 351   | >MDS2-S49G` LQRLGCSVLN | 1167 | 816   |

|                         |      |                        |      |      |
|-------------------------|------|------------------------|------|------|
| >MDS2-S49G LQRLSCSVL    | 422  | >MDS2-S49G LQRLGCSVL   | 295  | 127  |
| >MDS2-S49G RLQRLSCSV    | 86   | >MDS2-S49G RLQRLGCSV   | 429  | 343  |
| >MDS2-S49G RLQRLSCSV    | 74   | >MDS2-S49G RLQRLGCSV   | 301  | 227  |
| >MDS2-S49G RLQRLSCSVL   | 486  | >MDS2-S49G RLQRLGCSVL  | 655  | 169  |
| >MDS2-S49G RLQRLSCSV    | 26   | >MDS2-S49G RLQRLGCSV   | 52   | 26   |
| >MDS2-S49G RLQRLSCSVL   | 183  | >MDS2-S49G RLQRLGCSVL  | 186  | 3    |
| >MDS2-S49G RLQRLSCSV    | 165  | >MDS2-S49G RLQRLGCSV   | 418  | 253  |
| >MDS2-S49G RLQRLSCSV    | 3    | >MDS2-S49G RLQRLGCSV   | 4    | 1    |
| >MDS2-S49G RLQRLSCSVL   | 195  | >MDS2-S49G RLQRLGCSVL  | 186  | 9    |
| >MDS2-S49G RLQRLSCSV    | 5    | >MDS2-S49G RLQRLGCSV   | 8    | 3    |
| >MDS2-S49G RLQRLSCSVL   | 114  | >MDS2-S49G RLQRLGCSVL  | 187  | 73   |
| >MDS2-S49G RLQRLSCSV    | 13   | >MDS2-S49G RLQRLGCSV   | 15   | 2    |
| >MDS2-S49G RLQRLSCSV    | 17   | >MDS2-S49G RLQRLGCSV   | 94   | 77   |
| >MDS2-S49G RLQRLSCSV    | 2    | >MDS2-S49G RLQRLGCSV   | 3    | 1    |
| >MDS2-S49G RLQRLSCSVL   | 27   | >MDS2-S49G RLQRLGCSVL  | 27   | 0    |
| >MDS2-S49G RLQRLSCSV    | 271  | >MDS2-S49G RLQRLGCSV   | 1274 | 1003 |
| >MDS2-S49G RLQRLSCSV    | 136  | >MDS2-S49G RLQRLGCSV   | 631  | 495  |
| >MDS2-S49G RLQRLSCSVL   | 396  | >MDS2-S49G RLQRLGCSVL  | 796  | 400  |
| >MDS2-S49G RLQRLSCSV    | 187  | >MDS2-S49G RLQRLGCSV   | 286  | 99   |
| >MDS2-S49G RLQRLSCSVL   | 131  | >MDS2-S49G RLQRLGCSVL  | 162  | 31   |
| >MDS2-S49G RLQRLSCSVL   | 318  | >MDS2-S49G RLQRLGCSVL  | 547  | 229  |
| >MDS2-S49G TRLQRLSCSVI  | 454  | >MDS2-S49G TRLQRLGCSV  | 1248 | 794  |
| >MDS2-S49G TRLQRLSCSVI  | 46   | >MDS2-S49G TRLQRLGCSV  | 73   | 27   |
| >MDS2-S49G TRLQRLSCSVI  | 296  | >MDS2-S49G TRLQRLGCSV  | 310  | 14   |
| >MDS2-S49G TRLQRLSCSVI  | 35   | >MDS2-S49G TRLQRLGCSV  | 37   | 2    |
| >MDS2-S49G PTRLQRLSCSVI | 21   | >MDS2-S49G PTRLQRLGCS  | 47   | 26   |
| >MDS2-S49G LPTRLQRLS    | 336  | >MDS2-S49G LPTRLQRLG   | 483  | 147  |
| >MDS2-S49G KLPTRLQRLS   | 305  | >MDS2-S49G KLPTRLQRLG  | 419  | 114  |
| >MDS2-S49R SCSVLNSSPAI  | 2377 | >MDS2-S49R RCSVLNSSPA  | 457  | 1920 |
| >MDS2-S49R SCSVLNSSPAI  | 145  | >MDS2-S49R RCSVLNSSPA  | 111  | 34   |
| >MDS2-S49R RLSCSVLNS    | 246  | >MDS2-S49R RLRCSVLNS   | 720  | 474  |
| >MDS2-S49R RLSCSVLN     | 8820 | >MDS2-S49R RLRCSVLN    | 126  | 8694 |
| >MDS2-S49R RLSCSVLNS    | 3337 | >MDS2-S49R RLRCSVLNS   | 17   | 3320 |
| >MDS2-S49R RLSCSVLNSS   | 4271 | >MDS2-S49R RLRCSVLNSS  | 24   | 4247 |
| >MDS2-S49R RLSCSVLNSSF  | 7027 | >MDS2-S49R RLRCSVLNSSI | 68   | 6959 |
| >MDS2-S49R RLSCSVLNSSF  | 988  | >MDS2-S49R RLRCSVLNSSI | 464  | 524  |
| >MDS2-S49R QRLSCSVL     | 62   | >MDS2-S49R QRLRCSVL    | 145  | 83   |
| >MDS2-S49R QRLSCSVL     | 591  | >MDS2-S49R QRLRCSVL    | 360  | 231  |
| >MDS2-S49R QRLSCSVL     | 53   | >MDS2-S49R QRLRCSVL    | 193  | 140  |
| >MDS2-S49R LQRLSCSV     | 217  | >MDS2-S49R LQRLRCSV    | 532  | 315  |
| >MDS2-S49R LQRLSCSV     | 150  | >MDS2-S49R LQRLRCSV    | 404  | 254  |
| >MDS2-S49R LQRLSCSV     | 352  | >MDS2-S49R LQRLRCSV    | 375  | 23   |
| >MDS2-S49R LQRLSCSV     | 3240 | >MDS2-S49R LQRLRCSV    | 232  | 3008 |

|                          |       |                          |      |       |
|--------------------------|-------|--------------------------|------|-------|
| >MDS2-S49R LQRLSCSVL     | 2920  | >MDS2-S49R LQRLRCSVL     | 58   | 2862  |
| >MDS2-S49R LQRLSCSV      | 108   | >MDS2-S49R LQRLRCSV      | 263  | 155   |
| >MDS2-S49R LQRLSCSVL     | 44    | >MDS2-S49R LQRLRCSVL     | 73   | 29    |
| >MDS2-S49R LQRLSCSV      | 31    | >MDS2-S49R LQRLRCSV      | 115  | 84    |
| >MDS2-S49R LQRLSCSVL     | 10    | >MDS2-S49R LQRLRCSVL     | 33   | 23    |
| >MDS2-S49R LQRLSCSVLN:   | 351   | >MDS2-S49R LQRLRCSVLN    | 1210 | 859   |
| >MDS2-S49R LQRLSCSVL     | 422   | >MDS2-S49R LQRLRCSVL     | 798  | 376   |
| >MDS2-S49R RLQRLSCSV     | 86    | >MDS2-S49R RLQRLRCSV     | 819  | 733   |
| >MDS2-S49R RLQRLSCSV     | 74    | >MDS2-S49R RLQRLRCSV     | 545  | 471   |
| >MDS2-S49R RLQRLSCSVL    | 486   | >MDS2-S49R RLQRLRCSVL    | 994  | 508   |
| >MDS2-S49R RLQRLSCSV     | 26    | >MDS2-S49R RLQRLRCSV     | 195  | 169   |
| >MDS2-S49R RLQRLSCSVL    | 183   | >MDS2-S49R RLQRLRCSVL    | 368  | 185   |
| >MDS2-S49R RLQRLSCSV     | 165   | >MDS2-S49R RLQRLRCSV     | 939  | 774   |
| >MDS2-S49R RLQRLSCSV     | 3     | >MDS2-S49R RLQRLRCSV     | 14   | 11    |
| >MDS2-S49R RLQRLSCSVL    | 195   | >MDS2-S49R RLQRLRCSVL    | 793  | 598   |
| >MDS2-S49R RLQRLSCSV     | 5     | >MDS2-S49R RLQRLRCSV     | 49   | 44    |
| >MDS2-S49R RLQRLSCSVL    | 114   | >MDS2-S49R RLQRLRCSVL    | 913  | 799   |
| >MDS2-S49R RLQRLSCSV     | 13    | >MDS2-S49R RLQRLRCSV     | 44   | 31    |
| >MDS2-S49R RLQRLSCSV     | 17    | >MDS2-S49R RLQRLRCSV     | 682  | 665   |
| >MDS2-S49R RLQRLSCSV     | 2     | >MDS2-S49R RLQRLRCSV     | 3    | 1     |
| >MDS2-S49R RLQRLSCSVL    | 27    | >MDS2-S49R RLQRLRCSVL    | 35   | 8     |
| >MDS2-S49R RLQRLSCSV     | 271   | >MDS2-S49R RLQRLRCSV     | 220  | 51    |
| >MDS2-S49R RLQRLSCSV     | 136   | >MDS2-S49R RLQRLRCSV     | 392  | 256   |
| >MDS2-S49R RLQRLSCSVL    | 396   | >MDS2-S49R RLQRLRCSVL    | 596  | 200   |
| >MDS2-S49R RLQRLSCSV     | 633   | >MDS2-S49R RLQRLRCSV     | 223  | 410   |
| >MDS2-S49R RLQRLSCSV     | 187   | >MDS2-S49R RLQRLRCSV     | 758  | 571   |
| >MDS2-S49R RLQRLSCSVL    | 131   | >MDS2-S49R RLQRLRCSVL    | 307  | 176   |
| >MDS2-S49R RLQRLSCSVL    | 318   | >MDS2-S49R RLQRLRCSVL    | 744  | 426   |
| >MDS2-S49R TRLQRLSCSVI   | 686   | >MDS2-S49R TRLQRLRCSV    | 256  | 430   |
| >MDS2-S49R TRLQRLSCSVI   | 454   | >MDS2-S49R TRLQRLRCSV    | 1150 | 696   |
| >MDS2-S49R TRLQRLSCSVI   | 640   | >MDS2-S49R TRLQRLRCSV    | 424  | 216   |
| >MDS2-S49R TRLQRLSCSVI   | 46    | >MDS2-S49R TRLQRLRCSV    | 109  | 63    |
| >MDS2-S49R TRLQRLSCSVI   | 296   | >MDS2-S49R TRLQRLRCSV    | 237  | 59    |
| >MDS2-S49R TRLQRLSCSVI   | 35    | >MDS2-S49R TRLQRLRCSV    | 22   | 13    |
| >MDS2-S49R PTRLQRLS      | 842   | >MDS2-S49R PTRLQRLR      | 289  | 553   |
| >MDS2-S49R PTRLQRLSCSV   | 21    | >MDS2-S49R PTRLQRLRCSV   | 24   | 3     |
| >MDS2-S49R PTRLQRLS      | 31166 | >MDS2-S49R PTRLQRLR      | 415  | 30751 |
| >MDS2-S49R LPTRLQRLS     | 336   | >MDS2-S49R LPTRLQRLR     | 1602 | 1266  |
| >MDS2-S49R KLPTRLQRLSCSV | 305   | >MDS2-S49R KLPTRLQRLRCSV | 334  | 29    |
| >MDS2-S49R KLPTRLQRLS    | 16365 | >MDS2-S49R KLPTRLQRLR    | 29   | 16336 |
| >MDS2-S49R KLPTRLQRLS    | 18844 | >MDS2-S49R KLPTRLQRLR    | 132  | 18712 |
| >MDS2-S49R KLPTRLQRLS    | 22552 | >MDS2-S49R KLPTRLQRLR    | 94   | 22458 |
| >MECOM-D9 DDYEETSALE     | 1679  | >MECOM-D9 NDYEETSALE     | 384  | 1295  |

|                      |      |                       |      |      |
|----------------------|------|-----------------------|------|------|
| >MECOM-D9 DDYEETSAL  | 2837 | >MECOM-D9 NDYEETSAL   | 187  | 2650 |
| >MECOM-D9 DDYEETSAL  | 41   | >MECOM-D9 NDYEETSAL   | 141  | 100  |
| >MECOM-D9 PEDDYEETSA | 284  | >MECOM-D9 PENDYEETSA  | 507  | 223  |
| >MECOM-D9 NLHEGNPEDI | 1748 | >MECOM-D9 NLHEGNPENI  | 349  | 1399 |
| >MECOM-D9 NLHEGNPEDI | 659  | >MECOM-D9 NLHEGNPENI  | 334  | 325  |
| >MECOM-D9 NLHEGNPEDI | 55   | >MECOM-D9 NLHEGNPENI  | 47   | 8    |
| >MECOM-M; MFSTTSSL   | 419  | >MECOM-M; IFSTTSSL    | 175  | 244  |
| >MECOM-M; MFSTTSSL   | 103  | >MECOM-M; IFSTTSSL    | 642  | 539  |
| >MECOM-M; MFSTTSSLNK | 52   | >MECOM-M; IFSTTSSLNK  | 58   | 6    |
| >MECOM-M; MFSTTSSLNK | 39   | >MECOM-M; IFSTTSSLNK  | 58   | 19   |
| >MECOM-M; MFSTTSSL   | 132  | >MECOM-M; IFSTTSSL    | 1025 | 893  |
| >MECOM-M; MFSTTSSLNK | 17   | >MECOM-M; IFSTTSSLNK  | 102  | 85   |
| >MECOM-M; MFSTTSSLNK | 179  | >MECOM-M; IFSTTSSLNK  | 499  | 320  |
| >MECOM-M; MFSTTSSLNK | 49   | >MECOM-M; IFSTTSSLNK  | 338  | 289  |
| >MECOM-M; MFSTTSSLNK | 434  | >MECOM-M; IFSTTSSLNK  | 479  | 45   |
| >MECOM-M; MFSTTSSL   | 93   | >MECOM-M; IFSTTSSL    | 634  | 541  |
| >MECOM-M; QMFSTTSSL  | 158  | >MECOM-M; QIFSTTSSL   | 529  | 371  |
| >MECOM-M; QMFSTTSSL  | 182  | >MECOM-M; QIFSTTSSL   | 366  | 184  |
| >MECOM-M; QMFSTTSSL  | 62   | >MECOM-M; QIFSTTSSL   | 1217 | 1155 |
| >MECOM-M; QMFSTTSSL  | 9    | >MECOM-M; QIFSTTSSL   | 51   | 42   |
| >MECOM-M; QMFSTTSS   | 400  | >MECOM-M; QIFSTTSS    | 4706 | 4306 |
| >MECOM-M; QMFSTTSSL  | 8    | >MECOM-M; QIFSTTSSL   | 53   | 45   |
| >MECOM-M; QMFSTTSSL  | 254  | >MECOM-M; QIFSTTSSL   | 426  | 172  |
| >MECOM-M; QMFSTTSSL  | 7    | >MECOM-M; QIFSTTSSL   | 269  | 262  |
| >MECOM-M; QMFSTTSSL  | 22   | >MECOM-M; QIFSTTSSL   | 1639 | 1617 |
| >MECOM-M; QMFSTTSSL  | 44   | >MECOM-M; QIFSTTSSL   | 2486 | 2442 |
| >MECOM-M; QMFSTTSSL  | 23   | >MECOM-M; QIFSTTSSL   | 2655 | 2632 |
| >MECOM-M; QMFSTTSSL  | 5    | >MECOM-M; QIFSTTSSL   | 122  | 117  |
| >MECOM-M; QMFSTTSSLN | 27   | >MECOM-M; QIFSTTSSLNK | 34   | 7    |
| >MECOM-M; QMFSTTSSLN | 10   | >MECOM-M; QIFSTTSSLNK | 14   | 4    |
| >MECOM-M; QMFSTTSSLN | 34   | >MECOM-M; QIFSTTSSLNK | 26   | 8    |
| >MECOM-M; QMFSTTSSLN | 452  | >MECOM-M; QIFSTTSSLNK | 2248 | 1796 |
| >MECOM-M; QMFSTTSSL  | 31   | >MECOM-M; QIFSTTSSL   | 43   | 12   |
| >MECOM-M; QMFSTTSSLN | 69   | >MECOM-M; QIFSTTSSLNK | 22   | 47   |
| >MECOM-M; QMFSTTSSL  | 1414 | >MECOM-M; QIFSTTSSL   | 149  | 1265 |
| >MECOM-M; QMFSTTSSL  | 429  | >MECOM-M; QIFSTTSSL   | 160  | 269  |
| >MECOM-M; QMFSTTSSL  | 48   | >MECOM-M; QIFSTTSSL   | 328  | 280  |
| >MECOM-M; QMFSTTSSL  | 89   | >MECOM-M; QIFSTTSSL   | 819  | 730  |
| >MECOM-M; QMFSTTSS   | 97   | >MECOM-M; QIFSTTSS    | 4144 | 4047 |
| >MECOM-M; QMFSTTSSL  | 3    | >MECOM-M; QIFSTTSSL   | 33   | 30   |
| >MECOM-M; QMFSTTSSLN | 22   | >MECOM-M; QIFSTTSSLNK | 1389 | 1367 |
| >MECOM-M; QMFSTTSSL  | 24   | >MECOM-M; QIFSTTSSL   | 202  | 178  |
| >MECOM-M; QMFSTTSSL  | 91   | >MECOM-M; QIFSTTSSL   | 37   | 54   |

|                      |      |                      |      |      |
|----------------------|------|----------------------|------|------|
| >MECOM-M:QMFSTTSSLN  | 172  | >MECOM-M:QIFSTTSSLNK | 280  | 108  |
| >MECOM-M:GQMFSTTSSL  | 42   | >MECOM-M:GQIFSTTSSL  | 140  | 98   |
| >MECOM-M:GQMFSTTSSL  | 65   | >MECOM-M:GQIFSTTSSL  | 201  | 136  |
| >MECOM-M:GQMFSTTSSL  | 313  | >MECOM-M:GQIFSTTSSL  | 653  | 340  |
| >MECOM-M:GQMFSTTSSL  | 193  | >MECOM-M:GQIFSTTSSL  | 521  | 328  |
| >MECOM-M:GQMFSTTSSL  | 54   | >MECOM-M:GQIFSTTSSL  | 57   | 3    |
| >MECOM-M:GQMFSTTSSL  | 9    | >MECOM-M:GQIFSTTSSL  | 13   | 4    |
| >MECOM-M:GQMFSTTSSL  | 62   | >MECOM-M:GQIFSTTSSL  | 166  | 104  |
| >MECOM-M:GQMFSTTSSL  | 78   | >MECOM-M:GQIFSTTSSL  | 171  | 93   |
| >MECOM-M:CGQMFSTTS   | 273  | >MECOM-M:CGQIFSTTSSL | 222  | 51   |
| >MECOM-M:CKDCGQMF    | 145  | >MECOM-M:CKDCGQIF    | 137  | 8    |
| >MECOM-M:KCKDCGQMF   | 219  | >MECOM-M:KCKDCGQIFS  | 284  | 65   |
| >MECOM-M:KCKDCGQMF   | 90   | >MECOM-M:KCKDCGQIF   | 57   | 33   |
| >MECOM-M:KCKDCGQMF   | 34   | >MECOM-M:KCKDCGQIF   | 65   | 31   |
| >MECOM-M:IKCKDCGQM   | 10   | >MECOM-M:IKCKDCGQIF  | 8    | 2    |
| >MECOM-M:QIKCKDCGQI  | 287  | >MECOM-M:QIKCKDCGQI  | 369  | 82   |
| >MECOM-M:QIKCKDCGQI  | 436  | >MECOM-M:QIKCKDCGQI  | 314  | 122  |
| >MECOM-M:MFNFRAPPN   | 147  | >MECOM-M:VFNFRAPPN/  | 2600 | 2453 |
| >MECOM-M:MFNFRAPPN   | 219  | >MECOM-M:VFNFRAPPN/  | 1179 | 960  |
| >MECOM-M:SMFNFRAPP   | 43   | >MECOM-M:SVFNFRAPP   | 65   | 22   |
| >MECOM-M:SMFNFRAPPI  | 198  | >MECOM-M:SVFNFRAPPN  | 332  | 134  |
| >MECOM-M:SMFNFRAPPI  | 35   | >MECOM-M:SVFNFRAPPN  | 733  | 698  |
| >MECOM-M:SMFNFRAPPI  | 90   | >MECOM-M:SVFNFRAPPN  | 2122 | 2032 |
| >MECOM-M:SMFNFRAPPI  | 24   | >MECOM-M:SVFNFRAPPN  | 418  | 394  |
| >MECOM-M:SMFNFRAPPI  | 430  | >MECOM-M:SVFNFRAPPN  | 674  | 244  |
| >MECOM-M:SMFNFRAPPI  | 6    | >MECOM-M:SVFNFRAPPN  | 531  | 525  |
| >MECOM-M:SMFNFRAPPI  | 105  | >MECOM-M:SVFNFRAPPN  | 7624 | 7519 |
| >MECOM-M:SMFNFRAPPI  | 11   | >MECOM-M:SVFNFRAPPN  | 484  | 473  |
| >MECOM-M:SMFNFRAPPI  | 10   | >MECOM-M:SVFNFRAPPN  | 689  | 679  |
| >MECOM-M:SMFNFRAPPI  | 116  | >MECOM-M:SVFNFRAPPN  | 28   | 88   |
| >MECOM-M:SMFNFRAPP   | 437  | >MECOM-M:SVFNFRAPP   | 826  | 389  |
| >MECOM-M:SMFNFRAPPI  | 2839 | >MECOM-M:SVFNFRAPPN  | 170  | 2669 |
| >MECOM-M:SMFNFRAPPI  | 727  | >MECOM-M:SVFNFRAPPN  | 153  | 574  |
| >MECOM-M:SMFNFRAP    | 372  | >MECOM-M:SVFNFRAP    | 9216 | 8844 |
| >MECOM-M:SMFNFRAPP   | 253  | >MECOM-M:SVFNFRAPP   | 5898 | 5645 |
| >MECOM-M:SMFNFRAPPI  | 132  | >MECOM-M:SVFNFRAPPN  | 5031 | 4899 |
| >MECOM-M:ASELLQSVPSI | 29   | >MECOM-M:ASELLQSVPSI | 1484 | 1455 |
| >MECOM-M:ASELLQSVPSI | 114  | >MECOM-M:ASELLQSVPSI | 1754 | 1640 |
| >MECOM-M:VPSMFNFR    | 450  | >MECOM-M:VPSVFNFR    | 530  | 80   |
| >MECOM-M:VPSMFNFR    | 180  | >MECOM-M:VPSVFNFR    | 200  | 20   |
| >MECOM-M:VPSMFNFRA   | 724  | >MECOM-M:VPSVFNFRA   | 289  | 435  |
| >MECOM-M:VPSMFNFR    | 248  | >MECOM-M:VPSVFNFR    | 555  | 307  |
| >MECOM-M:SVPSMFNFRA  | 341  | >MECOM-M:SVPSVFNFRA  | 353  | 12   |

|                     |      |                     |      |      |
|---------------------|------|---------------------|------|------|
| >MECOM-M:SVPSMFNFR  | 41   | >MECOM-M:SVPSVFNFR  | 33   | 8    |
| >MECOM-M:SVPSMFNF   | 86   | >MECOM-M:SVPSVFNF   | 46   | 40   |
| >MECOM-M:SVPSMFNF   | 55   | >MECOM-M:SVPSVFNF   | 130  | 75   |
| >MECOM-M:SVPSMFNFR  | 17   | >MECOM-M:SVPSVFNFR  | 19   | 2    |
| >MECOM-M:SVPSMFNF   | 558  | >MECOM-M:SVPSVFNF   | 369  | 189  |
| >MECOM-M:SVPSMFNFR  | 248  | >MECOM-M:SVPSVFNFR  | 89   | 159  |
| >MECOM-M:SVPSMFNFR  | 7    | >MECOM-M:SVPSVFNFR  | 5    | 2    |
| >MECOM-M:SVPSMFNFR/ | 83   | >MECOM-M:SVPSVFNFR  | 113  | 30   |
| >MECOM-M:SVPSMFNF   | 588  | >MECOM-M:SVPSVFNF   | 350  | 238  |
| >MECOM-M:SVPSMFNFR  | 126  | >MECOM-M:SVPSVFNFR  | 119  | 7    |
| >MECOM-M:SVPSMFNFR/ | 397  | >MECOM-M:SVPSVFNFR  | 442  | 45   |
| >MECOM-M:SVPSMFNFR  | 165  | >MECOM-M:SVPSVFNFR  | 275  | 110  |
| >MECOM-M:QSVPSMFNFI | 237  | >MECOM-M:QSVPSVFNFR | 200  | 37   |
| >MECOM-M:QSVPSMFNF  | 404  | >MECOM-M:QSVPSVFNF  | 379  | 25   |
| >MECOM-M:QSVPSMFNF  | 11   | >MECOM-M:QSVPSVFNF  | 43   | 32   |
| >MECOM-M:QSVPSMFNFI | 20   | >MECOM-M:QSVPSVFNFR | 21   | 1    |
| >MECOM-M:QSVPSMFNFI | 150  | >MECOM-M:QSVPSVFNFR | 221  | 71   |
| >MECOM-M:QSVPSMFNFI | 10   | >MECOM-M:QSVPSVFNFR | 11   | 1    |
| >MECOM-M:QSVPSMFNFI | 92   | >MECOM-M:QSVPSVFNFR | 119  | 27   |
| >MECOM-M:QSVPSMFNF  | 39   | >MECOM-M:QSVPSVFNF  | 19   | 20   |
| >MECOM-M:QSVPSMFNF  | 2    | >MECOM-M:QSVPSVFNF  | 2    | 0    |
| >MECOM-M:QSVPSMFNFI | 240  | >MECOM-M:QSVPSVFNFR | 334  | 94   |
| >MECOM-M:QSVPSMFNF  | 22   | >MECOM-M:QSVPSVFNF  | 13   | 9    |
| >MECOM-M:QSVPSMFNF  | 107  | >MECOM-M:QSVPSVFNF  | 153  | 46   |
| >MECOM-M:QSVPSMFNF  | 291  | >MECOM-M:QSVPSVFNF  | 735  | 444  |
| >MECOM-M:QSVPSMFNF  | 230  | >MECOM-M:QSVPSVFNF  | 543  | 313  |
| >MECOM-M:QSVPSMFNFI | 82   | >MECOM-M:QSVPSVFNFR | 118  | 36   |
| >MECOM-M:QSVPSMFNFI | 233  | >MECOM-M:QSVPSVFNFR | 270  | 37   |
| >MECOM-M:LQSVPSMFNI | 396  | >MECOM-M:LQSVPSVFNF | 594  | 198  |
| >MECOM-M:LQSVPSMFNI | 25   | >MECOM-M:LQSVPSVFNF | 21   | 4    |
| >MECOM-M:LQSVPSMFNI | 268  | >MECOM-M:LQSVPSVFNF | 210  | 58   |
| >MECOM-M:LQSVPSMF   | 52   | >MECOM-M:LQSVPSVF   | 37   | 15   |
| >MECOM-M:LQSVPSMFNI | 57   | >MECOM-M:LQSVPSVFNF | 49   | 8    |
| >MECOM-M:LQSVPSMF   | 380  | >MECOM-M:LQSVPSVF   | 338  | 42   |
| >MECOM-M:LQSVPSMF   | 3    | >MECOM-M:LQSVPSVF   | 3    | 0    |
| >MECOM-M:LQSVPSMFNI | 4    | >MECOM-M:LQSVPSVFNF | 3    | 1    |
| >MECOM-M:LQSVPSMFNI | 482  | >MECOM-M:LQSVPSVFNF | 483  | 1    |
| >MECOM-M:LQSVPSMFNI | 356  | >MECOM-M:LQSVPSVFNF | 1075 | 719  |
| >MECOM-M:LQSVPSMFNI | 443  | >MECOM-M:LQSVPSVFNF | 506  | 63   |
| >MECOM-M:LLQSVPSM   | 166  | >MECOM-M:LLQSVPSV   | 15   | 151  |
| >MECOM-M:LLQSVPSM   | 362  | >MECOM-M:LLQSVPSV   | 23   | 339  |
| >MECOM-M:LLQSVPSM   | 296  | >MECOM-M:LLQSVPSV   | 5    | 291  |
| >MECOM-M:LLQSVPSM   | 2208 | >MECOM-M:LLQSVPSV   | 99   | 2109 |



|                      |      |                       |      |      |
|----------------------|------|-----------------------|------|------|
| >MECOM-M: LLQSVPSM   | 33   | >MECOM-M: LLQSVPSV    | 2    | 31   |
| >MECOM-M: LLQSVPSMF  | 448  | >MECOM-M: LLQSVPSVF   | 1069 | 621  |
| >MECOM-M: LLQSVPSMFM | 906  | >MECOM-M: LLQSVPSVFN  | 485  | 421  |
| >MECOM-M: LLQSVPSM   | 227  | >MECOM-M: LLQSVPSV    | 4    | 223  |
| >MECOM-M: LLQSVPSM   | 546  | >MECOM-M: LLQSVPSV    | 7    | 539  |
| >MECOM-M: LLQSVPSM   | 159  | >MECOM-M: LLQSVPSV    | 4    | 155  |
| >MECOM-M: LLQSVPSM   | 24   | >MECOM-M: LLQSVPSV    | 2    | 22   |
| >MECOM-M: LLQSVPSMF  | 223  | >MECOM-M: LLQSVPSVF   | 375  | 152  |
| >MECOM-M: LLQSVPSMFM | 93   | >MECOM-M: LLQSVPSVFN  | 95   | 2    |
| >MECOM-M: LLQSVPSMFM | 444  | >MECOM-M: LLQSVPSVFN  | 403  | 41   |
| >MECOM-M: LLQSVPSM   | 105  | >MECOM-M: LLQSVPSV    | 1209 | 1104 |
| >MECOM-M: LLQSVPSMF  | 76   | >MECOM-M: LLQSVPSVF   | 34   | 42   |
| >MECOM-M: LLQSVPSMFM | 111  | >MECOM-M: LLQSVPSVFN  | 80   | 31   |
| >MECOM-M: LLQSVPSMF  | 190  | >MECOM-M: LLQSVPSVF   | 142  | 48   |
| >MECOM-M: LLQSVPSM   | 418  | >MECOM-M: LLQSVPSV    | 1382 | 964  |
| >MECOM-M: LLQSVPSMF  | 28   | >MECOM-M: LLQSVPSVF   | 19   | 9    |
| >MECOM-M: LLQSVPSMFM | 48   | >MECOM-M: LLQSVPSVFN  | 31   | 17   |
| >MECOM-M: LLQSVPSMF  | 10   | >MECOM-M: LLQSVPSVF   | 18   | 8    |
| >MECOM-M: LLQSVPSMFM | 343  | >MECOM-M: LLQSVPSVFN  | 545  | 202  |
| >MECOM-M: ELLQSVPSM  | 3846 | >MECOM-M: ELLQSVPSV   | 86   | 3760 |
| >MECOM-M: ELLQSVPSM  | 7673 | >MECOM-M: ELLQSVPSV   | 207  | 7466 |
| >MECOM-M: ELLQSVPSM  | 2039 | >MECOM-M: ELLQSVPSV   | 54   | 1985 |
| >MECOM-M: ELLQSVPSM  | 55   | >MECOM-M: ELLQSVPSV   | 2    | 53   |
| >MECOM-M: ELLQSVPSM  | 1609 | >MECOM-M: ELLQSVPSV   | 20   | 1589 |
| >MECOM-M: ELLQSVPSM  | 112  | >MECOM-M: ELLQSVPSV   | 5    | 107  |
| >MECOM-M: ELLQSVPSM  | 36   | >MECOM-M: ELLQSVPSV   | 2    | 34   |
| >MECOM-M: ELLQSVPSM  | 82   | >MECOM-M: ELLQSVPSV   | 2    | 80   |
| >MECOM-M: ELLQSVPSM  | 24   | >MECOM-M: ELLQSVPSV   | 2594 | 2570 |
| >MECOM-M: ELLQSVPSMF | 126  | >MECOM-M: ELLQSVPSVF  | 99   | 27   |
| >MECOM-M: ELLQSVPSM  | 72   | >MECOM-M: ELLQSVPSV   | 4006 | 3934 |
| >MECOM-M: ELLQSVPSM  | 21   | >MECOM-M: ELLQSVPSV   | 5    | 16   |
| >MECOM-M: ELLQSVPSMF | 795  | >MECOM-M: ELLQSVPSVF  | 223  | 572  |
| >MECOM-M: ELLQSVPSMF | 312  | >MECOM-M: ELLQSVPSVF  | 267  | 45   |
| >MECOM-M: ELLQSVPSM  | 437  | >MECOM-M: ELLQSVPSV   | 1659 | 1222 |
| >MECOM-M: ELLQSVPSMF | 46   | >MECOM-M: ELLQSVPSVF  | 29   | 17   |
| >MECOM-M: SELLQSVPSM | 47   | >MECOM-M: SELLQSVPSV  | 15   | 32   |
| >MECOM-M: SELLQSVPSM | 133  | >MECOM-M: SELLQSVPSVI | 254  | 121  |
| >MECOM-M: SELLQSVPSM | 100  | >MECOM-M: SELLQSVPSVI | 60   | 40   |
| >MECOM-M: SELLQSVPSM | 147  | >MECOM-M: SELLQSVPSVI | 83   | 64   |
| >MECOM-M: SELLQSVPSM | 462  | >MECOM-M: SELLQSVPSV  | 665  | 203  |
| >MECOM-M: SELLQSVPSM | 262  | >MECOM-M: SELLQSVPSV  | 260  | 2    |
| >MECOM-M: SELLQSVPSM | 176  | >MECOM-M: SELLQSVPSVI | 134  | 42   |
| >MECOM-M: SELLQSVPSM | 132  | >MECOM-M: SELLQSVPSVI | 286  | 154  |

|                     |      |                      |      |      |
|---------------------|------|----------------------|------|------|
| >MECOM-M:SELLQSVPSM | 121  | >MECOM-M:SELLQSVPSVI | 197  | 76   |
| >MECOM-M:SELLQSVPSM | 2351 | >MECOM-M:SELLQSVPSV  | 494  | 1857 |
| >MECOM-M:SELLQSVPSM | 464  | >MECOM-M:SELLQSVPSVI | 788  | 324  |
| >MECOM-M:SELLQSVPSM | 71   | >MECOM-M:SELLQSVPSV  | 56   | 15   |
| >MECOM-M:SELLQSVPSM | 123  | >MECOM-M:SELLQSVPSVI | 155  | 32   |
| >MECOM-V2 MVNMSHAN  | 225  | >MECOM-V2 MINMSHANF  | 73   | 152  |
| >MECOM-V2 MVNMSHAN  | 247  | >MECOM-V2 MINMSHANF  | 82   | 165  |
| >MECOM-V2 MVNMSHAN  | 224  | >MECOM-V2 MINMSHANF  | 226  | 2    |
| >MECOM-V2 MVNMSHAN  | 737  | >MECOM-V2 MINMSHANF  | 229  | 508  |
| >MECOM-V2 MVNMSHAN  | 119  | >MECOM-V2 MINMSHANF  | 34   | 85   |
| >MECOM-V2 MVNMSHAN  | 443  | >MECOM-V2 MINMSHANF  | 1237 | 794  |
| >MECOM-V2 MVNMSHAN  | 134  | >MECOM-V2 MINMSHANF  | 465  | 331  |
| >MECOM-V2 MVNMSHAN  | 97   | >MECOM-V2 MINMSHANF  | 460  | 363  |
| >MECOM-V2 MVNMSHAN  | 133  | >MECOM-V2 MINMSHANF  | 284  | 151  |
| >MECOM-V2 MVNMSHAN  | 143  | >MECOM-V2 MINMSHANF  | 587  | 444  |
| >MECOM-V2 GTPAMDKTS | 30   | >MECOM-V2 GTPAMDKTS  | 17   | 13   |
| >MECOM-V2 GTPAMDKTS | 651  | >MECOM-V2 GTPAMDKTS  | 465  | 186  |
| >MECOM-V2 GTPAMDKTS | 8227 | >MECOM-V2 GTPAMDKTS  | 123  | 8104 |
| >MECOM-V2 SMVNMSHA  | 495  | >MECOM-V2 SMINMSHA   | 98   | 397  |
| >MECOM-V2 SMVNMSHA  | 152  | >MECOM-V2 SMINMSHA   | 80   | 72   |
| >MECOM-V2 SMVNMSHA  | 15   | >MECOM-V2 SMINMSHA   | 9    | 6    |
| >MECOM-V2 SMVNMSHA  | 92   | >MECOM-V2 SMINMSHA   | 62   | 30   |
| >MECOM-V2 SMVNMSHA  | 54   | >MECOM-V2 SMINMSHA   | 37   | 17   |
| >MECOM-V2 SMVNMSHA  | 53   | >MECOM-V2 SMINMSHA   | 19   | 34   |
| >MECOM-V2 SMVNMSHA  | 35   | >MECOM-V2 SMINMSHA   | 31   | 4    |
| >MECOM-V2 SMVNMSHA  | 14   | >MECOM-V2 SMINMSHA   | 13   | 1    |
| >MECOM-V2 SMVNMSHA  | 430  | >MECOM-V2 SMINMSHA   | 203  | 227  |
| >MECOM-V2 SMVNMSHAI | 498  | >MECOM-V2 SMINMSHAN  | 245  | 253  |
| >MECOM-V2 TSMVNMSH/ | 88   | >MECOM-V2 TSMINMSHA  | 127  | 39   |
| >MECOM-V2 TSMVNMSH/ | 83   | >MECOM-V2 TSMINMSHA  | 92   | 9    |
| >MECOM-V2 KTSMVNMSH | 384  | >MECOM-V2 KTSMINMSH  | 620  | 236  |
| >MECOM-V2 KTSMVNMSH | 125  | >MECOM-V2 KTSMINMSH  | 184  | 59   |
| >MECOM-V2 KTSMVNMSH | 41   | >MECOM-V2 KTSMINMSH  | 42   | 1    |
| >MECOM-V2 KTSMVNMSH | 484  | >MECOM-V2 KTSMINMSH  | 276  | 208  |
| >MECOM-V2 KTSMVNMSH | 73   | >MECOM-V2 KTSMINMSH  | 65   | 8    |
| >MECOM-V2 AMDKTSMV  | 41   | >MECOM-V2 AMDKTSMI   | 179  | 138  |
| >MECOM-V2 AMDKTSMV  | 48   | >MECOM-V2 AMDKTSMI   | 344  | 296  |
| >MECOM-V2 AMDKTSMV  | 31   | >MECOM-V2 AMDKTSMI   | 200  | 169  |
| >MECOM-V2 AMDKTSMV  | 84   | >MECOM-V2 AMDKTSMI   | 773  | 689  |
| >MECOM-V2 AMDKTSMV  | 2    | >MECOM-V2 AMDKTSMI   | 8    | 6    |
| >MECOM-V2 AMDKTSMV  | 142  | >MECOM-V2 AMDKTSMIN  | 158  | 16   |
| >MECOM-V2 AMDKTSMV  | 4    | >MECOM-V2 AMDKTSMI   | 20   | 16   |
| >MECOM-V2 AMDKTSMV  | 172  | >MECOM-V2 AMDKTSMIN  | 187  | 15   |

|                       |      |                       |      |      |
|-----------------------|------|-----------------------|------|------|
| >MECOM-V2 AMDKTSMV    | 6    | >MECOM-V2 AMDKTSMI    | 18   | 12   |
| >MECOM-V2 AMDKTSMV†   | 141  | >MECOM-V2 AMDKTSMIN   | 137  | 4    |
| >MECOM-V2 AMDKTSMV    | 7    | >MECOM-V2 AMDKTSMI    | 198  | 191  |
| >MECOM-V2 AMDKTSMV    | 3    | >MECOM-V2 AMDKTSMI    | 60   | 57   |
| >MECOM-V2 AMDKTSMV†   | 462  | >MECOM-V2 AMDKTSMIN   | 614  | 152  |
| >MECOM-V2 AMDKTSMV†   | 304  | >MECOM-V2 AMDKTSMIN   | 535  | 231  |
| >MECOM-V2 TPAMDKTSM   | 178  | >MECOM-V2 TPAMDKTSM   | 205  | 27   |
| >MEN1-A284NLADLEEL    | 52   | >MEN1-A284NLPDLEEL    | 321  | 269  |
| >MEN1-A284NLADLEEL    | 3    | >MEN1-A284NLPDLEEL    | 16   | 13   |
| >MEN1-A284NLADLEELEP† | 29   | >MEN1-A284NLPDLEELEP† | 471  | 442  |
| >MEN1-A284NLADLEEL    | 55   | >MEN1-A284NLPDLEEL    | 341  | 286  |
| >MEN1-A284NLADLEELEP† | 199  | >MEN1-A284NLPDLEELEP† | 1022 | 823  |
| >MEN1-A284NLADLEEL    | 103  | >MEN1-A284NLPDLEEL    | 295  | 192  |
| >MEN1-A284NLADLEELEP† | 329  | >MEN1-A284NLPDLEELEP† | 843  | 514  |
| >MEN1-A284NLADLEEL    | 32   | >MEN1-A284NLPDLEEL    | 51   | 19   |
| >MEN1-A284NLADLEEL    | 59   | >MEN1-A284NLPDLEEL    | 240  | 181  |
| >MEN1-A284NLADLEEL    | 43   | >MEN1-A284NLPDLEEL    | 171  | 128  |
| >MEN1-A284NLADLEEL    | 17   | >MEN1-A284NLPDLEEL    | 298  | 281  |
| >MEN1-A284NLADLEEL    | 6    | >MEN1-A284NLPDLEEL    | 11   | 5    |
| >MEN1-A284NLADLEELEP† | 416  | >MEN1-A284NLPDLEELEP† | 1042 | 626  |
| >MEN1-A284NLADLEEL    | 182  | >MEN1-A284NLPDLEEL    | 761  | 579  |
| >MEN1-A284ALGNLADLEE  | 224  | >MEN1-A284ALGNLPDLEE  | 149  | 75   |
| >MEN1-A284ALGNLADL    | 109  | >MEN1-A284ALGNLPDL    | 248  | 139  |
| >MEN1-A284ALGNLADLEE  | 14   | >MEN1-A284ALGNLPDLEE  | 16   | 2    |
| >MEN1-A284ALGNLADL    | 355  | >MEN1-A284ALGNLPDL    | 727  | 372  |
| >MEN1-A284ALGNLADLEE  | 376  | >MEN1-A284ALGNLPDLEE  | 284  | 92   |
| >MEN1-A284ALGNLADL    | 61   | >MEN1-A284ALGNLPDL    | 36   | 25   |
| >MEN1-A284ALGNLADLEE  | 14   | >MEN1-A284ALGNLPDLEE  | 9    | 5    |
| >MEN1-A284ALGNLADL    | 47   | >MEN1-A284ALGNLPDL    | 72   | 25   |
| >MEN1-A284ALGNLADLEE  | 29   | >MEN1-A284ALGNLPDLEE  | 24   | 5    |
| >MEN1-A284ALGNLADL    | 60   | >MEN1-A284ALGNLPDL    | 22   | 38   |
| >MEN1-A284ALGNLADLEE  | 24   | >MEN1-A284ALGNLPDLEE  | 21   | 3    |
| >MEN1-A284ALGNLADL    | 379  | >MEN1-A284ALGNLPDL    | 296  | 83   |
| >MEN1-A284ALGNLADLEE  | 89   | >MEN1-A284ALGNLPDLEE  | 69   | 20   |
| >MEN1-A284ALGNLADL    | 6    | >MEN1-A284ALGNLPDL    | 8    | 2    |
| >MEN1-A284ALGNLADLEE  | 6    | >MEN1-A284ALGNLPDLEE  | 7    | 1    |
| >MEN1-A284MALGNLADL   | 101  | >MEN1-A284MALGNLPDL   | 352  | 251  |
| >MEN1-A284MALGNLADL   | 5285 | >MEN1-A284MALGNLPDL   | 338  | 4947 |
| >MEN1-A284MALGNLADL   | 528  | >MEN1-A284MALGNLPDL   | 318  | 210  |
| >MEN1-A284MALGNLADL   | 182  | >MEN1-A284MALGNLPDL   | 138  | 44   |
| >MEN1-A284MALGNLADL   | 908  | >MEN1-A284MALGNLPDL   | 412  | 496  |
| >MEN1-A284MALGNLADL   | 37   | >MEN1-A284MALGNLPDL   | 96   | 59   |
| >MEN1-A284PMALGNLAD   | 1652 | >MEN1-A284PMALGNLPD   | 428  | 1224 |

|                       |     |                       |       |       |
|-----------------------|-----|-----------------------|-------|-------|
| >MEN1-A284PMALGNLAD   | 575 | >MEN1-A284PMALGNLPD   | 492   | 83    |
| >MEN1-A284PMALGNLAD   | 183 | >MEN1-A284PMALGNLPD   | 150   | 33    |
| >MEN1-A284YPMALGNLA   | 32  | >MEN1-A284YPMALGNLPI  | 14    | 18    |
| >MEN1-A284YPMALGNLA   | 78  | >MEN1-A284YPMALGNLP   | 6639  | 6561  |
| >MEN1-A284YPMALGNLA   | 14  | >MEN1-A284YPMALGNLPI  | 19    | 5     |
| >MEN1-A284YPMALGNLA   | 97  | >MEN1-A284YPMALGNLPI  | 112   | 15    |
| >MEN1-A284YPMALGNLA   | 21  | >MEN1-A284YPMALGNLPI  | 28    | 7     |
| >MEN1-A284YPMALGNLA   | 524 | >MEN1-A284YPMALGNLPI  | 465   | 59    |
| >MEN1-A284YPMALGNLA   | 5   | >MEN1-A284YPMALGNLP   | 28    | 23    |
| >MEN1-A284YPMALGNLA   | 278 | >MEN1-A284YPMALGNLPI  | 477   | 199   |
| >MEN1-A284RYPMALGNL   | 138 | >MEN1-A284RYPMALGNLI  | 398   | 260   |
| >MEN1-A284RYPMALGNL   | 496 | >MEN1-A284RYPMALGNLI  | 829   | 333   |
| >MEN1-A284RYPMALGNL   | 212 | >MEN1-A284RYPMALGNLI  | 5009  | 4797  |
| >MEN1-A284RYPMALGNL   | 355 | >MEN1-A284RYPMALGNLI  | 10204 | 9849  |
| >MEN1-A49[AVNRVIPTNV  | 86  | >MEN1-A49[DVNRVIPTNV  | 704   | 618   |
| >MEN1-A49[AVNRVIPTNV  | 35  | >MEN1-A49[DVNRVIPTNV  | 1318  | 1283  |
| >MEN1-A49[AVNRVIPTNV  | 77  | >MEN1-A49[DVNRVIPTNV  | 1303  | 1226  |
| >MEN1-A49[AVNRVIPTNV  | 486 | >MEN1-A49[DVNRVIPTNV  | 1721  | 1235  |
| >MEN1-A49[AVNRVIPTNV  | 18  | >MEN1-A49[DVNRVIPTNV  | 917   | 899   |
| >MEN1-A49[AVNRVIPTNV  | 708 | >MEN1-A49[DVNRVIPTNV  | 46    | 662   |
| >MEN1-A49[LAVNRVIPTN  | 119 | >MEN1-A49[LDVNRVIPTN  | 6031  | 5912  |
| >MEN1-A49[LAVNRVIPTN  | 350 | >MEN1-A49[LDVNRVIPTN  | 7304  | 6954  |
| >MEN1-A49[LAVNRVIPTN  | 251 | >MEN1-A49[LDVNRVIPTN  | 15865 | 15614 |
| >MEN1-A49[LAVNRVIPTN  | 362 | >MEN1-A49[LDVNRVIPTN  | 8254  | 7892  |
| >MEN1-A49[LVLGFVEHFL  | 298 | >MEN1-A49[LVLGFVEHFLI | 19472 | 19174 |
| >MEN1-A49[LVLGFVEHFL  | 316 | >MEN1-A49[LVLGFVEHFLI | 9908  | 9592  |
| >MEN1-A49[LVLGFVEHFL  | 34  | >MEN1-A49[LVLGFVEHFLI | 13147 | 13113 |
| >MEN1-A49[LVLGFVEHFL  | 121 | >MEN1-A49[LVLGFVEHFLI | 13818 | 13697 |
| >MEN1-A49[LVLGFVEHFL  | 121 | >MEN1-A49[LVLGFVEHFLI | 25161 | 25040 |
| >MEN1-A49[FLAVNRVI    | 241 | >MEN1-A49[FLDVNRVI    | 341   | 100   |
| >MEN1-A49[FLAVNRVIPT  | 215 | >MEN1-A49[FLDVNRVIPT  | 224   | 9     |
| >MEN1-A49[FLAVNRVI    | 17  | >MEN1-A49[FLDVNRVI    | 176   | 159   |
| >MEN1-A49[FLAVNRVIPT  | 96  | >MEN1-A49[FLDVNRVIPT  | 369   | 273   |
| >MEN1-A49[FLAVNRVI    | 17  | >MEN1-A49[FLDVNRVI    | 610   | 593   |
| >MEN1-A49[FLAVNRVIPT  | 81  | >MEN1-A49[FLDVNRVIPT  | 230   | 149   |
| >MEN1-A49[FLAVNRVI    | 370 | >MEN1-A49[FLDVNRVI    | 594   | 224   |
| >MEN1-A49[FLAVNRVIPT  | 238 | >MEN1-A49[FLDVNRVIPT  | 322   | 84    |
| >MEN1-A49[FLAVNRVI    | 30  | >MEN1-A49[FLDVNRVI    | 15    | 15    |
| >MEN1-A49[FLAVNRVIPT  | 182 | >MEN1-A49[FLDVNRVIPT  | 87    | 95    |
| >MEN1-A49[FLAVNRVIPTI | 798 | >MEN1-A49[FLDVNRVIPTI | 442   | 356   |
| >MEN1-A49[FLAVNRVI    | 58  | >MEN1-A49[FLDVNRVI    | 20    | 38    |
| >MEN1-A49[FLAVNRVIPT  | 529 | >MEN1-A49[FLDVNRVIPT  | 199   | 330   |
| >MEN1-A49[FLAVNRVI    | 103 | >MEN1-A49[FLDVNRVI    | 76    | 27    |

|                        |     |                        |      |      |
|------------------------|-----|------------------------|------|------|
| >MEN1-A49[ FLAVNRVIPT  | 238 | >MEN1-A49[ FLDVNRVIPT  | 192  | 46   |
| >MEN1-A49[ FLAVNRVI    | 207 | >MEN1-A49[ FLDVNRVI    | 376  | 169  |
| >MEN1-A49[ FLAVNRVI    | 14  | >MEN1-A49[ FLDVNRVI    | 40   | 26   |
| >MEN1-A49[ FLAVNRVIPT  | 13  | >MEN1-A49[ FLDVNRVIPT  | 34   | 21   |
| >MEN1-A49[ FLAVNRVIPTI | 284 | >MEN1-A49[ FLDVNRVIPTI | 967  | 683  |
| >MEN1-A49[ HFLAVNRVI   | 46  | >MEN1-A49[ HFLDVNRVI   | 4522 | 4476 |
| >MEN1-A49[ HFLAVNRVI   | 152 | >MEN1-A49[ HFLDVNRVI   | 323  | 171  |
| >MEN1-A49[ EHFLAVNRVI  | 223 | >MEN1-A49[ EHFLDVNRVI  | 520  | 297  |
| >MEN1-A49[ EHFLAVNR    | 45  | >MEN1-A49[ EHFLDVNR    | 83   | 38   |
| >MEN1-A49[ EHFLAVNRVI  | 519 | >MEN1-A49[ EHFLDVNRVI  | 478  | 41   |
| >MEN1-A49[ EHFLAVNRVI  | 454 | >MEN1-A49[ EHFLDVNRVI  | 750  | 296  |
| >MEN1-A49[ EHFLAVNR    | 171 | >MEN1-A49[ EHFLDVNR    | 207  | 36   |
| >MEN1-A49[ VEHFLAVNR\  | 361 | >MEN1-A49[ VEHFLDVNR\  | 1663 | 1302 |
| >MEN1-A49[ VEHFLAVNR\  | 38  | >MEN1-A49[ VEHFLDVNR\  | 97   | 59   |
| >MEN1-A49[ VEHFLAVNR\  | 100 | >MEN1-A49[ VEHFLDVNR\  | 148  | 48   |
| >MEN1-A49[ VEHFLAVNR\  | 150 | >MEN1-A49[ VEHFLDVNR\  | 161  | 11   |
| >MEN1-A49[ VEHFLAVNR\  | 366 | >MEN1-A49[ VEHFLDVNR\  | 925  | 559  |
| >MEN1-A49[ VEHFLAVNR\  | 38  | >MEN1-A49[ VEHFLDVNR\  | 53   | 15   |
| >MEN1-A49[ VEHFLAVNR   | 386 | >MEN1-A49[ VEHFLDVNR   | 407  | 21   |
| >MEN1-A49[ FVEHFLAV    | 85  | >MEN1-A49[ FVEHFLDV    | 579  | 494  |
| >MEN1-A49[ FVEHFLAVNR  | 227 | >MEN1-A49[ FVEHFLDVNR  | 423  | 196  |
| >MEN1-A49[ FVEHFLAV    | 48  | >MEN1-A49[ FVEHFLDV    | 386  | 338  |
| >MEN1-A49[ FVEHFLAVNR  | 30  | >MEN1-A49[ FVEHFLDVNR  | 35   | 5    |
| >MEN1-A49[ FVEHFLAV    | 30  | >MEN1-A49[ FVEHFLDV    | 146  | 116  |
| >MEN1-A49[ FVEHFLAVNR  | 30  | >MEN1-A49[ FVEHFLDVNR  | 63   | 33   |
| >MEN1-A49[ FVEHFLAV    | 5   | >MEN1-A49[ FVEHFLDV    | 18   | 13   |
| >MEN1-A49[ FVEHFLAVNR  | 17  | >MEN1-A49[ FVEHFLDVNR  | 19   | 2    |
| >MEN1-A49[ FVEHFLAV    | 70  | >MEN1-A49[ FVEHFLDV    | 622  | 552  |
| >MEN1-A49[ FVEHFLAVNR  | 117 | >MEN1-A49[ FVEHFLDVNR  | 158  | 41   |
| >MEN1-A49[ FVEHFLAV    | 151 | >MEN1-A49[ FVEHFLDV    | 860  | 709  |
| >MEN1-A49[ FVEHFLAVNR  | 326 | >MEN1-A49[ FVEHFLDVNR  | 389  | 63   |
| >MEN1-A49[ FVEHFLAV    | 13  | >MEN1-A49[ FVEHFLDV    | 23   | 10   |
| >MEN1-A49[ FVEHFLAVNR  | 10  | >MEN1-A49[ FVEHFLDVNR  | 16   | 6    |
| >MEN1-A49[ FVEHFLAVNR  | 116 | >MEN1-A49[ FVEHFLDVNR  | 292  | 176  |
| >MEN1-A49[ FVEHFLAVNR  | 153 | >MEN1-A49[ FVEHFLDVNR  | 316  | 163  |
| >MEN1-A49[ FVEHFLAVNR  | 74  | >MEN1-A49[ FVEHFLDVNR  | 87   | 13   |
| >MEN1-A49[ FVEHFLAV    | 133 | >MEN1-A49[ FVEHFLDV    | 642  | 509  |
| >MEN1-A49[ FVEHFLAVNR  | 57  | >MEN1-A49[ FVEHFLDVNR  | 103  | 46   |
| >MEN1-A49[ FVEHFLAV    | 74  | >MEN1-A49[ FVEHFLDV    | 629  | 555  |
| >MEN1-A49[ FVEHFLAVNR  | 249 | >MEN1-A49[ FVEHFLDVNR  | 584  | 335  |
| >MEN1-A49[ FVEHFLAVNR  | 373 | >MEN1-A49[ FVEHFLDVNR  | 490  | 117  |
| >MEN1-A49[ GFVEHFLAV   | 85  | >MEN1-A49[ GFVEHFLDV   | 1614 | 1529 |
| >MEN1-A49[ GFVEHFLAVN  | 68  | >MEN1-A49[ GFVEHFLDVN  | 90   | 22   |

|                        |      |                        |       |       |
|------------------------|------|------------------------|-------|-------|
| >MEN1-A49[ GFVEHFLAVN  | 71   | >MEN1-A49[ GFVEHFLDVN  | 73    | 2     |
| >MEN1-A49[ VLG FVEHFLA | 56   | >MEN1-A49[ VLG FVEHFLD | 217   | 161   |
| >MEN1-A49[ VLG FVEHFLA | 441  | >MEN1-A49[ VLG FVEHFLD | 17459 | 17018 |
| >MEN1-A49[ VLG FVEHFLA | 42   | >MEN1-A49[ VLG FVEHFLD | 236   | 194   |
| >MEN1-A49[ VLG FVEHFLA | 42   | >MEN1-A49[ VLG FVEHFLD | 102   | 60    |
| >MEN1-A49[ VLG FVEHFLA | 107  | >MEN1-A49[ VLG FVEHFLD | 374   | 267   |
| >MEN1-A49[ VLG FVEHFLA | 32   | >MEN1-A49[ VLG FVEHFLD | 9018  | 8986  |
| >MEN1-A49[ VLG FVEHFLA | 2    | >MEN1-A49[ VLG FVEHFLD | 6     | 4     |
| >MEN1-A49[ VLG FVEHFLA | 387  | >MEN1-A49[ VLG FVEHFLD | 19829 | 19442 |
| >MEN1-A49[ VLG FVEHFLA | 7    | >MEN1-A49[ VLG FVEHFLD | 26    | 19    |
| >MEN1-A49[ VLG FVEHFLA | 52   | >MEN1-A49[ VLG FVEHFLD | 15275 | 15223 |
| >MEN1-A49[ VLG FVEHFLA | 8    | >MEN1-A49[ VLG FVEHFLD | 9     | 1     |
| >MEN1-A49[ VLG FVEHFLA | 377  | >MEN1-A49[ VLG FVEHFLD | 23091 | 22714 |
| >MEN1-A49[ VLG FVEHFLA | 8    | >MEN1-A49[ VLG FVEHFLD | 26    | 18    |
| >MEN1-A49[ VLG FVEHFLA | 17   | >MEN1-A49[ VLG FVEHFLD | 17792 | 17775 |
| >MEN1-A49[ VLG FVEHFLA | 3    | >MEN1-A49[ VLG FVEHFLD | 3     | 0     |
| >MEN1-A535 AQVPAPTA    | 19   | >MEN1-A535 VQVPAPTA    | 21    | 2     |
| >MEN1-A535 AQVPAPTAS   | 477  | >MEN1-A535 VQVPAPTAS   | 737   | 260   |
| >MEN1-A535 AQVPAPTA    | 341  | >MEN1-A535 VQVPAPTA    | 628   | 287   |
| >MEN1-A535 AQVPAPTAS   | 321  | >MEN1-A535 VQVPAPTAS   | 563   | 242   |
| >MEN1-A535 AQVPAPTASF  | 265  | >MEN1-A535 VQVPAPTASF  | 436   | 171   |
| >MEN1-A535 TARGPEGGST  | 1596 | >MEN1-A535 TARGPEGGST  | 287   | 1309  |
| >MEN1-A535 STAQVPAPT   | 40   | >MEN1-A535 STVQVPAPT   | 185   | 145   |
| >MEN1-A535 STAQVPAPTA  | 173  | >MEN1-A535 STVQVPAPTA  | 183   | 10    |
| >MEN1-A535 STAQVPAPTA  | 328  | >MEN1-A535 STVQVPAPTA  | 1122  | 794   |
| >MEN1-A535 STAQVPAPT   | 495  | >MEN1-A535 STVQVPAPT   | 872   | 377   |
| >MEN1-A535 STAQVPAPTA  | 99   | >MEN1-A535 STVQVPAPTA  | 167   | 68    |
| >MEN1-A535 PEGGSTAQVI  | 194  | >MEN1-A535 PEGGSTVQVI  | 161   | 33    |
| >MEN1-A535 GPEGGSTA    | 1563 | >MEN1-A535 GPEGGSTV    | 455   | 1108  |
| >MEN1-D172 LRDVHLAL    | 1995 | >MEN1-D172 LRVVHLAL    | 201   | 1794  |
| >MEN1-D172 LRDVHLAL    | 1768 | >MEN1-D172 LRVVHLAL    | 252   | 1516  |
| >MEN1-D172 LRDVHLAL    | 158  | >MEN1-D172 LRVVHLAL    | 153   | 5     |
| >MEN1-D172 GLRDVHLA    | 169  | >MEN1-D172 GLRVVHLA    | 771   | 602   |
| >MEN1-D172 GLRDVHLAL   | 204  | >MEN1-D172 GLRVVHLAL   | 1265  | 1061  |
| >MEN1-D172 GLRDVHLA    | 23   | >MEN1-D172 GLRVVHLA    | 163   | 140   |
| >MEN1-D172 GLRDVHLAL   | 60   | >MEN1-D172 GLRVVHLAL   | 839   | 779   |
| >MEN1-D172 GLRDVHLA    | 85   | >MEN1-D172 GLRVVHLA    | 643   | 558   |
| >MEN1-D172 GLRDVHLAL   | 18   | >MEN1-D172 GLRVVHLAL   | 297   | 279   |
| >MEN1-D172 GLRDVHLA    | 498  | >MEN1-D172 GLRVVHLA    | 2631  | 2133  |
| >MEN1-D172 GLRDVHLAL   | 182  | >MEN1-D172 GLRVVHLAL   | 1798  | 1616  |
| >MEN1-D172 GLRDVHLA    | 244  | >MEN1-D172 GLRVVHLA    | 834   | 590   |
| >MEN1-D172 GLRDVHLAL   | 254  | >MEN1-D172 GLRVVHLAL   | 1734  | 1480  |
| >MEN1-D172 GLRDVHLA    | 7    | >MEN1-D172 GLRVVHLA    | 68    | 61    |

|                      |       |                      |      |       |
|----------------------|-------|----------------------|------|-------|
| >MEN1-D172GLRDVHLAL  | 6     | >MEN1-D172GLRVVHLAL  | 94   | 88    |
| >MEN1-D172GLRDVHLA   | 430   | >MEN1-D172GLRVVHLA   | 218  | 212   |
| >MEN1-D172GLRDVHLAL  | 196   | >MEN1-D172GLRVVHLAL  | 127  | 69    |
| >MEN1-D172GLRDVHLAL  | 481   | >MEN1-D172GLRVVHLAL  | 1319 | 838   |
| >MEN1-D172GLRDVHLAL  | 3356  | >MEN1-D172GLRVVHLAL  | 469  | 2887  |
| >MEN1-D172GLRDVHLAL  | 270   | >MEN1-D172GLRVVHLAL  | 445  | 175   |
| >MEN1-D172LGLRDVHL   | 4162  | >MEN1-D172LGLRVVHL   | 304  | 3858  |
| >MEN1-D172ALGLRDVHL  | 432   | >MEN1-D172ALGLRVVHL  | 158  | 274   |
| >MEN1-D172ALGLRDVHLA | 689   | >MEN1-D172ALGLRVVHLA | 396  | 293   |
| >MEN1-D172ALGLRDVHLA | 264   | >MEN1-D172ALGLRVVHLA | 236  | 28    |
| >MEN1-D172ALGLRDVHL  | 4772  | >MEN1-D172ALGLRVVHL  | 484  | 4288  |
| >MEN1-D172ALGLRDVHLA | 750   | >MEN1-D172ALGLRVVHLA | 377  | 373   |
| >MEN1-D172ALGLRDVHL  | 1202  | >MEN1-D172ALGLRVVHL  | 93   | 1109  |
| >MEN1-D172ALGLRDVHLA | 502   | >MEN1-D172ALGLRVVHLA | 87   | 415   |
| >MEN1-D172ALGLRDVHLA | 153   | >MEN1-D172ALGLRVVHLA | 53   | 100   |
| >MEN1-D172ALGLRDVHL  | 330   | >MEN1-D172ALGLRVVHL  | 102  | 228   |
| >MEN1-D172ALGLRDVHLA | 559   | >MEN1-D172ALGLRVVHLA | 390  | 169   |
| >MEN1-D172ALGLRDVHLA | 281   | >MEN1-D172ALGLRVVHLA | 245  | 36    |
| >MEN1-D172ALGLRDVHL  | 108   | >MEN1-D172ALGLRVVHL  | 32   | 76    |
| >MEN1-D172ALGLRDVHLA | 220   | >MEN1-D172ALGLRVVHLA | 88   | 132   |
| >MEN1-D172ALGLRDVHLA | 217   | >MEN1-D172ALGLRVVHLA | 142  | 75    |
| >MEN1-D172ALGLRDVHL  | 5672  | >MEN1-D172ALGLRVVHL  | 455  | 5217  |
| >MEN1-D172ALGLRDVHL  | 32    | >MEN1-D172ALGLRVVHL  | 8    | 24    |
| >MEN1-D172ALGLRDVHLA | 23    | >MEN1-D172ALGLRVVHLA | 11   | 12    |
| >MEN1-D172ALGLRDVHLA | 20    | >MEN1-D172ALGLRVVHLA | 12   | 8     |
| >MEN1-D172ALGLRDVHLA | 902   | >MEN1-D172ALGLRVVHLA | 465  | 437   |
| >MEN1-D172CQALGLRD   | 20569 | >MEN1-D172CQALGLRV   | 344  | 20225 |
| >MEN1-D172CQALGLRDV  | 364   | >MEN1-D172CQALGLRVV  | 267  | 97    |
| >MEN1-D172CQALGLRD   | 23305 | >MEN1-D172CQALGLRV   | 90   | 23215 |
| >MEN1-D172CQALGLRDV  | 782   | >MEN1-D172CQALGLRVV  | 171  | 611   |
| >MEN1-D172CQALGLRDVf | 524   | >MEN1-D172CQALGLRVVf | 203  | 321   |
| >MEN1-D418FYDGICKW   | 742   | >MEN1-D418FYNGICKW   | 386  | 356   |
| >MEN1-D418FYDGICKW   | 22    | >MEN1-D418FYNGICKW   | 14   | 8     |
| >MEN1-D418FYDGICKW   | 503   | >MEN1-D418FYNGICKW   | 242  | 261   |
| >MEN1-D418RFYDGICK   | 240   | >MEN1-D418RFYNGICK   | 101  | 139   |
| >MEN1-D418RFYDGICK   | 151   | >MEN1-D418RFYNGICK   | 126  | 25    |
| >MEN1-D418RFYDGICKW  | 393   | >MEN1-D418RFYNGICKW  | 213  | 180   |
| >MEN1-D418RFYDGICKW  | 76    | >MEN1-D418RFYNGICKW  | 32   | 44    |
| >MEN1-D418RFYDGICK   | 57    | >MEN1-D418RFYNGICK   | 29   | 28    |
| >MEN1-D418RFYDGICK   | 71    | >MEN1-D418RFYNGICK   | 46   | 25    |
| >MEN1-D418RFYDGICKW  | 232   | >MEN1-D418RFYNGICKW  | 609  | 377   |
| >MEN1-D418RFYDGICKW  | 34    | >MEN1-D418RFYNGICKW  | 33   | 1     |
| >MEN1-D418RFYDGICKW  | 611   | >MEN1-D418RFYNGICKW  | 406  | 205   |

|                       |      |                       |       |       |
|-----------------------|------|-----------------------|-------|-------|
| >MEN1-D41&RFYDGICK    | 169  | >MEN1-D41&RFYNGICK    | 243   | 74    |
| >MEN1-D41&LRFYDGICK   | 208  | >MEN1-D41&LRFYNGICK   | 177   | 31    |
| >MEN1-D41&LRFYDGICKW  | 162  | >MEN1-D41&LRFYNGICKW  | 114   | 48    |
| >MEN1-D41&LRFYDGICK   | 70   | >MEN1-D41&LRFYNGICK   | 53    | 17    |
| >MEN1-D41&LRFYDGIC    | 461  | >MEN1-D41&LRFYNGIC    | 385   | 76    |
| >MEN1-D41&LRFYDGICKW  | 465  | >MEN1-D41&LRFYNGICKW  | 431   | 34    |
| >MEN1-D41&LRFYDGICKW  | 469  | >MEN1-D41&LRFYNGICKW  | 673   | 204   |
| >MEN1-D41&LRFYDGICKW  | 109  | >MEN1-D41&LRFYNGICKW  | 144   | 35    |
| >MEN1-D41&LLRFYDGI    | 349  | >MEN1-D41&LLRFYNGI    | 193   | 156   |
| >MEN1-D41&LLRFYDGI    | 63   | >MEN1-D41&LLRFYNGI    | 24    | 39    |
| >MEN1-D41&LLRFYDGI    | 195  | >MEN1-D41&LLRFYNGI    | 194   | 1     |
| >MEN1-D41&LLRFYDGI    | 103  | >MEN1-D41&LLRFYNGI    | 55    | 48    |
| >MEN1-D41&LLRFYDGICK  | 77   | >MEN1-D41&LLRFYNGICK  | 33    | 44    |
| >MEN1-D41&LLRFYDGICK  | 378  | >MEN1-D41&LLRFYNGICK  | 265   | 113   |
| >MEN1-D41&LLRFYDGI    | 1906 | >MEN1-D41&LLRFYNGI    | 174   | 1732  |
| >MEN1-D41&LLRFYDGICK  | 47   | >MEN1-D41&LLRFYNGICK  | 14    | 33    |
| >MEN1-D41&LLRFYDGICK  | 622  | >MEN1-D41&LLRFYNGICK  | 229   | 393   |
| >MEN1-D41&LLRFYDGICK\ | 162  | >MEN1-D41&LLRFYNGICK\ | 188   | 26    |
| >MEN1-D41&LLRFYDGICK\ | 203  | >MEN1-D41&LLRFYNGICK\ | 228   | 25    |
| >MEN1-D41&HLLRFYDGI   | 609  | >MEN1-D41&HLLRFYNGI   | 117   | 492   |
| >MEN1-D41&HLLRFYDGI   | 403  | >MEN1-D41&HLLRFYNGI   | 262   | 141   |
| >MEN1-D41&HLLRFYDGI   | 89   | >MEN1-D41&HLLRFYNGI   | 64    | 25    |
| >MEN1-D41&HLLRFYDGI   | 388  | >MEN1-D41&HLLRFYNGI   | 134   | 254   |
| >MEN1-D41&HLLRFYDGI   | 186  | >MEN1-D41&HLLRFYNGI   | 177   | 9     |
| >MEN1-D41&HLLRFYDGI   | 10   | >MEN1-D41&HLLRFYNGI   | 12    | 2     |
| >MEN1-D41&HLLRFYDGI   | 15   | >MEN1-D41&HLLRFYNGI   | 14    | 1     |
| >MEN1-D41&HLLRFYDGI   | 50   | >MEN1-D41&HLLRFYNGI   | 74    | 24    |
| >MEN1-D41&HLLRFYDGI   | 160  | >MEN1-D41&HLLRFYNGI   | 214   | 54    |
| >MEN1-D41&HLLRFYDGI   | 55   | >MEN1-D41&HLLRFYNGI   | 27    | 28    |
| >MEN1-D41&HLLRFYDGICf | 135  | >MEN1-D41&HLLRFYNGICf | 69    | 66    |
| >MEN1-D41&HLLRFYDGICf | 176  | >MEN1-D41&HLLRFYNGICf | 127   | 49    |
| >MEN1-D41&HLLRFYDGI   | 4178 | >MEN1-D41&HLLRFYNGI   | 374   | 3804  |
| >MEN1-D41&HLLRFYDGICf | 157  | >MEN1-D41&HLLRFYNGICf | 34    | 123   |
| >MEN1-D41&HLLRFYDGI   | 672  | >MEN1-D41&HLLRFYNGI   | 422   | 250   |
| >MEN1-D41&HLLRFYDGI   | 99   | >MEN1-D41&HLLRFYNGI   | 51    | 48    |
| >MEN1-D41&AHLLRFYDGI  | 527  | >MEN1-D41&AHLLRFYNGI  | 459   | 68    |
| >MEN1-D41&FAHLLRFYDG  | 589  | >MEN1-D41&FAHLLRFYNG  | 242   | 347   |
| >MEN1-D41&FAHLLRFYDG  | 548  | >MEN1-D41&FAHLLRFYNG  | 475   | 73    |
| >MEN1-D41&FAHLLRFYDG  | 414  | >MEN1-D41&FAHLLRFYNG  | 411   | 3     |
| >MEN1-D41&FAHLLRFYDG  | 82   | >MEN1-D41&FAHLLRFYNG  | 60    | 22    |
| >MEN1-D41&FAHLLRFYDG  | 221  | >MEN1-D41&FAHLLRFYNG  | 235   | 14    |
| >MEN1-E179EDHAWVVF    | 2268 | >MEN1-E179VDHAWVVF    | 455   | 1813  |
| >MEN1-E179SEDHAWVV    | 19   | >MEN1-E179SVDHAWVV    | 32617 | 32598 |



|                       |       |                       |       |       |
|-----------------------|-------|-----------------------|-------|-------|
| >MEN1-E179 SEDHAWVV   | 15662 | >MEN1-E179 SVDHAWVV   | 185   | 15477 |
| >MEN1-E179 SEDHAWVV   | 477   | >MEN1-E179 SVDHAWVV   | 11    | 466   |
| >MEN1-E179 SEDHAWVV   | 1784  | >MEN1-E179 SVDHAWVV   | 24    | 1760  |
| >MEN1-E179 SEDHAWVV   | 3477  | >MEN1-E179 SVDHAWVV   | 81    | 3396  |
| >MEN1-E179 SEDHAWVV   | 1133  | >MEN1-E179 SVDHAWVV   | 14    | 1119  |
| >MEN1-E179 SEDHAWVV   | 7472  | >MEN1-E179 SVDHAWVV   | 42    | 7430  |
| >MEN1-E179 SEDHAWVV   | 16671 | >MEN1-E179 SVDHAWVV   | 396   | 16275 |
| >MEN1-E179 SEDHAWVV   | 10476 | >MEN1-E179 SVDHAWVV   | 51    | 10425 |
| >MEN1-E179 SEDHAWVVF  | 278   | >MEN1-E179 SVDHAWVVF  | 17900 | 17622 |
| >MEN1-E179 SEDHAWVVF  | 5546  | >MEN1-E179 SVDHAWVVF  | 323   | 5223  |
| >MEN1-E179 SEDHAWVV   | 88    | >MEN1-E179 SVDHAWVV   | 20953 | 20865 |
| >MEN1-E179 SEDHAWVVF  | 51    | >MEN1-E179 SVDHAWVVF  | 20445 | 20394 |
| >MEN1-E179 SEDHAWVVF  | 447   | >MEN1-E179 SVDHAWVVF  | 29061 | 28614 |
| >MEN1-E179 SEDHAWVVF  | 411   | >MEN1-E179 SVDHAWVVF  | 27254 | 26843 |
| >MEN1-E179 SEDHAWVVF  | 70    | >MEN1-E179 SVDHAWVVF  | 29712 | 29642 |
| >MEN1-E179 SEDHAWVV   | 127   | >MEN1-E179 SVDHAWVV   | 31691 | 31564 |
| >MEN1-E179 SEDHAWVVF  | 248   | >MEN1-E179 SVDHAWVVF  | 26997 | 26749 |
| >MEN1-E179 SEDHAWVVF  | 4774  | >MEN1-E179 SVDHAWVVF  | 280   | 4494  |
| >MEN1-E179 GLRDVHLALS | 24109 | >MEN1-E179 GLRDVHLALS | 403   | 23706 |
| >MEN1-E179 GLRDVHLALS | 17995 | >MEN1-E179 GLRDVHLALS | 201   | 17794 |
| >MEN1-E179 GLRDVHLALS | 15951 | >MEN1-E179 GLRDVHLALS | 9     | 15942 |
| >MEN1-E179 GLRDVHLALS | 25518 | >MEN1-E179 GLRDVHLALS | 377   | 25141 |
| >MEN1-E179 GLRDVHLALS | 15551 | >MEN1-E179 GLRDVHLALS | 7     | 15544 |
| >MEN1-E179 GLRDVHLALS | 22285 | >MEN1-E179 GLRDVHLALS | 26    | 22259 |
| >MEN1-E179 GLRDVHLALS | 19240 | >MEN1-E179 GLRDVHLALS | 16    | 19224 |
| >MEN1-E179 GLRDVHLALS | 9451  | >MEN1-E179 GLRDVHLALS | 2     | 9449  |
| >MEN1-E179 GLRDVHLALS | 5971  | >MEN1-E179 GLRDVHLALS | 199   | 5772  |
| >MEN1-E179 LSEDHAWVV  | 471   | >MEN1-E179 LSVDHAWVV  | 2674  | 2203  |
| >MEN1-E179 LSEDHAWV   | 1550  | >MEN1-E179 LSVDHAWV   | 285   | 1265  |
| >MEN1-E179 LSEDHAWV   | 1383  | >MEN1-E179 LSVDHAWV   | 179   | 1204  |
| >MEN1-E179 LSEDHAWVV  | 307   | >MEN1-E179 LSVDHAWVV  | 63    | 244   |
| >MEN1-E179 LSEDHAWVV  | 1410  | >MEN1-E179 LSVDHAWVV  | 223   | 1187  |
| >MEN1-E179 LSEDHAWV   | 719   | >MEN1-E179 LSVDHAWV   | 268   | 451   |
| >MEN1-E179 LSEDHAWVV  | 366   | >MEN1-E179 LSVDHAWVV  | 140   | 226   |
| >MEN1-E179 LSEDHAWVV  | 17991 | >MEN1-E179 LSVDHAWVV  | 347   | 17644 |
| >MEN1-E179 LSEDHAWV   | 7453  | >MEN1-E179 LSVDHAWV   | 384   | 7069  |
| >MEN1-E179 LSEDHAWVV  | 8058  | >MEN1-E179 LSVDHAWVV  | 461   | 7597  |
| >MEN1-E179 LSEDHAWV   | 3854  | >MEN1-E179 LSVDHAWV   | 497   | 3357  |
| >MEN1-E179 LSEDHAWVV  | 2221  | >MEN1-E179 LSVDHAWVV  | 202   | 2019  |
| >MEN1-E179 LSEDHAWVV  | 355   | >MEN1-E179 LSVDHAWVV  | 52    | 303   |
| >MEN1-E179 LSEDHAWVV  | 399   | >MEN1-E179 LSVDHAWVV  | 21    | 378   |
| >MEN1-E179 LSEDHAWV   | 1011  | >MEN1-E179 LSVDHAWV   | 104   | 907   |
| >MEN1-E179 LSEDHAWVV  | 1841  | >MEN1-E179 LSVDHAWVV  | 137   | 1704  |

|                       |      |                       |     |      |
|-----------------------|------|-----------------------|-----|------|
| >MEN1-E179 LSEDHAWVV  | 8    | >MEN1-E179 LSVDHAWVV  | 3   | 5    |
| >MEN1-E179 LSEDHAWVV  | 4487 | >MEN1-E179 LSVDHAWVV  | 479 | 4008 |
| >MEN1-E179 LSEDHAWVV  | 1572 | >MEN1-E179 LSVDHAWVV  | 44  | 1528 |
| >MEN1-E179 LSEDHAWVV  | 385  | >MEN1-E179 LSVDHAWVV  | 262 | 123  |
| >MEN1-E179 LSEDHAWVV  | 517  | >MEN1-E179 LSVDHAWVV  | 357 | 160  |
| >MEN1-E179 LSEDHAWVV  | 54   | >MEN1-E179 LSVDHAWVV  | 46  | 8    |
| >MEN1-E179 ALSEDHAWV  | 22   | >MEN1-E179 ALSVDHAWV  | 147 | 125  |
| >MEN1-E179 ALSEDHAWV  | 53   | >MEN1-E179 ALSVDHAWV  | 158 | 105  |
| >MEN1-E179 ALSEDHAWV  | 4    | >MEN1-E179 ALSVDHAWV  | 6   | 2    |
| >MEN1-E179 ALSEDHAWV  | 22   | >MEN1-E179 ALSVDHAWV  | 46  | 24   |
| >MEN1-E179 ALSEDHAWV  | 4    | >MEN1-E179 ALSVDHAWV  | 10  | 6    |
| >MEN1-E179 ALSEDHAWV  | 103  | >MEN1-E179 ALSVDHAWV  | 180 | 77   |
| >MEN1-E179 ALSEDHAWV  | 25   | >MEN1-E179 ALSVDHAWV  | 247 | 222  |
| >MEN1-E179 ALSEDHAWV  | 397  | >MEN1-E179 ALSVDHAWV  | 636 | 239  |
| >MEN1-E179 ALSEDHAWV  | 2    | >MEN1-E179 ALSVDHAWV  | 10  | 8    |
| >MEN1-E179 ALSEDHAWV  | 2    | >MEN1-E179 ALSVDHAWV  | 5   | 3    |
| >MEN1-E179 ALSEDHAWV  | 11   | >MEN1-E179 ALSVDHAWV  | 76  | 65   |
| >MEN1-E179 ALSEDHAWV  | 4    | >MEN1-E179 ALSVDHAWV  | 8   | 4    |
| >MEN1-E179 ALSEDHAWV  | 6    | >MEN1-E179 ALSVDHAWV  | 17  | 11   |
| >MEN1-E179 ALSEDHAWV  | 5    | >MEN1-E179 ALSVDHAWV  | 9   | 4    |
| >MEN1-E179 ALSEDHAWV  | 4    | >MEN1-E179 ALSVDHAWV  | 14  | 10   |
| >MEN1-E179 ALSEDHAWV  | 3    | >MEN1-E179 ALSVDHAWV  | 6   | 3    |
| >MEN1-E179 ALSEDHAWV  | 1    | >MEN1-E179 ALSVDHAWV  | 2   | 1    |
| >MEN1-E179 ALSEDHAWV  | 1    | >MEN1-E179 ALSVDHAWV  | 2   | 1    |
| >MEN1-E179 ALSEDHAWV  | 68   | >MEN1-E179 ALSVDHAWV  | 79  | 11   |
| >MEN1-E179 ALSEDHAWV  | 47   | >MEN1-E179 ALSVDHAWV  | 44  | 3    |
| >MEN1-E179 LALSEDHAW' | 631  | >MEN1-E179 LALSVDHAW' | 301 | 330  |
| >MEN1-E179 LALSEDHAW' | 424  | >MEN1-E179 LALSVDHAW' | 392 | 32   |
| >MEN1-E179 LALSEDHAW' | 149  | >MEN1-E179 LALSVDHAW' | 147 | 2    |
| >MEN1-E179 LALSEDHAW' | 76   | >MEN1-E179 LALSVDHAW' | 39  | 37   |
| >MEN1-E179 LALSEDHAW' | 93   | >MEN1-E179 LALSVDHAW' | 40  | 53   |
| >MEN1-E179 LALSEDHAW' | 51   | >MEN1-E179 LALSVDHAW' | 14  | 37   |
| >MEN1-E179 LALSEDHAW' | 218  | >MEN1-E179 LALSVDHAW' | 169 | 49   |
| >MEN1-E179 LALSEDHAW' | 819  | >MEN1-E179 LALSVDHAW' | 286 | 533  |
| >MEN1-E179 LALSEDHAW' | 217  | >MEN1-E179 LALSVDHAW' | 59  | 158  |
| >MEN1-E179 LALSEDHAW' | 266  | >MEN1-E179 LALSVDHAW' | 158 | 108  |
| >MEN1-E179 LALSEDHAW' | 30   | >MEN1-E179 LALSVDHAW' | 33  | 3    |
| >MEN1-E179 LALSEDHAW' | 34   | >MEN1-E179 LALSVDHAW' | 29  | 5    |
| >MEN1-E179 LALSEDHAW' | 369  | >MEN1-E179 LALSVDHAW' | 247 | 122  |
| >MEN1-E179 LALSEDHAW' | 225  | >MEN1-E179 LALSVDHAW' | 103 | 122  |
| >MEN1-E179 LALSEDHAW  | 18   | >MEN1-E179 LALSVDHAW  | 29  | 11   |
| >MEN1-E179 LALSEDHAW  | 73   | >MEN1-E179 LALSVDHAW  | 72  | 1    |
| >MEN1-E179 LALSEDHAW  | 14   | >MEN1-E179 LALSVDHAW  | 25  | 11   |

|                       |       |                       |       |       |
|-----------------------|-------|-----------------------|-------|-------|
| >MEN1-E179 LALSEDHAW  | 60    | >MEN1-E179 LALSVDHAW  | 52    | 8     |
| >MEN1-E179 LALSEDHAW  | 13    | >MEN1-E179 LALSVDHAW  | 10    | 3     |
| >MEN1-E179 LALSEDHAW  | 12    | >MEN1-E179 LALSVDHAW  | 10    | 2     |
| >MEN1-E179 LALSEDHAW  | 76    | >MEN1-E179 LALSVDHAW  | 138   | 62    |
| >MEN1-E179 HLALSEDHAV | 207   | >MEN1-E179 HLALSVDHAV | 110   | 97    |
| >MEN1-E179 HLALSEDHA  | 160   | >MEN1-E179 HLALSVDHA  | 28    | 132   |
| >MEN1-E179 HLALSEDHAV | 9     | >MEN1-E179 HLALSVDHAV | 7     | 2     |
| >MEN1-E179 HLALSEDHA  | 2155  | >MEN1-E179 HLALSVDHA  | 37    | 2118  |
| >MEN1-E179 HLALSEDHAV | 26    | >MEN1-E179 HLALSVDHAV | 8     | 18    |
| >MEN1-E179 HLALSEDHAV | 286   | >MEN1-E179 HLALSVDHAV | 153   | 133   |
| >MEN1-E179 HLALSEDHAV | 38    | >MEN1-E179 HLALSVDHAV | 18    | 20    |
| >MEN1-E179 HLALSEDHAV | 75    | >MEN1-E179 HLALSVDHAV | 45    | 30    |
| >MEN1-E179 HLALSEDHA  | 651   | >MEN1-E179 HLALSVDHA  | 175   | 476   |
| >MEN1-E179 HLALSEDHAV | 16    | >MEN1-E179 HLALSVDHAV | 14    | 2     |
| >MEN1-E179 HLALSEDHAV | 24    | >MEN1-E179 HLALSVDHAV | 12    | 12    |
| >MEN1-E179 HLALSEDHA  | 669   | >MEN1-E179 HLALSVDHA  | 231   | 438   |
| >MEN1-E179 HLALSEDHAV | 5     | >MEN1-E179 HLALSVDHAV | 3     | 2     |
| >MEN1-E179 HLALSEDHAV | 237   | >MEN1-E179 HLALSVDHAV | 117   | 120   |
| >MEN1-E179 HLALSEDHAV | 863   | >MEN1-E179 HLALSVDHAV | 464   | 399   |
| >MEN1-E179 HLALSEDHAV | 202   | >MEN1-E179 HLALSVDHAV | 65    | 137   |
| >MEN1-E179 HLALSEDHAV | 306   | >MEN1-E179 HLALSVDHAV | 333   | 27    |
| >MEN1-E179 VHLALSEDHA | 463   | >MEN1-E179 VHLALSVDHA | 315   | 148   |
| >MEN1-E179 VHLALSEDHA | 32    | >MEN1-E179 VHLALSVDHA | 54    | 22    |
| >MEN1-E179 DVHLALSE   | 23319 | >MEN1-E179 DVHLALSV   | 103   | 23216 |
| >MEN1-E179 DVHLALSE   | 20743 | >MEN1-E179 DVHLALSV   | 287   | 20456 |
| >MEN1-E179 RDVHLALSE  | 4874  | >MEN1-E179 RDVHLALSV  | 142   | 4732  |
| >MEN1-E179 RDVHLALSE  | 18206 | >MEN1-E179 RDVHLALSV  | 77    | 18129 |
| >MEN1-E26K ELGREEPDLV | 2734  | >MEN1-E26K KLGREEPDLV | 236   | 2498  |
| >MEN1-E26K ELGREEPDLV | 826   | >MEN1-E26K KLGREEPDLV | 101   | 725   |
| >MEN1-E26K ELGREEPDLV | 583   | >MEN1-E26K KLGREEPDLV | 109   | 474   |
| >MEN1-E26K ELGREEPDLV | 104   | >MEN1-E26K KLGREEPDLV | 11    | 93    |
| >MEN1-E26K ELGREEPDLV | 1905  | >MEN1-E26K KLGREEPDLV | 172   | 1733  |
| >MEN1-E26K ELGREEPDLV | 651   | >MEN1-E26K KLGREEPDLV | 27    | 624   |
| >MEN1-E26K ELGREEPDLV | 3962  | >MEN1-E26K KLGREEPDLV | 200   | 3762  |
| >MEN1-E26K ELGREEPDL  | 1660  | >MEN1-E26K KLGREEPDL  | 80    | 1580  |
| >MEN1-E26K ELGREEPDLV | 64    | >MEN1-E26K KLGREEPDLV | 11    | 53    |
| >MEN1-E26K ELGREEPDLV | 1830  | >MEN1-E26K KLGREEPDLV | 106   | 1724  |
| >MEN1-E26K ELGREEPDLV | 145   | >MEN1-E26K KLGREEPDLV | 75    | 70    |
| >MEN1-E26K ELGREEPDL  | 117   | >MEN1-E26K KLGREEPDL  | 29    | 88    |
| >MEN1-E26K ELGREEPDLV | 22    | >MEN1-E26K KLGREEPDLV | 12    | 10    |
| >MEN1-E26K ELGREEPDLV | 175   | >MEN1-E26K KLGREEPDLV | 40    | 135   |
| >MEN1-E26K AELGREEPDL | 349   | >MEN1-E26K AKLGREEPDL | 12849 | 12500 |
| >MEN1-E26K AELGREEPDL | 9634  | >MEN1-E26K AKLGREEPDL | 446   | 9188  |

|                       |       |                       |       |       |
|-----------------------|-------|-----------------------|-------|-------|
| >MEN1-E26K AELGREEPDL | 346   | >MEN1-E26K AKLGREEPDL | 22285 | 21939 |
| >MEN1-E26K AELGREEPDL | 86    | >MEN1-E26K AKLGREEPDL | 24681 | 24595 |
| >MEN1-E26K AELGREEPDL | 35    | >MEN1-E26K AKLGREEPDL | 13192 | 13157 |
| >MEN1-E26K AELGREEPDL | 15    | >MEN1-E26K AKLGREEPDL | 9464  | 9449  |
| >MEN1-E26K LFAAELGR   | 1286  | >MEN1-E26K LFAAKLGR   | 118   | 1168  |
| >MEN1-E26K LFAAELGR   | 476   | >MEN1-E26K LFAAKLGR   | 649   | 173   |
| >MEN1-E26K LFAAELGR   | 175   | >MEN1-E26K LFAAKLGR   | 155   | 20    |
| >MEN1-E26K RLFAAELGR  | 65    | >MEN1-E26K RLFAAKLGR  | 46    | 19    |
| >MEN1-E26K RLFAAELGR  | 285   | >MEN1-E26K RLFAAKLGR  | 228   | 57    |
| >MEN1-E26K RLFAAELGR  | 93    | >MEN1-E26K RLFAAKLGR  | 22    | 71    |
| >MEN1-E26K RLFAAELGR  | 435   | >MEN1-E26K RLFAAKLGR  | 618   | 183   |
| >MEN1-E26K RLFAAELGR  | 34    | >MEN1-E26K RLFAAKLGR  | 24    | 10    |
| >MEN1-E26K VRLFAAELGR | 1253  | >MEN1-E26K VRLFAAKLGR | 497   | 756   |
| >MEN1-E26K VRLFAAEL   | 405   | >MEN1-E26K VRLFAAKL   | 209   | 196   |
| >MEN1-E26K VRLFAAELGR | 312   | >MEN1-E26K VRLFAAKLGR | 429   | 117   |
| >MEN1-E26K VVRLFAAEL  | 170   | >MEN1-E26K VVRLFAAKL  | 218   | 48    |
| >MEN1-E26K VVRLFAAE   | 19108 | >MEN1-E26K VVRLFAAK   | 115   | 18993 |
| >MEN1-E26K VVRLFAAE   | 27668 | >MEN1-E26K VVRLFAAK   | 223   | 27445 |
| >MEN1-E26K VVRLFAAE   | 2692  | >MEN1-E26K VVRLFAAK   | 6     | 2686  |
| >MEN1-E26K VVRLFAAEL  | 156   | >MEN1-E26K VVRLFAAKL  | 239   | 83    |
| >MEN1-E26K VVRLFAAELG | 473   | >MEN1-E26K VVRLFAAKLG | 339   | 134   |
| >MEN1-E26K VVRLFAAE   | 13833 | >MEN1-E26K VVRLFAAK   | 268   | 13565 |
| >MEN1-E26K VVRLFAAELG | 458   | >MEN1-E26K VVRLFAAKLG | 176   | 282   |
| >MEN1-E26K VVRLFAAEL  | 461   | >MEN1-E26K VVRLFAAKL  | 1846  | 1385  |
| >MEN1-E26K VVRLFAAEL  | 55    | >MEN1-E26K VVRLFAAKL  | 53    | 2     |
| >MEN1-E26K VVRLFAAEL  | 386   | >MEN1-E26K VVRLFAAKL  | 265   | 121   |
| >MEN1-E26K DVVRLFAAEL | 37    | >MEN1-E26K DVVRLFAAKL | 52    | 15    |
| >MEN1-E26K DVVRLFAAE  | 4499  | >MEN1-E26K DVVRLFAAK  | 89    | 4410  |
| >MEN1-E26K DVVRLFAAE  | 6436  | >MEN1-E26K DVVRLFAAK  | 19    | 6417  |
| >MEN1-E26K DVVRLFAAEL | 169   | >MEN1-E26K DVVRLFAAKL | 334   | 165   |
| >MEN1-E26K DVVRLFAAEL | 86    | >MEN1-E26K DVVRLFAAKL | 140   | 54    |
| >MEN1-E359 EIYKEFFEVE | 254   | >MEN1-E359 KIYKEFFEVE | 9     | 245   |
| >MEN1-E359 EIYKEFFEVE | 150   | >MEN1-E359 KIYKEFFEVE | 10    | 140   |
| >MEN1-E359 EIYKEFFEVA | 2323  | >MEN1-E359 KIYKEFFEVA | 472   | 1851  |
| >MEN1-E359 EIYKEFFEVE | 489   | >MEN1-E359 KIYKEFFEVE | 15    | 474   |
| >MEN1-E359 EIYKEFFEVA | 1116  | >MEN1-E359 KIYKEFFEVA | 231   | 885   |
| >MEN1-E359 EIYKEFFEVE | 10    | >MEN1-E359 KIYKEFFEVE | 3     | 7     |
| >MEN1-E359 EIYKEFFEVA | 1546  | >MEN1-E359 KIYKEFFEVA | 237   | 1309  |
| >MEN1-E359 EIYKEFFEVE | 18    | >MEN1-E359 KIYKEFFEVE | 3     | 15    |
| >MEN1-E359 EIYKEFFEVA | 1719  | >MEN1-E359 KIYKEFFEVA | 142   | 1577  |
| >MEN1-E359 EIYKEFFEVE | 468   | >MEN1-E359 KIYKEFFEVE | 13    | 455   |
| >MEN1-E359 EIYKEFFEVE | 33    | >MEN1-E359 KIYKEFFEVE | 8     | 25    |
| >MEN1-E359 EIYKEFFEVE | 318   | >MEN1-E359 KIYKEFFEVE | 129   | 189   |

|                         |       |                         |       |       |
|-------------------------|-------|-------------------------|-------|-------|
| >MEN1-E359 EIYKEFFEVEV  | 18    | >MEN1-E359 KIYKEFFEVEV  | 6     | 12    |
| >MEN1-E359 EIYKEFFEVEV  | 5779  | >MEN1-E359 KIYKEFFEVEV  | 393   | 5386  |
| >MEN1-E359 EIYKEFFFE    | 300   | >MEN1-E359 KIYKEFFFE    | 12567 | 12267 |
| >MEN1-E359 EIYKEFFEVEV  | 12    | >MEN1-E359 KIYKEFFEVEV  | 1236  | 1224  |
| >MEN1-E359 EIYKEFFEVEVA | 272   | >MEN1-E359 KIYKEFFEVEVA | 6550  | 6278  |
| >MEN1-E359 EIYKEFFEVEV  | 4     | >MEN1-E359 KIYKEFFEVEV  | 98    | 94    |
| >MEN1-E359 EIYKEFFEVEVA | 124   | >MEN1-E359 KIYKEFFEVEVA | 7270  | 7146  |
| >MEN1-E359 EEIYKEFF     | 292   | >MEN1-E359 EKIYKEFF     | 29947 | 29655 |
| >MEN1-E359 EEIYKEFFFEV  | 213   | >MEN1-E359 EKIYKEFFFEV  | 9688  | 9475  |
| >MEN1-E359 EEIYKEFF     | 312   | >MEN1-E359 EKIYKEFF     | 224   | 88    |
| >MEN1-E359 EEIYKEFF     | 2164  | >MEN1-E359 EKIYKEFF     | 71    | 2093  |
| >MEN1-E359 EEIYKEFFFEV  | 52    | >MEN1-E359 EKIYKEFFFEV  | 14217 | 14165 |
| >MEN1-E359 EEIYKEFFFEV  | 210   | >MEN1-E359 EKIYKEFFFEV  | 12785 | 12575 |
| >MEN1-E359 EEIYKEFF     | 42    | >MEN1-E359 EKIYKEFF     | 8665  | 8623  |
| >MEN1-E359 EEIYKEFFFEV  | 117   | >MEN1-E359 EKIYKEFFFEV  | 11283 | 11166 |
| >MEN1-E359 EEIYKEFFFEV  | 181   | >MEN1-E359 EKIYKEFFFEV  | 9214  | 9033  |
| >MEN1-E359 EEIYKEFFFEVA | 9     | >MEN1-E359 EKIYKEFFFEVA | 3435  | 3426  |
| >MEN1-E359 EEIYKEFFFEV  | 120   | >MEN1-E359 EKIYKEFFFEV  | 23579 | 23459 |
| >MEN1-E359 DEEIYKEFF    | 26    | >MEN1-E359 DEKIYKEFF    | 36    | 10    |
| >MEN1-E359 DEEIYKEFFFEV | 47    | >MEN1-E359 DEKIYKEFFFEV | 66    | 19    |
| >MEN1-E359 DEEIYKEF     | 13    | >MEN1-E359 DEKIYKEF     | 12    | 1     |
| >MEN1-E359 DEEIYKEFF    | 17    | >MEN1-E359 DEKIYKEFF    | 16    | 1     |
| >MEN1-E359 DEEIYKEFFFEV | 141   | >MEN1-E359 DEKIYKEFFFEV | 135   | 6     |
| >MEN1-E359 REDEEIYKEFF  | 59    | >MEN1-E359 REDEKIYKEFF  | 63    | 4     |
| >MEN1-E359 REDEEIYKEF   | 330   | >MEN1-E359 REDEKIYKEF   | 315   | 15    |
| >MEN1-E359 REDEEIYKEF   | 147   | >MEN1-E359 REDEKIYKEF   | 141   | 6     |
| >MEN1-E359 REDEEIYKEF   | 467   | >MEN1-E359 REDEKIYKEF   | 325   | 142   |
| >MEN1-E359 REDEEIYKEFF  | 273   | >MEN1-E359 REDEKIYKEFF  | 349   | 76    |
| >MEN1-E359 REDEEIYKEF   | 92    | >MEN1-E359 REDEKIYKEF   | 112   | 20    |
| >MEN1-E359 REDEEIYKEFF  | 220   | >MEN1-E359 REDEKIYKEFF  | 348   | 128   |
| >MEN1-E359 YCREDEEIYK   | 485   | >MEN1-E359 YCREDEKIYK   | 253   | 232   |
| >MEN1-E359 YCREDEEIY    | 760   | >MEN1-E359 YCREDEKIY    | 419   | 341   |
| >MEN1-E359 YCREDEEIY    | 284   | >MEN1-E359 YCREDEKIY    | 454   | 170   |
| >MEN1-E359 NYCREDEEI    | 309   | >MEN1-E359 NYCREDEKI    | 382   | 73    |
| >MEN1-E359 NYCREDEEI    | 33    | >MEN1-E359 NYCREDEKI    | 49    | 16    |
| >MEN1-E359 NYCREDEEIYI  | 189   | >MEN1-E359 NYCREDEKIYI  | 146   | 43    |
| >MEN1-E359 YNYCREDEEI\  | 431   | >MEN1-E359 YNYCREDEKI\  | 346   | 85    |
| >MEN1-E359 YNYCREDEEI\  | 131   | >MEN1-E359 YNYCREDEKI\  | 92    | 39    |
| >MEN1-E359 YNYCREDEEI\  | 444   | >MEN1-E359 YNYCREDEKI\  | 614   | 170   |
| >MEN1-E359 YNYCREDEEI   | 445   | >MEN1-E359 YNYCREDEKI   | 302   | 143   |
| >MEN1-E378 EAASLLEA     | 43    | >MEN1-E378 VAASLLEA     | 3687  | 3644  |
| >MEN1-E378 EAASLLEA     | 223   | >MEN1-E378 VAASLLEA     | 7689  | 7466  |
| >MEN1-E378 KEAASLLEA    | 17777 | >MEN1-E378 KVAASLLEA    | 109   | 17668 |

|                        |       |                        |       |       |
|------------------------|-------|------------------------|-------|-------|
| >MEN1-E378 KEAASLLEA   | 6854  | >MEN1-E378 KVAASLLEA   | 87    | 6767  |
| >MEN1-E378 KEAASLLEA   | 5685  | >MEN1-E378 KVAASLLEA   | 34    | 5651  |
| >MEN1-E378 KEAASLLEA   | 1187  | >MEN1-E378 KVAASLLEA   | 16    | 1171  |
| >MEN1-E378 KEAASLLEA   | 11903 | >MEN1-E378 KVAASLLEA   | 77    | 11826 |
| >MEN1-E378 KEAASLLEA   | 43    | >MEN1-E378 KVAASLLEA   | 34600 | 34557 |
| >MEN1-E378 KEAASLLEA   | 10    | >MEN1-E378 KVAASLLEA   | 24490 | 24480 |
| >MEN1-E378 KEAASLLEA   | 152   | >MEN1-E378 KVAASLLEA   | 36478 | 36326 |
| >MEN1-E378 LKEAASLL    | 1166  | >MEN1-E378 LKVAASLL    | 38    | 1128  |
| >MEN1-E378 LKEAASLLEA  | 5575  | >MEN1-E378 LKVAASLLEA  | 229   | 5346  |
| >MEN1-E378 LKEAASLL    | 641   | >MEN1-E378 LKVAASLL    | 278   | 363   |
| >MEN1-E378 LLKEAASL    | 28    | >MEN1-E378 LLKVAASL    | 116   | 88    |
| >MEN1-E378 LLKEAASLL   | 19    | >MEN1-E378 LLKVAASLL   | 94    | 75    |
| >MEN1-E378 LLKEAASLLEA | 107   | >MEN1-E378 LLKVAASLLEA | 508   | 401   |
| >MEN1-E378 LLKEAASL    | 9     | >MEN1-E378 LLKVAASL    | 40    | 31    |
| >MEN1-E378 LLKEAASLL   | 7     | >MEN1-E378 LLKVAASLL   | 49    | 42    |
| >MEN1-E378 LLKEAASLLEA | 7     | >MEN1-E378 LLKVAASLLEA | 38    | 31    |
| >MEN1-E378 LLKEAASLLEA | 426   | >MEN1-E378 LLKVAASLLEA | 3421  | 2995  |
| >MEN1-E378 LLKEAASL    | 108   | >MEN1-E378 LLKVAASL    | 959   | 851   |
| >MEN1-E378 LLKEAASLL   | 266   | >MEN1-E378 LLKVAASLL   | 4192  | 3926  |
| >MEN1-E378 LLKEAASLLEA | 338   | >MEN1-E378 LLKVAASLLEA | 3371  | 3033  |
| >MEN1-E378 LLKEAASL    | 57    | >MEN1-E378 LLKVAASL    | 535   | 478   |
| >MEN1-E378 LLKEAASLL   | 208   | >MEN1-E378 LLKVAASLL   | 2483  | 2275  |
| >MEN1-E378 LLKEAASL    | 3     | >MEN1-E378 LLKVAASL    | 9     | 6     |
| >MEN1-E378 LLKEAASLL   | 5     | >MEN1-E378 LLKVAASLL   | 22    | 17    |
| >MEN1-E378 LLKEAASLLEA | 7     | >MEN1-E378 LLKVAASLLEA | 28    | 21    |
| >MEN1-E378 LLKEAASLLEA | 669   | >MEN1-E378 LLKVAASLLEA | 377   | 292   |
| >MEN1-E378 LLKEAASL    | 221   | >MEN1-E378 LLKVAASL    | 147   | 74    |
| >MEN1-E378 LLKEAASL    | 174   | >MEN1-E378 LLKVAASL    | 184   | 10    |
| >MEN1-E378 LLKEAASLL   | 426   | >MEN1-E378 LLKVAASLL   | 169   | 257   |
| >MEN1-E378 NLLKEAASL   | 451   | >MEN1-E378 NLLKVAASL   | 160   | 291   |
| >MEN1-E378 NLLKEAASL   | 92    | >MEN1-E378 NLLKVAASL   | 81    | 11    |
| >MEN1-E378 NLLKEAASLL  | 90    | >MEN1-E378 NLLKVAASLL  | 106   | 16    |
| >MEN1-E378 NLLKEAASL   | 518   | >MEN1-E378 NLLKVAASL   | 185   | 333   |
| >MEN1-E378 NLLKEAASLL  | 215   | >MEN1-E378 NLLKVAASLL  | 233   | 18    |
| >MEN1-E378 NLLKEAASL   | 467   | >MEN1-E378 NLLKVAASL   | 209   | 258   |
| >MEN1-E378 NLLKEAASL   | 83    | >MEN1-E378 NLLKVAASL   | 13    | 70    |
| >MEN1-E378 NLLKEAASLL  | 137   | >MEN1-E378 NLLKVAASLL  | 63    | 74    |
| >MEN1-E378 NLLKEAASL   | 26    | >MEN1-E378 NLLKVAASL   | 19    | 7     |
| >MEN1-E378 NLLKEAASLL  | 76    | >MEN1-E378 NLLKVAASLL  | 90    | 14    |
| >MEN1-E378 NLLKEAASL   | 227   | >MEN1-E378 NLLKVAASL   | 35    | 192   |
| >MEN1-E378 NLLKEAASLL  | 167   | >MEN1-E378 NLLKVAASLL  | 70    | 97    |
| >MEN1-E378 NLLKEAASL   | 43    | >MEN1-E378 NLLKVAASL   | 24    | 19    |
| >MEN1-E378 NLLKEAASLL  | 96    | >MEN1-E378 NLLKVAASLL  | 72    | 24    |

|                        |       |                        |       |       |
|------------------------|-------|------------------------|-------|-------|
| >MEN1-E378 NLLKEAASL   | 33    | >MEN1-E378 NLLKVAASL   | 27    | 6     |
| >MEN1-E378 NLLKEAASLL  | 46    | >MEN1-E378 NLLKVAASLL  | 61    | 15    |
| >MEN1-E378 NLLKEAASL   | 485   | >MEN1-E378 NLLKVAASL   | 179   | 306   |
| >MEN1-E378 NLLKEAASLL  | 565   | >MEN1-E378 NLLKVAASLL  | 445   | 120   |
| >MEN1-E378 NLLKEAASL   | 231   | >MEN1-E378 NLLKVAASL   | 325   | 94    |
| >MEN1-E378 NLLKEAASL   | 398   | >MEN1-E378 NLLKVAASL   | 169   | 229   |
| >MEN1-E378 IPNLLKEAA   | 1606  | >MEN1-E378 IPNLLKVAA   | 321   | 1285  |
| >MEN1-E378 IPNLLKEAASL | 44    | >MEN1-E378 IPNLLKVAASL | 29    | 15    |
| >MEN1-E378 IPNLLKEAASL | 420   | >MEN1-E378 IPNLLKVAASL | 256   | 164   |
| >MEN1-E378 IPNLLKEAASL | 151   | >MEN1-E378 IPNLLKVAASL | 149   | 2     |
| >MEN1-E378 IPNLLKEA    | 27    | >MEN1-E378 IPNLLKVA    | 12    | 15    |
| >MEN1-E378 IPNLLKEAA   | 17    | >MEN1-E378 IPNLLKVAA   | 7     | 10    |
| >MEN1-E378 VIPNLLKE    | 22449 | >MEN1-E378 VIPNLLKV    | 79    | 22370 |
| >MEN1-E378 VIPNLLKE    | 23542 | >MEN1-E378 VIPNLLKV    | 135   | 23407 |
| >MEN1-E378 VIPNLLKE    | 26227 | >MEN1-E378 VIPNLLKV    | 30    | 26197 |
| >MEN1-E378 VIPNLLKE    | 23800 | >MEN1-E378 VIPNLLKV    | 84    | 23716 |
| >MEN1-E378 VIPNLLKE    | 26638 | >MEN1-E378 VIPNLLKV    | 9     | 26629 |
| >MEN1-E378 DVIPNLLKE   | 34077 | >MEN1-E378 DVIPNLLKV   | 295   | 33782 |
| >MEN1-E378 DVIPNLLKE   | 1148  | >MEN1-E378 DVIPNLLKV   | 273   | 875   |
| >MEN1-E378 DVIPNLLKE   | 23018 | >MEN1-E378 DVIPNLLKV   | 41    | 22977 |
| >MEN1-E378 DVIPNLLKEA\ | 123   | >MEN1-E378 DVIPNLLKVA\ | 117   | 6     |
| >MEN1-E378 DVIPNLLKE   | 17153 | >MEN1-E378 DVIPNLLKV   | 28    | 17125 |
| >MEN1-E45C EHFLAVNRVI  | 223   | >MEN1-E45C DHFLAVNRVI  | 333   | 110   |
| >MEN1-E45C EHFLAVNR    | 45    | >MEN1-E45C DHFLAVNR    | 172   | 127   |
| >MEN1-E45C EHFLAVNRVI  | 454   | >MEN1-E45C DHFLAVNRVI  | 2085  | 1631  |
| >MEN1-E45C EHFLAVNR    | 171   | >MEN1-E45C DHFLAVNR    | 479   | 308   |
| >MEN1-E45C VEHFLAVNR\  | 361   | >MEN1-E45C VDHFLAVNR\  | 8986  | 8625  |
| >MEN1-E45C VEHFLAVNR\  | 38    | >MEN1-E45C VDHFLAVNR\  | 1098  | 1060  |
| >MEN1-E45C VEHFLAVNR\  | 100   | >MEN1-E45C VDHFLAVNR\  | 18060 | 17960 |
| >MEN1-E45C VEHFLAVNR\  | 150   | >MEN1-E45C VDHFLAVNR\  | 1582  | 1432  |
| >MEN1-E45C VEHFLAVNR\  | 366   | >MEN1-E45C VDHFLAVNR\  | 10416 | 10050 |
| >MEN1-E45C VEHFLAVNR\  | 38    | >MEN1-E45C VDHFLAVNR\  | 1418  | 1380  |
| >MEN1-E45C VEHFLAVNR   | 386   | >MEN1-E45C VDHFLAVNR   | 1322  | 936   |
| >MEN1-E45C FVEHFLAV    | 4207  | >MEN1-E45C FVDHFLAV    | 462   | 3745  |
| >MEN1-E45C FVEHFLAV    | 85    | >MEN1-E45C FVDHFLAV    | 12    | 73    |
| >MEN1-E45C FVEHFLAVNR  | 227   | >MEN1-E45C FVDHFLAVNF  | 20    | 207   |
| >MEN1-E45C FVEHFLAV    | 48    | >MEN1-E45C FVDHFLAV    | 19    | 29    |
| >MEN1-E45C FVEHFLAVNR  | 30    | >MEN1-E45C FVDHFLAVNF  | 13    | 17    |
| >MEN1-E45C FVEHFLAV    | 30    | >MEN1-E45C FVDHFLAV    | 20    | 10    |
| >MEN1-E45C FVEHFLAVNR  | 30    | >MEN1-E45C FVDHFLAVNF  | 20    | 10    |
| >MEN1-E45C FVEHFLAV    | 5     | >MEN1-E45C FVDHFLAV    | 3     | 2     |
| >MEN1-E45C FVEHFLAVNR  | 17    | >MEN1-E45C FVDHFLAVNF  | 7     | 10    |
| >MEN1-E45C FVEHFLAV    | 70    | >MEN1-E45C FVDHFLAV    | 6     | 64    |

|                        |      |                        |     |      |
|------------------------|------|------------------------|-----|------|
| >MEN1-E45C FVEHFLAVNR  | 117  | >MEN1-E45C FVDHFLAVNF  | 8   | 109  |
| >MEN1-E45C FVEHFLAV    | 151  | >MEN1-E45C FVDHFLAV    | 15  | 136  |
| >MEN1-E45C FVEHFLAVNR  | 326  | >MEN1-E45C FVDHFLAVNF  | 25  | 301  |
| >MEN1-E45C FVEHFLAV    | 1655 | >MEN1-E45C FVDHFLAV    | 27  | 1628 |
| >MEN1-E45C FVEHFLAVNR  | 1735 | >MEN1-E45C FVDHFLAVNF  | 30  | 1705 |
| >MEN1-E45C FVEHFLAV    | 5974 | >MEN1-E45C FVDHFLAV    | 113 | 5861 |
| >MEN1-E45C FVEHFLAVNR  | 3016 | >MEN1-E45C FVDHFLAVNF  | 35  | 2981 |
| >MEN1-E45C FVEHFLAV    | 13   | >MEN1-E45C FVDHFLAV    | 7   | 6    |
| >MEN1-E45C FVEHFLAVNR  | 10   | >MEN1-E45C FVDHFLAVNF  | 6   | 4    |
| >MEN1-E45C FVEHFLAVNR  | 116  | >MEN1-E45C FVDHFLAVNF  | 86  | 30   |
| >MEN1-E45C FVEHFLAVNR  | 153  | >MEN1-E45C FVDHFLAVNF  | 139 | 14   |
| >MEN1-E45C FVEHFLAVNR  | 74   | >MEN1-E45C FVDHFLAVNF  | 47  | 27   |
| >MEN1-E45C FVEHFLAV    | 133  | >MEN1-E45C FVDHFLAV    | 140 | 7    |
| >MEN1-E45C FVEHFLAVNR  | 57   | >MEN1-E45C FVDHFLAVNF  | 56  | 1    |
| >MEN1-E45C FVEHFLAV    | 74   | >MEN1-E45C FVDHFLAV    | 9   | 65   |
| >MEN1-E45C FVEHFLAVNR  | 249  | >MEN1-E45C FVDHFLAVNF  | 19  | 230  |
| >MEN1-E45C FVEHFLAVNR  | 373  | >MEN1-E45C FVDHFLAVNF  | 799 | 426  |
| >MEN1-E45C GFVEHFLAV   | 85   | >MEN1-E45C GFVDHFLAV   | 106 | 21   |
| >MEN1-E45C GFVEHFLAV   | 919  | >MEN1-E45C GFVDHFLAV   | 303 | 616  |
| >MEN1-E45C GFVEHFLAVN  | 68   | >MEN1-E45C GFVDHFLAVN  | 51  | 17   |
| >MEN1-E45C GFVEHFLAVN  | 71   | >MEN1-E45C GFVDHFLAVN  | 47  | 24   |
| >MEN1-E45C GFVEHFLAV   | 592  | >MEN1-E45C GFVDHFLAV   | 374 | 218  |
| >MEN1-E45C VLG FVEHFL  | 136  | >MEN1-E45C VLG FVDHFL  | 136 | 0    |
| >MEN1-E45C VLG FVEHFLA | 56   | >MEN1-E45C VLG FVDHFLA | 54  | 2    |
| >MEN1-E45C VLG FVEHFL  | 18   | >MEN1-E45C VLG FVDHFL  | 17  | 1    |
| >MEN1-E45C VLG FVEHFLA | 441  | >MEN1-E45C VLG FVDHFLA | 585 | 144  |
| >MEN1-E45C VLG FVEHFLA | 42   | >MEN1-E45C VLG FVDHFLA | 37  | 5    |
| >MEN1-E45C VLG FVEHFLA | 42   | >MEN1-E45C VLG FVDHFLA | 32  | 10   |
| >MEN1-E45C VLG FVEHFLA | 107  | >MEN1-E45C VLG FVDHFLA | 77  | 30   |
| >MEN1-E45C VLG FVEHFL  | 5    | >MEN1-E45C VLG FVDHFL  | 7   | 2    |
| >MEN1-E45C VLG FVEHFLA | 32   | >MEN1-E45C VLG FVDHFLA | 37  | 5    |
| >MEN1-E45C VLG FVEHFLA | 2    | >MEN1-E45C VLG FVDHFLA | 3   | 1    |
| >MEN1-E45C VLG FVEHFL  | 17   | >MEN1-E45C VLG FVDHFL  | 13  | 4    |
| >MEN1-E45C VLG FVEHFLA | 387  | >MEN1-E45C VLG FVDHFLA | 242 | 145  |
| >MEN1-E45C VLG FVEHFLA | 7    | >MEN1-E45C VLG FVDHFLA | 6   | 1    |
| >MEN1-E45C VLG FVEHFL  | 8    | >MEN1-E45C VLG FVDHFL  | 8   | 0    |
| >MEN1-E45C VLG FVEHFLA | 52   | >MEN1-E45C VLG FVDHFLA | 45  | 7    |
| >MEN1-E45C VLG FVEHFLA | 8    | >MEN1-E45C VLG FVDHFLA | 8   | 0    |
| >MEN1-E45C VLG FVEHFL  | 8    | >MEN1-E45C VLG FVDHFL  | 12  | 4    |
| >MEN1-E45C VLG FVEHFLA | 377  | >MEN1-E45C VLG FVDHFLA | 379 | 2    |
| >MEN1-E45C VLG FVEHFLA | 8    | >MEN1-E45C VLG FVDHFLA | 9   | 1    |
| >MEN1-E45C VLG FVEHFL  | 5    | >MEN1-E45C VLG FVDHFL  | 6   | 1    |
| >MEN1-E45C VLG FVEHFLA | 17   | >MEN1-E45C VLG FVDHFLA | 18  | 1    |



|                        |     |                       |     |     |
|------------------------|-----|-----------------------|-----|-----|
| >MEN1-E45C VLGFVEHFLA  | 3   | >MEN1-E45C VLGFVDHFLA | 3   | 0   |
| >MEN1-E45C VLGFVEHF    | 537 | >MEN1-E45C VLGFVDHF   | 475 | 62  |
| >MEN1-E45C VLGFVEHF    | 202 | >MEN1-E45C VLGFVDHF   | 219 | 17  |
| >MEN1-E45C LVLGFVEHF   | 235 | >MEN1-E45C LVLGFVDHF  | 193 | 42  |
| >MEN1-E45C LVLGFVEHFL  | 143 | >MEN1-E45C LVLGFVDHFL | 112 | 31  |
| >MEN1-E45C LVLGFVEHFL  | 298 | >MEN1-E45C LVLGFVDHFL | 332 | 34  |
| >MEN1-E45C LVLGFVEHFL  | 34  | >MEN1-E45C LVLGFVDHFL | 32  | 2   |
| >MEN1-E45C LVLGFVEHFL  | 316 | >MEN1-E45C LVLGFVDHFL | 370 | 54  |
| >MEN1-E45C LVLGFVEHFL  | 377 | >MEN1-E45C LVLGFVDHFL | 330 | 47  |
| >MEN1-E45C LVLGFVEHF   | 308 | >MEN1-E45C LVLGFVDHF  | 356 | 48  |
| >MEN1-E45C LVLGFVEHFL  | 98  | >MEN1-E45C LVLGFVDHFL | 65  | 33  |
| >MEN1-E45C LVLGFVEHFL  | 34  | >MEN1-E45C LVLGFVDHFL | 32  | 2   |
| >MEN1-E45C LVLGFVEHFL  | 14  | >MEN1-E45C LVLGFVDHFL | 22  | 8   |
| >MEN1-E45C LVLGFVEHFL  | 121 | >MEN1-E45C LVLGFVDHFL | 148 | 27  |
| >MEN1-E45C LVLGFVEHFL  | 450 | >MEN1-E45C LVLGFVDHFL | 294 | 156 |
| >MEN1-E45C LVLGFVEHFL  | 45  | >MEN1-E45C LVLGFVDHFL | 40  | 5   |
| >MEN1-E45C LVLGFVEHFL  | 32  | >MEN1-E45C LVLGFVDHFL | 50  | 18  |
| >MEN1-E45C LVLGFVEHFL  | 18  | >MEN1-E45C LVLGFVDHFL | 29  | 11  |
| >MEN1-E45C LVLGFVEHFL  | 121 | >MEN1-E45C LVLGFVDHFL | 168 | 47  |
| >MEN1-E45C LVLGFVEHF   | 63  | >MEN1-E45C LVLGFVDHF  | 48  | 15  |
| >MEN1-E45C LVLGFVEHF   | 34  | >MEN1-E45C LVLGFVDHF  | 33  | 1   |
| >MEN1-E45C LVLGFVEHFL  | 516 | >MEN1-E45C LVLGFVDHFL | 468 | 48  |
| >MEN1-E45C LVLGFVEHF   | 181 | >MEN1-E45C LVLGFVDHF  | 338 | 157 |
| >MEN1-E45C LVLGFVEHFL  | 289 | >MEN1-E45C LVLGFVDHFL | 697 | 408 |
| >MEN1-E45C LVLGFVEHFL  | 192 | >MEN1-E45C LVLGFVDHFL | 247 | 55  |
| >MEN1-E45C LVLGFVEHF   | 113 | >MEN1-E45C LVLGFVDHF  | 321 | 208 |
| >MEN1-E45C LVLGFVEHF   | 353 | >MEN1-E45C LVLGFVDHF  | 809 | 456 |
| >MEN1-E45C LVLGFVEHF   | 252 | >MEN1-E45C LVLGFVDHF  | 818 | 566 |
| >MEN1-E45C LVLGFVEHF   | 69  | >MEN1-E45C LVLGFVDHF  | 150 | 81  |
| >MEN1-E45C LVLGFVEHF   | 383 | >MEN1-E45C LVLGFVDHF  | 509 | 126 |
| >MEN1-E45C SLVLGFVEHFI | 75  | >MEN1-E45C SLVLGFVDHF | 115 | 40  |
| >MEN1-E45C SLVLGFVEHFI | 14  | >MEN1-E45C SLVLGFVDHF | 20  | 6   |
| >MEN1-E45C SLVLGFVEHFI | 206 | >MEN1-E45C SLVLGFVDHF | 201 | 5   |
| >MEN1-E45C SLVLGFVEHFI | 149 | >MEN1-E45C SLVLGFVDHF | 127 | 22  |
| >MEN1-E45C SLVLGFVEHFI | 16  | >MEN1-E45C SLVLGFVDHF | 33  | 17  |
| >MEN1-E45C SLVLGFVEHFI | 33  | >MEN1-E45C SLVLGFVDHF | 37  | 4   |
| >MEN1-E45C SLVLGFVEHFI | 11  | >MEN1-E45C SLVLGFVDHF | 14  | 3   |
| >MEN1-E45C SLVLGFVEHFI | 254 | >MEN1-E45C SLVLGFVDHF | 420 | 166 |
| >MEN1-E45C SLVLGFVEHFI | 4   | >MEN1-E45C SLVLGFVDHF | 6   | 2   |
| >MEN1-E45C SLVLGFVEHF  | 243 | >MEN1-E45C SLVLGFVDHF | 268 | 25  |
| >MEN1-E45C SLVLGFVEHF  | 57  | >MEN1-E45C SLVLGFVDHF | 115 | 58  |
| >MEN1-E45C SLVLGFVEHF  | 214 | >MEN1-E45C SLVLGFVDHF | 438 | 224 |
| >MEN1-E45C LSLVLGFVEHI | 103 | >MEN1-E45C LSLVLGFVDH | 210 | 107 |

|                        |     |                       |       |       |
|------------------------|-----|-----------------------|-------|-------|
| >MEN1-E45C LSLVLGFVEHI | 36  | >MEN1-E45C LSLVLGFVDH | 65    | 29    |
| >MEN1-E45C LSLVLGFVEHI | 5   | >MEN1-E45C LSLVLGFVDH | 7     | 2     |
| >MEN1-E45C LSLVLGFVEHI | 132 | >MEN1-E45C LSLVLGFVDH | 217   | 85    |
| >MEN1-E45C LSLVLGFVEHI | 18  | >MEN1-E45C LSLVLGFVDH | 23    | 5     |
| >MEN1-E45C LSLVLGFVEHI | 86  | >MEN1-E45C LSLVLGFVDH | 111   | 25    |
| >MEN1-F159 FAVVGACQA   | 132 | >MEN1-F159 CAVVGACQA  | 10597 | 10465 |
| >MEN1-F159 FAVVGACQA   | 353 | >MEN1-F159 CAVVGACQA  | 8663  | 8310  |
| >MEN1-F159 FAVVGACQA   | 468 | >MEN1-F159 CAVVGACQA  | 2133  | 1665  |
| >MEN1-F159 FAVVGACQA   | 378 | >MEN1-F159 CAVVGACQA  | 2099  | 1721  |
| >MEN1-F159 FAVVGACQA   | 55  | >MEN1-F159 CAVVGACQA  | 455   | 400   |
| >MEN1-F159 FAVVGACQA   | 139 | >MEN1-F159 CAVVGACQA  | 3376  | 3237  |
| >MEN1-F159 FAVVGACQA   | 35  | >MEN1-F159 CAVVGACQA  | 539   | 504   |
| >MEN1-F159 GTKLDSSGVA  | 138 | >MEN1-F159 GTKLDSSGVA | 14352 | 14214 |
| >MEN1-F159 GTKLDSSGVA  | 148 | >MEN1-F159 GTKLDSSGVA | 14984 | 14836 |
| >MEN1-F159 GTKLDSSGVA  | 17  | >MEN1-F159 GTKLDSSGVA | 15309 | 15292 |
| >MEN1-F159 GTKLDSSGVA  | 39  | >MEN1-F159 GTKLDSSGVA | 5577  | 5538  |
| >MEN1-F159 VAFVAVGA    | 318 | >MEN1-F159 VACAVVGA   | 1766  | 1448  |
| >MEN1-F159 VAFVAVGA    | 299 | >MEN1-F159 VACAVVGA   | 2553  | 2254  |
| >MEN1-F159 VAFVAVGAC   | 399 | >MEN1-F159 VACAVVAC   | 2946  | 2547  |
| >MEN1-F159 VAFVAVGA    | 266 | >MEN1-F159 VACAVVGA   | 4107  | 3841  |
| >MEN1-F159 GVAFAVVGA   | 327 | >MEN1-F159 GVACAVVGA  | 443   | 116   |
| >MEN1-F159 GVAFAVVGA   | 80  | >MEN1-F159 GVACAVVGA  | 62    | 18    |
| >MEN1-F159 GVAFAVVGA   | 547 | >MEN1-F159 GVACAVVGA  | 228   | 319   |
| >MEN1-F159 GVAFAVVGA   | 164 | >MEN1-F159 GVACAVVGA  | 158   | 6     |
| >MEN1-F159 SGVAFVAV    | 141 | >MEN1-F159 SGVACAVV   | 6441  | 6300  |
| >MEN1-F159 SGVAFVAV    | 435 | >MEN1-F159 SGVACAVV   | 1327  | 892   |
| >MEN1-F159 SSGVAFVAV   | 399 | >MEN1-F159 SSGVACAV   | 4090  | 3691  |
| >MEN1-F159 SSGVAFVAV   | 434 | >MEN1-F159 SSGVACAV   | 2341  | 1907  |
| >MEN1-F159 SSGVAFVAV   | 297 | >MEN1-F159 SSGVACAV   | 1832  | 1535  |
| >MEN1-F159 SSGVAFVAV   | 258 | >MEN1-F159 SSGVACAVV  | 2670  | 2412  |
| >MEN1-F159 DSSGVAFVA   | 79  | >MEN1-F159 DSSGVACA   | 976   | 897   |
| >MEN1-F159 DSSGVAFVAV  | 13  | >MEN1-F159 DSSGVACAV  | 45    | 32    |
| >MEN1-F159 DSSGVAFVAV  | 90  | >MEN1-F159 DSSGVACAV  | 149   | 59    |
| >MEN1-F159 DSSGVAFVAV  | 56  | >MEN1-F159 DSSGVACAV  | 403   | 347   |
| >MEN1-F159 LDSSGVAF    | 122 | >MEN1-F159 LDSSGVAC   | 16641 | 16519 |
| >MEN1-F159 LDSSGVAFVAV | 124 | >MEN1-F159 LDSSGVACAV | 260   | 136   |
| >MEN1-F159 LDSSGVAFVAV | 185 | >MEN1-F159 LDSSGVACAV | 274   | 89    |
| >MEN1-F159 KLDSSGVAFVA | 343 | >MEN1-F159 KLDSSGVACA | 1958  | 1615  |
| >MEN1-F159 KLDSSGVAFVA | 13  | >MEN1-F159 KLDSSGVACA | 27    | 14    |
| >MEN1-F159 KLDSSGVAFVA | 63  | >MEN1-F159 KLDSSGVACA | 369   | 306   |
| >MEN1-F159 KLDSSGVAFVA | 13  | >MEN1-F159 KLDSSGVACA | 32    | 19    |
| >MEN1-F159 KLDSSGVAFVA | 69  | >MEN1-F159 KLDSSGVACA | 253   | 184   |
| >MEN1-F159 KLDSSGVAFVA | 40  | >MEN1-F159 KLDSSGVACA | 52    | 12    |

|                       |      |                       |       |       |
|-----------------------|------|-----------------------|-------|-------|
| >MEN1-F159 KLDSSGVAFA | 9    | >MEN1-F159 KLDSSGVACA | 20    | 11    |
| >MEN1-F159 KLDSSGVAF  | 719  | >MEN1-F159 KLDSSGVAC  | 64    | 655   |
| >MEN1-F159 KLDSSGVAFA | 9    | >MEN1-F159 KLDSSGVACA | 36    | 27    |
| >MEN1-F159 KLDSSGVAFA | 2    | >MEN1-F159 KLDSSGVACA | 2     | 0     |
| >MEN1-F159 KLDSSGVAF  | 3425 | >MEN1-F159 KLDSSGVAC  | 195   | 3230  |
| >MEN1-F159 KLDSSGVAFA | 16   | >MEN1-F159 KLDSSGVACA | 35    | 19    |
| >MEN1-F159 KLDSSGVAFA | 3    | >MEN1-F159 KLDSSGVACA | 3     | 0     |
| >MEN1-F159 KLDSSGVAFA | 13   | >MEN1-F159 KLDSSGVACA | 23    | 10    |
| >MEN1-F159 KLDSSGVAFA | 5    | >MEN1-F159 KLDSSGVACA | 5     | 0     |
| >MEN1-F159 KLDSSGVAFA | 69   | >MEN1-F159 KLDSSGVACA | 153   | 84    |
| >MEN1-F159 KLDSSGVAFA | 5    | >MEN1-F159 KLDSSGVACA | 9     | 4     |
| >MEN1-F159 KLDSSGVAFA | 26   | >MEN1-F159 KLDSSGVACA | 66    | 40    |
| >MEN1-F159 KLDSSGVAFA | 3    | >MEN1-F159 KLDSSGVACA | 4     | 1     |
| >MEN1-F159 KLDSSGVAF  | 82   | >MEN1-F159 KLDSSGVAC  | 5118  | 5036  |
| >MEN1-F159 KLDSSGVAF  | 175  | >MEN1-F159 KLDSSGVAC  | 16816 | 16641 |
| >MEN1-F159 KLDSSGVAF  | 333  | >MEN1-F159 KLDSSGVAC  | 23030 | 22697 |
| >MEN1-F159 KLDSSGVAF  | 17   | >MEN1-F159 KLDSSGVAC  | 6599  | 6582  |
| >MEN1-F159 KLDSSGVAF  | 438  | >MEN1-F159 KLDSSGVAC  | 23579 | 23141 |
| >MEN1-F159 TKLDSSGVAF | 3    | >MEN1-F159 TKLDSSGVAC | 846   | 843   |
| >MEN1-F159 TKLDSSGVAF | 392  | >MEN1-F159 TKLDSSGVAC | 4775  | 4383  |
| >MEN1-F410 FAHLLRFYDG | 414  | >MEN1-F410 LAHLLRFYDG | 2781  | 2367  |
| >MEN1-F410 FAHLLRFY   | 76   | >MEN1-F410 LAHLLRFY   | 346   | 270   |
| >MEN1-F410 FAHLLRFY   | 915  | >MEN1-F410 LAHLLRFY   | 342   | 573   |
| >MEN1-F410 FAHLLRFYDG | 82   | >MEN1-F410 LAHLLRFYDG | 747   | 665   |
| >MEN1-F410 FAHLLRFY   | 113  | >MEN1-F410 LAHLLRFY   | 116   | 3     |
| >MEN1-F410 FAHLLRFY   | 232  | >MEN1-F410 LAHLLRFY   | 775   | 543   |
| >MEN1-F410 FAHLLRFYDG | 221  | >MEN1-F410 LAHLLRFYDG | 176   | 45    |
| >MEN1-F410 CFAHLLRF   | 99   | >MEN1-F410 CLAHLLRF   | 2073  | 1974  |
| >MEN1-F410 CFAHLLRF   | 368  | >MEN1-F410 CLAHLLRF   | 4673  | 4305  |
| >MEN1-F410 CFAHLLRF   | 13   | >MEN1-F410 CLAHLLRF   | 1845  | 1832  |
| >MEN1-F410 CFAHLLRFY  | 888  | >MEN1-F410 CLAHLLRFY  | 229   | 659   |
| >MEN1-F410 CFAHLLRF   | 236  | >MEN1-F410 CLAHLLRF   | 816   | 580   |
| >MEN1-F410 CFAHLLRFY  | 18   | >MEN1-F410 CLAHLLRFY  | 43    | 25    |
| >MEN1-F410 CFAHLLRFY  | 97   | >MEN1-F410 CLAHLLRFY  | 36    | 61    |
| >MEN1-F410 CFAHLLRFY  | 53   | >MEN1-F410 CLAHLLRFY  | 13    | 40    |
| >MEN1-F410 CFAHLLRFY  | 145  | >MEN1-F410 CLAHLLRFY  | 185   | 40    |
| >MEN1-F410 ECFAHLLRF  | 162  | >MEN1-F410 ECLAHLLRF  | 23    | 139   |
| >MEN1-F410 ECFAHLLRFY | 17   | >MEN1-F410 ECLAHLLRFY | 6     | 11    |
| >MEN1-F410 ECFAHLLRFY | 461  | >MEN1-F410 ECLAHLLRFY | 281   | 180   |
| >MEN1-F410 ECFAHLLRFY | 400  | >MEN1-F410 ECLAHLLRFY | 1639  | 1239  |
| >MEN1-F410 ECFAHLLRFY | 478  | >MEN1-F410 ECLAHLLRFY | 1375  | 897   |
| >MEN1-F410 ECFAHLLR   | 164  | >MEN1-F410 ECLAHLLR   | 340   | 176   |
| >MEN1-F410 ECFAHLLR   | 43   | >MEN1-F410 ECLAHLLR   | 1085  | 1042  |

|                        |       |                        |      |       |
|------------------------|-------|------------------------|------|-------|
| >MEN1-F410 ECFAHLLRFY  | 330   | >MEN1-F410 ECLAHLLRFY  | 303  | 27    |
| >MEN1-F410 ECFAHLLR    | 39    | >MEN1-F410 ECLAHLLR    | 70   | 31    |
| >MEN1-F410 PECFAHLL    | 56    | >MEN1-F410 PECLAHLL    | 25   | 31    |
| >MEN1-F410 PECFAHLLRF\ | 69    | >MEN1-F410 PECLAHLLRF\ | 74   | 5     |
| >MEN1-F410 PECFAHLL    | 129   | >MEN1-F410 PECLAHLL    | 198  | 69    |
| >MEN1-F410 PECFAHLLRF\ | 443   | >MEN1-F410 PECLAHLLRF\ | 637  | 194   |
| >MEN1-F410 DPECFAHLLR  | 185   | >MEN1-F410 DPECLAHLLR  | 401  | 216   |
| >MEN1-F410 DPECFAHLLR  | 129   | >MEN1-F410 DPECLAHLLR  | 122  | 7     |
| >MEN1-F410 DPECFAHL    | 475   | >MEN1-F410 DPECLAHL    | 2227 | 1752  |
| >MEN1-F410 DPECFAHLL   | 479   | >MEN1-F410 DPECLAHLL   | 1859 | 1380  |
| >MEN1-F410 DPECFAHLLR  | 104   | >MEN1-F410 DPECLAHLLR  | 201  | 97    |
| >MEN1-F410 QDPECFAHLL  | 161   | >MEN1-F410 QDPECLAHLL  | 724  | 563   |
| >MEN1-F410 QDPECFAHLL  | 233   | >MEN1-F410 QDPECLAHLL  | 564  | 331   |
| >MEN1-F410 LQDPECFAHL  | 240   | >MEN1-F410 LQDPECLAHL  | 696  | 456   |
| >MEN1-F410 LQDPECFAHL  | 74    | >MEN1-F410 LQDPECLAHL  | 205  | 131   |
| >MEN1-F410 LQDPECFA    | 33    | >MEN1-F410 LQDPECLA    | 111  | 78    |
| >MEN1-F410 LQDPECFAHL  | 176   | >MEN1-F410 LQDPECLAHL  | 178  | 2     |
| >MEN1-F410 LQDPECFAHL  | 16    | >MEN1-F410 LQDPECLAHL  | 25   | 9     |
| >MEN1-F410 LQDPECFAHL  | 163   | >MEN1-F410 LQDPECLAHL  | 204  | 41    |
| >MEN1-F410 ALQDPECF    | 14715 | >MEN1-F410 ALQDPECL    | 219  | 14496 |
| >MEN1-F410 ALQDPECFA   | 219   | >MEN1-F410 ALQDPECLA   | 465  | 246   |
| >MEN1-F410 ALQDPECFA\  | 55    | >MEN1-F410 ALQDPECLA\  | 54   | 1     |
| >MEN1-F410 ALQDPECF    | 5835  | >MEN1-F410 ALQDPECL    | 79   | 5756  |
| >MEN1-F410 ALQDPECFA   | 343   | >MEN1-F410 ALQDPECLA   | 872  | 529   |
| >MEN1-F410 ALQDPECFA\  | 27    | >MEN1-F410 ALQDPECLA\  | 27   | 0     |
| >MEN1-F410 ALQDPECFA\  | 163   | >MEN1-F410 ALQDPECLA\  | 118  | 45    |
| >MEN1-F410 ALQDPECFA\  | 97    | >MEN1-F410 ALQDPECLA\  | 146  | 49    |
| >MEN1-F410 ALQDPECF    | 2140  | >MEN1-F410 ALQDPECL    | 24   | 2116  |
| >MEN1-F410 ALQDPECFA   | 10    | >MEN1-F410 ALQDPECLA   | 27   | 17    |
| >MEN1-F410 ALQDPECFA\  | 11    | >MEN1-F410 ALQDPECLA\  | 9    | 2     |
| >MEN1-F410 ALQDPECF    | 8656  | >MEN1-F410 ALQDPECL    | 25   | 8631  |
| >MEN1-F410 ALQDPECFA   | 43    | >MEN1-F410 ALQDPECLA   | 176  | 133   |
| >MEN1-F410 ALQDPECFA\  | 8     | >MEN1-F410 ALQDPECLA\  | 8    | 0     |
| >MEN1-F410 ALQDPECF    | 13194 | >MEN1-F410 ALQDPECL    | 91   | 13103 |
| >MEN1-F410 ALQDPECFA   | 31    | >MEN1-F410 ALQDPECLA   | 120  | 89    |
| >MEN1-F410 ALQDPECFA\  | 35    | >MEN1-F410 ALQDPECLA\  | 35   | 0     |
| >MEN1-F410 ALQDPECF    | 11547 | >MEN1-F410 ALQDPECL    | 72   | 11475 |
| >MEN1-F410 ALQDPECFA   | 189   | >MEN1-F410 ALQDPECLA   | 1505 | 1316  |
| >MEN1-F410 ALQDPECFA\  | 62    | >MEN1-F410 ALQDPECLA\  | 60   | 2     |
| >MEN1-F410 ALQDPECF    | 1291  | >MEN1-F410 ALQDPECL    | 7    | 1284  |
| >MEN1-F410 ALQDPECFA   | 4     | >MEN1-F410 ALQDPECLA   | 4    | 0     |
| >MEN1-F410 ALQDPECFA\  | 2     | >MEN1-F410 ALQDPECLA\  | 2    | 0     |
| >MEN1-F410 ALQDPECF    | 403   | >MEN1-F410 ALQDPECL    | 6712 | 6309  |

|                       |       |                       |      |       |
|-----------------------|-------|-----------------------|------|-------|
| >MEN1-F410 ALQDPECF   | 349   | >MEN1-F410 ALQDPECL   | 5339 | 4990  |
| >MEN1-F410 SALQDPECF  | 251   | >MEN1-F410 SALQDPECL  | 5321 | 5070  |
| >MEN1-F410 GSALQDPECF | 219   | >MEN1-F410 GSALQDPECL | 2999 | 2780  |
| >MEN1-F410 GSALQDPECF | 68    | >MEN1-F410 GSALQDPECL | 523  | 455   |
| >MEN1-G15€GVAFAVVGA   | 327   | >MEN1-G15€DVAFAVVGA   | 8565 | 8238  |
| >MEN1-G15€GVAFAVVGA   | 80    | >MEN1-G15€DVAFAVVGA   | 2940 | 2860  |
| >MEN1-G15€GVAFAVVGA   | 4053  | >MEN1-G15€DVAFAVVGA   | 260  | 3793  |
| >MEN1-G15€GVAFAVVGA   | 164   | >MEN1-G15€DVAFAVVGA   | 9    | 155   |
| >MEN1-G15€GVAFAVVGA   | 7752  | >MEN1-G15€DVAFAVVGA   | 139  | 7613  |
| >MEN1-G15€SGVAFAVV    | 141   | >MEN1-G15€SDVAFAVV    | 1983 | 1842  |
| >MEN1-G15€SGVAFAVV    | 435   | >MEN1-G15€SDVAFAVV    | 2629 | 2194  |
| >MEN1-G15€SGVAFAVV    | 8604  | >MEN1-G15€SDVAFAVV    | 66   | 8538  |
| >MEN1-G15€SSGVAFAV    | 16300 | >MEN1-G15€SSDVAFAV    | 496  | 15804 |
| >MEN1-G15€SSGVAFAV    | 399   | >MEN1-G15€SSDVAFAV    | 48   | 351   |
| >MEN1-G15€SSGVAFAV    | 1489  | >MEN1-G15€SSDVAFAV    | 187  | 1302  |
| >MEN1-G15€SSGVAFAV    | 434   | >MEN1-G15€SSDVAFAV    | 934  | 500   |
| >MEN1-G15€SSGVAFAV    | 297   | >MEN1-G15€SSDVAFAV    | 58   | 239   |
| >MEN1-G15€SSGVAFAV    | 1934  | >MEN1-G15€SSDVAFAV    | 401  | 1533  |
| >MEN1-G15€SSGVAFAV    | 258   | >MEN1-G15€SSDVAFAV    | 238  | 20    |
| >MEN1-G15€DSSGVAFA    | 79    | >MEN1-G15€DSSDVAFA    | 64   | 15    |
| >MEN1-G15€DSSGVAFAV   | 13    | >MEN1-G15€DSSDVAFAV   | 11   | 2     |
| >MEN1-G15€DSSGVAFAV   | 90    | >MEN1-G15€DSSDVAFAV   | 67   | 23    |
| >MEN1-G15€DSSGVAFAV   | 56    | >MEN1-G15€DSSDVAFAV   | 18   | 38    |
| >MEN1-G15€DSSGVAFAV   | 530   | >MEN1-G15€DSSDVAFAV   | 150  | 380   |
| >MEN1-G15€LDSSGVAF    | 122   | >MEN1-G15€LDSSDVAF    | 258  | 136   |
| >MEN1-G15€LDSSGVAF    | 716   | >MEN1-G15€LDSSDVAF    | 475  | 241   |
| >MEN1-G15€LDSSGVAF    | 124   | >MEN1-G15€LDSSDVAFAV  | 65   | 59    |
| >MEN1-G15€LDSSGVAF    | 185   | >MEN1-G15€LDSSDVAFAV  | 102  | 83    |
| >MEN1-G15€KLDSSGVAFA  | 343   | >MEN1-G15€KLDSSDVAFA  | 208  | 135   |
| >MEN1-G15€KLDSSGVAFA  | 13    | >MEN1-G15€KLDSSDVAFA  | 11   | 2     |
| >MEN1-G15€KLDSSGVAFA  | 63    | >MEN1-G15€KLDSSDVAFA  | 61   | 2     |
| >MEN1-G15€KLDSSGVAFA  | 13    | >MEN1-G15€KLDSSDVAFA  | 11   | 2     |
| >MEN1-G15€KLDSSGVAFA  | 69    | >MEN1-G15€KLDSSDVAFA  | 135  | 66    |
| >MEN1-G15€KLDSSGVAFA  | 40    | >MEN1-G15€KLDSSDVAFA  | 63   | 23    |
| >MEN1-G15€KLDSSGVAFA  | 9     | >MEN1-G15€KLDSSDVAFA  | 8    | 1     |
| >MEN1-G15€KLDSSGVA    | 83    | >MEN1-G15€KLDSSDVA    | 105  | 22    |
| >MEN1-G15€KLDSSGVAFA  | 9     | >MEN1-G15€KLDSSDVAFA  | 18   | 9     |
| >MEN1-G15€KLDSSGVAFA  | 2     | >MEN1-G15€KLDSSDVAFA  | 2    | 0     |
| >MEN1-G15€KLDSSGVA    | 260   | >MEN1-G15€KLDSSDVA    | 97   | 163   |
| >MEN1-G15€KLDSSGVAFA  | 16    | >MEN1-G15€KLDSSDVAFA  | 16   | 0     |
| >MEN1-G15€KLDSSGVAFA  | 3     | >MEN1-G15€KLDSSDVAFA  | 3    | 0     |
| >MEN1-G15€KLDSSGVA    | 137   | >MEN1-G15€KLDSSDVA    | 51   | 86    |
| >MEN1-G15€KLDSSGVAFA  | 13    | >MEN1-G15€KLDSSDVAFA  | 14   | 1     |

|                       |       |                       |      |       |
|-----------------------|-------|-----------------------|------|-------|
| >MEN1-G15€KLDSSGVAFA  | 5     | >MEN1-G15€KLDSSDVAF   | 5    | 0     |
| >MEN1-G15€KLDSSGVAFA  | 69    | >MEN1-G15€KLDSSDVAF   | 92   | 23    |
| >MEN1-G15€KLDSSGVAFA  | 5     | >MEN1-G15€KLDSSDVAF   | 6    | 1     |
| >MEN1-G15€KLDSSGVA    | 306   | >MEN1-G15€KLDSSDVA    | 251  | 55    |
| >MEN1-G15€KLDSSGVAFA  | 26    | >MEN1-G15€KLDSSDVAF   | 42   | 16    |
| >MEN1-G15€KLDSSGVAFA  | 3     | >MEN1-G15€KLDSSDVAF   | 4    | 1     |
| >MEN1-G15€KLDSSGVA    | 82    | >MEN1-G15€KLDSSDVA    | 63   | 19    |
| >MEN1-G15€KLDSSGVA    | 175   | >MEN1-G15€KLDSSDVA    | 398  | 223   |
| >MEN1-G15€KLDSSGVA    | 333   | >MEN1-G15€KLDSSDVA    | 910  | 577   |
| >MEN1-G15€KLDSSGVA    | 17    | >MEN1-G15€KLDSSDVA    | 78   | 61    |
| >MEN1-G15€KLDSSGVA    | 438   | >MEN1-G15€KLDSSDVA    | 642  | 204   |
| >MEN1-G15€TKLDSSGV    | 482   | >MEN1-G15€TKLDSSDV    | 294  | 188   |
| >MEN1-G15€TKLDSSGVA   | 3     | >MEN1-G15€TKLDSSDVA   | 3    | 0     |
| >MEN1-G15€TKLDSSGVA   | 392   | >MEN1-G15€TKLDSSDVA   | 607  | 215   |
| >MEN1-G15€GTKLDSSGV   | 292   | >MEN1-G15€GTKLDSSDV   | 1408 | 1116  |
| >MEN1-G15€GTKLDSSGVA  | 138   | >MEN1-G15€GTKLDSSDVA  | 217  | 79    |
| >MEN1-G15€GTKLDSSGVA  | 148   | >MEN1-G15€GTKLDSSDVA  | 290  | 142   |
| >MEN1-G15€GTKLDSSGVA  | 17    | >MEN1-G15€GTKLDSSDVA  | 26   | 9     |
| >MEN1-G15€GTKLDSSGV   | 152   | >MEN1-G15€GTKLDSSDV   | 258  | 106   |
| >MEN1-G15€GTKLDSSGVA  | 39    | >MEN1-G15€GTKLDSSDVA  | 83   | 44    |
| >MEN1-G15€ITGTKLDSSG\ | 450   | >MEN1-G15€ITGTKLDSSD\ | 1554 | 1104  |
| >MEN1-G15€ITGTKLDSSG\ | 499   | >MEN1-G15€ITGTKLDSSD\ | 3518 | 3019  |
| >MEN1-G42€GFVEHFLAV   | 710   | >MEN1-G42€SFVEHFLAV   | 485  | 225   |
| >MEN1-G42€GFVEHFLAV   | 85    | >MEN1-G42€SFVEHFLAV   | 28   | 57    |
| >MEN1-G42€GFVEHFLAV   | 795   | >MEN1-G42€SFVEHFLAV   | 334  | 461   |
| >MEN1-G42€GFVEHFLAV\  | 68    | >MEN1-G42€SFVEHFLAV\  | 32   | 36    |
| >MEN1-G42€GFVEHFLAV\  | 1013  | >MEN1-G42€SFVEHFLAV\  | 245  | 768   |
| >MEN1-G42€GFVEHFLAV\  | 1372  | >MEN1-G42€SFVEHFLAV\  | 212  | 1160  |
| >MEN1-G42€GFVEHFLAV\  | 613   | >MEN1-G42€SFVEHFLAV\  | 438  | 175   |
| >MEN1-G42€GFVEHFLAV\  | 71    | >MEN1-G42€SFVEHFLAV\  | 24   | 47    |
| >MEN1-G42€GFVEHFLAV   | 592   | >MEN1-G42€SFVEHFLAV   | 88   | 504   |
| >MEN1-G42€GFVEHFLAV   | 2611  | >MEN1-G42€SFVEHFLAV   | 321  | 2290  |
| >MEN1-G42€LGFVEHFL    | 2307  | >MEN1-G42€LSFVEHFL    | 478  | 1829  |
| >MEN1-G42€LGFVEHFL    | 690   | >MEN1-G42€LSFVEHFL    | 312  | 378   |
| >MEN1-G42€LGFVEHFLAV  | 2267  | >MEN1-G42€LSFVEHFLAV  | 337  | 1930  |
| >MEN1-G42€LGFVEHFLAV  | 816   | >MEN1-G42€LSFVEHFLAV  | 123  | 693   |
| >MEN1-G42€LGFVEHFLAV  | 12522 | >MEN1-G42€LSFVEHFLAV  | 403  | 12119 |
| >MEN1-G42€LGFVEHFL    | 4058  | >MEN1-G42€LSFVEHFL    | 471  | 3587  |
| >MEN1-G42€LGFVEHFLAV  | 1207  | >MEN1-G42€LSFVEHFLAV  | 73   | 1134  |
| >MEN1-G42€LGFVEHFL    | 5606  | >MEN1-G42€LSFVEHFL    | 24   | 5582  |
| >MEN1-G42€LGFVEHFLAV  | 15613 | >MEN1-G42€LSFVEHFLAV  | 245  | 15368 |
| >MEN1-G42€LGFVEHFL    | 8238  | >MEN1-G42€LSFVEHFL    | 298  | 7940  |
| >MEN1-G42€LGFVEHFL    | 5369  | >MEN1-G42€LSFVEHFL    | 126  | 5243  |

|                         |      |                         |     |      |
|-------------------------|------|-------------------------|-----|------|
| >MEN1-G42S LGFVEHFL     | 2242 | >MEN1-G42S LSFVEHFL     | 110 | 2132 |
| >MEN1-G42S VLG FVEHFL   | 136  | >MEN1-G42S VLSFVEHFL    | 54  | 82   |
| >MEN1-G42S VLG FVEHFLA  | 647  | >MEN1-G42S VLSFVEHFLA   | 497 | 150  |
| >MEN1-G42S VLG FVEHFLA  | 56   | >MEN1-G42S VLSFVEHFLA\  | 26  | 30   |
| >MEN1-G42S VLG FVEHFL   | 18   | >MEN1-G42S VLSFVEHFL    | 4   | 14   |
| >MEN1-G42S VLG FVEHFLA  | 441  | >MEN1-G42S VLSFVEHFLA   | 135 | 306  |
| >MEN1-G42S VLG FVEHFLA  | 42   | >MEN1-G42S VLSFVEHFLA\  | 6   | 36   |
| >MEN1-G42S VLG FVEHFL   | 1065 | >MEN1-G42S VLSFVEHFL    | 110 | 955  |
| >MEN1-G42S VLG FVEHFLA  | 42   | >MEN1-G42S VLSFVEHFLA\  | 8   | 34   |
| >MEN1-G42S VLG FVEHFLA  | 107  | >MEN1-G42S VLSFVEHFLA\  | 42  | 65   |
| >MEN1-G42S VLG FVEHFL   | 5    | >MEN1-G42S VLSFVEHFL    | 7   | 2    |
| >MEN1-G42S VLG FVEHFLA  | 32   | >MEN1-G42S VLSFVEHFLA   | 51  | 19   |
| >MEN1-G42S VLG FVEHFLA  | 2    | >MEN1-G42S VLSFVEHFLA\  | 3   | 1    |
| >MEN1-G42S VLG FVEHFL   | 17   | >MEN1-G42S VLSFVEHFL    | 20  | 3    |
| >MEN1-G42S VLG FVEHFLA  | 387  | >MEN1-G42S VLSFVEHFLA   | 551 | 164  |
| >MEN1-G42S VLG FVEHFLA  | 7    | >MEN1-G42S VLSFVEHFLA\  | 7   | 0    |
| >MEN1-G42S VLG FVEHFL   | 8    | >MEN1-G42S VLSFVEHFL    | 9   | 1    |
| >MEN1-G42S VLG FVEHFLA  | 52   | >MEN1-G42S VLSFVEHFLA   | 62  | 10   |
| >MEN1-G42S VLG FVEHFLA  | 8    | >MEN1-G42S VLSFVEHFLA\  | 8   | 0    |
| >MEN1-G42S VLG FVEHFL   | 8    | >MEN1-G42S VLSFVEHFL    | 7   | 1    |
| >MEN1-G42S VLG FVEHFLA  | 377  | >MEN1-G42S VLSFVEHFLA   | 269 | 108  |
| >MEN1-G42S VLG FVEHFLA  | 8    | >MEN1-G42S VLSFVEHFLA\  | 7   | 1    |
| >MEN1-G42S VLG FVEHFL   | 5    | >MEN1-G42S VLSFVEHFL    | 4   | 1    |
| >MEN1-G42S VLG FVEHFLA  | 17   | >MEN1-G42S VLSFVEHFLA   | 13  | 4    |
| >MEN1-G42S VLG FVEHFLA  | 3    | >MEN1-G42S VLSFVEHFLA\  | 2   | 1    |
| >MEN1-G42S VLG FVEHF    | 202  | >MEN1-G42S VLSFVEHF     | 147 | 55   |
| >MEN1-G42S VLG FVEHF    | 1706 | >MEN1-G42S VLSFVEHF     | 336 | 1370 |
| >MEN1-G42S LVLG FVEHF   | 235  | >MEN1-G42S LVLSFVEHF    | 131 | 104  |
| >MEN1-G42S LVLG FVEHFL  | 143  | >MEN1-G42S LVLSFVEHFL   | 171 | 28   |
| >MEN1-G42S LVLG FVEHFL/ | 298  | >MEN1-G42S LVLSFVEHFLA/ | 244 | 54   |
| >MEN1-G42S LVLG FVEHFL  | 34   | >MEN1-G42S LVLSFVEHFL   | 24  | 10   |
| >MEN1-G42S LVLG FVEHFL/ | 316  | >MEN1-G42S LVLSFVEHFLA/ | 325 | 9    |
| >MEN1-G42S LVLG FVEHFL  | 377  | >MEN1-G42S LVLSFVEHFL   | 316 | 61   |
| >MEN1-G42S LVLG FVEHF   | 308  | >MEN1-G42S LVLSFVEHF    | 347 | 39   |
| >MEN1-G42S LVLG FVEHFL  | 98   | >MEN1-G42S LVLSFVEHFL   | 134 | 36   |
| >MEN1-G42S LVLG FVEHFL/ | 34   | >MEN1-G42S LVLSFVEHFLA/ | 39  | 5    |
| >MEN1-G42S LVLG FVEHFL  | 14   | >MEN1-G42S LVLSFVEHFL   | 20  | 6    |
| >MEN1-G42S LVLG FVEHFL/ | 121  | >MEN1-G42S LVLSFVEHFLA/ | 229 | 108  |
| >MEN1-G42S LVLG FVEHFL  | 450  | >MEN1-G42S LVLSFVEHFL   | 384 | 66   |
| >MEN1-G42S LVLG FVEHFL  | 45   | >MEN1-G42S LVLSFVEHFL   | 61  | 16   |
| >MEN1-G42S LVLG FVEHFL  | 32   | >MEN1-G42S LVLSFVEHFL   | 45  | 13   |
| >MEN1-G42S LVLG FVEHFL  | 18   | >MEN1-G42S LVLSFVEHFL   | 43  | 25   |
| >MEN1-G42S LVLG FVEHFL/ | 121  | >MEN1-G42S LVLSFVEHFLA/ | 494 | 373  |

|                        |      |                        |     |     |
|------------------------|------|------------------------|-----|-----|
| >MEN1-G42S LVLGFVEHF   | 63   | >MEN1-G42S LVLSFVEHF   | 81  | 18  |
| >MEN1-G42S LVLGFVEHF   | 34   | >MEN1-G42S LVLSFVEHF   | 47  | 13  |
| >MEN1-G42S LVLGFVEHF   | 181  | >MEN1-G42S LVLSFVEHF   | 468 | 287 |
| >MEN1-G42S LVLGFVEHF   | 289  | >MEN1-G42S LVLSFVEHF   | 172 | 117 |
| >MEN1-G42S LVLGFVEHF   | 192  | >MEN1-G42S LVLSFVEHF   | 120 | 72  |
| >MEN1-G42S LVLGFVEHF   | 525  | >MEN1-G42S LVLSFVEHF   | 323 | 202 |
| >MEN1-G42S LVLGFVEHF   | 113  | >MEN1-G42S LVLSFVEHF   | 73  | 40  |
| >MEN1-G42S LVLGFVEHF   | 353  | >MEN1-G42S LVLSFVEHF   | 37  | 316 |
| >MEN1-G42S LVLGFVEHF   | 252  | >MEN1-G42S LVLSFVEHF   | 335 | 83  |
| >MEN1-G42S LVLGFVEHF   | 69   | >MEN1-G42S LVLSFVEHF   | 63  | 6   |
| >MEN1-G42S LVLGFVEHF   | 383  | >MEN1-G42S LVLSFVEHF   | 130 | 253 |
| >MEN1-G42S SLVLGFVEHF  | 75   | >MEN1-G42S SLVLSFVEHF  | 88  | 13  |
| >MEN1-G42S SLVLGFVEHF  | 14   | >MEN1-G42S SLVLSFVEHF  | 13  | 1   |
| >MEN1-G42S SLVLGFVEHF  | 206  | >MEN1-G42S SLVLSFVEHF  | 204 | 2   |
| >MEN1-G42S SLVLGFVEHF  | 149  | >MEN1-G42S SLVLSFVEHF  | 232 | 83  |
| >MEN1-G42S SLVLGFVEHF  | 16   | >MEN1-G42S SLVLSFVEHF  | 24  | 8   |
| >MEN1-G42S SLVLGFVEHF  | 33   | >MEN1-G42S SLVLSFVEHF  | 35  | 2   |
| >MEN1-G42S SLVLGFVEHF  | 11   | >MEN1-G42S SLVLSFVEHF  | 15  | 4   |
| >MEN1-G42S SLVLGFVEHF  | 254  | >MEN1-G42S SLVLSFVEHF  | 325 | 71  |
| >MEN1-G42S SLVLGFVEHF  | 4    | >MEN1-G42S SLVLSFVEHF  | 6   | 2   |
| >MEN1-G42S SLVLGFVEHF  | 243  | >MEN1-G42S SLVLSFVEHF  | 304 | 61  |
| >MEN1-G42S SLVLGFVEHF  | 57   | >MEN1-G42S SLVLSFVEHF  | 47  | 10  |
| >MEN1-G42S SLVLGFVEHF  | 214  | >MEN1-G42S SLVLSFVEHF  | 52  | 162 |
| >MEN1-G42S LSLVLGFVEHF | 737  | >MEN1-G42S LSLVLSFVEHF | 493 | 244 |
| >MEN1-G42S LSLVLGFV    | 160  | >MEN1-G42S LSLVLSFV    | 55  | 105 |
| >MEN1-G42S LSLVLGFV    | 778  | >MEN1-G42S LSLVLSFV    | 486 | 292 |
| >MEN1-G42S LSLVLGFV    | 400  | >MEN1-G42S LSLVLSFV    | 235 | 165 |
| >MEN1-G42S LSLVLGFVEHF | 103  | >MEN1-G42S LSLVLSFVEHF | 76  | 27  |
| >MEN1-G42S LSLVLGFVEHF | 36   | >MEN1-G42S LSLVLSFVEHF | 28  | 8   |
| >MEN1-G42S LSLVLGFV    | 1397 | >MEN1-G42S LSLVLSFV    | 498 | 899 |
| >MEN1-G42S LSLVLGFVEHF | 5    | >MEN1-G42S LSLVLSFVEHF | 5   | 0   |
| >MEN1-G42S LSLVLGFVEHF | 132  | >MEN1-G42S LSLVLSFVEHF | 142 | 10  |
| >MEN1-G42S LSLVLGFVEHF | 18   | >MEN1-G42S LSLVLSFVEHF | 15  | 3   |
| >MEN1-G42S LSLVLGFVEHF | 86   | >MEN1-G42S LSLVLSFVEHF | 82  | 4   |
| >MEN1-G42S LLSLVLGFV   | 68   | >MEN1-G42S LLSLVLFSV   | 24  | 44  |
| >MEN1-G42S LLSLVLGFV   | 10   | >MEN1-G42S LLSLVLFSV   | 4   | 6   |
| >MEN1-G42S LLSLVLGFV   | 7    | >MEN1-G42S LLSLVLFSV   | 4   | 3   |
| >MEN1-G42S LLSLVLGFV   | 53   | >MEN1-G42S LLSLVLFSV   | 23  | 30  |
| >MEN1-G42S LLSLVLGFV   | 4    | >MEN1-G42S LLSLVLFSV   | 3   | 1   |
| >MEN1-G42S LLSLVLGFV   | 14   | >MEN1-G42S LLSLVLFSV   | 5   | 9   |
| >MEN1-G42S LLSLVLGFV   | 10   | >MEN1-G42S LLSLVLFSV   | 6   | 4   |
| >MEN1-G42S LLSLVLGFV   | 7    | >MEN1-G42S LLSLVLFSV   | 3   | 4   |
| >MEN1-G42S LLSLVLGFV   | 4    | >MEN1-G42S LLSLVLFSV   | 2   | 2   |



|                                    |      |                                    |     |      |
|------------------------------------|------|------------------------------------|-----|------|
| >MEN1-G42 <sup>5</sup> LLSLVLGFV   | 476  | >MEN1-G42 <sup>5</sup> LLSLVLSFV   | 379 | 97   |
| >MEN1-G42 <sup>5</sup> LLSLVLGF    | 113  | >MEN1-G42 <sup>5</sup> LLSLVLSF    | 57  | 56   |
| >MEN1-G42 <sup>5</sup> LLSLVLGF    | 534  | >MEN1-G42 <sup>5</sup> LLSLVLSF    | 91  | 443  |
| >MEN1-G42 <sup>5</sup> VLLSLVLGFV  | 12   | >MEN1-G42 <sup>5</sup> VLLSLVLSFV  | 10  | 2    |
| >MEN1-G42 <sup>5</sup> VLLSLVLGFV  | 37   | >MEN1-G42 <sup>5</sup> VLLSLVLSFV  | 20  | 17   |
| >MEN1-G42 <sup>5</sup> VLLSLVLGFV  | 19   | >MEN1-G42 <sup>5</sup> VLLSLVLSFV  | 16  | 3    |
| >MEN1-G42 <sup>5</sup> VLLSLVLGFV  | 61   | >MEN1-G42 <sup>5</sup> VLLSLVLSFV  | 46  | 15   |
| >MEN1-G42 <sup>5</sup> VLLSLVLG    | 632  | >MEN1-G42 <sup>5</sup> VLLSLVLS    | 256 | 376  |
| >MEN1-G42 <sup>5</sup> VLLSLVLGF   | 59   | >MEN1-G42 <sup>5</sup> VLLSLVLSF   | 80  | 21   |
| >MEN1-G42 <sup>5</sup> VLLSLVLGFV  | 1    | >MEN1-G42 <sup>5</sup> VLLSLVLSFV  | 1   | 0    |
| >MEN1-G42 <sup>5</sup> VLLSLVLGFV  | 4    | >MEN1-G42 <sup>5</sup> VLLSLVLSFV  | 3   | 1    |
| >MEN1-G42 <sup>5</sup> VLLSLVLGFV  | 4    | >MEN1-G42 <sup>5</sup> VLLSLVLSFV  | 4   | 0    |
| >MEN1-G42 <sup>5</sup> VLLSLVLGFV  | 2    | >MEN1-G42 <sup>5</sup> VLLSLVLSFV  | 2   | 0    |
| >MEN1-G42 <sup>5</sup> VLLSLVLGFV  | 2    | >MEN1-G42 <sup>5</sup> VLLSLVLSFV  | 2   | 0    |
| >MEN1-G42 <sup>5</sup> VLLSLVLGF   | 1075 | >MEN1-G42 <sup>5</sup> VLLSLVLSF   | 379 | 696  |
| >MEN1-G42 <sup>5</sup> VLLSLVLGF   | 592  | >MEN1-G42 <sup>5</sup> VLLSLVLSF   | 428 | 164  |
| >MEN1-G42 <sup>5</sup> VLLSLVLGF   | 131  | >MEN1-G42 <sup>5</sup> VLLSLVLSF   | 32  | 99   |
| >MEN1-G42 <sup>5</sup> VLLSLVLGFV  | 285  | >MEN1-G42 <sup>5</sup> VLLSLVLSFV  | 324 | 39   |
| >MEN1-G42 <sup>5</sup> VLLSLVLGF   | 111  | >MEN1-G42 <sup>5</sup> VLLSLVLSF   | 46  | 65   |
| >MEN1-G42 <sup>5</sup> VLLSLVLGF   | 38   | >MEN1-G42 <sup>5</sup> VLLSLVLSF   | 10  | 28   |
| >MEN1-G42 <sup>5</sup> VLLSLVLGF   | 241  | >MEN1-G42 <sup>5</sup> VLLSLVLSF   | 263 | 22   |
| >MEN1-G42 <sup>5</sup> VLLSLVLGF   | 1270 | >MEN1-G42 <sup>5</sup> VLLSLVLSF   | 345 | 925  |
| >MEN1-G42 <sup>5</sup> VLLSLVLGF   | 1204 | >MEN1-G42 <sup>5</sup> VLLSLVLSF   | 343 | 861  |
| >MEN1-G42 <sup>5</sup> VLLSLVLGFV  | 836  | >MEN1-G42 <sup>5</sup> VLLSLVLSFV  | 324 | 512  |
| >MEN1-G42 <sup>5</sup> LVLLSLVLGFV | 220  | >MEN1-G42 <sup>5</sup> LVLLSLVLSFV | 88  | 132  |
| >MEN1-G42 <sup>5</sup> LVLLSLVLGFV | 500  | >MEN1-G42 <sup>5</sup> LVLLSLVLSFV | 270 | 230  |
| >MEN1-G42 <sup>5</sup> LVLLSLVLGFV | 182  | >MEN1-G42 <sup>5</sup> LVLLSLVLSFV | 112 | 70   |
| >MEN1-G42 <sup>5</sup> LVLLSLVLGFV | 12   | >MEN1-G42 <sup>5</sup> LVLLSLVLSFV | 8   | 4    |
| >MEN1-G42 <sup>5</sup> LVLLSLVLGFV | 34   | >MEN1-G42 <sup>5</sup> LVLLSLVLSFV | 22  | 12   |
| >MEN1-G42 <sup>5</sup> LVLLSLVLGFV | 198  | >MEN1-G42 <sup>5</sup> LVLLSLVLSFV | 53  | 145  |
| >MEN1-G42 <sup>5</sup> LVLLSLVLGFV | 46   | >MEN1-G42 <sup>5</sup> LVLLSLVLSFV | 24  | 22   |
| >MEN1-G42 <sup>5</sup> LVLLSLVLGFV | 61   | >MEN1-G42 <sup>5</sup> LVLLSLVLSFV | 14  | 47   |
| >MEN1-G42 <sup>5</sup> LVLLSLVLGFV | 44   | >MEN1-G42 <sup>5</sup> LVLLSLVLSFV | 14  | 30   |
| >MEN1-G42 <sup>5</sup> LVLLSLVLGF  | 574  | >MEN1-G42 <sup>5</sup> LVLLSLVLSF  | 258 | 316  |
| >MEN1-G42 <sup>5</sup> LVLLSLVLGF  | 1242 | >MEN1-G42 <sup>5</sup> LVLLSLVLSF  | 346 | 896  |
| >MEN1-G42 <sup>5</sup> LVLLSLVLGFV | 241  | >MEN1-G42 <sup>5</sup> LVLLSLVLSFV | 202 | 39   |
| >MEN1-G42 <sup>5</sup> LVLLSLVLGFV | 74   | >MEN1-G42 <sup>5</sup> LVLLSLVLSFV | 66  | 8    |
| >MEN1-G42 <sup>5</sup> LVLLSLVLGF  | 428  | >MEN1-G42 <sup>5</sup> LVLLSLVLSF  | 156 | 272  |
| >MEN1-G42 <sup>5</sup> LVLLSLVLGF  | 257  | >MEN1-G42 <sup>5</sup> LVLLSLVLSF  | 63  | 194  |
| >MEN1-G42 <sup>5</sup> LVLLSLVLGF  | 21   | >MEN1-G42 <sup>5</sup> LVLLSLVLSF  | 23  | 2    |
| >MEN1-G42 <sup>5</sup> LVLLSLVLGF  | 444  | >MEN1-G42 <sup>5</sup> LVLLSLVLSF  | 187 | 257  |
| >MEN1-G42 <sup>5</sup> LVLLSLVLGF  | 510  | >MEN1-G42 <sup>5</sup> LVLLSLVLSF  | 255 | 255  |
| >MEN1-G42 <sup>5</sup> LVLLSLVLGFV | 2628 | >MEN1-G42 <sup>5</sup> LVLLSLVLSFV | 403 | 2225 |

|                       |       |                       |       |       |
|-----------------------|-------|-----------------------|-------|-------|
| >MEN1-H13☹HIQSLFSFI   | 453   | >MEN1-H13☹DIQSLFSFI   | 2025  | 1572  |
| >MEN1-H13☹HIQSLFSFI   | 141   | >MEN1-H13☹DIQSLFSFI   | 5678  | 5537  |
| >MEN1-H13☹HIQSLFSFI   | 176   | >MEN1-H13☹DIQSLFSFI   | 5502  | 5326  |
| >MEN1-H13☹HIQSLFSFI   | 143   | >MEN1-H13☹DIQSLFSFI   | 6211  | 6068  |
| >MEN1-H13☹HIQSLFSF    | 369   | >MEN1-H13☹DIQSLFSF    | 9255  | 8886  |
| >MEN1-H13☹HIQSLFSF    | 1250  | >MEN1-H13☹DIQSLFSF    | 384   | 866   |
| >MEN1-H13☹HIQSLFSF    | 259   | >MEN1-H13☹DIQSLFSF    | 2125  | 1866  |
| >MEN1-H13☹HIQSLFSFI   | 86    | >MEN1-H13☹DIQSLFSFI   | 178   | 92    |
| >MEN1-H13☹HIQSLFSF    | 89    | >MEN1-H13☹DIQSLFSF    | 3259  | 3170  |
| >MEN1-H13☹HIQSLFSF    | 212   | >MEN1-H13☹DIQSLFSF    | 2309  | 2097  |
| >MEN1-H13☹HIQSLFSFI   | 195   | >MEN1-H13☹DIQSLFSFI   | 2159  | 1964  |
| >MEN1-H13☹HIQSLFSF    | 169   | >MEN1-H13☹DIQSLFSF    | 7430  | 7261  |
| >MEN1-H13☹AHIQSLFSFI  | 352   | >MEN1-H13☹ADIQSLFSFI  | 8042  | 7690  |
| >MEN1-H13☹AHIQSLFSFI  | 331   | >MEN1-H13☹ADIQSLFSFI  | 125   | 206   |
| >MEN1-H13☹AHIQSLFSF   | 295   | >MEN1-H13☹ADIQSLFSF   | 4201  | 3906  |
| >MEN1-H13☹AHIQSLFSF   | 272   | >MEN1-H13☹ADIQSLFSF   | 12223 | 11951 |
| >MEN1-H13☹AHIQSLFSF   | 10    | >MEN1-H13☹ADIQSLFSF   | 232   | 222   |
| >MEN1-H13☹AHIQSLFSFI  | 366   | >MEN1-H13☹ADIQSLFSFI  | 5255  | 4889  |
| >MEN1-H13☹AHIQSLFSF   | 481   | >MEN1-H13☹ADIQSLFSF   | 18559 | 18078 |
| >MEN1-H13☹AHIQSLFSF   | 6478  | >MEN1-H13☹ADIQSLFSF   | 87    | 6391  |
| >MEN1-H13☹AHIQSLFSFIT | 16577 | >MEN1-H13☹ADIQSLFSFIT | 340   | 16237 |
| >MEN1-H13☹AHIQSLFSFI  | 1876  | >MEN1-H13☹ADIQSLFSFI  | 402   | 1474  |
| >MEN1-H13☹AHIQSLFSF   | 3205  | >MEN1-H13☹ADIQSLFSF   | 104   | 3101  |
| >MEN1-H13☹AHIQSLFSFI  | 1175  | >MEN1-H13☹ADIQSLFSFI  | 64    | 1111  |
| >MEN1-H13☹AHIQSLFSFIT | 9537  | >MEN1-H13☹ADIQSLFSFIT | 443   | 9094  |
| >MEN1-H13☹AHIQSLFSF   | 364   | >MEN1-H13☹ADIQSLFSF   | 3733  | 3369  |
| >MEN1-H13☹AHIQSLFSFI  | 4312  | >MEN1-H13☹ADIQSLFSFI  | 28    | 4284  |
| >MEN1-H13☹RAHIQSLFSFI | 1565  | >MEN1-H13☹RADIQSLFSFI | 421   | 1144  |
| >MEN1-H13☹RAHIQSLFSF  | 308   | >MEN1-H13☹RADIQSLFSF  | 2860  | 2552  |
| >MEN1-H13☹RAHIQSLF    | 461   | >MEN1-H13☹RADIQSLF    | 15435 | 14974 |
| >MEN1-H13☹RAHIQSLFS   | 10    | >MEN1-H13☹RADIQSLFS   | 5942  | 5932  |
| >MEN1-H13☹RAHIQSLFSF  | 129   | >MEN1-H13☹RADIQSLFSF  | 12301 | 12172 |
| >MEN1-H13☹RAHIQSLFSFI | 6     | >MEN1-H13☹RADIQSLFSFI | 2415  | 2409  |
| >MEN1-H13☹RAHIQSLFSF  | 381   | >MEN1-H13☹RADIQSLFSF  | 1239  | 858   |
| >MEN1-H13☹RAHIQSLFSF  | 94    | >MEN1-H13☹RADIQSLFSF  | 2235  | 2141  |
| >MEN1-H13☹RAHIQSLF    | 58    | >MEN1-H13☹RADIQSLF    | 2007  | 1949  |
| >MEN1-H13☹RAHIQSLFSF  | 21    | >MEN1-H13☹RADIQSLFSF  | 969   | 948   |
| >MEN1-H13☹RAHIQSLF    | 4     | >MEN1-H13☹RADIQSLF    | 12    | 8     |
| >MEN1-H13☹RAHIQSLFSF  | 3     | >MEN1-H13☹RADIQSLFSF  | 5     | 2     |
| >MEN1-H13☹RAHIQSLFSFI | 48    | >MEN1-H13☹RADIQSLFSFI | 164   | 116   |
| >MEN1-H13☹RAHIQSLF    | 311   | >MEN1-H13☹RADIQSLF    | 1869  | 1558  |
| >MEN1-H13☹RAHIQSLFSF  | 148   | >MEN1-H13☹RADIQSLFSF  | 734   | 586   |
| >MEN1-H13☹RAHIQSLF    | 88    | >MEN1-H13☹RADIQSLF    | 65    | 23    |

|                       |     |                       |      |      |
|-----------------------|-----|-----------------------|------|------|
| >MEN1-H13☹RAHIQSLFSF  | 35  | >MEN1-H13☹RADIQSLFSF  | 27   | 8    |
| >MEN1-H13☹RAHIQSLF    | 336 | >MEN1-H13☹RADIQSLF    | 353  | 17   |
| >MEN1-H13☹RAHIQSLFSF  | 64  | >MEN1-H13☹RADIQSLFSF  | 159  | 95   |
| >MEN1-H13☹RAHIQSLFSFI | 19  | >MEN1-H13☹RADIQSLFSFI | 54   | 35   |
| >MEN1-H13☹DRAHIQSLF   | 401 | >MEN1-H13☹DRADIQSLF   | 855  | 454  |
| >MEN1-H13☹DRAHIQSLFSI | 232 | >MEN1-H13☹DRADIQSLFSI | 500  | 268  |
| >MEN1-H13☹DRAHIQSLF   | 313 | >MEN1-H13☹DRADIQSLF   | 372  | 59   |
| >MEN1-H13☹KDRAHIQSL   | 464 | >MEN1-H13☹KDRADIQSL   | 2750 | 2286 |
| >MEN1-H13☹KDRAHIQSLF: | 304 | >MEN1-H13☹KDRADIQSLF: | 1059 | 755  |
| >MEN1-H13☹KDRAHIQSLF  | 203 | >MEN1-H13☹KDRADIQSLF  | 385  | 182  |
| >MEN1-H13☹KDRAHIQSL   | 117 | >MEN1-H13☹KDRADIQSL   | 687  | 570  |
| >MEN1-H13☹KDRAHIQSL   | 209 | >MEN1-H13☹KDRADIQSL   | 1101 | 892  |
| >MEN1-H13☹FKDRAHIQSL  | 197 | >MEN1-H13☹FKDRADIQSL  | 461  | 264  |
| >MEN1-H13☹FKDRAHIQSL  | 35  | >MEN1-H13☹FKDRADIQSL  | 93   | 58   |
| >MEN1-H13☹FKDRAHIQSL  | 56  | >MEN1-H13☹FKDRADIQSL  | 130  | 74   |
| >MEN1-H13☹YFKDRAHIQS  | 210 | >MEN1-H13☹YFKDRADIQS  | 539  | 329  |
| >MEN1-H13☹YFKDRAHIQS  | 180 | >MEN1-H13☹YFKDRADIQS  | 245  | 65   |
| >MEN1-H13☹YFKDRAHIQS  | 61  | >MEN1-H13☹YFKDRADIQS  | 465  | 404  |
| >MEN1-H13☹SYFKDRAHI   | 4   | >MEN1-H13☹SYFKDRADI   | 10   | 6    |
| >MEN1-H13☹SYFKDRAHI   | 238 | >MEN1-H13☹SYFKDRADI   | 650  | 412  |
| >MEN1-H13☹SYFKDRAHI   | 14  | >MEN1-H13☹SYFKDRADI   | 29   | 15   |
| >MEN1-H13☹SYFKDRAHI   | 458 | >MEN1-H13☹SYFKDRADI   | 3499 | 3041 |
| >MEN1-H13☹RSYFKDRAHI  | 384 | >MEN1-H13☹RSYFKDRADI  | 426  | 42   |
| >MEN1-H13☹RSYFKDRAHI  | 99  | >MEN1-H13☹RSYFKDRADI  | 640  | 541  |
| >MEN1-H13☹RSYFKDRAHI  | 166 | >MEN1-H13☹RSYFKDRADI  | 83   | 83   |
| >MEN1-H13☹RSYFKDRAHI  | 267 | >MEN1-H13☹RSYFKDRADI  | 1013 | 746  |
| >MEN1-H13☹RSYFKDRAH   | 51  | >MEN1-H13☹RSYFKDRAD   | 3359 | 3308 |
| >MEN1-H13☹RSYFKDRAHI  | 8   | >MEN1-H13☹RSYFKDRADI  | 17   | 9    |
| >MEN1-H13☹RSYFKDRAHI  | 324 | >MEN1-H13☹RSYFKDRADI  | 1217 | 893  |
| >MEN1-H13☹RSYFKDRAHI  | 224 | >MEN1-H13☹RSYFKDRADI  | 2923 | 2699 |
| >MEN1-H13☹RSYFKDRAHI  | 448 | >MEN1-H13☹RSYFKDRADI  | 318  | 130  |
| >MEN1-H13☹RSYFKDRAHI  | 80  | >MEN1-H13☹RSYFKDRADI  | 236  | 156  |
| >MEN1-H13☹SRSYFKDRAH  | 475 | >MEN1-H13☹SRSYFKDRAD  | 2234 | 1759 |
| >MEN1-H13☹SRSYFKDRAH  | 324 | >MEN1-H13☹SRSYFKDRAD  | 872  | 548  |
| >MEN1-H43☹HVGWATFLV   | 102 | >MEN1-H43☹PVGWATFLV   | 3110 | 3008 |
| >MEN1-H43☹HVGWATFL    | 365 | >MEN1-H43☹PVGWATFL    | 7257 | 6892 |
| >MEN1-H43☹HVGWATFLV   | 95  | >MEN1-H43☹PVGWATFLV   | 2760 | 2665 |
| >MEN1-H43☹HVGWATFLV   | 467 | >MEN1-H43☹PVGWATFLV   | 4305 | 3838 |
| >MEN1-H43☹HVGWATFL    | 376 | >MEN1-H43☹PVGWATFL    | 8997 | 8621 |
| >MEN1-H43☹HVGWATFLV   | 18  | >MEN1-H43☹PVGWATFLV   | 941  | 923  |
| >MEN1-H43☹HVGWATFLV   | 49  | >MEN1-H43☹PVGWATFLV   | 333  | 284  |
| >MEN1-H43☹HVGWATFLV   | 231 | >MEN1-H43☹PVGWATFLV   | 5260 | 5029 |
| >MEN1-H43☹HVGWATFLV   | 25  | >MEN1-H43☹PVGWATFLV   | 106  | 81   |

|                      |       |                      |       |       |
|----------------------|-------|----------------------|-------|-------|
| >MEN1-H43:HVGWATFLV  | 23    | >MEN1-H43:PVGWATFLV  | 48    | 25    |
| >MEN1-H43:HVGWATFL   | 311   | >MEN1-H43:PVGWATFL   | 3366  | 3055  |
| >MEN1-H43:HVGWATFLV  | 7     | >MEN1-H43:PVGWATFLV  | 52    | 45    |
| >MEN1-H43:HVGWATFL   | 161   | >MEN1-H43:PVGWATFL   | 11720 | 11559 |
| >MEN1-H43:HVGWATFLV  | 12    | >MEN1-H43:PVGWATFLV  | 1240  | 1228  |
| >MEN1-H43:HVGWATFL   | 45    | >MEN1-H43:PVGWATFL   | 2102  | 2057  |
| >MEN1-H43:HVGWATFLV  | 4     | >MEN1-H43:PVGWATFLV  | 65    | 61    |
| >MEN1-H43:LHVGWATF   | 34896 | >MEN1-H43:LPVGWATF   | 327   | 34569 |
| >MEN1-H43:LHVGWATFL  | 31019 | >MEN1-H43:LPVGWATFL  | 53    | 30966 |
| >MEN1-H43:LHVGWATFL\ | 27625 | >MEN1-H43:LPVGWATFL\ | 380   | 27245 |
| >MEN1-H43:LHVGWATFL\ | 544   | >MEN1-H43:LPVGWATFL\ | 394   | 150   |
| >MEN1-H43:LHVGWATFL\ | 390   | >MEN1-H43:LPVGWATFL\ | 1539  | 1149  |
| >MEN1-H43:LHVGWATF   | 341   | >MEN1-H43:LPVGWATF   | 2141  | 1800  |
| >MEN1-H43:LHVGWATFL\ | 10027 | >MEN1-H43:LPVGWATFL\ | 115   | 9912  |
| >MEN1-H43:LHVGWATF   | 24025 | >MEN1-H43:LPVGWATF   | 111   | 23914 |
| >MEN1-H43:LHVGWATFL  | 25936 | >MEN1-H43:LPVGWATFL  | 81    | 25855 |
| >MEN1-H43:LHVGWATF   | 93    | >MEN1-H43:LPVGWATF   | 836   | 743   |
| >MEN1-H43:LHVGWATF   | 1055  | >MEN1-H43:LPVGWATF   | 8     | 1047  |
| >MEN1-H43:LHVGWATFL  | 18732 | >MEN1-H43:LPVGWATFL  | 79    | 18653 |
| >MEN1-H43:LHVGWATFL\ | 21800 | >MEN1-H43:LPVGWATFL\ | 247   | 21553 |
| >MEN1-H43:LHVGWATF   | 397   | >MEN1-H43:LPVGWATF   | 2463  | 2066  |
| >MEN1-H43:LHVGWATFL  | 39    | >MEN1-H43:LPVGWATFL  | 177   | 138   |
| >MEN1-H43:LHVGWATFL\ | 225   | >MEN1-H43:LPVGWATFL\ | 1332  | 1107  |
| >MEN1-H43:LHVGWATF   | 4034  | >MEN1-H43:LPVGWATF   | 19    | 4015  |
| >MEN1-H43:LHVGWATFL  | 11789 | >MEN1-H43:LPVGWATFL  | 77    | 11712 |
| >MEN1-H43:LHVGWATF   | 27854 | >MEN1-H43:LPVGWATF   | 492   | 27362 |
| >MEN1-H43:LHVGWATFL\ | 20129 | >MEN1-H43:LPVGWATFL\ | 122   | 20007 |
| >MEN1-H43:LHVGWATFL\ | 16545 | >MEN1-H43:LPVGWATFL\ | 93    | 16452 |
| >MEN1-H43:LHVGWATF   | 7573  | >MEN1-H43:LPVGWATF   | 59    | 7514  |
| >MEN1-H43:LHVGWATF   | 6583  | >MEN1-H43:LPVGWATF   | 12    | 6571  |
| >MEN1-H43:LHVGWATFL  | 23237 | >MEN1-H43:LPVGWATFL  | 286   | 22951 |
| >MEN1-H43:LHVGWATF   | 25    | >MEN1-H43:LPVGWATF   | 348   | 323   |
| >MEN1-H43:LHVGWATFL  | 196   | >MEN1-H43:LPVGWATFL  | 5026  | 4830  |
| >MEN1-H43:VLHVGWATF  | 27    | >MEN1-H43:VLPVGWATF\ | 31    | 4     |
| >MEN1-H43:VLHVGWATF  | 118   | >MEN1-H43:VLPVGWATF\ | 145   | 27    |
| >MEN1-H43:VLHVGWATF  | 28    | >MEN1-H43:VLPVGWATF\ | 32    | 4     |
| >MEN1-H43:VLHVGWATF  | 18    | >MEN1-H43:VLPVGWATF\ | 24    | 6     |
| >MEN1-H43:VLHVGWATF  | 37    | >MEN1-H43:VLPVGWATF\ | 14    | 23    |
| >MEN1-H43:VLHVGWAT   | 87    | >MEN1-H43:VLPVGWAT   | 168   | 81    |
| >MEN1-H43:VLHVGWATF  | 11    | >MEN1-H43:VLPVGWATF\ | 18    | 7     |
| >MEN1-H43:VLHVGWATF  | 3     | >MEN1-H43:VLPVGWATF\ | 4     | 1     |
| >MEN1-H43:VLHVGWATF  | 116   | >MEN1-H43:VLPVGWATF\ | 250   | 134   |
| >MEN1-H43:VLHVGWATF  | 11    | >MEN1-H43:VLPVGWATF\ | 20    | 9     |

|                     |       |                     |      |       |
|---------------------|-------|---------------------|------|-------|
| >MEN1-H43EVLHVGWATF | 20    | >MEN1-H43EVLVPGWATF | 14   | 6     |
| >MEN1-H43EVLHVGWATF | 6     | >MEN1-H43EVLVPGWATF | 5    | 1     |
| >MEN1-H43EVLHVGWATF | 115   | >MEN1-H43EVLVPGWATF | 57   | 58    |
| >MEN1-H43EVLHVGWATF | 8     | >MEN1-H43EVLVPGWATF | 5    | 3     |
| >MEN1-H43EVLHVGWAT  | 59    | >MEN1-H43EVLVPGWAT  | 74   | 15    |
| >MEN1-H43EVLHVGWATF | 5     | >MEN1-H43EVLVPGWATF | 6    | 1     |
| >MEN1-H43EVLHVGWATF | 2     | >MEN1-H43EVLVPGWATF | 2    | 0     |
| >MEN1-H43EVLHVGWATF | 892   | >MEN1-H43EVLVPGWATF | 233  | 659   |
| >MEN1-H43EVLHVGWATF | 66    | >MEN1-H43EVLVPGWATF | 234  | 168   |
| >MEN1-H43EVLHVGWATF | 24    | >MEN1-H43EVLVPGWATF | 54   | 30    |
| >MEN1-H43EVLHVGWATF | 82    | >MEN1-H43EVLVPGWATF | 881  | 799   |
| >MEN1-H43EVLHVGWATF | 37    | >MEN1-H43EVLVPGWATF | 2629 | 2592  |
| >MEN1-H43EVLHVGWATF | 20742 | >MEN1-H43EVLVPGWATF | 293  | 20449 |
| >MEN1-H43EVLHVGWATF | 7957  | >MEN1-H43EVLVPGWATF | 38   | 7919  |
| >MEN1-H43EVLHVGWATF | 10942 | >MEN1-H43EVLVPGWATF | 72   | 10870 |
| >MEN1-H43EVLHVGWAT  | 731   | >MEN1-H43EVLVPGWAT  | 323  | 408   |
| >MEN1-H43EVLHVGWAT  | 729   | >MEN1-H43EVLVPGWAT  | 338  | 391   |
| >MEN1-H43EVLHVGWAT  | 1014  | >MEN1-H43EVLVPGWAT  | 397  | 617   |
| >MEN1-H43EVLHVGWA   | 363   | >MEN1-H43EVLVPGWA   | 541  | 178   |
| >MEN1-H43EVLHVGWA   | 434   | >MEN1-H43EVLVPGWA   | 480  | 46    |
| >MEN1-H43EVLHVGWA   | 16    | >MEN1-H43EVLVPGWA   | 28   | 12    |
| >MEN1-H43EVLHVGW    | 88    | >MEN1-H43EVLVPGW    | 58   | 30    |
| >MEN1-H43EVLHVGWA   | 205   | >MEN1-H43EVLVPGWA   | 188  | 17    |
| >MEN1-H43EVLHVGWA   | 657   | >MEN1-H43EVLVPGWA   | 175  | 482   |
| >MEN1-H43EVLHVGWA   | 435   | >MEN1-H43EVLVPGWA   | 506  | 71    |
| >MEN1-H43EVLHVGWA   | 45    | >MEN1-H43EVLVPGWA   | 61   | 16    |
| >MEN1-H43EVLHVGW    | 12    | >MEN1-H43EVLVPGW    | 28   | 16    |
| >MEN1-H43EVLHVGWA   | 43    | >MEN1-H43EVLVPGWA   | 108  | 65    |
| >MEN1-H43EVLHVGW    | 189   | >MEN1-H43EVLVPGW    | 1928 | 1739  |
| >MEN1-H43EVLHVGW    | 475   | >MEN1-H43EVLVPGW    | 1161 | 686   |
| >MEN1-H43EVLHVGW    | 458   | >MEN1-H43EVLVPGW    | 2830 | 2372  |
| >MEN1-H43EVLHVGW    | 1303  | >MEN1-H43EVLVPGW    | 411  | 892   |
| >MEN1-H43EVLHVGW    | 1092  | >MEN1-H43EVLVPGW    | 97   | 995   |
| >MEN1-H43EVLHVGW    | 1991  | >MEN1-H43EVLVPGW    | 331  | 1660  |
| >MEN1-H43EVLHVGW    | 514   | >MEN1-H43EVLVPGW    | 350  | 164   |
| >MEN1-H43EVLHVGW    | 23    | >MEN1-H43EVLVPGW    | 45   | 22    |
| >MEN1-H43EVLHVGW    | 97    | >MEN1-H43EVLVPGW    | 116  | 19    |
| >MEN1-H43EVLHVGW    | 50    | >MEN1-H43EVLVPGW    | 160  | 110   |
| >MEN1-H43EVLHVGW    | 12    | >MEN1-H43EVLVPGW    | 9    | 3     |
| >MEN1-H43EVLHVGW    | 142   | >MEN1-H43EVLVPGW    | 227  | 85    |
| >MEN1-H43EVLHVGW    | 90    | >MEN1-H43EVLVPGW    | 276  | 186   |
| >MEN1-H43EVLHVGW    | 1869  | >MEN1-H43EVLVPGW    | 459  | 1410  |
| >MEN1-H43EVLHVGW    | 121   | >MEN1-H43EVLVPGW    | 54   | 67    |

|                        |      |                        |       |       |
|------------------------|------|------------------------|-------|-------|
| >MEN1-H43E EEGSPTPVLH  | 580  | >MEN1-H43E EEGSPTPVLH  | 480   | 100   |
| >MEN1-I86F-IAALYARF    | 312  | >MEN1-I86F-FAALYARF    | 2836  | 2524  |
| >MEN1-I86F-IAALYARFTA  | 1917 | >MEN1-I86F-FAALYARFTA  | 391   | 1526  |
| >MEN1-I86F-IAALYARFTA  | 1629 | >MEN1-I86F-FAALYARFTA  | 187   | 1442  |
| >MEN1-I86F-IAALYARFTA  | 3039 | >MEN1-I86F-FAALYARFTA  | 413   | 2626  |
| >MEN1-I86F-IAALYARF    | 204  | >MEN1-I86F-FAALYARF    | 128   | 76    |
| >MEN1-I86F-IAALYARF    | 10   | >MEN1-I86F-FAALYARF    | 13    | 3     |
| >MEN1-I86F-IAALYARF    | 322  | >MEN1-I86F-FAALYARF    | 50    | 272   |
| >MEN1-I86F-IAALYARF    | 110  | >MEN1-I86F-FAALYARF    | 197   | 87    |
| >MEN1-I86F-IIAALYARF   | 79   | >MEN1-I86F-IFAALYARF   | 325   | 246   |
| >MEN1-I86F-IIAALYARFTA | 489  | >MEN1-I86F-IFAALYARFTA | 13236 | 12747 |
| >MEN1-I86F-IIAALYARFTA | 82   | >MEN1-I86F-IFAALYARFTA | 727   | 645   |
| >MEN1-I86F-IIAALYARFTA | 96   | >MEN1-I86F-IFAALYARFTA | 7282  | 7186  |
| >MEN1-I86F-IIAALYARFTA | 121  | >MEN1-I86F-IFAALYARFTA | 5795  | 5674  |
| >MEN1-I86F-IIAALYARFTA | 203  | >MEN1-I86F-IFAALYARFTA | 15007 | 14804 |
| >MEN1-I86F-IIAALYAR    | 472  | >MEN1-I86F-IFAALYAR    | 8971  | 8499  |
| >MEN1-I86F-IIAALYARF   | 924  | >MEN1-I86F-IFAALYARF   | 32    | 892   |
| >MEN1-I86F-IIAALYARF   | 715  | >MEN1-I86F-IFAALYARF   | 55    | 660   |
| >MEN1-I86F-IIAALYARF   | 4139 | >MEN1-I86F-IFAALYARF   | 23    | 4116  |
| >MEN1-I86F-IIAALYARF   | 1087 | >MEN1-I86F-IFAALYARF   | 213   | 874   |
| >MEN1-I86F-IIAALYAR    | 19   | >MEN1-I86F-IFAALYAR    | 11    | 8     |
| >MEN1-I86F-IIAALYAR    | 168  | >MEN1-I86F-IFAALYAR    | 41    | 127   |
| >MEN1-I86F-IIAALYAR    | 20   | >MEN1-I86F-IFAALYAR    | 112   | 92    |
| >MEN1-I86F-IIAALYARFTA | 113  | >MEN1-I86F-IFAALYARFTA | 9433  | 9320  |
| >MEN1-I86F-IIAALYARF   | 157  | >MEN1-I86F-IFAALYARF   | 1398  | 1241  |
| >MEN1-I86F-IIAALYARF   | 399  | >MEN1-I86F-IFAALYARF   | 1311  | 912   |
| >MEN1-I86F-IIAALYARF   | 283  | >MEN1-I86F-IFAALYARF   | 12272 | 11989 |
| >MEN1-I86F-IIAALYARF   | 55   | >MEN1-I86F-IFAALYARF   | 752   | 697   |
| >MEN1-I86F-IIAALYARF   | 265  | >MEN1-I86F-IFAALYARF   | 646   | 381   |
| >MEN1-I86F-IIAALYAR    | 61   | >MEN1-I86F-IFAALYAR    | 29    | 32    |
| >MEN1-I86F-TYFPVADLSII | 5    | >MEN1-I86F-TYFPVADLSIF | 541   | 536   |
| >MEN1-I86F-TYFPVADLSII | 355  | >MEN1-I86F-TYFPVADLSIF | 9602  | 9247  |
| >MEN1-I86F-TYFPVADLSII | 61   | >MEN1-I86F-TYFPVADLSIF | 19    | 42    |
| >MEN1-I86F-TYFPVADLSII | 169  | >MEN1-I86F-TYFPVADLSIF | 89    | 80    |
| >MEN1-I86F-TYFPVADLSII | 10   | >MEN1-I86F-TYFPVADLSIF | 5     | 5     |
| >MEN1-I86F-TYFPVADLSII | 4607 | >MEN1-I86F-TYFPVADLSIF | 259   | 4348  |
| >MEN1-I86F-TYFPVADLSII | 1001 | >MEN1-I86F-TYFPVADLSIF | 65    | 936   |
| >MEN1-I86F-TYFPVADLSII | 432  | >MEN1-I86F-TYFPVADLSIF | 22581 | 22149 |
| >MEN1-I86F-SIIAALYA    | 101  | >MEN1-I86F-SIFAALYA    | 43    | 58    |
| >MEN1-I86F-SIIAALYA    | 105  | >MEN1-I86F-SIFAALYA    | 44    | 61    |
| >MEN1-I86F-SIIAALYARFT | 960  | >MEN1-I86F-SIFAALYARFT | 393   | 567   |
| >MEN1-I86F-SIIAALYA    | 58   | >MEN1-I86F-SIFAALYA    | 50    | 8     |
| >MEN1-I86F-SIIAALYA    | 23   | >MEN1-I86F-SIFAALYA    | 30    | 7     |

|                        |      |                        |     |     |
|------------------------|------|------------------------|-----|-----|
| >MEN1-I86F-SIIAALYARFT | 367  | >MEN1-I86F-SIFAALYARFT | 344 | 23  |
| >MEN1-I86F-SIIAALYA    | 258  | >MEN1-I86F-SIFAALYA    | 26  | 232 |
| >MEN1-I86F-SIIAALYA    | 465  | >MEN1-I86F-SIFAALYA    | 49  | 416 |
| >MEN1-I86F-SIIAALYA    | 411  | >MEN1-I86F-SIFAALYA    | 90  | 321 |
| >MEN1-I86F-SIIAALYAR   | 45   | >MEN1-I86F-SIFAALYAR   | 17  | 28  |
| >MEN1-I86F-SIIAALYARF  | 182  | >MEN1-I86F-SIFAALYARF  | 250 | 68  |
| >MEN1-I86F-SIIAALYARF  | 10   | >MEN1-I86F-SIFAALYARF  | 888 | 878 |
| >MEN1-I86F-SIIAALYA    | 1101 | >MEN1-I86F-SIFAALYA    | 142 | 959 |
| >MEN1-I86F-SIIAALYAR   | 15   | >MEN1-I86F-SIFAALYAR   | 9   | 6   |
| >MEN1-I86F-SIIAALYARF  | 733  | >MEN1-I86F-SIFAALYARF  | 90  | 643 |
| >MEN1-I86F-SIIAALYAR   | 316  | >MEN1-I86F-SIFAALYAR   | 121 | 195 |
| >MEN1-I86F-SIIAALYAR   | 19   | >MEN1-I86F-SIFAALYAR   | 8   | 11  |
| >MEN1-I86F-SIIAALYA    | 153  | >MEN1-I86F-SIFAALYA    | 73  | 80  |
| >MEN1-I86F-SIIAALYA    | 512  | >MEN1-I86F-SIFAALYA    | 257 | 255 |
| >MEN1-I86F-SIIAALYARF  | 76   | >MEN1-I86F-SIFAALYARF  | 68  | 8   |
| >MEN1-I86F-SIIAALYARF  | 660  | >MEN1-I86F-SIFAALYARF  | 122 | 538 |
| >MEN1-I86F-SIIAALYARF  | 300  | >MEN1-I86F-SIFAALYARF  | 141 | 159 |
| >MEN1-I86F-SIIAALYARF  | 324  | >MEN1-I86F-SIFAALYARF  | 343 | 19  |
| >MEN1-I86F-SIIAALYAR   | 69   | >MEN1-I86F-SIFAALYAR   | 32  | 37  |
| >MEN1-I86F-LSIIAALYARF | 300  | >MEN1-I86F-LSIFAALYARF | 277 | 23  |
| >MEN1-I86F-LSIIAALY    | 427  | >MEN1-I86F-LSIFAALY    | 358 | 69  |
| >MEN1-I86F-LSIIAALYAR  | 1201 | >MEN1-I86F-LSIFAALYAR  | 359 | 842 |
| >MEN1-I86F-LSIIAALYAR  | 57   | >MEN1-I86F-LSIFAALYAR  | 34  | 23  |
| >MEN1-I86F-LSIIAALYARF | 819  | >MEN1-I86F-LSIFAALYARF | 419 | 400 |
| >MEN1-I86F-LSIIAALY    | 1115 | >MEN1-I86F-LSIFAALY    | 273 | 842 |
| >MEN1-I86F-LSIIAALYARF | 1200 | >MEN1-I86F-LSIFAALYARF | 314 | 886 |
| >MEN1-I86F-LSIIAALY    | 17   | >MEN1-I86F-LSIFAALY    | 13  | 4   |
| >MEN1-I86F-LSIIAALY    | 65   | >MEN1-I86F-LSIFAALY    | 51  | 14  |
| >MEN1-I86F-LSIIAALYAR  | 19   | >MEN1-I86F-LSIFAALYAR  | 12  | 7   |
| >MEN1-I86F-LSIIAALYAR  | 280  | >MEN1-I86F-LSIFAALYAR  | 246 | 34  |
| >MEN1-I86F-LSIIAALY    | 518  | >MEN1-I86F-LSIFAALY    | 201 | 317 |
| >MEN1-I86F-LSIIAALYAR  | 9    | >MEN1-I86F-LSIFAALYAR  | 7   | 2   |
| >MEN1-I86F-LSIIAALY    | 163  | >MEN1-I86F-LSIFAALY    | 115 | 48  |
| >MEN1-I86F-LSIIAALYARF | 101  | >MEN1-I86F-LSIFAALYARF | 72  | 29  |
| >MEN1-I86F-LSIIAALY    | 551  | >MEN1-I86F-LSIFAALY    | 282 | 269 |
| >MEN1-I86F-LSIIAALYARF | 109  | >MEN1-I86F-LSIFAALYARF | 74  | 35  |
| >MEN1-I86F-LSIIAALY    | 3    | >MEN1-I86F-LSIFAALY    | 3   | 0   |
| >MEN1-I86F-LSIIAALYA   | 293  | >MEN1-I86F-LSIFAALYA   | 913 | 620 |
| >MEN1-I86F-LSIIAALYARF | 3    | >MEN1-I86F-LSIFAALYARF | 3   | 0   |
| >MEN1-I86F-LSIIAALY    | 352  | >MEN1-I86F-LSIFAALY    | 319 | 33  |
| >MEN1-I86F-LSIIAALY    | 305  | >MEN1-I86F-LSIFAALY    | 432 | 127 |
| >MEN1-I86F-LSIIAALYARF | 182  | >MEN1-I86F-LSIFAALYARF | 295 | 113 |
| >MEN1-I86F-LSIIAALY    | 45   | >MEN1-I86F-LSIFAALY    | 54  | 9   |

|                        |      |                        |      |      |
|------------------------|------|------------------------|------|------|
| >MEN1-I86F-LSIIAALYARF | 23   | >MEN1-I86F-LSIFAALYARF | 25   | 2    |
| >MEN1-I86F-LSIIAALYARF | 311  | >MEN1-I86F-LSIFAALYARF | 518  | 207  |
| >MEN1-I86F-LSIIAALY    | 138  | >MEN1-I86F-LSIFAALY    | 105  | 33   |
| >MEN1-I86F-LSIIAALYARF | 87   | >MEN1-I86F-LSIFAALYARF | 38   | 49   |
| >MEN1-I86F-LSIIAALY    | 868  | >MEN1-I86F-LSIFAALY    | 493  | 375  |
| >MEN1-I86F-DLSIIAAL    | 214  | >MEN1-I86F-DLSIFAAL    | 300  | 86   |
| >MEN1-I86F-DLSIIAALYA  | 279  | >MEN1-I86F-DLSIFAALYA  | 120  | 159  |
| >MEN1-I86F-DLSIIAALYA  | 478  | >MEN1-I86F-DLSIFAALYA  | 229  | 249  |
| >MEN1-I86F-DLSIIAAL    | 394  | >MEN1-I86F-DLSIFAAL    | 1027 | 633  |
| >MEN1-I86F-DLSIIAAL    | 138  | >MEN1-I86F-DLSIFAAL    | 195  | 57   |
| >MEN1-I86F-DLSIIAALY   | 26   | >MEN1-I86F-DLSIFAALY   | 30   | 4    |
| >MEN1-I86F-DLSIIAALY   | 78   | >MEN1-I86F-DLSIFAALY   | 115  | 37   |
| >MEN1-I86F-DLSIIAALYAR | 19   | >MEN1-I86F-DLSIFAALYAR | 19   | 0    |
| >MEN1-I86F-DLSIIAALY   | 197  | >MEN1-I86F-DLSIFAALY   | 362  | 165  |
| >MEN1-I86F-DLSIIAALYAR | 20   | >MEN1-I86F-DLSIFAALYAR | 24   | 4    |
| >MEN1-I86F-DLSIIAALY   | 466  | >MEN1-I86F-DLSIFAALY   | 875  | 409  |
| >MEN1-I86F-DLSIIAALY   | 233  | >MEN1-I86F-DLSIFAALY   | 220  | 13   |
| >MEN1-I86F-DLSIIAALYAR | 688  | >MEN1-I86F-DLSIFAALYAR | 295  | 393  |
| >MEN1-I86F-ADLSIIAALY  | 424  | >MEN1-I86F-ADLSIFAALY  | 247  | 177  |
| >MEN1-I86F-ADLSIIAALY  | 267  | >MEN1-I86F-ADLSIFAALY  | 429  | 162  |
| >MEN1-I86F-ADLSIIAA    | 715  | >MEN1-I86F-ADLSIFAA    | 330  | 385  |
| >MEN1-I86F-ADLSIIAAL   | 328  | >MEN1-I86F-ADLSIFAAL   | 159  | 169  |
| >MEN1-I86F-ADLSIIAALY  | 413  | >MEN1-I86F-ADLSIFAALY  | 308  | 105  |
| >MEN1-I86F-ADLSIIAALY  | 482  | >MEN1-I86F-ADLSIFAALY  | 370  | 112  |
| >MEN1-I86F-ADLSIIAA    | 533  | >MEN1-I86F-ADLSIFAA    | 195  | 338  |
| >MEN1-I86F-ADLSIIAAL   | 132  | >MEN1-I86F-ADLSIFAAL   | 148  | 16   |
| >MEN1-I86F-ADLSIIAAL   | 310  | >MEN1-I86F-ADLSIFAAL   | 242  | 68   |
| >MEN1-I86F-VADLSIIAALY | 24   | >MEN1-I86F-VADLSIFAALY | 20   | 4    |
| >MEN1-I86F-VADLSIIAA   | 1246 | >MEN1-I86F-VADLSIFAA   | 259  | 987  |
| >MEN1-I86F-VADLSIIAALY | 681  | >MEN1-I86F-VADLSIFAALY | 414  | 267  |
| >MEN1-I86F-VADLSIIAAL  | 178  | >MEN1-I86F-VADLSIFAAL  | 249  | 71   |
| >MEN1-I86F-VADLSIIAALY | 30   | >MEN1-I86F-VADLSIFAALY | 20   | 10   |
| >MEN1-I86F-VADLSIIAALY | 289  | >MEN1-I86F-VADLSIFAALY | 290  | 1    |
| >MEN1-I86F-VADLSIIAAL  | 670  | >MEN1-I86F-VADLSIFAAL  | 352  | 318  |
| >MEN1-I86F-PVADLSIIAAL | 129  | >MEN1-I86F-PVADLSIFAAI | 93   | 36   |
| >MEN1-I86F-PVADLSII    | 7543 | >MEN1-I86F-PVADLSIF    | 327  | 7216 |
| >MEN1-I86F-PVADLSIIA   | 5186 | >MEN1-I86F-PVADLSIFA   | 421  | 4765 |
| >MEN1-I86F-PVADLSIIAAL | 284  | >MEN1-I86F-PVADLSIFAAI | 165  | 119  |
| >MEN1-I86F-FPVADLSIIAA | 1172 | >MEN1-I86F-FPVADLSIFAA | 313  | 859  |
| >MEN1-I86F-FPVADLSII   | 5643 | >MEN1-I86F-FPVADLSIF   | 142  | 5501 |
| >MEN1-I86F-FPVADLSII   | 252  | >MEN1-I86F-FPVADLSIF   | 151  | 101  |
| >MEN1-I86F-FPVADLSIIAA | 272  | >MEN1-I86F-FPVADLSIFAA | 294  | 22   |
| >MEN1-I86F-FPVADLSII   | 3089 | >MEN1-I86F-FPVADLSIF   | 110  | 2979 |



|                        |       |                       |       |       |
|------------------------|-------|-----------------------|-------|-------|
| >MEN1-I86F-FPVADLSII   | 135   | >MEN1-I86F-FPVADLSIF  | 9     | 126   |
| >MEN1-I86F-FPVADLSIIA  | 42    | >MEN1-I86F-FPVADLSIFA | 151   | 109   |
| >MEN1-I86F-FPVADLSIIAA | 27    | >MEN1-I86F-FPVADLSIFA | 29    | 2     |
| >MEN1-I86F-FPVADLSII   | 371   | >MEN1-I86F-FPVADLSIF  | 1018  | 647   |
| >MEN1-I86F-FPVADLSII   | 48    | >MEN1-I86F-FPVADLSIF  | 716   | 668   |
| >MEN1-I86F-FPVADLSII   | 16    | >MEN1-I86F-FPVADLSIF  | 15    | 1     |
| >MEN1-I86F-FPVADLSIIA  | 234   | >MEN1-I86F-FPVADLSIFA | 253   | 19    |
| >MEN1-I86F-FPVADLSII   | 18    | >MEN1-I86F-FPVADLSIF  | 238   | 220   |
| >MEN1-I86F-FPVADLSIIA  | 11    | >MEN1-I86F-FPVADLSIFA | 17    | 6     |
| >MEN1-I86F-FPVADLSIIAA | 4     | >MEN1-I86F-FPVADLSIFA | 4     | 0     |
| >MEN1-I86F-FPVADLSII   | 1877  | >MEN1-I86F-FPVADLSIF  | 158   | 1719  |
| >MEN1-I86F-FPVADLSII   | 7948  | >MEN1-I86F-FPVADLSIF  | 142   | 7806  |
| >MEN1-I86F-FPVADLSII   | 368   | >MEN1-I86F-FPVADLSIF  | 14    | 354   |
| >MEN1-I86F-YFPVADLSII  | 4422  | >MEN1-I86F-YFPVADLSIF | 60    | 4362  |
| >MEN1-I86F-YFPVADLSII  | 3295  | >MEN1-I86F-YFPVADLSIF | 84    | 3211  |
| >MEN1-I86F-YFPVADLSII  | 22    | >MEN1-I86F-YFPVADLSIF | 6     | 16    |
| >MEN1-I86F-YFPVADLSII  | 8281  | >MEN1-I86F-YFPVADLSIF | 245   | 8036  |
| >MEN1-I86F-YFPVADLSII  | 514   | >MEN1-I86F-YFPVADLSIF | 258   | 256   |
| >MEN1-K502DKGLGTGQG    | 26711 | >MEN1-K502DMGLGTGQC   | 412   | 26299 |
| >MEN1-K502DKGLGTGQG    | 23147 | >MEN1-K502DMGLGTGQC   | 436   | 22711 |
| >MEN1-K502DKGLGTGQG    | 21937 | >MEN1-K502DMGLGTGQC   | 145   | 21792 |
| >MEN1-K502DKGLGTGQG    | 31838 | >MEN1-K502DMGLGTGQC   | 189   | 31649 |
| >MEN1-K502PPPKKPALD    | 28587 | >MEN1-K502PPPKKPALD   | 35    | 28552 |
| >MEN1-K502ALDKGLGT     | 339   | >MEN1-K502ALDMGLGT    | 249   | 90    |
| >MEN1-K502ALDKGLGT     | 277   | >MEN1-K502ALDMGLGT    | 129   | 148   |
| >MEN1-K502ALDKGLGTGC   | 335   | >MEN1-K502ALDMGLGTG   | 183   | 152   |
| >MEN1-K502KPALDKGL     | 60    | >MEN1-K502KPALDMGL    | 45    | 15    |
| >MEN1-K502PPKKPALDK    | 34028 | >MEN1-K502PPKKPALDM   | 186   | 33842 |
| >MEN1-K502PPPKKPALDK   | 30959 | >MEN1-K502PPPKKPALDM  | 77    | 30882 |
| >MEN1-L152LDSSGVAF     | 122   | >MEN1-L152WDSSGVAF    | 94    | 28    |
| >MEN1-L152LDSSGVAF     | 1381  | >MEN1-L152WDSSGVAF    | 412   | 969   |
| >MEN1-L152LDSSGVAF     | 716   | >MEN1-L152WDSSGVAF    | 240   | 476   |
| >MEN1-L152LDSSGVAFAV   | 1510  | >MEN1-L152WDSSGVAFA   | 201   | 1309  |
| >MEN1-L152LDSSGVAFAV   | 124   | >MEN1-L152WDSSGVAFA   | 90    | 34    |
| >MEN1-L152LDSSGVAFAV   | 185   | >MEN1-L152WDSSGVAFA   | 135   | 50    |
| >MEN1-L152KLDSSGVAFA   | 343   | >MEN1-L152KWDSSGVAF   | 25554 | 25211 |
| >MEN1-L152KLDSSGVAFA   | 13    | >MEN1-L152KWDSSGVAF   | 5625  | 5612  |
| >MEN1-L152KLDSSGVAFA   | 63    | >MEN1-L152KWDSSGVAF   | 13000 | 12937 |
| >MEN1-L152KLDSSGVAFA   | 13    | >MEN1-L152KWDSSGVAF   | 2039  | 2026  |
| >MEN1-L152KLDSSGVAFA   | 69    | >MEN1-L152KWDSSGVAF   | 13634 | 13565 |
| >MEN1-L152KLDSSGVAFA   | 40    | >MEN1-L152KWDSSGVAF   | 17355 | 17315 |
| >MEN1-L152KLDSSGVAFA   | 9     | >MEN1-L152KWDSSGVAF   | 212   | 203   |
| >MEN1-L152KLDSSGVA     | 83    | >MEN1-L152KWDSSGVA    | 21613 | 21530 |

|                        |       |                        |       |       |
|------------------------|-------|------------------------|-------|-------|
| >MEN1-L152 KLDSSGVAFA  | 9     | >MEN1-L152 KWDSSGVAFA  | 10081 | 10072 |
| >MEN1-L152 KLDSSGVAFA  | 2     | >MEN1-L152 KWDSSGVAFA  | 689   | 687   |
| >MEN1-L152 KLDSSGVA    | 260   | >MEN1-L152 KWDSSGVA    | 22029 | 21769 |
| >MEN1-L152 KLDSSGVAFA  | 16    | >MEN1-L152 KWDSSGVAFA  | 16896 | 16880 |
| >MEN1-L152 KLDSSGVAFA  | 3     | >MEN1-L152 KWDSSGVAFA  | 5975  | 5972  |
| >MEN1-L152 KLDSSGVA    | 137   | >MEN1-L152 KWDSSGVA    | 23248 | 23111 |
| >MEN1-L152 KLDSSGVAFA  | 13    | >MEN1-L152 KWDSSGVAFA  | 12059 | 12046 |
| >MEN1-L152 KLDSSGVAFA  | 5     | >MEN1-L152 KWDSSGVAFA  | 1794  | 1789  |
| >MEN1-L152 KLDSSGVAFA  | 69    | >MEN1-L152 KWDSSGVAFA  | 19835 | 19766 |
| >MEN1-L152 KLDSSGVAFA  | 5     | >MEN1-L152 KWDSSGVAFA  | 15064 | 15059 |
| >MEN1-L152 KLDSSGVA    | 306   | >MEN1-L152 KWDSSGVA    | 34457 | 34151 |
| >MEN1-L152 KLDSSGVAFA  | 26    | >MEN1-L152 KWDSSGVAFA  | 28627 | 28601 |
| >MEN1-L152 KLDSSGVAFA  | 3     | >MEN1-L152 KWDSSGVAFA  | 11687 | 11684 |
| >MEN1-L152 KLDSSGVAFA  | 10425 | >MEN1-L152 KWDSSGVAFA  | 70    | 10355 |
| >MEN1-L152 KLDSSGVAFA  | 82    | >MEN1-L152 KWDSSGVAFA  | 6181  | 6099  |
| >MEN1-L152 KLDSSGVAFA  | 175   | >MEN1-L152 KWDSSGVAFA  | 12066 | 11891 |
| >MEN1-L152 KLDSSGVAFA  | 333   | >MEN1-L152 KWDSSGVAFA  | 10567 | 10234 |
| >MEN1-L152 KLDSSGVAFA  | 17    | >MEN1-L152 KWDSSGVAFA  | 258   | 241   |
| >MEN1-L152 KLDSSGVAFA  | 438   | >MEN1-L152 KWDSSGVAFA  | 17750 | 17312 |
| >MEN1-L152 KLDSSGVA    | 21572 | >MEN1-L152 KWDSSGVA    | 187   | 21385 |
| >MEN1-L152 KLDSSGVAFA  | 23955 | >MEN1-L152 KWDSSGVAFA  | 56    | 23899 |
| >MEN1-L152 KLDSSGVAFA  | 21532 | >MEN1-L152 KWDSSGVAFA  | 198   | 21334 |
| >MEN1-L152 KLDSSGVAFA  | 15443 | >MEN1-L152 KWDSSGVAFA  | 54    | 15389 |
| >MEN1-L152 SLFSFITGTKL | 342   | >MEN1-L152 SLFSFITGTKW | 8013  | 7671  |
| >MEN1-L152 SLFSFITGTKL | 37    | >MEN1-L152 SLFSFITGTKW | 11935 | 11898 |
| >MEN1-L152 SLFSFITGTKL | 8     | >MEN1-L152 SLFSFITGTKW | 1154  | 1146  |
| >MEN1-L152 SLFSFITGTKL | 14    | >MEN1-L152 SLFSFITGTKW | 4155  | 4141  |
| >MEN1-L152 SLFSFITGTKL | 349   | >MEN1-L152 SLFSFITGTKW | 11899 | 11550 |
| >MEN1-L152 SLFSFITGTKL | 3     | >MEN1-L152 SLFSFITGTKW | 1333  | 1330  |
| >MEN1-L152 SLFSFITGTKL | 53    | >MEN1-L152 SLFSFITGTKW | 16338 | 16285 |
| >MEN1-L152 SLFSFITGTKL | 7     | >MEN1-L152 SLFSFITGTKW | 5813  | 5806  |
| >MEN1-L152 SLFSFITGTKL | 420   | >MEN1-L152 SLFSFITGTKW | 23844 | 23424 |
| >MEN1-L152 SLFSFITGTKL | 3     | >MEN1-L152 SLFSFITGTKW | 2774  | 2771  |
| >MEN1-L152 SLFSFITGTKL | 128   | >MEN1-L152 SLFSFITGTKW | 94    | 34    |
| >MEN1-L152 SLFSFITGTKL | 109   | >MEN1-L152 SLFSFITGTKW | 346   | 237   |
| >MEN1-L152 SLFSFITGTKL | 2528  | >MEN1-L152 SLFSFITGTKW | 93    | 2435  |
| >MEN1-L152 SLFSFITGTKL | 20901 | >MEN1-L152 SLFSFITGTKW | 384   | 20517 |
| >MEN1-L152 SLFSFITGTKL | 134   | >MEN1-L152 SLFSFITGTKW | 260   | 126   |
| >MEN1-L152 TKLDSSGV    | 482   | >MEN1-L152 TKWDSSGV    | 190   | 292   |
| >MEN1-L152 TKLDSSGVAFA | 3     | >MEN1-L152 TKWDSSGVA   | 3     | 0     |
| >MEN1-L152 TKLDSSGVAFA | 392   | >MEN1-L152 TKWDSSGVA   | 1177  | 785   |
| >MEN1-L152 GTKLDSSGV   | 292   | >MEN1-L152 GTKWDSSGV   | 71    | 221   |
| >MEN1-L152 GTKLDSSGV   | 4901  | >MEN1-L152 GTKWDSSGV   | 333   | 4568  |

|                        |       |                       |       |       |
|------------------------|-------|-----------------------|-------|-------|
| >MEN1-L152 GTKLDSSGVA  | 138   | >MEN1-L152 GTKWDSSGV  | 133   | 5     |
| >MEN1-L152 GTKLDSSGVA  | 148   | >MEN1-L152 GTKWDSSGV  | 166   | 18    |
| >MEN1-L152 GTKLDSSGVA  | 17    | >MEN1-L152 GTKWDSSGV  | 14    | 3     |
| >MEN1-L152 GTKLDSSGV   | 152   | >MEN1-L152 GTKWDSSGV  | 91    | 61    |
| >MEN1-L152 GTKLDSSGVA  | 39    | >MEN1-L152 GTKWDSSGV  | 24    | 15    |
| >MEN1-L152 ITGTKLDSSG\ | 450   | >MEN1-L152 ITGTKWDSSC | 872   | 422   |
| >MEN1-L152 ITGTKLDSSG\ | 499   | >MEN1-L152 ITGTKWDSSC | 312   | 187   |
| >MEN1-L152 FITGTKLDS   | 5191  | >MEN1-L152 FITGTKWDS  | 439   | 4752  |
| >MEN1-L152 SFITGTKL    | 102   | >MEN1-L152 SFITGTKW   | 20283 | 20181 |
| >MEN1-L152 FSFITGTKL   | 36    | >MEN1-L152 FSFITGTKW  | 111   | 75    |
| >MEN1-L152 FSFITGTKL   | 7     | >MEN1-L152 FSFITGTKW  | 3     | 4     |
| >MEN1-L152 FSFITGTKL   | 14292 | >MEN1-L152 FSFITGTKW  | 346   | 13946 |
| >MEN1-L152 FSFITGTKL   | 10796 | >MEN1-L152 FSFITGTKW  | 43    | 10753 |
| >MEN1-L152 FSFITGTKL   | 3259  | >MEN1-L152 FSFITGTKW  | 11    | 3248  |
| >MEN1-L152 FSFITGTKL   | 286   | >MEN1-L152 FSFITGTKW  | 5289  | 5003  |
| >MEN1-L152 FSFITGTKL   | 24    | >MEN1-L152 FSFITGTKW  | 37    | 13    |
| >MEN1-L152 FSFITGTKL   | 19534 | >MEN1-L152 FSFITGTKW  | 267   | 19267 |
| >MEN1-L152 FSFITGTKL   | 12758 | >MEN1-L152 FSFITGTKW  | 74    | 12684 |
| >MEN1-L152 FSFITGTKL   | 79    | >MEN1-L152 FSFITGTKW  | 20344 | 20265 |
| >MEN1-L152 LFSFITGTKL  | 317   | >MEN1-L152 LFSFITGTKW | 401   | 84    |
| >MEN1-L152 LFSFITGTKL  | 13923 | >MEN1-L152 LFSFITGTKW | 109   | 13814 |
| >MEN1-L175 LALSEDHAW'  | 424   | >MEN1-L175 RALSEDHAW  | 591   | 167   |
| >MEN1-L175 LALSEDHAW'  | 149   | >MEN1-L175 RALSEDHAW  | 297   | 148   |
| >MEN1-L175 LALSEDHAW'  | 76    | >MEN1-L175 RALSEDHAW  | 64    | 12    |
| >MEN1-L175 LALSEDHAW'  | 93    | >MEN1-L175 RALSEDHAW  | 92    | 1     |
| >MEN1-L175 LALSEDHAW'  | 51    | >MEN1-L175 RALSEDHAW  | 49    | 2     |
| >MEN1-L175 LALSEDHAW'  | 218   | >MEN1-L175 RALSEDHAW  | 231   | 13    |
| >MEN1-L175 LALSEDHAW'  | 217   | >MEN1-L175 RALSEDHAW  | 208   | 9     |
| >MEN1-L175 LALSEDHAW'  | 266   | >MEN1-L175 RALSEDHAW  | 609   | 343   |
| >MEN1-L175 LALSEDHAW'  | 30    | >MEN1-L175 RALSEDHAW  | 138   | 108   |
| >MEN1-L175 LALSEDHAW'  | 34    | >MEN1-L175 RALSEDHAW  | 150   | 116   |
| >MEN1-L175 LALSEDHAW'  | 369   | >MEN1-L175 RALSEDHAW  | 1083  | 714   |
| >MEN1-L175 LALSEDHAW'  | 225   | >MEN1-L175 RALSEDHAW  | 616   | 391   |
| >MEN1-L175 LALSEDHAW   | 18    | >MEN1-L175 RALSEDHAW  | 8     | 10    |
| >MEN1-L175 LALSEDHAW'  | 3723  | >MEN1-L175 RALSEDHAW  | 450   | 3273  |
| >MEN1-L175 LALSEDHAW   | 73    | >MEN1-L175 RALSEDHAW  | 858   | 785   |
| >MEN1-L175 LALSEDHAW   | 14    | >MEN1-L175 RALSEDHAW  | 235   | 221   |
| >MEN1-L175 LALSEDHAW   | 60    | >MEN1-L175 RALSEDHAW  | 46    | 14    |
| >MEN1-L175 LALSEDHAW   | 13    | >MEN1-L175 RALSEDHAW  | 9     | 4     |
| >MEN1-L175 LALSEDHAW   | 12    | >MEN1-L175 RALSEDHAW  | 70    | 58    |
| >MEN1-L175 LALSEDHAW   | 76    | >MEN1-L175 RALSEDHAW  | 87    | 11    |
| >MEN1-L175 HLALSEDHAW  | 207   | >MEN1-L175 HRALSEDHAW | 22398 | 22191 |
| >MEN1-L175 HLALSEDHAW  | 160   | >MEN1-L175 HRALSEDHAW | 26191 | 26031 |

|                       |       |                       |       |       |
|-----------------------|-------|-----------------------|-------|-------|
| >MEN1-L175 HLALSEDHAV | 9     | >MEN1-L175 HRALSEDHAV | 8428  | 8419  |
| >MEN1-L175 HLALSEDHAV | 26    | >MEN1-L175 HRALSEDHAV | 15633 | 15607 |
| >MEN1-L175 HLALSEDHAV | 286   | >MEN1-L175 HRALSEDHAV | 16742 | 16456 |
| >MEN1-L175 HLALSEDHAV | 38    | >MEN1-L175 HRALSEDHAV | 17008 | 16970 |
| >MEN1-L175 HLALSEDHAV | 75    | >MEN1-L175 HRALSEDHAV | 20097 | 20022 |
| >MEN1-L175 HLALSEDHAV | 16    | >MEN1-L175 HRALSEDHAV | 17038 | 17022 |
| >MEN1-L175 HLALSEDHAV | 24    | >MEN1-L175 HRALSEDHAV | 21421 | 21397 |
| >MEN1-L175 HLALSEDHAV | 5     | >MEN1-L175 HRALSEDHAV | 11493 | 11488 |
| >MEN1-L175 HLALSEDHAV | 237   | >MEN1-L175 HRALSEDHAV | 6607  | 6370  |
| >MEN1-L175 HLALSEDHAV | 28923 | >MEN1-L175 HRALSEDHAV | 207   | 28716 |
| >MEN1-L175 HLALSEDHAV | 202   | >MEN1-L175 HRALSEDHAV | 7668  | 7466  |
| >MEN1-L175 HLALSEDHAV | 306   | >MEN1-L175 HRALSEDHAV | 53    | 253   |
| >MEN1-L175 CQALGLRDVH | 18249 | >MEN1-L175 CQALGLRDVH | 461   | 17788 |
| >MEN1-L175 CQALGLRDVH | 32393 | >MEN1-L175 CQALGLRDVH | 456   | 31937 |
| >MEN1-L175 VHLALSEDHA | 463   | >MEN1-L175 VHRALSEDHA | 4794  | 4331  |
| >MEN1-L175 VHLALSEDHA | 32    | >MEN1-L175 VHRALSEDHA | 55    | 23    |
| >MEN1-L175 LRDVHLAL   | 158   | >MEN1-L175 LRDVHRAL   | 299   | 141   |
| >MEN1-L175 GLRDVHLA   | 169   | >MEN1-L175 GLRDVHRA   | 550   | 381   |
| >MEN1-L175 GLRDVHLAL  | 204   | >MEN1-L175 GLRDVHRAL  | 654   | 450   |
| >MEN1-L175 GLRDVHLA   | 23    | >MEN1-L175 GLRDVHRA   | 45    | 22    |
| >MEN1-L175 GLRDVHLAL  | 60    | >MEN1-L175 GLRDVHRAL  | 125   | 65    |
| >MEN1-L175 GLRDVHLA   | 85    | >MEN1-L175 GLRDVHRA   | 69    | 16    |
| >MEN1-L175 GLRDVHLAL  | 18    | >MEN1-L175 GLRDVHRAL  | 37    | 19    |
| >MEN1-L175 GLRDVHLA   | 498   | >MEN1-L175 GLRDVHRA   | 719   | 221   |
| >MEN1-L175 GLRDVHLAL  | 182   | >MEN1-L175 GLRDVHRAL  | 883   | 701   |
| >MEN1-L175 GLRDVHLA   | 244   | >MEN1-L175 GLRDVHRA   | 583   | 339   |
| >MEN1-L175 GLRDVHLAL  | 254   | >MEN1-L175 GLRDVHRAL  | 2919  | 2665  |
| >MEN1-L175 GLRDVHLA   | 7     | >MEN1-L175 GLRDVHRA   | 9     | 2     |
| >MEN1-L175 GLRDVHLAL  | 6     | >MEN1-L175 GLRDVHRAL  | 25    | 19    |
| >MEN1-L175 GLRDVHLA   | 430   | >MEN1-L175 GLRDVHRA   | 1185  | 755   |
| >MEN1-L175 GLRDVHLAL  | 196   | >MEN1-L175 GLRDVHRAL  | 594   | 398   |
| >MEN1-L175 GLRDVHLA   | 481   | >MEN1-L175 GLRDVHRA   | 313   | 168   |
| >MEN1-L175 GLRDVHLAL  | 270   | >MEN1-L175 GLRDVHRAL  | 894   | 624   |
| >MEN1-L175 LGLRDVHL   | 33400 | >MEN1-L175 LGLRDVHR   | 490   | 32910 |
| >MEN1-L175 ALGLRDVHL  | 432   | >MEN1-L175 ALGLRDVHR  | 26309 | 25877 |
| >MEN1-L175 ALGLRDVHLA | 264   | >MEN1-L175 ALGLRDVHR/ | 513   | 249   |
| >MEN1-L175 ALGLRDVHLA | 502   | >MEN1-L175 ALGLRDVHR/ | 342   | 160   |
| >MEN1-L175 ALGLRDVHLA | 153   | >MEN1-L175 ALGLRDVHR/ | 249   | 96    |
| >MEN1-L175 ALGLRDVHL  | 330   | >MEN1-L175 ALGLRDVHR  | 27135 | 26805 |
| >MEN1-L175 ALGLRDVHLA | 281   | >MEN1-L175 ALGLRDVHR/ | 655   | 374   |
| >MEN1-L175 ALGLRDVHL  | 108   | >MEN1-L175 ALGLRDVHR  | 20463 | 20355 |
| >MEN1-L175 ALGLRDVHLA | 220   | >MEN1-L175 ALGLRDVHR/ | 344   | 124   |
| >MEN1-L175 ALGLRDVHLA | 217   | >MEN1-L175 ALGLRDVHR/ | 907   | 690   |

|                        |       |                        |       |       |
|------------------------|-------|------------------------|-------|-------|
| >MEN1-L175 ALGLRDVHL   | 32    | >MEN1-L175 ALGLRDVHR   | 18570 | 18538 |
| >MEN1-L175 ALGLRDVHLA  | 23    | >MEN1-L175 ALGLRDVHR/  | 18    | 5     |
| >MEN1-L175 ALGLRDVHLA  | 20    | >MEN1-L175 ALGLRDVHR/  | 75    | 55    |
| >MEN1-L175 ALGLRDVHL   | 16890 | >MEN1-L175 ALGLRDVHR   | 119   | 16771 |
| >MEN1-L175 ALGLRDVHL   | 33573 | >MEN1-L175 ALGLRDVHR   | 204   | 33369 |
| >MEN1-L175 QALGLRDVHI  | 14456 | >MEN1-L175 QALGLRDVHI  | 110   | 14346 |
| >MEN1-L175 QALGLRDVHI  | 29627 | >MEN1-L175 QALGLRDVHI  | 53    | 29574 |
| >MEN1-L175 QALGLRDVHI  | 30166 | >MEN1-L175 QALGLRDVHI  | 113   | 30053 |
| >MEN1-L37P LSLVLGFV    | 160   | >MEN1-L37P PSLVLGFV    | 6687  | 6527  |
| >MEN1-L37P LSLVLGFV    | 400   | >MEN1-L37P PSLVLGFV    | 3457  | 3057  |
| >MEN1-L37P LSLVLGFVEHI | 103   | >MEN1-L37P PSLVLGFVEHI | 6805  | 6702  |
| >MEN1-L37P LSLVLGFVEHI | 36    | >MEN1-L37P PSLVLGFVEHI | 422   | 386   |
| >MEN1-L37P LSLVLGFVEHI | 5     | >MEN1-L37P PSLVLGFVEHI | 469   | 464   |
| >MEN1-L37P LSLVLGFVEHI | 132   | >MEN1-L37P PSLVLGFVEHI | 4390  | 4258  |
| >MEN1-L37P LSLVLGFVEHI | 18    | >MEN1-L37P PSLVLGFVEHI | 2765  | 2747  |
| >MEN1-L37P LSLVLGFVEHI | 86    | >MEN1-L37P PSLVLGFVEHI | 5502  | 5416  |
| >MEN1-L37P LLSLVLGFV   | 1343  | >MEN1-L37P LPSLVLGFV   | 437   | 906   |
| >MEN1-L37P LLSLVLGFV   | 68    | >MEN1-L37P LPSLVLGFV   | 18493 | 18425 |
| >MEN1-L37P LLSLVLGFV   | 10    | >MEN1-L37P LPSLVLGFV   | 5031  | 5021  |
| >MEN1-L37P LLSLVLGFV   | 7     | >MEN1-L37P LPSLVLGFV   | 4933  | 4926  |
| >MEN1-L37P LLSLVLGFV   | 53    | >MEN1-L37P LPSLVLGFV   | 3661  | 3608  |
| >MEN1-L37P LLSLVLGFV   | 4     | >MEN1-L37P LPSLVLGFV   | 14104 | 14100 |
| >MEN1-L37P LLSLVLGFV   | 14    | >MEN1-L37P LPSLVLGFV   | 21065 | 21051 |
| >MEN1-L37P LLSLVLGFV   | 10    | >MEN1-L37P LPSLVLGFV   | 16880 | 16870 |
| >MEN1-L37P LLSLVLGFV   | 7     | >MEN1-L37P LPSLVLGFV   | 21534 | 21527 |
| >MEN1-L37P LLSLVLGFV   | 4     | >MEN1-L37P LPSLVLGFV   | 25746 | 25742 |
| >MEN1-L37P LLSLVLGFV   | 476   | >MEN1-L37P LPSLVLGFV   | 3274  | 2798  |
| >MEN1-L37P LLSLVLGF    | 113   | >MEN1-L37P LPSLVLGF    | 10189 | 10076 |
| >MEN1-L37P LLSLVLGF    | 4308  | >MEN1-L37P LPSLVLGF    | 24    | 4284  |
| >MEN1-L37P LLSLVLGFVEH | 7644  | >MEN1-L37P LPSLVLGFVEH | 140   | 7504  |
| >MEN1-L37P LLSLVLGFV   | 21458 | >MEN1-L37P LPSLVLGFV   | 417   | 21041 |
| >MEN1-L37P LLSLVLGF    | 24729 | >MEN1-L37P LPSLVLGF    | 106   | 24623 |
| >MEN1-L37P LLSLVLGFV   | 20294 | >MEN1-L37P LPSLVLGFV   | 62    | 20232 |
| >MEN1-L37P LLSLVLGF    | 19386 | >MEN1-L37P LPSLVLGF    | 165   | 19221 |
| >MEN1-L37P VLLSLVLGFV  | 12    | >MEN1-L37P VLPSLVLGFV  | 46    | 34    |
| >MEN1-L37P VLLSLVLGFV  | 37    | >MEN1-L37P VLPSLVLGFV  | 42    | 5     |
| >MEN1-L37P VLLSLVLGFV  | 19    | >MEN1-L37P VLPSLVLGFV  | 25    | 6     |
| >MEN1-L37P VLLSLVLGFV  | 61    | >MEN1-L37P VLPSLVLGFV  | 147   | 86    |
| >MEN1-L37P VLLSLVLGF   | 59    | >MEN1-L37P VLPSLVLGF   | 668   | 609   |
| >MEN1-L37P VLLSLVLGFV  | 1     | >MEN1-L37P VLPSLVLGFV  | 2     | 1     |
| >MEN1-L37P VLLSLVLGFV  | 4     | >MEN1-L37P VLPSLVLGFV  | 17    | 13    |
| >MEN1-L37P VLLSLVLGFV  | 4     | >MEN1-L37P VLPSLVLGFV  | 6     | 2     |
| >MEN1-L37P VLLSLVLGFV  | 2     | >MEN1-L37P VLPSLVLGFV  | 8     | 6     |

|                        |       |                         |      |       |
|------------------------|-------|-------------------------|------|-------|
| >MEN1-L37P VLLSLVLGFV  | 2     | >MEN1-L37P VLPSVLGFV    | 3    | 1     |
| >MEN1-L37P VLLSLVLGF   | 131   | >MEN1-L37P VLPSVLGF     | 471  | 340   |
| >MEN1-L37P VLLSLVLGFV  | 285   | >MEN1-L37P VLPSVLGFV    | 6640 | 6355  |
| >MEN1-L37P VLLSLVLGF   | 111   | >MEN1-L37P VLPSVLGF     | 232  | 121   |
| >MEN1-L37P VLLSLVLGF   | 38    | >MEN1-L37P VLPSVLGF     | 368  | 330   |
| >MEN1-L37P VLLSLVLGF   | 241   | >MEN1-L37P VLPSVLGF     | 6582 | 6341  |
| >MEN1-L37P VLLSLVLGF   | 13571 | >MEN1-L37P VLPSVLGF     | 33   | 13538 |
| >MEN1-L37P VLLSLVLGFV  | 14880 | >MEN1-L37P VLPSVLGFV    | 80   | 14800 |
| >MEN1-L37P LVLLSLVLGFV | 220   | >MEN1-L37P LVLPSVLGFV   | 75   | 145   |
| >MEN1-L37P LVLLSLVLGFV | 500   | >MEN1-L37P LVLPSVLGFV   | 133  | 367   |
| >MEN1-L37P LVLLSLVLGFV | 182   | >MEN1-L37P LVLPSVLGFV   | 49   | 133   |
| >MEN1-L37P LVLLSLVL    | 244   | >MEN1-L37P LVLPSVL      | 55   | 189   |
| >MEN1-L37P LVLLSLVLGFV | 12    | >MEN1-L37P LVLPSVLGFV   | 5    | 7     |
| >MEN1-L37P LVLLSLVL    | 1662  | >MEN1-L37P LVLPSVL      | 366  | 1296  |
| >MEN1-L37P LVLLSLVLGFV | 34    | >MEN1-L37P LVLPSVLGFV   | 9    | 25    |
| >MEN1-L37P LVLLSLVLGFV | 198   | >MEN1-L37P LVLPSVLGFV   | 60   | 138   |
| >MEN1-L37P LVLLSLVLGFV | 46    | >MEN1-L37P LVLPSVLGFV   | 19   | 27    |
| >MEN1-L37P LVLLSLVLGFV | 61    | >MEN1-L37P LVLPSVLGFV   | 30   | 31    |
| >MEN1-L37P LVLLSLVL    | 823   | >MEN1-L37P LVLPSVL      | 82   | 741   |
| >MEN1-L37P LVLLSLVLGFV | 44    | >MEN1-L37P LVLPSVLGFV   | 9    | 35    |
| >MEN1-L37P LVLLSLVLGF  | 574   | >MEN1-L37P LVLPSVLGF    | 104  | 470   |
| >MEN1-L37P LVLLSLVLGFV | 241   | >MEN1-L37P LVLPSVLGFV   | 70   | 171   |
| >MEN1-L37P LVLLSLVLGFV | 74    | >MEN1-L37P LVLPSVLGFV   | 35   | 39    |
| >MEN1-L37P LVLLSLVLGF  | 428   | >MEN1-L37P LVLPSVLGF    | 125  | 303   |
| >MEN1-L37P LVLLSLVLGF  | 257   | >MEN1-L37P LVLPSVLGF    | 83   | 174   |
| >MEN1-L37P LVLLSLVL    | 455   | >MEN1-L37P LVLPSVL      | 55   | 400   |
| >MEN1-L37P LVLLSLVLGF  | 21    | >MEN1-L37P LVLPSVLGF    | 8    | 13    |
| >MEN1-L37P LVLLSLVLGF  | 444   | >MEN1-L37P LVLPSVLGF    | 93   | 351   |
| >MEN1-L37P LVLLSLVL    | 1312  | >MEN1-L37P LVLPSVL      | 248  | 1064  |
| >MEN1-L37P DLVLLSLV    | 410   | >MEN1-L37P DLVLPVSLV    | 261  | 149   |
| >MEN1-L37P DLVLLSLV    | 174   | >MEN1-L37P DLVLPVSLV    | 380  | 206   |
| >MEN1-L37P DLVLLSLV    | 415   | >MEN1-L37P DLVLPVSLV    | 564  | 149   |
| >MEN1-L37P DLVLLSLV    | 38    | >MEN1-L37P DLVLPVSLV    | 42   | 4     |
| >MEN1-L37P DLVLLSLV    | 537   | >MEN1-L37P DLVLPVSLV    | 428  | 109   |
| >MEN1-L37P DLVLLSLV    | 421   | >MEN1-L37P DLVLPVSLV    | 315  | 106   |
| >MEN1-L37P PDLVLLSL    | 475   | >MEN1-L37P PDLVLPVSL    | 1019 | 544   |
| >MEN1-L37P PDLVLLSLV   | 36    | >MEN1-L37P PDLVLPVSLV   | 40   | 4     |
| >MEN1-L37P PDLVLLSLVL  | 158   | >MEN1-L37P PDLVLPVSLVL  | 222  | 64    |
| >MEN1-L37P EPDLVLLSL   | 541   | >MEN1-L37P EPDLVLPVSL   | 183  | 358   |
| >MEN1-L37P EPDLVLLSLV  | 139   | >MEN1-L37P EPDLVLPVSLV  | 143  | 4     |
| >MEN1-L37P EPDLVLLSLVL | 383   | >MEN1-L37P EPDLVLPVSLVL | 483  | 100   |
| >MEN1-L37P EPDLVLLSLVL | 105   | >MEN1-L37P EPDLVLPVSLVL | 152  | 47    |
| >MEN1-L37P EPDLVLLSL   | 357   | >MEN1-L37P EPDLVLPVSL   | 798  | 441   |

|                        |      |                        |       |       |
|------------------------|------|------------------------|-------|-------|
| >MEN1-L37P EEPDLVLL    | 212  | >MEN1-L37P EEPDLVLP    | 7045  | 6833  |
| >MEN1-L37P EEPDLVLLSL  | 180  | >MEN1-L37P EEPDLVLPSL  | 271   | 91    |
| >MEN1-L37P EEPDLVLLSLV | 39   | >MEN1-L37P EEPDLVLPSLV | 116   | 77    |
| >MEN1-L37P EEPDLVLLSL  | 161  | >MEN1-L37P EEPDLVLPSL  | 181   | 20    |
| >MEN1-L37P EEPDLVLLSLV | 53   | >MEN1-L37P EEPDLVLPSLV | 136   | 83    |
| >MEN1-L37P REEPDLVLL   | 7    | >MEN1-L37P REEPDLVLP   | 695   | 688   |
| >MEN1-L37P REEPDLVLLSL | 7    | >MEN1-L37P REEPDLVLPSI | 7     | 0     |
| >MEN1-L37P REEPDLVLLSL | 156  | >MEN1-L37P REEPDLVLPSI | 169   | 13    |
| >MEN1-L37P REEPDLVLLS  | 264  | >MEN1-L37P REEPDLVLPS  | 306   | 42    |
| >MEN1-L37P REEPDLVLL   | 19   | >MEN1-L37P REEPDLVLP   | 2405  | 2386  |
| >MEN1-L37P REEPDLVLLSL | 22   | >MEN1-L37P REEPDLVLPSI | 19    | 3     |
| >MEN1-L37P REEPDLVLL   | 249  | >MEN1-L37P REEPDLVLP   | 18418 | 18169 |
| >MEN1-L37P GREEPDLVLL  | 329  | >MEN1-L37P GREEPDLVLP  | 16716 | 16387 |
| >MEN1-L37P GREEPDLVLL  | 290  | >MEN1-L37P GREEPDLVLP  | 15576 | 15286 |
| >MEN1-L89R LYARFTAQI   | 305  | >MEN1-L89R RYARFTAQI   | 255   | 50    |
| >MEN1-L89R LYARFTAQI   | 187  | >MEN1-L89R RYARFTAQI   | 788   | 601   |
| >MEN1-L89R LYARFTAQI   | 204  | >MEN1-L89R RYARFTAQI   | 1000  | 796   |
| >MEN1-L89R LYARFTAQI   | 179  | >MEN1-L89R RYARFTAQI   | 105   | 74    |
| >MEN1-L89R LYARFTAQI   | 60   | >MEN1-L89R RYARFTAQI   | 31    | 29    |
| >MEN1-L89R LYARFTAQI   | 5    | >MEN1-L89R RYARFTAQI   | 4     | 1     |
| >MEN1-L89R LYARFTAQIR  | 1177 | >MEN1-L89R RYARFTAQIR  | 432   | 745   |
| >MEN1-L89R LYARFTAQI   | 1926 | >MEN1-L89R RYARFTAQI   | 51    | 1875  |
| >MEN1-L89R LYARFTAQIR  | 7094 | >MEN1-L89R RYARFTAQIR  | 480   | 6614  |
| >MEN1-L89R LYARFTAQIR  | 343  | >MEN1-L89R RYARFTAQIR  | 61    | 282   |
| >MEN1-L89R LYARFTAQI   | 2594 | >MEN1-L89R RYARFTAQI   | 51    | 2543  |
| >MEN1-L89R LYARFTAQIR  | 418  | >MEN1-L89R RYARFTAQIR  | 1849  | 1431  |
| >MEN1-L89R LYARFTAQ    | 2706 | >MEN1-L89R RYARFTAQ    | 290   | 2416  |
| >MEN1-L89R LYARFTAQIR  | 81   | >MEN1-L89R RYARFTAQIR  | 20    | 61    |
| >MEN1-L89R LYARFTAQI   | 433  | >MEN1-L89R RYARFTAQI   | 142   | 291   |
| >MEN1-L89R ALYARFTAQI  | 2733 | >MEN1-L89R ARYARFTAQI  | 484   | 2249  |
| >MEN1-L89R ALYARFTA    | 36   | >MEN1-L89R ARYARFTA    | 21484 | 21448 |
| >MEN1-L89R ALYARFTAQI  | 260  | >MEN1-L89R ARYARFTAQI  | 22407 | 22147 |
| >MEN1-L89R ALYARFTA    | 44   | >MEN1-L89R ARYARFTA    | 16865 | 16821 |
| >MEN1-L89R ALYARFTAQ   | 184  | >MEN1-L89R ARYARFTAQ   | 28632 | 28448 |
| >MEN1-L89R ALYARFTAQI  | 29   | >MEN1-L89R ARYARFTAQI  | 8737  | 8708  |
| >MEN1-L89R ALYARFTA    | 9    | >MEN1-L89R ARYARFTA    | 12305 | 12296 |
| >MEN1-L89R ALYARFTAQ   | 205  | >MEN1-L89R ARYARFTAQ   | 20849 | 20644 |
| >MEN1-L89R ALYARFTAQI  | 17   | >MEN1-L89R ARYARFTAQI  | 5886  | 5869  |
| >MEN1-L89R ALYARFTA    | 59   | >MEN1-L89R ARYARFTA    | 5846  | 5787  |
| >MEN1-L89R ALYARFTAQ   | 484  | >MEN1-L89R ARYARFTAQ   | 20715 | 20231 |
| >MEN1-L89R ALYARFTA    | 7    | >MEN1-L89R ARYARFTA    | 15887 | 15880 |
| >MEN1-L89R ALYARFTAQI  | 3    | >MEN1-L89R ARYARFTAQI  | 8331  | 8328  |
| >MEN1-L89R ALYARFTA    | 59   | >MEN1-L89R ARYARFTA    | 21456 | 21397 |

|                        |       |                        |       |       |
|------------------------|-------|------------------------|-------|-------|
| >MEN1-L89R ALYARFTAQI  | 25    | >MEN1-L89R ARYARFTAQI  | 21871 | 21846 |
| >MEN1-L89R ALYARFTA    | 16    | >MEN1-L89R ARYARFTA    | 19355 | 19339 |
| >MEN1-L89R ALYARFTAQI  | 15    | >MEN1-L89R ARYARFTAQI  | 18467 | 18452 |
| >MEN1-L89R ALYARFTAQI  | 131   | >MEN1-L89R ARYARFTAQI  | 23420 | 23289 |
| >MEN1-L89R ALYARFTA    | 4     | >MEN1-L89R ARYARFTA    | 21219 | 21215 |
| >MEN1-L89R ALYARFTAQ   | 26    | >MEN1-L89R ARYARFTAQ   | 32913 | 32887 |
| >MEN1-L89R ALYARFTAQI  | 3     | >MEN1-L89R ARYARFTAQI  | 20233 | 20230 |
| >MEN1-L89R ALYARFTAQII | 76    | >MEN1-L89R ARYARFTAQI  | 17453 | 17377 |
| >MEN1-L89R ALYARFTAQII | 38    | >MEN1-L89R ARYARFTAQI  | 3961  | 3923  |
| >MEN1-L89R ALYARFTAQI  | 32    | >MEN1-L89R ARYARFTAQI  | 2579  | 2547  |
| >MEN1-L89R ALYARFTAQ   | 485   | >MEN1-L89R ARYARFTAQ   | 3152  | 2667  |
| >MEN1-L89R ALYARFTAQ   | 906   | >MEN1-L89R ARYARFTAQ   | 399   | 507   |
| >MEN1-L89R ALYARFTAQI  | 226   | >MEN1-L89R ARYARFTAQI  | 94    | 132   |
| >MEN1-L89R ALYARFTAQII | 566   | >MEN1-L89R ARYARFTAQI  | 235   | 331   |
| >MEN1-L89R ALYARFTA    | 18674 | >MEN1-L89R ARYARFTA    | 119   | 18555 |
| >MEN1-L89R ALYARFTAQ   | 22401 | >MEN1-L89R ARYARFTAQ   | 330   | 22071 |
| >MEN1-L89R ALYARFTAQI  | 22855 | >MEN1-L89R ARYARFTAQI  | 45    | 22810 |
| >MEN1-L89R ALYARFTAQII | 15882 | >MEN1-L89R ARYARFTAQI  | 69    | 15813 |
| >MEN1-L89R ALYARFTA    | 22060 | >MEN1-L89R ARYARFTA    | 328   | 21732 |
| >MEN1-L89R ALYARFTAQI  | 27035 | >MEN1-L89R ARYARFTAQI  | 439   | 26596 |
| >MEN1-L89R ALYARFTAQ   | 17638 | >MEN1-L89R ARYARFTAQ   | 123   | 17515 |
| >MEN1-L89R ALYARFTAQI  | 25951 | >MEN1-L89R ARYARFTAQI  | 354   | 25597 |
| >MEN1-L89R ALYARFTAQII | 13592 | >MEN1-L89R ARYARFTAQI  | 136   | 13456 |
| >MEN1-L89R ALYARFTAQII | 405   | >MEN1-L89R ARYARFTAQI  | 1078  | 673   |
| >MEN1-L89R PVADLSIIAAL | 129   | >MEN1-L89R PVADLSIIAAR | 19538 | 19409 |
| >MEN1-L89R PVADLSIIAAL | 24857 | >MEN1-L89R PVADLSIIAAR | 118   | 24739 |
| >MEN1-L89R PVADLSIIAAL | 284   | >MEN1-L89R PVADLSIIAAR | 19735 | 19451 |
| >MEN1-L89R AALYARFTA   | 372   | >MEN1-L89R AARYARFTA   | 8812  | 8440  |
| >MEN1-L89R AALYARFT    | 3781  | >MEN1-L89R AARYARFT    | 50    | 3731  |
| >MEN1-L89R AALYARFTA   | 126   | >MEN1-L89R AARYARFTA   | 6     | 120   |
| >MEN1-L89R AALYARFTAC  | 3853  | >MEN1-L89R AARYARFTAC  | 79    | 3774  |
| >MEN1-L89R AALYARFTAC  | 225   | >MEN1-L89R AARYARFTAC  | 6     | 219   |
| >MEN1-L89R AALYARFTAC  | 344   | >MEN1-L89R AARYARFTAC  | 3221  | 2877  |
| >MEN1-L89R AALYARFTAC  | 439   | >MEN1-L89R AARYARFTAC  | 10818 | 10379 |
| >MEN1-L89R AALYARFTAC  | 10466 | >MEN1-L89R AARYARFTAC  | 453   | 10013 |
| >MEN1-L89R AALYARFTAC  | 187   | >MEN1-L89R AARYARFTAC  | 75    | 112   |
| >MEN1-L89R AALYARFTAC  | 59    | >MEN1-L89R AARYARFTAC  | 107   | 48    |
| >MEN1-L89R IAALYARF    | 312   | >MEN1-L89R IAARYARF    | 231   | 81    |
| >MEN1-L89R IAALYARF    | 204   | >MEN1-L89R IAARYARF    | 72    | 132   |
| >MEN1-L89R IAALYARF    | 10    | >MEN1-L89R IAARYARF    | 13    | 3     |
| >MEN1-L89R IAALYARF    | 322   | >MEN1-L89R IAARYARF    | 830   | 508   |
| >MEN1-L89R IAALYARF    | 518   | >MEN1-L89R IAARYARF    | 160   | 358   |
| >MEN1-L89R IAALYARF    | 110   | >MEN1-L89R IAARYARF    | 52    | 58    |



|                        |      |                        |      |      |
|------------------------|------|------------------------|------|------|
| >MEN1-L89R IIAALYARF   | 79   | >MEN1-L89R IIAARYARF   | 36   | 43   |
| >MEN1-L89R IIAALYARFTA | 489  | >MEN1-L89R IIAARYARFTA | 853  | 364  |
| >MEN1-L89R IIAALYARFTA | 82   | >MEN1-L89R IIAARYARFTA | 176  | 94   |
| >MEN1-L89R IIAALYARFTA | 96   | >MEN1-L89R IIAARYARFTA | 87   | 9    |
| >MEN1-L89R IIAALYARFTA | 121  | >MEN1-L89R IIAARYARFTA | 110  | 11   |
| >MEN1-L89R IIAALYARFTA | 203  | >MEN1-L89R IIAARYARFTA | 168  | 35   |
| >MEN1-L89R IIAALYAR    | 472  | >MEN1-L89R IIAARYAR    | 581  | 109  |
| >MEN1-L89R IIAALYARF   | 715  | >MEN1-L89R IIAARYARF   | 484  | 231  |
| >MEN1-L89R IIAALYAR    | 19   | >MEN1-L89R IIAARYAR    | 14   | 5    |
| >MEN1-L89R IIAALYAR    | 168  | >MEN1-L89R IIAARYAR    | 74   | 94   |
| >MEN1-L89R IIAALYAR    | 20   | >MEN1-L89R IIAARYAR    | 20   | 0    |
| >MEN1-L89R IIAALYARFTA | 113  | >MEN1-L89R IIAARYARFTA | 399  | 286  |
| >MEN1-L89R IIAALYARF   | 157  | >MEN1-L89R IIAARYARF   | 199  | 42   |
| >MEN1-L89R IIAALYARF   | 399  | >MEN1-L89R IIAARYARF   | 387  | 12   |
| >MEN1-L89R IIAALYARF   | 283  | >MEN1-L89R IIAARYARF   | 111  | 172  |
| >MEN1-L89R IIAALYARF   | 55   | >MEN1-L89R IIAARYARF   | 475  | 420  |
| >MEN1-L89R IIAALYARF   | 265  | >MEN1-L89R IIAARYARF   | 910  | 645  |
| >MEN1-L89R IIAALYAR    | 61   | >MEN1-L89R IIAARYAR    | 68   | 7    |
| >MEN1-L89R SIIAALYA    | 101  | >MEN1-L89R SIIAARYA    | 2106 | 2005 |
| >MEN1-L89R SIIAALYA    | 105  | >MEN1-L89R SIIAARYA    | 865  | 760  |
| >MEN1-L89R SIIAALYA    | 58   | >MEN1-L89R SIIAARYA    | 319  | 261  |
| >MEN1-L89R SIIAALYA    | 23   | >MEN1-L89R SIIAARYA    | 294  | 271  |
| >MEN1-L89R SIIAALYARFT | 367  | >MEN1-L89R SIIAARYARFT | 2173 | 1806 |
| >MEN1-L89R SIIAALYA    | 258  | >MEN1-L89R SIIAARYA    | 1562 | 1304 |
| >MEN1-L89R SIIAALYA    | 465  | >MEN1-L89R SIIAARYA    | 3974 | 3509 |
| >MEN1-L89R SIIAALYA    | 411  | >MEN1-L89R SIIAARYA    | 2287 | 1876 |
| >MEN1-L89R SIIAALYAR   | 45   | >MEN1-L89R SIIAARYAR   | 49   | 4    |
| >MEN1-L89R SIIAALYARF  | 182  | >MEN1-L89R SIIAARYARF  | 380  | 198  |
| >MEN1-L89R SIIAALYARF  | 10   | >MEN1-L89R SIIAARYARF  | 38   | 28   |
| >MEN1-L89R SIIAALYAR   | 15   | >MEN1-L89R SIIAARYAR   | 10   | 5    |
| >MEN1-L89R SIIAALYAR   | 316  | >MEN1-L89R SIIAARYAR   | 124  | 192  |
| >MEN1-L89R SIIAALYAR   | 19   | >MEN1-L89R SIIAARYAR   | 10   | 9    |
| >MEN1-L89R SIIAALYA    | 153  | >MEN1-L89R SIIAARYA    | 200  | 47   |
| >MEN1-L89R SIIAALYARF  | 76   | >MEN1-L89R SIIAARYARF  | 92   | 16   |
| >MEN1-L89R SIIAALYARF  | 300  | >MEN1-L89R SIIAARYARF  | 458  | 158  |
| >MEN1-L89R SIIAALYARF  | 324  | >MEN1-L89R SIIAARYARF  | 473  | 149  |
| >MEN1-L89R SIIAALYAR   | 69   | >MEN1-L89R SIIAARYAR   | 42   | 27   |
| >MEN1-L89R LSIIAALYARF | 300  | >MEN1-L89R LSIIAARYARF | 268  | 32   |
| >MEN1-L89R LSIIAALY    | 427  | >MEN1-L89R LSIIAARY    | 2024 | 1597 |
| >MEN1-L89R LSIIAALYAR  | 57   | >MEN1-L89R LSIIAARYAR  | 114  | 57   |
| >MEN1-L89R LSIIAALY    | 1115 | >MEN1-L89R LSIIAARY    | 300  | 815  |
| >MEN1-L89R LSIIAALY    | 17   | >MEN1-L89R LSIIAARY    | 74   | 57   |
| >MEN1-L89R LSIIAALY    | 65   | >MEN1-L89R LSIIAARY    | 71   | 6    |

|                        |       |                        |       |       |
|------------------------|-------|------------------------|-------|-------|
| >MEN1-L89R LSIIAALYAR  | 19    | >MEN1-L89R LSIIAARYAR  | 11    | 8     |
| >MEN1-L89R LSIIAALYAR  | 280   | >MEN1-L89R LSIIAARYAR  | 373   | 93    |
| >MEN1-L89R LSIIAALYAR  | 9     | >MEN1-L89R LSIIAARYAR  | 13    | 4     |
| >MEN1-L89R LSIIAALY    | 163   | >MEN1-L89R LSIIAARY    | 159   | 4     |
| >MEN1-L89R LSIIAALYARF | 101   | >MEN1-L89R LSIIAARYARF | 152   | 51    |
| >MEN1-L89R LSIIAALYARF | 109   | >MEN1-L89R LSIIAARYARF | 130   | 21    |
| >MEN1-L89R LSIIAALY    | 3     | >MEN1-L89R LSIIAARY    | 3     | 0     |
| >MEN1-L89R LSIIAALYA   | 293   | >MEN1-L89R LSIIAARYA   | 1421  | 1128  |
| >MEN1-L89R LSIIAALYARF | 3     | >MEN1-L89R LSIIAARYARF | 3     | 0     |
| >MEN1-L89R LSIIAALY    | 352   | >MEN1-L89R LSIIAARY    | 550   | 198   |
| >MEN1-L89R LSIIAALY    | 305   | >MEN1-L89R LSIIAARY    | 241   | 64    |
| >MEN1-L89R LSIIAALYARF | 182   | >MEN1-L89R LSIIAARYARF | 181   | 1     |
| >MEN1-L89R LSIIAALY    | 45    | >MEN1-L89R LSIIAARY    | 139   | 94    |
| >MEN1-L89R LSIIAALYARF | 23    | >MEN1-L89R LSIIAARYARF | 61    | 38    |
| >MEN1-L89R LSIIAALYARF | 311   | >MEN1-L89R LSIIAARYARF | 643   | 332   |
| >MEN1-L89R LSIIAALY    | 138   | >MEN1-L89R LSIIAARY    | 652   | 514   |
| >MEN1-L89R LSIIAALYARF | 87    | >MEN1-L89R LSIIAARYARF | 144   | 57    |
| >MEN1-L89R DLSIIAAL    | 214   | >MEN1-L89R DLSIIAAR    | 14853 | 14639 |
| >MEN1-L89R DLSIIAALYA  | 279   | >MEN1-L89R DLSIIAARYA  | 1149  | 870   |
| >MEN1-L89R DLSIIAALYA  | 478   | >MEN1-L89R DLSIIAARYA  | 1006  | 528   |
| >MEN1-L89R DLSIIAAL    | 394   | >MEN1-L89R DLSIIAAR    | 25962 | 25568 |
| >MEN1-L89R DLSIIAAL    | 138   | >MEN1-L89R DLSIIAAR    | 23663 | 23525 |
| >MEN1-L89R DLSIIAALY   | 26    | >MEN1-L89R DLSIIAARY   | 103   | 77    |
| >MEN1-L89R DLSIIAALY   | 78    | >MEN1-L89R DLSIIAARY   | 80    | 2     |
| >MEN1-L89R DLSIIAAL    | 6846  | >MEN1-L89R DLSIIAAR    | 20    | 6826  |
| >MEN1-L89R DLSIIAALYAR | 19    | >MEN1-L89R DLSIIAARYAR | 18    | 1     |
| >MEN1-L89R DLSIIAAL    | 17317 | >MEN1-L89R DLSIIAAR    | 19    | 17298 |
| >MEN1-L89R DLSIIAALY   | 197   | >MEN1-L89R DLSIIAARY   | 739   | 542   |
| >MEN1-L89R DLSIIAALYAR | 20    | >MEN1-L89R DLSIIAARYAR | 15    | 5     |
| >MEN1-L89R DLSIIAALY   | 466   | >MEN1-L89R DLSIIAARY   | 1833  | 1367  |
| >MEN1-L89R DLSIIAALY   | 233   | >MEN1-L89R DLSIIAARY   | 231   | 2     |
| >MEN1-L89R ADLSIIAALY  | 424   | >MEN1-L89R ADLSIIAARY  | 798   | 374   |
| >MEN1-L89R ADLSIIAALY  | 267   | >MEN1-L89R ADLSIIAARY  | 533   | 266   |
| >MEN1-L89R ADLSIIAAL   | 328   | >MEN1-L89R ADLSIIAAR   | 10550 | 10222 |
| >MEN1-L89R ADLSIIAALY  | 413   | >MEN1-L89R ADLSIIAARY  | 1676  | 1263  |
| >MEN1-L89R ADLSIIAALY  | 482   | >MEN1-L89R ADLSIIAARY  | 1797  | 1315  |
| >MEN1-L89R ADLSIIAAL   | 132   | >MEN1-L89R ADLSIIAAR   | 9146  | 9014  |
| >MEN1-L89R ADLSIIAAL   | 310   | >MEN1-L89R ADLSIIAAR   | 17775 | 17465 |
| >MEN1-L89R VADLSIIAALY | 24    | >MEN1-L89R VADLSIIAARY | 44    | 20    |
| >MEN1-L89R VADLSIIAAL  | 22989 | >MEN1-L89R VADLSIIAAR  | 416   | 22573 |
| >MEN1-L89R VADLSIIAAL  | 33037 | >MEN1-L89R VADLSIIAAR  | 431   | 32606 |
| >MEN1-L89R VADLSIIAAL  | 178   | >MEN1-L89R VADLSIIAAR  | 11177 | 10999 |
| >MEN1-L89R VADLSIIAALY | 30    | >MEN1-L89R VADLSIIAARY | 16    | 14    |

|                        |       |                        |       |       |
|------------------------|-------|------------------------|-------|-------|
| >MEN1-L89R VADLSIIAALY | 289   | >MEN1-L89R VADLSIIAARY | 329   | 40    |
| >MEN1-M56 MKELLVATKI   | 357   | >MEN1-M56 TKELLVATKI   | 473   | 116   |
| >MEN1-M56 GMKELLVAT    | 405   | >MEN1-M56 GTKELLVAT    | 9492  | 9087  |
| >MEN1-M56 GMKELLVATK   | 139   | >MEN1-M56 GTKELLVATKI  | 5444  | 5305  |
| >MEN1-M56 GMKELLVA     | 17    | >MEN1-M56 GTKELLVA     | 1144  | 1127  |
| >MEN1-M56 GMKELLVAT    | 39    | >MEN1-M56 GTKELLVAT    | 2578  | 2539  |
| >MEN1-M56 GMKELLVATK   | 10    | >MEN1-M56 GTKELLVATKI  | 783   | 773   |
| >MEN1-M56 GMKELLVA     | 341   | >MEN1-M56 GTKELLVA     | 12657 | 12316 |
| >MEN1-M56 GMKELLVAT    | 441   | >MEN1-M56 GTKELLVAT    | 14132 | 13691 |
| >MEN1-M56 GMKELLVATK   | 104   | >MEN1-M56 GTKELLVATKI  | 7388  | 7284  |
| >MEN1-M56 GMKELLVA     | 209   | >MEN1-M56 GTKELLVA     | 13083 | 12874 |
| >MEN1-M56 GMKELLVAT    | 443   | >MEN1-M56 GTKELLVAT    | 16096 | 15653 |
| >MEN1-M56 GMKELLVATK   | 97    | >MEN1-M56 GTKELLVATKI  | 10201 | 10104 |
| >MEN1-M56 GMKELLVATK   | 416   | >MEN1-M56 GTKELLVATKI  | 14073 | 13657 |
| >MEN1-M56 GMKELLVA     | 97    | >MEN1-M56 GTKELLVA     | 16959 | 16862 |
| >MEN1-M56 GMKELLVATK   | 92    | >MEN1-M56 GTKELLVATKI  | 16866 | 16774 |
| >MEN1-M56 GMKELLVATK   | 384   | >MEN1-M56 GTKELLVATK   | 911   | 527   |
| >MEN1-M56 GMKELLVATK   | 594   | >MEN1-M56 GTKELLVATK   | 178   | 416   |
| >MEN1-M56 GMKELLVA     | 2895  | >MEN1-M56 GTKELLVA     | 436   | 2459  |
| >MEN1-M56 GMKELLVATK   | 59    | >MEN1-M56 GTKELLVATK   | 11    | 48    |
| >MEN1-M56 GMKELLVATK   | 2651  | >MEN1-M56 GTKELLVATK   | 470   | 2181  |
| >MEN1-M56 GMKELLVATK   | 16176 | >MEN1-M56 GTKELLVATKI  | 495   | 15681 |
| >MEN1-M56 GMKELLVATK   | 7127  | >MEN1-M56 GTKELLVATKI  | 139   | 6988  |
| >MEN1-M56 GMKELLVATK   | 10849 | >MEN1-M56 GTKELLVATKI  | 301   | 10548 |
| >MEN1-M56 LTFQSEKMKC   | 118   | >MEN1-M56 LTFQSEKMKC   | 14068 | 13950 |
| >MEN1-M56 LTFQSEKMKC   | 498   | >MEN1-M56 LTFQSEKMKC   | 13231 | 12733 |
| >MEN1-M56 LTFQSEKMKC   | 4     | >MEN1-M56 LTFQSEKMKC   | 151   | 147   |
| >MEN1-M56 LTFQSEKMKC   | 29    | >MEN1-M56 LTFQSEKMKC   | 2610  | 2581  |
| >MEN1-M56 KGMKELLVAT   | 288   | >MEN1-M56 KGTKELLVAT   | 3942  | 3654  |
| >MEN1-M56 KGMKELLVAT   | 107   | >MEN1-M56 KGTKELLVAT   | 482   | 375   |
| >MEN1-M56 KMKGMKELL    | 235   | >MEN1-M56 KMKGTKELLV   | 354   | 119   |
| >MEN1-M56 KMKGMKEL     | 243   | >MEN1-M56 KMKGTKEL     | 248   | 5     |
| >MEN1-M56 KMKGMKELL    | 107   | >MEN1-M56 KMKGTKELL    | 144   | 37    |
| >MEN1-M56 KMKGMKELL    | 84    | >MEN1-M56 KMKGTKELLV   | 69    | 15    |
| >MEN1-M56 KMKGMKEL     | 107   | >MEN1-M56 KMKGTKEL     | 139   | 32    |
| >MEN1-M56 KMKGMKELL    | 69    | >MEN1-M56 KMKGTKELLV   | 67    | 2     |
| >MEN1-M56 KMKGMKELL    | 118   | >MEN1-M56 KMKGTKELLV   | 144   | 26    |
| >MEN1-M56 KMKGMKEL     | 541   | >MEN1-M56 KMKGTKEL     | 248   | 293   |
| >MEN1-M56 KMKGMKELL    | 889   | >MEN1-M56 KMKGTKELL    | 319   | 570   |
| >MEN1-M56 KMKGMKELL    | 72    | >MEN1-M56 KMKGTKELLV   | 40    | 32    |
| >MEN1-M56 KMKGMKELL    | 502   | >MEN1-M56 KMKGTKELLV   | 224   | 278   |
| >MEN1-M56 KMKGMKELL    | 135   | >MEN1-M56 KMKGTKELLV   | 98    | 37    |
| >MEN1-M56 KMKGMKEL     | 22    | >MEN1-M56 KMKGTKEL     | 20    | 2     |

|                        |       |                        |       |       |
|------------------------|-------|------------------------|-------|-------|
| >MEN1-M56 KMKGMKELL    | 29    | >MEN1-M56 KMKGTKELL    | 36    | 7     |
| >MEN1-M56 KMKGMKELL    | 6     | >MEN1-M56 KMKGTKELLV   | 7     | 1     |
| >MEN1-M56 KMKGMKELL    | 188   | >MEN1-M56 KMKGTKELLV   | 239   | 51    |
| >MEN1-M56 KMKGMKEL     | 434   | >MEN1-M56 KMKGTKEL     | 187   | 247   |
| >MEN1-M56 KMKGMKELL    | 136   | >MEN1-M56 KMKGTKELLV   | 78    | 58    |
| >MEN1-M56 KMKGMKELL    | 91    | >MEN1-M56 KMKGTKELLV   | 53    | 38    |
| >MEN1-M56 KMKGMKEL     | 686   | >MEN1-M56 KMKGTKEL     | 484   | 202   |
| >MEN1-M56 KMKGMKEL     | 656   | >MEN1-M56 KMKGTKEL     | 225   | 431   |
| >MEN1-M56 EKMKGKMKEL   | 187   | >MEN1-M56 EKMKGTKEL    | 93    | 94    |
| >MEN1-M56 EKMKGKMKEL   | 853   | >MEN1-M56 EKMKGTKEL    | 460   | 393   |
| >MEN1-M56 EKMKGKMKEL   | 656   | >MEN1-M56 EKMKGTKELL   | 339   | 317   |
| >MEN1-M56 SEKMKGKMK    | 237   | >MEN1-M56 SEKMKGTK     | 270   | 33    |
| >MEN1-M56 SEKMKGKMKEL  | 144   | >MEN1-M56 SEKMKGTKEL   | 94    | 50    |
| >MEN1-M56 SEKMKGKMKEL  | 141   | >MEN1-M56 SEKMKGTKEL   | 138   | 3     |
| >MEN1-M56 SEKMKGKMKEL  | 221   | >MEN1-M56 SEKMKGTKEL   | 230   | 9     |
| >MEN1-M56 SEKMKGKMKEL  | 296   | >MEN1-M56 SEKMKGTKEL   | 451   | 155   |
| >MEN1-M56 SEKMKGKMKEL  | 119   | >MEN1-M56 SEKMKGTKEL   | 195   | 76    |
| >MEN1-M56 SEKMKGKMKEL  | 287   | >MEN1-M56 SEKMKGTKEL   | 534   | 247   |
| >MEN1-M56 QSEKMKGM     | 251   | >MEN1-M56 QSEKMKGT     | 15761 | 15510 |
| >MEN1-M56 FQSEKMKGN    | 192   | >MEN1-M56 FQSEKMKGT    | 226   | 34    |
| >MEN1-M56 FQSEKMKGN    | 57    | >MEN1-M56 FQSEKMKGT    | 113   | 56    |
| >MEN1-M56 FQSEKMKGN    | 350   | >MEN1-M56 FQSEKMKGT    | 11232 | 10882 |
| >MEN1-P291 PTPGRPDPL   | 2465  | >MEN1-P291 ATPGRPDPL   | 108   | 2357  |
| >MEN1-P291 PTPGRPDPLT  | 1022  | >MEN1-P291 ATPGRPDPLT  | 59    | 963   |
| >MEN1-P291 PTPGRPDPLT  | 8402  | >MEN1-P291 ATPGRPDPLT  | 154   | 8248  |
| >MEN1-P291 PTPGRPDPL   | 198   | >MEN1-P291 ATPGRPDPL   | 21    | 177   |
| >MEN1-P291 PTPGRPDPLT  | 72    | >MEN1-P291 ATPGRPDPLT  | 11    | 61    |
| >MEN1-P291 LEPTPGRPDP  | 956   | >MEN1-P291 LEATPGRPDP  | 62    | 894   |
| >MEN1-P291 LEPTPGRPDP  | 321   | >MEN1-P291 LEATPGRPDP  | 115   | 206   |
| >MEN1-P291 ELEPTPGR    | 164   | >MEN1-P291 ELEATPGR    | 82    | 82    |
| >MEN1-P291 EELEPTPGR   | 512   | >MEN1-P291 EELEATPGR   | 442   | 70    |
| >MEN1-P291 DLEELEPTPGI | 416   | >MEN1-P291 DLEELEATPGI | 268   | 148   |
| >MEN1-P291 DLEELEPTPGI | 335   | >MEN1-P291 DLEELEATPGI | 222   | 113   |
| >MEN1-P291 NLADLEELEP  | 5444  | >MEN1-P291 NLADLEELEA  | 222   | 5222  |
| >MEN1-P291 NLADLEELEP  | 5646  | >MEN1-P291 NLADLEELEA  | 74    | 5572  |
| >MEN1-P291 NLADLEELEP` | 29    | >MEN1-P291 NLADLEELEA` | 32    | 3     |
| >MEN1-P291 NLADLEELEP  | 12931 | >MEN1-P291 NLADLEELEA  | 332   | 12599 |
| >MEN1-P291 NLADLEELEP` | 199   | >MEN1-P291 NLADLEELEA` | 319   | 120   |
| >MEN1-P291 NLADLEELEP` | 329   | >MEN1-P291 NLADLEELEA` | 514   | 185   |
| >MEN1-P291 NLADLEELEP  | 15705 | >MEN1-P291 NLADLEELEA  | 483   | 15222 |
| >MEN1-P291 NLADLEELEP  | 16047 | >MEN1-P291 NLADLEELEA  | 214   | 15833 |
| >MEN1-P291 NLADLEELEP  | 14246 | >MEN1-P291 NLADLEELEA  | 36    | 14210 |
| >MEN1-P291 NLADLEELEP` | 416   | >MEN1-P291 NLADLEELEA` | 525   | 109   |

|                       |       |                       |     |       |
|-----------------------|-------|-----------------------|-----|-------|
| >MEN1-P320 PYMYLAGY   | 2708  | >MEN1-P320 LYMYLAGY   | 290 | 2418  |
| >MEN1-P320 PYMYLAGYH  | 3867  | >MEN1-P320 LYMYLAGYH  | 391 | 3476  |
| >MEN1-P320 PYMYLAGY   | 65    | >MEN1-P320 LYMYLAGY   | 22  | 43    |
| >MEN1-P320 PYMYLAGY   | 156   | >MEN1-P320 LYMYLAGY   | 35  | 121   |
| >MEN1-P320 PYMYLAGYH  | 248   | >MEN1-P320 LYMYLAGYH  | 16  | 232   |
| >MEN1-P320 PYMYLAGYH  | 161   | >MEN1-P320 LYMYLAGYH  | 39  | 122   |
| >MEN1-P320 PYMYLAGYH  | 2825  | >MEN1-P320 LYMYLAGYH  | 141 | 2684  |
| >MEN1-P320 PYMYLAGY   | 2087  | >MEN1-P320 LYMYLAGY   | 470 | 1617  |
| >MEN1-P320 PYMYLAGYH  | 65    | >MEN1-P320 LYMYLAGYH  | 87  | 22    |
| >MEN1-P320 PYMYLAGYH  | 1236  | >MEN1-P320 LYMYLAGYH  | 431 | 805   |
| >MEN1-P320 YPYMYLAGY  | 22868 | >MEN1-P320 YLYMYLAGY  | 387 | 22481 |
| >MEN1-P320 YPYMYLAGYH | 20428 | >MEN1-P320 YLYMYLAGYH | 134 | 20294 |
| >MEN1-P320 YPYMYLAG   | 28245 | >MEN1-P320 YLYMYLAG   | 221 | 28024 |
| >MEN1-P320 YPYMYLAGY  | 24624 | >MEN1-P320 YLYMYLAGY  | 338 | 24286 |
| >MEN1-P320 YPYMYLAGYH | 25215 | >MEN1-P320 YLYMYLAGYH | 217 | 24998 |
| >MEN1-P320 YPYMYLAG   | 20632 | >MEN1-P320 YLYMYLAG   | 80  | 20552 |
| >MEN1-P320 YPYMYLAGY  | 18477 | >MEN1-P320 YLYMYLAGY  | 37  | 18440 |
| >MEN1-P320 YPYMYLAGYH | 19323 | >MEN1-P320 YLYMYLAGYH | 59  | 19264 |
| >MEN1-P320 YPYMYLAGY  | 8564  | >MEN1-P320 YLYMYLAGY  | 462 | 8102  |
| >MEN1-P320 YPYMYLAGYH | 8348  | >MEN1-P320 YLYMYLAGYH | 170 | 8178  |
| >MEN1-P320 YPYMYLAG   | 19278 | >MEN1-P320 YLYMYLAG   | 25  | 19253 |
| >MEN1-P320 YPYMYLAGY  | 17969 | >MEN1-P320 YLYMYLAGY  | 7   | 17962 |
| >MEN1-P320 YPYMYLAGYH | 25160 | >MEN1-P320 YLYMYLAGYH | 134 | 25026 |
| >MEN1-P320 YPYMYLAGYH | 5538  | >MEN1-P320 YLYMYLAGYH | 4   | 5534  |
| >MEN1-P320 YPYMYLAGY  | 21113 | >MEN1-P320 YLYMYLAGY  | 196 | 20917 |
| >MEN1-P320 YPYMYLAGYH | 15385 | >MEN1-P320 YLYMYLAGYH | 8   | 15377 |
| >MEN1-P320 YPYMYLAGYH | 20646 | >MEN1-P320 YLYMYLAGYH | 25  | 20621 |
| >MEN1-P320 YPYMYLAGYH | 21347 | >MEN1-P320 YLYMYLAGYH | 145 | 21202 |
| >MEN1-P320 YPYMYLAG   | 35844 | >MEN1-P320 YLYMYLAG   | 99  | 35745 |
| >MEN1-P320 YPYMYLAGY  | 32360 | >MEN1-P320 YLYMYLAGY  | 8   | 32352 |
| >MEN1-P320 YPYMYLAGYH | 27045 | >MEN1-P320 YLYMYLAGYH | 5   | 27040 |
| >MEN1-P320 YPYMYLAGY  | 17804 | >MEN1-P320 YLYMYLAGY  | 165 | 17639 |
| >MEN1-P320 YPYMYLAGY  | 373   | >MEN1-P320 YLYMYLAGY  | 64  | 309   |
| >MEN1-P320 YPYMYLAGY  | 2121  | >MEN1-P320 YLYMYLAGY  | 52  | 2069  |
| >MEN1-P320 YPYMYLAGY  | 66    | >MEN1-P320 YLYMYLAGY  | 20  | 46    |
| >MEN1-P320 YPYMYLAGY  | 98    | >MEN1-P320 YLYMYLAGY  | 11  | 87    |
| >MEN1-P320 YPYMYLAGY  | 1219  | >MEN1-P320 YLYMYLAGY  | 81  | 1138  |
| >MEN1-P320 YPYMYLAGY  | 3463  | >MEN1-P320 YLYMYLAGY  | 40  | 3423  |
| >MEN1-P320 YPYMYLAG   | 16290 | >MEN1-P320 YLYMYLAG   | 358 | 15932 |
| >MEN1-P320 YPYMYLAGY  | 1235  | >MEN1-P320 YLYMYLAGY  | 36  | 1199  |
| >MEN1-P320 YPYMYLAGY  | 203   | >MEN1-P320 YLYMYLAGY  | 27  | 176   |
| >MEN1-P320 YPYMYLAGY  | 171   | >MEN1-P320 YLYMYLAGY  | 15  | 156   |
| >MEN1-P320 YPYMYLAGY  | 94    | >MEN1-P320 YLYMYLAGY  | 8   | 86    |

|                      |       |                       |       |       |
|----------------------|-------|-----------------------|-------|-------|
| >MEN1-P320YPYMYLAGY  | 308   | >MEN1-P320YLYMYLAGY   | 6173  | 5865  |
| >MEN1-P320YPYMYLAG   | 51    | >MEN1-P320YLYMYLAG    | 6480  | 6429  |
| >MEN1-P320YPYMYLAGY  | 9     | >MEN1-P320YLYMYLAGY   | 216   | 207   |
| >MEN1-P320YPYMYLAGY  | 117   | >MEN1-P320YLYMYLAGY   | 27315 | 27198 |
| >MEN1-P320YPYMYLAG   | 84    | >MEN1-P320YLYMYLAG    | 16518 | 16434 |
| >MEN1-P320YPYMYLAGY† | 462   | >MEN1-P320YLYMYLAGY†  | 27140 | 26678 |
| >MEN1-P320YPYMYLAGY† | 372   | >MEN1-P320YLYMYLAGY†  | 21929 | 21557 |
| >MEN1-P320YPYMYLAGY  | 364   | >MEN1-P320YLYMYLAGY   | 273   | 91    |
| >MEN1-P320YPYMYLAGY  | 66    | >MEN1-P320YLYMYLAGY   | 4392  | 4326  |
| >MEN1-P320YPYMYLAGY  | 108   | >MEN1-P320YLYMYLAGY   | 15515 | 15407 |
| >MEN1-P320KTYRDEHIY† | 3606  | >MEN1-P320KTYRDEHIY†  | 99    | 3507  |
| >MEN1-P320KTYRDEHIY† | 19543 | >MEN1-P320KTYRDEHIY†  | 297   | 19246 |
| >MEN1-P320KTYRDEHIY† | 12991 | >MEN1-P320KTYRDEHIY†  | 211   | 12780 |
| >MEN1-P320KTYRDEHIY† | 16793 | >MEN1-P320KTYRDEHIY†  | 267   | 16526 |
| >MEN1-P320KTYRDEHIY† | 507   | >MEN1-P320KTYRDEHIY†  | 79    | 428   |
| >MEN1-P320KTYRDEHIY† | 2383  | >MEN1-P320KTYRDEHIY†  | 234   | 2149  |
| >MEN1-P320KTYRDEHIY† | 1723  | >MEN1-P320KTYRDEHIY†  | 40    | 1683  |
| >MEN1-P320KTYRDEHIY† | 5758  | >MEN1-P320KTYRDEHIY†  | 5     | 5753  |
| >MEN1-P320KTYRDEHIY† | 13108 | >MEN1-P320KTYRDEHIY†  | 363   | 12745 |
| >MEN1-P320KTYRDEHIY† | 14236 | >MEN1-P320KTYRDEHIY†  | 93    | 14143 |
| >MEN1-P320KTYRDEHIY† | 10272 | >MEN1-P320KTYRDEHIY†  | 265   | 10007 |
| >MEN1-P320KTYRDEHIY† | 9760  | >MEN1-P320KTYRDEHIY†  | 170   | 9590  |
| >MEN1-P320KTYRDEHIY† | 12169 | >MEN1-P320KTYRDEHIY†  | 90    | 12079 |
| >MEN1-P320IYPYMYLAGY | 368   | >MEN1-P320IYLYMYLAGY  | 534   | 166   |
| >MEN1-P320IYPYMYLA   | 317   | >MEN1-P320IYLYMYLA    | 593   | 276   |
| >MEN1-P320IYPYMYLAGY | 343   | >MEN1-P320IYLYMYLAGY  | 628   | 285   |
| >MEN1-P320IYPYMYLAGY | 31    | >MEN1-P320IYLYMYLAGY  | 28    | 3     |
| >MEN1-P320IYPYMYLAGY | 1641  | >MEN1-P320IYLYMYLAGY† | 217   | 1424  |
| >MEN1-P320IYPYMYLAGY | 36    | >MEN1-P320IYLYMYLAGY  | 23    | 13    |
| >MEN1-P320IYPYMYLAGY | 1290  | >MEN1-P320IYLYMYLAGY  | 157   | 1133  |
| >MEN1-P320IYPYMYLA   | 1565  | >MEN1-P320IYLYMYLA    | 462   | 1103  |
| >MEN1-P320HIYPYMYL   | 17    | >MEN1-P320HIYLYMYL    | 8     | 9     |
| >MEN1-P320HIYPYMYL   | 40    | >MEN1-P320HIYLYMYL    | 72    | 32    |
| >MEN1-P320HIYPYMYLA  | 19    | >MEN1-P320HIYLYMYLA   | 55    | 36    |
| >MEN1-P320HIYPYMYL   | 13    | >MEN1-P320HIYLYMYL    | 32    | 19    |
| >MEN1-P320HIYPYMYLA  | 9     | >MEN1-P320HIYLYMYLA   | 30    | 21    |
| >MEN1-P320HIYPYMYL   | 23    | >MEN1-P320HIYLYMYL    | 62    | 39    |
| >MEN1-P320HIYPYMYLA  | 16    | >MEN1-P320HIYLYMYLA   | 61    | 45    |
| >MEN1-P320HIYPYMYL   | 19    | >MEN1-P320HIYLYMYL    | 121   | 102   |
| >MEN1-P320HIYPYMYLA  | 15    | >MEN1-P320HIYLYMYLA   | 209   | 194   |
| >MEN1-P320HIYPYMYL   | 11    | >MEN1-P320HIYLYMYL    | 48    | 37    |
| >MEN1-P320HIYPYMYLA  | 80    | >MEN1-P320HIYLYMYLA   | 637   | 557   |
| >MEN1-P320HIYPYMYL   | 162   | >MEN1-P320HIYLYMYL    | 465   | 303   |

|                       |      |                       |      |      |
|-----------------------|------|-----------------------|------|------|
| >MEN1-P320 HIYPYMYL   | 101  | >MEN1-P320 HIYLYMYL   | 317  | 216  |
| >MEN1-P320 HIYPYMYL   | 13   | >MEN1-P320 HIYLYMYL   | 98   | 85   |
| >MEN1-P320 HIYPYMYLA  | 108  | >MEN1-P320 HIYLYMYLA  | 2537 | 2429 |
| >MEN1-P320 HIYPYMYLAG | 74   | >MEN1-P320 HIYLYMYLAG | 115  | 41   |
| >MEN1-P320 HIYPYMYLAG | 274  | >MEN1-P320 HIYLYMYLAG | 518  | 244  |
| >MEN1-P320 HIYPYMYLAG | 40   | >MEN1-P320 HIYLYMYLAG | 69   | 29   |
| >MEN1-P320 HIYPYMYLAG | 14   | >MEN1-P320 HIYLYMYLAG | 51   | 37   |
| >MEN1-P320 HIYPYMYLAG | 8    | >MEN1-P320 HIYLYMYLAG | 8    | 0    |
| >MEN1-P320 HIYPYMYLAG | 323  | >MEN1-P320 HIYLYMYLAG | 330  | 7    |
| >MEN1-P320 HIYPYMYLAG | 15   | >MEN1-P320 HIYLYMYLAG | 24   | 9    |
| >MEN1-P320 HIYPYMYL   | 226  | >MEN1-P320 HIYLYMYL   | 440  | 214  |
| >MEN1-P320 HIYPYMYLA  | 467  | >MEN1-P320 HIYLYMYLA  | 1241 | 774  |
| >MEN1-P320 HIYPYMYLAG | 32   | >MEN1-P320 HIYLYMYLAG | 87   | 55   |
| >MEN1-P320 HIYPYMYLAG | 110  | >MEN1-P320 HIYLYMYLAG | 305  | 195  |
| >MEN1-P320 HIYPYMYL   | 17   | >MEN1-P320 HIYLYMYL   | 44   | 27   |
| >MEN1-P320 HIYPYMYLA  | 15   | >MEN1-P320 HIYLYMYLA  | 37   | 22   |
| >MEN1-P320 HIYPYMYL   | 15   | >MEN1-P320 HIYLYMYL   | 35   | 20   |
| >MEN1-P320 HIYPYMYLA  | 54   | >MEN1-P320 HIYLYMYLA  | 180  | 126  |
| >MEN1-P320 HIYPYMYLAG | 77   | >MEN1-P320 HIYLYMYLAG | 132  | 55   |
| >MEN1-P320 HIYPYMYLAG | 81   | >MEN1-P320 HIYLYMYLAG | 195  | 114  |
| >MEN1-P320 HIYPYMYLAG | 164  | >MEN1-P320 HIYLYMYLAG | 356  | 192  |
| >MEN1-P320 HIYPYMYLAG | 401  | >MEN1-P320 HIYLYMYLAG | 1166 | 765  |
| >MEN1-P320 HIYPYMYL   | 122  | >MEN1-P320 HIYLYMYL   | 800  | 678  |
| >MEN1-P320 HIYPYMYLAG | 7    | >MEN1-P320 HIYLYMYLAG | 19   | 12   |
| >MEN1-P320 HIYPYMYLAG | 219  | >MEN1-P320 HIYLYMYLAG | 413  | 194  |
| >MEN1-P320 HIYPYMYLAG | 261  | >MEN1-P320 HIYLYMYLAG | 461  | 200  |
| >MEN1-P320 EHIYPYMY   | 168  | >MEN1-P320 EHIYLYMY   | 162  | 6    |
| >MEN1-P320 EHIYPYMY   | 100  | >MEN1-P320 EHIYLYMY   | 79   | 21   |
| >MEN1-P320 EHIYPYMYL  | 389  | >MEN1-P320 EHIYLYMYL  | 643  | 254  |
| >MEN1-P320 EHIYPYMY   | 206  | >MEN1-P320 EHIYLYMY   | 523  | 317  |
| >MEN1-P320 EHIYPYMYL  | 242  | >MEN1-P320 EHIYLYMYL  | 446  | 204  |
| >MEN1-P320 EHIYPYMYL  | 393  | >MEN1-P320 EHIYLYMYL  | 185  | 208  |
| >MEN1-P320 DEHIYPYM   | 924  | >MEN1-P320 DEHIYLYM   | 195  | 729  |
| >MEN1-P320 DEHIYPYMY  | 1516 | >MEN1-P320 DEHIYLYMY  | 302  | 1214 |
| >MEN1-P320 DEHIYPYMYL | 533  | >MEN1-P320 DEHIYLYMYL | 71   | 462  |
| >MEN1-P320 DEHIYPYMYL | 1080 | >MEN1-P320 DEHIYLYMYL | 494  | 586  |
| >MEN1-P320 DEHIYPYMY  | 405  | >MEN1-P320 DEHIYLYMY  | 824  | 419  |
| >MEN1-P320 DEHIYPYM   | 24   | >MEN1-P320 DEHIYLYM   | 15   | 9    |
| >MEN1-P320 DEHIYPYMY  | 6    | >MEN1-P320 DEHIYLYMY  | 4    | 2    |
| >MEN1-P320 DEHIYPYMYL | 1308 | >MEN1-P320 DEHIYLYMYL | 360  | 948  |
| >MEN1-P320 DEHIYPYMYL | 121  | >MEN1-P320 DEHIYLYMYL | 53   | 68   |
| >MEN1-P320 DEHIYPYMYL | 321  | >MEN1-P320 DEHIYLYMYL | 272  | 49   |
| >MEN1-P320 DEHIYPYMYL | 967  | >MEN1-P320 DEHIYLYMYL | 497  | 470  |

|                       |       |                        |      |       |
|-----------------------|-------|------------------------|------|-------|
| >MEN1-P320 DEHIYPMYL  | 448   | >MEN1-P320 DEHIYLYMYL  | 271  | 177   |
| >MEN1-P320 DEHIYPMY   | 133   | >MEN1-P320 DEHIYLYMY   | 133  | 0     |
| >MEN1-P320 DEHIYPMYL  | 353   | >MEN1-P320 DEHIYLYMYL  | 136  | 217   |
| >MEN1-P320 DEHIYPMYL  | 82    | >MEN1-P320 DEHIYLYMYL  | 54   | 28    |
| >MEN1-P320 RDEHIYPMY  | 218   | >MEN1-P320 RDEHIYLYMY  | 225  | 7     |
| >MEN1-P320 YRDEHIYPY  | 818   | >MEN1-P320 YRDEHIYLY   | 400  | 418   |
| >MEN1-P320 YRDEHIYPM  | 430   | >MEN1-P320 YRDEHIYLYM  | 390  | 40    |
| >MEN1-P320 YRDEHIYP   | 14040 | >MEN1-P320 YRDEHIYL    | 219  | 13821 |
| >MEN1-P320 YRDEHIYPY  | 365   | >MEN1-P320 YRDEHIYLY   | 107  | 258   |
| >MEN1-P320 YRDEHIYPM  | 225   | >MEN1-P320 YRDEHIYLYM  | 195  | 30    |
| >MEN1-P320 YRDEHIYPY  | 400   | >MEN1-P320 YRDEHIYLY   | 1225 | 825   |
| >MEN1-P320 YRDEHIYPY  | 128   | >MEN1-P320 YRDEHIYLY   | 144  | 16    |
| >MEN1-P320 YRDEHIYPM  | 125   | >MEN1-P320 YRDEHIYLYM  | 92   | 33    |
| >MEN1-P320 YRDEHIYPM  | 221   | >MEN1-P320 YRDEHIYLYM  | 190  | 31    |
| >MEN1-P320 YRDEHIYPY  | 243   | >MEN1-P320 YRDEHIYLY   | 4516 | 4273  |
| >MEN1-P320 YRDEHIYP   | 10459 | >MEN1-P320 YRDEHIYL    | 35   | 10424 |
| >MEN1-P320 YRDEHIYPM  | 114   | >MEN1-P320 YRDEHIYLYM  | 107  | 7     |
| >MEN1-P320 YRDEHIYPY  | 109   | >MEN1-P320 YRDEHIYLY   | 1635 | 1526  |
| >MEN1-P320 YRDEHIYPM  | 390   | >MEN1-P320 YRDEHIYLYM  | 117  | 273   |
| >MEN1-P320 YRDEHIYPY  | 1845  | >MEN1-P320 YRDEHIYLY   | 426  | 1419  |
| >MEN1-P320 YRDEHIYPM  | 704   | >MEN1-P320 YRDEHIYLYM  | 481  | 223   |
| >MEN1-P320 YYRDEHIYPY | 445   | >MEN1-P320 YYRDEHIYLY  | 191  | 254   |
| >MEN1-P320 YYRDEHIYP  | 27295 | >MEN1-P320 YYRDEHIYL   | 298  | 26997 |
| >MEN1-P320 YYRDEHIYP  | 4577  | >MEN1-P320 YYRDEHIYL   | 12   | 4565  |
| >MEN1-P320 YYRDEHIYPY | 38    | >MEN1-P320 YYRDEHIYLYM | 32   | 6     |
| >MEN1-P320 YYRDEHIYPY | 371   | >MEN1-P320 YYRDEHIYLY  | 864  | 493   |
| >MEN1-P320 YYRDEHIYPY | 157   | >MEN1-P320 YYRDEHIYLY  | 733  | 576   |
| >MEN1-P320 YYRDEHIYPY | 87    | >MEN1-P320 YYRDEHIYLY  | 58   | 29    |
| >MEN1-P320 YYRDEHIYPY | 352   | >MEN1-P320 YYRDEHIYLYM | 154  | 198   |
| >MEN1-P320 YYRDEHIYP  | 321   | >MEN1-P320 YYRDEHIYL   | 25   | 296   |
| >MEN1-P320 YYRDEHIYPY | 118   | >MEN1-P320 YYRDEHIYLY  | 253  | 135   |
| >MEN1-P320 YYRDEHIYPY | 17    | >MEN1-P320 YYRDEHIYLYM | 22   | 5     |
| >MEN1-P320 YYRDEHIYPY | 182   | >MEN1-P320 YYRDEHIYLY  | 84   | 98    |
| >MEN1-P320 YYRDEHIYPY | 499   | >MEN1-P320 YYRDEHIYLY  | 84   | 415   |
| >MEN1-P320 YYRDEHIYPY | 454   | >MEN1-P320 YYRDEHIYLY  | 3610 | 3156  |
| >MEN1-P320 YYRDEHIYPY | 447   | >MEN1-P320 YYRDEHIYLY  | 1530 | 1083  |
| >MEN1-P320 YYRDEHIYPY | 261   | >MEN1-P320 YYRDEHIYLY  | 1140 | 879   |
| >MEN1-P320 TYRDEHIYP  | 614   | >MEN1-P320 TYRDEHIYLY  | 195  | 419   |
| >MEN1-P320 TYRDEHIYP  | 4906  | >MEN1-P320 TYRDEHIYL   | 11   | 4895  |
| >MEN1-P320 TYRDEHIYP  | 58    | >MEN1-P320 TYRDEHIYLY  | 273  | 215   |
| >MEN1-P320 TYRDEHIYP  | 26    | >MEN1-P320 TYRDEHIYLY  | 14   | 12    |
| >MEN1-P320 TYRDEHIYP  | 119   | >MEN1-P320 TYRDEHIYLY  | 76   | 43    |
| >MEN1-P320 TYRDEHIYP  | 422   | >MEN1-P320 TYRDEHIYLY  | 80   | 342   |



|                       |       |                       |       |       |
|-----------------------|-------|-----------------------|-------|-------|
| >MEN1-P320TYRDEHIYP\  | 511   | >MEN1-P320TYRDEHIYLY  | 165   | 346   |
| >MEN1-P320TYRDEHIYP   | 16918 | >MEN1-P320TYRDEHIYL   | 483   | 16435 |
| >MEN1-P320TYRDEHIYP   | 6132  | >MEN1-P320TYRDEHIYL   | 88    | 6044  |
| >MEN1-P32RPDLVLLSL    | 2176  | >MEN1-P32RRDLVLLSL    | 32    | 2144  |
| >MEN1-P32RPDLVLLSLV   | 10681 | >MEN1-P32RRDLVLLSLV   | 155   | 10526 |
| >MEN1-P32RPDLVLLSLV   | 13931 | >MEN1-P32RRDLVLLSLV   | 225   | 13706 |
| >MEN1-P32RPDLVLLSLV   | 748   | >MEN1-P32RRDLVLLSLV   | 22    | 726   |
| >MEN1-P32RPDLVLLSL    | 26246 | >MEN1-P32RRDLVLLSL    | 448   | 25798 |
| >MEN1-P32RPDLVLLSL    | 475   | >MEN1-P32RRDLVLLSL    | 624   | 149   |
| >MEN1-P32RPDLVLLSLV   | 36    | >MEN1-P32RRDLVLLSLV   | 40    | 4     |
| >MEN1-P32RPDLVLLSLVL  | 158   | >MEN1-P32RRDLVLLSLVL  | 204   | 46    |
| >MEN1-P32REPDVLLSLV   | 139   | >MEN1-P32RERDLVLLSLV  | 9831  | 9692  |
| >MEN1-P32REPDVLLSLVL  | 383   | >MEN1-P32RERDLVLLSLVL | 23420 | 23037 |
| >MEN1-P32REPDVLLSL    | 505   | >MEN1-P32RERDLVLLSL   | 287   | 218   |
| >MEN1-P32REPDVLLSLVL  | 105   | >MEN1-P32RERDLVLLSLVL | 78    | 27    |
| >MEN1-P32REPDVLLSL    | 357   | >MEN1-P32RERDLVLLSL   | 32388 | 32031 |
| >MEN1-P32RLFAAELGREEI | 24505 | >MEN1-P32RLFAAELGREEI | 267   | 24238 |
| >MEN1-P32RLFAAELGREEI | 36724 | >MEN1-P32RLFAAELGREEI | 430   | 36294 |
| >MEN1-P32REEPDLVLL    | 212   | >MEN1-P32REERDLVLL    | 21    | 191   |
| >MEN1-P32REEPDLVLLSL  | 180   | >MEN1-P32REERDLVLLSL  | 379   | 199   |
| >MEN1-P32REEPDLVLLSLV | 39    | >MEN1-P32REERDLVLLSLV | 73    | 34    |
| >MEN1-P32REEPDLVLL    | 1964  | >MEN1-P32REERDLVLL    | 190   | 1774  |
| >MEN1-P32REEPDLVLLSL  | 161   | >MEN1-P32REERDLVLLSL  | 168   | 7     |
| >MEN1-P32REEPDLVLLSLV | 2500  | >MEN1-P32REERDLVLLSLV | 195   | 2305  |
| >MEN1-P32REEPDLVLLSL  | 889   | >MEN1-P32REERDLVLLSL  | 432   | 457   |
| >MEN1-P32REEPDLVLL    | 1426  | >MEN1-P32REERDLVLL    | 386   | 1040  |
| >MEN1-P32REEPDLVLLSLV | 6033  | >MEN1-P32REERDLVLLSLV | 243   | 5790  |
| >MEN1-P32REEPDLVLLSLV | 53    | >MEN1-P32REERDLVLLSLV | 17    | 36    |
| >MEN1-P32RREEPDLVLLSL | 518   | >MEN1-P32RREERDLVLLSL | 481   | 37    |
| >MEN1-P32RREEPDLVL    | 9     | >MEN1-P32RREERDLVL    | 10    | 1     |
| >MEN1-P32RREEPDLVLL   | 7     | >MEN1-P32RREERDLVLL   | 8     | 1     |
| >MEN1-P32RREEPDLVLLSL | 7     | >MEN1-P32RREERDLVLLSL | 7     | 0     |
| >MEN1-P32RREEPDLVL    | 559   | >MEN1-P32RREERDLVL    | 449   | 110   |
| >MEN1-P32RREEPDLVLLSL | 156   | >MEN1-P32RREERDLVLLSL | 144   | 12    |
| >MEN1-P32RREEPDLVLLS  | 264   | >MEN1-P32RREERDLVLLS  | 393   | 129   |
| >MEN1-P32RREEPDLVLL   | 19    | >MEN1-P32RREERDLVLL   | 11    | 8     |
| >MEN1-P32RREEPDLVLLSL | 22    | >MEN1-P32RREERDLVLLSL | 14    | 8     |
| >MEN1-P32RREEPDLVL    | 561   | >MEN1-P32RREERDLVL    | 154   | 407   |
| >MEN1-P32RREEPDLVLL   | 249   | >MEN1-P32RREERDLVLL   | 162   | 87    |
| >MEN1-P32RREEPDLVLLSL | 575   | >MEN1-P32RREERDLVLLSL | 387   | 188   |
| >MEN1-P32RGREEPDLVLL  | 329   | >MEN1-P32RGREERDLVLL  | 176   | 153   |
| >MEN1-P32RGREEPDLVL   | 379   | >MEN1-P32RGREERDLVL   | 237   | 142   |
| >MEN1-P32RGREEPDLVLL  | 828   | >MEN1-P32RGREERDLVLL  | 480   | 348   |

|                        |       |                         |       |       |
|------------------------|-------|-------------------------|-------|-------|
| >MEN1-P32R GREEPDLVL   | 173   | >MEN1-P32R GREERDLVL    | 34    | 139   |
| >MEN1-P32R GREEPDLVLL  | 290   | >MEN1-P32R GREERDLVLL   | 200   | 90    |
| >MEN1-P32R ELGREEPDLV  | 104   | >MEN1-P32R ELGREERDLV   | 860   | 756   |
| >MEN1-P32R ELGREEPDLV  | 64    | >MEN1-P32R ELGREERDLV   | 599   | 535   |
| >MEN1-P32R ELGREEPDLV  | 145   | >MEN1-P32R ELGREERDLV   | 2216  | 2071  |
| >MEN1-P32R ELGREEPDL   | 117   | >MEN1-P32R ELGREERDL    | 2583  | 2466  |
| >MEN1-P32R ELGREEPDLV  | 22    | >MEN1-P32R ELGREERDLV   | 40    | 18    |
| >MEN1-P32R ELGREEPDLV  | 175   | >MEN1-P32R ELGREERDLV   | 514   | 339   |
| >MEN1-P32RAELGREEPDL   | 349   | >MEN1-P32RAELGREERDL    | 188   | 161   |
| >MEN1-P32RAELGREEPDL   | 346   | >MEN1-P32RAELGREERDL    | 382   | 36    |
| >MEN1-P32RAELGREEPDL   | 86    | >MEN1-P32RAELGREERDL    | 92    | 6     |
| >MEN1-P32RAELGREEPDL   | 35    | >MEN1-P32RAELGREERDL    | 34    | 1     |
| >MEN1-P32RAELGREEPDL   | 15    | >MEN1-P32RAELGREERDL    | 15    | 0     |
| >MEN1-P32R FAAELGREEP  | 29327 | >MEN1-P32R FAAELGREER   | 16    | 29311 |
| >MEN1-Q141 QSLFSFITGTK | 257   | >MEN1-Q141 RSLFSFITGTK  | 47    | 210   |
| >MEN1-Q141 QSLFSFITGTK | 31    | >MEN1-Q141 RSLFSFITGTK  | 11    | 20    |
| >MEN1-Q141 QSLFSFITG   | 3967  | >MEN1-Q141 RSLFSFITG    | 84    | 3883  |
| >MEN1-Q141 QSLFSFITGTK | 49    | >MEN1-Q141 RSLFSFITGTK  | 5     | 44    |
| >MEN1-Q141 QSLFSFITGTK | 1837  | >MEN1-Q141 RSLFSFITGTK  | 68    | 1769  |
| >MEN1-Q141 QSLFSFITGTK | 130   | >MEN1-Q141 RSLFSFITGTK  | 899   | 769   |
| >MEN1-Q141 QSLFSFITGT  | 3303  | >MEN1-Q141 RSLFSFITGT   | 175   | 3128  |
| >MEN1-Q141 QSLFSFITGTK | 110   | >MEN1-Q141 RSLFSFITGTK  | 169   | 59    |
| >MEN1-Q141 IQSLFSFI    | 47    | >MEN1-Q141 IRSLSFSFI    | 4149  | 4102  |
| >MEN1-Q141 IQSLFSFI    | 185   | >MEN1-Q141 IRSLSFSFI    | 12555 | 12370 |
| >MEN1-Q141 IQSLFSFI    | 21    | >MEN1-Q141 IRSLSFSFI    | 8248  | 8227  |
| >MEN1-Q141 IQSLFSFITGT | 222   | >MEN1-Q141 IRSLSFSFITGT | 21604 | 21382 |
| >MEN1-Q141 IQSLFSFI    | 59    | >MEN1-Q141 IRSLSFSFI    | 353   | 294   |
| >MEN1-Q141 IQSLFSFI    | 7511  | >MEN1-Q141 IRSLSFSFI    | 444   | 7067  |
| >MEN1-Q141 RSYFKDRAHII | 15019 | >MEN1-Q141 RSYFKDRAHII  | 334   | 14685 |
| >MEN1-Q141 RSYFKDRAHII | 3648  | >MEN1-Q141 RSYFKDRAHII  | 12    | 3636  |
| >MEN1-Q141 RSYFKDRAHII | 9330  | >MEN1-Q141 RSYFKDRAHII  | 201   | 9129  |
| >MEN1-Q141 RSYFKDRAHII | 324   | >MEN1-Q141 RSYFKDRAHII  | 987   | 663   |
| >MEN1-Q141 RSYFKDRAHII | 12015 | >MEN1-Q141 RSYFKDRAHII  | 118   | 11897 |
| >MEN1-Q141 HIQSLFSFI   | 453   | >MEN1-Q141 HIRSLFSFI    | 4605  | 4152  |
| >MEN1-Q141 HIQSLFSFI   | 141   | >MEN1-Q141 HIRSLFSFI    | 709   | 568   |
| >MEN1-Q141 HIQSLFSFI   | 176   | >MEN1-Q141 HIRSLFSFI    | 88    | 88    |
| >MEN1-Q141 HIQSLFSFI   | 143   | >MEN1-Q141 HIRSLFSFI    | 759   | 616   |
| >MEN1-Q141 HIQSLFSF    | 369   | >MEN1-Q141 HIRSLFSF     | 3623  | 3254  |
| >MEN1-Q141 HIQSLFSF    | 11374 | >MEN1-Q141 HIRSLFSF     | 205   | 11169 |
| >MEN1-Q141 HIQSLFSFI   | 801   | >MEN1-Q141 HIRSLFSFI    | 6     | 795   |
| >MEN1-Q141 HIQSLFSFIT  | 9869  | >MEN1-Q141 HIRSLFSFIT   | 90    | 9779  |
| >MEN1-Q141 HIQSLFSFITG | 5639  | >MEN1-Q141 HIRSLFSFITG  | 24    | 5615  |
| >MEN1-Q141 HIQSLFSF    | 259   | >MEN1-Q141 HIRSLFSF     | 980   | 721   |

|                       |      |                       |      |      |
|-----------------------|------|-----------------------|------|------|
| >MEN1-Q141HIQSLFSFI   | 86   | >MEN1-Q141HIRSLFSFI   | 526  | 440  |
| >MEN1-Q141HIQSLFSFI   | 2841 | >MEN1-Q141HIRSLFSFI   | 353  | 2488 |
| >MEN1-Q141HIQSLFSF    | 89   | >MEN1-Q141HIRSLFSF    | 57   | 32   |
| >MEN1-Q141HIQSLFSF    | 212  | >MEN1-Q141HIRSLFSF    | 38   | 174  |
| >MEN1-Q141HIQSLFSF    | 1190 | >MEN1-Q141HIRSLFSF    | 152  | 1038 |
| >MEN1-Q141HIQSLFSFI   | 195  | >MEN1-Q141HIRSLFSFI   | 36   | 159  |
| >MEN1-Q141HIQSLFSF    | 169  | >MEN1-Q141HIRSLFSF    | 1321 | 1152 |
| >MEN1-Q141AHIQSLFSFI  | 352  | >MEN1-Q141AHIRSLFSFI  | 332  | 20   |
| >MEN1-Q141AHIQSLFSFI  | 331  | >MEN1-Q141AHIRSLFSFI  | 276  | 55   |
| >MEN1-Q141AHIQSLFSF   | 295  | >MEN1-Q141AHIRSLFSF   | 205  | 90   |
| >MEN1-Q141AHIQSLFSF   | 272  | >MEN1-Q141AHIRSLFSF   | 434  | 162  |
| >MEN1-Q141AHIQSLFSF   | 10   | >MEN1-Q141AHIRSLFSF   | 7    | 3    |
| >MEN1-Q141AHIQSLFSFI  | 366  | >MEN1-Q141AHIRSLFSFI  | 228  | 138  |
| >MEN1-Q141AHIQSLFSF   | 481  | >MEN1-Q141AHIRSLFSF   | 1935 | 1454 |
| >MEN1-Q141AHIQSLFSF   | 364  | >MEN1-Q141AHIRSLFSF   | 538  | 174  |
| >MEN1-Q141RAHIQSLFSF  | 308  | >MEN1-Q141RAHIRSLFSF  | 603  | 295  |
| >MEN1-Q141RAHIQSLF    | 461  | >MEN1-Q141RAHIRSLF    | 298  | 163  |
| >MEN1-Q141RAHIQSLFS   | 10   | >MEN1-Q141RAHIRSLFS   | 10   | 0    |
| >MEN1-Q141RAHIQSLFSF  | 129  | >MEN1-Q141RAHIRSLFSF  | 94   | 35   |
| >MEN1-Q141RAHIQSLFSFI | 6    | >MEN1-Q141RAHIRSLFSFI | 7    | 1    |
| >MEN1-Q141RAHIQSLFSF  | 381  | >MEN1-Q141RAHIRSLFSF  | 391  | 10   |
| >MEN1-Q141RAHIQSLFSFI | 2715 | >MEN1-Q141RAHIRSLFSFI | 362  | 2353 |
| >MEN1-Q141RAHIQSLFSF  | 94   | >MEN1-Q141RAHIRSLFSF  | 103  | 9    |
| >MEN1-Q141RAHIQSLF    | 58   | >MEN1-Q141RAHIRSLF    | 54   | 4    |
| >MEN1-Q141RAHIQSLFSF  | 21   | >MEN1-Q141RAHIRSLFSF  | 22   | 1    |
| >MEN1-Q141RAHIQSLF    | 4    | >MEN1-Q141RAHIRSLF    | 5    | 1    |
| >MEN1-Q141RAHIQSLFSF  | 3    | >MEN1-Q141RAHIRSLFSF  | 3    | 0    |
| >MEN1-Q141RAHIQSLFSFI | 48   | >MEN1-Q141RAHIRSLFSFI | 45   | 3    |
| >MEN1-Q141RAHIQSLF    | 311  | >MEN1-Q141RAHIRSLF    | 455  | 144  |
| >MEN1-Q141RAHIQSLFSF  | 148  | >MEN1-Q141RAHIRSLFSF  | 199  | 51   |
| >MEN1-Q141RAHIQSLF    | 88   | >MEN1-Q141RAHIRSLF    | 297  | 209  |
| >MEN1-Q141RAHIQSLFSF  | 35   | >MEN1-Q141RAHIRSLFSF  | 52   | 17   |
| >MEN1-Q141RAHIQSLF    | 336  | >MEN1-Q141RAHIRSLF    | 269  | 67   |
| >MEN1-Q141RAHIQSLFSF  | 64   | >MEN1-Q141RAHIRSLFSF  | 59   | 5    |
| >MEN1-Q141RAHIQSLFSFI | 19   | >MEN1-Q141RAHIRSLFSFI | 17   | 2    |
| >MEN1-Q141DRAHIQSLF   | 401  | >MEN1-Q141DRAHIRSLF   | 352  | 49   |
| >MEN1-Q141DRAHIQSLFSI | 232  | >MEN1-Q141DRAHIRSLFSF | 206  | 26   |
| >MEN1-Q141DRAHIQSLF   | 313  | >MEN1-Q141DRAHIRSLF   | 93   | 220  |
| >MEN1-Q141KDRAHIQSL   | 464  | >MEN1-Q141KDRAHIRSL   | 596  | 132  |
| >MEN1-Q141KDRAHIQSLF  | 304  | >MEN1-Q141KDRAHIRSLF  | 328  | 24   |
| >MEN1-Q141KDRAHIQSLF  | 203  | >MEN1-Q141KDRAHIRSLF  | 265  | 62   |
| >MEN1-Q141KDRAHIQSL   | 117  | >MEN1-Q141KDRAHIRSL   | 128  | 11   |
| >MEN1-Q141KDRAHIQSL   | 209  | >MEN1-Q141KDRAHIRSL   | 593  | 384  |

|                      |       |                       |       |       |
|----------------------|-------|-----------------------|-------|-------|
| >MEN1-Q141FKDRAHIQSL | 197   | >MEN1-Q141FKDRAHIRSL  | 483   | 286   |
| >MEN1-Q141FKDRAHIQSL | 35    | >MEN1-Q141FKDRAHIRSL  | 38    | 3     |
| >MEN1-Q141FKDRAHIQSL | 56    | >MEN1-Q141FKDRAHIRSL  | 162   | 106   |
| >MEN1-Q141YFKDRAHIQS | 210   | >MEN1-Q141YFKDRAHIRSI | 1270  | 1060  |
| >MEN1-Q141YFKDRAHIQS | 180   | >MEN1-Q141YFKDRAHIRSI | 500   | 320   |
| >MEN1-Q141YFKDRAHIQ  | 12783 | >MEN1-Q141YFKDRAHIR   | 24    | 12759 |
| >MEN1-Q141YFKDRAHIQ  | 10041 | >MEN1-Q141YFKDRAHIR   | 53    | 9988  |
| >MEN1-Q141YFKDRAHIQ  | 12994 | >MEN1-Q141YFKDRAHIR   | 158   | 12836 |
| >MEN1-Q141YFKDRAHIQS | 61    | >MEN1-Q141YFKDRAHIRSI | 71    | 10    |
| >MEN1-Q141YFKDRAHIQ  | 5984  | >MEN1-Q141YFKDRAHIR   | 59    | 5925  |
| >MEN1-Q141SYFKDRAHIQ | 17296 | >MEN1-Q141SYFKDRAHIR  | 129   | 17167 |
| >MEN1-Q141SYFKDRAHIQ | 5008  | >MEN1-Q141SYFKDRAHIR  | 459   | 4549  |
| >MEN1-Q141SYFKDRAHIQ | 586   | >MEN1-Q141SYFKDRAHIR  | 19    | 567   |
| >MEN1-R171LRDVHLAL   | 16058 | >MEN1-R171LQDVHLAL    | 29    | 16029 |
| >MEN1-R171LRDVHLALS  | 26630 | >MEN1-R171LQDVHLALS   | 423   | 26207 |
| >MEN1-R171LRDVHLAL   | 158   | >MEN1-R171LQDVHLAL    | 111   | 47    |
| >MEN1-R171VVGACQALG  | 263   | >MEN1-R171VVGACQALG   | 15522 | 15259 |
| >MEN1-R171GLRDVHLA   | 1704  | >MEN1-R171GLQDVHLA    | 77    | 1627  |
| >MEN1-R171GLRDVHLAL  | 1679  | >MEN1-R171GLQDVHLAL   | 68    | 1611  |
| >MEN1-R171GLRDVHLA   | 169   | >MEN1-R171GLQDVHLA    | 42    | 127   |
| >MEN1-R171GLRDVHLAL  | 204   | >MEN1-R171GLQDVHLAL   | 40    | 164   |
| >MEN1-R171GLRDVHLA   | 23    | >MEN1-R171GLQDVHLA    | 42    | 19    |
| >MEN1-R171GLRDVHLAL  | 60    | >MEN1-R171GLQDVHLAL   | 128   | 68    |
| >MEN1-R171GLRDVHLAL  | 1744  | >MEN1-R171GLQDVHLAL   | 461   | 1283  |
| >MEN1-R171GLRDVHLA   | 85    | >MEN1-R171GLQDVHLA    | 19    | 66    |
| >MEN1-R171GLRDVHLAL  | 18    | >MEN1-R171GLQDVHLAL   | 6     | 12    |
| >MEN1-R171GLRDVHLA   | 498   | >MEN1-R171GLQDVHLA    | 27    | 471   |
| >MEN1-R171GLRDVHLAL  | 182   | >MEN1-R171GLQDVHLAL   | 12    | 170   |
| >MEN1-R171GLRDVHLA   | 244   | >MEN1-R171GLQDVHLA    | 48    | 196   |
| >MEN1-R171GLRDVHLAL  | 254   | >MEN1-R171GLQDVHLAL   | 41    | 213   |
| >MEN1-R171GLRDVHLA   | 7     | >MEN1-R171GLQDVHLA    | 5     | 2     |
| >MEN1-R171GLRDVHLAL  | 6     | >MEN1-R171GLQDVHLAL   | 4     | 2     |
| >MEN1-R171GLRDVHLA   | 430   | >MEN1-R171GLQDVHLA    | 13756 | 13326 |
| >MEN1-R171GLRDVHLAL  | 196   | >MEN1-R171GLQDVHLAL   | 12560 | 12364 |
| >MEN1-R171GLRDVHLAL  | 481   | >MEN1-R171GLQDVHLAL   | 6774  | 6293  |
| >MEN1-R171GLRDVHLAL  | 270   | >MEN1-R171GLQDVHLAL   | 597   | 327   |
| >MEN1-R171ALGLRDVHL  | 432   | >MEN1-R171ALGLQDVHL   | 294   | 138   |
| >MEN1-R171ALGLRDVHLA | 264   | >MEN1-R171ALGLQDVHL/  | 204   | 60    |
| >MEN1-R171ALGLRDVHLA | 502   | >MEN1-R171ALGLQDVHL/  | 377   | 125   |
| >MEN1-R171ALGLRDVHLA | 153   | >MEN1-R171ALGLQDVHL/  | 125   | 28    |
| >MEN1-R171ALGLRDVHL  | 330   | >MEN1-R171ALGLQDVHL   | 155   | 175   |
| >MEN1-R171ALGLRDVHLA | 559   | >MEN1-R171ALGLQDVHL/  | 412   | 147   |
| >MEN1-R171ALGLRDVHLA | 281   | >MEN1-R171ALGLQDVHL/  | 178   | 103   |

|                       |       |                       |       |       |
|-----------------------|-------|-----------------------|-------|-------|
| >MEN1-R171ALGLRDVHL   | 108   | >MEN1-R171ALGLQDVHL   | 61    | 47    |
| >MEN1-R171ALGLRDVHLA  | 220   | >MEN1-R171ALGLQDVHLA  | 136   | 84    |
| >MEN1-R171ALGLRDVHLA  | 217   | >MEN1-R171ALGLQDVHLA  | 145   | 72    |
| >MEN1-R171ALGLRDVHL   | 32    | >MEN1-R171ALGLQDVHL   | 29    | 3     |
| >MEN1-R171ALGLRDVHLA  | 23    | >MEN1-R171ALGLQDVHLA  | 21    | 2     |
| >MEN1-R171ALGLRDVHLA  | 20    | >MEN1-R171ALGLQDVHLA  | 19    | 1     |
| >MEN1-R171QALGLRDV    | 1251  | >MEN1-R171QALGLQDV    | 469   | 782   |
| >MEN1-R171CQALGLRDV   | 364   | >MEN1-R171CQALGLQDV   | 202   | 162   |
| >MEN1-R171CQALGLRDV   | 782   | >MEN1-R171CQALGLQDV   | 121   | 661   |
| >MEN1-R171CQALGLRDVH  | 524   | >MEN1-R171CQALGLQDVH  | 330   | 194   |
| >MEN1-R295RPDPLTLY    | 257   | >MEN1-R295LPDPLTLY    | 1544  | 1287  |
| >MEN1-R295RPDPLTLY    | 134   | >MEN1-R295LPDPLTLY    | 25    | 109   |
| >MEN1-R295RPDPLTLYH   | 1566  | >MEN1-R295LPDPLTLYH   | 217   | 1349  |
| >MEN1-R295RPDPLTLY    | 1436  | >MEN1-R295LPDPLTLY    | 51    | 1385  |
| >MEN1-R295RPDPLTLYHK  | 2147  | >MEN1-R295LPDPLTLYHK  | 444   | 1703  |
| >MEN1-R295RPDPLTLY    | 218   | >MEN1-R295LPDPLTLY    | 380   | 162   |
| >MEN1-R295RPDPLTLY    | 3228  | >MEN1-R295LPDPLTLY    | 216   | 3012  |
| >MEN1-R295GRPDPLTL    | 23586 | >MEN1-R295GLPDPLTL    | 98    | 23488 |
| >MEN1-R295GRPDPLTL    | 24860 | >MEN1-R295GLPDPLTL    | 104   | 24756 |
| >MEN1-R295GRPDPLTL    | 20943 | >MEN1-R295GLPDPLTL    | 42    | 20901 |
| >MEN1-R295GRPDPLTL    | 18607 | >MEN1-R295GLPDPLTL    | 284   | 18323 |
| >MEN1-R295GRPDPLTL    | 15391 | >MEN1-R295GLPDPLTL    | 7     | 15384 |
| >MEN1-R295GRPDPLTL    | 20621 | >MEN1-R295GLPDPLTL    | 18    | 20603 |
| >MEN1-R295GRPDPLTL    | 19791 | >MEN1-R295GLPDPLTL    | 18    | 19773 |
| >MEN1-R295GRPDPLTL    | 26092 | >MEN1-R295GLPDPLTL    | 357   | 25735 |
| >MEN1-R295GRPDPLTL    | 15399 | >MEN1-R295GLPDPLTL    | 4     | 15395 |
| >MEN1-R295GRPDPLTLY   | 33693 | >MEN1-R295GLPDPLTLY   | 348   | 33345 |
| >MEN1-R295GRPDPLTLYH  | 17491 | >MEN1-R295GLPDPLTLYH  | 379   | 17112 |
| >MEN1-R295GRPDPLTLY   | 2411  | >MEN1-R295GLPDPLTLY   | 59    | 2352  |
| >MEN1-R295DLEELEPTPGI | 17830 | >MEN1-R295DLEELEPTPGI | 73    | 17757 |
| >MEN1-R295DLEELEPTPGI | 416   | >MEN1-R295DLEELEPTPGI | 27459 | 27043 |
| >MEN1-R295DLEELEPTPGI | 335   | >MEN1-R295DLEELEPTPGI | 35493 | 35158 |
| >MEN1-R295DLEELEPTPGI | 14795 | >MEN1-R295DLEELEPTPGI | 485   | 14310 |
| >MEN1-R295TPGRPDPL    | 167   | >MEN1-R295TPGLPDPL    | 397   | 230   |
| >MEN1-R295TPGRPDPLT   | 297   | >MEN1-R295TPGLPDPLT   | 230   | 67    |
| >MEN1-R295PTPGRPDPL   | 198   | >MEN1-R295PTPGLPDPL   | 40    | 158   |
| >MEN1-R295PTPGRPDPLT  | 72    | >MEN1-R295PTPGLPDPLT  | 26    | 46    |
| >MEN1-R295LEPTPGRPDP  | 956   | >MEN1-R295LEPTPGLPDP  | 401   | 555   |
| >MEN1-R295LEPTPGRPDP  | 321   | >MEN1-R295LEPTPGLPDP  | 223   | 98    |
| >MEN1-R295ELEPTPGR    | 15972 | >MEN1-R295ELEPTPGL    | 51    | 15921 |
| >MEN1-R295ELEPTPGR    | 164   | >MEN1-R295ELEPTPGL    | 30894 | 30730 |
| >MEN1-R295EELEPTPGR   | 4355  | >MEN1-R295EELEPTPGL   | 253   | 4102  |
| >MEN1-R295EELEPTPGR   | 7048  | >MEN1-R295EELEPTPGL   | 32    | 7016  |

|                       |       |                       |       |       |
|-----------------------|-------|-----------------------|-------|-------|
| >MEN1-R295 EEELETPGR  | 18414 | >MEN1-R295 EEELETPGL  | 95    | 18319 |
| >MEN1-R295 EEELETPGR  | 12100 | >MEN1-R295 EEELETPGL  | 487   | 11613 |
| >MEN1-R295 EEELETPGR  | 2078  | >MEN1-R295 EEELETPGL  | 298   | 1780  |
| >MEN1-R295 EEELETPGR  | 1764  | >MEN1-R295 EEELETPGL  | 326   | 1438  |
| >MEN1-R295 EEELETPGR  | 3676  | >MEN1-R295 EEELETPGL  | 40    | 3636  |
| >MEN1-R295 LEELETPGR  | 4094  | >MEN1-R295 LEELETPGL  | 459   | 3635  |
| >MEN1-R295 LEELETPGR  | 19190 | >MEN1-R295 LEELETPGL  | 111   | 19079 |
| >MEN1-R330 RNRNVREA   | 63    | >MEN1-R330 PNRNVREA   | 7512  | 7449  |
| >MEN1-R330 RNRNVREALC | 59    | >MEN1-R330 PNRNVREALC | 6656  | 6597  |
| >MEN1-R330 RNRNVREAL  | 420   | >MEN1-R330 PNRNVREAL  | 17783 | 17363 |
| >MEN1-R330 CRNRNVREAL | 32380 | >MEN1-R330 CPNRNVREAL | 319   | 32061 |
| >MEN1-R330 CRNRNVREAL | 262   | >MEN1-R330 CPNRNVREAL | 30586 | 30324 |
| >MEN1-R330 CRNRNVREA  | 28770 | >MEN1-R330 CPNRNVREA  | 67    | 28703 |
| >MEN1-R330 CRNRNVREAL | 24874 | >MEN1-R330 CPNRNVREAL | 262   | 24612 |
| >MEN1-R330 CRNRNVREAL | 228   | >MEN1-R330 CPNRNVREAL | 25980 | 25752 |
| >MEN1-R330 CRNRNVREAL | 384   | >MEN1-R330 CPNRNVREAL | 30461 | 30077 |
| >MEN1-R330 PYMYLAGYH  | 248   | >MEN1-R330 PYMYLAGYH  | 23707 | 23459 |
| >MEN1-R330 PYMYLAGYH  | 161   | >MEN1-R330 PYMYLAGYH  | 31166 | 31005 |
| >MEN1-R330 PYMYLAGYH  | 65    | >MEN1-R330 PYMYLAGYH  | 28246 | 28181 |
| >MEN1-R330 HCRNRNVR   | 88    | >MEN1-R330 HCPNRNVR   | 14988 | 14900 |
| >MEN1-R330 HCRNRNVRE  | 25    | >MEN1-R330 HCPNRNVRE  | 12709 | 12684 |
| >MEN1-R330 HCRNRNVRE  | 232   | >MEN1-R330 HCPNRNVRE  | 15591 | 15359 |
| >MEN1-R330 HCRNRNVR   | 185   | >MEN1-R330 HCPNRNVR   | 3614  | 3429  |
| >MEN1-R330 HCRNRNVR   | 171   | >MEN1-R330 HCPNRNVR   | 2328  | 2157  |
| >MEN1-R330 HCRNRNVRE  | 483   | >MEN1-R330 HCPNRNVRE  | 6241  | 5758  |
| >MEN1-R330 HCRNRNVR   | 235   | >MEN1-R330 HCPNRNVR   | 156   | 79    |
| >MEN1-R330 GYHCRNRNV  | 176   | >MEN1-R330 GYHCPNRNV  | 210   | 34    |
| >MEN1-R330 AGYHCRNR   | 227   | >MEN1-R330 AGYHCPNR   | 406   | 179   |
| >MEN1-R330 AGYHCRNRN  | 175   | >MEN1-R330 AGYHCPNRN  | 541   | 366   |
| >MEN1-R330 AGYHCRNR   | 905   | >MEN1-R330 AGYHCPNR   | 391   | 514   |
| >MEN1-R330 AGYHCRNR   | 675   | >MEN1-R330 AGYHCPNR   | 466   | 209   |
| >MEN1-R330 LAGYHCRNR  | 505   | >MEN1-R330 LAGYHCPNR  | 295   | 210   |
| >MEN1-R330 LAGYHCRNR  | 766   | >MEN1-R330 LAGYHCPNR  | 265   | 501   |
| >MEN1-R330 YLAGYHCR   | 276   | >MEN1-R330 YLAGYHCP   | 77    | 199   |
| >MEN1-R330 YLAGYHCRN  | 357   | >MEN1-R330 YLAGYHCPN  | 112   | 245   |
| >MEN1-R330 YLAGYHCRNF | 412   | >MEN1-R330 YLAGYHCPNF | 207   | 205   |
| >MEN1-R330 YLAGYHCRN  | 59    | >MEN1-R330 YLAGYHCPN  | 49    | 10    |
| >MEN1-R330 YLAGYHCRNF | 1026  | >MEN1-R330 YLAGYHCPNF | 371   | 655   |
| >MEN1-R330 YLAGYHCR   | 41    | >MEN1-R330 YLAGYHCP   | 58    | 17    |
| >MEN1-R330 YLAGYHCRN  | 16    | >MEN1-R330 YLAGYHCPN  | 26    | 10    |
| >MEN1-R330 YLAGYHCRNF | 570   | >MEN1-R330 YLAGYHCPNF | 74    | 496   |
| >MEN1-R330 YLAGYHCRNF | 139   | >MEN1-R330 YLAGYHCPNF | 183   | 44    |
| >MEN1-R330 YLAGYHCR   | 114   | >MEN1-R330 YLAGYHCP   | 22145 | 22031 |

|                       |       |                       |       |       |
|-----------------------|-------|-----------------------|-------|-------|
| >MEN1-R33C YLAGYHCRNF | 201   | >MEN1-R33C YLAGYHCPNF | 811   | 610   |
| >MEN1-R33C YLAGYHCR   | 146   | >MEN1-R33C YLAGYHCP   | 32437 | 32291 |
| >MEN1-R33C YLAGYHCR   | 13    | >MEN1-R33C YLAGYHCP   | 22883 | 22870 |
| >MEN1-R33C YLAGYHCRNF | 164   | >MEN1-R33C YLAGYHCPNF | 54    | 110   |
| >MEN1-R33C YLAGYHCRNF | 158   | >MEN1-R33C YLAGYHCPNF | 134   | 24    |
| >MEN1-R33C YLAGYHCR   | 249   | >MEN1-R33C YLAGYHCP   | 35149 | 34900 |
| >MEN1-R33C YLAGYHCRNF | 320   | >MEN1-R33C YLAGYHCPNF | 179   | 141   |
| >MEN1-R33C MYLAGYHCR  | 261   | >MEN1-R33C MYLAGYHCP  | 1260  | 999   |
| >MEN1-R33C MYLAGYHCR  | 935   | >MEN1-R33C MYLAGYHCP  | 476   | 459   |
| >MEN1-R33C MYLAGYHCR  | 278   | >MEN1-R33C MYLAGYHCP  | 609   | 331   |
| >MEN1-R33C MYLAGYHCR  | 438   | >MEN1-R33C MYLAGYHCP  | 288   | 150   |
| >MEN1-R33C MYLAGYHCR  | 8     | >MEN1-R33C MYLAGYHCP  | 9720  | 9712  |
| >MEN1-R33C MYLAGYHCR  | 15    | >MEN1-R33C MYLAGYHCP  | 14    | 1     |
| >MEN1-R33C MYLAGYHCR  | 16    | >MEN1-R33C MYLAGYHCP  | 18513 | 18497 |
| >MEN1-R33C MYLAGYHCR  | 26    | >MEN1-R33C MYLAGYHCP  | 27    | 1     |
| >MEN1-R33C MYLAGYHCR  | 130   | >MEN1-R33C MYLAGYHCP  | 35327 | 35197 |
| >MEN1-R33C MYLAGYHCR  | 482   | >MEN1-R33C MYLAGYHCP  | 252   | 230   |
| >MEN1-R33C MYLAGYHCR  | 43    | >MEN1-R33C MYLAGYHCP  | 16475 | 16432 |
| >MEN1-R33C MYLAGYHCR  | 35    | >MEN1-R33C MYLAGYHCP  | 31    | 4     |
| >MEN1-R33C MYLAGYHCR  | 295   | >MEN1-R33C MYLAGYHCP  | 272   | 23    |
| >MEN1-R33C MYLAGYHCR  | 413   | >MEN1-R33C MYLAGYHCP  | 532   | 119   |
| >MEN1-R33C YMYLAGYHCI | 875   | >MEN1-R33C YMYLAGYHCI | 420   | 455   |
| >MEN1-R33C YMYLAGYHCI | 62    | >MEN1-R33C YMYLAGYHCI | 51    | 11    |
| >MEN1-R33C YMYLAGYHCI | 402   | >MEN1-R33C YMYLAGYHCI | 676   | 274   |
| >MEN1-R33C YMYLAGYHCI | 204   | >MEN1-R33C YMYLAGYHCI | 9596  | 9392  |
| >MEN1-R33C YMYLAGYHCI | 13    | >MEN1-R33C YMYLAGYHCI | 14532 | 14519 |
| >MEN1-R33C YMYLAGYHCI | 30    | >MEN1-R33C YMYLAGYHCI | 10790 | 10760 |
| >MEN1-R33C YMYLAGYHCI | 62    | >MEN1-R33C YMYLAGYHCI | 33110 | 33048 |
| >MEN1-R33C YMYLAGYHCI | 2687  | >MEN1-R33C YMYLAGYHCI | 364   | 2323  |
| >MEN1-R33C YMYLAGYHCI | 137   | >MEN1-R33C YMYLAGYHCI | 715   | 578   |
| >MEN1-R33C YMYLAGYHCI | 67    | >MEN1-R33C YMYLAGYHCI | 18015 | 17948 |
| >MEN1-R33C YMYLAGYHCI | 74    | >MEN1-R33C YMYLAGYHCI | 31152 | 31078 |
| >MEN1-S145 SFITGTKL   | 102   | >MEN1-S145 RFITGTKL   | 1199  | 1097  |
| >MEN1-S145 SFITGTKL   | 604   | >MEN1-S145 RFITGTKL   | 102   | 502   |
| >MEN1-S145 FSFITGTK   | 84    | >MEN1-S145 FRFITGTK   | 18634 | 18550 |
| >MEN1-S145 FSFITGTK   | 15    | >MEN1-S145 FRFITGTK   | 1175  | 1160  |
| >MEN1-S145 FSFITGTKL  | 36    | >MEN1-S145 FRFITGTKL  | 20    | 16    |
| >MEN1-S145 FSFITGTKL  | 7     | >MEN1-S145 FRFITGTKL  | 16560 | 16553 |
| >MEN1-S145 FSFITGTK   | 12554 | >MEN1-S145 FRFITGTK   | 32    | 12522 |
| >MEN1-S145 FSFITGTKL  | 12700 | >MEN1-S145 FRFITGTKL  | 27    | 12673 |
| >MEN1-S145 FSFITGTKL  | 6343  | >MEN1-S145 FRFITGTKL  | 180   | 6163  |
| >MEN1-S145 FSFITGTKL  | 286   | >MEN1-S145 FRFITGTKL  | 26856 | 26570 |
| >MEN1-S145 FSFITGTKL  | 24    | >MEN1-S145 FRFITGTKL  | 1225  | 1201  |

|                        |       |                        |      |       |
|------------------------|-------|------------------------|------|-------|
| >MEN1-S145 FSFITGTKL   | 17364 | >MEN1-S145 FRFITGTKL   | 296  | 17068 |
| >MEN1-S145 FSFITGTKL   | 29626 | >MEN1-S145 FRFITGTKL   | 249  | 29377 |
| >MEN1-S145 FSFITGTKL   | 79    | >MEN1-S145 FRFITGTKL   | 5110 | 5031  |
| >MEN1-S145 KDRAHIQSLF: | 304   | >MEN1-S145 KDRAHIQSLF: | 121  | 183   |
| >MEN1-S145 KDRAHIQSLF: | 20574 | >MEN1-S145 KDRAHIQSLF: | 330  | 20244 |
| >MEN1-S145 KDRAHIQSLF: | 21674 | >MEN1-S145 KDRAHIQSLF: | 110  | 21564 |
| >MEN1-S145 LFSFITGTKL  | 317   | >MEN1-S145 LFRFITGTKL  | 1422 | 1105  |
| >MEN1-S145 LFSFITGTK   | 956   | >MEN1-S145 LFRFITGTK   | 7    | 949   |
| >MEN1-S145 LFSFITGTK   | 1350  | >MEN1-S145 LFRFITGTK   | 336  | 1014  |
| >MEN1-S145 LFSFITGTK   | 136   | >MEN1-S145 LFRFITGTK   | 1188 | 1052  |
| >MEN1-S145 SLFSFITGTKL | 342   | >MEN1-S145 SLFRFITGTKL | 283  | 59    |
| >MEN1-S145 SLFSFITGT   | 29    | >MEN1-S145 SLFRFITGT   | 84   | 55    |
| >MEN1-S145 SLFSFITGTKL | 37    | >MEN1-S145 SLFRFITGTKL | 70   | 33    |
| >MEN1-S145 SLFSFITG    | 395   | >MEN1-S145 SLFRFITG    | 1034 | 639   |
| >MEN1-S145 SLFSFITGT   | 11    | >MEN1-S145 SLFRFITGT   | 39   | 28    |
| >MEN1-S145 SLFSFITGTK  | 338   | >MEN1-S145 SLFRFITGTK  | 1620 | 1282  |
| >MEN1-S145 SLFSFITGTKL | 8     | >MEN1-S145 SLFRFITGTKL | 15   | 7     |
| >MEN1-S145 SLFSFITGT   | 11    | >MEN1-S145 SLFRFITGT   | 26   | 15    |
| >MEN1-S145 SLFSFITGTK  | 324   | >MEN1-S145 SLFRFITGTK  | 564  | 240   |
| >MEN1-S145 SLFSFITGTKL | 14    | >MEN1-S145 SLFRFITGTKL | 27   | 13    |
| >MEN1-S145 SLFSFITGT   | 248   | >MEN1-S145 SLFRFITGT   | 446  | 198   |
| >MEN1-S145 SLFSFITGTKL | 349   | >MEN1-S145 SLFRFITGTKL | 558  | 209   |
| >MEN1-S145 SLFSFITG    | 79    | >MEN1-S145 SLFRFITG    | 140  | 61    |
| >MEN1-S145 SLFSFITGT   | 5     | >MEN1-S145 SLFRFITGT   | 7    | 2     |
| >MEN1-S145 SLFSFITGTK  | 339   | >MEN1-S145 SLFRFITGTK  | 536  | 197   |
| >MEN1-S145 SLFSFITGTKL | 3     | >MEN1-S145 SLFRFITGTKL | 4    | 1     |
| >MEN1-S145 SLFSFITGTKL | 53    | >MEN1-S145 SLFRFITGTKL | 67   | 14    |
| >MEN1-S145 SLFSFITGT   | 33    | >MEN1-S145 SLFRFITGT   | 62   | 29    |
| >MEN1-S145 SLFSFITGTKL | 7     | >MEN1-S145 SLFRFITGTKL | 8    | 1     |
| >MEN1-S145 SLFSFITGTKL | 420   | >MEN1-S145 SLFRFITGTKL | 1152 | 732   |
| >MEN1-S145 SLFSFITGT   | 6     | >MEN1-S145 SLFRFITGT   | 6    | 0     |
| >MEN1-S145 SLFSFITGTK  | 497   | >MEN1-S145 SLFRFITGTK  | 584  | 87    |
| >MEN1-S145 SLFSFITGTKL | 3     | >MEN1-S145 SLFRFITGTKL | 3    | 0     |
| >MEN1-S145 SLFSFITGTK  | 11    | >MEN1-S145 SLFRFITGTK  | 13   | 2     |
| >MEN1-S145 SLFSFITGTK  | 15    | >MEN1-S145 SLFRFITGTK  | 27   | 12    |
| >MEN1-S145 SLFSFITGTK  | 209   | >MEN1-S145 SLFRFITGTK  | 80   | 129   |
| >MEN1-S145 SLFSFITGTKL | 128   | >MEN1-S145 SLFRFITGTKL | 122  | 6     |
| >MEN1-S145 SLFSFITGTK  | 48    | >MEN1-S145 SLFRFITGTK  | 263  | 215   |
| >MEN1-S145 SLFSFITGTKL | 109   | >MEN1-S145 SLFRFITGTKL | 186  | 77    |
| >MEN1-S145 SLFSFITGTKL | 134   | >MEN1-S145 SLFRFITGTKL | 335  | 201   |
| >MEN1-S145 SLFSFITGTK  | 229   | >MEN1-S145 SLFRFITGTK  | 219  | 10    |
| >MEN1-S145 QSLFSFITGTK | 257   | >MEN1-S145 QSLFRFITGTK | 224  | 33    |
| >MEN1-S145 QSLFSFITGTK | 31    | >MEN1-S145 QSLFRFITGTK | 43   | 12    |



|                        |       |                        |      |       |
|------------------------|-------|------------------------|------|-------|
| >MEN1-S145 QSLFSFITGTK | 49    | >MEN1-S145 QSLFRFITGTK | 57   | 8     |
| >MEN1-S145 QSLFSFITGTK | 130   | >MEN1-S145 QSLFRFITGTK | 248  | 118   |
| >MEN1-S145 QSLFSFITGTK | 110   | >MEN1-S145 QSLFRFITGTK | 113  | 3     |
| >MEN1-S145 IQSLFSFI    | 47    | >MEN1-S145 IQSLFRFI    | 354  | 307   |
| >MEN1-S145 IQSLFSFI    | 185   | >MEN1-S145 IQSLFRFI    | 1092 | 907   |
| >MEN1-S145 IQSLFSFI    | 21    | >MEN1-S145 IQSLFRFI    | 73   | 52    |
| >MEN1-S145 IQSLFSFITGT | 222   | >MEN1-S145 IQSLFRFITGT | 534  | 312   |
| >MEN1-S145 IQSLFSFI    | 59    | >MEN1-S145 IQSLFRFI    | 164  | 105   |
| >MEN1-S145 HIQSLFSFI   | 453   | >MEN1-S145 HIQSLFRFI   | 7347 | 6894  |
| >MEN1-S145 HIQSLFSFI   | 141   | >MEN1-S145 HIQSLFRFI   | 1111 | 970   |
| >MEN1-S145 HIQSLFSFI   | 176   | >MEN1-S145 HIQSLFRFI   | 1490 | 1314  |
| >MEN1-S145 HIQSLFSFI   | 143   | >MEN1-S145 HIQSLFRFI   | 1297 | 1154  |
| >MEN1-S145 HIQSLFSF    | 644   | >MEN1-S145 HIQSLFRF    | 433  | 211   |
| >MEN1-S145 HIQSLFSF    | 369   | >MEN1-S145 HIQSLFRF    | 870  | 501   |
| >MEN1-S145 HIQSLFSF    | 259   | >MEN1-S145 HIQSLFRF    | 958  | 699   |
| >MEN1-S145 HIQSLFSFI   | 86    | >MEN1-S145 HIQSLFRFI   | 801  | 715   |
| >MEN1-S145 HIQSLFSF    | 89    | >MEN1-S145 HIQSLFRF    | 475  | 386   |
| >MEN1-S145 HIQSLFSF    | 212   | >MEN1-S145 HIQSLFRF    | 1425 | 1213  |
| >MEN1-S145 HIQSLFSFI   | 195   | >MEN1-S145 HIQSLFRFI   | 4047 | 3852  |
| >MEN1-S145 HIQSLFSF    | 169   | >MEN1-S145 HIQSLFRF    | 646  | 477   |
| >MEN1-S145 AHIQSLFSFI  | 352   | >MEN1-S145 AHIQSLFRFI  | 3240 | 2888  |
| >MEN1-S145 AHIQSLFSFI  | 331   | >MEN1-S145 AHIQSLFRFI  | 365  | 34    |
| >MEN1-S145 AHIQSLFSF   | 295   | >MEN1-S145 AHIQSLFRF   | 128  | 167   |
| >MEN1-S145 AHIQSLFSF   | 272   | >MEN1-S145 AHIQSLFRF   | 538  | 266   |
| >MEN1-S145 AHIQSLFSF   | 10    | >MEN1-S145 AHIQSLFRF   | 67   | 57    |
| >MEN1-S145 AHIQSLFSFI  | 366   | >MEN1-S145 AHIQSLFRFI  | 1236 | 870   |
| >MEN1-S145 AHIQSLFSF   | 481   | >MEN1-S145 AHIQSLFRF   | 4036 | 3555  |
| >MEN1-S145 AHIQSLFSF   | 364   | >MEN1-S145 AHIQSLFRF   | 756  | 392   |
| >MEN1-S145 RAHIQSLFS   | 15020 | >MEN1-S145 RAHIQSLFR   | 392  | 14628 |
| >MEN1-S145 RAHIQSLFS   | 17544 | >MEN1-S145 RAHIQSLFR   | 225  | 17319 |
| >MEN1-S145 RAHIQSLFSF  | 308   | >MEN1-S145 RAHIQSLFRF  | 592  | 284   |
| >MEN1-S145 RAHIQSLFS   | 10    | >MEN1-S145 RAHIQSLFR   | 6    | 4     |
| >MEN1-S145 RAHIQSLFSF  | 129   | >MEN1-S145 RAHIQSLFRF  | 382  | 253   |
| >MEN1-S145 RAHIQSLFSFI | 6     | >MEN1-S145 RAHIQSLFRFI | 6    | 0     |
| >MEN1-S145 RAHIQSLFS   | 11207 | >MEN1-S145 RAHIQSLFR   | 12   | 11195 |
| >MEN1-S145 RAHIQSLFSF  | 381   | >MEN1-S145 RAHIQSLFRF  | 1899 | 1518  |
| >MEN1-S145 RAHIQSLFS   | 35663 | >MEN1-S145 RAHIQSLFR   | 356  | 35307 |
| >MEN1-S145 RAHIQSLFSF  | 94    | >MEN1-S145 RAHIQSLFRF  | 353  | 259   |
| >MEN1-S145 RAHIQSLFSF  | 21    | >MEN1-S145 RAHIQSLFRF  | 133  | 112   |
| >MEN1-S145 RAHIQSLFSF  | 3     | >MEN1-S145 RAHIQSLFRF  | 3    | 0     |
| >MEN1-S145 RAHIQSLFSFI | 48    | >MEN1-S145 RAHIQSLFRFI | 121  | 73    |
| >MEN1-S145 RAHIQSLFSF  | 148   | >MEN1-S145 RAHIQSLFRF  | 141  | 7     |
| >MEN1-S145 RAHIQSLFSF  | 35    | >MEN1-S145 RAHIQSLFRF  | 39   | 4     |

|                        |       |                        |       |       |
|------------------------|-------|------------------------|-------|-------|
| >MEN1-S145 RAHIQSLFSF  | 64    | >MEN1-S145 RAHIQSLFRF  | 138   | 74    |
| >MEN1-S145 RAHIQSLFS   | 23276 | >MEN1-S145 RAHIQSLFR   | 38    | 23238 |
| >MEN1-S145 RAHIQSLFSFI | 19    | >MEN1-S145 RAHIQSLFRFI | 29    | 10    |
| >MEN1-S145 DRAHIQSLFS  | 18780 | >MEN1-S145 DRAHIQSLFR  | 97    | 18683 |
| >MEN1-S145 DRAHIQSLFS  | 34644 | >MEN1-S145 DRAHIQSLFR  | 331   | 34313 |
| >MEN1-S145 DRAHIQSLFSI | 232   | >MEN1-S145 DRAHIQSLFR  | 943   | 711   |
| >MEN1-S178 SEDHAWVV    | 19    | >MEN1-S178 YEDHAWVV    | 14    | 5     |
| >MEN1-S178 SEDHAWVV    | 477   | >MEN1-S178 YEDHAWVV    | 90    | 387   |
| >MEN1-S178 SEDHAWVV    | 1784  | >MEN1-S178 YEDHAWVV    | 251   | 1533  |
| >MEN1-S178 SEDHAWVV    | 1133  | >MEN1-S178 YEDHAWVV    | 307   | 826   |
| >MEN1-S178 SEDHAWVVF   | 772   | >MEN1-S178 YEDHAWVVF   | 143   | 629   |
| >MEN1-S178 SEDHAWVV    | 3792  | >MEN1-S178 YEDHAWVV    | 482   | 3310  |
| >MEN1-S178 SEDHAWVVF   | 278   | >MEN1-S178 YEDHAWVVF   | 31    | 247   |
| >MEN1-S178 SEDHAWVV    | 1389  | >MEN1-S178 YEDHAWVV    | 256   | 1133  |
| >MEN1-S178 SEDHAWVVF   | 3315  | >MEN1-S178 YEDHAWVVF   | 494   | 2821  |
| >MEN1-S178 SEDHAWVV    | 88    | >MEN1-S178 YEDHAWVV    | 24    | 64    |
| >MEN1-S178 SEDHAWVVF   | 51    | >MEN1-S178 YEDHAWVVF   | 12    | 39    |
| >MEN1-S178 SEDHAWVVF   | 1111  | >MEN1-S178 YEDHAWVVF   | 250   | 861   |
| >MEN1-S178 SEDHAWVV    | 589   | >MEN1-S178 YEDHAWVV    | 350   | 239   |
| >MEN1-S178 SEDHAWVVF   | 447   | >MEN1-S178 YEDHAWVVF   | 316   | 131   |
| >MEN1-S178 SEDHAWVVF   | 411   | >MEN1-S178 YEDHAWVVF   | 2383  | 1972  |
| >MEN1-S178 SEDHAWVVF   | 70    | >MEN1-S178 YEDHAWVVF   | 165   | 95    |
| >MEN1-S178 SEDHAWVV    | 127   | >MEN1-S178 YEDHAWVV    | 1482  | 1355  |
| >MEN1-S178 SEDHAWVVF   | 248   | >MEN1-S178 YEDHAWVVF   | 1700  | 1452  |
| >MEN1-S178 SEDHAWVV    | 553   | >MEN1-S178 YEDHAWVV    | 63    | 490   |
| >MEN1-S178 SEDHAWVVF   | 1043  | >MEN1-S178 YEDHAWVVF   | 108   | 935   |
| >MEN1-S178 LSEDHAWVV   | 471   | >MEN1-S178 LYEDHAWVV   | 1479  | 1008  |
| >MEN1-S178 LSEDHAWVV   | 307   | >MEN1-S178 LYEDHAWVV   | 731   | 424   |
| >MEN1-S178 LSEDHAWV    | 719   | >MEN1-S178 LYEDHAWV    | 54    | 665   |
| >MEN1-S178 LSEDHAWVV   | 366   | >MEN1-S178 LYEDHAWVV   | 41    | 325   |
| >MEN1-S178 LSEDHAWVV   | 5179  | >MEN1-S178 LYEDHAWVV   | 22    | 5157  |
| >MEN1-S178 LSEDHAWVV   | 13959 | >MEN1-S178 LYEDHAWVV   | 90    | 13869 |
| >MEN1-S178 LSEDHAWVV   | 23089 | >MEN1-S178 LYEDHAWVV   | 302   | 22787 |
| >MEN1-S178 LSEDHAWVV   | 6869  | >MEN1-S178 LYEDHAWVV   | 11    | 6858  |
| >MEN1-S178 LSEDHAWVV   | 355   | >MEN1-S178 LYEDHAWVV   | 10319 | 9964  |
| >MEN1-S178 LSEDHAWVV   | 399   | >MEN1-S178 LYEDHAWVV   | 2662  | 2263  |
| >MEN1-S178 LSEDHAWVV   | 8     | >MEN1-S178 LYEDHAWVV   | 20876 | 20868 |
| >MEN1-S178 LSEDHAWVV   | 385   | >MEN1-S178 LYEDHAWVV   | 17890 | 17505 |
| >MEN1-S178 LSEDHAWVV   | 54    | >MEN1-S178 LYEDHAWVV   | 7255  | 7201  |
| >MEN1-S178 LSEDHAWVV   | 15472 | >MEN1-S178 LYEDHAWVV   | 255   | 15217 |
| >MEN1-S178 LGLRDVHLAL  | 24121 | >MEN1-S178 LGLRDVHLAL  | 270   | 23851 |
| >MEN1-S178 LGLRDVHLAL  | 28252 | >MEN1-S178 LGLRDVHLAL  | 281   | 27971 |
| >MEN1-S178 LGLRDVHLAL  | 22102 | >MEN1-S178 LGLRDVHLAL  | 420   | 21682 |

|                       |      |                       |     |      |
|-----------------------|------|-----------------------|-----|------|
| >MEN1-S178 ALSEDHAWV  | 22   | >MEN1-S178 ALYEDHAWV  | 11  | 11   |
| >MEN1-S178 ALSEDHAWV  | 53   | >MEN1-S178 ALYEDHAWV  | 13  | 40   |
| >MEN1-S178 ALSEDHAWV  | 4    | >MEN1-S178 ALYEDHAWV  | 5   | 1    |
| >MEN1-S178 ALSEDHAWV  | 22   | >MEN1-S178 ALYEDHAWV  | 13  | 9    |
| >MEN1-S178 ALSEDHAWV  | 4    | >MEN1-S178 ALYEDHAWV  | 3   | 1    |
| >MEN1-S178 ALSEDHAWV  | 103  | >MEN1-S178 ALYEDHAWV  | 34  | 69   |
| >MEN1-S178 ALSEDHAWV  | 25   | >MEN1-S178 ALYEDHAWV  | 9   | 16   |
| >MEN1-S178 ALSEDHAWV  | 397  | >MEN1-S178 ALYEDHAWV  | 114 | 283  |
| >MEN1-S178 ALSEDHAWV  | 1074 | >MEN1-S178 ALYEDHAWV  | 255 | 819  |
| >MEN1-S178 ALSEDHAW   | 5230 | >MEN1-S178 ALYEDHAW   | 417 | 4813 |
| >MEN1-S178 ALSEDHAWV  | 2    | >MEN1-S178 ALYEDHAWV  | 1   | 1    |
| >MEN1-S178 ALSEDHAWV  | 2    | >MEN1-S178 ALYEDHAWV  | 1   | 1    |
| >MEN1-S178 ALSEDHAWV  | 1049 | >MEN1-S178 ALYEDHAWV  | 50  | 999  |
| >MEN1-S178 ALSEDHAWV  | 11   | >MEN1-S178 ALYEDHAWV  | 5   | 6    |
| >MEN1-S178 ALSEDHAWV  | 4    | >MEN1-S178 ALYEDHAWV  | 3   | 1    |
| >MEN1-S178 ALSEDHAWV  | 6    | >MEN1-S178 ALYEDHAWV  | 4   | 2    |
| >MEN1-S178 ALSEDHAWV  | 5    | >MEN1-S178 ALYEDHAWV  | 4   | 1    |
| >MEN1-S178 ALSEDHAWV  | 4    | >MEN1-S178 ALYEDHAWV  | 4   | 0    |
| >MEN1-S178 ALSEDHAWV  | 3    | >MEN1-S178 ALYEDHAWV  | 3   | 0    |
| >MEN1-S178 ALSEDHAWV  | 1    | >MEN1-S178 ALYEDHAWV  | 1   | 0    |
| >MEN1-S178 ALSEDHAWV  | 1    | >MEN1-S178 ALYEDHAWV  | 1   | 0    |
| >MEN1-S178 ALSEDHAWV  | 630  | >MEN1-S178 ALYEDHAWV  | 194 | 436  |
| >MEN1-S178 ALSEDHAW   | 1481 | >MEN1-S178 ALYEDHAW   | 140 | 1341 |
| >MEN1-S178 ALSEDHAWV  | 1223 | >MEN1-S178 ALYEDHAWV  | 132 | 1091 |
| >MEN1-S178 ALSEDHAWV  | 1389 | >MEN1-S178 ALYEDHAWV  | 143 | 1246 |
| >MEN1-S178 ALSEDHAWV  | 896  | >MEN1-S178 ALYEDHAWV  | 108 | 788  |
| >MEN1-S178 ALSEDHAWV  | 68   | >MEN1-S178 ALYEDHAWV  | 44  | 24   |
| >MEN1-S178 ALSEDHAWV  | 613  | >MEN1-S178 ALYEDHAWV  | 79  | 534  |
| >MEN1-S178 ALSEDHAWV  | 47   | >MEN1-S178 ALYEDHAWV  | 10  | 37   |
| >MEN1-S178 ALSEDHAW   | 594  | >MEN1-S178 ALYEDHAW   | 47  | 547  |
| >MEN1-S178 ALSEDHAWV  | 1300 | >MEN1-S178 ALYEDHAWV  | 76  | 1224 |
| >MEN1-S178 ALSEDHAW   | 1366 | >MEN1-S178 ALYEDHAW   | 411 | 955  |
| >MEN1-S178 LALSEDHAW' | 579  | >MEN1-S178 LALYEDHAW' | 488 | 91   |
| >MEN1-S178 LALSEDHAW' | 424  | >MEN1-S178 LALYEDHAW' | 723 | 299  |
| >MEN1-S178 LALSEDHAW' | 149  | >MEN1-S178 LALYEDHAW' | 130 | 19   |
| >MEN1-S178 LALSEDHAW' | 76   | >MEN1-S178 LALYEDHAW' | 71  | 5    |
| >MEN1-S178 LALSEDHAW' | 93   | >MEN1-S178 LALYEDHAW' | 358 | 265  |
| >MEN1-S178 LALSEDHAW' | 51   | >MEN1-S178 LALYEDHAW' | 191 | 140  |
| >MEN1-S178 LALSEDHAW' | 218  | >MEN1-S178 LALYEDHAW' | 251 | 33   |
| >MEN1-S178 LALSEDHAW' | 217  | >MEN1-S178 LALYEDHAW' | 727 | 510  |
| >MEN1-S178 LALSEDHAW' | 266  | >MEN1-S178 LALYEDHAW' | 857 | 591  |
| >MEN1-S178 LALSEDHAW' | 30   | >MEN1-S178 LALYEDHAW' | 130 | 100  |
| >MEN1-S178 LALSEDHAW' | 34   | >MEN1-S178 LALYEDHAW' | 137 | 103  |

|                       |       |                       |      |       |
|-----------------------|-------|-----------------------|------|-------|
| >MEN1-S178 LALSEDHAW' | 369   | >MEN1-S178 LALYEDHAW' | 590  | 221   |
| >MEN1-S178 LALSEDHAW' | 225   | >MEN1-S178 LALYEDHAW' | 378  | 153   |
| >MEN1-S178 LALSEDHAW  | 18    | >MEN1-S178 LALYEDHAW  | 35   | 17    |
| >MEN1-S178 LALSEDHAW  | 73    | >MEN1-S178 LALYEDHAW  | 76   | 3     |
| >MEN1-S178 LALSEDHAW  | 14    | >MEN1-S178 LALYEDHAW  | 17   | 3     |
| >MEN1-S178 LALSEDHAW  | 60    | >MEN1-S178 LALYEDHAW  | 61   | 1     |
| >MEN1-S178 LALSEDHAW  | 13    | >MEN1-S178 LALYEDHAW  | 13   | 0     |
| >MEN1-S178 LALSEDHAW  | 12    | >MEN1-S178 LALYEDHAW  | 11   | 1     |
| >MEN1-S178 LALSEDHAW  | 76    | >MEN1-S178 LALYEDHAW  | 55   | 21    |
| >MEN1-S178 HLALSEDHAV | 207   | >MEN1-S178 HLALYEDHAV | 56   | 151   |
| >MEN1-S178 HLALSEDHA  | 160   | >MEN1-S178 HLALYEDHA  | 48   | 112   |
| >MEN1-S178 HLALSEDHAV | 9     | >MEN1-S178 HLALYEDHAV | 6    | 3     |
| >MEN1-S178 HLALSEDHAV | 26    | >MEN1-S178 HLALYEDHAV | 19   | 7     |
| >MEN1-S178 HLALSEDHAV | 286   | >MEN1-S178 HLALYEDHAV | 156  | 130   |
| >MEN1-S178 HLALSEDHAV | 38    | >MEN1-S178 HLALYEDHAV | 16   | 22    |
| >MEN1-S178 HLALSEDHAV | 75    | >MEN1-S178 HLALYEDHAV | 54   | 21    |
| >MEN1-S178 HLALSEDHAV | 16    | >MEN1-S178 HLALYEDHAV | 15   | 1     |
| >MEN1-S178 HLALSEDHAV | 24    | >MEN1-S178 HLALYEDHAV | 20   | 4     |
| >MEN1-S178 HLALSEDHAV | 5     | >MEN1-S178 HLALYEDHAV | 4    | 1     |
| >MEN1-S178 HLALSEDHAV | 237   | >MEN1-S178 HLALYEDHAV | 206  | 31    |
| >MEN1-S178 HLALSEDHAV | 202   | >MEN1-S178 HLALYEDHAV | 259  | 57    |
| >MEN1-S178 HLALSEDHAV | 306   | >MEN1-S178 HLALYEDHAV | 152  | 154   |
| >MEN1-S178 VHLALSEDHA | 463   | >MEN1-S178 VHLALYEDHA | 182  | 281   |
| >MEN1-S178 VHLALSEDHA | 32    | >MEN1-S178 VHLALYEDHA | 34   | 2     |
| >MEN1-S178 RDVHLALS   | 24376 | >MEN1-S178 RDVHLALY   | 401  | 23975 |
| >MEN1-S178 RDVHLALS   | 26479 | >MEN1-S178 RDVHLALY   | 339  | 26140 |
| >MEN1-S178 GLRDVHLALS | 33232 | >MEN1-S178 GLRDVHLALY | 457  | 32775 |
| >MEN1-S178 GLRDVHLALS | 12619 | >MEN1-S178 GLRDVHLALY | 425  | 12194 |
| >MEN1-S178 GLRDVHLALS | 24257 | >MEN1-S178 GLRDVHLALY | 127  | 24130 |
| >MEN1-S178 GLRDVHLALS | 13571 | >MEN1-S178 GLRDVHLALY | 99   | 13472 |
| >MEN1-S178 GLRDVHLALS | 26808 | >MEN1-S178 GLRDVHLALY | 385  | 26423 |
| >MEN1-S178 GLRDVHLALS | 26989 | >MEN1-S178 GLRDVHLALY | 428  | 26561 |
| >MEN1-S253 SLELLQLQQK | 262   | >MEN1-S253 LLELLQLQQK | 412  | 150   |
| >MEN1-S253 SLELLQLQQK | 20    | >MEN1-S253 LLELLQLQQK | 15   | 5     |
| >MEN1-S253 SLELLQLQQK | 441   | >MEN1-S253 LLELLQLQQK | 811  | 370   |
| >MEN1-S253 SLELLQLQQK | 230   | >MEN1-S253 LLELLQLQQK | 1355 | 1125  |
| >MEN1-S253 DSLELLQL   | 13160 | >MEN1-S253 DLLELLQL   | 23   | 13137 |
| >MEN1-S253 DSLELLQL   | 21482 | >MEN1-S253 DLLELLQL   | 233  | 21249 |
| >MEN1-S253 DSLELLQL   | 14624 | >MEN1-S253 DLLELLQL   | 35   | 14589 |
| >MEN1-S253 DSLELLQL   | 17282 | >MEN1-S253 DLLELLQL   | 18   | 17264 |
| >MEN1-S253 DSLELLQL   | 26607 | >MEN1-S253 DLLELLQL   | 23   | 26584 |
| >MEN1-S253 DSLELLQL   | 135   | >MEN1-S253 DLLELLQL   | 80   | 55    |
| >MEN1-S253 TDSLELLQL  | 85    | >MEN1-S253 TDLELLQL   | 61   | 24    |

|                        |       |                        |       |       |
|------------------------|-------|------------------------|-------|-------|
| >MEN1-S253 TDSLELLQL   | 366   | >MEN1-S253 TDLELLQL    | 183   | 183   |
| >MEN1-S253 HTDSLELL    | 282   | >MEN1-S253 HTDLELL     | 333   | 51    |
| >MEN1-S253 HTDSLELLQ   | 174   | >MEN1-S253 HTDLELLQ    | 213   | 39    |
| >MEN1-S253 HTDSLELL    | 496   | >MEN1-S253 HTDLELL     | 1273  | 777   |
| >MEN1-S253 HTDSLELLQL  | 393   | >MEN1-S253 HTDLELLQL   | 1161  | 768   |
| >MEN1-S253 HTDSLELL    | 219   | >MEN1-S253 HTDLELL     | 319   | 100   |
| >MEN1-S253 HTDSLELLQL  | 36    | >MEN1-S253 HTDLELLQL   | 32    | 4     |
| >MEN1-S253 LHTDSLELL   | 102   | >MEN1-S253 LHTDLELL    | 212   | 110   |
| >MEN1-S253 DLHTDSLELL  | 97    | >MEN1-S253 DLHTDLELL   | 76    | 21    |
| >MEN1-S253 DLHTDSLEL   | 212   | >MEN1-S253 DLHTDLEL    | 108   | 104   |
| >MEN1-S253 DLHTDSLELL  | 168   | >MEN1-S253 DLHTDLELL   | 148   | 20    |
| >MEN1-S253 IDLHTDSL    | 306   | >MEN1-S253 IDLHTDLL    | 103   | 203   |
| >MEN1-S253 IDLHTDSLEL  | 286   | >MEN1-S253 IDLHTDLEL   | 300   | 14    |
| >MEN1-S253 IDLHTDSLELL | 105   | >MEN1-S253 IDLHTDLELL  | 115   | 10    |
| >MEN1-S253 SIDLHTDSLEL | 763   | >MEN1-S253 SIDLHTDLEL  | 392   | 371   |
| >MEN1-S253 SIDLHTDSL   | 195   | >MEN1-S253 SIDLHTDLL   | 106   | 89    |
| >MEN1-S253 SIDLHTDSLEL | 556   | >MEN1-S253 SIDLHTDLEL  | 379   | 177   |
| >MEN1-S253 SIDLHTDSLEL | 615   | >MEN1-S253 SIDLHTDLEL  | 327   | 288   |
| >MEN1-S253 NPSIDLHTDS  | 10959 | >MEN1-S253 NPSIDLHTDL  | 324   | 10635 |
| >MEN1-S253 NPSIDLHTDSI | 62    | >MEN1-S253 NPSIDLHTDLI | 494   | 432   |
| >MEN1-S253 NPSIDLHTDSI | 155   | >MEN1-S253 NPSIDLHTDLI | 469   | 314   |
| >MEN1-S253 NPSIDLHTDSI | 259   | >MEN1-S253 NPSIDLHTDLI | 192   | 67    |
| >MEN1-S443 SLGRFEGQV   | 238   | >MEN1-S443 PLGRFEGQV   | 4767  | 4529  |
| >MEN1-S443 SLGRFEGQV   | 271   | >MEN1-S443 PLGRFEGQV   | 7913  | 7642  |
| >MEN1-S443 SLGRFEGQV   | 6     | >MEN1-S443 PLGRFEGQV   | 101   | 95    |
| >MEN1-S443 SLGRFEGQV   | 204   | >MEN1-S443 PLGRFEGQV   | 7146  | 6942  |
| >MEN1-S443 SLGRFEGQV   | 16    | >MEN1-S443 PLGRFEGQV   | 336   | 320   |
| >MEN1-S443 SLGRFEGQ    | 460   | >MEN1-S443 PLGRFEGQ    | 7102  | 6642  |
| >MEN1-S443 SLGRFEGQV   | 3     | >MEN1-S443 PLGRFEGQV   | 19    | 16    |
| >MEN1-S443 SLGRFEGQVF  | 169   | >MEN1-S443 PLGRFEGQVF  | 2955  | 2786  |
| >MEN1-S443 SLGRFEGQVF  | 245   | >MEN1-S443 PLGRFEGQVF  | 2958  | 2713  |
| >MEN1-S443 QSLGRFEGQ\  | 473   | >MEN1-S443 QPLGRFEGQ\  | 10366 | 9893  |
| >MEN1-S443 VQSLGRFEGC  | 337   | >MEN1-S443 VQPLGRFEGC  | 392   | 55    |
| >MEN1-S443 LVQSLGRF    | 175   | >MEN1-S443 LVQPLGRF    | 201   | 26    |
| >MEN1-S443 LVQSLGRF    | 423   | >MEN1-S443 LVQPLGRF    | 84    | 339   |
| >MEN1-S443 FLVQSLGRF   | 370   | >MEN1-S443 FLVQPLGRF   | 1212  | 842   |
| >MEN1-S443 FLVQSLGRFEI | 243   | >MEN1-S443 FLVQPLGRFEI | 627   | 384   |
| >MEN1-S443 FLVQSLGRF   | 313   | >MEN1-S443 FLVQPLGRF   | 1293  | 980   |
| >MEN1-S443 FLVQSLGRF   | 388   | >MEN1-S443 FLVQPLGRF   | 975   | 587   |
| >MEN1-S443 FLVQSLGRF   | 710   | >MEN1-S443 FLVQPLGRF   | 217   | 493   |
| >MEN1-S443 FLVQSLGRFEI | 325   | >MEN1-S443 FLVQPLGRFEI | 441   | 116   |
| >MEN1-S443 FLVQSLGRF   | 170   | >MEN1-S443 FLVQPLGRF   | 307   | 137   |
| >MEN1-S443 FLVQSLGRF   | 54    | >MEN1-S443 FLVQPLGRF   | 40    | 14    |

|                       |     |                       |      |      |
|-----------------------|-----|-----------------------|------|------|
| >MEN1-S443 FLVQSLGR   | 105 | >MEN1-S443 FLVQPLGR   | 233  | 128  |
| >MEN1-S443 FLVQSLGRF  | 71  | >MEN1-S443 FLVQPLGRF  | 151  | 80   |
| >MEN1-S443 FLVQSLGRF  | 72  | >MEN1-S443 FLVQPLGRF  | 47   | 25   |
| >MEN1-S443 FLVQSLGRF  | 273 | >MEN1-S443 FLVQPLGRF  | 800  | 527  |
| >MEN1-S443 FLVQSLGRF  | 51  | >MEN1-S443 FLVQPLGRF  | 120  | 69   |
| >MEN1-S443 FLVQSLGRF  | 458 | >MEN1-S443 FLVQPLGRF  | 231  | 227  |
| >MEN1-S443 FLVQSLGR   | 359 | >MEN1-S443 FLVQPLGR   | 323  | 36   |
| >MEN1-S443 TFLVQSLGRF | 21  | >MEN1-S443 TFLVQPLGRF | 28   | 7    |
| >MEN1-S443 TFLVQSLGR  | 197 | >MEN1-S443 TFLVQPLGR  | 261  | 64   |
| >MEN1-S443 TFLVQSLGR  | 481 | >MEN1-S443 TFLVQPLGR  | 572  | 91   |
| >MEN1-S443 TFLVQSLGR  | 77  | >MEN1-S443 TFLVQPLGR  | 53   | 24   |
| >MEN1-S443 ATFLVQSL   | 201 | >MEN1-S443 ATFLVQPL   | 75   | 126  |
| >MEN1-S443 ATFLVQSL   | 228 | >MEN1-S443 ATFLVQPL   | 191  | 37   |
| >MEN1-S443 ATFLVQSL   | 523 | >MEN1-S443 ATFLVQPL   | 262  | 261  |
| >MEN1-S443 ATFLVQSL   | 286 | >MEN1-S443 ATFLVQPL   | 214  | 72   |
| >MEN1-S443 ATFLVQSLGR | 139 | >MEN1-S443 ATFLVQPLGR | 253  | 114  |
| >MEN1-S443 ATFLVQSLGR | 28  | >MEN1-S443 ATFLVQPLGR | 35   | 7    |
| >MEN1-S443 ATFLVQSLGR | 434 | >MEN1-S443 ATFLVQPLGR | 365  | 69   |
| >MEN1-S443 ATFLVQSL   | 855 | >MEN1-S443 ATFLVQPL   | 334  | 521  |
| >MEN1-S443 ATFLVQSLGR | 51  | >MEN1-S443 ATFLVQPLGR | 64   | 13   |
| >MEN1-S443 ATFLVQSL   | 26  | >MEN1-S443 ATFLVQPL   | 22   | 4    |
| >MEN1-S443 ATFLVQSLGR | 215 | >MEN1-S443 ATFLVQPLGR | 167  | 48   |
| >MEN1-S443 ATFLVQSLGR | 11  | >MEN1-S443 ATFLVQPLGR | 19   | 8    |
| >MEN1-S443 ATFLVQSL   | 280 | >MEN1-S443 ATFLVQPL   | 114  | 166  |
| >MEN1-S443 ATFLVQSL   | 417 | >MEN1-S443 ATFLVQPL   | 443  | 26   |
| >MEN1-S443 ATFLVQSLGR | 399 | >MEN1-S443 ATFLVQPLGR | 825  | 426  |
| >MEN1-S443 ATFLVQSL   | 11  | >MEN1-S443 ATFLVQPL   | 11   | 0    |
| >MEN1-S443 ATFLVQSLGR | 4   | >MEN1-S443 ATFLVQPLGR | 5    | 1    |
| >MEN1-S443 ATFLVQSLGR | 435 | >MEN1-S443 ATFLVQPLGR | 550  | 115  |
| >MEN1-S443 ATFLVQSLG  | 85  | >MEN1-S443 ATFLVQPLG  | 3019 | 2934 |
| >MEN1-S443 ATFLVQSLGR | 5   | >MEN1-S443 ATFLVQPLGR | 7    | 2    |
| >MEN1-S443 ATFLVQSLGR | 115 | >MEN1-S443 ATFLVQPLGR | 78   | 37   |
| >MEN1-S443 ATFLVQSL   | 127 | >MEN1-S443 ATFLVQPL   | 298  | 171  |
| >MEN1-S443 WATFLVQSLC | 92  | >MEN1-S443 WATFLVQPLC | 136  | 44   |
| >MEN1-S443 WATFLVQSL  | 286 | >MEN1-S443 WATFLVQPL  | 63   | 223  |
| >MEN1-S443 WATFLVQSL  | 497 | >MEN1-S443 WATFLVQPL  | 442  | 55   |
| >MEN1-S443 WATFLVQSL  | 576 | >MEN1-S443 WATFLVQPL  | 124  | 452  |
| >MEN1-S443 WATFLVQSL  | 477 | >MEN1-S443 WATFLVQPL  | 1766 | 1289 |
| >MEN1-S443 WATFLVQSLC | 735 | >MEN1-S443 WATFLVQPLC | 489  | 246  |
| >MEN1-S443 GWATFLVQSL | 359 | >MEN1-S443 GWATFLVQPL | 1056 | 697  |
| >MEN1-S443 GWATFLVQSL | 793 | >MEN1-S443 GWATFLVQPL | 433  | 360  |
| >MEN1-S543 SPPPEGPVL  | 273 | >MEN1-S543 LPPPEGPVL  | 392  | 119  |
| >MEN1-S543 SPPPEGPVLT | 188 | >MEN1-S543 LPPPEGPVLT | 291  | 103  |

|                       |       |                       |       |       |
|-----------------------|-------|-----------------------|-------|-------|
| >MEN1-S543 SPPPEGPVL  | 255   | >MEN1-S543 LPPPEGPVL  | 293   | 38    |
| >MEN1-S543 SPPPEGPVLT | 162   | >MEN1-S543 LPPPEGPVLT | 186   | 24    |
| >MEN1-S543 SPPPEGPV   | 477   | >MEN1-S543 LPPPEGPV   | 700   | 223   |
| >MEN1-S543 SPPPEGPVL  | 321   | >MEN1-S543 LPPPEGPVL  | 468   | 147   |
| >MEN1-S543 SPPPEGPVLT | 178   | >MEN1-S543 LPPPEGPVLT | 39    | 139   |
| >MEN1-S543 SPPPEGPVLT | 1277  | >MEN1-S543 LPPPEGPVLT | 131   | 1146  |
| >MEN1-S543 SPPPEGPV   | 3015  | >MEN1-S543 LPPPEGPV   | 95    | 2920  |
| >MEN1-S543 SPPPEGPVL  | 44    | >MEN1-S543 LPPPEGPVL  | 48    | 4     |
| >MEN1-S543 SPPPEGPVLT | 64    | >MEN1-S543 LPPPEGPVLT | 60    | 4     |
| >MEN1-S543 SPPPEGPVLT | 1432  | >MEN1-S543 LPPPEGPVLT | 181   | 1251  |
| >MEN1-S543 ASPPPEGPV  | 12095 | >MEN1-S543 ALPPPEGPV  | 39    | 12056 |
| >MEN1-S543 ASPPPEGPV  | 6598  | >MEN1-S543 ALPPPEGPV  | 6     | 6592  |
| >MEN1-S543 ASPPPEGPVL | 15743 | >MEN1-S543 ALPPPEGPVL | 48    | 15695 |
| >MEN1-S543 ASPPPEGPVL | 23954 | >MEN1-S543 ALPPPEGPVL | 494   | 23460 |
| >MEN1-S543 ASPPPEGPV  | 21216 | >MEN1-S543 ALPPPEGPV  | 114   | 21102 |
| >MEN1-S543 ASPPPEGPV  | 12526 | >MEN1-S543 ALPPPEGPV  | 36    | 12490 |
| >MEN1-S543 ASPPPEGPVL | 17889 | >MEN1-S543 ALPPPEGPVL | 85    | 17804 |
| >MEN1-S543 ASPPPEGPV  | 10562 | >MEN1-S543 ALPPPEGPV  | 4     | 10558 |
| >MEN1-S543 ASPPPEGPVL | 15484 | >MEN1-S543 ALPPPEGPVL | 13    | 15471 |
| >MEN1-S543 ASPPPEGPVL | 30240 | >MEN1-S543 ALPPPEGPVL | 101   | 30139 |
| >MEN1-S543 ASPPPEGPV  | 392   | >MEN1-S543 ALPPPEGPV  | 1265  | 873   |
| >MEN1-S543 ASPPPEGPVL | 339   | >MEN1-S543 ALPPPEGPVL | 10795 | 10456 |
| >MEN1-S543 ASPPPEGPV  | 135   | >MEN1-S543 ALPPPEGPV  | 5750  | 5615  |
| >MEN1-S543 ASPPPEGPVL | 6     | >MEN1-S543 ALPPPEGPVL | 119   | 113   |
| >MEN1-S543 STAQVPAPTA | 11351 | >MEN1-S543 STAQVPAPTA | 122   | 11229 |
| >MEN1-S543 STAQVPAPTA | 7849  | >MEN1-S543 STAQVPAPTA | 347   | 7502  |
| >MEN1-S543 STAQVPAPTA | 12326 | >MEN1-S543 STAQVPAPTA | 363   | 11963 |
| >MEN1-S543 STAQVPAPTA | 8324  | >MEN1-S543 STAQVPAPTA | 120   | 8204  |
| >MEN1-S543 STAQVPAPTA | 328   | >MEN1-S543 STAQVPAPTA | 18    | 310   |
| >MEN1-S543 STAQVPAPTA | 6766  | >MEN1-S543 STAQVPAPTA | 141   | 6625  |
| >MEN1-S543 STAQVPAPTA | 10400 | >MEN1-S543 STAQVPAPTA | 35    | 10365 |
| >MEN1-S543 STAQVPAPTA | 12064 | >MEN1-S543 STAQVPAPTA | 133   | 11931 |
| >MEN1-S543 STAQVPAPTA | 2974  | >MEN1-S543 STAQVPAPTA | 85    | 2889  |
| >MEN1-S543 STAQVPAPTA | 12763 | >MEN1-S543 STAQVPAPTA | 88    | 12675 |
| >MEN1-S543 TASPPPEGPV | 2270  | >MEN1-S543 TALPPPEGPV | 263   | 2007  |
| >MEN1-S543 TASPPPEGPV | 125   | >MEN1-S543 TALPPPEGPV | 535   | 410   |
| >MEN1-S543 TASPPPEGPV | 131   | >MEN1-S543 TALPPPEGPV | 18    | 113   |
| >MEN1-S543 TASPPPEGPV | 3308  | >MEN1-S543 TALPPPEGPV | 407   | 2901  |
| >MEN1-S543 TASPPPEGPV | 252   | >MEN1-S543 TALPPPEGPV | 86    | 166   |
| >MEN1-S543 PTASPPPEGP | 145   | >MEN1-S543 PTALPPPEGP | 287   | 142   |
| >MEN1-S543 PTASPPPEGP | 151   | >MEN1-S543 PTALPPPEGP | 407   | 256   |
| >MEN1-S543 QVPAPTAS   | 857   | >MEN1-S543 QVPAPTAL   | 42    | 815   |
| >MEN1-S543 QVPAPTAS   | 27293 | >MEN1-S543 QVPAPTAL   | 39    | 27254 |

|                        |       |                        |      |       |
|------------------------|-------|------------------------|------|-------|
| >MEN1-S543 QVPAPTASP   | 5028  | >MEN1-S543 QVPAPTALP   | 492  | 4536  |
| >MEN1-S543 AQVPAPTAS   | 14598 | >MEN1-S543 AQVPAPTAL   | 301  | 14297 |
| >MEN1-S543 AQVPAPTAS   | 4524  | >MEN1-S543 AQVPAPTAL   | 131  | 4393  |
| >MEN1-S543 AQVPAPTAS   | 477   | >MEN1-S543 AQVPAPTAL   | 18   | 459   |
| >MEN1-S543 AQVPAPTAS   | 3636  | >MEN1-S543 AQVPAPTAL   | 144  | 3492  |
| >MEN1-S543 AQVPAPTAS   | 321   | >MEN1-S543 AQVPAPTAL   | 9    | 312   |
| >MEN1-S543 AQVPAPTASF  | 265   | >MEN1-S543 AQVPAPTALF  | 399  | 134   |
| >MEN1-S543 AQVPAPTAS   | 14034 | >MEN1-S543 AQVPAPTAL   | 24   | 14010 |
| >MEN1-S543 AQVPAPTAS   | 11580 | >MEN1-S543 AQVPAPTAL   | 154  | 11426 |
| >MEN1-S543 TAQVPAPTAS  | 19309 | >MEN1-S543 TAQVPAPTAL  | 487  | 18822 |
| >MEN1-T552 LTFQSEKMKC  | 723   | >MEN1-T552 LSFQSEKMKC  | 454  | 269   |
| >MEN1-T552 LTFQSEKMK   | 104   | >MEN1-T552 LSFQSEKMK   | 263  | 159   |
| >MEN1-T552 LTFQSEKMKC  | 118   | >MEN1-T552 LSFQSEKMKC  | 1305 | 1187  |
| >MEN1-T552 LTFQSEKMK   | 16    | >MEN1-T552 LSFQSEKMK   | 72   | 56    |
| >MEN1-T552 LTFQSEKM    | 350   | >MEN1-T552 LSFQSEKM    | 90   | 260   |
| >MEN1-T552 LTFQSEKMKC  | 498   | >MEN1-T552 LSFQSEKMKC  | 146  | 352   |
| >MEN1-T552 LTFQSEKM    | 6     | >MEN1-T552 LSFQSEKM    | 7    | 1     |
| >MEN1-T552 LTFQSEKMKC  | 4     | >MEN1-T552 LSFQSEKMKC  | 5    | 1     |
| >MEN1-T552 LTFQSEKM    | 277   | >MEN1-T552 LSFQSEKM    | 261  | 16    |
| >MEN1-T552 LTFQSEKMKC  | 524   | >MEN1-T552 LSFQSEKMKC  | 487  | 37    |
| >MEN1-T552 LTFQSEKM    | 356   | >MEN1-T552 LSFQSEKM    | 171  | 185   |
| >MEN1-T552 LTFQSEKMKC  | 29    | >MEN1-T552 LSFQSEKMKC  | 73   | 44    |
| >MEN1-T552 LTFQSEKMK   | 321   | >MEN1-T552 LSFQSEKMK   | 416  | 95    |
| >MEN1-T552 LTFQSEKM    | 158   | >MEN1-T552 LSFQSEKM    | 159  | 1     |
| >MEN1-T552 LTFQSEKMKC  | 517   | >MEN1-T552 LSFQSEKMKC  | 470  | 47    |
| >MEN1-T552 ASPPPEGPVL  | 643   | >MEN1-T552 ASPPPEGPVL  | 432  | 211   |
| >MEN1-T552 VLTFQSEKM   | 661   | >MEN1-T552 VLSFQSEKM   | 116  | 545   |
| >MEN1-T552 VLTFQSEKM   | 1607  | >MEN1-T552 VLSFQSEKM   | 456  | 1151  |
| >MEN1-T552 VLTFQSEKM   | 364   | >MEN1-T552 VLSFQSEKM   | 484  | 120   |
| >MEN1-T552 VLTFQSEK    | 134   | >MEN1-T552 VLSFQSEK    | 63   | 71    |
| >MEN1-T552 VLTFQSEKMK  | 237   | >MEN1-T552 VLSFQSEKMK  | 95   | 142   |
| >MEN1-T552 VLTFQSEK    | 186   | >MEN1-T552 VLSFQSEK    | 67   | 119   |
| >MEN1-T552 VLTFQSEKMK  | 417   | >MEN1-T552 VLSFQSEKMK  | 159  | 258   |
| >MEN1-T552 PVLTFQSEK   | 511   | >MEN1-T552 PVLSFQSEK   | 405  | 106   |
| >MEN1-T552 PEGPVLTF    | 377   | >MEN1-T552 PEGPVLSF    | 460  | 83    |
| >MEN1-T552 PPEGPVLTF   | 393   | >MEN1-T552 PPEGPVLSF   | 904  | 511   |
| >MEN1-T552 PPEGPVLTF   | 127   | >MEN1-T552 PPEGPVLSF   | 192  | 65    |
| >MEN1-T552 PPEGPVLTF   | 109   | >MEN1-T552 PPEGPVLSF   | 234  | 125   |
| >MEN1-T552 PPPEGPVLTF  | 205   | >MEN1-T552 PPPEGPVLSF  | 152  | 53    |
| >MEN1-T552 SPPPEGPVLSI | 188   | >MEN1-T552 SPPPEGPVLSI | 405  | 217   |
| >MEN1-T552 SPPPEGPVLSI | 162   | >MEN1-T552 SPPPEGPVLSI | 113  | 49    |
| >MEN1-T552 SPPPEGPVLSI | 1229  | >MEN1-T552 SPPPEGPVLSI | 349  | 880   |
| >MEN1-T552 SPPPEGPVLSI | 178   | >MEN1-T552 SPPPEGPVLSI | 315  | 137   |



|                        |       |                        |       |       |
|------------------------|-------|------------------------|-------|-------|
| >MEN1-T552 SPPPEGPVLSI | 64    | >MEN1-T552 SPPPEGPVLSI | 94    | 30    |
| >MEN1-T580 TAQSQVQMI   | 784   | >MEN1-T580 RAQSQVQMI   | 166   | 618   |
| >MEN1-T580 TAQSQVQMI   | 151   | >MEN1-T580 RAQSQVQMI   | 144   | 7     |
| >MEN1-T580 TAQSQVQMI   | 37    | >MEN1-T580 RAQSQVQMI   | 41    | 4     |
| >MEN1-T580 TAQSQVQMI   | 2756  | >MEN1-T580 RAQSQVQMI   | 33    | 2723  |
| >MEN1-T580 TAQSQVQMI   | 2008  | >MEN1-T580 RAQSQVQMI   | 28    | 1980  |
| >MEN1-T580 TAQSQVQMI   | 4435  | >MEN1-T580 RAQSQVQMI   | 487   | 3948  |
| >MEN1-T580 TAQSQVQMI   | 409   | >MEN1-T580 RAQSQVQMI   | 5720  | 5311  |
| >MEN1-T580 TAQSQVQMI   | 391   | >MEN1-T580 RAQSQVQMI   | 2966  | 2575  |
| >MEN1-T580 TAQSQVQM    | 551   | >MEN1-T580 RAQSQVQM    | 16    | 535   |
| >MEN1-T580 TAQSQVQM    | 4346  | >MEN1-T580 RAQSQVQM    | 159   | 4187  |
| >MEN1-T580 LTAQSQVQM   | 85    | >MEN1-T580 LRAQSQVQM   | 17233 | 17148 |
| >MEN1-T580 LTAQSQVQM   | 77    | >MEN1-T580 LRAQSQVQM   | 11588 | 11511 |
| >MEN1-T580 LTAQSQVQM   | 36    | >MEN1-T580 LRAQSQVQM   | 18091 | 18055 |
| >MEN1-T580 LTAQSQVQM   | 98    | >MEN1-T580 LRAQSQVQM   | 12296 | 12198 |
| >MEN1-T580 LTAQSQVQM   | 13    | >MEN1-T580 LRAQSQVQM   | 3505  | 3492  |
| >MEN1-T580 LTAQSQVQM   | 407   | >MEN1-T580 LRAQSQVQM   | 13712 | 13305 |
| >MEN1-T580 LTAQSQVQM   | 784   | >MEN1-T580 LRAQSQVQM   | 105   | 679   |
| >MEN1-T580 LTAQSQVQM   | 5     | >MEN1-T580 LRAQSQVQM   | 18853 | 18848 |
| >MEN1-T580 LTAQSQVQM   | 20129 | >MEN1-T580 LRAQSQVQM   | 81    | 20048 |
| >MEN1-T580 LTAQSQVQM   | 28353 | >MEN1-T580 LRAQSQVQM   | 237   | 28116 |
| >MEN1-T580 LTAQSQVQM   | 20972 | >MEN1-T580 LRAQSQVQM   | 88    | 20884 |
| >MEN1-T580 LTAQSQVQM   | 30    | >MEN1-T580 LRAQSQVQM   | 16578 | 16548 |
| >MEN1-T580 LTAQSQVQM   | 195   | >MEN1-T580 LRAQSQVQM   | 33938 | 33743 |
| >MEN1-T580 LTAQSQVQM   | 32    | >MEN1-T580 LRAQSQVQM   | 6097  | 6065  |
| >MEN1-T580 LTAQSQVQM   | 462   | >MEN1-T580 LRAQSQVQM   | 14345 | 13883 |
| >MEN1-T580 LTAQSQVQM   | 271   | >MEN1-T580 LRAQSQVQM   | 11196 | 10925 |
| >MEN1-T580 LTAQSQVQM   | 268   | >MEN1-T580 LRAQSQVQM   | 14449 | 14181 |
| >MEN1-T580 QLTAQSQV    | 31    | >MEN1-T580 QLRAQSQV    | 234   | 203   |
| >MEN1-T580 QLTAQSQV    | 35    | >MEN1-T580 QLRAQSQV    | 27    | 8     |
| >MEN1-T580 QLTAQSQV    | 34    | >MEN1-T580 QLRAQSQV    | 138   | 104   |
| >MEN1-T580 QLTAQSQV    | 156   | >MEN1-T580 QLRAQSQV    | 1276  | 1120  |
| >MEN1-T580 QLTAQSQV    | 25    | >MEN1-T580 QLRAQSQV    | 498   | 473   |
| >MEN1-T580 QLTAQSQV    | 42    | >MEN1-T580 QLRAQSQV    | 1226  | 1184  |
| >MEN1-T580 QLTAQSQV    | 3     | >MEN1-T580 QLRAQSQV    | 4     | 1     |
| >MEN1-T580 QLTAQSQVQ   | 129   | >MEN1-T580 QLRAQSQVQ   | 624   | 495   |
| >MEN1-T580 QLTAQSQVQ   | 443   | >MEN1-T580 QLRAQSQVQ   | 131   | 312   |
| >MEN1-T580 QLTAQSQV    | 13128 | >MEN1-T580 QLRAQSQV    | 228   | 12900 |
| >MEN1-T580 QLTAQSQVQ   | 13349 | >MEN1-T580 QLRAQSQVQ   | 260   | 13089 |
| >MEN1-T580 QLTAQSQVQ   | 2467  | >MEN1-T580 QLRAQSQVQ   | 8     | 2459  |
| >MEN1-T580 QLTAQSQVQ   | 3202  | >MEN1-T580 QLRAQSQVQ   | 204   | 2998  |
| >MEN1-T580 QLTAQSQVQ   | 831   | >MEN1-T580 QLRAQSQVQ   | 318   | 513   |
| >MEN1-T580 QLTAQSQVQ   | 1874  | >MEN1-T580 QLRAQSQVQ   | 292   | 1582  |

|                        |       |                        |       |       |
|------------------------|-------|------------------------|-------|-------|
| >MEN1-T580 QLTAQSQVQ   | 126   | >MEN1-T580 QLRAQSQVQ   | 173   | 47    |
| >MEN1-T580 LQLTAQSQVQ  | 286   | >MEN1-T580 LQLRAQSQVQ  | 523   | 237   |
| >MEN1-T580 LQLTAQSQV   | 236   | >MEN1-T580 LQLRAQSQV   | 463   | 227   |
| >MEN1-T580 LQLTAQSQV   | 36    | >MEN1-T580 LQLRAQSQV   | 43    | 7     |
| >MEN1-T580 LQLTAQSQV   | 167   | >MEN1-T580 LQLRAQSQV   | 110   | 57    |
| >MEN1-T580 LQLTAQSQV   | 159   | >MEN1-T580 LQLRAQSQV   | 144   | 15    |
| >MEN1-T580 LQLTAQSQV   | 150   | >MEN1-T580 LQLRAQSQV   | 250   | 100   |
| >MEN1-T580 LQLTAQSQV   | 139   | >MEN1-T580 LQLRAQSQV   | 87    | 52    |
| >MEN1-T580 LQLTAQSQVQ  | 182   | >MEN1-T580 LQLRAQSQVQ  | 145   | 37    |
| >MEN1-T580 LQLTAQSQ    | 401   | >MEN1-T580 LQLRAQSQ    | 595   | 194   |
| >MEN1-T580 LQLTAQSQV   | 42    | >MEN1-T580 LQLRAQSQV   | 50    | 8     |
| >MEN1-T580 LQLTAQSQVQ  | 402   | >MEN1-T580 LQLRAQSQVQ  | 475   | 73    |
| >MEN1-T580 LQLTAQSQVQ  | 10    | >MEN1-T580 LQLRAQSQVQ  | 10    | 0     |
| >MEN1-T580 KLQLTAQSQV  | 324   | >MEN1-T580 KLQLRAQSQV  | 701   | 377   |
| >MEN1-T580 KLQLTAQSQV  | 299   | >MEN1-T580 KLQLRAQSQV  | 614   | 315   |
| >MEN1-T580 KLQLTAQSQV  | 12    | >MEN1-T580 KLQLRAQSQV  | 23    | 11    |
| >MEN1-T580 KLQLTAQSQV  | 13    | >MEN1-T580 KLQLRAQSQV  | 28    | 15    |
| >MEN1-T580 KLQLTAQSQV  | 20    | >MEN1-T580 KLQLRAQSQV  | 43    | 23    |
| >MEN1-T580 KLQLTAQSQV  | 12    | >MEN1-T580 KLQLRAQSQV  | 37    | 25    |
| >MEN1-T580 KLQLTAQSQV  | 4     | >MEN1-T580 KLQLRAQSQV  | 4     | 0     |
| >MEN1-T580 IKLQLTAQSQV | 104   | >MEN1-T580 IKLQLRAQSQV | 126   | 22    |
| >MEN1-T580 AIKLQLTA    | 487   | >MEN1-T580 AIKLQLRA    | 1352  | 865   |
| >MEN1-T580 AIKLQLTA    | 83    | >MEN1-T580 AIKLQLRA    | 139   | 56    |
| >MEN1-T580 SAIKLQLT    | 19235 | >MEN1-T580 SAIKLQLR    | 69    | 19166 |
| >MEN1-T580 SAIKLQLT    | 20020 | >MEN1-T580 SAIKLQLR    | 36    | 19984 |
| >MEN1-T580 SSAIKLQLT   | 17824 | >MEN1-T580 SSAIKLQLR   | 67    | 17757 |
| >MEN1-T580 SSAIKLQLT   | 28582 | >MEN1-T580 SSAIKLQLR   | 147   | 28435 |
| >MEN1-T580 SSAIKLQLTA  | 343   | >MEN1-T580 SSAIKLQLRA  | 729   | 386   |
| >MEN1-T580 SSAIKLQLT   | 9468  | >MEN1-T580 SSAIKLQLR   | 444   | 9024  |
| >MEN1-T580 NSSAIKLQLT  | 32192 | >MEN1-T580 NSSAIKLQLR  | 424   | 31768 |
| >MEN1-T580 NSSAIKLQLT  | 20479 | >MEN1-T580 NSSAIKLQLR  | 50    | 20429 |
| >MEN1-T580 NSSAIKLQLT  | 28534 | >MEN1-T580 NSSAIKLQLR  | 394   | 28140 |
| >MEN1-T580 NSSAIKLQLT  | 24578 | >MEN1-T580 NSSAIKLQLR  | 8     | 24570 |
| >MEN1-V121 VSDVIWNSLS  | 4546  | >MEN1-V121 DSDVIWNSLS  | 260   | 4286  |
| >MEN1-V121 VSDVIWNSLS  | 1437  | >MEN1-V121 DSDVIWNSLS  | 136   | 1301  |
| >MEN1-V121 KVSDVIWNS   | 456   | >MEN1-V121 KDSDVIWNS   | 12520 | 12064 |
| >MEN1-V121 KVSDVIWNSI  | 113   | >MEN1-V121 KDSDVIWNSI  | 8798  | 8685  |
| >MEN1-V121 KVSDVIWNSI  | 388   | >MEN1-V121 KDSDVIWNSI  | 19782 | 19394 |
| >MEN1-V121 KVSDVIWNS   | 138   | >MEN1-V121 KDSDVIWNS   | 12431 | 12293 |
| >MEN1-V121 KVSDVIWNSI  | 128   | >MEN1-V121 KDSDVIWNSI  | 7952  | 7824  |
| >MEN1-V121 KVSDVIWNSI  | 499   | >MEN1-V121 KDSDVIWNSI  | 17706 | 17207 |
| >MEN1-V121 KVSDVIWNSI  | 237   | >MEN1-V121 KDSDVIWNSI  | 12318 | 12081 |
| >MEN1-V121 KVSDVIWNSI  | 101   | >MEN1-V121 KDSDVIWNSI  | 16302 | 16201 |

|                      |      |                      |       |       |
|----------------------|------|----------------------|-------|-------|
| >MEN1-V121KVSDVIWNSI | 376  | >MEN1-V121KDSDVIWNSI | 13954 | 13578 |
| >MEN1-V121KVSDVIWNSI | 148  | >MEN1-V121KDSDVIWNSI | 12049 | 11901 |
| >MEN1-V121KVSDVIWNSI | 408  | >MEN1-V121KDSDVIWNSI | 4424  | 4016  |
| >MEN1-V121GVSSRELVKK | 362  | >MEN1-V121GVSSRELVKK | 25228 | 24866 |
| >MEN1-V121GVSSRELVKK | 162  | >MEN1-V121GVSSRELVKK | 36424 | 36262 |
| >MEN1-V121KKVSDVIW   | 40   | >MEN1-V121KKDSDVIW   | 1660  | 1620  |
| >MEN1-V121KKVSDVIWN! | 23   | >MEN1-V121KKDSDVIWN! | 544   | 521   |
| >MEN1-V121KKVSDVIW   | 285  | >MEN1-V121KKDSDVIW   | 566   | 281   |
| >MEN1-V121VKKVSDVI   | 175  | >MEN1-V121VKKDSDVI   | 246   | 71    |
| >MEN1-V121VKKVSDVIW  | 132  | >MEN1-V121VKKDSDVIW  | 218   | 86    |
| >MEN1-V121LVKKVSDV   | 87   | >MEN1-V121LVKKDSDV   | 579   | 492   |
| >MEN1-V121LVKKVSDV   | 230  | >MEN1-V121LVKKDSDV   | 344   | 114   |
| >MEN1-V121LVKKVSDVIW | 225  | >MEN1-V121LVKKDSDVIW | 329   | 104   |
| >MEN1-V121LVKKVSDVIW | 97   | >MEN1-V121LVKKDSDVIW | 473   | 376   |
| >MEN1-V121ELVKKVSDV  | 91   | >MEN1-V121ELVKKDSDV  | 2306  | 2215  |
| >MEN1-V121ELVKKVSDV  | 219  | >MEN1-V121ELVKKDSDV  | 2277  | 2058  |
| >MEN1-V121ELVKKVSDV  | 157  | >MEN1-V121ELVKKDSDV  | 701   | 544   |
| >MEN1-V121ELVKKVSDV  | 16   | >MEN1-V121ELVKKDSDV  | 45    | 29    |
| >MEN1-V121RELVKKVSDV | 289  | >MEN1-V121RELVKKDSDV | 538   | 249   |
| >MEN1-V121RELVKKVSDV | 24   | >MEN1-V121RELVKKDSDV | 26    | 2     |
| >MEN1-V121RELVKKVSDV | 41   | >MEN1-V121RELVKKDSDV | 51    | 10    |
| >MEN1-V121RELVKKVSDV | 319  | >MEN1-V121RELVKKDSDV | 466   | 147   |
| >MEN1-V121RELVKKVSDV | 105  | >MEN1-V121RELVKKDSDV | 149   | 44    |
| >MEN1-V121RELVKKVSDV | 67   | >MEN1-V121RELVKKDSDV | 97    | 30    |
| >MEN1-V121RELVKKVSDV | 8    | >MEN1-V121RELVKKDSDV | 9     | 1     |
| >MEN1-V121SSRELVKKV  | 224  | >MEN1-V121SSRELVKKD  | 5216  | 4992  |
| >MEN1-V121SSRELVKKV  | 241  | >MEN1-V121SSRELVKKD  | 7747  | 7506  |
| >MEN1-V162VGACQALGLF | 1445 | >MEN1-V162CGACQALGLF | 485   | 960   |
| >MEN1-V162VVGACQALG  | 263  | >MEN1-V162VCGACQALG  | 2797  | 2534  |
| >MEN1-V162VVGACQALG  | 563  | >MEN1-V162VCGACQALG  | 388   | 175   |
| >MEN1-V162LDSSGVAFAV | 185  | >MEN1-V162LDSSGVAFAV | 10617 | 10432 |
| >MEN1-V162AVVGACQAL  | 304  | >MEN1-V162AVCGACQAL  | 1140  | 836   |
| >MEN1-V162AVVGACQA   | 360  | >MEN1-V162AVCGACQA   | 2417  | 2057  |
| >MEN1-V162AVVGACQAL  | 93   | >MEN1-V162AVCGACQAL  | 696   | 603   |
| >MEN1-V162AVVGACQALI | 77   | >MEN1-V162AVCGACQALI | 496   | 419   |
| >MEN1-V162AVVGACQA   | 177  | >MEN1-V162AVCGACQA   | 318   | 141   |
| >MEN1-V162AVVGACQAL  | 122  | >MEN1-V162AVCGACQAL  | 227   | 105   |
| >MEN1-V162AVVGACQALI | 192  | >MEN1-V162AVCGACQALI | 335   | 143   |
| >MEN1-V162AVVGACQAL  | 100  | >MEN1-V162AVCGACQAL  | 707   | 607   |
| >MEN1-V162AVVGACQALI | 332  | >MEN1-V162AVCGACQALI | 2217  | 1885  |
| >MEN1-V162AVVGACQAL  | 259  | >MEN1-V162AVCGACQAL  | 4211  | 3952  |
| >MEN1-V162AVVGACQALI | 174  | >MEN1-V162AVCGACQALI | 539   | 365   |
| >MEN1-V162FAVVGACQA  | 132  | >MEN1-V162FAVCGACQA  | 64    | 68    |

|                       |       |                       |       |       |
|-----------------------|-------|-----------------------|-------|-------|
| >MEN1-V162 FAVVGACQA  | 353   | >MEN1-V162 FAVCGACQA  | 324   | 29    |
| >MEN1-V162 FAVVGACQA  | 468   | >MEN1-V162 FAVCGACQA  | 289   | 179   |
| >MEN1-V162 FAVVGACQA  | 1041  | >MEN1-V162 FAVCGACQA  | 251   | 790   |
| >MEN1-V162 FAVVGACQA  | 837   | >MEN1-V162 FAVCGACQA  | 270   | 567   |
| >MEN1-V162 FAVVGACQA  | 378   | >MEN1-V162 FAVCGACQA  | 220   | 158   |
| >MEN1-V162 FAVVGACQA  | 55    | >MEN1-V162 FAVCGACQA  | 86    | 31    |
| >MEN1-V162 FAVVGACQA  | 139   | >MEN1-V162 FAVCGACQA  | 197   | 58    |
| >MEN1-V162 FAVVGACQA  | 35    | >MEN1-V162 FAVCGACQA  | 47    | 12    |
| >MEN1-V162 VAFVAVGA   | 318   | >MEN1-V162 VAFVAVCGA  | 419   | 101   |
| >MEN1-V162 VAFVAVGA   | 299   | >MEN1-V162 VAFVAVCGA  | 558   | 259   |
| >MEN1-V162 VAFVAVGAC  | 399   | >MEN1-V162 VAFVAVCGAC | 1175  | 776   |
| >MEN1-V162 VAFVAVGA   | 266   | >MEN1-V162 VAFVAVCGA  | 823   | 557   |
| >MEN1-V162 GVAFVAVGA  | 327   | >MEN1-V162 GVAFVAVCGA | 584   | 257   |
| >MEN1-V162 GVAFVAVGA  | 80    | >MEN1-V162 GVAFVAVCGA | 64    | 16    |
| >MEN1-V162 GVAFVAVGA  | 164   | >MEN1-V162 GVAFVAVCGA | 568   | 404   |
| >MEN1-V162 SGVAFAVV   | 141   | >MEN1-V162 SGVAFAVC   | 1433  | 1292  |
| >MEN1-V162 SGVAFAVV   | 435   | >MEN1-V162 SGVAFAVC   | 15184 | 14749 |
| >MEN1-V162 SSGVAFAVV  | 258   | >MEN1-V162 SSGVAFAVC  | 1221  | 963   |
| >MEN1-V162 DSSGVAFAV  | 90    | >MEN1-V162 DSSGVAFAVC | 12865 | 12775 |
| >MEN1-V162 VVGACQALG  | 263   | >MEN1-V162 VVGACQALGI | 115   | 148   |
| >MEN1-V162 VVGACQALG  | 563   | >MEN1-V162 VVGACQALGI | 80    | 483   |
| >MEN1-V162 LDSSGVAFAV | 10689 | >MEN1-V162 LDSSGVAFAV | 277   | 10412 |
| >MEN1-V162 LDSSGVAFAV | 5766  | >MEN1-V162 LDSSGVAFAV | 312   | 5454  |
| >MEN1-V162 LDSSGVAFAV | 4761  | >MEN1-V162 LDSSGVAFAV | 303   | 4458  |
| >MEN1-V162 LDSSGVAFAV | 185   | >MEN1-V162 LDSSGVAFAV | 10731 | 10546 |
| >MEN1-V162 AVVGACQAL  | 1655  | >MEN1-V162 AVFGACQAL  | 274   | 1381  |
| >MEN1-V162 AVVGACQAL  | 304   | >MEN1-V162 AVFGACQAL  | 42    | 262   |
| >MEN1-V162 AVVGACQAL  | 798   | >MEN1-V162 AVFGACQAL  | 128   | 670   |
| >MEN1-V162 AVVGACQA   | 360   | >MEN1-V162 AVFGACQA   | 172   | 188   |
| >MEN1-V162 AVVGACQAL  | 93    | >MEN1-V162 AVFGACQAL  | 43    | 50    |
| >MEN1-V162 AVVGACQAL  | 77    | >MEN1-V162 AVFGACQAL  | 46    | 31    |
| >MEN1-V162 AVVGACQA   | 4329  | >MEN1-V162 AVFGACQA   | 474   | 3855  |
| >MEN1-V162 AVVGACQAL  | 3764  | >MEN1-V162 AVFGACQAL  | 434   | 3330  |
| >MEN1-V162 AVVGACQAL  | 3192  | >MEN1-V162 AVFGACQAL  | 322   | 2870  |
| >MEN1-V162 AVVGACQA   | 177   | >MEN1-V162 AVFGACQA   | 42    | 135   |
| >MEN1-V162 AVVGACQAL  | 122   | >MEN1-V162 AVFGACQAL  | 25    | 97    |
| >MEN1-V162 AVVGACQAL  | 192   | >MEN1-V162 AVFGACQAL  | 43    | 149   |
| >MEN1-V162 AVVGACQAL  | 100   | >MEN1-V162 AVFGACQAL  | 6757  | 6657  |
| >MEN1-V162 AVVGACQAL  | 332   | >MEN1-V162 AVFGACQAL  | 10078 | 9746  |
| >MEN1-V162 AVVGACQAL  | 1330  | >MEN1-V162 AVFGACQAL  | 71    | 1259  |
| >MEN1-V162 AVVGACQAL  | 2038  | >MEN1-V162 AVFGACQAL  | 94    | 1944  |
| >MEN1-V162 AVVGACQAL  | 259   | >MEN1-V162 AVFGACQAL  | 815   | 556   |
| >MEN1-V162 AVVGACQAL  | 1497  | >MEN1-V162 AVFGACQAL  | 423   | 1074  |

|                      |       |                       |       |       |
|----------------------|-------|-----------------------|-------|-------|
| >MEN1-V162AVVGACQAL  | 1055  | >MEN1-V162AVFGACQAL   | 462   | 593   |
| >MEN1-V162AVVGACQAL  | 174   | >MEN1-V162AVFGACQAL   | 80    | 94    |
| >MEN1-V162FAVVGACQA  | 132   | >MEN1-V162FAVFGACQA   | 160   | 28    |
| >MEN1-V162FAVVGACQA  | 353   | >MEN1-V162FAVFGACQAI  | 422   | 69    |
| >MEN1-V162FAVVGACQA  | 468   | >MEN1-V162FAVFGACQAI  | 97    | 371   |
| >MEN1-V162FAVVGACQA  | 1041  | >MEN1-V162FAVFGACQA   | 472   | 569   |
| >MEN1-V162FAVVGACQA  | 837   | >MEN1-V162FAVFGACQAI  | 447   | 390   |
| >MEN1-V162FAVVGACQA  | 378   | >MEN1-V162FAVFGACQAI  | 532   | 154   |
| >MEN1-V162FAVVGACQA  | 55    | >MEN1-V162FAVFGACQAI  | 60    | 5     |
| >MEN1-V162FAVVGACQA  | 139   | >MEN1-V162FAVFGACQAI  | 261   | 122   |
| >MEN1-V162FAVVGACQA  | 35    | >MEN1-V162FAVFGACQA   | 47    | 12    |
| >MEN1-V162FAVVGACQA  | 634   | >MEN1-V162FAVFGACQAI  | 383   | 251   |
| >MEN1-V162VAFVAVGA   | 318   | >MEN1-V162VAFVAVFGA   | 56    | 262   |
| >MEN1-V162VAFVAVGAC  | 1048  | >MEN1-V162VAFVAVFGACC | 471   | 577   |
| >MEN1-V162VAFVAVGA   | 299   | >MEN1-V162VAFVAVFGA   | 231   | 68    |
| >MEN1-V162VAFVAVGAC  | 399   | >MEN1-V162VAFVAVFGACC | 642   | 243   |
| >MEN1-V162VAFVAVGA   | 266   | >MEN1-V162VAFVAVFGA   | 127   | 139   |
| >MEN1-V162GVAFVAVGA  | 2960  | >MEN1-V162GVAFVAVFGA  | 381   | 2579  |
| >MEN1-V162GVAFVAVGA  | 327   | >MEN1-V162GVAFVAVFGA  | 86    | 241   |
| >MEN1-V162GVAFVAVGA  | 80    | >MEN1-V162GVAFVAVFGA  | 61    | 19    |
| >MEN1-V162GVAFVAVGA  | 547   | >MEN1-V162GVAFVAVFGA  | 79    | 468   |
| >MEN1-V162GVAFVAVGA  | 1769  | >MEN1-V162GVAFVAVFGA  | 426   | 1343  |
| >MEN1-V162GVAFVAVGA  | 164   | >MEN1-V162GVAFVAVFGA  | 84    | 80    |
| >MEN1-V162SGVAFAVV   | 141   | >MEN1-V162SGVAFAVF    | 2364  | 2223  |
| >MEN1-V162SGVAFAVV   | 435   | >MEN1-V162SGVAFAVF    | 7925  | 7490  |
| >MEN1-V162SGVAFAVV   | 7989  | >MEN1-V162SGVAFAVF    | 248   | 7741  |
| >MEN1-V162SGVAFAVV   | 7731  | >MEN1-V162SGVAFAVF    | 273   | 7458  |
| >MEN1-V162SSGVAFAVV  | 858   | >MEN1-V162SSGVAFAVF   | 480   | 378   |
| >MEN1-V162SSGVAFAVV  | 1767  | >MEN1-V162SSGVAFAVF   | 46    | 1721  |
| >MEN1-V162SSGVAFAVV  | 5138  | >MEN1-V162SSGVAFAVF   | 128   | 5010  |
| >MEN1-V162SSGVAFAVV  | 10975 | >MEN1-V162SSGVAFAVF   | 35    | 10940 |
| >MEN1-V162SSGVAFAVV  | 18459 | >MEN1-V162SSGVAFAVF   | 428   | 18031 |
| >MEN1-V162SSGVAFAVV  | 258   | >MEN1-V162SSGVAFAVF   | 60    | 198   |
| >MEN1-V162SSGVAFAVV  | 1822  | >MEN1-V162SSGVAFAVF   | 74    | 1748  |
| >MEN1-V162DSSGVAFAVV | 90    | >MEN1-V162DSSGVAFAVF  | 19709 | 19619 |
| >MEN1-V162DSSGVAFAVV | 15240 | >MEN1-V162DSSGVAFAVF  | 400   | 14840 |
| >MEN1-V162DSSGVAFAVV | 4113  | >MEN1-V162DSSGVAFAVF  | 270   | 3843  |
| >MEN1-V211VNAGVAERS  | 3483  | >MEN1-V211FNAGVAERS   | 169   | 3314  |
| >MEN1-V211VNAGVAER   | 224   | >MEN1-V211FNAGVAER    | 21    | 203   |
| >MEN1-V211VNAGVAERS  | 420   | >MEN1-V211FNAGVAERS   | 372   | 48    |
| >MEN1-V211VNAGVAERS  | 2272  | >MEN1-V211FNAGVAERS   | 183   | 2089  |
| >MEN1-V211TVNAGVAER  | 135   | >MEN1-V211TFNAGVAER   | 9224  | 9089  |
| >MEN1-V211TVNAGVAER  | 23    | >MEN1-V211TFNAGVAER   | 14    | 9     |

|                        |      |                        |      |      |
|------------------------|------|------------------------|------|------|
| >MEN1-V211TVNAGVAER    | 278  | >MEN1-V211TFNAGVAER    | 86   | 192  |
| >MEN1-V211TVNAGVAER    | 14   | >MEN1-V211TFNAGVAER    | 118  | 104  |
| >MEN1-V211TVNAGVAER:   | 411  | >MEN1-V211TFNAGVAERS   | 9834 | 9423 |
| >MEN1-V211TVNAGVAER:   | 206  | >MEN1-V211TFNAGVAERS   | 8895 | 8689 |
| >MEN1-V211TVNAGVAER:   | 105  | >MEN1-V211TFNAGVAERS   | 1355 | 1250 |
| >MEN1-V211KGNEDRRGQ    | 8757 | >MEN1-V211KGNEDRRGQ    | 326  | 8431 |
| >MEN1-V211QTVNAGVAE    | 1013 | >MEN1-V211QTFNAGVAE    | 412  | 601  |
| >MEN1-V211QTVNAGVAE    | 303  | >MEN1-V211QTFNAGVAE    | 100  | 203  |
| >MEN1-V211QTVNAGVAE    | 11   | >MEN1-V211QTFNAGVAE    | 7    | 4    |
| >MEN1-V211QTVNAGVA     | 541  | >MEN1-V211QTFNAGVA     | 108  | 433  |
| >MEN1-V211QTVNAGVAE    | 1129 | >MEN1-V211QTFNAGVAE    | 282  | 847  |
| >MEN1-V211QTVNAGVAE    | 836  | >MEN1-V211QTFNAGVAE    | 192  | 644  |
| >MEN1-V211GQTVNAGV     | 814  | >MEN1-V211GQTFNAGV     | 256  | 558  |
| >MEN1-V211GQTVNAGV     | 75   | >MEN1-V211GQTFNAGV     | 77   | 2    |
| >MEN1-V211GQTVNAGV     | 173  | >MEN1-V211GQTFNAGV     | 149  | 24   |
| >MEN1-V211RRGQTVNAG    | 159  | >MEN1-V211RRGQTFNAG    | 176  | 17   |
| >MEN1-V211RRGQTVNA     | 110  | >MEN1-V211RRGQTFNA     | 96   | 14   |
| >MEN1-V211RRGQTVNAG    | 98   | >MEN1-V211RRGQTFNAG    | 105  | 7    |
| >MEN1-V211RRGQTVNAG    | 79   | >MEN1-V211RRGQTFNAG    | 70   | 9    |
| >MEN1-V211NEDRRGQTV    | 4258 | >MEN1-V211NEDRRGQTF    | 120  | 4138 |
| >MEN1-V211NEDRRGQTV    | 5088 | >MEN1-V211NEDRRGQTF    | 498  | 4590 |
| >MEN1-V211NEDRRGQTV    | 937  | >MEN1-V211NEDRRGQTF    | 495  | 442  |
| >MEN1-V53I·VIPTNVPEL   | 459  | >MEN1-V53I·IIPTNVPEL   | 329  | 130  |
| >MEN1-V53I·VIPTNVPEL   | 98   | >MEN1-V53I·IIPTNVPEL   | 123  | 25   |
| >MEN1-V53I·VIPTNVPEL   | 426  | >MEN1-V53I·IIPTNVPEL   | 781  | 355  |
| >MEN1-V53I·VIPTNVPEL   | 22   | >MEN1-V53I·IIPTNVPEL   | 30   | 8    |
| >MEN1-V53I·VIPTNVPELTF | 927  | >MEN1-V53I·IIPTNVPELTF | 386  | 541  |
| >MEN1-V53I·VIPTNVPEL   | 216  | >MEN1-V53I·IIPTNVPEL   | 233  | 17   |
| >MEN1-V53I·RVIPTNVPEL  | 768  | >MEN1-V53I·RIIPTNVPEL  | 421  | 347  |
| >MEN1-V53I·RVIPTNVPEL  | 170  | >MEN1-V53I·RIIPTNVPEL  | 159  | 11   |
| >MEN1-V53I·RVIPTNVPEL  | 282  | >MEN1-V53I·RIIPTNVPEL  | 81   | 201  |
| >MEN1-V53I·RVIPTNVPEL  | 660  | >MEN1-V53I·RIIPTNVPEL  | 342  | 318  |
| >MEN1-V53I·RVIPTNVPEL  | 1308 | >MEN1-V53I·RIIPTNVPEL  | 426  | 882  |
| >MEN1-V53I·RVIPTNVPEL  | 156  | >MEN1-V53I·RIIPTNVPEL  | 49   | 107  |
| >MEN1-V53I·RVIPTNVPEL  | 378  | >MEN1-V53I·RIIPTNVPEL  | 1255 | 877  |
| >MEN1-V53I·RVIPTNVPEL  | 80   | >MEN1-V53I·RIIPTNVPEL  | 283  | 203  |
| >MEN1-V53I·RVIPTNVPEL  | 169  | >MEN1-V53I·RIIPTNVPEL  | 205  | 36   |
| >MEN1-V53I·RVIPTNVPEL  | 533  | >MEN1-V53I·RIIPTNVPEL  | 434  | 99   |
| >MEN1-V53I·RVIPTNVPEL  | 18   | >MEN1-V53I·RIIPTNVPEL  | 50   | 32   |
| >MEN1-V53I·RVIPTNVPEL  | 273  | >MEN1-V53I·RIIPTNVPEL  | 556  | 283  |
| >MEN1-V53I·FVEHFLAVNR  | 227  | >MEN1-V53I·FVEHFLAVNR  | 1251 | 1024 |
| >MEN1-V53I·FVEHFLAVNR  | 30   | >MEN1-V53I·FVEHFLAVNR  | 91   | 61   |
| >MEN1-V53I·FVEHFLAVNR  | 30   | >MEN1-V53I·FVEHFLAVNR  | 211  | 181  |

|                        |      |                        |      |      |
|------------------------|------|------------------------|------|------|
| >MEN1-V53I·FVEHFLAVNR  | 17   | >MEN1-V53I·FVEHFLAVNR  | 141  | 124  |
| >MEN1-V53I·FVEHFLAVNR  | 117  | >MEN1-V53I·FVEHFLAVNR  | 1498 | 1381 |
| >MEN1-V53I·FVEHFLAVNR  | 326  | >MEN1-V53I·FVEHFLAVNR  | 3251 | 2925 |
| >MEN1-V53I·FVEHFLAVNR  | 10   | >MEN1-V53I·FVEHFLAVNR  | 1164 | 1154 |
| >MEN1-V53I·FVEHFLAVNR  | 57   | >MEN1-V53I·FVEHFLAVNR  | 200  | 143  |
| >MEN1-V53I·FVEHFLAVNR  | 249  | >MEN1-V53I·FVEHFLAVNR  | 1715 | 1466 |
| >MEN1-V53I·NRVIPTNVPE  | 116  | >MEN1-V53I·NRVIPTNVPE  | 80   | 36   |
| >MEN1-V53I·NRVIPTNVPE  | 727  | >MEN1-V53I·NRVIPTNVPE  | 378  | 349  |
| >MEN1-V53I·NRVIPTNVPE  | 193  | >MEN1-V53I·NRVIPTNVPE  | 100  | 93   |
| >MEN1-V53I·AVNRVIPTNV  | 86   | >MEN1-V53I·AVNRVIPTNV  | 70   | 16   |
| >MEN1-V53I·AVNRVIPTNV  | 35   | >MEN1-V53I·AVNRVIPTNV  | 54   | 19   |
| >MEN1-V53I·AVNRVIPTNV  | 77   | >MEN1-V53I·AVNRVIPTNV  | 110  | 33   |
| >MEN1-V53I·AVNRVIPTNV  | 486  | >MEN1-V53I·AVNRVIPTNV  | 258  | 228  |
| >MEN1-V53I·AVNRVIPTNV  | 18   | >MEN1-V53I·AVNRVIPTNV  | 16   | 2    |
| >MEN1-V53I·LAVNRVIPTN  | 119  | >MEN1-V53I·LAVNRVIPTN  | 133  | 14   |
| >MEN1-V53I·LAVNRVIPTN  | 350  | >MEN1-V53I·LAVNRVIPTN  | 251  | 99   |
| >MEN1-V53I·LAVNRVIPTN  | 638  | >MEN1-V53I·LAVNRVIPTN  | 466  | 172  |
| >MEN1-V53I·LAVNRVIPTN  | 251  | >MEN1-V53I·LAVNRVIPTN  | 156  | 95   |
| >MEN1-V53I·LAVNRVIPTN  | 362  | >MEN1-V53I·LAVNRVIPTN  | 321  | 41   |
| >MEN1-V53I·FLAVNRVI    | 241  | >MEN1-V53I·FLAVNRVI    | 245  | 4    |
| >MEN1-V53I·FLAVNRVIPT  | 215  | >MEN1-V53I·FLAVNRVIPT  | 113  | 102  |
| >MEN1-V53I·FLAVNRVI    | 17   | >MEN1-V53I·FLAVNRVI    | 17   | 0    |
| >MEN1-V53I·FLAVNRVIPT  | 96   | >MEN1-V53I·FLAVNRVIPT  | 75   | 21   |
| >MEN1-V53I·FLAVNRVI    | 17   | >MEN1-V53I·FLAVNRVI    | 17   | 0    |
| >MEN1-V53I·FLAVNRVIPT  | 81   | >MEN1-V53I·FLAVNRVIPT  | 59   | 22   |
| >MEN1-V53I·FLAVNRVI    | 370  | >MEN1-V53I·FLAVNRVI    | 409  | 39   |
| >MEN1-V53I·FLAVNRVIPT  | 238  | >MEN1-V53I·FLAVNRVIPT  | 127  | 111  |
| >MEN1-V53I·FLAVNRVI    | 30   | >MEN1-V53I·FLAVNRVI    | 73   | 43   |
| >MEN1-V53I·FLAVNRVIPT  | 182  | >MEN1-V53I·FLAVNRVIPT  | 148  | 34   |
| >MEN1-V53I·FLAVNRVI    | 58   | >MEN1-V53I·FLAVNRVI    | 75   | 17   |
| >MEN1-V53I·FLAVNRVIPT  | 529  | >MEN1-V53I·FLAVNRVIPT  | 484  | 45   |
| >MEN1-V53I·FLAVNRVI    | 103  | >MEN1-V53I·FLAVNRVI    | 123  | 20   |
| >MEN1-V53I·FLAVNRVIPT  | 238  | >MEN1-V53I·FLAVNRVIPT  | 237  | 1    |
| >MEN1-V53I·FLAVNRVI    | 207  | >MEN1-V53I·FLAVNRVI    | 430  | 223  |
| >MEN1-V53I·FLAVNRVI    | 14   | >MEN1-V53I·FLAVNRVI    | 19   | 5    |
| >MEN1-V53I·FLAVNRVIPT  | 13   | >MEN1-V53I·FLAVNRVIPT  | 12   | 1    |
| >MEN1-V53I·FLAVNRVIPTI | 284  | >MEN1-V53I·FLAVNRVIPTI | 274  | 10   |
| >MEN1-V53I·HFLAVNRV    | 1144 | >MEN1-V53I·HFLAVNRV    | 94   | 1050 |
| >MEN1-V53I·HFLAVNRVI   | 46   | >MEN1-V53I·HFLAVNRVI   | 194  | 148  |
| >MEN1-V53I·HFLAVNRV    | 5853 | >MEN1-V53I·HFLAVNRV    | 372  | 5481 |
| >MEN1-V53I·HFLAVNRV    | 1925 | >MEN1-V53I·HFLAVNRV    | 65   | 1860 |
| >MEN1-V53I·HFLAVNRVI   | 152  | >MEN1-V53I·HFLAVNRVI   | 398  | 246  |
| >MEN1-V53I·EHFLAVNRV   | 2342 | >MEN1-V53I·EHFLAVNRV   | 361  | 1981 |

|                       |      |                        |       |       |
|-----------------------|------|------------------------|-------|-------|
| >MEN1-V53I·EHFLAVNRVI | 223  | >MEN1-V53I·EHFLAVNRII  | 202   | 21    |
| >MEN1-V53I·EHFLAVNRVI | 454  | >MEN1-V53I·EHFLAVNRII  | 886   | 432   |
| >MEN1-V53I·VEHFLAVNRV | 361  | >MEN1-V53I·VEHFLAVNRII | 44    | 317   |
| >MEN1-V53I·VEHFLAVNRV | 38   | >MEN1-V53I·VEHFLAVNRII | 35    | 3     |
| >MEN1-V53I·VEHFLAVNRV | 100  | >MEN1-V53I·VEHFLAVNRII | 85    | 15    |
| >MEN1-V53I·VEHFLAVNRV | 150  | >MEN1-V53I·VEHFLAVNRII | 192   | 42    |
| >MEN1-V53I·VEHFLAVNRV | 366  | >MEN1-V53I·VEHFLAVNRII | 35    | 331   |
| >MEN1-V53I·VEHFLAVNRV | 38   | >MEN1-V53I·VEHFLAVNRII | 25    | 13    |
| >MEN1-W12 WNSLSRSYFK  | 757  | >MEN1-W12 GNSLSRSYFK   | 269   | 488   |
| >MEN1-W12 WNSLSRSYF   | 61   | >MEN1-W12 GNSLSRSYF    | 490   | 429   |
| >MEN1-W12 WNSLSRSY    | 267  | >MEN1-W12 GNSLSRSY     | 3513  | 3246  |
| >MEN1-W12 WNSLSRSYF   | 33   | >MEN1-W12 GNSLSRSYF    | 47    | 14    |
| >MEN1-W12 IWNSLSRSYFI | 3537 | >MEN1-W12 IGNSLSRSYFK  | 381   | 3156  |
| >MEN1-W12 IWNSLSRSYFI | 1006 | >MEN1-W12 IGNSLSRSYFK  | 138   | 868   |
| >MEN1-W12 IWNSLSRSYF  | 19   | >MEN1-W12 IGNSLSRSYF   | 8480  | 8461  |
| >MEN1-W12 IWNSLSRSYF  | 58   | >MEN1-W12 IGNSLSRSYF   | 12925 | 12867 |
| >MEN1-W12 IWNSLSRSYF  | 104  | >MEN1-W12 IGNSLSRSYF   | 20622 | 20518 |
| >MEN1-W12 IWNSLSRSY   | 204  | >MEN1-W12 IGNSLSRSY    | 3126  | 2922  |
| >MEN1-W12 IWNSLSRSYF  | 425  | >MEN1-W12 IGNSLSRSYF   | 5194  | 4769  |
| >MEN1-W12 IWNSLSRSYFI | 270  | >MEN1-W12 IGNSLSRSYFK  | 404   | 134   |
| >MEN1-W12 IWNSLSRSY   | 39   | >MEN1-W12 IGNSLSRSY    | 54    | 15    |
| >MEN1-W12 IWNSLSRSYFI | 116  | >MEN1-W12 IGNSLSRSYFK  | 295   | 179   |
| >MEN1-W12 IWNSLSRSY   | 1425 | >MEN1-W12 IGNSLSRSY    | 149   | 1276  |
| >MEN1-W12 IWNSLSRSYF  | 129  | >MEN1-W12 IGNSLSRSYF   | 109   | 20    |
| >MEN1-W12 IWNSLSRSY   | 560  | >MEN1-W12 IGNSLSRSY    | 110   | 450   |
| >MEN1-W12 IWNSLSRSY   | 283  | >MEN1-W12 IGNSLSRSY    | 119   | 164   |
| >MEN1-W12 IWNSLSRSYFI | 54   | >MEN1-W12 IGNSLSRSYFK  | 2522  | 2468  |
| >MEN1-W12 IWNSLSRSY   | 473  | >MEN1-W12 IGNSLSRSY    | 36433 | 35960 |
| >MEN1-W12 IWNSLSRSYF  | 368  | >MEN1-W12 IGNSLSRSYF   | 32850 | 32482 |
| >MEN1-W12 IWNSLSRSYFI | 223  | >MEN1-W12 IGNSLSRSYFK  | 31289 | 31066 |
| >MEN1-W12 VIWNSLSR    | 433  | >MEN1-W12 VIGNSLSR     | 1680  | 1247  |
| >MEN1-W12 VIWNSLSR    | 319  | >MEN1-W12 VIGNSLSR     | 1034  | 715   |
| >MEN1-W12 VIWNSLSRSY  | 292  | >MEN1-W12 VIGNSLRSYF   | 1779  | 1487  |
| >MEN1-W12 VIWNSLSRSY  | 264  | >MEN1-W12 VIGNSLRSY    | 944   | 680   |
| >MEN1-W12 VIWNSLSR    | 75   | >MEN1-W12 VIGNSLSR     | 1264  | 1189  |
| >MEN1-W12 VIWNSLSRSY  | 537  | >MEN1-W12 VIGNSLRSY    | 279   | 258   |
| >MEN1-W12 VIWNSLSRSY  | 112  | >MEN1-W12 VIGNSLRSY    | 100   | 12    |
| >MEN1-W12 VIWNSLSRSY  | 300  | >MEN1-W12 VIGNSLRSYF   | 274   | 26    |
| >MEN1-W12 VIWNSLSRSY  | 197  | >MEN1-W12 VIGNSLRSY    | 818   | 621   |
| >MEN1-W12 VIWNSLSRSY  | 81   | >MEN1-W12 VIGNSLRSY    | 1357  | 1276  |
| >MEN1-W12 VIWNSLSRSY  | 17   | >MEN1-W12 VIGNSLRSYF   | 267   | 250   |
| >MEN1-W12 VIWNSLSRSY  | 67   | >MEN1-W12 VIGNSLRSY    | 1694  | 1627  |
| >MEN1-W12 VIWNSLSRSY  | 53   | >MEN1-W12 VIGNSLRSYF   | 1302  | 1249  |



|                      |      |                      |       |       |
|----------------------|------|----------------------|-------|-------|
| >MEN1-W12 VIWNSLSRSY | 29   | >MEN1-W12 VIGNSLRSYF | 98    | 69    |
| >MEN1-W12 VIWNSLSRSY | 313  | >MEN1-W12 VIGNSLRSY  | 1457  | 1144  |
| >MEN1-W12 VIWNSLSR   | 194  | >MEN1-W12 VIGNSLR    | 765   | 571   |
| >MEN1-W12 DVIWNSLSRS | 57   | >MEN1-W12 DVIGNSLRS` | 32    | 25    |
| >MEN1-W12 DVIWNSLSRS | 12   | >MEN1-W12 DVIGNSLRS` | 6     | 6     |
| >MEN1-W12 DVIWNSLSRS | 970  | >MEN1-W12 DVIGNSLRS  | 438   | 532   |
| >MEN1-W12 DVIWNSLSRS | 12   | >MEN1-W12 DVIGNSLRS` | 6     | 6     |
| >MEN1-W12 DVIWNSLSRS | 30   | >MEN1-W12 DVIGNSLRS` | 16    | 14    |
| >MEN1-W12 DVIWNSLSRS | 107  | >MEN1-W12 DVIGNSLRS` | 97    | 10    |
| >MEN1-W12 DVIWNSLSRS | 350  | >MEN1-W12 DVIGNSLRS` | 877   | 527   |
| >MEN1-W12 DVIWNSLSR  | 85   | >MEN1-W12 DVIGNSLR   | 162   | 77    |
| >MEN1-W12 DVIWNSLSR  | 6    | >MEN1-W12 DVIGNSLR   | 12    | 6     |
| >MEN1-W12 DVIWNSLSRS | 304  | >MEN1-W12 DVIGNSLRS` | 656   | 352   |
| >MEN1-W12 DVIWNSLSRS | 70   | >MEN1-W12 DVIGNSLRS` | 130   | 60    |
| >MEN1-W12 DVIWNSLSR  | 457  | >MEN1-W12 DVIGNSLR   | 1458  | 1001  |
| >MEN1-W12 SDVIWNSL   | 2964 | >MEN1-W12 SDVIGNSL   | 172   | 2792  |
| >MEN1-W12 SDVIWNSL   | 390  | >MEN1-W12 SDVIGNSL   | 759   | 369   |
| >MEN1-W12 VSDVIWNSL  | 692  | >MEN1-W12 VSDVIGNSL  | 350   | 342   |
| >MEN1-W12 KVSDVIWNS  | 456  | >MEN1-W12 KVSDVIGNS  | 6274  | 5818  |
| >MEN1-W12 KVSDVIWNSL | 113  | >MEN1-W12 KVSDVIGNSL | 119   | 6     |
| >MEN1-W12 KVSDVIWNSL | 388  | >MEN1-W12 KVSDVIGNSL | 614   | 226   |
| >MEN1-W12 KVSDVIWNS  | 138  | >MEN1-W12 KVSDVIGNS  | 6194  | 6056  |
| >MEN1-W12 KVSDVIWNSL | 128  | >MEN1-W12 KVSDVIGNSL | 439   | 311   |
| >MEN1-W12 KVSDVIWNSL | 499  | >MEN1-W12 KVSDVIGNSL | 2371  | 1872  |
| >MEN1-W12 KVSDVIWNSL | 237  | >MEN1-W12 KVSDVIGNSL | 1598  | 1361  |
| >MEN1-W12 KVSDVIWNSL | 101  | >MEN1-W12 KVSDVIGNSL | 390   | 289   |
| >MEN1-W12 KVSDVIWNSL | 376  | >MEN1-W12 KVSDVIGNSL | 1067  | 691   |
| >MEN1-W12 KVSDVIWNSL | 148  | >MEN1-W12 KVSDVIGNSL | 234   | 86    |
| >MEN1-W12 KVSDVIWNSL | 408  | >MEN1-W12 KVSDVIGNSL | 7048  | 6640  |
| >MEN1-W12 KKVSDVIW   | 40   | >MEN1-W12 KKVSDVIG   | 2002  | 1962  |
| >MEN1-W12 KKVSDVIWN` | 23   | >MEN1-W12 KKVSDVIGNS | 11    | 12    |
| >MEN1-W12 KKVSDVIW   | 285  | >MEN1-W12 KKVSDVIG   | 32900 | 32615 |
| >MEN1-W12 VKKVSDVIW  | 132  | >MEN1-W12 VKKVSDVIG  | 5886  | 5754  |
| >MEN1-W12 LVKKVSDVIW | 225  | >MEN1-W12 LVKKVSDVIG | 23777 | 23552 |
| >MEN1-W12 LVKKVSDVIW | 97   | >MEN1-W12 LVKKVSDVIG | 21881 | 21784 |
| >MEN1-W18 AWWVFGPN   | 344  | >MEN1-W18 AGVVFPGN   | 34879 | 34535 |
| >MEN1-W18 AWWVFGPNC  | 494  | >MEN1-W18 AGVVFPGNG  | 37084 | 36590 |
| >MEN1-W18 AWWVFGPNC  | 479  | >MEN1-W18 AGVVFPGNG  | 36460 | 35981 |
| >MEN1-W18 VHLALSEDHA | 463  | >MEN1-W18 VHLALSEDHA | 32059 | 31596 |
| >MEN1-W18 VHLALSEDHA | 32   | >MEN1-W18 VHLALSEDHA | 25457 | 25425 |
| >MEN1-W18 SEDHAWVV   | 19   | >MEN1-W18 SEDHAGVV   | 5     | 14    |
| >MEN1-W18 SEDHAWVV   | 477  | >MEN1-W18 SEDHAGVV   | 6608  | 6131  |
| >MEN1-W18 SEDHAWVVF  | 772  | >MEN1-W18 SEDHAGVVF  | 452   | 320   |

|                      |      |                      |       |       |
|----------------------|------|----------------------|-------|-------|
| >MEN1-W18 SEDHAWVVF  | 278  | >MEN1-W18 SEDHAGVVF  | 296   | 18    |
| >MEN1-W18 SEDHAWVV   | 88   | >MEN1-W18 SEDHAGVV   | 187   | 99    |
| >MEN1-W18 SEDHAWVVF  | 51   | >MEN1-W18 SEDHAGVVF  | 83    | 32    |
| >MEN1-W18 SEDHAWVVF  | 447  | >MEN1-W18 SEDHAGVVF  | 1446  | 999   |
| >MEN1-W18 SEDHAWVVF  | 411  | >MEN1-W18 SEDHAGVVF  | 389   | 22    |
| >MEN1-W18 SEDHAWVVF  | 70   | >MEN1-W18 SEDHAGVVF  | 176   | 106   |
| >MEN1-W18 SEDHAWVV   | 127  | >MEN1-W18 SEDHAGVV   | 1004  | 877   |
| >MEN1-W18 SEDHAWVVF  | 248  | >MEN1-W18 SEDHAGVVF  | 268   | 20    |
| >MEN1-W18 LSEDHAWVV  | 471  | >MEN1-W18 LSEDHAGVVF | 897   | 426   |
| >MEN1-W18 LSEDHAWVV  | 307  | >MEN1-W18 LSEDHAGVV  | 3118  | 2811  |
| >MEN1-W18 LSEDHAWVV  | 366  | >MEN1-W18 LSEDHAGVV  | 11219 | 10853 |
| >MEN1-W18 LSEDHAWVV  | 355  | >MEN1-W18 LSEDHAGVVF | 190   | 165   |
| >MEN1-W18 LSEDHAWVV  | 399  | >MEN1-W18 LSEDHAGVVF | 428   | 29    |
| >MEN1-W18 LSEDHAWVV  | 8    | >MEN1-W18 LSEDHAGVVF | 8     | 0     |
| >MEN1-W18 LSEDHAWVV  | 385  | >MEN1-W18 LSEDHAGVV  | 3760  | 3375  |
| >MEN1-W18 LSEDHAWVV  | 54   | >MEN1-W18 LSEDHAGVVF | 49    | 5     |
| >MEN1-W18 ALSEDHAWV  | 22   | >MEN1-W18 ALSEDHAGV  | 35    | 13    |
| >MEN1-W18 ALSEDHAWV  | 53   | >MEN1-W18 ALSEDHAGV  | 842   | 789   |
| >MEN1-W18 ALSEDHAWV  | 4    | >MEN1-W18 ALSEDHAGV  | 5     | 1     |
| >MEN1-W18 ALSEDHAWV  | 22   | >MEN1-W18 ALSEDHAGV  | 62    | 40    |
| >MEN1-W18 ALSEDHAWV  | 4    | >MEN1-W18 ALSEDHAGV  | 4     | 0     |
| >MEN1-W18 ALSEDHAWV  | 103  | >MEN1-W18 ALSEDHAGV  | 66    | 37    |
| >MEN1-W18 ALSEDHAWV  | 25   | >MEN1-W18 ALSEDHAGV  | 15    | 10    |
| >MEN1-W18 ALSEDHAWV  | 397  | >MEN1-W18 ALSEDHAGV  | 3288  | 2891  |
| >MEN1-W18 ALSEDHAWV  | 2    | >MEN1-W18 ALSEDHAGV  | 2     | 0     |
| >MEN1-W18 ALSEDHAWV  | 2    | >MEN1-W18 ALSEDHAGV  | 4     | 2     |
| >MEN1-W18 ALSEDHAWV  | 11   | >MEN1-W18 ALSEDHAGV  | 4     | 7     |
| >MEN1-W18 ALSEDHAWV  | 4    | >MEN1-W18 ALSEDHAGV  | 10    | 6     |
| >MEN1-W18 ALSEDHAWV  | 6    | >MEN1-W18 ALSEDHAGV  | 5     | 1     |
| >MEN1-W18 ALSEDHAWV  | 5    | >MEN1-W18 ALSEDHAGV  | 12    | 7     |
| >MEN1-W18 ALSEDHAWV  | 4    | >MEN1-W18 ALSEDHAGV  | 3     | 1     |
| >MEN1-W18 ALSEDHAWV  | 3    | >MEN1-W18 ALSEDHAGV  | 21    | 18    |
| >MEN1-W18 ALSEDHAWV  | 1    | >MEN1-W18 ALSEDHAGV  | 2     | 1     |
| >MEN1-W18 ALSEDHAWV  | 1    | >MEN1-W18 ALSEDHAGV  | 2     | 1     |
| >MEN1-W18 ALSEDHAWV  | 1389 | >MEN1-W18 ALSEDHAGV  | 405   | 984   |
| >MEN1-W18 ALSEDHAWV  | 68   | >MEN1-W18 ALSEDHAGV  | 51    | 17    |
| >MEN1-W18 ALSEDHAWV  | 613  | >MEN1-W18 ALSEDHAGV  | 478   | 135   |
| >MEN1-W18 ALSEDHAWV  | 47   | >MEN1-W18 ALSEDHAGV  | 32    | 15    |
| >MEN1-W18 LALSEDHAWV | 424  | >MEN1-W18 LALSEDHAGV | 193   | 231   |
| >MEN1-W18 LALSEDHAWV | 149  | >MEN1-W18 LALSEDHAGV | 174   | 25    |
| >MEN1-W18 LALSEDHAWV | 76   | >MEN1-W18 LALSEDHAGV | 908   | 832   |
| >MEN1-W18 LALSEDHAWV | 93   | >MEN1-W18 LALSEDHAGV | 74    | 19    |
| >MEN1-W18 LALSEDHAWV | 51   | >MEN1-W18 LALSEDHAGV | 601   | 550   |

|                      |       |                      |       |       |
|----------------------|-------|----------------------|-------|-------|
| >MEN1-W18 LALSEDHAW' | 218   | >MEN1-W18 LALSEDHAGV | 3438  | 3220  |
| >MEN1-W18 LALSEDHAW' | 217   | >MEN1-W18 LALSEDHAGV | 3319  | 3102  |
| >MEN1-W18 LALSEDHAW' | 266   | >MEN1-W18 LALSEDHAGV | 3719  | 3453  |
| >MEN1-W18 LALSEDHAW' | 30    | >MEN1-W18 LALSEDHAGV | 38    | 8     |
| >MEN1-W18 LALSEDHAW' | 34    | >MEN1-W18 LALSEDHAGV | 526   | 492   |
| >MEN1-W18 LALSEDHAW' | 369   | >MEN1-W18 LALSEDHAGV | 119   | 250   |
| >MEN1-W18 LALSEDHAW' | 225   | >MEN1-W18 LALSEDHAGV | 1037  | 812   |
| >MEN1-W18 LALSEDHAW  | 18    | >MEN1-W18 LALSEDHAG  | 20931 | 20913 |
| >MEN1-W18 LALSEDHAW  | 73    | >MEN1-W18 LALSEDHAG  | 589   | 516   |
| >MEN1-W18 LALSEDHAW  | 14    | >MEN1-W18 LALSEDHAG  | 18080 | 18066 |
| >MEN1-W18 LALSEDHAW  | 60    | >MEN1-W18 LALSEDHAG  | 22313 | 22253 |
| >MEN1-W18 LALSEDHAW  | 13    | >MEN1-W18 LALSEDHAG  | 17219 | 17206 |
| >MEN1-W18 LALSEDHAW  | 12    | >MEN1-W18 LALSEDHAG  | 14918 | 14906 |
| >MEN1-W18 LALSEDHAW  | 76    | >MEN1-W18 LALSEDHAG  | 26714 | 26638 |
| >MEN1-W18 HLALSEDHAV | 207   | >MEN1-W18 HLALSEDHAC | 363   | 156   |
| >MEN1-W18 HLALSEDHAV | 9     | >MEN1-W18 HLALSEDHAC | 10    | 1     |
| >MEN1-W18 HLALSEDHAV | 26    | >MEN1-W18 HLALSEDHAC | 24    | 2     |
| >MEN1-W18 HLALSEDHAV | 286   | >MEN1-W18 HLALSEDHAC | 165   | 121   |
| >MEN1-W18 HLALSEDHAV | 38    | >MEN1-W18 HLALSEDHAC | 29    | 9     |
| >MEN1-W18 HLALSEDHAV | 75    | >MEN1-W18 HLALSEDHAC | 18    | 57    |
| >MEN1-W18 HLALSEDHAV | 16    | >MEN1-W18 HLALSEDHAC | 14    | 2     |
| >MEN1-W18 HLALSEDHAV | 24    | >MEN1-W18 HLALSEDHAC | 12    | 12    |
| >MEN1-W18 HLALSEDHAV | 5     | >MEN1-W18 HLALSEDHAC | 5     | 0     |
| >MEN1-W18 HLALSEDHAV | 237   | >MEN1-W18 HLALSEDHAC | 126   | 111   |
| >MEN1-W18 HLALSEDHAV | 863   | >MEN1-W18 HLALSEDHAC | 331   | 532   |
| >MEN1-W18 HLALSEDHAV | 202   | >MEN1-W18 HLALSEDHAC | 22474 | 22272 |
| >MEN1-W18 HLALSEDHAV | 306   | >MEN1-W18 HLALSEDHAC | 29815 | 29509 |
| >MEN1-W18 AWVVFPGN   | 344   | >MEN1-W18 ARVVFPGN   | 34322 | 33978 |
| >MEN1-W18 AWVVFPGNC  | 494   | >MEN1-W18 ARVVFPGNG  | 36712 | 36218 |
| >MEN1-W18 AWVVFPGNC  | 479   | >MEN1-W18 ARVVFPGNGI | 36045 | 35566 |
| >MEN1-W18 VHLALSEDHA | 463   | >MEN1-W18 VHLALSEDHA | 32609 | 32146 |
| >MEN1-W18 VHLALSEDHA | 32    | >MEN1-W18 VHLALSEDHA | 21418 | 21386 |
| >MEN1-W18 HAWVVFPGN  | 11485 | >MEN1-W18 HARVVFPGN  | 192   | 11293 |
| >MEN1-W18 HAWVVFPGN  | 7147  | >MEN1-W18 HARVVFPGNI | 36    | 7111  |
| >MEN1-W18 SEDHAWVV   | 19    | >MEN1-W18 SEDHARVV   | 6     | 13    |
| >MEN1-W18 SEDHAWVV   | 477   | >MEN1-W18 SEDHARVV   | 9265  | 8788  |
| >MEN1-W18 SEDHAWVVF  | 278   | >MEN1-W18 SEDHARVVF  | 241   | 37    |
| >MEN1-W18 SEDHAWVV   | 88    | >MEN1-W18 SEDHARVV   | 468   | 380   |
| >MEN1-W18 SEDHAWVVF  | 51    | >MEN1-W18 SEDHARVVF  | 153   | 102   |
| >MEN1-W18 SEDHAWVVF  | 447   | >MEN1-W18 SEDHARVVF  | 722   | 275   |
| >MEN1-W18 SEDHAWVVF  | 411   | >MEN1-W18 SEDHARVVF  | 462   | 51    |
| >MEN1-W18 SEDHAWVVF  | 70    | >MEN1-W18 SEDHARVVF  | 539   | 469   |
| >MEN1-W18 SEDHAWVV   | 127   | >MEN1-W18 SEDHARVV   | 729   | 602   |

|                      |       |                      |       |       |
|----------------------|-------|----------------------|-------|-------|
| >MEN1-W18 SEDHAWVVF  | 248   | >MEN1-W18 SEDHARVVF  | 215   | 33    |
| >MEN1-W18 LSEDHAWVV  | 471   | >MEN1-W18 LSEDHARVVF | 1152  | 681   |
| >MEN1-W18 LSEDHAWVV  | 307   | >MEN1-W18 LSEDHARVV  | 3664  | 3357  |
| >MEN1-W18 LSEDHAWVV  | 366   | >MEN1-W18 LSEDHARVV  | 12325 | 11959 |
| >MEN1-W18 LSEDHAWVV  | 355   | >MEN1-W18 LSEDHARVVF | 360   | 5     |
| >MEN1-W18 LSEDHAWVV  | 399   | >MEN1-W18 LSEDHARVVF | 332   | 67    |
| >MEN1-W18 LSEDHAWVV  | 8     | >MEN1-W18 LSEDHARVVF | 14    | 6     |
| >MEN1-W18 LSEDHAWVV  | 385   | >MEN1-W18 LSEDHARVV  | 2007  | 1622  |
| >MEN1-W18 LSEDHAWVV  | 54    | >MEN1-W18 LSEDHARVVF | 56    | 2     |
| >MEN1-W18 ALSEDHAWV  | 22    | >MEN1-W18 ALSEDHARV  | 41    | 19    |
| >MEN1-W18 ALSEDHAWV  | 53    | >MEN1-W18 ALSEDHARV\ | 1345  | 1292  |
| >MEN1-W18 ALSEDHAWV  | 4     | >MEN1-W18 ALSEDHARV  | 7     | 3     |
| >MEN1-W18 ALSEDHAWV  | 22    | >MEN1-W18 ALSEDHARV\ | 87    | 65    |
| >MEN1-W18 ALSEDHAWV  | 4     | >MEN1-W18 ALSEDHARV  | 5     | 1     |
| >MEN1-W18 ALSEDHAWV  | 103   | >MEN1-W18 ALSEDHARV\ | 126   | 23    |
| >MEN1-W18 ALSEDHAWV  | 25    | >MEN1-W18 ALSEDHARV  | 76    | 51    |
| >MEN1-W18 ALSEDHAWV  | 397   | >MEN1-W18 ALSEDHARV\ | 4206  | 3809  |
| >MEN1-W18 ALSEDHAWV  | 2     | >MEN1-W18 ALSEDHARV  | 2     | 0     |
| >MEN1-W18 ALSEDHAWV  | 2     | >MEN1-W18 ALSEDHARV\ | 5     | 3     |
| >MEN1-W18 ALSEDHAWV  | 11    | >MEN1-W18 ALSEDHARV  | 9     | 2     |
| >MEN1-W18 ALSEDHAWV  | 4     | >MEN1-W18 ALSEDHARV\ | 13    | 9     |
| >MEN1-W18 ALSEDHAWV  | 6     | >MEN1-W18 ALSEDHARV  | 7     | 1     |
| >MEN1-W18 ALSEDHAWV  | 5     | >MEN1-W18 ALSEDHARV\ | 17    | 12    |
| >MEN1-W18 ALSEDHAWV  | 4     | >MEN1-W18 ALSEDHARV  | 5     | 1     |
| >MEN1-W18 ALSEDHAWV  | 3     | >MEN1-W18 ALSEDHARV\ | 23    | 20    |
| >MEN1-W18 ALSEDHAWV  | 1     | >MEN1-W18 ALSEDHARV  | 1     | 0     |
| >MEN1-W18 ALSEDHAWV  | 1     | >MEN1-W18 ALSEDHARV\ | 2     | 1     |
| >MEN1-W18 ALSEDHAW   | 22836 | >MEN1-W18 ALSEDHAR   | 331   | 22505 |
| >MEN1-W18 ALSEDHAWV  | 68    | >MEN1-W18 ALSEDHARV\ | 65    | 3     |
| >MEN1-W18 ALSEDHAWV  | 47    | >MEN1-W18 ALSEDHARV\ | 38    | 9     |
| >MEN1-W18 LALSEDHAW' | 424   | >MEN1-W18 LALSEDHARV | 631   | 207   |
| >MEN1-W18 LALSEDHAW' | 149   | >MEN1-W18 LALSEDHARV | 495   | 346   |
| >MEN1-W18 LALSEDHAW' | 76    | >MEN1-W18 LALSEDHARV | 1186  | 1110  |
| >MEN1-W18 LALSEDHAW' | 93    | >MEN1-W18 LALSEDHARV | 112   | 19    |
| >MEN1-W18 LALSEDHAW' | 51    | >MEN1-W18 LALSEDHARV | 631   | 580   |
| >MEN1-W18 LALSEDHAW' | 218   | >MEN1-W18 LALSEDHARV | 3566  | 3348  |
| >MEN1-W18 LALSEDHAW' | 217   | >MEN1-W18 LALSEDHARV | 4196  | 3979  |
| >MEN1-W18 LALSEDHAW' | 266   | >MEN1-W18 LALSEDHARV | 3638  | 3372  |
| >MEN1-W18 LALSEDHAW' | 30    | >MEN1-W18 LALSEDHARV | 37    | 7     |
| >MEN1-W18 LALSEDHAW' | 34    | >MEN1-W18 LALSEDHARV | 647   | 613   |
| >MEN1-W18 LALSEDHAW  | 24034 | >MEN1-W18 LALSEDHAR  | 250   | 23784 |
| >MEN1-W18 LALSEDHAW  | 30951 | >MEN1-W18 LALSEDHAR  | 220   | 30731 |
| >MEN1-W18 LALSEDHAW' | 369   | >MEN1-W18 LALSEDHARV | 397   | 28    |

|                        |       |                         |       |       |
|------------------------|-------|-------------------------|-------|-------|
| >MEN1-W18 LALSEDHAW    | 225   | >MEN1-W18 LALSEDHARV    | 2138  | 1913  |
| >MEN1-W18 LALSEDHAW    | 18    | >MEN1-W18 LALSEDHAR     | 21287 | 21269 |
| >MEN1-W18 LALSEDHAW    | 73    | >MEN1-W18 LALSEDHAR     | 1546  | 1473  |
| >MEN1-W18 LALSEDHAW    | 14    | >MEN1-W18 LALSEDHAR     | 18866 | 18852 |
| >MEN1-W18 LALSEDHAW    | 60    | >MEN1-W18 LALSEDHAR     | 22826 | 22766 |
| >MEN1-W18 LALSEDHAW    | 13    | >MEN1-W18 LALSEDHAR     | 20604 | 20591 |
| >MEN1-W18 LALSEDHAW    | 12    | >MEN1-W18 LALSEDHAR     | 18313 | 18301 |
| >MEN1-W18 LALSEDHAW    | 76    | >MEN1-W18 LALSEDHAR     | 23979 | 23903 |
| >MEN1-W18 HLALSEDHAV   | 207   | >MEN1-W18 HLALSEDHAR    | 453   | 246   |
| >MEN1-W18 HLALSEDHAV   | 9     | >MEN1-W18 HLALSEDHAR    | 15    | 6     |
| >MEN1-W18 HLALSEDHAV   | 26    | >MEN1-W18 HLALSEDHAR    | 43    | 17    |
| >MEN1-W18 HLALSEDHAV   | 286   | >MEN1-W18 HLALSEDHAR    | 718   | 432   |
| >MEN1-W18 HLALSEDHAV   | 38    | >MEN1-W18 HLALSEDHAR    | 41    | 3     |
| >MEN1-W18 HLALSEDHAV   | 75    | >MEN1-W18 HLALSEDHAR    | 57    | 18    |
| >MEN1-W18 HLALSEDHAV   | 16    | >MEN1-W18 HLALSEDHAR    | 25    | 9     |
| >MEN1-W18 HLALSEDHAV   | 24    | >MEN1-W18 HLALSEDHAR    | 25    | 1     |
| >MEN1-W18 HLALSEDHAV   | 5     | >MEN1-W18 HLALSEDHAR    | 5     | 0     |
| >MEN1-W18 HLALSEDHAV   | 33362 | >MEN1-W18 HLALSEDHAR    | 94    | 33268 |
| >MEN1-W18 HLALSEDHAV   | 237   | >MEN1-W18 HLALSEDHAR    | 172   | 65    |
| >MEN1-W18 HLALSEDHAV   | 202   | >MEN1-W18 HLALSEDHAR    | 22787 | 22585 |
| >MEN1-W18 HLALSEDHAV   | 306   | >MEN1-W18 HLALSEDHAR    | 29774 | 29468 |
| >MEN1-W18 HLALSEDHAV   | 31074 | >MEN1-W18 HLALSEDHAR    | 125   | 30949 |
| >MET-A1126 AVKSLNRI    | 66    | >MET-A1126 SVKSLNRI     | 105   | 39    |
| >MET-A1126 AVKSLNRTDI  | 353   | >MET-A1126 SVKSLNRTDI   | 612   | 259   |
| >MET-A1126 CAVKSLNR    | 729   | >MET-A1126 CSVKSLNR     | 441   | 288   |
| >MET-A1126 CAVKSLNR    | 88    | >MET-A1126 CSVKSLNR     | 123   | 35    |
| >MET-A1126 CAVKSLNR    | 360   | >MET-A1126 CSVKSLNR     | 460   | 100   |
| >MET-A1126 CAVKSLNRI   | 163   | >MET-A1126 CSVKSLNRI    | 37    | 126   |
| >MET-A1126 HCAVKSLNR   | 101   | >MET-A1126 HCSVKSLNR    | 107   | 6     |
| >MET-A1126 IHCAVKSLNR  | 312   | >MET-A1126 IHCSVKSLNRI  | 951   | 639   |
| >MET-A1126 IHCAVKSL    | 864   | >MET-A1126 IHCSVKSL     | 412   | 452   |
| >MET-A1126 IHCAVKSL    | 308   | >MET-A1126 IHCSVKSL     | 446   | 138   |
| >MET-A1126 KIHCAVKSL   | 85    | >MET-A1126 KIHCSVKSL    | 67    | 18    |
| >MET-A1126 KIHCAVKSL   | 483   | >MET-A1126 KIHCSVKSL    | 416   | 67    |
| >MET-A1126 KIHCAVKSLNI | 342   | >MET-A1126 KIHCSVKSLNFI | 222   | 120   |
| >MET-A1126 KIHCAVKS    | 538   | >MET-A1126 KIHCSVKS     | 375   | 163   |
| >MET-A1126 KIHCAVKSL   | 32    | >MET-A1126 KIHCSVKSL    | 43    | 11    |
| >MET-A1126 KIHCAVKSLNI | 26    | >MET-A1126 KIHCSVKSLNFI | 30    | 4     |
| >MET-A1126 KIHCAVKSLNI | 56    | >MET-A1126 KIHCSVKSLNFI | 36    | 20    |
| >MET-A1126 KIHCAVKSL   | 133   | >MET-A1126 KIHCSVKSL    | 202   | 69    |
| >MET-A1126 KIHCAVKSL   | 318   | >MET-A1126 KIHCSVKSL    | 75    | 243   |
| >MET-A1126 KIHCAVKSL   | 946   | >MET-A1126 KIHCSVKSL    | 268   | 678   |
| >MET-A1126 KIHCAVKSLNI | 20    | >MET-A1126 KIHCSVKSLNFI | 21    | 1     |

|                  |     |                  |       |       |
|------------------|-----|------------------|-------|-------|
| >MET-A1126 KKIHC | 129 | >MET-A1126 KKIHC | 61    | 68    |
| >MET-A1126 KKIHC | 513 | >MET-A1126 KKIHC | 271   | 242   |
| >MET-A1126 KKIHC | 7   | >MET-A1126 KKIHC | 5     | 2     |
| >MET-A1126 GKKIH | 145 | >MET-A1126 GKKIH | 71    | 74    |
| >MET-A1209 AMKYL | 144 | >MET-A1209 GMKYL | 252   | 108   |
| >MET-A1209 AMKYL | 16  | >MET-A1209 GMKYL | 23    | 7     |
| >MET-A1209 AMKYL | 183 | >MET-A1209 GMKYL | 327   | 144   |
| >MET-A1209 AMKYL | 327 | >MET-A1209 GMKYL | 169   | 158   |
| >MET-A1209 AMKYL | 420 | >MET-A1209 GMKYL | 384   | 36    |
| >MET-A1209 AMKYL | 16  | >MET-A1209 GMKYL | 40    | 24    |
| >MET-A1209 AMKYL | 84  | >MET-A1209 GMKYL | 120   | 36    |
| >MET-A1209 AMKYL | 70  | >MET-A1209 GMKYL | 93    | 23    |
| >MET-A1209 AMKYL | 88  | >MET-A1209 GMKYL | 171   | 83    |
| >MET-A1209 AMKYL | 111 | >MET-A1209 GMKYL | 228   | 117   |
| >MET-A1209 AMKYL | 9   | >MET-A1209 GMKYL | 36    | 27    |
| >MET-A1209 AMKYL | 26  | >MET-A1209 GMKYL | 243   | 217   |
| >MET-A1209 AMKYL | 157 | >MET-A1209 GMKYL | 1202  | 1045  |
| >MET-A1209 AMKYL | 66  | >MET-A1209 GMKYL | 104   | 38    |
| >MET-A1209 AMKYL | 169 | >MET-A1209 GMKYL | 339   | 170   |
| >MET-A1209 AMKYL | 73  | >MET-A1209 GMKYL | 129   | 56    |
| >MET-A1209 AMKYL | 454 | >MET-A1209 GMKYL | 493   | 39    |
| >MET-A1209 AMKYL | 494 | >MET-A1209 GMKYL | 2995  | 2501  |
| >MET-A1209 AMKYL | 9   | >MET-A1209 GMKYL | 29    | 20    |
| >MET-A1209 AMKYL | 244 | >MET-A1209 GMKYL | 1455  | 1211  |
| >MET-A1209 AMKYL | 155 | >MET-A1209 GMKYL | 853   | 698   |
| >MET-A1209 AMKYL | 266 | >MET-A1209 GMKYL | 425   | 159   |
| >MET-A1209 KAMKY | 52  | >MET-A1209 KGMKY | 183   | 131   |
| >MET-A1209 KAMKY | 37  | >MET-A1209 KGMKY | 1965  | 1928  |
| >MET-A1209 KAMKY | 12  | >MET-A1209 KGMKY | 86    | 74    |
| >MET-A1209 KAMKY | 38  | >MET-A1209 KGMKY | 9748  | 9710  |
| >MET-A1209 KAMKY | 7   | >MET-A1209 KGMKY | 20    | 13    |
| >MET-A1209 KAMKY | 25  | >MET-A1209 KGMKY | 152   | 127   |
| >MET-A1209 KAMKY | 27  | >MET-A1209 KGMKY | 212   | 185   |
| >MET-A1209 KAMKY | 118 | >MET-A1209 KGMKY | 725   | 607   |
| >MET-A1209 KAMKY | 430 | >MET-A1209 KGMKY | 4693  | 4263  |
| >MET-A1209 KAMKY | 17  | >MET-A1209 KGMKY | 100   | 83    |
| >MET-A1209 KAMKY | 5   | >MET-A1209 KGMKY | 47    | 42    |
| >MET-A1209 KAMKY | 71  | >MET-A1209 KGMKY | 831   | 760   |
| >MET-A1209 KAMKY | 41  | >MET-A1209 KGMKY | 720   | 679   |
| >MET-A1209 KAMKY | 231 | >MET-A1209 KGMKY | 413   | 182   |
| >MET-A1209 LIGFG | 409 | >MET-A1209 LIGFG | 15532 | 15123 |
| >MET-A1209 AKAMK | 357 | >MET-A1209 AKGMK | 1683  | 1326  |
| >MET-A1209 VAKAM | 212 | >MET-A1209 VAKGM | 470   | 258   |

|                       |       |                       |      |       |
|-----------------------|-------|-----------------------|------|-------|
| >MET-A1209 VAKAMKYLA' | 21    | >MET-A1209 VAKGMKYLA' | 41   | 20    |
| >MET-A1209 VAKAMKYLA' | 123   | >MET-A1209 VAKGMKYLA' | 240  | 117   |
| >MET-A1209 VAKAMKYL   | 389   | >MET-A1209 VAKGMKYL   | 346  | 43    |
| >MET-A1209 QVAKAMKYL  | 274   | >MET-A1209 QVAKGMKYL  | 734  | 460   |
| >MET-A1209 QVAKAMKY   | 164   | >MET-A1209 QVAKGMKY   | 185  | 21    |
| >MET-A1209 QVAKAMKY   | 195   | >MET-A1209 QVAKGMKY   | 164  | 31    |
| >MET-A1209 QVAKAMKY   | 58    | >MET-A1209 QVAKGMKY   | 73   | 15    |
| >MET-A1209 QVAKAMKYL  | 40    | >MET-A1209 QVAKGMKYL  | 55   | 15    |
| >MET-A1209 QVAKAMKY   | 97    | >MET-A1209 QVAKGMKY   | 57   | 40    |
| >MET-A1209 QVAKAMKY   | 348   | >MET-A1209 QVAKGMKY   | 238  | 110   |
| >MET-A1209 QVAKAMKYL  | 67    | >MET-A1209 QVAKGMKYL  | 135  | 68    |
| >MET-A1209 QVAKAMKYL  | 283   | >MET-A1209 QVAKGMKYL  | 320  | 37    |
| >MET-A1209 QVAKAMKY   | 41    | >MET-A1209 QVAKGMKY   | 29   | 12    |
| >MET-A1209 QVAKAMKY   | 1096  | >MET-A1209 QVAKGMKY   | 317  | 779   |
| >MET-A1209 QVAKAMKY   | 350   | >MET-A1209 QVAKGMKY   | 418  | 68    |
| >MET-A1209 QVAKAMKY   | 315   | >MET-A1209 QVAKGMKY   | 1085 | 770   |
| >MET-A1209 LQVAKAMKY  | 487   | >MET-A1209 LQVAKGMKY  | 680  | 193   |
| >MET-A1209 LQVAKAMKY  | 518   | >MET-A1209 LQVAKGMKY  | 414  | 104   |
| >MET-A1209 LQVAKAMKY  | 91    | >MET-A1209 LQVAKGMKY  | 124  | 33    |
| >MET-A1209 LQVAKAMKY  | 365   | >MET-A1209 LQVAKGMKY  | 494  | 129   |
| >MET-A1209 LQVAKAMKY  | 485   | >MET-A1209 LQVAKGMKY  | 940  | 455   |
| >MET-A1209 LQVAKAMKY  | 122   | >MET-A1209 LQVAKGMKY  | 80   | 42    |
| >MET-A1209 LQVAKAMKY  | 703   | >MET-A1209 LQVAKGMKY  | 451  | 252   |
| >MET-A1209 LQVAKAMKY  | 746   | >MET-A1209 LQVAKGMKY  | 192  | 554   |
| >MET-A1209 LQVAKAMKY  | 20    | >MET-A1209 LQVAKGMKY  | 12   | 8     |
| >MET-A1209 LQVAKAMKY  | 75    | >MET-A1209 LQVAKGMKY  | 61   | 14    |
| >MET-A1209 GLQVAKAMK  | 175   | >MET-A1209 GLQVAKGMK  | 468  | 293   |
| >MET-A1209 GLQVAKAMK  | 284   | >MET-A1209 GLQVAKGMK  | 366  | 82    |
| >MET-A1209 GLQVAKAMK  | 102   | >MET-A1209 GLQVAKGMK  | 215  | 113   |
| >MET-A1209 GLQVAKAMK  | 422   | >MET-A1209 GLQVAKGMK  | 579  | 157   |
| >MET-A1209 GLQVAKAMK  | 40    | >MET-A1209 GLQVAKGMK  | 63   | 23    |
| >MET-A1209 GLQVAKAMK  | 400   | >MET-A1209 GLQVAKGMK  | 1131 | 731   |
| >MET-A1209 GLQVAKAMK  | 225   | >MET-A1209 GLQVAKGMK  | 254  | 29    |
| >MET-A1209 GLQVAKAMK  | 337   | >MET-A1209 GLQVAKGMK  | 163  | 174   |
| >MET-A1209 FGLQVAKAM  | 230   | >MET-A1209 FGLQVAKGM  | 287  | 57    |
| >MET-A1209 FGLQVAKAM  | 680   | >MET-A1209 FGLQVAKGM  | 369  | 311   |
| >MET-A1209 FGLQVAKAM  | 379   | >MET-A1209 FGLQVAKGM  | 471  | 92    |
| >MET-A1209 FGLQVAKAM  | 126   | >MET-A1209 FGLQVAKGM  | 1944 | 1818  |
| >MET-A1209 FGLQVAKAM  | 393   | >MET-A1209 FGLQVAKGM  | 700  | 307   |
| >MET-A1209 FGLQVAKAM  | 263   | >MET-A1209 FGLQVAKGM  | 278  | 15    |
| >MET-A1209 IGFLQVAKA  | 329   | >MET-A1209 IGFLQVAKG  | 2763 | 2434  |
| >MET-A1209 IGFLQVAKA  | 135   | >MET-A1209 IGFLQVAKG  | 226  | 91    |
| >MET-D1246 DMYDKEYYS  | 13509 | >MET-D1246 HMYDKEYYS  | 290  | 13219 |

|                       |       |                       |       |       |
|-----------------------|-------|-----------------------|-------|-------|
| >MET-D1246 DMYDKEYYS\ | 37    | >MET-D1246 HMYDKEYYS\ | 10    | 27    |
| >MET-D1246 DMYDKEYYS  | 6524  | >MET-D1246 HMYDKEYYS  | 119   | 6405  |
| >MET-D1246 DMYDKEYYS\ | 35    | >MET-D1246 HMYDKEYYS\ | 11    | 24    |
| >MET-D1246 DMYDKEYYS\ | 55    | >MET-D1246 HMYDKEYYS\ | 20    | 35    |
| >MET-D1246 DMYDKEYYS\ | 132   | >MET-D1246 HMYDKEYYS\ | 44    | 88    |
| >MET-D1246 DMYDKEYY   | 2012  | >MET-D1246 HMYDKEYY   | 190   | 1822  |
| >MET-D1246 DMYDKEYYS  | 179   | >MET-D1246 HMYDKEYYS  | 16    | 163   |
| >MET-D1246 DMYDKEYYS\ | 3     | >MET-D1246 HMYDKEYYS\ | 2     | 1     |
| >MET-D1246 DMYDKEYYS  | 2716  | >MET-D1246 HMYDKEYYS  | 78    | 2638  |
| >MET-D1246 DMYDKEYYS\ | 5     | >MET-D1246 HMYDKEYYS\ | 2     | 3     |
| >MET-D1246 DMYDKEYYS  | 3329  | >MET-D1246 HMYDKEYYS  | 421   | 2908  |
| >MET-D1246 DMYDKEYYS\ | 8     | >MET-D1246 HMYDKEYYS\ | 5     | 3     |
| >MET-D1246 DMYDKEYYS\ | 4     | >MET-D1246 HMYDKEYYS\ | 4     | 0     |
| >MET-D1246 DMYDKEYYS  | 4825  | >MET-D1246 HMYDKEYYS  | 174   | 4651  |
| >MET-D1246 DMYDKEYYS\ | 4     | >MET-D1246 HMYDKEYYS\ | 2     | 2     |
| >MET-D1246 DMYDKEYY   | 10987 | >MET-D1246 HMYDKEYY   | 199   | 10788 |
| >MET-D1246 DMYDKEYYS\ | 13006 | >MET-D1246 HMYDKEYYS\ | 425   | 12581 |
| >MET-D1246 DMYDKEYY   | 24    | >MET-D1246 HMYDKEYY   | 13    | 11    |
| >MET-D1246 DMYDKEYY   | 168   | >MET-D1246 HMYDKEYY   | 40    | 128   |
| >MET-D1246 DMYDKEYYS\ | 8168  | >MET-D1246 HMYDKEYYS\ | 441   | 7727  |
| >MET-D1246 DMYDKEYY   | 482   | >MET-D1246 HMYDKEYY   | 448   | 34    |
| >MET-D1246 DMYDKEYYS\ | 324   | >MET-D1246 HMYDKEYYS\ | 352   | 28    |
| >MET-D1246 DMYDKEYYS\ | 73    | >MET-D1246 HMYDKEYYS\ | 84    | 11    |
| >MET-D1246 DMYDKEYY   | 5915  | >MET-D1246 HMYDKEYY   | 260   | 5655  |
| >MET-D1246 DMYDKEYY   | 1453  | >MET-D1246 HMYDKEYY   | 70    | 1383  |
| >MET-D1246 DMYDKEYY   | 383   | >MET-D1246 HMYDKEYY   | 67    | 316   |
| >MET-D1246 DMYDKEYY   | 911   | >MET-D1246 HMYDKEYY   | 44    | 867   |
| >MET-D1246 DMYDKEYYS\ | 1968  | >MET-D1246 HMYDKEYYS\ | 132   | 1836  |
| >MET-D1246 DMYDKEYYS\ | 2560  | >MET-D1246 HMYDKEYYS\ | 276   | 2284  |
| >MET-D1246 DMYDKEYY   | 7514  | >MET-D1246 HMYDKEYY   | 123   | 7391  |
| >MET-D1246 RDMYDKEYY  | 1114  | >MET-D1246 RHMYDKEYY  | 169   | 945   |
| >MET-D1246 RDMYDKEY   | 850   | >MET-D1246 RHMYDKEY   | 29    | 821   |
| >MET-D1246 RDMYDKEYY  | 1486  | >MET-D1246 RHMYDKEYY  | 59    | 1427  |
| >MET-D1246 RDMYDKEYY! | 2680  | >MET-D1246 RHMYDKEYY! | 134   | 2546  |
| >MET-D1246 RDMYDKEYY! | 201   | >MET-D1246 RHMYDKEYY! | 4508  | 4307  |
| >MET-D1246 RDMYDKEYY! | 320   | >MET-D1246 RHMYDKEYY! | 21707 | 21387 |
| >MET-D1246 ARDMYDKEY  | 1395  | >MET-D1246 ARHMYDKEY  | 40    | 1355  |
| >MET-D1246 ARDMYDKEY  | 1732  | >MET-D1246 ARHMYDKEY  | 94    | 1638  |
| >MET-D1246 ARDMYDKEY  | 416   | >MET-D1246 ARHMYDKEY  | 164   | 252   |
| >MET-D1246 LARDMYDKE' | 449   | >MET-D1246 LARHMYDKE' | 574   | 125   |
| >MET-D1246 LARDMYDK   | 34    | >MET-D1246 LARHMYDK   | 16    | 18    |
| >MET-D1246 LARDMYDKE' | 717   | >MET-D1246 LARHMYDKE' | 483   | 234   |
| >MET-D1246 LARDMYDKE' | 303   | >MET-D1246 LARHMYDKE' | 279   | 24    |



|                       |      |                       |      |      |
|-----------------------|------|-----------------------|------|------|
| >MET-D1246 LARDMYDKE' | 305  | >MET-D1246 LARHMYDKE' | 279  | 26   |
| >MET-D1246 LARDMYDKE' | 353  | >MET-D1246 LARHMYDKE' | 106  | 247  |
| >MET-D1246 LARDMYDKE' | 855  | >MET-D1246 LARHMYDKE' | 227  | 628  |
| >MET-D1246 LARDMYDKE' | 14   | >MET-D1246 LARHMYDKE' | 15   | 1    |
| >MET-D1246 LARDMYDKE' | 78   | >MET-D1246 LARHMYDKE' | 85   | 7    |
| >MET-D1246 LARDMYDKE' | 84   | >MET-D1246 LARHMYDKE' | 93   | 9    |
| >MET-D1246 GLARDMYDK  | 376  | >MET-D1246 GLARHMYDK  | 66   | 310  |
| >MET-D1246 GLARDMYDK  | 142  | >MET-D1246 GLARHMYDK  | 63   | 79   |
| >MET-D1246 GLARDMYDK  | 115  | >MET-D1246 GLARHMYDK  | 81   | 34   |
| >MET-D1246 GLARDMYDK  | 214  | >MET-D1246 GLARHMYDK  | 488  | 274  |
| >MET-D1246 GLARDMYDK  | 553  | >MET-D1246 GLARHMYDK  | 291  | 262  |
| >MET-D1246 GLARDMYDK  | 1161 | >MET-D1246 GLARHMYDK  | 449  | 712  |
| >MET-D1246 GLARDMYDK  | 371  | >MET-D1246 GLARHMYDK  | 141  | 230  |
| >MET-D1246 FGLARDMY   | 398  | >MET-D1246 FGLARHMY   | 58   | 340  |
| >MET-D1246 FGLARDMY   | 339  | >MET-D1246 FGLARHMY   | 209  | 130  |
| >MET-D1246 FGLARDMY   | 290  | >MET-D1246 FGLARHMY   | 568  | 278  |
| >MET-D1246 DFGLARDMY  | 1112 | >MET-D1246 DFGLARHMY  | 76   | 1036 |
| >MET-D1246 DFGLARDMY  | 4216 | >MET-D1246 DFGLARHMY  | 478  | 3738 |
| >MET-D1246 DFGLARDMY  | 927  | >MET-D1246 DFGLARHMY  | 367  | 560  |
| >MET-D1246 DFGLARDMY  | 4192 | >MET-D1246 DFGLARHMY  | 414  | 3778 |
| >MET-D1246 ADFGLARDM  | 1556 | >MET-D1246 ADFGLARHM  | 445  | 1111 |
| >MET-D1246 ADFGLARDM  | 342  | >MET-D1246 ADFGLARHM  | 523  | 181  |
| >MET-D1246 VADFLARDI  | 82   | >MET-D1246 VADFLARHI  | 43   | 39   |
| >MET-D1246 VADFLARDI  | 218  | >MET-D1246 VADFLARHI  | 56   | 162  |
| >MET-D1246 VADFLARDI  | 601  | >MET-D1246 VADFLARHI  | 245  | 356  |
| >MET-D1246 VADFLARDI  | 520  | >MET-D1246 VADFLARHI  | 146  | 374  |
| >MET-D1246 VADFLARDI  | 340  | >MET-D1246 VADFLARHI  | 359  | 19   |
| >MET-D1246 VADFLARDI  | 973  | >MET-D1246 VADFLARHI  | 474  | 499  |
| >MET-D1246 KVADFLARL  | 2264 | >MET-D1246 KVADFLARL  | 471  | 1793 |
| >MET-D1246 KVADFLARL  | 425  | >MET-D1246 KVADFLARL  | 576  | 151  |
| >MET-D1246 KVADFLARL  | 520  | >MET-D1246 KVADFLARL  | 225  | 295  |
| >MET-D1246 KVADFLARL  | 513  | >MET-D1246 KVADFLARL  | 336  | 177  |
| >MET-D1398 DTRPASFW   | 398  | >MET-D1398 NTRPASFW   | 1496 | 1098 |
| >MET-D1398 DTRPASFW   | 12   | >MET-D1398 NTRPASFW   | 7    | 5    |
| >MET-D1398 DTRPASFW   | 58   | >MET-D1398 NTRPASFW   | 43   | 15   |
| >MET-D1398 VDTRPASF   | 1381 | >MET-D1398 VNTRPASF   | 259  | 1122 |
| >MET-D1398 VDTRPASFW  | 344  | >MET-D1398 VNTRPASFW  | 151  | 193  |
| >MET-D1398 EVDTRPASF  | 1610 | >MET-D1398 EVNTRPASF  | 456  | 1154 |
| >MET-D1398 EVDTRPASF  | 1323 | >MET-D1398 EVNTRPASF  | 63   | 1260 |
| >MET-D1398 EVDTRPASFW | 4362 | >MET-D1398 EVNTRPASFW | 297  | 4065 |
| >MET-D1398 EVDTRPASF  | 1455 | >MET-D1398 EVNTRPASF  | 179  | 1276 |
| >MET-D1398 EVDTRPASFW | 1723 | >MET-D1398 EVNTRPASFW | 266  | 1457 |
| >MET-D1398 DEVNTRPASF | 497  | >MET-D1398 DEVNTRPASF | 367  | 130  |

|                        |      |                       |       |       |
|------------------------|------|-----------------------|-------|-------|
| >MET-D1398 DEVDTRPA    | 42   | >MET-D1398 DEVNTRPA   | 55    | 13    |
| >MET-D1398 DEVDTRPAS   | 22   | >MET-D1398 DEVNTRPAS  | 37    | 15    |
| >MET-D1398 DEVDTRPASF  | 382  | >MET-D1398 DEVNTRPASF | 859   | 477   |
| >MET-D1398 DEVDTRPASF  | 22   | >MET-D1398 DEVNTRPASF | 34    | 12    |
| >MET-D1398 DEVDTRPASF  | 77   | >MET-D1398 DEVNTRPASF | 88    | 11    |
| >MET-D1398 DEVDTRPASF  | 34   | >MET-D1398 DEVNTRPASF | 34    | 0     |
| >MET-D1398 NADDEVNTR   | 140  | >MET-D1398 NADDEVNTR  | 127   | 13    |
| >MET-D1398 EDNADDEVN   | 570  | >MET-D1398 EDNADDEVN  | 489   | 81    |
| >MET-E168D EPSQCPDCV\  | 230  | >MET-E168D DPSQCPDCV\ | 543   | 313   |
| >MET-E168D EEPSQCPDCV  | 190  | >MET-E168D EDPSQCPDCV | 6397  | 6207  |
| >MET-E168D IEEPSQCPDC\ | 51   | >MET-E168D IEDPSQCPDC | 113   | 62    |
| >MET-E168D IEEPSQCPDC\ | 222  | >MET-E168D IEDPSQCPDC | 418   | 196   |
| >MET-E221G ETKDGMFL    | 3556 | >MET-E221G GTKDGMFL   | 253   | 3303  |
| >MET-E221G ETKDGMFL    | 1066 | >MET-E221G GTKDGMFL   | 105   | 961   |
| >MET-E221G ETKDGMFM    | 414  | >MET-E221G GTKDGMFM   | 9996  | 9582  |
| >MET-E221G ETKDGMFM    | 36   | >MET-E221G GTKDGMFM   | 3561  | 3525  |
| >MET-E221G ETKDGMFL    | 16   | >MET-E221G GTKDGMFL   | 3266  | 3250  |
| >MET-E221G ETKDGMFM    | 37   | >MET-E221G GTKDGMFM   | 6701  | 6664  |
| >MET-E221G ETKDGMFL    | 34   | >MET-E221G GTKDGMFL   | 5913  | 5879  |
| >MET-E221G ETKDGMFL    | 112  | >MET-E221G GTKDGMFL   | 7902  | 7790  |
| >MET-E221G ETKDGMFL    | 1077 | >MET-E221G GTKDGMFL   | 22    | 1055  |
| >MET-E221G ETKDGMFL    | 339  | >MET-E221G GTKDGMFL   | 6195  | 5856  |
| >MET-E221G ETKDGMFL    | 11   | >MET-E221G GTKDGMFL   | 2449  | 2438  |
| >MET-E221G ETKDGMFLT   | 143  | >MET-E221G GTKDGMFLT  | 2642  | 2499  |
| >MET-E221G ETKDGMFL    | 22   | >MET-E221G GTKDGMFL   | 6276  | 6254  |
| >MET-E221G ETKDGMFLT   | 382  | >MET-E221G GTKDGMFLT  | 13048 | 12666 |
| >MET-E221G ETKDGMFM    | 968  | >MET-E221G GTKDGMFM   | 279   | 689   |
| >MET-E221G ETKDGMFM    | 20   | >MET-E221G GTKDGMFM   | 12    | 8     |
| >MET-E221G ETKDGMFL    | 328  | >MET-E221G GTKDGMFL   | 152   | 176   |
| >MET-E221G ETKDGMFM    | 1774 | >MET-E221G GTKDGMFM   | 221   | 1553  |
| >MET-E221G ETKDGMFL    | 392  | >MET-E221G GTKDGMFL   | 135   | 257   |
| >MET-E221G ETKDGMFL    | 384  | >MET-E221G GTKDGMFL   | 26    | 358   |
| >MET-E221G KETKDGFM    | 53   | >MET-E221G KGTKDGFM   | 37214 | 37161 |
| >MET-E221G KETKDGFMFM  | 147  | >MET-E221G KGTKDGFMFM | 1002  | 855   |
| >MET-E221G KETKDGFM    | 158  | >MET-E221G KGTKDGFM   | 22150 | 21992 |
| >MET-E221G KETKDGFMFM  | 35   | >MET-E221G KGTKDGFMFM | 20343 | 20308 |
| >MET-E221G KETKDGFMFM  | 311  | >MET-E221G KGTKDGFMFM | 36872 | 36561 |
| >MET-E221G KETKDGFMFI  | 109  | >MET-E221G KGTKDGFMFM | 31558 | 31449 |
| >MET-E221G KETKDGFMFI  | 368  | >MET-E221G KGTKDGFMFM | 38156 | 37788 |
| >MET-E221G KETKDGFMFM  | 479  | >MET-E221G KGTKDGFMFM | 20964 | 20485 |
| >MET-E221G KETKDGFMFI  | 404  | >MET-E221G KGTKDGFMFM | 28396 | 27992 |
| >MET-E221G KETKDGFMFM  | 160  | >MET-E221G KGTKDGFMFM | 33987 | 33827 |
| >MET-E221G KETKDGFMFI  | 124  | >MET-E221G KGTKDGFMFM | 37024 | 36900 |

|                        |      |                        |       |       |
|------------------------|------|------------------------|-------|-------|
| >MET-E221G KETKDGFMF   | 1622 | >MET-E221G KGTKDGFMF   | 244   | 1378  |
| >MET-E221G KETKDGFMF   | 453  | >MET-E221G KGTKDGFMF   | 37445 | 36992 |
| >MET-E221G KETKDGFMFI  | 122  | >MET-E221G KGTKDGFMF   | 32379 | 32257 |
| >MET-E221G KETKDGFMFI  | 250  | >MET-E221G KGTKDGFMF   | 36198 | 35948 |
| >MET-E221G LKETKDG     | 1054 | >MET-E221G LKGTKDG     | 408   | 646   |
| >MET-E221G LKETKDGFMF  | 349  | >MET-E221G LKGTKDGFM   | 111   | 238   |
| >MET-E221G RLKETKDGFM  | 194  | >MET-E221G RLKGTKDGFM  | 172   | 22    |
| >MET-E221G RLKETKDG    | 159  | >MET-E221G RLKGTKDG    | 170   | 11    |
| >MET-E221G RLKETKDGFM  | 96   | >MET-E221G RLKGTKDGFM  | 102   | 6     |
| >MET-E221G RLKETKDG    | 297  | >MET-E221G RLKGTKDG    | 831   | 534   |
| >MET-E221G RLKETKDGFM  | 47   | >MET-E221G RLKGTKDGFM  | 115   | 68    |
| >MET-E221G RLKETKDGFM  | 367  | >MET-E221G RLKGTKDGFM  | 563   | 196   |
| >MET-E221G RLKETKDGFM  | 508  | >MET-E221G RLKGTKDGFM  | 490   | 18    |
| >MET-E221G RLKETKDGFM  | 927  | >MET-E221G RLKGTKDGFM  | 297   | 630   |
| >MET-E221G RRLKETKDG   | 29   | >MET-E221G RRLKGTKDG   | 36    | 7     |
| >MET-E221G RRLKETKDG   | 384  | >MET-E221G RRLKGTKDG   | 353   | 31    |
| >MET-E221G RRLKETKDG   | 42   | >MET-E221G RRLKGTKDG   | 36    | 6     |
| >MET-E221G RRLKETKDG   | 46   | >MET-E221G RRLKGTKDG   | 38    | 8     |
| >MET-E221G RRLKETD     | 241  | >MET-E221G RRLKGTKD    | 221   | 20    |
| >MET-E221G RRLKETKDG   | 219  | >MET-E221G RRLKGTKDG   | 228   | 9     |
| >MET-E221G RRLKETKDG   | 187  | >MET-E221G RRLKGTKDG   | 95    | 92    |
| >MET-E221G RRLKETKDG   | 219  | >MET-E221G RRLKGTKDG   | 222   | 3     |
| >MET-E221G RRLKETKDG   | 401  | >MET-E221G RRLKGTKDG   | 138   | 263   |
| >MET-E221G VRRLKETKDG  | 477  | >MET-E221G VRRLKGTKDC  | 314   | 163   |
| >MET-E221G SVRRLKETK   | 1584 | >MET-E221G SVRRLKGTK   | 256   | 1328  |
| >MET-E221G SVRRLKETK   | 8    | >MET-E221G SVRRLKGTK   | 4     | 4     |
| >MET-E221G SVRRLKETK   | 278  | >MET-E221G SVRRLKGTK   | 386   | 108   |
| >MET-E221G ISVRRLKETK  | 694  | >MET-E221G ISVRRLKGTK  | 473   | 221   |
| >MET-E221G ISVRRLKETK  | 207  | >MET-E221G ISVRRLKGTK  | 557   | 350   |
| >MET-E221G SISVRRLKETK | 484  | >MET-E221G SISVRRLKGTK | 137   | 347   |
| >MET-E221G SISVRRLKETK | 43   | >MET-E221G SISVRRLKGTK | 49    | 6     |
| >MET-E221G SISVRRLKETK | 627  | >MET-E221G SISVRRLKGTK | 202   | 425   |
| >MET-E221G SISVRRLKETK | 280  | >MET-E221G SISVRRLKGTK | 530   | 250   |
| >MET-G1137 GEVSQFLTEG  | 67   | >MET-G1137 VEVSQFLTEG  | 33    | 34    |
| >MET-G1137 GEVSQFLTEG  | 25   | >MET-G1137 VEVSQFLTEG  | 65    | 40    |
| >MET-G1137 GEVSQFLT    | 279  | >MET-G1137 VEVSQFLT    | 802   | 523   |
| >MET-G1137 GEVSQFLTEG  | 267  | >MET-G1137 VEVSQFLTEG  | 761   | 494   |
| >MET-G1137 GEVSQFLT    | 229  | >MET-G1137 VEVSQFLT    | 938   | 709   |
| >MET-G1137 GEVSQFLTEG  | 3    | >MET-G1137 VEVSQFLTEG  | 6     | 3     |
| >MET-G1137 DIGEVSQFL   | 382  | >MET-G1137 DIVEVSQFL   | 809   | 427   |
| >MET-G1137 DIGEVSQF    | 5988 | >MET-G1137 DIVEVSQF    | 50    | 5938  |
| >MET-G1137 DIGEVSQFL   | 9429 | >MET-G1137 DIVEVSQFL   | 183   | 9246  |
| >MET-G1137 DIGEVSQF    | 541  | >MET-G1137 DIVEVSQF    | 28    | 513   |

|                        |       |                        |      |       |
|------------------------|-------|------------------------|------|-------|
| >MET-G1137 DIGEVSQFL   | 5927  | >MET-G1137 DIVEVSQFL   | 212  | 5715  |
| >MET-G1137 DIGEVSQFL   | 701   | >MET-G1137 DIVEVSQFL   | 70   | 631   |
| >MET-G1137 DIGEVSQFL   | 140   | >MET-G1137 DIVEVSQFL   | 47   | 93    |
| >MET-G1137 TDIGEVSQF   | 398   | >MET-G1137 TDIVEVSQF   | 3394 | 2996  |
| >MET-G1137 TDIGEVSQF   | 3385  | >MET-G1137 TDIVEVSQF   | 369  | 3016  |
| >MET-G1137 TDIGEVSQFL  | 543   | >MET-G1137 TDIVEVSQFL  | 196  | 347   |
| >MET-G1137 TDIGEVSQFL  | 639   | >MET-G1137 TDIVEVSQFL  | 253  | 386   |
| >MET-G1137 ITDIGEVSQF  | 525   | >MET-G1137 ITDIVEVSQF  | 283  | 242   |
| >MET-G1137 ITDIGEVSQFL | 359   | >MET-G1137 ITDIVEVSQFL | 167  | 192   |
| >MET-G1137 ITDIGEVSQFL | 682   | >MET-G1137 ITDIVEVSQFL | 475  | 207   |
| >MET-G1137 ITDIGEVSQF  | 4     | >MET-G1137 ITDIVEVSQF  | 6    | 2     |
| >MET-G1137 ITDIGEVSQFL | 15    | >MET-G1137 ITDIVEVSQFL | 54   | 39    |
| >MET-G1137 ITDIGEVSQF  | 231   | >MET-G1137 ITDIVEVSQF  | 82   | 149   |
| >MET-G1137 ITDIGEVSQFL | 310   | >MET-G1137 ITDIVEVSQFL | 140  | 170   |
| >MET-G1137 ITDIGEVSQF  | 235   | >MET-G1137 ITDIVEVSQF  | 239  | 4     |
| >MET-G1137 ITDIGEVSQFL | 646   | >MET-G1137 ITDIVEVSQFL | 483  | 163   |
| >MET-G1137 RITDIGEV    | 484   | >MET-G1137 RITDIVEV    | 35   | 449   |
| >MET-G1137 RITDIGEV    | 100   | >MET-G1137 RITDIVEV    | 23   | 77    |
| >MET-G1137 RITDIGEV    | 31    | >MET-G1137 RITDIVEV    | 17   | 14    |
| >MET-G1137 RITDIGEV    | 36    | >MET-G1137 RITDIVEV    | 9    | 27    |
| >MET-G1137 RITDIGEV    | 16    | >MET-G1137 RITDIVEV    | 6    | 10    |
| >MET-G1137 RITDIGEV    | 566   | >MET-G1137 RITDIVEV    | 68   | 498   |
| >MET-G1137 RITDIGEV    | 56    | >MET-G1137 RITDIVEV    | 15   | 41    |
| >MET-G1137 RITDIGEV    | 797   | >MET-G1137 RITDIVEV    | 57   | 740   |
| >MET-G1137 RITDIGEV    | 5     | >MET-G1137 RITDIVEV    | 3    | 2     |
| >MET-G1137 RITDIGEVSQF | 164   | >MET-G1137 RITDIVEVSQF | 110  | 54    |
| >MET-G1137 RITDIGEV    | 477   | >MET-G1137 RITDIVEV    | 128  | 349   |
| >MET-G1137 RITDIGEVSQF | 444   | >MET-G1137 RITDIVEVSQF | 363  | 81    |
| >MET-G1137 RITDIGEVSQF | 89    | >MET-G1137 RITDIVEVSQF | 71   | 18    |
| >MET-G1137 RITDIGEVSQF | 287   | >MET-G1137 RITDIVEVSQF | 119  | 168   |
| >MET-G1137 RITDIGEVSQF | 39    | >MET-G1137 RITDIVEVSQF | 66   | 27    |
| >MET-G1137 SLNRITDIG   | 22623 | >MET-G1137 SLNRITDIV   | 262  | 22361 |
| >MET-G1137 SLNRITDIGEV | 96    | >MET-G1137 SLNRITDIVEV | 28   | 68    |
| >MET-G1137 SLNRITDIG   | 1252  | >MET-G1137 SLNRITDIV   | 5    | 1247  |
| >MET-G1137 SLNRITDIGEV | 7     | >MET-G1137 SLNRITDIVEV | 4    | 3     |
| >MET-G1137 SLNRITDIG   | 8648  | >MET-G1137 SLNRITDIV   | 7    | 8641  |
| >MET-G1137 SLNRITDIGEV | 5     | >MET-G1137 SLNRITDIVEV | 6    | 1     |
| >MET-G1137 SLNRITDIGEV | 444   | >MET-G1137 SLNRITDIVEV | 137  | 307   |
| >MET-G1137 SLNRITDIG   | 11679 | >MET-G1137 SLNRITDIV   | 10   | 11669 |
| >MET-G1137 SLNRITDIGEV | 3     | >MET-G1137 SLNRITDIVEV | 3    | 0     |
| >MET-G1137 SLNRITDIG   | 17914 | >MET-G1137 SLNRITDIV   | 9    | 17905 |
| >MET-G1137 SLNRITDIGEV | 11    | >MET-G1137 SLNRITDIVEV | 5    | 6     |
| >MET-G1137 SLNRITDIG   | 10756 | >MET-G1137 SLNRITDIV   | 12   | 10744 |

|                        |       |                        |      |       |
|------------------------|-------|------------------------|------|-------|
| >MET-G1137 SLNRITDIGEV | 9     | >MET-G1137 SLNRITDIVEV | 6    | 3     |
| >MET-G1137 SLNRITDIG   | 23217 | >MET-G1137 SLNRITDIV   | 25   | 23192 |
| >MET-G1137 SLNRITDIGEV | 34    | >MET-G1137 SLNRITDIVEV | 10   | 24    |
| >MET-G1137 SLNRITDIG   | 14033 | >MET-G1137 SLNRITDIV   | 6    | 14027 |
| >MET-G1137 SLNRITDIGEV | 3     | >MET-G1137 SLNRITDIVEV | 2    | 1     |
| >MET-G1137 SLNRITDIGEV | 296   | >MET-G1137 SLNRITDIVEV | 159  | 137   |
| >MET-G1137 KSLNRITDIG  | 2432  | >MET-G1137 KSLNRITDIV  | 222  | 2210  |
| >MET-G1260 GAKLPVKW    | 73    | >MET-G1260 CAKLPVKW    | 116  | 43    |
| >MET-G1260 GAKLPVKWM   | 331   | >MET-G1260 CAKLPVKWM   | 903  | 572   |
| >MET-G1260 GAKLPVKW    | 128   | >MET-G1260 CAKLPVKW    | 107  | 21    |
| >MET-G1260 GAKLPVKWM   | 319   | >MET-G1260 CAKLPVKWM   | 3065 | 2746  |
| >MET-G1260 TGAKLPVKW   | 279   | >MET-G1260 TCAKLPVKW   | 3057 | 2778  |
| >MET-G1260 TGAKLPVKW   | 206   | >MET-G1260 TCAKLPVKW   | 1039 | 833   |
| >MET-G1260 KEYYSVHNKT  | 1714  | >MET-G1260 KEYYSVHNKT  | 180  | 1534  |
| >MET-G1260 KTGAKLPV    | 749   | >MET-G1260 KTCAKLPV    | 486  | 263   |
| >MET-G1260 KTGAKLPV    | 298   | >MET-G1260 KTCAKLPV    | 106  | 192   |
| >MET-G1260 KTGAKLPV    | 182   | >MET-G1260 KTCAKLPV    | 179  | 3     |
| >MET-G1260 KTGAKLPV    | 373   | >MET-G1260 KTCAKLPV    | 1972 | 1599  |
| >MET-G1260 KTGAKLPVK   | 109   | >MET-G1260 KTCAKLPVK   | 102  | 7     |
| >MET-G1260 KTGAKLPVK   | 59    | >MET-G1260 KTCAKLPVK   | 26   | 33    |
| >MET-G1260 KTGAKLPVKV  | 196   | >MET-G1260 KTCAKLPVKV  | 37   | 159   |
| >MET-G1260 KTGAKLPVKV  | 493   | >MET-G1260 KTCAKLPVKV  | 315  | 178   |
| >MET-G1260 KTGAKLPV    | 222   | >MET-G1260 KTCAKLPV    | 59   | 163   |
| >MET-G1260 KTGAKLPVK   | 10    | >MET-G1260 KTCAKLPVK   | 6    | 4     |
| >MET-G1260 KTGAKLPVK   | 211   | >MET-G1260 KTCAKLPVK   | 64   | 147   |
| >MET-G1260 KTGAKLPVKV  | 59    | >MET-G1260 KTCAKLPVKV  | 43   | 16    |
| >MET-G1260 KTGAKLPV    | 423   | >MET-G1260 KTCAKLPV    | 73   | 350   |
| >MET-G1260 KTGAKLPVKV  | 17    | >MET-G1260 KTCAKLPVKV  | 8    | 9     |
| >MET-G1260 KTGAKLPVKV  | 13    | >MET-G1260 KTCAKLPVKV  | 7    | 6     |
| >MET-G1260 KTGAKLPVKV  | 42    | >MET-G1260 KTCAKLPVKV  | 53   | 11    |
| >MET-G1260 KTGAKLPVKV  | 13    | >MET-G1260 KTCAKLPVKV  | 17   | 4     |
| >MET-G1260 KTGAKLPVKV  | 176   | >MET-G1260 KTCAKLPVKV  | 83   | 93    |
| >MET-G1260 HNKTGAKLPV  | 419   | >MET-G1260 HNKTCAKLPV  | 674  | 255   |
| >MET-G1260 HNKTGAKLPV  | 25    | >MET-G1260 HNKTCAKLPV  | 47   | 22    |
| >MET-G1260 VHNTGAKL    | 328   | >MET-G1260 VHNTCAKL    | 915  | 587   |
| >MET-G1260 SVHNKTGAKI  | 1448  | >MET-G1260 SVHNKTCAKL  | 478  | 970   |
| >MET-G1260 SVHNKTGAK   | 113   | >MET-G1260 SVHNKTCAK   | 128  | 15    |
| >MET-G1260 SVHNKTGAK   | 38    | >MET-G1260 SVHNKTCAK   | 25   | 13    |
| >MET-G1260 SVHNKTGAK   | 8     | >MET-G1260 SVHNKTCAK   | 5    | 3     |
| >MET-G1260 SVHNKTGAKI  | 240   | >MET-G1260 SVHNKTCAKL  | 244  | 4     |
| >MET-G1260 SVHNKTGAK   | 1147  | >MET-G1260 SVHNKTCAK   | 292  | 855   |
| >MET-G1260 SVHNKTGAK   | 358   | >MET-G1260 SVHNKTCAK   | 161  | 197   |
| >MET-G1260 YSVHNKTGA   | 863   | >MET-G1260 YSVHNKTCA   | 116  | 747   |

|                        |       |                        |      |       |
|------------------------|-------|------------------------|------|-------|
| >MET-G1260 YSVHNKTGAI  | 128   | >MET-G1260 YSVHNKTCAK  | 200  | 72    |
| >MET-G1260 YSVHNKTGAI  | 929   | >MET-G1260 YSVHNKTCAK  | 490  | 439   |
| >MET-G1260 YSVHNKTGAI  | 648   | >MET-G1260 YSVHNKTCAK  | 222  | 426   |
| >MET-G1260 YSVHNKTGAI  | 1658  | >MET-G1260 YSVHNKTCAK  | 300  | 1358  |
| >MET-G1260 YSVHNKTGAI  | 222   | >MET-G1260 YSVHNKTCAK  | 291  | 69    |
| >MET-G1260 YSVHNKTGAI  | 8     | >MET-G1260 YSVHNKTCAK  | 14   | 6     |
| >MET-G1260 YSVHNKTGAI  | 179   | >MET-G1260 YSVHNKTCAK  | 173  | 6     |
| >MET-G1260 YYSVHNKTGA  | 887   | >MET-G1260 YYSVHNKTCA  | 388  | 499   |
| >MET-G1260 YYSVHNKTGA  | 2018  | >MET-G1260 YYSVHNKTCA  | 499  | 1519  |
| >MET-G983V LGSELVRY    | 26828 | >MET-G983V LVSELVRY    | 251  | 26577 |
| >MET-G983V LGSELVRY    | 2708  | >MET-G983V LVSELVRY    | 92   | 2616  |
| >MET-G983V LGSELVRY    | 668   | >MET-G983V LVSELVRY    | 272  | 396   |
| >MET-G983V LGSELVRYDA  | 1882  | >MET-G983V LVSELVRYDA  | 177  | 1705  |
| >MET-G983V LGSELVRYDA  | 12699 | >MET-G983V LVSELVRYDA  | 452  | 12247 |
| >MET-G983V LGSELVRYDA  | 1786  | >MET-G983V LVSELVRYDA  | 82   | 1704  |
| >MET-G983V LGSELVRYDA  | 17854 | >MET-G983V LVSELVRYDA  | 400  | 17454 |
| >MET-G983V LGSELVRY    | 932   | >MET-G983V LVSELVRY    | 228  | 704   |
| >MET-G983V LGSELVRY    | 1060  | >MET-G983V LVSELVRY    | 160  | 900   |
| >MET-G983V LGSELVRY    | 603   | >MET-G983V LVSELVRY    | 234  | 369   |
| >MET-G983V LGSELVRY    | 837   | >MET-G983V LVSELVRY    | 174  | 663   |
| >MET-G983V DLGSELVRY   | 9469  | >MET-G983V DLVSELVRY   | 192  | 9277  |
| >MET-G983V DLGSELVRY   | 144   | >MET-G983V DLVSELVRY   | 11   | 133   |
| >MET-G983V DLGSELVR    | 579   | >MET-G983V DLVSELVR    | 309  | 270   |
| >MET-G983V DLGSELVR    | 896   | >MET-G983V DLVSELVR    | 128  | 768   |
| >MET-G983V KDLGSELVR   | 188   | >MET-G983V KDLVSELVR   | 737  | 549   |
| >MET-G983V KDLGSELV    | 55    | >MET-G983V KDLVSELV    | 28   | 27    |
| >MET-G983V QIKDLGSEL   | 806   | >MET-G983V QIKDLVSEL   | 175  | 631   |
| >MET-G983V QIKDLGSELV  | 547   | >MET-G983V QIKDLVSELV  | 328  | 219   |
| >MET-G983V QIKDLGSEL   | 409   | >MET-G983V QIKDLVSEL   | 37   | 372   |
| >MET-G983V QIKDLGSELV  | 194   | >MET-G983V QIKDLVSELV  | 180  | 14    |
| >MET-G983V QIKDLGSEL   | 791   | >MET-G983V QIKDLVSEL   | 193  | 598   |
| >MET-G983V QIKDLGSELV  | 68    | >MET-G983V QIKDLVSELV  | 53   | 15    |
| >MET-G983V QIKDLGSELVI | 719   | >MET-G983V QIKDLVSELVI | 459  | 260   |
| >MET-G983V QIKDLGSELVI | 445   | >MET-G983V QIKDLVSELVI | 233  | 212   |
| >MET-G983V QIKDLGSEL   | 435   | >MET-G983V QIKDLVSEL   | 1044 | 609   |
| >MET-G983V QIKDLGSELVI | 297   | >MET-G983V QIKDLVSELVI | 243  | 54    |
| >MET-G983V KQIKDLGSEL  | 121   | >MET-G983V KQIKDLVSEL  | 51   | 70    |
| >MET-G983V KQIKDLGSEL  | 462   | >MET-G983V KQIKDLVSEL  | 246  | 216   |
| >MET-G983V KQIKDLGSEL  | 195   | >MET-G983V KQIKDLVSEL  | 70   | 125   |
| >MET-G983V KQIKDLGSEL  | 962   | >MET-G983V KQIKDLVSEL  | 285  | 677   |
| >MET-G983V KQIKDLGSEL  | 47    | >MET-G983V KQIKDLVSEL  | 56   | 9     |
| >MET-G983V KQIKDLGSEL  | 195   | >MET-G983V KQIKDLVSEL  | 187  | 8     |
| >MET-G983V KQIKDLGSEL  | 8     | >MET-G983V KQIKDLVSEL  | 6    | 2     |

|                        |       |                        |     |       |
|------------------------|-------|------------------------|-----|-------|
| >MET-G983V KQIKDLGSEL\ | 570   | >MET-G983V KQIKDLVSEL\ | 236 | 334   |
| >MET-G983V KQIKDLGSEL  | 1156  | >MET-G983V KQIKDLVSEL  | 328 | 828   |
| >MET-G983V KQIKDLGSEL\ | 190   | >MET-G983V KQIKDLVSEL\ | 90  | 100   |
| >MET-G983V KQIKDLGSEL\ | 853   | >MET-G983V KQIKDLVSEL\ | 341 | 512   |
| >MET-G983V KQIKDLGSEL  | 228   | >MET-G983V KQIKDLVSEL  | 184 | 44    |
| >MET-G983V KQIKDLGSEL  | 31    | >MET-G983V KQIKDLVSEL  | 14  | 17    |
| >MET-G983V KQIKDLGSEL\ | 364   | >MET-G983V KQIKDLVSEL\ | 160 | 204   |
| >MET-G983V KQIKDLGSEL  | 605   | >MET-G983V KQIKDLVSEL  | 347 | 258   |
| >MET-G983V RKQIKDLGSEI | 198   | >MET-G983V RKQIKDLVSEI | 174 | 24    |
| >MET-G983V RKQIKDLGSEI | 163   | >MET-G983V RKQIKDLVSEI | 137 | 26    |
| >MET-G983V RKQIKDLGSEI | 170   | >MET-G983V RKQIKDLVSEI | 123 | 47    |
| >MET-G983V KRKQIKDLG   | 524   | >MET-G983V KRKQIKDLV   | 79  | 445   |
| >MET-G983V KRKQIKDLGS  | 255   | >MET-G983V KRKQIKDLVS  | 210 | 45    |
| >MET-G983V KRKQIKDLG   | 3454  | >MET-G983V KRKQIKDLV   | 282 | 3172  |
| >MET-G983V KRKQIKDLGS  | 266   | >MET-G983V KRKQIKDLVS  | 266 | 0     |
| >MET-G983V KKRKQIKDLG  | 8941  | >MET-G983V KKRKQIKDLV  | 397 | 8544  |
| >MET-H1112 CVYHGTL     | 155   | >MET-H1112 CVYLGTL     | 606 | 451   |
| >MET-H1112 CVYHGTL     | 463   | >MET-H1112 CVYLGTL     | 904 | 441   |
| >MET-H1112 CVYHGTL     | 341   | >MET-H1112 CVYLGTL     | 429 | 88    |
| >MET-H1112 CVYHGTL     | 217   | >MET-H1112 CVYLGTL     | 390 | 173   |
| >MET-H1112 GCVYHGTL    | 358   | >MET-H1112 GCVYLGTL    | 49  | 309   |
| >MET-H1112 HFGCVYHGTL  | 38    | >MET-H1112 HFGCVYLGTL  | 34  | 4     |
| >MET-H1112 HFGCVYHGTL  | 171   | >MET-H1112 HFGCVYLGTL  | 171 | 0     |
| >MET-H1112 GHFGCVYH    | 18170 | >MET-H1112 GHFGCVYL    | 247 | 17923 |
| >MET-H1112 GHFGCVYHG   | 78    | >MET-H1112 GHFGCVYLG   | 104 | 26    |
| >MET-H1112 GHFGCVYHG   | 384   | >MET-H1112 GHFGCVYLG   | 399 | 15    |
| >MET-H1112 RGHFVCVYH   | 3292  | >MET-H1112 RGHFVCVYL   | 309 | 2983  |
| >MET-H1112 GRGHFGCVYH  | 1976  | >MET-H1112 GRGHFGCVYL  | 112 | 1864  |
| >MET-H1112 YHGTLNDNC   | 21094 | >MET-H1112 YRGTLNDNC   | 383 | 20711 |
| >MET-H1112 IGRGHFGCVY  | 10188 | >MET-H1112 IGRGHFGCVY  | 70  | 10118 |
| >MET-H1112 IGRGHFGCVY  | 20806 | >MET-H1112 IGRGHFGCVY  | 179 | 20627 |
| >MET-H1112 CVYHGTL     | 155   | >MET-H1112 CVYRGTL     | 465 | 310   |
| >MET-H1112 CVYHGTL     | 463   | >MET-H1112 CVYRGTL     | 923 | 460   |
| >MET-H1112 CVYHGTL     | 341   | >MET-H1112 CVYRGTL     | 681 | 340   |
| >MET-H1112 CVYHGTL     | 217   | >MET-H1112 CVYRGTL     | 273 | 56    |
| >MET-H1112 GCVYHGTL    | 358   | >MET-H1112 GCVYRGTL    | 144 | 214   |
| >MET-H1112 HFGCVYHGTL  | 38    | >MET-H1112 HFGCVYRGTL  | 78  | 40    |
| >MET-H1112 HFGCVYHGTL  | 171   | >MET-H1112 HFGCVYRGTL  | 325 | 154   |
| >MET-H1112 GHFGCVYH    | 16808 | >MET-H1112 GHFGCVYR    | 436 | 16372 |
| >MET-H1112 GHFGCVYHG   | 78    | >MET-H1112 GHFGCVYRG   | 74  | 4     |
| >MET-H1112 GHFGCVYHG   | 384   | >MET-H1112 GHFGCVYRG   | 506 | 122   |
| >MET-H1112 GHFGCVYH    | 16060 | >MET-H1112 GHFGCVYR    | 64  | 15996 |
| >MET-H1112 RGHFVCVYH   | 3292  | >MET-H1112 RGHFVCVYR   | 492 | 2800  |

|                        |       |                        |       |       |
|------------------------|-------|------------------------|-------|-------|
| >MET-H1112 RGHFGCVYH   | 2703  | >MET-H1112 RGHFGCVYR   | 25    | 2678  |
| >MET-H1112 RGHFGCVYH   | 15903 | >MET-H1112 RGHFGCVYR   | 31    | 15872 |
| >MET-H1112 GRGHFGCVYI  | 1976  | >MET-H1112 GRGHFGCVYI  | 342   | 1634  |
| >MET-H1112 GRGHFGCVYI  | 27256 | >MET-H1112 GRGHFGCVYI  | 323   | 26933 |
| >MET-H1112 IGRGHFGCVY  | 14280 | >MET-H1112 IGRGHFGCVY  | 183   | 14097 |
| >MET-H1112 IGRGHFGCVY  | 17582 | >MET-H1112 IGRGHFGCVY  | 271   | 17311 |
| >MET-H1112 IGRGHFGCVY  | 12878 | >MET-H1112 IGRGHFGCVY  | 308   | 12570 |
| >MET-H1112 IGRGHFGCVY  | 3234  | >MET-H1112 IGRGHFGCVY  | 176   | 3058  |
| >MET-H1112 CVYHGTL     | 575   | >MET-H1112 CVYYGTL     | 477   | 98    |
| >MET-H1112 CVYHGTL     | 155   | >MET-H1112 CVYYGTL     | 296   | 141   |
| >MET-H1112 CVYHGTL     | 463   | >MET-H1112 CVYYGTL     | 519   | 56    |
| >MET-H1112 CVYHGTL     | 506   | >MET-H1112 CVYYGTL     | 304   | 202   |
| >MET-H1112 CVYHGTL     | 341   | >MET-H1112 CVYYGTL     | 304   | 37    |
| >MET-H1112 CVYHGTL     | 217   | >MET-H1112 CVYYGTL     | 171   | 46    |
| >MET-H1112 GCVYHGTL    | 358   | >MET-H1112 GCVYYGTL    | 80    | 278   |
| >MET-H1112 HFGCVYHGTL  | 38    | >MET-H1112 HFGCVYYGTL  | 17    | 21    |
| >MET-H1112 HFGCVYHGTL  | 171   | >MET-H1112 HFGCVYYGTL  | 183   | 12    |
| >MET-H1112 GHFGCVYH    | 5168  | >MET-H1112 GHFGCVYY    | 27    | 5141  |
| >MET-H1112 GHFGCVYH    | 17989 | >MET-H1112 GHFGCVYY    | 213   | 17776 |
| >MET-H1112 GHFGCVYH    | 5718  | >MET-H1112 GHFGCVYY    | 206   | 5512  |
| >MET-H1112 GHFGCVYHG   | 78    | >MET-H1112 GHFGCVYYG   | 78    | 0     |
| >MET-H1112 GHFGCVYHG   | 384   | >MET-H1112 GHFGCVYYG   | 475   | 91    |
| >MET-H1112 GHFGCVYH    | 14680 | >MET-H1112 GHFGCVYY    | 238   | 14442 |
| >MET-H1112 RGHFGCVYH   | 16073 | >MET-H1112 RGHFGCVYY   | 258   | 15815 |
| >MET-H1112 RGHFGCVYH   | 8996  | >MET-H1112 RGHFGCVYY   | 51    | 8945  |
| >MET-H1112 RGHFGCVYH   | 12136 | >MET-H1112 RGHFGCVYY   | 308   | 11828 |
| >MET-H1112 RGHFGCVYH   | 16401 | >MET-H1112 RGHFGCVYY   | 232   | 16169 |
| >MET-H1112 RGHFGCVYH   | 5583  | >MET-H1112 RGHFGCVYY   | 326   | 5257  |
| >MET-H1112 GRGHFGCVYI  | 5545  | >MET-H1112 GRGHFGCVYI  | 246   | 5299  |
| >MET-H1112 GRGHFGCVYI  | 1976  | >MET-H1112 GRGHFGCVYI  | 111   | 1865  |
| >MET-H1124 HCAVKSLNR   | 101   | >MET-H1124 DCAVKSLNR   | 3739  | 3638  |
| >MET-H1124 IHCAVKSLNR  | 312   | >MET-H1124 IDC AVKSLNR | 7251  | 6939  |
| >MET-H1124 IHCAVKSL    | 308   | >MET-H1124 IDC AVKSL   | 14461 | 14153 |
| >MET-H1124 IHCAVKSLNR  | 20395 | >MET-H1124 IDC AVKSLNR | 323   | 20072 |
| >MET-H1124 KIHCAVKSL   | 85    | >MET-H1124 KIDCAVKSL   | 1239  | 1154  |
| >MET-H1124 KIHCAVKSL   | 483   | >MET-H1124 KIDCAVKSL   | 242   | 241   |
| >MET-H1124 KIHCAVKSLNI | 342   | >MET-H1124 KIDCAVKSLNI | 1565  | 1223  |
| >MET-H1124 KIHCAVKSL   | 32    | >MET-H1124 KIDCAVKSL   | 11293 | 11261 |
| >MET-H1124 KIHCAVKSLNI | 26    | >MET-H1124 KIDCAVKSLNI | 9580  | 9554  |
| >MET-H1124 KIHCAVKSLNI | 56    | >MET-H1124 KIDCAVKSLNI | 887   | 831   |
| >MET-H1124 KIHCAVKSL   | 133   | >MET-H1124 KIDCAVKSL   | 534   | 401   |
| >MET-H1124 KIHCAVKSL   | 318   | >MET-H1124 KIDCAVKSL   | 6758  | 6440  |
| >MET-H1124 KIHCAVKSLNI | 20    | >MET-H1124 KIDCAVKSLNI | 59    | 39    |



|                   |       |                   |      |       |
|-------------------|-------|-------------------|------|-------|
| >MET-H1124 KKIHC  | 129   | >MET-H1124 KKIDC  | 344  | 215   |
| >MET-H1124 KKIHC  | 7     | >MET-H1124 KKIDC  | 14   | 7     |
| >MET-H1124 GKKIHC | 145   | >MET-H1124 GKKIDC | 193  | 48    |
| >MET-H1124 LLDNDG | 270   | >MET-H1124 LLDNDG | 1350 | 1080  |
| >MET-H1124 LLDNDG | 194   | >MET-H1124 LLDNDG | 468  | 274   |
| >MET-K1262 KLPVK  | 492   | >MET-K1262 RLPVK  | 1485 | 993   |
| >MET-K1262 KLPVK  | 278   | >MET-K1262 RLPVK  | 584  | 306   |
| >MET-K1262 KLPVK  | 169   | >MET-K1262 RLPVK  | 184  | 15    |
| >MET-K1262 KLPVK  | 227   | >MET-K1262 RLPVK  | 443  | 216   |
| >MET-K1262 KLPVK  | 98    | >MET-K1262 RLPVK  | 192  | 94    |
| >MET-K1262 KLPVK  | 67    | >MET-K1262 RLPVK  | 71   | 4     |
| >MET-K1262 KLPVK  | 99    | >MET-K1262 RLPVK  | 103  | 4     |
| >MET-K1262 KLPVK  | 382   | >MET-K1262 RLPVK  | 819  | 437   |
| >MET-K1262 KLPVK  | 71    | >MET-K1262 RLPVK  | 140  | 69    |
| >MET-K1262 KLPVK  | 193   | >MET-K1262 RLPVK  | 393  | 200   |
| >MET-K1262 KLPVK  | 50    | >MET-K1262 RLPVK  | 55   | 5     |
| >MET-K1262 KLPVK  | 65    | >MET-K1262 RLPVK  | 72   | 7     |
| >MET-K1262 KLPVK  | 422   | >MET-K1262 RLPVK  | 160  | 262   |
| >MET-K1262 AKLPV  | 128   | >MET-K1262 ARLPV  | 799  | 671   |
| >MET-K1262 AKLPV  | 49    | >MET-K1262 ARLPV  | 335  | 286   |
| >MET-K1262 AKLPV  | 8415  | >MET-K1262 ARLPV  | 129  | 8286  |
| >MET-K1262 AKLPV  | 10028 | >MET-K1262 ARLPV  | 342  | 9686  |
| >MET-K1262 AKLPV  | 8532  | >MET-K1262 ARLPV  | 84   | 8448  |
| >MET-K1262 AKLPV  | 115   | >MET-K1262 ARLPV  | 52   | 63    |
| >MET-K1262 AKLPV  | 10531 | >MET-K1262 ARLPV  | 456  | 10075 |
| >MET-K1262 AKLPV  | 8505  | >MET-K1262 ARLPV  | 257  | 8248  |
| >MET-K1262 YYSVH  | 3830  | >MET-K1262 YYSVH  | 229  | 3601  |
| >MET-K1262 YYSVH  | 3239  | >MET-K1262 YYSVH  | 104  | 3135  |
| >MET-K1262 YYSVH  | 1505  | >MET-K1262 YYSVH  | 403  | 1102  |
| >MET-K1262 YYSVH  | 2018  | >MET-K1262 YYSVH  | 86   | 1932  |
| >MET-K1262 GAKLP  | 1123  | >MET-K1262 GARLP  | 237  | 886   |
| >MET-K1262 GAKLP  | 6932  | >MET-K1262 GARLP  | 234  | 6698  |
| >MET-K1262 GAKLP  | 73    | >MET-K1262 GARLP  | 22   | 51    |
| >MET-K1262 GAKLP  | 331   | >MET-K1262 GARLP  | 50   | 281   |
| >MET-K1262 GAKLP  | 1088  | >MET-K1262 GARLP  | 143  | 945   |
| >MET-K1262 GAKLP  | 128   | >MET-K1262 GARLP  | 84   | 44    |
| >MET-K1262 GAKLP  | 319   | >MET-K1262 GARLP  | 108  | 211   |
| >MET-K1262 TGAKL  | 279   | >MET-K1262 TGARL  | 190  | 89    |
| >MET-K1262 TGAKL  | 206   | >MET-K1262 TGARL  | 66   | 140   |
| >MET-K1262 TGAKL  | 560   | >MET-K1262 TGARL  | 250  | 310   |
| >MET-K1262 KTGAK  | 298   | >MET-K1262 KTGAR  | 177  | 121   |
| >MET-K1262 KTGAK  | 182   | >MET-K1262 KTGAR  | 363  | 181   |
| >MET-K1262 KTGAK  | 373   | >MET-K1262 KTGAR  | 556  | 183   |

|                         |      |                         |      |      |
|-------------------------|------|-------------------------|------|------|
| >MET-K1262 KTGAKLPVK    | 109  | >MET-K1262 KTGARLPVK    | 62   | 47   |
| >MET-K1262 KTGAKLPVK    | 59   | >MET-K1262 KTGARLPVK    | 42   | 17   |
| >MET-K1262 KTGAKLPVKV   | 196  | >MET-K1262 KTGARLPVKV   | 235  | 39   |
| >MET-K1262 KTGAKLPVKV   | 493  | >MET-K1262 KTGARLPVKV   | 503  | 10   |
| >MET-K1262 KTGAKLPV     | 222  | >MET-K1262 KTGARLPV     | 71   | 151  |
| >MET-K1262 KTGAKLPVK    | 10   | >MET-K1262 KTGARLPVK    | 7    | 3    |
| >MET-K1262 KTGAKLPVK    | 211  | >MET-K1262 KTGARLPVK    | 139  | 72   |
| >MET-K1262 KTGAKLPVKV   | 59   | >MET-K1262 KTGARLPVKV   | 52   | 7    |
| >MET-K1262 KTGAKLPV     | 423  | >MET-K1262 KTGARLPV     | 433  | 10   |
| >MET-K1262 KTGAKLPVKV   | 17   | >MET-K1262 KTGARLPVKV   | 16   | 1    |
| >MET-K1262 KTGAKLPVKV   | 13   | >MET-K1262 KTGARLPVKV   | 13   | 0    |
| >MET-K1262 KTGAKLPVKV   | 42   | >MET-K1262 KTGARLPVKV   | 38   | 4    |
| >MET-K1262 KTGAKLPVKV   | 13   | >MET-K1262 KTGARLPVKV   | 13   | 0    |
| >MET-K1262 KTGAKLPVKV   | 599  | >MET-K1262 KTGARLPVKV   | 492  | 107  |
| >MET-K1262 KTGAKLPVKV   | 176  | >MET-K1262 KTGARLPVKV   | 120  | 56   |
| >MET-K1262 HNKTGAKLPV   | 419  | >MET-K1262 HNKTGARLPV   | 140  | 279  |
| >MET-K1262 HNKTGAKLPV   | 25   | >MET-K1262 HNKTGARLPV   | 19   | 6    |
| >MET-K1262 VHNKTGAKL    | 328  | >MET-K1262 VHNKTGARL    | 826  | 498  |
| >MET-K1262 SVHNKTGAK    | 113  | >MET-K1262 SVHNKTGAR    | 1865 | 1752 |
| >MET-K1262 SVHNKTGAK    | 38   | >MET-K1262 SVHNKTGAR    | 568  | 530  |
| >MET-K1262 SVHNKTGAK    | 8    | >MET-K1262 SVHNKTGAR    | 337  | 329  |
| >MET-K1262 SVHNKTGAKI   | 240  | >MET-K1262 SVHNKTGARI   | 238  | 2    |
| >MET-K1262 SVHNKTGAK    | 1147 | >MET-K1262 SVHNKTGAR    | 47   | 1100 |
| >MET-K1262 SVHNKTGAK    | 358  | >MET-K1262 SVHNKTGAR    | 123  | 235  |
| >MET-K1262 YSVHNKTGAF   | 128  | >MET-K1262 YSVHNKTGAF   | 234  | 106  |
| >MET-K1262 YSVHNKTGAF   | 6194 | >MET-K1262 YSVHNKTGAF   | 398  | 5796 |
| >MET-K1262 YSVHNKTGAF   | 1658 | >MET-K1262 YSVHNKTGAF   | 482  | 1176 |
| >MET-K1262 YSVHNKTGAF   | 222  | >MET-K1262 YSVHNKTGAF   | 318  | 96   |
| >MET-K1262 YSVHNKTGAF   | 8    | >MET-K1262 YSVHNKTGAF   | 6    | 2    |
| >MET-K1262 YSVHNKTGAF   | 179  | >MET-K1262 YSVHNKTGAF   | 121  | 58   |
| >MET-L1213' LASKKFFVHR  | 15   | >MET-L1213' VASKKFFVHR  | 18   | 3    |
| >MET-L1213' LASKKFFVHR  | 115  | >MET-L1213' VASKKFFVHR  | 152  | 37   |
| >MET-L1213' LASKKFFVHR  | 102  | >MET-L1213' VASKKFFVHR  | 244  | 142  |
| >MET-L1213' LASKKFFVHRD | 318  | >MET-L1213' VASKKFFVHRD | 777  | 459  |
| >MET-L1213' LASKKFFVHR  | 429  | >MET-L1213' VASKKFFVHR  | 494  | 65   |
| >MET-L1213' LASKKFFVHR  | 133  | >MET-L1213' VASKKFFVHR  | 142  | 9    |
| >MET-L1213' YLASKKFFV   | 17   | >MET-L1213' YVASKKFFV   | 177  | 160  |
| >MET-L1213' YLASKKFFV   | 4    | >MET-L1213' YVASKKFFV   | 43   | 39   |
| >MET-L1213' YLASKKFFV   | 4    | >MET-L1213' YVASKKFFV   | 23   | 19   |
| >MET-L1213' YLASKKFFV   | 22   | >MET-L1213' YVASKKFFV   | 31   | 9    |
| >MET-L1213' YLASKKFFV   | 2    | >MET-L1213' YVASKKFFV   | 28   | 26   |
| >MET-L1213' YLASKKFFV   | 6    | >MET-L1213' YVASKKFFV   | 338  | 332  |
| >MET-L1213' YLASKKFFV   | 5    | >MET-L1213' YVASKKFFV   | 29   | 24   |

|                       |      |                       |       |       |
|-----------------------|------|-----------------------|-------|-------|
| >MET-L1213'YLASKKFV   | 3    | >MET-L1213'YVASKKFV   | 36    | 33    |
| >MET-L1213'YLASKKFV   | 2    | >MET-L1213'YVASKKFV   | 5     | 3     |
| >MET-L1213'YLASKKFVHR | 245  | >MET-L1213'YVASKKFVHR | 14479 | 14234 |
| >MET-L1213'YLASKKFVHR | 83   | >MET-L1213'YVASKKFVHR | 63    | 20    |
| >MET-L1213'YLASKKFVHR | 478  | >MET-L1213'YVASKKFVHR | 392   | 86    |
| >MET-L1213'YLASKKFVHR | 93   | >MET-L1213'YVASKKFVHR | 14    | 79    |
| >MET-L1213'YLASKKFV   | 353  | >MET-L1213'YVASKKFV   | 20    | 333   |
| >MET-L1213'YLASKKFV   | 467  | >MET-L1213'YVASKKFV   | 75    | 392   |
| >MET-L1213'YLASKKFVHR | 203  | >MET-L1213'YVASKKFVHR | 759   | 556   |
| >MET-L1213'YLASKKFVHR | 84   | >MET-L1213'YVASKKFVHR | 128   | 44    |
| >MET-L1213'GLQVAKAMK  | 1940 | >MET-L1213'GLQVAKAMK  | 457   | 1483  |
| >MET-L1213'GLQVAKAMK  | 175  | >MET-L1213'GLQVAKAMK  | 129   | 46    |
| >MET-L1213'GLQVAKAMK  | 1313 | >MET-L1213'GLQVAKAMK  | 126   | 1187  |
| >MET-L1213'GLQVAKAMK  | 284  | >MET-L1213'GLQVAKAMK  | 19    | 265   |
| >MET-L1213'GLQVAKAMK  | 102  | >MET-L1213'GLQVAKAMK  | 13    | 89    |
| >MET-L1213'GLQVAKAMK  | 422  | >MET-L1213'GLQVAKAMK  | 30    | 392   |
| >MET-L1213'GLQVAKAMK  | 2985 | >MET-L1213'GLQVAKAMK  | 142   | 2843  |
| >MET-L1213'GLQVAKAMK  | 40   | >MET-L1213'GLQVAKAMK  | 8     | 32    |
| >MET-L1213'KYLASKKFV  | 12   | >MET-L1213'KYVASKKFV  | 17    | 5     |
| >MET-L1213'KYLASKKF   | 31   | >MET-L1213'KYVASKKF   | 28    | 3     |
| >MET-L1213'KYLASKKF   | 195  | >MET-L1213'KYVASKKF   | 272   | 77    |
| >MET-L1213'KYLASKKF   | 6    | >MET-L1213'KYVASKKF   | 13    | 7     |
| >MET-L1213'KYLASKKFV  | 342  | >MET-L1213'KYVASKKFV  | 1818  | 1476  |
| >MET-L1213'KYLASKKFV  | 38   | >MET-L1213'KYVASKKFV  | 241   | 203   |
| >MET-L1213'KYLASKKFVH | 138  | >MET-L1213'KYVASKKFVH | 871   | 733   |
| >MET-L1213'KYLASKKFVH | 6    | >MET-L1213'KYVASKKFVH | 8     | 2     |
| >MET-L1213'KYLASKKFVH | 460  | >MET-L1213'KYVASKKFVH | 1128  | 668   |
| >MET-L1213'KYLASKKF   | 145  | >MET-L1213'KYVASKKF   | 262   | 117   |
| >MET-L1213'KYLASKKFVH | 7    | >MET-L1213'KYVASKKFVH | 7     | 0     |
| >MET-L1213'KYLASKKF   | 444  | >MET-L1213'KYVASKKF   | 471   | 27    |
| >MET-L1213'KYLASKKFV  | 34   | >MET-L1213'KYVASKKFV  | 36    | 2     |
| >MET-L1213'MKYLASKKFV | 23   | >MET-L1213'MKYVASKKFV | 45    | 22    |
| >MET-L1213'MKYLASKK   | 637  | >MET-L1213'MKYVASKK   | 424   | 213   |
| >MET-L1213'MKYLASKK   | 190  | >MET-L1213'MKYVASKK   | 98    | 92    |
| >MET-L1213'MKYLASKKF  | 3    | >MET-L1213'MKYVASKKF  | 2     | 1     |
| >MET-L1213'MKYLASKKFV | 29   | >MET-L1213'MKYVASKKFV | 15    | 14    |
| >MET-L1213'MKYLASKKFV | 172  | >MET-L1213'MKYVASKKFV | 85    | 87    |
| >MET-L1213'AMKYLASKKF | 144  | >MET-L1213'AMKYVASKKI | 142   | 2     |
| >MET-L1213'AMKYLASKKF | 16   | >MET-L1213'AMKYVASKKI | 14    | 2     |
| >MET-L1213'AMKYLASKKF | 183  | >MET-L1213'AMKYVASKKI | 74    | 109   |
| >MET-L1213'AMKYLASKKF | 327  | >MET-L1213'AMKYVASKKI | 253   | 74    |
| >MET-L1213'AMKYLASKKF | 420  | >MET-L1213'AMKYVASKKI | 245   | 175   |
| >MET-L1213'AMKYLASKKF | 16   | >MET-L1213'AMKYVASKKI | 16    | 0     |

|                       |      |                       |      |      |
|-----------------------|------|-----------------------|------|------|
| >MET-L1213'AMKYLASK   | 84   | >MET-L1213'AMKYVASK   | 61   | 23   |
| >MET-L1213'AMKYLASKK  | 70   | >MET-L1213'AMKYVASKK  | 48   | 22   |
| >MET-L1213'AMKYLASK   | 88   | >MET-L1213'AMKYVASK   | 75   | 13   |
| >MET-L1213'AMKYLASKK  | 111  | >MET-L1213'AMKYVASKK  | 91   | 20   |
| >MET-L1213'AMKYLASK   | 9    | >MET-L1213'AMKYVASK   | 9    | 0    |
| >MET-L1213'AMKYLASKK  | 26   | >MET-L1213'AMKYVASKK  | 27   | 1    |
| >MET-L1213'AMKYLASKKF | 157  | >MET-L1213'AMKYVASKKI | 155  | 2    |
| >MET-L1213'AMKYLASK   | 66   | >MET-L1213'AMKYVASK   | 83   | 17   |
| >MET-L1213'AMKYLASKK  | 169  | >MET-L1213'AMKYVASKK  | 186  | 17   |
| >MET-L1213'AMKYLASKKF | 73   | >MET-L1213'AMKYVASKKI | 73   | 0    |
| >MET-L1213'AMKYLASKKF | 454  | >MET-L1213'AMKYVASKKI | 303  | 151  |
| >MET-L1213'AMKYLASK   | 494  | >MET-L1213'AMKYVASK   | 404  | 90   |
| >MET-L1213'AMKYLASKKF | 9    | >MET-L1213'AMKYVASKKI | 8    | 1    |
| >MET-L1213'AMKYLASKKf | 244  | >MET-L1213'AMKYVASKKI | 266  | 22   |
| >MET-L1213'AMKYLASKKF | 155  | >MET-L1213'AMKYVASKKI | 291  | 136  |
| >MET-L1213'AMKYLASKKF | 266  | >MET-L1213'AMKYVASKKI | 463  | 197  |
| >MET-L1213'KAMKYLASK  | 52   | >MET-L1213'KAMKYVASK  | 48   | 4    |
| >MET-L1213'KAMKYLASKf | 37   | >MET-L1213'KAMKYVASKI | 32   | 5    |
| >MET-L1213'KAMKYLASK  | 12   | >MET-L1213'KAMKYVASK  | 11   | 1    |
| >MET-L1213'KAMKYLASKf | 38   | >MET-L1213'KAMKYVASKI | 30   | 8    |
| >MET-L1213'KAMKYLASK  | 7    | >MET-L1213'KAMKYVASK  | 7    | 0    |
| >MET-L1213'KAMKYLASKf | 25   | >MET-L1213'KAMKYVASKI | 27   | 2    |
| >MET-L1213'KAMKYLASK  | 27   | >MET-L1213'KAMKYVASK  | 44   | 17   |
| >MET-L1213'KAMKYLASKf | 118  | >MET-L1213'KAMKYVASKI | 83   | 35   |
| >MET-L1213'KAMKYLASKf | 430  | >MET-L1213'KAMKYVASKI | 269  | 161  |
| >MET-L1213'KAMKYLASK  | 570  | >MET-L1213'KAMKYVASK  | 250  | 320  |
| >MET-L1213'KAMKYLASKf | 733  | >MET-L1213'KAMKYVASKI | 367  | 366  |
| >MET-L1213'KAMKYLASKf | 688  | >MET-L1213'KAMKYVASKI | 459  | 229  |
| >MET-L1213'KAMKYLASKf | 17   | >MET-L1213'KAMKYVASKI | 11   | 6    |
| >MET-L1213'KAMKYLASKf | 5    | >MET-L1213'KAMKYVASKI | 4    | 1    |
| >MET-L1213'KAMKYLASKf | 71   | >MET-L1213'KAMKYVASKI | 60   | 11   |
| >MET-L1213'KAMKYLASKf | 41   | >MET-L1213'KAMKYVASKI | 29   | 12   |
| >MET-L1213'KAMKYLASKf | 231  | >MET-L1213'KAMKYVASKI | 306  | 75   |
| >MET-L1213'AKAMKYLASH | 357  | >MET-L1213'AKAMKYVASI | 191  | 166  |
| >MET-L1213'VAKAMKYLA' | 212  | >MET-L1213'VAKAMKYVA  | 267  | 55   |
| >MET-L1213'VAKAMKYLA' | 21   | >MET-L1213'VAKAMKYVA  | 24   | 3    |
| >MET-L1213'VAKAMKYLA' | 123  | >MET-L1213'VAKAMKYVA  | 180  | 57   |
| >MET-L1213'VAKAMKYL   | 389  | >MET-L1213'VAKAMKYV   | 5353 | 4964 |
| >MET-L1213'QVAKAMKYL  | 274  | >MET-L1213'QVAKAMKYV  | 216  | 58   |
| >MET-L1213'QVAKAMKYL  | 2055 | >MET-L1213'QVAKAMKYV  | 176  | 1879 |
| >MET-L1213'QVAKAMKYL  | 1177 | >MET-L1213'QVAKAMKYV  | 113  | 1064 |
| >MET-L1213'QVAKAMKYL  | 40   | >MET-L1213'QVAKAMKYV  | 299  | 259  |
| >MET-L1213'QVAKAMKYL  | 67   | >MET-L1213'QVAKAMKYV  | 17   | 50   |

|                       |       |                       |       |       |
|-----------------------|-------|-----------------------|-------|-------|
| >MET-L1213' QVAKAMKYL | 283   | >MET-L1213' QVAKAMKYV | 32    | 251   |
| >MET-L1213' LQVAKAMKY | 487   | >MET-L1213' LQVAKAMKY | 463   | 24    |
| >MET-L1213' LQVAKAMKY | 518   | >MET-L1213' LQVAKAMKY | 99    | 419   |
| >MET-L1213' LQVAKAMKY | 1609  | >MET-L1213' LQVAKAMKY | 329   | 1280  |
| >MET-L1213' LQVAKAMKY | 91    | >MET-L1213' LQVAKAMKY | 275   | 184   |
| >MET-L1213' LQVAKAMKY | 3485  | >MET-L1213' LQVAKAMKY | 256   | 3229  |
| >MET-L1213' LQVAKAMKY | 75    | >MET-L1213' LQVAKAMKY | 190   | 115   |
| >MET-L211W LHSISVRR   | 6503  | >MET-L211W WHSISVRR   | 441   | 6062  |
| >MET-L211W PLHSISVRR  | 352   | >MET-L211W PWHSISVRR  | 27152 | 26800 |
| >MET-L211W PLHSISVRR  | 151   | >MET-L211W PWHSISVRR  | 32332 | 32181 |
| >MET-L211W PLHSISVRR  | 303   | >MET-L211W PWHSISVRR  | 17572 | 17269 |
| >MET-L211W PLHSISVRR  | 275   | >MET-L211W PWHSISVRR  | 546   | 271   |
| >MET-L211W PLHSISVR   | 748   | >MET-L211W PWHSISVR   | 28    | 720   |
| >MET-L211W PLHSISVRR  | 177   | >MET-L211W PWHSISVRR  | 17    | 160   |
| >MET-L211W PLHSISVRR  | 12284 | >MET-L211W PWHSISVRR  | 457   | 11827 |
| >MET-L211W INSSYFPDHP | 413   | >MET-L211W INSSYFPDHP | 7460  | 7047  |
| >MET-L211W INSSYFPDHP | 18402 | >MET-L211W INSSYFPDHP | 310   | 18092 |
| >MET-L211W INSSYFPDHP | 19768 | >MET-L211W INSSYFPDHP | 205   | 19563 |
| >MET-L211W HPLHSISVRR | 464   | >MET-L211W HPWHSISVRF | 725   | 261   |
| >MET-L211W HPLHSISVR  | 843   | >MET-L211W HPWHSISVR  | 274   | 569   |
| >MET-L211W HPLHSISV   | 142   | >MET-L211W HPWHSISV   | 110   | 32    |
| >MET-L211W HPLHSISV   | 44    | >MET-L211W HPWHSISV   | 24    | 20    |
| >MET-L211W HPLHSISVRR | 29    | >MET-L211W HPWHSISVRF | 21    | 8     |
| >MET-L211W HPLHSISV   | 447   | >MET-L211W HPWHSISV   | 51    | 396   |
| >MET-L211W HPLHSISVR  | 1888  | >MET-L211W HPWHSISVR  | 171   | 1717  |
| >MET-L211W HPLHSISVRR | 632   | >MET-L211W HPWHSISVRF | 76    | 556   |
| >MET-L211W HPLHSISV   | 299   | >MET-L211W HPWHSISV   | 1057  | 758   |
| >MET-L211W HPLHSISVRR | 334   | >MET-L211W HPWHSISVRF | 972   | 638   |
| >MET-L211W HPLHSISV   | 464   | >MET-L211W HPWHSISV   | 382   | 82    |
| >MET-L211W HPLHSISV   | 1052  | >MET-L211W HPWHSISV   | 395   | 657   |
| >MET-L211W HPLHSISVRR | 1163  | >MET-L211W HPWHSISVRF | 491   | 672   |
| >MET-L211W HPLHSISV   | 158   | >MET-L211W HPWHSISV   | 30    | 128   |
| >MET-L211W HPLHSISVRR | 944   | >MET-L211W HPWHSISVRF | 396   | 548   |
| >MET-L211W HPLHSISVRR | 305   | >MET-L211W HPWHSISVRF | 830   | 525   |
| >MET-L211W HPLHSISVR  | 335   | >MET-L211W HPWHSISVR  | 127   | 208   |
| >MET-L211W HPLHSISVRR | 105   | >MET-L211W HPWHSISVRF | 44    | 61    |
| >MET-L211W PDHPLHSI   | 276   | >MET-L211W PDHPWHSI   | 364   | 88    |
| >MET-L211W FPDHPLHSI  | 104   | >MET-L211W FPDHPWHSI  | 210   | 106   |
| >MET-L211W FPDHPLHSI  | 64    | >MET-L211W FPDHPWHSI  | 60    | 4     |
| >MET-L211W FPDHPLHSI  | 47    | >MET-L211W FPDHPWHSI  | 31    | 16    |
| >MET-L211W FPDHPLHSI  | 46    | >MET-L211W FPDHPWHSI  | 31    | 15    |
| >MET-L211W FPDHPLHSI  | 1316  | >MET-L211W FPDHPWHSI  | 398   | 918   |
| >MET-L211W FPDHPLHSI  | 464   | >MET-L211W FPDHPWHSI  | 206   | 258   |

|                        |      |                       |       |       |
|------------------------|------|-----------------------|-------|-------|
| >MET-L211W FPDHPLHSI   | 448  | >MET-L211W FPDHPWHSI  | 151   | 297   |
| >MET-L211W FPDHPLHSIS\ | 313  | >MET-L211W FPDHPWHSIS | 150   | 163   |
| >MET-L211W FPDHPLHSI   | 50   | >MET-L211W FPDHPWHSI  | 44    | 6     |
| >MET-L211W FPDHPLHSIS\ | 100  | >MET-L211W FPDHPWHSIS | 107   | 7     |
| >MET-L211W FPDHPLHSI   | 60   | >MET-L211W FPDHPWHSI  | 25    | 35    |
| >MET-L211W FPDHPLHSIS\ | 301  | >MET-L211W FPDHPWHSIS | 149   | 152   |
| >MET-L211W FPDHPLHS    | 413  | >MET-L211W FPDHPWHS   | 283   | 130   |
| >MET-L211W FPDHPLHSI   | 21   | >MET-L211W FPDHPWHSI  | 25    | 4     |
| >MET-L211W FPDHPLHSIS  | 38   | >MET-L211W FPDHPWHSIS | 70    | 32    |
| >MET-L211W FPDHPLHSIS\ | 15   | >MET-L211W FPDHPWHSIS | 14    | 1     |
| >MET-L211W FPDHPLHSI   | 434  | >MET-L211W FPDHPWHSI  | 278   | 156   |
| >MET-L211W YFPDHPLHSI  | 360  | >MET-L211W YFPDHPWHS  | 146   | 214   |
| >MET-L211W YFPDHPLHSI  | 603  | >MET-L211W YFPDHPWHS  | 385   | 218   |
| >MET-L211W YFPDHPLHSI  | 19   | >MET-L211W YFPDHPWHS  | 14    | 5     |
| >MET-L211W YFPDHPLH    | 145  | >MET-L211W YFPDHPWH   | 1671  | 1526  |
| >MET-L211W YFPDHPLHSI  | 183  | >MET-L211W YFPDHPWHS  | 315   | 132   |
| >MET-L211W YFPDHPLHSI  | 1448 | >MET-L211W YFPDHPWHS  | 232   | 1216  |
| >MET-L211W YFPDHPLHSI  | 1352 | >MET-L211W YFPDHPWHS  | 328   | 1024  |
| >MET-L211W SYFPDHPL    | 55   | >MET-L211W SYFPDHPW   | 15027 | 14972 |
| >MET-L211W SYFPDHPLHS  | 23   | >MET-L211W SYFPDHPWH  | 17    | 6     |
| >MET-L211W SYFPDHPL    | 724  | >MET-L211W SYFPDHPW   | 428   | 296   |
| >MET-L211W SYFPDHPLHS  | 154  | >MET-L211W SYFPDHPWH  | 160   | 6     |
| >MET-L211W SYFPDHPLHS  | 229  | >MET-L211W SYFPDHPWH  | 164   | 65    |
| >MET-L211W SYFPDHPL    | 13   | >MET-L211W SYFPDHPW   | 20    | 7     |
| >MET-L211W SYFPDHPLHS  | 6    | >MET-L211W SYFPDHPWH  | 7     | 1     |
| >MET-L211W SYFPDHPLH   | 115  | >MET-L211W SYFPDHPWH  | 2087  | 1972  |
| >MET-L211W SYFPDHPLHS  | 342  | >MET-L211W SYFPDHPWH  | 189   | 153   |
| >MET-L211W SYFPDHPLH   | 1006 | >MET-L211W SYFPDHPWH  | 494   | 512   |
| >MET-L211W SYFPDHPLHS  | 251  | >MET-L211W SYFPDHPWH  | 560   | 309   |
| >MET-L211W SYFPDHPL    | 96   | >MET-L211W SYFPDHPW   | 219   | 123   |
| >MET-L211W SYFPDHPLHS  | 265  | >MET-L211W SYFPDHPWH  | 277   | 12    |
| >MET-L211W SYFPDHPLHS  | 102  | >MET-L211W SYFPDHPWH  | 107   | 5     |
| >MET-L211W SYFPDHPLHS  | 158  | >MET-L211W SYFPDHPWH  | 180   | 22    |
| >MET-L211W SSYFPDHPL   | 193  | >MET-L211W SSYFPDHPW  | 7723  | 7530  |
| >MET-L211W SSYFPDHPL   | 238  | >MET-L211W SSYFPDHPW  | 169   | 69    |
| >MET-L211W SSYFPDHPL   | 17   | >MET-L211W SSYFPDHPW  | 15955 | 15938 |
| >MET-L211W SSYFPDHPL   | 277  | >MET-L211W SSYFPDHPW  | 15292 | 15015 |
| >MET-L211W SSYFPDHPL   | 6    | >MET-L211W SSYFPDHPW  | 3     | 3     |
| >MET-L211W SSYFPDHPLH  | 642  | >MET-L211W SSYFPDHPWH | 237   | 405   |
| >MET-L211W SSYFPDHPL   | 7552 | >MET-L211W SSYFPDHPW  | 36    | 7516  |
| >MET-L211W SSYFPDHPL   | 5073 | >MET-L211W SSYFPDHPW  | 19    | 5054  |
| >MET-L211W SSYFPDHPL   | 81   | >MET-L211W SSYFPDHPW  | 17238 | 17157 |
| >MET-L211W NSSYFPDHPL  | 73   | >MET-L211W NSSYFPDHPV | 25976 | 25903 |

|                         |       |                         |       |       |
|-------------------------|-------|-------------------------|-------|-------|
| >MET-L211W NSSYFPDHPL   | 2227  | >MET-L211W NSSYFPDHPV   | 92    | 2135  |
| >MET-L211W NSSYFPDHPL   | 13829 | >MET-L211W NSSYFPDHPV   | 63    | 13766 |
| >MET-L211W NSSYFPDHPL   | 12012 | >MET-L211W NSSYFPDHPV   | 41    | 11971 |
| >MET-L229F- LTDQSYIDV   | 236   | >MET-L229F- FTDQSYIDV   | 104   | 132   |
| >MET-L229F- LTDQSYIDVL  | 870   | >MET-L229F- FTDQSYIDVL  | 256   | 614   |
| >MET-L229F- LTDQSYIDV   | 2906  | >MET-L229F- FTDQSYIDV   | 151   | 2755  |
| >MET-L229F- LTDQSYIDVL  | 1298  | >MET-L229F- FTDQSYIDVL  | 202   | 1096  |
| >MET-L229F- LTDQSYIDV   | 394   | >MET-L229F- FTDQSYIDV   | 46    | 348   |
| >MET-L229F- LTDQSYIDVL  | 832   | >MET-L229F- FTDQSYIDVL  | 107   | 725   |
| >MET-L229F- LTDQSYIDV   | 426   | >MET-L229F- FTDQSYIDV   | 35    | 391   |
| >MET-L229F- LTDQSYIDV   | 381   | >MET-L229F- FTDQSYIDV   | 49    | 332   |
| >MET-L229F- LTDQSYIDV   | 296   | >MET-L229F- FTDQSYIDV   | 34    | 262   |
| >MET-L229F- LTDQSYIDVL  | 2602  | >MET-L229F- FTDQSYIDVL  | 435   | 2167  |
| >MET-L229F- LTDQSYIDVL  | 82    | >MET-L229F- FTDQSYIDVL  | 113   | 31    |
| >MET-L229F- LTDQSYIDVL  | 5381  | >MET-L229F- FTDQSYIDVL  | 308   | 5073  |
| >MET-L229F- LTDQSYIDVL  | 193   | >MET-L229F- FTDQSYIDVL  | 149   | 44    |
| >MET-L229F- FLTDQSYI    | 10    | >MET-L229F- FFTDQSYI    | 4273  | 4263  |
| >MET-L229F- FLTDQSYIDV  | 27    | >MET-L229F- FFTDQSYIDV  | 6210  | 6183  |
| >MET-L229F- FLTDQSYIDVI | 13    | >MET-L229F- FFTDQSYIDVI | 5431  | 5418  |
| >MET-L229F- FLTDQSYI    | 2     | >MET-L229F- FFTDQSYI    | 55    | 53    |
| >MET-L229F- FLTDQSYID   | 270   | >MET-L229F- FFTDQSYID   | 12913 | 12643 |
| >MET-L229F- FLTDQSYIDV  | 24    | >MET-L229F- FFTDQSYIDV  | 4090  | 4066  |
| >MET-L229F- FLTDQSYIDVI | 2     | >MET-L229F- FFTDQSYIDVI | 37    | 35    |
| >MET-L229F- FLTDQSYI    | 4     | >MET-L229F- FFTDQSYI    | 5381  | 5377  |
| >MET-L229F- FLTDQSYIDV  | 21    | >MET-L229F- FFTDQSYIDV  | 3941  | 3920  |
| >MET-L229F- FLTDQSYIDVI | 9     | >MET-L229F- FFTDQSYIDVI | 11684 | 11675 |
| >MET-L229F- FLTDQSYI    | 9     | >MET-L229F- FFTDQSYI    | 956   | 947   |
| >MET-L229F- FLTDQSYIDV  | 71    | >MET-L229F- FFTDQSYIDV  | 2635  | 2564  |
| >MET-L229F- FLTDQSYIDVI | 14    | >MET-L229F- FFTDQSYIDVI | 1466  | 1452  |
| >MET-L229F- FLTDQSYI    | 2     | >MET-L229F- FFTDQSYI    | 1081  | 1079  |
| >MET-L229F- FLTDQSYIDV  | 3     | >MET-L229F- FFTDQSYIDV  | 1373  | 1370  |
| >MET-L229F- FLTDQSYIDVI | 4     | >MET-L229F- FFTDQSYIDVI | 2953  | 2949  |
| >MET-L229F- FLTDQSYI    | 3     | >MET-L229F- FFTDQSYI    | 2825  | 2822  |
| >MET-L229F- FLTDQSYIDV  | 4     | >MET-L229F- FFTDQSYIDV  | 1484  | 1480  |
| >MET-L229F- FLTDQSYIDVI | 3     | >MET-L229F- FFTDQSYIDVI | 3647  | 3644  |
| >MET-L229F- FLTDQSYI    | 6     | >MET-L229F- FFTDQSYI    | 2535  | 2529  |
| >MET-L229F- FLTDQSYIDV  | 4     | >MET-L229F- FFTDQSYIDV  | 297   | 293   |
| >MET-L229F- FLTDQSYIDVI | 7     | >MET-L229F- FFTDQSYIDVI | 5179  | 5172  |
| >MET-L229F- FLTDQSYI    | 5     | >MET-L229F- FFTDQSYI    | 8034  | 8029  |
| >MET-L229F- FLTDQSYIDV  | 6     | >MET-L229F- FFTDQSYIDV  | 7780  | 7774  |
| >MET-L229F- FLTDQSYIDVI | 8     | >MET-L229F- FFTDQSYIDVI | 10825 | 10817 |
| >MET-L229F- FLTDQSYI    | 2     | >MET-L229F- FFTDQSYI    | 653   | 651   |
| >MET-L229F- FLTDQSYIDV  | 1     | >MET-L229F- FFTDQSYIDV  | 18    | 17    |

|                        |       |                        |      |       |
|------------------------|-------|------------------------|------|-------|
| >MET-L229F-FLTDQSYIDVI | 2     | >MET-L229F-FFTDQSYIDVI | 669  | 667   |
| >MET-L229F-FLTDQSYI    | 13554 | >MET-L229F-FFTDQSYI    | 104  | 13450 |
| >MET-L229F-FLTDQSYIDVI | 10931 | >MET-L229F-FFTDQSYIDVI | 68   | 10863 |
| >MET-L229F-FLTDQSYI    | 277   | >MET-L229F-FFTDQSYI    | 4031 | 3754  |
| >MET-L229F-FLTDQSYIDV  | 369   | >MET-L229F-FFTDQSYIDV  | 6305 | 5936  |
| >MET-L229F-LKETKDGFMF  | 2568  | >MET-L229F-LKETKDGFMF  | 196  | 2372  |
| >MET-L229F-MFLTDQSYI   | 302   | >MET-L229F-MFFTDQSYI   | 433  | 131   |
| >MET-L229F-MFLTDQSYI   | 1111  | >MET-L229F-MFFTDQSYI   | 93   | 1018  |
| >MET-L229F-MFLTDQSYID  | 564   | >MET-L229F-MFFTDQSYID  | 221  | 343   |
| >MET-L229F-MFLTDQSYI   | 45    | >MET-L229F-MFFTDQSYI   | 70   | 25    |
| >MET-L229F-MFLTDQSY    | 14    | >MET-L229F-MFFTDQSY    | 10   | 4     |
| >MET-L229F-MFLTDQSY    | 184   | >MET-L229F-MFFTDQSY    | 78   | 106   |
| >MET-L229F-MFLTDQSY    | 2738  | >MET-L229F-MFFTDQSY    | 389  | 2349  |
| >MET-L229F-MFLTDQSY    | 295   | >MET-L229F-MFFTDQSY    | 123  | 172   |
| >MET-L229F-MFLTDQSY    | 506   | >MET-L229F-MFFTDQSY    | 134  | 372   |
| >MET-L229F-MFLTDQSY    | 53    | >MET-L229F-MFFTDQSY    | 38   | 15    |
| >MET-L229F-MFLTDQSY    | 2601  | >MET-L229F-MFFTDQSY    | 263  | 2338  |
| >MET-L229F-FMFLTDQSYI  | 15    | >MET-L229F-FMFFTDQSYI  | 16   | 1     |
| >MET-L229F-FMFLTDQS    | 110   | >MET-L229F-FMFFTDQS    | 57   | 53    |
| >MET-L229F-FMFLTDQSYI  | 10    | >MET-L229F-FMFFTDQSYI  | 10   | 0     |
| >MET-L229F-FMFLTDQSYI  | 705   | >MET-L229F-FMFFTDQSYI  | 485  | 220   |
| >MET-L229F-FMFLTDQS    | 528   | >MET-L229F-FMFFTDQS    | 188  | 340   |
| >MET-L229F-FMFLTDQSYI  | 15    | >MET-L229F-FMFFTDQSYI  | 20   | 5     |
| >MET-L229F-FMFLTDQSYI  | 47    | >MET-L229F-FMFFTDQSYI  | 55   | 8     |
| >MET-L229F-FMFLTDQS    | 104   | >MET-L229F-FMFFTDQS    | 40   | 64    |
| >MET-L229F-FMFLTDQSY   | 481   | >MET-L229F-FMFFTDQSY   | 191  | 290   |
| >MET-L229F-FMFLTDQSYI  | 2     | >MET-L229F-FMFFTDQSYI  | 2    | 0     |
| >MET-L229F-FMFLTDQSYI  | 4     | >MET-L229F-FMFFTDQSYI  | 3    | 1     |
| >MET-L229F-FMFLTDQS    | 486   | >MET-L229F-FMFFTDQS    | 423  | 63    |
| >MET-L229F-FMFLTDQSYI  | 6     | >MET-L229F-FMFFTDQSYI  | 6    | 0     |
| >MET-L229F-FMFLTDQSYI  | 10    | >MET-L229F-FMFFTDQSYI  | 8    | 2     |
| >MET-L229F-FMFLTDQS    | 524   | >MET-L229F-FMFFTDQS    | 341  | 183   |
| >MET-L229F-FMFLTDQSY   | 588   | >MET-L229F-FMFFTDQSY   | 412  | 176   |
| >MET-L229F-FMFLTDQSYI  | 5     | >MET-L229F-FMFFTDQSYI  | 4    | 1     |
| >MET-L229F-FMFLTDQSY   | 11    | >MET-L229F-FMFFTDQSY   | 8    | 3     |
| >MET-L229F-FMFLTDQSY   | 152   | >MET-L229F-FMFFTDQSY   | 44   | 108   |
| >MET-L229F-FMFLTDQSYI  | 350   | >MET-L229F-FMFFTDQSYI  | 61   | 289   |
| >MET-L229F-FMFLTDQSY   | 31    | >MET-L229F-FMFFTDQSY   | 26   | 5     |
| >MET-L229F-FMFLTDQSYI  | 582   | >MET-L229F-FMFFTDQSYI  | 267  | 315   |
| >MET-L229F-FMFLTDQSY   | 10    | >MET-L229F-FMFFTDQSY   | 9    | 1     |
| >MET-L229F-FMFLTDQSYI  | 524   | >MET-L229F-FMFFTDQSYI  | 382  | 142   |
| >MET-L229F-FMFLTDQSY   | 3     | >MET-L229F-FMFFTDQSY   | 3    | 0     |
| >MET-L229F-FMFLTDQSYI  | 16    | >MET-L229F-FMFFTDQSYI  | 11   | 5     |



|                       |      |                       |      |      |
|-----------------------|------|-----------------------|------|------|
| >MET-L229F-FMFLTDQSY  | 51   | >MET-L229F-FMFFTDQSY  | 46   | 5    |
| >MET-L229F-FMFLTDQSY  | 26   | >MET-L229F-FMFFTDQSY  | 24   | 2    |
| >MET-L229F-FMFLTDQSY  | 830  | >MET-L229F-FMFFTDQSY  | 484  | 346  |
| >MET-L229F-FMFLTDQSY  | 1239 | >MET-L229F-FMFFTDQSY  | 474  | 765  |
| >MET-L229F-FMFLTDQSYI | 449  | >MET-L229F-FMFFTDQSYI | 278  | 171  |
| >MET-L229F-FMFLTDQSY  | 558  | >MET-L229F-FMFFTDQSY  | 103  | 455  |
| >MET-L229F-GFMFLTDQS' | 276  | >MET-L229F-GFMFFTDQS' | 1495 | 1219 |
| >MET-L229F-GFMFLTDQS' | 167  | >MET-L229F-GFMFFTDQS' | 100  | 67   |
| >MET-L229F-GFMFLTDQS' | 81   | >MET-L229F-GFMFFTDQS' | 75   | 6    |
| >MET-L229F-GFMFLTDQS' | 50   | >MET-L229F-GFMFFTDQS' | 25   | 25   |
| >MET-L229F-GFMFLTDQS' | 102  | >MET-L229F-GFMFFTDQS' | 53   | 49   |
| >MET-L229F-GFMFLTDQS' | 676  | >MET-L229F-GFMFFTDQS' | 280  | 396  |
| >MET-L229F-DGFMFLTDQ  | 447  | >MET-L229F-DGFMFFTDQ  | 468  | 21   |
| >MET-L229F-DGFMFLTDQ  | 383  | >MET-L229F-DGFMFFTDQ  | 291  | 92   |
| >MET-L229F-TKDGFMFL   | 126  | >MET-L229F-TKDGFMFF   | 3097 | 2971 |
| >MET-L229F-ETKDGFMFL  | 843  | >MET-L229F-ETKDGFMFF  | 146  | 697  |
| >MET-L229F-ETKDGFMFL  | 16   | >MET-L229F-ETKDGFMFF  | 6    | 10   |
| >MET-L229F-ETKDGFMFL  | 34   | >MET-L229F-ETKDGFMFF  | 6    | 28   |
| >MET-L229F-ETKDGFMFL  | 3093 | >MET-L229F-ETKDGFMFF  | 389  | 2704 |
| >MET-L229F-ETKDGFMFL  | 112  | >MET-L229F-ETKDGFMFF  | 89   | 23   |
| >MET-L229F-ETKDGFMFL  | 339  | >MET-L229F-ETKDGFMFF  | 674  | 335  |
| >MET-L229F-ETKDGFMFL  | 1354 | >MET-L229F-ETKDGFMFF  | 481  | 873  |
| >MET-L229F-ETKDGFMFL  | 11   | >MET-L229F-ETKDGFMFF  | 1204 | 1193 |
| >MET-L229F-ETKDGFMFL  | 143  | >MET-L229F-ETKDGFMFF  | 74   | 69   |
| >MET-L229F-ETKDGFMFL  | 22   | >MET-L229F-ETKDGFMFF  | 2509 | 2487 |
| >MET-L229F-ETKDGFMFL  | 382  | >MET-L229F-ETKDGFMFF  | 153  | 229  |
| >MET-L229F-ETKDGFMFL  | 8048 | >MET-L229F-ETKDGFMFF  | 418  | 7630 |
| >MET-L229F-ETKDGFMFL  | 328  | >MET-L229F-ETKDGFMFF  | 45   | 283  |
| >MET-L229F-ETKDGFMFL  | 392  | >MET-L229F-ETKDGFMFF  | 646  | 254  |
| >MET-L229F-ETKDGFMFL  | 384  | >MET-L229F-ETKDGFMFF  | 51   | 333  |
| >MET-L229F-KETKDGFMFI | 2057 | >MET-L229F-KETKDGFMFI | 81   | 1976 |
| >MET-L229F-KETKDGFMFI | 109  | >MET-L229F-KETKDGFMFI | 357  | 248  |
| >MET-L229F-KETKDGFMFI | 368  | >MET-L229F-KETKDGFMFI | 230  | 138  |
| >MET-L229F-KETKDGFMFI | 404  | >MET-L229F-KETKDGFMFI | 62   | 342  |
| >MET-L229F-KETKDGFMFI | 1596 | >MET-L229F-KETKDGFMFI | 223  | 1373 |
| >MET-L229F-KETKDGFMFI | 124  | >MET-L229F-KETKDGFMFI | 67   | 57   |
| >MET-L229F-KETKDGFMFI | 122  | >MET-L229F-KETKDGFMFI | 377  | 255  |
| >MET-L229F-KETKDGFMFI | 250  | >MET-L229F-KETKDGFMFI | 482  | 232  |
| >MET-L238F-LPEFRDSYPI | 177  | >MET-L238F-FPEFRDSYPI | 94   | 83   |
| >MET-L238F-LPEFRDSY   | 19   | >MET-L238F-FPEFRDSY   | 12   | 7    |
| >MET-L238F-LPEFRDSY   | 117  | >MET-L238F-FPEFRDSY   | 63   | 54   |
| >MET-L238F-LPEFRDSYPI | 1312 | >MET-L238F-FPEFRDSYPI | 344  | 968  |
| >MET-L238F-LPEFRDSYPI | 1973 | >MET-L238F-FPEFRDSYPI | 176  | 1797 |

|                        |       |                        |       |       |
|------------------------|-------|------------------------|-------|-------|
| >MET-L238F-LPEFRDSY    | 482   | >MET-L238F-FPEFRDSY    | 352   | 130   |
| >MET-L238F-LPEFRDSY    | 166   | >MET-L238F-FPEFRDSY    | 53    | 113   |
| >MET-L238F-LPEFRDSYPI  | 1512  | >MET-L238F-FPEFRDSYPI  | 394   | 1118  |
| >MET-L238F-VLPEFRDSYPI | 60    | >MET-L238F-VFPEFRDSYPI | 11221 | 11161 |
| >MET-L238F-VLPEFRDSYPI | 38    | >MET-L238F-VFPEFRDSYPI | 2623  | 2585  |
| >MET-L238F-VLPEFRDSYPI | 36    | >MET-L238F-VFPEFRDSYPI | 14229 | 14193 |
| >MET-L238F-VLPEFRDSYPI | 67    | >MET-L238F-VFPEFRDSYPI | 6928  | 6861  |
| >MET-L238F-VLPEFRDSYPI | 7     | >MET-L238F-VFPEFRDSYPI | 4346  | 4339  |
| >MET-L238F-VLPEFRDSYPI | 24    | >MET-L238F-VFPEFRDSYPI | 8779  | 8755  |
| >MET-L238F-VLPEFRDSYPI | 43    | >MET-L238F-VFPEFRDSYPI | 11790 | 11747 |
| >MET-L238F-VLPEFRDSYPI | 167   | >MET-L238F-VFPEFRDSYPI | 17959 | 17792 |
| >MET-L238F-VLPEFRDSYPI | 12    | >MET-L238F-VFPEFRDSYPI | 17831 | 17819 |
| >MET-L238F-VLPEFRDSYPI | 13514 | >MET-L238F-VFPEFRDSYPI | 205   | 13309 |
| >MET-L238F-VLPEFRDSY   | 152   | >MET-L238F-VFPEFRDSY   | 391   | 239   |
| >MET-L238F-VLPEFRDSYPI | 116   | >MET-L238F-VFPEFRDSYPI | 2221  | 2105  |
| >MET-L238F-VLPEFRDSY   | 334   | >MET-L238F-VFPEFRDSY   | 1441  | 1107  |
| >MET-L238F-VLPEFRDSYPI | 110   | >MET-L238F-VFPEFRDSYPI | 630   | 520   |
| >MET-L238F-FLTDQSYIDVI | 13    | >MET-L238F-FLTDQSYIDVI | 1218  | 1205  |
| >MET-L238F-FLTDQSYIDVI | 2     | >MET-L238F-FLTDQSYIDVI | 22    | 20    |
| >MET-L238F-FLTDQSYIDVI | 9     | >MET-L238F-FLTDQSYIDVI | 1157  | 1148  |
| >MET-L238F-FLTDQSYIDVI | 14    | >MET-L238F-FLTDQSYIDVI | 94    | 80    |
| >MET-L238F-FLTDQSYIDVI | 4     | >MET-L238F-FLTDQSYIDVI | 170   | 166   |
| >MET-L238F-FLTDQSYIDVI | 3     | >MET-L238F-FLTDQSYIDVI | 353   | 350   |
| >MET-L238F-FLTDQSYIDVI | 7     | >MET-L238F-FLTDQSYIDVI | 2573  | 2566  |
| >MET-L238F-FLTDQSYIDVI | 8     | >MET-L238F-FLTDQSYIDVI | 3869  | 3861  |
| >MET-L238F-FLTDQSYIDVI | 2     | >MET-L238F-FLTDQSYIDVI | 62    | 60    |
| >MET-L238F-FLTDQSYIDVI | 3778  | >MET-L238F-FLTDQSYIDVI | 188   | 3590  |
| >MET-L238F-FLTDQSYIDVI | 2979  | >MET-L238F-FLTDQSYIDVI | 139   | 2840  |
| >MET-L238F-FLTDQSYIDVI | 2552  | >MET-L238F-FLTDQSYIDVI | 117   | 2435  |
| >MET-L238F-FLTDQSYIDVI | 2462  | >MET-L238F-FLTDQSYIDVI | 143   | 2319  |
| >MET-L238F-DVLPEFRDSY  | 199   | >MET-L238F-DVFPEFRDSY  | 70    | 129   |
| >MET-L238F-DVLPEFRDSY  | 52    | >MET-L238F-DVFPEFRDSY  | 226   | 174   |
| >MET-L238F-DVLPEFRDSY  | 230   | >MET-L238F-DVFPEFRDSY  | 309   | 79    |
| >MET-L238F-YIDVLPEF    | 583   | >MET-L238F-YIDVFPEF    | 429   | 154   |
| >MET-L238F-YIDVLPEFR   | 403   | >MET-L238F-YIDVFPEFR   | 254   | 149   |
| >MET-L238F-YIDVLPEFR   | 41    | >MET-L238F-YIDVFPEFR   | 17    | 24    |
| >MET-L238F-YIDVLPEFR   | 518   | >MET-L238F-YIDVFPEFR   | 185   | 333   |
| >MET-L238F-SYIDVLPEF   | 524   | >MET-L238F-SYIDVFPEF   | 293   | 231   |
| >MET-L238F-SYIDVLPEF   | 20    | >MET-L238F-SYIDVFPEF   | 11    | 9     |
| >MET-L238F-SYIDVLPEF   | 82    | >MET-L238F-SYIDVFPEF   | 29    | 53    |
| >MET-L238F-SYIDVLPEF   | 4     | >MET-L238F-SYIDVFPEF   | 3     | 1     |
| >MET-L238F-SYIDVLPEF   | 22    | >MET-L238F-SYIDVFPEF   | 169   | 147   |
| >MET-L238F-SYIDVLPEF   | 278   | >MET-L238F-SYIDVFPEF   | 136   | 142   |

|                        |      |                        |       |       |
|------------------------|------|------------------------|-------|-------|
| >MET-L238F-SYIDVLPEFR  | 38   | >MET-L238F-SYIDVFPEFR  | 18    | 20    |
| >MET-L238F-SYIDVLPEFR  | 47   | >MET-L238F-SYIDVFPEFR  | 24    | 23    |
| >MET-L238F-SYIDVLPEFR  | 97   | >MET-L238F-SYIDVFPEFR  | 64    | 33    |
| >MET-L238F-SYIDVLPEFR  | 1226 | >MET-L238F-SYIDVFPEFR  | 334   | 892   |
| >MET-L238F-SYIDVLPEFR  | 44   | >MET-L238F-SYIDVFPEFR  | 21    | 23    |
| >MET-L238F-SYIDVLPEF   | 109  | >MET-L238F-SYIDVFPEF   | 86    | 23    |
| >MET-L238F-QSYIDVLPEFF | 299  | >MET-L238F-QSYIDVFPEFF | 155   | 144   |
| >MET-L238F-QSYIDVLPEF  | 212  | >MET-L238F-QSYIDVFPEF  | 462   | 250   |
| >MET-L238F-QSYIDVLPEFF | 94   | >MET-L238F-QSYIDVFPEFF | 37    | 57    |
| >MET-L238F-QSYIDVLPEF  | 469  | >MET-L238F-QSYIDVFPEF  | 364   | 105   |
| >MET-L238F-QSYIDVLPEFF | 856  | >MET-L238F-QSYIDVFPEFF | 364   | 492   |
| >MET-L238F-QSYIDVLPEFF | 19   | >MET-L238F-QSYIDVFPEFF | 10    | 9     |
| >MET-L238F-QSYIDVLPEF  | 300  | >MET-L238F-QSYIDVFPEF  | 245   | 55    |
| >MET-L238F-QSYIDVLPEF  | 32   | >MET-L238F-QSYIDVFPEF  | 24    | 8     |
| >MET-L238F-QSYIDVLPEF  | 4    | >MET-L238F-QSYIDVFPEF  | 5     | 1     |
| >MET-L238F-QSYIDVLPEF  | 97   | >MET-L238F-QSYIDVFPEF  | 84    | 13    |
| >MET-L238F-QSYIDVLPEF  | 89   | >MET-L238F-QSYIDVFPEF  | 174   | 85    |
| >MET-L238F-QSYIDVLPEFF | 133  | >MET-L238F-QSYIDVFPEFF | 101   | 32    |
| >MET-L238F-QSYIDVLPEFF | 207  | >MET-L238F-QSYIDVFPEFF | 180   | 27    |
| >MET-L238F-DQSYIDVL    | 2801 | >MET-L238F-DQSYIDVF    | 217   | 2584  |
| >MET-L238F-DQSYIDVLPEI | 183  | >MET-L238F-DQSYIDVFPEI | 107   | 76    |
| >MET-L238F-DQSYIDVLPEI | 259  | >MET-L238F-DQSYIDVFPEI | 252   | 7     |
| >MET-L238F-TDQSYIDVL   | 446  | >MET-L238F-TDQSYIDVF   | 694   | 248   |
| >MET-L238F-TDQSYIDVL   | 109  | >MET-L238F-TDQSYIDVF   | 2807  | 2698  |
| >MET-L238F-LTDQSYIDVL  | 82   | >MET-L238F-LTDQSYIDVF  | 13    | 69    |
| >MET-L238F-LTDQSYIDVL  | 2146 | >MET-L238F-LTDQSYIDVF  | 114   | 2032  |
| >MET-L238F-LTDQSYIDVL  | 193  | >MET-L238F-LTDQSYIDVF  | 298   | 105   |
| >MET-M114!MKDFSHPNV    | 328  | >MET-M114!TKDFSHPNVL   | 2390  | 2062  |
| >MET-M114!MKDFSHPNV    | 55   | >MET-M114!TKDFSHPNVL   | 70    | 15    |
| >MET-M114!IMKDFSHPN\   | 392  | >MET-M114!ITKDFSHPNV\  | 1111  | 719   |
| >MET-M114!IMKDFSHPN\   | 66   | >MET-M114!ITKDFSHPNV\  | 1610  | 1544  |
| >MET-M114!IMKDFSHPN\   | 392  | >MET-M114!ITKDFSHPNV\  | 9291  | 8899  |
| >MET-M114!IMKDFSHPN\   | 37   | >MET-M114!ITKDFSHPNV\  | 579   | 542   |
| >MET-M114!IMKDFSHPN\   | 21   | >MET-M114!ITKDFSHPNV\  | 821   | 800   |
| >MET-M114!IMKDFSHPN\   | 19   | >MET-M114!ITKDFSHPNV\  | 138   | 119   |
| >MET-M114!IMKDFSHPN\   | 9    | >MET-M114!ITKDFSHPNV\  | 690   | 681   |
| >MET-M114!IMKDFSHPN\   | 174  | >MET-M114!ITKDFSHPNV\  | 345   | 171   |
| >MET-M114!IMKDFSHPN\   | 5    | >MET-M114!ITKDFSHPNV\  | 337   | 332   |
| >MET-M114!IMKDFSHPN\   | 47   | >MET-M114!ITKDFSHPNV\  | 5222  | 5175  |
| >MET-M114!IMKDFSHPN\   | 24   | >MET-M114!ITKDFSHPNV\  | 3608  | 3584  |
| >MET-M114!IMKDFSHPN\   | 78   | >MET-M114!ITKDFSHPNV\  | 10910 | 10832 |
| >MET-M114!IMKDFSHPN\   | 25   | >MET-M114!ITKDFSHPNV\  | 4301  | 4276  |
| >MET-M114!IMKDFSHPN\   | 19   | >MET-M114!ITKDFSHPNV\  | 7060  | 7041  |

|                       |       |                       |       |       |
|-----------------------|-------|-----------------------|-------|-------|
| >MET-M114☹IMKDFSHPN\  | 2     | >MET-M114☹ITKDFSHPNV  | 47    | 45    |
| >MET-M114☹IMKDFSHPN\  | 13    | >MET-M114☹ITKDFSHPNV  | 3097  | 3084  |
| >MET-M114☹IMKDFSHPN   | 2448  | >MET-M114☹ITKDFSHPN   | 366   | 2082  |
| >MET-M114☹IMKDFSHPN\  | 61    | >MET-M114☹ITKDFSHPNV  | 13    | 48    |
| >MET-M114☹IMKDFSHPN\  | 880   | >MET-M114☹ITKDFSHPNV  | 103   | 777   |
| >MET-M114☹IMKDFSHPN\  | 1295  | >MET-M114☹ITKDFSHPNV  | 133   | 1162  |
| >MET-M114☹IMKDFSHPN\  | 688   | >MET-M114☹ITKDFSHPNV  | 113   | 575   |
| >MET-M114☹IMKDFSHPN\  | 377   | >MET-M114☹ITKDFSHPNV  | 4451  | 4074  |
| >MET-M114☹IMKDFSHPN\  | 110   | >MET-M114☹ITKDFSHPNV  | 1433  | 1323  |
| >MET-M114☹IMKDFSHPN\  | 72    | >MET-M114☹ITKDFSHPNV  | 1294  | 1222  |
| >MET-M114☹IMKDFSHPN\  | 28    | >MET-M114☹ITKDFSHPNV  | 473   | 445   |
| >MET-M114☹IMKDFSHPN\  | 8190  | >MET-M114☹ITKDFSHPNV  | 61    | 8129  |
| >MET-M114☹IMKDFSHPN\  | 4435  | >MET-M114☹ITKDFSHPNV  | 29    | 4406  |
| >MET-M114☹IMKDFSHPN\  | 10937 | >MET-M114☹ITKDFSHPNV  | 204   | 10733 |
| >MET-M114☹IMKDFSHPN\  | 5117  | >MET-M114☹ITKDFSHPNV  | 74    | 5043  |
| >MET-M114☹IMKDFSHPN\  | 4604  | >MET-M114☹ITKDFSHPNV  | 55    | 4549  |
| >MET-M114☹VSQFLTEGIIM | 194   | >MET-M114☹VSQFLTEGIIT | 14863 | 14669 |
| >MET-M114☹VSQFLTEGIIM | 62    | >MET-M114☹VSQFLTEGIIT | 6506  | 6444  |
| >MET-M114☹IIMKDFSHPN  | 63    | >MET-M114☹IITKDFSHPNV | 1969  | 1906  |
| >MET-M114☹IIMKDFSHPN  | 64    | >MET-M114☹IITKDFSHPNV | 932   | 868   |
| >MET-M114☹IIMKDFSHPN  | 18    | >MET-M114☹IITKDFSHPNV | 208   | 190   |
| >MET-M114☹IIMKDFSHPN  | 21    | >MET-M114☹IITKDFSHPNV | 143   | 122   |
| >MET-M114☹IIMKDFSHPN  | 42    | >MET-M114☹IITKDFSHPNV | 278   | 236   |
| >MET-M114☹IIMKDFSHPN  | 213   | >MET-M114☹IITKDFSHPNV | 2069  | 1856  |
| >MET-M114☹IIMKDFSHPN  | 70    | >MET-M114☹IITKDFSHPNV | 94    | 24    |
| >MET-M114☹IIMKDFSHPN  | 17    | >MET-M114☹IITKDFSHPNV | 1190  | 1173  |
| >MET-M114☹IIMKDFSHPN  | 9     | >MET-M114☹IITKDFSHPNV | 10    | 1     |
| >MET-M114☹IIMKDFSHPN  | 106   | >MET-M114☹IITKDFSHPNV | 1479  | 1373  |
| >MET-M114☹TEGIIMKDF   | 96    | >MET-M114☹TEGIITKDF   | 65    | 31    |
| >MET-M114☹TEGIIMKDF   | 295   | >MET-M114☹TEGIITKDF   | 247   | 48    |
| >MET-M114☹TEGIIMKDF   | 158   | >MET-M114☹TEGIITKDF   | 115   | 43    |
| >MET-M114☹LTEGIIMK    | 80    | >MET-M114☹LTEGIITK    | 193   | 113   |
| >MET-M114☹LTEGIIMKDF  | 1219  | >MET-M114☹LTEGIITKDF  | 469   | 750   |
| >MET-M114☹LTEGIIMK    | 77    | >MET-M114☹LTEGIITK    | 115   | 38    |
| >MET-M114☹LTEGIIMKDF  | 21    | >MET-M114☹LTEGIITKDF  | 29    | 8     |
| >MET-M114☹LTEGIIMKDF  | 69    | >MET-M114☹LTEGIITKDF  | 64    | 5     |
| >MET-M114☹FLTEGIIM    | 54    | >MET-M114☹FLTEGIIT    | 159   | 105   |
| >MET-M114☹FLTEGIIM    | 34    | >MET-M114☹FLTEGIIT    | 120   | 86    |
| >MET-M114☹FLTEGIIM    | 71    | >MET-M114☹FLTEGIIT    | 70    | 1     |
| >MET-M114☹FLTEGIIM    | 55    | >MET-M114☹FLTEGIIT    | 95    | 40    |
| >MET-M114☹FLTEGIIMKDF | 302   | >MET-M114☹FLTEGIITKDF | 410   | 108   |
| >MET-M114☹FLTEGIIM    | 21    | >MET-M114☹FLTEGIIT    | 51    | 30    |
| >MET-M114☹FLTEGIIMK   | 53    | >MET-M114☹FLTEGIITK   | 39    | 14    |

|                       |     |                       |       |       |
|-----------------------|-----|-----------------------|-------|-------|
| >MET-M114☹FLTEGIIMKD  | 431 | >MET-M114☹FLTEGIITKD  | 541   | 110   |
| >MET-M114☹FLTEGIIM    | 22  | >MET-M114☹FLTEGIIT    | 156   | 134   |
| >MET-M114☹FLTEGIIM    | 23  | >MET-M114☹FLTEGIIT    | 51    | 28    |
| >MET-M114☹FLTEGIIMK   | 316 | >MET-M114☹FLTEGIITK   | 254   | 62    |
| >MET-M114☹FLTEGIIM    | 144 | >MET-M114☹FLTEGIIT    | 1102  | 958   |
| >MET-M114☹FLTEGIIM    | 5   | >MET-M114☹FLTEGIIT    | 6     | 1     |
| >MET-M114☹FLTEGIIMK   | 6   | >MET-M114☹FLTEGIITK   | 4     | 2     |
| >MET-M114☹FLTEGIIMKD  | 49  | >MET-M114☹FLTEGIITKD  | 52    | 3     |
| >MET-M114☹FLTEGIIMKDF | 183 | >MET-M114☹FLTEGIITKDF | 121   | 62    |
| >MET-M114☹FLTEGIIMK   | 191 | >MET-M114☹FLTEGIITK   | 238   | 47    |
| >MET-M114☹FLTEGIIMK   | 408 | >MET-M114☹FLTEGIITK   | 855   | 447   |
| >MET-M114☹FLTEGIIMK   | 134 | >MET-M114☹FLTEGIITK   | 155   | 21    |
| >MET-M114☹FLTEGIIM    | 188 | >MET-M114☹FLTEGIIT    | 7093  | 6905  |
| >MET-M114☹FLTEGIIMKDF | 87  | >MET-M114☹FLTEGIITKDF | 64    | 23    |
| >MET-M114☹FLTEGIIMKDF | 210 | >MET-M114☹FLTEGIITKDF | 133   | 77    |
| >MET-M114☹FLTEGIIM    | 374 | >MET-M114☹FLTEGIIT    | 10914 | 10540 |
| >MET-M114☹QFLTEGIIMK  | 478 | >MET-M114☹QFLTEGIITK  | 325   | 153   |
| >MET-M114☹SQFLTEGIIMK | 356 | >MET-M114☹SQFLTEGIITK | 423   | 67    |
| >MET-M114☹SQFLTEGIIMK | 20  | >MET-M114☹SQFLTEGIITK | 25    | 5     |
| >MET-M114☹SQFLTEGIIMK | 625 | >MET-M114☹SQFLTEGIITK | 353   | 272   |
| >MET-M114☹SQFLTEGIIM  | 316 | >MET-M114☹SQFLTEGIIT  | 11709 | 11393 |
| >MET-M114☹SQFLTEGIIM  | 22  | >MET-M114☹SQFLTEGIIT  | 1914  | 1892  |
| >MET-M114☹SQFLTEGIIM  | 252 | >MET-M114☹SQFLTEGIIT  | 11873 | 11621 |
| >MET-M117☹MKHGDLRNF   | 254 | >MET-M117☹IKHGDLRNFI  | 285   | 31    |
| >MET-M117☹MKHGDLRNF   | 9   | >MET-M117☹IKHGDLRNF   | 12    | 3     |
| >MET-M117☹MKHGDLRNF   | 398 | >MET-M117☹IKHGDLRNFI  | 449   | 51    |
| >MET-M117☹YMKHGDLRN   | 334 | >MET-M117☹YIKHGDLRNF  | 4349  | 4015  |
| >MET-M117☹YMKHGDLRN   | 53  | >MET-M117☹YIKHGDLRNF  | 583   | 530   |
| >MET-M117☹YMKHGDLRN   | 10  | >MET-M117☹YIKHGDLRNF  | 76    | 66    |
| >MET-M117☹YMKHGDLRN   | 188 | >MET-M117☹YIKHGDLRNF  | 434   | 246   |
| >MET-M117☹YMKHGDLRN   | 142 | >MET-M117☹YIKHGDLRNF  | 4523  | 4381  |
| >MET-M117☹YMKHGDLRN   | 54  | >MET-M117☹YIKHGDLRNF  | 4339  | 4285  |
| >MET-M117☹YMKHGDLRN   | 292 | >MET-M117☹YIKHGDLRNF  | 7066  | 6774  |
| >MET-M117☹YMKHGDLRN   | 18  | >MET-M117☹YIKHGDLRNF  | 805   | 787   |
| >MET-M117☹YMKHGDLRN   | 320 | >MET-M117☹YIKHGDLRNF  | 227   | 93    |
| >MET-M117☹YMKHGDLR    | 58  | >MET-M117☹YIKHGDLR    | 374   | 316   |
| >MET-M117☹YMKHGDLR    | 133 | >MET-M117☹YIKHGDLR    | 280   | 147   |
| >MET-M117☹YMKHGDLR    | 162 | >MET-M117☹YIKHGDLR    | 63    | 99    |
| >MET-M117☹YMKHGDLRN   | 34  | >MET-M117☹YIKHGDLRNF  | 121   | 87    |
| >MET-M117☹YMKHGDLRN   | 314 | >MET-M117☹YIKHGDLRNF  | 3114  | 2800  |
| >MET-M117☹YMKHGDLRN   | 38  | >MET-M117☹YIKHGDLRNF  | 224   | 186   |
| >MET-M117☹YMKHGDLRN   | 8   | >MET-M117☹YIKHGDLRNF  | 183   | 175   |
| >MET-M117☹YMKHGDLRN   | 195 | >MET-M117☹YIKHGDLRNF  | 4206  | 4011  |

|                      |      |                      |      |      |
|----------------------|------|----------------------|------|------|
| >MET-M117ÿYMKHGDLRN  | 113  | >MET-M117ÿYIKHGDLRNF | 233  | 120  |
| >MET-M117ÿYMKHGDLR   | 404  | >MET-M117ÿYIKHGDLR   | 704  | 300  |
| >MET-M117ÿEGSPLVVLPI | 4167 | >MET-M117ÿEGSPLVVLPI | 316  | 3851 |
| >MET-M117ÿPYMKHGDLR  | 95   | >MET-M117ÿPYIKHGDLRN | 69   | 26   |
| >MET-M117ÿPYMKHGDLR  | 242  | >MET-M117ÿPYIKHGDLRN | 402  | 160  |
| >MET-M117ÿPYMKHGD    | 78   | >MET-M117ÿPYIKHGD    | 191  | 113  |
| >MET-M117ÿPYMKHGDLR  | 18   | >MET-M117ÿPYIKHGDLRN | 35   | 17   |
| >MET-M117ÿPYMKHGDLR  | 1580 | >MET-M117ÿPYIKHGDLRN | 226  | 1354 |
| >MET-M117ÿPYMKHGDLR  | 76   | >MET-M117ÿPYIKHGD    | 112  | 36   |
| >MET-M117ÿLPYMKHGD   | 41   | >MET-M117ÿLPYIKHGD   | 69   | 28   |
| >MET-M117ÿLPYMKHGD   | 19   | >MET-M117ÿLPYIKHGD   | 42   | 23   |
| >MET-M117ÿLPYMKHGD   | 71   | >MET-M117ÿLPYIKHGD   | 161  | 90   |
| >MET-M117ÿLPYMKHGD   | 774  | >MET-M117ÿLPYIKHGD   | 479  | 295  |
| >MET-M117ÿVLPYMKHGD  | 92   | >MET-M117ÿVLPYIKHGD  | 109  | 17   |
| >MET-M117ÿVVLPMKHG   | 165  | >MET-M117ÿVVLPMKHG   | 230  | 65   |
| >MET-M117ÿVVLPMKHG   | 360  | >MET-M117ÿVVLPMKHG   | 566  | 206  |
| >MET-M117ÿLVVLPYMK   | 35   | >MET-M117ÿLVVLPYIK   | 56   | 21   |
| >MET-M117ÿLVVLPYMK   | 102  | >MET-M117ÿLVVLPYIK   | 253  | 151  |
| >MET-M117ÿPLVVLPI    | 647  | >MET-M117ÿPLVVLPI    | 79   | 568  |
| >MET-M117ÿPLVVLPI    | 1774 | >MET-M117ÿPLVVLPI    | 228  | 1546 |
| >MET-M117ÿPLVVLPI    | 1745 | >MET-M117ÿPLVVLPI    | 345  | 1400 |
| >MET-M117ÿSPLVVLPI   | 6    | >MET-M117ÿSPLVVLPI   | 13   | 7    |
| >MET-M117ÿSPLVVLPI   | 272  | >MET-M117ÿSPLVVLPI   | 464  | 192  |
| >MET-M117ÿSPLVVLPI   | 263  | >MET-M117ÿSPLVVLPI   | 133  | 130  |
| >MET-M117ÿSPLVVLPI   | 2154 | >MET-M117ÿSPLVVLPI   | 231  | 1923 |
| >MET-M117ÿSPLVVLPI   | 772  | >MET-M117ÿSPLVVLPI   | 423  | 349  |
| >MET-M117ÿSPLVVLPI   | 587  | >MET-M117ÿSPLVVLPI   | 260  | 327  |
| >MET-M117ÿGSPLVVLPI  | 32   | >MET-M117ÿGSPLVVLPI  | 56   | 24   |
| >MET-M117ÿGSPLVVLPI  | 4    | >MET-M117ÿGSPLVVLPI  | 6    | 2    |
| >MET-M117ÿGSPLVVLPI  | 56   | >MET-M117ÿGSPLVVLPI  | 2626 | 2570 |
| >MET-M126ÿMAESLQTQI  | 184  | >MET-M126ÿIAESLQTQK  | 249  | 65   |
| >MET-M126ÿMAESLQTQI  | 294  | >MET-M126ÿIAESLQTQKF | 1894 | 1600 |
| >MET-M126ÿMAESLQTQI  | 150  | >MET-M126ÿIAESLQTQK  | 1060 | 910  |
| >MET-M126ÿMAESLQTQI  | 320  | >MET-M126ÿIAESLQTQK  | 2114 | 1794 |
| >MET-M126ÿMAESLQTQI  | 16   | >MET-M126ÿIAESLQTQKF | 21   | 5    |
| >MET-M126ÿMAESLQTQI  | 4    | >MET-M126ÿIAESLQTQKF | 4    | 0    |
| >MET-M126ÿMAESLQTQI  | 21   | >MET-M126ÿIAESLQTQKF | 195  | 174  |
| >MET-M126ÿMAESLQTQI  | 151  | >MET-M126ÿIAESLQTQKF | 108  | 43   |
| >MET-M126ÿMAESLQTQI  | 52   | >MET-M126ÿIAESLQTQKF | 100  | 48   |
| >MET-M126ÿWMAESLQT   | 462  | >MET-M126ÿWIAESLQT   | 4877 | 4415 |
| >MET-M126ÿWMAESLQT   | 404  | >MET-M126ÿWIAESLQT   | 8322 | 7918 |
| >MET-M126ÿWMAESLQT   | 159  | >MET-M126ÿWIAESLQTQ  | 3392 | 3233 |
| >MET-M126ÿWMAESLQT   | 670  | >MET-M126ÿWIAESLQTQ  | 288  | 382  |

|                      |      |                      |      |      |
|----------------------|------|----------------------|------|------|
| >MET-M1268KTGAKLPVKV | 196  | >MET-M1268KTGAKLPVKV | 4501 | 4305 |
| >MET-M1268KTGAKLPVKV | 493  | >MET-M1268KTGAKLPVKV | 9182 | 8689 |
| >MET-M1268KTGAKLPVKV | 5441 | >MET-M1268KTGAKLPVKV | 321  | 5120 |
| >MET-M1268KTGAKLPVKV | 13   | >MET-M1268KTGAKLPVKV | 50   | 37   |
| >MET-M1268KTGAKLPVKV | 176  | >MET-M1268KTGAKLPVKV | 2480 | 2304 |
| >MET-M1268KTGAKLPVKV | 2113 | >MET-M1268KTGAKLPVKV | 58   | 2055 |
| >MET-M1268KWMALES    | 93   | >MET-M1268KWIALES    | 92   | 1    |
| >MET-M1268KWMALES    | 109  | >MET-M1268KWIALES    | 466  | 357  |
| >MET-M1268KWMALES    | 430  | >MET-M1268KWIALES    | 681  | 251  |
| >MET-M1268KWMALES    | 44   | >MET-M1268KWIALES    | 127  | 83   |
| >MET-M1268KWMALESQ   | 134  | >MET-M1268KWIALESQ   | 191  | 57   |
| >MET-M1268KWMALESQ   | 190  | >MET-M1268KWIALESQ   | 269  | 79   |
| >MET-M1268KWMALES    | 19   | >MET-M1268KWIALES    | 30   | 11   |
| >MET-M1268KWMALESQ   | 87   | >MET-M1268KWIALESQ   | 160  | 73   |
| >MET-M1268KWMALESQ   | 65   | >MET-M1268KWIALESQ   | 115  | 50   |
| >MET-M1268VKWMALES   | 18   | >MET-M1268VKWIALES   | 55   | 37   |
| >MET-M1268LPVKWMAL   | 1267 | >MET-M1268LPVKWIAL   | 374  | 893  |
| >MET-M1268LPVKWMALE  | 631  | >MET-M1268LPVKWIALES | 433  | 198  |
| >MET-M1268LPVKWMAL   | 16   | >MET-M1268LPVKWIAL   | 23   | 7    |
| >MET-M1268LPVKWMALE  | 46   | >MET-M1268LPVKWIALES | 76   | 30   |
| >MET-M1268LPVKWMAL   | 35   | >MET-M1268LPVKWIAL   | 23   | 12   |
| >MET-M1268LPVKWMALE  | 190  | >MET-M1268LPVKWIALES | 187  | 3    |
| >MET-M1268LPVKWMAL   | 92   | >MET-M1268LPVKWIAL   | 87   | 5    |
| >MET-M1268LPVKWMAL   | 81   | >MET-M1268LPVKWIAL   | 73   | 8    |
| >MET-M1268LPVKWMALE  | 77   | >MET-M1268LPVKWIALES | 63   | 14   |
| >MET-M1268LPVKWMAL   | 223  | >MET-M1268LPVKWIAL   | 179  | 44   |
| >MET-M1268LPVKWMALE  | 82   | >MET-M1268LPVKWIALE  | 134  | 52   |
| >MET-M1268LPVKWMAL   | 86   | >MET-M1268LPVKWIAL   | 49   | 37   |
| >MET-M1268LPVKWMAL   | 78   | >MET-M1268LPVKWIAL   | 55   | 23   |
| >MET-M1268LPVKWMALE  | 170  | >MET-M1268LPVKWIALES | 125  | 45   |
| >MET-M1268KLPVKWMAL  | 492  | >MET-M1268KLPVKWIAL  | 283  | 209  |
| >MET-M1268KLPVKWMAL  | 278  | >MET-M1268KLPVKWIAL  | 367  | 89   |
| >MET-M1268KLPVKWMAL  | 169  | >MET-M1268KLPVKWIAL  | 591  | 422  |
| >MET-M1268KLPVKWMA   | 227  | >MET-M1268KLPVKWIA   | 372  | 145  |
| >MET-M1268KLPVKWMAL  | 98   | >MET-M1268KLPVKWIAL  | 100  | 2    |
| >MET-M1268KLPVKWMA   | 67   | >MET-M1268KLPVKWIA   | 310  | 243  |
| >MET-M1268KLPVKWMAL  | 99   | >MET-M1268KLPVKWIAL  | 67   | 32   |
| >MET-M1268KLPVKWMAL  | 382  | >MET-M1268KLPVKWIAL  | 402  | 20   |
| >MET-M1268KLPVKWMA   | 71   | >MET-M1268KLPVKWIA   | 157  | 86   |
| >MET-M1268KLPVKWMAL  | 193  | >MET-M1268KLPVKWIAL  | 160  | 33   |
| >MET-M1268KLPVKWMA   | 50   | >MET-M1268KLPVKWIA   | 88   | 38   |
| >MET-M1268KLPVKWMAL  | 65   | >MET-M1268KLPVKWIAL  | 87   | 22   |
| >MET-M1268KLPVKWMAL  | 422  | >MET-M1268KLPVKWIAL  | 2284 | 1862 |

|                     |      |                     |       |       |
|---------------------|------|---------------------|-------|-------|
| >MET-M126AKLPVKWM   | 128  | >MET-M126AKLPVKWI   | 429   | 301   |
| >MET-M126AKLPVKWMA  | 49   | >MET-M126AKLPVKWIAL | 75    | 26    |
| >MET-M126AKLPVKWMA  | 115  | >MET-M126AKLPVKWIAL | 77    | 38    |
| >MET-M126AKLPVKWM   | 4417 | >MET-M126AKLPVKWI   | 217   | 4200  |
| >MET-M126GAKLPVKWN  | 331  | >MET-M126GAKLPVKWI  | 2327  | 1996  |
| >MET-M126GAKLPVKWN  | 319  | >MET-M126GAKLPVKWI  | 2958  | 2639  |
| >MET-M126MAESLQTQI  | 184  | >MET-M126TAESLQTQK  | 144   | 40    |
| >MET-M126MAESLQTQI  | 294  | >MET-M126TAESLQTQK  | 1546  | 1252  |
| >MET-M126MAESLQTQI  | 150  | >MET-M126TAESLQTQK  | 2028  | 1878  |
| >MET-M126MAESLQTQI  | 320  | >MET-M126TAESLQTQK  | 671   | 351   |
| >MET-M126MAESLQTQI  | 16   | >MET-M126TAESLQTQK  | 130   | 114   |
| >MET-M126MAESLQTQI  | 4    | >MET-M126TAESLQTQK  | 8     | 4     |
| >MET-M126MAESLQTQI  | 21   | >MET-M126TAESLQTQK  | 241   | 220   |
| >MET-M126MAESLQTQI  | 151  | >MET-M126TAESLQTQK  | 356   | 205   |
| >MET-M126MAESLQTQI  | 52   | >MET-M126TAESLQTQK  | 976   | 924   |
| >MET-M126WMAESLQT   | 462  | >MET-M126WTAESLQT   | 9972  | 9510  |
| >MET-M126WMAESLQT   | 404  | >MET-M126WTAESLQT   | 28453 | 28049 |
| >MET-M126WMAESLQT   | 159  | >MET-M126WTAESLQTC  | 18504 | 18345 |
| >MET-M126WMAESLQT   | 670  | >MET-M126WTAESLQTC  | 57    | 613   |
| >MET-M126KTGAKLPVKV | 196  | >MET-M126KTGAKLPVKV | 18033 | 17837 |
| >MET-M126KTGAKLPVKV | 493  | >MET-M126KTGAKLPVKV | 21721 | 21228 |
| >MET-M126KTGAKLPVKV | 13   | >MET-M126KTGAKLPVKV | 2656  | 2643  |
| >MET-M126KTGAKLPVKV | 176  | >MET-M126KTGAKLPVKV | 11976 | 11800 |
| >MET-M126KWMAESL    | 93   | >MET-M126KWTALESL   | 250   | 157   |
| >MET-M126KWMAESL    | 109  | >MET-M126KWTALESL   | 1331  | 1222  |
| >MET-M126KWMAESL    | 430  | >MET-M126KWTALESL   | 2839  | 2409  |
| >MET-M126KWMAESL    | 44   | >MET-M126KWTALESL   | 272   | 228   |
| >MET-M126KWMAESLQ   | 134  | >MET-M126KWTALESLQ  | 277   | 143   |
| >MET-M126KWMAESLQ   | 190  | >MET-M126KWTALESLQI | 392   | 202   |
| >MET-M126KWMAESL    | 19   | >MET-M126KWTALESL   | 24    | 5     |
| >MET-M126KWMAESLQ   | 87   | >MET-M126KWTALESLQ  | 137   | 50    |
| >MET-M126KWMAESLQ   | 65   | >MET-M126KWTALESLQI | 106   | 41    |
| >MET-M126VKWMAESL   | 18   | >MET-M126VKWTAESL   | 18    | 0     |
| >MET-M126LPVKWMALE  | 631  | >MET-M126LPVKWTALES | 432   | 199   |
| >MET-M126LPVKWMAL   | 16   | >MET-M126LPVKWTAL   | 12    | 4     |
| >MET-M126LPVKWMALE  | 46   | >MET-M126LPVKWTALES | 39    | 7     |
| >MET-M126LPVKWMAL   | 35   | >MET-M126LPVKWTAL   | 20    | 15    |
| >MET-M126LPVKWMALE  | 190  | >MET-M126LPVKWTALES | 96    | 94    |
| >MET-M126LPVKWMAL   | 92   | >MET-M126LPVKWTAL   | 144   | 52    |
| >MET-M126LPVKWMALE  | 657  | >MET-M126LPVKWTALES | 467   | 190   |
| >MET-M126LPVKWMAL   | 81   | >MET-M126LPVKWTAL   | 62    | 19    |
| >MET-M126LPVKWMALE  | 77   | >MET-M126LPVKWTALES | 59    | 18    |
| >MET-M126LPVKWMAL   | 223  | >MET-M126LPVKWTAL   | 303   | 80    |



|                      |       |                      |       |       |
|----------------------|-------|----------------------|-------|-------|
| >MET-M1268LPVKWMALE  | 82    | >MET-M1268LPVKWTALE  | 181   | 99    |
| >MET-M1268LPVKWMAL   | 86    | >MET-M1268LPVKWTAL   | 60    | 26    |
| >MET-M1268LPVKWMAL   | 78    | >MET-M1268LPVKWTAL   | 102   | 24    |
| >MET-M1268LPVKWMALE  | 170   | >MET-M1268LPVKWTALES | 122   | 48    |
| >MET-M1268KLPVKWMAL  | 492   | >MET-M1268KLPVKWTAL  | 762   | 270   |
| >MET-M1268KLPVKWMAL  | 278   | >MET-M1268KLPVKWTAL  | 139   | 139   |
| >MET-M1268KLPVKWMA   | 507   | >MET-M1268KLPVKWTA   | 280   | 227   |
| >MET-M1268KLPVKWMAL  | 169   | >MET-M1268KLPVKWTAL  | 99    | 70    |
| >MET-M1268KLPVKWMA   | 227   | >MET-M1268KLPVKWTA   | 196   | 31    |
| >MET-M1268KLPVKWMAL  | 98    | >MET-M1268KLPVKWTAL  | 82    | 16    |
| >MET-M1268KLPVKWMA   | 67    | >MET-M1268KLPVKWTA   | 61    | 6     |
| >MET-M1268KLPVKWMAL  | 99    | >MET-M1268KLPVKWTAL  | 170   | 71    |
| >MET-M1268KLPVKWMA   | 974   | >MET-M1268KLPVKWTA   | 234   | 740   |
| >MET-M1268KLPVKWMAL  | 382   | >MET-M1268KLPVKWTAL  | 1044  | 662   |
| >MET-M1268KLPVKWMA   | 71    | >MET-M1268KLPVKWTA   | 68    | 3     |
| >MET-M1268KLPVKWMAL  | 193   | >MET-M1268KLPVKWTAL  | 254   | 61    |
| >MET-M1268KLPVKWMA   | 50    | >MET-M1268KLPVKWTA   | 33    | 17    |
| >MET-M1268KLPVKWMAL  | 65    | >MET-M1268KLPVKWTAL  | 83    | 18    |
| >MET-M1268KLPVKWMAL  | 422   | >MET-M1268KLPVKWTAL  | 828   | 406   |
| >MET-M1268AKLPVKWM   | 128   | >MET-M1268AKLPVKWT   | 5814  | 5686  |
| >MET-M1268AKLPVKWMA  | 49    | >MET-M1268AKLPVKWTAI | 50    | 1     |
| >MET-M1268AKLPVKWMA  | 115   | >MET-M1268AKLPVKWTAI | 174   | 59    |
| >MET-M1268GAKLPVKWN  | 331   | >MET-M1268GAKLPVKWT  | 17589 | 17258 |
| >MET-M1268GAKLPVKWN  | 319   | >MET-M1268GAKLPVKWT  | 13154 | 12835 |
| >MET-N1118GCVYHGTLLE | 18819 | >MET-N1118GCVYHGTLLE | 68    | 18751 |
| >MET-N1118LDNDGKKI   | 3704  | >MET-N1118LDYDGKKI   | 371   | 3333  |
| >MET-N1118LDNDGKKI   | 797   | >MET-N1118LDYDGKKI   | 499   | 298   |
| >MET-N1118LLDNDGKKI  | 48    | >MET-N1118LLDYDGKKI  | 462   | 414   |
| >MET-N1118LLDNDGKKIH | 270   | >MET-N1118LLDYDGKKIH | 1338  | 1068  |
| >MET-N1118LLDNDGKKI  | 194   | >MET-N1118LLDYDGKKI  | 600   | 406   |
| >MET-N1118LLDNDGKKI  | 317   | >MET-N1118LLDYDGKKI  | 1594  | 1277  |
| >MET-N1118LLDNDGKKI  | 116   | >MET-N1118LLDYDGKKI  | 1188  | 1072  |
| >MET-N1118LLDNDGKKIH | 194   | >MET-N1118LLDYDGKKIH | 1290  | 1096  |
| >MET-N1118TLLDNDGKKI | 626   | >MET-N1118TLLDYDGKKI | 479   | 147   |
| >MET-N1118TLLDNDGKKI | 43    | >MET-N1118TLLDYDGKKI | 46    | 3     |
| >MET-N1118TLLDNDGKKI | 67    | >MET-N1118TLLDYDGKKI | 146   | 79    |
| >MET-N1118TLLDNDGKKI | 166   | >MET-N1118TLLDYDGKKI | 190   | 24    |
| >MET-N1118TLLDNDGKKI | 350   | >MET-N1118TLLDYDGKKI | 616   | 266   |
| >MET-N1118TLLDNDGKKI | 46    | >MET-N1118TLLDYDGKKI | 61    | 15    |
| >MET-N1118TLLDNDGK   | 383   | >MET-N1118TLLDYDGK   | 149   | 234   |
| >MET-N1118TLLDNDGKK  | 1247  | >MET-N1118TLLDYDGKK  | 420   | 827   |
| >MET-N1118GTLLDNDGK  | 200   | >MET-N1118GTLLDYDGK  | 84    | 116   |
| >MET-N1118GTLLDNDGKI | 187   | >MET-N1118GTLLDYDGKK | 113   | 74    |

|                        |       |                        |     |       |
|------------------------|-------|------------------------|-----|-------|
| >MET-N1118 GTLLDNDGK   | 852   | >MET-N1118 GTLLDYDGK   | 244 | 608   |
| >MET-N1118 GTLLDNDGKI  | 636   | >MET-N1118 GTLLDYDGKK  | 355 | 281   |
| >MET-N1118 GTLLDNDGKI  | 118   | >MET-N1118 GTLLDYDGKK  | 84  | 34    |
| >MET-N1118 YHGTLLDN    | 18689 | >MET-N1118 YHGTLLDY    | 42  | 18647 |
| >MET-N1118 YHGTLLDN    | 21338 | >MET-N1118 YHGTLLDY    | 26  | 21312 |
| >MET-N1118 VYHGTLLDN   | 3448  | >MET-N1118 VYHGTLLDY   | 441 | 3007  |
| >MET-N1118 VYHGTLLDN   | 12491 | >MET-N1118 VYHGTLLDY   | 12  | 12479 |
| >MET-N1118 VYHGTLLDN   | 20980 | >MET-N1118 VYHGTLLDY   | 244 | 20736 |
| >MET-N1118 VYHGTLLDN   | 21215 | >MET-N1118 VYHGTLLDY   | 12  | 21203 |
| >MET-N1118 VYHGTLLDN   | 33097 | >MET-N1118 VYHGTLLDY   | 198 | 32899 |
| >MET-N1118 CVYHGTLLDN  | 13995 | >MET-N1118 CVYHGTLLDY  | 114 | 13881 |
| >MET-N1118 CVYHGTLLDN  | 29076 | >MET-N1118 CVYHGTLLDY  | 312 | 28764 |
| >MET-N1118 CVYHGTLLDN  | 30006 | >MET-N1118 CVYHGTLLDY  | 150 | 29856 |
| >MET-N1118 CVYHGTLLDN  | 31532 | >MET-N1118 CVYHGTLLDY  | 489 | 31043 |
| >MET-N1118 CVYHGTLLDN  | 28979 | >MET-N1118 CVYHGTLLDY  | 238 | 28741 |
| >MET-N1118 CVYHGTLLDN  | 13681 | >MET-N1118 CVYHGTLLDY  | 5   | 13676 |
| >MET-N1118 CVYHGTLLDN  | 19603 | >MET-N1118 CVYHGTLLDY  | 424 | 19179 |
| >MET-N1118 CVYHGTLLDN  | 22064 | >MET-N1118 CVYHGTLLDY  | 92  | 21972 |
| >MET-N375S NKIVNKNNV   | 1539  | >MET-N375S SKIVNKNNV   | 447 | 1092  |
| >MET-N375S FNKIVNKNNV  | 4833  | >MET-N375S FSKIVNKNNV  | 258 | 4575  |
| >MET-N375S FNKIVNKNNV  | 5701  | >MET-N375S FSKIVNKNNV  | 388 | 5313  |
| >MET-N375S FNKIVNKNNV  | 626   | >MET-N375S FSKIVNKNNV  | 58  | 568   |
| >MET-N375S FPIKYVNDFFI | 1134  | >MET-N375S FPIKYVNDFFI | 377 | 757   |
| >MET-N375S FPIKYVNDFFI | 107   | >MET-N375S FPIKYVNDFFI | 43  | 64    |
| >MET-N375S FFNKIVNKNN  | 51    | >MET-N375S FFSKIVNKNN  | 30  | 21    |
| >MET-N375S FFNKIVNK    | 206   | >MET-N375S FFSKIVNK    | 121 | 85    |
| >MET-N375S DFFNKIVNK   | 639   | >MET-N375S DFFSKIVNK   | 440 | 199   |
| >MET-N375S DFFNKIVNK   | 29    | >MET-N375S DFFSKIVNK   | 28  | 1     |
| >MET-N375S DFFNKIVNK   | 84    | >MET-N375S DFFSKIVNK   | 63  | 21    |
| >MET-N375S DFFNKIVNK   | 547   | >MET-N375S DFFSKIVNK   | 384 | 163   |
| >MET-N375S YVNDFFNKI   | 208   | >MET-N375S YVNDFFSKI   | 274 | 66    |
| >MET-N375S YVNDFFNKI   | 74    | >MET-N375S YVNDFFSKI   | 76  | 2     |
| >MET-N375S YVNDFFNKI   | 13    | >MET-N375S YVNDFFSKI   | 22  | 9     |
| >MET-N375S YVNDFFNKIV  | 277   | >MET-N375S YVNDFFSKIV  | 274 | 3     |
| >MET-N375S YVNDFFNKI   | 13    | >MET-N375S YVNDFFSKI   | 7   | 6     |
| >MET-N375S YVNDFFNKIV  | 83    | >MET-N375S YVNDFFSKIV  | 51  | 32    |
| >MET-N375S YVNDFFNKI   | 8     | >MET-N375S YVNDFFSKI   | 9   | 1     |
| >MET-N375S YVNDFFNKIV  | 130   | >MET-N375S YVNDFFSKIV  | 113 | 17    |
| >MET-N375S YVNDFFNKI   | 44    | >MET-N375S YVNDFFSKI   | 22  | 22    |
| >MET-N375S YVNDFFNKIV  | 30    | >MET-N375S YVNDFFSKIV  | 19  | 11    |
| >MET-N375S YVNDFFNKI   | 442   | >MET-N375S YVNDFFSKI   | 471 | 29    |
| >MET-N375S YVNDFFNKIV  | 113   | >MET-N375S YVNDFFSKIV  | 72  | 41    |
| >MET-N375S YVNDFFNKI   | 674   | >MET-N375S YVNDFFSKI   | 426 | 248   |

|                       |      |                        |     |     |
|-----------------------|------|------------------------|-----|-----|
| >MET-N375S YVNDFFNKIV | 176  | >MET-N375S YVNDFFSKIV  | 98  | 78  |
| >MET-N375S YVNDFFNKI  | 584  | >MET-N375S YVNDFFSKI   | 287 | 297 |
| >MET-N375S YVNDFFNKIV | 72   | >MET-N375S YVNDFFSKIV  | 36  | 36  |
| >MET-N375S YVNDFFNKI  | 47   | >MET-N375S YVNDFFSKI   | 18  | 29  |
| >MET-N375S YVNDFFNKIV | 7    | >MET-N375S YVNDFFSKIV  | 5   | 2   |
| >MET-N375S YVNDFFNK   | 165  | >MET-N375S YVNDFFSK    | 154 | 11  |
| >MET-N375S YVNDFFNK   | 9    | >MET-N375S YVNDFFSK    | 8   | 1   |
| >MET-N375S YVNDFFNKI  | 99   | >MET-N375S YVNDFFSKI   | 143 | 44  |
| >MET-N375S YVNDFFNK   | 405  | >MET-N375S YVNDFFSK    | 303 | 102 |
| >MET-N375S YVNDFFNK   | 75   | >MET-N375S YVNDFFSK    | 114 | 39  |
| >MET-N375S YVNDFFNK   | 10   | >MET-N375S YVNDFFSK    | 10  | 0   |
| >MET-N375S YVNDFFNKI  | 11   | >MET-N375S YVNDFFSKI   | 16  | 5   |
| >MET-N375S YVNDFFNKIV | 203  | >MET-N375S YVNDFFSKIV  | 278 | 75  |
| >MET-N375S YVNDFFNKI  | 16   | >MET-N375S YVNDFFSKI   | 16  | 0   |
| >MET-N375S YVNDFFNKIV | 35   | >MET-N375S YVNDFFSKIV  | 29  | 6   |
| >MET-N375S YVNDFFNKI  | 424  | >MET-N375S YVNDFFSKI   | 38  | 386 |
| >MET-N375S YVNDFFNK   | 360  | >MET-N375S YVNDFFSK    | 514 | 154 |
| >MET-N375S YVNDFFNKI  | 1066 | >MET-N375S YVNDFFSKI   | 252 | 814 |
| >MET-N375S KYVNDFFNKI | 98   | >MET-N375S KYVNDFFSKI  | 35  | 63  |
| >MET-N375S KYVNDFFNK  | 113  | >MET-N375S KYVNDFFSK   | 147 | 34  |
| >MET-N375S KYVNDFFNK  | 23   | >MET-N375S KYVNDFFSK   | 48  | 25  |
| >MET-N375S KYVNDFFNKI | 383  | >MET-N375S KYVNDFFSKI  | 517 | 134 |
| >MET-N375S KYVNDFFNK  | 335  | >MET-N375S KYVNDFFSK   | 274 | 61  |
| >MET-N375S KYVNDFFNKI | 7    | >MET-N375S KYVNDFFSKI  | 8   | 1   |
| >MET-N375S KYVNDFFNKI | 614  | >MET-N375S KYVNDFFSKI  | 475 | 139 |
| >MET-N375S KYVNDFFNK  | 79   | >MET-N375S KYVNDFFSK   | 50  | 29  |
| >MET-N375S KYVNDFFNK  | 22   | >MET-N375S KYVNDFFSK   | 36  | 14  |
| >MET-N375S KYVNDFFNKI | 493  | >MET-N375S KYVNDFFSKI  | 651 | 158 |
| >MET-N375S KYVNDFFNK  | 130  | >MET-N375S KYVNDFFSK   | 178 | 48  |
| >MET-N375S KYVNDFFNK  | 20   | >MET-N375S KYVNDFFSK   | 28  | 8   |
| >MET-N375S KYVNDFFNKI | 253  | >MET-N375S KYVNDFFSKI  | 615 | 362 |
| >MET-N375S KYVNDFFN   | 474  | >MET-N375S KYVNDFFS    | 463 | 11  |
| >MET-N375S KYVNDFFNKI | 326  | >MET-N375S KYVNDFFSKI  | 290 | 36  |
| >MET-N375S IKYVNDFFNK | 365  | >MET-N375S IKYVNDFFSKI | 416 | 51  |
| >MET-N375S IKYVNDFFNK | 427  | >MET-N375S IKYVNDFFSKI | 458 | 31  |
| >MET-N375S IKYVNDFFNK | 201  | >MET-N375S IKYVNDFFSK  | 113 | 88  |
| >MET-N375S IKYVNDFFNK | 37   | >MET-N375S IKYVNDFFSKI | 24  | 13  |
| >MET-N375S IKYVNDFFNK | 716  | >MET-N375S IKYVNDFFSKI | 242 | 474 |
| >MET-N375S PIKYVNDFFN | 256  | >MET-N375S PIKYVNDFFSK | 172 | 84  |
| >MET-Q978L QIKDLGSEL  | 806  | >MET-Q978L LIKDLGSEL   | 262 | 544 |
| >MET-Q978L QIKDLGSELV | 547  | >MET-Q978L LIKDLGSELV  | 164 | 383 |
| >MET-Q978L QIKDLGSEL  | 409  | >MET-Q978L LIKDLGSEL   | 64  | 345 |
| >MET-Q978L QIKDLGSELV | 194  | >MET-Q978L LIKDLGSELV  | 63  | 131 |

|                        |       |                        |      |       |
|------------------------|-------|------------------------|------|-------|
| >MET-Q978L QIKDLGSELV  | 2489  | >MET-Q978L LIKDLGSELV  | 373  | 2116  |
| >MET-Q978L QIKDLGSEL   | 791   | >MET-Q978L LIKDLGSEL   | 35   | 756   |
| >MET-Q978L QIKDLGSELV  | 68    | >MET-Q978L LIKDLGSELV  | 7    | 61    |
| >MET-Q978L QIKDLGSELVI | 719   | >MET-Q978L LIKDLGSELVR | 262  | 457   |
| >MET-Q978L QIKDLGSELVI | 445   | >MET-Q978L LIKDLGSELVR | 457  | 12    |
| >MET-Q978L QIKDLGSEL   | 2206  | >MET-Q978L LIKDLGSEL   | 412  | 1794  |
| >MET-Q978L QIKDLGSEL   | 435   | >MET-Q978L LIKDLGSEL   | 141  | 294   |
| >MET-Q978L QIKDLGSELVI | 297   | >MET-Q978L LIKDLGSELVR | 650  | 353   |
| >MET-Q978L KQIKDLGSEL  | 6428  | >MET-Q978L KLIKDLGSEL  | 367  | 6061  |
| >MET-Q978L KQIKDLGSEL\ | 121   | >MET-Q978L KLIKDLGSELV | 19   | 102   |
| >MET-Q978L KQIKDLGSEL  | 462   | >MET-Q978L KLIKDLGSEL  | 46   | 416   |
| >MET-Q978L KQIKDLGSEL\ | 195   | >MET-Q978L KLIKDLGSELV | 9    | 186   |
| >MET-Q978L KQIKDLGSEL  | 962   | >MET-Q978L KLIKDLGSEL  | 86   | 876   |
| >MET-Q978L KQIKDLGSEL\ | 47    | >MET-Q978L KLIKDLGSELV | 5    | 42    |
| >MET-Q978L KQIKDLGSEL  | 195   | >MET-Q978L KLIKDLGSEL  | 192  | 3     |
| >MET-Q978L KQIKDLGSEL\ | 8     | >MET-Q978L KLIKDLGSELV | 12   | 4     |
| >MET-Q978L KQIKDLGSEL  | 3295  | >MET-Q978L KLIKDLGSEL  | 23   | 3272  |
| >MET-Q978L KQIKDLGSEL\ | 570   | >MET-Q978L KLIKDLGSELV | 6    | 564   |
| >MET-Q978L KQIKDLGSEL  | 1156  | >MET-Q978L KLIKDLGSEL  | 15   | 1141  |
| >MET-Q978L KQIKDLGSEL\ | 190   | >MET-Q978L KLIKDLGSELV | 5    | 185   |
| >MET-Q978L KQIKDLGSEL  | 6208  | >MET-Q978L KLIKDLGSEL  | 74   | 6134  |
| >MET-Q978L KQIKDLGSEL\ | 853   | >MET-Q978L KLIKDLGSELV | 13   | 840   |
| >MET-Q978L KQIKDLGSEL\ | 10259 | >MET-Q978L KLIKDLGSELV | 83   | 10176 |
| >MET-Q978L KQIKDLGSEL  | 15028 | >MET-Q978L KLIKDLGSEL  | 14   | 15014 |
| >MET-Q978L KQIKDLGSEL\ | 5013  | >MET-Q978L KLIKDLGSELV | 6    | 5007  |
| >MET-Q978L KQIKDLGSEL  | 228   | >MET-Q978L KLIKDLGSEL  | 1111 | 883   |
| >MET-Q978L KQIKDLGSEL  | 31    | >MET-Q978L KLIKDLGSEL  | 630  | 599   |
| >MET-Q978L KQIKDLGSEL\ | 364   | >MET-Q978L KLIKDLGSELV | 5222 | 4858  |
| >MET-Q978L RKQIKDLGSEI | 198   | >MET-Q978L RKLIKDLGSEL | 62   | 136   |
| >MET-Q978L RKQIKDLGSEI | 163   | >MET-Q978L RKLIKDLGSEL | 454  | 291   |
| >MET-Q978L RKQIKDLGSEI | 170   | >MET-Q978L RKLIKDLGSEL | 775  | 605   |
| >MET-Q978L KRKQIKDL    | 42    | >MET-Q978L KRKLIKDL    | 60   | 18    |
| >MET-Q978L KRKQIKDLGS  | 255   | >MET-Q978L KRKLIKDLGS  | 417  | 162   |
| >MET-Q978L KRKQIKDLGS  | 266   | >MET-Q978L KRKLIKDLGS  | 423  | 157   |
| >MET-Q978L KKRKQIKDL   | 19    | >MET-Q978L KKRKLIKDL   | 35   | 16    |
| >MET-Q978L KKRKQIKDL   | 601   | >MET-Q978L KKRKLIKDL   | 243  | 358   |
| >MET-Q978L LKKRKQIK    | 544   | >MET-Q978L LKKRKLIK    | 364  | 180   |
| >MET-Q978L LKKRKQIKDL  | 152   | >MET-Q978L LKKRKLIKDL  | 199  | 47    |
| >MET-Q978L WLKKRKQI    | 514   | >MET-Q978L WLKKRKLI    | 388  | 126   |
| >MET-Q978L WLKKRKQI    | 179   | >MET-Q978L WLKKRKLI    | 356  | 177   |
| >MET-Q978L WLKKRKQIKI  | 104   | >MET-Q978L WLKKRKLIKD  | 128  | 24    |
| >MET-Q978L WLKKRKQIK   | 3907  | >MET-Q978L WLKKRKLIK   | 475  | 3432  |
| >MET-Q978L WLKKRKQI    | 19    | >MET-Q978L WLKKRKLI    | 31   | 12    |

|                       |       |                        |       |       |
|-----------------------|-------|------------------------|-------|-------|
| >MET-Q978L WLKKRKQIK  | 214   | >MET-Q978L WLKKRKLIK   | 299   | 85    |
| >MET-Q978L WLKKRKQIKI | 20    | >MET-Q978L WLKKRKLIKD  | 24    | 4     |
| >MET-Q978L LWLKKRKQI  | 485   | >MET-Q978L LWLKKRKLI   | 196   | 289   |
| >MET-Q978L LWLKKRKQ   | 11091 | >MET-Q978L LWLKKRKL    | 183   | 10908 |
| >MET-Q978L LWLKKRKQI  | 103   | >MET-Q978L LWLKKRKLI   | 249   | 146   |
| >MET-Q978L LWLKKRKQIK | 174   | >MET-Q978L LWLKKRKLIK  | 84    | 90    |
| >MET-Q978L LWLKKRKQ   | 670   | >MET-Q978L LWLKKRKL    | 192   | 478   |
| >MET-Q978L LWLKKRKQI  | 310   | >MET-Q978L LWLKKRKLI   | 188   | 122   |
| >MET-Q978L FLWLKKRKQI | 405   | >MET-Q978L FLWLKKRKLI  | 192   | 213   |
| >MET-Q978L FLWLKKRKQI | 1079  | >MET-Q978L FLWLKKRKLI  | 374   | 705   |
| >MET-Q978L FLWLKKRKQI | 379   | >MET-Q978L FLWLKKRKLI  | 168   | 211   |
| >MET-Q978L FLWLKKRKQ  | 2945  | >MET-Q978L FLWLKKRKL   | 18    | 2927  |
| >MET-Q978L FLWLKKRKQI | 19    | >MET-Q978L FLWLKKRKLI  | 33    | 14    |
| >MET-Q978L FLWLKKRKQ  | 19143 | >MET-Q978L FLWLKKRKL   | 379   | 18764 |
| >MET-Q978L FLWLKKRKQ  | 5451  | >MET-Q978L FLWLKKRKL   | 115   | 5336  |
| >MET-Q978L FLWLKKRKQI | 115   | >MET-Q978L FLWLKKRKLI  | 131   | 16    |
| >MET-Q978L FLWLKKRKQ  | 18796 | >MET-Q978L FLWLKKRKL   | 133   | 18663 |
| >MET-Q978L FLWLKKRKQI | 201   | >MET-Q978L FLWLKKRKLI  | 804   | 603   |
| >MET-Q978L FLWLKKRKQ  | 838   | >MET-Q978L FLWLKKRKL   | 19    | 819   |
| >MET-Q978L FLWLKKRKQI | 25    | >MET-Q978L FLWLKKRKLI  | 38    | 13    |
| >MET-Q978L FLWLKKRKQI | 1157  | >MET-Q978L FLWLKKRKLIK | 355   | 802   |
| >MET-Q978L FLWLKKRKQ  | 7887  | >MET-Q978L FLWLKKRKL   | 124   | 7763  |
| >MET-Q978L FFLWLKKRKC | 663   | >MET-Q978L FFLWLKKRKL  | 286   | 377   |
| >MET-Q978L FFLWLKKRKC | 9295  | >MET-Q978L FFLWLKKRKL  | 146   | 9149  |
| >MET-Q978L FFLWLKKRKC | 48    | >MET-Q978L FFLWLKKRKL  | 106   | 58    |
| >MET-Q978L FFLWLKKRKC | 279   | >MET-Q978L FFLWLKKRKL  | 171   | 108   |
| >MET-R1000 RLVSARSV   | 732   | >MET-R1000 SLVSARSV    | 434   | 298   |
| >MET-R1000 RLVSARSV   | 88    | >MET-R1000 SLVSARSV    | 61    | 27    |
| >MET-R1000 RLVSARSV   | 8     | >MET-R1000 SLVSARSV    | 10    | 2     |
| >MET-R1000 RLVSARSVSP | 66    | >MET-R1000 SLVSARSVSP  | 67    | 1     |
| >MET-R1000 RLVSARSV   | 119   | >MET-R1000 SLVSARSV    | 205   | 86    |
| >MET-R1000 RLVSARSV   | 11    | >MET-R1000 SLVSARSV    | 10    | 1     |
| >MET-R1000 RLVSARSV   | 79    | >MET-R1000 SLVSARSV    | 67    | 12    |
| >MET-R1000 RLVSARSV   | 50    | >MET-R1000 SLVSARSV    | 19    | 31    |
| >MET-R1000 RLVSARSV   | 361   | >MET-R1000 SLVSARSV    | 492   | 131   |
| >MET-R1000 RLVSARSV   | 5     | >MET-R1000 SLVSARSV    | 3     | 2     |
| >MET-R1000 RLVSARSVSP | 537   | >MET-R1000 SLVSARSVSP  | 154   | 383   |
| >MET-R1000 RLVSARSV   | 305   | >MET-R1000 SLVSARSV    | 1625  | 1320  |
| >MET-R1000 DRLVSARSV  | 16842 | >MET-R1000 DSLVSARSV   | 473   | 16369 |
| >MET-R1000 DARVHTPHLI | 71    | >MET-R1000 DARVHTPHLI  | 23122 | 23051 |
| >MET-R1000 LDRLVSARSV | 450   | >MET-R1000 LDSLVSARSV  | 256   | 194   |
| >MET-R1000 HLDRLVSA   | 491   | >MET-R1000 HLDLVSAS    | 129   | 362   |
| >MET-R1000 HLDRLVSARS | 655   | >MET-R1000 HLDLVSARS   | 243   | 412   |

|                       |      |                        |       |       |
|-----------------------|------|------------------------|-------|-------|
| >MET-R1000 HLDRLVSA   | 233  | >MET-R1000 HLDSLVA     | 63    | 170   |
| >MET-R1000 HLDRLVSARS | 202  | >MET-R1000 HLDSLVSARS' | 74    | 128   |
| >MET-R1000 HLDRLVSA   | 400  | >MET-R1000 HLDSLVA     | 162   | 238   |
| >MET-R1000 HLDRLVSARS | 160  | >MET-R1000 HLDSLVSARS' | 72    | 88    |
| >MET-R1000 HLDRLVSA   | 553  | >MET-R1000 HLDSLVA     | 313   | 240   |
| >MET-R1000 HLDRLVSA   | 71   | >MET-R1000 HLDSLVA     | 40    | 31    |
| >MET-R1000 HLDRLVSARS | 8    | >MET-R1000 HLDSLVSARS' | 7     | 1     |
| >MET-R1000 HLDRLVSA   | 90   | >MET-R1000 HLDSLVA     | 64    | 26    |
| >MET-R1000 HLDRLVSARS | 13   | >MET-R1000 HLDSLVSARS' | 12    | 1     |
| >MET-R1000 HLDRLVSA   | 115  | >MET-R1000 HLDSLVA     | 52    | 63    |
| >MET-R1000 HLDRLVSARS | 25   | >MET-R1000 HLDSLVSARS' | 18    | 7     |
| >MET-R1000 HLDRLVSARS | 83   | >MET-R1000 HLDSLVSARS' | 29    | 54    |
| >MET-R1000 HLDRLVSA   | 28   | >MET-R1000 HLDSLVA     | 22    | 6     |
| >MET-R1000 HLDRLVSARS | 6    | >MET-R1000 HLDSLVSARS' | 5     | 1     |
| >MET-R1000 HLDRLVSAR  | 247  | >MET-R1000 HLDSLVSAR   | 211   | 36    |
| >MET-R1000 HLDRLVSAR  | 366  | >MET-R1000 HLDSLVSAR   | 311   | 55    |
| >MET-R1000 HLDRLVSAR  | 819  | >MET-R1000 HLDSLVSAR   | 327   | 492   |
| >MET-R1000 HLDRLVSARS | 676  | >MET-R1000 HLDSLVSARS' | 304   | 372   |
| >MET-R1000 TPHLDRVSA  | 351  | >MET-R1000 TPHLDRVSA   | 616   | 265   |
| >MET-R1000 TPHLDRVSA  | 29   | >MET-R1000 TPHLDRVSA   | 43    | 14    |
| >MET-R1000 HTPHLDR    | 3220 | >MET-R1000 HTPHLDR     | 402   | 2818  |
| >MET-R1000 HTPHLDR    | 52   | >MET-R1000 HTPHLDR     | 33    | 19    |
| >MET-R1000 HTPHLDRV   | 15   | >MET-R1000 HTPHLDRV    | 8     | 7     |
| >MET-R1000 HTPHLDRVSA | 49   | >MET-R1000 HTPHLDRVSA  | 20    | 29    |
| >MET-R1000 HTPHLDR    | 51   | >MET-R1000 HTPHLDR     | 92    | 41    |
| >MET-R1000 HTPHLDRV   | 108  | >MET-R1000 HTPHLDRV    | 70    | 38    |
| >MET-R1000 VHTPHLDR   | 658  | >MET-R1000 VHTPHLDR    | 435   | 223   |
| >MET-R1000 RVHTPHLDR  | 1553 | >MET-R1000 RVHTPHLDR   | 372   | 1181  |
| >MET-R1000 RVHTPHLDR  | 1340 | >MET-R1000 RVHTPHLDR   | 276   | 1064  |
| >MET-R1000 RVHTPHLDR  | 331  | >MET-R1000 RVHTPHLDR   | 13586 | 13255 |
| >MET-R1000 RVHTPHLDR  | 259  | >MET-R1000 RVHTPHLDR   | 14826 | 14567 |
| >MET-R1000 RVHTPHLDR  | 26   | >MET-R1000 RVHTPHLDR   | 64    | 38    |
| >MET-R1000 RVHTPHLDR  | 107  | >MET-R1000 RVHTPHLDR   | 39    | 68    |
| >MET-R1000 RVHTPHLDR  | 19   | >MET-R1000 RVHTPHLDR   | 19    | 0     |
| >MET-R1000 RVHTPHLDR  | 54   | >MET-R1000 RVHTPHLDR   | 16533 | 16479 |
| >MET-R1000 RVHTPHLDR  | 874  | >MET-R1000 RVHTPHLDR   | 170   | 704   |
| >MET-R1000 RVHTPHLDR  | 291  | >MET-R1000 RVHTPHLDR   | 357   | 66    |
| >MET-R1000 RVHTPHLDR  | 2928 | >MET-R1000 RVHTPHLDR   | 290   | 2638  |
| >MET-R1000 RVHTPHLDR  | 82   | >MET-R1000 RVHTPHLDR   | 26322 | 26240 |
| >MET-R1000 ARVHTPHLDR | 572  | >MET-R1000 ARVHTPHLDR  | 151   | 421   |
| >MET-R1000 ARVHTPHLDR | 82   | >MET-R1000 ARVHTPHLDR  | 2714  | 2632  |
| >MET-R1000 ARVHTPHLDR | 312  | >MET-R1000 ARVHTPHLDR  | 270   | 42    |
| >MET-R1000 ARVHTPHLDR | 692  | >MET-R1000 ARVHTPHLDR  | 173   | 519   |

|                        |       |                        |       |       |
|------------------------|-------|------------------------|-------|-------|
| >MET-R1000 ARVHTPHLDF  | 439   | >MET-R1000 ARVHTPHLDS  | 726   | 287   |
| >MET-R1000 ARVHTPHLDF  | 76    | >MET-R1000 ARVHTPHLDS  | 95    | 19    |
| >MET-R266S RETLDAQTF   | 122   | >MET-R266S SETLDAQTF   | 932   | 810   |
| >MET-R266S RETLDAQTF   | 409   | >MET-R266S SETLDAQTF   | 180   | 229   |
| >MET-R266S RETLDAQTF   | 22    | >MET-R266S SETLDAQTF   | 188   | 166   |
| >MET-R266S RETLDAQTF   | 200   | >MET-R266S SETLDAQTF   | 103   | 97    |
| >MET-R266S RETLDAQTF   | 308   | >MET-R266S SETLDAQTF   | 189   | 119   |
| >MET-R266S RETLDAQTFH  | 374   | >MET-R266S SETLDAQTFH  | 201   | 173   |
| >MET-R266S RETLDAQTF   | 330   | >MET-R266S SETLDAQTF   | 2696  | 2366  |
| >MET-R266S RETLDAQTFH  | 261   | >MET-R266S SETLDAQTFH  | 1596  | 1335  |
| >MET-R266S QRETLDAQTF  | 470   | >MET-R266S QSETLDAQTF  | 1272  | 802   |
| >MET-R266S QRETLDAQTF  | 21873 | >MET-R266S QSETLDAQTF  | 15    | 21858 |
| >MET-R266S QRETLDAQTF  | 17433 | >MET-R266S QSETLDAQTF  | 463   | 16970 |
| >MET-R266S NNFIYFLTVQI | 430   | >MET-R266S NNFIYFLTVQI | 19850 | 19420 |
| >MET-R266S NNFIYFLTVQI | 24    | >MET-R266S NNFIYFLTVQI | 15467 | 15443 |
| >MET-R266S NNFIYFLTVQI | 62    | >MET-R266S NNFIYFLTVQI | 21735 | 21673 |
| >MET-R266S VQRETLDA    | 1327  | >MET-R266S VQSETLDA    | 189   | 1138  |
| >MET-R266S VQRETLDAQ   | 2351  | >MET-R266S VQSETLDAQ   | 364   | 1987  |
| >MET-R266S VQRETLDAQ   | 763   | >MET-R266S VQSETLDAQI  | 108   | 655   |
| >MET-R266S VQRETLDAQ   | 46    | >MET-R266S VQSETLDAQI  | 65    | 19    |
| >MET-R266S VQRETLDAQ   | 217   | >MET-R266S VQSETLDAQI  | 744   | 527   |
| >MET-R266S VQRETLDAQ   | 4     | >MET-R266S VQSETLDAQI  | 6     | 2     |
| >MET-R266S LTVQRETL    | 15    | >MET-R266S LTVQSETL    | 6     | 9     |
| >MET-R266S LTVQRETL    | 10568 | >MET-R266S LTVQSETL    | 173   | 10395 |
| >MET-R266S FLTVQRETL   | 1004  | >MET-R266S FLTVQSETL   | 120   | 884   |
| >MET-R266S FLTVQRET    | 538   | >MET-R266S FLTVQSET    | 61    | 477   |
| >MET-R266S FLTVQRETL   | 20    | >MET-R266S FLTVQSETL   | 7     | 13    |
| >MET-R266S FLTVQRETL   | 224   | >MET-R266S FLTVQSETLD  | 69    | 155   |
| >MET-R266S FLTVQRET    | 1416  | >MET-R266S FLTVQSET    | 182   | 1234  |
| >MET-R266S FLTVQRETL   | 285   | >MET-R266S FLTVQSETL   | 55    | 230   |
| >MET-R266S FLTVQRETL   | 210   | >MET-R266S FLTVQSETLD  | 69    | 141   |
| >MET-R266S FLTVQRETL   | 571   | >MET-R266S FLTVQSETL   | 130   | 441   |
| >MET-R266S FLTVQRETL   | 954   | >MET-R266S FLTVQSETLD  | 399   | 555   |
| >MET-R266S FLTVQRET    | 1383  | >MET-R266S FLTVQSET    | 374   | 1009  |
| >MET-R266S FLTVQRETL   | 160   | >MET-R266S FLTVQSETL   | 19    | 141   |
| >MET-R266S FLTVQRETL   | 172   | >MET-R266S FLTVQSETL   | 8     | 164   |
| >MET-R266S FLTVQRETL   | 1326  | >MET-R266S FLTVQSETLD  | 292   | 1034  |
| >MET-R266S FLTVQRET    | 2066  | >MET-R266S FLTVQSET    | 268   | 1798  |
| >MET-R266S FLTVQRETL   | 96    | >MET-R266S FLTVQSETL   | 15    | 81    |
| >MET-R266S FLTVQRETL   | 228   | >MET-R266S FLTVQSETLD  | 62    | 166   |
| >MET-R266S FLTVQRETL   | 895   | >MET-R266S FLTVQSETL   | 37    | 858   |
| >MET-R266S FLTVQRET    | 49    | >MET-R266S FLTVQSET    | 13    | 36    |
| >MET-R266S FLTVQRETL   | 5     | >MET-R266S FLTVQSETL   | 4     | 1     |

|                        |      |                        |       |       |
|------------------------|------|------------------------|-------|-------|
| >MET-R266S·FLTVQRETL   | 11   | >MET-R266S·FLTVQSETL   | 9     | 2     |
| >MET-R266S·YFLTVQRETL  | 75   | >MET-R266S·YFLTVQSETL  | 59    | 16    |
| >MET-R266S·YFLTVQRETL  | 1781 | >MET-R266S·YFLTVQSETL  | 481   | 1300  |
| >MET-R266S·YFLTVQRETL  | 15   | >MET-R266S·YFLTVQSETL  | 11    | 4     |
| >MET-R266S·IYFLTVQRETL | 186  | >MET-R266S·IYFLTVQSETL | 261   | 75    |
| >MET-R266S·IYFLTVQRETL | 13   | >MET-R266S·IYFLTVQSETL | 16    | 3     |
| >MET-R266S·IYFLTVQRETL | 102  | >MET-R266S·IYFLTVQSETL | 126   | 24    |
| >MET-R266S·IYFLTVQRETL | 178  | >MET-R266S·IYFLTVQSETL | 95    | 83    |
| >MET-R266S·IYFLTVQRETL | 19   | >MET-R266S·IYFLTVQSETL | 14    | 5     |
| >MET-R266S·IYFLTVQR    | 25   | >MET-R266S·IYFLTVQS    | 12847 | 12822 |
| >MET-R266S·IYFLTVQRETL | 698  | >MET-R266S·IYFLTVQSETL | 278   | 420   |
| >MET-R266S·IYFLTVQR    | 36   | >MET-R266S·IYFLTVQS    | 14979 | 14943 |
| >MET-R266S·IYFLTVQR    | 103  | >MET-R266S·IYFLTVQS    | 22229 | 22126 |
| >MET-R266S·IYFLTVQR    | 20   | >MET-R266S·IYFLTVQS    | 4619  | 4599  |
| >MET-R266S·IYFLTVQRETL | 406  | >MET-R266S·IYFLTVQSETL | 501   | 95    |
| >MET-R266S·FIYFLTVQRET | 935  | >MET-R266S·FIYFLTVQSET | 288   | 647   |
| >MET-R266S·FIYFLTVQR   | 2108 | >MET-R266S·FIYFLTVQS   | 300   | 1808  |
| >MET-R266S·FIYFLTVQRET | 292  | >MET-R266S·FIYFLTVQSET | 83    | 209   |
| >MET-R266S·FIYFLTVQR   | 5984 | >MET-R266S·FIYFLTVQS   | 309   | 5675  |
| >MET-R266S·FIYFLTVQRET | 118  | >MET-R266S·FIYFLTVQSET | 32    | 86    |
| >MET-R266S·FIYFLTVQRET | 985  | >MET-R266S·FIYFLTVQSET | 432   | 553   |
| >MET-R266S·FIYFLTVQRET | 208  | >MET-R266S·FIYFLTVQSET | 98    | 110   |
| >MET-R266S·FIYFLTVQRET | 1139 | >MET-R266S·FIYFLTVQSET | 221   | 918   |
| >MET-R266S·FIYFLTVQR   | 326  | >MET-R266S·FIYFLTVQS   | 15092 | 14766 |
| >MET-R266S·FIYFLTVQR   | 262  | >MET-R266S·FIYFLTVQS   | 17695 | 17433 |
| >MET-R266S·FIYFLTVQR   | 134  | >MET-R266S·FIYFLTVQS   | 13626 | 13492 |
| >MET-R266S·FIYFLTVQR   | 84   | >MET-R266S·FIYFLTVQS   | 21772 | 21688 |
| >MET-R266S·FIYFLTVQR   | 5    | >MET-R266S·FIYFLTVQS   | 2163  | 2158  |
| >MET-R266S·FIYFLTVQR   | 42   | >MET-R266S·FIYFLTVQS   | 20414 | 20372 |
| >MET-R266S·NFIYFLTVQR  | 35   | >MET-R266S·NFIYFLTVQS  | 11002 | 10967 |
| >MET-R266S·NFIYFLTVQR  | 23   | >MET-R266S·NFIYFLTVQS  | 1722  | 1699  |
| >MET-R266S·NFIYFLTVQR  | 11   | >MET-R266S·NFIYFLTVQS  | 12888 | 12877 |
| >MET-R266S·NFIYFLTVQR  | 45   | >MET-R266S·NFIYFLTVQS  | 19086 | 19041 |
| >MET-R988C RYDARVHTPI  | 458  | >MET-R988C CYDARVHTPI  | 1439  | 981   |
| >MET-R988C RYDARVHTPI  | 13   | >MET-R988C CYDARVHTPI  | 15    | 2     |
| >MET-R988C VRYDARVHTI  | 380  | >MET-R988C VCYDARVHTI  | 5416  | 5036  |
| >MET-R988C VRYDARVHTI  | 292  | >MET-R988C VCYDARVHTI  | 25903 | 25611 |
| >MET-R988C QIKDLGSELVI | 445  | >MET-R988C QIKDLGSELVI | 41068 | 40623 |
| >MET-R988C QIKDLGSELVI | 297  | >MET-R988C QIKDLGSELVI | 35896 | 35599 |
| >MET-R988C LVRYPDARV   | 140  | >MET-R988C LVCYPDARV   | 107   | 33    |
| >MET-R988C LVRYPDARV   | 345  | >MET-R988C LVCYPDARV   | 11889 | 11544 |
| >MET-R988C LVRYPDARV   | 2250 | >MET-R988C LVCYPDARV   | 397   | 1853  |
| >MET-R988C ELVRYPDARV  | 357  | >MET-R988C ELVCYPDARV  | 129   | 228   |



|                        |       |                        |       |       |
|------------------------|-------|------------------------|-------|-------|
| >MET-R988C ELVRYDARV   | 938   | >MET-R988C ELVCYDARV   | 242   | 696   |
| >MET-R988C ELVRYDARV   | 31    | >MET-R988C ELVCYDARV   | 16    | 15    |
| >MET-R988C ELVRYDARV   | 208   | >MET-R988C ELVCYDARV   | 28    | 180   |
| >MET-R988C ELVRYDARV   | 271   | >MET-R988C ELVCYDARV   | 290   | 19    |
| >MET-R988C ELVRYDARV   | 222   | >MET-R988C ELVCYDARV   | 109   | 113   |
| >MET-R988C ELVRYDARV   | 6     | >MET-R988C ELVCYDARV   | 10    | 4     |
| >MET-R988C ELVRYDAR    | 131   | >MET-R988C ELVCYDAR    | 140   | 9     |
| >MET-R988C ELVRYDAR    | 23    | >MET-R988C ELVCYDAR    | 18    | 5     |
| >MET-R988C ELVRYDARV   | 66    | >MET-R988C ELVCYDARV   | 21    | 45    |
| >MET-R988C ELVRYDARV   | 274   | >MET-R988C ELVCYDARV   | 85    | 189   |
| >MET-R988C ELVRYDAR    | 630   | >MET-R988C ELVCYDAR    | 210   | 420   |
| >MET-R988C SELVRYDARV  | 87    | >MET-R988C SELVCYDARV  | 205   | 118   |
| >MET-R988C SELVRYDA    | 612   | >MET-R988C SELVCYDA    | 186   | 426   |
| >MET-R988C SELVRYDARV  | 594   | >MET-R988C SELVCYDARV  | 454   | 140   |
| >MET-R988C SELVRYDA    | 23    | >MET-R988C SELVCYDA    | 15    | 8     |
| >MET-R988C SELVRYDARV  | 301   | >MET-R988C SELVCYDARV  | 193   | 108   |
| >MET-R988C LGSELVRY    | 603   | >MET-R988C LGSELVCY    | 323   | 280   |
| >MET-R988C DLGSELVRY   | 144   | >MET-R988C DLGSELVCY   | 146   | 2     |
| >MET-R988C KDLGSELVR   | 188   | >MET-R988C KDLGSELVC   | 33716 | 33528 |
| >MET-R988C IKDLGSELVRY | 1148  | >MET-R988C IKDLGSELVCY | 492   | 656   |
| >MET-T1010 TTEMVSNES\  | 181   | >MET-T1010 ITEMVSNESV  | 878   | 697   |
| >MET-T1010 TTEMVSNES\  | 477   | >MET-T1010 ITEMVSNESV  | 4771  | 4294  |
| >MET-T1010 PTTEMVSNES\ | 1116  | >MET-T1010 PITEMVSNES  | 32    | 1084  |
| >MET-T1010 PTTEMVSNES\ | 403   | >MET-T1010 PITEMVSNES  | 2563  | 2160  |
| >MET-T1010 RLVSARVSP\  | 1312  | >MET-T1010 RLVSARVSP\  | 87    | 1225  |
| >MET-T1010 RLVSARVSP\  | 66    | >MET-T1010 RLVSARVSP\  | 9     | 57    |
| >MET-T1010 RLVSARVSP\  | 1209  | >MET-T1010 RLVSARVSP\  | 166   | 1043  |
| >MET-T1010 RLVSARVSP\  | 1292  | >MET-T1010 RLVSARVSP\  | 57    | 1235  |
| >MET-T1010 RLVSARVSP\  | 4564  | >MET-T1010 RLVSARVSP\  | 140   | 4424  |
| >MET-T1010 RLVSARVSP\  | 5454  | >MET-T1010 RLVSARVSP\  | 355   | 5099  |
| >MET-T1010 RLVSARVSP\  | 537   | >MET-T1010 RLVSARVSP\  | 41    | 496   |
| >MET-T1010 RLVSARVSP\  | 5033  | >MET-T1010 RLVSARVSP\  | 332   | 4701  |
| >MET-T1010 RLVSARVSP\  | 12432 | >MET-T1010 RLVSARVSP\  | 216   | 12216 |
| >MET-T1010 RLVSARVSP\  | 1826  | >MET-T1010 RLVSARVSP\  | 156   | 1670  |
| >MET-T1010 RLVSARVSP\  | 1064  | >MET-T1010 RLVSARVSP\  | 47    | 1017  |
| >MET-T1010 VSPTTEMV    | 5     | >MET-T1010 VSPITEMV    | 5     | 0     |
| >MET-T1010 SVSPTTEMV   | 624   | >MET-T1010 SVSPITEMV   | 191   | 433   |
| >MET-T1010 SVSPTTEM    | 957   | >MET-T1010 SVSPITEM    | 174   | 783   |
| >MET-T1010 SVSPTTEMV   | 44    | >MET-T1010 SVSPITEMV   | 7     | 37    |
| >MET-T1010 SVSPTTEMV   | 61    | >MET-T1010 SVSPITEMV   | 30    | 31    |
| >MET-T1010 SVSPTTEMV   | 56    | >MET-T1010 SVSPITEMV   | 34    | 22    |
| >MET-T1010 SVSPTTEMV   | 44    | >MET-T1010 SVSPITEMV   | 45    | 1     |
| >MET-T1010 SVSPTTEMV   | 37    | >MET-T1010 SVSPITEMV   | 39    | 2     |

|                        |       |                        |     |       |
|------------------------|-------|------------------------|-----|-------|
| >MET-T1010 SVSPTTEMV   | 221   | >MET-T1010 SVSPITEMV   | 117 | 104   |
| >MET-T1010 SVSPTTEMV   | 8     | >MET-T1010 SVSPITEMV   | 8   | 0     |
| >MET-T1010 SVSPTTEM    | 501   | >MET-T1010 SVSPITEM    | 74  | 427   |
| >MET-T1010 SVSPTTEMV   | 10    | >MET-T1010 SVSPITEMV   | 5   | 5     |
| >MET-T1010 SVSPTTEMV   | 26    | >MET-T1010 SVSPITEMV   | 24  | 2     |
| >MET-T1010 SVSPTTEM    | 394   | >MET-T1010 SVSPITEM    | 494 | 100   |
| >MET-T1010 SVSPTTEMV   | 757   | >MET-T1010 SVSPITEMV   | 487 | 270   |
| >MET-T1010 RSVSPTTEM   | 166   | >MET-T1010 RSVSPITEM   | 79  | 87    |
| >MET-T1010 RSVSPTTEMV  | 164   | >MET-T1010 RSVSPITEMV  | 108 | 56    |
| >MET-T1010 RSVSPTTEM   | 301   | >MET-T1010 RSVSPITEM   | 386 | 85    |
| >MET-T1010 RSVSPTTEM   | 23    | >MET-T1010 RSVSPITEM   | 23  | 0     |
| >MET-T1010 RSVSPTTEMV  | 226   | >MET-T1010 RSVSPITEMV  | 358 | 132   |
| >MET-T1010 RSVSPTTEM   | 4     | >MET-T1010 RSVSPITEM   | 4   | 0     |
| >MET-T1010 RSVSPTTEMV  | 60    | >MET-T1010 RSVSPITEMV  | 76  | 16    |
| >MET-T1010 RSVSPTTEM   | 41    | >MET-T1010 RSVSPITEM   | 72  | 31    |
| >MET-T1010 RSVSPTTEM   | 700   | >MET-T1010 RSVSPITEM   | 330 | 370   |
| >MET-T1010 RSVSPTTEM   | 8     | >MET-T1010 RSVSPITEM   | 7   | 1     |
| >MET-T1010 RSVSPTTEMV  | 316   | >MET-T1010 RSVSPITEMV  | 212 | 104   |
| >MET-T1010 RSVSPTTEM   | 233   | >MET-T1010 RSVSPITEM   | 326 | 93    |
| >MET-T1010 ARSVSPTTEM  | 26    | >MET-T1010 ARSVSPITEM  | 34  | 8     |
| >MET-T1010 ARSVSPTTEM  | 260   | >MET-T1010 ARSVSPITEM  | 474 | 214   |
| >MET-T1010 ARSVSPTTEM  | 824   | >MET-T1010 ARSVSPITEM  | 490 | 334   |
| >MET-T1010 SARSVSPT    | 237   | >MET-T1010 SARSVSPI    | 12  | 225   |
| >MET-T1010 SARSVSPTT   | 91    | >MET-T1010 SARSVSPIT   | 137 | 46    |
| >MET-T1010 SARSVSPTTEI | 134   | >MET-T1010 SARSVSPITEM | 195 | 61    |
| >MET-T1010 SARSVSPTTEI | 177   | >MET-T1010 SARSVSPITEM | 448 | 271   |
| >MET-T1010 SARSVSPTTEI | 453   | >MET-T1010 SARSVSPITEM | 622 | 169   |
| >MET-T1010 SARSVSPT    | 6430  | >MET-T1010 SARSVSPI    | 337 | 6093  |
| >MET-T1010 SARSVSPTTEI | 180   | >MET-T1010 SARSVSPITEM | 187 | 7     |
| >MET-T1010 SARSVSPT    | 5744  | >MET-T1010 SARSVSPI    | 294 | 5450  |
| >MET-T1010 SARSVSPTTEI | 78    | >MET-T1010 SARSVSPITEM | 103 | 25    |
| >MET-T1010 SARSVSPTTEI | 244   | >MET-T1010 SARSVSPITEM | 645 | 401   |
| >MET-T1010 SARSVSPTTEI | 13    | >MET-T1010 SARSVSPITEM | 13  | 0     |
| >MET-T1010 SARSVSPT    | 30341 | >MET-T1010 SARSVSPI    | 109 | 30232 |
| >MET-T1010 VSARSVSPT   | 7480  | >MET-T1010 VSARSVSPI   | 369 | 7111  |
| >MET-T1010 VSARSVSPT   | 2337  | >MET-T1010 VSARSVSPI   | 60  | 2277  |
| >MET-T1010 VSARSVSPT   | 1337  | >MET-T1010 VSARSVSPI   | 13  | 1324  |
| >MET-T1010 VSARSVSPT   | 12619 | >MET-T1010 VSARSVSPI   | 103 | 12516 |
| >MET-T1010 VSARSVSPT   | 3599  | >MET-T1010 VSARSVSPI   | 352 | 3247  |
| >MET-T1010 VSARSVSPT   | 29181 | >MET-T1010 VSARSVSPI   | 30  | 29151 |
| >MET-T1010 LVSARSVSPT  | 1908  | >MET-T1010 LVSARSVSPI  | 182 | 1726  |
| >MET-T1010 LVSARSVSPT  | 373   | >MET-T1010 LVSARSVSPI  | 76  | 297   |
| >MET-T1010 LVSARSVSPT  | 597   | >MET-T1010 LVSARSVSPI  | 61  | 536   |

|                       |       |                        |       |       |
|-----------------------|-------|------------------------|-------|-------|
| >MET-T1010 LVSARVSPT  | 3214  | >MET-T1010 LVSARVSPI   | 263   | 2951  |
| >MET-T1010 LVSARVSPT  | 16862 | >MET-T1010 LVSARVSPI   | 51    | 16811 |
| >MET-T1191 THNPTVKDLI | 69    | >MET-T1191 IHNPTVKDLI  | 87    | 18    |
| >MET-T1191 THNPTVKDL  | 1310  | >MET-T1191 IHNPTVKDL   | 245   | 1065  |
| >MET-T1191 THNPTVKDL  | 468   | >MET-T1191 IHNPTVKDL   | 4946  | 4478  |
| >MET-T1191 ETHNPTVKDL | 95    | >MET-T1191 EIHNPVKDL   | 1020  | 925   |
| >MET-T1191 ETHNPTVKDL | 61    | >MET-T1191 EIHNPVKDL   | 709   | 648   |
| >MET-T1191 ETHNPTVK   | 10    | >MET-T1191 EIHNPVK     | 41    | 31    |
| >MET-T1191 ETHNPTVKDL | 8     | >MET-T1191 EIHNPVKDL   | 25    | 17    |
| >MET-T1191 ETHNPTVKDL | 172   | >MET-T1191 EIHNPVKDL   | 701   | 529   |
| >MET-T1191 ETHNPTVKDL | 348   | >MET-T1191 EIHNPVKDL   | 15240 | 14892 |
| >MET-T1191 ETHNPTVKDL | 176   | >MET-T1191 EIHNPVKDL   | 8270  | 8094  |
| >MET-T1191 GDLRNFIRNE | 21815 | >MET-T1191 GDLRNFIRNE  | 489   | 21326 |
| >MET-T1191 GDLRNFIRNE | 1134  | >MET-T1191 GDLRNFIRNE  | 473   | 661   |
| >MET-T1191 GDLRNFIRNE | 7338  | >MET-T1191 GDLRNFIRNE  | 101   | 7237  |
| >MET-T1191 GDLRNFIRNE | 13002 | >MET-T1191 GDLRNFIRNE  | 241   | 12761 |
| >MET-T1191 NETHNPTV   | 357   | >MET-T1191 NEIHNPV     | 325   | 32    |
| >MET-T1191 NETHNPTVKI | 110   | >MET-T1191 NEIHNPVKD   | 190   | 80    |
| >MET-T1191 NETHNPTVKI | 557   | >MET-T1191 NEIHNPVKD   | 184   | 373   |
| >MET-T1191 NETHNPTV   | 592   | >MET-T1191 NEIHNPV     | 382   | 210   |
| >MET-T1191 NETHNPTVKI | 1592  | >MET-T1191 NEIHNPVKD   | 200   | 1392  |
| >MET-T1191 IRNETHNPV  | 223   | >MET-T1191 IRNEIHNPV   | 536   | 313   |
| >MET-T1191 FIRNETHNPV | 246   | >MET-T1191 FIRNEIHNPV  | 191   | 55    |
| >MET-T1191 FIRNETHNPV | 172   | >MET-T1191 FIRNEIHNPV  | 184   | 12    |
| >MET-T1191 FIRNETHNPV | 9     | >MET-T1191 FIRNEIHNPV  | 9     | 0     |
| >MET-T1191 FIRNETHNPV | 26    | >MET-T1191 FIRNEIHNPV  | 20    | 6     |
| >MET-T1191 FIRNETHNPV | 19    | >MET-T1191 FIRNEIHNPV  | 11    | 8     |
| >MET-T1191 FIRNETHNPV | 68    | >MET-T1191 FIRNEIHNPV  | 69    | 1     |
| >MET-T1191 FIRNETHNPV | 56    | >MET-T1191 FIRNEIHNPV  | 41    | 15    |
| >MET-T1191 FIRNETHNPV | 273   | >MET-T1191 FIRNEIHNPV  | 297   | 24    |
| >MET-T1191 FIRNETHNPV | 3     | >MET-T1191 FIRNEIHNPV  | 3     | 0     |
| >MET-T1191 FIRNETHNPV | 291   | >MET-T1191 FIRNEIHNPV  | 377   | 86    |
| >MET-T1191 FIRNETHNPV | 392   | >MET-T1191 FIRNEIHNPV  | 417   | 25    |
| >MET-T1191 RNFIRNET   | 32331 | >MET-T1191 RNFIRNEI    | 96    | 32235 |
| >MET-T1191 LRNFIRNET  | 4545  | >MET-T1191 LRNFIRNEI   | 104   | 4441  |
| >MET-T1275 TQKFTTKSDV | 491   | >MET-T1275 IQKFTTKSDV\ | 228   | 263   |
| >MET-T1275 TQKFTTKSDV | 378   | >MET-T1275 IQKFTTKSDV  | 39    | 339   |
| >MET-T1275 TQKFTTKSDV | 1321  | >MET-T1275 IQKFTTKSDV\ | 176   | 1145  |
| >MET-T1275 QTQKFTTKSD | 6145  | >MET-T1275 QIQKFTTKSD' | 301   | 5844  |
| >MET-T1275 QTQKFTTK   | 32    | >MET-T1275 QIQKFTTK    | 68    | 36    |
| >MET-T1275 QTQKFTTK   | 413   | >MET-T1275 QIQKFTTK    | 2031  | 1618  |
| >MET-T1275 QTQKFTTK   | 80    | >MET-T1275 QIQKFTTK    | 431   | 351   |
| >MET-T1275 QTQKFTTKSD | 438   | >MET-T1275 QIQKFTTKSD' | 9202  | 8764  |

|                       |       |                        |      |       |
|-----------------------|-------|------------------------|------|-------|
| >MET-T1275 QTQKFTTK   | 115   | >MET-T1275 QIQKFTTK    | 1927 | 1812  |
| >MET-T1275 VKWMAESL   | 17825 | >MET-T1275 VKWMAESL    | 189  | 17636 |
| >MET-T1275 VKWMAESL   | 2270  | >MET-T1275 VKWMAESL    | 72   | 2198  |
| >MET-T1275 LQTQKFTT   | 551   | >MET-T1275 LQIQKFTT    | 74   | 477   |
| >MET-T1275 LQTQKFTTK  | 1389  | >MET-T1275 LQIQKFTTK   | 305  | 1084  |
| >MET-T1275 SLQTQKFTT  | 73    | >MET-T1275 SLQIQKFTT   | 78   | 5     |
| >MET-T1275 SLQTQKFTTK | 44    | >MET-T1275 SLQIQKFTTK  | 72   | 28    |
| >MET-T1275 SLQTQKFTTK | 80    | >MET-T1275 SLQIQKFTTK  | 84   | 4     |
| >MET-T1275 ESLQTQKF   | 83    | >MET-T1275 ESLQIQKF    | 64   | 19    |
| >MET-T1275 ESLQTQKFTT | 62    | >MET-T1275 ESLQIQKFTTK | 30   | 32    |
| >MET-T1275 ESLQTQKF   | 197   | >MET-T1275 ESLQIQKF    | 511  | 314   |
| >MET-T1275 ESLQTQKF   | 12    | >MET-T1275 ESLQIQKF    | 19   | 7     |
| >MET-T1275 LESLQTQKF  | 472   | >MET-T1275 LESLQIQKF   | 2069 | 1597  |
| >MET-T1275 LESLQTQKFT | 86    | >MET-T1275 LESLQIQKFT  | 130  | 44    |
| >MET-T1275 LESLQTQKF  | 80    | >MET-T1275 LESLQIQKF   | 67   | 13    |
| >MET-T1275 LESLQTQKF  | 214   | >MET-T1275 LESLQIQKF   | 218  | 4     |
| >MET-T1275 LESLQTQKF  | 197   | >MET-T1275 LESLQIQKF   | 229  | 32    |
| >MET-T1275 ALESQTQ    | 137   | >MET-T1275 ALESLIQ     | 636  | 499   |
| >MET-T1275 ALESQTQK   | 247   | >MET-T1275 ALESLIQK    | 174  | 73    |
| >MET-T1275 ALESQTQK   | 525   | >MET-T1275 ALESLIQK    | 131  | 394   |
| >MET-T1275 MAESLQT    | 6593  | >MET-T1275 MAESLQI     | 411  | 6182  |
| >MET-T1275 MAESLQT    | 736   | >MET-T1275 MAESLQI     | 50   | 686   |
| >MET-T1275 MAESLQT    | 2662  | >MET-T1275 MAESLQI     | 106  | 2556  |
| >MET-T1275 MAESLQTQI  | 184   | >MET-T1275 MAESLQIQK   | 96   | 88    |
| >MET-T1275 MAESLQTQI  | 294   | >MET-T1275 MAESLQIQK   | 425  | 131   |
| >MET-T1275 MAESLQTQI  | 150   | >MET-T1275 MAESLQIQK   | 34   | 116   |
| >MET-T1275 MAESLQTQI  | 320   | >MET-T1275 MAESLQIQK   | 190  | 130   |
| >MET-T1275 MAESLQT    | 688   | >MET-T1275 MAESLQI     | 24   | 664   |
| >MET-T1275 MAESLQTQI  | 16    | >MET-T1275 MAESLQIQK   | 19   | 3     |
| >MET-T1275 MAESLQT    | 1578  | >MET-T1275 MAESLQI     | 24   | 1554  |
| >MET-T1275 MAESLQTQI  | 4     | >MET-T1275 MAESLQIQK   | 4    | 0     |
| >MET-T1275 MAESLQTQI  | 21    | >MET-T1275 MAESLQIQK   | 39   | 18    |
| >MET-T1275 MAESLQT    | 7739  | >MET-T1275 MAESLQI     | 383  | 7356  |
| >MET-T1275 MAESLQT    | 8389  | >MET-T1275 MAESLQI     | 346  | 8043  |
| >MET-T1275 MAESLQTQI  | 151   | >MET-T1275 MAESLQIQK   | 169  | 18    |
| >MET-T1275 MAESLQT    | 12796 | >MET-T1275 MAESLQI     | 83   | 12713 |
| >MET-T1275 MAESLQTQI  | 52    | >MET-T1275 MAESLQIQK   | 69   | 17    |
| >MET-T1275 MAESLQT    | 31878 | >MET-T1275 MAESLQI     | 72   | 31806 |
| >MET-T1275 WMAESLQT   | 4304  | >MET-T1275 WMAESLQI    | 197  | 4107  |
| >MET-T1275 WMAESLQT   | 462   | >MET-T1275 WMAESLQI    | 26   | 436   |
| >MET-T1275 WMAESLQT   | 588   | >MET-T1275 WMAESLQI    | 37   | 551   |
| >MET-T1275 WMAESLQT   | 2869  | >MET-T1275 WMAESLQI    | 266  | 2603  |
| >MET-T1275 WMAESLQT   | 1887  | >MET-T1275 WMAESLQI    | 81   | 1806  |

|                        |       |                       |       |       |
|------------------------|-------|-----------------------|-------|-------|
| >MET-T1275 WMALESLQT   | 10475 | >MET-T1275 WMALESLQI  | 369   | 10106 |
| >MET-T1275 WMALESLQT   | 1709  | >MET-T1275 WMALESLQI  | 52    | 1657  |
| >MET-T1275 WMALESLQT   | 1023  | >MET-T1275 WMALESLQI  | 23    | 1000  |
| >MET-T1275 WMALESLQT   | 404   | >MET-T1275 WMALESLQI  | 43    | 361   |
| >MET-T1275 WMALESLQT   | 159   | >MET-T1275 WMALESLQI  | 560   | 401   |
| >MET-T1275 WMALESLQT   | 504   | >MET-T1275 WMALESLQI  | 385   | 119   |
| >MET-T1275 KWMALESLO   | 14797 | >MET-T1275 KWMALESLO  | 444   | 14353 |
| >MET-T1275 KWMALESLO   | 4528  | >MET-T1275 KWMALESLO  | 40    | 4488  |
| >MET-T1275 KWMALESLO   | 190   | >MET-T1275 KWMALESLO  | 199   | 9     |
| >MET-T1275 KWMALESLO   | 65    | >MET-T1275 KWMALESLO  | 101   | 36    |
| >MET-T230M TDQSYIDVL   | 446   | >MET-T230M MDQSYIDVL  | 2713  | 2267  |
| >MET-T230M TDQSYIDV    | 107   | >MET-T230M MDQSYIDV   | 164   | 57    |
| >MET-T230M TDQSYIDVL   | 109   | >MET-T230M MDQSYIDVL  | 160   | 51    |
| >MET-T230M LTDQSYIDV   | 236   | >MET-T230M LMDQSYIDV  | 4577  | 4341  |
| >MET-T230M LTDQSYIDV   | 6177  | >MET-T230M LMDQSYIDV  | 111   | 6066  |
| >MET-T230M LTDQSYIDVL  | 7118  | >MET-T230M LMDQSYIDVL | 375   | 6743  |
| >MET-T230M LTDQSYIDV   | 10466 | >MET-T230M LMDQSYIDV  | 393   | 10073 |
| >MET-T230M LTDQSYIDVL  | 870   | >MET-T230M LMDQSYIDVL | 60    | 810   |
| >MET-T230M LTDQSYIDV   | 7228  | >MET-T230M LMDQSYIDV  | 213   | 7015  |
| >MET-T230M LTDQSYIDVL  | 3744  | >MET-T230M LMDQSYIDVL | 366   | 3378  |
| >MET-T230M LTDQSYIDV   | 2906  | >MET-T230M LMDQSYIDV  | 182   | 2724  |
| >MET-T230M LTDQSYIDV   | 394   | >MET-T230M LMDQSYIDV  | 5     | 389   |
| >MET-T230M LTDQSYIDVL  | 832   | >MET-T230M LMDQSYIDVL | 8     | 824   |
| >MET-T230M LTDQSYIDV   | 3802  | >MET-T230M LMDQSYIDV  | 12    | 3790  |
| >MET-T230M LTDQSYIDVL  | 7711  | >MET-T230M LMDQSYIDVL | 23    | 7688  |
| >MET-T230M LTDQSYIDV   | 426   | >MET-T230M LMDQSYIDV  | 7     | 419   |
| >MET-T230M LTDQSYIDVL  | 5867  | >MET-T230M LMDQSYIDVL | 26    | 5841  |
| >MET-T230M LTDQSYIDV   | 12242 | >MET-T230M LMDQSYIDV  | 20    | 12222 |
| >MET-T230M LTDQSYIDVL  | 13270 | >MET-T230M LMDQSYIDVL | 64    | 13206 |
| >MET-T230M LTDQSYIDV   | 381   | >MET-T230M LMDQSYIDV  | 2     | 379   |
| >MET-T230M LTDQSYIDVL  | 5601  | >MET-T230M LMDQSYIDVL | 11    | 5590  |
| >MET-T230M LTDQSYIDV   | 296   | >MET-T230M LMDQSYIDV  | 1549  | 1253  |
| >MET-T230M LTDQSYIDVL  | 82    | >MET-T230M LMDQSYIDVL | 11180 | 11098 |
| >MET-T230M LTDQSYIDVL  | 5381  | >MET-T230M LMDQSYIDVL | 365   | 5016  |
| >MET-T230M LTDQSYIDVL  | 193   | >MET-T230M LMDQSYIDVL | 7892  | 7699  |
| >MET-T230M KETKDGFMFI  | 1707  | >MET-T230M KETKDGFMFI | 37    | 1670  |
| >MET-T230M KETKDGFMFI  | 368   | >MET-T230M KETKDGFMFI | 174   | 194   |
| >MET-T230M KETKDGFMFI  | 124   | >MET-T230M KETKDGFMFI | 1404  | 1280  |
| >MET-T230M KETKDGFMFI  | 250   | >MET-T230M KETKDGFMFI | 38    | 212   |
| >MET-T230M FLTDQSYI    | 10    | >MET-T230M FLMDQSYI   | 6     | 4     |
| >MET-T230M FLTDQSYIDV  | 27    | >MET-T230M FLMDQSYIDV | 6     | 21    |
| >MET-T230M FLTDQSYIDVI | 13    | >MET-T230M FLMDQSYIDV | 7     | 6     |
| >MET-T230M FLTDQSYI    | 2     | >MET-T230M FLMDQSYI   | 2     | 0     |

|                        |      |                       |     |      |
|------------------------|------|-----------------------|-----|------|
| >MET-T230M FLTDQSYID   | 270  | >MET-T230M FLMDQSYID  | 23  | 247  |
| >MET-T230M FLTDQSYIDV  | 24   | >MET-T230M FLMDQSYIDV | 8   | 16   |
| >MET-T230M FLTDQSYIDVI | 2    | >MET-T230M FLMDQSYIDV | 2   | 0    |
| >MET-T230M FLTDQSYI    | 4    | >MET-T230M FLMDQSYI   | 2   | 2    |
| >MET-T230M FLTDQSYIDV  | 21   | >MET-T230M FLMDQSYIDV | 7   | 14   |
| >MET-T230M FLTDQSYIDVI | 9    | >MET-T230M FLMDQSYIDV | 3   | 6    |
| >MET-T230M FLTDQSYI    | 9    | >MET-T230M FLMDQSYI   | 4   | 5    |
| >MET-T230M FLTDQSYIDV  | 71   | >MET-T230M FLMDQSYIDV | 24  | 47   |
| >MET-T230M FLTDQSYIDVI | 14   | >MET-T230M FLMDQSYIDV | 5   | 9    |
| >MET-T230M FLTDQSYI    | 2    | >MET-T230M FLMDQSYI   | 2   | 0    |
| >MET-T230M FLTDQSYIDV  | 3    | >MET-T230M FLMDQSYIDV | 2   | 1    |
| >MET-T230M FLTDQSYIDVI | 4    | >MET-T230M FLMDQSYIDV | 2   | 2    |
| >MET-T230M FLTDQSYI    | 3    | >MET-T230M FLMDQSYI   | 2   | 1    |
| >MET-T230M FLTDQSYID   | 1872 | >MET-T230M FLMDQSYID  | 137 | 1735 |
| >MET-T230M FLTDQSYIDV  | 4    | >MET-T230M FLMDQSYIDV | 2   | 2    |
| >MET-T230M FLTDQSYIDVI | 3    | >MET-T230M FLMDQSYIDV | 2   | 1    |
| >MET-T230M FLTDQSYI    | 6    | >MET-T230M FLMDQSYI   | 5   | 1    |
| >MET-T230M FLTDQSYIDV  | 4    | >MET-T230M FLMDQSYIDV | 4   | 0    |
| >MET-T230M FLTDQSYIDVI | 7    | >MET-T230M FLMDQSYIDV | 7   | 0    |
| >MET-T230M FLTDQSYI    | 5    | >MET-T230M FLMDQSYI   | 2   | 3    |
| >MET-T230M FLTDQSYIDV  | 6    | >MET-T230M FLMDQSYIDV | 2   | 4    |
| >MET-T230M FLTDQSYIDVI | 8    | >MET-T230M FLMDQSYIDV | 2   | 6    |
| >MET-T230M FLTDQSYI    | 2    | >MET-T230M FLMDQSYI   | 2   | 0    |
| >MET-T230M FLTDQSYID   | 507  | >MET-T230M FLMDQSYID  | 466 | 41   |
| >MET-T230M FLTDQSYIDV  | 1    | >MET-T230M FLMDQSYIDV | 1   | 0    |
| >MET-T230M FLTDQSYIDVI | 2    | >MET-T230M FLMDQSYIDV | 2   | 0    |
| >MET-T230M FLTDQSYI    | 277  | >MET-T230M FLMDQSYI   | 60  | 217  |
| >MET-T230M FLTDQSYIDVI | 1676 | >MET-T230M FLMDQSYIDV | 419 | 1257 |
| >MET-T230M FLTDQSYI    | 609  | >MET-T230M FLMDQSYI   | 52  | 557  |
| >MET-T230M FLTDQSYIDV  | 369  | >MET-T230M FLMDQSYIDV | 50  | 319  |
| >MET-T230M FLTDQSYIDVI | 4503 | >MET-T230M FLMDQSYIDV | 377 | 4126 |
| >MET-T230M FLTDQSYIDVI | 3778 | >MET-T230M FLMDQSYIDV | 189 | 3589 |
| >MET-T230M FLTDQSYIDVI | 2552 | >MET-T230M FLMDQSYIDV | 496 | 2056 |
| >MET-T230M FLTDQSYIDVI | 549  | >MET-T230M FLMDQSYIDV | 26  | 523  |
| >MET-T230M MFLTDQSYI   | 302  | >MET-T230M MFLMDQSYI  | 674 | 372  |
| >MET-T230M MFLTDQSYID  | 564  | >MET-T230M MFLMDQSYII | 366 | 198  |
| >MET-T230M MFLTDQSYI   | 45   | >MET-T230M MFLMDQSYI  | 42  | 3    |
| >MET-T230M MFLTDQSY    | 14   | >MET-T230M MFLMDQSY   | 14  | 0    |
| >MET-T230M MFLTDQSY    | 184  | >MET-T230M MFLMDQSY   | 199 | 15   |
| >MET-T230M MFLTDQSY    | 295  | >MET-T230M MFLMDQSY   | 330 | 35   |
| >MET-T230M MFLTDQSY    | 53   | >MET-T230M MFLMDQSY   | 50  | 3    |
| >MET-T230M MFLTDQSYI   | 698  | >MET-T230M MFLMDQSYI  | 453 | 245  |
| >MET-T230M FMFLTDQSYI  | 15   | >MET-T230M FMFLMDQSY  | 13  | 2    |

|                       |       |                       |      |       |
|-----------------------|-------|-----------------------|------|-------|
| >MET-T230M FMFLTDQS   | 110   | >MET-T230M FMFLMDQS   | 93   | 17    |
| >MET-T230M FMFLTDQSYI | 10    | >MET-T230M FMFLMDQSY  | 11   | 1     |
| >MET-T230M FMFLTDQS   | 528   | >MET-T230M FMFLMDQS   | 422  | 106   |
| >MET-T230M FMFLTDQSYI | 15    | >MET-T230M FMFLMDQSY  | 17   | 2     |
| >MET-T230M FMFLTDQSYI | 47    | >MET-T230M FMFLMDQSY  | 57   | 10    |
| >MET-T230M FMFLTDQS   | 104   | >MET-T230M FMFLMDQS   | 216  | 112   |
| >MET-T230M FMFLTDQSY  | 481   | >MET-T230M FMFLMDQSY  | 1280 | 799   |
| >MET-T230M FMFLTDQSYI | 2     | >MET-T230M FMFLMDQSY  | 3    | 1     |
| >MET-T230M FMFLTDQSYI | 4     | >MET-T230M FMFLMDQSY  | 7    | 3     |
| >MET-T230M FMFLTDQS   | 486   | >MET-T230M FMFLMDQS   | 957  | 471   |
| >MET-T230M FMFLTDQSYI | 6     | >MET-T230M FMFLMDQSY  | 7    | 1     |
| >MET-T230M FMFLTDQSYI | 10    | >MET-T230M FMFLMDQSY  | 13   | 3     |
| >MET-T230M FMFLTDQSY  | 588   | >MET-T230M FMFLMDQSY  | 426  | 162   |
| >MET-T230M FMFLTDQSYI | 5     | >MET-T230M FMFLMDQSY  | 5    | 0     |
| >MET-T230M FMFLTDQSY  | 11    | >MET-T230M FMFLMDQSY  | 9    | 2     |
| >MET-T230M FMFLTDQSY  | 152   | >MET-T230M FMFLMDQSY  | 169  | 17    |
| >MET-T230M FMFLTDQSYI | 350   | >MET-T230M FMFLMDQSY  | 159  | 191   |
| >MET-T230M FMFLTDQSY  | 31    | >MET-T230M FMFLMDQSY  | 35   | 4     |
| >MET-T230M FMFLTDQSY  | 10    | >MET-T230M FMFLMDQSY  | 15   | 5     |
| >MET-T230M FMFLTDQSY  | 3     | >MET-T230M FMFLMDQSY  | 5    | 2     |
| >MET-T230M FMFLTDQSYI | 16    | >MET-T230M FMFLMDQSY  | 42   | 26    |
| >MET-T230M FMFLTDQSY  | 51    | >MET-T230M FMFLMDQSY  | 64   | 13    |
| >MET-T230M FMFLTDQSY  | 26    | >MET-T230M FMFLMDQSY  | 19   | 7     |
| >MET-T230M FMFLTDQSYI | 449   | >MET-T230M FMFLMDQSY  | 353  | 96    |
| >MET-T230M GFMFLTDQS' | 276   | >MET-T230M GFMFLMDQS' | 305  | 29    |
| >MET-T230M GFMFLTDQS' | 167   | >MET-T230M GFMFLMDQS' | 195  | 28    |
| >MET-T230M GFMFLTDQS' | 81    | >MET-T230M GFMFLMDQS' | 101  | 20    |
| >MET-T230M GFMFLTDQS' | 50    | >MET-T230M GFMFLMDQS' | 33   | 17    |
| >MET-T230M GFMFLTDQS' | 102   | >MET-T230M GFMFLMDQS' | 143  | 41    |
| >MET-T230M DGFMFLTDQ  | 447   | >MET-T230M DGFMFLMDC  | 354  | 93    |
| >MET-T230M DGFMFLTDQ  | 383   | >MET-T230M DGFMFLMDC  | 380  | 3     |
| >MET-T230M TKDGFMFMT  | 6807  | >MET-T230M TKDGFMFMT  | 136  | 6671  |
| >MET-T230M ETKDGFMFMT | 5628  | >MET-T230M ETKDGFMFMT | 490  | 5138  |
| >MET-T230M ETKDGFMFMT | 3093  | >MET-T230M ETKDGFMFMT | 11   | 3082  |
| >MET-T230M ETKDGFMFMT | 9095  | >MET-T230M ETKDGFMFMT | 89   | 9006  |
| >MET-T230M ETKDGFMFMT | 143   | >MET-T230M ETKDGFMFMT | 219  | 76    |
| >MET-T230M ETKDGFMFMT | 382   | >MET-T230M ETKDGFMFMT | 26   | 356   |
| >MET-T230M ETKDGFMFMT | 12234 | >MET-T230M ETKDGFMFMT | 78   | 12156 |
| >MET-T230M ETKDGFMFMT | 7673  | >MET-T230M ETKDGFMFMT | 169  | 7504  |
| >MET-T230M ETKDGFMFMT | 15762 | >MET-T230M ETKDGFMFMT | 114  | 15648 |
| >MET-V1290 VLWELMTRG  | 711   | >MET-V1290 LLWELMTRG  | 362  | 349   |
| >MET-V1290 VLWELMTRG  | 504   | >MET-V1290 LLWELMTRG  | 154  | 350   |
| >MET-V1290 VLWELMTRG  | 88    | >MET-V1290 LLWELMTRG  | 39   | 49    |

|                       |       |                       |      |       |
|-----------------------|-------|-----------------------|------|-------|
| >MET-V1290 VLWELMTRG  | 1011  | >MET-V1290 LLWELMTRG  | 266  | 745   |
| >MET-V1290 VLWELMTR   | 280   | >MET-V1290 LLWELMTR   | 322  | 42    |
| >MET-V1290 VLWELMTRG  | 81    | >MET-V1290 LLWELMTRG  | 95   | 14    |
| >MET-V1290 VLWELMTRG  | 5     | >MET-V1290 LLWELMTRG  | 6    | 1     |
| >MET-V1290 VLWELMTRG  | 56    | >MET-V1290 LLWELMTRG  | 46   | 10    |
| >MET-V1290 VLWELMTRG  | 15    | >MET-V1290 LLWELMTRG  | 19   | 4     |
| >MET-V1290 VLWELMTRG  | 28    | >MET-V1290 LLWELMTRG  | 39   | 11    |
| >MET-V1290 VLWELMTR   | 312   | >MET-V1290 LLWELMTR   | 202  | 110   |
| >MET-V1290 VLWELMTRG  | 551   | >MET-V1290 LLWELMTRG  | 348  | 203   |
| >MET-V1290 VLWELMTRG  | 11    | >MET-V1290 LLWELMTRG  | 8    | 3     |
| >MET-V1290 VLWELMTR   | 52    | >MET-V1290 LLWELMTR   | 45   | 7     |
| >MET-V1290 VLWELMTR   | 95    | >MET-V1290 LLWELMTR   | 69   | 26    |
| >MET-V1290 VLWELMTR   | 177   | >MET-V1290 LLWELMTR   | 164  | 13    |
| >MET-V1290 VVLWELMT   | 7066  | >MET-V1290 VLLWELMT   | 387  | 6679  |
| >MET-V1290 VVLWELMTR  | 3779  | >MET-V1290 VLLWELMTR  | 347  | 3432  |
| >MET-V1290 VVLWELMTR  | 1246  | >MET-V1290 VLLWELMTR  | 122  | 1124  |
| >MET-V1290 VVLWELMTR  | 250   | >MET-V1290 VLLWELMTR  | 248  | 2     |
| >MET-V1290 VVLWELMT   | 1395  | >MET-V1290 VLLWELMT   | 15   | 1380  |
| >MET-V1290 VVLWELMTR  | 8814  | >MET-V1290 VLLWELMTR  | 237  | 8577  |
| >MET-V1290 VVLWELMTR  | 458   | >MET-V1290 VLLWELMTR  | 10   | 448   |
| >MET-V1290 VVLWELMTR  | 6544  | >MET-V1290 VLLWELMTR  | 143  | 6401  |
| >MET-V1290 VVLWELMT   | 4781  | >MET-V1290 VLLWELMT   | 63   | 4718  |
| >MET-V1290 VVLWELMTR  | 2437  | >MET-V1290 VLLWELMTR  | 38   | 2399  |
| >MET-V1290 VVLWELMTR  | 2455  | >MET-V1290 VLLWELMTR  | 40   | 2415  |
| >MET-V1290 VVLWELMT   | 5466  | >MET-V1290 VLLWELMT   | 18   | 5448  |
| >MET-V1290 VVLWELMTR  | 17636 | >MET-V1290 VLLWELMTR  | 275  | 17361 |
| >MET-V1290 VVLWELMTR  | 945   | >MET-V1290 VLLWELMTR  | 12   | 933   |
| >MET-V1290 VVLWELMTR  | 87    | >MET-V1290 VLLWELMTR  | 930  | 843   |
| >MET-V1290 VVLWELMTR  | 235   | >MET-V1290 VLLWELMTR  | 468  | 233   |
| >MET-V1290 VVLWELMTR  | 306   | >MET-V1290 VLLWELMTR  | 404  | 98    |
| >MET-V1290 VVLWELMTR  | 388   | >MET-V1290 VLLWELMTR  | 1669 | 1281  |
| >MET-V1290 VVLWELMTR  | 341   | >MET-V1290 VLLWELMTR  | 249  | 92    |
| >MET-V1290 TKSDVWSFG' | 1913  | >MET-V1290 TKSDVWSFG' | 101  | 1812  |
| >MET-V1290 GVVLWELMT  | 760   | >MET-V1290 GVLLWELMT  | 388  | 372   |
| >MET-V1290 GVVLWELMT  | 126   | >MET-V1290 GVLLWELMT  | 82   | 44    |
| >MET-V1290 GVVLWELMT  | 198   | >MET-V1290 GVLLWELMT  | 92   | 106   |
| >MET-V1290 GVVLWELMT  | 91    | >MET-V1290 GVLLWELMT  | 264  | 173   |
| >MET-V1290 FGVVLWELM  | 328   | >MET-V1290 FGVLLWELM  | 732  | 404   |
| >MET-V1290 FGVVLWELM  | 261   | >MET-V1290 FGVLLWELM  | 339  | 78    |
| >MET-V1290 FGVVLWEL   | 132   | >MET-V1290 FGVLLWEL   | 131  | 1     |
| >MET-V1290 FGVVLWEL   | 48    | >MET-V1290 FGVLLWEL   | 59   | 11    |
| >MET-V1290 FGVVLWELM  | 231   | >MET-V1290 FGVLLWELM  | 301  | 70    |
| >MET-V1290 FGVVLWELM  | 252   | >MET-V1290 FGVLLWELM  | 315  | 63    |



|                       |      |                       |      |      |
|-----------------------|------|-----------------------|------|------|
| >MET-V1290 SFGVLLWEL  | 364  | >MET-V1290 SFGVLLWEL  | 405  | 41   |
| >MET-V1290 SFGVLLWEL  | 442  | >MET-V1290 SFGVLLWEL  | 1396 | 954  |
| >MET-V1290 SFGVLLWEL  | 233  | >MET-V1290 SFGVLLWEL  | 549  | 316  |
| >MET-V1290 SFGVLLWEL  | 12   | >MET-V1290 SFGVLLWEL  | 16   | 4    |
| >MET-V1290 SFGVLLWEL  | 130  | >MET-V1290 SFGVLLWEL  | 140  | 10   |
| >MET-V1290 SFGVLLWELM | 37   | >MET-V1290 SFGVLLWELM | 32   | 5    |
| >MET-V1290 SFGVLLWEL  | 346  | >MET-V1290 SFGVLLWEL  | 317  | 29   |
| >MET-V1290 WSFGVLLWE  | 487  | >MET-V1290 WSFGVLLWE  | 398  | 89   |
| >MET-V1290 WSFGVLLWE  | 367  | >MET-V1290 WSFGVLLWE  | 434  | 67   |
| >MET-V1290 WSFGVLLWE  | 179  | >MET-V1290 WSFGVLLWE  | 177  | 2    |
| >MET-V1290 WSFGVLLWE  | 138  | >MET-V1290 WSFGVLLWE  | 95   | 43   |
| >MET-V1290 WSFGVLLWE  | 51   | >MET-V1290 WSFGVLLWE  | 99   | 48   |
| >MET-V1290 WSFGVLLWE  | 419  | >MET-V1290 WSFGVLLWE  | 680  | 261  |
| >MET-V1290 WSFGVLLW   | 427  | >MET-V1290 WSFGVLLW   | 1337 | 910  |
| >MET-V1290 WSFGVLLWE  | 165  | >MET-V1290 WSFGVLLWE  | 414  | 249  |
| >MET-V1290 WSFGVLLWE  | 211  | >MET-V1290 WSFGVLLWE  | 295  | 84   |
| >MET-V1290 WSFGVLLWE  | 390  | >MET-V1290 WSFGVLLWE  | 335  | 55   |
| >MET-V1290 WSFGVLLW   | 5    | >MET-V1290 WSFGVLLW   | 4    | 1    |
| >MET-V1290 WSFGVLLWE  | 26   | >MET-V1290 WSFGVLLWE  | 23   | 3    |
| >MET-V1290 WSFGVLLWE  | 44   | >MET-V1290 WSFGVLLWE  | 55   | 11   |
| >MET-V1290 WSFGVLLWE  | 210  | >MET-V1290 WSFGVLLWE  | 418  | 208  |
| >MET-V1290 WSFGVLLW   | 420  | >MET-V1290 WSFGVLLW   | 432  | 12   |
| >MET-V1290 WSFGVLLW   | 30   | >MET-V1290 WSFGVLLW   | 31   | 1    |
| >MET-V1290 WSFGVLLWE  | 469  | >MET-V1290 WSFGVLLWE  | 610  | 141  |
| >MET-V1290 WSFGVLLWE  | 321  | >MET-V1290 WSFGVLLWE  | 394  | 73   |
| >MET-V1290 WSFGVLLW   | 9    | >MET-V1290 WSFGVLLW   | 9    | 0    |
| >MET-V1290 WSFGVLLWE  | 86   | >MET-V1290 WSFGVLLWE  | 190  | 104  |
| >MET-V1290 WSFGVLLWE  | 84   | >MET-V1290 WSFGVLLWE  | 153  | 69   |
| >MET-V1290 WSFGVLLW   | 234  | >MET-V1290 WSFGVLLW   | 203  | 31   |
| >MET-V1290 WSFGVLLWE  | 427  | >MET-V1290 WSFGVLLWE  | 241  | 186  |
| >MET-V1290 WSFGVLLWE  | 152  | >MET-V1290 WSFGVLLWE  | 181  | 29   |
| >MET-V1290 WSFGVLLWE  | 4    | >MET-V1290 WSFGVLLWE  | 4    | 0    |
| >MET-V1290 WSFGVLLW   | 34   | >MET-V1290 WSFGVLLW   | 95   | 61   |
| >MET-V1290 WSFGVLLW   | 91   | >MET-V1290 WSFGVLLW   | 64   | 27   |
| >MET-V1290 VWSFGVLLM  | 342  | >MET-V1290 VWSFGVLLM  | 412  | 70   |
| >MET-V1290 VWSFGVLLM  | 319  | >MET-V1290 VWSFGVLLM  | 459  | 140  |
| >MET-V1290 VWSFGVLLM  | 205  | >MET-V1290 VWSFGVLLM  | 156  | 49   |
| >MET-V1290 VWSFGVLLM  | 390  | >MET-V1290 VWSFGVLLM  | 411  | 21   |
| >MET-V1290 VWSFGVLL   | 312  | >MET-V1290 VWSFGVLL   | 541  | 229  |
| >MET-V1290 VWSFGVLLM  | 410  | >MET-V1290 VWSFGVLLM  | 603  | 193  |
| >MET-V1290 VWSFGVLLM  | 59   | >MET-V1290 VWSFGVLLM  | 74   | 15   |
| >MET-V1290 VWSFGVLLM  | 2159 | >MET-V1290 VWSFGVLLM  | 320  | 1839 |
| >MET-V1290 VWSFGVLL   | 242  | >MET-V1290 VWSFGVLL   | 197  | 45   |

|                       |      |                       |     |      |
|-----------------------|------|-----------------------|-----|------|
| >MET-V1290 VWSFGVLLW  | 336  | >MET-V1290 VWSFGVLLW  | 333 | 3    |
| >MET-V1290 VWSFGVLLW  | 110  | >MET-V1290 VWSFGVLLW  | 95  | 15   |
| >MET-V1290 DVWSFGVV   | 50   | >MET-V1290 DVWSFGVL   | 523 | 473  |
| >MET-V1290 DVWSFGVLL  | 728  | >MET-V1290 DVWSFGVLL  | 191 | 537  |
| >MET-V1290 DVWSFGVV   | 13   | >MET-V1290 DVWSFGVL   | 96  | 83   |
| >MET-V1290 DVWSFGVLL  | 103  | >MET-V1290 DVWSFGVLL  | 29  | 74   |
| >MET-V1290 DVWSFGVLL  | 325  | >MET-V1290 DVWSFGVLL  | 542 | 217  |
| >MET-V1290 SDVWSFGVV  | 67   | >MET-V1290 SDVWSFGVL  | 271 | 204  |
| >MET-V1290 KSDVWSFGV  | 236  | >MET-V1290 KSDVWSFGV  | 509 | 273  |
| >MET-V1290 KSDVWSFGV  | 879  | >MET-V1290 KSDVWSFGV  | 30  | 849  |
| >MET-V1290 KSDVWSFGV  | 16   | >MET-V1290 KSDVWSFGV  | 20  | 4    |
| >MET-V1290 KSDVWSFGV  | 2403 | >MET-V1290 KSDVWSFGV  | 124 | 2279 |
| >MET-V1290 KSDVWSFGV  | 125  | >MET-V1290 KSDVWSFGV  | 144 | 19   |
| >MET-V1290 KSDVWSFGV  | 663  | >MET-V1290 KSDVWSFGV  | 172 | 491  |
| >MET-V1290 KSDVWSFGV  | 691  | >MET-V1290 KSDVWSFGV  | 490 | 201  |
| >MET-V1290 KSDVWSFGV  | 362  | >MET-V1290 KSDVWSFGV  | 403 | 41   |
| >MET-V1333 VMLKCWHPK  | 802  | >MET-V1333 IMLKCWHPK  | 383 | 419  |
| >MET-V1333 VMLKCWHPK  | 1033 | >MET-V1333 IMLKCWHPK  | 459 | 574  |
| >MET-V1333 VMLKCWHPK  | 10   | >MET-V1333 IMLKCWHPK  | 12  | 2    |
| >MET-V1333 VMLKCWHPK  | 89   | >MET-V1333 IMLKCWHPK  | 115 | 26   |
| >MET-V1333 VMLKCWHPK  | 14   | >MET-V1333 IMLKCWHPK  | 21  | 7    |
| >MET-V1333 VMLKCWHPK  | 40   | >MET-V1333 IMLKCWHPK  | 41  | 1    |
| >MET-V1333 VMLKCWHPK  | 15   | >MET-V1333 IMLKCWHPK  | 18  | 3    |
| >MET-V1333 VMLKCWHPK  | 62   | >MET-V1333 IMLKCWHPK  | 53  | 9    |
| >MET-V1333 VMLKCWHPK  | 17   | >MET-V1333 IMLKCWHPK  | 19  | 2    |
| >MET-V1333 VMLKCWHPK  | 164  | >MET-V1333 IMLKCWHPK  | 65  | 99   |
| >MET-V1333 VMLKCWHPK  | 49   | >MET-V1333 IMLKCWHPK  | 37  | 12   |
| >MET-V1333 VMLKCWHPK  | 878  | >MET-V1333 IMLKCWHPK  | 358 | 520  |
| >MET-V1333 VMLKCWHPK  | 716  | >MET-V1333 IMLKCWHPK  | 288 | 428  |
| >MET-V1333 VMLKCWHPK  | 352  | >MET-V1333 IMLKCWHPK  | 198 | 154  |
| >MET-V1333 VMLKCWHPK  | 26   | >MET-V1333 IMLKCWHPK  | 18  | 8    |
| >MET-V1333 EVMLKCWHF  | 131  | >MET-V1333 EIMLKCWHPK | 100 | 31   |
| >MET-V1333 EVMLKCWHF  | 77   | >MET-V1333 EIMLKCWHPK | 94  | 17   |
| >MET-V1333 EVMLKCWHF  | 296  | >MET-V1333 EIMLKCWHPK | 266 | 30   |
| >MET-V1333 EVMLKCWHF  | 85   | >MET-V1333 EIMLKCWHPK | 140 | 55   |
| >MET-V1333 EVMLKCWHF  | 154  | >MET-V1333 EIMLKCWHPK | 640 | 486  |
| >MET-V1333 EVMLKCWHF  | 97   | >MET-V1333 EIMLKCWHPK | 165 | 68   |
| >MET-V1333 EVMLKCWHF  | 881  | >MET-V1333 EIMLKCWHPK | 320 | 561  |
| >MET-V1333 PEYCPDPLYE | 139  | >MET-V1333 PEYCPDPLYE | 52  | 87   |
| >MET-V1333 YEVMKLCW   | 22   | >MET-V1333 YEIMKLCW   | 29  | 7    |
| >MET-V1333 YEVMKLCW   | 47   | >MET-V1333 YEIMKLCW   | 51  | 4    |
| >MET-V1333 YEVMKLCWH  | 83   | >MET-V1333 YEIMKLCWH  | 92  | 9    |
| >MET-V1333 YEVMKLCWH  | 338  | >MET-V1333 YEIMKLCWH  | 225 | 113  |

|                        |      |                        |      |      |
|------------------------|------|------------------------|------|------|
| >MET-V1333 YEVMLKCW    | 74   | >MET-V1333 YEIMLKCW    | 61   | 13   |
| >MET-V1333 YEVMLKCW    | 30   | >MET-V1333 YEIMLKCW    | 23   | 7    |
| >MET-V1333 YEVMLKCVH   | 1355 | >MET-V1333 YEIMLKCVH   | 334  | 1021 |
| >MET-V1333 YEVMLKCVH   | 984  | >MET-V1333 YEIMLKCVH   | 474  | 510  |
| >MET-V1333 YEVMLKCV    | 366  | >MET-V1333 YEIMLKCV    | 269  | 97   |
| >MET-V1333 LYEVMLKCV   | 348  | >MET-V1333 LYEIMLKCV   | 717  | 369  |
| >MET-V1333 PLYEVMLKC   | 30   | >MET-V1333 PLYEIMLK    | 90   | 60   |
| >MET-V1333 PLYEVMLKC   | 390  | >MET-V1333 PLYEIMLK    | 235  | 155  |
| >MET-V1333 PLYEVMLK    | 41   | >MET-V1333 PLYEIMLK    | 43   | 2    |
| >MET-V1333 PLYEVMLK    | 133  | >MET-V1333 PLYEIMLK    | 139  | 6    |
| >MET-V1333 DPLYEVMLKC  | 58   | >MET-V1333 DPLYEIMLK   | 64   | 6    |
| >MET-V1333 DPLYEVML    | 241  | >MET-V1333 DPLYEIML    | 409  | 168  |
| >MET-V1333 DPLYEVMLKC  | 7    | >MET-V1333 DPLYEIMLK   | 8    | 1    |
| >MET-V1333 CPDPLYEVM   | 95   | >MET-V1333 CPDPLYEIM   | 148  | 53   |
| >MET-V1333 CPDPLYEV    | 990  | >MET-V1333 CPDPLYEI    | 495  | 495  |
| >MET-V1333 CPDPLYEV    | 858  | >MET-V1333 CPDPLYEI    | 98   | 760  |
| >MET-V1333 CPDPLYEVM   | 285  | >MET-V1333 CPDPLYEIM   | 241  | 44   |
| >MET-V1333 CPDPLYEV    | 300  | >MET-V1333 CPDPLYEI    | 1394 | 1094 |
| >MET-V1333 CPDPLYEVM   | 404  | >MET-V1333 CPDPLYEIML  | 613  | 209  |
| >MET-V1333 YCPDPLYEVM  | 250  | >MET-V1333 YCPDPLYEIM  | 385  | 135  |
| >MET-V1333 YCPDPLYEV   | 59   | >MET-V1333 YCPDPLYEI   | 274  | 215  |
| >MET-V1333 YCPDPLYEV   | 118  | >MET-V1333 YCPDPLYEI   | 561  | 443  |
| >MET-V1333 YCPDPLYEV   | 427  | >MET-V1333 YCPDPLYEI   | 1859 | 1432 |
| >MET-V1333 YCPDPLYEV   | 6    | >MET-V1333 YCPDPLYEI   | 42   | 36   |
| >MET-V1333 YCPDPLYEVM  | 290  | >MET-V1333 YCPDPLYEIM  | 243  | 47   |
| >MET-V1333 YCPDPLYEV   | 70   | >MET-V1333 YCPDPLYEI   | 902  | 832  |
| >MET-V1333 YCPDPLYEV   | 69   | >MET-V1333 YCPDPLYEI   | 3251 | 3182 |
| >MET-V1333 YCPDPLYEV   | 395  | >MET-V1333 YCPDPLYEI   | 7579 | 7184 |
| >MET-V1333 YCPDPLYEV   | 6    | >MET-V1333 YCPDPLYEI   | 793  | 787  |
| >MET-V1333 YCPDPLYEV   | 23   | >MET-V1333 YCPDPLYEI   | 75   | 52   |
| >MET-V1333 YCPDPLYEV   | 156  | >MET-V1333 YCPDPLYEI   | 849  | 693  |
| >MET-V1333 YCPDPLYEV   | 81   | >MET-V1333 YCPDPLYEI   | 37   | 44   |
| >MET-V1333 YCPDPLYEVM  | 29   | >MET-V1333 YCPDPLYEIM  | 16   | 13   |
| >MET-V1333 YCPDPLYEVM  | 36   | >MET-V1333 YCPDPLYEIM  | 26   | 10   |
| >MET-V1333 EYCPDPLYEV  | 867  | >MET-V1333 EYCPDPLYEI  | 44   | 823  |
| >MET-V1333 EYCPDPLYEVM | 309  | >MET-V1333 EYCPDPLYEIM | 632  | 323  |
| >MET-V1333 EYCPDPLYEVM | 283  | >MET-V1333 EYCPDPLYEIM | 388  | 105  |
| >MET-V1333 EYCPDPLYEV  | 115  | >MET-V1333 EYCPDPLYEI  | 280  | 165  |
| >MET-V1333 EYCPDPLYEV  | 336  | >MET-V1333 EYCPDPLYEI  | 607  | 271  |
| >MET-V136I-VNRGTCQRH   | 177  | >MET-V136I-INRGTCQRH   | 76   | 101  |
| >MET-V136I-VNRGTCQRH   | 205  | >MET-V136I-INRGTCQRH   | 121  | 84   |
| >MET-V136I-SVNRGTCQRH  | 184  | >MET-V136I-SINRGTCQRH  | 64   | 120  |
| >MET-V136I-SVNRGTCQRH  | 317  | >MET-V136I-SINRGTCQRH  | 104  | 213  |

|                        |      |                        |       |       |
|------------------------|------|------------------------|-------|-------|
| >MET-V136I-SVNRGTCQRI  | 200  | >MET-V136I-SINRGTCQRH  | 82    | 118   |
| >MET-V136I-SVNRGTCQRI  | 48   | >MET-V136I-SINRGTCQRH  | 20    | 28    |
| >MET-V136I-SVNRGTCQR   | 61   | >MET-V136I-SINRGTCQR   | 166   | 105   |
| >MET-V136I-SVNRGTCQR   | 23   | >MET-V136I-SINRGTCQR   | 33    | 10    |
| >MET-V136I-SVNRGTCQR   | 40   | >MET-V136I-SINRGTCQR   | 89    | 49    |
| >MET-V136I-SVNRGTCQRI  | 158  | >MET-V136I-SINRGTCQRH  | 823   | 665   |
| >MET-V136I-YDDQLISCGS' | 1148 | >MET-V136I-YDDQLISCGS' | 190   | 958   |
| >MET-V136I-YDDQLISCGS' | 1094 | >MET-V136I-YDDQLISCGS' | 245   | 849   |
| >MET-V136I-YDDQLISCGS' | 369  | >MET-V136I-YDDQLISCGS' | 167   | 202   |
| >MET-V136I-GSVNRGTCQ   | 318  | >MET-V136I-GSINRGTCQF  | 126   | 192   |
| >MET-V136I-GSVNRGTCQ   | 989  | >MET-V136I-GSINRGTCQF  | 411   | 578   |
| >MET-V136I-GSVNRGTCQ   | 194  | >MET-V136I-GSINRGTCQF  | 300   | 106   |
| >MET-V136I-GSVNRGTCQ   | 547  | >MET-V136I-GSINRGTCQF  | 385   | 162   |
| >MET-V136I-ISCGSVNR    | 789  | >MET-V136I-ISCGSINR    | 399   | 390   |
| >MET-V136I-ISCGSVNR    | 77   | >MET-V136I-ISCGSINR    | 88    | 11    |
| >MET-V136I-ISCGSVNR    | 405  | >MET-V136I-ISCGSINR    | 319   | 86    |
| >MET-V136I-ISCGSVNR    | 65   | >MET-V136I-ISCGSINR    | 82    | 17    |
| >MET-V136I-LISCGSVNR   | 280  | >MET-V136I-LISCGSINR   | 556   | 276   |
| >MET-V136I-LISCGSVNR   | 121  | >MET-V136I-LISCGSINR   | 160   | 39    |
| >MET-V136I-LISCGSVNR   | 291  | >MET-V136I-LISCGSINR   | 345   | 54    |
| >MET-V136I-QLISCGSV    | 154  | >MET-V136I-QLISCGSI    | 724   | 570   |
| >MET-V136I-QLISCGSV    | 34   | >MET-V136I-QLISCGSI    | 135   | 101   |
| >MET-V136I-QLISCGSV    | 8    | >MET-V136I-QLISCGSI    | 28    | 20    |
| >MET-V136I-QLISCGSV    | 107  | >MET-V136I-QLISCGSI    | 802   | 695   |
| >MET-V136I-QLISCGSV    | 46   | >MET-V136I-QLISCGSI    | 739   | 693   |
| >MET-V136I-QLISCGSV    | 60   | >MET-V136I-QLISCGSI    | 655   | 595   |
| >MET-V136I-QLISCGSV    | 287  | >MET-V136I-QLISCGSI    | 4902  | 4615  |
| >MET-V136I-QLISCGSV    | 445  | >MET-V136I-QLISCGSI    | 5868  | 5423  |
| >MET-V136I-QLISCGSV    | 5    | >MET-V136I-QLISCGSI    | 346   | 341   |
| >MET-V136I-QLISCGSVNR  | 342  | >MET-V136I-QLISCGSINR  | 289   | 53    |
| >MET-V136I-QLISCGSVNR  | 70   | >MET-V136I-QLISCGSINR  | 75    | 5     |
| >MET-V136I-QLISCGSVNR  | 280  | >MET-V136I-QLISCGSINR  | 270   | 10    |
| >MET-V136I-QLISCGSVNR  | 38   | >MET-V136I-QLISCGSINR  | 42    | 4     |
| >MET-V136I-QLISCGSV    | 456  | >MET-V136I-QLISCGSI    | 2084  | 1628  |
| >MET-V136I-QLISCGSVNR  | 479  | >MET-V136I-QLISCGSINR  | 366   | 113   |
| >MET-V136I-QLISCGSVNR  | 155  | >MET-V136I-QLISCGSINR  | 184   | 29    |
| >MET-V136I-DQLISCGSV   | 528  | >MET-V136I-DQLISCGSI   | 53    | 475   |
| >MET-V136I-DQLISCGSVN  | 395  | >MET-V136I-DQLISCGSINF | 457   | 62    |
| >MET-V136I-DDQLISCGSV  | 1205 | >MET-V136I-DDQLISCGSI  | 129   | 1076  |
| >MET-V136I-DDQLISCGSV  | 704  | >MET-V136I-DDQLISCGSI  | 326   | 378   |
| >MET-V370DYVNDFFNKI    | 208  | >MET-V370DYDNDFFNKI    | 6807  | 6599  |
| >MET-V370DYVNDFFNKI    | 8691 | >MET-V370DYDNDFFNKI    | 270   | 8421  |
| >MET-V370DYVNDFFNKI    | 74   | >MET-V370DYDNDFFNKI    | 18772 | 18698 |

|                      |       |                      |       |       |
|----------------------|-------|----------------------|-------|-------|
| >MET-V370DYVNDFFNKI  | 13    | >MET-V370DYDNDFFNKI  | 1772  | 1759  |
| >MET-V370DYVNDFFNKIV | 277   | >MET-V370DYDNDFFNKIV | 10887 | 10610 |
| >MET-V370DYVNDFFNKI  | 13    | >MET-V370DYDNDFFNKI  | 6794  | 6781  |
| >MET-V370DYVNDFFNKIV | 83    | >MET-V370DYDNDFFNKIV | 12747 | 12664 |
| >MET-V370DYVNDFFNKI  | 8     | >MET-V370DYDNDFFNKI  | 2811  | 2803  |
| >MET-V370DYVNDFFNKIV | 130   | >MET-V370DYDNDFFNKIV | 8616  | 8486  |
| >MET-V370DYVNDFFNKI  | 44    | >MET-V370DYDNDFFNKI  | 5974  | 5930  |
| >MET-V370DYVNDFFNKIV | 30    | >MET-V370DYDNDFFNKIV | 3584  | 3554  |
| >MET-V370DYVNDFFNKI  | 442   | >MET-V370DYDNDFFNKI  | 19059 | 18617 |
| >MET-V370DYVNDFFNKIV | 113   | >MET-V370DYDNDFFNKIV | 14873 | 14760 |
| >MET-V370DYVNDFFNKIV | 176   | >MET-V370DYDNDFFNKIV | 13418 | 13242 |
| >MET-V370DYVNDFFNKIV | 72    | >MET-V370DYDNDFFNKIV | 18733 | 18661 |
| >MET-V370DYVNDFFNKI  | 47    | >MET-V370DYDNDFFNKI  | 11902 | 11855 |
| >MET-V370DYVNDFFNKIV | 7     | >MET-V370DYDNDFFNKIV | 4759  | 4752  |
| >MET-V370DYVNDFFNK   | 165   | >MET-V370DYDNDFFNK   | 16911 | 16746 |
| >MET-V370DYVNDFFNK   | 9     | >MET-V370DYDNDFFNK   | 3157  | 3148  |
| >MET-V370DYVNDFFNKI  | 99    | >MET-V370DYDNDFFNKI  | 8485  | 8386  |
| >MET-V370DYVNDFFNK   | 405   | >MET-V370DYDNDFFNK   | 13362 | 12957 |
| >MET-V370DYVNDFFNK   | 75    | >MET-V370DYDNDFFNK   | 9935  | 9860  |
| >MET-V370DYVNDFFNK   | 10    | >MET-V370DYDNDFFNK   | 1099  | 1089  |
| >MET-V370DYVNDFFNKI  | 11    | >MET-V370DYDNDFFNKI  | 3223  | 3212  |
| >MET-V370DYVNDFFNKIV | 203   | >MET-V370DYDNDFFNKIV | 12798 | 12595 |
| >MET-V370DYVNDFFNKI  | 16    | >MET-V370DYDNDFFNKI  | 4940  | 4924  |
| >MET-V370DYVNDFFNKIV | 35    | >MET-V370DYDNDFFNKIV | 5770  | 5735  |
| >MET-V370DYVNDFFNKI  | 424   | >MET-V370DYDNDFFNKI  | 3391  | 2967  |
| >MET-V370DYVNDFFNKI  | 7535  | >MET-V370DYDNDFFNKI  | 83    | 7452  |
| >MET-V370DYVNDFFNKI  | 3112  | >MET-V370DYDNDFFNKI  | 168   | 2944  |
| >MET-V370DYVNDFFNK   | 360   | >MET-V370DYDNDFFNK   | 2917  | 2557  |
| >MET-V370DYVNDFFNKI  | 19088 | >MET-V370DYDNDFFNKI  | 113   | 18975 |
| >MET-V370DYVNDFFNKIV | 25732 | >MET-V370DYDNDFFNKIV | 362   | 25370 |
| >MET-V370DSAMCAFPIKY | 156   | >MET-V370DSAMCAFPIKY | 22827 | 22671 |
| >MET-V370DSAMCAFPIKY | 360   | >MET-V370DSAMCAFPIKY | 27075 | 26715 |
| >MET-V370DSAMCAFPIKY | 107   | >MET-V370DSAMCAFPIKY | 24211 | 24104 |
| >MET-V370DSAMCAFPIKY | 14    | >MET-V370DSAMCAFPIKY | 15463 | 15449 |
| >MET-V370DSAMCAFPIKY | 40    | >MET-V370DSAMCAFPIKY | 24711 | 24671 |
| >MET-V370DSAMCAFPIKY | 267   | >MET-V370DSAMCAFPIKY | 22831 | 22564 |
| >MET-V370DSAMCAFPIKY | 391   | >MET-V370DSAMCAFPIKY | 26305 | 25914 |
| >MET-V370DSAMCAFPIKY | 463   | >MET-V370DSAMCAFPIKY | 26225 | 25762 |
| >MET-V370DSAMCAFPIKY | 17    | >MET-V370DSAMCAFPIKY | 11866 | 11849 |
| >MET-V370DSAMCAFPIKY | 17    | >MET-V370DSAMCAFPIKY | 12606 | 12589 |
| >MET-V370DKYVNDFFNKI | 98    | >MET-V370KYDNDFFNKI  | 2048  | 1950  |
| >MET-V370DKYVNDFFNK  | 113   | >MET-V370KYDNDFFNK   | 138   | 25    |
| >MET-V370DKYVNDFFNK  | 23    | >MET-V370KYDNDFFNK   | 200   | 177   |

|                       |      |                       |       |       |
|-----------------------|------|-----------------------|-------|-------|
| >MET-V370DKYVNDFFNKI  | 383  | >MET-V370DKYDNDFFNKI  | 3107  | 2724  |
| >MET-V370DKYVNDFFNK   | 335  | >MET-V370DKYDNDFFNK   | 1182  | 847   |
| >MET-V370DKYVNDFFNKI  | 7    | >MET-V370DKYDNDFFNKI  | 14    | 7     |
| >MET-V370DKYVNDFFNK   | 79   | >MET-V370DKYDNDFFNK   | 2233  | 2154  |
| >MET-V370DKYVNDFFNK   | 22   | >MET-V370DKYDNDFFNK   | 83    | 61    |
| >MET-V370DKYVNDFFNKI  | 493  | >MET-V370DKYDNDFFNKI  | 921   | 428   |
| >MET-V370DKYVNDFFNK   | 130  | >MET-V370DKYDNDFFNK   | 154   | 24    |
| >MET-V370DKYVNDFFNK   | 20   | >MET-V370DKYDNDFFNK   | 63    | 43    |
| >MET-V370DKYVNDFFNKI  | 253  | >MET-V370DKYDNDFFNKI  | 422   | 169   |
| >MET-V370DKYVNDFFN    | 474  | >MET-V370DKYDNDFFN    | 1210  | 736   |
| >MET-V370DKYVNDFFNKI  | 326  | >MET-V370DKYDNDFFNKI  | 1163  | 837   |
| >MET-V370DIKYVNDFFNK  | 365  | >MET-V370DIKYDNDFFNK  | 556   | 191   |
| >MET-V370DIKYVNDFFNK  | 427  | >MET-V370DIKYDNDFFNK  | 607   | 180   |
| >MET-V370DIKYVNDFFN   | 5    | >MET-V370DIKYDNDFFN   | 5     | 0     |
| >MET-V370DIKYVNDFFNK  | 201  | >MET-V370DIKYDNDFFNK  | 247   | 46    |
| >MET-V370DIKYVNDFFNK  | 37   | >MET-V370DIKYDNDFFNK  | 47    | 10    |
| >MET-V370DPIKYVNDFFN  | 256  | >MET-V370DPIKYDNDFFN  | 702   | 446   |
| >MET-V370DPIKYVNDF    | 14   | >MET-V370DPIKYDNDF    | 14    | 0     |
| >MET-V370DPIKYVNDFFN  | 8    | >MET-V370DPIKYDNDFFN  | 16    | 8     |
| >MET-V370DPIKYVNDFFN  | 287  | >MET-V370DPIKYDNDFFN  | 559   | 272   |
| >MET-V370DPIKYVNDF    | 444  | >MET-V370DPIKYDNDF    | 1003  | 559   |
| >MET-V370DPIKYVNDF    | 62   | >MET-V370DPIKYDNDF    | 247   | 185   |
| >MET-V370DPIKYVNDFFN  | 230  | >MET-V370DPIKYDNDFFN  | 447   | 217   |
| >MET-V370DPIKYVNDF    | 16   | >MET-V370DPIKYDNDF    | 11    | 5     |
| >MET-V370DPIKYVNDFFN  | 42   | >MET-V370DPIKYDNDFFN  | 75    | 33    |
| >MET-V370DPIKYVNDFFI  | 1134 | >MET-V370DPIKYDNDFFI  | 471   | 663   |
| >MET-V370DPIKYVNDF    | 38   | >MET-V370DPIKYDNDF    | 35    | 3     |
| >MET-V370DPIKYVNDFFN  | 51   | >MET-V370DPIKYDNDFFN  | 71    | 20    |
| >MET-V370DPIKYVNDF    | 156  | >MET-V370DPIKYDND     | 208   | 52    |
| >MET-V370DPIKYVNDFFN  | 250  | >MET-V370DPIKYDNDFFN  | 1389  | 1139  |
| >MET-V370DPIKYVNDFFI  | 107  | >MET-V370DPIKYDNDFFI  | 157   | 50    |
| >MET-V370DPIKYVNDF    | 15   | >MET-V370DPIKYDNDF    | 56    | 41    |
| >MET-V370DPIKYVNDFFN  | 41   | >MET-V370DPIKYDNDFFN  | 141   | 100   |
| >MET-V370DPIKYVNDF    | 8    | >MET-V370DPIKYDNDF    | 11    | 3     |
| >MET-V370DPIKYVNDFFN  | 10   | >MET-V370DPIKYDNDFFN  | 12    | 2     |
| >MET-V370DAFPIKYVNDF  | 286  | >MET-V370DAFPIKYDNDF  | 383   | 97    |
| >MET-V370DAFPIKYVNDF  | 295  | >MET-V370DAFPIKYDNDF  | 206   | 89    |
| >MET-V370DAFPIKYVNDFI | 209  | >MET-V370DAFPIKYDNDFI | 444   | 235   |
| >MET-V370DAFPIKYVNDF  | 9    | >MET-V370DAFPIKYDNDF  | 16    | 7     |
| >MET-V370DAFPIKYVNDFI | 7    | >MET-V370DAFPIKYDNDFI | 9     | 2     |
| >MET-V370DAFPIKYV     | 378  | >MET-V370DAFPIKYD     | 30537 | 30159 |
| >MET-V370DAFPIKYV     | 86   | >MET-V370DAFPIKYD     | 27880 | 27794 |
| >MET-V370DAFPIKYV     | 375  | >MET-V370DAFPIKYD     | 36595 | 36220 |

|                       |     |                       |       |       |
|-----------------------|-----|-----------------------|-------|-------|
| >MET-V370D CAFPIKYVND | 366 | >MET-V370D CAFPIKYDND | 941   | 575   |
| >MET-V370D CAFPIKYV   | 13  | >MET-V370D CAFPIKYD   | 10686 | 10673 |
| >MET-V370D CAFPIKYVND | 45  | >MET-V370D CAFPIKYDND | 97    | 52    |
| >MET-V370D CAFPIKYVND | 213 | >MET-V370D CAFPIKYDND | 355   | 142   |
| >MET-V370D CAFPIKYVND | 213 | >MET-V370D CAFPIKYDND | 132   | 81    |
| >MET-V370D CAFPIKYVND | 470 | >MET-V370D CAFPIKYDND | 296   | 174   |
| >MET-V370D CAFPIKYV   | 287 | >MET-V370D CAFPIKYD   | 23104 | 22817 |
| >MET-V370D MCAFPIKYV  | 407 | >MET-V370D MCAFPIKYD  | 25356 | 24949 |
| >MET-V370D MCAFPIKYV  | 72  | >MET-V370D MCAFPIKYD  | 26771 | 26699 |
| >MET-V370D MCAFPIKYV  | 9   | >MET-V370D MCAFPIKYD  | 10275 | 10266 |
| >MET-V370D MCAFPIKYV  | 148 | >MET-V370D MCAFPIKYD  | 18419 | 18271 |
| >MET-V370D AMCAFPIKYV | 22  | >MET-V370D AMCAFPIKYD | 8898  | 8876  |
| >MET-V370D AMCAFPIKYV | 22  | >MET-V370D AMCAFPIKYD | 4954  | 4932  |
| >MET-V370D AMCAFPIKYV | 10  | >MET-V370D AMCAFPIKYD | 4053  | 4043  |
| >MET-V370D AMCAFPIKYV | 144 | >MET-V370D AMCAFPIKYD | 20487 | 20343 |
| >MET-V370D AMCAFPIKYV | 2   | >MET-V370D AMCAFPIKYD | 1192  | 1190  |
| >MET-V370D AMCAFPIKYV | 49  | >MET-V370D AMCAFPIKYD | 23002 | 22953 |
| >MET-V370D AMCAFPIKYV | 15  | >MET-V370D AMCAFPIKYD | 20769 | 20754 |
| >MET-V370D AMCAFPIKYV | 15  | >MET-V370D AMCAFPIKYD | 24997 | 24982 |
| >MET-V370D AMCAFPIKYV | 3   | >MET-V370D AMCAFPIKYD | 17793 | 17790 |
| >MET-V370D AMCAFPIKYV | 403 | >MET-V370D AMCAFPIKYD | 25649 | 25246 |
| >MET-V370D AMCAFPIKYV | 376 | >MET-V370D AMCAFPIKYD | 12542 | 12166 |
| >MET-Y1021 YRATFPEDQF | 39  | >MET-Y1021 NRATFPEDQF | 333   | 294   |
| >MET-Y1021 DYRATFPEDC | 458 | >MET-Y1021 DNRATFPEDC | 15910 | 15452 |
| >MET-Y1021 DYRATFPEDC | 67  | >MET-Y1021 DNRATFPEDC | 23266 | 23199 |
| >MET-Y1021 TEMVSNESVI | 250 | >MET-Y1021 TEMVSNESVI | 19774 | 19524 |
| >MET-Y1021 TEMVSNESVI | 180 | >MET-Y1021 TEMVSNESVI | 13870 | 13690 |
| >MET-Y1021 TEMVSNESVI | 75  | >MET-Y1021 TEMVSNESVI | 1279  | 1204  |
| >MET-Y1021 TEMVSNESVI | 106 | >MET-Y1021 TEMVSNESVI | 4494  | 4388  |
| >MET-Y1021 SVDYRATF   | 204 | >MET-Y1021 SVDNRATF   | 316   | 112   |
| >MET-Y1021 ESVDYRATF  | 100 | >MET-Y1021 ESVDNRATF  | 115   | 15    |
| >MET-Y1021 ESVDYRATF  | 108 | >MET-Y1021 ESVDNRATF  | 73    | 35    |
| >MET-Y1021 ESVDYRATF  | 8   | >MET-Y1021 ESVDNRATF  | 8     | 0     |
| >MET-Y1021 ESVDYRATF  | 157 | >MET-Y1021 ESVDNRATF  | 227   | 70    |
| >MET-Y1021 ESVDYRATF  | 6   | >MET-Y1021 ESVDNRATF  | 7     | 1     |
| >MET-Y1021 ESVDYRATF  | 222 | >MET-Y1021 ESVDNRATF  | 244   | 22    |
| >MET-Y1021 ESVDYRATF  | 264 | >MET-Y1021 ESVDNRATF  | 1329  | 1065  |
| >MET-Y1021 NESVDYRATF | 493 | >MET-Y1021 NESVDNRATF | 802   | 309   |
| >MET-Y1021 NESVDYRATF | 468 | >MET-Y1021 NESVDNRATF | 858   | 390   |
| >MET-Y1021 NESVDYRATF | 246 | >MET-Y1021 NESVDNRATF | 1065  | 819   |
| >MET-Y1021 NESVDYRATF | 181 | >MET-Y1021 NESVDNRATF | 1195  | 1014  |
| >MET-Y1021 NESVDYRA   | 51  | >MET-Y1021 NESVDNRA   | 171   | 120   |
| >MET-Y1021 NESVDYRAT  | 86  | >MET-Y1021 NESVDNRAT  | 258   | 172   |

|                       |      |                       |       |       |
|-----------------------|------|-----------------------|-------|-------|
| >MET-Y1021 SNESVDYR   | 222  | >MET-Y1021 SNESVDNR   | 801   | 579   |
| >MET-Y1021 SNESVDYRAT | 252  | >MET-Y1021 SNESVDNRA  | 272   | 20    |
| >MET-Y1021 VSNESVDY   | 237  | >MET-Y1021 VSNESVDN   | 22122 | 21885 |
| >MET-Y1021 VSNESVDYR  | 118  | >MET-Y1021 VSNESVDNR  | 816   | 698   |
| >MET-Y1021 VSNESVDY   | 117  | >MET-Y1021 VSNESVDN   | 22496 | 22379 |
| >MET-Y1021 VSNESVDYR  | 55   | >MET-Y1021 VSNESVDNR  | 491   | 436   |
| >MET-Y1021 VSNESVDYR  | 52   | >MET-Y1021 VSNESVDNR  | 193   | 141   |
| >MET-Y1021 VSNESVDY   | 342  | >MET-Y1021 VSNESVDN   | 20448 | 20106 |
| >MET-Y1021 VSNESVDY   | 169  | >MET-Y1021 VSNESVDN   | 18184 | 18015 |
| >MET-Y1021 VSNESVDY   | 8    | >MET-Y1021 VSNESVDN   | 13048 | 13040 |
| >MET-Y1021 MVSNESVDY  | 233  | >MET-Y1021 MVSNESVDN  | 462   | 229   |
| >MET-Y1021 MVSNESVDY  | 207  | >MET-Y1021 MVSNESVDN  | 781   | 574   |
| >MET-Y1021 MVSNESVDY  | 38   | >MET-Y1021 MVSNESVDN  | 19702 | 19664 |
| >MET-Y1021 MVSNESVDY  | 120  | >MET-Y1021 MVSNESVDN  | 28696 | 28576 |
| >MET-Y1021 MVSNESVDY  | 53   | >MET-Y1021 MVSNESVDN  | 219   | 166   |
| >MET-Y1021 MVSNESVDY  | 426  | >MET-Y1021 MVSNESVDN  | 2616  | 2190  |
| >MET-Y1021 MVSNESVDY  | 492  | >MET-Y1021 MVSNESVDN  | 9462  | 8970  |
| >MET-Y1021 MVSNESVDY  | 4    | >MET-Y1021 MVSNESVDN  | 12    | 8     |
| >MET-Y1021 MVSNESVDY  | 32   | >MET-Y1021 MVSNESVDN  | 54    | 22    |
| >MET-Y1021 MVSNESVDY  | 181  | >MET-Y1021 MVSNESVDN  | 25438 | 25257 |
| >MET-Y1021 MVSNESVDY  | 182  | >MET-Y1021 MVSNESVDN  | 18447 | 18265 |
| >MET-Y1021 MVSNESVDY  | 293  | >MET-Y1021 MVSNESVDN  | 17849 | 17556 |
| >MET-Y1021 MVSNESVDY  | 28   | >MET-Y1021 MVSNESVDN  | 7612  | 7584  |
| >MET-Y1021 MVSNESVDY  | 162  | >MET-Y1021 MVSNESVDN  | 37909 | 37747 |
| >MET-Y1021 MVSNESVDY  | 228  | >MET-Y1021 MVSNESVDN  | 990   | 762   |
| >MET-Y1021 EMVSNESVD  | 406  | >MET-Y1021 EMVSNESVD  | 32575 | 32169 |
| >MET-Y1021 EMVSNESVD  | 38   | >MET-Y1021 EMVSNESVD  | 18237 | 18199 |
| >MET-Y1021 EMVSNESVD  | 209  | >MET-Y1021 EMVSNESVD  | 596   | 387   |
| >MET-Y1021 EMVSNESVD  | 5    | >MET-Y1021 EMVSNESVD  | 9     | 4     |
| >MET-Y1021 EMVSNESVD  | 286  | >MET-Y1021 EMVSNESVD  | 18879 | 18593 |
| >MET-Y1021 EMVSNESVD  | 329  | >MET-Y1021 EMVSNESVD  | 26503 | 26174 |
| >MET-Y1021 EMVSNESVD  | 37   | >MET-Y1021 EMVSNESVD  | 8033  | 7996  |
| >MET-Y1021 EMVSNESVD  | 78   | >MET-Y1021 EMVSNESVD  | 382   | 304   |
| >MET-Y1248 YDKEYYSV   | 329  | >MET-Y1248 CDKEYYSV   | 793   | 464   |
| >MET-Y1248 YDKEYYSV   | 241  | >MET-Y1248 CDKEYYSV   | 68    | 173   |
| >MET-Y1248 MYDKEYYSV  | 284  | >MET-Y1248 MCDKEYYSV  | 393   | 109   |
| >MET-Y1248 MYDKEYYSV  | 454  | >MET-Y1248 MCDKEYYSV  | 311   | 143   |
| >MET-Y1248 MYDKEYYSV  | 391  | >MET-Y1248 MCDKEYYSV  | 20843 | 20452 |
| >MET-Y1248 MYDKEYYSV  | 41   | >MET-Y1248 MCDKEYYSV  | 21074 | 21033 |
| >MET-Y1248 MYDKEYYSV  | 4013 | >MET-Y1248 MCDKEYYSV  | 409   | 3604  |
| >MET-Y1248 MYDKEYYSV  | 435  | >MET-Y1248 MCDKEYYSV  | 11701 | 11266 |
| >MET-Y1248 VADFLGARDI | 82   | >MET-Y1248 VADFLGARDI | 20575 | 20493 |
| >MET-Y1248 VADFLGARDI | 218  | >MET-Y1248 VADFLGARDI | 23515 | 23297 |



|                       |      |                       |       |       |
|-----------------------|------|-----------------------|-------|-------|
| >MET-Y1248 VADFLARDI  | 340  | >MET-Y1248 VADFLARDI  | 23640 | 23300 |
| >MET-Y1248 DMYDKEYYS\ | 37   | >MET-Y1248 DMCDKEYYS\ | 179   | 142   |
| >MET-Y1248 DMYDKEYYS\ | 35   | >MET-Y1248 DMCDKEYYS\ | 169   | 134   |
| >MET-Y1248 DMYDKEYYS\ | 55   | >MET-Y1248 DMCDKEYYS\ | 273   | 218   |
| >MET-Y1248 DMYDKEYYS\ | 132  | >MET-Y1248 DMCDKEYYS\ | 427   | 295   |
| >MET-Y1248 DMYDKEYYS  | 179  | >MET-Y1248 DMCDKEYYS  | 2786  | 2607  |
| >MET-Y1248 DMYDKEYYS\ | 3    | >MET-Y1248 DMCDKEYYS\ | 12    | 9     |
| >MET-Y1248 DMYDKEYYS\ | 5    | >MET-Y1248 DMCDKEYYS\ | 110   | 105   |
| >MET-Y1248 DMYDKEYYS\ | 8    | >MET-Y1248 DMCDKEYYS\ | 86    | 78    |
| >MET-Y1248 DMYDKEYYS\ | 4    | >MET-Y1248 DMCDKEYYS\ | 24    | 20    |
| >MET-Y1248 DMYDKEYYS\ | 4    | >MET-Y1248 DMCDKEYYS\ | 9     | 5     |
| >MET-Y1248 DMYDKEYY   | 24   | >MET-Y1248 DMCDKEYY   | 81    | 57    |
| >MET-Y1248 DMYDKEYY   | 168  | >MET-Y1248 DMCDKEYY   | 234   | 66    |
| >MET-Y1248 DMYDKEYY   | 482  | >MET-Y1248 DMCDKEYY   | 3192  | 2710  |
| >MET-Y1248 DMYDKEYYS\ | 324  | >MET-Y1248 DMCDKEYYS\ | 1357  | 1033  |
| >MET-Y1248 DMYDKEYYS\ | 73   | >MET-Y1248 DMCDKEYYS\ | 1230  | 1157  |
| >MET-Y1248 DMYDKEYY   | 383  | >MET-Y1248 DMCDKEYY   | 4024  | 3641  |
| >MET-Y1248 RDMYDKEYY! | 201  | >MET-Y1248 RDMCDKEYY! | 234   | 33    |
| >MET-Y1248 RDMYDKEYY! | 320  | >MET-Y1248 RDMCDKEYY! | 178   | 142   |
| >MET-Y1248 ARDMYDKEY  | 416  | >MET-Y1248 ARDMCDKEY  | 249   | 167   |
| >MET-Y1248 LARDMYDKE' | 449  | >MET-Y1248 LARDMCDKE' | 532   | 83    |
| >MET-Y1248 LARDMYDK   | 34   | >MET-Y1248 LARDMCDK   | 49    | 15    |
| >MET-Y1248 LARDMYDKE' | 303  | >MET-Y1248 LARDMCDKE' | 311   | 8     |
| >MET-Y1248 LARDMYDKE' | 305  | >MET-Y1248 LARDMCDKE' | 269   | 36    |
| >MET-Y1248 LARDMYDKE' | 353  | >MET-Y1248 LARDMCDKE' | 648   | 295   |
| >MET-Y1248 LARDMYDKE' | 14   | >MET-Y1248 LARDMCDKE' | 20    | 6     |
| >MET-Y1248 LARDMYDKE' | 78   | >MET-Y1248 LARDMCDKE' | 93    | 15    |
| >MET-Y1248 LARDMYDKE' | 84   | >MET-Y1248 LARDMCDKE' | 61    | 23    |
| >MET-Y1248 GLARDMYDK  | 376  | >MET-Y1248 GLARDMCDK  | 358   | 18    |
| >MET-Y1248 GLARDMYDK  | 142  | >MET-Y1248 GLARDMCDK  | 865   | 723   |
| >MET-Y1248 GLARDMYDK  | 115  | >MET-Y1248 GLARDMCDK  | 410   | 295   |
| >MET-Y1248 GLARDMYDK  | 214  | >MET-Y1248 GLARDMCDK  | 324   | 110   |
| >MET-Y1248 GLARDMYDK  | 553  | >MET-Y1248 GLARDMCDK  | 463   | 90    |
| >MET-Y1248 GLARDMYDK  | 371  | >MET-Y1248 GLARDMCDK  | 1881  | 1510  |
| >MET-Y1248 FGLARDMY   | 398  | >MET-Y1248 FGLARDMC   | 24994 | 24596 |
| >MET-Y1248 FGLARDMY   | 339  | >MET-Y1248 FGLARDMC   | 25944 | 25605 |
| >MET-Y1248 FGLARDMY   | 290  | >MET-Y1248 FGLARDMC   | 21781 | 21491 |
| >MET-Y1248 YDKEYYSVHN | 4535 | >MET-Y1248 HDKEYYSVHN | 446   | 4089  |
| >MET-Y1248 YDKEYYSV   | 329  | >MET-Y1248 HDKEYYSV   | 209   | 120   |
| >MET-Y1248 YDKEYYSV   | 241  | >MET-Y1248 HDKEYYSV   | 163   | 78    |
| >MET-Y1248 MYDKEYYSV  | 284  | >MET-Y1248 MHDKEYYSV  | 2717  | 2433  |
| >MET-Y1248 MYDKEYYSV  | 454  | >MET-Y1248 MHDKEYYSV  | 3439  | 2985  |
| >MET-Y1248 MYDKEYYSV  | 391  | >MET-Y1248 MHDKEYYSV  | 11600 | 11209 |

|                       |      |                       |       |       |
|-----------------------|------|-----------------------|-------|-------|
| >MET-Y1248 MYDKEYYSV  | 41   | >MET-Y1248 MHDKEYYSV  | 15670 | 15629 |
| >MET-Y1248 MYDKEYYSV  | 6751 | >MET-Y1248 MHDKEYYSV  | 89    | 6662  |
| >MET-Y1248 MYDKEYYSV  | 435  | >MET-Y1248 MHDKEYYSV  | 5631  | 5196  |
| >MET-Y1248 VADFLGARDI | 82   | >MET-Y1248 VADFLGARDI | 16600 | 16518 |
| >MET-Y1248 VADFLGARDI | 218  | >MET-Y1248 VADFLGARDI | 11702 | 11484 |
| >MET-Y1248 VADFLGARDI | 340  | >MET-Y1248 VADFLGARDI | 6079  | 5739  |
| >MET-Y1248 DMYDKEYYS\ | 37   | >MET-Y1248 DMHDKEYYS' | 415   | 378   |
| >MET-Y1248 DMYDKEYYS\ | 35   | >MET-Y1248 DMHDKEYYS' | 163   | 128   |
| >MET-Y1248 DMYDKEYYS\ | 55   | >MET-Y1248 DMHDKEYYS' | 256   | 201   |
| >MET-Y1248 DMYDKEYYS\ | 132  | >MET-Y1248 DMHDKEYYS' | 924   | 792   |
| >MET-Y1248 DMYDKEYYS  | 179  | >MET-Y1248 DMHDKEYYS  | 2108  | 1929  |
| >MET-Y1248 DMYDKEYYS\ | 3    | >MET-Y1248 DMHDKEYYS' | 8     | 5     |
| >MET-Y1248 DMYDKEYYS\ | 5    | >MET-Y1248 DMHDKEYYS' | 22    | 17    |
| >MET-Y1248 DMYDKEYYS\ | 8    | >MET-Y1248 DMHDKEYYS' | 43    | 35    |
| >MET-Y1248 DMYDKEYYS\ | 4    | >MET-Y1248 DMHDKEYYS' | 25    | 21    |
| >MET-Y1248 DMYDKEYYS\ | 4    | >MET-Y1248 DMHDKEYYS' | 6     | 2     |
| >MET-Y1248 DMYDKEYY   | 24   | >MET-Y1248 DMHDKEYY   | 90    | 66    |
| >MET-Y1248 DMYDKEYY   | 168  | >MET-Y1248 DMHDKEYY   | 254   | 86    |
| >MET-Y1248 DMYDKEYY   | 482  | >MET-Y1248 DMHDKEYY   | 2911  | 2429  |
| >MET-Y1248 DMYDKEYYS\ | 324  | >MET-Y1248 DMHDKEYYS' | 2615  | 2291  |
| >MET-Y1248 DMYDKEYYS\ | 73   | >MET-Y1248 DMHDKEYYS' | 974   | 901   |
| >MET-Y1248 DMYDKEYY   | 383  | >MET-Y1248 DMHDKEYY   | 1284  | 901   |
| >MET-Y1248 RDMYDKEYY! | 201  | >MET-Y1248 RDMHDKEYY  | 276   | 75    |
| >MET-Y1248 RDMYDKEYY! | 320  | >MET-Y1248 RDMHDKEYY  | 119   | 201   |
| >MET-Y1248 ARDMYDKEY  | 416  | >MET-Y1248 ARDMHDKEY  | 998   | 582   |
| >MET-Y1248 LARDMYDKE' | 449  | >MET-Y1248 LARDMHDKE  | 399   | 50    |
| >MET-Y1248 LARDMYDK   | 34   | >MET-Y1248 LARDMHDK   | 26    | 8     |
| >MET-Y1248 LARDMYDKE' | 303  | >MET-Y1248 LARDMHDKE  | 226   | 77    |
| >MET-Y1248 LARDMYDKE' | 305  | >MET-Y1248 LARDMHDKE  | 244   | 61    |
| >MET-Y1248 LARDMYDKE' | 353  | >MET-Y1248 LARDMHDKE  | 544   | 191   |
| >MET-Y1248 LARDMYDKE' | 14   | >MET-Y1248 LARDMHDKE  | 11    | 3     |
| >MET-Y1248 LARDMYDKE' | 78   | >MET-Y1248 LARDMHDKE  | 44    | 34    |
| >MET-Y1248 LARDMYDKE' | 84   | >MET-Y1248 LARDMHDKE  | 70    | 14    |
| >MET-Y1248 GLARDMYDK  | 376  | >MET-Y1248 GLARDMHDK  | 323   | 53    |
| >MET-Y1248 GLARDMYDK  | 142  | >MET-Y1248 GLARDMHDK  | 287   | 145   |
| >MET-Y1248 GLARDMYDK  | 115  | >MET-Y1248 GLARDMHDK  | 142   | 27    |
| >MET-Y1248 GLARDMYDK  | 214  | >MET-Y1248 GLARDMHDK  | 247   | 33    |
| >MET-Y1248 GLARDMYDK  | 698  | >MET-Y1248 GLARDMHDK  | 408   | 290   |
| >MET-Y1248 GLARDMYDK  | 371  | >MET-Y1248 GLARDMHDK  | 331   | 40    |
| >MET-Y1248 FGLARDMY   | 398  | >MET-Y1248 FGLARDMH   | 15448 | 15050 |
| >MET-Y1248 FGLARDMY   | 339  | >MET-Y1248 FGLARDMH   | 11039 | 10700 |
| >MET-Y1248 FGLARDMY   | 290  | >MET-Y1248 FGLARDMH   | 7277  | 6987  |
| >MET-Y1253 YSVHNKTGAI | 128  | >MET-Y1253 DSVHNKTGAI | 11638 | 11510 |

|                       |     |                       |       |       |
|-----------------------|-----|-----------------------|-------|-------|
| >MET-Y1253 YSVHNKTGAI | 222 | >MET-Y1253 DSVHNKTGAI | 9702  | 9480  |
| >MET-Y1253 YSVHNKTGAI | 8   | >MET-Y1253 DSVHNKTGAI | 447   | 439   |
| >MET-Y1253 YSVHNKTGAI | 179 | >MET-Y1253 DSVHNKTGAI | 9215  | 9036  |
| >MET-Y1253 LARDMYDKE' | 449 | >MET-Y1253 LARDMYDKE' | 26918 | 26469 |
| >MET-Y1253 LARDMYDKE' | 305 | >MET-Y1253 LARDMYDKE' | 22075 | 21770 |
| >MET-Y1253 LARDMYDKE' | 78  | >MET-Y1253 LARDMYDKE' | 21799 | 21721 |
| >MET-Y1253 LARDMYDKE' | 84  | >MET-Y1253 LARDMYDKE' | 21435 | 21351 |
| >MET-Y1253 EYYSVHNK   | 165 | >MET-Y1253 EYDSVHNK   | 4343  | 4178  |
| >MET-Y1253 EYYSVHNK   | 117 | >MET-Y1253 EYDSVHNK   | 968   | 851   |
| >MET-Y1253 EYYSVHNK   | 12  | >MET-Y1253 EYDSVHNK   | 204   | 192   |
| >MET-Y1253 EYYSVHNK   | 120 | >MET-Y1253 EYDSVHNK   | 2408  | 2288  |
| >MET-Y1253 KEYYSVHNK  | 399 | >MET-Y1253 KEYDSVHNK  | 692   | 293   |
| >MET-Y1253 KEYYSVHNK  | 408 | >MET-Y1253 KEYDSVHNK  | 1477  | 1069  |
| >MET-Y1253 KEYYSVHNKT | 255 | >MET-Y1253 KEYDSVHNKT | 851   | 596   |
| >MET-Y1253 KEYYSVHNKT | 365 | >MET-Y1253 KEYDSVHNKT | 1022  | 657   |
| >MET-Y1253 KEYYSVHNK  | 644 | >MET-Y1253 KEYDSVHNK  | 445   | 199   |
| >MET-Y1253 KEYYSVHNK  | 373 | >MET-Y1253 KEYDSVHNK  | 176   | 197   |
| >MET-Y1253 YDKEYYSV   | 329 | >MET-Y1253 YDKEYDSV   | 881   | 552   |
| >MET-Y1253 YDKEYYSV   | 241 | >MET-Y1253 YDKEYDSV   | 436   | 195   |
| >MET-Y1253 MYDKEYYSV  | 284 | >MET-Y1253 MYDKEYDSV  | 1066  | 782   |
| >MET-Y1253 MYDKEYYSV  | 454 | >MET-Y1253 MYDKEYDSV  | 2389  | 1935  |
| >MET-Y1253 MYDKEYYSV  | 391 | >MET-Y1253 MYDKEYDSV  | 3077  | 2686  |
| >MET-Y1253 MYDKEYYSV  | 41  | >MET-Y1253 MYDKEYDSV  | 52    | 11    |
| >MET-Y1253 MYDKEYYSV  | 435 | >MET-Y1253 MYDKEYDSV  | 1014  | 579   |
| >MET-Y1253 DMYDKEYYS\ | 37  | >MET-Y1253 DMYDKEYDS' | 359   | 322   |
| >MET-Y1253 DMYDKEYYS\ | 35  | >MET-Y1253 DMYDKEYDS' | 99    | 64    |
| >MET-Y1253 DMYDKEYYS\ | 55  | >MET-Y1253 DMYDKEYDS' | 82    | 27    |
| >MET-Y1253 DMYDKEYYS\ | 132 | >MET-Y1253 DMYDKEYDS' | 651   | 519   |
| >MET-Y1253 DMYDKEYYS  | 179 | >MET-Y1253 DMYDKEYDS  | 8171  | 7992  |
| >MET-Y1253 DMYDKEYYS\ | 3   | >MET-Y1253 DMYDKEYDS' | 6     | 3     |
| >MET-Y1253 DMYDKEYYS\ | 5   | >MET-Y1253 DMYDKEYDS' | 33    | 28    |
| >MET-Y1253 DMYDKEYYS\ | 8   | >MET-Y1253 DMYDKEYDS' | 13    | 5     |
| >MET-Y1253 DMYDKEYYS\ | 4   | >MET-Y1253 DMYDKEYDS' | 23    | 19    |
| >MET-Y1253 DMYDKEYYS\ | 4   | >MET-Y1253 DMYDKEYDS' | 8     | 4     |
| >MET-Y1253 DMYDKEYY   | 24  | >MET-Y1253 DMYDKEYD   | 20133 | 20109 |
| >MET-Y1253 DMYDKEYY   | 168 | >MET-Y1253 DMYDKEYD   | 31228 | 31060 |
| >MET-Y1253 DMYDKEYY   | 482 | >MET-Y1253 DMYDKEYD   | 20497 | 20015 |
| >MET-Y1253 DMYDKEYYS\ | 324 | >MET-Y1253 DMYDKEYDS' | 629   | 305   |
| >MET-Y1253 DMYDKEYYS\ | 73  | >MET-Y1253 DMYDKEYDS' | 271   | 198   |
| >MET-Y1253 DMYDKEYY   | 383 | >MET-Y1253 DMYDKEYD   | 32436 | 32053 |
| >MET-Y1253 RDMYDKEYY! | 201 | >MET-Y1253 RDMYDKEYD  | 226   | 25    |
| >MET-Y1253 RDMYDKEYY! | 320 | >MET-Y1253 RDMYDKEYD  | 505   | 185   |
| >MET-Y1253 ARDMYDKEY  | 416 | >MET-Y1253 ARDMYDKEY  | 16196 | 15780 |

|                        |       |                        |      |       |
|------------------------|-------|------------------------|------|-------|
| >MITF-N3231 ENCSQDLL   | 14173 | >MITF-N3231 ETCSQDLL   | 76   | 14097 |
| >MITF-N3231 ENCSQDLLQH | 11342 | >MITF-N3231 ETCSQDLLQH | 124  | 11218 |
| >MITF-N3231 ENCSQDLLQH | 7508  | >MITF-N3231 ETCSQDLLQH | 55   | 7453  |
| >MITF-N3231 ENCSQDLLQ  | 14504 | >MITF-N3231 ETCSQDLLQ  | 436  | 14068 |
| >MITF-N3231 ENCSQDLL   | 9571  | >MITF-N3231 ETCSQDLL   | 124  | 9447  |
| >MITF-N3231 LENCSDLL   | 147   | >MITF-N3231 LETCSQDLL  | 155  | 8     |
| >MITF-N3231 LENCSDQL   | 119   | >MITF-N3231 LETCSQDL   | 53   | 66    |
| >MITF-N3231 LENCSDLL   | 54    | >MITF-N3231 LETCSQDLL  | 25   | 29    |
| >MITF-N3231 LENCSDQL   | 203   | >MITF-N3231 LETCSQDL   | 297  | 94    |
| >MITF-N3231 LENCSDLL   | 357   | >MITF-N3231 LETCSQDLL  | 526  | 169   |
| >MITF-N3231 LENCSDLL   | 252   | >MITF-N3231 LETCSQDLL  | 155  | 97    |
| >MITF-N3231 VLENCSDQL  | 351   | >MITF-N3231 VLETCSQDL  | 340  | 11    |
| >MITF-N3231 VLENCSDLL  | 130   | >MITF-N3231 VLETCSQDLL | 198  | 68    |
| >MITF-N3231 VLENCSDQL  | 275   | >MITF-N3231 VLETCSQDL  | 793  | 518   |
| >MITF-N3231 VLENCSDLL  | 181   | >MITF-N3231 VLETCSQDLL | 475  | 294   |
| >MITF-N3231 VLENCSDQL  | 14    | >MITF-N3231 VLETCSQDL  | 27   | 13    |
| >MITF-N3231 VLENCSDLL  | 26    | >MITF-N3231 VLETCSQDLL | 41   | 15    |
| >MITF-N3231 EPVLENCSD  | 354   | >MITF-N3231 EPVLETCSQD | 213  | 141   |
| >MITF-N3231 EPVLENCSD  | 464   | >MITF-N3231 EPVLETCSQD | 488  | 24    |
| >MITF-N3231 KQEPVLEN   | 9823  | >MITF-N3231 KQEPVLET   | 316  | 9507  |
| >MITF-N3231 KQEPVLENC  | 397   | >MITF-N3231 KQEPVLETC  | 92   | 305   |
| >MITF-R270L RQKKLEHANF | 324   | >MITF-R270L LQKKLEHANF | 4792 | 4468  |
| >MITF-R270L RQKKLEHANF | 15    | >MITF-R270L LQKKLEHANF | 55   | 40    |
| >MITF-R270L RQKKLEHA   | 284   | >MITF-R270L LQKKLEHA   | 312  | 28    |
| >MITF-R270L RQKKLEHANF | 286   | >MITF-R270L LQKKLEHANF | 876  | 590   |
| >MITF-R270L RQKKLEHANF | 71    | >MITF-R270L LQKKLEHANF | 388  | 317   |
| >MITF-R270L NRQKKLEHAI | 12279 | >MITF-R270L NLQKKLEHAN | 215  | 12064 |
| >MITF-R270L NRQKKLEHAI | 5639  | >MITF-R270L NLQKKLEHAN | 147  | 5492  |
| >MITF-R270L LENRQKKL   | 777   | >MITF-R270L LENLQKKL   | 69   | 708   |
| >MITF-R270L KELENRQKKL | 349   | >MITF-R270L KELENLQKKL | 250  | 99    |
| >MITF-R270L KELENRQKK  | 1059  | >MITF-R270L KELENLQKK  | 241  | 818   |
| >MITF-R270L KELENRQKKL | 38    | >MITF-R270L KELENLQKKL | 19   | 19    |
| >MITF-R270L RAKELENRQK | 3385  | >MITF-R270L RAKELENLQK | 328  | 3057  |
| >MITF-R270L RAKELENRQK | 9     | >MITF-R270L RAKELENLQK | 7    | 2     |
| >MITF-R270L RAKELENRQK | 8     | >MITF-R270L RAKELENLQK | 8    | 0     |
| >MITF-R270L RAKELENR   | 18    | >MITF-R270L RAKELENL   | 8889 | 8871  |
| >MITF-R270L RAKELENRQK | 206   | >MITF-R270L RAKELENLQK | 280  | 74    |
| >MITF-R270L RAKELENR   | 18150 | >MITF-R270L RAKELENL   | 122  | 18028 |
| >MITF-R270L QRAKELENRC | 287   | >MITF-R270L QRAKELENLC | 214  | 73    |
| >MITF-R270L QQRAKELENI | 2183  | >MITF-R270L QQRAKELENI | 166  | 2017  |
| >MKL1-L39V·LVRMHILE    | 380   | >MKL1-L39V·VVRMHILE    | 877  | 497   |
| >MKL1-L39V·ELVRMHIL    | 47    | >MKL1-L39V·EVVRMHIL    | 5327 | 5280  |
| >MKL1-L39V·ELVRMHIL    | 150   | >MKL1-L39V·EVVRMHIL    | 7    | 143   |

|                        |      |                        |      |      |
|------------------------|------|------------------------|------|------|
| >MKL1-L39V·ELVRMHILEE' | 5568 | >MKL1-L39V·EVVRMHILEE  | 237  | 5331 |
| >MKL1-L39V·ELVRMHIL    | 1615 | >MKL1-L39V·EVVRMHIL    | 61   | 1554 |
| >MKL1-L39V·ELVRMHILEE' | 2478 | >MKL1-L39V·EVVRMHILEE  | 189  | 2289 |
| >MKL1-L39V·ELVRMHIL    | 875  | >MKL1-L39V·EVVRMHIL    | 164  | 711  |
| >MKL1-L39V·KIRSRPERSEL | 1081 | >MKL1-L39V·KIRSRPERSEV | 84   | 997  |
| >MKL1-L39V·KIRSRPERSEL | 1327 | >MKL1-L39V·KIRSRPERSEV | 47   | 1280 |
| >MKL1-L39V·KIRSRPERSEL | 20   | >MKL1-L39V·KIRSRPERSEV | 15   | 5    |
| >MKL1-L39V·KIRSRPERSEL | 364  | >MKL1-L39V·KIRSRPERSEV | 2304 | 1940 |
| >MKL1-L39V·KIRSRPERSEL | 451  | >MKL1-L39V·KIRSRPERSEV | 1436 | 985  |
| >MKL1-L39V·KIRSRPERSEL | 427  | >MKL1-L39V·KIRSRPERSEV | 1191 | 764  |
| >MKL1-L39V·SELVRMHI    | 53   | >MKL1-L39V·SEVVRMHI    | 71   | 18   |
| >MKL1-L39V·SELVRMHIL   | 21   | >MKL1-L39V·SEVVRMHIL   | 57   | 36   |
| >MKL1-L39V·SELVRMHIL   | 393  | >MKL1-L39V·SEVVRMHIL   | 484  | 91   |
| >MKL1-L39V·SELVRMHIL   | 304  | >MKL1-L39V·SEVVRMHIL   | 281  | 23   |
| >MKL1-L39V·SELVRMHIL   | 129  | >MKL1-L39V·SEVVRMHIL   | 63   | 66   |
| >MKL1-L39V·SELVRMHI    | 475  | >MKL1-L39V·SEVVRMHI    | 1011 | 536  |
| >MKL1-L39V·SELVRMHIL   | 92   | >MKL1-L39V·SEVVRMHIL   | 203  | 111  |
| >MKL1-L39V·SELVRMHI    | 34   | >MKL1-L39V·SEVVRMHI    | 109  | 75   |
| >MKL1-L39V·SELVRMHIL   | 28   | >MKL1-L39V·SEVVRMHIL   | 38   | 10   |
| >MKL1-L39V·RSELVRMHI   | 162  | >MKL1-L39V·RSEVVRMHI   | 95   | 67   |
| >MKL1-L39V·RSELVRMHIL  | 84   | >MKL1-L39V·RSEVVRMHIL  | 74   | 10   |
| >MKL1-L39V·RSELVRMHI   | 760  | >MKL1-L39V·RSEVVRMHI   | 237  | 523  |
| >MKL1-L39V·RSELVRMHIL  | 464  | >MKL1-L39V·RSEVVRMHIL  | 583  | 119  |
| >MKL1-L39V·RSELVRMH    | 492  | >MKL1-L39V·RSEVVRMH    | 338  | 154  |
| >MKL1-L39V·RSELVRMHI   | 73   | >MKL1-L39V·RSEVVRMHI   | 46   | 27   |
| >MKL1-L39V·ERSELVRMHI  | 67   | >MKL1-L39V·ERSEVVRMHI  | 57   | 10   |
| >MKL1-L39V·ERSELVRMHI  | 254  | >MKL1-L39V·ERSEVVRMHI  | 412  | 158  |
| >MKL1-L39V·PERSELVRM   | 298  | >MKL1-L39V·PERSEVVRM   | 428  | 130  |
| >MKL1-L39V·PERSELVRM   | 51   | >MKL1-L39V·PERSEVVRM   | 54   | 3    |
| >MKL1-L39V·RPERSELVRM  | 345  | >MKL1-L39V·RPERSEVVRM  | 227  | 118  |
| >MKL1-L39V·RPERSELV    | 307  | >MKL1-L39V·RPERSEVV    | 74   | 233  |
| >MKL1-L39V·RPERSELVRM  | 407  | >MKL1-L39V·RPERSEVVRM  | 1331 | 924  |
| >MKL1-L39V·RSRPERSEL   | 7    | >MKL1-L39V·RSRPERSEV   | 6    | 1    |
| >MKL1-L39V·RSRPERSELV  | 9    | >MKL1-L39V·RSRPERSEVV  | 11   | 2    |
| >MKL1-L39V·RSRPERSELVI | 9    | >MKL1-L39V·RSRPERSEVV  | 11   | 2    |
| >MKL1-L39V·RSRPERSELVI | 35   | >MKL1-L39V·RSRPERSEVV  | 17   | 18   |
| >MKL1-L39V·RSRPERSEL   | 96   | >MKL1-L39V·RSRPERSEV   | 912  | 816  |
| >MKL1-L39V·RSRPERSEL   | 75   | >MKL1-L39V·RSRPERSEV   | 169  | 94   |
| >MKL1-L39V·RSRPERSELV  | 862  | >MKL1-L39V·RSRPERSEVV  | 280  | 582  |
| >MKL1-L39V·RSRPERSELVI | 593  | >MKL1-L39V·RSRPERSEVV  | 360  | 233  |
| >MKL1-L39V·RSRPERSEL   | 4    | >MKL1-L39V·RSRPERSEV   | 14   | 10   |
| >MKL1-L39V·RSRPERSELV  | 36   | >MKL1-L39V·RSRPERSEVV  | 33   | 3    |
| >MKL1-L39V·RSRPERSELVI | 489  | >MKL1-L39V·RSRPERSEVV  | 855  | 366  |

|                        |      |                        |      |      |
|------------------------|------|------------------------|------|------|
| >MKL1-L39V·RSRPERSEL   | 353  | >MKL1-L39V·RSRPERSEV   | 2094 | 1741 |
| >MKL1-L39V·RSRPERSEL   | 16   | >MKL1-L39V·RSRPERSEV   | 46   | 30   |
| >MKL1-L39V·RSRPERSELV  | 163  | >MKL1-L39V·RSRPERSEVV  | 249  | 86   |
| >MKL1-L39V·RSRPERSEL   | 166  | >MKL1-L39V·RSRPERSEV   | 1214 | 1048 |
| >MKL1-L39V·IRSRPERSEL  | 131  | >MKL1-L39V·IRSRPERSEV  | 276  | 145  |
| >MKL1-L39V·IRSRPERSELV | 1120 | >MKL1-L39V·IRSRPERSEVV | 450  | 670  |
| >MLH1-A410QAIVTEDK     | 1775 | >MLH1-A410QTIVTEDK     | 220  | 1555 |
| >MLH1-A410QAIVTEDK     | 156  | >MLH1-A410QTIVTEDK     | 27   | 129  |
| >MLH1-A410QAIVTEDK     | 2166 | >MLH1-A410QTIVTEDK     | 303  | 1863 |
| >MLH1-A410LSKPLSSQPQ   | 39   | >MLH1-A410LSKPLSSQPQ   | 1202 | 1163 |
| >MLH1-A410LSSQPQAI     | 156  | >MLH1-A410LSSQPQTI     | 66   | 90   |
| >MLH1-A410LSSQPQAI     | 561  | >MLH1-A410LSSQPQTI     | 126  | 435  |
| >MLH1-A410LSSQPQAI     | 479  | >MLH1-A410LSSQPQTI     | 2090 | 1611 |
| >MLH1-A410LSSQPQAI     | 240  | >MLH1-A410LSSQPQTI     | 89   | 151  |
| >MLH1-A410LSSQPQAI     | 24   | >MLH1-A410LSSQPQTI     | 15   | 9    |
| >MLH1-A410PLSSQPQAI    | 426  | >MLH1-A410PLSSQPQTI    | 291  | 135  |
| >MLH1-A410PLSSQPQAI    | 151  | >MLH1-A410PLSSQPQTI    | 285  | 134  |
| >MLH1-A410PLSSQPQAI    | 149  | >MLH1-A410PLSSQPQTI    | 115  | 34   |
| >MLH1-A410PLSSQPQAI    | 56   | >MLH1-A410PLSSQPQTI    | 174  | 118  |
| >MLH1-A410PLSSQPQA     | 91   | >MLH1-A410PLSSQPQT     | 869  | 778  |
| >MLH1-A410PLSSQPQAI    | 434  | >MLH1-A410PLSSQPQTI    | 123  | 311  |
| >MLH1-A410PLSSQPQAI    | 14   | >MLH1-A410PLSSQPQTI    | 14   | 0    |
| >MLH1-A410KPLSSQPQAI   | 180  | >MLH1-A410KPLSSQPQTI   | 111  | 69   |
| >MLH1-A410KPLSSQPQAI   | 494  | >MLH1-A410KPLSSQPQTI   | 281  | 213  |
| >MLH1-A410KPLSSQPQAI   | 303  | >MLH1-A410KPLSSQPQTI   | 454  | 151  |
| >MLH1-A410KPLSSQPQAI   | 268  | >MLH1-A410KPLSSQPQTI   | 204  | 64   |
| >MLH1-A410KPLSSQPQA    | 182  | >MLH1-A410KPLSSQPQT    | 5060 | 4878 |
| >MLH1-A410SKPLSSQPQA   | 164  | >MLH1-A410SKPLSSQPQT   | 301  | 137  |
| >MLH1-A681AMFYSIRKQY   | 218  | >MLH1-A681VMFYSIRKQY   | 66   | 152  |
| >MLH1-A681AMFYSIRKQY   | 55   | >MLH1-A681VMFYSIRKQY   | 72   | 17   |
| >MLH1-A681AMFYSIRKQY   | 33   | >MLH1-A681VMFYSIRKQY   | 71   | 38   |
| >MLH1-A681AMFYSIRKQY   | 29   | >MLH1-A681VMFYSIRKQY   | 39   | 10   |
| >MLH1-A681AMFYSIRKQY   | 366  | >MLH1-A681VMFYSIRKQY   | 453  | 87   |
| >MLH1-A681AMFYSIRKQY   | 4    | >MLH1-A681VMFYSIRKQY   | 4    | 0    |
| >MLH1-A681AMFYSIRKQY   | 35   | >MLH1-A681VMFYSIRKQY   | 37   | 2    |
| >MLH1-A681AMFYSIRKQY   | 32   | >MLH1-A681VMFYSIRKQY   | 29   | 3    |
| >MLH1-A681AMFYSIRKQY   | 484  | >MLH1-A681VMFYSIRKQY   | 210  | 274  |
| >MLH1-A681AMFYSIRKQY   | 20   | >MLH1-A681VMFYSIRKQY   | 23   | 3    |
| >MLH1-A681AMFYSIRK     | 28   | >MLH1-A681VMFYSIRK     | 28   | 0    |
| >MLH1-A681AMFYSIRKQY   | 109  | >MLH1-A681VMFYSIRKQY   | 331  | 222  |
| >MLH1-A681AMFYSIRK     | 8    | >MLH1-A681VMFYSIRK     | 11   | 3    |
| >MLH1-A681AMFYSIRKQY   | 25   | >MLH1-A681VMFYSIRKQY   | 29   | 4    |
| >MLH1-A681AMFYSIRK     | 28   | >MLH1-A681VMFYSIRK     | 261  | 233  |

|                         |      |                         |      |      |
|-------------------------|------|-------------------------|------|------|
| >MLH1-A681 AMFY S IRKQY | 319  | >MLH1-A681 VMFY S IRKQY | 2484 | 2165 |
| >MLH1-A681 AMFY S IRKQY | 43   | >MLH1-A681 VMFY S IRKQY | 39   | 4    |
| >MLH1-A681 AMFY S IRK   | 116  | >MLH1-A681 VMFY S IRK   | 218  | 102  |
| >MLH1-A681 AMFY S IRKQY | 240  | >MLH1-A681 VMFY S IRKQY | 882  | 642  |
| >MLH1-A681 AMFY S IRKQY | 187  | >MLH1-A681 VMFY S IRKQY | 669  | 482  |
| >MLH1-A681 AMFY S IRK   | 348  | >MLH1-A681 VMFY S IRK   | 186  | 162  |
| >MLH1-A681 AMFY S IRKQY | 55   | >MLH1-A681 VMFY S IRKQY | 66   | 11   |
| >MLH1-A681 AMFY S IRKQY | 96   | >MLH1-A681 VMFY S IRKQY | 77   | 19   |
| >MLH1-A681 AMFY S IRK   | 143  | >MLH1-A681 VMFY S IRK   | 208  | 65   |
| >MLH1-A681 AMFY S IRKQ  | 245  | >MLH1-A681 VMFY S IRKQ  | 403  | 158  |
| >MLH1-A681 AMFY S IRKQY | 4    | >MLH1-A681 VMFY S IRKQY | 4    | 0    |
| >MLH1-A681 AMFY S IRKQY | 16   | >MLH1-A681 VMFY S IRKQY | 22   | 6    |
| >MLH1-A681 AMFY S IRKQY | 41   | >MLH1-A681 VMFY S IRKQY | 56   | 15   |
| >MLH1-A681 AMFY S IRK   | 133  | >MLH1-A681 VMFY S IRK   | 1234 | 1101 |
| >MLH1-A681 CAMFY S IRK  | 119  | >MLH1-A681 CVMFY S IRK  | 47   | 72   |
| >MLH1-A681 CAMFY S IR   | 349  | >MLH1-A681 CVMFY S IR   | 56   | 293  |
| >MLH1-A681 CAMFY S IRK  | 15   | >MLH1-A681 CVMFY S IRK  | 12   | 3    |
| >MLH1-A681 CAMFY S IRKQ | 1299 | >MLH1-A681 CVMFY S IRKQ | 287  | 1012 |
| >MLH1-A681 CAMFY S IRKQ | 7475 | >MLH1-A681 CVMFY S IRKQ | 292  | 7183 |
| >MLH1-A681 CAMFY S IRKQ | 494  | >MLH1-A681 CVMFY S IRKQ | 67   | 427  |
| >MLH1-A681 CAMFY S IRK  | 172  | >MLH1-A681 CVMFY S IRK  | 49   | 123  |
| >MLH1-A681 CAMFY S IRKQ | 716  | >MLH1-A681 CVMFY S IRKQ | 381  | 335  |
| >MLH1-A681 CAMFY S IR   | 56   | >MLH1-A681 CVMFY S IR   | 46   | 10   |
| >MLH1-A681 CAMFY S IR   | 188  | >MLH1-A681 CVMFY S IR   | 156  | 32   |
| >MLH1-A681 CAMFY S IR   | 16   | >MLH1-A681 CVMFY S IR   | 15   | 1    |
| >MLH1-A681 CAMFY S IRK  | 37   | >MLH1-A681 CVMFY S IRK  | 30   | 7    |
| >MLH1-A681 CAMFY S IRKQ | 81   | >MLH1-A681 CVMFY S IRKQ | 568  | 487  |
| >MLH1-A681 CAMFY S IRKQ | 156  | >MLH1-A681 CVMFY S IRKQ | 778  | 622  |
| >MLH1-A681 CAMFY S IRKQ | 587  | >MLH1-A681 CVMFY S IRKQ | 246  | 341  |
| >MLH1-A681 CAMFY S IR   | 710  | >MLH1-A681 CVMFY S IR   | 414  | 296  |
| >MLH1-A681 ECFESLSKECA  | 869  | >MLH1-A681 ECFESLSKECV  | 56   | 813  |
| >MLH1-A681 ECFESLSKECA  | 4205 | >MLH1-A681 ECFESLSKECV  | 231  | 3974 |
| >MLH1-A681 ECAMFY S IR  | 377  | >MLH1-A681 ECVMFY S IR  | 240  | 137  |
| >MLH1-A681 ECAMFY S IR  | 41   | >MLH1-A681 ECVMFY S IR  | 65   | 24   |
| >MLH1-A681 ECAMFY S IRK | 282  | >MLH1-A681 ECVMFY S IRK | 567  | 285  |
| >MLH1-A681 ECAMFY S I   | 36   | >MLH1-A681 ECVMFY S I   | 111  | 75   |
| >MLH1-A681 ECAMFY S I   | 251  | >MLH1-A681 ECVMFY S I   | 460  | 209  |
| >MLH1-A681 ECAMFY S IR  | 228  | >MLH1-A681 ECVMFY S IR  | 166  | 62   |
| >MLH1-A681 KECAMFY S I  | 24   | >MLH1-A681 KECVMFY S I  | 22   | 2    |
| >MLH1-A681 KECAMFY S IR | 74   | >MLH1-A681 KECVMFY S IR | 106  | 32   |
| >MLH1-A681 KECAMFY S I  | 63   | >MLH1-A681 KECVMFY S I  | 190  | 127  |
| >MLH1-A681 KECAMFY S I  | 414  | >MLH1-A681 KECVMFY S I  | 521  | 107  |
| >MLH1-A681 KECAMFY S I  | 21   | >MLH1-A681 KECVMFY S I  | 35   | 14   |

|                       |      |                       |     |      |
|-----------------------|------|-----------------------|-----|------|
| >MLH1-A681 KECAMFYSI  | 14   | >MLH1-A681 KECVMFYSI  | 17  | 3    |
| >MLH1-A681 KECAMFY    | 151  | >MLH1-A681 KECVMFY    | 185 | 34   |
| >MLH1-A681 KECAMFYSI  | 45   | >MLH1-A681 KECVMFYSI  | 70  | 25   |
| >MLH1-A681 KECAMFYSI  | 7    | >MLH1-A681 KECVMFYSI  | 7   | 0    |
| >MLH1-A681 KECAMFY    | 42   | >MLH1-A681 KECVMFY    | 80  | 38   |
| >MLH1-A681 KECAMFY    | 281  | >MLH1-A681 KECVMFY    | 921 | 640  |
| >MLH1-A681 SKECAMFY   | 635  | >MLH1-A681 SKECAMFY   | 430 | 205  |
| >MLH1-A681 SKECAMFY   | 228  | >MLH1-A681 SKECAMFY   | 284 | 56   |
| >MLH1-A681 LSKECAMFY  | 185  | >MLH1-A681 LSKECAMFY  | 325 | 140  |
| >MLH1-A681 LSKECAMFY  | 3488 | >MLH1-A681 LSKECAMFY  | 460 | 3028 |
| >MLH1-A681 LSKECAMFY  | 132  | >MLH1-A681 LSKECAMFY  | 392 | 260  |
| >MLH1-A681 LSKECAMFY  | 228  | >MLH1-A681 LSKECAMFY  | 158 | 70   |
| >MLH1-A681 LSKECAMFY  | 186  | >MLH1-A681 LSKECAMFY  | 171 | 15   |
| >MLH1-A681 LSKECAMFY  | 47   | >MLH1-A681 LSKECAMFY  | 52  | 5    |
| >MLH1-A681 LSKECAMFY  | 170  | >MLH1-A681 LSKECAMFY  | 306 | 136  |
| >MLH1-A681 LSKECAMF   | 107  | >MLH1-A681 LSKECAMF   | 101 | 6    |
| >MLH1-A681 LSKECAMFY  | 153  | >MLH1-A681 LSKECAMFY  | 83  | 70   |
| >MLH1-A681 LSKECAMF   | 34   | >MLH1-A681 LSKECAMF   | 19  | 15   |
| >MLH1-A681 LSKECAMFY  | 48   | >MLH1-A681 LSKECAMFY  | 33  | 15   |
| >MLH1-A681 LSKECAMFY  | 300  | >MLH1-A681 LSKECAMFY  | 254 | 46   |
| >MLH1-A681 LSKECAMF   | 6    | >MLH1-A681 LSKECAMF   | 8   | 2    |
| >MLH1-A681 LSKECAMFY  | 8    | >MLH1-A681 LSKECAMFY  | 9   | 1    |
| >MLH1-A681 LSKECAMFY  | 255  | >MLH1-A681 LSKECAMFY  | 350 | 95   |
| >MLH1-A681 LSKECAMF   | 345  | >MLH1-A681 LSKECAMF   | 565 | 220  |
| >MLH1-A681 LSKECAMFY  | 131  | >MLH1-A681 LSKECAMFY  | 159 | 28   |
| >MLH1-A681 LSKECAMFY  | 1049 | >MLH1-A681 LSKECAMFY  | 339 | 710  |
| >MLH1-A681 LSKECAMF   | 586  | >MLH1-A681 LSKECAMF   | 365 | 221  |
| >MLH1-A681 LSKECAMFY  | 429  | >MLH1-A681 LSKECAMFY  | 447 | 18   |
| >MLH1-A681 LSKECAMF   | 440  | >MLH1-A681 LSKECAMF   | 237 | 203  |
| >MLH1-A681 LSKECAMFY  | 15   | >MLH1-A681 LSKECAMFY  | 35  | 20   |
| >MLH1-A681 LSKECAMFY  | 44   | >MLH1-A681 LSKECAMFY  | 57  | 13   |
| >MLH1-A681 SLSKECAMFY | 369  | >MLH1-A681 SLSKECAMFY | 402 | 33   |
| >MLH1-A681 SLSKECAM   | 166  | >MLH1-A681 SLSKECAM   | 448 | 282  |
| >MLH1-A681 SLSKECAMFY | 120  | >MLH1-A681 SLSKECAMFY | 105 | 15   |
| >MLH1-A681 SLSKECAM   | 156  | >MLH1-A681 SLSKECAM   | 186 | 30   |
| >MLH1-A681 SLSKECAMFY | 114  | >MLH1-A681 SLSKECAMFY | 134 | 20   |
| >MLH1-A681 SLSKECAMFY | 124  | >MLH1-A681 SLSKECAMFY | 133 | 9    |
| >MLH1-A681 SLSKECAMFY | 72   | >MLH1-A681 SLSKECAMFY | 118 | 46   |
| >MLH1-A681 SLSKECAMFY | 149  | >MLH1-A681 SLSKECAMFY | 138 | 11   |
| >MLH1-A681 SLSKECAMFY | 14   | >MLH1-A681 SLSKECAMFY | 15  | 1    |
| >MLH1-A681 SLSKECAM   | 334  | >MLH1-A681 SLSKECAM   | 370 | 36   |
| >MLH1-A681 SLSKECAMF  | 118  | >MLH1-A681 SLSKECAMF  | 193 | 75   |
| >MLH1-A681 SLSKECAMFY | 167  | >MLH1-A681 SLSKECAMFY | 135 | 32   |



|                        |       |                        |      |       |
|------------------------|-------|------------------------|------|-------|
| >MLH1-A681 SLSKECAMF   | 139   | >MLH1-A681 SLSKECVMF   | 52   | 87    |
| >MLH1-A681 SLSKECAMFY  | 434   | >MLH1-A681 SLSKECVMFY  | 264  | 170   |
| >MLH1-A681 SLSKECAMF   | 269   | >MLH1-A681 SLSKECVMF   | 868  | 599   |
| >MLH1-A681 SLSKECAMFY  | 91    | >MLH1-A681 SLSKECVMFY  | 132  | 41    |
| >MLH1-A681 ESLSKECAM   | 295   | >MLH1-A681 ESLSKECVM   | 617  | 322   |
| >MLH1-A681 ESLSKECAMF  | 198   | >MLH1-A681 ESLSKECVMF  | 801  | 603   |
| >MLH1-A681 ESLSKECAMF  | 31    | >MLH1-A681 ESLSKECVMF  | 17   | 14    |
| >MLH1-A681 ESLSKECAMF  | 201   | >MLH1-A681 ESLSKECVMF  | 194  | 7     |
| >MLH1-A681 ESLSKECAMF  | 352   | >MLH1-A681 ESLSKECVMF  | 391  | 39    |
| >MLH1-A681 ESLSKECAMF  | 360   | >MLH1-A681 ESLSKECVMF  | 365  | 5     |
| >MLH1-A681 ESLSKECAMF  | 231   | >MLH1-A681 ESLSKECVMF  | 137  | 94    |
| >MLH1-A681 ESLSKECAM   | 195   | >MLH1-A681 ESLSKECVM   | 227  | 32    |
| >MLH1-A681 ESLSKECAMF  | 23    | >MLH1-A681 ESLSKECVMF  | 39   | 16    |
| >MLH1-A681 ESLSKECAMF  | 29    | >MLH1-A681 ESLSKECVMF  | 32   | 3     |
| >MLH1-A681 ESLSKECAMF  | 391   | >MLH1-A681 ESLSKECVMF  | 527  | 136   |
| >MLH1-A681 FESLSKECA   | 432   | >MLH1-A681 FESLSKECV   | 16   | 416   |
| >MLH1-A681 FESLSKECAM  | 106   | >MLH1-A681 FESLSKECVM  | 89   | 17    |
| >MLH1-A681 FESLSKECAM  | 114   | >MLH1-A681 FESLSKECVM  | 169  | 55    |
| >MLH1-A681 FESLSKECAM  | 136   | >MLH1-A681 FESLSKECVM  | 72   | 64    |
| >MLH1-A681 FESLSKECAM  | 100   | >MLH1-A681 FESLSKECVM  | 96   | 4     |
| >MLH1-A681 FESLSKECA   | 8063  | >MLH1-A681 FESLSKECV   | 363  | 7700  |
| >MLH1-A681 FESLSKECAM  | 381   | >MLH1-A681 FESLSKECVM  | 230  | 151   |
| >MLH1-A681 FESLSKECAM  | 341   | >MLH1-A681 FESLSKECVM  | 391  | 50    |
| >MLH1-A681 FESLSKECA   | 121   | >MLH1-A681 FESLSKECV   | 595  | 474   |
| >MLH1-A681 FESLSKECA   | 3836  | >MLH1-A681 FESLSKECV   | 90   | 3746  |
| >MLH1-A681 FESLSKECAM  | 293   | >MLH1-A681 FESLSKECVM  | 410  | 117   |
| >MLH1-A681 FESLSKECAM  | 359   | >MLH1-A681 FESLSKECVM  | 290  | 69    |
| >MLH1-C233 CEDKTLAF    | 2620  | >MLH1-C233 REDKTLAF    | 401  | 2219  |
| >MLH1-C233 CEDKTLAF    | 72    | >MLH1-C233 REDKTLAF    | 334  | 262   |
| >MLH1-C233 CEDKTLAF    | 552   | >MLH1-C233 REDKTLAF    | 29   | 523   |
| >MLH1-C233 CEDKTLAF    | 1244  | >MLH1-C233 REDKTLAF    | 238  | 1006  |
| >MLH1-C233 CEDKTLAFKN  | 499   | >MLH1-C233 REDKTLAFKN  | 103  | 396   |
| >MLH1-C233 CEDKTLAF    | 323   | >MLH1-C233 REDKTLAF    | 1019 | 696   |
| >MLH1-C233 CEDKTLAFKN  | 1658  | >MLH1-C233 REDKTLAFKN  | 429  | 1229  |
| >MLH1-C233 CEDKTLAF    | 623   | >MLH1-C233 REDKTLAF    | 473  | 150   |
| >MLH1-C233 CEDKTLAF    | 8160  | >MLH1-C233 REDKTLAF    | 495  | 7665  |
| >MLH1-C233 CEDKTLAFKN  | 3305  | >MLH1-C233 REDKTLAFKN  | 42   | 3263  |
| >MLH1-C233 GCEDKTLAFK  | 32109 | >MLH1-C233 GREDKTLAFK  | 337  | 31772 |
| >MLH1-C233 GCEDKTLAF   | 31866 | >MLH1-C233 GREDKTLAF   | 87   | 31779 |
| >MLH1-C233 GCEDKTLAFK  | 36499 | >MLH1-C233 GREDKTLAFK  | 432  | 36067 |
| >MLH1-C233 AVSRELIEIGC | 23169 | >MLH1-C233 AVSRELIEIGR | 184  | 22985 |
| >MLH1-C233 AVSRELIEIGC | 41073 | >MLH1-C233 AVSRELIEIGR | 192  | 40881 |
| >MLH1-C233 IGCEDKTLAFI | 2865  | >MLH1-C233 IGREDKTLAFI | 48   | 2817  |

|                        |       |                        |       |       |
|------------------------|-------|------------------------|-------|-------|
| >MLH1-C233 IGCEDKTLAF  | 1105  | >MLH1-C233 IGREDKTLAF  | 181   | 924   |
| >MLH1-C233 IGCEDKTLAF  | 1358  | >MLH1-C233 IGREDKTLAF  | 328   | 1030  |
| >MLH1-C233 EIGCEDKTLAF | 432   | >MLH1-C233 EIGREDKTLAF | 213   | 219   |
| >MLH1-C233 IEIGCEDKTL  | 158   | >MLH1-C233 IEIGREDKTL  | 540   | 382   |
| >MLH1-C233 IEIGCEDKTL  | 57    | >MLH1-C233 IEIGREDKTL  | 109   | 52    |
| >MLH1-C233 ELIEIGCEDK  | 284   | >MLH1-C233 ELIEIGREDK  | 453   | 169   |
| >MLH1-C233 RELIEIGC    | 33714 | >MLH1-C233 RELIEIGR    | 111   | 33603 |
| >MLH1-C233 VSRELIEIGC  | 27296 | >MLH1-C233 VSRELIEIGR  | 122   | 27174 |
| >MLH1-C233 VSRELIEIGC  | 39586 | >MLH1-C233 VSRELIEIGR  | 358   | 39228 |
| >MLH1-E523 EMLHNHSFV   | 194   | >MLH1-E523 DMLHNHSFV   | 850   | 656   |
| >MLH1-E523 EMLHNHSFV   | 320   | >MLH1-E523 DMLHNHSFV   | 2208  | 1888  |
| >MLH1-E523 EMLHNHSFV   | 3     | >MLH1-E523 DMLHNHSFV   | 7     | 4     |
| >MLH1-E523 EMLHNHSFV   | 217   | >MLH1-E523 DMLHNHSFV   | 879   | 662   |
| >MLH1-E523 EMLHNHSFV   | 9     | >MLH1-E523 DMLHNHSFV   | 25    | 16    |
| >MLH1-E523 EMLHNHSFV   | 10    | >MLH1-E523 DMLHNHSFV   | 15    | 5     |
| >MLH1-E523 EMLHNHSFV   | 7     | >MLH1-E523 DMLHNHSFV   | 14    | 7     |
| >MLH1-E523 EMLHNHSFV   | 7     | >MLH1-E523 DMLHNHSFV   | 18    | 11    |
| >MLH1-E523 EMLHNHSF    | 493   | >MLH1-E523 DMLHNHSF    | 827   | 334   |
| >MLH1-E523 EMLHNHSF    | 198   | >MLH1-E523 DMLHNHSF    | 1270  | 1072  |
| >MLH1-E523 EMLHNHSF    | 204   | >MLH1-E523 DMLHNHSF    | 494   | 290   |
| >MLH1-E523 EMLHNHSFV   | 146   | >MLH1-E523 DMLHNHSFV   | 753   | 607   |
| >MLH1-E523 EMLHNHSFV   | 9     | >MLH1-E523 DMLHNHSFV   | 35    | 26    |
| >MLH1-E523 EMLHNHSF    | 143   | >MLH1-E523 DMLHNHSF    | 1108  | 965   |
| >MLH1-E523 EMLHNHSF    | 122   | >MLH1-E523 DMLHNHSF    | 139   | 17    |
| >MLH1-E523 EMLHNHSF    | 9     | >MLH1-E523 DMLHNHSF    | 24    | 15    |
| >MLH1-E523 EMLHNHSFV   | 279   | >MLH1-E523 DMLHNHSFV   | 1250  | 971   |
| >MLH1-E523 EMLHNHSF    | 340   | >MLH1-E523 DMLHNHSF    | 567   | 227   |
| >MLH1-E523 REMLHNHSF'  | 39    | >MLH1-E523 RDMLHNHSF   | 1644  | 1605  |
| >MLH1-E523 REMLHNHSF   | 130   | >MLH1-E523 RDMLHNHSF   | 566   | 436   |
| >MLH1-E523 REMLHNHSF   | 121   | >MLH1-E523 RDMLHNHSF   | 1334  | 1213  |
| >MLH1-E523 REMLHNHSF   | 21    | >MLH1-E523 RDMLHNHSF   | 170   | 149   |
| >MLH1-E523 REMLHNHSF   | 15    | >MLH1-E523 RDMLHNHSF   | 2484  | 2469  |
| >MLH1-E523 REMLHNHSF   | 25    | >MLH1-E523 RDMLHNHSF   | 10322 | 10297 |
| >MLH1-E523 REMLHNHSF   | 25    | >MLH1-E523 RDMLHNHSF   | 100   | 75    |
| >MLH1-E523 REMLHNHSF'  | 185   | >MLH1-E523 RDMLHNHSF   | 18748 | 18563 |
| >MLH1-E523 REMLHNHSF   | 133   | >MLH1-E523 RDMLHNHSF   | 3938  | 3805  |
| >MLH1-E523 REMLHNHSF   | 80    | >MLH1-E523 RDMLHNHSF   | 7990  | 7910  |
| >MLH1-E523 REMLHNHS    | 264   | >MLH1-E523 RDMLHNHS    | 22485 | 22221 |
| >MLH1-E523 REMLHNHSF   | 365   | >MLH1-E523 RDMLHNHSF   | 24011 | 23646 |
| >MLH1-E523 REMLHNHSF'  | 142   | >MLH1-E523 RDMLHNHSF   | 18482 | 18340 |
| >MLH1-E523 REMLHNHSF   | 18    | >MLH1-E523 RDMLHNHSF   | 301   | 283   |
| >MLH1-E523 REMLHNHSF'  | 12    | >MLH1-E523 RDMLHNHSF   | 360   | 348   |
| >MLH1-E523 REMLHNHSF'  | 198   | >MLH1-E523 RDMLHNHSF   | 2870  | 2672  |

|                       |       |                       |      |       |
|-----------------------|-------|-----------------------|------|-------|
| >MLH1-E523 REMLHNHSF' | 7451  | >MLH1-E523 RDMLHNHSF  | 154  | 7297  |
| >MLH1-E523 LREMLHNHSI | 202   | >MLH1-E523 LRDMLHNHS  | 302  | 100   |
| >MLH1-E523 LREMLHNHSI | 637   | >MLH1-E523 LRDMLHNHS  | 475  | 162   |
| >MLH1-E523 VLREMLHNH  | 776   | >MLH1-E523 VLRDMLHNH  | 317  | 459   |
| >MLH1-E523 VLREMLHNH  | 230   | >MLH1-E523 VLRDMLHNH  | 86   | 144   |
| >MLH1-E523 VLREMLHNH  | 567   | >MLH1-E523 VLRDMLHNH  | 379  | 188   |
| >MLH1-E523 VLREMLHNH  | 377   | >MLH1-E523 VLRDMLHNH  | 1004 | 627   |
| >MLH1-E523 VLREMLHNH  | 69    | >MLH1-E523 VLRDMLHNH  | 58   | 11    |
| >MLH1-E523 VLREMLHNH  | 171   | >MLH1-E523 VLRDMLHNH  | 273  | 102   |
| >MLH1-E523 VLREMLHNH  | 50    | >MLH1-E523 VLRDMLHNH  | 60   | 10    |
| >MLH1-E523 VLREMLHNH  | 101   | >MLH1-E523 VLRDMLHNH  | 79   | 22    |
| >MLH1-E523 EVLREMLHN  | 514   | >MLH1-E523 EVLRDMLHN  | 203  | 311   |
| >MLH1-E523 EVLREMLHNI | 15    | >MLH1-E523 EVLRDMLHN  | 10   | 5     |
| >MLH1-E523 EVLREMLHNI | 667   | >MLH1-E523 EVLRDMLHN  | 370  | 297   |
| >MLH1-E523 HEVLREML   | 45    | >MLH1-E523 HEVLRDML   | 92   | 47    |
| >MLH1-E523 HEVLREML   | 27    | >MLH1-E523 HEVLRDML   | 29   | 2     |
| >MLH1-E523 HEVLREML   | 82    | >MLH1-E523 HEVLRDML   | 80   | 2     |
| >MLH1-E523 NEQGHEVLRI | 101   | >MLH1-E523 NEQGHEVLRI | 323  | 222   |
| >MLH1-E523 EMLHNHSFV  | 1061  | >MLH1-E523 KMLHNHSFV  | 39   | 1022  |
| >MLH1-E523 EMLHNHSFV  | 2285  | >MLH1-E523 KMLHNHSFV  | 23   | 2262  |
| >MLH1-E523 EMLHNHSFV  | 511   | >MLH1-E523 KMLHNHSFV  | 20   | 491   |
| >MLH1-E523 EMLHNHSFV  | 194   | >MLH1-E523 KMLHNHSFV  | 9    | 185   |
| >MLH1-E523 EMLHNHSF   | 6963  | >MLH1-E523 KMLHNHSF   | 313  | 6650  |
| >MLH1-E523 EMLHNHSFV  | 320   | >MLH1-E523 KMLHNHSFV  | 11   | 309   |
| >MLH1-E523 EMLHNHSFV  | 3520  | >MLH1-E523 KMLHNHSFV  | 212  | 3308  |
| >MLH1-E523 EMLHNHSF   | 2371  | >MLH1-E523 KMLHNHSF   | 138  | 2233  |
| >MLH1-E523 EMLHNHSFV  | 3     | >MLH1-E523 KMLHNHSFV  | 2    | 1     |
| >MLH1-E523 EMLHNHSFV  | 4740  | >MLH1-E523 KMLHNHSFV  | 380  | 4360  |
| >MLH1-E523 EMLHNHSFV  | 217   | >MLH1-E523 KMLHNHSFV  | 18   | 199   |
| >MLH1-E523 EMLHNHSF   | 5254  | >MLH1-E523 KMLHNHSF   | 402  | 4852  |
| >MLH1-E523 EMLHNHSFV  | 9     | >MLH1-E523 KMLHNHSFV  | 3    | 6     |
| >MLH1-E523 EMLHNHSFV  | 915   | >MLH1-E523 KMLHNHSFV  | 26   | 889   |
| >MLH1-E523 EMLHNHSFV  | 10    | >MLH1-E523 KMLHNHSFV  | 5    | 5     |
| >MLH1-E523 EMLHNHSFV  | 7     | >MLH1-E523 KMLHNHSFV  | 4    | 3     |
| >MLH1-E523 EMLHNHSFV  | 7     | >MLH1-E523 KMLHNHSFV  | 3    | 4     |
| >MLH1-E523 EMLHNHSFV  | 2328  | >MLH1-E523 KMLHNHSFV  | 245  | 2083  |
| >MLH1-E523 EMLHNHSF   | 493   | >MLH1-E523 KMLHNHSF   | 103  | 390   |
| >MLH1-E523 EMLHNHSF   | 1898  | >MLH1-E523 KMLHNHSF   | 487  | 1411  |
| >MLH1-E523 EMLHNHSF   | 1167  | >MLH1-E523 KMLHNHSF   | 112  | 1055  |
| >MLH1-E523 EMLHNHSF   | 198   | >MLH1-E523 KMLHNHSF   | 9197 | 8999  |
| >MLH1-E523 EMLHNHSF   | 1192  | >MLH1-E523 KMLHNHSF   | 419  | 773   |
| >MLH1-E523 EMLHNHSFV  | 10769 | >MLH1-E523 KMLHNHSFV  | 17   | 10752 |
| >MLH1-E523 EMLHNHSF   | 4550  | >MLH1-E523 KMLHNHSF   | 337  | 4213  |

|                       |       |                       |       |       |
|-----------------------|-------|-----------------------|-------|-------|
| >MLH1-E523 EMLHNHSFV  | 10831 | >MLH1-E523 KMLHNHSFV  | 270   | 10561 |
| >MLH1-E523 EMLHNHSF   | 204   | >MLH1-E523 KMLHNHSF   | 8     | 196   |
| >MLH1-E523 EMLHNHSFV  | 146   | >MLH1-E523 KMLHNHSFV  | 7265  | 7119  |
| >MLH1-E523 EMLHNHSFV  | 9     | >MLH1-E523 KMLHNHSFV  | 1367  | 1358  |
| >MLH1-E523 EMLHNHSF   | 143   | >MLH1-E523 KMLHNHSF   | 52    | 91    |
| >MLH1-E523 EMLHNHSF   | 122   | >MLH1-E523 KMLHNHSF   | 197   | 75    |
| >MLH1-E523 EMLHNHSF   | 9     | >MLH1-E523 KMLHNHSF   | 4     | 5     |
| >MLH1-E523 EMLHNHSFV  | 279   | >MLH1-E523 KMLHNHSFV  | 29    | 250   |
| >MLH1-E523 EMLHNHSFV  | 2670  | >MLH1-E523 KMLHNHSFV  | 401   | 2269  |
| >MLH1-E523 EMLHNHSF   | 1133  | >MLH1-E523 KMLHNHSF   | 26    | 1107  |
| >MLH1-E523 EMLHNHSF   | 340   | >MLH1-E523 KMLHNHSF   | 2549  | 2209  |
| >MLH1-E523 EMLHNHSF   | 9921  | >MLH1-E523 KMLHNHSF   | 42    | 9879  |
| >MLH1-E523 REMLHNHSF' | 39    | >MLH1-E523 RKMLHNHSF' | 2599  | 2560  |
| >MLH1-E523 REMLHNHSF  | 130   | >MLH1-E523 RKMLHNHSF  | 241   | 111   |
| >MLH1-E523 REMLHNHSF  | 121   | >MLH1-E523 RKMLHNHSF  | 1256  | 1135  |
| >MLH1-E523 REMLHNHSF  | 21    | >MLH1-E523 RKMLHNHSF  | 3     | 18    |
| >MLH1-E523 REMLHNHSF' | 891   | >MLH1-E523 RKMLHNHSF' | 22    | 869   |
| >MLH1-E523 REMLHNHSF  | 15    | >MLH1-E523 RKMLHNHSF  | 6857  | 6842  |
| >MLH1-E523 REMLHNHSF  | 4631  | >MLH1-E523 RKMLHNHSF  | 234   | 4397  |
| >MLH1-E523 REMLHNHSF  | 25    | >MLH1-E523 RKMLHNHSF  | 13006 | 12981 |
| >MLH1-E523 REMLHNHSF  | 25    | >MLH1-E523 RKMLHNHSF  | 9536  | 9511  |
| >MLH1-E523 REMLHNHSF' | 185   | >MLH1-E523 RKMLHNHSF' | 24942 | 24757 |
| >MLH1-E523 REMLHNHSF  | 133   | >MLH1-E523 RKMLHNHSF  | 12297 | 12164 |
| >MLH1-E523 REMLHNHSF  | 80    | >MLH1-E523 RKMLHNHSF  | 15345 | 15265 |
| >MLH1-E523 REMLHNHS   | 264   | >MLH1-E523 RKMLHNHS   | 28534 | 28270 |
| >MLH1-E523 REMLHNHSF  | 365   | >MLH1-E523 RKMLHNHSF  | 29566 | 29201 |
| >MLH1-E523 REMLHNHSF' | 142   | >MLH1-E523 RKMLHNHSF' | 25653 | 25511 |
| >MLH1-E523 REMLHNHSF  | 18    | >MLH1-E523 RKMLHNHSF  | 5454  | 5436  |
| >MLH1-E523 REMLHNHSF' | 12    | >MLH1-E523 RKMLHNHSF' | 3082  | 3070  |
| >MLH1-E523 REMLHNHSF' | 198   | >MLH1-E523 RKMLHNHSF' | 18391 | 18193 |
| >MLH1-E523 LREMLHNHSI | 202   | >MLH1-E523 LRKMLHNHSI | 21    | 181   |
| >MLH1-E523 LREMLHNHSI | 3048  | >MLH1-E523 LRKMLHNHSI | 361   | 2687  |
| >MLH1-E523 LREMLHNHSI | 637   | >MLH1-E523 LRKMLHNHSI | 226   | 411   |
| >MLH1-E523 VLREMLHNNH | 230   | >MLH1-E523 VLRKMLHNNH | 1815  | 1585  |
| >MLH1-E523 VLREMLHNNH | 567   | >MLH1-E523 VLRKMLHNNH | 353   | 214   |
| >MLH1-E523 VLREMLHNNH | 377   | >MLH1-E523 VLRKMLHNNH | 128   | 249   |
| >MLH1-E523 VLREMLHNNH | 69    | >MLH1-E523 VLRKMLHNNH | 62    | 7     |
| >MLH1-E523 VLREMLHNNH | 171   | >MLH1-E523 VLRKMLHNNH | 224   | 53    |
| >MLH1-E523 VLREMLHNNH | 50    | >MLH1-E523 VLRKMLHNNH | 39    | 11    |
| >MLH1-E523 VLREMLHNNH | 101   | >MLH1-E523 VLRKMLHNNH | 204   | 103   |
| >MLH1-E523 EVLREMLHNI | 15    | >MLH1-E523 EVLRKMLHNI | 27    | 12    |
| >MLH1-E523 HEVLREML   | 45    | >MLH1-E523 HEVLRKML   | 10    | 35    |
| >MLH1-E523 HEVLREML   | 27    | >MLH1-E523 HEVLRKML   | 66    | 39    |

|                       |       |                       |      |       |
|-----------------------|-------|-----------------------|------|-------|
| >MLH1-E523 HEVLRKML   | 82    | >MLH1-E523 HEVLRKML   | 113  | 31    |
| >MLH1-E523 NEQGHEVLR  | 101   | >MLH1-E523 NEQGHEVLR  | 158  | 57    |
| >MLH1-G101GEALASIS    | 784   | >MLH1-G101SEALASIS    | 81   | 703   |
| >MLH1-G101GEALASISHV  | 105   | >MLH1-G101SEALASISHV  | 27   | 78    |
| >MLH1-G101GEALASISHV  | 297   | >MLH1-G101SEALASISHV  | 241  | 56    |
| >MLH1-G101GEALASISHV/ | 274   | >MLH1-G101SEALASISHV/ | 550  | 276   |
| >MLH1-G101GEALASIS    | 1092  | >MLH1-G101SEALASIS    | 444  | 648   |
| >MLH1-G101GEALASISHV  | 2238  | >MLH1-G101SEALASISHV  | 332  | 1906  |
| >MLH1-G101GEALASISHV/ | 13    | >MLH1-G101SEALASISHV/ | 8    | 5     |
| >MLH1-G101GEALASISHV  | 66    | >MLH1-G101SEALASISHV  | 70   | 4     |
| >MLH1-G101GEALASISHV/ | 291   | >MLH1-G101SEALASISHV/ | 1847 | 1556  |
| >MLH1-G101RGEALASI    | 7928  | >MLH1-G101RSEALASI    | 152  | 7776  |
| >MLH1-G101RGEALASI    | 3678  | >MLH1-G101RSEALASI    | 15   | 3663  |
| >MLH1-G101RGEALASISH  | 13793 | >MLH1-G101RSEALASISH  | 241  | 13552 |
| >MLH1-G101RGEALASISH\ | 11639 | >MLH1-G101RSEALASISH\ | 65   | 11574 |
| >MLH1-G101RGEALASI    | 7112  | >MLH1-G101RSEALASI    | 116  | 6996  |
| >MLH1-G101RGEALASIS   | 1958  | >MLH1-G101RSEALASIS   | 130  | 1828  |
| >MLH1-G101RGEALASISH  | 7149  | >MLH1-G101RSEALASISH  | 465  | 6684  |
| >MLH1-G101RGEALASISH\ | 1872  | >MLH1-G101RSEALASISH\ | 132  | 1740  |
| >MLH1-G101RGEALASI    | 152   | >MLH1-G101RSEALASI    | 15   | 137   |
| >MLH1-G101FRGEALASI   | 463   | >MLH1-G101FRSEALASI   | 319  | 144   |
| >MLH1-G101FRGEALASI   | 1848  | >MLH1-G101FRSEALASI   | 274  | 1574  |
| >MLH1-G101FRGEALASI   | 920   | >MLH1-G101FRSEALASI   | 185  | 735   |
| >MLH1-G101FRGEALASI   | 1344  | >MLH1-G101FRSEALASI   | 342  | 1002  |
| >MLH1-G101FRGEALASI   | 268   | >MLH1-G101FRSEALASI   | 105  | 163   |
| >MLH1-G101FRGEALASISH | 755   | >MLH1-G101FRSEALASISH | 297  | 458   |
| >MLH1-G101FRGEALASI   | 1654  | >MLH1-G101FRSEALASI   | 84   | 1570  |
| >MLH1-G101GFRGEALA    | 726   | >MLH1-G101GFRSEALA    | 469  | 257   |
| >MLH1-G101GFRGEALASI  | 197   | >MLH1-G101GFRSEALASI  | 150  | 47    |
| >MLH1-G101YGFRGEALAS  | 250   | >MLH1-G101YGFRSEALAS  | 395  | 145   |
| >MLH1-G101YGFRGEAL    | 462   | >MLH1-G101YGFRSEAL    | 186  | 276   |
| >MLH1-G101YGFRGEALAS  | 1262  | >MLH1-G101YGFRSEALAS  | 370  | 892   |
| >MLH1-G101YGFRGEALAS  | 104   | >MLH1-G101YGFRSEALAS  | 118  | 14    |
| >MLH1-G101TYGFRGEAL   | 51    | >MLH1-G101TYGFRSEAL   | 29   | 22    |
| >MLH1-G101STYGFRGEA   | 257   | >MLH1-G101STYGFRSEA   | 98   | 159   |
| >MLH1-G101STYGFRGEAL  | 236   | >MLH1-G101STYGFRSEAL/ | 152  | 84    |
| >MLH1-G101STYGFRGEAL  | 77    | >MLH1-G101STYGFRSEAL  | 46   | 31    |
| >MLH1-G101STYGFRGEAL  | 180   | >MLH1-G101STYGFRSEAL  | 89   | 91    |
| >MLH1-G101STYGFRGEAL  | 131   | >MLH1-G101STYGFRSEAL  | 132  | 1     |
| >MLH1-G101STYGFRGEAL  | 158   | >MLH1-G101STYGFRSEAL  | 114  | 44    |
| >MLH1-G101STYGFRGEAL  | 442   | >MLH1-G101STYGFRSEAL  | 439  | 3     |
| >MLH1-G101STYGFRGEA   | 521   | >MLH1-G101STYGFRSEA   | 370  | 151   |
| >MLH1-G101STYGFRGEAL  | 488   | >MLH1-G101STYGFRSEAL/ | 331  | 157   |

|                       |       |                       |      |       |
|-----------------------|-------|-----------------------|------|-------|
| >MLH1-G101STYGFRGEAL  | 51    | >MLH1-G101STYGFRSEAL  | 18   | 33    |
| >MLH1-G101STYGFRGEA   | 22    | >MLH1-G101STYGFRSEA   | 19   | 3     |
| >MLH1-G101STYGFRGEAL  | 45    | >MLH1-G101STYGFRSEAL  | 52   | 7     |
| >MLH1-G101STYGFRGEAL  | 62    | >MLH1-G101STYGFRSEAL  | 54   | 8     |
| >MLH1-G101STYGFRGEA   | 349   | >MLH1-G101STYGFRSEA   | 375  | 26    |
| >MLH1-G101STYGFRGEAL  | 219   | >MLH1-G101STYGFRSEAL  | 112  | 107   |
| >MLH1-G101STYGFRGEAL  | 20    | >MLH1-G101STYGFRSEAL  | 12   | 8     |
| >MLH1-G101STYGFRGEAL  | 432   | >MLH1-G101STYGFRSEAL  | 248  | 184   |
| >MLH1-G101STYGFRGEA   | 728   | >MLH1-G101STYGFRSEA   | 58   | 670   |
| >MLH1-G101STYGFRGEAL  | 149   | >MLH1-G101STYGFRSEAL  | 62   | 87    |
| >MLH1-G101STYGFRGEAL  | 333   | >MLH1-G101STYGFRSEAL  | 170  | 163   |
| >MLH1-G101ISTYGFRGEAI | 484   | >MLH1-G101ISTYGFRSEAL | 394  | 90    |
| >MLH1-G101ISTYGFRGEAI | 57    | >MLH1-G101ISTYGFRSEAL | 45   | 12    |
| >MLH1-G101ISTYGFRGEAI | 515   | >MLH1-G101ISTYGFRSEAL | 404  | 111   |
| >MLH1-G101ISTYGFRGEAI | 249   | >MLH1-G101ISTYGFRSEAL | 215  | 34    |
| >MLH1-G101SISTYGFRGEA | 801   | >MLH1-G101SISTYGFRSEA | 305  | 496   |
| >MLH1-G101SISTYGFRGEA | 566   | >MLH1-G101SISTYGFRSEA | 265  | 301   |
| >MLH1-G101SISTYGFRGEA | 1549  | >MLH1-G101SISTYGFRSEA | 391  | 1158  |
| >MLH1-G244GYISNANYSV  | 142   | >MLH1-G244VYISNANYSV  | 102  | 40    |
| >MLH1-G244GYISNANYSV  | 470   | >MLH1-G244VYISNANYSV  | 1010 | 540   |
| >MLH1-G244GYISNANYSV  | 1697  | >MLH1-G244VYISNANYSV  | 477  | 1220  |
| >MLH1-G244GYISNANY    | 1296  | >MLH1-G244VYISNANY    | 360  | 936   |
| >MLH1-G244GYISNANYSV  | 364   | >MLH1-G244VYISNANYSV  | 149  | 215   |
| >MLH1-G244GYISNANYSV  | 1842  | >MLH1-G244VYISNANYSV  | 372  | 1470  |
| >MLH1-G244GYISNANYSV  | 165   | >MLH1-G244VYISNANYSV  | 116  | 49    |
| >MLH1-G244GYISNANYSV  | 578   | >MLH1-G244VYISNANYSV  | 431  | 147   |
| >MLH1-G244GYISNANY    | 691   | >MLH1-G244VYISNANY    | 164  | 527   |
| >MLH1-G244GYISNANY    | 23    | >MLH1-G244VYISNANY    | 25   | 2     |
| >MLH1-G244GYISNANY    | 70    | >MLH1-G244VYISNANY    | 29   | 41    |
| >MLH1-G244GYISNANY    | 4841  | >MLH1-G244VYISNANY    | 341  | 4500  |
| >MLH1-G244GYISNANY    | 459   | >MLH1-G244VYISNANY    | 845  | 386   |
| >MLH1-G244GYISNANYSV  | 363   | >MLH1-G244VYISNANYSV  | 183  | 180   |
| >MLH1-G244NGYISNANY   | 12035 | >MLH1-G244NVYISNANY   | 259  | 11776 |
| >MLH1-G244NGYISNANY   | 1883  | >MLH1-G244NVYISNANY   | 107  | 1776  |
| >MLH1-G244NGYISNANY   | 7757  | >MLH1-G244NVYISNANY   | 63   | 7694  |
| >MLH1-G244NGYISNANY   | 2950  | >MLH1-G244NVYISNANY   | 62   | 2888  |
| >MLH1-G244NGYISNANY   | 3724  | >MLH1-G244NVYISNANY   | 82   | 3642  |
| >MLH1-G244NGYISNANY   | 11652 | >MLH1-G244NVYISNANY   | 225  | 11427 |
| >MLH1-G244NGYISNANY   | 7972  | >MLH1-G244NVYISNANY   | 331  | 7641  |
| >MLH1-G244NGYISNANY   | 13809 | >MLH1-G244NVYISNANY   | 77   | 13732 |
| >MLH1-G244NGYISNANY   | 25966 | >MLH1-G244NVYISNANY   | 238  | 25728 |
| >MLH1-G244NGYISNANY   | 7388  | >MLH1-G244NVYISNANY   | 294  | 7094  |
| >MLH1-G244NGYISNANY   | 3383  | >MLH1-G244NVYISNANY   | 123  | 3260  |

|                      |      |                      |      |      |
|----------------------|------|----------------------|------|------|
| >MLH1-G244NGYISNANY  | 428  | >MLH1-G244NVYISNANY  | 174  | 254  |
| >MLH1-G244NGYISNANY  | 4884 | >MLH1-G244NVYISNANY  | 182  | 4702 |
| >MLH1-G244NGYISNANYS | 227  | >MLH1-G244NVYISNANYS | 8    | 219  |
| >MLH1-G244NGYISNANYS | 689  | >MLH1-G244NVYISNANYS | 7    | 682  |
| >MLH1-G244NGYISNANY  | 1808 | >MLH1-G244NVYISNANY  | 391  | 1417 |
| >MLH1-G244NGYISNANY  | 208  | >MLH1-G244NVYISNANY  | 97   | 111  |
| >MLH1-G244NGYISNANY  | 115  | >MLH1-G244NVYISNANY  | 26   | 89   |
| >MLH1-G244NGYISNANY  | 864  | >MLH1-G244NVYISNANY  | 247  | 617  |
| >MLH1-G244MNGYISNAN  | 474  | >MLH1-G244MNVYISNAN' | 451  | 23   |
| >MLH1-G244MNGYISNAN  | 88   | >MLH1-G244MNVYISNAN' | 71   | 17   |
| >MLH1-G244MNGYISNA   | 1867 | >MLH1-G244MNVYISNA   | 142  | 1725 |
| >MLH1-G244MNGYISNAN  | 867  | >MLH1-G244MNVYISNAN' | 144  | 723  |
| >MLH1-G244KMNGYISNA  | 27   | >MLH1-G244KMNVYISNA  | 77   | 50   |
| >MLH1-G244KMNGYISNA  | 7    | >MLH1-G244KMNVYISNA  | 15   | 8    |
| >MLH1-G244KMNGYISNA  | 3    | >MLH1-G244KMNVYISNA  | 4    | 1    |
| >MLH1-G244KMNGYISNA  | 99   | >MLH1-G244KMNVYISNA  | 293  | 194  |
| >MLH1-G244KMNGYISN   | 449  | >MLH1-G244KMNVYISN   | 1942 | 1493 |
| >MLH1-G244KMNGYISNA  | 5    | >MLH1-G244KMNVYISNA  | 17   | 12   |
| >MLH1-G244KMNGYISNA  | 46   | >MLH1-G244KMNVYISNA  | 80   | 34   |
| >MLH1-G244KMNGYISNA  | 33   | >MLH1-G244KMNVYISNA  | 119  | 86   |
| >MLH1-G244KMNGYISNA  | 89   | >MLH1-G244KMNVYISNA  | 415  | 326  |
| >MLH1-G244KMNGYISNA  | 6    | >MLH1-G244KMNVYISNA  | 35   | 29   |
| >MLH1-G244KMNGYISNAI | 55   | >MLH1-G244KMNVYISNAI | 63   | 8    |
| >MLH1-G244KMNGYISNAI | 385  | >MLH1-G244KMNVYISNAI | 449  | 64   |
| >MLH1-G244KMNGYISNAI | 74   | >MLH1-G244KMNVYISNAI | 161  | 87   |
| >MLH1-G244KMNGYISNA  | 670  | >MLH1-G244KMNVYISNA  | 400  | 270  |
| >MLH1-G244KMNGYISNAI | 8    | >MLH1-G244KMNVYISNAI | 8    | 0    |
| >MLH1-G244KMNGYISNAI | 278  | >MLH1-G244KMNVYISNAI | 135  | 143  |
| >MLH1-G244KMNGYISNAI | 371  | >MLH1-G244KMNVYISNAI | 1665 | 1294 |
| >MLH1-G244KMNGYISNAI | 119  | >MLH1-G244KMNVYISNAI | 85   | 34   |
| >MLH1-G244KMNGYISNAI | 45   | >MLH1-G244KMNVYISNAI | 52   | 7    |
| >MLH1-G244KMNGYISNAI | 264  | >MLH1-G244KMNVYISNAI | 444  | 180  |
| >MLH1-G244KMNGYISNA  | 1022 | >MLH1-G244KMNVYISNA  | 248  | 774  |
| >MLH1-G244KMNGYISNAI | 15   | >MLH1-G244KMNVYISNAI | 8    | 7    |
| >MLH1-G244KMNGYISNAI | 47   | >MLH1-G244KMNVYISNAI | 39   | 8    |
| >MLH1-G244KMNGYISNAI | 152  | >MLH1-G244KMNVYISNAI | 140  | 12   |
| >MLH1-G244KMNGYISNAI | 303  | >MLH1-G244KMNVYISNAI | 460  | 157  |
| >MLH1-G244FKMNGYISN/ | 368  | >MLH1-G244FKMNVYISN/ | 552  | 184  |
| >MLH1-G244FKMNGYISN/ | 270  | >MLH1-G244FKMNVYISN/ | 227  | 43   |
| >MLH1-G244FKMNGYIS   | 234  | >MLH1-G244FKMNVYIS   | 280  | 46   |
| >MLH1-G244FKMNGYISN  | 254  | >MLH1-G244FKMNVYISN  | 272  | 18   |
| >MLH1-G244FKMNGYISN/ | 29   | >MLH1-G244FKMNVYISN/ | 30   | 1    |
| >MLH1-G244FKMNGYISN/ | 255  | >MLH1-G244FKMNVYISN/ | 285  | 30   |

|                      |       |                       |      |       |
|----------------------|-------|-----------------------|------|-------|
| >MLH1-G244FKMNGYISN/ | 1299  | >MLH1-G244FKMNVDYISN/ | 331  | 968   |
| >MLH1-G244AFKMNGYI   | 1163  | >MLH1-G244AFKMNDYI    | 425  | 738   |
| >MLH1-G244AFKMNGYI   | 60    | >MLH1-G244AFKMNDYI    | 41   | 19    |
| >MLH1-G244AFKMNGYISN | 143   | >MLH1-G244AFKMNDYISN  | 105  | 38    |
| >MLH1-G244LAFKMNGYI  | 1017  | >MLH1-G244LAFKMNDYI   | 405  | 612   |
| >MLH1-G244LAFKMNGYI  | 1242  | >MLH1-G244LAFKMNDYI   | 422  | 820   |
| >MLH1-G244LAFKMNGYI  | 3369  | >MLH1-G244LAFKMNDYI   | 424  | 2945  |
| >MLH1-G244LAFKMNGY   | 400   | >MLH1-G244LAFKMNDY    | 523  | 123   |
| >MLH1-G244LAFKMNGY   | 78    | >MLH1-G244LAFKMNDY    | 109  | 31    |
| >MLH1-G244LAFKMNGYI  | 224   | >MLH1-G244LAFKMNDYI   | 87   | 137   |
| >MLH1-G244LAFKMNGY   | 146   | >MLH1-G244LAFKMNDY    | 79   | 67    |
| >MLH1-G244LAFKMNGY   | 193   | >MLH1-G244LAFKMNDY    | 30   | 163   |
| >MLH1-G244LAFKMNGYI  | 2028  | >MLH1-G244LAFKMNDYI   | 204  | 1824  |
| >MLH1-G244LAFKMNGY   | 14    | >MLH1-G244LAFKMNDY    | 18   | 4     |
| >MLH1-G244LAFKMNGY   | 89    | >MLH1-G244LAFKMNDY    | 40   | 49    |
| >MLH1-G244LAFKMNGYI  | 1076  | >MLH1-G244LAFKMNDYI   | 197  | 879   |
| >MLH1-G244LAFKMNGY   | 1765  | >MLH1-G244LAFKMNDY    | 216  | 1549  |
| >MLH1-G244LAFKMNGYI  | 243   | >MLH1-G244LAFKMNDYI   | 713  | 470   |
| >MLH1-G244LAFKMNGY   | 5890  | >MLH1-G244LAFKMNDY    | 178  | 5712  |
| >MLH1-G244LAFKMNGY   | 462   | >MLH1-G244LAFKMNDY    | 673  | 211   |
| >MLH1-G244LAFKMNGYI  | 105   | >MLH1-G244LAFKMNDYI   | 1150 | 1045  |
| >MLH1-G244LAFKMNGYI  | 24    | >MLH1-G244LAFKMNDYI   | 33   | 9     |
| >MLH1-G244TLAFKMNG   | 22622 | >MLH1-G244TLAFKMND    | 69   | 22553 |
| >MLH1-G244TLAFKMNGYI | 483   | >MLH1-G244TLAFKMNDYI  | 150  | 333   |
| >MLH1-G244TLAFKMNG   | 3698  | >MLH1-G244TLAFKMND    | 8    | 3690  |
| >MLH1-G244TLAFKMNGYI | 86    | >MLH1-G244TLAFKMNDYI  | 53   | 33    |
| >MLH1-G244TLAFKMNG   | 4661  | >MLH1-G244TLAFKMND    | 5    | 4656  |
| >MLH1-G244TLAFKMNGYI | 78    | >MLH1-G244TLAFKMNDYI  | 128  | 50    |
| >MLH1-G244TLAFKMNG   | 22264 | >MLH1-G244TLAFKMND    | 293  | 21971 |
| >MLH1-G244TLAFKMNG   | 18760 | >MLH1-G244TLAFKMND    | 30   | 18730 |
| >MLH1-G244TLAFKMNGYI | 194   | >MLH1-G244TLAFKMNDYI  | 100  | 94    |
| >MLH1-G244TLAFKMNG   | 20036 | >MLH1-G244TLAFKMND    | 76   | 19960 |
| >MLH1-G244TLAFKMNGYI | 674   | >MLH1-G244TLAFKMNDYI  | 165  | 509   |
| >MLH1-G244TLAFKMNG   | 20264 | >MLH1-G244TLAFKMND    | 19   | 20245 |
| >MLH1-G244TLAFKMNGYI | 605   | >MLH1-G244TLAFKMNDYI  | 180  | 425   |
| >MLH1-G244TLAFKMNG   | 25083 | >MLH1-G244TLAFKMND    | 24   | 25059 |
| >MLH1-G244TLAFKMNGYI | 682   | >MLH1-G244TLAFKMNDYI  | 177  | 505   |
| >MLH1-G244TLAFKMNG   | 18151 | >MLH1-G244TLAFKMND    | 4    | 18147 |
| >MLH1-G244TLAFKMNGYI | 412   | >MLH1-G244TLAFKMNDYI  | 94   | 318   |
| >MLH1-G244TLAFKMNGY  | 498   | >MLH1-G244TLAFKMNDY   | 827  | 329   |
| >MLH1-G244TLAFKMNGY  | 114   | >MLH1-G244TLAFKMNDY   | 885  | 771   |
| >MLH1-G244TLAFKMNGY  | 56    | >MLH1-G244TLAFKMNDY   | 67   | 11    |
| >MLH1-G244TLAFKMNGY  | 79    | >MLH1-G244TLAFKMNDY   | 106  | 27    |



|                      |       |                      |      |       |
|----------------------|-------|----------------------|------|-------|
| >MLH1-G244TLAFKMNGY  | 30    | >MLH1-G244TLAFKMNVY  | 31   | 1     |
| >MLH1-G244TLAFKMNG   | 8418  | >MLH1-G244TLAFKMNV   | 21   | 8397  |
| >MLH1-G244TLAFKMNGYI | 264   | >MLH1-G244TLAFKMNVYI | 336  | 72    |
| >MLH1-G244TLAFKMNG   | 20435 | >MLH1-G244TLAFKMNV   | 158  | 20277 |
| >MLH1-G244TLAFKMNGY  | 61    | >MLH1-G244TLAFKMNVY  | 68   | 7     |
| >MLH1-G244TLAFKMNGY  | 699   | >MLH1-G244TLAFKMNVY  | 204  | 495   |
| >MLH1-G244TLAFKMNGY  | 382   | >MLH1-G244TLAFKMNVY  | 404  | 22    |
| >MLH1-G244KTAFKMNG   | 22681 | >MLH1-G244KTAFKMNV   | 257  | 22424 |
| >MLH1-G244KTAFKMNG`  | 1180  | >MLH1-G244KTAFKMNV`  | 183  | 997   |
| >MLH1-G244KTAFKMNG   | 20854 | >MLH1-G244KTAFKMNV   | 242  | 20612 |
| >MLH1-G244KTAFKMNG`  | 426   | >MLH1-G244KTAFKMNV`  | 98   | 328   |
| >MLH1-G244KTAFKMNG   | 20267 | >MLH1-G244KTAFKMNV   | 30   | 20237 |
| >MLH1-G244KTAFKMNG`  | 179   | >MLH1-G244KTAFKMNV`  | 83   | 96    |
| >MLH1-G244KTAFKMNG   | 23508 | >MLH1-G244KTAFKMNV   | 110  | 23398 |
| >MLH1-G244KTAFKMNG   | 35684 | >MLH1-G244KTAFKMNV   | 323  | 35361 |
| >MLH1-G244KTAFKMNG`  | 98    | >MLH1-G244KTAFKMNV`  | 190  | 92    |
| >MLH1-G244KTAFKMNG`  | 307   | >MLH1-G244KTAFKMNV`  | 354  | 47    |
| >MLH1-G244KTAFKMNG`  | 219   | >MLH1-G244KTAFKMNV`  | 239  | 20    |
| >MLH1-G244KTAFKMNG`  | 45    | >MLH1-G244KTAFKMNV`  | 314  | 269   |
| >MLH1-G244KTAFKMNG   | 94    | >MLH1-G244KTAFKMNV   | 18   | 76    |
| >MLH1-G244KTAFKMNG`  | 149   | >MLH1-G244KTAFKMNV`  | 89   | 60    |
| >MLH1-G244KTAFKMNG`  | 12    | >MLH1-G244KTAFKMNV`  | 9    | 3     |
| >MLH1-G244KTAFKMNG`  | 60    | >MLH1-G244KTAFKMNV`  | 58   | 2     |
| >MLH1-G244KTAFKMNG   | 4210  | >MLH1-G244KTAFKMNV   | 496  | 3714  |
| >MLH1-G244KTAFKMNG   | 2346  | >MLH1-G244KTAFKMNV   | 195  | 2151  |
| >MLH1-G244KTAFKMNG`  | 157   | >MLH1-G244KTAFKMNV`  | 99   | 58    |
| >MLH1-G244KTAFKMNG`  | 94    | >MLH1-G244KTAFKMNV`  | 14   | 80    |
| >MLH1-G244KTAFKMNG   | 21355 | >MLH1-G244KTAFKMNV   | 390  | 20965 |
| >MLH1-G244KTAFKMNG   | 11187 | >MLH1-G244KTAFKMNV   | 20   | 11167 |
| >MLH1-G244KTAFKMNG`  | 162   | >MLH1-G244KTAFKMNV`  | 100  | 62    |
| >MLH1-G244KTAFKMNG`  | 16    | >MLH1-G244KTAFKMNV`  | 16   | 0     |
| >MLH1-G244KTAFKMNG`  | 454   | >MLH1-G244KTAFKMNV`  | 156  | 298   |
| >MLH1-G244KTAFKMNG   | 7601  | >MLH1-G244KTAFKMNV   | 226  | 7375  |
| >MLH1-G244KTAFKMNG`  | 5     | >MLH1-G244KTAFKMNV`  | 5    | 0     |
| >MLH1-G244KTAFKMNG`  | 37    | >MLH1-G244KTAFKMNV`  | 26   | 11    |
| >MLH1-G244KTAFKMNG`  | 172   | >MLH1-G244KTAFKMNV`  | 126  | 46    |
| >MLH1-G244KTAFKMNG`  | 204   | >MLH1-G244KTAFKMNV`  | 64   | 140   |
| >MLH1-G244KTAFKMNG`  | 58    | >MLH1-G244KTAFKMNV`  | 35   | 23    |
| >MLH1-G244KTAFKMNG`  | 69    | >MLH1-G244KTAFKMNV`  | 53   | 16    |
| >MLH1-G244KTAFKMNG`  | 126   | >MLH1-G244KTAFKMNV`  | 261  | 135   |
| >MLH1-G244KTAFKMNG`  | 24    | >MLH1-G244KTAFKMNV`  | 32   | 8     |
| >MLH1-G54E GGLKLIQI  | 393   | >MLH1-G54E EGLKLIQI  | 5743 | 5350  |
| >MLH1-G54E EGGLKLIQI | 8864  | >MLH1-G54E EEGLKLIQI | 15   | 8849  |

|                       |       |                       |      |       |
|-----------------------|-------|-----------------------|------|-------|
| >MLH1-G54E EGGLKLIQI  | 32321 | >MLH1-G54E EEGLKLIQI  | 60   | 32261 |
| >MLH1-G54E KEGGLKLI   | 47    | >MLH1-G54E KEEGLKLI   | 17   | 30    |
| >MLH1-G54E KEGGLKLIQI | 87    | >MLH1-G54E KEEGLKLIQI | 50   | 37    |
| >MLH1-G54E KEGGLKLI   | 434   | >MLH1-G54E KEEGLKLI   | 51   | 383   |
| >MLH1-G54E KEGGLKLI   | 407   | >MLH1-G54E KEEGLKLI   | 987  | 580   |
| >MLH1-G54E KEGGLKLIQI | 442   | >MLH1-G54E KEEGLKLIQI | 270  | 172   |
| >MLH1-G54E KEGGLKLIQI | 2098  | >MLH1-G54E KEEGLKLIQI | 271  | 1827  |
| >MLH1-G54E KEGGLKLIQI | 27    | >MLH1-G54E KEEGLKLIQI | 23   | 4     |
| >MLH1-G54E VKEGGLKLI  | 660   | >MLH1-G54E VKEEGLKLI  | 189  | 471   |
| >MLH1-G54E IVKEGGLKLI | 404   | >MLH1-G54E IVKEEGLKLI | 503  | 99    |
| >MLH1-G54E IVKEGGLK   | 155   | >MLH1-G54E IVKEEGLK   | 432  | 277   |
| >MLH1-G54E IVKEGGLK   | 272   | >MLH1-G54E IVKEEGLK   | 412  | 140   |
| >MLH1-G54E IVKEGGLK   | 19    | >MLH1-G54E IVKEEGLK   | 51   | 32    |
| >MLH1-G54E IVKEGGLKLI | 385   | >MLH1-G54E IVKEEGLKLI | 828  | 443   |
| >MLH1-G54E IVKEGGLKL  | 143   | >MLH1-G54E IVKEEGLKL  | 609  | 466   |
| >MLH1-G54E VIVKEGGLK  | 436   | >MLH1-G54E VIVKEEGLK  | 903  | 467   |
| >MLH1-G54E QVIVKEGGL  | 357   | >MLH1-G54E QVIVKEEGL  | 620  | 263   |
| >MLH1-G54E QVIVKEGGLK | 290   | >MLH1-G54E QVIVKEEGLK | 1521 | 1231  |
| >MLH1-G54E QVIVKEGGLK | 237   | >MLH1-G54E QVIVKEEGLK | 590  | 353   |
| >MLH1-G54E QVIVKEGGLK | 141   | >MLH1-G54E QVIVKEEGLK | 310  | 169   |
| >MLH1-H543 HQTCLYLL   | 255   | >MLH1-H543 RQTCLYLL   | 415  | 160   |
| >MLH1-H543 HQTCLYLL   | 149   | >MLH1-H543 RQTCLYLL   | 42   | 107   |
| >MLH1-H543 HQTCLYLL   | 811   | >MLH1-H543 RQTCLYLL   | 213  | 598   |
| >MLH1-H543 HQTCLYLL   | 441   | >MLH1-H543 RQTCLYLL   | 70   | 371   |
| >MLH1-H543 HQTCLYLL   | 207   | >MLH1-H543 RQTCLYLL   | 2248 | 2041  |
| >MLH1-H543 HQTCLYLL   | 623   | >MLH1-H543 RQTCLYLL   | 239  | 384   |
| >MLH1-H543 HQTCLYLL   | 344   | >MLH1-H543 RQTCLYLL   | 78   | 266   |
| >MLH1-H543 HQTCLYLL   | 4769  | >MLH1-H543 RQTCLYLL   | 42   | 4727  |
| >MLH1-H543 HQTCLYLLN  | 5309  | >MLH1-H543 RQTCLYLLN  | 226  | 5083  |
| >MLH1-H543 HQTCLYLL   | 3900  | >MLH1-H543 RQTCLYLL   | 130  | 3770  |
| >MLH1-H543 HQTCLYLLN  | 1824  | >MLH1-H543 RQTCLYLLN  | 121  | 1703  |
| >MLH1-H543 HQTCLYLLNT | 8455  | >MLH1-H543 RQTCLYLLNT | 498  | 7957  |
| >MLH1-H543 QHQTKLYL   | 17983 | >MLH1-H543 QRQTKLYL   | 256  | 17727 |
| >MLH1-H543 QHQTKLYLL  | 13852 | >MLH1-H543 QRQTKLYLL  | 89   | 13763 |
| >MLH1-H543 QHQTKLYL   | 9179  | >MLH1-H543 QRQTKLYL   | 80   | 9099  |
| >MLH1-H543 QHQTKLYLL  | 3215  | >MLH1-H543 QRQTKLYLL  | 46   | 3169  |
| >MLH1-H543 QHQTKLYLLN | 19801 | >MLH1-H543 QRQTKLYLLN | 273  | 19528 |
| >MLH1-H543 QHQTKLYL   | 4528  | >MLH1-H543 QRQTKLYL   | 104  | 4424  |
| >MLH1-H543 QHQTKLYLL  | 3683  | >MLH1-H543 QRQTKLYLL  | 17   | 3666  |
| >MLH1-H543 QHQTKLYLLN | 19796 | >MLH1-H543 QRQTKLYLLN | 194  | 19602 |
| >MLH1-H543 CVNPQWALA  | 4018  | >MLH1-H543 CVNPQWALA  | 26   | 3992  |
| >MLH1-H543 CVNPQWALA  | 20952 | >MLH1-H543 CVNPQWALA  | 375  | 20577 |
| >MLH1-H543 CVNPQWALA  | 8292  | >MLH1-H543 CVNPQWALA  | 68   | 8224  |

|                       |      |                       |      |      |
|-----------------------|------|-----------------------|------|------|
| >MLH1-H543 AQHQTKLYLL | 264  | >MLH1-H543 AQRQTKLYLL | 685  | 421  |
| >MLH1-H543 AQHQTKLYL  | 327  | >MLH1-H543 AQRQTKLYL  | 1652 | 1325 |
| >MLH1-H543 AQHQTKLYL  | 858  | >MLH1-H543 AQRQTKLYL  | 74   | 784  |
| >MLH1-H543 AQHQTKLYLL | 2804 | >MLH1-H543 AQRQTKLYLL | 322  | 2482 |
| >MLH1-H543 AQHQTKLY   | 71   | >MLH1-H543 AQRQTKLY   | 58   | 13   |
| >MLH1-H543 AQHQTKLYL  | 365  | >MLH1-H543 AQRQTKLYL  | 194  | 171  |
| >MLH1-H543 AQHQTKLY   | 289  | >MLH1-H543 AQRQTKLY   | 243  | 46   |
| >MLH1-H543 AQHQTKLY   | 13   | >MLH1-H543 AQRQTKLY   | 10   | 3    |
| >MLH1-H543 AQHQTKLYL  | 58   | >MLH1-H543 AQRQTKLYL  | 40   | 18   |
| >MLH1-H543 AQHQTKLYLL | 183  | >MLH1-H543 AQRQTKLYLL | 118  | 65   |
| >MLH1-H543 AQHQTKLYL  | 375  | >MLH1-H543 AQRQTKLYL  | 5724 | 5349 |
| >MLH1-H543 AQHQTKLYLL | 244  | >MLH1-H543 AQRQTKLYLL | 3484 | 3240 |
| >MLH1-H543 AQHQTKLYL  | 498  | >MLH1-H543 AQRQTKLYL  | 290  | 208  |
| >MLH1-H543 LAQHQTCLY  | 470  | >MLH1-H543 LAQRQTKLY  | 1600 | 1130 |
| >MLH1-H543 LAQHQTCL   | 485  | >MLH1-H543 LAQRQTKL   | 1538 | 1053 |
| >MLH1-H543 LAQHQTCLY  | 51   | >MLH1-H543 LAQRQTKLY  | 301  | 250  |
| >MLH1-H543 LAQHQTCLY  | 273  | >MLH1-H543 LAQRQTKLY  | 784  | 511  |
| >MLH1-H543 ALAQHQTKLY | 409  | >MLH1-H543 ALAQRQTKLY | 397  | 12   |
| >MLH1-H543 ALAQHQTKL  | 238  | >MLH1-H543 ALAQRQTKL  | 623  | 385  |
| >MLH1-H543 ALAQHQTKLY | 76   | >MLH1-H543 ALAQRQTKLY | 120  | 44   |
| >MLH1-H543 ALAQHQTKL  | 7    | >MLH1-H543 ALAQRQTKL  | 12   | 5    |
| >MLH1-H543 ALAQHQTKLY | 8    | >MLH1-H543 ALAQRQTKLY | 12   | 4    |
| >MLH1-H543 ALAQHQTKL  | 14   | >MLH1-H543 ALAQRQTKL  | 39   | 25   |
| >MLH1-H543 ALAQHQTKLY | 32   | >MLH1-H543 ALAQRQTKLY | 67   | 35   |
| >MLH1-H543 ALAQHQTKLY | 373  | >MLH1-H543 ALAQRQTKLY | 588  | 215  |
| >MLH1-H543 ALAQHQTKL  | 92   | >MLH1-H543 ALAQRQTKL  | 218  | 126  |
| >MLH1-H543 ALAQHQTKLY | 14   | >MLH1-H543 ALAQRQTKLY | 21   | 7    |
| >MLH1-H543 ALAQHQTKLY | 243  | >MLH1-H543 ALAQRQTKLY | 332  | 89   |
| >MLH1-H543 ALAQHQTKL  | 74   | >MLH1-H543 ALAQRQTKL  | 51   | 23   |
| >MLH1-H543 ALAQHQTKLY | 21   | >MLH1-H543 ALAQRQTKLY | 20   | 1    |
| >MLH1-H543 ALAQHQTKLY | 107  | >MLH1-H543 ALAQRQTKLY | 149  | 42   |
| >MLH1-H543 ALAQHQTK   | 290  | >MLH1-H543 ALAQRQTK   | 340  | 50   |
| >MLH1-H543 ALAQHQTKL  | 3    | >MLH1-H543 ALAQRQTKL  | 3    | 0    |
| >MLH1-H543 ALAQHQTKLY | 3    | >MLH1-H543 ALAQRQTKLY | 3    | 0    |
| >MLH1-H543 ALAQHQTK   | 106  | >MLH1-H543 ALAQRQTK   | 99   | 7    |
| >MLH1-H543 ALAQHQTK   | 475  | >MLH1-H543 ALAQRQTK   | 621  | 146  |
| >MLH1-H543 ALAQHQTKLY | 493  | >MLH1-H543 ALAQRQTKLY | 535  | 42   |
| >MLH1-H543 ALAQHQTKLY | 721  | >MLH1-H543 ALAQRQTKLY | 368  | 353  |
| >MLH1-H543 ALAQHQTKLY | 210  | >MLH1-H543 ALAQRQTKLY | 87   | 123  |
| >MLH1-H543 ALAQHQTKL  | 1115 | >MLH1-H543 ALAQRQTKL  | 393  | 722  |
| >MLH1-H543 ALAQHQTKLY | 180  | >MLH1-H543 ALAQRQTKLY | 321  | 141  |
| >MLH1-H543 ALAQHQTKLY | 249  | >MLH1-H543 ALAQRQTKLY | 298  | 49   |
| >MLH1-H543 WALAQHQTK  | 73   | >MLH1-H543 WALAQHQTK  | 175  | 102  |

|                        |       |                        |       |       |
|------------------------|-------|------------------------|-------|-------|
| >MLH1-H543 WALAQHQTK   | 196   | >MLH1-H543 WALAQRQTK   | 215   | 19    |
| >MLH1-H543 WALAQHQTK   | 84    | >MLH1-H543 WALAQRQTK   | 177   | 93    |
| >MLH1-H543 WALAQHQTK   | 17    | >MLH1-H543 WALAQRQTK   | 40    | 23    |
| >MLH1-H543 WALAQHQTK   | 33    | >MLH1-H543 WALAQRQTK   | 48    | 15    |
| >MLH1-H543 WALAQHQTK   | 238   | >MLH1-H543 WALAQRQTK   | 319   | 81    |
| >MLH1-H543 QWALAQHQ    | 140   | >MLH1-H543 QWALAQRQ    | 386   | 246   |
| >MLH1-H543 PQWALAQH    | 12274 | >MLH1-H543 PQWALAQR    | 374   | 11900 |
| >MLH1-H543 PQWALAQH    | 29022 | >MLH1-H543 PQWALAQR    | 171   | 28851 |
| >MLH1-H543 NPQWALAQ    | 232   | >MLH1-H543 NPQWALAQ    | 5137  | 4905  |
| >MLH1-K618 KAEMLADY    | 173   | >MLH1-K618 TAEMLADY    | 676   | 503   |
| >MLH1-K618 KAEMLADY    | 88    | >MLH1-K618 TAEMLADY    | 861   | 773   |
| >MLH1-K618 KAEMLADYF   | 80    | >MLH1-K618 TAEMLADYF   | 998   | 918   |
| >MLH1-K618 KAEMLADYF   | 252   | >MLH1-K618 TAEMLADYF   | 2647  | 2395  |
| >MLH1-K618 KAEMLADY    | 2026  | >MLH1-K618 TAEMLADY    | 312   | 1714  |
| >MLH1-K618 KAEMLADYF   | 261   | >MLH1-K618 TAEMLADYF   | 9248  | 8987  |
| >MLH1-K618 KAEMLADYF   | 200   | >MLH1-K618 TAEMLADYF   | 520   | 320   |
| >MLH1-K618 KKAEMLADY   | 22431 | >MLH1-K618 KTAEMLADY   | 166   | 22265 |
| >MLH1-K618 KKAEMLADY   | 8100  | >MLH1-K618 KTAEMLADY   | 41    | 8059  |
| >MLH1-K618 KKAEMLADY   | 5447  | >MLH1-K618 KTAEMLADY   | 9     | 5438  |
| >MLH1-K618 KKAEMLADYI  | 10891 | >MLH1-K618 KTAEMLADYI  | 55    | 10836 |
| >MLH1-K618 KKAEMLADY   | 2593  | >MLH1-K618 KTAEMLADY   | 64    | 2529  |
| >MLH1-K618 KKAEMLADY   | 133   | >MLH1-K618 KTAEMLADY   | 16    | 117   |
| >MLH1-K618 KKAEMLADYI  | 8520  | >MLH1-K618 KTAEMLADYI  | 53    | 8467  |
| >MLH1-K618 KKAEMLADY   | 1523  | >MLH1-K618 KTAEMLADY   | 46    | 1477  |
| >MLH1-K618 KKAEMLADY   | 36    | >MLH1-K618 KTAEMLADY   | 1913  | 1877  |
| >MLH1-K618 KKAEMLADYI  | 15    | >MLH1-K618 KTAEMLADYI  | 799   | 784   |
| >MLH1-K618 KKAEMLADY   | 10995 | >MLH1-K618 KTAEMLADY   | 5     | 10990 |
| >MLH1-K618 KKAEMLADYI  | 11682 | >MLH1-K618 KTAEMLADYI  | 5     | 11677 |
| >MLH1-K618 KKAEMLADY   | 21008 | >MLH1-K618 KTAEMLADY   | 412   | 20596 |
| >MLH1-K618 KKAEMLADYI  | 16863 | >MLH1-K618 KTAEMLADYI  | 121   | 16742 |
| >MLH1-K618 KKAEMLADY   | 13187 | >MLH1-K618 KTAEMLADY   | 113   | 13074 |
| >MLH1-K618 KKAEMLADYI  | 5420  | >MLH1-K618 KTAEMLADYI  | 18    | 5402  |
| >MLH1-K618 KKAEMLADYI  | 22539 | >MLH1-K618 KTAEMLADYI  | 45    | 22494 |
| >MLH1-K618 KKAEMLADY   | 9347  | >MLH1-K618 KTAEMLADY   | 78    | 9269  |
| >MLH1-K618 KKAEMLADYI  | 9502  | >MLH1-K618 KTAEMLADYI  | 50    | 9452  |
| >MLH1-K618 AEYIVEFLKKK | 2739  | >MLH1-K618 AEYIVEFLKKT | 170   | 2569  |
| >MLH1-K618 AEYIVEFLKKK | 486   | >MLH1-K618 AEYIVEFLKKT | 38    | 448   |
| >MLH1-K618 AEYIVEFLKKK | 252   | >MLH1-K618 AEYIVEFLKKT | 35    | 217   |
| >MLH1-K618 KKAEMLA     | 452   | >MLH1-K618 KKTAEMLA    | 10045 | 9593  |
| >MLH1-K618 KKAEMLAD'   | 743   | >MLH1-K618 KKTAEMLAD'  | 270   | 473   |
| >MLH1-K618 KKAEMLAD'   | 12    | >MLH1-K618 KKTAEMLAD'  | 27    | 15    |
| >MLH1-K618 KKAEMLAD'   | 7     | >MLH1-K618 KKTAEMLAD'  | 12    | 5     |
| >MLH1-K618 LKKAEML     | 84    | >MLH1-K618 LKKAEML     | 52    | 32    |

|                        |       |                       |       |       |
|------------------------|-------|-----------------------|-------|-------|
| >MLH1-K618 LKKKAEMLAC  | 18    | >MLH1-K618 LKKTAEMLAC | 17    | 1     |
| >MLH1-K618 FLKKKAEMLA  | 924   | >MLH1-K618 FLKKTAEMLA | 386   | 538   |
| >MLH1-K618 FLKKKAEM    | 132   | >MLH1-K618 FLKKTAEM   | 44    | 88    |
| >MLH1-K618 FLKKKAEML   | 13    | >MLH1-K618 FLKKTAEML  | 16    | 3     |
| >MLH1-K618 FLKKKAEMLA  | 71    | >MLH1-K618 FLKKTAEMLA | 46    | 25    |
| >MLH1-K618 FLKKKAEM    | 84    | >MLH1-K618 FLKKTAEM   | 34    | 50    |
| >MLH1-K618 FLKKKAEML   | 22    | >MLH1-K618 FLKKTAEML  | 26    | 4     |
| >MLH1-K618 FLKKKAEMLA  | 89    | >MLH1-K618 FLKKTAEMLA | 69    | 20    |
| >MLH1-K618 FLKKKAEM    | 1083  | >MLH1-K618 FLKKTAEM   | 390   | 693   |
| >MLH1-K618 FLKKKAEML   | 148   | >MLH1-K618 FLKKTAEML  | 53    | 95    |
| >MLH1-K618 FLKKKAEM    | 1911  | >MLH1-K618 FLKKTAEM   | 382   | 1529  |
| >MLH1-K618 FLKKKAEML   | 730   | >MLH1-K618 FLKKTAEML  | 222   | 508   |
| >MLH1-K618 FLKKKAEML   | 1203  | >MLH1-K618 FLKKTAEML  | 279   | 924   |
| >MLH1-K618 FLKKKAEM    | 45    | >MLH1-K618 FLKKTAEM   | 22    | 23    |
| >MLH1-K618 FLKKKAEML   | 17    | >MLH1-K618 FLKKTAEML  | 10    | 7     |
| >MLH1-K618 FLKKKAEMLA  | 24    | >MLH1-K618 FLKKTAEMLA | 17    | 7     |
| >MLH1-K618 FLKKKAEM    | 25    | >MLH1-K618 FLKKTAEM   | 111   | 86    |
| >MLH1-K618 FLKKKAEML   | 30    | >MLH1-K618 FLKKTAEML  | 326   | 296   |
| >MLH1-K618 FLKKKAEML   | 443   | >MLH1-K618 FLKKTAEML  | 2183  | 1740  |
| >MLH1-K618 FLKKKAEM    | 370   | >MLH1-K618 FLKKTAEM   | 113   | 257   |
| >MLH1-K618 FLKKKAEM    | 1079  | >MLH1-K618 FLKKTAEM   | 293   | 786   |
| >MLH1-K618 FLKKKAEM    | 1339  | >MLH1-K618 FLKKTAEM   | 195   | 1144  |
| >MLH1-K618 FLKKKAEML   | 3003  | >MLH1-K618 FLKKTAEML  | 305   | 2698  |
| >MLH1-K618 EFLKKKAEML  | 677   | >MLH1-K618 EFLKKTAEML | 202   | 475   |
| >MLH1-K618 EFLKKKAEM   | 2735  | >MLH1-K618 EFLKKTAEM  | 239   | 2496  |
| >MLH1-K618 VEFLKKKA    | 923   | >MLH1-K618 VEFLKKTA   | 210   | 713   |
| >MLH1-K618 VEFLKKKAEM  | 41    | >MLH1-K618 VEFLKKTAEM | 51    | 10    |
| >MLH1-K618 VEFLKKKAEM  | 30    | >MLH1-K618 VEFLKKTAEM | 40    | 10    |
| >MLH1-K618 VEFLKKKAEM  | 61    | >MLH1-K618 VEFLKKTAEM | 33    | 28    |
| >MLH1-K618 VEFLKKKAEM  | 475   | >MLH1-K618 VEFLKKTAEM | 308   | 167   |
| >MLH1-K618 VEFLKKKAEM  | 203   | >MLH1-K618 VEFLKKTAEM | 136   | 67    |
| >MLH1-K618 VEFLKKKAEM  | 124   | >MLH1-K618 VEFLKKTAEM | 70    | 54    |
| >MLH1-K618 IVEFLKKK    | 482   | >MLH1-K618 IVEFLKKT   | 29475 | 28993 |
| >MLH1-K618 IVEFLKKKAEM | 241   | >MLH1-K618 IVEFLKKAEM | 238   | 3     |
| >MLH1-K618 YIVEFLKKK   | 11079 | >MLH1-K618 YIVEFLKKT  | 223   | 10856 |
| >MLH1-K618 YIVEFLKKKA  | 363   | >MLH1-K618 YIVEFLKKTA | 135   | 228   |
| >MLH1-K618 YIVEFLKKK   | 9512  | >MLH1-K618 YIVEFLKKT  | 174   | 9338  |
| >MLH1-K618 YIVEFLKKKA  | 674   | >MLH1-K618 YIVEFLKKTA | 242   | 432   |
| >MLH1-K618 YIVEFLKKK   | 6268  | >MLH1-K618 YIVEFLKKT  | 262   | 6006  |
| >MLH1-K618 YIVEFLKKKA  | 181   | >MLH1-K618 YIVEFLKKTA | 70    | 111   |
| >MLH1-K618 YIVEFLKKKA  | 235   | >MLH1-K618 YIVEFLKKTA | 108   | 127   |
| >MLH1-K618 YIVEFLKKK   | 74    | >MLH1-K618 YIVEFLKKT  | 21324 | 21250 |
| >MLH1-K618 EYIVEFLKKK  | 319   | >MLH1-K618 EYIVEFLKKT | 20230 | 19911 |

|                        |       |                        |       |       |
|------------------------|-------|------------------------|-------|-------|
| >MLH1-L724' LRSILPPKH  | 19    | >MLH1-L724' WRSILPPKH  | 19    | 0     |
| >MLH1-L724' LRSILPPK   | 98    | >MLH1-L724' WRSILPPK   | 56    | 42    |
| >MLH1-L724' LRSILPPKH  | 908   | >MLH1-L724' WRSILPPKH  | 132   | 776   |
| >MLH1-L724' LRSILPPKH  | 437   | >MLH1-L724' WRSILPPKH  | 220   | 217   |
| >MLH1-L724' LRSILPPK   | 955   | >MLH1-L724' WRSILPPK   | 256   | 699   |
| >MLH1-L724' LRSILPPKH  | 628   | >MLH1-L724' WRSILPPKH  | 183   | 445   |
| >MLH1-L724' ALRSILPPK  | 16    | >MLH1-L724' AWRSHILPPK | 255   | 239   |
| >MLH1-L724' ALRSILPPK  | 49    | >MLH1-L724' AWRSHILPPK | 1474  | 1425  |
| >MLH1-L724' ALRSILP    | 305   | >MLH1-L724' AWRSHILP   | 572   | 267   |
| >MLH1-L724' ALRSILPP   | 190   | >MLH1-L724' AWRSHILPP  | 377   | 187   |
| >MLH1-L724' ALRSILPPK  | 4     | >MLH1-L724' AWRSHILPPK | 4     | 0     |
| >MLH1-L724' ALRSILPPK  | 491   | >MLH1-L724' AWRSHILPPK | 808   | 317   |
| >MLH1-L724' ALRSILPPK  | 11184 | >MLH1-L724' AWRSHILPPK | 386   | 10798 |
| >MLH1-L724' WTVEHIVYKA | 439   | >MLH1-L724' WTVEHIVYKA | 18876 | 18437 |
| >MLH1-L724' WTVEHIVYKA | 295   | >MLH1-L724' WTVEHIVYKA | 17521 | 17226 |
| >MLH1-L724' WTVEHIVYKA | 94    | >MLH1-L724' WTVEHIVYKA | 7223  | 7129  |
| >MLH1-L724' WTVEHIVYKA | 177   | >MLH1-L724' WTVEHIVYKA | 16945 | 16768 |
| >MLH1-L724' WTVEHIVYKA | 110   | >MLH1-L724' WTVEHIVYKA | 926   | 816   |
| >MLH1-L724' WTVEHIVYKA | 68    | >MLH1-L724' WTVEHIVYKA | 314   | 246   |
| >MLH1-L724' WTVEHIVYKA | 67    | >MLH1-L724' WTVEHIVYKA | 18804 | 18737 |
| >MLH1-L724' WTVEHIVYKA | 89    | >MLH1-L724' WTVEHIVYKA | 10954 | 10865 |
| >MLH1-L724' WTVEHIVYKA | 49    | >MLH1-L724' WTVEHIVYKA | 5     | 44    |
| >MLH1-L724' WTVEHIVYKA | 17277 | >MLH1-L724' WTVEHIVYKA | 142   | 17135 |
| >MLH1-L724' WTVEHIVYKA | 11733 | >MLH1-L724' WTVEHIVYKA | 59    | 11674 |
| >MLH1-L724' WTVEHIVYKA | 454   | >MLH1-L724' WTVEHIVYKA | 3251  | 2797  |
| >MLH1-L724' WTVEHIVYKA | 5061  | >MLH1-L724' WTVEHIVYKA | 21    | 5040  |
| >MLH1-L724' KALRSILPPK | 93    | >MLH1-L724' KAWRSILPP  | 74    | 19    |
| >MLH1-L724' KALRSILPPK | 19    | >MLH1-L724' KAWRSILPP  | 22    | 3     |
| >MLH1-L724' KALRSIL    | 87    | >MLH1-L724' KAWRSIL    | 442   | 355   |
| >MLH1-L724' KALRSILP   | 98    | >MLH1-L724' KAWRSILP   | 508   | 410   |
| >MLH1-L724' KALRSILPP  | 169   | >MLH1-L724' KAWRSILPP  | 724   | 555   |
| >MLH1-L724' KALRSILPPK | 4     | >MLH1-L724' KAWRSILPP  | 5     | 1     |
| >MLH1-L724' KALRSILPPK | 34    | >MLH1-L724' KAWRSILPP  | 14    | 20    |
| >MLH1-L724' KALRSIL    | 236   | >MLH1-L724' KAWRSIL    | 119   | 117   |
| >MLH1-L724' KALRSIL    | 49    | >MLH1-L724' KAWRSIL    | 23    | 26    |
| >MLH1-L724' KALRSIL    | 424   | >MLH1-L724' KAWRSIL    | 151   | 273   |
| >MLH1-L724' KALRSIL    | 54    | >MLH1-L724' KAWRSIL    | 64    | 10    |
| >MLH1-L724' KALRSIL    | 4786  | >MLH1-L724' KAWRSIL    | 431   | 4355  |
| >MLH1-L724' KALRSILPPK | 1278  | >MLH1-L724' KAWRSILPP  | 301   | 977   |
| >MLH1-L724' KALRSIL    | 1759  | >MLH1-L724' KAWRSIL    | 348   | 1411  |
| >MLH1-L724' YKALRSIL   | 233   | >MLH1-L724' YKAWRSIL   | 380   | 147   |
| >MLH1-L724' YKALRSI    | 93    | >MLH1-L724' YKAWRSI    | 120   | 27    |
| >MLH1-L724' YKALRSIL   | 86    | >MLH1-L724' YKAWRSIL   | 134   | 48    |

|                        |       |                        |      |       |
|------------------------|-------|------------------------|------|-------|
| >MLH1-L724'YKALRSHIL   | 15    | >MLH1-L724'YKAWRSHIL   | 9    | 6     |
| >MLH1-L724'VYKALRSHI   | 2     | >MLH1-L724'VYKAWRSHI   | 47   | 45    |
| >MLH1-L724'VYKALRSHIL  | 137   | >MLH1-L724'VYKAWRSHIL  | 2654 | 2517  |
| >MLH1-L724'VYKALRSHI   | 252   | >MLH1-L724'VYKAWRSHI   | 30   | 222   |
| >MLH1-L724'VYKALRSHIL  | 349   | >MLH1-L724'VYKAWRSHIL  | 476  | 127   |
| >MLH1-L724'VYKALRSHI   | 778   | >MLH1-L724'VYKAWRSHI   | 197  | 581   |
| >MLH1-L724'VYKALRSHIL  | 248   | >MLH1-L724'VYKAWRSHIL  | 292  | 44    |
| >MLH1-L724'VYKALRSHI   | 57    | >MLH1-L724'VYKAWRSHI   | 62   | 5     |
| >MLH1-L724'VYKALRSHIL  | 68    | >MLH1-L724'VYKAWRSHIL  | 64   | 4     |
| >MLH1-L724'VYKALRSHI   | 102   | >MLH1-L724'VYKAWRSHI   | 140  | 38    |
| >MLH1-L724'VYKALRSHIL  | 455   | >MLH1-L724'VYKAWRSHIL  | 583  | 128   |
| >MLH1-L724'IVYKALRSHIL | 76    | >MLH1-L724'IVYKAWRSHI  | 52   | 24    |
| >MLH1-L724'IVYKALRSHIL | 434   | >MLH1-L724'IVYKAWRSHI  | 750  | 316   |
| >MLH1-L724'IVYKALRSHI  | 249   | >MLH1-L724'IVYKAWRSHI  | 494  | 245   |
| >MLH1-L724'IVYKALRSHIL | 258   | >MLH1-L724'IVYKAWRSHI  | 627  | 369   |
| >MLH1-L724'IVYKALRSHIL | 251   | >MLH1-L724'IVYKAWRSHI  | 224  | 27    |
| >MLH1-L724'IVYKALRSHIL | 320   | >MLH1-L724'IVYKAWRSHI  | 323  | 3     |
| >MLH1-L724'IVYKALRSHI  | 566   | >MLH1-L724'IVYKAWRSHI  | 274  | 292   |
| >MLH1-L724'IVYKALRSHIL | 322   | >MLH1-L724'IVYKAWRSHI  | 305  | 17    |
| >MLH1-L724'IVYKALRSHI  | 96    | >MLH1-L724'IVYKAWRSHI  | 65   | 31    |
| >MLH1-L724'HIVYKALR    | 36    | >MLH1-L724'HIVYKAWR    | 28   | 8     |
| >MLH1-L724'HIVYKALR    | 85    | >MLH1-L724'HIVYKAWR    | 81   | 4     |
| >MLH1-L724'HIVYKALR    | 12    | >MLH1-L724'HIVYKAWR    | 11   | 1     |
| >MLH1-L724'HIVYKALRSHI | 144   | >MLH1-L724'HIVYKAWRSHI | 57   | 87    |
| >MLH1-L724'HIVYKALR    | 49    | >MLH1-L724'HIVYKAWR    | 57   | 8     |
| >MLH1-L724'EHIVYKALR   | 56    | >MLH1-L724'EHIVYKAWR   | 53   | 3     |
| >MLH1-L724'EHIVYKAL    | 391   | >MLH1-L724'EHIVYKAW    | 2442 | 2051  |
| >MLH1-L724'EHIVYKAL    | 27    | >MLH1-L724'EHIVYKAW    | 6338 | 6311  |
| >MLH1-L724'VEHIVYKAL   | 30    | >MLH1-L724'VEHIVYKAW   | 169  | 139   |
| >MLH1-L724'VEHIVYKALR  | 1270  | >MLH1-L724'VEHIVYKAWR  | 462  | 808   |
| >MLH1-L724'VEHIVYKAL   | 216   | >MLH1-L724'VEHIVYKAW   | 165  | 51    |
| >MLH1-L724'VEHIVYKAL   | 34    | >MLH1-L724'VEHIVYKAW   | 8760 | 8726  |
| >MLH1-L724'VEHIVYKAL   | 67    | >MLH1-L724'VEHIVYKAW   | 2036 | 1969  |
| >MLH1-L724'VEHIVYKAL   | 1774  | >MLH1-L724'VEHIVYKAW   | 68   | 1706  |
| >MLH1-L724'VEHIVYKAL   | 744   | >MLH1-L724'VEHIVYKAW   | 43   | 701   |
| >MLH1-L724'VEHIVYKAL   | 139   | >MLH1-L724'VEHIVYKAW   | 2265 | 2126  |
| >MLH1-L724'VEHIVYKAL   | 20122 | >MLH1-L724'VEHIVYKAW   | 189  | 19933 |
| >MLH1-L724'TVEHIVYKALR | 26    | >MLH1-L724'TVEHIVYKAW  | 32   | 6     |
| >MLH1-L724'TVEHIVYKALR | 144   | >MLH1-L724'TVEHIVYKAW  | 162  | 18    |
| >MLH1-L724'TVEHIVYKALR | 9     | >MLH1-L724'TVEHIVYKAW  | 11   | 2     |
| >MLH1-L724'TVEHIVYKAL  | 10722 | >MLH1-L724'TVEHIVYKAW  | 43   | 10679 |
| >MLH1-M58'MLALDSPES    | 356   | >MLH1-M58'VLALDSPES    | 3376 | 3020  |
| >MLH1-M58'MLALDSPES    | 341   | >MLH1-M58'VLALDSPES    | 812  | 471   |

|                       |     |                      |       |       |
|-----------------------|-----|----------------------|-------|-------|
| >MLH1-M58:MLALDSPESC  | 218 | >MLH1-M58:VLALDSPESG | 504   | 286   |
| >MLH1-M58:MLALDSPESC  | 215 | >MLH1-M58:VLALDSPESG | 829   | 614   |
| >MLH1-M58:MLALDSPESC  | 105 | >MLH1-M58:VLALDSPESG | 3683  | 3578  |
| >MLH1-M58:AMLALDSPES  | 394 | >MLH1-M58:AVLALDSPES | 13248 | 12854 |
| >MLH1-M58:SEPAPFLDLA  | 389 | >MLH1-M58:SEPAPFLDLA | 114   | 275   |
| >MLH1-M58:FDLAMLAL    | 512 | >MLH1-M58:FDLAVLAL   | 298   | 214   |
| >MLH1-M58:FDLAMLAL    | 175 | >MLH1-M58:FDLAVLAL   | 122   | 53    |
| >MLH1-M58:FDLAMLAL    | 48  | >MLH1-M58:FDLAVLAL   | 115   | 67    |
| >MLH1-M58:FDLAMLAL    | 110 | >MLH1-M58:FDLAVLAL   | 104   | 6     |
| >MLH1-M58:FDLAMLAL    | 341 | >MLH1-M58:FDLAVLAL   | 492   | 151   |
| >MLH1-M58:PLFDLAML    | 242 | >MLH1-M58:PLFDLAVL   | 494   | 252   |
| >MLH1-M58:PLFDLAMLAL  | 418 | >MLH1-M58:PLFDLAVLAL | 414   | 4     |
| >MLH1-M58:PLFDLAML    | 38  | >MLH1-M58:PLFDLAVL   | 73    | 35    |
| >MLH1-M58:PLFDLAMLAL  | 127 | >MLH1-M58:PLFDLAVLA  | 86    | 41    |
| >MLH1-M58:PLFDLAMLAL  | 88  | >MLH1-M58:PLFDLAVLAL | 96    | 8     |
| >MLH1-M58:PLFDLAML    | 390 | >MLH1-M58:PLFDLAVL   | 682   | 292   |
| >MLH1-M58:PLFDLAMLAL  | 272 | >MLH1-M58:PLFDLAVLA  | 916   | 644   |
| >MLH1-M58:PLFDLAMLAL  | 235 | >MLH1-M58:PLFDLAVLAL | 234   | 1     |
| >MLH1-M58:PLFDLAML    | 10  | >MLH1-M58:PLFDLAVL   | 18    | 8     |
| >MLH1-M58:PLFDLAMLAL  | 113 | >MLH1-M58:PLFDLAVLA  | 86    | 27    |
| >MLH1-M58:PLFDLAMLAL  | 31  | >MLH1-M58:PLFDLAVLAL | 15    | 16    |
| >MLH1-M58:PLFDLAML    | 362 | >MLH1-M58:PLFDLAVL   | 241   | 121   |
| >MLH1-M58:PLFDLAMLAL  | 494 | >MLH1-M58:PLFDLAVLAL | 334   | 160   |
| >MLH1-M58:PLFDLAML    | 34  | >MLH1-M58:PLFDLAVL   | 56    | 22    |
| >MLH1-M58:PLFDLAMLAL  | 89  | >MLH1-M58:PLFDLAVLA  | 76    | 13    |
| >MLH1-M58:PLFDLAMLAL  | 82  | >MLH1-M58:PLFDLAVLAL | 44    | 38    |
| >MLH1-M58:PLFDLAML    | 98  | >MLH1-M58:PLFDLAVL   | 117   | 19    |
| >MLH1-M58:PLFDLAMLAL  | 791 | >MLH1-M58:PLFDLAVLAL | 178   | 613   |
| >MLH1-M58:PLFDLAML    | 7   | >MLH1-M58:PLFDLAVL   | 10    | 3     |
| >MLH1-M58:PLFDLAMLAL  | 19  | >MLH1-M58:PLFDLAVLA  | 24    | 5     |
| >MLH1-M58:PLFDLAMLAL  | 16  | >MLH1-M58:PLFDLAVLAL | 13    | 3     |
| >MLH1-M58:PLFDLAMLAL  | 557 | >MLH1-M58:PLFDLAVLAL | 221   | 336   |
| >MLH1-M58:APLFDLAM    | 49  | >MLH1-M58:APLFDLAV   | 226   | 177   |
| >MLH1-M58:APLFDLAML   | 264 | >MLH1-M58:APLFDLAVL  | 75    | 189   |
| >MLH1-M58:APLFDLAMLAL | 36  | >MLH1-M58:APLFDLAVLA | 32    | 4     |
| >MLH1-M58:APLFDLAM    | 31  | >MLH1-M58:APLFDLAV   | 1720  | 1689  |
| >MLH1-M58:APLFDLAMLAL | 463 | >MLH1-M58:APLFDLAVLA | 297   | 166   |
| >MLH1-M58:APLFDLAMLAL | 323 | >MLH1-M58:APLFDLAVLA | 200   | 123   |
| >MLH1-M58:APLFDLAMLAL | 343 | >MLH1-M58:APLFDLAVLA | 653   | 310   |
| >MLH1-M58:APLFDLAMLAL | 826 | >MLH1-M58:APLFDLAVLA | 451   | 375   |
| >MLH1-M58:PAPLFDLAM   | 285 | >MLH1-M58:PAPLFDLAV  | 1281  | 996   |
| >MLH1-M58:PAPLFDLAML  | 38  | >MLH1-M58:PAPLFDLAVL | 61    | 23    |
| >MLH1-M58:EPAPLFDLAV  | 284 | >MLH1-M58:EPAPLFDLAV | 494   | 210   |



|                        |      |                        |      |      |
|------------------------|------|------------------------|------|------|
| >MLH1-M58:EPAPLFDLAV   | 748  | >MLH1-M58:EPAPLFDLAV   | 108  | 640  |
| >MLH1-M58:EPAPLFDLAV   | 131  | >MLH1-M58:EPAPLFDLAV   | 418  | 287  |
| >MLH1-M58:EPAPLFDLAV   | 1017 | >MLH1-M58:EPAPLFDLAV   | 351  | 666  |
| >MLH1-M58:EPAPLFDLAV   | 306  | >MLH1-M58:EPAPLFDLAV   | 123  | 183  |
| >MLH1-M58:EPAPLFDLAV   | 1506 | >MLH1-M58:EPAPLFDLAV   | 214  | 1292 |
| >MLH1-M58:EPAPLFDLAV   | 370  | >MLH1-M58:EPAPLFDLAV   | 478  | 108  |
| >MLH1-N158:NIATRRKALK  | 108  | >MLH1-N158:HIATRRKALK  | 54   | 54   |
| >MLH1-N158:NIATRRKALK  | 4994 | >MLH1-N158:HIATRRKALK  | 53   | 4941 |
| >MLH1-N158:NIATRRKALK  | 805  | >MLH1-N158:HIATRRKALK  | 435  | 370  |
| >MLH1-N158:NIATRRKALK  | 15   | >MLH1-N158:HIATRRKALK  | 18   | 3    |
| >MLH1-N158:NIATRRKAL   | 367  | >MLH1-N158:HIATRRKAL   | 101  | 266  |
| >MLH1-N158:NIATRRKAL   | 18   | >MLH1-N158:HIATRRKAL   | 25   | 7    |
| >MLH1-N158:YNIATRRKAL  | 2825 | >MLH1-N158:YHIATRRKAL  | 432  | 2393 |
| >MLH1-N158:YNIATRRKALI | 287  | >MLH1-N158:YHIATRRKALI | 1451 | 1164 |
| >MLH1-N158:YNIATRRKAL  | 328  | >MLH1-N158:YHIATRRKAL  | 64   | 264  |
| >MLH1-N158:YNIATRRKAL  | 7623 | >MLH1-N158:YHIATRRKAL  | 265  | 7358 |
| >MLH1-N158:YNIATRRKAL  | 151  | >MLH1-N158:YHIATRRKAL  | 10   | 141  |
| >MLH1-N158:FYNIATRRKAI | 48   | >MLH1-N158:FYHIATRRKAI | 34   | 14   |
| >MLH1-N158:FYNIATRRKAI | 35   | >MLH1-N158:FYHIATRRKAI | 13   | 22   |
| >MLH1-N158:FYNIATRRK   | 2104 | >MLH1-N158:FYHIATRRK   | 167  | 1937 |
| >MLH1-N158:FYNIATRR    | 336  | >MLH1-N158:FYHIATRR    | 677  | 341  |
| >MLH1-N158:FYNIATRR    | 309  | >MLH1-N158:FYHIATRR    | 431  | 122  |
| >MLH1-N158:FYNIATRR    | 221  | >MLH1-N158:FYHIATRR    | 208  | 13   |
| >MLH1-N158:FYNIATRR    | 83   | >MLH1-N158:FYHIATRR    | 49   | 34   |
| >MLH1-N158:LFYNIATRRK  | 104  | >MLH1-N158:LFYHIATRRK  | 131  | 27   |
| >MLH1-N158:LFYNIATR    | 12   | >MLH1-N158:LFYHIATR    | 13   | 1    |
| >MLH1-N158:LFYNIATRR   | 16   | >MLH1-N158:LFYHIATRR   | 21   | 5    |
| >MLH1-N158:LFYNIATRRK  | 154  | >MLH1-N158:LFYHIATRRK  | 128  | 26   |
| >MLH1-N158:LFYNIATR    | 50   | >MLH1-N158:LFYHIATR    | 34   | 16   |
| >MLH1-N158:LFYNIATRR   | 120  | >MLH1-N158:LFYHIATRR   | 81   | 39   |
| >MLH1-N158:LFYNIATR    | 60   | >MLH1-N158:LFYHIATR    | 84   | 24   |
| >MLH1-N158:LFYNIATRR   | 59   | >MLH1-N158:LFYHIATRR   | 88   | 29   |
| >MLH1-N158:LFYNIATR    | 70   | >MLH1-N158:LFYHIATR    | 58   | 12   |
| >MLH1-N158:LFYNIATRR   | 67   | >MLH1-N158:LFYHIATRR   | 44   | 23   |
| >MLH1-N158:DLFYNIATRR  | 911  | >MLH1-N158:DLFYHIATRR  | 367  | 544  |
| >MLH1-N158:DLFYNIATR   | 209  | >MLH1-N158:DLFYHIATR   | 72   | 137  |
| >MLH1-N158:DLFYNIATRR  | 237  | >MLH1-N158:DLFYHIATRR  | 148  | 89   |
| >MLH1-N158:DLFYNIATR   | 10   | >MLH1-N158:DLFYHIATR   | 8    | 2    |
| >MLH1-N158:DLFYNIATRR  | 76   | >MLH1-N158:DLFYHIATRR  | 114  | 38   |
| >MLH1-N158:DLFYNIATRR  | 781  | >MLH1-N158:DLFYHIATRR  | 436  | 345  |
| >MLH1-N158:DLFYNIATR   | 4    | >MLH1-N158:DLFYHIATR   | 5    | 1    |
| >MLH1-N158:DLFYNIATRR  | 19   | >MLH1-N158:DLFYHIATRR  | 12   | 7    |
| >MLH1-N158:DLFYNIATRR  | 38   | >MLH1-N158:DLFYHIATRR  | 48   | 10   |

|                       |      |                       |      |      |
|-----------------------|------|-----------------------|------|------|
| >MLH1-N158DLFYNIATR   | 293  | >MLH1-N158DLFYHIATR   | 341  | 48   |
| >MLH1-N158DLFYNIATRR  | 377  | >MLH1-N158DLFYHIATRR  | 354  | 23   |
| >MLH1-N158EDLFYNIATRF | 205  | >MLH1-N158EDLFYHIATRF | 194  | 11   |
| >MLH1-N158EDLFYNI     | 1528 | >MLH1-N158EDLFYHIA    | 464  | 1064 |
| >MLH1-N158VEDLFYNI    | 193  | >MLH1-N158VEDLFYHI    | 95   | 98   |
| >MLH1-N158VEDLFYNI    | 167  | >MLH1-N158VEDLFYHI    | 158  | 9    |
| >MLH1-N158VEDLFYNI    | 418  | >MLH1-N158VEDLFYHI    | 1045 | 627  |
| >MLH1-N158VEDLFYNI    | 340  | >MLH1-N158VEDLFYHIA   | 123  | 217  |
| >MLH1-N158VEDLFYNIAT  | 386  | >MLH1-N158VEDLFYHIAT  | 268  | 118  |
| >MLH1-N158VEDLFYNI    | 340  | >MLH1-N158VEDLFYHI    | 39   | 301  |
| >MLH1-N158TVEDLFYNI   | 396  | >MLH1-N158TVEDLFYHI   | 592  | 196  |
| >MLH1-N158TVEDLFYNI   | 191  | >MLH1-N158TVEDLFYHI   | 43   | 148  |
| >MLH1-N158TVEDLFYNI   | 15   | >MLH1-N158TVEDLFYHI   | 13   | 2    |
| >MLH1-N158TVEDLFYNI   | 105  | >MLH1-N158TVEDLFYHI   | 173  | 68   |
| >MLH1-N158ITVEDLFYNI  | 379  | >MLH1-N158ITVEDLFYHI  | 473  | 94   |
| >MLH1-N158ITVEDLFYNI  | 192  | >MLH1-N158ITVEDLFYHI  | 290  | 98   |
| >MLH1-N158ITVEDLFYNI  | 370  | >MLH1-N158ITVEDLFYH   | 808  | 438  |
| >MLH1-N158ITVEDLFYNI  | 31   | >MLH1-N158ITVEDLFYHI  | 43   | 12   |
| >MLH1-N158ITVEDLFYNI  | 157  | >MLH1-N158ITVEDLFYHIA | 107  | 50   |
| >MLH1-N158ITVEDLFYNI  | 104  | >MLH1-N158ITVEDLFYHI  | 88   | 16   |
| >MLH1-N158ITVEDLFYNI  | 285  | >MLH1-N158ITVEDLFYHI  | 158  | 127  |
| >MLH1-N158ITVEDLFYNI  | 1975 | >MLH1-N158ITVEDLFYH   | 58   | 1917 |
| >MLH1-N158ITVEDLFYNI  | 335  | >MLH1-N158ITVEDLFYHI  | 207  | 128  |
| >MLH1-N158ITVEDLFYNI  | 80   | >MLH1-N158ITVEDLFYHI  | 75   | 5    |
| >MLH1-N158ITVEDLFYNI  | 634  | >MLH1-N158ITVEDLFYHIA | 466  | 168  |
| >MLH1-N158ITVEDLFYNI  | 44   | >MLH1-N158ITVEDLFYHI  | 72   | 28   |
| >MLH1-N158ITVEDLFYNI  | 4279 | >MLH1-N158ITVEDLFYH   | 343  | 3936 |
| >MLH1-N158ITVEDLFYNI  | 62   | >MLH1-N158ITVEDLFYHI  | 100  | 38   |
| >MLH1-N158ITVEDLFYNI  | 461  | >MLH1-N158ITVEDLFYHI  | 104  | 357  |
| >MLH1-N158ITVEDLFYNI  | 141  | >MLH1-N158ITVEDLFYHI  | 175  | 34   |
| >MLH1-N158ITVEDLFYNI  | 325  | >MLH1-N158ITVEDLFYHI  | 186  | 139  |
| >MLH1-N158QITVEDLFYNI | 1241 | >MLH1-N158QITVEDLFYHI | 498  | 743  |
| >MLH1-N158QITVEDLFYNI | 454  | >MLH1-N158QITVEDLFYHI | 412  | 42   |
| >MLH1-N187NAGISFSV    | 6818 | >MLH1-N187YAGISFSV    | 447  | 6371 |
| >MLH1-N187NAGISFSV    | 2537 | >MLH1-N187YAGISFSV    | 309  | 2228 |
| >MLH1-N187NAGISFSV    | 3481 | >MLH1-N187YAGISFSV    | 433  | 3048 |
| >MLH1-N187NAGISFSV    | 542  | >MLH1-N187YAGISFSV    | 24   | 518  |
| >MLH1-N187NAGISFSV    | 2367 | >MLH1-N187YAGISFSV    | 35   | 2332 |
| >MLH1-N187NAGISFSV    | 4715 | >MLH1-N187YAGISFSV    | 300  | 4415 |
| >MLH1-N187NAGISFSV    | 5133 | >MLH1-N187YAGISFSV    | 95   | 5038 |
| >MLH1-N187NAGISFSV    | 3918 | >MLH1-N187YAGISFSV    | 235  | 3683 |
| >MLH1-N187NAGISFSV    | 2419 | >MLH1-N187YAGISFSV    | 11   | 2408 |
| >MLH1-N187NAGISFSVK   | 1208 | >MLH1-N187YAGISFSVK   | 440  | 768  |

|                       |       |                       |     |       |
|-----------------------|-------|-----------------------|-----|-------|
| >MLH1-N187NAGISFSVKK  | 427   | >MLH1-N187YAGISFSVKK  | 271 | 156   |
| >MLH1-N187NAGISFSVK   | 325   | >MLH1-N187YAGISFSVK   | 179 | 146   |
| >MLH1-N187NAGISFSVKK  | 60    | >MLH1-N187YAGISFSVKK  | 45  | 15    |
| >MLH1-N187NAGISFSV    | 195   | >MLH1-N187YAGISFSV    | 289 | 94    |
| >MLH1-N187NAGISFSV    | 80    | >MLH1-N187YAGISFSV    | 57  | 23    |
| >MLH1-N187HNAGISFSV   | 26386 | >MLH1-N187HYAGISFSV   | 204 | 26182 |
| >MLH1-N187HNAGISFSV   | 87    | >MLH1-N187HYAGISFSV   | 11  | 76    |
| >MLH1-N187HNAGISFSV   | 1387  | >MLH1-N187HYAGISFSV   | 139 | 1248  |
| >MLH1-N187HNAGISFSV   | 3192  | >MLH1-N187HYAGISFSV   | 222 | 2970  |
| >MLH1-N187HNAGISFSV   | 3123  | >MLH1-N187HYAGISFSV   | 44  | 3079  |
| >MLH1-N187HNAGISFSV   | 20380 | >MLH1-N187HYAGISFSV   | 279 | 20101 |
| >MLH1-N187HNAGISFSV   | 23974 | >MLH1-N187HYAGISFSV   | 36  | 23938 |
| >MLH1-N187HNAGISFSVK  | 24731 | >MLH1-N187HYAGISFSVK  | 338 | 24393 |
| >MLH1-N187HNAGISFSVK  | 25691 | >MLH1-N187HYAGISFSVKI | 377 | 25314 |
| >MLH1-N187HNAGISFSVK  | 2482  | >MLH1-N187HYAGISFSVK  | 76  | 2406  |
| >MLH1-N187HNAGISFSVK  | 2330  | >MLH1-N187HYAGISFSVKI | 65  | 2265  |
| >MLH1-N187HNAGISFSVK  | 8340  | >MLH1-N187HYAGISFSVKI | 354 | 7986  |
| >MLH1-N187HNAGISFSVK  | 1012  | >MLH1-N187HYAGISFSVK  | 384 | 628   |
| >MLH1-N187HNAGISFSVK  | 95    | >MLH1-N187HYAGISFSVKI | 69  | 26    |
| >MLH1-N187HNAGISFSV   | 8     | >MLH1-N187HYAGISFSV   | 13  | 5     |
| >MLH1-N187HNAGISFSV   | 316   | >MLH1-N187HYAGISFSV   | 671 | 355   |
| >MLH1-N187HNAGISFSVK  | 4582  | >MLH1-N187HYAGISFSVK  | 87  | 4495  |
| >MLH1-N187HNAGISFSVK  | 1389  | >MLH1-N187HYAGISFSVKI | 35  | 1354  |
| >MLH1-N187LEVVGGRYSVH | 15676 | >MLH1-N187LEVVGGRYSVH | 129 | 15547 |
| >MLH1-N187LEVVGGRYSVH | 15847 | >MLH1-N187LEVVGGRYSVH | 204 | 15643 |
| >MLH1-N187LEVVGGRYSVH | 2233  | >MLH1-N187LEVVGGRYSVH | 20  | 2213  |
| >MLH1-N187LEVVGGRYSVH | 5725  | >MLH1-N187LEVVGGRYSVH | 450 | 5275  |
| >MLH1-N187LEVVGGRYSVH | 9829  | >MLH1-N187LEVVGGRYSVH | 339 | 9490  |
| >MLH1-N187VHNAGISFSV  | 1393  | >MLH1-N187VHYAGISFSV  | 137 | 1256  |
| >MLH1-N187VHNAGISFSV  | 2793  | >MLH1-N187VHYAGISFSV  | 311 | 2482  |
| >MLH1-N187VHNAGISFSV  | 1152  | >MLH1-N187VHYAGISFSV  | 195 | 957   |
| >MLH1-N187VHNAGISF    | 23    | >MLH1-N187VHYAGISF    | 5   | 18    |
| >MLH1-N187VHNAGISFSV  | 2100  | >MLH1-N187VHYAGISFSV  | 345 | 1755  |
| >MLH1-N187VHNAGISFSV  | 2934  | >MLH1-N187VHYAGISFSVI | 494 | 2440  |
| >MLH1-N187VHNAGISFSV  | 567   | >MLH1-N187VHYAGISFSV  | 144 | 423   |
| >MLH1-N187SVHNAGISFS' | 205   | >MLH1-N187SVHYAGISFS\ | 199 | 6     |
| >MLH1-N187SVHNAGISFS' | 293   | >MLH1-N187SVHYAGISFS\ | 189 | 104   |
| >MLH1-N187SVHNAGISFS' | 57    | >MLH1-N187SVHYAGISFS\ | 87  | 30    |
| >MLH1-N187SVHNAGISFS' | 28    | >MLH1-N187SVHYAGISFS\ | 47  | 19    |
| >MLH1-N187SVHNAGISFS' | 16    | >MLH1-N187SVHYAGISFS\ | 93  | 77    |
| >MLH1-N187SVHNAGISFS' | 122   | >MLH1-N187SVHYAGISFS\ | 281 | 159   |
| >MLH1-N187SVHNAGISFS' | 23    | >MLH1-N187SVHYAGISFS\ | 88  | 65    |
| >MLH1-N187SVHNAGISFS' | 7     | >MLH1-N187SVHYAGISFS\ | 34  | 27    |

|                       |      |                       |     |      |
|-----------------------|------|-----------------------|-----|------|
| >MLH1-N187SVHNAGISF   | 1036 | >MLH1-N187SVHYAGISF   | 402 | 634  |
| >MLH1-N187SVHNAGISF   | 373  | >MLH1-N187SVHYAGISF   | 312 | 61   |
| >MLH1-N187SVHNAGISFS  | 91   | >MLH1-N187SVHYAGISFS  | 82  | 9    |
| >MLH1-N187SVHNAGISFS' | 25   | >MLH1-N187SVHYAGISFS\ | 23  | 2    |
| >MLH1-N187SVHNAGISF   | 286  | >MLH1-N187SVHYAGISF   | 183 | 103  |
| >MLH1-N187SVHNAGISFS' | 563  | >MLH1-N187SVHYAGISFS\ | 444 | 119  |
| >MLH1-N187SVHNAGISFS' | 28   | >MLH1-N187SVHYAGISFS\ | 18  | 10   |
| >MLH1-N187SVHNAGISFS' | 89   | >MLH1-N187SVHYAGISFS\ | 113 | 24   |
| >MLH1-N187SVHNAGISF   | 54   | >MLH1-N187SVHYAGISF   | 53  | 1    |
| >MLH1-N187SVHNAGISF   | 227  | >MLH1-N187SVHYAGISF   | 326 | 99   |
| >MLH1-N187SVHNAGISF   | 58   | >MLH1-N187SVHYAGISF   | 42  | 16   |
| >MLH1-N187SVHNAGISF   | 304  | >MLH1-N187SVHYAGISF   | 237 | 67   |
| >MLH1-N187SVHNAGISF   | 218  | >MLH1-N187SVHYAGISF   | 299 | 81   |
| >MLH1-N187YSVHNAGI    | 8060 | >MLH1-N187YSVHYAGI    | 72  | 7988 |
| >MLH1-N187YSVHNAGI    | 512  | >MLH1-N187YSVHYAGI    | 181 | 331  |
| >MLH1-N187YSVHNAGISF  | 133  | >MLH1-N187YSVHYAGISF  | 115 | 18   |
| >MLH1-N187YSVHNAGI    | 133  | >MLH1-N187YSVHYAGI    | 124 | 9    |
| >MLH1-N187YSVHNAGI    | 526  | >MLH1-N187YSVHYAGI    | 257 | 269  |
| >MLH1-N187YSVHNAGISF  | 56   | >MLH1-N187YSVHYAGISF  | 47  | 9    |
| >MLH1-N187YSVHNAGI    | 682  | >MLH1-N187YSVHYAGI    | 378 | 304  |
| >MLH1-N187YSVHNAGISF  | 8    | >MLH1-N187YSVHYAGISF  | 7   | 1    |
| >MLH1-N187YSVHNAGI    | 11   | >MLH1-N187YSVHYAGI    | 9   | 2    |
| >MLH1-N187YSVHNAGISF  | 3    | >MLH1-N187YSVHYAGISF  | 3   | 0    |
| >MLH1-N187YSVHNAGISF  | 118  | >MLH1-N187YSVHYAGISF  | 87  | 31   |
| >MLH1-N187YSVHNAGISF  | 675  | >MLH1-N187YSVHYAGISF  | 283 | 392  |
| >MLH1-N187YSVHNAGISF  | 28   | >MLH1-N187YSVHYAGISF  | 31  | 3    |
| >MLH1-N187YSVHNAGISF  | 843  | >MLH1-N187YSVHYAGISF  | 365 | 478  |
| >MLH1-N187YSVHNAGI    | 173  | >MLH1-N187YSVHYAGI    | 97  | 76   |
| >MLH1-N187RYSVHNAGIS  | 314  | >MLH1-N187RYSVHYAGISI | 193 | 121  |
| >MLH1-N187RYSVHNAGI   | 349  | >MLH1-N187RYSVHYAGI   | 100 | 249  |
| >MLH1-N187RYSVHNAGIS  | 128  | >MLH1-N187RYSVHYAGISI | 71  | 57   |
| >MLH1-N187RYSVHNAGI   | 25   | >MLH1-N187RYSVHYAGI   | 8   | 17   |
| >MLH1-N187RYSVHNAGIS  | 6    | >MLH1-N187RYSVHYAGISI | 5   | 1    |
| >MLH1-N187RYSVHNAGI   | 167  | >MLH1-N187RYSVHYAGI   | 85  | 82   |
| >MLH1-N187RYSVHNAGIS  | 80   | >MLH1-N187RYSVHYAGISI | 55  | 25   |
| >MLH1-N187GRYSVHNAG   | 597  | >MLH1-N187GRYSVHYAGI  | 463 | 134  |
| >MLH1-N187GRYSVHNA    | 278  | >MLH1-N187GRYSVHYA    | 250 | 28   |
| >MLH1-N187GRYSVHNAG   | 101  | >MLH1-N187GRYSVHYAGI  | 51  | 50   |
| >MLH1-N187GRYSVHNA    | 693  | >MLH1-N187GRYSVHYA    | 456 | 237  |
| >MLH1-N187GRYSVHNAG   | 721  | >MLH1-N187GRYSVHYAG   | 214 | 507  |
| >MLH1-N187GRYSVHNAG   | 962  | >MLH1-N187GRYSVHYAGI  | 405 | 557  |
| >MLH1-N187VGRYSVHNA   | 554  | >MLH1-N187VGRYSVHYA   | 148 | 406  |
| >MLH1-N187VGRYSVHNA   | 780  | >MLH1-N187VGRYSVHYAC  | 471 | 309  |

|                       |       |                       |      |       |
|-----------------------|-------|-----------------------|------|-------|
| >MLH1-N187VGRYSVHN    | 27020 | >MLH1-N187VGRYSVHY    | 206  | 26814 |
| >MLH1-N187VGRYSVHN    | 16028 | >MLH1-N187VGRYSVHY    | 106  | 15922 |
| >MLH1-N187VGRYSVHN    | 18404 | >MLH1-N187VGRYSVHY    | 173  | 18231 |
| >MLH1-N187VGRYSVHN    | 19595 | >MLH1-N187VGRYSVHY    | 91   | 19504 |
| >MLH1-N187VVGGRYSVHN, | 2691  | >MLH1-N187VVGGRYSVHY/ | 290  | 2401  |
| >MLH1-N187VVGGRYSVHN, | 823   | >MLH1-N187VVGGRYSVHY/ | 308  | 515   |
| >MLH1-N187VVGGRYSVHN  | 20102 | >MLH1-N187VVGGRYSVHY  | 91   | 20011 |
| >MLH1-N187VVGGRYSVHN  | 27913 | >MLH1-N187VVGGRYSVHY  | 447  | 27466 |
| >MLH1-N187VVGGRYSVHN  | 19837 | >MLH1-N187VVGGRYSVHY  | 11   | 19826 |
| >MLH1-N187VVGGRYSVHN  | 13347 | >MLH1-N187VVGGRYSVHY  | 90   | 13257 |
| >MLH1-N187EVVGRYSVHN  | 14195 | >MLH1-N187EVVGRYSVHY  | 193  | 14002 |
| >MLH1-N187EVVGRYSVHN  | 10900 | >MLH1-N187EVVGRYSVHY  | 128  | 10772 |
| >MLH1-N187EVVGRYSVHN  | 1485  | >MLH1-N187EVVGRYSVHY  | 3    | 1482  |
| >MLH1-N187EVVGRYSVHN  | 95    | >MLH1-N187EVVGRYSVHY  | 54   | 41    |
| >MLH1-N187EVVGRYSVHN  | 19502 | >MLH1-N187EVVGRYSVHY  | 28   | 19474 |
| >MLH1-N187EVVGRYSVHN  | 17101 | >MLH1-N187EVVGRYSVHY  | 223  | 16878 |
| >MLH1-N187EVVGRYSVHN  | 18    | >MLH1-N187EVVGRYSVHY  | 11   | 7     |
| >MLH1-N187EVVGRYSVHN  | 195   | >MLH1-N187EVVGRYSVHY  | 88   | 107   |
| >MLH1-N187EVVGRYSVHN  | 18541 | >MLH1-N187EVVGRYSVHY  | 347  | 18194 |
| >MLH1-P469 NPRKRHRE   | 483   | >MLH1-P469 NLRKRHRE   | 497  | 14    |
| >MLH1-P469 SEKRGPSSN  | 8273  | >MLH1-P469 SEKRGPSSN  | 235  | 8038  |
| >MLH1-P469 SEKRGPSSN  | 9794  | >MLH1-P469 SEKRGPSSN  | 289  | 9505  |
| >MLH1-P469 SNPRKRHR   | 2418  | >MLH1-P469 SNLRKRHR   | 191  | 2227  |
| >MLH1-P469 SSNPRKRHR  | 16    | >MLH1-P469 SSNLRKRHR  | 16   | 0     |
| >MLH1-P469 SSNPRKRHR  | 443   | >MLH1-P469 SSNLRKRHR  | 1303 | 860   |
| >MLH1-P469 TSSNPRKR   | 410   | >MLH1-P469 TSSNLRKR   | 142  | 268   |
| >MLH1-P469 TSSNPRKRHR | 31    | >MLH1-P469 TSSNLRKRHR | 22   | 9     |
| >MLH1-P469 TSSNPRKR   | 93    | >MLH1-P469 TSSNLRKR   | 44   | 49    |
| >MLH1-P469 TSSNPRKRHR | 260   | >MLH1-P469 TSSNLRKRHR | 178  | 82    |
| >MLH1-P469 PTSSNPRK   | 954   | >MLH1-P469 PTSSNLRK   | 449  | 505   |
| >MLH1-P469 RGPTSSNPRK | 280   | >MLH1-P469 RGPTSSNLRK | 435  | 155   |
| >MLH1-P469 RGPTSSNPR  | 72    | >MLH1-P469 RGPTSSNLR  | 176  | 104   |
| >MLH1-P469 RGPTSSNPRK | 228   | >MLH1-P469 RGPTSSNLRK | 378  | 150   |
| >MLH1-P469 KRGPTSSNP  | 3213  | >MLH1-P469 KRGPTSSNL  | 143  | 3070  |
| >MLH1-P469 KRGPTSSNP  | 7383  | >MLH1-P469 KRGPTSSNL  | 223  | 7160  |
| >MLH1-P469 KRGPTSSNP  | 13601 | >MLH1-P469 KRGPTSSNL  | 89   | 13512 |
| >MLH1-P469 KRGPTSSNPR | 65    | >MLH1-P469 KRGPTSSNLR | 97   | 32    |
| >MLH1-P469 EKRGPSSNP  | 16058 | >MLH1-P469 EKRGPSSNL  | 353  | 15705 |
| >MLH1-P469 EKRGPSSNP  | 3582  | >MLH1-P469 EKRGPSSNL  | 92   | 3490  |
| >MLH1-R325 RVQQHIESK  | 404   | >MLH1-R325 QVQQHIESK  | 4936 | 4532  |
| >MLH1-R325 RVQQHIESK  | 53    | >MLH1-R325 QVQQHIESK  | 219  | 166   |
| >MLH1-R325 RVQQHIESK  | 218   | >MLH1-R325 QVQQHIESK  | 5355 | 5137  |
| >MLH1-R325 RVQQHIESK  | 382   | >MLH1-R325 QVQQHIESK  | 7876 | 7494  |

|                        |      |                        |       |       |
|------------------------|------|------------------------|-------|-------|
| >MLH1-R325 RVQQHIESKL  | 469  | >MLH1-R325 QVQQHIESKL  | 3024  | 2555  |
| >MLH1-R325 RVQQHIESKL  | 415  | >MLH1-R325 QVQQHIESKL  | 6955  | 6540  |
| >MLH1-R325 RVQQHIESKL  | 401  | >MLH1-R325 QVQQHIESKL  | 6412  | 6011  |
| >MLH1-R325 RVQQHIESK   | 998  | >MLH1-R325 QVQQHIESK   | 466   | 532   |
| >MLH1-R325 HFLHEESILER | 123  | >MLH1-R325 HFLHEESILEC | 16302 | 16179 |
| >MLH1-R325 HFLHEESILER | 55   | >MLH1-R325 HFLHEESILEC | 16708 | 16653 |
| >MLH1-R325 HFLHEESILER | 31   | >MLH1-R325 HFLHEESILEC | 2832  | 2801  |
| >MLH1-R325 LERVQQHI    | 81   | >MLH1-R325 LEQVQQHI    | 193   | 112   |
| >MLH1-R325 LERVQQHI    | 485  | >MLH1-R325 LEQVQQHI    | 1213  | 728   |
| >MLH1-R325 LERVQQHI    | 70   | >MLH1-R325 LEQVQQHI    | 217   | 147   |
| >MLH1-R325 ILERVQQHI   | 547  | >MLH1-R325 ILEQVQQHI   | 304   | 243   |
| >MLH1-R325 ILERVQQHI   | 130  | >MLH1-R325 ILEQVQQHI   | 77    | 53    |
| >MLH1-R325 ILERVQQHI   | 499  | >MLH1-R325 ILEQVQQHI   | 638   | 139   |
| >MLH1-R325 ILERVQQHI   | 628  | >MLH1-R325 ILEQVQQHI   | 262   | 366   |
| >MLH1-R325 ILERVQQHI   | 30   | >MLH1-R325 ILEQVQQHI   | 20    | 10    |
| >MLH1-R325 SILERVQQHI  | 15   | >MLH1-R325 SILEQVQQHI  | 13    | 2     |
| >MLH1-R325 SILERVQQHI  | 145  | >MLH1-R325 SILEQVQQHI  | 108   | 37    |
| >MLH1-R325 SILERVQQHI  | 19   | >MLH1-R325 SILEQVQQHI  | 14    | 5     |
| >MLH1-R325 SILERVQQHI  | 67   | >MLH1-R325 SILEQVQQHI  | 56    | 11    |
| >MLH1-R325 SILERVQQHI  | 260  | >MLH1-R325 SILEQVQQHI  | 120   | 140   |
| >MLH1-R325 ESILERVQQH  | 362  | >MLH1-R325 ESILEQVQQH  | 164   | 198   |
| >MLH1-R325 ESILERVQQH  | 431  | >MLH1-R325 ESILEQVQQH  | 270   | 161   |
| >MLH1-R325 ESILERVQQH  | 148  | >MLH1-R325 ESILEQVQQH  | 182   | 34    |
| >MLH1-R325 EESILERV    | 97   | >MLH1-R325 EESILEQV    | 122   | 25    |
| >MLH1-R325 EESILERVQ   | 842  | >MLH1-R325 EESILEQVQ   | 419   | 423   |
| >MLH1-R325 HEESILERV   | 171  | >MLH1-R325 HEESILEQV   | 31    | 140   |
| >MLH1-R325 HEESILERV   | 48   | >MLH1-R325 HEESILEQV   | 37    | 11    |
| >MLH1-R325 HEESILERV   | 7    | >MLH1-R325 HEESILEQV   | 5     | 2     |
| >MLH1-R325 HEESILER    | 485  | >MLH1-R325 HEESILEQ    | 24005 | 23520 |
| >MLH1-R325 FLHEESILERV | 9    | >MLH1-R325 FLHEESILEQV | 9     | 0     |
| >MLH1-R325 FLHEESILERV | 2    | >MLH1-R325 FLHEESILEQV | 2     | 0     |
| >MLH1-R325 FLHEESILERV | 3    | >MLH1-R325 FLHEESILEQV | 2     | 1     |
| >MLH1-R325 FLHEESILERV | 7    | >MLH1-R325 FLHEESILEQV | 6     | 1     |
| >MLH1-R325 FLHEESILER  | 312  | >MLH1-R325 FLHEESILEQ  | 35    | 277   |
| >MLH1-R325 FLHEESILERV | 1    | >MLH1-R325 FLHEESILEQV | 1     | 0     |
| >MLH1-R325 FLHEESILERV | 3    | >MLH1-R325 FLHEESILEQV | 3     | 0     |
| >MLH1-R325 FLHEESILER  | 5538 | >MLH1-R325 FLHEESILEQ  | 157   | 5381  |
| >MLH1-R325 FLHEESILERV | 5    | >MLH1-R325 FLHEESILEQV | 4     | 1     |
| >MLH1-R325 FLHEESILERV | 3    | >MLH1-R325 FLHEESILEQV | 3     | 0     |
| >MLH1-R325 FLHEESILER  | 119  | >MLH1-R325 FLHEESILEQ  | 5     | 114   |
| >MLH1-R325 FLHEESILERV | 1    | >MLH1-R325 FLHEESILEQV | 1     | 0     |
| >MLH1-R325 FLHEESILER  | 271  | >MLH1-R325 FLHEESILEQ  | 32868 | 32597 |
| >MLH1-R325 FLHEESILERV | 233  | >MLH1-R325 FLHEESILEQV | 315   | 82    |

|                        |       |                        |       |       |
|------------------------|-------|------------------------|-------|-------|
| >MLH1-R325 FLHEESILERV | 370   | >MLH1-R325 FLHEESILEQV | 167   | 203   |
| >MLH1-R325 FLHEESILER  | 377   | >MLH1-R325 FLHEESILEQ  | 24339 | 23962 |
| >MLH1-R522 REMLHNHSF   | 1372  | >MLH1-R522 WEMLHNHSF   | 269   | 1103  |
| >MLH1-R522 REMLHNHSF'  | 39    | >MLH1-R522 WEMLHNHSF   | 23    | 16    |
| >MLH1-R522 REMLHNHSF   | 130   | >MLH1-R522 WEMLHNHSF   | 9210  | 9080  |
| >MLH1-R522 REMLHNHSF   | 121   | >MLH1-R522 WEMLHNHSF   | 193   | 72    |
| >MLH1-R522 REMLHNHSF   | 21    | >MLH1-R522 WEMLHNHSF   | 45    | 24    |
| >MLH1-R522 REMLHNHSF   | 15    | >MLH1-R522 WEMLHNHSF   | 4     | 11    |
| >MLH1-R522 REMLHNHSF   | 3562  | >MLH1-R522 WEMLHNHSF   | 358   | 3204  |
| >MLH1-R522 REMLHNHSF   | 25    | >MLH1-R522 WEMLHNHSF   | 28    | 3     |
| >MLH1-R522 REMLHNHSF   | 25    | >MLH1-R522 WEMLHNHSF   | 42    | 17    |
| >MLH1-R522 REMLHNHSF'  | 185   | >MLH1-R522 WEMLHNHSF   | 541   | 356   |
| >MLH1-R522 REMLHNHSF   | 133   | >MLH1-R522 WEMLHNHSF   | 141   | 8     |
| >MLH1-R522 REMLHNHSF   | 80    | >MLH1-R522 WEMLHNHSF   | 178   | 98    |
| >MLH1-R522 REMLHNHS    | 264   | >MLH1-R522 WEMLHNHS    | 3930  | 3666  |
| >MLH1-R522 REMLHNHSF   | 365   | >MLH1-R522 WEMLHNHSF   | 3969  | 3604  |
| >MLH1-R522 REMLHNHSF'  | 142   | >MLH1-R522 WEMLHNHSF   | 2112  | 1970  |
| >MLH1-R522 REMLHNHSF   | 18    | >MLH1-R522 WEMLHNHSF   | 22    | 4     |
| >MLH1-R522 REMLHNHSF'  | 12    | >MLH1-R522 WEMLHNHSF   | 9     | 3     |
| >MLH1-R522 REMLHNHSF'  | 198   | >MLH1-R522 WEMLHNHSF   | 163   | 35    |
| >MLH1-R522 LREMLHNHSI  | 16832 | >MLH1-R522 LWEMLNHS    | 161   | 16671 |
| >MLH1-R522 LREMLHNHSI  | 17164 | >MLH1-R522 LWEMLNHS    | 78    | 17086 |
| >MLH1-R522 LREMLHNHSI  | 202   | >MLH1-R522 LWEMLNHS    | 4019  | 3817  |
| >MLH1-R522 LREMLHNHS   | 38812 | >MLH1-R522 LWEMLNHS    | 456   | 38356 |
| >MLH1-R522 LREMLHNHSI  | 28696 | >MLH1-R522 LWEMLNHS    | 39    | 28657 |
| >MLH1-R522 EINEQGHEVL  | 110   | >MLH1-R522 EINEQGHEVL  | 24542 | 24432 |
| >MLH1-R522 EINEQGHEVL  | 10    | >MLH1-R522 EINEQGHEVL  | 10223 | 10213 |
| >MLH1-R522 EINEQGHEVL  | 378   | >MLH1-R522 EINEQGHEVL  | 34055 | 33677 |
| >MLH1-R522 VLREMLHNH   | 14675 | >MLH1-R522 VLWEMLNH    | 155   | 14520 |
| >MLH1-R522 VLREMLHNH   | 3323  | >MLH1-R522 VLWEMLNH    | 235   | 3088  |
| >MLH1-R522 VLREMLHN    | 10006 | >MLH1-R522 VLWEMLNH    | 252   | 9754  |
| >MLH1-R522 VLREMLHNH   | 13880 | >MLH1-R522 VLWEMLNH    | 477   | 13403 |
| >MLH1-R522 VLREMLHNH   | 5536  | >MLH1-R522 VLWEMLNH    | 68    | 5468  |
| >MLH1-R522 VLREMLHNH   | 2084  | >MLH1-R522 VLWEMLNH    | 16    | 2068  |
| >MLH1-R522 VLREMLHNH   | 5534  | >MLH1-R522 VLWEMLNH    | 300   | 5234  |
| >MLH1-R522 VLREMLHNH   | 12601 | >MLH1-R522 VLWEMLNH    | 212   | 12389 |
| >MLH1-R522 VLREMLHNH   | 12739 | >MLH1-R522 VLWEMLNH    | 205   | 12534 |
| >MLH1-R522 VLREMLHNH   | 1883  | >MLH1-R522 VLWEMLNH    | 89    | 1794  |
| >MLH1-R522 VLREMLHNH   | 776   | >MLH1-R522 VLWEMLNH    | 96    | 680   |
| >MLH1-R522 VLREMLHNH   | 230   | >MLH1-R522 VLWEMLNH    | 25    | 205   |
| >MLH1-R522 VLREMLHNH   | 567   | >MLH1-R522 VLWEMLNH    | 74    | 493   |
| >MLH1-R522 VLREMLHNH   | 5061  | >MLH1-R522 VLWEMLNH    | 257   | 4804  |
| >MLH1-R522 VLREMLHNH   | 1554  | >MLH1-R522 VLWEMLNH    | 37    | 1517  |

|                        |       |                        |       |       |
|------------------------|-------|------------------------|-------|-------|
| >MLH1-R522 VLREMLHNNH  | 377   | >MLH1-R522 VLWEMLHNNH  | 3641  | 3264  |
| >MLH1-R522 VLREMLHNNH  | 69    | >MLH1-R522 VLWEMLHNNH  | 200   | 131   |
| >MLH1-R522 VLREMLHNNH  | 171   | >MLH1-R522 VLWEMLHNNH  | 185   | 14    |
| >MLH1-R522 VLREMLHNNH  | 50    | >MLH1-R522 VLWEMLHNNH  | 33    | 17    |
| >MLH1-R522 VLREMLHNNH  | 101   | >MLH1-R522 VLWEMLHNNH  | 128   | 27    |
| >MLH1-R522 VLREMLHNNH  | 4947  | >MLH1-R522 VLWEMLHNNH  | 296   | 4651  |
| >MLH1-R522 EVLREMLHNI  | 15    | >MLH1-R522 EVLWEMLHNI  | 25    | 10    |
| >MLH1-R522 HEVLREML    | 45    | >MLH1-R522 HEVLWEML    | 25    | 20    |
| >MLH1-R522 HEVLREMLHI  | 818   | >MLH1-R522 HEVLWEMLHI  | 438   | 380   |
| >MLH1-R522 HEVLREML    | 27    | >MLH1-R522 HEVLWEML    | 19    | 8     |
| >MLH1-R522 HEVLREML    | 82    | >MLH1-R522 HEVLWEML    | 49    | 33    |
| >MLH1-R522 EQGHEVLR    | 166   | >MLH1-R522 EQGHEVLW    | 33507 | 33341 |
| >MLH1-R522 NEQGHEVLR   | 7261  | >MLH1-R522 NEQGHEVLW   | 468   | 6793  |
| >MLH1-R522 NEQGHEVLR   | 101   | >MLH1-R522 NEQGHEVLW   | 32    | 69    |
| >MLH1-R522 NEQGHEVLR   | 15732 | >MLH1-R522 NEQGHEVLW   | 491   | 15241 |
| >MLH1-R522 NEQGHEVLR   | 9222  | >MLH1-R522 NEQGHEVLW   | 61    | 9161  |
| >MLH1-R522 NEQGHEVLR   | 1345  | >MLH1-R522 NEQGHEVLW   | 472   | 873   |
| >MLH1-R522 INEQGHEVLR  | 32256 | >MLH1-R522 INEQGHEVLV  | 356   | 31900 |
| >MLH1-R69K RKEDLDIVCEI | 148   | >MLH1-R69K KKEDLDIVCEI | 99    | 49    |
| >MLH1-R69K IRKEDLDI    | 1138  | >MLH1-R69K IKKEDLDI    | 288   | 850   |
| >MLH1-R69K IQDNGTGIRK  | 233   | >MLH1-R69K IQDNGTGIRK  | 219   | 14    |
| >MLH1-R69K IQDNGTGIRK  | 210   | >MLH1-R69K IQDNGTGIRK  | 182   | 28    |
| >MLH1-R69K QIQDNGTGIF  | 124   | >MLH1-R69K QIQDNGTGIF  | 116   | 8     |
| >MLH1-S108 SHVAHVTI    | 303   | >MLH1-S108 RHVAHVTI    | 2078  | 1775  |
| >MLH1-S108 SHVAHVTI    | 3668  | >MLH1-S108 RHVAHVTI    | 426   | 3242  |
| >MLH1-S108 SHVAHVTI    | 786   | >MLH1-S108 RHVAHVTI    | 133   | 653   |
| >MLH1-S108 SHVAHVTI    | 117   | >MLH1-S108 RHVAHVTI    | 281   | 164   |
| >MLH1-S108 ISHVAHVTI   | 411   | >MLH1-S108 IRHVAHVTI   | 3252  | 2841  |
| >MLH1-S108 ISHVAHVTI   | 19    | >MLH1-S108 IRHVAHVTI   | 1970  | 1951  |
| >MLH1-S108 ISHVAHVTI   | 186   | >MLH1-S108 IRHVAHVTI   | 9703  | 9517  |
| >MLH1-S108 ISHVAHVTI   | 130   | >MLH1-S108 IRHVAHVTI   | 68    | 62    |
| >MLH1-S108 ISHVAHVTI   | 13    | >MLH1-S108 IRHVAHVTI   | 19615 | 19602 |
| >MLH1-S108 ISHVAHVTI   | 21190 | >MLH1-S108 IRHVAHVTI   | 488   | 20702 |
| >MLH1-S108 ISHVAHVTI   | 29594 | >MLH1-S108 IRHVAHVTI   | 327   | 29267 |
| >MLH1-S108 ISHVAHVTI   | 29    | >MLH1-S108 IRHVAHVTI   | 2661  | 2632  |
| >MLH1-S108 SISHVAHV    | 171   | >MLH1-S108 SIRHVAHV    | 4136  | 3965  |
| >MLH1-S108 SISHVAHV    | 23    | >MLH1-S108 SIRHVAHV    | 1108  | 1085  |
| >MLH1-S108 SISHVAHV    | 12    | >MLH1-S108 SIRHVAHV    | 23    | 11    |
| >MLH1-S108 SISHVAHVTI  | 459   | >MLH1-S108 SIRHVAHVTI  | 1423  | 964   |
| >MLH1-S108 SISHVAHV    | 26    | >MLH1-S108 SIRHVAHV    | 312   | 286   |
| >MLH1-S108 SISHVAHV    | 22    | >MLH1-S108 SIRHVAHV    | 119   | 97    |
| >MLH1-S108 SISHVAHVTI  | 291   | >MLH1-S108 SIRHVAHVTI  | 1650  | 1359  |
| >MLH1-S108 SISHVAHV    | 101   | >MLH1-S108 SIRHVAHV    | 1171  | 1070  |



|                        |      |                       |      |      |
|------------------------|------|-----------------------|------|------|
| >MLH1-S108 SISHVAHV    | 18   | >MLH1-S108 SIRHVAHV   | 185  | 167  |
| >MLH1-S108 SISHVAHVTI  | 393  | >MLH1-S108 SIRHVAHVTI | 5352 | 4959 |
| >MLH1-S108 SISHVAHV    | 7    | >MLH1-S108 SIRHVAHV   | 17   | 10   |
| >MLH1-S108 SISHVAHV    | 5535 | >MLH1-S108 SIRHVAHV   | 28   | 5507 |
| >MLH1-S108 SISHVAHVTI  | 2135 | >MLH1-S108 SIRHVAHVTI | 15   | 2120 |
| >MLH1-S108 SISHVAHVTI  | 41   | >MLH1-S108 SIRHVAHVTI | 139  | 98   |
| >MLH1-S108 SISHVAHV    | 22   | >MLH1-S108 SIRHVAHV   | 840  | 818  |
| >MLH1-S108 SISHVAHVTI  | 178  | >MLH1-S108 SIRHVAHVTI | 2123 | 1945 |
| >MLH1-S108 SISHVAHV    | 233  | >MLH1-S108 SIRHVAHV   | 2057 | 1824 |
| >MLH1-S108 ASISHVAHV   | 223  | >MLH1-S108 ASIRHVAHV  | 199  | 24   |
| >MLH1-S108 ASISHVAHV   | 564  | >MLH1-S108 ASIRHVAHV  | 498  | 66   |
| >MLH1-S108 ASISHVAHV   | 227  | >MLH1-S108 ASIRHVAHV  | 1205 | 978  |
| >MLH1-S108 ASISHVAHV   | 40   | >MLH1-S108 ASIRHVAHV  | 141  | 101  |
| >MLH1-S108 ASISHVAHV   | 91   | >MLH1-S108 ASIRHVAHV  | 162  | 71   |
| >MLH1-S108 ASISHVAH    | 194  | >MLH1-S108 ASIRHVAH   | 277  | 83   |
| >MLH1-S108 ASISHVAHV   | 18   | >MLH1-S108 ASIRHVAHV  | 21   | 3    |
| >MLH1-S108 ASISHVAHV   | 326  | >MLH1-S108 ASIRHVAHV  | 383  | 57   |
| >MLH1-S108 ASISHVAHV   | 539  | >MLH1-S108 ASIRHVAHV  | 202  | 337  |
| >MLH1-S108 ASISHVAHV   | 71   | >MLH1-S108 ASIRHVAHV  | 84   | 13   |
| >MLH1-S108 ASISHVAHV   | 214  | >MLH1-S108 ASIRHVAHV  | 524  | 310  |
| >MLH1-S108 ASISHVAHV   | 360  | >MLH1-S108 ASIRHVAHV  | 615  | 255  |
| >MLH1-S108 ASISHVAH    | 386  | >MLH1-S108 ASIRHVAH   | 1015 | 629  |
| >MLH1-S108 ASISHVAHV   | 321  | >MLH1-S108 ASIRHVAHV  | 817  | 496  |
| >MLH1-S108 ASISHVAHV   | 115  | >MLH1-S108 ASIRHVAHV  | 238  | 123  |
| >MLH1-S108 ASISHVAHV   | 180  | >MLH1-S108 ASIRHVAHV  | 366  | 186  |
| >MLH1-S108 ASISHVAHV   | 21   | >MLH1-S108 ASIRHVAHV  | 35   | 14   |
| >MLH1-S108 ASISHVAHV   | 704  | >MLH1-S108 ASIRHVAHV  | 387  | 317  |
| >MLH1-S108 ASISHVAHV   | 422  | >MLH1-S108 ASIRHVAHV  | 1591 | 1169 |
| >MLH1-S108 ASISHVAH    | 324  | >MLH1-S108 ASIRHVAH   | 457  | 133  |
| >MLH1-S108 ASISHVAHV   | 30   | >MLH1-S108 ASIRHVAHV  | 44   | 14   |
| >MLH1-S108 LASISHVAHV  | 314  | >MLH1-S108 LASIRHVAHV | 624  | 310  |
| >MLH1-S108 LASISHVAHV  | 97   | >MLH1-S108 LASIRHVAHV | 133  | 36   |
| >MLH1-S108 LASISHVAHV  | 119  | >MLH1-S108 LASIRHVAHV | 334  | 215  |
| >MLH1-S108 LASISHVAH   | 211  | >MLH1-S108 LASIRHVAH  | 794  | 583  |
| >MLH1-S108 ALASISHV    | 14   | >MLH1-S108 ALASIRHV   | 46   | 32   |
| >MLH1-S108 ALASISHVA   | 58   | >MLH1-S108 ALASIRHVA  | 527  | 469  |
| >MLH1-S108 ALASISHVAH' | 12   | >MLH1-S108 ALASIRHVAH | 21   | 9    |
| >MLH1-S108 ALASISHV    | 2    | >MLH1-S108 ALASIRHV   | 5    | 3    |
| >MLH1-S108 ALASISHVA   | 3    | >MLH1-S108 ALASIRHVA  | 11   | 8    |
| >MLH1-S108 ALASISHVAH' | 2    | >MLH1-S108 ALASIRHVAH | 3    | 1    |
| >MLH1-S108 ALASISHV    | 2    | >MLH1-S108 ALASIRHV   | 4    | 2    |
| >MLH1-S108 ALASISHVA   | 7    | >MLH1-S108 ALASIRHVA  | 34   | 27   |
| >MLH1-S108 ALASISHVAH' | 2    | >MLH1-S108 ALASIRHVAH | 4    | 2    |

|                        |       |                        |      |       |
|------------------------|-------|------------------------|------|-------|
| >MLH1-S108 ALASISHV    | 12    | >MLH1-S108 ALASIRHV    | 56   | 44    |
| >MLH1-S108 ALASISHVA   | 289   | >MLH1-S108 ALASIRHVA   | 1591 | 1302  |
| >MLH1-S108 ALASISHVAH' | 12    | >MLH1-S108 ALASIRHVAH  | 25   | 13    |
| >MLH1-S108 ALASISHV    | 3     | >MLH1-S108 ALASIRHV    | 6    | 3     |
| >MLH1-S108 ALASISHVA   | 30    | >MLH1-S108 ALASIRHVA   | 328  | 298   |
| >MLH1-S108 ALASISHVAH' | 2     | >MLH1-S108 ALASIRHVAH  | 4    | 2     |
| >MLH1-S108 ALASISHV    | 5     | >MLH1-S108 ALASIRHV    | 27   | 22    |
| >MLH1-S108 ALASISHVA   | 55    | >MLH1-S108 ALASIRHVA   | 2498 | 2443  |
| >MLH1-S108 ALASISHVAH' | 4     | >MLH1-S108 ALASIRHVAH  | 11   | 7     |
| >MLH1-S108 ALASISHV    | 5     | >MLH1-S108 ALASIRHV    | 8    | 3     |
| >MLH1-S108 ALASISHVA   | 22    | >MLH1-S108 ALASIRHVA   | 160  | 138   |
| >MLH1-S108 ALASISHVAH' | 5     | >MLH1-S108 ALASIRHVAH  | 6    | 1     |
| >MLH1-S108 ALASISHV    | 4     | >MLH1-S108 ALASIRHV    | 17   | 13    |
| >MLH1-S108 ALASISHVA   | 15    | >MLH1-S108 ALASIRHVA   | 974  | 959   |
| >MLH1-S108 ALASISHVAH' | 3     | >MLH1-S108 ALASIRHVAH  | 6    | 3     |
| >MLH1-S108 ALASISHV    | 2     | >MLH1-S108 ALASIRHV    | 2    | 0     |
| >MLH1-S108 ALASISHVA   | 4     | >MLH1-S108 ALASIRHVA   | 5    | 1     |
| >MLH1-S108 ALASISHVAH' | 2     | >MLH1-S108 ALASIRHVAH  | 2    | 0     |
| >MLH1-S108 ALASISHV    | 179   | >MLH1-S108 ALASIRHV    | 532  | 353   |
| >MLH1-S108 ALASISHVAH' | 118   | >MLH1-S108 ALASIRHVAH  | 122  | 4     |
| >MLH1-S108 ALASISHVAH' | 317   | >MLH1-S108 ALASIRHVAH  | 800  | 483   |
| >MLH1-S108 ALASISHVAH' | 480   | >MLH1-S108 ALASIRHVAH  | 1130 | 650   |
| >MLH1-S108 EALASISHV   | 486   | >MLH1-S108 EALASIRHV   | 2862 | 2376  |
| >MLH1-S108 EALASISHV   | 15    | >MLH1-S108 EALASIRHV   | 111  | 96    |
| >MLH1-S108 EALASISHVA  | 232   | >MLH1-S108 EALASIRHVA  | 154  | 78    |
| >MLH1-S108 EALASISHV   | 7     | >MLH1-S108 EALASIRHV   | 21   | 14    |
| >MLH1-S108 EALASISHVA  | 72    | >MLH1-S108 EALASIRHVA  | 215  | 143   |
| >MLH1-S108 EALASISHVAI | 395   | >MLH1-S108 EALASIRHVAI | 885  | 490   |
| >MLH1-S108 GEALASISHV  | 105   | >MLH1-S108 GEALASIRHV  | 113  | 8     |
| >MLH1-S108 GEALASISHV  | 297   | >MLH1-S108 GEALASIRHV  | 345  | 48    |
| >MLH1-S108 GEALASISHV, | 274   | >MLH1-S108 GEALASIRHV, | 362  | 88    |
| >MLH1-S108 GEALASISHV, | 13    | >MLH1-S108 GEALASIRHV, | 16   | 3     |
| >MLH1-S108 GEALASISHV  | 66    | >MLH1-S108 GEALASIRHV  | 75   | 9     |
| >MLH1-S108 GEALASISHV, | 291   | >MLH1-S108 GEALASIRHV, | 312  | 21    |
| >MLH1-S108 RGEALASIS   | 33784 | >MLH1-S108 RGEALASIR   | 351  | 33433 |
| >MLH1-S108 FRGEALASIS  | 7338  | >MLH1-S108 FRGEALASIR  | 305  | 7033  |
| >MLH1-S2L-v SFVAGVIRRL | 228   | >MLH1-S2L-r Lfvagvirrl | 2989 | 2761  |
| >MLH1-S2L-v SFVAGVIRRL | 858   | >MLH1-S2L-r Lfvagvirrl | 457  | 401   |
| >MLH1-S2L-v SFVAGVIR   | 84    | >MLH1-S2L-r Lfvagvir   | 118  | 34    |
| >MLH1-S2L-v SFVAGVIRR  | 73    | >MLH1-S2L-r Lfvagvirr  | 124  | 51    |
| >MLH1-S2L-v SFVAGVIRR  | 424   | >MLH1-S2L-r Lfvagvirr  | 592  | 168   |
| >MLH1-S2L-v SFVAGVIR   | 80    | >MLH1-S2L-r Lfvagvir   | 201  | 121   |
| >MLH1-S2L-v SFVAGVIRR  | 60    | >MLH1-S2L-r Lfvagvirr  | 163  | 103   |

|                        |       |                        |       |       |
|------------------------|-------|------------------------|-------|-------|
| >MLH1-S2L-v MSFVAGVIRF | 231   | >MLH1-S2L-r MLFVAGVIRF | 1421  | 1190  |
| >MLH1-S2L-v MSFVAGVI   | 13811 | >MLH1-S2L-r MLFVAGVI   | 163   | 13648 |
| >MLH1-S2L-v MSFVAGVIRF | 9964  | >MLH1-S2L-r MLFVAGVIRF | 72    | 9892  |
| >MLH1-S2L-v MSFVAGVI   | 3460  | >MLH1-S2L-r MLFVAGVI   | 64    | 3396  |
| >MLH1-S2L-v MSFVAGVIRF | 1455  | >MLH1-S2L-r MLFVAGVIRF | 23    | 1432  |
| >MLH1-S2L-v MSFVAGVI   | 5735  | >MLH1-S2L-r MLFVAGVI   | 26    | 5709  |
| >MLH1-S2L-v MSFVAGVIRF | 7024  | >MLH1-S2L-r MLFVAGVIRF | 53    | 6971  |
| >MLH1-S2L-v MSFVAGVI   | 4066  | >MLH1-S2L-r MLFVAGVI   | 380   | 3686  |
| >MLH1-S2L-v MSFVAGVI   | 8789  | >MLH1-S2L-r MLFVAGVI   | 9     | 8780  |
| >MLH1-S2L-v MSFVAGVIRF | 3853  | >MLH1-S2L-r MLFVAGVIRF | 6     | 3847  |
| >MLH1-S2L-v MSFVAGVI   | 20706 | >MLH1-S2L-r MLFVAGVI   | 102   | 20604 |
| >MLH1-S2L-v MSFVAGVIRF | 21582 | >MLH1-S2L-r MLFVAGVIRF | 169   | 21413 |
| >MLH1-S2L-v MSFVAGVI   | 18171 | >MLH1-S2L-r MLFVAGVI   | 45    | 18126 |
| >MLH1-S2L-v MSFVAGVIRF | 17303 | >MLH1-S2L-r MLFVAGVIRF | 29    | 17274 |
| >MLH1-S2L-v MSFVAGVIRF | 23206 | >MLH1-S2L-r MLFVAGVIRF | 242   | 22964 |
| >MLH1-S2L-v MSFVAGVI   | 30509 | >MLH1-S2L-r MLFVAGVI   | 26    | 30483 |
| >MLH1-S2L-v MSFVAGVIRF | 19041 | >MLH1-S2L-r MLFVAGVIRF | 6     | 19035 |
| >MLH1-S2L-v MSFVAGVIR  | 2629  | >MLH1-S2L-r MLFVAGVIR  | 343   | 2286  |
| >MLH1-S2L-v MSFVAGVIRF | 1608  | >MLH1-S2L-r MLFVAGVIRF | 441   | 1167  |
| >MLH1-S2L-v MSFVAGVIR  | 155   | >MLH1-S2L-r MLFVAGVIR  | 733   | 578   |
| >MLH1-S2L-v MSFVAGVIRF | 342   | >MLH1-S2L-r MLFVAGVIRF | 939   | 597   |
| >MLH1-S2L-v MSFVAGVI   | 414   | >MLH1-S2L-r MLFVAGVI   | 2353  | 1939  |
| >MLH1-S2L-v MSFVAGVIR  | 15    | >MLH1-S2L-r MLFVAGVIR  | 24    | 9     |
| >MLH1-S2L-v MSFVAGVIRF | 39    | >MLH1-S2L-r MLFVAGVIRF | 84    | 45    |
| >MLH1-S2L-v MSFVAGVI   | 744   | >MLH1-S2L-r MLFVAGVI   | 431   | 313   |
| >MLH1-S2L-v MSFVAGVIR  | 756   | >MLH1-S2L-r MLFVAGVIR  | 450   | 306   |
| >MLH1-S2L-v MSFVAGVIR  | 5     | >MLH1-S2L-r MLFVAGVIR  | 12    | 7     |
| >MLH1-S2L-v MSFVAGVIRF | 9     | >MLH1-S2L-r MLFVAGVIRF | 29    | 20    |
| >MLH1-S2L-v MSFVAGVI   | 54    | >MLH1-S2L-r MLFVAGVI   | 333   | 279   |
| >MLH1-S2L-v MSFVAGVIRF | 110   | >MLH1-S2L-r MLFVAGVIRF | 524   | 414   |
| >MLH1-S2L-v MSFVAGVI   | 1547  | >MLH1-S2L-r MLFVAGVI   | 483   | 1064  |
| >MLH1-S2L-v MSFVAGVI   | 193   | >MLH1-S2L-r MLFVAGVI   | 272   | 79    |
| >MLH1-S2L-v MSFVAGVIR  | 152   | >MLH1-S2L-r MLFVAGVIR  | 191   | 39    |
| >MLH1-S2L-v MSFVAGVIRF | 215   | >MLH1-S2L-r MLFVAGVIRF | 296   | 81    |
| >MLH1-S2L-v MSFVAGVI   | 27    | >MLH1-S2L-r MLFVAGVI   | 6266  | 6239  |
| >MLH1-S2L-v MSFVAGVIRF | 7     | >MLH1-S2L-r MLFVAGVIRF | 1416  | 1409  |
| >MLH1-S2L-v MSFVAGVIRF | 331   | >MLH1-S2L-r MLFVAGVIRF | 12742 | 12411 |
| >MLH1-S2L-v MSFVAGVI   | 120   | >MLH1-S2L-r MLFVAGVI   | 10088 | 9968  |
| >MLH1-S2L-v MSFVAGVI   | 494   | >MLH1-S2L-r MLFVAGVI   | 15841 | 15347 |
| >MLH1-S2L-v MSFVAGVIRF | 111   | >MLH1-S2L-r MLFVAGVIRF | 2046  | 1935  |
| >MLH1-S2L-v MSFVAGVI   | 128   | >MLH1-S2L-r MLFVAGVI   | 659   | 531   |
| >MLH1-S2L-v MSFVAGVIRF | 7387  | >MLH1-S2L-r MLFVAGVIRF | 383   | 7004  |
| >MLH1-S2L-v MSFVAGVIRF | 364   | >MLH1-S2L-r MLFVAGVIRF | 7976  | 7612  |

|                        |     |                        |       |       |
|------------------------|-----|------------------------|-------|-------|
| >MLH1-S2L-v MSFVAGVIR  | 600 | >MLH1-S2L-r MLFVAGVIR  | 240   | 360   |
| >MLH1-S2L-v MSFVAGVIRF | 561 | >MLH1-S2L-r MLFVAGVIRF | 169   | 392   |
| >MLH1-S2L-v MSFVAGVI   | 8   | >MLH1-S2L-r MLFVAGVI   | 156   | 148   |
| >MLH1-S2L-v MSFVAGVIRF | 101 | >MLH1-S2L-r MLFVAGVIRF | 5700  | 5599  |
| >MLH1-V384 VRTDSREQKL  | 123 | >MLH1-V384 DRTDSREQKL  | 550   | 427   |
| >MLH1-V384 VRTDSREQKL  | 226 | >MLH1-V384 DRTDSREQKL  | 1724  | 1498  |
| >MLH1-V384 MVRTDSREQ   | 143 | >MLH1-V384 MDRTDSREQ   | 12988 | 12845 |
| >MLH1-V384 MVRTDSREQ   | 5   | >MLH1-V384 MDRTDSREQ   | 1023  | 1018  |
| >MLH1-V384 MVRTDSREQ   | 60  | >MLH1-V384 MDRTDSREQ   | 10556 | 10496 |
| >MLH1-V384 MVRTDSREQ   | 252 | >MLH1-V384 MDRTDSREQ   | 24484 | 24232 |
| >MLH1-V384 MVRTDSREQ   | 333 | >MLH1-V384 MDRTDSREQ   | 17703 | 17370 |
| >MLH1-V384 SSDKVYAHQI  | 203 | >MLH1-V384 SSDKVYAHQI  | 20007 | 19804 |
| >MLH1-V384 QMVRTDSR    | 411 | >MLH1-V384 QMDRTDSR    | 2851  | 2440  |
| >MLH1-V384 QMVRTDSR    | 145 | >MLH1-V384 QMDRTDSR    | 1275  | 1130  |
| >MLH1-V384 QMVRTDSRE   | 338 | >MLH1-V384 QMDRTDSRE   | 2655  | 2317  |
| >MLH1-V384 QMVRTDSR    | 231 | >MLH1-V384 QMDRTDSR    | 1435  | 1204  |
| >MLH1-V384 HQMVRTDSR   | 49  | >MLH1-V384 HQMDRTDSF   | 86    | 37    |
| >MLH1-V384 HQMVRTDSR   | 566 | >MLH1-V384 HQMDRTDSF   | 426   | 140   |
| >MLH1-V384 HQMVRTDSR   | 783 | >MLH1-V384 HQMDRTDSF   | 324   | 459   |
| >MLH1-V384 HQMVRTDSR   | 357 | >MLH1-V384 HQMDRTDSF   | 101   | 256   |
| >MLH1-V384 YAHQMVRTC   | 20  | >MLH1-V384 YAHQMDRTC   | 19    | 1     |
| >MLH1-V384 VYAHQMVR    | 137 | >MLH1-V384 VYAHQMDR    | 1027  | 890   |
| >MLH1-V384 VYAHQMVR    | 414 | >MLH1-V384 VYAHQMDR    | 933   | 519   |
| >MLH1-V384 VYAHQMVR    | 64  | >MLH1-V384 VYAHQMDR    | 126   | 62    |
| >MLH1-V384 KVYAHQMV    | 138 | >MLH1-V384 KVYAHQMD    | 17447 | 17309 |
| >MLH1-V384 KVYAHQMV    | 82  | >MLH1-V384 KVYAHQMD    | 23261 | 23179 |
| >MLH1-V384 KVYAHQMV    | 94  | >MLH1-V384 KVYAHQMD    | 20631 | 20537 |
| >MLH1-V384 KVYAHQMV    | 15  | >MLH1-V384 KVYAHQMD    | 18551 | 18536 |
| >MLH1-V384 KVYAHQMV    | 20  | >MLH1-V384 KVYAHQMD    | 21864 | 21844 |
| >MLH1-V384 KVYAHQMV    | 7   | >MLH1-V384 KVYAHQMD    | 19218 | 19211 |
| >MLH1-V384 KVYAHQMV    | 383 | >MLH1-V384 KVYAHQMD    | 25268 | 24885 |
| >MLH1-V384 KVYAHQMV    | 30  | >MLH1-V384 KVYAHQMD    | 23350 | 23320 |
| >MLH1-V384 KVYAHQMV    | 14  | >MLH1-V384 KVYAHQMD    | 33173 | 33159 |
| >MLH1-V384 KVYAHQMV F  | 28  | >MLH1-V384 KVYAHQMD F  | 33    | 5     |
| >MLH1-V384 KVYAHQMV F  | 39  | >MLH1-V384 KVYAHQMD F  | 75    | 36    |
| >MLH1-V384 KVYAHQMV    | 50  | >MLH1-V384 KVYAHQMD    | 1836  | 1786  |
| >MLH1-V384 KVYAHQMV F  | 49  | >MLH1-V384 KVYAHQMD F  | 243   | 194   |
| >MLH1-V384 KVYAHQMV F  | 9   | >MLH1-V384 KVYAHQMD F  | 16    | 7     |
| >MLH1-V384 KVYAHQMV    | 350 | >MLH1-V384 KVYAHQMD    | 6012  | 5662  |
| >MLH1-V384 KVYAHQMV F  | 459 | >MLH1-V384 KVYAHQMD F  | 996   | 537   |
| >MLH1-V384 KVYAHQMV F  | 136 | >MLH1-V384 KVYAHQMD F  | 196   | 60    |
| >MLH1-V384 KVYAHQMV    | 121 | >MLH1-V384 KVYAHQMD    | 20583 | 20462 |
| >MLH1-V384 KVYAHQMV F  | 829 | >MLH1-V384 KVYAHQMD F  | 418   | 411   |

|                        |       |                        |       |       |
|------------------------|-------|------------------------|-------|-------|
| >MLH1-V384 KVYAHQMVF   | 24    | >MLH1-V384 KVYAHQMDF   | 31    | 7     |
| >MLH1-V384 SDKVYAHQM   | 220   | >MLH1-V384 SDKVYAHQM   | 18784 | 18564 |
| >MLL-A1904' ALWSAEVF   | 427   | >MLL-A1904' VLWSAEVF   | 311   | 116   |
| >MLL-A1904' ALWSAEVF   | 1333  | >MLL-A1904' VLWSAEVF   | 194   | 1139  |
| >MLL-A1904' ALWSAEVF   | 68    | >MLL-A1904' VLWSAEVF   | 270   | 202   |
| >MLL-A1904' ALWSAEVF   | 86    | >MLL-A1904' VLWSAEVF   | 123   | 37    |
| >MLL-A1904' ALWSAEVF   | 469   | >MLL-A1904' VLWSAEVF   | 337   | 132   |
| >MLL-A1904' ALWSAEVF   | 8     | >MLL-A1904' VLWSAEVF   | 11    | 3     |
| >MLL-A1904' ALWSAEVF   | 876   | >MLL-A1904' VLWSAEVF   | 388   | 488   |
| >MLL-A1904' CALWSAEV   | 1148  | >MLL-A1904' CVLWSAEV   | 185   | 963   |
| >MLL-A1904' CALWSAEV   | 2183  | >MLL-A1904' CVLWSAEV   | 469   | 1714  |
| >MLL-A1904' CALWSAEV   | 176   | >MLL-A1904' CVLWSAEV   | 36    | 140   |
| >MLL-A1904' CALWSAEV   | 98    | >MLL-A1904' CVLWSAEV   | 22    | 76    |
| >MLL-A1904' CALWSAEV   | 2822  | >MLL-A1904' CVLWSAEV   | 386   | 2436  |
| >MLL-A1904' CALWSAEV   | 1481  | >MLL-A1904' CVLWSAEV   | 119   | 1362  |
| >MLL-A1904' CALWSAEV   | 428   | >MLL-A1904' CVLWSAEV   | 24    | 404   |
| >MLL-A1904' CALWSAEV   | 211   | >MLL-A1904' CVLWSAEV   | 17    | 194   |
| >MLL-A1904' CALWSAEVF  | 428   | >MLL-A1904' CVLWSAEVF  | 144   | 284   |
| >MLL-A1904' CALWSAEV   | 449   | >MLL-A1904' CVLWSAEV   | 78    | 371   |
| >MLL-A1904' CALWSAEV   | 48    | >MLL-A1904' CVLWSAEV   | 19    | 29    |
| >MLL-A1904' CALWSAEVF  | 137   | >MLL-A1904' CVLWSAEVF  | 719   | 582   |
| >MLL-A1904' CALWSAEVF  | 18    | >MLL-A1904' CVLWSAEVF  | 209   | 191   |
| >MLL-A1904' CALWSAEVF  | 91    | >MLL-A1904' CVLWSAEVF  | 284   | 193   |
| >MLL-A1904' CALWSAEVF  | 39    | >MLL-A1904' CVLWSAEVF  | 240   | 201   |
| >MLL-A1904' GQNEWTHVI  | 1303  | >MLL-A1904' GQNEWTHVI  | 96    | 1207  |
| >MLL-A1904' GQNEWTHVI  | 1061  | >MLL-A1904' GQNEWTHVI  | 146   | 915   |
| >MLL-A1904' GQNEWTHVI  | 171   | >MLL-A1904' GQNEWTHVI  | 19    | 152   |
| >MLL-A1904' GQNEWTHVI  | 167   | >MLL-A1904' GQNEWTHVI  | 25    | 142   |
| >MLL-A1904' GQNEWTHVI  | 923   | >MLL-A1904' GQNEWTHVI  | 43    | 880   |
| >MLL-A1904' GQNEWTHVI  | 535   | >MLL-A1904' GQNEWTHVI  | 20    | 515   |
| >MLL-A1904' GQNEWTHVI  | 1263  | >MLL-A1904' GQNEWTHVI  | 61    | 1202  |
| >MLL-A1904' GQNEWTHVI  | 6313  | >MLL-A1904' GQNEWTHVI  | 202   | 6111  |
| >MLL-A1904' GQNEWTHVI  | 10400 | >MLL-A1904' GQNEWTHVI  | 312   | 10088 |
| >MLL-A1904' NCALWSAEV  | 31    | >MLL-A1904' NCVLWSAEV  | 78    | 47    |
| >MLL-A1904' NCALWSAEV  | 26    | >MLL-A1904' NCVLWSAEV  | 49    | 23    |
| >MLL-A1904' VNCALWSAE' | 480   | >MLL-A1904' VNCVLWSAE' | 1247  | 767   |
| >MLL-A1904' HVNCALWSA  | 431   | >MLL-A1904' HVNCVLWSA  | 265   | 166   |
| >MLL-A1904' HVNCALWSA  | 94    | >MLL-A1904' HVNCVLWSA  | 74    | 20    |
| >MLL-A1904' HVNCALWSA  | 264   | >MLL-A1904' HVNCVLWSA  | 150   | 114   |
| >MLL-A1904' HVNCALWSA  | 60    | >MLL-A1904' HVNCVLWSA  | 43    | 17    |
| >MLL-A1904' HVNCALWSA  | 54    | >MLL-A1904' HVNCVLWSA  | 50    | 4     |
| >MLL-A1904' HVNCALWSA  | 13    | >MLL-A1904' HVNCVLWSA  | 13    | 0     |
| >MLL-A1904' HVNCALWSA  | 20    | >MLL-A1904' HVNCVLWSA  | 25    | 5     |

|                       |     |                       |     |     |
|-----------------------|-----|-----------------------|-----|-----|
| >MLL-A1904' HVNCALWSA | 24  | >MLL-A1904' HVNCVLWSA | 26  | 2   |
| >MLL-A1904' HVNCALWSA | 958 | >MLL-A1904' HVNCVLWSA | 150 | 808 |
| >MLL-A1904' HVNCALWSA | 36  | >MLL-A1904' HVNCVLWSA | 14  | 22  |
| >MLL-A1904' HVNCALWSA | 339 | >MLL-A1904' HVNCVLWSA | 267 | 72  |
| >MLL-A1904' HVNCALWSA | 22  | >MLL-A1904' HVNCVLWSA | 20  | 2   |
| >MLL-A1904' HVNCALWSA | 179 | >MLL-A1904' HVNCVLWSA | 110 | 69  |
| >MLL-A1904' HVNCALWSA | 49  | >MLL-A1904' HVNCVLWSA | 71  | 22  |
| >MLL-A1904' HVNCALWSA | 20  | >MLL-A1904' HVNCVLWSA | 24  | 4   |
| >MLL-A1904' HVNCALWSA | 160 | >MLL-A1904' HVNCVLWSA | 688 | 528 |
| >MLL-A1904' HVNCALWSA | 289 | >MLL-A1904' HVNCVLWSA | 735 | 446 |
| >MLL-A1904' HVNCALWSA | 15  | >MLL-A1904' HVNCVLWSA | 9   | 6   |
| >MLL-A1904' HVNCALWSA | 6   | >MLL-A1904' HVNCVLWSA | 5   | 1   |
| >MLL-A1904' HVNCALWSA | 61  | >MLL-A1904' HVNCVLWSA | 81  | 20  |
| >MLL-A1904' HVNCALWSA | 7   | >MLL-A1904' HVNCVLWSA | 8   | 1   |
| >MLL-A1904' THVNCALW  | 34  | >MLL-A1904' THVNCVLW  | 133 | 99  |
| >MLL-A1904' WTHVNCALV | 305 | >MLL-A1904' WTHVNCVLV | 315 | 10  |
| >MLL-A1904' WTHVNCAL  | 191 | >MLL-A1904' WTHVNCVL  | 491 | 300 |
| >MLL-A1904' WTHVNCALV | 83  | >MLL-A1904' WTHVNCVLV | 79  | 4   |
| >MLL-A1904' WTHVNCAL  | 45  | >MLL-A1904' WTHVNCVL  | 59  | 14  |
| >MLL-A1904' WTHVNCALV | 4   | >MLL-A1904' WTHVNCVLV | 6   | 2   |
| >MLL-A1904' WTHVNCALV | 81  | >MLL-A1904' WTHVNCVLV | 129 | 48  |
| >MLL-A1904' WTHVNCALV | 49  | >MLL-A1904' WTHVNCVLV | 126 | 77  |
| >MLL-A1904' WTHVNCAL  | 413 | >MLL-A1904' WTHVNCVL  | 333 | 80  |
| >MLL-A1904' WTHVNCAL  | 332 | >MLL-A1904' WTHVNCVL  | 179 | 153 |
| >MLL-A1904' WTHVNCALV | 139 | >MLL-A1904' WTHVNCVLV | 419 | 280 |
| >MLL-A1904' WTHVNCALV | 190 | >MLL-A1904' WTHVNCVLV | 291 | 101 |
| >MLL-A1904' WTHVNCALV | 811 | >MLL-A1904' WTHVNCVLV | 410 | 401 |
| >MLL-A1904' EWTHVNCAL | 69  | >MLL-A1904' EWTHVNCVL | 72  | 3   |
| >MLL-A1904' EWTHVNCAL | 349 | >MLL-A1904' EWTHVNCVL | 393 | 44  |
| >MLL-A1904' EWTHVNCA  | 404 | >MLL-A1904' EWTHVNCV  | 346 | 58  |
| >MLL-A1904' EWTHVNCAL | 153 | >MLL-A1904' EWTHVNCVL | 476 | 323 |
| >MLL-A1904' NEWTHVNC/ | 220 | >MLL-A1904' NEWTHVNCV | 8   | 212 |
| >MLL-A1904' NEWTHVNC/ | 27  | >MLL-A1904' NEWTHVNCV | 25  | 2   |
| >MLL-A1904' NEWTHVNC/ | 33  | >MLL-A1904' NEWTHVNCV | 44  | 11  |
| >MLL-A1904' NEWTHVNC/ | 453 | >MLL-A1904' NEWTHVNCV | 190 | 263 |
| >MLL-A1904' NEWTHVNC/ | 54  | >MLL-A1904' NEWTHVNCV | 50  | 4   |
| >MLL-A1904' NEWTHVNC/ | 170 | >MLL-A1904' NEWTHVNCV | 221 | 51  |
| >MLL-A1904' NEWTHVNC/ | 90  | >MLL-A1904' NEWTHVNCV | 93  | 3   |
| >MLL-A1904' NEWTHVNC/ | 31  | >MLL-A1904' NEWTHVNCV | 27  | 4   |
| >MLL-A1904' NEWTHVNC/ | 31  | >MLL-A1904' NEWTHVNCV | 125 | 94  |
| >MLL-A1904' NEWTHVNC/ | 393 | >MLL-A1904' NEWTHVNCV | 18  | 375 |
| >MLL-A1904' NEWTHVNC/ | 43  | >MLL-A1904' NEWTHVNCV | 65  | 22  |
| >MLL-A1904' NEWTHVNC/ | 200 | >MLL-A1904' NEWTHVNCV | 164 | 36  |

|                        |      |                        |       |       |
|------------------------|------|------------------------|-------|-------|
| >MLL-D1690 IPSRSSPEGPC | 4530 | >MLL-D1690 IPSRSSPEGPT | 135   | 4395  |
| >MLL-D1690 GPDPPVLTEV  | 1851 | >MLL-D1690 GPHPPVLTEV  | 193   | 1658  |
| >MLL-D1690 EGPDPVPL    | 227  | >MLL-D1690 EGPHPVPL    | 105   | 122   |
| >MLL-D1690 EGPDPVPLTE  | 816  | >MLL-D1690 EGPHPVPLTE  | 293   | 523   |
| >MLL-D1690 EGPDPVPLTE  | 2165 | >MLL-D1690 EGPHPVPLTE  | 497   | 1668  |
| >MLL-D1690 EGPDPVPLTE  | 29   | >MLL-D1690 EGPHPVPLTE  | 33    | 4     |
| >MLL-D1690 SPEGDPVPL   | 419  | >MLL-D1690 SPEGPHPPV   | 316   | 103   |
| >MLL-D1690 SPEGDPVPL   | 4245 | >MLL-D1690 SPEGPHPPV   | 278   | 3967  |
| >MLL-D1690 SPEGDPVPL   | 84   | >MLL-D1690 SPEGPHPPV   | 19    | 65    |
| >MLL-D1690 SPEGDPVPL   | 225  | >MLL-D1690 SPEGPHPPV   | 97    | 128   |
| >MLL-D1690 SPEGDPVPL   | 191  | >MLL-D1690 SPEGPHPPV   | 77    | 114   |
| >MLL-D1690 SPEGDPVPL   | 536  | >MLL-D1690 SPEGPHPPV   | 342   | 194   |
| >MLL-D1690 SSPEGDPVPL  | 467  | >MLL-D1690 SSPEGPHPPV  | 135   | 332   |
| >MLL-D1690 SSPEGDPVPL  | 500  | >MLL-D1690 SSPEGPHPPV  | 443   | 57    |
| >MLL-D1690 SSPEGDPVPL  | 268  | >MLL-D1690 SSPEGPHPPV  | 72    | 196   |
| >MLL-D1690 SSPEGDPVPL  | 386  | >MLL-D1690 SSPEGPHPPV  | 41    | 345   |
| >MLL-D1690 SSPEGDPVPL  | 95   | >MLL-D1690 SSPEGPHPPV  | 17    | 78    |
| >MLL-D1690 SSPEGDPVPL  | 12   | >MLL-D1690 SSPEGPHPPV  | 6     | 6     |
| >MLL-D1690 SSPEGDPVPL  | 489  | >MLL-D1690 SSPEGPHPPV  | 485   | 4     |
| >MLL-D1690 RSSPEGDP    | 288  | >MLL-D1690 RSSPEGPHPP  | 48    | 240   |
| >MLL-D1690 RSSPEGDP    | 765  | >MLL-D1690 RSSPEGPHPP  | 392   | 373   |
| >MLL-D1690 RSSPEGDP    | 5750 | >MLL-D1690 RSSPEGPH    | 140   | 5610  |
| >MLL-D1690 RSSPEGDP    | 33   | >MLL-D1690 RSSPEGPHPP  | 22    | 11    |
| >MLL-D1690 RSSPEGDP    | 2208 | >MLL-D1690 RSSPEGPHPP  | 441   | 1767  |
| >MLL-D1690 RSSPEGDP    | 480  | >MLL-D1690 RSSPEGPHPP  | 428   | 52    |
| >MLL-E1464<NERPLEDQL   | 167  | >MLL-E1464<NGRPLEDQL   | 27121 | 26954 |
| >MLL-E1464<EENERPLEDC  | 218  | >MLL-E1464<EENGRPLEDC  | 714   | 496   |
| >MLL-E1464<LEENERPL    | 1507 | >MLL-E1464<LEENGRPL    | 84    | 1423  |
| >MLL-E1464<LEENERPL    | 1003 | >MLL-E1464<LEENGRPL    | 242   | 761   |
| >MLL-E1464<LEENERPL    | 129  | >MLL-E1464<LEENGRPL    | 31    | 98    |
| >MLL-E1464<LEENERPL    | 436  | >MLL-E1464<LEENGRPL    | 214   | 222   |
| >MLL-E1464<CLEENERPL   | 904  | >MLL-E1464<CLEENGRPL   | 488   | 416   |
| >MLL-E1464<CLEENERPL   | 394  | >MLL-E1464<CLEENGRPL   | 246   | 148   |
| >MLL-E1464<CLEENERPL   | 414  | >MLL-E1464<CLEENGRPL   | 478   | 64    |
| >MLL-E1464<FCLEENERPL  | 461  | >MLL-E1464<FCLEENGRPL  | 488   | 27    |
| >MLL-E1464<KFCLEENER   | 204  | >MLL-E1464<KFCLEENGR   | 557   | 353   |
| >MLL-E1464<KFCLEENER   | 40   | >MLL-E1464<KFCLEENGR   | 23    | 17    |
| >MLL-E1464<HKFCLEENER  | 246  | >MLL-E1464<HKFCLEENGR  | 581   | 335   |
| >MLL-E1464<HKFCLEENER  | 160  | >MLL-E1464<HKFCLEENGR  | 100   | 60    |
| >MLL-G2158 GCRPLPSA    | 234  | >MLL-G2158 DCRPLPSA    | 5279  | 5045  |
| >MLL-G2158 SPGCRPLPSA  | 332  | >MLL-G2158 SPDCRPLPSA  | 136   | 196   |
| >MLL-G2158 RSPGCRPL    | 445  | >MLL-G2158 RSPDCRPL    | 1473  | 1028  |
| >MLL-G2158 RSPGCRPL    | 207  | >MLL-G2158 RSPDCRPL    | 229   | 22    |

|                       |       |                       |      |       |
|-----------------------|-------|-----------------------|------|-------|
| >MLL-G2158 RSPGCRPL   | 151   | >MLL-G2158 RSPDCRPL   | 110  | 41    |
| >MLL-G2158 RSPGCRPLP  | 342   | >MLL-G2158 RSPDCRPLP  | 364  | 22    |
| >MLL-G2158 RSPGCRPLPS | 287   | >MLL-G2158 RSPDCRPLPS | 310  | 23    |
| >MLL-G2158 RSPGCRPL   | 274   | >MLL-G2158 RSPDCRPL   | 349  | 75    |
| >MLL-G2158 RSPGCRPL   | 414   | >MLL-G2158 RSPDCRPL   | 251  | 163   |
| >MLL-G2158 QRSPGCRPL  | 443   | >MLL-G2158 QRSPDCRPL  | 472  | 29    |
| >MLL-G2158 QRSPGCRPL  | 76    | >MLL-G2158 QRSPDCRPL  | 173  | 97    |
| >MLL-G2158 TQRSPGCR   | 197   | >MLL-G2158 TQRSPDCR   | 354  | 157   |
| >MLL-G2158 TQRSPGCRPL | 142   | >MLL-G2158 TQRSPDCRPL | 264  | 122   |
| >MLL-G2158 TQRSPGCRPL | 432   | >MLL-G2158 TQRSPDCRPL | 1056 | 624   |
| >MLL-G2158 TQRSPGCRPL | 31    | >MLL-G2158 TQRSPDCRPL | 71   | 40    |
| >MLL-G2158 YSPTQRSPGC | 174   | >MLL-G2158 YSPTQRSPDC | 130  | 44    |
| >MLL-G2158 YSPTQRSPGC | 447   | >MLL-G2158 YSPTQRSPDC | 758  | 311   |
| >MLL-G2274 VGNKNSHL   | 7023  | >MLL-G2274 VRNKNSHL   | 372  | 6651  |
| >MLL-G2274 VGNKNSHL   | 28849 | >MLL-G2274 VRNKNSHL   | 247  | 28602 |
| >MLL-G2274 SNLQRTVVTV | 31630 | >MLL-G2274 SNLQRTVVTV | 328  | 31302 |
| >MLL-G2274 TVGNKNSHL  | 13111 | >MLL-G2274 TVRNKNSHL  | 61   | 13050 |
| >MLL-G2274 TVGNKNSHLI | 16296 | >MLL-G2274 TVRNKNSHLI | 453  | 15843 |
| >MLL-G2274 TVGNKNSHL  | 5466  | >MLL-G2274 TVRNKNSHL  | 406  | 5060  |
| >MLL-G2274 TVGNKNSHL  | 3921  | >MLL-G2274 TVRNKNSHL  | 264  | 3657  |
| >MLL-G2274 VTVGNKNSH  | 148   | >MLL-G2274 VTVRNKNSHI | 234  | 86    |
| >MLL-G2274 VTVGNKNSH  | 16    | >MLL-G2274 VTVRNKNSHI | 43   | 27    |
| >MLL-G2274 VTVGNKNSH  | 351   | >MLL-G2274 VTVRNKNSHI | 1292 | 941   |
| >MLL-G2274 VVTVGNKNSI | 1632  | >MLL-G2274 VVTVRNKNST | 313  | 1319  |
| >MLL-G2274 TVVTVGNK   | 304   | >MLL-G2274 TVVTVRNK   | 375  | 71    |
| >MLL-G2274 TVVTVGNK   | 39    | >MLL-G2274 TVVTVRNK   | 51   | 12    |
| >MLL-G2274 TVVTVGNK   | 20    | >MLL-G2274 TVVTVRNK   | 22   | 2     |
| >MLL-G2274 RTVVTVGNK  | 131   | >MLL-G2274 RTVVTVRNK  | 243  | 112   |
| >MLL-G2274 RTVVTVGNK  | 47    | >MLL-G2274 RTVVTVRNK  | 81   | 34    |
| >MLL-G2274 RTVVTVGNK  | 9     | >MLL-G2274 RTVVTVRNK  | 8    | 1     |
| >MLL-G2274 RTVVTVGNK  | 215   | >MLL-G2274 RTVVTVRNK  | 188  | 27    |
| >MLL-G2274 RTVVTVGNK  | 379   | >MLL-G2274 RTVVTVRNK  | 815  | 436   |
| >MLL-G2274 RTVVTVGNKI | 343   | >MLL-G2274 RTVVTVRNKI | 363  | 20    |
| >MLL-G2274 RTVVTVGNK  | 471   | >MLL-G2274 RTVVTVRNK  | 284  | 187   |
| >MLL-G2274 QRTVVTVG   | 7667  | >MLL-G2274 QRTVVTVR   | 295  | 7372  |
| >MLL-G2274 QRTVVTVGN  | 285   | >MLL-G2274 QRTVVTVRNI | 553  | 268   |
| >MLL-G2274 LQRTVVTVGN | 342   | >MLL-G2274 LQRTVVTVRN | 560  | 218   |
| >MLL-G2274 LQRTVVTVGN | 31    | >MLL-G2274 LQRTVVTVRN | 29   | 2     |
| >MLL-G2274 LQRTVVTVG  | 19151 | >MLL-G2274 LQRTVVTVR  | 35   | 19116 |
| >MLL-G2274 LQRTVVTVG  | 148   | >MLL-G2274 LQRTVVTVR  | 2114 | 1966  |
| >MLL-G2274 LQRTVVTVG  | 1012  | >MLL-G2274 LQRTVVTVR  | 44   | 968   |
| >MLL-G2274 LQRTVVTVGN | 434   | >MLL-G2274 LQRTVVTVRN | 150  | 284   |
| >MLL-G3550 KGNKGGKH   | 420   | >MLL-G3550 KRNGKGGKH  | 2323 | 1903  |



|                        |       |                       |      |       |
|------------------------|-------|-----------------------|------|-------|
| >MLL-G3550 KGNGKKHK    | 20787 | >MLL-G3550 KRNGKKHK   | 135  | 20652 |
| >MLL-G3550 KGNGKKHKV   | 23183 | >MLL-G3550 KRNGKKHKV  | 170  | 23013 |
| >MLL-G3550 KGNGKKHKV   | 23043 | >MLL-G3550 KRNGKKHKV  | 335  | 22708 |
| >MLL-G3550 KGNGKKHK    | 29214 | >MLL-G3550 KRNGKKHK   | 489  | 28725 |
| >MLL-G3550 FQLPLDKG    | 453   | >MLL-G3550 FQLPLDKR   | 2798 | 2345  |
| >MLL-G3550 RFQLPLDKG   | 20066 | >MLL-G3550 RFQLPLDKR  | 31   | 20035 |
| >MLL-G3550 RFQLPLDKG   | 35460 | >MLL-G3550 RFQLPLDKR  | 142  | 35318 |
| >MLL-G3550 KRFQLPLDKG  | 302   | >MLL-G3550 KRFQLPLDKR | 26   | 276   |
| >MLL-G3550 KRFQLPLDKG  | 319   | >MLL-G3550 KRFQLPLDKR | 375  | 56    |
| >MLL-G3550 KRFQLPLDKG  | 1363  | >MLL-G3550 KRFQLPLDKR | 356  | 1007  |
| >MLL-G3550 KRFQLPLDKG  | 397   | >MLL-G3550 KRFQLPLDKR | 311  | 86    |
| >MLL-G3550 KRFQLPLDKG  | 20738 | >MLL-G3550 KRFQLPLDKR | 41   | 20697 |
| >MLL-I960M·ILIKKGRGNL  | 713   | >MLL-I960M·MLIKKGRGNI | 383  | 330   |
| >MLL-I960M·ILIKKGRGNL  | 125   | >MLL-I960M·MLIKKGRGNI | 75   | 50    |
| >MLL-I960M·ILIKKGRGNL  | 651   | >MLL-I960M·MLIKKGRGNI | 270  | 381   |
| >MLL-I960M·ILIKKGRGNL  | 95    | >MLL-I960M·MLIKKGRGNI | 32   | 63    |
| >MLL-I960M·KILIKKGRGNL | 3235  | >MLL-I960M·KMLIKKGRGN | 104  | 3131  |
| >MLL-I960M·KILIKKGRGNL | 4988  | >MLL-I960M·KMLIKKGRGN | 259  | 4729  |
| >MLL-I960M·KILIKKGRGNL | 5668  | >MLL-I960M·KMLIKKGRGN | 192  | 5476  |
| >MLL-I960M·KILIKKGR    | 30    | >MLL-I960M·KMLIKKGR   | 13   | 17    |
| >MLL-I960M·KILIKKGR    | 33    | >MLL-I960M·KMLIKKGR   | 25   | 8     |
| >MLL-I960M·KTKILIKK    | 121   | >MLL-I960M·KTKMLIKK   | 98   | 23    |
| >MLL-I960M·KTKILIKK    | 65    | >MLL-I960M·KTKMLIKK   | 42   | 23    |
| >MLL-I960M·KTKILIKK    | 4     | >MLL-I960M·KTKMLIKK   | 4    | 0     |
| >MLL-I960M·KTKILIKKG   | 278   | >MLL-I960M·KTKMLIKKG  | 156  | 122   |
| >MLL-I960M·KTKILIKKGR  | 153   | >MLL-I960M·KTKMLIKKGR | 96   | 57    |
| >MLL-I960M·KTKILIKKGRG | 313   | >MLL-I960M·KTKMLIKKGR | 199  | 114   |
| >MLL-I960M·KTKILIKK    | 20    | >MLL-I960M·KTKMLIKK   | 17   | 3     |
| >MLL-I960M·KTKILIKKGR  | 9     | >MLL-I960M·KTKMLIKKGR | 8    | 1     |
| >MLL-I960M·KTKILIKKGR  | 106   | >MLL-I960M·KTKMLIKKGR | 112  | 6     |
| >MLL-I960M·AVTKILIK    | 112   | >MLL-I960M·AVTKMLIK   | 116  | 4     |
| >MLL-I960M·AVTKILIKK   | 42    | >MLL-I960M·AVTKMLIKK  | 42   | 0     |
| >MLL-I960M·AVTKILIK    | 85    | >MLL-I960M·AVTKMLIK   | 60   | 25    |
| >MLL-I960M·AVTKILIKK   | 42    | >MLL-I960M·AVTKMLIKK  | 43   | 1     |
| >MLL-I960M·AVTKILI     | 18    | >MLL-I960M·AVTKMLI    | 15   | 3     |
| >MLL-I960M·AVTKILIK    | 5     | >MLL-I960M·AVTKMLIK   | 5    | 0     |
| >MLL-I960M·AVTKILIKK   | 5     | >MLL-I960M·AVTKMLIKK  | 5    | 0     |
| >MLL-I960M·AVTKILIKK   | 385   | >MLL-I960M·AVTKMLIKK  | 548  | 163   |
| >MLL-I960M·AVTKILIKK   | 341   | >MLL-I960M·AVTKMLIKK  | 503  | 162   |
| >MLL-I960M·AVTKILIK    | 871   | >MLL-I960M·AVTKMLIK   | 408  | 463   |
| >MLL-I960M·TAVTKILIK   | 1162  | >MLL-I960M·TAVTKMLIK  | 478  | 684   |
| >MLL-I960M·TAVTKILIK   | 116   | >MLL-I960M·TAVTKMLIK  | 68   | 48    |
| >MLL-I960M·TAVTKILIKK  | 93    | >MLL-I960M·TAVTKMLIK  | 71   | 22    |

|                        |      |                       |       |       |
|------------------------|------|-----------------------|-------|-------|
| >MLL-I960M·TAVKTKILIKK | 39   | >MLL-I960M·TAVKTKMLIK | 43    | 4     |
| >MLL-I960M·TAVKTKILI   | 1149 | >MLL-I960M·TAVKTKMLI  | 400   | 749   |
| >MLL-I960M·TTAVKTKILI  | 632  | >MLL-I960M·TTAVKTKMLI | 461   | 171   |
| >MLL-I960M·TTAVKTKILIK | 290  | >MLL-I960M·TTAVKTKMLI | 263   | 27    |
| >MLL-I960M·TTAVKTKILIK | 37   | >MLL-I960M·TTAVKTKMLI | 29    | 8     |
| >MLL-I960M·TTAVKTKILIK | 44   | >MLL-I960M·TTAVKTKMLI | 43    | 1     |
| >MLL-I960M·TTAVKTKI    | 31   | >MLL-I960M·TTAVKTKM   | 491   | 460   |
| >MLL-I960M·TTAVKTKIL   | 840  | >MLL-I960M·TTAVKTKML  | 244   | 596   |
| >MLL-I960M·TTAVKTKILI  | 253  | >MLL-I960M·TTAVKTKMLI | 172   | 81    |
| >MLL-I960M·TTAVKTKI    | 550  | >MLL-I960M·TTAVKTKM   | 70    | 480   |
| >MLL-I960M·TTAVKTKIL   | 126  | >MLL-I960M·TTAVKTKML  | 39    | 87    |
| >MLL-I960M·TTAVKTKIL   | 560  | >MLL-I960M·TTAVKTKML  | 462   | 98    |
| >MLL-I960M·TTAVKTKILI  | 435  | >MLL-I960M·TTAVKTKMLI | 563   | 128   |
| >MLL-I960M·TTAVKTKI    | 2340 | >MLL-I960M·TTAVKTKM   | 415   | 1925  |
| >MLL-I960M·TTAVKTKILI  | 164  | >MLL-I960M·TTAVKTKMLI | 241   | 77    |
| >MLL-I960M·TTAVKTKILIK | 177  | >MLL-I960M·TTAVKTKMLI | 145   | 32    |
| >MLL-I960M·TTAVKTKI    | 52   | >MLL-I960M·TTAVKTKM   | 1973  | 1921  |
| >MLL-I960M·TTAVKTKILI  | 116  | >MLL-I960M·TTAVKTKMLI | 64    | 52    |
| >MLL-I960M·DTTAVKTKI   | 33   | >MLL-I960M·DTTAVKTKM  | 731   | 698   |
| >MLL-I960M·DTTAVKTKILI | 53   | >MLL-I960M·DTTAVKTKMI | 29    | 24    |
| >MLL-I960M·DTTAVKTKI   | 2951 | >MLL-I960M·DTTAVKTKM  | 161   | 2790  |
| >MLL-I960M·GDTTAVKTKI  | 151  | >MLL-I960M·GDTTAVKTKM | 4432  | 4281  |
| >MLL-K2330I·KLAPQVHNT  | 179  | >MLL-K2330I·ELAPQVHNT | 12949 | 12770 |
| >MLL-K2330I·KLAPQVHNT  | 24   | >MLL-K2330I·ELAPQVHNT | 445   | 421   |
| >MLL-K2330I·KLAPQVHNT  | 198  | >MLL-K2330I·ELAPQVHNT | 3449  | 3251  |
| >MLL-K2330I·KLAPQVHNT  | 18   | >MLL-K2330I·ELAPQVHNT | 999   | 981   |
| >MLL-K2330I·KLAPQVHNT  | 152  | >MLL-K2330I·ELAPQVHNT | 5139  | 4987  |
| >MLL-K2330I·KLAPQVHNT  | 89   | >MLL-K2330I·ELAPQVHNT | 1709  | 1620  |
| >MLL-K2330I·KLAPQVHNT  | 120  | >MLL-K2330I·ELAPQVHNT | 1985  | 1865  |
| >MLL-K2330I·KLAPQVHNT  | 341  | >MLL-K2330I·ELAPQVHNT | 7176  | 6835  |
| >MLL-K2330I·KLAPQVHNT  | 59   | >MLL-K2330I·ELAPQVHNT | 1378  | 1319  |
| >MLL-K2330I·KLAPQVHNT  | 185  | >MLL-K2330I·ELAPQVHNT | 3197  | 3012  |
| >MLL-K2330I·KLAPQVHNT  | 183  | >MLL-K2330I·ELAPQVHNT | 478   | 295   |
| >MLL-K2330I·KLAPQVHNT  | 8    | >MLL-K2330I·ELAPQVHNT | 32    | 24    |
| >MLL-K2330I·KLAPQVHNT  | 33   | >MLL-K2330I·ELAPQVHNT | 238   | 205   |
| >MLL-K2330I·KLAPQVHNT  | 267  | >MLL-K2330I·ELAPQVHNT | 2056  | 1789  |
| >MLL-K2330I·IPKLAPQV   | 181  | >MLL-K2330I·IPELAPQV  | 151   | 30    |
| >MLL-K2330I·IPKLAPQVH  | 1465 | >MLL-K2330I·IPELAPQVH | 320   | 1145  |
| >MLL-K2330I·IPKLAPQV   | 240  | >MLL-K2330I·IPELAPQV  | 364   | 124   |
| >MLL-K2330I·GIPKLAPQV  | 3197 | >MLL-K2330I·GIPELAPQV | 451   | 2746  |
| >MLL-K2330I·GIPKLAPQV  | 712  | >MLL-K2330I·GIPELAPQV | 136   | 576   |
| >MLL-K2330I·GIPKLAPQV  | 517  | >MLL-K2330I·GIPELAPQV | 67    | 450   |
| >MLL-K2330I·GIPKLAPQV  | 142  | >MLL-K2330I·GIPELAPQV | 14    | 128   |

|                        |       |                        |       |       |
|------------------------|-------|------------------------|-------|-------|
| >MLL-K2330IGIPKLAPQV   | 3183  | >MLL-K2330IGIPELAPQV   | 418   | 2765  |
| >MLL-K2330IGIPKLAPQV   | 19    | >MLL-K2330IGIPELAPQV   | 8     | 11    |
| >MLL-K2330IGIPKLAPQV   | 4058  | >MLL-K2330IGIPELAPQV   | 266   | 3792  |
| >MLL-K2330IGIPKLAPQV   | 23    | >MLL-K2330IGIPELAPQV   | 7     | 16    |
| >MLL-K2330IYPGIPKLAPQ' | 235   | >MLL-K2330IYPGIPELAPQ' | 321   | 86    |
| >MLL-K2330IYPGIPKLAPQ' | 239   | >MLL-K2330IYPGIPELAPQ' | 547   | 308   |
| >MLL-K2330IYPGIPKLA    | 57    | >MLL-K2330IYPGIPELA    | 159   | 102   |
| >MLL-K2330IYPGIPKLAPQ' | 191   | >MLL-K2330IYPGIPELAPQ' | 209   | 18    |
| >MLL-K2330IAYPGIPKL    | 335   | >MLL-K2330IAYPGIPEL    | 336   | 1     |
| >MLL-K2330IAYPGIPKL    | 7     | >MLL-K2330IAYPGIPEL    | 5     | 2     |
| >MLL-K2330IAYPGIPKL    | 255   | >MLL-K2330IAYPGIPEL    | 229   | 26    |
| >MLL-K2330IVAYPGIPKL   | 123   | >MLL-K2330IVAYPGIPEL   | 87    | 36    |
| >MLL-K2330IVAYPGIPKL   | 1183  | >MLL-K2330IVAYPGIPEL   | 450   | 733   |
| >MLL-K2330IVAYPGIPKL   | 1635  | >MLL-K2330IVAYPGIPEL   | 256   | 1379  |
| >MLL-K2330IVAYPGIPKL   | 81    | >MLL-K2330IVAYPGIPEL   | 16    | 65    |
| >MLL-K2330IVAYPGIPKL   | 56    | >MLL-K2330IVAYPGIPEL   | 22    | 34    |
| >MLL-K2330IVAYPGIPKLA  | 967   | >MLL-K2330IVAYPGIPELA  | 279   | 688   |
| >MLL-K2330IVAYPGIPKL   | 185   | >MLL-K2330IVAYPGIPEL   | 80    | 105   |
| >MLL-K2330IVAYPGIPKL   | 27    | >MLL-K2330IVAYPGIPEL   | 13    | 14    |
| >MLL-K2330IVAYPGIPK    | 55    | >MLL-K2330IVAYPGIPE    | 18607 | 18552 |
| >MLL-K2330IVAYPGIPK    | 14    | >MLL-K2330IVAYPGIPE    | 18253 | 18239 |
| >MLL-K2330IVAYPGIPK    | 197   | >MLL-K2330IVAYPGIPE    | 14460 | 14263 |
| >MLL-K2330IVAYPGIPK    | 366   | >MLL-K2330IVAYPGIPE    | 18695 | 18329 |
| >MLL-K2330IVAYPGIPKL   | 918   | >MLL-K2330IVAYPGIPEL   | 410   | 508   |
| >MLL-K2330IVAYPGIPKL   | 5     | >MLL-K2330IVAYPGIPEL   | 5     | 0     |
| >MLL-K2330IVAYPGIPKL   | 482   | >MLL-K2330IVAYPGIPEL   | 417   | 65    |
| >MLL-K2330IVAYPGIPKL   | 109   | >MLL-K2330IVAYPGIPEL   | 187   | 78    |
| >MLL-K2330INVAYPGIPK   | 40    | >MLL-K2330INVAYPGIPE   | 21675 | 21635 |
| >MLL-K2330INVAYPGIPK   | 43    | >MLL-K2330INVAYPGIPE   | 7325  | 7282  |
| >MLL-K2330INVAYPGIPKL  | 1001  | >MLL-K2330INVAYPGIPEL  | 418   | 583   |
| >MLL-K2330INVAYPGIPKL  | 34    | >MLL-K2330INVAYPGIPEL  | 11    | 23    |
| >MLL-K2330INVAYPGIPKL  | 72    | >MLL-K2330INVAYPGIPEL  | 46    | 26    |
| >MLL-K2330HNVAYPGIPK   | 686   | >MLL-K2330HNVAYPGIPE   | 229   | 457   |
| >MLL-N2590NLPVQDRNLI   | 1122  | >MLL-N2590KLPVQDRNLI   | 445   | 677   |
| >MLL-N2590NLPVQDRNLI   | 2490  | >MLL-N2590KLPVQDRNLI   | 439   | 2051  |
| >MLL-N2590NLPVQDRNLI   | 3182  | >MLL-N2590KLPVQDRNLI   | 328   | 2854  |
| >MLL-N2590NLPVQDRNLI   | 441   | >MLL-N2590KLPVQDRNLI   | 101   | 340   |
| >MLL-N2590QNLPVQDRN    | 8512  | >MLL-N2590QKLPVQDRN    | 498   | 8014  |
| >MLL-N2590QNLPVQDRN    | 7769  | >MLL-N2590QKLPVQDRN    | 254   | 7515  |
| >MLL-N2590CQDSQSNNY    | 26554 | >MLL-N2590CQDSQSNNY    | 393   | 26161 |
| >MLL-N2590YQNLVPVQDR   | 409   | >MLL-N2590YQKLPVQDR    | 338   | 71    |
| >MLL-N2590YQNLVPVQDR   | 97    | >MLL-N2590YQKLPVQDR    | 83    | 14    |
| >MLL-N2590NYQNLVPVQD   | 158   | >MLL-N2590NYQKLPVQD    | 84    | 74    |

|                        |       |                        |       |       |
|------------------------|-------|------------------------|-------|-------|
| >MLL-N2590 NNYQNLPV    | 435   | >MLL-N2590 NNYQKLPV    | 1784  | 1349  |
| >MLL-N2590 QSNNYQNL    | 206   | >MLL-N2590 QSNNYQKL    | 943   | 737   |
| >MLL-N2590 QSNNYQNL    | 317   | >MLL-N2590 QSNNYQKLPV  | 948   | 631   |
| >MLL-N2590 QSNNYQNL    | 351   | >MLL-N2590 QSNNYQKL    | 227   | 124   |
| >MLL-N2590 SQSNNYQNL   | 299   | >MLL-N2590 SQSNNYQKLF  | 996   | 697   |
| >MLL-N2590 SQSNNYQNL   | 435   | >MLL-N2590 SQSNNYQKLF  | 1119  | 684   |
| >MLL-N2590 SQSNNYQNL   | 53    | >MLL-N2590 SQSNNYQKLF  | 115   | 62    |
| >MLL-N2590 SQSNNYQNL   | 17    | >MLL-N2590 SQSNNYQKLF  | 31    | 14    |
| >MLL-N2590 SQSNNYQNL   | 245   | >MLL-N2590 SQSNNYQKLF  | 286   | 41    |
| >MLL-N2590 SQSNNYQNL   | 119   | >MLL-N2590 SQSNNYQKLF  | 227   | 108   |
| >MLL-N2590 SQSNNYQNL   | 241   | >MLL-N2590 SQSNNYQKLF  | 332   | 91    |
| >MLL-N2590 SQSNNYQN    | 19211 | >MLL-N2590 SQSNNYQK    | 23    | 19188 |
| >MLL-N2590 SQSNNYQNL   | 281   | >MLL-N2590 SQSNNYQKLF  | 506   | 225   |
| >MLL-N2590 SQSNNYQNL   | 20    | >MLL-N2590 SQSNNYQKL   | 43    | 23    |
| >MLL-N2590 SQSNNYQNL   | 34    | >MLL-N2590 SQSNNYQKLF  | 76    | 42    |
| >MLL-N2590 DSQSNNYQN   | 13063 | >MLL-N2590 DSQSNNYQK   | 43    | 13020 |
| >MLL-P2170:PTTHEIVTV   | 5113  | >MLL-P2170:STTHEIVTV   | 277   | 4836  |
| >MLL-P2170:PTTHEIVTV   | 4761  | >MLL-P2170:STTHEIVTV   | 46    | 4715  |
| >MLL-P2170:PTTHEIVTV   | 2927  | >MLL-P2170:STTHEIVTV   | 84    | 2843  |
| >MLL-P2170:PTTHEIVTV   | 8701  | >MLL-P2170:STTHEIVTV   | 238   | 8463  |
| >MLL-P2170:PTTHEIVTV   | 3309  | >MLL-P2170:STTHEIVTV   | 57    | 3252  |
| >MLL-P2170:PTTHEIVTV   | 1242  | >MLL-P2170:STTHEIVTV   | 57    | 1185  |
| >MLL-P2170:PTTHEIVTV   | 3279  | >MLL-P2170:STTHEIVTV   | 483   | 2796  |
| >MLL-P2170:PTTHEIVTV   | 1657  | >MLL-P2170:STTHEIVTV   | 22    | 1635  |
| >MLL-P2170:PTTHEIVTV   | 6166  | >MLL-P2170:STTHEIVTV   | 425   | 5741  |
| >MLL-P2170:TPTTHEIV    | 9349  | >MLL-P2170:TSTTHEIV    | 472   | 8877  |
| >MLL-P2170:TPTTHEIVTV  | 13561 | >MLL-P2170:TSTTHEIVTV  | 296   | 13265 |
| >MLL-P2170:TPTTHEIVT   | 280   | >MLL-P2170:TSTTHEIVT   | 13168 | 12888 |
| >MLL-P2170:TPTTHEIVTV  | 211   | >MLL-P2170:TSTTHEIVTV  | 23123 | 22912 |
| >MLL-P2170:PTPTTHEI    | 21    | >MLL-P2170:PTSTTHEI    | 5734  | 5713  |
| >MLL-P2170:PTPTTHEIV   | 12    | >MLL-P2170:PTSTTHEIV   | 2483  | 2471  |
| >MLL-P2170:PTPTTHEIVTV | 20    | >MLL-P2170:PTSTTHEIVTV | 2999  | 2979  |
| >MLL-P2170:SPTPTTHEI   | 297   | >MLL-P2170:SPTSTTHEI   | 605   | 308   |
| >MLL-P2170:SPTPTTHEI   | 67    | >MLL-P2170:SPTSTTHEI   | 36    | 31    |
| >MLL-P2170:SPTPTTHEI   | 54    | >MLL-P2170:SPTSTTHEI   | 58    | 4     |
| >MLL-P2170:SPTPTTHEIV  | 95    | >MLL-P2170:SPTSTTHEIV  | 38    | 57    |
| >MLL-P2170:SPTPTTHEIVT | 465   | >MLL-P2170:SPTSTTHEIVT | 501   | 36    |
| >MLL-P2170:SPTPTTHEI   | 584   | >MLL-P2170:SPTSTTHEI   | 242   | 342   |
| >MLL-P2170:SPTPTTHEIV  | 209   | >MLL-P2170:SPTSTTHEIV  | 152   | 57    |
| >MLL-P2170:SPTPTTHEI   | 381   | >MLL-P2170:SPTSTTHEI   | 297   | 84    |
| >MLL-P2170:GSPTPTTHEI  | 13    | >MLL-P2170:GSPTSTTHEI  | 18    | 5     |
| >MLL-P2170:GSPTPTTHEIV | 12    | >MLL-P2170:GSPTSTTHEIV | 15    | 3     |
| >MLL-P2170:GSPTPTTHEI  | 215   | >MLL-P2170:GSPTSTTHEI  | 179   | 36    |

|                        |       |                         |       |       |
|------------------------|-------|-------------------------|-------|-------|
| >MLL-P2170!AGSPTPTTHE  | 296   | >MLL-P2170!AGSPTSTTHE   | 321   | 25    |
| >MLL-P2170!LPSAGSPTP   | 425   | >MLL-P2170!LPSAGSPTS    | 50    | 375   |
| >MLL-P2170!LPSAGSPTPT  | 50    | >MLL-P2170!LPSAGSPTST   | 48    | 2     |
| >MLL-P2170!LPSAGSPTP   | 697   | >MLL-P2170!LPSAGSPTS    | 368   | 329   |
| >MLL-P2170!LPSAGSPTPT  | 132   | >MLL-P2170!LPSAGSPTST   | 287   | 155   |
| >MLL-R2204!RSKLRIMS    | 29    | >MLL-R2204!QSKLRIMS     | 1551  | 1522  |
| >MLL-R2204!RSKLRIMSP   | 24    | >MLL-R2204!QSKLRIMSP    | 1384  | 1360  |
| >MLL-R2204!RSKLRIMSPN  | 8     | >MLL-R2204!QSKLRIMSPN   | 142   | 134   |
| >MLL-R2204!RSKLRIMSPN  | 9     | >MLL-R2204!QSKLRIMSPN   | 239   | 230   |
| >MLL-R2204!RSKLRIMSPN  | 10    | >MLL-R2204!QSKLRIMSPN   | 72    | 62    |
| >MLL-R2204!RSKLRIMSPN  | 1072  | >MLL-R2204!QSKLRIMSPN   | 397   | 675   |
| >MLL-R2204!RSKLRIMSPN  | 1325  | >MLL-R2204!QSKLRIMSPN   | 236   | 1089  |
| >MLL-R2204!RSKLRIMSPN  | 132   | >MLL-R2204!QSKLRIMSPN   | 672   | 540   |
| >MLL-R2204!RSKLRIMSPN  | 129   | >MLL-R2204!QSKLRIMSPN   | 772   | 643   |
| >MLL-R2204!RSKLRIMSPN  | 5     | >MLL-R2204!QSKLRIMSPN   | 24    | 19    |
| >MLL-R2204!RSKLRIMSPN  | 19    | >MLL-R2204!QSKLRIMSPN   | 34    | 15    |
| >MLL-R2204!QRSKLRIMSP  | 16446 | >MLL-R2204!QQSKLRIMSF   | 95    | 16351 |
| >MLL-R2204!QRSKLRIM    | 764   | >MLL-R2204!QQSKLRIM     | 146   | 618   |
| >MLL-R2204!QRSKLRIMSP  | 203   | >MLL-R2204!QQSKLRIMSF   | 29    | 174   |
| >MLL-R2204!QRSKLRIM    | 166   | >MLL-R2204!QQSKLRIM     | 3587  | 3421  |
| >MLL-R2204!QRSKLRIMSP  | 58    | >MLL-R2204!QQSKLRIMSF   | 1216  | 1158  |
| >MLL-R2204!QRSKLRIMSP  | 466   | >MLL-R2204!QQSKLRIMSF   | 463   | 3     |
| >MLL-R2204!QRSKLRIMSP  | 189   | >MLL-R2204!QQSKLRIMSF   | 2952  | 2763  |
| >MLL-R2204!RHSTSSLSPQI | 251   | >MLL-R2204!RHSTSSLSPQI  | 24326 | 24075 |
| >MLL-R2204!SPQRSKLRI   | 117   | >MLL-R2204!SPQQSKLRI    | 142   | 25    |
| >MLL-R2204!SPQRSKLRI   | 120   | >MLL-R2204!SPQQSKLRI    | 95    | 25    |
| >MLL-R2204!SPQRSKLRI   | 46    | >MLL-R2204!SPQQSKLRIM   | 55    | 9     |
| >MLL-R2204!LSPQRSKL    | 411   | >MLL-R2204!LSPQQSKL     | 375   | 36    |
| >MLL-R2204!LSPQRSKL    | 368   | >MLL-R2204!LSPQQSKL     | 175   | 193   |
| >MLL-R2204!LSPQRSKLRI  | 57    | >MLL-R2204!LSPQQSKLRI   | 58    | 1     |
| >MLL-R2204!LSPQRSKLRI  | 5     | >MLL-R2204!LSPQQSKLRIM  | 6     | 1     |
| >MLL-R2204!LSPQRSKL    | 379   | >MLL-R2204!LSPQQSKL     | 444   | 65    |
| >MLL-R2204!LSPQRSKLRI  | 26    | >MLL-R2204!LSPQQSKLRI   | 33    | 7     |
| >MLL-R2204!SLSPQRSKL   | 50    | >MLL-R2204!SLSPQQSKL    | 15    | 35    |
| >MLL-R2204!SLSPQRSKLRI | 414   | >MLL-R2204!SLSPQQSKLRIM | 177   | 237   |
| >MLL-R2204!SLSPQRSKL   | 116   | >MLL-R2204!SLSPQQSKL    | 42    | 74    |
| >MLL-R2204!SLSPQRSKLRI | 183   | >MLL-R2204!SLSPQQSKLRIM | 111   | 72    |
| >MLL-R2204!SLSPQRSKL   | 808   | >MLL-R2204!SLSPQQSKL    | 124   | 684   |
| >MLL-R2204!SLSPQRSKLRI | 260   | >MLL-R2204!SLSPQQSKLRIM | 90    | 170   |
| >MLL-R2204!SLSPQRSKL   | 2436  | >MLL-R2204!SLSPQQSKL    | 237   | 2199  |
| >MLL-R2204!SLSPQRSKL   | 225   | >MLL-R2204!SLSPQQSKL    | 42    | 183   |
| >MLL-R2204!SLSPQRSKLRI | 228   | >MLL-R2204!SLSPQQSKLRIM | 76    | 152   |
| >MLL-R2204!SLSPQRSKL   | 4475  | >MLL-R2204!SLSPQQSKL    | 352   | 4123  |

|                        |       |                        |       |       |
|------------------------|-------|------------------------|-------|-------|
| >MLL-R2204(SLSPQRSK    | 2112  | >MLL-R2204(SLSPQQSK    | 294   | 1818  |
| >MLL-R2204(SLSPQRSKL   | 4     | >MLL-R2204(SLSPQQSKL   | 3     | 1     |
| >MLL-R2204(SLSPQRSKLR  | 8     | >MLL-R2204(SLSPQQSKLR  | 6     | 2     |
| >MLL-R2204(SLSPQRSK    | 73    | >MLL-R2204(SLSPQQSK    | 74    | 1     |
| >MLL-R2204(SLSPQRSK    | 86    | >MLL-R2204(SLSPQQSK    | 81    | 5     |
| >MLL-R2204(SLSPQRSK    | 293   | >MLL-R2204(SLSPQQSK    | 379   | 86    |
| >MLL-R2204(SLSPQRSKLR  | 111   | >MLL-R2204(SLSPQQSKLR  | 397   | 286   |
| >MLL-R2204(SLSPQRSKLR  | 131   | >MLL-R2204(SLSPQQSKLR  | 110   | 21    |
| >MLL-R2204(SLSPQRSKLR  | 465   | >MLL-R2204(SLSPQQSKLR  | 574   | 109   |
| >MLL-R2204(SSLSPQRSK   | 309   | >MLL-R2204(SSLSPQQSK   | 364   | 55    |
| >MLL-R2204(SSLSPQRSK   | 46    | >MLL-R2204(SSLSPQQSK   | 34    | 12    |
| >MLL-R2204(SSLSPQRSK   | 60    | >MLL-R2204(SSLSPQQSK   | 47    | 13    |
| >MLL-R2204(SSLSPQRSKLF | 99    | >MLL-R2204(SSLSPQQSKLI | 112   | 13    |
| >MLL-R2204(SSLSPQRSKL  | 32    | >MLL-R2204(SSLSPQQSKL  | 21    | 11    |
| >MLL-R2204(SSLSPQRSKL  | 535   | >MLL-R2204(SSLSPQQSKL  | 258   | 277   |
| >MLL-R2204(SSLSPQRSK   | 223   | >MLL-R2204(SSLSPQQSK   | 514   | 291   |
| >MLL-R2204(SSLSPQRSKLF | 253   | >MLL-R2204(SSLSPQQSKLI | 369   | 116   |
| >MLL-R2204(SSLSPQRSKL  | 337   | >MLL-R2204(SSLSPQQSKL  | 1160  | 823   |
| >MLL-R2204(TSSLSPQR    | 407   | >MLL-R2204(TSSLSPQQ    | 19632 | 19225 |
| >MLL-R2204(TSSLSPQRSK  | 48    | >MLL-R2204(TSSLSPQQSK  | 24    | 24    |
| >MLL-R2204(TSSLSPQRSK  | 524   | >MLL-R2204(TSSLSPQQSK  | 400   | 124   |
| >MLL-R2204(TSSLSPQR    | 393   | >MLL-R2204(TSSLSPQQ    | 20273 | 19880 |
| >MLL-R2204(TSSLSPQR    | 28    | >MLL-R2204(TSSLSPQQ    | 5912  | 5884  |
| >MLL-R2204(TSSLSPQRSK  | 1264  | >MLL-R2204(TSSLSPQQSK  | 449   | 815   |
| >MLL-R2204(TSSLSPQRSKI | 30    | >MLL-R2204(TSSLSPQQSK  | 22    | 8     |
| >MLL-R2204(TSSLSPQRSKI | 449   | >MLL-R2204(TSSLSPQQSK  | 503   | 54    |
| >MLL-R2204(STSSLSPQRSK | 139   | >MLL-R2204(STSSLSPQQSI | 154   | 15    |
| >MLL-R2204(STSSLSPQR   | 54    | >MLL-R2204(STSSLSPQQ   | 10869 | 10815 |
| >MLL-R2204(STSSLSPQRSK | 21    | >MLL-R2204(STSSLSPQQSI | 18    | 3     |
| >MLL-R2204(STSSLSPQRSK | 33    | >MLL-R2204(STSSLSPQQSI | 28    | 5     |
| >MLL-R2204(STSSLSPQR   | 41    | >MLL-R2204(STSSLSPQQ   | 15389 | 15348 |
| >MLL-R2204(STSSLSPQR   | 9     | >MLL-R2204(STSSLSPQQ   | 1223  | 1214  |
| >MLL-R2204(STSSLSPQRSK | 53    | >MLL-R2204(STSSLSPQQSI | 38    | 15    |
| >MLL-R2204(STSSLSPQR   | 616   | >MLL-R2204(STSSLSPQQ   | 234   | 382   |
| >MLL-R2204(STSSLSPQRS  | 796   | >MLL-R2204(STSSLSPQQS  | 478   | 318   |
| >MLL-R2204(STSSLSPQR   | 135   | >MLL-R2204(STSSLSPQQ   | 1255  | 1120  |
| >MLL-R2204(STSSLSPQRSK | 165   | >MLL-R2204(STSSLSPQQSI | 249   | 84    |
| >MLL-R2204(HSTSSLSPQR  | 36    | >MLL-R2204(HSTSSLSPQQ  | 23980 | 23944 |
| >MLL-R353Q EGLSQLGLF   | 1581  | >MLL-R353Q QGLSQLGLF   | 319   | 1262  |
| >MLL-R353Q LEGSQLGL    | 427   | >MLL-R353Q LQGLSQLGL   | 9449  | 9022  |
| >MLL-R353Q LEGSQLGLF   | 189   | >MLL-R353Q LQGLSQLGLF  | 9369  | 9180  |
| >MLL-R353Q LEGSQLGLFI  | 44    | >MLL-R353Q LQGLSQLGLF  | 2128  | 2084  |
| >MLL-R353Q LEGSQLGLFI  | 12690 | >MLL-R353Q LQGLSQLGLF  | 402   | 12288 |

|                         |       |                         |       |       |
|-------------------------|-------|-------------------------|-------|-------|
| >MLL-R353Q LEGLSQLGLF   | 3687  | >MLL-R353Q LQGLSQLGLF   | 103   | 3584  |
| >MLL-R353Q LEGLSQLGLFI  | 10600 | >MLL-R353Q LQGLSQLGLF   | 412   | 10188 |
| >MLL-R353Q LEGLSQLGLF   | 3647  | >MLL-R353Q LQGLSQLGLF   | 162   | 3485  |
| >MLL-R353Q LEGLSQLGL    | 161   | >MLL-R353Q LQGLSQLGL    | 8353  | 8192  |
| >MLL-R353Q LEGLSQLGLFI  | 129   | >MLL-R353Q LQGLSQLGLF   | 6912  | 6783  |
| >MLL-R353Q LEGLSQLGL    | 121   | >MLL-R353Q LQGLSQLGL    | 14007 | 13886 |
| >MLL-R353Q LEGLSQLGLFI  | 77    | >MLL-R353Q LQGLSQLGLF   | 8768  | 8691  |
| >MLL-R353Q KIRQLSDKALFI | 1414  | >MLL-R353Q KIRQLSDKALFI | 215   | 1199  |
| >MLL-R353Q ALEGLSQL     | 1585  | >MLL-R353Q ALQGLSQL     | 158   | 1427  |
| >MLL-R353Q ALEGLSQL     | 22    | >MLL-R353Q ALQGLSQL     | 16    | 6     |
| >MLL-R353Q ALEGLSQLGL   | 118   | >MLL-R353Q ALQGLSQLGL   | 74    | 44    |
| >MLL-R353Q ALEGLSQL     | 390   | >MLL-R353Q ALQGLSQL     | 58    | 332   |
| >MLL-R353Q ALEGLSQLGL   | 555   | >MLL-R353Q ALQGLSQLGL   | 257   | 298   |
| >MLL-R353Q ALEGLSQL     | 74    | >MLL-R353Q ALQGLSQL     | 15    | 59    |
| >MLL-R353Q ALEGLSQLGL   | 172   | >MLL-R353Q ALQGLSQLGL   | 34    | 138   |
| >MLL-R353Q ALEGLSQL     | 457   | >MLL-R353Q ALQGLSQL     | 53    | 404   |
| >MLL-R353Q ALEGLSQLGL   | 425   | >MLL-R353Q ALQGLSQLGL   | 50    | 375   |
| >MLL-R353Q ALEGLSQL     | 327   | >MLL-R353Q ALQGLSQL     | 58    | 269   |
| >MLL-R353Q ALEGLSQLGL   | 329   | >MLL-R353Q ALQGLSQLGL   | 65    | 264   |
| >MLL-R353Q ALEGLSQL     | 2269  | >MLL-R353Q ALQGLSQL     | 61    | 2208  |
| >MLL-R353Q ALEGLSQLGL   | 2618  | >MLL-R353Q ALQGLSQLGL   | 109   | 2509  |
| >MLL-R353Q ALEGLSQL     | 3     | >MLL-R353Q ALQGLSQL     | 2     | 1     |
| >MLL-R353Q ALEGLSQLGL   | 5     | >MLL-R353Q ALQGLSQLGL   | 3     | 2     |
| >MLL-R353Q ALEGLSQLGL   | 2926  | >MLL-R353Q ALQGLSQLGL   | 214   | 2712  |
| >MLL-R353Q ALEGLSQLGL   | 1734  | >MLL-R353Q ALQGLSQLGL   | 491   | 1243  |
| >MLL-R353Q ALEGLSQLGL   | 553   | >MLL-R353Q ALQGLSQLGL   | 494   | 59    |
| >MLL-R353Q KALEGLSQL    | 1102  | >MLL-R353Q KALQGLSQL    | 347   | 755   |
| >MLL-R353Q KALEGLSQL    | 30    | >MLL-R353Q KALQGLSQL    | 174   | 144   |
| >MLL-R353Q KALEGLSQLG   | 64    | >MLL-R353Q KALQGLSQLG   | 265   | 201   |
| >MLL-R353Q KALEGLSQL    | 69    | >MLL-R353Q KALQGLSQL    | 692   | 623   |
| >MLL-R353Q KALEGLSQLG   | 222   | >MLL-R353Q KALQGLSQLG   | 1403  | 1181  |
| >MLL-R353Q KALEGLSQL    | 408   | >MLL-R353Q KALQGLSQL    | 1801  | 1393  |
| >MLL-R353Q KALEGLSQL    | 394   | >MLL-R353Q KALQGLSQL    | 1334  | 940   |
| >MLL-R353Q KALEGLSQL    | 5     | >MLL-R353Q KALQGLSQL    | 4     | 1     |
| >MLL-R353Q KALEGLSQLG   | 6     | >MLL-R353Q KALQGLSQLG   | 5     | 1     |
| >MLL-R353Q KALEGLSQL    | 186   | >MLL-R353Q KALQGLSQL    | 131   | 55    |
| >MLL-R353Q KALEGLSQLG   | 133   | >MLL-R353Q KALQGLSQLG   | 101   | 32    |
| >MLL-R353Q KALEGLSQL    | 194   | >MLL-R353Q KALQGLSQL    | 49    | 145   |
| >MLL-R353Q KALEGLSQL    | 319   | >MLL-R353Q KALQGLSQL    | 259   | 60    |
| >MLL-R353Q LSDKALEGL    | 262   | >MLL-R353Q LSDKALQGL    | 63    | 199   |
| >MLL-R353Q QLSDKALEGL   | 340   | >MLL-R353Q QLSDKALQGL   | 533   | 193   |
| >MLL-R353Q QLSDKALEGL   | 25    | >MLL-R353Q QLSDKALQGL   | 49    | 24    |
| >MLL-R353Q QLSDKALEGL   | 90    | >MLL-R353Q QLSDKALQGL   | 110   | 20    |

|                       |      |                       |      |      |
|-----------------------|------|-----------------------|------|------|
| >MLL-R353Q QLSDKALEGL | 80   | >MLL-R353Q QLSDKALQGI | 91   | 11   |
| >MLL-R353Q QLSDKALEGL | 108  | >MLL-R353Q QLSDKALQGI | 102  | 6    |
| >MLL-R353Q QLSDKALEGL | 271  | >MLL-R353Q QLSDKALQGI | 214  | 57   |
| >MLL-R353Q QLSDKALEGL | 36   | >MLL-R353Q QLSDKALQGI | 34   | 2    |
| >MLL-R353Q QLSDKALE   | 9003 | >MLL-R353Q QLSDKALQ   | 339  | 8664 |
| >MLL-R353Q QLSDKALEGL | 6    | >MLL-R353Q QLSDKALQGI | 4    | 2    |
| >MLL-R353Q RQLSDKALEG | 24   | >MLL-R353Q RQLSDKALQC | 28   | 4    |
| >MLL-R353Q RQLSDKALEG | 50   | >MLL-R353Q RQLSDKALQC | 26   | 24   |
| >MLL-R353Q RQLSDKALEG | 239  | >MLL-R353Q RQLSDKALQC | 207  | 32   |
| >MLL-R353Q RQLSDKALEG | 164  | >MLL-R353Q RQLSDKALQC | 300  | 136  |
| >MLL-R353Q RQLSDKALEG | 155  | >MLL-R353Q RQLSDKALQC | 135  | 20   |
| >MLL-R353Q RQLSDKALEG | 177  | >MLL-R353Q RQLSDKALQC | 125  | 52   |
| >MLL-T2338!TTSRELVN   | 1872 | >MLL-T2338!STSRELVN   | 448  | 1424 |
| >MLL-T2338!TTSRELVN   | 465  | >MLL-T2338!STSRELVN   | 218  | 247  |
| >MLL-T2338!TTSRELVN   | 15   | >MLL-T2338!STSRELVN   | 9    | 6    |
| >MLL-T2338!TTSRELVN   | 207  | >MLL-T2338!STSRELVN   | 39   | 168  |
| >MLL-T2338!TTSRELVN   | 102  | >MLL-T2338!STSRELVN   | 183  | 81   |
| >MLL-T2338!TTSRELVN   | 87   | >MLL-T2338!STSRELVN   | 345  | 258  |
| >MLL-T2338!TTSRELVN   | 133  | >MLL-T2338!STSRELVN   | 551  | 418  |
| >MLL-T2338!TTSRELVN   | 444  | >MLL-T2338!STSRELVN   | 700  | 256  |
| >MLL-T2338!TTSRELVN   | 352  | >MLL-T2338!STSRELVN   | 93   | 259  |
| >MLL-T2338!TTSRELVN   | 700  | >MLL-T2338!STSRELVN   | 222  | 478  |
| >MLL-T2338!TTSRELVN   | 110  | >MLL-T2338!STSRELVN   | 40   | 70   |
| >MLL-T2338!NTTSRELVN  | 188  | >MLL-T2338!NTSRELVN   | 423  | 235  |
| >MLL-T2338!NTTSRELVN  | 15   | >MLL-T2338!NTSRELVN   | 73   | 58   |
| >MLL-T2338!NTTSRELVN  | 412  | >MLL-T2338!NTSRELVN   | 4407 | 3995 |
| >MLL-T2338!VHNTTSREL  | 429  | >MLL-T2338!VHNSTSREL  | 245  | 184  |
| >MLL-T2338!VHNTTSREL  | 910  | >MLL-T2338!VHNSTSREL  | 443  | 467  |
| >MLL-T2338!VHNTTSREL  | 628  | >MLL-T2338!VHNSTSREL  | 499  | 129  |
| >MLL-T2338!QVHNTTSREL | 276  | >MLL-T2338!QVHNSTSREL | 350  | 74   |
| >MLL-T2338!QVHNTTSR   | 119  | >MLL-T2338!QVHNSTSRL  | 157  | 38   |
| >MLL-T2338!QVHNTTSR   | 21   | >MLL-T2338!QVHNSTSRL  | 24   | 3    |
| >MLL-T2338!QVHNTTSR   | 394  | >MLL-T2338!QVHNSTSRL  | 722  | 328  |
| >MLL-T2338!PQVHNTTSR  | 516  | >MLL-T2338!PQVHNSTSRL | 408  | 108  |
| >MLL-T2338!PQVHNTTSR  | 156  | >MLL-T2338!PQVHNSTSRL | 126  | 30   |
| >MLL-T2338!LAPQVHNTT  | 114  | >MLL-T2338!LAPQVHNST  | 146  | 32   |
| >MLL-T2338!KLAPQVHNT  | 179  | >MLL-T2338!KLAPQVHNS  | 1810 | 1631 |
| >MLL-T2338!KLAPQVHNT  | 24   | >MLL-T2338!KLAPQVHNS  | 58   | 34   |
| >MLL-T2338!KLAPQVHNT  | 198  | >MLL-T2338!KLAPQVHNS  | 292  | 94   |
| >MLL-T2338!KLAPQVHNT  | 18   | >MLL-T2338!KLAPQVHNS  | 125  | 107  |
| >MLL-T2338!KLAPQVHNT  | 535  | >MLL-T2338!KLAPQVHNS  | 450  | 85   |
| >MLL-T2338!KLAPQVHNT  | 152  | >MLL-T2338!KLAPQVHNS  | 156  | 4    |
| >MLL-T2338!KLAPQVHNT  | 89   | >MLL-T2338!KLAPQVHNS  | 605  | 516  |



|                      |     |                      |      |      |
|----------------------|-----|----------------------|------|------|
| >MLL-T2338!KLAPQVHNT | 120 | >MLL-T2338!KLAPQVHNS | 188  | 68   |
| >MLL-T2338!KLAPQVHNT | 341 | >MLL-T2338!KLAPQVHNS | 2225 | 1884 |
| >MLL-T2338!KLAPQVHNT | 59  | >MLL-T2338!KLAPQVHNS | 883  | 824  |
| >MLL-T2338!KLAPQVHNT | 185 | >MLL-T2338!KLAPQVHNS | 327  | 142  |
| >MLL-T2338!KLAPQVHNT | 183 | >MLL-T2338!KLAPQVHNS | 2660 | 2477 |
| >MLL-T2338!KLAPQVHNT | 8   | >MLL-T2338!KLAPQVHNS | 52   | 44   |
| >MLL-T2338!KLAPQVHNT | 33  | >MLL-T2338!KLAPQVHNS | 37   | 4    |
| >MLL-T2338!KLAPQVHNT | 267 | >MLL-T2338!KLAPQVHNS | 286  | 19   |
| >MLL-T2673!TSDEDDL   | 8   | >MLL-T2673!SSDEDDL   | 7    | 1    |
| >MLL-T2673!TSDEDDL   | 6   | >MLL-T2673!SSDEDDL   | 6    | 0    |
| >MLL-T2673!TSDEDDL   | 11  | >MLL-T2673!SSDEDDL   | 12   | 1    |
| >MLL-T2673!TSDEDDL   | 332 | >MLL-T2673!SSDEDDL   | 132  | 200  |
| >MLL-T2673!TSDEDDL   | 116 | >MLL-T2673!SSDEDDL   | 113  | 3    |
| >MLL-T2673!TSDEDDL   | 193 | >MLL-T2673!SSDEDDL   | 210  | 17   |
| >MLL-T2673!TSDEDDL   | 697 | >MLL-T2673!SSDEDDL   | 362  | 335  |
| >MLL-T2673!TSDEDDL   | 369 | >MLL-T2673!SSDEDDL   | 195  | 174  |
| >MLL-T2673!TSDEDDL   | 50  | >MLL-T2673!SSDEDDL   | 46   | 4    |
| >MLL-T2673!TSDEDDL   | 417 | >MLL-T2673!SSDEDDL   | 192  | 225  |
| >MLL-T2673!TSDEDDL   | 732 | >MLL-T2673!SSDEDDL   | 421  | 311  |
| >MLL-T2673!TSDEDDL   | 90  | >MLL-T2673!SSDEDDL   | 58   | 32   |
| >MLL-T2673!TSDEDDL   | 195 | >MLL-T2673!SSDEDDL   | 110  | 85   |
| >MLL-T2673!TSDEDDL   | 399 | >MLL-T2673!SSDEDDL   | 582  | 183  |
| >MLL-T2673!TSDEDDL   | 839 | >MLL-T2673!SSDEDDL   | 300  | 539  |
| >MLL-T2673!TSDEDDL   | 538 | >MLL-T2673!SSDEDDL   | 345  | 193  |
| >MLL-T2673!STSDEDDL  | 21  | >MLL-T2673!SSSDEDDL  | 34   | 13   |
| >MLL-T2673!STSDEDDL  | 13  | >MLL-T2673!SSSDEDDL  | 17   | 4    |
| >MLL-T2673!STSDEDDL  | 23  | >MLL-T2673!SSSDEDDL  | 42   | 19   |
| >MLL-T2673!STSDEDDL  | 27  | >MLL-T2673!SSSDEDDL  | 51   | 24   |
| >MLL-T2673!STSDEDDL  | 44  | >MLL-T2673!SSSDEDDL  | 116  | 72   |
| >MLL-T2673!STSDEDDL  | 79  | >MLL-T2673!SSSDEDDL  | 3553 | 3474 |
| >MLL-T2673!STSDEDDL  | 364 | >MLL-T2673!SSSDEDDL  | 3135 | 2771 |
| >MLL-T2673!STSDEDDL  | 127 | >MLL-T2673!SSSDEDDL  | 1013 | 886  |
| >MLL-T2673!STSDEDDL  | 24  | >MLL-T2673!SSSDEDDL  | 127  | 103  |
| >MLL-T2673!STSDEDDL  | 68  | >MLL-T2673!SSSDEDDL  | 283  | 215  |
| >MLL-T2673!STSDEDDL  | 45  | >MLL-T2673!SSSDEDDL  | 61   | 16   |
| >MLL-T2673!STSDEDDL  | 19  | >MLL-T2673!SSSDEDDL  | 49   | 30   |
| >MLL-T2673!STSDEDDL  | 55  | >MLL-T2673!SSSDEDDL  | 59   | 4    |
| >MLL-T2673!STSDEDDL  | 136 | >MLL-T2673!SSSDEDDL  | 109  | 27   |
| >MLL-T2673!STSDEDDL  | 13  | >MLL-T2673!SSSDEDDL  | 14   | 1    |
| >MLL-T2673!STSDEDDL  | 310 | >MLL-T2673!SSSDEDDL  | 2279 | 1969 |
| >MLL-T2673!STSDEDDL  | 207 | >MLL-T2673!SSSDEDDL  | 565  | 358  |
| >MLL-T2673!STSDEDDL  | 130 | >MLL-T2673!SSSDEDDL  | 983  | 853  |
| >MLL-T2673!STSDEDDL  | 74  | >MLL-T2673!SSSDEDDL  | 466  | 392  |

|                       |      |                       |       |       |
|-----------------------|------|-----------------------|-------|-------|
| >MLL-T2673!STSEDDLYY' | 187  | >MLL-T2673!SSSEDDLYY' | 1260  | 1073  |
| >MLL-T2673!STSEDDLYY  | 610  | >MLL-T2673!SSSEDDLYY  | 480   | 130   |
| >MLL-T2673!STSEDDLY   | 165  | >MLL-T2673!SSSEDDLY   | 233   | 68    |
| >MLL-T2673!STSEDDLYY  | 25   | >MLL-T2673!SSSEDDLYY  | 33    | 8     |
| >MLL-T2673!STSEDDLYY' | 35   | >MLL-T2673!SSSEDDLYY' | 47    | 12    |
| >MLL-T2673!STSEDDLY   | 895  | >MLL-T2673!SSSEDDLY   | 490   | 405   |
| >MLL-T2673!STSEDDLYY  | 966  | >MLL-T2673!SSSEDDLYY  | 421   | 545   |
| >MLL-T2673!STSEDDLY   | 40   | >MLL-T2673!SSSEDDLY   | 106   | 66    |
| >MLL-T2673!STSEDDLYY  | 27   | >MLL-T2673!SSSEDDLYY  | 49    | 22    |
| >MLL-T2673!STSEDDLYY' | 46   | >MLL-T2673!SSSEDDLYY' | 124   | 78    |
| >MLL-T2673!STSEDDLYY' | 390  | >MLL-T2673!SSSEDDLYY' | 589   | 199   |
| >MLL-T2673!GQVDGADDL  | 220  | >MLL-T2673!GQVDGADDL  | 704   | 484   |
| >MLL-T2673!LSTSEDDLY  | 35   | >MLL-T2673!LSSSEDDLY  | 17    | 18    |
| >MLL-T2673!LSTSEDDLY' | 54   | >MLL-T2673!LSSSEDDLY' | 20    | 34    |
| >MLL-T2673!LSTSEDDLY' | 67   | >MLL-T2673!LSSSEDDLY' | 61    | 6     |
| >MLL-T2673!LSTSEDDLY  | 251  | >MLL-T2673!LSSSEDDLY  | 81    | 170   |
| >MLL-T2673!LSTSEDDLY' | 41   | >MLL-T2673!LSSSEDDLY' | 26    | 15    |
| >MLL-T2673!LSTSEDDLY' | 2408 | >MLL-T2673!LSSSEDDLY' | 376   | 2032  |
| >MLL-T2673!LSTSEDDLY' | 860  | >MLL-T2673!LSSSEDDLY' | 458   | 402   |
| >MLL-T2673!LSTSEDDLY  | 516  | >MLL-T2673!LSSSEDDLY  | 401   | 115   |
| >MLL-T2673!LSTSEDDLY' | 71   | >MLL-T2673!LSSSEDDLY' | 58    | 13    |
| >MLL-T2673!LSTSEDDLY' | 312  | >MLL-T2673!LSSSEDDLY' | 172   | 140   |
| >MLL-T2673!LSTSEDDLY  | 437  | >MLL-T2673!LSSSEDDLY  | 333   | 104   |
| >MLL-T2673!LSTSEDDLY' | 87   | >MLL-T2673!LSSSEDDLY' | 69    | 18    |
| >MLL-T2673!LSTSEDDLY  | 257  | >MLL-T2673!LSSSEDDLY  | 199   | 58    |
| >MLL-T2673!LSTSEDDLY' | 162  | >MLL-T2673!LSSSEDDLY' | 155   | 7     |
| >MLL-T2673!LSTSEDDLY' | 511  | >MLL-T2673!LSSSEDDLY' | 403   | 108   |
| >MLL-T2673!DLSTSEDDL  | 495  | >MLL-T2673!DLSSSEDDL  | 326   | 169   |
| >MLL-T2673!DLSTSEDDL  | 723  | >MLL-T2673!DLSSSEDDL  | 401   | 322   |
| >MLLT10-S3!SFSGTPGSV  | 331  | >MLLT10-S3!NFSGTPGSV  | 3239  | 2908  |
| >MLLT10-S3!SFSGTPGSVK | 148  | >MLLT10-S3!NFSGTPGSVK | 560   | 412   |
| >MLLT10-S3!SFSGTPGSVK | 92   | >MLLT10-S3!NFSGTPGSVK | 782   | 690   |
| >MLLT10-S3!SFSGTPGSVK | 237  | >MLLT10-S3!NFSGTPGSVK | 102   | 135   |
| >MLLT10-S3!SFSGTPGSVK | 248  | >MLLT10-S3!NFSGTPGSVK | 2545  | 2297  |
| >MLLT10-S3!SFSGTPGSV  | 79   | >MLLT10-S3!NFSGTPGSV  | 261   | 182   |
| >MLLT10-S3!GSFSGTPGSV | 383  | >MLLT10-S3!GNFSGTPGS\ | 566   | 183   |
| >MLLT10-S3!GSFSGTPGSV | 155  | >MLLT10-S3!GNFSGTPGS\ | 336   | 181   |
| >MLLT10-S3!GSFSGTPGSV | 475  | >MLLT10-S3!GNFSGTPGS\ | 2485  | 2010  |
| >MLLT10-S3!GSFSGTPGSV | 79   | >MLLT10-S3!GNFSGTPGS\ | 5412  | 5333  |
| >MLLT10-S3!GSFSGTPGSV | 13   | >MLLT10-S3!GNFSGTPGS\ | 1218  | 1205  |
| >MLLT10-S3!GSFSGTPGSV | 221  | >MLLT10-S3!GNFSGTPGS\ | 5049  | 4828  |
| >MLLT10-S3!GSFSGTPGSV | 352  | >MLLT10-S3!GNFSGTPGS\ | 3540  | 3188  |
| >MLLT10-S3!GSFSGTPGSV | 321  | >MLLT10-S3!GNFSGTPGS\ | 12141 | 11820 |

|                        |      |                        |      |      |
|------------------------|------|------------------------|------|------|
| >MLLT10-S3!GSFSGTPGSV  | 85   | >MLLT10-S3!GNFSGTPGSV  | 916  | 831  |
| >MLLT10-S3!GSFSGTPGSV  | 309  | >MLLT10-S3!GNFSGTPGSV  | 4109 | 3800 |
| >MLLT10-S3!FPQGSFSG    | 471  | >MLLT10-S3!FPQGNFSG    | 813  | 342  |
| >MLLT10-S3!FPQGSFSGTP  | 260  | >MLLT10-S3!FPQGNFSGTF  | 312  | 52   |
| >MLLT10-S3!FPQGSFSG    | 114  | >MLLT10-S3!FPQGNFSG    | 88   | 26   |
| >MLLT10-S3!FPQGSFSGT   | 52   | >MLLT10-S3!FPQGNFSGT   | 28   | 24   |
| >MLLT10-S3!FPQGSFSGTP  | 61   | >MLLT10-S3!FPQGNFSGTF  | 47   | 14   |
| >MLLT10-S3!SPFPQGSF    | 12   | >MLLT10-S3!SPFPQGNF    | 7    | 5    |
| >MLLT10-S3!SPFPQGSF    | 92   | >MLLT10-S3!SPFPQGNF    | 806  | 714  |
| >MLLT10-S3!SPFPQGSF    | 286  | >MLLT10-S3!SPFPQGNF    | 620  | 334  |
| >MLLT10-S3!SPFPQGSF    | 112  | >MLLT10-S3!SPFPQGNF    | 221  | 109  |
| >MLLT10-S3!SPFPQGSF    | 48   | >MLLT10-S3!SPFPQGNF    | 163  | 115  |
| >MLLT10-S3!SPFPQGSF    | 43   | >MLLT10-S3!SPFPQGNF    | 198  | 155  |
| >MLLT10-S3!ASFPFPQGSF  | 663  | >MLLT10-S3!ASFPFPQGNF  | 303  | 360  |
| >MLLT10-S3!ASFPFPQGSF  | 215  | >MLLT10-S3!ASFPFPQGNF  | 241  | 26   |
| >MLLT10-S3!ASFPFPQGSF  | 54   | >MLLT10-S3!ASFPFPQGNF  | 49   | 5    |
| >MLLT10-S3!AASFPFPQGSF | 457  | >MLLT10-S3!AASFPFPQGNF | 2843 | 2386 |
| >MLLT10-S3!AASFPFPQGSF | 78   | >MLLT10-S3!AASFPFPQGNF | 149  | 71   |
| >MLLT10-S3!AASFPFPQGSF | 10   | >MLLT10-S3!AASFPFPQGNF | 11   | 1    |
| >MLLT10-S3!AASFPFPQGSF | 327  | >MLLT10-S3!AASFPFPQGNF | 662  | 335  |
| >MLLT10-S3!AASFPFPQGSF | 63   | >MLLT10-S3!AASFPFPQGNF | 96   | 33   |
| >MLLT10-S3!SAASFPFPQGS | 372  | >MLLT10-S3!SAASFPFPQGN | 323  | 49   |
| >MLLT10-S3!SAASFPFPQGS | 174  | >MLLT10-S3!SAASFPFPQGN | 1024 | 850  |
| >MLLT10-S3!SAASFPFPQGS | 90   | >MLLT10-S3!SAASFPFPQGN | 180  | 90   |
| >MLLT10-S3!SAASFPFPQGS | 105  | >MLLT10-S3!SAASFPFPQGN | 116  | 11   |
| >MLLT10-S3!SAASFPFPQGS | 47   | >MLLT10-S3!SAASFPFPQGN | 103  | 56   |
| >MLLT3-K21!KDSREHKSAF  | 461  | >MLLT3-K21!KDSREHKSAF  | 9699 | 9238 |
| >MLLT3-K21!KDSREHKSAF  | 5441 | >MLLT3-K21!KDSREHKSAF  | 370  | 5071 |
| >MLLT3-K21!AFKEPSRDHM  | 22   | >MLLT3-K21!AFREPSRDHM  | 8    | 14   |
| >MLLT3-K21!AFKEPSRDHM  | 336  | >MLLT3-K21!AFREPSRDHM  | 555  | 219  |
| >MLLT3-K21!SAFKEPSR    | 650  | >MLLT3-K21!SAFREPSR    | 400  | 250  |
| >MLLT3-K21!SAFKEPSR    | 283  | >MLLT3-K21!SAFREPSR    | 172  | 111  |
| >MLLT3-K21!SAFKEPSR    | 31   | >MLLT3-K21!SAFREPSR    | 32   | 1    |
| >MLLT3-K21!SAFKEPSR    | 416  | >MLLT3-K21!SAFREPSR    | 430  | 14   |
| >MLLT3-K21!KSAFKEPSR   | 66   | >MLLT3-K21!KSAFREPSR   | 43   | 23   |
| >MLLT3-K21!HKSAFKEPSR  | 343  | >MLLT3-K21!HKSAFREPSR  | 292  | 51   |
| >MLLT3-K21!REHKSAFK    | 24   | >MLLT3-K21!REHKSAFR    | 2105 | 2081 |
| >MLLT3-K21!REHKSAFK    | 2522 | >MLLT3-K21!REHKSAFR    | 102  | 2420 |
| >MLLT3-K21!REHKSAFKEP  | 597  | >MLLT3-K21!REHKSAFREP  | 353  | 244  |
| >MLLT3-K21!REHKSAFKEP  | 180  | >MLLT3-K21!REHKSAFREP  | 115  | 65   |
| >MLLT3-K21!REHKSAFKE   | 476  | >MLLT3-K21!REHKSAFRE   | 362  | 114  |
| >MLLT3-K21!REHKSAFKEP  | 97   | >MLLT3-K21!REHKSAFREP  | 75   | 22   |
| >MLLT3-K21!REHKSAFKEP  | 828  | >MLLT3-K21!REHKSAFREP  | 433  | 395  |

|                       |       |                       |      |       |
|-----------------------|-------|-----------------------|------|-------|
| >MLLT3-K21!REHKSAFK   | 1239  | >MLLT3-K21!REHKSAFR   | 55   | 1184  |
| >MLLT3-K21!DSREHKSAFK | 36    | >MLLT3-K21!DSREHKSAFR | 1819 | 1783  |
| >MLLT3-K21!DSREHKSAFK | 1160  | >MLLT3-K21!DSREHKSAFR | 58   | 1102  |
| >MLLT3-K21!DSREHKSAFK | 3012  | >MLLT3-K21!DSREHKSAFR | 81   | 2931  |
| >MLLT3-K21!DSREHKSAFK | 118   | >MLLT3-K21!DSREHKSAFR | 36   | 82    |
| >MLLT3-V36!FVRGPEHSNI | 1080  | >MLLT3-V36!FLRGPEHSNI | 57   | 1023  |
| >MLLT3-V36!FVRGPEHSNI | 234   | >MLLT3-V36!FLRGPEHSNI | 30   | 204   |
| >MLLT3-V36!FVRGPEHSNI | 1334  | >MLLT3-V36!FLRGPEHSNI | 15   | 1319  |
| >MLLT3-V36!FVRGPEHSNI | 11928 | >MLLT3-V36!FLRGPEHSNI | 276  | 11652 |
| >MLLT3-V36!FVRGPEHSNI | 9960  | >MLLT3-V36!FLRGPEHSNI | 299  | 9661  |
| >MLLT3-V36!FVRGPEHS   | 14326 | >MLLT3-V36!FLRGPEHS   | 187  | 14139 |
| >MLLT3-V36!FVRGPEHSN  | 13739 | >MLLT3-V36!FLRGPEHSN  | 133  | 13606 |
| >MLLT3-V36!FVRGPEHSNI | 151   | >MLLT3-V36!FLRGPEHSNI | 3    | 148   |
| >MLLT3-V36!FVRGPEHSNI | 5502  | >MLLT3-V36!FLRGPEHSNI | 49   | 5453  |
| >MLLT3-V36!FVRGPEHSNI | 2747  | >MLLT3-V36!FLRGPEHSNI | 435  | 2312  |
| >MLLT3-V36!EGFTHDWM\  | 14    | >MLLT3-V36!EGFTHDWM\  | 72   | 58    |
| >MLLT3-V36!EGFTHDWM\  | 150   | >MLLT3-V36!EGFTHDWM\  | 1026 | 876   |
| >MLLT3-V36!VFVRGPEHSN | 51    | >MLLT3-V36!VFLRGPEHSN | 50   | 1     |
| >MLLT3-V36!VFVRGPEHSN | 586   | >MLLT3-V36!VFLRGPEHSN | 394  | 192   |
| >MLLT3-V36!VFVRGPEHSN | 1276  | >MLLT3-V36!VFLRGPEHSN | 184  | 1092  |
| >MLLT3-V36!DWMVFVRG\  | 497   | >MLLT3-V36!DWMVFVRG\  | 517  | 20    |
| >MLLT3-V36!HDWMVFVR   | 142   | >MLLT3-V36!HDWMVFLR   | 98   | 44    |
| >MLLT3-V36!HDWMVFVR   | 539   | >MLLT3-V36!HDWMVFLR   | 249  | 290   |
| >MLLT3-V36!HDWMVFVR   | 856   | >MLLT3-V36!HDWMVFLR   | 390  | 466   |
| >MLLT3-V36!HDWMVFVR   | 81    | >MLLT3-V36!HDWMVFLR   | 60   | 21    |
| >MLLT3-V36!THDWMVFVI  | 559   | >MLLT3-V36!THDWMVFLF  | 158  | 401   |
| >MLLT3-V36!THDWMVFV   | 203   | >MLLT3-V36!THDWMVFL   | 19   | 184   |
| >MLLT3-V36!FTHDWMVF\  | 7     | >MLLT3-V36!FTHDWMVFL  | 11   | 4     |
| >MLLT3-V36!FTHDWMVF\  | 6     | >MLLT3-V36!FTHDWMVFL  | 6    | 0     |
| >MLLT3-V36!FTHDWMVF\  | 5     | >MLLT3-V36!FTHDWMVFL  | 26   | 21    |
| >MLLT3-V36!FTHDWMVF\  | 3     | >MLLT3-V36!FTHDWMVFL  | 5    | 2     |
| >MLLT3-V36!FTHDWMVF\  | 2     | >MLLT3-V36!FTHDWMVFL  | 6    | 4     |
| >MLLT3-V36!FTHDWMVF\  | 8     | >MLLT3-V36!FTHDWMVFL  | 53   | 45    |
| >MLLT3-V36!FTHDWMVF\  | 7     | >MLLT3-V36!FTHDWMVFL  | 35   | 28    |
| >MLLT3-V36!FTHDWMVF\  | 93    | >MLLT3-V36!FTHDWMVFL  | 1287 | 1194  |
| >MLLT3-V36!FTHDWMVF\  | 3     | >MLLT3-V36!FTHDWMVFL  | 9    | 6     |
| >MLLT3-V36!FTHDWMVF\  | 445   | >MLLT3-V36!FTHDWMVFL  | 188  | 257   |
| >MLLT3-V36!FTHDWMVF\  | 16    | >MLLT3-V36!FTHDWMVFL  | 11   | 5     |
| >MLLT3-V36!FTHDWMVF\  | 86    | >MLLT3-V36!FTHDWMVFL  | 13   | 73    |
| >MLLT3-V36!FTHDWMVF\  | 39    | >MLLT3-V36!FTHDWMVFL  | 19   | 20    |
| >MLLT3-V36!FTHDWMVF\  | 79    | >MLLT3-V36!FTHDWMVFL  | 28   | 51    |
| >MLLT3-V36!FTHDWMVF\  | 9     | >MLLT3-V36!FTHDWMVFL  | 4    | 5     |
| >MLLT3-V36!FTHDWMVF\  | 4     | >MLLT3-V36!FTHDWMVFL  | 5    | 1     |

|                       |       |                       |       |       |
|-----------------------|-------|-----------------------|-------|-------|
| >MLLT3-V36IFTHDWMVF\  | 442   | >MLLT3-V36IFTHDWMVFL  | 1347  | 905   |
| >MLLT3-V36IFTHDWMVF\  | 3     | >MLLT3-V36IFTHDWMVFL  | 7     | 4     |
| >MLLT3-V36IFTHDWMVF\  | 283   | >MLLT3-V36IFTHDWMVFL  | 15    | 268   |
| >MLLT3-V36IFTHDWMVF\  | 84    | >MLLT3-V36IFTHDWMVFL  | 21    | 63    |
| >MLLT3-V36IFTHDWMVF\  | 372   | >MLLT3-V36IFTHDWMVFL  | 138   | 234   |
| >MLLT3-V36IFTHDWMVF\  | 714   | >MLLT3-V36IFTHDWMVFL  | 400   | 314   |
| >MLLT3-V36IFTHDWMVF\  | 246   | >MLLT3-V36IFTHDWMVFL  | 180   | 66    |
| >MLLT3-V36IFTHDWMVF\  | 1093  | >MLLT3-V36IFTHDWMVFL  | 230   | 863   |
| >MLLT3-V36IGFTHDWMV\  | 309   | >MLLT3-V36IGFTHDWMV\  | 3577  | 3268  |
| >MLLT3-V36IGFTHDWMV\  | 6942  | >MLLT3-V36IGFTHDWMV\  | 310   | 6632  |
| >MLLT3-V36IGFTHDWMV\  | 68    | >MLLT3-V36IGFTHDWMV\  | 40    | 28    |
| >MLLT3-V36IGFTHDWMV\  | 481   | >MLLT3-V36IGFTHDWMV\  | 174   | 307   |
| >MLLT3-V36IGFTHDWMV\  | 444   | >MLLT3-V36IGFTHDWMV\  | 314   | 130   |
| >MLLT3-V36IGFTHDWMV\  | 128   | >MLLT3-V36IGFTHDWMV\  | 111   | 17    |
| >MLLT3-V36IGFTHDWMV\  | 353   | >MLLT3-V36IGFTHDWMV\  | 275   | 78    |
| >MLLT4-I134VSQPIRTDL  | 353   | >MLLT4-I134VSQPVRTDL  | 540   | 187   |
| >MLLT4-I134VSQPIRTDL  | 472   | >MLLT4-I134VSQPVRTDL  | 605   | 133   |
| >MLLT4-I134VAVSQPIR   | 591   | >MLLT4-I134VAVSQPVR   | 430   | 161   |
| >MLLT4-I134VAVSQPIR   | 303   | >MLLT4-I134VAVSQPVR   | 246   | 57    |
| >MLLT4-I134PVAVSQPI   | 15702 | >MLLT4-I134PVAVSQPV   | 445   | 15257 |
| >MLLT4-I134PVAVSQPI   | 1947  | >MLLT4-I134PVAVSQPV   | 446   | 1501  |
| >MLLT4-I134TPVAVSQPI  | 287   | >MLLT4-I134TPVAVSQPV  | 61    | 226   |
| >MLLT4-I134TPVAVSQPI  | 359   | >MLLT4-I134TPVAVSQPV  | 93    | 266   |
| >MLLT4-I134TPVAVSQPI  | 128   | >MLLT4-I134TPVAVSQPV  | 109   | 19    |
| >MLLT4-I134TPVAVSQPI  | 97    | >MLLT4-I134TPVAVSQPV  | 112   | 15    |
| >MLLT4-I134TPVAVSQPI  | 79    | >MLLT4-I134TPVAVSQPV  | 86    | 7     |
| >MLLT4-I134TPVAVSQPI  | 233   | >MLLT4-I134TPVAVSQPV  | 640   | 407   |
| >MLLT4-I134TPVAVSQPI  | 662   | >MLLT4-I134TPVAVSQPV  | 101   | 561   |
| >MLLT4-I134TPVAVSQPI  | 135   | >MLLT4-I134TPVAVSQPV  | 392   | 257   |
| >MLLT4-I134ATPVAVSQPI | 2997  | >MLLT4-I134ATPVAVSQP\ | 245   | 2752  |
| >MLLT4-I134ATPVAVSQPI | 5431  | >MLLT4-I134ATPVAVSQP\ | 334   | 5097  |
| >MLLT4-I134ATPVAVSQPI | 14488 | >MLLT4-I134ATPVAVSQP\ | 299   | 14189 |
| >MLLT4-I134ATPVAVSQPI | 212   | >MLLT4-I134ATPVAVSQP\ | 2995  | 2783  |
| >MLLT4-I134ATPVAVSQPI | 423   | >MLLT4-I134ATPVAVSQP\ | 384   | 39    |
| >MLLT4-I134ATPVAVSQPI | 120   | >MLLT4-I134ATPVAVSQP\ | 39    | 81    |
| >MLLT4-I134ATPVAVSQPI | 5     | >MLLT4-I134ATPVAVSQP\ | 8     | 3     |
| >MLLT4-I134ATPVAVSQPI | 233   | >MLLT4-I134ATPVAVSQP\ | 482   | 249   |
| >MLLT4-I134ATPVAVSQPI | 175   | >MLLT4-I134ATPVAVSQP\ | 10750 | 10575 |
| >MLLT6-T64;HTEPDLEDCS | 17    | >MLLT6-T64;HIEPDLEDCS | 1396  | 1379  |
| >MLLT6-T64;PLLSQAESSH | 4698  | >MLLT6-T64;PLLSQAESSH | 246   | 4452  |
| >MLLT6-T64;PLLSQAESSH | 4662  | >MLLT6-T64;PLLSQAESSH | 185   | 4477  |
| >MLLT6-T64;PLLSQAESSH | 6691  | >MLLT6-T64;PLLSQAESSH | 419   | 6272  |
| >MLLT6-T64;PLLSQAESSH | 2912  | >MLLT6-T64;PLLSQAESSH | 262   | 2650  |

|                       |       |                       |      |       |
|-----------------------|-------|-----------------------|------|-------|
| >MLLT6-T64;SSHTEPDL   | 845   | >MLLT6-T64;SSHIEPDL   | 374  | 471   |
| >MLLT6-T64;AESSHTEPDL | 363   | >MLLT6-T64;AESSHIEPDL | 257  | 106   |
| >MLLT6-T64;AESSHTEP   | 515   | >MLLT6-T64;AESSHIEP   | 274  | 241   |
| >MLLT6-T64;AESSHTEPD  | 576   | >MLLT6-T64;AESSHIEPD  | 395  | 181   |
| >MLLT6-T64;AESSHTEPDL | 1382  | >MLLT6-T64;AESSHIEPDL | 497  | 885   |
| >MLLT6-T64;AESSHTEPD  | 171   | >MLLT6-T64;AESSHIEPD  | 161  | 10    |
| >MLLT6-T64;AESSHTEPDL | 15    | >MLLT6-T64;AESSHIEPDL | 15   | 0     |
| >MLLT6-T64;SQAESSHT   | 2583  | >MLLT6-T64;SQAESSHI   | 167  | 2416  |
| >MLLT6-T64;SQAESSHT   | 1164  | >MLLT6-T64;SQAESSHI   | 69   | 1095  |
| >MLLT6-T64;SQAESSHT   | 133   | >MLLT6-T64;SQAESSHI   | 18   | 115   |
| >MLLT6-T64;SQAESSHT   | 8842  | >MLLT6-T64;SQAESSHI   | 388  | 8454  |
| >MLLT6-T64;SQAESSHT   | 5904  | >MLLT6-T64;SQAESSHI   | 337  | 5567  |
| >MLLT6-T64;SQAESSHT   | 1791  | >MLLT6-T64;SQAESSHI   | 153  | 1638  |
| >MLLT6-T64;SQAESSHT   | 3060  | >MLLT6-T64;SQAESSHI   | 62   | 2998  |
| >MLLT6-T64;SQAESSHT   | 34296 | >MLLT6-T64;SQAESSHI   | 410  | 33886 |
| >MLLT6-T64;LSQAESSHT  | 4369  | >MLLT6-T64;LSQAESSHI  | 471  | 3898  |
| >MLLT6-T64;LSQAESSHT  | 5856  | >MLLT6-T64;LSQAESSHI  | 99   | 5757  |
| >MLLT6-T64;LSQAESSHT  | 15699 | >MLLT6-T64;LSQAESSHI  | 305  | 15394 |
| >MLLT6-T64;LSQAESSHT  | 19251 | >MLLT6-T64;LSQAESSHI  | 10   | 19241 |
| >MLLT6-T64;LLSQAESSHT | 289   | >MLLT6-T64;LLSQAESSHI | 40   | 249   |
| >MLLT6-T64;LLSQAESSHT | 303   | >MLLT6-T64;LLSQAESSHI | 61   | 242   |
| >MLLT6-T64;LLSQAESSHT | 3201  | >MLLT6-T64;LLSQAESSHI | 121  | 3080  |
| >MLLT6-T64;LLSQAESSHT | 7788  | >MLLT6-T64;LLSQAESSHI | 127  | 7661  |
| >MLLT6-T64;LLSQAESSHT | 1892  | >MLLT6-T64;LLSQAESSHI | 61   | 1831  |
| >MLLT6-T64;LLSQAESSHT | 9221  | >MLLT6-T64;LLSQAESSHI | 388  | 8833  |
| >MLLT6-T64;LLSQAESSHT | 51    | >MLLT6-T64;LLSQAESSHI | 8    | 43    |
| >MLLT6-T64;LLSQAESSHT | 3347  | >MLLT6-T64;LLSQAESSHI | 321  | 3026  |
| >MLLT6-T64;LLSQAESSHT | 33138 | >MLLT6-T64;LLSQAESSHI | 435  | 32703 |
| >MN1-A1292AKARASVPTV  | 2475  | >MN1-A1292TKARASVPTV  | 165  | 2310  |
| >MN1-A1292AKARASVPT   | 257   | >MN1-A1292TKARASVPT   | 1458 | 1201  |
| >MN1-A1292AKARASVPTV  | 37    | >MN1-A1292TKARASVPTV  | 178  | 141   |
| >MN1-A1292AKARASVPTV  | 426   | >MN1-A1292TKARASVPTV  | 260  | 166   |
| >MN1-A1292DAKARASV    | 825   | >MN1-A1292DTKARASV    | 93   | 732   |
| >MN1-A1292DAKARASV    | 317   | >MN1-A1292DTKARASV    | 1487 | 1170  |
| >MN1-A1292DAKARASVPT  | 209   | >MN1-A1292DTKARASVPT  | 20   | 189   |
| >MN1-A1292DAKARASVPT  | 228   | >MN1-A1292DTKARASVPT  | 144  | 84    |
| >MN1-A1292GDAKARASV   | 434   | >MN1-A1292GDTKARASV   | 902  | 468   |
| >MN1-A1292DVGDAKARA   | 195   | >MN1-A1292DVGDTKARA   | 188  | 7     |
| >MN1-A1292DVGDAKAR    | 298   | >MN1-A1292DVGDTKAR    | 183  | 115   |
| >MN1-A1292DVGDAKAR    | 141   | >MN1-A1292DVGDTKAR    | 117  | 24    |
| >MN1-A1292DVGDAKARA   | 44    | >MN1-A1292DVGDTKARA   | 92   | 48    |
| >MN1-A1292DVGDAKARA   | 45    | >MN1-A1292DVGDTKARA   | 48   | 3     |
| >MN1-A1292CTDDVGD     | 126   | >MN1-A1292CTDDVGD     | 177  | 51    |

|                     |     |       |                      |     |       |       |
|---------------------|-----|-------|----------------------|-----|-------|-------|
| >MN1-A1292CTDDVGD   | AK  | 338   | >MN1-A1292CTDDVGD    | TK  | 211   | 127   |
| >MN1-A1292CTDDVGD   | AK  | 297   | >MN1-A1292CTDDVGD    | TK  | 242   | 55    |
| >MN1-G1005HGHPGSH   | HP  | 3647  | >MN1-G1005HSHPGSH    | HP  | 176   | 3471  |
| >MN1-G1005HGHPGSH   | HP  | 1522  | >MN1-G1005HSHPGSH    | HP  | 80    | 1442  |
| >MN1-G1005HGHPGSH   | HP  | 361   | >MN1-G1005HSHPGSH    | HP  | 26    | 335   |
| >MN1-G1005HGHPGSH   | H   | 15415 | >MN1-G1005HSHPGSH    | H   | 154   | 15261 |
| >MN1-G1005HGHPGSH   | HP  | 11181 | >MN1-G1005HSHPGSH    | HP  | 55    | 11126 |
| >MN1-G1005GQQPHHG   | H   | 380   | >MN1-G1005GQQPHSH    | P   | 254   | 126   |
| >MN1-G1005FFGGQQP   | H   | 464   | >MN1-G1005FFGGQQP    | H   | 338   | 126   |
| >MN1-P67S-1EPYGF    | HAR | 5461  | >MN1-P67S-1ESYGF     | HAR | 52    | 5409  |
| >MN1-P67S-1EPYGF    | HAR | 92    | >MN1-P67S-1ESYGF     | HAR | 23    | 69    |
| >MN1-P67S-1EPYGF    | HAR | 16    | >MN1-P67S-1ESYGF     | HAR | 2     | 14    |
| >MN1-P67S-1EPYGF    | HAR | 396   | >MN1-P67S-1ESYGF     | HAR | 13612 | 13216 |
| >MN1-P67S-1EPYGF    | HAR | 5255  | >MN1-P67S-1ESYGF     | HAR | 271   | 4984  |
| >MN1-P67S-1EPYGF    | HAR | 69    | >MN1-P67S-1ESYGF     | HAR | 76    | 7     |
| >MN1-P67S-1MEPYGF   | H   | 334   | >MN1-P67S-1MESYGF    | H   | 83    | 251   |
| >MN1-P67S-1MEPYGF   | HAR | 1208  | >MN1-P67S-1MESYGF    | HAR | 203   | 1005  |
| >MN1-P67S-1MEPYGF   | HAR | 646   | >MN1-P67S-1MESYGF    | HAR | 94    | 552   |
| >MN1-P67S-1MEPYGF   | HAR | 430   | >MN1-P67S-1MESYGF    | HAR | 46    | 384   |
| >MN1-P67S-1MEPYGF   | HAR | 2998  | >MN1-P67S-1MESYGF    | HAR | 448   | 2550  |
| >MN1-P67S-1MEPYGF   | H   | 136   | >MN1-P67S-1MESYGF    | H   | 7     | 129   |
| >MN1-P67S-1MEPYGF   | HAR | 1403  | >MN1-P67S-1MESYGF    | HAR | 39    | 1364  |
| >MN1-P67S-1MEPYGF   | HAR | 6293  | >MN1-P67S-1MESYGF    | HAR | 346   | 5947  |
| >MN1-P67S-1MEPYGF   | HAR | 201   | >MN1-P67S-1MESYGF    | HAR | 235   | 34    |
| >MN1-P67S-1NMEPYGF  | H   | 253   | >MN1-P67S-1NMESYGF   | H   | 249   | 4     |
| >MN1-P67S-1NMEPYGF  | HAR | 95    | >MN1-P67S-1NMESYGF   | HAR | 324   | 229   |
| >MN1-P67S-1NMEPYGF  | HAR | 322   | >MN1-P67S-1NMESYGF   | HAR | 434   | 112   |
| >MN1-P67S-1NMEPYGF  | HAR | 166   | >MN1-P67S-1NMESYGF   | HAR | 227   | 61    |
| >MN1-P67S-1NMEPYGF  | HAR | 163   | >MN1-P67S-1NMESYGF   | HAR | 505   | 342   |
| >MN1-P67S-1NMEPYGF  | HAR | 155   | >MN1-P67S-1NMESYGF   | HAR | 120   | 35    |
| >MN1-P67S-1NMEPYGF  | HAR | 437   | >MN1-P67S-1NMESYGF   | HAR | 205   | 232   |
| >MN1-P67S-1NMEPYGF  | HAR | 778   | >MN1-P67S-1NMESYGF   | HAR | 406   | 372   |
| >MN1-P67S-1NMEPYGF  | HAR | 263   | >MN1-P67S-1NMESYGF   | HAR | 341   | 78    |
| >MN1-P67S-1NMEPYGF  | HAR | 130   | >MN1-P67S-1NMESYGF   | HAR | 156   | 26    |
| >MN1-P67S-1MNMEPYGF | F   | 445   | >MN1-P67S-1MNMESYGF  | F   | 385   | 60    |
| >MN1-P67S-1MNMEPYGF | F   | 61    | >MN1-P67S-1MNMESYGF  | F   | 44    | 17    |
| >MN1-P67S-1MNMEPYGF | F   | 41    | >MN1-P67S-1MNMESYGF  | F   | 21    | 20    |
| >MN1-P67S-1MNMEPYGF | F   | 1815  | >MN1-P67S-1MNMESYGF  | F   | 388   | 1427  |
| >MN1-P67S-1MNMEPYGF | F   | 104   | >MN1-P67S-1MNMESYGF  | F   | 56    | 48    |
| >MN1-P67S-1MNMEPYGF | F   | 806   | >MN1-P67S-1MNMESYGF  | F   | 298   | 508   |
| >MN1-P67S-1MNMEPYGF | F   | 315   | >MN1-P67S-1MNMESYGF  | F   | 299   | 16    |
| >MN1-P67S-1GMNMEPYG | I   | 233   | >MN1-P67S-1GMNMESYGI | I   | 217   | 16    |
| >MN1-P67S-1GMNMEPYG | I   | 93    | >MN1-P67S-1GMNMESYGI | I   | 62    | 31    |

|                       |      |                       |      |      |
|-----------------------|------|-----------------------|------|------|
| >MN1-P67S-1GMNMEPYGI  | 33   | >MN1-P67S-1GMNMESYGI  | 36   | 3    |
| >MN1-P67S-1GMNMEPYGI  | 26   | >MN1-P67S-1GMNMESYGI  | 38   | 12   |
| >MN1-P67S-1GMNMEPYGI  | 23   | >MN1-P67S-1GMNMESYGI  | 17   | 6    |
| >MN1-P67S-1GMNMEPYGI  | 35   | >MN1-P67S-1GMNMESYGI  | 33   | 2    |
| >MN1-P67S-1GMNMEPYGI  | 57   | >MN1-P67S-1GMNMESYGI  | 51   | 6    |
| >MN1-P67S-1GMNMEPYGI  | 478  | >MN1-P67S-1GMNMESYGI  | 632  | 154  |
| >MN1-P67S-1GMNMEPYGI  | 262  | >MN1-P67S-1GMNMESYGI  | 239  | 23   |
| >MN1-P67S-1GMNMEPYGI  | 206  | >MN1-P67S-1GMNMESYGI  | 43   | 163  |
| >MN1-P67S-1GMNMEPYGI  | 58   | >MN1-P67S-1GMNMESYGI  | 41   | 17   |
| >MN1-P67S-1LGMNMEPY   | 440  | >MN1-P67S-1LGMNMESY   | 192  | 248  |
| >MN1-P67S-1LGMNMEPY   | 131  | >MN1-P67S-1LGMNMESY   | 145  | 14   |
| >MN1-P67S-1LGMNMEPYC  | 1089 | >MN1-P67S-1LGMNMESYC  | 291  | 798  |
| >MN1-P67S-1LGMNMEPYC  | 514  | >MN1-P67S-1LGMNMESYC  | 340  | 174  |
| >MN1-P67S-1LGMNMEPYC  | 1022 | >MN1-P67S-1LGMNMESYC  | 483  | 539  |
| >MN1-P67S-1LGMNMEPY   | 96   | >MN1-P67S-1LGMNMESY   | 338  | 242  |
| >MN1-P67S-1LGMNMEPYC  | 130  | >MN1-P67S-1LGMNMESYC  | 182  | 52   |
| >MN1-P67S-1ILGMNMEPY  | 88   | >MN1-P67S-1ILGMNMESY  | 121  | 33   |
| >MN1-P67S-1ILGMNMEPY  | 277  | >MN1-P67S-1ILGMNMESY  | 85   | 192  |
| >MN1-P67S-1ILGMNMEPY  | 97   | >MN1-P67S-1ILGMNMESY  | 101  | 4    |
| >MN1-P67S-1ILGMNMEPY  | 63   | >MN1-P67S-1ILGMNMESY  | 75   | 12   |
| >MN1-P67S-1ILGMNMEPY  | 315  | >MN1-P67S-1ILGMNMESY  | 116  | 199  |
| >MN1-P67S-1ILGMNMEPY  | 318  | >MN1-P67S-1ILGMNMESY  | 571  | 253  |
| >MN1-P67S-1ILGMNMEPY  | 371  | >MN1-P67S-1ILGMNMESY  | 351  | 20   |
| >MN1-P67S-1PILGMNMEP  | 174  | >MN1-P67S-1PILGMNMES  | 238  | 64   |
| >MN1-P67S-1PPILGMNME  | 46   | >MN1-P67S-1PPILGMNME  | 65   | 19   |
| >MN1-P67S-1PPILGMNME  | 98   | >MN1-P67S-1PPILGMNME  | 285  | 187  |
| >MN1-P67S-1PPILGMNME  | 619  | >MN1-P67S-1PPILGMNME  | 289  | 330  |
| >MN1-S1197 SELGSCCSEA | 451  | >MN1-S1197 NELGSCCSEA | 309  | 142  |
| >MN1-S1197 SELGSCCSEA | 54   | >MN1-S1197 NELGSCCSEA | 43   | 11   |
| >MN1-S1197 SELGSCCSEA | 446  | >MN1-S1197 NELGSCCSEA | 1093 | 647  |
| >MN1-S1197 SELGSCCSEA | 1354 | >MN1-S1197 NELGSCCSEA | 127  | 1227 |
| >MN1-S1197 SELGSCCSEA | 67   | >MN1-S1197 NELGSCCSEA | 301  | 234  |
| >MN1-S1197 SELGSCCSEA | 116  | >MN1-S1197 NELGSCCSEA | 434  | 318  |
| >MN1-S1197 SELGSCCSEA | 206  | >MN1-S1197 NELGSCCSEA | 618  | 412  |
| >MN1-S1197 SELGSCCS   | 260  | >MN1-S1197 NELGSCCS   | 795  | 535  |
| >MN1-S1197 SELGSCCSEA | 155  | >MN1-S1197 NELGSCCSEA | 847  | 692  |
| >MN1-S1197 SELGSCCSEA | 33   | >MN1-S1197 NELGSCCSEA | 96   | 63   |
| >MN1-S1197 SELGSCCSEA | 44   | >MN1-S1197 NELGSCCSEA | 104  | 60   |
| >MN1-S1197 AQNGDSEL   | 251  | >MN1-S1197 AQNGDNEL   | 197  | 54   |
| >MN1-S1197 AQNGDSEL   | 163  | >MN1-S1197 AQNGDNEL   | 209  | 46   |
| >MN1-S1197 AQNGDSEL   | 357  | >MN1-S1197 AQNGDNEL   | 997  | 640  |
| >MN1-S1197 AQNGDSEL   | 229  | >MN1-S1197 AQNGDNEL   | 466  | 237  |
| >MN1-S1197 GAQNGDSEL  | 241  | >MN1-S1197 GAQNGDNEL  | 2464 | 2223 |



|                        |      |                        |      |      |
|------------------------|------|------------------------|------|------|
| >MN1-S1197 ASGAQNGDS   | 191  | >MN1-S1197 ASGAQNGDN   | 1252 | 1061 |
| >MPL-A506T AVLGLLLL    | 112  | >MPL-A506T TVLGLLLL    | 237  | 125  |
| >MPL-A506T AVLGLLLL    | 410  | >MPL-A506T TVLGLLLL    | 748  | 338  |
| >MPL-A506T AVLGLLLL    | 24   | >MPL-A506T TVLGLLLL    | 49   | 25   |
| >MPL-A506T AVLGLLLL    | 188  | >MPL-A506T TVLGLLLL    | 842  | 654  |
| >MPL-A506T AVLGLLLL    | 236  | >MPL-A506T TVLGLLLL    | 951  | 715  |
| >MPL-A506T AVLGLLLL    | 48   | >MPL-A506T TVLGLLLL    | 393  | 345  |
| >MPL-A506T AVLGLLLLR   | 30   | >MPL-A506T TVLGLLLLR   | 28   | 2    |
| >MPL-A506T AVLGLLLLR   | 50   | >MPL-A506T TVLGLLLLR   | 70   | 20   |
| >MPL-A506T AVLGLLLLRW  | 196  | >MPL-A506T TVLGLLLLRW  | 737  | 541  |
| >MPL-A506T AVLGLLLLR   | 965  | >MPL-A506T TVLGLLLLR   | 126  | 839  |
| >MPL-A506T AVLGLLLLR   | 743  | >MPL-A506T TVGLLLLLR   | 51   | 692  |
| >MPL-A506T AVLGLLLL    | 2044 | >MPL-A506T TVLGLLLL    | 117  | 1927 |
| >MPL-A506T AVLGLLLLRW  | 23   | >MPL-A506T TVGLLLLLRW  | 99   | 76   |
| >MPL-A506T AVLGLLLLRW  | 704  | >MPL-A506T TVGLLLLLRW  | 205  | 499  |
| >MPL-A506T AVLGLLLLRW  | 40   | >MPL-A506T TVGLLLLLRW  | 35   | 5    |
| >MPL-A506T AVLGLLLLR   | 487  | >MPL-A506T TVGLLLLLR   | 1492 | 1005 |
| >MPL-A506T AVLGLLLLR   | 426  | >MPL-A506T TVGLLLLLR   | 109  | 317  |
| >MPL-A506T SAVLGLLLL   | 440  | >MPL-A506T STVLGLLLL   | 7929 | 7489 |
| >MPL-A506T SAVLGLLL    | 744  | >MPL-A506T STVLGLLL    | 496  | 248  |
| >MPL-A506T SAVLGLLLL   | 357  | >MPL-A506T STVLGLLLL   | 224  | 133  |
| >MPL-A506T SAVLGLLLLR  | 1262 | >MPL-A506T STVLGLLLLR  | 413  | 849  |
| >MPL-A506T SAVLGLLLLR  | 70   | >MPL-A506T STVLGLLLLR  | 21   | 49   |
| >MPL-A506T SAVLGLLLL   | 4577 | >MPL-A506T STVLGLLLL   | 170  | 4407 |
| >MPL-A506T SAVLGLLLLR  | 159  | >MPL-A506T STVLGLLLLR  | 85   | 74   |
| >MPL-A506T SAVLGLLLLR  | 764  | >MPL-A506T STVLGLLLLR  | 396  | 368  |
| >MPL-A506T SAVLGLLLLR  | 24   | >MPL-A506T STVLGLLLLR  | 11   | 13   |
| >MPL-A506T SAVLGLLL    | 126  | >MPL-A506T STVLGLLL    | 11   | 115  |
| >MPL-A506T SAVLGLLLL   | 81   | >MPL-A506T STVLGLLLL   | 7    | 74   |
| >MPL-A506T SAVGLLLLRV  | 8    | >MPL-A506T STVLGLLLLRV | 4    | 4    |
| >MPL-A506T SAVGLLLLRV  | 201  | >MPL-A506T STVLGLLLLRV | 3232 | 3031 |
| >MPL-A506T SAVGLLLLRV  | 224  | >MPL-A506T STVLGLLLLRV | 142  | 82   |
| >MPL-A506T SAVGLLLLRV  | 21   | >MPL-A506T STVLGLLLLRV | 21   | 0    |
| >MPL-A506T SAVGLLL     | 792  | >MPL-A506T STVLGLLL    | 24   | 768  |
| >MPL-A506T SAVGLLLL    | 1082 | >MPL-A506T STVLGLLLL   | 116  | 966  |
| >MPL-A506T SAVGLLL     | 3941 | >MPL-A506T STVLGLLL    | 374  | 3567 |
| >MPL-A506T SAVGLLLL    | 1060 | >MPL-A506T STVLGLLLL   | 45   | 1015 |
| >MPL-A506T SAVGLLLLRV  | 3026 | >MPL-A506T STVLGLLLLRV | 130  | 2896 |
| >MPL-A506T SAVGLLLLR   | 773  | >MPL-A506T STVLGLLLLR  | 190  | 583  |
| >MPL-A506T LSAVLGLLLLR | 352  | >MPL-A506T LSTVLGLLLLR | 757  | 405  |
| >MPL-A506T LSAVLGLLLLR | 135  | >MPL-A506T LSTVLGLLLLR | 166  | 31   |
| >MPL-A506T LSAVLGLLLLR | 64   | >MPL-A506T LSTVLGLLLLR | 159  | 95   |
| >MPL-A506T LSAVLGLL    | 104  | >MPL-A506T LSTVLGLL    | 163  | 59   |

|                        |     |                        |      |     |
|------------------------|-----|------------------------|------|-----|
| >MPL-A506T LSAVLGLLL   | 25  | >MPL-A506T LSTVLGLLL   | 33   | 8   |
| >MPL-A506T LSAVLGLLLL  | 21  | >MPL-A506T LSTVLGLLLL  | 28   | 7   |
| >MPL-A506T LSAVLGLL    | 267 | >MPL-A506T LSTVLGLL    | 622  | 355 |
| >MPL-A506T LSAVLGLLL   | 77  | >MPL-A506T LSTVLGLLL   | 180  | 103 |
| >MPL-A506T LSAVLGLLLL  | 73  | >MPL-A506T LSTVLGLLLL  | 154  | 81  |
| >MPL-A506T LSAVLGLL    | 264 | >MPL-A506T LSTVLGLL    | 1186 | 922 |
| >MPL-A506T LSAVLGLLL   | 26  | >MPL-A506T LSTVLGLLL   | 23   | 3   |
| >MPL-A506T LSAVLGLLLL  | 36  | >MPL-A506T LSTVLGLLLL  | 37   | 1   |
| >MPL-A506T LSAVLGLL    | 120 | >MPL-A506T LSTVLGLL    | 58   | 62  |
| >MPL-A506T LSAVLGLLL   | 57  | >MPL-A506T LSTVLGLLL   | 57   | 0   |
| >MPL-A506T LSAVLGLLLL  | 44  | >MPL-A506T LSTVLGLLLL  | 36   | 8   |
| >MPL-A506T LSAVLGLLLLR | 493 | >MPL-A506T LSTVLGLLLLR | 1483 | 990 |
| >MPL-A506T LSAVLGLL    | 230 | >MPL-A506T LSTVLGLL    | 517  | 287 |
| >MPL-A506T LSAVLGLLL   | 316 | >MPL-A506T LSTVLGLLL   | 694  | 378 |
| >MPL-A506T LSAVLGLLLL  | 103 | >MPL-A506T LSTVLGLLLL  | 142  | 39  |
| >MPL-A506T GLSAVLGL    | 54  | >MPL-A506T GLSTVLGL    | 90   | 36  |
| >MPL-A506T GLSAVLGLL   | 136 | >MPL-A506T GLSTVLGLL   | 255  | 119 |
| >MPL-A506T GLSAVLGLLL  | 390 | >MPL-A506T GLSTVLGLLL  | 540  | 150 |
| >MPL-A506T GLSAVLGLLLL | 54  | >MPL-A506T GLSTVLGLLLL | 77   | 23  |
| >MPL-A506T GLSAVLGL    | 6   | >MPL-A506T GLSTVLGL    | 10   | 4   |
| >MPL-A506T GLSAVLGLL   | 5   | >MPL-A506T GLSTVLGLL   | 7    | 2   |
| >MPL-A506T GLSAVLGLLL  | 19  | >MPL-A506T GLSTVLGLLL  | 22   | 3   |
| >MPL-A506T GLSAVLGLLLL | 6   | >MPL-A506T GLSTVLGLLLL | 7    | 1   |
| >MPL-A506T GLSAVLGL    | 12  | >MPL-A506T GLSTVLGL    | 18   | 6   |
| >MPL-A506T GLSAVLGLL   | 8   | >MPL-A506T GLSTVLGLL   | 12   | 4   |
| >MPL-A506T GLSAVLGLLL  | 186 | >MPL-A506T GLSTVLGLLL  | 268  | 82  |
| >MPL-A506T GLSAVLGLLLL | 15  | >MPL-A506T GLSTVLGLLLL | 23   | 8   |
| >MPL-A506T GLSAVLGL    | 210 | >MPL-A506T GLSTVLGL    | 458  | 248 |
| >MPL-A506T GLSAVLGLLLL | 261 | >MPL-A506T GLSTVLGLLLL | 505  | 244 |
| >MPL-A506T GLSAVLGL    | 12  | >MPL-A506T GLSTVLGL    | 21   | 9   |
| >MPL-A506T GLSAVLGLL   | 25  | >MPL-A506T GLSTVLGLL   | 75   | 50  |
| >MPL-A506T GLSAVLGLLL  | 54  | >MPL-A506T GLSTVLGLLL  | 131  | 77  |
| >MPL-A506T GLSAVLGLLLL | 34  | >MPL-A506T GLSTVLGLLLL | 81   | 47  |
| >MPL-A506T GLSAVLGL    | 23  | >MPL-A506T GLSTVLGL    | 23   | 0   |
| >MPL-A506T GLSAVLGLL   | 126 | >MPL-A506T GLSTVLGLL   | 164  | 38  |
| >MPL-A506T GLSAVLGLLL  | 165 | >MPL-A506T GLSTVLGLLL  | 202  | 37  |
| >MPL-A506T GLSAVLGLLLL | 66  | >MPL-A506T GLSTVLGLLLL | 81   | 15  |
| >MPL-A506T GLSAVLGL    | 16  | >MPL-A506T GLSTVLGL    | 23   | 7   |
| >MPL-A506T GLSAVLGLL   | 55  | >MPL-A506T GLSTVLGLL   | 111  | 56  |
| >MPL-A506T GLSAVLGLLL  | 39  | >MPL-A506T GLSTVLGLLL  | 64   | 25  |
| >MPL-A506T GLSAVLGLLLL | 31  | >MPL-A506T GLSTVLGLLLL | 52   | 21  |
| >MPL-A506T GLSAVLGL    | 162 | >MPL-A506T GLSTVLGL    | 254  | 92  |
| >MPL-A506T GLSAVLGL    | 6   | >MPL-A506T GLSTVLGL    | 8    | 2   |

|                        |     |                        |     |     |
|------------------------|-----|------------------------|-----|-----|
| >MPL-A506T GLSAVLGLL   | 17  | >MPL-A506T GLSTVLGLL   | 36  | 19  |
| >MPL-A506T GLSAVLGLLL  | 16  | >MPL-A506T GLSTVLGLLL  | 28  | 12  |
| >MPL-A506T GLSAVLGLLLL | 8   | >MPL-A506T GLSTVLGLLLL | 13  | 5   |
| >MPL-A506T GLSAVLGLLL  | 289 | >MPL-A506T GLSTVLGLLL  | 322 | 33  |
| >MPL-A506T VLGLSAVLGL  | 226 | >MPL-A506T VLGLSTVLGL  | 236 | 10  |
| >MPL-A506T VLGLSAVL    | 290 | >MPL-A506T VLGLSTVL    | 187 | 103 |
| >MPL-A506T VLGLSAVLGL  | 108 | >MPL-A506T VLGLSTVLGL  | 96  | 12  |
| >MPL-A506T VLGLSAVLGLI | 225 | >MPL-A506T VLGLSTVLGLI | 147 | 78  |
| >MPL-A506T VLGLSAVLGL  | 245 | >MPL-A506T VLGLSTVLGL  | 170 | 75  |
| >MPL-A506T VLGLSAVLGLI | 496 | >MPL-A506T VLGLSTVLGLI | 390 | 106 |
| >MPL-A506T VLGLSAVL    | 101 | >MPL-A506T VLGLSTVL    | 146 | 45  |
| >MPL-A506T VLGLSAVLGL  | 49  | >MPL-A506T VLGLSTVLGL  | 32  | 17  |
| >MPL-A506T VLGLSAVLGLI | 140 | >MPL-A506T VLGLSTVLGLI | 121 | 19  |
| >MPL-A506T VLGLSAVL    | 67  | >MPL-A506T VLGLSTVL    | 117 | 50  |
| >MPL-A506T VLGLSAVLGL  | 98  | >MPL-A506T VLGLSTVLGL  | 49  | 49  |
| >MPL-A506T VLGLSAVLGLI | 476 | >MPL-A506T VLGLSTVLGLI | 306 | 170 |
| >MPL-A506T VLGLSAVL    | 151 | >MPL-A506T VLGLSTVL    | 108 | 43  |
| >MPL-A506T VLGLSAVLGL  | 39  | >MPL-A506T VLGLSTVLGL  | 30  | 9   |
| >MPL-A506T VLGLSAVLGLI | 212 | >MPL-A506T VLGLSTVLGLI | 173 | 39  |
| >MPL-A506T VLGLSAVL    | 49  | >MPL-A506T VLGLSTVL    | 94  | 45  |
| >MPL-A506T VLGLSAVLGL  | 30  | >MPL-A506T VLGLSTVLGL  | 16  | 14  |
| >MPL-A506T VLGLSAVLGLI | 700 | >MPL-A506T VLGLSTVLGLI | 337 | 363 |
| >MPL-A506T VLGLSAVL    | 14  | >MPL-A506T VLGLSTVL    | 13  | 1   |
| >MPL-A506T VLGLSAVLGL  | 9   | >MPL-A506T VLGLSTVLGL  | 7   | 2   |
| >MPL-A506T VLGLSAVLGLI | 26  | >MPL-A506T VLGLSTVLGLI | 22  | 4   |
| >MPL-A506T LVLGLSAV    | 90  | >MPL-A506T LVLGLSTV    | 91  | 1   |
| >MPL-A506T LVLGLSAVLGI | 216 | >MPL-A506T LVLGLSTVLGI | 314 | 98  |
| >MPL-A506T LVLGLSAV    | 115 | >MPL-A506T LVLGLSTV    | 194 | 79  |
| >MPL-A506T LVLGLSAVL   | 350 | >MPL-A506T LVLGLSTVL   | 427 | 77  |
| >MPL-A506T LVLGLSAVLGI | 385 | >MPL-A506T LVLGLSTVLGI | 515 | 130 |
| >MPL-A506T LVLGLSAV    | 57  | >MPL-A506T LVLGLSTV    | 75  | 18  |
| >MPL-A506T LVLGLSAV    | 8   | >MPL-A506T LVLGLSTV    | 9   | 1   |
| >MPL-A506T LVLGLSAVL   | 140 | >MPL-A506T LVLGLSTVL   | 174 | 34  |
| >MPL-A506T LVLGLSAVLGI | 43  | >MPL-A506T LVLGLSTVLGI | 53  | 10  |
| >MPL-A506T LVLGLSAV    | 7   | >MPL-A506T LVLGLSTV    | 7   | 0   |
| >MPL-A506T LVLGLSAVL   | 164 | >MPL-A506T LVLGLSTVL   | 457 | 293 |
| >MPL-A506T LVLGLSAVLGI | 70  | >MPL-A506T LVLGLSTVLGI | 79  | 9   |
| >MPL-A506T LVLGLSAV    | 44  | >MPL-A506T LVLGLSTV    | 38  | 6   |
| >MPL-A506T LVLGLSAV    | 36  | >MPL-A506T LVLGLSTV    | 19  | 17  |
| >MPL-A506T LVLGLSAVLGI | 177 | >MPL-A506T LVLGLSTVLGI | 165 | 12  |
| >MPL-A506T LVLGLSAV    | 20  | >MPL-A506T LVLGLSTV    | 15  | 5   |
| >MPL-A506T LVLGLSAVL   | 163 | >MPL-A506T LVLGLSTVL   | 854 | 691 |
| >MPL-A506T LVLGLSAVLGI | 86  | >MPL-A506T LVLGLSTVLGI | 172 | 86  |

|                        |     |                        |      |     |
|------------------------|-----|------------------------|------|-----|
| >MPL-A506T LVLGLSAV    | 4   | >MPL-A506T LVLGLSTV    | 3    | 1   |
| >MPL-A506T LVLGLSAVL   | 51  | >MPL-A506T LVLGLSTVL   | 81   | 30  |
| >MPL-A506T LVLGLSAVLGI | 37  | >MPL-A506T LVLGLSTVLGI | 43   | 6   |
| >MPL-A506T LVLGLSAVL   | 524 | >MPL-A506T LVLGLSTVL   | 295  | 229 |
| >MPL-A506T LVLGLSAV    | 194 | >MPL-A506T LVLGLSTV    | 414  | 220 |
| >MPL-A506T LVLGLSAV    | 39  | >MPL-A506T LVLGLSTV    | 66   | 27  |
| >MPL-A506T LVLGLSAVLGI | 214 | >MPL-A506T LVLGLSTVLGI | 322  | 108 |
| >MPL-A506T LVLGLSAVL   | 356 | >MPL-A506T LVLGLSTVL   | 928  | 572 |
| >MPL-A506T LVLGLSAVLGI | 205 | >MPL-A506T LVLGLSTVLGI | 244  | 39  |
| >MPL-A506T LVLGLSAVL   | 418 | >MPL-A506T LVLGLSTVL   | 1212 | 794 |
| >MPL-A506T LVLGLSAVL   | 144 | >MPL-A506T LVLGLSTVL   | 59   | 85  |
| >MPL-A506T HLVLGLSAV   | 216 | >MPL-A506T HLVLGLSTV   | 203  | 13  |
| >MPL-A506T HLVLGLSAV   | 41  | >MPL-A506T HLVLGLSTV   | 96   | 55  |
| >MPL-A506T HLVLGLSAVL  | 108 | >MPL-A506T HLVLGLSTVL  | 115  | 7   |
| >MPL-A506T HLVLGLSA    | 91  | >MPL-A506T HLVLGLST    | 790  | 699 |
| >MPL-A506T HLVLGLSAV   | 5   | >MPL-A506T HLVLGLSTV   | 7    | 2   |
| >MPL-A506T HLVLGLSAVL  | 341 | >MPL-A506T HLVLGLSTVL  | 407  | 66  |
| >MPL-A506T HLVLGLSAV   | 15  | >MPL-A506T HLVLGLSTV   | 29   | 14  |
| >MPL-A506T HLVLGLSAV   | 11  | >MPL-A506T HLVLGLSTV   | 9    | 2   |
| >MPL-A506T HLVLGLSAVL  | 268 | >MPL-A506T HLVLGLSTVL  | 466  | 198 |
| >MPL-A506T HLVLGLSAV   | 5   | >MPL-A506T HLVLGLSTV   | 5    | 0   |
| >MPL-A506T HLVLGLSAVL  | 49  | >MPL-A506T HLVLGLSTVL  | 147  | 98  |
| >MPL-A506T HLVLGLSAV   | 28  | >MPL-A506T HLVLGLSTV   | 14   | 14  |
| >MPL-A506T HLVLGLSAVL  | 571 | >MPL-A506T HLVLGLSTVL  | 471  | 100 |
| >MPL-A506T HLVLGLSAV   | 61  | >MPL-A506T HLVLGLSTV   | 31   | 30  |
| >MPL-A506T HLVLGLSA    | 58  | >MPL-A506T HLVLGLST    | 837  | 779 |
| >MPL-A506T HLVLGLSAV   | 3   | >MPL-A506T HLVLGLSTV   | 2    | 1   |
| >MPL-A506T HLVLGLSAVL  | 16  | >MPL-A506T HLVLGLSTVL  | 17   | 1   |
| >MPL-A506T HLVLGLSAV   | 492 | >MPL-A506T HLVLGLSTV   | 915  | 423 |
| >MPL-A506T HLVLGLSAV   | 491 | >MPL-A506T HLVLGLSTV   | 701  | 210 |
| >MPL-A506T HLVLGLSAVL  | 74  | >MPL-A506T HLVLGLSTVL  | 178  | 104 |
| >MPL-A506T LHLVLGLSAV  | 440 | >MPL-A506T LHLVLGLSTV  | 642  | 202 |
| >MPL-A506T LHLVLGLSAVI | 382 | >MPL-A506T LHLVLGLSTVI | 217  | 165 |
| >MPL-A506T LHLVLGLSAVI | 32  | >MPL-A506T LHLVLGLSTVI | 52   | 20  |
| >MPL-A506T ALHLVLGLSA  | 141 | >MPL-A506T ALHLVLGLST  | 146  | 5   |
| >MPL-A506T ALHLVLGLSA  | 243 | >MPL-A506T ALHLVLGLST  | 764  | 521 |
| >MPL-A506T ALHLVLGLSA  | 41  | >MPL-A506T ALHLVLGLST  | 101  | 60  |
| >MPL-A506T ALHLVLGLSA  | 225 | >MPL-A506T ALHLVLGLST  | 532  | 307 |
| >MPL-A506T ALHLVLGLSA  | 4   | >MPL-A506T ALHLVLGLST  | 6    | 2   |
| >MPL-A506T ALHLVLGLSA  | 122 | >MPL-A506T ALHLVLGLST  | 306  | 184 |
| >MPL-A506T ALHLVLGLSA  | 126 | >MPL-A506T ALHLVLGLST  | 950  | 824 |
| >MPL-A506T ALHLVLGLSA  | 3   | >MPL-A506T ALHLVLGLST  | 3    | 0   |
| >MPL-A506T ALHLVLGLSA  | 11  | >MPL-A506T ALHLVLGLST  | 10   | 1   |

|                        |      |                        |      |      |
|------------------------|------|------------------------|------|------|
| >MPL-A506T ALHLVLGLSA' | 18   | >MPL-A506T ALHLVLGLST\ | 12   | 6    |
| >MPL-A506T ALHLVLGLSA' | 164  | >MPL-A506T ALHLVLGLST\ | 76   | 88   |
| >MPL-A506T ALHLVLGLSA  | 58   | >MPL-A506T ALHLVLGLST  | 907  | 849  |
| >MPL-A506T ALHLVLGLSA' | 3    | >MPL-A506T ALHLVLGLST\ | 2    | 1    |
| >MPL-A506T ALHLVLGLSA  | 487  | >MPL-A506T ALHLVLGLST  | 6196 | 5709 |
| >MPL-A519T AHYRRLRHAL  | 182  | >MPL-A519T THYRRLRHAL  | 910  | 728  |
| >MPL-A519T AHYRRLRHAL  | 252  | >MPL-A519T THYRRLRHAL  | 114  | 138  |
| >MPL-A519T AHYRRLRHAL  | 959  | >MPL-A519T THYRRLRHAL  | 441  | 518  |
| >MPL-A519T AHYRRLRHAL  | 81   | >MPL-A519T THYRRLRHAL  | 41   | 40   |
| >MPL-A519T AHYRRLRHAL  | 117  | >MPL-A519T THYRRLRHAL  | 181  | 64   |
| >MPL-A519T PAHYRRLRHA' | 914  | >MPL-A519T PTHYRRLRHA  | 175  | 739  |
| >MPL-A519T PAHYRRLRHA' | 1999 | >MPL-A519T PTHYRRLRHA  | 453  | 1546 |
| >MPL-A519T PAHYRRLR    | 632  | >MPL-A519T PTHYRRLR    | 251  | 381  |
| >MPL-A519T PAHYRRLR    | 585  | >MPL-A519T PTHYRRLR    | 250  | 335  |
| >MPL-A519T PAHYRRLRHA' | 173  | >MPL-A519T PTHYRRLRHA  | 619  | 446  |
| >MPL-A519T GLLLLRWQFF  | 47   | >MPL-A519T GLLLLRWQFF  | 228  | 181  |
| >MPL-A519T GLLLLRWQFF  | 261  | >MPL-A519T GLLLLRWQFF  | 1692 | 1431 |
| >MPL-A519T GLLLLRWQFF  | 148  | >MPL-A519T GLLLLRWQFF  | 800  | 652  |
| >MPL-A519T GLLLLRWQFF  | 33   | >MPL-A519T GLLLLRWQFF  | 179  | 146  |
| >MPL-A519T GLLLLRWQFF  | 29   | >MPL-A519T GLLLLRWQFF  | 236  | 207  |
| >MPL-A519T GLLLLRWQFF  | 13   | >MPL-A519T GLLLLRWQFF  | 95   | 82   |
| >MPL-A519T GLLLLRWQFF  | 386  | >MPL-A519T GLLLLRWQFF  | 2167 | 1781 |
| >MPL-A519T GLLLLRWQFF  | 18   | >MPL-A519T GLLLLRWQFF  | 112  | 94   |
| >MPL-A519T FPAHYRRLR   | 247  | >MPL-A519T FPTHYRRLR   | 488  | 241  |
| >MPL-A519T FPAHYRRL    | 11   | >MPL-A519T FPTHYRRL    | 21   | 10   |
| >MPL-A519T FPAHYRRLRH  | 30   | >MPL-A519T FPTHYRRLRH  | 172  | 142  |
| >MPL-A519T FPAHYRRL    | 176  | >MPL-A519T FPTHYRRL    | 387  | 211  |
| >MPL-A519T FPAHYRRL    | 152  | >MPL-A519T FPTHYRRL    | 251  | 99   |
| >MPL-A519T FPAHYRRL    | 439  | >MPL-A519T FPTHYRRL    | 2273 | 1834 |
| >MPL-A519T FPAHYRRL    | 320  | >MPL-A519T FPTHYRRL    | 264  | 56   |
| >MPL-A519T FPAHYRRLR   | 212  | >MPL-A519T FPTHYRRLR   | 232  | 20   |
| >MPL-A519T FPAHYRRLRH  | 721  | >MPL-A519T FPTHYRRLRH  | 499  | 222  |
| >MPL-A519T FPAHYRRLRH  | 8    | >MPL-A519T FPTHYRRLRH  | 9    | 1    |
| >MPL-A519T FPAHYRRL    | 49   | >MPL-A519T FPTHYRRL    | 60   | 11   |
| >MPL-A519T QFPAHYRRL   | 557  | >MPL-A519T QFPTHYRRL   | 381  | 176  |
| >MPL-A519T QFPAHYRRL   | 57   | >MPL-A519T QFPTHYRRL   | 115  | 58   |
| >MPL-A519T QFPAHYRR    | 71   | >MPL-A519T QFPTHYRR    | 87   | 16   |
| >MPL-A519T QFPAHYRRLR  | 19   | >MPL-A519T QFPTHYRRLR  | 17   | 2    |
| >MPL-A519T QFPAHYRRLR  | 262  | >MPL-A519T QFPTHYRRLR  | 259  | 3    |
| >MPL-A519T QFPAHYRRLR  | 142  | >MPL-A519T QFPTHYRRLR  | 234  | 92   |
| >MPL-A519T QFPAHYRRLR  | 214  | >MPL-A519T QFPTHYRRLR  | 486  | 272  |
| >MPL-A519T QFPAHYRR    | 28   | >MPL-A519T QFPTHYRR    | 26   | 2    |
| >MPL-A519T QFPAHYRRLR  | 84   | >MPL-A519T QFPTHYRRLR  | 84   | 0    |

|                      |     |                       |      |      |
|----------------------|-----|-----------------------|------|------|
| >MPL-A519T WQFPAHYRR | 482 | >MPL-A519T WQFPPTHYRR | 614  | 132  |
| >MPL-A519T WQFPAHYRR | 324 | >MPL-A519T WQFPPTHYRR | 240  | 84   |
| >MPL-A519T WQFPAHYR  | 26  | >MPL-A519T WQFPPTHYR  | 14   | 12   |
| >MPL-A519T WQFPAHYRR | 24  | >MPL-A519T WQFPPTHYRR | 16   | 8    |
| >MPL-A519T WQFPAHYRR | 53  | >MPL-A519T WQFPPTHYRR | 35   | 18   |
| >MPL-A519T WQFPAHYR  | 57  | >MPL-A519T WQFPPTHYR  | 54   | 3    |
| >MPL-A519T WQFPAHYRR | 103 | >MPL-A519T WQFPPTHYRR | 108  | 5    |
| >MPL-A519T WQFPAHYRR | 272 | >MPL-A519T WQFPPTHYRR | 276  | 4    |
| >MPL-A519T WQFPAHYRR | 164 | >MPL-A519T WQFPPTHYRR | 228  | 64   |
| >MPL-A519T WQFPAHYR  | 61  | >MPL-A519T WQFPPTHYR  | 39   | 22   |
| >MPL-A519T WQFPAHYRR | 133 | >MPL-A519T WQFPPTHYRR | 71   | 62   |
| >MPL-A519T WQFPAHYRR | 23  | >MPL-A519T WQFPPTHYRR | 18   | 5    |
| >MPL-A519T WQFPAHYRR | 122 | >MPL-A519T WQFPPTHYRR | 78   | 44   |
| >MPL-A519T WQFPAHYRR | 474 | >MPL-A519T WQFPPTHYRR | 484  | 10   |
| >MPL-A519T WQFPAHYRR | 84  | >MPL-A519T WQFPPTHYRR | 52   | 32   |
| >MPL-A519T WQFPAHYRR | 252 | >MPL-A519T WQFPPTHYRR | 401  | 149  |
| >MPL-A519T WQFPAHYR  | 15  | >MPL-A519T WQFPPTHYR  | 13   | 2    |
| >MPL-A519T WQFPAHYRR | 24  | >MPL-A519T WQFPPTHYRR | 19   | 5    |
| >MPL-A519T WQFPAHYRR | 65  | >MPL-A519T WQFPPTHYRR | 56   | 9    |
| >MPL-A519T RWQFPAHYR | 546 | >MPL-A519T RWQFPPTHYR | 442  | 104  |
| >MPL-A519T RWQFPAHYR | 61  | >MPL-A519T RWQFPPTHYR | 49   | 12   |
| >MPL-A519T RWQFPAHY  | 135 | >MPL-A519T RWQFPPTHY  | 194  | 59   |
| >MPL-A519T RWQFPAHY  | 55  | >MPL-A519T RWQFPPTHY  | 128  | 73   |
| >MPL-A519T RWQFPAHYR | 18  | >MPL-A519T RWQFPPTHYR | 9    | 9    |
| >MPL-A519T RWQFPAHYR | 8   | >MPL-A519T RWQFPPTHYR | 6    | 2    |
| >MPL-A519T RWQFPAHY  | 380 | >MPL-A519T RWQFPPTHY  | 224  | 156  |
| >MPL-A519T RWQFPAHYR | 507 | >MPL-A519T RWQFPPTHYR | 446  | 61   |
| >MPL-A519T RWQFPAHYR | 386 | >MPL-A519T RWQFPPTHYR | 332  | 54   |
| >MPL-A519T RWQFPAHYR | 8   | >MPL-A519T RWQFPPTHYR | 7    | 1    |
| >MPL-A519T RWQFPAHYR | 10  | >MPL-A519T RWQFPPTHYR | 9    | 1    |
| >MPL-A519T RWQFPAHY  | 353 | >MPL-A519T RWQFPPTHY  | 346  | 7    |
| >MPL-A519T RWQFPAHYR | 162 | >MPL-A519T RWQFPPTHYR | 166  | 4    |
| >MPL-A519T RWQFPAHYR | 198 | >MPL-A519T RWQFPPTHYR | 187  | 11   |
| >MPL-A519T LRWQFPAHY | 67  | >MPL-A519T LRWQFPPTHY | 139  | 72   |
| >MPL-A519T LRWQFPAHY | 194 | >MPL-A519T LRWQFPPTHY | 1207 | 1013 |
| >MPL-A519T LRWQFPAHY | 168 | >MPL-A519T LRWQFPPTHY | 166  | 2    |
| >MPL-A519T LRWQFPAH  | 296 | >MPL-A519T LRWQFPPTH  | 384  | 88   |
| >MPL-A519T LRWQFPAHY | 22  | >MPL-A519T LRWQFPPTHY | 12   | 10   |
| >MPL-A519T LRWQFPAH  | 84  | >MPL-A519T LRWQFPPTH  | 81   | 3    |
| >MPL-A519T LRWQFPAHY | 34  | >MPL-A519T LRWQFPPTHY | 29   | 5    |
| >MPL-A519T LRWQFPAHY | 36  | >MPL-A519T LRWQFPPTHY | 32   | 4    |
| >MPL-A519T LRWQFPAHY | 34  | >MPL-A519T LRWQFPPTHY | 33   | 1    |
| >MPL-A519T LRWQFPAH  | 994 | >MPL-A519T LRWQFPPTH  | 339  | 655  |

|                       |      |                       |      |      |
|-----------------------|------|-----------------------|------|------|
| >MPL-A519T LRWQFPAHY  | 70   | >MPL-A519T LRWQFPTHY  | 84   | 14   |
| >MPL-A519T LRWQFPAHY  | 250  | >MPL-A519T LRWQFPTHYI | 223  | 27   |
| >MPL-A519T LRWQFPAHY  | 352  | >MPL-A519T LRWQFPTHYI | 339  | 13   |
| >MPL-A519T LRWQFPAHY  | 17   | >MPL-A519T LRWQFPTHYI | 15   | 2    |
| >MPL-A519T LRWQFPAHY  | 28   | >MPL-A519T LRWQFPTHYI | 25   | 3    |
| >MPL-A519T LLRWQFPA   | 499  | >MPL-A519T LLRWQFPT   | 3064 | 2565 |
| >MPL-A519T LLRWQFPA   | 452  | >MPL-A519T LLRWQFPT   | 2842 | 2390 |
| >MPL-A519T LLRWQFPA   | 37   | >MPL-A519T LLRWQFPT   | 493  | 456  |
| >MPL-A519T LLRWQFPA   | 311  | >MPL-A519T LLRWQFPT   | 1758 | 1447 |
| >MPL-A519T LLRWQFPA   | 46   | >MPL-A519T LLRWQFPT   | 354  | 308  |
| >MPL-A519T LLRWQFPA   | 208  | >MPL-A519T LLRWQFPT   | 2398 | 2190 |
| >MPL-A519T LLRWQFPA   | 5    | >MPL-A519T LLRWQFPT   | 17   | 12   |
| >MPL-A519T LLRWQFPAH' | 751  | >MPL-A519T LLRWQFPTH\ | 443  | 308  |
| >MPL-A519T LLRWQFPAH' | 189  | >MPL-A519T LLRWQFPTH\ | 158  | 31   |
| >MPL-A519T LLRWQFPAH' | 362  | >MPL-A519T LLRWQFPTH\ | 375  | 13   |
| >MPL-A519T LLRWQFPA   | 79   | >MPL-A519T LLRWQFPT   | 2444 | 2365 |
| >MPL-A519T LLRWQFPAH' | 364  | >MPL-A519T LLRWQFPTH\ | 1133 | 769  |
| >MPL-A519T LLRWQFPAH' | 342  | >MPL-A519T LLRWQFPTH\ | 205  | 137  |
| >MPL-A519T LLRWQFPAH' | 423  | >MPL-A519T LLRWQFPTH\ | 1015 | 592  |
| >MPL-A519T LLRWQFPAH' | 11   | >MPL-A519T LLRWQFPTH\ | 9    | 2    |
| >MPL-A519T LLRWQFPAH' | 70   | >MPL-A519T LLRWQFPTH\ | 46   | 24   |
| >MPL-A519T LLRWQFPAH' | 294  | >MPL-A519T LLRWQFPTH\ | 263  | 31   |
| >MPL-A519T LLRWQFPAH' | 43   | >MPL-A519T LLRWQFPTH\ | 48   | 5    |
| >MPL-A519T LLRWQFPAH' | 104  | >MPL-A519T LLRWQFPTH\ | 73   | 31   |
| >MPL-A519T LLRWQFPAH' | 276  | >MPL-A519T LLRWQFPTH\ | 423  | 147  |
| >MPL-A519T LLRWQFPAH' | 85   | >MPL-A519T LLRWQFPTH\ | 85   | 0    |
| >MPL-A519T LLRWQFPAH' | 66   | >MPL-A519T LLRWQFPTH\ | 51   | 15   |
| >MPL-A519T LLLRWQFPA  | 9    | >MPL-A519T LLLRWQFPT  | 19   | 10   |
| >MPL-A519T LLLRWQFPA  | 94   | >MPL-A519T LLLRWQFPT  | 676  | 582  |
| >MPL-A519T LLLRWQFPA  | 134  | >MPL-A519T LLLRWQFPT  | 1102 | 968  |
| >MPL-A519T LLLRWQFPA  | 13   | >MPL-A519T LLLRWQFPT  | 51   | 38   |
| >MPL-A519T LLLRWQFPA  | 3    | >MPL-A519T LLLRWQFPT  | 6    | 3    |
| >MPL-A519T LLLRWQFPAH | 157  | >MPL-A519T LLLRWQFPTH | 292  | 135  |
| >MPL-A519T LLLRWQFPA  | 5    | >MPL-A519T LLLRWQFPT  | 21   | 16   |
| >MPL-A519T LLLRWQFPA  | 7    | >MPL-A519T LLLRWQFPT  | 21   | 14   |
| >MPL-A519T LLLRWQFPA  | 6    | >MPL-A519T LLLRWQFPT  | 35   | 29   |
| >MPL-A519T LLLRWQFPA  | 3    | >MPL-A519T LLLRWQFPT  | 5    | 2    |
| >MPL-A519T LLLRWQFPAH | 1264 | >MPL-A519T LLLRWQFPTH | 414  | 850  |
| >MPL-A519T LLLRWQFPAH | 147  | >MPL-A519T LLLRWQFPTH | 196  | 49   |
| >MPL-A519T LLLRWQFPAH | 323  | >MPL-A519T LLLRWQFPTH | 280  | 43   |
| >MPL-A519T LLLRWQFPAH | 13   | >MPL-A519T LLLRWQFPTH | 17   | 4    |
| >MPL-A519T LLLRWQFPAH | 57   | >MPL-A519T LLLRWQFPTH | 180  | 123  |
| >MPL-A519T LLLRWQFPA  | 95   | >MPL-A519T LLLRWQFPT  | 840  | 745  |

|                       |       |                        |      |       |
|-----------------------|-------|------------------------|------|-------|
| >MPL-A519T LLLRWQFPAH | 27    | >MPL-A519T LLLRWQFPTH  | 26   | 1     |
| >MPL-A519T LLLRWQFPAH | 84    | >MPL-A519T LLLRWQFPTH  | 96   | 12    |
| >MPL-A519T LLLRWQFPAH | 74    | >MPL-A519T LLLRWQFPTH  | 49   | 25    |
| >MPL-A519T LLLRWQFPAH | 462   | >MPL-A519T LLLRWQFPTH  | 700  | 238   |
| >MPL-A519T LLLLRWQFPA | 138   | >MPL-A519T LLLLRWQFPT  | 376  | 238   |
| >MPL-A519T LLLLRWQFPA | 153   | >MPL-A519T LLLLRWQFPT  | 492  | 339   |
| >MPL-A519T LLLLRWQFPA | 175   | >MPL-A519T LLLLRWQFPT  | 548  | 373   |
| >MPL-A519T LLLLRWQFPA | 17    | >MPL-A519T LLLLRWQFPT  | 93   | 76    |
| >MPL-A519T LLLLRWQFPA | 58    | >MPL-A519T LLLLRWQFPT  | 533  | 475   |
| >MPL-A519T LLLLRWQFPA | 21    | >MPL-A519T LLLLRWQFPT  | 185  | 164   |
| >MPL-A519T LLLLRWQFPA | 96    | >MPL-A519T LLLLRWQFPT  | 592  | 496   |
| >MPL-A519T LLLLRWQFPA | 14    | >MPL-A519T LLLLRWQFPT  | 62   | 48    |
| >MPL-G509C GLLLRWQFF  | 47    | >MPL-G509C CLLLRWQFP   | 99   | 52    |
| >MPL-G509C GLLLRWQFF  | 261   | >MPL-G509C CLLLRWQFP   | 850  | 589   |
| >MPL-G509C GLLLRWQFF  | 148   | >MPL-G509C CLLLRWQFP   | 297  | 149   |
| >MPL-G509C GLLLRWQFF  | 33    | >MPL-G509C CLLLRWQFP   | 123  | 90    |
| >MPL-G509C GLLLRWQFF  | 29    | >MPL-G509C CLLLRWQFP   | 149  | 120   |
| >MPL-G509C GLLLRWQFF  | 13    | >MPL-G509C CLLLRWQFP   | 153  | 140   |
| >MPL-G509C GLLLRWQFF  | 386   | >MPL-G509C CLLLRWQFP   | 238  | 148   |
| >MPL-G509C GLLLRWQFF  | 18    | >MPL-G509C CLLLRWQFP   | 69   | 51    |
| >MPL-G509C GLLLRWQF   | 732   | >MPL-G509C CLLLRWQF    | 304  | 428   |
| >MPL-G509C GLLLRWQF   | 248   | >MPL-G509C CLLLRWQF    | 39   | 209   |
| >MPL-G509C LGLLLLRW   | 155   | >MPL-G509C LCLLLLRW    | 498  | 343   |
| >MPL-G509C LGLLLLRW   | 374   | >MPL-G509C LCLLLLRW    | 4358 | 3984  |
| >MPL-G509C LGLLLLRW   | 79    | >MPL-G509C LCLLLLRW    | 459  | 380   |
| >MPL-G509C LGLLLLRW   | 701   | >MPL-G509C LCLLLLRW    | 390  | 311   |
| >MPL-G509C HVLGLSAVLI | 15741 | >MPL-G509C HVLGLSAVLI  | 493  | 15248 |
| >MPL-G509C VLGLLLLR   | 554   | >MPL-G509C VLCLLLLLR   | 213  | 341   |
| >MPL-G509C VLGLLLLR   | 1656  | >MPL-G509C VLCLLLLLR   | 261  | 1395  |
| >MPL-G509C VLGLLLLRW  | 1513  | >MPL-G509C VLCLLLLLRW  | 181  | 1332  |
| >MPL-G509C VLGLLLLRW  | 295   | >MPL-G509C VLCLLLLLRW  | 567  | 272   |
| >MPL-G509C VLGLLLLR   | 262   | >MPL-G509C VLCLLLLLR   | 249  | 13    |
| >MPL-G509C AVLGLLLL   | 112   | >MPL-G509C AVLCLLLLL   | 94   | 18    |
| >MPL-G509C AVLGLLLL   | 410   | >MPL-G509C AVLCLLLLL   | 633  | 223   |
| >MPL-G509C AVLGLLLL   | 24    | >MPL-G509C AVLCLLLLL   | 32   | 8     |
| >MPL-G509C AVLGLLLL   | 188   | >MPL-G509C AVLCLLLLL   | 388  | 200   |
| >MPL-G509C AVLGLLLL   | 236   | >MPL-G509C AVLCLLLLL   | 1021 | 785   |
| >MPL-G509C AVLGLLLL   | 48    | >MPL-G509C AVLCLLLLL   | 977  | 929   |
| >MPL-G509C AVLGLLLLR  | 30    | >MPL-G509C AVLCLLLLLR  | 38   | 8     |
| >MPL-G509C AVLGLLLLR  | 50    | >MPL-G509C AVLCLLLLLR  | 44   | 6     |
| >MPL-G509C AVLGLLLLRW | 196   | >MPL-G509C AVLCLLLLLRW | 468  | 272   |
| >MPL-G509C AVLGLLLLRW | 23    | >MPL-G509C AVLCLLLLLRW | 43   | 20    |
| >MPL-G509C AVLGLLLLRW | 40    | >MPL-G509C AVLCLLLLLRW | 70   | 30    |



|                        |      |                         |      |      |
|------------------------|------|-------------------------|------|------|
| >MPL-G509C AVLGLLLLR   | 487  | >MPL-G509C AVLCLLLLLR   | 209  | 278  |
| >MPL-G509C AVLGLLLLR   | 426  | >MPL-G509C AVLCLLLLLR   | 307  | 119  |
| >MPL-G509C SAVLGLLLL   | 440  | >MPL-G509C SAVLCLLLL    | 3053 | 2613 |
| >MPL-G509C SAVLGLLLL   | 357  | >MPL-G509C SAVLCLLLL    | 378  | 21   |
| >MPL-G509C SAVLGLLLLR  | 70   | >MPL-G509C SAVLCLLLLLR  | 77   | 7    |
| >MPL-G509C SAVLGLLLLR  | 159  | >MPL-G509C SAVLCLLLLLR  | 42   | 117  |
| >MPL-G509C SAVLGLLLLR  | 764  | >MPL-G509C SAVLCLLLLLR  | 161  | 603  |
| >MPL-G509C SAVLGLLLLR  | 24   | >MPL-G509C SAVLCLLLLLR  | 17   | 7    |
| >MPL-G509C SAVLGLLL    | 126  | >MPL-G509C SAVLCLLL     | 368  | 242  |
| >MPL-G509C SAVLGLLL    | 81   | >MPL-G509C SAVLCLLLL    | 263  | 182  |
| >MPL-G509C SAVLGLLLLRV | 8    | >MPL-G509C SAVLCLLLLLRV | 11   | 3    |
| >MPL-G509C SAVLGLLLLRV | 201  | >MPL-G509C SAVLCLLLLLRV | 102  | 99   |
| >MPL-G509C SAVLGLLLLRV | 224  | >MPL-G509C SAVLCLLLLLRV | 102  | 122  |
| >MPL-G509C SAVLGLLLLRV | 21   | >MPL-G509C SAVLCLLLLLRV | 22   | 1    |
| >MPL-G509C SAVLGLLLL   | 1082 | >MPL-G509C SAVLCLLLL    | 451  | 631  |
| >MPL-G509C SAVLGLLLLR  | 920  | >MPL-G509C SAVLCLLLLLR  | 162  | 758  |
| >MPL-G509C LSAVLGLL    | 574  | >MPL-G509C LSAVLCLL     | 284  | 290  |
| >MPL-G509C LSAVLGLLLLR | 352  | >MPL-G509C LSAVLCLLLLR  | 364  | 12   |
| >MPL-G509C LSAVLGLLLLR | 135  | >MPL-G509C LSAVLCLLLLR  | 117  | 18   |
| >MPL-G509C LSAVLGLLLLR | 64   | >MPL-G509C LSAVLCLLLLR  | 43   | 21   |
| >MPL-G509C LSAVLGLL    | 104  | >MPL-G509C LSAVLCLL     | 67   | 37   |
| >MPL-G509C LSAVLGLLL   | 25   | >MPL-G509C LSAVLCLLL    | 65   | 40   |
| >MPL-G509C LSAVLGLLLL  | 21   | >MPL-G509C LSAVLCLLLL   | 42   | 21   |
| >MPL-G509C LSAVLGLL    | 267  | >MPL-G509C LSAVLCLL     | 91   | 176  |
| >MPL-G509C LSAVLGLLL   | 77   | >MPL-G509C LSAVLCLLL    | 81   | 4    |
| >MPL-G509C LSAVLGLLLL  | 73   | >MPL-G509C LSAVLCLLLL   | 78   | 5    |
| >MPL-G509C LSAVLGLL    | 264  | >MPL-G509C LSAVLCLL     | 23   | 241  |
| >MPL-G509C LSAVLGLLL   | 26   | >MPL-G509C LSAVLCLLL    | 32   | 6    |
| >MPL-G509C LSAVLGLLLL  | 36   | >MPL-G509C LSAVLCLLLL   | 30   | 6    |
| >MPL-G509C LSAVLGLL    | 120  | >MPL-G509C LSAVLCLL     | 148  | 28   |
| >MPL-G509C LSAVLGLLL   | 57   | >MPL-G509C LSAVLCLLL    | 47   | 10   |
| >MPL-G509C LSAVLGLLLL  | 44   | >MPL-G509C LSAVLCLLLL   | 42   | 2    |
| >MPL-G509C LSAVLGLLLLR | 493  | >MPL-G509C LSAVLCLLLLR  | 301  | 192  |
| >MPL-G509C LSAVLGLL    | 230  | >MPL-G509C LSAVLCLL     | 569  | 339  |
| >MPL-G509C LSAVLGLLL   | 316  | >MPL-G509C LSAVLCLLL    | 276  | 40   |
| >MPL-G509C LSAVLGLLLL  | 103  | >MPL-G509C LSAVLCLLLL   | 54   | 49   |
| >MPL-G509C GLSAVLGL    | 54   | >MPL-G509C GLSAVLCL     | 49   | 5    |
| >MPL-G509C GLSAVLGLL   | 136  | >MPL-G509C GLSAVLCLL    | 25   | 111  |
| >MPL-G509C GLSAVLGLLL  | 390  | >MPL-G509C GLSAVLCLLL   | 173  | 217  |
| >MPL-G509C GLSAVLGLLLL | 54   | >MPL-G509C GLSAVLCLLLL  | 25   | 29   |
| >MPL-G509C GLSAVLGL    | 6    | >MPL-G509C GLSAVLCL     | 8    | 2    |
| >MPL-G509C GLSAVLGLL   | 5    | >MPL-G509C GLSAVLCLL    | 3    | 2    |
| >MPL-G509C GLSAVLGLLL  | 19   | >MPL-G509C GLSAVLCLLL   | 17   | 2    |

|                        |       |                        |     |       |
|------------------------|-------|------------------------|-----|-------|
| >MPL-G509C GLSAVLGLLLL | 6     | >MPL-G509C GLSAVLCLLLL | 4   | 2     |
| >MPL-G509C GLSAVLGL    | 12    | >MPL-G509C GLSAVLCCL   | 64  | 52    |
| >MPL-G509C GLSAVLGLL   | 8     | >MPL-G509C GLSAVLCCL   | 11  | 3     |
| >MPL-G509C GLSAVLGLLL  | 186   | >MPL-G509C GLSAVLCLLL  | 89  | 97    |
| >MPL-G509C GLSAVLGLLLL | 15    | >MPL-G509C GLSAVLCLLLL | 18  | 3     |
| >MPL-G509C GLSAVLGL    | 210   | >MPL-G509C GLSAVLCCL   | 567 | 357   |
| >MPL-G509C GLSAVLGLL   | 505   | >MPL-G509C GLSAVLCCL   | 67  | 438   |
| >MPL-G509C GLSAVLGLLLL | 261   | >MPL-G509C GLSAVLCLLLL | 136 | 125   |
| >MPL-G509C GLSAVLGL    | 12    | >MPL-G509C GLSAVLCCL   | 39  | 27    |
| >MPL-G509C GLSAVLGLL   | 25    | >MPL-G509C GLSAVLCCL   | 7   | 18    |
| >MPL-G509C GLSAVLGLLL  | 54    | >MPL-G509C GLSAVLCLLL  | 68  | 14    |
| >MPL-G509C GLSAVLGLLLL | 34    | >MPL-G509C GLSAVLCLLLL | 34  | 0     |
| >MPL-G509C GLSAVLGL    | 23    | >MPL-G509C GLSAVLCCL   | 26  | 3     |
| >MPL-G509C GLSAVLGLL   | 126   | >MPL-G509C GLSAVLCCL   | 14  | 112   |
| >MPL-G509C GLSAVLGLLL  | 165   | >MPL-G509C GLSAVLCLLL  | 158 | 7     |
| >MPL-G509C GLSAVLGLLLL | 66    | >MPL-G509C GLSAVLCLLLL | 31  | 35    |
| >MPL-G509C GLSAVLGL    | 16    | >MPL-G509C GLSAVLCCL   | 14  | 2     |
| >MPL-G509C GLSAVLGLL   | 55    | >MPL-G509C GLSAVLCCL   | 10  | 45    |
| >MPL-G509C GLSAVLGLLL  | 39    | >MPL-G509C GLSAVLCLLL  | 29  | 10    |
| >MPL-G509C GLSAVLGLLLL | 31    | >MPL-G509C GLSAVLCLLLL | 28  | 3     |
| >MPL-G509C GLSAVLGL    | 162   | >MPL-G509C GLSAVLCCL   | 121 | 41    |
| >MPL-G509C GLSAVLGLL   | 2920  | >MPL-G509C GLSAVLCCL   | 130 | 2790  |
| >MPL-G509C GLSAVLGLLL  | 1175  | >MPL-G509C GLSAVLCLLL  | 395 | 780   |
| >MPL-G509C GLSAVLGL    | 6     | >MPL-G509C GLSAVLCCL   | 11  | 5     |
| >MPL-G509C GLSAVLGLL   | 17    | >MPL-G509C GLSAVLCCL   | 3   | 14    |
| >MPL-G509C GLSAVLGLLL  | 16    | >MPL-G509C GLSAVLCLLL  | 9   | 7     |
| >MPL-G509C GLSAVLGLLLL | 8     | >MPL-G509C GLSAVLCLLLL | 6   | 2     |
| >MPL-G509C GLSAVLGLLL  | 289   | >MPL-G509C GLSAVLCLLL  | 245 | 44    |
| >MPL-G509C VLGLSAVLGL  | 226   | >MPL-G509C VLGLSAVLCCL | 426 | 200   |
| >MPL-G509C VLGLSAVLGL  | 108   | >MPL-G509C VLGLSAVLCCL | 223 | 115   |
| >MPL-G509C VLGLSAVGLI  | 225   | >MPL-G509C VLGLSAVLCCL | 115 | 110   |
| >MPL-G509C VLGLSAVLGL  | 245   | >MPL-G509C VLGLSAVLCCL | 855 | 610   |
| >MPL-G509C VLGLSAVGLI  | 496   | >MPL-G509C VLGLSAVLCCL | 684 | 188   |
| >MPL-G509C VLGLSAVLGL  | 49    | >MPL-G509C VLGLSAVLCCL | 254 | 205   |
| >MPL-G509C VLGLSAVGLI  | 140   | >MPL-G509C VLGLSAVLCCL | 47  | 93    |
| >MPL-G509C VLGLSAVLGL  | 98    | >MPL-G509C VLGLSAVLCCL | 188 | 90    |
| >MPL-G509C VLGLSAVGLI  | 476   | >MPL-G509C VLGLSAVLCCL | 108 | 368   |
| >MPL-G509C VLGLSAVLGL  | 39    | >MPL-G509C VLGLSAVLCCL | 51  | 12    |
| >MPL-G509C VLGLSAVGLI  | 212   | >MPL-G509C VLGLSAVLCCL | 40  | 172   |
| >MPL-G509C VLGLSAVLGL  | 30    | >MPL-G509C VLGLSAVLCCL | 49  | 19    |
| >MPL-G509C VLGLSAVGLI  | 700   | >MPL-G509C VLGLSAVLCCL | 59  | 641   |
| >MPL-G509C VLGLSAVLG   | 14661 | >MPL-G509C VLGLSAVLC   | 274 | 14387 |
| >MPL-G509C VLGLSAVLGL  | 9     | >MPL-G509C VLGLSAVLCCL | 24  | 15    |

|                         |       |                         |       |       |
|-------------------------|-------|-------------------------|-------|-------|
| >MPL-G509C VLGLSAVLGI   | 26    | >MPL-G509C VLGLSAVLCI   | 8     | 18    |
| >MPL-G509C LVLGLSAVLGI  | 216   | >MPL-G509C LVLGLSAVLCI  | 335   | 119   |
| >MPL-G509C LVLGLSAVLGI  | 385   | >MPL-G509C LVLGLSAVLCI  | 640   | 255   |
| >MPL-G509C LVLGLSAVLGI  | 43    | >MPL-G509C LVLGLSAVLCI  | 187   | 144   |
| >MPL-G509C LVLGLSAVLGI  | 70    | >MPL-G509C LVLGLSAVLCI  | 401   | 331   |
| >MPL-G509C LVLGLSAVLGI  | 177   | >MPL-G509C LVLGLSAVLCI  | 233   | 56    |
| >MPL-G509C LVLGLSAVLGI  | 86    | >MPL-G509C LVLGLSAVLCI  | 139   | 53    |
| >MPL-G509C LVLGLSAVLGI  | 37    | >MPL-G509C LVLGLSAVLCI  | 136   | 99    |
| >MPL-G509C LVLGLSAVLGI  | 214   | >MPL-G509C LVLGLSAVLCI  | 2300  | 2086  |
| >MPL-G509C LVLGLSAVLGI  | 205   | >MPL-G509C LVLGLSAVLCI  | 2097  | 1892  |
| >MPL-L510P- LLLLRWQFPA  | 138   | >MPL-L510P- PLLLLRWQFPA | 2572  | 2434  |
| >MPL-L510P- LLLLRWQFPA  | 153   | >MPL-L510P- PLLLLRWQFPA | 4518  | 4365  |
| >MPL-L510P- LLLLRWQFPA  | 175   | >MPL-L510P- PLLLLRWQFPA | 9574  | 9399  |
| >MPL-L510P- LLLLRWQFPA  | 17    | >MPL-L510P- PLLLLRWQFPA | 307   | 290   |
| >MPL-L510P- LLLLRWQFPA  | 58    | >MPL-L510P- PLLLLRWQFPA | 1418  | 1360  |
| >MPL-L510P- LLLLRWQFPA  | 21    | >MPL-L510P- PLLLLRWQFPA | 207   | 186   |
| >MPL-L510P- LLLLRWQFPA  | 96    | >MPL-L510P- PLLLLRWQFPA | 719   | 623   |
| >MPL-L510P- LLLLRWQFPA  | 14    | >MPL-L510P- PLLLLRWQFPA | 221   | 207   |
| >MPL-L510P- LLLLRWQF    | 281   | >MPL-L510P- PLLLLRWQF   | 2293  | 2012  |
| >MPL-L510P- LLLLRWQF    | 208   | >MPL-L510P- PLLLLRWQF   | 2284  | 2076  |
| >MPL-L510P- LLLLRWQF    | 202   | >MPL-L510P- PLLLLRWQF   | 2035  | 1833  |
| >MPL-L510P- GLLLLRWQFF  | 47    | >MPL-L510P- GPLLLRWQFF  | 20595 | 20548 |
| >MPL-L510P- GLLLLRWQFF  | 261   | >MPL-L510P- GPLLLRWQFF  | 29707 | 29446 |
| >MPL-L510P- GLLLLRWQFF  | 148   | >MPL-L510P- GPLLLRWQFF  | 14351 | 14203 |
| >MPL-L510P- GLLLLRWQFF  | 33    | >MPL-L510P- GPLLLRWQFF  | 20315 | 20282 |
| >MPL-L510P- GLLLLRWQFF  | 29    | >MPL-L510P- GPLLLRWQFF  | 15386 | 15357 |
| >MPL-L510P- GLLLLRWQFF  | 13    | >MPL-L510P- GPLLLRWQFF  | 17921 | 17908 |
| >MPL-L510P- GLLLLRWQFF  | 386   | >MPL-L510P- GPLLLRWQFF  | 20225 | 19839 |
| >MPL-L510P- GLLLLRWQFF  | 18    | >MPL-L510P- GPLLLRWQFF  | 33926 | 33908 |
| >MPL-L510P- GLLLLRWQF   | 248   | >MPL-L510P- GPLLLRWQF   | 2544  | 2296  |
| >MPL-L510P- GLLLLRWQF   | 30378 | >MPL-L510P- GPLLLRWQF   | 250   | 30128 |
| >MPL-L510P- GLLLLRWQFF  | 20448 | >MPL-L510P- GPLLLRWQFF  | 39    | 20409 |
| >MPL-L510P- GLLLLRWQF   | 26279 | >MPL-L510P- GPLLLRWQF   | 417   | 25862 |
| >MPL-L510P- LVLGLSAVLGI | 216   | >MPL-L510P- LVLGLSAVLCI | 21181 | 20965 |
| >MPL-L510P- LVLGLSAVLGI | 385   | >MPL-L510P- LVLGLSAVLCI | 11214 | 10829 |
| >MPL-L510P- LVLGLSAVLGI | 43    | >MPL-L510P- LVLGLSAVLCI | 5750  | 5707  |
| >MPL-L510P- LVLGLSAVLGI | 70    | >MPL-L510P- LVLGLSAVLCI | 14115 | 14045 |
| >MPL-L510P- LVLGLSAVLGI | 177   | >MPL-L510P- LVLGLSAVLCI | 18333 | 18156 |
| >MPL-L510P- LVLGLSAVLGI | 86    | >MPL-L510P- LVLGLSAVLCI | 20291 | 20205 |
| >MPL-L510P- LVLGLSAVLGI | 37    | >MPL-L510P- LVLGLSAVLCI | 22946 | 22909 |
| >MPL-L510P- LVLGLSAVLGI | 214   | >MPL-L510P- LVLGLSAVLCI | 13486 | 13272 |
| >MPL-L510P- LVLGLSAVLGI | 205   | >MPL-L510P- LVLGLSAVLCI | 18923 | 18718 |
| >MPL-L510P- LGLLLLRW    | 155   | >MPL-L510P- LGPLLLRW    | 5480  | 5325  |

|                        |       |                        |      |       |
|------------------------|-------|------------------------|------|-------|
| >MPL-L510P-LGLLLLRW    | 374   | >MPL-L510P-LGPLLLLRW   | 3569 | 3195  |
| >MPL-L510P-LGLLLLRW    | 79    | >MPL-L510P-LGPLLLLRW   | 4464 | 4385  |
| >MPL-L510P-LGLLLLRWQF  | 18341 | >MPL-L510P-LGPLLLLRWQF | 113  | 18228 |
| >MPL-L510P-VLGLLLLRWC  | 1896  | >MPL-L510P-VLGPLLRRWC  | 173  | 1723  |
| >MPL-L510P-VLGLLLLRWC  | 1955  | >MPL-L510P-VLGPLLRRWC  | 195  | 1760  |
| >MPL-L510P-VLGLLLLRWC  | 806   | >MPL-L510P-VLGPLLRRWC  | 215  | 591   |
| >MPL-L510P-VLGLLLLRWC  | 1272  | >MPL-L510P-VLGPLLRRWC  | 251  | 1021  |
| >MPL-L510P-VLGLLLLRWC  | 1161  | >MPL-L510P-VLGPLLRRWC  | 441  | 720   |
| >MPL-L510P-VLGLLLLR    | 554   | >MPL-L510P-VLGPLLRR    | 371  | 183   |
| >MPL-L510P-VLGLLLLRW   | 1513  | >MPL-L510P-VLGPLLRRW   | 90   | 1423  |
| >MPL-L510P-VLGLLLLRW   | 295   | >MPL-L510P-VLGPLLRRW   | 56   | 239   |
| >MPL-L510P-VLGLLLLR    | 262   | >MPL-L510P-VLGPLLRR    | 297  | 35    |
| >MPL-L510P-AVLGLLLL    | 112   | >MPL-L510P-AVLGPLL     | 336  | 224   |
| >MPL-L510P-AVLGLLLL    | 410   | >MPL-L510P-AVLGPLL     | 1513 | 1103  |
| >MPL-L510P-AVLGLLLL    | 24    | >MPL-L510P-AVLGPLL     | 101  | 77    |
| >MPL-L510P-AVLGLLLL    | 188   | >MPL-L510P-AVLGPLL     | 114  | 74    |
| >MPL-L510P-AVLGLLLL    | 236   | >MPL-L510P-AVLGPLL     | 592  | 356   |
| >MPL-L510P-AVLGLLLL    | 48    | >MPL-L510P-AVLGPLL     | 91   | 43    |
| >MPL-L510P-AVLGLLLLR   | 579   | >MPL-L510P-AVLGPLLRR   | 339  | 240   |
| >MPL-L510P-AVLGLLLLR   | 30    | >MPL-L510P-AVLGPLLRR   | 24   | 6     |
| >MPL-L510P-AVLGLLLLRW  | 1314  | >MPL-L510P-AVLGPLLRRW  | 486  | 828   |
| >MPL-L510P-AVLGLLLLR   | 50    | >MPL-L510P-AVLGPLLRR   | 134  | 84    |
| >MPL-L510P-AVLGLLLLRW  | 196   | >MPL-L510P-AVLGPLLRRW  | 410  | 214   |
| >MPL-L510P-AVLGLLLLRW  | 23    | >MPL-L510P-AVLGPLLRRW  | 12   | 11    |
| >MPL-L510P-AVLGLLLLRW  | 40    | >MPL-L510P-AVLGPLLRRW  | 48   | 8     |
| >MPL-L510P-AVLGLLLLR   | 487   | >MPL-L510P-AVLGPLLRR   | 1025 | 538   |
| >MPL-L510P-AVLGLLLLR   | 426   | >MPL-L510P-AVLGPLLRR   | 990  | 564   |
| >MPL-L510P-SAVLGLLLL   | 440   | >MPL-L510P-SAVLGPLL    | 910  | 470   |
| >MPL-L510P-SAVLGLLLL   | 357   | >MPL-L510P-SAVLGPLL    | 3749 | 3392  |
| >MPL-L510P-SAVLGLLLLR  | 70    | >MPL-L510P-SAVLGPLLRR  | 67   | 3     |
| >MPL-L510P-SAVLGLLLLR  | 159   | >MPL-L510P-SAVLGPLLRR  | 494  | 335   |
| >MPL-L510P-SAVLGLLLLR  | 24    | >MPL-L510P-SAVLGPLLRR  | 20   | 4     |
| >MPL-L510P-SAVLGLLLL   | 126   | >MPL-L510P-SAVLGPLL    | 204  | 78    |
| >MPL-L510P-SAVLGLLLL   | 81    | >MPL-L510P-SAVLGPLL    | 109  | 28    |
| >MPL-L510P-SAVLGLLLLRW | 8     | >MPL-L510P-SAVLGPLLRR  | 7    | 1     |
| >MPL-L510P-SAVLGLLLLRW | 201   | >MPL-L510P-SAVLGPLLRR  | 166  | 35    |
| >MPL-L510P-SAVLGLLLLRW | 224   | >MPL-L510P-SAVLGPLLRR  | 147  | 77    |
| >MPL-L510P-SAVLGLLLLRW | 21    | >MPL-L510P-SAVLGPLLRR  | 17   | 4     |
| >MPL-L510P-LSAVLGLLLLR | 352   | >MPL-L510P-LSAVLGPLLRF | 536  | 184   |
| >MPL-L510P-LSAVLGLLLLR | 135   | >MPL-L510P-LSAVLGPLLRF | 153  | 18    |
| >MPL-L510P-LSAVLGLLLLR | 64    | >MPL-L510P-LSAVLGPLLRF | 75   | 11    |
| >MPL-L510P-LSAVLGLL    | 104   | >MPL-L510P-LSAVLGPL    | 36   | 68    |
| >MPL-L510P-LSAVLGLL    | 25    | >MPL-L510P-LSAVLGPL    | 42   | 17    |

|                       |     |                        |       |       |
|-----------------------|-----|------------------------|-------|-------|
| >MPL-L510P-LSAVLGLLL  | 21  | >MPL-L510P-LSAVLGPLLL  | 26    | 5     |
| >MPL-L510P-LSAVLGLL   | 267 | >MPL-L510P-LSAVLGPL    | 1124  | 857   |
| >MPL-L510P-LSAVLGLLL  | 77  | >MPL-L510P-LSAVLGPLL   | 169   | 92    |
| >MPL-L510P-LSAVLGLLL  | 73  | >MPL-L510P-LSAVLGPLLL  | 79    | 6     |
| >MPL-L510P-LSAVLGLL   | 264 | >MPL-L510P-LSAVLGPL    | 2565  | 2301  |
| >MPL-L510P-LSAVLGLLL  | 26  | >MPL-L510P-LSAVLGPLL   | 20    | 6     |
| >MPL-L510P-LSAVLGLLL  | 36  | >MPL-L510P-LSAVLGPLLL  | 56    | 20    |
| >MPL-L510P-LSAVLGLL   | 120 | >MPL-L510P-LSAVLGPL    | 822   | 702   |
| >MPL-L510P-LSAVLGLLL  | 57  | >MPL-L510P-LSAVLGPLL   | 84    | 27    |
| >MPL-L510P-LSAVLGLLL  | 44  | >MPL-L510P-LSAVLGPLLL  | 27    | 17    |
| >MPL-L510P-LSAVLGLLLL | 493 | >MPL-L510P-LSAVLGPLLLF | 843   | 350   |
| >MPL-L510P-LSAVLGLL   | 230 | >MPL-L510P-LSAVLGPL    | 236   | 6     |
| >MPL-L510P-LSAVLGLLL  | 316 | >MPL-L510P-LSAVLGPLL   | 337   | 21    |
| >MPL-L510P-LSAVLGLLL  | 103 | >MPL-L510P-LSAVLGPLLL  | 69    | 34    |
| >MPL-L510P-GLSAVLGL   | 54  | >MPL-L510P-GLSAVLGP    | 19488 | 19434 |
| >MPL-L510P-GLSAVLGLL  | 136 | >MPL-L510P-GLSAVLGPL   | 77    | 59    |
| >MPL-L510P-GLSAVLGLLL | 390 | >MPL-L510P-GLSAVLGPLL  | 483   | 93    |
| >MPL-L510P-GLSAVLGLLL | 54  | >MPL-L510P-GLSAVLGPLLI | 67    | 13    |
| >MPL-L510P-GLSAVLGL   | 6   | >MPL-L510P-GLSAVLGP    | 1038  | 1032  |
| >MPL-L510P-GLSAVLGLL  | 5   | >MPL-L510P-GLSAVLGPL   | 5     | 0     |
| >MPL-L510P-GLSAVLGLLL | 19  | >MPL-L510P-GLSAVLGPLL  | 27    | 8     |
| >MPL-L510P-GLSAVLGLLL | 6   | >MPL-L510P-GLSAVLGPLLI | 9     | 3     |
| >MPL-L510P-GLSAVLGL   | 12  | >MPL-L510P-GLSAVLGP    | 3003  | 2991  |
| >MPL-L510P-GLSAVLGLL  | 8   | >MPL-L510P-GLSAVLGPL   | 5     | 3     |
| >MPL-L510P-GLSAVLGLLL | 186 | >MPL-L510P-GLSAVLGPLL  | 385   | 199   |
| >MPL-L510P-GLSAVLGLLL | 15  | >MPL-L510P-GLSAVLGPLLI | 19    | 4     |
| >MPL-L510P-GLSAVLGL   | 210 | >MPL-L510P-GLSAVLGP    | 13083 | 12873 |
| >MPL-L510P-GLSAVLGLL  | 505 | >MPL-L510P-GLSAVLGPL   | 151   | 354   |
| >MPL-L510P-GLSAVLGLLL | 261 | >MPL-L510P-GLSAVLGPLL  | 819   | 558   |
| >MPL-L510P-GLSAVLGL   | 12  | >MPL-L510P-GLSAVLGP    | 7635  | 7623  |
| >MPL-L510P-GLSAVLGLL  | 25  | >MPL-L510P-GLSAVLGPL   | 14    | 11    |
| >MPL-L510P-GLSAVLGLLL | 54  | >MPL-L510P-GLSAVLGPLL  | 30    | 24    |
| >MPL-L510P-GLSAVLGLLL | 34  | >MPL-L510P-GLSAVLGPLLI | 29    | 5     |
| >MPL-L510P-GLSAVLGL   | 23  | >MPL-L510P-GLSAVLGP    | 14840 | 14817 |
| >MPL-L510P-GLSAVLGLL  | 126 | >MPL-L510P-GLSAVLGPL   | 22    | 104   |
| >MPL-L510P-GLSAVLGLLL | 165 | >MPL-L510P-GLSAVLGPLL  | 87    | 78    |
| >MPL-L510P-GLSAVLGLLL | 66  | >MPL-L510P-GLSAVLGPLLI | 89    | 23    |
| >MPL-L510P-GLSAVLGL   | 16  | >MPL-L510P-GLSAVLGP    | 9820  | 9804  |
| >MPL-L510P-GLSAVLGLL  | 55  | >MPL-L510P-GLSAVLGPL   | 33    | 22    |
| >MPL-L510P-GLSAVLGLLL | 39  | >MPL-L510P-GLSAVLGPLL  | 19    | 20    |
| >MPL-L510P-GLSAVLGLLL | 31  | >MPL-L510P-GLSAVLGPLLI | 33    | 2     |
| >MPL-L510P-GLSAVLGL   | 162 | >MPL-L510P-GLSAVLGP    | 24271 | 24109 |
| >MPL-L510P-GLSAVLGL   | 6   | >MPL-L510P-GLSAVLGP    | 12773 | 12767 |

|                        |       |                        |       |       |
|------------------------|-------|------------------------|-------|-------|
| >MPL-L510P-GLSAVLGLL   | 17    | >MPL-L510P-GLSAVLGPL   | 21    | 4     |
| >MPL-L510P-GLSAVLGLLL  | 16    | >MPL-L510P-GLSAVLGPLL  | 13    | 3     |
| >MPL-L510P-GLSAVLGLLLL | 8     | >MPL-L510P-GLSAVLGPLLI | 15    | 7     |
| >MPL-L510P-GLSAVLGLLL  | 289   | >MPL-L510P-GLSAVLGPLL  | 1243  | 954   |
| >MPL-L510P-VLGLSAVLGL  | 226   | >MPL-L510P-VLGLSAVLGP  | 7597  | 7371  |
| >MPL-L510P-VLGLSAVLGL  | 108   | >MPL-L510P-VLGLSAVLGP  | 15333 | 15225 |
| >MPL-L510P-VLGLSAVLGLI | 225   | >MPL-L510P-VLGLSAVLGP  | 263   | 38    |
| >MPL-L510P-VLGLSAVLGL  | 245   | >MPL-L510P-VLGLSAVLGP  | 11703 | 11458 |
| >MPL-L510P-VLGLSAVLGLI | 496   | >MPL-L510P-VLGLSAVLGP  | 230   | 266   |
| >MPL-L510P-VLGLSAVLGL  | 49    | >MPL-L510P-VLGLSAVLGP  | 11933 | 11884 |
| >MPL-L510P-VLGLSAVLGLI | 140   | >MPL-L510P-VLGLSAVLGP  | 76    | 64    |
| >MPL-L510P-VLGLSAVLGL  | 98    | >MPL-L510P-VLGLSAVLGP  | 19604 | 19506 |
| >MPL-L510P-VLGLSAVLGLI | 476   | >MPL-L510P-VLGLSAVLGP  | 116   | 360   |
| >MPL-L510P-VLGLSAVLGL  | 39    | >MPL-L510P-VLGLSAVLGP  | 13777 | 13738 |
| >MPL-L510P-VLGLSAVLGLI | 212   | >MPL-L510P-VLGLSAVLGP  | 159   | 53    |
| >MPL-L510P-VLGLSAVLGL  | 30    | >MPL-L510P-VLGLSAVLGP  | 22273 | 22243 |
| >MPL-L510P-VLGLSAVLGL  | 9     | >MPL-L510P-VLGLSAVLGP  | 14751 | 14742 |
| >MPL-L510P-VLGLSAVLGLI | 26    | >MPL-L510P-VLGLSAVLGP  | 30    | 4     |
| >MPL-S204F-SALDQSPCA   | 4425  | >MPL-S204F-FALDQSPCA   | 257   | 4168  |
| >MPL-S204F-SALDQSPC    | 3078  | >MPL-S204F-FALDQSPC    | 198   | 2880  |
| >MPL-S204F-SALDQSPCA   | 669   | >MPL-S204F-FALDQSPCA   | 44    | 625   |
| >MPL-S204F-SALDQSPCA   | 398   | >MPL-S204F-FALDQSPCA   | 146   | 252   |
| >MPL-S204F-SALDQSPCA   | 2876  | >MPL-S204F-FALDQSPCA   | 300   | 2576  |
| >MPL-S204F-SALDQSPCA   | 1068  | >MPL-S204F-FALDQSPCA   | 309   | 759   |
| >MPL-S204F-SALDQSPCA   | 21899 | >MPL-S204F-FALDQSPCA   | 252   | 21647 |
| >MPL-S204F-CPALQRPHSA  | 1906  | >MPL-S204F-CPALQRPHSA  | 27    | 1879  |
| >MPL-S204F-CPALQRPHSA  | 826   | >MPL-S204F-CPALQRPHSA  | 22    | 804   |
| >MPL-S204F-CPALQRPHSA  | 21735 | >MPL-S204F-CPALQRPHSA  | 432   | 21303 |
| >MPL-S204F-CPALQRPHSA  | 207   | >MPL-S204F-CPALQRPHSA  | 2018  | 1811  |
| >MPL-S204F-CPALQRPHSA  | 7809  | >MPL-S204F-CPALQRPHSA  | 80    | 7729  |
| >MPL-S204F-RPHSASAL    | 10    | >MPL-S204F-RPHSAFAL    | 5     | 5     |
| >MPL-S204F-RPHSASALDC  | 63    | >MPL-S204F-RPHSAFALDC  | 113   | 50    |
| >MPL-S204F-RPHSASAL    | 7     | >MPL-S204F-RPHSAFAL    | 9     | 2     |
| >MPL-S204F-RPHSASAL    | 279   | >MPL-S204F-RPHSAFAL    | 543   | 264   |
| >MPL-S204F-RPHSASAL    | 246   | >MPL-S204F-RPHSAFAL    | 283   | 37    |
| >MPL-S204F-RPHSASAL    | 57    | >MPL-S204F-RPHSAFAL    | 56    | 1     |
| >MPL-S204F-RPHSASAL    | 291   | >MPL-S204F-RPHSAFAL    | 242   | 49    |
| >MPL-S204F-QRPHSASAL   | 64    | >MPL-S204F-QRPHSAFAL   | 270   | 206   |
| >MPL-S204F-QRPHSASAL   | 181   | >MPL-S204F-QRPHSAFAL   | 102   | 79    |
| >MPL-S204F-QRPHSASAL   | 169   | >MPL-S204F-QRPHSAFAL   | 363   | 194   |
| >MPL-S204F-LQRPHSASA   | 60    | >MPL-S204F-LQRPHSAFA   | 59    | 1     |
| >MPL-S204F-LQRPHSASA   | 123   | >MPL-S204F-LQRPHSAFA   | 44    | 79    |
| >MPL-S204F-LQRPHSASA   | 21    | >MPL-S204F-LQRPHSAFA   | 10    | 11    |

|                       |       |                       |      |       |
|-----------------------|-------|-----------------------|------|-------|
| >MPL-S204F-LQRPHSASAL | 246   | >MPL-S204F-LQRPHSAFAL | 151  | 95    |
| >MPL-S204F-LQRPHSAS   | 227   | >MPL-S204F-LQRPHSAF   | 21   | 206   |
| >MPL-S204F-LQRPHSASA  | 44    | >MPL-S204F-LQRPHSAFA  | 72   | 28    |
| >MPL-S204F-LQRPHSASAL | 30    | >MPL-S204F-LQRPHSAFAL | 40   | 10    |
| >MPL-S204F-LQRPHSAS   | 8010  | >MPL-S204F-LQRPHSAF   | 59   | 7951  |
| >MPL-S204F-LQRPHSAS   | 173   | >MPL-S204F-LQRPHSAF   | 2    | 171   |
| >MPL-S204F-LQRPHSASA  | 49    | >MPL-S204F-LQRPHSAFA  | 174  | 125   |
| >MPL-S204F-LQRPHSASAL | 5     | >MPL-S204F-LQRPHSAFAL | 8    | 3     |
| >MPL-S204F-LQRPHSAS   | 20499 | >MPL-S204F-LQRPHSAF   | 202  | 20297 |
| >MPL-S204F-LQRPHSASAL | 383   | >MPL-S204F-LQRPHSAFAL | 308  | 75    |
| >MPL-S204F-LQRPHSASAL | 323   | >MPL-S204F-LQRPHSAFAL | 448  | 125   |
| >MPL-S204F-ALQRPHSASA | 4271  | >MPL-S204F-ALQRPHSAFA | 469  | 3802  |
| >MPL-S204F-ALQRPHSASA | 354   | >MPL-S204F-ALQRPHSAFA | 134  | 220   |
| >MPL-S204F-ALQRPHSASA | 278   | >MPL-S204F-ALQRPHSAFA | 383  | 105   |
| >MPL-S204F-ALQRPHSASA | 256   | >MPL-S204F-ALQRPHSAFA | 535  | 279   |
| >MPL-S204F-ALQRPHSASA | 84    | >MPL-S204F-ALQRPHSAFA | 48   | 36    |
| >MPL-S204F-ALQRPHSASA | 48    | >MPL-S204F-ALQRPHSAFA | 17   | 31    |
| >MPL-S204F-ALQRPHSASA | 256   | >MPL-S204F-ALQRPHSAFA | 163  | 93    |
| >MPL-S204F-ALQRPHSASA | 61    | >MPL-S204F-ALQRPHSAFA | 24   | 37    |
| >MPL-S204F-ALQRPHSASA | 2044  | >MPL-S204F-ALQRPHSAFA | 467  | 1577  |
| >MPL-S204F-ALQRPHSASA | 10    | >MPL-S204F-ALQRPHSAFA | 14   | 4     |
| >MPL-S204F-ALQRPHSASA | 8     | >MPL-S204F-ALQRPHSAFA | 5    | 3     |
| >MPL-S204F-ALQRPHSASA | 1470  | >MPL-S204F-ALQRPHSAFA | 455  | 1015  |
| >MPL-S204F-ALQRPHSASA | 417   | >MPL-S204F-ALQRPHSAFA | 1196 | 779   |
| >MPL-S204F-ALQRPHSAS  | 8718  | >MPL-S204F-ALQRPHSAF  | 43   | 8675  |
| >MPL-S204F-ALQRPHSASA | 444   | >MPL-S204F-ALQRPHSAFA | 895  | 451   |
| >MPL-S204F-ALQRPHSAS  | 5260  | >MPL-S204F-ALQRPHSAF  | 27   | 5233  |
| >MPL-S204F-ALQRPHSASA | 422   | >MPL-S204F-ALQRPHSAFA | 1374 | 952   |
| >MPL-S204F-ALQRPHSAS  | 5077  | >MPL-S204F-ALQRPHSAF  | 11   | 5066  |
| >MPL-S204F-ALQRPHSASA | 168   | >MPL-S204F-ALQRPHSAFA | 384  | 216   |
| >MPL-S204F-ALQRPHSAS  | 12414 | >MPL-S204F-ALQRPHSAF  | 117  | 12297 |
| >MPL-S204F-PALQRPHSAS | 20501 | >MPL-S204F-PALQRPHSAF | 154  | 20347 |
| >MPL-S204P-SALDQSPCA  | 398   | >MPL-S204P-PALDQSPCA  | 8935 | 8537  |
| >MPL-S204P-ASALDQSPC  | 23809 | >MPL-S204P-APALDQSPC  | 306  | 23503 |
| >MPL-S204P-CPALQRPHSA | 207   | >MPL-S204P-CPALQRPHSA | 340  | 133   |
| >MPL-S204P-RPHSASAL   | 10    | >MPL-S204P-RPHSAPAL   | 6    | 4     |
| >MPL-S204P-RPHSASALDC | 63    | >MPL-S204P-RPHSAPALDC | 151  | 88    |
| >MPL-S204P-RPHSASAL   | 7     | >MPL-S204P-RPHSAPAL   | 11   | 4     |
| >MPL-S204P-RPHSASAL   | 279   | >MPL-S204P-RPHSAPAL   | 563  | 284   |
| >MPL-S204P-RPHSASAL   | 246   | >MPL-S204P-RPHSAPAL   | 404  | 158   |
| >MPL-S204P-RPHSASAL   | 57    | >MPL-S204P-RPHSAPAL   | 64   | 7     |
| >MPL-S204P-RPHSASAL   | 291   | >MPL-S204P-RPHSAPAL   | 2352 | 2061  |
| >MPL-S204P-QRPHSASAL  | 64    | >MPL-S204P-QRPHSAPAL  | 160  | 96    |

|                        |     |                        |       |       |
|------------------------|-----|------------------------|-------|-------|
| >MPL-S204P-QRPHSASAL   | 181 | >MPL-S204P-QRPHSAPAL   | 243   | 62    |
| >MPL-S204P-QRPHSASAL   | 169 | >MPL-S204P-QRPHSAPAL   | 218   | 49    |
| >MPL-S204P-LQRPHSASA   | 60  | >MPL-S204P-LQRPHSAPA   | 44    | 16    |
| >MPL-S204P-LQRPHSASA   | 123 | >MPL-S204P-LQRPHSAPA   | 69    | 54    |
| >MPL-S204P-LQRPHSASA   | 21  | >MPL-S204P-LQRPHSAPA   | 13    | 8     |
| >MPL-S204P-LQRPHSASAL  | 246 | >MPL-S204P-LQRPHSAPAL  | 71    | 175   |
| >MPL-S204P-LQRPHSAS    | 227 | >MPL-S204P-LQRPHSAP    | 240   | 13    |
| >MPL-S204P-LQRPHSASA   | 44  | >MPL-S204P-LQRPHSAPA   | 36    | 8     |
| >MPL-S204P-LQRPHSASAL  | 30  | >MPL-S204P-LQRPHSAPAL  | 38    | 8     |
| >MPL-S204P-LQRPHSAS    | 173 | >MPL-S204P-LQRPHSAP    | 168   | 5     |
| >MPL-S204P-LQRPHSASA   | 49  | >MPL-S204P-LQRPHSAPA   | 47    | 2     |
| >MPL-S204P-LQRPHSASAL  | 5   | >MPL-S204P-LQRPHSAPAL  | 7     | 2     |
| >MPL-S204P-LQRPHSASAL  | 383 | >MPL-S204P-LQRPHSAPAL  | 400   | 17    |
| >MPL-S204P-LQRPHSASAL  | 323 | >MPL-S204P-LQRPHSAPAL  | 254   | 69    |
| >MPL-S204P-ALQRPHSASA  | 354 | >MPL-S204P-ALQRPHSAP/  | 680   | 326   |
| >MPL-S204P-ALQRPHSASA  | 278 | >MPL-S204P-ALQRPHSAP/  | 408   | 130   |
| >MPL-S204P-ALQRPHSASA  | 256 | >MPL-S204P-ALQRPHSAP/  | 676   | 420   |
| >MPL-S204P-ALQRPHSASA  | 84  | >MPL-S204P-ALQRPHSAP/  | 74    | 10    |
| >MPL-S204P-ALQRPHSASA  | 48  | >MPL-S204P-ALQRPHSAP/  | 31    | 17    |
| >MPL-S204P-ALQRPHSASA  | 256 | >MPL-S204P-ALQRPHSAP/  | 179   | 77    |
| >MPL-S204P-ALQRPHSASA  | 61  | >MPL-S204P-ALQRPHSAP/  | 62    | 1     |
| >MPL-S204P-ALQRPHSASA  | 10  | >MPL-S204P-ALQRPHSAP/  | 16    | 6     |
| >MPL-S204P-ALQRPHSASA  | 8   | >MPL-S204P-ALQRPHSAP/  | 8     | 0     |
| >MPL-S204P-ALQRPHSASA  | 417 | >MPL-S204P-ALQRPHSAP/  | 1051  | 634   |
| >MPL-S204P-ALQRPHSASA  | 705 | >MPL-S204P-ALQRPHSAP/  | 456   | 249   |
| >MPL-S204P-ALQRPHSASA  | 444 | >MPL-S204P-ALQRPHSAP/  | 698   | 254   |
| >MPL-S204P-ALQRPHSASA  | 422 | >MPL-S204P-ALQRPHSAP/  | 1763  | 1341  |
| >MPL-S204P-ALQRPHSASA  | 168 | >MPL-S204P-ALQRPHSAP/  | 308   | 140   |
| >MPL-S505N SAVLGLLLL   | 440 | >MPL-S505N NAVLGLLLL   | 3052  | 2612  |
| >MPL-S505N SAVLGLLLL   | 357 | >MPL-S505N NAVLGLLLL   | 803   | 446   |
| >MPL-S505N SAVLGLLLLR  | 70  | >MPL-S505N NAVLGLLLLR  | 537   | 467   |
| >MPL-S505N SAVLGLLLLR  | 159 | >MPL-S505N NAVLGLLLLR  | 554   | 395   |
| >MPL-S505N SAVLGLLLLR  | 764 | >MPL-S505N NAVLGLLLLR  | 410   | 354   |
| >MPL-S505N SAVLGLLLLR  | 24  | >MPL-S505N NAVLGLLLLR  | 13    | 11    |
| >MPL-S505N SAVLGLLL    | 126 | >MPL-S505N NAVLGLLL    | 1920  | 1794  |
| >MPL-S505N SAVLGLLLL   | 81  | >MPL-S505N NAVLGLLLL   | 1572  | 1491  |
| >MPL-S505N SAVLGLLLLRV | 8   | >MPL-S505N NAVLGLLLLRV | 39    | 31    |
| >MPL-S505N SAVLGLLLLRV | 201 | >MPL-S505N NAVLGLLLLRV | 90    | 111   |
| >MPL-S505N SAVLGLLLLRV | 224 | >MPL-S505N NAVLGLLLLRV | 863   | 639   |
| >MPL-S505N SAVLGLLLLRV | 21  | >MPL-S505N NAVLGLLLLRV | 72    | 51    |
| >MPL-S505N LSAVLGLLLLR | 352 | >MPL-S505N LNAVLGLLLLF | 13684 | 13332 |
| >MPL-S505N LSAVLGLLLLR | 135 | >MPL-S505N LNAVLGLLLLF | 2760  | 2625  |
| >MPL-S505N LSAVLGLLLLR | 64  | >MPL-S505N LNAVLGLLLLF | 522   | 458   |



|                        |     |                        |       |       |
|------------------------|-----|------------------------|-------|-------|
| >MPL-S505N LSAVLGLL    | 104 | >MPL-S505N LNAVLGLL    | 20867 | 20763 |
| >MPL-S505N LSAVLGLLL   | 25  | >MPL-S505N LNAVLGLLL   | 15682 | 15657 |
| >MPL-S505N LSAVLGLLLL  | 21  | >MPL-S505N LNAVLGLLLL  | 16212 | 16191 |
| >MPL-S505N LSAVLGLL    | 267 | >MPL-S505N LNAVLGLL    | 18018 | 17751 |
| >MPL-S505N LSAVLGLLL   | 77  | >MPL-S505N LNAVLGLLL   | 14366 | 14289 |
| >MPL-S505N LSAVLGLLLL  | 73  | >MPL-S505N LNAVLGLLLL  | 13135 | 13062 |
| >MPL-S505N LSAVLGLL    | 264 | >MPL-S505N LNAVLGLL    | 24349 | 24085 |
| >MPL-S505N LSAVLGLLL   | 26  | >MPL-S505N LNAVLGLLL   | 3604  | 3578  |
| >MPL-S505N LSAVLGLLLL  | 36  | >MPL-S505N LNAVLGLLLL  | 4250  | 4214  |
| >MPL-S505N LSAVLGLL    | 120 | >MPL-S505N LNAVLGLL    | 3205  | 3085  |
| >MPL-S505N LSAVLGLLL   | 57  | >MPL-S505N LNAVLGLLL   | 1175  | 1118  |
| >MPL-S505N LSAVLGLLLL  | 44  | >MPL-S505N LNAVLGLLLL  | 3403  | 3359  |
| >MPL-S505N LSAVLGLLLLR | 493 | >MPL-S505N LNAVLGLLLLF | 8380  | 7887  |
| >MPL-S505N LSAVLGLL    | 230 | >MPL-S505N LNAVLGLL    | 4927  | 4697  |
| >MPL-S505N LSAVLGLLL   | 316 | >MPL-S505N LNAVLGLLL   | 5655  | 5339  |
| >MPL-S505N LSAVLGLLLL  | 103 | >MPL-S505N LNAVLGLLLL  | 11680 | 11577 |
| >MPL-S505N GLSAVLGL    | 54  | >MPL-S505N GLNAVLGL    | 74    | 20    |
| >MPL-S505N GLSAVLGLL   | 136 | >MPL-S505N GLNAVLGLL   | 213   | 77    |
| >MPL-S505N GLSAVLGLLL  | 390 | >MPL-S505N GLNAVLGLLL  | 808   | 418   |
| >MPL-S505N GLSAVLGLLLL | 54  | >MPL-S505N GLNAVLGLLL  | 78    | 24    |
| >MPL-S505N GLSAVLGL    | 6   | >MPL-S505N GLNAVLGL    | 10    | 4     |
| >MPL-S505N GLSAVLGLL   | 5   | >MPL-S505N GLNAVLGLL   | 7     | 2     |
| >MPL-S505N GLSAVLGLLL  | 19  | >MPL-S505N GLNAVLGLLL  | 44    | 25    |
| >MPL-S505N GLSAVLGLLLL | 6   | >MPL-S505N GLNAVLGLLL  | 9     | 3     |
| >MPL-S505N GLSAVLGL    | 12  | >MPL-S505N GLNAVLGL    | 9     | 3     |
| >MPL-S505N GLSAVLGLL   | 8   | >MPL-S505N GLNAVLGLL   | 6     | 2     |
| >MPL-S505N GLSAVLGLLL  | 186 | >MPL-S505N GLNAVLGLLL  | 335   | 149   |
| >MPL-S505N GLSAVLGLLLL | 15  | >MPL-S505N GLNAVLGLLL  | 12    | 3     |
| >MPL-S505N GLSAVLGL    | 210 | >MPL-S505N GLNAVLGL    | 415   | 205   |
| >MPL-S505N GLSAVLGLLL  | 261 | >MPL-S505N GLNAVLGLLL  | 548   | 287   |
| >MPL-S505N GLSAVLGL    | 12  | >MPL-S505N GLNAVLGL    | 7     | 5     |
| >MPL-S505N GLSAVLGLL   | 25  | >MPL-S505N GLNAVLGLL   | 13    | 12    |
| >MPL-S505N GLSAVLGLLL  | 54  | >MPL-S505N GLNAVLGLLL  | 26    | 28    |
| >MPL-S505N GLSAVLGLLLL | 34  | >MPL-S505N GLNAVLGLLL  | 17    | 17    |
| >MPL-S505N GLSAVLGL    | 23  | >MPL-S505N GLNAVLGL    | 18    | 5     |
| >MPL-S505N GLSAVLGLL   | 126 | >MPL-S505N GLNAVLGLL   | 85    | 41    |
| >MPL-S505N GLSAVLGLLL  | 165 | >MPL-S505N GLNAVLGLLL  | 117   | 48    |
| >MPL-S505N GLSAVLGLLLL | 66  | >MPL-S505N GLNAVLGLLL  | 47    | 19    |
| >MPL-S505N GLSAVLGL    | 16  | >MPL-S505N GLNAVLGL    | 15    | 1     |
| >MPL-S505N GLSAVLGLL   | 55  | >MPL-S505N GLNAVLGLL   | 51    | 4     |
| >MPL-S505N GLSAVLGLLL  | 39  | >MPL-S505N GLNAVLGLLL  | 37    | 2     |
| >MPL-S505N GLSAVLGLLLL | 31  | >MPL-S505N GLNAVLGLLL  | 30    | 1     |
| >MPL-S505N GLSAVLGL    | 162 | >MPL-S505N GLNAVLGL    | 159   | 3     |

|                        |     |                        |     |     |
|------------------------|-----|------------------------|-----|-----|
| >MPL-S505N GLSAVLGL    | 6   | >MPL-S505N GLNAVLGL    | 6   | 0   |
| >MPL-S505N GLSAVLGLL   | 17  | >MPL-S505N GLNAVLGLL   | 23  | 6   |
| >MPL-S505N GLSAVLGLLL  | 16  | >MPL-S505N GLNAVLGLLL  | 21  | 5   |
| >MPL-S505N GLSAVLGLLLL | 8   | >MPL-S505N GLNAVLGLLLL | 10  | 2   |
| >MPL-S505N GLSAVLGLLL  | 289 | >MPL-S505N GLNAVLGLLL  | 772 | 483 |
| >MPL-S505N VLGLSAVLGL  | 226 | >MPL-S505N VLGLNAVLGL  | 252 | 26  |
| >MPL-S505N VLGLSAVL    | 290 | >MPL-S505N VLGLNAVL    | 371 | 81  |
| >MPL-S505N VLGLSAVLGL  | 108 | >MPL-S505N VLGLNAVLGL  | 177 | 69  |
| >MPL-S505N VLGLSAVLGLI | 225 | >MPL-S505N VLGLNAVLGL  | 305 | 80  |
| >MPL-S505N VLGLSAVLGL  | 245 | >MPL-S505N VLGLNAVLGL  | 246 | 1   |
| >MPL-S505N VLGLSAVLGLI | 496 | >MPL-S505N VLGLNAVLGL  | 691 | 195 |
| >MPL-S505N VLGLSAVL    | 101 | >MPL-S505N VLGLNAVL    | 73  | 28  |
| >MPL-S505N VLGLSAVLGL  | 49  | >MPL-S505N VLGLNAVLGL  | 27  | 22  |
| >MPL-S505N VLGLSAVLGLI | 140 | >MPL-S505N VLGLNAVLGL  | 77  | 63  |
| >MPL-S505N VLGLSAVL    | 67  | >MPL-S505N VLGLNAVL    | 45  | 22  |
| >MPL-S505N VLGLSAVLGL  | 98  | >MPL-S505N VLGLNAVLGL  | 34  | 64  |
| >MPL-S505N VLGLSAVLGLI | 476 | >MPL-S505N VLGLNAVLGL  | 184 | 292 |
| >MPL-S505N VLGLSAVL    | 151 | >MPL-S505N VLGLNAVL    | 285 | 134 |
| >MPL-S505N VLGLSAVLGL  | 39  | >MPL-S505N VLGLNAVLGL  | 46  | 7   |
| >MPL-S505N VLGLSAVLGLI | 212 | >MPL-S505N VLGLNAVLGL  | 259 | 47  |
| >MPL-S505N VLGLSAVL    | 49  | >MPL-S505N VLGLNAVL    | 44  | 5   |
| >MPL-S505N VLGLSAVLGL  | 30  | >MPL-S505N VLGLNAVLGL  | 18  | 12  |
| >MPL-S505N VLGLSAVLGLI | 700 | >MPL-S505N VLGLNAVLGL  | 409 | 291 |
| >MPL-S505N VLGLSAVL    | 14  | >MPL-S505N VLGLNAVL    | 14  | 0   |
| >MPL-S505N VLGLSAVLGL  | 9   | >MPL-S505N VLGLNAVLGL  | 8   | 1   |
| >MPL-S505N VLGLSAVLGLI | 26  | >MPL-S505N VLGLNAVLGL  | 22  | 4   |
| >MPL-S505N LVLGLSAV    | 90  | >MPL-S505N LVLGLNAV    | 98  | 8   |
| >MPL-S505N LVLGLSAVLGI | 216 | >MPL-S505N LVLGLNAVGL  | 253 | 37  |
| >MPL-S505N LVLGLSAV    | 115 | >MPL-S505N LVLGLNAV    | 94  | 21  |
| >MPL-S505N LVLGLSAVL   | 350 | >MPL-S505N LVLGLNAVL   | 509 | 159 |
| >MPL-S505N LVLGLSAVLGI | 385 | >MPL-S505N LVLGLNAVGL  | 515 | 130 |
| >MPL-S505N LVLGLSAV    | 57  | >MPL-S505N LVLGLNAV    | 142 | 85  |
| >MPL-S505N LVLGLSAV    | 8   | >MPL-S505N LVLGLNAV    | 10  | 2   |
| >MPL-S505N LVLGLSAVL   | 140 | >MPL-S505N LVLGLNAVL   | 332 | 192 |
| >MPL-S505N LVLGLSAVLGI | 43  | >MPL-S505N LVLGLNAVGL  | 62  | 19  |
| >MPL-S505N LVLGLSAV    | 7   | >MPL-S505N LVLGLNAV    | 12  | 5   |
| >MPL-S505N LVLGLSAVL   | 164 | >MPL-S505N LVLGLNAVL   | 332 | 168 |
| >MPL-S505N LVLGLSAVLGI | 70  | >MPL-S505N LVLGLNAVGL  | 92  | 22  |
| >MPL-S505N LVLGLSAV    | 44  | >MPL-S505N LVLGLNAV    | 73  | 29  |
| >MPL-S505N LVLGLSAV    | 36  | >MPL-S505N LVLGLNAV    | 61  | 25  |
| >MPL-S505N LVLGLSAVLGI | 177 | >MPL-S505N LVLGLNAVGL  | 285 | 108 |
| >MPL-S505N LVLGLSAV    | 20  | >MPL-S505N LVLGLNAV    | 40  | 20  |
| >MPL-S505N LVLGLSAVL   | 163 | >MPL-S505N LVLGLNAVL   | 581 | 418 |

|                        |     |                       |      |     |
|------------------------|-----|-----------------------|------|-----|
| >MPL-S505N LVLGLSAVLGI | 86  | >MPL-S505N LVLGLNAVLG | 148  | 62  |
| >MPL-S505N LVLGLSAV    | 4   | >MPL-S505N LVLGLNAV   | 6    | 2   |
| >MPL-S505N LVLGLSAVL   | 51  | >MPL-S505N LVLGLNAVL  | 87   | 36  |
| >MPL-S505N LVLGLSAVLGI | 37  | >MPL-S505N LVLGLNAVLG | 47   | 10  |
| >MPL-S505N LVLGLSAV    | 194 | >MPL-S505N LVLGLNAV   | 164  | 30  |
| >MPL-S505N LVLGLSAV    | 39  | >MPL-S505N LVLGLNAV   | 44   | 5   |
| >MPL-S505N LVLGLSAVLGI | 214 | >MPL-S505N LVLGLNAVLG | 290  | 76  |
| >MPL-S505N LVLGLSAVL   | 356 | >MPL-S505N LVLGLNAVL  | 1137 | 781 |
| >MPL-S505N LVLGLSAVLGI | 205 | >MPL-S505N LVLGLNAVLG | 406  | 201 |
| >MPL-S505N LVLGLSAVL   | 418 | >MPL-S505N LVLGLNAVL  | 776  | 358 |
| >MPL-S505N LVLGLSAVL   | 144 | >MPL-S505N LVLGLNAVL  | 163  | 19  |
| >MPL-S505N HLVLGLSAV   | 216 | >MPL-S505N HLVLGLNAV  | 234  | 18  |
| >MPL-S505N HLVLGLSAV   | 41  | >MPL-S505N HLVLGLNAV  | 23   | 18  |
| >MPL-S505N HLVLGLSAVL  | 108 | >MPL-S505N HLVLGLNAVL | 95   | 13  |
| >MPL-S505N HLVLGLSA    | 91  | >MPL-S505N HLVLGLNA   | 153  | 62  |
| >MPL-S505N HLVLGLSAV   | 5   | >MPL-S505N HLVLGLNAV  | 8    | 3   |
| >MPL-S505N HLVLGLSAVL  | 341 | >MPL-S505N HLVLGLNAVL | 526  | 185 |
| >MPL-S505N HLVLGLSAV   | 15  | >MPL-S505N HLVLGLNAV  | 14   | 1   |
| >MPL-S505N HLVLGLSAV   | 11  | >MPL-S505N HLVLGLNAV  | 21   | 10  |
| >MPL-S505N HLVLGLSAVL  | 268 | >MPL-S505N HLVLGLNAVL | 492  | 224 |
| >MPL-S505N HLVLGLSAV   | 5   | >MPL-S505N HLVLGLNAV  | 6    | 1   |
| >MPL-S505N HLVLGLSAVL  | 49  | >MPL-S505N HLVLGLNAVL | 86   | 37  |
| >MPL-S505N HLVLGLSAV   | 28  | >MPL-S505N HLVLGLNAV  | 43   | 15  |
| >MPL-S505N HLVLGLSAV   | 61  | >MPL-S505N HLVLGLNAV  | 111  | 50  |
| >MPL-S505N HLVLGLSA    | 58  | >MPL-S505N HLVLGLNA   | 157  | 99  |
| >MPL-S505N HLVLGLSAV   | 3   | >MPL-S505N HLVLGLNAV  | 4    | 1   |
| >MPL-S505N HLVLGLSAVL  | 16  | >MPL-S505N HLVLGLNAVL | 27   | 11  |
| >MPL-S505N HLVLGLSAV   | 492 | >MPL-S505N HLVLGLNAV  | 339  | 153 |
| >MPL-S505N HLVLGLSAV   | 491 | >MPL-S505N HLVLGLNAV  | 392  | 99  |
| >MPL-S505N HLVLGLSAVL  | 74  | >MPL-S505N HLVLGLNAVL | 86   | 12  |
| >MPL-S505N LHLVLGLSAV  | 440 | >MPL-S505N LHLVLGLNAV | 772  | 332 |
| >MPL-S505N LHLVLGLSAVI | 382 | >MPL-S505N LHLVLGLNAV | 485  | 103 |
| >MPL-S505N LHLVLGLSAVI | 32  | >MPL-S505N LHLVLGLNAV | 55   | 23  |
| >MPL-S505N ALHLVLGLSA' | 141 | >MPL-S505N ALHLVLGLNA | 150  | 9   |
| >MPL-S505N ALHLVLGLSA  | 243 | >MPL-S505N ALHLVLGLNA | 446  | 203 |
| >MPL-S505N ALHLVLGLSA' | 41  | >MPL-S505N ALHLVLGLNA | 27   | 14  |
| >MPL-S505N ALHLVLGLSA  | 225 | >MPL-S505N ALHLVLGLNA | 372  | 147 |
| >MPL-S505N ALHLVLGLSA' | 4   | >MPL-S505N ALHLVLGLNA | 6    | 2   |
| >MPL-S505N ALHLVLGLSA' | 122 | >MPL-S505N ALHLVLGLNA | 107  | 15  |
| >MPL-S505N ALHLVLGLSA  | 126 | >MPL-S505N ALHLVLGLNA | 243  | 117 |
| >MPL-S505N ALHLVLGLSA' | 3   | >MPL-S505N ALHLVLGLNA | 4    | 1   |
| >MPL-S505N ALHLVLGLSA' | 11  | >MPL-S505N ALHLVLGLNA | 11   | 0   |
| >MPL-S505N ALHLVLGLSA' | 18  | >MPL-S505N ALHLVLGLNA | 23   | 5   |

|                        |      |                       |      |      |
|------------------------|------|-----------------------|------|------|
| >MPL-S505N ALHLVLGLSA' | 164  | >MPL-S505N ALHLVLGLNA | 241  | 77   |
| >MPL-S505N ALHLVLGLSA  | 58   | >MPL-S505N ALHLVLGLNA | 132  | 74   |
| >MPL-S505N ALHLVLGLSA' | 3    | >MPL-S505N ALHLVLGLNA | 3    | 0    |
| >MPL-S505N ALHLVLGLSA  | 487  | >MPL-S505N ALHLVLGLNA | 728  | 241  |
| >MPL-T487A TETAWISL    | 279  | >MPL-T487A AETAWISL   | 1532 | 1253 |
| >MPL-T487A TETAWISLV   | 27   | >MPL-T487A AETAWISLV  | 133  | 106  |
| >MPL-T487A TETAWISLV   | 681  | >MPL-T487A AETAWISLV  | 241  | 440  |
| >MPL-T487A TETAWISLV   | 1352 | >MPL-T487A AETAWISLV  | 139  | 1213 |
| >MPL-T487A TETAWISL    | 437  | >MPL-T487A AETAWISL   | 3570 | 3133 |
| >MPL-T487A TETAWISL    | 171  | >MPL-T487A AETAWISL   | 594  | 423  |
| >MPL-T487A TETAWISL    | 30   | >MPL-T487A AETAWISL   | 15   | 15   |
| >MPL-T487A TETAWISL    | 52   | >MPL-T487A AETAWISL   | 41   | 11   |
| >MPL-T487A TETAWISLV   | 460  | >MPL-T487A AETAWISLV  | 297  | 163  |
| >MPL-T487A TETAWISLVT, | 465  | >MPL-T487A AETAWISLVT | 253  | 212  |
| >MPL-T487A TETAWISL    | 639  | >MPL-T487A AETAWISL   | 303  | 336  |
| >MPL-T487A TETAWISLV   | 976  | >MPL-T487A AETAWISLV  | 490  | 486  |
| >MPL-T487A TETAWISL    | 826  | >MPL-T487A AETAWISL   | 178  | 648  |
| >MPL-T487A TETAWISL    | 739  | >MPL-T487A AETAWISL   | 99   | 640  |
| >MPL-T487A TETAWISLV   | 536  | >MPL-T487A AETAWISLV  | 84   | 452  |
| >MPL-T487A TETAWISLVT  | 1559 | >MPL-T487A AETAWISLVT | 117  | 1442 |
| >MPL-T487A TETAWISLVT, | 50   | >MPL-T487A AETAWISLVT | 12   | 38   |
| >MPL-T487A TETAWISLV   | 9    | >MPL-T487A AETAWISLV  | 4    | 5    |
| >MPL-T487A TETAWISLVT, | 504  | >MPL-T487A AETAWISLVT | 63   | 441  |
| >MPL-T487A ATETAWISLV  | 181  | >MPL-T487A AAETAWISLV | 245  | 64   |
| >MPL-T487A ATETAWISL   | 303  | >MPL-T487A AAETAWISL  | 1830 | 1527 |
| >MPL-T487A ATETAWISL   | 92   | >MPL-T487A AAETAWISL  | 1029 | 937  |
| >MPL-T487A ATETAWISL   | 165  | >MPL-T487A AAETAWISL  | 2010 | 1845 |
| >MPL-T487A ATETAWISLV  | 201  | >MPL-T487A AAETAWISLV | 2042 | 1841 |
| >MPL-T487A TATETAWISL' | 1382 | >MPL-T487A TAAETAWISL | 305  | 1077 |
| >MPL-T487A TATETAWISL' | 1463 | >MPL-T487A TAAETAWISL | 126  | 1337 |
| >MPL-T487A TATETAWISL' | 386  | >MPL-T487A TAAETAWISL | 56   | 330  |
| >MPL-T487A TATETAWI    | 916  | >MPL-T487A TAAETAWI   | 333  | 583  |
| >MPL-T487A TATETAWISL' | 44   | >MPL-T487A TAAETAWISL | 21   | 23   |
| >MPL-T487A TATETAWISL' | 200  | >MPL-T487A TAAETAWISL | 78   | 122  |
| >MPL-T487A TATETAWISL' | 343  | >MPL-T487A TAAETAWISL | 146  | 197  |
| >MPL-T487A TATETAWISL' | 2818 | >MPL-T487A TAAETAWISL | 461  | 2357 |
| >MPL-T487A TATETAWISL' | 33   | >MPL-T487A TAAETAWISL | 28   | 5    |
| >MPL-T487A TATETAWI    | 195  | >MPL-T487A TAAETAWI   | 35   | 160  |
| >MPL-T487A TATETAWISL  | 1085 | >MPL-T487A TAAETAWISL | 401  | 684  |
| >MPL-T487A TATETAWISL' | 26   | >MPL-T487A TAAETAWISL | 10   | 16   |
| >MPL-T487A TATETAWI    | 216  | >MPL-T487A TAAETAWI   | 49   | 167  |
| >MPL-T487A TATETAWISL  | 290  | >MPL-T487A TAAETAWISL | 56   | 234  |
| >MPL-T487A TATETAWISL' | 21   | >MPL-T487A TAAETAWISL | 8    | 13   |

|                        |      |                       |     |      |
|------------------------|------|-----------------------|-----|------|
| >MPL-T487A TATETAWISL  | 541  | >MPL-T487A TAAETAWISL | 367 | 174  |
| >MPL-T487A TATETAWISL  | 231  | >MPL-T487A TAAETAWISL | 47  | 184  |
| >MPL-T487A TATETAWISL  | 168  | >MPL-T487A TAAETAWISL | 345 | 177  |
| >MPL-T487A TATETAWISL' | 240  | >MPL-T487A TAAETAWISL | 361 | 121  |
| >MPL-T487A TATETAWI    | 310  | >MPL-T487A TAAETAWI   | 101 | 209  |
| >MPL-T487A ETATETAWI   | 1645 | >MPL-T487A ETAAETAWI  | 448 | 1197 |
| >MPL-T487A ETATETAW    | 406  | >MPL-T487A ETAAETAW   | 323 | 83   |
| >MPL-T487A ETATETAWI   | 152  | >MPL-T487A ETAAETAWI  | 158 | 6    |
| >MPL-T487A ETATETAWIS  | 75   | >MPL-T487A ETAAETAWIS | 72  | 3    |
| >MPL-T487A ETATETAW    | 118  | >MPL-T487A ETAAETAW   | 165 | 47   |
| >MPL-T487A ETATETAWI   | 8    | >MPL-T487A ETAAETAWI  | 14  | 6    |
| >MPL-T487A ETATETAWIS  | 12   | >MPL-T487A ETAAETAWIS | 17  | 5    |
| >MPL-T487A ETATETAW    | 438  | >MPL-T487A ETAAETAW   | 344 | 94   |
| >MPL-T487A ETATETAWIS  | 228  | >MPL-T487A ETAAETAWIS | 166 | 62   |
| >MPL-T487A ETATETAWI   | 7    | >MPL-T487A ETAAETAWI  | 6   | 1    |
| >MPL-T487A ETATETAWIS  | 9    | >MPL-T487A ETAAETAWIS | 7   | 2    |
| >MPL-T487A ETATETAWI   | 19   | >MPL-T487A ETAAETAWI  | 9   | 10   |
| >MPL-T487A ETATETAWIS  | 23   | >MPL-T487A ETAAETAWIS | 13  | 10   |
| >MPL-T487A ETATETAW    | 53   | >MPL-T487A ETAAETAW   | 32  | 21   |
| >MPL-T487A ETATETAWI   | 633  | >MPL-T487A ETAAETAWI  | 266 | 367  |
| >MPL-T487A ETATETAWIS  | 281  | >MPL-T487A ETAAETAWIS | 121 | 160  |
| >MPL-T487A ETATETAW    | 855  | >MPL-T487A ETAAETAW   | 453 | 402  |
| >MPL-T487A ETATETAW    | 160  | >MPL-T487A ETAAETAW   | 85  | 75   |
| >MPL-T487A ETATETAWI   | 334  | >MPL-T487A ETAAETAWI  | 179 | 155  |
| >MPL-T487A ETATETAWIS  | 415  | >MPL-T487A ETAAETAWIS | 268 | 147  |
| >MPL-T487A ETATETAWI   | 168  | >MPL-T487A ETAAETAWI  | 167 | 1    |
| >MPL-T487A VETATETAWI  | 43   | >MPL-T487A VETAAETAWI | 50  | 7    |
| >MPL-T487A VETATETAW   | 841  | >MPL-T487A VETAAETAW  | 435 | 406  |
| >MPL-T487A VETATETAW   | 90   | >MPL-T487A VETAAETAW  | 117 | 27   |
| >MPL-T487A VETATETAW   | 159  | >MPL-T487A VETAAETAW  | 116 | 43   |
| >MPL-T487A VETATETA    | 157  | >MPL-T487A VETAAETA   | 161 | 4    |
| >MPL-T487A VETATETAWI  | 41   | >MPL-T487A VETAAETAWI | 65  | 24   |
| >MPL-T487A RVETATETAV  | 164  | >MPL-T487A RVETAAETAV | 349 | 185  |
| >MPL-T487A RVETATETAV  | 258  | >MPL-T487A RVETAAETAV | 425 | 167  |
| >MPL-T487A RVETATETAV  | 157  | >MPL-T487A RVETAAETAV | 140 | 17   |
| >MPL-T487A RVETATETAV  | 186  | >MPL-T487A RVETAAETAV | 344 | 158  |
| >MPL-T487A RVETATETAV  | 306  | >MPL-T487A RVETAAETAV | 285 | 21   |
| >MPL-T487A PTRVETATET, | 299  | >MPL-T487A PTRVETAAET | 474 | 175  |
| >MPL-T487A DPTRVETAT   | 3981 | >MPL-T487A DPTRVETAA  | 157 | 3824 |
| >MPL-W515/WQFPAHYRR    | 482  | >MPL-W515/AQFPAHYRRI  | 548 | 66   |
| >MPL-W515/WQFPAHYRR    | 324  | >MPL-W515/AQFPAHYRRI  | 421 | 97   |
| >MPL-W515/WQFPAHYR     | 1492 | >MPL-W515/AQFPAHYR    | 39  | 1453 |
| >MPL-W515/WQFPAHYRR    | 3998 | >MPL-W515/AQFPAHYRR   | 80  | 3918 |

|                     |       |                      |       |       |
|---------------------|-------|----------------------|-------|-------|
| >MPL-W515/WQFPAHYRR | 5730  | >MPL-W515/AQFPAHYRRI | 205   | 5525  |
| >MPL-W515/WQFPAHYR  | 26    | >MPL-W515/AQFPAHYR   | 9     | 17    |
| >MPL-W515/WQFPAHYRR | 24    | >MPL-W515/AQFPAHYRR  | 7     | 17    |
| >MPL-W515/WQFPAHYRR | 53    | >MPL-W515/AQFPAHYRRI | 9     | 44    |
| >MPL-W515/WQFPAHYR  | 57    | >MPL-W515/AQFPAHYR   | 215   | 158   |
| >MPL-W515/WQFPAHYRR | 103   | >MPL-W515/AQFPAHYRR  | 591   | 488   |
| >MPL-W515/WQFPAHYRR | 272   | >MPL-W515/AQFPAHYRRI | 996   | 724   |
| >MPL-W515/WQFPAHYRR | 164   | >MPL-W515/AQFPAHYRRI | 171   | 7     |
| >MPL-W515/WQFPAHYR  | 61    | >MPL-W515/AQFPAHYR   | 63    | 2     |
| >MPL-W515/WQFPAHYRR | 133   | >MPL-W515/AQFPAHYRR  | 132   | 1     |
| >MPL-W515/WQFPAHYRR | 23    | >MPL-W515/AQFPAHYRRI | 19    | 4     |
| >MPL-W515/WQFPAHYRR | 122   | >MPL-W515/AQFPAHYRRI | 120   | 2     |
| >MPL-W515/WQFPAHYRR | 474   | >MPL-W515/AQFPAHYRRI | 839   | 365   |
| >MPL-W515/WQFPAHYRR | 84    | >MPL-W515/AQFPAHYRRI | 502   | 418   |
| >MPL-W515/WQFPAHYRR | 252   | >MPL-W515/AQFPAHYRRI | 1582  | 1330  |
| >MPL-W515/WQFPAHYR  | 4017  | >MPL-W515/AQFPAHYR   | 181   | 3836  |
| >MPL-W515/WQFPAHYRR | 3373  | >MPL-W515/AQFPAHYRR  | 148   | 3225  |
| >MPL-W515/WQFPAHYRR | 9257  | >MPL-W515/AQFPAHYRRI | 440   | 8817  |
| >MPL-W515/WQFPAHYR  | 15    | >MPL-W515/AQFPAHYR   | 48    | 33    |
| >MPL-W515/WQFPAHYRR | 24    | >MPL-W515/AQFPAHYRR  | 103   | 79    |
| >MPL-W515/WQFPAHYRR | 65    | >MPL-W515/AQFPAHYRRI | 325   | 260   |
| >MPL-W515/RWQFPAHYR | 5148  | >MPL-W515/RAQFPAHYR  | 70    | 5078  |
| >MPL-W515/RWQFPAHYR | 6511  | >MPL-W515/RAQFPAHYRf | 381   | 6130  |
| >MPL-W515/RWQFPAHYR | 61    | >MPL-W515/RAQFPAHYRf | 7201  | 7140  |
| >MPL-W515/RWQFPAHY  | 135   | >MPL-W515/RAQFPAHY   | 717   | 582   |
| >MPL-W515/RWQFPAHY  | 55    | >MPL-W515/RAQFPAHY   | 71    | 16    |
| >MPL-W515/RWQFPAHYR | 18    | >MPL-W515/RAQFPAHYR  | 12    | 6     |
| >MPL-W515/RWQFPAHYR | 8     | >MPL-W515/RAQFPAHYRf | 7     | 1     |
| >MPL-W515/RWQFPAHYR | 5798  | >MPL-W515/RAQFPAHYR  | 132   | 5666  |
| >MPL-W515/RWQFPAHYR | 6144  | >MPL-W515/RAQFPAHYRf | 231   | 5913  |
| >MPL-W515/RWQFPAHY  | 380   | >MPL-W515/RAQFPAHY   | 345   | 35    |
| >MPL-W515/RWQFPAHY  | 3170  | >MPL-W515/RAQFPAHY   | 147   | 3023  |
| >MPL-W515/RWQFPAHY  | 3126  | >MPL-W515/RAQFPAHY   | 462   | 2664  |
| >MPL-W515/RWQFPAHY  | 13067 | >MPL-W515/RAQFPAHY   | 8     | 13059 |
| >MPL-W515/RWQFPAHYR | 19452 | >MPL-W515/RAQFPAHYRf | 36    | 19416 |
| >MPL-W515/RWQFPAHY  | 23246 | >MPL-W515/RAQFPAHY   | 492   | 22754 |
| >MPL-W515/RWQFPAHY  | 15580 | >MPL-W515/RAQFPAHY   | 117   | 15463 |
| >MPL-W515/RWQFPAHYR | 386   | >MPL-W515/RAQFPAHYRf | 667   | 281   |
| >MPL-W515/RWQFPAHYR | 8     | >MPL-W515/RAQFPAHYR  | 41    | 33    |
| >MPL-W515/RWQFPAHYR | 10    | >MPL-W515/RAQFPAHYRf | 109   | 99    |
| >MPL-W515/RWQFPAHY  | 353   | >MPL-W515/RAQFPAHY   | 34315 | 33962 |
| >MPL-W515/RWQFPAHYR | 162   | >MPL-W515/RAQFPAHYR  | 24343 | 24181 |
| >MPL-W515/RWQFPAHYR | 198   | >MPL-W515/RAQFPAHYRf | 25685 | 25487 |

|                       |      |                       |       |       |
|-----------------------|------|-----------------------|-------|-------|
| >MPL-W515/SAVLGLLLLRV | 8    | >MPL-W515/SAVLGLLLLR/ | 6548  | 6540  |
| >MPL-W515/SAVLGLLLLRV | 201  | >MPL-W515/SAVLGLLLLR/ | 28744 | 28543 |
| >MPL-W515/SAVLGLLLLRV | 224  | >MPL-W515/SAVLGLLLLR/ | 24295 | 24071 |
| >MPL-W515/SAVLGLLLLRV | 21   | >MPL-W515/SAVLGLLLLR/ | 21004 | 20983 |
| >MPL-W515/LRWQFPAHY   | 67   | >MPL-W515/LRAQFPAHY   | 423   | 356   |
| >MPL-W515/LRWQFPAHY   | 194  | >MPL-W515/LRAQFPAHY   | 244   | 50    |
| >MPL-W515/LRWQFPAHY   | 168  | >MPL-W515/LRAQFPAHYF  | 382   | 214   |
| >MPL-W515/LRWQFPAH    | 296  | >MPL-W515/LRAQFPAH    | 928   | 632   |
| >MPL-W515/LRWQFPAHY   | 22   | >MPL-W515/LRAQFPAHY   | 67    | 45    |
| >MPL-W515/LRWQFPAH    | 84   | >MPL-W515/LRAQFPAH    | 534   | 450   |
| >MPL-W515/LRWQFPAHY   | 34   | >MPL-W515/LRAQFPAHY   | 127   | 93    |
| >MPL-W515/LRWQFPAHY   | 36   | >MPL-W515/LRAQFPAHYF  | 166   | 130   |
| >MPL-W515/LRWQFPAHY   | 34   | >MPL-W515/LRAQFPAHYF  | 141   | 107   |
| >MPL-W515/LRWQFPAHY   | 70   | >MPL-W515/LRAQFPAHY   | 405   | 335   |
| >MPL-W515/LRWQFPAHY   | 250  | >MPL-W515/LRAQFPAHYF  | 1224  | 974   |
| >MPL-W515/LRWQFPAHY   | 352  | >MPL-W515/LRAQFPAHYF  | 2337  | 1985  |
| >MPL-W515/LRWQFPAHY   | 17   | >MPL-W515/LRAQFPAHYF  | 50    | 33    |
| >MPL-W515/LRWQFPAHY   | 28   | >MPL-W515/LRAQFPAHYF  | 111   | 83    |
| >MPL-W515/LLRWQFPAH'  | 612  | >MPL-W515/LLRAQFPAHY  | 288   | 324   |
| >MPL-W515/LLRWQFPA    | 499  | >MPL-W515/LLRAQFPA    | 789   | 290   |
| >MPL-W515/LLRWQFPA    | 452  | >MPL-W515/LLRAQFPA    | 153   | 299   |
| >MPL-W515/LLRWQFPA    | 37   | >MPL-W515/LLRAQFPA    | 29    | 8     |
| >MPL-W515/LLRWQFPA    | 311  | >MPL-W515/LLRAQFPA    | 239   | 72    |
| >MPL-W515/LLRWQFPA    | 46   | >MPL-W515/LLRAQFPA    | 312   | 266   |
| >MPL-W515/LLRWQFPA    | 208  | >MPL-W515/LLRAQFPA    | 777   | 569   |
| >MPL-W515/LLRWQFPA    | 5    | >MPL-W515/LLRAQFPA    | 10    | 5     |
| >MPL-W515/LLRWQFPAH'  | 189  | >MPL-W515/LLRAQFPAHY  | 178   | 11    |
| >MPL-W515/LLRWQFPAH'  | 362  | >MPL-W515/LLRAQFPAHY  | 470   | 108   |
| >MPL-W515/LLRWQFPA    | 79   | >MPL-W515/LLRAQFPA    | 20    | 59    |
| >MPL-W515/LLRWQFPAH'  | 364  | >MPL-W515/LLRAQFPAHY  | 89    | 275   |
| >MPL-W515/LLRWQFPAH'  | 342  | >MPL-W515/LLRAQFPAHY  | 93    | 249   |
| >MPL-W515/LLRWQFPAH'  | 423  | >MPL-W515/LLRAQFPAHY  | 492   | 69    |
| >MPL-W515/LLRWQFPAH'  | 11   | >MPL-W515/LLRAQFPAHY  | 12    | 1     |
| >MPL-W515/LLRWQFPAH'  | 70   | >MPL-W515/LLRAQFPAHY  | 138   | 68    |
| >MPL-W515/LLRWQFPAH'  | 294  | >MPL-W515/LLRAQFPAHY  | 568   | 274   |
| >MPL-W515/LLRWQFPAH'  | 698  | >MPL-W515/LLRAQFPAHY  | 123   | 575   |
| >MPL-W515/LLRWQFPA    | 1115 | >MPL-W515/LLRAQFPA    | 300   | 815   |
| >MPL-W515/LLRWQFPAH   | 800  | >MPL-W515/LLRAQFPAH   | 155   | 645   |
| >MPL-W515/LLRWQFPAH'  | 43   | >MPL-W515/LLRAQFPAHY  | 32    | 11    |
| >MPL-W515/LLRWQFPAH'  | 582  | >MPL-W515/LLRAQFPAHY  | 130   | 452   |
| >MPL-W515/LLRWQFPAH'  | 104  | >MPL-W515/LLRAQFPAHY  | 29    | 75    |
| >MPL-W515/LLRWQFPAH'  | 276  | >MPL-W515/LLRAQFPAHY  | 270   | 6     |
| >MPL-W515/LLRWQFPAH'  | 85   | >MPL-W515/LLRAQFPAHY  | 132   | 47    |

|                      |      |                      |      |      |
|----------------------|------|----------------------|------|------|
| >MPL-W515/LLRWQFPAH' | 66   | >MPL-W515/LLRAQFPAHY | 87   | 21   |
| >MPL-W515/LLLRWQFPA  | 9    | >MPL-W515/LLLRAQFPA  | 17   | 8    |
| >MPL-W515/LLLRWQFPA  | 94   | >MPL-W515/LLLRAQFPA  | 53   | 41   |
| >MPL-W515/LLLRWQFPA  | 134  | >MPL-W515/LLLRAQFPA  | 187  | 53   |
| >MPL-W515/LLLRWQFPA  | 13   | >MPL-W515/LLLRAQFPA  | 14   | 1    |
| >MPL-W515/LLLRWQFP   | 454  | >MPL-W515/LLLRAQFP   | 3022 | 2568 |
| >MPL-W515/LLLRWQFPA  | 3    | >MPL-W515/LLLRAQFPA  | 9    | 6    |
| >MPL-W515/LLLRWQFPA† | 157  | >MPL-W515/LLLRAQFPAH | 1120 | 963  |
| >MPL-W515/LLLRWQFPA  | 5    | >MPL-W515/LLLRAQFPA  | 11   | 6    |
| >MPL-W515/LLLRWQFPA  | 7    | >MPL-W515/LLLRAQFPA  | 10   | 3    |
| >MPL-W515/LLLRWQFPA  | 6    | >MPL-W515/LLLRAQFPA  | 13   | 7    |
| >MPL-W515/LLLRWQFPA  | 3    | >MPL-W515/LLLRAQFPA  | 5    | 2    |
| >MPL-W515/LLLRWQFPA† | 147  | >MPL-W515/LLLRAQFPAH | 680  | 533  |
| >MPL-W515/LLLRWQFPA† | 323  | >MPL-W515/LLLRAQFPAH | 445  | 122  |
| >MPL-W515/LLLRWQFPA† | 13   | >MPL-W515/LLLRAQFPAH | 30   | 17   |
| >MPL-W515/LLLRWQFPA† | 57   | >MPL-W515/LLLRAQFPAH | 128  | 71   |
| >MPL-W515/LLLRWQFPA  | 95   | >MPL-W515/LLLRAQFPA  | 878  | 783  |
| >MPL-W515/LLLRWQFPA† | 27   | >MPL-W515/LLLRAQFPAH | 71   | 44   |
| >MPL-W515/LLLRWQFPA† | 84   | >MPL-W515/LLLRAQFPAH | 78   | 6    |
| >MPL-W515/LLLRWQFPA† | 629  | >MPL-W515/LLLRAQFPAH | 365  | 264  |
| >MPL-W515/LLLRWQFPA† | 74   | >MPL-W515/LLLRAQFPAH | 59   | 15   |
| >MPL-W515/LLLRWQFPA† | 462  | >MPL-W515/LLLRAQFPAH | 560  | 98   |
| >MPL-W515/LLLLRWQFPA | 138  | >MPL-W515/LLLLRAQFPA | 134  | 4    |
| >MPL-W515/LLLLRWQFPA | 153  | >MPL-W515/LLLLRAQFPA | 113  | 40   |
| >MPL-W515/LLLLRWQFPA | 175  | >MPL-W515/LLLLRAQFPA | 192  | 17   |
| >MPL-W515/LLLLRWQFPA | 17   | >MPL-W515/LLLLRAQFPA | 37   | 20   |
| >MPL-W515/LLLLRWQFPA | 58   | >MPL-W515/LLLLRAQFPA | 42   | 16   |
| >MPL-W515/LLLLRWQFPA | 21   | >MPL-W515/LLLLRAQFPA | 30   | 9    |
| >MPL-W515/LLLLRWQFPA | 96   | >MPL-W515/LLLLRAQFPA | 94   | 2    |
| >MPL-W515/LLLLRWQFPA | 14   | >MPL-W515/LLLLRAQFPA | 14   | 0    |
| >MPL-W515/LLLLRWQF   | 281  | >MPL-W515/LLLLRAQF   | 1390 | 1109 |
| >MPL-W515/LLLLRWQF   | 208  | >MPL-W515/LLLLRAQF   | 301  | 93   |
| >MPL-W515/LLLLRWQF   | 1392 | >MPL-W515/LLLLRAQF   | 464  | 928  |
| >MPL-W515/LLLLRWQF   | 202  | >MPL-W515/LLLLRAQF   | 148  | 54   |
| >MPL-W515/LLLLRWQF   | 679  | >MPL-W515/LLLLRAQF   | 152  | 527  |
| >MPL-W515/GLLLRWQFF  | 47   | >MPL-W515/GLLLRAQFP, | 124  | 77   |
| >MPL-W515/GLLLRWQFF  | 261  | >MPL-W515/GLLLRAQFP, | 306  | 45   |
| >MPL-W515/GLLLRWQFF  | 148  | >MPL-W515/GLLLRAQFP, | 284  | 136  |
| >MPL-W515/GLLLRWQFF  | 33   | >MPL-W515/GLLLRAQFP, | 124  | 91   |
| >MPL-W515/GLLLRWQFF  | 29   | >MPL-W515/GLLLRAQFP, | 81   | 52   |
| >MPL-W515/GLLLRWQFF  | 13   | >MPL-W515/GLLLRAQFP, | 38   | 25   |
| >MPL-W515/GLLLRWQFF  | 386  | >MPL-W515/GLLLRAQFP, | 853  | 467  |
| >MPL-W515/GLLLRWQFF  | 18   | >MPL-W515/GLLLRAQFP, | 48   | 30   |



|                      |       |                      |       |       |
|----------------------|-------|----------------------|-------|-------|
| >MPL-W515/GLLLRWQF   | 248   | >MPL-W515/GLLLRAQF   | 3249  | 3001  |
| >MPL-W515/LGLLLLRW   | 155   | >MPL-W515/LGLLLLRA   | 22838 | 22683 |
| >MPL-W515/LGLLLLRWQF | 1012  | >MPL-W515/LGLLLLRAQF | 404   | 608   |
| >MPL-W515/LGLLLLRW   | 374   | >MPL-W515/LGLLLLRA   | 24956 | 24582 |
| >MPL-W515/LGLLLLRW   | 79    | >MPL-W515/LGLLLLRA   | 21353 | 21274 |
| >MPL-W515/LGLLLLRWQF | 571   | >MPL-W515/LGLLLLRAQF | 460   | 111   |
| >MPL-W515/VLGLLLRW   | 16363 | >MPL-W515/VLGLLLRA   | 208   | 16155 |
| >MPL-W515/VLGLLLRW   | 18946 | >MPL-W515/VLGLLLRA   | 383   | 18563 |
| >MPL-W515/VLGLLLRW   | 17976 | >MPL-W515/VLGLLLRA   | 29    | 17947 |
| >MPL-W515/VLGLLLRW   | 295   | >MPL-W515/VLGLLLRA   | 22186 | 21891 |
| >MPL-W515/AVLGLLLRW  | 6632  | >MPL-W515/AVLGLLLRA  | 436   | 6196  |
| >MPL-W515/AVLGLLLRW  | 13344 | >MPL-W515/AVLGLLLRA  | 313   | 13031 |
| >MPL-W515/AVLGLLLRW  | 7065  | >MPL-W515/AVLGLLLRA  | 91    | 6974  |
| >MPL-W515/AVLGLLLRW  | 24801 | >MPL-W515/AVLGLLLRA  | 367   | 24434 |
| >MPL-W515/AVLGLLLRW  | 196   | >MPL-W515/AVLGLLLRA  | 8212  | 8016  |
| >MPL-W515/AVLGLLLRW  | 23    | >MPL-W515/AVLGLLLRA  | 13694 | 13671 |
| >MPL-W515/AVLGLLLRW  | 40    | >MPL-W515/AVLGLLLRA  | 21124 | 21084 |
| >MPL-W515/WQFPAHYRR  | 482   | >MPL-W515/KQFPAHYRRL | 503   | 21    |
| >MPL-W515/WQFPAHYRR  | 324   | >MPL-W515/KQFPAHYRRL | 360   | 36    |
| >MPL-W515/WQFPAHYR   | 10451 | >MPL-W515/KQFPAHYR   | 297   | 10154 |
| >MPL-W515/WQFPAHYR   | 1492  | >MPL-W515/KQFPAHYR   | 44    | 1448  |
| >MPL-W515/WQFPAHYRR  | 3998  | >MPL-W515/KQFPAHYRR  | 100   | 3898  |
| >MPL-W515/WQFPAHYRR  | 5730  | >MPL-W515/KQFPAHYRRL | 247   | 5483  |
| >MPL-W515/WQFPAHYR   | 15331 | >MPL-W515/KQFPAHYR   | 383   | 14948 |
| >MPL-W515/WQFPAHYRR  | 16040 | >MPL-W515/KQFPAHYRR  | 475   | 15565 |
| >MPL-W515/WQFPAHYRR  | 15197 | >MPL-W515/KQFPAHYRRL | 454   | 14743 |
| >MPL-W515/WQFPAHYRR  | 15255 | >MPL-W515/KQFPAHYRRL | 286   | 14969 |
| >MPL-W515/WQFPAHYR   | 26    | >MPL-W515/KQFPAHYR   | 6     | 20    |
| >MPL-W515/WQFPAHYRR  | 24    | >MPL-W515/KQFPAHYRR  | 6     | 18    |
| >MPL-W515/WQFPAHYRR  | 53    | >MPL-W515/KQFPAHYRRL | 6     | 47    |
| >MPL-W515/WQFPAHYRR  | 15776 | >MPL-W515/KQFPAHYRRL | 259   | 15517 |
| >MPL-W515/WQFPAHYR   | 57    | >MPL-W515/KQFPAHYR   | 508   | 451   |
| >MPL-W515/WQFPAHYRR  | 103   | >MPL-W515/KQFPAHYRR  | 1160  | 1057  |
| >MPL-W515/WQFPAHYRR  | 272   | >MPL-W515/KQFPAHYRRL | 1849  | 1577  |
| >MPL-W515/WQFPAHYRR  | 164   | >MPL-W515/KQFPAHYRRL | 226   | 62    |
| >MPL-W515/WQFPAHYR   | 61    | >MPL-W515/KQFPAHYR   | 43    | 18    |
| >MPL-W515/WQFPAHYRR  | 133   | >MPL-W515/KQFPAHYRR  | 75    | 58    |
| >MPL-W515/WQFPAHYRR  | 23    | >MPL-W515/KQFPAHYRRL | 15    | 8     |
| >MPL-W515/WQFPAHYRR  | 122   | >MPL-W515/KQFPAHYRRL | 74    | 48    |
| >MPL-W515/WQFPAHYRR  | 474   | >MPL-W515/KQFPAHYRRL | 419   | 55    |
| >MPL-W515/WQFPAHYRR  | 84    | >MPL-W515/KQFPAHYRRL | 1471  | 1387  |
| >MPL-W515/WQFPAHYRR  | 252   | >MPL-W515/KQFPAHYRRL | 477   | 225   |
| >MPL-W515/WQFPAHYR   | 15    | >MPL-W515/KQFPAHYR   | 9     | 6     |

|                        |       |                        |       |       |
|------------------------|-------|------------------------|-------|-------|
| >MPL-W515F WQFPAHYRR   | 24    | >MPL-W515F KQFPAHYRR   | 10    | 14    |
| >MPL-W515F WQFPAHYRR   | 65    | >MPL-W515F KQFPAHYRRL  | 21    | 44    |
| >MPL-W515F RWQFPAHYR   | 61    | >MPL-W515F RKQFPAHYRF  | 15168 | 15107 |
| >MPL-W515F RWQFPAHY    | 135   | >MPL-W515F RKQFPAHY    | 3363  | 3228  |
| >MPL-W515F RWQFPAHY    | 55    | >MPL-W515F RKQFPAHY    | 259   | 204   |
| >MPL-W515F RWQFPAHYR   | 18    | >MPL-W515F RKQFPAHYR   | 251   | 233   |
| >MPL-W515F RWQFPAHYR   | 8     | >MPL-W515F RKQFPAHYRF  | 38    | 30    |
| >MPL-W515F RWQFPAHY    | 380   | >MPL-W515F RKQFPAHY    | 1225  | 845   |
| >MPL-W515F RWQFPAHY    | 3126  | >MPL-W515F RKQFPAHY    | 12    | 3114  |
| >MPL-W515F RWQFPAHYR   | 13096 | >MPL-W515F RKQFPAHYRF  | 172   | 12924 |
| >MPL-W515F RWQFPAHYR   | 507   | >MPL-W515F RKQFPAHYRF  | 109   | 398   |
| >MPL-W515F RWQFPAHYR   | 386   | >MPL-W515F RKQFPAHYRF  | 47    | 339   |
| >MPL-W515F RWQFPAHYR   | 8     | >MPL-W515F RKQFPAHYR   | 44    | 36    |
| >MPL-W515F RWQFPAHYR   | 10    | >MPL-W515F RKQFPAHYRF  | 122   | 112   |
| >MPL-W515F RWQFPAHY    | 353   | >MPL-W515F RKQFPAHY    | 34608 | 34255 |
| >MPL-W515F RWQFPAHYR   | 162   | >MPL-W515F RKQFPAHYR   | 24619 | 24457 |
| >MPL-W515F RWQFPAHYR   | 198   | >MPL-W515F RKQFPAHYRF  | 26102 | 25904 |
| >MPL-W515F SAVLGLLLLRV | 26021 | >MPL-W515F SAVLGLLLLRK | 46    | 25975 |
| >MPL-W515F SAVLGLLLLRV | 8     | >MPL-W515F SAVLGLLLLRK | 11388 | 11380 |
| >MPL-W515F SAVLGLLLLRV | 201   | >MPL-W515F SAVLGLLLLRK | 30382 | 30181 |
| >MPL-W515F SAVLGLLLLRV | 224   | >MPL-W515F SAVLGLLLLRK | 24772 | 24548 |
| >MPL-W515F SAVLGLLLLRV | 21    | >MPL-W515F SAVLGLLLLRK | 22163 | 22142 |
| >MPL-W515F SAVLGLLLLRV | 11004 | >MPL-W515F SAVLGLLLLRK | 459   | 10545 |
| >MPL-W515F LRWQFPAHY   | 67    | >MPL-W515F LRKQFPAHY   | 2824  | 2757  |
| >MPL-W515F LRWQFPAHY   | 194   | >MPL-W515F LRKQFPAHY   | 486   | 292   |
| >MPL-W515F LRWQFPAHY   | 168   | >MPL-W515F LRKQFPAHYR  | 133   | 35    |
| >MPL-W515F LRWQFPAH    | 296   | >MPL-W515F LRKQFPAH    | 854   | 558   |
| >MPL-W515F LRWQFPAHY   | 22    | >MPL-W515F LRKQFPAHY   | 59    | 37    |
| >MPL-W515F LRWQFPAH    | 84    | >MPL-W515F LRKQFPAH    | 1121  | 1037  |
| >MPL-W515F LRWQFPAHY   | 34    | >MPL-W515F LRKQFPAHY   | 284   | 250   |
| >MPL-W515F LRWQFPAHY   | 36    | >MPL-W515F LRKQFPAHYR  | 142   | 106   |
| >MPL-W515F LRWQFPAHY   | 34    | >MPL-W515F LRKQFPAHYR  | 302   | 268   |
| >MPL-W515F LRWQFPAHY   | 70    | >MPL-W515F LRKQFPAHY   | 759   | 689   |
| >MPL-W515F LRWQFPAHY   | 250   | >MPL-W515F LRKQFPAHYR  | 636   | 386   |
| >MPL-W515F LRWQFPAHY   | 352   | >MPL-W515F LRKQFPAHYR  | 3780  | 3428  |
| >MPL-W515F LRWQFPAHY   | 17    | >MPL-W515F LRKQFPAHYR  | 70    | 53    |
| >MPL-W515F LRWQFPAHY   | 28    | >MPL-W515F LRKQFPAHYR  | 156   | 128   |
| >MPL-W515F LLRWQFPA    | 499   | >MPL-W515F LLRKQFPA    | 2180  | 1681  |
| >MPL-W515F LLRWQFPA    | 452   | >MPL-W515F LLRKQFPA    | 580   | 128   |
| >MPL-W515F LLRWQFPA    | 37    | >MPL-W515F LLRKQFPA    | 72    | 35    |
| >MPL-W515F LLRWQFPA    | 311   | >MPL-W515F LLRKQFPA    | 838   | 527   |
| >MPL-W515F LLRWQFPA    | 46    | >MPL-W515F LLRKQFPA    | 769   | 723   |
| >MPL-W515F LLRWQFPA    | 208   | >MPL-W515F LLRKQFPA    | 1332  | 1124  |

|                      |      |                      |      |      |
|----------------------|------|----------------------|------|------|
| >MPL-W515HLLRWQFPA   | 5    | >MPL-W515HLLRKQFPA   | 20   | 15   |
| >MPL-W515HLLRWQFPAH' | 189  | >MPL-W515HLLRKQFPAHY | 234  | 45   |
| >MPL-W515HLLRWQFPAH' | 362  | >MPL-W515HLLRKQFPAHY | 512  | 150  |
| >MPL-W515HLLRWQFPA   | 79   | >MPL-W515HLLRKQFPA   | 30   | 49   |
| >MPL-W515HLLRWQFPAH' | 364  | >MPL-W515HLLRKQFPAHY | 120  | 244  |
| >MPL-W515HLLRWQFPAH' | 342  | >MPL-W515HLLRKQFPAHY | 123  | 219  |
| >MPL-W515HLLRWQFPAH' | 423  | >MPL-W515HLLRKQFPAHY | 466  | 43   |
| >MPL-W515HLLRWQFPAH' | 11   | >MPL-W515HLLRKQFPAHY | 13   | 2    |
| >MPL-W515HLLRWQFPAH' | 70   | >MPL-W515HLLRKQFPAHY | 158  | 88   |
| >MPL-W515HLLRWQFPAH' | 294  | >MPL-W515HLLRKQFPAHY | 693  | 399  |
| >MPL-W515HLLRWQFPAH' | 698  | >MPL-W515HLLRKQFPAHY | 129  | 569  |
| >MPL-W515HLLRWQFPA   | 974  | >MPL-W515HLLRKQFPA   | 189  | 785  |
| >MPL-W515HLLRWQFPAH  | 800  | >MPL-W515HLLRKQFPAH  | 262  | 538  |
| >MPL-W515HLLRWQFPAH' | 43   | >MPL-W515HLLRKQFPAHY | 31   | 12   |
| >MPL-W515HLLRWQFPAH' | 582  | >MPL-W515HLLRKQFPAHY | 263  | 319  |
| >MPL-W515HLLRWQFPAH' | 104  | >MPL-W515HLLRKQFPAHY | 26   | 78   |
| >MPL-W515HLLRWQFPAH' | 276  | >MPL-W515HLLRKQFPAHY | 559  | 283  |
| >MPL-W515HLLRWQFPAH' | 85   | >MPL-W515HLLRKQFPAHY | 245  | 160  |
| >MPL-W515HLLRWQFPAH' | 66   | >MPL-W515HLLRKQFPAHY | 93   | 27   |
| >MPL-W515HLLRWQFPA   | 9    | >MPL-W515HLLRKQFPA   | 26   | 17   |
| >MPL-W515HLLRWQFPA   | 94   | >MPL-W515HLLRKQFPA   | 114  | 20   |
| >MPL-W515HLLRWQFPA   | 134  | >MPL-W515HLLRKQFPA   | 237  | 103  |
| >MPL-W515HLLRWQFPA   | 13   | >MPL-W515HLLRKQFPA   | 32   | 19   |
| >MPL-W515HLLRWQFP    | 454  | >MPL-W515HLLRKQFP    | 4012 | 3558 |
| >MPL-W515HLLRWQFPA   | 3    | >MPL-W515HLLRKQFPA   | 9    | 6    |
| >MPL-W515HLLRWQFPAH' | 157  | >MPL-W515HLLRKQFPAH' | 1261 | 1104 |
| >MPL-W515HLLRWQFPA   | 5    | >MPL-W515HLLRKQFPA   | 14   | 9    |
| >MPL-W515HLLRWQFPA   | 7    | >MPL-W515HLLRKQFPA   | 17   | 10   |
| >MPL-W515HLLRWQFPA   | 6    | >MPL-W515HLLRKQFPA   | 41   | 35   |
| >MPL-W515HLLRWQFPA   | 3    | >MPL-W515HLLRKQFPA   | 6    | 3    |
| >MPL-W515HLLRWQFPAH' | 147  | >MPL-W515HLLRKQFPAH' | 901  | 754  |
| >MPL-W515HLLRWQFPAH' | 323  | >MPL-W515HLLRKQFPAH' | 486  | 163  |
| >MPL-W515HLLRWQFPAH' | 13   | >MPL-W515HLLRKQFPAH' | 36   | 23   |
| >MPL-W515HLLRWQFPAH' | 57   | >MPL-W515HLLRKQFPAH' | 176  | 119  |
| >MPL-W515HLLRWQFPA   | 95   | >MPL-W515HLLRKQFPA   | 5267 | 5172 |
| >MPL-W515HLLRWQFPAH' | 27   | >MPL-W515HLLRKQFPAH' | 44   | 17   |
| >MPL-W515HLLRWQFPA   | 3717 | >MPL-W515HLLRKQFPA   | 177  | 3540 |
| >MPL-W515HLLRWQFPAH' | 84   | >MPL-W515HLLRKQFPAH' | 127  | 43   |
| >MPL-W515HLLRWQFPAH' | 74   | >MPL-W515HLLRKQFPAH' | 159  | 85   |
| >MPL-W515HLLRWQFPAH' | 462  | >MPL-W515HLLRKQFPAH' | 1579 | 1117 |
| >MPL-W515HLLLRWQFPA  | 138  | >MPL-W515HLLLRKQFPA  | 360  | 222  |
| >MPL-W515HLLLRWQFPA  | 153  | >MPL-W515HLLLRKQFPA  | 291  | 138  |
| >MPL-W515HLLLRWQFPA  | 175  | >MPL-W515HLLLRKQFPA  | 407  | 232  |

|                       |       |                       |       |       |
|-----------------------|-------|-----------------------|-------|-------|
| >MPL-W515I LLLLRWQFPA | 17    | >MPL-W515I LLLLRKQFPA | 54    | 37    |
| >MPL-W515I LLLLRWQFPA | 58    | >MPL-W515I LLLLRKQFPA | 94    | 36    |
| >MPL-W515I LLLLRWQFPA | 21    | >MPL-W515I LLLLRKQFPA | 55    | 34    |
| >MPL-W515I LLLLRWQFPA | 96    | >MPL-W515I LLLLRKQFPA | 287   | 191   |
| >MPL-W515I LLLLRWQFPA | 14    | >MPL-W515I LLLLRKQFPA | 17    | 3     |
| >MPL-W515I LLLLRWQF   | 281   | >MPL-W515I LLLLRKQF   | 2474  | 2193  |
| >MPL-W515I LLLLRWQF   | 208   | >MPL-W515I LLLLRKQF   | 214   | 6     |
| >MPL-W515I LLLLRWQF   | 202   | >MPL-W515I LLLLRKQF   | 204   | 2     |
| >MPL-W515I GLLLRWQFF  | 47    | >MPL-W515I GLLLRKQFP/ | 286   | 239   |
| >MPL-W515I GLLLRWQFF  | 261   | >MPL-W515I GLLLRKQFP/ | 746   | 485   |
| >MPL-W515I GLLLRWQFF  | 148   | >MPL-W515I GLLLRKQFP/ | 571   | 423   |
| >MPL-W515I GLLLRWQFF  | 33    | >MPL-W515I GLLLRKQFP/ | 214   | 181   |
| >MPL-W515I GLLLRWQFF  | 29    | >MPL-W515I GLLLRKQFP/ | 169   | 140   |
| >MPL-W515I GLLLRWQFF  | 13    | >MPL-W515I GLLLRKQFP/ | 88    | 75    |
| >MPL-W515I GLLLRWQFF  | 386   | >MPL-W515I GLLLRKQFP/ | 1826  | 1440  |
| >MPL-W515I GLLLRWQFF  | 18    | >MPL-W515I GLLLRKQFP/ | 110   | 92    |
| >MPL-W515I GLLLRWQF   | 248   | >MPL-W515I GLLLRKQF   | 4142  | 3894  |
| >MPL-W515I LGLLLRW    | 155   | >MPL-W515I LGLLLRK    | 25450 | 25295 |
| >MPL-W515I LGLLLRW    | 374   | >MPL-W515I LGLLLRK    | 25326 | 24952 |
| >MPL-W515I LGLLLRW    | 79    | >MPL-W515I LGLLLRK    | 22160 | 22081 |
| >MPL-W515I VLGLLLRW   | 20591 | >MPL-W515I VLGLLLRK   | 81    | 20510 |
| >MPL-W515I VLGLLLRW   | 28829 | >MPL-W515I VLGLLLRK   | 110   | 28719 |
| >MPL-W515I VLGLLLRW   | 295   | >MPL-W515I VLGLLLRK   | 22379 | 22084 |
| >MPL-W515I AVLGLLLRW  | 7287  | >MPL-W515I AVLGLLLRK  | 21    | 7266  |
| >MPL-W515I AVLGLLLRW  | 19198 | >MPL-W515I AVLGLLLRK  | 10    | 19188 |
| >MPL-W515I AVLGLLLRW  | 11866 | >MPL-W515I AVLGLLLRK  | 41    | 11825 |
| >MPL-W515I AVLGLLLRW  | 11117 | >MPL-W515I AVLGLLLRK  | 494   | 10623 |
| >MPL-W515I AVLGLLLRW  | 196   | >MPL-W515I AVLGLLLRK  | 9339  | 9143  |
| >MPL-W515I AVLGLLLRW  | 31221 | >MPL-W515I AVLGLLLRK  | 371   | 30850 |
| >MPL-W515I AVLGLLLRW  | 23    | >MPL-W515I AVLGLLLRK  | 17678 | 17655 |
| >MPL-W515I AVLGLLLRW  | 40    | >MPL-W515I AVLGLLLRK  | 21938 | 21898 |
| >MPL-W515I AVLGLLLRW  | 5023  | >MPL-W515I AVLGLLLRK  | 280   | 4743  |
| >MPL-W515I WQFPAHYRR  | 482   | >MPL-W515I LQFPAHYRRL | 363   | 119   |
| >MPL-W515I WQFPAHYRR  | 324   | >MPL-W515I LQFPAHYRRL | 385   | 61    |
| >MPL-W515I WQFPAHYR   | 1492  | >MPL-W515I LQFPAHYR   | 139   | 1353  |
| >MPL-W515I WQFPAHYR   | 26    | >MPL-W515I LQFPAHYR   | 8     | 18    |
| >MPL-W515I WQFPAHYRR  | 24    | >MPL-W515I LQFPAHYRR  | 8     | 16    |
| >MPL-W515I WQFPAHYRR  | 53    | >MPL-W515I LQFPAHYRRL | 10    | 43    |
| >MPL-W515I WQFPAHYRR  | 1484  | >MPL-W515I LQFPAHYRR  | 469   | 1015  |
| >MPL-W515I WQFPAHYR   | 57    | >MPL-W515I LQFPAHYR   | 47    | 10    |
| >MPL-W515I WQFPAHYRR  | 103   | >MPL-W515I LQFPAHYRR  | 93    | 10    |
| >MPL-W515I WQFPAHYRR  | 272   | >MPL-W515I LQFPAHYRRL | 228   | 44    |
| >MPL-W515I WQFPAHYRR  | 164   | >MPL-W515I LQFPAHYRRL | 113   | 51    |

|                         |       |                        |       |       |
|-------------------------|-------|------------------------|-------|-------|
| >MPL-W515I WQFPAHYR     | 61    | >MPL-W515I LQFPAHYR    | 54    | 7     |
| >MPL-W515I WQFPAHYRR    | 133   | >MPL-W515I LQFPAHYRR   | 123   | 10    |
| >MPL-W515I WQFPAHYRR    | 23    | >MPL-W515I LQFPAHYRRL  | 18    | 5     |
| >MPL-W515I WQFPAHYRR    | 122   | >MPL-W515I LQFPAHYRRL  | 107   | 15    |
| >MPL-W515I WQFPAHYRR    | 474   | >MPL-W515I LQFPAHYRRL  | 1240  | 766   |
| >MPL-W515I WQFPAHYRR    | 84    | >MPL-W515I LQFPAHYRRL  | 1049  | 965   |
| >MPL-W515I WQFPAHYRR    | 252   | >MPL-W515I LQFPAHYRRL  | 1000  | 748   |
| >MPL-W515I WQFPAHYR     | 15    | >MPL-W515I LQFPAHYR    | 32    | 17    |
| >MPL-W515I WQFPAHYRR    | 24    | >MPL-W515I LQFPAHYRR   | 63    | 39    |
| >MPL-W515I WQFPAHYRR    | 65    | >MPL-W515I LQFPAHYRRL  | 175   | 110   |
| >MPL-W515I RWQFPAHYR    | 19478 | >MPL-W515I RLQFPAHYRF  | 45    | 19433 |
| >MPL-W515I RWQFPAHYR    | 22651 | >MPL-W515I RLQFPAHYRF  | 369   | 22282 |
| >MPL-W515I RWQFPAHYR    | 30685 | >MPL-W515I RLQFPAHYRF  | 71    | 30614 |
| >MPL-W515I RWQFPAHY     | 19314 | >MPL-W515I RLQFPAHY    | 336   | 18978 |
| >MPL-W515I RWQFPAHYR    | 17247 | >MPL-W515I RLQFPAHYR   | 149   | 17098 |
| >MPL-W515I RWQFPAHYR    | 3979  | >MPL-W515I RLQFPAHYRF  | 148   | 3831  |
| >MPL-W515I RWQFPAHYR    | 5148  | >MPL-W515I RLQFPAHYR   | 69    | 5079  |
| >MPL-W515I RWQFPAHYR    | 6511  | >MPL-W515I RLQFPAHYRF  | 339   | 6172  |
| >MPL-W515I RWQFPAHYR    | 61    | >MPL-W515I RLQFPAHYRF  | 6112  | 6051  |
| >MPL-W515I RWQFPAHY     | 135   | >MPL-W515I RLQFPAHY    | 100   | 35    |
| >MPL-W515I RWQFPAHY     | 55    | >MPL-W515I RLQFPAHY    | 41    | 14    |
| >MPL-W515I RWQFPAHYR    | 18    | >MPL-W515I RLQFPAHYR   | 14    | 4     |
| >MPL-W515I RWQFPAHYR    | 8     | >MPL-W515I RLQFPAHYRF  | 5     | 3     |
| >MPL-W515I RWQFPAHY     | 380   | >MPL-W515I RLQFPAHY    | 24    | 356   |
| >MPL-W515I RWQFPAHY     | 3170  | >MPL-W515I RLQFPAHY    | 60    | 3110  |
| >MPL-W515I RWQFPAHY     | 9127  | >MPL-W515I RLQFPAHY    | 447   | 8680  |
| >MPL-W515I RWQFPAHY     | 3126  | >MPL-W515I RLQFPAHY    | 364   | 2762  |
| >MPL-W515I RWQFPAHY     | 13067 | >MPL-W515I RLQFPAHY    | 198   | 12869 |
| >MPL-W515I RWQFPAHYR    | 386   | >MPL-W515I RLQFPAHYRF  | 210   | 176   |
| >MPL-W515I RWQFPAHY     | 1294  | >MPL-W515I RLQFPAHY    | 305   | 989   |
| >MPL-W515I RWQFPAHYR    | 864   | >MPL-W515I RLQFPAHYRF  | 58    | 806   |
| >MPL-W515I RWQFPAHYR    | 8     | >MPL-W515I RLQFPAHYR   | 20    | 12    |
| >MPL-W515I RWQFPAHYR    | 10    | >MPL-W515I RLQFPAHYRF  | 44    | 34    |
| >MPL-W515I RWQFPAHY     | 353   | >MPL-W515I RLQFPAHY    | 28513 | 28160 |
| >MPL-W515I RWQFPAHYR    | 162   | >MPL-W515I RLQFPAHYR   | 15876 | 15714 |
| >MPL-W515I RWQFPAHYR    | 198   | >MPL-W515I RLQFPAHYRF  | 15644 | 15446 |
| >MPL-W515I SAVLGLLLLRLV | 8     | >MPL-W515I SAVLGLLLLRL | 33    | 25    |
| >MPL-W515I SAVLGLLLLRLV | 201   | >MPL-W515I SAVLGLLLLRL | 10262 | 10061 |
| >MPL-W515I SAVLGLLLLRLV | 224   | >MPL-W515I SAVLGLLLLRL | 19729 | 19505 |
| >MPL-W515I SAVLGLLLLRLV | 21    | >MPL-W515I SAVLGLLLLRL | 9283  | 9262  |
| >MPL-W515I LRWQFPAHY    | 67    | >MPL-W515I LRLQFPAHY   | 369   | 302   |
| >MPL-W515I LRWQFPAHY    | 194   | >MPL-W515I LRLQFPAHY   | 718   | 524   |
| >MPL-W515I LRWQFPAHY    | 168   | >MPL-W515I LRLQFPAHYR  | 114   | 54    |

|                        |     |                        |      |      |
|------------------------|-----|------------------------|------|------|
| >MPL-W515I LRWQFPAH    | 296 | >MPL-W515I LRLQFPAH    | 615  | 319  |
| >MPL-W515I LRWQFPAHY   | 22  | >MPL-W515I LRLQFPAHY   | 40   | 18   |
| >MPL-W515I LRWQFPAH    | 84  | >MPL-W515I LRLQFPAH    | 256  | 172  |
| >MPL-W515I LRWQFPAHY   | 34  | >MPL-W515I LRLQFPAHY   | 71   | 37   |
| >MPL-W515I LRWQFPAHY   | 36  | >MPL-W515I LRLQFPAHYR  | 72   | 36   |
| >MPL-W515I LRWQFPAHY   | 34  | >MPL-W515I LRLQFPAHYR  | 78   | 44   |
| >MPL-W515I LRWQFPAHY   | 70  | >MPL-W515I LRLQFPAHY   | 433  | 363  |
| >MPL-W515I LRWQFPAHY   | 250 | >MPL-W515I LRLQFPAHYR  | 464  | 214  |
| >MPL-W515I LRWQFPAHY   | 352 | >MPL-W515I LRLQFPAHYR  | 2441 | 2089 |
| >MPL-W515I LRWQFPAHY   | 17  | >MPL-W515I LRLQFPAHYR  | 32   | 15   |
| >MPL-W515I LRWQFPAHY   | 28  | >MPL-W515I LRLQFPAHYR  | 68   | 40   |
| >MPL-W515I LLRWQFPAH'  | 612 | >MPL-W515I LLRLQFPAHY  | 393  | 219  |
| >MPL-W515I LLRWQFPA    | 499 | >MPL-W515I LLRLQFPA    | 2186 | 1687 |
| >MPL-W515I LLRWQFPA    | 452 | >MPL-W515I LLRLQFPA    | 686  | 234  |
| >MPL-W515I LLRWQFPA    | 37  | >MPL-W515I LLRLQFPA    | 135  | 98   |
| >MPL-W515I LLRWQFPA    | 311 | >MPL-W515I LLRLQFPA    | 1184 | 873  |
| >MPL-W515I LLRWQFPA    | 46  | >MPL-W515I LLRLQFPA    | 1216 | 1170 |
| >MPL-W515I LLRWQFPA    | 208 | >MPL-W515I LLRLQFPA    | 1913 | 1705 |
| >MPL-W515I LLRWQFPA    | 5   | >MPL-W515I LLRLQFPA    | 30   | 25   |
| >MPL-W515I LLRWQFPAH'  | 189 | >MPL-W515I LLRLQFPAHY  | 453  | 264  |
| >MPL-W515I LLRWQFPAH'  | 362 | >MPL-W515I LLRLQFPAHY  | 411  | 49   |
| >MPL-W515I LLRWQFPA    | 79  | >MPL-W515I LLRLQFPA    | 48   | 31   |
| >MPL-W515I LLRWQFPAH'  | 364 | >MPL-W515I LLRLQFPAHY  | 217  | 147  |
| >MPL-W515I LLRWQFPAH'  | 342 | >MPL-W515I LLRLQFPAHY  | 210  | 132  |
| >MPL-W515I LLRWQFPAH'  | 423 | >MPL-W515I LLRLQFPAHY  | 365  | 58   |
| >MPL-W515I LLRWQFPAH'  | 11  | >MPL-W515I LLRLQFPAHY  | 14   | 3    |
| >MPL-W515I LLRWQFPAH'  | 70  | >MPL-W515I LLRLQFPAHY  | 86   | 16   |
| >MPL-W515I LLRWQFPAH'  | 294 | >MPL-W515I LLRLQFPAHY  | 864  | 570  |
| >MPL-W515I LLRWQFPAH'  | 43  | >MPL-W515I LLRLQFPAHY  | 44   | 1    |
| >MPL-W515I LLRWQFPAH'  | 104 | >MPL-W515I LLRLQFPAHY  | 83   | 21   |
| >MPL-W515I LLRWQFPAH'  | 276 | >MPL-W515I LLRLQFPAHY  | 390  | 114  |
| >MPL-W515I LLRWQFPAH'  | 85  | >MPL-W515I LLRLQFPAHY  | 87   | 2    |
| >MPL-W515I LLRWQFPAH'  | 66  | >MPL-W515I LLRLQFPAHY  | 110  | 44   |
| >MPL-W515I LLLRWQFPA   | 9   | >MPL-W515I LLLRLQFPA   | 16   | 7    |
| >MPL-W515I LLLRWQFPA   | 94  | >MPL-W515I LLLRLQFPA   | 74   | 20   |
| >MPL-W515I LLLRWQFPA   | 134 | >MPL-W515I LLLRLQFPA   | 279  | 145  |
| >MPL-W515I LLLRWQFPA   | 13  | >MPL-W515I LLLRLQFPA   | 23   | 10   |
| >MPL-W515I LLLRWQFP    | 454 | >MPL-W515I LLLRLQFP    | 1694 | 1240 |
| >MPL-W515I LLLRWQFPA   | 3   | >MPL-W515I LLLRLQFPA   | 7    | 4    |
| >MPL-W515I LLLRWQFPAH' | 157 | >MPL-W515I LLLRLQFPAH' | 859  | 702  |
| >MPL-W515I LLLRWQFPA   | 5   | >MPL-W515I LLLRLQFPA   | 13   | 8    |
| >MPL-W515I LLLRWQFPA   | 7   | >MPL-W515I LLLRLQFPA   | 11   | 4    |
| >MPL-W515I LLLRWQFPA   | 6   | >MPL-W515I LLLRLQFPA   | 41   | 35   |

|                       |       |                        |       |       |
|-----------------------|-------|------------------------|-------|-------|
| >MPL-W515I LLLRWQFPA  | 3     | >MPL-W515I LLLRLQFPA   | 5     | 2     |
| >MPL-W515I LLLRWQFPA† | 147   | >MPL-W515I LLLRLQFPAH' | 975   | 828   |
| >MPL-W515I LLLRWQFPA† | 323   | >MPL-W515I LLLRLQFPAH' | 442   | 119   |
| >MPL-W515I LLLRWQFPA† | 13    | >MPL-W515I LLLRLQFPAH' | 22    | 9     |
| >MPL-W515I LLLRWQFPA† | 57    | >MPL-W515I LLLRLQFPAH' | 131   | 74    |
| >MPL-W515I LLLRWQFPA  | 95    | >MPL-W515I LLLRLQFPA   | 1229  | 1134  |
| >MPL-W515I LLLRWQFPA† | 27    | >MPL-W515I LLLRLQFPAH' | 22    | 5     |
| >MPL-W515I LLLRWQFPA† | 84    | >MPL-W515I LLLRLQFPAH' | 94    | 10    |
| >MPL-W515I LLLRWQFPA† | 74    | >MPL-W515I LLLRLQFPAH' | 96    | 22    |
| >MPL-W515I LLLRWQFPA† | 462   | >MPL-W515I LLLRLQFPAH' | 411   | 51    |
| >MPL-W515I LLLLRWQFPA | 138   | >MPL-W515I LLLLRQFPA   | 111   | 27    |
| >MPL-W515I LLLLRWQFPA | 153   | >MPL-W515I LLLLRQFPA   | 90    | 63    |
| >MPL-W515I LLLLRWQFPA | 175   | >MPL-W515I LLLLRQFPA   | 122   | 53    |
| >MPL-W515I LLLLRWQFPA | 17    | >MPL-W515I LLLLRQFPA   | 20    | 3     |
| >MPL-W515I LLLLRWQFPA | 58    | >MPL-W515I LLLLRQFPA   | 30    | 28    |
| >MPL-W515I LLLLRWQFPA | 21    | >MPL-W515I LLLLRQFPA   | 24    | 3     |
| >MPL-W515I LLLLRWQFPA | 96    | >MPL-W515I LLLLRQFPA   | 80    | 16    |
| >MPL-W515I LLLLRWQFPA | 14    | >MPL-W515I LLLLRQFPA   | 10    | 4     |
| >MPL-W515I LLLLRWQF   | 281   | >MPL-W515I LLLLRQF     | 827   | 546   |
| >MPL-W515I LLLLRWQF   | 208   | >MPL-W515I LLLLRQF     | 287   | 79    |
| >MPL-W515I LLLLRWQF   | 1392  | >MPL-W515I LLLLRQF     | 461   | 931   |
| >MPL-W515I LLLLRWQF   | 202   | >MPL-W515I LLLLRQF     | 159   | 43    |
| >MPL-W515I LLLLRWQF   | 679   | >MPL-W515I LLLLRQF     | 316   | 363   |
| >MPL-W515I GLLLRWQFF  | 47    | >MPL-W515I GLLLRQFF/   | 122   | 75    |
| >MPL-W515I GLLLRWQFF  | 261   | >MPL-W515I GLLLRQFF/   | 444   | 183   |
| >MPL-W515I GLLLRWQFF  | 148   | >MPL-W515I GLLLRQFF/   | 374   | 226   |
| >MPL-W515I GLLLRWQFF  | 33    | >MPL-W515I GLLLRQFF/   | 135   | 102   |
| >MPL-W515I GLLLRWQFF  | 29    | >MPL-W515I GLLLRQFF/   | 124   | 95    |
| >MPL-W515I GLLLRWQFF  | 13    | >MPL-W515I GLLLRQFF/   | 35    | 22    |
| >MPL-W515I GLLLRWQFF  | 386   | >MPL-W515I GLLLRQFF/   | 1572  | 1186  |
| >MPL-W515I GLLLRWQFF  | 18    | >MPL-W515I GLLLRQFF/   | 59    | 41    |
| >MPL-W515I GLLLRWQF   | 248   | >MPL-W515I GLLLRQF     | 2345  | 2097  |
| >MPL-W515I GLLLRWQF   | 585   | >MPL-W515I GLLLRQF     | 352   | 233   |
| >MPL-W515I LGLLLRW    | 155   | >MPL-W515I LGLLLR      | 4552  | 4397  |
| >MPL-W515I LGLLLRWQF  | 1012  | >MPL-W515I LGLLLRQF    | 498   | 514   |
| >MPL-W515I LGLLLRW    | 374   | >MPL-W515I LGLLLR      | 21494 | 21120 |
| >MPL-W515I LGLLLRW    | 79    | >MPL-W515I LGLLLR      | 13357 | 13278 |
| >MPL-W515I LGLLLRWQF  | 571   | >MPL-W515I LGLLLRQF    | 362   | 209   |
| >MPL-W515I VLGLLLRW   | 20133 | >MPL-W515I VLGLLLR     | 424   | 19709 |
| >MPL-W515I VLGLLLRW   | 16363 | >MPL-W515I VLGLLLR     | 50    | 16313 |
| >MPL-W515I VLGLLLRW   | 23499 | >MPL-W515I VLGLLLR     | 469   | 23030 |
| >MPL-W515I VLGLLLRW   | 18946 | >MPL-W515I VLGLLLR     | 90    | 18856 |
| >MPL-W515I VLGLLLRW   | 24766 | >MPL-W515I VLGLLLR     | 239   | 24527 |

|                       |       |                       |       |       |
|-----------------------|-------|-----------------------|-------|-------|
| >MPL-W515I VLGLLLLRW  | 17976 | >MPL-W515I VLGLLLLR   | 8     | 17968 |
| >MPL-W515I VLGLLLLRW  | 295   | >MPL-W515I VLGLLLLR   | 19079 | 18784 |
| >MPL-W515I AVLGLLLLRW | 6632  | >MPL-W515I AVLGLLLLR  | 270   | 6362  |
| >MPL-W515I AVLGLLLLRW | 11976 | >MPL-W515I AVLGLLLLR  | 155   | 11821 |
| >MPL-W515I AVLGLLLLRW | 13344 | >MPL-W515I AVLGLLLLR  | 313   | 13031 |
| >MPL-W515I AVLGLLLLRW | 7065  | >MPL-W515I AVLGLLLLR  | 91    | 6974  |
| >MPL-W515I AVLGLLLLRW | 20759 | >MPL-W515I AVLGLLLLR  | 159   | 20600 |
| >MPL-W515I AVLGLLLLRW | 21451 | >MPL-W515I AVLGLLLLR  | 389   | 21062 |
| >MPL-W515I AVLGLLLLRW | 24801 | >MPL-W515I AVLGLLLLR  | 54    | 24747 |
| >MPL-W515I AVLGLLLLRW | 196   | >MPL-W515I AVLGLLLLR  | 325   | 129   |
| >MPL-W515I AVLGLLLLRW | 23    | >MPL-W515I AVLGLLLLR  | 339   | 316   |
| >MPL-W515I AVLGLLLLRW | 40    | >MPL-W515I AVLGLLLLR  | 12309 | 12269 |
| >MPL-W515F WQFPAHYRR  | 482   | >MPL-W515F RQFPAHYRRL | 663   | 181   |
| >MPL-W515F WQFPAHYRR  | 324   | >MPL-W515F RQFPAHYRRL | 378   | 54    |
| >MPL-W515F WQFPAHYR   | 10451 | >MPL-W515F RQFPAHYR   | 322   | 10129 |
| >MPL-W515F WQFPAHYR   | 1492  | >MPL-W515F RQFPAHYR   | 44    | 1448  |
| >MPL-W515F WQFPAHYRR  | 3998  | >MPL-W515F RQFPAHYRR  | 106   | 3892  |
| >MPL-W515F WQFPAHYRR  | 5730  | >MPL-W515F RQFPAHYRRL | 246   | 5484  |
| >MPL-W515F WQFPAHYR   | 15331 | >MPL-W515F RQFPAHYR   | 340   | 14991 |
| >MPL-W515F WQFPAHYRR  | 16040 | >MPL-W515F RQFPAHYRR  | 424   | 15616 |
| >MPL-W515F WQFPAHYRR  | 15197 | >MPL-W515F RQFPAHYRRL | 404   | 14793 |
| >MPL-W515F WQFPAHYRR  | 15255 | >MPL-W515F RQFPAHYRRL | 254   | 15001 |
| >MPL-W515F WQFPAHYR   | 26    | >MPL-W515F RQFPAHYR   | 6     | 20    |
| >MPL-W515F WQFPAHYRR  | 24    | >MPL-W515F RQFPAHYRR  | 5     | 19    |
| >MPL-W515F WQFPAHYRR  | 53    | >MPL-W515F RQFPAHYRRL | 6     | 47    |
| >MPL-W515F WQFPAHYRR  | 15776 | >MPL-W515F RQFPAHYRRL | 263   | 15513 |
| >MPL-W515F WQFPAHYR   | 57    | >MPL-W515F RQFPAHYR   | 366   | 309   |
| >MPL-W515F WQFPAHYRR  | 103   | >MPL-W515F RQFPAHYRR  | 961   | 858   |
| >MPL-W515F WQFPAHYRR  | 272   | >MPL-W515F RQFPAHYRRL | 1394  | 1122  |
| >MPL-W515F WQFPAHYRR  | 164   | >MPL-W515F RQFPAHYRRL | 103   | 61    |
| >MPL-W515F WQFPAHYR   | 61    | >MPL-W515F RQFPAHYR   | 24    | 37    |
| >MPL-W515F WQFPAHYRR  | 133   | >MPL-W515F RQFPAHYRR  | 41    | 92    |
| >MPL-W515F WQFPAHYRR  | 23    | >MPL-W515F RQFPAHYRRL | 10    | 13    |
| >MPL-W515F WQFPAHYRR  | 122   | >MPL-W515F RQFPAHYRRL | 37    | 85    |
| >MPL-W515F WQFPAHYRR  | 3804  | >MPL-W515F RQFPAHYRRL | 498   | 3306  |
| >MPL-W515F WQFPAHYR   | 1085  | >MPL-W515F RQFPAHYR   | 155   | 930   |
| >MPL-W515F WQFPAHYRR  | 876   | >MPL-W515F RQFPAHYRR  | 154   | 722   |
| >MPL-W515F WQFPAHYRR  | 1042  | >MPL-W515F RQFPAHYRRL | 182   | 860   |
| >MPL-W515F WQFPAHYRR  | 474   | >MPL-W515F RQFPAHYRRL | 85    | 389   |
| >MPL-W515F WQFPAHYRR  | 84    | >MPL-W515F RQFPAHYRRL | 653   | 569   |
| >MPL-W515F WQFPAHYRR  | 252   | >MPL-W515F RQFPAHYRRL | 122   | 130   |
| >MPL-W515F WQFPAHYRR  | 2080  | >MPL-W515F RQFPAHYRRL | 239   | 1841  |
| >MPL-W515F WQFPAHYR   | 15    | >MPL-W515F RQFPAHYR   | 11    | 4     |



|                       |       |                       |       |       |
|-----------------------|-------|-----------------------|-------|-------|
| >MPL-W515FWQFPAHYRR   | 24    | >MPL-W515FRQFPAHYRR   | 16    | 8     |
| >MPL-W515FWQFPAHYRR   | 65    | >MPL-W515FRQFPAHYRRL  | 37    | 28    |
| >MPL-W515FRWQFPAHYR   | 61    | >MPL-W515FRRQFPAHYRF  | 14946 | 14885 |
| >MPL-W515FRWQFPAHY    | 135   | >MPL-W515FRRQFPAHY    | 3241  | 3106  |
| >MPL-W515FRWQFPAHY    | 55    | >MPL-W515FRRQFPAHY    | 273   | 218   |
| >MPL-W515FRWQFPAHYR   | 18    | >MPL-W515FRRQFPAHYR   | 574   | 556   |
| >MPL-W515FRWQFPAHYR   | 8     | >MPL-W515FRRQFPAHYRF  | 24    | 16    |
| >MPL-W515FRWQFPAHY    | 380   | >MPL-W515FRRQFPAHY    | 682   | 302   |
| >MPL-W515FRWQFPAHY    | 3126  | >MPL-W515FRRQFPAHY    | 88    | 3038  |
| >MPL-W515FRWQFPAHY    | 7175  | >MPL-W515FRRQFPAHY    | 141   | 7034  |
| >MPL-W515FRWQFPAHYR   | 8089  | >MPL-W515FRRQFPAHYR   | 118   | 7971  |
| >MPL-W515FRWQFPAHYR   | 1719  | >MPL-W515FRRQFPAHYRF  | 21    | 1698  |
| >MPL-W515FRWQFPAHYR   | 7098  | >MPL-W515FRRQFPAHYRF  | 69    | 7029  |
| >MPL-W515FRWQFPAHY    | 9836  | >MPL-W515FRRQFPAHY    | 44    | 9792  |
| >MPL-W515FRWQFPAHYR   | 7723  | >MPL-W515FRRQFPAHYR   | 120   | 7603  |
| >MPL-W515FRWQFPAHYR   | 3817  | >MPL-W515FRRQFPAHYRF  | 101   | 3716  |
| >MPL-W515FRWQFPAHYR   | 507   | >MPL-W515FRRQFPAHYRF  | 15    | 492   |
| >MPL-W515FRWQFPAHY    | 11380 | >MPL-W515FRRQFPAHY    | 224   | 11156 |
| >MPL-W515FRWQFPAHYR   | 8601  | >MPL-W515FRRQFPAHYR   | 97    | 8504  |
| >MPL-W515FRWQFPAHYR   | 2521  | >MPL-W515FRRQFPAHYRF  | 61    | 2460  |
| >MPL-W515FRWQFPAHYR   | 386   | >MPL-W515FRRQFPAHYRF  | 5     | 381   |
| >MPL-W515FRWQFPAHYR   | 8     | >MPL-W515FRRQFPAHYR   | 34    | 26    |
| >MPL-W515FRWQFPAHYR   | 10    | >MPL-W515FRRQFPAHYRF  | 89    | 79    |
| >MPL-W515FRWQFPAHY    | 353   | >MPL-W515FRRQFPAHY    | 33580 | 33227 |
| >MPL-W515FRWQFPAHYR   | 162   | >MPL-W515FRRQFPAHYR   | 22932 | 22770 |
| >MPL-W515FRWQFPAHYR   | 198   | >MPL-W515FRRQFPAHYRF  | 23880 | 23682 |
| >MPL-W515FSAVLGLLLLRV | 33059 | >MPL-W515FSAVLGLLLLRF | 202   | 32857 |
| >MPL-W515FSAVLGLLLLRV | 8     | >MPL-W515FSAVLGLLLLRF | 7937  | 7929  |
| >MPL-W515FSAVLGLLLLRV | 201   | >MPL-W515FSAVLGLLLLRF | 33606 | 33405 |
| >MPL-W515FSAVLGLLLLRV | 224   | >MPL-W515FSAVLGLLLLRF | 24496 | 24272 |
| >MPL-W515FSAVLGLLLLRV | 21    | >MPL-W515FSAVLGLLLLRF | 22344 | 22323 |
| >MPL-W515FLRWQFPAHY   | 67    | >MPL-W515FLRRQFPAHY   | 1913  | 1846  |
| >MPL-W515FLRWQFPAHY   | 194   | >MPL-W515FLRRQFPAHY   | 879   | 685   |
| >MPL-W515FLRWQFPAHY   | 168   | >MPL-W515FLRRQFPAHYRF | 122   | 46    |
| >MPL-W515FLRWQFPAH    | 296   | >MPL-W515FLRRQFPAH    | 416   | 120   |
| >MPL-W515FLRWQFPAHY   | 22    | >MPL-W515FLRRQFPAHY   | 33    | 11    |
| >MPL-W515FLRWQFPAH    | 84    | >MPL-W515FLRRQFPAH    | 1484  | 1400  |
| >MPL-W515FLRWQFPAHY   | 34    | >MPL-W515FLRRQFPAHY   | 369   | 335   |
| >MPL-W515FLRWQFPAHY   | 36    | >MPL-W515FLRRQFPAHYRF | 80    | 44    |
| >MPL-W515FLRWQFPAHY   | 34    | >MPL-W515FLRRQFPAHYRF | 396   | 362   |
| >MPL-W515FLRWQFPAHY   | 70    | >MPL-W515FLRRQFPAHY   | 276   | 206   |
| >MPL-W515FLRWQFPAHY   | 250   | >MPL-W515FLRRQFPAHYRF | 247   | 3     |
| >MPL-W515FLRWQFPAHY   | 352   | >MPL-W515FLRRQFPAHYRF | 1945  | 1593  |

|                      |      |                      |      |      |
|----------------------|------|----------------------|------|------|
| >MPL-W515FLRWQFPAHY  | 17   | >MPL-W515FLRRQFPAHYF | 93   | 76   |
| >MPL-W515FLRWQFPAHY  | 28   | >MPL-W515FLRRQFPAHYF | 224  | 196  |
| >MPL-W515FLLRWQFPA   | 499  | >MPL-W515FLLRQFPA    | 2837 | 2338 |
| >MPL-W515FLLRWQFPA   | 452  | >MPL-W515FLLRQFPA    | 773  | 321  |
| >MPL-W515FLLRWQFPA   | 37   | >MPL-W515FLLRQFPA    | 72   | 35   |
| >MPL-W515FLLRWQFPA   | 311  | >MPL-W515FLLRQFPA    | 808  | 497  |
| >MPL-W515FLLRWQFPA   | 46   | >MPL-W515FLLRQFPA    | 625  | 579  |
| >MPL-W515FLLRWQFPA   | 208  | >MPL-W515FLLRQFPA    | 1892 | 1684 |
| >MPL-W515FLLRWQFPA   | 5    | >MPL-W515FLLRQFPA    | 12   | 7    |
| >MPL-W515FLLRWQFPAH' | 189  | >MPL-W515FLLRQFPAHY  | 219  | 30   |
| >MPL-W515FLLRWQFPAH' | 362  | >MPL-W515FLLRQFPAHY  | 586  | 224  |
| >MPL-W515FLLRWQFPA   | 79   | >MPL-W515FLLRQFPA    | 17   | 62   |
| >MPL-W515FLLRWQFPAH  | 2486 | >MPL-W515FLLRQFPAH   | 341  | 2145 |
| >MPL-W515FLLRWQFPAH' | 364  | >MPL-W515FLLRQFPAHY  | 63   | 301  |
| >MPL-W515FLLRWQFPAH' | 342  | >MPL-W515FLLRQFPAHY  | 67   | 275  |
| >MPL-W515FLLRWQFPAH' | 423  | >MPL-W515FLLRQFPAHY  | 459  | 36   |
| >MPL-W515FLLRWQFPAH' | 11   | >MPL-W515FLLRQFPAHY  | 11   | 0    |
| >MPL-W515FLLRWQFPAH' | 70   | >MPL-W515FLLRQFPAHY  | 137  | 67   |
| >MPL-W515FLLRWQFPAH' | 294  | >MPL-W515FLLRQFPAHY  | 781  | 487  |
| >MPL-W515FLLRWQFPAH' | 698  | >MPL-W515FLLRQFPAHY  | 225  | 473  |
| >MPL-W515FLLRWQFPA   | 974  | >MPL-W515FLLRQFPA    | 145  | 829  |
| >MPL-W515FLLRWQFPAH  | 800  | >MPL-W515FLLRQFPAH   | 364  | 436  |
| >MPL-W515FLLRWQFPAH' | 43   | >MPL-W515FLLRQFPAHY  | 36   | 7    |
| >MPL-W515FLLRWQFPAH' | 582  | >MPL-W515FLLRQFPAHY  | 344  | 238  |
| >MPL-W515FLLRWQFPAH' | 104  | >MPL-W515FLLRQFPAHY  | 27   | 77   |
| >MPL-W515FLLRWQFPAH' | 276  | >MPL-W515FLLRQFPAHY  | 1010 | 734  |
| >MPL-W515FLLRWQFPAH' | 85   | >MPL-W515FLLRQFPAHY  | 108  | 23   |
| >MPL-W515FLLRWQFPAH' | 66   | >MPL-W515FLLRQFPAHY  | 177  | 111  |
| >MPL-W515FLLRWQFPA   | 9    | >MPL-W515FLLRQFPA    | 24   | 15   |
| >MPL-W515FLLRWQFPA   | 94   | >MPL-W515FLLRQFPA    | 128  | 34   |
| >MPL-W515FLLRWQFPA   | 134  | >MPL-W515FLLRQFPA    | 234  | 100  |
| >MPL-W515FLLRWQFPA   | 13   | >MPL-W515FLLRQFPA    | 20   | 7    |
| >MPL-W515FLLRWQFP    | 454  | >MPL-W515FLLRQFP     | 5597 | 5143 |
| >MPL-W515FLLRWQFPA   | 3    | >MPL-W515FLLRQFPA    | 12   | 9    |
| >MPL-W515FLLRWQFPAH  | 157  | >MPL-W515FLLRQFPAH   | 1433 | 1276 |
| >MPL-W515FLLRWQFPA   | 5    | >MPL-W515FLLRQFPA    | 17   | 12   |
| >MPL-W515FLLRWQFPA   | 7    | >MPL-W515FLLRQFPA    | 18   | 11   |
| >MPL-W515FLLRWQFPA   | 6    | >MPL-W515FLLRQFPA    | 133  | 127  |
| >MPL-W515FLLRWQFPA   | 3    | >MPL-W515FLLRQFPA    | 5    | 2    |
| >MPL-W515FLLRWQFPAH  | 147  | >MPL-W515FLLRQFPAH   | 751  | 604  |
| >MPL-W515FLLRWQFPAH  | 323  | >MPL-W515FLLRQFPAH   | 248  | 75   |
| >MPL-W515FLLRWQFPAH  | 13   | >MPL-W515FLLRQFPAH   | 36   | 23   |
| >MPL-W515FLLRWQFPAH  | 57   | >MPL-W515FLLRQFPAH   | 215  | 158  |

|                       |       |                       |       |       |
|-----------------------|-------|-----------------------|-------|-------|
| >MPL-W515F LLLRWQFPA  | 95    | >MPL-W515F LLLRRQFPA  | 5127  | 5032  |
| >MPL-W515F LLLRWQFPAH | 27    | >MPL-W515F LLLRRQFPAH | 39    | 12    |
| >MPL-W515F LLLRWQFPA  | 3717  | >MPL-W515F LLLRRQFPA  | 84    | 3633  |
| >MPL-W515F LLLRWQFPAH | 84    | >MPL-W515F LLLRRQFPAH | 103   | 19    |
| >MPL-W515F LLLRWQFPAH | 629   | >MPL-W515F LLLRRQFPAH | 438   | 191   |
| >MPL-W515F LLLRWQFPAH | 74    | >MPL-W515F LLLRRQFPAH | 98    | 24    |
| >MPL-W515F LLLRWQFPAH | 462   | >MPL-W515F LLLRRQFPAH | 1556  | 1094  |
| >MPL-W515F LLLLRWQFPA | 138   | >MPL-W515F LLLLRQFPA  | 323   | 185   |
| >MPL-W515F LLLLRWQFPA | 153   | >MPL-W515F LLLLRQFPA  | 263   | 110   |
| >MPL-W515F LLLLRWQFPA | 175   | >MPL-W515F LLLLRQFPA  | 326   | 151   |
| >MPL-W515F LLLLRWQFPA | 17    | >MPL-W515F LLLLRQFPA  | 120   | 103   |
| >MPL-W515F LLLLRWQFPA | 58    | >MPL-W515F LLLLRQFPA  | 180   | 122   |
| >MPL-W515F LLLLRWQFPA | 21    | >MPL-W515F LLLLRQFPA  | 92    | 71    |
| >MPL-W515F LLLLRWQFPA | 96    | >MPL-W515F LLLLRQFPA  | 742   | 646   |
| >MPL-W515F LLLLRWQFPA | 14    | >MPL-W515F LLLLRQFPA  | 17    | 3     |
| >MPL-W515F LLLLRWQF   | 281   | >MPL-W515F LLLLRQF    | 2402  | 2121  |
| >MPL-W515F LLLLRWQF   | 208   | >MPL-W515F LLLLRQF    | 217   | 9     |
| >MPL-W515F LLLLRWQF   | 202   | >MPL-W515F LLLLRQF    | 189   | 13    |
| >MPL-W515F GLLLRWQFF  | 47    | >MPL-W515F GLLLRQFP/  | 268   | 221   |
| >MPL-W515F GLLLRWQFF  | 261   | >MPL-W515F GLLLRQFP/  | 749   | 488   |
| >MPL-W515F GLLLRWQFF  | 148   | >MPL-W515F GLLLRQFP/  | 473   | 325   |
| >MPL-W515F GLLLRWQFF  | 33    | >MPL-W515F GLLLRQFP/  | 219   | 186   |
| >MPL-W515F GLLLRWQFF  | 29    | >MPL-W515F GLLLRQFP/  | 177   | 148   |
| >MPL-W515F GLLLRWQFF  | 13    | >MPL-W515F GLLLRQFP/  | 95    | 82    |
| >MPL-W515F GLLLRWQFF  | 386   | >MPL-W515F GLLLRQFP/  | 2430  | 2044  |
| >MPL-W515F GLLLRWQFF  | 18    | >MPL-W515F GLLLRQFP/  | 131   | 113   |
| >MPL-W515F GLLLRWQF   | 248   | >MPL-W515F GLLLRQF    | 5476  | 5228  |
| >MPL-W515F LGLLLRW    | 155   | >MPL-W515F LGLLLR     | 24169 | 24014 |
| >MPL-W515F LGLLLRW    | 374   | >MPL-W515F LGLLLR     | 25176 | 24802 |
| >MPL-W515F LGLLLRW    | 79    | >MPL-W515F LGLLLR     | 22276 | 22197 |
| >MPL-W515F VLGLLLRW   | 295   | >MPL-W515F VLGLLLR    | 22461 | 22166 |
| >MPL-W515F VLGLLLRW   | 33204 | >MPL-W515F VLGLLLR    | 275   | 32929 |
| >MPL-W515F AVLGLLLRW  | 7287  | >MPL-W515F AVLGLLLR   | 227   | 7060  |
| >MPL-W515F AVLGLLLRW  | 19198 | >MPL-W515F AVLGLLLR   | 56    | 19142 |
| >MPL-W515F AVLGLLLRW  | 11117 | >MPL-W515F AVLGLLLR   | 37    | 11080 |
| >MPL-W515F AVLGLLLRW  | 196   | >MPL-W515F AVLGLLLR   | 11150 | 10954 |
| >MPL-W515F AVLGLLLRW  | 31221 | >MPL-W515F AVLGLLLR   | 111   | 31110 |
| >MPL-W515F AVLGLLLRW  | 23    | >MPL-W515F AVLGLLLR   | 14885 | 14862 |
| >MPL-W515F AVLGLLLRW  | 40    | >MPL-W515F AVLGLLLR   | 21952 | 21912 |
| >MPL-W515F AVLGLLLRW  | 5023  | >MPL-W515F AVLGLLLR   | 427   | 4596  |
| >MPL-Y591D YRRQPSC    | 259   | >MPL-Y591D DRRQPSC    | 2960  | 2701  |
| >MPL-Y591D YRRQPSC    | 108   | >MPL-Y591D DRRQPSC    | 3135  | 3027  |
| >MPL-Y591D YRRQPSC    | 322   | >MPL-Y591D DRRQPSC    | 7513  | 7191  |

|                       |      |                      |       |       |
|-----------------------|------|----------------------|-------|-------|
| >MPL-Y591D YRRQLQPSCL | 418  | >MPL-Y591D DRRLQPSCL | 1544  | 1126  |
| >MPL-Y591D YRRQLQPSCL | 141  | >MPL-Y591D DRRLQPSCL | 800   | 659   |
| >MPL-Y591D PLCSSQAQM  | 210  | >MPL-Y591D PLCSSQAQM | 25296 | 25086 |
| >MPL-Y591D PLCSSQAQM  | 349  | >MPL-Y591D PLCSSQAQM | 33992 | 33643 |
| >MPL-Y591D MDYRRQLQPS | 358  | >MPL-Y591D MDDRRLQPS | 3994  | 3636  |
| >MPL-Y591D MDYRRQLQPS | 164  | >MPL-Y591D MDDRRLQPS | 2555  | 2391  |
| >MPL-Y591D MDYRRQLQPS | 292  | >MPL-Y591D MDDRRLQPS | 4981  | 4689  |
| >MPL-Y591D QMDYRRQLQ  | 3769 | >MPL-Y591D QMDDRRLQF | 462   | 3307  |
| >MPL-Y591D QMDYRRQLQ  | 5344 | >MPL-Y591D QMDDRRLQF | 149   | 5195  |
| >MPL-Y591D AQMDYRRRL  | 168  | >MPL-Y591D AQMDDRRL  | 17315 | 17147 |
| >MPL-Y591D AQMDYRRRL  | 365  | >MPL-Y591D AQMDDRRL  | 1810  | 1445  |
| >MPL-Y591D AQMDYRRRL  | 237  | >MPL-Y591D AQMDDRRL  | 1065  | 828   |
| >MPL-Y591D AQMDYRRRL  | 485  | >MPL-Y591D AQMDDRRL  | 2024  | 1539  |
| >MPL-Y591D AQMDYRRRL  | 60   | >MPL-Y591D AQMDDRRL  | 141   | 81    |
| >MPL-Y591D AQMDYRRRLC | 126  | >MPL-Y591D AQMDDRRLC | 193   | 67    |
| >MPL-Y591D AQMDYRRRL  | 489  | >MPL-Y591D AQMDDRRL  | 868   | 379   |
| >MPL-Y591D AQMDYRRRL  | 71   | >MPL-Y591D AQMDDRRL  | 308   | 237   |
| >MPL-Y591D AQMDYRRRL  | 258  | >MPL-Y591D AQMDDRRL  | 1065  | 807   |
| >MPL-Y591D QAQMDYRR   | 224  | >MPL-Y591D QAQMDDRR  | 4714  | 4490  |
| >MPL-Y591D QAQMDYRR   | 282  | >MPL-Y591D QAQMDDRR  | 472   | 190   |
| >MPL-Y591D SQAQMDYR   | 105  | >MPL-Y591D SQAQMDDR  | 6223  | 6118  |
| >MPL-Y591D SQAQMDYRF  | 118  | >MPL-Y591D SQAQMDDR  | 5517  | 5399  |
| >MPL-Y591D SQAQMDYR   | 196  | >MPL-Y591D SQAQMDDR  | 1329  | 1133  |
| >MPL-Y591D SQAQMDYRF  | 333  | >MPL-Y591D SQAQMDDR  | 721   | 388   |
| >MPL-Y591D SQAQMDYR   | 80   | >MPL-Y591D SQAQMDDR  | 1198  | 1118  |
| >MPL-Y591D SQAQMDYRF  | 46   | >MPL-Y591D SQAQMDDR  | 1076  | 1030  |
| >MPL-Y591D SSQAQMDY   | 212  | >MPL-Y591D SSQAQMDD  | 22774 | 22562 |
| >MPL-Y591D SSQAQMDY   | 458  | >MPL-Y591D SSQAQMDD  | 23545 | 23087 |
| >MPL-Y591D SSQAQMDYR  | 37   | >MPL-Y591D SSQAQMDDF | 1048  | 1011  |
| >MPL-Y591D SSQAQMDYR  | 167  | >MPL-Y591D SSQAQMDDF | 2156  | 1989  |
| >MPL-Y591D SSQAQMDY   | 101  | >MPL-Y591D SSQAQMDD  | 22381 | 22280 |
| >MPL-Y591D SSQAQMDYR  | 23   | >MPL-Y591D SSQAQMDDF | 1201  | 1178  |
| >MPL-Y591D SSQAQMDYR  | 64   | >MPL-Y591D SSQAQMDDF | 918   | 854   |
| >MPL-Y591D SSQAQMDYR  | 104  | >MPL-Y591D SSQAQMDDF | 1130  | 1026  |
| >MPL-Y591D SSQAQMDYR  | 77   | >MPL-Y591D SSQAQMDDF | 364   | 287   |
| >MPL-Y591D SSQAQMDY   | 142  | >MPL-Y591D SSQAQMDD  | 25619 | 25477 |
| >MPL-Y591D SSQAQMDY   | 51   | >MPL-Y591D SSQAQMDD  | 23123 | 23072 |
| >MPL-Y591D SSQAQMDYR  | 216  | >MPL-Y591D SSQAQMDDF | 226   | 10    |
| >MPL-Y591D SSQAQMDYR  | 206  | >MPL-Y591D SSQAQMDDF | 335   | 129   |
| >MPL-Y591D SSQAQMDYR  | 225  | >MPL-Y591D SSQAQMDDF | 806   | 581   |
| >MPL-Y591D CSSQAQMDY  | 28   | >MPL-Y591D CSSQAQMDE | 19489 | 19461 |
| >MPL-Y591D CSSQAQMDY  | 290  | >MPL-Y591D CSSQAQMDE | 2130  | 1840  |
| >MPL-Y591D CSSQAQMDY  | 348  | >MPL-Y591D CSSQAQMDE | 25851 | 25503 |

|                       |       |                       |       |       |
|-----------------------|-------|-----------------------|-------|-------|
| >MPL-Y591D CSSQAQMDY  | 83    | >MPL-Y591D CSSQAQMDE  | 24958 | 24875 |
| >MPL-Y591D CSSQAQMDY  | 279   | >MPL-Y591D CSSQAQMDE  | 2685  | 2406  |
| >MPL-Y591D CSSQAQMDY  | 38    | >MPL-Y591D CSSQAQMDE  | 740   | 702   |
| >MPL-Y591D CSSQAQMDY  | 46    | >MPL-Y591D CSSQAQMDE  | 68    | 22    |
| >MPL-Y591D CSSQAQMDY  | 490   | >MPL-Y591D CSSQAQMDE  | 27563 | 27073 |
| >MPL-Y591D CSSQAQMDY  | 199   | >MPL-Y591D CSSQAQMDE  | 26251 | 26052 |
| >MPL-Y591D CSSQAQMDY  | 189   | >MPL-Y591D CSSQAQMDE  | 17405 | 17216 |
| >MPL-Y591D CSSQAQMDY  | 127   | >MPL-Y591D CSSQAQMDE  | 32995 | 32868 |
| >MPL-Y591D CSSQAQMDY  | 383   | >MPL-Y591D CSSQAQMDE  | 3761  | 3378  |
| >MPL-Y591D CSSQAQMDY  | 356   | >MPL-Y591D CSSQAQMDE  | 2846  | 2490  |
| >MPL-Y591D LCSSQAQMD  | 178   | >MPL-Y591D LCSSQAQMD  | 31583 | 31405 |
| >MPL-Y591D LCSSQAQMD  | 434   | >MPL-Y591D LCSSQAQMD  | 32644 | 32210 |
| >MPL-Y591D LCSSQAQMD  | 207   | >MPL-Y591D LCSSQAQMD  | 27719 | 27512 |
| >MPL-Y591D LCSSQAQMD  | 316   | >MPL-Y591D LCSSQAQMD  | 4238  | 3922  |
| >MSH2-C822 CDQSFQIHV  | 371   | >MSH2-C822 FDQSFQIHV  | 1027  | 656   |
| >MSH2-C822 TMLYQVKKG' | 16679 | >MSH2-C822 TMLYQVKKG' | 244   | 16435 |
| >MSH2-C822 TMLYQVKKG' | 19920 | >MSH2-C822 TMLYQVKKG' | 285   | 19635 |
| >MSH2-C822 TMLYQVKKG' | 13882 | >MSH2-C822 TMLYQVKKG' | 57    | 13825 |
| >MSH2-C822 GVCDQSFQI  | 641   | >MSH2-C822 GVFDQSFQI  | 30    | 611   |
| >MSH2-C822 GVCDQSFQIH | 660   | >MSH2-C822 GVFDQSFQIH | 36    | 624   |
| >MSH2-C822 GVCDQSFQI  | 528   | >MSH2-C822 GVFDQSFQI  | 26    | 502   |
| >MSH2-C822 GVCDQSFQIH | 793   | >MSH2-C822 GVFDQSFQIH | 36    | 757   |
| >MSH2-C822 GVCDQSFQI  | 1325  | >MSH2-C822 GVFDQSFQI  | 101   | 1224  |
| >MSH2-C822 GVCDQSFQIH | 574   | >MSH2-C822 GVFDQSFQIH | 51    | 523   |
| >MSH2-C822 GVCDQSFQI  | 52    | >MSH2-C822 GVFDQSFQI  | 7     | 45    |
| >MSH2-C822 GVCDQSFQIH | 63    | >MSH2-C822 GVFDQSFQIH | 10    | 53    |
| >MSH2-C822 GVCDQSFQI  | 196   | >MSH2-C822 GVFDQSFQI  | 18    | 178   |
| >MSH2-C822 GVCDQSFQIH | 49    | >MSH2-C822 GVFDQSFQIH | 8     | 41    |
| >MSH2-C822 GVCDQSFQI  | 492   | >MSH2-C822 GVFDQSFQI  | 12    | 480   |
| >MSH2-C822 GVCDQSFQIH | 321   | >MSH2-C822 GVFDQSFQIH | 14    | 307   |
| >MSH2-C822 GVCDQSFQI  | 1052  | >MSH2-C822 GVFDQSFQI  | 27    | 1025  |
| >MSH2-C822 GVCDQSFQIH | 79    | >MSH2-C822 GVFDQSFQIH | 8     | 71    |
| >MSH2-C822 GVCDQSFQI  | 3643  | >MSH2-C822 GVFDQSFQI  | 460   | 3183  |
| >MSH2-C822 GVCDQSFQI  | 354   | >MSH2-C822 GVFDQSFQI  | 32    | 322   |
| >MSH2-C822 GVCDQSFQIH | 16    | >MSH2-C822 GVFDQSFQIH | 5     | 11    |
| >MSH2-C822 GVCDQSFQI  | 1692  | >MSH2-C822 GVFDQSFQI  | 95    | 1597  |
| >MSH2-C822 GVCDQSFQI  | 4063  | >MSH2-C822 GVFDQSFQI  | 120   | 3943  |
| >MSH2-C822 GVCDQSFQIH | 3051  | >MSH2-C822 GVFDQSFQIH | 136   | 2915  |
| >MSH2-C822 GVCDQSFQI  | 3376  | >MSH2-C822 GVFDQSFQI  | 214   | 3162  |
| >MSH2-C822 GVCDQSFQIH | 2286  | >MSH2-C822 GVFDQSFQIH | 233   | 2053  |
| >MSH2-C822 GVCDQSFQI  | 1338  | >MSH2-C822 GVFDQSFQI  | 427   | 911   |
| >MSH2-C822 KGVCDQSF   | 183   | >MSH2-C822 KGVFDQSF   | 476   | 293   |
| >MSH2-C822 KGVCDQSF   | 413   | >MSH2-C822 KGVFDQSF   | 289   | 124   |

|                       |       |                       |       |       |
|-----------------------|-------|-----------------------|-------|-------|
| >MSH2-C822 KKGVCDDQSF | 10    | >MSH2-C822 KKGVFDQSF  | 7     | 3     |
| >MSH2-C822 VKKGVCDQSI | 27    | >MSH2-C822 VKKGVFDQSI | 17    | 10    |
| >MSH2-C822 QVKKGVCDQ  | 97    | >MSH2-C822 QVKKGVFDQ  | 135   | 38    |
| >MSH2-C822 QVKKGVCDQ  | 816   | >MSH2-C822 QVKKGVFDQ  | 417   | 399   |
| >MSH2-C822 QVKKGVCDQ  | 244   | >MSH2-C822 QVKKGVFDQ  | 241   | 3     |
| >MSH2-C822 QVKKGVCDQ  | 539   | >MSH2-C822 QVKKGVFDQ  | 443   | 96    |
| >MSH2-C822 YQVKKGVCDQ | 1421  | >MSH2-C822 YQVKKGVFDQ | 282   | 1139  |
| >MSH2-C822 YQVKKGVC   | 6307  | >MSH2-C822 YQVKKGVF   | 36    | 6271  |
| >MSH2-C822 YQVKKGVC   | 12318 | >MSH2-C822 YQVKKGVF   | 141   | 12177 |
| >MSH2-C822 YQVKKGVC   | 3211  | >MSH2-C822 YQVKKGVF   | 8     | 3203  |
| >MSH2-C822 LYQVKKGVC  | 23472 | >MSH2-C822 LYQVKKGVF  | 386   | 23086 |
| >MSH2-C822 LYQVKKGVC  | 17108 | >MSH2-C822 LYQVKKGVF  | 464   | 16644 |
| >MSH2-C822 LYQVKKGVC  | 3910  | >MSH2-C822 LYQVKKGVF  | 9     | 3901  |
| >MSH2-C822 MLYQVKKGV  | 46    | >MSH2-C822 MLYQVKKGV  | 499   | 453   |
| >MSH2-C822 MLYQVKKGV  | 160   | >MSH2-C822 MLYQVKKGV  | 5320  | 5160  |
| >MSH2-C822 MLYQVKKGV  | 12321 | >MSH2-C822 MLYQVKKGV  | 62    | 12259 |
| >MSH2-C822 MLYQVKKGV  | 11937 | >MSH2-C822 MLYQVKKGV  | 68    | 11869 |
| >MSH2-C822 MLYQVKKGV  | 12850 | >MSH2-C822 MLYQVKKGV  | 91    | 12759 |
| >MSH2-C822 MLYQVKKGV  | 26302 | >MSH2-C822 MLYQVKKGV  | 380   | 25922 |
| >MSH2-D603 DAVVSFAHV  | 22672 | >MSH2-D603 YAVVSFAHV  | 70    | 22602 |
| >MSH2-D603 DAVVSFAHV  | 2017  | >MSH2-D603 YAVVSFAHV  | 207   | 1810  |
| >MSH2-D603 DAVVSFAHV  | 13589 | >MSH2-D603 YAVVSFAHV  | 289   | 13300 |
| >MSH2-D603 DAVVSFAHV  | 7670  | >MSH2-D603 YAVVSFAHV  | 69    | 7601  |
| >MSH2-D603 DAVVSFAHV  | 1897  | >MSH2-D603 YAVVSFAHV  | 5     | 1892  |
| >MSH2-D603 DAVVSFAHV  | 16127 | >MSH2-D603 YAVVSFAHV  | 272   | 15855 |
| >MSH2-D603 DAVVSFAHV  | 12239 | >MSH2-D603 YAVVSFAHV  | 306   | 11933 |
| >MSH2-D603 DAVVSFAHV  | 14725 | >MSH2-D603 YAVVSFAHV  | 485   | 14240 |
| >MSH2-D603 DAVVSFAHV  | 9120  | >MSH2-D603 YAVVSFAHV  | 27    | 9093  |
| >MSH2-D603 DAVVSFAHV  | 22    | >MSH2-D603 YAVVSFAHV  | 23    | 1     |
| >MSH2-D603 DAVVSFAHV  | 49    | >MSH2-D603 YAVVSFAHV  | 36    | 13    |
| >MSH2-D603 DAVVSFAHV  | 8864  | >MSH2-D603 YAVVSFAHV  | 194   | 8670  |
| >MSH2-D603 DAVVSFAHV  | 12529 | >MSH2-D603 YAVVSFAHV  | 265   | 12264 |
| >MSH2-D603 DAVVSFAH   | 360   | >MSH2-D603 YAVVSFAH   | 65    | 295   |
| >MSH2-D603 DAVVSFAHV  | 11594 | >MSH2-D603 YAVVSFAHV  | 458   | 11136 |
| >MSH2-D603 DAVVSFAHV  | 11297 | >MSH2-D603 YAVVSFAHV  | 355   | 10942 |
| >MSH2-D603 LDAVVSFAHV | 29642 | >MSH2-D603 LYAVVSFAHV | 105   | 29537 |
| >MSH2-D603 LDAVVSFAHV | 15568 | >MSH2-D603 LYAVVSFAHV | 398   | 15170 |
| >MSH2-D603 LDAVVSFAHV | 25386 | >MSH2-D603 LYAVVSFAHV | 76    | 25310 |
| >MSH2-D603 LDAVVSFAHV | 26100 | >MSH2-D603 LYAVVSFAHV | 380   | 25720 |
| >MSH2-D603 LDAVVSFA   | 31044 | >MSH2-D603 LYAVVSFA   | 418   | 30626 |
| >MSH2-D603 LDAVVSFAHV | 30231 | >MSH2-D603 LYAVVSFAHV | 263   | 29968 |
| >MSH2-D603 LDAVVSFAHV | 105   | >MSH2-D603 LYAVVSFAHV | 18679 | 18574 |
| >MSH2-D603 QTLNDVLAQI | 31811 | >MSH2-D603 QTLNDVLAQI | 131   | 31680 |

|                       |       |                       |      |       |
|-----------------------|-------|-----------------------|------|-------|
| >MSH2-D603 QTLNDVLAQI | 36972 | >MSH2-D603 QTLNDVLAQI | 235  | 36737 |
| >MSH2-D603 QTLNDVLAQI | 17941 | >MSH2-D603 QTLNDVLAQI | 22   | 17919 |
| >MSH2-D603 QTLNDVLAQI | 31088 | >MSH2-D603 QTLNDVLAQI | 413  | 30675 |
| >MSH2-D603 QTLNDVLAQI | 24331 | >MSH2-D603 QTLNDVLAQI | 32   | 24299 |
| >MSH2-D603 QTLNDVLAQI | 17137 | >MSH2-D603 QTLNDVLAQI | 10   | 17127 |
| >MSH2-D603 QTLNDVLAQI | 8823  | >MSH2-D603 QTLNDVLAQI | 17   | 8806  |
| >MSH2-D603 QLDAVVSFA  | 118   | >MSH2-D603 QLYAVVSFA  | 47   | 71    |
| >MSH2-D603 QLDAVVSFAI | 34    | >MSH2-D603 QLYAVVSFAI | 18   | 16    |
| >MSH2-D603 QLDAVVSF   | 1390  | >MSH2-D603 QLYAVVSF   | 475  | 915   |
| >MSH2-D603 QLDAVVSFA  | 26    | >MSH2-D603 QLYAVVSFA  | 11   | 15    |
| >MSH2-D603 QLDAVVSFAI | 16    | >MSH2-D603 QLYAVVSFAI | 6    | 10    |
| >MSH2-D603 QLDAVVSFA  | 40    | >MSH2-D603 QLYAVVSFA  | 4    | 36    |
| >MSH2-D603 QLDAVVSFAI | 30    | >MSH2-D603 QLYAVVSFAI | 3    | 27    |
| >MSH2-D603 QLDAVVSFA  | 143   | >MSH2-D603 QLYAVVSFA  | 79   | 64    |
| >MSH2-D603 QLDAVVSFAI | 11    | >MSH2-D603 QLYAVVSFAI | 8    | 3     |
| >MSH2-D603 QLDAVVSF   | 944   | >MSH2-D603 QLYAVVSF   | 136  | 808   |
| >MSH2-D603 QLDAVVSFA  | 9     | >MSH2-D603 QLYAVVSFA  | 3    | 6     |
| >MSH2-D603 QLDAVVSFAI | 4     | >MSH2-D603 QLYAVVSFAI | 2    | 2     |
| >MSH2-D603 QLDAVVSFA  | 183   | >MSH2-D603 QLYAVVSFA  | 108  | 75    |
| >MSH2-D603 QLDAVVSFAI | 6     | >MSH2-D603 QLYAVVSFAI | 6    | 0     |
| >MSH2-D603 QLDAVVSFA  | 23    | >MSH2-D603 QLYAVVSFA  | 13   | 10    |
| >MSH2-D603 QLDAVVSFAI | 7     | >MSH2-D603 QLYAVVSFAI | 6    | 1     |
| >MSH2-D603 QLDAVVSFA  | 100   | >MSH2-D603 QLYAVVSFA  | 170  | 70    |
| >MSH2-D603 QLDAVVSFAI | 10    | >MSH2-D603 QLYAVVSFAI | 13   | 3     |
| >MSH2-D603 QLDAVVSFA  | 91    | >MSH2-D603 QLYAVVSFA  | 10   | 81    |
| >MSH2-D603 QLDAVVSFAI | 4     | >MSH2-D603 QLYAVVSFAI | 2    | 2     |
| >MSH2-D603 QLDAVVSF   | 134   | >MSH2-D603 QLYAVVSF   | 12   | 122   |
| >MSH2-D603 QLDAVVSFA  | 1975  | >MSH2-D603 QLYAVVSFA  | 177  | 1798  |
| >MSH2-D603 QLDAVVSFAI | 442   | >MSH2-D603 QLYAVVSFAI | 38   | 404   |
| >MSH2-D603 QLDAVVSFAI | 71    | >MSH2-D603 QLYAVVSFAI | 26   | 45    |
| >MSH2-D603 QLDAVVSF   | 751   | >MSH2-D603 QLYAVVSF   | 35   | 716   |
| >MSH2-D603 QLDAVVSFAI | 10791 | >MSH2-D603 QLYAVVSFAI | 360  | 10431 |
| >MSH2-D603 QLDAVVSF   | 1165  | >MSH2-D603 QLYAVVSF   | 46   | 1119  |
| >MSH2-D603 QLDAVVSFAI | 6535  | >MSH2-D603 QLYAVVSFAI | 416  | 6119  |
| >MSH2-D603 QLDAVVSF   | 548   | >MSH2-D603 QLYAVVSF   | 7    | 541   |
| >MSH2-D603 QLDAVVSFAI | 10778 | >MSH2-D603 QLYAVVSFAI | 361  | 10417 |
| >MSH2-D603 QLDAVVSF   | 6739  | >MSH2-D603 QLYAVVSF   | 291  | 6448  |
| >MSH2-D603 AQLDAVVSFA | 455   | >MSH2-D603 AQLYAVVSFA | 808  | 353   |
| >MSH2-D603 AQLDAVVSFA | 177   | >MSH2-D603 AQLYAVVSFA | 370  | 193   |
| >MSH2-D603 AQLDAVVSFA | 179   | >MSH2-D603 AQLYAVVSFA | 310  | 131   |
| >MSH2-D603 AQLDAVVS   | 338   | >MSH2-D603 AQLYAVVS   | 1357 | 1019  |
| >MSH2-D603 AQLDAVVSF  | 12    | >MSH2-D603 AQLYAVVSF  | 100  | 88    |
| >MSH2-D603 AQLDAVVSFA | 155   | >MSH2-D603 AQLYAVVSFA | 319  | 164   |

|                       |      |                       |      |      |
|-----------------------|------|-----------------------|------|------|
| >MSH2-D603 AQLDAVVSFA | 449  | >MSH2-D603 AQLYAVVSFA | 2011 | 1562 |
| >MSH2-D603 AQLDAVVSFA | 69   | >MSH2-D603 AQLYAVVSFA | 1009 | 940  |
| >MSH2-D603 AQLDAVVSFA | 309  | >MSH2-D603 AQLYAVVSFA | 1961 | 1652 |
| >MSH2-D603 AQLDAVVSFA | 79   | >MSH2-D603 AQLYAVVSFA | 803  | 724  |
| >MSH2-D603 AQLDAVVSF  | 52   | >MSH2-D603 AQLYAVVSF  | 19   | 33   |
| >MSH2-D603 AQLDAVVSF  | 29   | >MSH2-D603 AQLYAVVSF  | 29   | 0    |
| >MSH2-D603 AQLDAVVSFA | 509  | >MSH2-D603 AQLYAVVSFA | 454  | 55   |
| >MSH2-D603 AQLDAVVS   | 1492 | >MSH2-D603 AQLYAVVS   | 354  | 1138 |
| >MSH2-D603 AQLDAVVSF  | 2    | >MSH2-D603 AQLYAVVSF  | 2    | 0    |
| >MSH2-D603 AQLDAVVSFA | 322  | >MSH2-D603 AQLYAVVSFA | 114  | 208  |
| >MSH2-D603 AQLDAVVSFA | 168  | >MSH2-D603 AQLYAVVSFA | 65   | 103  |
| >MSH2-D603 LAQLDAVVSF | 156  | >MSH2-D603 LAQLYAVVSF | 102  | 54   |
| >MSH2-D603 LAQLDAVVSF | 84   | >MSH2-D603 LAQLYAVVSF | 28   | 56   |
| >MSH2-D603 LAQLDAVVSF | 44   | >MSH2-D603 LAQLYAVVSF | 22   | 22   |
| >MSH2-D603 LAQLDAVVSF | 857  | >MSH2-D603 LAQLYAVVSF | 403  | 454  |
| >MSH2-D603 LAQLDAVVSF | 126  | >MSH2-D603 LAQLYAVVSF | 100  | 26   |
| >MSH2-D603 VLAQLDAV   | 43   | >MSH2-D603 VLAQLYAV   | 14   | 29   |
| >MSH2-D603 VLAQLDAVV  | 85   | >MSH2-D603 VLAQLYAVV  | 40   | 45   |
| >MSH2-D603 VLAQLDAV   | 5    | >MSH2-D603 VLAQLYAV   | 3    | 2    |
| >MSH2-D603 VLAQLDAVV  | 17   | >MSH2-D603 VLAQLYAVV  | 8    | 9    |
| >MSH2-D603 VLAQLDAVVS | 364  | >MSH2-D603 VLAQLYAVVS | 294  | 70   |
| >MSH2-D603 VLAQLDAV   | 8    | >MSH2-D603 VLAQLYAV   | 4    | 4    |
| >MSH2-D603 VLAQLDAVV  | 20   | >MSH2-D603 VLAQLYAVV  | 6    | 14   |
| >MSH2-D603 VLAQLDAV   | 27   | >MSH2-D603 VLAQLYAV   | 16   | 11   |
| >MSH2-D603 VLAQLDAVV  | 197  | >MSH2-D603 VLAQLYAVV  | 83   | 114  |
| >MSH2-D603 VLAQLDAV   | 3    | >MSH2-D603 VLAQLYAV   | 2    | 1    |
| >MSH2-D603 VLAQLDAVV  | 6    | >MSH2-D603 VLAQLYAVV  | 3    | 3    |
| >MSH2-D603 VLAQLDAV   | 8    | >MSH2-D603 VLAQLYAV   | 5    | 3    |
| >MSH2-D603 VLAQLDAVV  | 14   | >MSH2-D603 VLAQLYAVV  | 12   | 2    |
| >MSH2-D603 VLAQLDAV   | 7    | >MSH2-D603 VLAQLYAV   | 6    | 1    |
| >MSH2-D603 VLAQLDAVV  | 7    | >MSH2-D603 VLAQLYAVV  | 6    | 1    |
| >MSH2-D603 VLAQLDAV   | 6    | >MSH2-D603 VLAQLYAV   | 3    | 3    |
| >MSH2-D603 VLAQLDAVV  | 8    | >MSH2-D603 VLAQLYAVV  | 4    | 4    |
| >MSH2-D603 VLAQLDAV   | 2    | >MSH2-D603 VLAQLYAV   | 2    | 0    |
| >MSH2-D603 VLAQLDAVV  | 2    | >MSH2-D603 VLAQLYAVV  | 2    | 0    |
| >MSH2-D603 VLAQLDAVVS | 238  | >MSH2-D603 VLAQLYAVVS | 213  | 25   |
| >MSH2-D603 VLAQLDAVVS | 35   | >MSH2-D603 VLAQLYAVVS | 33   | 2    |
| >MSH2-D603 VLAQLDAVVS | 449  | >MSH2-D603 VLAQLYAVVS | 716  | 267  |
| >MSH2-D603 VLAQLDAVVS | 70   | >MSH2-D603 VLAQLYAVVS | 25   | 45   |
| >MSH2-D603 VLAQLDAVVS | 464  | >MSH2-D603 VLAQLYAVVS | 867  | 403  |
| >MSH2-D603 VLAQLDAVVS | 382  | >MSH2-D603 VLAQLYAVVS | 821  | 439  |
| >MSH2-D603 DVLAQLDAV  | 459  | >MSH2-D603 DVLAQLYAV  | 120  | 339  |
| >MSH2-D603 DVLAQLDAV  | 1030 | >MSH2-D603 DVLAQLYAV  | 161  | 869  |



|                       |       |                        |       |       |
|-----------------------|-------|------------------------|-------|-------|
| >MSH2-D603 DVLAQLDAV  | 2178  | >MSH2-D603 DVLAQLYAV   | 198   | 1980  |
| >MSH2-D603 DVLAQLDAV  | 961   | >MSH2-D603 DVLAQLYAV   | 60    | 901   |
| >MSH2-D603 DVLAQLDAV\ | 1034  | >MSH2-D603 DVLAQLYAV\  | 243   | 791   |
| >MSH2-D603 DVLAQLDAV  | 196   | >MSH2-D603 DVLAQLYAV   | 305   | 109   |
| >MSH2-D603 DVLAQLDAV  | 121   | >MSH2-D603 DVLAQLYAV   | 23    | 98    |
| >MSH2-D603 DVLAQLDA   | 2348  | >MSH2-D603 DVLAQLYA    | 90    | 2258  |
| >MSH2-D603 DVLAQLDAV  | 12    | >MSH2-D603 DVLAQLYAV   | 6     | 6     |
| >MSH2-D603 DVLAQLDAV\ | 61    | >MSH2-D603 DVLAQLYAV\  | 10    | 51    |
| >MSH2-D603 NDVLAQLDA' | 168   | >MSH2-D603 NDVLAQLYA\  | 107   | 61    |
| >MSH2-D603 NDVLAQLDA' | 213   | >MSH2-D603 NDVLAQLYA\  | 169   | 44    |
| >MSH2-D603 LNDVLAQLD  | 21544 | >MSH2-D603 LNDVLAQLY   | 259   | 21285 |
| >MSH2-D603 LNDVLAQLD  | 28440 | >MSH2-D603 LNDVLAQLY   | 473   | 27967 |
| >MSH2-D603 TLNDVLAQLC | 33378 | >MSH2-D603 TLNDVLAQLY  | 227   | 33151 |
| >MSH2-D603 TLNDVLAQLC | 513   | >MSH2-D603 TLNDVLAQLY  | 46    | 467   |
| >MSH2-D603 TLNDVLAQLC | 172   | >MSH2-D603 TLNDVLAQLY  | 11    | 161   |
| >MSH2-D603 TLNDVLAQLC | 33    | >MSH2-D603 TLNDVLAQLY  | 10    | 23    |
| >MSH2-D603 TLNDVLAQLC | 1025  | >MSH2-D603 TLNDVLAQLY  | 159   | 866   |
| >MSH2-D603 TLNDVLAQLC | 210   | >MSH2-D603 TLNDVLAQLY  | 13    | 197   |
| >MSH2-D603 TLNDVLAQLC | 873   | >MSH2-D603 TLNDVLAQLY  | 78    | 795   |
| >MSH2-D603 TLNDVLAQLC | 151   | >MSH2-D603 TLNDVLAQLY  | 36    | 115   |
| >MSH2-D603 TLNDVLAQLC | 793   | >MSH2-D603 TLNDVLAQLY  | 26    | 767   |
| >MSH2-D603 TLNDVLAQLC | 19    | >MSH2-D603 TLNDVLAQLY  | 7     | 12    |
| >MSH2-D603 TLNDVLAQLC | 33183 | >MSH2-D603 TLNDVLAQLY  | 393   | 32790 |
| >MSH2-D603 TLNDVLAQLC | 29570 | >MSH2-D603 TLNDVLAQLY  | 183   | 29387 |
| >MSH2-D603 TLNDVLAQLC | 3254  | >MSH2-D603 TLNDVLAQLY  | 311   | 2943  |
| >MSH2-D603 TLNDVLAQLC | 25112 | >MSH2-D603 TLNDVLAQLY  | 47    | 25065 |
| >MSH2-D603 TLNDVLAQLC | 22819 | >MSH2-D603 TLNDVLAQLY  | 329   | 22490 |
| >MSH2-E467 EFLVKPSF   | 393   | >MSH2-E467 KFLVKPSF    | 74    | 319   |
| >MSH2-E467 EFLVKPSF   | 1253  | >MSH2-E467 KFLVKPSF    | 357   | 896   |
| >MSH2-E467 EFLVKPSF   | 200   | >MSH2-E467 KFLVKPSF    | 26    | 174   |
| >MSH2-E467 HEFLVKPS   | 54    | >MSH2-E467 HKFLVKPS    | 18995 | 18941 |
| >MSH2-E467 HEFLVKPSF  | 37    | >MSH2-E467 HKFLVKPSF   | 6460  | 6423  |
| >MSH2-E467 HEFLVKPSF  | 110   | >MSH2-E467 HKFLVKPSF   | 5     | 105   |
| >MSH2-E467 HEFLVKPS   | 220   | >MSH2-E467 HKFLVKPS    | 18509 | 18289 |
| >MSH2-E467 HEFLVKPSF  | 6     | >MSH2-E467 HKFLVKPSF   | 990   | 984   |
| >MSH2-E467 HEFLVKPSF  | 75    | >MSH2-E467 HKFLVKPSF   | 14475 | 14400 |
| >MSH2-E467 HEFLVKPS   | 98    | >MSH2-E467 HKFLVKPS    | 19146 | 19048 |
| >MSH2-E467 HEFLVKPSF  | 38    | >MSH2-E467 HKFLVKPSF   | 6187  | 6149  |
| >MSH2-E467 HEFLVKPSF  | 288   | >MSH2-E467 HKFLVKPSF   | 13144 | 12856 |
| >MSH2-E467 HEFLVKPSF  | 81    | >MSH2-E467 HKFLVKPSF   | 11241 | 11160 |
| >MSH2-E467 HEFLVKPSF  | 20    | >MSH2-E467 HKFLVKPSF   | 11510 | 11490 |
| >MSH2-E467 NHEFLVKPSF | 4227  | >MSH2-E467 NHHKFLVKPSF | 424   | 3803  |
| >MSH2-E467 ENHEFLVK   | 313   | >MSH2-E467 ENHKFLVK    | 415   | 102   |

|                       |       |                       |      |       |
|-----------------------|-------|-----------------------|------|-------|
| >MSH2-E467 VENHEFLV   | 140   | >MSH2-E467 VENHKFLV   | 99   | 41    |
| >MSH2-E467 VENHEFLV   | 494   | >MSH2-E467 VENHKFLV   | 506  | 12    |
| >MSH2-E467 QVENHEFLV  | 371   | >MSH2-E467 QVENHKFLV  | 505  | 134   |
| >MSH2-E467 QVENHEFLV  | 411   | >MSH2-E467 QVENHKFLV  | 467  | 56    |
| >MSH2-E467 QVENHEFLV  | 386   | >MSH2-E467 QVENHKFLV  | 141  | 245   |
| >MSH2-E467 QVENHEFLV  | 104   | >MSH2-E467 QVENHKFLV  | 103  | 1     |
| >MSH2-E467 QVENHEFLV  | 1455  | >MSH2-E467 QVENHKFLV  | 428  | 1027  |
| >MSH2-E467 QVENHEFLV  | 456   | >MSH2-E467 QVENHKFLV  | 367  | 89    |
| >MSH2-E467 DQVENHEF   | 456   | >MSH2-E467 DQVENHKF   | 770  | 314   |
| >MSH2-E467 DQVENHEFL  | 468   | >MSH2-E467 DQVENHKFL  | 1180 | 712   |
| >MSH2-E467 DQVENHEF   | 114   | >MSH2-E467 DQVENHKF   | 192  | 78    |
| >MSH2-E467 DQVENHEF   | 31    | >MSH2-E467 DQVENHKF   | 43   | 12    |
| >MSH2-E467 MDQVENHEF  | 43    | >MSH2-E467 MDQVENHKF  | 50   | 7     |
| >MSH2-E467 DMDQVENHI  | 70    | >MSH2-E467 DMDQVENHI  | 178  | 108   |
| >MSH2-E467 DMDQVENHI  | 86    | >MSH2-E467 DMDQVENHI  | 250  | 164   |
| >MSH2-E467 DMDQVENHI  | 311   | >MSH2-E467 DMDQVENHI  | 1447 | 1136  |
| >MSH2-G322 GSQSLAALLN | 15    | >MSH2-G322 DSQSLAALLN | 506  | 491   |
| >MSH2-G322 GSQSLAALLN | 481   | >MSH2-G322 DSQSLAALLN | 5694 | 5213  |
| >MSH2-G322 GSQSLAALLN | 3789  | >MSH2-G322 DSQSLAALLN | 251  | 3538  |
| >MSH2-G322 GSQSLAAL   | 107   | >MSH2-G322 DSQSLAAL   | 2045 | 1938  |
| >MSH2-G322 GSQSLAALL  | 119   | >MSH2-G322 DSQSLAALL  | 1844 | 1725  |
| >MSH2-G322 GSQSLAALL  | 79    | >MSH2-G322 DSQSLAALL  | 1161 | 1082  |
| >MSH2-G322 GSQSLAALL  | 10    | >MSH2-G322 DSQSLAALL  | 446  | 436   |
| >MSH2-G322 GSQSLAALLN | 272   | >MSH2-G322 DSQSLAALLN | 1687 | 1415  |
| >MSH2-G322 TGSQSLAALL | 17464 | >MSH2-G322 TDSQSLAALL | 213  | 17251 |
| >MSH2-G322 TTGSQSLA   | 11973 | >MSH2-G322 TTDSQSLA   | 260  | 11713 |
| >MSH2-G322 TTGSQSLAA  | 9209  | >MSH2-G322 TTDSQSLAA  | 82   | 9127  |
| >MSH2-G322 TTGSQSLAAL | 12940 | >MSH2-G322 TTDSQSLAAL | 246  | 12694 |
| >MSH2-G322 TTGSQSLAAL | 305   | >MSH2-G322 TTDSQSLAAL | 493  | 188   |
| >MSH2-G322 TTGSQSLAAL | 277   | >MSH2-G322 TTDSQSLAAL | 4951 | 4674  |
| >MSH2-G322 TTGSQSLAAL | 670   | >MSH2-G322 TTDSQSLAAL | 446  | 224   |
| >MSH2-G322 TTGSQSLAAL | 343   | >MSH2-G322 TTDSQSLAAL | 750  | 407   |
| >MSH2-G322 TTGSQSLAA  | 1464  | >MSH2-G322 TTDSQSLAA  | 355  | 1109  |
| >MSH2-G322 TTGSQSLAAL | 334   | >MSH2-G322 TTDSQSLAAL | 68   | 266   |
| >MSH2-G322 TTGSQSLAAL | 407   | >MSH2-G322 TTDSQSLAAL | 81   | 326   |
| >MSH2-G322 TTGSQSLAAL | 110   | >MSH2-G322 TTDSQSLAAL | 44   | 66    |
| >MSH2-G322 TTGSQSLAAL | 250   | >MSH2-G322 TTDSQSLAAL | 79   | 171   |
| >MSH2-G322 TTGSQSLAAL | 4818  | >MSH2-G322 TTDSQSLAAL | 261  | 4557  |
| >MSH2-G322 TTGSQSLAAL | 286   | >MSH2-G322 TTDSQSLAAL | 240  | 46    |
| >MSH2-G322 TTGSQSLAAL | 45    | >MSH2-G322 TTDSQSLAAL | 47   | 2     |
| >MSH2-G322 TTGSQSLAAL | 199   | >MSH2-G322 TTDSQSLAAL | 169  | 30    |
| >MSH2-G322 DTTGSQSLAA | 596   | >MSH2-G322 DTTDSQSLAA | 439  | 157   |
| >MSH2-G322 DTTGSQSLAA | 310   | >MSH2-G322 DTTDSQSLAA | 108  | 202   |

|                        |       |                        |     |       |
|------------------------|-------|------------------------|-----|-------|
| >MSH2-G322 DTTGSQSL    | 282   | >MSH2-G322 DTTDSQSL    | 537 | 255   |
| >MSH2-G322 DTTGSQSLAA  | 21    | >MSH2-G322 DTTDSQSLAA  | 34  | 13    |
| >MSH2-G322 DTTGSQSLAA  | 223   | >MSH2-G322 DTTDSQSLAA  | 670 | 447   |
| >MSH2-G322 DTTGSQSL    | 172   | >MSH2-G322 DTTDSQSL    | 132 | 40    |
| >MSH2-G322 DTTGSQSLA   | 86    | >MSH2-G322 DTTDSQSLA   | 61  | 25    |
| >MSH2-G322 DTTGSQSLAA  | 59    | >MSH2-G322 DTTDSQSLAA  | 44  | 15    |
| >MSH2-G322 DTTGSQSL    | 1310  | >MSH2-G322 DTTDSQSL    | 489 | 821   |
| >MSH2-G322 DTTGSQSLAA  | 682   | >MSH2-G322 DTTDSQSLAA  | 204 | 478   |
| >MSH2-G322 DTTGSQSL    | 457   | >MSH2-G322 DTTDSQSL    | 532 | 75    |
| >MSH2-G322 DTTGSQSLAA  | 252   | >MSH2-G322 DTTDSQSLAA  | 192 | 60    |
| >MSH2-G322 VEDTTGSQSL  | 47    | >MSH2-G322 VEDTTDSQSL  | 87  | 40    |
| >MSH2-G322 SVEDTTGSQS  | 117   | >MSH2-G322 SVEDTTDSQS  | 139 | 22    |
| >MSH2-G587 GYVEPMQTL   | 637   | >MSH2-G587 RYVEPMQTL   | 350 | 287   |
| >MSH2-G587 GYVEPMQTL   | 1126  | >MSH2-G587 RYVEPMQTL   | 369 | 757   |
| >MSH2-G587 GYVEPMQTL   | 2169  | >MSH2-G587 RYVEPMQTL   | 216 | 1953  |
| >MSH2-G587 GYVEPMQT    | 3464  | >MSH2-G587 RYVEPMQT    | 493 | 2971  |
| >MSH2-G587 GYVEPMQTL   | 21    | >MSH2-G587 RYVEPMQTL   | 6   | 15    |
| >MSH2-G587 GYVEPMQTL   | 1070  | >MSH2-G587 RYVEPMQTL   | 264 | 806   |
| >MSH2-G587 GYVEPMQTL   | 1392  | >MSH2-G587 RYVEPMQTL   | 372 | 1020  |
| >MSH2-G587 GYVEPMQTL   | 3033  | >MSH2-G587 RYVEPMQTL   | 361 | 2672  |
| >MSH2-G587 SGYVEPMQT   | 3184  | >MSH2-G587 SRYVEPMQTI  | 63  | 3121  |
| >MSH2-G587 SGYVEPMQT   | 24209 | >MSH2-G587 SRYVEPMQTI  | 58  | 24151 |
| >MSH2-G587 SGYVEPMQT   | 7680  | >MSH2-G587 SRYVEPMQTI  | 59  | 7621  |
| >MSH2-G587 SGYVEPMQT   | 24375 | >MSH2-G587 SRYVEPMQTI  | 132 | 24243 |
| >MSH2-G587 SGYVEPMQT   | 24927 | >MSH2-G587 SRYVEPMQTI  | 110 | 24817 |
| >MSH2-G587 IVKEIVNISSG | 19491 | >MSH2-G587 IVKEIVNISSR | 27  | 19464 |
| >MSH2-G587 IVKEIVNISSG | 25510 | >MSH2-G587 IVKEIVNISSR | 86  | 25424 |
| >MSH2-G587 IVKEIVNISSG | 26000 | >MSH2-G587 IVKEIVNISSR | 27  | 25973 |
| >MSH2-G587 SSGYVEPM    | 12993 | >MSH2-G587 SSRYVEPM    | 93  | 12900 |
| >MSH2-G587 SSGYVEPMQ   | 13974 | >MSH2-G587 SSRYVEPMQ   | 346 | 13628 |
| >MSH2-G587 SSGYVEPMQ   | 14851 | >MSH2-G587 SSRYVEPMQ   | 338 | 14513 |
| >MSH2-G587 SSGYVEPMQ   | 11340 | >MSH2-G587 SSRYVEPMQ   | 49  | 11291 |
| >MSH2-G587 SSGYVEPM    | 619   | >MSH2-G587 SSRYVEPM    | 230 | 389   |
| >MSH2-G587 SSGYVEPM    | 3252  | >MSH2-G587 SSRYVEPM    | 238 | 3014  |
| >MSH2-G587 SSGYVEPM    | 1144  | >MSH2-G587 SSRYVEPM    | 31  | 1113  |
| >MSH2-G587 SSGYVEPMQ   | 321   | >MSH2-G587 SSRYVEPMQ   | 17  | 304   |
| >MSH2-G587 SSGYVEPMQ   | 6172  | >MSH2-G587 SSRYVEPMQ   | 410 | 5762  |
| >MSH2-G587 SSGYVEPMQ   | 275   | >MSH2-G587 SSRYVEPMQ   | 19  | 256   |
| >MSH2-G587 SSGYVEPMQ   | 354   | >MSH2-G587 SSRYVEPMQ   | 460 | 106   |
| >MSH2-G587 ISSGYVEPM   | 336   | >MSH2-G587 ISSRYVEPM   | 181 | 155   |
| >MSH2-G587 ISSGYVEPM   | 407   | >MSH2-G587 ISSRYVEPM   | 919 | 512   |
| >MSH2-G587 ISSGYVEPM   | 134   | >MSH2-G587 ISSRYVEPM   | 137 | 3     |
| >MSH2-G587 ISSGYVEPM   | 280   | >MSH2-G587 ISSRYVEPM   | 50  | 230   |

|                       |       |                       |      |       |
|-----------------------|-------|-----------------------|------|-------|
| >MSH2-G587ISSGYVEPM   | 7     | >MSH2-G587ISSRYVEPM   | 21   | 14    |
| >MSH2-G587ISSGYVEPM   | 436   | >MSH2-G587ISSRYVEPM   | 1265 | 829   |
| >MSH2-G587ISSGYVEPM   | 98    | >MSH2-G587ISSRYVEPM   | 61   | 37    |
| >MSH2-G587ISSGYVEPM   | 274   | >MSH2-G587ISSRYVEPM   | 1123 | 849   |
| >MSH2-G587ISSGYVEPM   | 171   | >MSH2-G587ISSRYVEPM   | 188  | 17    |
| >MSH2-G587NISSGYVEPM  | 89    | >MSH2-G587NISSRYVEPM  | 321  | 232   |
| >MSH2-G587NISSGYVEPM  | 348   | >MSH2-G587NISSRYVEPM  | 1175 | 827   |
| >MSH2-G587NISSGYVEPM  | 496   | >MSH2-G587NISSRYVEPM  | 846  | 350   |
| >MSH2-G587VNISSGYVEPI | 257   | >MSH2-G587VNISSRYVEPI | 152  | 105   |
| >MSH2-G587VNISSGYVEPI | 360   | >MSH2-G587VNISSRYVEPI | 697  | 337   |
| >MSH2-G587VNISSGYVEPI | 177   | >MSH2-G587VNISSRYVEPI | 185  | 8     |
| >MSH2-G587IVNISSGYV   | 238   | >MSH2-G587IVNISSRYV   | 498  | 260   |
| >MSH2-G587IVNISSGYV   | 28    | >MSH2-G587IVNISSRYV   | 81   | 53    |
| >MSH2-G587IVNISSGYV   | 292   | >MSH2-G587IVNISSRYV   | 685  | 393   |
| >MSH2-G587IVNISSGYV   | 68    | >MSH2-G587IVNISSRYV   | 69   | 1     |
| >MSH2-G587IVNISSGYV   | 471   | >MSH2-G587IVNISSRYV   | 1004 | 533   |
| >MSH2-G587IVNISSGYV   | 109   | >MSH2-G587IVNISSRYV   | 175  | 66    |
| >MSH2-G587IVNISSGY    | 444   | >MSH2-G587IVNISSRY    | 373  | 71    |
| >MSH2-G587IVNISSGY    | 148   | >MSH2-G587IVNISSRY    | 135  | 13    |
| >MSH2-G587IVNISSGY    | 20    | >MSH2-G587IVNISSRY    | 29   | 9     |
| >MSH2-G587IVNISSGYV   | 79    | >MSH2-G587IVNISSRYV   | 480  | 401   |
| >MSH2-G587IVNISSGY    | 193   | >MSH2-G587IVNISSRY    | 201  | 8     |
| >MSH2-G587IVNISSGY    | 130   | >MSH2-G587IVNISSRY    | 177  | 47    |
| >MSH2-G587IVNISSGY    | 424   | >MSH2-G587IVNISSRY    | 1035 | 611   |
| >MSH2-G587IVNISSGY    | 21    | >MSH2-G587IVNISSRY    | 19   | 2     |
| >MSH2-G587IVNISSGY    | 289   | >MSH2-G587IVNISSRY    | 530  | 241   |
| >MSH2-G587EIVNISSGYV  | 76    | >MSH2-G587EIVNISSRYV  | 147  | 71    |
| >MSH2-G587EIVNISSGYV  | 494   | >MSH2-G587EIVNISSRYV  | 659  | 165   |
| >MSH2-G587EIVNISSGYV  | 130   | >MSH2-G587EIVNISSRYV  | 149  | 19    |
| >MSH2-G587EIVNISSGYV  | 335   | >MSH2-G587EIVNISSRYV  | 418  | 83    |
| >MSH2-G587EIVNISSGYV  | 235   | >MSH2-G587EIVNISSRYV  | 313  | 78    |
| >MSH2-G587EIVNISSGY   | 145   | >MSH2-G587EIVNISSRY   | 296  | 151   |
| >MSH2-G587EIVNISSGY   | 4     | >MSH2-G587EIVNISSRY   | 5    | 1     |
| >MSH2-G587EIVNISSGY   | 10    | >MSH2-G587EIVNISSRY   | 10   | 0     |
| >MSH2-G587EIVNISSGY   | 26    | >MSH2-G587EIVNISSRY   | 380  | 354   |
| >MSH2-G587EIVNISSGY   | 677   | >MSH2-G587EIVNISSRY   | 443  | 234   |
| >MSH2-G587EIVNISSGY   | 241   | >MSH2-G587EIVNISSRY   | 266  | 25    |
| >MSH2-G587EIVNISSG    | 31275 | >MSH2-G587EIVNISSR    | 74   | 31201 |
| >MSH2-G587EIVNISSG    | 11323 | >MSH2-G587EIVNISSR    | 3    | 11320 |
| >MSH2-G587EIVNISSGY   | 47    | >MSH2-G587EIVNISSRY   | 52   | 5     |
| >MSH2-G587EIVNISSGYV  | 14    | >MSH2-G587EIVNISSRYV  | 36   | 22    |
| >MSH2-G587EIVNISSGYV  | 6     | >MSH2-G587EIVNISSRYV  | 12   | 6     |
| >MSH2-G587EIVNISSGY   | 447   | >MSH2-G587EIVNISSRY   | 699  | 252   |

|                       |       |                       |      |       |
|-----------------------|-------|-----------------------|------|-------|
| >MSH2-G587EIVNISSGY   | 416   | >MSH2-G587EIVNISSRY   | 1174 | 758   |
| >MSH2-G587EIVNISSGY   | 240   | >MSH2-G587EIVNISSRY   | 401  | 161   |
| >MSH2-G587EIVNISSGY   | 201   | >MSH2-G587EIVNISSRY   | 33   | 168   |
| >MSH2-G587EIVNISSGY   | 4797  | >MSH2-G587EIVNISSRY   | 361  | 4436  |
| >MSH2-G587EIVNISSG    | 36385 | >MSH2-G587EIVNISSR    | 491  | 35894 |
| >MSH2-G587KEIVNISSGYV | 288   | >MSH2-G587KEIVNISSRYV | 305  | 17    |
| >MSH2-G587KEIVNISSGYV | 459   | >MSH2-G587KEIVNISSRYV | 665  | 206   |
| >MSH2-G587KEIVNISSGY  | 355   | >MSH2-G587KEIVNISSRY  | 186  | 169   |
| >MSH2-G587KEIVNISSGY  | 262   | >MSH2-G587KEIVNISSRY  | 368  | 106   |
| >MSH2-G587KEIVNISSGY  | 149   | >MSH2-G587KEIVNISSRY  | 233  | 84    |
| >MSH2-G587KEIVNISSGYV | 165   | >MSH2-G587KEIVNISSRYV | 297  | 132   |
| >MSH2-G587KEIVNISSGYV | 223   | >MSH2-G587KEIVNISSRYV | 142  | 81    |
| >MSH2-G587KEIVNISSGY  | 136   | >MSH2-G587KEIVNISSRY  | 174  | 38    |
| >MSH2-G587KEIVNISSGY  | 80    | >MSH2-G587KEIVNISSRY  | 97   | 17    |
| >MSH2-G587KEIVNISSGYV | 374   | >MSH2-G587KEIVNISSRYV | 271  | 103   |
| >MSH2-G587KEIVNISSG   | 767   | >MSH2-G587KEIVNISSR   | 454  | 313   |
| >MSH2-G587KEIVNISSGY  | 241   | >MSH2-G587KEIVNISSRY  | 811  | 570   |
| >MSH2-G587KEIVNISSGYV | 9     | >MSH2-G587KEIVNISSRYV | 14   | 5     |
| >MSH2-G587VKEIVNISSGY | 965   | >MSH2-G587VKEIVNISSRY | 277  | 688   |
| >MSH2-G674GKSTYIRQTG' | 882   | >MSH2-G674SKSTYIRQTG\ | 314  | 568   |
| >MSH2-G674GGKSTYIR    | 68    | >MSH2-G674GSKSTYIR    | 12   | 56    |
| >MSH2-G674GGKSTYIR    | 5328  | >MSH2-G674GSKSTYIR    | 384  | 4944  |
| >MSH2-G674MGGKSTYI    | 2607  | >MSH2-G674MGSKSTYI    | 417  | 2190  |
| >MSH2-G674MGGKSTYIR   | 139   | >MSH2-G674MGSKSTYIR   | 68   | 71    |
| >MSH2-G674MGGKSTYIR   | 202   | >MSH2-G674MGSKSTYIR   | 33   | 169   |
| >MSH2-G674MGGKSTYI    | 4322  | >MSH2-G674MGSKSTYI    | 325  | 3997  |
| >MSH2-G674MGGKSTYIR   | 35    | >MSH2-G674MGSKSTYIR   | 50   | 15    |
| >MSH2-G674MGGKSTYI    | 741   | >MSH2-G674MGSKSTYI    | 434  | 307   |
| >MSH2-G674NMGGKSTYI   | 621   | >MSH2-G674NMGSKSTYI   | 416  | 205   |
| >MSH2-G674NMGGKSTYI   | 30    | >MSH2-G674NMGSKSTYI   | 36   | 6     |
| >MSH2-G674NMGGKSTYI   | 39    | >MSH2-G674NMGSKSTYI   | 28   | 11    |
| >MSH2-G674NMGGKSTYI   | 20    | >MSH2-G674NMGSKSTYI   | 30   | 10    |
| >MSH2-G674NMGGKSTYI   | 36    | >MSH2-G674NMGSKSTYI   | 30   | 6     |
| >MSH2-G674NMGGKSTYI   | 103   | >MSH2-G674NMGSKSTYI   | 153  | 50    |
| >MSH2-G674NMGGKSTYI   | 28    | >MSH2-G674NMGSKSTYI   | 42   | 14    |
| >MSH2-G674NMGGKSTYI   | 68    | >MSH2-G674NMGSKSTYI   | 313  | 245   |
| >MSH2-G674NMGGKSTY    | 89    | >MSH2-G674NMGSKSTY    | 145  | 56    |
| >MSH2-G674NMGGKSTY    | 203   | >MSH2-G674NMGSKSTY    | 96   | 107   |
| >MSH2-G674NMGGKSTYIF  | 111   | >MSH2-G674NMGSKSTYIR  | 139  | 28    |
| >MSH2-G674NMGGKSTYIF  | 265   | >MSH2-G674NMGSKSTYIR  | 270  | 5     |
| >MSH2-G674NMGGKSTYIF  | 174   | >MSH2-G674NMGSKSTYIR  | 145  | 29    |
| >MSH2-G674NMGGKSTY    | 644   | >MSH2-G674NMGSKSTY    | 406  | 238   |
| >MSH2-G674NMGGKSTY    | 111   | >MSH2-G674NMGSKSTY    | 85   | 26    |

|                      |       |                      |      |       |
|----------------------|-------|----------------------|------|-------|
| >MSH2-G674NMGGKSTY   | 66    | >MSH2-G674NMGSKSTY   | 85   | 19    |
| >MSH2-G674NMGGKSTY   | 2771  | >MSH2-G674NMGSKSTY   | 368  | 2403  |
| >MSH2-G674NMGGKSTYIF | 39    | >MSH2-G674NMGSKSTYIR | 47   | 8     |
| >MSH2-G674GPNMGGKST  | 481   | >MSH2-G674GPNMGGKST  | 743  | 262   |
| >MSH2-G674GPNMGGKST  | 173   | >MSH2-G674GPNMGGKST  | 61   | 112   |
| >MSH2-G674TGPNMGGKS  | 700   | >MSH2-G674TGPNMGGKS  | 473  | 227   |
| >MSH2-G674TGPNMGGKS  | 414   | >MSH2-G674TGPNMGGKS  | 684  | 270   |
| >MSH2-G674TGPNMGGKS  | 307   | >MSH2-G674TGPNMGGKS  | 142  | 165   |
| >MSH2-G674ITGPNMGGK  | 268   | >MSH2-G674ITGPNMGGK  | 169  | 99    |
| >MSH2-G674ITGPNMGGK  | 95    | >MSH2-G674ITGPNMGGK  | 64   | 31    |
| >MSH2-G674ITGPNMGGK  | 1853  | >MSH2-G674ITGPNMGGK  | 407  | 1446  |
| >MSH2-G674ITGPNMGGK  | 324   | >MSH2-G674ITGPNMGGK  | 341  | 17    |
| >MSH2-G674ITGPNMGGK  | 349   | >MSH2-G674ITGPNMGGK  | 342  | 7     |
| >MSH2-G674IITGPNMGGK | 73    | >MSH2-G674IITGPNMGGK | 55   | 18    |
| >MSH2-G674IITGPNMGGK | 253   | >MSH2-G674IITGPNMGGK | 144  | 109   |
| >MSH2-G674HIITGPNMGG | 176   | >MSH2-G674HIITGPNMGG | 122  | 54    |
| >MSH2-G674HIITGPNMGG | 283   | >MSH2-G674HIITGPNMGG | 171  | 112   |
| >MSH2-G674HIITGPNMGG | 300   | >MSH2-G674HIITGPNMGG | 80   | 220   |
| >MSH2-G674HIITGPNMGG | 131   | >MSH2-G674HIITGPNMGG | 126  | 5     |
| >MSH2-G692GCFVPCESA  | 13594 | >MSH2-G692ECFVPCESA  | 237  | 13357 |
| >MSH2-G692GCFVPCESAE | 3181  | >MSH2-G692ECFVPCESAE | 17   | 3164  |
| >MSH2-G692GCFVPCESAE | 8348  | >MSH2-G692ECFVPCESAE | 52   | 8296  |
| >MSH2-G692IGCFVPCESA | 39378 | >MSH2-G692IECFVPCESA | 457  | 38921 |
| >MSH2-G692AQIGCFVP   | 535   | >MSH2-G692AQIECFVP   | 291  | 244   |
| >MSH2-G692AQIGCFVPC  | 12    | >MSH2-G692AQIECFVPC  | 7    | 5     |
| >MSH2-G692AQIGCFVPC  | 217   | >MSH2-G692AQIECFVPC  | 100  | 117   |
| >MSH2-G692AQIGCFVPC  | 667   | >MSH2-G692AQIECFVPC  | 167  | 500   |
| >MSH2-G692MAQIGCFV   | 76    | >MSH2-G692MAQIECFV   | 227  | 151   |
| >MSH2-G692MAQIGCFV   | 201   | >MSH2-G692MAQIECFV   | 427  | 226   |
| >MSH2-G692MAQIGCFV   | 51    | >MSH2-G692MAQIECFV   | 110  | 59    |
| >MSH2-G692MAQIGCFV   | 144   | >MSH2-G692MAQIECFV   | 343  | 199   |
| >MSH2-G692MAQIGCFV   | 438   | >MSH2-G692MAQIECFV   | 1560 | 1122  |
| >MSH2-G692LMAQIGCFV  | 19    | >MSH2-G692LMAQIECFV  | 16   | 3     |
| >MSH2-G692LMAQIGCF   | 739   | >MSH2-G692LMAQIECF   | 263  | 476   |
| >MSH2-G692LMAQIGCFV  | 3     | >MSH2-G692LMAQIECFV  | 3    | 0     |
| >MSH2-G692LMAQIGCFVF | 168   | >MSH2-G692LMAQIECFVP | 169  | 1     |
| >MSH2-G692LMAQIGCFV  | 5     | >MSH2-G692LMAQIECFV  | 10   | 5     |
| >MSH2-G692LMAQIGCFV  | 11    | >MSH2-G692LMAQIECFV  | 17   | 6     |
| >MSH2-G692LMAQIGCFVF | 243   | >MSH2-G692LMAQIECFVP | 268  | 25    |
| >MSH2-G692LMAQIGCFV  | 2     | >MSH2-G692LMAQIECFV  | 2    | 0     |
| >MSH2-G692LMAQIGCFVF | 69    | >MSH2-G692LMAQIECFVP | 71   | 2     |
| >MSH2-G692LMAQIGCFV  | 5     | >MSH2-G692LMAQIECFV  | 6    | 1     |
| >MSH2-G692LMAQIGCFVF | 586   | >MSH2-G692LMAQIECFVP | 479  | 107   |

|                      |      |                       |      |      |
|----------------------|------|-----------------------|------|------|
| >MSH2-G692LMAQIGCFV  | 4    | >MSH2-G692LMAQIECFV   | 5    | 1    |
| >MSH2-G692LMAQIGCFV\ | 533  | >MSH2-G692LMAQIECFVP  | 422  | 111  |
| >MSH2-G692LMAQIGCFV  | 2    | >MSH2-G692LMAQIECFV   | 2    | 0    |
| >MSH2-G692LMAQIGCFV\ | 620  | >MSH2-G692LMAQIECFVP  | 432  | 188  |
| >MSH2-G692LMAQIGCFV  | 2    | >MSH2-G692LMAQIECFV   | 2    | 0    |
| >MSH2-G692LMAQIGCFV\ | 20   | >MSH2-G692LMAQIECFVP  | 19   | 1    |
| >MSH2-G692LMAQIGCFV  | 419  | >MSH2-G692LMAQIECFV   | 1888 | 1469 |
| >MSH2-G692LMAQIGCF   | 36   | >MSH2-G692LMAQIECF    | 47   | 11   |
| >MSH2-G692LMAQIGCFV  | 244  | >MSH2-G692LMAQIECFV   | 2063 | 1819 |
| >MSH2-G692LMAQIGCF   | 316  | >MSH2-G692LMAQIECF    | 1440 | 1124 |
| >MSH2-G692LMAQIGCF   | 42   | >MSH2-G692LMAQIECF    | 25   | 17   |
| >MSH2-G692LMAQIGCF   | 2066 | >MSH2-G692LMAQIECF    | 454  | 1612 |
| >MSH2-G692VLMAQIGCF\ | 14   | >MSH2-G692VLMAQIECFV  | 12   | 2    |
| >MSH2-G692VLMAQIGCF  | 1046 | >MSH2-G692VLMAQIECF   | 172  | 874  |
| >MSH2-G692VLMAQIGCF\ | 31   | >MSH2-G692VLMAQIECFV  | 19   | 12   |
| >MSH2-G692VLMAQIGCF\ | 26   | >MSH2-G692VLMAQIECFV  | 28   | 2    |
| >MSH2-G692VLMAQIGCF\ | 103  | >MSH2-G692VLMAQIECFV  | 197  | 94   |
| >MSH2-G692VLMAQIGC   | 35   | >MSH2-G692VLMAQIEC    | 28   | 7    |
| >MSH2-G692VLMAQIGCF\ | 2    | >MSH2-G692VLMAQIECFV  | 2    | 0    |
| >MSH2-G692VLMAQIGC   | 197  | >MSH2-G692VLMAQIEC    | 190  | 7    |
| >MSH2-G692VLMAQIGCF\ | 3    | >MSH2-G692VLMAQIECFV  | 3    | 0    |
| >MSH2-G692VLMAQIGCF\ | 5    | >MSH2-G692VLMAQIECFV  | 5    | 0    |
| >MSH2-G692VLMAQIGC   | 86   | >MSH2-G692VLMAQIEC    | 98   | 12   |
| >MSH2-G692VLMAQIGCF\ | 2    | >MSH2-G692VLMAQIECFV  | 2    | 0    |
| >MSH2-G692VLMAQIGC   | 18   | >MSH2-G692VLMAQIEC    | 12   | 6    |
| >MSH2-G692VLMAQIGCF\ | 2    | >MSH2-G692VLMAQIECFV  | 2    | 0    |
| >MSH2-G692VLMAQIGCF\ | 487  | >MSH2-G692VLMAQIECFV  | 652  | 165  |
| >MSH2-G692VLMAQIGCF  | 91   | >MSH2-G692VLMAQIECF   | 75   | 16   |
| >MSH2-G692VLMAQIGCF  | 175  | >MSH2-G692VLMAQIECF   | 455  | 280  |
| >MSH2-G692VLMAQIGCF  | 340  | >MSH2-G692VLMAQIECF   | 54   | 286  |
| >MSH2-G692IVLMAQIGCF | 143  | >MSH2-G692IVLMAQIECF\ | 102  | 41   |
| >MSH2-G692IVLMAQIGCF | 456  | >MSH2-G692IVLMAQIECF\ | 398  | 58   |
| >MSH2-G692IVLMAQIGCF | 16   | >MSH2-G692IVLMAQIECF\ | 22   | 6    |
| >MSH2-G692IVLMAQIGCF | 12   | >MSH2-G692IVLMAQIECF\ | 15   | 3    |
| >MSH2-G692IVLMAQIGCF | 216  | >MSH2-G692IVLMAQIECF\ | 318  | 102  |
| >MSH2-G692IVLMAQIGCF | 12   | >MSH2-G692IVLMAQIECF\ | 13   | 1    |
| >MSH2-G692IVLMAQIGCF | 11   | >MSH2-G692IVLMAQIECF\ | 12   | 1    |
| >MSH2-G692IVLMAQIGCF | 13   | >MSH2-G692IVLMAQIECF\ | 13   | 0    |
| >MSH2-G692IVLMAQIGCF | 327  | >MSH2-G692IVLMAQIECF\ | 492  | 165  |
| >MSH2-G692IVLMAQIGCF | 143  | >MSH2-G692IVLMAQIECF\ | 394  | 251  |
| >MSH2-G692IVLMAQIGCF | 535  | >MSH2-G692IVLMAQIECF  | 170  | 365  |
| >MSH2-G827GIHVAELA   | 3768 | >MSH2-G827RIHVAELA    | 85   | 3683 |
| >MSH2-G827GIHVAELANF | 6145 | >MSH2-G827RIHVAELANF  | 172  | 5973 |

|                      |       |                      |       |       |
|----------------------|-------|----------------------|-------|-------|
| >MSH2-G827GIHVAELANF | 8720  | >MSH2-G827RIHVAELANF | 379   | 8341  |
| >MSH2-G827GIHVAELANF | 1061  | >MSH2-G827RIHVAELANF | 217   | 844   |
| >MSH2-G827GIHVAELANF | 1485  | >MSH2-G827RIHVAELANF | 105   | 1380  |
| >MSH2-G827GIHVAELANF | 953   | >MSH2-G827RIHVAELANF | 34    | 919   |
| >MSH2-G827GIHVAELANF | 1888  | >MSH2-G827RIHVAELANF | 217   | 1671  |
| >MSH2-G827FGIHVAEL   | 83    | >MSH2-G827FRIHVAEL   | 565   | 482   |
| >MSH2-G827FGIHVAEL   | 164   | >MSH2-G827FRIHVAEL   | 1805  | 1641  |
| >MSH2-G827FGIHVAELA  | 412   | >MSH2-G827FRIHVAELA  | 3297  | 2885  |
| >MSH2-G827FGIHVAELA  | 291   | >MSH2-G827FRIHVAELA  | 2125  | 1834  |
| >MSH2-G827FGIHVAEL   | 2377  | >MSH2-G827FRIHVAEL   | 82    | 2295  |
| >MSH2-G827FGIHVAELAN | 203   | >MSH2-G827FRIHVAELAN | 14    | 189   |
| >MSH2-G827FGIHVAELAN | 319   | >MSH2-G827FRIHVAELAN | 17329 | 17010 |
| >MSH2-G827FGIHVAEL   | 22665 | >MSH2-G827FRIHVAEL   | 107   | 22558 |
| >MSH2-G827FGIHVAELA  | 24030 | >MSH2-G827FRIHVAELA  | 442   | 23588 |
| >MSH2-G827FGIHVAELAN | 21642 | >MSH2-G827FRIHVAELAN | 95    | 21547 |
| >MSH2-G827FGIHVAEL   | 1953  | >MSH2-G827FRIHVAEL   | 19    | 1934  |
| >MSH2-G827SFGIHVAEL  | 112   | >MSH2-G827SFRIHVAEL  | 745   | 633   |
| >MSH2-G827SFGIHVAEL  | 13047 | >MSH2-G827SFRIHVAEL  | 78    | 12969 |
| >MSH2-G827SFGIHVAELA | 13238 | >MSH2-G827SFRIHVAELA | 183   | 13055 |
| >MSH2-G827SFGIHVAEL  | 3749  | >MSH2-G827SFRIHVAEL  | 201   | 3548  |
| >MSH2-G827QSFGIHVAE  | 85    | >MSH2-G827QSFRIHVAE  | 212   | 127   |
| >MSH2-G827QSFGIHVAEL | 30    | >MSH2-G827QSFRIHVAEL | 57    | 27    |
| >MSH2-G827QSFGIHVA   | 58    | >MSH2-G827QSFRIHVA   | 153   | 95    |
| >MSH2-G827QSFGIHVAEL | 309   | >MSH2-G827QSFRIHVAEL | 375   | 66    |
| >MSH2-G827QSFGIHVAEL | 19    | >MSH2-G827QSFRIHVAEL | 33    | 14    |
| >MSH2-G827QSFGIHVAEL | 480   | >MSH2-G827QSFRIHVAEL | 136   | 344   |
| >MSH2-G827QSFGIHVAEL | 9     | >MSH2-G827QSFRIHVAEL | 21    | 12    |
| >MSH2-G827CDQSFGIHV  | 371   | >MSH2-G827CDQSFRIHV  | 703   | 332   |
| >MSH2-G827GVCDQSFGI  | 52    | >MSH2-G827GVCDQSFRI  | 303   | 251   |
| >MSH2-G827GVCDQSFGIH | 63    | >MSH2-G827GVCDQSFRIH | 139   | 76    |
| >MSH2-G827GVCDQSFGI  | 196   | >MSH2-G827GVCDQSFRI  | 331   | 135   |
| >MSH2-G827GVCDQSFGIH | 49    | >MSH2-G827GVCDQSFRIH | 143   | 94    |
| >MSH2-G827GVCDQSFGI  | 492   | >MSH2-G827GVCDQSFRI  | 2481  | 1989  |
| >MSH2-G827GVCDQSFGIH | 321   | >MSH2-G827GVCDQSFRIH | 921   | 600   |
| >MSH2-G827GVCDQSFGIH | 79    | >MSH2-G827GVCDQSFRIH | 291   | 212   |
| >MSH2-G827GVCDQSFGI  | 354   | >MSH2-G827GVCDQSFRI  | 304   | 50    |
| >MSH2-G827GVCDQSFGIH | 16    | >MSH2-G827GVCDQSFRIH | 15    | 1     |
| >MSH2-G827GVCDQSF    | 21228 | >MSH2-G827GVCDQSFR   | 72    | 21156 |
| >MSH2-G827GVCDQSF    | 20647 | >MSH2-G827GVCDQSFR   | 45    | 20602 |
| >MSH2-G827GVCDQSF    | 32713 | >MSH2-G827GVCDQSFR   | 410   | 32303 |
| >MSH2-G827GVCDQSF    | 32977 | >MSH2-G827GVCDQSFR   | 58    | 32919 |
| >MSH2-G827KGVCDQSF   | 21890 | >MSH2-G827KGVCDQSFR  | 226   | 21664 |
| >MSH2-G827KGVCDQSF   | 29903 | >MSH2-G827KGVCDQSFR  | 106   | 29797 |



|                        |       |                        |       |       |
|------------------------|-------|------------------------|-------|-------|
| >MSH2-G827KKGVCDSQSF   | 31776 | >MSH2-G827KKGVCDSQSF   | 124   | 31652 |
| >MSH2-I237\IYQDLNRL    | 191   | >MSH2-I237\IYQDLNRL    | 333   | 142   |
| >MSH2-I237\IYQDLNRL    | 119   | >MSH2-I237\IYQDLNRL    | 137   | 18    |
| >MSH2-I237\IYQDLNRLL   | 461   | >MSH2-I237\IYQDLNRLL   | 522   | 61    |
| >MSH2-I237\IYQDLNRL    | 375   | >MSH2-I237\IYQDLNRL    | 605   | 230   |
| >MSH2-I237\IYQDLNRLL   | 292   | >MSH2-I237\IYQDLNRLL   | 492   | 200   |
| >MSH2-I237\IYQDLNRL    | 36    | >MSH2-I237\IYQDLNRL    | 29    | 7     |
| >MSH2-I237\IYQDLNRLL   | 130   | >MSH2-I237\IYQDLNRLL   | 102   | 28    |
| >MSH2-I237\IYQDLNRLLK  | 165   | >MSH2-I237\IYQDLNRLLK  | 482   | 317   |
| >MSH2-I237\IYQDLNRLLK  | 253   | >MSH2-I237\IYQDLNRLLK  | 532   | 279   |
| >MSH2-I237\DIYQDLNRL   | 35    | >MSH2-I237\DIYQDLNRL   | 11    | 24    |
| >MSH2-I237\DIYQDLNRLL  | 807   | >MSH2-I237\DIYQDLNRLL  | 255   | 552   |
| >MSH2-I237\DIYQDLNRL   | 971   | >MSH2-I237\DIYQDLNRL   | 298   | 673   |
| >MSH2-I237\DIYQDLNR    | 73    | >MSH2-I237\DIYQDLNR    | 62    | 11    |
| >MSH2-I237\DIYQDLNR    | 36    | >MSH2-I237\DIYQDLNR    | 17    | 19    |
| >MSH2-I237\DIYQDLNRLLI | 40    | >MSH2-I237\DIYQDLNRLLI | 17    | 23    |
| >MSH2-I237\DIYQDLNRL   | 697   | >MSH2-I237\DIYQDLNRL   | 304   | 393   |
| >MSH2-I237\DIYQDLNRLL  | 908   | >MSH2-I237\DIYQDLNRLL  | 388   | 520   |
| >MSH2-I237\DIYQDLNR    | 157   | >MSH2-I237\DIYQDLNR    | 403   | 246   |
| >MSH2-I237\RKKADFSTKD  | 14    | >MSH2-I237\RKKADFSTKD  | 18    | 4     |
| >MSH2-I237\KDIYQDLNR   | 181   | >MSH2-I237\KDIYQDLNR   | 171   | 10    |
| >MSH2-I237\STKDIYQDLN  | 474   | >MSH2-I237\STKDIYQDLN  | 395   | 79    |
| >MSH2-I237\STKDIYQDL   | 312   | >MSH2-I237\STKDIYQDL   | 356   | 44    |
| >MSH2-I237\STKDIYQDLN  | 156   | >MSH2-I237\STKDIYQDLN  | 169   | 13    |
| >MSH2-I237\STKDIYQDLN  | 28    | >MSH2-I237\STKDIYQDLN  | 31    | 3     |
| >MSH2-I237\STKDIYQDLN  | 200   | >MSH2-I237\STKDIYQDLN  | 174   | 26    |
| >MSH2-I237\STKDIYQDLN  | 36    | >MSH2-I237\STKDIYQDLN  | 38    | 2     |
| >MSH2-I237\STKDIYQDL   | 406   | >MSH2-I237\STKDIYQDL   | 502   | 96    |
| >MSH2-I237\STKDIYQDLN  | 379   | >MSH2-I237\STKDIYQDLN  | 769   | 390   |
| >MSH2-I237\FSTKDIYQDL  | 424   | >MSH2-I237\FSTKDIYQDL  | 534   | 110   |
| >MSH2-I237\ADFSTKDIY   | 131   | >MSH2-I237\ADFSTKDIY   | 137   | 6     |
| >MSH2-I237\ADFSTKDI    | 458   | >MSH2-I237\ADFSTKDI    | 3231  | 2773  |
| >MSH2-I237\ADFSTKDI    | 57    | >MSH2-I237\ADFSTKDI    | 102   | 45    |
| >MSH2-I237\KADFSTKDIY  | 370   | >MSH2-I237\KADFSTKDIY  | 578   | 208   |
| >MSH2-I237\KADFSTKDIY  | 377   | >MSH2-I237\KADFSTKDIY  | 218   | 159   |
| >MSH2-I237\KKADFSTKDI  | 206   | >MSH2-I237\KKADFSTKDI  | 203   | 3     |
| >MSH2-I237\KKADFSTKDI  | 50    | >MSH2-I237\KKADFSTKDI  | 59    | 9     |
| >MSH2-I237\KKADFSTKDI  | 13    | >MSH2-I237\KKADFSTKDI  | 12    | 1     |
| >MSH2-P69T PAGAKNLQS   | 6295  | >MSH2-P69T PAGAKNLQS   | 485   | 5810  |
| >MSH2-P69T GPAGAKNL    | 200   | >MSH2-P69T GPAGAKNL    | 27452 | 27252 |
| >MSH2-P69T GPAGAKNLQ   | 13879 | >MSH2-P69T GPAGAKNLQ   | 158   | 13721 |
| >MSH2-P69T GPAGAKNLQ   | 14783 | >MSH2-P69T GPAGAKNLQ   | 190   | 14593 |
| >MSH2-P69T GPAGAKNLQ   | 10536 | >MSH2-P69T GPAGAKNLQ   | 309   | 10227 |

|                       |       |                       |       |       |
|-----------------------|-------|-----------------------|-------|-------|
| >MSH2-P69T GPAGAKNLQ  | 12796 | >MSH2-P69T GTAGAKNLQ  | 274   | 12522 |
| >MSH2-P69T GPAGAKNLQ  | 13143 | >MSH2-P69T GTAGAKNLQ  | 182   | 12961 |
| >MSH2-P69T GPAGAKNLQ  | 8807  | >MSH2-P69T GTAGAKNLQ  | 40    | 8767  |
| >MSH2-P69T GPAGAKNLQ  | 15201 | >MSH2-P69T GTAGAKNLQ  | 219   | 14982 |
| >MSH2-P69T GPAGAKNL   | 86    | >MSH2-P69T GTAGAKNL   | 15899 | 15813 |
| >MSH2-P69T GPAGAKNLQ  | 56    | >MSH2-P69T GTAGAKNLQ  | 14933 | 14877 |
| >MSH2-P69T GPAGAKNL   | 22522 | >MSH2-P69T GTAGAKNL   | 73    | 22449 |
| >MSH2-P69T GPAGAKNLQ  | 14380 | >MSH2-P69T GTAGAKNLQ  | 493   | 13887 |
| >MSH2-P69T GPAGAKNLQ  | 12343 | >MSH2-P69T GTAGAKNLQ  | 377   | 11966 |
| >MSH2-P69T YMGPAGAKN  | 197   | >MSH2-P69T YMGTAGAKN  | 132   | 65    |
| >MSH2-P69T YMGPAGAKN  | 189   | >MSH2-P69T YMGTAGAKN  | 150   | 39    |
| >MSH2-P69T YMGPAGAKN  | 9     | >MSH2-P69T YMGTAGAKN  | 16    | 7     |
| >MSH2-P69T YMGPAGAKN  | 13    | >MSH2-P69T YMGTAGAKN  | 17    | 4     |
| >MSH2-P69T YMGPAGAKN  | 16    | >MSH2-P69T YMGTAGAKN  | 30    | 14    |
| >MSH2-P69T YMGPAGAKN  | 26    | >MSH2-P69T YMGTAGAKN  | 29    | 3     |
| >MSH2-P69T YMGPAGAKN  | 3     | >MSH2-P69T YMGTAGAKN  | 5     | 2     |
| >MSH2-P69T YMGPAGAKN  | 29    | >MSH2-P69T YMGTAGAKN  | 136   | 107   |
| >MSH2-P69T YMGPAGAK   | 294   | >MSH2-P69T YMGTAGAK   | 304   | 10    |
| >MSH2-P69T YMGPAGAKN  | 165   | >MSH2-P69T YMGTAGAKN  | 152   | 13    |
| >MSH2-P69T YMGPAGAKN  | 462   | >MSH2-P69T YMGTAGAKN  | 3600  | 3138  |
| >MSH2-P69T KYMGPAGAK  | 108   | >MSH2-P69T KYMGTAGAK  | 13    | 95    |
| >MSH2-P69T KYMGPAGAK  | 1939  | >MSH2-P69T KYMGTAGAK  | 478   | 1461  |
| >MSH2-P69T KYMGPAGAK  | 11    | >MSH2-P69T KYMGTAGAK  | 9     | 2     |
| >MSH2-P69T KYMGPAGA   | 524   | >MSH2-P69T KYMGTAGA   | 172   | 352   |
| >MSH2-P69T KYMGPAGAK  | 32    | >MSH2-P69T KYMGTAGAK  | 11    | 21    |
| >MSH2-P69T KYMGPAGAK  | 401   | >MSH2-P69T KYMGTAGAK  | 294   | 107   |
| >MSH2-P69T KYMGPAGAK  | 273   | >MSH2-P69T KYMGTAGAK  | 129   | 144   |
| >MSH2-P69T KYMGPAGA   | 157   | >MSH2-P69T KYMGTAGA   | 122   | 35    |
| >MSH2-P69T KYMGPAGAK  | 323   | >MSH2-P69T KYMGTAGAK  | 135   | 188   |
| >MSH2-P69T KYMGPAGAK  | 194   | >MSH2-P69T KYMGTAGAK  | 110   | 84    |
| >MSH2-P69T IKYMGPAG   | 555   | >MSH2-P69T IKYMGTAG   | 319   | 236   |
| >MSH2-P69T IKYMGPAGA  | 186   | >MSH2-P69T IKYMGTAGA  | 185   | 1     |
| >MSH2-P69T IKYMGPAGAI | 168   | >MSH2-P69T IKYMGTAGAI | 161   | 7     |
| >MSH2-P69T VIKYMGPA   | 182   | >MSH2-P69T VIKYMGTA   | 231   | 49    |
| >MSH2-P69T VIKYMGPA/  | 341   | >MSH2-P69T VIKYMGTA/  | 355   | 14    |
| >MSH2-P69T VIKYMGPA/  | 310   | >MSH2-P69T VIKYMGTA/  | 336   | 26    |
| >MSH2-P69T VIKYMGPA/  | 66    | >MSH2-P69T VIKYMGTA/  | 88    | 22    |
| >MSH2-P69T GVIKYMGA   | 67    | >MSH2-P69T GVIKYMGA   | 153   | 86    |
| >MSH2-P69T GVIKYMGA/  | 85    | >MSH2-P69T GVIKYMGA/  | 75    | 10    |
| >MSH2-P69T GVIKYMGA   | 157   | >MSH2-P69T GVIKYMGA   | 472   | 315   |
| >MSH2-P69T GVIKYMGA/  | 372   | >MSH2-P69T GVIKYMGA/  | 134   | 238   |
| >MSH6-A115 AVMAQMGC   | 45    | >MSH6-A115 VVMAQMGC   | 56    | 11    |
| >MSH6-A115 AVMAQMGC   | 58    | >MSH6-A115 VVMAQMGC   | 100   | 42    |

|                      |       |                      |      |      |
|----------------------|-------|----------------------|------|------|
| >MSH6-A115AVMAQMGC   | 26    | >MSH6-A115VVMAQMGC   | 47   | 21   |
| >MSH6-A115AVMAQMGC   | 71    | >MSH6-A115VVMAQMGC   | 88   | 17   |
| >MSH6-A115AVMAQMGC   | 20    | >MSH6-A115VVMAQMGC   | 17   | 3    |
| >MSH6-A115AVMAQMGC   | 82    | >MSH6-A115VVMAQMGC   | 76   | 6    |
| >MSH6-A115AVMAQMGC   | 68    | >MSH6-A115VVMAQMGC   | 72   | 4    |
| >MSH6-A115AVMAQMGC   | 55    | >MSH6-A115VVMAQMGC   | 25   | 30   |
| >MSH6-A115AVMAQMGC   | 11    | >MSH6-A115VVMAQMGC   | 12   | 1    |
| >MSH6-A115AVMAQMGC   | 65    | >MSH6-A115VVMAQMGC   | 186  | 121  |
| >MSH6-A115AVMAQMGC   | 195   | >MSH6-A115VVMAQMGC   | 1328 | 1133 |
| >MSH6-A115AVMAQMGC   | 3     | >MSH6-A115VVMAQMGC   | 5    | 2    |
| >MSH6-A115AVMAQMGC   | 152   | >MSH6-A115VVMAQMGC   | 77   | 75   |
| >MSH6-A115AVMAQMGC   | 268   | >MSH6-A115VVMAQMGC   | 1966 | 1698 |
| >MSH6-A115AVMAQMGC   | 58    | >MSH6-A115VVMAQMGC   | 38   | 20   |
| >MSH6-A115AVMAQMGC   | 92    | >MSH6-A115VVMAQMGC   | 114  | 22   |
| >MSH6-A115AVMAQMGC   | 79    | >MSH6-A115VVMAQMGC   | 99   | 20   |
| >MSH6-A115AVMAQMGC   | 11    | >MSH6-A115VVMAQMGC   | 7    | 4    |
| >MSH6-A115AVMAQMGC   | 164   | >MSH6-A115VVMAQMGC   | 216  | 52   |
| >MSH6-A115AVMAQMGC   | 587   | >MSH6-A115VVMAQMGC   | 420  | 167  |
| >MSH6-A115AVMAQMGC   | 353   | >MSH6-A115VVMAQMGC   | 410  | 57   |
| >MSH6-A115LAVMAQMG   | 648   | >MSH6-A115LVVMAQMG   | 345  | 303  |
| >MSH6-A115LAVMAQMG   | 1005  | >MSH6-A115LVVMAQMG   | 263  | 742  |
| >MSH6-A115LAVMAQMG   | 916   | >MSH6-A115LVVMAQMG   | 123  | 793  |
| >MSH6-A115LAVMAQMG   | 109   | >MSH6-A115LVVMAQMG   | 23   | 86   |
| >MSH6-A115LAVMAQMG   | 184   | >MSH6-A115LVVMAQMG   | 38   | 146  |
| >MSH6-A115LAVMAQMG   | 690   | >MSH6-A115LVVMAQMG   | 77   | 613  |
| >MSH6-A115LAVMAQMG   | 4373  | >MSH6-A115LVVMAQMG   | 288  | 4085 |
| >MSH6-A115LAVMAQMG   | 45    | >MSH6-A115LVVMAQMG   | 7    | 38   |
| >MSH6-A115LAVMAQMG   | 251   | >MSH6-A115LVVMAQMG   | 14   | 237  |
| >MSH6-A115LAVMAQMG   | 50    | >MSH6-A115LVVMAQMG   | 40   | 10   |
| >MSH6-A115LAVMAQMG   | 289   | >MSH6-A115LVVMAQMG   | 74   | 215  |
| >MSH6-A115LAVMAQMG   | 581   | >MSH6-A115LVVMAQMG   | 222  | 359  |
| >MSH6-A115LAVMAQMG   | 2354  | >MSH6-A115LVVMAQMG   | 176  | 2178 |
| >MSH6-A115LAVMAQMG   | 281   | >MSH6-A115LVVMAQMG   | 185  | 96   |
| >MSH6-A115LAVMAQMG   | 51    | >MSH6-A115LVVMAQMG   | 559  | 508  |
| >MSH6-A115STLMRQAGLI | 1719  | >MSH6-A115STLMRQAGLI | 107  | 1612 |
| >MSH6-A115STLMRQAGLI | 4652  | >MSH6-A115STLMRQAGLI | 99   | 4553 |
| >MSH6-A115STLMRQAGLI | 4375  | >MSH6-A115STLMRQAGLI | 59   | 4316 |
| >MSH6-A115STLMRQAGLI | 10107 | >MSH6-A115STLMRQAGLI | 172  | 9935 |
| >MSH6-A115STLMRQAGLI | 152   | >MSH6-A115STLMRQAGLI | 292  | 140  |
| >MSH6-A115STLMRQAGLI | 2660  | >MSH6-A115STLMRQAGLI | 68   | 2592 |
| >MSH6-A115STLMRQAGLI | 3579  | >MSH6-A115STLMRQAGLI | 286  | 3293 |
| >MSH6-A115STLMRQAGLI | 1342  | >MSH6-A115STLMRQAGLI | 181  | 1161 |
| >MSH6-A115LLAVMAQM   | 65    | >MSH6-A115LLVVMAQM   | 533  | 468  |

|                      |      |                      |      |      |
|----------------------|------|----------------------|------|------|
| >MSH6-A115 LLAVMAQM  | 136  | >MSH6-A115 LLVVMAQM  | 441  | 305  |
| >MSH6-A115 LLAVMAQM  | 352  | >MSH6-A115 LLVVMAQM  | 427  | 75   |
| >MSH6-A115 LLAVMAQM  | 198  | >MSH6-A115 LLVVMAQM  | 2043 | 1845 |
| >MSH6-A115 LLAVMAQM  | 17   | >MSH6-A115 LLVVMAQM  | 37   | 20   |
| >MSH6-A115 LLAVMAQM  | 20   | >MSH6-A115 LLVVMAQM  | 41   | 21   |
| >MSH6-A115 LLAVMAQM  | 47   | >MSH6-A115 LLVVMAQM  | 69   | 22   |
| >MSH6-A115 LLAVMAQM  | 99   | >MSH6-A115 LLVVMAQM  | 303  | 204  |
| >MSH6-A115 LLAVMAQM  | 70   | >MSH6-A115 LLVVMAQM  | 133  | 63   |
| >MSH6-A115 LLAVMAQM  | 248  | >MSH6-A115 LLVVMAQM  | 335  | 87   |
| >MSH6-A115 LLAVMAQM  | 127  | >MSH6-A115 LLVVMAQM  | 166  | 39   |
| >MSH6-A115 LLAVMAQM  | 275  | >MSH6-A115 LLVVMAQM  | 501  | 226  |
| >MSH6-A115 GLLAVMAQM | 80   | >MSH6-A115 GLLVVMAQM | 358  | 278  |
| >MSH6-A115 GLLAVMAQM | 108  | >MSH6-A115 GLLVVMAQM | 671  | 563  |
| >MSH6-A115 GLLAVMAQM | 160  | >MSH6-A115 GLLVVMAQM | 868  | 708  |
| >MSH6-A115 GLLAVMAQM | 399  | >MSH6-A115 GLLVVMAQM | 1735 | 1336 |
| >MSH6-A115 GLLAVMAQ  | 294  | >MSH6-A115 GLLVVMAQ  | 666  | 372  |
| >MSH6-A115 GLLAVMAQM | 8    | >MSH6-A115 GLLVVMAQM | 30   | 22   |
| >MSH6-A115 GLLAVMAQM | 28   | >MSH6-A115 GLLVVMAQM | 88   | 60   |
| >MSH6-A115 GLLAVMAQM | 75   | >MSH6-A115 GLLVVMAQM | 196  | 121  |
| >MSH6-A115 GLLAVMAQM | 100  | >MSH6-A115 GLLVVMAQM | 209  | 109  |
| >MSH6-A115 GLLAVMAQM | 32   | >MSH6-A115 GLLVVMAQM | 67   | 35   |
| >MSH6-A115 GLLAVMAQM | 151  | >MSH6-A115 GLLVVMAQM | 337  | 186  |
| >MSH6-A115 GLLAVMAQM | 211  | >MSH6-A115 GLLVVMAQM | 334  | 123  |
| >MSH6-A115 GLLAVMAQ  | 250  | >MSH6-A115 GLLVVMAQ  | 774  | 524  |
| >MSH6-A115 GLLAVMAQM | 35   | >MSH6-A115 GLLVVMAQM | 137  | 102  |
| >MSH6-A115 GLLAVMAQM | 41   | >MSH6-A115 GLLVVMAQM | 118  | 77   |
| >MSH6-A115 GLLAVMAQM | 175  | >MSH6-A115 GLLVVMAQM | 180  | 5    |
| >MSH6-A115 AGLLAVMAQ | 464  | >MSH6-A115 AGLLVVMAQ | 1431 | 967  |
| >MSH6-A115 AGLLAVMAQ | 244  | >MSH6-A115 AGLLVVMAQ | 428  | 184  |
| >MSH6-A115 QAGLLAVMA | 428  | >MSH6-A115 QAGLLVVMA | 505  | 77   |
| >MSH6-A115 RQAGLLAV  | 40   | >MSH6-A115 RQAGLLVV  | 89   | 49   |
| >MSH6-A115 RQAGLLAV  | 47   | >MSH6-A115 RQAGLLVV  | 173  | 126  |
| >MSH6-A115 RQAGLLAV  | 10   | >MSH6-A115 RQAGLLVV  | 27   | 17   |
| >MSH6-A115 RQAGLLAV  | 3    | >MSH6-A115 RQAGLLVV  | 6    | 3    |
| >MSH6-A115 RQAGLLAVM | 32   | >MSH6-A115 RQAGLLVVM | 53   | 21   |
| >MSH6-A115 RQAGLLAVM | 851  | >MSH6-A115 RQAGLLVVM | 466  | 385  |
| >MSH6-A115 RQAGLLAV  | 43   | >MSH6-A115 RQAGLLVV  | 87   | 44   |
| >MSH6-A115 RQAGLLAV  | 337  | >MSH6-A115 RQAGLLVV  | 774  | 437  |
| >MSH6-A115 RQAGLLAV  | 121  | >MSH6-A115 RQAGLLVV  | 98   | 23   |
| >MSH6-A115 RQAGLLAV  | 418  | >MSH6-A115 RQAGLLVV  | 545  | 127  |
| >MSH6-A115 RQAGLLAVM | 1604 | >MSH6-A115 RQAGLLVVM | 274  | 1330 |
| >MSH6-A115 RQAGLLAV  | 153  | >MSH6-A115 RQAGLLVV  | 169  | 16   |
| >MSH6-A115 RQAGLLAVM | 30   | >MSH6-A115 RQAGLLVVM | 34   | 4    |

|                       |      |                       |     |      |
|-----------------------|------|-----------------------|-----|------|
| >MSH6-A115 RQAGLLAVM  | 606  | >MSH6-A115 RQAGLLVVM  | 423 | 183  |
| >MSH6-A115 RQAGLLAVM  | 250  | >MSH6-A115 RQAGLLVVM  | 365 | 115  |
| >MSH6-A115 RQAGLLAV   | 173  | >MSH6-A115 RQAGLLVV   | 231 | 58   |
| >MSH6-A115 RQAGLLAVM  | 102  | >MSH6-A115 RQAGLLVVM  | 38  | 64   |
| >MSH6-A115 RQAGLLAV   | 305  | >MSH6-A115 RQAGLLVV   | 329 | 24   |
| >MSH6-A115 RQAGLLAVM  | 64   | >MSH6-A115 RQAGLLVVM  | 51  | 13   |
| >MSH6-A115 RQAGLLAVM  | 165  | >MSH6-A115 RQAGLLVVM  | 119 | 46   |
| >MSH6-A115 RQAGLLAVM  | 716  | >MSH6-A115 RQAGLLVVM  | 293 | 423  |
| >MSH6-A115 RQAGLLAV   | 437  | >MSH6-A115 RQAGLLVV   | 893 | 456  |
| >MSH6-A115 RQAGLLAVM  | 185  | >MSH6-A115 RQAGLLVVM  | 123 | 62   |
| >MSH6-A115 RQAGLLAVM  | 550  | >MSH6-A115 RQAGLLVVM  | 377 | 173  |
| >MSH6-A115 MRQAGLLAV  | 482  | >MSH6-A115 MRQAGLLVV  | 755 | 273  |
| >MSH6-A115 MRQAGLLAV  | 375  | >MSH6-A115 MRQAGLLVV  | 258 | 117  |
| >MSH6-A115 MRQAGLLA   | 754  | >MSH6-A115 MRQAGLLV   | 242 | 512  |
| >MSH6-A115 MRQAGLLAV  | 293  | >MSH6-A115 MRQAGLLVV  | 352 | 59   |
| >MSH6-A115 MRQAGLLAV  | 93   | >MSH6-A115 MRQAGLLVV  | 99  | 6    |
| >MSH6-A115 MRQAGLLAV  | 486  | >MSH6-A115 MRQAGLLVV  | 488 | 2    |
| >MSH6-A115 MRQAGLLAV  | 101  | >MSH6-A115 MRQAGLLVV  | 138 | 37   |
| >MSH6-A115 MRQAGLLAV  | 43   | >MSH6-A115 MRQAGLLVV  | 38  | 5    |
| >MSH6-A115 MRQAGLLAV  | 239  | >MSH6-A115 MRQAGLLVV  | 158 | 81   |
| >MSH6-A115 MRQAGLLAV  | 254  | >MSH6-A115 MRQAGLLVV  | 305 | 51   |
| >MSH6-A115 MRQAGLLAV  | 98   | >MSH6-A115 MRQAGLLVV  | 122 | 24   |
| >MSH6-A115 MRQAGLLAV  | 84   | >MSH6-A115 MRQAGLLVV  | 86  | 2    |
| >MSH6-A115 LMRQAGLLA' | 107  | >MSH6-A115 LMRQAGLLV' | 173 | 66   |
| >MSH6-A115 LMRQAGLLA  | 2920 | >MSH6-A115 LMRQAGLLV  | 454 | 2466 |
| >MSH6-A115 LMRQAGLLA' | 54   | >MSH6-A115 LMRQAGLLV' | 103 | 49   |
| >MSH6-A115 LMRQAGLLA  | 150  | >MSH6-A115 LMRQAGLLV  | 21  | 129  |
| >MSH6-A115 LMRQAGLLA' | 12   | >MSH6-A115 LMRQAGLLV' | 20  | 8    |
| >MSH6-A115 LMRQAGLLA' | 149  | >MSH6-A115 LMRQAGLLV' | 439 | 290  |
| >MSH6-A115 LMRQAGLLA  | 1540 | >MSH6-A115 LMRQAGLLV  | 20  | 1520 |
| >MSH6-A115 LMRQAGLLA' | 7    | >MSH6-A115 LMRQAGLLV' | 12  | 5    |
| >MSH6-A115 LMRQAGLLA' | 57   | >MSH6-A115 LMRQAGLLV' | 121 | 64   |
| >MSH6-A115 LMRQAGLLA  | 3245 | >MSH6-A115 LMRQAGLLV  | 37  | 3208 |
| >MSH6-A115 LMRQAGLLA' | 39   | >MSH6-A115 LMRQAGLLV' | 35  | 4    |
| >MSH6-A115 LMRQAGLLA' | 478  | >MSH6-A115 LMRQAGLLV' | 531 | 53   |
| >MSH6-A115 LMRQAGLLA  | 61   | >MSH6-A115 LMRQAGLLV  | 4   | 57   |
| >MSH6-A115 LMRQAGLLA' | 3    | >MSH6-A115 LMRQAGLLV' | 3   | 0    |
| >MSH6-A115 LMRQAGLLA' | 194  | >MSH6-A115 LMRQAGLLV' | 237 | 43   |
| >MSH6-A115 LMRQAGLLA  | 53   | >MSH6-A115 LMRQAGLLV  | 102 | 49   |
| >MSH6-A115 LMRQAGLLA' | 103  | >MSH6-A115 LMRQAGLLV' | 156 | 53   |
| >MSH6-A115 LMRQAGLLA' | 364  | >MSH6-A115 LMRQAGLLV' | 505 | 141  |
| >MSH6-A115 LMRQAGLLA' | 227  | >MSH6-A115 LMRQAGLLV' | 274 | 47   |
| >MSH6-A115 LMRQAGLLA  | 140  | >MSH6-A115 LMRQAGLLV  | 125 | 15   |

|                       |      |                        |      |      |
|-----------------------|------|------------------------|------|------|
| >MSH6-A115 LMRQAGLLA' | 55   | >MSH6-A115 LMRQAGLLV'  | 56   | 1    |
| >MSH6-A115 LMRQAGLLA' | 23   | >MSH6-A115 LMRQAGLLV'  | 25   | 2    |
| >MSH6-A115 LMRQAGLLA' | 426  | >MSH6-A115 LMRQAGLLV'  | 579  | 153  |
| >MSH6-A115 LMRQAGLLA  | 682  | >MSH6-A115 LMRQAGLLV   | 136  | 546  |
| >MSH6-A115 LMRQAGLLA' | 51   | >MSH6-A115 LMRQAGLLV'  | 77   | 26   |
| >MSH6-A115 LMRQAGLLA' | 35   | >MSH6-A115 LMRQAGLLV'  | 21   | 14   |
| >MSH6-A115 LMRQAGLLA' | 199  | >MSH6-A115 LMRQAGLLV'  | 428  | 229  |
| >MSH6-A115 LMRQAGLLA' | 150  | >MSH6-A115 LMRQAGLLV'  | 307  | 157  |
| >MSH6-A115 TLMRQAGLL\ | 148  | >MSH6-A115 TLMRQAGLL\  | 24   | 124  |
| >MSH6-A115 TLMRQAGLL\ | 48   | >MSH6-A115 TLMRQAGLL\  | 77   | 29   |
| >MSH6-A115 TLMRQAGLL\ | 185  | >MSH6-A115 TLMRQAGLL\  | 57   | 128  |
| >MSH6-A115 TLMRQAGLL\ | 17   | >MSH6-A115 TLMRQAGLL\  | 46   | 29   |
| >MSH6-A115 TLMRQAGLL\ | 68   | >MSH6-A115 TLMRQAGLL\  | 19   | 49   |
| >MSH6-A115 TLMRQAGLL\ | 6    | >MSH6-A115 TLMRQAGLL\  | 9    | 3    |
| >MSH6-A115 TLMRQAGLL\ | 422  | >MSH6-A115 TLMRQAGLL\  | 95   | 327  |
| >MSH6-A115 TLMRQAGLL\ | 27   | >MSH6-A115 TLMRQAGLL\  | 60   | 33   |
| >MSH6-A115 TLMRQAGLL\ | 1151 | >MSH6-A115 TLMRQAGLL\  | 21   | 1130 |
| >MSH6-A115 TLMRQAGLL\ | 8    | >MSH6-A115 TLMRQAGLL\  | 13   | 5    |
| >MSH6-A115 TLMRQAGLL\ | 2324 | >MSH6-A115 TLMRQAGLL\  | 24   | 2300 |
| >MSH6-A115 TLMRQAGLL\ | 8    | >MSH6-A115 TLMRQAGLL\  | 11   | 3    |
| >MSH6-A115 TLMRQAGLL\ | 1569 | >MSH6-A115 TLMRQAGLL\  | 30   | 1539 |
| >MSH6-A115 TLMRQAGLL\ | 33   | >MSH6-A115 TLMRQAGLL\  | 30   | 3    |
| >MSH6-A115 TLMRQAGLL\ | 3029 | >MSH6-A115 TLMRQAGLL\  | 27   | 3002 |
| >MSH6-A115 TLMRQAGLL\ | 12   | >MSH6-A115 TLMRQAGLL\  | 14   | 2    |
| >MSH6-A115 TLMRQAGLL\ | 101  | >MSH6-A115 TLMRQAGLL\  | 6    | 95   |
| >MSH6-A115 TLMRQAGLL\ | 4    | >MSH6-A115 TLMRQAGLL\  | 4    | 0    |
| >MSH6-A115 TLMRQAGLL\ | 327  | >MSH6-A115 TLMRQAGLL\  | 687  | 360  |
| >MSH6-A115 TLMRQAGLL\ | 5730 | >MSH6-A115 TLMRQAGLL\  | 189  | 5541 |
| >MSH6-A115 TLMRQAGLL\ | 71   | >MSH6-A115 TLMRQAGLL\  | 321  | 250  |
| >MSH6-A130 ARLANLPEEV | 494  | >MSH6-A130 TRLANLPEEV\ | 1542 | 1048 |
| >MSH6-A130 ARLANLPEEV | 245  | >MSH6-A130 TRLANLPEEV  | 1036 | 791  |
| >MSH6-A130 ARLANLPEEV | 455  | >MSH6-A130 TRLANLPEEV\ | 1329 | 874  |
| >MSH6-A130 AARLANLP   | 452  | >MSH6-A130 ATRLANLP    | 78   | 374  |
| >MSH6-A130 AARLANLPE  | 118  | >MSH6-A130 ATRLANLPE   | 25   | 93   |
| >MSH6-A130 AARLANLPEE | 393  | >MSH6-A130 ATRLANLPEE  | 78   | 315  |
| >MSH6-A130 AARLANLPEE | 133  | >MSH6-A130 ATRLANLPEE' | 35   | 98   |
| >MSH6-A130 AARLANLPEE | 2673 | >MSH6-A130 ATRLANLPEE' | 276  | 2397 |
| >MSH6-A130 NAARLANL   | 94   | >MSH6-A130 NATRLANL    | 770  | 676  |
| >MSH6-A130 FNAARLANL  | 44   | >MSH6-A130 FNATRLANL   | 157  | 113  |
| >MSH6-A130 FNAARLANL  | 276  | >MSH6-A130 FNATRLANL   | 262  | 14   |
| >MSH6-A130 YGFNAARL   | 206  | >MSH6-A130 YGFNATRL    | 846  | 640  |
| >MSH6-A130 YGFNAARLAN | 536  | >MSH6-A130 YGFNATRLAN  | 405  | 131  |
| >MSH6-A130 YGFNAARLAN | 432  | >MSH6-A130 YGFNATRLAN  | 308  | 124  |

|                       |       |                       |      |       |
|-----------------------|-------|-----------------------|------|-------|
| >MSH6-A130 YGFNAARL   | 168   | >MSH6-A130 YGFNATRL   | 488  | 320   |
| >MSH6-A130 YGFNAARLAN | 286   | >MSH6-A130 YGFNATRLAN | 606  | 320   |
| >MSH6-A130 YGFNAARLAN | 417   | >MSH6-A130 YGFNATRLAN | 629  | 212   |
| >MSH6-A130 SYGFNAARL  | 739   | >MSH6-A130 SYGFNATRL  | 39   | 700   |
| >MSH6-A130 SYGFNAARL  | 19    | >MSH6-A130 SYGFNATRL  | 31   | 12    |
| >MSH6-A130 SYGFNAAR   | 80    | >MSH6-A130 SYGFNATR   | 118  | 38    |
| >MSH6-A130 SYGFNAAR   | 31    | >MSH6-A130 SYGFNATR   | 29   | 2     |
| >MSH6-A130 KSYGFNAA   | 173   | >MSH6-A130 KSYGFNAT   | 296  | 123   |
| >MSH6-A130 KSYGFNAARL | 540   | >MSH6-A130 KSYGFNATRL | 448  | 92    |
| >MSH6-A130 KSYGFNAA   | 258   | >MSH6-A130 KSYGFNAT   | 2090 | 1832  |
| >MSH6-A130 KSYGFNAAR  | 117   | >MSH6-A130 KSYGFNATR  | 132  | 15    |
| >MSH6-A130 KSYGFNAAR  | 45    | >MSH6-A130 KSYGFNATR  | 69   | 24    |
| >MSH6-A130 KSYGFNAA   | 74    | >MSH6-A130 KSYGFNAT   | 2076 | 2002  |
| >MSH6-A130 KSYGFNAAR  | 147   | >MSH6-A130 KSYGFNATR  | 144  | 3     |
| >MSH6-A130 KSYGFNAARL | 302   | >MSH6-A130 KSYGFNATRL | 948  | 646   |
| >MSH6-A130 KSYGFNAARL | 54    | >MSH6-A130 KSYGFNATRL | 35   | 19    |
| >MSH6-A130 KSYGFNAAR  | 6     | >MSH6-A130 KSYGFNATR  | 7    | 1     |
| >MSH6-A130 KSYGFNAA   | 205   | >MSH6-A130 KSYGFNAT   | 277  | 72    |
| >MSH6-A130 KSYGFNAAR  | 101   | >MSH6-A130 KSYGFNATR  | 51   | 50    |
| >MSH6-A130 KSYGFNAARL | 19    | >MSH6-A130 KSYGFNATRL | 16   | 3     |
| >MSH6-A130 KSYGFNAARL | 788   | >MSH6-A130 KSYGFNATRL | 400  | 388   |
| >MSH6-A130 KSYGFNAAR  | 477   | >MSH6-A130 KSYGFNATR  | 715  | 238   |
| >MSH6-A130 KSYGFNAAR  | 36    | >MSH6-A130 KSYGFNATR  | 28   | 8     |
| >MSH6-A130 KSYGFNAARL | 590   | >MSH6-A130 KSYGFNATRL | 455  | 135   |
| >MSH6-A130 KSYGFNAAR  | 633   | >MSH6-A130 KSYGFNATR  | 165  | 468   |
| >MSH6-A130 KSYGFNAARL | 3     | >MSH6-A130 KSYGFNATRL | 3    | 0     |
| >MSH6-A130 KSYGFNAARL | 131   | >MSH6-A130 KSYGFNATRL | 155  | 24    |
| >MSH6-A130 KSYGFNAARL | 38    | >MSH6-A130 KSYGFNATRL | 40   | 2     |
| >MSH6-A130 KSYGFNAARL | 200   | >MSH6-A130 KSYGFNATRL | 460  | 260   |
| >MSH6-A130 KSYGFNAARL | 434   | >MSH6-A130 KSYGFNATRL | 398  | 36    |
| >MSH6-A130 KSYGFNAAR  | 19    | >MSH6-A130 KSYGFNATR  | 18   | 1     |
| >MSH6-A130 KSYGFNAARL | 332   | >MSH6-A130 KSYGFNATRL | 334  | 2     |
| >MSH6-A130 CPKSYGFNAA | 482   | >MSH6-A130 CPKSYGFNAT | 560  | 78    |
| >MSH6-A130 CPKSYGFNAA | 495   | >MSH6-A130 CPKSYGFNAT | 547  | 52    |
| >MSH6-A130 CPKSYGFNAA | 67    | >MSH6-A130 CPKSYGFNAT | 1510 | 1443  |
| >MSH6-D197 ELAVCDEPS  | 363   | >MSH6-D197 ELAVCHEPS  | 366  | 3     |
| >MSH6-D197 KRLELAVCD  | 1054  | >MSH6-D197 KRLELAVCH  | 71   | 983   |
| >MSH6-D197 KRLELAVCD  | 1201  | >MSH6-D197 KRLELAVCH  | 383  | 818   |
| >MSH6-D197 KRLELAVCDE | 711   | >MSH6-D197 KRLELAVCHE | 414  | 297   |
| >MSH6-D197 IKRLELAVCD | 11055 | >MSH6-D197 IKRLELAVCH | 450  | 10605 |
| >MSH6-D39C DFDASTLY   | 168   | >MSH6-D39C NFDASTLY   | 87   | 81    |
| >MSH6-D39C DFDASTLYV  | 467   | >MSH6-D39C NFDASTLYV  | 407  | 60    |
| >MSH6-D39C DFDASTLY   | 1691  | >MSH6-D39C NFDASTLY   | 169  | 1522  |

|                       |       |                       |       |       |
|-----------------------|-------|-----------------------|-------|-------|
| >MSH6-D39C DFDASTLY   | 188   | >MSH6-D39C NFDASTLY   | 189   | 1     |
| >MSH6-D39C PDFDASTLY  | 410   | >MSH6-D39C PNFDASTLY  | 133   | 277   |
| >MSH6-D39C PDFDASTL   | 316   | >MSH6-D39C PNFDASTL   | 12484 | 12168 |
| >MSH6-D39C PDFDASTLYV | 74    | >MSH6-D39C PNFDASTLYV | 4052  | 3978  |
| >MSH6-D39C DEHRRRPDHI | 350   | >MSH6-D39C DEHRRRPDHI | 533   | 183   |
| >MSH6-D39C HPDFDASTLY | 112   | >MSH6-D39C HPNFDASTLY | 236   | 124   |
| >MSH6-D39C HPDFDASTL  | 153   | >MSH6-D39C HPNFDASTL  | 58    | 95    |
| >MSH6-D39C HPDFDASTLY | 640   | >MSH6-D39C HPNFDASTLY | 230   | 410   |
| >MSH6-D39C HPDFDAST   | 334   | >MSH6-D39C HPNFDAST   | 136   | 198   |
| >MSH6-D39C HPDFDASTL  | 52    | >MSH6-D39C HPNFDASTL  | 29    | 23    |
| >MSH6-D39C HPDFDASTLY | 43    | >MSH6-D39C HPNFDASTLY | 47    | 4     |
| >MSH6-D39C HPDFDASTL  | 33    | >MSH6-D39C HPNFDASTL  | 85    | 52    |
| >MSH6-D39C HPDFDASTL  | 218   | >MSH6-D39C HPNFDASTL  | 106   | 112   |
| >MSH6-D39C HPDFDASTLY | 312   | >MSH6-D39C HPNFDASTLY | 559   | 247   |
| >MSH6-D39C HPDFDASTLY | 655   | >MSH6-D39C HPNFDASTLY | 323   | 332   |
| >MSH6-D39C HPDFDASTL  | 2960  | >MSH6-D39C HPNFDASTL  | 443   | 2517  |
| >MSH6-D39C HPDFDASTLY | 149   | >MSH6-D39C HPNFDASTLY | 40    | 109   |
| >MSH6-D39C PDHPDFDAST | 399   | >MSH6-D39C PDHPNFDAST | 307   | 92    |
| >MSH6-D39C RPDHPDFDA  | 2025  | >MSH6-D39C RPDHPNFDAA | 473   | 1552  |
| >MSH6-D39C RPDHPDFDA  | 774   | >MSH6-D39C RPDHPNFDAA | 380   | 394   |
| >MSH6-D39C RRPDHPDF   | 110   | >MSH6-D39C RRPDHPNF   | 58    | 52    |
| >MSH6-D39C RRRPDHPDFI | 787   | >MSH6-D39C RRRPDHPNFI | 258   | 529   |
| >MSH6-D39C RRRPDHPDF  | 8     | >MSH6-D39C RRRPDHPNF  | 6     | 2     |
| >MSH6-D39C RRRPDHPDFI | 701   | >MSH6-D39C RRRPDHPNFI | 387   | 314   |
| >MSH6-D39C RRRPDHPD   | 56    | >MSH6-D39C RRRPDHPN   | 52    | 4     |
| >MSH6-D39C RRRPDHPDF  | 42    | >MSH6-D39C RRRPDHPNF  | 55    | 13    |
| >MSH6-D39C RRRPDHPDFI | 116   | >MSH6-D39C RRRPDHPNFI | 68    | 48    |
| >MSH6-D39C RRRPDHPDFI | 273   | >MSH6-D39C RRRPDHPNFI | 188   | 85    |
| >MSH6-D39C RRRPDHPDF  | 55    | >MSH6-D39C RRRPDHPNF  | 31    | 24    |
| >MSH6-D39C RRRPDHPDFI | 432   | >MSH6-D39C RRRPDHPNFI | 222   | 210   |
| >MSH6-D39C HRRRPDHPD  | 31    | >MSH6-D39C HRRRPDHPN  | 20    | 11    |
| >MSH6-D39C HRRRPDHPD  | 42    | >MSH6-D39C HRRRPDHPN  | 34    | 8     |
| >MSH6-D39C HRRRPDHPD  | 259   | >MSH6-D39C HRRRPDHPN  | 267   | 8     |
| >MSH6-D39C EHRRRPDHPI | 370   | >MSH6-D39C EHRRRPDHPI | 221   | 149   |
| >MSH6-D575 DDRHCSRF   | 5376  | >MSH6-D575 YDRHCSRF   | 106   | 5270  |
| >MSH6-D575 DDRHCSRFRT | 12422 | >MSH6-D575 YDRHCSRFRT | 454   | 11968 |
| >MSH6-D575 SDDRHCSRF  | 24950 | >MSH6-D575 SYDRHCSRF  | 222   | 24728 |
| >MSH6-D575 SDDRHCSRF  | 21068 | >MSH6-D575 SYDRHCSRF  | 229   | 20839 |
| >MSH6-D575 SDDRHCSRF  | 22666 | >MSH6-D575 SYDRHCSRF  | 19    | 22647 |
| >MSH6-D575 SDDRHCSR   | 10625 | >MSH6-D575 SYDRHCSR   | 269   | 10356 |
| >MSH6-D575 SDDRHCSRFF | 1361  | >MSH6-D575 SYDRHCSRFR | 43    | 1318  |
| >MSH6-D575 SDDRHCSR   | 25595 | >MSH6-D575 SYDRHCSR   | 431   | 25164 |
| >MSH6-D575 SDDRHCSRFF | 10020 | >MSH6-D575 SYDRHCSRFR | 447   | 9573  |



|                       |       |                       |      |       |
|-----------------------|-------|-----------------------|------|-------|
| >MSH6-D575 SDDRHC     | 3322  | >MSH6-D575 SYDRHC     | 302  | 3020  |
| >MSH6-D575 SDDRHC     | 12323 | >MSH6-D575 SYDRHC     | 150  | 12173 |
| >MSH6-D575 SDDRHC     | 11442 | >MSH6-D575 SYDRHC     | 131  | 11311 |
| >MSH6-D575 LGKFFIGQFS | 25039 | >MSH6-D575 LGKFFIGQFS | 30   | 25009 |
| >MSH6-D575 LGKFFIGQFS | 21740 | >MSH6-D575 LGKFFIGQFS | 198  | 21542 |
| >MSH6-D575 LGKFFIGQFS | 26086 | >MSH6-D575 LGKFFIGQFS | 318  | 25768 |
| >MSH6-D575 FSDDRHC    | 190   | >MSH6-D575 FSYDRHC    | 1151 | 961   |
| >MSH6-D575 FSDDRHC    | 5509  | >MSH6-D575 FSYDRHC    | 436  | 5073  |
| >MSH6-D575 FSDDRHC    | 1790  | >MSH6-D575 FSYDRHC    | 39   | 1751  |
| >MSH6-D575 FSDDRHC    | 1251  | >MSH6-D575 FSYDRHC    | 34   | 1217  |
| >MSH6-D575 FSDDRHC    | 143   | >MSH6-D575 FSYDRHC    | 22   | 121   |
| >MSH6-D575 FSDDRHC    | 249   | >MSH6-D575 FSYDRHC    | 32   | 217   |
| >MSH6-D575 FSDDRHC    | 112   | >MSH6-D575 FSYDRHC    | 6    | 106   |
| >MSH6-D575 FSDDRHC    | 94    | >MSH6-D575 FSYDRHC    | 5    | 89    |
| >MSH6-D575 FSDDRHC    | 2076  | >MSH6-D575 FSYDRHC    | 55   | 2021  |
| >MSH6-D575 FSDDRHC    | 1318  | >MSH6-D575 FSYDRHC    | 11   | 1307  |
| >MSH6-D575 FSDDRHC    | 8     | >MSH6-D575 FSYDRHC    | 3    | 5     |
| >MSH6-D575 FSDDRHC    | 1637  | >MSH6-D575 FSYDRHC    | 216  | 1421  |
| >MSH6-D575 FSDDRHC    | 404   | >MSH6-D575 FSYDRHC    | 70   | 334   |
| >MSH6-D575 FSDDRHC    | 3679  | >MSH6-D575 FSYDRHC    | 207  | 3472  |
| >MSH6-D575 FSDDRHC    | 2361  | >MSH6-D575 FSYDRHC    | 144  | 2217  |
| >MSH6-D575 QFSDDRHC   | 330   | >MSH6-D575 QFSYDRHC   | 210  | 120   |
| >MSH6-D575 QFSDDRHC   | 235   | >MSH6-D575 QFSYDRHC   | 178  | 57    |
| >MSH6-D575 QFSDDRHC   | 29    | >MSH6-D575 QFSYDRHC   | 26   | 3     |
| >MSH6-D575 QFSDDRHC   | 43    | >MSH6-D575 QFSYDRHC   | 35   | 8     |
| >MSH6-D575 QFSDDRHC   | 664   | >MSH6-D575 QFSYDRHC   | 441  | 223   |
| >MSH6-D575 QFSDDRHC   | 281   | >MSH6-D575 QFSYDRHC   | 123  | 158   |
| >MSH6-D575 QFSDDRHC   | 46    | >MSH6-D575 QFSYDRHC   | 87   | 41    |
| >MSH6-D575 GQFSDDRHC  | 88    | >MSH6-D575 GQFSYDRHC  | 20   | 68    |
| >MSH6-D575 GQFSDDRHC  | 317   | >MSH6-D575 GQFSYDRHC  | 202  | 115   |
| >MSH6-D575 GQFSDDRHC  | 799   | >MSH6-D575 GQFSYDRHC  | 427  | 372   |
| >MSH6-D575 FIGQFSDDR  | 145   | >MSH6-D575 FIGQFSYDR  | 76   | 69    |
| >MSH6-D575 FIGQFSDDR  | 150   | >MSH6-D575 FIGQFSYDR  | 26   | 124   |
| >MSH6-D575 FFIGQFS    | 32268 | >MSH6-D575 FFIGQFSY   | 207  | 32061 |
| >MSH6-D575 FFIGQFS    | 5638  | >MSH6-D575 FFIGQFSY   | 5    | 5633  |
| >MSH6-D575 FFIGQFS    | 534   | >MSH6-D575 FFIGQFSYDR | 339  | 195   |
| >MSH6-D575 FFIGQFS    | 28898 | >MSH6-D575 FFIGQFSY   | 291  | 28607 |
| >MSH6-D575 FFIGQFS    | 259   | >MSH6-D575 FFIGQFSYDR | 20   | 239   |
| >MSH6-D575 FFIGQFS    | 270   | >MSH6-D575 FFIGQFSYDR | 71   | 199   |
| >MSH6-D575 FFIGQFS    | 52    | >MSH6-D575 FFIGQFSYDR | 19   | 33    |
| >MSH6-D575 FFIGQFS    | 25952 | >MSH6-D575 FFIGQFSY   | 485  | 25467 |
| >MSH6-D575 FFIGQFS    | 21791 | >MSH6-D575 FFIGQFSY   | 254  | 21537 |
| >MSH6-D575 FFIGQFS    | 27943 | >MSH6-D575 FFIGQFSY   | 84   | 27859 |

|                        |       |                        |     |       |
|------------------------|-------|------------------------|-----|-------|
| >MSH6-D575 FFIGQFSD    | 18696 | >MSH6-D575 FFIGQFSY    | 92  | 18604 |
| >MSH6-D575 FFIGQFSD    | 30473 | >MSH6-D575 FFIGQFSY    | 274 | 30199 |
| >MSH6-D575 FFIGQFSDDR  | 164   | >MSH6-D575 FFIGQFSYDR  | 34  | 130   |
| >MSH6-D575 KFFIGQFSD   | 13643 | >MSH6-D575 KFFIGQFSY   | 7   | 13636 |
| >MSH6-D575 KFFIGQFSD   | 8289  | >MSH6-D575 KFFIGQFSY   | 9   | 8280  |
| >MSH6-D575 KFFIGQFSD   | 1914  | >MSH6-D575 KFFIGQFSY   | 202 | 1712  |
| >MSH6-D575 KFFIGQFSDD  | 32    | >MSH6-D575 KFFIGQFSYDI | 8   | 24    |
| >MSH6-D575 KFFIGQFSDD  | 1754  | >MSH6-D575 KFFIGQFSYDI | 411 | 1343  |
| >MSH6-D575 KFFIGQFSD   | 26065 | >MSH6-D575 KFFIGQFSY   | 41  | 26024 |
| >MSH6-D575 KFFIGQFSD   | 19009 | >MSH6-D575 KFFIGQFSY   | 231 | 18778 |
| >MSH6-D575 KFFIGQFSD   | 27757 | >MSH6-D575 KFFIGQFSY   | 484 | 27273 |
| >MSH6-D575 KFFIGQFSD   | 21778 | >MSH6-D575 KFFIGQFSY   | 24  | 21754 |
| >MSH6-D575 KFFIGQFSDD  | 23    | >MSH6-D575 KFFIGQFSYDI | 12  | 11    |
| >MSH6-D575 GKFFIGQFSD  | 26413 | >MSH6-D575 GKFFIGQFSY  | 80  | 26333 |
| >MSH6-D575 GKFFIGQFSD  | 30158 | >MSH6-D575 GKFFIGQFSY  | 133 | 30025 |
| >MSH6-D575 GKFFIGQFSD  | 9660  | >MSH6-D575 GKFFIGQFSY  | 9   | 9651  |
| >MSH6-E198 EPSEPEEEEEI | 21    | >MSH6-E198 APSEPEEEEEI | 81  | 60    |
| >MSH6-E198 EPSEPEEEEEI | 227   | >MSH6-E198 APSEPEEEEEI | 683 | 456   |
| >MSH6-E198 LAVCDEPS    | 801   | >MSH6-E198 LAVCDAPS    | 440 | 361   |
| >MSH6-E198 ELAVCDEPS   | 363   | >MSH6-E198 ELAVCDAPS   | 339 | 24    |
| >MSH6-E198 LELAVCDE    | 5331  | >MSH6-E198 LELAVCDA    | 316 | 5015  |
| >MSH6-E198 LELAVCDE    | 15683 | >MSH6-E198 LELAVCDA    | 478 | 15205 |
| >MSH6-E198 RLELAVCDE   | 24013 | >MSH6-E198 RLELAVCDA   | 228 | 23785 |
| >MSH6-E198 KRLELAVCDE  | 2616  | >MSH6-E198 KRLELAVCDA  | 425 | 2191  |
| >MSH6-E198 KRLELAVCDE  | 711   | >MSH6-E198 KRLELAVCDA  | 407 | 304   |
| >MSH6-E198 KRLELAVCDE  | 1853  | >MSH6-E198 KRLELAVCDA  | 430 | 1423  |
| >MSH6-E201 EPEEEEEEM   | 31    | >MSH6-E201 QPEEEEEEM   | 50  | 19    |
| >MSH6-E201 EPEEEEEEM   | 215   | >MSH6-E201 QPEEEEEEM   | 501 | 286   |
| >MSH6-E201 SEPEEEEEEM  | 14376 | >MSH6-E201 SQPEEEEEEM  | 491 | 13885 |
| >MSH6-E201 SEPEEEEEEME | 2602  | >MSH6-E201 SQPEEEEEEME | 36  | 2566  |
| >MSH6-E201 SEPEEEEEEME | 3551  | >MSH6-E201 SQPEEEEEEME | 106 | 3445  |
| >MSH6-E201 SEPEEEEEEME | 11996 | >MSH6-E201 SQPEEEEEEME | 435 | 11561 |
| >MSH6-E201 SEPEEEEEEME | 2641  | >MSH6-E201 SQPEEEEEEME | 85  | 2556  |
| >MSH6-E201 SEPEEEEEEME | 4125  | >MSH6-E201 SQPEEEEEEME | 309 | 3816  |
| >MSH6-E201 EPSEPEEEEEI | 21    | >MSH6-E201 EPSQPEEEEEI | 24  | 3     |
| >MSH6-E201 EPSEPEEEEEI | 227   | >MSH6-E201 EPSQPEEEEEI | 290 | 63    |
| >MSH6-E484 EQTETPEM    | 2640  | >MSH6-E484 KQTETPEM    | 80  | 2560  |
| >MSH6-E484 EQTETPEMM   | 8664  | >MSH6-E484 KQTETPEMM   | 369 | 8295  |
| >MSH6-E484 EQTETPEMM   | 1132  | >MSH6-E484 KQTETPEMM   | 33  | 1099  |
| >MSH6-E484 EQTETPEM    | 747   | >MSH6-E484 KQTETPEM    | 39  | 708   |
| >MSH6-E484 EQTETPEMM   | 926   | >MSH6-E484 KQTETPEMM   | 32  | 894   |
| >MSH6-E484 VEQTETPEM   | 4139  | >MSH6-E484 VKQTETPEM   | 103 | 4036  |
| >MSH6-E484 VEQTETPEMI  | 4111  | >MSH6-E484 VKQTETPEMI  | 132 | 3979  |

|                       |       |                       |       |       |
|-----------------------|-------|-----------------------|-------|-------|
| >MSH6-E484 VEQTETPEM  | 41    | >MSH6-E484 VKQTETPEM  | 17706 | 17665 |
| >MSH6-E484 VEQTETPEMI | 48    | >MSH6-E484 VKQTETPEMI | 14390 | 14342 |
| >MSH6-E484 RVEQTETPEN | 4465  | >MSH6-E484 RVKQTETPEN | 29    | 4436  |
| >MSH6-E484 RVEQTETPEN | 10843 | >MSH6-E484 RVKQTETPEN | 243   | 10600 |
| >MSH6-E484 RVEQTETPEN | 6027  | >MSH6-E484 RVKQTETPEN | 314   | 5713  |
| >MSH6-E484 RVEQTETPEN | 306   | >MSH6-E484 RVKQTETPEN | 113   | 193   |
| >MSH6-E484 RVEQTETPEN | 621   | >MSH6-E484 RVKQTETPEN | 195   | 426   |
| >MSH6-E484 RVEQTETPEN | 76    | >MSH6-E484 RVKQTETPEN | 49    | 27    |
| >MSH6-E484 ARVEQTETPE | 298   | >MSH6-E484 ARVKQTETPE | 204   | 94    |
| >MSH6-E484 ARVEQTETPE | 474   | >MSH6-E484 ARVKQTETPE | 379   | 95    |
| >MSH6-E484 GYKVARVE   | 7429  | >MSH6-E484 GYKVARVK   | 15    | 7414  |
| >MSH6-E484 KGYKVARVE  | 20279 | >MSH6-E484 KGYKVARVK  | 110   | 20169 |
| >MSH6-E484 KGYKVARVE  | 14586 | >MSH6-E484 KGYKVARVK  | 285   | 14301 |
| >MSH6-E487 ETPEMMEAR  | 163   | >MSH6-E487 DTPEMMEAR  | 744   | 581   |
| >MSH6-E487 ETPEMMEAR  | 106   | >MSH6-E487 DTPEMMEAR  | 477   | 371   |
| >MSH6-E487 ETPEMMEAR  | 149   | >MSH6-E487 DTPEMMEAR  | 66    | 83    |
| >MSH6-E487 ETPEMMEAR  | 627   | >MSH6-E487 DTPEMMEAR  | 247   | 380   |
| >MSH6-E487 ETPEMMEAR  | 5     | >MSH6-E487 DTPEMMEAR  | 13    | 8     |
| >MSH6-E487 ETPEMMEAR  | 11    | >MSH6-E487 DTPEMMEAR  | 45    | 34    |
| >MSH6-E487 ETPEMMEA   | 10    | >MSH6-E487 DTPEMMEA   | 30    | 20    |
| >MSH6-E487 ETPEMMEA   | 145   | >MSH6-E487 DTPEMMEA   | 902   | 757   |
| >MSH6-E487 TETPEMMEA  | 112   | >MSH6-E487 TDTPEMMEA  | 20998 | 20886 |
| >MSH6-E487 QTETPEMME  | 42    | >MSH6-E487 QTDTPEMME  | 89    | 47    |
| >MSH6-E487 QTETPEMM   | 4935  | >MSH6-E487 QTDTPEMM   | 488   | 4447  |
| >MSH6-E487 QTETPEMM   | 495   | >MSH6-E487 QTDTPEMM   | 376   | 119   |
| >MSH6-E487 VEQTETPEM  | 41    | >MSH6-E487 VEQTDTPEM  | 59    | 18    |
| >MSH6-E487 VEQTETPEMI | 48    | >MSH6-E487 VEQTDTPEM  | 73    | 25    |
| >MSH6-E487 RVEQTETPEN | 306   | >MSH6-E487 RVEQTDTPEN | 247   | 59    |
| >MSH6-E487 RVEQTETPEN | 621   | >MSH6-E487 RVEQTDTPEN | 348   | 273   |
| >MSH6-E487 RVEQTETPEN | 76    | >MSH6-E487 RVEQTDTPEN | 70    | 6     |
| >MSH6-E487 ARVEQTETPE | 298   | >MSH6-E487 ARVEQTDTPE | 430   | 132   |
| >MSH6-E487 ARVEQTETPE | 474   | >MSH6-E487 ARVEQTDTPE | 499   | 25    |
| >MSH6-F265 ESDIGGSDVE | 25    | >MSH6-F265 ESDIGGSDVE | 14099 | 14074 |
| >MSH6-F265 DVEFKPDTK  | 227   | >MSH6-F265 DVECKPDTK  | 620   | 393   |
| >MSH6-F265 GSDVEFKPDT | 437   | >MSH6-F265 GSDVECKPDT | 1114  | 677   |
| >MSH6-F265 GSDVEFKPDT | 487   | >MSH6-F265 GSDVECKPDT | 1374  | 887   |
| >MSH6-F265 GGSDFEFK   | 312   | >MSH6-F265 GGSDFECK   | 2261  | 1949  |
| >MSH6-F265 DIGGSDVEFK | 93    | >MSH6-F265 DIGGSDVECK | 1218  | 1125  |
| >MSH6-G77C GKRLKQWL   | 322   | >MSH6-G77C VKRLKQWL   | 2883  | 2561  |
| >MSH6-G77C FGKRLKQWI  | 11538 | >MSH6-G77C FVKRLKQWI  | 191   | 11347 |
| >MSH6-G77C FGKRLKQW   | 1503  | >MSH6-G77C FVKRLKQW   | 233   | 1270  |
| >MSH6-G77C FGKRLKQW   | 220   | >MSH6-G77C FVKRLKQW   | 214   | 6     |
| >MSH6-G77C FGKRLKQW   | 1187  | >MSH6-G77C FVKRLKQW   | 318   | 869   |

|                       |       |                        |      |       |
|-----------------------|-------|------------------------|------|-------|
| >MSH6-G77C TPFGRLL    | 125   | >MSH6-G77C TPFVKRLL    | 634  | 509   |
| >MSH6-G77C TPFGRLL    | 175   | >MSH6-G77C TPFVKRLL    | 599  | 424   |
| >MSH6-G77C TPFGRLL    | 381   | >MSH6-G77C TPFVKRLL    | 1030 | 649   |
| >MSH6-G77C TPFGRLLKQ  | 114   | >MSH6-G77C TPFVKRLLKQ' | 114  | 0     |
| >MSH6-G77C TPFGRLLKQ  | 9     | >MSH6-G77C TPFVKRLLKQ' | 9    | 0     |
| >MSH6-G77C HTPFGRLLK  | 42    | >MSH6-G77C HTPFVKRLLK  | 39   | 3     |
| >MSH6-G77C HTPFGRLLK  | 21    | >MSH6-G77C HTPFVKRLLK  | 20   | 1     |
| >MSH6-G77C HTPFGRLLK  | 60    | >MSH6-G77C HTPFVKRLLK  | 64   | 4     |
| >MSH6-G77C HTPFGRLLK  | 644   | >MSH6-G77C HTPFVKRLLK  | 324  | 320   |
| >MSH6-G77C HTPFGRLLK  | 22    | >MSH6-G77C HTPFVKRLLK  | 12   | 10    |
| >MSH6-G77C HTPFGRLL   | 486   | >MSH6-G77C HTPFVKRLL   | 65   | 421   |
| >MSH6-G77C HTPFGRLL   | 344   | >MSH6-G77C HTPFVKRLL   | 50   | 294   |
| >MSH6-G77C HTPFGRLL   | 395   | >MSH6-G77C HTPFVKRLL   | 988  | 593   |
| >MSH6-G77C HTPFGRLL   | 8     | >MSH6-G77C HTPFVKRLL   | 37   | 29    |
| >MSH6-G77C HTPFGRLL   | 23    | >MSH6-G77C HTPFVKRLL   | 11   | 12    |
| >MSH6-G77C CHTPFGR    | 416   | >MSH6-G77C CHTPFVKR    | 107  | 309   |
| >MSH6-G77C TCHTPFGK   | 666   | >MSH6-G77C TCHTPFVK    | 365  | 301   |
| >MSH6-G77C TCHTPFGK   | 2034  | >MSH6-G77C TCHTPFVKR   | 363  | 1671  |
| >MSH6-G77C TCHTPFGK   | 234   | >MSH6-G77C TCHTPFVKR   | 50   | 184   |
| >MSH6-G77C DTCHTPFGK  | 369   | >MSH6-G77C DTCHTPFVK   | 314  | 55    |
| >MSH6-G77C DTCHTPFGK  | 1328  | >MSH6-G77C DTCHTPFVKR  | 348  | 980   |
| >MSH6-G77C DTCHTPFGK  | 224   | >MSH6-G77C DTCHTPFVK   | 164  | 60    |
| >MSH6-G77C DTCHTPFGK  | 340   | >MSH6-G77C DTCHTPFVKR  | 81   | 259   |
| >MSH6-G77C DTCHTPFGK  | 22    | >MSH6-G77C DTCHTPFVK   | 29   | 7     |
| >MSH6-G77C DTCHTPFGK  | 237   | >MSH6-G77C DTCHTPFVKR  | 33   | 204   |
| >MSH6-G77C DTCHTPFG   | 12330 | >MSH6-G77C DTCHTPFV    | 79   | 12251 |
| >MSH6-G77C DTCHTPFG   | 14909 | >MSH6-G77C DTCHTPFV    | 34   | 14875 |
| >MSH6-G77C DTCHTPFGK  | 376   | >MSH6-G77C DTCHTPFVKR  | 364  | 12    |
| >MSH6-G77C DTCHTPFGK  | 331   | >MSH6-G77C DTCHTPFVK   | 464  | 133   |
| >MSH6-G77C VDTCHTPFG  | 18740 | >MSH6-G77C VDTCHTPFV   | 107  | 18633 |
| >MSH6-G77C RVDTCHTPFC | 21057 | >MSH6-G77C RVDTCHTPFV  | 345  | 20712 |
| >MSH6-G77C RVDTCHTPFC | 18045 | >MSH6-G77C RVDTCHTPFV  | 237  | 17808 |
| >MSH6-G77C RVDTCHTPFC | 19001 | >MSH6-G77C RVDTCHTPFV  | 60   | 18941 |
| >MSH6-G77C RVDTCHTPFC | 19041 | >MSH6-G77C RVDTCHTPFV  | 206  | 18835 |
| >MSH6-G77C RVDTCHTPFC | 19934 | >MSH6-G77C RVDTCHTPFV  | 57   | 19877 |
| >MSH6-G77C RVDTCHTPFC | 24795 | >MSH6-G77C RVDTCHTPFV  | 169  | 24626 |
| >MSH6-G77C RVDTCHTPFC | 32701 | >MSH6-G77C RVDTCHTPFV  | 108  | 32593 |
| >MSH6-G77C RVDTCHTPFC | 111   | >MSH6-G77C RVDTCHTPFV  | 110  | 1     |
| >MSH6-G77C RVDTCHTPFC | 30    | >MSH6-G77C RVDTCHTPFV  | 28   | 2     |
| >MSH6-G77C RVDTCHTPFC | 536   | >MSH6-G77C RVDTCHTPFV  | 359  | 177   |
| >MSH6-G77C RVDTCHTPFC | 432   | >MSH6-G77C RVDTCHTPFV  | 298  | 134   |
| >MSH6-G77C RVDTCHTPFC | 19604 | >MSH6-G77C RVDTCHTPFV  | 186  | 19418 |
| >MSH6-G932 AGFSDYDQ   | 16285 | >MSH6-G932 ADFSDYDQ    | 62   | 16223 |

|                       |       |                       |      |       |
|-----------------------|-------|-----------------------|------|-------|
| >MSH6-G932AGFDSYDQ,   | 19469 | >MSH6-G932ADFDSYDQ,   | 313  | 19156 |
| >MSH6-G932KAGFDSY     | 65    | >MSH6-G932KADFDSY     | 131  | 66    |
| >MSH6-G932KAGFDSY     | 346   | >MSH6-G932KADFDSY     | 1515 | 1169  |
| >MSH6-G932KAGFDSY     | 1302  | >MSH6-G932KADFDSY     | 439  | 863   |
| >MSH6-G932PKAGFDSY    | 417   | >MSH6-G932PKADFDSY    | 172  | 245   |
| >MSH6-G932TPKAGFDSY   | 190   | >MSH6-G932TPKADFDSY   | 644  | 454   |
| >MSH6-G932TPKAGFDSY   | 839   | >MSH6-G932TPKADFDSY   | 251  | 588   |
| >MSH6-G932ITPKAGFDS'  | 265   | >MSH6-G932ITPKADFSD'  | 280  | 15    |
| >MSH6-G932ITPKAGFDS'  | 176   | >MSH6-G932ITPKADFSD'  | 132  | 44    |
| >MSH6-G932ITPKAGFDS'  | 154   | >MSH6-G932ITPKADFSD'  | 182  | 28    |
| >MSH6-G932ITPKAGFD    | 541   | >MSH6-G932ITPKAFD     | 439  | 102   |
| >MSH6-G932ITPKAGFDS   | 124   | >MSH6-G932ITPKAFDS    | 871  | 747   |
| >MSH6-G932ITPKAGFDS   | 362   | >MSH6-G932ITPKAFDS    | 979  | 617   |
| >MSH6-G932ITPKAGFDS'  | 206   | >MSH6-G932ITPKADFSD'  | 587  | 381   |
| >MSH6-G932ITPKAGFDS'  | 102   | >MSH6-G932ITPKADFSD'  | 223  | 121   |
| >MSH6-G932LITPKAGF    | 116   | >MSH6-G932LITPKADF    | 615  | 499   |
| >MSH6-G932GLITPKAGF   | 347   | >MSH6-G932GLITPKADF   | 731  | 384   |
| >MSH6-G932TGLITPKAGF  | 467   | >MSH6-G932TGLITPKADF  | 2124 | 1657  |
| >MSH6-G932KTGLITPKAGI | 59    | >MSH6-G932KTGLITPKADI | 63   | 4     |
| >MSH6-G932KTGLITPKAGI | 12    | >MSH6-G932KTGLITPKADI | 33   | 21    |
| >MSH6-G932KTGLITPKAGI | 214   | >MSH6-G932KTGLITPKADI | 582  | 368   |
| >MSH6-G932KTGLITPKAGI | 245   | >MSH6-G932KTGLITPKADI | 427  | 182   |
| >MSH6-G971GIGRNRQ     | 232   | >MSH6-G971EIGRNRQ     | 2874 | 2642  |
| >MSH6-G971GIGRNRQLE   | 14317 | >MSH6-G971EIGRNRQLE   | 480  | 13837 |
| >MSH6-G971WGIGRNR     | 842   | >MSH6-G971WEIGRNR     | 471  | 371   |
| >MSH6-G971WGIGRNR     | 15119 | >MSH6-G971WEIGRNR     | 27   | 15092 |
| >MSH6-G971WGIGRNRQ    | 2994  | >MSH6-G971WEIGRNRQ    | 222  | 2772  |
| >MSH6-G971WGIGRNRQ    | 31309 | >MSH6-G971WEIGRNRQ    | 92   | 31217 |
| >MSH6-G971WGIGRNRQ    | 17118 | >MSH6-G971WEIGRNRQ    | 12   | 17106 |
| >MSH6-G971YWGIGRNR    | 274   | >MSH6-G971YWEIGRNR    | 512  | 238   |
| >MSH6-G971YWGIGRNR    | 29    | >MSH6-G971YWEIGRNR    | 135  | 106   |
| >MSH6-G971YWGIGRNR    | 45    | >MSH6-G971YWEIGRNR    | 333  | 288   |
| >MSH6-G971YWGIGRNR    | 91    | >MSH6-G971YWEIGRNR    | 163  | 72    |
| >MSH6-G971YWGIGRNR    | 29    | >MSH6-G971YWEIGRNR    | 53   | 24    |
| >MSH6-G971YWGIGRNR    | 457   | >MSH6-G971YWEIGRNR    | 348  | 109   |
| >MSH6-G971VYWIGRNR    | 47    | >MSH6-G971VYWEIGRNR   | 73   | 26    |
| >MSH6-G971VYWIGRNR    | 28    | >MSH6-G971VYWEIGRNR   | 48   | 20    |
| >MSH6-G971VYWIGRNR    | 37    | >MSH6-G971VYWEIGRNR   | 41   | 4     |
| >MSH6-G971VYWIGRNR    | 109   | >MSH6-G971VYWEIGRNR   | 78   | 31    |
| >MSH6-G971VYWIGRNR    | 443   | >MSH6-G971VYWEIGRNR   | 261  | 182   |
| >MSH6-G971VYWIGRNR    | 26    | >MSH6-G971VYWEIGRNR   | 38   | 12    |
| >MSH6-G971VYWIGRNR    | 491   | >MSH6-G971VYWEIGRNR   | 633  | 142   |
| >MSH6-G971IVYWIGR     | 90    | >MSH6-G971IVYWEIGR    | 206  | 116   |

|                      |      |                      |      |      |
|----------------------|------|----------------------|------|------|
| >MSH6-G971IVYWGIGRNF | 118  | >MSH6-G971IVYWEIGRNR | 380  | 262  |
| >MSH6-G971IVYWGIGRNF | 96   | >MSH6-G971IVYWEIGRNR | 149  | 53   |
| >MSH6-G971IVYWGIGR   | 63   | >MSH6-G971IVYWEIGR   | 112  | 49   |
| >MSH6-G971IVYWGIGRNF | 358  | >MSH6-G971IVYWEIGRNR | 482  | 124  |
| >MSH6-G971IVYWGIGRNF | 124  | >MSH6-G971IVYWEIGRNR | 127  | 3    |
| >MSH6-G971IVYWGIGRNF | 15   | >MSH6-G971IVYWEIGRNR | 26   | 11   |
| >MSH6-G971IVYWGIGRNF | 8    | >MSH6-G971IVYWEIGRNR | 12   | 4    |
| >MSH6-G971IVYWGIGR   | 43   | >MSH6-G971IVYWEIGR   | 135  | 92   |
| >MSH6-G971IVYWGIGRNF | 19   | >MSH6-G971IVYWEIGRNR | 27   | 8    |
| >MSH6-G971IVYWGIGR   | 113  | >MSH6-G971IVYWEIGR   | 179  | 66   |
| >MSH6-G971IVYWGIGRNF | 167  | >MSH6-G971IVYWEIGRNR | 190  | 23   |
| >MSH6-G971IVYWGIGR   | 19   | >MSH6-G971IVYWEIGR   | 12   | 7    |
| >MSH6-G971IVYWGIGRNF | 22   | >MSH6-G971IVYWEIGRNR | 34   | 12   |
| >MSH6-G971IVYWGIGRNF | 400  | >MSH6-G971IVYWEIGRNR | 848  | 448  |
| >MSH6-G971IVYWGIGRNF | 438  | >MSH6-G971IVYWEIGRNR | 1826 | 1388 |
| >MSH6-G971IVYWGIGRNF | 19   | >MSH6-G971IVYWEIGRNR | 35   | 16   |
| >MSH6-G971IVYWGIGRNF | 275  | >MSH6-G971IVYWEIGRNR | 385  | 110  |
| >MSH6-G971IVYWGIGRNF | 24   | >MSH6-G971IVYWEIGRNR | 60   | 36   |
| >MSH6-G971IVYWGIGR   | 141  | >MSH6-G971IVYWEIGR   | 85   | 56   |
| >MSH6-G971IVYWGIGRNF | 233  | >MSH6-G971IVYWEIGRNR | 141  | 92   |
| >MSH6-G971TIVYWGIGR  | 430  | >MSH6-G971TIVYWEIGR  | 742  | 312  |
| >MSH6-G971TIVYWGIGR  | 347  | >MSH6-G971TIVYWEIGR  | 770  | 423  |
| >MSH6-G971TIVYWGIGRN | 288  | >MSH6-G971TIVYWEIGRN | 409  | 121  |
| >MSH6-G971TIVYWGIGR  | 315  | >MSH6-G971TIVYWEIGR  | 144  | 171  |
| >MSH6-G971TIVYWGIGRN | 506  | >MSH6-G971TIVYWEIGRN | 322  | 184  |
| >MSH6-G971TIVYWGIGR  | 26   | >MSH6-G971TIVYWEIGR  | 11   | 15   |
| >MSH6-G971TIVYWGIGRN | 40   | >MSH6-G971TIVYWEIGRN | 24   | 16   |
| >MSH6-G971TIVYWGIGR  | 337  | >MSH6-G971TIVYWEIGR  | 281  | 56   |
| >MSH6-G971TIVYWGIGRN | 516  | >MSH6-G971TIVYWEIGRN | 489  | 27   |
| >MSH6-G971RTIVYWGI   | 486  | >MSH6-G971RTIVYWEI   | 1253 | 767  |
| >MSH6-G971RTIVYWGI   | 704  | >MSH6-G971RTIVYWEI   | 293  | 411  |
| >MSH6-G971RTIVYWGI   | 32   | >MSH6-G971RTIVYWEI   | 30   | 2    |
| >MSH6-G971RTIVYWGI   | 265  | >MSH6-G971RTIVYWEI   | 227  | 38   |
| >MSH6-G971RTIVYWGIGR | 496  | >MSH6-G971RTIVYWEIGR | 1654 | 1158 |
| >MSH6-G971RTIVYWGIGR | 74   | >MSH6-G971RTIVYWEIGR | 147  | 73   |
| >MSH6-G971RTIVYWGI   | 2369 | >MSH6-G971RTIVYWEI   | 461  | 1908 |
| >MSH6-G971RTIVYWGI   | 868  | >MSH6-G971RTIVYWEI   | 365  | 503  |
| >MSH6-G971RTIVYWGI   | 1293 | >MSH6-G971RTIVYWEI   | 443  | 850  |
| >MSH6-G971RTIVYWGI   | 256  | >MSH6-G971RTIVYWEI   | 251  | 5    |
| >MSH6-G971RTIVYWGIGR | 13   | >MSH6-G971RTIVYWEIGR | 18   | 5    |
| >MSH6-G971RTIVYWGI   | 254  | >MSH6-G971RTIVYWEI   | 143  | 111  |
| >MSH6-G971RTIVYWGIGR | 12   | >MSH6-G971RTIVYWEIGR | 18   | 6    |
| >MSH6-G971RTIVYWGI   | 217  | >MSH6-G971RTIVYWEI   | 167  | 50   |

|                        |       |                        |       |       |
|------------------------|-------|------------------------|-------|-------|
| >MSH6-G971RTIVYWGI     | 370   | >MSH6-G971RTIVYWEI     | 662   | 292   |
| >MSH6-G971RTIVYWGI     | 9     | >MSH6-G971RTIVYWEI     | 12    | 3     |
| >MSH6-G971RTIVYWGI     | 65    | >MSH6-G971RTIVYWEI     | 36    | 29    |
| >MSH6-G971RTIVYWGIGR   | 265   | >MSH6-G971RTIVYWEIGR   | 236   | 29    |
| >MSH6-G971RTIVYWGIGR   | 385   | >MSH6-G971RTIVYWEIGR   | 328   | 57    |
| >MSH6-G971RTIVYWGI     | 20    | >MSH6-G971RTIVYWEI     | 24    | 4     |
| >MSH6-G971CRTIVYWGI    | 177   | >MSH6-G971CRTIVYWEI    | 367   | 190   |
| >MSH6-G971CRTIVYWGIG   | 235   | >MSH6-G971CRTIVYWEIG   | 399   | 164   |
| >MSH6-I258DIGGSDVEF    | 2276  | >MSH6-I258DTGGSDVEF    | 268   | 2008  |
| >MSH6-I258DIGGSDVEFK   | 93    | >MSH6-I258DTGGSDVEFK   | 34    | 59    |
| >MSH6-I258DIGGSDVEF    | 13625 | >MSH6-I258DTGGSDVEF    | 315   | 13310 |
| >MSH6-I258RRVISDSSESDI | 129   | >MSH6-I258RRVISDSSESDI | 2977  | 2848  |
| >MSH6-I258RRVISDSSESDI | 260   | >MSH6-I258RRVISDSSESDI | 1427  | 1167  |
| >MSH6-I258ESDIGGSDVE   | 25    | >MSH6-I258ESDTGGSDVE   | 74    | 49    |
| >MSH6-I258SESDIGGSDV   | 459   | >MSH6-I258SESDTGGSDV   | 617   | 158   |
| >MSH6-I258SESDIGGSDV   | 453   | >MSH6-I258SESDTGGSDV   | 258   | 195   |
| >MSH6-I258ISDSSESDI    | 461   | >MSH6-I258ISDSSESDT    | 33663 | 33202 |
| >MSH6-I258VISDSSESDI   | 162   | >MSH6-I258VISDSSESDT   | 2362  | 2200  |
| >MSH6-I258RVISDSSESDI  | 308   | >MSH6-I258RVISDSSESDT  | 9692  | 9384  |
| >MSH6-K187KIKRLELAV    | 487   | >MSH6-K187TIKRLELAV    | 681   | 194   |
| >MSH6-K187KIKRLELA     | 41    | >MSH6-K187TIKRLELA     | 2661  | 2620  |
| >MSH6-K187KIKRLELAV    | 21    | >MSH6-K187TIKRLELAV    | 1607  | 1586  |
| >MSH6-K187DKIKRLEL     | 19922 | >MSH6-K187DTIKRLEL     | 320   | 19602 |
| >MSH6-K187DKIKRLEL     | 13166 | >MSH6-K187DTIKRLEL     | 69    | 13097 |
| >MSH6-K187DKIKRLELAV   | 21137 | >MSH6-K187DTIKRLELAV   | 260   | 20877 |
| >MSH6-K187DKIKRLEL     | 12552 | >MSH6-K187DTIKRLEL     | 299   | 12253 |
| >MSH6-K187DKIKRLEL     | 21027 | >MSH6-K187DTIKRLEL     | 271   | 20756 |
| >MSH6-K187DKIKRLELA    | 19710 | >MSH6-K187DTIKRLELA    | 169   | 19541 |
| >MSH6-K187DKIKRLELAV   | 16833 | >MSH6-K187DTIKRLELAV   | 140   | 16693 |
| >MSH6-K187KDKIKRLEL    | 413   | >MSH6-K187KDTIKRLEL    | 755   | 342   |
| >MSH6-K187KDKIKRLELAV  | 1337  | >MSH6-K187KDTIKRLELAV  | 205   | 1132  |
| >MSH6-K187LNKDKIKRLEL  | 354   | >MSH6-K187LNKDTIKRLEL  | 1936  | 1582  |
| >MSH6-K187ALNKDKIKRL   | 1284  | >MSH6-K187ALNKDTIKRL   | 478   | 806   |
| >MSH6-K187ALNKDKIKRL   | 72    | >MSH6-K187ALNKDTIKRL   | 33    | 39    |
| >MSH6-K187ALNKDKIKRL   | 838   | >MSH6-K187ALNKDTIKRL   | 187   | 651   |
| >MSH6-K187ALNKDKIKRL   | 366   | >MSH6-K187ALNKDTIKRL   | 110   | 256   |
| >MSH6-K187ALNKDKIKRL   | 1421  | >MSH6-K187ALNKDTIKRL   | 248   | 1173  |
| >MSH6-K187ALNKDKIKRL   | 9     | >MSH6-K187ALNKDTIKRL   | 6     | 3     |
| >MSH6-K187ALNKDKIK     | 485   | >MSH6-K187ALNKDTIK     | 125   | 360   |
| >MSH6-K187ALNKDKIKR    | 1109  | >MSH6-K187ALNKDTIKR    | 321   | 788   |
| >MSH6-K187ALNKDKIK     | 1053  | >MSH6-K187ALNKDTIK     | 252   | 801   |
| >MSH6-K187ALNKDKIKR    | 124   | >MSH6-K187ALNKDTIKR    | 275   | 151   |
| >MSH6-K187EALNKDKIK    | 1214  | >MSH6-K187EALNKDTIK    | 214   | 1000  |

|                        |       |                        |       |       |
|------------------------|-------|------------------------|-------|-------|
| >MSH6-K187 EALNKDKIKR  | 172   | >MSH6-K187 EALNKDTIKR  | 69    | 103   |
| >MSH6-K187 DEALNKDK    | 516   | >MSH6-K187 DEALNKDT    | 346   | 170   |
| >MSH6-K187 DEALNKDKI   | 17    | >MSH6-K187 DEALNKDTI   | 13    | 4     |
| >MSH6-K187 DEALNKDKI   | 1289  | >MSH6-K187 DEALNKDTI   | 248   | 1041  |
| >MSH6-K187 ADEALNKDKI  | 75    | >MSH6-K187 ADEALNKDTI  | 49    | 26    |
| >MSH6-K187 RADEALNKDKI | 1290  | >MSH6-K187 RADEALNKDTI | 398   | 892   |
| >MSH6-K187 RADEALNKDKI | 231   | >MSH6-K187 RADEALNKDTI | 131   | 100   |
| >MSH6-K247 KRRVISDS    | 258   | >MSH6-K247 IRRVISDS    | 6041  | 5783  |
| >MSH6-K247 KKRRVISD    | 1184  | >MSH6-K247 KIRRVISD    | 109   | 1075  |
| >MSH6-K247 KKRRVISDS   | 3661  | >MSH6-K247 KIRRVISDS   | 80    | 3581  |
| >MSH6-K247 KKRRVISDSE  | 6036  | >MSH6-K247 KIRRVISDSE  | 438   | 5598  |
| >MSH6-K247 KKRRVISDSES | 2313  | >MSH6-K247 KIRRVISDSES | 49    | 2264  |
| >MSH6-K247 KKRRVISDSES | 483   | >MSH6-K247 KIRRVISDSES | 12846 | 12363 |
| >MSH6-K247 GSRRSSRQIKI | 115   | >MSH6-K247 GSRRSSRQIKI | 19224 | 19109 |
| >MSH6-K247 GSRRSSRQIKI | 4     | >MSH6-K247 GSRRSSRQIKI | 12    | 8     |
| >MSH6-K247 GSRRSSRQIKI | 12911 | >MSH6-K247 GSRRSSRQIKI | 121   | 12790 |
| >MSH6-K247 GSRRSSRQIKI | 5593  | >MSH6-K247 GSRRSSRQIKI | 365   | 5228  |
| >MSH6-K247 GSRRSSRQIKI | 39028 | >MSH6-K247 GSRRSSRQIKI | 231   | 38797 |
| >MSH6-K247 QIKKRRVI    | 282   | >MSH6-K247 QIKIRRV     | 428   | 146   |
| >MSH6-K247 QIKKRRVI    | 36    | >MSH6-K247 QIKIRRV     | 71    | 35    |
| >MSH6-K247 QIKKRRVIS   | 314   | >MSH6-K247 QIKIRRVIS   | 501   | 187   |
| >MSH6-K247 RQIKKRRV    | 1751  | >MSH6-K247 RQIKIRRV    | 252   | 1499  |
| >MSH6-K247 RQIKKRRV    | 574   | >MSH6-K247 RQIKIRRV    | 60    | 514   |
| >MSH6-K247 RQIKKRRVI   | 1460  | >MSH6-K247 RQIKIRRV    | 179   | 1281  |
| >MSH6-K247 RQIKKRRVI   | 521   | >MSH6-K247 RQIKIRRV    | 399   | 122   |
| >MSH6-K247 RQIKKRRV    | 474   | >MSH6-K247 RQIKIRRV    | 207   | 267   |
| >MSH6-K247 RQIKKRRVI   | 54    | >MSH6-K247 RQIKIRRV    | 44    | 10    |
| >MSH6-K247 RQIKKRRV    | 1133  | >MSH6-K247 RQIKIRRV    | 400   | 733   |
| >MSH6-K247 RQIKKRRVI   | 485   | >MSH6-K247 RQIKIRRV    | 211   | 274   |
| >MSH6-K247 RQIKKRRVI   | 1772  | >MSH6-K247 RQIKIRRV    | 271   | 1501  |
| >MSH6-K247 RQIKKRRV    | 5973  | >MSH6-K247 RQIKIRRV    | 397   | 5576  |
| >MSH6-K247 RQIKKRRV    | 130   | >MSH6-K247 RQIKIRRV    | 112   | 18    |
| >MSH6-K247 RQIKKRRVI   | 338   | >MSH6-K247 RQIKIRRV    | 155   | 183   |
| >MSH6-K247 RQIKKRRVI   | 375   | >MSH6-K247 RQIKIRRV    | 94    | 281   |
| >MSH6-K247 SRQIKKRR    | 992   | >MSH6-K247 SRQIKIRR    | 466   | 526   |
| >MSH6-K247 SRQIKKRRVI  | 954   | >MSH6-K247 SRQIKIRRV   | 242   | 712   |
| >MSH6-K247 SRQIKKRRV   | 909   | >MSH6-K247 SRQIKIRRV   | 329   | 580   |
| >MSH6-K247 SRQIKKRRVI  | 426   | >MSH6-K247 SRQIKIRRV   | 229   | 197   |
| >MSH6-K247 SRQIKKRRV   | 343   | >MSH6-K247 SRQIKIRRV   | 105   | 238   |
| >MSH6-K247 SRQIKKRRVI  | 489   | >MSH6-K247 SRQIKIRRV   | 174   | 315   |
| >MSH6-K247 SSRQIKKR    | 740   | >MSH6-K247 SSRQIKIR    | 331   | 409   |
| >MSH6-K247 SSRQIKKRR   | 1650  | >MSH6-K247 SSRQIKIRR   | 310   | 1340  |
| >MSH6-K247 SSRQIKKRRV  | 429   | >MSH6-K247 SSRQIKIRRV  | 154   | 275   |



|                        |       |                        |       |       |
|------------------------|-------|------------------------|-------|-------|
| >MSH6-K247 SSRQIKRRVI  | 71    | >MSH6-K247 SSRQIKIRRV  | 38    | 33    |
| >MSH6-K247 SSRQIKKR    | 108   | >MSH6-K247 SSRQIKIR    | 137   | 29    |
| >MSH6-K247 SSRQIKRR    | 109   | >MSH6-K247 SSRQIKIR    | 43    | 66    |
| >MSH6-K247 SSRQIKRR    | 912   | >MSH6-K247 SSRQIKIR    | 231   | 681   |
| >MSH6-K247 SSRQIKRRVI  | 124   | >MSH6-K247 SSRQIKIRRV  | 63    | 61    |
| >MSH6-K247 SSRQIKRRVI  | 86    | >MSH6-K247 SSRQIKIRRV  | 72    | 14    |
| >MSH6-K247 RSRQIKK     | 71    | >MSH6-K247 RSRQIKI     | 16389 | 16318 |
| >MSH6-K247 RSRQIKK     | 25    | >MSH6-K247 RSRQIKI     | 18967 | 18942 |
| >MSH6-K247 RSRQIKRR    | 3652  | >MSH6-K247 RSRQIKIR    | 462   | 3190  |
| >MSH6-K247 RSRQIKK     | 9     | >MSH6-K247 RSRQIKI     | 92    | 83    |
| >MSH6-K247 RSRQIKRR\   | 635   | >MSH6-K247 RSRQIKIRRV  | 403   | 232   |
| >MSH6-K247 RSRQIKK     | 236   | >MSH6-K247 RSRQIKI     | 13592 | 13356 |
| >MSH6-K247 RSRQIKKR    | 20    | >MSH6-K247 RSRQIKIR    | 30    | 10    |
| >MSH6-K247 RSRQIKRR    | 12    | >MSH6-K247 RSRQIKIR    | 8     | 4     |
| >MSH6-K247 RSRQIKK     | 15839 | >MSH6-K247 RSRQIKI     | 306   | 15533 |
| >MSH6-K247 RSRQIKRR    | 4738  | >MSH6-K247 RSRQIKIR    | 474   | 4264  |
| >MSH6-K247 RSRQIKK     | 11191 | >MSH6-K247 RSRQIKI     | 55    | 11136 |
| >MSH6-K247 RSRQIKRR\   | 351   | >MSH6-K247 RSRQIKIRRV  | 191   | 160   |
| >MSH6-K247 RSRQIKK     | 14871 | >MSH6-K247 RSRQIKI     | 82    | 14789 |
| >MSH6-K247 RSRQIKK     | 449   | >MSH6-K247 RSRQIKI     | 12026 | 11577 |
| >MSH6-K247 RSRQIKKR    | 455   | >MSH6-K247 RSRQIKIR    | 523   | 68    |
| >MSH6-K247 RSRQIKRR    | 536   | >MSH6-K247 RSRQIKIR    | 284   | 252   |
| >MSH6-K247 RSRQIKK     | 33932 | >MSH6-K247 RSRQIKI     | 30    | 33902 |
| >MSH6-K247 RRSSRQIKKR  | 355   | >MSH6-K247 RRSSRQIKIR  | 605   | 250   |
| >MSH6-K247 RRSSRQIKK   | 2515  | >MSH6-K247 RRSSRQIKI   | 468   | 2047  |
| >MSH6-K247 RRSSRQIKK   | 20    | >MSH6-K247 RRSSRQIKI   | 21    | 1     |
| >MSH6-K247 RRSSRQIKKR  | 31    | >MSH6-K247 RRSSRQIKIR  | 28    | 3     |
| >MSH6-K247 RRSSRQIKKRI | 49    | >MSH6-K247 RRSSRQIKIR  | 41    | 8     |
| >MSH6-K247 RRSSRQIKK   | 296   | >MSH6-K247 RRSSRQIKI   | 70    | 226   |
| >MSH6-K247 RRSSRQIKKR  | 348   | >MSH6-K247 RRSSRQIKIR  | 184   | 164   |
| >MSH6-K247 RRSSRQIKKRI | 495   | >MSH6-K247 RRSSRQIKIR  | 248   | 247   |
| >MSH6-K247 RRSSRQIKK   | 141   | >MSH6-K247 RRSSRQIKI   | 49    | 92    |
| >MSH6-K247 RRSSRQIKKR  | 286   | >MSH6-K247 RRSSRQIKIR  | 160   | 126   |
| >MSH6-K247 RRSSRQIKKRI | 816   | >MSH6-K247 RRSSRQIKIR  | 400   | 416   |
| >MSH6-K247 RRSSRQIKKR  | 257   | >MSH6-K247 RRSSRQIKIR  | 265   | 8     |
| >MSH6-K247 RRSSRQIKKRI | 295   | >MSH6-K247 RRSSRQIKIR  | 140   | 155   |
| >MSH6-K247 SRRSSRQIKK  | 18    | >MSH6-K247 SRRSSRQIKI  | 459   | 441   |
| >MSH6-K247 SRRSSRQIKK  | 1118  | >MSH6-K247 SRRSSRQIKI  | 190   | 928   |
| >MSH6-K247 SRRSSRQIKKF | 889   | >MSH6-K247 SRRSSRQIKIR | 445   | 444   |
| >MSH6-K247 SRRSSRQIKK  | 183   | >MSH6-K247 SRRSSRQIKI  | 144   | 39    |
| >MSH6-L109 LVYNHPFDG\  | 149   | >MSH6-L109 VVYNHPFDG\  | 43    | 106   |
| >MSH6-L109 LVYNHPFDG\  | 376   | >MSH6-L109 VVYNHPFDG\  | 1009  | 633   |
| >MSH6-L109 LVYNHPFDG\  | 432   | >MSH6-L109 VVYNHPFDG\  | 1626  | 1194  |

|                       |      |                       |      |      |
|-----------------------|------|-----------------------|------|------|
| >MSH6-L109 LVYNHPFDG1 | 412  | >MSH6-L109 VVYNHPFDG` | 175  | 237  |
| >MSH6-L109 LVYNHPFDG1 | 241  | >MSH6-L109 VVYNHPFDG` | 298  | 57   |
| >MSH6-L109 LVYNHPFDG1 | 121  | >MSH6-L109 VVYNHPFDG` | 64   | 57   |
| >MSH6-L109 LVYNHPFDG1 | 67   | >MSH6-L109 VVYNHPFDG` | 174  | 107  |
| >MSH6-L109 LVYNHPFDG1 | 264  | >MSH6-L109 VVYNHPFDG` | 249  | 15   |
| >MSH6-L109 LVYNHPFDG1 | 113  | >MSH6-L109 VVYNHPFDG` | 173  | 60   |
| >MSH6-L109 LVYNHPFDG1 | 17   | >MSH6-L109 VVYNHPFDG` | 17   | 0    |
| >MSH6-L109 LVYNHPFDG1 | 45   | >MSH6-L109 VVYNHPFDG` | 106  | 61   |
| >MSH6-L109 LVYNHPFDG1 | 341  | >MSH6-L109 VVYNHPFDG` | 678  | 337  |
| >MSH6-L109 LVYNHPFDG1 | 136  | >MSH6-L109 VVYNHPFDG` | 162  | 26   |
| >MSH6-L109 CLVYNHPP   | 364  | >MSH6-L109 CVVYNHPP   | 430  | 66   |
| >MSH6-L109 CLVYNHPP   | 661  | >MSH6-L109 CVVYNHPP   | 17   | 644  |
| >MSH6-L109 CLVYNHPP   | 177  | >MSH6-L109 CVVYNHPP   | 514  | 337  |
| >MSH6-L109 CLVYNHPP   | 34   | >MSH6-L109 CVVYNHPP   | 233  | 199  |
| >MSH6-L109 CLVYNHPP   | 525  | >MSH6-L109 CVVYNHPP   | 105  | 420  |
| >MSH6-L109 KMEGYPWW   | 33   | >MSH6-L109 KMEGYPWW   | 18   | 15   |
| >MSH6-L109 KMEGYPWW   | 80   | >MSH6-L109 KMEGYPWW   | 73   | 7    |
| >MSH6-L109 KMEGYPWW   | 2229 | >MSH6-L109 KMEGYPWW   | 238  | 1991 |
| >MSH6-L109 KMEGYPWW   | 180  | >MSH6-L109 KMEGYPWW   | 29   | 151  |
| >MSH6-L109 KMEGYPWW   | 11   | >MSH6-L109 KMEGYPWW   | 3    | 8    |
| >MSH6-L109 KMEGYPWW   | 50   | >MSH6-L109 KMEGYPWW   | 11   | 39   |
| >MSH6-L109 KMEGYPWW   | 24   | >MSH6-L109 KMEGYPWW   | 6    | 18   |
| >MSH6-L109 KMEGYPWW   | 136  | >MSH6-L109 KMEGYPWW   | 10   | 126  |
| >MSH6-L109 KMEGYPWW   | 12   | >MSH6-L109 KMEGYPWW   | 4    | 8    |
| >MSH6-L109 KMEGYPWW   | 479  | >MSH6-L109 KMEGYPWW   | 5510 | 5031 |
| >MSH6-L109 WPCLVYNHP  | 645  | >MSH6-L109 WPCVVYNHP  | 318  | 327  |
| >MSH6-L109 WPCLVYNH   | 245  | >MSH6-L109 WPCVVYNH   | 280  | 35   |
| >MSH6-L109 WPCLVYNHP  | 155  | >MSH6-L109 WPCVVYNHP  | 308  | 153  |
| >MSH6-L109 WPCLVYNHP  | 605  | >MSH6-L109 WPCVVYNHP  | 490  | 115  |
| >MSH6-L109 WPCLVYNHP  | 383  | >MSH6-L109 WPCVVYNHP  | 516  | 133  |
| >MSH6-L109 WPCLVYNHP  | 195  | >MSH6-L109 WPCVVYNHP  | 247  | 52   |
| >MSH6-L109 WPCLVYNHP  | 94   | >MSH6-L109 WPCVVYNHP  | 45   | 49   |
| >MSH6-L109 WWPCLVYNI  | 69   | >MSH6-L109 WWPCVVYNI  | 48   | 21   |
| >MSH6-L109 WWPCLVYNI  | 98   | >MSH6-L109 WWPCVVYNI  | 74   | 24   |
| >MSH6-L109 WWPCLVYNI  | 7    | >MSH6-L109 WWPCVVYNI  | 6    | 1    |
| >MSH6-L109 WWPCLVYN   | 296  | >MSH6-L109 WWPCVVYN   | 556  | 260  |
| >MSH6-L109 WWPCLVYNI  | 256  | >MSH6-L109 WWPCVVYNI  | 843  | 587  |
| >MSH6-L109 PWWPCLVY   | 18   | >MSH6-L109 PWWPCVVY   | 56   | 38   |
| >MSH6-L109 PWWPCLVY   | 199  | >MSH6-L109 PWWPCVVY   | 281  | 82   |
| >MSH6-L109 PWWPCLVYN  | 159  | >MSH6-L109 PWWPCVVYI  | 128  | 31   |
| >MSH6-L109 PWWPCLVYN  | 276  | >MSH6-L109 PWWPCVVYI  | 336  | 60   |
| >MSH6-L109 PWWPCLVY   | 442  | >MSH6-L109 PWWPCVVY   | 448  | 6    |
| >MSH6-L109 PWWPCLVYN  | 462  | >MSH6-L109 PWWPCVVYI  | 470  | 8    |

|                      |      |                      |      |      |
|----------------------|------|----------------------|------|------|
| >MSH6-L109 YPWWPCLV  | 47   | >MSH6-L109 YPWWPCVV  | 49   | 2    |
| >MSH6-L109 YPWWPCLV  | 182  | >MSH6-L109 YPWWPCVV  | 240  | 58   |
| >MSH6-L109 YPWWPCLV  | 262  | >MSH6-L109 YPWWPCVV  | 366  | 104  |
| >MSH6-L109 YPWWPCLVY | 17   | >MSH6-L109 YPWWPCVV\ | 101  | 84   |
| >MSH6-L109 YPWWPCLV  | 20   | >MSH6-L109 YPWWPCVV  | 35   | 15   |
| >MSH6-L109 YPWWPCLV  | 162  | >MSH6-L109 YPWWPCVV  | 38   | 124  |
| >MSH6-L109 YPWWPCLVY | 162  | >MSH6-L109 YPWWPCVV\ | 231  | 69   |
| >MSH6-L109 YPWWPCLVY | 371  | >MSH6-L109 YPWWPCVV\ | 415  | 44   |
| >MSH6-L109 YPWWPCLVY | 276  | >MSH6-L109 YPWWPCVV\ | 161  | 115  |
| >MSH6-L109 YPWWPCLVY | 448  | >MSH6-L109 YPWWPCVV\ | 506  | 58   |
| >MSH6-L109 YPWWPCLV  | 168  | >MSH6-L109 YPWWPCVV  | 55   | 113  |
| >MSH6-L109 YPWWPCLVY | 7    | >MSH6-L109 YPWWPCVV\ | 7    | 0    |
| >MSH6-L109 YPWWPCLVY | 17   | >MSH6-L109 YPWWPCVV\ | 17   | 0    |
| >MSH6-L109 YPWWPCLV  | 154  | >MSH6-L109 YPWWPCVV  | 172  | 18   |
| >MSH6-L109 YPWWPCLV  | 274  | >MSH6-L109 YPWWPCVV  | 403  | 129  |
| >MSH6-L109 YPWWPCLVY | 136  | >MSH6-L109 YPWWPCVV\ | 170  | 34   |
| >MSH6-L109 YPWWPCLV  | 11   | >MSH6-L109 YPWWPCVV  | 10   | 1    |
| >MSH6-L109 YPWWPCLVY | 192  | >MSH6-L109 YPWWPCVV\ | 66   | 126  |
| >MSH6-L109 YPWWPCLVY | 409  | >MSH6-L109 YPWWPCVV\ | 198  | 211  |
| >MSH6-L109 YPWWPCLVY | 103  | >MSH6-L109 YPWWPCVV\ | 182  | 79   |
| >MSH6-L109 YPWWPCLVY | 100  | >MSH6-L109 YPWWPCVV\ | 29   | 71   |
| >MSH6-L109 GYPWWPCL  | 2972 | >MSH6-L109 GYPWWPCV  | 271  | 2701 |
| >MSH6-L109 GYPWWPCL\ | 32   | >MSH6-L109 GYPWWPCV\ | 34   | 2    |
| >MSH6-L109 GYPWWPCL  | 1783 | >MSH6-L109 GYPWWPCV  | 76   | 1707 |
| >MSH6-L109 GYPWWPCL\ | 79   | >MSH6-L109 GYPWWPCV\ | 109  | 30   |
| >MSH6-L109 GYPWWPCL  | 4145 | >MSH6-L109 GYPWWPCV  | 207  | 3938 |
| >MSH6-L109 GYPWWPCL\ | 50   | >MSH6-L109 GYPWWPCV\ | 74   | 24   |
| >MSH6-L109 GYPWWPCL  | 434  | >MSH6-L109 GYPWWPCV  | 2382 | 1948 |
| >MSH6-L109 GYPWWPCL  | 87   | >MSH6-L109 GYPWWPCV  | 352  | 265  |
| >MSH6-L109 GYPWWPCL\ | 151  | >MSH6-L109 GYPWWPCV\ | 285  | 134  |
| >MSH6-L109 GYPWWPCL  | 44   | >MSH6-L109 GYPWWPCV  | 847  | 803  |
| >MSH6-L109 GYPWWPCL\ | 471  | >MSH6-L109 GYPWWPCV\ | 265  | 206  |
| >MSH6-L109 GYPWWPCL\ | 260  | >MSH6-L109 GYPWWPCV\ | 175  | 85   |
| >MSH6-L109 GYPWWPCL\ | 40   | >MSH6-L109 GYPWWPCV\ | 70   | 30   |
| >MSH6-L109 GYPWWPCL\ | 733  | >MSH6-L109 GYPWWPCV\ | 455  | 278  |
| >MSH6-L109 GYPWWPCL\ | 338  | >MSH6-L109 GYPWWPCV\ | 512  | 174  |
| >MSH6-L109 GYPWWPCL  | 379  | >MSH6-L109 GYPWWPCV  | 558  | 179  |
| >MSH6-L109 GYPWWPCL\ | 271  | >MSH6-L109 GYPWWPCV\ | 418  | 147  |
| >MSH6-L109 EGYWWPCL  | 190  | >MSH6-L109 EGYWWPC\  | 313  | 123  |
| >MSH6-L109 EGYWWPCL  | 589  | >MSH6-L109 EGYWWPC\  | 472  | 117  |
| >MSH6-L109 EGYWWPCL  | 434  | >MSH6-L109 EGYWWPC\  | 1441 | 1007 |
| >MSH6-L109 EGYWWPCL  | 169  | >MSH6-L109 EGYWWPC\  | 185  | 16   |
| >MSH6-L109 EGYWWPCL  | 2197 | >MSH6-L109 EGYWWPC\  | 95   | 2102 |

|                        |       |                        |       |       |
|------------------------|-------|------------------------|-------|-------|
| >MSH6-L109 EGYPWWPCL   | 201   | >MSH6-L109 EGYPWWPC\   | 307   | 106   |
| >MSH6-L109 EGYPWWPCL   | 116   | >MSH6-L109 EGYPWWPC\   | 521   | 405   |
| >MSH6-L109 EGYPWWPCL   | 741   | >MSH6-L109 EGYPWWPC\   | 48    | 693   |
| >MSH6-L109 EGYPWWPCL   | 19    | >MSH6-L109 EGYPWWPC\   | 46    | 27    |
| >MSH6-L109 EGYPWWPCL   | 436   | >MSH6-L109 EGYPWWPC\   | 593   | 157   |
| >MSH6-L109 EGYPWWPCL   | 321   | >MSH6-L109 EGYPWWPC\   | 630   | 309   |
| >MSH6-L109 EGYPWWPCL   | 71    | >MSH6-L109 EGYPWWPC\   | 76    | 5     |
| >MSH6-L109 MEGYPWWP    | 713   | >MSH6-L109 MEGYPWWP    | 325   | 388   |
| >MSH6-L109 MEGYPWWP    | 233   | >MSH6-L109 MEGYPWWP    | 733   | 500   |
| >MSH6-L109 MEGYPWWP    | 275   | >MSH6-L109 MEGYPWWP    | 572   | 297   |
| >MSH6-L109 MEGYPWWP    | 871   | >MSH6-L109 MEGYPWWP    | 479   | 392   |
| >MSH6-L109 MEGYPWWP    | 770   | >MSH6-L109 MEGYPWWP    | 244   | 526   |
| >MSH6-L109 MEGYPWWP    | 135   | >MSH6-L109 MEGYPWWP    | 70    | 65    |
| >MSH6-L109 MEGYPWWP    | 55    | >MSH6-L109 MEGYPWWP    | 68    | 13    |
| >MSH6-L109 MEGYPWWP    | 19    | >MSH6-L109 MEGYPWWP    | 32    | 13    |
| >MSH6-P42S PSPGGDAAW   | 2024  | >MSH6-P42S SSPGGDAAW   | 107   | 1917  |
| >MSH6-P42S PSPGGDAAW   | 5142  | >MSH6-P42S SSPGGDAAW   | 482   | 4660  |
| >MSH6-P42S SPSPGGDA    | 358   | >MSH6-P42S SSSPGGDA    | 24255 | 23897 |
| >MSH6-P42S SPSPGGDAA   | 50    | >MSH6-P42S SSSPGGDAA   | 19096 | 19046 |
| >MSH6-P42S SPSPGGDAA\  | 460   | >MSH6-P42S SSSPGGDAA\  | 30839 | 30379 |
| >MSH6-P42S SPSPGGDAA\  | 2887  | >MSH6-P42S SSSPGGDAA\  | 6     | 2881  |
| >MSH6-P42S SPSPGGDAA   | 270   | >MSH6-P42S SSSPGGDAA   | 7902  | 7632  |
| >MSH6-P42S SPSPGGDAA\  | 463   | >MSH6-P42S SSSPGGDAA\  | 17672 | 17209 |
| >MSH6-P42S SPSPGGDAA   | 154   | >MSH6-P42S SSSPGGDAA   | 27658 | 27504 |
| >MSH6-P42S SPSPGGDAA\  | 14722 | >MSH6-P42S SSSPGGDAA\  | 159   | 14563 |
| >MSH6-P42S SPSPGGDAA\  | 9074  | >MSH6-P42S SSSPGGDAA\  | 20    | 9054  |
| >MSH6-P42S SPSPGGDAA\  | 15    | >MSH6-P42S SSSPGGDAA\  | 1027  | 1012  |
| >MSH6-P42S ASPSPGGDA/  | 59    | >MSH6-P42S ASSSPGGDA/  | 6     | 53    |
| >MSH6-P42S ASPSPGGDA/  | 3655  | >MSH6-P42S ASSSPGGDA/  | 69    | 3586  |
| >MSH6-P42S ASPSPGGDA/  | 206   | >MSH6-P42S ASSSPGGDA/  | 11772 | 11566 |
| >MSH6-P623 IPGSQFWDA   | 22954 | >MSH6-P623 ILGSQFWDA   | 320   | 22634 |
| >MSH6-P623 IPGSQFWDA   | 31413 | >MSH6-P623 ILGSQFWDA   | 127   | 31286 |
| >MSH6-P623 IPGSQFWDA   | 23787 | >MSH6-P623 ILGSQFWDA   | 360   | 23427 |
| >MSH6-P623 IPGSQFWDA   | 21166 | >MSH6-P623 ILGSQFWDA   | 153   | 21013 |
| >MSH6-P623 IPGSQFWDA   | 26167 | >MSH6-P623 ILGSQFWDA   | 68    | 26099 |
| >MSH6-P623 IPGSQFWDA   | 22956 | >MSH6-P623 ILGSQFWDA   | 98    | 22858 |
| >MSH6-P623 IPGSQFWDA   | 22949 | >MSH6-P623 ILGSQFWDA   | 43    | 22906 |
| >MSH6-P623 IPGSQFWDA   | 30776 | >MSH6-P623 ILGSQFWDA   | 6     | 30770 |
| >MSH6-P623 IPGSQFWDA:  | 16018 | >MSH6-P623 ILGSQFWDA:  | 119   | 15899 |
| >MSH6-P623 IPGSQFWDA:  | 14121 | >MSH6-P623 ILGSQFWDA:  | 370   | 13751 |
| >MSH6-P623 IPGSQFWDA   | 210   | >MSH6-P623 ILGSQFWDA   | 30829 | 30619 |
| >MSH6-P623 LSCSLQEGLIP | 21359 | >MSH6-P623 LSCSLQEGLIL | 163   | 21196 |
| >MSH6-P623 LSCSLQEGLIP | 10283 | >MSH6-P623 LSCSLQEGLIL | 224   | 10059 |

|                        |       |                        |      |       |
|------------------------|-------|------------------------|------|-------|
| >MSH6-P623 LSCSLQEGLIP | 24037 | >MSH6-P623 LSCSLQEGLIL | 190  | 23847 |
| >MSH6-P623 LIPGSQFWD/  | 4175  | >MSH6-P623 LILGSQFWD/  | 278  | 3897  |
| >MSH6-P623 LIPGSQFWD/  | 252   | >MSH6-P623 LILGSQFWD/  | 63   | 189   |
| >MSH6-P623 LIPGSQFWD/  | 1785  | >MSH6-P623 LILGSQFWD/  | 223  | 1562  |
| >MSH6-P623 LIPGSQFWD/  | 1947  | >MSH6-P623 LILGSQFWD/  | 153  | 1794  |
| >MSH6-P623 LIPGSQFWD/  | 29    | >MSH6-P623 LILGSQFWD/  | 16   | 13    |
| >MSH6-P623 LIPGSQFW    | 2593  | >MSH6-P623 LILGSQFW    | 62   | 2531  |
| >MSH6-P623 LIPGSQFW    | 625   | >MSH6-P623 LILGSQFW    | 106  | 519   |
| >MSH6-P623 LIPGSQFW    | 1171  | >MSH6-P623 LILGSQFW    | 24   | 1147  |
| >MSH6-P623 LIPGSQFW    | 444   | >MSH6-P623 LILGSQFW    | 160  | 284   |
| >MSH6-P623 GLIPGSQFWE  | 116   | >MSH6-P623 GLILGSQFWE  | 325  | 209   |
| >MSH6-P623 GLIPGSQFWE  | 93    | >MSH6-P623 GLILGSQFWE  | 223  | 130   |
| >MSH6-P623 GLIPGSQFWE  | 25    | >MSH6-P623 GLILGSQFWE  | 94   | 69    |
| >MSH6-P623 GLIPGSQFWE  | 29    | >MSH6-P623 GLILGSQFWE  | 139  | 110   |
| >MSH6-P623 GLIPGSQFWE  | 82    | >MSH6-P623 GLILGSQFWE  | 413  | 331   |
| >MSH6-P623 GLIPGSQFWE  | 14    | >MSH6-P623 GLILGSQFWE  | 40   | 26    |
| >MSH6-P623 GLIPGSQFWE  | 23    | >MSH6-P623 GLILGSQFWE  | 88   | 65    |
| >MSH6-P623 GLIPGSQFWE  | 6     | >MSH6-P623 GLILGSQFWE  | 26   | 20    |
| >MSH6-P623 GLIPGSQF    | 395   | >MSH6-P623 GLILGSQF    | 987  | 592   |
| >MSH6-P623 GLIPGSQF    | 52    | >MSH6-P623 GLILGSQF    | 103  | 51    |
| >MSH6-P623 GLIPGSQF    | 87    | >MSH6-P623 GLILGSQF    | 252  | 165   |
| >MSH6-P623 GLIPGSQF    | 129   | >MSH6-P623 GLILGSQF    | 468  | 339   |
| >MSH6-P623 GLIPGSQF    | 34    | >MSH6-P623 GLILGSQF    | 266  | 232   |
| >MSH6-P623 GLIPGSQFW   | 15    | >MSH6-P623 GLILGSQFW   | 132  | 117   |
| >MSH6-P623 GLIPGSQFW   | 312   | >MSH6-P623 GLILGSQFW   | 1933 | 1621  |
| >MSH6-P623 EGLIPGSQF   | 260   | >MSH6-P623 EGLILGSQF   | 506  | 246   |
| >MSH6-P623 EGLIPGSQFW  | 243   | >MSH6-P623 EGLILGSQFW  | 799  | 556   |
| >MSH6-P623 EGLIPGSQF   | 157   | >MSH6-P623 EGLILGSQF   | 175  | 18    |
| >MSH6-P623 QEGLIPGSQF  | 1614  | >MSH6-P623 QEGLILGSQF  | 320  | 1294  |
| >MSH6-P623 QEGLIPGSQF  | 207   | >MSH6-P623 QEGLILGSQF' | 72   | 135   |
| >MSH6-P623 QEGLIPGSQF  | 137   | >MSH6-P623 QEGLILGSQF  | 75   | 62    |
| >MSH6-P623 QEGLIPGSQF  | 129   | >MSH6-P623 QEGLILGSQF' | 116  | 13    |
| >MSH6-P623 QEGLIPGSQF  | 93    | >MSH6-P623 QEGLILGSQF  | 43   | 50    |
| >MSH6-P623 QEGLIPGSQF  | 62    | >MSH6-P623 QEGLILGSQF' | 67   | 5     |
| >MSH6-P623 LQEGLIPGSQ  | 133   | >MSH6-P623 LQEGLILGSQI | 107  | 26    |
| >MSH6-P623 LQEGLIPGSQ  | 154   | >MSH6-P623 LQEGLILGSQI | 183  | 29    |
| >MSH6-P623 SLQEGLIP    | 17951 | >MSH6-P623 SLQEGLIL    | 78   | 17873 |
| >MSH6-P623 SLQEGLIP    | 11482 | >MSH6-P623 SLQEGLIL    | 83   | 11399 |
| >MSH6-P623 SLQEGLIP    | 11368 | >MSH6-P623 SLQEGLIL    | 110  | 11258 |
| >MSH6-P623 SLQEGLIP    | 14339 | >MSH6-P623 SLQEGLIL    | 307  | 14032 |
| >MSH6-P623 SLQEGLIP    | 7227  | >MSH6-P623 SLQEGLIL    | 27   | 7200  |
| >MSH6-P623 SLQEGLIPG   | 347   | >MSH6-P623 SLQEGLILG   | 748  | 401   |
| >MSH6-P623 SLQEGLIPGS  | 92    | >MSH6-P623 SLQEGLILGS  | 174  | 82    |

|                         |       |                        |       |       |
|-------------------------|-------|------------------------|-------|-------|
| >MSH6-P623 SLQEGLIP     | 11386 | >MSH6-P623 SLQEGLIL    | 17    | 11369 |
| >MSH6-P623 SLQEGLIP     | 11286 | >MSH6-P623 SLQEGLIL    | 27    | 11259 |
| >MSH6-P623 SLQEGLIPGS   | 456   | >MSH6-P623 SLQEGLILGS  | 1392  | 936   |
| >MSH6-P623 SLQEGLIP     | 5775  | >MSH6-P623 SLQEGLIL    | 5     | 5770  |
| >MSH6-P623 SLQEGLIPGS   | 58    | >MSH6-P623 SLQEGLILGS  | 126   | 68    |
| >MSH6-P623 SLQEGLIPGS   | 153   | >MSH6-P623 SLQEGLILGSC | 79    | 74    |
| >MSH6-P623 CSLQEGLIP    | 20584 | >MSH6-P623 CSLQEGLIL   | 277   | 20307 |
| >MSH6-P623 CSLQEGLIP    | 16127 | >MSH6-P623 CSLQEGLIL   | 74    | 16053 |
| >MSH6-R102 RRDVSLKDCN   | 117   | >MSH6-R102 WRDVSLKDC   | 490   | 373   |
| >MSH6-R102 RRDVSLKDCN   | 329   | >MSH6-R102 WRDVSLKDC   | 1684  | 1355  |
| >MSH6-R102 RRDVSLKDCN   | 295   | >MSH6-R102 WRDVSLKDC   | 1104  | 809   |
| >MSH6-R102 ERRDVSLKDC   | 37117 | >MSH6-R102 EWRDVSLKDC  | 371   | 36746 |
| >MSH6-R102 KLANLINAEEI  | 55    | >MSH6-R102 KLANLINAEEI | 15457 | 15402 |
| >MSH6-R102 KLANLINAEEI  | 3585  | >MSH6-R102 KLANLINAEEI | 47    | 3538  |
| >MSH6-R102 KLANLINAEEI  | 25292 | >MSH6-R102 KLANLINAEEI | 347   | 24945 |
| >MSH6-R102 KLANLINAEEI  | 21307 | >MSH6-R102 KLANLINAEEI | 27    | 21280 |
| >MSH6-R102 KLANLINAEEI  | 115   | >MSH6-R102 KLANLINAEEI | 30559 | 30444 |
| >MSH6-R102 EERRDVSL     | 121   | >MSH6-R102 EEWRDVSL    | 160   | 39    |
| >MSH6-R102 EERRDVSL     | 2588  | >MSH6-R102 EEWRDVSL    | 409   | 2179  |
| >MSH6-R102 EERRDVSL     | 454   | >MSH6-R102 EEWRDVSL    | 500   | 46    |
| >MSH6-R102 EERRDVSL     | 1727  | >MSH6-R102 EEWRDVSL    | 440   | 1287  |
| >MSH6-R102 AEERRDVSL    | 69    | >MSH6-R102 AEEWRDVSL   | 12    | 57    |
| >MSH6-R102 AEERRDVS     | 419   | >MSH6-R102 AEEWRDVS    | 198   | 221   |
| >MSH6-R102 AEERRDVSLK   | 586   | >MSH6-R102 AEEWRDVSLI  | 317   | 269   |
| >MSH6-R102 AEERRDVSL    | 264   | >MSH6-R102 AEEWRDVSL   | 129   | 135   |
| >MSH6-R102 NAEERRDVSL   | 133   | >MSH6-R102 NAEWRDVS    | 105   | 28    |
| >MSH6-R102 LINAEEERRDV  | 2251  | >MSH6-R102 LINAEEWRD\  | 216   | 2035  |
| >MSH6-R102 LINAEEERRDV  | 103   | >MSH6-R102 LINAEEWRD\  | 42    | 61    |
| >MSH6-R102 LINAEEERR    | 241   | >MSH6-R102 LINAEEWR    | 84    | 157   |
| >MSH6-R102 NLINAEEERRD  | 304   | >MSH6-R102 NLINAEEWRI  | 135   | 169   |
| >MSH6-R102 NLINAEEERRD  | 395   | >MSH6-R102 NLINAEEWRI  | 102   | 293   |
| >MSH6-R102 NLINAEEERRD  | 406   | >MSH6-R102 NLINAEEWRI  | 204   | 202   |
| >MSH6-R102 NLINAEEERRD  | 572   | >MSH6-R102 NLINAEEWRI  | 138   | 434   |
| >MSH6-R102 NLINAEEERRD  | 29    | >MSH6-R102 NLINAEEWRI  | 33    | 4     |
| >MSH6-R102 NLINAEEER    | 32    | >MSH6-R102 NLINAEEW    | 20322 | 20290 |
| >MSH6-R102 NLINAEEERR   | 55    | >MSH6-R102 NLINAEEWR   | 26    | 29    |
| >MSH6-R102 LANLINAEEER  | 351   | >MSH6-R102 LANLINAEEW  | 31265 | 30914 |
| >MSH6-R102 LANLINAEEERI | 156   | >MSH6-R102 LANLINAEEW  | 112   | 44    |
| >MSH6-R102 LANLINAEEERI | 745   | >MSH6-R102 LANLINAEEW  | 397   | 348   |
| >MSH6-R102 LANLINAEEER  | 89    | >MSH6-R102 LANLINAEEW  | 34682 | 34593 |
| >MSH6-R102 LANLINAEEERI | 37    | >MSH6-R102 LANLINAEEW  | 20    | 17    |
| >MSH6-R102 LANLINAEEER  | 20416 | >MSH6-R102 LANLINAEEW  | 45    | 20371 |
| >MSH6-R102 LANLINAEEER  | 23074 | >MSH6-R102 LANLINAEEW  | 78    | 22996 |

|                        |       |                       |       |       |
|------------------------|-------|-----------------------|-------|-------|
| >MSH6-R102 LANLINAEEER | 20441 | >MSH6-R102 LANLINAEEW | 13    | 20428 |
| >MSH6-R102 LANLINAEEER | 27991 | >MSH6-R102 LANLINAEEW | 39    | 27952 |
| >MSH6-R103 RRLFYNFDKN  | 27    | >MSH6-R103 QRLFYNFDKN | 129   | 102   |
| >MSH6-R103 RRLFYNFDK   | 29    | >MSH6-R103 QRLFYNFDK  | 168   | 139   |
| >MSH6-R103 RRLFYNFDKN  | 128   | >MSH6-R103 QRLFYNFDKN | 2908  | 2780  |
| >MSH6-R103 RRLFYNFDKN  | 38    | >MSH6-R103 QRLFYNFDKN | 329   | 291   |
| >MSH6-R103 RRLFYNFDK   | 121   | >MSH6-R103 QRLFYNFDK  | 2844  | 2723  |
| >MSH6-R103 RRLFYNFDKN  | 214   | >MSH6-R103 QRLFYNFDKN | 2503  | 2289  |
| >MSH6-R103 RRLFYNFDK   | 80    | >MSH6-R103 QRLFYNFDK  | 783   | 703   |
| >MSH6-R103 RRLFYNFDKN  | 456   | >MSH6-R103 QRLFYNFDKN | 2462  | 2006  |
| >MSH6-R103 MRRLFYNFDI  | 3088  | >MSH6-R103 MQRLFYNF   | 464   | 2624  |
| >MSH6-R103 MRRLFYNFDI  | 5429  | >MSH6-R103 MQRLFYNF   | 155   | 5274  |
| >MSH6-R103 MRRLFYNF    | 1080  | >MSH6-R103 MQRLFYNF   | 281   | 799   |
| >MSH6-R103 MRRLFYNF    | 1571  | >MSH6-R103 MQRLFYNF   | 286   | 1285  |
| >MSH6-R103 MRRLFYNFDI  | 28    | >MSH6-R103 MQRLFYNF   | 8     | 20    |
| >MSH6-R103 MRRLFYNFDI  | 363   | >MSH6-R103 MQRLFYNF   | 109   | 254   |
| >MSH6-R103 MRRLFYNF    | 11773 | >MSH6-R103 MQRLFYNF   | 62    | 11711 |
| >MSH6-R103 MRRLFYNF    | 13    | >MSH6-R103 MQRLFYNF   | 3     | 10    |
| >MSH6-R103 MRRLFYNF    | 1990  | >MSH6-R103 MQRLFYNF   | 331   | 1659  |
| >MSH6-R103 MRRLFYNF    | 8052  | >MSH6-R103 MQRLFYNF   | 461   | 7591  |
| >MSH6-R103 MRRLFYNF    | 249   | >MSH6-R103 MQRLFYNF   | 4975  | 4726  |
| >MSH6-R103 MRRLFYNF    | 115   | >MSH6-R103 MQRLFYNF   | 11098 | 10983 |
| >MSH6-R103 MRRLFYNF    | 468   | >MSH6-R103 MQRLFYNF   | 3311  | 2843  |
| >MSH6-R103 CMRRLFYNF   | 264   | >MSH6-R103 CMQRLFYNF  | 325   | 61    |
| >MSH6-R103 CMRRLFYNF   | 88    | >MSH6-R103 CMQRLFYNF  | 398   | 310   |
| >MSH6-R103 CMRRLFYNF   | 357   | >MSH6-R103 CMQRLFYNF  | 28    | 329   |
| >MSH6-R103 CMRRLFYNF   | 52    | >MSH6-R103 CMQRLFYNF  | 28    | 24    |
| >MSH6-R103 CMRRLFYNF   | 516   | >MSH6-R103 CMQRLFYNF  | 160   | 356   |
| >MSH6-R103 CMRRLFYNF   | 90    | >MSH6-R103 CMQRLFYNF  | 12    | 78    |
| >MSH6-R103 CMRRLFYNF   | 16    | >MSH6-R103 CMQRLFYNF  | 4220  | 4204  |
| >MSH6-R103 CMRRLFYNF   | 65    | >MSH6-R103 CMQRLFYNF  | 120   | 55    |
| >MSH6-R103 CMRRLFYNF   | 1469  | >MSH6-R103 CMQRLFYNF  | 442   | 1027  |
| >MSH6-R103 CMRRLFYNF   | 143   | >MSH6-R103 CMQRLFYNF  | 1147  | 1004  |
| >MSH6-R103 CMRRLFYNF   | 103   | >MSH6-R103 CMQRLFYNF  | 188   | 85    |
| >MSH6-R103 CMRRLFYNF   | 7     | >MSH6-R103 CMQRLFYNF  | 24    | 17    |
| >MSH6-R103 DCMRRLFYNF  | 644   | >MSH6-R103 DCMQRLFY   | 470   | 174   |
| >MSH6-R103 DCMRRLFY    | 196   | >MSH6-R103 DCMQRLFY   | 149   | 47    |
| >MSH6-R103 DCMRRLFYNF  | 260   | >MSH6-R103 DCMQRLFY   | 251   | 9     |
| >MSH6-R103 DCMRRLFY    | 827   | >MSH6-R103 DCMQRLFY   | 242   | 585   |
| >MSH6-R103 DCMRRLFY    | 362   | >MSH6-R103 DCMQRLFY   | 533   | 171   |
| >MSH6-R103 KDCMRRLFY   | 147   | >MSH6-R103 KDCMQRLFY  | 117   | 30    |
| >MSH6-R103 LKDCMRRLFY  | 209   | >MSH6-R103 LKDCMQRLFY | 169   | 40    |
| >MSH6-R103 LKDCMRRLFY  | 303   | >MSH6-R103 LKDCMQRLFY | 376   | 73    |

|                       |      |                       |       |       |
|-----------------------|------|-----------------------|-------|-------|
| >MSH6-R103 SLKDCMRRL  | 1204 | >MSH6-R103 SLKDCMQRL  | 152   | 1052  |
| >MSH6-R103 SLKDCMRRL  | 57   | >MSH6-R103 SLKDCMQRL  | 12    | 45    |
| >MSH6-R103 SLKDCMRRL  | 21   | >MSH6-R103 SLKDCMQRL  | 12    | 9     |
| >MSH6-R103 SLKDCMRRL  | 748  | >MSH6-R103 SLKDCMQRL  | 252   | 496   |
| >MSH6-R103 SLKDCMRRL  | 1470 | >MSH6-R103 SLKDCMQRL  | 214   | 1256  |
| >MSH6-R103 SLKDCMRRL  | 8    | >MSH6-R103 SLKDCMQRL  | 3     | 5     |
| >MSH6-R103 SLKDCMRRLF | 345  | >MSH6-R103 SLKDCMQRLI | 466   | 121   |
| >MSH6-R103 SLKDCMRRLF | 67   | >MSH6-R103 SLKDCMQRLI | 47    | 20    |
| >MSH6-R103 SLKDCMRRLF | 372  | >MSH6-R103 SLKDCMQRLI | 341   | 31    |
| >MSH6-R103 SLKDCMRRLF | 38   | >MSH6-R103 SLKDCMQRLI | 33    | 5     |
| >MSH6-R103 SLKDCMRR   | 52   | >MSH6-R103 SLKDCMQR   | 46    | 6     |
| >MSH6-R103 SLKDCMRR   | 514  | >MSH6-R103 SLKDCMQR   | 397   | 117   |
| >MSH6-R103 SLKDCMRR   | 853  | >MSH6-R103 SLKDCMQR   | 484   | 369   |
| >MSH6-R103 SLKDCMRRLF | 27   | >MSH6-R103 SLKDCMQRLI | 18    | 9     |
| >MSH6-R103 SLKDCMRRLF | 299  | >MSH6-R103 SLKDCMQRLI | 241   | 58    |
| >MSH6-R103 SLKDCMRRLF | 109  | >MSH6-R103 SLKDCMQRLI | 88    | 21    |
| >MSH6-R103 SLKDCMRRLF | 497  | >MSH6-R103 SLKDCMQRLI | 455   | 42    |
| >MSH6-R103 SLKDCMRRLF | 1164 | >MSH6-R103 SLKDCMQRLI | 492   | 672   |
| >MSH6-R103 SLKDCMRRLF | 406  | >MSH6-R103 SLKDCMQRLI | 419   | 13    |
| >MSH6-R103 SLKDCMRR   | 195  | >MSH6-R103 SLKDCMQR   | 231   | 36    |
| >MSH6-R103 VSLKDCMR   | 462  | >MSH6-R103 VSLKDCMQ   | 20833 | 20371 |
| >MSH6-R103 VSLKDCMRRI | 90   | >MSH6-R103 VSLKDCMQR  | 100   | 10    |
| >MSH6-R103 VSLKDCMRRI | 35   | >MSH6-R103 VSLKDCMQR  | 26    | 9     |
| >MSH6-R103 VSLKDCMRRI | 24   | >MSH6-R103 VSLKDCMQR  | 20    | 4     |
| >MSH6-R103 VSLKDCMRRI | 1456 | >MSH6-R103 VSLKDCMQR  | 327   | 1129  |
| >MSH6-R103 VSLKDCMRRI | 26   | >MSH6-R103 VSLKDCMQR  | 28    | 2     |
| >MSH6-R103 VSLKDCMRR  | 445  | >MSH6-R103 VSLKDCMQR  | 433   | 12    |
| >MSH6-R103 DVSLKDCMR  | 34   | >MSH6-R103 DVSLKDCMQ  | 9675  | 9641  |
| >MSH6-R103 DVSLKDCMR  | 200  | >MSH6-R103 DVSLKDCMQ  | 134   | 66    |
| >MSH6-R103 DVSLKDCMR  | 20   | >MSH6-R103 DVSLKDCMQ  | 4168  | 4148  |
| >MSH6-R103 DVSLKDCMR  | 92   | >MSH6-R103 DVSLKDCMQ  | 86    | 6     |
| >MSH6-R58S RPLARSASPP | 288  | >MSH6-R58S SPLARSASPP | 3062  | 2774  |
| >MSH6-R58S RPLARSAS   | 206  | >MSH6-R58S SPLARSAS   | 1194  | 988   |
| >MSH6-R58S AAWSEAGPG  | 98   | >MSH6-R58S AAWSEAGPG  | 20956 | 20858 |
| >MSH6-R58S GPRPLARSA  | 27   | >MSH6-R58S GPSPLARSA  | 454   | 427   |
| >MSH6-R58S PGPRPLARSA | 569  | >MSH6-R58S PGPSPLARSA | 369   | 200   |
| >MSH6-R58S EAGPGRPLA  | 329  | >MSH6-R58S EAGPGPSPLA | 134   | 195   |
| >MSH6-R58S EAGPGRPL   | 3016 | >MSH6-R58S EAGPGPSPL  | 360   | 2656  |
| >MSH6-R58S EAGPGRPL   | 985  | >MSH6-R58S EAGPGPSPL  | 224   | 761   |
| >MSH6-R58S EAGPGRPLA  | 1379 | >MSH6-R58S EAGPGPSPLA | 438   | 941   |
| >MSH6-R58S SEAGPGRPL  | 845  | >MSH6-R58S SEAGPGPSPL | 176   | 669   |
| >MSH6-R58S SEAGPGRPL  | 172  | >MSH6-R58S SEAGPGPSPL | 147   | 25    |
| >MSH6-R58S SEAGPGRPL  | 473  | >MSH6-R58S SEAGPGPSPL | 745   | 272   |



|                        |       |                        |       |       |
|------------------------|-------|------------------------|-------|-------|
| >MSH6-R58S SEAGPGPR    | 2657  | >MSH6-R58S SEAGPGPS    | 351   | 2306  |
| >MSH6-R58S SEAGPGPRPL  | 18    | >MSH6-R58S SEAGPGPSPL  | 15    | 3     |
| >MSH6-R58S SEAGPGPRPL  | 227   | >MSH6-R58S SEAGPGPSPL  | 202   | 25    |
| >MSH6-R58S WSEAGPGPR   | 66    | >MSH6-R58S WSEAGPGPS   | 28    | 38    |
| >MSH6-R58S WSEAGPGPR   | 261   | >MSH6-R58S WSEAGPGPS   | 76    | 185   |
| >MSH6-R58S WSEAGPGPR   | 2083  | >MSH6-R58S WSEAGPGPS   | 226   | 1857  |
| >MSH6-R58S AWSEAGPGP   | 168   | >MSH6-R58S AWSEAGPGP   | 28992 | 28824 |
| >MSH6-R644 REKLSDGI    | 299   | >MSH6-R644 SEKLSDGI    | 16    | 283   |
| >MSH6-R644 REKLSDGI    | 110   | >MSH6-R644 SEKLSDGI    | 872   | 762   |
| >MSH6-R644 REKLSDGIGVI | 161   | >MSH6-R644 SEKLSDGIGVI | 1199  | 1038  |
| >MSH6-R644 REKLSDGI    | 184   | >MSH6-R644 SEKLSDGI    | 586   | 402   |
| >MSH6-R644 REKLSDGIGVI | 142   | >MSH6-R644 SEKLSDGIGVI | 427   | 285   |
| >MSH6-R644 REKLSDGI    | 51    | >MSH6-R644 SEKLSDGI    | 96    | 45    |
| >MSH6-R644 REKLSDGIGV  | 193   | >MSH6-R644 SEKLSDGIGV  | 1084  | 891   |
| >MSH6-R644 REKLSDGIGVI | 68    | >MSH6-R644 SEKLSDGIGVI | 416   | 348   |
| >MSH6-R644 FREKLSDGI   | 417   | >MSH6-R644 FSEKLSDGI   | 1578  | 1161  |
| >MSH6-R644 FREKLSDGI   | 11141 | >MSH6-R644 FSEKLSDGI   | 135   | 11006 |
| >MSH6-R644 LRTLLEEEYFR | 471   | >MSH6-R644 LRTLLEEEYFS | 3755  | 3284  |
| >MSH6-R644 YFREKLSDGI  | 805   | >MSH6-R644 YFSEKLSDGI  | 151   | 654   |
| >MSH6-R644 EYFREKLSDGI | 67    | >MSH6-R644 EYFSEKLSDGI | 72    | 5     |
| >MSH6-R644 EEYFREKL    | 885   | >MSH6-R644 EEYFSEKL    | 165   | 720   |
| >MSH6-R644 EEYFREKL    | 260   | >MSH6-R644 EEYFSEKL    | 75    | 185   |
| >MSH6-R644 EEYFREKLS   | 1772  | >MSH6-R644 EEYFSEKLS   | 395   | 1377  |
| >MSH6-R644 EEEYFREKL   | 325   | >MSH6-R644 EEEYFSEKL   | 213   | 112   |
| >MSH6-R644 EEEYFREKL   | 42    | >MSH6-R644 EEEYFSEKL   | 35    | 7     |
| >MSH6-R644 EEEYFREK    | 455   | >MSH6-R644 EEEYFSEK    | 431   | 24    |
| >MSH6-R644 EEEYFREKLS  | 119   | >MSH6-R644 EEEYFSEKLS  | 165   | 46    |
| >MSH6-R644 LEEYFREKL   | 115   | >MSH6-R644 LEEYFSEKL   | 99    | 16    |
| >MSH6-R644 LEEYFREKL   | 126   | >MSH6-R644 LEEYFSEKL   | 178   | 52    |
| >MSH6-R644 LLEEEYFREKL | 1101  | >MSH6-R644 LLEEEYFSEKL | 442   | 659   |
| >MSH6-R644 LLEEEYFR    | 3837  | >MSH6-R644 LLEEEYFS    | 376   | 3461  |
| >MSH6-R644 LLEEEYFREKL | 30    | >MSH6-R644 LLEEEYFSEKL | 13    | 17    |
| >MSH6-R644 LLEEEYFREKL | 1018  | >MSH6-R644 LLEEEYFSEKL | 447   | 571   |
| >MSH6-R644 LLEEEYFREKL | 126   | >MSH6-R644 LLEEEYFSEKL | 40    | 86    |
| >MSH6-R644 LLEEEYFREKL | 369   | >MSH6-R644 LLEEEYFSEKL | 67    | 302   |
| >MSH6-R644 LLEEEYFREKL | 976   | >MSH6-R644 LLEEEYFSEKL | 373   | 603   |
| >MSH6-R644 LLEEEYFREK  | 1712  | >MSH6-R644 LLEEEYFSEK  | 318   | 1394  |
| >MSH6-R644 LLEEEYFREKL | 8     | >MSH6-R644 LLEEEYFSEKL | 7     | 1     |
| >MSH6-R644 LLEEEYFR    | 199   | >MSH6-R644 LLEEEYFS    | 19946 | 19747 |
| >MSH6-R644 LLEEEYFR    | 243   | >MSH6-R644 LLEEEYFS    | 29430 | 29187 |
| >MSH6-R644 LLEEEYFR    | 178   | >MSH6-R644 LLEEEYFS    | 32000 | 31822 |
| >MSH6-R644 LLEEEYFR    | 272   | >MSH6-R644 LLEEEYFS    | 30230 | 29958 |
| >MSH6-R644 TLLEEEYFR   | 11909 | >MSH6-R644 TLLEEEYFS   | 499   | 11410 |

|                        |      |                        |       |       |
|------------------------|------|------------------------|-------|-------|
| >MSH6-R644 TLLEEEYFR   | 3125 | >MSH6-R644 TLLEEEYFS   | 197   | 2928  |
| >MSH6-R644 TLLEEEYFR   | 7147 | >MSH6-R644 TLLEEEYFS   | 342   | 6805  |
| >MSH6-R644 TLLEEEYFR   | 6522 | >MSH6-R644 TLLEEEYFS   | 410   | 6112  |
| >MSH6-R644 TLLEEEYFREK | 500  | >MSH6-R644 TLLEEEYFSEK | 251   | 249   |
| >MSH6-R644 TLLEEEYFREK | 125  | >MSH6-R644 TLLEEEYFSEK | 43    | 82    |
| >MSH6-R644 TLLEEEYFR   | 90   | >MSH6-R644 TLLEEEYFS   | 18876 | 18786 |
| >MSH6-R644 TLLEEEYFR   | 36   | >MSH6-R644 TLLEEEYFS   | 20465 | 20429 |
| >MSH6-R644 TLLEEEYFR   | 36   | >MSH6-R644 TLLEEEYFS   | 23983 | 23947 |
| >MSH6-R644 TLLEEEYFREK | 1265 | >MSH6-R644 TLLEEEYFSEK | 351   | 914   |
| >MSH6-R644 TLLEEEYFR   | 62   | >MSH6-R644 TLLEEEYFS   | 18930 | 18868 |
| >MSH6-R644 RTLLEEEYFR  | 39   | >MSH6-R644 RTLLEEEYFS  | 23778 | 23739 |
| >MSH6-R644 RTLLEEEYFR  | 14   | >MSH6-R644 RTLLEEEYFS  | 12030 | 12016 |
| >MSH6-R644 RTLLEEEYFR  | 59   | >MSH6-R644 RTLLEEEYFS  | 27838 | 27779 |
| >MSH6-R644 RTLLEEEYFR  | 33   | >MSH6-R644 RTLLEEEYFS  | 18018 | 17985 |
| >MSH6-S315 SRKETPSATK  | 108  | >MSH6-S315 FRKETPSATK  | 4849  | 4741  |
| >MSH6-S315 SRKETPSAT   | 2110 | >MSH6-S315 FRKETPSAT   | 467   | 1643  |
| >MSH6-S315 SRKETPSATK  | 1474 | >MSH6-S315 FRKETPSATK  | 398   | 1076  |
| >MSH6-S315 SSRKETPSATI | 286  | >MSH6-S315 SFRKETPSATI | 3085  | 2799  |
| >MSH6-S315 SSRKETPS    | 281  | >MSH6-S315 SFRKETPS    | 911   | 630   |
| >MSH6-S315 SSRKETPSA   | 7    | >MSH6-S315 SFRKETPSA   | 12    | 5     |
| >MSH6-S315 SSRKETPSAT  | 168  | >MSH6-S315 SFRKETPSAT  | 593   | 425   |
| >MSH6-S315 SSRKETPSATI | 4    | >MSH6-S315 SFRKETPSATI | 4     | 0     |
| >MSH6-S315 KSSRKETPSA  | 103  | >MSH6-S315 KSFRKETPSA  | 26    | 77    |
| >MSH6-S315 RKSSRKETPSA | 159  | >MSH6-S315 RKSFRKETPSA | 527   | 368   |
| >MSH6-S315 KRKSSRKET   | 830  | >MSH6-S315 KRKSFRKET   | 168   | 662   |
| >MSH6-S315 LKRKSSRK    | 89   | >MSH6-S315 LKRKSFRK    | 91    | 2     |
| >MSH6-S315 LKRKSSRK    | 207  | >MSH6-S315 LKRKSFRK    | 418   | 211   |
| >MSH6-S315 LKRKSSRKET  | 181  | >MSH6-S315 LKRKSFRKET  | 191   | 10    |
| >MSH6-S315 LKRKSSRKETF | 478  | >MSH6-S315 LKRKSFRKET  | 505   | 27    |
| >MSH6-S315 SLKRKSSR    | 1388 | >MSH6-S315 SLKRKSFR    | 392   | 996   |
| >MSH6-S315 SLKRKSSRK   | 61   | >MSH6-S315 SLKRKSFRK   | 54    | 7     |
| >MSH6-S315 SLKRKSSRK   | 466  | >MSH6-S315 SLKRKSFRK   | 85    | 381   |
| >MSH6-S315 SLKRKSSR    | 837  | >MSH6-S315 SLKRKSFR    | 249   | 588   |
| >MSH6-S315 SLKRKSSRK   | 11   | >MSH6-S315 SLKRKSFRK   | 9     | 2     |
| >MSH6-S315 SLKRKSSR    | 23   | >MSH6-S315 SLKRKSFR    | 9     | 14    |
| >MSH6-S315 SLKRKSSRK   | 489  | >MSH6-S315 SLKRKSFRK   | 50    | 439   |
| >MSH6-S315 SLKRKSSR    | 491  | >MSH6-S315 SLKRKSFR    | 95    | 396   |
| >MSH6-S315 SLKRKSSR    | 1238 | >MSH6-S315 SLKRKSFR    | 291   | 947   |
| >MSH6-S315 GSLKRKSSRK  | 89   | >MSH6-S315 GSLKRKSFRK  | 118   | 29    |
| >MSH6-S315 GSLKRKSSR   | 3358 | >MSH6-S315 GSLKRKSFR   | 332   | 3026  |
| >MSH6-S315 GSLKRKSSRK  | 119  | >MSH6-S315 GSLKRKSFRK  | 39    | 80    |
| >MSH6-S315 GSLKRKSSRK  | 283  | >MSH6-S315 GSLKRKSFRK  | 171   | 112   |
| >MSH6-S315 GSLKRKSSR   | 37   | >MSH6-S315 GSLKRKSFR   | 10    | 27    |

|                        |       |                        |      |       |
|------------------------|-------|------------------------|------|-------|
| >MSH6-S315 GSLKRKSSRK  | 1593  | >MSH6-S315 GSLKRKSFRK  | 477  | 1116  |
| >MSH6-S315 GSLKRKSSR   | 1670  | >MSH6-S315 GSLKRKSFR   | 317  | 1353  |
| >MSH6-S315 GSLKRKSS    | 19788 | >MSH6-S315 GSLKRKSF    | 113  | 19675 |
| >MSH6-S315 GSLKRKSS    | 18170 | >MSH6-S315 GSLKRKSF    | 13   | 18157 |
| >MSH6-S315 GSLKRKSS    | 14618 | >MSH6-S315 GSLKRKSF    | 387  | 14231 |
| >MSH6-S315 GSLKRKSSR   | 752   | >MSH6-S315 GSLKRKSFR   | 423  | 329   |
| >MSH6-S315 GSLKRKSSRK  | 306   | >MSH6-S315 GSLKRKSFRK  | 110  | 196   |
| >MSH6-S315 NGSLKRKSSR  | 1383  | >MSH6-S315 NGSLKRKSFR  | 290  | 1093  |
| >MSH6-S315 NGSLKRKSSR  | 1890  | >MSH6-S315 NGSLKRKSFR  | 270  | 1620  |
| >MSH6-S315 NGSLKRKSS   | 6911  | >MSH6-S315 NGSLKRKSF   | 477  | 6434  |
| >MSH6-S532 SENYSKYL    | 8     | >MSH6-S532 AENYSKYL    | 24   | 16    |
| >MSH6-S532 SENYSKYLL   | 22    | >MSH6-S532 AENYSKYLL   | 77   | 55    |
| >MSH6-S532 SENYSKYLLSL | 57    | >MSH6-S532 AENYSKYLLSL | 236  | 179   |
| >MSH6-S532 SENYSKYL    | 94    | >MSH6-S532 AENYSKYL    | 30   | 64    |
| >MSH6-S532 SENYSKYLL   | 29    | >MSH6-S532 AENYSKYLL   | 13   | 16    |
| >MSH6-S532 SENYSKYLLSL | 26    | >MSH6-S532 AENYSKYLLSL | 11   | 15    |
| >MSH6-S532 SENYSKYL    | 271   | >MSH6-S532 AENYSKYL    | 100  | 171   |
| >MSH6-S532 SENYSKYLL   | 146   | >MSH6-S532 AENYSKYLL   | 65   | 81    |
| >MSH6-S532 SENYSKYLLS  | 377   | >MSH6-S532 AENYSKYLLS  | 294  | 83    |
| >MSH6-S532 SENYSKYLLSL | 35    | >MSH6-S532 AENYSKYLLSL | 20   | 15    |
| >MSH6-S532 SENYSKYL    | 692   | >MSH6-S532 AENYSKYL    | 440  | 252   |
| >MSH6-S532 SENYSKYLL   | 726   | >MSH6-S532 AENYSKYLL   | 462  | 264   |
| >MSH6-S532 SENYSKYLLS  | 985   | >MSH6-S532 AENYSKYLLS  | 468  | 517   |
| >MSH6-S532 SENYSKYLLSL | 662   | >MSH6-S532 AENYSKYLLSL | 408  | 254   |
| >MSH6-S532 SENYSKYL    | 186   | >MSH6-S532 AENYSKYL    | 83   | 103   |
| >MSH6-S532 SENYSKYLL   | 297   | >MSH6-S532 AENYSKYLL   | 120  | 177   |
| >MSH6-S532 SENYSKYLLS  | 488   | >MSH6-S532 AENYSKYLLS  | 474  | 14    |
| >MSH6-S532 SENYSKYLLSL | 244   | >MSH6-S532 AENYSKYLLSL | 112  | 132   |
| >MSH6-S532 SENYSKYL    | 736   | >MSH6-S532 AENYSKYL    | 199  | 537   |
| >MSH6-S532 SENYSKYLL   | 538   | >MSH6-S532 AENYSKYLL   | 146  | 392   |
| >MSH6-S532 SENYSKYLLS  | 78    | >MSH6-S532 AENYSKYLLS  | 44   | 34    |
| >MSH6-S532 SENYSKYLLSL | 423   | >MSH6-S532 AENYSKYLLSL | 124  | 299   |
| >MSH6-S532 SENYSKYLL   | 520   | >MSH6-S532 AENYSKYLL   | 79   | 441   |
| >MSH6-S532 SENYSKYLLSL | 260   | >MSH6-S532 AENYSKYLLSL | 55   | 205   |
| >MSH6-S532 PSENYSKY    | 207   | >MSH6-S532 PAENYSKY    | 4206 | 3999  |
| >MSH6-S532 QTYSVLEGDP  | 5880  | >MSH6-S532 QTYSVLEGDP  | 376  | 5504  |
| >MSH6-S532 QTYSVLEGDP  | 445   | >MSH6-S532 QTYSVLEGDP  | 52   | 393   |
| >MSH6-S532 QTYSVLEGDP  | 3499  | >MSH6-S532 QTYSVLEGDP  | 194  | 3305  |
| >MSH6-S532 DPSENYSKY   | 366   | >MSH6-S532 DPAENYSKY   | 133  | 233   |
| >MSH6-S532 DPSENYSKY   | 2373  | >MSH6-S532 DPAENYSKY   | 298  | 2075  |
| >MSH6-S532 DPSENYSK    | 913   | >MSH6-S532 DPAENYSK    | 426  | 487   |
| >MSH6-S532 DPSENYSKYL  | 1788  | >MSH6-S532 DPAENYSKYL  | 398  | 1390  |
| >MSH6-S532 DPSENYSKY   | 209   | >MSH6-S532 DPAENYSKY   | 264  | 55    |

|                       |       |                        |       |       |
|-----------------------|-------|------------------------|-------|-------|
| >MSH6-S532 DPSENYISKY | 53    | >MSH6-S532 DPAENYSKY   | 44    | 9     |
| >MSH6-S532 DPSENYISKY | 412   | >MSH6-S532 DPAENYSKY   | 233   | 179   |
| >MSH6-S532 DPSENYISKY | 190   | >MSH6-S532 DPAENYSKY   | 131   | 59    |
| >MSH6-S532 LEGDPSENY  | 390   | >MSH6-S532 LEGDPAENY   | 1743  | 1353  |
| >MSH6-S532 LEGDPSENY  | 618   | >MSH6-S532 LEGDPAENY   | 457   | 161   |
| >MSH6-S532 LEGDPSENY  | 178   | >MSH6-S532 LEGDPAENY   | 216   | 38    |
| >MSH6-S532 VLEGDPSENY | 497   | >MSH6-S532 VLEGDPAENY  | 346   | 151   |
| >MSH6-S532 VLEGDPSENY | 222   | >MSH6-S532 VLEGDPAENY  | 441   | 219   |
| >MSH6-S532 SVLEGDP    | 867   | >MSH6-S532 SVLEGDPA    | 32    | 835   |
| >MSH6-S532 SVLEGDP    | 6830  | >MSH6-S532 SVLEGDPA    | 355   | 6475  |
| >MSH6-S532 SVLEGDP    | 7610  | >MSH6-S532 SVLEGDPA    | 133   | 7477  |
| >MSH6-S532 SVLEGDPSEN | 34    | >MSH6-S532 SVLEGDPAEN  | 25    | 9     |
| >MSH6-S532 SVLEGDPSEN | 236   | >MSH6-S532 SVLEGDPAEN  | 234   | 2     |
| >MSH6-S532 SVLEGDPSEN | 45    | >MSH6-S532 SVLEGDPAEN  | 39    | 6     |
| >MSH6-S532 SVLEGDPSEN | 270   | >MSH6-S532 SVLEGDPAEN  | 315   | 45    |
| >MSH6-S532 SVLEGDP    | 5665  | >MSH6-S532 SVLEGDPA    | 233   | 5432  |
| >MSH6-S532 SVLEGDPSEN | 141   | >MSH6-S532 SVLEGDPAEN  | 138   | 3     |
| >MSH6-S532 SVLEGDPSEN | 135   | >MSH6-S532 SVLEGDPAEN  | 175   | 40    |
| >MSH6-S532 SVLEGDPSEN | 98    | >MSH6-S532 SVLEGDPAEN  | 103   | 5     |
| >MSH6-S532 SVLEGDPSEN | 432   | >MSH6-S532 SVLEGDPAEN  | 493   | 61    |
| >MSH6-T100 WTKTIEKK   | 112   | >MSH6-T100 WIKTIEKK    | 542   | 430   |
| >MSH6-T100 WTKTIEKKL  | 368   | >MSH6-T100 WIKTIEKKL   | 18252 | 17884 |
| >MSH6-T100 WTKTIEKKL  | 75    | >MSH6-T100 WIKTIEKKL   | 2495  | 2420  |
| >MSH6-T100 STKKGCKRYV | 2132  | >MSH6-T100 STKKGCKRYV  | 100   | 2032  |
| >MSH6-T100 STKKGCKRYV | 1111  | >MSH6-T100 STKKGCKRYV  | 135   | 976   |
| >MSH6-T100 STKKGCKRYV | 31316 | >MSH6-T100 STKKGCKRYV  | 146   | 31170 |
| >MSH6-T100 YWTKTIEK   | 3493  | >MSH6-T100 YWIKTIEK    | 369   | 3124  |
| >MSH6-T100 YWTKTIEKK  | 2400  | >MSH6-T100 YWIKTIEKK   | 207   | 2193  |
| >MSH6-T100 YWTKTIEKKL | 702   | >MSH6-T100 YWIKTIEKKL  | 379   | 323   |
| >MSH6-T100 YWTKTIEKKL | 60    | >MSH6-T100 YWIKTIEKKL  | 34    | 26    |
| >MSH6-T100 YWTKTIEK   | 108   | >MSH6-T100 YWIKTIEK    | 85    | 23    |
| >MSH6-T100 YWTKTIEKK  | 135   | >MSH6-T100 YWIKTIEKK   | 89    | 46    |
| >MSH6-T100 YWTKTIEKKL | 421   | >MSH6-T100 YWIKTIEKKL  | 465   | 44    |
| >MSH6-T100 RYWTKTIEK  | 322   | >MSH6-T100 RYWIKTIEK   | 594   | 272   |
| >MSH6-T100 RYWTKTIEK  | 696   | >MSH6-T100 RYWIKTIEK   | 315   | 381   |
| >MSH6-T100 RYWTKTIEKK | 433   | >MSH6-T100 RYWIKTIEKKL | 255   | 178   |
| >MSH6-T100 RYWTKTIEK  | 392   | >MSH6-T100 RYWIKTIEK   | 399   | 7     |
| >MSH6-T100 RYWTKTIEKK | 466   | >MSH6-T100 RYWIKTIEKK  | 480   | 14    |
| >MSH6-T100 RYWTKTIEKK | 14    | >MSH6-T100 RYWIKTIEKKL | 14    | 0     |
| >MSH6-T100 RYWTKTIEK  | 10    | >MSH6-T100 RYWIKTIEK   | 13    | 3     |
| >MSH6-T100 RYWTKTIEKK | 94    | >MSH6-T100 RYWIKTIEKK  | 125   | 31    |
| >MSH6-T100 RYWTKTIEK  | 26    | >MSH6-T100 RYWIKTIEK   | 25    | 1     |
| >MSH6-T100 RYWTKTIEKK | 299   | >MSH6-T100 RYWIKTIEKKL | 510   | 211   |

|                        |       |                        |      |       |
|------------------------|-------|------------------------|------|-------|
| >MSH6-T100 RYWTKTIEK   | 15    | >MSH6-T100 RYWIKTIEK   | 23   | 8     |
| >MSH6-T100 RYWTKTIEKK  | 20    | >MSH6-T100 RYWIKTIEKK  | 27   | 7     |
| >MSH6-T100 KRYWTKTIEK  | 147   | >MSH6-T100 KRYWIKTIEK  | 160  | 13    |
| >MSH6-T100 KRYWTKTIEK  | 705   | >MSH6-T100 KRYWIKTIEK  | 238  | 467   |
| >MSH6-T100 KRYWTKTI    | 122   | >MSH6-T100 KRYWIKTI    | 107  | 15    |
| >MSH6-T100 KRYWTKTI    | 157   | >MSH6-T100 KRYWIKTI    | 310  | 153   |
| >MSH6-T100 KRYWTKTI    | 42    | >MSH6-T100 KRYWIKTI    | 27   | 15    |
| >MSH6-T100 KRYWTKTIEK  | 32    | >MSH6-T100 KRYWIKTIEK  | 28   | 4     |
| >MSH6-T100 KRYWTKTIEK  | 31    | >MSH6-T100 KRYWIKTIEK  | 27   | 4     |
| >MSH6-T100 KRYWTKTIE   | 658   | >MSH6-T100 KRYWIKTIE   | 374  | 284   |
| >MSH6-T100 KRYWTKTI    | 59    | >MSH6-T100 KRYWIKTI    | 35   | 24    |
| >MSH6-T100 KRYWTKTIE   | 132   | >MSH6-T100 KRYWIKTIE   | 90   | 42    |
| >MSH6-T100 KRYWTKTIEK  | 105   | >MSH6-T100 KRYWIKTIEK  | 159  | 54    |
| >MSH6-T100 KRYWTKTIEK  | 135   | >MSH6-T100 KRYWIKTIEK  | 107  | 28    |
| >MSH6-T100 KRYWTKTIEK  | 206   | >MSH6-T100 KRYWIKTIEK  | 189  | 17    |
| >MSH6-T100 KRYWTKTIEK  | 134   | >MSH6-T100 KRYWIKTIEK  | 90   | 44    |
| >MSH6-T100 KRYWTKTIEK  | 329   | >MSH6-T100 KRYWIKTIEK  | 264  | 65    |
| >MSH6-T100 KRYWTKTIEK  | 532   | >MSH6-T100 KRYWIKTIEK  | 392  | 140   |
| >MSH6-T100 KRYWTKTI    | 158   | >MSH6-T100 KRYWIKTI    | 173  | 15    |
| >MSH6-T100 CKRYWTKTIE  | 210   | >MSH6-T100 CKRYWIKTIE  | 297  | 87    |
| >MSH6-T100 CKRYWTKTI   | 42    | >MSH6-T100 CKRYWIKTI   | 43   | 1     |
| >MSH6-T100 CKRYWTKTI   | 218   | >MSH6-T100 CKRYWIKTI   | 389  | 171   |
| >MSH6-T100 GCKRYWTK    | 49    | >MSH6-T100 GCKRYWIK    | 46   | 3     |
| >MSH6-T100 KGCKRYWTK   | 403   | >MSH6-T100 KGCKRYWIK   | 438  | 35    |
| >MSH6-T100 KGCKRYWTK   | 99    | >MSH6-T100 KGCKRYWIK   | 147  | 48    |
| >MSH6-T100 KGCKRYWTK   | 122   | >MSH6-T100 KGCKRYWIK   | 214  | 92    |
| >MSH6-T100 KGCKRYWTK   | 164   | >MSH6-T100 KGCKRYWIK   | 147  | 17    |
| >MSH6-T100 KGCKRYWT    | 35789 | >MSH6-T100 KGCKRYWI    | 359  | 35430 |
| >MSH6-T100 KGCKRYWTK   | 96    | >MSH6-T100 KGCKRYWIKT  | 132  | 36    |
| >MSH6-T100 KKGCKRYWT   | 219   | >MSH6-T100 KKGCKRYWIK  | 465  | 246   |
| >MSH6-T100 KKGCKRYWT   | 389   | >MSH6-T100 KKGCKRYWIK  | 393  | 4     |
| >MSH6-T121 TATFDGTAI   | 705   | >MSH6-T121 IATFDGTAI   | 453  | 252   |
| >MSH6-T121 GTATFDGTAI  | 540   | >MSH6-T121 GIATFDGTAI  | 232  | 308   |
| >MSH6-T121 GTATFDGTAI  | 1063  | >MSH6-T121 GIATFDGTAI  | 403  | 660   |
| >MSH6-T121 GTATFDGTAI  | 1105  | >MSH6-T121 GIATFDGTAI  | 159  | 946   |
| >MSH6-T121 GTATFDGTAI  | 362   | >MSH6-T121 GIATFDGTAI  | 2611 | 2249  |
| >MSH6-T121 GTATFDGTAI  | 43    | >MSH6-T121 GIATFDGTAI  | 1379 | 1336  |
| >MSH6-T121 RGTATFDGTAI | 295   | >MSH6-T121 RGIATFDGTAI | 280  | 15    |
| >MSH6-T121 LGRGTATF    | 135   | >MSH6-T121 LGRGIATF    | 231  | 96    |
| >MSH6-T121 LGRGTATF    | 204   | >MSH6-T121 LGRGIATF    | 566  | 362   |
| >MSH6-T121 LGRGTATF    | 18    | >MSH6-T121 LGRGIATF    | 37   | 19    |
| >MSH6-T121 ELGRGTATF   | 191   | >MSH6-T121 ELGRGIATF   | 62   | 129   |
| >MSH6-T121 ELGRGTATF   | 348   | >MSH6-T121 ELGRGIATF   | 2070 | 1722  |

|                       |       |                        |      |       |
|-----------------------|-------|------------------------|------|-------|
| >MSH6-T121 ELGRGTATF  | 273   | >MSH6-T121 ELGRGIATF   | 1605 | 1332  |
| >MSH6-T121 ELGRGTATF  | 152   | >MSH6-T121 ELGRGIATF   | 186  | 34    |
| >MSH6-T121 ELGRGTATF  | 347   | >MSH6-T121 ELGRGIATF   | 735  | 388   |
| >MSH6-T121 DELGRGTA   | 108   | >MSH6-T121 DELGRGIA    | 255  | 147   |
| >MSH6-T121 DELGRGTAT  | 112   | >MSH6-T121 DELGRGIAT   | 67   | 45    |
| >MSH6-T121 DELGRGTATF | 432   | >MSH6-T121 DELGRGIATF  | 382  | 50    |
| >MSH6-T121 DELGRGTATF | 181   | >MSH6-T121 DELGRGIATFI | 144  | 37    |
| >MSH6-T121 VDELGRGT   | 8073  | >MSH6-T121 VDELGRGI    | 215  | 7858  |
| >MSH6-T121 VDELGRGT   | 28653 | >MSH6-T121 VDELGRGI    | 486  | 28167 |
| >MSH6-T121 LVDELGRGT  | 4231  | >MSH6-T121 LVDELGRGI   | 175  | 4056  |
| >MSH6-T121 VLVDELGRGT | 1273  | >MSH6-T121 VLVDELGRGI  | 285  | 988   |
| >MSH6-T121 VLVDELGRGT | 32    | >MSH6-T121 VLVDELGRGI  | 59   | 27    |
| >MSH6-T121 VLVDELGRGT | 404   | >MSH6-T121 VLVDELGRGI  | 888  | 484   |
| >MSH6-T121 VLVDELGRGT | 243   | >MSH6-T121 VLVDELGRGI  | 10   | 233   |
| >MSH6-T121 VLVDELGRGT | 131   | >MSH6-T121 VLVDELGRGI  | 724  | 593   |
| >MSH6-T121 VLVDELGRGT | 3955  | >MSH6-T121 VLVDELGRGI  | 43   | 3912  |
| >MSH6-T121 VLVDELGRGT | 4144  | >MSH6-T121 VLVDELGRGI  | 202  | 3942  |
| >MSH6-T121 VLVDELGRGT | 122   | >MSH6-T121 VLVDELGRGI  | 15   | 107   |
| >MSH6-T121 VLVDELGRGT | 11    | >MSH6-T121 VLVDELGRGI  | 31   | 20    |
| >MSH6-V105 VLDVLLCLAN | 142   | >MSH6-V105 MLDVLLCLAN  | 61   | 81    |
| >MSH6-V105 VLDVLLCL   | 96    | >MSH6-V105 MLDVLLCL    | 27   | 69    |
| >MSH6-V105 VLDVLLCLA  | 167   | >MSH6-V105 MLDVLLCLA   | 38   | 129   |
| >MSH6-V105 VLDVLLCL   | 313   | >MSH6-V105 MLDVLLCL    | 41   | 272   |
| >MSH6-V105 VLDVLLCLA  | 342   | >MSH6-V105 MLDVLLCLA   | 37   | 305   |
| >MSH6-V105 VLDVLLCLA  | 827   | >MSH6-V105 MLDVLLCLA   | 222  | 605   |
| >MSH6-V105 VLDVLLCL   | 481   | >MSH6-V105 MLDVLLCL    | 137  | 344   |
| >MSH6-V105 VLDVLLCLA  | 317   | >MSH6-V105 MLDVLLCLA   | 62   | 255   |
| >MSH6-V105 VLDVLLCL   | 28    | >MSH6-V105 MLDVLLCL    | 17   | 11    |
| >MSH6-V105 VLDVLLCLA  | 28    | >MSH6-V105 MLDVLLCLA   | 16   | 12    |
| >MSH6-V105 VLDVLLCL   | 36    | >MSH6-V105 MLDVLLCL    | 21   | 15    |
| >MSH6-V105 VLDVLLCLA  | 179   | >MSH6-V105 MLDVLLCLA   | 96   | 83    |
| >MSH6-V105 VLDVLLCL   | 14    | >MSH6-V105 MLDVLLCL    | 13   | 1     |
| >MSH6-V105 VLDVLLCLA  | 21    | >MSH6-V105 MLDVLLCLA   | 19   | 2     |
| >MSH6-V105 VLDVLLCL   | 35    | >MSH6-V105 MLDVLLCL    | 24   | 11    |
| >MSH6-V105 VLDVLLCLA  | 365   | >MSH6-V105 MLDVLLCLA   | 270  | 95    |
| >MSH6-V105 VLDVLLCL   | 17    | >MSH6-V105 MLDVLLCL    | 9    | 8     |
| >MSH6-V105 VLDVLLCLA  | 14    | >MSH6-V105 MLDVLLCLA   | 7    | 7     |
| >MSH6-V105 VLDVLLCLAN | 733   | >MSH6-V105 MLDVLLCLAN  | 185  | 548   |
| >MSH6-V105 VLDVLLCLAN | 181   | >MSH6-V105 MLDVLLCLAN  | 247  | 66    |
| >MSH6-V105 VLDVLLCLAN | 123   | >MSH6-V105 MLDVLLCLAN  | 144  | 21    |
| >MSH6-V105 VLDVLLCLAN | 345   | >MSH6-V105 MLDVLLCLAN  | 260  | 85    |
| >MSH6-V105 AVLDVLLC   | 5416  | >MSH6-V105 AMLDVLLC    | 368  | 5048  |
| >MSH6-V105 AVLDVLLCL  | 52    | >MSH6-V105 AMLDVLLCL   | 9    | 43    |

|                        |       |                       |     |       |
|------------------------|-------|-----------------------|-----|-------|
| >MSH6-V105 AVLDVLLCLA  | 463   | >MSH6-V105 AMLDVLLCLA | 45  | 418   |
| >MSH6-V105 AVLDVLLCL   | 545   | >MSH6-V105 AMLDVLLCL  | 32  | 513   |
| >MSH6-V105 AVLDVLLCLA  | 294   | >MSH6-V105 AMLDVLLCLA | 37  | 257   |
| >MSH6-V105 AVLDVLLCL   | 1785  | >MSH6-V105 AMLDVLLCL  | 126 | 1659  |
| >MSH6-V105 AVLDVLLCLA  | 288   | >MSH6-V105 AMLDVLLCLA | 49  | 239   |
| >MSH6-V105 AVLDVLLC    | 248   | >MSH6-V105 AMLDVLLC   | 135 | 113   |
| >MSH6-V105 AVLDVLLCL   | 14    | >MSH6-V105 AMLDVLLCL  | 9   | 5     |
| >MSH6-V105 AVLDVLLCLA  | 85    | >MSH6-V105 AMLDVLLCLA | 58  | 27    |
| >MSH6-V105 AVLDVLLC    | 423   | >MSH6-V105 AMLDVLLC   | 5   | 418   |
| >MSH6-V105 AVLDVLLCL   | 53    | >MSH6-V105 AMLDVLLCL  | 2   | 51    |
| >MSH6-V105 AVLDVLLCLA  | 103   | >MSH6-V105 AMLDVLLCLA | 3   | 100   |
| >MSH6-V105 AVLDVLLCLA  | 10659 | >MSH6-V105 AMLDVLLCLA | 370 | 10289 |
| >MSH6-V105 AVLDVLLC    | 9457  | >MSH6-V105 AMLDVLLC   | 80  | 9377  |
| >MSH6-V105 AVLDVLLCL   | 268   | >MSH6-V105 AMLDVLLCL  | 4   | 264   |
| >MSH6-V105 AVLDVLLCLA  | 1940  | >MSH6-V105 AMLDVLLCLA | 14  | 1926  |
| >MSH6-V105 AVLDVLLC    | 5545  | >MSH6-V105 AMLDVLLC   | 55  | 5490  |
| >MSH6-V105 AVLDVLLCL   | 40    | >MSH6-V105 AMLDVLLCL  | 5   | 35    |
| >MSH6-V105 AVLDVLLCLA  | 121   | >MSH6-V105 AMLDVLLCLA | 8   | 113   |
| >MSH6-V105 AVLDVLLC    | 5324  | >MSH6-V105 AMLDVLLC   | 93  | 5231  |
| >MSH6-V105 AVLDVLLCL   | 122   | >MSH6-V105 AMLDVLLCL  | 4   | 118   |
| >MSH6-V105 AVLDVLLCLA  | 1010  | >MSH6-V105 AMLDVLLCLA | 15  | 995   |
| >MSH6-V105 AVLDVLLC    | 1212  | >MSH6-V105 AMLDVLLC   | 10  | 1202  |
| >MSH6-V105 AVLDVLLCL   | 71    | >MSH6-V105 AMLDVLLCL  | 3   | 68    |
| >MSH6-V105 AVLDVLLCLA  | 90    | >MSH6-V105 AMLDVLLCLA | 4   | 86    |
| >MSH6-V105 AVLDVLLCL   | 9071  | >MSH6-V105 AMLDVLLCL  | 478 | 8593  |
| >MSH6-V105 AVLDVLLCL   | 713   | >MSH6-V105 AMLDVLLCL  | 304 | 409   |
| >MSH6-V105 AVLDVLLCLA  | 742   | >MSH6-V105 AMLDVLLCLA | 254 | 488   |
| >MSH6-V105 DWQSAVECI/  | 182   | >MSH6-V105 DWQSAVECI/ | 173 | 9     |
| >MSH6-V105 IAVLDVLLCL  | 1085  | >MSH6-V105 IAMLDVLLCL | 117 | 968   |
| >MSH6-V105 IAVLDVLL    | 2000  | >MSH6-V105 IAMLDVLL   | 487 | 1513  |
| >MSH6-V105 IAVLDVLLCL  | 697   | >MSH6-V105 IAMLDVLLCL | 160 | 537   |
| >MSH6-V105 IAVLDVLLCL  | 1921  | >MSH6-V105 IAMLDVLLCL | 495 | 1426  |
| >MSH6-V105 IAVLDVLL    | 1249  | >MSH6-V105 IAMLDVLL   | 443 | 806   |
| >MSH6-V105 IAVLDVLLCL  | 364   | >MSH6-V105 IAMLDVLLCL | 173 | 191   |
| >MSH6-V105 IAVLDVLLCLA | 940   | >MSH6-V105 IAMLDVLLCL | 287 | 653   |
| >MSH6-V105 IAVLDVLL    | 229   | >MSH6-V105 IAMLDVLL   | 228 | 1     |
| >MSH6-V105 CIAVLDVL    | 462   | >MSH6-V105 CIAMLDVL   | 544 | 82    |
| >MSH6-V105 CIAVLDVLL   | 239   | >MSH6-V105 CIAMLDVLL  | 262 | 23    |
| >MSH6-V105 CIAVLDVLL   | 311   | >MSH6-V105 CIAMLDVLL  | 311 | 0     |
| >MSH6-V105 ECIAVLDVL   | 21    | >MSH6-V105 ECIAMLDVL  | 16  | 5     |
| >MSH6-V105 ECIAVLDVLL  | 522   | >MSH6-V105 ECIAMLDVLL | 427 | 95    |
| >MSH6-V105 ECIAVLDV    | 163   | >MSH6-V105 ECIAMLDV   | 338 | 175   |
| >MSH6-V105 ECIAVLDVL   | 207   | >MSH6-V105 ECIAMLDVL  | 888 | 681   |

|                             |       |                             |       |       |
|-----------------------------|-------|-----------------------------|-------|-------|
| >MSH6-V105 ECI AVL DV       | 400   | >MSH6-V105 ECI AML DV       | 420   | 20    |
| >MSH6-V105 VE CI AVL DV     | 159   | >MSH6-V105 VE CI AML DV     | 155   | 4     |
| >MSH6-V105 VE CI AVL DV L   | 276   | >MSH6-V105 VE CI AML DV L   | 284   | 8     |
| >MSH6-V105 VE CI AVL DV L I | 508   | >MSH6-V105 VE CI AML DV L I | 395   | 113   |
| >MSH6-V105 VE CI AVL DV L I | 63    | >MSH6-V105 VE CI AML DV L I | 50    | 13    |
| >MSH6-V105 VE CI AVL DV     | 84    | >MSH6-V105 VE CI AML DV     | 128   | 44    |
| >MSH6-V105 VE CI AVL DV L   | 214   | >MSH6-V105 VE CI AML DV L   | 104   | 110   |
| >MSH6-V105 VE CI AVL DV L I | 102   | >MSH6-V105 VE CI AML DV L I | 136   | 34    |
| >MSH6-V105 A VE CI AVL DV   | 424   | >MSH6-V105 A VE CI AML DV   | 661   | 237   |
| >MSH6-V105 SA VE CI AV      | 289   | >MSH6-V105 SA VE CI AM      | 5807  | 5518  |
| >MSH6-V105 SA VE CI AVL     | 807   | >MSH6-V105 SA VE CI AML     | 276   | 531   |
| >MSH6-V105 SA VE CI AVL     | 515   | >MSH6-V105 SA VE CI AML     | 224   | 291   |
| >MSH6-V105 SA VE CI AV      | 219   | >MSH6-V105 SA VE CI AM      | 7973  | 7754  |
| >MSH6-V105 SA VE CI AVL     | 863   | >MSH6-V105 SA VE CI AML     | 455   | 408   |
| >MSH6-V105 SA VE CI AVL D   | 247   | >MSH6-V105 SA VE CI AML D   | 294   | 47    |
| >MSH6-V105 SA VE CI AV      | 13    | >MSH6-V105 SA VE CI AM      | 291   | 278   |
| >MSH6-V105 SA VE CI AVL     | 63    | >MSH6-V105 SA VE CI AML     | 31    | 32    |
| >MSH6-V105 SA VE CI AVL D   | 78    | >MSH6-V105 SA VE CI AML D   | 68    | 10    |
| >MSH6-V105 SA VE CI AV      | 120   | >MSH6-V105 SA VE CI AM      | 6022  | 5902  |
| >MSH6-V105 SA VE CI AVL     | 800   | >MSH6-V105 SA VE CI AML     | 306   | 494   |
| >MSH6-V105 SA VE CI AVL D   | 449   | >MSH6-V105 SA VE CI AML D   | 698   | 249   |
| >MSH6-V105 SA VE CI AVL D   | 435   | >MSH6-V105 SA VE CI AML D   | 719   | 284   |
| >MSH6-V105 SA VE CI AV      | 128   | >MSH6-V105 SA VE CI AM      | 15148 | 15020 |
| >MSH6-V105 SA VE CI AVL D   | 126   | >MSH6-V105 SA VE CI AML D   | 201   | 75    |
| >MSH6-V105 SA VE CI AV      | 12281 | >MSH6-V105 SA VE CI AM      | 274   | 12007 |
| >MSH6-V105 SA VE CI AVL     | 484   | >MSH6-V105 SA VE CI AML     | 736   | 252   |
| >MSH6-V105 SA VE CI AV      | 67    | >MSH6-V105 SA VE CI AM      | 2699  | 2632  |
| >MSH6-V105 SA VE CI AVL     | 136   | >MSH6-V105 SA VE CI AML     | 74    | 62    |
| >MSH6-V105 SA VE CI AVL D   | 241   | >MSH6-V105 SA VE CI AML D   | 191   | 50    |
| >MSH6-V105 SA VE CI AV      | 72    | >MSH6-V105 SA VE CI AM      | 1515  | 1443  |
| >MSH6-V105 SA VE CI AVL     | 2287  | >MSH6-V105 SA VE CI AML     | 249   | 2038  |
| >MSH6-V105 SA VE CI AVL D   | 383   | >MSH6-V105 SA VE CI AML D   | 189   | 194   |
| >MSH6-V105 SA VE CI AV      | 7210  | >MSH6-V105 SA VE CI AM      | 182   | 7028  |
| >MSH6-V105 SA VE CI AVL     | 82    | >MSH6-V105 SA VE CI AML     | 47    | 35    |
| >MSH6-V105 SA VE CI AV      | 2310  | >MSH6-V105 SA VE CI AM      | 26    | 2284  |
| >MSH6-V105 SA VE CI AVL     | 157   | >MSH6-V105 SA VE CI AML     | 1729  | 1572  |
| >MSH6-V105 SA VE CI AVL     | 309   | >MSH6-V105 SA VE CI AML     | 141   | 168   |
| >MSH6-V105 QS AV E CI AV    | 9830  | >MSH6-V105 QS AV E CI AM    | 271   | 9559  |
| >MSH6-V105 QS AV E CI AVL   | 107   | >MSH6-V105 QS AV E CI AML   | 68    | 39    |
| >MSH6-V105 QS AV E CI AV    | 11696 | >MSH6-V105 QS AV E CI AM    | 192   | 11504 |
| >MSH6-V105 QS AV E CI AVL   | 310   | >MSH6-V105 QS AV E CI AML   | 185   | 125   |
| >MSH6-V105 QS AV E CI AVL   | 299   | >MSH6-V105 QS AV E CI AML   | 157   | 142   |
| >MSH6-V105 QS AV E CI AVL   | 130   | >MSH6-V105 QS AV E CI AML   | 161   | 31    |



|                        |      |                        |       |       |
|------------------------|------|------------------------|-------|-------|
| >MSH6-V105 WQSAVECIA\  | 754  | >MSH6-V105 WQSAVECIA\  | 378   | 376   |
| >MSH6-V105 WQSAVECIA\  | 181  | >MSH6-V105 WQSAVECIA\  | 940   | 759   |
| >MSH6-V105 WQSAVECIA\  | 89   | >MSH6-V105 WQSAVECIA\  | 44    | 45    |
| >MSH6-V105 WQSAVECIA\  | 146  | >MSH6-V105 WQSAVECIA\  | 3225  | 3079  |
| >MSH6-V105 WQSAVECIA\  | 433  | >MSH6-V105 WQSAVECIA\  | 272   | 161   |
| >MSH6-V105 WQSAVECIA\  | 87   | >MSH6-V105 WQSAVECIA\  | 1117  | 1030  |
| >MSH6-V105 WQSAVECIA\  | 59   | >MSH6-V105 WQSAVECIA\  | 39    | 20    |
| >MSH6-V105 WQSAVECIA\  | 227  | >MSH6-V105 WQSAVECIA\  | 8220  | 7993  |
| >MSH6-V105 WQSAVECIA\  | 410  | >MSH6-V105 WQSAVECIA\  | 13451 | 13041 |
| >MSH6-V105 WQSAVECIA\  | 398  | >MSH6-V105 WQSAVECIA\  | 7489  | 7091  |
| >MSH6-V105 WQSAVECIA\  | 710  | >MSH6-V105 WQSAVECIA\  | 80    | 630   |
| >MSH6-V105 WQSAVECIA\  | 117  | >MSH6-V105 WQSAVECIA\  | 282   | 165   |
| >MSH6-V105 WQSAVECIA\  | 125  | >MSH6-V105 WQSAVECIA\  | 36    | 89    |
| >MSH6-V105 WQSAVECIA\  | 91   | >MSH6-V105 WQSAVECIA\  | 130   | 39    |
| >MSH6-V105 WQSAVECIA\  | 80   | >MSH6-V105 WQSAVECIA\  | 31    | 49    |
| >MSH6-V105 WQSAVECIA\  | 10   | >MSH6-V105 WQSAVECIA\  | 24    | 14    |
| >MSH6-V105 WQSAVECIA\  | 314  | >MSH6-V105 WQSAVECIA\  | 401   | 87    |
| >MSH6-V105 WQSAVECIA\  | 1262 | >MSH6-V105 WQSAVECIA\  | 464   | 798   |
| >MSH6-V105 WQSAVECIA\  | 81   | >MSH6-V105 WQSAVECIA\  | 94    | 13    |
| >MSH6-V474 VQKGYKVAR\  | 856  | >MSH6-V474 AQKGYKVAR\  | 399   | 457   |
| >MSH6-V474 VQKGYKVAR\  | 325  | >MSH6-V474 AQKGYKVAR\  | 300   | 25    |
| >MSH6-V474 VQKGYKVAR   | 14   | >MSH6-V474 AQKGYKVAR   | 13    | 1     |
| >MSH6-V474 VQKGYKVAR   | 875  | >MSH6-V474 AQKGYKVAR   | 432   | 443   |
| >MSH6-V474 VQKGYKVA    | 7490 | >MSH6-V474 AQKGYKVA    | 321   | 7169  |
| >MSH6-V474 LVQKGYKVAF  | 200  | >MSH6-V474 LAQKGYKVAF  | 1580  | 1380  |
| >MSH6-V474 LVQKGYKV    | 419  | >MSH6-V474 LAQKGYKV    | 2053  | 1634  |
| >MSH6-V474 LVQKGYKVAF  | 372  | >MSH6-V474 LAQKGYKVAF  | 1746  | 1374  |
| >MSH6-V474 LVQKGYKV    | 30   | >MSH6-V474 LAQKGYKV    | 594   | 564   |
| >MSH6-V474 LVQKGYKVAF  | 19   | >MSH6-V474 LAQKGYKVAF  | 236   | 217   |
| >MSH6-V474 LVQKGYKVAF  | 44   | >MSH6-V474 LAQKGYKVAF  | 111   | 67    |
| >MSH6-V474 LVQKGYKVAF  | 471  | >MSH6-V474 LAQKGYKVAF  | 1457  | 986   |
| >MSH6-V474 LVQKGYKVAF  | 360  | >MSH6-V474 LAQKGYKVAF  | 843   | 483   |
| >MSH6-V474 IAFGRYSDSL\ | 52   | >MSH6-V474 IAFGRYSDSL\ | 217   | 165   |
| >MSH6-V474 IAFGRYSDSL\ | 343  | >MSH6-V474 IAFGRYSDSL\ | 3656  | 3313  |
| >MSH6-V474 IAFGRYSDSL\ | 226  | >MSH6-V474 IAFGRYSDSL\ | 1491  | 1265  |
| >MSH6-V474 IAFGRYSDSL\ | 310  | >MSH6-V474 IAFGRYSDSL\ | 2273  | 1963  |
| >MSH6-V474 IAFGRYSDSL\ | 335  | >MSH6-V474 IAFGRYSDSL\ | 8393  | 8058  |
| >MSH6-V474 IAFGRYSDSL\ | 61   | >MSH6-V474 IAFGRYSDSL\ | 7310  | 7249  |
| >MSH6-V474 IAFGRYSDSL\ | 134  | >MSH6-V474 IAFGRYSDSL\ | 1622  | 1488  |
| >MSH6-V474 IAFGRYSDSL\ | 68   | >MSH6-V474 IAFGRYSDSL\ | 498   | 430   |
| >MSH6-V474 SLVQKGYKV   | 138  | >MSH6-V474 SLAQKGYKV   | 38    | 100   |
| >MSH6-V474 SLVQKGYKV   | 32   | >MSH6-V474 SLAQKGYKV   | 9     | 23    |
| >MSH6-V474 SLVQKGYKV   | 36   | >MSH6-V474 SLAQKGYKV   | 15    | 21    |

|                       |       |                       |      |       |
|-----------------------|-------|-----------------------|------|-------|
| >MSH6-V474 SLVQKGYKVA | 364   | >MSH6-V474 SLAQKGYKVA | 338  | 26    |
| >MSH6-V474 SLVQKGYKV  | 484   | >MSH6-V474 SLAQKGYKV  | 567  | 83    |
| >MSH6-V474 SLVQKGYKV  | 3     | >MSH6-V474 SLAQKGYKV  | 3    | 0     |
| >MSH6-V474 SLVQKGYKVA | 368   | >MSH6-V474 SLAQKGYKVA | 281  | 87    |
| >MSH6-V474 SLVQKGYKV  | 11    | >MSH6-V474 SLAQKGYKV  | 11   | 0     |
| >MSH6-V474 SLVQKGYKV  | 8     | >MSH6-V474 SLAQKGYKV  | 5    | 3     |
| >MSH6-V474 SLVQKGYKVA | 664   | >MSH6-V474 SLAQKGYKVA | 147  | 517   |
| >MSH6-V474 SLVQKGYKV  | 117   | >MSH6-V474 SLAQKGYKV  | 17   | 100   |
| >MSH6-V474 SLVQKGYKV  | 2     | >MSH6-V474 SLAQKGYKV  | 2    | 0     |
| >MSH6-V474 SLVQKGYKVA | 105   | >MSH6-V474 SLAQKGYKVA | 44   | 61    |
| >MSH6-V474 SLVQKGYK   | 202   | >MSH6-V474 SLAQKGYK   | 81   | 121   |
| >MSH6-V474 SLVQKGYK   | 127   | >MSH6-V474 SLAQKGYK   | 84   | 43    |
| >MSH6-V474 SLVQKGYKVA | 104   | >MSH6-V474 SLAQKGYKVA | 106  | 2     |
| >MSH6-V474 SLVQKGYKVA | 566   | >MSH6-V474 SLAQKGYKVA | 282  | 284   |
| >MSH6-V474 SLVQKGYKVA | 111   | >MSH6-V474 SLAQKGYKVA | 148  | 37    |
| >MSH6-V474 DSVLQKGY   | 902   | >MSH6-V474 DSVLQKGY   | 294  | 608   |
| >MSH6-V474 DSVLQKGY   | 1037  | >MSH6-V474 DSVLQKGY   | 326  | 711   |
| >MSH6-V474 DSVLQKGYK  | 720   | >MSH6-V474 DSVLQKGYK  | 295  | 425   |
| >MSH6-V474 DSVLQKGY   | 351   | >MSH6-V474 DSVLQKGY   | 199  | 152   |
| >MSH6-V474 SDSLVQKGYK | 164   | >MSH6-V474 SDSLVQKGYK | 128  | 36    |
| >MSH6-V474 YSDSLVQKGY | 57    | >MSH6-V474 YSDSLVQKGY | 51   | 6     |
| >MSH6-V474 YSDSLVQK   | 139   | >MSH6-V474 YSDSLVQK   | 228  | 89    |
| >MSH6-V474 YSDSLVQKGY | 178   | >MSH6-V474 YSDSLVQKGY | 191  | 13    |
| >MSH6-V474 YSDSLVQKGY | 412   | >MSH6-V474 YSDSLVQKGY | 515  | 103   |
| >MSH6-V474 YSDSLVQK   | 228   | >MSH6-V474 YSDSLVQK   | 185  | 43    |
| >MSH6-V474 YSDSLVQKGY | 307   | >MSH6-V474 YSDSLVQKGY | 285  | 22    |
| >MSH6-V474 YSDSLVQKGY | 10    | >MSH6-V474 YSDSLVQKGY | 7    | 3     |
| >MSH6-V474 YSDSLVQKGY | 87    | >MSH6-V474 YSDSLVQKGY | 77   | 10    |
| >MSH6-V474 RYSDSLVQK  | 158   | >MSH6-V474 RYSDSLVQK  | 278  | 120   |
| >MSH6-V474 RYSDSLVQK  | 457   | >MSH6-V474 RYSDSLVQK  | 1057 | 600   |
| >MSH6-V474 RYSDSLVQK  | 15    | >MSH6-V474 RYSDSLVQK  | 10   | 5     |
| >MSH6-V474 RYSDSLVQKE | 154   | >MSH6-V474 RYSDSLVQKE | 98   | 56    |
| >MSH6-V474 RYSDSLVQK  | 107   | >MSH6-V474 RYSDSLVQK  | 80   | 27    |
| >MSH6-V474 RYSDSLVQK  | 115   | >MSH6-V474 RYSDSLVQK  | 360  | 245   |
| >MSH6-V474 GRYSDSL    | 203   | >MSH6-V474 GRYSDSL    | 515  | 312   |
| >MSH6-V474 GRYSDSLQK  | 95    | >MSH6-V474 GRYSDSLQK  | 92   | 3     |
| >MSH6-V474 FGRYSDSLQ  | 622   | >MSH6-V474 FGRYSDSLQ  | 443  | 179   |
| >MSH6-V474 FGRYSDSL   | 126   | >MSH6-V474 FGRYSDSL   | 1093 | 967   |
| >MSH6-V474 AFGRYSDSL  | 307   | >MSH6-V474 AFGRYSDSL  | 927  | 620   |
| >MSH6-V480 KVARVEQT   | 6297  | >MSH6-V480 KVARVEQT   | 237  | 6060  |
| >MSH6-V480 KVARVEQT   | 6455  | >MSH6-V480 KVARVEQT   | 461  | 5994  |
| >MSH6-V480 KVARVEQT   | 8738  | >MSH6-V480 KVARVEQT   | 184  | 8554  |
| >MSH6-V480 KVARVEQT   | 13215 | >MSH6-V480 KVARVEQT   | 408  | 12807 |

|                        |       |                        |      |       |
|------------------------|-------|------------------------|------|-------|
| >MSH6-V480 KVARVEQTET  | 12914 | >MSH6-V480 KLARVEQTET  | 440  | 12474 |
| >MSH6-V480 KVARVEQT    | 16563 | >MSH6-V480 KLARVEQT    | 146  | 16417 |
| >MSH6-V480 KVARVEQTET  | 14751 | >MSH6-V480 KLARVEQTET  | 137  | 14614 |
| >MSH6-V480 SDSLVQKGYK  | 164   | >MSH6-V480 SDSLVQKGYK  | 967  | 803   |
| >MSH6-V480 YKVARVEQ    | 574   | >MSH6-V480 YKLARVEQ    | 420  | 154   |
| >MSH6-V480 KGYKVARV    | 109   | >MSH6-V480 KGYKLARV    | 114  | 5     |
| >MSH6-V480 KGYKVARV    | 314   | >MSH6-V480 KGYKLARV    | 836  | 522   |
| >MSH6-V480 VQKGYKVAR\  | 856   | >MSH6-V480 VQKGYKLAR\  | 383  | 473   |
| >MSH6-V480 VQKGYKVAR\  | 325   | >MSH6-V480 VQKGYKLAR\  | 386  | 61    |
| >MSH6-V480 VQKGYKVAR   | 14    | >MSH6-V480 VQKGYKLAR   | 28   | 14    |
| >MSH6-V480 VQKGYKVAR   | 524   | >MSH6-V480 VQKGYKLAR   | 492  | 32    |
| >MSH6-V480 LVQKGYKVAF  | 200   | >MSH6-V480 LVQKGYKLAR  | 189  | 11    |
| >MSH6-V480 LVQKGYKVAF  | 1145  | >MSH6-V480 LVQKGYKLAR  | 477  | 668   |
| >MSH6-V480 LVQKGYKV    | 419   | >MSH6-V480 LVQKGYKL    | 5235 | 4816  |
| >MSH6-V480 LVQKGYKVAF  | 372   | >MSH6-V480 LVQKGYKLAR  | 501  | 129   |
| >MSH6-V480 LVQKGYKV    | 30    | >MSH6-V480 LVQKGYKL    | 1140 | 1110  |
| >MSH6-V480 LVQKGYKVAF  | 19    | >MSH6-V480 LVQKGYKLAR  | 17   | 2     |
| >MSH6-V480 LVQKGYKVAF  | 44    | >MSH6-V480 LVQKGYKLAR  | 65   | 21    |
| >MSH6-V480 LVQKGYKVAF  | 471   | >MSH6-V480 LVQKGYKLAR  | 594  | 123   |
| >MSH6-V480 LVQKGYKVAF  | 360   | >MSH6-V480 LVQKGYKLAR  | 670  | 310   |
| >MSH6-V480 SLVQKGYKV   | 138   | >MSH6-V480 SLVQKGYKL   | 726  | 588   |
| >MSH6-V480 SLVQKGYKV   | 32    | >MSH6-V480 SLVQKGYKL   | 42   | 10    |
| >MSH6-V480 SLVQKGYKV   | 36    | >MSH6-V480 SLVQKGYKL   | 451  | 415   |
| >MSH6-V480 SLVQKGYKVA  | 364   | >MSH6-V480 SLVQKGYKLA  | 219  | 145   |
| >MSH6-V480 SLVQKGYKV   | 484   | >MSH6-V480 SLVQKGYKL   | 3780 | 3296  |
| >MSH6-V480 SLVQKGYKV   | 3     | >MSH6-V480 SLVQKGYKL   | 18   | 15    |
| >MSH6-V480 SLVQKGYKVA  | 368   | >MSH6-V480 SLVQKGYKLA  | 348  | 20    |
| >MSH6-V480 SLVQKGYKV   | 11    | >MSH6-V480 SLVQKGYKL   | 55   | 44    |
| >MSH6-V480 SLVQKGYKV   | 8     | >MSH6-V480 SLVQKGYKL   | 38   | 30    |
| >MSH6-V480 SLVQKGYKVA  | 664   | >MSH6-V480 SLVQKGYKLA  | 473  | 191   |
| >MSH6-V480 SLVQKGYKV   | 117   | >MSH6-V480 SLVQKGYKL   | 2179 | 2062  |
| >MSH6-V480 SLVQKGYKV   | 2     | >MSH6-V480 SLVQKGYKL   | 9    | 7     |
| >MSH6-V480 SLVQKGYKVA  | 105   | >MSH6-V480 SLVQKGYKLA  | 62   | 43    |
| >MSH6-V480 SLVQKGYKVA  | 104   | >MSH6-V480 SLVQKGYKLA  | 257  | 153   |
| >MSH6-V480 SLVQKGYKVA  | 111   | >MSH6-V480 SLVQKGYKLA  | 107  | 4     |
| >MSH6-V509 VRREICRIITK | 504   | >MSH6-V509 ARREICRIITK | 56   | 448   |
| >MSH6-V509 VRREICRIITK | 625   | >MSH6-V509 ARREICRIITK | 283  | 342   |
| >MSH6-V509 VRREICRII   | 1558  | >MSH6-V509 ARREICRII   | 468  | 1090  |
| >MSH6-V509 VRREICRII   | 611   | >MSH6-V509 ARREICRII   | 223  | 388   |
| >MSH6-V509 VRREICRIITK | 286   | >MSH6-V509 ARREICRIITK | 107  | 179   |
| >MSH6-V509 VVRREICRI   | 410   | >MSH6-V509 VARREICRI   | 6323 | 5913  |
| >MSH6-V509 VVRREICRI   | 79    | >MSH6-V509 VARREICRI   | 264  | 185   |
| >MSH6-V509 VVRREICRII  | 154   | >MSH6-V509 VARREICRII  | 526  | 372   |

|                        |      |                        |       |       |
|------------------------|------|------------------------|-------|-------|
| >MSH6-V509 VVRREICR    | 151  | >MSH6-V509 VARREICR    | 325   | 174   |
| >MSH6-V509 VVRREICR    | 411  | >MSH6-V509 VARREICR    | 527   | 116   |
| >MSH6-V509 VVRREICRI   | 2808 | >MSH6-V509 VARREICRI   | 249   | 2559  |
| >MSH6-V509 MAHISKYDR\  | 892  | >MSH6-V509 MAHISKYDR\  | 490   | 402   |
| >MSH6-V509 MAHISKYDR\  | 374  | >MSH6-V509 MAHISKYDR\  | 3716  | 3342  |
| >MSH6-V509 RVVRREICR   | 505  | >MSH6-V509 RVARREICR   | 308   | 197   |
| >MSH6-V509 RVVRREICRI  | 392  | >MSH6-V509 RVARREICRI  | 430   | 38    |
| >MSH6-V509 RVVRREICR   | 27   | >MSH6-V509 RVARREICR   | 27    | 0     |
| >MSH6-V509 RVVRREICRII | 367  | >MSH6-V509 RVARREICRII | 310   | 57    |
| >MSH6-V509 RVVRREICR   | 216  | >MSH6-V509 RVARREICR   | 99    | 117   |
| >MSH6-V509 RVVRREICRII | 886  | >MSH6-V509 RVARREICRII | 239   | 647   |
| >MSH6-V509 YDRVVRREI   | 287  | >MSH6-V509 YDRVARREI   | 479   | 192   |
| >MSH6-V509 YDRVVRREI   | 229  | >MSH6-V509 YDRVARREI   | 290   | 61    |
| >MSH6-V509 KYDRVVRREI  | 45   | >MSH6-V509 KYDRVARREI  | 73    | 28    |
| >MSH6-V509 KYDRVVRREI  | 50   | >MSH6-V509 KYDRVARREI  | 78    | 28    |
| >MSH6-V509 KYDRVVRR    | 38   | >MSH6-V509 KYDRVARR    | 50    | 12    |
| >MSH6-V509 KYDRVVRR    | 30   | >MSH6-V509 KYDRVARR    | 40    | 10    |
| >MSH6-V509 SKYDRVVRRE  | 109  | >MSH6-V509 SKYDRVARRE  | 116   | 7     |
| >MSH6-V509 SKYDRVVR    | 190  | >MSH6-V509 SKYDRVAR    | 135   | 55    |
| >MSH6-V509 SKYDRVVRRE  | 99   | >MSH6-V509 SKYDRVARRE  | 114   | 15    |
| >MSH6-V509 SKYDRVVR    | 233  | >MSH6-V509 SKYDRVAR    | 320   | 87    |
| >MSH6-V509 SKYDRVVRR   | 202  | >MSH6-V509 SKYDRVARR   | 446   | 244   |
| >MSH6-V509 ISKYDRVVR   | 20   | >MSH6-V509 ISKYDRVAR   | 17    | 3     |
| >MSH6-V509 ISKYDRVVRR  | 65   | >MSH6-V509 ISKYDRVARR  | 56    | 9     |
| >MSH6-V509 ISKYDRVVR   | 235  | >MSH6-V509 ISKYDRVAR   | 80    | 155   |
| >MSH6-V509 ISKYDRVVR   | 111  | >MSH6-V509 ISKYDRVAR   | 88    | 23    |
| >MSH6-V509 ISKYDRVVRR  | 551  | >MSH6-V509 ISKYDRVARR  | 461   | 90    |
| >MSH6-V509 ISKYDRVVR   | 868  | >MSH6-V509 ISKYDRVAR   | 466   | 402   |
| >MSH6-V509 HISKYDRVVR  | 50   | >MSH6-V509 HISKYDRVAR  | 27    | 23    |
| >MSH6-V509 HISKYDRVVR  | 76   | >MSH6-V509 HISKYDRVAR  | 64    | 12    |
| >MSH6-V509 HISKYDRVVR  | 346  | >MSH6-V509 HISKYDRVAR  | 249   | 97    |
| >MSH6-V509 HISKYDRVVR  | 27   | >MSH6-V509 HISKYDRVAR  | 15    | 12    |
| >MSH6-V509 HISKYDRVVR  | 43   | >MSH6-V509 HISKYDRVAR  | 37    | 6     |
| >MSH6-V509 HISKYDRVVR  | 52   | >MSH6-V509 HISKYDRVAR  | 55    | 3     |
| >MSH6-V509 HISKYDRVVR  | 37   | >MSH6-V509 HISKYDRVAR  | 55    | 18    |
| >MSH6-Y397 YVPEDFLNS   | 217  | >MSH6-Y397 CVPEDFLNS   | 8965  | 8748  |
| >MSH6-Y397 YVPEDFLNSC  | 435  | >MSH6-Y397 CVPEDFLNSC  | 8297  | 7862  |
| >MSH6-Y397 YVPEDFLNSC  | 493  | >MSH6-Y397 CVPEDFLNSC  | 12280 | 11787 |
| >MSH6-Y397 YVPEDFLNSC  | 393  | >MSH6-Y397 CVPEDFLNSC  | 11707 | 11314 |
| >MSH6-Y397 YVPEDFLNSC  | 285  | >MSH6-Y397 CVPEDFLNSC  | 2703  | 2418  |
| >MSH6-Y397 LYVPEDFL    | 357  | >MSH6-Y397 LCVPEDFL    | 21655 | 21298 |
| >MSH6-Y397 LYVPEDFL    | 13   | >MSH6-Y397 LCVPEDFL    | 16497 | 16484 |
| >MSH6-Y397 LYVPEDFL    | 130  | >MSH6-Y397 LCVPEDFL    | 18683 | 18553 |

|                        |       |                        |       |       |
|------------------------|-------|------------------------|-------|-------|
| >MSH6-Y397 LYVPEDFLNSI | 477   | >MSH6-Y397 LCVPEDFLNSI | 27771 | 27294 |
| >MSH6-Y397 TLYVPEDFL   | 53    | >MSH6-Y397 TLCVPEDFL   | 245   | 192   |
| >MSH6-Y397 TLYVPEDFL   | 22    | >MSH6-Y397 TLCVPEDFL   | 281   | 259   |
| >MSH6-Y397 TLYVPEDFL   | 218   | >MSH6-Y397 TLCVPEDFL   | 3757  | 3539  |
| >MSH6-Y397 TLYVPEDFL   | 29    | >MSH6-Y397 TLCVPEDFL   | 1173  | 1144  |
| >MSH6-Y397 TLYVPEDFL   | 40    | >MSH6-Y397 TLCVPEDFL   | 225   | 185   |
| >MSH6-Y397 TLYVPEDF    | 138   | >MSH6-Y397 TLCVPEDF    | 1488  | 1350  |
| >MSH6-Y397 TLYVPEDF    | 142   | >MSH6-Y397 TLCVPEDF    | 1799  | 1657  |
| >MSH6-Y397 STLYVPEDFL  | 149   | >MSH6-Y397 STLCVPEDFL  | 168   | 19    |
| >MSH6-Y397 STLYVPEDFL  | 576   | >MSH6-Y397 STLCVPEDFL  | 119   | 457   |
| >MSH6-Y397 STLYVPEDFL  | 464   | >MSH6-Y397 STLCVPEDFL  | 310   | 154   |
| >MSH6-Y397 STLYVPEDFL  | 433   | >MSH6-Y397 STLCVPEDFL  | 771   | 338   |
| >MSH6-Y397 STLYVPEDF   | 9     | >MSH6-Y397 STLCVPEDF   | 21    | 12    |
| >MSH6-Y397 STLYVPEDFL  | 141   | >MSH6-Y397 STLCVPEDFL  | 386   | 245   |
| >MSH6-Y397 STLYVPEDFL  | 487   | >MSH6-Y397 STLCVPEDFL  | 221   | 266   |
| >MSH6-Y397 STLYVPEDF   | 265   | >MSH6-Y397 STLCVPEDF   | 294   | 29    |
| >MSH6-Y397 STLYVPEDF   | 128   | >MSH6-Y397 STLCVPEDF   | 204   | 76    |
| >MSH6-Y397 STLYVPEDF   | 44    | >MSH6-Y397 STLCVPEDF   | 56    | 12    |
| >MSH6-Y397 STLYVPEDFL  | 383   | >MSH6-Y397 STLCVPEDFL  | 2559  | 2176  |
| >MSH6-Y397 ASTLYVPEDF  | 251   | >MSH6-Y397 ASTLCVPEDF  | 363   | 112   |
| >MSH6-Y397 ASTLYVPEDF  | 34    | >MSH6-Y397 ASTLCVPEDF  | 48    | 14    |
| >MSH6-Y397 ASTLYVPEDFI | 162   | >MSH6-Y397 ASTLCVPEDFI | 268   | 106   |
| >MSH6-Y397 ASTLYVPEDFI | 108   | >MSH6-Y397 ASTLCVPEDFI | 159   | 51    |
| >MSH6-Y397 ASTLYVPEDF  | 39    | >MSH6-Y397 ASTLCVPEDF  | 55    | 16    |
| >MSH6-Y397 DASTLYVPED  | 586   | >MSH6-Y397 DASTLCVPED  | 492   | 94    |
| >MSH6-Y397 FFASTLYV    | 65    | >MSH6-Y397 FFASTLCV    | 828   | 763   |
| >MSH6-Y397 FFASTLYV    | 121   | >MSH6-Y397 FFASTLCV    | 1709  | 1588  |
| >MSH6-Y397 FFASTLYV    | 469   | >MSH6-Y397 FFASTLCV    | 4554  | 4085  |
| >MSH6-Y397 FFASTLYV    | 57    | >MSH6-Y397 FFASTLCV    | 99    | 42    |
| >MSH6-Y397 DFASTLY     | 168   | >MSH6-Y397 DFASTLC     | 20312 | 20144 |
| >MSH6-Y397 DFASTLYV    | 467   | >MSH6-Y397 DFASTLCV    | 5395  | 4928  |
| >MSH6-Y397 DFASTLY     | 188   | >MSH6-Y397 DFASTLC     | 37120 | 36932 |
| >MSH6-Y397 PDFFASTLY   | 410   | >MSH6-Y397 PDFFASTLC   | 24545 | 24135 |
| >MSH6-Y397 PDFFASTLYV  | 74    | >MSH6-Y397 PDFFASTLCV  | 111   | 37    |
| >MSH6-Y397 HPDFFASTLY  | 112   | >MSH6-Y397 HPDFFASTLC  | 1240  | 1128  |
| >MSH6-Y397 HPDFFASTLY  | 43    | >MSH6-Y397 HPDFFASTLC  | 5526  | 5483  |
| >MSH6-Y397 HPDFFASTLY  | 2240  | >MSH6-Y397 HPDFFASTLC  | 497   | 1743  |
| >MSH6-Y397 HPDFFASTLY  | 312   | >MSH6-Y397 HPDFFASTLC  | 7737  | 7425  |
| >MSH6-Y397 HPDFFASTLY  | 149   | >MSH6-Y397 HPDFFASTLC  | 29742 | 29593 |
| >MSN-D88A- DVSEELIQDI  | 11208 | >MSN-D88A- AVSEELIQDI  | 352   | 10856 |
| >MSN-D88A- EDVSEELI    | 11528 | >MSN-D88A- EAVSEELI    | 305   | 11223 |
| >MSN-D88A- EDVSEELI    | 47    | >MSN-D88A- EAVSEELI    | 24075 | 24028 |
| >MSN-D88A- EDVSEELIQDI | 166   | >MSN-D88A- EAVSEELIQDI | 29816 | 29650 |

|                        |       |                        |     |       |
|------------------------|-------|------------------------|-----|-------|
| >MSN-D88A- FKFRAKFYPEI | 22292 | >MSN-D88A- FKFRAKFYPE/ | 492 | 21800 |
| >MSN-D88A- FKFRAKFYPEI | 1810  | >MSN-D88A- FKFRAKFYPE/ | 41  | 1769  |
| >MSN-D88A- PEDVSEELI   | 357   | >MSN-D88A- PEAVSEELI   | 66  | 291   |
| >MSN-D88A- PEDVSEELI   | 694   | >MSN-D88A- PEAVSEELI   | 166 | 528   |
| >MSN-D88A- PEDVSEELI   | 413   | >MSN-D88A- PEAVSEELI   | 263 | 150   |
| >MSN-D88A- YPEDVSEEL   | 2096  | >MSN-D88A- YPEAVSEEL   | 83  | 2013  |
| >MSN-D88A- YPEDVSEEL   | 238   | >MSN-D88A- YPEAVSEEL   | 169 | 69    |
| >MSN-D88A- YPEDVSEE    | 480   | >MSN-D88A- YPEAVSEE    | 501 | 21    |
| >MSN-D88A- YPEDVSEEL   | 35    | >MSN-D88A- YPEAVSEEL   | 38  | 3     |
| >MSN-D88A- YPEDVSEELIC | 228   | >MSN-D88A- YPEAVSEELIC | 266 | 38    |
| >MSN-D88A- YPEDVSEEL   | 123   | >MSN-D88A- YPEAVSEEL   | 50  | 73    |
| >MSN-D88A- YPEDVSEEL   | 240   | >MSN-D88A- YPEAVSEEL   | 311 | 71    |
| >MSN-D88A- YPEDVSEEL   | 107   | >MSN-D88A- YPEAVSEEL   | 61  | 46    |
| >MSN-D88A- YPEDVSEEL   | 76    | >MSN-D88A- YPEAVSEEL   | 118 | 42    |
| >MSN-D88A- FYPEDVSEELI | 602   | >MSN-D88A- FYPEAVSEELI | 394 | 208   |
| >MSN-D88A- FYPEDVSEEL  | 343   | >MSN-D88A- FYPEAVSEEL  | 445 | 102   |
| >MSN-D88A- FYPEDVSEEL  | 370   | >MSN-D88A- FYPEAVSEEL  | 580 | 210   |
| >MSN-D88A- FYPEDVSEELI | 579   | >MSN-D88A- FYPEAVSEELI | 294 | 285   |
| >MSN-D88A- FYPEDVSEEL  | 250   | >MSN-D88A- FYPEAVSEEL  | 160 | 90    |
| >MSN-D88A- FYPEDVSEELI | 217   | >MSN-D88A- FYPEAVSEELI | 132 | 85    |
| >MSN-D88A- FYPEDVSE    | 505   | >MSN-D88A- FYPEAVSE    | 257 | 248   |
| >MSN-D88A- FYPEDVSEE   | 253   | >MSN-D88A- FYPEAVSEE   | 120 | 133   |
| >MSN-D88A- FYPEDVSEEL  | 4     | >MSN-D88A- FYPEAVSEEL  | 3   | 1     |
| >MSN-D88A- FYPEDVSEELI | 6     | >MSN-D88A- FYPEAVSEELI | 5   | 1     |
| >MSN-D88A- KFYPEDVSEEI | 134   | >MSN-D88A- KFYPEAVSEEI | 109 | 25    |
| >MSN-D88A- KFYPEDVSEEI | 154   | >MSN-D88A- KFYPEAVSEEI | 196 | 42    |
| >MSN-D88A- KFYPEDVSEEI | 28    | >MSN-D88A- KFYPEAVSEEI | 19  | 9     |
| >MSN-D88A- KFYPEDVSEEI | 664   | >MSN-D88A- KFYPEAVSEEI | 326 | 338   |
| >MSN-D88A- KFYPEDVSEEI | 153   | >MSN-D88A- KFYPEAVSEEI | 127 | 26    |
| >MSN-D88A- AKFYPEDV    | 23    | >MSN-D88A- AKFYPEAV    | 8   | 15    |
| >MSN-D88A- AKFYPEDVS   | 599   | >MSN-D88A- AKFYPEAVS   | 204 | 395   |
| >MSN-D88A- AKFYPEDVSE  | 589   | >MSN-D88A- AKFYPEAVSE  | 252 | 337   |
| >MSN-D88A- AKFYPEDVSE  | 457   | >MSN-D88A- AKFYPEAVSE  | 317 | 140   |
| >MSN-D88A- RAKFYPEDV   | 1729  | >MSN-D88A- RAKFYPEAV   | 312 | 1417  |
| >MSN-D88A- RAKFYPED    | 528   | >MSN-D88A- RAKFYPEA    | 13  | 515   |
| >MSN-D88A- RAKFYPEDV   | 1022  | >MSN-D88A- RAKFYPEAV   | 139 | 883   |
| >MSN-D88A- RAKFYPEDV   | 2005  | >MSN-D88A- RAKFYPEAV   | 383 | 1622  |
| >MSN-D88A- FRAKFYPEDV  | 296   | >MSN-D88A- FRAKFYPEAV  | 98  | 198   |
| >MSN-D88A- FRAKFYPEDV  | 1763  | >MSN-D88A- FRAKFYPEAV  | 99  | 1664  |
| >MSN-D88A- KFRAKFYPED  | 117   | >MSN-D88A- KFRAKFYPEA  | 4   | 113   |
| >MSN-D88A- KFRAKFYPED  | 80    | >MSN-D88A- KFRAKFYPEA' | 18  | 62    |
| >MSN-D88A- KFRAKFYPED  | 512   | >MSN-D88A- KFRAKFYPEA' | 203 | 309   |
| >MUC1-R244TDRSPYEKV    | 320   | >MUC1-R244TDHSPYEKV    | 315 | 5     |

|                       |      |                       |       |       |
|-----------------------|------|-----------------------|-------|-------|
| >MUC1-R244STDRSPYEKV  | 38   | >MUC1-R244STDHSPYEKV  | 45    | 7     |
| >MUC1-R244STDRSPYEKV  | 141  | >MUC1-R244STDHSPYEKV  | 147   | 6     |
| >MUC1-R244STDRSPYEK   | 12   | >MUC1-R244STDHSPYEK   | 11    | 1     |
| >MUC1-R244STDRSPYEK   | 294  | >MUC1-R244STDHSPYEK   | 228   | 66    |
| >MUC1-R244STDRSPYEKV  | 287  | >MUC1-R244STDHSPYEKV  | 212   | 75    |
| >MUC1-R244STDRSPYEKV  | 35   | >MUC1-R244STDHSPYEKV  | 34    | 1     |
| >MUC1-R244STDRSPYEK   | 77   | >MUC1-R244STDHSPYEK   | 63    | 14    |
| >MUC1-R244SSTDRSPY    | 845  | >MUC1-R244SSTDHSPY    | 488   | 357   |
| >MUC1-R244SSTDRSPYEK  | 180  | >MUC1-R244SSTDHSPYEK  | 163   | 17    |
| >MUC1-R244SSTDRSPY    | 573  | >MUC1-R244SSTDHSPY    | 462   | 111   |
| >MUC1-R244SSTDRSPYEK  | 8    | >MUC1-R244SSTDHSPYEK  | 7     | 1     |
| >MUC1-R244SSTDRSPY    | 380  | >MUC1-R244SSTDHSPY    | 45    | 335   |
| >MUC1-R244SSTDRSPY    | 487  | >MUC1-R244SSTDHSPY    | 115   | 372   |
| >MUC1-R244SSTDRSPYEK  | 85   | >MUC1-R244SSTDHSPYEK  | 106   | 21    |
| >MUC1-R244SSTDRSPY    | 69   | >MUC1-R244SSTDHSPY    | 99    | 30    |
| >MUC1-R244SSTDRSPYEK  | 90   | >MUC1-R244SSTDHSPYEK  | 44    | 46    |
| >MUC1-R244SSTDRSPYEK\ | 176  | >MUC1-R244SSTDHSPYEK\ | 142   | 34    |
| >MUC1-R244SSTDRSPYEK\ | 811  | >MUC1-R244SSTDHSPYEK\ | 257   | 554   |
| >MUC1-R244SSTDRSPY    | 319  | >MUC1-R244SSTDHSPY    | 146   | 173   |
| >MUC1-R244SSTDRSPY    | 667  | >MUC1-R244SSTDHSPY    | 344   | 323   |
| >MUC1-R244SSTDRSPY    | 13   | >MUC1-R244SSTDHSPY    | 9     | 4     |
| >MUC1-R244SSTDRSPY    | 545  | >MUC1-R244SSTDHSPY    | 138   | 407   |
| >MUC1-R244SSTDRSPYEK\ | 921  | >MUC1-R244SSTDHSPYEK\ | 322   | 599   |
| >MUC1-R244SSTDRSPYEK  | 133  | >MUC1-R244SSTDHSPYEK  | 87    | 46    |
| >MUC1-R244PSSTDRSPY   | 517  | >MUC1-R244PSSTDHSPY   | 155   | 362   |
| >MUC1-R244PSSTDRSPY   | 748  | >MUC1-R244PSSTDHSPY   | 265   | 483   |
| >MUC1-R244PSSTDRSPY   | 95   | >MUC1-R244PSSTDHSPY   | 159   | 64    |
| >MUC1-R244PSSTDRSPY   | 496  | >MUC1-R244PSSTDHSPY   | 382   | 114   |
| >MUC1-R244PPSSTDRSPY  | 63   | >MUC1-R244PPSSTDHSPY  | 93    | 30    |
| >MUC1-R244VPPSSTDRSP\ | 26   | >MUC1-R244VPPSSTDHSP  | 26    | 0     |
| >MUC1-R244YVPPSSTDR   | 76   | >MUC1-R244YVPPSSTDH   | 13237 | 13161 |
| >MUC1-R244RYVPPSSTDR  | 123  | >MUC1-R244RYVPPSSTDH  | 10325 | 10202 |
| >MUC1-R244RYVPPSSTDR  | 27   | >MUC1-R244RYVPPSSTDH  | 15983 | 15956 |
| >MUC1-T137TQFNQYKTE/  | 609  | >MUC1-T137KQFNQYKTE/  | 324   | 285   |
| >MUC1-T137TQFNQYKTE/  | 123  | >MUC1-T137KQFNQYKTE/  | 38    | 85    |
| >MUC1-T137TQFNQYKTE/  | 3775 | >MUC1-T137KQFNQYKTE/  | 284   | 3491  |
| >MUC1-T137TQFNQYKTE/  | 620  | >MUC1-T137KQFNQYKTE/  | 295   | 325   |
| >MUC1-T137TQFNQYKT    | 2725 | >MUC1-T137KQFNQYKT    | 455   | 2270  |
| >MUC1-T137TQFNQYKTE   | 1815 | >MUC1-T137KQFNQYKTE   | 235   | 1580  |
| >MUC1-T137TQFNQYKTE/  | 179  | >MUC1-T137KQFNQYKTE/  | 31    | 148   |
| >MUC1-T137TQFNQYKTE/  | 157  | >MUC1-T137KQFNQYKTE/  | 28    | 129   |
| >MUC1-T137ETQFNQYK    | 91   | >MUC1-T137EKQFNQYK    | 18007 | 17916 |
| >MUC1-T137ETQFNQYK    | 4    | >MUC1-T137EKQFNQYK    | 810   | 806   |

|                        |       |                        |       |       |
|------------------------|-------|------------------------|-------|-------|
| >MUC1-T137ETQFNQYKT    | 263   | >MUC1-T137EKQFNQYKT    | 18156 | 17893 |
| >MUC1-T137ETQFNQYKTE   | 53    | >MUC1-T137EKQFNQYKTE   | 13111 | 13058 |
| >MUC1-T137EGTINVHDVE   | 27698 | >MUC1-T137EGTINVHDVE   | 326   | 27372 |
| >MUC1-T137VETQFNQY     | 1101  | >MUC1-T137VEKQFNQY     | 453   | 648   |
| >MUC1-T137VETQFNQY     | 153   | >MUC1-T137VEKQFNQY     | 193   | 40    |
| >MUC1-T137VETQFNQY     | 425   | >MUC1-T137VEKQFNQY     | 629   | 204   |
| >MUC1-T137VETQFNQY     | 183   | >MUC1-T137VEKQFNQY     | 420   | 237   |
| >MUC1-T137DVETQFNQY    | 435   | >MUC1-T137DVEKQFNQY    | 138   | 297   |
| >MUC1-T137DVETQFNQY    | 115   | >MUC1-T137DVEKQFNQY    | 317   | 202   |
| >MUC1-T137DVETQFNQYI   | 238   | >MUC1-T137DVEKQFNQYI   | 562   | 324   |
| >MUC1-T137HDVETQFNQ    | 460   | >MUC1-T137HDVEKQFNQ    | 397   | 63    |
| >MUC1-T137INVHDVETQF   | 107   | >MUC1-T137INVHDVEKQF   | 192   | 85    |
| >MUC1-T137TINVHDVET    | 24818 | >MUC1-T137TINVHDVEK    | 55    | 24763 |
| >MUC1-T137TINVHDVET    | 21678 | >MUC1-T137TINVHDVEK    | 76    | 21602 |
| >MUC1-T137GTINVHDVET   | 27600 | >MUC1-T137GTINVHDVEK   | 325   | 27275 |
| >MUC1-T137GTINVHDVET   | 31880 | >MUC1-T137GTINVHDVEK   | 24    | 31856 |
| >MUC1-T137GTINVHDVET   | 23747 | >MUC1-T137GTINVHDVEK   | 38    | 23709 |
| >MUC1-T137GTINVHDVET   | 5835  | >MUC1-T137GTINVHDVEK   | 180   | 5655  |
| >MYB-C130Y CRERWHNHL   | 2502  | >MYB-C130Y YRERWHNHL   | 74    | 2428  |
| >MYB-C130Y CRERWHNHL   | 1373  | >MYB-C130Y YRERWHNHL   | 308   | 1065  |
| >MYB-C130Y CRERWHNHL   | 53    | >MYB-C130Y YRERWHNHL   | 72    | 19    |
| >MYB-C130Y QCRERWHNHL  | 26771 | >MYB-C130Y QYRERWHNHL  | 409   | 26362 |
| >MYB-C130Y QCRERWHNHL  | 23937 | >MYB-C130Y QYRERWHNHL  | 75    | 23862 |
| >MYB-C130Y QCRERWHNHL  | 4101  | >MYB-C130Y QYRERWHNHL  | 440   | 3661  |
| >MYB-C130Y QCRERWHNHL  | 253   | >MYB-C130Y QYRERWHNHL  | 21    | 232   |
| >MYB-C130Y QCRERWHNHL  | 14656 | >MYB-C130Y QYRERWHNHL  | 265   | 14391 |
| >MYB-C130Y QCRERWHNHL  | 13736 | >MYB-C130Y QYRERWHNHL  | 66    | 13670 |
| >MYB-C130Y KHLKGRIGKQ  | 9709  | >MYB-C130Y KHLKGRIGKQ  | 74    | 9635  |
| >MYB-C130Y KQCRERWHNHL | 10708 | >MYB-C130Y KQYRERWHNHL | 311   | 10397 |
| >MYB-C130Y KQCRERWHNHL | 170   | >MYB-C130Y KQYRERWHNHL | 29    | 141   |
| >MYB-C130Y KQCRERWHNHL | 736   | >MYB-C130Y KQYRERWHNHL | 223   | 513   |
| >MYB-C130Y KQCRERWH    | 3994  | >MYB-C130Y KQYRERWH    | 390   | 3604  |
| >MYB-C130Y KQCRERWH    | 1653  | >MYB-C130Y KQYRERWH    | 115   | 1538  |
| >MYB-C130Y KQCRERWH    | 119   | >MYB-C130Y KQYRERWH    | 9     | 110   |
| >MYB-C130Y KQCRERWH    | 2239  | >MYB-C130Y KQYRERWH    | 320   | 1919  |
| >MYB-C130Y KQCRERWH    | 1426  | >MYB-C130Y KQYRERWH    | 308   | 1118  |
| >MYB-C130Y IGKQCRER    | 709   | >MYB-C130Y IGKQYRER    | 266   | 443   |
| >MYB-C130Y IGKQCRERW   | 76    | >MYB-C130Y IGKQYRERW   | 86    | 10    |
| >MYB-C130Y RIGKQCRER   | 271   | >MYB-C130Y RIGKQYRER   | 36    | 235   |
| >MYB-C130Y RIGKQCRERV  | 221   | >MYB-C130Y RIGKQYRERV  | 166   | 55    |
| >MYB-C130Y RIGKQCRERV  | 245   | >MYB-C130Y RIGKQYRERV  | 118   | 127   |
| >MYB-C130Y RIGKQCRER   | 143   | >MYB-C130Y RIGKQYRER   | 90    | 53    |
| >MYB-C130Y GRIGKQCR    | 325   | >MYB-C130Y GRIGKQYR    | 306   | 19    |



|                        |       |                        |       |       |
|------------------------|-------|------------------------|-------|-------|
| >MYB-C130Y GRIGKQCRER  | 134   | >MYB-C130Y GRIGKQYRER  | 64    | 70    |
| >MYB-C130Y GRIGKQCRER  | 298   | >MYB-C130Y GRIGKQYRER  | 229   | 69    |
| >MYB-C130Y KGRIGKQCR   | 963   | >MYB-C130Y KGRIGKQYR   | 54    | 909   |
| >MYB-C130Y KGRIGKQCRE  | 469   | >MYB-C130Y KGRIGKQYRE  | 91    | 378   |
| >MYB-C130Y KGRIGKQCR   | 142   | >MYB-C130Y KGRIGKQYR   | 23    | 119   |
| >MYB-C130Y KGRIGKQCRE  | 186   | >MYB-C130Y KGRIGKQYRE  | 54    | 132   |
| >MYB-C130Y KGRIGKQC    | 15148 | >MYB-C130Y KGRIGKQY    | 52    | 15096 |
| >MYB-C130Y KGRIGKQCR   | 1189  | >MYB-C130Y KGRIGKQYR   | 138   | 1051  |
| >MYB-C130Y LKGRIGKQC   | 8410  | >MYB-C130Y LKGRIGKQY   | 42    | 8368  |
| >MYB-C130Y HLKGRIGKQC  | 2599  | >MYB-C130Y HLKGRIGKQY  | 362   | 2237  |
| >MYB-C130Y HLKGRIGKQC  | 44    | >MYB-C130Y HLKGRIGKQY  | 13    | 31    |
| >MYB-C130Y HLKGRIGKQC  | 51    | >MYB-C130Y HLKGRIGKQY  | 28    | 23    |
| >MYB-C130Y HLKGRIGKQC  | 825   | >MYB-C130Y HLKGRIGKQY  | 343   | 482   |
| >MYB-C130Y HLKGRIGKQC  | 19196 | >MYB-C130Y HLKGRIGKQY  | 206   | 18990 |
| >MYB-C130Y HLKGRIGKQC  | 13766 | >MYB-C130Y HLKGRIGKQY  | 46    | 13720 |
| >MYB-C130Y HLKGRIGKQC  | 409   | >MYB-C130Y HLKGRIGKQY  | 42    | 367   |
| >MYC-S250I- ETPPTTSS   | 2587  | >MYC-S250I- ETPPTTSI   | 251   | 2336  |
| >MYC-S250I- ETPPTTSS   | 6464  | >MYC-S250I- ETPPTTSI   | 459   | 6005  |
| >MYC-S250I- ETPPTTSS   | 21041 | >MYC-S250I- ETPPTTSI   | 395   | 20646 |
| >MYC-S250I- ETPPTTSS   | 110   | >MYC-S250I- ETPPTTSI   | 8     | 102   |
| >MYC-S250I- ETPPTTSS   | 9683  | >MYC-S250I- ETPPTTSI   | 65    | 9618  |
| >MYC-S250I- ETPPTTSS   | 21126 | >MYC-S250I- ETPPTTSI   | 83    | 21043 |
| >MYC-S250I- ETPPTTSS   | 23035 | >MYC-S250I- ETPPTTSI   | 29    | 23006 |
| >MYC-S250I- EETPPTTSS  | 17788 | >MYC-S250I- EETPPTTSI  | 68    | 17720 |
| >MYC-S250I- EETPPTTSS  | 20299 | >MYC-S250I- EETPPTTSI  | 206   | 20093 |
| >MYC-S250I- HEETPPTTSS | 20119 | >MYC-S250I- HEETPPTTSI | 84    | 20035 |
| >MYC-S250I- HEETPPTTSS | 2096  | >MYC-S250I- HEETPPTTSI | 260   | 1836  |
| >MYC-S250I- HEETPPTTSS | 13342 | >MYC-S250I- HEETPPTTSI | 17    | 13325 |
| >MYCL1-F20! SQALGPSPL  | 148   | >MYCL1-F20! SQALGPSPL  | 12849 | 12701 |
| >MYCL1-F20! SQALGPSPL  | 469   | >MYCL1-F20! SQALGPSPL  | 20179 | 19710 |
| >MYCL1-F20! SQALGPSPL  | 11    | >MYCL1-F20! SQALGPSPL  | 8502  | 8491  |
| >MYCL1-F20! LGPSPLF    | 101   | >MYCL1-F20! LGPSPLC    | 3225  | 3124  |
| >MYCL1-F20! LGPSPLF    | 266   | >MYCL1-F20! LGPSPLC    | 4187  | 3921  |
| >MYCL1-F20! ALGPSPLF   | 1386  | >MYCL1-F20! ALGPSPLC   | 102   | 1284  |
| >MYCL1-F20! ALGPSPLF   | 338   | >MYCL1-F20! ALGPSPLC   | 20    | 318   |
| >MYCL1-F20! ALGPSPLF   | 472   | >MYCL1-F20! ALGPSPLC   | 18809 | 18337 |
| >MYCL1-F20! ALGPSPLF   | 105   | >MYCL1-F20! ALGPSPLC   | 19573 | 19468 |
| >MYCL1-F20! ALGPSPLF   | 355   | >MYCL1-F20! ALGPSPLC   | 24599 | 24244 |
| >MYCL1-F20! QALGPSPLF  | 332   | >MYCL1-F20! QALGPSPLC  | 38302 | 37970 |
| >MYCL1-F20! QALGPSPLF  | 190   | >MYCL1-F20! QALGPSPLC  | 21449 | 21259 |
| >MYCL1-F20! QALGPSPLF  | 10    | >MYCL1-F20! QALGPSPLC  | 13376 | 13366 |
| >MYCL1-F20! QALGPSPLF  | 286   | >MYCL1-F20! QALGPSPLC  | 16806 | 16520 |
| >MYCL1-P14! PAPAAPCPL  | 12077 | >MYCL1-P14! TAPAAPCPL  | 44    | 12033 |

|                        |       |                        |       |       |
|------------------------|-------|------------------------|-------|-------|
| >MYCL1-P14 PAPAAPCPL   | 427   | >MYCL1-P14 TAPAAPCPL   | 25    | 402   |
| >MYCL1-P14 PAPAAPCPLG  | 3217  | >MYCL1-P14 TAPAAPCPLG  | 431   | 2786  |
| >MYCL1-P14 NPAPAAPCPL  | 15871 | >MYCL1-P14 NTAPAAPCPL  | 482   | 15389 |
| >MYCL1-P14 NPAPAAPC    | 12622 | >MYCL1-P14 NTAPAAPC    | 137   | 12485 |
| >MYCL1-P14 NPAPAAPCPL  | 25401 | >MYCL1-P14 NTAPAAPCPL  | 351   | 25050 |
| >MYCL1-P14 NPAPAAPCPL  | 299   | >MYCL1-P14 NTAPAAPCPL  | 15    | 284   |
| >MYCL1-P14 NPAPAAPC    | 262   | >MYCL1-P14 NTAPAAPC    | 19870 | 19608 |
| >MYCL1-P14 NPAPAAPCPL  | 146   | >MYCL1-P14 NTAPAAPCPL  | 22321 | 22175 |
| >MYCL1-P14 NPAPAAPCPL  | 22298 | >MYCL1-P14 NTAPAAPCPL  | 48    | 22250 |
| >MYCL1-P14 NPAPAAPC    | 297   | >MYCL1-P14 NTAPAAPC    | 13088 | 12791 |
| >MYCL1-P14 NPAPAAPCPL  | 318   | >MYCL1-P14 NTAPAAPCPL  | 31797 | 31479 |
| >MYCL1-P14 NPAPAAPCPL  | 23    | >MYCL1-P14 NTAPAAPCPL  | 522   | 499   |
| >MYCL1-P14 EAGNPAPA    | 171   | >MYCL1-P14 EAGNTAPA    | 182   | 11    |
| >MYCL1-P14 EAGNPAPAA   | 67    | >MYCL1-P14 EAGNTAPAA   | 163   | 96    |
| >MYCL1-P14 LEAGNPAPA   | 911   | >MYCL1-P14 LEAGNTAPA   | 322   | 589   |
| >MYCL1-P14 LEAGNPAPA   | 98    | >MYCL1-P14 LEAGNTAPA   | 59    | 39    |
| >MYCL1-P14 SLEAGNPA    | 335   | >MYCL1-P14 SLEAGNTA    | 610   | 275   |
| >MYCL1-P14 SLEAGNPAPA  | 136   | >MYCL1-P14 SLEAGNTAPA  | 103   | 33    |
| >MYCL1-P14 SLEAGNPA    | 463   | >MYCL1-P14 SLEAGNTA    | 613   | 150   |
| >MYCL1-P14 SLEAGNPAPA  | 96    | >MYCL1-P14 SLEAGNTAPA  | 103   | 7     |
| >MYCL1-P14 SLEAGNPAPA  | 153   | >MYCL1-P14 SLEAGNTAPA  | 314   | 161   |
| >MYCL1-P14 SLEAGNPAPA  | 254   | >MYCL1-P14 SLEAGNTAPA  | 424   | 170   |
| >MYCL1-P14 SLEAGNPAPA  | 286   | >MYCL1-P14 SLEAGNTAPA  | 233   | 53    |
| >MYCL1-P14 SLEAGNPAPA  | 481   | >MYCL1-P14 SLEAGNTAPA  | 659   | 178   |
| >MYCL1-P14 SLEAGNPAPA  | 412   | >MYCL1-P14 SLEAGNTAPA  | 491   | 79    |
| >MYCL1-P14 SLEAGNPA    | 59    | >MYCL1-P14 SLEAGNTA    | 27    | 32    |
| >MYCL1-P14 SLEAGNPAPA  | 19    | >MYCL1-P14 SLEAGNTAPA  | 13    | 6     |
| >MYCL1-P14 SLEAGNPAPA  | 24    | >MYCL1-P14 SLEAGNTAPA  | 24    | 0     |
| >MYCL1-P14 TPSLEAGNPA  | 469   | >MYCL1-P14 TPSLEAGNTA  | 377   | 92    |
| >MYCL1-P14 CTPSLEAGNP  | 98    | >MYCL1-P14 CTPSLEAGNT  | 668   | 570   |
| >MYCL1-P14 CTPSLEAGNP  | 184   | >MYCL1-P14 CTPSLEAGNT  | 192   | 8     |
| >MYCN-L402 LTLRDHVPEL  | 1993  | >MYCN-L402 FTLRDHVPEL  | 232   | 1761  |
| >MYCN-L402 LTLRDHVPEL' | 1372  | >MYCN-L402 FTLRDHVPEL' | 73    | 1299  |
| >MYCN-L402 LTLRDHVPEL  | 1002  | >MYCN-L402 FTLRDHVPEL  | 226   | 776   |
| >MYCN-L402 LTLRDHVPEL' | 1538  | >MYCN-L402 FTLRDHVPEL' | 152   | 1386  |
| >MYCN-L402 LTLRDHVPEL  | 1533  | >MYCN-L402 FTLRDHVPEL  | 368   | 1165  |
| >MYCN-L402 LTLRDHVPEL' | 2076  | >MYCN-L402 FTLRDHVPEL' | 291   | 1785  |
| >MYCN-L402 LTLRDHVPEL  | 187   | >MYCN-L402 FTLRDHVPEL  | 47    | 140   |
| >MYCN-L402 LTLRDHVPEL' | 305   | >MYCN-L402 FTLRDHVPEL' | 17    | 288   |
| >MYCN-L402 LTLRDHVPEL  | 133   | >MYCN-L402 FTLRDHVPEL  | 19    | 114   |
| >MYCN-L402 LTLRDHVPEL' | 25    | >MYCN-L402 FTLRDHVPEL' | 5     | 20    |
| >MYCN-L402 LTLRDHVPEL  | 2257  | >MYCN-L402 FTLRDHVPEL  | 227   | 2030  |
| >MYCN-L402 LTLRDHVPEL' | 1039  | >MYCN-L402 FTLRDHVPEL' | 78    | 961   |

|                        |       |                        |       |       |
|------------------------|-------|------------------------|-------|-------|
| >MYCN-L402 LTLRDHVPEL  | 895   | >MYCN-L402 FTLRDHVPEL  | 100   | 795   |
| >MYCN-L402 LTLRDHVPEL' | 246   | >MYCN-L402 FTLRDHVPEL' | 25    | 221   |
| >MYCN-L402 LTLRDHVPEL' | 1985  | >MYCN-L402 FTLRDHVPEL' | 423   | 1562  |
| >MYCN-L402 LTLRDHVPEL  | 336   | >MYCN-L402 FTLRDHVPEL  | 63    | 273   |
| >MYCN-L402 LTLRDHVPEL' | 148   | >MYCN-L402 FTLRDHVPEL' | 32    | 116   |
| >MYCN-L402 LTLRDHVPEL  | 510   | >MYCN-L402 FTLRDHVPEL  | 180   | 330   |
| >MYCN-L402 LTLRDHVPEL' | 188   | >MYCN-L402 FTLRDHVPEL' | 24    | 164   |
| >MYCN-L402 LTLRDHVPEL  | 150   | >MYCN-L402 FTLRDHVPEL  | 16    | 134   |
| >MYCN-L402 LTLRDHVPEL' | 87    | >MYCN-L402 FTLRDHVPEL' | 11    | 76    |
| >MYCN-L402 LTLRDHVPEL  | 753   | >MYCN-L402 FTLRDHVPEL  | 371   | 382   |
| >MYCN-L402 LTLRDHVPEL  | 24    | >MYCN-L402 FTLRDHVPEL  | 32    | 8     |
| >MYCN-L402 LTLRDHVPEL' | 305   | >MYCN-L402 FTLRDHVPEL' | 340   | 35    |
| >MYCN-L402 FLTLRDHV    | 80    | >MYCN-L402 FFTLRDHV    | 13786 | 13706 |
| >MYCN-L402 FLTLRDHVPE  | 28    | >MYCN-L402 FFTLRDHVPE  | 5424  | 5396  |
| >MYCN-L402 FLTLRDHV    | 8     | >MYCN-L402 FFTLRDHV    | 1019  | 1011  |
| >MYCN-L402 FLTLRDHVPE  | 7     | >MYCN-L402 FFTLRDHVPE  | 440   | 433   |
| >MYCN-L402 FLTLRDHV    | 18    | >MYCN-L402 FFTLRDHV    | 9949  | 9931  |
| >MYCN-L402 FLTLRDHVPE  | 35    | >MYCN-L402 FFTLRDHVPE  | 9076  | 9041  |
| >MYCN-L402 FLTLRDHV    | 19    | >MYCN-L402 FFTLRDHV    | 2455  | 2436  |
| >MYCN-L402 FLTLRDHVPE  | 57    | >MYCN-L402 FFTLRDHVPE  | 2256  | 2199  |
| >MYCN-L402 FLTLRDHV    | 18    | >MYCN-L402 FFTLRDHV    | 8541  | 8523  |
| >MYCN-L402 FLTLRDHVPE  | 21    | >MYCN-L402 FFTLRDHVPE  | 5615  | 5594  |
| >MYCN-L402 FLTLRDHV    | 11    | >MYCN-L402 FFTLRDHV    | 10318 | 10307 |
| >MYCN-L402 FLTLRDHVPE  | 21    | >MYCN-L402 FFTLRDHVPE  | 11289 | 11268 |
| >MYCN-L402 FLTLRDHV    | 7     | >MYCN-L402 FFTLRDHV    | 2531  | 2524  |
| >MYCN-L402 FLTLRDHVPE  | 10    | >MYCN-L402 FFTLRDHVPE  | 4141  | 4131  |
| >MYCN-L402 FLTLRDHV    | 80    | >MYCN-L402 FFTLRDHV    | 17067 | 16987 |
| >MYCN-L402 FLTLRDHVPE  | 64    | >MYCN-L402 FFTLRDHVPE  | 13617 | 13553 |
| >MYCN-L402 FLTLRDHV    | 3     | >MYCN-L402 FFTLRDHV    | 775   | 772   |
| >MYCN-L402 FLTLRDHVPE  | 3     | >MYCN-L402 FFTLRDHVPE  | 1049  | 1046  |
| >MYCN-L402 FLTLRDHVPE  | 11393 | >MYCN-L402 FFTLRDHVPE  | 106   | 11287 |
| >MYCN-L402 FLTLRDHVPE  | 253   | >MYCN-L402 FFTLRDHVPE  | 2635  | 2382  |
| >MYCN-L402 QRRNDRSSF   | 288   | >MYCN-L402 QRRNDRSSF   | 19    | 269   |
| >MYCN-L402 QRRNDRSSF   | 2283  | >MYCN-L402 QRRNDRSSF   | 343   | 1940  |
| >MYCN-L402 QRRNDRSSF   | 130   | >MYCN-L402 QRRNDRSSF   | 463   | 333   |
| >MYCN-L402 QRRNDRSSF   | 36    | >MYCN-L402 QRRNDRSSF   | 98    | 62    |
| >MYCN-L402 SFLTLRDHV   | 37    | >MYCN-L402 SFFTTLRDHV  | 47    | 10    |
| >MYCN-L402 SFLTLRDHV   | 469   | >MYCN-L402 SFFTTLRDHV  | 438   | 31    |
| >MYCN-L402 SFLTLRDHV   | 166   | >MYCN-L402 SFFTTLRDHV  | 138   | 28    |
| >MYCN-L402 SSFLTLRDHV  | 188   | >MYCN-L402 SSFFTTLRDHV | 42    | 146   |
| >MYCN-L402 SSFLTLRDH   | 1128  | >MYCN-L402 SSFFTTLRDH  | 439   | 689   |
| >MYCN-L402 SSFLTLRDH   | 888   | >MYCN-L402 SSFFTTLRDH  | 312   | 576   |
| >MYCN-L402 RSSFLTLR    | 295   | >MYCN-L402 RSSFFTTLR   | 165   | 130   |

|                        |       |                        |      |       |
|------------------------|-------|------------------------|------|-------|
| >MYCN-L402 RSSFLTLR    | 52    | >MYCN-L402 RSSFFTLR    | 22   | 30    |
| >MYCN-L402 RSSFLTLRDH\ | 613   | >MYCN-L402 RSSFFTLRDH\ | 336  | 277   |
| >MYCN-L402 RSSFLTLR    | 9     | >MYCN-L402 RSSFFTLR    | 7    | 2     |
| >MYCN-L402 RSSFLTLRDH  | 553   | >MYCN-L402 RSSFFTLRDH  | 222  | 331   |
| >MYCN-L402 RSSFLTLR    | 53    | >MYCN-L402 RSSFFTLR    | 24   | 29    |
| >MYCN-L402 RSSFLTLRDH\ | 636   | >MYCN-L402 RSSFFTLRDH\ | 440  | 196   |
| >MYCN-L402 RSSFLTLR    | 597   | >MYCN-L402 RSSFFTLR    | 350  | 247   |
| >MYCN-L402 RSSFLTLR    | 400   | >MYCN-L402 RSSFFTLR    | 164  | 236   |
| >MYCN-L402 RSSFLTLR    | 139   | >MYCN-L402 RSSFFTLR    | 51   | 88    |
| >MYCN-L402 LRSSFLTLR   | 676   | >MYCN-L402 LRSSFFTLR   | 325  | 351   |
| >MYCN-L402 LRSSFLT     | 83    | >MYCN-L402 LRSSFFTL    | 78   | 5     |
| >MYCN-L402 LRSSFLTLR   | 1254  | >MYCN-L402 LRSSFFTLR   | 496  | 758   |
| >MYCN-L402 LRSSFLT     | 123   | >MYCN-L402 LRSSFFTL    | 99   | 24    |
| >MYCN-L402 LRSSFLTLR   | 91    | >MYCN-L402 LRSSFFTLR   | 74   | 17    |
| >MYCN-L402 LRSSFLT     | 251   | >MYCN-L402 LRSSFFTL    | 137  | 114   |
| >MYCN-L402 LRSSFLTLR   | 1293  | >MYCN-L402 LRSSFFTLR   | 337  | 956   |
| >MYCN-L402 LRSSFLTLR   | 739   | >MYCN-L402 LRSSFFTLR   | 124  | 615   |
| >MYCN-L402 DLRSSFLT    | 192   | >MYCN-L402 DLRSSFFTL   | 52   | 140   |
| >MYCN-L402 DLRSSFLT    | 363   | >MYCN-L402 DLRSSFFTL   | 998  | 635   |
| >MYCN-L402 DLRSSFLTLR  | 114   | >MYCN-L402 DLRSSFFTLR  | 61   | 53    |
| >MYCN-L402 DLRSSFLTLR  | 44    | >MYCN-L402 DLRSSFFTLR  | 28   | 16    |
| >MYCN-L402 DLRSSFLTLR  | 162   | >MYCN-L402 DLRSSFFTLR  | 174  | 12    |
| >MYCN-L402 DLRSSFLT    | 56    | >MYCN-L402 DLRSSFFTL   | 140  | 84    |
| >MYCN-L402 DLRSSFLT    | 491   | >MYCN-L402 DLRSSFFTL   | 1081 | 590   |
| >MYCN-L402 NDLRSSFLT   | 171   | >MYCN-L402 NDLRSSFFTL  | 94   | 77    |
| >MYCN-L402 RNDLRSSFL   | 1596  | >MYCN-L402 RNDLRSSFF   | 158  | 1438  |
| >MYCN-L402 RRNDLRSSFL  | 231   | >MYCN-L402 RRNDLRSSFF  | 13   | 218   |
| >MYCN-L402 RRNDLRSSFL  | 11    | >MYCN-L402 RRNDLRSSFF  | 15   | 4     |
| >MYCN-L402 RRNDLRSSFL  | 214   | >MYCN-L402 RRNDLRSSFF  | 288  | 74    |
| >MYCN-L402 RRNDLRSSFL  | 40    | >MYCN-L402 RRNDLRSSFF  | 209  | 169   |
| >MYCN-L402 RRNDLRSSFL  | 210   | >MYCN-L402 RRNDLRSSFF  | 283  | 73    |
| >MYCN-L402 RRNDLRSSFL  | 20    | >MYCN-L402 RRNDLRSSFF  | 56   | 36    |
| >MYCN-P358 PLKSVIPPKA  | 6514  | >MYCN-P358 LLKSVIPPKA  | 311  | 6203  |
| >MYCN-P358 PLKSVIPPKA  | 3547  | >MYCN-P358 LLKSVIPPKA  | 117  | 3430  |
| >MYCN-P358 PLKSVIPPKA  | 2932  | >MYCN-P358 LLKSVIPPKA  | 153  | 2779  |
| >MYCN-P358 PLKSVIPPKA  | 716   | >MYCN-P358 LLKSVIPPKA  | 17   | 699   |
| >MYCN-P358 PLKSVIPPK   | 607   | >MYCN-P358 LLKSVIPPK   | 55   | 552   |
| >MYCN-P358 PLKSVIPPKAK | 2244  | >MYCN-P358 LLKSVIPPKAK | 151  | 2093  |
| >MYCN-P358 PLKSVIPPK   | 2849  | >MYCN-P358 LLKSVIPPK   | 162  | 2687  |
| >MYCN-P358 PLKSVIPPK   | 36    | >MYCN-P358 LLKSVIPPK   | 9    | 27    |
| >MYCN-P358 PLKSVIPPKAK | 457   | >MYCN-P358 LLKSVIPPKAK | 62   | 395   |
| >MYCN-P358 PLKSVIPPK   | 2475  | >MYCN-P358 LLKSVIPPK   | 69   | 2406  |
| >MYCN-P358 RPLKSVIPPKA | 22751 | >MYCN-P358 RLLKSVIPPKA | 104  | 22647 |

|                        |       |                        |       |       |
|------------------------|-------|------------------------|-------|-------|
| >MYCN-P358 RPLKSVIPPKA | 22369 | >MYCN-P358 RLLKSVIPPKA | 208   | 22161 |
| >MYCN-P358 RPLKSVIPPKA | 21988 | >MYCN-P358 RLLKSVIPPKA | 452   | 21536 |
| >MYCN-P358 RPLKSVIPPK  | 28308 | >MYCN-P358 RLLKSVIPPK  | 459   | 27849 |
| >MYCN-P358 RPLKSVIPPKA | 19861 | >MYCN-P358 RLLKSVIPPKA | 13    | 19848 |
| >MYCN-P358 RPLKSVIPPKA | 23072 | >MYCN-P358 RLLKSVIPPKA | 122   | 22950 |
| >MYCN-P358 RPLKSVIPPKA | 21072 | >MYCN-P358 RLLKSVIPPKA | 15    | 21057 |
| >MYCN-P358 RPLKSVIPPKA | 20914 | >MYCN-P358 RLLKSVIPPKA | 194   | 20720 |
| >MYCN-P358 RPLKSVIPPKA | 34704 | >MYCN-P358 RLLKSVIPPKA | 36    | 34668 |
| >MYCN-P358 RPLKSVIPPK  | 3501  | >MYCN-P358 RLLKSVIPPK  | 23    | 3478  |
| >MYCN-P358 RPLKSVIPPK  | 3283  | >MYCN-P358 RLLKSVIPPK  | 47    | 3236  |
| >MYCN-P358 RPLKSVIPPK  | 953   | >MYCN-P358 RLLKSVIPPK  | 6     | 947   |
| >MYCN-P358 RPLKSVIPPKA | 12198 | >MYCN-P358 RLLKSVIPPKA | 140   | 12058 |
| >MYCN-P358 RPLKSVIPPK  | 3142  | >MYCN-P358 RLLKSVIPPK  | 493   | 2649  |
| >MYCN-P358 RPLKSVIPPKA | 494   | >MYCN-P358 RLLKSVIPPKA | 31832 | 31338 |
| >MYCN-P358 RPLKSVIPPK  | 10823 | >MYCN-P358 RLLKSVIPPK  | 141   | 10682 |
| >MYCN-P358 RPLKSVIPPK  | 521   | >MYCN-P358 RLLKSVIPPK  | 171   | 350   |
| >MYCN-P358 KIKSEASPRL  | 1037  | >MYCN-P358 KIKSEASPRL  | 32    | 1005  |
| >MYCN-P358 SPRPLKSV    | 18    | >MYCN-P358 SPRLLKSV    | 21    | 3     |
| >MYCN-P358 SPRPLKSVI   | 13    | >MYCN-P358 SPRLLKSVI   | 13    | 0     |
| >MYCN-P358 SPRPLKSV    | 876   | >MYCN-P358 SPRLLKSV    | 236   | 640   |
| >MYCN-P358 SPRPLKSVI   | 595   | >MYCN-P358 SPRLLKSVI   | 173   | 422   |
| >MYCN-P358 SPRPLKSVI   | 56    | >MYCN-P358 SPRLLKSVI   | 165   | 109   |
| >MYCN-P358 ASPRPLKSVI  | 433   | >MYCN-P358 ASPRLLKSVI  | 863   | 430   |
| >MYCN-P358 ASPRPLKSV   | 52    | >MYCN-P358 ASPRLLKSV   | 123   | 71    |
| >MYCN-P358 ASPRPLKSVI  | 29    | >MYCN-P358 ASPRLLKSVI  | 60    | 31    |
| >MYCN-P358 ASPRPLKSVI  | 118   | >MYCN-P358 ASPRLLKSVI  | 118   | 0     |
| >MYCN-P358 EASPRPLK    | 587   | >MYCN-P358 EASPRLLK    | 309   | 278   |
| >MYCN-P358 EASPRPLK    | 33    | >MYCN-P358 EASPRLLK    | 33    | 0     |
| >MYCN-P358 EASPRPLKSVI | 474   | >MYCN-P358 EASPRLLKSVI | 508   | 34    |
| >MYCN-P358 EASPRPLKSV  | 340   | >MYCN-P358 EASPRLLKSV  | 348   | 8     |
| >MYCN-P358 EASPRPLKSVI | 227   | >MYCN-P358 EASPRLLKSVI | 291   | 64    |
| >MYCN-P358 SEASPRPL    | 91    | >MYCN-P358 SEASPRLL    | 15    | 76    |
| >MYCN-P358 SEASPRPLKS\ | 142   | >MYCN-P358 SEASPRLLKS\ | 73    | 69    |
| >MYCN-P358 SEASPRPL    | 167   | >MYCN-P358 SEASPRLL    | 196   | 29    |
| >MYCN-P358 SEASPRPLKS\ | 109   | >MYCN-P358 SEASPRLLKS\ | 123   | 14    |
| >MYCN-P358 SEASPRPLKS\ | 44    | >MYCN-P358 SEASPRLLKS\ | 46    | 2     |
| >MYCN-P358 KSEASPRPLK  | 883   | >MYCN-P358 KSEASPRLLK  | 127   | 756   |
| >MYCN-P358 KSEASPRPLK  | 182   | >MYCN-P358 KSEASPRLLK  | 48    | 134   |
| >MYCN-P358 KSEASPRPL   | 481   | >MYCN-P358 KSEASPRLL   | 1258  | 777   |
| >MYCN-P358 KSEASPRPLK  | 9     | >MYCN-P358 KSEASPRLLK  | 11    | 2     |
| >MYCN-P358 KSEASPRP    | 9769  | >MYCN-P358 KSEASPRL    | 7     | 9762  |
| >MYCN-P358 KSEASPRPL   | 7     | >MYCN-P358 KSEASPRLL   | 13    | 6     |
| >MYCN-P358 KSEASPRPL   | 1842  | >MYCN-P358 KSEASPRLL   | 273   | 1569  |

|                        |       |                        |       |       |
|------------------------|-------|------------------------|-------|-------|
| >MYCN-P358 IKSEASPRP   | 4520  | >MYCN-P358 IKSEASPRL   | 104   | 4416  |
| >MYCN-P358 IKSEASPRPL  | 16    | >MYCN-P358 IKSEASPRLL  | 70    | 54    |
| >MYCN-P358 KIKSEASPRPL | 164   | >MYCN-P358 KIKSEASPRLL | 348   | 184   |
| >MYCN-P358 KIKSEASPRP  | 440   | >MYCN-P358 KIKSEASPRL  | 45    | 395   |
| >MYCN-P358 KIKSEASPRPL | 30    | >MYCN-P358 KIKSEASPRLL | 60    | 30    |
| >MYCN-P358 KIKSEASPRPL | 481   | >MYCN-P358 KIKSEASPRLL | 2313  | 1832  |
| >MYCN-P44L PPGEDIWKKF  | 9833  | >MYCN-P44L LPGEDIWKKF  | 199   | 9634  |
| >MYCN-P44L PPGEDIWKKF  | 3265  | >MYCN-P44L LPGEDIWKKF  | 184   | 3081  |
| >MYCN-P44L PPGEDIWKKF  | 1726  | >MYCN-P44L LPGEDIWKKF  | 80    | 1646  |
| >MYCN-P44L TPPGEDIWKK  | 289   | >MYCN-P44L TLPGEDIWKK  | 7371  | 7082  |
| >MYCN-P44L TPPGEDIWKK  | 37032 | >MYCN-P44L TLPGEDIWKK  | 425   | 36607 |
| >MYCN-P44L TPPGEDIWKK  | 9361  | >MYCN-P44L TLPGEDIWKK  | 305   | 9056  |
| >MYCN-P44L TPPGEDIWKK  | 474   | >MYCN-P44L TLPGEDIWKK  | 11034 | 10560 |
| >MYCN-P44L TPPGEDIW    | 63    | >MYCN-P44L TLPGEDIW    | 18495 | 18432 |
| >MYCN-P44L TPPGEDIW    | 46    | >MYCN-P44L TLPGEDIW    | 10461 | 10415 |
| >MYCN-P44L STPPGEDIWK  | 681   | >MYCN-P44L STLPGEDIWK  | 94    | 587   |
| >MYCN-P44L STPPGEDIWK  | 16    | >MYCN-P44L STLPGEDIWK  | 9     | 7     |
| >MYCN-P44L STPPGEDIWK  | 71    | >MYCN-P44L STLPGEDIWK  | 17    | 54    |
| >MYCN-P44L STPPGEDIWK  | 3688  | >MYCN-P44L STLPGEDIWK  | 281   | 3407  |
| >MYCN-P44L STPPGEDIWK  | 26    | >MYCN-P44L STLPGEDIWK  | 36    | 10    |
| >MYCN-P44L STPPGEDIWK  | 449   | >MYCN-P44L STLPGEDIWK  | 319   | 130   |
| >MYCN-P44L STPPGEDI    | 7251  | >MYCN-P44L STLPGEDI    | 201   | 7050  |
| >MYCN-P44L STPPGEDIW   | 374   | >MYCN-P44L STLPGEDIW   | 7     | 367   |
| >MYCN-P44L STPPGEDIW   | 349   | >MYCN-P44L STLPGEDIW   | 67    | 282   |
| >MYCN-P44L STPPGEDIW   | 2168  | >MYCN-P44L STLPGEDIW   | 20    | 2148  |
| >MYCN-P44L STPPGEDI    | 8     | >MYCN-P44L STLPGEDI    | 4190  | 4182  |
| >MYCN-P44L STPPGEDIW   | 105   | >MYCN-P44L STLPGEDIW   | 18423 | 18318 |
| >MYCN-P44L STPPGEDIW   | 3214  | >MYCN-P44L STLPGEDIW   | 142   | 3072  |
| >MYCN-P44L STPPGEDIWK  | 629   | >MYCN-P44L STLPGEDIWK  | 91    | 538   |
| >MYCN-P44L STPPGEDIWK  | 568   | >MYCN-P44L STLPGEDIWK  | 94    | 474   |
| >MYCN-P44L STPPGEDI    | 48    | >MYCN-P44L STLPGEDI    | 26    | 22    |
| >MYCN-P44L DSTPPGEDIW  | 231   | >MYCN-P44L DSTLPGEDIW  | 172   | 59    |
| >MYCN-P44L DSTPPGEDIW  | 402   | >MYCN-P44L DSTLPGEDIW  | 1823  | 1421  |
| >MYCN-P44L DSTPPGEDIW  | 342   | >MYCN-P44L DSTLPGEDIW  | 1729  | 1387  |
| >MYCN-P44L PDSTPPGEDI  | 288   | >MYCN-P44L PDSTLPGEDI  | 169   | 119   |
| >MYCN-P44L GGPDPSTPGE  | 459   | >MYCN-P44L GGPDPSTLPE  | 491   | 32    |
| >MYCN-P44L YFGGPDSTP   | 9026  | >MYCN-P44L YFGGPDSTL   | 61    | 8965  |
| >MYCN-P44L YFGGPDSTP   | 9588  | >MYCN-P44L YFGGPDSTL   | 311   | 9277  |
| >MYCN-P44L YFGGPDSTP   | 11035 | >MYCN-P44L YFGGPDSTL   | 393   | 10642 |
| >MYCN-P44L FYFGGPDSTP  | 4664  | >MYCN-P44L FYFGGPDSTL  | 7     | 4657  |
| >MYCN-P44L FYFGGPDSTP  | 14124 | >MYCN-P44L FYFGGPDSTL  | 128   | 13996 |
| >MYCN-P44L FYFGGPDSTP  | 14901 | >MYCN-P44L FYFGGPDSTL  | 165   | 14736 |
| >MYCN-P44L FYFGGPDSTP  | 27938 | >MYCN-P44L FYFGGPDSTL  | 152   | 27786 |

|                       |       |                       |       |       |
|-----------------------|-------|-----------------------|-------|-------|
| >MYCN-P44L FYFGGPDSTP | 25388 | >MYCN-P44L FYFGGPDSTL | 165   | 25223 |
| >MYCN-P44L FYFGGPDSTP | 11756 | >MYCN-P44L FYFGGPDSTL | 70    | 11686 |
| >MYCN-P44L FYFGGPDSTP | 1097  | >MYCN-P44L FYFGGPDSTL | 6     | 1091  |
| >MYCN-P44L FYFGGPDSTP | 11243 | >MYCN-P44L FYFGGPDSTL | 463   | 10780 |
| >MYCN-P44L FYFGGPDSTP | 18667 | >MYCN-P44L FYFGGPDSTL | 124   | 18543 |
| >MYCN-P44L FYFGGPDSTP | 6408  | >MYCN-P44L FYFGGPDSTL | 65    | 6343  |
| >MYCN-P74L PPSWVTEM   | 898   | >MYCN-P74L LPSWVTEM   | 47    | 851   |
| >MYCN-P74L PPSWVTEML  | 1576  | >MYCN-P74L LPSWVTEML  | 97    | 1479  |
| >MYCN-P74L PPSWVTEM   | 92    | >MYCN-P74L LPSWVTEM   | 9     | 83    |
| >MYCN-P74L PPSWVTEML  | 1913  | >MYCN-P74L LPSWVTEML  | 71    | 1842  |
| >MYCN-P74L PPSWVTEM   | 310   | >MYCN-P74L LPSWVTEM   | 39    | 271   |
| >MYCN-P74L PPSWVTEML  | 369   | >MYCN-P74L LPSWVTEML  | 44    | 325   |
| >MYCN-P74L PPSWVTEM   | 8224  | >MYCN-P74L LPSWVTEM   | 483   | 7741  |
| >MYCN-P74L PPSWVTEML  | 3632  | >MYCN-P74L LPSWVTEML  | 144   | 3488  |
| >MYCN-P74L PPSWVTEML  | 6564  | >MYCN-P74L LPSWVTEML  | 346   | 6218  |
| >MYCN-P74L EPPSWVTE   | 238   | >MYCN-P74L ELPSWVTE   | 2701  | 2463  |
| >MYCN-P74L EPPSWVTEM  | 85    | >MYCN-P74L ELPSWVTEM  | 921   | 836   |
| >MYCN-P74L EPPSWVTEM  | 141   | >MYCN-P74L ELPSWVTEM  | 1054  | 913   |
| >MYCN-P74L EPPSWVTEM  | 98    | >MYCN-P74L ELPSWVTEM  | 876   | 778   |
| >MYCN-P74L EPPSWVTEM  | 382   | >MYCN-P74L ELPSWVTEM  | 35765 | 35383 |
| >MYCN-P74L EPPSWVTEM  | 15423 | >MYCN-P74L ELPSWVTEM  | 39    | 15384 |
| >MYCN-P74L EPPSWVTEM  | 31451 | >MYCN-P74L ELPSWVTEM  | 380   | 31071 |
| >MYCN-P74L EPPSWVTEM  | 24448 | >MYCN-P74L ELPSWVTEM  | 318   | 24130 |
| >MYCN-P74L EPPSWVTEM  | 25258 | >MYCN-P74L ELPSWVTEM  | 64    | 25194 |
| >MYCN-P74L EPPSWVTEM  | 21035 | >MYCN-P74L ELPSWVTEM  | 13    | 21022 |
| >MYCN-P74L EPPSWVTEM  | 25347 | >MYCN-P74L ELPSWVTEM  | 103   | 25244 |
| >MYCN-P74L EPPSWVTEM  | 26198 | >MYCN-P74L ELPSWVTEM  | 473   | 25725 |
| >MYCN-P74L EPPSWVTEM  | 25199 | >MYCN-P74L ELPSWVTEM  | 58    | 25141 |
| >MYCN-P74L EPPSWVTEM  | 25645 | >MYCN-P74L ELPSWVTEM  | 145   | 25500 |
| >MYCN-P74L EPPSWVTEM  | 24136 | >MYCN-P74L ELPSWVTEM  | 274   | 23862 |
| >MYCN-P74L EPPSWVTEM  | 23379 | >MYCN-P74L ELPSWVTEM  | 42    | 23337 |
| >MYCN-P74L EPPSWVTEM  | 24230 | >MYCN-P74L ELPSWVTEM  | 256   | 23974 |
| >MYCN-P74L EPPSWVTEM  | 34352 | >MYCN-P74L ELPSWVTEM  | 42    | 34310 |
| >MYCN-P74L EPPSWVTEM  | 30441 | >MYCN-P74L ELPSWVTEM  | 17    | 30424 |
| >MYCN-P74L EPPSWVTEM  | 28765 | >MYCN-P74L ELPSWVTEM  | 16    | 28749 |
| >MYCN-P74L EPPSWVTEM  | 7424  | >MYCN-P74L ELPSWVTEM  | 294   | 7130  |
| >MYCN-P74L EPPSWVTEM  | 379   | >MYCN-P74L ELPSWVTEM  | 86    | 293   |
| >MYCN-P74L EPPSWVTEM  | 8314  | >MYCN-P74L ELPSWVTEM  | 392   | 7922  |
| >MYCN-P74L EPPSWVTEM  | 3073  | >MYCN-P74L ELPSWVTEM  | 345   | 2728  |
| >MYCN-P74L EPPSWVTEM  | 1154  | >MYCN-P74L ELPSWVTEM  | 274   | 880   |
| >MYCN-P74L EPPSWVTEM  | 467   | >MYCN-P74L ELPSWVTEM  | 187   | 280   |
| >MYCN-P74L EPPSWVTEM  | 34    | >MYCN-P74L ELPSWVTEM  | 3805  | 3771  |
| >MYCN-P74L EPPSWVTEM  | 596   | >MYCN-P74L ELPSWVTEM  | 261   | 335   |

|                       |       |                       |      |       |
|-----------------------|-------|-----------------------|------|-------|
| >MYCN-P74L EPPSWVTEM  | 484   | >MYCN-P74L ELPSWVTEM  | 221  | 263   |
| >MYCN-P74L EPPSWVTEM  | 2726  | >MYCN-P74L ELPSWVTEM  | 431  | 2295  |
| >MYCN-P74L SRGFAEHSSE | 16471 | >MYCN-P74L SRGFAEHSSE | 123  | 16348 |
| >MYCN-P74L SEPPSWVTEM | 149   | >MYCN-P74L SELPSWVTEM | 58   | 91    |
| >MYCN-P74L SEPPSWVTEM | 74    | >MYCN-P74L SELPSWVTEM | 30   | 44    |
| >MYCN-P74L SEPPSWVTEM | 2322  | >MYCN-P74L SELPSWVTEM | 244  | 2078  |
| >MYCN-P74L SEPPSWVTEM | 299   | >MYCN-P74L SELPSWVTEM | 17   | 282   |
| >MYCN-P74L SEPPSWVT   | 2108  | >MYCN-P74L SELPSWVT   | 195  | 1913  |
| >MYCN-P74L SEPPSWVTEM | 451   | >MYCN-P74L SELPSWVTEM | 396  | 55    |
| >MYCN-P74L SEPPSWVTEM | 1192  | >MYCN-P74L SELPSWVTEM | 93   | 1099  |
| >MYCN-P74L SEPPSWVTEM | 1020  | >MYCN-P74L SELPSWVTEM | 285  | 735   |
| >MYCN-P74L SEPPSWVTEM | 2383  | >MYCN-P74L SELPSWVTEM | 156  | 2227  |
| >MYCN-P74L SEPPSWVT   | 978   | >MYCN-P74L SELPSWVT   | 22   | 956   |
| >MYCN-P74L SEPPSWVTEM | 9895  | >MYCN-P74L SELPSWVTEM | 450  | 9445  |
| >MYCN-P74L SEPPSWVTEM | 2412  | >MYCN-P74L SELPSWVTEM | 169  | 2243  |
| >MYCN-P74L SEPPSWVTEM | 199   | >MYCN-P74L SELPSWVTEM | 30   | 169   |
| >MYCN-P74L SSEPPSWVTE | 20    | >MYCN-P74L SSELPSWVTE | 60   | 40    |
| >MYCN-P74L SSEPPSWVTE | 388   | >MYCN-P74L SSELPSWVTE | 941  | 553   |
| >MYCN-P74L SSEPPSWVTE | 29    | >MYCN-P74L SSELPSWVTE | 52   | 23    |
| >MYCN-P74L SSEPPSWVTE | 461   | >MYCN-P74L SSELPSWVTE | 2120 | 1659  |
| >MYCN-P74L HSSEPPSWV  | 2298  | >MYCN-P74L HSSELPSWV  | 470  | 1828  |
| >MYCN-P74L HSSEPPSWV  | 32    | >MYCN-P74L HSSELPSWV  | 41   | 9     |
| >MYCN-P74L HSSEPPSWV  | 162   | >MYCN-P74L HSSELPSWV  | 413  | 251   |
| >MYCN-P74L HSSEPPSW   | 6     | >MYCN-P74L HSSELPSW   | 8    | 2     |
| >MYCN-P74L HSSEPPSWV  | 222   | >MYCN-P74L HSSELPSWV  | 480  | 258   |
| >MYCN-P74L HSSEPPSW   | 720   | >MYCN-P74L HSSELPSW   | 428  | 292   |
| >MYCN-P74L HSSEPPSW   | 43    | >MYCN-P74L HSSELPSW   | 44   | 1     |
| >MYCN-P74L HSSEPPSW   | 11    | >MYCN-P74L HSSELPSW   | 11   | 0     |
| >MYCN-P74L HSSEPPSWV  | 301   | >MYCN-P74L HSSELPSWV  | 276  | 25    |
| >MYCN-P74L HSSEPPSW   | 481   | >MYCN-P74L HSSELPSW   | 285  | 196   |
| >MYCN-P74L EHSSEPPSW  | 112   | >MYCN-P74L EHSSELPSW  | 77   | 35    |
| >MYCN-P74L AEHSSEPPSW | 254   | >MYCN-P74L AEHSSELPSW | 178  | 76    |
| >MYCN-P74L AEHSSEPPS  | 135   | >MYCN-P74L AEHSSELPS  | 91   | 44    |
| >MYCN-P74L AEHSSEPPSW | 600   | >MYCN-P74L AEHSSELPSW | 264  | 336   |
| >MYCN-P74L AEHSSEPPSW | 28    | >MYCN-P74L AEHSSELPSW | 23   | 5     |
| >MYCN-P74L AEHSSEPPSW | 151   | >MYCN-P74L AEHSSELPSW | 168  | 17    |
| >MYCN-P74L AEHSSEPPSW | 544   | >MYCN-P74L AEHSSELPSW | 288  | 256   |
| >MYCN-P74L AEHSSEPP   | 176   | >MYCN-P74L AEHSSELP   | 504  | 328   |
| >MYCN-P74L AEHSSEPPS  | 14    | >MYCN-P74L AEHSSELPS  | 21   | 7     |
| >MYCN-P74L AEHSSEPPSW | 11    | >MYCN-P74L AEHSSELPSW | 11   | 0     |
| >MYCN-P74L AEHSSEPPSW | 194   | >MYCN-P74L AEHSSELPSW | 207  | 13    |
| >MYCN-P74L AEHSSEPPSW | 61    | >MYCN-P74L AEHSSELPSW | 54   | 7     |
| >MYCN-P74L FAEHSSEP   | 20276 | >MYCN-P74L FAEHSSEL   | 289  | 19987 |



|                        |       |                        |      |       |
|------------------------|-------|------------------------|------|-------|
| >MYCN-P74L FAEHSSEP    | 21204 | >MYCN-P74L FAEHSSEL    | 123  | 21081 |
| >MYCN-P74L FAEHSSEPPS\ | 16    | >MYCN-P74L FAEHSSELPS\ | 16   | 0     |
| >MYCN-P74L FAEHSSEP    | 8962  | >MYCN-P74L FAEHSSEL    | 191  | 8771  |
| >MYCN-P74L FAEHSSEPPS\ | 28    | >MYCN-P74L FAEHSSELPS\ | 26   | 2     |
| >MYCN-P74L FAEHSSEPPS\ | 66    | >MYCN-P74L FAEHSSELPS\ | 66   | 0     |
| >MYCN-P74L FAEHSSEPPS\ | 28    | >MYCN-P74L FAEHSSELPS\ | 15   | 13    |
| >MYCN-P74L FAEHSSEPPS\ | 208   | >MYCN-P74L FAEHSSELPS\ | 165  | 43    |
| >MYCN-P74L GFAEHSSEP   | 8311  | >MYCN-P74L GFAEHSSEL   | 71   | 8240  |
| >MYCN-P74L RGFAEHSSEP  | 6025  | >MYCN-P74L RGFAEHSSEL  | 163  | 5862  |
| >MYCN-P74L RGFAEHSSEP  | 17624 | >MYCN-P74L RGFAEHSSEL  | 51   | 17573 |
| >MYH11-I78\ITDVIMAF    | 135   | >MYH11-I78\TTDVIMAF    | 88   | 47    |
| >MYH11-I78\ITDVIMAF    | 370   | >MYH11-I78\TTDVIMAF    | 530  | 160   |
| >MYH11-I78\ITDVIMAFQ   | 1039  | >MYH11-I78\TTDVIMAFQ   | 270  | 769   |
| >MYH11-I78\ITDVIMAFQA  | 909   | >MYH11-I78\TTDVIMAFQ/  | 50   | 859   |
| >MYH11-I78\ITDVIMAFQA  | 1093  | >MYH11-I78\TTDVIMAFQ/  | 75   | 1018  |
| >MYH11-I78\ITDVIMAF    | 9     | >MYH11-I78\TTDVIMAF    | 41   | 32    |
| >MYH11-I78\ITDVIMAFQA  | 24    | >MYH11-I78\TTDVIMAFQ/  | 195  | 171   |
| >MYH11-I78\ITDVIMAF    | 163   | >MYH11-I78\TTDVIMAF    | 1369 | 1206  |
| >MYH11-I78\ITDVIMAFQA  | 153   | >MYH11-I78\TTDVIMAFQ/  | 197  | 44    |
| >MYH11-I78\ITDVIMAF    | 61    | >MYH11-I78\TTDVIMAF    | 44   | 17    |
| >MYH11-I78\ITDVIMAFQA  | 47    | >MYH11-I78\TTDVIMAFQ/  | 167  | 120   |
| >MYH11-I78\KITDVIMA    | 278   | >MYH11-I78\KTDDVIMA    | 1526 | 1248  |
| >MYH11-I78\KITDVIMAFQ  | 215   | >MYH11-I78\KTDDVIMAFC  | 1079 | 864   |
| >MYH11-I78\KITDVIMAFQ  | 241   | >MYH11-I78\KTDDVIMAFC  | 1046 | 805   |
| >MYH11-I78\KITDVIMA    | 200   | >MYH11-I78\KTDDVIMA    | 1258 | 1058  |
| >MYH11-I78\KITDVIMAFQ  | 225   | >MYH11-I78\KTDDVIMAFC  | 1345 | 1120  |
| >MYH11-I78\KITDVIMA    | 60    | >MYH11-I78\KTDDVIMA    | 235  | 175   |
| >MYH11-I78\KITDVIMAF   | 75    | >MYH11-I78\KTDDVIMAF   | 156  | 81    |
| >MYH11-I78\KITDVIMAFQ  | 32    | >MYH11-I78\KTDDVIMAFC  | 95   | 63    |
| >MYH11-I78\KITDVIMA    | 110   | >MYH11-I78\KTDDVIMA    | 486  | 376   |
| >MYH11-I78\KITDVIMAFQ  | 114   | >MYH11-I78\KTDDVIMAFC  | 437  | 323   |
| >MYH11-I78\KITDVIMA    | 181   | >MYH11-I78\KTDDVIMA    | 1385 | 1204  |
| >MYH11-I78\KITDVIMAFQ  | 129   | >MYH11-I78\KTDDVIMAFC  | 831  | 702   |
| >MYH11-I78\KITDVIMA    | 152   | >MYH11-I78\KTDDVIMA    | 4080 | 3928  |
| >MYH11-I78\KITDVIMAFQ  | 43    | >MYH11-I78\KTDDVIMAFC  | 1220 | 1177  |
| >MYH11-I78\KITDVIMAF   | 2123  | >MYH11-I78\KTDDVIMAF   | 299  | 1824  |
| >MYH11-I78\KITDVIMA    | 2078  | >MYH11-I78\KTDDVIMA    | 438  | 1640  |
| >MYH11-I78\KITDVIMAFQ  | 1892  | >MYH11-I78\KTDDVIMAFC  | 467  | 1425  |
| >MYH11-I78\KITDVIMAFQ  | 1875  | >MYH11-I78\KTDDVIMAFC  | 377  | 1498  |
| >MYH11-I78\KITDVIMAF   | 26    | >MYH11-I78\KTDDVIMAF   | 10   | 16    |
| >MYH11-I78\KITDVIMAFQ  | 3332  | >MYH11-I78\KTDDVIMAFC  | 435  | 2897  |
| >MYH11-I78\KITDVIMAF   | 229   | >MYH11-I78\KTDDVIMAF   | 101  | 128   |
| >MYH11-I78\KITDVIMAF   | 860   | >MYH11-I78\KTDDVIMAF   | 13   | 847   |

|                        |       |                        |      |       |
|------------------------|-------|------------------------|------|-------|
| >MYH11-I78(KITDVIMAF   | 1020  | >MYH11-I78(KTTDVIMAF   | 334  | 686   |
| >MYH11-I78(KITDVIMAF   | 75    | >MYH11-I78(KTTDVIMAF   | 17   | 58    |
| >MYH11-I78(KITDVIMAF   | 5678  | >MYH11-I78(KTTDVIMAF   | 46   | 5632  |
| >MYH11-I78(KITDVIMAFQ  | 14109 | >MYH11-I78(KTTDVIMAF   | 246  | 13863 |
| >MYH11-I78(KITDVIMAF   | 1103  | >MYH11-I78(KTTDVIMAF   | 22   | 1081  |
| >MYH11-I78(KITDVIMAF   | 207   | >MYH11-I78(KTTDVIMAF   | 573  | 366   |
| >MYH11-I78(LKITDVIM    | 11    | >MYH11-I78(LKTTDVIM    | 55   | 44    |
| >MYH11-I78(LKITDVIMA   | 262   | >MYH11-I78(LKTTDVIMA   | 1656 | 1394  |
| >MYH11-I78(LKITDVIMAF  | 2     | >MYH11-I78(LKTTDVIMAF  | 3    | 1     |
| >MYH11-I78(DLKITDVIMA  | 654   | >MYH11-I78(DLKTTDVIMA  | 253  | 401   |
| >MYH11-I78(RDLKITDVI   | 133   | >MYH11-I78(RDLKTTDVI   | 202  | 69    |
| >MYH11-I78(RDLKITDVI   | 373   | >MYH11-I78(RDLKTTDVI   | 875  | 502   |
| >MYH11-I78(RDLKITDV    | 65    | >MYH11-I78(RDLKTTDV    | 423  | 358   |
| >MYH11-I78(RDLKITDVI   | 19    | >MYH11-I78(RDLKTTDVI   | 50   | 31    |
| >MYH11-I78(RDLKITDVI   | 444   | >MYH11-I78(RDLKTTDVI   | 381  | 63    |
| >MYH11-I78(RDLKITDV    | 227   | >MYH11-I78(RDLKTTDV    | 91   | 136   |
| >MYH11-I78(RDLKITDVI   | 41    | >MYH11-I78(RDLKTTDVI   | 19   | 22    |
| >MYH11-I78(RDLKITDVIM  | 1195  | >MYH11-I78(RDLKTTDVIM  | 479  | 716   |
| >MYH11-I78(EERDLKIT    | 249   | >MYH11-I78(EERDLKTT    | 351  | 102   |
| >MYH11-I78(EERDLKITDV  | 887   | >MYH11-I78(EERDLKTTDV  | 368  | 519   |
| >MYH11-I78(EERDLKITDVI | 28    | >MYH11-I78(EERDLKTTDV  | 26   | 2     |
| >MYH11-I78(EERDLKITDVI | 410   | >MYH11-I78(EERDLKTTDV  | 578  | 168   |
| >MYH11-I78(EERDLKITDVI | 496   | >MYH11-I78(EERDLKTTDV  | 715  | 219   |
| >MYH11-I78(EERDLKITDVI | 55    | >MYH11-I78(EERDLKTTDV  | 79   | 24    |
| >MYH11-I78(EEERDLKI    | 445   | >MYH11-I78(EEERDLKT    | 5922 | 5477  |
| >MYH11-I78(EEERDLKITD\ | 181   | >MYH11-I78(EEERDLKTTD' | 91   | 90    |
| >MYH11-I78(EEERDLKIT   | 580   | >MYH11-I78(EEERDLKTT   | 377  | 203   |
| >MYH11-I78(EEERDLKITD\ | 359   | >MYH11-I78(EEERDLKTTD' | 380  | 21    |
| >MYH11-I78(LEEERDLKI   | 82    | >MYH11-I78(LEEERDLKT   | 9975 | 9893  |
| >MYH11-I78(LEEERDLKI   | 55    | >MYH11-I78(LEEERDLKT   | 5331 | 5276  |
| >MYH11-I78(HLEEERDLKI  | 187   | >MYH11-I78(HLEEERDLKT  | 2260 | 2073  |
| >MYH11-K12 KLQNEVESV   | 21    | >MYH11-K12 QLQNEVESV   | 134  | 113   |
| >MYH11-K12 KLQNEVESV   | 11    | >MYH11-K12 QLQNEVESV   | 25   | 14    |
| >MYH11-K12 KLQNEVESV   | 8     | >MYH11-K12 QLQNEVESV   | 31   | 23    |
| >MYH11-K12 KLQNEVESV   | 40    | >MYH11-K12 QLQNEVESV   | 227  | 187   |
| >MYH11-K12 KLQNEVESV   | 2     | >MYH11-K12 QLQNEVESV   | 6    | 4     |
| >MYH11-K12 KLQNEVESV   | 3     | >MYH11-K12 QLQNEVESV   | 7    | 4     |
| >MYH11-K12 KLQNEVESV   | 11    | >MYH11-K12 QLQNEVESV   | 58   | 47    |
| >MYH11-K12 KLQNEVESV   | 6     | >MYH11-K12 QLQNEVESV   | 9    | 3     |
| >MYH11-K12 KLQNEVESV   | 2     | >MYH11-K12 QLQNEVESV   | 3    | 1     |
| >MYH11-K12 KLQNEVESV   | 109   | >MYH11-K12 QLQNEVESV   | 1081 | 972   |
| >MYH11-K12 KLQNEVESVT  | 395   | >MYH11-K12 QLQNEVESV\  | 3245 | 2850  |
| >MYH11-K12 HKLQNEVESV\ | 8134  | >MYH11-K12 HQLQNEVESV\ | 455  | 7679  |

|                       |      |                       |      |      |
|-----------------------|------|-----------------------|------|------|
| >MYH11-K12 HKLQNEVES\ | 8052 | >MYH11-K12 HQLQNEVES\ | 271  | 7781 |
| >MYH11-K12 HKLQNEVES\ | 6580 | >MYH11-K12 HQLQNEVES\ | 288  | 6292 |
| >MYH11-K12 HKLQNEVES\ | 2802 | >MYH11-K12 HQLQNEVES\ | 69   | 2733 |
| >MYH11-K12 HKLQNEVES\ | 5542 | >MYH11-K12 HQLQNEVES\ | 78   | 5464 |
| >MYH11-K12 HKLQNEVES\ | 7358 | >MYH11-K12 HQLQNEVES\ | 204  | 7154 |
| >MYH11-K12 HKLQNEVES\ | 94   | >MYH11-K12 HQLQNEVES\ | 89   | 5    |
| >MYH11-K12 HKLQNEVES\ | 1748 | >MYH11-K12 HQLQNEVES\ | 412  | 1336 |
| >MYH11-K12 ARAELNDKVF | 94   | >MYH11-K12 ARAELNDKVF | 2356 | 2262 |
| >MYH11-K12 KVHKLQNEV  | 201  | >MYH11-K12 KVHQLQNEV  | 202  | 1    |
| >MYH11-K12 KVHKLQNEV  | 403  | >MYH11-K12 KVHQLQNEV  | 423  | 20   |
| >MYH11-K12 KVHKLQNEV  | 468  | >MYH11-K12 KVHQLQNEV  | 203  | 265  |
| >MYH11-K12 KVHKLQNEV  | 437  | >MYH11-K12 KVHQLQNEV  | 332  | 105  |
| >MYH11-K12 KVHKLQNEV  | 183  | >MYH11-K12 KVHQLQNEV  | 47   | 136  |
| >MYH11-K12 KVHKLQNEV  | 17   | >MYH11-K12 KVHQLQNEV  | 55   | 38   |
| >MYH11-K12 KVHKLQNEV\ | 270  | >MYH11-K12 KVHQLQNEV  | 938  | 668  |
| >MYH11-K12 ELNDKVHKL  | 22   | >MYH11-K12 ELNDKVHQL  | 15   | 7    |
| >MYH11-K12 ELNDKVHKL  | 95   | >MYH11-K12 ELNDKVHQL  | 52   | 43   |
| >MYH11-K12 ELNDKVHKL  | 13   | >MYH11-K12 ELNDKVHQL  | 7    | 6    |
| >MYH11-K12 ELNDKVHKL  | 60   | >MYH11-K12 ELNDKVHQL  | 54   | 6    |
| >MYH11-K12 ELNDKVHKL  | 50   | >MYH11-K12 ELNDKVHQL  | 34   | 16   |
| >MYH11-K12 ELNDKVHKL  | 6    | >MYH11-K12 ELNDKVHQL  | 4    | 2    |
| >MYH11-K12 ELNDKVHK   | 3526 | >MYH11-K12 ELNDKVHQ   | 428  | 3098 |
| >MYH11-K12 ELNDKVHKL  | 3    | >MYH11-K12 ELNDKVHQL  | 2    | 1    |
| >MYH11-K12 ELNDKVHKLC | 975  | >MYH11-K12 ELNDKVHQLC | 228  | 747  |
| >MYH11-K12 ELNDKVHK   | 150  | >MYH11-K12 ELNDKVHQ   | 5792 | 5642 |
| >MYH11-K12 ELNDKVHKL  | 353  | >MYH11-K12 ELNDKVHQL  | 346  | 7    |
| >MYH11-K12 ELNDKVHKL  | 229  | >MYH11-K12 ELNDKVHQL  | 95   | 134  |
| >MYH11-K12 AELNDKVHKL | 341  | >MYH11-K12 AELNDKVHQ  | 295  | 46   |
| >MYH11-K12 AELNDKVHKL | 165  | >MYH11-K12 AELNDKVHQ  | 85   | 80   |
| >MYH11-K12 AELNDKVHKL | 512  | >MYH11-K12 AELNDKVHQ  | 167  | 345  |
| >MYH11-K12 AELNDKVHKL | 22   | >MYH11-K12 AELNDKVHQ  | 52   | 30   |
| >MYH11-K12 RAELNDKVHI | 61   | >MYH11-K12 RAELNDKVHC | 34   | 27   |
| >MYH11-K41 KEQADFAV   | 257  | >MYH11-K41 EEQADFAV   | 105  | 152  |
| >MYH11-K41 KEQADFAV   | 297  | >MYH11-K41 EEQADFAV   | 4147 | 3850 |
| >MYH11-K41 KEQADFAV   | 52   | >MYH11-K41 EEQADFAV   | 296  | 244  |
| >MYH11-K41 KEQADFAVE/ | 12   | >MYH11-K41 EEQADFAVE/ | 47   | 35   |
| >MYH11-K41 KEQADFAV   | 110  | >MYH11-K41 EEQADFAV   | 817  | 707  |
| >MYH11-K41 KEQADFAVE/ | 299  | >MYH11-K41 EEQADFAVE/ | 599  | 300  |
| >MYH11-K41 KEQADFAVE/ | 62   | >MYH11-K41 EEQADFAVE/ | 381  | 319  |
| >MYH11-K41 KEQADFAVE/ | 424  | >MYH11-K41 EEQADFAVE/ | 215  | 209  |
| >MYH11-K41 KEQADFAVE/ | 584  | >MYH11-K41 EEQADFAVE/ | 302  | 282  |
| >MYH11-K41 KEQADFAV   | 18   | >MYH11-K41 EEQADFAV   | 9    | 9    |
| >MYH11-K41 KEQADFAVE  | 408  | >MYH11-K41 EEQADFAVE  | 121  | 287  |

|                        |       |                        |       |       |
|------------------------|-------|------------------------|-------|-------|
| >MYH11-K41 KEQADFAVE/  | 44    | >MYH11-K41 EEQADFAVE/  | 23    | 21    |
| >MYH11-K41 KEQADFAVE/  | 215   | >MYH11-K41 EEQADFAVE/  | 62    | 153   |
| >MYH11-K41 KEQADFAVE/  | 35    | >MYH11-K41 EEQADFAVE/  | 712   | 677   |
| >MYH11-K41 TKEQADFAV   | 16140 | >MYH11-K41 TEEQADFAV   | 429   | 15711 |
| >MYH11-K41 TKEQADFAV   | 20774 | >MYH11-K41 TEEQADFAV   | 366   | 20408 |
| >MYH11-K41 TKEQADFAV   | 16583 | >MYH11-K41 TEEQADFAV   | 31    | 16552 |
| >MYH11-K41 TKEQADFAV   | 32788 | >MYH11-K41 TEEQADFAV   | 404   | 32384 |
| >MYH11-K41 TKEQADFA    | 24335 | >MYH11-K41 TEEQADFA    | 68    | 24267 |
| >MYH11-K41 TKEQADFAV   | 23321 | >MYH11-K41 TEEQADFAV   | 53    | 23268 |
| >MYH11-K41 TKEQADFAVE  | 14398 | >MYH11-K41 TEEQADFAVE  | 23    | 14375 |
| >MYH11-K41 TKEQADFAV   | 25148 | >MYH11-K41 TEEQADFAV   | 229   | 24919 |
| >MYH11-K41 QTKEQADF    | 323   | >MYH11-K41 QTEEQADF    | 2649  | 2326  |
| >MYH11-K41 QTKEQADFA   | 383   | >MYH11-K41 QTEEQADFA   | 12958 | 12575 |
| >MYH11-K41 QTKEQADFA\  | 165   | >MYH11-K41 QTEEQADFA\  | 81    | 84    |
| >MYH11-K41 QTKEQADF    | 16    | >MYH11-K41 QTEEQADF    | 28    | 12    |
| >MYH11-K41 AQTKEQADF,  | 1051  | >MYH11-K41 AQTEEQADF,  | 189   | 862   |
| >MYH11-K41 AQTKEQADF,  | 758   | >MYH11-K41 AQTEEQADF,  | 275   | 483   |
| >MYH11-K41 AQTKEQADF,  | 26    | >MYH11-K41 AQTEEQADF,  | 12    | 14    |
| >MYH11-K41 AQTKEQADF,  | 1268  | >MYH11-K41 AQTEEQADF,  | 154   | 1114  |
| >MYH11-K41 AQTKEQADF,  | 513   | >MYH11-K41 AQTEEQADF,  | 57    | 456   |
| >MYH11-K41 AQTKEQADF,  | 336   | >MYH11-K41 AQTEEQADF,  | 84    | 252   |
| >MYH11-K41 AQTKEQADF,  | 1017  | >MYH11-K41 AQTEEQADF,  | 140   | 877   |
| >MYH11-K41 AQTKEQADF   | 16    | >MYH11-K41 AQTEEQADF   | 25    | 9     |
| >MYH11-K41 KAQTKEQAD   | 271   | >MYH11-K41 KAQTEEQADI  | 169   | 102   |
| >MYH11-K41 KAQTKEQAD   | 110   | >MYH11-K41 KAQTEEQADI  | 158   | 48    |
| >MYH11-K41 KAQTKEQAD   | 479   | >MYH11-K41 KAQTEEQADI  | 249   | 230   |
| >MYH11-K41 QKAQTKEQA   | 21    | >MYH11-K41 QKAQTEEQQA  | 17    | 4     |
| >MYH11-K41 VVQKAQTK    | 125   | >MYH11-K41 VVQKAQTE    | 27725 | 27600 |
| >MYH11-K41 DVVQKAQTK   | 149   | >MYH11-K41 DVVQKAQTE   | 15896 | 15747 |
| >MYH11-T28 TFHIFYYM    | 219   | >MYH11-T28 RFHIFYYM    | 329   | 110   |
| >MYH11-T28 TFHIFYYMI   | 381   | >MYH11-T28 RFHIFYYMI   | 924   | 543   |
| >MYH11-T28 TFHIFYYMI   | 85    | >MYH11-T28 RFHIFYYMI   | 89    | 4     |
| >MYH11-T28 TFHIFYYMI   | 101   | >MYH11-T28 RFHIFYYMI   | 49    | 52    |
| >MYH11-T28 TFHIFYYM    | 391   | >MYH11-T28 RFHIFYYM    | 50    | 341   |
| >MYH11-T28 TFHIFYYMI   | 16    | >MYH11-T28 RFHIFYYMI   | 6     | 10    |
| >MYH11-T28 TFHIFYYM    | 341   | >MYH11-T28 RFHIFYYM    | 754   | 413   |
| >MYH11-T28 TFHIFYYM    | 1510  | >MYH11-T28 RFHIFYYM    | 22    | 1488  |
| >MYH11-T28 TFHIFYYMI   | 1118  | >MYH11-T28 RFHIFYYMI   | 17    | 1101  |
| >MYH11-T28 TFHIFYYMIAC | 258   | >MYH11-T28 RFHIFYYMIAC | 8     | 250   |
| >MYH11-T28 TFHIFYYMIAC | 4288  | >MYH11-T28 RFHIFYYMIAC | 73    | 4215  |
| >MYH11-T28 TFHIFYYM    | 721   | >MYH11-T28 RFHIFYYM    | 72    | 649   |
| >MYH11-T28 TFHIFYYMI   | 3362  | >MYH11-T28 RFHIFYYMI   | 312   | 3050  |
| >MYH11-T28 TFHIFYYM    | 615   | >MYH11-T28 RFHIFYYM    | 100   | 515   |

|                        |     |                        |       |       |
|------------------------|-----|------------------------|-------|-------|
| >MYH11-T28 TFHIFYYM    | 350 | >MYH11-T28 RFHIFYYM    | 97    | 253   |
| >MYH11-T28 TFHIFYYMI   | 670 | >MYH11-T28 RFHIFYYMI   | 188   | 482   |
| >MYH11-T28 RTFHIFYYM   | 139 | >MYH11-T28 RRFHIFYYM   | 1426  | 1287  |
| >MYH11-T28 RTFHIFYYMI  | 698 | >MYH11-T28 RRFHIFYYMI  | 313   | 385   |
| >MYH11-T28 RTFHIFYY    | 402 | >MYH11-T28 RRFHIFYY    | 22693 | 22291 |
| >MYH11-T28 RTFHIFYYM   | 64  | >MYH11-T28 RRFHIFYYM   | 12587 | 12523 |
| >MYH11-T28 RTFHIFYYM   | 41  | >MYH11-T28 RRFHIFYYM   | 2019  | 1978  |
| >MYH11-T28 RTFHIFYYMI  | 382 | >MYH11-T28 RRFHIFYYMI  | 4158  | 3776  |
| >MYH11-T28 RTFHIFYYMI/ | 264 | >MYH11-T28 RRFHIFYYMI/ | 10085 | 9821  |
| >MYH11-T28 RTFHIFYYM   | 29  | >MYH11-T28 RRFHIFYYM   | 2614  | 2585  |
| >MYH11-T28 RTFHIFYYMI  | 157 | >MYH11-T28 RRFHIFYYMI  | 3030  | 2873  |
| >MYH11-T28 RTFHIFYYMI/ | 186 | >MYH11-T28 RRFHIFYYMI/ | 8103  | 7917  |
| >MYH11-T28 RTFHIFYYM   | 97  | >MYH11-T28 RRFHIFYYM   | 8562  | 8465  |
| >MYH11-T28 RTFHIFYYMI  | 37  | >MYH11-T28 RRFHIFYYMI  | 3778  | 3741  |
| >MYH11-T28 RTFHIFYY    | 37  | >MYH11-T28 RRFHIFYY    | 10830 | 10793 |
| >MYH11-T28 RTFHIFYY    | 7   | >MYH11-T28 RRFHIFYY    | 4590  | 4583  |
| >MYH11-T28 RTFHIFYYM   | 116 | >MYH11-T28 RRFHIFYYM   | 19934 | 19818 |
| >MYH11-T28 RTFHIFYYMI  | 109 | >MYH11-T28 RRFHIFYYMI  | 5141  | 5032  |
| >MYH11-T28 RTFHIFYY    | 7   | >MYH11-T28 RRFHIFYY    | 54    | 47    |
| >MYH11-T28 RTFHIFYYM   | 95  | >MYH11-T28 RRFHIFYYM   | 2359  | 2264  |
| >MYH11-T28 RTFHIFYY    | 30  | >MYH11-T28 RRFHIFYY    | 4194  | 4164  |
| >MYH11-T28 RTFHIFYYM   | 17  | >MYH11-T28 RRFHIFYYM   | 3391  | 3374  |
| >MYH11-T28 RTFHIFYYMI  | 19  | >MYH11-T28 RRFHIFYYMI  | 2889  | 2870  |
| >MYH11-T28 RTFHIFYYMI/ | 8   | >MYH11-T28 RRFHIFYYMI/ | 956   | 948   |
| >MYH11-T28 RTFHIFYY    | 8   | >MYH11-T28 RRFHIFYY    | 43    | 35    |
| >MYH11-T28 RTFHIFYYM   | 251 | >MYH11-T28 RRFHIFYYM   | 3144  | 2893  |
| >MYH11-T28 RTFHIFYY    | 19  | >MYH11-T28 RRFHIFYY    | 4062  | 4043  |
| >MYH11-T28 RTFHIFYYM   | 17  | >MYH11-T28 RRFHIFYYM   | 3835  | 3818  |
| >MYH11-T28 RTFHIFYYMI  | 317 | >MYH11-T28 RRFHIFYYMI  | 2239  | 1922  |
| >MYH11-T28 RTFHIFYYMI/ | 426 | >MYH11-T28 RRFHIFYYMI/ | 13010 | 12584 |
| >MYH11-T28 RTFHIFYY    | 19  | >MYH11-T28 RRFHIFYY    | 2201  | 2182  |
| >MYH11-T28 RTFHIFYYM   | 11  | >MYH11-T28 RRFHIFYYM   | 902   | 891   |
| >MYH11-T28 RTFHIFYYMI  | 4   | >MYH11-T28 RRFHIFYYMI  | 90    | 86    |
| >MYH11-T28 RTFHIFYYMI/ | 104 | >MYH11-T28 RRFHIFYYMI/ | 9653  | 9549  |
| >MYH11-T28 RTFHIFYY    | 30  | >MYH11-T28 RRFHIFYY    | 10108 | 10078 |
| >MYH11-T28 RTFHIFYYM   | 10  | >MYH11-T28 RRFHIFYYM   | 4377  | 4367  |
| >MYH11-T28 RTFHIFYYMI  | 42  | >MYH11-T28 RRFHIFYYMI  | 7913  | 7871  |
| >MYH11-T28 RTFHIFYYMI/ | 48  | >MYH11-T28 RRFHIFYYMI/ | 8749  | 8701  |
| >MYH11-T28 RTFHIFYYM   | 166 | >MYH11-T28 RRFHIFYYM   | 18041 | 17875 |
| >MYH11-T28 RTFHIFYYMI  | 105 | >MYH11-T28 RRFHIFYYMI  | 18515 | 18410 |
| >MYH11-T28 RTFHIFYY    | 7   | >MYH11-T28 RRFHIFYY    | 33    | 26    |
| >MYH11-T28 RTFHIFYY    | 76  | >MYH11-T28 RRFHIFYY    | 3423  | 3347  |
| >MYH11-T28 RTFHIFYYM   | 172 | >MYH11-T28 RRFHIFYYM   | 9441  | 9269  |

|                        |       |                        |       |       |
|------------------------|-------|------------------------|-------|-------|
| >MYH11-T28 RTFHIFYY    | 25    | >MYH11-T28 RRFHIFYY    | 5     | 20    |
| >MYH11-T28 RTFHIFYYM   | 24    | >MYH11-T28 RRFHIFYYM   | 5     | 19    |
| >MYH11-T28 RTFHIFYYMI  | 75    | >MYH11-T28 RRFHIFYYMI  | 11    | 64    |
| >MYH11-T28 RTFHIFYYMI/ | 207   | >MYH11-T28 RRFHIFYYMI/ | 26    | 181   |
| >MYH11-T28 RTFHIFYY    | 3     | >MYH11-T28 RRFHIFYY    | 8441  | 8438  |
| >MYH11-T28 RTFHIFYYM   | 6     | >MYH11-T28 RRFHIFYYM   | 19044 | 19038 |
| >MYH11-T28 RTFHIFYYMI  | 11    | >MYH11-T28 RRFHIFYYMI  | 22350 | 22339 |
| >MYH11-T28 RTFHIFYY    | 5296  | >MYH11-T28 RRFHIFYY    | 15    | 5281  |
| >MYH11-T28 RTFHIFYYM   | 1739  | >MYH11-T28 RRFHIFYYM   | 10    | 1729  |
| >MYH11-T28 RTFHIFYYMI  | 2526  | >MYH11-T28 RRFHIFYYMI  | 10    | 2516  |
| >MYH11-T28 RTFHIFYYMI/ | 10212 | >MYH11-T28 RRFHIFYYMI/ | 35    | 10177 |
| >MYH11-T28 RTFHIFYY    | 50    | >MYH11-T28 RRFHIFYY    | 15783 | 15733 |
| >MYH11-T28 RTFHIFYYM   | 52    | >MYH11-T28 RRFHIFYYM   | 16136 | 16084 |
| >MYH11-T28 RTFHIFYYMI  | 170   | >MYH11-T28 RRFHIFYYMI  | 21050 | 20880 |
| >MYH11-T28 RTFHIFYY    | 14    | >MYH11-T28 RRFHIFYY    | 12794 | 12780 |
| >MYH11-T28 RTFHIFYYM   | 19    | >MYH11-T28 RRFHIFYYM   | 16457 | 16438 |
| >MYH11-T28 RTFHIFYYMI  | 45    | >MYH11-T28 RRFHIFYYMI  | 18724 | 18679 |
| >MYH11-T28 RTFHIFYYM   | 12658 | >MYH11-T28 RRFHIFYYM   | 379   | 12279 |
| >MYH11-T28 RTFHIFYYMI  | 9728  | >MYH11-T28 RRFHIFYYMI  | 227   | 9501  |
| >MYH11-T28 RTFHIFYYMI/ | 9263  | >MYH11-T28 RRFHIFYYMI/ | 166   | 9097  |
| >MYH11-T28 RTFHIFYYM   | 26    | >MYH11-T28 RRFHIFYYM   | 9853  | 9827  |
| >MYH11-T28 RTFHIFYYMI  | 72    | >MYH11-T28 RRFHIFYYMI  | 16432 | 16360 |
| >MYH11-T28 RTFHIFYY    | 65    | >MYH11-T28 RRFHIFYY    | 6214  | 6149  |
| >MYH11-T28 RTFHIFYYM   | 3     | >MYH11-T28 RRFHIFYYM   | 138   | 135   |
| >MYH11-T28 RTFHIFYYMI  | 477   | >MYH11-T28 RRFHIFYYMI  | 25525 | 25048 |
| >MYH11-T28 RTFHIFYYMI/ | 64    | >MYH11-T28 RRFHIFYYMI/ | 8394  | 8330  |
| >MYH11-T28 RTFHIFYY    | 7011  | >MYH11-T28 RRFHIFYY    | 36    | 6975  |
| >MYH11-T28 RTFHIFYYM   | 2644  | >MYH11-T28 RRFHIFYYM   | 53    | 2591  |
| >MYH11-T28 RTFHIFYYMI  | 13512 | >MYH11-T28 RRFHIFYYMI  | 145   | 13367 |
| >MYH11-T28 RTFHIFYYMI/ | 4772  | >MYH11-T28 RRFHIFYYMI/ | 72    | 4700  |
| >MYH11-T28 RTFHIFYY    | 13057 | >MYH11-T28 RRFHIFYY    | 215   | 12842 |
| >MYH11-T28 RTFHIFYYM   | 2326  | >MYH11-T28 RRFHIFYYM   | 14    | 2312  |
| >MYH11-T28 RTFHIFYYMI  | 8520  | >MYH11-T28 RRFHIFYYMI  | 53    | 8467  |
| >MYH11-T28 RTFHIFYYMI/ | 9905  | >MYH11-T28 RRFHIFYYMI/ | 47    | 9858  |
| >MYH11-T28 RTFHIFYY    | 4184  | >MYH11-T28 RRFHIFYY    | 116   | 4068  |
| >MYH11-T28 RTFHIFYY    | 56    | >MYH11-T28 RRFHIFYY    | 367   | 311   |
| >MYH11-T28 RTFHIFYY    | 164   | >MYH11-T28 RRFHIFYY    | 5007  | 4843  |
| >MYH11-T28 RTFHIFYYM   | 220   | >MYH11-T28 RRFHIFYYM   | 5510  | 5290  |
| >MYH11-T28 RTFHIFYYMI  | 320   | >MYH11-T28 RRFHIFYYMI  | 7640  | 7320  |
| >MYH11-T28 RTFHIFYYM   | 94    | >MYH11-T28 RRFHIFYYM   | 106   | 12    |
| >MYH11-T28 RTFHIFYYM   | 60    | >MYH11-T28 RRFHIFYYM   | 7040  | 6980  |
| >MYH11-T28 RTFHIFYYMI  | 231   | >MYH11-T28 RRFHIFYYMI  | 15787 | 15556 |
| >MYH11-T28 RAIRQARDER  | 19729 | >MYH11-T28 RAIRQARDER  | 69    | 19660 |

|                       |       |                       |      |       |
|-----------------------|-------|-----------------------|------|-------|
| >MYH11-T28 ERTFHIFY   | 409   | >MYH11-T28 ERRFHIFY   | 637  | 228   |
| >MYH11-T28 ERTFHIFY   | 182   | >MYH11-T28 ERRFHIFY   | 357  | 175   |
| >MYH11-T28 ERTFHIFY   | 294   | >MYH11-T28 ERRFHIFY   | 609  | 315   |
| >MYH11-T28 ERTFHIFYM  | 219   | >MYH11-T28 ERRFHIFYM  | 136  | 83    |
| >MYH11-T28 ERTFHIFYM  | 814   | >MYH11-T28 ERRFHIFYM  | 335  | 479   |
| >MYH11-T28 ERTFHIFYM  | 1063  | >MYH11-T28 ERRFHIFYM  | 382  | 681   |
| >MYH11-T28 ERTFHIFY   | 374   | >MYH11-T28 ERRFHIFY   | 596  | 222   |
| >MYH11-T28 DERTFHIF   | 291   | >MYH11-T28 DERRFHIF   | 313  | 22    |
| >MYH11-T28 DERTFHIFYM | 209   | >MYH11-T28 DERRFHIFYM | 236  | 27    |
| >MYH11-T28 DERTFHIFY  | 488   | >MYH11-T28 DERRFHIFY  | 642  | 154   |
| >MYH11-T28 DERTFHIF   | 411   | >MYH11-T28 DERRFHIF   | 655  | 244   |
| >MYH11-T28 DERTFHIF   | 4     | >MYH11-T28 DERRFHIF   | 5    | 1     |
| >MYH11-T28 DERTFHIFY  | 4     | >MYH11-T28 DERRFHIFY  | 4    | 0     |
| >MYH11-T28 DERTFHIFY  | 70    | >MYH11-T28 DERRFHIFY  | 50   | 20    |
| >MYH11-T28 DERTFHIFYM | 6     | >MYH11-T28 DERRFHIFYM | 8    | 2     |
| >MYH11-T28 DERTFHIFY  | 249   | >MYH11-T28 DERRFHIFY  | 271  | 22    |
| >MYH11-T28 DERTFHIF   | 324   | >MYH11-T28 DERRFHIF   | 308  | 16    |
| >MYH11-T28 DERTFHIFY  | 210   | >MYH11-T28 DERRFHIFY  | 160  | 50    |
| >MYH11-T28 DERTFHIFY  | 85    | >MYH11-T28 DERRFHIFY  | 107  | 22    |
| >MYH11-T28 RDERTFHIFY | 373   | >MYH11-T28 RDERRFHIFY | 1211 | 838   |
| >MYH11-T28 RDERTFHIFY | 437   | >MYH11-T28 RDERRFHIFY | 356  | 81    |
| >MYH11-T28 RDERTFHI   | 45    | >MYH11-T28 RDERRFHI   | 133  | 88    |
| >MYH11-T28 ARDERTFHIF | 228   | >MYH11-T28 ARDERRFHIF | 828  | 600   |
| >MYH11-T28 ARDERTFHIF | 494   | >MYH11-T28 ARDERRFHIF | 786  | 292   |
| >MYH11-T28 ARDERTFHI  | 547   | >MYH11-T28 ARDERRFHI  | 244  | 303   |
| >MYH11-T28 ARDERTFHIF | 64    | >MYH11-T28 ARDERRFHIF | 92   | 28    |
| >MYH11-T28 ARDERTFHI  | 645   | >MYH11-T28 ARDERRFHI  | 349  | 296   |
| >MYH11-T28 ARDERTFHIF | 264   | >MYH11-T28 ARDERRFHIF | 292  | 28    |
| >MYH11-T28 ARDERTFHIF | 683   | >MYH11-T28 ARDERRFHIF | 458  | 225   |
| >MYH11-T28 QARDERTFHI | 87    | >MYH11-T28 QARDERRFHI | 48   | 39    |
| >MYH11-T28 QARDERTF   | 102   | >MYH11-T28 QARDERRF   | 654  | 552   |
| >MYH11-T28 QARDERTFHI | 33    | >MYH11-T28 QARDERRFHI | 76   | 43    |
| >MYH11-T28 QARDERTF   | 30    | >MYH11-T28 QARDERRF   | 44   | 14    |
| >MYH11-T28 QARDERTFHI | 68    | >MYH11-T28 QARDERRFHI | 99   | 31    |
| >MYH11-T28 QARDERTFHI | 302   | >MYH11-T28 QARDERRFHI | 794  | 492   |
| >MYH11-T28 RQARDERTF  | 72    | >MYH11-T28 RQARDERRF  | 134  | 62    |
| >MYH11-T28 RQARDERT   | 21224 | >MYH11-T28 RQARDERR   | 138  | 21086 |
| >MYH11-T28 RQARDERTF  | 405   | >MYH11-T28 RQARDERRF  | 4826 | 4421  |
| >MYH11-T28 RQARDERTF  | 104   | >MYH11-T28 RQARDERRF  | 249  | 145   |
| >MYH11-T28 RQARDERTF  | 3     | >MYH11-T28 RQARDERRF  | 10   | 7     |
| >MYH11-T28 RQARDERTF  | 351   | >MYH11-T28 RQARDERRF  | 779  | 428   |
| >MYH11-T28 RQARDERTF  | 88    | >MYH11-T28 RQARDERRF  | 137  | 49    |
| >MYH11-T28 RQARDERTF  | 383   | >MYH11-T28 RQARDERRF  | 308  | 75    |

|                         |       |                         |      |       |
|-------------------------|-------|-------------------------|------|-------|
| >MYH11-T28 RQARDERTFI   | 339   | >MYH11-T28 RQARDERRFI   | 598  | 259   |
| >MYH11-T28 IRQARDERTF   | 137   | >MYH11-T28 IRQARDERRF   | 429  | 292   |
| >MYH11-T28 IRQARDERTF   | 217   | >MYH11-T28 IRQARDERRF   | 202  | 15    |
| >MYH11-T28 IRQARDERTF   | 208   | >MYH11-T28 IRQARDERRF   | 400  | 192   |
| >MYH11-T28 IRQARDERTF   | 292   | >MYH11-T28 IRQARDERRF   | 393  | 101   |
| >MYH11-T28 AIRQARDERT   | 30551 | >MYH11-T28 AIRQARDERR   | 245  | 30306 |
| >MYH11-T28 AIRQARDERT   | 268   | >MYH11-T28 AIRQARDERR   | 665  | 397   |
| >MYH11-T28 AIRQARDERT   | 237   | >MYH11-T28 AIRQARDERR   | 1026 | 789   |
| >MYH9-D43E DKTKRQGAS    | 265   | >MYH9-D43E EKTKRQGASF   | 131  | 134   |
| >MYH9-D43E DKTKRQGAS    | 158   | >MYH9-D43E EKTKRQGASF   | 41   | 117   |
| >MYH9-D43E LDKTKRQGA    | 1994  | >MYH9-D43E LEKTKRQGAS   | 229  | 1765  |
| >MYH9-D43E LDKTKRQGA    | 598   | >MYH9-D43E LEKTKRQGAS   | 47   | 551   |
| >MYH9-D43E LDKTKRQGA    | 10729 | >MYH9-D43E LEKTKRQGAS   | 104  | 10625 |
| >MYH9-D43E ALDKTKRQGA   | 336   | >MYH9-D43E ALEKTKRQGA   | 5072 | 4736  |
| >MYH9-D43E ALDKTKRQGA   | 374   | >MYH9-D43E ALEKTKRQGA   | 8856 | 8482  |
| >MYH9-D43E ALDKTKRQGA   | 74    | >MYH9-D43E ALEKTKRQGA   | 125  | 51    |
| >MYH9-D43E KALDKTKR     | 16    | >MYH9-D43E KALEKTKR     | 20   | 4     |
| >MYH9-D43E KALDKTKR     | 62    | >MYH9-D43E KALEKTKR     | 71   | 9     |
| >MYH9-D43E RINKALDK     | 72    | >MYH9-D43E RINKALEK     | 60   | 12    |
| >MYH9-D43E RINKALDKTK   | 401   | >MYH9-D43E RINKALEKTK   | 287  | 114   |
| >MYH9-D43E RINKALDK     | 58    | >MYH9-D43E RINKALEK     | 27   | 31    |
| >MYH9-D43E RINKALDKTK   | 292   | >MYH9-D43E RINKALEKTK   | 306  | 14    |
| >MYH9-D43E RINKALDK     | 38    | >MYH9-D43E RINKALEK     | 18   | 20    |
| >MYH9-D43E RINKALDKTK   | 46    | >MYH9-D43E RINKALEKTK   | 49   | 3     |
| >MYH9-D43E RINKALDK     | 2656  | >MYH9-D43E RINKALEK     | 393  | 2263  |
| >MYH9-D43E RINKALDKTKI  | 19    | >MYH9-D43E RINKALEKTKI  | 15   | 4     |
| >MYH9-D43E RINKALDKTKI  | 183   | >MYH9-D43E RINKALEKTKI  | 134  | 49    |
| >MYH9-D43E LRINKALDK    | 247   | >MYH9-D43E LRINKALEK    | 84   | 163   |
| >MYH9-D43E LRINKALDKTI  | 171   | >MYH9-D43E LRINKALEKTK  | 145  | 26    |
| >MYH9-D43E VLRINKALDK   | 200   | >MYH9-D43E VLRINKALEK   | 98   | 102   |
| >MYH9-D43E VLRINKALDK   | 998   | >MYH9-D43E VLRINKALEK   | 412  | 586   |
| >MYH9-D43E VLRINKALDK   | 83    | >MYH9-D43E VLRINKALEK   | 28   | 55    |
| >MYH9-D43E LVL RINKALDK | 386   | >MYH9-D43E LVL RINKALEK | 272  | 114   |
| >MYH9-D43E LVL RINKALDK | 193   | >MYH9-D43E LVL RINKALEK | 79   | 114   |
| >MYH9-D43E LVL RINKALDK | 166   | >MYH9-D43E LVL RINKALEK | 51   | 115   |
| >MYH9-H68E HLVL DQLRC   | 5971  | >MYH9-H68E YLVL DQLRC   | 308  | 5663  |
| >MYH9-H68E HLVL DQLRC   | 948   | >MYH9-H68E YLVL DQLRC   | 19   | 929   |
| >MYH9-H68E HLVL DQLR    | 413   | >MYH9-H68E YLVL DQLR    | 1756 | 1343  |
| >MYH9-H68E HLVL DQLR    | 331   | >MYH9-H68E YLVL DQLR    | 714  | 383   |
| >MYH9-H68E HLVL DQLR    | 170   | >MYH9-H68E YLVL DQLR    | 95   | 75    |
| >MYH9-H68E HLVL DQLR    | 75    | >MYH9-H68E YLVL DQLR    | 329  | 254   |
| >MYH9-H68E PHLVL DQL    | 17533 | >MYH9-H68E PYLVL DQL    | 285  | 17248 |
| >MYH9-H68E PHLVL DQL    | 12338 | >MYH9-H68E PYLVL DQL    | 33   | 12305 |



|                       |       |                       |      |       |
|-----------------------|-------|-----------------------|------|-------|
| >MYH9-H68€ PHLVLDQLR  | 1870  | >MYH9-H68€ PYLVLDQLR  | 53   | 1817  |
| >MYH9-H68€ HEKKAGKLDf | 11864 | >MYH9-H68€ HEKKAGKLDf | 343  | 11521 |
| >MYH9-H68€ HEKKAGKLDf | 2396  | >MYH9-H68€ HEKKAGKLDf | 56   | 2340  |
| >MYH9-H68€ DPHLVLDQLf | 2009  | >MYH9-H68€ DPYLVLDQLR | 383  | 1626  |
| >MYH9-H68€ DPHLVLDQLf | 1182  | >MYH9-H68€ DPYLVLDQLR | 202  | 980   |
| >MYH9-H68€ KLDPHLVL   | 63    | >MYH9-H68€ KLDPYLVL   | 27   | 36    |
| >MYH9-H68€ KLDPHLVLDc | 27    | >MYH9-H68€ KLDPYLVLDQ | 19   | 8     |
| >MYH9-H68€ KLDPHLVL   | 93    | >MYH9-H68€ KLDPYLVL   | 52   | 41    |
| >MYH9-H68€ KLDPHLVLDc | 9     | >MYH9-H68€ KLDPYLVLDQ | 7    | 2     |
| >MYH9-H68€ KLDPHLVL   | 422   | >MYH9-H68€ KLDPYLVL   | 389  | 33    |
| >MYH9-H68€ KLDPHLVLDc | 116   | >MYH9-H68€ KLDPYLVLDQ | 175  | 59    |
| >MYH9-H68€ KLDPHLVL   | 84    | >MYH9-H68€ KLDPYLVL   | 36   | 48    |
| >MYH9-H68€ KLDPHLVLDc | 21    | >MYH9-H68€ KLDPYLVLDQ | 15   | 6     |
| >MYH9-H68€ KLDPHLVL   | 9     | >MYH9-H68€ KLDPYLVL   | 6    | 3     |
| >MYH9-H68€ KLDPHLVLDc | 6     | >MYH9-H68€ KLDPYLVLDQ | 4    | 2     |
| >MYH9-H68€ KLDPHLVL   | 21    | >MYH9-H68€ KLDPYLVL   | 12   | 9     |
| >MYH9-H68€ KLDPHLVLDc | 11    | >MYH9-H68€ KLDPYLVLDQ | 9    | 2     |
| >MYH9-H68€ KLDPHLVL   | 26    | >MYH9-H68€ KLDPYLVL   | 14   | 12    |
| >MYH9-H68€ KLDPHLVLDc | 13    | >MYH9-H68€ KLDPYLVLDQ | 10   | 3     |
| >MYH9-H68€ KLDPHLVL   | 332   | >MYH9-H68€ KLDPYLVL   | 92   | 240   |
| >MYH9-H68€ KLDPHLVLDc | 40    | >MYH9-H68€ KLDPYLVLDQ | 19   | 21    |
| >MYH9-H68€ KLDPHLVL   | 16    | >MYH9-H68€ KLDPYLVL   | 11   | 5     |
| >MYH9-H68€ KLDPHLVLDc | 674   | >MYH9-H68€ KLDPYLVLDQ | 475  | 199   |
| >MYH9-H68€ KLDPHLVLDc | 14    | >MYH9-H68€ KLDPYLVLDQ | 9    | 5     |
| >MYH9-H68€ GKLDPHLV   | 361   | >MYH9-H68€ GKLDPYLV   | 324  | 37    |
| >MYH9-H68€ GKLDPHLVL  | 73    | >MYH9-H68€ GKLDPYLVL  | 50   | 23    |
| >MYH9-H68€ GKLDPHLVL  | 532   | >MYH9-H68€ GKLDPYLVL  | 348  | 184   |
| >MYH9-H68€ KAGKLDPh   | 15657 | >MYH9-H68€ KAGKLDpY   | 385  | 15272 |
| >MYH9-H68€ KAGKLDPh   | 17483 | >MYH9-H68€ KAGKLDpY   | 244  | 17239 |
| >MYH9-H68€ KAGKLDPh   | 14000 | >MYH9-H68€ KAGKLDpY   | 478  | 13522 |
| >MYH9-H68€ KAGKLDPhL  | 195   | >MYH9-H68€ KAGKLDpYL  | 141  | 54    |
| >MYH9-H68€ KAGKLDPhLV | 256   | >MYH9-H68€ KAGKLDpYLV | 190  | 66    |
| >MYH9-H68€ KKAGKLDPh  | 6678  | >MYH9-H68€ KKAGKLDpY  | 265  | 6413  |
| >MYH9-H68€ EKKAGKLDPh | 7738  | >MYH9-H68€ EKKAGKLDpY | 392  | 7346  |
| >MYH9-K810 KVLQRNCAA' | 195   | >MYH9-K810 NVLQRNCAA' | 1763 | 1568  |
| >MYH9-K810 KVLQRNCAA' | 391   | >MYH9-K810 NVLQRNCAA' | 830  | 439   |
| >MYH9-K810 KVLQRNCAA  | 161   | >MYH9-K810 NVLQRNCAA  | 1082 | 921   |
| >MYH9-K810 KVLQRNCAA' | 32    | >MYH9-K810 NVLQRNCAA' | 172  | 140   |
| >MYH9-K810 KVLQRNCAA' | 95    | >MYH9-K810 NVLQRNCAA' | 970  | 875   |
| >MYH9-K810 KVLQRNCAA' | 290   | >MYH9-K810 NVLQRNCAA' | 1282 | 992   |
| >MYH9-K810 KVLQRNCAA' | 403   | >MYH9-K810 NVLQRNCAA' | 3664 | 3261  |
| >MYH9-K810 KVLQRNCAA' | 337   | >MYH9-K810 NVLQRNCAA' | 386  | 49    |
| >MYH9-K810 KVLQRNCAA' | 331   | >MYH9-K810 NVLQRNCAA' | 1843 | 1512  |

|                       |       |                       |       |       |
|-----------------------|-------|-----------------------|-------|-------|
| >MYH9-K810 KVLQRNCAA' | 362   | >MYH9-K810 NVLQRNCAA' | 2616  | 2254  |
| >MYH9-K810 KVLQRNCAA' | 626   | >MYH9-K810 NVLQRNCAA' | 230   | 396   |
| >MYH9-K810 KVLQRNCAA' | 282   | >MYH9-K810 NVLQRNCAA' | 95    | 187   |
| >MYH9-K810 KVLQRNCA   | 204   | >MYH9-K810 NVLQRNCA   | 12436 | 12232 |
| >MYH9-K810 KVLQRNCAA  | 44    | >MYH9-K810 NVLQRNCAA  | 9419  | 9375  |
| >MYH9-K810 KVLQRNCAA' | 380   | >MYH9-K810 NVLQRNCAA' | 12910 | 12530 |
| >MYH9-K810 KVLQRNCAA' | 103   | >MYH9-K810 NVLQRNCAA' | 10704 | 10601 |
| >MYH9-K810 KVLQRNCAA' | 149   | >MYH9-K810 NVLQRNCAA' | 347   | 198   |
| >MYH9-K810 KVLQRNCAA' | 119   | >MYH9-K810 NVLQRNCAA' | 9022  | 8903  |
| >MYH9-K810 KVLQRNCAA' | 310   | >MYH9-K810 NVLQRNCAA' | 11289 | 10979 |
| >MYH9-K810 KVLQRNCAA' | 10336 | >MYH9-K810 NVLQRNCAA' | 443   | 9893  |
| >MYH9-K810 KVLQRNCAA' | 2116  | >MYH9-K810 NVLQRNCAA' | 54    | 2062  |
| >MYH9-K810 KVLQRNCAA  | 1145  | >MYH9-K810 NVLQRNCAA  | 241   | 904   |
| >MYH9-K810 KVLQRNCAA' | 135   | >MYH9-K810 NVLQRNCAA' | 367   | 232   |
| >MYH9-K810 KVLQRNCAA' | 854   | >MYH9-K810 NVLQRNCAA' | 165   | 689   |
| >MYH9-K810 KVLQRNCAA' | 300   | >MYH9-K810 NVLQRNCAA' | 2752  | 2452  |
| >MYH9-K810 KVLQRNCAA' | 45    | >MYH9-K810 NVLQRNCAA' | 2837  | 2792  |
| >MYH9-K810 KVLQRNCAA' | 61    | >MYH9-K810 NVLQRNCAA' | 4681  | 4620  |
| >MYH9-K810 MKVLQRNCA  | 1062  | >MYH9-K810 MNVLQRNCA  | 285   | 777   |
| >MYH9-K810 MKVLQRNCA  | 491   | >MYH9-K810 MNVLQRNCA  | 9457  | 8966  |
| >MYH9-K810 MKVLQRNCA  | 9     | >MYH9-K810 MNVLQRNCA  | 544   | 535   |
| >MYH9-K810 MKVLQRNCA  | 238   | >MYH9-K810 MNVLQRNCA  | 126   | 112   |
| >MYH9-K810 MKVLQRNCA  | 446   | >MYH9-K810 MNVLQRNCA  | 294   | 152   |
| >MYH9-K810 AKRQQQLTA  | 41    | >MYH9-K810 AKRQQQLTA  | 9360  | 9319  |
| >MYH9-K810 AMKVLQRNC  | 2694  | >MYH9-K810 AMNVLQRNC  | 345   | 2349  |
| >MYH9-K810 AMKVLQRNC  | 218   | >MYH9-K810 AMNVLQRNC  | 104   | 114   |
| >MYH9-K810 AMKVLQRNC  | 2986  | >MYH9-K810 AMNVLQRNC  | 144   | 2842  |
| >MYH9-K810 AMKVLQRNC  | 7583  | >MYH9-K810 AMNVLQRNC  | 475   | 7108  |
| >MYH9-K810 AMKVLQRNC  | 387   | >MYH9-K810 AMNVLQRNC  | 105   | 282   |
| >MYH9-K810 AMKVLQRNC  | 237   | >MYH9-K810 AMNVLQRNC  | 3455  | 3218  |
| >MYH9-K810 AMKVLQRNC  | 78    | >MYH9-K810 AMNVLQRNC  | 2038  | 1960  |
| >MYH9-K810 AMKVLQRNC  | 380   | >MYH9-K810 AMNVLQRNC  | 678   | 298   |
| >MYH9-K810 TAMKVLQR   | 142   | >MYH9-K810 TAMNVLQR   | 78    | 64    |
| >MYH9-K810 TAMKVLQR   | 84    | >MYH9-K810 TAMNVLQR   | 82    | 2     |
| >MYH9-K810 TAMKVLQR   | 276   | >MYH9-K810 TAMNVLQR   | 261   | 15    |
| >MYH9-K810 TAMKVLQR   | 13    | >MYH9-K810 TAMNVLQR   | 9     | 4     |
| >MYH9-K810 TAMKVLQRN  | 230   | >MYH9-K810 TAMNVLQRN  | 157   | 73    |
| >MYH9-K810 LTAMKVLQR  | 332   | >MYH9-K810 LTAMNVLQR  | 224   | 108   |
| >MYH9-K810 LTAMKVLQR  | 105   | >MYH9-K810 LTAMNVLQR  | 301   | 196   |
| >MYH9-K810 LTAMKVLQ   | 996   | >MYH9-K810 LTAMNVLQ   | 417   | 579   |
| >MYH9-K810 LTAMKVLQR  | 26    | >MYH9-K810 LTAMNVLQR  | 11    | 15    |
| >MYH9-K810 LTAMKVLQR  | 272   | >MYH9-K810 LTAMNVLQR  | 150   | 122   |
| >MYH9-K810 QLTAMKVL   | 503   | >MYH9-K810 QLTAMNVL   | 44    | 459   |

|                        |      |                        |       |       |
|------------------------|------|------------------------|-------|-------|
| >MYH9-K810 QLTAMKVL    | 63   | >MYH9-K810 QLTAMNVL    | 35    | 28    |
| >MYH9-K810 QLTAMKVLQ   | 220  | >MYH9-K810 QLTAMNVLQ   | 494   | 274   |
| >MYH9-K810 QLTAMKVLQ   | 635  | >MYH9-K810 QLTAMNVLQ   | 278   | 357   |
| >MYH9-K810 QLTAMKVLQ   | 212  | >MYH9-K810 QLTAMNVLQ   | 400   | 188   |
| >MYH9-K810 QLTAMKVLQ   | 174  | >MYH9-K810 QLTAMNVLQ   | 134   | 40    |
| >MYH9-K810 QQLTAMKV    | 43   | >MYH9-K810 QQLTAMNV    | 27    | 16    |
| >MYH9-K810 QQLTAMKVL   | 857  | >MYH9-K810 QQLTAMNVL   | 97    | 760   |
| >MYH9-K810 QQLTAMKV    | 143  | >MYH9-K810 QQLTAMNV    | 70    | 73    |
| >MYH9-K810 QQLTAMKVL   | 32   | >MYH9-K810 QQLTAMNVL   | 37    | 5     |
| >MYH9-K810 QQLTAMKVL   | 102  | >MYH9-K810 QQLTAMNVL   | 18    | 84    |
| >MYH9-K810 QQLTAMKVL   | 154  | >MYH9-K810 QQLTAMNVL   | 158   | 4     |
| >MYH9-K810 QQQLTAMKV   | 465  | >MYH9-K810 QQQLTAMN\   | 333   | 132   |
| >MYH9-K810 QQQLTAMK    | 201  | >MYH9-K810 QQQLTAMN    | 25772 | 25571 |
| >MYH9-K810 QQQLTAMKV   | 786  | >MYH9-K810 QQQLTAMN\   | 301   | 485   |
| >MYH9-K810 QQQLTAMKV   | 215  | >MYH9-K810 QQQLTAMN\   | 201   | 14    |
| >MYH9-K810 QQQLTAMKV   | 292  | >MYH9-K810 QQQLTAMN\   | 66    | 226   |
| >MYH9-K810 RQQQLTAMk   | 682  | >MYH9-K810 RQQQLTAMf   | 320   | 362   |
| >MYH9-K810 RQQQLTAMk   | 575  | >MYH9-K810 RQQQLTAMf   | 253   | 322   |
| >MYH9-K810 RQQQLTAMk   | 1407 | >MYH9-K810 RQQQLTAMf   | 332   | 1075  |
| >MYH9-K810 RQQQLTAMk   | 54   | >MYH9-K810 RQQQLTAMf   | 23733 | 23679 |
| >MYH9-K810 RQQQLTAMk   | 473  | >MYH9-K810 RQQQLTAMf   | 14832 | 14359 |
| >MYH9-K810 RQQQLTAMk   | 204  | >MYH9-K810 RQQQLTAMf   | 12693 | 12489 |
| >MYH9-K810 RQQQLTAMk   | 94   | >MYH9-K810 RQQQLTAMf   | 72    | 22    |
| >MYH9-K810 RQQQLTAMk   | 252  | >MYH9-K810 RQQQLTAMf   | 128   | 124   |
| >MYH9-K810 RQQQLTAMk   | 89   | >MYH9-K810 RQQQLTAMf   | 86    | 3     |
| >MYH9-K810 RQQQLTAMk   | 94   | >MYH9-K810 RQQQLTAMf   | 2033  | 1939  |
| >MYH9-K810 RQQQLTAMk   | 405  | >MYH9-K810 RQQQLTAMf   | 596   | 191   |
| >MYH9-K810 RQQQLTAMk   | 329  | >MYH9-K810 RQQQLTAMf   | 81    | 248   |
| >MYH9-K810 RQQQLTAMk   | 215  | >MYH9-K810 RQQQLTAMf   | 213   | 2     |
| >MYH9-K810 RQQQLTAMk   | 574  | >MYH9-K810 RQQQLTAMf   | 454   | 120   |
| >MYH9-K810 RQQQLTAMk   | 260  | >MYH9-K810 RQQQLTAMf   | 345   | 85    |
| >MYH9-K810 RQQQLTAMk   | 120  | >MYH9-K810 RQQQLTAMf   | 96    | 24    |
| >MYH9-K810 RQQQLTAMk   | 44   | >MYH9-K810 RQQQLTAMf   | 348   | 304   |
| >MYH9-K810 RQQQLTAMk   | 147  | >MYH9-K810 RQQQLTAMf   | 143   | 4     |
| >MYH9-K810 RQQQLTAMk   | 25   | >MYH9-K810 RQQQLTAMf   | 15    | 10    |
| >MYH9-K810 KRQQQLTAM   | 51   | >MYH9-K810 KRQQQLTAM   | 682   | 631   |
| >MYH9-K810 KRQQQLTAM   | 148  | >MYH9-K810 KRQQQLTAM   | 218   | 70    |
| >MYH9-K810 KRQQQLTAM   | 71   | >MYH9-K810 KRQQQLTAM   | 132   | 61    |
| >MYH9-K810 KRQQQLTAM   | 69   | >MYH9-K810 KRQQQLTAM   | 78    | 9     |
| >MYH9-K810 KRQQQLTAM   | 57   | >MYH9-K810 KRQQQLTAM   | 168   | 111   |
| >MYH9-K810 KRQQQLTAM   | 247  | >MYH9-K810 KRQQQLTAM   | 228   | 19    |
| >MYH9-R398 GILTPRIKVGR | 110  | >MYH9-R398 GILTPRIKVGc | 15802 | 15692 |
| >MYH9-R398 GILTPRIKVGR | 266  | >MYH9-R398 GILTPRIKVGc | 20154 | 19888 |

|                        |      |                        |       |       |
|------------------------|------|------------------------|-------|-------|
| >MYH9-R398 VGRDYVQK    | 107  | >MYH9-R398 VGQDYVQK    | 10057 | 9950  |
| >MYH9-R398 KVGRDYVQK   | 160  | >MYH9-R398 KVGQDYVQK   | 400   | 240   |
| >MYH9-R398 KVGRDYVQK   | 61   | >MYH9-R398 KVGQDYVQK   | 105   | 44    |
| >MYH9-R398 KVGRDYVQK   | 47   | >MYH9-R398 KVGQDYVQK   | 581   | 534   |
| >MYH9-R398 KVGRDYVQK   | 369  | >MYH9-R398 KVGQDYVQK   | 2194  | 1825  |
| >MYH9-R398 RIKVGRDYV   | 632  | >MYH9-R398 RIKVGQDYV   | 215   | 417   |
| >MYH9-R398 RIKVGRDYV   | 221  | >MYH9-R398 RIKVGQDYV   | 130   | 91    |
| >MYH9-R398 RIKVGRDYVC  | 169  | >MYH9-R398 RIKVGQDYVC  | 189   | 20    |
| >MYH9-R398 RIKVGRDYVC  | 152  | >MYH9-R398 RIKVGQDYVC  | 210   | 58    |
| >MYH9-R398 RIKVGRDY    | 484  | >MYH9-R398 RIKVGQDY    | 625   | 141   |
| >MYH9-R398 RIKVGRDYV   | 25   | >MYH9-R398 RIKVGQDYV   | 61    | 36    |
| >MYH9-R398 RIKVGRDYVC  | 467  | >MYH9-R398 RIKVGQDYVC  | 800   | 333   |
| >MYH9-R398 RIKVGRDYVC  | 5    | >MYH9-R398 RIKVGQDYVC  | 6     | 1     |
| >MYH9-R398 RIKVGRDY    | 180  | >MYH9-R398 RIKVGQDY    | 171   | 9     |
| >MYH9-R398 RIKVGRDYVC  | 37   | >MYH9-R398 RIKVGQDYVC  | 83    | 46    |
| >MYH9-R398 RIKVGRDY    | 1402 | >MYH9-R398 RIKVGQDY    | 394   | 1008  |
| >MYH9-R398 RIKVGRDY    | 235  | >MYH9-R398 RIKVGQDY    | 166   | 69    |
| >MYH9-R398 PRIKVGRDY   | 947  | >MYH9-R398 PRIKVGQDY   | 363   | 584   |
| >MYH9-R398 TPRIKVGRDY  | 138  | >MYH9-R398 TPRIKVGQDY  | 140   | 2     |
| >MYH9-R398 TPRIKVGRDY  | 113  | >MYH9-R398 TPRIKVGQDY  | 437   | 324   |
| >MYH9-R398 LTPRIKVGR   | 96   | >MYH9-R398 LTPRIKVGQ   | 15827 | 15731 |
| >MYH9-R398 LTPRIKVGR   | 49   | >MYH9-R398 LTPRIKVGQ   | 7125  | 7076  |
| >MYH9-R398 ILTPRIKVGR  | 3199 | >MYH9-R398 ILTPRIKVGQ  | 46    | 3153  |
| >MYH9-R398 ILTPRIKVGR  | 40   | >MYH9-R398 ILTPRIKVGQ  | 12591 | 12551 |
| >MYH9-R398 ILTPRIKVGR  | 217  | >MYH9-R398 ILTPRIKVGQ  | 20031 | 19814 |
| >MYH9-R398 ILTPRIKVGR  | 385  | >MYH9-R398 ILTPRIKVGQ  | 30958 | 30573 |
| >MYH9-R398 ILTPRIKVGR  | 160  | >MYH9-R398 ILTPRIKVGQ  | 15523 | 15363 |
| >MYST3-E67: LLSKREGQA  | 438  | >MYST3-E67: LLSKRDGQA  | 305   | 133   |
| >MYST3-E67: LLSKREGQA  | 83   | >MYST3-E67: LLSKRDGQA  | 136   | 53    |
| >MYST3-E67: YLLSKREGQA | 254  | >MYST3-E67: YLLSKRDGQA | 202   | 52    |
| >MYST3-E67: YLLSKREGQA | 165  | >MYST3-E67: YLLSKRDGQA | 146   | 19    |
| >MYST3-E67: YLLSKREGQA | 16   | >MYST3-E67: YLLSKRDGQA | 26    | 10    |
| >MYST3-E67: YLLSKREGQA | 428  | >MYST3-E67: YLLSKRDGQA | 499   | 71    |
| >MYST3-E67: YLLSKREGQA | 328  | >MYST3-E67: YLLSKRDGQA | 233   | 95    |
| >MYST3-E67: YLLSKREGQA | 33   | >MYST3-E67: YLLSKRDGQA | 31    | 2     |
| >MYST3-E67: YLLSKREGQA | 212  | >MYST3-E67: YLLSKRDGQA | 335   | 123   |
| >MYST3-E67: YLLSKREGQ  | 27   | >MYST3-E67: YLLSKRDGQ  | 68    | 41    |
| >MYST3-E67: YLLSKREGQA | 7    | >MYST3-E67: YLLSKRDGQA | 11    | 4     |
| >MYST3-N45 WPTDNQDG\   | 191  | >MYST3-N45 WPTDSQDGV   | 144   | 47    |
| >MYST3-N45 WPTDNQDG\   | 31   | >MYST3-N45 WPTDSQDGV   | 27    | 4     |
| >MYST3-N45 WPTDNQDG\   | 22   | >MYST3-N45 WPTDSQDGV   | 23    | 1     |
| >MYST3-N45 WPTDNQDG\   | 37   | >MYST3-N45 WPTDSQDGV   | 20    | 17    |
| >MYST3-R26 RPSEERICNA\ | 33   | >MYST3-R26 CPSEERICNA\ | 901   | 868   |

|                        |       |                        |       |       |
|------------------------|-------|------------------------|-------|-------|
| >MYST3-R26 RPSEERICNA\ | 1521  | >MYST3-R26 CPSEERICNA\ | 424   | 1097  |
| >MYST3-R26 RPSEERICNA\ | 3210  | >MYST3-R26 CPSEERICNA\ | 179   | 3031  |
| >MYST3-R26 RPSEERICNA\ | 358   | >MYST3-R26 CPSEERICNA\ | 822   | 464   |
| >MYST3-R26 AIKKVKKQKQ  | 45    | >MYST3-R26 AIKKVKKQKQ  | 21789 | 21744 |
| >MYST3-R26 KQRPSEER    | 460   | >MYST3-R26 KQCPSEER    | 11886 | 11426 |
| >MYST3-R26 KQRPSEERI   | 496   | >MYST3-R26 KQCPSEERI   | 10823 | 10327 |
| >MYST3-R26 KQRPSEER    | 25    | >MYST3-R26 KQCPSEER    | 36    | 11    |
| >MYST3-R26 KQRPSEER    | 91    | >MYST3-R26 KQCPSEER    | 458   | 367   |
| >MYST3-R26 KQRPSEERI   | 88    | >MYST3-R26 KQCPSEERI   | 540   | 452   |
| >MYST3-R26 KQRPSEER    | 513   | >MYST3-R26 KQCPSEER    | 205   | 308   |
| >MYST3-R26 KQKQRPSEEF  | 395   | >MYST3-R26 KQKQCPSEEF  | 279   | 116   |
| >MYST3-R26 KQKQRPSEEF  | 313   | >MYST3-R26 KQKQCPSEEF  | 191   | 122   |
| >MYST3-R26 KQKQRPSEEF  | 239   | >MYST3-R26 KQKQCPSEEF  | 180   | 59    |
| >MYST3-R26 KQKQRPSEEF  | 303   | >MYST3-R26 KQKQCPSEEF  | 98    | 205   |
| >MYST3-R26 KVKKQKQR    | 34    | >MYST3-R26 KVKKQKQC    | 620   | 586   |
| >MYST3-R26 KVKKQKQRP   | 320   | >MYST3-R26 KVKKQKQCP   | 537   | 217   |
| >MYST3-R26 KVKKQKQRP!  | 24    | >MYST3-R26 KVKKQKQCP!  | 19    | 5     |
| >MYST3-R26 KVKKQKQRP!  | 64    | >MYST3-R26 KVKKQKQCP!  | 210   | 146   |
| >MYST3-R26 KVKKQKQR    | 12    | >MYST3-R26 KVKKQKQC    | 14507 | 14495 |
| >MYST3-R26 KVKKQKQR    | 158   | >MYST3-R26 KVKKQKQC    | 33337 | 33179 |
| >MYST3-R26 KKVKKQKQR   | 348   | >MYST3-R26 KKVKKQKQC   | 33123 | 32775 |
| >MYST3-V58 VSTIYCQNL   | 155   | >MYST3-V58 MSTIYCQNL   | 508   | 353   |
| >MYST3-V58 VSTIYCQNL   | 14    | >MYST3-V58 MSTIYCQNL   | 10    | 4     |
| >MYST3-V58 VSTIYCQNLCI | 107   | >MYST3-V58 MSTIYCQNLC  | 50    | 57    |
| >MYST3-V58 VSTIYCQNL   | 118   | >MYST3-V58 MSTIYCQNL   | 171   | 53    |
| >MYST3-V58 VSTIYCQNLCI | 427   | >MYST3-V58 MSTIYCQNLC  | 573   | 146   |
| >MYST3-V58 NVSTIYCQNL  | 1078  | >MYST3-V58 NMSTIYCQNI  | 86    | 992   |
| >MYST3-V58 NVSTIYCQNL  | 1906  | >MYST3-V58 NMSTIYCQNI  | 215   | 1691  |
| >MYST3-V58 NVSTIYCQNL  | 12713 | >MYST3-V58 NMSTIYCQNI  | 369   | 12344 |
| >MYST3-V58 NVSTIYCQNL  | 5672  | >MYST3-V58 NMSTIYCQNI  | 105   | 5567  |
| >MYST3-V58 NVSTIYCQNL  | 5300  | >MYST3-V58 NMSTIYCQNI  | 47    | 5253  |
| >MYST3-V58 NVSTIYCQNL  | 71    | >MYST3-V58 NMSTIYCQNI  | 195   | 124   |
| >MYST3-V58 NISVFEVDGN  | 77    | >MYST3-V58 NISVFEVDGN  | 3877  | 3800  |
| >MYST3-V58 DGNVSTIY    | 626   | >MYST3-V58 DGNMSTIY    | 438   | 188   |
| >MYST3-V58 VDGNVSTIY   | 197   | >MYST3-V58 VDGNMSTIY   | 235   | 38    |
| >MYST3-V58 VDGNVSTI    | 318   | >MYST3-V58 VDGNMSTI    | 225   | 93    |
| >MYST3-V58 EVDGNVSTIY  | 193   | >MYST3-V58 EVDGNMSTI\  | 123   | 70    |
| >MYST3-V58 EVDGNVSTI   | 405   | >MYST3-V58 EVDGNMSTI   | 1846  | 1441  |
| >MYST3-V58 EVDGNVSTI   | 989   | >MYST3-V58 EVDGNMSTI   | 183   | 806   |
| >MYST3-V58 EVDGNVSTIY  | 190   | >MYST3-V58 EVDGNMSTI\  | 107   | 83    |
| >MYST3-V58 EVDGNVSTIY  | 276   | >MYST3-V58 EVDGNMSTI\  | 178   | 98    |
| >MYST3-V58 EVDGNVSTIY  | 225   | >MYST3-V58 EVDGNMSTI\  | 117   | 108   |
| >MYST3-V58 EVDGNVSTIY  | 803   | >MYST3-V58 EVDGNMSTI\  | 370   | 433   |

|                       |      |                       |       |       |
|-----------------------|------|-----------------------|-------|-------|
| >MYST3-V58 EVDGNVSTI  | 208  | >MYST3-V58 EVDGNMSTI  | 135   | 73    |
| >MYST3-V58 EVDGNVSTI  | 36   | >MYST3-V58 EVDGNMSTI  | 19    | 17    |
| >MYST3-V58 FEVDGNVS   | 102  | >MYST3-V58 FEVDGNMS   | 125   | 23    |
| >MYST3-V58 FEVDGNVSTI | 71   | >MYST3-V58 FEVDGNMST  | 69    | 2     |
| >MYST3-V58 FEVDGNVSTI | 521  | >MYST3-V58 FEVDGNMST  | 317   | 204   |
| >MYST3-V58 FEVDGNVSTI | 183  | >MYST3-V58 FEVDGNMST  | 182   | 1     |
| >MYST3-V58 FEVDGNVSTI | 200  | >MYST3-V58 FEVDGNMST  | 207   | 7     |
| >MYST3-V58 FEVDGNVSTI | 86   | >MYST3-V58 FEVDGNMST  | 90    | 4     |
| >MYST3-V58 FEVDGNVSTI | 16   | >MYST3-V58 FEVDGNMST  | 15    | 1     |
| >MYST3-V58 FEVDGNVSTI | 243  | >MYST3-V58 FEVDGNMST  | 258   | 15    |
| >MYST3-V58 FEVDGNVSTI | 235  | >MYST3-V58 FEVDGNMST  | 296   | 61    |
| >MYST3-V58 FEVDGNVST  | 440  | >MYST3-V58 FEVDGNMST  | 445   | 5     |
| >MYST3-V58 FEVDGNVST  | 100  | >MYST3-V58 FEVDGNMST  | 82    | 18    |
| >MYST3-V58 FEVDGNVSTI | 159  | >MYST3-V58 FEVDGNMST  | 151   | 8     |
| >MYST3-V58 FEVDGNVSTI | 185  | >MYST3-V58 FEVDGNMST  | 187   | 2     |
| >MYST3-V58 FEVDGNVST  | 158  | >MYST3-V58 FEVDGNMST  | 153   | 5     |
| >MYST3-V58 FEVDGNVSTI | 16   | >MYST3-V58 FEVDGNMST  | 12    | 4     |
| >MYST3-V58 SVFEVDGNV  | 250  | >MYST3-V58 SVFEVDGNM  | 5606  | 5356  |
| >MYST3-V58 SVFEVDGNV  | 192  | >MYST3-V58 SVFEVDGNM  | 3448  | 3256  |
| >MYST3-V58 SVFEVDGNV  | 73   | >MYST3-V58 SVFEVDGNM  | 4488  | 4415  |
| >MYST3-V58 SVFEVDGNV  | 87   | >MYST3-V58 SVFEVDGNM  | 2505  | 2418  |
| >MYST3-V58 SVFEVDGNV  | 299  | >MYST3-V58 SVFEVDGNM  | 335   | 36    |
| >MYST3-V58 SVFEVDGNV  | 8    | >MYST3-V58 SVFEVDGNM  | 835   | 827   |
| >MYST3-V58 SVFEVDGNV  | 266  | >MYST3-V58 SVFEVDGNM  | 11533 | 11267 |
| >MYST3-V58 SVFEVDGNV  | 14   | >MYST3-V58 SVFEVDGNM  | 1788  | 1774  |
| >MYST3-V58 SVFEVDGNV  | 38   | >MYST3-V58 SVFEVDGNM  | 12208 | 12170 |
| >MYST3-V58 SVFEVDGNV  | 3826 | >MYST3-V58 SVFEVDGNM  | 129   | 3697  |
| >MYST3-V58 SVFEVDGNV  | 6    | >MYST3-V58 SVFEVDGNM  | 96    | 90    |
| >MYST3-V58 SVFEVDGNV  | 173  | >MYST3-V58 SVFEVDGNM  | 137   | 36    |
| >MYST3-V58 SVFEVDGNV  | 59   | >MYST3-V58 SVFEVDGNM  | 679   | 620   |
| >MYST3-V58 SVFEVDGNV  | 5069 | >MYST3-V58 SVFEVDGNM  | 248   | 4821  |
| >MYST3-V58 ISVFEVDGNV | 9813 | >MYST3-V58 ISVFEVDGNM | 210   | 9603  |
| >MYST3-V58 ISVFEVDGNV | 421  | >MYST3-V58 ISVFEVDGNM | 11910 | 11489 |
| >MYST3-V58 ISVFEVDGNV | 1073 | >MYST3-V58 ISVFEVDGNM | 19    | 1054  |
| >MYST3-V58 ISVFEVDGNV | 5812 | >MYST3-V58 ISVFEVDGNM | 144   | 5668  |
| >MYST4-A13 ALLPQEENR  | 338  | >MYST4-A13 TLLPQEENR  | 492   | 154   |
| >MYST4-A13 ALLPQEENR  | 1411 | >MYST4-A13 TLLPQEENR  | 423   | 988   |
| >MYST4-A13 ALLPQEENRR | 1297 | >MYST4-A13 TLLPQEENRR | 414   | 883   |
| >MYST4-A13 EALLPQEENR | 285  | >MYST4-A13 ETLLPQEENR | 100   | 185   |
| >MYST4-A13 EALLPQEENR | 75   | >MYST4-A13 ETLLPQEENR | 26    | 49    |
| >MYST4-A13 EALLPQEENR | 62   | >MYST4-A13 ETLLPQEENR | 14    | 48    |
| >MYST4-A13 ETGEALLPQ  | 179  | >MYST4-A13 ETGETLLPQ  | 266   | 87    |
| >MYST4-A13 ETGEALLPQ  | 165  | >MYST4-A13 ETGETLLPQ  | 94    | 71    |

|                        |       |                        |       |       |
|------------------------|-------|------------------------|-------|-------|
| >MYST4-A13 ETGEALLPQ   | 201   | >MYST4-A13 ETGETLLPQ   | 247   | 46    |
| >MYST4-A13 KETGEALL    | 143   | >MYST4-A13 KETGETLL    | 485   | 342   |
| >MYST4-A13 KETGEALL    | 14    | >MYST4-A13 KETGETLL    | 19    | 5     |
| >MYST4-A13 KETGEALL    | 569   | >MYST4-A13 KETGETLL    | 157   | 412   |
| >MYST4-A13 EVKETGEAL   | 270   | >MYST4-A13 EVKETGETL   | 625   | 355   |
| >MYST4-A13 EEVKETGEAL  | 498   | >MYST4-A13 EEVKETGETLI | 581   | 83    |
| >MYST4-A13 EEVKETGEAL  | 282   | >MYST4-A13 EEVKETGETLI | 306   | 24    |
| >MYST4-A13 EEVKETGEAL  | 420   | >MYST4-A13 EEVKETGETL  | 321   | 99    |
| >MYST4-A13 EEVKETGEA   | 98    | >MYST4-A13 EEVKETGET   | 732   | 634   |
| >MYST4-A13 EEVKETGEAL  | 377   | >MYST4-A13 EEVKETGETLI | 364   | 13    |
| >MYST4-A13 EEEVKETGEA  | 107   | >MYST4-A13 EEEVKETGETI | 157   | 50    |
| >MYST4-A13 EEEVKETGEA  | 154   | >MYST4-A13 EEEVKETGET  | 843   | 689   |
| >MYST4-E13' EEEGGGNVEK | 356   | >MYST4-E13' EGGGGNVEK  | 37430 | 37074 |
| >MYST4-E13' EEEGGGNV   | 73    | >MYST4-E13' EGGGGNV    | 205   | 132   |
| >MYST4-E13' EEEGGGNV   | 259   | >MYST4-E13' EGGGGNV    | 1840  | 1581  |
| >MYST4-E13' EEEGGGNV   | 192   | >MYST4-E13' EGGGGNV    | 110   | 82    |
| >MYST4-E13' EEEGGGN    | 417   | >MYST4-E13' EEEGGGN    | 1397  | 980   |
| >MYST4-E13' EEEGGGNV   | 324   | >MYST4-E13' EEEGGGNV   | 147   | 177   |
| >MYST4-E13' EEEGGGNV   | 359   | >MYST4-E13' EEEGGGNV   | 302   | 57    |
| >MYST4-E13' GEEEGGGN'  | 215   | >MYST4-E13' GEEEGGGN   | 813   | 598   |
| >MYST4-E70! EKIECESGV  | 3223  | >MYST4-E70! KKIECESGV  | 332   | 2891  |
| >MYST4-E70! EKIECESGV  | 988   | >MYST4-E70! KKIECESGV  | 116   | 872   |
| >MYST4-E70! WEKIECESGV | 194   | >MYST4-E70! WKKIECESGV | 5496  | 5302  |
| >MYST4-E70! WEKIECESGV | 7434  | >MYST4-E70! WKKIECESGV | 416   | 7018  |
| >MYST4-E70! WEKIECESGV | 297   | >MYST4-E70! WKKIECESGV | 21091 | 20794 |
| >MYST4-E70! ELSWEKIEC  | 345   | >MYST4-E70! ELSWKKIEC  | 436   | 91    |
| >MYST4-E70! QELSWEKI   | 427   | >MYST4-E70! QELSWKKI   | 44    | 383   |
| >MYST4-E70! QELSWEKI   | 483   | >MYST4-E70! QELSWKKI   | 1744  | 1261  |
| >MYST4-E70! QELSWEKI   | 461   | >MYST4-E70! QELSWKKI   | 827   | 366   |
| >MYST4-E70! AQELSWEKI  | 1511  | >MYST4-E70! AQELSWKKI  | 467   | 1044  |
| >MYST4-E70! AQELSWEK   | 273   | >MYST4-E70! AQELSWKK   | 393   | 120   |
| >MYST4-E70! QAQELSWE   | 27054 | >MYST4-E70! QAQELSWK   | 409   | 26645 |
| >MYST4-E70! QAQELSWEK  | 79    | >MYST4-E70! QAQELSWKK  | 87    | 8     |
| >MYST4-E70! QAQELSWE   | 25682 | >MYST4-E70! QAQELSWK   | 407   | 25275 |
| >MYST4-E70! QAQELSWEK  | 489   | >MYST4-E70! QAQELSWKK  | 332   | 157   |
| >MYST4-E70! KQAQELSWE  | 47    | >MYST4-E70! KQAQELSWK  | 218   | 171   |
| >MYST4-E70! KQAQELSWE  | 21759 | >MYST4-E70! KQAQELSWK  | 396   | 21363 |
| >MYST4-E70! KQAQELSWE  | 186   | >MYST4-E70! KQAQELSWK  | 237   | 51    |
| >MYST4-E70! KQAQELSWE  | 426   | >MYST4-E70! KQAQELSWK  | 275   | 151   |
| >MYST4-E70! KQAQELSWE  | 346   | >MYST4-E70! KQAQELSWK  | 742   | 396   |
| >MYST4-E70! KQAQELSWE  | 589   | >MYST4-E70! KQAQELSWK  | 291   | 298   |
| >MYST4-E70! KQAQELSWE  | 499   | >MYST4-E70! KQAQELSWK  | 529   | 30    |
| >MYST4-G15 GNPATMEI    | 15049 | >MYST4-G15 ENPATMEI    | 136   | 14913 |

|                        |       |                        |      |       |
|------------------------|-------|------------------------|------|-------|
| >MYST4-G15 EGNPATMEI   | 2922  | >MYST4-G15 EENPATMEI   | 8    | 2914  |
| >MYST4-G15 EGNPATMEI   | 63    | >MYST4-G15 EENPATMEI   | 672  | 609   |
| >MYST4-G15 EGNPATMEI   | 39730 | >MYST4-G15 EENPATMEI   | 358  | 39372 |
| >MYST4-G15 EGNPATMEI   | 38908 | >MYST4-G15 EENPATMEI   | 308  | 38600 |
| >MYST4-G15 EGNPATMEI   | 37930 | >MYST4-G15 EENPATMEI   | 246  | 37684 |
| >MYST4-G15 EGNPATMEI   | 33595 | >MYST4-G15 EENPATMEI   | 220  | 33375 |
| >MYST4-G15 KEGNPATM    | 1237  | >MYST4-G15 KEENPATM    | 402  | 835   |
| >MYST4-G15 KEGNPATME   | 246   | >MYST4-G15 KEENPATMEI  | 129  | 117   |
| >MYST4-G15 KEGNPATM    | 641   | >MYST4-G15 KEENPATM    | 101  | 540   |
| >MYST4-G15 KEGNPATME   | 326   | >MYST4-G15 KEENPATMEI  | 204  | 122   |
| >MYST4-G15 KEGNPATME   | 3217  | >MYST4-G15 KEENPATMEI  | 442  | 2775  |
| >MYST4-G15 KEGNPATME   | 9     | >MYST4-G15 KEENPATMEI  | 9    | 0     |
| >MYST4-G15 FKEGNPATM   | 708   | >MYST4-G15 FKEENPATM   | 202  | 506   |
| >MYST4-G15 FKEGNPATM   | 1016  | >MYST4-G15 FKEENPATMEI | 396  | 620   |
| >MYST4-G15 FKEGNPATM   | 35    | >MYST4-G15 FKEENPATM   | 32   | 3     |
| >MYST4-G15 FKEGNPATM   | 334   | >MYST4-G15 FKEENPATMEI | 313  | 21    |
| >MYST4-G15 TEFKEGNPAT  | 420   | >MYST4-G15 TEFKEENPAT  | 684  | 264   |
| >MYST4-G15 TEFKEGNPAT  | 72    | >MYST4-G15 TEFKEENPAT  | 140  | 68    |
| >MYST4-G15 TEFKEGNPAT  | 497   | >MYST4-G15 TEFKEENPAT  | 604  | 107   |
| >MYST4-G15 TEFKEGNPAT  | 186   | >MYST4-G15 TEFKEENPAT  | 310  | 124   |
| >MYST4-G15 TEFKEGNPA   | 66    | >MYST4-G15 TEFKEENPA   | 131  | 65    |
| >MYST4-G15 TEFKEGNPAT  | 369   | >MYST4-G15 TEFKEENPAT  | 492  | 123   |
| >MYST4-G15 TEFKEGNPA   | 140   | >MYST4-G15 TEFKEENPA   | 136  | 4     |
| >MYST4-G15 TEFKEGNPAT  | 172   | >MYST4-G15 TEFKEENPAT  | 142  | 30    |
| >MYST4-Q11 FQHQP GKRR  | 9074  | >MYST4-Q11 FLHQP GKRR  | 165  | 8909  |
| >MYST4-Q11 FQHQP GKRR  | 26642 | >MYST4-Q11 FLHQP GKRR  | 85   | 26557 |
| >MYST4-Q11 FQHQP GKRR  | 27041 | >MYST4-Q11 FLHQP GKRR  | 101  | 26940 |
| >MYST4-Q11 FQHQP GKRR  | 4953  | >MYST4-Q11 FLHQP GKRR  | 379  | 4574  |
| >MYST4-Q11 FQHQP GKRR  | 231   | >MYST4-Q11 FLHQP GKRR  | 3931 | 3700  |
| >MYST4-Q11 GRKP VLRKAF | 5376  | >MYST4-Q11 GRKP VLRKAF | 463  | 4913  |
| >MYST4-Q11 GRKP VLRKAF | 4350  | >MYST4-Q11 GRKP VLRKAF | 122  | 4228  |
| >MYST4-Q11 GRKP VLRKAF | 1127  | >MYST4-Q11 GRKP VLRKAF | 13   | 1114  |
| >MYST4-Q11 AFQHQP GK   | 221   | >MYST4-Q11 AFLHQP GK   | 56   | 165   |
| >MYST4-Q11 AFQHQP GK   | 520   | >MYST4-Q11 AFLHQP GK   | 125  | 395   |
| >MYST4-Q11 AFQHQP GK   | 518   | >MYST4-Q11 AFLHQP GK   | 297  | 221   |
| >MYST4-Q11 AFQHQP GK   | 1498  | >MYST4-Q11 AFLHQP GK   | 363  | 1135  |
| >MYST4-Q11 KAFQHQP GK  | 55    | >MYST4-Q11 KAFLHQP GK  | 53   | 2     |
| >MYST4-Q11 KAFQHQP GK  | 508   | >MYST4-Q11 KAFLHQP GK  | 181  | 327   |
| >MYST4-Q11 KAFQHQP GK  | 86    | >MYST4-Q11 KAFLHQP GK  | 49   | 37    |
| >MYST4-Q11 KAFQHQP GK  | 733   | >MYST4-Q11 KAFLHQP GK  | 413  | 320   |
| >MYST4-Q11 KAFQHQP G   | 682   | >MYST4-Q11 KAFLHQP G   | 435  | 247   |
| >MYST4-Q11 KAFQHQP GK  | 11    | >MYST4-Q11 KAFLHQP GK  | 7    | 4     |
| >MYST4-Q11 KAFQHQP GK  | 20    | >MYST4-Q11 KAFLHQP GK  | 13   | 7     |



|                          |      |                          |       |       |
|--------------------------|------|--------------------------|-------|-------|
| >MYST4-Q11 KAFQHQP GK    | 658  | >MYST4-Q11 KAFLHQP GK    | 243   | 415   |
| >MYST4-Q11 KAFQHQP GK    | 40   | >MYST4-Q11 KAFLHQP GK    | 24    | 16    |
| >MYST4-Q11 KAFQHQP GK    | 200  | >MYST4-Q11 KAFLHQP GK    | 350   | 150   |
| >MYST4-Q11 KAFQHQP GK    | 314  | >MYST4-Q11 KAFLHQP GK    | 456   | 142   |
| >MYST4-Q11 KAFQHQP GK    | 50   | >MYST4-Q11 KAFLHQP GK    | 77    | 27    |
| >MYST4-Q11 RKAFLHQP GK   | 492  | >MYST4-Q11 RKAFLHQP GK   | 786   | 294   |
| >MYST4-Q11 LRKAFLHQP GK  | 380  | >MYST4-Q11 LRKAFLHQP GK  | 358   | 22    |
| >MYST4-Q11 LRKAFLHQP GK  | 94   | >MYST4-Q11 LRKAFLHQP GK  | 96    | 2     |
| >MYST4-Q11 LRKAFLHQP GK  | 667  | >MYST4-Q11 LRKAFLHQP GK  | 466   | 201   |
| >MYST4-Q11 VLRKAFLH      | 1241 | >MYST4-Q11 VLRKAFLH      | 404   | 837   |
| >MYST4-Q11 VLRKAFLHQ     | 709  | >MYST4-Q11 VLRKAFLHQ     | 376   | 333   |
| >MYST4-Q11 VLRKAFLHQ     | 267  | >MYST4-Q11 VLRKAFLHQ     | 287   | 20    |
| >MYST4-Q11 KPVL RKAFL    | 6354 | >MYST4-Q11 KPVL RKAFL    | 25    | 6329  |
| >MYST4-Q11 RKPVL RKAFL   | 3165 | >MYST4-Q11 RKPVL RKAFL   | 279   | 2886  |
| >MYST4-Q11 RKPVL RKAFL   | 9186 | >MYST4-Q11 RKPVL RKAFL   | 419   | 8767  |
| >MYST4-S16: SVPAL ENSYA  | 411  | >MYST4-S16: IVPAL ENSYA  | 429   | 18    |
| >MYST4-S16: SVPAL ENSYA  | 304  | >MYST4-S16: IVPAL ENSYA  | 363   | 59    |
| >MYST4-S16: SVPAL ENSYA  | 277  | >MYST4-S16: IVPAL ENSYA  | 376   | 99    |
| >MYST4-S16: SVPAL ENSY   | 152  | >MYST4-S16: IVPAL ENSY   | 775   | 623   |
| >MYST4-S16: SVPAL ENSY   | 273  | >MYST4-S16: IVPAL ENSY   | 1519  | 1246  |
| >MYST4-S16: SVPAL ENSY   | 242  | >MYST4-S16: IVPAL ENSY   | 377   | 135   |
| >MYST4-S16: SVPAL ENSY   | 153  | >MYST4-S16: IVPAL ENSY   | 113   | 40    |
| >MYST4-S16: SVPAL ENSYA  | 94   | >MYST4-S16: IVPAL ENSYA  | 322   | 228   |
| >MYST4-S16: SVPAL ENSY   | 489  | >MYST4-S16: IVPAL ENSY   | 965   | 476   |
| >MYST4-S16: PSVPAL ENSY  | 114  | >MYST4-S16: PIVPAL ENSY  | 101   | 13    |
| >MYST4-S16: PSVPAL ENSY  | 275  | >MYST4-S16: PIVPAL ENSY  | 12724 | 12449 |
| >MYST4-S16: GQSVRSVNSI   | 7585 | >MYST4-S16: GQSVRSVNSI   | 248   | 7337  |
| >MYST4-S16: GQSVRSVNSI   | 3567 | >MYST4-S16: GQSVRSVNSI   | 411   | 3156  |
| >MYST4-S16: GQSVRSVNSI   | 4040 | >MYST4-S16: GQSVRSVNSI   | 109   | 3931  |
| >MYST4-S16: SPSVPAL ENS' | 32   | >MYST4-S16: SPIVPAL ENSY | 22    | 10    |
| >MYST4-S16: SPSVPAL ENS' | 356  | >MYST4-S16: SPIVPAL ENSY | 260   | 96    |
| >MYST4-S16: SPSVPAL ENS' | 35   | >MYST4-S16: SPIVPAL ENSY | 30    | 5     |
| >MYST4-S16: NSPSVPAL     | 317  | >MYST4-S16: NSPIVPAL     | 192   | 125   |
| >MYST4-S16: SVNSPSVPA    | 490  | >MYST4-S16: SVNSPIVPA    | 124   | 366   |
| >MYST4-S16: SVNSPSVPAL   | 546  | >MYST4-S16: SVNSPIVPAL   | 458   | 88    |
| >MYST4-S16: SVNSPSVPA    | 718  | >MYST4-S16: SVNSPIVPA    | 265   | 453   |
| >MYST4-S16: SVNSPSVPA    | 1372 | >MYST4-S16: SVNSPIVPA    | 241   | 1131  |
| >MYST4-S16: SVNSPSVPAL   | 194  | >MYST4-S16: SVNSPIVPAL   | 67    | 127   |
| >MYST4-S16: SVNSPSVPAL   | 682  | >MYST4-S16: SVNSPIVPAL   | 343   | 339   |
| >MYST4-S16: SVNSPSVPAL   | 332  | >MYST4-S16: SVNSPIVPAL   | 170   | 162   |
| >MYST4-S16: SVNSPSVPAL   | 561  | >MYST4-S16: SVNSPIVPAL   | 199   | 362   |
| >MYST4-S16: SVNSPSVPA    | 275  | >MYST4-S16: SVNSPIVPA    | 761   | 486   |
| >MYST4-S16: SVNSPSVPAL   | 462  | >MYST4-S16: SVNSPIVPAL   | 302   | 160   |

|                       |       |                        |      |       |
|-----------------------|-------|------------------------|------|-------|
| >MYST4-S16:SVNSPSVPA  | 16    | >MYST4-S16:SVNSPIVPA   | 11   | 5     |
| >MYST4-S16:SVNSPSVPAL | 733   | >MYST4-S16:SVNSPIVPAL  | 291  | 442   |
| >MYST4-S16:SVNSPSVPA  | 91    | >MYST4-S16:SVNSPIVPA   | 125  | 34    |
| >MYST4-S16:SVNSPSVPAL | 60    | >MYST4-S16:SVNSPIVPAL  | 54   | 6     |
| >MYST4-S16:RSVNSPSV   | 408   | >MYST4-S16:RSVNSPIV    | 1157 | 749   |
| >MYST4-S16:RSVNSPSV   | 133   | >MYST4-S16:RSVNSPIV    | 192  | 59    |
| >MYST4-S16:RSVNSPSVPA | 79    | >MYST4-S16:RSVNSPIVPA  | 85   | 6     |
| >MYST4-S16:RSVNSPSVPA | 261   | >MYST4-S16:RSVNSPIVPA  | 231  | 30    |
| >MYST4-S16:RSVNSPSVPA | 323   | >MYST4-S16:RSVNSPIVPA  | 101  | 222   |
| >MYST4-S16:RSVNSPSVPA | 655   | >MYST4-S16:RSVNSPIVPA  | 431  | 224   |
| >MYST4-S16:RSVNSPSVPA | 416   | >MYST4-S16:RSVNSPIVPA  | 911  | 495   |
| >MYST4-S16:RSVNSPSV   | 92    | >MYST4-S16:RSVNSPIV    | 179  | 87    |
| >MYST4-S16:RSVNSPSVPA | 124   | >MYST4-S16:RSVNSPIVPA  | 190  | 66    |
| >MYST4-S16:RSVNSPSVPA | 16    | >MYST4-S16:RSVNSPIVPA  | 40   | 24    |
| >MYST4-S16:RSVNSPSV   | 12    | >MYST4-S16:RSVNSPIV    | 48   | 36    |
| >MYST4-S16:RSVNSPSVPA | 103   | >MYST4-S16:RSVNSPIVPA  | 178  | 75    |
| >MYST4-S16:RSVNSPSVPA | 3     | >MYST4-S16:RSVNSPIVPA  | 4    | 1     |
| >MYST4-S16:RSVNSPSVPA | 350   | >MYST4-S16:RSVNSPIVPA  | 279  | 71    |
| >MYST4-S16:RSVNSPSVPA | 98    | >MYST4-S16:RSVNSPIVPA  | 104  | 6     |
| >MYST4-S16:RSVNSPSVPA | 545   | >MYST4-S16:RSVNSPIVPA  | 461  | 84    |
| >MYST4-S16:RSVNSPSV   | 342   | >MYST4-S16:RSVNSPIV    | 297  | 45    |
| >MYST4-S16:RSVNSPSVPA | 235   | >MYST4-S16:RSVNSPIVPA  | 550  | 315   |
| >MYST4-S16:RSVNSPSVPA | 172   | >MYST4-S16:RSVNSPIVPA  | 245  | 73    |
| >MYST4-S16:VRSVNSPS   | 4865  | >MYST4-S16:VRSVNSPI    | 284  | 4581  |
| >MYST4-S16:VRSVNSPSV  | 373   | >MYST4-S16:VRSVNSPIV   | 601  | 228   |
| >MYST4-S16:SVRSVNSPS  | 22072 | >MYST4-S16:SVRSVNSPI   | 119  | 21953 |
| >MYST4-S16:SVRSVNSPS  | 9427  | >MYST4-S16:SVRSVNSPI   | 226  | 9201  |
| >MYST4-S16:SVRSVNSPSV | 232   | >MYST4-S16:SVRSVNSPIV  | 826  | 594   |
| >MYST4-S16:SVRSVNSPSV | 313   | >MYST4-S16:SVRSVNSPIV  | 1248 | 935   |
| >MYST4-S16:SVRSVNSPSV | 478   | >MYST4-S16:SVRSVNSPIV  | 878  | 400   |
| >MYST4-S16:SVRSVNSPSV | 32    | >MYST4-S16:SVRSVNSPIV  | 129  | 97    |
| >MYST4-S16:SVRSVNSPS  | 35    | >MYST4-S16:SVRSVNSPI   | 7    | 28    |
| >MYST4-S16:SVRSVNSPSV | 7     | >MYST4-S16:SVRSVNSPIV  | 9    | 2     |
| >MYST4-S16:SVRSVNSPSV | 375   | >MYST4-S16:SVRSVNSPIV  | 152  | 223   |
| >MYST4-S16:SVRSVNSPS  | 4796  | >MYST4-S16:SVRSVNSPI   | 166  | 4630  |
| >MYST4-S16:SVRSVNSPSV | 310   | >MYST4-S16:SVRSVNSPIV  | 1172 | 862   |
| >MYST4-S16:SVRSVNSPS  | 9748  | >MYST4-S16:SVRSVNSPI   | 171  | 9577  |
| >MYST4-S16:SVRSVNSPS  | 405   | >MYST4-S16:SVRSVNSPI   | 30   | 375   |
| >MYST4-S16:SVRSVNSPSV | 467   | >MYST4-S16:SVRSVNSPIV  | 2996 | 2529  |
| >MYST4-S16:SVRSVNSPS  | 29614 | >MYST4-S16:SVRSVNSPI   | 307  | 29307 |
| >MYST4-S16:QSVRSVNSPS | 16295 | >MYST4-S16:QSVRSVNSPI  | 385  | 15910 |
| >MYST4-S16:QSVRSVNSPS | 432   | >MYST4-S16:QSVRSVNSPI' | 1291 | 859   |
| >MYST4-S16:QSVRSVNSPS | 279   | >MYST4-S16:QSVRSVNSPI' | 1052 | 773   |

|                        |       |                         |      |       |
|------------------------|-------|-------------------------|------|-------|
| >MYST4-S16: QSVRSVNSPS | 3488  | >MYST4-S16: QSVRSVNSPI  | 162  | 3326  |
| >MYST4-S16: QSVRSVNSPS | 349   | >MYST4-S16: QSVRSVNSPI' | 623  | 274   |
| >MYST4-S16: QSVRSVNSPS | 5431  | >MYST4-S16: QSVRSVNSPI  | 110  | 5321  |
| >MYST4-S16: QSVRSVNSPS | 456   | >MYST4-S16: QSVRSVNSPI' | 1607 | 1151  |
| >MYST4-S16: QSVRSVNSPS | 29325 | >MYST4-S16: QSVRSVNSPI  | 50   | 29275 |
| >MYST4-T48: ATGTTQKLK  | 533   | >MYST4-T48: ATGATQKLK   | 357  | 176   |
| >MYST4-T48: ATGTTQKLK  | 120   | >MYST4-T48: ATGATQKLK   | 80   | 40    |
| >MYST4-T48: ATGTTQKLK  | 90    | >MYST4-T48: ATGATQKLK   | 60   | 30    |
| >MYST4-T48: ATGTTQKL   | 156   | >MYST4-T48: ATGATQKL    | 70   | 86    |
| >MYST4-T48: ATGTTQKLK  | 259   | >MYST4-T48: ATGATQKLK   | 302  | 43    |
| >MYST4-T48: LATGTTQKL  | 267   | >MYST4-T48: LATGATQKL   | 292  | 25    |
| >MYST4-T48: LATGTTQKLK | 380   | >MYST4-T48: LATGATQKLK  | 283  | 97    |
| >MYST4-T48: LATGTTQK   | 109   | >MYST4-T48: LATGATQK    | 112  | 3     |
| >MYST4-T48: LATGTTQKL  | 118   | >MYST4-T48: LATGATQKL   | 155  | 37    |
| >MYST4-T48: LATGTTQKL  | 354   | >MYST4-T48: LATGATQKL   | 270  | 84    |
| >MYST4-T48: VLATGTTQKL | 55    | >MYST4-T48: VLATGATQKL  | 66   | 11    |
| >MYST4-T48: VLATGTTQKL | 321   | >MYST4-T48: VLATGATQKL  | 515  | 194   |
| >MYST4-T48: VLATGTTQKL | 30    | >MYST4-T48: VLATGATQKL  | 48   | 18    |
| >MYST4-T48: VLATGTTQKL | 75    | >MYST4-T48: VLATGATQKL  | 160  | 85    |
| >MYST4-T48: VLATGTTQKL | 17    | >MYST4-T48: VLATGATQKL  | 24   | 7     |
| >MYST4-T48: VLATGTTQKL | 8     | >MYST4-T48: VLATGATQKL  | 13   | 5     |
| >MYST4-T48: VLATGTTQ   | 34    | >MYST4-T48: VLATGATQ    | 36   | 2     |
| >MYST4-T48: VLATGTTQK  | 168   | >MYST4-T48: VLATGATQK   | 358  | 190   |
| >MYST4-T48: VLATGTTQKL | 3     | >MYST4-T48: VLATGATQKL  | 3    | 0     |
| >MYST4-T48: VLATGTTQK  | 35    | >MYST4-T48: VLATGATQK   | 40   | 5     |
| >MYST4-T48: VLATGTTQKL | 46    | >MYST4-T48: VLATGATQKL  | 49   | 3     |
| >MYST4-T48: VLATGTTQK  | 146   | >MYST4-T48: VLATGATQK   | 323  | 177   |
| >MYST4-T48: VLATGTTQKL | 283   | >MYST4-T48: VLATGATQKL  | 385  | 102   |
| >MYST4-T48: HVLATGTTQK | 559   | >MYST4-T48: HVLATGATQI  | 488  | 71    |
| >MYST4-T48: HVLATGTTQK | 51    | >MYST4-T48: HVLATGATQI  | 72   | 21    |
| >MYST4-T48: HVLATGTTQK | 112   | >MYST4-T48: HVLATGATQI  | 145  | 33    |
| >MYST4-T48: HVLATGTTQ  | 2215  | >MYST4-T48: HVLATGATQ   | 493  | 1722  |
| >MYST4-T48: HVLATGTTQK | 18    | >MYST4-T48: HVLATGATQI  | 19   | 1     |
| >MYST4-T48: HVLATGTTQK | 480   | >MYST4-T48: HVLATGATQI  | 245  | 235   |
| >MYST4-T48: HVLATGTTQK | 107   | >MYST4-T48: HVLATGATQI  | 100  | 7     |
| >MYST4-T48: HVLATGTTQK | 116   | >MYST4-T48: HVLATGATQI  | 80   | 36    |
| >MYST4-T48: HVLATGTTQK | 213   | >MYST4-T48: HVLATGATQI  | 185  | 28    |
| >MYST4-T48: CTSHVLATGT | 1229  | >MYST4-T48: CTSHVLATGA  | 449  | 780   |
| >NACA-I128MEDLSQQA     | 798   | >NACA-I128MEDLSQQA      | 347  | 451   |
| >NACA-I128MEDLSQQAQL   | 549   | >NACA-I128MEDLSQQAC     | 352  | 197   |
| >NACA-I128MEDLSQQAQL   | 184   | >NACA-I128MEDLSQQAC     | 138  | 46    |
| >NACA-I128MEDLSQQA     | 2851  | >NACA-I128MEDLSQQA      | 106  | 2745  |
| >NACA-I128MEDLSQQAQL   | 1852  | >NACA-I128MEDLSQQAC     | 76   | 1776  |

|                         |      |                         |      |      |
|-------------------------|------|-------------------------|------|------|
| >NACA-I128M MEDLSQQAQL  | 1052 | >NACA-I128M MEDLSQQAC   | 419  | 633  |
| >NACA-I128M KIEDLSQQAC  | 3155 | >NACA-I128M KMEDLSQQA   | 187  | 2968 |
| >NACA-I128M KIEDLSQQA   | 1403 | >NACA-I128M KMEDLSQQA   | 85   | 1318 |
| >NACA-I128M KIEDLSQQAC  | 140  | >NACA-I128M KMEDLSQQA   | 16   | 124  |
| >NACA-I128M KIEDLSQQA   | 4341 | >NACA-I128M KMEDLSQQA   | 369  | 3972 |
| >NACA-I128M KIEDLSQQAC  | 4275 | >NACA-I128M KMEDLSQQA   | 402  | 3873 |
| >NACA-I128M KIEDLSQQA   | 2713 | >NACA-I128M KMEDLSQQA   | 61   | 2652 |
| >NACA-I128M KIEDLSQQAC  | 1332 | >NACA-I128M KMEDLSQQA   | 29   | 1303 |
| >NACA-I128M KIEDLSQQA   | 8800 | >NACA-I128M KMEDLSQQA   | 187  | 8613 |
| >NACA-I128M KIEDLSQQAC  | 3988 | >NACA-I128M KMEDLSQQA   | 41   | 3947 |
| >NACA-I128M KIEDLSQQA   | 6301 | >NACA-I128M KMEDLSQQA   | 223  | 6078 |
| >NACA-I128M KIEDLSQQAC  | 4549 | >NACA-I128M KMEDLSQQA   | 164  | 4385 |
| >NACA-I128M KIEDLSQQAC  | 8658 | >NACA-I128M KMEDLSQQA   | 233  | 8425 |
| >NACA-I128M KIEDLSQQ    | 6616 | >NACA-I128M KMEDLSQQ    | 243  | 6373 |
| >NACA-I128M KIEDLSQQA   | 309  | >NACA-I128M KMEDLSQQA   | 10   | 299  |
| >NACA-I128M KIEDLSQQAC  | 53   | >NACA-I128M KMEDLSQQA   | 5    | 48   |
| >NACA-I128M KIEDLSQQAC  | 981  | >NACA-I128M KMEDLSQQA   | 464  | 517  |
| >NACA-I128M KIEDLSQQAC  | 892  | >NACA-I128M KMEDLSQQA   | 448  | 444  |
| >NACA-I128M DTYIVFGEAKI | 4477 | >NACA-I128M DTYIVFGEAKI | 98   | 4379 |
| >NACA-I128M DTYIVFGEAKI | 5350 | >NACA-I128M DTYIVFGEAKI | 139  | 5211 |
| >NACA-I128M DTYIVFGEAKI | 48   | >NACA-I128M DTYIVFGEAKI | 721  | 673  |
| >NACA-I128M DTYIVFGEAKI | 87   | >NACA-I128M DTYIVFGEAKI | 184  | 97   |
| >NACA-I128M DTYIVFGEAKI | 1261 | >NACA-I128M DTYIVFGEAKI | 208  | 1053 |
| >NACA-I128M DTYIVFGEAKI | 3681 | >NACA-I128M DTYIVFGEAKI | 272  | 3409 |
| >NACA-I128M DTYIVFGEAKI | 140  | >NACA-I128M DTYIVFGEAKI | 3299 | 3159 |
| >NACA-I128M AKIEDLSQQA  | 715  | >NACA-I128M AKMEDLSQQ   | 396  | 319  |
| >NACA-I128M AKIEDLSQQA  | 527  | >NACA-I128M AKMEDLSQQ   | 323  | 204  |
| >NACA-I128M GEAKIEDL    | 35   | >NACA-I128M GEAKMEDL    | 62   | 27   |
| >NACA-I128M GEAKIEDL    | 544  | >NACA-I128M GEAKMEDL    | 353  | 191  |
| >NACA-I128M GEAKIEDL    | 134  | >NACA-I128M GEAKMEDL    | 235  | 101  |
| >NACA-I128M GEAKIEDLS   | 1017 | >NACA-I128M GEAKMEDLS   | 448  | 569  |
| >NACA-I128M GEAKIEDLSQ  | 532  | >NACA-I128M GEAKMEDLS   | 358  | 174  |
| >NACA-I128M IVFGEAKIEDL | 417  | >NACA-I128M IVFGEAKMEL  | 396  | 21   |
| >NACA-I128M IVFGEAKI    | 328  | >NACA-I128M IVFGEAKM    | 2648 | 2320 |
| >NACA-I128M IVFGEAKI    | 481  | >NACA-I128M IVFGEAKM    | 3329 | 2848 |
| >NACA-I128M IVFGEAKIEDL | 282  | >NACA-I128M IVFGEAKMEL  | 612  | 330  |
| >NACA-I128M IVFGEAKI    | 154  | >NACA-I128M IVFGEAKM    | 2331 | 2177 |
| >NACA-I128M IVFGEAKIEDL | 341  | >NACA-I128M IVFGEAKMEL  | 455  | 114  |
| >NACA-I128M IVFGEAKI    | 525  | >NACA-I128M IVFGEAKM    | 57   | 468  |
| >NACA-I128M IVFGEAKI    | 455  | >NACA-I128M IVFGEAKM    | 8660 | 8205 |
| >NACA-I128M YIVFGEAKI   | 126  | >NACA-I128M YIVFGEAKM   | 2128 | 2002 |
| >NACA-I128M YIVFGEAKI   | 241  | >NACA-I128M YIVFGEAKM   | 1195 | 954  |
| >NACA-I128M YIVFGEAKI   | 215  | >NACA-I128M YIVFGEAKM   | 1762 | 1547 |

|                        |       |                        |      |       |
|------------------------|-------|------------------------|------|-------|
| >NACA-I128M YIVFGEAKI  | 118   | >NACA-I128M YIVFGEAKM  | 797  | 679   |
| >NACA-I128M YIVFGEAKI  | 2729  | >NACA-I128M YIVFGEAKM  | 61   | 2668  |
| >NACA-I128M YIVFGEAKI  | 2833  | >NACA-I128M YIVFGEAKM  | 426  | 2407  |
| >NACA-I128M YIVFGEAKI  | 12249 | >NACA-I128M YIVFGEAKM  | 454  | 11795 |
| >NACA-I128M YIVFGEAKI  | 3245  | >NACA-I128M YIVFGEAKM  | 304  | 2941  |
| >NACA-I128M TYIVFGEAKI | 156   | >NACA-I128M TYIVFGEAKM | 1727 | 1571  |
| >NACA-I128M TYIVFGEAKI | 22    | >NACA-I128M TYIVFGEAKM | 250  | 228   |
| >NBN-P748S NPYLKRRR    | 6686  | >NBN-P748S NSYLKRRR    | 113  | 6573  |
| >NBN-P748S NPYLKRRR    | 932   | >NBN-P748S NSYLKRRR    | 175  | 757   |
| >NBN-P748S NPYLKRRR    | 2826  | >NBN-P748S NSYLKRRR    | 140  | 2686  |
| >NBN-P748S SLADDLFRYN  | 7766  | >NBN-P748S SLADDLFRYN  | 454  | 7312  |
| >NBN-P748S SLADDLFRYN  | 128   | >NBN-P748S SLADDLFRYN  | 44   | 84    |
| >NBN-P748S SLADDLFRYN  | 775   | >NBN-P748S SLADDLFRYN  | 89   | 686   |
| >NBN-P748S YNPYLKRR    | 1736  | >NBN-P748S YNSYLKRR    | 258  | 1478  |
| >NBN-P748S YNPYLKRRR   | 1962  | >NBN-P748S YNSYLKRRR   | 297  | 1665  |
| >NBN-P748S RYNPYLKR    | 440   | >NBN-P748S RYNSYLKR    | 543  | 103   |
| >NBN-P748S RYNPYLKR    | 8     | >NBN-P748S RYNSYLKR    | 7    | 1     |
| >NBN-P748S RYNPYLKRR   | 9     | >NBN-P748S RYNSYLKRR   | 7    | 2     |
| >NBN-P748S RYNPYLKRRR  | 11    | >NBN-P748S RYNSYLKRRR  | 10   | 1     |
| >NBN-P748S RYNPYLKR    | 16    | >NBN-P748S RYNSYLKR    | 18   | 2     |
| >NBN-P748S RYNPYLKR    | 27    | >NBN-P748S RYNSYLKRR   | 29   | 2     |
| >NBN-P748S RYNPYLKRRR  | 29    | >NBN-P748S RYNSYLKRRR  | 32   | 3     |
| >NBN-P748S FRYNPYLKRR  | 400   | >NBN-P748S FRYNSYLKRR  | 453  | 53    |
| >NBN-P748S FRYNPYLK    | 964   | >NBN-P748S FRYNSYLK    | 427  | 537   |
| >NBN-P748S FRYNPYLKR   | 1509  | >NBN-P748S FRYNSYLKR   | 460  | 1049  |
| >NBN-P748S FRYNPYLK    | 338   | >NBN-P748S FRYNSYLK    | 191  | 147   |
| >NBN-P748S FRYNPYLKR   | 112   | >NBN-P748S FRYNSYLKR   | 38   | 74    |
| >NBN-P748S FRYNPYLKRR  | 381   | >NBN-P748S FRYNSYLKRR  | 181  | 200   |
| >NBN-P748S FRYNPYLKRR  | 774   | >NBN-P748S FRYNSYLKRR  | 404  | 370   |
| >NBN-P748S FRYNPYLK    | 22    | >NBN-P748S FRYNSYLK    | 20   | 2     |
| >NBN-P748S FRYNPYLKR   | 32    | >NBN-P748S FRYNSYLKR   | 26   | 6     |
| >NBN-P748S FRYNPYLKRR  | 91    | >NBN-P748S FRYNSYLKRR  | 75   | 16    |
| >NBN-P748S FRYNPYLKRR  | 40    | >NBN-P748S FRYNSYLKRR  | 32   | 8     |
| >NBN-P748S FRYNPYLKRR  | 280   | >NBN-P748S FRYNSYLKRR  | 356  | 76    |
| >NBN-P748S FRYNPYLKR   | 308   | >NBN-P748S FRYNSYLKR   | 324  | 16    |
| >NBN-P748S LFRYNPYLK   | 274   | >NBN-P748S LFRYNSYLK   | 755  | 481   |
| >NBN-P748S LFRYNPYL    | 34    | >NBN-P748S LFRYNSYL    | 54   | 20    |
| >NBN-P748S LFRYNPYLK   | 6     | >NBN-P748S LFRYNSYLK   | 5    | 1     |
| >NBN-P748S LFRYNPYLKR  | 237   | >NBN-P748S LFRYNSYLKR  | 95   | 142   |
| >NBN-P748S LFRYNPYLK   | 66    | >NBN-P748S LFRYNSYLK   | 45   | 21    |
| >NBN-P748S LFRYNPYLKR  | 63    | >NBN-P748S LFRYNSYLKR  | 14   | 49    |
| >NBN-P748S LFRYNPYLKRI | 25    | >NBN-P748S LFRYNSYLKRI | 22   | 3     |
| >NBN-P748S LFRYNPYLK   | 569   | >NBN-P748S LFRYNSYLK   | 447  | 122   |

|                        |      |                        |       |       |
|------------------------|------|------------------------|-------|-------|
| >NBN-P748S·LFRYNPYLKR  | 135  | >NBN-P748S·LFRYNSYLKR  | 32    | 103   |
| >NBN-P748S·LFRYNPYLKRI | 134  | >NBN-P748S·LFRYNSYLKRF | 120   | 14    |
| >NBN-P748S·LFRYNPYLKR  | 217  | >NBN-P748S·LFRYNSYLKR  | 286   | 69    |
| >NBN-P748S·LFRYNPYLKR  | 162  | >NBN-P748S·LFRYNSYLKR  | 194   | 32    |
| >NBN-P748S·LFRYNPYLKRI | 271  | >NBN-P748S·LFRYNSYLKRF | 307   | 36    |
| >NBN-P748S·LFRYNPYL    | 427  | >NBN-P748S·LFRYNSYL    | 493   | 66    |
| >NBN-P748S·DLFRYNPYL   | 204  | >NBN-P748S·DLFRYNSYL   | 1766  | 1562  |
| >NBN-P748S·DLFRYNPYL   | 90   | >NBN-P748S·DLFRYNSYL   | 55    | 35    |
| >NBN-P748S·DLFRYNPYL   | 11   | >NBN-P748S·DLFRYNSYL   | 16    | 5     |
| >NBN-P748S·DLFRYNPYL   | 238  | >NBN-P748S·DLFRYNSYL   | 308   | 70    |
| >NBN-P748S·DLFRYNPYL   | 46   | >NBN-P748S·DLFRYNSYL   | 226   | 180   |
| >NBN-P748S·DLFRYNPYL   | 63   | >NBN-P748S·DLFRYNSYL   | 203   | 140   |
| >NBN-P748S·DLFRYNPYL   | 19   | >NBN-P748S·DLFRYNSYL   | 28    | 9     |
| >NBN-P748S·DLFRYNPYLK  | 151  | >NBN-P748S·DLFRYNSYLK  | 93    | 58    |
| >NBN-P748S·DLFRYNPYLK  | 171  | >NBN-P748S·DLFRYNSYLK  | 139   | 32    |
| >NBN-P748S·DLFRYNPY    | 3375 | >NBN-P748S·DLFRYNSY    | 487   | 2888  |
| >NBN-P748S·DLFRYNPY    | 457  | >NBN-P748S·DLFRYNSY    | 354   | 103   |
| >NBN-P748S·DLFRYNPY    | 218  | >NBN-P748S·DLFRYNSY    | 338   | 120   |
| >NBN-P748S·DLFRYNPY    | 891  | >NBN-P748S·DLFRYNSY    | 381   | 510   |
| >NBN-P748S·DLFRYNPYLKI | 413  | >NBN-P748S·DLFRYNSYLKI | 337   | 76    |
| >NBN-P748S·DLFRYNPYLKI | 25   | >NBN-P748S·DLFRYNSYLKI | 22    | 3     |
| >NBN-P748S·DLFRYNPYLK  | 91   | >NBN-P748S·DLFRYNSYLK  | 41    | 50    |
| >NBN-P748S·DLFRYNPYLKI | 33   | >NBN-P748S·DLFRYNSYLKI | 17    | 16    |
| >NBN-P748S·DLFRYNPYL   | 1596 | >NBN-P748S·DLFRYNSYL   | 273   | 1323  |
| >NBN-P748S·DLFRYNPYL   | 44   | >NBN-P748S·DLFRYNSYL   | 294   | 250   |
| >NBN-P748S·DLFRYNPY    | 130  | >NBN-P748S·DLFRYNSY    | 123   | 7     |
| >NBN-P748S·DLFRYNPY    | 175  | >NBN-P748S·DLFRYNSY    | 168   | 7     |
| >NBN-P748S·DLFRYNPY    | 447  | >NBN-P748S·DLFRYNSY    | 1245  | 798   |
| >NBN-P748S·DLFRYNPYLK  | 468  | >NBN-P748S·DLFRYNSYLK  | 608   | 140   |
| >NBN-P748S·DLFRYNPYLKI | 167  | >NBN-P748S·DLFRYNSYLKI | 196   | 29    |
| >NBN-P748S·DDLFRYNPY   | 269  | >NBN-P748S·DDLFRYNSY   | 390   | 121   |
| >NBN-P748S·LADDFRYNP   | 24   | >NBN-P748S·LADDFRYNS   | 49    | 25    |
| >NBN-P748S·LADDFRYNP   | 49   | >NBN-P748S·LADDFRYNS   | 137   | 88    |
| >NBN-P748S·LADDFRYNP   | 1790 | >NBN-P748S·LADDFRYNS   | 464   | 1326  |
| >NBN-Y679H YGQLKNFKKF  | 180  | >NBN-Y679H HGQLKNFKFI  | 1683  | 1503  |
| >NBN-Y679H DYGQLKNFKI  | 315  | >NBN-Y679H DHGQLKNFKI  | 10005 | 9690  |
| >NBN-Y679H DYGQLKNFKI  | 402  | >NBN-Y679H DHGQLKNFKI  | 9540  | 9138  |
| >NBN-Y679H DYGQLKNF    | 51   | >NBN-Y679H DHGQLKNF    | 15893 | 15842 |
| >NBN-Y679H DYGQLKNFKI  | 30   | >NBN-Y679H DHGQLKNFKI  | 9381  | 9351  |
| >NBN-Y679H DYGQLKNFK   | 126  | >NBN-Y679H DHGQLKNFK   | 11319 | 11193 |
| >NBN-Y679H DYGQLKNFK   | 370  | >NBN-Y679H DHGQLKNFK   | 10387 | 10017 |
| >NBN-Y679H DYGQLKNFKI  | 491  | >NBN-Y679H DHGQLKNFKI  | 12675 | 12184 |
| >NBN-Y679H SRNPSGINDC  | 209  | >NBN-Y679H SRNPSGINDC  | 3455  | 3246  |

|                        |       |                        |       |       |
|------------------------|-------|------------------------|-------|-------|
| >NBN-Y679H INDDYGQL    | 187   | >NBN-Y679H INDDHGQL    | 2127  | 1940  |
| >NBN-Y679H GINDDYGQL   | 267   | >NBN-Y679H GINDDHGQL   | 918   | 651   |
| >NBN-Y679H GINDDYGQL   | 93    | >NBN-Y679H GINDDHGQL   | 486   | 393   |
| >NBN-Y679H GINDDYGQL   | 101   | >NBN-Y679H GINDDHGQL   | 115   | 14    |
| >NBN-Y679H GINDDYGQL   | 488   | >NBN-Y679H GINDDHGQL   | 510   | 22    |
| >NBN-Y679H GINDDYGQL   | 70    | >NBN-Y679H GINDDHGQL   | 146   | 76    |
| >NBN-Y679H NPSGINDDY   | 23    | >NBN-Y679H NPSGINDDH   | 295   | 272   |
| >NBN-Y679H NPSGINDDY   | 148   | >NBN-Y679H NPSGINDDH   | 11288 | 11140 |
| >NBN-Y679H NPSGINDDY   | 498   | >NBN-Y679H NPSGINDDH   | 30621 | 30123 |
| >NBN-Y679H RNPSGINDDY  | 355   | >NBN-Y679H RNPSGINDDH  | 24991 | 24636 |
| >NCOA1-P35 PFIMGIHI    | 352   | >NCOA1-P35 LFIMGIHI    | 204   | 148   |
| >NCOA1-P35 PFIMGIHII   | 105   | >NCOA1-P35 LFIMGIHII   | 73    | 32    |
| >NCOA1-P35 PFIMGIHI    | 2227  | >NCOA1-P35 LFIMGIHI    | 169   | 2058  |
| >NCOA1-P35 PFIMGIHII   | 1421  | >NCOA1-P35 LFIMGIHII   | 133   | 1288  |
| >NCOA1-P35 PFIMGIHIIDR | 2032  | >NCOA1-P35 LFIMGIHIIDR | 89    | 1943  |
| >NCOA1-P35 PFIMGIHIIDR | 628   | >NCOA1-P35 LFIMGIHIIDR | 130   | 498   |
| >NCOA1-P35 PFIMGIHIIDR | 5071  | >NCOA1-P35 LFIMGIHIIDR | 419   | 4652  |
| >NCOA1-P35 PFIMGIHIIDR | 187   | >NCOA1-P35 LFIMGIHIIDR | 267   | 80    |
| >NCOA1-P35 PFIMGIHII   | 2678  | >NCOA1-P35 LFIMGIHII   | 452   | 2226  |
| >NCOA1-P35 QPFIMGIHI   | 235   | >NCOA1-P35 QLFIMGIHI   | 34908 | 34673 |
| >NCOA1-P35 QPFIMGIHII  | 425   | >NCOA1-P35 QLFIMGIHII  | 37095 | 36670 |
| >NCOA1-P35 QPFIMGIHI   | 26501 | >NCOA1-P35 QLFIMGIHI   | 400   | 26101 |
| >NCOA1-P35 QPFIMGIHII  | 13438 | >NCOA1-P35 QLFIMGIHII  | 218   | 13220 |
| >NCOA1-P35 QPFIMGIHI   | 22470 | >NCOA1-P35 QLFIMGIHI   | 464   | 22006 |
| >NCOA1-P35 QPFIMGIHII  | 14815 | >NCOA1-P35 QLFIMGIHII  | 62    | 14753 |
| >NCOA1-P35 QPFIMGIHI   | 24876 | >NCOA1-P35 QLFIMGIHI   | 60    | 24816 |
| >NCOA1-P35 QPFIMGIHII  | 22731 | >NCOA1-P35 QLFIMGIHII  | 36    | 22695 |
| >NCOA1-P35 QPFIMGIHII  | 22643 | >NCOA1-P35 QLFIMGIHII  | 171   | 22472 |
| >NCOA1-P35 QPFIMGIHI   | 25093 | >NCOA1-P35 QLFIMGIHI   | 79    | 25014 |
| >NCOA1-P35 QPFIMGIHII  | 24182 | >NCOA1-P35 QLFIMGIHII  | 89    | 24093 |
| >NCOA1-P35 QPFIMGIHI   | 35858 | >NCOA1-P35 QLFIMGIHI   | 72    | 35786 |
| >NCOA1-P35 QPFIMGIHII  | 32385 | >NCOA1-P35 QLFIMGIHII  | 23    | 32362 |
| >NCOA1-P35 QPFIMGIHII  | 15249 | >NCOA1-P35 QLFIMGIHII  | 187   | 15062 |
| >NCOA1-P35 QPFIMGIH    | 430   | >NCOA1-P35 QLFIMGIH    | 11855 | 11425 |
| >NCOA1-P35 QPFIMGIHI   | 352   | >NCOA1-P35 QLFIMGIHI   | 29500 | 29148 |
| >NCOA1-P35 MQPFIMGIHI  | 445   | >NCOA1-P35 MQLFIMGIHI  | 168   | 277   |
| >NCOA1-P35 MQPFIMGI    | 607   | >NCOA1-P35 MQLFIMGI    | 67    | 540   |
| >NCOA1-P35 MQPFIMGIHI  | 1496  | >NCOA1-P35 MQLFIMGIHI  | 183   | 1313  |
| >NCOA1-P35 MQPFIMGI    | 168   | >NCOA1-P35 MQLFIMGI    | 170   | 2     |
| >NCOA1-P35 MQPFIMGIHI  | 309   | >NCOA1-P35 MQLFIMGIHI  | 311   | 2     |
| >NCOA1-P35 MQPFIMGI    | 45    | >NCOA1-P35 MQLFIMGI    | 92    | 47    |
| >NCOA1-P35 MQPFIMGIHI  | 82    | >NCOA1-P35 MQLFIMGIHI  | 156   | 74    |
| >NCOA1-P35 MQPFIMGI    | 21    | >NCOA1-P35 MQLFIMGI    | 9     | 12    |

|                       |       |                       |      |       |
|-----------------------|-------|-----------------------|------|-------|
| >NCOA1-P35 MQPFIMGIHI | 350   | >NCOA1-P35 MQLFIMGIHI | 121  | 229   |
| >NCOA1-P35 MQPFIMGIHI | 52    | >NCOA1-P35 MQLFIMGIHI | 16   | 36    |
| >NCOA1-P35 MQPFIMGI   | 768   | >NCOA1-P35 MQLFIMGI   | 104  | 664   |
| >NCOA1-P35 MQPFIMGIHI | 2582  | >NCOA1-P35 MQLFIMGIHI | 419  | 2163  |
| >NCOA1-P35 MQPFIMGI   | 5137  | >NCOA1-P35 MQLFIMGI   | 406  | 4731  |
| >NCOA1-P35 MQPFIMGIHI | 6093  | >NCOA1-P35 MQLFIMGIHI | 488  | 5605  |
| >NCOA1-P35 MQPFIMGI   | 58    | >NCOA1-P35 MQLFIMGI   | 441  | 383   |
| >NCOA1-P35 MQPFIMGIHI | 474   | >NCOA1-P35 MQLFIMGIHI | 2078 | 1604  |
| >NCOA1-P35 MQPFIMGIHI | 409   | >NCOA1-P35 MQLFIMGIHI | 2415 | 2006  |
| >NCOA1-P35 MQPFIMGI   | 1138  | >NCOA1-P35 MQLFIMGI   | 125  | 1013  |
| >NCOA1-P35 MQPFIMGIHI | 1714  | >NCOA1-P35 MQLFIMGIHI | 167  | 1547  |
| >NCOA1-P35 MQPFIMGIHI | 1853  | >NCOA1-P35 MQLFIMGIHI | 175  | 1678  |
| >NCOA1-P35 MQPFIMGIHI | 5283  | >NCOA1-P35 MQLFIMGIHI | 403  | 4880  |
| >NCOA1-P35 MQPFIMGIHI | 1401  | >NCOA1-P35 MQLFIMGIHI | 490  | 911   |
| >NCOA1-P35 MQPFIMGI   | 623   | >NCOA1-P35 MQLFIMGI   | 27   | 596   |
| >NCOA1-P35 MQPFIMGIHI | 3403  | >NCOA1-P35 MQLFIMGIHI | 296  | 3107  |
| >NCOA1-P35 MQPFIMGIHI | 1591  | >NCOA1-P35 MQLFIMGIHI | 396  | 1195  |
| >NCOA1-P35 DMQPFIMGI  | 35    | >NCOA1-P35 DMQLFIMGI  | 246  | 211   |
| >NCOA1-P35 DMQPFIMGI  | 252   | >NCOA1-P35 DMQLFIMGI  | 1105 | 853   |
| >NCOA1-P35 DMQPFIMGI  | 152   | >NCOA1-P35 DMQLFIMGI  | 517  | 365   |
| >NCOA1-P35 DMQPFIMGI  | 111   | >NCOA1-P35 DMQLFIMGI  | 412  | 301   |
| >NCOA1-P35 DMQPFIMGI  | 62    | >NCOA1-P35 DMQLFIMGI  | 987  | 925   |
| >NCOA1-P35 DMQPFIMGI  | 403   | >NCOA1-P35 DMQLFIMGI  | 3089 | 2686  |
| >NCOA1-P35 DMQPFIMGI  | 201   | >NCOA1-P35 DMQLFIMGI  | 535  | 334   |
| >NCOA1-P35 PDMQPFIMG  | 275   | >NCOA1-P35 PDMQLFIMG  | 164  | 111   |
| >NCOA1-P35 PDMQPFIMG  | 144   | >NCOA1-P35 PDMQLFIMG  | 76   | 68    |
| >NCOA1-P35 SPDMQPF    | 108   | >NCOA1-P35 SPDMQLFI   | 254  | 146   |
| >NCOA1-P35 SPDMQPFIM  | 677   | >NCOA1-P35 SPDMQLFIM  | 316  | 361   |
| >NCOA1-P35 SPDMQPFIM  | 115   | >NCOA1-P35 SPDMQLFIM  | 125  | 10    |
| >NCOA1-P35 SPDMQPF    | 412   | >NCOA1-P35 SPDMQLFI   | 295  | 117   |
| >NCOA1-P35 SPDMQPFIM  | 165   | >NCOA1-P35 SPDMQLFIM  | 205  | 40    |
| >NCOA1-P35 QSPDMQPF   | 240   | >NCOA1-P35 QSPDMQLF   | 1199 | 959   |
| >NCOA1-P35 QSPDMQPF   | 678   | >NCOA1-P35 QSPDMQLFI  | 238  | 440   |
| >NCOA1-P35 QSPDMQPF   | 84    | >NCOA1-P35 QSPDMQLF   | 157  | 73    |
| >NCOA1-P35 QSPDMQPF   | 1080  | >NCOA1-P35 QSPDMQLF   | 199  | 881   |
| >NCOA1-P35 QSPDMQPF   | 8     | >NCOA1-P35 QSPDMQLFI  | 7    | 1     |
| >NCOA1-P35 QSPDMQPFII | 6     | >NCOA1-P35 QSPDMQLFII | 4    | 2     |
| >NCOA1-P35 QSPDMQPFII | 112   | >NCOA1-P35 QSPDMQLFII | 134  | 22    |
| >NCOA1-P35 QSPDMQPFII | 26    | >NCOA1-P35 QSPDMQLFII | 46   | 20    |
| >NCOA1-P35 QSPDMQPF   | 90    | >NCOA1-P35 QSPDMQLFI  | 96   | 6     |
| >NCOA1-P35 PQSPDMQPF  | 212   | >NCOA1-P35 PQSPDMQLF  | 2678 | 2466  |
| >NCOA1-P35 PQSPDMQPF  | 15    | >NCOA1-P35 PQSPDMQLF  | 86   | 71    |
| >NCOA1-P35 YPQSPDMQP  | 35350 | >NCOA1-P35 YPQSPDMQL  | 39   | 35311 |



|                      |       |                      |      |       |
|----------------------|-------|----------------------|------|-------|
| >NCOA1-P35 YPQSPDMQP | 15    | >NCOA1-P35 YPQSPDMQL | 24   | 9     |
| >NCOA1-P35 YPQSPDMQP | 18473 | >NCOA1-P35 YPQSPDMQL | 44   | 18429 |
| >NCOA1-P35 YPQSPDMQP | 84    | >NCOA1-P35 YPQSPDMQL | 612  | 528   |
| >NCOA1-P35 YPQSPDMQP | 776   | >NCOA1-P35 YPQSPDMQL | 329  | 447   |
| >NCOA1-P35 YPQSPDMQP | 95    | >NCOA1-P35 YPQSPDMQL | 312  | 217   |
| >NCOA1-P35 YPQSPDMQP | 73    | >NCOA1-P35 YPQSPDMQL | 419  | 346   |
| >NCOA1-P35 YPQSPDMQP | 4760  | >NCOA1-P35 YPQSPDMQL | 167  | 4593  |
| >NCOA1-P35 YPQSPDMQP | 50    | >NCOA1-P35 YPQSPDMQL | 98   | 48    |
| >NCOA1-P35 YPQSPDMQP | 14651 | >NCOA1-P35 YPQSPDMQL | 412  | 14239 |
| >NCOA1-P35 YPQSPDMQP | 143   | >NCOA1-P35 YPQSPDMQL | 187  | 44    |
| >NCOA1-P35 YPQSPDMQP | 179   | >NCOA1-P35 YPQSPDMQL | 98   | 81    |
| >NCOA1-P35 YPQSPDMQP | 26    | >NCOA1-P35 YPQSPDMQL | 151  | 125   |
| >NCOA1-P35 YPQSPDMQP | 21450 | >NCOA1-P35 YPQSPDMQL | 456  | 20994 |
| >NCOA1-P35 YPQSPDMQP | 122   | >NCOA1-P35 YPQSPDMQL | 109  | 13    |
| >NCOA1-P35 CYPQSPDMQ | 102   | >NCOA1-P35 CYPQSPDMQ | 50   | 52    |
| >NCOA1-P35 CYPQSPDMQ | 19578 | >NCOA1-P35 CYPQSPDMQ | 155  | 19423 |
| >NCOA1-P35 CYPQSPDMQ | 80    | >NCOA1-P35 CYPQSPDMQ | 37   | 43    |
| >NCOA1-P35 CYPQSPDMQ | 268   | >NCOA1-P35 CYPQSPDMQ | 4    | 264   |
| >NCOA1-P35 CYPQSPDMQ | 4     | >NCOA1-P35 CYPQSPDMQ | 4    | 0     |
| >NCOA2-G43 GRFGGSGGM | 34    | >NCOA2-G43 DRFGGSGGM | 369  | 335   |
| >NCOA2-G43 GRFGGSGGM | 158   | >NCOA2-G43 DRFGGSGGM | 2201 | 2043  |
| >NCOA2-G43 GRFGGSGGM | 480   | >NCOA2-G43 DRFGGSGGM | 8772 | 8292  |
| >NCOA2-G43 MGRFGGSGC | 139   | >NCOA2-G43 MDRFGGSGC | 7373 | 7234  |
| >NCOA2-G43 MGRFGGSGC | 53    | >NCOA2-G43 MDRFGGSGC | 398  | 345   |
| >NCOA2-G43 MPMGRFGG  | 48    | >NCOA2-G43 MPMDRFGG  | 72   | 24    |
| >NCOA2-G43 MPMGRFGG  | 21    | >NCOA2-G43 MPMDRFGG  | 25   | 4     |
| >NCOA2-G43 MPMGRFGG  | 135   | >NCOA2-G43 MPMDRFGG  | 81   | 54    |
| >NCOA2-G43 MPMGRFGG  | 78    | >NCOA2-G43 MPMDRFGG  | 96   | 18    |
| >NCOA2-G43 MGMPMDRF  | 19    | >NCOA2-G43 MGMPMDRF  | 38   | 19    |
| >NCOA2-G43 MGMPMDRF  | 527   | >NCOA2-G43 MGMPMDRF  | 181  | 346   |
| >NCOA2-G43 QMGMPMDI  | 334   | >NCOA2-G43 QMGMPMDI  | 316  | 18    |
| >NCOA2-G43 QMGMPMDI  | 199   | >NCOA2-G43 QMGMPMDI  | 515  | 316   |
| >NCOA2-G43 QMGMPMDI  | 307   | >NCOA2-G43 QMGMPMDI  | 807  | 500   |
| >NCOA2-G43 QMGMPMDI  | 112   | >NCOA2-G43 QMGMPMDI  | 165  | 53    |
| >NCOA2-G43 EQMGMPME  | 81    | >NCOA2-G43 EQMGMPME  | 91   | 10    |
| >NCOA2-G43 EQMGMPME  | 67    | >NCOA2-G43 EQMGMPME  | 147  | 80    |
| >NCOA2-G43 EQMGMPME  | 257   | >NCOA2-G43 EQMGMPME  | 486  | 229   |
| >NCOA2-G43 EQMGMPME  | 314   | >NCOA2-G43 EQMGMPME  | 207  | 107   |
| >NCOA2-G43 EQMGMPME  | 122   | >NCOA2-G43 EQMGMPME  | 359  | 237   |
| >NCOA2-G43 KEQMGMPM  | 322   | >NCOA2-G43 KEQMGMPM  | 236  | 86    |
| >NCOA2-G43 KEQMGMPM  | 74    | >NCOA2-G43 KEQMGMPM  | 60   | 14    |
| >NCOA2-G43 KEQMGMPM  | 289   | >NCOA2-G43 KEQMGMPM  | 659  | 370   |
| >NCOA2-L12 LMNQISNV  | 46    | >NCOA2-L12 RMNQISNV  | 60   | 14    |

|                       |       |                       |       |       |
|-----------------------|-------|-----------------------|-------|-------|
| >NCOA2-L12 LMNQISNVSI | 64    | >NCOA2-L12 RMNQISNVSI | 84    | 20    |
| >NCOA2-L12 LMNQISNV   | 4     | >NCOA2-L12 RMNQISNV   | 6     | 2     |
| >NCOA2-L12 LMNQISNVSI | 479   | >NCOA2-L12 RMNQISNVSI | 1594  | 1115  |
| >NCOA2-L12 LMNQISNVSI | 4     | >NCOA2-L12 RMNQISNVSI | 6     | 2     |
| >NCOA2-L12 LMNQISNV   | 3     | >NCOA2-L12 RMNQISNV   | 3     | 0     |
| >NCOA2-L12 LMNQISNVSI | 3     | >NCOA2-L12 RMNQISNVSI | 3     | 0     |
| >NCOA2-L12 LMNQISNV   | 75    | >NCOA2-L12 RMNQISNV   | 84    | 9     |
| >NCOA2-L12 LMNQISNVSI | 157   | >NCOA2-L12 RMNQISNVSI | 185   | 28    |
| >NCOA2-L12 LMNQISNV   | 2     | >NCOA2-L12 RMNQISNV   | 3     | 1     |
| >NCOA2-L12 LMNQISNVSI | 3     | >NCOA2-L12 RMNQISNVSI | 3     | 0     |
| >NCOA2-L12 LMNQISNV   | 7     | >NCOA2-L12 RMNQISNV   | 7     | 0     |
| >NCOA2-L12 LMNQISNVSI | 5     | >NCOA2-L12 RMNQISNVSI | 6     | 1     |
| >NCOA2-L12 LMNQISNV   | 9     | >NCOA2-L12 RMNQISNV   | 9     | 0     |
| >NCOA2-L12 LMNQISNVSI | 9     | >NCOA2-L12 RMNQISNVSI | 10    | 1     |
| >NCOA2-L12 LMNQISNV   | 4     | >NCOA2-L12 RMNQISNV   | 8     | 4     |
| >NCOA2-L12 LMNQISNVSI | 3     | >NCOA2-L12 RMNQISNVSI | 6     | 3     |
| >NCOA2-L12 LMNQISNV   | 2     | >NCOA2-L12 RMNQISNV   | 3     | 1     |
| >NCOA2-L12 LMNQISNVSI | 2     | >NCOA2-L12 RMNQISNVSI | 3     | 1     |
| >NCOA2-L12 LMNQISNV   | 7184  | >NCOA2-L12 RMNQISNV   | 381   | 6803  |
| >NCOA2-L12 LMNQISNVSI | 7182  | >NCOA2-L12 RMNQISNVSI | 432   | 6750  |
| >NCOA2-L12 LMNQISNVSI | 5642  | >NCOA2-L12 RMNQISNVSI | 233   | 5409  |
| >NCOA2-L12 LMNQISNVSI | 382   | >NCOA2-L12 RMNQISNVSI | 367   | 15    |
| >NCOA2-L12 LMNQISNV   | 362   | >NCOA2-L12 RMNQISNV   | 185   | 177   |
| >NCOA2-L12 LMNQISNVSI | 170   | >NCOA2-L12 RMNQISNVSI | 96    | 74    |
| >NCOA2-L12 PLMNQISNV  | 265   | >NCOA2-L12 PRMNQISNV  | 22732 | 22467 |
| >NCOA2-L12 PLMNQISNV  | 31    | >NCOA2-L12 PRMNQISNV  | 20704 | 20673 |
| >NCOA2-L12 PLMNQISNV  | 9     | >NCOA2-L12 PRMNQISNV  | 11876 | 11867 |
| >NCOA2-L12 PLMNQISNV  | 7     | >NCOA2-L12 PRMNQISNV  | 16324 | 16317 |
| >NCOA2-L12 PLMNQISNV  | 23    | >NCOA2-L12 PRMNQISNV  | 19431 | 19408 |
| >NCOA2-L12 PLMNQISNV  | 15    | >NCOA2-L12 PRMNQISNV  | 20184 | 20169 |
| >NCOA2-L12 PLMNQISNV  | 4     | >NCOA2-L12 PRMNQISNV  | 16316 | 16312 |
| >NCOA2-L12 PLMNQISNV  | 3     | >NCOA2-L12 PRMNQISNV  | 14528 | 14525 |
| >NCOA2-L12 RLQAQQNRC  | 104   | >NCOA2-L12 RLQAQQNRC  | 20011 | 19907 |
| >NCOA2-L12 RLQAQQNRC  | 431   | >NCOA2-L12 RLQAQQNRC  | 22221 | 21790 |
| >NCOA2-L12 RLQAQQNRC  | 155   | >NCOA2-L12 RLQAQQNRC  | 21060 | 20905 |
| >NCOA2-L12 RLQAQQNRC  | 95    | >NCOA2-L12 RLQAQQNRC  | 22101 | 22006 |
| >NCOA2-L12 RLQAQQNRC  | 13    | >NCOA2-L12 RLQAQQNRC  | 14494 | 14481 |
| >NCOA2-L12 RLQAQQNRC  | 4531  | >NCOA2-L12 RLQAQQNRC  | 14    | 4517  |
| >NCOA2-L12 RLQAQQNRC  | 195   | >NCOA2-L12 RLQAQQNRC  | 8209  | 8014  |
| >NCOA2-L12 RLQAQQNRC  | 451   | >NCOA2-L12 RLQAQQNRC  | 20362 | 19911 |
| >NCOA2-L12 RLQAQQNRC  | 321   | >NCOA2-L12 RLQAQQNRC  | 10275 | 9954  |
| >NCOA2-L12 RLQAQQNRC  | 26051 | >NCOA2-L12 RLQAQQNRC  | 48    | 26003 |
| >NCOA2-L12 QPLMNQISN  | 471   | >NCOA2-L12 QPRMNQISN  | 8633  | 8162  |

|                       |       |                       |       |       |
|-----------------------|-------|-----------------------|-------|-------|
| >NCOA2-L12 QPLMNQISN' | 2418  | >NCOA2-L12 QPRMNQISN  | 388   | 2030  |
| >NCOA2-L12 QPLMNQISN' | 159   | >NCOA2-L12 QPRMNQISN  | 296   | 137   |
| >NCOA2-L12 RQPLMNQISI | 209   | >NCOA2-L12 RQPRMNQIS  | 191   | 18    |
| >NCOA2-L12 RQPLMNQI   | 354   | >NCOA2-L12 RQPRMNQI   | 414   | 60    |
| >NCOA2-L12 RQPLMNQISI | 116   | >NCOA2-L12 RQPRMNQIS  | 134   | 18    |
| >NCOA2-L12 RQPLMNQI   | 481   | >NCOA2-L12 RQPRMNQI   | 433   | 48    |
| >NCOA2-L12 RQPLMNQISI | 515   | >NCOA2-L12 RQPRMNQIS  | 161   | 354   |
| >NCOA2-L12 RQPLMNQISI | 573   | >NCOA2-L12 RQPRMNQIS  | 449   | 124   |
| >NCOA2-L12 NRQPLMNQI  | 260   | >NCOA2-L12 NRQPRMNQI  | 275   | 15    |
| >NCOA2-L12 NRQPLMNQI  | 94    | >NCOA2-L12 NRQPRMNQI  | 107   | 13    |
| >NCOA2-L12 QQNRQPLMI  | 341   | >NCOA2-L12 QQNRQPRMI  | 271   | 70    |
| >NCOA2-L12 QQNRQPLM   | 228   | >NCOA2-L12 QQNRQPRM   | 338   | 110   |
| >NCOA2-L12 QQNRQPLMI  | 432   | >NCOA2-L12 QQNRQPRMI  | 544   | 112   |
| >NCOA2-L12 AQQNRQPL   | 348   | >NCOA2-L12 AQQNRQPR   | 22388 | 22040 |
| >NCOA2-L12 AQQNRQPL   | 10168 | >NCOA2-L12 AQQNRQPR   | 27    | 10141 |
| >NCOA2-L12 AQQNRQPL   | 196   | >NCOA2-L12 AQQNRQPR   | 7706  | 7510  |
| >NCOA2-L12 AQQNRQPLM  | 380   | >NCOA2-L12 AQQNRQPRM  | 317   | 63    |
| >NCOA2-L12 AQQNRQPL   | 46    | >NCOA2-L12 AQQNRQPR   | 579   | 533   |
| >NCOA2-L12 AQQNRQPLM  | 379   | >NCOA2-L12 AQQNRQPRM  | 549   | 170   |
| >NCOA2-L12 AQQNRQPLM  | 196   | >NCOA2-L12 AQQNRQPRM  | 871   | 675   |
| >NCOA2-L12 QAQQNRQPL  | 394   | >NCOA2-L12 QAQQNRQPF  | 22681 | 22287 |
| >NCOA2-L12 QAQQNRQPL  | 19724 | >NCOA2-L12 QAQQNRQPF  | 316   | 19408 |
| >NCOA2-L12 QAQQNRQPL  | 219   | >NCOA2-L12 QAQQNRQPF  | 22204 | 21985 |
| >NCOA2-L12 QAQQNRQPL  | 33789 | >NCOA2-L12 QAQQNRQPF  | 371   | 33418 |
| >NCOA2-L12 LQAQQNRQF  | 87    | >NCOA2-L12 LQAQQNRQF  | 3980  | 3893  |
| >NCOA2-L12 LQAQQNRQF  | 147   | >NCOA2-L12 LQAQQNRQF  | 131   | 16    |
| >NCOA2-L12 LQAQQNRQF  | 37    | >NCOA2-L12 LQAQQNRQF  | 384   | 347   |
| >NCOA2-L12 LQAQQNRQF  | 226   | >NCOA2-L12 LQAQQNRQF  | 321   | 95    |
| >NCOA2-L12 LQAQQNRQF  | 213   | >NCOA2-L12 LQAQQNRQF  | 20231 | 20018 |
| >NCOA2-L12 LQAQQNRQF  | 34198 | >NCOA2-L12 LQAQQNRQF  | 188   | 34010 |
| >NCOA2-P47 PSQSPPGM   | 2214  | >NCOA2-P47 SSQSPPGM   | 22    | 2192  |
| >NCOA2-P47 SPSQSSPGM  | 73    | >NCOA2-P47 SSSQSSPGM  | 29156 | 29083 |
| >NCOA2-P47 SPSQSSPGM  | 57    | >NCOA2-P47 SSSQSSPGM  | 16498 | 16441 |
| >NCOA2-P47 SPSQSSPGM  | 10640 | >NCOA2-P47 SSSQSSPGM  | 233   | 10407 |
| >NCOA2-P47 SPSQSSPGM  | 5760  | >NCOA2-P47 SSSQSSPGM  | 5     | 5755  |
| >NCOA2-P47 SPSQSSPGM  | 30    | >NCOA2-P47 SSSQSSPGM  | 1371  | 1341  |
| >NCOA2-P47 SPSQSSPGM  | 3413  | >NCOA2-P47 SSSQSSPGM  | 184   | 3229  |
| >NCOA2-P47 NSPSQSPPGM | 2233  | >NCOA2-P47 NSSSQSSPGM | 116   | 2117  |
| >NCOA2-P47 NSPSQSPPGM | 128   | >NCOA2-P47 NSSSQSSPGM | 10834 | 10706 |
| >NCOA2-P47 NSPSQSPPGM | 185   | >NCOA2-P47 NSSSQSSPGM | 71    | 114   |
| >NCOA2-P47 MNSPSQSPPG | 487   | >NCOA2-P47 MNSSSQSSPG | 326   | 161   |
| >NCOA2-P47 MNSPSQSPPG | 497   | >NCOA2-P47 MNSSSQSSPG | 617   | 120   |
| >NCOA2-P47 KMNSPSQS   | 745   | >NCOA2-P47 KMNSSSQS   | 386   | 359   |

|                       |       |                       |      |       |
|-----------------------|-------|-----------------------|------|-------|
| >NCOA2-P47 KMNSPSQSS  | 1348  | >NCOA2-P47 KMNSSSQSS  | 338  | 1010  |
| >NCOA2-P47 KMNSPSQSS  | 452   | >NCOA2-P47 KMNSSSQSS  | 1210 | 758   |
| >NCOA2-P47 KMNSPSQSSI | 217   | >NCOA2-P47 KMNSSSQSSI | 150  | 67    |
| >NCOA2-P47 KMNSPSQSS  | 153   | >NCOA2-P47 KMNSSSQSS  | 77   | 76    |
| >NCOA2-P47 KMNSPSQSSI | 159   | >NCOA2-P47 KMNSSSQSSI | 94   | 65    |
| >NCOA2-P47 KMNSPSQSSI | 529   | >NCOA2-P47 KMNSSSQSSI | 365  | 164   |
| >NCOA2-P47 LKMNSPSQ   | 113   | >NCOA2-P47 LKMNSSSQ   | 55   | 58    |
| >NCOA2-P47 LKMNSPSQS  | 99    | >NCOA2-P47 LKMNSSSQS  | 71   | 28    |
| >NCOA2-P47 LKMNSPSQS  | 38    | >NCOA2-P47 LKMNSSSQS  | 26   | 12    |
| >NCOA2-P47 LKMNSPSQS  | 36    | >NCOA2-P47 LKMNSSSQS  | 29   | 7     |
| >NCOA2-P47 ALKMNSPSQ  | 105   | >NCOA2-P47 ALKMNSSSQ  | 257  | 152   |
| >NCOA2-P47 ALKMNSPSQ  | 129   | >NCOA2-P47 ALKMNSSSQ  | 608  | 479   |
| >NCOA2-P47 ALKMNSPSQ  | 428   | >NCOA2-P47 ALKMNSSSQ  | 468  | 40    |
| >NCOA2-P47 ALKMNSPSQ  | 871   | >NCOA2-P47 ALKMNSSSQ  | 473  | 398   |
| >NCOA2-P47 YALKMNSPS  | 2200  | >NCOA2-P47 YALKMNSSS  | 447  | 1753  |
| >NCOA2-P47 YALKMNSPSC | 889   | >NCOA2-P47 YALKMNSSSC | 428  | 461   |
| >NCOA2-Q1C QTAPWPESIL | 314   | >NCOA2-Q1C ETAPWPESIL | 1078 | 764   |
| >NCOA2-Q1C QTAPWPESI  | 314   | >NCOA2-Q1C ETAPWPESI  | 518  | 204   |
| >NCOA2-Q1C QTAPWPESI  | 4668  | >NCOA2-Q1C ETAPWPESI  | 306  | 4362  |
| >NCOA2-Q1C QTAPWPESIL | 604   | >NCOA2-Q1C ETAPWPESIL | 31   | 573   |
| >NCOA2-Q1C QTAPWPESI  | 37    | >NCOA2-Q1C ETAPWPESI  | 189  | 152   |
| >NCOA2-Q1C QTAPWPES   | 414   | >NCOA2-Q1C ETAPWPES   | 57   | 357   |
| >NCOA2-Q1C QTAPWPESI  | 8     | >NCOA2-Q1C ETAPWPESI  | 5    | 3     |
| >NCOA2-Q1C QTAPWPESIL | 819   | >NCOA2-Q1C ETAPWPESIL | 110  | 709   |
| >NCOA2-Q1C QTAPWPES   | 3217  | >NCOA2-Q1C ETAPWPES   | 447  | 2770  |
| >NCOA2-Q1C QTAPWPESI  | 17    | >NCOA2-Q1C ETAPWPESI  | 5    | 12    |
| >NCOA2-Q1C QTAPWPESIL | 335   | >NCOA2-Q1C ETAPWPESIL | 42   | 293   |
| >NCOA2-Q1C QTAPWPESI  | 159   | >NCOA2-Q1C ETAPWPESI  | 763  | 604   |
| >NCOA2-Q1C QTAPWPESIL | 35    | >NCOA2-Q1C ETAPWPESIL | 159  | 124   |
| >NCOA2-Q1C QTAPWPESI  | 231   | >NCOA2-Q1C ETAPWPESI  | 2268 | 2037  |
| >NCOA2-Q1C QTAPWPESIL | 253   | >NCOA2-Q1C ETAPWPESIL | 1181 | 928   |
| >NCOA2-Q1C QTAPWPESI  | 487   | >NCOA2-Q1C ETAPWPESI  | 2273 | 1786  |
| >NCOA2-Q1C QTAPWPESIL | 156   | >NCOA2-Q1C ETAPWPESIL | 1339 | 1183  |
| >NCOA2-Q1C QTAPWPESI  | 9     | >NCOA2-Q1C ETAPWPESI  | 15   | 6     |
| >NCOA2-Q1C QTAPWPESIL | 294   | >NCOA2-Q1C ETAPWPESIL | 1518 | 1224  |
| >NCOA2-Q1C NQTAPWPES  | 3789  | >NCOA2-Q1C NETAPWPESI | 100  | 3689  |
| >NCOA2-Q1C NQTAPWPES  | 136   | >NCOA2-Q1C NETAPWPESI | 1682 | 1546  |
| >NCOA2-Q1C NQTAPWPES  | 5180  | >NCOA2-Q1C NETAPWPESI | 99   | 5081  |
| >NCOA2-Q1C NQTAPWPES  | 25433 | >NCOA2-Q1C NETAPWPESI | 419  | 25014 |
| >NCOA2-Q1C NQTAPWPES  | 13991 | >NCOA2-Q1C NETAPWPES  | 158  | 13833 |
| >NCOA2-Q1C NQTAPWPES  | 218   | >NCOA2-Q1C NETAPWPESI | 3651 | 3433  |
| >NCOA2-Q1C NQTAPWPES  | 17230 | >NCOA2-Q1C NETAPWPESI | 187  | 17043 |
| >NCOA2-Q1C NQTAPWPES  | 15025 | >NCOA2-Q1C NETAPWPESI | 361  | 14664 |

|                      |     |                       |      |     |
|----------------------|-----|-----------------------|------|-----|
| >NCOA2-Q1C PPNQTAPW  | 39  | >NCOA2-Q1C PPNETAPW   | 30   | 9   |
| >NCOA2-Q1C PPNQTAPW  | 16  | >NCOA2-Q1C PPNETAPW   | 14   | 2   |
| >NCOA2-Q1C APPNQTAPW | 312 | >NCOA2-Q1C APPNETAPW  | 1147 | 835 |
| >NCOA2-Q1C APPNQTAPW | 205 | >NCOA2-Q1C APPNETAPW  | 150  | 55  |
| >NCOA2-Q1C APPNQTAPW | 21  | >NCOA2-Q1C APPNETAPW  | 28   | 7   |
| >NCOA2-Q1C APPNQTAPW | 306 | >NCOA2-Q1C APPNETAPW  | 98   | 208 |
| >NCOA2-Q1C QAPPNQTAP | 152 | >NCOA2-Q1C QAPPNETAP\ | 215  | 63  |
| >NCOA2-Q1C QAPPNQTAP | 359 | >NCOA2-Q1C QAPPNETAP\ | 383  | 24  |
| >NCOA2-Q1C QQAPPNQTA | 189 | >NCOA2-Q1C QQAPPNETA  | 104  | 85  |
| >NCOA2-Q1C QQAPPNQTA | 200 | >NCOA2-Q1C QQAPPNETA  | 233  | 33  |
| >NCOA2-Q1C QQAPPNQTA | 430 | >NCOA2-Q1C QQAPPNETA  | 811  | 381 |
| >NCOA2-Q1C QQAPPNQTA | 306 | >NCOA2-Q1C QQAPPNETA  | 892  | 586 |
| >NCOA2-Q1C QQAPPNQTA | 116 | >NCOA2-Q1C QQAPPNETA  | 158  | 42  |
| >NCOA2-Q1C QQAPPNQTA | 243 | >NCOA2-Q1C QQAPPNETA  | 509  | 266 |
| >NCOA2-Q1C QQAPPNQTA | 226 | >NCOA2-Q1C QQAPPNETA  | 104  | 122 |
| >NF1-A1858\LLNIALLN  | 420 | >NF1-A1858\LLNITLLNL  | 320  | 100 |
| >NF1-A1858\LLNIALLN  | 132 | >NF1-A1858\LLNITLLNL  | 192  | 60  |
| >NF1-A1858\LLNIALLN  | 23  | >NF1-A1858\LLNITLLNL  | 73   | 50  |
| >NF1-A1858\LLNIALLN  | 30  | >NF1-A1858\LLNITLLNL  | 37   | 7   |
| >NF1-A1858\LLNIALLN  | 37  | >NF1-A1858\LLNITLLNL  | 19   | 18  |
| >NF1-A1858\LLNIALLN  | 218 | >NF1-A1858\LLNITLLNL  | 95   | 123 |
| >NF1-A1858\LLNIALLN  | 33  | >NF1-A1858\LLNITLLNL  | 34   | 1   |
| >NF1-A1858\LLNIALLN  | 92  | >NF1-A1858\LLNITLLNL  | 122  | 30  |
| >NF1-A1858\LLNIALLN  | 4   | >NF1-A1858\LLNITLLNL  | 4    | 0   |
| >NF1-A1858\TLLNIAL   | 28  | >NF1-A1858\TLLNITLL   | 21   | 7   |
| >NF1-A1858\TLLNIALLN | 20  | >NF1-A1858\TLLNITLLNL | 20   | 0   |
| >NF1-A1858\TLLNIAL   | 40  | >NF1-A1858\TLLNITLL   | 22   | 18  |
| >NF1-A1858\TLLNIALLN | 24  | >NF1-A1858\TLLNITLLNL | 20   | 4   |
| >NF1-A1858\TLLNIAL   | 109 | >NF1-A1858\TLLNITLL   | 71   | 38  |
| >NF1-A1858\TLLNIALLN | 32  | >NF1-A1858\TLLNITLLNL | 24   | 8   |
| >NF1-A1858\TLLNIAL   | 83  | >NF1-A1858\TLLNITLL   | 64   | 19  |
| >NF1-A1858\TLLNIALLN | 51  | >NF1-A1858\TLLNITLLNL | 44   | 7   |
| >NF1-A1858\TLLNIAL   | 8   | >NF1-A1858\TLLNITLL   | 10   | 2   |
| >NF1-A1858\TLLNIALLN | 21  | >NF1-A1858\TLLNITLLNL | 14   | 7   |
| >NF1-A1858\TLLNIAL   | 13  | >NF1-A1858\TLLNITLL   | 18   | 5   |
| >NF1-A1858\TLLNIALLN | 37  | >NF1-A1858\TLLNITLLNL | 20   | 17  |
| >NF1-A1858\TLLNIAL   | 16  | >NF1-A1858\TLLNITLL   | 15   | 1   |
| >NF1-A1858\TLLNIALLN | 15  | >NF1-A1858\TLLNITLLNL | 13   | 2   |
| >NF1-A1858\TLLNIAL   | 11  | >NF1-A1858\TLLNITLL   | 14   | 3   |
| >NF1-A1858\TLLNIALLN | 22  | >NF1-A1858\TLLNITLLNL | 12   | 10  |
| >NF1-A1858\TLLNIAL   | 5   | >NF1-A1858\TLLNITLL   | 5    | 0   |
| >NF1-A1858\TLLNIALLN | 9   | >NF1-A1858\TLLNITLLNL | 7    | 2   |
| >NF1-A1858\TLLNIAL   | 957 | >NF1-A1858\TLLNITLL   | 438  | 519 |

|                       |      |                       |      |      |
|-----------------------|------|-----------------------|------|------|
| >NF1-A1858TLLNIALLN   | 540  | >NF1-A1858TLLNITLLNL  | 244  | 296  |
| >NF1-A1858TLLNIAL     | 373  | >NF1-A1858TLLNITLL    | 590  | 217  |
| >NF1-A1858TLLNIALLN   | 243  | >NF1-A1858TLLNITLLNL  | 208  | 35   |
| >NF1-A1858TLLNIALLN   | 361  | >NF1-A1858TLLNITLLNL  | 454  | 93   |
| >NF1-A1858GTLLNIAL    | 827  | >NF1-A1858GTLLNITLL   | 187  | 640  |
| >NF1-A1858GTLLNIAL    | 467  | >NF1-A1858GTLLNITLL   | 2560 | 2093 |
| >NF1-A1858GTLLNIAL    | 496  | >NF1-A1858GTLLNITL    | 227  | 269  |
| >NF1-A1858GTLLNIAL    | 49   | >NF1-A1858GTLLNITL    | 23   | 26   |
| >NF1-A1858GTLLNIAL    | 24   | >NF1-A1858GTLLNITLL   | 59   | 35   |
| >NF1-A1858GTLLNIALLN  | 14   | >NF1-A1858GTLLNITLLNL | 19   | 5    |
| >NF1-A1858GTLLNIAL    | 232  | >NF1-A1858GTLLNITLL   | 915  | 683  |
| >NF1-A1858GTLLNIAL    | 209  | >NF1-A1858GTLLNITLL   | 78   | 131  |
| >NF1-A1858GTLLNIALLN  | 920  | >NF1-A1858GTLLNITLLNL | 493  | 427  |
| >NF1-A1858VPGTLLNIAL  | 492  | >NF1-A1858VPGTLLNITL  | 324  | 168  |
| >NF1-A1858VPGTLLNIA   | 66   | >NF1-A1858VPGTLLNIT   | 1456 | 1390 |
| >NF1-A1858DVPGTLLNIA  | 237  | >NF1-A1858DVPGTLLNITI | 488  | 251  |
| >NF1-A1858DVPGTLLNIA  | 211  | >NF1-A1858DVPGTLLNITI | 258  | 47   |
| >NF1-A1858DVPGTLLNIA  | 377  | >NF1-A1858DVPGTLLNITI | 633  | 256  |
| >NF1-A2336TALLEQNLHT  | 273  | >NF1-A2336TALLEQNLHT  | 725  | 452  |
| >NF1-A2336TALLEQNLHTL | 40   | >NF1-A2336TALLEQNLHTL | 39   | 1    |
| >NF1-A2336TALLEQNLHTL | 31   | >NF1-A2336TALLEQNLHTL | 39   | 8    |
| >NF1-A2336TALLEQNLHTL | 37   | >NF1-A2336TALLEQNLHTL | 35   | 2    |
| >NF1-A2336TALLEQNLHT  | 228  | >NF1-A2336TALLEQNLHT  | 584  | 356  |
| >NF1-A2336TALLEQNLHTL | 225  | >NF1-A2336TALLEQNLHTL | 185  | 40   |
| >NF1-A2336TALLEQNLHT  | 78   | >NF1-A2336TALLEQNLHT  | 341  | 263  |
| >NF1-A2336TALLEQNLHTL | 2    | >NF1-A2336TALLEQNLHTL | 4    | 2    |
| >NF1-A2336TALLEQNLHT  | 306  | >NF1-A2336TALLEQNLHT  | 977  | 671  |
| >NF1-A2336TALLEQNLHTL | 3    | >NF1-A2336TALLEQNLHTL | 4    | 1    |
| >NF1-A2336TALLEQNLHT  | 64   | >NF1-A2336TALLEQNLHT  | 218  | 154  |
| >NF1-A2336TALLEQNLHTL | 5    | >NF1-A2336TALLEQNLHTL | 8    | 3    |
| >NF1-A2336TALLEQNLHTL | 5    | >NF1-A2336TALLEQNLHTL | 7    | 2    |
| >NF1-A2336TALLEQNLHT  | 35   | >NF1-A2336TALLEQNLHT  | 237  | 202  |
| >NF1-A2336TALLEQNLHTL | 2    | >NF1-A2336TALLEQNLHTL | 3    | 1    |
| >NF1-A2336TALLEQNLHTL | 134  | >NF1-A2336TALLEQNLHTL | 506  | 372  |
| >NF1-A2336TALLEQNLHTL | 761  | >NF1-A2336TALLEQNLHTL | 50   | 711  |
| >NF1-A2336TALLEQNLHTL | 1356 | >NF1-A2336TALLEQNLHTL | 372  | 984  |
| >NF1-A2336TALLEQNLHT  | 472  | >NF1-A2336TTALLEQNLHT | 2593 | 2121 |
| >NF1-A2336TALLEQNLHT  | 6484 | >NF1-A2336TTALLEQNLHT | 361  | 6123 |
| >NF1-A2336TALLEQNLHT  | 538  | >NF1-A2336TTALLEQNLHT | 110  | 428  |
| >NF1-A2336TALLEQNL    | 2241 | >NF1-A2336TTALLEQNL   | 137  | 2104 |
| >NF1-A2336TALLEQNLHT  | 643  | >NF1-A2336TTALLEQNLHT | 66   | 577  |
| >NF1-A2336DEVNLYSAGT  | 79   | >NF1-A2336DEVNLYSAGT  | 169  | 90   |
| >NF1-A2336GTALLEQNL   | 244  | >NF1-A2336GTALLEQNL   | 439  | 195  |

|                       |     |                      |      |      |
|-----------------------|-----|----------------------|------|------|
| >NF1-A23361YSAGTALL   | 49  | >NF1-A23361YSAGTTLL  | 36   | 13   |
| >NF1-A23361YSAGTALL   | 252 | >NF1-A23361YSAGTTLL  | 251  | 1    |
| >NF1-A23361YSAGTALL   | 109 | >NF1-A23361YSAGTTLL  | 108  | 1    |
| >NF1-A23361YSAGTALL   | 7   | >NF1-A23361YSAGTTLL  | 11   | 4    |
| >NF1-A23361YSAGTALL   | 71  | >NF1-A23361YSAGTTLL  | 171  | 100  |
| >NF1-A23361YSAGTALL   | 131 | >NF1-A23361YSAGTTLL  | 149  | 18   |
| >NF1-A23361YSAGTALL   | 22  | >NF1-A23361YSAGTTLL  | 65   | 43   |
| >NF1-A23361YSAGTALL   | 25  | >NF1-A23361YSAGTTLL  | 16   | 9    |
| >NF1-A23361YSAGTALL   | 256 | >NF1-A23361YSAGTTLL  | 234  | 22   |
| >NF1-A23361LYSAGTAL   | 13  | >NF1-A23361LYSAGTTL  | 4    | 9    |
| >NF1-A23361LYSAGTALL  | 154 | >NF1-A23361LYSAGTTL  | 9    | 145  |
| >NF1-A23361LYSAGTAL   | 397 | >NF1-A23361LYSAGTTL  | 698  | 301  |
| >NF1-A23361LYSAGTALL  | 60  | >NF1-A23361LYSAGTTL  | 95   | 35   |
| >NF1-A23361LYSAGTALL  | 369 | >NF1-A23361LYSAGTTL  | 582  | 213  |
| >NF1-A23361LYSAGTAL   | 15  | >NF1-A23361LYSAGTTL  | 10   | 5    |
| >NF1-A23361LYSAGTALL  | 8   | >NF1-A23361LYSAGTTL  | 10   | 2    |
| >NF1-A23361NLYSAGTAL  | 315 | >NF1-A23361NLYSAGTTL | 307  | 8    |
| >NF1-A23361NLYSAGTALL | 177 | >NF1-A23361NLYSAGTTL | 197  | 20   |
| >NF1-A23361NLYSAGTA   | 432 | >NF1-A23361NLYSAGTT  | 2387 | 1955 |
| >NF1-A23361NLYSAGTAL  | 12  | >NF1-A23361NLYSAGTTL | 30   | 18   |
| >NF1-A23361NLYSAGTALL | 9   | >NF1-A23361NLYSAGTTL | 9    | 0    |
| >NF1-A23361NLYSAGTA   | 14  | >NF1-A23361NLYSAGTT  | 107  | 93   |
| >NF1-A23361NLYSAGTAL  | 11  | >NF1-A23361NLYSAGTTL | 12   | 1    |
| >NF1-A23361NLYSAGTALL | 14  | >NF1-A23361NLYSAGTTL | 15   | 1    |
| >NF1-A23361NLYSAGTAL  | 247 | >NF1-A23361NLYSAGTTL | 597  | 350  |
| >NF1-A23361NLYSAGTA   | 63  | >NF1-A23361NLYSAGTT  | 506  | 443  |
| >NF1-A23361NLYSAGTAL  | 18  | >NF1-A23361NLYSAGTTL | 15   | 3    |
| >NF1-A23361NLYSAGTALL | 16  | >NF1-A23361NLYSAGTTL | 25   | 9    |
| >NF1-A23361NLYSAGTA   | 311 | >NF1-A23361NLYSAGTT  | 3717 | 3406 |
| >NF1-A23361NLYSAGTAL  | 68  | >NF1-A23361NLYSAGTTL | 37   | 31   |
| >NF1-A23361NLYSAGTALL | 41  | >NF1-A23361NLYSAGTTL | 100  | 59   |
| >NF1-A23361NLYSAGTA   | 242 | >NF1-A23361NLYSAGTT  | 2793 | 2551 |
| >NF1-A23361NLYSAGTAL  | 74  | >NF1-A23361NLYSAGTTL | 23   | 51   |
| >NF1-A23361NLYSAGTALL | 36  | >NF1-A23361NLYSAGTTL | 31   | 5    |
| >NF1-A23361NLYSAGTAL  | 653 | >NF1-A23361NLYSAGTTL | 417  | 236  |
| >NF1-A23361NLYSAGTALL | 106 | >NF1-A23361NLYSAGTTL | 264  | 158  |
| >NF1-A23361NLYSAGTA   | 95  | >NF1-A23361NLYSAGTT  | 1030 | 935  |
| >NF1-A23361NLYSAGTAL  | 22  | >NF1-A23361NLYSAGTTL | 13   | 9    |
| >NF1-A23361NLYSAGTALL | 12  | >NF1-A23361NLYSAGTTL | 12   | 0    |
| >NF1-A23361NLYSAGTALL | 181 | >NF1-A23361NLYSAGTTL | 379  | 198  |
| >NF1-A23361NLYSAGTAL  | 191 | >NF1-A23361NLYSAGTTL | 361  | 170  |
| >NF1-A23361NLYSAGTAL  | 78  | >NF1-A23361NLYSAGTTL | 129  | 51   |
| >NF1-A23361NLYSAGTALL | 216 | >NF1-A23361NLYSAGTTL | 267  | 51   |

|                         |      |                         |       |       |
|-------------------------|------|-------------------------|-------|-------|
| >NF1-A2336V NLYSAGTAL   | 63   | >NF1-A2336V NLYSAGTTL   | 125   | 62    |
| >NF1-A2336V NLYSAGTAL   | 160  | >NF1-A2336V NLYSAGTTL   | 611   | 451   |
| >NF1-A2336V NLYSAGTALL  | 258  | >NF1-A2336V NLYSAGTTL   | 656   | 398   |
| >NF1-A2336V NLYSAGTAL   | 361  | >NF1-A2336V NLYSAGTTL   | 486   | 125   |
| >NF1-A2336V NLYSAGTAL   | 414  | >NF1-A2336V NLYSAGTTL   | 624   | 210   |
| >NF1-A2336V EVNLYSAGTA  | 207  | >NF1-A2336V EVNLYSAGTT  | 658   | 451   |
| >NF1-A2336V EVNLYSAGTA  | 55   | >NF1-A2336V EVNLYSAGTT  | 81    | 26    |
| >NF1-A2336V EVNLYSAGTA  | 291  | >NF1-A2336V EVNLYSAGTT  | 1969  | 1678  |
| >NF1-A2336V EVNLYSAGTA  | 73   | >NF1-A2336V EVNLYSAGTT  | 99    | 26    |
| >NF1-A74D-v AAEKNLYLSQ  | 369  | >NF1-A74D-r DAEKNLYLSQ  | 8868  | 8499  |
| >NF1-A74D-v EAAEKNL     | 68   | >NF1-A74D-r EDAEKNL     | 3849  | 3781  |
| >NF1-A74D-v EAAEKNL     | 130  | >NF1-A74D-r EDAEKNL     | 6424  | 6294  |
| >NF1-A74D-v EAAEKNL     | 33   | >NF1-A74D-r EDAEKNL     | 2569  | 2536  |
| >NF1-A74D-v EAAEKNL     | 20   | >NF1-A74D-r EDAEKNL     | 4358  | 4338  |
| >NF1-A74D-v EAAEKNL     | 173  | >NF1-A74D-r EDAEKNL     | 5848  | 5675  |
| >NF1-A74D-v NVNNMRIFG   | 39   | >NF1-A74D-r NVNNMRIFG   | 8019  | 7980  |
| >NF1-A74D-v GEAAEKNL    | 129  | >NF1-A74D-r GEAAEKNL    | 86    | 43    |
| >NF1-A74D-v GEAAEKNL    | 376  | >NF1-A74D-r GEAAEKNL    | 828   | 452   |
| >NF1-A74D-v GEAAEKNL    | 142  | >NF1-A74D-r GEAAEKNL    | 202   | 60    |
| >NF1-A74D-v GEAAEKNL    | 384  | >NF1-A74D-r GEAAEKNL    | 1188  | 804   |
| >NF1-A74D-v FGEEAENLY   | 1030 | >NF1-A74D-r FGEEAENLY   | 421   | 609   |
| >NF1-A74D-v IFGEAAEKNL' | 32   | >NF1-A74D-r IFGEAAEKNL' | 31    | 1     |
| >NF1-A74D-v IFGEAAEKNL' | 389  | >NF1-A74D-r IFGEAAEKNL' | 375   | 14    |
| >NF1-A74D-v RIFGEAAEKN  | 204  | >NF1-A74D-r RIFGEAAEKN  | 234   | 30    |
| >NF1-A74D-v RIFGEAAEKN  | 353  | >NF1-A74D-r RIFGEAAEKN  | 490   | 137   |
| >NF1-A74D-v RIFGEAAEKN  | 243  | >NF1-A74D-r RIFGEAAEKN  | 232   | 11    |
| >NF1-A74D-v RIFGEAAEK   | 49   | >NF1-A74D-r RIFGEAAEK   | 170   | 121   |
| >NF1-A74D-v RIFGEAAEK   | 24   | >NF1-A74D-r RIFGEAAEK   | 57    | 33    |
| >NF1-A74D-v RIFGEAAEK   | 29   | >NF1-A74D-r RIFGEAAEK   | 84    | 55    |
| >NF1-A74D-v RIFGEAAEKN  | 56   | >NF1-A74D-r RIFGEAAEKN  | 95    | 39    |
| >NF1-A74D-v RIFGEAAEK   | 198  | >NF1-A74D-r RIFGEAAEK   | 358   | 160   |
| >NF1-A74D-v RIFGEAAEKN  | 92   | >NF1-A74D-r RIFGEAAEKN  | 150   | 58    |
| >NF1-A74D-v RIFGEAAEK   | 332  | >NF1-A74D-r RIFGEAAEK   | 365   | 33    |
| >NF1-A74D-v MRIFGEAAEK  | 219  | >NF1-A74D-r MRIFGEAAEK  | 249   | 30    |
| >NF1-A74D-v MRIFGEAAEK  | 374  | >NF1-A74D-r MRIFGEAAEK  | 316   | 58    |
| >NF1-A74D-v NMRIFGEA    | 207  | >NF1-A74D-r NMRIFGED    | 20074 | 19867 |
| >NF1-A74D-v NMRIFGEAAI  | 268  | >NF1-A74D-r NMRIFGEDAI  | 561   | 293   |
| >NF1-A74D-v NMRIFGEA    | 132  | >NF1-A74D-r NMRIFGED    | 14311 | 14179 |
| >NF1-C1882F CTFNLKIEGQI | 327  | >NF1-C1882F CTFNLKIEGQI | 399   | 72    |
| >NF1-C1882F CTFNLKIEGQI | 1928 | >NF1-C1882F CTFNLKIEGQI | 80    | 1848  |
| >NF1-C1882F CTFNLKIEGQI | 4067 | >NF1-C1882F CTFNLKIEGQI | 70    | 3997  |
| >NF1-C1882F CTFNLKIEGQI | 150  | >NF1-C1882F CTFNLKIEGQI | 27    | 123   |
| >NF1-C1882F CTFNLKIEGQI | 5552 | >NF1-C1882F CTFNLKIEGQI | 235   | 5317  |



|                       |       |                       |     |       |
|-----------------------|-------|-----------------------|-----|-------|
| >NF1-C1882FTFNLKIEGQI | 319   | >NF1-C1882FTFNLKIEGQI | 36  | 283   |
| >NF1-C1882FTFNLKIEGQI | 85    | >NF1-C1882FTFNLKIEGQI | 15  | 70    |
| >NF1-C1882FTFNLKIEGQI | 67    | >NF1-C1882FTFNLKIEGQI | 165 | 98    |
| >NF1-C1882FAAYNLLCALT | 2062  | >NF1-C1882FAAYNLLCALT | 118 | 1944  |
| >NF1-C1882FAAYNLLCALT | 3476  | >NF1-C1882FAAYNLLCALT | 51  | 3425  |
| >NF1-C1882FAAYNLLCALT | 14581 | >NF1-C1882FAAYNLLCALT | 74  | 14507 |
| >NF1-C1882FAAYNLLCALT | 4998  | >NF1-C1882FAAYNLLCALT | 11  | 4987  |
| >NF1-C1882FAAYNLLCALT | 3597  | >NF1-C1882FAAYNLLCALT | 4   | 3593  |
| >NF1-C1882FAAYNLLCALT | 12064 | >NF1-C1882FAAYNLLCALT | 92  | 11972 |
| >NF1-C1882FAAYNLLCALT | 9982  | >NF1-C1882FAAYNLLCALT | 368 | 9614  |
| >NF1-C1882FAAYNLLCALT | 14256 | >NF1-C1882FAAYNLLCALT | 112 | 14144 |
| >NF1-C1882FAAYNLLCALT | 11211 | >NF1-C1882FAAYNLLCALT | 86  | 11125 |
| >NF1-C1882FLTCTFNLK   | 229   | >NF1-C1882FLTFTFNLK   | 46  | 183   |
| >NF1-C1882FLTCTFNLK   | 15    | >NF1-C1882FLTFTFNLK   | 9   | 6     |
| >NF1-C1882FLTCTFNLK   | 59    | >NF1-C1882FLTFTFNLK   | 13  | 46    |
| >NF1-C1882FLTCTFNLKI  | 1846  | >NF1-C1882FLTFTFNLKI  | 275 | 1571  |
| >NF1-C1882FLTCTFNLK   | 479   | >NF1-C1882FLTFTFNLK   | 110 | 369   |
| >NF1-C1882FLTCTFNLKI  | 467   | >NF1-C1882FLTFTFNLKI  | 27  | 440   |
| >NF1-C1882FLTCTFNLK   | 21    | >NF1-C1882FLTFTFNLK   | 4   | 17    |
| >NF1-C1882FLTCTFNLKI  | 1950  | >NF1-C1882FLTFTFNLKI  | 83  | 1867  |
| >NF1-C1882FLTCTFNLKI  | 4701  | >NF1-C1882FLTFTFNLKI  | 226 | 4475  |
| >NF1-C1882FLTCTFNLKI  | 3157  | >NF1-C1882FLTFTFNLKI  | 244 | 2913  |
| >NF1-C1882FLTCTFNLKI  | 120   | >NF1-C1882FLTFTFNLKI  | 20  | 100   |
| >NF1-C1882FLTCTFNLKI  | 3309  | >NF1-C1882FLTFTFNLKI  | 214 | 3095  |
| >NF1-C1882FLTCTFNLKI  | 515   | >NF1-C1882FLTFTFNLKI  | 250 | 265   |
| >NF1-C1882FLTCTFNLKI  | 313   | >NF1-C1882FLTFTFNLKI  | 31  | 282   |
| >NF1-C1882FLTCTFNLK   | 579   | >NF1-C1882FLTFTFNLK   | 135 | 444   |
| >NF1-C1882FLTCTFNLKI  | 20    | >NF1-C1882FLTFTFNLKI  | 9   | 11    |
| >NF1-C1882FALTCTFNL   | 54    | >NF1-C1882FALTFTFNL   | 87  | 33    |
| >NF1-C1882FALTCTFNL   | 10    | >NF1-C1882FALTFTFNL   | 11  | 1     |
| >NF1-C1882FALTCTFNLKI | 130   | >NF1-C1882FALTFTFNLKI | 178 | 48    |
| >NF1-C1882FALTCTFNL   | 58    | >NF1-C1882FALTFTFNL   | 69  | 11    |
| >NF1-C1882FALTCTFNLKI | 276   | >NF1-C1882FALTFTFNLKI | 365 | 89    |
| >NF1-C1882FALTCTFNL   | 84    | >NF1-C1882FALTFTFNL   | 161 | 77    |
| >NF1-C1882FALTCTFNL   | 33    | >NF1-C1882FALTFTFNL   | 45  | 12    |
| >NF1-C1882FALTCTFNLKI | 84    | >NF1-C1882FALTFTFNLKI | 175 | 91    |
| >NF1-C1882FALTCTFNL   | 10    | >NF1-C1882FALTFTFNL   | 39  | 29    |
| >NF1-C1882FALTCTFNLKI | 89    | >NF1-C1882FALTFTFNLKI | 578 | 489   |
| >NF1-C1882FALTCTFNL   | 28    | >NF1-C1882FALTFTFNL   | 24  | 4     |
| >NF1-C1882FALTCTFNLKI | 177   | >NF1-C1882FALTFTFNLKI | 177 | 0     |
| >NF1-C1882FALTCTFNL   | 119   | >NF1-C1882FALTFTFNL   | 76  | 43    |
| >NF1-C1882FALTCTFNL   | 5     | >NF1-C1882FALTFTFNL   | 4   | 1     |
| >NF1-C1882FALTCTFNLKI | 42    | >NF1-C1882FALTFTFNLKI | 23  | 19    |

|                        |      |                        |     |      |
|------------------------|------|------------------------|-----|------|
| >NF1-C1882FALTCTFNLK   | 91   | >NF1-C1882FALTFTFNLK   | 61  | 30   |
| >NF1-C1882FALTCTFNLK   | 42   | >NF1-C1882FALTFTFNLK   | 24  | 18   |
| >NF1-C1882FALTCTFNLK   | 196  | >NF1-C1882FALTFTFNLK   | 130 | 66   |
| >NF1-C1882FALTCTFNLKI  | 632  | >NF1-C1882FALTFTFNLKI  | 363 | 269  |
| >NF1-C1882FALTCTFNLK   | 892  | >NF1-C1882FALTFTFNLK   | 359 | 533  |
| >NF1-C1882FCALTCTFNL   | 1326 | >NF1-C1882FCALTFTFNL   | 163 | 1163 |
| >NF1-C1882FCALTCTFNLK  | 142  | >NF1-C1882FCALTFTFNLK  | 112 | 30   |
| >NF1-C1882FCALTCTFNLK  | 112  | >NF1-C1882FCALTFTFNLK  | 62  | 50   |
| >NF1-C1882FCALTCTFNLK  | 446  | >NF1-C1882FCALTFTFNLK  | 142 | 304  |
| >NF1-C1882FCALTCTFNLK  | 429  | >NF1-C1882FCALTFTFNLK  | 466 | 37   |
| >NF1-C1882FCALTCTFNLK  | 272  | >NF1-C1882FCALTFTFNLK  | 196 | 76   |
| >NF1-C1882FCALTCTFNL   | 2359 | >NF1-C1882FCALTFTFNL   | 100 | 2259 |
| >NF1-C1882FCALTCTFNL   | 151  | >NF1-C1882FCALTFTFNL   | 326 | 175  |
| >NF1-C1882FCALTCTFNLKI | 231  | >NF1-C1882FCALTFTFNLKI | 383 | 152  |
| >NF1-C1882FCALTCTFNLK  | 804  | >NF1-C1882FCALTFTFNLK  | 456 | 348  |
| >NF1-C1882FCALTCTFNLK  | 486  | >NF1-C1882FCALTFTFNLK  | 456 | 30   |
| >NF1-C1882FCALTCTFNL   | 356  | >NF1-C1882FCALTFTFNL   | 268 | 88   |
| >NF1-C1882FCALTCTFNLKI | 33   | >NF1-C1882FCALTFTFNLKI | 29  | 4    |
| >NF1-C1882FLCALTCTF    | 338  | >NF1-C1882FLCALTFTF    | 351 | 13   |
| >NF1-C1882FLCALTCT     | 2844 | >NF1-C1882FLCALTFT     | 434 | 2410 |
| >NF1-C1882FLCALTCTFNL  | 27   | >NF1-C1882FLCALTFTFNL  | 16  | 11   |
| >NF1-C1882FLCALTCT     | 404  | >NF1-C1882FLCALTFT     | 63  | 341  |
| >NF1-C1882FLCALTCTFNL  | 10   | >NF1-C1882FLCALTFTFNL  | 7   | 3    |
| >NF1-C1882FLCALTCT     | 1050 | >NF1-C1882FLCALTFT     | 218 | 832  |
| >NF1-C1882FLCALTCTFNL  | 87   | >NF1-C1882FLCALTFTFNL  | 84  | 3    |
| >NF1-C1882FLCALTCTFNL  | 102  | >NF1-C1882FLCALTFTFNL  | 56  | 46   |
| >NF1-C1882FLCALTCT     | 1272 | >NF1-C1882FLCALTFT     | 172 | 1100 |
| >NF1-C1882FLCALTCTF    | 347  | >NF1-C1882FLCALTFTF    | 217 | 130  |
| >NF1-C1882FLCALTCTFNL  | 14   | >NF1-C1882FLCALTFTFNL  | 8   | 6    |
| >NF1-C1882FLCALTCTFNL  | 83   | >NF1-C1882FLCALTFTFNL  | 62  | 21   |
| >NF1-C1882FLCALTCTFNL  | 44   | >NF1-C1882FLCALTFTFNL  | 31  | 13   |
| >NF1-C1882FLCALTCTFNL  | 31   | >NF1-C1882FLCALTFTFNL  | 23  | 8    |
| >NF1-C1882FLCALTCT     | 159  | >NF1-C1882FLCALTFT     | 50  | 109  |
| >NF1-C1882FLCALTCTF    | 416  | >NF1-C1882FLCALTFTF    | 578 | 162  |
| >NF1-C1882FLCALTCTFNL  | 3    | >NF1-C1882FLCALTFTFNL  | 3   | 0    |
| >NF1-C1882FLCALTCTF    | 1471 | >NF1-C1882FLCALTFTF    | 216 | 1255 |
| >NF1-C1882FLCALTCTF    | 55   | >NF1-C1882FLCALTFTF    | 23  | 32   |
| >NF1-C1882FLCALTCTFNL  | 1131 | >NF1-C1882FLCALTFTFNL  | 381 | 750  |
| >NF1-C1882FLCALTCTF    | 33   | >NF1-C1882FLCALTFTF    | 47  | 14   |
| >NF1-C1882FLCALTCTF    | 140  | >NF1-C1882FLCALTFTF    | 150 | 10   |
| >NF1-C1882FLCALTCTF    | 350  | >NF1-C1882FLCALTFTF    | 319 | 31   |
| >NF1-C1882FLCALTCTF    | 642  | >NF1-C1882FLCALTFTF    | 194 | 448  |
| >NF1-C1882FLCALTCTF    | 955  | >NF1-C1882FLCALTFTF    | 265 | 690  |

|                        |       |                        |      |       |
|------------------------|-------|------------------------|------|-------|
| >NF1-C1882FNLLCALTCT   | 1655  | >NF1-C1882FNLLCALTFT   | 246  | 1409  |
| >NF1-C1882FNLLCALTCTF  | 1757  | >NF1-C1882FNLLCALTFTF  | 443  | 1314  |
| >NF1-C1882FNLLCALTCT   | 2531  | >NF1-C1882FNLLCALTFT   | 315  | 2216  |
| >NF1-C1882FNLLCALTCT   | 1120  | >NF1-C1882FNLLCALTFT   | 177  | 943   |
| >NF1-C1882FNLLCALTCT   | 583   | >NF1-C1882FNLLCALTFT   | 56   | 527   |
| >NF1-C1882FNLLCALTC    | 237   | >NF1-C1882FNLLCALTF    | 2505 | 2268  |
| >NF1-C1882FNLLCALTCT   | 2995  | >NF1-C1882FNLLCALTFT   | 311  | 2684  |
| >NF1-C1882FNLLCALTC    | 122   | >NF1-C1882FNLLCALTF    | 2035 | 1913  |
| >NF1-C1882FNLLCALTCT   | 678   | >NF1-C1882FNLLCALTFT   | 250  | 428   |
| >NF1-C1882FNLLCALTCTF  | 854   | >NF1-C1882FNLLCALTFTF  | 416  | 438   |
| >NF1-C1882FNLLCALTCT   | 777   | >NF1-C1882FNLLCALTFT   | 275  | 502   |
| >NF1-C1882FNLLCALTC    | 26426 | >NF1-C1882FNLLCALTF    | 287  | 26139 |
| >NF1-C1882FNLLCALTCTF  | 1735  | >NF1-C1882FNLLCALTFTF  | 337  | 1398  |
| >NF1-C1882FNLLCALTCTF  | 273   | >NF1-C1882FNLLCALTFTF  | 146  | 127   |
| >NF1-C1882FNLLCALTC    | 18360 | >NF1-C1882FNLLCALTF    | 434  | 17926 |
| >NF1-C1882FNLLCALTCTF  | 193   | >NF1-C1882FNLLCALTFTF  | 421  | 228   |
| >NF1-C1882FNLLCALTC    | 20543 | >NF1-C1882FNLLCALTF    | 328  | 20215 |
| >NF1-C1882FNLLCALTCTF  | 306   | >NF1-C1882FNLLCALTFTF  | 341  | 35    |
| >NF1-C1882FNLLCALTC    | 18253 | >NF1-C1882FNLLCALTF    | 70   | 18183 |
| >NF1-C1882FNLLCALTCTF  | 78    | >NF1-C1882FNLLCALTFTF  | 99   | 21    |
| >NF1-C1882FNLLCALTC    | 17892 | >NF1-C1882FNLLCALTF    | 386  | 17506 |
| >NF1-C1882FYNLLCALTCTF | 1888  | >NF1-C1882FYNLLCALTFTF | 311  | 1577  |
| >NF1-C1882FYNLLCALTCTF | 2189  | >NF1-C1882FYNLLCALTFTF | 466  | 1723  |
| >NF1-C1882FYNLLCALTC   | 17271 | >NF1-C1882FYNLLCALTF   | 496  | 16775 |
| >NF1-C1882FYNLLCALTC   | 13059 | >NF1-C1882FYNLLCALTF   | 41   | 13018 |
| >NF1-C1882FYNLLCALTCTF | 55    | >NF1-C1882FYNLLCALTFTF | 59   | 4     |
| >NF1-C1882FYNLLCALTC   | 21327 | >NF1-C1882FYNLLCALTF   | 355  | 20972 |
| >NF1-C1882FYNLLCALTC   | 17321 | >NF1-C1882FYNLLCALTF   | 322  | 16999 |
| >NF1-C1882FYNLLCALTCTF | 408   | >NF1-C1882FYNLLCALTFTF | 169  | 239   |
| >NF1-C1882FYNLLCALTC   | 11923 | >NF1-C1882FYNLLCALTF   | 93   | 11830 |
| >NF1-C1882FYNLLCALTCTF | 331   | >NF1-C1882FYNLLCALTFTF | 185  | 146   |
| >NF1-C1882FAYNLLCALTC  | 29471 | >NF1-C1882FAYNLLCALTF  | 74   | 29397 |
| >NF1-C1882FAYNLLCALTC  | 19973 | >NF1-C1882FAYNLLCALTF  | 47   | 19926 |
| >NF1-C1882FAYNLLCALTC  | 7840  | >NF1-C1882FAYNLLCALTF  | 12   | 7828  |
| >NF1-C1882FAYNLLCALTC  | 21531 | >NF1-C1882FAYNLLCALTF  | 303  | 21228 |
| >NF1-C1882FAYNLLCALTC  | 11640 | >NF1-C1882FAYNLLCALTF  | 376  | 11264 |
| >NF1-D1302'DPLLRIVI    | 6704  | >NF1-D1302'YPLLRIVI    | 49   | 6655  |
| >NF1-D1302'DPLLRIVI    | 1086  | >NF1-D1302'YPLLRIVI    | 149  | 937   |
| >NF1-D1302'DPLLRIVI    | 8675  | >NF1-D1302'YPLLRIVI    | 310  | 8365  |
| >NF1-D1302'DPLLRIVI    | 989   | >NF1-D1302'YPLLRIVI    | 212  | 777   |
| >NF1-D1302'DPLLRIVI    | 2475  | >NF1-D1302'YPLLRIVI    | 219  | 2256  |
| >NF1-D1302'DPLLRIVI    | 4366  | >NF1-D1302'YPLLRIVI    | 130  | 4236  |
| >NF1-D1302'DPLLRIVIT   | 2876  | >NF1-D1302'YPLLRIVIT   | 50   | 2826  |

|                         |       |                         |       |       |
|-------------------------|-------|-------------------------|-------|-------|
| >NF1-D1302'DPLLRRIVITS  | 10243 | >NF1-D1302'YPLLRRIVITS  | 213   | 10030 |
| >NF1-D1302'DPLLRRIVITSS | 6219  | >NF1-D1302'YPLLRRIVITSS | 275   | 5944  |
| >NF1-D1302'DPLLRRIVI    | 1572  | >NF1-D1302'YPLLRRIVI    | 33    | 1539  |
| >NF1-D1302'LDPLLRRIVI   | 317   | >NF1-D1302'LYPLLRRIVI   | 2801  | 2484  |
| >NF1-D1302'LDPLLRRIVI   | 24683 | >NF1-D1302'LYPLLRRIVI   | 267   | 24416 |
| >NF1-D1302'LDPLLRRIV    | 24833 | >NF1-D1302'LYPLLRRIV    | 158   | 24675 |
| >NF1-D1302'LDPLLRRIVI   | 20949 | >NF1-D1302'LYPLLRRIVI   | 7     | 20942 |
| >NF1-D1302'LDPLLRRIVITS | 24786 | >NF1-D1302'LYPLLRRIVITS | 454   | 24332 |
| >NF1-D1302'LDPLLRRIVI   | 478   | >NF1-D1302'LYPLLRRIVI   | 23137 | 22659 |
| >NF1-D1302'YGATYLQKLLI  | 18994 | >NF1-D1302'YGATYLQKLL'  | 22    | 18972 |
| >NF1-D1302'YGATYLQKLLI  | 23664 | >NF1-D1302'YGATYLQKLL'  | 112   | 23552 |
| >NF1-D1302'YGATYLQKLLI  | 23581 | >NF1-D1302'YGATYLQKLL'  | 353   | 23228 |
| >NF1-D1302'YGATYLQKLLI  | 23611 | >NF1-D1302'YGATYLQKLL'  | 149   | 23462 |
| >NF1-D1302'YGATYLQKLLI  | 38308 | >NF1-D1302'YGATYLQKLL'  | 447   | 37861 |
| >NF1-D1302'LLDPLLRI     | 54    | >NF1-D1302'LLYPLLRI     | 27    | 27    |
| >NF1-D1302'LLDPLLRRIV   | 160   | >NF1-D1302'LLYPLLRRIV   | 45    | 115   |
| >NF1-D1302'LLDPLLRRIVI  | 203   | >NF1-D1302'LLYPLLRRIVI  | 67    | 136   |
| >NF1-D1302'LLDPLLRI     | 195   | >NF1-D1302'LLYPLLRI     | 61    | 134   |
| >NF1-D1302'LLDPLLRRIV   | 242   | >NF1-D1302'LLYPLLRRIV   | 80    | 162   |
| >NF1-D1302'LLDPLLRRIVI  | 189   | >NF1-D1302'LLYPLLRRIVI  | 35    | 154   |
| >NF1-D1302'LLDPLLRRIVIT | 1412  | >NF1-D1302'LLYPLLRRIVIT | 460   | 952   |
| >NF1-D1302'LLDPLLRI     | 294   | >NF1-D1302'LLYPLLRI     | 8     | 286   |
| >NF1-D1302'LLDPLLRRIV   | 77    | >NF1-D1302'LLYPLLRRIV   | 4     | 73    |
| >NF1-D1302'LLDPLLRRIVI  | 568   | >NF1-D1302'LLYPLLRRIVI  | 76    | 492   |
| >NF1-D1302'LLDPLLRRIVIT | 2967  | >NF1-D1302'LLYPLLRRIVIT | 62    | 2905  |
| >NF1-D1302'LLDPLLRI     | 116   | >NF1-D1302'LLYPLLRI     | 66    | 50    |
| >NF1-D1302'LLDPLLRRIV   | 61    | >NF1-D1302'LLYPLLRRIV   | 26    | 35    |
| >NF1-D1302'LLDPLLRRIVI  | 455   | >NF1-D1302'LLYPLLRRIVI  | 155   | 300   |
| >NF1-D1302'LLDPLLRI     | 7     | >NF1-D1302'LLYPLLRI     | 3     | 4     |
| >NF1-D1302'LLDPLLRRIV   | 6     | >NF1-D1302'LLYPLLRRIV   | 3     | 3     |
| >NF1-D1302'LLDPLLRRIVI  | 42    | >NF1-D1302'LLYPLLRRIVI  | 11    | 31    |
| >NF1-D1302'LLDPLLRRIVIT | 513   | >NF1-D1302'LLYPLLRRIVIT | 97    | 416   |
| >NF1-D1302'LLDPLLRI     | 35    | >NF1-D1302'LLYPLLRI     | 26    | 9     |
| >NF1-D1302'LLDPLLRRIV   | 8     | >NF1-D1302'LLYPLLRRIV   | 6     | 2     |
| >NF1-D1302'LLDPLLRRIVI  | 126   | >NF1-D1302'LLYPLLRRIVI  | 79    | 47    |
| >NF1-D1302'LLDPLLRI     | 32    | >NF1-D1302'LLYPLLRI     | 14    | 18    |
| >NF1-D1302'LLDPLLRRIV   | 14    | >NF1-D1302'LLYPLLRRIV   | 9     | 5     |
| >NF1-D1302'LLDPLLRRIVI  | 106   | >NF1-D1302'LLYPLLRRIVI  | 36    | 70    |
| >NF1-D1302'LLDPLLRRIVIT | 1148  | >NF1-D1302'LLYPLLRRIVIT | 366   | 782   |
| >NF1-D1302'LLDPLLRI     | 108   | >NF1-D1302'LLYPLLRI     | 187   | 79    |
| >NF1-D1302'LLDPLLRRIV   | 23    | >NF1-D1302'LLYPLLRRIV   | 32    | 9     |
| >NF1-D1302'LLDPLLRI     | 7     | >NF1-D1302'LLYPLLRI     | 3     | 4     |
| >NF1-D1302'LLDPLLRRIV   | 3     | >NF1-D1302'LLYPLLRRIV   | 2     | 1     |

|                       |       |                       |      |       |
|-----------------------|-------|-----------------------|------|-------|
| >NF1-D1302'LLDPLLRI   | 33    | >NF1-D1302'LLYPLLRI   | 8    | 25    |
| >NF1-D1302'LLDPLLRI   | 146   | >NF1-D1302'LLYPLLRI   | 23   | 123   |
| >NF1-D1302'LLDPLLRI   | 10964 | >NF1-D1302'LLYPLLRI   | 486  | 10478 |
| >NF1-D1302'LLDPLLRI   | 2690  | >NF1-D1302'LLYPLLRI   | 172  | 2518  |
| >NF1-D1302'KLLDPLLRI  | 11    | >NF1-D1302'KLLYPLLRI  | 31   | 20    |
| >NF1-D1302'KLLDPLLRI  | 45    | >NF1-D1302'KLLYPLLRI  | 84   | 39    |
| >NF1-D1302'KLLDPLLRI  | 34    | >NF1-D1302'KLLYPLLRI  | 102  | 68    |
| >NF1-D1302'KLLDPLLRI  | 119   | >NF1-D1302'KLLYPLLRI  | 972  | 853   |
| >NF1-D1302'KLLDPLLRI  | 68    | >NF1-D1302'KLLYPLLRI  | 153  | 85    |
| >NF1-D1302'KLLDPLLRI  | 499   | >NF1-D1302'KLLYPLLRI  | 1637 | 1138  |
| >NF1-D1302'KLLDPLLRI  | 42    | >NF1-D1302'KLLYPLLRI  | 324  | 282   |
| >NF1-D1302'KLLDPLLRI  | 19    | >NF1-D1302'KLLYPLLRI  | 28   | 9     |
| >NF1-D1302'KLLDPLLRI  | 266   | >NF1-D1302'KLLYPLLRI  | 885  | 619   |
| >NF1-D1302'KLLDPLLRI  | 9     | >NF1-D1302'KLLYPLLRI  | 148  | 139   |
| >NF1-D1302'KLLDPLLRI  | 39    | >NF1-D1302'KLLYPLLRI  | 65   | 26    |
| >NF1-D1302'KLLDPLLRI  | 42    | >NF1-D1302'KLLYPLLRI  | 295  | 253   |
| >NF1-D1302'KLLDPLLRI  | 2     | >NF1-D1302'KLLYPLLRI  | 6    | 4     |
| >NF1-D1302'KLLDPLLRI  | 2     | >NF1-D1302'KLLYPLLRI  | 5    | 3     |
| >NF1-D1302'KLLDPLLRI  | 7     | >NF1-D1302'KLLYPLLRI  | 34   | 27    |
| >NF1-D1302'KLLDPLLRI  | 6     | >NF1-D1302'KLLYPLLRI  | 38   | 32    |
| >NF1-D1302'KLLDPLLRI  | 3     | >NF1-D1302'KLLYPLLRI  | 8    | 5     |
| >NF1-D1302'KLLDPLLRI  | 18    | >NF1-D1302'KLLYPLLRI  | 82   | 64    |
| >NF1-D1302'KLLDPLLRI  | 11    | >NF1-D1302'KLLYPLLRI  | 100  | 89    |
| >NF1-D1302'KLLDPLLRI  | 7     | >NF1-D1302'KLLYPLLRI  | 17   | 10    |
| >NF1-D1302'KLLDPLLRI  | 22    | >NF1-D1302'KLLYPLLRI  | 136  | 114   |
| >NF1-D1302'KLLDPLLRI  | 9     | >NF1-D1302'KLLYPLLRI  | 354  | 345   |
| >NF1-D1302'KLLDPLLRI  | 4     | >NF1-D1302'KLLYPLLRI  | 33   | 29    |
| >NF1-D1302'KLLDPLLRI  | 74    | >NF1-D1302'KLLYPLLRI  | 1118 | 1044  |
| >NF1-D1302'KLLDPLLRI  | 4     | >NF1-D1302'KLLYPLLRI  | 85   | 81    |
| >NF1-D1302'KLLDPLLRI  | 2     | >NF1-D1302'KLLYPLLRI  | 13   | 11    |
| >NF1-D1302'KLLDPLLRI  | 17    | >NF1-D1302'KLLYPLLRI  | 219  | 202   |
| >NF1-D1302'KLLDPLLRI  | 118   | >NF1-D1302'KLLYPLLRI  | 78   | 40    |
| >NF1-D1302'KLLDPLLRI  | 175   | >NF1-D1302'KLLYPLLRI  | 176  | 1     |
| >NF1-D1302'KLLDPLLRI  | 579   | >NF1-D1302'KLLYPLLRI  | 374  | 205   |
| >NF1-D1302'KLLDPLLRI  | 46    | >NF1-D1302'KLLYPLLRI  | 22   | 24    |
| >NF1-D1302'KLLDPLLRI  | 117   | >NF1-D1302'KLLYPLLRI  | 30   | 87    |
| >NF1-D1302'KLLDPLLRI  | 61    | >NF1-D1302'KLLYPLLRI  | 21   | 40    |
| >NF1-D1302'KLLDPLLRI  | 20    | >NF1-D1302'KLLYPLLRI  | 31   | 11    |
| >NF1-D1302'QKLLDPLL   | 827   | >NF1-D1302'QKLLYPLL   | 179  | 648   |
| >NF1-D1302'QKLLDPLLRI | 1332  | >NF1-D1302'QKLLYPLLRI | 437  | 895   |
| >NF1-D1302'QKLLDPLLRI | 910   | >NF1-D1302'QKLLYPLLRI | 381  | 529   |
| >NF1-D1302'QKLLDPLLRI | 279   | >NF1-D1302'QKLLYPLLRI | 90   | 189   |
| >NF1-D1302'LQKLLDPL   | 271   | >NF1-D1302'LQKLLYPL   | 137  | 134   |

|                        |      |                        |     |      |
|------------------------|------|------------------------|-----|------|
| >NF1-D1302`LQKLLDPLL   | 1129 | >NF1-D1302`LQKLLYPLL   | 466 | 663  |
| >NF1-D1302`LQKLLDPLL   | 325  | >NF1-D1302`LQKLLYPLL   | 75  | 250  |
| >NF1-D1302`LQKLLDPL    | 159  | >NF1-D1302`LQKLLYPL    | 106 | 53   |
| >NF1-D1302`LQKLLDPL    | 524  | >NF1-D1302`LQKLLYPL    | 80  | 444  |
| >NF1-D1302`LQKLLDPLL   | 1751 | >NF1-D1302`LQKLLYPLL   | 341 | 1410 |
| >NF1-D1302`LQKLLDPL    | 726  | >NF1-D1302`LQKLLYPL    | 257 | 469  |
| >NF1-D1302`LQKLLDPLL   | 586  | >NF1-D1302`LQKLLYPLL   | 292 | 294  |
| >NF1-D1302`LQKLLDPLL   | 2601 | >NF1-D1302`LQKLLYPLL   | 161 | 2440 |
| >NF1-D1302`LQKLLDPLL   | 462  | >NF1-D1302`LQKLLYPLL   | 304 | 158  |
| >NF1-D1302`YLQKLLDPL   | 13   | >NF1-D1302`YLQKLLYPL   | 7   | 6    |
| >NF1-D1302`YLQKLLDPLL  | 66   | >NF1-D1302`YLQKLLYPLL  | 84  | 18   |
| >NF1-D1302`YLQKLLDP    | 4389 | >NF1-D1302`YLQKLLYP    | 420 | 3969 |
| >NF1-D1302`YLQKLLDPL   | 4    | >NF1-D1302`YLQKLLYPL   | 3   | 1    |
| >NF1-D1302`YLQKLLDPLL  | 28   | >NF1-D1302`YLQKLLYPLL  | 39  | 11   |
| >NF1-D1302`YLQKLLDPL   | 13   | >NF1-D1302`YLQKLLYPL   | 8   | 5    |
| >NF1-D1302`YLQKLLDPLL  | 224  | >NF1-D1302`YLQKLLYPLL  | 130 | 94   |
| >NF1-D1302`YLQKLLDPL   | 14   | >NF1-D1302`YLQKLLYPL   | 11  | 3    |
| >NF1-D1302`YLQKLLDPLL  | 178  | >NF1-D1302`YLQKLLYPLL  | 181 | 3    |
| >NF1-D1302`YLQKLLDPL   | 6    | >NF1-D1302`YLQKLLYPL   | 3   | 3    |
| >NF1-D1302`YLQKLLDPLL  | 17   | >NF1-D1302`YLQKLLYPLL  | 7   | 10   |
| >NF1-D1302`YLQKLLDPL   | 4    | >NF1-D1302`YLQKLLYPL   | 2   | 2    |
| >NF1-D1302`YLQKLLDPLL  | 11   | >NF1-D1302`YLQKLLYPLL  | 9   | 2    |
| >NF1-D1302`YLQKLLDPL   | 18   | >NF1-D1302`YLQKLLYPL   | 11  | 7    |
| >NF1-D1302`YLQKLLDPLL  | 13   | >NF1-D1302`YLQKLLYPLL  | 11  | 2    |
| >NF1-D1302`YLQKLLDPL   | 47   | >NF1-D1302`YLQKLLYPL   | 6   | 41   |
| >NF1-D1302`YLQKLLDPLL  | 75   | >NF1-D1302`YLQKLLYPLL  | 18  | 57   |
| >NF1-D1302`YLQKLLDPL   | 4    | >NF1-D1302`YLQKLLYPL   | 3   | 1    |
| >NF1-D1302`YLQKLLDPLL  | 5    | >NF1-D1302`YLQKLLYPLL  | 3   | 2    |
| >NF1-D1302`YLQKLLDPLLF | 738  | >NF1-D1302`YLQKLLYPLL  | 114 | 624  |
| >NF1-D1302`YLQKLLDPL   | 4151 | >NF1-D1302`YLQKLLYPL   | 388 | 3763 |
| >NF1-D1302`YLQKLLDPLLF | 686  | >NF1-D1302`YLQKLLYPLL  | 160 | 526  |
| >NF1-D1302`YLQKLLDPLLF | 518  | >NF1-D1302`YLQKLLYPLL  | 302 | 216  |
| >NF1-D1302`YLQKLLDPL   | 1096 | >NF1-D1302`YLQKLLYPL   | 85  | 1011 |
| >NF1-D1302`YLQKLLDPL   | 432  | >NF1-D1302`YLQKLLYPL   | 175 | 257  |
| >NF1-D1302`YLQKLLDPL   | 3984 | >NF1-D1302`YLQKLLYPL   | 489 | 3495 |
| >NF1-D1302`YLQKLLDPLLF | 212  | >NF1-D1302`YLQKLLYPLL  | 75  | 137  |
| >NF1-D1302`TYLQKLLDPLI | 583  | >NF1-D1302`TYLQKLLYPLL | 118 | 465  |
| >NF1-D1302`TYLQKLLDPL  | 87   | >NF1-D1302`TYLQKLLYPL  | 225 | 138  |
| >NF1-D1302`TYLQKLLDPL  | 5036 | >NF1-D1302`TYLQKLLYPL  | 258 | 4778 |
| >NF1-D1302`TYLQKLLDPLI | 219  | >NF1-D1302`TYLQKLLYPLL | 102 | 117  |
| >NF1-D1302`TYLQKLLDPL  | 3483 | >NF1-D1302`TYLQKLLYPL  | 247 | 3236 |
| >NF1-D1302`TYLQKLLDPLI | 270  | >NF1-D1302`TYLQKLLYPLL | 74  | 196  |
| >NF1-D1302`TYLQKLLD    | 3884 | >NF1-D1302`TYLQKLLY    | 363 | 3521 |

|                        |       |                        |     |       |
|------------------------|-------|------------------------|-----|-------|
| >NF1-D1302'TYLQKLLDPL  | 10    | >NF1-D1302'TYLQKLLYPL  | 9   | 1     |
| >NF1-D1302'TYLQKLLDPLI | 13    | >NF1-D1302'TYLQKLLYPLL | 6   | 7     |
| >NF1-D1302'TYLQKLLD    | 14695 | >NF1-D1302'TYLQKLLY    | 11  | 14684 |
| >NF1-D1302'TYLQKLLD    | 22837 | >NF1-D1302'TYLQKLLY    | 15  | 22822 |
| >NF1-D1302'TYLQKLLDPL  | 412   | >NF1-D1302'TYLQKLLYPL  | 118 | 294   |
| >NF1-D1302'TYLQKLLDPLI | 586   | >NF1-D1302'TYLQKLLYPLL | 259 | 327   |
| >NF1-D1302'TYLQKLLDPL  | 180   | >NF1-D1302'TYLQKLLYPL  | 46  | 134   |
| >NF1-D1302'TYLQKLLDPLI | 1160  | >NF1-D1302'TYLQKLLYPLL | 492 | 668   |
| >NF1-D1302'ATYLQKLLDP  | 124   | >NF1-D1302'ATYLQKLLYPI | 82  | 42    |
| >NF1-D1302'ATYLQKLLD   | 20597 | >NF1-D1302'ATYLQKLLY   | 104 | 20493 |
| >NF1-D1302'ATYLQKLLDP  | 561   | >NF1-D1302'ATYLQKLLYPI | 255 | 306   |
| >NF1-D1302'ATYLQKLLDP  | 482   | >NF1-D1302'ATYLQKLLYPI | 286 | 196   |
| >NF1-D1302'ATYLQKLLD   | 14249 | >NF1-D1302'ATYLQKLLY   | 89  | 14160 |
| >NF1-D1302'ATYLQKLLD   | 11248 | >NF1-D1302'ATYLQKLLY   | 24  | 11224 |
| >NF1-D1302'ATYLQKLLD   | 16781 | >NF1-D1302'ATYLQKLLY   | 9   | 16772 |
| >NF1-D1302'ATYLQKLLD   | 29564 | >NF1-D1302'ATYLQKLLY   | 379 | 29185 |
| >NF1-D1302'ATYLQKLLDP  | 182   | >NF1-D1302'ATYLQKLLYPI | 51  | 131   |
| >NF1-D1302'ATYLQKLLDP  | 1540  | >NF1-D1302'ATYLQKLLYPI | 422 | 1118  |
| >NF1-D1302'ATYLQKLLD   | 22279 | >NF1-D1302'ATYLQKLLY   | 12  | 22267 |
| >NF1-D1302'ATYLQKLLD   | 10447 | >NF1-D1302'ATYLQKLLY   | 4   | 10443 |
| >NF1-D1302'ATYLQKLLDP  | 15    | >NF1-D1302'ATYLQKLLYPI | 9   | 6     |
| >NF1-D1302'ATYLQKLLDP  | 1602  | >NF1-D1302'ATYLQKLLYPI | 472 | 1130  |
| >NF1-D1302'ATYLQKLLD   | 13047 | >NF1-D1302'ATYLQKLLY   | 35  | 13012 |
| >NF1-D1302'ATYLQKLLD   | 5086  | >NF1-D1302'ATYLQKLLY   | 493 | 4593  |
| >NF1-D1302'GATYLQKLLD  | 32888 | >NF1-D1302'GATYLQKLLY  | 490 | 32398 |
| >NF1-D1302'GATYLQKLLD  | 26841 | >NF1-D1302'GATYLQKLLY  | 245 | 26596 |
| >NF1-D176E-DIELLQYINV  | 922   | >NF1-D176E-EIELLQYINV  | 224 | 698   |
| >NF1-D176E-HDIELLQYI   | 145   | >NF1-D176E-HEIELLQYI   | 8   | 137   |
| >NF1-D176E-HDIELLQYINV | 3291  | >NF1-D176E-HEIELLQYINV | 127 | 3164  |
| >NF1-D176E-HDIELLQYI   | 1683  | >NF1-D176E-HEIELLQYI   | 254 | 1429  |
| >NF1-D176E-HDIELLQY    | 1109  | >NF1-D176E-HEIELLQY    | 464 | 645   |
| >NF1-D176E-HDIELLQY    | 285   | >NF1-D176E-HEIELLQY    | 316 | 31    |
| >NF1-D176E-HDIELLQY    | 1162  | >NF1-D176E-HEIELLQY    | 241 | 921   |
| >NF1-D176E-HDIELLQY    | 638   | >NF1-D176E-HEIELLQY    | 10  | 628   |
| >NF1-D176E-HDIELLQYI   | 14026 | >NF1-D176E-HEIELLQYI   | 99  | 13927 |
| >NF1-D176E-HDIELLQYINV | 14877 | >NF1-D176E-HEIELLQYINV | 170 | 14707 |
| >NF1-D176E-HDIELLQYI   | 13314 | >NF1-D176E-HEIELLQYI   | 16  | 13298 |
| >NF1-D176E-HDIELLQYINV | 13766 | >NF1-D176E-HEIELLQYINV | 26  | 13740 |
| >NF1-D176E-HDIELLQYI   | 132   | >NF1-D176E-HEIELLQYI   | 41  | 91    |
| >NF1-D176E-HDIELLQYINV | 180   | >NF1-D176E-HEIELLQYINV | 40  | 140   |
| >NF1-D176E-HDIELLQY    | 6295  | >NF1-D176E-HEIELLQY    | 196 | 6099  |
| >NF1-D176E-HDIELLQY    | 3589  | >NF1-D176E-HEIELLQY    | 39  | 3550  |
| >NF1-D176E-HDIELLQYI   | 7560  | >NF1-D176E-HEIELLQYI   | 61  | 7499  |

|                        |       |                        |      |       |
|------------------------|-------|------------------------|------|-------|
| >NF1-D176E-HDIELLQYINV | 14714 | >NF1-D176E-HEIELLQYINV | 250  | 14464 |
| >NF1-D176E-HDIELLQYINV | 18010 | >NF1-D176E-HEIELLQYINV | 119  | 17891 |
| >NF1-D176E-HDIELLQYI   | 40    | >NF1-D176E-HEIELLQYI   | 3    | 37    |
| >NF1-D176E-HDIELLQYINV | 147   | >NF1-D176E-HEIELLQYINV | 5    | 142   |
| >NF1-D176E-HDIELLQYI   | 125   | >NF1-D176E-HEIELLQYI   | 7188 | 7063  |
| >NF1-D176E-HDIELLQYINV | 167   | >NF1-D176E-HEIELLQYINV | 7698 | 7531  |
| >NF1-D176E-VHDIELLQY   | 231   | >NF1-D176E-VHEIELLQY   | 658  | 427   |
| >NF1-D176E-DVHDIELLQY  | 62    | >NF1-D176E-DVHEIELLQY  | 44   | 18    |
| >NF1-D176E-DVHDIELLQY  | 1103  | >NF1-D176E-DVHEIELLQY  | 283  | 820   |
| >NF1-D176E-DVHDIELL    | 56    | >NF1-D176E-DVHEIELL    | 81   | 25    |
| >NF1-D176E-DVHDIELLQY  | 34    | >NF1-D176E-DVHEIELLQYI | 44   | 10    |
| >NF1-D176E-DVHDIELLQY  | 360   | >NF1-D176E-DVHEIELLQYI | 226  | 134   |
| >NF1-D176E-DVHDIELLQY  | 171   | >NF1-D176E-DVHEIELLQY  | 112  | 59    |
| >NF1-D176E-VDVHDIELLQ  | 417   | >NF1-D176E-VDVHEIELLQ  | 520  | 103   |
| >NF1-D176E-VDVHDIELL   | 1752  | >NF1-D176E-VDVHEIELL   | 380  | 1372  |
| >NF1-D176E-VDVHDIELL   | 188   | >NF1-D176E-VDVHEIELL   | 122  | 66    |
| >NF1-D176E-EDNVDVHDI   | 105   | >NF1-D176E-EDNVDVHEI   | 75   | 30    |
| >NF1-D176E-SEDNVDVHD   | 58    | >NF1-D176E-SEDNVDVHEI  | 39   | 19    |
| >NF1-D176E-SEDNVDVHD   | 523   | >NF1-D176E-SEDNVDVHEI  | 308  | 215   |
| >NF1-D176E-SEDNVDVHD   | 683   | >NF1-D176E-SEDNVDVHEI  | 261  | 422   |
| >NF1-D176E-SEDNVDVHD   | 50    | >NF1-D176E-SEDNVDVHEI  | 54   | 4     |
| >NF1-D176E-CSEDNVDVHI  | 141   | >NF1-D176E-CSEDNVDVHI  | 74   | 67    |
| >NF1-D1849I DVPGTLLNIA | 6137  | >NF1-D1849I NVPGTLLNIA | 498  | 5639  |
| >NF1-D1849I DVPGTLLNIA | 237   | >NF1-D1849I NVPGTLLNIA | 1452 | 1215  |
| >NF1-D1849I DVPGTLLNIA | 211   | >NF1-D1849I NVPGTLLNIA | 977  | 766   |
| >NF1-D1849I DVPGTLLNI  | 880   | >NF1-D1849I NVPGTLLNI  | 321  | 559   |
| >NF1-D1849I DVPGTLLNIA | 377   | >NF1-D1849I NVPGTLLNIA | 172  | 205   |
| >NF1-D1849I DVPGTLLNIA | 2179  | >NF1-D1849I NVPGTLLNIA | 457  | 1722  |
| >NF1-D1849I KDVPGTLLNI | 86    | >NF1-D1849I KNVPGTLLNI | 4606 | 4520  |
| >NF1-D1849I RPKDVPGT   | 39    | >NF1-D1849I RPKNVPGT   | 41   | 2     |
| >NF1-D1849I RPKDVPGT   | 17    | >NF1-D1849I RPKNVPGT   | 14   | 3     |
| >NF1-D1849I IRPKDVPGT  | 177   | >NF1-D1849I IRPKNVPGT  | 164  | 13    |
| >NF1-D1849I IRPKDVPGT  | 215   | >NF1-D1849I IRPKNVPGT  | 180  | 35    |
| >NF1-D1849I IRPKDVPGT  | 92    | >NF1-D1849I IRPKNVPGT  | 91   | 1     |
| >NF1-D1849I IRPKDVPGT  | 96    | >NF1-D1849I IRPKNVPGT  | 60   | 36    |
| >NF1-D1849I KIRPKDVP   | 1213  | >NF1-D1849I KIRPKNVP   | 111  | 1102  |
| >NF1-D1849I KIRPKDVP   | 23    | >NF1-D1849I KIRPKNVP   | 8    | 15    |
| >NF1-D1849I KIRPKDVP   | 110   | >NF1-D1849I KIRPKNVP   | 24   | 86    |
| >NF1-D1849I KIRPKDVP   | 13    | >NF1-D1849I KIRPKNVP   | 8    | 5     |
| >NF1-D1849I KIRPKDVP   | 987   | >NF1-D1849I KIRPKNVP   | 448  | 539   |
| >NF1-D1849I KIRPKDVP   | 837   | >NF1-D1849I KIRPKNVP   | 441  | 396   |
| >NF1-D1849I KIRPKDVP   | 74    | >NF1-D1849I KIRPKNVP   | 99   | 25    |
| >NF1-D1849I TKIRPKDV   | 911   | >NF1-D1849I TKIRPKNV   | 417  | 494   |



|                        |       |                        |       |       |
|------------------------|-------|------------------------|-------|-------|
| >NF1-D1849IHTKIRPKD    | 586   | >NF1-D1849IHTKIRPKN    | 309   | 277   |
| >NF1-D1849IHTKIRPKDV   | 114   | >NF1-D1849IHTKIRPKNV   | 21    | 93    |
| >NF1-D1849IHTKIRPKDVP  | 103   | >NF1-D1849IHTKIRPKNVP  | 32    | 71    |
| >NF1-D1849IHTKIRPKDV   | 1172  | >NF1-D1849IHTKIRPKNV   | 238   | 934   |
| >NF1-D2632IDEFDQRIL    | 86    | >NF1-D2632IEEFDQRIL    | 26    | 60    |
| >NF1-D2632IDEFDQRILYE\ | 428   | >NF1-D2632IEEFDQRILYEY | 395   | 33    |
| >NF1-D2632IDEFDQRILYE\ | 473   | >NF1-D2632IEEFDQRILYEY | 693   | 220   |
| >NF1-D2632IDEFDQRIL    | 14    | >NF1-D2632IEEFDQRIL    | 590   | 576   |
| >NF1-D2632IDEFDQRILY   | 4     | >NF1-D2632IEEFDQRILY   | 34    | 30    |
| >NF1-D2632IDEFDQRILYE\ | 3     | >NF1-D2632IEEFDQRILYEY | 13    | 10    |
| >NF1-D2632IDEFDQRIL    | 470   | >NF1-D2632IEEFDQRIL    | 100   | 370   |
| >NF1-D2632IDEFDQRIL    | 905   | >NF1-D2632IEEFDQRIL    | 94    | 811   |
| >NF1-D2632IDEFDQRILYE\ | 310   | >NF1-D2632IEEFDQRILYEY | 212   | 98    |
| >NF1-D2632IDEFDQRIL    | 914   | >NF1-D2632IEEFDQRIL    | 207   | 707   |
| >NF1-D2632IDEFDQRILY   | 139   | >NF1-D2632IEEFDQRILY   | 46    | 93    |
| >NF1-D2632IDEFDQRILYE\ | 75    | >NF1-D2632IEEFDQRILYEY | 28    | 47    |
| >NF1-D2632ITDEFDQRI    | 4986  | >NF1-D2632ITEEFDQRI    | 122   | 4864  |
| >NF1-D2632ITDEFDQRIL   | 16928 | >NF1-D2632ITEEFDQRIL   | 92    | 16836 |
| >NF1-D2632ITDEFDQRI    | 313   | >NF1-D2632ITEEFDQRI    | 11548 | 11235 |
| >NF1-D2632ITTDEFDQRIL\ | 6     | >NF1-D2632ITTEEFDRILY  | 10    | 4     |
| >NF1-D2632ITTDEFDQRIL\ | 277   | >NF1-D2632ITTEEFDRILY  | 722   | 445   |
| >NF1-D2632ITTDEFDQRIL\ | 183   | >NF1-D2632ITTEEFDRILY  | 158   | 25    |
| >NF1-D2632ITTDEFDQR    | 17    | >NF1-D2632ITTEEFDR     | 9     | 8     |
| >NF1-D2632ITTDEFDQRIL\ | 854   | >NF1-D2632ITTEEFDRILY  | 398   | 456   |
| >NF1-D2632ITTDEFDQRI   | 373   | >NF1-D2632ITTEEFDR     | 333   | 40    |
| >NF1-D2632ITTDEFDQRI   | 120   | >NF1-D2632ITTEEFDR     | 2015  | 1895  |
| >NF1-D2632ITTDEFDQRIL\ | 309   | >NF1-D2632ITTEEFDRILY  | 777   | 468   |
| >NF1-D2632ITTDEFDQRIL\ | 70    | >NF1-D2632ITTEEFDRILY  | 72    | 2     |
| >NF1-D2632ITTDEFDQRIL\ | 341   | >NF1-D2632ITTEEFDRILY  | 130   | 211   |
| >NF1-D2632ITTDEFDQRI   | 129   | >NF1-D2632ITTEEFDR     | 80    | 49    |
| >NF1-D2632IYTTEFDQRI   | 478   | >NF1-D2632IYTTEFDQRI   | 614   | 136   |
| >NF1-D2632IYTTEFDQRIL  | 502   | >NF1-D2632IYTTEFDQRIL  | 468   | 34    |
| >NF1-D2632IYTTEFDQRI   | 222   | >NF1-D2632IYTTEFDQRI   | 143   | 79    |
| >NF1-D2632IYTTEFDQRI   | 170   | >NF1-D2632IYTTEFDQRI   | 511   | 341   |
| >NF1-D2632IYTTEFDQRIL  | 641   | >NF1-D2632IYTTEFDQRIL  | 465   | 176   |
| >NF1-D2632IYTTEFDQR    | 454   | >NF1-D2632IYTTEFDQR    | 350   | 104   |
| >NF1-D2632IYTTEFDQR    | 4     | >NF1-D2632IYTTEFDQR    | 4     | 0     |
| >NF1-D2632IYTTEFDQRI   | 198   | >NF1-D2632IYTTEFDQRI   | 155   | 43    |
| >NF1-D2632IYTTEFDQRI   | 435   | >NF1-D2632IYTTEFDQRI   | 251   | 184   |
| >NF1-D2632IYTTEFDQRI   | 125   | >NF1-D2632IYTTEFDQRI   | 162   | 37    |
| >NF1-D2632IYTTEFDQRIL  | 246   | >NF1-D2632IYTTEFDQRIL  | 332   | 86    |
| >NF1-D2632IYTTEFDQRI   | 98    | >NF1-D2632IYTTEFDQRI   | 124   | 26    |
| >NF1-D2632IYTTEFDQRIL  | 19    | >NF1-D2632IYTTEFDQRIL  | 24    | 5     |

|                         |       |                         |       |       |
|-------------------------|-------|-------------------------|-------|-------|
| >NF1-D2632IYTTDEFDQRIL  | 98    | >NF1-D2632IYTTEFDQRIL   | 265   | 167   |
| >NF1-D2632IYTTDEFDQR    | 427   | >NF1-D2632IYTTEFDQR     | 438   | 11    |
| >NF1-D2632IYTTDEFDQRI   | 388   | >NF1-D2632IYTTEFDQRI    | 131   | 257   |
| >NF1-D2632IKYTTDEFDQR   | 50    | >NF1-D2632IKYTTEFDQR    | 143   | 93    |
| >NF1-D2632IKYTTDEFDQR   | 761   | >NF1-D2632IKYTTEFDQR    | 387   | 374   |
| >NF1-D2632IKYTTDEFDQR   | 529   | >NF1-D2632IKYTTEFDQR    | 332   | 197   |
| >NF1-D2632IKYTTDEFDQR   | 75    | >NF1-D2632IKYTTEFDQR    | 48    | 27    |
| >NF1-D2632IKYTTDEFDQR   | 19    | >NF1-D2632IKYTTEFDQR    | 15    | 4     |
| >NF1-D2632IVKYTTDEF     | 3     | >NF1-D2632IVKYTTEEF     | 3     | 0     |
| >NF1-D2632ILVKYTTDEF    | 83    | >NF1-D2632ILVKYTTEEF    | 41    | 42    |
| >NF1-D2632ILVKYTTDEF    | 179   | >NF1-D2632ILVKYTTEEF    | 44    | 135   |
| >NF1-D2632ILVKYTTDEF    | 1419  | >NF1-D2632ILVKYTTEEF    | 498   | 921   |
| >NF1-D2632ILVKYTTDEF    | 308   | >NF1-D2632ILVKYTTEEF    | 218   | 90    |
| >NF1-D2632ITLVKYTTDEF   | 811   | >NF1-D2632ITLVKYTTEEF   | 430   | 381   |
| >NF1-D2632ITLVKYTTDEF   | 345   | >NF1-D2632ITLVKYTTEEF   | 129   | 216   |
| >NF1-D2632ITLVKYTTDEF   | 140   | >NF1-D2632ITLVKYTTEEF   | 65    | 75    |
| >NF1-D2632IATLVKYTTDE   | 175   | >NF1-D2632IATLVKYTTEEF  | 189   | 14    |
| >NF1-D2632IATLVKYTTDE   | 85    | >NF1-D2632IATLVKYTTEEF  | 60    | 25    |
| >NF1-D2632IATLVKYTTDE   | 123   | >NF1-D2632IATLVKYTTEEF  | 57    | 66    |
| >NF1-D2632IATLVKYTTDE   | 5     | >NF1-D2632IATLVKYTTEEF  | 4     | 1     |
| >NF1-D2632IATLVKYTTDE   | 103   | >NF1-D2632IATLVKYTTEEF  | 80    | 23    |
| >NF1-E1919K*EPHLLTEF    | 2219  | >NF1-E1919K*KPHLLTEF    | 67    | 2152  |
| >NF1-E1919K*EPHLLTEFL   | 6060  | >NF1-E1919K*KPHLLTEFL   | 172   | 5888  |
| >NF1-E1919K*EPHLLTEF    | 2687  | >NF1-E1919K*KPHLLTEF    | 336   | 2351  |
| >NF1-E1919K*EPHLLTEF    | 43    | >NF1-E1919K*KPHLLTEF    | 270   | 227   |
| >NF1-E1919K*EPHLLTEF    | 228   | >NF1-E1919K*KPHLLTEF    | 922   | 694   |
| >NF1-E1919K*EPHLLTEF    | 168   | >NF1-E1919K*KPHLLTEF    | 323   | 155   |
| >NF1-E1919K*NEPHLLTEF   | 82    | >NF1-E1919K*NKPHLLTEF   | 8062  | 7980  |
| >NF1-E1919K*NEPHLLTEFL  | 12    | >NF1-E1919K*NKPHLLTEFL  | 479   | 467   |
| >NF1-E1919K*NEPHLLTEF   | 2122  | >NF1-E1919K*NKPHLLTEF   | 40    | 2082  |
| >NF1-E1919K*NEPHLLTEF   | 95    | >NF1-E1919K*NKPHLLTEF   | 16504 | 16409 |
| >NF1-E1919K*NEPHLLTEFL  | 457   | >NF1-E1919K*NKPHLLTEFL  | 28725 | 28268 |
| >NF1-E1919K*NEPHLLTEF   | 180   | >NF1-E1919K*NKPHLLTEF   | 20257 | 20077 |
| >NF1-E1919K*NEPHLLTEFL  | 173   | >NF1-E1919K*NKPHLLTEFL  | 20379 | 20206 |
| >NF1-E1919K*VSISKTAAANE | 21106 | >NF1-E1919K*VSISKTAAAN* | 192   | 20914 |
| >NF1-E1919K*VSISKTAAANE | 21656 | >NF1-E1919K*VSISKTAAAN* | 20    | 21636 |
| >NF1-E1919K*VSISKTAAANE | 19687 | >NF1-E1919K*VSISKTAAAN* | 201   | 19486 |
| >NF1-E1919K*ANEPHLLTEF  | 7060  | >NF1-E1919K*ANKPHLLTEF  | 313   | 6747  |
| >NF1-E1919K*ANEPHLLTEF  | 2058  | >NF1-E1919K*ANKPHLLTEF  | 104   | 1954  |
| >NF1-E1919K*AANEPHLLTL  | 263   | >NF1-E1919K*AANKPHLLTL  | 4099  | 3836  |
| >NF1-E1919K*AANEPHLLTE  | 197   | >NF1-E1919K*AANKPHLLTE  | 173   | 24    |
| >NF1-E1919K*AANEPHLLTL  | 587   | >NF1-E1919K*AANKPHLLTL  | 337   | 250   |
| >NF1-E1919K*AANEPHLLTE  | 38    | >NF1-E1919K*AANKPHLLTE  | 27    | 11    |

|                       |       |                       |      |       |
|-----------------------|-------|-----------------------|------|-------|
| >NF1-E1919†AANEPHLTL  | 21    | >NF1-E1919†AANKPHLTL  | 37   | 16    |
| >NF1-E1919†AANEPHLTLE | 8     | >NF1-E1919†AANKPHLTLE | 13   | 5     |
| >NF1-E1919†AANEPHLTLE | 147   | >NF1-E1919†AANKPHLTLE | 434  | 287   |
| >NF1-E1919†AANEPHLTLE | 137   | >NF1-E1919†AANKPHLTLE | 194  | 57    |
| >NF1-E1919†LAANEPHLTL | 167   | >NF1-E1919†LAANKPHLTL | 393  | 226   |
| >NF1-E1919†LAANEPHLTL | 108   | >NF1-E1919†LAANKPHLTL | 65   | 43    |
| >NF1-E1919†LAANEPHLTL | 412   | >NF1-E1919†LAANKPHLTL | 780  | 368   |
| >NF1-E1919†LAANEPHLTL | 443   | >NF1-E1919†LAANKPHLTL | 923  | 480   |
| >NF1-E1919†TLAANEPHL  | 136   | >NF1-E1919†TLAANKPHL  | 555  | 419   |
| >NF1-E1919†TLAANEPHLT | 158   | >NF1-E1919†TLAANKPHLT | 487  | 329   |
| >NF1-E1919†TLAANEPHL  | 29    | >NF1-E1919†TLAANKPHL  | 94   | 65    |
| >NF1-E1919†TLAANEPHLT | 288   | >NF1-E1919†TLAANKPHLT | 744  | 456   |
| >NF1-E1919†TLAANEPHLT | 45    | >NF1-E1919†TLAANKPHLT | 99   | 54    |
| >NF1-E1919†TLAANEPHL  | 458   | >NF1-E1919†TLAANKPHL  | 481  | 23    |
| >NF1-E1919†TLAANEPHLT | 150   | >NF1-E1919†TLAANKPHLT | 223  | 73    |
| >NF1-E1919†TLAANEPHLT | 134   | >NF1-E1919†TLAANKPHLT | 185  | 51    |
| >NF1-E1919†TLAANEPHL  | 449   | >NF1-E1919†TLAANKPHL  | 714  | 265   |
| >NF1-E1919†TLAANEPHL  | 88    | >NF1-E1919†TLAANKPHL  | 105  | 17    |
| >NF1-E1919†TLAANEPHLT | 27    | >NF1-E1919†TLAANKPHLT | 42   | 15    |
| >NF1-E1919†TLAANEPHL  | 129   | >NF1-E1919†TLAANKPHL  | 333  | 204   |
| >NF1-E1919†TLAANEPHLT | 110   | >NF1-E1919†TLAANKPHLT | 267  | 157   |
| >NF1-E1919†TLAANEPHL  | 13    | >NF1-E1919†TLAANKPHL  | 23   | 10    |
| >NF1-E1919†TLAANEPHLT | 31    | >NF1-E1919†TLAANKPHLT | 63   | 32    |
| >NF1-E1919†TLAANEPHL  | 92    | >NF1-E1919†TLAANKPHL  | 219  | 127   |
| >NF1-E1919†TLAANEPHLT | 135   | >NF1-E1919†TLAANKPHLT | 341  | 206   |
| >NF1-E1919†TLAANEPHL  | 7     | >NF1-E1919†TLAANKPHL  | 7    | 0     |
| >NF1-E1919†TLAANEPHLT | 75    | >NF1-E1919†TLAANKPHLT | 74   | 1     |
| >NF1-E1919†TLAANEPHLT | 5     | >NF1-E1919†TLAANKPHLT | 6    | 1     |
| >NF1-E1919†KTLAANEPHL | 270   | >NF1-E1919†KTLAANKPHL | 730  | 460   |
| >NF1-E1919†KTLAANEPH  | 1164  | >NF1-E1919†KTLAANKPH  | 207  | 957   |
| >NF1-E1919†KTLAANEPHL | 46    | >NF1-E1919†KTLAANKPHL | 17   | 29    |
| >NF1-E1919†KTLAANEPHL | 702   | >NF1-E1919†KTLAANKPHL | 289  | 413   |
| >NF1-E1919†KTLAANEPH  | 392   | >NF1-E1919†KTLAANKPH  | 1040 | 648   |
| >NF1-E1919†KTLAANEPHL | 230   | >NF1-E1919†KTLAANKPHL | 427  | 197   |
| >NF1-E1919†KTLAANEPH  | 195   | >NF1-E1919†KTLAANKPH  | 57   | 138   |
| >NF1-E1919†KTLAANEPHL | 7     | >NF1-E1919†KTLAANKPHL | 6    | 1     |
| >NF1-E1919†KTLAANEPHL | 48    | >NF1-E1919†KTLAANKPHL | 146  | 98    |
| >NF1-E1919†ISKTLAANE  | 21462 | >NF1-E1919†ISKTLAANK  | 196  | 21266 |
| >NF1-E1919†ISKTLAANE  | 26883 | >NF1-E1919†ISKTLAANK  | 223  | 26660 |
| >NF1-E1919†ISKTLAANE  | 6843  | >NF1-E1919†ISKTLAANK  | 10   | 6833  |
| >NF1-E1919†ISKTLAANE  | 15331 | >NF1-E1919†ISKTLAANK  | 235  | 15096 |
| >NF1-E1919†ISKTLAANE  | 23214 | >NF1-E1919†ISKTLAANK  | 380  | 22834 |
| >NF1-E1919†SISKTLAANE | 24566 | >NF1-E1919†SISKTLAANK | 100  | 24466 |

|                         |       |                         |      |       |
|-------------------------|-------|-------------------------|------|-------|
| >NF1-E1919†SISKTAAANE   | 31343 | >NF1-E1919†SISKTAAANK   | 26   | 31317 |
| >NF1-E1919†SISKTAAANE   | 13971 | >NF1-E1919†SISKTAAANK   | 99   | 13872 |
| >NF1-E1919†SISKTAAANE   | 12643 | >NF1-E1919†SISKTAAANK   | 404  | 12239 |
| >NF1-E1919†SISKTAAANE   | 26284 | >NF1-E1919†SISKTAAANK   | 72   | 26212 |
| >NF1-E91K-ᵛEKCLAGQPK    | 15098 | >NF1-E91K-ᵛKKCLAGQPK    | 385  | 14713 |
| >NF1-E91K-ᵛEKCLAGQPK    | 4612  | >NF1-E91K-ᵛKKCLAGQPK    | 372  | 4240  |
| >NF1-E91K-ᵛLEKCLAGQPK   | 6613  | >NF1-E91K-ᵛLKKCLAGQPK   | 324  | 6289  |
| >NF1-E91K-ᵛLSQLIILDITLE | 23152 | >NF1-E91K-ᵛLSQLIILDITLK | 48   | 23104 |
| >NF1-E91K-ᵛLSQLIILDITLE | 20863 | >NF1-E91K-ᵛLSQLIILDITLK | 392  | 20471 |
| >NF1-E91K-ᵛTLEKCLAGQP   | 1228  | >NF1-E91K-ᵛTLKKCLAGQP   | 221  | 1007  |
| >NF1-E91K-ᵛTLEKCLAGQP   | 6688  | >NF1-E91K-ᵛTLKKCLAGQP   | 47   | 6641  |
| >NF1-E91K-ᵛTLEKCLAGQP   | 5056  | >NF1-E91K-ᵛTLKKCLAGQP   | 488  | 4568  |
| >NF1-E91K-ᵛDTLEKCLAGC   | 352   | >NF1-E91K-ᵛDTLKKCLAGC   | 888  | 536   |
| >NF1-E91K-ᵛDTLEKCLA     | 261   | >NF1-E91K-ᵛDTLKKCLA     | 1797 | 1536  |
| >NF1-E91K-ᵛILDITLEKCLA  | 497   | >NF1-E91K-ᵛILDITLKKCLA  | 1083 | 586   |
| >NF1-E91K-ᵛILDITLEKC    | 278   | >NF1-E91K-ᵛILDITLKKC    | 845  | 567   |
| >NF1-E91K-ᵛILDITLEKCLA  | 403   | >NF1-E91K-ᵛILDITLKKCLA  | 418  | 15    |
| >NF1-E91K-ᵛILDITLEKCL   | 356   | >NF1-E91K-ᵛILDITLKKCL   | 813  | 457   |
| >NF1-E91K-ᵛILDITLEKCLA  | 295   | >NF1-E91K-ᵛILDITLKKCLA  | 475  | 180   |
| >NF1-E91K-ᵛILDITLEKCL   | 350   | >NF1-E91K-ᵛILDITLKKCL   | 374  | 24    |
| >NF1-E91K-ᵛILDITLEKCLA  | 128   | >NF1-E91K-ᵛILDITLKKCLA  | 132  | 4     |
| >NF1-E91K-ᵛIILDITLEKC   | 391   | >NF1-E91K-ᵛIILDITLKKC   | 3399 | 3008  |
| >NF1-E91K-ᵛIILDITLEKCLA | 96    | >NF1-E91K-ᵛIILDITLKKCLA | 250  | 154   |
| >NF1-E91K-ᵛIILDITLEKC   | 99    | >NF1-E91K-ᵛIILDITLKKC   | 611  | 512   |
| >NF1-E91K-ᵛIILDITLEKCL  | 242   | >NF1-E91K-ᵛIILDITLKKCL  | 436  | 194   |
| >NF1-E91K-ᵛIILDITLEKCLA | 115   | >NF1-E91K-ᵛIILDITLKKCLA | 209  | 94    |
| >NF1-E91K-ᵛIILDITLEKCLA | 443   | >NF1-E91K-ᵛIILDITLKKCLA | 878  | 435   |
| >NF1-E91K-ᵛIILDITLEKC   | 415   | >NF1-E91K-ᵛIILDITLKKC   | 4891 | 4476  |
| >NF1-E91K-ᵛIILDITLEKCL  | 196   | >NF1-E91K-ᵛIILDITLKKCL  | 573  | 377   |
| >NF1-E91K-ᵛIILDITLEKCLA | 393   | >NF1-E91K-ᵛIILDITLKKCLA | 958  | 565   |
| >NF1-E91K-ᵛIILDITLEKC   | 366   | >NF1-E91K-ᵛIILDITLKKC   | 1145 | 779   |
| >NF1-E91K-ᵛIILDITLEKCL  | 188   | >NF1-E91K-ᵛIILDITLKKCL  | 279  | 91    |
| >NF1-E91K-ᵛIILDITLEKCLA | 55    | >NF1-E91K-ᵛIILDITLKKCLA | 94   | 39    |
| >NF1-E91K-ᵛIILDITLEK    | 287   | >NF1-E91K-ᵛIILDITLKK    | 161  | 126   |
| >NF1-E91K-ᵛIILDITLEK    | 28    | >NF1-E91K-ᵛIILDITLKK    | 37   | 9     |
| >NF1-E91K-ᵛIILDITLEK    | 437   | >NF1-E91K-ᵛIILDITLKK    | 431  | 6     |
| >NF1-E91K-ᵛLIILDITLEK   | 853   | >NF1-E91K-ᵛLIILDITLKK   | 411  | 442   |
| >NF1-E91K-ᵛLIILDITLE    | 26494 | >NF1-E91K-ᵛLIILDITLK    | 97   | 26397 |
| >NF1-E91K-ᵛLIILDITLEK   | 52    | >NF1-E91K-ᵛLIILDITLKK   | 52   | 0     |
| >NF1-E91K-ᵛLIILDITLE    | 14422 | >NF1-E91K-ᵛLIILDITLK    | 116  | 14306 |
| >NF1-E91K-ᵛLIILDITLEK   | 309   | >NF1-E91K-ᵛLIILDITLKK   | 470  | 161   |
| >NF1-E91K-ᵛQLIILDITLEK  | 159   | >NF1-E91K-ᵛQLIILDITLKK  | 145  | 14    |
| >NF1-E91K-ᵛQLIILDITLEK  | 42    | >NF1-E91K-ᵛQLIILDITLKK  | 54   | 12    |

|                               |       |                               |      |       |
|-------------------------------|-------|-------------------------------|------|-------|
| >NF1-E91K- $\nu$ QLIILDITLE   | 19201 | >NF1-E91K- $\eta$ QLIILDTLK   | 250  | 18951 |
| >NF1-E91K- $\nu$ QLIILDITLEK  | 119   | >NF1-E91K- $\eta$ QLIILDTLKK  | 134  | 15    |
| >NF1-E91K- $\nu$ SQLIILDITLE  | 22844 | >NF1-E91K- $\eta$ SQLIILDTLK  | 456  | 22388 |
| >NF1-E91K- $\nu$ SQLIILDITLE  | 31703 | >NF1-E91K- $\eta$ SQLIILDTLK  | 46   | 31657 |
| >NF1-E91K- $\nu$ SQLIILDITLEK | 33    | >NF1-E91K- $\eta$ SQLIILDTLKK | 35   | 2     |
| >NF1-F2156L FSLPKFYLL         | 58    | >NF1-F2156L LSLPKFYLL         | 65   | 7     |
| >NF1-F2156L FSLPKFYLL         | 119   | >NF1-F2156L LSLPKFYLL         | 2158 | 2039  |
| >NF1-F2156L FSLPKFYLL         | 76    | >NF1-F2156L LSLPKFYLL         | 1277 | 1201  |
| >NF1-F2156L FSLPKFYLL         | 103   | >NF1-F2156L LSLPKFYLL         | 840  | 737   |
| >NF1-F2156L FSLPKFYLL         | 43    | >NF1-F2156L LSLPKFYLL         | 384  | 341   |
| >NF1-F2156L FSLPKFYLL         | 17    | >NF1-F2156L LSLPKFYLL         | 229  | 212   |
| >NF1-F2156L FSLPKFYLL         | 15    | >NF1-F2156L LSLPKFYLL         | 178  | 163   |
| >NF1-F2156L FSLPKFYLL         | 108   | >NF1-F2156L LSLPKFYLL         | 984  | 876   |
| >NF1-F2156L FSLPKFYLL         | 461   | >NF1-F2156L LSLPKFYLL         | 763  | 302   |
| >NF1-F2156L FSLPKFYLLF        | 32    | >NF1-F2156L LSLPKFYLLF        | 74   | 42    |
| >NF1-F2156L FSLPKFYLLF        | 259   | >NF1-F2156L LSLPKFYLLF        | 486  | 227   |
| >NF1-F2156L FSLPKFYLL         | 180   | >NF1-F2156L LSLPKFYLL         | 2416 | 2236  |
| >NF1-F2156L FSLPKFYLL         | 95    | >NF1-F2156L LSLPKFYLL         | 1539 | 1444  |
| >NF1-F2156L FSLPKFYLL         | 117   | >NF1-F2156L LSLPKFYLL         | 1258 | 1141  |
| >NF1-F2156L FSLPKFYLL         | 143   | >NF1-F2156L LSLPKFYLL         | 413  | 270   |
| >NF1-F2156L FSLPKFYLLF        | 14    | >NF1-F2156L LSLPKFYLLF        | 24   | 10    |
| >NF1-F2156L FSLPKFYLL         | 33    | >NF1-F2156L LSLPKFYLL         | 22   | 11    |
| >NF1-F2156L FSLPKFYLL         | 52    | >NF1-F2156L LSLPKFYLL         | 34   | 18    |
| >NF1-F2156L FSLPKFYLLF        | 6     | >NF1-F2156L LSLPKFYLLF        | 5    | 1     |
| >NF1-F2156L FSLPKFYLLF        | 483   | >NF1-F2156L LSLPKFYLLF        | 116  | 367   |
| >NF1-F2156L FSLPKFYLL         | 287   | >NF1-F2156L LSLPKFYLL         | 156  | 131   |
| >NF1-F2156L FSLPKFYLL         | 872   | >NF1-F2156L LSLPKFYLL         | 388  | 484   |
| >NF1-F2156L FSLPKFYLLF        | 23    | >NF1-F2156L LSLPKFYLLF        | 19   | 4     |
| >NF1-F2156L FSLPKFYLL         | 252   | >NF1-F2156L LSLPKFYLL         | 575  | 323   |
| >NF1-F2156L FSLPKFYLL         | 35    | >NF1-F2156L LSLPKFYLL         | 43   | 8     |
| >NF1-F2156L FSLPKFYLLF        | 132   | >NF1-F2156L LSLPKFYLLF        | 145  | 13    |
| >NF1-F2156L FSLPKFYLL         | 261   | >NF1-F2156L LSLPKFYLL         | 245  | 16    |
| >NF1-F2156L FSLPKFYLLF        | 82    | >NF1-F2156L LSLPKFYLLF        | 55   | 27    |
| >NF1-F2156L FSLPKFYLLF        | 312   | >NF1-F2156L LSLPKFYLLF        | 1017 | 705   |
| >NF1-F2156L FSLPKFYLL         | 152   | >NF1-F2156L LSLPKFYLL         | 126  | 26    |
| >NF1-F2156L FSLPKFYLL         | 165   | >NF1-F2156L LSLPKFYLL         | 138  | 27    |
| >NF1-F2156L EFSLPKFYLL        | 11076 | >NF1-F2156L ELSLPKFYLL        | 244  | 10832 |
| >NF1-F2156L EFSLPKFYLL        | 6213  | >NF1-F2156L ELSLPKFYLL        | 114  | 6099  |
| >NF1-F2156L EFSLPKFYLL        | 19382 | >NF1-F2156L ELSLPKFYLL        | 108  | 19274 |
| >NF1-F2156L EFSLPKFYLL        | 21538 | >NF1-F2156L ELSLPKFYLL        | 356  | 21182 |
| >NF1-F2156L EFSLPKFYLL        | 16093 | >NF1-F2156L ELSLPKFYLL        | 52   | 16041 |
| >NF1-F2156L EFSLPKFYLL        | 19718 | >NF1-F2156L ELSLPKFYLL        | 294  | 19424 |
| >NF1-F2156L EFSLPKFYLL        | 21113 | >NF1-F2156L ELSLPKFYLL        | 54   | 21059 |

|                         |       |                         |       |       |
|-------------------------|-------|-------------------------|-------|-------|
| >NF1-F2156L EFSLPKFYLL  | 24199 | >NF1-F2156L ELSLPKFYLL  | 102   | 24097 |
| >NF1-F2156L EFSLPKFYLL  | 169   | >NF1-F2156L ELSLPKFYLL  | 5628  | 5459  |
| >NF1-F2156L EFSLPKFYLLF | 322   | >NF1-F2156L ELSLPKFYLLF | 2989  | 2667  |
| >NF1-F2156L EFSLPKFYLLF | 152   | >NF1-F2156L ELSLPKFYLLF | 9204  | 9052  |
| >NF1-F2156L EFSLPKFY    | 157   | >NF1-F2156L ELSLPKFY    | 610   | 453   |
| >NF1-F2156L EFSLPKFYLLF | 460   | >NF1-F2156L ELSLPKFYLLF | 1640  | 1180  |
| >NF1-F2156L EFSLPKFYL   | 1768  | >NF1-F2156L ELSLPKFYL   | 70    | 1698  |
| >NF1-F2156L EFSLPKFYL   | 3603  | >NF1-F2156L ELSLPKFYL   | 94    | 3509  |
| >NF1-F2156L EFSLPKFYLL  | 56    | >NF1-F2156L ELSLPKFYLL  | 130   | 74    |
| >NF1-F2156L EFSLPKFYLLF | 456   | >NF1-F2156L ELSLPKFYLLF | 2319  | 1863  |
| >NF1-F2156L EFSLPKFYLL  | 331   | >NF1-F2156L ELSLPKFYLL  | 14043 | 13712 |
| >NF1-F2156L KQVLRSLSTEI | 7353  | >NF1-F2156L KQVLRSLSTEI | 235   | 7118  |
| >NF1-F2156L KQVLRSLSTEI | 7689  | >NF1-F2156L KQVLRSLSTEI | 159   | 7530  |
| >NF1-F2156L KQVLRSLSTEI | 54    | >NF1-F2156L KQVLRSLSTEI | 8     | 46    |
| >NF1-F2156L KQVLRSLSTEI | 103   | >NF1-F2156L KQVLRSLSTEI | 1777  | 1674  |
| >NF1-F2156L KQVLRSLSTEI | 5     | >NF1-F2156L KQVLRSLSTEI | 80    | 75    |
| >NF1-F2156L KQVLRSLSTEI | 437   | >NF1-F2156L KQVLRSLSTEI | 5183  | 4746  |
| >NF1-F2156L KQVLRSLSTEI | 6862  | >NF1-F2156L KQVLRSLSTEI | 382   | 6480  |
| >NF1-F2156L KQVLRSLSTEI | 1825  | >NF1-F2156L KQVLRSLSTEI | 392   | 1433  |
| >NF1-F2156L TEFSLPKFY   | 39    | >NF1-F2156L TELSLPKFY   | 73    | 34    |
| >NF1-F2156L TEFSLPKFYL  | 64    | >NF1-F2156L TELSLPKFYL  | 111   | 47    |
| >NF1-F2156L TEFSLPKFYLL | 26    | >NF1-F2156L TELSLPKFYLL | 37    | 11    |
| >NF1-F2156L TEFSLPKFYL  | 493   | >NF1-F2156L TELSLPKFYL  | 1364  | 871   |
| >NF1-F2156L TEFSLPKFY   | 265   | >NF1-F2156L TELSLPKFY   | 840   | 575   |
| >NF1-F2156L TEFSLPKFY   | 487   | >NF1-F2156L TELSLPKFY   | 539   | 52    |
| >NF1-F2156L TEFSLPKF    | 61    | >NF1-F2156L TELSLPKF    | 293   | 232   |
| >NF1-F2156L TEFSLPKFY   | 172   | >NF1-F2156L TELSLPKFY   | 844   | 672   |
| >NF1-F2156L TEFSLPKF    | 20    | >NF1-F2156L TELSLPKF    | 37    | 17    |
| >NF1-F2156L TEFSLPKFY   | 35    | >NF1-F2156L TELSLPKFY   | 73    | 38    |
| >NF1-F2156L TEFSLPKFYLL | 137   | >NF1-F2156L TELSLPKFYLL | 311   | 174   |
| >NF1-F2156L TEFSLPKFYLL | 266   | >NF1-F2156L TELSLPKFYLL | 526   | 260   |
| >NF1-F2156L TEFSLPKF    | 353   | >NF1-F2156L TELSLPKF    | 1782  | 1429  |
| >NF1-F2156L TEFSLPKFYL  | 254   | >NF1-F2156L TELSLPKFYL  | 1135  | 881   |
| >NF1-F2156L TEFSLPKFYLL | 40    | >NF1-F2156L TELSLPKFYLL | 138   | 98    |
| >NF1-F2156L TEFSLPKF    | 184   | >NF1-F2156L TELSLPKF    | 322   | 138   |
| >NF1-F2156L TEFSLPKFYL  | 34    | >NF1-F2156L TELSLPKFYL  | 55    | 21    |
| >NF1-F2156L TEFSLPKFYLL | 32    | >NF1-F2156L TELSLPKFYLL | 67    | 35    |
| >NF1-F2156L TEFSLPKF    | 197   | >NF1-F2156L TELSLPKF    | 196   | 1     |
| >NF1-F2156L TEFSLPKFY   | 89    | >NF1-F2156L TELSLPKFY   | 95    | 6     |
| >NF1-F2156L TEFSLPKFYL  | 149   | >NF1-F2156L TELSLPKFYL  | 229   | 80    |
| >NF1-F2156L TEFSLPKF    | 38    | >NF1-F2156L TELSLPKF    | 68    | 30    |
| >NF1-F2156L TEFSLPKFY   | 14    | >NF1-F2156L TELSLPKFY   | 21    | 7     |
| >NF1-F2156L TEFSLPKFYL  | 109   | >NF1-F2156L TELSLPKFYL  | 392   | 283   |

|                          |     |                          |      |      |
|--------------------------|-----|--------------------------|------|------|
| >NF1-F2156L TEFSLPKFYLL  | 66  | >NF1-F2156L TELSLPKFYLL  | 159  | 93   |
| >NF1-F2156L TEFSLPKFY    | 59  | >NF1-F2156L TELSLPKFY    | 54   | 5    |
| >NF1-F2156L TEFSLPKFYLL  | 15  | >NF1-F2156L TELSLPKFYLL  | 42   | 27   |
| >NF1-F2156L LTEFSLPKFY   | 44  | >NF1-F2156L LTELSLPKFY   | 44   | 0    |
| >NF1-F2156L LTEFSLPK     | 33  | >NF1-F2156L LTELSLPK     | 55   | 22   |
| >NF1-F2156L LTEFSLPKFY   | 72  | >NF1-F2156L LTELSLPKFY   | 105  | 33   |
| >NF1-F2156L LTEFSLPK     | 64  | >NF1-F2156L LTELSLPK     | 144  | 80   |
| >NF1-F2156L LTEFSLPKFY   | 68  | >NF1-F2156L LTELSLPKFY   | 85   | 17   |
| >NF1-F2156L LTEFSLPK     | 141 | >NF1-F2156L LTELSLPK     | 485  | 344  |
| >NF1-F2156L LTEFSLPKF    | 4   | >NF1-F2156L LTELSLPKF    | 5    | 1    |
| >NF1-F2156L LTEFSLPKFY   | 9   | >NF1-F2156L LTELSLPKFY   | 10   | 1    |
| >NF1-F2156L LTEFSLPKFYLL | 29  | >NF1-F2156L LTELSLPKFYLL | 32   | 3    |
| >NF1-F2156L LTEFSLPKF    | 275 | >NF1-F2156L LTELSLPKF    | 228  | 47   |
| >NF1-F2156L LTEFSLPKFYLL | 62  | >NF1-F2156L LTELSLPKFYLL | 46   | 16   |
| >NF1-F2156L LTEFSLPKF    | 31  | >NF1-F2156L LTELSLPKF    | 83   | 52   |
| >NF1-F2156L LTEFSLPKFY   | 18  | >NF1-F2156L LTELSLPKFY   | 17   | 1    |
| >NF1-F2156L LTEFSLPKFYLL | 126 | >NF1-F2156L LTELSLPKFYLL | 318  | 192  |
| >NF1-F2156L LTEFSLPK     | 346 | >NF1-F2156L LTELSLPK     | 948  | 602  |
| >NF1-F2156L SLTEFSLPKF   | 431 | >NF1-F2156L SLTELSLPKF   | 963  | 532  |
| >NF1-F2156L SLTEFSLPKF   | 385 | >NF1-F2156L SLTELSLPKF   | 639  | 254  |
| >NF1-F2156L SLTEFSLPK    | 52  | >NF1-F2156L SLTELSLPK    | 69   | 17   |
| >NF1-F2156L SLTEFSLPK    | 12  | >NF1-F2156L SLTELSLPK    | 22   | 10   |
| >NF1-F2156L SLTEFSLPKFY  | 40  | >NF1-F2156L SLTELSLPKFY  | 44   | 4    |
| >NF1-F2156L SLTEFSLPK    | 80  | >NF1-F2156L SLTELSLPK    | 225  | 145  |
| >NF1-F2156L SLTEFSLPKFY  | 193 | >NF1-F2156L SLTELSLPKFY  | 257  | 64   |
| >NF1-F2156L SLTEFSLPKFY  | 9   | >NF1-F2156L SLTELSLPKFY  | 9    | 0    |
| >NF1-F2156L SLTEFSLPKF   | 284 | >NF1-F2156L SLTELSLPKF   | 710  | 426  |
| >NF1-F2156L SLTEFSLPKFY  | 135 | >NF1-F2156L SLTELSLPKFY  | 281  | 146  |
| >NF1-F2156L SLTEFSLPKF   | 221 | >NF1-F2156L SLTELSLPKF   | 541  | 320  |
| >NF1-F2156L SLTEFSLPKF   | 123 | >NF1-F2156L SLTELSLPKF   | 174  | 51   |
| >NF1-F2156L SLTEFSLPK    | 288 | >NF1-F2156L SLTELSLPK    | 1383 | 1095 |
| >NF1-F2156L LSLTEFSLPK   | 52  | >NF1-F2156L LSLTELSLPK   | 54   | 2    |
| >NF1-F2156L LSLTEFSLPK   | 15  | >NF1-F2156L LSLTELSLPK   | 18   | 3    |
| >NF1-F2156L LSLTEFSLPKF  | 925 | >NF1-F2156L LSLTELSLPKF  | 391  | 534  |
| >NF1-F2156L LSLTEFSLPK   | 37  | >NF1-F2156L LSLTELSLPK   | 51   | 14   |
| >NF1-F2156L LSLTEFSLPK   | 275 | >NF1-F2156L LSLTELSLPK   | 693  | 418  |
| >NF1-F2156L LSLTEFSL     | 254 | >NF1-F2156L LSLTELSL     | 297  | 43   |
| >NF1-F2156L LSLTEFSLPKF  | 21  | >NF1-F2156L LSLTELSLPKF  | 40   | 19   |
| >NF1-F2156L LSLTEFSL     | 44  | >NF1-F2156L LSLTELSL     | 21   | 23   |
| >NF1-F2156L LSLTEFSLPKF  | 6   | >NF1-F2156L LSLTELSLPKF  | 5    | 1    |
| >NF1-F2156L LSLTEFSL     | 470 | >NF1-F2156L LSLTELSL     | 613  | 143  |
| >NF1-F2156L LSLTEFSLPKF  | 87  | >NF1-F2156L LSLTELSLPKF  | 74   | 13   |
| >NF1-F2156L LSLTEFSLPKF  | 39  | >NF1-F2156L LSLTELSLPKF  | 50   | 11   |

|                         |       |                         |      |       |
|-------------------------|-------|-------------------------|------|-------|
| >NF1-F2156L LSLTEFSLPK  | 222   | >NF1-F2156L LSLTELSLPK  | 713  | 491   |
| >NF1-F2156L LSLTEFSL    | 216   | >NF1-F2156L LSLTELSL    | 368  | 152   |
| >NF1-F2156L RLSLTEFSL   | 114   | >NF1-F2156L RLSLTELSL   | 956  | 842   |
| >NF1-F2156L RLSLTEFSL   | 23    | >NF1-F2156L RLSLTELSL   | 145  | 122   |
| >NF1-F2156L RLSLTEFSL   | 469   | >NF1-F2156L RLSLTELSL   | 560  | 91    |
| >NF1-F2156L RLSLTEFSL   | 49    | >NF1-F2156L RLSLTELSL   | 326  | 277   |
| >NF1-F2156L RLSLTEFSL   | 27    | >NF1-F2156L RLSLTELSL   | 412  | 385   |
| >NF1-F2156L RLSLTEFSL   | 35    | >NF1-F2156L RLSLTELSL   | 180  | 145   |
| >NF1-F2156L RLSLTEFSL   | 54    | >NF1-F2156L RLSLTELSL   | 993  | 939   |
| >NF1-F2156L RLSLTEFSL   | 10    | >NF1-F2156L RLSLTELSL   | 28   | 18    |
| >NF1-F2156L RLSLTEFSLPK | 40    | >NF1-F2156L RLSLTELSLPK | 40   | 0     |
| >NF1-F2156L RLSLTEFSLPK | 17    | >NF1-F2156L RLSLTELSLPK | 25   | 8     |
| >NF1-F2156L RLSLTEFSLPK | 19    | >NF1-F2156L RLSLTELSLPK | 18   | 1     |
| >NF1-F2156L RLSLTEFSLPK | 464   | >NF1-F2156L RLSLTELSLPK | 1427 | 963   |
| >NF1-F2156L RLSLTEFSL   | 168   | >NF1-F2156L RLSLTELSL   | 250  | 82    |
| >NF1-F2156L RLSLTEFSLPK | 305   | >NF1-F2156L RLSLTELSLPK | 461  | 156   |
| >NF1-F2156L LRLSLTEF    | 10    | >NF1-F2156L LRLSLTEL    | 122  | 112   |
| >NF1-F2156L LRLSLTEFSL  | 209   | >NF1-F2156L LRLSLTELSL  | 147  | 62    |
| >NF1-F2156L LRLSLTEF    | 160   | >NF1-F2156L LRLSLTEL    | 103  | 57    |
| >NF1-F2156L LRLSLTEFSL  | 48    | >NF1-F2156L LRLSLTELSL  | 23   | 25    |
| >NF1-F2156L LRLSLTEFSL  | 182   | >NF1-F2156L LRLSLTELSL  | 221  | 39    |
| >NF1-F2156L LRLSLTEF    | 1644  | >NF1-F2156L LRLSLTEL    | 284  | 1360  |
| >NF1-F2156L LRLSLTEFSL  | 1642  | >NF1-F2156L LRLSLTELSL  | 310  | 1332  |
| >NF1-F2156L LRLSLTEF    | 380   | >NF1-F2156L LRLSLTEL    | 137  | 243   |
| >NF1-F2156L LRLSLTEFSL  | 188   | >NF1-F2156L LRLSLTELSL  | 66   | 122   |
| >NF1-F2156L VLRLSLTEF   | 5521  | >NF1-F2156L VLRLSLTEL   | 208  | 5313  |
| >NF1-F2156L VLRLSLTEFSL | 399   | >NF1-F2156L VLRLSLTELSL | 1025 | 626   |
| >NF1-F2156L VLRLSLTEF   | 3383  | >NF1-F2156L VLRLSLTEL   | 33   | 3350  |
| >NF1-F2156L VLRLSLTEFSL | 245   | >NF1-F2156L VLRLSLTELSL | 277  | 32    |
| >NF1-F2156L VLRLSLTEFSL | 382   | >NF1-F2156L VLRLSLTELSL | 1073 | 691   |
| >NF1-F2156L VLRLSLTEFSL | 490   | >NF1-F2156L VLRLSLTELSL | 2513 | 2023  |
| >NF1-F2156L VLRLSLTEF   | 6454  | >NF1-F2156L VLRLSLTEL   | 7    | 6447  |
| >NF1-F2156L VLRLSLTEFSL | 7     | >NF1-F2156L VLRLSLTELSL | 15   | 8     |
| >NF1-F2156L VLRLSLTEF   | 101   | >NF1-F2156L VLRLSLTEL   | 2606 | 2505  |
| >NF1-F2156L VLRLSLTEF   | 20    | >NF1-F2156L VLRLSLTEL   | 443  | 423   |
| >NF1-F2156L VLRLSLTEFSL | 596   | >NF1-F2156L VLRLSLTELSL | 394  | 202   |
| >NF1-F2156L VLRLSLTEF   | 31    | >NF1-F2156L VLRLSLTEL   | 505  | 474   |
| >NF1-F2156L VLRLSLTEF   | 368   | >NF1-F2156L VLRLSLTEL   | 2243 | 1875  |
| >NF1-F2156L QVLRLSLTEF  | 11609 | >NF1-F2156L QVLRLSLTEL  | 280  | 11329 |
| >NF1-F2156L QVLRLSLTEF  | 11686 | >NF1-F2156L QVLRLSLTEL  | 312  | 11374 |
| >NF1-F2156L QVLRLSLTEF  | 483   | >NF1-F2156L QVLRLSLTEL  | 6026 | 5543  |
| >NF1-F2156L QVLRLSLTEF  | 419   | >NF1-F2156L QVLRLSLTEL  | 2370 | 1951  |
| >NF1-F2156L QVLRLSLTEF  | 111   | >NF1-F2156L QVLRLSLTEL  | 405  | 294   |



|                         |       |                         |      |       |
|-------------------------|-------|-------------------------|------|-------|
| >NF1-F2156L QVLRLSLTEF  | 10930 | >NF1-F2156L QVLRLSLTEL  | 230  | 10700 |
| >NF1-F2156L QVLRLSLTEF  | 146   | >NF1-F2156L QVLRLSLTEL  | 3568 | 3422  |
| >NF1-F2156L QVLRLSLTEF  | 154   | >NF1-F2156L QVLRLSLTEL  | 1648 | 1494  |
| >NF1-G1863, GSSDPSLR    | 167   | >NF1-G1863, ASSDPSLR    | 109  | 58    |
| >NF1-G1863, GSSDPSLR    | 623   | >NF1-G1863, ASSDPSLR    | 294  | 329   |
| >NF1-G1863, GSSDPSLR    | 235   | >NF1-G1863, ASSDPSLR    | 190  | 45    |
| >NF1-G1863, GSSDPSLR    | 517   | >NF1-G1863, ASSDPSLR    | 257  | 260   |
| >NF1-G1863, LGSSDPSLR   | 898   | >NF1-G1863, LASSDPSLR   | 31   | 867   |
| >NF1-G1863, LGSSDPSL    | 8826  | >NF1-G1863, LASSDPSL    | 413  | 8413  |
| >NF1-G1863, LGSSDPSL    | 3133  | >NF1-G1863, LASSDPSL    | 339  | 2794  |
| >NF1-G1863, TLLNIALLNLG | 13228 | >NF1-G1863, TLLNIALLNLA | 85   | 13143 |
| >NF1-G1863, TLLNIALLNLG | 1995  | >NF1-G1863, TLLNIALLNLA | 90   | 1905  |
| >NF1-G1863, TLLNIALLNLG | 8631  | >NF1-G1863, TLLNIALLNLA | 88   | 8543  |
| >NF1-G1863, TLLNIALLNLG | 6633  | >NF1-G1863, TLLNIALLNLA | 87   | 6546  |
| >NF1-G1863, TLLNIALLNLG | 5952  | >NF1-G1863, TLLNIALLNLA | 90   | 5862  |
| >NF1-G1863, TLLNIALLNLG | 12914 | >NF1-G1863, TLLNIALLNLA | 236  | 12678 |
| >NF1-G1863, TLLNIALLNLG | 8707  | >NF1-G1863, TLLNIALLNLA | 67   | 8640  |
| >NF1-G1863, TLLNIALLNLG | 20236 | >NF1-G1863, TLLNIALLNLA | 341  | 19895 |
| >NF1-G1863, TLLNIALLNLG | 13216 | >NF1-G1863, TLLNIALLNLA | 46   | 13170 |
| >NF1-G1863, NLGSSDPSL   | 1344  | >NF1-G1863, NLASSDPSL   | 156  | 1188  |
| >NF1-G1863, NLGSSDPSL   | 393   | >NF1-G1863, NLASSDPSL   | 24   | 369   |
| >NF1-G1863, NLGSSDPSL   | 2039  | >NF1-G1863, NLASSDPSL   | 125  | 1914  |
| >NF1-G1863, NLGSSDPSL   | 4281  | >NF1-G1863, NLASSDPSL   | 425  | 3856  |
| >NF1-G1863, NLGSSDPSL   | 371   | >NF1-G1863, NLASSDPSL   | 313  | 58    |
| >NF1-G1863, NLGSSDPSL   | 238   | >NF1-G1863, NLASSDPSL   | 272  | 34    |
| >NF1-G1863, NLGSSDPSL   | 114   | >NF1-G1863, NLASSDPSL   | 40   | 74    |
| >NF1-G1863, NLGSSDPSL   | 237   | >NF1-G1863, NLASSDPSL   | 77   | 160   |
| >NF1-G1863, NLGSSDPSL   | 30    | >NF1-G1863, NLASSDPSL   | 18   | 12    |
| >NF1-G1863, NLGSSDPSLR  | 217   | >NF1-G1863, NLASSDPSLR  | 17   | 200   |
| >NF1-G1863, LLNLGSSDPSI | 444   | >NF1-G1863, LLNLASSDPSI | 455  | 11    |
| >NF1-G1863, LLNLGSSDPSI | 61    | >NF1-G1863, LLNLASSDPSI | 35   | 26    |
| >NF1-G1863, LLNLGSSDPSI | 48    | >NF1-G1863, LLNLASSDPSI | 60   | 12    |
| >NF1-G1863, LLNLGSSDPSI | 97    | >NF1-G1863, LLNLASSDPSI | 143  | 46    |
| >NF1-G1863, LLNLGSSDPSI | 91    | >NF1-G1863, LLNLASSDPSI | 118  | 27    |
| >NF1-G1863, LLNLGSSDPSI | 51    | >NF1-G1863, LLNLASSDPSI | 63   | 12    |
| >NF1-G1863, LLNLGSSDPSI | 55    | >NF1-G1863, LLNLASSDPSI | 55   | 0     |
| >NF1-G1863, LLNLGSSDPSI | 6     | >NF1-G1863, LLNLASSDPSI | 9    | 3     |
| >NF1-G1863, LLNLGSSDPSI | 339   | >NF1-G1863, LLNLASSDPSI | 320  | 19    |
| >NF1-G1863, ALLNLGSS    | 536   | >NF1-G1863, ALLNLASS    | 221  | 315   |
| >NF1-G1863, ALLNLGSS    | 1669  | >NF1-G1863, ALLNLASS    | 261  | 1408  |
| >NF1-G1863, NIALLNLG    | 5599  | >NF1-G1863, NIALLNLA    | 202  | 5397  |
| >NF1-G1863, NIALLNLG    | 14472 | >NF1-G1863, NIALLNLA    | 403  | 14069 |
| >NF1-G1863, NIALLNLG    | 6540  | >NF1-G1863, NIALLNLA    | 133  | 6407  |

|                        |       |                        |      |       |
|------------------------|-------|------------------------|------|-------|
| >NF1-G1863/LLNIALNLG   | 3232  | >NF1-G1863/LLNIALNLA   | 96   | 3136  |
| >NF1-G1863/LLNIALNLG   | 5488  | >NF1-G1863/LLNIALNLA   | 111  | 5377  |
| >NF1-G1863/LLNIALNLG   | 9803  | >NF1-G1863/LLNIALNLA   | 371  | 9432  |
| >NF1-G1863/LLNIALNLG   | 7652  | >NF1-G1863/LLNIALNLA   | 152  | 7500  |
| >NF1-G1863/LLNIALNLG   | 13537 | >NF1-G1863/LLNIALNLA   | 283  | 13254 |
| >NF1-G1863/LLNIALNLG   | 8911  | >NF1-G1863/LLNIALNLA   | 14   | 8897  |
| >NF1-G2745IGIDEETSEESL | 232   | >NF1-G2745IRIDEETSEESL | 307  | 75    |
| >NF1-G2745IGIDEETSEESL | 702   | >NF1-G2745IRIDEETSEESL | 225  | 477   |
| >NF1-G2745IGIDEETSEESL | 177   | >NF1-G2745IRIDEETSEESL | 88   | 89    |
| >NF1-G2745IGIDEETSEESL | 264   | >NF1-G2745IRIDEETSEESL | 549  | 285   |
| >NF1-G2745IGIDEETSEESL | 313   | >NF1-G2745IRIDEETSEESL | 612  | 299   |
| >NF1-G2745IGIDEETSEESL | 221   | >NF1-G2745IRIDEETSEESL | 326  | 105   |
| >NF1-G2745IYLPGIDEET   | 30    | >NF1-G2745IYLPRIDEET   | 139  | 109   |
| >NF1-G2745IYLPGIDEET   | 46    | >NF1-G2745IYLPRIDEET   | 166  | 120   |
| >NF1-G2745IYLPGIDEETS  | 263   | >NF1-G2745IYLPRIDEETS  | 776  | 513   |
| >NF1-G2745IYLPGIDEET   | 90    | >NF1-G2745IYLPRIDEET   | 317  | 227   |
| >NF1-G2745IYLPGIDEE    | 471   | >NF1-G2745IYLPRIDEE    | 1935 | 1464  |
| >NF1-G2745IYLPGIDEET   | 10    | >NF1-G2745IYLPRIDEET   | 33   | 23    |
| >NF1-G2745IYLPGIDEETS  | 69    | >NF1-G2745IYLPRIDEETS  | 286  | 217   |
| >NF1-G2745IYLPGIDEETSE | 338   | >NF1-G2745IYLPRIDEETSE | 1305 | 967   |
| >NF1-G2745ITYLPGIDEE   | 250   | >NF1-G2745ITYLPRIDEE   | 354  | 104   |
| >NF1-G2745ITYLPGIDEET  | 166   | >NF1-G2745ITYLPRIDEET  | 240  | 74    |
| >NF1-G2745IDTYLPGIDEET | 804   | >NF1-G2745IDTYLPRIDEET | 469  | 335   |
| >NF1-G2745IIDTYLPGI    | 105   | >NF1-G2745IIDTYLPRI    | 430  | 325   |
| >NF1-G2745IIDTYLPGI    | 244   | >NF1-G2745IIDTYLPRI    | 370  | 126   |
| >NF1-G2745ILIDTYLPGI   | 25    | >NF1-G2745ILIDTYLPRI   | 35   | 10    |
| >NF1-G2745ILIDTYLPGI   | 474   | >NF1-G2745ILIDTYLPRI   | 778  | 304   |
| >NF1-G2745ILIDTYLPGI   | 450   | >NF1-G2745ILIDTYLPRI   | 1292 | 842   |
| >NF1-G2745ILIDTYLPGI   | 13    | >NF1-G2745ILIDTYLPRI   | 55   | 42    |
| >NF1-G2745ILIDTYLPGI   | 24    | >NF1-G2745ILIDTYLPRI   | 39   | 15    |
| >NF1-G2745ILIDTYLPGI   | 275   | >NF1-G2745ILIDTYLPRI   | 1511 | 1236  |
| >NF1-G2745ILIDTYLPGI   | 262   | >NF1-G2745ILIDTYLPRI   | 869  | 607   |
| >NF1-G2745ILIDTYLPGI   | 234   | >NF1-G2745ILIDTYLPRI   | 1235 | 1001  |
| >NF1-G2745ILIDTYLPGI   | 138   | >NF1-G2745ILIDTYLPRI   | 124  | 14    |
| >NF1-G2745ILIDTYLPGI   | 140   | >NF1-G2745ILIDTYLPRI   | 731  | 591   |
| >NF1-G2745ILIDTYLPG    | 35424 | >NF1-G2745ILIDTYLPR    | 229  | 35195 |
| >NF1-G2745IALIDTYLPGI  | 19    | >NF1-G2745IALIDTYLPRI  | 38   | 19    |
| >NF1-G2745IALIDTYLPG   | 476   | >NF1-G2745IALIDTYLPR   | 2031 | 1555  |
| >NF1-G2745IALIDTYLPGI  | 20    | >NF1-G2745IALIDTYLPRI  | 26   | 6     |
| >NF1-G2745IALIDTYLPGI  | 19    | >NF1-G2745IALIDTYLPRI  | 44   | 25    |
| >NF1-G2745IALIDTYLPGI  | 34    | >NF1-G2745IALIDTYLPRI  | 60   | 26    |
| >NF1-G2745IALIDTYLPGI  | 3     | >NF1-G2745IALIDTYLPRI  | 4    | 1     |
| >NF1-G2745IALIDTYLPGI  | 5     | >NF1-G2745IALIDTYLPRI  | 9    | 4     |

|                        |       |                        |      |       |
|------------------------|-------|------------------------|------|-------|
| >NF1-G2745IALIDTYLPGI  | 12    | >NF1-G2745IALIDTYLPRI  | 17   | 5     |
| >NF1-G2745IALIDTYLPGI  | 35    | >NF1-G2745IALIDTYLPRI  | 89   | 54    |
| >NF1-G2745IALIDTYLPGI  | 3     | >NF1-G2745IALIDTYLPRI  | 3    | 0     |
| >NF1-G2745IALIDTYLPG   | 18050 | >NF1-G2745IALIDTYLPR   | 50   | 18000 |
| >NF1-G2745IALIDTYLPG   | 19297 | >NF1-G2745IALIDTYLPR   | 42   | 19255 |
| >NF1-G2745IALIDTYLPGI  | 376   | >NF1-G2745IALIDTYLPRI  | 1077 | 701   |
| >NF1-G2745IALIDTYLPG   | 484   | >NF1-G2745IALIDTYLPR   | 6436 | 5952  |
| >NF1-G2745IALIDTYLPG   | 32999 | >NF1-G2745IALIDTYLPR   | 128  | 32871 |
| >NF1-G2745IDALIDTYLPG  | 15247 | >NF1-G2745IDALIDTYLPR  | 49   | 15198 |
| >NF1-G2745IDALIDTYLPG  | 34395 | >NF1-G2745IDALIDTYLPR  | 83   | 34312 |
| >NF1-G2745IDALIDTYLPGI | 26    | >NF1-G2745IDALIDTYLPRI | 73   | 47    |
| >NF1-G2745IDALIDTYLPG  | 35287 | >NF1-G2745IDALIDTYLPR  | 277  | 35010 |
| >NF1-G922V·GLELSPALY   | 379   | >NF1-G922V·VLELSPALY   | 136  | 243   |
| >NF1-G922V·GLELSPAL    | 261   | >NF1-G922V·VLELSPAL    | 322  | 61    |
| >NF1-G922V·GLELSPALYPM | 316   | >NF1-G922V·VLELSPALYPM | 436  | 120   |
| >NF1-G922V·GLELSPAL    | 635   | >NF1-G922V·VLELSPAL    | 263  | 372   |
| >NF1-G922V·GLELSPAL    | 109   | >NF1-G922V·VLELSPAL    | 205  | 96    |
| >NF1-G922V·GLELSPALYPM | 175   | >NF1-G922V·VLELSPALYPM | 330  | 155   |
| >NF1-G922V·GLELSPAL    | 48    | >NF1-G922V·VLELSPAL    | 27   | 21    |
| >NF1-G922V·GLELSPALYPM | 1282  | >NF1-G922V·VLELSPALYPM | 450  | 832   |
| >NF1-G922V·GLELSPALY   | 94    | >NF1-G922V·VLELSPALY   | 147  | 53    |
| >NF1-G922V·GLELSPALY   | 910   | >NF1-G922V·VLELSPALY   | 376  | 534   |
| >NF1-G922V·GLELSPALY   | 5346  | >NF1-G922V·VLELSPALY   | 472  | 4874  |
| >NF1-G922V·GLELSPALY   | 206   | >NF1-G922V·VLELSPALY   | 450  | 244   |
| >NF1-G922V·VGLELSPAL   | 391   | >NF1-G922V·VVLELSPAL   | 124  | 267   |
| >NF1-G922V·VGLELSPA    | 14882 | >NF1-G922V·VVLELSPA    | 332  | 14550 |
| >NF1-G922V·VGLELSPAL   | 9187  | >NF1-G922V·VVLELSPAL   | 62   | 9125  |
| >NF1-G922V·VGLELSPA    | 10558 | >NF1-G922V·VVLELSPA    | 256  | 10302 |
| >NF1-G922V·VGLELSPA    | 1384  | >NF1-G922V·VVLELSPA    | 15   | 1369  |
| >NF1-G922V·VGLELSPAL   | 446   | >NF1-G922V·VVLELSPAL   | 7    | 439   |
| >NF1-G922V·VGLELSPA    | 5508  | >NF1-G922V·VVLELSPA    | 124  | 5384  |
| >NF1-G922V·VGLELSPAL   | 985   | >NF1-G922V·VVLELSPAL   | 14   | 971   |
| >NF1-G922V·VGLELSPAL   | 8701  | >NF1-G922V·VVLELSPAL   | 57   | 8644  |
| >NF1-G922V·VGLELSPA    | 6568  | >NF1-G922V·VVLELSPA    | 291  | 6277  |
| >NF1-G922V·VGLELSPAL   | 1623  | >NF1-G922V·VVLELSPAL   | 26   | 1597  |
| >NF1-G922V·VGLELSPAL   | 9735  | >NF1-G922V·VVLELSPAL   | 30   | 9705  |
| >NF1-G922V·VGLELSPAL   | 12570 | >NF1-G922V·VVLELSPAL   | 73   | 12497 |
| >NF1-G922V·VGLELSPALY  | 754   | >NF1-G922V·VVLELSPALY  | 352  | 402   |
| >NF1-G922V·VGLELSPALY  | 273   | >NF1-G922V·VVLELSPALY  | 138  | 135   |
| >NF1-G922V·VGLELSPAL   | 16724 | >NF1-G922V·VVLELSPAL   | 349  | 16375 |
| >NF1-G922V·VGLELSPA    | 10385 | >NF1-G922V·VVLELSPA    | 312  | 10073 |
| >NF1-G922V·VGLELSPAL   | 3467  | >NF1-G922V·VVLELSPAL   | 31   | 3436  |
| >NF1-G922V·VGLELSPALY  | 1128  | >NF1-G922V·VVLELSPALY  | 20   | 1108  |

|                        |      |                        |      |      |
|------------------------|------|------------------------|------|------|
| >NF1-G922V·VGLELSPALY  | 193  | >NF1-G922V·VVLELSPALY  | 38   | 155  |
| >NF1-G922V·VGLELSPAL   | 1075 | >NF1-G922V·VVLELSPAL   | 366  | 709  |
| >NF1-G922V·VGLELSPALY  | 221  | >NF1-G922V·VVLELSPALY  | 224  | 3    |
| >NF1-G922V·QIRTNVKDLV  | 2464 | >NF1-G922V·QIRTNVKDLV  | 428  | 2036 |
| >NF1-G922V·LVGLELSPA   | 441  | >NF1-G922V·LVVLELSPA   | 79   | 362  |
| >NF1-G922V·LVGLELSPA   | 923  | >NF1-G922V·LVVLELSPA   | 60   | 863  |
| >NF1-G922V·LVGLELSPAL  | 241  | >NF1-G922V·LVVLELSPAL  | 79   | 162  |
| >NF1-G922V·LVGLELSPAL  | 5956 | >NF1-G922V·LVVLELSPAL  | 274  | 5682 |
| >NF1-G922V·LVGLELSPALY | 850  | >NF1-G922V·LVVLELSPALY | 42   | 808  |
| >NF1-G922V·LVGLELSPALY | 33   | >NF1-G922V·LVVLELSPALY | 23   | 10   |
| >NF1-G922V·LVGLELSPALY | 391  | >NF1-G922V·LVVLELSPALY | 415  | 24   |
| >NF1-G922V·LVGLELSPALY | 137  | >NF1-G922V·LVVLELSPALY | 556  | 419  |
| >NF1-G922V·LVGLELSPALY | 1265 | >NF1-G922V·LVVLELSPALY | 58   | 1207 |
| >NF1-G922V·LVGLELSPALY | 2164 | >NF1-G922V·LVVLELSPALY | 314  | 1850 |
| >NF1-G922V·LVGLELSPALY | 479  | >NF1-G922V·LVVLELSPALY | 123  | 356  |
| >NF1-G922V·DLVGLELSPA  | 299  | >NF1-G922V·DLVVLELSPA  | 724  | 425  |
| >NF1-G922V·DLVGLELSPA  | 116  | >NF1-G922V·DLVVLELSPA  | 235  | 119  |
| >NF1-G922V·DLVGLELSPA  | 383  | >NF1-G922V·DLVVLELSPA  | 682  | 299  |
| >NF1-G922V·DLVGLELSPA  | 496  | >NF1-G922V·DLVVLELSPA  | 1594 | 1098 |
| >NF1-G922V·DLVGLELSPA  | 473  | >NF1-G922V·DLVVLELSPA  | 1290 | 817  |
| >NF1-G922V·DLVGLELSPA  | 109  | >NF1-G922V·DLVVLELSPA  | 603  | 494  |
| >NF1-G922V·KDLVGLEL    | 228  | >NF1-G922V·KDLVVLEL    | 172  | 56   |
| >NF1-G922V·KDLVGLELSP  | 507  | >NF1-G922V·KDLVVLELSP  | 488  | 19   |
| >NF1-G922V·KDLVGLEL    | 1002 | >NF1-G922V·KDLVVLEL    | 457  | 545  |
| >NF1-G922V·NVKDLVGL    | 313  | >NF1-G922V·NVKDLVVL    | 817  | 504  |
| >NF1-G922V·NVKDLVGL    | 320  | >NF1-G922V·NVKDLVVL    | 771  | 451  |
| >NF1-G922V·RTNVKDLVG   | 2142 | >NF1-G922V·RTNVKDLVV   | 328  | 1814 |
| >NF1-G922V·RTNVKDLVGI  | 164  | >NF1-G922V·RTNVKDLVVL  | 108  | 56   |
| >NF1-G922V·RTNVKDLVG   | 3257 | >NF1-G922V·RTNVKDLVV   | 49   | 3208 |
| >NF1-G922V·RTNVKDLVGI  | 6    | >NF1-G922V·RTNVKDLVVL  | 9    | 3    |
| >NF1-G922V·RTNVKDLVGI  | 808  | >NF1-G922V·RTNVKDLVVL  | 186  | 622  |
| >NF1-G922V·RTNVKDLVGI  | 121  | >NF1-G922V·RTNVKDLVVL  | 81   | 40   |
| >NF1-G922V·IRTNVKDLVG  | 197  | >NF1-G922V·IRTNVKDLVV  | 353  | 156  |
| >NF1-G922V·IRTNVKDLVG  | 668  | >NF1-G922V·IRTNVKDLVV  | 407  | 261  |
| >NF1-G922V·IRTNVKDLVG  | 43   | >NF1-G922V·IRTNVKDLVV  | 65   | 22   |
| >NF1-H712R·HLCEEADI    | 437  | >NF1-H712R·RLCEEADI    | 603  | 166  |
| >NF1-H712R·HLCEEADI    | 873  | >NF1-H712R·RLCEEADI    | 352  | 521  |
| >NF1-H712R·HLCEEADI    | 203  | >NF1-H712R·RLCEEADI    | 51   | 152  |
| >NF1-H712R·HLCEEADIRC  | 589  | >NF1-H712R·RLCEEADIRC  | 152  | 437  |
| >NF1-H712R·HLCEEADI    | 89   | >NF1-H712R·RLCEEADI    | 90   | 1    |
| >NF1-H712R·HLCEEADIRC  | 409  | >NF1-H712R·RLCEEADIRC  | 389  | 20   |
| >NF1-H712R·HLCEEADI    | 4188 | >NF1-H712R·RLCEEADI    | 371  | 3817 |
| >NF1-H712R·HLCEEADIR   | 332  | >NF1-H712R·RLCEEADIR   | 4232 | 3900 |

|                       |       |                       |      |       |
|-----------------------|-------|-----------------------|------|-------|
| >NF1-H712R·HLCEEADIR  | 212   | >NF1-H712R·RLCEEADIR  | 214  | 2     |
| >NF1-H712R·RHLCEEADI  | 887   | >NF1-H712R·RRLCEEADI  | 234  | 653   |
| >NF1-H712R·RHLCEEADI  | 17357 | >NF1-H712R·RRLCEEADI  | 250  | 17107 |
| >NF1-H712R·RHLCEEADIR | 7461  | >NF1-H712R·RRLCEEADIR | 90   | 7371  |
| >NF1-H712R·RHLCEEADI  | 11927 | >NF1-H712R·RRLCEEADI  | 274  | 11653 |
| >NF1-H712R·RHLCEEADIR | 18907 | >NF1-H712R·RRLCEEADIR | 263  | 18644 |
| >NF1-H712R·RHLCEEADI  | 306   | >NF1-H712R·RRLCEEADI  | 1380 | 1074  |
| >NF1-H712R·RHLCEEADIR | 203   | >NF1-H712R·RRLCEEADIR | 217  | 14    |
| >NF1-H712R·AVLVAMSCFI | 630   | >NF1-H712R·AVLVAMSCFI | 62   | 568   |
| >NF1-H712R·AVLVAMSCFI | 2789  | >NF1-H712R·AVLVAMSCFI | 19   | 2770  |
| >NF1-H712R·AVLVAMSCFI | 20110 | >NF1-H712R·AVLVAMSCFI | 146  | 19964 |
| >NF1-H712R·AVLVAMSCFI | 643   | >NF1-H712R·AVLVAMSCFI | 164  | 479   |
| >NF1-H712R·FRHLCEEADI | 293   | >NF1-H712R·FRRLCEEADI | 191  | 102   |
| >NF1-H712R·FRHLCEEADI | 1040  | >NF1-H712R·FRRLCEEADI | 476  | 564   |
| >NF1-H712R·AMSCFRHL   | 305   | >NF1-H712R·AMSCFRRL   | 296  | 9     |
| >NF1-H712R·AMSCFRHL   | 261   | >NF1-H712R·AMSCFRRL   | 533  | 272   |
| >NF1-H712R·AMSCFRHL   | 14    | >NF1-H712R·AMSCFRRL   | 27   | 13    |
| >NF1-H712R·AMSCFRHL   | 38    | >NF1-H712R·AMSCFRRL   | 63   | 25    |
| >NF1-H712R·AMSCFRHL   | 284   | >NF1-H712R·AMSCFRRL   | 1560 | 1276  |
| >NF1-H712R·AMSCFRHL   | 58    | >NF1-H712R·AMSCFRRL   | 65   | 7     |
| >NF1-H712R·AMSCFRHLC  | 368   | >NF1-H712R·AMSCFRRLC  | 2287 | 1919  |
| >NF1-H712R·AMSCFRHL   | 59    | >NF1-H712R·AMSCFRRL   | 425  | 366   |
| >NF1-H712R·AMSCFRHL   | 348   | >NF1-H712R·AMSCFRRL   | 2260 | 1912  |
| >NF1-H712R·AMSCFRHL   | 29    | >NF1-H712R·AMSCFRRL   | 41   | 12    |
| >NF1-H712R·AMSCFRHLC  | 71    | >NF1-H712R·AMSCFRRLC  | 5707 | 5636  |
| >NF1-H712R·AMSCFRHL   | 315   | >NF1-H712R·AMSCFRRL   | 1453 | 1138  |
| >NF1-H712R·AMSCFRHL   | 59    | >NF1-H712R·AMSCFRRL   | 148  | 89    |
| >NF1-H712R·VAMSCFRHL  | 54    | >NF1-H712R·VAMSCFRRL  | 44   | 10    |
| >NF1-H712R·VAMSCFRHL  | 382   | >NF1-H712R·VAMSCFRRL  | 1898 | 1516  |
| >NF1-H712R·VAMSCFRH   | 1961  | >NF1-H712R·VAMSCFRRL  | 171  | 1790  |
| >NF1-H712R·VAMSCFRH   | 4040  | >NF1-H712R·VAMSCFRRL  | 18   | 4022  |
| >NF1-H712R·VAMSCFRH   | 18850 | >NF1-H712R·VAMSCFRRL  | 131  | 18719 |
| >NF1-H712R·VAMSCFRH   | 7363  | >NF1-H712R·VAMSCFRRL  | 36   | 7327  |
| >NF1-H712R·VAMSCFRHL  | 238   | >NF1-H712R·VAMSCFRRL  | 660  | 422   |
| >NF1-H712R·VAMSCFRHL  | 1322  | >NF1-H712R·VAMSCFRRL  | 258  | 1064  |
| >NF1-H712R·VAMSCFRH   | 3054  | >NF1-H712R·VAMSCFRRL  | 425  | 2629  |
| >NF1-H712R·VAMSCFRH   | 29928 | >NF1-H712R·VAMSCFRRL  | 464  | 29464 |
| >NF1-H712R·LVAMSCFRHI | 390   | >NF1-H712R·LVAMSCFRRL | 635  | 245   |
| >NF1-H712R·LVAMSCFRHI | 688   | >NF1-H712R·LVAMSCFRRL | 429  | 259   |
| >NF1-H712R·LVAMSCFRH  | 2196  | >NF1-H712R·LVAMSCFRRL | 158  | 2038  |
| >NF1-H712R·LVAMSCFRH  | 5005  | >NF1-H712R·LVAMSCFRRL | 29   | 4976  |
| >NF1-H712R·LVAMSCFRH  | 22833 | >NF1-H712R·LVAMSCFRRL | 164  | 22669 |
| >NF1-H712R·LVAMSCFRH  | 1090  | >NF1-H712R·LVAMSCFRRL | 7    | 1083  |

|                        |       |                        |      |       |
|------------------------|-------|------------------------|------|-------|
| >NF1-H712R·VLVAMSCFRF  | 435   | >NF1-H712R·VLVAMSCFRF  | 423  | 12    |
| >NF1-H712R·VLVAMSCFRF  | 78    | >NF1-H712R·VLVAMSCFRF  | 115  | 37    |
| >NF1-H712R·VLVAMSCFRF  | 89    | >NF1-H712R·VLVAMSCFRF  | 116  | 27    |
| >NF1-H712R·VLVAMSCFRF  | 116   | >NF1-H712R·VLVAMSCFRF  | 490  | 374   |
| >NF1-H712R·VLVAMSCFRF  | 70    | >NF1-H712R·VLVAMSCFRF  | 49   | 21    |
| >NF1-H712R·VLVAMSCFRF  | 139   | >NF1-H712R·VLVAMSCFRF  | 363  | 224   |
| >NF1-H712R·VLVAMSCFRF  | 156   | >NF1-H712R·VLVAMSCFRF  | 437  | 281   |
| >NF1-H712R·VLVAMSCFRF  | 10    | >NF1-H712R·VLVAMSCFRF  | 7    | 3     |
| >NF1-H712R·VLVAMSCFRF  | 10116 | >NF1-H712R·VLVAMSCFRF  | 268  | 9848  |
| >NF1-H712R·VLVAMSCFRF  | 4073  | >NF1-H712R·VLVAMSCFRF  | 46   | 4027  |
| >NF1-H712R·VLVAMSCFRF  | 12042 | >NF1-H712R·VLVAMSCFRF  | 232  | 11810 |
| >NF1-H712R·VLVAMSCFRF  | 15322 | >NF1-H712R·VLVAMSCFRF  | 128  | 15194 |
| >NF1-H712R·VLVAMSCFRF  | 468   | >NF1-H712R·VLVAMSCFRF  | 1993 | 1525  |
| >NF1-H712R·VLVAMSCFRF  | 20164 | >NF1-H712R·VLVAMSCFRF  | 185  | 19979 |
| >NF1-H712R·VLVAMSCFRF  | 26627 | >NF1-H712R·VLVAMSCFRF  | 250  | 26377 |
| >NF1-H809Y·LHKTIVKR    | 1064  | >NF1-H809Y·LYKTIVKR    | 14   | 1050  |
| >NF1-H809Y·LHKTIVKRR   | 2992  | >NF1-H809Y·LYKTIVKRR   | 31   | 2961  |
| >NF1-H809Y·LHKTIVKR    | 10144 | >NF1-H809Y·LYKTIVKR    | 119  | 10025 |
| >NF1-H809Y·LHKTIVKRR   | 16061 | >NF1-H809Y·LYKTIVKRR   | 399  | 15662 |
| >NF1-H809Y·LHKTIVKR    | 592   | >NF1-H809Y·LYKTIVKR    | 42   | 550   |
| >NF1-H809Y·LHKTIVKRR   | 1145  | >NF1-H809Y·LYKTIVKRR   | 50   | 1095  |
| >NF1-H809Y·MEDGQAAES   | 7235  | >NF1-H809Y·MEDGQAAES   | 180  | 7055  |
| >NF1-H809Y·MEDGQAAES   | 4086  | >NF1-H809Y·MEDGQAAES   | 231  | 3855  |
| >NF1-H809Y·SLHKTIVKRRM | 5601  | >NF1-H809Y·SLYKTIVKRRM | 453  | 5148  |
| >NF1-H809Y·SLHKTIVKRRM | 156   | >NF1-H809Y·SLYKTIVKRRM | 19   | 137   |
| >NF1-H809Y·SLHKTIVKRRM | 1764  | >NF1-H809Y·SLYKTIVKRRM | 137  | 1627  |
| >NF1-H809Y·SLHKTIVKRRM | 418   | >NF1-H809Y·SLYKTIVKRRM | 95   | 323   |
| >NF1-H809Y·SLHKTIVK    | 53    | >NF1-H809Y·SLYKTIVK    | 27   | 26    |
| >NF1-H809Y·SLHKTIVKR   | 491   | >NF1-H809Y·SLYKTIVKR   | 61   | 430   |
| >NF1-H809Y·SLHKTIVK    | 53    | >NF1-H809Y·SLYKTIVK    | 16   | 37    |
| >NF1-H809Y·SLHKTIVKR   | 2016  | >NF1-H809Y·SLYKTIVKR   | 235  | 1781  |
| >NF1-H809Y·SLHKTIVK    | 13    | >NF1-H809Y·SLYKTIVK    | 122  | 109   |
| >NF1-H809Y·SLHKTIVKR   | 31    | >NF1-H809Y·SLYKTIVKR   | 19   | 12    |
| >NF1-H809Y·SLHKTIVKRR  | 143   | >NF1-H809Y·SLYKTIVKRR  | 33   | 110   |
| >NF1-H809Y·SLHKTIVK    | 1042  | >NF1-H809Y·SLYKTIVK    | 341  | 701   |
| >NF1-H809Y·SLHKTIVKR   | 139   | >NF1-H809Y·SLYKTIVKR   | 50   | 89    |
| >NF1-H809Y·SLHKTIVKRR  | 3333  | >NF1-H809Y·SLYKTIVKRR  | 427  | 2906  |
| >NF1-H809Y·SLHKTIVKRRM | 2077  | >NF1-H809Y·SLYKTIVKRRM | 483  | 1594  |
| >NF1-H809Y·SLHKTIVKRR  | 790   | >NF1-H809Y·SLYKTIVKRR  | 400  | 390   |
| >NF1-H809Y·SLHKTIVKR   | 78    | >NF1-H809Y·SLYKTIVKR   | 50   | 28    |
| >NF1-H809Y·SLHKTIVKRR  | 133   | >NF1-H809Y·SLYKTIVKRR  | 64   | 69    |
| >NF1-H809Y·ESLHKTIVK   | 652   | >NF1-H809Y·ESLYKTIVK   | 428  | 224   |
| >NF1-H809Y·ESLHKTIVKR  | 272   | >NF1-H809Y·ESLYKTIVKR  | 229  | 43    |

|                        |       |                        |     |       |
|------------------------|-------|------------------------|-----|-------|
| >NF1-H809Y-ESLHKTIVKR  | 791   | >NF1-H809Y-ESLYKTIVKR  | 379 | 412   |
| >NF1-H809Y-ESLHKTIVKRF | 417   | >NF1-H809Y-ESLYKTIVKRR | 292 | 125   |
| >NF1-H809Y-ESLHKTIVK   | 283   | >NF1-H809Y-ESLYKTIVK   | 73  | 210   |
| >NF1-H809Y-ESLHKTIVKR  | 180   | >NF1-H809Y-ESLYKTIVKR  | 49  | 131   |
| >NF1-H809Y-ESLHKTIVKRF | 65    | >NF1-H809Y-ESLYKTIVKRR | 26  | 39    |
| >NF1-H809Y-ESLHKTIV    | 455   | >NF1-H809Y-ESLYKTIV    | 290 | 165   |
| >NF1-H809Y-ESLHKTIV    | 207   | >NF1-H809Y-ESLYKTIV    | 159 | 48    |
| >NF1-H809Y-ESLHKTIVKR  | 219   | >NF1-H809Y-ESLYKTIVKR  | 362 | 143   |
| >NF1-H809Y-ESLHKTIVKRF | 473   | >NF1-H809Y-ESLYKTIVKRR | 682 | 209   |
| >NF1-H809Y-AESLHKTI    | 11    | >NF1-H809Y-AESLYKTI    | 9   | 2     |
| >NF1-H809Y-AESLHKTIV   | 783   | >NF1-H809Y-AESLYKTIV   | 170 | 613   |
| >NF1-H809Y-AESLHKTI    | 101   | >NF1-H809Y-AESLYKTI    | 79  | 22    |
| >NF1-H809Y-AESLHKTIV   | 292   | >NF1-H809Y-AESLYKTIV   | 200 | 92    |
| >NF1-H809Y-AESLHKTI    | 228   | >NF1-H809Y-AESLYKTI    | 162 | 66    |
| >NF1-H809Y-AESLHKTIV   | 416   | >NF1-H809Y-AESLYKTIV   | 213 | 203   |
| >NF1-H809Y-AESLHKTI    | 1037  | >NF1-H809Y-AESLYKTI    | 466 | 571   |
| >NF1-H809Y-AESLHKTI    | 127   | >NF1-H809Y-AESLYKTI    | 83  | 44    |
| >NF1-H809Y-AESLHKTIV   | 58    | >NF1-H809Y-AESLYKTIV   | 37  | 21    |
| >NF1-H809Y-AESLHKTI    | 231   | >NF1-H809Y-AESLYKTI    | 268 | 37    |
| >NF1-H809Y-AESLHKTIV   | 15    | >NF1-H809Y-AESLYKTIV   | 28  | 13    |
| >NF1-H809Y-AAESLHKTIV  | 556   | >NF1-H809Y-AAESLYKTIVK | 395 | 161   |
| >NF1-H809Y-AAESLHKTI   | 258   | >NF1-H809Y-AAESLYKTI   | 89  | 169   |
| >NF1-H809Y-QAAESLHKTI  | 402   | >NF1-H809Y-QAAESLYKTI  | 524 | 122   |
| >NF1-H809Y-QAAESLHKTI  | 385   | >NF1-H809Y-QAAESLYKTI  | 336 | 49    |
| >NF1-H809Y-QAAESLHK    | 1130  | >NF1-H809Y-QAAESLYK    | 430 | 700   |
| >NF1-H809Y-QAAESLHK    | 265   | >NF1-H809Y-QAAESLYK    | 47  | 218   |
| >NF1-H809Y-QAAESLHK    | 90    | >NF1-H809Y-QAAESLYK    | 28  | 62    |
| >NF1-H809Y-QAAESLHKTI  | 123   | >NF1-H809Y-QAAESLYKTI  | 87  | 36    |
| >NF1-H809Y-QAAESLHKTI  | 246   | >NF1-H809Y-QAAESLYKTI  | 252 | 6     |
| >NF1-H809Y-QAAESLHKTI  | 109   | >NF1-H809Y-QAAESLYKTI  | 109 | 0     |
| >NF1-H809Y-QAAESLHKTI  | 251   | >NF1-H809Y-QAAESLYKTI  | 512 | 261   |
| >NF1-H809Y-QAAESLHK    | 309   | >NF1-H809Y-QAAESLYK    | 277 | 32    |
| >NF1-H809Y-QAAESLHKTI  | 309   | >NF1-H809Y-QAAESLYKTI  | 221 | 88    |
| >NF1-H809Y-GQAAESLHKTI | 983   | >NF1-H809Y-GQAAESLYKT  | 385 | 598   |
| >NF1-H809Y-GQAAESLHKTI | 429   | >NF1-H809Y-GQAAESLYKT  | 190 | 239   |
| >NF1-H809Y-GQAAESLHK   | 257   | >NF1-H809Y-GQAAESLYK   | 96  | 161   |
| >NF1-H809Y-GQAAESLHK   | 97    | >NF1-H809Y-GQAAESLYK   | 18  | 79    |
| >NF1-H809Y-GQAAESLH    | 14353 | >NF1-H809Y-GQAAESLY    | 176 | 14177 |
| >NF1-H809Y-GQAAESLH    | 15337 | >NF1-H809Y-GQAAESLY    | 135 | 15202 |
| >NF1-H809Y-GQAAESLH    | 3604  | >NF1-H809Y-GQAAESLY    | 81  | 3523  |
| >NF1-H809Y-GQAAESLH    | 9367  | >NF1-H809Y-GQAAESLY    | 303 | 9064  |
| >NF1-H809Y-GQAAESLH    | 3557  | >NF1-H809Y-GQAAESLY    | 90  | 3467  |
| >NF1-H809Y-GQAAESLHKTI | 260   | >NF1-H809Y-GQAAESLYKT  | 217 | 43    |

|                        |       |                        |       |       |
|------------------------|-------|------------------------|-------|-------|
| >NF1-H809Y-GQAAESLH    | 21861 | >NF1-H809Y-GQAAESLY    | 461   | 21400 |
| >NF1-I23L-wiVVSRFDEQLP | 864   | >NF1-I23L-mVVSRFDEQLP  | 339   | 525   |
| >NF1-I23L-wiVVSRFDEQLP | 1400  | >NF1-I23L-mVVSRFDEQLP  | 423   | 977   |
| >NF1-I23L-wiLPIKTGQQNT | 107   | >NF1-I23L-mLPLKTGQQNT  | 171   | 64    |
| >NF1-I23L-wiRFDEQLPIK  | 616   | >NF1-I23L-mRFDEQLPLK   | 351   | 265   |
| >NF1-I23L-wiSRFDEQLPI  | 159   | >NF1-I23L-mSRFDEQLPL   | 97    | 62    |
| >NF1-I23L-wiSRFDEQLPI  | 57    | >NF1-I23L-mSRFDEQLPL   | 41    | 16    |
| >NF1-I23L-wiSRFDEQLPIK | 64    | >NF1-I23L-mSRFDEQLPLK  | 63    | 1     |
| >NF1-I23L-wiSRFDEQLPI  | 293   | >NF1-I23L-mSRFDEQLPL   | 30    | 263   |
| >NF1-I23L-wiSRFDEQLPI  | 804   | >NF1-I23L-mSRFDEQLPL   | 129   | 675   |
| >NF1-I23L-wiVSRFDEQLPI | 141   | >NF1-I23L-mVSRFDEQLPL  | 352   | 211   |
| >NF1-I23L-wiVSRFDEQLPI | 15    | >NF1-I23L-mVSRFDEQLPL  | 12    | 3     |
| >NF1-I23L-wiVSRFDEQLPI | 54    | >NF1-I23L-mVSRFDEQLPL  | 14    | 40    |
| >NF1-I23L-wiVSRFDEQLPI | 1099  | >NF1-I23L-mVSRFDEQLPL  | 433   | 666   |
| >NF1-I23L-wiVSRFDEQLPI | 469   | >NF1-I23L-mVSRFDEQLPL  | 4040  | 3571  |
| >NF1-I526S-vITGLVQLV   | 261   | >NF1-I526S-rSTGLVQLV   | 211   | 50    |
| >NF1-I526S-vITGLVQLV   | 707   | >NF1-I526S-rSTGLVQLV   | 113   | 594   |
| >NF1-I526S-vITGLVQLV   | 765   | >NF1-I526S-rSTGLVQLV   | 167   | 598   |
| >NF1-I526S-vITGLVQLV   | 3120  | >NF1-I526S-rSTGLVQLV   | 386   | 2734  |
| >NF1-I526S-vLITGLVQLV  | 198   | >NF1-I526S-rLSTGLVQLV  | 6711  | 6513  |
| >NF1-I526S-vLITGLVQL   | 99    | >NF1-I526S-rLSTGLVQL   | 1142  | 1043  |
| >NF1-I526S-vLITGLVQLV  | 35    | >NF1-I526S-rLSTGLVQLV  | 357   | 322   |
| >NF1-I526S-vLITGLVQLV  | 30    | >NF1-I526S-rLSTGLVQLV  | 1902  | 1872  |
| >NF1-I526S-vLITGLVQL   | 357   | >NF1-I526S-rLSTGLVQL   | 4988  | 4631  |
| >NF1-I526S-vLITGLVQLV  | 55    | >NF1-I526S-rLSTGLVQLV  | 1196  | 1141  |
| >NF1-I526S-vLITGLVQL   | 235   | >NF1-I526S-rLSTGLVQL   | 9498  | 9263  |
| >NF1-I526S-vLITGLVQLV  | 15    | >NF1-I526S-rLSTGLVQLV  | 1554  | 1539  |
| >NF1-I526S-vLITGLVQL   | 434   | >NF1-I526S-rLSTGLVQL   | 14425 | 13991 |
| >NF1-I526S-vLITGLVQLV  | 20    | >NF1-I526S-rLSTGLVQLV  | 2771  | 2751  |
| >NF1-I526S-vLITGLVQLV  | 129   | >NF1-I526S-rLSTGLVQLV  | 13743 | 13614 |
| >NF1-I526S-vLITGLVQL   | 6     | >NF1-I526S-rLSTGLVQL   | 6408  | 6402  |
| >NF1-I526S-vLITGLVQLV  | 2     | >NF1-I526S-rLSTGLVQLV  | 356   | 354   |
| >NF1-I526S-vLITGLVQLV  | 244   | >NF1-I526S-rLSTGLVQLV  | 246   | 2     |
| >NF1-I526S-vLITGLVQL   | 4819  | >NF1-I526S-rLSTGLVQL   | 17    | 4802  |
| >NF1-I526S-vLITGLVQL   | 8093  | >NF1-I526S-rLSTGLVQL   | 311   | 7782  |
| >NF1-I526S-vLITGLVQLV  | 3578  | >NF1-I526S-rLSTGLVQLV  | 70    | 3508  |
| >NF1-I526S-vLITGLVQL   | 11297 | >NF1-I526S-rLSTGLVQL   | 386   | 10911 |
| >NF1-I526S-vLITGLVQLV  | 4075  | >NF1-I526S-rLSTGLVQLV  | 330   | 3745  |
| >NF1-I526S-vPETQGSTAEL | 40    | >NF1-I526S-rPETQGSTAEL | 18193 | 18153 |
| >NF1-I526S-vPETQGSTAEL | 437   | >NF1-I526S-rPETQGSTAEL | 16179 | 15742 |
| >NF1-I526S-vPETQGSTAEL | 125   | >NF1-I526S-rPETQGSTAEL | 17497 | 17372 |
| >NF1-I526S-vELITGLVQLV | 461   | >NF1-I526S-rELSTGLVQLV | 1076  | 615   |
| >NF1-I526S-vELITGLVQL  | 108   | >NF1-I526S-rELSTGLVQL  | 64    | 44    |



|                          |      |                          |      |      |
|--------------------------|------|--------------------------|------|------|
| >NF1-I526S-v ELITGLVQLV  | 139  | >NF1-I526S-r ELSTGLVQLV  | 86   | 53   |
| >NF1-I526S-v ELITGLVQL   | 380  | >NF1-I526S-r ELSTGLVQL   | 508  | 128  |
| >NF1-I526S-v ELITGLVQLV  | 84   | >NF1-I526S-r ELSTGLVQLV  | 111  | 27   |
| >NF1-I526S-v ELITGLVQL   | 384  | >NF1-I526S-r ELSTGLVQL   | 1568 | 1184 |
| >NF1-I526S-v ELITGLVQL   | 114  | >NF1-I526S-r ELSTGLVQL   | 312  | 198  |
| >NF1-I526S-v ELITGLVQLV  | 10   | >NF1-I526S-r ELSTGLVQLV  | 20   | 10   |
| >NF1-I526S-v ELITGLVQL   | 319  | >NF1-I526S-r ELSTGLVQL   | 1257 | 938  |
| >NF1-I526S-v ELITGLVQLV  | 29   | >NF1-I526S-r ELSTGLVQLV  | 108  | 79   |
| >NF1-I526S-v ELITGLVQL   | 301  | >NF1-I526S-r ELSTGLVQL   | 194  | 107  |
| >NF1-I526S-v ELITGLVQLV  | 22   | >NF1-I526S-r ELSTGLVQLV  | 18   | 4    |
| >NF1-I526S-v ELITGLVQL   | 106  | >NF1-I526S-r ELSTGLVQL   | 33   | 73   |
| >NF1-I526S-v ELITGLVQLV  | 22   | >NF1-I526S-r ELSTGLVQLV  | 7    | 15   |
| >NF1-I526S-v ELITGLVQL   | 8    | >NF1-I526S-r ELSTGLVQL   | 7    | 1    |
| >NF1-I526S-v ELITGLVQLV  | 3    | >NF1-I526S-r ELSTGLVQLV  | 3    | 0    |
| >NF1-I526S-v ELITGLVQL   | 18   | >NF1-I526S-r ELSTGLVQL   | 1699 | 1681 |
| >NF1-I526S-v ELITGLVQL   | 268  | >NF1-I526S-r ELSTGLVQL   | 668  | 400  |
| >NF1-I526S-v ELITGLVQLV  | 194  | >NF1-I526S-r ELSTGLVQLV  | 205  | 11   |
| >NF1-I526S-v ELITGLVQL   | 181  | >NF1-I526S-r ELSTGLVQL   | 721  | 540  |
| >NF1-I526S-v ELITGLVQLV  | 32   | >NF1-I526S-r ELSTGLVQLV  | 122  | 90   |
| >NF1-I526S-v AELITGLV    | 10   | >NF1-I526S-r AELSTGLV    | 25   | 15   |
| >NF1-I526S-v AELITGLVQL\ | 98   | >NF1-I526S-r AELSTGLVQL' | 205  | 107  |
| >NF1-I526S-v AELITGLVQL  | 1520 | >NF1-I526S-r AELSTGLVQL  | 352  | 1168 |
| >NF1-I526S-v AELITGLVQL  | 2091 | >NF1-I526S-r AELSTGLVQL  | 499  | 1592 |
| >NF1-I526S-v AELITGLV    | 223  | >NF1-I526S-r AELSTGLV    | 97   | 126  |
| >NF1-I526S-v AELITGLVQL\ | 169  | >NF1-I526S-r AELSTGLVQL' | 65   | 104  |
| >NF1-I526S-v AELITGLV    | 189  | >NF1-I526S-r AELSTGLV    | 359  | 170  |
| >NF1-I526S-v AELITGLVQL  | 220  | >NF1-I526S-r AELSTGLVQL  | 137  | 83   |
| >NF1-I526S-v AELITGLVQL\ | 70   | >NF1-I526S-r AELSTGLVQL' | 113  | 43   |
| >NF1-I526S-v AELITGLVQL  | 119  | >NF1-I526S-r AELSTGLVQL  | 139  | 20   |
| >NF1-I526S-v AELITGLVQL\ | 355  | >NF1-I526S-r AELSTGLVQL' | 274  | 81   |
| >NF1-I526S-v AELITGLV    | 285  | >NF1-I526S-r AELSTGLV    | 204  | 81   |
| >NF1-I526S-v AELITGLVQ   | 535  | >NF1-I526S-r AELSTGLVQ   | 325  | 210  |
| >NF1-I526S-v AELITGLVQL  | 295  | >NF1-I526S-r AELSTGLVQL  | 384  | 89   |
| >NF1-I526S-v AELITGLVQL\ | 108  | >NF1-I526S-r AELSTGLVQL' | 71   | 37   |
| >NF1-I526S-v AELITGLV    | 59   | >NF1-I526S-r AELSTGLV    | 50   | 9    |
| >NF1-I526S-v AELITGLVQ   | 376  | >NF1-I526S-r AELSTGLVQ   | 318  | 58   |
| >NF1-I526S-v AELITGLVQL  | 878  | >NF1-I526S-r AELSTGLVQL  | 494  | 384  |
| >NF1-I526S-v AELITGLVQL\ | 34   | >NF1-I526S-r AELSTGLVQL' | 27   | 7    |
| >NF1-I526S-v AELITGLV    | 34   | >NF1-I526S-r AELSTGLV    | 67   | 33   |
| >NF1-I526S-v AELITGLVQL  | 23   | >NF1-I526S-r AELSTGLVQL  | 14   | 9    |
| >NF1-I526S-v AELITGLVQL\ | 9    | >NF1-I526S-r AELSTGLVQL' | 8    | 1    |
| >NF1-I526S-v AELITGLV    | 428  | >NF1-I526S-r AELSTGLV    | 401  | 27   |
| >NF1-I526S-v TAEITGLV    | 78   | >NF1-I526S-r TAEITGLV    | 956  | 878  |

|                          |      |                          |       |       |
|--------------------------|------|--------------------------|-------|-------|
| >NF1-I526S-v STAELITGL   | 117  | >NF1-I526S-r STAELSTGL   | 520   | 403   |
| >NF1-I526S-v STAELITGL   | 10   | >NF1-I526S-r STAELSTGL   | 13    | 3     |
| >NF1-I526S-v STAELITGLV  | 154  | >NF1-I526S-r STAELSTGLV  | 196   | 42    |
| >NF1-I526S-v STAELITGL   | 27   | >NF1-I526S-r STAELSTGL   | 93    | 66    |
| >NF1-I526S-v STAELITGLV  | 41   | >NF1-I526S-r STAELSTGLV  | 39    | 2     |
| >NF1-I526S-v STAELITGL   | 17   | >NF1-I526S-r STAELSTGL   | 52    | 35    |
| >NF1-I526S-v STAELITGLV  | 173  | >NF1-I526S-r STAELSTGLV  | 208   | 35    |
| >NF1-I526S-v STAELITGL   | 52   | >NF1-I526S-r STAELSTGL   | 326   | 274   |
| >NF1-I526S-v STAELITGLV  | 40   | >NF1-I526S-r STAELSTGLV  | 101   | 61    |
| >NF1-I526S-v STAELITGL   | 52   | >NF1-I526S-r STAELSTGL   | 127   | 75    |
| >NF1-I526S-v STAELITGLV  | 35   | >NF1-I526S-r STAELSTGLV  | 53    | 18    |
| >NF1-I526S-v STAELITGL   | 233  | >NF1-I526S-r STAELSTGL   | 992   | 759   |
| >NF1-I526S-v STAELITGLV  | 91   | >NF1-I526S-r STAELSTGLV  | 181   | 90    |
| >NF1-I526S-v STAELITGL   | 143  | >NF1-I526S-r STAELSTGL   | 325   | 182   |
| >NF1-I526S-v STAELITGL   | 178  | >NF1-I526S-r STAELSTGL   | 3802  | 3624  |
| >NF1-I526S-v STAELITGL   | 712  | >NF1-I526S-r STAELSTGL   | 224   | 488   |
| >NF1-I526S-v STAELITGL   | 7    | >NF1-I526S-r STAELSTGL   | 10    | 3     |
| >NF1-I526S-v STAELITGLV  | 10   | >NF1-I526S-r STAELSTGLV  | 12    | 2     |
| >NF1-I526S-v STAELITGL   | 17   | >NF1-I526S-r STAELSTGL   | 12    | 5     |
| >NF1-I526S-v STAELITGLV  | 9    | >NF1-I526S-r STAELSTGLV  | 9     | 0     |
| >NF1-I526S-v STAELITGL   | 16   | >NF1-I526S-r STAELSTGL   | 13    | 3     |
| >NF1-I526S-v STAELITGL   | 43   | >NF1-I526S-r STAELSTGL   | 86    | 43    |
| >NF1-I526S-v STAELITGLV  | 117  | >NF1-I526S-r STAELSTGLV  | 128   | 11    |
| >NF1-I526S-v STAELITGL   | 248  | >NF1-I526S-r STAELSTGL   | 105   | 143   |
| >NF1-I526S-v STAELITGLV  | 37   | >NF1-I526S-r STAELSTGLV  | 33    | 4     |
| >NF1-I526S-v STAELITGL   | 254  | >NF1-I526S-r STAELSTGL   | 192   | 62    |
| >NF1-I526S-v GSTAELITGL  | 88   | >NF1-I526S-r GSTAELSTGL  | 46    | 42    |
| >NF1-I526S-v GSTAELITGL  | 468  | >NF1-I526S-r GSTAELSTGL  | 815   | 347   |
| >NF1-I526S-v GSTAELITGL  | 788  | >NF1-I526S-r GSTAELSTGL  | 343   | 445   |
| >NF1-I526S-v GSTAELITGLV | 797  | >NF1-I526S-r GSTAELSTGLV | 308   | 489   |
| >NF1-I526S-v GSTAELITGL  | 688  | >NF1-I526S-r GSTAELSTGL  | 343   | 345   |
| >NF1-I526S-v TQGSTAELI   | 164  | >NF1-I526S-r TQGSTAELS   | 31976 | 31812 |
| >NF1-I526S-v ETQGSTAELI  | 104  | >NF1-I526S-r ETQGSTAELS  | 12056 | 11952 |
| >NF1-I526S-v ETQGSTAELI  | 72   | >NF1-I526S-r ETQGSTAELS  | 9129  | 9057  |
| >NF1-K1099I KSQFLKYF     | 1199 | >NF1-K1099I ISQFLKYF     | 254   | 945   |
| >NF1-K1099I KSQFLKYFTL   | 324  | >NF1-K1099I ISQFLKYFTL   | 92    | 232   |
| >NF1-K1099I KSQFLKY      | 452  | >NF1-K1099I ISQFLKY      | 210   | 242   |
| >NF1-K1099I KSQFLKY      | 166  | >NF1-K1099I ISQFLKY      | 555   | 389   |
| >NF1-K1099I KSQFLKY      | 424  | >NF1-K1099I ISQFLKY      | 133   | 291   |
| >NF1-K1099I KSQFLKY      | 93   | >NF1-K1099I ISQFLKY      | 145   | 52    |
| >NF1-K1099I KSQFLKYFTL   | 101  | >NF1-K1099I ISQFLKYFTL   | 1538  | 1437  |
| >NF1-K1099I KSQFLKY      | 232  | >NF1-K1099I ISQFLKY      | 621   | 389   |
| >NF1-K1099I KSQFLKYF     | 97   | >NF1-K1099I ISQFLKYF     | 81    | 16    |

|                         |       |                          |      |       |
|-------------------------|-------|--------------------------|------|-------|
| >NF1-K1099I KSQFLKYY    | 7     | >NF1-K1099I ISQFLKYY     | 7    | 0     |
| >NF1-K1099I KSQFLKYYF   | 8     | >NF1-K1099I ISQFLKYYF    | 7    | 1     |
| >NF1-K1099I KSQFLKYYFTL | 10    | >NF1-K1099I ISQFLKYYFTL  | 14   | 4     |
| >NF1-K1099I KSQFLKYY    | 316   | >NF1-K1099I ISQFLKYY     | 712  | 396   |
| >NF1-K1099I KSQFLKYYF   | 61    | >NF1-K1099I ISQFLKYYF    | 99   | 38    |
| >NF1-K1099I KSQFLKYY    | 91    | >NF1-K1099I ISQFLKYY     | 552  | 461   |
| >NF1-K1099I KSQFLKYYF   | 61    | >NF1-K1099I ISQFLKYYF    | 347  | 286   |
| >NF1-K1099I KSQFLKYYFTL | 185   | >NF1-K1099I ISQFLKYYFTL  | 1224 | 1039  |
| >NF1-K1099I KSQFLKYYF   | 709   | >NF1-K1099I ISQFLKYYF    | 416  | 293   |
| >NF1-K1099I KSQFLKYYFTL | 509   | >NF1-K1099I ISQFLKYYFTL  | 317  | 192   |
| >NF1-K1099I KSQFLKYY    | 267   | >NF1-K1099I ISQFLKYY     | 276  | 9     |
| >NF1-K1099I KSQFLKYYF   | 65    | >NF1-K1099I ISQFLKYYF    | 46   | 19    |
| >NF1-K1099I KSQFLKYYFTL | 483   | >NF1-K1099I ISQFLKYYFTL  | 341  | 142   |
| >NF1-K1099I KSQFLKYYFTL | 148   | >NF1-K1099I ISQFLKYYFTL  | 370  | 222   |
| >NF1-K1099I AKSQFLKYY   | 12814 | >NF1-K1099I AISQFLKYY    | 260  | 12554 |
| >NF1-K1099I AKSQFLK     | 14225 | >NF1-K1099I AISQFLK      | 69   | 14156 |
| >NF1-K1099I AKSQFLKYY   | 20303 | >NF1-K1099I AISQFLKYY    | 412  | 19891 |
| >NF1-K1099I AKSQFLK     | 2273  | >NF1-K1099I AISQFLK      | 10   | 2263  |
| >NF1-K1099I AKSQFLKYY   | 15281 | >NF1-K1099I AISQFLKYY    | 75   | 15206 |
| >NF1-K1099I AKSQFLKYY   | 199   | >NF1-K1099I AISQFLKYY    | 15   | 184   |
| >NF1-K1099I AKSQFLK     | 6484  | >NF1-K1099I AISQFLK      | 407  | 6077  |
| >NF1-K1099I AKSQFLKYY   | 655   | >NF1-K1099I AISQFLKYY    | 100  | 555   |
| >NF1-K1099I AKSQFLK     | 9275  | >NF1-K1099I AISQFLK      | 462  | 8813  |
| >NF1-K1099I AKSQFLKYY   | 258   | >NF1-K1099I AISQFLKYY    | 16   | 242   |
| >NF1-K1099I AKSQFLKYY   | 5147  | >NF1-K1099I AISQFLKYY    | 166  | 4981  |
| >NF1-K1099I AKSQFLKYYF  | 7357  | >NF1-K1099I AISQFLKYYF   | 374  | 6983  |
| >NF1-K1099I AKSQFLKYY   | 16    | >NF1-K1099I AISQFLKYY    | 1590 | 1574  |
| >NF1-K1099I AKSQFLKYYF  | 8     | >NF1-K1099I AISQFLKYYF   | 355  | 347   |
| >NF1-K1099I AKSQFLKYY   | 1567  | >NF1-K1099I AISQFLKYY    | 361  | 1206  |
| >NF1-K1099I AKSQFLKYY   | 5206  | >NF1-K1099I AISQFLKYY    | 272  | 4934  |
| >NF1-K1099I AKSQFLK     | 293   | >NF1-K1099I AISQFLK      | 221  | 72    |
| >NF1-K1099I EAKSQFLK    | 713   | >NF1-K1099I E AISQFLK    | 85   | 628   |
| >NF1-K1099I EAKSQFLKYY  | 871   | >NF1-K1099I E AISQFLKYY  | 357  | 514   |
| >NF1-K1099I EAKSQFLKYY  | 784   | >NF1-K1099I E AISQFLKYY  | 127  | 657   |
| >NF1-K1099I EAKSQFLKYYF | 1315  | >NF1-K1099I E AISQFLKYYF | 113  | 1202  |
| >NF1-K1099I EAKSQFL     | 2230  | >NF1-K1099I E AISQFL     | 28   | 2202  |
| >NF1-K1099I EAKSQFLKYY  | 203   | >NF1-K1099I E AISQFLKYY  | 7    | 196   |
| >NF1-K1099I EAKSQFLKYYF | 111   | >NF1-K1099I E AISQFLKYYF | 4    | 107   |
| >NF1-K1099I EAKSQFLKYY  | 4060  | >NF1-K1099I E AISQFLKYY  | 162  | 3898  |
| >NF1-K1099I EAKSQFLK    | 483   | >NF1-K1099I E AISQFLK    | 2000 | 1517  |
| >NF1-K1099I EAKSQFLK    | 193   | >NF1-K1099I E AISQFLK    | 316  | 123   |
| >NF1-K1099I EAKSQFLK    | 15    | >NF1-K1099I E AISQFLK    | 4    | 11    |
| >NF1-K1099I EAKSQFL     | 2494  | >NF1-K1099I E AISQFL     | 53   | 2441  |

|                         |      |                         |     |      |
|-------------------------|------|-------------------------|-----|------|
| >NF1-K1099I EAKSQLFL    | 2154 | >NF1-K1099I EAISQLFL    | 74  | 2080 |
| >NF1-K1099I EAKSQLFLKY  | 1831 | >NF1-K1099I EAISQLFLKY  | 432 | 1399 |
| >NF1-K1099I EAKSQLFLKYI | 514  | >NF1-K1099I EAISQLFLKYF | 391 | 123  |
| >NF1-K1099I EAKSQLFLKY  | 459  | >NF1-K1099I EAISQLFLKY  | 90  | 369  |
| >NF1-K1099I EAKSQLFLKYI | 421  | >NF1-K1099I EAISQLFLKYF | 99  | 322  |
| >NF1-K1099I MEAKSQLF    | 47   | >NF1-K1099I MEAISQLF    | 53  | 6    |
| >NF1-K1099I MEAKSQLFL   | 16   | >NF1-K1099I MEAISQLFL   | 11  | 5    |
| >NF1-K1099I MEAKSQLFLK  | 76   | >NF1-K1099I MEAISQLFLK' | 43  | 33   |
| >NF1-K1099I MEAKSQLFLK  | 38   | >NF1-K1099I MEAISQLFLK' | 117 | 79   |
| >NF1-K1099I MEAKSQLF    | 33   | >NF1-K1099I MEAISQLF    | 81  | 48   |
| >NF1-K1099I MEAKSQLFLK  | 120  | >NF1-K1099I MEAISQLFLK' | 361 | 241  |
| >NF1-K1099I MEAKSQLF    | 76   | >NF1-K1099I MEAISQLF    | 55  | 21   |
| >NF1-K1099I MEAKSQLFLK  | 22   | >NF1-K1099I MEAISQLFLK' | 24  | 2    |
| >NF1-K1099I MEAKSQLF    | 374  | >NF1-K1099I MEAISQLF    | 352 | 22   |
| >NF1-K1099I MEAKSQLFL   | 25   | >NF1-K1099I MEAISQLFL   | 32  | 7    |
| >NF1-K1099I MEAKSQLFL   | 79   | >NF1-K1099I MEAISQLFL   | 66  | 13   |
| >NF1-K1099I MEAKSQLFLK  | 394  | >NF1-K1099I MEAISQLFLK  | 575 | 181  |
| >NF1-K1099I MEAKSQLF    | 147  | >NF1-K1099I MEAISQLF    | 113 | 34   |
| >NF1-K1099I MEAKSQLFL   | 566  | >NF1-K1099I MEAISQLFL   | 426 | 140  |
| >NF1-K1099I MEAKSQLFLK  | 394  | >NF1-K1099I MEAISQLFLK' | 317 | 77   |
| >NF1-K1099I MEAKSQLF    | 46   | >NF1-K1099I MEAISQLF    | 41  | 5    |
| >NF1-K1099I MEAKSQLFL   | 136  | >NF1-K1099I MEAISQLFL   | 132 | 4    |
| >NF1-K1099I MEAKSQLFLK  | 33   | >NF1-K1099I MEAISQLFLK' | 38  | 5    |
| >NF1-K1099I MEAKSQLFL   | 220  | >NF1-K1099I MEAISQLFL   | 156 | 64   |
| >NF1-K1099I MEAKSQLFLK  | 227  | >NF1-K1099I MEAISQLFLK' | 178 | 49   |
| >NF1-K1099I MEAKSQLFL   | 100  | >NF1-K1099I MEAISQLFL   | 96  | 4    |
| >NF1-K1099I LMEAKSQLFL  | 870  | >NF1-K1099I LMEAISQLFL  | 343 | 527  |
| >NF1-K1099I LMEAKSQL    | 71   | >NF1-K1099I LMEAISQL    | 13  | 58   |
| >NF1-K1099I LMEAKSQLF   | 3280 | >NF1-K1099I LMEAISQLF   | 340 | 2940 |
| >NF1-K1099I LMEAKSQLFL  | 89   | >NF1-K1099I LMEAISQLFL  | 38  | 51   |
| >NF1-K1099I LMEAKSQL    | 779  | >NF1-K1099I LMEAISQL    | 130 | 649  |
| >NF1-K1099I LMEAKSQLFL  | 492  | >NF1-K1099I LMEAISQLFL  | 392 | 100  |
| >NF1-K1099I LMEAKSQL    | 207  | >NF1-K1099I LMEAISQL    | 37  | 170  |
| >NF1-K1099I LMEAKSQLFL  | 128  | >NF1-K1099I LMEAISQLFL  | 72  | 56   |
| >NF1-K1099I LMEAKSQL    | 718  | >NF1-K1099I LMEAISQL    | 172 | 546  |
| >NF1-K1099I LMEAKSQLFL  | 146  | >NF1-K1099I LMEAISQLFL  | 115 | 31   |
| >NF1-K1099I LMEAKSQLFL  | 404  | >NF1-K1099I LMEAISQLFL  | 191 | 213  |
| >NF1-K1099I LMEAKSQL    | 2951 | >NF1-K1099I LMEAISQL    | 379 | 2572 |
| >NF1-K1099I LMEAKSQLFL  | 1218 | >NF1-K1099I LMEAISQLFL  | 499 | 719  |
| >NF1-K1099I LMEAKSQL    | 8    | >NF1-K1099I LMEAISQL    | 4   | 4    |
| >NF1-K1099I LMEAKSQLFL  | 14   | >NF1-K1099I LMEAISQLFL  | 9   | 5    |
| >NF1-K1099I LMEAKSQLFL  | 116  | >NF1-K1099I LMEAISQLFLI | 101 | 15   |
| >NF1-K1099I LMEAKSQLFL  | 78   | >NF1-K1099I LMEAISQLFLI | 42  | 36   |

|                        |      |                         |     |      |
|------------------------|------|-------------------------|-----|------|
| >NF1-K1099I LMEAKSQLFL | 203  | >NF1-K1099I LMEAISQLFLI | 151 | 52   |
| >NF1-K1099I LMEAKSQLFL | 1469 | >NF1-K1099I LMEAISQLFLI | 322 | 1147 |
| >NF1-K1099I LMEAKSQLF  | 149  | >NF1-K1099I LMEAISQLF   | 132 | 17   |
| >NF1-K1099I LMEAKSQLF  | 333  | >NF1-K1099I LMEAISQLF   | 284 | 49   |
| >NF1-K1099I LMEAKSQLF  | 233  | >NF1-K1099I LMEAISQLF   | 112 | 121  |
| >NF1-K1099I ELMEAKSQL  | 3571 | >NF1-K1099I ELMEAISQL   | 71  | 3500 |
| >NF1-K1099I ELMEAKSQLF | 231  | >NF1-K1099I ELMEAISQLFI | 48  | 183  |
| >NF1-K1099I ELMEAKSQL  | 91   | >NF1-K1099I ELMEAISQL   | 9   | 82   |
| >NF1-K1099I ELMEAKSQLF | 27   | >NF1-K1099I ELMEAISQLFI | 11  | 16   |
| >NF1-K1099I ELMEAKSQL  | 561  | >NF1-K1099I ELMEAISQL   | 14  | 547  |
| >NF1-K1099I ELMEAKSQLF | 441  | >NF1-K1099I ELMEAISQLFI | 91  | 350  |
| >NF1-K1099I ELMEAKSQL  | 3947 | >NF1-K1099I ELMEAISQL   | 70  | 3877 |
| >NF1-K1099I ELMEAKSQLF | 322  | >NF1-K1099I ELMEAISQLFI | 71  | 251  |
| >NF1-K1099I ELMEAKSQL  | 56   | >NF1-K1099I ELMEAISQL   | 5   | 51   |
| >NF1-K1099I ELMEAKSQLF | 43   | >NF1-K1099I ELMEAISQLFI | 14  | 29   |
| >NF1-K1099I ELMEAKSQL  | 437  | >NF1-K1099I ELMEAISQL   | 22  | 415  |
| >NF1-K1099I ELMEAKSQLF | 83   | >NF1-K1099I ELMEAISQLFI | 27  | 56   |
| >NF1-K1099I ELMEAKSQL  | 199  | >NF1-K1099I ELMEAISQL   | 20  | 179  |
| >NF1-K1099I ELMEAKSQLF | 55   | >NF1-K1099I ELMEAISQLFI | 25  | 30   |
| >NF1-K1099I ELMEAKSQL  | 8    | >NF1-K1099I ELMEAISQL   | 2   | 6    |
| >NF1-K1099I ELMEAKSQLF | 7    | >NF1-K1099I ELMEAISQLFI | 4   | 3    |
| >NF1-K1099I ELMEAKSQ   | 2607 | >NF1-K1099I ELMEAISQ    | 377 | 2230 |
| >NF1-K1099I ELMEAKSQL  | 7    | >NF1-K1099I ELMEAISQL   | 3   | 4    |
| >NF1-K1099I ELMEAKSQLF | 15   | >NF1-K1099I ELMEAISQLFI | 9   | 6    |
| >NF1-K1099I ELMEAKSQL  | 3172 | >NF1-K1099I ELMEAISQL   | 157 | 3015 |
| >NF1-K1099I ELMEAKSQLF | 1758 | >NF1-K1099I ELMEAISQLFI | 445 | 1313 |
| >NF1-K1099I ELMEAKSQL  | 1966 | >NF1-K1099I ELMEAISQL   | 79  | 1887 |
| >NF1-K1099I ELMEAKSQLF | 1514 | >NF1-K1099I ELMEAISQLF  | 223 | 1291 |
| >NF1-K1099I ELMEAKSQLF | 947  | >NF1-K1099I ELMEAISQLFI | 236 | 711  |
| >NF1-K1099I ELMEAKSQL  | 216  | >NF1-K1099I ELMEAISQL   | 43  | 173  |
| >NF1-K1099I ELMEAKSQLF | 111  | >NF1-K1099I ELMEAISQLFI | 54  | 57   |
| >NF1-K1099I ELMEAKSQL  | 21   | >NF1-K1099I ELMEAISQL   | 8   | 13   |
| >NF1-K1099I ELMEAKSQLF | 21   | >NF1-K1099I ELMEAISQLFI | 15  | 6    |
| >NF1-K1099I ELMEAKSQLF | 391  | >NF1-K1099I ELMEAISQLF  | 193 | 198  |
| >NF1-K1099I ELMEAKSQLF | 188  | >NF1-K1099I ELMEAISQLF  | 171 | 17   |
| >NF1-K1099I ELMEAKSQLF | 380  | >NF1-K1099I ELMEAISQLF  | 190 | 190  |
| >NF1-K1099I VELMEAKSQI | 25   | >NF1-K1099I VELMEAISQL  | 54  | 29   |
| >NF1-K1099I VELMEAKSQI | 82   | >NF1-K1099I VELMEAISQL  | 131 | 49   |
| >NF1-K1099I VELMEAKSQI | 146  | >NF1-K1099I VELMEAISQL  | 104 | 42   |
| >NF1-K1099I VELMEAKSQI | 195  | >NF1-K1099I VELMEAISQL  | 67  | 128  |
| >NF1-K1099I VELMEAKSQI | 687  | >NF1-K1099I VELMEAISQL  | 469 | 218  |
| >NF1-K1099I VELMEAKSQI | 1649 | >NF1-K1099I VELMEAISQL  | 334 | 1315 |
| >NF1-K1099I VELMEAKSQI | 333  | >NF1-K1099I VELMEAISQL  | 284 | 49   |

|                         |       |                         |       |       |
|-------------------------|-------|-------------------------|-------|-------|
| >NF1-K1099I VELMEAKSQI  | 876   | >NF1-K1099I VELMEAISQL  | 462   | 414   |
| >NF1-K1099I VELMEAKSQI  | 237   | >NF1-K1099I VELMEAISQL  | 238   | 1     |
| >NF1-K1099I VELMEAKSQI  | 123   | >NF1-K1099I VELMEAISQL  | 79    | 44    |
| >NF1-K1099I VELMEAKSQI  | 39    | >NF1-K1099I VELMEAISQL  | 12    | 27    |
| >NF1-K1099I VELMEAKSQI  | 606   | >NF1-K1099I VELMEAISQL  | 192   | 414   |
| >NF1-K1099I GVVELMEAK   | 208   | >NF1-K1099I GVVELMEAI   | 26677 | 26469 |
| >NF1-K1099I GVVELMEAKS  | 443   | >NF1-K1099I GVVELMEAISC | 454   | 11    |
| >NF1-K1099I GDGVVELMEA  | 23346 | >NF1-K1099I GDGVVELMEA  | 141   | 23205 |
| >NF1-K1444E KILQSIANHVL | 308   | >NF1-K1444E EILQSIANHVL | 13194 | 12886 |
| >NF1-K1444E KILQSIANHV  | 368   | >NF1-K1444E EILQSIANHV  | 2124  | 1756  |
| >NF1-K1444E KILQSIANHV  | 159   | >NF1-K1444E EILQSIANHV  | 863   | 704   |
| >NF1-K1444E KILQSIANHV  | 197   | >NF1-K1444E EILQSIANHV  | 1581  | 1384  |
| >NF1-K1444E KILQSIANHVL | 116   | >NF1-K1444E EILQSIANHVL | 5443  | 5327  |
| >NF1-K1444E KILQSIANHV  | 10    | >NF1-K1444E EILQSIANHV  | 127   | 117   |
| >NF1-K1444E KILQSIANHVL | 61    | >NF1-K1444E EILQSIANHVL | 896   | 835   |
| >NF1-K1444E KILQSIANHV  | 27    | >NF1-K1444E EILQSIANHV  | 1084  | 1057  |
| >NF1-K1444E KILQSIANHVL | 209   | >NF1-K1444E EILQSIANHVL | 5116  | 4907  |
| >NF1-K1444E KILQSIANHV  | 12    | >NF1-K1444E EILQSIANHV  | 79    | 67    |
| >NF1-K1444E KILQSIANHVL | 122   | >NF1-K1444E EILQSIANHVL | 2559  | 2437  |
| >NF1-K1444E KILQSIANHV  | 56    | >NF1-K1444E EILQSIANHV  | 81    | 25    |
| >NF1-K1444E KILQSIANHVL | 224   | >NF1-K1444E EILQSIANHVL | 318   | 94    |
| >NF1-K1444E KILQSIANHV  | 10    | >NF1-K1444E EILQSIANHV  | 50    | 40    |
| >NF1-K1444E KILQSIANHVL | 58    | >NF1-K1444E EILQSIANHVL | 487   | 429   |
| >NF1-K1444E KILQSIANH   | 8425  | >NF1-K1444E EILQSIANH   | 93    | 8332  |
| >NF1-K1444E KILQSIANHV  | 8825  | >NF1-K1444E EILQSIANHV  | 478   | 8347  |
| >NF1-K1444E KILQSIANHVL | 4218  | >NF1-K1444E EILQSIANHVL | 107   | 4111  |
| >NF1-K1444E KILQSIANH   | 9835  | >NF1-K1444E EILQSIANH   | 470   | 9365  |
| >NF1-K1444E KILQSIANHV  | 481   | >NF1-K1444E EILQSIANHV  | 16478 | 15997 |
| >NF1-K1444E KILQSIANHVL | 217   | >NF1-K1444E EILQSIANHVL | 7620  | 7403  |
| >NF1-K1444E KILQSIANHV  | 3623  | >NF1-K1444E EILQSIANHV  | 120   | 3503  |
| >NF1-K1444E KILQSIANHV  | 336   | >NF1-K1444E EILQSIANHV  | 5     | 331   |
| >NF1-K1444E KILQSIANHVL | 3735  | >NF1-K1444E EILQSIANHVL | 20    | 3715  |
| >NF1-K1444E KILQSIANHVL | 200   | >NF1-K1444E EILQSIANHVL | 5314  | 5114  |
| >NF1-K1444E KILQSIANHVL | 1323  | >NF1-K1444E EILQSIANHVL | 410   | 913   |
| >NF1-K1444E KILQSIANHVL | 474   | >NF1-K1444E EILQSIANHVL | 17962 | 17488 |
| >NF1-K1444E SKILQSIA    | 25840 | >NF1-K1444E SEILQSIA    | 151   | 25689 |
| >NF1-K1444E SKILQSIANH  | 5601  | >NF1-K1444E SEILQSIANH  | 59    | 5542  |
| >NF1-K1444E SKILQSIANH  | 449   | >NF1-K1444E SEILQSIANH  | 8873  | 8424  |
| >NF1-K1444E SKILQSIA    | 29766 | >NF1-K1444E SEILQSIA    | 170   | 29596 |
| >NF1-K1444E SKILQSIA    | 18488 | >NF1-K1444E SEILQSIA    | 44    | 18444 |
| >NF1-K1444E SKILQSIANH  | 28933 | >NF1-K1444E SEILQSIANH  | 211   | 28722 |
| >NF1-K1444E SKILQSIANH  | 11209 | >NF1-K1444E SEILQSIANH  | 17    | 11192 |
| >NF1-K1444E RIERGLKLMS  | 160   | >NF1-K1444E RIERGLKLMS  | 20095 | 19935 |

|                        |      |                        |       |       |
|------------------------|------|------------------------|-------|-------|
| >NF1-K1444E RIERGLKLMS | 161  | >NF1-K1444E RIERGLKLMS | 24817 | 24656 |
| >NF1-K1444E RIERGLKLMS | 31   | >NF1-K1444E RIERGLKLMS | 10741 | 10710 |
| >NF1-K1444E MSKILQSI   | 27   | >NF1-K1444E MSEILQSI   | 5971  | 5944  |
| >NF1-K1444E MSKILQSI   | 47   | >NF1-K1444E MSEILQSI   | 7964  | 7917  |
| >NF1-K1444E MSKILQSI   | 485  | >NF1-K1444E MSEILQSI   | 4863  | 4378  |
| >NF1-K1444E MSKILQSI   | 419  | >NF1-K1444E MSEILQSI   | 8404  | 7985  |
| >NF1-K1444E MSKILQSI   | 57   | >NF1-K1444E MSEILQSI   | 162   | 105   |
| >NF1-K1444E MSKILQSI   | 211  | >NF1-K1444E MSEILQSI   | 614   | 403   |
| >NF1-K1444E MSKILQSI   | 247  | >NF1-K1444E MSEILQSI   | 410   | 163   |
| >NF1-K1444E MSKILQSI   | 55   | >NF1-K1444E MSEILQSI   | 32    | 23    |
| >NF1-K1444E LMSKILQSI  | 48   | >NF1-K1444E LMSEILQSI  | 14    | 34    |
| >NF1-K1444E LMSKILQSI  | 356  | >NF1-K1444E LMSEILQSI  | 78    | 278   |
| >NF1-K1444E LMSKILQSI  | 5    | >NF1-K1444E LMSEILQSI  | 3     | 2     |
| >NF1-K1444E LMSKILQSI  | 335  | >NF1-K1444E LMSEILQSI  | 96    | 239   |
| >NF1-K1444E LMSKILQSI  | 842  | >NF1-K1444E LMSEILQSI  | 196   | 646   |
| >NF1-K1444E LMSKILQSI  | 6    | >NF1-K1444E LMSEILQSI  | 3     | 3     |
| >NF1-K1444E LMSKILQSI  | 290  | >NF1-K1444E LMSEILQSI  | 172   | 118   |
| >NF1-K1444E LMSKILQSI  | 56   | >NF1-K1444E LMSEILQSI  | 8     | 48    |
| >NF1-K1444E LMSKILQSI  | 1875 | >NF1-K1444E LMSEILQSI  | 190   | 1685  |
| >NF1-K1444E LMSKILQSI  | 12   | >NF1-K1444E LMSEILQSI  | 3     | 9     |
| >NF1-K1444E LMSKILQSI  | 479  | >NF1-K1444E LMSEILQSI  | 47    | 432   |
| >NF1-K1444E LMSKILQSI  | 21   | >NF1-K1444E LMSEILQSI  | 4     | 17    |
| >NF1-K1444E LMSKILQSI  | 654  | >NF1-K1444E LMSEILQSI  | 66    | 588   |
| >NF1-K1444E LMSKILQSI  | 54   | >NF1-K1444E LMSEILQSI  | 13    | 41    |
| >NF1-K1444E LMSKILQSI  | 430  | >NF1-K1444E LMSEILQSI  | 82    | 348   |
| >NF1-K1444E LMSKILQSI  | 19   | >NF1-K1444E LMSEILQSI  | 4     | 15    |
| >NF1-K1444E LMSKILQSI  | 1316 | >NF1-K1444E LMSEILQSI  | 84    | 1232  |
| >NF1-K1444E LMSKILQSI  | 839  | >NF1-K1444E LMSEILQSI  | 96    | 743   |
| >NF1-K1444E LMSKILQSI  | 6    | >NF1-K1444E LMSEILQSI  | 3     | 3     |
| >NF1-K1444E LMSKILQSI  | 29   | >NF1-K1444E LMSEILQSI  | 8     | 21    |
| >NF1-K1444E LMSKILQSI  | 587  | >NF1-K1444E LMSEILQSI  | 321   | 266   |
| >NF1-K1444E LMSKILQSI  | 483  | >NF1-K1444E LMSEILQSI  | 2242  | 1759  |
| >NF1-K1444E LMSKILQSI  | 328  | >NF1-K1444E LMSEILQSI  | 378   | 50    |
| >NF1-K1444E LMSKILQSI  | 113  | >NF1-K1444E LMSEILQSI  | 184   | 71    |
| >NF1-K1444E KLMSKILQSI | 256  | >NF1-K1444E KLMSEILQSI | 212   | 44    |
| >NF1-K1444E KLMSKILQSI | 17   | >NF1-K1444E KLMSEILQSI | 9     | 8     |
| >NF1-K1444E KLMSKILQSI | 44   | >NF1-K1444E KLMSEILQSI | 41    | 3     |
| >NF1-K1444E KLMSKILQSI | 468  | >NF1-K1444E KLMSEILQSI | 198   | 270   |
| >NF1-K1444E KLMSKILQSI | 306  | >NF1-K1444E KLMSEILQSI | 126   | 180   |
| >NF1-K1444E KLMSKILQSI | 10   | >NF1-K1444E KLMSEILQSI | 7     | 3     |
| >NF1-K1444E KLMSKILQSI | 27   | >NF1-K1444E KLMSEILQSI | 18    | 9     |
| >NF1-K1444E KLMSKILQSI | 164  | >NF1-K1444E KLMSEILQSI | 289   | 125   |
| >NF1-K1444E KLMSKILQSI | 9    | >NF1-K1444E KLMSEILQSI | 8     | 1     |

|                         |      |                         |       |       |
|-------------------------|------|-------------------------|-------|-------|
| >NF1-K1444E KLMSKILQSI  | 8    | >NF1-K1444E KLMSEILQSI  | 10    | 2     |
| >NF1-K1444E KLMSKILQSI  | 114  | >NF1-K1444E KLMSEILQSI  | 59    | 55    |
| >NF1-K1444E KLMSKILQSI  | 289  | >NF1-K1444E KLMSEILQSI  | 203   | 86    |
| >NF1-K1444E KLMSKILQS   | 347  | >NF1-K1444E KLMSEILQS   | 377   | 30    |
| >NF1-K1444E KLMSKILQSI  | 4    | >NF1-K1444E KLMSEILQSI  | 4     | 0     |
| >NF1-K1444E KLMSKILQSI  | 94   | >NF1-K1444E KLMSEILQSI  | 101   | 7     |
| >NF1-K1444E KLMSKILQSI  | 6    | >NF1-K1444E KLMSEILQSI  | 5     | 1     |
| >NF1-K1444E KLMSKILQSI  | 73   | >NF1-K1444E KLMSEILQSI  | 66    | 7     |
| >NF1-K1444E KLMSKILQSI  | 27   | >NF1-K1444E KLMSEILQSI  | 21    | 6     |
| >NF1-K1444E KLMSKILQSI  | 162  | >NF1-K1444E KLMSEILQSI  | 136   | 26    |
| >NF1-K1444E KLMSKILQSI  | 6    | >NF1-K1444E KLMSEILQSI  | 5     | 1     |
| >NF1-K1444E KLMSKILQSI  | 154  | >NF1-K1444E KLMSEILQSI  | 148   | 6     |
| >NF1-K1444E KLMSKILQ    | 260  | >NF1-K1444E KLMSEILQ    | 233   | 27    |
| >NF1-K1444E KLMSKILQSI  | 6    | >NF1-K1444E KLMSEILQSI  | 5     | 1     |
| >NF1-K1444E KLMSKILQSI  | 36   | >NF1-K1444E KLMSEILQSI  | 34    | 2     |
| >NF1-K1444E KLMSKILQSI  | 11   | >NF1-K1444E KLMSEILQSI  | 11    | 0     |
| >NF1-K1444E KLMSKILQSI  | 348  | >NF1-K1444E KLMSEILQSI  | 202   | 146   |
| >NF1-K1444E LKLSKILQSI  | 106  | >NF1-K1444E LKLMSEILQSI | 212   | 106   |
| >NF1-K1444E LKLSKIL     | 14   | >NF1-K1444E LKLMSEIL    | 17    | 3     |
| >NF1-K1444E LKLSKILQSI  | 18   | >NF1-K1444E LKLMSEILQSI | 17    | 1     |
| >NF1-K1444E GLKLSKIL    | 1062 | >NF1-K1444E GLKLMSEI    | 306   | 756   |
| >NF1-K1444E GLKLSKIL    | 2413 | >NF1-K1444E GLKLMSEIL   | 345   | 2068  |
| >NF1-K1444E GLKLSKIL    | 62   | >NF1-K1444E GLKLMSEI    | 40    | 22    |
| >NF1-K1444E GLKLSKIL    | 545  | >NF1-K1444E GLKLMSEI    | 180   | 365   |
| >NF1-K1444E GLKLSKIL    | 887  | >NF1-K1444E GLKLMSEIL   | 269   | 618   |
| >NF1-K1444E GLKLSKIL    | 426  | >NF1-K1444E GLKLMSEIL   | 2083  | 1657  |
| >NF1-K1444E RGLKLSKIL   | 417  | >NF1-K1444E RGLKLMSE    | 21954 | 21537 |
| >NF1-K1444E RGLKLSKIL   | 262  | >NF1-K1444E RGLKLMSE    | 24904 | 24642 |
| >NF1-K1444E RGLKLSKIL   | 31   | >NF1-K1444E RGLKLMSE    | 10265 | 10234 |
| >NF1-K1444E RGLKLSKIL   | 51   | >NF1-K1444E RGLKLMSEI   | 78    | 27    |
| >NF1-K1444E RGLKLSKIL   | 156  | >NF1-K1444E RGLKLMSEI   | 275   | 119   |
| >NF1-K1444E IERGLKLSKIL | 46   | >NF1-K1444E IERGLKLMSEI | 21    | 25    |
| >NF1-K1444E IERGLKLSKIL | 335  | >NF1-K1444E IERGLKLMSEI | 102   | 233   |
| >NF1-K1444E IERGLKLSKIL | 11   | >NF1-K1444E IERGLKLMSEI | 16    | 5     |
| >NF1-K1444C KILQSIANHV  | 308  | >NF1-K1444C QILQSIANHV  | 3764  | 3456  |
| >NF1-K1444C KILQSIANHV  | 368  | >NF1-K1444C QILQSIANHV  | 781   | 413   |
| >NF1-K1444C KILQSIANHV  | 159  | >NF1-K1444C QILQSIANHV  | 338   | 179   |
| >NF1-K1444C KILQSIANHV  | 197  | >NF1-K1444C QILQSIANHV  | 552   | 355   |
| >NF1-K1444C KILQSIANHV  | 116  | >NF1-K1444C QILQSIANHV  | 727   | 611   |
| >NF1-K1444C KILQSIANHV  | 10   | >NF1-K1444C QILQSIANHV  | 73    | 63    |
| >NF1-K1444C KILQSIANHV  | 61   | >NF1-K1444C QILQSIANHV  | 551   | 490   |
| >NF1-K1444C KILQSIANHV  | 27   | >NF1-K1444C QILQSIANHV  | 375   | 348   |
| >NF1-K1444C KILQSIANHV  | 209  | >NF1-K1444C QILQSIANHV  | 2428  | 2219  |



|                        |       |                        |       |       |
|------------------------|-------|------------------------|-------|-------|
| >NF1-K1444(KILQSIANHV  | 12    | >NF1-K1444(QILQSIANHV  | 78    | 66    |
| >NF1-K1444(KILQSIANHVI | 122   | >NF1-K1444(QILQSIANHV  | 2692  | 2570  |
| >NF1-K1444(KILQSIANHV  | 56    | >NF1-K1444(QILQSIANHV  | 158   | 102   |
| >NF1-K1444(KILQSIANHVI | 224   | >NF1-K1444(QILQSIANHV  | 692   | 468   |
| >NF1-K1444(KILQSIANHV  | 10    | >NF1-K1444(QILQSIANHV  | 23    | 13    |
| >NF1-K1444(KILQSIANHVI | 58    | >NF1-K1444(QILQSIANHV  | 215   | 157   |
| >NF1-K1444(KILQSIANHV  | 481   | >NF1-K1444(QILQSIANHV  | 7370  | 6889  |
| >NF1-K1444(KILQSIANHVI | 217   | >NF1-K1444(QILQSIANHV  | 2368  | 2151  |
| >NF1-K1444(KILQSIANHV  | 336   | >NF1-K1444(QILQSIANHV  | 21    | 315   |
| >NF1-K1444(KILQSIANHVI | 3735  | >NF1-K1444(QILQSIANHV  | 211   | 3524  |
| >NF1-K1444(KILQSIANHVI | 200   | >NF1-K1444(QILQSIANHV  | 1901  | 1701  |
| >NF1-K1444(KILQSIANHVI | 474   | >NF1-K1444(QILQSIANHV  | 11765 | 11291 |
| >NF1-K1444(SKILQSIANHV | 7084  | >NF1-K1444(SQILQSIANHV | 316   | 6768  |
| >NF1-K1444(SKILQSIANHV | 9343  | >NF1-K1444(SQILQSIANHV | 167   | 9176  |
| >NF1-K1444(SKILQSIAN   | 17796 | >NF1-K1444(SQILQSIAN   | 322   | 17474 |
| >NF1-K1444(SKILQSIANHV | 1810  | >NF1-K1444(SQILQSIANHV | 7     | 1803  |
| >NF1-K1444(SKILQSIANHV | 11154 | >NF1-K1444(SQILQSIANHV | 172   | 10982 |
| >NF1-K1444(SKILQSIANHV | 449   | >NF1-K1444(SQILQSIANHV | 472   | 23    |
| >NF1-K1444(RIERGLKLMS  | 160   | >NF1-K1444(RIERGLKLMS  | 18467 | 18307 |
| >NF1-K1444(RIERGLKLMS  | 161   | >NF1-K1444(RIERGLKLMS  | 23780 | 23619 |
| >NF1-K1444(RIERGLKLMS  | 31    | >NF1-K1444(RIERGLKLMS  | 4315  | 4284  |
| >NF1-K1444(MSKILQSI    | 27    | >NF1-K1444(MSQILQSI    | 2206  | 2179  |
| >NF1-K1444(MSKILQSIAN  | 47    | >NF1-K1444(MSQILQSIAN  | 3777  | 3730  |
| >NF1-K1444(MSKILQSIAN  | 485   | >NF1-K1444(MSQILQSIAN  | 1327  | 842   |
| >NF1-K1444(MSKILQSI    | 419   | >NF1-K1444(MSQILQSI    | 4548  | 4129  |
| >NF1-K1444(MSKILQSI    | 57    | >NF1-K1444(MSQILQSI    | 94    | 37    |
| >NF1-K1444(MSKILQSIAN  | 211   | >NF1-K1444(MSQILQSIAN  | 311   | 100   |
| >NF1-K1444(MSKILQSI    | 2584  | >NF1-K1444(MSQILQSI    | 311   | 2273  |
| >NF1-K1444(MSKILQSIAN  | 247   | >NF1-K1444(MSQILQSIAN  | 355   | 108   |
| >NF1-K1444(MSKILQSI    | 55    | >NF1-K1444(MSQILQSI    | 21    | 34    |
| >NF1-K1444(LMSKILQSI   | 48    | >NF1-K1444(LMSQILQSI   | 51    | 3     |
| >NF1-K1444(LMSKILQSI   | 356   | >NF1-K1444(LMSQILQSI   | 280   | 76    |
| >NF1-K1444(LMSKILQSI   | 5     | >NF1-K1444(LMSQILQSI   | 4     | 1     |
| >NF1-K1444(LMSKILQSIAN | 335   | >NF1-K1444(LMSQILQSIAN | 176   | 159   |
| >NF1-K1444(LMSKILQSI   | 6     | >NF1-K1444(LMSQILQSI   | 5     | 1     |
| >NF1-K1444(LMSKILQSIAN | 290   | >NF1-K1444(LMSQILQSIAN | 231   | 59    |
| >NF1-K1444(LMSKILQSI   | 56    | >NF1-K1444(LMSQILQSI   | 48    | 8     |
| >NF1-K1444(LMSKILQSI   | 12    | >NF1-K1444(LMSQILQSI   | 7     | 5     |
| >NF1-K1444(LMSKILQSIAN | 479   | >NF1-K1444(LMSQILQSIAN | 244   | 235   |
| >NF1-K1444(LMSKILQSI   | 21    | >NF1-K1444(LMSQILQSI   | 21    | 0     |
| >NF1-K1444(LMSKILQSI   | 54    | >NF1-K1444(LMSQILQSI   | 42    | 12    |
| >NF1-K1444(LMSKILQSIAN | 430   | >NF1-K1444(LMSQILQSIAN | 329   | 101   |
| >NF1-K1444(LMSKILQSI   | 19    | >NF1-K1444(LMSQILQSI   | 12    | 7     |

|                       |     |                       |     |     |
|-----------------------|-----|-----------------------|-----|-----|
| >NF1-K1444(LMSKILQS   | 839 | >NF1-K1444(LMSQILQS   | 243 | 596 |
| >NF1-K1444(LMSKILQSI  | 6   | >NF1-K1444(LMSQILQSI  | 4   | 2   |
| >NF1-K1444(LMSKILQSI  | 29  | >NF1-K1444(LMSQILQSI  | 13  | 16  |
| >NF1-K1444(LMSKILQSI  | 587 | >NF1-K1444(LMSQILQSI  | 386 | 201 |
| >NF1-K1444(LMSKILQSI  | 483 | >NF1-K1444(LMSQILQSI  | 834 | 351 |
| >NF1-K1444(LMSKILQSI  | 328 | >NF1-K1444(LMSQILQSI  | 214 | 114 |
| >NF1-K1444(LMSKILQSI  | 113 | >NF1-K1444(LMSQILQSI  | 296 | 183 |
| >NF1-K1444(LMSKILQSI  | 622 | >NF1-K1444(LMSQILQSI  | 413 | 209 |
| >NF1-K1444(KLMSKILQS  | 256 | >NF1-K1444(KLMSQILQS  | 232 | 24  |
| >NF1-K1444(KLMSKILQSI | 17  | >NF1-K1444(KLMSQILQSI | 14  | 3   |
| >NF1-K1444(KLMSKILQSI | 44  | >NF1-K1444(KLMSQILQSI | 46  | 2   |
| >NF1-K1444(KLMSKILQ   | 468 | >NF1-K1444(KLMSQILQ   | 183 | 285 |
| >NF1-K1444(KLMSKILQS  | 306 | >NF1-K1444(KLMSQILQS  | 219 | 87  |
| >NF1-K1444(KLMSKILQSI | 10  | >NF1-K1444(KLMSQILQSI | 11  | 1   |
| >NF1-K1444(KLMSKILQSI | 27  | >NF1-K1444(KLMSQILQSI | 23  | 4   |
| >NF1-K1444(KLMSKILQS  | 164 | >NF1-K1444(KLMSQILQS  | 235 | 71  |
| >NF1-K1444(KLMSKILQSI | 9   | >NF1-K1444(KLMSQILQSI | 9   | 0   |
| >NF1-K1444(KLMSKILQSI | 8   | >NF1-K1444(KLMSQILQSI | 9   | 1   |
| >NF1-K1444(KLMSKILQSI | 114 | >NF1-K1444(KLMSQILQSI | 100 | 14  |
| >NF1-K1444(KLMSKILQSI | 289 | >NF1-K1444(KLMSQILQSI | 229 | 60  |
| >NF1-K1444(KLMSKILQS  | 347 | >NF1-K1444(KLMSQILQS  | 337 | 10  |
| >NF1-K1444(KLMSKILQSI | 4   | >NF1-K1444(KLMSQILQSI | 4   | 0   |
| >NF1-K1444(KLMSKILQSI | 94  | >NF1-K1444(KLMSQILQSI | 96  | 2   |
| >NF1-K1444(KLMSKILQSI | 6   | >NF1-K1444(KLMSQILQSI | 5   | 1   |
| >NF1-K1444(KLMSKILQSI | 73  | >NF1-K1444(KLMSQILQSI | 62  | 11  |
| >NF1-K1444(KLMSKILQSI | 27  | >NF1-K1444(KLMSQILQSI | 21  | 6   |
| >NF1-K1444(KLMSKILQSI | 162 | >NF1-K1444(KLMSQILQSI | 114 | 48  |
| >NF1-K1444(KLMSKILQSI | 6   | >NF1-K1444(KLMSQILQSI | 6   | 0   |
| >NF1-K1444(KLMSKILQSI | 154 | >NF1-K1444(KLMSQILQSI | 164 | 10  |
| >NF1-K1444(KLMSKILQ   | 260 | >NF1-K1444(KLMSQILQ   | 154 | 106 |
| >NF1-K1444(KLMSKILQS  | 692 | >NF1-K1444(KLMSQILQS  | 393 | 299 |
| >NF1-K1444(KLMSKILQSI | 6   | >NF1-K1444(KLMSQILQSI | 5   | 1   |
| >NF1-K1444(KLMSKILQSI | 36  | >NF1-K1444(KLMSQILQSI | 29  | 7   |
| >NF1-K1444(KLMSKILQSI | 520 | >NF1-K1444(KLMSQILQSI | 422 | 98  |
| >NF1-K1444(KLMSKILQSI | 11  | >NF1-K1444(KLMSQILQSI | 9   | 2   |
| >NF1-K1444(KLMSKILQSI | 348 | >NF1-K1444(KLMSQILQSI | 221 | 127 |
| >NF1-K1444(LKLSKILQSI | 106 | >NF1-K1444(LKLSQILQS  | 151 | 45  |
| >NF1-K1444(LKLSKIL    | 14  | >NF1-K1444(LKLSQIL    | 9   | 5   |
| >NF1-K1444(LKLSKILQSI | 18  | >NF1-K1444(LKLSQILQS  | 16  | 2   |
| >NF1-K1444(GLKLSKI    | 62  | >NF1-K1444(GLKLSQI    | 37  | 25  |
| >NF1-K1444(GLKLSKIL   | 987 | >NF1-K1444(GLKLSQIL   | 397 | 590 |
| >NF1-K1444(GLKLSKI    | 545 | >NF1-K1444(GLKLSQI    | 137 | 408 |
| >NF1-K1444(GLKLSKIL   | 887 | >NF1-K1444(GLKLSQIL   | 101 | 786 |

|                        |       |                        |       |       |
|------------------------|-------|------------------------|-------|-------|
| >NF1-K1444(GLKLMISKIL  | 426   | >NF1-K1444(GLKLMISQIL  | 409   | 17    |
| >NF1-K1444(RGLKLMSK    | 417   | >NF1-K1444(RGLKLMSQ    | 21137 | 20720 |
| >NF1-K1444(RGLKLMSK    | 262   | >NF1-K1444(RGLKLMSQ    | 24976 | 24714 |
| >NF1-K1444(RGLKLMSK    | 31    | >NF1-K1444(RGLKLMSQ    | 4253  | 4222  |
| >NF1-K1444(RGLKLMSKI   | 723   | >NF1-K1444(RGLKLMSQI   | 326   | 397   |
| >NF1-K1444(RGLKLMSKI   | 51    | >NF1-K1444(RGLKLMSQI   | 39    | 12    |
| >NF1-K1444(RGLKLMSKI   | 156   | >NF1-K1444(RGLKLMSQI   | 114   | 42    |
| >NF1-K1444(IERGLKLMSKI | 46    | >NF1-K1444(IERGLKLMSQ  | 21    | 25    |
| >NF1-K1444(IERGLKLMSKI | 335   | >NF1-K1444(IERGLKLMSQ  | 206   | 129   |
| >NF1-K1444(IERGLKLMSKI | 528   | >NF1-K1444(IERGLKLMSQ  | 372   | 156   |
| >NF1-K1444(IERGLKLMSKI | 11    | >NF1-K1444(IERGLKLMSQ  | 11    | 0     |
| >NF1-K583R-KKLTSHQM    | 9     | >NF1-K583R-RKLTSHQM    | 6     | 3     |
| >NF1-K583R-KKLTSHQML   | 5     | >NF1-K583R-RKLTSHQML   | 4     | 1     |
| >NF1-K583R-KKLTSHQML   | 301   | >NF1-K583R-RKLTSHQML   | 171   | 130   |
| >NF1-K583R-KKLTSHQML   | 131   | >NF1-K583R-RKLTSHQML   | 77    | 54    |
| >NF1-K583R-KKLTSHQML   | 2061  | >NF1-K583R-RKLTSHQML   | 311   | 1750  |
| >NF1-K583R-KKLTSHQM    | 955   | >NF1-K583R-RKLTSHQM    | 452   | 503   |
| >NF1-K583R-KKLTSHQML   | 1085  | >NF1-K583R-RKLTSHQML   | 341   | 744   |
| >NF1-K583R-KKLTSHQML   | 3677  | >NF1-K583R-RKLTSHQML   | 485   | 3192  |
| >NF1-K583R-CKKLTSHQM   | 222   | >NF1-K583R-CRKLTSHQM   | 1642  | 1420  |
| >NF1-K583R-CKKLTSHQMI  | 99    | >NF1-K583R-CRKLTSHQMI  | 624   | 525   |
| >NF1-K583R-CKKLTSHQM   | 12657 | >NF1-K583R-CRKLTSHQM   | 459   | 12198 |
| >NF1-K583R-CKKLTSHQMI  | 5238  | >NF1-K583R-CRKLTSHQMI  | 45    | 5193  |
| >NF1-K583R-CKKLTSHQMI  | 2838  | >NF1-K583R-CRKLTSHQMI  | 85    | 2753  |
| >NF1-K583R-CKKLTSHQMI  | 4118  | >NF1-K583R-CRKLTSHQMI  | 93    | 4025  |
| >NF1-K583R-ISSQMLFYICK | 238   | >NF1-K583R-ISSQMLFYICF | 4890  | 4652  |
| >NF1-K583R-ISSQMLFYICK | 12    | >NF1-K583R-ISSQMLFYICF | 123   | 111   |
| >NF1-K583R-ISSQMLFYICK | 833   | >NF1-K583R-ISSQMLFYICF | 45    | 788   |
| >NF1-K583R-ISSQMLFYICK | 5834  | >NF1-K583R-ISSQMLFYICF | 338   | 5496  |
| >NF1-K583R-ISSQMLFYICK | 101   | >NF1-K583R-ISSQMLFYICF | 33    | 68    |
| >NF1-K583R-ISSQMLFYICK | 165   | >NF1-K583R-ISSQMLFYICF | 226   | 61    |
| >NF1-K583R-ISSQMLFYICK | 5547  | >NF1-K583R-ISSQMLFYICF | 447   | 5100  |
| >NF1-K583R-ICKKLTSHQM  | 2319  | >NF1-K583R-ICRKLTSHQM  | 433   | 1886  |
| >NF1-K583R-ICKKLTSHQM  | 139   | >NF1-K583R-ICRKLTSHQM  | 44    | 95    |
| >NF1-K583R-YICKKLTSHQI | 494   | >NF1-K583R-YICRKLTSHQI | 386   | 108   |
| >NF1-K583R-YICKKLTSHQI | 278   | >NF1-K583R-YICRKLTSHQI | 130   | 148   |
| >NF1-K583R-YICKKLTSHQI | 281   | >NF1-K583R-YICRKLTSHQI | 175   | 106   |
| >NF1-K583R-LFYICKKL    | 642   | >NF1-K583R-LFYICRKL    | 354   | 288   |
| >NF1-K583R-LFYICKKL    | 493   | >NF1-K583R-LFYICRKL    | 621   | 128   |
| >NF1-K583R-MLFYICKKL   | 55    | >NF1-K583R-MLFYICRKL   | 49    | 6     |
| >NF1-K583R-MLFYICKKL   | 9     | >NF1-K583R-MLFYICRKL   | 9     | 0     |
| >NF1-K583R-MLFYICKKL   | 59    | >NF1-K583R-MLFYICRKL   | 52    | 7     |
| >NF1-K583R-MLFYICKKLT  | 332   | >NF1-K583R-MLFYICRKL   | 270   | 62    |

|                       |      |                       |      |      |
|-----------------------|------|-----------------------|------|------|
| >NF1-K583R-MLFYICKKL  | 88   | >NF1-K583R-MLFYICRKL  | 62   | 26   |
| >NF1-K583R-MLFYICKKL  | 444  | >NF1-K583R-MLFYICRKL  | 583  | 139  |
| >NF1-K583R-MLFYICKK   | 506  | >NF1-K583R-MLFYICRK   | 312  | 194  |
| >NF1-K583R-MLFYICKKL  | 18   | >NF1-K583R-MLFYICRKL  | 29   | 11   |
| >NF1-K583R-MLFYICKK   | 33   | >NF1-K583R-MLFYICRK   | 32   | 1    |
| >NF1-K583R-MLFYICKK   | 27   | >NF1-K583R-MLFYICRK   | 28   | 1    |
| >NF1-K583R-MLFYICKK   | 176  | >NF1-K583R-MLFYICRK   | 148  | 28   |
| >NF1-K583R-MLFYICKK   | 81   | >NF1-K583R-MLFYICRK   | 73   | 8    |
| >NF1-K583R-MLFYICKKL  | 45   | >NF1-K583R-MLFYICRKL  | 34   | 11   |
| >NF1-K583R-MLFYICKK   | 366  | >NF1-K583R-MLFYICRK   | 279  | 87   |
| >NF1-K583R-MLFYICKK   | 7    | >NF1-K583R-MLFYICRK   | 7    | 0    |
| >NF1-K583R-MLFYICKKL  | 285  | >NF1-K583R-MLFYICRKL  | 177  | 108  |
| >NF1-K583R-MLFYICKKL  | 433  | >NF1-K583R-MLFYICRKL  | 689  | 256  |
| >NF1-K583R-MLFYICKKL  | 123  | >NF1-K583R-MLFYICRKL  | 299  | 176  |
| >NF1-K583R-MLFYICKKL  | 313  | >NF1-K583R-MLFYICRKL  | 360  | 47   |
| >NF1-K583R-MLFYICKK   | 328  | >NF1-K583R-MLFYICRK   | 454  | 126  |
| >NF1-K583R-QMLFYICKKL | 604  | >NF1-K583R-QMLFYICRKL | 450  | 154  |
| >NF1-K583R-QMLFYICKKL | 67   | >NF1-K583R-QMLFYICRKL | 52   | 15   |
| >NF1-K583R-QMLFYICKKL | 502  | >NF1-K583R-QMLFYICRKL | 486  | 16   |
| >NF1-K583R-QMLFYICKKL | 490  | >NF1-K583R-QMLFYICRKL | 576  | 86   |
| >NF1-K583R-QMLFYICKKL | 108  | >NF1-K583R-QMLFYICRKL | 128  | 20   |
| >NF1-K583R-QMLFYICKKL | 130  | >NF1-K583R-QMLFYICRKL | 188  | 58   |
| >NF1-K583R-QMLFYICK   | 118  | >NF1-K583R-QMLFYICR   | 2570 | 2452 |
| >NF1-K583R-QMLFYICKK  | 83   | >NF1-K583R-QMLFYICRK  | 85   | 2    |
| >NF1-K583R-QMLFYICK   | 23   | >NF1-K583R-QMLFYICR   | 395  | 372  |
| >NF1-K583R-QMLFYICKK  | 24   | >NF1-K583R-QMLFYICRK  | 26   | 2    |
| >NF1-K583R-QMLFYICK   | 420  | >NF1-K583R-QMLFYICR   | 9637 | 9217 |
| >NF1-K583R-QMLFYICKK  | 412  | >NF1-K583R-QMLFYICRK  | 403  | 9    |
| >NF1-K583R-QMLFYICK   | 275  | >NF1-K583R-QMLFYICR   | 20   | 255  |
| >NF1-K583R-QMLFYICKK  | 231  | >NF1-K583R-QMLFYICRK  | 203  | 28   |
| >NF1-K583R-QMLFYICKKL | 534  | >NF1-K583R-QMLFYICRKL | 464  | 70   |
| >NF1-K583R-QMLFYICK   | 2636 | >NF1-K583R-QMLFYICR   | 115  | 2521 |
| >NF1-K583R-QMLFYICK   | 543  | >NF1-K583R-QMLFYICR   | 154  | 389  |
| >NF1-K583R-QMLFYICKKL | 349  | >NF1-K583R-QMLFYICRKL | 564  | 215  |
| >NF1-K583R-QMLFYICKK  | 851  | >NF1-K583R-QMLFYICRK  | 446  | 405  |
| >NF1-K583R-QMLFYICK   | 517  | >NF1-K583R-QMLFYICR   | 85   | 432  |
| >NF1-K583R-QMLFYICKK  | 185  | >NF1-K583R-QMLFYICRK  | 191  | 6    |
| >NF1-K583R-SQMLFYICKK | 561  | >NF1-K583R-SQMLFYICRK | 460  | 101  |
| >NF1-K583R-SQMLFYICKK | 335  | >NF1-K583R-SQMLFYICRK | 287  | 48   |
| >NF1-K583R-SQMLFYICKK | 212  | >NF1-K583R-SQMLFYICRK | 195  | 17   |
| >NF1-K583R-SQMLFYICK  | 375  | >NF1-K583R-SQMLFYICR  | 6535 | 6160 |
| >NF1-K583R-SQMLFYICKK | 45   | >NF1-K583R-SQMLFYICRK | 47   | 2    |
| >NF1-K583R-SQMLFYICK  | 6    | >NF1-K583R-SQMLFYICR  | 17   | 11   |

|                        |      |                         |      |      |
|------------------------|------|-------------------------|------|------|
| >NF1-K583R-SQMLFYICKK  | 14   | >NF1-K583R-SQMLFYICKR   | 15   | 1    |
| >NF1-K583R-SQMLFYICK   | 330  | >NF1-K583R-SQMLFYICR    | 9171 | 8841 |
| >NF1-K583R-SQMLFYICKK  | 475  | >NF1-K583R-SQMLFYICKR   | 472  | 3    |
| >NF1-K583R-SQMLFYICK   | 179  | >NF1-K583R-SQMLFYICR    | 16   | 163  |
| >NF1-K583R-SQMLFYICKK  | 118  | >NF1-K583R-SQMLFYICKR   | 94   | 24   |
| >NF1-K583R-SQMLFYICK   | 1247 | >NF1-K583R-SQMLFYICR    | 352  | 895  |
| >NF1-K583R-SQMLFYICKK  | 367  | >NF1-K583R-SQMLFYICKR   | 557  | 190  |
| >NF1-K583R-SQMLFYICK   | 260  | >NF1-K583R-SQMLFYICR    | 223  | 37   |
| >NF1-K583R-SQMLFYICKK  | 100  | >NF1-K583R-SQMLFYICKR   | 137  | 37   |
| >NF1-K583R-SQMLFYICK   | 310  | >NF1-K583R-SQMLFYICR    | 631  | 321  |
| >NF1-K583R-SQMLFYICKK  | 521  | >NF1-K583R-SQMLFYICKR   | 240  | 281  |
| >NF1-K583R-SQMLFYICK   | 230  | >NF1-K583R-SQMLFYICR    | 357  | 127  |
| >NF1-K583R-SQMLFYICKK  | 406  | >NF1-K583R-SQMLFYICKR   | 257  | 149  |
| >NF1-K583R-SQMLFYICK   | 1226 | >NF1-K583R-SQMLFYICR    | 125  | 1101 |
| >NF1-K583R-SSQMLFYICK  | 175  | >NF1-K583R-SSQMLFYICR   | 2188 | 2013 |
| >NF1-K583R-SSQMLFYICK  | 9    | >NF1-K583R-SSQMLFYICR   | 43   | 34   |
| >NF1-K583R-SSQMLFYICK  | 7    | >NF1-K583R-SSQMLFYICR   | 7    | 0    |
| >NF1-K583R-SSQMLFYICK  | 149  | >NF1-K583R-SSQMLFYICR   | 7184 | 7035 |
| >NF1-K583R-SSQMLFYICK  | 203  | >NF1-K583R-SSQMLFYICR   | 200  | 3    |
| >NF1-K583R-SSQMLFYICK  | 45   | >NF1-K583R-SSQMLFYICR   | 5    | 40   |
| >NF1-K583R-SSQMLFYICK  | 102  | >NF1-K583R-SSQMLFYICR   | 98   | 4    |
| >NF1-K583R-SSQMLFYICK  | 450  | >NF1-K583R-SSQMLFYICR   | 25   | 425  |
| >NF1-K583R-SSQMLFYICK  | 393  | >NF1-K583R-SSQMLFYICR   | 115  | 278  |
| >NF1-K583R-SSQMLFYICK  | 409  | >NF1-K583R-SSQMLFYICR   | 429  | 20   |
| >NF1-K583R-SSQMLFYICK  | 74   | >NF1-K583R-SSQMLFYICR   | 93   | 19   |
| >NF1-K583R-SSQMLFYICK  | 102  | >NF1-K583R-SSQMLFYICR   | 81   | 21   |
| >NF1-K583R-SSQMLFYICK  | 6367 | >NF1-K583R-SSQMLFYICR   | 476  | 5891 |
| >NF1-L1187I-LQQGTEFDTL | 413  | >NF1-L1187I-IQQGTEFDTL  | 567  | 154  |
| >NF1-L1187I-LQQGTEFDTL | 192  | >NF1-L1187I-IQQGTEFDTL  | 269  | 77   |
| >NF1-L1187I-LQQGTEFDTL | 244  | >NF1-L1187I-IQQGTEFDTL  | 249  | 5    |
| >NF1-L1187I-LQQGTEFDTL | 558  | >NF1-L1187I-IQQGTEFDTL  | 365  | 193  |
| >NF1-L1187I-ILQQGTEFDT | 283  | >NF1-L1187I-IIQQGTEFDTI | 3793 | 3510 |
| >NF1-L1187I-ILQQGTEFDT | 35   | >NF1-L1187I-IIQQGTEFDTI | 535  | 500  |
| >NF1-L1187I-ILQQGTEFDT | 438  | >NF1-L1187I-IIQQGTEFDTI | 2780 | 2342 |
| >NF1-L1187I-ILQQGTEFDT | 309  | >NF1-L1187I-IIQQGTEFDTI | 360  | 51   |
| >NF1-L1187I-ILQQGTEFDT | 26   | >NF1-L1187I-IIQQGTEFDTI | 892  | 866  |
| >NF1-L1187I-ILQQGTEFDT | 20   | >NF1-L1187I-IIQQGTEFDTI | 2246 | 2226 |
| >NF1-L1187I-ILQQGTEFDT | 128  | >NF1-L1187I-IIQQGTEFDTI | 4545 | 4417 |
| >NF1-L1187I-ILQQGTEFDT | 68   | >NF1-L1187I-IIQQGTEFDTI | 1837 | 1769 |
| >NF1-L1187I-ILQQGTEFDT | 81   | >NF1-L1187I-IIQQGTEFDT  | 5437 | 5356 |
| >NF1-L1187I-ILQQGTEFDT | 7    | >NF1-L1187I-IIQQGTEFDTI | 231  | 224  |
| >NF1-L1187I-ILQQGTEF   | 60   | >NF1-L1187I-IIQQGTEF    | 107  | 47   |
| >NF1-L1187I-ILQQGTEF   | 71   | >NF1-L1187I-IIQQGTEF    | 408  | 337  |

|                         |      |                         |      |      |
|-------------------------|------|-------------------------|------|------|
| >NF1-L1187I·ILQQGTEF    | 61   | >NF1-L1187I·IIQQGTEF    | 289  | 228  |
| >NF1-L1187I·ILQQGTEF    | 643  | >NF1-L1187I·IIQQGTEF    | 445  | 198  |
| >NF1-L1187I·ATFMEVLTKII | 1324 | >NF1-L1187I·ATFMEVLTKII | 464  | 860  |
| >NF1-L1187I·ATFMEVLTKII | 50   | >NF1-L1187I·ATFMEVLTKII | 24   | 26   |
| >NF1-L1187I·ATFMEVLTKII | 220  | >NF1-L1187I·ATFMEVLTKII | 376  | 156  |
| >NF1-L1187I·ATFMEVLTKII | 10   | >NF1-L1187I·ATFMEVLTKII | 34   | 24   |
| >NF1-L1187I·ATFMEVLTKII | 293  | >NF1-L1187I·ATFMEVLTKII | 888  | 595  |
| >NF1-L1187I·ATFMEVLTKII | 99   | >NF1-L1187I·ATFMEVLTKII | 232  | 133  |
| >NF1-L1187I·ATFMEVLTKII | 631  | >NF1-L1187I·ATFMEVLTKII | 433  | 198  |
| >NF1-L1187I·ATFMEVLTKII | 201  | >NF1-L1187I·ATFMEVLTKII | 20   | 181  |
| >NF1-L1187I·KILQQGTEF   | 68   | >NF1-L1187I·KIIQQGTEF   | 106  | 38   |
| >NF1-L1187I·KILQQGTEF   | 338  | >NF1-L1187I·KIIQQGTEF   | 79   | 259  |
| >NF1-L1187I·KILQQGTEF   | 38   | >NF1-L1187I·KIIQQGTEF   | 44   | 6    |
| >NF1-L1187I·KILQQGTEF   | 33   | >NF1-L1187I·KIIQQGTEF   | 29   | 4    |
| >NF1-L1187I·KILQQGTEF   | 1169 | >NF1-L1187I·KIIQQGTEF   | 462  | 707  |
| >NF1-L1187I·KILQQGTEF   | 482  | >NF1-L1187I·KIIQQGTEF   | 986  | 504  |
| >NF1-L1187I·KILQQGTEF   | 1712 | >NF1-L1187I·KIIQQGTEF   | 216  | 1496 |
| >NF1-L1187I·TKILQQGTEF  | 22   | >NF1-L1187I·TKIIQQGTEF  | 18   | 4    |
| >NF1-L1187I·LTKILQQGTEI | 140  | >NF1-L1187I·LTKIIQQGTEF | 208  | 68   |
| >NF1-L1187I·LTKILQQGTEI | 147  | >NF1-L1187I·LTKIIQQGTEF | 140  | 7    |
| >NF1-L1187I·LTKILQQGTEI | 5    | >NF1-L1187I·LTKIIQQGTEF | 5    | 0    |
| >NF1-L1187I·LTKILQQGTEI | 28   | >NF1-L1187I·LTKIIQQGTEF | 26   | 2    |
| >NF1-L1187I·VLTKILQQGT  | 845  | >NF1-L1187I·VLTkIIQQGT  | 464  | 381  |
| >NF1-L1187I·VLTKILQQ    | 45   | >NF1-L1187I·VLTkIIQQ    | 33   | 12   |
| >NF1-L1187I·VLTKILQQGT  | 33   | >NF1-L1187I·VLTkIIQQGT  | 23   | 10   |
| >NF1-L1187I·MEVLTKIL    | 5    | >NF1-L1187I·MEVLTKII    | 3    | 2    |
| >NF1-L1187I·MEVLTKIL    | 87   | >NF1-L1187I·MEVLTKII    | 563  | 476  |
| >NF1-L1187I·MEVLTKILQ   | 516  | >NF1-L1187I·MEVLTKIIQ   | 234  | 282  |
| >NF1-L1187I·MEVLTKIL    | 498  | >NF1-L1187I·MEVLTKII    | 6103 | 5605 |
| >NF1-L1187I·MEVLTKIL    | 25   | >NF1-L1187I·MEVLTKII    | 100  | 75   |
| >NF1-L1187I·MEVLTKIL    | 198  | >NF1-L1187I·MEVLTKII    | 434  | 236  |
| >NF1-L1187I·MEVLTKIL    | 191  | >NF1-L1187I·MEVLTKII    | 324  | 133  |
| >NF1-L1187I·MEVLTKIL    | 1303 | >NF1-L1187I·MEVLTKII    | 54   | 1249 |
| >NF1-L1187I·FMEVLTKIL   | 5481 | >NF1-L1187I·FMEVLTKII   | 382  | 5099 |
| >NF1-L1187I·FMEVLTKIL   | 96   | >NF1-L1187I·FMEVLTKII   | 241  | 145  |
| >NF1-L1187I·FMEVLTKIL   | 903  | >NF1-L1187I·FMEVLTKII   | 458  | 445  |
| >NF1-L1187I·FMEVLTKIL   | 233  | >NF1-L1187I·FMEVLTKII   | 251  | 18   |
| >NF1-L1187I·FMEVLTKIL   | 57   | >NF1-L1187I·FMEVLTKII   | 348  | 291  |
| >NF1-L1187I·FMEVLTKILQ  | 247  | >NF1-L1187I·FMEVLTKIIQ  | 219  | 28   |
| >NF1-L1187I·FMEVLTKIL   | 232  | >NF1-L1187I·FMEVLTKII   | 3158 | 2926 |
| >NF1-L1187I·TFMEVLTKIL  | 133  | >NF1-L1187I·TFMEVLTKII  | 165  | 32   |
| >NF1-L194P·LKETAFFK     | 61   | >NF1-L194P·PKETAFFK     | 1108 | 1047 |
| >NF1-L194P·LKETAFFKAI   | 224  | >NF1-L194P·PKETAFFKAI   | 3521 | 3297 |

|                         |       |                         |       |       |
|-------------------------|-------|-------------------------|-------|-------|
| >NF1-L194P- LLKETAFKF   | 32281 | >NF1-L194P- LPKETAFKF   | 193   | 32088 |
| >NF1-L194P- LLKETAFKFK/ | 279   | >NF1-L194P- LPKETAFKFK/ | 31896 | 31617 |
| >NF1-L194P- LLKETAFKFK/ | 67    | >NF1-L194P- LPKETAFKFK/ | 20539 | 20472 |
| >NF1-L194P- LLKETAFKFK/ | 123   | >NF1-L194P- LPKETAFKFK/ | 25563 | 25440 |
| >NF1-L194P- LLKETAFKFK/ | 247   | >NF1-L194P- LPKETAFKFK/ | 23830 | 23583 |
| >NF1-L194P- LLKETAFKFK/ | 465   | >NF1-L194P- LPKETAFKFK/ | 26601 | 26136 |
| >NF1-L194P- LLKETAFKFK/ | 6     | >NF1-L194P- LPKETAFKFK/ | 29464 | 29458 |
| >NF1-L194P- LLKETAFK    | 65    | >NF1-L194P- LPKETAFK    | 13820 | 13755 |
| >NF1-L194P- LLKETAFKFK  | 105   | >NF1-L194P- LPKETAFKFK  | 8276  | 8171  |
| >NF1-L194P- LLKETAFK    | 423   | >NF1-L194P- LPKETAFK    | 14936 | 14513 |
| >NF1-L194P- LLKETAFKFK  | 469   | >NF1-L194P- LPKETAFKFK  | 11242 | 10773 |
| >NF1-L194P- LLKETAFK    | 13    | >NF1-L194P- LPKETAFK    | 4307  | 4294  |
| >NF1-L194P- LLKETAFKFK  | 16    | >NF1-L194P- LPKETAFKFK  | 4832  | 4816  |
| >NF1-L194P- LLKETAFK    | 213   | >NF1-L194P- LPKETAFK    | 7514  | 7301  |
| >NF1-L194P- LLKETAFK    | 298   | >NF1-L194P- LPKETAFK    | 2124  | 1826  |
| >NF1-L194P- LLKETAFKF   | 212   | >NF1-L194P- LPKETAFKF   | 12144 | 11932 |
| >NF1-L194P- LLKETAFKF   | 463   | >NF1-L194P- LPKETAFKF   | 5761  | 5298  |
| >NF1-L194P- LLKETAFKF   | 70    | >NF1-L194P- LPKETAFKF   | 701   | 631   |
| >NF1-L194P- LLKETAFKF   | 103   | >NF1-L194P- LPKETAFKF   | 3243  | 3140  |
| >NF1-L194P- LLKETAFKF   | 7232  | >NF1-L194P- LPKETAFKF   | 66    | 7166  |
| >NF1-L194P- LLKETAFKF   | 23840 | >NF1-L194P- LPKETAFKF   | 56    | 23784 |
| >NF1-L194P- LLKETAFKFK/ | 23749 | >NF1-L194P- LPKETAFKFK/ | 31    | 23718 |
| >NF1-L194P- LLKETAFKF   | 12906 | >NF1-L194P- LPKETAFKF   | 418   | 12488 |
| >NF1-L194P- LLKETAFKF   | 19157 | >NF1-L194P- LPKETAFKF   | 62    | 19095 |
| >NF1-L194P- RLLKETAFKF  | 433   | >NF1-L194P- RLPKETAFKF  | 2999  | 2566  |
| >NF1-L194P- RLLKETAFK   | 29    | >NF1-L194P- RLPKETAFK   | 43    | 14    |
| >NF1-L194P- RLLKETAFKFK | 32    | >NF1-L194P- RLPKETAFKFK | 55    | 23    |
| >NF1-L194P- RLLKETAFK   | 24    | >NF1-L194P- RLPKETAFK   | 227   | 203   |
| >NF1-L194P- RLLKETAFKFK | 42    | >NF1-L194P- RLPKETAFKFK | 435   | 393   |
| >NF1-L194P- RLLKETAFKF  | 855   | >NF1-L194P- RLPKETAFKF  | 196   | 659   |
| >NF1-L194P- RLLKETAF    | 300   | >NF1-L194P- RLPKETAF    | 231   | 69    |
| >NF1-L194P- RLLKETAFKF  | 36    | >NF1-L194P- RLPKETAFKF  | 32    | 4     |
| >NF1-L194P- RLLKETAFK   | 8     | >NF1-L194P- RLPKETAFK   | 91    | 83    |
| >NF1-L194P- RLLKETAFKFK | 9     | >NF1-L194P- RLPKETAFKFK | 127   | 118   |
| >NF1-L194P- RLLKETAFK   | 83    | >NF1-L194P- RLPKETAFK   | 1155  | 1072  |
| >NF1-L194P- RLLKETAFKFK | 129   | >NF1-L194P- RLPKETAFKFK | 1497  | 1368  |
| >NF1-L194P- RLLKETAF    | 15    | >NF1-L194P- RLPKETAF    | 58    | 43    |
| >NF1-L194P- RLLKETAFKF  | 23    | >NF1-L194P- RLPKETAFKF  | 78    | 55    |
| >NF1-L194P- RLLKETAF    | 112   | >NF1-L194P- RLPKETAF    | 216   | 104   |
| >NF1-L194P- RLLKETAF    | 8     | >NF1-L194P- RLPKETAF    | 61    | 53    |
| >NF1-L194P- RLLKETAFKF  | 22    | >NF1-L194P- RLPKETAFKF  | 300   | 278   |
| >NF1-L194P- RLLKETAF    | 149   | >NF1-L194P- RLPKETAF    | 7059  | 6910  |
| >NF1-L194P- RLLKETAFKF  | 36    | >NF1-L194P- RLPKETAFKF  | 2079  | 2043  |

|                         |       |                         |       |       |
|-------------------------|-------|-------------------------|-------|-------|
| >NF1-L194P- RLLKETAFK   | 315   | >NF1-L194P- RLPKETAFK   | 12440 | 12125 |
| >NF1-L194P- RLLKETAFK   | 16929 | >NF1-L194P- RLPKETAFK   | 50    | 16879 |
| >NF1-L194P- RLLKETAFK   | 60    | >NF1-L194P- RLPKETAFK   | 124   | 64    |
| >NF1-L194P- RLLKETAFKf  | 56    | >NF1-L194P- RLPKETAFKf  | 120   | 64    |
| >NF1-L194P- KRLLKETAFK  | 473   | >NF1-L194P- KRLPKETAFK  | 298   | 175   |
| >NF1-L194P- KRLLKETAFK  | 368   | >NF1-L194P- KRLPKETAFK  | 186   | 182   |
| >NF1-L194P- KRLLKETAF   | 21    | >NF1-L194P- KRLPKETAF   | 9     | 12    |
| >NF1-L194P- KRLLKETAFKf | 76    | >NF1-L194P- KRLPKETAFKf | 28    | 48    |
| >NF1-L194P- KRLLKETAF   | 305   | >NF1-L194P- KRLPKETAF   | 576   | 271   |
| >NF1-L194P- KRLLKETAFK  | 57    | >NF1-L194P- KRLPKETAFK  | 127   | 70    |
| >NF1-L194P- KRLLKETAFKf | 60    | >NF1-L194P- KRLPKETAFKf | 96    | 36    |
| >NF1-L194P- KRLLKETAF   | 401   | >NF1-L194P- KRLPKETAF   | 385   | 16    |
| >NF1-L194P- KRLLKETAFK  | 274   | >NF1-L194P- KRLPKETAFK  | 506   | 232   |
| >NF1-L194P- KRLLKETAFKf | 281   | >NF1-L194P- KRLPKETAFKf | 273   | 8     |
| >NF1-L194P- KRLLKETAFK  | 298   | >NF1-L194P- KRLPKETAFK  | 347   | 49    |
| >NF1-L194P- KRLLKETAFK  | 631   | >NF1-L194P- KRLPKETAFK  | 489   | 142   |
| >NF1-L194P- LKRLKETAFK  | 119   | >NF1-L194P- LKRLPKETAFK | 130   | 11    |
| >NF1-L194P- LKRLKETAF   | 7     | >NF1-L194P- LKRLPKETAF  | 4     | 3     |
| >NF1-L194P- KLRLLKETA   | 343   | >NF1-L194P- KLRLLPKETA  | 426   | 83    |
| >NF1-L194P- KLRLLKETA   | 363   | >NF1-L194P- KLRLLPKETA  | 588   | 225   |
| >NF1-L194P- KLRLLKETA   | 213   | >NF1-L194P- KLRLLPKETA  | 213   | 0     |
| >NF1-L194P- KLRLLKETAF  | 136   | >NF1-L194P- KLRLLPKETAf | 90    | 46    |
| >NF1-L194P- KLRLLKETAF  | 388   | >NF1-L194P- KLRLLPKETAf | 551   | 163   |
| >NF1-L194P- KLRLLKETAF  | 135   | >NF1-L194P- KLRLLPKETAf | 163   | 28    |
| >NF1-L194P- KLRLLKETAF  | 28    | >NF1-L194P- KLRLLPKETAf | 17    | 11    |
| >NF1-L194P- AKLRLLK     | 779   | >NF1-L194P- AKLRLLPK    | 327   | 452   |
| >NF1-L194P- AKLRLLK     | 1344  | >NF1-L194P- AKLRLLPK    | 334   | 1010  |
| >NF1-L194P- CAKLKRLK    | 315   | >NF1-L194P- CAKLKRLPK   | 389   | 74    |
| >NF1-L194P- CAKLKRLK    | 11    | >NF1-L194P- CAKLKRLPK   | 7     | 4     |
| >NF1-L21R-w LPIKTGQQ    | 3878  | >NF1-L21R-r LPIKTGQQ    | 486   | 3392  |
| >NF1-L21R-w LPIKTGQQNT  | 107   | >NF1-L21R-r LPIKTGQQNT  | 835   | 728   |
| >NF1-L21R-w QAVVSRFDEC  | 17167 | >NF1-L21R-r QAVVSRFDEC  | 414   | 16753 |
| >NF1-L21R-w QAVVSRFDEC  | 15529 | >NF1-L21R-r QAVVSRFDEC  | 15    | 15514 |
| >NF1-L21R-w QAVVSRFDEC  | 175   | >NF1-L21R-r QAVVSRFDEC  | 16305 | 16130 |
| >NF1-L21R-w RFDEQLPIK   | 616   | >NF1-L21R-r RFDEQRPIK   | 188   | 428   |
| >NF1-L21R-w SRFDEQLPI   | 159   | >NF1-L21R-r SRFDEQRPI   | 337   | 178   |
| >NF1-L21R-w SRFDEQLPI   | 57    | >NF1-L21R-r SRFDEQRPI   | 88    | 31    |
| >NF1-L21R-w SRFDEQLPIK  | 64    | >NF1-L21R-r SRFDEQRPIK  | 102   | 38    |
| >NF1-L21R-w SRFDEQLPI   | 293   | >NF1-L21R-r SRFDEQRPI   | 2128  | 1835  |
| >NF1-L21R-w VSRFDEQLPI  | 141   | >NF1-L21R-r VSRFDEQRPI  | 286   | 145   |
| >NF1-L21R-w VSRFDEQLPIf | 15    | >NF1-L21R-r VSRFDEQRPIf | 16    | 1     |
| >NF1-L21R-w VSRFDEQL    | 20211 | >NF1-L21R-r VSRFDEQR    | 444   | 19767 |
| >NF1-L21R-w VSRFDEQL    | 23    | >NF1-L21R-r VSRFDEQR    | 8750  | 8727  |



|                         |       |                         |       |       |
|-------------------------|-------|-------------------------|-------|-------|
| >NF1-L21R-w VSRFDEQLPI  | 54    | >NF1-L21R-r VSRFDEQRPI  | 107   | 53    |
| >NF1-L21R-w VSRFDEQLPI  | 469   | >NF1-L21R-r VSRFDEQRPI  | 1191  | 722   |
| >NF1-L21R-w VVSRFDEQL   | 468   | >NF1-L21R-r VVSRFDEQR   | 22055 | 21587 |
| >NF1-L21R-w VVSRFDEQL   | 362   | >NF1-L21R-r VVSRFDEQR   | 30656 | 30294 |
| >NF1-L21R-w VVSRFDEQL   | 17076 | >NF1-L21R-r VVSRFDEQR   | 483   | 16593 |
| >NF1-L21R-w VVSRFDEQL   | 21052 | >NF1-L21R-r VVSRFDEQR   | 32    | 21020 |
| >NF1-L21R-w AVVSRFDEQL  | 205   | >NF1-L21R-r AVVSRFDEQF  | 8391  | 8186  |
| >NF1-L21R-w AVVSRFDEQL  | 16570 | >NF1-L21R-r AVVSRFDEQF  | 238   | 16332 |
| >NF1-L21R-w AVVSRFDEQL  | 25647 | >NF1-L21R-r AVVSRFDEQF  | 49    | 25598 |
| >NF1-L21R-w AVVSRFDEQL  | 4463  | >NF1-L21R-r AVVSRFDEQF  | 344   | 4119  |
| >NF1-L2416V LLTLVNKHR   | 262   | >NF1-L2416V VLTLVNKHR   | 379   | 117   |
| >NF1-L2416V LLTLVNKHR   | 379   | >NF1-L2416V VLTLVNKHR   | 886   | 507   |
| >NF1-L2416V TLLTLVNK    | 70    | >NF1-L2416V TVLTLVNK    | 168   | 98    |
| >NF1-L2416V TLLTLVNK    | 34    | >NF1-L2416V TVLTLVNK    | 15    | 19    |
| >NF1-L2416V TLLTLVNK    | 1784  | >NF1-L2416V TVLTLVNK    | 190   | 1594  |
| >NF1-L2416V TLLTLVNKHR  | 152   | >NF1-L2416V TVLTLVNKHR  | 103   | 49    |
| >NF1-L2416V TLLTLVNK    | 772   | >NF1-L2416V TVLTLVNK    | 81    | 691   |
| >NF1-L2416V TLLTLVNKHR  | 621   | >NF1-L2416V TVLTLVNKHR  | 57    | 564   |
| >NF1-L2416V TLLTLVNKHR  | 78    | >NF1-L2416V TVLTLVNKHR  | 110   | 32    |
| >NF1-L2416V VARTVRILHTI | 3779  | >NF1-L2416V VARTVRILHTI | 151   | 3628  |
| >NF1-L2416V VARTVRILHTI | 215   | >NF1-L2416V VARTVRILHTI | 130   | 85    |
| >NF1-L2416V VARTVRILHTI | 239   | >NF1-L2416V VARTVRILHTI | 5024  | 4785  |
| >NF1-L2416V VARTVRILHTI | 326   | >NF1-L2416V VARTVRILHTI | 1014  | 688   |
| >NF1-L2416V HTLLTLVNK   | 175   | >NF1-L2416V HTVTLVNK    | 405   | 230   |
| >NF1-L2416V HTLLTLVNK   | 33    | >NF1-L2416V HTVTLVNK    | 66    | 33    |
| >NF1-L2416V HTLLTLVNKH  | 3213  | >NF1-L2416V HTVTLVNKH   | 371   | 2842  |
| >NF1-L2416V HTLLTLVNK   | 7     | >NF1-L2416V HTVTLVNK    | 18    | 11    |
| >NF1-L2416V HTLLTLVNK   | 90    | >NF1-L2416V HTVTLVNK    | 232   | 142   |
| >NF1-L2416V HTLLTLVNKH  | 17    | >NF1-L2416V HTVTLVNKH   | 33    | 16    |
| >NF1-L2416V HTLLTLVNKH  | 26    | >NF1-L2416V HTVTLVNKH   | 60    | 34    |
| >NF1-L2416V HTLLTLVNK   | 79    | >NF1-L2416V HTVTLVNK    | 21    | 58    |
| >NF1-L2416V HTLLTLVNKH  | 51    | >NF1-L2416V HTVTLVNKH   | 14    | 37    |
| >NF1-L2416V HTLLTLVNKH  | 60    | >NF1-L2416V HTVTLVNKH   | 87    | 27    |
| >NF1-L2416V ILHTLLTL    | 71    | >NF1-L2416V ILHTVLTTL   | 76    | 5     |
| >NF1-L2416V ILHTLLTLV   | 16    | >NF1-L2416V ILHTVLTTLV  | 17    | 1     |
| >NF1-L2416V ILHTLLTL    | 83    | >NF1-L2416V ILHTVLTTL   | 83    | 0     |
| >NF1-L2416V ILHTLLTLV   | 5     | >NF1-L2416V ILHTVLTTLV  | 5     | 0     |
| >NF1-L2416V ILHTLLTL    | 40    | >NF1-L2416V ILHTVLTTL   | 30    | 10    |
| >NF1-L2416V ILHTLLTLV   | 4     | >NF1-L2416V ILHTVLTTLV  | 3     | 1     |
| >NF1-L2416V ILHTLLTLV   | 39    | >NF1-L2416V ILHTVLTTLV  | 34    | 5     |
| >NF1-L2416V ILHTLLTL    | 12    | >NF1-L2416V ILHTVLTTL   | 6     | 6     |
| >NF1-L2416V ILHTLLTLV   | 5     | >NF1-L2416V ILHTVLTTLV  | 3     | 2     |
| >NF1-L2416V ILHTLLTL    | 49    | >NF1-L2416V ILHTVLTTL   | 40    | 9     |

|                        |      |                         |     |     |
|------------------------|------|-------------------------|-----|-----|
| >NF1-L2416\ILHTLLTLV   | 25   | >NF1-L2416\ILHTVLTTLV   | 17  | 8   |
| >NF1-L2416\ILHTLLTL    | 83   | >NF1-L2416\ILHTVLTTL    | 41  | 42  |
| >NF1-L2416\ILHTLLTLV   | 15   | >NF1-L2416\ILHTVLTTLV   | 10  | 5   |
| >NF1-L2416\ILHTLLTL    | 491  | >NF1-L2416\ILHTVLTTL    | 312 | 179 |
| >NF1-L2416\ILHTLLTLV   | 108  | >NF1-L2416\ILHTVLTTLV   | 63  | 45  |
| >NF1-L2416\ILHTLLTL    | 4    | >NF1-L2416\ILHTVLTTL    | 4   | 0   |
| >NF1-L2416\ILHTLLTLV   | 2    | >NF1-L2416\ILHTVLTTLV   | 2   | 0   |
| >NF1-L2416\ILHTLLTLVnk | 39   | >NF1-L2416\ILHTVLTTLVnk | 35  | 4   |
| >NF1-L2416\ILHTLLTLVnk | 104  | >NF1-L2416\ILHTVLTTLVnk | 79  | 25  |
| >NF1-L2416\ILHTLLTLVnk | 86   | >NF1-L2416\ILHTVLTTLVnk | 84  | 2   |
| >NF1-L2416\ILHTLLTL    | 674  | >NF1-L2416\ILHTVLTTL    | 435 | 239 |
| >NF1-L2416\ILHTLLTL    | 488  | >NF1-L2416\ILHTVLTTL    | 402 | 86  |
| >NF1-L2416\RILHTLLTL   | 186  | >NF1-L2416\RILHTVLTTL   | 208 | 22  |
| >NF1-L2416\RILHTLLTLV  | 64   | >NF1-L2416\RILHTVLTTLV  | 62  | 2   |
| >NF1-L2416\RILHTLLTLV  | 319  | >NF1-L2416\RILHTVLTTLV  | 334 | 15  |
| >NF1-L2416\RILHTLLTL   | 446  | >NF1-L2416\RILHTVLTTL   | 423 | 23  |
| >NF1-L2416\RILHTLLTLV  | 49   | >NF1-L2416\RILHTVLTTLV  | 49  | 0   |
| >NF1-L2416\RILHTLLTL   | 36   | >NF1-L2416\RILHTVLTTL   | 127 | 91  |
| >NF1-L2416\RILHTLLTLV  | 41   | >NF1-L2416\RILHTVLTTLV  | 55  | 14  |
| >NF1-L2416\RILHTLLTL   | 35   | >NF1-L2416\RILHTVLTTL   | 19  | 16  |
| >NF1-L2416\RILHTLLTLV  | 9    | >NF1-L2416\RILHTVLTTLV  | 6   | 3   |
| >NF1-L2416\RILHTLLTL   | 81   | >NF1-L2416\RILHTVLTTL   | 99  | 18  |
| >NF1-L2416\RILHTLLTLV  | 46   | >NF1-L2416\RILHTVLTTLV  | 44  | 2   |
| >NF1-L2416\RILHTLLTL   | 164  | >NF1-L2416\RILHTVLTTL   | 84  | 80  |
| >NF1-L2416\RILHTLLTLV  | 20   | >NF1-L2416\RILHTVLTTLV  | 15  | 5   |
| >NF1-L2416\RILHTLLTLV  | 162  | >NF1-L2416\RILHTVLTTLV  | 97  | 65  |
| >NF1-L2416\RILHTLLTL   | 303  | >NF1-L2416\RILHTVLTTL   | 271 | 32  |
| >NF1-L2416\RILHTLLTLV  | 16   | >NF1-L2416\RILHTVLTTLV  | 15  | 1   |
| >NF1-L2416\RILHTLLTL   | 59   | >NF1-L2416\RILHTVLTTL   | 66  | 7   |
| >NF1-L2416\RILHTLLTLV  | 224  | >NF1-L2416\RILHTVLTTLV  | 238 | 14  |
| >NF1-L2416\RILHTLLTL   | 17   | >NF1-L2416\RILHTVLTTL   | 12  | 5   |
| >NF1-L2416\RILHTLLTLV  | 685  | >NF1-L2416\RILHTVLTTLV  | 420 | 265 |
| >NF1-L2416\RILHTLLTL   | 223  | >NF1-L2416\RILHTVLTTL   | 84  | 139 |
| >NF1-L2416\RILHTLLTL   | 22   | >NF1-L2416\RILHTVLTTL   | 19  | 3   |
| >NF1-L2416\RILHTLLTL   | 241  | >NF1-L2416\RILHTVLTTL   | 104 | 137 |
| >NF1-L2416\VRILHTLL    | 929  | >NF1-L2416\VRILHTVL     | 417 | 512 |
| >NF1-L2416\VRILHTLLTL  | 454  | >NF1-L2416\VRILHTVLTTL  | 272 | 182 |
| >NF1-L2416\VRILHTLL    | 323  | >NF1-L2416\VRILHTVL     | 549 | 226 |
| >NF1-L2416\VRILHTLLTL  | 26   | >NF1-L2416\VRILHTVLTTL  | 27  | 1   |
| >NF1-L2416\VRILHTLLTLV | 419  | >NF1-L2416\VRILHTVLTTLV | 554 | 135 |
| >NF1-L2416\VRILHTLL    | 1020 | >NF1-L2416\VRILHTVL     | 182 | 838 |
| >NF1-L2416\VRILHTLLTL  | 244  | >NF1-L2416\VRILHTVLTTL  | 106 | 138 |
| >NF1-L2416\VRILHTLL    | 101  | >NF1-L2416\VRILHTVL     | 266 | 165 |

|                        |      |                       |      |      |
|------------------------|------|-----------------------|------|------|
| >NF1-L2416\VRILHTLLT   | 76   | >NF1-L2416\VRILHTVLT  | 101  | 25   |
| >NF1-L2416\VRILHTLL    | 476  | >NF1-L2416\VRILHTVL   | 659  | 183  |
| >NF1-L2416\VRILHTLLT   | 40   | >NF1-L2416\VRILHTVLT  | 57   | 17   |
| >NF1-L2416\VRILHTLLTLV | 116  | >NF1-L2416\VRILHTVLT  | 204  | 88   |
| >NF1-L2416\TVRILHTL    | 2124 | >NF1-L2416\TVRILHTV   | 329  | 1795 |
| >NF1-L2416\TVRILHTL    | 1506 | >NF1-L2416\TVRILHTV   | 56   | 1450 |
| >NF1-L2416\TVRILHTL    | 142  | >NF1-L2416\TVRILHTV   | 83   | 59   |
| >NF1-L2416\TVRILHTLL   | 126  | >NF1-L2416\TVRILHTVL  | 275  | 149  |
| >NF1-L2416\TVRILHTLLT  | 393  | >NF1-L2416\TVRILHTVLT | 727  | 334  |
| >NF1-L2416\TVRILHTLLTL | 46   | >NF1-L2416\TVRILHTVLT | 54   | 8    |
| >NF1-L2416\TVRILHTL    | 2625 | >NF1-L2416\TVRILHTV   | 328  | 2297 |
| >NF1-L2416\TVRILHTL    | 3725 | >NF1-L2416\TVRILHTV   | 421  | 3304 |
| >NF1-L2416\TVRILHTLLT  | 158  | >NF1-L2416\TVRILHTVLT | 131  | 27   |
| >NF1-L2416\TVRILHTLL   | 60   | >NF1-L2416\TVRILHTVL  | 102  | 42   |
| >NF1-L2416\TVRILHTLLTL | 209  | >NF1-L2416\TVRILHTVLT | 316  | 107  |
| >NF1-L2416\RTVRILHTL   | 2287 | >NF1-L2416\RTVRILHTV  | 434  | 1853 |
| >NF1-L2416\RTVRILHTL   | 339  | >NF1-L2416\RTVRILHTV  | 208  | 131  |
| >NF1-L2416\RTVRILHTL   | 523  | >NF1-L2416\RTVRILHTV  | 53   | 470  |
| >NF1-L2416\RTVRILHTL   | 38   | >NF1-L2416\RTVRILHTV  | 8    | 30   |
| >NF1-L2416\RTVRILHTL   | 326  | >NF1-L2416\RTVRILHTV  | 17   | 309  |
| >NF1-L2416\RTVRILHTL   | 905  | >NF1-L2416\RTVRILHTV  | 50   | 855  |
| >NF1-L2416\RTVRILHTL   | 6072 | >NF1-L2416\RTVRILHTV  | 198  | 5874 |
| >NF1-L2416\RTVRILHTL   | 1040 | >NF1-L2416\RTVRILHTV  | 26   | 1014 |
| >NF1-L2416\RTVRILHTL   | 23   | >NF1-L2416\RTVRILHTV  | 298  | 275  |
| >NF1-L2416\RTVRILHTLL  | 729  | >NF1-L2416\RTVRILHTVL | 311  | 418  |
| >NF1-L2416\RTVRILHTL   | 268  | >NF1-L2416\RTVRILHTV  | 153  | 115  |
| >NF1-L2416\RTVRILHTLL  | 355  | >NF1-L2416\RTVRILHTVL | 663  | 308  |
| >NF1-L2416\RTVRILHTL   | 9    | >NF1-L2416\RTVRILHTV  | 34   | 25   |
| >NF1-L2416\RTVRILHTLL  | 46   | >NF1-L2416\RTVRILHTVL | 25   | 21   |
| >NF1-L2416\RTVRILHTL   | 406  | >NF1-L2416\RTVRILHTV  | 41   | 365  |
| >NF1-L2416\RTVRILHTLL  | 312  | >NF1-L2416\RTVRILHTVL | 534  | 222  |
| >NF1-L2416\RTVRILHTL   | 748  | >NF1-L2416\RTVRILHTV  | 44   | 704  |
| >NF1-L2416\RTVRILHTL   | 4    | >NF1-L2416\RTVRILHTV  | 61   | 57   |
| >NF1-L2416\RTVRILHTLL  | 7    | >NF1-L2416\RTVRILHTVL | 6    | 1    |
| >NF1-L2416\RTVRILHTL   | 91   | >NF1-L2416\RTVRILHTV  | 456  | 365  |
| >NF1-L2416\RTVRILHTLL  | 343  | >NF1-L2416\RTVRILHTVL | 393  | 50   |
| >NF1-L2416\RTVRILHTL   | 29   | >NF1-L2416\RTVRILHTV  | 228  | 199  |
| >NF1-L2416\RTVRILHTLL  | 56   | >NF1-L2416\RTVRILHTVL | 54   | 2    |
| >NF1-L2416\RTVRILHTL   | 135  | >NF1-L2416\RTVRILHTV  | 801  | 666  |
| >NF1-L2416\RTVRILHTLL  | 53   | >NF1-L2416\RTVRILHTVL | 210  | 157  |
| >NF1-L2416\RTVRILHTL   | 18   | >NF1-L2416\RTVRILHTV  | 49   | 31   |
| >NF1-L2416\RTVRILHTLL  | 90   | >NF1-L2416\RTVRILHTVL | 136  | 46   |
| >NF1-L2416\RTVRILHTL   | 195  | >NF1-L2416\RTVRILHTV  | 1107 | 912  |

|                         |       |                         |       |       |
|-------------------------|-------|-------------------------|-------|-------|
| >NF1-L2416\ARTVRILHTL   | 32    | >NF1-L2416\ARTVRILHTV   | 241   | 209   |
| >NF1-L2416\ARTVRILHTLL  | 61    | >NF1-L2416\ARTVRILHTVI  | 92    | 31    |
| >NF1-L2416\ARTVRILHTL   | 125   | >NF1-L2416\ARTVRILHTV   | 706   | 581   |
| >NF1-L2416\ARTVRILHTLL  | 48    | >NF1-L2416\ARTVRILHTVI  | 64    | 16    |
| >NF1-L2416\ARTVRILHTL   | 96    | >NF1-L2416\ARTVRILHTV   | 468   | 372   |
| >NF1-L2416\ARTVRILHTLL  | 6     | >NF1-L2416\ARTVRILHTVI  | 12    | 6     |
| >NF1-L274R- LILCPEII    | 184   | >NF1-L274R- RILCPEII    | 183   | 1     |
| >NF1-L274R- LILCPEIIQDI | 137   | >NF1-L274R- RILCPEIIQDI | 135   | 2     |
| >NF1-L274R- LILCPEII    | 3776  | >NF1-L274R- RILCPEII    | 69    | 3707  |
| >NF1-L274R- LILCPEIIQDI | 4316  | >NF1-L274R- RILCPEIIQDI | 74    | 4242  |
| >NF1-L274R- LLILCPEI    | 28    | >NF1-L274R- LRILCPEI    | 20641 | 20613 |
| >NF1-L274R- LLILCPEII   | 205   | >NF1-L274R- LRILCPEII   | 22241 | 22036 |
| >NF1-L274R- LLILCPEI    | 86    | >NF1-L274R- LRILCPEI    | 11968 | 11882 |
| >NF1-L274R- LLILCPEII   | 226   | >NF1-L274R- LRILCPEII   | 9114  | 8888  |
| >NF1-L274R- LLILCPEI    | 51    | >NF1-L274R- LRILCPEI    | 17247 | 17196 |
| >NF1-L274R- LLILCPEII   | 114   | >NF1-L274R- LRILCPEII   | 18535 | 18421 |
| >NF1-L274R- LLILCPEI    | 218   | >NF1-L274R- LRILCPEI    | 13740 | 13522 |
| >NF1-L274R- LLILCPEI    | 59    | >NF1-L274R- LRILCPEI    | 24024 | 23965 |
| >NF1-L274R- LLILCPEII   | 355   | >NF1-L274R- LRILCPEII   | 28997 | 28642 |
| >NF1-L274R- LLILCPEI    | 85    | >NF1-L274R- LRILCPEI    | 22508 | 22423 |
| >NF1-L274R- LLILCPEII   | 93    | >NF1-L274R- LRILCPEII   | 23401 | 23308 |
| >NF1-L274R- LLILCPEI    | 191   | >NF1-L274R- LRILCPEI    | 23165 | 22974 |
| >NF1-L274R- LLILCPEI    | 347   | >NF1-L274R- LRILCPEI    | 24067 | 23720 |
| >NF1-L274R- LLILCPEI    | 25    | >NF1-L274R- LRILCPEI    | 29745 | 29720 |
| >NF1-L274R- LLILCPEII   | 198   | >NF1-L274R- LRILCPEII   | 35646 | 35448 |
| >NF1-L274R- LLILCPEIIQ  | 28812 | >NF1-L274R- LRILCPEIIQ  | 184   | 28628 |
| >NF1-L274R- AAVWPLQIIL  | 315   | >NF1-L274R- AAVWPLQIIL  | 23080 | 22765 |
| >NF1-L274R- AAVWPLQIIL  | 19540 | >NF1-L274R- AAVWPLQIIL  | 410   | 19130 |
| >NF1-L274R- AAVWPLQIIL  | 15662 | >NF1-L274R- AAVWPLQIIL  | 105   | 15557 |
| >NF1-L274R- AAVWPLQIIL  | 27532 | >NF1-L274R- AAVWPLQIIL  | 145   | 27387 |
| >NF1-L274R- AAVWPLQIIL  | 113   | >NF1-L274R- AAVWPLQIIL  | 11834 | 11721 |
| >NF1-L274R- AAVWPLQIIL  | 435   | >NF1-L274R- AAVWPLQIIL  | 15657 | 15222 |
| >NF1-L274R- ILLILCPEI   | 21    | >NF1-L274R- ILRILCPEI   | 1416  | 1395  |
| >NF1-L274R- ILLILCPEII  | 92    | >NF1-L274R- ILRILCPEII  | 1186  | 1094  |
| >NF1-L274R- ILLILCPEI   | 340   | >NF1-L274R- ILRILCPEI   | 1277  | 937   |
| >NF1-L274R- ILLILCPEII  | 215   | >NF1-L274R- ILRILCPEII  | 612   | 397   |
| >NF1-L274R- ILLILCPEI   | 600   | >NF1-L274R- ILRILCPEI   | 378   | 222   |
| >NF1-L274R- ILLILCPEII  | 157   | >NF1-L274R- ILRILCPEII  | 302   | 145   |
| >NF1-L274R- ILLILCPEI   | 123   | >NF1-L274R- ILRILCPEI   | 3921  | 3798  |
| >NF1-L274R- ILLILCPEII  | 206   | >NF1-L274R- ILRILCPEII  | 3471  | 3265  |
| >NF1-L274R- ILLILCPEI   | 13    | >NF1-L274R- ILRILCPEI   | 359   | 346   |
| >NF1-L274R- ILLILCPEII  | 35    | >NF1-L274R- ILRILCPEII  | 1494  | 1459  |
| >NF1-L274R- ILLILCPEI   | 379   | >NF1-L274R- ILRILCPEI   | 6818  | 6439  |

|                         |      |                         |       |       |
|-------------------------|------|-------------------------|-------|-------|
| >NF1-L274R- ILLILCPEII  | 320  | >NF1-L274R- ILRILCPEII  | 7205  | 6885  |
| >NF1-L274R- ILLILCPEI   | 10   | >NF1-L274R- ILRILCPEI   | 747   | 737   |
| >NF1-L274R- ILLILCPEII  | 69   | >NF1-L274R- ILRILCPEII  | 4529  | 4460  |
| >NF1-L274R- ILLILCPEI   | 53   | >NF1-L274R- ILRILCPEI   | 10411 | 10358 |
| >NF1-L274R- ILLILCPEII  | 101  | >NF1-L274R- ILRILCPEII  | 11620 | 11519 |
| >NF1-L274R- ILLILCPEI   | 15   | >NF1-L274R- ILRILCPEI   | 38    | 23    |
| >NF1-L274R- ILLILCPEII  | 92   | >NF1-L274R- ILRILCPEII  | 304   | 212   |
| >NF1-L274R- ILLILCPEI   | 9885 | >NF1-L274R- ILRILCPEI   | 454   | 9431  |
| >NF1-L274R- IILLILCPEI  | 164  | >NF1-L274R- IILRILCPEI  | 296   | 132   |
| >NF1-L274R- IILLILCPEI  | 461  | >NF1-L274R- IILRILCPEI  | 302   | 159   |
| >NF1-L274R- IILLILCPEI  | 72   | >NF1-L274R- IILRILCPEI  | 87    | 15    |
| >NF1-L274R- IILLILCPEII | 502  | >NF1-L274R- IILRILCPEII | 434   | 68    |
| >NF1-L274R- IILLILCPEI  | 127  | >NF1-L274R- IILRILCPEI  | 53    | 74    |
| >NF1-L274R- IILLILCPEII | 632  | >NF1-L274R- IILRILCPEII | 235   | 397   |
| >NF1-L274R- IILLILCPEI  | 240  | >NF1-L274R- IILRILCPEI  | 154   | 86    |
| >NF1-L274R- IILLILCPEI  | 207  | >NF1-L274R- IILRILCPEI  | 239   | 32    |
| >NF1-L274R- IILLILCPEII | 450  | >NF1-L274R- IILRILCPEII | 620   | 170   |
| >NF1-L274R- IILLILCPEI  | 468  | >NF1-L274R- IILRILCPEI  | 133   | 335   |
| >NF1-L274R- IILLILCPEII | 545  | >NF1-L274R- IILRILCPEII | 328   | 217   |
| >NF1-L274R- QIILLILCPEI | 348  | >NF1-L274R- QIILRILCPEI | 347   | 1     |
| >NF1-L274R- LQIILLIL    | 27   | >NF1-L274R- LQIILRIL    | 265   | 238   |
| >NF1-L274R- LQIILLILC   | 260  | >NF1-L274R- LQIILRILC   | 2463  | 2203  |
| >NF1-L274R- LQIILLIL    | 319  | >NF1-L274R- LQIILRIL    | 742   | 423   |
| >NF1-L274R- LQIILLIL    | 116  | >NF1-L274R- LQIILRIL    | 155   | 39    |
| >NF1-L274R- LQIILLIL    | 495  | >NF1-L274R- LQIILRIL    | 846   | 351   |
| >NF1-L274R- PLQIILLI    | 370  | >NF1-L274R- PLQIILRI    | 425   | 55    |
| >NF1-L274R- PLQIILLIL   | 277  | >NF1-L274R- PLQIILRIL   | 1816  | 1539  |
| >NF1-L274R- WPLQIILLI   | 221  | >NF1-L274R- WPLQIILRI   | 1236  | 1015  |
| >NF1-L274R- WPLQIILLI   | 437  | >NF1-L274R- WPLQIILRI   | 791   | 354   |
| >NF1-L274R- WPLQIILL    | 84   | >NF1-L274R- WPLQIILR    | 2050  | 1966  |
| >NF1-L274R- WPLQIILLI   | 446  | >NF1-L274R- WPLQIILRI   | 446   | 0     |
| >NF1-L274R- WPLQIILL    | 63   | >NF1-L274R- WPLQIILR    | 16072 | 16009 |
| >NF1-L274R- WPLQIILLIL  | 64   | >NF1-L274R- WPLQIILRIL  | 253   | 189   |
| >NF1-L274R- WPLQIILLI   | 213  | >NF1-L274R- WPLQIILRI   | 314   | 101   |
| >NF1-L274R- WPLQIILL    | 88   | >NF1-L274R- WPLQIILR    | 7337  | 7249  |
| >NF1-L274R- WPLQIILLI   | 28   | >NF1-L274R- WPLQIILRI   | 33    | 5     |
| >NF1-L274R- WPLQIILLIL  | 265  | >NF1-L274R- WPLQIILRIL  | 555   | 290   |
| >NF1-L274R- WPLQIILLI   | 217  | >NF1-L274R- WPLQIILRI   | 793   | 576   |
| >NF1-L274R- WPLQIILLILC | 421  | >NF1-L274R- WPLQIILRILC | 814   | 393   |
| >NF1-L274R- WPLQIILL    | 192  | >NF1-L274R- WPLQIILR    | 20305 | 20113 |
| >NF1-L274R- WPLQIILL    | 63   | >NF1-L274R- WPLQIILR    | 3136  | 3073  |
| >NF1-L274R- WPLQIILLI   | 120  | >NF1-L274R- WPLQIILRI   | 148   | 28    |
| >NF1-L274R- WPLQIILLIL  | 105  | >NF1-L274R- WPLQIILRIL  | 148   | 43    |

|                         |       |                         |       |       |
|-------------------------|-------|-------------------------|-------|-------|
| >NF1-L274R- WPLQIILL    | 23072 | >NF1-L274R- WPLQIILR    | 65    | 23007 |
| >NF1-L274R- WPLQIILLIL  | 477   | >NF1-L274R- WPLQIILRIL  | 4272  | 3795  |
| >NF1-L274R- VWPLQIILL   | 283   | >NF1-L274R- VWPLQIILR   | 17628 | 17345 |
| >NF1-L274R- VWPLQIILLI  | 244   | >NF1-L274R- VWPLQIILRI  | 915   | 671   |
| >NF1-L274R- VWPLQIILL   | 81    | >NF1-L274R- VWPLQIILR   | 8100  | 8019  |
| >NF1-L274R- VWPLQIILLI  | 61    | >NF1-L274R- VWPLQIILRI  | 73    | 12    |
| >NF1-L274R- VWPLQIILLIL | 102   | >NF1-L274R- VWPLQIILRIL | 256   | 154   |
| >NF1-L274R- VWPLQIILL   | 26    | >NF1-L274R- VWPLQIILR   | 11168 | 11142 |
| >NF1-L274R- VWPLQIILLI  | 70    | >NF1-L274R- VWPLQIILRI  | 646   | 576   |
| >NF1-L274R- VWPLQIILLIL | 64    | >NF1-L274R- VWPLQIILRIL | 92    | 28    |
| >NF1-L274R- VWPLQIILL   | 7517  | >NF1-L274R- VWPLQIILR   | 23    | 7494  |
| >NF1-L274R- VWPLQIILL   | 418   | >NF1-L274R- VWPLQIILR   | 1448  | 1030  |
| >NF1-L274R- VWPLQIILLIL | 402   | >NF1-L274R- VWPLQIILRIL | 402   | 0     |
| >NF1-L274R- AVWPLQIILLI | 57    | >NF1-L274R- AVWPLQIILRI | 89    | 32    |
| >NF1-L274R- AVWPLQIILL  | 363   | >NF1-L274R- AVWPLQIILR  | 13431 | 13068 |
| >NF1-L274R- AVWPLQIILL  | 296   | >NF1-L274R- AVWPLQIILR  | 10706 | 10410 |
| >NF1-L274R- AVWPLQIILLI | 111   | >NF1-L274R- AVWPLQIILRI | 274   | 163   |
| >NF1-L274R- AVWPLQIILL  | 118   | >NF1-L274R- AVWPLQIILR  | 17745 | 17627 |
| >NF1-L274R- AVWPLQIILLI | 83    | >NF1-L274R- AVWPLQIILRI | 58    | 25    |
| >NF1-L274R- AVWPLQIILL  | 92    | >NF1-L274R- AVWPLQIILR  | 19452 | 19360 |
| >NF1-L274R- AVWPLQIILLI | 111   | >NF1-L274R- AVWPLQIILRI | 184   | 73    |
| >NF1-L274R- AVWPLQIILL  | 29    | >NF1-L274R- AVWPLQIILR  | 20078 | 20049 |
| >NF1-L274R- AVWPLQIILLI | 106   | >NF1-L274R- AVWPLQIILRI | 66    | 40    |
| >NF1-L274R- AVWPLQIILL  | 23386 | >NF1-L274R- AVWPLQIILR  | 310   | 23076 |
| >NF1-L274R- AVWPLQIILL  | 11623 | >NF1-L274R- AVWPLQIILR  | 74    | 11549 |
| >NF1-L274R- AVWPLQIILLI | 105   | >NF1-L274R- AVWPLQIILRI | 97    | 8     |
| >NF1-L274R- AVWPLQIILL  | 24659 | >NF1-L274R- AVWPLQIILR  | 103   | 24556 |
| >NF1-L274R- AVWPLQIILLI | 1553  | >NF1-L274R- AVWPLQIILRI | 467   | 1086  |
| >NF1-L274R- AVWPLQIILL  | 26982 | >NF1-L274R- AVWPLQIILR  | 124   | 26858 |
| >NF1-L274R- AVWPLQIILL  | 5945  | >NF1-L274R- AVWPLQIILR  | 405   | 5540  |
| >NF1-L274R- AVWPLQIILL  | 22292 | >NF1-L274R- AVWPLQIILR  | 162   | 22130 |
| >NF1-L274R- AVWPLQIILLI | 61    | >NF1-L274R- AVWPLQIILRI | 103   | 42    |
| >NF1-L550P- LVLHQLDSI   | 28    | >NF1-L550P- PVLHQLDSI   | 3432  | 3404  |
| >NF1-L550P- LVLHQLDSI   | 488   | >NF1-L550P- PVLHQLDSI   | 7890  | 7402  |
| >NF1-L550P- LLVLHQLDSI  | 359   | >NF1-L550P- LPVLHQLDSI  | 25339 | 24980 |
| >NF1-L550P- LLVLHQLDSI  | 108   | >NF1-L550P- LPVLHQLDSI  | 15169 | 15061 |
| >NF1-L550P- LLVLHQLDSI  | 83    | >NF1-L550P- LPVLHQLDSI  | 15859 | 15776 |
| >NF1-L550P- LLVLHQLDSI  | 207   | >NF1-L550P- LPVLHQLDSI  | 9690  | 9483  |
| >NF1-L550P- LLVLHQLDSI  | 160   | >NF1-L550P- LPVLHQLDSI  | 27957 | 27797 |
| >NF1-L550P- LLVLHQLDSI  | 193   | >NF1-L550P- LPVLHQLDSI  | 23173 | 22980 |
| >NF1-L550P- LLVLHQLDSI  | 65    | >NF1-L550P- LPVLHQLDSI  | 35803 | 35738 |
| >NF1-L550P- LLVLHQLDSI  | 20562 | >NF1-L550P- LPVLHQLDSI  | 386   | 20176 |
| >NF1-L550P- LLVLHQLDSI  | 23181 | >NF1-L550P- LPVLHQLDSI  | 92    | 23089 |

|                        |      |                        |       |       |
|------------------------|------|------------------------|-------|-------|
| >NF1-L550P- EIAQEAMEAL | 100  | >NF1-L550P- EIAQEAMEAL | 13612 | 13512 |
| >NF1-L550P- EIAQEAMEAL | 270  | >NF1-L550P- EIAQEAMEAL | 16043 | 15773 |
| >NF1-L550P- ALLVLHQL   | 86   | >NF1-L550P- ALPVLHQL   | 526   | 440   |
| >NF1-L550P- ALLVLHQLDS | 216  | >NF1-L550P- ALPVLHQLDS | 1929  | 1713  |
| >NF1-L550P- ALLVLHQL   | 63   | >NF1-L550P- ALPVLHQL   | 35    | 28    |
| >NF1-L550P- ALLVLHQLDS | 208  | >NF1-L550P- ALPVLHQLDS | 132   | 76    |
| >NF1-L550P- ALLVLHQL   | 427  | >NF1-L550P- ALPVLHQL   | 186   | 241   |
| >NF1-L550P- ALLVLHQLDS | 372  | >NF1-L550P- ALPVLHQLDS | 151   | 221   |
| >NF1-L550P- ALLVLHQL   | 195  | >NF1-L550P- ALPVLHQL   | 560   | 365   |
| >NF1-L550P- ALLVLHQLDS | 211  | >NF1-L550P- ALPVLHQLDS | 565   | 354   |
| >NF1-L550P- ALLVLHQL   | 6    | >NF1-L550P- ALPVLHQL   | 28    | 22    |
| >NF1-L550P- ALLVLHQLDS | 13   | >NF1-L550P- ALPVLHQLDS | 93    | 80    |
| >NF1-L550P- ALLVLHQL   | 39   | >NF1-L550P- ALPVLHQL   | 380   | 341   |
| >NF1-L550P- ALLVLHQLDS | 50   | >NF1-L550P- ALPVLHQLDS | 683   | 633   |
| >NF1-L550P- ALLVLHQL   | 9    | >NF1-L550P- ALPVLHQL   | 42    | 33    |
| >NF1-L550P- ALLVLHQLDS | 28   | >NF1-L550P- ALPVLHQLDS | 222   | 194   |
| >NF1-L550P- ALLVLHQL   | 19   | >NF1-L550P- ALPVLHQL   | 335   | 316   |
| >NF1-L550P- ALLVLHQLDS | 221  | >NF1-L550P- ALPVLHQLDS | 5247  | 5026  |
| >NF1-L550P- ALLVLHQL   | 3    | >NF1-L550P- ALPVLHQL   | 4     | 1     |
| >NF1-L550P- ALLVLHQLDS | 22   | >NF1-L550P- ALPVLHQLDS | 46    | 24    |
| >NF1-L550P- ALLVLHQLDS | 145  | >NF1-L550P- ALPVLHQLDS | 527   | 382   |
| >NF1-L550P- EALLVLHQL  | 292  | >NF1-L550P- EALPVLHQL  | 58    | 234   |
| >NF1-L550P- EALLVLHQL  | 12   | >NF1-L550P- EALPVLHQL  | 7     | 5     |
| >NF1-L550P- EALLVLHQL  | 2188 | >NF1-L550P- EALPVLHQL  | 306   | 1882  |
| >NF1-L550P- MEALLVLH   | 450  | >NF1-L550P- MEALPVLH   | 240   | 210   |
| >NF1-L550P- MEALLVLHQI | 12   | >NF1-L550P- MEALPVLHQI | 78    | 66    |
| >NF1-L550P- MEALLVLHQI | 363  | >NF1-L550P- MEALPVLHQI | 2441  | 2078  |
| >NF1-L550P- MEALLVLHQI | 167  | >NF1-L550P- MEALPVLHQI | 484   | 317   |
| >NF1-L550P- MEALLVLHQI | 25   | >NF1-L550P- MEALPVLHQI | 29    | 4     |
| >NF1-L550P- MEALLVLHQI | 131  | >NF1-L550P- MEALPVLHQI | 394   | 263   |
| >NF1-L550P- MEALLVLHQI | 265  | >NF1-L550P- MEALPVLHQI | 789   | 524   |
| >NF1-L550P- MEALLVLHQI | 122  | >NF1-L550P- MEALPVLHQI | 233   | 111   |
| >NF1-L550P- AMEALLVL   | 304  | >NF1-L550P- AMEALPVL   | 386   | 82    |
| >NF1-L550P- AMEALLVLHC | 98   | >NF1-L550P- AMEALPVLHC | 137   | 39    |
| >NF1-L550P- AMEALLVL   | 66   | >NF1-L550P- AMEALPVL   | 96    | 30    |
| >NF1-L550P- AMEALLVLHC | 9    | >NF1-L550P- AMEALPVLHC | 13    | 4     |
| >NF1-L550P- AMEALLVLHC | 168  | >NF1-L550P- AMEALPVLHC | 223   | 55    |
| >NF1-L550P- AMEALLVL   | 393  | >NF1-L550P- AMEALPVL   | 726   | 333   |
| >NF1-L550P- AMEALLVLHC | 243  | >NF1-L550P- AMEALPVLHC | 699   | 456   |
| >NF1-L550P- AMEALLVL   | 100  | >NF1-L550P- AMEALPVL   | 65    | 35    |
| >NF1-L550P- AMEALLVLHC | 20   | >NF1-L550P- AMEALPVLHC | 15    | 5     |
| >NF1-L550P- AMEALLVL   | 144  | >NF1-L550P- AMEALPVL   | 130   | 14    |
| >NF1-L550P- AMEALLVLHC | 56   | >NF1-L550P- AMEALPVLHC | 69    | 13    |

|                        |      |                        |       |       |
|------------------------|------|------------------------|-------|-------|
| >NF1-L550P- AMEALLVL   | 541  | >NF1-L550P- AMEALPVL   | 257   | 284   |
| >NF1-L550P- AMEALLVLHC | 106  | >NF1-L550P- AMEALPVLHC | 104   | 2     |
| >NF1-L550P- AMEALLVLHC | 471  | >NF1-L550P- AMEALPVLHC | 460   | 11    |
| >NF1-L550P- AMEALLVL   | 14   | >NF1-L550P- AMEALPVL   | 18    | 4     |
| >NF1-L550P- AMEALLVLHC | 4    | >NF1-L550P- AMEALPVLHC | 5     | 1     |
| >NF1-L550P- AMEALLVL   | 216  | >NF1-L550P- AMEALPVL   | 151   | 65    |
| >NF1-L550P- AMEALLVLHC | 550  | >NF1-L550P- AMEALPVLHC | 227   | 323   |
| >NF1-L550P- EAMEALLV   | 108  | >NF1-L550P- EAMEALPV   | 58    | 50    |
| >NF1-L550P- EAMEALLVL  | 511  | >NF1-L550P- EAMEALPVL  | 305   | 206   |
| >NF1-L550P- EAMEALLV   | 273  | >NF1-L550P- EAMEALPV   | 176   | 97    |
| >NF1-L550P- EAMEALLVL  | 1078 | >NF1-L550P- EAMEALPVL  | 202   | 876   |
| >NF1-L550P- EAMEALLVL  | 807  | >NF1-L550P- EAMEALPVL  | 430   | 377   |
| >NF1-L550P- EAMEALLVL  | 179  | >NF1-L550P- EAMEALPVL  | 29    | 150   |
| >NF1-L550P- EAMEALLV   | 12   | >NF1-L550P- EAMEALPV   | 9     | 3     |
| >NF1-L550P- EAMEALLVL  | 111  | >NF1-L550P- EAMEALPVL  | 343   | 232   |
| >NF1-L550P- EAMEALLV   | 4    | >NF1-L550P- EAMEALPV   | 3     | 1     |
| >NF1-L550P- EAMEALLVL  | 16   | >NF1-L550P- EAMEALPVL  | 8     | 8     |
| >NF1-L550P- EAMEALLVLF | 946  | >NF1-L550P- EAMEALPVLf | 430   | 516   |
| >NF1-L550P- EAMEALLVL  | 309  | >NF1-L550P- EAMEALPVL  | 674   | 365   |
| >NF1-L550P- EAMEALLVL  | 417  | >NF1-L550P- EAMEALPVL  | 409   | 8     |
| >NF1-L550P- EAMEALLVL  | 182  | >NF1-L550P- EAMEALPVL  | 260   | 78    |
| >NF1-L550P- QEAMEALL   | 14   | >NF1-L550P- QEAMEALP   | 599   | 585   |
| >NF1-L550P- QEAMEALLV  | 13   | >NF1-L550P- QEAMEALPV  | 42    | 29    |
| >NF1-L550P- QEAMEALLVI | 56   | >NF1-L550P- QEAMEALPV  | 90    | 34    |
| >NF1-L550P- QEAMEALL   | 118  | >NF1-L550P- QEAMEALP   | 9342  | 9224  |
| >NF1-L550P- QEAMEALLV  | 529  | >NF1-L550P- QEAMEALPV  | 308   | 221   |
| >NF1-L550P- QEAMEALLVI | 144  | >NF1-L550P- QEAMEALPV  | 162   | 18    |
| >NF1-L550P- QEAMEALLV  | 240  | >NF1-L550P- QEAMEALPV  | 83    | 157   |
| >NF1-L550P- QEAMEALLV  | 151  | >NF1-L550P- QEAMEALPV  | 225   | 74    |
| >NF1-L550P- QEAMEALLVI | 112  | >NF1-L550P- QEAMEALPV  | 70    | 42    |
| >NF1-L550P- AQEAMEALL' | 314  | >NF1-L550P- AQEAMEALP' | 254   | 60    |
| >NF1-L550P- AQEAMEALL  | 189  | >NF1-L550P- AQEAMEALP  | 21792 | 21603 |
| >NF1-L550P- AQEAMEALL' | 49   | >NF1-L550P- AQEAMEALP' | 60    | 11    |
| >NF1-L550P- AQEAMEALL' | 383  | >NF1-L550P- AQEAMEALP' | 563   | 180   |
| >NF1-L550P- IAQEAMEALL | 123  | >NF1-L550P- IAQEAMEALF | 67    | 56    |
| >NF1-L550P- IAQEAMEALL | 682  | >NF1-L550P- IAQEAMEALF | 391   | 291   |
| >NF1-L550P- IAQEAMEALL | 337  | >NF1-L550P- IAQEAMEALF | 473   | 136   |
| >NF1-L550P- IAQEAMEALL | 1251 | >NF1-L550P- IAQEAMEALF | 333   | 918   |
| >NF1-L550P- IAQEAMEALL | 196  | >NF1-L550P- IAQEAMEALF | 20562 | 20366 |
| >NF1-N1984' NEKQMYPsi  | 12   | >NF1-N1984' TEKQMYPsi  | 12    | 0     |
| >NF1-N1984' NEKQMYPs   | 378  | >NF1-N1984' TEKQMYPs   | 1676  | 1298  |
| >NF1-N1984' NEKQMYPsi  | 273  | >NF1-N1984' TEKQMYPsi  | 1258  | 985   |
| >NF1-N1984' NEKQMYPs   | 572  | >NF1-N1984' TEKQMYPs   | 121   | 451   |



|                        |       |                        |      |       |
|------------------------|-------|------------------------|------|-------|
| >NF1-N1984' NEKQMYP    | 54    | >NF1-N1984' TEKQMYP    | 22   | 32    |
| >NF1-N1984' NEKQMYP    | 507   | >NF1-N1984' TEKQMYP    | 157  | 350   |
| >NF1-N1984' NEKQMYP    | 260   | >NF1-N1984' TEKQMYP    | 247  | 13    |
| >NF1-N1984' NEKQMYP    | 137   | >NF1-N1984' TEKQMYP    | 132  | 5     |
| >NF1-N1984' NEKQMYP    | 41    | >NF1-N1984' TEKQMYP    | 39   | 2     |
| >NF1-N1984' NEKQMYP    | 9     | >NF1-N1984' TEKQMYP    | 6    | 3     |
| >NF1-N1984' NEKQMYP    | 558   | >NF1-N1984' TEKQMYP    | 299  | 259   |
| >NF1-N1984' INEKQMYP   | 23463 | >NF1-N1984' ITEKQMYP   | 112  | 23351 |
| >NF1-N1984' INEKQMYP   | 8477  | >NF1-N1984' ITEKQMYP   | 379  | 8098  |
| >NF1-N1984' TINEKQMYP  | 75    | >NF1-N1984' TITEKQMYP  | 534  | 459   |
| >NF1-N1984' TINEKQMYP  | 798   | >NF1-N1984' TITEKQMYP  | 419  | 379   |
| >NF1-N1984' TINEKQMYP  | 304   | >NF1-N1984' TITEKQMYP  | 934  | 630   |
| >NF1-N1984' TINEKQMYP  | 405   | >NF1-N1984' TITEKQMYP  | 228  | 177   |
| >NF1-N1984' TINEKQMY   | 594   | >NF1-N1984' TITEKQMY   | 477  | 117   |
| >NF1-N1984' TINEKQMY   | 417   | >NF1-N1984' TITEKQMY   | 856  | 439   |
| >NF1-N1984' TINEKQMYP  | 136   | >NF1-N1984' TITEKQMYP  | 299  | 163   |
| >NF1-N1984' MTINEKQM   | 436   | >NF1-N1984' MTITEKQM   | 1385 | 949   |
| >NF1-N1984' MTINEKQMY  | 33    | >NF1-N1984' MTITEKQMY  | 112  | 79    |
| >NF1-N1984' MTINEKQM   | 71    | >NF1-N1984' MTITEKQM   | 37   | 34    |
| >NF1-N1984' MTINEKQMY  | 56    | >NF1-N1984' MTITEKQMY  | 21   | 35    |
| >NF1-N1984' MTINEKQMY  | 38    | >NF1-N1984' MTITEKQMY  | 40   | 2     |
| >NF1-N1984' MTINEKQMY  | 142   | >NF1-N1984' MTITEKQMY  | 165  | 23    |
| >NF1-N1984' MTINEKQMY  | 64    | >NF1-N1984' MTITEKQMY  | 78   | 14    |
| >NF1-N1984' MTINEKQMY  | 80    | >NF1-N1984' MTITEKQMY  | 64   | 16    |
| >NF1-N1984' MTINEKQMY  | 337   | >NF1-N1984' MTITEKQMY  | 998  | 661   |
| >NF1-N1984' MTINEKQMY  | 215   | >NF1-N1984' MTITEKQMY  | 322  | 107   |
| >NF1-N1984' MTINEKQM   | 12    | >NF1-N1984' MTITEKQM   | 12   | 0     |
| >NF1-N1984' MTINEKQMY  | 9     | >NF1-N1984' MTITEKQMY  | 9    | 0     |
| >NF1-N1984' MTINEKQMY  | 18    | >NF1-N1984' MTITEKQMY  | 37   | 19    |
| >NF1-N1984' TMTINEKQM  | 455   | >NF1-N1984' TMTITEKQM  | 553  | 98    |
| >NF1-N1984' TMTINEKQM  | 334   | >NF1-N1984' TMTITEKQM  | 222  | 112   |
| >NF1-N1984' TMTINEKQM  | 513   | >NF1-N1984' TMTITEKQM  | 423  | 90    |
| >NF1-N1984' TMTINEKQM  | 315   | >NF1-N1984' TMTITEKQM  | 353  | 38    |
| >NF1-N1984' ITMTINEKQM | 390   | >NF1-N1984' ITMTITEKQM | 329  | 61    |
| >NF1-N1984' ITMTINEK   | 121   | >NF1-N1984' ITMTITEK   | 63   | 58    |
| >NF1-N1984' ITMTINEK   | 13    | >NF1-N1984' ITMTITEK   | 10   | 3     |
| >NF1-N1984' ITMTINEKQM | 316   | >NF1-N1984' ITMTITEKQM | 210  | 106   |
| >NF1-N1984' ITMTINEKQM | 403   | >NF1-N1984' ITMTITEKQM | 179  | 224   |
| >NF1-N1984' ITMTINEKQM | 94    | >NF1-N1984' ITMTITEKQM | 64   | 30    |
| >NF1-N1984' ITMTINEK   | 137   | >NF1-N1984' ITMTITEK   | 294  | 157   |
| >NF1-N1984' ITMTINEKQM | 47    | >NF1-N1984' ITMTITEKQM | 55   | 8     |
| >NF1-N1984' ITMTINEK   | 354   | >NF1-N1984' ITMTITEK   | 159  | 195   |
| >NF1-N1984' ITMTINEK   | 6     | >NF1-N1984' ITMTITEK   | 6    | 0     |

|                         |       |                         |       |       |
|-------------------------|-------|-------------------------|-------|-------|
| >NF1-N1984' ITMTINEKQ   | 293   | >NF1-N1984' ITMTITEKQ   | 189   | 104   |
| >NF1-N1984' ITMTINEKQM  | 155   | >NF1-N1984' ITMTITEKQM  | 139   | 16    |
| >NF1-N1984' ITMTINEKQM  | 465   | >NF1-N1984' ITMTITEKQM  | 160   | 305   |
| >NF1-N1984' ITMTINEKQM  | 202   | >NF1-N1984' ITMTITEKQM  | 203   | 1     |
| >NF1-N1984' ITMTINEKQM  | 11    | >NF1-N1984' ITMTITEKQM  | 10    | 1     |
| >NF1-N1984' ITMTINEKQM  | 9     | >NF1-N1984' ITMTITEKQM  | 8     | 1     |
| >NF1-N1984' ITMTINEKQM  | 320   | >NF1-N1984' ITMTITEKQM  | 219   | 101   |
| >NF1-N1984' ITMTINEKQM  | 221   | >NF1-N1984' ITMTITEKQM  | 165   | 56    |
| >NF1-N1984' ITMTINEKQM  | 583   | >NF1-N1984' ITMTITEKQM  | 230   | 353   |
| >NF1-N1984' ITMTINEKQM  | 680   | >NF1-N1984' ITMTITEKQM  | 367   | 313   |
| >NF1-N1984' ITMTINEKQ   | 373   | >NF1-N1984' ITMTITEKQ   | 711   | 338   |
| >NF1-N1984' ITMTINEKQM  | 93    | >NF1-N1984' ITMTITEKQM  | 93    | 0     |
| >NF1-N1984' ITMTINEKQM  | 5     | >NF1-N1984' ITMTITEKQM  | 6     | 1     |
| >NF1-N1984' ITMTINEK    | 672   | >NF1-N1984' ITMTITEK    | 367   | 305   |
| >NF1-N1984' LITMTINEK   | 153   | >NF1-N1984' LITMTITEK   | 107   | 46    |
| >NF1-N1984' LITMTINEK   | 98    | >NF1-N1984' LITMTITEK   | 105   | 7     |
| >NF1-N1984' KLITMTIN    | 7841  | >NF1-N1984' KLITMTIT    | 93    | 7748  |
| >NF1-N1984' KLITMTINEK  | 34    | >NF1-N1984' KLITMTITEK  | 19    | 15    |
| >NF1-N1984' KLITMTINEK  | 42    | >NF1-N1984' KLITMTITEK  | 30    | 12    |
| >NF1-N1984' KLITMTINEK  | 39    | >NF1-N1984' KLITMTITEK  | 101   | 62    |
| >NF1-N1984' KLITMTINEK  | 488   | >NF1-N1984' KLITMTITEK  | 533   | 45    |
| >NF1-N1984' KLITMTINE   | 1222  | >NF1-N1984' KLITMTITE   | 116   | 1106  |
| >NF1-N1984' KLITMTINEKC | 946   | >NF1-N1984' KLITMTITEKC | 358   | 588   |
| >NF1-P1951L PWLSNLVRF   | 1297  | >NF1-P1951L LWLSNLVRF   | 339   | 958   |
| >NF1-P1951L PWLSNLVRF   | 22    | >NF1-P1951L LWLSNLVRF   | 14    | 8     |
| >NF1-P1951L PWLSNLVRFC  | 714   | >NF1-P1951L LWLSNLVRFC  | 394   | 320   |
| >NF1-P1951L PWLSNLVRF   | 362   | >NF1-P1951L LWLSNLVRF   | 155   | 207   |
| >NF1-P1951L PWLSNLVRF   | 22    | >NF1-P1951L LWLSNLVRF   | 6     | 16    |
| >NF1-P1951L PWLSNLVR    | 3919  | >NF1-P1951L LWLSNLVR    | 423   | 3496  |
| >NF1-P1951L PWLSNLVRFC  | 3660  | >NF1-P1951L LWLSNLVRFC  | 440   | 3220  |
| >NF1-P1951L PWLSNLVRF   | 2321  | >NF1-P1951L LWLSNLVRF   | 322   | 1999  |
| >NF1-P1951L PWLSNLVR    | 18    | >NF1-P1951L LWLSNLVR    | 28    | 10    |
| >NF1-P1951L PWLSNLVRFC  | 285   | >NF1-P1951L LWLSNLVRFC  | 251   | 34    |
| >NF1-P1951L PWLSNLVR    | 998   | >NF1-P1951L LWLSNLVR    | 269   | 729   |
| >NF1-P1951L PWLSNLVRF   | 672   | >NF1-P1951L LWLSNLVRF   | 159   | 513   |
| >NF1-P1951L PWLSNLVRFC  | 918   | >NF1-P1951L LWLSNLVRFC  | 227   | 691   |
| >NF1-P1951L TPWLSNLV    | 227   | >NF1-P1951L TLWLSNLV    | 21556 | 21329 |
| >NF1-P1951L TPWLSNLVRF  | 176   | >NF1-P1951L TLWLSNLVRF  | 30993 | 30817 |
| >NF1-P1951L TPWLSNLV    | 18435 | >NF1-P1951L TLWLSNLV    | 17    | 18418 |
| >NF1-P1951L TPWLSNLV    | 20747 | >NF1-P1951L TLWLSNLV    | 40    | 20707 |
| >NF1-P1951L TPWLSNLV    | 20860 | >NF1-P1951L TLWLSNLV    | 89    | 20771 |
| >NF1-P1951L TPWLSNLV    | 13382 | >NF1-P1951L TLWLSNLV    | 178   | 13204 |
| >NF1-P1951L TPWLSNLV    | 17637 | >NF1-P1951L TLWLSNLV    | 8     | 17629 |

|                        |       |                        |       |       |
|------------------------|-------|------------------------|-------|-------|
| >NF1-P1951L TPWLSNLVRF | 26930 | >NF1-P1951L TLWLSNLVRF | 245   | 26685 |
| >NF1-P1951L TPWLSNLV   | 22238 | >NF1-P1951L TLWLSNLV   | 16    | 22222 |
| >NF1-P1951L TPWLSNLV   | 16302 | >NF1-P1951L TLWLSNLV   | 8     | 16294 |
| >NF1-P1951L TPWLSNLV   | 22265 | >NF1-P1951L TLWLSNLV   | 7     | 22258 |
| >NF1-P1951L TPWLSNLV   | 25735 | >NF1-P1951L TLWLSNLV   | 6     | 25729 |
| >NF1-P1951L TPWLSNLVR  | 5766  | >NF1-P1951L TLWLSNLVR  | 183   | 5583  |
| >NF1-P1951L TPWLSNLVRF | 17855 | >NF1-P1951L TLWLSNLVRF | 208   | 17647 |
| >NF1-P1951L TPWLSNLVR  | 2489  | >NF1-P1951L TLWLSNLVR  | 240   | 2249  |
| >NF1-P1951L TPWLSNLVR  | 1497  | >NF1-P1951L TLWLSNLVR  | 192   | 1305  |
| >NF1-P1951L TPWLSNLV   | 3515  | >NF1-P1951L TLWLSNLV   | 394   | 3121  |
| >NF1-P1951L TPWLSNLV   | 306   | >NF1-P1951L TLWLSNLV   | 102   | 204   |
| >NF1-P1951L TPWLSNLVRF | 698   | >NF1-P1951L TLWLSNLVRF | 83    | 615   |
| >NF1-P1951L TPWLSNLVRF | 5138  | >NF1-P1951L TLWLSNLVRF | 236   | 4902  |
| >NF1-P1951L TPWLSNLV   | 408   | >NF1-P1951L TLWLSNLV   | 23187 | 22779 |
| >NF1-P1951L TPWLSNLV   | 61    | >NF1-P1951L TLWLSNLV   | 16075 | 16014 |
| >NF1-P1951L TPWLSNLVRF | 160   | >NF1-P1951L TLWLSNLVRF | 22355 | 22195 |
| >NF1-P1951L TPWLSNLVR  | 98    | >NF1-P1951L TLWLSNLVR  | 43    | 55    |
| >NF1-P1951L LKHLCLEYMT | 1509  | >NF1-P1951L LKHLCLEYMT | 48    | 1461  |
| >NF1-P1951L MTPWLSNL   | 231   | >NF1-P1951L MTLWLSNL   | 79    | 152   |
| >NF1-P1951L MTPWLSNLV  | 699   | >NF1-P1951L MTLWLSNLV  | 386   | 313   |
| >NF1-P1951L MTPWLSNL   | 2358  | >NF1-P1951L MTLWLSNL   | 192   | 2166  |
| >NF1-P1951L MTPWLSNLV  | 569   | >NF1-P1951L MTLWLSNLV  | 40    | 529   |
| >NF1-P1951L MTPWLSNL   | 214   | >NF1-P1951L MTLWLSNL   | 175   | 39    |
| >NF1-P1951L MTPWLSNLV  | 30    | >NF1-P1951L MTLWLSNLV  | 24    | 6     |
| >NF1-P1951L MTPWLSNL   | 383   | >NF1-P1951L MTLWLSNL   | 647   | 264   |
| >NF1-P1951L MTPWLSNLV  | 92    | >NF1-P1951L MTLWLSNLV  | 194   | 102   |
| >NF1-P1951L MTPWLSNL   | 468   | >NF1-P1951L MTLWLSNL   | 78    | 390   |
| >NF1-P1951L MTPWLSNLV  | 36    | >NF1-P1951L MTLWLSNLV  | 10    | 26    |
| >NF1-P1951L MTPWLSNL   | 363   | >NF1-P1951L MTLWLSNL   | 36    | 327   |
| >NF1-P1951L MTPWLSNLV  | 60    | >NF1-P1951L MTLWLSNLV  | 8     | 52    |
| >NF1-P1951L MTPWLSNLV  | 4826  | >NF1-P1951L MTLWLSNLV  | 369   | 4457  |
| >NF1-P1951L MTPWLSNL   | 3342  | >NF1-P1951L MTLWLSNL   | 338   | 3004  |
| >NF1-P1951L MTPWLSNLV  | 229   | >NF1-P1951L MTLWLSNLV  | 34    | 195   |
| >NF1-P1951L MTPWLSNLV  | 7573  | >NF1-P1951L MTLWLSNLV  | 190   | 7383  |
| >NF1-P1951L MTPWLSNL   | 787   | >NF1-P1951L MTLWLSNL   | 327   | 460   |
| >NF1-P1951L MTPWLSNLV  | 97    | >NF1-P1951L MTLWLSNLV  | 37    | 60    |
| >NF1-P1951L MTPWLSNLV  | 1622  | >NF1-P1951L MTLWLSNLV  | 235   | 1387  |
| >NF1-P1951L MTPWLSNLV  | 115   | >NF1-P1951L MTLWLSNLV  | 58    | 57    |
| >NF1-P1951L MTPWLSNLV  | 1889  | >NF1-P1951L MTLWLSNLV  | 470   | 1419  |
| >NF1-P1951L MTPWLSNLV  | 51    | >NF1-P1951L MTLWLSNLV  | 82    | 31    |
| >NF1-P1951L MTPWLSNLV  | 494   | >NF1-P1951L MTLWLSNLV  | 371   | 123   |
| >NF1-P1951L MTPWLSNLV  | 2192  | >NF1-P1951L MTLWLSNLV  | 331   | 1861  |
| >NF1-P1951L MTPWLSNLV  | 5398  | >NF1-P1951L MTLWLSNLV  | 364   | 5034  |

|                       |      |                       |       |       |
|-----------------------|------|-----------------------|-------|-------|
| >NF1-P1951L MTPWLSNLV | 55   | >NF1-P1951L MTLWLSNLV | 16    | 39    |
| >NF1-P1951L MTPWLSNL  | 552  | >NF1-P1951L MTLWLSNL  | 163   | 389   |
| >NF1-P1951L MTPWLSNLV | 1216 | >NF1-P1951L MTLWLSNLV | 368   | 848   |
| >NF1-P1951L MTPWLSNLV | 59   | >NF1-P1951L MTLWLSNLV | 17    | 42    |
| >NF1-P1951L MTPWLSNLV | 426  | >NF1-P1951L MTLWLSNLV | 236   | 190   |
| >NF1-P1951L MTPWLSNLV | 6    | >NF1-P1951L MTLWLSNLV | 8     | 2     |
| >NF1-P1951L MTPWLSNL  | 10   | >NF1-P1951L MTLWLSNL  | 32    | 22    |
| >NF1-P1951L MTPWLSNLV | 5    | >NF1-P1951L MTLWLSNLV | 6     | 1     |
| >NF1-P1951L MTPWLSNL  | 226  | >NF1-P1951L MTLWLSNL  | 10    | 216   |
| >NF1-P1951L MTPWLSNLV | 22   | >NF1-P1951L MTLWLSNLV | 4     | 18    |
| >NF1-P1951L MTPWLSNLV | 2178 | >NF1-P1951L MTLWLSNLV | 216   | 1962  |
| >NF1-P1951L MTPWLSNL  | 126  | >NF1-P1951L MTLWLSNL  | 6     | 120   |
| >NF1-P1951L MTPWLSNLV | 28   | >NF1-P1951L MTLWLSNLV | 3     | 25    |
| >NF1-P1951L MTPWLSNLV | 943  | >NF1-P1951L MTLWLSNLV | 175   | 768   |
| >NF1-P1951L MTPWLSNLV | 4435 | >NF1-P1951L MTLWLSNLV | 32    | 4403  |
| >NF1-P1951L MTPWLSNL  | 106  | >NF1-P1951L MTLWLSNL  | 20606 | 20500 |
| >NF1-P1951L MTPWLSNLV | 2    | >NF1-P1951L MTLWLSNLV | 341   | 339   |
| >NF1-P1951L MTPWLSNLV | 98   | >NF1-P1951L MTLWLSNLV | 15208 | 15110 |
| >NF1-P1951L MTPWLSNLV | 3    | >NF1-P1951L MTLWLSNLV | 1187  | 1184  |
| >NF1-P1951L MTPWLSNL  | 709  | >NF1-P1951L MTLWLSNL  | 179   | 530   |
| >NF1-P1951L MTPWLSNLV | 477  | >NF1-P1951L MTLWLSNLV | 21    | 456   |
| >NF1-P1951L MTPWLSNLV | 167  | >NF1-P1951L MTLWLSNLV | 14    | 153   |
| >NF1-P1951L MTPWLSNLV | 91   | >NF1-P1951L MTLWLSNLV | 59    | 32    |
| >NF1-P1951L MTPWLSNL  | 411  | >NF1-P1951L MTLWLSNL  | 208   | 203   |
| >NF1-P1951L YMTPWLSNL | 532  | >NF1-P1951L YMTLWLSNL | 330   | 202   |
| >NF1-P1951L YMTPWLSNL | 8    | >NF1-P1951L YMTLWLSNL | 13    | 5     |
| >NF1-P1951L YMTPWLSNL | 11   | >NF1-P1951L YMTLWLSNL | 15    | 4     |
| >NF1-P1951L YMTPWLSNL | 4    | >NF1-P1951L YMTLWLSNL | 9     | 5     |
| >NF1-P1951L YMTPWLSNL | 9    | >NF1-P1951L YMTLWLSNL | 13    | 4     |
| >NF1-P1951L YMTPWLSNL | 3    | >NF1-P1951L YMTLWLSNL | 5     | 2     |
| >NF1-P1951L YMTPWLSNL | 8    | >NF1-P1951L YMTLWLSNL | 10    | 2     |
| >NF1-P1951L YMTPWLSNL | 5    | >NF1-P1951L YMTLWLSNL | 28    | 23    |
| >NF1-P1951L YMTPWLSNL | 24   | >NF1-P1951L YMTLWLSNL | 34    | 10    |
| >NF1-P1951L YMTPWLSN  | 182  | >NF1-P1951L YMTLWLSN  | 924   | 742   |
| >NF1-P1951L YMTPWLSNL | 2    | >NF1-P1951L YMTLWLSNL | 3     | 1     |
| >NF1-P1951L YMTPWLSNL | 2    | >NF1-P1951L YMTLWLSNL | 2     | 0     |
| >NF1-P1951L YMTPWLSNL | 3    | >NF1-P1951L YMTLWLSNL | 5     | 2     |
| >NF1-P1951L YMTPWLSNL | 2    | >NF1-P1951L YMTLWLSNL | 3     | 1     |
| >NF1-P1951L YMTPWLSNL | 6    | >NF1-P1951L YMTLWLSNL | 9     | 3     |
| >NF1-P1951L YMTPWLSNL | 4    | >NF1-P1951L YMTLWLSNL | 5     | 1     |
| >NF1-P1951L YMTPWLSNL | 3    | >NF1-P1951L YMTLWLSNL | 4     | 1     |
| >NF1-P1951L YMTPWLSNL | 3    | >NF1-P1951L YMTLWLSNL | 3     | 0     |
| >NF1-P1951L YMTPWLSN  | 114  | >NF1-P1951L YMTLWLSN  | 960   | 846   |

|                        |       |                        |      |       |
|------------------------|-------|------------------------|------|-------|
| >NF1-P1951L YMTPWLSNL  | 1     | >NF1-P1951L YMTLWLSNL  | 2    | 1     |
| >NF1-P1951L YMTPWLSNL  | 1     | >NF1-P1951L YMTLWLSNL  | 2    | 1     |
| >NF1-P1951L YMTPWLSNL  | 217   | >NF1-P1951L YMTLWLSNL  | 2038 | 1821  |
| >NF1-P1951L YMTPWLSNL  | 82    | >NF1-P1951L YMTLWLSNL  | 147  | 65    |
| >NF1-P1951L YMTPWLSNL  | 113   | >NF1-P1951L YMTLWLSNL  | 72   | 41    |
| >NF1-P1951L YMTPWLSNL  | 80    | >NF1-P1951L YMTLWLSNL  | 65   | 15    |
| >NF1-P1951L YMTPWLSNL  | 190   | >NF1-P1951L YMTLWLSNL  | 637  | 447   |
| >NF1-P1951L YMTPWLSNL  | 37    | >NF1-P1951L YMTLWLSNL  | 98   | 61    |
| >NF1-P1951L YMTPWLSNL  | 106   | >NF1-P1951L YMTLWLSNL  | 323  | 217   |
| >NF1-P1951L YMTPWLSNL  | 434   | >NF1-P1951L YMTLWLSNL  | 1296 | 862   |
| >NF1-P1951L YMTPWLSNL  | 184   | >NF1-P1951L YMTLWLSNL  | 1569 | 1385  |
| >NF1-P1951L YMTPWLSNL  | 385   | >NF1-P1951L YMTLWLSNL  | 988  | 603   |
| >NF1-P1951L YMTPWLSNL  | 226   | >NF1-P1951L YMTLWLSNL  | 529  | 303   |
| >NF1-P1951L YMTPWLSNL  | 147   | >NF1-P1951L YMTLWLSNL  | 148  | 1     |
| >NF1-P1951L EYMTPWLSN  | 1075  | >NF1-P1951L EYMTLWLSN  | 133  | 942   |
| >NF1-P1951L EYMTPWLSN  | 92    | >NF1-P1951L EYMTLWLSN  | 115  | 23    |
| >NF1-P1951L EYMTPWLSN  | 266   | >NF1-P1951L EYMTLWLSN  | 306  | 40    |
| >NF1-P1951L EYMTPWLSN  | 417   | >NF1-P1951L EYMTLWLSN  | 223  | 194   |
| >NF1-P1951L EYMTPWLSN  | 56    | >NF1-P1951L EYMTLWLSN  | 49   | 7     |
| >NF1-P1951L EYMTPWLSN  | 74    | >NF1-P1951L EYMTLWLSN  | 185  | 111   |
| >NF1-P1951L EYMTPWLSN  | 42    | >NF1-P1951L EYMTLWLSN  | 60   | 18    |
| >NF1-P1951L EYMTPWLSN  | 390   | >NF1-P1951L EYMTLWLSN  | 762  | 372   |
| >NF1-P1951L EYMTPWLSN  | 85    | >NF1-P1951L EYMTLWLSN  | 58   | 27    |
| >NF1-P1951L EYMTPWLSN  | 414   | >NF1-P1951L EYMTLWLSN  | 435  | 21    |
| >NF1-P1951L EYMTPWLSN  | 42    | >NF1-P1951L EYMTLWLSN  | 61   | 19    |
| >NF1-P1951L LEYMTPWL   | 78    | >NF1-P1951L LEYMTLWL   | 27   | 51    |
| >NF1-P1951L LEYMTPWLS  | 1044  | >NF1-P1951L LEYMTLWLS  | 206  | 838   |
| >NF1-P1951L LEYMTPWLSI | 29    | >NF1-P1951L LEYMTLWLSI | 12   | 17    |
| >NF1-P1951L LEYMTPWLSI | 182   | >NF1-P1951L LEYMTLWLSI | 313  | 131   |
| >NF1-P1951L LEYMTPWL   | 110   | >NF1-P1951L LEYMTLWL   | 56   | 54    |
| >NF1-P1951L LEYMTPWLS  | 389   | >NF1-P1951L LEYMTLWLS  | 63   | 326   |
| >NF1-P1951L LEYMTPWLSI | 100   | >NF1-P1951L LEYMTLWLSI | 54   | 46    |
| >NF1-P1951L LEYMTPWL   | 23    | >NF1-P1951L LEYMTLWL   | 17   | 6     |
| >NF1-P1951L LEYMTPWLSI | 52    | >NF1-P1951L LEYMTLWLSI | 36   | 16    |
| >NF1-P1951L LEYMTPWL   | 163   | >NF1-P1951L LEYMTLWL   | 113  | 50    |
| >NF1-P1951L LEYMTPWLS  | 881   | >NF1-P1951L LEYMTLWLS  | 353  | 528   |
| >NF1-P1951L LEYMTPWLSI | 59    | >NF1-P1951L LEYMTLWLSI | 43   | 16    |
| >NF1-P1951L LEYMTPWL   | 468   | >NF1-P1951L LEYMTLWL   | 318  | 150   |
| >NF1-P1951L LEYMTPWLSI | 24    | >NF1-P1951L LEYMTLWLSI | 12   | 12    |
| >NF1-P1951L CLEYMTPWL  | 332   | >NF1-P1951L CLEYMTLWL  | 658  | 326   |
| >NF1-P1951L CLEYMTPWL  | 43    | >NF1-P1951L CLEYMTLWL  | 146  | 103   |
| >NF1-P1951L LCLEYMTP   | 20008 | >NF1-P1951L LCLEYMTL   | 448  | 19560 |
| >NF1-P1951L LCLEYMTPWI | 456   | >NF1-P1951L LCLEYMTLWI | 864  | 408   |

|                        |       |                        |       |       |
|------------------------|-------|------------------------|-------|-------|
| >NF1-P1951L LCLEYMTPWI | 463   | >NF1-P1951L LCLEYMTLWI | 1228  | 765   |
| >NF1-P1951L LCLEYMTPW  | 57    | >NF1-P1951L LCLEYMTLW  | 115   | 58    |
| >NF1-P1951L LCLEYMTPW  | 1292  | >NF1-P1951L LCLEYMTLW  | 371   | 921   |
| >NF1-P1951L LCLEYMTPW  | 193   | >NF1-P1951L LCLEYMTLW  | 157   | 36    |
| >NF1-P1951L LCLEYMTPW  | 264   | >NF1-P1951L LCLEYMTLW  | 267   | 3     |
| >NF1-P1951L HLCLEYMTP  | 11215 | >NF1-P1951L HLCLEYMTL  | 272   | 10943 |
| >NF1-P1951L HLCLEYMTPV | 108   | >NF1-P1951L HLCLEYMTLV | 165   | 57    |
| >NF1-P1951L HLCLEYMTP  | 21689 | >NF1-P1951L HLCLEYMTL  | 442   | 21247 |
| >NF1-P1951L HLCLEYMTPV | 439   | >NF1-P1951L HLCLEYMTLV | 761   | 322   |
| >NF1-P1951L HLCLEYMTP  | 21504 | >NF1-P1951L HLCLEYMTL  | 26    | 21478 |
| >NF1-P1951L HLCLEYMTPV | 21    | >NF1-P1951L HLCLEYMTLV | 33    | 12    |
| >NF1-P1951L HLCLEYMTPV | 201   | >NF1-P1951L HLCLEYMTLV | 368   | 167   |
| >NF1-P1951L HLCLEYMTPV | 496   | >NF1-P1951L HLCLEYMTLV | 228   | 268   |
| >NF1-P1951L KHLCLEYMTP | 4195  | >NF1-P1951L KHLCLEYMTL | 118   | 4077  |
| >NF1-P1951L KHLCLEYMTP | 476   | >NF1-P1951L KHLCLEYMTL | 2239  | 1763  |
| >NF1-P1951L KHLCLEYMTP | 23057 | >NF1-P1951L KHLCLEYMTL | 296   | 22761 |
| >NF1-P1951L KHLCLEYMTP | 840   | >NF1-P1951L KHLCLEYMTL | 277   | 563   |
| >NF1-P1951L KHLCLEYMTP | 19    | >NF1-P1951L KHLCLEYMTL | 18    | 1     |
| >NF1-P2472F VPMDTYPI   | 408   | >NF1-P2472F VHMDTYPI   | 15907 | 15499 |
| >NF1-P2472F VPMDTYPI   | 34    | >NF1-P2472F VHMDTYPI   | 21462 | 21428 |
| >NF1-P2472F VPMDTYPI   | 2641  | >NF1-P2472F VHMDTYPI   | 335   | 2306  |
| >NF1-P2472F VPMDTYPI   | 168   | >NF1-P2472F VHMDTYPI   | 15352 | 15184 |
| >NF1-P2472F VPMDTYPIH  | 330   | >NF1-P2472F VHMDTYPIH  | 18904 | 18574 |
| >NF1-P2472F VPMDTYPIH  | 371   | >NF1-P2472F VHMDTYPIH  | 35718 | 35347 |
| >NF1-P2472F VPMDTYPI   | 390   | >NF1-P2472F VHMDTYPI   | 71    | 319   |
| >NF1-P2472F VPMDTYPI   | 111   | >NF1-P2472F VHMDTYPI   | 8810  | 8699  |
| >NF1-P2472F VPMDTYPI   | 71    | >NF1-P2472F VHMDTYPI   | 11618 | 11547 |
| >NF1-P2472F VPMDTYPI   | 72    | >NF1-P2472F VHMDTYPI   | 18368 | 18296 |
| >NF1-P2472F VPMDTYPIH  | 410   | >NF1-P2472F VHMDTYPIH  | 31212 | 30802 |
| >NF1-P2472F VPMDTYPI   | 221   | >NF1-P2472F VHMDTYPI   | 613   | 392   |
| >NF1-P2472F NVPMDTYPI  | 1243  | >NF1-P2472F NVHMDTYPI  | 446   | 797   |
| >NF1-P2472F NVPMDTYPI  | 284   | >NF1-P2472F NVHMDTYPI  | 788   | 504   |
| >NF1-P2472F NVPMDTYPI  | 337   | >NF1-P2472F NVHMDTYPI  | 261   | 76    |
| >NF1-P2472F NVPMDTYPI  | 10    | >NF1-P2472F NVHMDTYPI  | 10    | 0     |
| >NF1-P2472F NVPMDTYPI  | 410   | >NF1-P2472F NVHMDTYPI  | 267   | 143   |
| >NF1-P2472F ENVPMDTY   | 98    | >NF1-P2472F ENVHMDTY   | 85    | 13    |
| >NF1-P2472F ENVPMDTYP  | 914   | >NF1-P2472F ENVHMDTYP  | 442   | 472   |
| >NF1-P2472F ENVPMDTY   | 486   | >NF1-P2472F ENVHMDTY   | 398   | 88    |
| >NF1-P2472F MENVPMDTY  | 39    | >NF1-P2472F MENVHMDTY  | 13    | 26    |
| >NF1-P2472F MENVPMDTY  | 120   | >NF1-P2472F MENVHMDTY  | 37    | 83    |
| >NF1-P2472F MENVPMDTY  | 687   | >NF1-P2472F MENVHMDTY  | 300   | 387   |
| >NF1-P2472F MENVPMDTY  | 668   | >NF1-P2472F MENVHMDTY  | 246   | 422   |
| >NF1-P2472F MENVPMDTY  | 101   | >NF1-P2472F MENVHMDTY  | 95    | 6     |

|                        |      |                        |      |      |
|------------------------|------|------------------------|------|------|
| >NF1-P2472F MENVPMDT   | 86   | >NF1-P2472F MENVHMDT   | 44   | 42   |
| >NF1-P2472F MENVPMDT   | 167  | >NF1-P2472F MENVHMDT   | 305  | 138  |
| >NF1-P2472F MENVPMDT   | 482  | >NF1-P2472F MENVHMDT   | 763  | 281  |
| >NF1-P2472F MENVPMDT   | 332  | >NF1-P2472F MENVHMDT   | 141  | 191  |
| >NF1-P2472F MENVPMDT   | 155  | >NF1-P2472F MENVHMDT   | 51   | 104  |
| >NF1-P2472F MENVPMDT   | 496  | >NF1-P2472F MENVHMDT   | 633  | 137  |
| >NF1-P2472F MENVPMDT   | 71   | >NF1-P2472F MENVHMDT   | 43   | 28   |
| >NF1-P2472F MENVPMDT   | 11   | >NF1-P2472F MENVHMDT   | 9    | 2    |
| >NF1-P2472F SMENVPM D  | 461  | >NF1-P2472F SMENVHMD   | 292  | 169  |
| >NF1-P2472F SMENVPM D  | 230  | >NF1-P2472F SMENVHMD   | 256  | 26   |
| >NF1-P2472F SMENVPM D  | 790  | >NF1-P2472F SMENVHMD   | 285  | 505  |
| >NF1-P2472F SMENVPM D  | 128  | >NF1-P2472F SMENVHMD   | 141  | 13   |
| >NF1-P2472F ISMENVPM   | 58   | >NF1-P2472F ISMENVHM   | 169  | 111  |
| >NF1-P2472F ISMENVPM   | 296  | >NF1-P2472F ISMENVHM   | 519  | 223  |
| >NF1-P2472F ISMENVPM D | 1114 | >NF1-P2472F ISMENVHMD  | 332  | 782  |
| >NF1-P2472F ISMENVPM D | 613  | >NF1-P2472F ISMENVHMD  | 427  | 186  |
| >NF1-P2472F ISMENVPM D | 773  | >NF1-P2472F ISMENVHMD  | 239  | 534  |
| >NF1-P2472F ISMENVPM   | 513  | >NF1-P2472F ISMENVHM   | 425  | 88   |
| >NF1-P2472F ISMENVPM D | 19   | >NF1-P2472F ISMENVHMD  | 17   | 2    |
| >NF1-P2472F ISMENVPM D | 512  | >NF1-P2472F ISMENVHMD  | 324  | 188  |
| >NF1-P2472F ISMENVPM D | 49   | >NF1-P2472F ISMENVHMD  | 47   | 2    |
| >NF1-P2472F ISMENVPM   | 172  | >NF1-P2472F ISMENVHM   | 270  | 98   |
| >NF1-P2472F ISMENVPM D | 151  | >NF1-P2472F ISMENVHMD  | 129  | 22   |
| >NF1-P2472F ISMENVPM   | 33   | >NF1-P2472F ISMENVHM   | 89   | 56   |
| >NF1-P2472F ISMENVPM D | 77   | >NF1-P2472F ISMENVHMD  | 82   | 5    |
| >NF1-P2472F ISMENVPM   | 6    | >NF1-P2472F ISMENVHM   | 10   | 4    |
| >NF1-P2472F ISMENVPM D | 3    | >NF1-P2472F ISMENVHMD  | 3    | 0    |
| >NF1-P2472F ISMENVPM   | 133  | >NF1-P2472F ISMENVHM   | 2211 | 2078 |
| >NF1-P2472F ISMENVPM D | 123  | >NF1-P2472F ISMENVHMD  | 87   | 36   |
| >NF1-P2472F ISMENVPM   | 984  | >NF1-P2472F ISMENVHM   | 430  | 554  |
| >NF1-P2472F ISMENVPM D | 174  | >NF1-P2472F ISMENVHMD  | 147  | 27   |
| >NF1-P2472F ISMENVPM   | 235  | >NF1-P2472F ISMENVHM   | 47   | 188  |
| >NF1-P2472F ISMENVPM D | 52   | >NF1-P2472F ISMENVHMD  | 41   | 11   |
| >NF1-P2472F ISMENVPM D | 56   | >NF1-P2472F ISMENVHMD  | 97   | 41   |
| >NF1-P2472F DISMENVPM  | 278  | >NF1-P2472F DISMENVHM  | 4741 | 4463 |
| >NF1-P2472F LTDISMENVP | 9    | >NF1-P2472F LTDISMENVH | 13   | 4    |
| >NF1-P2472F LTDISMENVP | 287  | >NF1-P2472F LTDISMENVH | 484  | 197  |
| >NF1-P2477S PIHHGDPSY  | 1140 | >NF1-P2477S SIHHGDPSY  | 191  | 949  |
| >NF1-P2477S PIHHGDPSY  | 146  | >NF1-P2477S SIHHGDPSY  | 53   | 93   |
| >NF1-P2477S PIHHGDPSY  | 59   | >NF1-P2477S SIHHGDPSY  | 14   | 45   |
| >NF1-P2477S PIHHGDPSYR | 3134 | >NF1-P2477S SIHHGDPSYR | 276  | 2858 |
| >NF1-P2477S PIHHGDPSYR | 1859 | >NF1-P2477S SIHHGDPSYR | 43   | 1816 |
| >NF1-P2477S PIHHGDPSY  | 1375 | >NF1-P2477S SIHHGDPSY  | 62   | 1313 |

|                       |       |                       |       |       |
|-----------------------|-------|-----------------------|-------|-------|
| >NF1-P24775PIHHGDPSY  | 1153  | >NF1-P24775SIHHGDPSY  | 115   | 1038  |
| >NF1-P24775PIHHGDPSY  | 11775 | >NF1-P24775SIHHGDPSY  | 497   | 11278 |
| >NF1-P24775PIHHGDPSY  | 3730  | >NF1-P24775SIHHGDPSY  | 376   | 3354  |
| >NF1-P24775PIHHGDPSYR | 3020  | >NF1-P24775SIHHGDPSYR | 273   | 2747  |
| >NF1-P24775PIHHGDPSYR | 451   | >NF1-P24775SIHHGDPSYR | 176   | 275   |
| >NF1-P24775YPIHHGDPSY | 19547 | >NF1-P24775YSIHHGDPSY | 194   | 19353 |
| >NF1-P24775YPIHHGDPSY | 1371  | >NF1-P24775YSIHHGDPSY | 58    | 1313  |
| >NF1-P24775YPIHHGDPSY | 69    | >NF1-P24775YSIHHGDPSY | 7     | 62    |
| >NF1-P24775YPIHHGDPSY | 2386  | >NF1-P24775YSIHHGDPSY | 220   | 2166  |
| >NF1-P24775YPIHHGDPSY | 3446  | >NF1-P24775YSIHHGDPSY | 120   | 3326  |
| >NF1-P24775YPIHHGDPSY | 5746  | >NF1-P24775YSIHHGDPSY | 88    | 5658  |
| >NF1-P24775YPIHHGDPSY | 2462  | >NF1-P24775YSIHHGDPSY | 436   | 2026  |
| >NF1-P24775YPIHHGDPSY | 172   | >NF1-P24775YSIHHGDPSY | 8     | 164   |
| >NF1-P24775YPIHHGDPS  | 294   | >NF1-P24775YSIHHGDPS  | 22803 | 22509 |
| >NF1-P24775YPIHHGDPSY | 530   | >NF1-P24775YSIHHGDPSY | 31    | 499   |
| >NF1-P24775YPIHHGDPSY | 162   | >NF1-P24775YSIHHGDPSY | 337   | 175   |
| >NF1-P24775YPIHHGDPSY | 183   | >NF1-P24775YSIHHGDPSY | 19    | 164   |
| >NF1-P24775YPIHHGDPSY | 2337  | >NF1-P24775YSIHHGDPSY | 4     | 2333  |
| >NF1-P24775YPIHHGDPS  | 25    | >NF1-P24775YSIHHGDPS  | 2365  | 2340  |
| >NF1-P24775YPIHHGDPSY | 18    | >NF1-P24775YSIHHGDPSY | 5224  | 5206  |
| >NF1-P24775YPIHHGDPSY | 239   | >NF1-P24775YSIHHGDPSY | 13262 | 13023 |
| >NF1-P24775YPIHHGDPS  | 33    | >NF1-P24775YSIHHGDPS  | 16985 | 16952 |
| >NF1-P24775YPIHHGDPSY | 94    | >NF1-P24775YSIHHGDPSY | 17685 | 17591 |
| >NF1-P24775YPIHHGDPSY | 19758 | >NF1-P24775YSIHHGDPSY | 198   | 19560 |
| >NF1-P24775YPIHHGDPSY | 10933 | >NF1-P24775YSIHHGDPSY | 122   | 10811 |
| >NF1-P24775YPIHHGDPSY | 20    | >NF1-P24775YSIHHGDPSY | 1228  | 1208  |
| >NF1-P24775YPIHHGDPSY | 35    | >NF1-P24775YSIHHGDPSY | 7510  | 7475  |
| >NF1-P24775YPIHHGDPSY | 8964  | >NF1-P24775YSIHHGDPSY | 470   | 8494  |
| >NF1-P24775TYPIHHGDPS | 79    | >NF1-P24775TYSIHHGDPS | 35    | 44    |
| >NF1-P24775TYPIHHGDPS | 201   | >NF1-P24775TYSIHHGDPS | 37    | 164   |
| >NF1-P24775DTYPIHHGDP | 148   | >NF1-P24775DTYSIHHGDP | 219   | 71    |
| >NF1-P24775VPMDTYPI   | 408   | >NF1-P24775VPMDTYSI   | 1182  | 774   |
| >NF1-P24775VPMDTYPI   | 34    | >NF1-P24775VPMDTYSI   | 32    | 2     |
| >NF1-P24775VPMDTYPI   | 168   | >NF1-P24775VPMDTYSI   | 491   | 323   |
| >NF1-P24775VPMDTYPIH  | 330   | >NF1-P24775VPMDTYSIH  | 227   | 103   |
| >NF1-P24775VPMDTYPIHF | 371   | >NF1-P24775VPMDTYSIHF | 928   | 557   |
| >NF1-P24775VPMDTYPI   | 390   | >NF1-P24775VPMDTYSI   | 702   | 312   |
| >NF1-P24775VPMDTYPI   | 111   | >NF1-P24775VPMDTYSI   | 99    | 12    |
| >NF1-P24775VPMDTYPI   | 71    | >NF1-P24775VPMDTYSI   | 43    | 28    |
| >NF1-P24775VPMDTYPI   | 72    | >NF1-P24775VPMDTYSI   | 348   | 276   |
| >NF1-P24775VPMDTYPIHF | 410   | >NF1-P24775VPMDTYSIHF | 563   | 153   |
| >NF1-P24775VPMDTYPIH  | 9375  | >NF1-P24775VPMDTYSIH  | 354   | 9021  |
| >NF1-P24775VPMDTYPI   | 221   | >NF1-P24775VPMDTYSI   | 1231  | 1010  |



|                        |       |                        |      |       |
|------------------------|-------|------------------------|------|-------|
| >NF1-P24775 NVPM DTYPI | 284   | >NF1-P24775 NVPM DTYSI | 516  | 232   |
| >NF1-P24775 NVPM DTYPI | 337   | >NF1-P24775 NVPM DTYSI | 305  | 32    |
| >NF1-P24775 NVPM DTYPI | 10    | >NF1-P24775 NVPM DTYSI | 21   | 11    |
| >NF1-P24775 NVPM DTYPI | 410   | >NF1-P24775 NVPM DTYSI | 1399 | 989   |
| >NF1-P24775 MENVPMDT   | 39    | >NF1-P24775 MENVPMDT   | 23   | 16    |
| >NF1-P24775 MENVPMDT   | 101   | >NF1-P24775 MENVPMDT   | 131  | 30    |
| >NF1-P24775 MENVPMDT   | 86    | >NF1-P24775 MENVPMDT   | 129  | 43    |
| >NF1-P24775 MENVPMDT   | 482   | >NF1-P24775 MENVPMDT   | 317  | 165   |
| >NF1-P24775 MENVPMDT   | 496   | >NF1-P24775 MENVPMDT   | 347  | 149   |
| >NF1-P24775 MENVPMDT   | 71    | >NF1-P24775 MENVPMDT   | 120  | 49    |
| >NF1-P24775 MENVPMDT   | 11    | >NF1-P24775 MENVPMDT   | 14   | 3     |
| >NF1-Q1447 QSIANHVL    | 507   | >NF1-Q1447 KSIANHVL    | 250  | 257   |
| >NF1-Q1447 QSIANHVLFT  | 826   | >NF1-Q1447 KSIANHVLFT  | 78   | 748   |
| >NF1-Q1447 QSIANHVLFT  | 16    | >NF1-Q1447 KSIANHVLFT  | 9    | 7     |
| >NF1-Q1447 QSIANHVLF   | 399   | >NF1-Q1447 KSIANHVLF   | 192  | 207   |
| >NF1-Q1447 QSIANHVLF   | 1549  | >NF1-Q1447 KSIANHVLF   | 423  | 1126  |
| >NF1-Q1447 QSIANHVL    | 321   | >NF1-Q1447 KSIANHVL    | 2054 | 1733  |
| >NF1-Q1447 QSIANHVLF   | 228   | >NF1-Q1447 KSIANHVLF   | 1667 | 1439  |
| >NF1-Q1447 QSIANHVL    | 8002  | >NF1-Q1447 KSIANHVL    | 415  | 7587  |
| >NF1-Q1447 QSIANHVLFT  | 6311  | >NF1-Q1447 KSIANHVLFT  | 299  | 6012  |
| >NF1-Q1447 QSIANHVLFT  | 124   | >NF1-Q1447 KSIANHVLFT  | 8    | 116   |
| >NF1-Q1447 QSIANHVLFT  | 326   | >NF1-Q1447 KSIANHVLFT  | 18   | 308   |
| >NF1-Q1447 QSIANHVL    | 1392  | >NF1-Q1447 KSIANHVL    | 106  | 1286  |
| >NF1-Q1447 QSIANHVLF   | 177   | >NF1-Q1447 KSIANHVLF   | 20   | 157   |
| >NF1-Q1447 QSIANHVLFT  | 16    | >NF1-Q1447 KSIANHVLFT  | 132  | 116   |
| >NF1-Q1447 QSIANHVL    | 301   | >NF1-Q1447 KSIANHVL    | 8789 | 8488  |
| >NF1-Q1447 QSIANHVLF   | 324   | >NF1-Q1447 KSIANHVLF   | 187  | 137   |
| >NF1-Q1447 QSIANHVL    | 511   | >NF1-Q1447 KSIANHVL    | 166  | 345   |
| >NF1-Q1447 QSIANHVLF   | 26    | >NF1-Q1447 KSIANHVLF   | 10   | 16    |
| >NF1-Q1447 QSIANHVL    | 28    | >NF1-Q1447 KSIANHVL    | 6    | 22    |
| >NF1-Q1447 QSIANHVLF   | 5     | >NF1-Q1447 KSIANHVLF   | 3    | 2     |
| >NF1-Q1447 QSIANHVLFT  | 3179  | >NF1-Q1447 KSIANHVLFT  | 404  | 2775  |
| >NF1-Q1447 QSIANHVL    | 214   | >NF1-Q1447 KSIANHVL    | 596  | 382   |
| >NF1-Q1447 QSIANHVL    | 10671 | >NF1-Q1447 KSIANHVL    | 377  | 10294 |
| >NF1-Q1447 QSIANHVLF   | 1389  | >NF1-Q1447 KSIANHVLF   | 64   | 1325  |
| >NF1-Q1447 QSIANHVL    | 509   | >NF1-Q1447 KSIANHVL    | 22   | 487   |
| >NF1-Q1447 QSIANHVLF   | 66    | >NF1-Q1447 KSIANHVLF   | 13   | 53    |
| >NF1-Q1447 QSIANHVL    | 559   | >NF1-Q1447 KSIANHVL    | 322  | 237   |
| >NF1-Q1447 QSIANHVLF   | 348   | >NF1-Q1447 KSIANHVLF   | 193  | 155   |
| >NF1-Q1447 QSIANHVLF   | 729   | >NF1-Q1447 KSIANHVLF   | 278  | 451   |
| >NF1-Q1447 QSIANHVLFT  | 150   | >NF1-Q1447 KSIANHVLFT  | 241  | 91    |
| >NF1-Q1447 LQSIANHV    | 90    | >NF1-Q1447 LKSIANHV    | 3779 | 3689  |
| >NF1-Q1447 LQSIANHVL   | 192   | >NF1-Q1447 LKSIANHVL   | 6274 | 6082  |

|                        |       |                        |       |       |
|------------------------|-------|------------------------|-------|-------|
| >NF1-Q1447 LQSIANHV    | 174   | >NF1-Q1447 LKSIANHV    | 9981  | 9807  |
| >NF1-Q1447 LQSIANHV    | 21    | >NF1-Q1447 LKSIANHV    | 6108  | 6087  |
| >NF1-Q1447 LQSIANHVL   | 320   | >NF1-Q1447 LKSIANHVL   | 18092 | 17772 |
| >NF1-Q1447 LQSIANHVLF  | 434   | >NF1-Q1447 LKSIANHVLF  | 18570 | 18136 |
| >NF1-Q1447 LQSIANHVL   | 104   | >NF1-Q1447 LKSIANHVL   | 13716 | 13612 |
| >NF1-Q1447 LQSIANHVLF  | 62    | >NF1-Q1447 LKSIANHVLF  | 6520  | 6458  |
| >NF1-Q1447 LQSIANHV    | 372   | >NF1-Q1447 LKSIANHV    | 366   | 6     |
| >NF1-Q1447 LQSIANHVL   | 90    | >NF1-Q1447 LKSIANHVL   | 86    | 4     |
| >NF1-Q1447 LQSIANHVLF  | 7     | >NF1-Q1447 LKSIANHVLF  | 8     | 1     |
| >NF1-Q1447 LQSIANHVL   | 47    | >NF1-Q1447 LKSIANHVL   | 166   | 119   |
| >NF1-Q1447 LQSIANHVLF  | 217   | >NF1-Q1447 LKSIANHVLF  | 203   | 14    |
| >NF1-Q1447 RGLKLMKILI  | 20641 | >NF1-Q1447 RGLKLMKILI  | 229   | 20412 |
| >NF1-Q1447 RGLKLMKILI  | 23689 | >NF1-Q1447 RGLKLMKILI  | 164   | 23525 |
| >NF1-Q1447 RGLKLMKILI  | 4738  | >NF1-Q1447 RGLKLMKILI  | 41    | 4697  |
| >NF1-Q1447 ILQSIANHV   | 82    | >NF1-Q1447 ILKSIANHV   | 1225  | 1143  |
| >NF1-Q1447 ILQSIANHV   | 8     | >NF1-Q1447 ILKSIANHV   | 12    | 4     |
| >NF1-Q1447 ILQSIANHVL  | 58    | >NF1-Q1447 ILKSIANHVL  | 54    | 4     |
| >NF1-Q1447 ILQSIANHV   | 14    | >NF1-Q1447 ILKSIANHV   | 5     | 9     |
| >NF1-Q1447 ILQSIANHVL  | 361   | >NF1-Q1447 ILKSIANHVL  | 175   | 186   |
| >NF1-Q1447 ILQSIANHV   | 95    | >NF1-Q1447 ILKSIANHV   | 379   | 284   |
| >NF1-Q1447 ILQSIANHV   | 9     | >NF1-Q1447 ILKSIANHV   | 92    | 83    |
| >NF1-Q1447 ILQSIANHVL  | 66    | >NF1-Q1447 ILKSIANHVL  | 775   | 709   |
| >NF1-Q1447 ILQSIANHV   | 7     | >NF1-Q1447 ILKSIANHV   | 83    | 76    |
| >NF1-Q1447 ILQSIANHVL  | 31    | >NF1-Q1447 ILKSIANHVL  | 612   | 581   |
| >NF1-Q1447 ILQSIANHV   | 20    | >NF1-Q1447 ILKSIANHV   | 136   | 116   |
| >NF1-Q1447 ILQSIANHVL  | 342   | >NF1-Q1447 ILKSIANHVL  | 3876  | 3534  |
| >NF1-Q1447 ILQSIANHV   | 13    | >NF1-Q1447 ILKSIANHV   | 412   | 399   |
| >NF1-Q1447 ILQSIANHVL  | 45    | >NF1-Q1447 ILKSIANHVL  | 1834  | 1789  |
| >NF1-Q1447 ILQSIANHV   | 3     | >NF1-Q1447 ILKSIANHV   | 4     | 1     |
| >NF1-Q1447 ILQSIANHVL  | 7     | >NF1-Q1447 ILKSIANHVL  | 14    | 7     |
| >NF1-Q1447 ILQSIANHVLF | 171   | >NF1-Q1447 ILKSIANHVLF | 441   | 270   |
| >NF1-Q1447 ILQSIANHVLF | 439   | >NF1-Q1447 ILKSIANHVLF | 757   | 318   |
| >NF1-Q1447 ILQSIANHVLF | 256   | >NF1-Q1447 ILKSIANHVLF | 1394  | 1138  |
| >NF1-Q1447 ILQSIANHVLF | 244   | >NF1-Q1447 ILKSIANHVLF | 146   | 98    |
| >NF1-Q1447 ILQSIANHVL  | 1247  | >NF1-Q1447 ILKSIANHVL  | 444   | 803   |
| >NF1-Q1447 ILQSIANHVLF | 48    | >NF1-Q1447 ILKSIANHVLF | 20    | 28    |
| >NF1-Q1447 ILQSIANHVLF | 197   | >NF1-Q1447 ILKSIANHVLF | 148   | 49    |
| >NF1-Q1447 KILQSIANHVL | 308   | >NF1-Q1447 KILKSIANHVL | 302   | 6     |
| >NF1-Q1447 KILQSIANHV  | 368   | >NF1-Q1447 KILKSIANHV  | 597   | 229   |
| >NF1-Q1447 KILQSIANHV  | 159   | >NF1-Q1447 KILKSIANHV  | 206   | 47    |
| >NF1-Q1447 KILQSIANHV  | 197   | >NF1-Q1447 KILKSIANHV  | 332   | 135   |
| >NF1-Q1447 KILQSIANHVL | 116   | >NF1-Q1447 KILKSIANHVL | 129   | 13    |
| >NF1-Q1447 KILQSIANHV  | 10    | >NF1-Q1447 KILKSIANHV  | 18    | 8     |

|                        |     |                        |      |     |
|------------------------|-----|------------------------|------|-----|
| >NF1-Q1447 KILQSIANHVL | 61  | >NF1-Q1447 KILKSIANHVL | 121  | 60  |
| >NF1-Q1447 KILQSIANHV  | 27  | >NF1-Q1447 KILKSIANHV  | 25   | 2   |
| >NF1-Q1447 KILQSIANHVL | 209 | >NF1-Q1447 KILKSIANHVL | 204  | 5   |
| >NF1-Q1447 KILQSIANHV  | 12  | >NF1-Q1447 KILKSIANHV  | 13   | 1   |
| >NF1-Q1447 KILQSIANHVL | 122 | >NF1-Q1447 KILKSIANHVL | 165  | 43  |
| >NF1-Q1447 KILQSIANHV  | 56  | >NF1-Q1447 KILKSIANHV  | 87   | 31  |
| >NF1-Q1447 KILQSIANHVL | 224 | >NF1-Q1447 KILKSIANHVL | 451  | 227 |
| >NF1-Q1447 KILQSIANHV  | 10  | >NF1-Q1447 KILKSIANHV  | 21   | 11  |
| >NF1-Q1447 KILQSIANHVL | 58  | >NF1-Q1447 KILKSIANHVL | 142  | 84  |
| >NF1-Q1447 KILQSIANH   | 753 | >NF1-Q1447 KILKSIANH   | 273  | 480 |
| >NF1-Q1447 KILQSIANHV  | 481 | >NF1-Q1447 KILKSIANHV  | 144  | 337 |
| >NF1-Q1447 KILQSIANHVL | 809 | >NF1-Q1447 KILKSIANHVL | 236  | 573 |
| >NF1-Q1447 KILQSIANHVL | 217 | >NF1-Q1447 KILKSIANHVL | 311  | 94  |
| >NF1-Q1447 KILQSIANHV  | 336 | >NF1-Q1447 KILKSIANHV  | 452  | 116 |
| >NF1-Q1447 KILQSIANHVL | 200 | >NF1-Q1447 KILKSIANHVL | 501  | 301 |
| >NF1-Q1447 KILQSIANHVL | 474 | >NF1-Q1447 KILKSIANHVL | 934  | 460 |
| >NF1-Q1447 SKILQSIANHV | 449 | >NF1-Q1447 SKILKSIANHV | 789  | 340 |
| >NF1-Q1447 MSKILQSI    | 27  | >NF1-Q1447 MSKILKSI    | 62   | 35  |
| >NF1-Q1447 MSKILQSIA   | 47  | >NF1-Q1447 MSKILKSIA   | 126  | 79  |
| >NF1-Q1447 MSKILQSIANI | 485 | >NF1-Q1447 MSKILKSIANI | 333  | 152 |
| >NF1-Q1447 MSKILQSI    | 419 | >NF1-Q1447 MSKILKSI    | 318  | 101 |
| >NF1-Q1447 MSKILQSI    | 57  | >NF1-Q1447 MSKILKSI    | 82   | 25  |
| >NF1-Q1447 MSKILQSIANI | 211 | >NF1-Q1447 MSKILKSIANI | 355  | 144 |
| >NF1-Q1447 MSKILQSIA   | 247 | >NF1-Q1447 MSKILKSIA   | 200  | 47  |
| >NF1-Q1447 MSKILQSI    | 55  | >NF1-Q1447 MSKILKSI    | 69   | 14  |
| >NF1-Q1447 LMSKILQSI   | 48  | >NF1-Q1447 LMSKILKSI   | 292  | 244 |
| >NF1-Q1447 LMSKILQS    | 356 | >NF1-Q1447 LMSKILKS    | 809  | 453 |
| >NF1-Q1447 LMSKILQSI   | 5   | >NF1-Q1447 LMSKILKSI   | 19   | 14  |
| >NF1-Q1447 LMSKILQSIA  | 335 | >NF1-Q1447 LMSKILKSIA  | 539  | 204 |
| >NF1-Q1447 LMSKILQSI   | 6   | >NF1-Q1447 LMSKILKSI   | 9    | 3   |
| >NF1-Q1447 LMSKILQSIA  | 290 | >NF1-Q1447 LMSKILKSIA  | 202  | 88  |
| >NF1-Q1447 LMSKILQSI   | 56  | >NF1-Q1447 LMSKILKSI   | 374  | 318 |
| >NF1-Q1447 LMSKILQSI   | 12  | >NF1-Q1447 LMSKILKSI   | 48   | 36  |
| >NF1-Q1447 LMSKILQSIA  | 479 | >NF1-Q1447 LMSKILKSIA  | 1054 | 575 |
| >NF1-Q1447 LMSKILQSI   | 21  | >NF1-Q1447 LMSKILKSI   | 184  | 163 |
| >NF1-Q1447 LMSKILQSI   | 54  | >NF1-Q1447 LMSKILKSI   | 466  | 412 |
| >NF1-Q1447 LMSKILQSIA  | 430 | >NF1-Q1447 LMSKILKSIA  | 1412 | 982 |
| >NF1-Q1447 LMSKILQSI   | 19  | >NF1-Q1447 LMSKILKSI   | 197  | 178 |
| >NF1-Q1447 LMSKILQSI   | 6   | >NF1-Q1447 LMSKILKSI   | 29   | 23  |
| >NF1-Q1447 LMSKILQSIA  | 29  | >NF1-Q1447 LMSKILKSIA  | 86   | 57  |
| >NF1-Q1447 LMSKILQSI   | 483 | >NF1-Q1447 LMSKILKSI   | 453  | 30  |
| >NF1-Q1447 LMSKILQSI   | 328 | >NF1-Q1447 LMSKILKSI   | 1160 | 832 |
| >NF1-Q1447 LMSKILQSI   | 113 | >NF1-Q1447 LMSKILKSI   | 196  | 83  |

|                         |       |                        |      |       |
|-------------------------|-------|------------------------|------|-------|
| >NF1-Q1447 KLMSKILQS    | 256   | >NF1-Q1447 KLMSKILKS   | 421  | 165   |
| >NF1-Q1447 KLMSKILQSI   | 17    | >NF1-Q1447 KLMSKILKSI  | 50   | 33    |
| >NF1-Q1447 KLMSKILQSI/A | 44    | >NF1-Q1447 KLMSKILKSIA | 115  | 71    |
| >NF1-Q1447 KLMSKILQ     | 468   | >NF1-Q1447 KLMSKILK    | 3321 | 2853  |
| >NF1-Q1447 KLMSKILQS    | 306   | >NF1-Q1447 KLMSKILKS   | 535  | 229   |
| >NF1-Q1447 KLMSKILQSI   | 10    | >NF1-Q1447 KLMSKILKSI  | 18   | 8     |
| >NF1-Q1447 KLMSKILQSI/A | 27    | >NF1-Q1447 KLMSKILKSIA | 73   | 46    |
| >NF1-Q1447 KLMSKILQS    | 164   | >NF1-Q1447 KLMSKILKS   | 326  | 162   |
| >NF1-Q1447 KLMSKILQSI   | 9     | >NF1-Q1447 KLMSKILKSI  | 10   | 1     |
| >NF1-Q1447 KLMSKILQSI/A | 8     | >NF1-Q1447 KLMSKILKSIA | 14   | 6     |
| >NF1-Q1447 KLMSKILQSI   | 114   | >NF1-Q1447 KLMSKILKSI  | 244  | 130   |
| >NF1-Q1447 KLMSKILQSI/A | 289   | >NF1-Q1447 KLMSKILKSIA | 464  | 175   |
| >NF1-Q1447 KLMSKILQS    | 347   | >NF1-Q1447 KLMSKILKS   | 838  | 491   |
| >NF1-Q1447 KLMSKILQSI   | 4     | >NF1-Q1447 KLMSKILKSI  | 9    | 5     |
| >NF1-Q1447 KLMSKILQSI/A | 94    | >NF1-Q1447 KLMSKILKSIA | 147  | 53    |
| >NF1-Q1447 KLMSKILQSI   | 6     | >NF1-Q1447 KLMSKILKSI  | 12   | 6     |
| >NF1-Q1447 KLMSKILQSI/A | 73    | >NF1-Q1447 KLMSKILKSIA | 149  | 76    |
| >NF1-Q1447 KLMSKILQSI   | 27    | >NF1-Q1447 KLMSKILKSI  | 115  | 88    |
| >NF1-Q1447 KLMSKILQSI/A | 162   | >NF1-Q1447 KLMSKILKSIA | 314  | 152   |
| >NF1-Q1447 KLMSKILQSI   | 6     | >NF1-Q1447 KLMSKILKSI  | 17   | 11    |
| >NF1-Q1447 KLMSKILQSI/A | 154   | >NF1-Q1447 KLMSKILKSIA | 402  | 248   |
| >NF1-Q1447 KLMSKILQ     | 260   | >NF1-Q1447 KLMSKILK    | 2917 | 2657  |
| >NF1-Q1447 KLMSKILQSI   | 6     | >NF1-Q1447 KLMSKILKSI  | 21   | 15    |
| >NF1-Q1447 KLMSKILQSI/A | 36    | >NF1-Q1447 KLMSKILKSIA | 56   | 20    |
| >NF1-Q1447 KLMSKILQ     | 3400  | >NF1-Q1447 KLMSKILK    | 25   | 3375  |
| >NF1-Q1447 KLMSKILQ     | 11309 | >NF1-Q1447 KLMSKILK    | 12   | 11297 |
| >NF1-Q1447 KLMSKILQ     | 3323  | >NF1-Q1447 KLMSKILK    | 23   | 3300  |
| >NF1-Q1447 KLMSKILQ     | 1937  | >NF1-Q1447 KLMSKILK    | 42   | 1895  |
| >NF1-Q1447 KLMSKILQSI   | 11    | >NF1-Q1447 KLMSKILKSI  | 13   | 2     |
| >NF1-Q1447 KLMSKILQSI   | 348   | >NF1-Q1447 KLMSKILKSI  | 446  | 98    |
| >NF1-Q1447 KLMSKILQ     | 3109  | >NF1-Q1447 KLMSKILK    | 230  | 2879  |
| >NF1-Q1447 LKLMSKILQSI  | 106   | >NF1-Q1447 LKLMSKILKSI | 35   | 71    |
| >NF1-Q1447 LKLMSKILQSI  | 18    | >NF1-Q1447 LKLMSKILKSI | 23   | 5     |
| >NF1-Q1447 GLKLMSKILQ   | 13476 | >NF1-Q1447 GLKLMSKILK  | 74   | 13402 |
| >NF1-Q1447 GLKLMSKILQ   | 29829 | >NF1-Q1447 GLKLMSKILK  | 112  | 29717 |
| >NF1-Q1447 GLKLMSKILQ   | 5770  | >NF1-Q1447 GLKLMSKILK  | 47   | 5723  |
| >NF1-Q209H QLAVINSL     | 400   | >NF1-Q209H HLAVINSL    | 189  | 211   |
| >NF1-Q209H QLAVINSL     | 5     | >NF1-Q209H HLAVINSL    | 4    | 1     |
| >NF1-Q209H QLAVINSLEK/  | 21    | >NF1-Q209H HLAVINSLEK/ | 11   | 10    |
| >NF1-Q209H QLAVINSL     | 55    | >NF1-Q209H HLAVINSL    | 27   | 28    |
| >NF1-Q209H QLAVINSLEK/  | 114   | >NF1-Q209H HLAVINSLEK/ | 58   | 56    |
| >NF1-Q209H QLAVINSL     | 387   | >NF1-Q209H HLAVINSL    | 472  | 85    |
| >NF1-Q209H QLAVINSL     | 293   | >NF1-Q209H HLAVINSL    | 160  | 133   |

|                         |      |                         |       |       |
|-------------------------|------|-------------------------|-------|-------|
| >NF1-Q209H QLAVINSL     | 578  | >NF1-Q209H HLAVINSL     | 120   | 458   |
| >NF1-Q209H QLAVINSL     | 461  | >NF1-Q209H HLAVINSL     | 107   | 354   |
| >NF1-Q209H QLAVINSL     | 153  | >NF1-Q209H HLAVINSL     | 135   | 18    |
| >NF1-Q209H QLAVINSL     | 17   | >NF1-Q209H HLAVINSL     | 8     | 9     |
| >NF1-Q209H QLAVINSLEK/  | 189  | >NF1-Q209H HLAVINSLEK/  | 59    | 130   |
| >NF1-Q209H QLAVINSLEK   | 92   | >NF1-Q209H HLAVINSLEK   | 92    | 0     |
| >NF1-Q209H QLAVINSLEK   | 86   | >NF1-Q209H HLAVINSLEK   | 121   | 35    |
| >NF1-Q209H QLAVINSLEK   | 3154 | >NF1-Q209H HLAVINSLEK   | 255   | 2899  |
| >NF1-Q209H QLAVINSLEK   | 194  | >NF1-Q209H HLAVINSLEK   | 80    | 114   |
| >NF1-Q209H QLAVINSL     | 252  | >NF1-Q209H HLAVINSL     | 145   | 107   |
| >NF1-Q209H QLAVINSLEK/  | 550  | >NF1-Q209H HLAVINSLEK/  | 284   | 266   |
| >NF1-Q209H QLAVINSL     | 3868 | >NF1-Q209H HLAVINSL     | 442   | 3426  |
| >NF1-Q209H AQLAVINSL    | 617  | >NF1-Q209H AHLAVINSL    | 75    | 542   |
| >NF1-Q209H AQLAVINSL    | 91   | >NF1-Q209H AHLAVINSL    | 17767 | 17676 |
| >NF1-Q209H AQLAVINSL    | 55   | >NF1-Q209H AHLAVINSL    | 1435  | 1380  |
| >NF1-Q209H AQLAVINSL    | 215  | >NF1-Q209H AHLAVINSL    | 14470 | 14255 |
| >NF1-Q209H AQLAVINS     | 411  | >NF1-Q209H AHLAVINS     | 26205 | 25794 |
| >NF1-Q209H AQLAVINSL    | 5    | >NF1-Q209H AHLAVINSL    | 4237  | 4232  |
| >NF1-Q209H AQLAVINSL    | 53   | >NF1-Q209H AHLAVINSL    | 5308  | 5255  |
| >NF1-Q209H AQLAVINSL    | 305  | >NF1-Q209H AHLAVINSL    | 14255 | 13950 |
| >NF1-Q209H AQLAVINSL    | 242  | >NF1-Q209H AHLAVINSL    | 13656 | 13414 |
| >NF1-Q209H AQLAVINSLEI  | 235  | >NF1-Q209H AHLAVINSLEI  | 7277  | 7042  |
| >NF1-Q209H AQLAVINSLEI  | 27   | >NF1-Q209H AHLAVINSLEI  | 2150  | 2123  |
| >NF1-Q209H AQLAVINSLEI  | 142  | >NF1-Q209H AHLAVINSLEI  | 2144  | 2002  |
| >NF1-Q209H AQLAVINSL    | 435  | >NF1-Q209H AHLAVINSL    | 5881  | 5446  |
| >NF1-Q209H AQLAVINSL    | 250  | >NF1-Q209H AHLAVINSL    | 19794 | 19544 |
| >NF1-Q209H AQLAVINSL    | 20   | >NF1-Q209H AHLAVINSL    | 266   | 246   |
| >NF1-Q209H AQLAVINSLEI  | 318  | >NF1-Q209H AHLAVINSLEI  | 3411  | 3093  |
| >NF1-Q209H AQLAVINSL    | 21   | >NF1-Q209H AHLAVINSL    | 14    | 7     |
| >NF1-Q209H AQLAVINSL    | 248  | >NF1-Q209H AHLAVINSL    | 11292 | 11044 |
| >NF1-Q209H AQLAVINSL    | 461  | >NF1-Q209H AHLAVINSL    | 5395  | 4934  |
| >NF1-Q209H FKFKALKKKVA/ | 128  | >NF1-Q209H FKFKALKKKVA/ | 24    | 104   |
| >NF1-Q209H VAQLAVINSL   | 959  | >NF1-Q209H VAHLAVINSL   | 449   | 510   |
| >NF1-Q209H KVAQLAVI     | 306  | >NF1-Q209H KVAHLAVI     | 174   | 132   |
| >NF1-Q209H KVAQLAVINS   | 29   | >NF1-Q209H KVAHLAVINS   | 22    | 7     |
| >NF1-Q209H KVAQLAVI     | 285  | >NF1-Q209H KVAHLAVI     | 102   | 183   |
| >NF1-Q209H KVAQLAVINS   | 252  | >NF1-Q209H KVAHLAVINS   | 111   | 141   |
| >NF1-Q209H KVAQLAVI     | 134  | >NF1-Q209H KVAHLAVI     | 88    | 46    |
| >NF1-Q209H KVAQLAVINS   | 51   | >NF1-Q209H KVAHLAVINS   | 38    | 13    |
| >NF1-Q209H KVAQLAVI     | 44   | >NF1-Q209H KVAHLAVI     | 41    | 3     |
| >NF1-Q209H KVAQLAVINS   | 33   | >NF1-Q209H KVAHLAVINS   | 29    | 4     |
| >NF1-Q209H KVAQLAVINS   | 736  | >NF1-Q209H KVAHLAVINS   | 240   | 496   |
| >NF1-Q209H KVAQLAVINS   | 242  | >NF1-Q209H KVAHLAVINS   | 327   | 85    |

|                       |      |                       |     |     |
|-----------------------|------|-----------------------|-----|-----|
| >NF1-Q209H KVAQLAVI   | 130  | >NF1-Q209H KVAHLAVI   | 124 | 6   |
| >NF1-Q209H KVAQLAVINS | 426  | >NF1-Q209H KVAHLAVINS | 400 | 26  |
| >NF1-Q209H KVAQLAVINS | 487  | >NF1-Q209H KVAHLAVINS | 583 | 96  |
| >NF1-Q209H KVAQLAVI   | 113  | >NF1-Q209H KVAHLAVI   | 148 | 35  |
| >NF1-Q209H KKVAQLAV   | 489  | >NF1-Q209H KKVAHLAV   | 336 | 153 |
| >NF1-Q209H KKVAQLAV   | 46   | >NF1-Q209H KKVAHLAV   | 32  | 14  |
| >NF1-Q209H KKVAQLAVI  | 66   | >NF1-Q209H KKVAHLAVI  | 50  | 16  |
| >NF1-Q209H LKKVAQLAV  | 47   | >NF1-Q209H LKKVAHLAV  | 25  | 22  |
| >NF1-Q209H LKKVAQLAVI | 68   | >NF1-Q209H LKKVAHLAVI | 41  | 27  |
| >NF1-Q209H ALKKVAQL   | 55   | >NF1-Q209H ALKKVAHL   | 50  | 5   |
| >NF1-Q209H ALKKVAQLA  | 858  | >NF1-Q209H ALKKVAHLA  | 193 | 665 |
| >NF1-Q209H ALKKVAQLAV | 261  | >NF1-Q209H ALKKVAHLAV | 206 | 55  |
| >NF1-Q209H ALKKVAQLAV | 288  | >NF1-Q209H ALKKVAHLAV | 149 | 139 |
| >NF1-Q209H ALKKVAQL   | 29   | >NF1-Q209H ALKKVAHL   | 27  | 2   |
| >NF1-Q209H ALKKVAQLA  | 83   | >NF1-Q209H ALKKVAHLA  | 44  | 39  |
| >NF1-Q209H ALKKVAQLAV | 103  | >NF1-Q209H ALKKVAHLAV | 46  | 57  |
| >NF1-Q209H ALKKVAQLAV | 25   | >NF1-Q209H ALKKVAHLAV | 16  | 9   |
| >NF1-Q209H ALKKVAQL   | 178  | >NF1-Q209H ALKKVAHL   | 263 | 85  |
| >NF1-Q209H ALKKVAQLAV | 40   | >NF1-Q209H ALKKVAHLAV | 23  | 17  |
| >NF1-Q209H ALKKVAQLAV | 404  | >NF1-Q209H ALKKVAHLAV | 225 | 179 |
| >NF1-Q209H ALKKVAQL   | 1140 | >NF1-Q209H ALKKVAHL   | 286 | 854 |
| >NF1-Q209H ALKKVAQLAV | 107  | >NF1-Q209H ALKKVAHLAV | 92  | 15  |
| >NF1-Q209H ALKKVAQLAV | 552  | >NF1-Q209H ALKKVAHLAV | 320 | 232 |
| >NF1-Q209H ALKKVAQL   | 954  | >NF1-Q209H ALKKVAHL   | 481 | 473 |
| >NF1-Q209H ALKKVAQLAV | 90   | >NF1-Q209H ALKKVAHLAV | 93  | 3   |
| >NF1-Q209H ALKKVAQL   | 7    | >NF1-Q209H ALKKVAHL   | 9   | 2   |
| >NF1-Q209H ALKKVAQLA  | 80   | >NF1-Q209H ALKKVAHLA  | 24  | 56  |
| >NF1-Q209H ALKKVAQLAV | 4    | >NF1-Q209H ALKKVAHLAV | 3   | 1   |
| >NF1-Q209H ALKKVAQLAV | 69   | >NF1-Q209H ALKKVAHLAV | 49  | 20  |
| >NF1-Q209H ALKKVAQLA  | 311  | >NF1-Q209H ALKKVAHLA  | 333 | 22  |
| >NF1-Q209H ALKKVAQLAV | 208  | >NF1-Q209H ALKKVAHLAV | 113 | 95  |
| >NF1-Q209H ALKKVAQLAV | 239  | >NF1-Q209H ALKKVAHLAV | 261 | 22  |
| >NF1-Q209H ALKKVAQL   | 339  | >NF1-Q209H ALKKVAHL   | 289 | 50  |
| >NF1-Q209H ALKKVAQL   | 1159 | >NF1-Q209H ALKKVAHL   | 409 | 750 |
| >NF1-Q209H KALKKVAQL  | 583  | >NF1-Q209H KALKKVAHL  | 199 | 384 |
| >NF1-Q209H KALKKVAQLA | 97   | >NF1-Q209H KALKKVAHLA | 83  | 14  |
| >NF1-Q209H KALKKVAQLA | 154  | >NF1-Q209H KALKKVAHLA | 126 | 28  |
| >NF1-Q209H KALKKVAQLA | 480  | >NF1-Q209H KALKKVAHLA | 621 | 141 |
| >NF1-Q209H KALKKVAQL  | 704  | >NF1-Q209H KALKKVAHL  | 265 | 439 |
| >NF1-Q209H KALKKVAQLA | 206  | >NF1-Q209H KALKKVAHLA | 190 | 16  |
| >NF1-Q209H KALKKVAQLA | 134  | >NF1-Q209H KALKKVAHLA | 61  | 73  |
| >NF1-Q209H KALKKVAQL  | 314  | >NF1-Q209H KALKKVAHL  | 249 | 65  |
| >NF1-Q209H KALKKVAQL  | 5    | >NF1-Q209H KALKKVAHL  | 11  | 6   |

|                        |       |                        |       |       |
|------------------------|-------|------------------------|-------|-------|
| >NF1-Q209H KALKKVAQLA  | 414   | >NF1-Q209H KALKKVAHLA  | 337   | 77    |
| >NF1-Q209H KALKKVAQL   | 154   | >NF1-Q209H KALKKVAHL   | 131   | 23    |
| >NF1-Q209H FKALKKVAQL  | 319   | >NF1-Q209H FKALKKVAHL  | 212   | 107   |
| >NF1-Q209H FKALKKVAQL  | 250   | >NF1-Q209H FKALKKVAHL  | 744   | 494   |
| >NF1-Q209H KFKALKKVAC  | 73    | >NF1-Q209H KFKALKKVAH  | 38    | 35    |
| >NF1-Q209H KFKALKKVAC  | 2173  | >NF1-Q209H KFKALKKVAH  | 336   | 1837  |
| >NF1-Q209H KFKALKKVAC  | 667   | >NF1-Q209H KFKALKKVAH  | 267   | 400   |
| >NF1-Q519P·TQGSTAELI   | 164   | >NF1-Q519P·TPGSTAELI   | 2064  | 1900  |
| >NF1-Q519P·TQGSTAEL    | 27822 | >NF1-Q519P·TPGSTAEL    | 159   | 27663 |
| >NF1-Q519P·TQGSTAEL    | 25628 | >NF1-Q519P·TPGSTAEL    | 272   | 25356 |
| >NF1-Q519P·TQGSTAEL    | 405   | >NF1-Q519P·TPGSTAEL    | 14472 | 14067 |
| >NF1-Q519P·TQGSTAEL    | 255   | >NF1-Q519P·TPGSTAEL    | 786   | 531   |
| >NF1-Q519P·TQGSTAELI   | 21086 | >NF1-Q519P·TPGSTAELI   | 348   | 20738 |
| >NF1-Q519P·ETQGSTAEL   | 1160  | >NF1-Q519P·ETPGSTAEL   | 259   | 901   |
| >NF1-Q519P·ETQGSTAEL   | 108   | >NF1-Q519P·ETPGSTAEL   | 72    | 36    |
| >NF1-Q519P·ETQGSTAEL   | 22    | >NF1-Q519P·ETPGSTAEL   | 15    | 7     |
| >NF1-Q519P·ETQGSTAEL   | 81    | >NF1-Q519P·ETPGSTAEL   | 15    | 66    |
| >NF1-Q519P·ETQGSTAELI  | 2255  | >NF1-Q519P·ETPGSTAELI  | 478   | 1777  |
| >NF1-Q519P·ETQGSTAEL   | 13    | >NF1-Q519P·ETPGSTAEL   | 6     | 7     |
| >NF1-Q519P·ETQGSTAELI  | 104   | >NF1-Q519P·ETPGSTAELI  | 19    | 85    |
| >NF1-Q519P·ETQGSTAEL   | 49    | >NF1-Q519P·ETPGSTAEL   | 91    | 42    |
| >NF1-Q519P·ETQGSTAELI  | 72    | >NF1-Q519P·ETPGSTAELI  | 140   | 68    |
| >NF1-Q519P·ETQGSTAEL   | 21    | >NF1-Q519P·ETPGSTAEL   | 333   | 312   |
| >NF1-Q519P·ETQGSTAEL   | 1655  | >NF1-Q519P·ETPGSTAEL   | 5     | 1650  |
| >NF1-Q519P·ETQGSTAELI  | 1512  | >NF1-Q519P·ETPGSTAELI  | 5     | 1507  |
| >NF1-Q519P·ETQGSTAELI  | 823   | >NF1-Q519P·ETPGSTAELI  | 406   | 417   |
| >NF1-Q519P·PETQGSTAEL  | 40    | >NF1-Q519P·PETPGSTAELI | 51    | 11    |
| >NF1-Q519P·PETQGSTAEL  | 437   | >NF1-Q519P·PETPGSTAELI | 644   | 207   |
| >NF1-Q519P·PETQGSTAEL  | 125   | >NF1-Q519P·PETPGSTAELI | 424   | 299   |
| >NF1-Q519P·GPETQGSTAEL | 172   | >NF1-Q519P·GPETPGSTAEL | 76    | 96    |
| >NF1-Q519P·KQGPETQGS   | 347   | >NF1-Q519P·KQGPETPGST  | 243   | 104   |
| >NF1-Q554E·HQLDSIDL    | 15300 | >NF1-Q554E·HELDSIDL    | 138   | 15162 |
| >NF1-Q554E·HQLDSIDLW   | 5594  | >NF1-Q554E·HELDSIDLW   | 169   | 5425  |
| >NF1-Q554E·HQLDSIDL    | 121   | >NF1-Q554E·HELDSIDL    | 5347  | 5226  |
| >NF1-Q554E·HQLDSIDLW   | 447   | >NF1-Q554E·HELDSIDLW   | 12363 | 11916 |
| >NF1-Q554E·HQLDSIDL    | 385   | >NF1-Q554E·HELDSIDL    | 12640 | 12255 |
| >NF1-Q554E·HQLDSIDL    | 84    | >NF1-Q554E·HELDSIDL    | 3600  | 3516  |
| >NF1-Q554E·HQLDSIDL    | 47    | >NF1-Q554E·HELDSIDL    | 460   | 413   |
| >NF1-Q554E·HQLDSIDL    | 1207  | >NF1-Q554E·HELDSIDL    | 13    | 1194  |
| >NF1-Q554E·HQLDSIDL    | 5501  | >NF1-Q554E·HELDSIDL    | 50    | 5451  |
| >NF1-Q554E·HQLDSIDLW   | 2323  | >NF1-Q554E·HELDSIDLW   | 63    | 2260  |
| >NF1-Q554E·HQLDSIDL    | 14203 | >NF1-Q554E·HELDSIDL    | 325   | 13878 |
| >NF1-Q554E·HQLDSIDLW   | 474   | >NF1-Q554E·HELDSIDLW   | 12    | 462   |

|                        |      |                        |     |      |
|------------------------|------|------------------------|-----|------|
| >NF1-Q554E·HQLDSIDLW   | 3511 | >NF1-Q554E·HELDSIDLW   | 21  | 3490 |
| >NF1-Q554E·HQLDSIDLW   | 237  | >NF1-Q554E·HELDSIDLW   | 195 | 42   |
| >NF1-Q554E·HQLDSIDLW   | 17   | >NF1-Q554E·HELDSIDLW   | 80  | 63   |
| >NF1-Q554E·LHQLDSIDLW  | 1026 | >NF1-Q554E·LHELDSIDLW  | 328 | 698  |
| >NF1-Q554E·LHQLDSIDLW  | 29   | >NF1-Q554E·LHELDSIDLW  | 28  | 1    |
| >NF1-Q554E·VLHQLDSI    | 1146 | >NF1-Q554E·VLHELDSI    | 163 | 983  |
| >NF1-Q554E·VLHQLDSI    | 201  | >NF1-Q554E·VLHELDSI    | 64  | 137  |
| >NF1-Q554E·VLHQLDSIDL  | 510  | >NF1-Q554E·VLHELDSIDL  | 275 | 235  |
| >NF1-Q554E·VLHQLDSI    | 77   | >NF1-Q554E·VLHELDSI    | 20  | 57   |
| >NF1-Q554E·VLHQLDSI    | 1694 | >NF1-Q554E·VLHELDSI    | 346 | 1348 |
| >NF1-Q554E·VLHQLDSI    | 20   | >NF1-Q554E·VLHELDSI    | 6   | 14   |
| >NF1-Q554E·VLHQLDSIDL  | 234  | >NF1-Q554E·VLHELDSIDL  | 42  | 192  |
| >NF1-Q554E·VLHQLDSI    | 134  | >NF1-Q554E·VLHELDSI    | 18  | 116  |
| >NF1-Q554E·VLHQLDSIDL  | 708  | >NF1-Q554E·VLHELDSIDL  | 73  | 635  |
| >NF1-Q554E·VLHQLDSI    | 116  | >NF1-Q554E·VLHELDSI    | 40  | 76   |
| >NF1-Q554E·VLHQLDSIDL  | 172  | >NF1-Q554E·VLHELDSIDL  | 53  | 119  |
| >NF1-Q554E·VLHQLDSI    | 2654 | >NF1-Q554E·VLHELDSI    | 492 | 2162 |
| >NF1-Q554E·VLHQLDSI    | 20   | >NF1-Q554E·VLHELDSI    | 10  | 10   |
| >NF1-Q554E·VLHQLDSIDL  | 19   | >NF1-Q554E·VLHELDSIDL  | 9   | 10   |
| >NF1-Q554E·VLHQLDSIDL' | 530  | >NF1-Q554E·VLHELDSIDLV | 430 | 100  |
| >NF1-Q554E·VLHQLDSIDL' | 373  | >NF1-Q554E·VLHELDSIDLV | 449 | 76   |
| >NF1-Q554E·LVLHQLDSI   | 28   | >NF1-Q554E·LVLHELDSI   | 24  | 4    |
| >NF1-Q554E·LVLHQLDSI   | 488  | >NF1-Q554E·LVLHELDSI   | 377 | 111  |
| >NF1-Q554E·LLVLHQLDSI  | 359  | >NF1-Q554E·LLVLHELDSI  | 264 | 95   |
| >NF1-Q554E·LLVLHQLDSI  | 108  | >NF1-Q554E·LLVLHELDSI  | 77  | 31   |
| >NF1-Q554E·LLVLHQLDSI  | 83   | >NF1-Q554E·LLVLHELDSI  | 70  | 13   |
| >NF1-Q554E·LLVLHQLDSI  | 207  | >NF1-Q554E·LLVLHELDSI  | 114 | 93   |
| >NF1-Q554E·LLVLHQLDSI  | 160  | >NF1-Q554E·LLVLHELDSI  | 213 | 53   |
| >NF1-Q554E·LLVLHQLDSI  | 193  | >NF1-Q554E·LLVLHELDSI  | 255 | 62   |
| >NF1-Q554E·LLVLHQLDSI  | 65   | >NF1-Q554E·LLVLHELDSI  | 99  | 34   |
| >NF1-Q554E·ALLVLHQL    | 86   | >NF1-Q554E·ALLVLHEL    | 46  | 40   |
| >NF1-Q554E·ALLVLHQLDS  | 216  | >NF1-Q554E·ALLVLHELDSI | 187 | 29   |
| >NF1-Q554E·ALLVLHQL    | 63   | >NF1-Q554E·ALLVLHEL    | 39  | 24   |
| >NF1-Q554E·ALLVLHQLDS  | 208  | >NF1-Q554E·ALLVLHELDSI | 157 | 51   |
| >NF1-Q554E·ALLVLHQL    | 427  | >NF1-Q554E·ALLVLHEL    | 431 | 4    |
| >NF1-Q554E·ALLVLHQLDS  | 372  | >NF1-Q554E·ALLVLHELDSI | 456 | 84   |
| >NF1-Q554E·ALLVLHQL    | 195  | >NF1-Q554E·ALLVLHEL    | 111 | 84   |
| >NF1-Q554E·ALLVLHQLDS  | 211  | >NF1-Q554E·ALLVLHELDSI | 166 | 45   |
| >NF1-Q554E·ALLVLHQL    | 6    | >NF1-Q554E·ALLVLHEL    | 5   | 1    |
| >NF1-Q554E·ALLVLHQLDS  | 13   | >NF1-Q554E·ALLVLHELDSI | 13  | 0    |
| >NF1-Q554E·ALLVLHQL    | 39   | >NF1-Q554E·ALLVLHEL    | 26  | 13   |
| >NF1-Q554E·ALLVLHQLDS  | 50   | >NF1-Q554E·ALLVLHELDSI | 60  | 10   |
| >NF1-Q554E·ALLVLHQL    | 9    | >NF1-Q554E·ALLVLHEL    | 10  | 1    |



|                       |      |                        |       |       |
|-----------------------|------|------------------------|-------|-------|
| >NF1-Q554E·ALLVLHQLDS | 28   | >NF1-Q554E·ALLVLHELDSI | 33    | 5     |
| >NF1-Q554E·ALLVLHQL   | 19   | >NF1-Q554E·ALLVLHEL    | 25    | 6     |
| >NF1-Q554E·ALLVLHQLDS | 221  | >NF1-Q554E·ALLVLHELDSI | 167   | 54    |
| >NF1-Q554E·ALLVLHQL   | 3    | >NF1-Q554E·ALLVLHEL    | 4     | 1     |
| >NF1-Q554E·ALLVLHQLDS | 22   | >NF1-Q554E·ALLVLHELDSI | 34    | 12    |
| >NF1-Q554E·ALLVLHQLDS | 145  | >NF1-Q554E·ALLVLHELDSI | 131   | 14    |
| >NF1-Q554E·EALLVLHQL  | 292  | >NF1-Q554E·EALLVLHEL   | 96    | 196   |
| >NF1-Q554E·EALLVLHQL  | 12   | >NF1-Q554E·EALLVLHEL   | 15    | 3     |
| >NF1-Q554E·MEALLVLHQI | 12   | >NF1-Q554E·MEALLVLHEL  | 13    | 1     |
| >NF1-Q554E·MEALLVLHQI | 363  | >NF1-Q554E·MEALLVLHEL  | 357   | 6     |
| >NF1-Q554E·MEALLVLHQI | 167  | >NF1-Q554E·MEALLVLHEL  | 171   | 4     |
| >NF1-Q554E·MEALLVLHQI | 25   | >NF1-Q554E·MEALLVLHEL  | 28    | 3     |
| >NF1-Q554E·MEALLVLHQI | 131  | >NF1-Q554E·MEALLVLHEL  | 165   | 34    |
| >NF1-Q554E·MEALLVLHQI | 265  | >NF1-Q554E·MEALLVLHEL  | 256   | 9     |
| >NF1-Q554E·MEALLVLHQI | 122  | >NF1-Q554E·MEALLVLHEL  | 92    | 30    |
| >NF1-Q554E·AMEALLVLHC | 98   | >NF1-Q554E·AMEALLVLHE  | 45    | 53    |
| >NF1-Q554E·AMEALLVLHC | 9    | >NF1-Q554E·AMEALLVLHE  | 7     | 2     |
| >NF1-Q554E·AMEALLVLHC | 168  | >NF1-Q554E·AMEALLVLHE  | 152   | 16    |
| >NF1-Q554E·AMEALLVLHC | 243  | >NF1-Q554E·AMEALLVLHE  | 126   | 117   |
| >NF1-Q554E·AMEALLVLHC | 20   | >NF1-Q554E·AMEALLVLHE  | 17    | 3     |
| >NF1-Q554E·AMEALLVLHC | 56   | >NF1-Q554E·AMEALLVLHE  | 28    | 28    |
| >NF1-Q554E·AMEALLVLHC | 106  | >NF1-Q554E·AMEALLVLHE  | 86    | 20    |
| >NF1-Q554E·AMEALLVLHC | 471  | >NF1-Q554E·AMEALLVLHE  | 842   | 371   |
| >NF1-Q554E·AMEALLVLHC | 4    | >NF1-Q554E·AMEALLVLHE  | 4     | 0     |
| >NF1-Q835H QEWINMTGF  | 460  | >NF1-Q835H HEWINMTGF   | 322   | 138   |
| >NF1-Q835H QEWINMTGF  | 10   | >NF1-Q835H HEWINMTGF   | 10    | 0     |
| >NF1-Q835H QEWINMTGF  | 237  | >NF1-Q835H HEWINMTGF   | 192   | 45    |
| >NF1-Q835H QEWINMTGF  | 37   | >NF1-Q835H HEWINMTGF   | 22    | 15    |
| >NF1-Q835H QEWINMTGF  | 1509 | >NF1-Q835H HEWINMTGF   | 355   | 1154  |
| >NF1-Q835H QEWINMTGF  | 416  | >NF1-Q835H HEWINMTGF   | 62    | 354   |
| >NF1-Q835H QEWINMTGF  | 94   | >NF1-Q835H HEWINMTGF   | 100   | 6     |
| >NF1-Q835H QEWINMTGF  | 308  | >NF1-Q835H HEWINMTGF   | 310   | 2     |
| >NF1-Q835H QEWINMTGF  | 306  | >NF1-Q835H HEWINMTGF   | 1731  | 1425  |
| >NF1-Q835H QEWINMTGF  | 276  | >NF1-Q835H HEWINMTGF   | 244   | 32    |
| >NF1-Q835H QEWINMTGF  | 246  | >NF1-Q835H HEWINMTGF   | 1314  | 1068  |
| >NF1-Q835H QEWINMTGF  | 185  | >NF1-Q835H HEWINMTGF   | 42    | 143   |
| >NF1-Q835H QEWINMTGF  | 18   | >NF1-Q835H HEWINMTGF   | 16    | 2     |
| >NF1-Q835H QEWINMTGF  | 475  | >NF1-Q835H HEWINMTGF   | 121   | 354   |
| >NF1-Q835H LQEWINMTG  | 380  | >NF1-Q835H LHEWINMTG   | 6903  | 6523  |
| >NF1-Q835H LQEWINMTG  | 134  | >NF1-Q835H LHEWINMTG   | 17949 | 17815 |
| >NF1-Q835H LQEWINMTG  | 221  | >NF1-Q835H LHEWINMTG   | 2491  | 2270  |
| >NF1-Q835H LQEWINMTG  | 160  | >NF1-Q835H LHEWINMTG   | 7172  | 7012  |
| >NF1-Q835H LQEWINMTG  | 2270 | >NF1-Q835H LHEWINMTG   | 126   | 2144  |

|                       |      |                       |      |      |
|-----------------------|------|-----------------------|------|------|
| >NF1-Q835H SLQEWINM   | 47   | >NF1-Q835H SLHEWINM   | 67   | 20   |
| >NF1-Q835H SLQEWINMT  | 50   | >NF1-Q835H SLHEWINMT  | 73   | 23   |
| >NF1-Q835H SLQEWINM   | 239  | >NF1-Q835H SLHEWINM   | 216  | 23   |
| >NF1-Q835H SLQEWINMT  | 229  | >NF1-Q835H SLHEWINMT  | 195  | 34   |
| >NF1-Q835H SLQEWINM   | 467  | >NF1-Q835H SLHEWINM   | 163  | 304  |
| >NF1-Q835H SLQEWINMT  | 92   | >NF1-Q835H SLHEWINMT  | 27   | 65   |
| >NF1-Q835H SLQEWINMT  | 1074 | >NF1-Q835H SLHEWINMT  | 306  | 768  |
| >NF1-Q835H SLQEWINM   | 16   | >NF1-Q835H SLHEWINM   | 9    | 7    |
| >NF1-Q835H SLQEWINMT  | 5    | >NF1-Q835H SLHEWINMT  | 4    | 1    |
| >NF1-Q835H SLQEWINMT  | 125  | >NF1-Q835H SLHEWINMT  | 57   | 68   |
| >NF1-Q835H SLQEWINMT  | 73   | >NF1-Q835H SLHEWINMT  | 34   | 39   |
| >NF1-Q835H SLQEWINM   | 50   | >NF1-Q835H SLHEWINM   | 111  | 61   |
| >NF1-Q835H SLQEWINMT  | 64   | >NF1-Q835H SLHEWINMT  | 221  | 157  |
| >NF1-Q835H SLQEWINM   | 48   | >NF1-Q835H SLHEWINM   | 34   | 14   |
| >NF1-Q835H SLQEWINMT  | 43   | >NF1-Q835H SLHEWINMT  | 35   | 8    |
| >NF1-Q835H SLQEWINM   | 268  | >NF1-Q835H SLHEWINM   | 987  | 719  |
| >NF1-Q835H SLQEWINM   | 18   | >NF1-Q835H SLHEWINM   | 15   | 3    |
| >NF1-Q835H SLQEWINMT  | 6    | >NF1-Q835H SLHEWINMT  | 5    | 1    |
| >NF1-Q835H SLQEWINMT  | 287  | >NF1-Q835H SLHEWINMT  | 210  | 77   |
| >NF1-Q835H SLQEWINMT  | 197  | >NF1-Q835H SLHEWINMT  | 144  | 53   |
| >NF1-Q835H SLQEWINMT  | 588  | >NF1-Q835H SLHEWINMT  | 220  | 368  |
| >NF1-Q835H SLQEWINMT  | 1269 | >NF1-Q835H SLHEWINMT  | 385  | 884  |
| >NF1-Q835H SLQEWINMT  | 99   | >NF1-Q835H SLHEWINMT  | 95   | 4    |
| >NF1-Q835H SLQEWINMT  | 173  | >NF1-Q835H SLHEWINMT  | 174  | 1    |
| >NF1-Q835H SLQEWINMT  | 694  | >NF1-Q835H SLHEWINMT  | 187  | 507  |
| >NF1-Q835H SLQEWINMT  | 1230 | >NF1-Q835H SLHEWINMT  | 472  | 758  |
| >NF1-Q835H DSLQEWINM  | 167  | >NF1-Q835H DSLHEWINM  | 345  | 178  |
| >NF1-Q835H DSLQEWINM  | 175  | >NF1-Q835H DSLHEWINM  | 1179 | 1004 |
| >NF1-Q835H TDSLQEWI   | 42   | >NF1-Q835H TDSLHEWI   | 89   | 47   |
| >NF1-Q835H DTDSLQEWI  | 231  | >NF1-Q835H DTDSLHEWI  | 103  | 128  |
| >NF1-Q835H DTDSLQEWI  | 254  | >NF1-Q835H DTDSLHEWIN | 191  | 63   |
| >NF1-Q835H SDTDSLQEW  | 187  | >NF1-Q835H SDTDSLHEW  | 263  | 76   |
| >NF1-Q835H SDTDSLQEWI | 48   | >NF1-Q835H SDTDSLHEWI | 77   | 29   |
| >NF1-Q835H LSDTDSLQEV | 15   | >NF1-Q835H LSDTDSLHEV | 16   | 1    |
| >NF1-Q835H LSDTDSLQEV | 128  | >NF1-Q835H LSDTDSLHEV | 104  | 24   |
| >NF1-Q835H LSDTDSLQEV | 15   | >NF1-Q835H LSDTDSLHEV | 12   | 3    |
| >NF1-Q835H LSDTDSLQEV | 364  | >NF1-Q835H LSDTDSLHEV | 158  | 206  |
| >NF1-Q835H LSDTDSLQEV | 105  | >NF1-Q835H LSDTDSLHEV | 111  | 6    |
| >NF1-R1276(RGNLASK    | 472  | >NF1-R1276(QGNLASK    | 5947 | 5475 |
| >NF1-R1276(RGNLASK    | 88   | >NF1-R1276(QGNLASK    | 2946 | 2858 |
| >NF1-R1276(RGNLASKI   | 58   | >NF1-R1276(QGNLASKI   | 309  | 251  |
| >NF1-R1276(RGNLASKIM  | 101  | >NF1-R1276(QGNLASKIM  | 490  | 389  |
| >NF1-R1276(RGNLASKI   | 124  | >NF1-R1276(QGNLASKI   | 1213 | 1089 |

|                        |       |                         |       |       |
|------------------------|-------|-------------------------|-------|-------|
| >NF1-R1276( FRGNLASKI  | 7815  | >NF1-R1276( FQGNLASKI   | 182   | 7633  |
| >NF1-R1276( FRGNLASKI  | 10477 | >NF1-R1276( FQGNLASKI   | 349   | 10128 |
| >NF1-R1276( FRGNLASKI  | 25903 | >NF1-R1276( FQGNLASKI   | 272   | 25631 |
| >NF1-R1276( FRGNLASKI  | 9845  | >NF1-R1276( FQGNLASKI   | 356   | 9489  |
| >NF1-R1276( FRGNLASKI  | 22448 | >NF1-R1276( FQGNLASKI   | 388   | 22060 |
| >NF1-R1276( FRGNLASKI  | 12465 | >NF1-R1276( FQGNLASKI   | 436   | 12029 |
| >NF1-R1276( FRGNLASKI  | 15591 | >NF1-R1276( FQGNLASKI   | 393   | 15198 |
| >NF1-R1276( FRGNLASKI  | 15214 | >NF1-R1276( FQGNLASKI   | 91    | 15123 |
| >NF1-R1276( FRGNLASKI  | 11122 | >NF1-R1276( FQGNLASKI   | 440   | 10682 |
| >NF1-R1276( FRGNLASKI  | 1705  | >NF1-R1276( FQGNLASKI   | 248   | 1457  |
| >NF1-R1276( FRGNLASKI  | 621   | >NF1-R1276( FQGNLASKI   | 86    | 535   |
| >NF1-R1276( FRGNLASKI  | 204   | >NF1-R1276( FQGNLASKI   | 25    | 179   |
| >NF1-R1276( FRGNLASKI  | 129   | >NF1-R1276( FQGNLASKI   | 3811  | 3682  |
| >NF1-R1276( FRGNLASKI  | 464   | >NF1-R1276( FQGNLASKI   | 19209 | 18745 |
| >NF1-R1276( FRGNLASKI  | 395   | >NF1-R1276( FQGNLASKI   | 7163  | 6768  |
| >NF1-R1276( ELADSMQTLF | 6847  | >NF1-R1276( ELADSMQTLF  | 191   | 6656  |
| >NF1-R1276( ELADSMQTLF | 86    | >NF1-R1276( ELADSMQTLF  | 16665 | 16579 |
| >NF1-R1276( ELADSMQTLF | 5     | >NF1-R1276( ELADSMQTLF  | 554   | 549   |
| >NF1-R1276( ELADSMQTLF | 115   | >NF1-R1276( ELADSMQTLF  | 9513  | 9398  |
| >NF1-R1276( LFRGNLASKI | 233   | >NF1-R1276( LFQGNLASKI  | 356   | 123   |
| >NF1-R1276( LFRGNLASKI | 510   | >NF1-R1276( LFQGNLASKI  | 51    | 459   |
| >NF1-R1276( LFRGNLASKI | 53    | >NF1-R1276( LFQGNLASKI  | 9152  | 9099  |
| >NF1-R1276( LFRGNLASKI | 192   | >NF1-R1276( LFQGNLASKI  | 12562 | 12370 |
| >NF1-R1276( LFRGNLASKI | 5     | >NF1-R1276( LFQGNLASKI  | 306   | 301   |
| >NF1-R1276( LFRGNLASKI | 162   | >NF1-R1276( LFQGNLASKI  | 10563 | 10401 |
| >NF1-R1276( LFRGNLASKI | 117   | >NF1-R1276( LFQGNLASKI  | 183   | 66    |
| >NF1-R1276( TLFGRGNSL  | 198   | >NF1-R1276( TLFQGNLASKI | 144   | 54    |
| >NF1-R1276( TLFGRGNSL  | 418   | >NF1-R1276( TLFQGNLASKI | 244   | 174   |
| >NF1-R1276( TLFGRGNSL  | 23    | >NF1-R1276( TLFQGNLASKI | 17    | 6     |
| >NF1-R1276( TLFGRGNSL  | 112   | >NF1-R1276( TLFQGNLASKI | 65    | 47    |
| >NF1-R1276( TLFGRGNSL  | 48    | >NF1-R1276( TLFQGNLASKI | 43    | 5     |
| >NF1-R1276( TLFGRGNSL  | 23    | >NF1-R1276( TLFQGNLASKI | 20    | 3     |
| >NF1-R1276( TLFGRGNSL  | 603   | >NF1-R1276( TLFQGNLASKI | 495   | 108   |
| >NF1-R1276( TLFGRGNSL  | 32    | >NF1-R1276( TLFQGNLASKI | 23    | 9     |
| >NF1-R1276( TLFGRGNSL  | 153   | >NF1-R1276( TLFQGNLASKI | 106   | 47    |
| >NF1-R1276( TLFGRGNSL  | 92    | >NF1-R1276( TLFQGNLASKI | 110   | 18    |
| >NF1-R1276( TLFGRGNSL  | 78    | >NF1-R1276( TLFQGNLASKI | 42    | 36    |
| >NF1-R1276( TLFGRGNSL  | 322   | >NF1-R1276( TLFQGNLASKI | 142   | 180   |
| >NF1-R1276( TLFGRGNSL  | 8     | >NF1-R1276( TLFQGNLASKI | 6     | 2     |
| >NF1-R1276( TLFGRGNSL  | 17    | >NF1-R1276( TLFQGNLASKI | 12    | 5     |
| >NF1-R1276( TLFGRGNSL  | 30    | >NF1-R1276( TLFQGNLASKI | 36    | 6     |
| >NF1-R1276( TLFGRGNSL  | 18    | >NF1-R1276( TLFQGNLASKI | 28    | 10    |
| >NF1-R1276( TLFGRGNSL  | 110   | >NF1-R1276( TLFQGNLASKI | 782   | 672   |

|                        |     |                        |       |       |
|------------------------|-----|------------------------|-------|-------|
| >NF1-R1276(TLFRGNSL    | 477 | >NF1-R1276(TLFQGNSL    | 490   | 13    |
| >NF1-R1276(TLFRGNSLASI | 38  | >NF1-R1276(TLFQGNSLAS  | 33    | 5     |
| >NF1-R1276(TLFRGNSL    | 843 | >NF1-R1276(TLFQGNSL    | 452   | 391   |
| >NF1-R1276(TLFRGNSL    | 352 | >NF1-R1276(TLFQGNSL    | 226   | 126   |
| >NF1-R1276(TLFRGNSL    | 247 | >NF1-R1276(TLFQGNSL    | 404   | 157   |
| >NF1-R1276(TLFRGNSL    | 829 | >NF1-R1276(TLFQGNSL    | 244   | 585   |
| >NF1-R1276(QTLFRGNSL   | 443 | >NF1-R1276(QTLFQGNSL   | 1036  | 593   |
| >NF1-R1276(QTLFRGNSL   | 175 | >NF1-R1276(QTLFQGNSL   | 190   | 15    |
| >NF1-R1276(QTLFRGNSL   | 951 | >NF1-R1276(QTLFQGNSL   | 340   | 611   |
| >NF1-R1276(QTLFRGNSL   | 69  | >NF1-R1276(QTLFQGNSL   | 82    | 13    |
| >NF1-R1276(QTLFRGNSL   | 95  | >NF1-R1276(QTLFQGNSL   | 177   | 82    |
| >NF1-R1276(MQTLFRGNS   | 377 | >NF1-R1276(MQTLFQGNS   | 298   | 79    |
| >NF1-R1276(MQTLFRGNS   | 460 | >NF1-R1276(MQTLFQGNS   | 607   | 147   |
| >NF1-R1276(MQTLFRGNS   | 290 | >NF1-R1276(MQTLFQGNS   | 208   | 82    |
| >NF1-R1276(MQTLFRGNS   | 110 | >NF1-R1276(MQTLFQGNS   | 108   | 2     |
| >NF1-R1276(MQTLFRGNS   | 492 | >NF1-R1276(MQTLFQGNS   | 488   | 4     |
| >NF1-R1276(SMQTLFRGN   | 490 | >NF1-R1276(SMQTLFQGN   | 450   | 40    |
| >NF1-R1276(SMQTLFRGN   | 515 | >NF1-R1276(SMQTLFQGN   | 284   | 231   |
| >NF1-R1276(SMQTLFRGN   | 64  | >NF1-R1276(SMQTLFQGN   | 29    | 35    |
| >NF1-R1276(SMQTLFRGN   | 147 | >NF1-R1276(SMQTLFQGN   | 124   | 23    |
| >NF1-R1276(SMQTLFRGN   | 117 | >NF1-R1276(SMQTLFQGN   | 74    | 43    |
| >NF1-R1276(SMQTLFRGN   | 62  | >NF1-R1276(SMQTLFQGN   | 25    | 37    |
| >NF1-R1276(SMQTLFRGN   | 533 | >NF1-R1276(SMQTLFQGN   | 189   | 344   |
| >NF1-R1276(SMQTLFRGN   | 41  | >NF1-R1276(SMQTLFQGN   | 16    | 25    |
| >NF1-R1276(SMQTLFRGN   | 145 | >NF1-R1276(SMQTLFQGN   | 373   | 228   |
| >NF1-R1276(SMQTLFRGN   | 345 | >NF1-R1276(SMQTLFQGN   | 254   | 91    |
| >NF1-R1276(SMQTLFRGN   | 267 | >NF1-R1276(SMQTLFQGN   | 191   | 76    |
| >NF1-R1276(DSMQTLFR    | 19  | >NF1-R1276(DSMQTLFQ    | 6986  | 6967  |
| >NF1-R1276(DSMQTLFR    | 5   | >NF1-R1276(DSMQTLFQ    | 762   | 757   |
| >NF1-R1276(DSMQTLFR    | 404 | >NF1-R1276(DSMQTLFQ    | 5758  | 5354  |
| >NF1-R1276(DSMQTLFR    | 412 | >NF1-R1276(DSMQTLFQ    | 24248 | 23836 |
| >NF1-R1276(LADSMQTLFF  | 304 | >NF1-R1276(LADSMQTLF(  | 25630 | 25326 |
| >NF1-R1276(LADSMQTLFF  | 243 | >NF1-R1276(LADSMQTLF(  | 25281 | 25038 |
| >NF1-R1276(LADSMQTLFF  | 236 | >NF1-R1276(LADSMQTLF(  | 19385 | 19149 |
| >NF1-R1276(LADSMQTLFF  | 37  | >NF1-R1276(LADSMQTLF(  | 24625 | 24588 |
| >NF1-R1412(SFINPAIVSPY | 349 | >NF1-R1412(SFINPAIVSPY | 79    | 270   |
| >NF1-R1412(SFINPAIVSPY | 29  | >NF1-R1412(SFINPAIVSPY | 17    | 12    |
| >NF1-R1412(SFINPAIVSPY | 418 | >NF1-R1412(SFINPAIVSPY | 485   | 67    |
| >NF1-R1412(SFINPAIVSPY | 199 | >NF1-R1412(SFINPAIVSPY | 465   | 266   |
| >NF1-R1412(SFINPAIVSPY | 106 | >NF1-R1412(SFINPAIVSPY | 177   | 71    |
| >NF1-R1412(SFINPAIVSPY | 288 | >NF1-R1412(SFINPAIVSPY | 76    | 212   |
| >NF1-R1412(SFINPAIVSPY | 188 | >NF1-R1412(SFINPAIVSPY | 1056  | 868   |
| >NF1-R1412(SFINPAIVSPY | 603 | >NF1-R1412(SFINPAIVSPY | 314   | 289   |

|                               |       |                               |       |       |
|-------------------------------|-------|-------------------------------|-------|-------|
| >NF1-R1412 $\leq$ RFINPAIVSPY | 194   | >NF1-R1412 $\leq$ SFINPAIVSPY | 245   | 51    |
| >NF1-R1412 $\leq$ RFINPAIVSPY | 336   | >NF1-R1412 $\leq$ SFINPAIVSPY | 366   | 30    |
| >NF1-R1412 $\leq$ LRFINPAIV   | 16827 | >NF1-R1412 $\leq$ LSFINPAIV   | 165   | 16662 |
| >NF1-R1412 $\leq$ LRFINPAI    | 11105 | >NF1-R1412 $\leq$ LSFINPAI    | 399   | 10706 |
| >NF1-R1412 $\leq$ LRFINPAI    | 88    | >NF1-R1412 $\leq$ LSFINPAI    | 140   | 52    |
| >NF1-R1412 $\leq$ LRFINPAIV   | 148   | >NF1-R1412 $\leq$ LSFINPAIV   | 361   | 213   |
| >NF1-R1412 $\leq$ LRFINPAI    | 23540 | >NF1-R1412 $\leq$ LSFINPAI    | 21    | 23519 |
| >NF1-R1412 $\leq$ LRFINPAIV   | 25444 | >NF1-R1412 $\leq$ LSFINPAIV   | 103   | 25341 |
| >NF1-R1412 $\leq$ LRFINPAI    | 118   | >NF1-R1412 $\leq$ LSFINPAI    | 21047 | 20929 |
| >NF1-R1412 $\leq$ LRFINPAIV   | 372   | >NF1-R1412 $\leq$ LSFINPAIV   | 22041 | 21669 |
| >NF1-R1412 $\leq$ LRFINPAI    | 759   | >NF1-R1412 $\leq$ LSFINPAI    | 13    | 746   |
| >NF1-R1412 $\leq$ LRFINPAIV   | 19446 | >NF1-R1412 $\leq$ LSFINPAIV   | 440   | 19006 |
| >NF1-R1412 $\leq$ IGAVGSAMFI  | 192   | >NF1-R1412 $\leq$ IGAVGSAMFI  | 20742 | 20550 |
| >NF1-R1412 $\leq$ IGAVGSAMFI  | 113   | >NF1-R1412 $\leq$ IGAVGSAMFI  | 24081 | 23968 |
| >NF1-R1412 $\leq$ FLRFINPA    | 151   | >NF1-R1412 $\leq$ FLSFINPA    | 14    | 137   |
| >NF1-R1412 $\leq$ FLRFINPAI   | 77    | >NF1-R1412 $\leq$ FLSFINPAI   | 11    | 66    |
| >NF1-R1412 $\leq$ FLRFINPAIV  | 157   | >NF1-R1412 $\leq$ FLSFINPAIV  | 33    | 124   |
| >NF1-R1412 $\leq$ FLRFINPA    | 12    | >NF1-R1412 $\leq$ FLSFINPA    | 2     | 10    |
| >NF1-R1412 $\leq$ FLRFINPAI   | 12    | >NF1-R1412 $\leq$ FLSFINPAI   | 2     | 10    |
| >NF1-R1412 $\leq$ FLRFINPAIV  | 72    | >NF1-R1412 $\leq$ FLSFINPAIV  | 15    | 57    |
| >NF1-R1412 $\leq$ FLRFINPAIVS | 2328  | >NF1-R1412 $\leq$ FLSFINPAIVS | 120   | 2208  |
| >NF1-R1412 $\leq$ FLRFINPA    | 5     | >NF1-R1412 $\leq$ FLSFINPA    | 3     | 2     |
| >NF1-R1412 $\leq$ FLRFINPAI   | 8     | >NF1-R1412 $\leq$ FLSFINPAI   | 5     | 3     |
| >NF1-R1412 $\leq$ FLRFINPAIV  | 21    | >NF1-R1412 $\leq$ FLSFINPAIV  | 12    | 9     |
| >NF1-R1412 $\leq$ FLRFINPA    | 274   | >NF1-R1412 $\leq$ FLSFINPA    | 34    | 240   |
| >NF1-R1412 $\leq$ FLRFINPAI   | 199   | >NF1-R1412 $\leq$ FLSFINPAI   | 23    | 176   |
| >NF1-R1412 $\leq$ FLRFINPAIV  | 634   | >NF1-R1412 $\leq$ FLSFINPAIV  | 112   | 522   |
| >NF1-R1412 $\leq$ FLRFINPA    | 71    | >NF1-R1412 $\leq$ FLSFINPA    | 14    | 57    |
| >NF1-R1412 $\leq$ FLRFINPAI   | 19    | >NF1-R1412 $\leq$ FLSFINPAI   | 5     | 14    |
| >NF1-R1412 $\leq$ FLRFINPAIV  | 6     | >NF1-R1412 $\leq$ FLSFINPAIV  | 3     | 3     |
| >NF1-R1412 $\leq$ FLRFINPA    | 221   | >NF1-R1412 $\leq$ FLSFINPA    | 22    | 199   |
| >NF1-R1412 $\leq$ FLRFINPAI   | 55    | >NF1-R1412 $\leq$ FLSFINPAI   | 10    | 45    |
| >NF1-R1412 $\leq$ FLRFINPAIV  | 9     | >NF1-R1412 $\leq$ FLSFINPAIV  | 4     | 5     |
| >NF1-R1412 $\leq$ FLRFINPA    | 450   | >NF1-R1412 $\leq$ FLSFINPA    | 27    | 423   |
| >NF1-R1412 $\leq$ FLRFINPAI   | 211   | >NF1-R1412 $\leq$ FLSFINPAI   | 16    | 195   |
| >NF1-R1412 $\leq$ FLRFINPAIV  | 30    | >NF1-R1412 $\leq$ FLSFINPAIV  | 7     | 23    |
| >NF1-R1412 $\leq$ FLRFINPA    | 3671  | >NF1-R1412 $\leq$ FLSFINPA    | 52    | 3619  |
| >NF1-R1412 $\leq$ FLRFINPAI   | 190   | >NF1-R1412 $\leq$ FLSFINPAI   | 9     | 181   |
| >NF1-R1412 $\leq$ FLRFINPAIV  | 19    | >NF1-R1412 $\leq$ FLSFINPAIV  | 3     | 16    |
| >NF1-R1412 $\leq$ FLRFINPA    | 11    | >NF1-R1412 $\leq$ FLSFINPA    | 5     | 6     |
| >NF1-R1412 $\leq$ FLRFINPAI   | 11    | >NF1-R1412 $\leq$ FLSFINPAI   | 5     | 6     |
| >NF1-R1412 $\leq$ FLRFINPAIV  | 2     | >NF1-R1412 $\leq$ FLSFINPAIV  | 2     | 0     |
| >NF1-R1412 $\leq$ FLRFINPAI   | 1456  | >NF1-R1412 $\leq$ FLSFINPAI   | 418   | 1038  |

|                               |      |                               |      |      |
|-------------------------------|------|-------------------------------|------|------|
| >NF1-R1412 $\leq$ FLRFINPA    | 2515 | >NF1-R1412 $\leq$ FLSFINPA    | 93   | 2422 |
| >NF1-R1412 $\leq$ FLRFINPAI   | 2097 | >NF1-R1412 $\leq$ FLSFINPAI   | 235  | 1862 |
| >NF1-R1412 $\leq$ FLRFINPAIV  | 2196 | >NF1-R1412 $\leq$ FLSFINPAIV  | 356  | 1840 |
| >NF1-R1412 $\leq$ FLRFINPA    | 410  | >NF1-R1412 $\leq$ FLSFINPA    | 4141 | 3731 |
| >NF1-R1412 $\leq$ FLRFINPAI   | 177  | >NF1-R1412 $\leq$ FLSFINPAI   | 2590 | 2413 |
| >NF1-R1412 $\leq$ FLRFINPAI   | 469  | >NF1-R1412 $\leq$ FLSFINPAI   | 1347 | 878  |
| >NF1-R1412 $\leq$ MFLRFINPA   | 492  | >NF1-R1412 $\leq$ MFLSFINPA   | 114  | 378  |
| >NF1-R1412 $\leq$ MFLRFINPAI\ | 706  | >NF1-R1412 $\leq$ MFLSFINPAI\ | 236  | 470  |
| >NF1-R1412 $\leq$ MFLRFINPAI  | 999  | >NF1-R1412 $\leq$ MFLSFINPAI  | 456  | 543  |
| >NF1-R1412 $\leq$ MFLRFINPAI\ | 165  | >NF1-R1412 $\leq$ MFLSFINPAI\ | 106  | 59   |
| >NF1-R1412 $\leq$ MFLRFINPAI\ | 259  | >NF1-R1412 $\leq$ MFLSFINPAI\ | 244  | 15   |
| >NF1-R1412 $\leq$ MFLRFINPAI  | 30   | >NF1-R1412 $\leq$ MFLSFINPAI  | 29   | 1    |
| >NF1-R1412 $\leq$ MFLRFINPA   | 64   | >NF1-R1412 $\leq$ MFLSFINPA   | 203  | 139  |
| >NF1-R1412 $\leq$ MFLRFINPAI  | 99   | >NF1-R1412 $\leq$ MFLSFINPAI  | 269  | 170  |
| >NF1-R1412 $\leq$ MFLRFINPAI\ | 425  | >NF1-R1412 $\leq$ MFLSFINPAI\ | 1140 | 715  |
| >NF1-R1412 $\leq$ MFLRFINPAI  | 1029 | >NF1-R1412 $\leq$ MFLSFINPAI  | 458  | 571  |
| >NF1-R1412 $\leq$ MFLRFINPA   | 453  | >NF1-R1412 $\leq$ MFLSFINPA   | 351  | 102  |
| >NF1-R1412 $\leq$ MFLRFINP    | 802  | >NF1-R1412 $\leq$ MFLSFINP    | 482  | 320  |
| >NF1-R1412 $\leq$ MFLRFINPA   | 85   | >NF1-R1412 $\leq$ MFLSFINPA   | 52   | 33   |
| >NF1-R1412 $\leq$ MFLRFINPAI  | 244  | >NF1-R1412 $\leq$ MFLSFINPAI  | 192  | 52   |
| >NF1-R1412 $\leq$ MFLRFINPAI\ | 195  | >NF1-R1412 $\leq$ MFLSFINPAI\ | 124  | 71   |
| >NF1-R1412 $\leq$ AMFLRFINP   | 159  | >NF1-R1412 $\leq$ AMFLSFINP   | 1067 | 908  |
| >NF1-R1412 $\leq$ AMFLRFINPA  | 104  | >NF1-R1412 $\leq$ AMFLSFINPA  | 273  | 169  |
| >NF1-R1412 $\leq$ AMFLRFINPA  | 168  | >NF1-R1412 $\leq$ AMFLSFINPA  | 90   | 78   |
| >NF1-R1412 $\leq$ AMFLRFINPA  | 30   | >NF1-R1412 $\leq$ AMFLSFINPA  | 27   | 3    |
| >NF1-R1412 $\leq$ AMFLRFINPA  | 60   | >NF1-R1412 $\leq$ AMFLSFINPA  | 33   | 27   |
| >NF1-R1412 $\leq$ AMFLRFINPA  | 38   | >NF1-R1412 $\leq$ AMFLSFINPA  | 29   | 9    |
| >NF1-R1412 $\leq$ AMFLRFINPA  | 40   | >NF1-R1412 $\leq$ AMFLSFINPA  | 26   | 14   |
| >NF1-R1412 $\leq$ AMFLRFINPA  | 31   | >NF1-R1412 $\leq$ AMFLSFINPA  | 27   | 4    |
| >NF1-R1412 $\leq$ AMFLRFINPA  | 129  | >NF1-R1412 $\leq$ AMFLSFINPA  | 70   | 59   |
| >NF1-R1412 $\leq$ AMFLRFINPA  | 62   | >NF1-R1412 $\leq$ AMFLSFINPA  | 62   | 0    |
| >NF1-R1412 $\leq$ AMFLRFINPA  | 21   | >NF1-R1412 $\leq$ AMFLSFINPA  | 15   | 6    |
| >NF1-R1412 $\leq$ AMFLRFINPA  | 8    | >NF1-R1412 $\leq$ AMFLSFINPA  | 7    | 1    |
| >NF1-R1412 $\leq$ AMFLRFINPA  | 99   | >NF1-R1412 $\leq$ AMFLSFINPA  | 64   | 35   |
| >NF1-R1412 $\leq$ AMFLRFINPA  | 55   | >NF1-R1412 $\leq$ AMFLSFINPA  | 39   | 16   |
| >NF1-R1412 $\leq$ AMFLRFINPA  | 72   | >NF1-R1412 $\leq$ AMFLSFINPA  | 44   | 28   |
| >NF1-R1412 $\leq$ AMFLRFINPA  | 36   | >NF1-R1412 $\leq$ AMFLSFINPA  | 26   | 10   |
| >NF1-R1412 $\leq$ AMFLRFINPA  | 472  | >NF1-R1412 $\leq$ AMFLSFINPA  | 182  | 290  |
| >NF1-R1412 $\leq$ AMFLRFINPA  | 25   | >NF1-R1412 $\leq$ AMFLSFINPA  | 20   | 5    |
| >NF1-R1412 $\leq$ AMFLRFINPA  | 31   | >NF1-R1412 $\leq$ AMFLSFINPA  | 25   | 6    |
| >NF1-R1412 $\leq$ AMFLRFINPA  | 185  | >NF1-R1412 $\leq$ AMFLSFINPA  | 187  | 2    |
| >NF1-R1412 $\leq$ AMFLRFINPA  | 293  | >NF1-R1412 $\leq$ AMFLSFINPA  | 242  | 51   |
| >NF1-R1412 $\leq$ AMFLRFINPA  | 20   | >NF1-R1412 $\leq$ AMFLSFINPA  | 29   | 9    |

|                        |      |                         |       |       |
|------------------------|------|-------------------------|-------|-------|
| >NF1-R1412\$AMFLRFINPA | 366  | >NF1-R1412\$AMFLSFINPA  | 195   | 171   |
| >NF1-R1412\$AMFLRFINPA | 495  | >NF1-R1412\$AMFLSFINPA  | 269   | 226   |
| >NF1-R1412\$AMFLRFINP  | 1077 | >NF1-R1412\$AMFLSFINP   | 227   | 850   |
| >NF1-R1412\$AMFLRFINPA | 118  | >NF1-R1412\$AMFLSFINPA  | 39    | 79    |
| >NF1-R1412\$AMFLRFINPA | 41   | >NF1-R1412\$AMFLSFINPA  | 18    | 23    |
| >NF1-R1412\$AMFLRFINPA | 312  | >NF1-R1412\$AMFLSFINPA  | 329   | 17    |
| >NF1-R1412\$SAMFLRFI   | 370  | >NF1-R1412\$SAMFLSFI    | 157   | 213   |
| >NF1-R1412\$SAMFLRFI   | 2109 | >NF1-R1412\$SAMFLSFI    | 341   | 1768  |
| >NF1-R1412\$SAMFLRFI   | 534  | >NF1-R1412\$SAMFLSFI    | 78    | 456   |
| >NF1-R1412\$SAMFLRFINP | 626  | >NF1-R1412\$SAMFLSFINP  | 175   | 451   |
| >NF1-R1412\$SAMFLRFI   | 1000 | >NF1-R1412\$SAMFLSFI    | 201   | 799   |
| >NF1-R1412\$SAMFLRFINP | 601  | >NF1-R1412\$SAMFLSFINP  | 244   | 357   |
| >NF1-R1412\$SAMFLRFI   | 340  | >NF1-R1412\$SAMFLSFI    | 59    | 281   |
| >NF1-R1412\$SAMFLRFINP | 268  | >NF1-R1412\$SAMFLSFINP  | 94    | 174   |
| >NF1-R1412\$SAMFLRFINP | 485  | >NF1-R1412\$SAMFLSFINP  | 668   | 183   |
| >NF1-R1412\$SAMFLRFI   | 43   | >NF1-R1412\$SAMFLSFI    | 19    | 24    |
| >NF1-R1412\$SAMFLRFINP | 17   | >NF1-R1412\$SAMFLSFINP  | 17    | 0     |
| >NF1-R1412\$SAMFLRFI   | 309  | >NF1-R1412\$SAMFLSFI    | 81    | 228   |
| >NF1-R1412\$SAMFLRFINP | 337  | >NF1-R1412\$SAMFLSFINP  | 150   | 187   |
| >NF1-R1412\$SAMFLRFI   | 78   | >NF1-R1412\$SAMFLSFI    | 41    | 37    |
| >NF1-R1412\$GSAMFLRFI  | 36   | >NF1-R1412\$GSAMFLSFI   | 47    | 11    |
| >NF1-R1412\$GSAMFLRFI  | 889  | >NF1-R1412\$GSAMFLSFI   | 135   | 754   |
| >NF1-R1412\$GSAMFLRF   | 466  | >NF1-R1412\$GSAMFLSF    | 88    | 378   |
| >NF1-R1412\$GSAMFLRF   | 329  | >NF1-R1412\$GSAMFLSF    | 46    | 283   |
| >NF1-R1412\$GSAMFLRF   | 8    | >NF1-R1412\$GSAMFLSF    | 8     | 0     |
| >NF1-R1412\$GSAMFLRFI  | 1284 | >NF1-R1412\$GSAMFLSFI   | 283   | 1001  |
| >NF1-R1412\$GSAMFLRF   | 315  | >NF1-R1412\$GSAMFLSF    | 153   | 162   |
| >NF1-R1412\$GSAMFLRFI  | 115  | >NF1-R1412\$GSAMFLSFI   | 74    | 41    |
| >NF1-R1412\$GSAMFLRF   | 362  | >NF1-R1412\$GSAMFLSF    | 170   | 192   |
| >NF1-R1412\$GSAMFLRFI  | 280  | >NF1-R1412\$GSAMFLSFI   | 11    | 269   |
| >NF1-R1412\$GSAMFLRFI  | 44   | >NF1-R1412\$GSAMFLSFI   | 19    | 25    |
| >NF1-R1412\$VGSAMFLR   | 124  | >NF1-R1412\$VGSAMFLS    | 19670 | 19546 |
| >NF1-R1412\$VGSAMFLRF  | 523  | >NF1-R1412\$VGSAMFLSF   | 106   | 417   |
| >NF1-R1412\$VGSAMFLRF  | 1636 | >NF1-R1412\$VGSAMFLSF   | 230   | 1406  |
| >NF1-R1412\$VGSAMFLRF  | 599  | >NF1-R1412\$VGSAMFLSF   | 426   | 173   |
| >NF1-R1412\$VGSAMFLRF  | 407  | >NF1-R1412\$VGSAMFLSF   | 543   | 136   |
| >NF1-R1412\$VGSAMFLR   | 365  | >NF1-R1412\$VGSAMFLS    | 33054 | 32689 |
| >NF1-R1412\$AVGSAMFLRI | 390  | >NF1-R1412\$AVGSAMFLSFI | 94    | 296   |
| >NF1-R1412\$AVGSAMFLRI | 873  | >NF1-R1412\$AVGSAMFLSFI | 204   | 669   |
| >NF1-R1412\$AVGSAMFLRI | 287  | >NF1-R1412\$AVGSAMFLSFI | 85    | 202   |
| >NF1-R1412\$AVGSAMFLR  | 25   | >NF1-R1412\$AVGSAMFLS   | 4104  | 4079  |
| >NF1-R1412\$AVGSAMFLRI | 633  | >NF1-R1412\$AVGSAMFLSFI | 325   | 308   |
| >NF1-R1412\$AVGSAMFLRI | 193  | >NF1-R1412\$AVGSAMFLSFI | 204   | 11    |

|                        |      |                        |       |       |
|------------------------|------|------------------------|-------|-------|
| >NF1-R1412\$AVGSAMFLRI | 1115 | >NF1-R1412\$AVGSAMFLSI | 437   | 678   |
| >NF1-R1412\$AVGSAMFLR  | 12   | >NF1-R1412\$AVGSAMFLS  | 8332  | 8320  |
| >NF1-R1412\$AVGSAMFLRI | 1072 | >NF1-R1412\$AVGSAMFLSI | 258   | 814   |
| >NF1-R1412\$AVGSAMFLR  | 64   | >NF1-R1412\$AVGSAMFLS  | 22368 | 22304 |
| >NF1-R1412\$AVGSAMFLRI | 255  | >NF1-R1412\$AVGSAMFLSI | 80    | 175   |
| >NF1-R1412\$AVGSAMFLRI | 2331 | >NF1-R1412\$AVGSAMFLSI | 446   | 1885  |
| >NF1-R1412\$AVGSAMFLRI | 269  | >NF1-R1412\$AVGSAMFLSI | 351   | 82    |
| >NF1-R1412\$AVGSAMFLRI | 1553 | >NF1-R1412\$AVGSAMFLSI | 499   | 1054  |
| >NF1-R1412\$AVGSAMFLR  | 204  | >NF1-R1412\$AVGSAMFLS  | 4170  | 3966  |
| >NF1-R1412\$AVGSAMFLRI | 592  | >NF1-R1412\$AVGSAMFLSI | 347   | 245   |
| >NF1-R1412\$AVGSAMFLRI | 434  | >NF1-R1412\$AVGSAMFLSI | 210   | 224   |
| >NF1-R1412\$GAVGSAMFL  | 341  | >NF1-R1412\$GAVGSAMFL  | 22485 | 22144 |
| >NF1-R1412\$GAVGSAMFL  | 299  | >NF1-R1412\$GAVGSAMFL  | 26256 | 25957 |
| >NF1-R1412\$GAVGSAMFL  | 32   | >NF1-R1412\$GAVGSAMFL  | 26289 | 26257 |
| >NF1-R1412\$GAVGSAMFL  | 724  | >NF1-R1412\$GAVGSAMFL  | 167   | 557   |
| >NF1-R1412\$GAVGSAMFL  | 899  | >NF1-R1412\$GAVGSAMFL  | 144   | 755   |
| >NF1-R1412\$GAVGSAMFL  | 7    | >NF1-R1412\$GAVGSAMFL  | 8     | 1     |
| >NF1-R1412\$GAVGSAMFL  | 287  | >NF1-R1412\$GAVGSAMFL  | 211   | 76    |
| >NF1-R1412\$GAVGSAMFL  | 119  | >NF1-R1412\$GAVGSAMFL  | 153   | 34    |
| >NF1-R1412\$GAVGSAMFL  | 398  | >NF1-R1412\$GAVGSAMFL  | 23398 | 23000 |
| >NF1-R1412\$GAVGSAMFL  | 389  | >NF1-R1412\$GAVGSAMFL  | 8680  | 8291  |
| >NF1-R1830(TRWELSQPD)  | 356  | >NF1-R1830(TCWELSQPD)  | 2613  | 2257  |
| >NF1-R1830(TRWELSQPD)  | 4085 | >NF1-R1830(TCWELSQPD)  | 358   | 3727  |
| >NF1-R1830(TRWELSQPD)  | 9399 | >NF1-R1830(TCWELSQPD)  | 349   | 9050  |
| >NF1-R1830(TRWELSQPD)  | 89   | >NF1-R1830(TCWELSQPD)  | 25715 | 25626 |
| >NF1-R1830(TRWELSQP    | 354  | >NF1-R1830(TCWELSQP    | 24463 | 24109 |
| >NF1-R1830(TRWELSQPD   | 399  | >NF1-R1830(TCWELSQPD   | 23968 | 23569 |
| >NF1-R1830(TRWELSQPD)  | 333  | >NF1-R1830(TCWELSQPD)  | 21529 | 21196 |
| >NF1-R1830(TRWELSQPD)  | 430  | >NF1-R1830(TCWELSQPD)  | 39723 | 39293 |
| >NF1-R1830(TRWELSQPD)  | 1720 | >NF1-R1830(TCWELSQPD)  | 485   | 1235  |
| >NF1-R1830(IVQSIIHIRTR | 21   | >NF1-R1830(IVQSIIHIRTC | 18946 | 18925 |
| >NF1-R1830(IVQSIIHIRTR | 263  | >NF1-R1830(IVQSIIHIRTC | 31395 | 31132 |
| >NF1-R1830(IVQSIIHIRTR | 107  | >NF1-R1830(IVQSIIHIRTC | 30012 | 29905 |
| >NF1-R1830(RTRWELSQ    | 28   | >NF1-R1830(RTCWELSQ    | 3813  | 3785  |
| >NF1-R1830(RTRWELSQP   | 261  | >NF1-R1830(RTCWELSQP   | 9922  | 9661  |
| >NF1-R1830(RTRWELSQPI  | 135  | >NF1-R1830(RTCWELSQPI  | 3964  | 3829  |
| >NF1-R1830(RTRWELSQPI  | 44   | >NF1-R1830(RTCWELSQPI  | 4929  | 4885  |
| >NF1-R1830(RTRWELSQ    | 135  | >NF1-R1830(RTCWELSQ    | 896   | 761   |
| >NF1-R1830(RTRWELSQP   | 275  | >NF1-R1830(RTCWELSQP   | 2290  | 2015  |
| >NF1-R1830(HIRTRWEL    | 361  | >NF1-R1830(HIRTCWEL    | 328   | 33    |
| >NF1-R1830(HIRTRWEL    | 21   | >NF1-R1830(HIRTCWEL    | 116   | 95    |
| >NF1-R1830(HIRTRWELS   | 105  | >NF1-R1830(HIRTCWELS   | 519   | 414   |
| >NF1-R1830(HIRTRWELSC  | 63   | >NF1-R1830(HIRTCWELSC  | 184   | 121   |



|                         |     |                        |       |       |
|-------------------------|-----|------------------------|-------|-------|
| >NF1-R1830(HIRTRWEL     | 73  | >NF1-R1830(HIRTCWEL    | 1531  | 1458  |
| >NF1-R1830(IHIRTRWEL    | 286 | >NF1-R1830(IHIRTCWEL   | 107   | 179   |
| >NF1-R1830(IHIRTRWEL    | 234 | >NF1-R1830(IHIRTCWEL   | 227   | 7     |
| >NF1-R1830(IHIRTRWEL    | 71  | >NF1-R1830(IHIRTCWEL   | 334   | 263   |
| >NF1-R1830(IIHIRTRWEL   | 501 | >NF1-R1830(IIHIRTCWEL  | 162   | 339   |
| >NF1-R1830(IIHIRTRWEL   | 80  | >NF1-R1830(IIHIRTCWEL  | 22    | 58    |
| >NF1-R1830(IIHIRTRW     | 121 | >NF1-R1830(IIHIRTCW    | 683   | 562   |
| >NF1-R1830(IIHIRTRW     | 285 | >NF1-R1830(IIHIRTCW    | 1128  | 843   |
| >NF1-R1830(SIIHIRTRWEL  | 291 | >NF1-R1830(SIIHIRTCWEL | 125   | 166   |
| >NF1-R1830(SIIHIRTRWEL  | 67  | >NF1-R1830(SIIHIRTCWEL | 37    | 30    |
| >NF1-R1830(SIIHIRTRWEL  | 450 | >NF1-R1830(SIIHIRTCWEL | 312   | 138   |
| >NF1-R1830(SIIHIRTRWEL  | 124 | >NF1-R1830(SIIHIRTCWEL | 68    | 56    |
| >NF1-R1830(SIIHIRTRWEL  | 715 | >NF1-R1830(SIIHIRTCWEL | 489   | 226   |
| >NF1-R1830(SIIHIRTRWEL  | 927 | >NF1-R1830(SIIHIRTCWEL | 431   | 496   |
| >NF1-R1830(SIIHIRTRWEL  | 43  | >NF1-R1830(SIIHIRTCWEL | 55    | 12    |
| >NF1-R1830(SIIHIRTR     | 52  | >NF1-R1830(SIIHIRTC    | 19398 | 19346 |
| >NF1-R1830(SIIHIRTR     | 391 | >NF1-R1830(SIIHIRTC    | 37094 | 36703 |
| >NF1-R1830(SIIHIRTR     | 35  | >NF1-R1830(SIIHIRTC    | 29795 | 29760 |
| >NF1-R1830(SIIHIRTRWEL  | 42  | >NF1-R1830(SIIHIRTCWEL | 79    | 37    |
| >NF1-R1830(SIIHIRTRW    | 161 | >NF1-R1830(SIIHIRTCW   | 954   | 793   |
| >NF1-R1830(SIIHIRTR     | 279 | >NF1-R1830(SIIHIRTC    | 34968 | 34689 |
| >NF1-R1830(QSIIHIRTR    | 129 | >NF1-R1830(QSIIHIRTC   | 21346 | 21217 |
| >NF1-R1830(QSIIHIRTR    | 122 | >NF1-R1830(QSIIHIRTC   | 38462 | 38340 |
| >NF1-R1830(QSIIHIRTRW   | 6   | >NF1-R1830(QSIIHIRTCW  | 20    | 14    |
| >NF1-R1830(QSIIHIRTRW   | 100 | >NF1-R1830(QSIIHIRTCW  | 342   | 242   |
| >NF1-R1830(QSIIHIRTRW   | 27  | >NF1-R1830(QSIIHIRTCW  | 68    | 41    |
| >NF1-R1830(QSIIHIRTR    | 101 | >NF1-R1830(QSIIHIRTC   | 7035  | 6934  |
| >NF1-R1830(VQSIIHIRTR   | 143 | >NF1-R1830(VQSIIHIRTC  | 24835 | 24692 |
| >NF1-R1830(VQSIIHIRTRW  | 350 | >NF1-R1830(VQSIIHIRTCW | 838   | 488   |
| >NF1-R2150(SRLSLTEFSL   | 114 | >NF1-R2150(SLSLTEFSL   | 76    | 38    |
| >NF1-R2150(SRLSLTEFS    | 540 | >NF1-R2150(SLSLTEFS    | 278   | 262   |
| >NF1-R2150(SRLSLTEFSL   | 23  | >NF1-R2150(SLSLTEFSL   | 15    | 8     |
| >NF1-R2150(SRLSLTEFSL   | 469 | >NF1-R2150(SLSLTEFSL   | 457   | 12    |
| >NF1-R2150(SRLSLTEFSL   | 49  | >NF1-R2150(SLSLTEFSL   | 46    | 3     |
| >NF1-R2150(SRLSLTEFSL   | 27  | >NF1-R2150(SLSLTEFSL   | 28    | 1     |
| >NF1-R2150(SRLSLTEFSL   | 35  | >NF1-R2150(SLSLTEFSL   | 13    | 22    |
| >NF1-R2150(SRLSLTEFSL   | 54  | >NF1-R2150(SLSLTEFSL   | 59    | 5     |
| >NF1-R2150(SRLSLTEFSL   | 10  | >NF1-R2150(SLSLTEFSL   | 4     | 6     |
| >NF1-R2150(SRLSLTEFSLPK | 40  | >NF1-R2150(SLSLTEFSLPK | 76    | 36    |
| >NF1-R2150(SRLSLTEFSLPK | 17  | >NF1-R2150(SLSLTEFSLPK | 13    | 4     |
| >NF1-R2150(SRLSLTEFSLPK | 19  | >NF1-R2150(SLSLTEFSLPK | 152   | 133   |
| >NF1-R2150(SRLSLTEFSLPK | 464 | >NF1-R2150(SLSLTEFSLPK | 3309  | 2845  |
| >NF1-R2150(SRLSLTEFSL   | 168 | >NF1-R2150(SLSLTEFSL   | 1734  | 1566  |

|                        |       |                        |       |       |
|------------------------|-------|------------------------|-------|-------|
| >NF1-R2150ϙRLSLTEFSLPK | 305   | >NF1-R2150ϙSLSLTEFSLPK | 1807  | 1502  |
| >NF1-R2150ϙLRLSLTEFSL  | 790   | >NF1-R2150ϙLSLSLTEFSL  | 125   | 665   |
| >NF1-R2150ϙLRLSLTEFSL  | 2096  | >NF1-R2150ϙLSLSLTEFSL  | 362   | 1734  |
| >NF1-R2150ϙLRLSLTEF    | 11027 | >NF1-R2150ϙLSLSLTEF    | 174   | 10853 |
| >NF1-R2150ϙLRLSLTEF    | 10    | >NF1-R2150ϙLSLSLTEF    | 13    | 3     |
| >NF1-R2150ϙLRLSLTEFSL  | 209   | >NF1-R2150ϙLSLSLTEFSL  | 300   | 91    |
| >NF1-R2150ϙLRLSLTEF    | 18138 | >NF1-R2150ϙLSLSLTEF    | 5     | 18133 |
| >NF1-R2150ϙLRLSLTEFSL  | 24363 | >NF1-R2150ϙLSLSLTEFSL  | 30    | 24333 |
| >NF1-R2150ϙLRLSLTEF    | 160   | >NF1-R2150ϙLSLSLTEF    | 18578 | 18418 |
| >NF1-R2150ϙLRLSLTEFSL  | 48    | >NF1-R2150ϙLSLSLTEFSL  | 20037 | 19989 |
| >NF1-R2150ϙLRLSLTEF    | 9141  | >NF1-R2150ϙLSLSLTEF    | 480   | 8661  |
| >NF1-R2150ϙLRLSLTEFSL  | 182   | >NF1-R2150ϙLSLSLTEFSL  | 3739  | 3557  |
| >NF1-R2150ϙLRLSLTEF    | 19000 | >NF1-R2150ϙLSLSLTEF    | 30    | 18970 |
| >NF1-R2150ϙLRLSLTEFSL  | 20942 | >NF1-R2150ϙLSLSLTEFSL  | 66    | 20876 |
| >NF1-R2150ϙLRLSLTEF    | 12072 | >NF1-R2150ϙLSLSLTEF    | 128   | 11944 |
| >NF1-R2150ϙLRLSLTEFSL  | 18498 | >NF1-R2150ϙLSLSLTEFSL  | 213   | 18285 |
| >NF1-R2150ϙLRLSLTEF    | 380   | >NF1-R2150ϙLSLSLTEF    | 15903 | 15523 |
| >NF1-R2150ϙLRLSLTEFSL  | 188   | >NF1-R2150ϙLSLSLTEFSL  | 24051 | 23863 |
| >NF1-R2150ϙHFSEETKQVL  | 87    | >NF1-R2150ϙHFSEETKQVL  | 16570 | 16483 |
| >NF1-R2150ϙHFSEETKQVL  | 60    | >NF1-R2150ϙHFSEETKQVL  | 19316 | 19256 |
| >NF1-R2150ϙHFSEETKQVL  | 113   | >NF1-R2150ϙHFSEETKQVL  | 25415 | 25302 |
| >NF1-R2150ϙHFSEETKQVL  | 21    | >NF1-R2150ϙHFSEETKQVL  | 17442 | 17421 |
| >NF1-R2150ϙVLRLSLTEFSL | 2473  | >NF1-R2150ϙVLSLSLTEFSL | 93    | 2380  |
| >NF1-R2150ϙVLRLSLTEF   | 5521  | >NF1-R2150ϙVLSLSLTEF   | 417   | 5104  |
| >NF1-R2150ϙVLRLSLTEFSL | 399   | >NF1-R2150ϙVLSLSLTEFSL | 12    | 387   |
| >NF1-R2150ϙVLRLSLTEFSL | 245   | >NF1-R2150ϙVLSLSLTEFSL | 87    | 158   |
| >NF1-R2150ϙVLRLSLTEFSL | 2109  | >NF1-R2150ϙVLSLSLTEFSL | 341   | 1768  |
| >NF1-R2150ϙVLRLSLTEFSL | 382   | >NF1-R2150ϙVLSLSLTEFSL | 60    | 322   |
| >NF1-R2150ϙVLRLSLTEFSL | 490   | >NF1-R2150ϙVLSLSLTEFSL | 47    | 443   |
| >NF1-R2150ϙVLRLSLTEFSL | 663   | >NF1-R2150ϙVLSLSLTEFSL | 40    | 623   |
| >NF1-R2150ϙVLRLSLTEFSL | 959   | >NF1-R2150ϙVLSLSLTEFSL | 22    | 937   |
| >NF1-R2150ϙVLRLSLTEFSL | 7     | >NF1-R2150ϙVLSLSLTEFSL | 4     | 3     |
| >NF1-R2150ϙVLRLSLTEF   | 101   | >NF1-R2150ϙVLSLSLTEF   | 196   | 95    |
| >NF1-R2150ϙVLRLSLTEF   | 20    | >NF1-R2150ϙVLSLSLTEF   | 50    | 30    |
| >NF1-R2150ϙVLRLSLTEF   | 31    | >NF1-R2150ϙVLSLSLTEF   | 194   | 163   |
| >NF1-R2150ϙVLRLSLTEF   | 368   | >NF1-R2150ϙVLSLSLTEF   | 1089  | 721   |
| >NF1-R2150ϙQVLRLSLTEF  | 483   | >NF1-R2150ϙQVLSLSLTEF  | 435   | 48    |
| >NF1-R2150ϙQVLRLSLTEF  | 419   | >NF1-R2150ϙQVLSLSLTEF  | 346   | 73    |
| >NF1-R2150ϙQVLRLSLTEF  | 111   | >NF1-R2150ϙQVLSLSLTEF  | 106   | 5     |
| >NF1-R2150ϙQVLRLSLTEF  | 146   | >NF1-R2150ϙQVLSLSLTEF  | 80    | 66    |
| >NF1-R2150ϙQVLRLSLTEF  | 154   | >NF1-R2150ϙQVLSLSLTEF  | 67    | 87    |
| >NF1-R2150ϙKQVLRSL     | 21    | >NF1-R2150ϙKQVLSLSL    | 12    | 9     |
| >NF1-R2150ϙKQVLRSLT    | 105   | >NF1-R2150ϙKQVLSLSLT   | 90    | 15    |

|                         |      |                         |       |       |
|-------------------------|------|-------------------------|-------|-------|
| >NF1-R2150S KQVLRLSLTEF | 54   | >NF1-R2150S KQVLSLSLTEF | 54    | 0     |
| >NF1-R2150S KQVLRLSL    | 742  | >NF1-R2150S KQVLSLSL    | 234   | 508   |
| >NF1-R2150S KQVLRLSLTEF | 103  | >NF1-R2150S KQVLSLSLTEF | 69    | 34    |
| >NF1-R2150S KQVLRLSL    | 66   | >NF1-R2150S KQVLSLSL    | 18    | 48    |
| >NF1-R2150S KQVLRLSLTEF | 5    | >NF1-R2150S KQVLSLSLTEF | 3     | 2     |
| >NF1-R2150S KQVLRLSLTEF | 437  | >NF1-R2150S KQVLSLSLTEF | 152   | 285   |
| >NF1-R2150S KQVLRLSL    | 1063 | >NF1-R2150S KQVLSLSL    | 445   | 618   |
| >NF1-R2150S KQVLRLSL    | 384  | >NF1-R2150S KQVLSLSL    | 206   | 178   |
| >NF1-R2150S KQVLRLSL    | 136  | >NF1-R2150S KQVLSLSL    | 703   | 567   |
| >NF1-R2150S TKQVLRLSL   | 481  | >NF1-R2150S TKQVLSLSL   | 255   | 226   |
| >NF1-R2150S TKQVLRLSL   | 305  | >NF1-R2150S TKQVLSLSL   | 137   | 168   |
| >NF1-R2150S TKQVLRLSL   | 267  | >NF1-R2150S TKQVLSLSL   | 1425  | 1158  |
| >NF1-R2150S ETKQVLRL    | 1016 | >NF1-R2150S ETKQVLSL    | 82    | 934   |
| >NF1-R2150S ETKQVLRLSL  | 153  | >NF1-R2150S ETKQVLSLSL  | 111   | 42    |
| >NF1-R2150S ETKQVLRL    | 405  | >NF1-R2150S ETKQVLSL    | 176   | 229   |
| >NF1-R2150S ETKQVLRL    | 80   | >NF1-R2150S ETKQVLSL    | 67    | 13    |
| >NF1-R2150S ETKQVLRLSL  | 403  | >NF1-R2150S ETKQVLSLSL  | 294   | 109   |
| >NF1-R2150S ETKQVLRL    | 728  | >NF1-R2150S ETKQVLSL    | 195   | 533   |
| >NF1-R2150S ETKQVLRLSL  | 232  | >NF1-R2150S ETKQVLSLSL  | 224   | 8     |
| >NF1-R2150S ETKQVLRL    | 852  | >NF1-R2150S ETKQVLSL    | 439   | 413   |
| >NF1-R2150S ETKQVLRL    | 142  | >NF1-R2150S ETKQVLSL    | 152   | 10    |
| >NF1-R2150S ETKQVLRLSL  | 603  | >NF1-R2150S ETKQVLSLSL  | 121   | 482   |
| >NF1-R2150S ETKQVLRLS   | 5411 | >NF1-R2150S ETKQVLSLS   | 359   | 5052  |
| >NF1-R2150S ETKQVLRLSLT | 1056 | >NF1-R2150S ETKQVLSLSLT | 323   | 733   |
| >NF1-R2150S EETKQVLRL   | 1903 | >NF1-R2150S EETKQVLSL   | 296   | 1607  |
| >NF1-R2150S EETKQVLRLSI | 345  | >NF1-R2150S EETKQVLSLSI | 214   | 131   |
| >NF1-R2150S EETKQVLR    | 213  | >NF1-R2150S EETKQVLS    | 30901 | 30688 |
| >NF1-R2150S EETKQVLR    | 1458 | >NF1-R2150S EETKQVLSL   | 343   | 1115  |
| >NF1-R2150S EETKQVLRSLI | 317  | >NF1-R2150S EETKQVLSLSI | 176   | 141   |
| >NF1-R2150S EETKQVLR    | 572  | >NF1-R2150S EETKQVLSL   | 84    | 488   |
| >NF1-R2150S EETKQVLRSLI | 81   | >NF1-R2150S EETKQVLSLSI | 66    | 15    |
| >NF1-R2150S EETKQVLRSLI | 635  | >NF1-R2150S EETKQVLSLSI | 383   | 252   |
| >NF1-R2150S EETKQVLR    | 467  | >NF1-R2150S EETKQVLS    | 33523 | 33056 |
| >NF1-R2150S SEETKQVLRL  | 718  | >NF1-R2150S SEETKQVLSL  | 198   | 520   |
| >NF1-R2150S SEETKQVLRL  | 1157 | >NF1-R2150S SEETKQVLSL  | 268   | 889   |
| >NF1-R2150S SEETKQVLRL  | 425  | >NF1-R2150S SEETKQVLSL  | 202   | 223   |
| >NF1-R2150S FSEETKQVLR  | 200  | >NF1-R2150S FSEETKQVLS  | 35485 | 35285 |
| >NF1-R2150S FSEETKQVLR  | 67   | >NF1-R2150S FSEETKQVLSI | 78    | 11    |
| >NF1-R2150S FSEETKQVLR  | 994  | >NF1-R2150S FSEETKQVLSI | 173   | 821   |
| >NF1-R997K- RYVRVLGNM   | 111  | >NF1-R997K- KYVRVLGNM   | 23    | 88    |
| >NF1-R997K- RYVRVLGNM   | 145  | >NF1-R997K- KYVRVLGNM   | 29    | 116   |
| >NF1-R997K- RYVRVLGNM   | 423  | >NF1-R997K- KYVRVLGNM   | 368   | 55    |
| >NF1-R997K- RYVRVLGNM   | 15   | >NF1-R997K- KYVRVLGNM   | 54    | 39    |

|                        |     |                        |       |       |
|------------------------|-----|------------------------|-------|-------|
| >NF1-R997K- RYVRVLGNM  | 25  | >NF1-R997K- KYVRVLGNM  | 106   | 81    |
| >NF1-R997K- RYVRVLGNM  | 170 | >NF1-R997K- KYVRVLGNM  | 227   | 57    |
| >NF1-R997K- RYVRVLGNM  | 386 | >NF1-R997K- KYVRVLGNM  | 680   | 294   |
| >NF1-R997K- RYVRVLGNM  | 493 | >NF1-R997K- KYVRVLGNM  | 208   | 285   |
| >NF1-R997K- RYVRVLGNM  | 329 | >NF1-R997K- KYVRVLGNM  | 667   | 338   |
| >NF1-R997K- VRYVRVLGNM | 379 | >NF1-R997K- VKYVRVLGNM | 234   | 145   |
| >NF1-R997K- VRYVRVLGNM | 423 | >NF1-R997K- VKYVRVLGNM | 60    | 363   |
| >NF1-R997K- VRYVRVLGNM | 308 | >NF1-R997K- VKYVRVLGNM | 43    | 265   |
| >NF1-R997K- VRYVRVLGNM | 77  | >NF1-R997K- VKYVRVLGNM | 8030  | 7953  |
| >NF1-R997K- VRYVRVLGNM | 262 | >NF1-R997K- VKYVRVLGNM | 10940 | 10678 |
| >NF1-R997K- VRYVRVLGNM | 262 | >NF1-R997K- VKYVRVLGNM | 6364  | 6102  |
| >NF1-R997K- VRYVRVLGN  | 118 | >NF1-R997K- VKYVRVLGN  | 6058  | 5940  |
| >NF1-R997K- VRYVRVLGNM | 70  | >NF1-R997K- VKYVRVLGNM | 2988  | 2918  |
| >NF1-R997K- VRYVRVLGNM | 49  | >NF1-R997K- VKYVRVLGNM | 2675  | 2626  |
| >NF1-R997K- SIETMMLNLV | 501 | >NF1-R997K- SIETMMLNLV | 29    | 472   |
| >NF1-R997K- SIETMMLNLV | 302 | >NF1-R997K- SIETMMLNLV | 1332  | 1030  |
| >NF1-R997K- SIETMMLNLV | 132 | >NF1-R997K- SIETMMLNLV | 2598  | 2466  |
| >NF1-R997K- LVRYVRVL   | 71  | >NF1-R997K- LVKYVRVL   | 537   | 466   |
| >NF1-R997K- LVRYVRVLG  | 65  | >NF1-R997K- LVKYVRVLG  | 482   | 417   |
| >NF1-R997K- LVRYVRVLGN | 45  | >NF1-R997K- LVKYVRVLGN | 291   | 246   |
| >NF1-R997K- LVRYVRVL   | 65  | >NF1-R997K- LVKYVRVL   | 2120  | 2055  |
| >NF1-R997K- LVRYVRVLGN | 319 | >NF1-R997K- LVKYVRVLGN | 6058  | 5739  |
| >NF1-R997K- LVRYVRVL   | 590 | >NF1-R997K- LVKYVRVL   | 473   | 117   |
| >NF1-R997K- LVRYVRVLGN | 35  | >NF1-R997K- LVKYVRVLGN | 123   | 88    |
| >NF1-R997K- NLVRYVRV   | 254 | >NF1-R997K- NLVKYVRV   | 175   | 79    |
| >NF1-R997K- NLVRYVRV   | 44  | >NF1-R997K- NLVKYVRV   | 32    | 12    |
| >NF1-R997K- NLVRYVRVL  | 540 | >NF1-R997K- NLVKYVRVL  | 390   | 150   |
| >NF1-R997K- NLVRYVRV   | 20  | >NF1-R997K- NLVKYVRV   | 19    | 1     |
| >NF1-R997K- NLVRYVRVL  | 160 | >NF1-R997K- NLVKYVRVL  | 159   | 1     |
| >NF1-R997K- NLVRYVRV   | 192 | >NF1-R997K- NLVKYVRV   | 179   | 13    |
| >NF1-R997K- NLVRYVRV   | 9   | >NF1-R997K- NLVKYVRV   | 9     | 0     |
| >NF1-R997K- NLVRYVRVL  | 123 | >NF1-R997K- NLVKYVRVL  | 175   | 52    |
| >NF1-R997K- NLVRYVRV   | 42  | >NF1-R997K- NLVKYVRV   | 45    | 3     |
| >NF1-R997K- NLVRYVRV   | 84  | >NF1-R997K- NLVKYVRV   | 61    | 23    |
| >NF1-R997K- NLVRYVRV   | 146 | >NF1-R997K- NLVKYVRV   | 156   | 10    |
| >NF1-R997K- NLVRYVRV   | 5   | >NF1-R997K- NLVKYVRV   | 6     | 1     |
| >NF1-R997K- NLVRYVRVL  | 344 | >NF1-R997K- NLVKYVRVL  | 690   | 346   |
| >NF1-R997K- NLVRYVRV   | 287 | >NF1-R997K- NLVKYVRV   | 261   | 26    |
| >NF1-R997K- NLVRYVRV   | 410 | >NF1-R997K- NLVKYVRV   | 355   | 55    |
| >NF1-R997K- NLVRYVRVL  | 342 | >NF1-R997K- NLVKYVRVL  | 391   | 49    |
| >NF1-R997K- LNLVRYVRV  | 38  | >NF1-R997K- LNLVKYVRV  | 67    | 29    |
| >NF1-R997K- LNLVRYVR   | 82  | >NF1-R997K- LNLVKYVR   | 124   | 42    |
| >NF1-R997K- MLNLVRYV   | 33  | >NF1-R997K- MLNLVKYV   | 35    | 2     |

|                       |     |                       |     |     |
|-----------------------|-----|-----------------------|-----|-----|
| >NF1-R997K-MLNLVRYVR\ | 292 | >NF1-R997K-MLNLVKYVR\ | 338 | 46  |
| >NF1-R997K-MLNLVRYVR\ | 502 | >NF1-R997K-MLNLVKYVR\ | 493 | 9   |
| >NF1-R997K-MLNLVRYV   | 5   | >NF1-R997K-MLNLVKYV   | 6   | 1   |
| >NF1-R997K-MLNLVRYVR\ | 210 | >NF1-R997K-MLNLVKYVR\ | 231 | 21  |
| >NF1-R997K-MLNLVRYVR\ | 36  | >NF1-R997K-MLNLVKYVR\ | 41  | 5   |
| >NF1-R997K-MLNLVRYV   | 6   | >NF1-R997K-MLNLVKYV   | 7   | 1   |
| >NF1-R997K-MLNLVRYVR\ | 140 | >NF1-R997K-MLNLVKYVR\ | 166 | 26  |
| >NF1-R997K-MLNLVRYVR\ | 60  | >NF1-R997K-MLNLVKYVR\ | 75  | 15  |
| >NF1-R997K-MLNLVRYV   | 173 | >NF1-R997K-MLNLVKYV   | 206 | 33  |
| >NF1-R997K-MLNLVRYV   | 2   | >NF1-R997K-MLNLVKYV   | 2   | 0   |
| >NF1-R997K-MLNLVRYVR\ | 5   | >NF1-R997K-MLNLVKYVR\ | 3   | 2   |
| >NF1-R997K-MLNLVRYVR\ | 30  | >NF1-R997K-MLNLVKYVR\ | 17  | 13  |
| >NF1-R997K-MLNLVRYV   | 12  | >NF1-R997K-MLNLVKYV   | 8   | 4   |
| >NF1-R997K-MLNLVRYVR\ | 38  | >NF1-R997K-MLNLVKYVR\ | 20  | 18  |
| >NF1-R997K-MLNLVRYVR\ | 303 | >NF1-R997K-MLNLVKYVR\ | 182 | 121 |
| >NF1-R997K-MLNLVRYV   | 11  | >NF1-R997K-MLNLVKYV   | 9   | 2   |
| >NF1-R997K-MLNLVRYVR\ | 16  | >NF1-R997K-MLNLVKYVR\ | 13  | 3   |
| >NF1-R997K-MLNLVRYVR\ | 519 | >NF1-R997K-MLNLVKYVR\ | 312 | 207 |
| >NF1-R997K-MLNLVRYV   | 6   | >NF1-R997K-MLNLVKYV   | 5   | 1   |
| >NF1-R997K-MLNLVRYVR\ | 19  | >NF1-R997K-MLNLVKYVR\ | 12  | 7   |
| >NF1-R997K-MLNLVRYVR\ | 440 | >NF1-R997K-MLNLVKYVR\ | 259 | 181 |
| >NF1-R997K-MLNLVRYV   | 3   | >NF1-R997K-MLNLVKYV   | 2   | 1   |
| >NF1-R997K-MLNLVRYVR\ | 2   | >NF1-R997K-MLNLVKYVR\ | 2   | 0   |
| >NF1-R997K-MLNLVRYVR\ | 22  | >NF1-R997K-MLNLVKYVR\ | 25  | 3   |
| >NF1-R997K-MLNLVRYVR  | 415 | >NF1-R997K-MLNLVKYVR  | 862 | 447 |
| >NF1-R997K-MLNLVRYVR  | 255 | >NF1-R997K-MLNLVKYVR  | 615 | 360 |
| >NF1-R997K-MLNLVRYVR  | 7   | >NF1-R997K-MLNLVKYVR  | 8   | 1   |
| >NF1-R997K-MLNLVRYVR  | 21  | >NF1-R997K-MLNLVKYVR  | 41  | 20  |
| >NF1-R997K-MLNLVRYVR  | 12  | >NF1-R997K-MLNLVKYVR  | 21  | 9   |
| >NF1-R997K-MLNLVRYV   | 42  | >NF1-R997K-MLNLVKYV   | 79  | 37  |
| >NF1-R997K-MLNLVRYVR\ | 351 | >NF1-R997K-MLNLVKYVR\ | 593 | 242 |
| >NF1-R997K-MLNLVRYVR  | 124 | >NF1-R997K-MLNLVKYVR  | 113 | 11  |
| >NF1-R997K-MMLNLVRYV  | 124 | >NF1-R997K-MMLNLVKYV  | 164 | 40  |
| >NF1-R997K-MMLNLVRYV  | 8   | >NF1-R997K-MMLNLVKYV  | 8   | 0   |
| >NF1-R997K-MMLNLVRYV  | 10  | >NF1-R997K-MMLNLVKYV  | 10  | 0   |
| >NF1-R997K-MMLNLVRYV  | 14  | >NF1-R997K-MMLNLVKYV  | 15  | 1   |
| >NF1-R997K-MMLNLVRYV  | 17  | >NF1-R997K-MMLNLVKYV  | 17  | 0   |
| >NF1-R997K-MMLNLVRYV  | 5   | >NF1-R997K-MMLNLVKYV  | 5   | 0   |
| >NF1-R997K-MMLNLVRYV  | 10  | >NF1-R997K-MMLNLVKYV  | 10  | 0   |
| >NF1-R997K-MMLNLVRYV  | 8   | >NF1-R997K-MMLNLVKYV  | 9   | 1   |
| >NF1-R997K-MMLNLVRYV  | 14  | >NF1-R997K-MMLNLVKYV  | 16  | 2   |
| >NF1-R997K-MMLNLVRY   | 117 | >NF1-R997K-MMLNLVKY   | 206 | 89  |
| >NF1-R997K-MMLNLVRYV  | 1   | >NF1-R997K-MMLNLVKYV  | 1   | 0   |

|                      |     |                      |     |     |
|----------------------|-----|----------------------|-----|-----|
| >NF1-R997K-MMLNLVRYV | 1   | >NF1-R997K-MMLNLVKYV | 1   | 0   |
| >NF1-R997K-MMLNLVRYV | 2   | >NF1-R997K-MMLNLVKYV | 2   | 0   |
| >NF1-R997K-MMLNLVRYV | 4   | >NF1-R997K-MMLNLVKYV | 3   | 1   |
| >NF1-R997K-MMLNLVRYV | 5   | >NF1-R997K-MMLNLVKYV | 4   | 1   |
| >NF1-R997K-MMLNLVRYV | 5   | >NF1-R997K-MMLNLVKYV | 5   | 0   |
| >NF1-R997K-MMLNLVRYV | 2   | >NF1-R997K-MMLNLVKYV | 2   | 0   |
| >NF1-R997K-MMLNLVRYV | 2   | >NF1-R997K-MMLNLVKYV | 2   | 0   |
| >NF1-R997K-MMLNLVRYV | 2   | >NF1-R997K-MMLNLVKYV | 2   | 0   |
| >NF1-R997K-MMLNLVRYV | 2   | >NF1-R997K-MMLNLVKYV | 2   | 0   |
| >NF1-R997K-MMLNLVRY  | 206 | >NF1-R997K-MMLNLVKY  | 233 | 27  |
| >NF1-R997K-MMLNLVRYV | 341 | >NF1-R997K-MMLNLVKYV | 372 | 31  |
| >NF1-R997K-MMLNLVRYV | 207 | >NF1-R997K-MMLNLVKYV | 230 | 23  |
| >NF1-R997K-MMLNLVRY  | 11  | >NF1-R997K-MMLNLVKY  | 12  | 1   |
| >NF1-R997K-MMLNLVRY  | 60  | >NF1-R997K-MMLNLVKY  | 70  | 10  |
| >NF1-R997K-MMLNLVRYV | 4   | >NF1-R997K-MMLNLVKYV | 7   | 3   |
| >NF1-R997K-MMLNLVRY  | 324 | >NF1-R997K-MMLNLVKY  | 275 | 49  |
| >NF1-R997K-MMLNLVRYV | 155 | >NF1-R997K-MMLNLVKYV | 167 | 12  |
| >NF1-R997K-MMLNLVRYV | 28  | >NF1-R997K-MMLNLVKYV | 32  | 4   |
| >NF1-R997K-MMLNLVRYV | 38  | >NF1-R997K-MMLNLVKYV | 43  | 5   |
| >NF1-R997K-MMLNLVRYV | 89  | >NF1-R997K-MMLNLVKYV | 94  | 5   |
| >NF1-R997K-MMLNLVRY  | 99  | >NF1-R997K-MMLNLVKY  | 225 | 126 |
| >NF1-R997K-MMLNLVRY  | 68  | >NF1-R997K-MMLNLVKY  | 129 | 61  |
| >NF1-R997K-MMLNLVRY  | 216 | >NF1-R997K-MMLNLVKY  | 158 | 58  |
| >NF1-R997K-MMLNLVRY  | 11  | >NF1-R997K-MMLNLVKY  | 8   | 3   |
| >NF1-R997K-MMLNLVRYV | 84  | >NF1-R997K-MMLNLVKYV | 56  | 28  |
| >NF1-R997K-MMLNLVRYV | 319 | >NF1-R997K-MMLNLVKYV | 441 | 122 |
| >NF1-R997K-MMLNLVRYV | 107 | >NF1-R997K-MMLNLVKYV | 119 | 12  |
| >NF1-R997K-MMLNLVRY  | 113 | >NF1-R997K-MMLNLVKY  | 163 | 50  |
| >NF1-R997K-MMLNLVRY  | 166 | >NF1-R997K-MMLNLVKY  | 151 | 15  |
| >NF1-R997K-MMLNLVRYV | 39  | >NF1-R997K-MMLNLVKYV | 30  | 9   |
| >NF1-R997K-TMMLNLVRY | 12  | >NF1-R997K-TMMLNLVKY | 15  | 3   |
| >NF1-R997K-TMMLNLVRY | 27  | >NF1-R997K-TMMLNLVKY | 39  | 12  |
| >NF1-R997K-TMMLNLVRY | 10  | >NF1-R997K-TMMLNLVKY | 10  | 0   |
| >NF1-R997K-TMMLNLVRY | 49  | >NF1-R997K-TMMLNLVKY | 69  | 20  |
| >NF1-R997K-TMMLNLVRY | 2   | >NF1-R997K-TMMLNLVKY | 3   | 1   |
| >NF1-R997K-TMMLNLVRY | 4   | >NF1-R997K-TMMLNLVKY | 4   | 0   |
| >NF1-R997K-TMMLNLVRY | 18  | >NF1-R997K-TMMLNLVKY | 16  | 2   |
| >NF1-R997K-TMMLNLVRY | 2   | >NF1-R997K-TMMLNLVKY | 2   | 0   |
| >NF1-R997K-TMMLNLVRY | 4   | >NF1-R997K-TMMLNLVKY | 3   | 1   |
| >NF1-R997K-TMMLNLVR  | 608 | >NF1-R997K-TMMLNLVK  | 54  | 554 |
| >NF1-R997K-TMMLNLVRY | 329 | >NF1-R997K-TMMLNLVKY | 323 | 6   |
| >NF1-R997K-TMMLNLVR  | 106 | >NF1-R997K-TMMLNLVK  | 11  | 95  |
| >NF1-R997K-TMMLNLVRY | 190 | >NF1-R997K-TMMLNLVKY | 170 | 20  |

|                        |      |                        |      |      |
|------------------------|------|------------------------|------|------|
| >NF1-R997K-TMMLNLVRY   | 76   | >NF1-R997K-TMMLNLVKY   | 103  | 27   |
| >NF1-R997K-TMMLNLVRY   | 143  | >NF1-R997K-TMMLNLVKY   | 258  | 115  |
| >NF1-R997K-TMMLNLVRY   | 25   | >NF1-R997K-TMMLNLVKY   | 28   | 3    |
| >NF1-R997K-TMMLNLVRY   | 132  | >NF1-R997K-TMMLNLVKY   | 131  | 1    |
| >NF1-R997K-TMMLNLVLR   | 42   | >NF1-R997K-TMMLNLVK    | 1096 | 1054 |
| >NF1-R997K-TMMLNLVRY   | 11   | >NF1-R997K-TMMLNLVKY   | 11   | 0    |
| >NF1-R997K-TMMLNLVLR   | 255  | >NF1-R997K-TMMLNLVK    | 5737 | 5482 |
| >NF1-R997K-TMMLNLVRY   | 69   | >NF1-R997K-TMMLNLVKY   | 100  | 31   |
| >NF1-R997K-TMMLNLVLR   | 82   | >NF1-R997K-TMMLNLVK    | 307  | 225  |
| >NF1-R997K-TMMLNLVRY   | 33   | >NF1-R997K-TMMLNLVKY   | 44   | 11   |
| >NF1-R997K-TMMLNLVRY   | 88   | >NF1-R997K-TMMLNLVKY   | 96   | 8    |
| >NF1-R997K-TMMLNLVRY   | 156  | >NF1-R997K-TMMLNLVKY   | 379  | 223  |
| >NF1-R997K-TMMLNLVRY   | 393  | >NF1-R997K-TMMLNLVKY   | 277  | 116  |
| >NF1-R997K-TMMLNLVRY   | 190  | >NF1-R997K-TMMLNLVKY   | 95   | 95   |
| >NF1-R997K-TMMLNLVRY   | 391  | >NF1-R997K-TMMLNLVKY   | 629  | 238  |
| >NF1-R997K-TMMLNLVLR   | 64   | >NF1-R997K-TMMLNLVK    | 1173 | 1109 |
| >NF1-R997K-TMMLNLVRY   | 58   | >NF1-R997K-TMMLNLVKY   | 54   | 4    |
| >NF1-R997K-ETMMLNLVLR  | 78   | >NF1-R997K-ETMMLNLVK   | 68   | 10   |
| >NF1-R997K-ETMMLNLVLR  | 320  | >NF1-R997K-ETMMLNLVK   | 412  | 92   |
| >NF1-R997K-ETMMLNLVLR  | 456  | >NF1-R997K-ETMMLNLVK   | 450  | 6    |
| >NF1-R997K-ETMMLNLVLR  | 300  | >NF1-R997K-ETMMLNLVK   | 30   | 270  |
| >NF1-R997K-ETMMLNLVLR  | 147  | >NF1-R997K-ETMMLNLVK   | 124  | 23   |
| >NF1-R997K-ETMMLNLVLR  | 65   | >NF1-R997K-ETMMLNLVK   | 28   | 37   |
| >NF1-R997K-ETMMLNLVLR  | 113  | >NF1-R997K-ETMMLNLVK   | 72   | 41   |
| >NF1-R997K-ETMMLNLVLR  | 6    | >NF1-R997K-ETMMLNLVK   | 8    | 2    |
| >NF1-R997K-ETMMLNLVLR  | 399  | >NF1-R997K-ETMMLNLVK   | 441  | 42   |
| >NF1-R997K-ETMMLNLVLR  | 33   | >NF1-R997K-ETMMLNLVK   | 48   | 15   |
| >NF1-R997K-ETMMLNLVLR  | 252  | >NF1-R997K-ETMMLNLVK   | 191  | 61   |
| >NF1-R997K-ETMMLNLVLR  | 97   | >NF1-R997K-ETMMLNLVK   | 74   | 23   |
| >NF1-R997K-ETMMLNLVLR  | 25   | >NF1-R997K-ETMMLNLVK   | 483  | 458  |
| >NF1-R997K-ETMMLNLVLR  | 3    | >NF1-R997K-ETMMLNLVK   | 5    | 2    |
| >NF1-R997K-ETMMLNLVLR  | 39   | >NF1-R997K-ETMMLNLVK   | 27   | 12   |
| >NF1-R997K-ETMMLNLVLR  | 5    | >NF1-R997K-ETMMLNLVK   | 6    | 1    |
| >NF1-R997K-ETMMLNLVLR  | 6    | >NF1-R997K-ETMMLNLVK   | 6    | 0    |
| >NF1-R997K-ETMMLNLVLR  | 8    | >NF1-R997K-ETMMLNLVK   | 10   | 2    |
| >NF1-R997K-ETMMLNLVLR  | 218  | >NF1-R997K-ETMMLNLVK   | 93   | 125  |
| >NF1-R997K-ETMMLNLVLR  | 111  | >NF1-R997K-ETMMLNLVK   | 5043 | 4932 |
| >NF1-R997K-IETMMLNLVLR | 106  | >NF1-R997K-IETMMLNLVLR | 44   | 62   |
| >NF1-S1150L SNLLNANV   | 472  | >NF1-S1150L LNLLNANV   | 1374 | 902  |
| >NF1-S1150L MSNLLNANV  | 6083 | >NF1-S1150L MLNLLNANV  | 26   | 6057 |
| >NF1-S1150L MSNLLNANV  | 235  | >NF1-S1150L MLNLLNANV  | 3    | 232  |
| >NF1-S1150L MSNLLNANV  | 1225 | >NF1-S1150L MLNLLNANV  | 5    | 1220 |
| >NF1-S1150L MSNLLNANV  | 3876 | >NF1-S1150L MLNLLNANV  | 245  | 3631 |

|                        |       |                        |       |       |
|------------------------|-------|------------------------|-------|-------|
| >NF1-S1150L MSNLLNANV  | 7499  | >NF1-S1150L MLNLLNANV  | 7     | 7492  |
| >NF1-S1150L MSNLLNANV  | 15670 | >NF1-S1150L MLNLLNANV  | 12    | 15658 |
| >NF1-S1150L MSNLLNANV  | 14773 | >NF1-S1150L MLNLLNANV  | 13    | 14760 |
| >NF1-S1150L MSNLLNANV  | 12432 | >NF1-S1150L MLNLLNANV  | 5     | 12427 |
| >NF1-S1150L MSNLLNANV  | 13942 | >NF1-S1150L MLNLLNANV  | 3     | 13939 |
| >NF1-S1150L MSNLLNANV  | 10    | >NF1-S1150L MLNLLNANV  | 44    | 34    |
| >NF1-S1150L MSNLLNANV  | 281   | >NF1-S1150L MLNLLNANV  | 206   | 75    |
| >NF1-S1150L MSNLLNANV  | 464   | >NF1-S1150L MLNLLNANV  | 18702 | 18238 |
| >NF1-S1150L SLRHCTVLAN | 13271 | >NF1-S1150L SLRHCTVLAN | 357   | 12914 |
| >NF1-S1150L SLRHCTVLAN | 3321  | >NF1-S1150L SLRHCTVLAN | 43    | 3278  |
| >NF1-S1150L SLRHCTVLAN | 1036  | >NF1-S1150L SLRHCTVLAN | 27    | 1009  |
| >NF1-S1150L SLRHCTVLAN | 8400  | >NF1-S1150L SLRHCTVLAN | 155   | 8245  |
| >NF1-S1150L SLRHCTVLAN | 19536 | >NF1-S1150L SLRHCTVLAN | 203   | 19333 |
| >NF1-S1150L SLRHCTVLAN | 14654 | >NF1-S1150L SLRHCTVLAN | 287   | 14367 |
| >NF1-S1150L SLRHCTVLAN | 4712  | >NF1-S1150L SLRHCTVLAN | 10    | 4702  |
| >NF1-S1150L SLRHCTVLAN | 1123  | >NF1-S1150L SLRHCTVLAN | 252   | 871   |
| >NF1-S1150L SLRHCTVLAN | 6125  | >NF1-S1150L SLRHCTVLAN | 369   | 5756  |
| >NF1-S1150L AMSNLLNA   | 96    | >NF1-S1150L AMLNLLNA   | 33    | 63    |
| >NF1-S1150L AMSNLLNAN  | 42    | >NF1-S1150L AMLNLLNAN  | 15    | 27    |
| >NF1-S1150L AMSNLLNA   | 19    | >NF1-S1150L AMLNLLNA   | 211   | 192   |
| >NF1-S1150L AMSNLLNAN  | 13    | >NF1-S1150L AMLNLLNAN  | 20    | 7     |
| >NF1-S1150L AMSNLLNA   | 9     | >NF1-S1150L AMLNLLNA   | 40    | 31    |
| >NF1-S1150L AMSNLLNAN  | 13    | >NF1-S1150L AMLNLLNAN  | 15    | 2     |
| >NF1-S1150L AMSNLLNA   | 157   | >NF1-S1150L AMLNLLNA   | 39    | 118   |
| >NF1-S1150L AMSNLLNAN  | 87    | >NF1-S1150L AMLNLLNAN  | 35    | 52    |
| >NF1-S1150L AMSNLLNA   | 61    | >NF1-S1150L AMLNLLNA   | 8     | 53    |
| >NF1-S1150L AMSNLLNAN  | 5     | >NF1-S1150L AMLNLLNAN  | 2     | 3     |
| >NF1-S1150L AMSNLLNA   | 123   | >NF1-S1150L AMLNLLNA   | 22    | 101   |
| >NF1-S1150L AMSNLLNAN  | 5     | >NF1-S1150L AMLNLLNAN  | 3     | 2     |
| >NF1-S1150L AMSNLLNA   | 64    | >NF1-S1150L AMLNLLNA   | 14    | 50    |
| >NF1-S1150L AMSNLLNAN  | 9     | >NF1-S1150L AMLNLLNAN  | 5     | 4     |
| >NF1-S1150L AMSNLLNA   | 730   | >NF1-S1150L AMLNLLNA   | 85    | 645   |
| >NF1-S1150L AMSNLLNAN  | 7     | >NF1-S1150L AMLNLLNAN  | 3     | 4     |
| >NF1-S1150L AMSNLLNA   | 13    | >NF1-S1150L AMLNLLNA   | 10    | 3     |
| >NF1-S1150L AMSNLLNAN  | 2     | >NF1-S1150L AMLNLLNAN  | 2     | 0     |
| >NF1-S1150L AMSNLLNAN  | 2742  | >NF1-S1150L AMLNLLNAN  | 317   | 2425  |
| >NF1-S1150L AMSNLLNAN  | 521   | >NF1-S1150L AMLNLLNAN  | 300   | 221   |
| >NF1-S1150L LAMSNLLNAI | 498   | >NF1-S1150L LAMLNLLNAI | 548   | 50    |
| >NF1-S1150L LAMSNLLNAI | 138   | >NF1-S1150L LAMLNLLNAI | 563   | 425   |
| >NF1-S1150L LAMSNLLNAI | 60    | >NF1-S1150L LAMLNLLNAI | 213   | 153   |
| >NF1-S1150L LAMSNLLNA  | 337   | >NF1-S1150L LAMLNLLNA  | 999   | 662   |
| >NF1-S1150L LAMSNLLNAI | 68    | >NF1-S1150L LAMLNLLNAI | 220   | 152   |
| >NF1-S1150L LAMSNLLNA  | 320   | >NF1-S1150L LAMLNLLNA  | 636   | 316   |



|                        |      |                        |      |      |
|------------------------|------|------------------------|------|------|
| >NF1-S1150L LAMSNLLNAI | 90   | >NF1-S1150L LAMLNLLNAI | 107  | 17   |
| >NF1-S1150L LAMSNLLNAI | 256  | >NF1-S1150L LAMLNLLNAI | 1100 | 844  |
| >NF1-S1150L LAMSNLLNAI | 138  | >NF1-S1150L LAMLNLLNAI | 227  | 89   |
| >NF1-S1150L LAMSNLLNAI | 68   | >NF1-S1150L LAMLNLLNAI | 298  | 230  |
| >NF1-S1150L LAMSNLLNAI | 72   | >NF1-S1150L LAMLNLLNAI | 148  | 76   |
| >NF1-S1150L LAMSNLLNAI | 43   | >NF1-S1150L LAMLNLLNAI | 129  | 86   |
| >NF1-S1150L VLAMSNLL   | 119  | >NF1-S1150L VLAMLNLL   | 70   | 49   |
| >NF1-S1150L VLAMSNLLN/ | 204  | >NF1-S1150L VLAMLNLLN/ | 173  | 31   |
| >NF1-S1150L VLAMSNLL   | 7    | >NF1-S1150L VLAMLNLL   | 7    | 0    |
| >NF1-S1150L VLAMSNLLN/ | 99   | >NF1-S1150L VLAMLNLLN/ | 116  | 17   |
| >NF1-S1150L VLAMSNLL   | 24   | >NF1-S1150L VLAMLNLL   | 28   | 4    |
| >NF1-S1150L VLAMSNLLN/ | 76   | >NF1-S1150L VLAMLNLLN/ | 102  | 26   |
| >NF1-S1150L VLAMSNLL   | 456  | >NF1-S1150L VLAMLNLL   | 261  | 195  |
| >NF1-S1150L VLAMSNLLN/ | 453  | >NF1-S1150L VLAMLNLLN/ | 374  | 79   |
| >NF1-S1150L VLAMSNLL   | 99   | >NF1-S1150L VLAMLNLL   | 57   | 42   |
| >NF1-S1150L VLAMSNLLN/ | 171  | >NF1-S1150L VLAMLNLLN/ | 183  | 12   |
| >NF1-S1150L VLAMSNLL   | 259  | >NF1-S1150L VLAMLNLL   | 264  | 5    |
| >NF1-S1150L VLAMSNLL   | 45   | >NF1-S1150L VLAMLNLL   | 36   | 9    |
| >NF1-S1150L VLAMSNLLN/ | 91   | >NF1-S1150L VLAMLNLLN/ | 87   | 4    |
| >NF1-S1150L VLAMSNLL   | 139  | >NF1-S1150L VLAMLNLL   | 191  | 52   |
| >NF1-S1150L VLAMSNLL   | 6    | >NF1-S1150L VLAMLNLL   | 5    | 1    |
| >NF1-S1150L VLAMSNLLN/ | 11   | >NF1-S1150L VLAMLNLLN/ | 16   | 5    |
| >NF1-S1150L TVLAMSNL   | 143  | >NF1-S1150L TVLAMLNL   | 316  | 173  |
| >NF1-S1150L TVLAMSPLL  | 295  | >NF1-S1150L TVLAMLNLL  | 288  | 7    |
| >NF1-S1150L TVLAMSPLL  | 1250 | >NF1-S1150L TVLAMLNLL  | 305  | 945  |
| >NF1-S1150L TVLAMSPLL  | 194  | >NF1-S1150L TVLAMLNLL  | 195  | 1    |
| >NF1-S1150L TVLAMSPLL  | 523  | >NF1-S1150L TVLAMLNL   | 150  | 373  |
| >NF1-S1150L TVLAMSPLL  | 230  | >NF1-S1150L TVLAMLNLL  | 35   | 195  |
| >NF1-S1150L TVLAMSPLL  | 355  | >NF1-S1150L TVLAMLNLLN | 165  | 190  |
| >NF1-S1150L TVLAMSPLL  | 386  | >NF1-S1150L TVLAMLNL   | 333  | 53   |
| >NF1-S1150L TVLAMSPLL  | 94   | >NF1-S1150L TVLAMLNL   | 318  | 224  |
| >NF1-S1150L TVLAMSPLL  | 52   | >NF1-S1150L TVLAMLNLL  | 82   | 30   |
| >NF1-S1150L TVLAMSPLL  | 61   | >NF1-S1150L TVLAMLNL   | 53   | 8    |
| >NF1-S1150L TVLAMSPLL  | 121  | >NF1-S1150L TVLAMLNLL  | 137  | 16   |
| >NF1-S1150L TVLAMSPLL  | 193  | >NF1-S1150L TVLAMLNLLN | 274  | 81   |
| >NF1-S1150L TVLAMSPLL  | 396  | >NF1-S1150L TVLAMLNLL  | 2256 | 1860 |
| >NF1-S1150L TVLAMSPLL  | 474  | >NF1-S1150L TVLAMLNLL  | 567  | 93   |
| >NF1-S1150L CTVLAMSPLL | 11   | >NF1-S1150L CTVLAMLNL  | 45   | 34   |
| >NF1-S1150L CTVLAMSPLL | 341  | >NF1-S1150L CTVLAMLNLL | 119  | 222  |
| >NF1-S1150L CTVLAMSPLL | 84   | >NF1-S1150L CTVLAMLNL  | 426  | 342  |
| >NF1-S1150L CTVLAMSPLL | 12   | >NF1-S1150L CTVLAMLNL  | 12   | 0    |
| >NF1-S1150L CTVLAMSPLL | 127  | >NF1-S1150L CTVLAMLNLL | 179  | 52   |
| >NF1-S1150L CTVLAMSPLL | 174  | >NF1-S1150L CTVLAMLNL  | 118  | 56   |

|                        |       |                        |       |       |
|------------------------|-------|------------------------|-------|-------|
| >NF1-S1150L CTVLAMSNLI | 31    | >NF1-S1150L CTVLAMLNLI | 36    | 5     |
| >NF1-S1150L CTVLAMSNL  | 279   | >NF1-S1150L CTVLAMLNL  | 5362  | 5083  |
| >NF1-S1150L CTVLAMSNLI | 90    | >NF1-S1150L CTVLAMLNLI | 149   | 59    |
| >NF1-S1150L CTVLAMSNL  | 163   | >NF1-S1150L CTVLAMLNL  | 453   | 290   |
| >NF1-S1150L CTVLAMSNLI | 232   | >NF1-S1150L CTVLAMLNLI | 280   | 48    |
| >NF1-S1150L RHCTVLAMS  | 20799 | >NF1-S1150L RHCTVLAML  | 313   | 20486 |
| >NF1-S1150L RHCTVLAMS  | 15937 | >NF1-S1150L RHCTVLAML  | 358   | 15579 |
| >NF1-S1150L LRHCTVLAM  | 2091  | >NF1-S1150L LRHCTVLAMI | 80    | 2011  |
| >NF1-S1150L LRHCTVLAM  | 11676 | >NF1-S1150L LRHCTVLAMI | 298   | 11378 |
| >NF1-S1150L LRHCTVLAM  | 4442  | >NF1-S1150L LRHCTVLAMI | 198   | 4244  |
| >NF1-S1150L LRHCTVLAM  | 2986  | >NF1-S1150L LRHCTVLAMI | 174   | 2812  |
| >NF1-S2181C SYRDRSFS   | 25    | >NF1-S2181C GYRDRSFS   | 134   | 109   |
| >NF1-S2181C SYRDRSFSP  | 67    | >NF1-S2181C GYRDRSFSP  | 400   | 333   |
| >NF1-S2181C SYRDRSFSPG | 18    | >NF1-S2181C GYRDRSFSPG | 85    | 67    |
| >NF1-S2181C SYRDRSFSPG | 30    | >NF1-S2181C GYRDRSFSPG | 168   | 138   |
| >NF1-S2181C SSYRDRSF   | 292   | >NF1-S2181C SGYRDRSF   | 13252 | 12960 |
| >NF1-S2181C SSYRDRSF   | 122   | >NF1-S2181C SGYRDRSF   | 681   | 559   |
| >NF1-S2181C SSYRDRSF   | 17    | >NF1-S2181C SGYRDRSF   | 250   | 233   |
| >NF1-S2181C SSYRDRSF   | 11    | >NF1-S2181C SGYRDRSF   | 1523  | 1512  |
| >NF1-S2181C SSYRDRSF   | 265   | >NF1-S2181C SGYRDRSF   | 6444  | 6179  |
| >NF1-S2181C RSSYRDRSF  | 45    | >NF1-S2181C RSGYRDRSF  | 49    | 4     |
| >NF1-S2181C RSSYRDRSF  | 89    | >NF1-S2181C RSGYRDRSF  | 112   | 23    |
| >NF1-S2181C RSSYRDRSF  | 30    | >NF1-S2181C RSGYRDRSF  | 136   | 106   |
| >NF1-S2181C RSSYRDRSF  | 4     | >NF1-S2181C RSGYRDRSF  | 13    | 9     |
| >NF1-S2181C RSSYRDRSF  | 150   | >NF1-S2181C RSGYRDRSF  | 342   | 192   |
| >NF1-S2181C RSSYRDRSF  | 211   | >NF1-S2181C RSGYRDRSF  | 1587  | 1376  |
| >NF1-S2181C RSSYRDRSF  | 142   | >NF1-S2181C RSGYRDRSF  | 699   | 557   |
| >NF1-S2181C RSSYRDRSFS | 425   | >NF1-S2181C RSGYRDRSFS | 3066  | 2641  |
| >NF1-S2181C FRSSYRDRSF | 20    | >NF1-S2181C FRSGYRDRSF | 90    | 70    |
| >NF1-S2181C FRSSYRDR   | 527   | >NF1-S2181C FRSGYRDR   | 401   | 126   |
| >NF1-S2181C FRSSYRDRSF | 390   | >NF1-S2181C FRSGYRDRSF | 364   | 26    |
| >NF1-S2181C AFRSSYRDRS | 219   | >NF1-S2181C AFRSGYRDRS | 162   | 57    |
| >NF1-S2181C AFRSSYRDR  | 125   | >NF1-S2181C AFRSGYRDR  | 334   | 209   |
| >NF1-S2181C AFRSSYRDR  | 45    | >NF1-S2181C AFRSGYRDR  | 65    | 20    |
| >NF1-S2181C AFRSSYRDRS | 682   | >NF1-S2181C AFRSGYRDRS | 489   | 193   |
| >NF1-S2181C AFRSSYRDRS | 96    | >NF1-S2181C AFRSGYRDRS | 261   | 165   |
| >NF1-S2181C IAFRSSYR   | 242   | >NF1-S2181C IAFRSGYR   | 514   | 272   |
| >NF1-S2181C IAFRSSYR   | 57    | >NF1-S2181C IAFRSGYR   | 151   | 94    |
| >NF1-S2181C IAFRSSYR   | 8     | >NF1-S2181C IAFRSGYR   | 10    | 2     |
| >NF1-S2181C IAFRSSYRDR | 119   | >NF1-S2181C IAFRSGYRDR | 308   | 189   |
| >NF1-S2181C IAFRSSYR   | 41    | >NF1-S2181C IAFRSGYR   | 74    | 33    |
| >NF1-S2181C IAFRSSYR   | 4     | >NF1-S2181C IAFRSGYR   | 7     | 3     |
| >NF1-S2181C IAFRSSYR   | 373   | >NF1-S2181C IAFRSGYR   | 1347  | 974   |

|                         |     |                         |      |      |
|-------------------------|-----|-------------------------|------|------|
| >NF1-S2181C IAFRSSYRDR  | 472 | >NF1-S2181C IAFRSGYRDR  | 681  | 209  |
| >NF1-S2181C IAFRSSYRDR  | 420 | >NF1-S2181C IAFRSGYRDR  | 682  | 262  |
| >NF1-S2181C IAFRSSYR    | 113 | >NF1-S2181C IAFRSGYR    | 152  | 39   |
| >NF1-S2181C VIAFRSSY    | 361 | >NF1-S2181C VIAFRSGY    | 533  | 172  |
| >NF1-S2181C VIAFRSSYR   | 80  | >NF1-S2181C VIAFRSGYR   | 117  | 37   |
| >NF1-S2181C VIAFRSSYR   | 92  | >NF1-S2181C VIAFRSGYR   | 301  | 209  |
| >NF1-S2181C VIAFRSSY    | 81  | >NF1-S2181C VIAFRSGY    | 102  | 21   |
| >NF1-S2181C VIAFRSSY    | 17  | >NF1-S2181C VIAFRSGY    | 21   | 4    |
| >NF1-S2181C VIAFRSSYR   | 19  | >NF1-S2181C VIAFRSGYR   | 42   | 23   |
| >NF1-S2181C VIAFRSSYR   | 137 | >NF1-S2181C VIAFRSGYR   | 335  | 198  |
| >NF1-S2181C VIAFRSSYR   | 17  | >NF1-S2181C VIAFRSGYR   | 40   | 23   |
| >NF1-S2181C VIAFRSSYRDF | 185 | >NF1-S2181C VIAFRSGYRDF | 366  | 181  |
| >NF1-S2181C VIAFRSSY    | 243 | >NF1-S2181C VIAFRSGY    | 196  | 47   |
| >NF1-S2181C VIAFRSSY    | 94  | >NF1-S2181C VIAFRSGY    | 257  | 163  |
| >NF1-S2181C VIAFRSSY    | 319 | >NF1-S2181C VIAFRSGY    | 391  | 72   |
| >NF1-S2181C VIAFRSSY    | 317 | >NF1-S2181C VIAFRSGY    | 445  | 128  |
| >NF1-S2181C VIAFRSSYR   | 200 | >NF1-S2181C VIAFRSGYR   | 176  | 24   |
| >NF1-S2181C AVIAFRSSYR  | 41  | >NF1-S2181C AVIAFRSGYR  | 63   | 22   |
| >NF1-S2181C AVIAFRSSY   | 31  | >NF1-S2181C AVIAFRSGY   | 57   | 26   |
| >NF1-S2181C AVIAFRSSYR  | 17  | >NF1-S2181C AVIAFRSGYR  | 38   | 21   |
| >NF1-S2181C AVIAFRSSY   | 156 | >NF1-S2181C AVIAFRSGY   | 1319 | 1163 |
| >NF1-S2181C AVIAFRSSY   | 202 | >NF1-S2181C AVIAFRSGY   | 69   | 133  |
| >NF1-S2181C AVIAFRSSY   | 8   | >NF1-S2181C AVIAFRSGY   | 8    | 0    |
| >NF1-S2181C AVIAFRSSY   | 107 | >NF1-S2181C AVIAFRSGY   | 36   | 71   |
| >NF1-S2181C AVIAFRSSY   | 59  | >NF1-S2181C AVIAFRSGY   | 84   | 25   |
| >NF1-S2181C AVIAFRSSYR  | 477 | >NF1-S2181C AVIAFRSGYR  | 759  | 282  |
| >NF1-S2181C AVIAFRSSY   | 18  | >NF1-S2181C AVIAFRSGY   | 26   | 8    |
| >NF1-S2181C AVIAFRSSYR  | 7   | >NF1-S2181C AVIAFRSGYR  | 13   | 6    |
| >NF1-S2181C AVIAFRSSYR  | 104 | >NF1-S2181C AVIAFRSGYR  | 338  | 234  |
| >NF1-S2181C AVIAFRSSYR  | 3   | >NF1-S2181C AVIAFRSGYR  | 8    | 5    |
| >NF1-S2181C AVIAFRSSY   | 307 | >NF1-S2181C AVIAFRSGY   | 287  | 20   |
| >NF1-S2181C AVIAFRSSY   | 59  | >NF1-S2181C AVIAFRSGY   | 109  | 50   |
| >NF1-S2181C AVIAFRSSY   | 202 | >NF1-S2181C AVIAFRSGY   | 203  | 1    |
| >NF1-S2181C AVIAFRSSY   | 48  | >NF1-S2181C AVIAFRSGY   | 290  | 242  |
| >NF1-S2181C AVIAFRSSY   | 108 | >NF1-S2181C AVIAFRSGY   | 92   | 16   |
| >NF1-S2181C AVIAFRSSY   | 20  | >NF1-S2181C AVIAFRSGY   | 72   | 52   |
| >NF1-S2181C AVIAFRSSY   | 39  | >NF1-S2181C AVIAFRSGY   | 3296 | 3257 |
| >NF1-S2181C AVIAFRSSYR  | 165 | >NF1-S2181C AVIAFRSGYR  | 432  | 267  |
| >NF1-S2181C AVIAFRSSYR  | 352 | >NF1-S2181C AVIAFRSGYR  | 312  | 40   |
| >NF1-S2181C AAVIAFRSSY  | 549 | >NF1-S2181C AAVIAFRSGY  | 322  | 227  |
| >NF1-S2181C AAVIAFRSSY  | 175 | >NF1-S2181C AAVIAFRSGY  | 297  | 122  |
| >NF1-S2181C AAVIAFRSSYF | 33  | >NF1-S2181C AAVIAFRSGYF | 55   | 22   |
| >NF1-S2181C AAVIAFRSSYF | 68  | >NF1-S2181C AAVIAFRSGYF | 157  | 89   |

|                        |       |                         |      |       |
|------------------------|-------|-------------------------|------|-------|
| >NF1-S2181CAAIAFRSSY   | 127   | >NF1-S2181CAAIAFRSGY    | 318  | 191   |
| >NF1-S2181CAAIAFRSSY   | 58    | >NF1-S2181CAAIAFRSGY    | 307  | 249   |
| >NF1-S2181CAAIAFRSSY   | 10    | >NF1-S2181CAAIAFRSGY    | 9    | 1     |
| >NF1-S2181CAAIAFRSSY   | 496   | >NF1-S2181CAAIAFRSGY    | 1118 | 622   |
| >NF1-S2181CAAIAFRSSY   | 212   | >NF1-S2181CAAIAFRSGY    | 5355 | 5143  |
| >NF1-S2181CAAIAFRSSYF  | 368   | >NF1-S2181CAAIAFRSGY    | 327  | 41    |
| >NF1-S2181CSAAIAFRSSY  | 163   | >NF1-S2181CSAAIAFRSG'   | 202  | 39    |
| >NF1-S2181CSAAIAFRSSY  | 17    | >NF1-S2181CSAAIAFRSG'   | 23   | 6     |
| >NF1-S2181CSAAIAFRSSY  | 116   | >NF1-S2181CSAAIAFRSG'   | 123  | 7     |
| >NF1-S2181CSAAIAFRSSY  | 416   | >NF1-S2181CSAAIAFRSG'   | 367  | 49    |
| >NF1-S2181CSAAIAFRSSY  | 322   | >NF1-S2181CSAAIAFRSG'   | 922  | 600   |
| >NF1-S2181CSAAIAFRSSY  | 329   | >NF1-S2181CSAAIAFRSG'   | 1345 | 1016  |
| >NF1-S2181CSAAIAFRSSY  | 72    | >NF1-S2181CSAAIAFRSG'   | 60   | 12    |
| >NF1-S2181CSAAIAFRSSY  | 70    | >NF1-S2181CSAAIAFRSG'   | 139  | 69    |
| >NF1-S2181CSAAIAFRSSY  | 21    | >NF1-S2181CSAAIAFRSG'   | 46   | 25    |
| >NF1-S2181CSAAIAFRSSY  | 307   | >NF1-S2181CSAAIAFRSG'   | 5932 | 5625  |
| >NF1-S2181CSAAIAFRSSY  | 491   | >NF1-S2181CSAAIAFRSG'   | 704  | 213   |
| >NF1-S2484FSYRTLKETQP' | 207   | >NF1-S2484F FYRTLKETQP' | 62   | 145   |
| >NF1-S2484FDTYPIHHGDF  | 17124 | >NF1-S2484F DTYPIHHGDF  | 367  | 16757 |
| >NF1-S2484FDTYPIHHGDF  | 5378  | >NF1-S2484F DTYPIHHGDF  | 22   | 5356  |
| >NF1-S2484FDTYPIHHGDF  | 15812 | >NF1-S2484F DTYPIHHGDF  | 222  | 15590 |
| >NF1-S2484FDTYPIHHGDF  | 1223  | >NF1-S2484F DTYPIHHGDF  | 481  | 742   |
| >NF1-S2484FDTYPIHHGDF  | 148   | >NF1-S2484F DTYPIHHGDF  | 1182 | 1034  |
| >NF1-S2484FDTYPIHHGDF  | 10773 | >NF1-S2484F DTYPIHHGDF  | 14   | 10759 |
| >NF1-S2484FDTYPIHHGDF  | 8824  | >NF1-S2484F DTYPIHHGDF  | 190  | 8634  |
| >NF1-S2484FDPSYRTLK    | 1474  | >NF1-S2484F DPFYRTLK    | 282  | 1192  |
| >NF1-S2484FDPSYRTLK    | 398   | >NF1-S2484F DPFYRTLK    | 75   | 323   |
| >NF1-S2484FHHGDPSYR    | 2826  | >NF1-S2484F HHGDPSYR    | 427  | 2399  |
| >NF1-S2484FHHGDPSYRTL  | 127   | >NF1-S2484F HHGDPSYRTL  | 193  | 66    |
| >NF1-S2484FHHGDPSYRTL  | 229   | >NF1-S2484F HHGDPSYRTL  | 353  | 124   |
| >NF1-S2484FHHGDPSYR    | 41    | >NF1-S2484F HHGDPSYR    | 18   | 23    |
| >NF1-S2484FIHHGDPSY    | 367   | >NF1-S2484F IHHGDPSY    | 67   | 300   |
| >NF1-S2484FIHHGDPSY    | 142   | >NF1-S2484F IHHGDPSY    | 93   | 49    |
| >NF1-S2484FIHHGDPSY    | 161   | >NF1-S2484F IHHGDPSY    | 478  | 317   |
| >NF1-S2484FIHHGDPSYRT  | 398   | >NF1-S2484F IHHGDPSYRT  | 676  | 278   |
| >NF1-S2484FIHHGDPSYRT  | 151   | >NF1-S2484F IHHGDPSYRT  | 227  | 76    |
| >NF1-S2484FIHHGDPSYRT  | 378   | >NF1-S2484F IHHGDPSYRT  | 305  | 73    |
| >NF1-S2484FIHHGDPSY    | 1026  | >NF1-S2484F IHHGDPSY    | 471  | 555   |
| >NF1-S2484FIHHGDPSYR   | 309   | >NF1-S2484F IHHGDPSYR   | 67   | 242   |
| >NF1-S2484FPIHHGDPSY   | 1140  | >NF1-S2484F PIHHGDPSY   | 234  | 906   |
| >NF1-S2484FPIHHGDPSY   | 146   | >NF1-S2484F PIHHGDPSY   | 44   | 102   |
| >NF1-S2484FPIHHGDPSY   | 59    | >NF1-S2484F PIHHGDPSY   | 38   | 21    |
| >NF1-S2484FPIHHGDPSYR  | 451   | >NF1-S2484F PIHHGDPSYR  | 99   | 352   |

|                       |       |                       |      |       |
|-----------------------|-------|-----------------------|------|-------|
| >NF1-S2484FYPIHHGDPS  | 19847 | >NF1-S2484FYPIHHGDPF  | 144  | 19703 |
| >NF1-S2484FYPIHHGDPSY | 69    | >NF1-S2484FYPIHHGDPFY | 22   | 47    |
| >NF1-S2484FYPIHHGDPSY | 172   | >NF1-S2484FYPIHHGDPFY | 96   | 76    |
| >NF1-S2484FYPIHHGDPS  | 294   | >NF1-S2484FYPIHHGDPF  | 9    | 285   |
| >NF1-S2484FYPIHHGDPS  | 14968 | >NF1-S2484FYPIHHGDPF  | 174  | 14794 |
| >NF1-S2484FYPIHHGDPSY | 162   | >NF1-S2484FYPIHHGDPFY | 396  | 234   |
| >NF1-S2484FYPIHHGDPS  | 12416 | >NF1-S2484FYPIHHGDPF  | 31   | 12385 |
| >NF1-S2484FYPIHHGDPSY | 183   | >NF1-S2484FYPIHHGDPFY | 468  | 285   |
| >NF1-S2484FYPIHHGDPS  | 25    | >NF1-S2484FYPIHHGDPF  | 7    | 18    |
| >NF1-S2484FYPIHHGDPSY | 18    | >NF1-S2484FYPIHHGDPFY | 29   | 11    |
| >NF1-S2484FYPIHHGDPS  | 20359 | >NF1-S2484FYPIHHGDPF  | 406  | 19953 |
| >NF1-S2484FYPIHHGDPSY | 239   | >NF1-S2484FYPIHHGDPFY | 173  | 66    |
| >NF1-S2484FYPIHHGDPS  | 33    | >NF1-S2484FYPIHHGDPF  | 358  | 325   |
| >NF1-S2484FYPIHHGDPSY | 94    | >NF1-S2484FYPIHHGDPFY | 131  | 37    |
| >NF1-S2484FYPIHHGDPS  | 2475  | >NF1-S2484FYPIHHGDPF  | 14   | 2461  |
| >NF1-S2484FYPIHHGDPSY | 20    | >NF1-S2484FYPIHHGDPFY | 55   | 35    |
| >NF1-S2484FYPIHHGDPS  | 6692  | >NF1-S2484FYPIHHGDPF  | 19   | 6673  |
| >NF1-S2484FYPIHHGDPSY | 35    | >NF1-S2484FYPIHHGDPFY | 53   | 18    |
| >NF1-S2484FYPIHHGDPSY | 512   | >NF1-S2484FYPIHHGDPFY | 191  | 321   |
| >NF1-S2484FTYPIHHGDPS | 33247 | >NF1-S2484FTYPIHHGDPF | 186  | 33061 |
| >NF1-S2484FTYPIHHGDPS | 22738 | >NF1-S2484FTYPIHHGDPF | 61   | 22677 |
| >NF1-S2484FTYPIHHGDPS | 3676  | >NF1-S2484FTYPIHHGDPF | 8    | 3668  |
| >NF1-S2484FTYPIHHGDPS | 524   | >NF1-S2484FTYPIHHGDPF | 321  | 203   |
| >NF1-S2484FTYPIHHGDPS | 79    | >NF1-S2484FTYPIHHGDPF | 32   | 47    |
| >NF1-S2484FTYPIHHGDPS | 201   | >NF1-S2484FTYPIHHGDPF | 138  | 63    |
| >NF1-S574T-SSQMLFYICK | 175   | >NF1-S574T-TSQMLFYICK | 279  | 104   |
| >NF1-S574T-SSQMLFYICK | 9     | >NF1-S574T-TSQMLFYICK | 13   | 4     |
| >NF1-S574T-SSQMLFYICK | 7     | >NF1-S574T-TSQMLFYICK | 9    | 2     |
| >NF1-S574T-SSQMLFYICK | 149   | >NF1-S574T-TSQMLFYICK | 777  | 628   |
| >NF1-S574T-SSQMLFYICK | 203   | >NF1-S574T-TSQMLFYICK | 1121 | 918   |
| >NF1-S574T-SSQMLFYICK | 45    | >NF1-S574T-TSQMLFYICK | 84   | 39    |
| >NF1-S574T-SSQMLFYICK | 102   | >NF1-S574T-TSQMLFYICK | 150  | 48    |
| >NF1-S574T-SSQMLFYICK | 450   | >NF1-S574T-TSQMLFYICK | 651  | 201   |
| >NF1-S574T-SSQMLFYICK | 393   | >NF1-S574T-TSQMLFYICK | 201  | 192   |
| >NF1-S574T-SSQMLFYICK | 409   | >NF1-S574T-TSQMLFYICK | 135  | 274   |
| >NF1-S574T-SSQMLFYI   | 721   | >NF1-S574T-TSQMLFYI   | 171  | 550   |
| >NF1-S574T-SSQMLFYIC  | 445   | >NF1-S574T-TSQMLFYIC  | 462  | 17    |
| >NF1-S574T-SSQMLFYI   | 388   | >NF1-S574T-TSQMLFYI   | 1319 | 931   |
| >NF1-S574T-SSQMLFYICK | 74    | >NF1-S574T-TSQMLFYICK | 148  | 74    |
| >NF1-S574T-SSQMLFYICK | 102   | >NF1-S574T-TSQMLFYICK | 236  | 134   |
| >NF1-S574T-SSQMLFYI   | 32    | >NF1-S574T-TSQMLFYI   | 68   | 36    |
| >NF1-S574T-ISSQMLFY   | 19    | >NF1-S574T-ITSQMLFY   | 13   | 6     |
| >NF1-S574T-ISSQMLFYI  | 728   | >NF1-S574T-ITSQMLFYI  | 80   | 648   |

|                         |      |                         |      |      |
|-------------------------|------|-------------------------|------|------|
| >NF1-S574T- ISSQMLFYI   | 124  | >NF1-S574T- ITSQMLFYI   | 30   | 94   |
| >NF1-S574T- ISSQMLFYI   | 2769 | >NF1-S574T- ITSQMLFYI   | 287  | 2482 |
| >NF1-S574T- ISSQMLFYI   | 144  | >NF1-S574T- ITSQMLFYI   | 21   | 123  |
| >NF1-S574T- ISSQMLFYI   | 2639 | >NF1-S574T- ITSQMLFYI   | 115  | 2524 |
| >NF1-S574T- ISSQMLFY    | 622  | >NF1-S574T- ITSQMLFY    | 316  | 306  |
| >NF1-S574T- ISSQMLFYICK | 238  | >NF1-S574T- ITSQMLFYICK | 139  | 99   |
| >NF1-S574T- ISSQMLFY    | 131  | >NF1-S574T- ITSQMLFY    | 47   | 84   |
| >NF1-S574T- ISSQMLFYICK | 12   | >NF1-S574T- ITSQMLFYICK | 10   | 2    |
| >NF1-S574T- ISSQMLFY    | 318  | >NF1-S574T- ITSQMLFY    | 40   | 278  |
| >NF1-S574T- ISSQMLFY    | 18   | >NF1-S574T- ITSQMLFY    | 9    | 9    |
| >NF1-S574T- ISSQMLFYICK | 529  | >NF1-S574T- ITSQMLFYICK | 256  | 273  |
| >NF1-S574T- ISSQMLFY    | 16   | >NF1-S574T- ITSQMLFY    | 15   | 1    |
| >NF1-S574T- ISSQMLFYICK | 833  | >NF1-S574T- ITSQMLFYICK | 416  | 417  |
| >NF1-S574T- ISSQMLFY    | 1239 | >NF1-S574T- ITSQMLFY    | 283  | 956  |
| >NF1-S574T- ISSQMLFYICK | 101  | >NF1-S574T- ITSQMLFYICK | 22   | 79   |
| >NF1-S574T- ISSQMLFYI   | 705  | >NF1-S574T- ITSQMLFYI   | 49   | 656  |
| >NF1-S574T- ISSQMLFYI   | 3784 | >NF1-S574T- ITSQMLFYI   | 327  | 3457 |
| >NF1-S574T- ISSQMLFY    | 33   | >NF1-S574T- ITSQMLFY    | 10   | 23   |
| >NF1-S574T- ISSQMLFY    | 258  | >NF1-S574T- ITSQMLFY    | 331  | 73   |
| >NF1-S574T- ISSQMLFY    | 436  | >NF1-S574T- ITSQMLFY    | 1371 | 935  |
| >NF1-S574T- ISSQMLFY    | 4    | >NF1-S574T- ITSQMLFY    | 3    | 1    |
| >NF1-S574T- ISSQMLFYI   | 37   | >NF1-S574T- ITSQMLFYI   | 24   | 13   |
| >NF1-S574T- ISSQMLFY    | 345  | >NF1-S574T- ITSQMLFY    | 392  | 47   |
| >NF1-S574T- ISSQMLFY    | 39   | >NF1-S574T- ITSQMLFY    | 76   | 37   |
| >NF1-S574T- ISSQMLFYI   | 18   | >NF1-S574T- ITSQMLFYI   | 28   | 10   |
| >NF1-S574T- ISSQMLFYI   | 94   | >NF1-S574T- ITSQMLFYI   | 44   | 50   |
| >NF1-S574T- ISSQMLFYIC  | 466  | >NF1-S574T- ITSQMLFYIC  | 160  | 306  |
| >NF1-S574T- ISSQMLFY    | 136  | >NF1-S574T- ITSQMLFY    | 171  | 35   |
| >NF1-S574T- ISSQMLFYI   | 162  | >NF1-S574T- ITSQMLFYI   | 51   | 111  |
| >NF1-S574T- ISSQMLFYICK | 165  | >NF1-S574T- ITSQMLFYICK | 145  | 20   |
| >NF1-S574T- ISSQMLFYI   | 27   | >NF1-S574T- ITSQMLFYI   | 24   | 3    |
| >NF1-S574T- EISSQMLFY   | 68   | >NF1-S574T- EITSQMLFY   | 424  | 356  |
| >NF1-S574T- EISSQMLFYI  | 81   | >NF1-S574T- EITSQMLFYI  | 263  | 182  |
| >NF1-S574T- EISSQMLFYI  | 261  | >NF1-S574T- EITSQMLFYI  | 556  | 295  |
| >NF1-S574T- EISSQMLFYI  | 442  | >NF1-S574T- EITSQMLFYI  | 682  | 240  |
| >NF1-S574T- EISSQMLFY   | 414  | >NF1-S574T- EITSQMLFY   | 1416 | 1002 |
| >NF1-S574T- EISSQMLFY   | 319  | >NF1-S574T- EITSQMLFY   | 262  | 57   |
| >NF1-S574T- EISSQMLF    | 385  | >NF1-S574T- EITSQMLF    | 250  | 135  |
| >NF1-S574T- EISSQMLFY   | 13   | >NF1-S574T- EITSQMLFY   | 12   | 1    |
| >NF1-S574T- EISSQMLF    | 211  | >NF1-S574T- EITSQMLF    | 81   | 130  |
| >NF1-S574T- EISSQMLFY   | 3    | >NF1-S574T- EITSQMLFY   | 2    | 1    |
| >NF1-S574T- EISSQMLFYI  | 312  | >NF1-S574T- EITSQMLFYI  | 114  | 198  |
| >NF1-S574T- EISSQMLFY   | 17   | >NF1-S574T- EITSQMLFY   | 19   | 2    |

|                        |     |                        |     |     |
|------------------------|-----|------------------------|-----|-----|
| >NF1-S574T- EISSQMLFY  | 97  | >NF1-S574T- EITSQMLFY  | 198 | 101 |
| >NF1-S574T- EISSQMLFY  | 140 | >NF1-S574T- EITSQMLFY  | 156 | 16  |
| >NF1-S574T- EISSQMLFYI | 85  | >NF1-S574T- EITSQMLFYI | 128 | 43  |
| >NF1-S574T- EISSQMLFYI | 16  | >NF1-S574T- EITSQMLFYI | 18  | 2   |
| >NF1-S574T- EISSQMLFY  | 7   | >NF1-S574T- EITSQMLFY  | 6   | 1   |
| >NF1-S574T- WEISSQML   | 115 | >NF1-S574T- WEITSQML   | 72  | 43  |
| >NF1-S574T- WEISSQMLFY | 683 | >NF1-S574T- WEITSQMLFY | 282 | 401 |
| >NF1-S574T- WEISSQMLFY | 17  | >NF1-S574T- WEITSQMLFY | 10  | 7   |
| >NF1-S574T- WEISSQMLFY | 285 | >NF1-S574T- WEITSQMLFY | 330 | 45  |
| >NF1-S574T- WEISSQMLFY | 419 | >NF1-S574T- WEITSQMLFY | 436 | 17  |
| >NF1-S574T- WEISSQMLFY | 288 | >NF1-S574T- WEITSQMLFY | 267 | 21  |
| >NF1-S574T- WEISSQMLFY | 65  | >NF1-S574T- WEITSQMLFY | 90  | 25  |
| >NF1-S574T- WEISSQMLFY | 273 | >NF1-S574T- WEITSQMLFY | 595 | 322 |
| >NF1-S574T- WEISSQML   | 152 | >NF1-S574T- WEITSQML   | 297 | 145 |
| >NF1-S574T- WEISSQMLF  | 10  | >NF1-S574T- WEITSQMLF  | 15  | 5   |
| >NF1-S574T- WEISSQMLFY | 66  | >NF1-S574T- WEITSQMLFY | 110 | 44  |
| >NF1-S574T- WEISSQML   | 97  | >NF1-S574T- WEITSQML   | 76  | 21  |
| >NF1-S574T- WEISSQMLF  | 20  | >NF1-S574T- WEITSQMLF  | 19  | 1   |
| >NF1-S574T- WEISSQMLFY | 162 | >NF1-S574T- WEITSQMLFY | 143 | 19  |
| >NF1-S574T- WEISSQML   | 120 | >NF1-S574T- WEITSQML   | 119 | 1   |
| >NF1-S574T- WEISSQML   | 7   | >NF1-S574T- WEITSQML   | 8   | 1   |
| >NF1-S574T- WEISSQMLF  | 18  | >NF1-S574T- WEITSQMLF  | 21  | 3   |
| >NF1-S574T- WEISSQMLFY | 11  | >NF1-S574T- WEITSQMLFY | 14  | 3   |
| >NF1-S574T- WEISSQML   | 53  | >NF1-S574T- WEITSQML   | 75  | 22  |
| >NF1-S574T- WEISSQMLF  | 223 | >NF1-S574T- WEITSQMLF  | 287 | 64  |
| >NF1-S574T- WEISSQMLFY | 64  | >NF1-S574T- WEITSQMLFY | 91  | 27  |
| >NF1-S574T- WEISSQML   | 279 | >NF1-S574T- WEITSQML   | 373 | 94  |
| >NF1-S574T- WEISSQMLF  | 147 | >NF1-S574T- WEITSQMLF  | 207 | 60  |
| >NF1-S574T- WEISSQMLF  | 80  | >NF1-S574T- WEITSQMLF  | 119 | 39  |
| >NF1-S574T- WEISSQMLFY | 373 | >NF1-S574T- WEITSQMLFY | 406 | 33  |
| >NF1-S574T- WEISSQMLFY | 354 | >NF1-S574T- WEITSQMLFY | 485 | 131 |
| >NF1-S574T- WEISSQMLFY | 232 | >NF1-S574T- WEITSQMLFY | 284 | 52  |
| >NF1-S574T- WEISSQML   | 76  | >NF1-S574T- WEITSQML   | 69  | 7   |
| >NF1-S574T- WEISSQMLF  | 10  | >NF1-S574T- WEITSQMLF  | 7   | 3   |
| >NF1-S574T- WEISSQMLFY | 25  | >NF1-S574T- WEITSQMLFY | 26  | 1   |
| >NF1-S574T- WEISSQMLFY | 3   | >NF1-S574T- WEITSQMLFY | 3   | 0   |
| >NF1-S574T- FWEISSQMLF | 39  | >NF1-S574T- FWEITSQMLF | 30  | 9   |
| >NF1-S574T- FWEISSQMLF | 161 | >NF1-S574T- FWEITSQMLF | 137 | 24  |
| >NF1-S574T- FWEISSQML  | 298 | >NF1-S574T- FWEITSQML  | 207 | 91  |
| >NF1-S574T- FWEISSQMLF | 23  | >NF1-S574T- FWEITSQMLF | 23  | 0   |
| >NF1-S574T- FWEISSQMLF | 231 | >NF1-S574T- FWEITSQMLF | 184 | 47  |
| >NF1-S574T- FWEISSQMLF | 37  | >NF1-S574T- FWEITSQMLF | 28  | 9   |
| >NF1-S574T- FWEISSQMLF | 578 | >NF1-S574T- FWEITSQMLF | 480 | 98  |

|                        |      |                        |     |      |
|------------------------|------|------------------------|-----|------|
| >NF1-S574T- FWEISSQMLF | 209  | >NF1-S574T- FWEITSQMLF | 159 | 50   |
| >NF1-S574T- FWEISSQML  | 571  | >NF1-S574T- FWEITSQML  | 478 | 93   |
| >NF1-S574T- FWEISSQMLF | 257  | >NF1-S574T- FWEITSQMLF | 197 | 60   |
| >NF1-S574T- TFWEISSQMI | 16   | >NF1-S574T- TFWEITSQMI | 16  | 0    |
| >NF1-S574T- TFWEISSQMI | 114  | >NF1-S574T- TFWEITSQMI | 131 | 17   |
| >NF1-S574T- TFWEISSQMI | 169  | >NF1-S574T- TFWEITSQMI | 95  | 74   |
| >NF1-S574T- TFWEISSQMI | 16   | >NF1-S574T- TFWEITSQMI | 14  | 2    |
| >NF1-S574T- TFWEISSQM  | 392  | >NF1-S574T- TFWEITSQM  | 317 | 75   |
| >NF1-S574T- TFWEISSQMI | 30   | >NF1-S574T- TFWEITSQMI | 30  | 0    |
| >NF1-S574T- TFWEISSQM  | 164  | >NF1-S574T- TFWEITSQM  | 194 | 30   |
| >NF1-S574T- TFWEISSQMI | 430  | >NF1-S574T- TFWEITSQMI | 478 | 48   |
| >NF1-S574T- TFWEISSQM  | 319  | >NF1-S574T- TFWEITSQM  | 674 | 355  |
| >NF1-S574T- ETFWEISSQM | 412  | >NF1-S574T- ETFWEITSQM | 391 | 21   |
| >NF1-S574T- ETFWEISSQM | 638  | >NF1-S574T- ETFWEITSQM | 482 | 156  |
| >NF1-S574T- ETFWEISSQM | 881  | >NF1-S574T- ETFWEITSQM | 356 | 525  |
| >NF1-S574T- ETFWEISSQM | 326  | >NF1-S574T- ETFWEITSQM | 509 | 183  |
| >NF1-S574T- ETFWEISSQM | 22   | >NF1-S574T- ETFWEITSQM | 15  | 7    |
| >NF1-S574T- ETFWEISSQM | 488  | >NF1-S574T- ETFWEITSQM | 951 | 463  |
| >NF1-S574T- ETFWEISSQM | 80   | >NF1-S574T- ETFWEITSQM | 43  | 37   |
| >NF1-S574T- ETFWEISSQM | 1010 | >NF1-S574T- ETFWEITSQM | 403 | 607  |
| >NF1-S574T- ETFWEISSQM | 527  | >NF1-S574T- ETFWEITSQM | 241 | 286  |
| >NF1-S574T- ETFWEISS   | 231  | >NF1-S574T- ETFWEITS   | 201 | 30   |
| >NF1-S574T- ETFWEISSQ  | 16   | >NF1-S574T- ETFWEITSQ  | 18  | 2    |
| >NF1-S574T- ETFWEISSQM | 243  | >NF1-S574T- ETFWEITSQM | 305 | 62   |
| >NF1-S574T- ETFWEISS   | 207  | >NF1-S574T- ETFWEITS   | 318 | 111  |
| >NF1-S574T- ETFWEISSQM | 121  | >NF1-S574T- ETFWEITSQM | 100 | 21   |
| >NF1-S574T- ETFWEISSQM | 15   | >NF1-S574T- ETFWEITSQM | 18  | 3    |
| >NF1-S574T- ETFWEISSQM | 8    | >NF1-S574T- ETFWEITSQM | 7   | 1    |
| >NF1-S574T- ETFWEISSQM | 8    | >NF1-S574T- ETFWEITSQM | 8   | 0    |
| >NF1-S574T- ETFWEISSQM | 10   | >NF1-S574T- ETFWEITSQM | 15  | 5    |
| >NF1-S574T- ETFWEISSQM | 12   | >NF1-S574T- ETFWEITSQM | 17  | 5    |
| >NF1-S574T- ETFWEISSQM | 48   | >NF1-S574T- ETFWEITSQM | 69  | 21   |
| >NF1-S574T- ETFWEISSQM | 113  | >NF1-S574T- ETFWEITSQM | 175 | 62   |
| >NF1-S574T- ETFWEISSQM | 207  | >NF1-S574T- ETFWEITSQM | 236 | 29   |
| >NF1-S574T- VETFWEISSQ | 456  | >NF1-S574T- VETFWEITSQ | 378 | 78   |
| >NF1-S574T- VETFWEISSQ | 410  | >NF1-S574T- VETFWEITSQ | 553 | 143  |
| >NF1-S574T- VETFWEISSQ | 117  | >NF1-S574T- VETFWEITSQ | 82  | 35   |
| >NF1-V1182FVLTKILQQ    | 3505 | >NF1-V1182FVLTKILQQ    | 120 | 3385 |
| >NF1-V1182FVLTKILQQG   | 2273 | >NF1-V1182FVLTKILQQG   | 56  | 2217 |
| >NF1-V1182FVLTKILQQGT  | 4844 | >NF1-V1182FVLTKILQQGT  | 448 | 4396 |
| >NF1-V1182FVLTKILQQGT  | 845  | >NF1-V1182FVLTKILQQGT  | 112 | 733  |
| >NF1-V1182FVLTKILQQ    | 3658 | >NF1-V1182FVLTKILQQ    | 448 | 3210 |
| >NF1-V1182FVLTKILQQGT  | 838  | >NF1-V1182FVLTKILQQGT  | 93  | 745  |



|                       |      |                       |       |       |
|-----------------------|------|-----------------------|-------|-------|
| >NF1-V1182FVLTKILQQ   | 45   | >NF1-V1182FFLTKILQQ   | 8     | 37    |
| >NF1-V1182FVLTKILQQG  | 1857 | >NF1-V1182FFLTKILQQG  | 135   | 1722  |
| >NF1-V1182FVLTKILQQGT | 33   | >NF1-V1182FFLTKILQQGT | 7     | 26    |
| >NF1-V1182FDLQTRATFMI | 371  | >NF1-V1182FDLQTRATFMI | 21952 | 21581 |
| >NF1-V1182FDLQTRATFMI | 331  | >NF1-V1182FDLQTRATFMI | 19288 | 18957 |
| >NF1-V1182FDLQTRATFMI | 318  | >NF1-V1182FDLQTRATFMI | 21788 | 21470 |
| >NF1-V1182FDLQTRATFMI | 241  | >NF1-V1182FDLQTRATFMI | 21217 | 20976 |
| >NF1-V1182FDLQTRATFMI | 14   | >NF1-V1182FDLQTRATFMI | 16050 | 16036 |
| >NF1-V1182FMEVLTKIL   | 5    | >NF1-V1182FMEFLTKIL   | 5     | 0     |
| >NF1-V1182FMEVLTKIL   | 2089 | >NF1-V1182FMEFLTKIL   | 357   | 1732  |
| >NF1-V1182FMEVLTKIL   | 87   | >NF1-V1182FMEFLTKIL   | 33    | 54    |
| >NF1-V1182FMEVLTKILQ  | 516  | >NF1-V1182FMEFLTKILQ  | 165   | 351   |
| >NF1-V1182FMEVLTKIL   | 498  | >NF1-V1182FMEFLTKIL   | 247   | 251   |
| >NF1-V1182FMEVLTKIL   | 25   | >NF1-V1182FMEFLTKIL   | 20    | 5     |
| >NF1-V1182FMEVLTKIL   | 198  | >NF1-V1182FMEFLTKIL   | 45    | 153   |
| >NF1-V1182FMEVLTKIL   | 191  | >NF1-V1182FMEFLTKIL   | 83    | 108   |
| >NF1-V1182FMEVLTKILQ  | 1112 | >NF1-V1182FMEFLTKILQ  | 450   | 662   |
| >NF1-V1182FMEVLTKILQQ | 1259 | >NF1-V1182FMEFLTKILQQ | 491   | 768   |
| >NF1-V1182FMFVLTKI    | 241  | >NF1-V1182FMFVFLTKI   | 124   | 117   |
| >NF1-V1182FMFVLTKI    | 20   | >NF1-V1182FMFVFLTKI   | 11    | 9     |
| >NF1-V1182FMFVLTKIL   | 96   | >NF1-V1182FMFVFLTKIL  | 49    | 47    |
| >NF1-V1182FMFVLTKI    | 52   | >NF1-V1182FMFVFLTKI   | 18    | 34    |
| >NF1-V1182FMFVLTKIL   | 903  | >NF1-V1182FMFVFLTKIL  | 211   | 692   |
| >NF1-V1182FMFVLTKI    | 274  | >NF1-V1182FMFVFLTKI   | 239   | 35    |
| >NF1-V1182FMFVLTKI    | 54   | >NF1-V1182FMFVFLTKI   | 31    | 23    |
| >NF1-V1182FMFVLTKI    | 79   | >NF1-V1182FMFVFLTKI   | 56    | 23    |
| >NF1-V1182FMFVLTKIL   | 233  | >NF1-V1182FMFVFLTKIL  | 149   | 84    |
| >NF1-V1182FMFVLTKI    | 248  | >NF1-V1182FMFVFLTKI   | 353   | 105   |
| >NF1-V1182FMFVLTKI    | 18   | >NF1-V1182FMFVFLTKI   | 20    | 2     |
| >NF1-V1182FMFVLTKIL   | 57   | >NF1-V1182FMFVFLTKIL  | 61    | 4     |
| >NF1-V1182FMFVLTKILQ  | 247  | >NF1-V1182FMFVFLTKILQ | 277   | 30    |
| >NF1-V1182FMFVLTKIL   | 232  | >NF1-V1182FMFVFLTKIL  | 559   | 327   |
| >NF1-V1182TFMFLTKI    | 54   | >NF1-V1182TFMFLTKI    | 1319  | 1265  |
| >NF1-V1182TFMFLTKI    | 210  | >NF1-V1182TFMFLTKI    | 94    | 116   |
| >NF1-V1182TFMFLTK     | 77   | >NF1-V1182TFMFLTK     | 41    | 36    |
| >NF1-V1182TFMFLTKI    | 259  | >NF1-V1182TFMFLTKI    | 708   | 449   |
| >NF1-V1182TFMFLTKI    | 90   | >NF1-V1182TFMFLTKI    | 121   | 31    |
| >NF1-V1182TFMFLTKIL   | 133  | >NF1-V1182TFMFLTKIL   | 172   | 39    |
| >NF1-V1182TFMFLTK     | 1038 | >NF1-V1182TFMFLTK     | 462   | 576   |
| >NF1-V1182TFMFLTK     | 555  | >NF1-V1182TFMFLTK     | 369   | 186   |
| >NF1-V1182TFMFLTK     | 166  | >NF1-V1182TFMFLTK     | 175   | 9     |
| >NF1-V1182TFMFLTK     | 1634 | >NF1-V1182TFMFLTK     | 217   | 1417  |
| >NF1-V1182ATFMFLTKI   | 249  | >NF1-V1182ATFMFLTKI   | 238   | 11    |

|                        |      |                        |       |       |
|------------------------|------|------------------------|-------|-------|
| >NF1-V1182fATFMEVLTKI  | 129  | >NF1-V1182fATFMEFLTKI  | 124   | 5     |
| >NF1-V1182fATFMEVLTKI  | 367  | >NF1-V1182fATFMEFLTKI  | 170   | 197   |
| >NF1-V1182fATFMEVLTKI  | 205  | >NF1-V1182fATFMEFLTKI  | 409   | 204   |
| >NF1-V1182fATFMEVLTK   | 73   | >NF1-V1182fATFMEFLTK   | 55    | 18    |
| >NF1-V1182fATFMEVLTK   | 9    | >NF1-V1182fATFMEFLTK   | 9     | 0     |
| >NF1-V1182fATFMEVLTK   | 13   | >NF1-V1182fATFMEFLTK   | 11    | 2     |
| >NF1-V1182fATFMEVLTK   | 429  | >NF1-V1182fATFMEFLTK   | 771   | 342   |
| >NF1-V1182fATFMEVLTKI  | 20   | >NF1-V1182fATFMEFLTKI  | 21    | 1     |
| >NF1-V1182fATFMEVLTKII | 50   | >NF1-V1182fATFMEFLTKII | 57    | 7     |
| >NF1-V1182fATFMEVLTK   | 49   | >NF1-V1182fATFMEFLTK   | 45    | 4     |
| >NF1-V1182fATFMEVLTKII | 220  | >NF1-V1182fATFMEFLTKII | 187   | 33    |
| >NF1-V1182fATFMEVLTKI  | 18   | >NF1-V1182fATFMEFLTKI  | 24    | 6     |
| >NF1-V1182fATFMEVLTKII | 10   | >NF1-V1182fATFMEFLTKII | 16    | 6     |
| >NF1-V1182fATFMEVLTKII | 293  | >NF1-V1182fATFMEFLTKII | 184   | 109   |
| >NF1-V1182fATFMEVLTKII | 99   | >NF1-V1182fATFMEFLTKII | 53    | 46    |
| >NF1-V1182fATFMEVLT    | 806  | >NF1-V1182fATFMEFLT    | 182   | 624   |
| >NF1-V1182fATFMEVLTK   | 45   | >NF1-V1182fATFMEFLTK   | 34    | 11    |
| >NF1-V1182fATFMEVLTKI  | 688  | >NF1-V1182fATFMEFLTKI  | 201   | 487   |
| >NF1-V1182fATFMEVLTKII | 631  | >NF1-V1182fATFMEFLTKII | 262   | 369   |
| >NF1-V1182fATFMEVLTKII | 201  | >NF1-V1182fATFMEFLTKII | 153   | 48    |
| >NF1-V1182fRATFMEVLTK  | 105  | >NF1-V1182fRATFMEFLTK  | 52    | 53    |
| >NF1-V1182fRATFMEVLTK  | 17   | >NF1-V1182fRATFMEFLTK  | 12    | 5     |
| >NF1-V1182fRATFMEVLTK  | 55   | >NF1-V1182fRATFMEFLTK  | 46    | 9     |
| >NF1-V1182fRATFMEVLTK  | 568  | >NF1-V1182fRATFMEFLTK  | 174   | 394   |
| >NF1-V1182fRATFMEVLTK  | 125  | >NF1-V1182fRATFMEFLTK  | 90    | 35    |
| >NF1-V1182fRATFMEVL    | 112  | >NF1-V1182fRATFMEFL    | 105   | 7     |
| >NF1-V1182fRATFMEVLTK  | 362  | >NF1-V1182fRATFMEFLTK  | 199   | 163   |
| >NF1-V1182fRATFMEVLTK  | 431  | >NF1-V1182fRATFMEFLTK  | 269   | 162   |
| >NF1-V1182fRATFMEVL    | 448  | >NF1-V1182fRATFMEFL    | 1677  | 1229  |
| >NF1-V1182fRATFMEVLTK  | 144  | >NF1-V1182fRATFMEFLTK  | 107   | 37    |
| >NF1-V1182fTRATFMEVL   | 6735 | >NF1-V1182fTRATFMEFL   | 432   | 6303  |
| >NF1-V1182fTRATFMEV    | 122  | >NF1-V1182fTRATFMEF    | 19312 | 19190 |
| >NF1-V1182fTRATFMEVL   | 2206 | >NF1-V1182fTRATFMEFL   | 254   | 1952  |
| >NF1-V1182fTRATFMEV    | 812  | >NF1-V1182fTRATFMEF    | 42    | 770   |
| >NF1-V1182fTRATFMEVL   | 672  | >NF1-V1182fTRATFMEFL   | 499   | 173   |
| >NF1-V1182fTRATFMEVLT  | 229  | >NF1-V1182fTRATFMEFLT  | 186   | 43    |
| >NF1-V1182fTRATFMEVL   | 27   | >NF1-V1182fTRATFMEFL   | 265   | 238   |
| >NF1-V1182fTRATFMEV    | 614  | >NF1-V1182fTRATFMEF    | 469   | 145   |
| >NF1-V1182fTRATFMEVL   | 147  | >NF1-V1182fTRATFMEFL   | 135   | 12    |
| >NF1-V1182fTRATFMEVL   | 171  | >NF1-V1182fTRATFMEFL   | 81    | 90    |
| >NF1-V1182fTRATFMEVLT  | 801  | >NF1-V1182fTRATFMEFLT  | 376   | 425   |
| >NF1-V1182fQTRATFMEV   | 477  | >NF1-V1182fQTRATFMEF   | 19100 | 18623 |
| >NF1-V1182fQTRATFMEV   | 258  | >NF1-V1182fQTRATFMEF   | 8077  | 7819  |

|                       |       |                        |       |       |
|-----------------------|-------|------------------------|-------|-------|
| >NF1-V1182FQTRATFMEV  | 14666 | >NF1-V1182FQTRATFMEF   | 327   | 14339 |
| >NF1-V1182FQTRATFMEV  | 429   | >NF1-V1182FQTRATFMEFI  | 129   | 300   |
| >NF1-V1182FQTRATFMEV  | 1464  | >NF1-V1182FQTRATFMEF   | 155   | 1309  |
| >NF1-V1182FQTRATFMEV  | 660   | >NF1-V1182FQTRATFMEFI  | 270   | 390   |
| >NF1-V1182FQTRATFMEV  | 6     | >NF1-V1182FQTRATFMEF   | 32    | 26    |
| >NF1-V1182FQTRATFMEV  | 87    | >NF1-V1182FQTRATFMEFI  | 19    | 68    |
| >NF1-V1182FQTRATFMEV  | 149   | >NF1-V1182FQTRATFMEFI  | 138   | 11    |
| >NF1-V1182FQTRATFMEV  | 34    | >NF1-V1182FQTRATFMEF   | 14969 | 14935 |
| >NF1-V1182FQTRATFMEV  | 1105  | >NF1-V1182FQTRATFMEFI  | 349   | 756   |
| >NF1-V1182FQTRATFMEV  | 61    | >NF1-V1182FQTRATFMEF   | 12404 | 12343 |
| >NF1-V1182FQTRATFMEV  | 4710  | >NF1-V1182FQTRATFMEF   | 76    | 4634  |
| >NF1-V1182FQTRATFMEV  | 267   | >NF1-V1182FQTRATFMEF   | 8     | 259   |
| >NF1-V1182FQTRATFMEV  | 378   | >NF1-V1182FQTRATFMEFI  | 738   | 360   |
| >NF1-V1182FQTRATFMEV  | 580   | >NF1-V1182FQTRATFMEF   | 5     | 575   |
| >NF1-V1182FQTRATFMEV  | 18    | >NF1-V1182FQTRATFMEFI  | 19    | 1     |
| >NF1-V1182FQTRATFMEV  | 423   | >NF1-V1182FQTRATFMEFI  | 139   | 284   |
| >NF1-V1182FQTRATFMEV  | 134   | >NF1-V1182FQTRATFMEF   | 13    | 121   |
| >NF1-V1182FQTRATFMEV  | 288   | >NF1-V1182FQTRATFMEFI  | 126   | 162   |
| >NF1-V1182FLQTRATFMEV | 1938  | >NF1-V1182FLQTRATFMEF  | 245   | 1693  |
| >NF1-V1182FLQTRATFMEV | 285   | >NF1-V1182FLQTRATFMEFI | 14792 | 14507 |
| >NF1-V1182FLQTRATFMEV | 536   | >NF1-V1182FLQTRATFMEF  | 52    | 484   |
| >NF1-V1182FLQTRATFMEV | 69    | >NF1-V1182FLQTRATFMEFI | 16765 | 16696 |
| >NF1-V1182FLQTRATFMEV | 58    | >NF1-V1182FLQTRATFMEF  | 9325  | 9267  |
| >NF1-V1182FLQTRATFMEV | 87    | >NF1-V1182FLQTRATFMEFI | 12    | 75    |
| >NF1-V1182FLQTRATFMEV | 310   | >NF1-V1182FLQTRATFMEF  | 21344 | 21034 |
| >NF1-V1182FLQTRATFMEV | 418   | >NF1-V1182FLQTRATFMEFI | 17490 | 17072 |
| >NF1-V1182FLQTRATFMEV | 165   | >NF1-V1182FLQTRATFMEF  | 22029 | 21864 |
| >NF1-V1182FLQTRATFMEV | 51    | >NF1-V1182FLQTRATFMEFI | 30799 | 30748 |
| >NF1-V1182FLQTRATFMEV | 13736 | >NF1-V1182FLQTRATFMEF  | 103   | 13633 |
| >NF1-V1182FLQTRATFMEV | 301   | >NF1-V1182FLQTRATFMEFI | 26050 | 25749 |
| >NF1-V1182FLQTRATFMEV | 2714  | >NF1-V1182FLQTRATFMEF  | 74    | 2640  |
| >NF1-V1182FLQTRATFMEV | 80    | >NF1-V1182FLQTRATFMEFI | 4     | 76    |
| >NF1-V1182FLQTRATFMEV | 114   | >NF1-V1182FLQTRATFMEF  | 248   | 134   |
| >NF1-V1757IKVGSTAVQV  | 285   | >NF1-V1757IKDGSTAVQV   | 16112 | 15827 |
| >NF1-V1757IKVGSTAVQV  | 67    | >NF1-V1757IKDGSTAVQV   | 10817 | 10750 |
| >NF1-V1757IKVGSTAVQV  | 61    | >NF1-V1757IKDGSTAVQV   | 10688 | 10627 |
| >NF1-V1757IKVGSTAVQV  | 174   | >NF1-V1757IKDGSTAVQV   | 20790 | 20616 |
| >NF1-V1757IKVGSTAVQV  | 33    | >NF1-V1757IKDGSTAVQV   | 17019 | 16986 |
| >NF1-V1757IKVGSTAVQV  | 339   | >NF1-V1757IKDGSTAVQV   | 14426 | 14087 |
| >NF1-V1757IKVGSTAVQV  | 18488 | >NF1-V1757IKDGSTAVQV   | 100   | 18388 |
| >NF1-V1757IKVGSTAV    | 29    | >NF1-V1757IKDGSTAV     | 1173  | 1144  |
| >NF1-V1757IKVGSTAVQV  | 69    | >NF1-V1757IKDGSTAVQV   | 1852  | 1783  |
| >NF1-V1757ISIKVGSTAV  | 1341  | >NF1-V1757ISIKDGSTAV   | 191   | 1150  |

|                          |       |                          |       |       |
|--------------------------|-------|--------------------------|-------|-------|
| >NF1-V1757I SIKVGSTA     | 279   | >NF1-V1757I SIKDGSTA     | 50    | 229   |
| >NF1-V1757I SIKVGSTAV    | 12    | >NF1-V1757I SIKDGSTAV    | 4     | 8     |
| >NF1-V1757I SIKVGSTAVQ   | 55    | >NF1-V1757I SIKDGSTAVQ   | 14    | 41    |
| >NF1-V1757I SIKVGSTAV    | 241   | >NF1-V1757I SIKDGSTAV    | 49    | 192   |
| >NF1-V1757I SIKVGSTAVQ   | 1057  | >NF1-V1757I SIKDGSTAVQ   | 202   | 855   |
| >NF1-V1757I SIKVGSTAV    | 1711  | >NF1-V1757I SIKDGSTAV    | 144   | 1567  |
| >NF1-V1757I SIKVGSTAVQ   | 1105  | >NF1-V1757I SIKDGSTAVQ   | 135   | 970   |
| >NF1-V1757I SIKVGSTAV    | 2217  | >NF1-V1757I SIKDGSTAV    | 455   | 1762  |
| >NF1-V1757I SIKVGSTAVQ   | 1021  | >NF1-V1757I SIKDGSTAVQ   | 239   | 782   |
| >NF1-V1757I SIKVGSTA     | 3890  | >NF1-V1757I SIKDGSTA     | 200   | 3690  |
| >NF1-V1757I SIKVGSTAV    | 29    | >NF1-V1757I SIKDGSTAV    | 4     | 25    |
| >NF1-V1757I SIKVGSTAVQ   | 15    | >NF1-V1757I SIKDGSTAVQ   | 4     | 11    |
| >NF1-V1757I SIKVGSTA     | 218   | >NF1-V1757I SIKDGSTA     | 431   | 213   |
| >NF1-V1757I SIKVGSTAV    | 410   | >NF1-V1757I SIKDGSTAV    | 639   | 229   |
| >NF1-V1757I SIKVGSTAVQ   | 337   | >NF1-V1757I SIKDGSTAVQ   | 493   | 156   |
| >NF1-V1757I SIKVGSTAV    | 2613  | >NF1-V1757I SIKDGSTAV    | 486   | 2127  |
| >NF1-V1757I SIKVGSTAVQ   | 1325  | >NF1-V1757I SIKDGSTAVQ   | 317   | 1008  |
| >NF1-V1757I SIKVGSTAV    | 783   | >NF1-V1757I SIKDGSTAV    | 450   | 333   |
| >NF1-V1757I VSIKVGSTAV   | 315   | >NF1-V1757I VSIKDGSTAV   | 259   | 56    |
| >NF1-V1757I VSIKVGSTAV   | 487   | >NF1-V1757I VSIKDGSTAV   | 386   | 101   |
| >NF1-V1757I VSIKVGSTA    | 81    | >NF1-V1757I VSIKDGSTA    | 346   | 265   |
| >NF1-V1757I KVSIVKVGSTA\ | 243   | >NF1-V1757I KVSIVKDGSTA\ | 434   | 191   |
| >NF1-V1757I KVSIVKVGSTA\ | 16    | >NF1-V1757I KVSIVKDGSTA\ | 74    | 58    |
| >NF1-V1757I KVSIVKVGSTA\ | 77    | >NF1-V1757I KVSIVKDGSTA\ | 200   | 123   |
| >NF1-V1757I KVSIVKVGSTA\ | 340   | >NF1-V1757I KVSIVKDGSTA\ | 688   | 348   |
| >NF1-V1757I KVSIVKVGSTA\ | 145   | >NF1-V1757I KVSIVKDGSTA\ | 221   | 76    |
| >NF1-V1757I KVSIVKVGSTA  | 469   | >NF1-V1757I KVSIVKDGSTA  | 1629  | 1160  |
| >NF2-A211D·AQDLEMYGV     | 87    | >NF2-A211D·DQDLEMYGV     | 9445  | 9358  |
| >NF2-A211D·AQDLEMYGV     | 234   | >NF2-A211D·DQDLEMYGV     | 8601  | 8367  |
| >NF2-A211D·AQDLEMYGV     | 6     | >NF2-A211D·DQDLEMYGV     | 465   | 459   |
| >NF2-A211D·AQDLEMYGV     | 179   | >NF2-A211D·DQDLEMYGV     | 5481  | 5302  |
| >NF2-A211D·AQDLEMYGV     | 36    | >NF2-A211D·DQDLEMYGV     | 1820  | 1784  |
| >NF2-A211D·AQDLEMYGV     | 363   | >NF2-A211D·DQDLEMYGV     | 5984  | 5621  |
| >NF2-A211D·AQDLEMYGV     | 360   | >NF2-A211D·DQDLEMYGV     | 3481  | 3121  |
| >NF2-A211D·IAQDLEMYG\    | 94    | >NF2-A211D·IDQDLEMYG\    | 3584  | 3490  |
| >NF2-A211D·IAQDLEMYG\    | 202   | >NF2-A211D·IDQDLEMYG\    | 6415  | 6213  |
| >NF2-A211D·IAQDLEMYG\    | 86    | >NF2-A211D·IDQDLEMYG\    | 8305  | 8219  |
| >NF2-A211D·IAQDLEMY      | 238   | >NF2-A211D·IDQDLEMY      | 3288  | 3050  |
| >NF2-A211D·IAQDLEMY      | 160   | >NF2-A211D·IDQDLEMY      | 20527 | 20367 |
| >NF2-A211D·IAQDLEMYG\    | 28027 | >NF2-A211D·IDQDLEMYG\    | 124   | 27903 |
| >NF2-A211D·DEAEMEYLKI    | 69    | >NF2-A211D·DEAEMEYLKI    | 89    | 20    |
| >NF2-A211D·KIAQDLEMY     | 9126  | >NF2-A211D·KIDQDLEMY     | 252   | 8874  |
| >NF2-A211D·KIAQDLEMYC    | 31    | >NF2-A211D·KIDQDLEMYC    | 45    | 14    |

|                        |     |                        |      |      |
|------------------------|-----|------------------------|------|------|
| >NF2-A211D·KIAQDLEMYC  | 9   | >NF2-A211D·KIDQDLEMYC  | 99   | 90   |
| >NF2-A211D·KIAQDLEMYC  | 13  | >NF2-A211D·KIDQDLEMYC  | 492  | 479  |
| >NF2-A211D·KIAQDLEMYC  | 11  | >NF2-A211D·KIDQDLEMYC  | 13   | 2    |
| >NF2-A211D·KIAQDLEMYC  | 14  | >NF2-A211D·KIDQDLEMYC  | 8    | 6    |
| >NF2-A211D·KIAQDLEMYC  | 36  | >NF2-A211D·KIDQDLEMYC  | 18   | 18   |
| >NF2-A211D·KIAQDLEMYC  | 18  | >NF2-A211D·KIDQDLEMYC  | 16   | 2    |
| >NF2-A211D·KIAQDLEMYC  | 28  | >NF2-A211D·KIDQDLEMYC  | 42   | 14   |
| >NF2-A211D·KIAQDLEMYC  | 9   | >NF2-A211D·KIDQDLEMYC  | 27   | 18   |
| >NF2-A211D·KIAQDLEMY   | 26  | >NF2-A211D·KIDQDLEMY   | 3356 | 3330 |
| >NF2-A211D·KIAQDLEMY   | 265 | >NF2-A211D·KIDQDLEMY   | 2369 | 2104 |
| >NF2-A211D·KIAQDLEMY   | 37  | >NF2-A211D·KIDQDLEMY   | 248  | 211  |
| >NF2-A211D·KIAQDLEMYC  | 434 | >NF2-A211D·KIDQDLEMYC  | 512  | 78   |
| >NF2-A211D·KIAQDLEMY   | 187 | >NF2-A211D·KIDQDLEMY   | 549  | 362  |
| >NF2-A211D·KIAQDLEMY   | 288 | >NF2-A211D·KIDQDLEMY   | 6576 | 6288 |
| >NF2-A211D·KIAQDLEM    | 409 | >NF2-A211D·KIDQDLEM    | 2708 | 2299 |
| >NF2-A211D·KIAQDLEMY   | 285 | >NF2-A211D·KIDQDLEMY   | 1091 | 806  |
| >NF2-A211D·KIAQDLEMY   | 555 | >NF2-A211D·KIDQDLEMY   | 483  | 72   |
| >NF2-A211D·LKIAQDLEM   | 48  | >NF2-A211D·LKIDQDLEM   | 133  | 85   |
| >NF2-A211D·LKIAQDLEMY  | 21  | >NF2-A211D·LKIDQDLEMY  | 35   | 14   |
| >NF2-A211D·YLKIAQDLEM  | 472 | >NF2-A211D·YLKIDQDLEM  | 331  | 141  |
| >NF2-A211D·YLKIAQDL    | 84  | >NF2-A211D·YLKIDQDL    | 112  | 28   |
| >NF2-A211D·YLKIAQDLEM  | 102 | >NF2-A211D·YLKIDQDLEM  | 85   | 17   |
| >NF2-A211D·YLKIAQDL    | 46  | >NF2-A211D·YLKIDQDL    | 115  | 69   |
| >NF2-A211D·YLKIAQDL    | 479 | >NF2-A211D·YLKIDQDL    | 358  | 121  |
| >NF2-A211D·YLKIAQDL    | 5   | >NF2-A211D·YLKIDQDL    | 6    | 1    |
| >NF2-A211D·YLKIAQDLEM  | 47  | >NF2-A211D·YLKIDQDLEM  | 39   | 8    |
| >NF2-A211D·YLKIAQDLEM  | 94  | >NF2-A211D·YLKIDQDLEM  | 85   | 9    |
| >NF2-A211D·YLKIAQDLEM  | 308 | >NF2-A211D·YLKIDQDLEM  | 254  | 54   |
| >NF2-A211D·YLKIAQDLEM  | 492 | >NF2-A211D·YLKIDQDLEM  | 467  | 25   |
| >NF2-A211D·YLKIAQDL    | 248 | >NF2-A211D·YLKIDQDL    | 348  | 100  |
| >NF2-A211D·YLKIAQDLEM  | 203 | >NF2-A211D·YLKIDQDLEM  | 404  | 201  |
| >NF2-A211D·YLKIAQDLEM  | 91  | >NF2-A211D·YLKIDQDLEM  | 129  | 38   |
| >NF2-A211D·YLKIAQDLEM  | 463 | >NF2-A211D·YLKIDQDLEM  | 838  | 375  |
| >NF2-A211D·YLKIAQDLEM  | 92  | >NF2-A211D·YLKIDQDLEM  | 125  | 33   |
| >NF2-A211D·YLKIAQDLEM  | 335 | >NF2-A211D·YLKIDQDLEM  | 733  | 398  |
| >NF2-A211D·YLKIAQDLEM  | 360 | >NF2-A211D·YLKIDQDLEM  | 490  | 130  |
| >NF2-A211D·EYLKIAQDL   | 199 | >NF2-A211D·EYLKIDQDL   | 422  | 223  |
| >NF2-A211D·EYLKIAQDL   | 857 | >NF2-A211D·EYLKIDQDL   | 370  | 487  |
| >NF2-A211D·EYLKIAQDL   | 453 | >NF2-A211D·EYLKIDQDL   | 1126 | 673  |
| >NF2-A211D·EYLKIAQDL   | 28  | >NF2-A211D·EYLKIDQDL   | 52   | 24   |
| >NF2-A211D·EYLKIAQDLEM | 90  | >NF2-A211D·EYLKIDQDLEM | 146  | 56   |
| >NF2-A211D·EYLKIAQDLEM | 496 | >NF2-A211D·EYLKIDQDLEM | 676  | 180  |
| >NF2-A211D·MEYLKIAQ    | 408 | >NF2-A211D·MEYLKIDQ    | 1676 | 1268 |

|                        |      |                        |      |      |
|------------------------|------|------------------------|------|------|
| >NF2-A211D·MEYLKIAQDL  | 23   | >NF2-A211D·MEYLKIDQDL  | 59   | 36   |
| >NF2-A211D·MEYLKIAQ    | 122  | >NF2-A211D·MEYLKIDQ    | 1464 | 1342 |
| >NF2-A211D·MEYLKIAQDL  | 424  | >NF2-A211D·MEYLKIDQDL  | 617  | 193  |
| >NF2-A211D·MEYLKIAQDL  | 111  | >NF2-A211D·MEYLKIDQDL  | 137  | 26   |
| >NF2-A211D·MEYLKIAQDL  | 381  | >NF2-A211D·MEYLKIDQDL  | 696  | 315  |
| >NF2-A211D·MEYLKIAQDL  | 302  | >NF2-A211D·MEYLKIDQDL  | 404  | 102  |
| >NF2-A211D·MEYLKIAQ    | 394  | >NF2-A211D·MEYLKIDQ    | 1646 | 1252 |
| >NF2-A211D·MEYLKIAQD   | 215  | >NF2-A211D·MEYLKIDQD   | 182  | 33   |
| >NF2-A211D·MEYLKIAQDL  | 42   | >NF2-A211D·MEYLKIDQDL  | 60   | 18   |
| >NF2-A211D·AEMEYLKIA   | 31   | >NF2-A211D·AEMEYLKID   | 1268 | 1237 |
| >NF2-A211D·AEMEYLKIA   | 99   | >NF2-A211D·AEMEYLKID   | 127  | 28   |
| >NF2-A211D·AEMEYLKIAQ  | 387  | >NF2-A211D·AEMEYLKIDC  | 419  | 32   |
| >NF2-A211D·AEMEYLKIA   | 5    | >NF2-A211D·AEMEYLKID   | 339  | 334  |
| >NF2-A211D·AEMEYLKIAQ  | 421  | >NF2-A211D·AEMEYLKIDC  | 980  | 559  |
| >NF2-A211D·AEMEYLKIAQ  | 496  | >NF2-A211D·AEMEYLKIDC  | 676  | 180  |
| >NF2-A211D·AEMEYLKIA   | 8    | >NF2-A211D·AEMEYLKID   | 24   | 16   |
| >NF2-A211D·AEMEYLKIAQ  | 20   | >NF2-A211D·AEMEYLKIDC  | 20   | 0    |
| >NF2-A395V·AKLLAQKAA   | 394  | >NF2-A395V·VKLLAQKAA   | 730  | 336  |
| >NF2-A395V·EAKLLAQK    | 42   | >NF2-A395V·EVKLLAQK    | 22   | 20   |
| >NF2-A395V·AEKAQITEEE\ | 109  | >NF2-A395V·AEKAQITEEE\ | 86   | 23   |
| >NF2-A395V·AEKAQITEEE\ | 11   | >NF2-A395V·AEKAQITEEE\ | 29   | 18   |
| >NF2-A395V·AEKAQITEEE\ | 432  | >NF2-A395V·AEKAQITEEE\ | 19   | 413  |
| >NF2-A395V·EEAKLLAQK   | 268  | >NF2-A395V·EEVKLLAQK   | 552  | 284  |
| >NF2-A395V·EEAKLLAQKA  | 503  | >NF2-A395V·EEVKLLAQKA  | 448  | 55   |
| >NF2-A395V·EEAKLLAQKA  | 116  | >NF2-A395V·EEVKLLAQKA  | 224  | 108  |
| >NF2-A395V·EEAKLLAQKA  | 11   | >NF2-A395V·EEVKLLAQKA  | 16   | 5    |
| >NF2-A395V·EEEAKLLA    | 736  | >NF2-A395V·EEEVKLLA    | 355  | 381  |
| >NF2-A395V·EEEAKLLA    | 38   | >NF2-A395V·EEEVKLLA    | 60   | 22   |
| >NF2-A395V·EEEAKLLAQK  | 33   | >NF2-A395V·EEEVKLLAQK  | 44   | 11   |
| >NF2-A395V·TEEEAKLL    | 4    | >NF2-A395V·TEEEVKLL    | 5    | 1    |
| >NF2-A395V·TEEEAKLLA   | 882  | >NF2-A395V·TEEEVKLLA   | 497  | 385  |
| >NF2-A395V·TEEEAKLL    | 63   | >NF2-A395V·TEEEVKLL    | 96   | 33   |
| >NF2-A395V·TEEEAKLLA   | 241  | >NF2-A395V·TEEEVKLLA   | 224  | 17   |
| >NF2-A395V·ITEEEAKL    | 23   | >NF2-A395V·ITEEEVKL    | 49   | 26   |
| >NF2-A395V·ITEEEAKLL   | 34   | >NF2-A395V·ITEEEVKLL   | 43   | 9    |
| >NF2-A395V·ITEEEAKLL   | 77   | >NF2-A395V·ITEEEVKLL   | 86   | 9    |
| >NF2-A395V·QITEEEAK    | 347  | >NF2-A395V·QITEEEVK    | 425  | 78   |
| >NF2-A395V·AQITEEEA    | 5918 | >NF2-A395V·AQITEEEV    | 443  | 5475 |
| >NF2-A395V·AQITEEEA    | 3580 | >NF2-A395V·AQITEEEV    | 444  | 3136 |
| >NF2-A395V·AQITEEEAKL  | 368  | >NF2-A395V·AQITEEEVKL  | 565  | 197  |
| >NF2-A395V·AQITEEEA    | 121  | >NF2-A395V·AQITEEEV    | 19   | 102  |
| >NF2-A395V·AQITEEEAKLI | 239  | >NF2-A395V·AQITEEEVKLI | 241  | 2    |
| >NF2-A395V·AQITEEEA    | 801  | >NF2-A395V·AQITEEEV    | 151  | 650  |

|                        |       |                        |       |       |
|------------------------|-------|------------------------|-------|-------|
| >NF2-A395V-AQITEEEAKL  | 134   | >NF2-A395V-AQITEEEVKL  | 73    | 61    |
| >NF2-A395V-AQITEEEAKLI | 99    | >NF2-A395V-AQITEEEVKLL | 83    | 16    |
| >NF2-A395V-AQITEEEAKLI | 367   | >NF2-A395V-AQITEEEVKLL | 556   | 189   |
| >NF2-A395V-KAQITEEEAKI | 66    | >NF2-A395V-KAQITEEEVKI | 132   | 66    |
| >NF2-A395V-EKAQITEEEAI | 280   | >NF2-A395V-EKAQITEEEVI | 333   | 53    |
| >NF2-E167D-ELLPKRVI    | 496   | >NF2-E167D-DLLPKRVI    | 1850  | 1354  |
| >NF2-E167D-ELLPKRVINL  | 222   | >NF2-E167D-DLLPKRVINL  | 730   | 508   |
| >NF2-E167D-ELLPKRVINL  | 161   | >NF2-E167D-DLLPKRVINL  | 342   | 181   |
| >NF2-E167D-ELLPKRVINL  | 170   | >NF2-E167D-DLLPKRVINL  | 511   | 341   |
| >NF2-E167D-ELLPKRVINL  | 26    | >NF2-E167D-DLLPKRVINL  | 82    | 56    |
| >NF2-E167D-ELLPKRVINLY | 237   | >NF2-E167D-DLLPKRVINLY | 186   | 51    |
| >NF2-E167D-EELLPKRV    | 10    | >NF2-E167D-EDLLPKRV    | 375   | 365   |
| >NF2-E167D-EELLPKRVI   | 39    | >NF2-E167D-EDLLPKRVI   | 815   | 776   |
| >NF2-E167D-EELLPKRV    | 354   | >NF2-E167D-EDLLPKRV    | 24811 | 24457 |
| >NF2-E167D-EELLPKRVI   | 12969 | >NF2-E167D-EDLLPKRVI   | 425   | 12544 |
| >NF2-E167D-QEELLPKRV   | 82    | >NF2-E167D-QEDLLPKRV   | 193   | 111   |
| >NF2-E167D-QEELLPKRVI  | 21    | >NF2-E167D-QEDLLPKRVI  | 35    | 14    |
| >NF2-E167D-QEELLPKRVI  | 280   | >NF2-E167D-QEDLLPKRVI  | 253   | 27    |
| >NF2-E167D-QEELLPKRVI  | 292   | >NF2-E167D-QEDLLPKRVI  | 429   | 137   |
| >NF2-E167D-QEELLPKRVI  | 197   | >NF2-E167D-QEDLLPKRVI  | 556   | 359   |
| >NF2-E167D-QEELLPKRV   | 254   | >NF2-E167D-QEDLLPKRV   | 562   | 308   |
| >NF2-E167D-QEELLPKRVI  | 87    | >NF2-E167D-QEDLLPKRVI  | 86    | 1     |
| >NF2-E167D-AQEELLPK    | 158   | >NF2-E167D-AQEDLLPK    | 133   | 25    |
| >NF2-E167D-AQEELLPKR   | 616   | >NF2-E167D-AQEDLLPKR   | 432   | 184   |
| >NF2-E167D-LAQEELLPKR' | 533   | >NF2-E167D-LAQEDLLPKR' | 436   | 97    |
| >NF2-E167D-LAQEELLPKR' | 293   | >NF2-E167D-LAQEDLLPKR' | 222   | 71    |
| >NF2-E167D-LAQEELLPK   | 89    | >NF2-E167D-LAQEDLLPK   | 111   | 22    |
| >NF2-E167D-FLAQEELL    | 21    | >NF2-E167D-FLAQEDLL    | 25    | 4     |
| >NF2-E167D-FLAQEELLPK  | 363   | >NF2-E167D-FLAQEDLLPK  | 452   | 89    |
| >NF2-E167D-FLAQEELL    | 2     | >NF2-E167D-FLAQEDLL    | 2     | 0     |
| >NF2-E167D-FLAQEELLP   | 215   | >NF2-E167D-FLAQEDLLP   | 291   | 76    |
| >NF2-E167D-FLAQEELLPK  | 312   | >NF2-E167D-FLAQEDLLPK  | 404   | 92    |
| >NF2-E167D-FLAQEELL    | 20    | >NF2-E167D-FLAQEDLL    | 21    | 1     |
| >NF2-E167D-FLAQEELL    | 44    | >NF2-E167D-FLAQEDLL    | 42    | 2     |
| >NF2-E167D-FLAQEELL    | 11    | >NF2-E167D-FLAQEDLL    | 20    | 9     |
| >NF2-E167D-FLAQEELL    | 50    | >NF2-E167D-FLAQEDLL    | 35    | 15    |
| >NF2-E167D-FLAQEELL    | 10    | >NF2-E167D-FLAQEDLL    | 10    | 0     |
| >NF2-E167D-FLAQEELL    | 43    | >NF2-E167D-FLAQEDLL    | 82    | 39    |
| >NF2-E167D-FLAQEELL    | 3     | >NF2-E167D-FLAQEDLL    | 4     | 1     |
| >NF2-E167D-FLAQEELLPK  | 152   | >NF2-E167D-FLAQEDLLPK  | 171   | 19    |
| >NF2-E167D-FLAQEELLPKF | 451   | >NF2-E167D-FLAQEDLLPKI | 457   | 6     |
| >NF2-E167D-FLAQEELLPK  | 173   | >NF2-E167D-FLAQEDLLPK  | 317   | 144   |
| >NF2-E167D-FLAQEELLPK  | 86    | >NF2-E167D-FLAQEDLLPK  | 112   | 26    |

|                        |       |                        |       |       |
|------------------------|-------|------------------------|-------|-------|
| >NF2-E167D-FLAQEELLPK  | 216   | >NF2-E167D-FLAQEDLLPK  | 227   | 11    |
| >NF2-E167D-FLAQEELLPKF | 84    | >NF2-E167D-FLAQEDLLPKI | 70    | 14    |
| >NF2-E167D-FLAQEELLPKF | 470   | >NF2-E167D-FLAQEDLLPKI | 308   | 162   |
| >NF2-E167D-GFLAQEELLPI | 435   | >NF2-E167D-GFLAQEDLLP  | 452   | 17    |
| >NF2-E167D-GFLAQEEL    | 108   | >NF2-E167D-GFLAQEDL    | 416   | 308   |
| >NF2-E167D-GFLAQEELL   | 314   | >NF2-E167D-GFLAQEDLL   | 274   | 40    |
| >NF2-E167D-KRGFLAQEEL  | 144   | >NF2-E167D-KRGFLAQEDL  | 164   | 20    |
| >NF2-E167D-KRGFLAQEEL  | 69    | >NF2-E167D-KRGFLAQEDL  | 75    | 6     |
| >NF2-E167D-KRGFLAQEEL  | 305   | >NF2-E167D-KRGFLAQEDL  | 248   | 57    |
| >NF2-E167D-KRGFLAQEEL  | 83    | >NF2-E167D-KRGFLAQEDL  | 75    | 8     |
| >NF2-E167D-HKRGFLAQEE  | 252   | >NF2-E167D-HKRGFLAQEE  | 426   | 174   |
| >NF2-E247K-ENRLTPKI    | 10869 | >NF2-E247K-KNRLTPKI    | 25    | 10844 |
| >NF2-E247K-ENRLTPKISFP | 14861 | >NF2-E247K-KNRLTPKISFP | 274   | 14587 |
| >NF2-E247K-ENRLTPKISF  | 580   | >NF2-E247K-KNRLTPKISF  | 38    | 542   |
| >NF2-E247K-PENRLTPKI   | 42    | >NF2-E247K-PKNRLTPKI   | 5528  | 5486  |
| >NF2-E247K-PENRLTPKISF | 1211  | >NF2-E247K-PKNRLTPKISF | 36    | 1175  |
| >NF2-E247K-PENRLTPKISF | 459   | >NF2-E247K-PKNRLTPKISF | 20114 | 19655 |
| >NF2-E247K-PENRLTPKI   | 51    | >NF2-E247K-PKNRLTPKI   | 17402 | 17351 |
| >NF2-E247K-DALGLHIYDP  | 7148  | >NF2-E247K-DALGLHIYDP  | 207   | 6941  |
| >NF2-E247K-DALGLHIYDP  | 16379 | >NF2-E247K-DALGLHIYDP  | 151   | 16228 |
| >NF2-E247K-DPENRLTPK   | 3184  | >NF2-E247K-DPKNRLTPK   | 490   | 2694  |
| >NF2-E247K-YDPENRLTPK  | 132   | >NF2-E247K-YDPKNRLTPK  | 180   | 48    |
| >NF2-E247K-IYDPENRL    | 284   | >NF2-E247K-IYDPKNRL    | 578   | 294   |
| >NF2-E247K-HIYDPENRL   | 307   | >NF2-E247K-HIYDPKNRL   | 278   | 29    |
| >NF2-E247K-HIYDPENRL   | 246   | >NF2-E247K-HIYDPKNRL   | 574   | 328   |
| >NF2-E247K-HIYDPENRL   | 127   | >NF2-E247K-HIYDPKNRL   | 153   | 26    |
| >NF2-E247K-HIYDPENRL   | 28    | >NF2-E247K-HIYDPKNRL   | 29    | 1     |
| >NF2-E247K-HIYDPENR    | 101   | >NF2-E247K-HIYDPKNR    | 68    | 33    |
| >NF2-E247K-HIYDPENR    | 167   | >NF2-E247K-HIYDPKNR    | 226   | 59    |
| >NF2-E247K-HIYDPENR    | 25    | >NF2-E247K-HIYDPKNR    | 53    | 28    |
| >NF2-E247K-HIYDPENRL   | 220   | >NF2-E247K-HIYDPKNRL   | 105   | 115   |
| >NF2-E247K-HIYDPENRL   | 820   | >NF2-E247K-HIYDPKNRL   | 159   | 661   |
| >NF2-E247K-HIYDPENR    | 39    | >NF2-E247K-HIYDPKNR    | 27    | 12    |
| >NF2-E247K-GLHIYDPENR  | 173   | >NF2-E247K-GLHIYDPKNR  | 350   | 177   |
| >NF2-E247K-GLHIYDPENR  | 59    | >NF2-E247K-GLHIYDPKNR  | 72    | 13    |
| >NF2-E247K-GLHIYDPENR  | 412   | >NF2-E247K-GLHIYDPKNR  | 678   | 266   |
| >NF2-E247K-GLHIYDPENR  | 256   | >NF2-E247K-GLHIYDPKNR  | 391   | 135   |
| >NF2-E247K-GLHIYDPENR  | 16    | >NF2-E247K-GLHIYDPKNR  | 17    | 1     |
| >NF2-E247K-GLHIYDPE    | 26065 | >NF2-E247K-GLHIYDPK    | 199   | 25866 |
| >NF2-E247K-GLHIYDPE    | 15991 | >NF2-E247K-GLHIYDPK    | 381   | 15610 |
| >NF2-E247K-LGLHIYDPENI | 639   | >NF2-E247K-LGLHIYDPKNI | 416   | 223   |
| >NF2-E247K-ALGLHIYDPE  | 12373 | >NF2-E247K-ALGLHIYDPK  | 48    | 12325 |
| >NF2-E247K-ALGLHIYDPE  | 31523 | >NF2-E247K-ALGLHIYDPK  | 108   | 31415 |



|                         |       |                         |       |       |
|-------------------------|-------|-------------------------|-------|-------|
| >NF2-E270D- KEFTIKPL    | 99    | >NF2-E270D- KDFTIKPL    | 6764  | 6665  |
| >NF2-E270D- KEFTIKPL    | 136   | >NF2-E270D- KDFTIKPL    | 1382  | 1246  |
| >NF2-E270D- KEFTIKPL    | 280   | >NF2-E270D- KDFTIKPL    | 14581 | 14301 |
| >NF2-E270D- KEFTIKPL    | 12    | >NF2-E270D- KDFTIKPL    | 6498  | 6486  |
| >NF2-E270D- KEFTIKPL    | 20    | >NF2-E270D- KDFTIKPL    | 77    | 57    |
| >NF2-E270D- KEFTIKPL    | 198   | >NF2-E270D- KDFTIKPL    | 14436 | 14238 |
| >NF2-E270D- KEFTIKPL    | 146   | >NF2-E270D- KDFTIKPL    | 717   | 571   |
| >NF2-E270D- KEFTIKPLD   | 74    | >NF2-E270D- KDFTIKPLD   | 6235  | 6161  |
| >NF2-E270D- KEFTIKPLDKK | 123   | >NF2-E270D- KDFTIKPLDKK | 5981  | 5858  |
| >NF2-E270D- KEFTIKPL    | 134   | >NF2-E270D- KDFTIKPL    | 1273  | 1139  |
| >NF2-E270D- KEFTIKPLDK  | 374   | >NF2-E270D- KDFTIKPLDK  | 1185  | 811   |
| >NF2-E270D- YSDKEFTI    | 294   | >NF2-E270D- YSDKDFTI    | 174   | 120   |
| >NF2-E270D- YSDKEFTI    | 250   | >NF2-E270D- YSDKDFTI    | 304   | 54    |
| >NF2-E270D- YSDKEFTIKPL | 82    | >NF2-E270D- YSDKDFTIKPL | 128   | 46    |
| >NF2-E270D- YSDKEFTIKPL | 268   | >NF2-E270D- YSDKDFTIKPL | 544   | 276   |
| >NF2-E270D- YSDKEFTIK   | 440   | >NF2-E270D- YSDKDFTIK   | 335   | 105   |
| >NF2-E270D- YSDKEFTI    | 85    | >NF2-E270D- YSDKDFTI    | 49    | 36    |
| >NF2-E270D- SYSDKEFTI   | 227   | >NF2-E270D- SYSDKDFTI   | 471   | 244   |
| >NF2-E270D- SYSDKEFTI   | 141   | >NF2-E270D- SYSDKDFTI   | 156   | 15    |
| >NF2-E270D- SYSDKEFTI   | 16    | >NF2-E270D- SYSDKDFTI   | 20    | 4     |
| >NF2-E270D- SYSDKEFTIK  | 490   | >NF2-E270D- SYSDKDFTIK  | 505   | 15    |
| >NF2-E270D- SYSDKEFTIK  | 458   | >NF2-E270D- SYSDKDFTIK  | 430   | 28    |
| >NF2-E270D- ISYSDKEFTI  | 464   | >NF2-E270D- ISYSDKDFTI  | 352   | 112   |
| >NF2-E270D- ISYSDKEFTIK | 97    | >NF2-E270D- ISYSDKDFTIK | 110   | 13    |
| >NF2-E270D- ISYSDKEFTIK | 50    | >NF2-E270D- ISYSDKDFTIK | 53    | 3     |
| >NF2-E270D- ISYSDKEFTI  | 265   | >NF2-E270D- ISYSDKDFTI  | 294   | 29    |
| >NF2-E270D- ISYSDKEFTIK | 60    | >NF2-E270D- ISYSDKDFTIK | 62    | 2     |
| >NF2-E270D- ISYSDKEF    | 337   | >NF2-E270D- ISYSDKDF    | 1225  | 888   |
| >NF2-E270D- ISYSDKEF    | 7     | >NF2-E270D- ISYSDKDF    | 13    | 6     |
| >NF2-E270D- ISYSDKEFTI  | 409   | >NF2-E270D- ISYSDKDFTI  | 732   | 323   |
| >NF2-E270D- ISYSDKEF    | 4     | >NF2-E270D- ISYSDKDF    | 7     | 3     |
| >NF2-E270D- ISYSDKEFTI  | 36    | >NF2-E270D- ISYSDKDFTI  | 43    | 7     |
| >NF2-E270D- ISYSDKEF    | 115   | >NF2-E270D- ISYSDKDF    | 176   | 61    |
| >NF2-E270D- ISYSDKEF    | 105   | >NF2-E270D- ISYSDKDF    | 627   | 522   |
| >NF2-E270D- ISYSDKEFTI  | 91    | >NF2-E270D- ISYSDKDFTI  | 102   | 11    |
| >NF2-E270D- ISYSDKEFTIK | 234   | >NF2-E270D- ISYSDKDFTIK | 246   | 12    |
| >NF2-E270D- ISYSDKEFTI  | 340   | >NF2-E270D- ISYSDKDFTI  | 148   | 192   |
| >NF2-E270D- NISYSDKEFTI | 392   | >NF2-E270D- NISYSDKDFTI | 254   | 138   |
| >NF2-E270D- RNISYSDKEF  | 22    | >NF2-E270D- RNISYSDKDF  | 34    | 12    |
| >NF2-E270D- IRNISYSDKEF | 10    | >NF2-E270D- IRNISYSDKDF | 17    | 7     |
| >NF2-E463K- EAERRAKQK   | 15543 | >NF2-E463K- KAERRAKQK   | 192   | 15351 |
| >NF2-E463K- EAERRAKQK   | 325   | >NF2-E463K- KAERRAKQK   | 13720 | 13395 |
| >NF2-E463K- EAERRAKQKL  | 7707  | >NF2-E463K- KAERRAKQKL  | 420   | 7287  |

|                        |       |                        |       |       |
|------------------------|-------|------------------------|-------|-------|
| >NF2-E463K- REAERRAKQ† | 404   | >NF2-E463K- RKAERRAKQ† | 16632 | 16228 |
| >NF2-E463K- REAERRAK   | 8946  | >NF2-E463K- RKAERRAK   | 347   | 8599  |
| >NF2-E463K- REAERRAKQ† | 3447  | >NF2-E463K- RKAERRAKQ† | 89    | 3358  |
| >NF2-E463K- REAERRAKQ† | 33    | >NF2-E463K- RKAERRAKQ† | 17125 | 17092 |
| >NF2-E463K- REAERRAKQ† | 20    | >NF2-E463K- RKAERRAKQ† | 8089  | 8069  |
| >NF2-E463K- REAERRAKQ† | 1900  | >NF2-E463K- RKAERRAKQ† | 478   | 1422  |
| >NF2-E463K- AREAERRAK  | 10113 | >NF2-E463K- ARKAERRAK  | 144   | 9969  |
| >NF2-E463K- AREAERRAKC | 12210 | >NF2-E463K- ARKAERRAKC | 384   | 11826 |
| >NF2-E463K- AREAERRAK  | 2845  | >NF2-E463K- ARKAERRAK  | 424   | 2421  |
| >NF2-E463K- AREAERRAKC | 1620  | >NF2-E463K- ARKAERRAKC | 237   | 1383  |
| >NF2-E463K- EAREAERRAK | 465   | >NF2-E463K- EARKAERRAK | 252   | 213   |
| >NF2-E463K- EAREAERR   | 252   | >NF2-E463K- EARKAERR   | 398   | 146   |
| >NF2-E463K- EAREAERR   | 36    | >NF2-E463K- EARKAERR   | 49    | 13    |
| >NF2-E463K- LQEAREAER  | 279   | >NF2-E463K- LQEARKAER  | 48    | 231   |
| >NF2-E463K- DLQEAREAEF | 531   | >NF2-E463K- DLQEARKAEF | 225   | 306   |
| >NF2-E463K- DLQEAREAEF | 190   | >NF2-E463K- DLQEARKAEF | 150   | 40    |
| >NF2-E463K- DLQEAREAEF | 263   | >NF2-E463K- DLQEARKAEF | 537   | 274   |
| >NF2-G197C- GRARDEAEM  | 484   | >NF2-G197C- CRARDEAEM  | 343   | 141   |
| >NF2-G197C- GRARDEAEM  | 492   | >NF2-G197C- CRARDEAEM  | 1228  | 736   |
| >NF2-G197C- GRARDEAEM  | 5374  | >NF2-G197C- CRARDEAEM  | 245   | 5129  |
| >NF2-G197C- RGRARDEA   | 87    | >NF2-G197C- RCRARDEA   | 56    | 31    |
| >NF2-G197C- RGRARDEAEI | 323   | >NF2-G197C- RCRARDEAEI | 195   | 128   |
| >NF2-G197C- RGRARDEAEI | 262   | >NF2-G197C- RCRARDEAEI | 1324  | 1062  |
| >NF2-G197C- RGRARDEAEI | 182   | >NF2-G197C- RCRARDEAEI | 831   | 649   |
| >NF2-G197C- HRGRARDEA  | 444   | >NF2-G197C- HRCRARDEAI | 761   | 317   |
| >NF2-G197C- AEHRGRARD  | 90    | >NF2-G197C- AEHRCRARDI | 52    | 38    |
| >NF2-G197C- AEHRGRAR   | 217   | >NF2-G197C- AEHRCRAR   | 408   | 191   |
| >NF2-G197C- AEHRGRARD  | 7     | >NF2-G197C- AEHRCRARDI | 12    | 5     |
| >NF2-G197C- AEHRGRARD  | 398   | >NF2-G197C- AEHRCRARDI | 365   | 33    |
| >NF2-G197C- YAEHRGRAR  | 1369  | >NF2-G197C- YAEHRCRAR  | 290   | 1079  |
| >NF2-G197C- YAEHRGRAR  | 1090  | >NF2-G197C- YAEHRCRAR  | 375   | 715   |
| >NF2-G197C- WYAEHRGRA  | 424   | >NF2-G197C- WYAEHRCRA  | 135   | 289   |
| >NF2-G197C- WYAEHRGR   | 59    | >NF2-G197C- WYAEHRCR   | 82    | 23    |
| >NF2-G197C- WYAEHRGRA  | 144   | >NF2-G197C- WYAEHRCRA  | 76    | 68    |
| >NF2-G197C- AWYAEHRGR  | 733   | >NF2-G197C- AWYAEHRCR  | 287   | 446   |
| >NF2-G197C- AWYAEHRGR  | 254   | >NF2-G197C- AWYAEHRCR  | 223   | 31    |
| >NF2-G197C- AWYAEHRGR  | 34    | >NF2-G197C- AWYAEHRCR  | 56    | 22    |
| >NF2-G197C- AWYAEHRGR  | 58    | >NF2-G197C- AWYAEHRCR  | 48    | 10    |
| >NF2-G197C- AWYAEHRG   | 491   | >NF2-G197C- AWYAEHRC   | 283   | 208   |
| >NF2-G197C- AWYAEHRGR  | 345   | >NF2-G197C- AWYAEHRCR  | 188   | 157   |
| >NF2-G197C- TAWYAEHRG  | 397   | >NF2-G197C- TAWYAEHRC  | 213   | 184   |
| >NF2-G197C- ITAWYAEHRC | 168   | >NF2-G197C- ITAWYAEHRC | 89    | 79    |
| >NF2-G197C- ITAWYAEHRC | 7     | >NF2-G197C- ITAWYAEHRC | 8     | 1     |

|                          |       |                          |       |       |
|--------------------------|-------|--------------------------|-------|-------|
| >NF2-G197C-ITAWYAEHRC    | 365   | >NF2-G197C-ITAWYAEHRC    | 797   | 432   |
| >NF2-I273F-v IKPLDKKIDVF | 134   | >NF2-I273F-r FKPLDKKIDVF | 100   | 34    |
| >NF2-I273F-v TIKPLDKKIDV | 389   | >NF2-I273F-r TFKPLDKKIDV | 9150  | 8761  |
| >NF2-I273F-v TIKPLDKK    | 344   | >NF2-I273F-r TFKPLDKK    | 7357  | 7013  |
| >NF2-I273F-v NISYSDKEFTI | 392   | >NF2-I273F-r NISYSDKEFTF | 16383 | 15991 |
| >NF2-I273F-v NISYSDKEFTI | 9509  | >NF2-I273F-r NISYSDKEFTF | 473   | 9036  |
| >NF2-I273F-v NISYSDKEFTI | 12185 | >NF2-I273F-r NISYSDKEFTF | 433   | 11752 |
| >NF2-I273F-v FTIKPLDKKI  | 1563  | >NF2-I273F-r FTFKPLDKKI  | 212   | 1351  |
| >NF2-I273F-v FTIKPLDK    | 2227  | >NF2-I273F-r FTFKPLDK    | 212   | 2015  |
| >NF2-I273F-v FTIKPLDK    | 83    | >NF2-I273F-r FTFKPLDK    | 33    | 50    |
| >NF2-I273F-v FTIKPLDKK   | 88    | >NF2-I273F-r FTFKPLDKK   | 38    | 50    |
| >NF2-I273F-v FTIKPLDK    | 56    | >NF2-I273F-r FTFKPLDK    | 18    | 38    |
| >NF2-I273F-v FTIKPLDKK   | 42    | >NF2-I273F-r FTFKPLDKK   | 17    | 25    |
| >NF2-I273F-v FTIKPLDKKI  | 128   | >NF2-I273F-r FTFKPLDKKI  | 71    | 57    |
| >NF2-I273F-v FTIKPLDK    | 1115  | >NF2-I273F-r FTFKPLDK    | 368   | 747   |
| >NF2-I273F-v EFTIKPLDKK  | 524   | >NF2-I273F-r EFTFKPLDKK  | 208   | 316   |
| >NF2-I273F-v KEFTIKPL    | 6981  | >NF2-I273F-r KEFTFKPL    | 67    | 6914  |
| >NF2-I273F-v KEFTIKPL    | 99    | >NF2-I273F-r KEFTFKPL    | 114   | 15    |
| >NF2-I273F-v KEFTIKPL    | 136   | >NF2-I273F-r KEFTFKPL    | 52    | 84    |
| >NF2-I273F-v KEFTIKPL    | 280   | >NF2-I273F-r KEFTFKPL    | 154   | 126   |
| >NF2-I273F-v KEFTIKPL    | 12    | >NF2-I273F-r KEFTFKPL    | 10    | 2     |
| >NF2-I273F-v KEFTIKPL    | 20    | >NF2-I273F-r KEFTFKPL    | 15    | 5     |
| >NF2-I273F-v KEFTIKPL    | 198   | >NF2-I273F-r KEFTFKPL    | 178   | 20    |
| >NF2-I273F-v KEFTIKPL    | 146   | >NF2-I273F-r KEFTFKPL    | 819   | 673   |
| >NF2-I273F-v KEFTIKPLD   | 74    | >NF2-I273F-r KEFTFKPLD   | 62    | 12    |
| >NF2-I273F-v KEFTIKPLDKK | 123   | >NF2-I273F-r KEFTFKPLDKK | 112   | 11    |
| >NF2-I273F-v KEFTIKPL    | 134   | >NF2-I273F-r KEFTFKPL    | 100   | 34    |
| >NF2-I273F-v KEFTIKPLDK  | 374   | >NF2-I273F-r KEFTFKPLDK  | 184   | 190   |
| >NF2-I273F-v KEFTIKPLDKK | 665   | >NF2-I273F-r KEFTFKPLDKK | 370   | 295   |
| >NF2-I273F-v YSDKEFTI    | 1688  | >NF2-I273F-r YSDKEFTF    | 108   | 1580  |
| >NF2-I273F-v YSDKEFTI    | 294   | >NF2-I273F-r YSDKEFTF    | 2543  | 2249  |
| >NF2-I273F-v YSDKEFTIKPL | 916   | >NF2-I273F-r YSDKEFTFKPI | 363   | 553   |
| >NF2-I273F-v YSDKEFTIK   | 581   | >NF2-I273F-r YSDKEFTFK   | 46    | 535   |
| >NF2-I273F-v YSDKEFTIK   | 1413  | >NF2-I273F-r YSDKEFTFK   | 133   | 1280  |
| >NF2-I273F-v YSDKEFTI    | 7906  | >NF2-I273F-r YSDKEFTF    | 489   | 7417  |
| >NF2-I273F-v YSDKEFTI    | 250   | >NF2-I273F-r YSDKEFTF    | 10    | 240   |
| >NF2-I273F-v YSDKEFTIKPL | 82    | >NF2-I273F-r YSDKEFTFKPI | 134   | 52    |
| >NF2-I273F-v YSDKEFTI    | 12120 | >NF2-I273F-r YSDKEFTF    | 288   | 11832 |
| >NF2-I273F-v YSDKEFTI    | 1428  | >NF2-I273F-r YSDKEFTF    | 161   | 1267  |
| >NF2-I273F-v YSDKEFTIKPL | 268   | >NF2-I273F-r YSDKEFTFKPI | 151   | 117   |
| >NF2-I273F-v YSDKEFTI    | 973   | >NF2-I273F-r YSDKEFTF    | 138   | 835   |
| >NF2-I273F-v YSDKEFTIK   | 440   | >NF2-I273F-r YSDKEFTFK   | 387   | 53    |
| >NF2-I273F-v YSDKEFTI    | 85    | >NF2-I273F-r YSDKEFTF    | 15310 | 15225 |

|                          |       |                          |       |       |
|--------------------------|-------|--------------------------|-------|-------|
| >NF2-I273F-v SYSDKEFTI   | 227   | >NF2-I273F-r SYSDKEFTF   | 11609 | 11382 |
| >NF2-I273F-v SYSDKEFTIK  | 1501  | >NF2-I273F-r SYSDKEFTFK  | 301   | 1200  |
| >NF2-I273F-v SYSDKEFTI   | 1179  | >NF2-I273F-r SYSDKEFTF   | 224   | 955   |
| >NF2-I273F-v SYSDKEFTI   | 141   | >NF2-I273F-r SYSDKEFTF   | 79    | 62    |
| >NF2-I273F-v SYSDKEFTI   | 16    | >NF2-I273F-r SYSDKEFTF   | 6     | 10    |
| >NF2-I273F-v SYSDKEFTIK  | 1512  | >NF2-I273F-r SYSDKEFTFK  | 259   | 1253  |
| >NF2-I273F-v SYSDKEFTIK  | 2239  | >NF2-I273F-r SYSDKEFTFK  | 279   | 1960  |
| >NF2-I273F-v SYSDKEFTIK  | 490   | >NF2-I273F-r SYSDKEFTFK  | 370   | 120   |
| >NF2-I273F-v SYSDKEFTIK  | 458   | >NF2-I273F-r SYSDKEFTFK  | 156   | 302   |
| >NF2-I273F-v SYSDKEFTI   | 533   | >NF2-I273F-r SYSDKEFTF   | 414   | 119   |
| >NF2-I273F-v ISYSDKEFTI  | 464   | >NF2-I273F-r ISYSDKEFTF  | 11751 | 11287 |
| >NF2-I273F-v ISYSDKEFTIK | 97    | >NF2-I273F-r ISYSDKEFTFK | 48    | 49    |
| >NF2-I273F-v ISYSDKEFTIK | 50    | >NF2-I273F-r ISYSDKEFTFK | 15    | 35    |
| >NF2-I273F-v ISYSDKEFTIK | 715   | >NF2-I273F-r ISYSDKEFTFK | 85    | 630   |
| >NF2-I273F-v ISYSDKEFTI  | 265   | >NF2-I273F-r ISYSDKEFTF  | 174   | 91    |
| >NF2-I273F-v ISYSDKEFTIK | 60    | >NF2-I273F-r ISYSDKEFTFK | 11    | 49    |
| >NF2-I273F-v ISYSDKEFTI  | 12408 | >NF2-I273F-r ISYSDKEFTF  | 416   | 11992 |
| >NF2-I273F-v ISYSDKEFTI  | 409   | >NF2-I273F-r ISYSDKEFTF  | 14    | 395   |
| >NF2-I273F-v ISYSDKEFTI  | 36    | >NF2-I273F-r ISYSDKEFTF  | 4     | 32    |
| >NF2-I273F-v ISYSDKEFTI  | 1041  | >NF2-I273F-r ISYSDKEFTF  | 68    | 973   |
| >NF2-I273F-v ISYSDKEFTI  | 91    | >NF2-I273F-r ISYSDKEFTF  | 22    | 69    |
| >NF2-I273F-v ISYSDKEFTI  | 6126  | >NF2-I273F-r ISYSDKEFTF  | 308   | 5818  |
| >NF2-I273F-v ISYSDKEFTIK | 234   | >NF2-I273F-r ISYSDKEFTFK | 196   | 38    |
| >NF2-I273F-v ISYSDKEFTI  | 340   | >NF2-I273F-r ISYSDKEFTF  | 26445 | 26105 |
| >NF2-I487V-v IPAPLPPDI   | 23    | >NF2-I487V-i VPAPLPPDI   | 31    | 8     |
| >NF2-I487V-v IPAPLPPDIPS | 91    | >NF2-I487V-i VPAPLPPDIP  | 149   | 58    |
| >NF2-I487V-v IPAPLPPDI   | 152   | >NF2-I487V-i VPAPLPPDI   | 219   | 67    |
| >NF2-I487V-v IPAPLPPDI   | 264   | >NF2-I487V-i VPAPLPPDI   | 630   | 366   |
| >NF2-I487V-v IPAPLPPD    | 328   | >NF2-I487V-i VPAPLPPD    | 1062  | 734   |
| >NF2-I487V-v IPAPLPPDIPS | 264   | >NF2-I487V-i VPAPLPPDIP  | 893   | 629   |
| >NF2-I487V-v NPIPAPLPPDI | 10    | >NF2-I487V-i NPVPAPLPPC  | 25    | 15    |
| >NF2-I487V-v NPIPAPLPPDI | 303   | >NF2-I487V-i NPVPAPLPPC  | 332   | 29    |
| >NF2-I487V-v MNPIPAPL    | 356   | >NF2-I487V-i MNPVPAPL    | 299   | 57    |
| >NF2-I487V-v MNPIPAPL    | 313   | >NF2-I487V-i MNPVPAPL    | 325   | 12    |
| >NF2-I487V-v MNPIPAPL    | 281   | >NF2-I487V-i MNPVPAPL    | 156   | 125   |
| >NF2-I487V-v PMNPIPAPL   | 44    | >NF2-I487V-i PMNPVPAPL   | 133   | 89    |
| >NF2-I487V-v PMNPIPAPL   | 56    | >NF2-I487V-i PMNPVPAPL   | 72    | 16    |
| >NF2-I487V-v PMNPIPAPL   | 38    | >NF2-I487V-i PMNPVPAPL   | 16    | 22    |
| >NF2-I487V-v PMNPIPAPL   | 429   | >NF2-I487V-i PMNPVPAPL   | 392   | 37    |
| >NF2-I487V-v PMNPIPAPL   | 403   | >NF2-I487V-i PMNPVPAPL   | 132   | 271   |
| >NF2-I487V-v PMNPIPAPL   | 62    | >NF2-I487V-i PMNPVPAPL   | 222   | 160   |
| >NF2-I487V-v PMNPIPAPL   | 67    | >NF2-I487V-i PMNPVPAPL   | 96    | 29    |
| >NF2-I487V-v PPMNPIPAPL  | 72    | >NF2-I487V-i PPMNPVPAP   | 69    | 3     |

|                         |      |                         |       |       |
|-------------------------|------|-------------------------|-------|-------|
| >NF2-I487V-1 PPMNPIPA   | 100  | >NF2-I487V-i PPMNPVPA   | 100   | 0     |
| >NF2-I487V-1 YPPMNPIPAF | 412  | >NF2-I487V-i YPPMNPVPA  | 333   | 79    |
| >NF2-I487V-1 YPPMNPIPA  | 303  | >NF2-I487V-i YPPMNPVPA  | 199   | 104   |
| >NF2-I487V-1 YPPMNPIPAF | 38   | >NF2-I487V-i YPPMNPVPA  | 37    | 1     |
| >NF2-I487V-1 YPPMNPIPA  | 181  | >NF2-I487V-i YPPMNPVPA  | 257   | 76    |
| >NF2-I487V-1 YPPMNPIPAF | 71   | >NF2-I487V-i YPPMNPVPA  | 82    | 11    |
| >NF2-I487V-1 YPPMNPIPAF | 109  | >NF2-I487V-i YPPMNPVPA  | 95    | 14    |
| >NF2-I487V-1 YPPMNPIPA  | 26   | >NF2-I487V-i YPPMNPVPA  | 19    | 7     |
| >NF2-I487V-1 YPPMNPIPAF | 47   | >NF2-I487V-i YPPMNPVPA  | 58    | 11    |
| >NF2-I487V-1 TYPPMNPI   | 74   | >NF2-I487V-i TYPPMNPV   | 682   | 608   |
| >NF2-I487V-1 TYPPMNPI   | 340  | >NF2-I487V-i TYPPMNPV   | 4723  | 4383  |
| >NF2-I487V-1 TYPPMNPI   | 88   | >NF2-I487V-i TYPPMNPV   | 791   | 703   |
| >NF2-I487V-1 TYPPMNPI   | 11   | >NF2-I487V-i TYPPMNPV   | 211   | 200   |
| >NF2-I487V-1 TYPPMNPI   | 818  | >NF2-I487V-i TYPPMNPV   | 187   | 631   |
| >NF2-I487V-1 TYPPMNPIPA | 495  | >NF2-I487V-i TYPPMNPVP, | 405   | 90    |
| >NF2-I487V-1 PTYPPMNPI  | 3180 | >NF2-I487V-i PTYPPMNPV  | 255   | 2925  |
| >NF2-I487V-1 PTYPPMNPI  | 253  | >NF2-I487V-i PTYPPMNPV  | 395   | 142   |
| >NF2-I487V-1 PTYPPMNPI  | 48   | >NF2-I487V-i PTYPPMNPV  | 15    | 33    |
| >NF2-I487V-1 PTYPPMNPIP | 672  | >NF2-I487V-i PTYPPMNPV  | 391   | 281   |
| >NF2-I487V-1 PTYPPMNPI  | 56   | >NF2-I487V-i PTYPPMNPV  | 12    | 44    |
| >NF2-I487V-1 PTYPPMNPI  | 229  | >NF2-I487V-i PTYPPMNPV  | 1059  | 830   |
| >NF2-I487V-1 PTYPPMNPI  | 360  | >NF2-I487V-i PTYPPMNPV  | 724   | 364   |
| >NF2-I487V-1 PTYPPMNPI  | 44   | >NF2-I487V-i PTYPPMNPV  | 2959  | 2915  |
| >NF2-I487V-1 KPTYPPMNPI | 78   | >NF2-I487V-i KPTYPPMNP\ | 73    | 5     |
| >NF2-I487V-1 KPTYPPMNPI | 2518 | >NF2-I487V-i KPTYPPMNP\ | 491   | 2027  |
| >NF2-K149N· KYGDYDPSV   | 365  | >NF2-K149N· NYGDYDPSV   | 2356  | 1991  |
| >NF2-K149N· KYGDYDPSV   | 309  | >NF2-K149N· NYGDYDPSV   | 3353  | 3044  |
| >NF2-K149N· KYGDYDPSV   | 86   | >NF2-K149N· NYGDYDPSV   | 585   | 499   |
| >NF2-K149N· KYGDYDPSV†  | 43   | >NF2-K149N· NYGDYDPSV†  | 7977  | 7934  |
| >NF2-K149N· KYGDYDPSV†  | 258  | >NF2-K149N· NYGDYDPSV†  | 6389  | 6131  |
| >NF2-K149N· KYGDYDPSV†  | 23   | >NF2-K149N· NYGDYDPSV†  | 142   | 119   |
| >NF2-K149N· AKYGDYDPS\  | 1206 | >NF2-K149N· ANYGDYDPS\  | 309   | 897   |
| >NF2-K149N· AKYGDYDPS\  | 322  | >NF2-K149N· ANYGDYDPS\  | 930   | 608   |
| >NF2-K149N· AKYGDYDPS\  | 495  | >NF2-K149N· ANYGDYDPS\  | 1790  | 1295  |
| >NF2-K149N· AKYGDYDPS\  | 198  | >NF2-K149N· ANYGDYDPS\  | 973   | 775   |
| >NF2-K149N· AKYGDYDPS\  | 71   | >NF2-K149N· ANYGDYDPS\  | 4261  | 4190  |
| >NF2-K149N· AKYGDYDPS\  | 99   | >NF2-K149N· ANYGDYDPS\  | 3914  | 3815  |
| >NF2-K149N· VLLASYAVQA  | 64   | >NF2-K149N· VLLASYAVQA  | 17155 | 17091 |
| >NF2-K149N· VLLASYAVQA  | 100  | >NF2-K149N· VLLASYAVQA  | 24695 | 24595 |
| >NF2-K149N· VLLASYAVQA  | 276  | >NF2-K149N· VLLASYAVQA  | 14370 | 14094 |
| >NF2-K149N· QAKYGDYDP:  | 1728 | >NF2-K149N· QANYGDYDP   | 235   | 1493  |
| >NF2-K149N· VQAKYGDY    | 930  | >NF2-K149N· VQANYGDY    | 388   | 542   |
| >NF2-K149N· VQAKYGDY    | 70   | >NF2-K149N· VQANYGDY    | 39    | 31    |

|                       |      |                       |       |       |
|-----------------------|------|-----------------------|-------|-------|
| >NF2-K149N·VQAKYGDY   | 369  | >NF2-K149N·VQANYGDY   | 1049  | 680   |
| >NF2-K149N·VQAKYGDY   | 103  | >NF2-K149N·VQANYGDY   | 84    | 19    |
| >NF2-K149N·VQAKYGDY   | 313  | >NF2-K149N·VQANYGDY   | 189   | 124   |
| >NF2-K149N·VQAKYGDY   | 52   | >NF2-K149N·VQANYGDY   | 33    | 19    |
| >NF2-K149N·AVQAKYGDY  | 894  | >NF2-K149N·AVQANYGDY  | 272   | 622   |
| >NF2-K149N·AVQAKYGDY  | 317  | >NF2-K149N·AVQANYGDY  | 128   | 189   |
| >NF2-K149N·AVQAKYGDY  | 126  | >NF2-K149N·AVQANYGDY  | 61    | 65    |
| >NF2-K149N·AVQAKYGDY  | 281  | >NF2-K149N·AVQANYGDY  | 611   | 330   |
| >NF2-K149N·YAVQAKYGD' | 272  | >NF2-K149N·YAVQANYGD  | 111   | 161   |
| >NF2-K149N·YAVQAKYGD' | 102  | >NF2-K149N·YAVQANYGD  | 115   | 13    |
| >NF2-K149N·YAVQAKYGD' | 420  | >NF2-K149N·YAVQANYGD  | 217   | 203   |
| >NF2-K149N·YAVQAKYGD' | 1118 | >NF2-K149N·YAVQANYGD  | 391   | 727   |
| >NF2-K149N·YAVQAKYGD' | 1192 | >NF2-K149N·YAVQANYGD  | 441   | 751   |
| >NF2-K149N·YAVQAKYGD' | 32   | >NF2-K149N·YAVQANYGD  | 23    | 9     |
| >NF2-K149N·SYAVQAKYGI | 714  | >NF2-K149N·SYAVQANYGI | 381   | 333   |
| >NF2-K149N·SYAVQAKY   | 57   | >NF2-K149N·SYAVQANY   | 49    | 8     |
| >NF2-K149N·SYAVQAKYGI | 52   | >NF2-K149N·SYAVQANYGI | 35    | 17    |
| >NF2-K149N·SYAVQAKY   | 57   | >NF2-K149N·SYAVQANY   | 47    | 10    |
| >NF2-K149N·SYAVQAKYGI | 110  | >NF2-K149N·SYAVQANYGI | 48    | 62    |
| >NF2-K149N·SYAVQAKY   | 398  | >NF2-K149N·SYAVQANY   | 101   | 297   |
| >NF2-K149N·SYAVQAKYGI | 152  | >NF2-K149N·SYAVQANYGI | 114   | 38    |
| >NF2-K149N·SYAVQAKY   | 119  | >NF2-K149N·SYAVQANY   | 141   | 22    |
| >NF2-K149N·SYAVQAKYGI | 230  | >NF2-K149N·SYAVQANYGI | 164   | 66    |
| >NF2-K149N·ASYAVQAK   | 46   | >NF2-K149N·ASYAVQAN   | 15679 | 15633 |
| >NF2-K149N·ASYAVQAKY  | 93   | >NF2-K149N·ASYAVQANY  | 74    | 19    |
| >NF2-K149N·ASYAVQAK   | 12   | >NF2-K149N·ASYAVQAN   | 13628 | 13616 |
| >NF2-K149N·ASYAVQAKY  | 86   | >NF2-K149N·ASYAVQANY  | 56    | 30    |
| >NF2-K149N·ASYAVQAKY  | 319  | >NF2-K149N·ASYAVQANY  | 110   | 209   |
| >NF2-K149N·ASYAVQAKY  | 120  | >NF2-K149N·ASYAVQANY  | 133   | 13    |
| >NF2-K149N·ASYAVQAK   | 21   | >NF2-K149N·ASYAVQAN   | 8180  | 8159  |
| >NF2-K149N·ASYAVQAKY  | 14   | >NF2-K149N·ASYAVQANY  | 18    | 4     |
| >NF2-K149N·ASYAVQAK   | 296  | >NF2-K149N·ASYAVQAN   | 12603 | 12307 |
| >NF2-K149N·ASYAVQAK   | 235  | >NF2-K149N·ASYAVQAN   | 22079 | 21844 |
| >NF2-K149N·ASYAVQAKY  | 246  | >NF2-K149N·ASYAVQANY  | 126   | 120   |
| >NF2-K149N·ASYAVQAKY  | 96   | >NF2-K149N·ASYAVQANY  | 40    | 56    |
| >NF2-K149N·ASYAVQAKY  | 4    | >NF2-K149N·ASYAVQANY  | 4     | 0     |
| >NF2-K149N·ASYAVQAKY  | 323  | >NF2-K149N·ASYAVQANY  | 1046  | 723   |
| >NF2-K149N·ASYAVQAKY  | 18   | >NF2-K149N·ASYAVQANY  | 22    | 4     |
| >NF2-K149N·ASYAVQAKY  | 30   | >NF2-K149N·ASYAVQANY  | 67    | 37    |
| >NF2-K149N·ASYAVQAKY  | 242  | >NF2-K149N·ASYAVQANY  | 468   | 226   |
| >NF2-K149N·ASYAVQAK   | 342  | >NF2-K149N·ASYAVQAN   | 7807  | 7465  |
| >NF2-K149N·LASAVQAKY  | 242  | >NF2-K149N·LASAVQAN   | 217   | 25    |
| >NF2-K149N·LASAVQAK   | 248  | >NF2-K149N·LASAVQAN   | 14545 | 14297 |

|                         |       |                         |       |       |
|-------------------------|-------|-------------------------|-------|-------|
| >NF2-K149N·LASYAVQAKY   | 30    | >NF2-K149N·LASYAVQAN\   | 30    | 0     |
| >NF2-K149N·LASYAVQAK    | 140   | >NF2-K149N·LASYAVQAN    | 20249 | 20109 |
| >NF2-K149N·LASYAVQAKY   | 510   | >NF2-K149N·LASYAVQAN\   | 479   | 31    |
| >NF2-K149N·LASYAVQAKY   | 234   | >NF2-K149N·LASYAVQAN\   | 132   | 102   |
| >NF2-K149N·LASYAVQAKY   | 272   | >NF2-K149N·LASYAVQAN\   | 120   | 152   |
| >NF2-K149N·LASYAVQAKY   | 24    | >NF2-K149N·LASYAVQAN\   | 23    | 1     |
| >NF2-K149N·LASYAVQAKY   | 96    | >NF2-K149N·LASYAVQAN\   | 117   | 21    |
| >NF2-K149N·LASYAVQAKY   | 37    | >NF2-K149N·LASYAVQAN\   | 49    | 12    |
| >NF2-K149N·LASYAVQAKY   | 188   | >NF2-K149N·LASYAVQAN\   | 370   | 182   |
| >NF2-K149N·LLASYAVQAK   | 824   | >NF2-K149N·LLASYAVQAN   | 448   | 376   |
| >NF2-K149N·LLASYAVQAK   | 379   | >NF2-K149N·LLASYAVQAN   | 2808  | 2429  |
| >NF2-K149N·LLASYAVQAK   | 444   | >NF2-K149N·LLASYAVQAN   | 456   | 12    |
| >NF2-K149N·LLASYAVQAK   | 89    | >NF2-K149N·LLASYAVQAN   | 22169 | 22080 |
| >NF2-K149N·LLASYAVQAK   | 270   | >NF2-K149N·LLASYAVQAN   | 216   | 54    |
| >NF2-K149N·LLASYAVQAK   | 139   | >NF2-K149N·LLASYAVQAN   | 35553 | 35414 |
| >NF2-K149N·LLASYAVQAK   | 22    | >NF2-K149N·LLASYAVQAN   | 21    | 1     |
| >NF2-K149N·LLASYAVQAK   | 29    | >NF2-K149N·LLASYAVQAN   | 36    | 7     |
| >NF2-K149N·LLASYAVQAK   | 458   | >NF2-K149N·LLASYAVQAN   | 34591 | 34133 |
| >NF2-K149N·LLASYAVQAK   | 506   | >NF2-K149N·LLASYAVQAN   | 123   | 383   |
| >NF2-K149N·LLASYAVQAK   | 113   | >NF2-K149N·LLASYAVQAN   | 73    | 40    |
| >NF2-K149N·LLASYAVQAK   | 249   | >NF2-K149N·LLASYAVQAN   | 267   | 18    |
| >NF2-K149N·LLASYAVQAK   | 122   | >NF2-K149N·LLASYAVQAN   | 61    | 61    |
| >NF2-K149N·LLASYAVQAK   | 278   | >NF2-K149N·LLASYAVQAN   | 560   | 282   |
| >NF2-K149N·LLASYAVQAK   | 320   | >NF2-K149N·LLASYAVQAN   | 577   | 257   |
| >NF2-K149N·LLASYAVQAK   | 160   | >NF2-K149N·LLASYAVQAN   | 13260 | 13100 |
| >NF2-K149N·LLASYAVQAK   | 185   | >NF2-K149N·LLASYAVQAN   | 256   | 71    |
| >NF2-K364I-\ KEEATMANE\ | 4078  | >NF2-K364I-r IEEATMANE\ | 370   | 3708  |
| >NF2-K364I-\ KEEATMANE\ | 7     | >NF2-K364I-r IEEATMANE\ | 8     | 1     |
| >NF2-K364I-\ KEEATMANE\ | 143   | >NF2-K364I-r IEEATMANE\ | 888   | 745   |
| >NF2-K364I-\ KEEATMANE\ | 60    | >NF2-K364I-r IEEATMANE\ | 80    | 20    |
| >NF2-K364I-\ KEEATMANE\ | 139   | >NF2-K364I-r IEEATMANE\ | 175   | 36    |
| >NF2-K364I-\ MKEEATMAN  | 11913 | >NF2-K364I-r MIEEATMAN  | 236   | 11677 |
| >NF2-K364I-\ MKEEATMA   | 8528  | >NF2-K364I-r MIEEATMA   | 367   | 8161  |
| >NF2-K364I-\ MKEEATMAN  | 7224  | >NF2-K364I-r MIEEATMAN  | 221   | 7003  |
| >NF2-K364I-\ MKEEATMA   | 25197 | >NF2-K364I-r MIEEATMA   | 405   | 24792 |
| >NF2-K364I-\ MKEEATMAN  | 24907 | >NF2-K364I-r MIEEATMAN  | 325   | 24582 |
| >NF2-K364I-\ MKEEATMAN  | 13034 | >NF2-K364I-r MIEEATMAN  | 325   | 12709 |
| >NF2-K364I-\ DELERRLLQV | 4758  | >NF2-K364I-r DELERRLLQV | 7     | 4751  |
| >NF2-K364I-\ DELERRLLQV | 123   | >NF2-K364I-r DELERRLLQV | 44    | 79    |
| >NF2-K364I-\ DELERRLLQV | 13700 | >NF2-K364I-r DELERRLLQV | 57    | 13643 |
| >NF2-K364I-\ QMKEEATM   | 2023  | >NF2-K364I-r QMIEEATM   | 294   | 1729  |
| >NF2-K364I-\ QMKEEATM\  | 1157  | >NF2-K364I-r QMIEEATMA  | 105   | 1052  |
| >NF2-K364I-\ QMKEEATM   | 1026  | >NF2-K364I-r QMIEEATM   | 492   | 534   |

|                         |       |                         |     |       |
|-------------------------|-------|-------------------------|-----|-------|
| >NF2-K364I-1 QMKEEATM/  | 39    | >NF2-K364I-r QMIEEATMA  | 21  | 18    |
| >NF2-K364I-1 QMKEEATM   | 10580 | >NF2-K364I-r QMIEEATM   | 407 | 10173 |
| >NF2-K364I-1 QMKEEATM/  | 5844  | >NF2-K364I-r QMIEEATMA  | 140 | 5704  |
| >NF2-K364I-1 QMKEEATM   | 2825  | >NF2-K364I-r QMIEEATM   | 165 | 2660  |
| >NF2-K364I-1 QMKEEATM/  | 2589  | >NF2-K364I-r QMIEEATMA  | 114 | 2475  |
| >NF2-K364I-1 QMKEEATM   | 1991  | >NF2-K364I-r QMIEEATM   | 77  | 1914  |
| >NF2-K364I-1 QMKEEATM/  | 6705  | >NF2-K364I-r QMIEEATMA  | 439 | 6266  |
| >NF2-K364I-1 QMKEEATM   | 1666  | >NF2-K364I-r QMIEEATM   | 343 | 1323  |
| >NF2-K364I-1 QMKEEATM/  | 569   | >NF2-K364I-r QMIEEATMA  | 124 | 445   |
| >NF2-K364I-1 QMKEEATM   | 10395 | >NF2-K364I-r QMIEEATM   | 208 | 10187 |
| >NF2-K364I-1 QMKEEATM   | 242   | >NF2-K364I-r QMIEEATM   | 235 | 7     |
| >NF2-K364I-1 QMKEEATM   | 163   | >NF2-K364I-r QMIEEATM   | 120 | 43    |
| >NF2-K364I-1 QMKEEATM   | 2686  | >NF2-K364I-r QMIEEATM   | 236 | 2450  |
| >NF2-K364I-1 LQMKEEATM  | 894   | >NF2-K364I-r LQMIEEATM, | 474 | 420   |
| >NF2-K364I-1 LQMKEEAT   | 480   | >NF2-K364I-r LQMIEEAT   | 424 | 56    |
| >NF2-K364I-1 LQMKEEATM  | 277   | >NF2-K364I-r LQMIEEATM  | 274 | 3     |
| >NF2-K364I-1 LQMKEEATM  | 864   | >NF2-K364I-r LQMIEEATM, | 254 | 610   |
| >NF2-K364I-1 LQMKEEATM  | 71    | >NF2-K364I-r LQMIEEATM  | 106 | 35    |
| >NF2-K364I-1 LQMKEEATM  | 11    | >NF2-K364I-r LQMIEEATM  | 34  | 23    |
| >NF2-K364I-1 LQMKEEATM  | 267   | >NF2-K364I-r LQMIEEATM, | 670 | 403   |
| >NF2-K364I-1 LLQMKEEA   | 3119  | >NF2-K364I-r LLQMIEEA   | 299 | 2820  |
| >NF2-K364I-1 LLQMKEEA   | 1078  | >NF2-K364I-r LLQMIEEA   | 109 | 969   |
| >NF2-K364I-1 LLQMKEEATM | 458   | >NF2-K364I-r LLQMIEEATM | 183 | 275   |
| >NF2-K364I-1 LLQMKEEATM | 897   | >NF2-K364I-r LLQMIEEATM | 232 | 665   |
| >NF2-K364I-1 LLQMKEEA   | 1663  | >NF2-K364I-r LLQMIEEA   | 302 | 1361  |
| >NF2-K364I-1 LLQMKEEATM | 354   | >NF2-K364I-r LLQMIEEATM | 249 | 105   |
| >NF2-K364I-1 LLQMKEEA   | 428   | >NF2-K364I-r LLQMIEEA   | 77  | 351   |
| >NF2-K364I-1 LLQMKEEATM | 743   | >NF2-K364I-r LLQMIEEATM | 405 | 338   |
| >NF2-K364I-1 LLQMKEEATM | 449   | >NF2-K364I-r LLQMIEEATM | 240 | 209   |
| >NF2-K364I-1 LLQMKEEA   | 1815  | >NF2-K364I-r LLQMIEEA   | 499 | 1316  |
| >NF2-K364I-1 LLQMKEEATM | 533   | >NF2-K364I-r LLQMIEEATM | 423 | 110   |
| >NF2-K364I-1 LLQMKEEA   | 24    | >NF2-K364I-r LLQMIEEA   | 11  | 13    |
| >NF2-K364I-1 LLQMKEEAT  | 734   | >NF2-K364I-r LLQMIEEAT  | 467 | 267   |
| >NF2-K364I-1 LLQMKEEATM | 87    | >NF2-K364I-r LLQMIEEATM | 55  | 32    |
| >NF2-K364I-1 LLQMKEEATM | 35    | >NF2-K364I-r LLQMIEEATM | 24  | 11    |
| >NF2-K364I-1 LLQMKEEATM | 427   | >NF2-K364I-r LLQMIEEATM | 409 | 18    |
| >NF2-K364I-1 LLQMKEEATM | 236   | >NF2-K364I-r LLQMIEEATM | 329 | 93    |
| >NF2-K364I-1 RLLQMKEEA  | 1988  | >NF2-K364I-r RLLQMIEEA  | 48  | 1940  |
| >NF2-K364I-1 RLLQMKEEA  | 1843  | >NF2-K364I-r RLLQMIEEAT | 385 | 1458  |
| >NF2-K364I-1 RLLQMKEEA  | 2007  | >NF2-K364I-r RLLQMIEEA  | 159 | 1848  |
| >NF2-K364I-1 RLLQMKEEA  | 1813  | >NF2-K364I-r RLLQMIEEAT | 483 | 1330  |
| >NF2-K364I-1 RLLQMKEEA  | 3439  | >NF2-K364I-r RLLQMIEEA  | 126 | 3313  |
| >NF2-K364I-1 RLLQMKEEA  | 1398  | >NF2-K364I-r RLLQMIEEA  | 59  | 1339  |



|                         |       |                         |      |       |
|-------------------------|-------|-------------------------|------|-------|
| >NF2-K364I-\ RLLQMKEEA  | 35    | >NF2-K364I-r RLLQMIEEA  | 5    | 30    |
| >NF2-K364I-\ RLLQMKEEA† | 291   | >NF2-K364I-r RLLQMIEEAT | 49   | 242   |
| >NF2-K364I-\ RLLQMKEEA† | 56    | >NF2-K364I-r RLLQMIEEAT | 17   | 39    |
| >NF2-K364I-\ RLLQMKEEA  | 1417  | >NF2-K364I-r RLLQMIEEA  | 102  | 1315  |
| >NF2-K364I-\ RLLQMKEEA† | 269   | >NF2-K364I-r RLLQMIEEAT | 103  | 166   |
| >NF2-K364I-\ RLLQMKEEA  | 107   | >NF2-K364I-r RLLQMIEEA  | 19   | 88    |
| >NF2-K364I-\ RLLQMKEEA† | 295   | >NF2-K364I-r RLLQMIEEAT | 103  | 192   |
| >NF2-K364I-\ RLLQMKEEA  | 1575  | >NF2-K364I-r RLLQMIEEA  | 59   | 1516  |
| >NF2-K364I-\ RLLQMKEEA† | 572   | >NF2-K364I-r RLLQMIEEAT | 131  | 441   |
| >NF2-K364I-\ RLLQMKEEA  | 26    | >NF2-K364I-r RLLQMIEEA  | 7    | 19    |
| >NF2-K364I-\ RLLQMKEEA† | 691   | >NF2-K364I-r RLLQMIEEAT | 230  | 461   |
| >NF2-K364I-\ RLLQMKEEA† | 74    | >NF2-K364I-r RLLQMIEEAT | 31   | 43    |
| >NF2-K364I-\ RLLQMKEEA† | 201   | >NF2-K364I-r RLLQMIEEAT | 109  | 92    |
| >NF2-K364I-\ RLLQMKEEA† | 725   | >NF2-K364I-r RLLQMIEEAT | 412  | 313   |
| >NF2-K364I-\ RLLQMKEEA† | 290   | >NF2-K364I-r RLLQMIEEAT | 100  | 190   |
| >NF2-K364I-\ RLLQMKEEA† | 357   | >NF2-K364I-r RLLQMIEEAT | 477  | 120   |
| >NF2-K364I-\ RLLQMKE    | 401   | >NF2-K364I-r RLLQMIE    | 888  | 487   |
| >NF2-K364I-\ RLLQMKEE/  | 78    | >NF2-K364I-r RLLQMIEEA  | 50   | 28    |
| >NF2-K364I-\ RLLQMKEE/  | 421   | >NF2-K364I-r RLLQMIEEA  | 295  | 126   |
| >NF2-K364I-\ RLLQMKEE   | 1156  | >NF2-K364I-r RLLQMIEE   | 356  | 800   |
| >NF2-K364I-\ RLLQMKEE/  | 163   | >NF2-K364I-r RLLQMIEEA  | 160  | 3     |
| >NF2-K364I-\ RLLQMKEE/  | 860   | >NF2-K364I-r RLLQMIEEA  | 418  | 442   |
| >NF2-K364I-\ RLLQMKE    | 249   | >NF2-K364I-r RLLQMIE    | 935  | 686   |
| >NF2-K364I-\ RLLQMKEE/  | 181   | >NF2-K364I-r RLLQMIEEA  | 123  | 58    |
| >NF2-K364I-\ LERRLLQMK  | 10184 | >NF2-K364I-r LERRLLQMI  | 12   | 10172 |
| >NF2-K364I-\ LERRLLQMK  | 2427  | >NF2-K364I-r LERRLLQMI  | 76   | 2351  |
| >NF2-K364I-\ LERRLLQMK  | 1708  | >NF2-K364I-r LERRLLQMI  | 5    | 1703  |
| >NF2-K364I-\ ELERRLLQMK | 14361 | >NF2-K364I-r ELERRLLQMI | 430  | 13931 |
| >NF2-K387E- KAQITEEEAK  | 7950  | >NF2-K387E- EAQITEEEAK  | 382  | 7568  |
| >NF2-K387E- KAQITEEEAKI | 66    | >NF2-K387E- EAQITEEEAKI | 3243 | 3177  |
| >NF2-K387E- EKAQITEEEAI | 280   | >NF2-K387E- EEAQITEEEAI | 340  | 60    |
| >NF2-K387E- EKAQITEEEA  | 14734 | >NF2-K387E- EEAQITEEEA  | 234  | 14500 |
| >NF2-K387E- EKAQITEEEAI | 32023 | >NF2-K387E- EEAQITEEEAI | 476  | 31547 |
| >NF2-K387E- AEKAQITEEE/ | 109   | >NF2-K387E- AEEAQITEEE/ | 735  | 626   |
| >NF2-K387E- AEKAQITEEE  | 1600  | >NF2-K387E- AEEAQITEEE  | 443  | 1157  |
| >NF2-K387E- AEKAQITEEE/ | 11    | >NF2-K387E- AEEAQITEEE/ | 14   | 3     |
| >NF2-K387E- AEKAQITEEE/ | 432   | >NF2-K387E- AEEAQITEEE/ | 1433 | 1001  |
| >NF2-K387E- LLAEKAQI    | 119   | >NF2-K387E- LLAEEAQI    | 72   | 47    |
| >NF2-K387E- LLAEKAQI    | 14    | >NF2-K387E- LLAEEAQI    | 8    | 6     |
| >NF2-K387E- LLAEKAQIT   | 756   | >NF2-K387E- LLAEEAQIT   | 345  | 411   |
| >NF2-K387E- LLAEKAQI    | 12    | >NF2-K387E- LLAEEAQI    | 14   | 2     |
| >NF2-K387E- LLAEKAQIT   | 149   | >NF2-K387E- LLAEEAQIT   | 258  | 109   |
| >NF2-K387E- LLAEKAQI    | 190   | >NF2-K387E- LLAEEAQI    | 111  | 79    |

|                            |       |                              |       |       |
|----------------------------|-------|------------------------------|-------|-------|
| >NF2-K387E- LLAEKAQI       | 8     | >NF2-K387E- LLAEEAQI         | 8     | 0     |
| >NF2-K387E- LLAEKAQI       | 37    | >NF2-K387E- LLAEEAQI         | 26    | 11    |
| >NF2-K387E- LLAEKAQI       | 30    | >NF2-K387E- LLAEEAQI         | 20    | 10    |
| >NF2-K387E- LLAEKAQI       | 14    | >NF2-K387E- LLAEEAQI         | 10    | 4     |
| >NF2-K387E- LLAEKAQI       | 4     | >NF2-K387E- LLAEEAQI         | 4     | 0     |
| >NF2-K387E- LLAEKAQIT      | 29    | >NF2-K387E- LLAEEAQIT        | 27    | 2     |
| >NF2-K387E- LLAEKAQITEE    | 515   | >NF2-K387E- LLAEEAQITEE      | 465   | 50    |
| >NF2-K387E- DLLAEKAQI      | 406   | >NF2-K387E- DLLAEEAQI        | 339   | 67    |
| >NF2-K387E- DLLAEKAQI      | 268   | >NF2-K387E- DLLAEEAQI        | 136   | 132   |
| >NF2-K387E- DLLAEKAQI      | 249   | >NF2-K387E- DLLAEEAQI        | 226   | 23    |
| >NF2-K387E- DLLAEKAQI      | 401   | >NF2-K387E- DLLAEEAQI        | 1378  | 977   |
| >NF2-K387E- ADLLAEKAQI     | 41    | >NF2-K387E- ADLLAEEAQI       | 29    | 12    |
| >NF2-K387E- TADLLAEK       | 190   | >NF2-K387E- TADLLAEE         | 26493 | 26303 |
| >NF2-K387E- TADLLAEK       | 385   | >NF2-K387E- TADLLAEE         | 24782 | 24397 |
| >NF2-K387E- ETADLLAEK      | 136   | >NF2-K387E- ETADLLAEE        | 26743 | 26607 |
| >NF2-K387E- ETADLLAEK      | 295   | >NF2-K387E- ETADLLAEE        | 320   | 25    |
| >NF2-K387E- ETADLLAEKA     | 365   | >NF2-K387E- ETADLLAEEA       | 333   | 32    |
| >NF2-K387E- ETADLLAEK      | 1156  | >NF2-K387E- ETADLLAEE        | 368   | 788   |
| >NF2-K387E- ETADLLAEK      | 285   | >NF2-K387E- ETADLLAEE        | 148   | 137   |
| >NF2-K387E- ETADLLAEKA     | 144   | >NF2-K387E- ETADLLAEEA       | 81    | 63    |
| >NF2-K387E- ETADLLAEK      | 2     | >NF2-K387E- ETADLLAEE        | 168   | 166   |
| >NF2-K387E- ETADLLAEKA     | 207   | >NF2-K387E- ETADLLAEEA       | 76    | 131   |
| >NF2-K387E- ETADLLAEKA     | 56    | >NF2-K387E- ETADLLAEEA       | 34    | 22    |
| >NF2-K387E- ETADLLAEKA     | 1666  | >NF2-K387E- ETADLLAEEA       | 326   | 1340  |
| >NF2-K387E- ETADLLAEKA     | 24    | >NF2-K387E- ETADLLAEEA       | 17    | 7     |
| >NF2-K387E- EETADLLAEK     | 34    | >NF2-K387E- EETADLLAEE       | 18    | 16    |
| >NF2-K79E- $\nu$ DKKVLDHDV | 19609 | >NF2-K79E- $\eta$ DEKVLHDV   | 193   | 19416 |
| >NF2-K79E- $\nu$ DKKVLDHDV | 20062 | >NF2-K79E- $\eta$ DEKVLHDV   | 465   | 19597 |
| >NF2-K79E- $\nu$ KMDKKVLDH | 84    | >NF2-K79E- $\eta$ KMDEKVLHDH | 32    | 52    |
| >NF2-K79E- $\nu$ KMDKKVLDH | 418   | >NF2-K79E- $\eta$ KMDEKVLHDH | 128   | 290   |
| >NF2-K79E- $\nu$ KMDKKVLDH | 325   | >NF2-K79E- $\eta$ KMDEKVLHDH | 91    | 234   |
| >NF2-K79E- $\nu$ KMDKKVLDH | 257   | >NF2-K79E- $\eta$ KMDEKVLHDH | 54    | 203   |
| >NF2-K79E- $\nu$ KMDKKVLDH | 8     | >NF2-K79E- $\eta$ KMDEKVLHDH | 3     | 5     |
| >NF2-K79E- $\nu$ KMDKKVLDH | 6     | >NF2-K79E- $\eta$ KMDEKVLHDH | 4     | 2     |
| >NF2-K79E- $\nu$ KMDKKVLDH | 6     | >NF2-K79E- $\eta$ KMDEKVLHDH | 5     | 1     |
| >NF2-K79E- $\nu$ KMDKKVLDH | 41    | >NF2-K79E- $\eta$ KMDEKVLHDH | 9     | 32    |
| >NF2-K79E- $\nu$ KMDKKVLDH | 8     | >NF2-K79E- $\eta$ KMDEKVLHDH | 3     | 5     |
| >NF2-K79E- $\nu$ LKMDKKVL  | 68    | >NF2-K79E- $\eta$ LKMDEKVL   | 34    | 34    |
| >NF2-K79E- $\nu$ LKMDKKVL  | 858   | >NF2-K79E- $\eta$ LKMDEKVL   | 467   | 391   |
| >NF2-K79E- $\nu$ WLKMDKKV  | 101   | >NF2-K79E- $\eta$ WLKMDEKV   | 72    | 29    |
| >NF2-K79E- $\nu$ WLKMDKKV  | 510   | >NF2-K79E- $\eta$ WLKMDEKV   | 169   | 341   |
| >NF2-K79E- $\nu$ WLKMDKKV  | 1544  | >NF2-K79E- $\eta$ WLKMDEKV   | 487   | 1057  |
| >NF2-K79E- $\nu$ WLKMDKKV  | 1250  | >NF2-K79E- $\eta$ WLKMDEKV   | 349   | 901   |

|                          |      |                          |       |       |
|--------------------------|------|--------------------------|-------|-------|
| >NF2-K79E-v WLKMDKKV     | 6    | >NF2-K79E-n WLKMDEKV     | 5     | 1     |
| >NF2-K79E-v WLKMDKKVL    | 151  | >NF2-K79E-n WLKMDEKVL    | 140   | 11    |
| >NF2-K79E-v WLKMDKKV\    | 60   | >NF2-K79E-n WLKMDEKVL    | 263   | 203   |
| >NF2-K79E-v AWLKMDKK\    | 247  | >NF2-K79E-n AWLKMDEK\    | 144   | 103   |
| >NF2-K79E-v AWLKMDKK     | 454  | >NF2-K79E-n AWLKMDEK     | 1048  | 594   |
| >NF2-K79E-v AWLKMDKK     | 550  | >NF2-K79E-n AWLKMDEK     | 484   | 66    |
| >NF2-K79E-v AWLKMDKK\    | 373  | >NF2-K79E-n AWLKMDEK\    | 308   | 65    |
| >NF2-K79E-v VAWLKMDK     | 299  | >NF2-K79E-n VAWLKMDK     | 26948 | 26649 |
| >NF2-K79E-v VAWLKMDK†    | 359  | >NF2-K79E-n VAWLKMDK†    | 289   | 70    |
| >NF2-K79E-v VAWLKMDK†    | 210  | >NF2-K79E-n VAWLKMDK†    | 164   | 46    |
| >NF2-K79E-v TVAWLKMD†    | 1015 | >NF2-K79E-n TVAWLKMD     | 300   | 715   |
| >NF2-K79E-v TVAWLKMD†    | 148  | >NF2-K79E-n TVAWLKMD     | 60    | 88    |
| >NF2-K79E-v TVAWLKMD†    | 138  | >NF2-K79E-n TVAWLKMD     | 18327 | 18189 |
| >NF2-K79E-v TVAWLKMD†    | 236  | >NF2-K79E-n TVAWLKMD     | 254   | 18    |
| >NF2-K79E-v TVAWLKMD†    | 16   | >NF2-K79E-n TVAWLKMD     | 15998 | 15982 |
| >NF2-K79E-v TVAWLKMD†    | 77   | >NF2-K79E-n TVAWLKMD     | 61    | 16    |
| >NF2-K79E-v TVAWLKMD†    | 12   | >NF2-K79E-n TVAWLKMD     | 4003  | 3991  |
| >NF2-K79E-v TVAWLKMD†    | 37   | >NF2-K79E-n TVAWLKMD     | 34    | 3     |
| >NF2-K79E-v TVAWLKMD†    | 26   | >NF2-K79E-n TVAWLKMD     | 8     | 18    |
| >NF2-K79E-v TVAWLKMD†    | 292  | >NF2-K79E-n TVAWLKMD     | 88    | 204   |
| >NF2-K79E-v DTVAWLKMI    | 123  | >NF2-K79E-n DTVAWLKMI    | 33032 | 32909 |
| >NF2-K79E-v DTVAWLKMI    | 448  | >NF2-K79E-n DTVAWLKMI    | 324   | 124   |
| >NF2-K79E-v DTVAWLKMI    | 55   | >NF2-K79E-n DTVAWLKMI    | 19522 | 19467 |
| >NF2-K79E-v DTVAWLKMI    | 34   | >NF2-K79E-n DTVAWLKMI    | 25    | 9     |
| >NF2-L117I-v LFFLQVKKQI  | 227  | >NF2-L117I-r IFFLQVKKQI  | 232   | 5     |
| >NF2-L117I-v LFFLQVKKQI  | 147  | >NF2-L117I-r IFFLQVKKQI  | 500   | 353   |
| >NF2-L117I-v LFFLQVKKQIL | 444  | >NF2-L117I-r IFFLQVKKQIL | 1277  | 833   |
| >NF2-L117I-v LFFLQVKK    | 417  | >NF2-L117I-r IFFLQVKK    | 342   | 75    |
| >NF2-L117I-v LFFLQVKK    | 392  | >NF2-L117I-r IFFLQVKK    | 193   | 199   |
| >NF2-L117I-v HLFFLQVKKQ  | 146  | >NF2-L117I-r HIFFLQVKKQ  | 941   | 795   |
| >NF2-L117I-v HLFFLQVKKQ  | 318  | >NF2-L117I-r HIFFLQVKKQ  | 2004  | 1686  |
| >NF2-L117I-v HLFFLQVKKQ  | 38   | >NF2-L117I-r HIFFLQVKKQ  | 1067  | 1029  |
| >NF2-L117I-v HLFFLQVKKQ  | 184  | >NF2-L117I-r HIFFLQVKKQ  | 4437  | 4253  |
| >NF2-L117I-v HLFFLQVKKQ  | 77   | >NF2-L117I-r HIFFLQVKKQ  | 5344  | 5267  |
| >NF2-L117I-v HLFFLQVK    | 39   | >NF2-L117I-r HIFFLQVK    | 59    | 20    |
| >NF2-L117I-v HLFFLQVKK   | 28   | >NF2-L117I-r HIFFLQVKK   | 34    | 6     |
| >NF2-L117I-v HLFFLQVK    | 116  | >NF2-L117I-r HIFFLQVK    | 47    | 69    |
| >NF2-L117I-v HLFFLQVKK   | 48   | >NF2-L117I-r HIFFLQVKK   | 23    | 25    |
| >NF2-L117I-v HLFFLQVK    | 54   | >NF2-L117I-r HIFFLQVK    | 24    | 30    |
| >NF2-L117I-v HLFFLQVKK   | 79   | >NF2-L117I-r HIFFLQVKK   | 33    | 46    |
| >NF2-L117I-v HLFFLQVK    | 251  | >NF2-L117I-r HIFFLQVK    | 265   | 14    |
| >NF2-L117I-v HLFFLQVKK   | 134  | >NF2-L117I-r HIFFLQVKK   | 137   | 3     |
| >NF2-L117I-v HLFFLQVKKQ  | 48   | >NF2-L117I-r HIFFLQVKKQ  | 61    | 13    |

|                          |      |                          |     |     |
|--------------------------|------|--------------------------|-----|-----|
| >NF2-L117I-v HLFFLQVK    | 70   | >NF2-L117I-r HIFFLQVK    | 24  | 46  |
| >NF2-L117I-v HLFFLQVKK   | 26   | >NF2-L117I-r HIFFLQVKK   | 11  | 15  |
| >NF2-L117I-v HLFFLQVKKQ  | 712  | >NF2-L117I-r HIFFLQVKKQ  | 123 | 589 |
| >NF2-L117I-v HLFFLQVK    | 263  | >NF2-L117I-r HIFFLQVK    | 164 | 99  |
| >NF2-L117I-v HLFFLQVKK   | 115  | >NF2-L117I-r HIFFLQVKK   | 83  | 32  |
| >NF2-L117I-v EELVQEITQH  | 426  | >NF2-L117I-r EELVQEITQH  | 31  | 395 |
| >NF2-L117I-v EELVQEITQH  | 455  | >NF2-L117I-r EELVQEITQH  | 767 | 312 |
| >NF2-L117I-v EELVQEITQH  | 1160 | >NF2-L117I-r EELVQEITQH  | 464 | 696 |
| >NF2-L117I-v EELVQEITQH  | 242  | >NF2-L117I-r EELVQEITQH  | 41  | 201 |
| >NF2-L117I-v QHLFFLQV    | 365  | >NF2-L117I-r QHLFFLQV    | 256 | 109 |
| >NF2-L117I-v TQHLFFLQV   | 468  | >NF2-L117I-r TQHLFFLQV   | 654 | 186 |
| >NF2-L117I-v TQHLFFLQV   | 309  | >NF2-L117I-r TQHLFFLQV   | 295 | 14  |
| >NF2-L117I-v TQHLFFLQV   | 30   | >NF2-L117I-r TQHLFFLQV   | 28  | 2   |
| >NF2-L117I-v TQHLFFLQV   | 802  | >NF2-L117I-r TQHLFFLQV   | 253 | 549 |
| >NF2-L117I-v TQHLFFLQVK  | 376  | >NF2-L117I-r TQHLFFLQVK  | 389 | 13  |
| >NF2-L117I-v TQHLFFLQVK  | 185  | >NF2-L117I-r TQHLFFLQVK  | 225 | 40  |
| >NF2-L117I-v TQHLFFLQVK  | 29   | >NF2-L117I-r TQHLFFLQVK  | 35  | 6   |
| >NF2-L117I-v TQHLFFLQVK  | 182  | >NF2-L117I-r TQHLFFLQVK  | 160 | 22  |
| >NF2-L117I-v TQHLFFLQVK  | 364  | >NF2-L117I-r TQHLFFLQVK  | 320 | 44  |
| >NF2-L117I-v TQHLFFLQVK  | 665  | >NF2-L117I-r TQHLFFLQVK  | 446 | 219 |
| >NF2-L117I-v TQHLFFLQV   | 379  | >NF2-L117I-r TQHLFFLQV   | 249 | 130 |
| >NF2-L117I-v ITQHLFFL    | 263  | >NF2-L117I-r ITQHLFFL    | 182 | 81  |
| >NF2-L117I-v ITQHLFFL    | 136  | >NF2-L117I-r ITQHLFFL    | 76  | 60  |
| >NF2-L117I-v ITQHLFFL    | 42   | >NF2-L117I-r ITQHLFFL    | 39  | 3   |
| >NF2-L117I-v ITQHLFFLQV  | 180  | >NF2-L117I-r ITQHLFFLQV  | 183 | 3   |
| >NF2-L117I-v ITQHLFFLQV  | 249  | >NF2-L117I-r ITQHLFFLQV  | 165 | 84  |
| >NF2-L117I-v ITQHLFFLQV  | 421  | >NF2-L117I-r ITQHLFFLQV  | 231 | 190 |
| >NF2-L117I-v ITQHLFFLQVI | 472  | >NF2-L117I-r ITQHLFFLQVK | 389 | 83  |
| >NF2-L117I-v ITQHLFFLQVI | 21   | >NF2-L117I-r ITQHLFFLQVK | 21  | 0   |
| >NF2-L117I-v ITQHLFFLQVI | 141  | >NF2-L117I-r ITQHLFFLQVK | 129 | 12  |
| >NF2-L117I-v ITQHLFFL    | 722  | >NF2-L117I-r ITQHLFFL    | 491 | 231 |
| >NF2-L117I-v ITQHLFFLQ   | 756  | >NF2-L117I-r ITQHLFFLQ   | 489 | 267 |
| >NF2-L117I-v ITQHLFFLQVI | 142  | >NF2-L117I-r ITQHLFFLQVK | 113 | 29  |
| >NF2-L117I-v ITQHLFFLQVI | 368  | >NF2-L117I-r ITQHLFFLQVK | 151 | 217 |
| >NF2-L117I-v ITQHLFFL    | 295  | >NF2-L117I-r ITQHLFFL    | 75  | 220 |
| >NF2-L117I-v ITQHLFFLQV  | 263  | >NF2-L117I-r ITQHLFFLQV  | 192 | 71  |
| >NF2-L117I-v ITQHLFFL    | 28   | >NF2-L117I-r ITQHLFFL    | 41  | 13  |
| >NF2-L117I-v ITQHLFFL    | 478  | >NF2-L117I-r ITQHLFFL    | 653 | 175 |
| >NF2-L117I-v ITQHLFFL    | 180  | >NF2-L117I-r ITQHLFFL    | 35  | 145 |
| >NF2-L117I-v ITQHLFFLQV  | 380  | >NF2-L117I-r ITQHLFFLQV  | 367 | 13  |
| >NF2-L117I-v ITQHLFFLQ   | 186  | >NF2-L117I-r ITQHLFFLQ   | 161 | 25  |
| >NF2-L117I-v ITQHLFFLQ   | 263  | >NF2-L117I-r ITQHLFFLQ   | 508 | 245 |
| >NF2-L117I-v ITQHLFFLQV  | 487  | >NF2-L117I-r ITQHLFFLQV  | 636 | 149 |

|                           |     |                          |     |     |
|---------------------------|-----|--------------------------|-----|-----|
| >NF2-L117I-v ITQHLLFFLQVI | 279 | >NF2-L117I-r ITQHIFFLQVK | 363 | 84  |
| >NF2-L117I-v ITQHLLFFL    | 264 | >NF2-L117I-r ITQHIFFL    | 182 | 82  |
| >NF2-L117I-v EITQHLLFFL   | 231 | >NF2-L117I-r EITQHIFFL   | 273 | 42  |
| >NF2-L117I-v EITQHLLFFL   | 73  | >NF2-L117I-r EITQHIFFL   | 117 | 44  |
| >NF2-L117I-v EITQHLLFFLQ\ | 232 | >NF2-L117I-r EITQHIFFLQV | 279 | 47  |
| >NF2-L117I-v EITQHLLFFLQ\ | 383 | >NF2-L117I-r EITQHIFFLQV | 189 | 194 |
| >NF2-L117I-v EITQHLLFFLQ\ | 458 | >NF2-L117I-r EITQHIFFLQV | 299 | 159 |
| >NF2-L117I-v EITQHLLFFL   | 499 | >NF2-L117I-r EITQHIFFL   | 211 | 288 |
| >NF2-L117I-v EITQHLLFFLQ\ | 28  | >NF2-L117I-r EITQHIFFLQV | 19  | 9   |
| >NF2-L117I-v EITQHLLFF    | 414 | >NF2-L117I-r EITQHIF     | 459 | 45  |
| >NF2-L117I-v EITQHLLFF    | 8   | >NF2-L117I-r EITQHIF     | 7   | 1   |
| >NF2-L117I-v EITQHLLFFL   | 6   | >NF2-L117I-r EITQHIFFL   | 10  | 4   |
| >NF2-L117I-v EITQHLLFFL   | 57  | >NF2-L117I-r EITQHIFFL   | 25  | 32  |
| >NF2-L117I-v EITQHLLFFLQ\ | 56  | >NF2-L117I-r EITQHIFFLQV | 40  | 16  |
| >NF2-L117I-v EITQHLLFFL   | 20  | >NF2-L117I-r EITQHIFFL   | 22  | 2   |
| >NF2-L117I-v EITQHLLFFLQ\ | 9   | >NF2-L117I-r EITQHIFFLQV | 9   | 0   |
| >NF2-L117I-v QEITQHLLF    | 68  | >NF2-L117I-r QEITQHIF    | 153 | 85  |
| >NF2-L117I-v QEITQHLLFFL  | 56  | >NF2-L117I-r QEITQHIFFL  | 81  | 25  |
| >NF2-L117I-v QEITQHLLF    | 268 | >NF2-L117I-r QEITQHIF    | 97  | 171 |
| >NF2-L117I-v QEITQHLLFF   | 109 | >NF2-L117I-r QEITQHIF    | 119 | 10  |
| >NF2-L117I-v QEITQHLLF    | 45  | >NF2-L117I-r QEITQHIF    | 25  | 20  |
| >NF2-L117I-v QEITQHLLFF   | 41  | >NF2-L117I-r QEITQHIF    | 33  | 8   |
| >NF2-L117I-v QEITQHLLF    | 272 | >NF2-L117I-r QEITQHIF    | 160 | 112 |
| >NF2-L117I-v QEITQHLLFF   | 248 | >NF2-L117I-r QEITQHIF    | 105 | 143 |
| >NF2-L117I-v QEITQHLLFFL  | 470 | >NF2-L117I-r QEITQHIFFL  | 425 | 45  |
| >NF2-L117I-v QEITQHLLFF   | 433 | >NF2-L117I-r QEITQHIF    | 529 | 96  |
| >NF2-L117I-v QEITQHLLFFL  | 82  | >NF2-L117I-r QEITQHIFFL  | 92  | 10  |
| >NF2-L117I-v QEITQHLLF    | 350 | >NF2-L117I-r QEITQHIF    | 583 | 233 |
| >NF2-L117I-v QEITQHLLFFL  | 161 | >NF2-L117I-r QEITQHIFFL  | 152 | 9   |
| >NF2-L117I-v QEITQHLLF    | 67  | >NF2-L117I-r QEITQHIF    | 90  | 23  |
| >NF2-L117I-v QEITQHLLFF   | 51  | >NF2-L117I-r QEITQHIF    | 64  | 13  |
| >NF2-L117I-v QEITQHLLFFL  | 84  | >NF2-L117I-r QEITQHIFFL  | 96  | 12  |
| >NF2-L117I-v QEITQHLLFF   | 499 | >NF2-L117I-r QEITQHIF    | 290 | 209 |
| >NF2-L117I-v QEITQHLLFFL  | 34  | >NF2-L117I-r QEITQHIFFL  | 16  | 18  |
| >NF2-L117I-v VQEITQHLLFFI | 61  | >NF2-L117I-r VQEITQHIFFL | 86  | 25  |
| >NF2-L117I-v VQEITQHLLF   | 301 | >NF2-L117I-r VQEITQHIF   | 109 | 192 |
| >NF2-L117I-v VQEITQHLLFF  | 151 | >NF2-L117I-r VQEITQHIF   | 139 | 12  |
| >NF2-L117I-v LVQEITQHL    | 94  | >NF2-L117I-r LVQEITQHI   | 256 | 162 |
| >NF2-L117I-v LVQEITQHL    | 730 | >NF2-L117I-r LVQEITQHI   | 382 | 348 |
| >NF2-L117I-v LVQEITQHL    | 134 | >NF2-L117I-r LVQEITQHI   | 109 | 25  |
| >NF2-L117I-v LVQEITQHL    | 428 | >NF2-L117I-r LVQEITQHI   | 361 | 67  |
| >NF2-L117I-v LVQEITQHL    | 338 | >NF2-L117I-r LVQEITQHI   | 318 | 20  |
| >NF2-L117I-v LVQEITQHL    | 26  | >NF2-L117I-r LVQEITQHI   | 162 | 136 |

|                          |      |                          |       |       |
|--------------------------|------|--------------------------|-------|-------|
| >NF2-L117I-v LVQEITQHIF  | 356  | >NF2-L117I-r LVQEITQHIF  | 491   | 135   |
| >NF2-L117I-v LVQEITQHIFI | 188  | >NF2-L117I-r LVQEITQHIF  | 237   | 49    |
| >NF2-L117I-v LVQEITQHIFI | 328  | >NF2-L117I-r LVQEITQHIF  | 1559  | 1231  |
| >NF2-L117I-v LVQEITQHL   | 342  | >NF2-L117I-r LVQEITQHI   | 155   | 187   |
| >NF2-L117I-v LVQEITQHIF  | 554  | >NF2-L117I-r LVQEITQHIF  | 383   | 171   |
| >NF2-L117I-v LVQEITQHIFI | 160  | >NF2-L117I-r LVQEITQHIF  | 309   | 149   |
| >NF2-L117I-v LVQEITQHIFI | 476  | >NF2-L117I-r LVQEITQHIF  | 1034  | 558   |
| >NF2-L117I-v LVQEITQHIF  | 138  | >NF2-L117I-r LVQEITQHIF  | 156   | 18    |
| >NF2-L117I-v LVQEITQHL   | 2806 | >NF2-L117I-r LVQEITQHI   | 129   | 2677  |
| >NF2-L117I-v ELVQEITQHL  | 195  | >NF2-L117I-r ELVQEITQHI  | 174   | 21    |
| >NF2-L117I-v ELVQEITQHL  | 242  | >NF2-L117I-r ELVQEITQHI  | 383   | 141   |
| >NF2-L117I-v ELVQEITQHL  | 15   | >NF2-L117I-r ELVQEITQHI  | 58    | 43    |
| >NF2-L117I-v ELVQEITQHIF | 398  | >NF2-L117I-r ELVQEITQHIF | 939   | 541   |
| >NF2-L117I-v ELVQEITQHL  | 89   | >NF2-L117I-r ELVQEITQHI  | 402   | 313   |
| >NF2-L117I-v ELVQEITQHIF | 56   | >NF2-L117I-r ELVQEITQHIF | 29    | 27    |
| >NF2-L117I-v ELVQEITQHL  | 677  | >NF2-L117I-r ELVQEITQHI  | 330   | 347   |
| >NF2-L117I-v ELVQEITQHL  | 396  | >NF2-L117I-r ELVQEITQHI  | 242   | 154   |
| >NF2-L141R- LASYAVQAKY   | 1988 | >NF2-L141R- RASYAVQAKY   | 431   | 1557  |
| >NF2-L141R- LASYAVQAK    | 891  | >NF2-L141R- RASYAVQAK    | 167   | 724   |
| >NF2-L141R- LASYAVQAKY   | 242  | >NF2-L141R- RASYAVQAKY   | 353   | 111   |
| >NF2-L141R- LASYAVQAK    | 248  | >NF2-L141R- RASYAVQAK    | 11    | 237   |
| >NF2-L141R- LASYAVQAKY   | 30   | >NF2-L141R- RASYAVQAKY   | 15    | 15    |
| >NF2-L141R- LASYAVQAK    | 140  | >NF2-L141R- RASYAVQAK    | 824   | 684   |
| >NF2-L141R- LASYAVQAKY   | 234  | >NF2-L141R- RASYAVQAKY   | 209   | 25    |
| >NF2-L141R- LASYAVQAKY   | 272  | >NF2-L141R- RASYAVQAKY   | 120   | 152   |
| >NF2-L141R- LASYAVQAKY   | 24   | >NF2-L141R- RASYAVQAKY   | 7     | 17    |
| >NF2-L141R- LASYAVQAKY   | 916  | >NF2-L141R- RASYAVQAKY   | 188   | 728   |
| >NF2-L141R- LASYAVQAKY   | 96   | >NF2-L141R- RASYAVQAKY   | 28    | 68    |
| >NF2-L141R- LASYAVQAKY   | 37   | >NF2-L141R- RASYAVQAKY   | 28    | 9     |
| >NF2-L141R- LASYAVQAKY   | 188  | >NF2-L141R- RASYAVQAKY   | 122   | 66    |
| >NF2-L141R- LLASYAVQA    | 43   | >NF2-L141R- LRASYAVQA    | 22533 | 22490 |
| >NF2-L141R- LLASYAVQ     | 165  | >NF2-L141R- LRASYAVQ     | 24562 | 24397 |
| >NF2-L141R- LLASYAVQA    | 7    | >NF2-L141R- LRASYAVQA    | 8947  | 8940  |
| >NF2-L141R- LLASYAVQA    | 10   | >NF2-L141R- LRASYAVQA    | 15311 | 15301 |
| >NF2-L141R- LLASYAVQA    | 150  | >NF2-L141R- LRASYAVQA    | 20301 | 20151 |
| >NF2-L141R- LLASYAVQA    | 17   | >NF2-L141R- LRASYAVQA    | 19506 | 19489 |
| >NF2-L141R- LLASYAVQA    | 458  | >NF2-L141R- LRASYAVQA    | 24312 | 23854 |
| >NF2-L141R- LLASYAVQA    | 51   | >NF2-L141R- LRASYAVQA    | 23053 | 23002 |
| >NF2-L141R- LLASYAVQA    | 53   | >NF2-L141R- LRASYAVQA    | 20449 | 20396 |
| >NF2-L141R- LLASYAVQ     | 35   | >NF2-L141R- LRASYAVQ     | 32633 | 32598 |
| >NF2-L141R- LLASYAVQA    | 4    | >NF2-L141R- LRASYAVQA    | 23369 | 23365 |
| >NF2-L141R- LLASYAVQAK   | 379  | >NF2-L141R- LRASYAVQAK   | 35772 | 35393 |
| >NF2-L141R- LLASYAVQAK   | 444  | >NF2-L141R- LRASYAVQAK   | 36205 | 35761 |

|                         |       |                         |       |       |
|-------------------------|-------|-------------------------|-------|-------|
| >NF2-L141R- LLASYAVQAK  | 89    | >NF2-L141R- LRASYAVQAK  | 6130  | 6041  |
| >NF2-L141R- LLASYAVQAK  | 270   | >NF2-L141R- LRASYAVQAK  | 21620 | 21350 |
| >NF2-L141R- LLASYAVQAK  | 139   | >NF2-L141R- LRASYAVQAK  | 8211  | 8072  |
| >NF2-L141R- LLASYAVQAK  | 22    | >NF2-L141R- LRASYAVQAK  | 567   | 545   |
| >NF2-L141R- LLASYAVQAK  | 29    | >NF2-L141R- LRASYAVQAK  | 188   | 159   |
| >NF2-L141R- LLASYAVQAK  | 458   | >NF2-L141R- LRASYAVQAK  | 6536  | 6078  |
| >NF2-L141R- LLASYAVQAK  | 113   | >NF2-L141R- LRASYAVQAK  | 9371  | 9258  |
| >NF2-L141R- LLASYAVQAK  | 249   | >NF2-L141R- LRASYAVQAK  | 8945  | 8696  |
| >NF2-L141R- LLASYAVQAK  | 766   | >NF2-L141R- LRASYAVQAK  | 282   | 484   |
| >NF2-L141R- LLASYAVQAK  | 122   | >NF2-L141R- LRASYAVQAK  | 66    | 56    |
| >NF2-L141R- LLASYAVQA   | 20912 | >NF2-L141R- LRASYAVQA   | 471   | 20441 |
| >NF2-L141R- LLASYAVQAK  | 31167 | >NF2-L141R- LRASYAVQAK  | 459   | 30708 |
| >NF2-L141R- LLASYAVQAK  | 18598 | >NF2-L141R- LRASYAVQAK  | 103   | 18495 |
| >NF2-L141R- LLASYAVQAK  | 278   | >NF2-L141R- LRASYAVQAK  | 985   | 707   |
| >NF2-L141R- LLASYAVQAK  | 320   | >NF2-L141R- LRASYAVQAK  | 2553  | 2233  |
| >NF2-L141R- LLASYAVQAK  | 5759  | >NF2-L141R- LRASYAVQAK  | 178   | 5581  |
| >NF2-L141R- LLASYAVQAK  | 160   | >NF2-L141R- LRASYAVQAK  | 6179  | 6019  |
| >NF2-L141R- LLASYAVQAK  | 185   | >NF2-L141R- LRASYAVQAK  | 1474  | 1289  |
| >NF2-L141R- IYCPPEASVLL | 345   | >NF2-L141R- IYCPPEASVLR | 4604  | 4259  |
| >NF2-L141R- IYCPPEASVLL | 26    | >NF2-L141R- IYCPPEASVLR | 3138  | 3112  |
| >NF2-L141R- IYCPPEASVLL | 12225 | >NF2-L141R- IYCPPEASVLR | 69    | 12156 |
| >NF2-L141R- IYCPPEASVLL | 10239 | >NF2-L141R- IYCPPEASVLR | 48    | 10191 |
| >NF2-L141R- IYCPPEASVLL | 18423 | >NF2-L141R- IYCPPEASVLR | 25    | 18398 |
| >NF2-L141R- VLLASYAV    | 9     | >NF2-L141R- VLRASYAV    | 223   | 214   |
| >NF2-L141R- VLLASYAV    | 10    | >NF2-L141R- VLRASYAV    | 29    | 19    |
| >NF2-L141R- VLLASYAVQA  | 352   | >NF2-L141R- VLRASYAVQA  | 2341  | 1989  |
| >NF2-L141R- VLLASYAV    | 11    | >NF2-L141R- VLRASYAV    | 6     | 5     |
| >NF2-L141R- VLLASYAVQA  | 498   | >NF2-L141R- VLRASYAVQA  | 1841  | 1343  |
| >NF2-L141R- VLLASYAV    | 8     | >NF2-L141R- VLRASYAV    | 220   | 212   |
| >NF2-L141R- VLLASYAV    | 1     | >NF2-L141R- VLRASYAV    | 5     | 4     |
| >NF2-L141R- VLLASYAVQA  | 7     | >NF2-L141R- VLRASYAVQA  | 322   | 315   |
| >NF2-L141R- VLLASYAV    | 3     | >NF2-L141R- VLRASYAV    | 11    | 8     |
| >NF2-L141R- VLLASYAVQA  | 94    | >NF2-L141R- VLRASYAVQA  | 5504  | 5410  |
| >NF2-L141R- VLLASYAV    | 4     | >NF2-L141R- VLRASYAV    | 33    | 29    |
| >NF2-L141R- VLLASYAVQA  | 19    | >NF2-L141R- VLRASYAVQA  | 2086  | 2067  |
| >NF2-L141R- VLLASYAV    | 2     | >NF2-L141R- VLRASYAV    | 40    | 38    |
| >NF2-L141R- VLLASYAVQA  | 31    | >NF2-L141R- VLRASYAVQA  | 6853  | 6822  |
| >NF2-L141R- VLLASYAV    | 2     | >NF2-L141R- VLRASYAV    | 2     | 0     |
| >NF2-L141R- VLLASYAVQ   | 66    | >NF2-L141R- VLRASYAVQ   | 295   | 229   |
| >NF2-L141R- VLLASYAVQA  | 5     | >NF2-L141R- VLRASYAVQA  | 12    | 7     |
| >NF2-L141R- VLLASYAVQA  | 64    | >NF2-L141R- VLRASYAVQA  | 53    | 11    |
| >NF2-L141R- VLLASYAVQA  | 100   | >NF2-L141R- VLRASYAVQA  | 2507  | 2407  |
| >NF2-L141R- VLLASYAV    | 6591  | >NF2-L141R- VLRASYAV    | 166   | 6425  |

|                        |      |                        |      |      |
|------------------------|------|------------------------|------|------|
| >NF2-L141R- VLLASYAVQ  | 8061 | >NF2-L141R- VLRASYAVQ  | 456  | 7605 |
| >NF2-L141R- VLLASYAVQA | 6229 | >NF2-L141R- VLRASYAVQA | 153  | 6076 |
| >NF2-L141R- VLLASYAVQA | 276  | >NF2-L141R- VLRASYAVQA | 7    | 269  |
| >NF2-L141R- VLLASYAV   | 188  | >NF2-L141R- VLRASYAV   | 7081 | 6893 |
| >NF2-L141R- VLLASYAV   | 3232 | >NF2-L141R- VLRASYAV   | 492  | 2740 |
| >NF2-L141R- VLLASYAV   | 380  | >NF2-L141R- VLRASYAV   | 249  | 131  |
| >NF2-L141R- SVLLASYAV  | 50   | >NF2-L141R- SVLRASYAV  | 42   | 8    |
| >NF2-L141R- SVLLASYAV  | 84   | >NF2-L141R- SVLRASYAV  | 124  | 40   |
| >NF2-L141R- SVLLASYAV  | 466  | >NF2-L141R- SVLRASYAV  | 431  | 35   |
| >NF2-L141R- SVLLASYA   | 156  | >NF2-L141R- SVLRASYA   | 91   | 65   |
| >NF2-L141R- SVLLASYAV  | 9    | >NF2-L141R- SVLRASYAV  | 7    | 2    |
| >NF2-L141R- SVLLASYAVQ | 355  | >NF2-L141R- SVLRASYAVQ | 202  | 153  |
| >NF2-L141R- SVLLASYA   | 981  | >NF2-L141R- SVLRASYA   | 466  | 515  |
| >NF2-L141R- SVLLASYAV  | 24   | >NF2-L141R- SVLRASYAV  | 9    | 15   |
| >NF2-L141R- SVLLASYAV  | 10   | >NF2-L141R- SVLRASYAV  | 7    | 3    |
| >NF2-L141R- SVLLASYA   | 532  | >NF2-L141R- SVLRASYA   | 420  | 112  |
| >NF2-L141R- SVLLASYAV  | 18   | >NF2-L141R- SVLRASYAV  | 15   | 3    |
| >NF2-L141R- SVLLASYAV  | 17   | >NF2-L141R- SVLRASYAV  | 29   | 12   |
| >NF2-L141R- SVLLASYAV  | 57   | >NF2-L141R- SVLRASYAV  | 14   | 43   |
| >NF2-L141R- SVLLASYA   | 327  | >NF2-L141R- SVLRASYA   | 83   | 244  |
| >NF2-L141R- SVLLASYAV  | 462  | >NF2-L141R- SVLRASYAV  | 89   | 373  |
| >NF2-L141R- SVLLASYAVQ | 756  | >NF2-L141R- SVLRASYAVQ | 205  | 551  |
| >NF2-L141R- SVLLASYAV  | 302  | >NF2-L141R- SVLRASYAV  | 178  | 124  |
| >NF2-L141R- SVLLASYAV  | 25   | >NF2-L141R- SVLRASYAV  | 23   | 2    |
| >NF2-L141R- SVLLASYA   | 259  | >NF2-L141R- SVLRASYA   | 272  | 13   |
| >NF2-L141R- SVLLASYAV  | 8    | >NF2-L141R- SVLRASYAV  | 7    | 1    |
| >NF2-L141R- SVLLASYAVQ | 175  | >NF2-L141R- SVLRASYAVQ | 121  | 54   |
| >NF2-L141R- ASVLLASYAV | 194  | >NF2-L141R- ASVLRASYAV | 726  | 532  |
| >NF2-L141R- ASVLLASY   | 34   | >NF2-L141R- ASVLRASY   | 134  | 100  |
| >NF2-L141R- ASVLLASY   | 385  | >NF2-L141R- ASVLRASY   | 997  | 612  |
| >NF2-L141R- ASVLLASY   | 96   | >NF2-L141R- ASVLRASY   | 128  | 32   |
| >NF2-L141R- ASVLLASYAV | 368  | >NF2-L141R- ASVLRASYAV | 921  | 553  |
| >NF2-L141R- ASVLLASY   | 187  | >NF2-L141R- ASVLRASY   | 237  | 50   |
| >NF2-L141R- ASVLLASY   | 300  | >NF2-L141R- ASVLRASY   | 268  | 32   |
| >NF2-L141R- ASVLLASY   | 4    | >NF2-L141R- ASVLRASY   | 4    | 0    |
| >NF2-L141R- ASVLLASYAV | 216  | >NF2-L141R- ASVLRASYAV | 186  | 30   |
| >NF2-L141R- ASVLLASY   | 348  | >NF2-L141R- ASVLRASY   | 399  | 51   |
| >NF2-L141R- ASVLLASYA  | 418  | >NF2-L141R- ASVLRASYA  | 1706 | 1288 |
| >NF2-L141R- EASVLLASY  | 81   | >NF2-L141R- EASVLRASY  | 642  | 561  |
| >NF2-L141R- EASVLLASY  | 268  | >NF2-L141R- EASVLRASY  | 1991 | 1723 |
| >NF2-L141R- EASVLLASY  | 57   | >NF2-L141R- EASVLRASY  | 2337 | 2280 |
| >NF2-L141R- EASVLLASY  | 185  | >NF2-L141R- EASVLRASY  | 150  | 35   |
| >NF2-L141R- EASVLLASY  | 285  | >NF2-L141R- EASVLRASY  | 145  | 140  |



|                         |       |                         |       |       |
|-------------------------|-------|-------------------------|-------|-------|
| >NF2-L141R- EASVLLASYA  | 163   | >NF2-L141R- EASVLRASYA  | 162   | 1     |
| >NF2-L141R- EASVLLASYA\ | 10    | >NF2-L141R- EASVLRASYA\ | 8     | 2     |
| >NF2-L141R- EASVLLASYA\ | 17    | >NF2-L141R- EASVLRASYA\ | 30    | 13    |
| >NF2-L141R- EASVLLASY   | 145   | >NF2-L141R- EASVLRASY   | 567   | 422   |
| >NF2-L141R- EASVLLASY   | 48    | >NF2-L141R- EASVLRASY   | 62    | 14    |
| >NF2-L141R- PEASVLLASY  | 214   | >NF2-L141R- PEASVLRASY  | 416   | 202   |
| >NF2-L141R- PPEASVLL    | 147   | >NF2-L141R- PPEASVLR    | 38172 | 38025 |
| >NF2-L141R- PPEASVLLAS\ | 200   | >NF2-L141R- PPEASVLRAS\ | 234   | 34    |
| >NF2-L141R- PPEASVLLAS\ | 193   | >NF2-L141R- PPEASVLRAS\ | 248   | 55    |
| >NF2-L141R- PPEASVLLAS\ | 193   | >NF2-L141R- PPEASVLRAS\ | 159   | 34    |
| >NF2-L141R- CPPEASVLL   | 33    | >NF2-L141R- CPPEASVLR   | 35079 | 35046 |
| >NF2-L141R- CPPEASVLL   | 15    | >NF2-L141R- CPPEASVLR   | 9742  | 9727  |
| >NF2-L141R- CPPEASVLL   | 34220 | >NF2-L141R- CPPEASVLR   | 434   | 33786 |
| >NF2-L141R- YCPPEASVLL  | 7     | >NF2-L141R- YCPPEASVLR  | 4255  | 4248  |
| >NF2-L141R- YCPPEASVLL  | 29291 | >NF2-L141R- YCPPEASVLR  | 259   | 29032 |
| >NF2-L339F- LAREKQMRE\  | 443   | >NF2-L339F- LAREKQMRE\  | 4198  | 3755  |
| >NF2-L339F- LAREKQMR    | 157   | >NF2-L339F- LAREKQMR    | 1100  | 943   |
| >NF2-L339F- LAREKQMR    | 235   | >NF2-L339F- LAREKQMR    | 138   | 97    |
| >NF2-L339F- LAREKQMR    | 1204  | >NF2-L339F- LAREKQMR    | 279   | 925   |
| >NF2-L339F- RLAREKQM    | 389   | >NF2-L339F- RLAREKQM    | 32345 | 31956 |
| >NF2-L339F- RLAREKQMR   | 96    | >NF2-L339F- RLAREKQMR   | 31    | 65    |
| >NF2-L339F- RLAREKQMR   | 425   | >NF2-L339F- RLAREKQMR   | 100   | 325   |
| >NF2-L339F- KARKQMERC   | 22    | >NF2-L339F- KARKQMERC   | 200   | 178   |
| >NF2-L339F- KARKQMERC   | 322   | >NF2-L339F- KARKQMERC   | 2033  | 1711  |
| >NF2-L339F- KARKQMERC   | 1977  | >NF2-L339F- KARKQMERC   | 59    | 1918  |
| >NF2-L339F- KARKQMERC   | 16    | >NF2-L339F- KARKQMERC   | 6     | 10    |
| >NF2-L339F- KARKQMERC   | 418   | >NF2-L339F- KARKQMERC   | 61    | 357   |
| >NF2-L339F- KARKQMERC   | 1436  | >NF2-L339F- KARKQMERC   | 193   | 1243  |
| >NF2-L339F- QRLAREKQM   | 1042  | >NF2-L339F- QRLAREKQM   | 255   | 787   |
| >NF2-L339F- QRLAREKQM   | 105   | >NF2-L339F- QRLAREKQM   | 46    | 59    |
| >NF2-L339F- QRLAREKQM   | 145   | >NF2-L339F- QRLAREKQM   | 81    | 64    |
| >NF2-L339F- QRLAREKQM   | 1012  | >NF2-L339F- QRLAREKQM   | 362   | 650   |
| >NF2-L339F- RQRLAREK    | 879   | >NF2-L339F- RQRLAREK    | 411   | 468   |
| >NF2-L339F- RQRLAREK    | 5     | >NF2-L339F- RQRLAREK    | 4     | 1     |
| >NF2-L339F- RQRLAREKQ   | 619   | >NF2-L339F- RQRLAREKQ   | 311   | 308   |
| >NF2-L339F- RQRLAREKQ\  | 135   | >NF2-L339F- RQRLAREKQ\  | 72    | 63    |
| >NF2-L339F- RQRLAREKQ\  | 143   | >NF2-L339F- RQRLAREKQ\  | 78    | 65    |
| >NF2-L339F- RQRLAREK    | 395   | >NF2-L339F- RQRLAREK    | 207   | 188   |
| >NF2-L339F- RQRLAREKQ\  | 24    | >NF2-L339F- RQRLAREKQ\  | 18    | 6     |
| >NF2-L339F- RQRLAREKQ\  | 235   | >NF2-L339F- RQRLAREKQ\  | 137   | 98    |
| >NF2-L339F- RQRLAREK    | 531   | >NF2-L339F- RQRLAREK    | 253   | 278   |
| >NF2-L339F- RQRLAREKQ\  | 37    | >NF2-L339F- RQRLAREKQ\  | 21    | 16    |
| >NF2-L339F- RQRLAREKQ\  | 391   | >NF2-L339F- RQRLAREKQ\  | 238   | 153   |

|                        |      |                         |       |       |
|------------------------|------|-------------------------|-------|-------|
| >NF2-L339F-1 ERQLAREK  | 275  | >NF2-L339F-1 ERQRFAREK  | 276   | 1     |
| >NF2-L339F-1 ERQLAREKC | 437  | >NF2-L339F-1 ERQRFAREKC | 460   | 23    |
| >NF2-L339F-1 ERQLAREK  | 340  | >NF2-L339F-1 ERQRFAREK  | 387   | 47    |
| >NF2-L339F-1 MERQRLARE | 418  | >NF2-L339F-1 MERQRFARE  | 259   | 159   |
| >NF2-L339F-1 MERQRLAR  | 767  | >NF2-L339F-1 MERQRFAR   | 81    | 686   |
| >NF2-L339F-1 MERQRLAR  | 1155 | >NF2-L339F-1 MERQRFAR   | 227   | 928   |
| >NF2-L339F-1 MERQRLARE | 4578 | >NF2-L339F-1 MERQRFARE  | 476   | 4102  |
| >NF2-L339F-1 MERQRLAR  | 427  | >NF2-L339F-1 MERQRFAR   | 278   | 149   |
| >NF2-L339F-1 QMERQRLAR | 134  | >NF2-L339F-1 QMERQRFAR  | 12    | 122   |
| >NF2-L339F-1 QMERQRLAR | 1824 | >NF2-L339F-1 QMERQRFAR  | 203   | 1621  |
| >NF2-L339F-1 QMERQRLAR | 159  | >NF2-L339F-1 QMERQRFAR  | 206   | 47    |
| >NF2-L339F-1 KQMERQRL  | 278  | >NF2-L339F-1 KQMERQRF   | 14259 | 13981 |
| >NF2-L339F-1 KQMERQLA  | 867  | >NF2-L339F-1 KQMERQRFA  | 424   | 443   |
| >NF2-L339F-1 KQMERQRL  | 362  | >NF2-L339F-1 KQMERQRF   | 12764 | 12402 |
| >NF2-L339F-1 KQMERQLA  | 356  | >NF2-L339F-1 KQMERQRFA  | 272   | 84    |
| >NF2-L339F-1 KQMERQRL  | 49   | >NF2-L339F-1 KQMERQRF   | 189   | 140   |
| >NF2-L339F-1 KQMERQLA  | 57   | >NF2-L339F-1 KQMERQRFA  | 27    | 30    |
| >NF2-L339F-1 KQMERQLA  | 1511 | >NF2-L339F-1 KQMERQRFA  | 318   | 1193  |
| >NF2-L339F-1 KQMERQLA  | 13   | >NF2-L339F-1 KQMERQRFA  | 7     | 6     |
| >NF2-L339F-1 KQMERQRL  | 689  | >NF2-L339F-1 KQMERQRF   | 126   | 563   |
| >NF2-L339F-1 KQMERQLA  | 977  | >NF2-L339F-1 KQMERQRFA  | 376   | 601   |
| >NF2-L339F-1 KQMERQRL  | 1007 | >NF2-L339F-1 KQMERQRF   | 88    | 919   |
| >NF2-L339F-1 KQMERQRL  | 54   | >NF2-L339F-1 KQMERQRF   | 4     | 50    |
| >NF2-L339F-1 KQMERQLA  | 141  | >NF2-L339F-1 KQMERQRFA  | 201   | 60    |
| >NF2-L339F-1 KQMERQRL  | 476  | >NF2-L339F-1 KQMERQRF   | 7612  | 7136  |
| >NF2-L339F-1 KQMERQRL  | 275  | >NF2-L339F-1 KQMERQRF   | 1666  | 1391  |
| >NF2-L339F-1 KQMERQLA  | 66   | >NF2-L339F-1 KQMERQRFA  | 60    | 6     |
| >NF2-L339F-1 RKQMERQRL | 2039 | >NF2-L339F-1 RKQMERQRF  | 319   | 1720  |
| >NF2-L339F-1 RKQMERQRL | 93   | >NF2-L339F-1 RKQMERQRF  | 6     | 87    |
| >NF2-L339F-1 RKQMERQRL | 175  | >NF2-L339F-1 RKQMERQRF  | 282   | 107   |
| >NF2-L339F-1 RKQMERQRL | 348  | >NF2-L339F-1 RKQMERQRF  | 1090  | 742   |
| >NF2-L339F-1 RKQMERQRL | 438  | >NF2-L339F-1 RKQMERQRF  | 522   | 84    |
| >NF2-L339F-1 ARKQMERQF | 1555 | >NF2-L339F-1 ARKQMERQF  | 146   | 1409  |
| >NF2-L339F-1 ARKQMERQF | 86   | >NF2-L339F-1 ARKQMERQF  | 152   | 66    |
| >NF2-L339F-1 ARKQMERQF | 495  | >NF2-L339F-1 ARKQMERQF  | 3497  | 3002  |
| >NF2-L46R-w LFDLVCRTL  | 497  | >NF2-L46R-r RFDLVCRTL   | 225   | 272   |
| >NF2-L46R-w DLFDLVCRTL | 332  | >NF2-L46R-r DRFDLVCRTL  | 19390 | 19058 |
| >NF2-L46R-w DLFDLVCRTL | 136  | >NF2-L46R-r DRFDLVCRTL  | 12120 | 11984 |
| >NF2-L46R-w DLFDLVCRTL | 120  | >NF2-L46R-r DRFDLVCRTL  | 16427 | 16307 |
| >NF2-L46R-w DLFDLVCRT  | 53   | >NF2-L46R-r DRFDLVCRT   | 22928 | 22875 |
| >NF2-L46R-w DLFDLVCRTL | 32   | >NF2-L46R-r DRFDLVCRTL  | 18912 | 18880 |
| >NF2-L46R-w DLFDLVCRT  | 249  | >NF2-L46R-r DRFDLVCRT   | 24691 | 24442 |
| >NF2-L46R-w DLFDLVCRTL | 132  | >NF2-L46R-r DRFDLVCRTL  | 21968 | 21836 |

|                        |       |                        |       |       |
|------------------------|-------|------------------------|-------|-------|
| >NF2-L46R-w DLFDLVCTRL | 251   | >NF2-L46R-r DRFDLVCRTL | 24076 | 23825 |
| >NF2-L46R-w DLFDLVCRT  | 35    | >NF2-L46R-r DRFDLVCRT  | 31899 | 31864 |
| >NF2-L46R-w DLFDLVCTRL | 36    | >NF2-L46R-r DRFDLVCRTL | 26290 | 26254 |
| >NF2-L46R-w DLFDLVCTRL | 465   | >NF2-L46R-r DRFDLVCRTL | 13837 | 13372 |
| >NF2-L46R-w DLFDLVCR   | 13    | >NF2-L46R-r DRFDLVCR   | 299   | 286   |
| >NF2-L46R-w DLFDLVCR   | 13    | >NF2-L46R-r DRFDLVCR   | 279   | 266   |
| >NF2-L46R-w DLFDLVCTRL | 26674 | >NF2-L46R-r DRFDLVCRTL | 172   | 26502 |
| >NF2-L46R-w DLFDLVCR   | 241   | >NF2-L46R-r DRFDLVCR   | 637   | 396   |
| >NF2-L46R-w KGKDLFDLVC | 39    | >NF2-L46R-r KGKDRFDLVC | 34    | 5     |
| >NF2-L46R-w KGKDLFDLVC | 116   | >NF2-L46R-r KGKDRFDLVC | 152   | 36    |
| >NF2-L46R-w KWKGKDLF   | 462   | >NF2-L46R-r KWKGKDRF   | 693   | 231   |
| >NF2-L46R-w KWKGKDLF   | 392   | >NF2-L46R-r KWKGKDRF   | 1217  | 825   |
| >NF2-L46R-w KWKGKDLF   | 80    | >NF2-L46R-r KWKGKDRF   | 163   | 83    |
| >NF2-L46R-w KWKGKDLF   | 156   | >NF2-L46R-r KWKGKDRF   | 293   | 137   |
| >NF2-L46R-w KWKGKDLFD  | 201   | >NF2-L46R-r KWKGKDRFD  | 204   | 3     |
| >NF2-L46R-w KWKGKDLFD  | 84    | >NF2-L46R-r KWKGKDRFD  | 100   | 16    |
| >NF2-L46R-w MKWKGKDL   | 22    | >NF2-L46R-r MKWKGKDR   | 213   | 191   |
| >NF2-L46R-w MKWKGKDLF  | 9     | >NF2-L46R-r MKWKGKDRI  | 13    | 4     |
| >NF2-L46R-w MKWKGKDLF  | 55    | >NF2-L46R-r MKWKGKDRI  | 48    | 7     |
| >NF2-L46R-w MKWKGKDLF  | 332   | >NF2-L46R-r MKWKGKDRI  | 517   | 185   |
| >NF2-L46R-w MKWKGKDLF  | 299   | >NF2-L46R-r MKWKGKDRI  | 1169  | 870   |
| >NF2-L46R-w MKWKGKDL   | 33322 | >NF2-L46R-r MKWKGKDR   | 431   | 32891 |
| >NF2-L46R-w EMKWKGKDI  | 119   | >NF2-L46R-r EMKWKGKDI  | 11224 | 11105 |
| >NF2-L46R-w CEMKWKGKI  | 247   | >NF2-L46R-r CEMKWKGKI  | 507   | 260   |
| >NF2-L46R-w CEMKWKGKI  | 388   | >NF2-L46R-r CEMKWKGKI  | 780   | 392   |
| >NF2-L46R-w CEMKWKGKI  | 377   | >NF2-L46R-r CEMKWKGKI  | 589   | 212   |
| >NF2-L46R-w CEMKWKGKI  | 51    | >NF2-L46R-r CEMKWKGKI  | 90    | 39    |
| >NF2-L539H-QLNELKTEI   | 3402  | >NF2-L539H-QHNELKTEI   | 367   | 3035  |
| >NF2-L539H-QLNELKTEI   | 45    | >NF2-L539H-QHNELKTEI   | 15969 | 15924 |
| >NF2-L539H-QLNELKTEIEA | 259   | >NF2-L539H-QHNELKTEIEA | 22556 | 22297 |
| >NF2-L539H-QLNELKTEI   | 61    | >NF2-L539H-QHNELKTEI   | 19648 | 19587 |
| >NF2-L539H-QLNELKTEIEA | 388   | >NF2-L539H-QHNELKTEIEA | 20671 | 20283 |
| >NF2-L539H-QLNELKTEI   | 42    | >NF2-L539H-QHNELKTEI   | 21132 | 21090 |
| >NF2-L539H-QLNELKTEIEA | 139   | >NF2-L539H-QHNELKTEIEA | 23324 | 23185 |
| >NF2-L539H-QLNELKTEI   | 252   | >NF2-L539H-QHNELKTEI   | 23763 | 23511 |
| >NF2-L539H-QLNELKTEIEA | 384   | >NF2-L539H-QHNELKTEIEA | 24555 | 24171 |
| >NF2-L539H-QLNELKTEI   | 25    | >NF2-L539H-QHNELKTEI   | 31307 | 31282 |
| >NF2-L539H-QLNELKTEIEA | 39    | >NF2-L539H-QHNELKTEIEA | 31954 | 31915 |
| >NF2-L539H-MEKSKHLQE   | 412   | >NF2-L539H-MEKSKHLQE   | 13232 | 12820 |
| >NF2-L539H-MEKSKHLQE   | 218   | >NF2-L539H-MEKSKHLQE   | 15244 | 15026 |
| >NF2-L539H-MEKSKHLQE   | 159   | >NF2-L539H-MEKSKHLQE   | 10604 | 10445 |
| >NF2-L539H-MEKSKHLQE   | 115   | >NF2-L539H-MEKSKHLQE   | 7858  | 7743  |
| >NF2-L539H-EQLNELKTEI  | 325   | >NF2-L539H-EQHNELKTEI  | 626   | 301   |

|                        |       |                        |      |       |
|------------------------|-------|------------------------|------|-------|
| >NF2-L539H- QEQLNELK   | 116   | >NF2-L539H- QEQHNELK   | 723  | 607   |
| >NF2-L539H- QEQLNELKTE | 18    | >NF2-L539H- QEQHNELKTE | 26   | 8     |
| >NF2-L539H- QEQLNELKTE | 68    | >NF2-L539H- QEQHNELKTE | 142  | 74    |
| >NF2-L539H- LQEQLNEL   | 495   | >NF2-L539H- LQEQHNEL   | 1313 | 818   |
| >NF2-L539H- LQEQLNEL   | 334   | >NF2-L539H- LQEQHNEL   | 1198 | 864   |
| >NF2-L539H- HLQEQLNEL  | 49    | >NF2-L539H- HLQEQHNEL  | 944  | 895   |
| >NF2-L539H- HLQEQLNEL  | 6     | >NF2-L539H- HLQEQHNEL  | 19   | 13    |
| >NF2-L539H- HLQEQLNEL  | 43    | >NF2-L539H- HLQEQHNEL  | 558  | 515   |
| >NF2-L539H- HLQEQLNEL  | 178   | >NF2-L539H- HLQEQHNEL  | 5235 | 5057  |
| >NF2-L539H- HLQEQLNEL  | 28    | >NF2-L539H- HLQEQHNEL  | 54   | 26    |
| >NF2-L539H- HLQEQLNEL  | 5     | >NF2-L539H- HLQEQHNEL  | 28   | 23    |
| >NF2-L539H- HLQEQLNEL  | 119   | >NF2-L539H- HLQEQHNEL  | 430  | 311   |
| >NF2-L539H- HLQEQLNEL  | 438   | >NF2-L539H- HLQEQHNEL  | 3924 | 3486  |
| >NF2-L539H- HLQEQLNEL  | 4     | >NF2-L539H- HLQEQHNEL  | 5    | 1     |
| >NF2-L539H- HLQEQLNELK | 341   | >NF2-L539H- HLQEQHNELI | 485  | 144   |
| >NF2-L539H- KHLQEQLNEL | 829   | >NF2-L539H- KHLQEQHNEI | 329  | 500   |
| >NF2-L539H- KHLQEQLNEL | 460   | >NF2-L539H- KHLQEQHNEI | 445  | 15    |
| >NF2-L539H- SKHLQEQLNE | 470   | >NF2-L539H- SKHLQEQHNI | 240  | 230   |
| >NF2-L539H- KSKHLQEQL  | 271   | >NF2-L539H- KSKHLQEQH  | 3366 | 3095  |
| >NF2-L539H- KSKHLQEQL  | 23    | >NF2-L539H- KSKHLQEQH  | 2142 | 2119  |
| >NF2-L539H- KSKHLQEQL  | 66    | >NF2-L539H- KSKHLQEQH  | 987  | 921   |
| >NF2-L539H- KSKHLQEQL  | 182   | >NF2-L539H- KSKHLQEQH  | 449  | 267   |
| >NF2-Q324L- QAREEKARK  | 58    | >NF2-Q324L- LAREEKARK  | 39   | 19    |
| >NF2-Q324L- QAREEKARKC | 87    | >NF2-Q324L- LAREEKARKC | 39   | 48    |
| >NF2-Q324L- AQAREEKA   | 5779  | >NF2-Q324L- ALAREEKA   | 214  | 5565  |
| >NF2-Q324L- AQAREEKA   | 14747 | >NF2-Q324L- ALAREEKA   | 439  | 14308 |
| >NF2-Q324L- AQAREEKA   | 25929 | >NF2-Q324L- ALAREEKA   | 26   | 25903 |
| >NF2-Q324L- AQAREEKAR  | 497   | >NF2-Q324L- ALAREEKAR  | 6200 | 5703  |
| >NF2-Q324L- DSLEVQQMK  | 3333  | >NF2-Q324L- DSLEVQQMK  | 410  | 2923  |
| >NF2-Q324L- KAQAREEKAF | 1922  | >NF2-Q324L- KALAREEKAR | 486  | 1436  |
| >NF2-Q324L- KAQAREEK   | 193   | >NF2-Q324L- KALAREEK   | 150  | 43    |
| >NF2-Q324L- KAQAREEKAF | 396   | >NF2-Q324L- KALAREEKAR | 304  | 92    |
| >NF2-Q324L- KAQAREEK   | 259   | >NF2-Q324L- KALAREEK   | 72   | 187   |
| >NF2-Q324L- KAQAREEKAF | 310   | >NF2-Q324L- KALAREEKAR | 96   | 214   |
| >NF2-Q324L- KAQAREEK   | 344   | >NF2-Q324L- KALAREEK   | 242  | 102   |
| >NF2-Q324L- KAQAREEKAF | 386   | >NF2-Q324L- KALAREEKAR | 178  | 208   |
| >NF2-Q324L- KAQAREEKAF | 358   | >NF2-Q324L- KALAREEKAR | 256  | 102   |
| >NF2-Q324L- KAQAREEKAF | 837   | >NF2-Q324L- KALAREEKAR | 152  | 685   |
| >NF2-Q324L- MKAQAREEK  | 316   | >NF2-Q324L- MKALAREEK  | 648  | 332   |
| >NF2-Q324L- MKAQAREEK  | 289   | >NF2-Q324L- MKALAREEK/ | 510  | 221   |
| >NF2-Q324L- QMKAQAREE  | 711   | >NF2-Q324L- QMKALAREE  | 451  | 260   |
| >NF2-Q324L- QMKAQAREE  | 79    | >NF2-Q324L- QMKALAREE  | 120  | 41    |
| >NF2-Q324L- QQMKAQARI  | 244   | >NF2-Q324L- QQMKALARE  | 146  | 98    |

|                       |       |                       |     |       |
|-----------------------|-------|-----------------------|-----|-------|
| >NF2-Q324L-QQMKAQAR   | 273   | >NF2-Q324L-QQMKAQAR   | 305 | 32    |
| >NF2-Q324L-QQMKAQAR   | 138   | >NF2-Q324L-QQMKAQAR   | 210 | 72    |
| >NF2-Q324L-QQMKAQAR   | 308   | >NF2-Q324L-QQMKAQAR   | 164 | 144   |
| >NF2-Q324L-VQQMKAQA   | 207   | >NF2-Q324L-VQQMKAQAF  | 349 | 142   |
| >NF2-Q324L-EVQQMKAQ   | 1102  | >NF2-Q324L-EVQQMKAL   | 133 | 969   |
| >NF2-Q324L-EVQQMKAQ   | 529   | >NF2-Q324L-EVQQMKALA  | 285 | 244   |
| >NF2-Q324L-EVQQMKAQ   | 1176  | >NF2-Q324L-EVQQMKALA  | 397 | 779   |
| >NF2-Q324L-EVQQMKAQ   | 357   | >NF2-Q324L-EVQQMKALA  | 161 | 196   |
| >NF2-Q324L-LEVQQMKAC  | 4890  | >NF2-Q324L-LEVQQMKAL  | 43  | 4847  |
| >NF2-Q324L-LEVQQMKAC  | 594   | >NF2-Q324L-LEVQQMKAL  | 118 | 476   |
| >NF2-Q324L-LEVQQMKAC  | 15472 | >NF2-Q324L-LEVQQMKAL  | 91  | 15381 |
| >NF2-Q324L-LEVQQMKAC  | 2876  | >NF2-Q324L-LEVQQMKAL  | 119 | 2757  |
| >NF2-Q324L-LEVQQMKAC  | 8969  | >NF2-Q324L-LEVQQMKAL  | 63  | 8906  |
| >NF2-Q324L-SLEVQQMKA  | 4181  | >NF2-Q324L-SLEVQQMKA  | 82  | 4099  |
| >NF2-Q324L-SLEVQQMKA  | 38    | >NF2-Q324L-SLEVQQMKA  | 66  | 28    |
| >NF2-Q470L-KQKLEIA    | 2809  | >NF2-Q470L-KLKLEIA    | 288 | 2521  |
| >NF2-Q470L-KQKLEIATK  | 760   | >NF2-Q470L-KLKLEIATK  | 116 | 644   |
| >NF2-Q470L-KQKLEIATK  | 12    | >NF2-Q470L-KLKLEIATK  | 7   | 5     |
| >NF2-Q470L-KQKLEIATK  | 524   | >NF2-Q470L-KLKLEIATK  | 307 | 217   |
| >NF2-Q470L-EAREAERRAK | 15268 | >NF2-Q470L-EAREAERRAK | 469 | 14799 |
| >NF2-Q470L-AKQKLEI    | 497   | >NF2-Q470L-AKLKLEI    | 140 | 357   |
| >NF2-Q470L-AKQKLEI    | 894   | >NF2-Q470L-AKLKLEI    | 47  | 847   |
| >NF2-Q470L-RAKQKLEI   | 30    | >NF2-Q470L-RAKLKLEI   | 17  | 13    |
| >NF2-Q470L-RAKQKLEIA  | 225   | >NF2-Q470L-RAKLKLEIA  | 129 | 96    |
| >NF2-Q470L-RAKQKLEI   | 195   | >NF2-Q470L-RAKLKLEI   | 260 | 65    |
| >NF2-Q470L-RAKQKLEI   | 22    | >NF2-Q470L-RAKLKLEI   | 47  | 25    |
| >NF2-Q470L-RAKQKLEI   | 434   | >NF2-Q470L-RAKLKLEI   | 809 | 375   |
| >NF2-Q470L-RRAKQKLL   | 29    | >NF2-Q470L-RRAKLKLL   | 18  | 11    |
| >NF2-Q470L-RRAKQKLE   | 590   | >NF2-Q470L-RRAKLKLE   | 305 | 285   |
| >NF2-Q470L-RRAKQKLEI  | 28    | >NF2-Q470L-RRAKLKLEI  | 21  | 7     |
| >NF2-Q470L-RRAKQKLEI  | 166   | >NF2-Q470L-RRAKLKLEIA | 102 | 64    |
| >NF2-Q470L-RRAKQKLL   | 13    | >NF2-Q470L-RRAKLKLL   | 9   | 4     |
| >NF2-Q470L-RRAKQKLE   | 99    | >NF2-Q470L-RRAKLKLE   | 45  | 54    |
| >NF2-Q470L-RRAKQKLEI  | 59    | >NF2-Q470L-RRAKLKLEI  | 62  | 3     |
| >NF2-Q470L-RRAKQKLEI  | 167   | >NF2-Q470L-RRAKLKLEIA | 94  | 73    |
| >NF2-Q470L-RRAKQKLL   | 46    | >NF2-Q470L-RRAKLKLL   | 28  | 18    |
| >NF2-Q470L-RRAKQKLE   | 988   | >NF2-Q470L-RRAKLKLE   | 171 | 817   |
| >NF2-Q470L-RRAKQKLEI  | 42    | >NF2-Q470L-RRAKLKLEI  | 36  | 6     |
| >NF2-Q470L-RRAKQKLEI  | 571   | >NF2-Q470L-RRAKLKLEIA | 197 | 374   |
| >NF2-Q470L-ERRAKQKL   | 883   | >NF2-Q470L-ERRAKKL    | 326 | 557   |
| >NF2-Q470L-ERRAKQKLL  | 461   | >NF2-Q470L-ERRAKLKLL  | 297 | 164   |
| >NF2-Q470L-ERRAKQKL   | 546   | >NF2-Q470L-ERRAKKL    | 329 | 217   |
| >NF2-Q470L-AERRAKQK   | 905   | >NF2-Q470L-AERRAKLK   | 77  | 828   |

|                       |       |                       |       |       |
|-----------------------|-------|-----------------------|-------|-------|
| >NF2-Q470L-AERRAKQKLL | 312   | >NF2-Q470L-AERRAKLKL  | 197   | 115   |
| >NF2-Q470L-AERRAKQK   | 192   | >NF2-Q470L-AERRAKLK   | 97    | 95    |
| >NF2-Q470L-AERRAKQKL  | 597   | >NF2-Q470L-AERRAKLKL  | 430   | 167   |
| >NF2-Q470L-AERRAKQKL  | 231   | >NF2-Q470L-AERRAKLKL  | 134   | 97    |
| >NF2-Q470L-AERRAKQKL  | 63    | >NF2-Q470L-AERRAKLKL  | 65    | 2     |
| >NF2-Q470L-AERRAKQKLL | 55    | >NF2-Q470L-AERRAKLKL  | 37    | 18    |
| >NF2-Q470L-EAERRAKQK  | 325   | >NF2-Q470L-EAERRAKLK  | 231   | 94    |
| >NF2-Q470L-REAERRAKQ  | 13221 | >NF2-Q470L-REAERRAKL  | 332   | 12889 |
| >NF2-Q470L-REAERRAKQK | 404   | >NF2-Q470L-REAERRAKLK | 337   | 67    |
| >NF2-Q470L-REAERRAKQ  | 11822 | >NF2-Q470L-REAERRAKL  | 57    | 11765 |
| >NF2-Q470L-REAERRAKQK | 33    | >NF2-Q470L-REAERRAKLK | 31    | 2     |
| >NF2-Q470L-REAERRAKQ  | 829   | >NF2-Q470L-REAERRAKL  | 10    | 819   |
| >NF2-Q470L-REAERRAKQK | 20    | >NF2-Q470L-REAERRAKLK | 20    | 0     |
| >NF2-Q470L-AREAERRAKC | 6348  | >NF2-Q470L-AREAERRAKL | 351   | 5997  |
| >NF2-R346S-REEAERTRDE | 1716  | >NF2-R346S-SEEAERTRDE | 450   | 1266  |
| >NF2-R346S-REEAERTRDE | 17    | >NF2-R346S-SEEAERTRDE | 129   | 112   |
| >NF2-R346S-REEAERTRDE | 159   | >NF2-R346S-SEEAERTRDE | 559   | 400   |
| >NF2-R346S-REEAERTRDE | 89    | >NF2-R346S-SEEAERTRDE | 759   | 670   |
| >NF2-R346S-MREEAERTR  | 5208  | >NF2-R346S-MSEEAERTR  | 68    | 5140  |
| >NF2-R346S-RQRLAREKQI | 143   | >NF2-R346S-RQRLAREKQI | 381   | 238   |
| >NF2-R346S-RQRLAREKQI | 24    | >NF2-R346S-RQRLAREKQI | 13688 | 13664 |
| >NF2-R346S-RQRLAREKQI | 391   | >NF2-R346S-RQRLAREKQI | 2163  | 1772  |
| >NF2-R346S-QMREEAER   | 365   | >NF2-R346S-QMSEEAER   | 1255  | 890   |
| >NF2-R346S-QMREEAER   | 482   | >NF2-R346S-QMSEEAER   | 1591  | 1109  |
| >NF2-R346S-QMREEAER   | 1231  | >NF2-R346S-QMSEEAER   | 134   | 1097  |
| >NF2-R346S-QMREEAER   | 655   | >NF2-R346S-QMSEEAER   | 372   | 283   |
| >NF2-R346S-KQMREEAER  | 28    | >NF2-R346S-KQMSEEAER  | 27    | 1     |
| >NF2-R346S-KQMREEAER  | 72    | >NF2-R346S-KQMSEEAER  | 65    | 7     |
| >NF2-R346S-KQMREEAER  | 218   | >NF2-R346S-KQMSEEAER  | 120   | 98    |
| >NF2-R346S-KQMREEAER  | 239   | >NF2-R346S-KQMSEEAER  | 147   | 92    |
| >NF2-R346S-KQMREEAER  | 229   | >NF2-R346S-KQMSEEAER  | 133   | 96    |
| >NF2-R346S-KQMREEAER  | 226   | >NF2-R346S-KQMSEEAER  | 151   | 75    |
| >NF2-R346S-REKQMREEA  | 37    | >NF2-R346S-REKQMSEEA  | 42    | 5     |
| >NF2-R346S-REKQMREEA  | 59    | >NF2-R346S-REKQMSEEA  | 46    | 13    |
| >NF2-R346S-REKQMREEA  | 58    | >NF2-R346S-REKQMSEEA  | 49    | 9     |
| >NF2-R346S-LAREKQMREI | 443   | >NF2-R346S-LAREKQMSEI | 415   | 28    |
| >NF2-R346S-LAREKQMR   | 157   | >NF2-R346S-LAREKQMS   | 20382 | 20225 |
| >NF2-R346S-LAREKQMR   | 235   | >NF2-R346S-LAREKQMS   | 30418 | 30183 |
| >NF2-R346S-RLAREKQMR  | 96    | >NF2-R346S-RLAREKQMS  | 19001 | 18905 |
| >NF2-R346S-RLAREKQMR  | 425   | >NF2-R346S-RLAREKQMS  | 34130 | 33705 |
| >NF2-R346S-QLAREKQM   | 145   | >NF2-R346S-QLAREKQM   | 3962  | 3817  |
| >NF2-S156R-SVHKRGFL   | 45    | >NF2-S156R-RVHKRGFL   | 8     | 37    |
| >NF2-S156R-SVHKRGFLA  | 34    | >NF2-S156R-RVHKRGFLA  | 7     | 27    |

|                         |       |                         |       |       |
|-------------------------|-------|-------------------------|-------|-------|
| >NF2-S156R- SVHKRGFLAC  | 292   | >NF2-S156R- RVHKRGFLAC  | 23    | 269   |
| >NF2-S156R- SVHKRGFLAC  | 3901  | >NF2-S156R- RVHKRGFLAC  | 409   | 3492  |
| >NF2-S156R- SVHKRGFL    | 1708  | >NF2-S156R- RVHKRGFL    | 289   | 1419  |
| >NF2-S156R- PSVHKRGF    | 454   | >NF2-S156R- PRVHKRGF    | 27392 | 26938 |
| >NF2-S156R- VQAKYGDYD   | 23205 | >NF2-S156R- VQAKYGDYD   | 394   | 22811 |
| >NF2-S156R- DPSVHKRGF   | 6431  | >NF2-S156R- DPRVHKRGF   | 351   | 6080  |
| >NF2-S156R- DPSVHKRGFL  | 791   | >NF2-S156R- DPRVHKRGFL  | 339   | 452   |
| >NF2-S156R- YDPSVHKRGF  | 1082  | >NF2-S156R- YDPRVHKRGF  | 494   | 588   |
| >NF2-S156R- DYDPSVHK    | 995   | >NF2-S156R- DYDPRVHK    | 219   | 776   |
| >NF2-S156R- DYDPSVHKR   | 116   | >NF2-S156R- DYDPRVHKR   | 38    | 78    |
| >NF2-S156R- DYDPSVHKR   | 185   | >NF2-S156R- DYDPRVHKR   | 133   | 52    |
| >NF2-S156R- YGDYDPSV    | 485   | >NF2-S156R- YGDYDPRV    | 2088  | 1603  |
| >NF2-S156R- KYGDYDPSV   | 365   | >NF2-S156R- KYGDYDPRV   | 461   | 96    |
| >NF2-S156R- KYGDYDPSV   | 309   | >NF2-S156R- KYGDYDPRV   | 497   | 188   |
| >NF2-S156R- KYGDYDPSV   | 86    | >NF2-S156R- KYGDYDPRV   | 110   | 24    |
| >NF2-S156R- KYGDYDPSV†  | 43    | >NF2-S156R- KYGDYDPRV†  | 49    | 6     |
| >NF2-S156R- KYGDYDPS    | 15299 | >NF2-S156R- KYGDYDPR    | 32    | 15267 |
| >NF2-S156R- KYGDYDPSV†  | 258   | >NF2-S156R- KYGDYDPRV†  | 119   | 139   |
| >NF2-S156R- KYGDYDPS    | 2431  | >NF2-S156R- KYGDYDPR    | 10    | 2421  |
| >NF2-S156R- KYGDYDPSV†  | 23    | >NF2-S156R- KYGDYDPRV†  | 20    | 3     |
| >NF2-S156R- AKYGDYDPS\  | 322   | >NF2-S156R- AKYGDYDPR\  | 356   | 34    |
| >NF2-S156R- AKYGDYDPS\  | 495   | >NF2-S156R- AKYGDYDPR\  | 883   | 388   |
| >NF2-S156R- AKYGDYDPS\  | 198   | >NF2-S156R- AKYGDYDPR\  | 219   | 21    |
| >NF2-S156R- AKYGDYDPS\  | 71    | >NF2-S156R- AKYGDYDPR\  | 389   | 318   |
| >NF2-S156R- AKYGDYDPS\  | 99    | >NF2-S156R- AKYGDYDPR\  | 201   | 102   |
| >NF2-S156R- QAKYGDYDP   | 35011 | >NF2-S156R- QAKYGDYDP   | 284   | 34727 |
| >NF2-V146I-  VQAKYGDY   | 70    | >NF2-V146I-  IQAKYGDY   | 74    | 4     |
| >NF2-V146I-  VQAKYGDY   | 369   | >NF2-V146I-  IQAKYGDY   | 672   | 303   |
| >NF2-V146I-  VQAKYGDY   | 103   | >NF2-V146I-  IQAKYGDY   | 96    | 7     |
| >NF2-V146I-  VQAKYGDY   | 313   | >NF2-V146I-  IQAKYGDY   | 306   | 7     |
| >NF2-V146I-  VQAKYGDY   | 52    | >NF2-V146I-  IQAKYGDY   | 23    | 29    |
| >NF2-V146I-  AVQAKYGDY  | 317   | >NF2-V146I-  AIQAKYGDY  | 574   | 257   |
| >NF2-V146I-  AVQAKYGDY  | 126   | >NF2-V146I-  AIQAKYGDY  | 153   | 27    |
| >NF2-V146I-  AVQAKYGDY  | 281   | >NF2-V146I-  AIQAKYGDY  | 859   | 578   |
| >NF2-V146I-  EASVLLASYA | 10    | >NF2-V146I-  EASVLLASYA | 21    | 11    |
| >NF2-V146I-  EASVLLASYA | 17    | >NF2-V146I-  EASVLLASYA | 87    | 70    |
| >NF2-V146I-  YAVQAKYGD  | 272   | >NF2-V146I-  YAIQAKYGDY | 113   | 159   |
| >NF2-V146I-  YAVQAKYGD  | 102   | >NF2-V146I-  YAIQAKYGDY | 55    | 47    |
| >NF2-V146I-  YAVQAKYGD  | 420   | >NF2-V146I-  YAIQAKYGDY | 209   | 211   |
| >NF2-V146I-  YAVQAKYGD  | 32    | >NF2-V146I-  YAIQAKYGDY | 38    | 6     |
| >NF2-V146I-  YAVQAKYGD  | 556   | >NF2-V146I-  YAIQAKYGDY | 453   | 103   |
| >NF2-V146I-  SYAVQAKY   | 57    | >NF2-V146I-  SYAIQAKY   | 44    | 13    |
| >NF2-V146I-  SYAVQAKYGI | 52    | >NF2-V146I-  SYAIQAKYGD | 44    | 8     |

|                         |      |                         |     |     |
|-------------------------|------|-------------------------|-----|-----|
| >NF2-V146I-1 SYAVQAKY   | 57   | >NF2-V146I-1 SYAIQAKY   | 49  | 8   |
| >NF2-V146I-1 SYAVQAKYGI | 110  | >NF2-V146I-1 SYAIQAKYGD | 96  | 14  |
| >NF2-V146I-1 SYAVQAKY   | 398  | >NF2-V146I-1 SYAIQAKY   | 338 | 60  |
| >NF2-V146I-1 SYAVQAKYGI | 152  | >NF2-V146I-1 SYAIQAKYGD | 149 | 3   |
| >NF2-V146I-1 SYAVQAKY   | 119  | >NF2-V146I-1 SYAIQAKY   | 144 | 25  |
| >NF2-V146I-1 SYAVQAKYGI | 230  | >NF2-V146I-1 SYAIQAKYGD | 261 | 31  |
| >NF2-V146I-1 ASYAVQAK   | 46   | >NF2-V146I-1 ASYAIQAK   | 47  | 1   |
| >NF2-V146I-1 ASYAVQAKY  | 93   | >NF2-V146I-1 ASYAIQAKY  | 114 | 21  |
| >NF2-V146I-1 ASYAVQAK   | 12   | >NF2-V146I-1 ASYAIQAK   | 12  | 0   |
| >NF2-V146I-1 ASYAVQAKY  | 86   | >NF2-V146I-1 ASYAIQAKY  | 116 | 30  |
| >NF2-V146I-1 ASYAVQAKY  | 319  | >NF2-V146I-1 ASYAIQAKY  | 249 | 70  |
| >NF2-V146I-1 ASYAVQAKY  | 120  | >NF2-V146I-1 ASYAIQAKY  | 47  | 73  |
| >NF2-V146I-1 ASYAVQAK   | 21   | >NF2-V146I-1 ASYAIQAK   | 20  | 1   |
| >NF2-V146I-1 ASYAVQAKY  | 14   | >NF2-V146I-1 ASYAIQAKY  | 10  | 4   |
| >NF2-V146I-1 ASYAVQAK   | 296  | >NF2-V146I-1 ASYAIQAK   | 170 | 126 |
| >NF2-V146I-1 ASYAVQAKY  | 1113 | >NF2-V146I-1 ASYAIQAKY  | 478 | 635 |
| >NF2-V146I-1 ASYAVQAK   | 235  | >NF2-V146I-1 ASYAIQAK   | 226 | 9   |
| >NF2-V146I-1 ASYAVQAKY  | 246  | >NF2-V146I-1 ASYAIQAKY  | 351 | 105 |
| >NF2-V146I-1 ASYAVQAKY  | 96   | >NF2-V146I-1 ASYAIQAKY  | 91  | 5   |
| >NF2-V146I-1 ASYAVQAKY  | 4    | >NF2-V146I-1 ASYAIQAKY  | 4   | 0   |
| >NF2-V146I-1 ASYAVQAKY  | 323  | >NF2-V146I-1 ASYAIQAKY  | 427 | 104 |
| >NF2-V146I-1 ASYAVQAKY  | 18   | >NF2-V146I-1 ASYAIQAKY  | 42  | 24  |
| >NF2-V146I-1 ASYAVQAKY  | 30   | >NF2-V146I-1 ASYAIQAKY  | 25  | 5   |
| >NF2-V146I-1 ASYAVQAKY  | 242  | >NF2-V146I-1 ASYAIQAKY  | 382 | 140 |
| >NF2-V146I-1 ASYAVQAK   | 342  | >NF2-V146I-1 ASYAIQAK   | 321 | 21  |
| >NF2-V146I-1 LASYAVQAKY | 242  | >NF2-V146I-1 LASYAIQAKY | 123 | 119 |
| >NF2-V146I-1 LASYAVQAK  | 248  | >NF2-V146I-1 LASYAIQAK  | 234 | 14  |
| >NF2-V146I-1 LASYAVQAKY | 30   | >NF2-V146I-1 LASYAIQAKY | 30  | 0   |
| >NF2-V146I-1 LASYAVQAK  | 140  | >NF2-V146I-1 LASYAIQAK  | 142 | 2   |
| >NF2-V146I-1 LASYAVQAKY | 510  | >NF2-V146I-1 LASYAIQAKY | 247 | 263 |
| >NF2-V146I-1 LASYAVQAKY | 234  | >NF2-V146I-1 LASYAIQAKY | 321 | 87  |
| >NF2-V146I-1 LASYAVQAKY | 272  | >NF2-V146I-1 LASYAIQAKY | 371 | 99  |
| >NF2-V146I-1 LASYAVQAKY | 24   | >NF2-V146I-1 LASYAIQAKY | 26  | 2   |
| >NF2-V146I-1 LASYAVQAKY | 96   | >NF2-V146I-1 LASYAIQAKY | 220 | 124 |
| >NF2-V146I-1 LASYAVQAKY | 37   | >NF2-V146I-1 LASYAIQAKY | 32  | 5   |
| >NF2-V146I-1 LASYAVQAKY | 188  | >NF2-V146I-1 LASYAIQAKY | 252 | 64  |
| >NF2-V146I-1 LLASYAVQA  | 43   | >NF2-V146I-1 LLASYAIQA  | 38  | 5   |
| >NF2-V146I-1 LLASYAVQ   | 165  | >NF2-V146I-1 LLASYAIQ   | 179 | 14  |
| >NF2-V146I-1 LLASYAVQA  | 7    | >NF2-V146I-1 LLASYAIQA  | 10  | 3   |
| >NF2-V146I-1 LLASYAVQA  | 10   | >NF2-V146I-1 LLASYAIQA  | 11  | 1   |
| >NF2-V146I-1 LLASYAVQA  | 150  | >NF2-V146I-1 LLASYAIQA  | 153 | 3   |
| >NF2-V146I-1 LLASYAVQA  | 17   | >NF2-V146I-1 LLASYAIQA  | 15  | 2   |
| >NF2-V146I-1 LLASYAVQA  | 458  | >NF2-V146I-1 LLASYAIQA  | 495 | 37  |



|                         |      |                          |     |      |
|-------------------------|------|--------------------------|-----|------|
| >NF2-V146I-V LLASYAVQA  | 51   | >NF2-V146I-I LLASYAIQA   | 45  | 6    |
| >NF2-V146I-V LLASYAVQA  | 53   | >NF2-V146I-I LLASYAIQA   | 76  | 23   |
| >NF2-V146I-V LLASYAVQ   | 35   | >NF2-V146I-I LLASYAIQ    | 52  | 17   |
| >NF2-V146I-V LLASYAVQA  | 4    | >NF2-V146I-I LLASYAIQA   | 4   | 0    |
| >NF2-V146I-V LLASYAVQAK | 379  | >NF2-V146I-I LLASYAIQAK  | 296 | 83   |
| >NF2-V146I-V LLASYAVQAK | 444  | >NF2-V146I-I LLASYAIQAK\ | 419 | 25   |
| >NF2-V146I-V LLASYAVQAK | 89   | >NF2-V146I-I LLASYAIQAK  | 83  | 6    |
| >NF2-V146I-V LLASYAVQAK | 270  | >NF2-V146I-I LLASYAIQAK\ | 250 | 20   |
| >NF2-V146I-V LLASYAVQAK | 139  | >NF2-V146I-I LLASYAIQAK  | 131 | 8    |
| >NF2-V146I-V LLASYAVQAK | 22   | >NF2-V146I-I LLASYAIQAK\ | 17  | 5    |
| >NF2-V146I-V LLASYAVQAK | 29   | >NF2-V146I-I LLASYAIQAK\ | 27  | 2    |
| >NF2-V146I-V LLASYAVQAK | 458  | >NF2-V146I-I LLASYAIQAK  | 502 | 44   |
| >NF2-V146I-V LLASYAVQAK | 506  | >NF2-V146I-I LLASYAIQAK\ | 280 | 226  |
| >NF2-V146I-V LLASYAVQAK | 113  | >NF2-V146I-I LLASYAIQAK\ | 142 | 29   |
| >NF2-V146I-V LLASYAVQAK | 249  | >NF2-V146I-I LLASYAIQAK\ | 298 | 49   |
| >NF2-V146I-V LLASYAVQAK | 122  | >NF2-V146I-I LLASYAIQAK\ | 161 | 39   |
| >NF2-V146I-V LLASYAVQAK | 562  | >NF2-V146I-I LLASYAIQAK\ | 449 | 113  |
| >NF2-V146I-V LLASYAVQAK | 278  | >NF2-V146I-I LLASYAIQAK\ | 246 | 32   |
| >NF2-V146I-V LLASYAVQAK | 320  | >NF2-V146I-I LLASYAIQAK\ | 440 | 120  |
| >NF2-V146I-V LLASYAVQAK | 160  | >NF2-V146I-I LLASYAIQAK  | 218 | 58   |
| >NF2-V146I-V LLASYAVQAK | 185  | >NF2-V146I-I LLASYAIQAK\ | 163 | 22   |
| >NF2-V146I-V VLLASYAV   | 9    | >NF2-V146I-I VLLASYAI    | 20  | 11   |
| >NF2-V146I-V VLLASYAVQA | 651  | >NF2-V146I-I VLLASYAIQA  | 327 | 324  |
| >NF2-V146I-V VLLASYAV   | 10   | >NF2-V146I-I VLLASYAI    | 44  | 34   |
| >NF2-V146I-V VLLASYAVQA | 352  | >NF2-V146I-I VLLASYAIQA  | 236 | 116  |
| >NF2-V146I-V VLLASYAV   | 11   | >NF2-V146I-I VLLASYAI    | 42  | 31   |
| >NF2-V146I-V VLLASYAVQA | 498  | >NF2-V146I-I VLLASYAIQA  | 489 | 9    |
| >NF2-V146I-V VLLASYAV   | 8    | >NF2-V146I-I VLLASYAI    | 36  | 28   |
| >NF2-V146I-V VLLASYAV   | 1    | >NF2-V146I-I VLLASYAI    | 3   | 2    |
| >NF2-V146I-V VLLASYAVQA | 7    | >NF2-V146I-I VLLASYAIQA  | 8   | 1    |
| >NF2-V146I-V VLLASYAV   | 3    | >NF2-V146I-I VLLASYAI    | 5   | 2    |
| >NF2-V146I-V VLLASYAVQA | 94   | >NF2-V146I-I VLLASYAIQA  | 101 | 7    |
| >NF2-V146I-V VLLASYAV   | 4    | >NF2-V146I-I VLLASYAI    | 12  | 8    |
| >NF2-V146I-V VLLASYAVQA | 19   | >NF2-V146I-I VLLASYAIQA  | 20  | 1    |
| >NF2-V146I-V VLLASYAV   | 2    | >NF2-V146I-I VLLASYAI    | 9   | 7    |
| >NF2-V146I-V VLLASYAVQA | 31   | >NF2-V146I-I VLLASYAIQA  | 38  | 7    |
| >NF2-V146I-V VLLASYAV   | 2    | >NF2-V146I-I VLLASYAI    | 8   | 6    |
| >NF2-V146I-V VLLASYAVQ  | 66   | >NF2-V146I-I VLLASYAIQ   | 102 | 36   |
| >NF2-V146I-V VLLASYAVQA | 5    | >NF2-V146I-I VLLASYAIQA  | 6   | 1    |
| >NF2-V146I-V VLLASYAVQA | 64   | >NF2-V146I-I VLLASYAIQA\ | 59  | 5    |
| >NF2-V146I-V VLLASYAVQA | 100  | >NF2-V146I-I VLLASYAIQA\ | 84  | 16   |
| >NF2-V146I-V VLLASYAVQA | 276  | >NF2-V146I-I VLLASYAIQA\ | 258 | 18   |
| >NF2-V146I-V VLLASYAV   | 1906 | >NF2-V146I-I VLLASYAI    | 190 | 1716 |

|                       |       |                       |       |       |
|-----------------------|-------|-----------------------|-------|-------|
| >NF2-V146I-VLLASYAV   | 188   | >NF2-V146I-VLLASYAI   | 1425  | 1237  |
| >NF2-V146I-VLLASYAV   | 380   | >NF2-V146I-VLLASYAI   | 261   | 119   |
| >NF2-V146I-SVLLASYAV  | 50    | >NF2-V146I-SVLLASYAI  | 357   | 307   |
| >NF2-V146I-SVLLASYAV  | 84    | >NF2-V146I-SVLLASYAI  | 485   | 401   |
| >NF2-V146I-SVLLASYAV  | 466   | >NF2-V146I-SVLLASYAI  | 2027  | 1561  |
| >NF2-V146I-SVLLASYAV  | 9     | >NF2-V146I-SVLLASYAI  | 60    | 51    |
| >NF2-V146I-SVLLASYAVQ | 355   | >NF2-V146I-SVLLASYAIQ | 388   | 33    |
| >NF2-V146I-SVLLASYAV  | 24    | >NF2-V146I-SVLLASYAI  | 448   | 424   |
| >NF2-V146I-SVLLASYAV  | 10    | >NF2-V146I-SVLLASYAI  | 126   | 116   |
| >NF2-V146I-SVLLASYAV  | 18    | >NF2-V146I-SVLLASYAI  | 599   | 581   |
| >NF2-V146I-SVLLASYAV  | 17    | >NF2-V146I-SVLLASYAI  | 867   | 850   |
| >NF2-V146I-SVLLASYAV  | 57    | >NF2-V146I-SVLLASYAI  | 10146 | 10089 |
| >NF2-V146I-SVLLASYAV  | 462   | >NF2-V146I-SVLLASYAI  | 249   | 213   |
| >NF2-V146I-SVLLASYAVQ | 756   | >NF2-V146I-SVLLASYAIQ | 389   | 367   |
| >NF2-V146I-SVLLASYAV  | 302   | >NF2-V146I-SVLLASYAI  | 18    | 284   |
| >NF2-V146I-SVLLASYAV  | 25    | >NF2-V146I-SVLLASYAI  | 81    | 56    |
| >NF2-V146I-SVLLASYAV  | 8     | >NF2-V146I-SVLLASYAI  | 31    | 23    |
| >NF2-V146I-SVLLASYAVQ | 175   | >NF2-V146I-SVLLASYAIQ | 136   | 39    |
| >NF2-V146I-ASVLLASYAV | 194   | >NF2-V146I-ASVLLASYAI | 770   | 576   |
| >NF2-V146I-ASVLLASYAV | 1653  | >NF2-V146I-ASVLLASYAI | 159   | 1494  |
| >NF2-V146I-ASVLLASYAV | 368   | >NF2-V146I-ASVLLASYAI | 1392  | 1024  |
| >NF2-V146I-ASVLLASYAV | 216   | >NF2-V146I-ASVLLASYAI | 34    | 182   |
| >NF2-V146I-ASVLLASYAV | 13762 | >NF2-V146I-ASVLLASYAI | 304   | 13458 |
| >NF2-V219M VNYFAIRNK  | 3227  | >NF2-V219M MNYFAIRNK  | 209   | 3018  |
| >NF2-V219M VNYFAIRNKK | 4025  | >NF2-V219M MNYFAIRNK  | 294   | 3731  |
| >NF2-V219M VNYFAIRNKK | 1477  | >NF2-V219M MNYFAIRNK  | 356   | 1121  |
| >NF2-V219M VNYFAIRNK  | 2996  | >NF2-V219M MNYFAIRNK  | 101   | 2895  |
| >NF2-V219M VNYFAIRNKK | 1628  | >NF2-V219M MNYFAIRNK  | 131   | 1497  |
| >NF2-V219M GVNYFAIRNK | 49    | >NF2-V219M GMNYFAIRNI | 26    | 23    |
| >NF2-V219M GVNYFAIRNK | 125   | >NF2-V219M GMNYFAIRNI | 59    | 66    |
| >NF2-V219M GVNYFAIR   | 130   | >NF2-V219M GMNYFAIR   | 332   | 202   |
| >NF2-V219M GVNYFAIRNK | 61    | >NF2-V219M GMNYFAIRNI | 78    | 17    |
| >NF2-V219M GVNYFAIRNK | 15    | >NF2-V219M GMNYFAIRNI | 17    | 2     |
| >NF2-V219M GVNYFAIRNK | 120   | >NF2-V219M GMNYFAIRNI | 565   | 445   |
| >NF2-V219M GVNYFAIRNK | 158   | >NF2-V219M GMNYFAIRNI | 790   | 632   |
| >NF2-V219M GVNYFAIR   | 22    | >NF2-V219M GMNYFAIR   | 11    | 11    |
| >NF2-V219M GVNYFAIRNK | 520   | >NF2-V219M GMNYFAIRNI | 171   | 349   |
| >NF2-V219M GVNYFAIR   | 85    | >NF2-V219M GMNYFAIR   | 320   | 235   |
| >NF2-V219M GVNYFAIRNK | 122   | >NF2-V219M GMNYFAIRNI | 765   | 643   |
| >NF2-V219M GVNYFAIRNK | 612   | >NF2-V219M GMNYFAIRNI | 118   | 494   |
| >NF2-V219M GVNYFAIR   | 1942  | >NF2-V219M GMNYFAIR   | 370   | 1572  |
| >NF2-V219M KIAQDLEMYC | 31    | >NF2-V219M KIAQDLEMYC | 810   | 779   |
| >NF2-V219M KIAQDLEMYC | 9     | >NF2-V219M KIAQDLEMYC | 100   | 91    |

|                       |      |                       |      |      |
|-----------------------|------|-----------------------|------|------|
| >NF2-V219M KIAQDLEMYC | 13   | >NF2-V219M KIAQDLEMYC | 1400 | 1387 |
| >NF2-V219M KIAQDLEMYC | 11   | >NF2-V219M KIAQDLEMYC | 157  | 146  |
| >NF2-V219M KIAQDLEMYC | 14   | >NF2-V219M KIAQDLEMYC | 1883 | 1869 |
| >NF2-V219M KIAQDLEMYC | 36   | >NF2-V219M KIAQDLEMYC | 3532 | 3496 |
| >NF2-V219M KIAQDLEMYC | 18   | >NF2-V219M KIAQDLEMYC | 4835 | 4817 |
| >NF2-V219M KIAQDLEMYC | 28   | >NF2-V219M KIAQDLEMYC | 4562 | 4534 |
| >NF2-V219M KIAQDLEMYC | 9    | >NF2-V219M KIAQDLEMYC | 5955 | 5946 |
| >NF2-V219M KIAQDLEMYC | 5118 | >NF2-V219M KIAQDLEMYC | 48   | 5070 |
| >NF2-V219M KIAQDLEMYC | 434  | >NF2-V219M KIAQDLEMYC | 5150 | 4716 |
| >NF2-V219M YGVNYFAI   | 546  | >NF2-V219M YGMNYFAI   | 377  | 169  |
| >NF2-V219M YGVNYFAI   | 4966 | >NF2-V219M YGMNYFAI   | 259  | 4707 |
| >NF2-V219M YGVNYFAI   | 1041 | >NF2-V219M YGMNYFAI   | 143  | 898  |
| >NF2-V219M YGVNYFAI   | 35   | >NF2-V219M YGMNYFAI   | 15   | 20   |
| >NF2-V219M YGVNYFAI   | 1271 | >NF2-V219M YGMNYFAI   | 421  | 850  |
| >NF2-V219M YGVNYFAIRN | 3973 | >NF2-V219M YGMNYFAIRN | 334  | 3639 |
| >NF2-V219M YGVNYFAIR  | 156  | >NF2-V219M YGMNYFAIR  | 55   | 101  |
| >NF2-V219M YGVNYFAIR  | 98   | >NF2-V219M YGMNYFAIR  | 73   | 25   |
| >NF2-V219M YGVNYFAI   | 1826 | >NF2-V219M YGMNYFAI   | 468  | 1358 |
| >NF2-V219M YGVNYFAI   | 4454 | >NF2-V219M YGMNYFAI   | 448  | 4006 |
| >NF2-V219M YGVNYFAI   | 897  | >NF2-V219M YGMNYFAI   | 333  | 564  |
| >NF2-V219M YGVNYFAIR  | 227  | >NF2-V219M YGMNYFAIR  | 213  | 14   |
| >NF2-V219M YGVNYFAI   | 1647 | >NF2-V219M YGMNYFAI   | 400  | 1247 |
| >NF2-V219M MYGVNYFAI  | 20   | >NF2-V219M MYGMNYFAI  | 30   | 10   |
| >NF2-V219M MYGVNYFAI  | 60   | >NF2-V219M MYGMNYFAI  | 68   | 8    |
| >NF2-V219M MYGVNYFA   | 329  | >NF2-V219M MYGMNYFA   | 428  | 99   |
| >NF2-V219M MYGVNYFAI  | 5    | >NF2-V219M MYGMNYFAI  | 6    | 1    |
| >NF2-V219M MYGVNYFAIF | 74   | >NF2-V219M MYGMNYFAI  | 36   | 38   |
| >NF2-V219M MYGVNYFAIF | 126  | >NF2-V219M MYGMNYFAI  | 43   | 83   |
| >NF2-V219M MYGVNYFAIF | 29   | >NF2-V219M MYGMNYFAI  | 23   | 6    |
| >NF2-V219M MYGVNYFA   | 243  | >NF2-V219M MYGMNYFA   | 155  | 88   |
| >NF2-V219M MYGVNYFAI  | 533  | >NF2-V219M MYGMNYFAI  | 299  | 234  |
| >NF2-V219M EMYGVNYFA  | 73   | >NF2-V219M EMYGMNYFA  | 117  | 44   |
| >NF2-V219M EMYGVNYFA  | 174  | >NF2-V219M EMYGMNYFA  | 108  | 66   |
| >NF2-V219M EMYGVNYFA  | 19   | >NF2-V219M EMYGMNYFA  | 25   | 6    |
| >NF2-V219M EMYGVNYFA  | 46   | >NF2-V219M EMYGMNYFA  | 54   | 8    |
| >NF2-V219M EMYGVNYFA  | 223  | >NF2-V219M EMYGMNYFA  | 264  | 41   |
| >NF2-V219M EMYGVNYFA  | 151  | >NF2-V219M EMYGMNYFA  | 123  | 28   |
| >NF2-V219M EMYGVNYFA  | 250  | >NF2-V219M EMYGMNYFA  | 222  | 28   |
| >NF2-V219M EMYGVNYF   | 53   | >NF2-V219M EMYGMNYF   | 373  | 320  |
| >NF2-V219M EMYGVNYFA  | 4    | >NF2-V219M EMYGMNYFA  | 11   | 7    |
| >NF2-V219M EMYGVNYFA  | 3    | >NF2-V219M EMYGMNYFA  | 4    | 1    |
| >NF2-V219M EMYGVNYFA  | 62   | >NF2-V219M EMYGMNYFA  | 119  | 57   |
| >NF2-V219M EMYGVNYFA  | 15   | >NF2-V219M EMYGMNYFA  | 23   | 8    |

|                       |      |                      |     |     |
|-----------------------|------|----------------------|-----|-----|
| >NF2-V219M EMYGVNYFA  | 16   | >NF2-V219M EMYGMNYFA | 33  | 17  |
| >NF2-V219M EMYGVNYFA  | 21   | >NF2-V219M EMYGMNYFA | 34  | 13  |
| >NF2-V219M EMYGVNYFA  | 25   | >NF2-V219M EMYGMNYFA | 24  | 1   |
| >NF2-V219M EMYGVNYFA  | 23   | >NF2-V219M EMYGMNYFA | 24  | 1   |
| >NF2-V219M EMYGVNYFA  | 34   | >NF2-V219M EMYGMNYFA | 21  | 13  |
| >NF2-V219M EMYGVNYFA  | 27   | >NF2-V219M EMYGMNYFA | 16  | 11  |
| >NF2-V219M EMYGVNYF   | 55   | >NF2-V219M EMYGMNYF  | 30  | 25  |
| >NF2-V219M EMYGVNYF   | 428  | >NF2-V219M EMYGMNYF  | 179 | 249 |
| >NF2-V219M EMYGVNYFA  | 38   | >NF2-V219M EMYGMNYFA | 34  | 4   |
| >NF2-V219M EMYGVNYF   | 162  | >NF2-V219M EMYGMNYF  | 253 | 91  |
| >NF2-V219M EMYGVNYFA  | 36   | >NF2-V219M EMYGMNYFA | 31  | 5   |
| >NF2-V219M EMYGVNYFA  | 14   | >NF2-V219M EMYGMNYFA | 19  | 5   |
| >NF2-V219M EMYGVNYFA  | 4    | >NF2-V219M EMYGMNYFA | 4   | 0   |
| >NF2-V219M EMYGVNYFA  | 15   | >NF2-V219M EMYGMNYFA | 39  | 24  |
| >NF2-V219M EMYGVNYFA  | 63   | >NF2-V219M EMYGMNYFA | 46  | 17  |
| >NF2-V219M EMYGVNYFA  | 36   | >NF2-V219M EMYGMNYFA | 90  | 54  |
| >NF2-V219M EMYGVNYFA  | 8    | >NF2-V219M EMYGMNYFA | 12  | 4   |
| >NF2-V219M EMYGVNYF   | 92   | >NF2-V219M EMYGMNYF  | 105 | 13  |
| >NF2-V219M EMYGVNYF   | 104  | >NF2-V219M EMYGMNYF  | 113 | 9   |
| >NF2-V219M EMYGVNYF   | 23   | >NF2-V219M EMYGMNYF  | 34  | 11  |
| >NF2-V219M EMYGVNYFA  | 500  | >NF2-V219M EMYGMNYFA | 493 | 7   |
| >NF2-V219M EMYGVNYFA  | 338  | >NF2-V219M EMYGMNYFA | 459 | 121 |
| >NF2-V219M EMYGVNYFA  | 38   | >NF2-V219M EMYGMNYFA | 31  | 7   |
| >NF2-V219M LEMYGVNY   | 381  | >NF2-V219M LEMYGMNY  | 447 | 66  |
| >NF2-V219M LEMYGVNYF  | 112  | >NF2-V219M LEMYGMNYF | 125 | 13  |
| >NF2-V219M LEMYGVNYF, | 220  | >NF2-V219M LEMYGMNYF | 238 | 18  |
| >NF2-V219M LEMYGVNYF, | 12   | >NF2-V219M LEMYGMNYF | 12  | 0   |
| >NF2-V219M LEMYGVNYF, | 311  | >NF2-V219M LEMYGMNYF | 271 | 40  |
| >NF2-V219M LEMYGVNY   | 1077 | >NF2-V219M LEMYGMNY  | 473 | 604 |
| >NF2-V219M LEMYGVNY   | 134  | >NF2-V219M LEMYGMNY  | 153 | 19  |
| >NF2-V219M LEMYGVNYF  | 91   | >NF2-V219M LEMYGMNYF | 143 | 52  |
| >NF2-V219M LEMYGVNY   | 34   | >NF2-V219M LEMYGMNY  | 51  | 17  |
| >NF2-V219M LEMYGVNYF  | 16   | >NF2-V219M LEMYGMNYF | 30  | 14  |
| >NF2-V219M LEMYGVNYF, | 287  | >NF2-V219M LEMYGMNYF | 441 | 154 |
| >NF2-V219M LEMYGVNY   | 22   | >NF2-V219M LEMYGMNY  | 25  | 3   |
| >NF2-V219M LEMYGVNYF  | 24   | >NF2-V219M LEMYGMNYF | 33  | 9   |
| >NF2-V219M LEMYGVNYF, | 107  | >NF2-V219M LEMYGMNYF | 123 | 16  |
| >NF2-V219M LEMYGVNYF  | 83   | >NF2-V219M LEMYGMNYF | 65  | 18  |
| >NF2-V219M LEMYGVNYF, | 18   | >NF2-V219M LEMYGMNYF | 15  | 3   |
| >NF2-V219M LEMYGVNYF  | 411  | >NF2-V219M LEMYGMNYF | 374 | 37  |
| >NF2-V219M LEMYGVNYF, | 246  | >NF2-V219M LEMYGMNYF | 228 | 18  |
| >NF2-V219M LEMYGVNYF, | 45   | >NF2-V219M LEMYGMNYF | 42  | 3   |
| >NF2-V219M LEMYGVNY   | 239  | >NF2-V219M LEMYGMNY  | 227 | 12  |

|                      |       |                       |       |       |
|----------------------|-------|-----------------------|-------|-------|
| >NF2-V219MLEMYGVNY   | 106   | >NF2-V219MLEMYGMNY    | 123   | 17    |
| >NF2-V219MLEMYGVNYF  | 105   | >NF2-V219MLEMYGMNYF   | 145   | 40    |
| >NF2-V219MLEMYGVNYF/ | 320   | >NF2-V219MLEMYGMNYF   | 373   | 53    |
| >NF2-V219MLEMYGVNYF/ | 112   | >NF2-V219MLEMYGMNYF   | 98    | 14    |
| >NF2-V219MLEMYGVNYF  | 1176  | >NF2-V219MLEMYGMNYF   | 441   | 735   |
| >NF2-V219MLEMYGVNYF  | 18    | >NF2-V219MLEMYGMNYF   | 25    | 7     |
| >NF2-V219MLEMYGVNYF/ | 379   | >NF2-V219MLEMYGMNYF   | 179   | 200   |
| >NF2-V219MLEMYGVNYF/ | 4     | >NF2-V219MLEMYGMNYF   | 5     | 1     |
| >NF2-V219MDLEMYGVNY  | 1460  | >NF2-V219MDLEMYGMN\   | 423   | 1037  |
| >NF2-V219MQDLEMYGV   | 157   | >NF2-V219MQDLEMYGM    | 155   | 2     |
| >NF2-V219MQDLEMYGV   | 54    | >NF2-V219MQDLEMYGM    | 765   | 711   |
| >NF2-V219MAQDLEMYGV  | 1042  | >NF2-V219MAQDLEMYGM   | 443   | 599   |
| >NF2-V219MAQDLEMYGV  | 87    | >NF2-V219MAQDLEMYGM   | 3483  | 3396  |
| >NF2-V219MAQDLEMYGV  | 234   | >NF2-V219MAQDLEMYGM   | 2850  | 2616  |
| >NF2-V219MAQDLEMYGV  | 6     | >NF2-V219MAQDLEMYGM   | 146   | 140   |
| >NF2-V219MAQDLEMYGV  | 179   | >NF2-V219MAQDLEMYGM   | 8449  | 8270  |
| >NF2-V219MAQDLEMYGV  | 36    | >NF2-V219MAQDLEMYGM   | 3911  | 3875  |
| >NF2-V219MAQDLEMYGV  | 363   | >NF2-V219MAQDLEMYGM   | 12747 | 12384 |
| >NF2-V219MAQDLEMYGV  | 360   | >NF2-V219MAQDLEMYGM   | 334   | 26    |
| >NF2-V219MIAQDLEMYG\ | 94    | >NF2-V219MIAQDLEMYGI  | 1151  | 1057  |
| >NF2-V219MIAQDLEMYG\ | 202   | >NF2-V219MIAQDLEMYGI  | 8024  | 7822  |
| >NF2-V219MIAQDLEMYG\ | 86    | >NF2-V219MIAQDLEMYGI  | 12707 | 12621 |
| >NF2-V219MIAQDLEMYG\ | 4691  | >NF2-V219MIAQDLEMYGI  | 107   | 4584  |
| >NF2-W191RWYAEHRGR   | 3061  | >NF2-W191R RYAEHRGR   | 29    | 3032  |
| >NF2-W191RWYAEHRGRA  | 1035  | >NF2-W191R RYAEHRGRAI | 49    | 986   |
| >NF2-W191RWYAEHRGRA  | 424   | >NF2-W191R RYAEHRGRAI | 1156  | 732   |
| >NF2-W191RWYAEHRGR   | 59    | >NF2-W191R RYAEHRGR   | 30    | 29    |
| >NF2-W191RWYAEHRGRA  | 144   | >NF2-W191R RYAEHRGRAI | 52    | 92    |
| >NF2-W191RAWYAEHRGR  | 254   | >NF2-W191R RYAEHRGR/  | 9954  | 9700  |
| >NF2-W191RAWYAEHRGR  | 5915  | >NF2-W191R RYAEHRGR/  | 329   | 5586  |
| >NF2-W191RAWYAEHRGR  | 18263 | >NF2-W191R RYAEHRGR   | 164   | 18099 |
| >NF2-W191RAWYAEHRGR  | 16211 | >NF2-W191R RYAEHRGR/  | 385   | 15826 |
| >NF2-W191RAWYAEHRGR  | 16665 | >NF2-W191R RYAEHRGR/  | 126   | 16539 |
| >NF2-W191RAWYAEHRGR  | 34    | >NF2-W191R RYAEHRGR   | 1772  | 1738  |
| >NF2-W191RAWYAEHRGR  | 58    | >NF2-W191R RYAEHRGR/  | 4013  | 3955  |
| >NF2-W191RAWYAEHRG   | 491   | >NF2-W191R RYAEHRG    | 38521 | 38030 |
| >NF2-W191RAWYAEHRGR  | 345   | >NF2-W191R RYAEHRGR/  | 36848 | 36503 |
| >NF2-W191RPEMWEERIT/ | 219   | >NF2-W191RPEMWEERIT/  | 9955  | 9736  |
| >NF2-W191RPEMWEERIT/ | 172   | >NF2-W191RPEMWEERIT/  | 9487  | 9315  |
| >NF2-W191RTAWYAEHRG  | 12837 | >NF2-W191R TARYAEHRGF | 226   | 12611 |
| >NF2-W191RTAWYAEHR   | 33    | >NF2-W191R TARYAEHR   | 91    | 58    |
| >NF2-W191RTAWYAEHRG  | 397   | >NF2-W191R TARYAEHRGF | 246   | 151   |
| >NF2-W191RTAWYAEHR   | 98    | >NF2-W191R TARYAEHR   | 191   | 93    |

|                      |       |                       |       |       |
|----------------------|-------|-----------------------|-------|-------|
| >NF2-W191RTAWYAEHR   | 15    | >NF2-W191RTARYAEHR    | 30    | 15    |
| >NF2-W191RTAWYAEHR   | 258   | >NF2-W191RTARYAEHR    | 3438  | 3180  |
| >NF2-W191RITAWYAEHR  | 50    | >NF2-W191RITARYAEHR   | 50    | 0     |
| >NF2-W191RITAWYAEHRG | 168   | >NF2-W191RITARYAEHRG  | 186   | 18    |
| >NF2-W191RITAWYAEHR  | 328   | >NF2-W191RITARYAEHR   | 791   | 463   |
| >NF2-W191RITAWYAEH   | 392   | >NF2-W191RITARYAEH    | 918   | 526   |
| >NF2-W191RITAWYAEHR  | 3     | >NF2-W191RITARYAEHR   | 5     | 2     |
| >NF2-W191RITAWYAEHRG | 7     | >NF2-W191RITARYAEHRG  | 13    | 6     |
| >NF2-W191RITAWYAEH   | 243   | >NF2-W191RITARYAEH    | 810   | 567   |
| >NF2-W191RITAWYAEHR  | 358   | >NF2-W191RITARYAEHR   | 316   | 42    |
| >NF2-W191RITAWYAEHR  | 150   | >NF2-W191RITARYAEHR   | 1004  | 854   |
| >NF2-W191RITAWYAEHRG | 365   | >NF2-W191RITARYAEHRG  | 1323  | 958   |
| >NF2-W191RRITAWYAEH  | 352   | >NF2-W191RRITARYAEH   | 400   | 48    |
| >NF2-W191RRITAWYAEHF | 22    | >NF2-W191RRITARYAEHR  | 26    | 4     |
| >NF2-W191RRITAWYAEHF | 81    | >NF2-W191RRITARYAEHR  | 149   | 68    |
| >NF2-W191RRITAWYAEHF | 61    | >NF2-W191RRITARYAEHR  | 100   | 39    |
| >NF2-W191RRITAWYAEHF | 34    | >NF2-W191RRITARYAEHR  | 44    | 10    |
| >NF2-W191RERITAWYAEH | 134   | >NF2-W191RERITARYAEHI | 139   | 5     |
| >NF2-W191RERITAWYAEH | 361   | >NF2-W191RERITARYAEH  | 1226  | 865   |
| >NF2-W191RERITAWYAEH | 276   | >NF2-W191RERITARYAEHI | 496   | 220   |
| >NF2-W191REERITAWY   | 168   | >NF2-W191REERITARY    | 763   | 595   |
| >NF2-W191REERITAWY   | 122   | >NF2-W191REERITARY    | 371   | 249   |
| >NF2-W191REERITAWY   | 83    | >NF2-W191REERITARY    | 212   | 129   |
| >NF2-W191REERITAWYA  | 8     | >NF2-W191REERITARYA   | 20    | 12    |
| >NF2-W191RWEERITAWY  | 57    | >NF2-W191RWEERITARY   | 238   | 181   |
| >NF2-W191RWEERITAWY, | 299   | >NF2-W191RWEERITARYA  | 182   | 117   |
| >NF2-W191RWEERITAW   | 70    | >NF2-W191RWEERITAR    | 1020  | 950   |
| >NF2-W191RWEERITAWY  | 40    | >NF2-W191RWEERITARY   | 86    | 46    |
| >NF2-W191RWEERITAWY, | 298   | >NF2-W191RWEERITARYA  | 302   | 4     |
| >NF2-W191RWEERITAW   | 138   | >NF2-W191RWEERITAR    | 8447  | 8309  |
| >NF2-W191RWEERITAW   | 162   | >NF2-W191RWEERITAR    | 13927 | 13765 |
| >NF2-W191RWEERITAWY  | 267   | >NF2-W191RWEERITARY   | 693   | 426   |
| >NF2-W191RWEERITAWY, | 316   | >NF2-W191RWEERITARYA  | 518   | 202   |
| >NF2-W191RWEERITAWY  | 474   | >NF2-W191RWEERITARY   | 795   | 321   |
| >NF2-W191RWEERITAWY, | 20    | >NF2-W191RWEERITARYA  | 111   | 91    |
| >NF2-W191RWEERITAW   | 48    | >NF2-W191RWEERITAR    | 27590 | 27542 |
| >NF2-W191RMWEERITAW  | 84    | >NF2-W191RMWEERITAR'  | 163   | 79    |
| >NF2-W191RMWEERITAW  | 437   | >NF2-W191RMWEERITAR'  | 3386  | 2949  |
| >NF2-W191RMWEERITAW  | 59    | >NF2-W191RMWEERITAR'  | 79    | 20    |
| >NF2-W191RMWEERITAW  | 94    | >NF2-W191RMWEERITAR'  | 92    | 2     |
| >NF2-W191RMWEERITAW  | 19668 | >NF2-W191RMWEERITAR   | 58    | 19610 |
| >NF2-W191RMWEERITAW  | 23731 | >NF2-W191RMWEERITAR   | 112   | 23619 |
| >NF2-W191RMWEERITAW  | 12148 | >NF2-W191RMWEERITAR   | 36    | 12112 |

|                      |       |                       |       |       |
|----------------------|-------|-----------------------|-------|-------|
| >NF2-W191RMWEERITAV  | 58    | >NF2-W191RMWEERITAR   | 161   | 103   |
| >NF2-W191RMWEERITAV  | 24    | >NF2-W191RMWEERITAR'  | 55    | 31    |
| >NF2-W191REMWEERITA' | 464   | >NF2-W191REMWEERITAI  | 527   | 63    |
| >NF2-W191REMWEERITA' | 55    | >NF2-W191REMWEERITAI  | 168   | 113   |
| >NF2-W191REMWEERITA' | 139   | >NF2-W191REMWEERITAI  | 501   | 362   |
| >NF2-W191REMWEERITA' | 80    | >NF2-W191REMWEERITAI  | 41    | 39    |
| >NF2-W191REMWEERITA' | 113   | >NF2-W191REMWEERITAI  | 75    | 38    |
| >NF2-W191REMWEERITA' | 248   | >NF2-W191REMWEERITAI  | 11905 | 11657 |
| >NF2-W191REMWEERITA' | 263   | >NF2-W191REMWEERITAI  | 237   | 26    |
| >NF2-W191REMWEERITA' | 436   | >NF2-W191REMWEERITAI  | 28202 | 27766 |
| >NF2-W191REMWEERITA' | 64    | >NF2-W191REMWEERITAI  | 54    | 10    |
| >NF2-W191REMWEERITA' | 402   | >NF2-W191REMWEERITAI  | 30094 | 29692 |
| >NF2-W191REMWEERITA' | 13940 | >NF2-W191REMWEERITAI  | 40    | 13900 |
| >NF2-W41C- KWKGKDLF  | 462   | >NF2-W41C- KCKGKDLF   | 15962 | 15500 |
| >NF2-W41C- KWKGKDLF  | 392   | >NF2-W41C- KCKGKDLF   | 11879 | 11487 |
| >NF2-W41C- KWKGKDLF  | 80    | >NF2-W41C- KCKGKDLF   | 14631 | 14551 |
| >NF2-W41C- KWKGKDLF  | 156   | >NF2-W41C- KCKGKDLF   | 33476 | 33320 |
| >NF2-W41C- KWKGKDLFD | 201   | >NF2-W41C- KCKGKDLFD  | 27959 | 27758 |
| >NF2-W41C- KWKGKDLFD | 84    | >NF2-W41C- KCKGKDLFDL | 26849 | 26765 |
| >NF2-W41C- AEMEFNCEN | 488   | >NF2-W41C- AEMEFNCEN  | 244   | 244   |
| >NF2-W41C- AEMEFNCEN | 61    | >NF2-W41C- AEMEFNCEN  | 2160  | 2099  |
| >NF2-W41C- AEMEFNCEN | 12    | >NF2-W41C- AEMEFNCEN  | 776   | 764   |
| >NF2-W41C- AEMEFNCEN | 377   | >NF2-W41C- AEMEFNCEN  | 78    | 299   |
| >NF2-W41C- AEMEFNCEN | 11    | >NF2-W41C- AEMEFNCEN  | 17    | 6     |
| >NF2-W41C- AEMEFNCEN | 381   | >NF2-W41C- AEMEFNCEN  | 29681 | 29300 |
| >NF2-W41C- MKWKGKDL  | 22    | >NF2-W41C- MKCKGKDL   | 250   | 228   |
| >NF2-W41C- MKWKGKDLF | 9     | >NF2-W41C- MKCKGKDLF  | 94    | 85    |
| >NF2-W41C- MKWKGKDLF | 55    | >NF2-W41C- MKCKGKDLFI | 619   | 564   |
| >NF2-W41C- MKWKGKDLF | 332   | >NF2-W41C- MKCKGKDLFI | 5984  | 5652  |
| >NF2-W41C- MKWKGKDLF | 299   | >NF2-W41C- MKCKGKDLF  | 1135  | 836   |
| >NF2-W41C- EMKWKGKDI | 119   | >NF2-W41C- EMKCKGKDL  | 39    | 80    |
| >NF2-W41C- EMKWKGKDI | 1506  | >NF2-W41C- EMKCKGKDLI | 351   | 1155  |
| >NF2-W41C- CEMKWKGKI | 247   | >NF2-W41C- CEMKCKGKD  | 146   | 101   |
| >NF2-W41C- CEMKWKGKI | 388   | >NF2-W41C- CEMKCKGKD  | 349   | 39    |
| >NF2-W41C- CEMKWKGKI | 377   | >NF2-W41C- CEMKCKGKD  | 177   | 200   |
| >NF2-W41C- CEMKWKGKI | 51    | >NF2-W41C- CEMKCKGKD  | 73    | 22    |
| >NF2-W41C- MEFNCENKV | 458   | >NF2-W41C- MEFNCENKCC | 3841  | 3383  |
| >NF2-W41C- MEFNCENKV | 64    | >NF2-W41C- MEFNCENKCC | 3402  | 3338  |
| >NF2-W41C- MEFNCENKV | 2017  | >NF2-W41C- MEFNCENKCC | 485   | 1532  |
| >NF2-W41C- MEFNCENKV | 866   | >NF2-W41C- MEFNCENKCC | 484   | 382   |
| >NF2-W41C- MEFNCENKV | 137   | >NF2-W41C- MEFNCENKCC | 8875  | 8738  |
| >NF2-W41C- MEFNCENKV | 11    | >NF2-W41C- MEFNCENKCC | 1532  | 1521  |
| >NF2-W41C- MEFNCENKV | 375   | >NF2-W41C- MEFNCENKCC | 33598 | 33223 |

|                       |      |                       |       |       |
|-----------------------|------|-----------------------|-------|-------|
| >NF2-W41C-MEFNCEMKV   | 442  | >NF2-W41C-MEFNCEMKC   | 24670 | 24228 |
| >NF2-W41C-MEFNCEMKV   | 45   | >NF2-W41C-MEFNCEMKC   | 92    | 47    |
| >NF2-W41C-MEFNCEMKV   | 200  | >NF2-W41C-MEFNCEMKC   | 29920 | 29720 |
| >NF2-W41C-MEFNCEMKV   | 7    | >NF2-W41C-MEFNCEMKC   | 7430  | 7423  |
| >NF2-W41C-EMEFNCEMK   | 135  | >NF2-W41C-EMEFNCEMK   | 222   | 87    |
| >NF2-W41C-EMEFNCEMK   | 423  | >NF2-W41C-EMEFNCEMK   | 31180 | 30757 |
| >NF2-Y221C-YFAIRNKK   | 288  | >NF2-Y221C-CFAIRNKK   | 909   | 621   |
| >NF2-Y221C-NYFAIRNKK  | 327  | >NF2-Y221C-NCFAIRNKK  | 5717  | 5390  |
| >NF2-Y221C-NYFAIRNK   | 199  | >NF2-Y221C-NCFAIRNK   | 4288  | 4089  |
| >NF2-Y221C-NYFAIRNKK  | 121  | >NF2-Y221C-NCFAIRNKK  | 3194  | 3073  |
| >NF2-Y221C-NYFAIRNK   | 145  | >NF2-Y221C-NCFAIRNK   | 751   | 606   |
| >NF2-Y221C-NYFAIRNKK  | 40   | >NF2-Y221C-NCFAIRNKK  | 197   | 157   |
| >NF2-Y221C-NYFAIRNK   | 97   | >NF2-Y221C-NCFAIRNK   | 1568  | 1471  |
| >NF2-Y221C-NYFAIRNKK  | 91   | >NF2-Y221C-NCFAIRNKK  | 1240  | 1149  |
| >NF2-Y221C-AQDLEMYGV  | 360  | >NF2-Y221C-AQDLEMYGV  | 13511 | 13151 |
| >NF2-Y221C-GVNYFAIRNK | 49   | >NF2-Y221C-GVNCFAIRNK | 113   | 64    |
| >NF2-Y221C-GVNYFAIRNK | 125  | >NF2-Y221C-GVNCFAIRNK | 130   | 5     |
| >NF2-Y221C-GVNYFAIR   | 130  | >NF2-Y221C-GVNCFAIR   | 154   | 24    |
| >NF2-Y221C-GVNYFAIRNK | 61   | >NF2-Y221C-GVNCFAIRNK | 93    | 32    |
| >NF2-Y221C-GVNYFAIRNK | 15   | >NF2-Y221C-GVNCFAIRNK | 14    | 1     |
| >NF2-Y221C-GVNYFAIRNK | 120  | >NF2-Y221C-GVNCFAIRNK | 142   | 22    |
| >NF2-Y221C-GVNYFAIRNK | 158  | >NF2-Y221C-GVNCFAIRNK | 189   | 31    |
| >NF2-Y221C-GVNYFAIR   | 22   | >NF2-Y221C-GVNCFAIR   | 49    | 27    |
| >NF2-Y221C-GVNYFAIR   | 85   | >NF2-Y221C-GVNCFAIR   | 176   | 91    |
| >NF2-Y221C-GVNYFAIRNK | 122  | >NF2-Y221C-GVNCFAIRNK | 239   | 117   |
| >NF2-Y221C-GVNYFAIRNK | 612  | >NF2-Y221C-GVNCFAIRNK | 417   | 195   |
| >NF2-Y221C-GVNYFAIRNK | 548  | >NF2-Y221C-GVNCFAIRNK | 453   | 95    |
| >NF2-Y221C-YGVNYFAI   | 35   | >NF2-Y221C-YGVNCFAI   | 61    | 26    |
| >NF2-Y221C-YGVNYFAIR  | 156  | >NF2-Y221C-YGVNCFAIR  | 251   | 95    |
| >NF2-Y221C-YGVNYFAIR  | 98   | >NF2-Y221C-YGVNCFAIR  | 223   | 125   |
| >NF2-Y221C-YGVNYFAIR  | 227  | >NF2-Y221C-YGVNCFAIR  | 63    | 164   |
| >NF2-Y221C-MYGVNYFAI  | 2033 | >NF2-Y221C-MYGVNCFAI  | 458   | 1575  |
| >NF2-Y221C-MYGVNYFAI  | 20   | >NF2-Y221C-MYGVNCFAI  | 28    | 8     |
| >NF2-Y221C-MYGVNYFAI  | 60   | >NF2-Y221C-MYGVNCFAI  | 146   | 86    |
| >NF2-Y221C-MYGVNYFA   | 329  | >NF2-Y221C-MYGVNCFA   | 1194  | 865   |
| >NF2-Y221C-MYGVNYFAI  | 5    | >NF2-Y221C-MYGVNCFAI  | 7     | 2     |
| >NF2-Y221C-MYGVNYFAIF | 74   | >NF2-Y221C-MYGVNCFAIF | 59    | 15    |
| >NF2-Y221C-MYGVNYFAIF | 126  | >NF2-Y221C-MYGVNCFAIF | 202   | 76    |
| >NF2-Y221C-MYGVNYFAIF | 29   | >NF2-Y221C-MYGVNCFAIF | 23    | 6     |
| >NF2-Y221C-MYGVNYFA   | 243  | >NF2-Y221C-MYGVNCFA   | 260   | 17    |
| >NF2-Y221C-MYGVNYFAI  | 533  | >NF2-Y221C-MYGVNCFAI  | 196   | 337   |
| >NF2-Y221C-EMYGVNYFA  | 73   | >NF2-Y221C-EMYGVNCFA  | 901   | 828   |
| >NF2-Y221C-EMYGVNYFA  | 174  | >NF2-Y221C-EMYGVNCFA  | 123   | 51    |



|                        |     |                        |       |       |
|------------------------|-----|------------------------|-------|-------|
| >NF2-Y221C- EMYGVNYFA  | 19  | >NF2-Y221C- EMYGVNCFA  | 112   | 93    |
| >NF2-Y221C- EMYGVNYFA  | 46  | >NF2-Y221C- EMYGVNCFA  | 88    | 42    |
| >NF2-Y221C- EMYGVNYFA  | 223 | >NF2-Y221C- EMYGVNCFA  | 269   | 46    |
| >NF2-Y221C- EMYGVNYFA  | 151 | >NF2-Y221C- EMYGVNCFA  | 138   | 13    |
| >NF2-Y221C- EMYGVNYFA  | 250 | >NF2-Y221C- EMYGVNCFA  | 251   | 1     |
| >NF2-Y221C- EMYGVNYF   | 53  | >NF2-Y221C- EMYGVNCF   | 935   | 882   |
| >NF2-Y221C- EMYGVNYFA  | 4   | >NF2-Y221C- EMYGVNCFA  | 5     | 1     |
| >NF2-Y221C- EMYGVNYFA  | 3   | >NF2-Y221C- EMYGVNCFA  | 4     | 1     |
| >NF2-Y221C- EMYGVNYFA  | 62  | >NF2-Y221C- EMYGVNCFA  | 394   | 332   |
| >NF2-Y221C- EMYGVNYFA  | 15  | >NF2-Y221C- EMYGVNCFA  | 42    | 27    |
| >NF2-Y221C- EMYGVNYFA  | 16  | >NF2-Y221C- EMYGVNCFA  | 13    | 3     |
| >NF2-Y221C- EMYGVNYFA  | 21  | >NF2-Y221C- EMYGVNCFA  | 26    | 5     |
| >NF2-Y221C- EMYGVNYFA  | 25  | >NF2-Y221C- EMYGVNCFA  | 63    | 38    |
| >NF2-Y221C- EMYGVNYFA  | 23  | >NF2-Y221C- EMYGVNCFA  | 35    | 12    |
| >NF2-Y221C- EMYGVNYFA  | 34  | >NF2-Y221C- EMYGVNCFA  | 19    | 15    |
| >NF2-Y221C- EMYGVNYFA  | 27  | >NF2-Y221C- EMYGVNCFA  | 25    | 2     |
| >NF2-Y221C- EMYGVNYF   | 55  | >NF2-Y221C- EMYGVNCF   | 113   | 58    |
| >NF2-Y221C- EMYGVNYF   | 428 | >NF2-Y221C- EMYGVNCF   | 5015  | 4587  |
| >NF2-Y221C- EMYGVNYFA  | 38  | >NF2-Y221C- EMYGVNCFA  | 71    | 33    |
| >NF2-Y221C- EMYGVNYF   | 162 | >NF2-Y221C- EMYGVNCF   | 264   | 102   |
| >NF2-Y221C- EMYGVNYFA  | 36  | >NF2-Y221C- EMYGVNCFA  | 52    | 16    |
| >NF2-Y221C- EMYGVNYFA  | 14  | >NF2-Y221C- EMYGVNCFA  | 20    | 6     |
| >NF2-Y221C- EMYGVNYFA  | 4   | >NF2-Y221C- EMYGVNCFA  | 5     | 1     |
| >NF2-Y221C- EMYGVNYFA  | 15  | >NF2-Y221C- EMYGVNCFA  | 132   | 117   |
| >NF2-Y221C- EMYGVNYFA  | 63  | >NF2-Y221C- EMYGVNCFA  | 42    | 21    |
| >NF2-Y221C- EMYGVNYFA  | 36  | >NF2-Y221C- EMYGVNCFA  | 67    | 31    |
| >NF2-Y221C- EMYGVNYFA  | 8   | >NF2-Y221C- EMYGVNCFA  | 14    | 6     |
| >NF2-Y221C- EMYGVNYF   | 92  | >NF2-Y221C- EMYGVNCF   | 102   | 10    |
| >NF2-Y221C- EMYGVNYF   | 104 | >NF2-Y221C- EMYGVNCF   | 128   | 24    |
| >NF2-Y221C- EMYGVNYF   | 23  | >NF2-Y221C- EMYGVNCF   | 26    | 3     |
| >NF2-Y221C- EMYGVNYF   | 753 | >NF2-Y221C- EMYGVNCF   | 485   | 268   |
| >NF2-Y221C- EMYGVNYFA  | 338 | >NF2-Y221C- EMYGVNCFA  | 975   | 637   |
| >NF2-Y221C- EMYGVNYFA  | 38  | >NF2-Y221C- EMYGVNCFA  | 35    | 3     |
| >NF2-Y221C- LEMYGVNY   | 381 | >NF2-Y221C- LEMYGVNC   | 389   | 8     |
| >NF2-Y221C- LEMYGVNYF  | 112 | >NF2-Y221C- LEMYGVNCF  | 84    | 28    |
| >NF2-Y221C- LEMYGVNYF, | 220 | >NF2-Y221C- LEMYGVNCF, | 106   | 114   |
| >NF2-Y221C- LEMYGVNYF, | 12  | >NF2-Y221C- LEMYGVNCF, | 11    | 1     |
| >NF2-Y221C- LEMYGVNYF, | 311 | >NF2-Y221C- LEMYGVNCF, | 519   | 208   |
| >NF2-Y221C- LEMYGVNY   | 134 | >NF2-Y221C- LEMYGVNC   | 15667 | 15533 |
| >NF2-Y221C- LEMYGVNYF  | 91  | >NF2-Y221C- LEMYGVNCF  | 115   | 24    |
| >NF2-Y221C- LEMYGVNY   | 34  | >NF2-Y221C- LEMYGVNC   | 6737  | 6703  |
| >NF2-Y221C- LEMYGVNYF  | 16  | >NF2-Y221C- LEMYGVNCF  | 23    | 7     |
| >NF2-Y221C- LEMYGVNYF, | 287 | >NF2-Y221C- LEMYGVNCF, | 457   | 170   |

|                         |       |                          |       |       |
|-------------------------|-------|--------------------------|-------|-------|
| >NF2-Y221C- LEMYGVNY    | 22    | >NF2-Y221C- LEMYGVNC     | 3865  | 3843  |
| >NF2-Y221C- LEMYGVNYF   | 24    | >NF2-Y221C- LEMYGVNCF    | 24    | 0     |
| >NF2-Y221C- LEMYGVNYF/  | 107   | >NF2-Y221C- LEMYGVNCF/   | 174   | 67    |
| >NF2-Y221C- LEMYGVNYF   | 83    | >NF2-Y221C- LEMYGVNCF    | 259   | 176   |
| >NF2-Y221C- LEMYGVNYF/  | 18    | >NF2-Y221C- LEMYGVNCF/   | 30    | 12    |
| >NF2-Y221C- LEMYGVNYF   | 411   | >NF2-Y221C- LEMYGVNCF    | 127   | 284   |
| >NF2-Y221C- LEMYGVNYF/  | 246   | >NF2-Y221C- LEMYGVNCF/   | 2777  | 2531  |
| >NF2-Y221C- LEMYGVNYF/  | 45    | >NF2-Y221C- LEMYGVNCF/   | 44    | 1     |
| >NF2-Y221C- LEMYGVNY    | 239   | >NF2-Y221C- LEMYGVNC     | 4603  | 4364  |
| >NF2-Y221C- LEMYGVNYF   | 729   | >NF2-Y221C- LEMYGVNCF    | 183   | 546   |
| >NF2-Y221C- LEMYGVNY    | 106   | >NF2-Y221C- LEMYGVNC     | 4271  | 4165  |
| >NF2-Y221C- LEMYGVNYF   | 105   | >NF2-Y221C- LEMYGVNCF    | 145   | 40    |
| >NF2-Y221C- LEMYGVNYF/  | 320   | >NF2-Y221C- LEMYGVNCF/   | 1194  | 874   |
| >NF2-Y221C- LEMYGVNYF/  | 112   | >NF2-Y221C- LEMYGVNCF/   | 112   | 0     |
| >NF2-Y221C- LEMYGVNYF   | 18    | >NF2-Y221C- LEMYGVNCF    | 16    | 2     |
| >NF2-Y221C- LEMYGVNYF/  | 379   | >NF2-Y221C- LEMYGVNCF/   | 1613  | 1234  |
| >NF2-Y221C- LEMYGVNYF/  | 4     | >NF2-Y221C- LEMYGVNCF/   | 4     | 0     |
| >NIN-E1565K ETVKQENAA\  | 2238  | >NIN-E1565K KTVKQENAA\   | 497   | 1741  |
| >NIN-E1565K ETVKQENAA\  | 2961  | >NIN-E1565K KTVKQENAA\   | 472   | 2489  |
| >NIN-E1565K ETVKQENAA   | 289   | >NIN-E1565K KTVKQENAA    | 13314 | 13025 |
| >NIN-E1565K ETVKQENAA\  | 26    | >NIN-E1565K KTVKQENAA\   | 3176  | 3150  |
| >NIN-E1565K ETVKQENAA\  | 62    | >NIN-E1565K KTVKQENAA\   | 5119  | 5057  |
| >NIN-E1565K ETVKQENAA\  | 374   | >NIN-E1565K KTVKQENAA\   | 13633 | 13259 |
| >NIN-E1565K ETVKQENA    | 62    | >NIN-E1565K KTVKQENA     | 6975  | 6913  |
| >NIN-E1565K ETVKQENAA   | 170   | >NIN-E1565K KTVKQENAA    | 10531 | 10361 |
| >NIN-E1565K ETVKQENAA\  | 58    | >NIN-E1565K KTVKQENAA\   | 2100  | 2042  |
| >NIN-E1565K ETVKQENAA\  | 18    | >NIN-E1565K KTVKQENAA\   | 2069  | 2051  |
| >NIN-E1565K ETVKQENAA\  | 6218  | >NIN-E1565K KTVKQENAA\   | 210   | 6008  |
| >NIN-E1565K TETVKQENA   | 300   | >NIN-E1565K KTKVKQENA    | 32836 | 32536 |
| >NIN-E1565K TETVKQENA/  | 291   | >NIN-E1565K KTKVKQENA/   | 32953 | 32662 |
| >NIN-E1565K GSQEEMWQ    | 24471 | >NIN-E1565K GSQEEMWQ     | 148   | 24323 |
| >NIN-E1565K GSQEEMWQ    | 5749  | >NIN-E1565K GSQEEMWQ     | 224   | 5525  |
| >NIN-E1565K KTETVKQEN   | 11856 | >NIN-E1565K KTKTKVKQEN   | 476   | 11380 |
| >NIN-E1565K KTETVKQENA/ | 3745  | >NIN-E1565K KTKTKVKQENA/ | 26    | 3719  |
| >NIN-E1565K KTETVKQENA/ | 2062  | >NIN-E1565K KTKTKVKQENA/ | 9     | 2053  |
| >NIN-E1565K WQKTETVK    | 297   | >NIN-E1565K WQKTETVK     | 601   | 304   |
| >NIN-E1565K MWQKTETV\   | 292   | >NIN-E1565K MWQKTETV\    | 141   | 151   |
| >NIN-E1565K MWQKTETV    | 116   | >NIN-E1565K MWQKTETV     | 111   | 5     |
| >NIN-E1565K MWQKTETV\   | 533   | >NIN-E1565K MWQKTETV\    | 399   | 134   |
| >NIN-E1565K MWQKTETV\   | 537   | >NIN-E1565K MWQKTETV\    | 495   | 42    |
| >NIN-E1565K EMWQKTET\   | 250   | >NIN-E1565K EMWQKTET\    | 2693  | 2443  |
| >NIN-E1565K EMWQKTET    | 498   | >NIN-E1565K EMWQKTET     | 1520  | 1022  |
| >NIN-E1565K EMWQKTET\   | 2     | >NIN-E1565K EMWQKTET\    | 4     | 2     |

|                        |      |                        |       |       |
|------------------------|------|------------------------|-------|-------|
| >NIN-E1565K EMWQKTETV  | 10   | >NIN-E1565K EMWQKTETV  | 30    | 20    |
| >NIN-E1565K EMWQKTETV  | 9    | >NIN-E1565K EMWQKTETV  | 16    | 7     |
| >NIN-E1565K EMWQKTETV  | 2    | >NIN-E1565K EMWQKTETV  | 5     | 3     |
| >NIN-E1565K EMWQKTETV  | 4    | >NIN-E1565K EMWQKTETV  | 6     | 2     |
| >NIN-E1565K EMWQKTETV  | 242  | >NIN-E1565K EMWQKTETV  | 566   | 324   |
| >NIN-E1565K EMWQKTETV  | 363  | >NIN-E1565K EMWQKTETV  | 5730  | 5367  |
| >NIN-E1565K EMWQKTETV  | 16   | >NIN-E1565K EMWQKTETV  | 73    | 57    |
| >NIN-E1565K EMWQKTETV  | 1172 | >NIN-E1565K EMWQKTETV  | 258   | 914   |
| >NIN-E1565K EMWQKTETV  | 376  | >NIN-E1565K EMWQKTETV  | 219   | 157   |
| >NIN-E1565K EEMWQKTE   | 278  | >NIN-E1565K EEMWQKTK   | 219   | 59    |
| >NIN-E1565K EEMWQKTET  | 75   | >NIN-E1565K EEMWQTKT   | 38    | 37    |
| >NIN-E1565K EEMWQKTET  | 290  | >NIN-E1565K EEMWQTKT   | 487   | 197   |
| >NIN-E1565K EEMWQKTET  | 54   | >NIN-E1565K EEMWQTKT   | 165   | 111   |
| >NIN-E1565K EEMWQKTET  | 498  | >NIN-E1565K EEMWQTKT   | 786   | 288   |
| >NIN-E1565K EEMWQKTET  | 398  | >NIN-E1565K EEMWQTKT   | 555   | 157   |
| >NIN-E1565K QEEMWQKTI  | 37   | >NIN-E1565K QEEMWQKTI  | 14    | 23    |
| >NIN-E1565K QEEMWQKTI  | 462  | >NIN-E1565K QEEMWQKTI  | 1102  | 640   |
| >NIN-E1565K QEEMWQKTI  | 357  | >NIN-E1565K QEEMWQKTI  | 480   | 123   |
| >NIN-E1565K QEEMWQKTI  | 163  | >NIN-E1565K QEEMWQKTI  | 332   | 169   |
| >NKX2-G92D GNMSELPPY   | 1331 | >NKX2-G92D DNMSELPPY   | 25    | 1306  |
| >NKX2-G92D GNMSELPPY   | 487  | >NKX2-G92D DNMSELPPY   | 2596  | 2109  |
| >NKX2-G92D GNMSELPPY   | 258  | >NKX2-G92D DNMSELPPY   | 1062  | 804   |
| >NKX2-G92D GNMSELPPY   | 295  | >NKX2-G92D DNMSELPPY   | 5213  | 4918  |
| >NKX2-G92D LGNMSELPPY  | 107  | >NKX2-G92D LDNMSELPPY  | 749   | 642   |
| >NKX2-G92D LGNMSELPPY  | 409  | >NKX2-G92D LDNMSELPPY  | 11028 | 10619 |
| >NKX2-G92D NLGNMSELPI  | 6497 | >NKX2-G92D NLDNMSELPI  | 69    | 6428  |
| >NKX2-G92D NLGNMSEL    | 1480 | >NKX2-G92D NLDNMSEL    | 301   | 1179  |
| >NKX2-G92D NLGNMSEL    | 70   | >NKX2-G92D NLDNMSEL    | 59    | 11    |
| >NKX2-G92D NLGNMSEL    | 353  | >NKX2-G92D NLDNMSEL    | 837   | 484   |
| >NKX2-G92D NLGNMSEL    | 137  | >NKX2-G92D NLDNMSEL    | 48    | 89    |
| >NKX2-G92D NLGNMSEL    | 75   | >NKX2-G92D NLDNMSEL    | 31    | 44    |
| >NKX2-G92D NLGNMSEL    | 338  | >NKX2-G92D NLDNMSEL    | 106   | 232   |
| >NKX2-G92D NLGNMSEL    | 195  | >NKX2-G92D NLDNMSEL    | 126   | 69    |
| >NKX2-G92D NLGNMSEL    | 19   | >NKX2-G92D NLDNMSEL    | 32    | 13    |
| >NKX2-G92D NLGNMSELPI  | 150  | >NKX2-G92D NLDNMSELPI  | 410   | 260   |
| >NKX2-G92D NLGNMSELPI  | 145  | >NKX2-G92D NLDNMSELPI  | 517   | 372   |
| >NKX2-G92D NLGNMSELPI  | 105  | >NKX2-G92D NLDNMSELPI  | 1067  | 962   |
| >NKX2-G92D NLGNMSELPI  | 415  | >NKX2-G92D NLDNMSELPI  | 644   | 229   |
| >NKX2-G92D YCNGNLDNM   | 140  | >NKX2-G92D YCNGNLDNM   | 127   | 13    |
| >NKX2-G92D GYCNGNLDN   | 436  | >NKX2-G92D GYCNGNLDN   | 608   | 172   |
| >NKX2-G92D GYCNGNLDN   | 291  | >NKX2-G92D GYCNGNLDN   | 231   | 60    |
| >NONO-F213 FLLTTFPRPV  | 10   | >NONO-F213 LLLTTFPRPV  | 27    | 17    |
| >NONO-F213 FLLTTFPRPVT | 173  | >NONO-F213 LLLTTFPRPVT | 2236  | 2063  |

|                        |      |                        |       |       |
|------------------------|------|------------------------|-------|-------|
| >NONO-F213 FLLTTFPRPV  | 12   | >NONO-F213 LLLTTFPRPV  | 32    | 20    |
| >NONO-F213 FLLTTFPRPV  | 7    | >NONO-F213 LLLTTFPRPV  | 13    | 6     |
| >NONO-F213 FLLTTFPRPV  | 15   | >NONO-F213 LLLTTFPRPV  | 27    | 12    |
| >NONO-F213 FLLTTFPRPVT | 99   | >NONO-F213 LLLTTFPRPVT | 797   | 698   |
| >NONO-F213 FLLTTFPR    | 429  | >NONO-F213 LLLTTFPR    | 3104  | 2675  |
| >NONO-F213 FLLTTFPRP   | 347  | >NONO-F213 LLLTTFPRP   | 2579  | 2232  |
| >NONO-F213 FLLTTFPRPV  | 1    | >NONO-F213 LLLTTFPRPV  | 2     | 1     |
| >NONO-F213 FLLTTFPRPVT | 36   | >NONO-F213 LLLTTFPRPVT | 301   | 265   |
| >NONO-F213 FLLTTFPRPV  | 3    | >NONO-F213 LLLTTFPRPV  | 4     | 1     |
| >NONO-F213 FLLTTFPRPVT | 478  | >NONO-F213 LLLTTFPRPVT | 3322  | 2844  |
| >NONO-F213 FLLTTFPRPV  | 5    | >NONO-F213 LLLTTFPRPV  | 8     | 3     |
| >NONO-F213 FLLTTFPRPVT | 74   | >NONO-F213 LLLTTFPRPVT | 657   | 583   |
| >NONO-F213 FLLTTFPRPV  | 2    | >NONO-F213 LLLTTFPRPV  | 4     | 2     |
| >NONO-F213 FLLTTFPRPVT | 354  | >NONO-F213 LLLTTFPRPVT | 1441  | 1087  |
| >NONO-F213 FLLTTFPR    | 460  | >NONO-F213 LLLTTFPR    | 2851  | 2391  |
| >NONO-F213 FLLTTFPRP   | 356  | >NONO-F213 LLLTTFPRP   | 2116  | 1760  |
| >NONO-F213 FLLTTFPRPV  | 2    | >NONO-F213 LLLTTFPRPV  | 3     | 1     |
| >NONO-F213 FLLTTFPRPVT | 15   | >NONO-F213 LLLTTFPRPVT | 52    | 37    |
| >NONO-F213 FLLTTFPR    | 858  | >NONO-F213 LLLTTFPR    | 499   | 359   |
| >NONO-F213 FLLTTFPR    | 62   | >NONO-F213 LLLTTFPR    | 18    | 44    |
| >NONO-F213 FLLTTFPR    | 93   | >NONO-F213 LLLTTFPR    | 146   | 53    |
| >NONO-F213 FLLTTFPR    | 84   | >NONO-F213 LLLTTFPR    | 355   | 271   |
| >NONO-F213 FLLTTFPRPV  | 17   | >NONO-F213 LLLTTFPRPV  | 139   | 122   |
| >NONO-F213 FLLTTFPRPV  | 100  | >NONO-F213 LLLTTFPRPV  | 193   | 93    |
| >NONO-F213 FLLTTFPR    | 34   | >NONO-F213 LLLTTFPR    | 46    | 12    |
| >NONO-F213 SFLLTTFPRPV | 4332 | >NONO-F213 SLLTTFPRPV  | 26    | 4306  |
| >NONO-F213 SFLLTTFPRPV | 2539 | >NONO-F213 SLLTTFPRPV  | 155   | 2384  |
| >NONO-F213 SFLLTTFPRPV | 6517 | >NONO-F213 SLLTTFPRPV  | 36    | 6481  |
| >NONO-F213 SFLLTTFPRPV | 1663 | >NONO-F213 SLLTTFPRPV  | 117   | 1546  |
| >NONO-F213 SFLLTTFPRPV | 704  | >NONO-F213 SLLTTFPRPV  | 2     | 702   |
| >NONO-F213 SFLLTTFPRPV | 2143 | >NONO-F213 SLLTTFPRPV  | 6     | 2137  |
| >NONO-F213 SFLLTTFPRPV | 614  | >NONO-F213 SLLTTFPRPV  | 6     | 608   |
| >NONO-F213 SFLLTTFPRPV | 6077 | >NONO-F213 SLLTTFPRPV  | 10    | 6067  |
| >NONO-F213 SFLLTTFPRPV | 5045 | >NONO-F213 SLLTTFPRPV  | 4     | 5041  |
| >NONO-F213 SFLLTTFPR   | 333  | >NONO-F213 SLLTTFPR    | 31    | 302   |
| >NONO-F213 SFLLTTFPR   | 7    | >NONO-F213 SLLTTFPR    | 9     | 2     |
| >NONO-F213 SFLLTTFPR   | 26   | >NONO-F213 SLLTTFPR    | 83    | 57    |
| >NONO-F213 SFLLTTFPR   | 325  | >NONO-F213 SLLTTFPR    | 197   | 128   |
| >NONO-F213 SFLLTTFPRPV | 922  | >NONO-F213 SLLTTFPRPV  | 42    | 880   |
| >NONO-F213 SFLLTTFPR   | 14   | >NONO-F213 SLLTTFPR    | 23    | 9     |
| >NONO-F213 SFLLTTFPRPV | 268  | >NONO-F213 SLLTTFPRPV  | 15241 | 14973 |
| >NONO-F213 KALDRCSEGS  | 84   | >NONO-F213 KALDRCSEGS  | 1767  | 1683  |
| >NONO-F213 KALDRCSEGS  | 9    | >NONO-F213 KALDRCSEGS  | 23    | 14    |

|                       |       |                       |      |       |
|-----------------------|-------|-----------------------|------|-------|
| >NONO-F213KALDRCEGS   | 265   | >NONO-F213KALDRCEGS   | 5195 | 4930  |
| >NONO-F213KALDRCEGS   | 168   | >NONO-F213KALDRCEGS   | 1049 | 881   |
| >NONO-F213GSFLLTTFPR  | 40    | >NONO-F213GSLLLTTFPR  | 51   | 11    |
| >NONO-F213GSFLLTTFPR  | 17    | >NONO-F213GSLLLTTFPR  | 23   | 6     |
| >NONO-F213GSFLLTTF    | 27    | >NONO-F213GSLLLTTF    | 80   | 53    |
| >NONO-F213GSFLLTTFPR  | 218   | >NONO-F213GSLLLTTFPR  | 295  | 77    |
| >NONO-F213GSFLLTTFPR  | 22    | >NONO-F213GSLLLTTFPR  | 125  | 103   |
| >NONO-F213GSFLLTTF    | 186   | >NONO-F213GSLLLTTF    | 1941 | 1755  |
| >NONO-F213GSFLLTTF    | 45    | >NONO-F213GSLLLTTF    | 240  | 195   |
| >NONO-F213GSFLLTTF    | 5     | >NONO-F213GSLLLTTF    | 6    | 1     |
| >NONO-F213GSFLLTTF    | 268   | >NONO-F213GSLLLTTF    | 407  | 139   |
| >NONO-F213GSFLLTTFPR  | 87    | >NONO-F213GSLLLTTFPR  | 143  | 56    |
| >NONO-F213GSFLLTTFPR  | 131   | >NONO-F213GSLLLTTFPR  | 250  | 119   |
| >NONO-F213EGSFLLTTFPR | 18    | >NONO-F213EGSLLLTTFPR | 54   | 36    |
| >NONO-F213EGSFLLTTF   | 420   | >NONO-F213EGSLLLTTF   | 469  | 49    |
| >NONO-F213EGSFLLTTF   | 274   | >NONO-F213EGSLLLTTF   | 811  | 537   |
| >NONO-F213EGSFLLTTFPR | 154   | >NONO-F213EGSLLLTTFPR | 153  | 1     |
| >NONO-F213SEGSFLLTTF  | 290   | >NONO-F213SEGSLLLTTF  | 752  | 462   |
| >NONO-F213SEGSFLLT    | 489   | >NONO-F213SEGSLLLT    | 646  | 157   |
| >NONO-F213SEGSFLLT    | 234   | >NONO-F213SEGSLLLT    | 264  | 30    |
| >NONO-F213SEGSFLLTTF  | 390   | >NONO-F213SEGSLLLTTF  | 380  | 10    |
| >NONO-F213SEGSFLLTTF  | 40    | >NONO-F213SEGSLLLTTF  | 45   | 5     |
| >NONO-F213SEGSFLLTTF  | 27    | >NONO-F213SEGSLLLTTF  | 40   | 13    |
| >NONO-F213SEGSFLLT    | 33    | >NONO-F213SEGSLLLT    | 112  | 79    |
| >NONO-F213SEGSFLLT    | 29    | >NONO-F213SEGSLLLT    | 71   | 42    |
| >NONO-F213SEGSFLLTTF  | 154   | >NONO-F213SEGSLLLTTF  | 288  | 134   |
| >NONO-F213SEGSFLLT    | 437   | >NONO-F213SEGSLLLT    | 541  | 104   |
| >NONO-F213SEGSFLLTTF  | 342   | >NONO-F213SEGSLLLTTF  | 281  | 61    |
| >NONO-F213CSEGSFLL    | 540   | >NONO-F213CSEGSLLL    | 267  | 273   |
| >NONO-F213CSEGSFLLTTF | 15    | >NONO-F213CSEGSLLLTTF | 10   | 5     |
| >NONO-F213CSEGSFLL    | 90    | >NONO-F213CSEGSLLL    | 386  | 296   |
| >NONO-F213CSEGSFLLTTF | 350   | >NONO-F213CSEGSLLLTTF | 774  | 424   |
| >NONO-F213CSEGSFLL    | 614   | >NONO-F213CSEGSLLL    | 447  | 167   |
| >NONO-F213CSEGSFLLTTF | 75    | >NONO-F213CSEGSLLLTTF | 98   | 23    |
| >NONO-F213CSEGSFLL    | 152   | >NONO-F213CSEGSLLL    | 231  | 79    |
| >NONO-F213RCSEGSFLL   | 332   | >NONO-F213RCSEGSLLL   | 2622 | 2290  |
| >NONO-F213LDRCEGSF    | 418   | >NONO-F213LDRCEGS     | 4547 | 4129  |
| >NONO-F213LDRCEGSFLI  | 377   | >NONO-F213LDRCEGSLLI  | 784  | 407   |
| >NONO-F213ALDRCEGSF   | 146   | >NONO-F213ALDRCEGS    | 248  | 102   |
| >NONO-F213ALDRCEGSF   | 10667 | >NONO-F213ALDRCEGS    | 102  | 10565 |
| >NONO-F213ALDRCEGSF   | 15    | >NONO-F213ALDRCEGS    | 26   | 11    |
| >NONO-F213ALDRCEGSF   | 14899 | >NONO-F213ALDRCEGS    | 415  | 14484 |
| >NONO-F213ALDRCEGSF   | 327   | >NONO-F213ALDRCEGS    | 960  | 633   |

|                       |       |                       |      |       |
|-----------------------|-------|-----------------------|------|-------|
| >NONO-F213ALDRCEGSF   | 5023  | >NONO-F213ALDRCEGSL   | 65   | 4958  |
| >NONO-F213ALDRCEGSF   | 20    | >NONO-F213ALDRCEGSL   | 52   | 32    |
| >NONO-F213ALDRCEGSF   | 10730 | >NONO-F213ALDRCEGSL   | 63   | 10667 |
| >NONO-F213ALDRCEGSF   | 14    | >NONO-F213ALDRCEGSL   | 48   | 34    |
| >NONO-F213ALDRCEGSF   | 16976 | >NONO-F213ALDRCEGSL   | 144  | 16832 |
| >NONO-F213ALDRCEGSF   | 21    | >NONO-F213ALDRCEGSL   | 63   | 42    |
| >NONO-F213ALDRCEGSF   | 15933 | >NONO-F213ALDRCEGSL   | 460  | 15473 |
| >NONO-F213ALDRCEGSF   | 76    | >NONO-F213ALDRCEGSL   | 401  | 325   |
| >NONO-F213ALDRCEGSF   | 6462  | >NONO-F213ALDRCEGSL   | 23   | 6439  |
| >NONO-F213ALDRCEGSF   | 12    | >NONO-F213ALDRCEGSL   | 14   | 2     |
| >NOTCH1-A1AHGQQMIFP   | 161   | >NOTCH1-A1THGQQMIFP   | 95   | 66    |
| >NOTCH1-A1AHGQQMIFP   | 136   | >NOTCH1-A1THGQQMIFP   | 220  | 84    |
| >NOTCH1-A1AHGQQMIFP   | 251   | >NOTCH1-A1THGQQMIFP   | 207  | 44    |
| >NOTCH1-A1AHGQQMIFP   | 251   | >NOTCH1-A1THGQQMIFP   | 190  | 61    |
| >NOTCH1-A1AHGQQMIF    | 261   | >NOTCH1-A1THGQQMIF    | 985  | 724   |
| >NOTCH1-A1DAHGQQMIF   | 10558 | >NOTCH1-A1DTHGQQMIF   | 493  | 10065 |
| >NOTCH1-A1DAHGQQMIF   | 6288  | >NOTCH1-A1DTHGQQMIF   | 156  | 6132  |
| >NOTCH1-A1DAHGQQMIF   | 468   | >NOTCH1-A1DTHGQQMIF   | 14   | 454   |
| >NOTCH1-A1DAHGQQMIF   | 3818  | >NOTCH1-A1DTHGQQMIF   | 48   | 3770  |
| >NOTCH1-A1DAHGQQMIF   | 194   | >NOTCH1-A1DTHGQQMIF   | 8    | 186   |
| >NOTCH1-A1DAHGQQMIF   | 872   | >NOTCH1-A1DTHGQQMIF   | 22   | 850   |
| >NOTCH1-A1DAHGQQMIF   | 452   | >NOTCH1-A1DTHGQQMIF   | 83   | 369   |
| >NOTCH1-A1DAHGQQMIF   | 941   | >NOTCH1-A1DTHGQQMIF   | 226  | 715   |
| >NOTCH1-A1DAHGQQMI    | 2361  | >NOTCH1-A1DTHGQQMI    | 230  | 2131  |
| >NOTCH1-A1DAHGQQMIF   | 1326  | >NOTCH1-A1DTHGQQMIF   | 83   | 1243  |
| >NOTCH1-A1DAHGQQMIF   | 45    | >NOTCH1-A1DTHGQQMIF   | 537  | 492   |
| >NOTCH1-A1RDAHGQQM    | 148   | >NOTCH1-A1RDTHGQQMI   | 307  | 159   |
| >NOTCH1-A1RDAHGQQM    | 269   | >NOTCH1-A1RDTHGQQMI   | 544  | 275   |
| >NOTCH1-A1RDAHGQQM    | 325   | >NOTCH1-A1RDTHGQQMI   | 849  | 524   |
| >NOTCH1-A1RDAHGQQM    | 133   | >NOTCH1-A1RDTHGQQMI   | 90   | 43    |
| >NOTCH1-A1KRDAHGQQM   | 135   | >NOTCH1-A1KRDTHGQQM   | 131  | 4     |
| >NOTCH1-A1KRDAHGQQM   | 146   | >NOTCH1-A1KRDTHGQQM   | 207  | 61    |
| >NOTCH1-A1KRDAHGQQM   | 135   | >NOTCH1-A1KRDTHGQQM   | 144  | 9     |
| >NOTCH1-A1KRDAHGQQM   | 375   | >NOTCH1-A1KRDTHGQQM   | 311  | 64    |
| >NOTCH1-A1KRDAHGQQM   | 230   | >NOTCH1-A1KRDTHGQQM   | 221  | 9     |
| >NOTCH1-A1FKRDAHGQQ   | 17    | >NOTCH1-A1FKRDTHGQQ   | 11   | 6     |
| >NOTCH1-A1FKRDAHGQQ   | 43    | >NOTCH1-A1FKRDTHGQQ   | 26   | 17    |
| >NOTCH1-A1AAEGWAAPC   | 232   | >NOTCH1-A1SAEGWAAPD   | 180  | 52    |
| >NOTCH1-A1RAAEGWAA    | 25    | >NOTCH1-A1RSAEGWAA    | 118  | 93    |
| >NOTCH1-A1RAAEGWAAP   | 336   | >NOTCH1-A1RSAEGWAAP   | 1059 | 723   |
| >NOTCH1-A1EELRKHPIKRS | 33    | >NOTCH1-A1EELRKHPIKRS | 598  | 565   |
| >NOTCH1-A1IKRAAEGW    | 357   | >NOTCH1-A1IKRSAEGW    | 137  | 220   |
| >NOTCH1-A1IKRAAEGWA   | 213   | >NOTCH1-A1IKRSAEGWA   | 120  | 93    |

|                        |       |                         |      |       |
|------------------------|-------|-------------------------|------|-------|
| >NOTCH1-A1 IKRAAEGW    | 354   | >NOTCH1-A1 IKRSAEGW     | 515  | 161   |
| >NOTCH1-A1 HPIKRAAEGV  | 249   | >NOTCH1-A1 HPIKRSAEGW   | 265  | 16    |
| >NOTCH1-A1 HPIKRAAEGV  | 185   | >NOTCH1-A1 HPIKRSAEGW   | 166  | 19    |
| >NOTCH1-A1 HPIKRAAEGV  | 43    | >NOTCH1-A1 HPIKRSAEGW   | 41   | 2     |
| >NOTCH1-A1 HPIKRAAEGV  | 314   | >NOTCH1-A1 HPIKRSAEGW   | 303  | 11    |
| >NOTCH1-A1 KHPIKRAAEG  | 126   | >NOTCH1-A1 KHPIKRSAEG'  | 169  | 43    |
| >NOTCH1-A1 RKHPIKRAA   | 452   | >NOTCH1-A1 RKHPIKRSA    | 616  | 164   |
| >NOTCH1-A1 ELRKHPIKRA/ | 162   | >NOTCH1-A1 ELRKHPIKRSA/ | 154  | 8     |
| >NOTCH1-A1 KASLLPGGSE  | 15453 | >NOTCH1-A1 KTSLLPGGSE   | 430  | 15023 |
| >NOTCH1-A1 QVKASLLPG   | 78    | >NOTCH1-A1 QVKTSLLPG    | 126  | 48    |
| >NOTCH1-A1 GQVKASLL    | 119   | >NOTCH1-A1 GQVKTSL      | 121  | 2     |
| >NOTCH1-A1 GQVKASLLPG  | 387   | >NOTCH1-A1 GQVKTSLPG    | 571  | 184   |
| >NOTCH1-A1 GQVKASLL    | 410   | >NOTCH1-A1 GQVKTSL      | 219  | 191   |
| >NOTCH1-A1 GQVKASLL    | 151   | >NOTCH1-A1 GQVKTSL      | 209  | 58    |
| >NOTCH1-A1 LGQVKASLL   | 324   | >NOTCH1-A1 LGQVKTSL     | 894  | 570   |
| >NOTCH1-A1 LLGQVKASL   | 140   | >NOTCH1-A1 LLGQVKTSL    | 131  | 9     |
| >NOTCH1-A1 LLGQVKASLL  | 77    | >NOTCH1-A1 LLGQVKTSL    | 52   | 25    |
| >NOTCH1-A1 LLGQVKASLL  | 359   | >NOTCH1-A1 LLGQVKTSL    | 123  | 236   |
| >NOTCH1-A1 LLGQVKASL   | 9     | >NOTCH1-A1 LLGQVKTSL    | 20   | 11    |
| >NOTCH1-A1 LLGQVKASLL  | 36    | >NOTCH1-A1 LLGQVKTSL    | 37   | 1     |
| >NOTCH1-A1 LLGQVKASL   | 124   | >NOTCH1-A1 LLGQVKTSL    | 698  | 574   |
| >NOTCH1-A1 LLGQVKASLL  | 314   | >NOTCH1-A1 LLGQVKTSL    | 320  | 6     |
| >NOTCH1-A1 LLGQVKASL   | 58    | >NOTCH1-A1 LLGQVKTSL    | 61   | 3     |
| >NOTCH1-A1 LLGQVKASLL  | 118   | >NOTCH1-A1 LLGQVKTSL    | 87   | 31    |
| >NOTCH1-A1 LLGQVKASL   | 146   | >NOTCH1-A1 LLGQVKTSL    | 1029 | 883   |
| >NOTCH1-A1 LLGQVKASLL  | 510   | >NOTCH1-A1 LLGQVKTSL    | 412  | 98    |
| >NOTCH1-A1 LLGQVKASL   | 3     | >NOTCH1-A1 LLGQVKTSL    | 4    | 1     |
| >NOTCH1-A1 LLGQVKASLL  | 6     | >NOTCH1-A1 LLGQVKTSL    | 5    | 1     |
| >NOTCH1-A1 ALLGQVKA    | 247   | >NOTCH1-A1 ALLGQVKT     | 2221 | 1974  |
| >NOTCH1-A1 ALLGQVKASL  | 131   | >NOTCH1-A1 ALLGQVKTSL   | 143  | 12    |
| >NOTCH1-A1 ALLGQVKASL  | 163   | >NOTCH1-A1 ALLGQVKTSL   | 82   | 81    |
| >NOTCH1-A1 ALLGQVKA    | 306   | >NOTCH1-A1 ALLGQVKT     | 2424 | 2118  |
| >NOTCH1-A1 ALLGQVKASL  | 56    | >NOTCH1-A1 ALLGQVKTSL   | 61   | 5     |
| >NOTCH1-A1 ALLGQVKASL  | 54    | >NOTCH1-A1 ALLGQVKTSL   | 35   | 19    |
| >NOTCH1-A1 ALLGQVKA    | 300   | >NOTCH1-A1 ALLGQVKT     | 3392 | 3092  |
| >NOTCH1-A1 ALLGQVKASL  | 65    | >NOTCH1-A1 ALLGQVKTSL   | 77   | 12    |
| >NOTCH1-A1 ALLGQVKASL  | 100   | >NOTCH1-A1 ALLGQVKTSL   | 61   | 39    |
| >NOTCH1-A1 ALLGQVKASL  | 435   | >NOTCH1-A1 ALLGQVKTSL   | 392  | 43    |
| >NOTCH1-A1 ALLGQVKA    | 13    | >NOTCH1-A1 ALLGQVKT     | 79   | 66    |
| >NOTCH1-A1 ALLGQVKAS   | 411   | >NOTCH1-A1 ALLGQVKTS    | 273  | 138   |
| >NOTCH1-A1 ALLGQVKASL  | 4     | >NOTCH1-A1 ALLGQVKTSL   | 5    | 1     |
| >NOTCH1-A1 ALLGQVKASL  | 10    | >NOTCH1-A1 ALLGQVKTSL   | 8    | 2     |
| >NOTCH1-A1 ALLGQVKA    | 239   | >NOTCH1-A1 ALLGQVKT     | 3787 | 3548  |

|                        |       |                        |       |       |
|------------------------|-------|------------------------|-------|-------|
| >NOTCH1-A1 ALLGQVKASL  | 23    | >NOTCH1-A1 ALLGQVKTSL  | 54    | 31    |
| >NOTCH1-A1 ALLGQVKASL  | 49    | >NOTCH1-A1 ALLGQVKTSL  | 30    | 19    |
| >NOTCH1-A1 ALLGQVKA    | 16    | >NOTCH1-A1 ALLGQVKT    | 174   | 158   |
| >NOTCH1-A1 ALLGQVKASL  | 14    | >NOTCH1-A1 ALLGQVKTSL  | 13    | 1     |
| >NOTCH1-A1 ALLGQVKASL  | 19    | >NOTCH1-A1 ALLGQVKTSL  | 13    | 6     |
| >NOTCH1-A1 ALLGQVKA    | 128   | >NOTCH1-A1 ALLGQVKT    | 1187  | 1059  |
| >NOTCH1-A1 ALLGQVKASL  | 22    | >NOTCH1-A1 ALLGQVKTSL  | 43    | 21    |
| >NOTCH1-A1 ALLGQVKASL  | 42    | >NOTCH1-A1 ALLGQVKTSL  | 20    | 22    |
| >NOTCH1-A1 ALLGQVKA    | 4     | >NOTCH1-A1 ALLGQVKT    | 14    | 10    |
| >NOTCH1-A1 ALLGQVKAS   | 1033  | >NOTCH1-A1 ALLGQVKTS   | 232   | 801   |
| >NOTCH1-A1 ALLGQVKASL  | 2     | >NOTCH1-A1 ALLGQVKTSL  | 2     | 0     |
| >NOTCH1-A1 ALLGQVKASL  | 4     | >NOTCH1-A1 ALLGQVKTSL  | 3     | 1     |
| >NOTCH1-A1 ALLGQVKASL  | 184   | >NOTCH1-A1 ALLGQVKTSL  | 108   | 76    |
| >NOTCH1-A1 ATDVA AFL   | 173   | >NOTCH1-A1 DTDVA AFL   | 11318 | 11145 |
| >NOTCH1-A1 ATDVA AFLG/ | 296   | >NOTCH1-A1 DTDVA AFLG/ | 11661 | 11365 |
| >NOTCH1-A1 ATDVA AFL   | 675   | >NOTCH1-A1 DTDVA AFL   | 26    | 649   |
| >NOTCH1-A1 ATDVA AFLG/ | 1155  | >NOTCH1-A1 DTDVA AFLG/ | 48    | 1107  |
| >NOTCH1-A1 ATDVA AFLG/ | 567   | >NOTCH1-A1 DTDVA AFLG/ | 36    | 531   |
| >NOTCH1-A1 ATDVA AFL   | 14    | >NOTCH1-A1 DTDVA AFL   | 1346  | 1332  |
| >NOTCH1-A1 ATDVA AFLG/ | 41    | >NOTCH1-A1 DTDVA AFLG/ | 3777  | 3736  |
| >NOTCH1-A1 ATDVA AFL   | 160   | >NOTCH1-A1 DTDVA AFL   | 13613 | 13453 |
| >NOTCH1-A1 ATDVA AFLG/ | 367   | >NOTCH1-A1 DTDVA AFLG/ | 5100  | 4733  |
| >NOTCH1-A1 SATDVA AFL  | 9546  | >NOTCH1-A1 SDTDVA AFL  | 247   | 9299  |
| >NOTCH1-A1 SATDVA AFL  | 145   | >NOTCH1-A1 SDTDVA AFL  | 3354  | 3209  |
| >NOTCH1-A1 SATDVA AFL  | 47    | >NOTCH1-A1 SDTDVA AFL  | 4220  | 4173  |
| >NOTCH1-A1 SATDVA AFLG | 83    | >NOTCH1-A1 SDTDVA AFLG | 6619  | 6536  |
| >NOTCH1-A1 SATDVA AFL  | 450   | >NOTCH1-A1 SDTDVA AFL  | 9827  | 9377  |
| >NOTCH1-A1 SATDVA AFL  | 418   | >NOTCH1-A1 SDTDVA AFL  | 16863 | 16445 |
| >NOTCH1-A1 SATDVA AFL  | 24    | >NOTCH1-A1 SDTDVA AFL  | 3106  | 3082  |
| >NOTCH1-A1 SATDVA AFLG | 226   | >NOTCH1-A1 SDTDVA AFLG | 9858  | 9632  |
| >NOTCH1-A1 SATDVA AFL  | 267   | >NOTCH1-A1 SDTDVA AFL  | 10713 | 10446 |
| >NOTCH1-A1 SATDVA AF   | 390   | >NOTCH1-A1 SDTDVA AF   | 3700  | 3310  |
| >NOTCH1-A1 SATDVA AF   | 79    | >NOTCH1-A1 SDTDVA AF   | 18119 | 18040 |
| >NOTCH1-A1 SATDVA AFL  | 359   | >NOTCH1-A1 SDTDVA AFL  | 24188 | 23829 |
| >NOTCH1-A1 SATDVA AF   | 60    | >NOTCH1-A1 SDTDVA AF   | 2772  | 2712  |
| >NOTCH1-A1 SATDVA AF   | 443   | >NOTCH1-A1 SDTDVA AF   | 13124 | 12681 |
| >NOTCH1-A1 SATDVA AFL  | 19    | >NOTCH1-A1 SDTDVA AFL  | 6720  | 6701  |
| >NOTCH1-A1 SATDVA AFL  | 412   | >NOTCH1-A1 SDTDVA AFL  | 2166  | 1754  |
| >NOTCH1-A1 SATDVA AFL  | 459   | >NOTCH1-A1 SDTDVA AFL  | 7727  | 7268  |
| >NOTCH1-A1 SATDVA AFL  | 28211 | >NOTCH1-A1 SDTDVA AFL  | 112   | 28099 |
| >NOTCH1-A1 VQASSQCFQ!  | 272   | >NOTCH1-A1 VQASSQCFQ!  | 19950 | 19678 |
| >NOTCH1-A1 VQASSQCFQ!  | 42    | >NOTCH1-A1 VQASSQCFQ!  | 9485  | 9443  |
| >NOTCH1-A1 VQASSQCFQ!  | 242   | >NOTCH1-A1 VQASSQCFQ!  | 6998  | 6756  |



|                        |      |                        |      |      |
|------------------------|------|------------------------|------|------|
| >NOTCH1-A1 VQASSQCFQ!  | 65   | >NOTCH1-A1 VQASSQCFQ!  | 2629 | 2564 |
| >NOTCH1-A1 QSATDVAAF   | 6    | >NOTCH1-A1 QSATDVAAF   | 940  | 934  |
| >NOTCH1-A1 QSATDVAAFI  | 105  | >NOTCH1-A1 QSATDVAAFI  | 8297 | 8192 |
| >NOTCH1-A1 QSATDVAA    | 288  | >NOTCH1-A1 QSATDVAA    | 9819 | 9531 |
| >NOTCH1-A1 QSATDVAAFI  | 277  | >NOTCH1-A1 QSATDVAAFI  | 2607 | 2330 |
| >NOTCH1-A1 QSATDVAAF   | 138  | >NOTCH1-A1 QSATDVAAF   | 4794 | 4656 |
| >NOTCH1-A1 QSATDVAAF   | 20   | >NOTCH1-A1 QSATDVAAF   | 502  | 482  |
| >NOTCH1-A1 QSATDVAAF   | 17   | >NOTCH1-A1 QSATDVAAF   | 74   | 57   |
| >NOTCH1-A1 QSATDVAAFI  | 67   | >NOTCH1-A1 QSATDVAAFI  | 202  | 135  |
| >NOTCH1-A1 QSATDVAAF   | 102  | >NOTCH1-A1 QSATDVAAF   | 320  | 218  |
| >NOTCH1-A1 QSATDVAAF   | 273  | >NOTCH1-A1 QSATDVAAF   | 2136 | 1863 |
| >NOTCH1-A1 QSATDVAAFI  | 102  | >NOTCH1-A1 QSATDVAAFI  | 477  | 375  |
| >NOTCH1-A1 QSATDVAAFI  | 458  | >NOTCH1-A1 QSATDVAAFI  | 3210 | 2752 |
| >NOTCH1-A1 QSATDVAAFI  | 126  | >NOTCH1-A1 QSATDVAAFI  | 404  | 278  |
| >NOTCH1-A1 FQSATDVAA   | 570  | >NOTCH1-A1 FQSATDVAA   | 192  | 378  |
| >NOTCH1-A1 FQSATDVAAFI | 45   | >NOTCH1-A1 FQSATDVAAFI | 25   | 20   |
| >NOTCH1-A1 FQSATDVAA   | 91   | >NOTCH1-A1 FQSATDVAA   | 86   | 5    |
| >NOTCH1-A1 FQSATDVAA   | 69   | >NOTCH1-A1 FQSATDVAA   | 57   | 12   |
| >NOTCH1-A1 FQSATDVAAFI | 4    | >NOTCH1-A1 FQSATDVAAFI | 4    | 0    |
| >NOTCH1-A1 FQSATDVAA   | 217  | >NOTCH1-A1 FQSATDVAA   | 177  | 40   |
| >NOTCH1-A1 FQSATDVAA   | 225  | >NOTCH1-A1 FQSATDVAA   | 156  | 69   |
| >NOTCH1-A1 FQSATDVAAFI | 52   | >NOTCH1-A1 FQSATDVAAFI | 44   | 8    |
| >NOTCH1-A1 FQSATDVAA   | 19   | >NOTCH1-A1 FQSATDVAA   | 16   | 3    |
| >NOTCH1-A1 FQSATDVAA   | 8    | >NOTCH1-A1 FQSATDVAA   | 6    | 2    |
| >NOTCH1-A1 FQSATDVAAFI | 4    | >NOTCH1-A1 FQSATDVAAFI | 3    | 1    |
| >NOTCH1-A1 FQSATDVAAFI | 165  | >NOTCH1-A1 FQSATDVAAFI | 63   | 102  |
| >NOTCH1-A1 FQSATDVAA   | 1000 | >NOTCH1-A1 FQSATDVAA   | 192  | 808  |
| >NOTCH1-A1 FQSATDVAAFI | 85   | >NOTCH1-A1 FQSATDVAAFI | 26   | 59   |
| >NOTCH1-A1 FQSATDVAAFI | 202  | >NOTCH1-A1 FQSATDVAAFI | 86   | 116  |
| >NOTCH1-A1 FQSATDVAAFI | 932  | >NOTCH1-A1 FQSATDVAAFI | 301  | 631  |
| >NOTCH1-A1 FQSATDVAAFI | 1395 | >NOTCH1-A1 FQSATDVAAFI | 153  | 1242 |
| >NOTCH1-A1 FQSATDVAA   | 268  | >NOTCH1-A1 FQSATDVAA   | 475  | 207  |
| >NOTCH1-A1 FQSATDVAA   | 118  | >NOTCH1-A1 FQSATDVAA   | 163  | 45   |
| >NOTCH1-A1 FQSATDVAAFI | 28   | >NOTCH1-A1 FQSATDVAAFI | 28   | 0    |
| >NOTCH1-A1 FQSATDVAAFI | 145  | >NOTCH1-A1 FQSATDVAAFI | 187  | 42   |
| >NOTCH1-A1 FQSATDVAAFI | 52   | >NOTCH1-A1 FQSATDVAAFI | 96   | 44   |
| >NOTCH1-A1 FQSATDVAA   | 54   | >NOTCH1-A1 FQSATDVAA   | 116  | 62   |
| >NOTCH1-A1 FQSATDVAAFI | 2    | >NOTCH1-A1 FQSATDVAAFI | 2    | 0    |
| >NOTCH1-A1 FQSATDVAAFI | 42   | >NOTCH1-A1 FQSATDVAAFI | 73   | 31   |
| >NOTCH1-A1 FQSATDVAAFI | 24   | >NOTCH1-A1 FQSATDVAAFI | 43   | 19   |
| >NOTCH1-A1 FQSATDVAAFI | 11   | >NOTCH1-A1 FQSATDVAAFI | 16   | 5    |
| >NOTCH1-A1 FQSATDVAAFI | 465  | >NOTCH1-A1 FQSATDVAAFI | 539  | 74   |
| >NOTCH1-A1 FQSATDVAAFI | 2719 | >NOTCH1-A1 FQSATDVAAFI | 458  | 2261 |

|                       |       |                       |       |       |
|-----------------------|-------|-----------------------|-------|-------|
| >NOTCH1-A1 FQSATDVAAI | 418   | >NOTCH1-A1 FQSDTDVAAI | 810   | 392   |
| >NOTCH1-A1 CFQSATDVA/ | 63    | >NOTCH1-A1 CFQSDTDVA/ | 104   | 41    |
| >NOTCH1-A1 CFQSATDVA/ | 5     | >NOTCH1-A1 CFQSDTDVA/ | 6     | 1     |
| >NOTCH1-A1 SQCFQSATD\ | 474   | >NOTCH1-A1 SQCFQSDTD\ | 1178  | 704   |
| >NOTCH1-A1 SSQCFQSAT  | 449   | >NOTCH1-A1 SSQCFQSDT  | 1430  | 981   |
| >NOTCH1-A1 SSQCFQSATE | 434   | >NOTCH1-A1 SSQCFQSDTE | 1058  | 624   |
| >NOTCH1-A1 AAFLGALASL | 439   | >NOTCH1-A1 PAFLGALASL | 5848  | 5409  |
| >NOTCH1-A1 AAFLGALASL | 108   | >NOTCH1-A1 PAFLGALASL | 1320  | 1212  |
| >NOTCH1-A1 AAFLGALASL | 132   | >NOTCH1-A1 PAFLGALASL | 1893  | 1761  |
| >NOTCH1-A1 AAFLGALASL | 498   | >NOTCH1-A1 PAFLGALASL | 10219 | 9721  |
| >NOTCH1-A1 AAFLGALASL | 380   | >NOTCH1-A1 PAFLGALASL | 5335  | 4955  |
| >NOTCH1-A1 AAFLGALASL | 7     | >NOTCH1-A1 PAFLGALASL | 1058  | 1051  |
| >NOTCH1-A1 VAAFLGALAS | 174   | >NOTCH1-A1 VPAFLGALAS | 7570  | 7396  |
| >NOTCH1-A1 VAAFLGALAS | 493   | >NOTCH1-A1 VPAFLGALAS | 9523  | 9030  |
| >NOTCH1-A1 VAAFLGAL   | 815   | >NOTCH1-A1 VPAFLGAL   | 15    | 800   |
| >NOTCH1-A1 VAAFLGALAS | 857   | >NOTCH1-A1 VPAFLGALAS | 25    | 832   |
| >NOTCH1-A1 VAAFLGALAS | 68    | >NOTCH1-A1 VPAFLGALAS | 12729 | 12661 |
| >NOTCH1-A1 VAAFLGAL   | 1432  | >NOTCH1-A1 VPAFLGAL   | 193   | 1239  |
| >NOTCH1-A1 VAAFLGALAS | 2576  | >NOTCH1-A1 VPAFLGALAS | 440   | 2136  |
| >NOTCH1-A1 VAAFLGALA  | 3401  | >NOTCH1-A1 VPAFLGALA  | 19    | 3382  |
| >NOTCH1-A1 VAAFLGALAS | 164   | >NOTCH1-A1 VPAFLGALAS | 2810  | 2646  |
| >NOTCH1-A1 VAAFLGAL   | 12154 | >NOTCH1-A1 VPAFLGAL   | 364   | 11790 |
| >NOTCH1-A1 SQCFQSATD\ | 474   | >NOTCH1-A1 SQCFQSATD\ | 3301  | 2827  |
| >NOTCH1-A1 DVAAFLGAL  | 300   | >NOTCH1-A1 DVPAFLGAL  | 312   | 12    |
| >NOTCH1-A1 DVAAFLGAL  | 37    | >NOTCH1-A1 DVPAFLGAL  | 241   | 204   |
| >NOTCH1-A1 DVAAFLGAL  | 17    | >NOTCH1-A1 DVPAFLGAL  | 44    | 27    |
| >NOTCH1-A1 DVAAFLGA   | 23    | >NOTCH1-A1 DVPAFLGA   | 89    | 66    |
| >NOTCH1-A1 DVAAFLGAL  | 18    | >NOTCH1-A1 DVPAFLGAL  | 58    | 40    |
| >NOTCH1-A1 DVAAFLGALA | 59    | >NOTCH1-A1 DVPAFLGALA | 104   | 45    |
| >NOTCH1-A1 DVAAFLGA   | 61    | >NOTCH1-A1 DVPAFLGA   | 1464  | 1403  |
| >NOTCH1-A1 DVAAFLGAL  | 33    | >NOTCH1-A1 DVPAFLGAL  | 442   | 409   |
| >NOTCH1-A1 DVAAFLGALA | 188   | >NOTCH1-A1 DVPAFLGALA | 3015  | 2827  |
| >NOTCH1-A1 TDVAAFLGAL | 272   | >NOTCH1-A1 TDVPAFLGAL | 230   | 42    |
| >NOTCH1-A1 ATDVAAFL   | 173   | >NOTCH1-A1 ATDVPAFL   | 725   | 552   |
| >NOTCH1-A1 ATDVAAFLG/ | 508   | >NOTCH1-A1 ATDVPAFLG/ | 489   | 19    |
| >NOTCH1-A1 ATDVAAFLG/ | 296   | >NOTCH1-A1 ATDVPAFLG/ | 557   | 261   |
| >NOTCH1-A1 ATDVAAFL   | 1175  | >NOTCH1-A1 ATDVPAFL   | 430   | 745   |
| >NOTCH1-A1 ATDVAAFLG/ | 567   | >NOTCH1-A1 ATDVPAFLG/ | 339   | 228   |
| >NOTCH1-A1 ATDVAAFL   | 14    | >NOTCH1-A1 ATDVPAFL   | 20    | 6     |
| >NOTCH1-A1 ATDVAAFLG/ | 41    | >NOTCH1-A1 ATDVPAFLG/ | 40    | 1     |
| >NOTCH1-A1 ATDVAAFL   | 160   | >NOTCH1-A1 ATDVPAFL   | 165   | 5     |
| >NOTCH1-A1 ATDVAAFLG/ | 367   | >NOTCH1-A1 ATDVPAFLG/ | 384   | 17    |
| >NOTCH1-A1 SATDVAAFL  | 145   | >NOTCH1-A1 SATDVPAFL  | 201   | 56    |

|                       |     |                      |       |       |
|-----------------------|-----|----------------------|-------|-------|
| >NOTCH1-A1SATDVA AFL  | 47  | >NOTCH1-A1SATDVPAFL  | 364   | 317   |
| >NOTCH1-A1SATDVA AFLG | 83  | >NOTCH1-A1SATDVPAFLG | 199   | 116   |
| >NOTCH1-A1SATDVA AFL  | 536 | >NOTCH1-A1SATDVPAFL  | 176   | 360   |
| >NOTCH1-A1SATDVA AFL  | 450 | >NOTCH1-A1SATDVPAFL  | 373   | 77    |
| >NOTCH1-A1SATDVA AFL  | 418 | >NOTCH1-A1SATDVPAFL  | 722   | 304   |
| >NOTCH1-A1SATDVA AFL  | 24  | >NOTCH1-A1SATDVPAFL  | 27    | 3     |
| >NOTCH1-A1SATDVA AFLG | 226 | >NOTCH1-A1SATDVPAFLG | 251   | 25    |
| >NOTCH1-A1SATDVA AFL  | 267 | >NOTCH1-A1SATDVPAFL  | 558   | 291   |
| >NOTCH1-A1SATDVA AF   | 390 | >NOTCH1-A1SATDVPAF   | 330   | 60    |
| >NOTCH1-A1SATDVA AF   | 79  | >NOTCH1-A1SATDVPAF   | 232   | 153   |
| >NOTCH1-A1SATDVA AFL  | 359 | >NOTCH1-A1SATDVPAFL  | 1337  | 978   |
| >NOTCH1-A1SATDVA AF   | 60  | >NOTCH1-A1SATDVPAF   | 66    | 6     |
| >NOTCH1-A1SATDVA AF   | 443 | >NOTCH1-A1SATDVPAF   | 886   | 443   |
| >NOTCH1-A1SATDVA AFL  | 19  | >NOTCH1-A1SATDVPAFL  | 58    | 39    |
| >NOTCH1-A1SATDVA AFL  | 412 | >NOTCH1-A1SATDVPAFL  | 1347  | 935   |
| >NOTCH1-A1SATDVA AFL  | 459 | >NOTCH1-A1SATDVPAFL  | 652   | 193   |
| >NOTCH1-A1QSATDVA AF  | 6   | >NOTCH1-A1QSATDVPAF  | 7     | 1     |
| >NOTCH1-A1QSATDVA AFL | 105 | >NOTCH1-A1QSATDVPAFL | 122   | 17    |
| >NOTCH1-A1QSATDVAA    | 288 | >NOTCH1-A1QSATDVPA   | 150   | 138   |
| >NOTCH1-A1QSATDVA AFL | 277 | >NOTCH1-A1QSATDVPAFL | 2704  | 2427  |
| >NOTCH1-A1QSATDVA AF  | 138 | >NOTCH1-A1QSATDVPAF  | 291   | 153   |
| >NOTCH1-A1QSATDVA AF  | 20  | >NOTCH1-A1QSATDVPAF  | 19    | 1     |
| >NOTCH1-A1QSATDVA AF  | 17  | >NOTCH1-A1QSATDVPAF  | 37    | 20    |
| >NOTCH1-A1QSATDVA AFL | 67  | >NOTCH1-A1QSATDVPAFL | 187   | 120   |
| >NOTCH1-A1QSATDVA AF  | 102 | >NOTCH1-A1QSATDVPAF  | 106   | 4     |
| >NOTCH1-A1QSATDVA AF  | 273 | >NOTCH1-A1QSATDVPAF  | 285   | 12    |
| >NOTCH1-A1QSATDVA AFL | 102 | >NOTCH1-A1QSATDVPAFL | 222   | 120   |
| >NOTCH1-A1QSATDVA AFL | 458 | >NOTCH1-A1QSATDVPAFL | 121   | 337   |
| >NOTCH1-A1QSATDVA AFL | 126 | >NOTCH1-A1QSATDVPAFL | 77    | 49    |
| >NOTCH1-A1FQSATDVAA   | 570 | >NOTCH1-A1FQSATDVPA  | 179   | 391   |
| >NOTCH1-A1FQSATDVA AF | 45  | >NOTCH1-A1FQSATDVPAF | 34    | 11    |
| >NOTCH1-A1FQSATDVA    | 91  | >NOTCH1-A1FQSATDVP   | 5163  | 5072  |
| >NOTCH1-A1FQSATDVAA   | 69  | >NOTCH1-A1FQSATDVPA  | 49    | 20    |
| >NOTCH1-A1FQSATDVA AF | 4   | >NOTCH1-A1FQSATDVPAF | 4     | 0     |
| >NOTCH1-A1FQSATDVA    | 217 | >NOTCH1-A1FQSATDVP   | 14565 | 14348 |
| >NOTCH1-A1FQSATDVAA   | 225 | >NOTCH1-A1FQSATDVPA  | 127   | 98    |
| >NOTCH1-A1FQSATDVA AF | 52  | >NOTCH1-A1FQSATDVPAF | 37    | 15    |
| >NOTCH1-A1FQSATDVA    | 19  | >NOTCH1-A1FQSATDVP   | 1607  | 1588  |
| >NOTCH1-A1FQSATDVAA   | 8   | >NOTCH1-A1FQSATDVPA  | 7     | 1     |
| >NOTCH1-A1FQSATDVA AF | 4   | >NOTCH1-A1FQSATDVPAF | 5     | 1     |
| >NOTCH1-A1FQSATDVA AF | 165 | >NOTCH1-A1FQSATDVPAF | 112   | 53    |
| >NOTCH1-A1FQSATDVA AF | 85  | >NOTCH1-A1FQSATDVPAF | 74    | 11    |
| >NOTCH1-A1FQSATDVA AF | 202 | >NOTCH1-A1FQSATDVPAF | 169   | 33    |

|                       |      |                       |      |      |
|-----------------------|------|-----------------------|------|------|
| >NOTCH1-A1 FQSATDVA   | 268  | >NOTCH1-A1 FQSATDVP   | 2135 | 1867 |
| >NOTCH1-A1 FQSATDVAA  | 118  | >NOTCH1-A1 FQSATDVPA  | 93   | 25   |
| >NOTCH1-A1 FQSATDVAAF | 28   | >NOTCH1-A1 FQSATDVPAF | 31   | 3    |
| >NOTCH1-A1 FQSATDVAAF | 145  | >NOTCH1-A1 FQSATDVPAF | 207  | 62   |
| >NOTCH1-A1 FQSATDVAAF | 52   | >NOTCH1-A1 FQSATDVPAF | 93   | 41   |
| >NOTCH1-A1 FQSATDVAA  | 54   | >NOTCH1-A1 FQSATDVPA  | 63   | 9    |
| >NOTCH1-A1 FQSATDVAAF | 2    | >NOTCH1-A1 FQSATDVPAF | 2    | 0    |
| >NOTCH1-A1 FQSATDVAAF | 42   | >NOTCH1-A1 FQSATDVPAF | 37   | 5    |
| >NOTCH1-A1 FQSATDVAAF | 24   | >NOTCH1-A1 FQSATDVPAF | 34   | 10   |
| >NOTCH1-A1 FQSATDVAAF | 11   | >NOTCH1-A1 FQSATDVPAF | 12   | 1    |
| >NOTCH1-A1 FQSATDVAAF | 465  | >NOTCH1-A1 FQSATDVPAF | 978  | 513  |
| >NOTCH1-A1 FQSATDVAAF | 418  | >NOTCH1-A1 FQSATDVPAF | 334  | 84   |
| >NOTCH1-A1 CFQSATDVA/ | 63   | >NOTCH1-A1 CFQSATDVP/ | 68   | 5    |
| >NOTCH1-A1 CFQSATDVA/ | 5    | >NOTCH1-A1 CFQSATDVP/ | 5    | 0    |
| >NOTCH1-A1 AAFLGALASL | 439  | >NOTCH1-A1 VAFLGALASL | 593  | 154  |
| >NOTCH1-A1 AAFLGALASL | 108  | >NOTCH1-A1 VAFLGALASL | 202  | 94   |
| >NOTCH1-A1 AAFLGALASL | 132  | >NOTCH1-A1 VAFLGALASL | 297  | 165  |
| >NOTCH1-A1 AAFLGALASL | 498  | >NOTCH1-A1 VAFLGALASL | 707  | 209  |
| >NOTCH1-A1 AAFLGALASL | 380  | >NOTCH1-A1 VAFLGALASL | 538  | 158  |
| >NOTCH1-A1 AAFLGALASL | 7    | >NOTCH1-A1 VAFLGALASL | 9    | 2    |
| >NOTCH1-A1 VAAFLGAL   | 700  | >NOTCH1-A1 VVAFLGAL   | 172  | 528  |
| >NOTCH1-A1 VAAFLGALA  | 1608 | >NOTCH1-A1 VVAFLGALA  | 327  | 1281 |
| >NOTCH1-A1 VAAFLGALAS | 174  | >NOTCH1-A1 VVAFLGALAS | 40   | 134  |
| >NOTCH1-A1 VAAFLGAL   | 1353 | >NOTCH1-A1 VVAFLGAL   | 176  | 1177 |
| >NOTCH1-A1 VAAFLGALA  | 1458 | >NOTCH1-A1 VVAFLGALA  | 158  | 1300 |
| >NOTCH1-A1 VAAFLGALAS | 578  | >NOTCH1-A1 VVAFLGALAS | 63   | 515  |
| >NOTCH1-A1 VAAFLGAL   | 1664 | >NOTCH1-A1 VVAFLGAL   | 348  | 1316 |
| >NOTCH1-A1 VAAFLGALAS | 493  | >NOTCH1-A1 VVAFLGALAS | 146  | 347  |
| >NOTCH1-A1 VAAFLGALAS | 2800 | >NOTCH1-A1 VVAFLGALAS | 229  | 2571 |
| >NOTCH1-A1 VAAFLGAL   | 1111 | >NOTCH1-A1 VVAFLGAL   | 223  | 888  |
| >NOTCH1-A1 VAAFLGALA  | 966  | >NOTCH1-A1 VVAFLGALA  | 172  | 794  |
| >NOTCH1-A1 VAAFLGALAS | 522  | >NOTCH1-A1 VVAFLGALAS | 108  | 414  |
| >NOTCH1-A1 VAAFLGALAS | 68   | >NOTCH1-A1 VVAFLGALAS | 938  | 870  |
| >NOTCH1-A1 VAAFLGALAS | 164  | >NOTCH1-A1 VVAFLGALAS | 1226 | 1062 |
| >NOTCH1-A1 VAAFLGALAS | 640  | >NOTCH1-A1 VVAFLGALAS | 374  | 266  |
| >NOTCH1-A1 SQCFQSATD\ | 997  | >NOTCH1-A1 SQCFQSATD\ | 70   | 927  |
| >NOTCH1-A1 SQCFQSATD\ | 474  | >NOTCH1-A1 SQCFQSATD\ | 433  | 41   |
| >NOTCH1-A1 DVA AFLGAL | 300  | >NOTCH1-A1 DVVAFLGAL  | 336  | 36   |
| >NOTCH1-A1 DVA AFLGAL | 37   | >NOTCH1-A1 DVVAFLGAL  | 26   | 11   |
| >NOTCH1-A1 DVA AFLGAL | 17   | >NOTCH1-A1 DVVAFLGAL  | 7    | 10   |
| >NOTCH1-A1 DVA AFLGAL | 2270 | >NOTCH1-A1 DVVAFLGAL  | 358  | 1912 |
| >NOTCH1-A1 DVA AFLGA  | 23   | >NOTCH1-A1 DVVAFLGA   | 72   | 49   |
| >NOTCH1-A1 DVA AFLGAL | 18   | >NOTCH1-A1 DVVAFLGAL  | 52   | 34   |

|                        |      |                        |      |      |
|------------------------|------|------------------------|------|------|
| >NOTCH1-A1 DVA AFLGALA | 59   | >NOTCH1-A1 DVVA FLGALA | 65   | 6    |
| >NOTCH1-A1 DVA AFLGA   | 61   | >NOTCH1-A1 DVVA FLGA   | 113  | 52   |
| >NOTCH1-A1 DVA AFLGAL  | 33   | >NOTCH1-A1 DVVA FLGAL  | 52   | 19   |
| >NOTCH1-A1 DVA AFLGALA | 188  | >NOTCH1-A1 DVVA FLGALA | 331  | 143  |
| >NOTCH1-A1 TDVA AFLGAL | 272  | >NOTCH1-A1 TDVVA FLGAL | 200  | 72   |
| >NOTCH1-A1 ATDVA AFL   | 511  | >NOTCH1-A1 ATDVVA FL   | 293  | 218  |
| >NOTCH1-A1 ATDVA AFL   | 173  | >NOTCH1-A1 ATDVVA FL   | 173  | 0    |
| >NOTCH1-A1 ATDVA AFLG/ | 296  | >NOTCH1-A1 ATDVVA FLG/ | 289  | 7    |
| >NOTCH1-A1 ATDVA AFL   | 1175 | >NOTCH1-A1 ATDVVA FL   | 225  | 950  |
| >NOTCH1-A1 ATDVA AFL   | 1129 | >NOTCH1-A1 ATDVVA FL   | 350  | 779  |
| >NOTCH1-A1 ATDVA AFL   | 14   | >NOTCH1-A1 ATDVVA FL   | 37   | 23   |
| >NOTCH1-A1 ATDVA AFLG/ | 41   | >NOTCH1-A1 ATDVVA FLG/ | 117  | 76   |
| >NOTCH1-A1 ATDVA AFL   | 160  | >NOTCH1-A1 ATDVVA FL   | 1423 | 1263 |
| >NOTCH1-A1 ATDVA AFLG/ | 367  | >NOTCH1-A1 ATDVVA FLG/ | 551  | 184  |
| >NOTCH1-A1 SATDVA AFL  | 2331 | >NOTCH1-A1 SATDVVA FL  | 404  | 1927 |
| >NOTCH1-A1 SATDVA AFL  | 145  | >NOTCH1-A1 SATDVVA FL  | 57   | 88   |
| >NOTCH1-A1 SATDVA AFL  | 47   | >NOTCH1-A1 SATDVVA FL  | 32   | 15   |
| >NOTCH1-A1 SATDVA AFLG | 83   | >NOTCH1-A1 SATDVVA FLG | 89   | 6    |
| >NOTCH1-A1 SATDVA AFL  | 536  | >NOTCH1-A1 SATDVVA FL  | 102  | 434  |
| >NOTCH1-A1 SATDVA AFL  | 450  | >NOTCH1-A1 SATDVVA FL  | 97   | 353  |
| >NOTCH1-A1 SATDVA AFL  | 418  | >NOTCH1-A1 SATDVVA FL  | 162  | 256  |
| >NOTCH1-A1 SATDVA AFL  | 24   | >NOTCH1-A1 SATDVVA FL  | 18   | 6    |
| >NOTCH1-A1 SATDVA AFLG | 226  | >NOTCH1-A1 SATDVVA FLG | 203  | 23   |
| >NOTCH1-A1 SATDVA AFL  | 267  | >NOTCH1-A1 SATDVVA FL  | 338  | 71   |
| >NOTCH1-A1 SATDVA AF   | 390  | >NOTCH1-A1 SATDVVA F   | 180  | 210  |
| >NOTCH1-A1 SATDVA AF   | 79   | >NOTCH1-A1 SATDVVA F   | 168  | 89   |
| >NOTCH1-A1 SATDVA AFL  | 359  | >NOTCH1-A1 SATDVVA FL  | 717  | 358  |
| >NOTCH1-A1 SATDVA AF   | 60   | >NOTCH1-A1 SATDVVA F   | 60   | 0    |
| >NOTCH1-A1 SATDVA AF   | 443  | >NOTCH1-A1 SATDVVA F   | 468  | 25   |
| >NOTCH1-A1 SATDVA AFL  | 19   | >NOTCH1-A1 SATDVVA FL  | 19   | 0    |
| >NOTCH1-A1 SATDVA AFL  | 412  | >NOTCH1-A1 SATDVVA FL  | 1047 | 635  |
| >NOTCH1-A1 SATDVA AFL  | 459  | >NOTCH1-A1 SATDVVA FL  | 953  | 494  |
| >NOTCH1-A1 QSATDVA AF  | 6    | >NOTCH1-A1 QSATDVVA F  | 18   | 12   |
| >NOTCH1-A1 QSATDVA AFL | 105  | >NOTCH1-A1 QSATDVVA FL | 60   | 45   |
| >NOTCH1-A1 QSATDVA AF  | 563  | >NOTCH1-A1 QSATDVVA F  | 98   | 465  |
| >NOTCH1-A1 QSATDVAA    | 288  | >NOTCH1-A1 QSATDVVA    | 697  | 409  |
| >NOTCH1-A1 QSATDVA AFL | 277  | >NOTCH1-A1 QSATDVVA FL | 335  | 58   |
| >NOTCH1-A1 QSATDVA AF  | 138  | >NOTCH1-A1 QSATDVVA F  | 228  | 90   |
| >NOTCH1-A1 QSATDVA AF  | 20   | >NOTCH1-A1 QSATDVVA F  | 9    | 11   |
| >NOTCH1-A1 QSATDVA AF  | 17   | >NOTCH1-A1 QSATDVVA F  | 41   | 24   |
| >NOTCH1-A1 QSATDVA AFL | 67   | >NOTCH1-A1 QSATDVVA FL | 142  | 75   |
| >NOTCH1-A1 QSATDVA AF  | 102  | >NOTCH1-A1 QSATDVVA F  | 104  | 2    |
| >NOTCH1-A1 QSATDVA AF  | 273  | >NOTCH1-A1 QSATDVVA F  | 875  | 602  |

|                       |       |                       |      |       |
|-----------------------|-------|-----------------------|------|-------|
| >NOTCH1-A1 QSATDVAAFL | 102   | >NOTCH1-A1 QSATDVVAFI | 119  | 17    |
| >NOTCH1-A1 QSATDVAAFL | 458   | >NOTCH1-A1 QSATDVVAFI | 729  | 271   |
| >NOTCH1-A1 QSATDVAAFL | 126   | >NOTCH1-A1 QSATDVVAFI | 124  | 2     |
| >NOTCH1-A1 FQSATDVA   | 1536  | >NOTCH1-A1 FQSATDVV   | 87   | 1449  |
| >NOTCH1-A1 FQSATDVAAF | 45    | >NOTCH1-A1 FQSATDVVAF | 44   | 1     |
| >NOTCH1-A1 FQSATDVA   | 91    | >NOTCH1-A1 FQSATDVV   | 12   | 79    |
| >NOTCH1-A1 FQSATDVAA  | 69    | >NOTCH1-A1 FQSATDVVA  | 307  | 238   |
| >NOTCH1-A1 FQSATDVAAF | 4     | >NOTCH1-A1 FQSATDVVAF | 5    | 1     |
| >NOTCH1-A1 FQSATDVA   | 217   | >NOTCH1-A1 FQSATDVV   | 21   | 196   |
| >NOTCH1-A1 FQSATDVAA  | 225   | >NOTCH1-A1 FQSATDVVA  | 801  | 576   |
| >NOTCH1-A1 FQSATDVAAF | 52    | >NOTCH1-A1 FQSATDVVAF | 36   | 16    |
| >NOTCH1-A1 FQSATDVA   | 19    | >NOTCH1-A1 FQSATDVV   | 6    | 13    |
| >NOTCH1-A1 FQSATDVAA  | 8     | >NOTCH1-A1 FQSATDVVA  | 25   | 17    |
| >NOTCH1-A1 FQSATDVAAF | 4     | >NOTCH1-A1 FQSATDVVAF | 5    | 1     |
| >NOTCH1-A1 FQSATDVA   | 4269  | >NOTCH1-A1 FQSATDVV   | 97   | 4172  |
| >NOTCH1-A1 FQSATDVAAF | 165   | >NOTCH1-A1 FQSATDVVAF | 107  | 58    |
| >NOTCH1-A1 FQSATDVA   | 2497  | >NOTCH1-A1 FQSATDVV   | 55   | 2442  |
| >NOTCH1-A1 FQSATDVAAF | 85    | >NOTCH1-A1 FQSATDVVAF | 74   | 11    |
| >NOTCH1-A1 FQSATDVA   | 3243  | >NOTCH1-A1 FQSATDVV   | 72   | 3171  |
| >NOTCH1-A1 FQSATDVAAF | 202   | >NOTCH1-A1 FQSATDVVAF | 127  | 75    |
| >NOTCH1-A1 FQSATDVAAF | 932   | >NOTCH1-A1 FQSATDVVAF | 415  | 517   |
| >NOTCH1-A1 FQSATDVA   | 16798 | >NOTCH1-A1 FQSATDVV   | 227  | 16571 |
| >NOTCH1-A1 FQSATDVA   | 268   | >NOTCH1-A1 FQSATDVV   | 254  | 14    |
| >NOTCH1-A1 FQSATDVAA  | 118   | >NOTCH1-A1 FQSATDVVA  | 117  | 1     |
| >NOTCH1-A1 FQSATDVAAF | 28    | >NOTCH1-A1 FQSATDVVAF | 29   | 1     |
| >NOTCH1-A1 FQSATDVAAF | 145   | >NOTCH1-A1 FQSATDVVAF | 105  | 40    |
| >NOTCH1-A1 FQSATDVAAF | 52    | >NOTCH1-A1 FQSATDVVAF | 81   | 29    |
| >NOTCH1-A1 FQSATDVA   | 565   | >NOTCH1-A1 FQSATDVV   | 98   | 467   |
| >NOTCH1-A1 FQSATDVAA  | 54    | >NOTCH1-A1 FQSATDVVA  | 109  | 55    |
| >NOTCH1-A1 FQSATDVAAF | 2     | >NOTCH1-A1 FQSATDVVAF | 2    | 0     |
| >NOTCH1-A1 FQSATDVAAF | 42    | >NOTCH1-A1 FQSATDVVAF | 39   | 3     |
| >NOTCH1-A1 FQSATDVA   | 2302  | >NOTCH1-A1 FQSATDVV   | 54   | 2248  |
| >NOTCH1-A1 FQSATDVAAF | 24    | >NOTCH1-A1 FQSATDVVAF | 21   | 3     |
| >NOTCH1-A1 FQSATDVAAF | 11    | >NOTCH1-A1 FQSATDVVAF | 12   | 1     |
| >NOTCH1-A1 FQSATDVAAF | 465   | >NOTCH1-A1 FQSATDVVAF | 845  | 380   |
| >NOTCH1-A1 FQSATDVAAF | 418   | >NOTCH1-A1 FQSATDVVAF | 480  | 62    |
| >NOTCH1-A1 CFQSATDVA/ | 63    | >NOTCH1-A1 CFQSATDVV/ | 53   | 10    |
| >NOTCH1-A1 CFQSATDVA  | 1026  | >NOTCH1-A1 CFQSATDVV  | 186  | 840   |
| >NOTCH1-A1 CFQSATDVA/ | 5     | >NOTCH1-A1 CFQSATDVV/ | 5    | 0     |
| >NOTCH1-A1 AFLGALASL  | 259   | >NOTCH1-A1 PFLGALASL  | 3388 | 3129  |
| >NOTCH1-A1 AFLGALASL  | 27    | >NOTCH1-A1 PFLGALASL  | 238  | 211   |
| >NOTCH1-A1 AFLGALASL  | 178   | >NOTCH1-A1 PFLGALASL  | 1960 | 1782  |
| >NOTCH1-A1 AFLGALASL  | 403   | >NOTCH1-A1 PFLGALASL  | 1946 | 1543  |

|                       |       |                      |      |       |
|-----------------------|-------|----------------------|------|-------|
| >NOTCH1-A1AAFLGALASL  | 8963  | >NOTCH1-A1APFLGALASL | 17   | 8946  |
| >NOTCH1-A1AAFLGALASL  | 439   | >NOTCH1-A1APFLGALASL | 8455 | 8016  |
| >NOTCH1-A1AAFLGALASL  | 108   | >NOTCH1-A1APFLGALASL | 1637 | 1529  |
| >NOTCH1-A1AAFLGALASL  | 132   | >NOTCH1-A1APFLGALASL | 4149 | 4017  |
| >NOTCH1-A1AAFLGALASL  | 498   | >NOTCH1-A1APFLGALASL | 8891 | 8393  |
| >NOTCH1-A1AAFLGALASL  | 20443 | >NOTCH1-A1APFLGALASL | 65   | 20378 |
| >NOTCH1-A1AAFLGALASL  | 380   | >NOTCH1-A1APFLGALASL | 2577 | 2197  |
| >NOTCH1-A1AAFLGALASL  | 7     | >NOTCH1-A1APFLGALASL | 5403 | 5396  |
| >NOTCH1-A1AAFLGALAS   | 5375  | >NOTCH1-A1APFLGALAS  | 437  | 4938  |
| >NOTCH1-A1AAFLGALASL  | 632   | >NOTCH1-A1APFLGALASL | 56   | 576   |
| >NOTCH1-A1AAFLGALA    | 9799  | >NOTCH1-A1APFLGALA   | 114  | 9685  |
| >NOTCH1-A1VAAFLGAL    | 1175  | >NOTCH1-A1VAPFLGAL   | 384  | 791   |
| >NOTCH1-A1VAAFLGALAS  | 853   | >NOTCH1-A1VAPFLGALAS | 227  | 626   |
| >NOTCH1-A1VAAFLGALAS  | 174   | >NOTCH1-A1VAPFLGALAS | 1899 | 1725  |
| >NOTCH1-A1VAAFLGALAS  | 493   | >NOTCH1-A1VAPFLGALAS | 1007 | 514   |
| >NOTCH1-A1VAAFLGALAS  | 68    | >NOTCH1-A1VAPFLGALAS | 1233 | 1165  |
| >NOTCH1-A1VAAFLGAL    | 12822 | >NOTCH1-A1VAPFLGAL   | 256  | 12566 |
| >NOTCH1-A1VAAFLGALA   | 6519  | >NOTCH1-A1VAPFLGALA  | 85   | 6434  |
| >NOTCH1-A1VAAFLGALAS  | 164   | >NOTCH1-A1VAPFLGALAS | 5    | 159   |
| >NOTCH1-A1DVA AFLGAL  | 300   | >NOTCH1-A1DVAPFLGAL  | 207  | 93    |
| >NOTCH1-A1DVA AFLGAL  | 37    | >NOTCH1-A1DVAPFLGAL  | 43   | 6     |
| >NOTCH1-A1DVA AFLGAL  | 17    | >NOTCH1-A1DVAPFLGAL  | 26   | 9     |
| >NOTCH1-A1DVA AFLGA   | 23    | >NOTCH1-A1DVAPFLGA   | 23   | 0     |
| >NOTCH1-A1DVA AFLGAL  | 18    | >NOTCH1-A1DVAPFLGAL  | 21   | 3     |
| >NOTCH1-A1DVA AFLGALA | 59    | >NOTCH1-A1DVAPFLGALA | 334  | 275   |
| >NOTCH1-A1DVA AFLGA   | 61    | >NOTCH1-A1DVAPFLGA   | 65   | 4     |
| >NOTCH1-A1DVA AFLGAL  | 33    | >NOTCH1-A1DVAPFLGAL  | 38   | 5     |
| >NOTCH1-A1DVA AFLGALA | 188   | >NOTCH1-A1DVAPFLGALA | 231  | 43    |
| >NOTCH1-A1TDVA AFLGAL | 272   | >NOTCH1-A1TDVAPFLGAL | 503  | 231   |
| >NOTCH1-A1ATDVA AFL   | 173   | >NOTCH1-A1ATDVAPFL   | 244  | 71    |
| >NOTCH1-A1ATDVA AFLG/ | 296   | >NOTCH1-A1ATDVAPFLG/ | 626  | 330   |
| >NOTCH1-A1ATDVA AFL   | 1129  | >NOTCH1-A1ATDVAPFL   | 317  | 812   |
| >NOTCH1-A1ATDVA AFL   | 14    | >NOTCH1-A1ATDVAPFL   | 31   | 17    |
| >NOTCH1-A1ATDVA AFLG/ | 41    | >NOTCH1-A1ATDVAPFLG/ | 56   | 15    |
| >NOTCH1-A1ATDVA AFL   | 160   | >NOTCH1-A1ATDVAPFL   | 554  | 394   |
| >NOTCH1-A1ATDVA AFLG/ | 367   | >NOTCH1-A1ATDVAPFLG/ | 558  | 191   |
| >NOTCH1-A1SATDVA AFL  | 145   | >NOTCH1-A1SATDVAPFL  | 813  | 668   |
| >NOTCH1-A1SATDVA AFL  | 47    | >NOTCH1-A1SATDVAPFL  | 34   | 13    |
| >NOTCH1-A1SATDVA AFLG | 83    | >NOTCH1-A1SATDVAPFLG | 106  | 23    |
| >NOTCH1-A1SATDVA AFL  | 536   | >NOTCH1-A1SATDVAPFL  | 469  | 67    |
| >NOTCH1-A1SATDVA AFL  | 450   | >NOTCH1-A1SATDVAPFL  | 61   | 389   |
| >NOTCH1-A1SATDVA AFL  | 418   | >NOTCH1-A1SATDVAPFL  | 348  | 70    |
| >NOTCH1-A1SATDVA AFL  | 24    | >NOTCH1-A1SATDVAPFL  | 593  | 569   |

|                       |     |                      |       |       |
|-----------------------|-----|----------------------|-------|-------|
| >NOTCH1-A1SATDVA AFLG | 226 | >NOTCH1-A1SATDVAPFLG | 575   | 349   |
| >NOTCH1-A1SATDVA AFL  | 267 | >NOTCH1-A1SATDVAPFL  | 119   | 148   |
| >NOTCH1-A1SATDVA AF   | 390 | >NOTCH1-A1SATDVAPF   | 439   | 49    |
| >NOTCH1-A1SATDVA AF   | 79  | >NOTCH1-A1SATDVAPF   | 39    | 40    |
| >NOTCH1-A1SATDVA AFL  | 359 | >NOTCH1-A1SATDVAPFL  | 956   | 597   |
| >NOTCH1-A1SATDVA AF   | 60  | >NOTCH1-A1SATDVAPF   | 65    | 5     |
| >NOTCH1-A1SATDVA AF   | 443 | >NOTCH1-A1SATDVAPF   | 530   | 87    |
| >NOTCH1-A1SATDVA AFL  | 19  | >NOTCH1-A1SATDVAPFL  | 32    | 13    |
| >NOTCH1-A1SATDVA AFL  | 412 | >NOTCH1-A1SATDVAPFL  | 1004  | 592   |
| >NOTCH1-A1SATDVA AFL  | 459 | >NOTCH1-A1SATDVAPFL  | 736   | 277   |
| >NOTCH1-A1QSATDVA AF  | 6   | >NOTCH1-A1QSATDVAPF  | 7     | 1     |
| >NOTCH1-A1QSATDVA AFL | 105 | >NOTCH1-A1QSATDVAPFL | 115   | 10    |
| >NOTCH1-A1QSATDVAA    | 288 | >NOTCH1-A1QSATDVAP   | 13937 | 13649 |
| >NOTCH1-A1QSATDVA AFL | 277 | >NOTCH1-A1QSATDVAPFL | 907   | 630   |
| >NOTCH1-A1QSATDVA AFL | 806 | >NOTCH1-A1QSATDVAPFL | 457   | 349   |
| >NOTCH1-A1QSATDVA AF  | 138 | >NOTCH1-A1QSATDVAPF  | 88    | 50    |
| >NOTCH1-A1QSATDVA AF  | 20  | >NOTCH1-A1QSATDVAPF  | 24    | 4     |
| >NOTCH1-A1QSATDVA AF  | 17  | >NOTCH1-A1QSATDVAPF  | 11    | 6     |
| >NOTCH1-A1QSATDVA AFL | 67  | >NOTCH1-A1QSATDVAPFL | 106   | 39    |
| >NOTCH1-A1QSATDVA AF  | 102 | >NOTCH1-A1QSATDVAPF  | 106   | 4     |
| >NOTCH1-A1QSATDVA AF  | 273 | >NOTCH1-A1QSATDVAPF  | 206   | 67    |
| >NOTCH1-A1QSATDVA AFL | 102 | >NOTCH1-A1QSATDVAPFL | 110   | 8     |
| >NOTCH1-A1QSATDVA AFL | 458 | >NOTCH1-A1QSATDVAPFL | 1071  | 613   |
| >NOTCH1-A1QSATDVA AFL | 126 | >NOTCH1-A1QSATDVAPFL | 257   | 131   |
| >NOTCH1-A1FQSATDVA AF | 45  | >NOTCH1-A1FQSATDVAPF | 33    | 12    |
| >NOTCH1-A1FQSATDVAA   | 69  | >NOTCH1-A1FQSATDVAP  | 5106  | 5037  |
| >NOTCH1-A1FQSATDVA AF | 4   | >NOTCH1-A1FQSATDVAPF | 6     | 2     |
| >NOTCH1-A1FQSATDVAA   | 225 | >NOTCH1-A1FQSATDVAP  | 14365 | 14140 |
| >NOTCH1-A1FQSATDVA AF | 52  | >NOTCH1-A1FQSATDVAPF | 125   | 73    |
| >NOTCH1-A1FQSATDVAA   | 8   | >NOTCH1-A1FQSATDVAP  | 480   | 472   |
| >NOTCH1-A1FQSATDVA AF | 4   | >NOTCH1-A1FQSATDVAPF | 4     | 0     |
| >NOTCH1-A1FQSATDVA AF | 165 | >NOTCH1-A1FQSATDVAPF | 145   | 20    |
| >NOTCH1-A1FQSATDVA AF | 85  | >NOTCH1-A1FQSATDVAPF | 128   | 43    |
| >NOTCH1-A1FQSATDVA AF | 202 | >NOTCH1-A1FQSATDVAPF | 75    | 127   |
| >NOTCH1-A1FQSATDVAA   | 118 | >NOTCH1-A1FQSATDVAP  | 816   | 698   |
| >NOTCH1-A1FQSATDVA AF | 28  | >NOTCH1-A1FQSATDVAPF | 26    | 2     |
| >NOTCH1-A1FQSATDVA AF | 145 | >NOTCH1-A1FQSATDVAPF | 234   | 89    |
| >NOTCH1-A1FQSATDVA AF | 52  | >NOTCH1-A1FQSATDVAPF | 46    | 6     |
| >NOTCH1-A1FQSATDVAA   | 54  | >NOTCH1-A1FQSATDVAP  | 279   | 225   |
| >NOTCH1-A1FQSATDVA AF | 2   | >NOTCH1-A1FQSATDVAPF | 2     | 0     |
| >NOTCH1-A1FQSATDVA AF | 42  | >NOTCH1-A1FQSATDVAPF | 38    | 4     |
| >NOTCH1-A1FQSATDVA AF | 24  | >NOTCH1-A1FQSATDVAPF | 35    | 11    |
| >NOTCH1-A1FQSATDVA AF | 11  | >NOTCH1-A1FQSATDVAPF | 14    | 3     |



|                       |      |                       |      |      |
|-----------------------|------|-----------------------|------|------|
| >NOTCH1-A1 FQSATDVAAF | 465  | >NOTCH1-A1 FQSATDVAPF | 464  | 1    |
| >NOTCH1-A1 FQSATDVAAF | 418  | >NOTCH1-A1 FQSATDVAPF | 460  | 42   |
| >NOTCH1-A1 CFQSATDVA/ | 63   | >NOTCH1-A1 CFQSATDVAF | 92   | 29   |
| >NOTCH1-A1 CFQSATDVA/ | 5    | >NOTCH1-A1 CFQSATDVAF | 8    | 3    |
| >NOTCH1-A2 ASGTSTVL   | 114  | >NOTCH1-A2 VSGTSTVL   | 90   | 24   |
| >NOTCH1-A2 ASGTSTVL   | 448  | >NOTCH1-A2 VSGTSTVL   | 475  | 27   |
| >NOTCH1-A2 VASGTSTV   | 872  | >NOTCH1-A2 VVSGTSTV   | 151  | 721  |
| >NOTCH1-A2 VASGTSTVL  | 1885 | >NOTCH1-A2 VVSGTSTVL  | 368  | 1517 |
| >NOTCH1-A2 VASGTSTV   | 192  | >NOTCH1-A2 VVSGTSTV   | 22   | 170  |
| >NOTCH1-A2 VASGTSTV   | 351  | >NOTCH1-A2 VVSGTSTV   | 76   | 275  |
| >NOTCH1-A2 VASGTSTV   | 245  | >NOTCH1-A2 VVSGTSTV   | 42   | 203  |
| >NOTCH1-A2 VASGTSTV   | 4151 | >NOTCH1-A2 VVSGTSTV   | 330  | 3821 |
| >NOTCH1-A2 VASGTSTV   | 728  | >NOTCH1-A2 VVSGTSTV   | 76   | 652  |
| >NOTCH1-A2 VASGTSTV   | 1321 | >NOTCH1-A2 VVSGTSTV   | 39   | 1282 |
| >NOTCH1-A2 VASGTSTV   | 17   | >NOTCH1-A2 VVSGTSTV   | 4    | 13   |
| >NOTCH1-A2 VASGTSTVL  | 2886 | >NOTCH1-A2 VVSGTSTVL  | 123  | 2763 |
| >NOTCH1-A2 VASGTSTV   | 1193 | >NOTCH1-A2 VVSGTSTV   | 226  | 967  |
| >NOTCH1-A2 VASGTSTVL  | 54   | >NOTCH1-A2 VVSGTSTVL  | 732  | 678  |
| >NOTCH1-A2 VASGTSTVL  | 168  | >NOTCH1-A2 VVSGTSTVL  | 85   | 83   |
| >NOTCH1-A2 GPPRLSHLPV | 530  | >NOTCH1-A2 GPPRLSHLPV | 403  | 127  |
| >NOTCH1-A2 GPPRLSHLPV | 359  | >NOTCH1-A2 GPPRLSHLPV | 1593 | 1234 |
| >NOTCH1-A2 PVASGTSTV  | 145  | >NOTCH1-A2 PVVSGTSTV  | 457  | 312  |
| >NOTCH1-A2 PVASGTSTV  | 268  | >NOTCH1-A2 PVVSGTSTV  | 1902 | 1634 |
| >NOTCH1-A2 PVASGTSTV  | 35   | >NOTCH1-A2 PVVSGTSTV  | 86   | 51   |
| >NOTCH1-A2 PVASGTSTV  | 390  | >NOTCH1-A2 PVVSGTSTV  | 1508 | 1118 |
| >NOTCH1-A2 LPVASGTSTV | 94   | >NOTCH1-A2 LPVVSGTSTV | 795  | 701  |
| >NOTCH1-A2 LPVASGTSTV | 40   | >NOTCH1-A2 LPVVSGTSTV | 406  | 366  |
| >NOTCH1-A2 LPVASGTST  | 72   | >NOTCH1-A2 LPVVSGTST  | 139  | 67   |
| >NOTCH1-A2 LPVASGTSTV | 114  | >NOTCH1-A2 LPVVSGTSTV | 134  | 20   |
| >NOTCH1-A2 LPVASGTSTV | 14   | >NOTCH1-A2 LPVVSGTSTV | 13   | 1    |
| >NOTCH1-A2 LPVASGTSTV | 419  | >NOTCH1-A2 LPVVSGTSTV | 637  | 218  |
| >NOTCH1-A2 LPVASGTS   | 140  | >NOTCH1-A2 LPVVSGTS   | 361  | 221  |
| >NOTCH1-A2 LPVASGTST  | 136  | >NOTCH1-A2 LPVVSGTST  | 400  | 264  |
| >NOTCH1-A2 LPVASGTSTV | 33   | >NOTCH1-A2 LPVVSGTSTV | 61   | 28   |
| >NOTCH1-A2 LPVASGTSTV | 59   | >NOTCH1-A2 LPVVSGTSTV | 187  | 128  |
| >NOTCH1-A2 LPVASGTSTV | 594  | >NOTCH1-A2 LPVVSGTSTV | 389  | 205  |
| >NOTCH1-A2 LPVASGTSTV | 84   | >NOTCH1-A2 LPVVSGTSTV | 89   | 5    |
| >NOTCH1-A2 LPVASGTS   | 153  | >NOTCH1-A2 LPVVSGTS   | 135  | 18   |
| >NOTCH1-A2 LPVASGTST  | 58   | >NOTCH1-A2 LPVVSGTST  | 56   | 2    |
| >NOTCH1-A2 LPVASGTSTV | 184  | >NOTCH1-A2 LPVVSGTSTV | 97   | 87   |
| >NOTCH1-A2 LPVASGTSTV | 142  | >NOTCH1-A2 LPVVSGTSTV | 341  | 199  |
| >NOTCH1-A2 LPVASGTSTV | 661  | >NOTCH1-A2 LPVVSGTSTV | 458  | 203  |
| >NOTCH1-A2 HLPVASGTST | 128  | >NOTCH1-A2 HLPVVSGTST | 126  | 2    |

|                       |      |                       |      |      |
|-----------------------|------|-----------------------|------|------|
| >NOTCH1-A2 HLPVASGTST | 14   | >NOTCH1-A2 HLPVVSQTST | 15   | 1    |
| >NOTCH1-A2 HLPVASGTST | 278  | >NOTCH1-A2 HLPVVSQTST | 335  | 57   |
| >NOTCH1-A2 HLPVASGTST | 25   | >NOTCH1-A2 HLPVVSQTST | 9    | 16   |
| >NOTCH1-A2 HLPVASGTST | 18   | >NOTCH1-A2 HLPVVSQTST | 15   | 3    |
| >NOTCH1-A2 HLPVASGTST | 16   | >NOTCH1-A2 HLPVVSQTST | 14   | 2    |
| >NOTCH1-A2 HLPVASGTST | 46   | >NOTCH1-A2 HLPVVSQTST | 74   | 28   |
| >NOTCH1-A2 HLPVASGTST | 4    | >NOTCH1-A2 HLPVVSQTST | 4    | 0    |
| >NOTCH1-A2 HLPVASGTST | 270  | >NOTCH1-A2 HLPVVSQTST | 157  | 113  |
| >NOTCH1-A2 RLSHLPVA   | 330  | >NOTCH1-A2 RLSHLPVV   | 33   | 297  |
| >NOTCH1-A2 RLSHLPVA   | 144  | >NOTCH1-A2 RLSHLPVV   | 17   | 127  |
| >NOTCH1-A2 RLSHLPVAVG | 745  | >NOTCH1-A2 RLSHLPVVVG | 360  | 385  |
| >NOTCH1-A2 RLSHLPVA   | 22   | >NOTCH1-A2 RLSHLPVV   | 5    | 17   |
| >NOTCH1-A2 RLSHLPVAVG | 85   | >NOTCH1-A2 RLSHLPVVVG | 43   | 42   |
| >NOTCH1-A2 RLSHLPVA   | 619  | >NOTCH1-A2 RLSHLPVV   | 64   | 555  |
| >NOTCH1-A2 RLSHLPVA   | 119  | >NOTCH1-A2 RLSHLPVV   | 4    | 115  |
| >NOTCH1-A2 RLSHLPVAVG | 577  | >NOTCH1-A2 RLSHLPVVVG | 272  | 305  |
| >NOTCH1-A2 RLSHLPVA   | 347  | >NOTCH1-A2 RLSHLPVV   | 8    | 339  |
| >NOTCH1-A2 RLSHLPVA   | 185  | >NOTCH1-A2 RLSHLPVV   | 8    | 177  |
| >NOTCH1-A2 RLSHLPVA   | 3077 | >NOTCH1-A2 RLSHLPVV   | 16   | 3061 |
| >NOTCH1-A2 RLSHLPVA   | 84   | >NOTCH1-A2 RLSHLPVV   | 5    | 79   |
| >NOTCH1-A2 RLSHLPVAVS | 433  | >NOTCH1-A2 RLSHLPVVVS | 1568 | 1135 |
| >NOTCH1-A2 PPRLSHLPVA | 2780 | >NOTCH1-A2 PPRLSHLPVV | 336  | 2444 |
| >NOTCH1-A2 VAPGPLSTQ  | 267  | >NOTCH1-A2 VTPGPLSTQ  | 13   | 254  |
| >NOTCH1-A2 VAPGPLSTQA | 510  | >NOTCH1-A2 VTPGPLSTQA | 27   | 483  |
| >NOTCH1-A2 VAPGPLSTQA | 2211 | >NOTCH1-A2 VTPGPLSTQA | 104  | 2107 |
| >NOTCH1-A2 VAPGPLSTQ  | 5593 | >NOTCH1-A2 VTPGPLSTQ  | 308  | 5285 |
| >NOTCH1-A2 NQYNPLRGS\ | 400  | >NOTCH1-A2 NQYNPLRGS\ | 3296 | 2896 |
| >NOTCH1-A2 NQYNPLRGS\ | 443  | >NOTCH1-A2 NQYNPLRGS\ | 2846 | 2403 |
| >NOTCH1-A2 NQYNPLRGS\ | 346  | >NOTCH1-A2 NQYNPLRGS\ | 1417 | 1071 |
| >NOTCH1-A2 SVAPGPLSTQ | 72   | >NOTCH1-A2 SVTPGPLSTQ | 763  | 691  |
| >NOTCH1-A2 SVAPGPLSTQ | 321  | >NOTCH1-A2 SVTPGPLSTQ | 1034 | 713  |
| >NOTCH1-A2 SVAPGPLSTQ | 226  | >NOTCH1-A2 SVTPGPLSTQ | 275  | 49   |
| >NOTCH1-A2 SVAPGPLSTQ | 86   | >NOTCH1-A2 SVTPGPLSTQ | 604  | 518  |
| >NOTCH1-A2 GSVAPGPL   | 26   | >NOTCH1-A2 GSVTPGPL   | 48   | 22   |
| >NOTCH1-A2 GSVAPGPLST | 139  | >NOTCH1-A2 GSVTPGPLST | 106  | 33   |
| >NOTCH1-A2 LRGSVAPGPL | 177  | >NOTCH1-A2 LRGSVTPGPL | 76   | 101  |
| >NOTCH1-A2 LRGSVAPGPL | 631  | >NOTCH1-A2 LRGSVTPGPL | 342  | 289  |
| >NOTCH1-A2 PLRGSVAPGF | 230  | >NOTCH1-A2 PLRGSVTPGP | 245  | 15   |
| >NOTCH1-A2 NPLRGSVA   | 225  | >NOTCH1-A2 NPLRGSVT   | 870  | 645  |
| >NOTCH1-A2 NPLRGSVA   | 89   | >NOTCH1-A2 NPLRGSVT   | 2504 | 2415 |
| >NOTCH1-A2 QYNPLRGSV/ | 530  | >NOTCH1-A2 QYNPLRGSVT | 395  | 135  |
| >NOTCH1-A2 AASGHLGRSF | 392  | >NOTCH1-A2 VASGHLGRSF | 743  | 351  |
| >NOTCH1-A2 AASGHLGR   | 693  | >NOTCH1-A2 VASGHLGR   | 451  | 242  |

|                       |      |                        |      |      |
|-----------------------|------|------------------------|------|------|
| >NOTCH1-A2 AASGHLGRSF | 207  | >NOTCH1-A2 VASGHLGRSF  | 300  | 93   |
| >NOTCH1-A2 AASGHLGRSF | 293  | >NOTCH1-A2 VASGHLGRSF  | 397  | 104  |
| >NOTCH1-A2 AASGHLGRSF | 21   | >NOTCH1-A2 VASGHLGRSF  | 25   | 4    |
| >NOTCH1-A2 AASGHLGRSF | 305  | >NOTCH1-A2 VASGHLGRSF  | 332  | 27   |
| >NOTCH1-A2 SAASGHLGR  | 696  | >NOTCH1-A2 SVASGHLGR   | 74   | 622  |
| >NOTCH1-A2 SAASGHLGRS | 5835 | >NOTCH1-A2 SVASGHLGRS  | 193  | 5642 |
| >NOTCH1-A2 SAASGHLGR  | 337  | >NOTCH1-A2 SVASGHLGR   | 175  | 162  |
| >NOTCH1-A2 SAASGHLGR  | 31   | >NOTCH1-A2 SVASGHLGR   | 21   | 10   |
| >NOTCH1-A2 SAASGHLGRS | 432  | >NOTCH1-A2 SVASGHLGRS  | 344  | 88   |
| >NOTCH1-A2 SAASGHLGRS | 86   | >NOTCH1-A2 SVASGHLGRS  | 63   | 23   |
| >NOTCH1-A2 SAASGHLGRS | 884  | >NOTCH1-A2 SVASGHLGRS  | 240  | 644  |
| >NOTCH1-A2 SAASGHLGRS | 34   | >NOTCH1-A2 SVASGHLGRS  | 214  | 180  |
| >NOTCH1-A2 SAASGHLGRS | 28   | >NOTCH1-A2 SVASGHLGRS  | 217  | 189  |
| >NOTCH1-A2 SAASGHLGRS | 251  | >NOTCH1-A2 SVASGHLGRS  | 838  | 587  |
| >NOTCH1-A2 SAASGHLGRS | 88   | >NOTCH1-A2 SVASGHLGRS  | 50   | 38   |
| >NOTCH1-A2 SAASGHLGR  | 561  | >NOTCH1-A2 SVASGHLGR   | 454  | 107  |
| >NOTCH1-A2 SSAASGHL   | 2017 | >NOTCH1-A2 SSVASGHL    | 404  | 1613 |
| >NOTCH1-A2 SSAASGHLGR | 166  | >NOTCH1-A2 SSVASGHLGR  | 148  | 18   |
| >NOTCH1-A2 SSAASGHLGR | 169  | >NOTCH1-A2 SSVASGHLGR  | 128  | 41   |
| >NOTCH1-A2 SSAASGHLGR | 31   | >NOTCH1-A2 SSVASGHLGR  | 52   | 21   |
| >NOTCH1-A2 SSAASGHL   | 295  | >NOTCH1-A2 SSVASGHL    | 1256 | 961  |
| >NOTCH1-A2 SSAASGHL   | 28   | >NOTCH1-A2 SSVASGHL    | 12   | 16   |
| >NOTCH1-A2 SSAASGHL   | 487  | >NOTCH1-A2 SSVASGHL    | 758  | 271  |
| >NOTCH1-A2 SSAASGHLGR | 170  | >NOTCH1-A2 SSVASGHLGR  | 259  | 89   |
| >NOTCH1-A2 SSAASGHL   | 98   | >NOTCH1-A2 SSVASGHL    | 355  | 257  |
| >NOTCH1-A2 VSSAASGHLC | 304  | >NOTCH1-A2 VSSVASGHLC  | 385  | 81   |
| >NOTCH1-A2 VSSAASGHL  | 459  | >NOTCH1-A2 VSSVASGHL   | 1240 | 781  |
| >NOTCH1-A2 VSSAASGH   | 362  | >NOTCH1-A2 VSSVASGH    | 716  | 354  |
| >NOTCH1-A2 VSSAASGHL  | 21   | >NOTCH1-A2 VSSVASGHL   | 37   | 16   |
| >NOTCH1-A2 VSSAASGHL  | 459  | >NOTCH1-A2 VSSVASGHL   | 978  | 519  |
| >NOTCH1-A2 VSSAASGHL  | 448  | >NOTCH1-A2 VSSVASGHL   | 1262 | 814  |
| >NOTCH1-A2 VSSAASGHL  | 354  | >NOTCH1-A2 VSSVASGHL   | 276  | 78   |
| >NOTCH1-A2 GVSSAASGHL | 472  | >NOTCH1-A2 GVSSVASGHL  | 541  | 69   |
| >NOTCH1-A2 GVSSAASGH  | 116  | >NOTCH1-A2 GVSSVASGH   | 39   | 77   |
| >NOTCH1-A2 HLGVSSAA   | 422  | >NOTCH1-A2 HLGVSSVA    | 1062 | 640  |
| >NOTCH1-A2 HLGVSSAA   | 290  | >NOTCH1-A2 HLGVSSVA    | 959  | 669  |
| >NOTCH1-A2 HLGVSSAA   | 206  | >NOTCH1-A2 HLGVSSVA    | 542  | 336  |
| >NOTCH1-A2 HLGVSSAA   | 133  | >NOTCH1-A2 HLGVSSVA    | 160  | 27   |
| >NOTCH1-A2 QPHLGVSSA  | 259  | >NOTCH1-A2 QPHLGVSSV   | 117  | 142  |
| >NOTCH1-A2 QPHLGVSSA/ | 50   | >NOTCH1-A2 QPHLGVSSV/  | 94   | 44   |
| >NOTCH1-A2 ADVQPLGPS  | 375  | >NOTCH1-A2 VDVQPLGPS   | 1569 | 1194 |
| >NOTCH1-A2 RSFLSGEPSQ | 229  | >NOTCH1-A2 RSFLSGEPSQ' | 416  | 187  |
| >NOTCH1-A2 RSFLSGEPSQ | 675  | >NOTCH1-A2 RSFLSGEPSQ' | 109  | 566  |

|                        |       |                        |     |       |
|------------------------|-------|------------------------|-----|-------|
| >NOTCH1-A2 RSFLSGEPSQ, | 40    | >NOTCH1-A2 RSFLSGEPSQ' | 8   | 32    |
| >NOTCH1-A2 RSFLSGEPSQ, | 332   | >NOTCH1-A2 RSFLSGEPSQ' | 51  | 281   |
| >NOTCH1-A2 RSFLSGEPSQ, | 1210  | >NOTCH1-A2 RSFLSGEPSQ' | 198 | 1012  |
| >NOTCH1-A2 SQADVQPL    | 76    | >NOTCH1-A2 SQVDVQPL    | 222 | 146   |
| >NOTCH1-A2 SQADVQPL    | 28    | >NOTCH1-A2 SQVDVQPL    | 124 | 96    |
| >NOTCH1-A2 SQADVQPL    | 121   | >NOTCH1-A2 SQVDVQPL    | 296 | 175   |
| >NOTCH1-A2 SQADVQPL    | 10    | >NOTCH1-A2 SQVDVQPL    | 8   | 2     |
| >NOTCH1-A2 SQADVQPLG   | 266   | >NOTCH1-A2 SQVDVQPLG   | 172 | 94    |
| >NOTCH1-A2 SQADVQPL    | 183   | >NOTCH1-A2 SQVDVQPL    | 242 | 59    |
| >NOTCH1-A2 SQADVQPL    | 114   | >NOTCH1-A2 SQVDVQPL    | 468 | 354   |
| >NOTCH1-A2 SQADVQPL    | 143   | >NOTCH1-A2 SQVDVQPL    | 188 | 45    |
| >NOTCH1-A2 SQADVQPL    | 102   | >NOTCH1-A2 SQVDVQPL    | 92  | 10    |
| >NOTCH1-A2 SQADVQPL    | 36    | >NOTCH1-A2 SQVDVQPL    | 41  | 5     |
| >NOTCH1-A2 SQADVQPL    | 565   | >NOTCH1-A2 SQVDVQPL    | 306 | 259   |
| >NOTCH1-A2 EPSQADVQ    | 187   | >NOTCH1-A2 EPSQVDVQ    | 275 | 88    |
| >NOTCH1-A2 EPSQADVQPI  | 189   | >NOTCH1-A2 EPSQVDVQPI  | 226 | 37    |
| >NOTCH1-A2 EPSQADVQPI  | 288   | >NOTCH1-A2 EPSQVDVQPI  | 340 | 52    |
| >NOTCH1-A2 GEPSQADVQ   | 306   | >NOTCH1-A2 GEPSQVDVQ   | 534 | 228   |
| >NOTCH1-A2 GEPSQADVQ   | 467   | >NOTCH1-A2 GEPSQVDVQ   | 291 | 176   |
| >NOTCH1-A2 GEPSQADVQ   | 54    | >NOTCH1-A2 GEPSQVDVQ   | 23  | 31    |
| >NOTCH1-A2 LSGEPSQA    | 9432  | >NOTCH1-A2 LSGEPSQV    | 490 | 8942  |
| >NOTCH1-A2 FLSGEPSQA   | 86    | >NOTCH1-A2 FLSGEPSQV   | 16  | 70    |
| >NOTCH1-A2 FLSGEPSQAD  | 22    | >NOTCH1-A2 FLSGEPSQVD  | 24  | 2     |
| >NOTCH1-A2 FLSGEPSQA   | 5     | >NOTCH1-A2 FLSGEPSQV   | 2   | 3     |
| >NOTCH1-A2 FLSGEPSQAD  | 3     | >NOTCH1-A2 FLSGEPSQVD  | 4   | 1     |
| >NOTCH1-A2 FLSGEPSQA   | 4     | >NOTCH1-A2 FLSGEPSQV   | 2   | 2     |
| >NOTCH1-A2 FLSGEPSQAD  | 3     | >NOTCH1-A2 FLSGEPSQVD  | 4   | 1     |
| >NOTCH1-A2 FLSGEPSQA   | 1257  | >NOTCH1-A2 FLSGEPSQV   | 69  | 1188  |
| >NOTCH1-A2 FLSGEPSQAD  | 68    | >NOTCH1-A2 FLSGEPSQVD  | 67  | 1     |
| >NOTCH1-A2 FLSGEPSQA   | 7     | >NOTCH1-A2 FLSGEPSQV   | 2   | 5     |
| >NOTCH1-A2 FLSGEPSQAD  | 3     | >NOTCH1-A2 FLSGEPSQVD  | 3   | 0     |
| >NOTCH1-A2 FLSGEPSQA   | 141   | >NOTCH1-A2 FLSGEPSQV   | 7   | 134   |
| >NOTCH1-A2 FLSGEPSQAD  | 8     | >NOTCH1-A2 FLSGEPSQVD  | 9   | 1     |
| >NOTCH1-A2 FLSGEPSQA   | 25    | >NOTCH1-A2 FLSGEPSQV   | 5   | 20    |
| >NOTCH1-A2 FLSGEPSQAD  | 6     | >NOTCH1-A2 FLSGEPSQVD  | 5   | 1     |
| >NOTCH1-A2 FLSGEPSQA   | 17    | >NOTCH1-A2 FLSGEPSQV   | 3   | 14    |
| >NOTCH1-A2 FLSGEPSQAD  | 4     | >NOTCH1-A2 FLSGEPSQVD  | 5   | 1     |
| >NOTCH1-A2 FLSGEPSQA   | 2     | >NOTCH1-A2 FLSGEPSQV   | 1   | 1     |
| >NOTCH1-A2 FLSGEPSQAD  | 1     | >NOTCH1-A2 FLSGEPSQVD  | 1   | 0     |
| >NOTCH1-A2 SFLSGEPSQA  | 5772  | >NOTCH1-A2 SFLSGEPSQV  | 247 | 5525  |
| >NOTCH1-A2 SFLSGEPSQA  | 3703  | >NOTCH1-A2 SFLSGEPSQV  | 138 | 3565  |
| >NOTCH1-A2 SFLSGEPSQA  | 11275 | >NOTCH1-A2 SFLSGEPSQV  | 178 | 11097 |
| >NOTCH1-A2 AVHTILPQ    | 121   | >NOTCH1-A2 TVHTILPQ    | 911 | 790   |

|                        |      |                        |       |       |
|------------------------|------|------------------------|-------|-------|
| >NOTCH1-A2 LAVHTILPQ   | 3105 | >NOTCH1-A2 LTVHTILPQ   | 287   | 2818  |
| >NOTCH1-A2 SLAVHTIL    | 219  | >NOTCH1-A2 SLTVHTIL    | 955   | 736   |
| >NOTCH1-A2 SLAVHTIL    | 7    | >NOTCH1-A2 SLTVHTIL    | 36    | 29    |
| >NOTCH1-A2 SLAVHTIL    | 20   | >NOTCH1-A2 SLTVHTIL    | 144   | 124   |
| >NOTCH1-A2 SLAVHTIL    | 155  | >NOTCH1-A2 SLTVHTIL    | 375   | 220   |
| >NOTCH1-A2 SLAVHTIL    | 320  | >NOTCH1-A2 SLTVHTIL    | 500   | 180   |
| >NOTCH1-A2 SLAVHTIL    | 37   | >NOTCH1-A2 SLTVHTIL    | 78    | 41    |
| >NOTCH1-A2 SLAVHTIL    | 10   | >NOTCH1-A2 SLTVHTIL    | 12    | 2     |
| >NOTCH1-A2 SLAVHTILPQ  | 220  | >NOTCH1-A2 SLTVHTILPQ  | 263   | 43    |
| >NOTCH1-A2 SLAVHTIL    | 445  | >NOTCH1-A2 SLTVHTIL    | 1014  | 569   |
| >NOTCH1-A2 SSLAVHTI    | 36   | >NOTCH1-A2 SSLTVHTI    | 45    | 9     |
| >NOTCH1-A2 SSLAVHTI    | 205  | >NOTCH1-A2 SSLTVHTI    | 428   | 223   |
| >NOTCH1-A2 SSLAVHTI    | 84   | >NOTCH1-A2 SSLTVHTI    | 170   | 86    |
| >NOTCH1-A2 SSLAVHTIL   | 191  | >NOTCH1-A2 SSLTVHTIL   | 460   | 269   |
| >NOTCH1-A2 SSLAVHTI    | 135  | >NOTCH1-A2 SSLTVHTI    | 310   | 175   |
| >NOTCH1-A2 SSLAVHTIL   | 19   | >NOTCH1-A2 SSLTVHTIL   | 15    | 4     |
| >NOTCH1-A2 SSLAVHTI    | 25   | >NOTCH1-A2 SSLTVHTI    | 30    | 5     |
| >NOTCH1-A2 SSLAVHTIL   | 374  | >NOTCH1-A2 SSLTVHTIL   | 446   | 72    |
| >NOTCH1-A2 GPSSLAVHTI  | 278  | >NOTCH1-A2 GPSSLTVHTI  | 1173  | 895   |
| >NOTCH1-A2 GPSSLAVHTIL | 139  | >NOTCH1-A2 GPSSLTVHTIL | 92    | 47    |
| >NOTCH1-A2 GPSSLAVHTI  | 464  | >NOTCH1-A2 GPSSLTVHTI  | 619   | 155   |
| >NOTCH1-A2 GPSSLAVHTIL | 400  | >NOTCH1-A2 GPSSLTVHTIL | 564   | 164   |
| >NOTCH1-A2 GPSSLAVHTI  | 327  | >NOTCH1-A2 GPSSLTVHTI  | 242   | 85    |
| >NOTCH1-A2 LGPSSLAV    | 341  | >NOTCH1-A2 LGPSSLTV    | 439   | 98    |
| >NOTCH1-A2 LGPSSLAVHT  | 205  | >NOTCH1-A2 LGPSSLTVHTI | 177   | 28    |
| >NOTCH1-A2 LGPSSLAVHT  | 14   | >NOTCH1-A2 LGPSSLTVHTI | 24    | 10    |
| >NOTCH1-A2 PLGPSSLAV   | 36   | >NOTCH1-A2 PLGPSSLTV   | 26    | 10    |
| >NOTCH1-A2 PLGPSSLAV   | 215  | >NOTCH1-A2 PLGPSSLTV   | 122   | 93    |
| >NOTCH1-A2 PLGPSSLAV   | 34   | >NOTCH1-A2 PLGPSSLTV   | 16    | 18    |
| >NOTCH1-A2 PLGPSSLAV   | 48   | >NOTCH1-A2 PLGPSSLTV   | 21    | 27    |
| >NOTCH1-A2 PLGPSSLA    | 171  | >NOTCH1-A2 PLGPSSLT    | 1602  | 1431  |
| >NOTCH1-A2 PLGPSSLAV   | 7    | >NOTCH1-A2 PLGPSSLTV   | 5     | 2     |
| >NOTCH1-A2 QPLGPSSLAV  | 106  | >NOTCH1-A2 QPLGPSSLTV  | 128   | 22    |
| >NOTCH1-A2 QPLGPSSLAV  | 359  | >NOTCH1-A2 QPLGPSSLTV  | 392   | 33    |
| >NOTCH1-A2 QPLGPSSLA   | 43   | >NOTCH1-A2 QPLGPSSLT   | 1248  | 1205  |
| >NOTCH1-A2 VQPLGPSSLA  | 159  | >NOTCH1-A2 VQPLGPSSLT  | 183   | 24    |
| >NOTCH1-A2 VQPLGPSSLA  | 29   | >NOTCH1-A2 VQPLGPSSLT  | 35    | 6     |
| >NOTCH1-A2 VQPLGPSSLA  | 548  | >NOTCH1-A2 VQPLGPSSLT  | 401   | 147   |
| >NOTCH1-A2 MQSQIARIFE  | 334  | >NOTCH1-A2 MQSQIARIFE  | 13309 | 12975 |
| >NOTCH1-A2 MQSQIARIFE  | 279  | >NOTCH1-A2 MQSQIARIFE  | 18941 | 18662 |
| >NOTCH1-A2 MQSQIARIFE  | 50   | >NOTCH1-A2 MQSQIARIFE  | 9700  | 9650  |
| >NOTCH1-A2 ARIPEAFK    | 279  | >NOTCH1-A2 ARIPEDFK    | 877   | 598   |
| >NOTCH1-A2 IARIPEAFK   | 405  | >NOTCH1-A2 IARIPEDFK   | 5027  | 4622  |

|                         |       |                        |       |       |
|-------------------------|-------|------------------------|-------|-------|
| >NOTCH1-A2 IARIPEAFK    | 7     | >NOTCH1-A2 IARIPEDFK   | 65    | 58    |
| >NOTCH1-A2 IARIPEAFK    | 290   | >NOTCH1-A2 IARIPEDFK   | 658   | 368   |
| >NOTCH1-A2 IARIPEAF     | 21    | >NOTCH1-A2 IARIPEDF    | 100   | 79    |
| >NOTCH1-A2 IARIPEAF     | 12    | >NOTCH1-A2 IARIPEDF    | 24    | 12    |
| >NOTCH1-A2 IARIPEAF     | 672   | >NOTCH1-A2 IARIPEDF    | 410   | 262   |
| >NOTCH1-A2 QIARIPEAFK   | 156   | >NOTCH1-A2 QIARIPEDFK  | 611   | 455   |
| >NOTCH1-A2 QIARIPEAFK   | 244   | >NOTCH1-A2 QIARIPEDFK  | 357   | 113   |
| >NOTCH1-A2 QIARIPEAF    | 373   | >NOTCH1-A2 QIARIPEDF   | 1817  | 1444  |
| >NOTCH1-A2 QIARIPEAF    | 28    | >NOTCH1-A2 QIARIPEDF   | 85    | 57    |
| >NOTCH1-A2 QIARIPEAFK   | 21    | >NOTCH1-A2 QIARIPEDFK  | 89    | 68    |
| >NOTCH1-A2 QIARIPEA     | 294   | >NOTCH1-A2 QIARIPED    | 14981 | 14687 |
| >NOTCH1-A2 QIARIPEAF    | 264   | >NOTCH1-A2 QIARIPEDF   | 957   | 693   |
| >NOTCH1-A2 SQIARIPEA    | 76    | >NOTCH1-A2 SQIARIPED   | 18343 | 18267 |
| >NOTCH1-A2 SQIARIPEA    | 132   | >NOTCH1-A2 SQIARIPED   | 18246 | 18114 |
| >NOTCH1-A2 SQIARIPEA    | 7     | >NOTCH1-A2 SQIARIPED   | 3310  | 3303  |
| >NOTCH1-A2 SQIARIPEAFK  | 331   | >NOTCH1-A2 SQIARIPEDFK | 1443  | 1112  |
| >NOTCH1-A2 SQIARIPEAFK  | 16    | >NOTCH1-A2 SQIARIPEDFK | 20    | 4     |
| >NOTCH1-A2 SQIARIPEAF   | 400   | >NOTCH1-A2 SQIARIPEDF  | 1511  | 1111  |
| >NOTCH1-A2 SQIARIPEAFK  | 313   | >NOTCH1-A2 SQIARIPEDFK | 1373  | 1060  |
| >NOTCH1-A2 SQIARIPEAFK  | 198   | >NOTCH1-A2 SQIARIPEDFK | 1078  | 880   |
| >NOTCH1-A2 SQIARIPEAF   | 298   | >NOTCH1-A2 SQIARIPEDF  | 912   | 614   |
| >NOTCH1-A2 SQIARIPEAF   | 36    | >NOTCH1-A2 SQIARIPEDF  | 87    | 51    |
| >NOTCH1-A2 SQIARIPEAF   | 399   | >NOTCH1-A2 SQIARIPEDF  | 1200  | 801   |
| >NOTCH1-A2 SQIARIPEAF   | 4     | >NOTCH1-A2 SQIARIPEDF  | 8     | 4     |
| >NOTCH1-A2 QSQIARIPEAF  | 353   | >NOTCH1-A2 QSQIARIPEDI | 1228  | 875   |
| >NOTCH1-A2 QSQIARIPEAF  | 133   | >NOTCH1-A2 QSQIARIPEDI | 483   | 350   |
| >NOTCH1-A2 QSQIARIPEAF  | 70    | >NOTCH1-A2 QSQIARIPEDI | 151   | 81    |
| >NOTCH1-C1 CVQASSQCF    | 243   | >NOTCH1-C1 FVQASSQCF   | 42    | 201   |
| >NOTCH1-C1 CVQASSQCF    | 983   | >NOTCH1-C1 FVQASSQCF   | 42    | 941   |
| >NOTCH1-C1 CVQASSQCF    | 298   | >NOTCH1-C1 FVQASSQCF   | 44    | 254   |
| >NOTCH1-C1 CVQASSQCF    | 1736  | >NOTCH1-C1 FVQASSQCF   | 266   | 1470  |
| >NOTCH1-C1 CVQASSQCF    | 852   | >NOTCH1-C1 FVQASSQCF   | 116   | 736   |
| >NOTCH1-C1 QCVQASSQC    | 2115  | >NOTCH1-C1 QFVQASSQCI  | 119   | 1996  |
| >NOTCH1-C1 QCVQASSQC    | 4371  | >NOTCH1-C1 QFVQASSQCI  | 316   | 4055  |
| >NOTCH1-C1 QCVQASSQC    | 15405 | >NOTCH1-C1 QFVQASSQCI  | 126   | 15279 |
| >NOTCH1-C1 QCVQASSQC    | 6418  | >NOTCH1-C1 QFVQASSQCI  | 361   | 6057  |
| >NOTCH1-C1 QCVQASSQC    | 171   | >NOTCH1-C1 QFVQASSQCI  | 530   | 359   |
| >NOTCH1-C1 IVYLEIDNRQCF | 21078 | >NOTCH1-C1 IVYLEIDNRQF | 495   | 20583 |
| >NOTCH1-C1 IVYLEIDNRQCF | 17457 | >NOTCH1-C1 IVYLEIDNRQF | 20    | 17437 |
| >NOTCH1-C1 RQCVQASSQCF  | 2521  | >NOTCH1-C1 RQFVQASSQCI | 168   | 2353  |
| >NOTCH1-C1 RQCVQASSQCF  | 667   | >NOTCH1-C1 RQFVQASSQCI | 230   | 437   |
| >NOTCH1-C1 RQCVQASSQCF  | 43    | >NOTCH1-C1 RQFVQASSQCI | 29    | 14    |
| >NOTCH1-C1 RQCVQASSQCF  | 1869  | >NOTCH1-C1 RQFVQASSQCI | 267   | 1602  |

|                       |       |                       |      |       |
|-----------------------|-------|-----------------------|------|-------|
| >NOTCH1-C1 RQCVQASS   | 2333  | >NOTCH1-C1 RQFVQASS   | 120  | 2213  |
| >NOTCH1-C1 RQCVQASSQ  | 942   | >NOTCH1-C1 RQFVQASSQ  | 41   | 901   |
| >NOTCH1-C1 RQCVQASSQ  | 1621  | >NOTCH1-C1 RQFVQASSQ  | 115  | 1506  |
| >NOTCH1-C1 RQCVQASSQ  | 3     | >NOTCH1-C1 RQFVQASSQ  | 1    | 2     |
| >NOTCH1-C1 RQCVQASSQ  | 932   | >NOTCH1-C1 RQFVQASSQ  | 207  | 725   |
| >NOTCH1-C1 RQCVQASSQ  | 5780  | >NOTCH1-C1 RQFVQASSQ  | 176  | 5604  |
| >NOTCH1-C1 EIDNRQCV   | 1188  | >NOTCH1-C1 EIDNRQFV   | 207  | 981   |
| >NOTCH1-C1 EIDNRQCV   | 526   | >NOTCH1-C1 EIDNRQFV   | 134  | 392   |
| >NOTCH1-C1 EIDNRQCV   | 1088  | >NOTCH1-C1 EIDNRQFV   | 320  | 768   |
| >NOTCH1-C1 EIDNRQCV   | 260   | >NOTCH1-C1 EIDNRQFV   | 124  | 136   |
| >NOTCH1-C1 EIDNRQCV   | 2497  | >NOTCH1-C1 EIDNRQFV   | 312  | 2185  |
| >NOTCH1-C1 EIDNRQCV   | 351   | >NOTCH1-C1 EIDNRQFV   | 22   | 329   |
| >NOTCH1-C1 EIDNRQCVQ  | 1882  | >NOTCH1-C1 EIDNRQFVQ  | 489  | 1393  |
| >NOTCH1-C1 LEIDNRQCV  | 364   | >NOTCH1-C1 LEIDNRQFV  | 58   | 306   |
| >NOTCH1-C1 LEIDNRQCV  | 1118  | >NOTCH1-C1 LEIDNRQFV  | 273  | 845   |
| >NOTCH1-C1 LEIDNRQC   | 18898 | >NOTCH1-C1 LEIDNRQF   | 202  | 18696 |
| >NOTCH1-C1 LEIDNRQC   | 4027  | >NOTCH1-C1 LEIDNRQF   | 28   | 3999  |
| >NOTCH1-C1 LEIDNRQCV  | 391   | >NOTCH1-C1 LEIDNRQFV  | 324  | 67    |
| >NOTCH1-C1 LEIDNRQC   | 3299  | >NOTCH1-C1 LEIDNRQF   | 344  | 2955  |
| >NOTCH1-C1 LEIDNRQCV  | 418   | >NOTCH1-C1 LEIDNRQFV  | 143  | 275   |
| >NOTCH1-C1 LEIDNRQCV  | 275   | >NOTCH1-C1 LEIDNRQFV  | 258  | 17    |
| >NOTCH1-C1 LEIDNRQCVC | 412   | >NOTCH1-C1 LEIDNRQFVQ | 254  | 158   |
| >NOTCH1-C1 LEIDNRQC   | 3422  | >NOTCH1-C1 LEIDNRQF   | 183  | 3239  |
| >NOTCH1-C1 LEIDNRQC   | 7646  | >NOTCH1-C1 LEIDNRQF   | 161  | 7485  |
| >NOTCH1-C1 LEIDNRQCVC | 773   | >NOTCH1-C1 LEIDNRQFVQ | 478  | 295   |
| >NOTCH1-C1 LEIDNRQCV  | 25    | >NOTCH1-C1 LEIDNRQFV  | 27   | 2     |
| >NOTCH1-C1 LEIDNRQCVC | 231   | >NOTCH1-C1 LEIDNRQFVQ | 141  | 90    |
| >NOTCH1-C1 YLEIDNRQCV | 358   | >NOTCH1-C1 YLEIDNRQFV | 60   | 298   |
| >NOTCH1-C1 YLEIDNRQCV | 265   | >NOTCH1-C1 YLEIDNRQFV | 57   | 208   |
| >NOTCH1-C1 YLEIDNRQCV | 442   | >NOTCH1-C1 YLEIDNRQFV | 102  | 340   |
| >NOTCH1-C1 YLEIDNRQCV | 1394  | >NOTCH1-C1 YLEIDNRQFV | 469  | 925   |
| >NOTCH1-C1 YLEIDNRQCV | 30    | >NOTCH1-C1 YLEIDNRQFV | 7    | 23    |
| >NOTCH1-C1 YLEIDNRQCV | 28    | >NOTCH1-C1 YLEIDNRQFV | 16   | 12    |
| >NOTCH1-C1 YLEIDNRQCV | 41    | >NOTCH1-C1 YLEIDNRQFV | 19   | 22    |
| >NOTCH1-C1 YLEIDNRQCV | 181   | >NOTCH1-C1 YLEIDNRQFV | 74   | 107   |
| >NOTCH1-C1 YLEIDNRQC  | 291   | >NOTCH1-C1 YLEIDNRQF  | 8153 | 7862  |
| >NOTCH1-C1 YLEIDNRQCV | 3     | >NOTCH1-C1 YLEIDNRQFV | 2    | 1     |
| >NOTCH1-C1 YLEIDNRQCV | 144   | >NOTCH1-C1 YLEIDNRQFV | 158  | 14    |
| >NOTCH1-C1 YLEIDNRQC  | 19012 | >NOTCH1-C1 YLEIDNRQF  | 243  | 18769 |
| >NOTCH1-C1 VYLEIDNRQC | 2005  | >NOTCH1-C1 VYLEIDNRQF | 450  | 1555  |
| >NOTCH1-C1 VYLEIDNRQC | 1004  | >NOTCH1-C1 VYLEIDNRQF | 157  | 847   |
| >NOTCH1-C1 VYLEIDNRQC | 428   | >NOTCH1-C1 VYLEIDNRQF | 122  | 306   |
| >NOTCH1-C1 VYLEIDNRQC | 294   | >NOTCH1-C1 VYLEIDNRQF | 96   | 198   |

|                       |       |                        |       |       |
|-----------------------|-------|------------------------|-------|-------|
| >NOTCH1-C1 VYLEIDNRQC | 31327 | >NOTCH1-C1 VYLEIDNRQF  | 121   | 31206 |
| >NOTCH1-C1 VYLEIDNRQC | 581   | >NOTCH1-C1 VYLEIDNRQF' | 452   | 129   |
| >NOTCH1-C1 VYLEIDNRQC | 27538 | >NOTCH1-C1 VYLEIDNRQF  | 190   | 27348 |
| >NOTCH1-C1 VYLEIDNRQC | 2217  | >NOTCH1-C1 VYLEIDNRQF  | 7     | 2210  |
| >NOTCH1-C1 VYLEIDNRQC | 1265  | >NOTCH1-C1 VYLEIDNRQF' | 110   | 1155  |
| >NOTCH1-C1 VYLEIDNRQC | 1554  | >NOTCH1-C1 VYLEIDNRQF' | 341   | 1213  |
| >NOTCH1-C1 CFQSATDVA/ | 63    | >NOTCH1-C1 RFQSATDVA/  | 51    | 12    |
| >NOTCH1-C1 CFQSATDVA/ | 1118  | >NOTCH1-C1 RFQSATDVA/  | 349   | 769   |
| >NOTCH1-C1 CFQSATDVA/ | 5     | >NOTCH1-C1 RFQSATDVA/  | 5     | 0     |
| >NOTCH1-C1 CFQSATDVA/ | 15881 | >NOTCH1-C1 RFQSATDVA/  | 367   | 15514 |
| >NOTCH1-C1 CFQSATDVA/ | 1962  | >NOTCH1-C1 RFQSATDVA/  | 137   | 1825  |
| >NOTCH1-C1 CFQSATDVA/ | 1417  | >NOTCH1-C1 RFQSATDVA/  | 208   | 1209  |
| >NOTCH1-C1 QCFQSATDV  | 1919  | >NOTCH1-C1 QRFQSATDV   | 89    | 1830  |
| >NOTCH1-C1 QCFQSATDV/ | 3881  | >NOTCH1-C1 QRFQSATDV/  | 176   | 3705  |
| >NOTCH1-C1 QCFQSATDV/ | 26440 | >NOTCH1-C1 QRFQSATDV/  | 340   | 26100 |
| >NOTCH1-C1 QCFQSATDV/ | 23955 | >NOTCH1-C1 QRFQSATDV/  | 273   | 23682 |
| >NOTCH1-C1 SQCFQSATD\ | 8437  | >NOTCH1-C1 SQRFSATD\   | 167   | 8270  |
| >NOTCH1-C1 SQCFQSATD\ | 474   | >NOTCH1-C1 SQRFSATD\   | 224   | 250   |
| >NOTCH1-C1 SQCFQSATD\ | 851   | >NOTCH1-C1 SQRFSATD\   | 117   | 734   |
| >NOTCH1-C1 SSQCFQSAT  | 449   | >NOTCH1-C1 SSQRFQSAT   | 925   | 476   |
| >NOTCH1-C1 SSQCFQSATC | 434   | >NOTCH1-C1 SSQRFQSATC  | 722   | 288   |
| >NOTCH1-C1 ASSQCFQSA  | 11502 | >NOTCH1-C1 ASSQRFQSA   | 293   | 11209 |
| >NOTCH1-C1 VQASSQCFQ! | 272   | >NOTCH1-C1 VQASSQRFQ!  | 352   | 80    |
| >NOTCH1-C1 VQASSQCFQ! | 42    | >NOTCH1-C1 VQASSQRFQ!  | 98    | 56    |
| >NOTCH1-C1 VQASSQCF   | 39    | >NOTCH1-C1 VQASSQRF    | 50    | 11    |
| >NOTCH1-C1 VQASSQCFQ! | 242   | >NOTCH1-C1 VQASSQRFQ!  | 417   | 175   |
| >NOTCH1-C1 VQASSQCF   | 358   | >NOTCH1-C1 VQASSQRF    | 336   | 22    |
| >NOTCH1-C1 VQASSQCF   | 3     | >NOTCH1-C1 VQASSQRF    | 3     | 0     |
| >NOTCH1-C1 VQASSQCFQ! | 65    | >NOTCH1-C1 VQASSQRFQ!  | 88    | 23    |
| >NOTCH1-C1 CVQASSQC   | 26654 | >NOTCH1-C1 CVQASSQR    | 467   | 26187 |
| >NOTCH1-C1 CVQASSQC   | 23764 | >NOTCH1-C1 CVQASSQR    | 262   | 23502 |
| >NOTCH1-C1 CVQASSQC   | 35424 | >NOTCH1-C1 CVQASSQR    | 110   | 35314 |
| >NOTCH1-C1 CVQASSQCF  | 243   | >NOTCH1-C1 CVQASSQRF   | 277   | 34    |
| >NOTCH1-C1 CVQASSQCF  | 298   | >NOTCH1-C1 CVQASSQRF   | 968   | 670   |
| >NOTCH1-C1 CVQASSQCF  | 1736  | >NOTCH1-C1 CVQASSQRF   | 102   | 1634  |
| >NOTCH1-C1 QCVQASSQC  | 171   | >NOTCH1-C1 QCVQASSQR   | 486   | 315   |
| >NOTCH1-C1 QCVQASSQC  | 2533  | >NOTCH1-C1 QCVQASSQR   | 293   | 2240  |
| >NOTCH1-C1 RQCVQASSQ  | 27526 | >NOTCH1-C1 RQCVQASSQ   | 86    | 27440 |
| >NOTCH1-C1 RQCVQASSQ  | 43    | >NOTCH1-C1 RQCVQASSQ   | 50    | 7     |
| >NOTCH1-C1 RQCVQASSQ  | 1621  | >NOTCH1-C1 RQCVQASSQ   | 466   | 1155  |
| >NOTCH1-C1 RQCVQASSQ  | 3     | >NOTCH1-C1 RQCVQASSQ   | 5     | 2     |
| >NOTCH1-C1 RQCVQASSQ  | 932   | >NOTCH1-C1 RQCVQASSQ   | 89    | 843   |
| >NOTCH1-D1 DAHGQQMIF  | 468   | >NOTCH1-D1 VAHGQQMIF   | 14740 | 14272 |



|                      |       |                      |       |       |
|----------------------|-------|----------------------|-------|-------|
| >NOTCH1-D1DAHGQQMIF  | 194   | >NOTCH1-D1VAHGQQMIF  | 1730  | 1536  |
| >NOTCH1-D1DAHGQQMIF  | 452   | >NOTCH1-D1VAHGQQMIF  | 94    | 358   |
| >NOTCH1-D1DAHGQQMIF  | 1755  | >NOTCH1-D1VAHGQQMIF  | 177   | 1578  |
| >NOTCH1-D1DAHGQQMIF  | 7184  | >NOTCH1-D1VAHGQQMIF  | 396   | 6788  |
| >NOTCH1-D1DAHGQQMIF  | 5315  | >NOTCH1-D1VAHGQQMIF  | 244   | 5071  |
| >NOTCH1-D1DAHGQQMIF  | 2496  | >NOTCH1-D1VAHGQQMIF  | 111   | 2385  |
| >NOTCH1-D1DAHGQQMIF  | 5384  | >NOTCH1-D1VAHGQQMIF  | 74    | 5310  |
| >NOTCH1-D1DAHGQQMIF  | 1326  | >NOTCH1-D1VAHGQQMIF  | 16    | 1310  |
| >NOTCH1-D1DAHGQQMIF  | 45    | >NOTCH1-D1VAHGQQMIF  | 42    | 3     |
| >NOTCH1-D1DAHGQQMIF  | 11168 | >NOTCH1-D1VAHGQQMIF  | 85    | 11083 |
| >NOTCH1-D1DAHGQQMI   | 3552  | >NOTCH1-D1VAHGQQMI   | 445   | 3107  |
| >NOTCH1-D1RDAHGQQM   | 11261 | >NOTCH1-D1RVAHGQQM   | 304   | 10957 |
| >NOTCH1-D1RDAHGQQM   | 15705 | >NOTCH1-D1RVAHGQQM   | 495   | 15210 |
| >NOTCH1-D1RDAHGQQM   | 10544 | >NOTCH1-D1RVAHGQQM   | 150   | 10394 |
| >NOTCH1-D1RDAHGQQM   | 11076 | >NOTCH1-D1RVAHGQQM   | 97    | 10979 |
| >NOTCH1-D1RDAHGQQM   | 8339  | >NOTCH1-D1RVAHGQQM   | 296   | 8043  |
| >NOTCH1-D1RDAHGQQM   | 5521  | >NOTCH1-D1RVAHGQQM   | 205   | 5316  |
| >NOTCH1-D1RDAHGQQM   | 148   | >NOTCH1-D1RVAHGQQM   | 45    | 103   |
| >NOTCH1-D1RDAHGQQM   | 9862  | >NOTCH1-D1RVAHGQQM   | 29    | 9833  |
| >NOTCH1-D1RDAHGQQM   | 12807 | >NOTCH1-D1RVAHGQQM   | 68    | 12739 |
| >NOTCH1-D1RDAHGQQM   | 17283 | >NOTCH1-D1RVAHGQQM   | 271   | 17012 |
| >NOTCH1-D1RDAHGQQM   | 18142 | >NOTCH1-D1RVAHGQQM   | 263   | 17879 |
| >NOTCH1-D1RDAHGQQM   | 5615  | >NOTCH1-D1RVAHGQQM   | 19    | 5596  |
| >NOTCH1-D1RDAHGQQM   | 1954  | >NOTCH1-D1RVAHGQQM   | 387   | 1567  |
| >NOTCH1-D1RDAHGQQM   | 1822  | >NOTCH1-D1RVAHGQQM   | 117   | 1705  |
| >NOTCH1-D1RDAHGQQM   | 269   | >NOTCH1-D1RVAHGQQM   | 13342 | 13073 |
| >NOTCH1-D1RDAHGQQM   | 325   | >NOTCH1-D1RVAHGQQM   | 67    | 258   |
| >NOTCH1-D1RDAHGQQM   | 133   | >NOTCH1-D1RVAHGQQM   | 19267 | 19134 |
| >NOTCH1-D1VLHTNVVFKF | 24535 | >NOTCH1-D1VLHTNVVFKF | 391   | 24144 |
| >NOTCH1-D1VLHTNVVFKF | 19808 | >NOTCH1-D1VLHTNVVFKF | 246   | 19562 |
| >NOTCH1-D1VLHTNVVFKF | 20272 | >NOTCH1-D1VLHTNVVFKF | 19    | 20253 |
| >NOTCH1-D1VLHTNVVFKF | 9888  | >NOTCH1-D1VLHTNVVFKF | 3     | 9885  |
| >NOTCH1-D1VLHTNVVFKF | 22108 | >NOTCH1-D1VLHTNVVFKF | 29    | 22079 |
| >NOTCH1-D1VLHTNVVFKF | 21598 | >NOTCH1-D1VLHTNVVFKF | 31    | 21567 |
| >NOTCH1-D1VLHTNVVFKF | 26217 | >NOTCH1-D1VLHTNVVFKF | 69    | 26148 |
| >NOTCH1-D1VLHTNVVFKF | 15043 | >NOTCH1-D1VLHTNVVFKF | 2     | 15041 |
| >NOTCH1-D1KRDAHGQQM  | 1167  | >NOTCH1-D1KRVAHGQQM  | 58    | 1109  |
| >NOTCH1-D1KRDAHGQQM  | 2070  | >NOTCH1-D1KRVAHGQQM  | 142   | 1928  |
| >NOTCH1-D1KRDAHGQQM  | 135   | >NOTCH1-D1KRVAHGQQM  | 10    | 125   |
| >NOTCH1-D1KRDAHGQQM  | 989   | >NOTCH1-D1KRVAHGQQM  | 80    | 909   |
| >NOTCH1-D1KRDAHGQQM  | 146   | >NOTCH1-D1KRVAHGQQM  | 48    | 98    |
| >NOTCH1-D1KRDAHGQQM  | 2493  | >NOTCH1-D1KRVAHGQQM  | 289   | 2204  |
| >NOTCH1-D1KRDAHGQQM  | 135   | >NOTCH1-D1KRVAHGQQM  | 155   | 20    |

|                      |       |                      |       |       |
|----------------------|-------|----------------------|-------|-------|
| >NOTCH1-D1KRDAHGQQM  | 375   | >NOTCH1-D1KRVAHGQQM  | 196   | 179   |
| >NOTCH1-D1KRDAHGQQM  | 230   | >NOTCH1-D1KRVAHGQQM  | 167   | 63    |
| >NOTCH1-D1KRDAHGQQM  | 720   | >NOTCH1-D1KRVAHGQQM  | 410   | 310   |
| >NOTCH1-D1FKRDAHGQQ  | 17    | >NOTCH1-D1FKRVAHGQQ  | 13    | 4     |
| >NOTCH1-D1FKRDAHGQQ  | 43    | >NOTCH1-D1FKRVAHGQQ  | 32    | 11    |
| >NOTCH1-D1TNVVFKRDR  | 21181 | >NOTCH1-D1TNVVFKRVR  | 67    | 21114 |
| >NOTCH1-D1HTNVVFKRDR | 1407  | >NOTCH1-D1HTNVVFKRVR | 309   | 1098  |
| >NOTCH1-D1HTNVVFKRDR | 14407 | >NOTCH1-D1HTNVVFKRVR | 14    | 14393 |
| >NOTCH1-D1HTNVVFKRDR | 19630 | >NOTCH1-D1HTNVVFKRVR | 301   | 19329 |
| >NOTCH1-D1DALLGQVK   | 11402 | >NOTCH1-D1HALLGQVK   | 86    | 11316 |
| >NOTCH1-D1DALLGQVKA  | 5682  | >NOTCH1-D1HALLGQVKA  | 92    | 5590  |
| >NOTCH1-D1DALLGQVKA  | 8689  | >NOTCH1-D1HALLGQVKA  | 383   | 8306  |
| >NOTCH1-D1PDALLGQV   | 130   | >NOTCH1-D1PHALLGQV   | 17821 | 17691 |
| >NOTCH1-D1KRAAEGWAA  | 2744  | >NOTCH1-D1KRAAEGWAA  | 198   | 2546  |
| >NOTCH1-D1APDALLGQV  | 534   | >NOTCH1-D1APHALLGQV  | 30    | 504   |
| >NOTCH1-D1APDALLGQV  | 432   | >NOTCH1-D1APHALLGQV  | 140   | 292   |
| >NOTCH1-D1AAPDALLGQ  | 280   | >NOTCH1-D1AAPHALLGQ  | 943   | 663   |
| >NOTCH1-D1AAPDALLGQ  | 275   | >NOTCH1-D1AAPHALLGQ  | 1699  | 1424  |
| >NOTCH1-D1AAPDALLGQ  | 47    | >NOTCH1-D1AAPHALLGQ  | 914   | 867   |
| >NOTCH1-D1AAPDALLGQ  | 67    | >NOTCH1-D1AAPHALLGQ  | 280   | 213   |
| >NOTCH1-D1WAAPDALL   | 290   | >NOTCH1-D1WAAPHALL   | 187   | 103   |
| >NOTCH1-D1WAAPDALLG  | 388   | >NOTCH1-D1WAAPHALLG  | 225   | 163   |
| >NOTCH1-D1WAAPDALLG  | 148   | >NOTCH1-D1WAAPHALLG  | 54    | 94    |
| >NOTCH1-D1WAAPDALL   | 472   | >NOTCH1-D1WAAPHALL   | 390   | 82    |
| >NOTCH1-D1WAAPDALLG  | 122   | >NOTCH1-D1WAAPHALLG  | 99    | 23    |
| >NOTCH1-D1WAAPDALLG  | 670   | >NOTCH1-D1WAAPHALLG  | 491   | 179   |
| >NOTCH1-D1WAAPDALLG  | 73    | >NOTCH1-D1WAAPHALLG  | 91    | 18    |
| >NOTCH1-D1WAAPDALL   | 92    | >NOTCH1-D1WAAPHALL   | 87    | 5     |
| >NOTCH1-D1WAAPDALLG  | 42    | >NOTCH1-D1WAAPHALLG  | 36    | 6     |
| >NOTCH1-D1WAAPDALL   | 1575  | >NOTCH1-D1WAAPHALL   | 337   | 1238  |
| >NOTCH1-D1WAAPDALLG  | 53    | >NOTCH1-D1WAAPHALLG  | 36    | 17    |
| >NOTCH1-D1WAAPDALL   | 121   | >NOTCH1-D1WAAPHALL   | 51    | 70    |
| >NOTCH1-D1WAAPDALL   | 191   | >NOTCH1-D1WAAPHALL   | 269   | 78    |
| >NOTCH1-D1WAAPDALL   | 985   | >NOTCH1-D1WAAPHALL   | 113   | 872   |
| >NOTCH1-D1WAAPDALL   | 499   | >NOTCH1-D1WAAPHALL   | 463   | 36    |
| >NOTCH1-D1GWAAPDAL   | 275   | >NOTCH1-D1GWAAPHAL   | 212   | 63    |
| >NOTCH1-D1EGWAAPDAL  | 2021  | >NOTCH1-D1EGWAAPHAL  | 136   | 1885  |
| >NOTCH1-D1EGWAAPDAL  | 2577  | >NOTCH1-D1EGWAAPHAL  | 292   | 2285  |
| >NOTCH1-D1EGWAAPDAL  | 186   | >NOTCH1-D1EGWAAPHAL  | 213   | 27    |
| >NOTCH1-D1EGWAAPDAL  | 3791  | >NOTCH1-D1EGWAAPHAL  | 461   | 3330  |
| >NOTCH1-D1AEGWAAPDA  | 801   | >NOTCH1-D1AEGWAAPHA  | 499   | 302   |
| >NOTCH1-D1AEGWAAPDA  | 22    | >NOTCH1-D1AEGWAAPHA  | 17    | 5     |
| >NOTCH1-D1AEGWAAPDA  | 168   | >NOTCH1-D1AEGWAAPHA  | 50    | 118   |

|                      |      |                      |      |      |
|----------------------|------|----------------------|------|------|
| >NOTCH1-D1AEGWAAPDA  | 1006 | >NOTCH1-D1AEGWAAPHA  | 296  | 710  |
| >NOTCH1-D1AEGWAAPDA  | 340  | >NOTCH1-D1AEGWAAPHA  | 483  | 143  |
| >NOTCH1-D1AEGWAAPDA  | 168  | >NOTCH1-D1AEGWAAPHA  | 215  | 47   |
| >NOTCH1-D1AEGWAAPD   | 243  | >NOTCH1-D1AEGWAAPH   | 184  | 59   |
| >NOTCH1-D1AEGWAAPDA  | 7    | >NOTCH1-D1AEGWAAPHA  | 8    | 1    |
| >NOTCH1-D1AEGWAAPDA  | 439  | >NOTCH1-D1AEGWAAPHA  | 258  | 181  |
| >NOTCH1-D1AEGWAAPDA  | 310  | >NOTCH1-D1AEGWAAPHA  | 115  | 195  |
| >NOTCH1-D1AEGWAAPDA  | 391  | >NOTCH1-D1AEGWAAPHA  | 333  | 58   |
| >NOTCH1-D1AEGWAAPDA  | 31   | >NOTCH1-D1AEGWAAPHA  | 23   | 8    |
| >NOTCH1-D1AEGWAAPDA  | 54   | >NOTCH1-D1AEGWAAPHA  | 55   | 1    |
| >NOTCH1-D1AAEGWAAPL  | 803  | >NOTCH1-D1AAEGWAAPL  | 285  | 518  |
| >NOTCH1-D1AAEGWAAPL  | 232  | >NOTCH1-D1AAEGWAAPL  | 46   | 186  |
| >NOTCH1-D1RAAEGWAAF  | 336  | >NOTCH1-D1RAAEGWAAF  | 45   | 291  |
| >NOTCH1-D1RAAEGWAAF  | 1795 | >NOTCH1-D1RAAEGWAAF  | 287  | 1508 |
| >NOTCH1-D1RAAEGWAAF  | 4765 | >NOTCH1-D1RAAEGWAAF  | 115  | 4650 |
| >NOTCH1-D1EIDNRQCV   | 260  | >NOTCH1-D1EIGNRQCV   | 209  | 51   |
| >NOTCH1-D1EIDNRQCV   | 351  | >NOTCH1-D1EIGNRQCV   | 1480 | 1129 |
| >NOTCH1-D1LEIDNRQCV  | 364  | >NOTCH1-D1LEIGNRQCV  | 504  | 140  |
| >NOTCH1-D1LEIDNRQCV  | 391  | >NOTCH1-D1LEIGNRQCV  | 296  | 95   |
| >NOTCH1-D1LEIDNRQCV  | 418  | >NOTCH1-D1LEIGNRQCV  | 187  | 231  |
| >NOTCH1-D1LEIDNRQCV  | 275  | >NOTCH1-D1LEIGNRQCV  | 199  | 76   |
| >NOTCH1-D1LEIDNRQCVC | 412  | >NOTCH1-D1LEIGNRQCVC | 382  | 30   |
| >NOTCH1-D1LEIDNRQCV  | 903  | >NOTCH1-D1LEIGNRQCV  | 323  | 580  |
| >NOTCH1-D1LEIDNRQCVC | 773  | >NOTCH1-D1LEIGNRQCVC | 333  | 440  |
| >NOTCH1-D1LEIDNRQCV  | 25   | >NOTCH1-D1LEIGNRQCV  | 77   | 52   |
| >NOTCH1-D1LEIDNRQCVC | 231  | >NOTCH1-D1LEIGNRQCVC | 689  | 458  |
| >NOTCH1-D1YLEIDNRQCV | 358  | >NOTCH1-D1YLEIGNRQCV | 368  | 10   |
| >NOTCH1-D1YLEIDNRQCV | 265  | >NOTCH1-D1YLEIGNRQCV | 248  | 17   |
| >NOTCH1-D1YLEIDNRQCV | 442  | >NOTCH1-D1YLEIGNRQCV | 421  | 21   |
| >NOTCH1-D1YLEIDNRQCV | 30   | >NOTCH1-D1YLEIGNRQCV | 22   | 8    |
| >NOTCH1-D1YLEIDNRQCV | 28   | >NOTCH1-D1YLEIGNRQCV | 37   | 9    |
| >NOTCH1-D1YLEIDNRQCV | 41   | >NOTCH1-D1YLEIGNRQCV | 30   | 11   |
| >NOTCH1-D1YLEIDNRQCV | 181  | >NOTCH1-D1YLEIGNRQCV | 198  | 17   |
| >NOTCH1-D1YLEIDNRQ   | 250  | >NOTCH1-D1YLEIGNRQ   | 125  | 125  |
| >NOTCH1-D1YLEIDNRQC  | 291  | >NOTCH1-D1YLEIGNRQC  | 121  | 170  |
| >NOTCH1-D1YLEIDNRQCV | 3    | >NOTCH1-D1YLEIGNRQCV | 3    | 0    |
| >NOTCH1-D1YLEIDNRQCV | 144  | >NOTCH1-D1YLEIGNRQCV | 90   | 54   |
| >NOTCH1-D1VYLEIDNRQC | 428  | >NOTCH1-D1VYLEIGNRQC | 494  | 66   |
| >NOTCH1-D1VYLEIDNRQC | 294  | >NOTCH1-D1VYLEIGNRQC | 281  | 13   |
| >NOTCH1-D1VYLEIDNR   | 286  | >NOTCH1-D1VYLEIGNR   | 137  | 149  |
| >NOTCH1-D1VYLEIDNR   | 120  | >NOTCH1-D1VYLEIGNR   | 102  | 18   |
| >NOTCH1-D1VYLEIDNR   | 43   | >NOTCH1-D1VYLEIGNR   | 53   | 10   |
| >NOTCH1-D1IVYLEIDNR  | 3076 | >NOTCH1-D1IVYLEIGNR  | 284  | 2792 |

|                       |       |                       |       |       |
|-----------------------|-------|-----------------------|-------|-------|
| >NOTCH1-D1IVYLEIDNR   | 353   | >NOTCH1-D1IVYLEIGNR   | 486   | 133   |
| >NOTCH1-D1IVYLEIDNR   | 564   | >NOTCH1-D1IVYLEIGNR   | 233   | 331   |
| >NOTCH1-D1IVYLEIDNR   | 636   | >NOTCH1-D1IVYLEIGNR   | 357   | 279   |
| >NOTCH1-D1IVYLEIDNR   | 39    | >NOTCH1-D1IVYLEIGNR   | 50    | 11    |
| >NOTCH1-D1IVYLEIDNR   | 195   | >NOTCH1-D1IVYLEIGNR   | 201   | 6     |
| >NOTCH1-D1SIVYLEIDNR  | 491   | >NOTCH1-D1SIVYLEIGNR  | 644   | 153   |
| >NOTCH1-D1SIVYLEIDNR  | 831   | >NOTCH1-D1SIVYLEIGNR  | 408   | 423   |
| >NOTCH1-D1SIVYLEIDNR  | 33    | >NOTCH1-D1SIVYLEIGNR  | 67    | 34    |
| >NOTCH1-D1SIVYLEIDNR  | 272   | >NOTCH1-D1SIVYLEIGNR  | 235   | 37    |
| >NOTCH1-D1GSIVYLEIDNR | 263   | >NOTCH1-D1GSIVYLEIGNR | 157   | 106   |
| >NOTCH1-D1GSIVYLEIDNR | 215   | >NOTCH1-D1GSIVYLEIGNR | 290   | 75    |
| >NOTCH1-D1GSIVYLEIDNR | 170   | >NOTCH1-D1GSIVYLEIGNR | 160   | 10    |
| >NOTCH1-DÉ DRDNAYLCF  | 1572  | >NOTCH1-DÉ YRDNAYLCF  | 64    | 1508  |
| >NOTCH1-DÉ DRDNAYLCF  | 6173  | >NOTCH1-DÉ YRDNAYLCF  | 257   | 5916  |
| >NOTCH1-DÉ DRDNAYLCFC | 7414  | >NOTCH1-DÉ YRDNAYLCFC | 448   | 6966  |
| >NOTCH1-DÉ DRDNAYLCF  | 7128  | >NOTCH1-DÉ YRDNAYLCF  | 310   | 6818  |
| >NOTCH1-DÉ DRDNAYLCFC | 916   | >NOTCH1-DÉ YRDNAYLCFC | 36    | 880   |
| >NOTCH1-DÉ QDRDNAYLCF | 9550  | >NOTCH1-DÉ QYRDNAYLCF | 17    | 9533  |
| >NOTCH1-DÉ QDRDNAYLCF | 19412 | >NOTCH1-DÉ QYRDNAYLCF | 47    | 19365 |
| >NOTCH1-DÉ QDRDNAYL   | 26394 | >NOTCH1-DÉ QYRDNAYL   | 87    | 26307 |
| >NOTCH1-DÉ QDRDNAYLCF | 24042 | >NOTCH1-DÉ QYRDNAYLCF | 24    | 24018 |
| >NOTCH1-DÉ QDRDNAYL   | 10009 | >NOTCH1-DÉ QYRDNAYL   | 56    | 9953  |
| >NOTCH1-DÉ QDRDNAYLCF | 13739 | >NOTCH1-DÉ QYRDNAYLCF | 456   | 13283 |
| >NOTCH1-DÉ QDRDNAYLCF | 750   | >NOTCH1-DÉ QYRDNAYLCF | 397   | 353   |
| >NOTCH1-DÉ QDRDNAYLCF | 21391 | >NOTCH1-DÉ QYRDNAYLCF | 189   | 21202 |
| >NOTCH1-DÉ QPCRHHGGTC | 15865 | >NOTCH1-DÉ QPCRHHGGTC | 72    | 15793 |
| >NOTCH1-DÉ CQDRDNAY   | 88    | >NOTCH1-DÉ CQYRDNAY   | 12013 | 11925 |
| >NOTCH1-DÉ CQDRDNAYL  | 1668  | >NOTCH1-DÉ CQYRDNAYL  | 262   | 1406  |
| >NOTCH1-DÉ CQDRDNAYL  | 219   | >NOTCH1-DÉ CQYRDNAYL  | 58    | 161   |
| >NOTCH1-DÉ CQDRDNAYLC | 6009  | >NOTCH1-DÉ CQYRDNAYLC | 409   | 5600  |
| >NOTCH1-DÉ CQDRDNAY   | 406   | >NOTCH1-DÉ CQYRDNAY   | 91    | 315   |
| >NOTCH1-DÉ CQDRDNAY   | 1970  | >NOTCH1-DÉ CQYRDNAY   | 67    | 1903  |
| >NOTCH1-DÉ CQDRDNAYLC | 3635  | >NOTCH1-DÉ CQYRDNAYLC | 75    | 3560  |
| >NOTCH1-DÉ CQDRDNAY   | 1826  | >NOTCH1-DÉ CQYRDNAY   | 120   | 1706  |
| >NOTCH1-DÉ CQDRDNAY   | 898   | >NOTCH1-DÉ CQYRDNAY   | 7     | 891   |
| >NOTCH1-DÉ CQDRDNAYL  | 5255  | >NOTCH1-DÉ CQYRDNAYL  | 40    | 5215  |
| >NOTCH1-DÉ CQDRDNAYLC | 206   | >NOTCH1-DÉ CQYRDNAYLC | 3     | 203   |
| >NOTCH1-DÉ CQDRDNAY   | 1692  | >NOTCH1-DÉ CQYRDNAY   | 415   | 1277  |
| >NOTCH1-DÉ CQDRDNAY   | 499   | >NOTCH1-DÉ CQYRDNAY   | 1881  | 1382  |
| >NOTCH1-DÉ TCQDRDNAY  | 1090  | >NOTCH1-DÉ TCQYRDNAY  | 450   | 640   |
| >NOTCH1-DÉ GTCQDRDNA  | 172   | >NOTCH1-DÉ GTCQYRDNA  | 242   | 70    |
| >NOTCH1-DÉ GTCQDRDNA  | 175   | >NOTCH1-DÉ GTCQYRDNA  | 143   | 32    |
| >NOTCH1-DÉ GTCQDRDNA  | 2101  | >NOTCH1-DÉ GTCQYRDNA  | 366   | 1735  |

|                       |      |                       |       |       |
|-----------------------|------|-----------------------|-------|-------|
| >NOTCH1-D€ GTCQDRDNA  | 608  | >NOTCH1-D€ GTCQYRDNA  | 377   | 231   |
| >NOTCH1-D€ GTCQDRDNA  | 313  | >NOTCH1-D€ GTCQYRDNA  | 115   | 198   |
| >NOTCH1-D€ GTCQDRDNA  | 716  | >NOTCH1-D€ GTCQYRDNA  | 264   | 452   |
| >NOTCH1-D€ GTCQDRDNA  | 452  | >NOTCH1-D€ GTCQYRDNA  | 247   | 205   |
| >NOTCH1-D€ GGTCQDRDN  | 478  | >NOTCH1-D€ GGTCQYRDN  | 886   | 408   |
| >NOTCH1-D€ HGGTCQDR   | 6746 | >NOTCH1-D€ HGGTCQYR   | 200   | 6546  |
| >NOTCH1-D€ HGGTCQDR   | 179  | >NOTCH1-D€ HGGTCQYR   | 19    | 160   |
| >NOTCH1-D€ RHGGTCQDR  | 856  | >NOTCH1-D€ RHGGTCQYR  | 36    | 820   |
| >NOTCH1-D€ CRHGGTCQD  | 312  | >NOTCH1-D€ CRHGGTCQY  | 151   | 161   |
| >NOTCH1-D€ CRHGGTCQD  | 2336 | >NOTCH1-D€ CRHGGTCQY  | 149   | 2187  |
| >NOTCH1-E1 EQLRNSSFHF | 1102 | >NOTCH1-E1 GQLRNSSFHF | 187   | 915   |
| >NOTCH1-E1 EQLRNSSFHF | 189  | >NOTCH1-E1 GQLRNSSFHF | 434   | 245   |
| >NOTCH1-E1 EQLRNSSFHF | 3773 | >NOTCH1-E1 GQLRNSSFHF | 435   | 3338  |
| >NOTCH1-E1 EQLRNSSFHF | 69   | >NOTCH1-E1 GQLRNSSFHF | 14    | 55    |
| >NOTCH1-E1 EQLRNSSFHF | 1832 | >NOTCH1-E1 GQLRNSSFHF | 298   | 1534  |
| >NOTCH1-E1 EQLRNSSFHF | 914  | >NOTCH1-E1 GQLRNSSFHF | 21    | 893   |
| >NOTCH1-E1 EQLRNSSFHF | 3527 | >NOTCH1-E1 GQLRNSSFHF | 235   | 3292  |
| >NOTCH1-E1 EQLRNSSFHF | 406  | >NOTCH1-E1 GQLRNSSFHF | 16128 | 15722 |
| >NOTCH1-E1 EQLRNSSF   | 113  | >NOTCH1-E1 GQLRNSSF   | 58    | 55    |
| >NOTCH1-E1 EQLRNSSFHF | 84   | >NOTCH1-E1 GQLRNSSFHF | 48    | 36    |
| >NOTCH1-E1 EQLRNSSF   | 209  | >NOTCH1-E1 GQLRNSSF   | 178   | 31    |
| >NOTCH1-E1 EQLRNSSF   | 4    | >NOTCH1-E1 GQLRNSSF   | 4     | 0     |
| >NOTCH1-E1 EQLRNSSFH  | 723  | >NOTCH1-E1 GQLRNSSFH  | 471   | 252   |
| >NOTCH1-E1 EQLRNSSFHF | 6    | >NOTCH1-E1 GQLRNSSFHF | 5     | 1     |
| >NOTCH1-E1 EQLRNSSFHF | 136  | >NOTCH1-E1 GQLRNSSFHF | 63    | 73    |
| >NOTCH1-E1 EQLRNSSFHF | 230  | >NOTCH1-E1 GQLRNSSFHF | 1246  | 1016  |
| >NOTCH1-E1 EQLRNSSFHF | 4890 | >NOTCH1-E1 GQLRNSSFHF | 92    | 4798  |
| >NOTCH1-E1 MPPEQLRNS: | 395  | >NOTCH1-E1 MPPGQLRNS  | 131   | 264   |
| >NOTCH1-E1 MPPEQLRNS: | 124  | >NOTCH1-E1 MPPGQLRNS  | 61    | 63    |
| >NOTCH1-E1 MPPEQLRNS: | 34   | >NOTCH1-E1 MPPGQLRNS  | 48    | 14    |
| >NOTCH1-E1 MPPEQLRNS: | 137  | >NOTCH1-E1 MPPGQLRNS  | 187   | 50    |
| >NOTCH1-E1 LMPPEQLR   | 960  | >NOTCH1-E1 LMPPGQLR   | 283   | 677   |
| >NOTCH1-E1 LMPPEQLR   | 303  | >NOTCH1-E1 LMPPGQLR   | 653   | 350   |
| >NOTCH1-E1 VLMPPPEQL  | 57   | >NOTCH1-E1 VLMPPGQL   | 171   | 114   |
| >NOTCH1-E1 VLMPPPEQL  | 19   | >NOTCH1-E1 VLMPPGQL   | 53    | 34    |
| >NOTCH1-E1 VLMPPPEQL  | 87   | >NOTCH1-E1 VLMPPGQL   | 28    | 59    |
| >NOTCH1-E1 VLMPPPEQL  | 329  | >NOTCH1-E1 VLMPPGQL   | 648   | 319   |
| >NOTCH1-E1 VLMPPPEQL  | 5    | >NOTCH1-E1 VLMPPGQL   | 6     | 1     |
| >NOTCH1-E1 VLMPPPEQL  | 27   | >NOTCH1-E1 VLMPPGQL   | 48    | 21    |
| >NOTCH1-E1 VLMPPPEQL  | 37   | >NOTCH1-E1 VLMPPGQL   | 86    | 49    |
| >NOTCH1-E1 VLMPPPEQL  | 6    | >NOTCH1-E1 VLMPPGQL   | 14    | 8     |
| >NOTCH1-E1 VLMPPPEQL  | 4    | >NOTCH1-E1 VLMPPGQL   | 5     | 1     |
| >NOTCH1-E1 VLMPPPEQLR | 740  | >NOTCH1-E1 VLMPPGQLR  | 273   | 467   |

|                        |       |                        |       |       |
|------------------------|-------|------------------------|-------|-------|
| >NOTCH1-E1 VLMPPEQLR   | 740   | >NOTCH1-E1 VLMPPGQLR   | 349   | 391   |
| >NOTCH1-E1 VLMPPEQLR   | 250   | >NOTCH1-E1 VLMPPGQLR   | 114   | 136   |
| >NOTCH1-E1 VVLMPPPEQL  | 50    | >NOTCH1-E1 VVLMPPGQL   | 186   | 136   |
| >NOTCH1-E1 VVLMPPPEQL  | 441   | >NOTCH1-E1 VVLMPPGQL   | 156   | 285   |
| >NOTCH1-E1 VVLMPPPEQL  | 173   | >NOTCH1-E1 VVLMPPGQL   | 76    | 97    |
| >NOTCH1-E1 VVVLMPPPEQ  | 574   | >NOTCH1-E1 VVVLMPPGQ   | 470   | 104   |
| >NOTCH1-E1 VVVLMPPPEQ  | 177   | >NOTCH1-E1 VVVLMPPGQ   | 291   | 114   |
| >NOTCH1-E1 VVVVLMPPPEQ | 521   | >NOTCH1-E1 VVVVLMPPG   | 401   | 120   |
| >NOTCH1-E1 VVVVLMPPPEQ | 412   | >NOTCH1-E1 VVVVLMPPG   | 340   | 72    |
| >NOTCH1-E1 VVVVLMPPPEQ | 403   | >NOTCH1-E1 VVVVLMPPG   | 323   | 80    |
| >NOTCH1-F1 HFSDGHCDQ   | 20677 | >NOTCH1-F1 HLSDBGHCDQ  | 14    | 20663 |
| >NOTCH1-F1 HFSDGHCDQ   | 13300 | >NOTCH1-F1 HLSDBGHCDQ  | 20    | 13280 |
| >NOTCH1-F1 PLYDQYCKDF  | 8898  | >NOTCH1-F1 PLYDQYCKDF  | 164   | 8734  |
| >NOTCH1-F1 PLYDQYCKDF  | 4071  | >NOTCH1-F1 PLYDQYCKDF  | 75    | 3996  |
| >NOTCH1-F1 PLYDQYCKDF  | 10230 | >NOTCH1-F1 PLYDQYCKDF  | 54    | 10176 |
| >NOTCH1-F1 PLYDQYCKDF  | 3833  | >NOTCH1-F1 PLYDQYCKDF  | 23    | 3810  |
| >NOTCH1-F1 DQYCKDHF    | 131   | >NOTCH1-F1 DQYCKDHL    | 1861  | 1730  |
| >NOTCH1-F1 LYDQYCKDHF  | 143   | >NOTCH1-F1 LYDQYCKDHL  | 2758  | 2615  |
| >NOTCH1-F1 LYDQYCKDHF  | 133   | >NOTCH1-F1 LYDQYCKDHL  | 3460  | 3327  |
| >NOTCH1-F1 LYDQYCKDHF  | 16    | >NOTCH1-F1 LYDQYCKDHL  | 80    | 64    |
| >NOTCH1-F1 LYDQYCKDHF  | 669   | >NOTCH1-F1 LYDQYCKDHL  | 147   | 522   |
| >NOTCH1-F1 FLRELSRV    | 40    | >NOTCH1-F1 CLRELSRV    | 1901  | 1861  |
| >NOTCH1-F1 FLRELSRV    | 8     | >NOTCH1-F1 CLRELSRV    | 464   | 456   |
| >NOTCH1-F1 FLRELSRVL   | 89    | >NOTCH1-F1 CLRELSRVL   | 2756  | 2667  |
| >NOTCH1-F1 FLRELSRV    | 2     | >NOTCH1-F1 CLRELSRV    | 17    | 15    |
| >NOTCH1-F1 FLRELSRVL   | 11    | >NOTCH1-F1 CLRELSRVL   | 767   | 756   |
| >NOTCH1-F1 FLRELSRVLHT | 29    | >NOTCH1-F1 CLRELSRVLHT | 1230  | 1201  |
| >NOTCH1-F1 FLRELSRV    | 26    | >NOTCH1-F1 CLRELSRV    | 3171  | 3145  |
| >NOTCH1-F1 FLRELSRV    | 2     | >NOTCH1-F1 CLRELSRV    | 28    | 26    |
| >NOTCH1-F1 FLRELSRVL   | 15    | >NOTCH1-F1 CLRELSRVL   | 1208  | 1193  |
| >NOTCH1-F1 FLRELSRVLHT | 200   | >NOTCH1-F1 CLRELSRVLHT | 6533  | 6333  |
| >NOTCH1-F1 FLRELSRV    | 6     | >NOTCH1-F1 CLRELSRV    | 174   | 168   |
| >NOTCH1-F1 FLRELSRVL   | 53    | >NOTCH1-F1 CLRELSRVL   | 2752  | 2699  |
| >NOTCH1-F1 FLRELSRV    | 10    | >NOTCH1-F1 CLRELSRV    | 471   | 461   |
| >NOTCH1-F1 FLRELSRVL   | 200   | >NOTCH1-F1 CLRELSRVL   | 10008 | 9808  |
| >NOTCH1-F1 FLRELSRV    | 21    | >NOTCH1-F1 CLRELSRV    | 418   | 397   |
| >NOTCH1-F1 FLRELSRV    | 1     | >NOTCH1-F1 CLRELSRV    | 5     | 4     |
| >NOTCH1-F1 FLRELSRVL   | 8     | >NOTCH1-F1 CLRELSRVL   | 781   | 773   |
| >NOTCH1-F1 FLRELSRVLHT | 35    | >NOTCH1-F1 CLRELSRVLHT | 3742  | 3707  |
| >NOTCH1-F1 FLRELSRVL   | 282   | >NOTCH1-F1 CLRELSRVL   | 2856  | 2574  |
| >NOTCH1-F1 FLRELSRVL   | 65    | >NOTCH1-F1 CLRELSRVL   | 709   | 644   |
| >NOTCH1-F1 FLRELSRVL   | 123   | >NOTCH1-F1 CLRELSRVL   | 1787  | 1664  |
| >NOTCH1-F1 FLRELSRVL   | 470   | >NOTCH1-F1 CLRELSRVL   | 8561  | 8091  |

|                        |      |                        |       |       |
|------------------------|------|------------------------|-------|-------|
| >NOTCH1-F1 HFLRELSRVL  | 56   | >NOTCH1-F1 HCLRELSRVL  | 13521 | 13465 |
| >NOTCH1-F1 HFLRELSR    | 54   | >NOTCH1-F1 HCLRELSR    | 2589  | 2535  |
| >NOTCH1-F1 HFLRELSR    | 37   | >NOTCH1-F1 HCLRELSR    | 890   | 853   |
| >NOTCH1-F1 HFLRELSR    | 38   | >NOTCH1-F1 HCLRELSR    | 88    | 50    |
| >NOTCH1-F1 FHFLRELSRVL | 251  | >NOTCH1-F1 FHCLRELSRVI | 3311  | 3060  |
| >NOTCH1-F1 FHFLRELSRVL | 86   | >NOTCH1-F1 FHCLRELSRVI | 324   | 238   |
| >NOTCH1-F1 FHFLRELSRVL | 13   | >NOTCH1-F1 FHCLRELSRVI | 27    | 14    |
| >NOTCH1-F1 SFHFLREL    | 1115 | >NOTCH1-F1 SFHCLREL    | 487   | 628   |
| >NOTCH1-F1 SFHFLRELSRV | 1044 | >NOTCH1-F1 SFHCLRELSRV | 399   | 645   |
| >NOTCH1-F1 SFHFLREL    | 216  | >NOTCH1-F1 SFHCLREL    | 188   | 28    |
| >NOTCH1-F1 SFHFLRELSR  | 24   | >NOTCH1-F1 SFHCLRELSR  | 47    | 23    |
| >NOTCH1-F1 SFHFLRELSR  | 70   | >NOTCH1-F1 SFHCLRELSR  | 87    | 17    |
| >NOTCH1-F1 SFHFLRELSR  | 211  | >NOTCH1-F1 SFHCLRELSR  | 569   | 358   |
| >NOTCH1-F1 SFHFLRELSR  | 358  | >NOTCH1-F1 SFHCLRELSR  | 99    | 259   |
| >NOTCH1-F1 SFHFLRELSR  | 74   | >NOTCH1-F1 SFHCLRELSR  | 41    | 33    |
| >NOTCH1-F1 SFHFLREL    | 366  | >NOTCH1-F1 SFHCLREL    | 695   | 329   |
| >NOTCH1-F1 SFHFLREL    | 230  | >NOTCH1-F1 SFHCLREL    | 569   | 339   |
| >NOTCH1-F1 SSFHFLREL   | 16   | >NOTCH1-F1 SSFHCLREL   | 162   | 146   |
| >NOTCH1-F1 SSFHFLREL   | 350  | >NOTCH1-F1 SSFHCLREL   | 828   | 478   |
| >NOTCH1-F1 SSFHFLRELSR | 31   | >NOTCH1-F1 SSFHCLRELSF | 71    | 40    |
| >NOTCH1-F1 SSFHFLRELSR | 41   | >NOTCH1-F1 SSFHCLRELSF | 57    | 16    |
| >NOTCH1-F1 SSFHFLREL   | 167  | >NOTCH1-F1 SSFHCLREL   | 1978  | 1811  |
| >NOTCH1-F1 SSFHFLRELSR | 424  | >NOTCH1-F1 SSFHCLRELSF | 649   | 225   |
| >NOTCH1-F1 SSFHFLRELSR | 26   | >NOTCH1-F1 SSFHCLRELSF | 57    | 31    |
| >NOTCH1-F1 SSFHFLREL   | 369  | >NOTCH1-F1 SSFHCLREL   | 619   | 250   |
| >NOTCH1-F1 SSFHFLREL   | 86   | >NOTCH1-F1 SSFHCLREL   | 145   | 59    |
| >NOTCH1-F1 SSFHFLREL   | 13   | >NOTCH1-F1 SSFHCLREL   | 16    | 3     |
| >NOTCH1-F1 SSFHFLREL   | 57   | >NOTCH1-F1 SSFHCLREL   | 48    | 9     |
| >NOTCH1-F1 SSFHFLRE    | 139  | >NOTCH1-F1 SSFHCLRE    | 471   | 332   |
| >NOTCH1-F1 SSFHFLREL   | 283  | >NOTCH1-F1 SSFHCLREL   | 721   | 438   |
| >NOTCH1-F1 SSFHFLRELSR | 67   | >NOTCH1-F1 SSFHCLRELSF | 86    | 19    |
| >NOTCH1-F1 SSFHFLRELSR | 316  | >NOTCH1-F1 SSFHCLRELSF | 306   | 10    |
| >NOTCH1-F1 SSFHFLREL   | 52   | >NOTCH1-F1 SSFHCLREL   | 73    | 21    |
| >NOTCH1-F1 NSSFHFLR    | 152  | >NOTCH1-F1 NSSFHCLR    | 1048  | 896   |
| >NOTCH1-F1 NSSFHFLR    | 23   | >NOTCH1-F1 NSSFHCLR    | 131   | 108   |
| >NOTCH1-F1 NSSFHFLR    | 44   | >NOTCH1-F1 NSSFHCLR    | 100   | 56    |
| >NOTCH1-F1 NSSFHFLR    | 5    | >NOTCH1-F1 NSSFHCLR    | 8     | 3     |
| >NOTCH1-F1 NSSFHFLR    | 142  | >NOTCH1-F1 NSSFHCLR    | 643   | 501   |
| >NOTCH1-F1 NSSFHFLR    | 356  | >NOTCH1-F1 NSSFHCLR    | 708   | 352   |
| >NOTCH1-F1 RNSSFHFLR   | 7    | >NOTCH1-F1 RNSSFHCLR   | 18    | 11    |
| >NOTCH1-F1 RNSSFHFLR   | 46   | >NOTCH1-F1 RNSSFHCLR   | 193   | 147   |
| >NOTCH1-F1 RNSSFHFL    | 830  | >NOTCH1-F1 RNSSFHCL    | 271   | 559   |
| >NOTCH1-F1 RNSSFHFLREI | 466  | >NOTCH1-F1 RNSSFHCLRE  | 682   | 216   |

|                        |     |                        |       |       |
|------------------------|-----|------------------------|-------|-------|
| >NOTCH1-F1 RNSSFHFLR   | 32  | >NOTCH1-F1 RNSSFHCLR   | 27    | 5     |
| >NOTCH1-F1 LRNSSFHFL   | 492 | >NOTCH1-F1 LRNSSFHCL   | 20576 | 20084 |
| >NOTCH1-F1 LRNSSFHFLR  | 34  | >NOTCH1-F1 LRNSSFHCLR  | 52    | 18    |
| >NOTCH1-F1 LRNSSFHFLR  | 112 | >NOTCH1-F1 LRNSSFHCLR  | 207   | 95    |
| >NOTCH1-F1 LRNSSFHF    | 8   | >NOTCH1-F1 LRNSSFHC    | 1898  | 1890  |
| >NOTCH1-F1 LRNSSFHFL   | 65  | >NOTCH1-F1 LRNSSFHCL   | 46    | 19    |
| >NOTCH1-F1 LRNSSFHF    | 171 | >NOTCH1-F1 LRNSSFHC    | 5870  | 5699  |
| >NOTCH1-F1 LRNSSFHFL   | 113 | >NOTCH1-F1 LRNSSFHCL   | 153   | 40    |
| >NOTCH1-F1 LRNSSFHFLR  | 304 | >NOTCH1-F1 LRNSSFHCLR  | 618   | 314   |
| >NOTCH1-F1 LRNSSFHFL   | 373 | >NOTCH1-F1 LRNSSFHCL   | 126   | 247   |
| >NOTCH1-F1 LRNSSFHFL   | 48  | >NOTCH1-F1 LRNSSFHCL   | 138   | 90    |
| >NOTCH1-F1 LRNSSFHFLR  | 285 | >NOTCH1-F1 LRNSSFHCLR  | 322   | 37    |
| >NOTCH1-F1 QLRNSSFHFL  | 43  | >NOTCH1-F1 QLRNSSFHCL  | 224   | 181   |
| >NOTCH1-F1 QLRNSSFHFL  | 130 | >NOTCH1-F1 QLRNSSFHCL  | 545   | 415   |
| >NOTCH1-F1 QLRNSSFHFL  | 264 | >NOTCH1-F1 QLRNSSFHCL  | 1469  | 1205  |
| >NOTCH1-F1 QLRNSSFHFL  | 132 | >NOTCH1-F1 QLRNSSFHCL  | 366   | 234   |
| >NOTCH1-F1 QLRNSSFHFL  | 11  | >NOTCH1-F1 QLRNSSFHCL  | 23    | 12    |
| >NOTCH1-F1 QLRNSSFHFL  | 183 | >NOTCH1-F1 QLRNSSFHCL  | 414   | 231   |
| >NOTCH1-F1 QLRNSSFHFL  | 37  | >NOTCH1-F1 QLRNSSFHCL  | 574   | 537   |
| >NOTCH1-F1 QLRNSSFHFL  | 100 | >NOTCH1-F1 QLRNSSFHCL  | 79    | 21    |
| >NOTCH1-F1 QLRNSSFHFL  | 10  | >NOTCH1-F1 QLRNSSFHCL  | 21    | 11    |
| >NOTCH1-F1 QLRNSSFHFL  | 49  | >NOTCH1-F1 QLRNSSFHCL  | 77    | 28    |
| >NOTCH1-F1 QLRNSSFHFL  | 95  | >NOTCH1-F1 QLRNSSFHCL  | 232   | 137   |
| >NOTCH1-F1 QLRNSSFHF   | 26  | >NOTCH1-F1 QLRNSSFHC   | 6391  | 6365  |
| >NOTCH1-F1 QLRNSSFHF   | 102 | >NOTCH1-F1 QLRNSSFHC   | 14424 | 14322 |
| >NOTCH1-F1 QLRNSSFHF   | 9   | >NOTCH1-F1 QLRNSSFHC   | 5051  | 5042  |
| >NOTCH1-F1 QLRNSSFHFL  | 166 | >NOTCH1-F1 QLRNSSFHCL  | 128   | 38    |
| >NOTCH1-F1 QLRNSSFHF   | 74  | >NOTCH1-F1 QLRNSSFHC   | 19014 | 18940 |
| >NOTCH1-F1 QLRNSSFHFL  | 260 | >NOTCH1-F1 QLRNSSFHCL  | 211   | 49    |
| >NOTCH1-F1 EQLRNSSFHF  | 189 | >NOTCH1-F1 EQLRNSSFHC  | 882   | 693   |
| >NOTCH1-F1 EQLRNSSFHF  | 69  | >NOTCH1-F1 EQLRNSSFHC  | 647   | 578   |
| >NOTCH1-F1 EQLRNSSFHF  | 406 | >NOTCH1-F1 EQLRNSSFHC  | 3409  | 3003  |
| >NOTCH1-F1 EQLRNSSFHF  | 84  | >NOTCH1-F1 EQLRNSSFHC  | 13108 | 13024 |
| >NOTCH1-F1 EQLRNSSFHF  | 6   | >NOTCH1-F1 EQLRNSSFHC  | 4613  | 4607  |
| >NOTCH1-F1 EQLRNSSFHF  | 136 | >NOTCH1-F1 EQLRNSSFHC  | 99    | 37    |
| >NOTCH1-F1 EQLRNSSFHF  | 230 | >NOTCH1-F1 EQLRNSSFHC  | 81    | 149   |
| >NOTCH1-F1 FLRELSRV    | 40  | >NOTCH1-F1 LLRELSRV    | 478   | 438   |
| >NOTCH1-F1 FLRELSRV    | 8   | >NOTCH1-F1 LLRELSRV    | 98    | 90    |
| >NOTCH1-F1 FLRELSRVL   | 89  | >NOTCH1-F1 LLRELSRVL   | 1103  | 1014  |
| >NOTCH1-F1 FLRELSRV    | 2   | >NOTCH1-F1 LLRELSRV    | 5     | 3     |
| >NOTCH1-F1 FLRELSRVL   | 11  | >NOTCH1-F1 LLRELSRVL   | 151   | 140   |
| >NOTCH1-F1 FLRELSRVLHT | 29  | >NOTCH1-F1 LLRELSRVLHT | 339   | 310   |
| >NOTCH1-F1 FLRELSRV    | 26  | >NOTCH1-F1 LLRELSRV    | 401   | 375   |



|                        |       |                        |      |       |
|------------------------|-------|------------------------|------|-------|
| >NOTCH1-F1 FLRELSRV    | 2     | >NOTCH1-F1 LLRELSRV    | 5    | 3     |
| >NOTCH1-F1 FLRELSRVL   | 15    | >NOTCH1-F1 LLRELSRVL   | 122  | 107   |
| >NOTCH1-F1 FLRELSRVLHT | 200   | >NOTCH1-F1 LLRELSRVLHT | 1520 | 1320  |
| >NOTCH1-F1 FLRELSRV    | 6     | >NOTCH1-F1 LLRELSRV    | 28   | 22    |
| >NOTCH1-F1 FLRELSRVL   | 53    | >NOTCH1-F1 LLRELSRVL   | 667  | 614   |
| >NOTCH1-F1 FLRELSRV    | 10    | >NOTCH1-F1 LLRELSRV    | 36   | 26    |
| >NOTCH1-F1 FLRELSRVL   | 200   | >NOTCH1-F1 LLRELSRVL   | 2660 | 2460  |
| >NOTCH1-F1 FLRELSRV    | 21    | >NOTCH1-F1 LLRELSRV    | 103  | 82    |
| >NOTCH1-F1 FLRELSRV    | 1     | >NOTCH1-F1 LLRELSRV    | 2    | 1     |
| >NOTCH1-F1 FLRELSRVL   | 8     | >NOTCH1-F1 LLRELSRVL   | 31   | 23    |
| >NOTCH1-F1 FLRELSRVLHT | 35    | >NOTCH1-F1 LLRELSRVLHT | 187  | 152   |
| >NOTCH1-F1 FLRELSRVL   | 282   | >NOTCH1-F1 LLRELSRVL   | 386  | 104   |
| >NOTCH1-F1 FLRELSRVL   | 65    | >NOTCH1-F1 LLRELSRVL   | 189  | 124   |
| >NOTCH1-F1 FLRELSRVL   | 123   | >NOTCH1-F1 LLRELSRVL   | 101  | 22    |
| >NOTCH1-F1 FLRELSRVL   | 470   | >NOTCH1-F1 LLRELSRVL   | 3271 | 2801  |
| >NOTCH1-F1 HFLRELSRV   | 17016 | >NOTCH1-F1 HLLRELSRV   | 64   | 16952 |
| >NOTCH1-F1 HFLRELSRV   | 4854  | >NOTCH1-F1 HLLRELSRV   | 53   | 4801  |
| >NOTCH1-F1 HFLRELSRV   | 9114  | >NOTCH1-F1 HLLRELSRV   | 24   | 9090  |
| >NOTCH1-F1 HFLRELSRV   | 7546  | >NOTCH1-F1 HLLRELSRV   | 50   | 7496  |
| >NOTCH1-F1 HFLRELSRV   | 2855  | >NOTCH1-F1 HLLRELSRV   | 4    | 2851  |
| >NOTCH1-F1 HFLRELSRVL  | 15369 | >NOTCH1-F1 HLLRELSRVL  | 56   | 15313 |
| >NOTCH1-F1 HFLRELSRV   | 8129  | >NOTCH1-F1 HLLRELSRV   | 5    | 8124  |
| >NOTCH1-F1 HFLRELSRVL  | 17708 | >NOTCH1-F1 HLLRELSRVL  | 38   | 17670 |
| >NOTCH1-F1 HFLRELSRV   | 5811  | >NOTCH1-F1 HLLRELSRV   | 10   | 5801  |
| >NOTCH1-F1 HFLRELSRVL  | 18892 | >NOTCH1-F1 HLLRELSRVL  | 258  | 18634 |
| >NOTCH1-F1 HFLRELSRV   | 12112 | >NOTCH1-F1 HLLRELSRV   | 9    | 12103 |
| >NOTCH1-F1 HFLRELSRVL  | 19907 | >NOTCH1-F1 HLLRELSRVL  | 386  | 19521 |
| >NOTCH1-F1 HFLRELSRV   | 857   | >NOTCH1-F1 HLLRELSRV   | 2    | 855   |
| >NOTCH1-F1 HFLRELSRVL  | 17782 | >NOTCH1-F1 HLLRELSRVL  | 42   | 17740 |
| >NOTCH1-F1 HFLRELSRVL  | 56    | >NOTCH1-F1 HLLRELSRVL  | 9414 | 9358  |
| >NOTCH1-F1 HFLRELSR    | 54    | >NOTCH1-F1 HLLRELSR    | 211  | 157   |
| >NOTCH1-F1 HFLRELSR    | 37    | >NOTCH1-F1 HLLRELSR    | 187  | 150   |
| >NOTCH1-F1 HFLRELSRV   | 8948  | >NOTCH1-F1 HLLRELSRV   | 484  | 8464  |
| >NOTCH1-F1 HFLRELSR    | 38    | >NOTCH1-F1 HLLRELSR    | 104  | 66    |
| >NOTCH1-F1 FHFLRELSRVL | 251   | >NOTCH1-F1 FHLLRELSRVL | 973  | 722   |
| >NOTCH1-F1 FHFLRELSRVL | 86    | >NOTCH1-F1 FHLLRELSRVL | 279  | 193   |
| >NOTCH1-F1 FHFLRELSRVL | 13    | >NOTCH1-F1 FHLLRELSRVL | 17   | 4     |
| >NOTCH1-F1 SFHFLREL    | 216   | >NOTCH1-F1 SFHLLREL    | 258  | 42    |
| >NOTCH1-F1 SFHFLRELSR  | 24    | >NOTCH1-F1 SFHLLRELSR  | 40   | 16    |
| >NOTCH1-F1 SFHFLRELSR  | 70    | >NOTCH1-F1 SFHLLRELSR  | 81   | 11    |
| >NOTCH1-F1 SFHFLRELSR  | 211   | >NOTCH1-F1 SFHLLRELSR  | 1050 | 839   |
| >NOTCH1-F1 SFHFLRELSR  | 358   | >NOTCH1-F1 SFHLLRELSR  | 456  | 98    |
| >NOTCH1-F1 SFHFLRELSR  | 74    | >NOTCH1-F1 SFHLLRELSR  | 62   | 12    |

|                        |       |                        |      |       |
|------------------------|-------|------------------------|------|-------|
| >NOTCH1-F1 SFHFLREL    | 366   | >NOTCH1-F1 SFHLLREL    | 680  | 314   |
| >NOTCH1-F1 SFHFLREL    | 230   | >NOTCH1-F1 SFHLLREL    | 433  | 203   |
| >NOTCH1-F1 SSFHFLREL   | 16    | >NOTCH1-F1 SSFHLLREL   | 96   | 80    |
| >NOTCH1-F1 SSFHFLREL   | 350   | >NOTCH1-F1 SSFHLLREL   | 701  | 351   |
| >NOTCH1-F1 SSFHFLRELSR | 31    | >NOTCH1-F1 SSFHLLRELSR | 56   | 25    |
| >NOTCH1-F1 SSFHFLRELSR | 41    | >NOTCH1-F1 SSFHLLRELSR | 53   | 12    |
| >NOTCH1-F1 SSFHFLREL   | 167   | >NOTCH1-F1 SSFHLLREL   | 293  | 126   |
| >NOTCH1-F1 SSFHFLRELSR | 424   | >NOTCH1-F1 SSFHLLRELSR | 582  | 158   |
| >NOTCH1-F1 SSFHFLRELSR | 26    | >NOTCH1-F1 SSFHLLRELSR | 43   | 17    |
| >NOTCH1-F1 SSFHFLREL   | 369   | >NOTCH1-F1 SSFHLLREL   | 754  | 385   |
| >NOTCH1-F1 SSFHFLREL   | 86    | >NOTCH1-F1 SSFHLLREL   | 348  | 262   |
| >NOTCH1-F1 SSFHFLREL   | 13    | >NOTCH1-F1 SSFHLLREL   | 15   | 2     |
| >NOTCH1-F1 SSFHFLREL   | 57    | >NOTCH1-F1 SSFHLLREL   | 52   | 5     |
| >NOTCH1-F1 SSFHFLRE    | 139   | >NOTCH1-F1 SSFHLLRE    | 518  | 379   |
| >NOTCH1-F1 SSFHFLREL   | 283   | >NOTCH1-F1 SSFHLLREL   | 728  | 445   |
| >NOTCH1-F1 SSFHFLRELSR | 67    | >NOTCH1-F1 SSFHLLRELSR | 81   | 14    |
| >NOTCH1-F1 SSFHFLRELSR | 316   | >NOTCH1-F1 SSFHLLRELSR | 611  | 295   |
| >NOTCH1-F1 SSFHFLREL   | 52    | >NOTCH1-F1 SSFHLLREL   | 141  | 89    |
| >NOTCH1-F1 NSSFHFLR    | 152   | >NOTCH1-F1 NSSFHLLR    | 385  | 233   |
| >NOTCH1-F1 NSSFHFLR    | 23    | >NOTCH1-F1 NSSFHLLR    | 169  | 146   |
| >NOTCH1-F1 NSSFHFLR    | 44    | >NOTCH1-F1 NSSFHLLR    | 183  | 139   |
| >NOTCH1-F1 NSSFHFLR    | 5     | >NOTCH1-F1 NSSFHLLR    | 12   | 7     |
| >NOTCH1-F1 NSSFHFLR    | 142   | >NOTCH1-F1 NSSFHLLR    | 300  | 158   |
| >NOTCH1-F1 NSSFHFLR    | 356   | >NOTCH1-F1 NSSFHLLR    | 703  | 347   |
| >NOTCH1-F1 RNSSFHFLR   | 7     | >NOTCH1-F1 RNSSFHLLR   | 35   | 28    |
| >NOTCH1-F1 RNSSFHFLR   | 46    | >NOTCH1-F1 RNSSFHLLR   | 299  | 253   |
| >NOTCH1-F1 RNSSFHFL    | 830   | >NOTCH1-F1 RNSSFHLL    | 243  | 587   |
| >NOTCH1-F1 RNSSFHFLREI | 466   | >NOTCH1-F1 RNSSFHLLREI | 399  | 67    |
| >NOTCH1-F1 RNSSFHFLR   | 32    | >NOTCH1-F1 RNSSFHLLR   | 27   | 5     |
| >NOTCH1-F1 LRNSSFHFL   | 492   | >NOTCH1-F1 LRNSSFHLL   | 9348 | 8856  |
| >NOTCH1-F1 LRNSSFHFLR  | 34    | >NOTCH1-F1 LRNSSFHLLR  | 102  | 68    |
| >NOTCH1-F1 LRNSSFHFLR  | 112   | >NOTCH1-F1 LRNSSFHLLR  | 245  | 133   |
| >NOTCH1-F1 LRNSSFHF    | 8     | >NOTCH1-F1 LRNSSFHL    | 92   | 84    |
| >NOTCH1-F1 LRNSSFHFL   | 65    | >NOTCH1-F1 LRNSSFHLL   | 82   | 17    |
| >NOTCH1-F1 LRNSSFHF    | 171   | >NOTCH1-F1 LRNSSFHL    | 149  | 22    |
| >NOTCH1-F1 LRNSSFHFL   | 113   | >NOTCH1-F1 LRNSSFHLL   | 86   | 27    |
| >NOTCH1-F1 LRNSSFHFLR  | 304   | >NOTCH1-F1 LRNSSFHLLR  | 119  | 185   |
| >NOTCH1-F1 LRNSSFHFL   | 373   | >NOTCH1-F1 LRNSSFHLL   | 180  | 193   |
| >NOTCH1-F1 LRNSSFHFL   | 48    | >NOTCH1-F1 LRNSSFHLL   | 29   | 19    |
| >NOTCH1-F1 LRNSSFHFLR  | 285   | >NOTCH1-F1 LRNSSFHLLR  | 278  | 7     |
| >NOTCH1-F1 QLRNSSFHF   | 9313  | >NOTCH1-F1 QLRNSSFHL   | 172  | 9141  |
| >NOTCH1-F1 QLRNSSFHFL  | 43    | >NOTCH1-F1 QLRNSSFHLL  | 62   | 19    |
| >NOTCH1-F1 QLRNSSFHF   | 12266 | >NOTCH1-F1 QLRNSSFHL   | 434  | 11832 |

|                        |       |                        |      |       |
|------------------------|-------|------------------------|------|-------|
| >NOTCH1-F1 QLRNSSFHFL  | 130   | >NOTCH1-F1 QLRNSSFHLL  | 174  | 44    |
| >NOTCH1-F1 QLRNSSFHFL  | 264   | >NOTCH1-F1 QLRNSSFHLL  | 779  | 515   |
| >NOTCH1-F1 QLRNSSFHF   | 11542 | >NOTCH1-F1 QLRNSSFHL   | 103  | 11439 |
| >NOTCH1-F1 QLRNSSFHFL  | 132   | >NOTCH1-F1 QLRNSSFHLL  | 554  | 422   |
| >NOTCH1-F1 QLRNSSFHF   | 18823 | >NOTCH1-F1 QLRNSSFHL   | 366  | 18457 |
| >NOTCH1-F1 QLRNSSFHF   | 9576  | >NOTCH1-F1 QLRNSSFHL   | 15   | 9561  |
| >NOTCH1-F1 QLRNSSFHFL  | 11    | >NOTCH1-F1 QLRNSSFHLL  | 12   | 1     |
| >NOTCH1-F1 QLRNSSFHFL  | 183   | >NOTCH1-F1 QLRNSSFHLL  | 147  | 36    |
| >NOTCH1-F1 QLRNSSFHF   | 964   | >NOTCH1-F1 QLRNSSFHL   | 67   | 897   |
| >NOTCH1-F1 QLRNSSFHFL  | 37    | >NOTCH1-F1 QLRNSSFHLL  | 130  | 93    |
| >NOTCH1-F1 QLRNSSFHFL  | 100   | >NOTCH1-F1 QLRNSSFHLL  | 68   | 32    |
| >NOTCH1-F1 QLRNSSFHFL  | 10    | >NOTCH1-F1 QLRNSSFHLL  | 40   | 30    |
| >NOTCH1-F1 QLRNSSFHFL  | 49    | >NOTCH1-F1 QLRNSSFHLL  | 161  | 112   |
| >NOTCH1-F1 QLRNSSFHFL  | 95    | >NOTCH1-F1 QLRNSSFHLL  | 329  | 234   |
| >NOTCH1-F1 QLRNSSFHF   | 26    | >NOTCH1-F1 QLRNSSFHL   | 173  | 147   |
| >NOTCH1-F1 QLRNSSFHF   | 102   | >NOTCH1-F1 QLRNSSFHL   | 2232 | 2130  |
| >NOTCH1-F1 QLRNSSFHF   | 9     | >NOTCH1-F1 QLRNSSFHL   | 193  | 184   |
| >NOTCH1-F1 QLRNSSFHFL  | 166   | >NOTCH1-F1 QLRNSSFHLL  | 242  | 76    |
| >NOTCH1-F1 QLRNSSFHF   | 74    | >NOTCH1-F1 QLRNSSFHL   | 1131 | 1057  |
| >NOTCH1-F1 QLRNSSFHFL  | 260   | >NOTCH1-F1 QLRNSSFHLL  | 215  | 45    |
| >NOTCH1-F1 EQLRNSSFHF  | 189   | >NOTCH1-F1 EQLRNSSFHL  | 560  | 371   |
| >NOTCH1-F1 EQLRNSSFHF  | 69    | >NOTCH1-F1 EQLRNSSFHL  | 199  | 130   |
| >NOTCH1-F1 EQLRNSSFHF  | 406   | >NOTCH1-F1 EQLRNSSFHL  | 989  | 583   |
| >NOTCH1-F1 EQLRNSSFHF  | 84    | >NOTCH1-F1 EQLRNSSFHL  | 1658 | 1574  |
| >NOTCH1-F1 EQLRNSSFHF  | 6     | >NOTCH1-F1 EQLRNSSFHL  | 103  | 97    |
| >NOTCH1-F1 EQLRNSSFHF  | 136   | >NOTCH1-F1 EQLRNSSFHL  | 175  | 39    |
| >NOTCH1-F1 EQLRNSSFHF  | 6634  | >NOTCH1-F1 EQLRNSSFHL  | 428  | 6206  |
| >NOTCH1-F1 EQLRNSSFHF  | 230   | >NOTCH1-F1 EQLRNSSFHL  | 119  | 111   |
| >NOTCH1-F1 FLRELSRV    | 40    | >NOTCH1-F1 SLRELSRV    | 385  | 345   |
| >NOTCH1-F1 FLRELSRV    | 8     | >NOTCH1-F1 SLRELSRV    | 74   | 66    |
| >NOTCH1-F1 FLRELSRVL   | 89    | >NOTCH1-F1 SLRELSRVL   | 675  | 586   |
| >NOTCH1-F1 FLRELSRV    | 2     | >NOTCH1-F1 SLRELSRV    | 6    | 4     |
| >NOTCH1-F1 FLRELSRVL   | 11    | >NOTCH1-F1 SLRELSRVL   | 158  | 147   |
| >NOTCH1-F1 FLRELSRVLHT | 29    | >NOTCH1-F1 SLRELSRVLHT | 420  | 391   |
| >NOTCH1-F1 FLRELSRV    | 26    | >NOTCH1-F1 SLRELSRV    | 671  | 645   |
| >NOTCH1-F1 FLRELSRV    | 2     | >NOTCH1-F1 SLRELSRV    | 5    | 3     |
| >NOTCH1-F1 FLRELSRVL   | 15    | >NOTCH1-F1 SLRELSRVL   | 104  | 89    |
| >NOTCH1-F1 FLRELSRVLHT | 200   | >NOTCH1-F1 SLRELSRVLHT | 1238 | 1038  |
| >NOTCH1-F1 FLRELSRV    | 6     | >NOTCH1-F1 SLRELSRV    | 33   | 27    |
| >NOTCH1-F1 FLRELSRVL   | 53    | >NOTCH1-F1 SLRELSRVL   | 614  | 561   |
| >NOTCH1-F1 FLRELSRV    | 10    | >NOTCH1-F1 SLRELSRV    | 16   | 6     |
| >NOTCH1-F1 FLRELSRVL   | 200   | >NOTCH1-F1 SLRELSRVL   | 607  | 407   |
| >NOTCH1-F1 FLRELSRV    | 21    | >NOTCH1-F1 SLRELSRV    | 417  | 396   |

|                        |       |                        |       |       |
|------------------------|-------|------------------------|-------|-------|
| >NOTCH1-F1 FLRELSRV    | 1     | >NOTCH1-F1 SLRELSRV    | 2     | 1     |
| >NOTCH1-F1 FLRELSRVL   | 8     | >NOTCH1-F1 SLRELSRVL   | 54    | 46    |
| >NOTCH1-F1 FLRELSRVLH7 | 35    | >NOTCH1-F1 SLRELSRVLH7 | 376   | 341   |
| >NOTCH1-F1 FLRELSRVL   | 8602  | >NOTCH1-F1 SLRELSRVL   | 400   | 8202  |
| >NOTCH1-F1 FLRELSRVL   | 282   | >NOTCH1-F1 SLRELSRVL   | 431   | 149   |
| >NOTCH1-F1 FLRELSRVL   | 65    | >NOTCH1-F1 SLRELSRVL   | 201   | 136   |
| >NOTCH1-F1 FLRELSRVL   | 123   | >NOTCH1-F1 SLRELSRVL   | 237   | 114   |
| >NOTCH1-F1 FLRELSRVL   | 470   | >NOTCH1-F1 SLRELSRVL   | 1713  | 1243  |
| >NOTCH1-F1 HFLRELSRVL  | 56    | >NOTCH1-F1 HSLRELSRVL  | 11059 | 11003 |
| >NOTCH1-F1 HFLRELSR    | 54    | >NOTCH1-F1 HSLRELSR    | 125   | 71    |
| >NOTCH1-F1 HFLRELSR    | 37    | >NOTCH1-F1 HSLRELSR    | 259   | 222   |
| >NOTCH1-F1 HFLRELSR    | 1572  | >NOTCH1-F1 HSLRELSR    | 330   | 1242  |
| >NOTCH1-F1 HFLRELSRVL  | 24749 | >NOTCH1-F1 HSLRELSRVL  | 46    | 24703 |
| >NOTCH1-F1 HFLRELSRV   | 8354  | >NOTCH1-F1 HSLRELSRV   | 285   | 8069  |
| >NOTCH1-F1 HFLRELSR    | 38    | >NOTCH1-F1 HSLRELSR    | 446   | 408   |
| >NOTCH1-F1 FHFLRELSRVL | 251   | >NOTCH1-F1 FHSLRELSRVL | 1645  | 1394  |
| >NOTCH1-F1 FHFLRELSRVL | 86    | >NOTCH1-F1 FHSLRELSRVL | 145   | 59    |
| >NOTCH1-F1 FHFLRELSRVL | 13    | >NOTCH1-F1 FHSLRELSRVL | 20    | 7     |
| >NOTCH1-F1 SFHFLREL    | 1115  | >NOTCH1-F1 SFHSLREL    | 181   | 934   |
| >NOTCH1-F1 SFHFLRELSRV | 1044  | >NOTCH1-F1 SFHSLRELSRV | 273   | 771   |
| >NOTCH1-F1 SFHFLREL    | 216   | >NOTCH1-F1 SFHSLREL    | 116   | 100   |
| >NOTCH1-F1 SFHFLRELSR  | 24    | >NOTCH1-F1 SFHSLRELSR  | 57    | 33    |
| >NOTCH1-F1 SFHFLRELSR  | 70    | >NOTCH1-F1 SFHSLRELSR  | 92    | 22    |
| >NOTCH1-F1 SFHFLRELSR  | 211   | >NOTCH1-F1 SFHSLRELSR  | 390   | 179   |
| >NOTCH1-F1 SFHFLRELSR  | 358   | >NOTCH1-F1 SFHSLRELSR  | 251   | 107   |
| >NOTCH1-F1 SFHFLRELSR  | 74    | >NOTCH1-F1 SFHSLRELSR  | 64    | 10    |
| >NOTCH1-F1 SFHFLREL    | 366   | >NOTCH1-F1 SFHSLREL    | 370   | 4     |
| >NOTCH1-F1 SFHFLREL    | 230   | >NOTCH1-F1 SFHSLREL    | 250   | 20    |
| >NOTCH1-F1 SSFHFLREL   | 16    | >NOTCH1-F1 SSFHSLREL   | 288   | 272   |
| >NOTCH1-F1 SSFHFLREL   | 350   | >NOTCH1-F1 SSFHSLREL   | 1443  | 1093  |
| >NOTCH1-F1 SSFHFLRELSR | 31    | >NOTCH1-F1 SSFHSLRELSR | 45    | 14    |
| >NOTCH1-F1 SSFHFLRELSR | 41    | >NOTCH1-F1 SSFHSLRELSR | 67    | 26    |
| >NOTCH1-F1 SSFHFLREL   | 167   | >NOTCH1-F1 SSFHSLREL   | 1837  | 1670  |
| >NOTCH1-F1 SSFHFLRELSR | 424   | >NOTCH1-F1 SSFHSLRELSR | 999   | 575   |
| >NOTCH1-F1 SSFHFLRELSR | 26    | >NOTCH1-F1 SSFHSLRELSR | 33    | 7     |
| >NOTCH1-F1 SSFHFLREL   | 369   | >NOTCH1-F1 SSFHSLREL   | 1376  | 1007  |
| >NOTCH1-F1 SSFHFLREL   | 86    | >NOTCH1-F1 SSFHSLREL   | 58    | 28    |
| >NOTCH1-F1 SSFHFLREL   | 13    | >NOTCH1-F1 SSFHSLREL   | 5     | 8     |
| >NOTCH1-F1 SSFHFLREL   | 57    | >NOTCH1-F1 SSFHSLREL   | 113   | 56    |
| >NOTCH1-F1 SSFHFLRE    | 139   | >NOTCH1-F1 SSFHSLRE    | 440   | 301   |
| >NOTCH1-F1 SSFHFLREL   | 283   | >NOTCH1-F1 SSFHSLREL   | 545   | 262   |
| >NOTCH1-F1 SSFHFLRELSR | 67    | >NOTCH1-F1 SSFHSLRELSR | 75    | 8     |
| >NOTCH1-F1 SSFHFLRELSR | 316   | >NOTCH1-F1 SSFHSLRELSR | 1150  | 834   |

|                        |      |                        |       |       |
|------------------------|------|------------------------|-------|-------|
| >NOTCH1-F1 SSFHFLREL   | 52   | >NOTCH1-F1 SSFHSLREL   | 97    | 45    |
| >NOTCH1-F1 NSSFHFLR    | 152  | >NOTCH1-F1 NSSFHSLR    | 739   | 587   |
| >NOTCH1-F1 NSSFHFLR    | 23   | >NOTCH1-F1 NSSFHSLR    | 128   | 105   |
| >NOTCH1-F1 NSSFHFLR    | 44   | >NOTCH1-F1 NSSFHSLR    | 134   | 90    |
| >NOTCH1-F1 NSSFHFLR    | 5    | >NOTCH1-F1 NSSFHSLR    | 7     | 2     |
| >NOTCH1-F1 NSSFHFLR    | 142  | >NOTCH1-F1 NSSFHSLR    | 784   | 642   |
| >NOTCH1-F1 NSSFHFLR    | 356  | >NOTCH1-F1 NSSFHSLR    | 1822  | 1466  |
| >NOTCH1-F1 RNSSFHFL    | 570  | >NOTCH1-F1 RNSSFHSL    | 304   | 266   |
| >NOTCH1-F1 RNSSFHFLR   | 7    | >NOTCH1-F1 RNSSFHSLR   | 17    | 10    |
| >NOTCH1-F1 RNSSFHFLR   | 46   | >NOTCH1-F1 RNSSFHSLR   | 92    | 46    |
| >NOTCH1-F1 RNSSFHFL    | 665  | >NOTCH1-F1 RNSSFHSL    | 193   | 472   |
| >NOTCH1-F1 RNSSFHFLREI | 626  | >NOTCH1-F1 RNSSFHSLREI | 372   | 254   |
| >NOTCH1-F1 RNSSFHFLR   | 5234 | >NOTCH1-F1 RNSSFHSLR   | 338   | 4896  |
| >NOTCH1-F1 RNSSFHFLREI | 1021 | >NOTCH1-F1 RNSSFHSLREI | 481   | 540   |
| >NOTCH1-F1 RNSSFHFLREI | 466  | >NOTCH1-F1 RNSSFHSLREI | 720   | 254   |
| >NOTCH1-F1 RNSSFHFLR   | 32   | >NOTCH1-F1 RNSSFHSLR   | 85    | 53    |
| >NOTCH1-F1 LRNSSFHFL   | 492  | >NOTCH1-F1 LRNSSFHSL   | 3692  | 3200  |
| >NOTCH1-F1 LRNSSFHFLR  | 34   | >NOTCH1-F1 LRNSSFHSLR  | 110   | 76    |
| >NOTCH1-F1 LRNSSFHFLR  | 112  | >NOTCH1-F1 LRNSSFHSLR  | 272   | 160   |
| >NOTCH1-F1 LRNSSFHF    | 8    | >NOTCH1-F1 LRNSSFHS    | 2395  | 2387  |
| >NOTCH1-F1 LRNSSFHFL   | 65   | >NOTCH1-F1 LRNSSFHSL   | 19    | 46    |
| >NOTCH1-F1 LRNSSFHFLR  | 1008 | >NOTCH1-F1 LRNSSFHSLR  | 372   | 636   |
| >NOTCH1-F1 LRNSSFHF    | 171  | >NOTCH1-F1 LRNSSFHS    | 2222  | 2051  |
| >NOTCH1-F1 LRNSSFHFL   | 113  | >NOTCH1-F1 LRNSSFHSL   | 115   | 2     |
| >NOTCH1-F1 LRNSSFHFLR  | 304  | >NOTCH1-F1 LRNSSFHSLR  | 228   | 76    |
| >NOTCH1-F1 LRNSSFHFL   | 373  | >NOTCH1-F1 LRNSSFHSL   | 83    | 290   |
| >NOTCH1-F1 LRNSSFHFL   | 48   | >NOTCH1-F1 LRNSSFHSL   | 133   | 85    |
| >NOTCH1-F1 LRNSSFHFLR  | 285  | >NOTCH1-F1 LRNSSFHSLR  | 1291  | 1006  |
| >NOTCH1-F1 QLRNSSFHFL  | 43   | >NOTCH1-F1 QLRNSSFHSL  | 58    | 15    |
| >NOTCH1-F1 QLRNSSFHFL  | 130  | >NOTCH1-F1 QLRNSSFHSL  | 91    | 39    |
| >NOTCH1-F1 QLRNSSFHFL  | 264  | >NOTCH1-F1 QLRNSSFHSL  | 440   | 176   |
| >NOTCH1-F1 QLRNSSFHFL  | 132  | >NOTCH1-F1 QLRNSSFHSL  | 207   | 75    |
| >NOTCH1-F1 QLRNSSFHFL  | 11   | >NOTCH1-F1 QLRNSSFHSL  | 7     | 4     |
| >NOTCH1-F1 QLRNSSFHFL  | 183  | >NOTCH1-F1 QLRNSSFHSL  | 214   | 31    |
| >NOTCH1-F1 QLRNSSFHF   | 964  | >NOTCH1-F1 QLRNSSFHS   | 310   | 654   |
| >NOTCH1-F1 QLRNSSFHFL  | 37   | >NOTCH1-F1 QLRNSSFHSL  | 106   | 69    |
| >NOTCH1-F1 QLRNSSFHFL  | 100  | >NOTCH1-F1 QLRNSSFHSL  | 133   | 33    |
| >NOTCH1-F1 QLRNSSFHFL  | 10   | >NOTCH1-F1 QLRNSSFHSL  | 22    | 12    |
| >NOTCH1-F1 QLRNSSFHFL  | 49   | >NOTCH1-F1 QLRNSSFHSL  | 97    | 48    |
| >NOTCH1-F1 QLRNSSFHFL  | 95   | >NOTCH1-F1 QLRNSSFHSL  | 167   | 72    |
| >NOTCH1-F1 QLRNSSFHF   | 26   | >NOTCH1-F1 QLRNSSFHS   | 4321  | 4295  |
| >NOTCH1-F1 QLRNSSFHFL  | 898  | >NOTCH1-F1 QLRNSSFHSL  | 172   | 726   |
| >NOTCH1-F1 QLRNSSFHF   | 102  | >NOTCH1-F1 QLRNSSFHS   | 12585 | 12483 |

|                       |       |                       |       |       |
|-----------------------|-------|-----------------------|-------|-------|
| >NOTCH1-F1 QLRNSSFH   | 9     | >NOTCH1-F1 QLRNSSFHS  | 6899  | 6890  |
| >NOTCH1-F1 QLRNSSFHFL | 166   | >NOTCH1-F1 QLRNSSFHSL | 51    | 115   |
| >NOTCH1-F1 QLRNSSFHF  | 74    | >NOTCH1-F1 QLRNSSFHS  | 18215 | 18141 |
| >NOTCH1-F1 QLRNSSFHFL | 260   | >NOTCH1-F1 QLRNSSFHSL | 642   | 382   |
| >NOTCH1-F1 EQLRNSSFHF | 189   | >NOTCH1-F1 EQLRNSSFHS | 1246  | 1057  |
| >NOTCH1-F1 EQLRNSSFHF | 69    | >NOTCH1-F1 EQLRNSSFHS | 136   | 67    |
| >NOTCH1-F1 EQLRNSSFHF | 406   | >NOTCH1-F1 EQLRNSSFHS | 757   | 351   |
| >NOTCH1-F1 EQLRNSSFHF | 84    | >NOTCH1-F1 EQLRNSSFHS | 11639 | 11555 |
| >NOTCH1-F1 EQLRNSSFHF | 6     | >NOTCH1-F1 EQLRNSSFHS | 4864  | 4858  |
| >NOTCH1-F1 EQLRNSSFHF | 136   | >NOTCH1-F1 EQLRNSSFHS | 33    | 103   |
| >NOTCH1-F1 EQLRNSSFHF | 230   | >NOTCH1-F1 EQLRNSSFHS | 59    | 171   |
| >NOTCH1-F1 FQSATDVAAF | 45    | >NOTCH1-F1 SQSATDVAAF | 535   | 490   |
| >NOTCH1-F1 FQSATDVA   | 91    | >NOTCH1-F1 SQSATDVA   | 2288  | 2197  |
| >NOTCH1-F1 FQSATDVAA  | 69    | >NOTCH1-F1 SQSATDVAA  | 2036  | 1967  |
| >NOTCH1-F1 FQSATDVAAF | 4     | >NOTCH1-F1 SQSATDVAAF | 26    | 22    |
| >NOTCH1-F1 FQSATDVA   | 217   | >NOTCH1-F1 SQSATDVA   | 2384  | 2167  |
| >NOTCH1-F1 FQSATDVAA  | 225   | >NOTCH1-F1 SQSATDVAA  | 2303  | 2078  |
| >NOTCH1-F1 FQSATDVAAF | 52    | >NOTCH1-F1 SQSATDVAAF | 477   | 425   |
| >NOTCH1-F1 FQSATDVA   | 19    | >NOTCH1-F1 SQSATDVA   | 261   | 242   |
| >NOTCH1-F1 FQSATDVAA  | 8     | >NOTCH1-F1 SQSATDVAA  | 70    | 62    |
| >NOTCH1-F1 FQSATDVAAF | 4     | >NOTCH1-F1 SQSATDVAAF | 15    | 11    |
| >NOTCH1-F1 FQSATDVAAF | 165   | >NOTCH1-F1 SQSATDVAAF | 993   | 828   |
| >NOTCH1-F1 FQSATDVAAF | 85    | >NOTCH1-F1 SQSATDVAAF | 1022  | 937   |
| >NOTCH1-F1 FQSATDVAAF | 202   | >NOTCH1-F1 SQSATDVAAF | 519   | 317   |
| >NOTCH1-F1 FQSATDVA   | 268   | >NOTCH1-F1 SQSATDVA   | 491   | 223   |
| >NOTCH1-F1 FQSATDVAA  | 118   | >NOTCH1-F1 SQSATDVAA  | 190   | 72    |
| >NOTCH1-F1 FQSATDVAAF | 28    | >NOTCH1-F1 SQSATDVAAF | 28    | 0     |
| >NOTCH1-F1 FQSATDVAAF | 145   | >NOTCH1-F1 SQSATDVAAF | 236   | 91    |
| >NOTCH1-F1 FQSATDVAAF | 52    | >NOTCH1-F1 SQSATDVAAF | 139   | 87    |
| >NOTCH1-F1 FQSATDVAA  | 54    | >NOTCH1-F1 SQSATDVAA  | 248   | 194   |
| >NOTCH1-F1 FQSATDVAAF | 2     | >NOTCH1-F1 SQSATDVAAF | 3     | 1     |
| >NOTCH1-F1 FQSATDVAAF | 42    | >NOTCH1-F1 SQSATDVAAF | 149   | 107   |
| >NOTCH1-F1 FQSATDVAAF | 24    | >NOTCH1-F1 SQSATDVAAF | 140   | 116   |
| >NOTCH1-F1 FQSATDVAAF | 11    | >NOTCH1-F1 SQSATDVAAF | 39    | 28    |
| >NOTCH1-F1 FQSATDVAAF | 465   | >NOTCH1-F1 SQSATDVAAF | 1264  | 799   |
| >NOTCH1-F1 FQSATDVAAF | 418   | >NOTCH1-F1 SQSATDVAAF | 767   | 349   |
| >NOTCH1-F1 CFQSATDVA/ | 63    | >NOTCH1-F1 CSQSATDVA/ | 2517  | 2454  |
| >NOTCH1-F1 CFQSATDVA/ | 5     | >NOTCH1-F1 CSQSATDVA/ | 468   | 463   |
| >NOTCH1-F1 CFQSATDVA/ | 4481  | >NOTCH1-F1 CSQSATDVA/ | 237   | 4244  |
| >NOTCH1-F1 CFQSATDVA/ | 1962  | >NOTCH1-F1 CSQSATDVA/ | 216   | 1746  |
| >NOTCH1-F1 CFQSATDVA/ | 1417  | >NOTCH1-F1 CSQSATDVA/ | 68    | 1349  |
| >NOTCH1-F1 CFQSATDVA/ | 25408 | >NOTCH1-F1 CSQSATDVA/ | 90    | 25318 |
| >NOTCH1-F1 CFQSATDVA/ | 559   | >NOTCH1-F1 CSQSATDVA/ | 309   | 250   |

|                       |       |                       |       |       |
|-----------------------|-------|-----------------------|-------|-------|
| >NOTCH1-F1 CFQSATDVA/ | 16278 | >NOTCH1-F1 CSQSATDVA/ | 368   | 15910 |
| >NOTCH1-F1 RQCVQASSQ  | 43    | >NOTCH1-F1 RQCVQASSQ  | 3206  | 3163  |
| >NOTCH1-F1 RQCVQASSQ  | 3     | >NOTCH1-F1 RQCVQASSQ  | 1045  | 1042  |
| >NOTCH1-F1 SQCFQSATD\ | 474   | >NOTCH1-F1 SQCSQSATD\ | 390   | 84    |
| >NOTCH1-F1 SQCFQSATD\ | 851   | >NOTCH1-F1 SQCSQSATD\ | 230   | 621   |
| >NOTCH1-F1 SSQCFQSAT  | 449   | >NOTCH1-F1 SSQCSQSAT  | 929   | 480   |
| >NOTCH1-F1 SSQCFQSATC | 434   | >NOTCH1-F1 SSQCSQSATC | 686   | 252   |
| >NOTCH1-F1 VQASSQCFQ! | 272   | >NOTCH1-F1 VQASSQCSQ! | 362   | 90    |
| >NOTCH1-F1 VQASSQCFQ! | 42    | >NOTCH1-F1 VQASSQCSQ! | 131   | 89    |
| >NOTCH1-F1 VQASSQCF   | 39    | >NOTCH1-F1 VQASSQCS   | 6139  | 6100  |
| >NOTCH1-F1 VQASSQCFQ  | 2417  | >NOTCH1-F1 VQASSQCSQ  | 474   | 1943  |
| >NOTCH1-F1 VQASSQCFQ! | 242   | >NOTCH1-F1 VQASSQCSQ! | 176   | 66    |
| >NOTCH1-F1 VQASSQCF   | 358   | >NOTCH1-F1 VQASSQCS   | 19490 | 19132 |
| >NOTCH1-F1 VQASSQCF   | 3     | >NOTCH1-F1 VQASSQCS   | 905   | 902   |
| >NOTCH1-F1 VQASSQCFQ  | 1021  | >NOTCH1-F1 VQASSQCSQ  | 236   | 785   |
| >NOTCH1-F1 VQASSQCFQ! | 65    | >NOTCH1-F1 VQASSQCSQ! | 58    | 7     |
| >NOTCH1-F1 CVQASSQCF  | 243   | >NOTCH1-F1 CVQASSQCS  | 16338 | 16095 |
| >NOTCH1-F1 CVQASSQCF  | 298   | >NOTCH1-F1 CVQASSQCS  | 19309 | 19011 |
| >NOTCH1-F1 QCVQASSQC  | 171   | >NOTCH1-F1 QCVQASSQC! | 19163 | 18992 |
| >NOTCH1-G1GVHCEINV    | 244   | >NOTCH1-G1DVHCEINV    | 5048  | 4804  |
| >NOTCH1-G1GVHCEINV    | 231   | >NOTCH1-G1DVHCEINV    | 4619  | 4388  |
| >NOTCH1-G1GVHCEINV    | 207   | >NOTCH1-G1DVHCEINV    | 6435  | 6228  |
| >NOTCH1-G1GVHCEINV    | 235   | >NOTCH1-G1DVHCEINV    | 3784  | 3549  |
| >NOTCH1-G1GVHCEINV    | 2976  | >NOTCH1-G1DVHCEINV    | 48    | 2928  |
| >NOTCH1-G1GVHCEINV    | 6531  | >NOTCH1-G1DVHCEINV    | 444   | 6087  |
| >NOTCH1-G1TQGVHCEI    | 1363  | >NOTCH1-G1TQDVHCEI    | 206   | 1157  |
| >NOTCH1-G1TQGVHCEINV  | 854   | >NOTCH1-G1TQDVHCEINV  | 448   | 406   |
| >NOTCH1-G1GTQGVHCEI   | 202   | >NOTCH1-G1GTQDVHCEI   | 106   | 96    |
| >NOTCH1-G1GTQGVHCEIM  | 200   | >NOTCH1-G1GTQDVHCEIM  | 121   | 79    |
| >NOTCH1-G1GTQGVHCEIM  | 1313  | >NOTCH1-G1GTQDVHCEIM  | 281   | 1032  |
| >NOTCH1-G1GTQGVHCEIM  | 357   | >NOTCH1-G1GTQDVHCEIM  | 215   | 142   |
| >NOTCH1-G1GTQGVHCEIM  | 265   | >NOTCH1-G1GTQDVHCEIM  | 118   | 147   |
| >NOTCH1-G1GTQGVHCEI   | 199   | >NOTCH1-G1GTQDVHCEI   | 702   | 503   |
| >NOTCH1-G1GTQGVHCEI   | 463   | >NOTCH1-G1GTQDVHCEI   | 539   | 76    |
| >NOTCH1-G1CPRGTQGV    | 82    | >NOTCH1-G1CPRGTQDV    | 131   | 49    |
| >NOTCH1-G1CPRGTQGV    | 452   | >NOTCH1-G1CPRGTQDV    | 744   | 292   |
| >NOTCH1-G1SCPRGTQGV   | 308   | >NOTCH1-G1SCPRGTQDV   | 1031  | 723   |
| >NOTCH1-G1GQVKASLL    | 119   | >NOTCH1-G1SQVKASLL    | 39    | 80    |
| >NOTCH1-G1GQVKASLLPG  | 387   | >NOTCH1-G1SQVKASLLPG  | 231   | 156   |
| >NOTCH1-G1GQVKASLL    | 410   | >NOTCH1-G1SQVKASLL    | 134   | 276   |
| >NOTCH1-G1GQVKASLL    | 744   | >NOTCH1-G1SQVKASLL    | 101   | 643   |
| >NOTCH1-G1GQVKASLL    | 151   | >NOTCH1-G1SQVKASLL    | 379   | 228   |
| >NOTCH1-G1LGQVKASL    | 6734  | >NOTCH1-G1LSQVKASL    | 30    | 6704  |

|                      |      |                       |     |      |
|----------------------|------|-----------------------|-----|------|
| >NOTCH1-G1LGQVKASLL  | 6036 | >NOTCH1-G1LSQVKASLL   | 13  | 6023 |
| >NOTCH1-G1LGQVKASLL  | 324  | >NOTCH1-G1LSQVKASLL   | 20  | 304  |
| >NOTCH1-G1LGQVKASL   | 4753 | >NOTCH1-G1LSQVKASL    | 190 | 4563 |
| >NOTCH1-G1LGQVKASLL  | 5059 | >NOTCH1-G1LSQVKASLL   | 194 | 4865 |
| >NOTCH1-G1LLGQVKASL  | 1382 | >NOTCH1-G1LLSQVKASL   | 487 | 895  |
| >NOTCH1-G1LLGQVKASL  | 140  | >NOTCH1-G1LLSQVKASL   | 15  | 125  |
| >NOTCH1-G1LLGQVKASLL | 77   | >NOTCH1-G1LLSQVKASLL  | 31  | 46   |
| >NOTCH1-G1LLGQVKASL  | 538  | >NOTCH1-G1LLSQVKASL   | 56  | 482  |
| >NOTCH1-G1LLGQVKASLL | 359  | >NOTCH1-G1LLSQVKASLL  | 137 | 222  |
| >NOTCH1-G1LLGQVKASL  | 9    | >NOTCH1-G1LLSQVKASL   | 12  | 3    |
| >NOTCH1-G1LLGQVKASLL | 36   | >NOTCH1-G1LLSQVKASLL  | 57  | 21   |
| >NOTCH1-G1LLGQVKASL  | 124  | >NOTCH1-G1LLSQVKASL   | 214 | 90   |
| >NOTCH1-G1LLGQVKASLL | 314  | >NOTCH1-G1LLSQVKASLL  | 493 | 179  |
| >NOTCH1-G1LLGQVKASL  | 58   | >NOTCH1-G1LLSQVKASL   | 70  | 12   |
| >NOTCH1-G1LLGQVKASLL | 118  | >NOTCH1-G1LLSQVKASLL  | 140 | 22   |
| >NOTCH1-G1LLGQVKASL  | 146  | >NOTCH1-G1LLSQVKASL   | 155 | 9    |
| >NOTCH1-G1LLGQVKASLL | 510  | >NOTCH1-G1LLSQVKASLL  | 426 | 84   |
| >NOTCH1-G1LLGQVKASL  | 3    | >NOTCH1-G1LLSQVKASL   | 3   | 0    |
| >NOTCH1-G1LLGQVKASLL | 6    | >NOTCH1-G1LLSQVKASLL  | 5   | 1    |
| >NOTCH1-G1LLGQVKASL  | 564  | >NOTCH1-G1LLSQVKASL   | 338 | 226  |
| >NOTCH1-G1ALLGQVKA   | 247  | >NOTCH1-G1ALLSQVKA    | 212 | 35   |
| >NOTCH1-G1ALLGQVKASL | 131  | >NOTCH1-G1ALLSQVKASL  | 167 | 36   |
| >NOTCH1-G1ALLGQVKASL | 163  | >NOTCH1-G1ALLSQVKASLI | 130 | 33   |
| >NOTCH1-G1ALLGQVKA   | 306  | >NOTCH1-G1ALLSQVKA    | 309 | 3    |
| >NOTCH1-G1ALLGQVKASL | 56   | >NOTCH1-G1ALLSQVKASL  | 38  | 18   |
| >NOTCH1-G1ALLGQVKASL | 54   | >NOTCH1-G1ALLSQVKASLI | 56  | 2    |
| >NOTCH1-G1ALLGQVKA   | 300  | >NOTCH1-G1ALLSQVKA    | 222 | 78   |
| >NOTCH1-G1ALLGQVKASL | 65   | >NOTCH1-G1ALLSQVKASL  | 57  | 8    |
| >NOTCH1-G1ALLGQVKASL | 100  | >NOTCH1-G1ALLSQVKASLI | 70  | 30   |
| >NOTCH1-G1ALLGQVKASL | 435  | >NOTCH1-G1ALLSQVKASLI | 557 | 122  |
| >NOTCH1-G1ALLGQVKA   | 13   | >NOTCH1-G1ALLSQVKA    | 23  | 10   |
| >NOTCH1-G1ALLGQVKAS  | 411  | >NOTCH1-G1ALLSQVKAS   | 834 | 423  |
| >NOTCH1-G1ALLGQVKASL | 4    | >NOTCH1-G1ALLSQVKASL  | 5   | 1    |
| >NOTCH1-G1ALLGQVKASL | 10   | >NOTCH1-G1ALLSQVKASLI | 14  | 4    |
| >NOTCH1-G1ALLGQVKA   | 239  | >NOTCH1-G1ALLSQVKA    | 207 | 32   |
| >NOTCH1-G1ALLGQVKASL | 23   | >NOTCH1-G1ALLSQVKASL  | 20  | 3    |
| >NOTCH1-G1ALLGQVKASL | 49   | >NOTCH1-G1ALLSQVKASLI | 37  | 12   |
| >NOTCH1-G1ALLGQVKA   | 16   | >NOTCH1-G1ALLSQVKA    | 23  | 7    |
| >NOTCH1-G1ALLGQVKASL | 14   | >NOTCH1-G1ALLSQVKASL  | 17  | 3    |
| >NOTCH1-G1ALLGQVKASL | 19   | >NOTCH1-G1ALLSQVKASLI | 25  | 6    |
| >NOTCH1-G1ALLGQVKA   | 128  | >NOTCH1-G1ALLSQVKA    | 267 | 139  |
| >NOTCH1-G1ALLGQVKASL | 22   | >NOTCH1-G1ALLSQVKASL  | 27  | 5    |
| >NOTCH1-G1ALLGQVKASL | 42   | >NOTCH1-G1ALLSQVKASLI | 63  | 21   |



|                      |      |                       |      |      |
|----------------------|------|-----------------------|------|------|
| >NOTCH1-G1ALLGQVKA   | 4    | >NOTCH1-G1ALLSQVKA    | 8    | 4    |
| >NOTCH1-G1ALLGQVKASL | 2    | >NOTCH1-G1ALLSQVKASL  | 3    | 1    |
| >NOTCH1-G1ALLGQVKASL | 4    | >NOTCH1-G1ALLSQVKASLI | 6    | 2    |
| >NOTCH1-G1ALLGQVKASL | 184  | >NOTCH1-G1ALLSQVKASL  | 414  | 230  |
| >NOTCH1-G1ALLGQVKASL | 2256 | >NOTCH1-G1ALLSQVKASL  | 301  | 1955 |
| >NOTCH1-G1PDALLGQV   | 130  | >NOTCH1-G1PDALLSQV    | 170  | 40   |
| >NOTCH1-G1APDALLGQV  | 534  | >NOTCH1-G1APDALLSQV   | 311  | 223  |
| >NOTCH1-G1APDALLGQV  | 432  | >NOTCH1-G1APDALLSQV   | 351  | 81   |
| >NOTCH1-G1AAPDALLGQV | 552  | >NOTCH1-G1AAPDALLSQV  | 321  | 231  |
| >NOTCH1-G1AAPDALLGQV | 280  | >NOTCH1-G1AAPDALLSQV  | 135  | 145  |
| >NOTCH1-G1AAPDALLGQV | 275  | >NOTCH1-G1AAPDALLSQV  | 161  | 114  |
| >NOTCH1-G1AAPDALLGQV | 47   | >NOTCH1-G1AAPDALLSQV  | 12   | 35   |
| >NOTCH1-G1AAPDALLGQV | 67   | >NOTCH1-G1AAPDALLSQV  | 31   | 36   |
| >NOTCH1-G1WAAPDALLG  | 388  | >NOTCH1-G1WAAPDALLSQ  | 162  | 226  |
| >NOTCH1-G1WAAPDALLG  | 148  | >NOTCH1-G1WAAPDALLSQ  | 75   | 73   |
| >NOTCH1-G1WAAPDALLG  | 122  | >NOTCH1-G1WAAPDALLSQ  | 69   | 53   |
| >NOTCH1-G1WAAPDALLG  | 670  | >NOTCH1-G1WAAPDALLSQ  | 390  | 280  |
| >NOTCH1-G1WAAPDALLG  | 1868 | >NOTCH1-G1WAAPDALLSQ  | 472  | 1396 |
| >NOTCH1-G1WAAPDALLG  | 73   | >NOTCH1-G1WAAPDALLSQ  | 21   | 52   |
| >NOTCH1-G1WAAPDALLG  | 42   | >NOTCH1-G1WAAPDALLSQ  | 37   | 5    |
| >NOTCH1-G1WAAPDALLG  | 53   | >NOTCH1-G1WAAPDALLSQ  | 46   | 7    |
| >NOTCH1-G1WAAPDALLG  | 1056 | >NOTCH1-G1WAAPDALLSQ  | 253  | 803  |
| >NOTCH1-G1GGSEGRRRF  | 3430 | >NOTCH1-G1GSSEGRRRF   | 250  | 3180 |
| >NOTCH1-G1SLLPGGSEGG | 405  | >NOTCH1-G1SLLPGSSEGG  | 455  | 50   |
| >NOTCH1-G1SLLPGGSEG  | 756  | >NOTCH1-G1SLLPGSSEG   | 445  | 311  |
| >NOTCH1-G1GGRRRREL   | 545  | >NOTCH1-G1DGRRRREL    | 267  | 278  |
| >NOTCH1-G1EGRRRREL   | 493  | >NOTCH1-G1EDGRRRREL   | 1706 | 1213 |
| >NOTCH1-G1SEGRRRREL  | 254  | >NOTCH1-G1SEDGRRRREL  | 372  | 118  |
| >NOTCH1-G1SEGRRRREL  | 479  | >NOTCH1-G1SEDGRRRREL  | 255  | 224  |
| >NOTCH1-G1SLLPGGSEGG | 405  | >NOTCH1-G1SLLPGGSEGG  | 2997 | 2592 |
| >NOTCH1-G2GVQGKKVRK  | 1651 | >NOTCH1-G2RVQGKKVRK   | 217  | 1434 |
| >NOTCH1-G2GVQGKKVRK  | 105  | >NOTCH1-G2RVQGKKVRK   | 61   | 44   |
| >NOTCH1-G2GVQGKKVRK  | 3946 | >NOTCH1-G2RVQGKKVRK   | 69   | 3877 |
| >NOTCH1-G2GVQGKKVR   | 269  | >NOTCH1-G2RVQGKKVR    | 27   | 242  |
| >NOTCH1-G2GVQGKKVRK  | 1302 | >NOTCH1-G2RVQGKKVRK   | 67   | 1235 |
| >NOTCH1-G2GVQGKKVR   | 7518 | >NOTCH1-G2RVQGKKVR    | 284  | 7234 |
| >NOTCH1-G2KPGVQGKKV  | 2176 | >NOTCH1-G2KPRVQGKKV   | 50   | 2126 |
| >NOTCH1-G2KPGVQGKKV  | 475  | >NOTCH1-G2KPRVQGKKVI  | 1029 | 554  |
| >NOTCH1-G2SLKPGVQGKK | 510  | >NOTCH1-G2SLKPRVQGKK  | 485  | 25   |
| >NOTCH1-G2SLKPGVQGKK | 13   | >NOTCH1-G2SLKPRVQGKK  | 16   | 3    |
| >NOTCH1-G2SLKPGVQGKK | 49   | >NOTCH1-G2SLKPRVQGKK  | 86   | 37   |
| >NOTCH1-G2SLKPGVQGKK | 212  | >NOTCH1-G2SLKPRVQGKK  | 365  | 153  |
| >NOTCH1-G2SLKPGVQGKK | 89   | >NOTCH1-G2SLKPRVQGKK  | 183  | 94   |

|                      |       |                      |      |       |
|----------------------|-------|----------------------|------|-------|
| >NOTCH1-G2SLKPGVQGK  | 258   | >NOTCH1-G2SLKPRVQGK  | 828  | 570   |
| >NOTCH1-G2SLKPGVQGKK | 3     | >NOTCH1-G2SLKPRVQGKK | 4    | 1     |
| >NOTCH1-G2SLKPGVQGK  | 262   | >NOTCH1-G2SLKPRVQGK  | 129  | 133   |
| >NOTCH1-G2SLKPGVQGKK | 101   | >NOTCH1-G2SLKPRVQGKK | 84   | 17    |
| >NOTCH1-G2SLKPGVQGK  | 26    | >NOTCH1-G2SLKPRVQGK  | 17   | 9     |
| >NOTCH1-G2SLKPGVQGKK | 40    | >NOTCH1-G2SLKPRVQGKK | 23   | 17    |
| >NOTCH1-G2SLKPGVQGKK | 5954  | >NOTCH1-G2SLKPRVQGKK | 277  | 5677  |
| >NOTCH1-G2GSLKPGVQGI | 284   | >NOTCH1-G2GSLKPRVQGI | 210  | 74    |
| >NOTCH1-G2GSLKPGVQGI | 267   | >NOTCH1-G2GSLKPRVQGI | 232  | 35    |
| >NOTCH1-G2GSLKPGVQGI | 103   | >NOTCH1-G2GSLKPRVQGI | 83   | 20    |
| >NOTCH1-G2GSLKPGVQGI | 972   | >NOTCH1-G2GSLKPRVQGI | 335  | 637   |
| >NOTCH1-G2YLGSLKPGV  | 20    | >NOTCH1-G2YLGSLKPRV  | 22   | 2     |
| >NOTCH1-G2YLGSLKPGV  | 25    | >NOTCH1-G2YLGSLKPRV  | 44   | 19    |
| >NOTCH1-G2YLGSLKPGV  | 21    | >NOTCH1-G2YLGSLKPRV  | 49   | 28    |
| >NOTCH1-G2YLGSLKPGV  | 37    | >NOTCH1-G2YLGSLKPRV  | 224  | 187   |
| >NOTCH1-G2YLGSLKPGV  | 2     | >NOTCH1-G2YLGSLKPRV  | 2    | 0     |
| >NOTCH1-G2YLGSLKPGV  | 6     | >NOTCH1-G2YLGSLKPRV  | 13   | 7     |
| >NOTCH1-G2YLGSLKPGV  | 4     | >NOTCH1-G2YLGSLKPRV  | 4    | 0     |
| >NOTCH1-G2YLGSLKPGV  | 2     | >NOTCH1-G2YLGSLKPRV  | 4    | 2     |
| >NOTCH1-G2YLGSLKPGV  | 1     | >NOTCH1-G2YLGSLKPRV  | 1    | 0     |
| >NOTCH1-G2YLGSLKPGVQ | 312   | >NOTCH1-G2YLGSLKPRVQ | 387  | 75    |
| >NOTCH1-G2YLGSLKPG   | 22980 | >NOTCH1-G2YLGSLKPR   | 245  | 22735 |
| >NOTCH1-G2YLGSLKPGV  | 71    | >NOTCH1-G2YLGSLKPRV  | 240  | 169   |
| >NOTCH1-G2YLGSLKPG   | 33798 | >NOTCH1-G2YLGSLKPR   | 104  | 33694 |
| >NOTCH1-G2GYLGSLKPGV | 193   | >NOTCH1-G2GYLGSLKPRV | 569  | 376   |
| >NOTCH1-G2GYLGSLKPGV | 270   | >NOTCH1-G2GYLGSLKPRV | 222  | 48    |
| >NOTCH1-G2GYLGSLKPG  | 22718 | >NOTCH1-G2GYLGSLKPR  | 132  | 22586 |
| >NOTCH1-G2GYLGSLKPG  | 30161 | >NOTCH1-G2GYLGSLKPR  | 53   | 30108 |
| >NOTCH1-G2NGYLGSLKPG | 34597 | >NOTCH1-G2NGYLGSLKPR | 237  | 34360 |
| >NOTCH1-G2GHLNVAAKPI | 2891  | >NOTCH1-G2RHLNVAAKPI | 171  | 2720  |
| >NOTCH1-G2IGHLNVAAK  | 123   | >NOTCH1-G2IRHLNVAAK  | 961  | 838   |
| >NOTCH1-G2IGHLNVAAK  | 25425 | >NOTCH1-G2IRHLNVAAK  | 233  | 25192 |
| >NOTCH1-G2GIGHLNVAAK | 368   | >NOTCH1-G2GIRHLNVAAK | 227  | 141   |
| >NOTCH1-G2GIGHLNVA   | 15141 | >NOTCH1-G2GIRHLNVA   | 149  | 14992 |
| >NOTCH1-G2GIGHLNVAA  | 13874 | >NOTCH1-G2GIRHLNVAA  | 72   | 13802 |
| >NOTCH1-G2GIGHLNVAAK | 3990  | >NOTCH1-G2GIRHLNVAAK | 7    | 3983  |
| >NOTCH1-G2LGIGHLNV   | 3278  | >NOTCH1-G2LGIRHLNV   | 368  | 2910  |
| >NOTCH1-G2HLGIGHLNV  | 300   | >NOTCH1-G2HLGIRHLNV  | 396  | 96    |
| >NOTCH1-G2HLGIGHLNV  | 15    | >NOTCH1-G2HLGIRHLNV  | 36   | 21    |
| >NOTCH1-G2HLGIGHLNV  | 178   | >NOTCH1-G2HLGIRHLNV  | 417  | 239   |
| >NOTCH1-G2HLGIGHLNV  | 12    | >NOTCH1-G2HLGIRHLNV  | 37   | 25    |
| >NOTCH1-G2HLGIGHLNV  | 239   | >NOTCH1-G2HLGIRHLNV  | 2454 | 2215  |
| >NOTCH1-G2HLGIGHLNV  | 3     | >NOTCH1-G2HLGIRHLNV  | 5    | 2     |

|                       |       |                       |      |       |
|-----------------------|-------|-----------------------|------|-------|
| >NOTCH1-G2HLGIGHLNVA  | 90    | >NOTCH1-G2HLGIRHLNVA  | 277  | 187   |
| >NOTCH1-G2HLGIGHLNVA  | 94    | >NOTCH1-G2HLGIRHLNVA  | 245  | 151   |
| >NOTCH1-G2HLGIGHLNV   | 14281 | >NOTCH1-G2HLGIRHLNV   | 462  | 13819 |
| >NOTCH1-G2THLGIGHL    | 152   | >NOTCH1-G2THLGIRHL    | 146  | 6     |
| >NOTCH1-G2DTHLGIGHL   | 79    | >NOTCH1-G2DTHLGIRHL   | 110  | 31    |
| >NOTCH1-G2DTHLGIGH    | 462   | >NOTCH1-G2DTHLGIRH    | 3020 | 2558  |
| >NOTCH1-G2DTHLGIGHL   | 255   | >NOTCH1-G2DTHLGIRHL   | 1549 | 1294  |
| >NOTCH1-G2DTHLGIGHLN  | 99    | >NOTCH1-G2DTHLGIRHLN  | 242  | 143   |
| >NOTCH1-G2DTHLGIGHLN  | 203   | >NOTCH1-G2DTHLGIRHLN  | 578  | 375   |
| >NOTCH1-G2MPDTHLGIGI  | 69    | >NOTCH1-G2MPDTHLGIRI  | 59   | 10    |
| >NOTCH1-G2MPDTHLGIGI  | 474   | >NOTCH1-G2MPDTHLGIRI  | 483  | 9     |
| >NOTCH1-G2MPDTHLGIG   | 395   | >NOTCH1-G2MPDTHLGIR   | 2384 | 1989  |
| >NOTCH1-H1HFLRELSRV   | 2855  | >NOTCH1-H1YFLRELSRV   | 83   | 2772  |
| >NOTCH1-H1HFLRELSRV   | 5811  | >NOTCH1-H1YFLRELSRV   | 445  | 5366  |
| >NOTCH1-H1HFLRELSRV   | 857   | >NOTCH1-H1YFLRELSRV   | 19   | 838   |
| >NOTCH1-H1HFLRELSRV   | 1560  | >NOTCH1-H1YFLRELSRV   | 455  | 1105  |
| >NOTCH1-H1HFLRELSRVL  | 56    | >NOTCH1-H1YFLRELSRVL  | 18   | 38    |
| >NOTCH1-H1HFLRELSR    | 54    | >NOTCH1-H1YFLRELSR    | 291  | 237   |
| >NOTCH1-H1HFLRELSR    | 37    | >NOTCH1-H1YFLRELSR    | 71   | 34    |
| >NOTCH1-H1HFLRELSR    | 38    | >NOTCH1-H1YFLRELSR    | 113  | 75    |
| >NOTCH1-H1FHFLRELSRVL | 652   | >NOTCH1-H1FYFLRELSRVL | 463  | 189   |
| >NOTCH1-H1FHFLRELSRV  | 16406 | >NOTCH1-H1FYFLRELSRV  | 165  | 16241 |
| >NOTCH1-H1FHFLRELSRVL | 14065 | >NOTCH1-H1FYFLRELSRVL | 90   | 13975 |
| >NOTCH1-H1FHFLRELSRV  | 2550  | >NOTCH1-H1FYFLRELSRV  | 351  | 2199  |
| >NOTCH1-H1FHFLRELSRV  | 1486  | >NOTCH1-H1FYFLRELSRV  | 53   | 1433  |
| >NOTCH1-H1FHFLRELSRV  | 18282 | >NOTCH1-H1FYFLRELSRV  | 175  | 18107 |
| >NOTCH1-H1FHFLRELSRVL | 11127 | >NOTCH1-H1FYFLRELSRVL | 14   | 11113 |
| >NOTCH1-H1FHFLRELSR   | 1347  | >NOTCH1-H1FYFLRELSR   | 14   | 1333  |
| >NOTCH1-H1FHFLRELSR   | 1048  | >NOTCH1-H1FYFLRELSR   | 158  | 890   |
| >NOTCH1-H1FHFLRELSRVL | 251   | >NOTCH1-H1FYFLRELSRVL | 2433 | 2182  |
| >NOTCH1-H1FHFLRELSRVL | 86    | >NOTCH1-H1FYFLRELSRVL | 3322 | 3236  |
| >NOTCH1-H1FHFLRELSRVL | 13    | >NOTCH1-H1FYFLRELSRVL | 438  | 425   |
| >NOTCH1-H1FHFLRELSR   | 536   | >NOTCH1-H1FYFLRELSR   | 30   | 506   |
| >NOTCH1-H1PPEQLRNSSF  | 7130  | >NOTCH1-H1PPEQLRNSSF  | 422  | 6708  |
| >NOTCH1-H1PPEQLRNSSF  | 25673 | >NOTCH1-H1PPEQLRNSSF  | 297  | 25376 |
| >NOTCH1-H1SFHFLREL    | 1106  | >NOTCH1-H1SFYFLREL    | 292  | 814   |
| >NOTCH1-H1SFHFLRELSRV | 3473  | >NOTCH1-H1SFYFLRELSRV | 366  | 3107  |
| >NOTCH1-H1SFHFLRELSR  | 2857  | >NOTCH1-H1SFYFLRELSR  | 486  | 2371  |
| >NOTCH1-H1SFHFLRELSR  | 2350  | >NOTCH1-H1SFYFLRELSR  | 270  | 2080  |
| >NOTCH1-H1SFHFLREL    | 216   | >NOTCH1-H1SFYFLREL    | 227  | 11    |
| >NOTCH1-H1SFHFLRELSR  | 24    | >NOTCH1-H1SFYFLRELSR  | 9    | 15    |
| >NOTCH1-H1SFHFLRELSR  | 70    | >NOTCH1-H1SFYFLRELSR  | 36   | 34    |
| >NOTCH1-H1SFHFLRELSR  | 211   | >NOTCH1-H1SFYFLRELSR  | 33   | 178   |

|                       |      |                       |      |     |
|-----------------------|------|-----------------------|------|-----|
| >NOTCH1-H1SFHFLELSR   | 358  | >NOTCH1-H1SFYFLRELSR  | 211  | 147 |
| >NOTCH1-H1SFHFLELSR   | 74   | >NOTCH1-H1SFYFLRELSR  | 40   | 34  |
| >NOTCH1-H1SFHFLEL     | 366  | >NOTCH1-H1SFYFLREL    | 319  | 47  |
| >NOTCH1-H1SFHFLEL     | 230  | >NOTCH1-H1SFYFLREL    | 119  | 111 |
| >NOTCH1-H1SFHFLELS    | 871  | >NOTCH1-H1SFYFLRELS   | 440  | 431 |
| >NOTCH1-H1SFHFLELSRV  | 683  | >NOTCH1-H1SFYFLRELSRV | 383  | 300 |
| >NOTCH1-H1SSFHFLEL    | 16   | >NOTCH1-H1SSFYFLREL   | 15   | 1   |
| >NOTCH1-H1SSFHFLEL    | 350  | >NOTCH1-H1SSFYFLREL   | 294  | 56  |
| >NOTCH1-H1SSFHFLELSR  | 31   | >NOTCH1-H1SSFYFLRELSR | 26   | 5   |
| >NOTCH1-H1SSFHFLELSR  | 41   | >NOTCH1-H1SSFYFLRELSR | 32   | 9   |
| >NOTCH1-H1SSFHFLEL    | 167  | >NOTCH1-H1SSFYFLREL   | 56   | 111 |
| >NOTCH1-H1SSFHFLELSR  | 424  | >NOTCH1-H1SSFYFLRELSR | 292  | 132 |
| >NOTCH1-H1SSFHFLELSR  | 26   | >NOTCH1-H1SSFYFLRELSR | 12   | 14  |
| >NOTCH1-H1SSFHFLEL    | 369  | >NOTCH1-H1SSFYFLREL   | 229  | 140 |
| >NOTCH1-H1SSFHFLEL    | 86   | >NOTCH1-H1SSFYFLREL   | 99   | 13  |
| >NOTCH1-H1SSFHFLEL    | 13   | >NOTCH1-H1SSFYFLREL   | 22   | 9   |
| >NOTCH1-H1SSFHFLEL    | 57   | >NOTCH1-H1SSFYFLREL   | 34   | 23  |
| >NOTCH1-H1SSFHFLE     | 139  | >NOTCH1-H1SSFYFLRE    | 173  | 34  |
| >NOTCH1-H1SSFHFLEL    | 283  | >NOTCH1-H1SSFYFLREL   | 383  | 100 |
| >NOTCH1-H1SSFHFLELSR  | 67   | >NOTCH1-H1SSFYFLRELSR | 74   | 7   |
| >NOTCH1-H1SSFHFLELSR  | 316  | >NOTCH1-H1SSFYFLRELSR | 467  | 151 |
| >NOTCH1-H1SSFHFLEL    | 52   | >NOTCH1-H1SSFYFLREL   | 54   | 2   |
| >NOTCH1-H1NSSFHFLR    | 152  | >NOTCH1-H1NSSFYFLR    | 81   | 71  |
| >NOTCH1-H1NSSFHFLR    | 23   | >NOTCH1-H1NSSFYFLR    | 21   | 2   |
| >NOTCH1-H1NSSFHFLR    | 44   | >NOTCH1-H1NSSFYFLR    | 33   | 11  |
| >NOTCH1-H1NSSFHFLR    | 5    | >NOTCH1-H1NSSFYFLR    | 5    | 0   |
| >NOTCH1-H1NSSFHFLREL  | 1054 | >NOTCH1-H1NSSFYFLREL  | 265  | 789 |
| >NOTCH1-H1NSSFHFLR    | 142  | >NOTCH1-H1NSSFYFLR    | 154  | 12  |
| >NOTCH1-H1NSSFHFLR    | 356  | >NOTCH1-H1NSSFYFLR    | 349  | 7   |
| >NOTCH1-H1RNSSFHFL    | 570  | >NOTCH1-H1RNSSFYFL    | 136  | 434 |
| >NOTCH1-H1RNSSFHFL    | 1099 | >NOTCH1-H1RNSSFYFL    | 497  | 602 |
| >NOTCH1-H1RNSSFHFLR   | 602  | >NOTCH1-H1RNSSFYFLR   | 357  | 245 |
| >NOTCH1-H1RNSSFHFLR   | 7    | >NOTCH1-H1RNSSFYFLR   | 7    | 0   |
| >NOTCH1-H1RNSSFHFLR   | 46   | >NOTCH1-H1RNSSFYFLR   | 74   | 28  |
| >NOTCH1-H1RNSSFHFL    | 665  | >NOTCH1-H1RNSSFYFL    | 496  | 169 |
| >NOTCH1-H1RNSSFHFLREI | 466  | >NOTCH1-H1RNSSFYFLREL | 384  | 82  |
| >NOTCH1-H1RNSSFHFLR   | 32   | >NOTCH1-H1RNSSFYFLR   | 41   | 9   |
| >NOTCH1-H1LRNSSFHFL   | 492  | >NOTCH1-H1LRNSSFYFL   | 1195 | 703 |
| >NOTCH1-H1LRNSSFHFLR  | 34   | >NOTCH1-H1LRNSSFYFLR  | 36   | 2   |
| >NOTCH1-H1LRNSSFHFLR  | 112  | >NOTCH1-H1LRNSSFYFLR  | 149  | 37  |
| >NOTCH1-H1LRNSSFHF    | 8    | >NOTCH1-H1LRNSSFYF    | 7    | 1   |
| >NOTCH1-H1LRNSSFHFL   | 65   | >NOTCH1-H1LRNSSFYFL   | 57   | 8   |
| >NOTCH1-H1LRNSSFHF    | 171  | >NOTCH1-H1LRNSSFYF    | 275  | 104 |

|                      |       |                       |     |       |
|----------------------|-------|-----------------------|-----|-------|
| >NOTCH1-H1LRNSSFHFL  | 113   | >NOTCH1-H1LRNSSFYFL   | 123 | 10    |
| >NOTCH1-H1LRNSSFHFLR | 304   | >NOTCH1-H1LRNSSFYFLR  | 301 | 3     |
| >NOTCH1-H1LRNSSFHFL  | 373   | >NOTCH1-H1LRNSSFYFL   | 503 | 130   |
| >NOTCH1-H1LRNSSFHFL  | 48    | >NOTCH1-H1LRNSSFYFL   | 113 | 65    |
| >NOTCH1-H1LRNSSFHFLR | 285   | >NOTCH1-H1LRNSSFYFLR  | 239 | 46    |
| >NOTCH1-H1QLRNSSFHFL | 1046  | >NOTCH1-H1QLRNSSFYFL  | 146 | 900   |
| >NOTCH1-H1QLRNSSFHFL | 43    | >NOTCH1-H1QLRNSSFYFL  | 19  | 24    |
| >NOTCH1-H1QLRNSSFHFL | 130   | >NOTCH1-H1QLRNSSFYFL  | 193 | 63    |
| >NOTCH1-H1QLRNSSFHFL | 264   | >NOTCH1-H1QLRNSSFYFL  | 151 | 113   |
| >NOTCH1-H1QLRNSSFHFL | 132   | >NOTCH1-H1QLRNSSFYFL  | 62  | 70    |
| >NOTCH1-H1QLRNSSFHFL | 921   | >NOTCH1-H1QLRNSSFYFL  | 455 | 466   |
| >NOTCH1-H1QLRNSSFHFL | 11    | >NOTCH1-H1QLRNSSFYFL  | 23  | 12    |
| >NOTCH1-H1QLRNSSFH   | 587   | >NOTCH1-H1QLRNSSFY    | 143 | 444   |
| >NOTCH1-H1QLRNSSFHFL | 183   | >NOTCH1-H1QLRNSSFYFLI | 134 | 49    |
| >NOTCH1-H1QLRNSSFH   | 12531 | >NOTCH1-H1QLRNSSFY    | 102 | 12429 |
| >NOTCH1-H1QLRNSSFH   | 1118  | >NOTCH1-H1QLRNSSFY    | 103 | 1015  |
| >NOTCH1-H1QLRNSSFHF  | 964   | >NOTCH1-H1QLRNSSFYF   | 399 | 565   |
| >NOTCH1-H1QLRNSSFHFL | 37    | >NOTCH1-H1QLRNSSFYFL  | 38  | 1     |
| >NOTCH1-H1QLRNSSFHFL | 100   | >NOTCH1-H1QLRNSSFYFLI | 112 | 12    |
| >NOTCH1-H1QLRNSSFH   | 9590  | >NOTCH1-H1QLRNSSFY    | 90  | 9500  |
| >NOTCH1-H1QLRNSSFHFL | 10    | >NOTCH1-H1QLRNSSFYFLI | 10  | 0     |
| >NOTCH1-H1QLRNSSFHFL | 49    | >NOTCH1-H1QLRNSSFYFLI | 49  | 0     |
| >NOTCH1-H1QLRNSSFHFL | 95    | >NOTCH1-H1QLRNSSFYFLI | 99  | 4     |
| >NOTCH1-H1QLRNSSFH   | 15275 | >NOTCH1-H1QLRNSSFY    | 116 | 15159 |
| >NOTCH1-H1QLRNSSFH   | 3125  | >NOTCH1-H1QLRNSSFY    | 56  | 3069  |
| >NOTCH1-H1QLRNSSFHF  | 26    | >NOTCH1-H1QLRNSSFYF   | 43  | 17    |
| >NOTCH1-H1QLRNSSFH   | 1206  | >NOTCH1-H1QLRNSSFY    | 30  | 1176  |
| >NOTCH1-H1QLRNSSFHF  | 102   | >NOTCH1-H1QLRNSSFYF   | 73  | 29    |
| >NOTCH1-H1QLRNSSFH   | 1956  | >NOTCH1-H1QLRNSSFY    | 31  | 1925  |
| >NOTCH1-H1QLRNSSFHF  | 9     | >NOTCH1-H1QLRNSSFYF   | 8   | 1     |
| >NOTCH1-H1QLRNSSFHFL | 166   | >NOTCH1-H1QLRNSSFYFL  | 142 | 24    |
| >NOTCH1-H1QLRNSSFH   | 16225 | >NOTCH1-H1QLRNSSFY    | 204 | 16021 |
| >NOTCH1-H1QLRNSSFHF  | 74    | >NOTCH1-H1QLRNSSFYF   | 49  | 25    |
| >NOTCH1-H1QLRNSSFHF  | 1928  | >NOTCH1-H1QLRNSSFYF   | 481 | 1447  |
| >NOTCH1-H1QLRNSSFHFL | 260   | >NOTCH1-H1QLRNSSFYFLI | 264 | 4     |
| >NOTCH1-H1EQLRNSSFHF | 1102  | >NOTCH1-H1EQLRNSSFYFI | 440 | 662   |
| >NOTCH1-H1EQLRNSSFHF | 189   | >NOTCH1-H1EQLRNSSFYFI | 281 | 92    |
| >NOTCH1-H1EQLRNSSFHF | 69    | >NOTCH1-H1EQLRNSSFYFI | 62  | 7     |
| >NOTCH1-H1EQLRNSSFH  | 6228  | >NOTCH1-H1EQLRNSSFY   | 59  | 6169  |
| >NOTCH1-H1EQLRNSSFH  | 13060 | >NOTCH1-H1EQLRNSSFY   | 393 | 12667 |
| >NOTCH1-H1EQLRNSSFH  | 17881 | >NOTCH1-H1EQLRNSSFY   | 347 | 17534 |
| >NOTCH1-H1EQLRNSSFHF | 406   | >NOTCH1-H1EQLRNSSFYFI | 838 | 432   |
| >NOTCH1-H1EQLRNSSFH  | 8626  | >NOTCH1-H1EQLRNSSFY   | 160 | 8466  |

|                      |       |                       |      |       |
|----------------------|-------|-----------------------|------|-------|
| >NOTCH1-H1EQLRNSSFHF | 84    | >NOTCH1-H1EQLRNSSFYF  | 189  | 105   |
| >NOTCH1-H1EQLRNSSFH  | 5897  | >NOTCH1-H1EQLRNSSFY   | 168  | 5729  |
| >NOTCH1-H1EQLRNSSFH  | 723   | >NOTCH1-H1EQLRNSSFY   | 17   | 706   |
| >NOTCH1-H1EQLRNSSFHF | 6     | >NOTCH1-H1EQLRNSSFYF  | 6    | 0     |
| >NOTCH1-H1EQLRNSSFHF | 136   | >NOTCH1-H1EQLRNSSFYFI | 111  | 25    |
| >NOTCH1-H1EQLRNSSFHF | 230   | >NOTCH1-H1EQLRNSSFYFI | 291  | 61    |
| >NOTCH1-H1PEQLRNSSFH | 25782 | >NOTCH1-H1PEQLRNSSFY  | 422  | 25360 |
| >NOTCH1-H1HTNVVFKR   | 175   | >NOTCH1-H1PTNVVFKR    | 2687 | 2512  |
| >NOTCH1-H1HTNVVFKR   | 7     | >NOTCH1-H1PTNVVFKR    | 77   | 70    |
| >NOTCH1-H1HTNVVFKR   | 20    | >NOTCH1-H1PTNVVFKR    | 376  | 356   |
| >NOTCH1-H1HTNVVFKR   | 5     | >NOTCH1-H1PTNVVFKR    | 230  | 225   |
| >NOTCH1-H1HTNVVFKR   | 321   | >NOTCH1-H1PTNVVFKR    | 4186 | 3865  |
| >NOTCH1-H1LHTNVVFK   | 643   | >NOTCH1-H1LPTNVVFK    | 334  | 309   |
| >NOTCH1-H1LHTNVVFKR  | 176   | >NOTCH1-H1LPTNVVFKR   | 110  | 66    |
| >NOTCH1-H1LHTNVVFKRE | 13631 | >NOTCH1-H1LPTNVVFKRD  | 39   | 13592 |
| >NOTCH1-H1VLHTNVVFK  | 32    | >NOTCH1-H1VLPTNVVFK   | 66   | 34    |
| >NOTCH1-H1VLHTNVVFK  | 28    | >NOTCH1-H1VLPTNVVFK   | 136  | 108   |
| >NOTCH1-H1VLHTNVVFK  | 29    | >NOTCH1-H1VLPTNVVFK   | 4611 | 4582  |
| >NOTCH1-H1VLHTNVVFKF | 62    | >NOTCH1-H1VLPTNVVFKR  | 124  | 62    |
| >NOTCH1-H1VLHTNVVF   | 385   | >NOTCH1-H1VLPTNVVF    | 568  | 183   |
| >NOTCH1-H1VLHTNVVFKF | 381   | >NOTCH1-H1VLPTNVVFKR  | 608  | 227   |
| >NOTCH1-H1VLHTNVVFK  | 278   | >NOTCH1-H1VLPTNVVFK   | 1026 | 748   |
| >NOTCH1-H1VLHTNVVFKF | 946   | >NOTCH1-H1VLPTNVVFKR  | 476  | 470   |
| >NOTCH1-H1VLHTNVVF   | 87    | >NOTCH1-H1VLPTNVVF    | 504  | 417   |
| >NOTCH1-H1VLHTNVVF   | 358   | >NOTCH1-H1VLPTNVVF    | 1414 | 1056  |
| >NOTCH1-H1VLHTNVVF   | 14    | >NOTCH1-H1VLPTNVVF    | 115  | 101   |
| >NOTCH1-H1VLHTNVVFKF | 246   | >NOTCH1-H1VLPTNVVFKR  | 246  | 0     |
| >NOTCH1-H1RVLHTNVV   | 399   | >NOTCH1-H1RVLPTNVV    | 779  | 380   |
| >NOTCH1-H1RVLHTNVV   | 38    | >NOTCH1-H1RVLPTNVV    | 25   | 13    |
| >NOTCH1-H1RVLHTNVV   | 75    | >NOTCH1-H1RVLPTNVV    | 30   | 45    |
| >NOTCH1-H1RVLHTNVV   | 103   | >NOTCH1-H1RVLPTNVV    | 95   | 8     |
| >NOTCH1-H1RVLHTNVV   | 176   | >NOTCH1-H1RVLPTNVV    | 75   | 101   |
| >NOTCH1-H1RVLHTNVV   | 763   | >NOTCH1-H1RVLPTNVV    | 164  | 599   |
| >NOTCH1-H1RVLHTNVV   | 210   | >NOTCH1-H1RVLPTNVV    | 39   | 171   |
| >NOTCH1-H1RVLHTNVVFK | 15    | >NOTCH1-H1RVLPTNVVFK  | 14   | 1     |
| >NOTCH1-H1RVLHTNVVFK | 296   | >NOTCH1-H1RVLPTNVVFK  | 374  | 78    |
| >NOTCH1-H1RVLHTNVVFK | 14    | >NOTCH1-H1RVLPTNVVFK  | 12   | 2     |
| >NOTCH1-H1RVLHTNVVFK | 63    | >NOTCH1-H1RVLPTNVVFK  | 36   | 27    |
| >NOTCH1-H1RVLHTNVVF  | 436   | >NOTCH1-H1RVLPTNVVF   | 223  | 213   |
| >NOTCH1-H1RVLHTNVVF  | 121   | >NOTCH1-H1RVLPTNVVF   | 30   | 91    |
| >NOTCH1-H1RVLHTNVV   | 45    | >NOTCH1-H1RVLPTNVV    | 48   | 3     |
| >NOTCH1-H1RVLHTNVVFK | 4     | >NOTCH1-H1RVLPTNVVFK  | 4    | 0     |
| >NOTCH1-H1RVLHTNVVFK | 208   | >NOTCH1-H1RVLPTNVVFK  | 177  | 31    |

|                      |     |                       |      |      |
|----------------------|-----|-----------------------|------|------|
| >NOTCH1-H1RVLHTNVVFK | 89  | >NOTCH1-H1RVLPTNVVFK  | 150  | 61   |
| >NOTCH1-H1RVLHTNVVFK | 8   | >NOTCH1-H1RVLPTNVVFK  | 7    | 1    |
| >NOTCH1-H1RVLHTNVV   | 172 | >NOTCH1-H1RVLPTNVV    | 321  | 149  |
| >NOTCH1-H1RVLHTNVVF  | 7   | >NOTCH1-H1RVLPTNVVF   | 10   | 3    |
| >NOTCH1-H1RVLHTNVVFK | 386 | >NOTCH1-H1RVLPTNVVFK  | 162  | 224  |
| >NOTCH1-H1RVLHTNVVFK | 143 | >NOTCH1-H1RVLPTNVVFK  | 161  | 18   |
| >NOTCH1-H1RVLHTNVV   | 724 | >NOTCH1-H1RVLPTNVV    | 315  | 409  |
| >NOTCH1-H1RVLHTNVVF  | 71  | >NOTCH1-H1RVLPTNVVF   | 66   | 5    |
| >NOTCH1-H1RVLHTNVVF  | 8   | >NOTCH1-H1RVLPTNVVF   | 12   | 4    |
| >NOTCH1-H1RVLHTNVVF  | 12  | >NOTCH1-H1RVLPTNVVF   | 7    | 5    |
| >NOTCH1-H1RVLHTNVVF  | 49  | >NOTCH1-H1RVLPTNVVF   | 27   | 22   |
| >NOTCH1-H1RVLHTNVV   | 317 | >NOTCH1-H1RVLPTNVV    | 1571 | 1254 |
| >NOTCH1-H1RVLHTNVVF  | 77  | >NOTCH1-H1RVLPTNVVF   | 54   | 23   |
| >NOTCH1-H1RVLHTNVVFK | 481 | >NOTCH1-H1RVLPTNVVFK  | 295  | 186  |
| >NOTCH1-H1RVLHTNVVFK | 193 | >NOTCH1-H1RVLPTNVVFK  | 187  | 6    |
| >NOTCH1-H1RVLHTNVVFK | 76  | >NOTCH1-H1RVLPTNVVFK  | 76   | 0    |
| >NOTCH1-H1SRVLHTNVVF | 26  | >NOTCH1-H1SRVLPTNVVF  | 21   | 5    |
| >NOTCH1-H1SRVLHTNVVF | 115 | >NOTCH1-H1SRVLPTNVVF  | 106  | 9    |
| >NOTCH1-H1SRVLHTNVVF | 285 | >NOTCH1-H1SRVLPTNVVF  | 484  | 199  |
| >NOTCH1-H1SRVLHTNVV  | 295 | >NOTCH1-H1SRVLPTNVV   | 565  | 270  |
| >NOTCH1-H1SRVLHTNVVF | 285 | >NOTCH1-H1SRVLPTNVVF  | 471  | 186  |
| >NOTCH1-H1SRVLHTNVV  | 283 | >NOTCH1-H1SRVLPTNVV   | 1391 | 1108 |
| >NOTCH1-H1SRVLHTNVVF | 203 | >NOTCH1-H1SRVLPTNVVF  | 603  | 400  |
| >NOTCH1-H1LSRVLHTNV  | 42  | >NOTCH1-H1LSRVLPTNV   | 179  | 137  |
| >NOTCH1-H1LSRVLHTNVV | 35  | >NOTCH1-H1LSRVLPTNVV  | 88   | 53   |
| >NOTCH1-H1LSRVLHTNVV | 45  | >NOTCH1-H1LSRVLPTNVV  | 71   | 26   |
| >NOTCH1-H1LSRVLHTNV  | 451 | >NOTCH1-H1LSRVLPTNV   | 467  | 16   |
| >NOTCH1-H1LSRVLHTNVV | 424 | >NOTCH1-H1LSRVLPTNVV  | 410  | 14   |
| >NOTCH1-H1LSRVLHTNVV | 8   | >NOTCH1-H1LSRVLPTNVV  | 8    | 0    |
| >NOTCH1-H1LSRVLHTNV  | 103 | >NOTCH1-H1LSRVLPTNV   | 244  | 141  |
| >NOTCH1-H1LSRVLHTNVV | 3   | >NOTCH1-H1LSRVLPTNVV  | 4    | 1    |
| >NOTCH1-H1LSRVLHTNVV | 396 | >NOTCH1-H1LSRVLPTNVV  | 346  | 50   |
| >NOTCH1-H1LSRVLHTNVV | 344 | >NOTCH1-H1LSRVLPTNVV  | 205  | 139  |
| >NOTCH1-H1LSRVLHTNV  | 98  | >NOTCH1-H1LSRVLPTNV   | 350  | 252  |
| >NOTCH1-H1LSRVLHTNVV | 153 | >NOTCH1-H1LSRVLPTNVV  | 152  | 1    |
| >NOTCH1-H1LSRVLHTNVV | 15  | >NOTCH1-H1LSRVLPTNVV  | 21   | 6    |
| >NOTCH1-H1ELSRVLHTNV | 322 | >NOTCH1-H1ELSRVLPTNV  | 233  | 89   |
| >NOTCH1-H1ELSRVLHTNV | 63  | >NOTCH1-H1ELSRVLPTNV' | 203  | 140  |
| >NOTCH1-H1ELSRVLHTNV | 97  | >NOTCH1-H1ELSRVLPTNV  | 41   | 56   |
| >NOTCH1-H1ELSRVLHTNV | 77  | >NOTCH1-H1ELSRVLPTNV' | 210  | 133  |
| >NOTCH1-H1ELSRVLHTNV | 27  | >NOTCH1-H1ELSRVLPTNV  | 21   | 6    |
| >NOTCH1-H1ELSRVLHTNV | 38  | >NOTCH1-H1ELSRVLPTNV' | 32   | 6    |
| >NOTCH1-H1ELSRVLHTNV | 231 | >NOTCH1-H1ELSRVLPTNV  | 214  | 17   |

|                       |       |                       |      |       |
|-----------------------|-------|-----------------------|------|-------|
| >NOTCH1-H1ELSRVLHTNV  | 51    | >NOTCH1-H1ELSRVLPTNV' | 87   | 36    |
| >NOTCH1-H1ELSRVLHTNV  | 31    | >NOTCH1-H1ELSRVLPTNV  | 22   | 9     |
| >NOTCH1-H1ELSRVLHTNV  | 73    | >NOTCH1-H1ELSRVLPTNV' | 59   | 14    |
| >NOTCH1-H1ELSRVLHTNV  | 30    | >NOTCH1-H1ELSRVLPTNV  | 15   | 15    |
| >NOTCH1-H1ELSRVLHTNV  | 17    | >NOTCH1-H1ELSRVLPTNV' | 16   | 1     |
| >NOTCH1-H1ELSRVLHTNV  | 4     | >NOTCH1-H1ELSRVLPTNV  | 7    | 3     |
| >NOTCH1-H1ELSRVLHTNV  | 8     | >NOTCH1-H1ELSRVLPTNV' | 10   | 2     |
| >NOTCH1-H1ELSRVLHTNV  | 411   | >NOTCH1-H1ELSRVLPTNV  | 3717 | 3306  |
| >NOTCH1-H1ELSRVLHTNV  | 59    | >NOTCH1-H1ELSRVLPTNV' | 97   | 38    |
| >NOTCH1-H1ELSRVLHTNV  | 58    | >NOTCH1-H1ELSRVLPTNV  | 75   | 17    |
| >NOTCH1-H1ELSRVLHTNV  | 153   | >NOTCH1-H1ELSRVLPTNV' | 126  | 27    |
| >NOTCH1-H1RELSRVLHTN  | 584   | >NOTCH1-H1RELSRVLPTN' | 438  | 146   |
| >NOTCH1-H1RELSRVLHTN  | 466   | >NOTCH1-H1RELSRVLPTN' | 391  | 75    |
| >NOTCH1-H1RELSRVLHTN  | 210   | >NOTCH1-H1RELSRVLPTN' | 367  | 157   |
| >NOTCH1-H1RELSRVLHT   | 339   | >NOTCH1-H1RELSRVLPT   | 30   | 309   |
| >NOTCH1-H1RELSRVLHTN  | 327   | >NOTCH1-H1RELSRVLPTN  | 701  | 374   |
| >NOTCH1-H1RELSRVLHTN  | 74    | >NOTCH1-H1RELSRVLPTN' | 83   | 9     |
| >NOTCH1-H1RELSRVLHT   | 713   | >NOTCH1-H1RELSRVLPT   | 174  | 539   |
| >NOTCH1-H1RELSRVLHTN  | 276   | >NOTCH1-H1RELSRVLPTN' | 531  | 255   |
| >NOTCH1-H1RELSRVLHT   | 33    | >NOTCH1-H1RELSRVLPT   | 27   | 6     |
| >NOTCH1-H1RELSRVLHTN  | 8     | >NOTCH1-H1RELSRVLPTN' | 6    | 2     |
| >NOTCH1-H1FLRELSRVLHT | 566   | >NOTCH1-H1FLRELSRVLPT | 262  | 304   |
| >NOTCH1-H1FLRELSRVLHT | 29    | >NOTCH1-H1FLRELSRVLPT | 13   | 16    |
| >NOTCH1-H1FLRELSRVLHT | 200   | >NOTCH1-H1FLRELSRVLPT | 107  | 93    |
| >NOTCH1-H1FLRELSRVLHT | 35    | >NOTCH1-H1FLRELSRVLPT | 40   | 5     |
| >NOTCH1-H2HPFLTPSPE   | 266   | >NOTCH1-H2YPFLTPSPE   | 116  | 150   |
| >NOTCH1-H2HPFLTPSP    | 594   | >NOTCH1-H2YPFLTPSP    | 241  | 353   |
| >NOTCH1-H2HPFLTPSPE   | 705   | >NOTCH1-H2YPFLTPSPE   | 226  | 479   |
| >NOTCH1-H2HPFLTPSPES  | 420   | >NOTCH1-H2YPFLTPSPES  | 234  | 186   |
| >NOTCH1-H2TPSHQLQVPE  | 173   | >NOTCH1-H2TPSHQLQVPE  | 14   | 159   |
| >NOTCH1-H2TPSHQLQVPE  | 10822 | >NOTCH1-H2TPSHQLQVPE  | 110  | 10712 |
| >NOTCH1-H2TPSHQLQVPE  | 18191 | >NOTCH1-H2TPSHQLQVPE  | 33   | 18158 |
| >NOTCH1-H2TPSHQLQVPE  | 9943  | >NOTCH1-H2TPSHQLQVPE  | 186  | 9757  |
| >NOTCH1-H2VPEHPFLTPS  | 256   | >NOTCH1-H2VPEYPFLTPS  | 136  | 120   |
| >NOTCH1-H2QVPEHPFL    | 2847  | >NOTCH1-H2QVPEYPFL    | 385  | 2462  |
| >NOTCH1-H2QVPEHPFL    | 1137  | >NOTCH1-H2QVPEYPFL    | 437  | 700   |
| >NOTCH1-H2QVPEHPFL    | 201   | >NOTCH1-H2QVPEYPFL    | 73   | 128   |
| >NOTCH1-H2QVPEHPFL    | 954   | >NOTCH1-H2QVPEYPFL    | 461  | 493   |
| >NOTCH1-H2QVPEHPFL    | 217   | >NOTCH1-H2QVPEYPFL    | 503  | 286   |
| >NOTCH1-H2QVPEHPFL    | 387   | >NOTCH1-H2QVPEYPFL    | 190  | 197   |
| >NOTCH1-H2QVPEHPFLTP  | 612   | >NOTCH1-H2QVPEYPFLTP' | 376  | 236   |
| >NOTCH1-H2QVPEHPFL    | 378   | >NOTCH1-H2QVPEYPFL    | 180  | 198   |
| >NOTCH1-H2QVPEHPFL    | 107   | >NOTCH1-H2QVPEYPFL    | 143  | 36    |



|                        |       |                       |       |       |
|------------------------|-------|-----------------------|-------|-------|
| >NOTCH1-H2LQVPEHPFL    | 206   | >NOTCH1-H2LQVPEYPFL   | 83    | 123   |
| >NOTCH1-H2LQVPEHPF     | 68    | >NOTCH1-H2LQVPEYPF    | 44    | 24    |
| >NOTCH1-H2LQVPEHPFL    | 12    | >NOTCH1-H2LQVPEYPFL   | 6     | 6     |
| >NOTCH1-H2LQVPEHPFLT   | 620   | >NOTCH1-H2LQVPEYPFLT  | 252   | 368   |
| >NOTCH1-H2LQVPEHPF     | 38    | >NOTCH1-H2LQVPEYPF    | 41    | 3     |
| >NOTCH1-H2LQVPEHPFL    | 467   | >NOTCH1-H2LQVPEYPFL   | 771   | 304   |
| >NOTCH1-H2LQVPEHPF     | 4     | >NOTCH1-H2LQVPEYPF    | 3     | 1     |
| >NOTCH1-H2LQVPEHPFL    | 51    | >NOTCH1-H2LQVPEYPFL   | 39    | 12    |
| >NOTCH1-H2LQVPEHPF     | 362   | >NOTCH1-H2LQVPEYPF    | 244   | 118   |
| >NOTCH1-H2QLQVPEHPFL   | 562   | >NOTCH1-H2QLQVPEYPFL  | 314   | 248   |
| >NOTCH1-H2QLQVPEHPFL   | 254   | >NOTCH1-H2QLQVPEYPFL  | 237   | 17    |
| >NOTCH1-H2QLQVPEHPFL   | 416   | >NOTCH1-H2QLQVPEYPFL  | 214   | 202   |
| >NOTCH1-H2QLQVPEHPFL   | 770   | >NOTCH1-H2QLQVPEYPFL  | 450   | 320   |
| >NOTCH1-H2QLQVPEHPFL   | 28    | >NOTCH1-H2QLQVPEYPFL  | 48    | 20    |
| >NOTCH1-H2QLQVPEHPF    | 1134  | >NOTCH1-H2QLQVPEYPF   | 135   | 999   |
| >NOTCH1-H2QLQVPEHPF    | 383   | >NOTCH1-H2QLQVPEYPF   | 357   | 26    |
| >NOTCH1-H2QLQVPEHPF    | 43    | >NOTCH1-H2QLQVPEYPF   | 98    | 55    |
| >NOTCH1-H2QLQVPEHPF    | 203   | >NOTCH1-H2QLQVPEYPF   | 184   | 19    |
| >NOTCH1-H2HQLQVPEHPF   | 1200  | >NOTCH1-H2HQLQVPEYPF  | 424   | 776   |
| >NOTCH1-H2HQLQVPEHPF   | 36    | >NOTCH1-H2HQLQVPEYPF  | 21    | 15    |
| >NOTCH1-H2HQLQVPEHPF   | 232   | >NOTCH1-H2HQLQVPEYPF  | 151   | 81    |
| >NOTCH1-H2HQLQVPEHPF   | 265   | >NOTCH1-H2HQLQVPEYPF  | 144   | 121   |
| >NOTCH1-H2HQLQVPEH     | 15926 | >NOTCH1-H2HQLQVPEY    | 356   | 15570 |
| >NOTCH1-H2HQLQVPEHPF   | 311   | >NOTCH1-H2HQLQVPEYPF  | 95    | 216   |
| >NOTCH1-H2HQLQVPEH     | 5826  | >NOTCH1-H2HQLQVPEY    | 109   | 5717  |
| >NOTCH1-H2HQLQVPEHPF   | 84    | >NOTCH1-H2HQLQVPEYPF  | 101   | 17    |
| >NOTCH1-H2HQLQVPEH     | 9101  | >NOTCH1-H2HQLQVPEY    | 245   | 8856  |
| >NOTCH1-H2HQLQVPEHPF   | 103   | >NOTCH1-H2HQLQVPEYPF  | 164   | 61    |
| >NOTCH1-H2HQLQVPEH     | 983   | >NOTCH1-H2HQLQVPEY    | 14    | 969   |
| >NOTCH1-H2HQLQVPEHPF   | 5     | >NOTCH1-H2HQLQVPEYPF  | 4     | 1     |
| >NOTCH1-H2HQLQVPEHPF   | 149   | >NOTCH1-H2HQLQVPEYPF  | 121   | 28    |
| >NOTCH1-H2HQLQVPEH     | 7706  | >NOTCH1-H2HQLQVPEY    | 440   | 7266  |
| >NOTCH1-H2HQLQVPEHPF   | 184   | >NOTCH1-H2HQLQVPEYPF  | 223   | 39    |
| >NOTCH1-H2HQLQVPEHPF   | 53    | >NOTCH1-H2HQLQVPEYPF  | 55    | 2     |
| >NOTCH1-H2HQLQVPEHPF   | 470   | >NOTCH1-H2HQLQVPEYPF  | 351   | 119   |
| >NOTCH1-H2SHQLQVPEHI   | 356   | >NOTCH1-H2SHQLQVPEYF  | 290   | 66    |
| >NOTCH1-I1{IFPYYGREEEL | 180   | >NOTCH1-I1{NFPYYGREEE | 198   | 18    |
| >NOTCH1-I1{MIFPYYGR    | 257   | >NOTCH1-I1{MNFPPYYGR  | 610   | 353   |
| >NOTCH1-I1{MIFPYYGR    | 265   | >NOTCH1-I1{MNFPPYYGR  | 13430 | 13165 |
| >NOTCH1-I1{MIFPYYGR    | 23    | >NOTCH1-I1{MNFPPYYGR  | 2548  | 2525  |
| >NOTCH1-I1{MIFPYYGR    | 8     | >NOTCH1-I1{MNFPPYYGR  | 20    | 12    |
| >NOTCH1-I1{MIFPYYGR    | 23    | >NOTCH1-I1{MNFPPYYGR  | 567   | 544   |
| >NOTCH1-I1{MIFPYYGR    | 4     | >NOTCH1-I1{MNFPPYYGR  | 16    | 12    |

|                       |     |                       |      |      |
|-----------------------|-----|-----------------------|------|------|
| >NOTCH1-I1{MIFPYYGR   | 39  | >NOTCH1-I1{MNFPPYYGR  | 86   | 47   |
| >NOTCH1-I1{FKRDAHGQQ  | 43  | >NOTCH1-I1{FKRDAHGQQ  | 2927 | 2884 |
| >NOTCH1-I1{QMIFPYYGR  | 182 | >NOTCH1-I1{QMNFPPYYGR | 188  | 6    |
| >NOTCH1-I1{QMIFPYYGR  | 14  | >NOTCH1-I1{QMNFPPYYGR | 9    | 5    |
| >NOTCH1-I1{QMIFPYYGR  | 150 | >NOTCH1-I1{QMNFPPYYGR | 186  | 36   |
| >NOTCH1-I1{QMIFPYYGR  | 68  | >NOTCH1-I1{QMNFPPYYGR | 124  | 56   |
| >NOTCH1-I1{QMIFPYYGR  | 55  | >NOTCH1-I1{QMNFPPYYGR | 65   | 10   |
| >NOTCH1-I1{QQMIFPYY   | 598 | >NOTCH1-I1{QQMNFPPYY  | 249  | 349  |
| >NOTCH1-I1{QQMIFPYYGI | 465 | >NOTCH1-I1{QQMNFPPYYC | 236  | 229  |
| >NOTCH1-I1{QQMIFPYY   | 133 | >NOTCH1-I1{QQMNFPPYY  | 71   | 62   |
| >NOTCH1-I1{QQMIFPYYGI | 68  | >NOTCH1-I1{QQMNFPPYYC | 68   | 0    |
| >NOTCH1-I1{QQMIFPYY   | 52  | >NOTCH1-I1{QQMNFPPYY  | 58   | 6    |
| >NOTCH1-I1{QQMIFPYY   | 43  | >NOTCH1-I1{QQMNFPPYY  | 44   | 1    |
| >NOTCH1-I1{QQMIFPYYGI | 16  | >NOTCH1-I1{QQMNFPPYYC | 23   | 7    |
| >NOTCH1-I1{QQMIFPYYGI | 217 | >NOTCH1-I1{QQMNFPPYYC | 343  | 126  |
| >NOTCH1-I1{QQMIFPYYGI | 34  | >NOTCH1-I1{QQMNFPPYYC | 53   | 19   |
| >NOTCH1-I1{QQMIFPYY   | 98  | >NOTCH1-I1{QQMNFPPYY  | 60   | 38   |
| >NOTCH1-I1{QQMIFPYY   | 388 | >NOTCH1-I1{QQMNFPPYY  | 150  | 238  |
| >NOTCH1-I1{QQMIFPYY   | 7   | >NOTCH1-I1{QQMNFPPYY  | 4    | 3    |
| >NOTCH1-I1{QQMIFPYYGI | 682 | >NOTCH1-I1{QQMNFPPYYC | 184  | 498  |
| >NOTCH1-I1{QQMIFPYYGI | 335 | >NOTCH1-I1{QQMNFPPYYC | 387  | 52   |
| >NOTCH1-I1{QQMIFPYYGI | 26  | >NOTCH1-I1{QQMNFPPYYC | 35   | 9    |
| >NOTCH1-I1{GQQMIFPY   | 270 | >NOTCH1-I1{GQQMNFPPY  | 532  | 262  |
| >NOTCH1-I1{GQQMIFPYY  | 138 | >NOTCH1-I1{GQQMNFPPY  | 265  | 127  |
| >NOTCH1-I1{GQQMIFPYYC | 287 | >NOTCH1-I1{GQQMNFPPY  | 571  | 284  |
| >NOTCH1-I1{GQQMIFPY   | 337 | >NOTCH1-I1{GQQMNFPPY  | 445  | 108  |
| >NOTCH1-I1{GQQMIFPYY  | 85  | >NOTCH1-I1{GQQMNFPPY  | 134  | 49   |
| >NOTCH1-I1{GQQMIFPY   | 113 | >NOTCH1-I1{GQQMNFPPY  | 117  | 4    |
| >NOTCH1-I1{GQQMIFPYY  | 18  | >NOTCH1-I1{GQQMNFPPY  | 23   | 5    |
| >NOTCH1-I1{GQQMIFPYYC | 16  | >NOTCH1-I1{GQQMNFPPY  | 27   | 11   |
| >NOTCH1-I1{GQQMIFPY   | 43  | >NOTCH1-I1{GQQMNFPPY  | 41   | 2    |
| >NOTCH1-I1{GQQMIFPYY  | 50  | >NOTCH1-I1{GQQMNFPPY  | 46   | 4    |
| >NOTCH1-I1{GQQMIFPY   | 672 | >NOTCH1-I1{GQQMNFPPY  | 269  | 403  |
| >NOTCH1-I1{GQQMIFPY   | 76  | >NOTCH1-I1{GQQMNFPPY  | 51   | 25   |
| >NOTCH1-I1{GQQMIFPYY  | 76  | >NOTCH1-I1{GQQMNFPPY  | 44   | 32   |
| >NOTCH1-I1{GQQMIFPYY  | 439 | >NOTCH1-I1{GQQMNFPPY  | 750  | 311  |
| >NOTCH1-I1{GQQMIFPYYC | 418 | >NOTCH1-I1{GQQMNFPPY  | 551  | 133  |
| >NOTCH1-I1{HGQQMIFPY  | 148 | >NOTCH1-I1{HGQQMNFPP  | 264  | 116  |
| >NOTCH1-I1{HGQQMIFPY  | 213 | >NOTCH1-I1{HGQQMNFPP  | 161  | 52   |
| >NOTCH1-I1{HGQQMIFPY  | 281 | >NOTCH1-I1{HGQQMNFPP  | 293  | 12   |
| >NOTCH1-I1{HGQQMIFPY  | 193 | >NOTCH1-I1{HGQQMNFPP  | 222  | 29   |
| >NOTCH1-I1{HGQQMIFPY  | 930 | >NOTCH1-I1{HGQQMNFPP  | 333  | 597  |
| >NOTCH1-I1{HGQQMIFPY  | 475 | >NOTCH1-I1{HGQQMNFPP  | 959  | 484  |

|                        |     |                       |       |       |
|------------------------|-----|-----------------------|-------|-------|
| >NOTCH1-I1{HGQQMIFPY   | 48  | >NOTCH1-I1{HGQQMNF}   | 36    | 12    |
| >NOTCH1-I1{HGQQMIFPY   | 57  | >NOTCH1-I1{HGQQMNF}   | 80    | 23    |
| >NOTCH1-I1{AHGQQMIFP   | 579 | >NOTCH1-I1{AHGQQMNF   | 396   | 183   |
| >NOTCH1-I1{AHGQQMIFP   | 161 | >NOTCH1-I1{AHGQQMNF   | 257   | 96    |
| >NOTCH1-I1{AHGQQMIFP   | 136 | >NOTCH1-I1{AHGQQMNF   | 92    | 44    |
| >NOTCH1-I1{AHGQQMIFP   | 251 | >NOTCH1-I1{AHGQQMNF   | 394   | 143   |
| >NOTCH1-I1{AHGQQMIFP   | 251 | >NOTCH1-I1{AHGQQMNF   | 672   | 421   |
| >NOTCH1-I1{AHGQQMIF    | 261 | >NOTCH1-I1{AHGQQMNF   | 273   | 12    |
| >NOTCH1-I1{DAHGQQMIF   | 468 | >NOTCH1-I1{DAHGQQMN   | 1037  | 569   |
| >NOTCH1-I1{DAHGQQMIF   | 194 | >NOTCH1-I1{DAHGQQMN   | 490   | 296   |
| >NOTCH1-I1{DAHGQQMIF   | 872 | >NOTCH1-I1{DAHGQQMN   | 433   | 439   |
| >NOTCH1-I1{DAHGQQMIF   | 452 | >NOTCH1-I1{DAHGQQMN   | 433   | 19    |
| >NOTCH1-I1{DAHGQQMIF   | 45  | >NOTCH1-I1{DAHGQQMN   | 47    | 2     |
| >NOTCH1-I1{RDAHGQQM    | 148 | >NOTCH1-I1{RDAHGQQM   | 153   | 5     |
| >NOTCH1-I1{RDAHGQQM    | 269 | >NOTCH1-I1{RDAHGQQM   | 24013 | 23744 |
| >NOTCH1-I1{RDAHGQQM    | 325 | >NOTCH1-I1{RDAHGQQM   | 40478 | 40153 |
| >NOTCH1-I1{RDAHGQQM    | 133 | >NOTCH1-I1{RDAHGQQM   | 23107 | 22974 |
| >NOTCH1-I1{KRDAHGQQM   | 135 | >NOTCH1-I1{KRDAHGQQM  | 138   | 3     |
| >NOTCH1-I1{KRDAHGQQM   | 146 | >NOTCH1-I1{KRDAHGQQM  | 2213  | 2067  |
| >NOTCH1-I1{KRDAHGQQM   | 135 | >NOTCH1-I1{KRDAHGQQM  | 807   | 672   |
| >NOTCH1-I1{KRDAHGQQM   | 375 | >NOTCH1-I1{KRDAHGQQM  | 738   | 363   |
| >NOTCH1-I1{KRDAHGQQM   | 230 | >NOTCH1-I1{KRDAHGQQM  | 2434  | 2204  |
| >NOTCH1-I1{IKRAAEGW    | 357 | >NOTCH1-I1{VKRAAEGW   | 846   | 489   |
| >NOTCH1-I1{IKRAAEGWA/  | 213 | >NOTCH1-I1{VKRAAEGWA  | 550   | 337   |
| >NOTCH1-I1{IKRAAEGW    | 354 | >NOTCH1-I1{VKRAAEGW   | 604   | 250   |
| >NOTCH1-I1{HPIKRAAEGV  | 249 | >NOTCH1-I1{HPVKRAAEG} | 250   | 1     |
| >NOTCH1-I1{HPIKRAAEGV  | 185 | >NOTCH1-I1{HPVKRAAEG} | 195   | 10    |
| >NOTCH1-I1{HPIKRAAEGV  | 43  | >NOTCH1-I1{HPVKRAAEG} | 50    | 7     |
| >NOTCH1-I1{HPIKRAAEGV  | 314 | >NOTCH1-I1{HPVKRAAEG} | 439   | 125   |
| >NOTCH1-I1{KHPIKRAAEG  | 126 | >NOTCH1-I1{KHPVKRAAEC | 72    | 54    |
| >NOTCH1-I1{RKHPIKRAA   | 452 | >NOTCH1-I1{RKHPVKRAA  | 474   | 22    |
| >NOTCH1-I1{ELRKHPIK    | 467 | >NOTCH1-I1{ELRKHPVK   | 444   | 23    |
| >NOTCH1-I1{ELRKHPIK    | 140 | >NOTCH1-I1{ELRKHPVK   | 193   | 53    |
| >NOTCH1-I1{ELRKHPIKR   | 257 | >NOTCH1-I1{ELRKHPVKR  | 238   | 19    |
| >NOTCH1-I1{ELRKHPIKR   | 534 | >NOTCH1-I1{ELRKHPVKR  | 334   | 200   |
| >NOTCH1-I1{ELRKHPIKRA/ | 162 | >NOTCH1-I1{ELRKHPVKRA | 179   | 17    |
| >NOTCH1-I1{ELRKHPIKR   | 192 | >NOTCH1-I1{ELRKHPVKR  | 166   | 26    |
| >NOTCH1-I1{EELRKHPI    | 53  | >NOTCH1-I1{EELRKHPV   | 195   | 142   |
| >NOTCH1-I1{EELRKHPI    | 110 | >NOTCH1-I1{EELRKHPV   | 32    | 78    |
| >NOTCH1-I1{EELRKHPIK   | 818 | >NOTCH1-I1{EELRKHPVK  | 378   | 440   |
| >NOTCH1-I1{EELRKHPIKR/ | 33  | >NOTCH1-I1{EELRKHPVKR | 33    | 0     |
| >NOTCH1-I1{EELRKHPI    | 395 | >NOTCH1-I1{EELRKHPV   | 3153  | 2758  |
| >NOTCH1-I1{EEELRKHPI   | 7   | >NOTCH1-I1{EEELRKHPV  | 17    | 10    |

|                        |     |                        |       |       |
|------------------------|-----|------------------------|-------|-------|
| >NOTCH1-I1{EEELRKHPI   | 485 | >NOTCH1-I1{EEELRKHPV   | 123   | 362   |
| >NOTCH1-I1{REEELRKHPI  | 12  | >NOTCH1-I1{REEELRKHPV  | 45    | 33    |
| >NOTCH1-I1{REEELRKHPI  | 48  | >NOTCH1-I1{REEELRKHPV  | 59    | 11    |
| >NOTCH1-I1{REEELRKHPI  | 214 | >NOTCH1-I1{REEELRKHPV  | 126   | 88    |
| >NOTCH1-I1{REEELRKHPI  | 27  | >NOTCH1-I1{REEELRKHPV  | 242   | 215   |
| >NOTCH1-I1{EIDNRQCV    | 260 | >NOTCH1-I1{ENDNRQCV    | 26194 | 25934 |
| >NOTCH1-I1{EIDNRQCV    | 351 | >NOTCH1-I1{ENDNRQCV    | 11851 | 11500 |
| >NOTCH1-I1{LEIDNRQCV   | 364 | >NOTCH1-I1{LENDNRQCV   | 125   | 239   |
| >NOTCH1-I1{LEIDNRQCV   | 391 | >NOTCH1-I1{LENDNRQCV   | 820   | 429   |
| >NOTCH1-I1{LEIDNRQCV   | 418 | >NOTCH1-I1{LENDNRQCV   | 1776  | 1358  |
| >NOTCH1-I1{LEIDNRQCV   | 275 | >NOTCH1-I1{LENDNRQCV   | 232   | 43    |
| >NOTCH1-I1{LEIDNRQCV   | 412 | >NOTCH1-I1{LENDNRQCV   | 512   | 100   |
| >NOTCH1-I1{LEIDNRQCV   | 584 | >NOTCH1-I1{LENDNRQCV   | 479   | 105   |
| >NOTCH1-I1{LEIDNRQCV   | 25  | >NOTCH1-I1{LENDNRQCV   | 207   | 182   |
| >NOTCH1-I1{LEIDNRQCV   | 231 | >NOTCH1-I1{LENDNRQCV   | 2070  | 1839  |
| >NOTCH1-I1{YLEIDNRQCV  | 358 | >NOTCH1-I1{YLENDNRQCV  | 309   | 49    |
| >NOTCH1-I1{YLEIDNRQCV  | 265 | >NOTCH1-I1{YLENDNRQCV  | 129   | 136   |
| >NOTCH1-I1{YLEIDNRQCV  | 442 | >NOTCH1-I1{YLENDNRQCV  | 319   | 123   |
| >NOTCH1-I1{YLEIDNRQCV  | 30  | >NOTCH1-I1{YLENDNRQCV  | 16    | 14    |
| >NOTCH1-I1{YLEIDNRQCV  | 28  | >NOTCH1-I1{YLENDNRQCV  | 10    | 18    |
| >NOTCH1-I1{YLEIDNRQCV  | 41  | >NOTCH1-I1{YLENDNRQCV  | 25    | 16    |
| >NOTCH1-I1{YLEIDNRQCV  | 181 | >NOTCH1-I1{YLENDNRQCV  | 51    | 130   |
| >NOTCH1-I1{YLEIDNRQ    | 250 | >NOTCH1-I1{YLENDNRQ    | 123   | 127   |
| >NOTCH1-I1{YLEIDNRQ    | 291 | >NOTCH1-I1{YLENDNRQ    | 130   | 161   |
| >NOTCH1-I1{YLEIDNRQCV  | 3   | >NOTCH1-I1{YLENDNRQCV  | 2     | 1     |
| >NOTCH1-I1{YLEIDNRQCV  | 144 | >NOTCH1-I1{YLENDNRQCV  | 86    | 58    |
| >NOTCH1-I1{VYLEIDNRQ   | 428 | >NOTCH1-I1{VYLENDNRQ   | 815   | 387   |
| >NOTCH1-I1{VYLEIDNRQ   | 294 | >NOTCH1-I1{VYLENDNRQ   | 236   | 58    |
| >NOTCH1-I1{VYLEIDNR    | 286 | >NOTCH1-I1{VYLENDNR    | 989   | 703   |
| >NOTCH1-I1{VYLEIDNR    | 120 | >NOTCH1-I1{VYLENDNR    | 527   | 407   |
| >NOTCH1-I1{VYLEIDNR    | 43  | >NOTCH1-I1{VYLENDNR    | 45    | 2     |
| >NOTCH1-I1{IVYLEIDNR   | 353 | >NOTCH1-I1{IVYLENDNR   | 1036  | 683   |
| >NOTCH1-I1{IVYLEIDNR   | 39  | >NOTCH1-I1{IVYLENDNR   | 32    | 7     |
| >NOTCH1-I1{IVYLEIDNR   | 195 | >NOTCH1-I1{IVYLENDNR   | 195   | 0     |
| >NOTCH1-I1{SIVYLEIDNR  | 491 | >NOTCH1-I1{SIVYLENDNR  | 458   | 33    |
| >NOTCH1-I1{SIVYLEIDNR  | 33  | >NOTCH1-I1{SIVYLENDNR  | 18    | 15    |
| >NOTCH1-I1{SIVYLEIDNR  | 272 | >NOTCH1-I1{SIVYLENDNR  | 405   | 133   |
| >NOTCH1-I1{GSIVYLEIDNR | 263 | >NOTCH1-I1{GSIVYLENDNR | 323   | 60    |
| >NOTCH1-I1{GSIVYLEIDNR | 215 | >NOTCH1-I1{GSIVYLENDNR | 237   | 22    |
| >NOTCH1-I1{GSIVYLEI    | 266 | >NOTCH1-I1{GSIVYLEN    | 13704 | 13438 |
| >NOTCH1-I1{GSIVYLEIDNR | 170 | >NOTCH1-I1{GSIVYLENDNR | 340   | 170   |
| >NOTCH1-I1{GSIVYLEI    | 240 | >NOTCH1-I1{GSIVYLEN    | 37841 | 37601 |
| >NOTCH1-I1{RGSIVYLEI   | 321 | >NOTCH1-I1{RGSIVYLEN   | 17245 | 16924 |

|                        |     |                        |       |       |
|------------------------|-----|------------------------|-------|-------|
| >NOTCH1-I1{RGSIVYLEI   | 213 | >NOTCH1-I1{RGSIVYLEN   | 35804 | 35591 |
| >NOTCH1-I1{VRGSIVYLEI  | 401 | >NOTCH1-I1{VRGSIVYLEN  | 4208  | 3807  |
| >NOTCH1-I1{EIDNRQCV    | 260 | >NOTCH1-I1{ESDNRQCV    | 20669 | 20409 |
| >NOTCH1-I1{EIDNRQCV    | 351 | >NOTCH1-I1{ESDNRQCV    | 2027  | 1676  |
| >NOTCH1-I1{LEIDNRQCV   | 364 | >NOTCH1-I1{LESDNRQCV   | 206   | 158   |
| >NOTCH1-I1{LEIDNRQCV   | 391 | >NOTCH1-I1{LESDNRQCV   | 677   | 286   |
| >NOTCH1-I1{LEIDNRQCV   | 418 | >NOTCH1-I1{LESDNRQCV   | 655   | 237   |
| >NOTCH1-I1{LEIDNRQCV   | 275 | >NOTCH1-I1{LESDNRQCV   | 739   | 464   |
| >NOTCH1-I1{LEIDNRQCV   | 412 | >NOTCH1-I1{LESDNRQCV   | 1387  | 975   |
| >NOTCH1-I1{LEIDNRQCV   | 25  | >NOTCH1-I1{LESDNRQCV   | 98    | 73    |
| >NOTCH1-I1{LEIDNRQCV   | 231 | >NOTCH1-I1{LESDNRQCV   | 1106  | 875   |
| >NOTCH1-I1{YLEIDNRQCV  | 358 | >NOTCH1-I1{YLESNDRQCV  | 420   | 62    |
| >NOTCH1-I1{YLEIDNRQCV  | 265 | >NOTCH1-I1{YLESNDRQCV  | 103   | 162   |
| >NOTCH1-I1{YLEIDNRQCV  | 442 | >NOTCH1-I1{YLESNDRQCV  | 257   | 185   |
| >NOTCH1-I1{YLEIDNRQCV  | 30  | >NOTCH1-I1{YLESNDRQCV  | 21    | 9     |
| >NOTCH1-I1{YLEIDNRQCV  | 28  | >NOTCH1-I1{YLESNDRQCV  | 17    | 11    |
| >NOTCH1-I1{YLEIDNRQCV  | 41  | >NOTCH1-I1{YLESNDRQCV  | 34    | 7     |
| >NOTCH1-I1{YLEIDNRQCV  | 181 | >NOTCH1-I1{YLESNDRQCV  | 55    | 126   |
| >NOTCH1-I1{YLEIDNRQ    | 250 | >NOTCH1-I1{YLESNDRQ    | 145   | 105   |
| >NOTCH1-I1{YLEIDNRQ    | 291 | >NOTCH1-I1{YLESNDRQ    | 138   | 153   |
| >NOTCH1-I1{YLEIDNRQCV  | 3   | >NOTCH1-I1{YLESNDRQCV  | 3     | 0     |
| >NOTCH1-I1{YLEIDNRQCV  | 144 | >NOTCH1-I1{YLESNDRQCV  | 93    | 51    |
| >NOTCH1-I1{VYLEIDNRQ   | 428 | >NOTCH1-I1{VYLESNDRQ   | 647   | 219   |
| >NOTCH1-I1{VYLEIDNRQ   | 294 | >NOTCH1-I1{VYLESNDRQ   | 273   | 21    |
| >NOTCH1-I1{VYLEIDNR    | 286 | >NOTCH1-I1{VYLESNDR    | 766   | 480   |
| >NOTCH1-I1{VYLEIDNR    | 120 | >NOTCH1-I1{VYLESNDR    | 371   | 251   |
| >NOTCH1-I1{VYLEIDNR    | 43  | >NOTCH1-I1{VYLESNDR    | 64    | 21    |
| >NOTCH1-I1{IVYLEIDNR   | 353 | >NOTCH1-I1{IVYLESNDR   | 444   | 91    |
| >NOTCH1-I1{IVYLEIDNR   | 39  | >NOTCH1-I1{IVYLESNDR   | 42    | 3     |
| >NOTCH1-I1{IVYLEIDNR   | 195 | >NOTCH1-I1{IVYLESNDR   | 269   | 74    |
| >NOTCH1-I1{SIVYLEIDNR  | 491 | >NOTCH1-I1{SIVYLESNDR  | 302   | 189   |
| >NOTCH1-I1{SIVYLEIDNR  | 33  | >NOTCH1-I1{SIVYLESNDR  | 16    | 17    |
| >NOTCH1-I1{SIVYLEIDNR  | 272 | >NOTCH1-I1{SIVYLESNDR  | 572   | 300   |
| >NOTCH1-I1{GSIVYLEIDNR | 263 | >NOTCH1-I1{GSIVYLESNDR | 386   | 123   |
| >NOTCH1-I1{GSIVYLEIDNR | 215 | >NOTCH1-I1{GSIVYLESNDR | 263   | 48    |
| >NOTCH1-I1{GSIVYLEI    | 266 | >NOTCH1-I1{GSIVYLES    | 12176 | 11910 |
| >NOTCH1-I1{GSIVYLEIDNR | 170 | >NOTCH1-I1{GSIVYLESNDR | 275   | 105   |
| >NOTCH1-I1{GSIVYLEI    | 240 | >NOTCH1-I1{GSIVYLES    | 34128 | 33888 |
| >NOTCH1-I1{RGSIVYLEI   | 321 | >NOTCH1-I1{RGSIVYLES   | 17781 | 17460 |
| >NOTCH1-I1{RGSIVYLEI   | 213 | >NOTCH1-I1{RGSIVYLES   | 30836 | 30623 |
| >NOTCH1-I1{VRGSIVYLEI  | 401 | >NOTCH1-I1{VRGSIVYLES  | 2391  | 1990  |
| >NOTCH1-I1;IEAVQSETV   | 42  | >NOTCH1-I1;TEAVQSETV   | 49    | 7     |
| >NOTCH1-I1;IEAVQSETV   | 455 | >NOTCH1-I1;TEAVQSETV   | 666   | 211   |

|                        |      |                        |      |      |
|------------------------|------|------------------------|------|------|
| >NOTCH1-I1;IEAVQSET    | 2747 | >NOTCH1-I1;TEAVQSET    | 453  | 2294 |
| >NOTCH1-I1;IEAVQSETV   | 2546 | >NOTCH1-I1;TEAVQSETV   | 432  | 2114 |
| >NOTCH1-I1;IEAVQSETV   | 23   | >NOTCH1-I1;TEAVQSETV   | 77   | 54   |
| >NOTCH1-I1;KIEAVQSETV  | 100  | >NOTCH1-I1;KTEAVQSETV  | 460  | 360  |
| >NOTCH1-I1;KIEAVQSETV  | 435  | >NOTCH1-I1;KTEAVQSETV  | 2118 | 1683 |
| >NOTCH1-I1;KIEAVQSETV  | 394  | >NOTCH1-I1;KTEAVQSETV  | 2267 | 1873 |
| >NOTCH1-I1;KIEAVQSETV  | 44   | >NOTCH1-I1;KTEAVQSETV  | 1615 | 1571 |
| >NOTCH1-I1;KIEAVQSETV  | 524  | >NOTCH1-I1;KTEAVQSETV  | 209  | 315  |
| >NOTCH1-I1;KIEAVQSET   | 9823 | >NOTCH1-I1;KTEAVQSET   | 389  | 9434 |
| >NOTCH1-I1;SLGSLNIPYKI | 57   | >NOTCH1-I1;SLGSLNIPYKT | 1198 | 1141 |
| >NOTCH1-I1;SLGSLNIPYKI | 33   | >NOTCH1-I1;SLGSLNIPYKT | 513  | 480  |
| >NOTCH1-I1;SLGSLNIPYKI | 272  | >NOTCH1-I1;SLGSLNIPYKT | 3628 | 3356 |
| >NOTCH1-I1;SLGSLNIPYKI | 9    | >NOTCH1-I1;SLGSLNIPYKT | 186  | 177  |
| >NOTCH1-I1;SLGSLNIPYKI | 37   | >NOTCH1-I1;SLGSLNIPYKT | 2122 | 2085 |
| >NOTCH1-I1;SLGSLNIPYKI | 16   | >NOTCH1-I1;SLGSLNIPYKT | 281  | 265  |
| >NOTCH1-I1;SLGSLNIPYKI | 152  | >NOTCH1-I1;SLGSLNIPYKT | 3732 | 3580 |
| >NOTCH1-I1;SLGSLNIPYKI | 34   | >NOTCH1-I1;SLGSLNIPYKT | 483  | 449  |
| >NOTCH1-I1;SLGSLNIPYKI | 67   | >NOTCH1-I1;SLGSLNIPYKT | 5431 | 5364 |
| >NOTCH1-I1;YKIEAVQSET\ | 42   | >NOTCH1-I1;YKTEAVQSET  | 178  | 136  |
| >NOTCH1-I1;YKIEAVQSET\ | 62   | >NOTCH1-I1;YKTEAVQSET  | 184  | 122  |
| >NOTCH1-I1;YKIEAVQSET\ | 122  | >NOTCH1-I1;YKTEAVQSET  | 726  | 604  |
| >NOTCH1-I1;YKIEAVQSET\ | 269  | >NOTCH1-I1;YKTEAVQSET  | 186  | 83   |
| >NOTCH1-I1;YKIEAVQSET\ | 103  | >NOTCH1-I1;YKTEAVQSET  | 72   | 31   |
| >NOTCH1-I1;YKIEAVQSE   | 488  | >NOTCH1-I1;YKTEAVQSE   | 2249 | 1761 |
| >NOTCH1-I1;YKIEAVQSET  | 298  | >NOTCH1-I1;YKTEAVQSET  | 1385 | 1087 |
| >NOTCH1-I1;YKIEAVQSET\ | 20   | >NOTCH1-I1;YKTEAVQSET  | 59   | 39   |
| >NOTCH1-I1;YKIEAVQSET\ | 208  | >NOTCH1-I1;YKTEAVQSET  | 1733 | 1525 |
| >NOTCH1-I1;IPYKIEAV    | 243  | >NOTCH1-I1;IPYKTEAV    | 288  | 45   |
| >NOTCH1-I1;IPYKIEAV    | 150  | >NOTCH1-I1;IPYKTEAV    | 53   | 97   |
| >NOTCH1-I1;IPYKIEAVQ   | 440  | >NOTCH1-I1;IPYKTEAVQ   | 757  | 317  |
| >NOTCH1-I1;IPYKIEAV    | 149  | >NOTCH1-I1;IPYKTEAV    | 143  | 6    |
| >NOTCH1-I1;IPYKIEAV    | 29   | >NOTCH1-I1;IPYKTEAV    | 38   | 9    |
| >NOTCH1-I1;IPYKIEAVQ   | 364  | >NOTCH1-I1;IPYKTEAVQ   | 551  | 187  |
| >NOTCH1-I1;NIPYKIEAV   | 475  | >NOTCH1-I1;NIPYKTEAV   | 511  | 36   |
| >NOTCH1-I1;NIPYKIEAV   | 98   | >NOTCH1-I1;NIPYKTEAV   | 182  | 84   |
| >NOTCH1-I1;NIPYKIEAV   | 144  | >NOTCH1-I1;NIPYKTEAV   | 461  | 317  |
| >NOTCH1-I1;NIPYKIEAV   | 348  | >NOTCH1-I1;NIPYKTEAV   | 1462 | 1114 |
| >NOTCH1-I1;NIPYKIEA    | 327  | >NOTCH1-I1;NIPYKTEA    | 295  | 32   |
| >NOTCH1-I1;NIPYKIEAV   | 16   | >NOTCH1-I1;NIPYKTEAV   | 18   | 2    |
| >NOTCH1-I1;LNIPYKIEAV  | 456  | >NOTCH1-I1;LNIPYKTEAV  | 1080 | 624  |
| >NOTCH1-I1;SLNIPYKIEAV | 328  | >NOTCH1-I1;SLNIPYKTEAV | 476  | 148  |
| >NOTCH1-I1;SLNIPYKI    | 123  | >NOTCH1-I1;SLNIPYKT    | 1519 | 1396 |
| >NOTCH1-I1;SLNIPYKIEAV | 37   | >NOTCH1-I1;SLNIPYKTEAV | 36   | 1    |

|                        |      |                        |       |       |
|------------------------|------|------------------------|-------|-------|
| >NOTCH1-I1;SLNIPYKI    | 73   | >NOTCH1-I1;SLNIPYKT    | 1306  | 1233  |
| >NOTCH1-I1;SLNIPYKIEA  | 645  | >NOTCH1-I1;SLNIPYKTEA  | 360   | 285   |
| >NOTCH1-I1;SLNIPYKIEAV | 11   | >NOTCH1-I1;SLNIPYKTEAV | 11    | 0     |
| >NOTCH1-I1;SLNIPYKI    | 10   | >NOTCH1-I1;SLNIPYKT    | 178   | 168   |
| >NOTCH1-I1;SLNIPYKIEA  | 55   | >NOTCH1-I1;SLNIPYKTEA  | 57    | 2     |
| >NOTCH1-I1;SLNIPYKIEAV | 3    | >NOTCH1-I1;SLNIPYKTEAV | 3     | 0     |
| >NOTCH1-I1;SLNIPYKI    | 181  | >NOTCH1-I1;SLNIPYKT    | 6569  | 6388  |
| >NOTCH1-I1;SLNIPYKIEAV | 28   | >NOTCH1-I1;SLNIPYKTEAV | 24    | 4     |
| >NOTCH1-I1;SLNIPYKI    | 44   | >NOTCH1-I1;SLNIPYKT    | 1109  | 1065  |
| >NOTCH1-I1;SLNIPYKIEA  | 168  | >NOTCH1-I1;SLNIPYKTEA  | 190   | 22    |
| >NOTCH1-I1;SLNIPYKIEAV | 13   | >NOTCH1-I1;SLNIPYKTEAV | 14    | 1     |
| >NOTCH1-I1;SLNIPYKIEAV | 159  | >NOTCH1-I1;SLNIPYKTEAV | 107   | 52    |
| >NOTCH1-I1;SLNIPYKI    | 41   | >NOTCH1-I1;SLNIPYKT    | 526   | 485   |
| >NOTCH1-I1;SLNIPYKIEA  | 34   | >NOTCH1-I1;SLNIPYKTEA  | 23    | 11    |
| >NOTCH1-I1;SLNIPYKIEAV | 4    | >NOTCH1-I1;SLNIPYKTEAV | 4     | 0     |
| >NOTCH1-I1;SLNIPYKI    | 495  | >NOTCH1-I1;SLNIPYKT    | 12254 | 11759 |
| >NOTCH1-I1;GSLNIPYKI   | 21   | >NOTCH1-I1;GSLNIPYKT   | 2446  | 2425  |
| >NOTCH1-I1;GSLNIPYKI   | 352  | >NOTCH1-I1;GSLNIPYKT   | 3126  | 2774  |
| >NOTCH1-I1;GSLNIPYKI   | 104  | >NOTCH1-I1;GSLNIPYKT   | 33230 | 33126 |
| >NOTCH1-I1;LGSLNIPYKI  | 450  | >NOTCH1-I1;LGSLNIPYKT  | 5221  | 4771  |
| >NOTCH1-K1 KRDAHGQQM   | 135  | >NOTCH1-K1 NRDAHGQQM   | 691   | 556   |
| >NOTCH1-K1 KRDAHGQQM   | 146  | >NOTCH1-K1 NRDAHGQQM   | 1256  | 1110  |
| >NOTCH1-K1 KRDAHGQQM   | 2567 | >NOTCH1-K1 NRDAHGQQM   | 232   | 2335  |
| >NOTCH1-K1 KRDAHGQQM   | 3784 | >NOTCH1-K1 NRDAHGQQM   | 396   | 3388  |
| >NOTCH1-K1 KRDAHGQQM   | 135  | >NOTCH1-K1 NRDAHGQQM   | 2551  | 2416  |
| >NOTCH1-K1 KRDAHGQQM   | 375  | >NOTCH1-K1 NRDAHGQQM   | 5255  | 4880  |
| >NOTCH1-K1 KRDAHGQQM   | 230  | >NOTCH1-K1 NRDAHGQQM   | 1987  | 1757  |
| >NOTCH1-K1 FKRDHAGQQ   | 17   | >NOTCH1-K1 FNRDAHGQC   | 1240  | 1223  |
| >NOTCH1-K1 FKRDHAGQQ   | 43   | >NOTCH1-K1 FNRDAHGQC   | 3161  | 3118  |
| >NOTCH1-K1 SRVLHTNVVF  | 285  | >NOTCH1-K1 SRVLHTNVVF  | 5465  | 5180  |
| >NOTCH1-K1 SRVLHTNVVF  | 203  | >NOTCH1-K1 SRVLHTNVVF  | 2691  | 2488  |
| >NOTCH1-K1 HTNVVFKR    | 681  | >NOTCH1-K1 HTNVVFN     | 479   | 202   |
| >NOTCH1-K1 HTNVVFKR    | 175  | >NOTCH1-K1 HTNVVFN     | 87    | 88    |
| >NOTCH1-K1 HTNVVFKR    | 7    | >NOTCH1-K1 HTNVVFN     | 6     | 1     |
| >NOTCH1-K1 HTNVVFKR    | 20   | >NOTCH1-K1 HTNVVFN     | 13    | 7     |
| >NOTCH1-K1 HTNVVFKR    | 5    | >NOTCH1-K1 HTNVVFN     | 4     | 1     |
| >NOTCH1-K1 HTNVVFKR    | 321  | >NOTCH1-K1 HTNVVFN     | 290   | 31    |
| >NOTCH1-K1 LHTNVVFKR   | 176  | >NOTCH1-K1 LHTNVVFN    | 173   | 3     |
| >NOTCH1-K1 VLHTNVVFK   | 32   | >NOTCH1-K1 VLHTNVVFN   | 12779 | 12747 |
| >NOTCH1-K1 VLHTNVVFK   | 28   | >NOTCH1-K1 VLHTNVVFN   | 20022 | 19994 |
| >NOTCH1-K1 VLHTNVVFK   | 29   | >NOTCH1-K1 VLHTNVVFN   | 8290  | 8261  |
| >NOTCH1-K1 VLHTNVVFKF  | 62   | >NOTCH1-K1 VLHTNVVFN   | 42    | 20    |
| >NOTCH1-K1 VLHTNVVFKF  | 381  | >NOTCH1-K1 VLHTNVVFN   | 376   | 5     |

|                       |       |                       |       |       |
|-----------------------|-------|-----------------------|-------|-------|
| >NOTCH1-K1 VLHTNVVFK  | 278   | >NOTCH1-K1 VLHTNVVFN  | 24210 | 23932 |
| >NOTCH1-K1 VLHTNVVFKF | 246   | >NOTCH1-K1 VLHTNVVFNf | 216   | 30    |
| >NOTCH1-K1 RVLHTNVVFK | 15    | >NOTCH1-K1 RVLHTNVVFN | 8652  | 8637  |
| >NOTCH1-K1 RVLHTNVVFK | 296   | >NOTCH1-K1 RVLHTNVVFN | 245   | 51    |
| >NOTCH1-K1 RVLHTNVVFK | 14    | >NOTCH1-K1 RVLHTNVVFN | 25659 | 25645 |
| >NOTCH1-K1 RVLHTNVVFK | 63    | >NOTCH1-K1 RVLHTNVVFN | 49    | 14    |
| >NOTCH1-K1 RVLHTNVVFK | 4     | >NOTCH1-K1 RVLHTNVVFN | 253   | 249   |
| >NOTCH1-K1 RVLHTNVVFK | 208   | >NOTCH1-K1 RVLHTNVVFN | 98    | 110   |
| >NOTCH1-K1 RVLHTNVVFK | 89    | >NOTCH1-K1 RVLHTNVVFN | 4821  | 4732  |
| >NOTCH1-K1 RVLHTNVVFK | 8     | >NOTCH1-K1 RVLHTNVVFN | 7     | 1     |
| >NOTCH1-K1 RVLHTNVVFK | 864   | >NOTCH1-K1 RVLHTNVVFN | 441   | 423   |
| >NOTCH1-K1 RVLHTNVVFK | 386   | >NOTCH1-K1 RVLHTNVVFN | 27797 | 27411 |
| >NOTCH1-K1 RVLHTNVVFK | 143   | >NOTCH1-K1 RVLHTNVVFN | 137   | 6     |
| >NOTCH1-K1 RVLHTNVVFK | 481   | >NOTCH1-K1 RVLHTNVVFN | 19501 | 19020 |
| >NOTCH1-K1 RVLHTNVVFK | 193   | >NOTCH1-K1 RVLHTNVVFN | 8691  | 8498  |
| >NOTCH1-K1 RVLHTNVVFK | 76    | >NOTCH1-K1 RVLHTNVVFN | 67    | 9     |
| >NOTCH1-L1 TLVVVVLM   | 35612 | >NOTCH1-L1 TPVVVVLM   | 274   | 35338 |
| >NOTCH1-L1 TLVVVVLM   | 420   | >NOTCH1-L1 TPVVVVLM   | 24918 | 24498 |
| >NOTCH1-L1 TLVVVVLM   | 441   | >NOTCH1-L1 TPVVVVLM   | 29087 | 28646 |
| >NOTCH1-L1 TLVVVVLM   | 7176  | >NOTCH1-L1 TPVVVVLM   | 65    | 7111  |
| >NOTCH1-L1 TLVVVVLM   | 5073  | >NOTCH1-L1 TPVVVVLM   | 397   | 4676  |
| >NOTCH1-L1 TLVVVVLM   | 26392 | >NOTCH1-L1 TPVVVVLM   | 118   | 26274 |
| >NOTCH1-L1 TLVVVVLMPI | 29083 | >NOTCH1-L1 TPVVVVLMPI | 418   | 28665 |
| >NOTCH1-L1 TLVVVVLM   | 25778 | >NOTCH1-L1 TPVVVVLM   | 291   | 25487 |
| >NOTCH1-L1 HVPERLAAGT | 390   | >NOTCH1-L1 HVPERLAAGT | 13253 | 12863 |
| >NOTCH1-L1 HVPERLAAGT | 435   | >NOTCH1-L1 HVPERLAAGT | 7587  | 7152  |
| >NOTCH1-L1 HVPERLAAGT | 485   | >NOTCH1-L1 HVPERLAAGT | 23056 | 22571 |
| >NOTCH1-L1 HVPERLAAGT | 200   | >NOTCH1-L1 HVPERLAAGT | 15419 | 15219 |
| >NOTCH1-L1 GTLVVVVL   | 397   | >NOTCH1-L1 GTPVVVVL   | 2674  | 2277  |
| >NOTCH1-L1 GTLVVVVL   | 464   | >NOTCH1-L1 GTPVVVVL   | 3862  | 3398  |
| >NOTCH1-L1 GTLVVVVL   | 231   | >NOTCH1-L1 GTPVVVVL   | 835   | 604   |
| >NOTCH1-L1 GTLVVVVL   | 89    | >NOTCH1-L1 GTPVVVVL   | 4392  | 4303  |
| >NOTCH1-L1 GTLVVVVLM  | 105   | >NOTCH1-L1 GTPVVVVLM  | 4819  | 4714  |
| >NOTCH1-L1 GTLVVVVL   | 2778  | >NOTCH1-L1 GTPVVVVL   | 10    | 2768  |
| >NOTCH1-L1 GTLVVVVLM  | 1056  | >NOTCH1-L1 GTPVVVVLM  | 2     | 1054  |
| >NOTCH1-L1 GTLVVVVLMl | 18692 | >NOTCH1-L1 GTPVVVVLM  | 127   | 18565 |
| >NOTCH1-L1 GTLVVVVLMl | 23328 | >NOTCH1-L1 GTPVVVVLM  | 377   | 22951 |
| >NOTCH1-L1 GTLVVVVLM  | 10    | >NOTCH1-L1 GTPVVVVLM  | 168   | 158   |
| >NOTCH1-L1 AGTLVVVVL  | 126   | >NOTCH1-L1 AGTPVVVVL  | 312   | 186   |
| >NOTCH1-L1 AAGTLVVV   | 706   | >NOTCH1-L1 AAGTPVVV   | 488   | 218   |
| >NOTCH1-L1 AAGTLVVV   | 566   | >NOTCH1-L1 AAGTPVVV   | 306   | 260   |
| >NOTCH1-L1 AAGTLVVV   | 468   | >NOTCH1-L1 AAGTPVVV   | 538   | 70    |
| >NOTCH1-L1 AAGTLVVV   | 673   | >NOTCH1-L1 AAGTPVVV   | 446   | 227   |



|                       |     |                       |      |      |
|-----------------------|-----|-----------------------|------|------|
| >NOTCH1-L1 LAAGTLVV   | 433 | >NOTCH1-L1 LAAGTPVV   | 814  | 381  |
| >NOTCH1-L1 LAAGTLVVV  | 304 | >NOTCH1-L1 LAAGTPVVV  | 1209 | 905  |
| >NOTCH1-L1 LAAGTLVVVV | 462 | >NOTCH1-L1 LAAGTPVVV\ | 710  | 248  |
| >NOTCH1-L1 LAAGTLVV   | 303 | >NOTCH1-L1 LAAGTPVV   | 660  | 357  |
| >NOTCH1-L1 LAAGTLVVV  | 246 | >NOTCH1-L1 LAAGTPVVV  | 873  | 627  |
| >NOTCH1-L1 LAAGTLVVVV | 346 | >NOTCH1-L1 LAAGTPVVV\ | 323  | 23   |
| >NOTCH1-L1 LAAGTLVV   | 115 | >NOTCH1-L1 LAAGTPVV   | 303  | 188  |
| >NOTCH1-L1 LAAGTLVVV  | 58  | >NOTCH1-L1 LAAGTPVVV  | 1838 | 1780 |
| >NOTCH1-L1 LAAGTLVVVV | 197 | >NOTCH1-L1 LAAGTPVVV\ | 369  | 172  |
| >NOTCH1-L1 LAAGTLVV   | 290 | >NOTCH1-L1 LAAGTPVV   | 170  | 120  |
| >NOTCH1-L1 LAAGTLVVV  | 119 | >NOTCH1-L1 LAAGTPVVV  | 111  | 8    |
| >NOTCH1-L1 LAAGTLVVVV | 127 | >NOTCH1-L1 LAAGTPVVV\ | 101  | 26   |
| >NOTCH1-L1 LAAGTLVV   | 610 | >NOTCH1-L1 LAAGTPVV   | 252  | 358  |
| >NOTCH1-L1 LAAGTLVVV  | 399 | >NOTCH1-L1 LAAGTPVVV  | 583  | 184  |
| >NOTCH1-L1 LAAGTLVVVV | 349 | >NOTCH1-L1 LAAGTPVVV\ | 603  | 254  |
| >NOTCH1-L1 LAAGTLVV   | 20  | >NOTCH1-L1 LAAGTPVV   | 23   | 3    |
| >NOTCH1-L1 LAAGTLVVV  | 13  | >NOTCH1-L1 LAAGTPVVV  | 50   | 37   |
| >NOTCH1-L1 LAAGTLVVVV | 20  | >NOTCH1-L1 LAAGTPVVV\ | 39   | 19   |
| >NOTCH1-L1 LAAGTLVV   | 403 | >NOTCH1-L1 LAAGTPVV   | 673  | 270  |
| >NOTCH1-L1 LAAGTLVVV  | 249 | >NOTCH1-L1 LAAGTPVVV  | 331  | 82   |
| >NOTCH1-L1 LAAGTLVVVV | 715 | >NOTCH1-L1 LAAGTPVVV\ | 382  | 333  |
| >NOTCH1-L1 LAAGTLVV   | 840 | >NOTCH1-L1 LAAGTPVV   | 476  | 364  |
| >NOTCH1-L1 LAAGTLVVV  | 337 | >NOTCH1-L1 LAAGTPVVV\ | 250  | 87   |
| >NOTCH1-L1 LAAGTLVVVV | 651 | >NOTCH1-L1 LAAGTPVVV\ | 446  | 205  |
| >NOTCH1-L1 LAAGTLVVVV | 424 | >NOTCH1-L1 LAAGTPVVV\ | 161  | 263  |
| >NOTCH1-L1 LAAGTLVVV  | 255 | >NOTCH1-L1 LAAGTPVVV  | 982  | 727  |
| >NOTCH1-L1 LAAGTLVVVV | 220 | >NOTCH1-L1 LAAGTPVVV\ | 123  | 97   |
| >NOTCH1-L1 LAAGTLVVVV | 235 | >NOTCH1-L1 LAAGTPVVV\ | 353  | 118  |
| >NOTCH1-L1 RLAAGTLV   | 17  | >NOTCH1-L1 RLAAGTPV   | 14   | 3    |
| >NOTCH1-L1 RLAAGTLVV  | 18  | >NOTCH1-L1 RLAAGTPVV  | 12   | 6    |
| >NOTCH1-L1 RLAAGTLVVV | 30  | >NOTCH1-L1 RLAAGTPVV\ | 49   | 19   |
| >NOTCH1-L1 RLAAGTLVVV | 16  | >NOTCH1-L1 RLAAGTPVV\ | 17   | 1    |
| >NOTCH1-L1 RLAAGTLV   | 4   | >NOTCH1-L1 RLAAGTPV   | 5    | 1    |
| >NOTCH1-L1 RLAAGTLVV  | 10  | >NOTCH1-L1 RLAAGTPVV  | 11   | 1    |
| >NOTCH1-L1 RLAAGTLVVV | 18  | >NOTCH1-L1 RLAAGTPVV\ | 22   | 4    |
| >NOTCH1-L1 RLAAGTLVVV | 7   | >NOTCH1-L1 RLAAGTPVV\ | 9    | 2    |
| >NOTCH1-L1 RLAAGTLV   | 3   | >NOTCH1-L1 RLAAGTPV   | 2    | 1    |
| >NOTCH1-L1 RLAAGTLVV  | 3   | >NOTCH1-L1 RLAAGTPVV  | 3    | 0    |
| >NOTCH1-L1 RLAAGTLVVV | 15  | >NOTCH1-L1 RLAAGTPVV\ | 16   | 1    |
| >NOTCH1-L1 RLAAGTLVVV | 3   | >NOTCH1-L1 RLAAGTPVV\ | 3    | 0    |
| >NOTCH1-L1 RLAAGTLV   | 11  | >NOTCH1-L1 RLAAGTPV   | 7    | 4    |
| >NOTCH1-L1 RLAAGTLVV  | 12  | >NOTCH1-L1 RLAAGTPVV  | 8    | 4    |
| >NOTCH1-L1 RLAAGTLVVV | 131 | >NOTCH1-L1 RLAAGTPVV\ | 472  | 341  |

|                       |      |                       |       |       |
|-----------------------|------|-----------------------|-------|-------|
| >NOTCH1-L1 RLAAGTLVVV | 16   | >NOTCH1-L1 RLAAGTPVV\ | 16    | 0     |
| >NOTCH1-L1 RLAAGTLV   | 4    | >NOTCH1-L1 RLAAGTPV   | 3     | 1     |
| >NOTCH1-L1 RLAAGTLVV  | 3    | >NOTCH1-L1 RLAAGTPVV  | 3     | 0     |
| >NOTCH1-L1 RLAAGTLVVV | 3    | >NOTCH1-L1 RLAAGTPVV\ | 3     | 0     |
| >NOTCH1-L1 RLAAGTLVVV | 3    | >NOTCH1-L1 RLAAGTPVV\ | 2     | 1     |
| >NOTCH1-L1 RLAAGTLV   | 15   | >NOTCH1-L1 RLAAGTPV   | 7     | 8     |
| >NOTCH1-L1 RLAAGTLVV  | 7    | >NOTCH1-L1 RLAAGTPVV  | 6     | 1     |
| >NOTCH1-L1 RLAAGTLVVV | 5    | >NOTCH1-L1 RLAAGTPVV\ | 6     | 1     |
| >NOTCH1-L1 RLAAGTLVVV | 6    | >NOTCH1-L1 RLAAGTPVV\ | 6     | 0     |
| >NOTCH1-L1 RLAAGTLV   | 6    | >NOTCH1-L1 RLAAGTPV   | 5     | 1     |
| >NOTCH1-L1 RLAAGTLVV  | 5    | >NOTCH1-L1 RLAAGTPVV  | 4     | 1     |
| >NOTCH1-L1 RLAAGTLVVV | 5    | >NOTCH1-L1 RLAAGTPVV\ | 5     | 0     |
| >NOTCH1-L1 RLAAGTLVVV | 5    | >NOTCH1-L1 RLAAGTPVV\ | 5     | 0     |
| >NOTCH1-L1 RLAAGTLV   | 11   | >NOTCH1-L1 RLAAGTPV   | 7     | 4     |
| >NOTCH1-L1 RLAAGTLVV  | 4    | >NOTCH1-L1 RLAAGTPVV  | 2     | 2     |
| >NOTCH1-L1 RLAAGTLVVV | 3    | >NOTCH1-L1 RLAAGTPVV\ | 3     | 0     |
| >NOTCH1-L1 RLAAGTLVVV | 4    | >NOTCH1-L1 RLAAGTPVV\ | 3     | 1     |
| >NOTCH1-L1 RLAAGTLV   | 2    | >NOTCH1-L1 RLAAGTPV   | 2     | 0     |
| >NOTCH1-L1 RLAAGTLVV  | 2    | >NOTCH1-L1 RLAAGTPVV  | 2     | 0     |
| >NOTCH1-L1 RLAAGTLVVV | 2    | >NOTCH1-L1 RLAAGTPVV\ | 3     | 1     |
| >NOTCH1-L1 RLAAGTLVVV | 2    | >NOTCH1-L1 RLAAGTPVV\ | 2     | 0     |
| >NOTCH1-L1 RLAAGTLVV  | 248  | >NOTCH1-L1 RLAAGTPVV  | 753   | 505   |
| >NOTCH1-L1 RLAAGTLVVV | 253  | >NOTCH1-L1 RLAAGTPVV\ | 245   | 8     |
| >NOTCH1-L1 RLAAGTLVVV | 139  | >NOTCH1-L1 RLAAGTPVV\ | 291   | 152   |
| >NOTCH1-L1 RLAAGTLVVV | 292  | >NOTCH1-L1 RLAAGTPVV\ | 1973  | 1681  |
| >NOTCH1-L1 RLAAGTLV   | 2065 | >NOTCH1-L1 RLAAGTPV   | 419   | 1646  |
| >NOTCH1-L1 RLAAGTLV   | 4326 | >NOTCH1-L1 RLAAGTPV   | 409   | 3917  |
| >NOTCH1-L1 RLAAGTLVV  | 252  | >NOTCH1-L1 RLAAGTPVV  | 1066  | 814   |
| >NOTCH1-L1 RLAAGTLV   | 1345 | >NOTCH1-L1 RLAAGTPV   | 181   | 1164  |
| >NOTCH1-L1 RLAAGTLVV  | 126  | >NOTCH1-L1 RLAAGTPVV  | 194   | 68    |
| >NOTCH1-L1 RLAAGTLVVV | 212  | >NOTCH1-L1 RLAAGTPVV\ | 395   | 183   |
| >NOTCH1-L1 RLAAGTLVVV | 179  | >NOTCH1-L1 RLAAGTPVV\ | 232   | 53    |
| >NOTCH1-L1 RLAAGTLV   | 1754 | >NOTCH1-L1 RLAAGTPV   | 453   | 1301  |
| >NOTCH1-L1 RLAAGTLVVV | 583  | >NOTCH1-L1 RLAAGTPVV\ | 429   | 154   |
| >NOTCH1-L1 RLAAGTLVVV | 439  | >NOTCH1-L1 RLAAGTPVV\ | 334   | 105   |
| >NOTCH1-L1 ERLAAGTLV  | 2048 | >NOTCH1-L1 ERLAAGTPV  | 441   | 1607  |
| >NOTCH1-L1 ERLAAGTLVV | 304  | >NOTCH1-L1 ERLAAGTPVV | 499   | 195   |
| >NOTCH1-L1 ERLAAGTL   | 111  | >NOTCH1-L1 ERLAAGTP   | 19247 | 19136 |
| >NOTCH1-L1 ERLAAGTLVV | 191  | >NOTCH1-L1 ERLAAGTPVV | 186   | 5     |
| >NOTCH1-L1 ERLAAGTLVV | 319  | >NOTCH1-L1 ERLAAGTPVV | 129   | 190   |
| >NOTCH1-L1 PERLAAGTLV | 436  | >NOTCH1-L1 PERLAAGTPV | 189   | 247   |
| >NOTCH1-L1 VPERLAAGTL | 382  | >NOTCH1-L1 VPERLAAGTP | 39440 | 39058 |
| >NOTCH1-L1 VPERLAAGTL | 883  | >NOTCH1-L1 VPERLAAGTP | 71    | 812   |

|                       |      |                       |       |       |
|-----------------------|------|-----------------------|-------|-------|
| >NOTCH1-L1 TLVVVVLM   | 420  | >NOTCH1-L1 TQVVVVLM   | 3133  | 2713  |
| >NOTCH1-L1 TLVVVVLM   | 2694 | >NOTCH1-L1 TQVVVVLM   | 271   | 2423  |
| >NOTCH1-L1 TLVVVVLM   | 441  | >NOTCH1-L1 TQVVVVLM   | 13467 | 13026 |
| >NOTCH1-L1 TLVVVVLM   | 2837 | >NOTCH1-L1 TQVVVVLM   | 491   | 2346  |
| >NOTCH1-L1 TLVVVVLM   | 4050 | >NOTCH1-L1 TQVVVVLM   | 262   | 3788  |
| >NOTCH1-L1 TLVVVVLM   | 5073 | >NOTCH1-L1 TQVVVVLM   | 115   | 4958  |
| >NOTCH1-L1 HVPERLAAGT | 390  | >NOTCH1-L1 HVPERLAAGT | 10345 | 9955  |
| >NOTCH1-L1 HVPERLAAGT | 435  | >NOTCH1-L1 HVPERLAAGT | 1190  | 755   |
| >NOTCH1-L1 HVPERLAAGT | 485  | >NOTCH1-L1 HVPERLAAGT | 2414  | 1929  |
| >NOTCH1-L1 HVPERLAAGT | 200  | >NOTCH1-L1 HVPERLAAGT | 14120 | 13920 |
| >NOTCH1-L1 GTLVVVVL   | 397  | >NOTCH1-L1 GTQVVVVL   | 3139  | 2742  |
| >NOTCH1-L1 GTLVVVVL   | 464  | >NOTCH1-L1 GTQVVVVL   | 6873  | 6409  |
| >NOTCH1-L1 GTLVVVVL   | 231  | >NOTCH1-L1 GTQVVVVL   | 589   | 358   |
| >NOTCH1-L1 GTLVVVVL   | 89   | >NOTCH1-L1 GTQVVVVL   | 529   | 440   |
| >NOTCH1-L1 GTLVVVVLM  | 105  | >NOTCH1-L1 GTQVVVVLM  | 588   | 483   |
| >NOTCH1-L1 GTLVVVVLM  | 1056 | >NOTCH1-L1 GTQVVVVLM  | 347   | 709   |
| >NOTCH1-L1 GTLVVVVLM  | 10   | >NOTCH1-L1 GTQVVVVLM  | 16    | 6     |
| >NOTCH1-L1 AGTLVVVVLM | 126  | >NOTCH1-L1 AGTQVVVVLI | 599   | 473   |
| >NOTCH1-L1 AAGTLVVV   | 468  | >NOTCH1-L1 AAGTQVVV   | 365   | 103   |
| >NOTCH1-L1 AAGTLVVVV  | 673  | >NOTCH1-L1 AAGTQVVVV  | 353   | 320   |
| >NOTCH1-L1 LAAGTLVV   | 433  | >NOTCH1-L1 LAAGTQVV   | 432   | 1     |
| >NOTCH1-L1 LAAGTLVVV  | 304  | >NOTCH1-L1 LAAGTQVVV  | 600   | 296   |
| >NOTCH1-L1 LAAGTLVVVV | 462  | >NOTCH1-L1 LAAGTQVVV^ | 568   | 106   |
| >NOTCH1-L1 LAAGTLVV   | 303  | >NOTCH1-L1 LAAGTQVV   | 793   | 490   |
| >NOTCH1-L1 LAAGTLVVV  | 246  | >NOTCH1-L1 LAAGTQVVV  | 2148  | 1902  |
| >NOTCH1-L1 LAAGTLVVVV | 346  | >NOTCH1-L1 LAAGTQVVV^ | 641   | 295   |
| >NOTCH1-L1 LAAGTLVV   | 115  | >NOTCH1-L1 LAAGTQVV   | 630   | 515   |
| >NOTCH1-L1 LAAGTLVVV  | 58   | >NOTCH1-L1 LAAGTQVVV  | 1147  | 1089  |
| >NOTCH1-L1 LAAGTLVVVV | 197  | >NOTCH1-L1 LAAGTQVVV^ | 576   | 379   |
| >NOTCH1-L1 LAAGTLVV   | 290  | >NOTCH1-L1 LAAGTQVV   | 370   | 80    |
| >NOTCH1-L1 LAAGTLVVV  | 119  | >NOTCH1-L1 LAAGTQVVV  | 349   | 230   |
| >NOTCH1-L1 LAAGTLVVVV | 127  | >NOTCH1-L1 LAAGTQVVV^ | 263   | 136   |
| >NOTCH1-L1 LAAGTLVVV  | 399  | >NOTCH1-L1 LAAGTQVVV  | 576   | 177   |
| >NOTCH1-L1 LAAGTLVVVV | 349  | >NOTCH1-L1 LAAGTQVVV^ | 561   | 212   |
| >NOTCH1-L1 LAAGTLVV   | 20   | >NOTCH1-L1 LAAGTQVV   | 15    | 5     |
| >NOTCH1-L1 LAAGTLVVV  | 13   | >NOTCH1-L1 LAAGTQVVV  | 21    | 8     |
| >NOTCH1-L1 LAAGTLVVVV | 20   | >NOTCH1-L1 LAAGTQVVV^ | 23    | 3     |
| >NOTCH1-L1 LAAGTLVV   | 403  | >NOTCH1-L1 LAAGTQVV   | 244   | 159   |
| >NOTCH1-L1 LAAGTLVVV  | 249  | >NOTCH1-L1 LAAGTQVVV  | 186   | 63    |
| >NOTCH1-L1 LAAGTLVVVV | 337  | >NOTCH1-L1 LAAGTQVVV^ | 410   | 73    |
| >NOTCH1-L1 LAAGTLVVVV | 651  | >NOTCH1-L1 LAAGTQVVV^ | 485   | 166   |
| >NOTCH1-L1 LAAGTLVVVV | 424  | >NOTCH1-L1 LAAGTQVVV^ | 251   | 173   |
| >NOTCH1-L1 LAAGTLVVV  | 255  | >NOTCH1-L1 LAAGTQVVV  | 1105  | 850   |

|                       |     |                      |      |      |
|-----------------------|-----|----------------------|------|------|
| >NOTCH1-L1 LAAGTLVVVV | 220 | >NOTCH1-L1 LAAGTQVVV | 89   | 131  |
| >NOTCH1-L1 LAAGTLVVVV | 235 | >NOTCH1-L1 LAAGTQVVV | 386  | 151  |
| >NOTCH1-L1 RLAAGTLV   | 17  | >NOTCH1-L1 RLAAGTQV  | 27   | 10   |
| >NOTCH1-L1 RLAAGTLVV  | 18  | >NOTCH1-L1 RLAAGTQVV | 37   | 19   |
| >NOTCH1-L1 RLAAGTLVVV | 30  | >NOTCH1-L1 RLAAGTQVV | 173  | 143  |
| >NOTCH1-L1 RLAAGTLVVV | 16  | >NOTCH1-L1 RLAAGTQVV | 24   | 8    |
| >NOTCH1-L1 RLAAGTLV   | 4   | >NOTCH1-L1 RLAAGTQV  | 5    | 1    |
| >NOTCH1-L1 RLAAGTLVV  | 10  | >NOTCH1-L1 RLAAGTQVV | 8    | 2    |
| >NOTCH1-L1 RLAAGTLVVV | 18  | >NOTCH1-L1 RLAAGTQVV | 33   | 15   |
| >NOTCH1-L1 RLAAGTLVVV | 7   | >NOTCH1-L1 RLAAGTQVV | 6    | 1    |
| >NOTCH1-L1 RLAAGTLV   | 3   | >NOTCH1-L1 RLAAGTQV  | 3    | 0    |
| >NOTCH1-L1 RLAAGTLVV  | 3   | >NOTCH1-L1 RLAAGTQVV | 3    | 0    |
| >NOTCH1-L1 RLAAGTLVVV | 15  | >NOTCH1-L1 RLAAGTQVV | 82   | 67   |
| >NOTCH1-L1 RLAAGTLVVV | 3   | >NOTCH1-L1 RLAAGTQVV | 3    | 0    |
| >NOTCH1-L1 RLAAGTLV   | 11  | >NOTCH1-L1 RLAAGTQV  | 19   | 8    |
| >NOTCH1-L1 RLAAGTLVV  | 12  | >NOTCH1-L1 RLAAGTQVV | 17   | 5    |
| >NOTCH1-L1 RLAAGTLVVV | 131 | >NOTCH1-L1 RLAAGTQVV | 1664 | 1533 |
| >NOTCH1-L1 RLAAGTLVVV | 16  | >NOTCH1-L1 RLAAGTQVV | 19   | 3    |
| >NOTCH1-L1 RLAAGTLV   | 4   | >NOTCH1-L1 RLAAGTQV  | 3    | 1    |
| >NOTCH1-L1 RLAAGTLVV  | 3   | >NOTCH1-L1 RLAAGTQVV | 3    | 0    |
| >NOTCH1-L1 RLAAGTLVVV | 3   | >NOTCH1-L1 RLAAGTQVV | 3    | 0    |
| >NOTCH1-L1 RLAAGTLVVV | 3   | >NOTCH1-L1 RLAAGTQVV | 3    | 0    |
| >NOTCH1-L1 RLAAGTLV   | 15  | >NOTCH1-L1 RLAAGTQV  | 18   | 3    |
| >NOTCH1-L1 RLAAGTLVV  | 7   | >NOTCH1-L1 RLAAGTQVV | 5    | 2    |
| >NOTCH1-L1 RLAAGTLVVV | 5   | >NOTCH1-L1 RLAAGTQVV | 6    | 1    |
| >NOTCH1-L1 RLAAGTLVVV | 6   | >NOTCH1-L1 RLAAGTQVV | 5    | 1    |
| >NOTCH1-L1 RLAAGTLV   | 6   | >NOTCH1-L1 RLAAGTQV  | 5    | 1    |
| >NOTCH1-L1 RLAAGTLVV  | 5   | >NOTCH1-L1 RLAAGTQVV | 5    | 0    |
| >NOTCH1-L1 RLAAGTLVVV | 5   | >NOTCH1-L1 RLAAGTQVV | 6    | 1    |
| >NOTCH1-L1 RLAAGTLVVV | 5   | >NOTCH1-L1 RLAAGTQVV | 5    | 0    |
| >NOTCH1-L1 RLAAGTLV   | 11  | >NOTCH1-L1 RLAAGTQV  | 5    | 6    |
| >NOTCH1-L1 RLAAGTLVV  | 4   | >NOTCH1-L1 RLAAGTQVV | 3    | 1    |
| >NOTCH1-L1 RLAAGTLVVV | 3   | >NOTCH1-L1 RLAAGTQVV | 4    | 1    |
| >NOTCH1-L1 RLAAGTLVVV | 4   | >NOTCH1-L1 RLAAGTQVV | 4    | 0    |
| >NOTCH1-L1 RLAAGTLV   | 2   | >NOTCH1-L1 RLAAGTQV  | 2    | 0    |
| >NOTCH1-L1 RLAAGTLVV  | 2   | >NOTCH1-L1 RLAAGTQVV | 2    | 0    |
| >NOTCH1-L1 RLAAGTLVVV | 2   | >NOTCH1-L1 RLAAGTQVV | 2    | 0    |
| >NOTCH1-L1 RLAAGTLVVV | 2   | >NOTCH1-L1 RLAAGTQVV | 2    | 0    |
| >NOTCH1-L1 RLAAGTLVV  | 248 | >NOTCH1-L1 RLAAGTQVV | 519  | 271  |
| >NOTCH1-L1 RLAAGTLVVV | 253 | >NOTCH1-L1 RLAAGTQVV | 329  | 76   |
| >NOTCH1-L1 RLAAGTLVVV | 139 | >NOTCH1-L1 RLAAGTQVV | 250  | 111  |
| >NOTCH1-L1 RLAAGTLVVV | 292 | >NOTCH1-L1 RLAAGTQVV | 245  | 47   |
| >NOTCH1-L1 RLAAGTLVV  | 252 | >NOTCH1-L1 RLAAGTQVV | 332  | 80   |

|                       |       |                       |       |       |
|-----------------------|-------|-----------------------|-------|-------|
| >NOTCH1-L1 RLAAGTLVV  | 126   | >NOTCH1-L1 RLAAGTQVV  | 152   | 26    |
| >NOTCH1-L1 RLAAGTLVVV | 212   | >NOTCH1-L1 RLAAGTQVV\ | 268   | 56    |
| >NOTCH1-L1 RLAAGTLVVV | 179   | >NOTCH1-L1 RLAAGTQVV\ | 207   | 28    |
| >NOTCH1-L1 RLAAGTLVV  | 703   | >NOTCH1-L1 RLAAGTQVV  | 478   | 225   |
| >NOTCH1-L1 RLAAGTLVVV | 583   | >NOTCH1-L1 RLAAGTQVV\ | 460   | 123   |
| >NOTCH1-L1 RLAAGTLVVV | 439   | >NOTCH1-L1 RLAAGTQVV\ | 348   | 91    |
| >NOTCH1-L1 ERLAAGTLVV | 304   | >NOTCH1-L1 ERLAAGTQV\ | 419   | 115   |
| >NOTCH1-L1 ERLAAGTL   | 111   | >NOTCH1-L1 ERLAAGTQ   | 15705 | 15594 |
| >NOTCH1-L1 ERLAAGTLVV | 191   | >NOTCH1-L1 ERLAAGTQV\ | 258   | 67    |
| >NOTCH1-L1 ERLAAGTLVV | 319   | >NOTCH1-L1 ERLAAGTQV\ | 244   | 75    |
| >NOTCH1-L1 PERLAAGTLV | 436   | >NOTCH1-L1 PERLAAGTQ\ | 444   | 8     |
| >NOTCH1-L1 VPERLAAGTL | 382   | >NOTCH1-L1 VPERLAAGTC | 18517 | 18135 |
| >NOTCH1-L1 VPERLAAGTL | 1848  | >NOTCH1-L1 VPERLAAGTC | 480   | 1368  |
| >NOTCH1-L1 VPERLAAGTL | 883   | >NOTCH1-L1 VPERLAAGTC | 360   | 523   |
| >NOTCH1-L1 LRNSSFHFL  | 492   | >NOTCH1-L1 PRNSSFHFL  | 1411  | 919   |
| >NOTCH1-L1 LRNSSFHFLR | 34    | >NOTCH1-L1 PRNSSFHFLR | 312   | 278   |
| >NOTCH1-L1 LRNSSFHFLR | 112   | >NOTCH1-L1 PRNSSFHFLR | 1274  | 1162  |
| >NOTCH1-L1 LRNSSFHF   | 8     | >NOTCH1-L1 PRNSSFHF   | 70    | 62    |
| >NOTCH1-L1 LRNSSFHFL  | 65    | >NOTCH1-L1 PRNSSFHFL  | 706   | 641   |
| >NOTCH1-L1 LRNSSFHF   | 171   | >NOTCH1-L1 PRNSSFHF   | 2231  | 2060  |
| >NOTCH1-L1 LRNSSFHFL  | 113   | >NOTCH1-L1 PRNSSFHFL  | 1588  | 1475  |
| >NOTCH1-L1 LRNSSFHFLR | 304   | >NOTCH1-L1 PRNSSFHFLR | 4932  | 4628  |
| >NOTCH1-L1 LRNSSFHFL  | 373   | >NOTCH1-L1 PRNSSFHFL  | 5644  | 5271  |
| >NOTCH1-L1 LRNSSFHFL  | 48    | >NOTCH1-L1 PRNSSFHFL  | 232   | 184   |
| >NOTCH1-L1 LRNSSFHFLR | 285   | >NOTCH1-L1 PRNSSFHFLR | 483   | 198   |
| >NOTCH1-L1 QLRNSSFHF  | 37115 | >NOTCH1-L1 QPRNSSFHF  | 369   | 36746 |
| >NOTCH1-L1 QLRNSSFHFL | 31198 | >NOTCH1-L1 QPRNSSFHFL | 80    | 31118 |
| >NOTCH1-L1 QLRNSSFHFL | 43    | >NOTCH1-L1 QPRNSSFHFL | 13951 | 13908 |
| >NOTCH1-L1 QLRNSSFHFL | 130   | >NOTCH1-L1 QPRNSSFHFL | 21693 | 21563 |
| >NOTCH1-L1 QLRNSSFHFL | 264   | >NOTCH1-L1 QPRNSSFHFL | 27523 | 27259 |
| >NOTCH1-L1 QLRNSSFHFL | 132   | >NOTCH1-L1 QPRNSSFHFL | 23946 | 23814 |
| >NOTCH1-L1 QLRNSSFHFL | 11    | >NOTCH1-L1 QPRNSSFHFL | 28705 | 28694 |
| >NOTCH1-L1 QLRNSSFHFL | 183   | >NOTCH1-L1 QPRNSSFHFL | 18344 | 18161 |
| >NOTCH1-L1 QLRNSSFHFL | 37    | >NOTCH1-L1 QPRNSSFHFL | 8864  | 8827  |
| >NOTCH1-L1 QLRNSSFHFL | 100   | >NOTCH1-L1 QPRNSSFHFL | 11803 | 11703 |
| >NOTCH1-L1 QLRNSSFHFL | 10    | >NOTCH1-L1 QPRNSSFHFL | 405   | 395   |
| >NOTCH1-L1 QLRNSSFHFL | 49    | >NOTCH1-L1 QPRNSSFHFL | 486   | 437   |
| >NOTCH1-L1 QLRNSSFHFL | 95    | >NOTCH1-L1 QPRNSSFHFL | 664   | 569   |
| >NOTCH1-L1 QLRNSSFHF  | 18690 | >NOTCH1-L1 QPRNSSFHF  | 105   | 18585 |
| >NOTCH1-L1 QLRNSSFHFL | 32586 | >NOTCH1-L1 QPRNSSFHFL | 260   | 32326 |
| >NOTCH1-L1 QLRNSSFHF  | 26    | >NOTCH1-L1 QPRNSSFHF  | 2212  | 2186  |
| >NOTCH1-L1 QLRNSSFHF  | 102   | >NOTCH1-L1 QPRNSSFHF  | 1376  | 1274  |
| >NOTCH1-L1 QLRNSSFHF  | 9     | >NOTCH1-L1 QPRNSSFHF  | 45    | 36    |

|                        |       |                        |       |       |
|------------------------|-------|------------------------|-------|-------|
| >NOTCH1-L1 QLRNSSFHFL  | 166   | >NOTCH1-L1 QPRNSSFHFL  | 1674  | 1508  |
| >NOTCH1-L1 QLRNSSFHF   | 74    | >NOTCH1-L1 QPRNSSFHF   | 2770  | 2696  |
| >NOTCH1-L1 QLRNSSFHF   | 10452 | >NOTCH1-L1 QPRNSSFHF   | 277   | 10175 |
| >NOTCH1-L1 QLRNSSFHFL  | 260   | >NOTCH1-L1 QPRNSSFHFL  | 470   | 210   |
| >NOTCH1-L1 VVVVLMPPPEI | 412   | >NOTCH1-L1 VVVVLMPPPEI | 18277 | 17865 |
| >NOTCH1-L1 VVVVLMPPPEI | 403   | >NOTCH1-L1 VVVVLMPPPEI | 22206 | 21803 |
| >NOTCH1-L1 EQLRNSSFHF  | 189   | >NOTCH1-L1 EQPRNSSFHF  | 515   | 326   |
| >NOTCH1-L1 EQLRNSSFHF  | 69    | >NOTCH1-L1 EQPRNSSFHF  | 294   | 225   |
| >NOTCH1-L1 EQLRNSSFHF  | 1104  | >NOTCH1-L1 EQPRNSSFHF  | 238   | 866   |
| >NOTCH1-L1 EQLRNSSFHF  | 406   | >NOTCH1-L1 EQPRNSSFHF  | 7514  | 7108  |
| >NOTCH1-L1 EQLRNSSF    | 113   | >NOTCH1-L1 EQPRNSSF    | 202   | 89    |
| >NOTCH1-L1 EQLRNSSFHF  | 84    | >NOTCH1-L1 EQPRNSSFHF  | 136   | 52    |
| >NOTCH1-L1 EQLRNSSF    | 209   | >NOTCH1-L1 EQPRNSSF    | 616   | 407   |
| >NOTCH1-L1 EQLRNSSF    | 4     | >NOTCH1-L1 EQPRNSSF    | 27    | 23    |
| >NOTCH1-L1 EQLRNSSFHF  | 6     | >NOTCH1-L1 EQPRNSSFHF  | 54    | 48    |
| >NOTCH1-L1 EQLRNSSFHF  | 136   | >NOTCH1-L1 EQPRNSSFHF  | 1384  | 1248  |
| >NOTCH1-L1 EQLRNSSFHF  | 230   | >NOTCH1-L1 EQPRNSSFHF  | 4247  | 4017  |
| >NOTCH1-L1 MPPEQLRNSI  | 395   | >NOTCH1-L1 MPPEQPRNS   | 263   | 132   |
| >NOTCH1-L1 MPPEQLRNSI  | 124   | >NOTCH1-L1 MPPEQPRNS   | 176   | 52    |
| >NOTCH1-L1 MPPEQLRNSI  | 34    | >NOTCH1-L1 MPPEQPRNS   | 32    | 2     |
| >NOTCH1-L1 MPPEQLRNSI  | 137   | >NOTCH1-L1 MPPEQPRNS   | 120   | 17    |
| >NOTCH1-L1 LMPPEQLR    | 303   | >NOTCH1-L1 LMPPEQPR    | 174   | 129   |
| >NOTCH1-L1 VLMPPPEQL   | 57    | >NOTCH1-L1 VLMPPPEQP   | 20266 | 20209 |
| >NOTCH1-L1 VLMPPPEQL   | 19    | >NOTCH1-L1 VLMPPPEQP   | 4749  | 4730  |
| >NOTCH1-L1 VLMPPPEQL   | 87    | >NOTCH1-L1 VLMPPPEQP   | 12497 | 12410 |
| >NOTCH1-L1 VLMPPPEQL   | 329   | >NOTCH1-L1 VLMPPPEQP   | 16632 | 16303 |
| >NOTCH1-L1 VLMPPPEQL   | 5     | >NOTCH1-L1 VLMPPPEQP   | 1972  | 1967  |
| >NOTCH1-L1 VLMPPPEQL   | 27    | >NOTCH1-L1 VLMPPPEQP   | 16898 | 16871 |
| >NOTCH1-L1 VLMPPPEQL   | 37    | >NOTCH1-L1 VLMPPPEQP   | 12884 | 12847 |
| >NOTCH1-L1 VLMPPPEQL   | 6     | >NOTCH1-L1 VLMPPPEQP   | 13301 | 13295 |
| >NOTCH1-L1 VLMPPPEQL   | 4     | >NOTCH1-L1 VLMPPPEQP   | 3745  | 3741  |
| >NOTCH1-L1 VLMPPPEQLR  | 250   | >NOTCH1-L1 VLMPPPEQPR  | 185   | 65    |
| >NOTCH1-L1 VVLMPPPEQL  | 50    | >NOTCH1-L1 VVLMPPPEQP  | 16051 | 16001 |
| >NOTCH1-L1 VVLMPPPEQLI | 441   | >NOTCH1-L1 VVLMPPPEQPI | 587   | 146   |
| >NOTCH1-L1 VVLMPPPEQLI | 173   | >NOTCH1-L1 VVLMPPPEQPI | 398   | 225   |
| >NOTCH1-L1 VVVLMPPPEQ  | 574   | >NOTCH1-L1 VVVLMPPPEQ  | 407   | 167   |
| >NOTCH1-L1 VVVLMPPPEQ  | 177   | >NOTCH1-L1 VVVLMPPPEQ  | 395   | 218   |
| >NOTCH1-L1 LRNSSFHFL   | 492   | >NOTCH1-L1 QRNSSFHFL   | 3568  | 3076  |
| >NOTCH1-L1 LRNSSFHFLR  | 34    | >NOTCH1-L1 QRNSSFHFLR  | 54    | 20    |
| >NOTCH1-L1 LRNSSFHFLR  | 112   | >NOTCH1-L1 QRNSSFHFLR  | 226   | 114   |
| >NOTCH1-L1 LRNSSFHF    | 8     | >NOTCH1-L1 QRNSSFHF    | 13    | 5     |
| >NOTCH1-L1 LRNSSFHFL   | 65    | >NOTCH1-L1 QRNSSFHFL   | 115   | 50    |
| >NOTCH1-L1 LRNSSFHF    | 171   | >NOTCH1-L1 QRNSSFHF    | 182   | 11    |

|                        |      |                        |       |       |
|------------------------|------|------------------------|-------|-------|
| >NOTCH1-L1 LRNSSFHFL   | 113  | >NOTCH1-L1 QRNSSFHFL   | 112   | 1     |
| >NOTCH1-L1 LRNSSFHFLR  | 304  | >NOTCH1-L1 QRNSSFHFLR  | 243   | 61    |
| >NOTCH1-L1 LRNSSFHFL   | 373  | >NOTCH1-L1 QRNSSFHFL   | 204   | 169   |
| >NOTCH1-L1 LRNSSFHFL   | 955  | >NOTCH1-L1 QRNSSFHFL   | 270   | 685   |
| >NOTCH1-L1 LRNSSFHFL   | 48   | >NOTCH1-L1 QRNSSFHFL   | 33    | 15    |
| >NOTCH1-L1 LRNSSFHFLR  | 285  | >NOTCH1-L1 QRNSSFHFLR  | 142   | 143   |
| >NOTCH1-L1 QLRNSSFHFL  | 43   | >NOTCH1-L1 QQRNSSFHFL  | 493   | 450   |
| >NOTCH1-L1 QLRNSSFHFL  | 130  | >NOTCH1-L1 QQRNSSFHFL  | 1630  | 1500  |
| >NOTCH1-L1 QLRNSSFHFL  | 264  | >NOTCH1-L1 QQRNSSFHFL  | 10261 | 9997  |
| >NOTCH1-L1 QLRNSSFHFL  | 132  | >NOTCH1-L1 QQRNSSFHFL  | 6773  | 6641  |
| >NOTCH1-L1 QLRNSSFHFL  | 11   | >NOTCH1-L1 QQRNSSFHFL  | 14745 | 14734 |
| >NOTCH1-L1 QLRNSSFHFL  | 183  | >NOTCH1-L1 QQRNSSFHFL  | 3472  | 3289  |
| >NOTCH1-L1 QLRNSSFHFL  | 37   | >NOTCH1-L1 QQRNSSFHFL  | 73    | 36    |
| >NOTCH1-L1 QLRNSSFHFL  | 100  | >NOTCH1-L1 QQRNSSFHFL  | 212   | 112   |
| >NOTCH1-L1 QLRNSSFHFL  | 10   | >NOTCH1-L1 QQRNSSFHFL  | 10    | 0     |
| >NOTCH1-L1 QLRNSSFHFL  | 49   | >NOTCH1-L1 QQRNSSFHFL  | 471   | 422   |
| >NOTCH1-L1 QLRNSSFHFL  | 95   | >NOTCH1-L1 QQRNSSFHFL  | 767   | 672   |
| >NOTCH1-L1 QLRNSSFHF   | 26   | >NOTCH1-L1 QQRNSSFHF   | 22    | 4     |
| >NOTCH1-L1 QLRNSSFHFL  | 898  | >NOTCH1-L1 QQRNSSFHFL  | 165   | 733   |
| >NOTCH1-L1 QLRNSSFHF   | 102  | >NOTCH1-L1 QQRNSSFHF   | 126   | 24    |
| >NOTCH1-L1 QLRNSSFH    | 1956 | >NOTCH1-L1 QQRNSSFH    | 74    | 1882  |
| >NOTCH1-L1 QLRNSSFHF   | 9    | >NOTCH1-L1 QQRNSSFHF   | 2     | 7     |
| >NOTCH1-L1 QLRNSSFHFL  | 166  | >NOTCH1-L1 QQRNSSFHFL  | 9     | 157   |
| >NOTCH1-L1 QLRNSSFHFL  | 3875 | >NOTCH1-L1 QQRNSSFHFL  | 206   | 3669  |
| >NOTCH1-L1 QLRNSSFHF   | 74   | >NOTCH1-L1 QQRNSSFHF   | 756   | 682   |
| >NOTCH1-L1 QLRNSSFHFL  | 260  | >NOTCH1-L1 QQRNSSFHFL  | 231   | 29    |
| >NOTCH1-L1 VVVVLMPPPEI | 412  | >NOTCH1-L1 VVVVLMPPPEI | 3407  | 2995  |
| >NOTCH1-L1 VVVVLMPPPEI | 403  | >NOTCH1-L1 VVVVLMPPPEI | 15925 | 15522 |
| >NOTCH1-L1 EQLRNSSFHF  | 189  | >NOTCH1-L1 EQQRNSSFHI  | 702   | 513   |
| >NOTCH1-L1 EQLRNSSFHF  | 69   | >NOTCH1-L1 EQQRNSSFHI  | 605   | 536   |
| >NOTCH1-L1 EQLRNSSFHF  | 406  | >NOTCH1-L1 EQQRNSSFHI  | 6023  | 5617  |
| >NOTCH1-L1 EQLRNSSF    | 113  | >NOTCH1-L1 EQQRNSSF    | 59    | 54    |
| >NOTCH1-L1 EQLRNSSFHF  | 84   | >NOTCH1-L1 EQQRNSSFHI  | 49    | 35    |
| >NOTCH1-L1 EQLRNSSF    | 209  | >NOTCH1-L1 EQQRNSSF    | 171   | 38    |
| >NOTCH1-L1 EQLRNSSF    | 4    | >NOTCH1-L1 EQQRNSSF    | 10    | 6     |
| >NOTCH1-L1 EQLRNSSFHF  | 6    | >NOTCH1-L1 EQQRNSSFHI  | 17    | 11    |
| >NOTCH1-L1 EQLRNSSFHF  | 136  | >NOTCH1-L1 EQQRNSSFHI  | 628   | 492   |
| >NOTCH1-L1 EQLRNSSFHF  | 230  | >NOTCH1-L1 EQQRNSSFHI  | 784   | 554   |
| >NOTCH1-L1 MPPEQQRNS:  | 395  | >NOTCH1-L1 MPPEQQRNS   | 137   | 258   |
| >NOTCH1-L1 MPPEQQRNS:  | 124  | >NOTCH1-L1 MPPEQQRNS   | 153   | 29    |
| >NOTCH1-L1 MPPEQQRNS:  | 34   | >NOTCH1-L1 MPPEQQRNS   | 29    | 5     |
| >NOTCH1-L1 MPPEQQRNS:  | 137  | >NOTCH1-L1 MPPEQQRNS   | 125   | 12    |
| >NOTCH1-L1 MPPEQQRNS:  | 519  | >NOTCH1-L1 MPPEQQRNS   | 348   | 171   |

|                        |       |                       |       |       |
|------------------------|-------|-----------------------|-------|-------|
| >NOTCH1-L1 LMPPEQLR    | 303   | >NOTCH1-L1 LMPPEQQR   | 648   | 345   |
| >NOTCH1-L1 VLMPPEQL    | 57    | >NOTCH1-L1 VLMPPEQQ   | 13111 | 13054 |
| >NOTCH1-L1 VLMPPEQL    | 19    | >NOTCH1-L1 VLMPPEQQ   | 2531  | 2512  |
| >NOTCH1-L1 VLMPPEQL    | 87    | >NOTCH1-L1 VLMPPEQQ   | 8865  | 8778  |
| >NOTCH1-L1 VLMPPEQL    | 329   | >NOTCH1-L1 VLMPPEQQ   | 12465 | 12136 |
| >NOTCH1-L1 VLMPPEQL    | 5     | >NOTCH1-L1 VLMPPEQQ   | 473   | 468   |
| >NOTCH1-L1 VLMPPEQL    | 27    | >NOTCH1-L1 VLMPPEQQ   | 11747 | 11720 |
| >NOTCH1-L1 VLMPPEQL    | 37    | >NOTCH1-L1 VLMPPEQQ   | 4421  | 4384  |
| >NOTCH1-L1 VLMPPEQL    | 6     | >NOTCH1-L1 VLMPPEQQ   | 3179  | 3173  |
| >NOTCH1-L1 VLMPPEQL    | 4     | >NOTCH1-L1 VLMPPEQQ   | 46    | 42    |
| >NOTCH1-L1 VLMPPEQLR   | 250   | >NOTCH1-L1 VLMPPEQQR  | 570   | 320   |
| >NOTCH1-L1 VVLMPEQL    | 50    | >NOTCH1-L1 VVLMPEQQ   | 7943  | 7893  |
| >NOTCH1-L1 VVLMPEQLI   | 441   | >NOTCH1-L1 VVLMPEQQ   | 1065  | 624   |
| >NOTCH1-L1 VVLMPEQLI   | 173   | >NOTCH1-L1 VVLMPEQQ   | 805   | 632   |
| >NOTCH1-L1 VVLMPEQL    | 177   | >NOTCH1-L1 VVLMPEQQ   | 310   | 133   |
| >NOTCH1-L1 LRNSSFHFL   | 492   | >NOTCH1-L1 RRNSSFHFL  | 889   | 397   |
| >NOTCH1-L1 LRNSSFHFLR  | 34    | >NOTCH1-L1 RRNSSFHFLR | 13    | 21    |
| >NOTCH1-L1 LRNSSFHFLR  | 112   | >NOTCH1-L1 RRNSSFHFLR | 545   | 433   |
| >NOTCH1-L1 LRNSSFHF    | 8     | >NOTCH1-L1 RRNSSFHF   | 4     | 4     |
| >NOTCH1-L1 LRNSSFHFL   | 65    | >NOTCH1-L1 RRNSSFHFL  | 23    | 42    |
| >NOTCH1-L1 LRNSSFHFLR  | 1008  | >NOTCH1-L1 RRNSSFHFLR | 429   | 579   |
| >NOTCH1-L1 LRNSSFHF    | 171   | >NOTCH1-L1 RRNSSFHF   | 32    | 139   |
| >NOTCH1-L1 LRNSSFHFL   | 113   | >NOTCH1-L1 RRNSSFHFL  | 23    | 90    |
| >NOTCH1-L1 LRNSSFHFLR  | 304   | >NOTCH1-L1 RRNSSFHFLR | 18    | 286   |
| >NOTCH1-L1 LRNSSFHFL   | 373   | >NOTCH1-L1 RRNSSFHFL  | 304   | 69    |
| >NOTCH1-L1 LRNSSFHF    | 8089  | >NOTCH1-L1 RRNSSFHF   | 58    | 8031  |
| >NOTCH1-L1 LRNSSFHFL   | 955   | >NOTCH1-L1 RRNSSFHFL  | 34    | 921   |
| >NOTCH1-L1 LRNSSFHFLR  | 8178  | >NOTCH1-L1 RRNSSFHFLR | 129   | 8049  |
| >NOTCH1-L1 LRNSSFHFLRI | 11789 | >NOTCH1-L1 RRNSSFHFLR | 365   | 11424 |
| >NOTCH1-L1 LRNSSFHF    | 4597  | >NOTCH1-L1 RRNSSFHF   | 235   | 4362  |
| >NOTCH1-L1 LRNSSFHFL   | 48    | >NOTCH1-L1 RRNSSFHFL  | 8     | 40    |
| >NOTCH1-L1 LRNSSFHFLR  | 2019  | >NOTCH1-L1 RRNSSFHFLR | 85    | 1934  |
| >NOTCH1-L1 LRNSSFHFLR  | 285   | >NOTCH1-L1 RRNSSFHFLR | 54    | 231   |
| >NOTCH1-L1 QLRNSSFHFL  | 43    | >NOTCH1-L1 QRRNSSFHFL | 10852 | 10809 |
| >NOTCH1-L1 QLRNSSFHFL  | 130   | >NOTCH1-L1 QRRNSSFHFL | 19233 | 19103 |
| >NOTCH1-L1 QLRNSSFHFL  | 264   | >NOTCH1-L1 QRRNSSFHFL | 25913 | 25649 |
| >NOTCH1-L1 QLRNSSFHFL  | 132   | >NOTCH1-L1 QRRNSSFHFL | 23156 | 23024 |
| >NOTCH1-L1 QLRNSSFHFL  | 11    | >NOTCH1-L1 QRRNSSFHFL | 23488 | 23477 |
| >NOTCH1-L1 QLRNSSFHFL  | 183   | >NOTCH1-L1 QRRNSSFHFL | 20915 | 20732 |
| >NOTCH1-L1 QLRNSSFHFL  | 37    | >NOTCH1-L1 QRRNSSFHFL | 830   | 793   |
| >NOTCH1-L1 QLRNSSFHFL  | 100   | >NOTCH1-L1 QRRNSSFHFL | 2001  | 1901  |
| >NOTCH1-L1 QLRNSSFHFL  | 10    | >NOTCH1-L1 QRRNSSFHFL | 1411  | 1401  |
| >NOTCH1-L1 QLRNSSFHFL  | 49    | >NOTCH1-L1 QRRNSSFHFL | 2397  | 2348  |



|                       |       |                       |       |       |
|-----------------------|-------|-----------------------|-------|-------|
| >NOTCH1-L1 QLRNSSFHFL | 95    | >NOTCH1-L1 QRRNSSFHFL | 2046  | 1951  |
| >NOTCH1-L1 QLRNSSFHF  | 26    | >NOTCH1-L1 QRRNSSFHF  | 2712  | 2686  |
| >NOTCH1-L1 QLRNSSFHF  | 102   | >NOTCH1-L1 QRRNSSFHF  | 4211  | 4109  |
| >NOTCH1-L1 QLRNSSFHF  | 9     | >NOTCH1-L1 QRRNSSFHF  | 6     | 3     |
| >NOTCH1-L1 QLRNSSFHFL | 166   | >NOTCH1-L1 QRRNSSFHFL | 54    | 112   |
| >NOTCH1-L1 QLRNSSFHF  | 74    | >NOTCH1-L1 QRRNSSFHF  | 10143 | 10069 |
| >NOTCH1-L1 QLRNSSFHF  | 17706 | >NOTCH1-L1 QRRNSSFHF  | 295   | 17411 |
| >NOTCH1-L1 QLRNSSFHFL | 19810 | >NOTCH1-L1 QRRNSSFHFL | 37    | 19773 |
| >NOTCH1-L1 QLRNSSFHFL | 15466 | >NOTCH1-L1 QRRNSSFHFL | 320   | 15146 |
| >NOTCH1-L1 QLRNSSFHFL | 7709  | >NOTCH1-L1 QRRNSSFHFL | 36    | 7673  |
| >NOTCH1-L1 QLRNSSFHFL | 9095  | >NOTCH1-L1 QRRNSSFHFL | 38    | 9057  |
| >NOTCH1-L1 QLRNSSFHFL | 260   | >NOTCH1-L1 QRRNSSFHFL | 450   | 190   |
| >NOTCH1-L1 VVVVLMPEQ  | 412   | >NOTCH1-L1 VVVVLMPEQ  | 9905  | 9493  |
| >NOTCH1-L1 VVVVLMPEQ  | 14632 | >NOTCH1-L1 VVVVLMPEQ  | 272   | 14360 |
| >NOTCH1-L1 VVVVLMPEQ  | 29376 | >NOTCH1-L1 VVVVLMPEQ  | 196   | 29180 |
| >NOTCH1-L1 VVVVLMPEQ  | 403   | >NOTCH1-L1 VVVVLMPEQ  | 18579 | 18176 |
| >NOTCH1-L1 EQLRNSSFHF | 189   | >NOTCH1-L1 EQRRNSSFHF | 1104  | 915   |
| >NOTCH1-L1 EQLRNSSFHF | 69    | >NOTCH1-L1 EQRRNSSFHF | 2163  | 2094  |
| >NOTCH1-L1 EQLRNSSFHF | 406   | >NOTCH1-L1 EQRRNSSFHF | 10966 | 10560 |
| >NOTCH1-L1 EQLRNSSF   | 113   | >NOTCH1-L1 EQRRNSSF   | 45    | 68    |
| >NOTCH1-L1 EQLRNSSFHF | 84    | >NOTCH1-L1 EQRRNSSFHF | 37    | 47    |
| >NOTCH1-L1 EQLRNSSF   | 209   | >NOTCH1-L1 EQRRNSSF   | 135   | 74    |
| >NOTCH1-L1 EQLRNSSF   | 4     | >NOTCH1-L1 EQRRNSSF   | 3     | 1     |
| >NOTCH1-L1 EQLRNSSFHF | 6     | >NOTCH1-L1 EQRRNSSFHF | 5     | 1     |
| >NOTCH1-L1 EQLRNSSFHF | 136   | >NOTCH1-L1 EQRRNSSFHF | 75    | 61    |
| >NOTCH1-L1 EQLRNSSFHF | 230   | >NOTCH1-L1 EQRRNSSFHF | 4413  | 4183  |
| >NOTCH1-L1 MPPEQRRNS: | 395   | >NOTCH1-L1 MPPEQRRNS  | 136   | 259   |
| >NOTCH1-L1 MPPEQRRNS: | 124   | >NOTCH1-L1 MPPEQRRNS  | 48    | 76    |
| >NOTCH1-L1 MPPEQRRNS: | 34    | >NOTCH1-L1 MPPEQRRNS  | 44    | 10    |
| >NOTCH1-L1 MPPEQRRNS: | 137   | >NOTCH1-L1 MPPEQRRNS  | 182   | 45    |
| >NOTCH1-L1 MPPEQRRNS: | 519   | >NOTCH1-L1 MPPEQRRNS  | 380   | 139   |
| >NOTCH1-L1 LMPPEQLR   | 303   | >NOTCH1-L1 LMPPEQRR   | 526   | 223   |
| >NOTCH1-L1 VLMPEQL    | 57    | >NOTCH1-L1 VLMPEQR    | 20455 | 20398 |
| >NOTCH1-L1 VLMPEQL    | 19    | >NOTCH1-L1 VLMPEQR    | 10753 | 10734 |
| >NOTCH1-L1 VLMPEQL    | 87    | >NOTCH1-L1 VLMPEQR    | 17958 | 17871 |
| >NOTCH1-L1 VLMPEQL    | 329   | >NOTCH1-L1 VLMPEQR    | 23591 | 23262 |
| >NOTCH1-L1 VLMPEQL    | 5     | >NOTCH1-L1 VLMPEQR    | 4160  | 4155  |
| >NOTCH1-L1 VLMPEQL    | 27    | >NOTCH1-L1 VLMPEQR    | 22559 | 22532 |
| >NOTCH1-L1 VLMPEQL    | 37    | >NOTCH1-L1 VLMPEQR    | 16571 | 16534 |
| >NOTCH1-L1 VLMPEQL    | 6     | >NOTCH1-L1 VLMPEQR    | 14978 | 14972 |
| >NOTCH1-L1 VLMPEQL    | 4     | >NOTCH1-L1 VLMPEQR    | 3098  | 3094  |
| >NOTCH1-L1 VLMPEQL    | 19474 | >NOTCH1-L1 VLMPEQR    | 375   | 19099 |
| >NOTCH1-L1 VLMPEQLR   | 250   | >NOTCH1-L1 VLMPEQRR   | 565   | 315   |

|                        |       |                        |       |       |
|------------------------|-------|------------------------|-------|-------|
| >NOTCH1-L1 VVLMPPPEQL  | 50    | >NOTCH1-L1 VVLMPPPEQR  | 18634 | 18584 |
| >NOTCH1-L1 VVLMPPPEQL  | 21630 | >NOTCH1-L1 VVLMPPPEQR  | 349   | 21281 |
| >NOTCH1-L1 VVLMPPPEQLI | 441   | >NOTCH1-L1 VVLMPPPEQR  | 1272  | 831   |
| >NOTCH1-L1 VVLMPPPEQL  | 18082 | >NOTCH1-L1 VVLMPPPEQR  | 393   | 17689 |
| >NOTCH1-L1 VVLMPPPEQLI | 173   | >NOTCH1-L1 VVLMPPPEQR  | 959   | 786   |
| >NOTCH1-L1 VVVLMPPPEQ  | 30238 | >NOTCH1-L1 VVVLMPPPEQ  | 134   | 30104 |
| >NOTCH1-L1 VVVLMPPPEQ  | 177   | >NOTCH1-L1 VVVLMPPPEQ  | 435   | 258   |
| >NOTCH1-L1 FLRELSRV    | 40    | >NOTCH1-L1 FPRELSRV    | 19407 | 19367 |
| >NOTCH1-L1 FLRELSRV    | 8     | >NOTCH1-L1 FPRELSRV    | 16224 | 16216 |
| >NOTCH1-L1 FLRELSRVL   | 89    | >NOTCH1-L1 FPRELSRVL   | 20577 | 20488 |
| >NOTCH1-L1 FLRELSRV    | 2     | >NOTCH1-L1 FPRELSRV    | 6582  | 6580  |
| >NOTCH1-L1 FLRELSRVL   | 11    | >NOTCH1-L1 FPRELSRVL   | 20245 | 20234 |
| >NOTCH1-L1 FLRELSRVLHT | 29    | >NOTCH1-L1 FPRELSRVLHT | 18881 | 18852 |
| >NOTCH1-L1 FLRELSRV    | 26    | >NOTCH1-L1 FPRELSRV    | 7683  | 7657  |
| >NOTCH1-L1 FLRELSRV    | 2     | >NOTCH1-L1 FPRELSRV    | 6634  | 6632  |
| >NOTCH1-L1 FLRELSRVL   | 15    | >NOTCH1-L1 FPRELSRVL   | 20694 | 20679 |
| >NOTCH1-L1 FLRELSRVLHT | 200   | >NOTCH1-L1 FPRELSRVLHT | 25418 | 25218 |
| >NOTCH1-L1 FLRELSRV    | 6     | >NOTCH1-L1 FPRELSRV    | 19446 | 19440 |
| >NOTCH1-L1 FLRELSRVL   | 53    | >NOTCH1-L1 FPRELSRVL   | 23143 | 23090 |
| >NOTCH1-L1 FLRELSRV    | 10    | >NOTCH1-L1 FPRELSRV    | 17661 | 17651 |
| >NOTCH1-L1 FLRELSRVL   | 200   | >NOTCH1-L1 FPRELSRVL   | 25675 | 25475 |
| >NOTCH1-L1 FLRELSRV    | 21    | >NOTCH1-L1 FPRELSRV    | 22637 | 22616 |
| >NOTCH1-L1 FLRELSRV    | 1     | >NOTCH1-L1 FPRELSRV    | 5162  | 5161  |
| >NOTCH1-L1 FLRELSRVL   | 8     | >NOTCH1-L1 FPRELSRVL   | 27748 | 27740 |
| >NOTCH1-L1 FLRELSRVLHT | 35    | >NOTCH1-L1 FPRELSRVLHT | 32321 | 32286 |
| >NOTCH1-L1 FLRELSRV    | 13797 | >NOTCH1-L1 FPRELSRV    | 38    | 13759 |
| >NOTCH1-L1 FLRELSRVL   | 282   | >NOTCH1-L1 FPRELSRVL   | 11    | 271   |
| >NOTCH1-L1 FLRELSRVLHT | 19735 | >NOTCH1-L1 FPRELSRVLHT | 197   | 19538 |
| >NOTCH1-L1 FLRELSRVL   | 65    | >NOTCH1-L1 FPRELSRVL   | 68    | 3     |
| >NOTCH1-L1 FLRELSRVL   | 123   | >NOTCH1-L1 FPRELSRVL   | 13652 | 13529 |
| >NOTCH1-L1 FLRELSRVL   | 470   | >NOTCH1-L1 FPRELSRVL   | 6547  | 6077  |
| >NOTCH1-L1 FLRELSRVL   | 10489 | >NOTCH1-L1 FPRELSRVL   | 61    | 10428 |
| >NOTCH1-L1 FLRELSRVL   | 2603  | >NOTCH1-L1 FPRELSRVL   | 189   | 2414  |
| >NOTCH1-L1 FLRELSRV    | 22151 | >NOTCH1-L1 FPRELSRV    | 247   | 21904 |
| >NOTCH1-L1 FLRELSRV    | 22053 | >NOTCH1-L1 FPRELSRV    | 20    | 22033 |
| >NOTCH1-L1 FLRELSRVLHT | 28740 | >NOTCH1-L1 FPRELSRVLHT | 192   | 28548 |
| >NOTCH1-L1 FLRELSRVL   | 10569 | >NOTCH1-L1 FPRELSRVL   | 178   | 10391 |
| >NOTCH1-L1 EQLRNSSFHF  | 189   | >NOTCH1-L1 EQLRNSSFHF  | 13045 | 12856 |
| >NOTCH1-L1 EQLRNSSFHF  | 69    | >NOTCH1-L1 EQLRNSSFHF  | 5170  | 5101  |
| >NOTCH1-L1 EQLRNSSFHF  | 406   | >NOTCH1-L1 EQLRNSSFHF  | 15701 | 15295 |
| >NOTCH1-L1 EQLRNSSFHF  | 136   | >NOTCH1-L1 EQLRNSSFHF  | 4336  | 4200  |
| >NOTCH1-L1 EQLRNSSFHF  | 230   | >NOTCH1-L1 EQLRNSSFHF  | 21894 | 21664 |
| >NOTCH1-L1 HFLRELSRVL  | 56    | >NOTCH1-L1 HFPRELSRVL  | 34    | 22    |

|                        |      |                        |      |      |
|------------------------|------|------------------------|------|------|
| >NOTCH1-L1 HFLRELSR    | 54   | >NOTCH1-L1 HFPRELSR    | 781  | 727  |
| >NOTCH1-L1 HFLRELSR    | 37   | >NOTCH1-L1 HFPRELSR    | 286  | 249  |
| >NOTCH1-L1 HFLRELSR    | 38   | >NOTCH1-L1 HFPRELSR    | 46   | 8    |
| >NOTCH1-L1 FHFLRELSRV  | 1486 | >NOTCH1-L1 FHFPRELSRV  | 156  | 1330 |
| >NOTCH1-L1 FHFLRELSR   | 1345 | >NOTCH1-L1 FHFPRELSR   | 496  | 849  |
| >NOTCH1-L1 FHFLRELSRV  | 1036 | >NOTCH1-L1 FHFPRELSRV  | 348  | 688  |
| >NOTCH1-L1 FHFLRELSRVI | 251  | >NOTCH1-L1 FHFPRELSRVI | 70   | 181  |
| >NOTCH1-L1 FHFLRELSRVI | 86   | >NOTCH1-L1 FHFPRELSRVI | 77   | 9    |
| >NOTCH1-L1 FHFLRELSRVI | 13   | >NOTCH1-L1 FHFPRELSRVI | 10   | 3    |
| >NOTCH1-L1 SFHFLREL    | 216  | >NOTCH1-L1 SFHFPREL    | 549  | 333  |
| >NOTCH1-L1 SFHFLRELSR  | 24   | >NOTCH1-L1 SFHFPRELSR  | 37   | 13   |
| >NOTCH1-L1 SFHFLRELSR  | 70   | >NOTCH1-L1 SFHFPRELSR  | 98   | 28   |
| >NOTCH1-L1 SFHFLRELSR  | 211  | >NOTCH1-L1 SFHFPRELSR  | 277  | 66   |
| >NOTCH1-L1 SFHFLRELSR  | 358  | >NOTCH1-L1 SFHFPRELSR  | 279  | 79   |
| >NOTCH1-L1 SFHFLRELSR  | 74   | >NOTCH1-L1 SFHFPRELSR  | 132  | 58   |
| >NOTCH1-L1 SFHFLREL    | 366  | >NOTCH1-L1 SFHFPREL    | 567  | 201  |
| >NOTCH1-L1 SFHFLREL    | 230  | >NOTCH1-L1 SFHFPREL    | 306  | 76   |
| >NOTCH1-L1 SSFHFLREL   | 16   | >NOTCH1-L1 SSFHFPREL   | 39   | 23   |
| >NOTCH1-L1 SSFHFLREL   | 350  | >NOTCH1-L1 SSFHFPREL   | 1507 | 1157 |
| >NOTCH1-L1 SSFHFLRELSR | 31   | >NOTCH1-L1 SSFHFPRELSF | 30   | 1    |
| >NOTCH1-L1 SSFHFLRELSR | 41   | >NOTCH1-L1 SSFHFPRELSF | 55   | 14   |
| >NOTCH1-L1 SSFHFLREL   | 167  | >NOTCH1-L1 SSFHFPREL   | 69   | 98   |
| >NOTCH1-L1 SSFHFLRELSR | 424  | >NOTCH1-L1 SSFHFPRELSF | 718  | 294  |
| >NOTCH1-L1 SSFHFLRELSR | 26   | >NOTCH1-L1 SSFHFPRELSF | 28   | 2    |
| >NOTCH1-L1 SSFHFLREL   | 369  | >NOTCH1-L1 SSFHFPREL   | 516  | 147  |
| >NOTCH1-L1 SSFHFLREL   | 86   | >NOTCH1-L1 SSFHFPREL   | 48   | 38   |
| >NOTCH1-L1 SSFHFLRELSR | 650  | >NOTCH1-L1 SSFHFPRELSF | 430  | 220  |
| >NOTCH1-L1 SSFHFLREL   | 13   | >NOTCH1-L1 SSFHFPREL   | 15   | 2    |
| >NOTCH1-L1 SSFHFLREL   | 57   | >NOTCH1-L1 SSFHFPREL   | 139  | 82   |
| >NOTCH1-L1 SSFHFLRE    | 139  | >NOTCH1-L1 SSFHFPRE    | 148  | 9    |
| >NOTCH1-L1 SSFHFLREL   | 283  | >NOTCH1-L1 SSFHFPREL   | 175  | 108  |
| >NOTCH1-L1 SSFHFLRELSR | 67   | >NOTCH1-L1 SSFHFPRELSF | 53   | 14   |
| >NOTCH1-L1 SSFHFLRELSR | 316  | >NOTCH1-L1 SSFHFPRELSF | 235  | 81   |
| >NOTCH1-L1 SSFHFLREL   | 52   | >NOTCH1-L1 SSFHFPREL   | 54   | 2    |
| >NOTCH1-L1 NSSFHFLR    | 152  | >NOTCH1-L1 NSSHFPR     | 217  | 65   |
| >NOTCH1-L1 NSSFHFLR    | 23   | >NOTCH1-L1 NSSHFPR     | 16   | 7    |
| >NOTCH1-L1 NSSFHFLR    | 44   | >NOTCH1-L1 NSSHFPR     | 52   | 8    |
| >NOTCH1-L1 NSSFHFLR    | 5    | >NOTCH1-L1 NSSHFPR     | 8    | 3    |
| >NOTCH1-L1 NSSFHFLR    | 142  | >NOTCH1-L1 NSSHFPR     | 162  | 20   |
| >NOTCH1-L1 NSSFHFLR    | 356  | >NOTCH1-L1 NSSHFPR     | 200  | 156  |
| >NOTCH1-L1 RNSSFHFLR   | 7    | >NOTCH1-L1 RNSSFHFPR   | 6    | 1    |
| >NOTCH1-L1 RNSSFHFLR   | 46   | >NOTCH1-L1 RNSSFHFPR   | 117  | 71   |
| >NOTCH1-L1 RNSSFHFLREI | 626  | >NOTCH1-L1 RNSSFHFPRE  | 328  | 298  |

|                        |      |                       |       |       |
|------------------------|------|-----------------------|-------|-------|
| >NOTCH1-L1 RNSSFHFLREI | 466  | >NOTCH1-L1 RNSSFHFPRE | 579   | 113   |
| >NOTCH1-L1 RNSSFHFLR   | 32   | >NOTCH1-L1 RNSSFHFPR  | 16    | 16    |
| >NOTCH1-L1 LRNSSFHFL   | 492  | >NOTCH1-L1 LRNSSFHFP  | 40909 | 40417 |
| >NOTCH1-L1 LRNSSFHFLR  | 34   | >NOTCH1-L1 LRNSSHFPR  | 31    | 3     |
| >NOTCH1-L1 LRNSSFHFLR  | 112  | >NOTCH1-L1 LRNSSHFPR  | 83    | 29    |
| >NOTCH1-L1 LRNSSFHFL   | 65   | >NOTCH1-L1 LRNSSFHFP  | 1515  | 1450  |
| >NOTCH1-L1 LRNSSFHFLR  | 1008 | >NOTCH1-L1 LRNSSHFPR  | 245   | 763   |
| >NOTCH1-L1 LRNSSFHFL   | 113  | >NOTCH1-L1 LRNSSFHFP  | 3125  | 3012  |
| >NOTCH1-L1 LRNSSFHFLR  | 304  | >NOTCH1-L1 LRNSSHFPR  | 567   | 263   |
| >NOTCH1-L1 LRNSSFHFL   | 373  | >NOTCH1-L1 LRNSSFHFP  | 25559 | 25186 |
| >NOTCH1-L1 LRNSSFHFL   | 48   | >NOTCH1-L1 LRNSSFHFP  | 12662 | 12614 |
| >NOTCH1-L1 LRNSSFHFLR  | 285  | >NOTCH1-L1 LRNSSHFPR  | 148   | 137   |
| >NOTCH1-L1 QLRNSSFHFL  | 43   | >NOTCH1-L1 QLRNSSFHFP | 9992  | 9949  |
| >NOTCH1-L1 QLRNSSFHFL  | 130  | >NOTCH1-L1 QLRNSSFHFP | 11866 | 11736 |
| >NOTCH1-L1 QLRNSSFHFL  | 264  | >NOTCH1-L1 QLRNSSFHFP | 18652 | 18388 |
| >NOTCH1-L1 QLRNSSFHFL  | 132  | >NOTCH1-L1 QLRNSSFHFP | 18489 | 18357 |
| >NOTCH1-L1 QLRNSSFHFL  | 11   | >NOTCH1-L1 QLRNSSFHFP | 12805 | 12794 |
| >NOTCH1-L1 QLRNSSFHFL  | 183  | >NOTCH1-L1 QLRNSSFHFP | 374   | 191   |
| >NOTCH1-L1 QLRNSSFHFL  | 37   | >NOTCH1-L1 QLRNSSFHFP | 560   | 523   |
| >NOTCH1-L1 QLRNSSFHFL  | 100  | >NOTCH1-L1 QLRNSSFHFP | 51    | 49    |
| >NOTCH1-L1 QLRNSSFHFL  | 10   | >NOTCH1-L1 QLRNSSFHFP | 9     | 1     |
| >NOTCH1-L1 QLRNSSFHFL  | 49   | >NOTCH1-L1 QLRNSSFHFP | 42    | 7     |
| >NOTCH1-L1 QLRNSSFHFL  | 95   | >NOTCH1-L1 QLRNSSFHFP | 226   | 131   |
| >NOTCH1-L1 QLRNSSFHFL  | 166  | >NOTCH1-L1 QLRNSSFHFP | 6138  | 5972  |
| >NOTCH1-L1 QLRNSSFHFL  | 260  | >NOTCH1-L1 QLRNSSFHFP | 132   | 128   |
| >NOTCH1-L1 LSRVLHTN    | 1418 | >NOTCH1-L1 HSRVLHTN   | 137   | 1281  |
| >NOTCH1-L1 LSRVLHTNV   | 42   | >NOTCH1-L1 HSRVLHTNV  | 8     | 34    |
| >NOTCH1-L1 LSRVLHTNVV  | 35   | >NOTCH1-L1 HSRVLHTNV\ | 8     | 27    |
| >NOTCH1-L1 LSRVLHTNVV  | 651  | >NOTCH1-L1 HSRVLHTNV\ | 62    | 589   |
| >NOTCH1-L1 LSRVLHTNVV  | 45   | >NOTCH1-L1 HSRVLHTNV\ | 82    | 37    |
| >NOTCH1-L1 LSRVLHTNV   | 451  | >NOTCH1-L1 HSRVLHTNV  | 1061  | 610   |
| >NOTCH1-L1 LSRVLHTNVV  | 424  | >NOTCH1-L1 HSRVLHTNV\ | 958   | 534   |
| >NOTCH1-L1 LSRVLHTNVV  | 8    | >NOTCH1-L1 HSRVLHTNV\ | 11    | 3     |
| >NOTCH1-L1 LSRVLHTNV   | 103  | >NOTCH1-L1 HSRVLHTNV  | 91    | 12    |
| >NOTCH1-L1 LSRVLHTNVV  | 3    | >NOTCH1-L1 HSRVLHTNV\ | 3     | 0     |
| >NOTCH1-L1 LSRVLHTNVV  | 396  | >NOTCH1-L1 HSRVLHTNV\ | 269   | 127   |
| >NOTCH1-L1 LSRVLHTNVV  | 344  | >NOTCH1-L1 HSRVLHTNV\ | 1137  | 793   |
| >NOTCH1-L1 LSRVLHTNV   | 98   | >NOTCH1-L1 HSRVLHTNV  | 356   | 258   |
| >NOTCH1-L1 LSRVLHTNVV  | 153  | >NOTCH1-L1 HSRVLHTNV\ | 998   | 845   |
| >NOTCH1-L1 LSRVLHTNVV  | 15   | >NOTCH1-L1 HSRVLHTNV\ | 35    | 20    |
| >NOTCH1-L1 ELSRVLHTNV  | 322  | >NOTCH1-L1 EHSRVLHTNV | 22594 | 22272 |
| >NOTCH1-L1 ELSRVLHTNV  | 63   | >NOTCH1-L1 EHSRVLHTNV | 16922 | 16859 |
| >NOTCH1-L1 ELSRVLHTNV  | 97   | >NOTCH1-L1 EHSRVLHTNV | 17124 | 17027 |

|                        |     |                        |       |       |
|------------------------|-----|------------------------|-------|-------|
| >NOTCH1-L1 ELSRVLHTNV  | 77  | >NOTCH1-L1 EHSRVLHTNV  | 19275 | 19198 |
| >NOTCH1-L1 ELSRVLHTNV  | 27  | >NOTCH1-L1 EHSRVLHTNV  | 20196 | 20169 |
| >NOTCH1-L1 ELSRVLHTNV  | 38  | >NOTCH1-L1 EHSRVLHTNV  | 20278 | 20240 |
| >NOTCH1-L1 ELSRVLHTNV  | 231 | >NOTCH1-L1 EHSRVLHTNV  | 23218 | 22987 |
| >NOTCH1-L1 ELSRVLHTNV  | 51  | >NOTCH1-L1 EHSRVLHTNV  | 22613 | 22562 |
| >NOTCH1-L1 ELSRVLHTNV  | 31  | >NOTCH1-L1 EHSRVLHTNV  | 19513 | 19482 |
| >NOTCH1-L1 ELSRVLHTNV  | 73  | >NOTCH1-L1 EHSRVLHTNV  | 21277 | 21204 |
| >NOTCH1-L1 ELSRVLHTNV  | 30  | >NOTCH1-L1 EHSRVLHTNV  | 21167 | 21137 |
| >NOTCH1-L1 ELSRVLHTNV  | 17  | >NOTCH1-L1 EHSRVLHTNV  | 19910 | 19893 |
| >NOTCH1-L1 ELSRVLHTNV  | 4   | >NOTCH1-L1 EHSRVLHTNV  | 19431 | 19427 |
| >NOTCH1-L1 ELSRVLHTNV  | 8   | >NOTCH1-L1 EHSRVLHTNV  | 20579 | 20571 |
| >NOTCH1-L1 ELSRVLHTNV  | 411 | >NOTCH1-L1 EHSRVLHTNV  | 8093  | 7682  |
| >NOTCH1-L1 ELSRVLHTNV  | 59  | >NOTCH1-L1 EHSRVLHTNV  | 5114  | 5055  |
| >NOTCH1-L1 ELSRVLHTNV  | 58  | >NOTCH1-L1 EHSRVLHTNV  | 10923 | 10865 |
| >NOTCH1-L1 ELSRVLHTNV  | 153 | >NOTCH1-L1 EHSRVLHTNV  | 13538 | 13385 |
| >NOTCH1-L1 RNSSFHFLREI | 466 | >NOTCH1-L1 RNSSFHFLREI | 4925  | 4459  |
| >NOTCH1-L1 RELSRVLHTN  | 466 | >NOTCH1-L1 REHSRVLHTN  | 494   | 28    |
| >NOTCH1-L1 RELSRVLHTN  | 210 | >NOTCH1-L1 REHSRVLHTN  | 167   | 43    |
| >NOTCH1-L1 RELSRVLHT   | 339 | >NOTCH1-L1 REHSRVLHT   | 253   | 86    |
| >NOTCH1-L1 RELSRVLHTN  | 327 | >NOTCH1-L1 REHSRVLHTN  | 260   | 67    |
| >NOTCH1-L1 RELSRVLHTN  | 74  | >NOTCH1-L1 REHSRVLHTN  | 59    | 15    |
| >NOTCH1-L1 RELSRVLHT   | 713 | >NOTCH1-L1 REHSRVLHT   | 219   | 494   |
| >NOTCH1-L1 RELSRVLHTN  | 276 | >NOTCH1-L1 REHSRVLHTN  | 104   | 172   |
| >NOTCH1-L1 RELSRVLHT   | 33  | >NOTCH1-L1 REHSRVLHT   | 58    | 25    |
| >NOTCH1-L1 RELSRVLHTN  | 8   | >NOTCH1-L1 REHSRVLHTN  | 9     | 1     |
| >NOTCH1-L1 LRELSRVL    | 574 | >NOTCH1-L1 LREHSRVL    | 406   | 168   |
| >NOTCH1-L1 FLRELSRV    | 40  | >NOTCH1-L1 FLREHSRV    | 95    | 55    |
| >NOTCH1-L1 FLRELSRV    | 8   | >NOTCH1-L1 FLREHSRV    | 10    | 2     |
| >NOTCH1-L1 FLRELSRVL   | 89  | >NOTCH1-L1 FLREHSRVL   | 39    | 50    |
| >NOTCH1-L1 FLRELSRV    | 2   | >NOTCH1-L1 FLREHSRV    | 2     | 0     |
| >NOTCH1-L1 FLRELSRVL   | 11  | >NOTCH1-L1 FLREHSRVL   | 5     | 6     |
| >NOTCH1-L1 FLRELSRVLHT | 29  | >NOTCH1-L1 FLREHSRVLHT | 12    | 17    |
| >NOTCH1-L1 FLRELSRV    | 26  | >NOTCH1-L1 FLREHSRV    | 69    | 43    |
| >NOTCH1-L1 FLRELSRV    | 2   | >NOTCH1-L1 FLREHSRV    | 2     | 0     |
| >NOTCH1-L1 FLRELSRVL   | 15  | >NOTCH1-L1 FLREHSRVL   | 16    | 1     |
| >NOTCH1-L1 FLRELSRVLHT | 200 | >NOTCH1-L1 FLREHSRVLHT | 190   | 10    |
| >NOTCH1-L1 FLRELSRV    | 6   | >NOTCH1-L1 FLREHSRV    | 13    | 7     |
| >NOTCH1-L1 FLRELSRVL   | 53  | >NOTCH1-L1 FLREHSRVL   | 46    | 7     |
| >NOTCH1-L1 FLRELSRV    | 10  | >NOTCH1-L1 FLREHSRV    | 18    | 8     |
| >NOTCH1-L1 FLRELSRVL   | 200 | >NOTCH1-L1 FLREHSRVL   | 1178  | 978   |
| >NOTCH1-L1 FLRELSRV    | 21  | >NOTCH1-L1 FLREHSRV    | 67    | 46    |
| >NOTCH1-L1 FLRELSRV    | 1   | >NOTCH1-L1 FLREHSRV    | 2     | 1     |
| >NOTCH1-L1 FLRELSRVL   | 8   | >NOTCH1-L1 FLREHSRVL   | 8     | 0     |

|                        |      |                        |       |       |
|------------------------|------|------------------------|-------|-------|
| >NOTCH1-L1 FLRELSRVLHT | 35   | >NOTCH1-L1 FLREHSRVLH' | 32    | 3     |
| >NOTCH1-L1 FLRELSRVL   | 282  | >NOTCH1-L1 FLREHSRVL   | 68    | 214   |
| >NOTCH1-L1 FLRELSRV    | 634  | >NOTCH1-L1 FLREHSRV    | 75    | 559   |
| >NOTCH1-L1 FLRELSRVL   | 65   | >NOTCH1-L1 FLREHSRVL   | 14    | 51    |
| >NOTCH1-L1 FLRELSRVLHT | 1970 | >NOTCH1-L1 FLREHSRVLH' | 352   | 1618  |
| >NOTCH1-L1 FLRELSRVL   | 123  | >NOTCH1-L1 FLREHSRVL   | 78    | 45    |
| >NOTCH1-L1 FLRELSRVL   | 470  | >NOTCH1-L1 FLREHSRVL   | 173   | 297   |
| >NOTCH1-L1 FLRELSRVL   | 517  | >NOTCH1-L1 FLREHSRVL   | 292   | 225   |
| >NOTCH1-L1 HFLRELSRVL  | 56   | >NOTCH1-L1 HFLREHSRVL  | 81    | 25    |
| >NOTCH1-L1 HFLRELSR    | 54   | >NOTCH1-L1 HFLREHSR    | 20    | 34    |
| >NOTCH1-L1 HFLRELSR    | 37   | >NOTCH1-L1 HFLREHSR    | 20    | 17    |
| >NOTCH1-L1 HFLRELSR    | 38   | >NOTCH1-L1 HFLREHSR    | 29    | 9     |
| >NOTCH1-L1 FHFLELSR    | 1347 | >NOTCH1-L1 FHFLEHSR    | 486   | 861   |
| >NOTCH1-L1 FHFLELSR    | 1048 | >NOTCH1-L1 FHFLEHSR    | 388   | 660   |
| >NOTCH1-L1 FHFLELSRVL  | 251  | >NOTCH1-L1 FHFLEHSRV   | 262   | 11    |
| >NOTCH1-L1 FHFLELSRV   | 907  | >NOTCH1-L1 FHFLEHSRV   | 412   | 495   |
| >NOTCH1-L1 FHFLELSRVL  | 86   | >NOTCH1-L1 FHFLEHSRV   | 68    | 18    |
| >NOTCH1-L1 FHFLELSRVL  | 13   | >NOTCH1-L1 FHFLEHSRV   | 12    | 1     |
| >NOTCH1-L1 FHFLELSR    | 536  | >NOTCH1-L1 FHFLEHSR    | 409   | 127   |
| >NOTCH1-L1 SFHFLEL     | 216  | >NOTCH1-L1 SFHFLEH     | 12143 | 11927 |
| >NOTCH1-L1 SFHFLELSR   | 24   | >NOTCH1-L1 SFHFLEHSR   | 18    | 6     |
| >NOTCH1-L1 SFHFLELSR   | 70   | >NOTCH1-L1 SFHFLEHSR   | 109   | 39    |
| >NOTCH1-L1 SFHFLELSR   | 211  | >NOTCH1-L1 SFHFLEHSR   | 232   | 21    |
| >NOTCH1-L1 SFHFLELSR   | 358  | >NOTCH1-L1 SFHFLEHSR   | 491   | 133   |
| >NOTCH1-L1 SFHFLELSR   | 74   | >NOTCH1-L1 SFHFLEHSR   | 66    | 8     |
| >NOTCH1-L1 SFHFLEL     | 366  | >NOTCH1-L1 SFHFLEH     | 12164 | 11798 |
| >NOTCH1-L1 SFHFLEL     | 230  | >NOTCH1-L1 SFHFLEH     | 2667  | 2437  |
| >NOTCH1-L1 SSFHFLREL   | 16   | >NOTCH1-L1 SSFHFLREH   | 2506  | 2490  |
| >NOTCH1-L1 SSFHFLREL   | 350  | >NOTCH1-L1 SSFHFLREH   | 22496 | 22146 |
| >NOTCH1-L1 SSFHFLRELSR | 31   | >NOTCH1-L1 SSFHFLREHSf | 43    | 12    |
| >NOTCH1-L1 SSFHFLRELSR | 41   | >NOTCH1-L1 SSFHFLREHSf | 16    | 25    |
| >NOTCH1-L1 SSFHFLREL   | 167  | >NOTCH1-L1 SSFHFLREH   | 5749  | 5582  |
| >NOTCH1-L1 SSFHFLRELSR | 424  | >NOTCH1-L1 SSFHFLREHSf | 219   | 205   |
| >NOTCH1-L1 SSFHFLRELSR | 26   | >NOTCH1-L1 SSFHFLREHSf | 14    | 12    |
| >NOTCH1-L1 SSFHFLREL   | 369  | >NOTCH1-L1 SSFHFLREH   | 21649 | 21280 |
| >NOTCH1-L1 SSFHFLREL   | 86   | >NOTCH1-L1 SSFHFLREH   | 808   | 722   |
| >NOTCH1-L1 SSFHFLREL   | 13   | >NOTCH1-L1 SSFHFLREH   | 1471  | 1458  |
| >NOTCH1-L1 SSFHFLREL   | 57   | >NOTCH1-L1 SSFHFLREH   | 124   | 67    |
| >NOTCH1-L1 SSFHFLREL   | 283  | >NOTCH1-L1 SSFHFLREH   | 97    | 186   |
| >NOTCH1-L1 SSFHFLRELSR | 67   | >NOTCH1-L1 SSFHFLREHSf | 59    | 8     |
| >NOTCH1-L1 SSFHFLRELSR | 316  | >NOTCH1-L1 SSFHFLREHSf | 260   | 56    |
| >NOTCH1-L1 SSFHFLREL   | 52   | >NOTCH1-L1 SSFHFLREH   | 25637 | 25585 |
| >NOTCH1-L1 LHTNVVFKR   | 176  | >NOTCH1-L1 PHTNVVFKR   | 3579  | 3403  |

|                        |       |                        |       |       |
|------------------------|-------|------------------------|-------|-------|
| >NOTCH1-L1 VLHTNVVF    | 13714 | >NOTCH1-L1 VPHTNVVF    | 11    | 13703 |
| >NOTCH1-L1 VLHTNVVFK   | 32    | >NOTCH1-L1 VPHTNVVFK   | 7280  | 7248  |
| >NOTCH1-L1 VLHTNVVFK   | 28    | >NOTCH1-L1 VPHTNVVFK   | 3334  | 3306  |
| >NOTCH1-L1 VLHTNVVFK   | 29    | >NOTCH1-L1 VPHTNVVFK   | 7048  | 7019  |
| >NOTCH1-L1 VLHTNVVFKF  | 62    | >NOTCH1-L1 VPHTNVVFKF  | 1077  | 1015  |
| >NOTCH1-L1 VLHTNVVF    | 385   | >NOTCH1-L1 VPHTNVVF    | 18188 | 17803 |
| >NOTCH1-L1 VLHTNVVFKF  | 381   | >NOTCH1-L1 VPHTNVVFKF  | 3401  | 3020  |
| >NOTCH1-L1 VLHTNVVFK   | 278   | >NOTCH1-L1 VPHTNVVFK   | 2310  | 2032  |
| >NOTCH1-L1 VLHTNVVF    | 18309 | >NOTCH1-L1 VPHTNVVF    | 112   | 18197 |
| >NOTCH1-L1 VLHTNVVF    | 87    | >NOTCH1-L1 VPHTNVVF    | 9582  | 9495  |
| >NOTCH1-L1 VLHTNVVF    | 358   | >NOTCH1-L1 VPHTNVVF    | 5131  | 4773  |
| >NOTCH1-L1 VLHTNVVF    | 14    | >NOTCH1-L1 VPHTNVVF    | 72    | 58    |
| >NOTCH1-L1 VLHTNVVF    | 3915  | >NOTCH1-L1 VPHTNVVF    | 53    | 3862  |
| >NOTCH1-L1 VLHTNVVF    | 30505 | >NOTCH1-L1 VPHTNVVF    | 285   | 30220 |
| >NOTCH1-L1 VLHTNVVF    | 16757 | >NOTCH1-L1 VPHTNVVF    | 53    | 16704 |
| >NOTCH1-L1 VLHTNVVFKF  | 246   | >NOTCH1-L1 VPHTNVVFKF  | 707   | 461   |
| >NOTCH1-L1 FHFLRELSRVL | 251   | >NOTCH1-L1 FHFLRELSRVL | 5916  | 5665  |
| >NOTCH1-L1 FHFLRELSRVL | 86    | >NOTCH1-L1 FHFLRELSRVL | 1071  | 985   |
| >NOTCH1-L1 FHFLRELSRVL | 13    | >NOTCH1-L1 FHFLRELSRVL | 6903  | 6890  |
| >NOTCH1-L1 RVLHTNVV    | 399   | >NOTCH1-L1 RVPHTNVV    | 286   | 113   |
| >NOTCH1-L1 RVLHTNVV    | 38    | >NOTCH1-L1 RVPHTNVV    | 217   | 179   |
| >NOTCH1-L1 RVLHTNVV    | 75    | >NOTCH1-L1 RVPHTNVV    | 852   | 777   |
| >NOTCH1-L1 RVLHTNVV    | 103   | >NOTCH1-L1 RVPHTNVV    | 2184  | 2081  |
| >NOTCH1-L1 RVLHTNVV    | 176   | >NOTCH1-L1 RVPHTNVV    | 2317  | 2141  |
| >NOTCH1-L1 RVLHTNVV    | 210   | >NOTCH1-L1 RVPHTNVV    | 489   | 279   |
| >NOTCH1-L1 RVLHTNVVFK  | 15    | >NOTCH1-L1 RVPHTNVVFK  | 38    | 23    |
| >NOTCH1-L1 RVLHTNVVFK  | 296   | >NOTCH1-L1 RVPHTNVVFK  | 1577  | 1281  |
| >NOTCH1-L1 RVLHTNVVFK  | 14    | >NOTCH1-L1 RVPHTNVVFK  | 22    | 8     |
| >NOTCH1-L1 RVLHTNVVFK  | 63    | >NOTCH1-L1 RVPHTNVVFK  | 660   | 597   |
| >NOTCH1-L1 RVLHTNVVF   | 436   | >NOTCH1-L1 RVPHTNVVF   | 1797  | 1361  |
| >NOTCH1-L1 RVLHTNVVF   | 121   | >NOTCH1-L1 RVPHTNVVF   | 81    | 40    |
| >NOTCH1-L1 RVLHTNVV    | 45    | >NOTCH1-L1 RVPHTNVV    | 1486  | 1441  |
| >NOTCH1-L1 RVLHTNVVFK  | 4     | >NOTCH1-L1 RVPHTNVVFK  | 11    | 7     |
| >NOTCH1-L1 RVLHTNVVFK  | 208   | >NOTCH1-L1 RVPHTNVVFK  | 3760  | 3552  |
| >NOTCH1-L1 RVLHTNVVFK  | 89    | >NOTCH1-L1 RVPHTNVVFK  | 361   | 272   |
| >NOTCH1-L1 RVLHTNVVFK  | 8     | >NOTCH1-L1 RVPHTNVVFK  | 22    | 14    |
| >NOTCH1-L1 RVLHTNVV    | 172   | >NOTCH1-L1 RVPHTNVV    | 545   | 373   |
| >NOTCH1-L1 RVLHTNVVF   | 7     | >NOTCH1-L1 RVPHTNVVF   | 19    | 12    |
| >NOTCH1-L1 RVLHTNVVFK  | 386   | >NOTCH1-L1 RVPHTNVVFK  | 180   | 206   |
| >NOTCH1-L1 RVLHTNVVFK  | 143   | >NOTCH1-L1 RVPHTNVVFK  | 209   | 66    |
| >NOTCH1-L1 RVLHTNVV    | 2334  | >NOTCH1-L1 RVPHTNVV    | 490   | 1844  |
| >NOTCH1-L1 RVLHTNVVF   | 71    | >NOTCH1-L1 RVPHTNVVF   | 119   | 48    |
| >NOTCH1-L1 RVLHTNVVF   | 8     | >NOTCH1-L1 RVPHTNVVF   | 32    | 24    |

|                       |       |                       |      |       |
|-----------------------|-------|-----------------------|------|-------|
| >NOTCH1-L1 RVLHTNVVF  | 12    | >NOTCH1-L1 RVPHTNVVF  | 822  | 810   |
| >NOTCH1-L1 RVLHTNVVF  | 49    | >NOTCH1-L1 RVPHTNVVF  | 7707 | 7658  |
| >NOTCH1-L1 RVLHTNVV   | 21244 | >NOTCH1-L1 RVPHTNVV   | 214  | 21030 |
| >NOTCH1-L1 RVLHTNVVF  | 20205 | >NOTCH1-L1 RVPHTNVVF  | 189  | 20016 |
| >NOTCH1-L1 RVLHTNVV   | 317   | >NOTCH1-L1 RVPHTNVV   | 1649 | 1332  |
| >NOTCH1-L1 RVLHTNVVF  | 77    | >NOTCH1-L1 RVPHTNVVF  | 1677 | 1600  |
| >NOTCH1-L1 RVLHTNVVFK | 481   | >NOTCH1-L1 RVPHTNVVFK | 388  | 93    |
| >NOTCH1-L1 RVLHTNVVFK | 193   | >NOTCH1-L1 RVPHTNVVFK | 417  | 224   |
| >NOTCH1-L1 RVLHTNVVFK | 76    | >NOTCH1-L1 RVPHTNVVFK | 110  | 34    |
| >NOTCH1-L1 SRVLHTNVVF | 26    | >NOTCH1-L1 SRVPHTNVVF | 14   | 12    |
| >NOTCH1-L1 SRVLHTNVVF | 115   | >NOTCH1-L1 SRVPHTNVVF | 237  | 122   |
| >NOTCH1-L1 SRVLHTNVVF | 285   | >NOTCH1-L1 SRVPHTNVVF | 425  | 140   |
| >NOTCH1-L1 SRVLHTNVV  | 295   | >NOTCH1-L1 SRVPHTNVV  | 139  | 156   |
| >NOTCH1-L1 SRVLHTNVVF | 285   | >NOTCH1-L1 SRVPHTNVVF | 146  | 139   |
| >NOTCH1-L1 SRVLHTNVV  | 283   | >NOTCH1-L1 SRVPHTNVV  | 190  | 93    |
| >NOTCH1-L1 SRVLHTNVVF | 203   | >NOTCH1-L1 SRVPHTNVVF | 129  | 74    |
| >NOTCH1-L1 LSRVLHTNV  | 42    | >NOTCH1-L1 LSRVPHTNV  | 50   | 8     |
| >NOTCH1-L1 LSRVLHTNVV | 35    | >NOTCH1-L1 LSRVPHTNVV | 34   | 1     |
| >NOTCH1-L1 LSRVLHTNVV | 45    | >NOTCH1-L1 LSRVPHTNVV | 46   | 1     |
| >NOTCH1-L1 LSRVLHTNV  | 451   | >NOTCH1-L1 LSRVPHTNV  | 170  | 281   |
| >NOTCH1-L1 LSRVLHTNVV | 424   | >NOTCH1-L1 LSRVPHTNVV | 182  | 242   |
| >NOTCH1-L1 LSRVLHTNVV | 8     | >NOTCH1-L1 LSRVPHTNVV | 6    | 2     |
| >NOTCH1-L1 LSRVLHTNV  | 103   | >NOTCH1-L1 LSRVPHTNV  | 59   | 44    |
| >NOTCH1-L1 LSRVLHTNVV | 821   | >NOTCH1-L1 LSRVPHTNVV | 337  | 484   |
| >NOTCH1-L1 LSRVLHTNVV | 3     | >NOTCH1-L1 LSRVPHTNVV | 3    | 0     |
| >NOTCH1-L1 LSRVLHTNVV | 396   | >NOTCH1-L1 LSRVPHTNVV | 478  | 82    |
| >NOTCH1-L1 LSRVLHTNVV | 344   | >NOTCH1-L1 LSRVPHTNVV | 903  | 559   |
| >NOTCH1-L1 LSRVLHTNV  | 98    | >NOTCH1-L1 LSRVPHTNV  | 99   | 1     |
| >NOTCH1-L1 LSRVLHTNVV | 153   | >NOTCH1-L1 LSRVPHTNVV | 216  | 63    |
| >NOTCH1-L1 LSRVLHTNVV | 15    | >NOTCH1-L1 LSRVPHTNVV | 14   | 1     |
| >NOTCH1-L1 ELSRVLHTNV | 322   | >NOTCH1-L1 ELSRVPHTNV | 307  | 15    |
| >NOTCH1-L1 ELSRVLHTNV | 63    | >NOTCH1-L1 ELSRVPHTNV | 114  | 51    |
| >NOTCH1-L1 ELSRVLHTNV | 97    | >NOTCH1-L1 ELSRVPHTNV | 116  | 19    |
| >NOTCH1-L1 ELSRVLHTNV | 77    | >NOTCH1-L1 ELSRVPHTNV | 104  | 27    |
| >NOTCH1-L1 ELSRVLHTNV | 27    | >NOTCH1-L1 ELSRVPHTNV | 21   | 6     |
| >NOTCH1-L1 ELSRVLHTNV | 38    | >NOTCH1-L1 ELSRVPHTNV | 26   | 12    |
| >NOTCH1-L1 ELSRVLHTNV | 231   | >NOTCH1-L1 ELSRVPHTNV | 370  | 139   |
| >NOTCH1-L1 ELSRVLHTNV | 51    | >NOTCH1-L1 ELSRVPHTNV | 66   | 15    |
| >NOTCH1-L1 ELSRVLHTNV | 31    | >NOTCH1-L1 ELSRVPHTNV | 46   | 15    |
| >NOTCH1-L1 ELSRVLHTNV | 73    | >NOTCH1-L1 ELSRVPHTNV | 58   | 15    |
| >NOTCH1-L1 ELSRVLHTNV | 30    | >NOTCH1-L1 ELSRVPHTNV | 37   | 7     |
| >NOTCH1-L1 ELSRVLHTNV | 17    | >NOTCH1-L1 ELSRVPHTNV | 17   | 0     |
| >NOTCH1-L1 ELSRVLHTNV | 4     | >NOTCH1-L1 ELSRVPHTNV | 6    | 2     |



|                        |      |                       |       |       |
|------------------------|------|-----------------------|-------|-------|
| >NOTCH1-L1 ELSRVLHTNV  | 8    | >NOTCH1-L1 ELSRVPHTNV | 10    | 2     |
| >NOTCH1-L1 ELSRVLHTNV  | 411  | >NOTCH1-L1 ELSRVPHTNV | 222   | 189   |
| >NOTCH1-L1 ELSRVLHTNV  | 59   | >NOTCH1-L1 ELSRVPHTNV | 48    | 11    |
| >NOTCH1-L1 ELSRVLHTNV  | 58   | >NOTCH1-L1 ELSRVPHTNV | 58    | 0     |
| >NOTCH1-L1 ELSRVLHTNV  | 153  | >NOTCH1-L1 ELSRVPHTNV | 175   | 22    |
| >NOTCH1-L1 RELSRVLHTN  | 466  | >NOTCH1-L1 RELSRVPHTN | 343   | 123   |
| >NOTCH1-L1 RELSRVLHTN  | 210  | >NOTCH1-L1 RELSRVPHTN | 294   | 84    |
| >NOTCH1-L1 RELSRVLHT   | 339  | >NOTCH1-L1 RELSRVPHT  | 639   | 300   |
| >NOTCH1-L1 RELSRVLHTN  | 327  | >NOTCH1-L1 RELSRVPHTN | 395   | 68    |
| >NOTCH1-L1 RELSRVLHTN  | 74   | >NOTCH1-L1 RELSRVPHTN | 153   | 79    |
| >NOTCH1-L1 RELSRVLHT   | 713  | >NOTCH1-L1 RELSRVPHT  | 441   | 272   |
| >NOTCH1-L1 RELSRVLHTN  | 276  | >NOTCH1-L1 RELSRVPHTN | 278   | 2     |
| >NOTCH1-L1 RELSRVLHT   | 33   | >NOTCH1-L1 RELSRVPHT  | 14    | 19    |
| >NOTCH1-L1 RELSRVLHTN  | 8    | >NOTCH1-L1 RELSRVPHTN | 9     | 1     |
| >NOTCH1-L1 FLRELSRVL   | 89   | >NOTCH1-L1 FLRELSRVP  | 5362  | 5273  |
| >NOTCH1-L1 FLRELSRVL   | 11   | >NOTCH1-L1 FLRELSRVP  | 5093  | 5082  |
| >NOTCH1-L1 FLRELSRVLHT | 29   | >NOTCH1-L1 FLRELSRVPH | 27    | 2     |
| >NOTCH1-L1 FLRELSRVL   | 15   | >NOTCH1-L1 FLRELSRVP  | 7793  | 7778  |
| >NOTCH1-L1 FLRELSRVLHT | 200  | >NOTCH1-L1 FLRELSRVPH | 111   | 89    |
| >NOTCH1-L1 FLRELSRVL   | 53   | >NOTCH1-L1 FLRELSRVP  | 19183 | 19130 |
| >NOTCH1-L1 FLRELSRVL   | 200  | >NOTCH1-L1 FLRELSRVP  | 19458 | 19258 |
| >NOTCH1-L1 FLRELSRVLHT | 627  | >NOTCH1-L1 FLRELSRVPH | 240   | 387   |
| >NOTCH1-L1 FLRELSRVL   | 8    | >NOTCH1-L1 FLRELSRVP  | 11822 | 11814 |
| >NOTCH1-L1 FLRELSRVLHT | 35   | >NOTCH1-L1 FLRELSRVPH | 24    | 11    |
| >NOTCH1-L1 FLRELSRVL   | 282  | >NOTCH1-L1 FLRELSRVP  | 22989 | 22707 |
| >NOTCH1-L1 FLRELSRVL   | 65   | >NOTCH1-L1 FLRELSRVP  | 8362  | 8297  |
| >NOTCH1-L1 FLRELSRVL   | 123  | >NOTCH1-L1 FLRELSRVP  | 3449  | 3326  |
| >NOTCH1-L1 FLRELSRVLH  | 3381 | >NOTCH1-L1 FLRELSRVPH | 375   | 3006  |
| >NOTCH1-L1 FLRELSRVL   | 470  | >NOTCH1-L1 FLRELSRVP  | 12247 | 11777 |
| >NOTCH1-L1 HFLRELSRVL  | 56   | >NOTCH1-L1 HFLRELSRVP | 8569  | 8513  |
| >NOTCH1-L1 LHTNVVFKR   | 176  | >NOTCH1-L1 QHTNVVFKR  | 184   | 8     |
| >NOTCH1-L1 VLHTNVVFK   | 32   | >NOTCH1-L1 VQHTNVVFK  | 116   | 84    |
| >NOTCH1-L1 VLHTNVVFK   | 28   | >NOTCH1-L1 VQHTNVVFK  | 27    | 1     |
| >NOTCH1-L1 VLHTNVVFK   | 29   | >NOTCH1-L1 VQHTNVVFK  | 43    | 14    |
| >NOTCH1-L1 VLHTNVVFK   | 720  | >NOTCH1-L1 VQHTNVVFK  | 444   | 276   |
| >NOTCH1-L1 VLHTNVVFKR  | 62   | >NOTCH1-L1 VQHTNVVFKI | 125   | 63    |
| >NOTCH1-L1 VLHTNVVF    | 385  | >NOTCH1-L1 VQHTNVVF   | 1515  | 1130  |
| >NOTCH1-L1 VLHTNVVFKR  | 381  | >NOTCH1-L1 VQHTNVVFKI | 1275  | 894   |
| >NOTCH1-L1 VLHTNVVFK   | 278  | >NOTCH1-L1 VQHTNVVFK  | 2708  | 2430  |
| >NOTCH1-L1 VLHTNVVF    | 87   | >NOTCH1-L1 VQHTNVVF   | 42    | 45    |
| >NOTCH1-L1 VLHTNVVF    | 358  | >NOTCH1-L1 VQHTNVVF   | 612   | 254   |
| >NOTCH1-L1 VLHTNVVF    | 14   | >NOTCH1-L1 VQHTNVVF   | 3     | 11    |
| >NOTCH1-L1 VLHTNVVFK   | 3947 | >NOTCH1-L1 VQHTNVVFK  | 308   | 3639  |

|                        |     |                        |      |      |
|------------------------|-----|------------------------|------|------|
| >NOTCH1-L1 VLHTNVVFK   | 246 | >NOTCH1-L1 VQHTNVVFK   | 360  | 114  |
| >NOTCH1-L1 FHFLRELSRVL | 251 | >NOTCH1-L1 FHFLRELSRVC | 4100 | 3849 |
| >NOTCH1-L1 FHFLRELSRVL | 86  | >NOTCH1-L1 FHFLRELSRVC | 654  | 568  |
| >NOTCH1-L1 FHFLRELSRVL | 13  | >NOTCH1-L1 FHFLRELSRVC | 3456 | 3443 |
| >NOTCH1-L1 RVLHTNVV    | 399 | >NOTCH1-L1 RVQHTNVV    | 506  | 107  |
| >NOTCH1-L1 RVLHTNVV    | 38  | >NOTCH1-L1 RVQHTNVV    | 539  | 501  |
| >NOTCH1-L1 RVLHTNVV    | 75  | >NOTCH1-L1 RVQHTNVV    | 1054 | 979  |
| >NOTCH1-L1 RVLHTNVV    | 103 | >NOTCH1-L1 RVQHTNVV    | 413  | 310  |
| >NOTCH1-L1 RVLHTNVV    | 176 | >NOTCH1-L1 RVQHTNVV    | 4905 | 4729 |
| >NOTCH1-L1 RVLHTNVV    | 210 | >NOTCH1-L1 RVQHTNVV    | 548  | 338  |
| >NOTCH1-L1 RVLHTNVVFK  | 15  | >NOTCH1-L1 RVQHTNVVFK  | 27   | 12   |
| >NOTCH1-L1 RVLHTNVVFK  | 296 | >NOTCH1-L1 RVQHTNVVFK  | 1199 | 903  |
| >NOTCH1-L1 RVLHTNVVFK  | 14  | >NOTCH1-L1 RVQHTNVVFK  | 23   | 9    |
| >NOTCH1-L1 RVLHTNVVFK  | 63  | >NOTCH1-L1 RVQHTNVVFK  | 79   | 16   |
| >NOTCH1-L1 RVLHTNVVF   | 436 | >NOTCH1-L1 RVQHTNVVF   | 485  | 49   |
| >NOTCH1-L1 RVLHTNVVF   | 121 | >NOTCH1-L1 RVQHTNVVF   | 212  | 91   |
| >NOTCH1-L1 RVLHTNVV    | 45  | >NOTCH1-L1 RVQHTNVV    | 181  | 136  |
| >NOTCH1-L1 RVLHTNVVFK  | 4   | >NOTCH1-L1 RVQHTNVVFK  | 5    | 1    |
| >NOTCH1-L1 RVLHTNVVFK  | 208 | >NOTCH1-L1 RVQHTNVVFK  | 789  | 581  |
| >NOTCH1-L1 RVLHTNVVFK  | 89  | >NOTCH1-L1 RVQHTNVVFK  | 102  | 13   |
| >NOTCH1-L1 RVLHTNVVFK  | 8   | >NOTCH1-L1 RVQHTNVVFK  | 8    | 0    |
| >NOTCH1-L1 RVLHTNVV    | 172 | >NOTCH1-L1 RVQHTNVV    | 389  | 217  |
| >NOTCH1-L1 RVLHTNVVF   | 7   | >NOTCH1-L1 RVQHTNVVF   | 13   | 6    |
| >NOTCH1-L1 RVLHTNVVFK  | 386 | >NOTCH1-L1 RVQHTNVVFK  | 693  | 307  |
| >NOTCH1-L1 RVLHTNVVFK  | 143 | >NOTCH1-L1 RVQHTNVVFK  | 188  | 45   |
| >NOTCH1-L1 RVLHTNVVF   | 71  | >NOTCH1-L1 RVQHTNVVF   | 41   | 30   |
| >NOTCH1-L1 RVLHTNVVF   | 8   | >NOTCH1-L1 RVQHTNVVF   | 16   | 8    |
| >NOTCH1-L1 RVLHTNVVF   | 12  | >NOTCH1-L1 RVQHTNVVF   | 31   | 19   |
| >NOTCH1-L1 RVLHTNVVF   | 49  | >NOTCH1-L1 RVQHTNVVF   | 117  | 68   |
| >NOTCH1-L1 RVLHTNVV    | 317 | >NOTCH1-L1 RVQHTNVV    | 367  | 50   |
| >NOTCH1-L1 RVLHTNVVF   | 77  | >NOTCH1-L1 RVQHTNVVF   | 131  | 54   |
| >NOTCH1-L1 RVLHTNVVFK  | 481 | >NOTCH1-L1 RVQHTNVVFK  | 443  | 38   |
| >NOTCH1-L1 RVLHTNVVFK  | 193 | >NOTCH1-L1 RVQHTNVVFK  | 883  | 690  |
| >NOTCH1-L1 RVLHTNVVFK  | 76  | >NOTCH1-L1 RVQHTNVVFK  | 207  | 131  |
| >NOTCH1-L1 SRVLHTNVVF  | 26  | >NOTCH1-L1 SRVQHTNVV   | 18   | 8    |
| >NOTCH1-L1 SRVLHTNVVF  | 115 | >NOTCH1-L1 SRVQHTNVV   | 113  | 2    |
| >NOTCH1-L1 SRVLHTNVVF  | 285 | >NOTCH1-L1 SRVQHTNVV   | 286  | 1    |
| >NOTCH1-L1 SRVLHTNVV   | 295 | >NOTCH1-L1 SRVQHTNVV   | 96   | 199  |
| >NOTCH1-L1 SRVLHTNVVF  | 285 | >NOTCH1-L1 SRVQHTNVV   | 109  | 176  |
| >NOTCH1-L1 SRVLHTNVV   | 283 | >NOTCH1-L1 SRVQHTNVV   | 320  | 37   |
| >NOTCH1-L1 SRVLHTNVVF  | 203 | >NOTCH1-L1 SRVQHTNVV   | 202  | 1    |
| >NOTCH1-L1 LSRVLHTNV   | 42  | >NOTCH1-L1 LSRVQHTNV   | 20   | 22   |
| >NOTCH1-L1 LSRVLHTNVV  | 35  | >NOTCH1-L1 LSRVQHTNV   | 24   | 11   |

|                        |     |                       |      |      |
|------------------------|-----|-----------------------|------|------|
| >NOTCH1-L1 LSRVLHTNVV  | 651 | >NOTCH1-L1 LSRVQHTNV\ | 357  | 294  |
| >NOTCH1-L1 LSRVLHTNVV  | 45  | >NOTCH1-L1 LSRVQHTNV\ | 49   | 4    |
| >NOTCH1-L1 LSRVLHTNV   | 451 | >NOTCH1-L1 LSRVQHTNV  | 348  | 103  |
| >NOTCH1-L1 LSRVLHTNVV  | 424 | >NOTCH1-L1 LSRVQHTNV\ | 340  | 84   |
| >NOTCH1-L1 LSRVLHTNVV  | 8   | >NOTCH1-L1 LSRVQHTNV\ | 7    | 1    |
| >NOTCH1-L1 LSRVLHTNV   | 103 | >NOTCH1-L1 LSRVQHTNV  | 90   | 13   |
| >NOTCH1-L1 LSRVLHTNVV  | 3   | >NOTCH1-L1 LSRVQHTNV\ | 3    | 0    |
| >NOTCH1-L1 LSRVLHTNVV  | 396 | >NOTCH1-L1 LSRVQHTNV\ | 359  | 37   |
| >NOTCH1-L1 LSRVLHTNVV  | 344 | >NOTCH1-L1 LSRVQHTNV\ | 920  | 576  |
| >NOTCH1-L1 LSRVLHTNV   | 98  | >NOTCH1-L1 LSRVQHTNV  | 724  | 626  |
| >NOTCH1-L1 LSRVLHTNVV  | 153 | >NOTCH1-L1 LSRVQHTNV\ | 130  | 23   |
| >NOTCH1-L1 LSRVLHTNVV  | 15  | >NOTCH1-L1 LSRVQHTNV\ | 35   | 20   |
| >NOTCH1-L1 ELSRVLHTNV  | 322 | >NOTCH1-L1 ELSRVQHTN\ | 721  | 399  |
| >NOTCH1-L1 ELSRVLHTNV  | 63  | >NOTCH1-L1 ELSRVQHTN\ | 82   | 19   |
| >NOTCH1-L1 ELSRVLHTNV  | 97  | >NOTCH1-L1 ELSRVQHTN\ | 217  | 120  |
| >NOTCH1-L1 ELSRVLHTNV  | 77  | >NOTCH1-L1 ELSRVQHTN\ | 228  | 151  |
| >NOTCH1-L1 ELSRVLHTNV  | 27  | >NOTCH1-L1 ELSRVQHTN\ | 49   | 22   |
| >NOTCH1-L1 ELSRVLHTNV  | 38  | >NOTCH1-L1 ELSRVQHTN\ | 41   | 3    |
| >NOTCH1-L1 ELSRVLHTNV  | 231 | >NOTCH1-L1 ELSRVQHTN\ | 482  | 251  |
| >NOTCH1-L1 ELSRVLHTNV  | 51  | >NOTCH1-L1 ELSRVQHTN\ | 95   | 44   |
| >NOTCH1-L1 ELSRVLHTNV  | 31  | >NOTCH1-L1 ELSRVQHTN\ | 45   | 14   |
| >NOTCH1-L1 ELSRVLHTNV  | 73  | >NOTCH1-L1 ELSRVQHTN\ | 66   | 7    |
| >NOTCH1-L1 ELSRVLHTNV  | 30  | >NOTCH1-L1 ELSRVQHTN\ | 45   | 15   |
| >NOTCH1-L1 ELSRVLHTNV  | 17  | >NOTCH1-L1 ELSRVQHTN\ | 20   | 3    |
| >NOTCH1-L1 ELSRVLHTNV  | 4   | >NOTCH1-L1 ELSRVQHTN\ | 5    | 1    |
| >NOTCH1-L1 ELSRVLHTNV  | 8   | >NOTCH1-L1 ELSRVQHTN\ | 8    | 0    |
| >NOTCH1-L1 ELSRVLHTNV  | 411 | >NOTCH1-L1 ELSRVQHTN\ | 514  | 103  |
| >NOTCH1-L1 ELSRVLHTNV  | 59  | >NOTCH1-L1 ELSRVQHTN\ | 53   | 6    |
| >NOTCH1-L1 ELSRVLHTNV  | 58  | >NOTCH1-L1 ELSRVQHTN\ | 109  | 51   |
| >NOTCH1-L1 ELSRVLHTNV  | 153 | >NOTCH1-L1 ELSRVQHTN\ | 220  | 67   |
| >NOTCH1-L1 RELSRVLHTN  | 466 | >NOTCH1-L1 RELSRVQHTM | 358  | 108  |
| >NOTCH1-L1 RELSRVLHTN  | 210 | >NOTCH1-L1 RELSRVQHTM | 349  | 139  |
| >NOTCH1-L1 RELSRVLHT   | 339 | >NOTCH1-L1 RELSRVQHT  | 910  | 571  |
| >NOTCH1-L1 RELSRVLHTN  | 327 | >NOTCH1-L1 RELSRVQHTM | 461  | 134  |
| >NOTCH1-L1 RELSRVLHTN  | 74  | >NOTCH1-L1 RELSRVQHTM | 128  | 54   |
| >NOTCH1-L1 RELSRVLHTN  | 276 | >NOTCH1-L1 RELSRVQHTM | 345  | 69   |
| >NOTCH1-L1 RELSRVLHT   | 33  | >NOTCH1-L1 RELSRVQHT  | 27   | 6    |
| >NOTCH1-L1 RELSRVLHTN  | 8   | >NOTCH1-L1 RELSRVQHTM | 10   | 2    |
| >NOTCH1-L1 FLRELSRVL   | 89  | >NOTCH1-L1 FLRELSRVQ  | 2935 | 2846 |
| >NOTCH1-L1 FLRELSRVLHT | 566 | >NOTCH1-L1 FLRELSRVQH | 401  | 165  |
| >NOTCH1-L1 FLRELSRVL   | 11  | >NOTCH1-L1 FLRELSRVQ  | 3042 | 3031 |
| >NOTCH1-L1 FLRELSRVLHT | 29  | >NOTCH1-L1 FLRELSRVQH | 24   | 5    |
| >NOTCH1-L1 FLRELSRVL   | 15  | >NOTCH1-L1 FLRELSRVQ  | 2337 | 2322 |

|                        |       |                       |       |       |
|------------------------|-------|-----------------------|-------|-------|
| >NOTCH1-L1 FLRELSRVLHT | 200   | >NOTCH1-L1 FLRELSRVQH | 145   | 55    |
| >NOTCH1-L1 FLRELSRVL   | 53    | >NOTCH1-L1 FLRELSRVQ  | 12854 | 12801 |
| >NOTCH1-L1 FLRELSRVL   | 200   | >NOTCH1-L1 FLRELSRVQ  | 11113 | 10913 |
| >NOTCH1-L1 FLRELSRVL   | 8     | >NOTCH1-L1 FLRELSRVQ  | 443   | 435   |
| >NOTCH1-L1 FLRELSRVLHT | 35    | >NOTCH1-L1 FLRELSRVQH | 24    | 11    |
| >NOTCH1-L1 FLRELSRVL   | 282   | >NOTCH1-L1 FLRELSRVQ  | 17907 | 17625 |
| >NOTCH1-L1 FLRELSRVL   | 65    | >NOTCH1-L1 FLRELSRVQ  | 8684  | 8619  |
| >NOTCH1-L1 FLRELSRVL   | 123   | >NOTCH1-L1 FLRELSRVQ  | 1166  | 1043  |
| >NOTCH1-L1 FLRELSRVL   | 470   | >NOTCH1-L1 FLRELSRVQ  | 4452  | 3982  |
| >NOTCH1-L1 HFLRELSRVL  | 56    | >NOTCH1-L1 HFLRELSRVQ | 5992  | 5936  |
| >NOTCH1-L1 LEIDNRQCV   | 364   | >NOTCH1-L1 PEIDNRQCV  | 3715  | 3351  |
| >NOTCH1-L1 LEIDNRQCV   | 391   | >NOTCH1-L1 PEIDNRQCV  | 4165  | 3774  |
| >NOTCH1-L1 LEIDNRQCV   | 418   | >NOTCH1-L1 PEIDNRQCV  | 5065  | 4647  |
| >NOTCH1-L1 LEIDNRQCV   | 275   | >NOTCH1-L1 PEIDNRQCV  | 6444  | 6169  |
| >NOTCH1-L1 LEIDNRQCVC  | 412   | >NOTCH1-L1 PEIDNRQCVC | 7945  | 7533  |
| >NOTCH1-L1 LEIDNRQCV   | 25    | >NOTCH1-L1 PEIDNRQCV  | 327   | 302   |
| >NOTCH1-L1 LEIDNRQCVC  | 231   | >NOTCH1-L1 PEIDNRQCVC | 2804  | 2573  |
| >NOTCH1-L1 YLEIDNRQCV  | 358   | >NOTCH1-L1 YPEIDNRQCV | 27266 | 26908 |
| >NOTCH1-L1 YLEIDNRQCV  | 265   | >NOTCH1-L1 YPEIDNRQCV | 24682 | 24417 |
| >NOTCH1-L1 YLEIDNRQCV  | 442   | >NOTCH1-L1 YPEIDNRQCV | 25724 | 25282 |
| >NOTCH1-L1 YLEIDNRQCV  | 30    | >NOTCH1-L1 YPEIDNRQCV | 19790 | 19760 |
| >NOTCH1-L1 YLEIDNRQCV  | 28    | >NOTCH1-L1 YPEIDNRQCV | 19591 | 19563 |
| >NOTCH1-L1 YLEIDNRQCV  | 41    | >NOTCH1-L1 YPEIDNRQCV | 21700 | 21659 |
| >NOTCH1-L1 YLEIDNRQCV  | 181   | >NOTCH1-L1 YPEIDNRQCV | 23263 | 23082 |
| >NOTCH1-L1 YLEIDNRQ    | 250   | >NOTCH1-L1 YPEIDNRQ   | 36581 | 36331 |
| >NOTCH1-L1 YLEIDNRQC   | 291   | >NOTCH1-L1 YPEIDNRQC  | 37160 | 36869 |
| >NOTCH1-L1 YLEIDNRQCV  | 3     | >NOTCH1-L1 YPEIDNRQCV | 12824 | 12821 |
| >NOTCH1-L1 YLEIDNRQCV  | 144   | >NOTCH1-L1 YPEIDNRQCV | 35089 | 34945 |
| >NOTCH1-L1 YLEIDNRQCV  | 13178 | >NOTCH1-L1 YPEIDNRQCV | 478   | 12700 |
| >NOTCH1-L1 PMDVRGSIV\  | 85    | >NOTCH1-L1 PMDVRGSIV\ | 9711  | 9626  |
| >NOTCH1-L1 PMDVRGSIV\  | 150   | >NOTCH1-L1 PMDVRGSIV\ | 16753 | 16603 |
| >NOTCH1-L1 PMDVRGSIV\  | 284   | >NOTCH1-L1 PMDVRGSIV\ | 23070 | 22786 |
| >NOTCH1-L1 PMDVRGSIV\  | 138   | >NOTCH1-L1 PMDVRGSIV\ | 21778 | 21640 |
| >NOTCH1-L1 VYLEIDNRQC  | 428   | >NOTCH1-L1 VYPEIDNRQC | 3387  | 2959  |
| >NOTCH1-L1 VYLEIDNRQC  | 294   | >NOTCH1-L1 VYPEIDNRQC | 611   | 317   |
| >NOTCH1-L1 VYLEIDNR    | 286   | >NOTCH1-L1 VYPEIDNR   | 3039  | 2753  |
| >NOTCH1-L1 VYLEIDNR    | 120   | >NOTCH1-L1 VYPEIDNR   | 918   | 798   |
| >NOTCH1-L1 VYLEIDNR    | 43    | >NOTCH1-L1 VYPEIDNR   | 49    | 6     |
| >NOTCH1-L1 IVYLEIDNR   | 353   | >NOTCH1-L1 IVYPEIDNR  | 139   | 214   |
| >NOTCH1-L1 IVYLEIDNR   | 564   | >NOTCH1-L1 IVYPEIDNR  | 262   | 302   |
| >NOTCH1-L1 IVYLEIDNR   | 39    | >NOTCH1-L1 IVYPEIDNR  | 19    | 20    |
| >NOTCH1-L1 IVYLEIDNR   | 195   | >NOTCH1-L1 IVYPEIDNR  | 146   | 49    |
| >NOTCH1-L1 SIVYLEIDNR  | 491   | >NOTCH1-L1 SIVYPEIDNR | 462   | 29    |

|                        |     |                        |       |       |
|------------------------|-----|------------------------|-------|-------|
| >NOTCH1-L1 SIVYLEIDNR  | 33  | >NOTCH1-L1 SIVYPEIDNR  | 34    | 1     |
| >NOTCH1-L1 SIVYLEIDNR  | 272 | >NOTCH1-L1 SIVYPEIDNR  | 549   | 277   |
| >NOTCH1-L1 GSIVYLEIDNR | 263 | >NOTCH1-L1 GSIVYPEIDNF | 394   | 131   |
| >NOTCH1-L1 GSIVYLEIDNR | 215 | >NOTCH1-L1 GSIVYPEIDNF | 212   | 3     |
| >NOTCH1-L1 GSIVYLEI    | 266 | >NOTCH1-L1 GSIVYPEI    | 427   | 161   |
| >NOTCH1-L1 GSIVYLEIDNR | 170 | >NOTCH1-L1 GSIVYPEIDNF | 115   | 55    |
| >NOTCH1-L1 GSIVYLEI    | 240 | >NOTCH1-L1 GSIVYPEI    | 192   | 48    |
| >NOTCH1-L1 RGSIVYLEI   | 321 | >NOTCH1-L1 RGSIVYPEI   | 931   | 610   |
| >NOTCH1-L1 RGSIVYLEI   | 213 | >NOTCH1-L1 RGSIVYPEI   | 195   | 18    |
| >NOTCH1-L1 VRGSIVYL    | 446 | >NOTCH1-L1 VRGSIVYP    | 11109 | 10663 |
| >NOTCH1-L1 VRGSIVYLEI  | 401 | >NOTCH1-L1 VRGSIVYPEI  | 1427  | 1026  |
| >NOTCH1-L1 DVRGSIVYL   | 80  | >NOTCH1-L1 DVRGSIVYP   | 15747 | 15667 |
| >NOTCH1-L1 DVRGSIVYL   | 390 | >NOTCH1-L1 DVRGSIVYP   | 19430 | 19040 |
| >NOTCH1-L1 LEIDNRQCV   | 364 | >NOTCH1-L1 QEIDNRQCV   | 447   | 83    |
| >NOTCH1-L1 LEIDNRQCV   | 391 | >NOTCH1-L1 QEIDNRQCV   | 1326  | 935   |
| >NOTCH1-L1 LEIDNRQCV   | 418 | >NOTCH1-L1 QEIDNRQCV   | 823   | 405   |
| >NOTCH1-L1 LEIDNRQCV   | 275 | >NOTCH1-L1 QEIDNRQCV   | 855   | 580   |
| >NOTCH1-L1 LEIDNRQCVC  | 412 | >NOTCH1-L1 QEIDNRQCVC  | 984   | 572   |
| >NOTCH1-L1 LEIDNRQCV   | 903 | >NOTCH1-L1 QEIDNRQCV   | 115   | 788   |
| >NOTCH1-L1 LEIDNRQCVC  | 773 | >NOTCH1-L1 QEIDNRQCVC  | 96    | 677   |
| >NOTCH1-L1 LEIDNRQCV   | 25  | >NOTCH1-L1 QEIDNRQCV   | 39    | 14    |
| >NOTCH1-L1 LEIDNRQCVC  | 231 | >NOTCH1-L1 QEIDNRQCVC  | 374   | 143   |
| >NOTCH1-L1 YLEIDNRQCV  | 358 | >NOTCH1-L1 YQEIDNRQCV  | 4694  | 4336  |
| >NOTCH1-L1 YLEIDNRQCV  | 265 | >NOTCH1-L1 YQEIDNRQCV  | 3288  | 3023  |
| >NOTCH1-L1 YLEIDNRQCV  | 442 | >NOTCH1-L1 YQEIDNRQCV  | 4353  | 3911  |
| >NOTCH1-L1 YLEIDNRQCV  | 30  | >NOTCH1-L1 YQEIDNRQCV  | 2340  | 2310  |
| >NOTCH1-L1 YLEIDNRQCV  | 28  | >NOTCH1-L1 YQEIDNRQCV  | 1570  | 1542  |
| >NOTCH1-L1 YLEIDNRQCV  | 41  | >NOTCH1-L1 YQEIDNRQCV  | 4998  | 4957  |
| >NOTCH1-L1 YLEIDNRQCV  | 181 | >NOTCH1-L1 YQEIDNRQCV  | 12841 | 12660 |
| >NOTCH1-L1 YLEIDNRQ    | 250 | >NOTCH1-L1 YQEIDNRQ    | 31771 | 31521 |
| >NOTCH1-L1 YLEIDNRQC   | 291 | >NOTCH1-L1 YQEIDNRQC   | 32476 | 32185 |
| >NOTCH1-L1 YLEIDNRQCV  | 3   | >NOTCH1-L1 YQEIDNRQCV  | 872   | 869   |
| >NOTCH1-L1 YLEIDNRQCV  | 144 | >NOTCH1-L1 YQEIDNRQCV  | 27977 | 27833 |
| >NOTCH1-L1 PMDVRGSIV\  | 85  | >NOTCH1-L1 PMDVRGSIV\  | 3973  | 3888  |
| >NOTCH1-L1 PMDVRGSIV\  | 150 | >NOTCH1-L1 PMDVRGSIV\  | 6980  | 6830  |
| >NOTCH1-L1 PMDVRGSIV\  | 284 | >NOTCH1-L1 PMDVRGSIV\  | 16072 | 15788 |
| >NOTCH1-L1 PMDVRGSIV\  | 138 | >NOTCH1-L1 PMDVRGSIV\  | 3494  | 3356  |
| >NOTCH1-L1 VYLEIDNRQC  | 428 | >NOTCH1-L1 VYQEIDNRQC  | 5900  | 5472  |
| >NOTCH1-L1 VYLEIDNRQC  | 294 | >NOTCH1-L1 VYQEIDNRQC  | 664   | 370   |
| >NOTCH1-L1 VYLEIDNR    | 286 | >NOTCH1-L1 VYQEIDNR    | 335   | 49    |
| >NOTCH1-L1 VYLEIDNR    | 120 | >NOTCH1-L1 VYQEIDNR    | 185   | 65    |
| >NOTCH1-L1 VYLEIDNR    | 43  | >NOTCH1-L1 VYQEIDNR    | 113   | 70    |
| >NOTCH1-L1 IVYLEIDNR   | 353 | >NOTCH1-L1 IVYQEIDNR   | 639   | 286   |

|                        |       |                        |       |       |
|------------------------|-------|------------------------|-------|-------|
| >NOTCH1-L1 IVYLEIDNR   | 39    | >NOTCH1-L1 IVYQEIDNR   | 27    | 12    |
| >NOTCH1-L1 IVYLEIDNR   | 195   | >NOTCH1-L1 IVYQEIDNR   | 104   | 91    |
| >NOTCH1-L1 SIVYLEIDNR  | 491   | >NOTCH1-L1 SIVYQEIDNR  | 697   | 206   |
| >NOTCH1-L1 SIVYLEIDNR  | 33    | >NOTCH1-L1 SIVYQEIDNR  | 106   | 73    |
| >NOTCH1-L1 SIVYLEIDNR  | 272   | >NOTCH1-L1 SIVYQEIDNR  | 326   | 54    |
| >NOTCH1-L1 GSIVYLEIDNR | 263   | >NOTCH1-L1 GSIVYQEIDNI | 386   | 123   |
| >NOTCH1-L1 GSIVYLEIDNR | 215   | >NOTCH1-L1 GSIVYQEIDNI | 189   | 26    |
| >NOTCH1-L1 GSIVYLEI    | 266   | >NOTCH1-L1 GSIVYQEI    | 610   | 344   |
| >NOTCH1-L1 GSIVYLEIDNR | 170   | >NOTCH1-L1 GSIVYQEIDNI | 156   | 14    |
| >NOTCH1-L1 GSIVYLEI    | 240   | >NOTCH1-L1 GSIVYQEI    | 228   | 12    |
| >NOTCH1-L1 RGSIVYLEI   | 321   | >NOTCH1-L1 RGSIVYQEI   | 2434  | 2113  |
| >NOTCH1-L1 RGSIVYLEI   | 213   | >NOTCH1-L1 RGSIVYQEI   | 215   | 2     |
| >NOTCH1-L1 VRGSIVYL    | 446   | >NOTCH1-L1 VRGSIVYQ    | 6865  | 6419  |
| >NOTCH1-L1 VRGSIVYLEI  | 401   | >NOTCH1-L1 VRGSIVYQEI  | 630   | 229   |
| >NOTCH1-L1 DVRGSIVYL   | 80    | >NOTCH1-L1 DVRGSIVYQ   | 1014  | 934   |
| >NOTCH1-L1 DVRGSIVYL   | 390   | >NOTCH1-L1 DVRGSIVYQ   | 15790 | 15400 |
| >NOTCH1-L1 LGSLNIPYK   | 483   | >NOTCH1-L1 PGSLNIPYK   | 5767  | 5284  |
| >NOTCH1-L1 LGSLNIPY    | 451   | >NOTCH1-L1 PGSLNIPY    | 11201 | 10750 |
| >NOTCH1-L1 LGSLNIPY    | 58    | >NOTCH1-L1 PGSLNIPY    | 1719  | 1661  |
| >NOTCH1-L1 LGSLNIPYKI  | 450   | >NOTCH1-L1 PGSLNIPYKI  | 8020  | 7570  |
| >NOTCH1-L1 SLGSLNIPYKI | 37843 | >NOTCH1-L1 SPGSLNIPYKI | 364   | 37479 |
| >NOTCH1-L1 SLGSLNIPYKI | 57    | >NOTCH1-L1 SPGSLNIPYKI | 22814 | 22757 |
| >NOTCH1-L1 SLGSLNIPYKI | 33    | >NOTCH1-L1 SPGSLNIPYKI | 27376 | 27343 |
| >NOTCH1-L1 SLGSLNIPYKI | 272   | >NOTCH1-L1 SPGSLNIPYKI | 24207 | 23935 |
| >NOTCH1-L1 SLGSLNIPYKI | 9     | >NOTCH1-L1 SPGSLNIPYKI | 18289 | 18280 |
| >NOTCH1-L1 SLGSLNIPYKI | 37    | >NOTCH1-L1 SPGSLNIPYKI | 21325 | 21288 |
| >NOTCH1-L1 SLGSLNIPYKI | 16    | >NOTCH1-L1 SPGSLNIPYKI | 21835 | 21819 |
| >NOTCH1-L1 SLGSLNIPYKI | 152   | >NOTCH1-L1 SPGSLNIPYKI | 23219 | 23067 |
| >NOTCH1-L1 SLGSLNIPYKI | 34    | >NOTCH1-L1 SPGSLNIPYKI | 34002 | 33968 |
| >NOTCH1-L1 SLGSLNIPYK  | 42    | >NOTCH1-L1 SPGSLNIPYK  | 4961  | 4919  |
| >NOTCH1-L1 SLGSLNIPYK  | 36    | >NOTCH1-L1 SPGSLNIPYK  | 2543  | 2507  |
| >NOTCH1-L1 SLGSLNIPY   | 89    | >NOTCH1-L1 SPGSLNIPY   | 1973  | 1884  |
| >NOTCH1-L1 SLGSLNIPYK  | 470   | >NOTCH1-L1 SPGSLNIPYK  | 13983 | 13513 |
| >NOTCH1-L1 SLGSLNIPY   | 234   | >NOTCH1-L1 SPGSLNIPY   | 3263  | 3029  |
| >NOTCH1-L1 SLGSLNIPYKI | 67    | >NOTCH1-L1 SPGSLNIPYKI | 7828  | 7761  |
| >NOTCH1-L1 SLGSLNIPY   | 24    | >NOTCH1-L1 SPGSLNIPY   | 1812  | 1788  |
| >NOTCH1-L1 SLGSLNIPY   | 52    | >NOTCH1-L1 SPGSLNIPY   | 5411  | 5359  |
| >NOTCH1-L1 SLGSLNIPY   | 171   | >NOTCH1-L1 SPGSLNIPY   | 2320  | 2149  |
| >NOTCH1-L1 SLGSLNIPY   | 756   | >NOTCH1-L1 SPGSLNIPY   | 12    | 744   |
| >NOTCH1-L1 SLGSLNIPYKI | 30621 | >NOTCH1-L1 SPGSLNIPYKI | 373   | 30248 |
| >NOTCH1-L1 SLGSLNIPY   | 3803  | >NOTCH1-L1 SPGSLNIPY   | 50    | 3753  |
| >NOTCH1-L1 SLGSLNIPYK  | 213   | >NOTCH1-L1 SPGSLNIPYK  | 9218  | 9005  |
| >NOTCH1-L1 SLGSLNIPYK  | 422   | >NOTCH1-L1 SPGSLNIPYK  | 1301  | 879   |

|                         |       |                        |       |       |
|-------------------------|-------|------------------------|-------|-------|
| >NOTCH1-L1 VAAFLGALAS   | 174   | >NOTCH1-L1 VAAFLGALAS  | 14599 | 14425 |
| >NOTCH1-L1 VAAFLGALAS   | 493   | >NOTCH1-L1 VAAFLGALAS  | 12095 | 11602 |
| >NOTCH1-L1 VAAFLGALAS   | 68    | >NOTCH1-L1 VAAFLGALAS  | 15714 | 15646 |
| >NOTCH1-L1 VAAFLGALAS   | 164   | >NOTCH1-L1 VAAFLGALAS  | 17408 | 17244 |
| >NOTCH1-L1 ASLGSLNIPY   | 303   | >NOTCH1-L1 ASPGSLNIPY  | 2223  | 1920  |
| >NOTCH1-L1 ASLGSLNIPYK  | 131   | >NOTCH1-L1 ASPGSLNIPYK | 654   | 523   |
| >NOTCH1-L1 ASLGSLNIPY   | 75    | >NOTCH1-L1 ASPGSLNIPY  | 165   | 90    |
| >NOTCH1-L1 ASLGSLNIPYK  | 10    | >NOTCH1-L1 ASPGSLNIPYK | 38    | 28    |
| >NOTCH1-L1 ASLGSLNIPY   | 57    | >NOTCH1-L1 ASPGSLNIPY  | 69    | 12    |
| >NOTCH1-L1 ASLGSLNIPY   | 204   | >NOTCH1-L1 ASPGSLNIPY  | 287   | 83    |
| >NOTCH1-L1 ASLGSLNIPY   | 243   | >NOTCH1-L1 ASPGSLNIPY  | 296   | 53    |
| >NOTCH1-L1 ASLGSLNI     | 375   | >NOTCH1-L1 ASPGSLNI    | 5370  | 4995  |
| >NOTCH1-L1 ASLGSLNIPY   | 495   | >NOTCH1-L1 ASPGSLNIPY  | 6309  | 5814  |
| >NOTCH1-L1 ASLGSLNIPYK  | 9     | >NOTCH1-L1 ASPGSLNIPYK | 90    | 81    |
| >NOTCH1-L1 ASLGSLNIPY   | 87    | >NOTCH1-L1 ASPGSLNIPY  | 161   | 74    |
| >NOTCH1-L1 ASLGSLNIPYK  | 368   | >NOTCH1-L1 ASPGSLNIPYK | 3884  | 3516  |
| >NOTCH1-L1 ASLGSLNI     | 277   | >NOTCH1-L1 ASPGSLNI    | 933   | 656   |
| >NOTCH1-L1 ASLGSLNIPY   | 181   | >NOTCH1-L1 ASPGSLNIPY  | 353   | 172   |
| >NOTCH1-L1 ASLGSLNIPY   | 54    | >NOTCH1-L1 ASPGSLNIPY  | 842   | 788   |
| >NOTCH1-L1 ASLGSLNI     | 15    | >NOTCH1-L1 ASPGSLNI    | 630   | 615   |
| >NOTCH1-L1 ASLGSLNIPY   | 4     | >NOTCH1-L1 ASPGSLNIPY  | 66    | 62    |
| >NOTCH1-L1 ASLGSLNI     | 18160 | >NOTCH1-L1 ASPGSLNI    | 88    | 18072 |
| >NOTCH1-L1 ASLGSLNIP    | 17511 | >NOTCH1-L1 ASPGSLNIP   | 73    | 17438 |
| >NOTCH1-L1 ASLGSLNIPY   | 16369 | >NOTCH1-L1 ASPGSLNIPY  | 68    | 16301 |
| >NOTCH1-L1 ASLGSLNIPYK  | 17461 | >NOTCH1-L1 ASPGSLNIPYK | 94    | 17367 |
| >NOTCH1-L1 ASLGSLNIPY   | 114   | >NOTCH1-L1 ASPGSLNIPY  | 134   | 20    |
| >NOTCH1-L1 ASLGSLNIPYK  | 74    | >NOTCH1-L1 ASPGSLNIPYK | 385   | 311   |
| >NOTCH1-L1 ASLGSLNI     | 91    | >NOTCH1-L1 ASPGSLNI    | 198   | 107   |
| >NOTCH1-L1 LASLGS LNIPY | 275   | >NOTCH1-L1 LASPGSLNIPY | 387   | 112   |
| >NOTCH1-L1 LASLGS LNIPY | 105   | >NOTCH1-L1 LASPGSLNIPY | 60    | 45    |
| >NOTCH1-L1 LASLGS LNIPY | 648   | >NOTCH1-L1 LASPGSLNIPY | 270   | 378   |
| >NOTCH1-L1 LASLGS LNIPY | 101   | >NOTCH1-L1 LASPGSLNIPY | 53    | 48    |
| >NOTCH1-L1 LASLGS LNIPY | 334   | >NOTCH1-L1 LASPGSLNIPY | 84    | 250   |
| >NOTCH1-L1 LASLGS LNI   | 94    | >NOTCH1-L1 LASPGSLNI   | 22    | 72    |
| >NOTCH1-L1 LASLGS LNIPY | 16    | >NOTCH1-L1 LASPGSLNIPY | 7     | 9     |
| >NOTCH1-L1 LASLGS LNIPY | 10    | >NOTCH1-L1 LASPGSLNIPY | 8     | 2     |
| >NOTCH1-L1 LASLGS LNI   | 384   | >NOTCH1-L1 LASPGSLNI   | 380   | 4     |
| >NOTCH1-L1 LASLGS LNI   | 1009  | >NOTCH1-L1 LASPGSLNI   | 87    | 922   |
| >NOTCH1-L1 LASLGS LNIPY | 1211  | >NOTCH1-L1 LASPGSLNIPY | 189   | 1022  |
| >NOTCH1-L1 LASLGS LNI   | 220   | >NOTCH1-L1 LASPGSLNI   | 40    | 180   |
| >NOTCH1-L1 ALASLGSL     | 120   | >NOTCH1-L1 ALASPGSL    | 412   | 292   |
| >NOTCH1-L1 ALASLGSLNI   | 351   | >NOTCH1-L1 ALASPGSLNI  | 1629  | 1278  |
| >NOTCH1-L1 ALASLGSL     | 6     | >NOTCH1-L1 ALASPGSL    | 20    | 14    |

|                        |      |                        |       |       |
|------------------------|------|------------------------|-------|-------|
| >NOTCH1-L1 ALASLGSLNI  | 24   | >NOTCH1-L1 ALASPGSLNI  | 38    | 14    |
| >NOTCH1-L1 ALASLGSLNIF | 497  | >NOTCH1-L1 ALASPGSLNIF | 1712  | 1215  |
| >NOTCH1-L1 ALASLGSL    | 7    | >NOTCH1-L1 ALASPGSL    | 13    | 6     |
| >NOTCH1-L1 ALASLGSLNI  | 22   | >NOTCH1-L1 ALASPGSLNI  | 28    | 6     |
| >NOTCH1-L1 ALASLGSL    | 312  | >NOTCH1-L1 ALASPGSL    | 1871  | 1559  |
| >NOTCH1-L1 ALASLGSL    | 24   | >NOTCH1-L1 ALASPGSL    | 16    | 8     |
| >NOTCH1-L1 ALASLGSLNI  | 45   | >NOTCH1-L1 ALASPGSLNI  | 21    | 24    |
| >NOTCH1-L1 ALASLGSL    | 140  | >NOTCH1-L1 ALASPGSL    | 291   | 151   |
| >NOTCH1-L1 ALASLGSLNI  | 234  | >NOTCH1-L1 ALASPGSLNI  | 228   | 6     |
| >NOTCH1-L1 ALASLGSL    | 39   | >NOTCH1-L1 ALASPGSL    | 81    | 42    |
| >NOTCH1-L1 ALASLGSLNI  | 21   | >NOTCH1-L1 ALASPGSLNI  | 32    | 11    |
| >NOTCH1-L1 ALASLGSL    | 302  | >NOTCH1-L1 ALASPGSL    | 429   | 127   |
| >NOTCH1-L1 ALASLGSLNI  | 297  | >NOTCH1-L1 ALASPGSLNI  | 257   | 40    |
| >NOTCH1-L1 ALASLGSL    | 4    | >NOTCH1-L1 ALASPGSL    | 6     | 2     |
| >NOTCH1-L1 ALASLGSLNI  | 11   | >NOTCH1-L1 ALASPGSLNI  | 10    | 1     |
| >NOTCH1-L1 ALASLGSLNI  | 827  | >NOTCH1-L1 ALASPGSLNI  | 442   | 385   |
| >NOTCH1-L1 GALASLGSL   | 75   | >NOTCH1-L1 GALASPGSL   | 94    | 19    |
| >NOTCH1-L1 GALASLGSLN  | 178  | >NOTCH1-L1 GALASPGSLN  | 153   | 25    |
| >NOTCH1-L1 GALASLGSLN  | 508  | >NOTCH1-L1 GALASPGSLN  | 383   | 125   |
| >NOTCH1-L1 LGALASLGSL  | 159  | >NOTCH1-L1 LGALASPGSL  | 76    | 83    |
| >NOTCH1-L1 FLGALASL    | 20   | >NOTCH1-L1 FLGALASP    | 12485 | 12465 |
| >NOTCH1-L1 FLGALASLGS  | 45   | >NOTCH1-L1 FLGALASPGS  | 67    | 22    |
| >NOTCH1-L1 FLGALASL    | 4    | >NOTCH1-L1 FLGALASP    | 124   | 120   |
| >NOTCH1-L1 FLGALASLG   | 136  | >NOTCH1-L1 FLGALASPG   | 157   | 21    |
| >NOTCH1-L1 FLGALASLGS  | 6    | >NOTCH1-L1 FLGALASPGS  | 10    | 4     |
| >NOTCH1-L1 FLGALASL    | 7    | >NOTCH1-L1 FLGALASP    | 1240  | 1233  |
| >NOTCH1-L1 FLGALASLGS  | 7    | >NOTCH1-L1 FLGALASPGS  | 7     | 0     |
| >NOTCH1-L1 FLGALASL    | 38   | >NOTCH1-L1 FLGALASP    | 5794  | 5756  |
| >NOTCH1-L1 FLGALASLGS  | 76   | >NOTCH1-L1 FLGALASPGS  | 334   | 258   |
| >NOTCH1-L1 FLGALASL    | 3    | >NOTCH1-L1 FLGALASP    | 1465  | 1462  |
| >NOTCH1-L1 FLGALASLGS  | 577  | >NOTCH1-L1 FLGALASPGS  | 272   | 305   |
| >NOTCH1-L1 FLGALASLGS  | 5    | >NOTCH1-L1 FLGALASPGS  | 5     | 0     |
| >NOTCH1-L1 FLGALASL    | 5    | >NOTCH1-L1 FLGALASP    | 4886  | 4881  |
| >NOTCH1-L1 FLGALASLGS  | 11   | >NOTCH1-L1 FLGALASPGS  | 14    | 3     |
| >NOTCH1-L1 FLGALASL    | 10   | >NOTCH1-L1 FLGALASP    | 6156  | 6146  |
| >NOTCH1-L1 FLGALASLGS  | 1330 | >NOTCH1-L1 FLGALASPGS  | 488   | 842   |
| >NOTCH1-L1 FLGALASLGS  | 23   | >NOTCH1-L1 FLGALASPGS  | 26    | 3     |
| >NOTCH1-L1 FLGALASL    | 8    | >NOTCH1-L1 FLGALASP    | 14763 | 14755 |
| >NOTCH1-L1 FLGALASLGS  | 41   | >NOTCH1-L1 FLGALASPGS  | 50    | 9     |
| >NOTCH1-L1 FLGALASL    | 2    | >NOTCH1-L1 FLGALASP    | 821   | 819   |
| >NOTCH1-L1 FLGALASLGS  | 266  | >NOTCH1-L1 FLGALASPGS  | 137   | 129   |
| >NOTCH1-L1 FLGALASLGS  | 3    | >NOTCH1-L1 FLGALASPGS  | 3     | 0     |
| >NOTCH1-L1 FLGALASL    | 375  | >NOTCH1-L1 FLGALASP    | 6635  | 6260  |



|                        |      |                        |       |       |
|------------------------|------|------------------------|-------|-------|
| >NOTCH1-L1 AFLGALASL   | 259  | >NOTCH1-L1 AFLGALASP   | 15087 | 14828 |
| >NOTCH1-L1 AFLGALASL   | 27   | >NOTCH1-L1 AFLGALASP   | 9628  | 9601  |
| >NOTCH1-L1 AFLGALASL   | 178  | >NOTCH1-L1 AFLGALASP   | 11362 | 11184 |
| >NOTCH1-L1 AFLGALASL   | 403  | >NOTCH1-L1 AFLGALASP   | 2205  | 1802  |
| >NOTCH1-L1 AAFLGALASL  | 439  | >NOTCH1-L1 AAFLGALASP  | 14461 | 14022 |
| >NOTCH1-L1 AAFLGALASL  | 108  | >NOTCH1-L1 AAFLGALASP  | 9532  | 9424  |
| >NOTCH1-L1 AAFLGALASL  | 132  | >NOTCH1-L1 AAFLGALASP  | 9284  | 9152  |
| >NOTCH1-L1 AAFLGALASL  | 498  | >NOTCH1-L1 AAFLGALASP  | 17011 | 16513 |
| >NOTCH1-L1 AAFLGALASL  | 380  | >NOTCH1-L1 AAFLGALASP  | 10254 | 9874  |
| >NOTCH1-L1 AAFLGALASL  | 7    | >NOTCH1-L1 AAFLGALASP  | 9994  | 9987  |
| >NOTCH1-L2 LPQESPAL    | 190  | >NOTCH1-L2 VPQESPAL    | 154   | 36    |
| >NOTCH1-L2 LPQESPAL    | 51   | >NOTCH1-L2 VPQESPAL    | 56    | 5     |
| >NOTCH1-L2 LPQESPAL    | 35   | >NOTCH1-L2 VPQESPAL    | 135   | 100   |
| >NOTCH1-L2 LPQESPAL    | 185  | >NOTCH1-L2 VPQESPAL    | 262   | 77    |
| >NOTCH1-L2 LPQESPAL    | 183  | >NOTCH1-L2 VPQESPAL    | 1145  | 962   |
| >NOTCH1-L2 ILPQESPAL   | 283  | >NOTCH1-L2 IVPQESPAL   | 7915  | 7632  |
| >NOTCH1-L2 ILPQESPAL   | 66   | >NOTCH1-L2 IVPQESPAL   | 2922  | 2856  |
| >NOTCH1-L2 ILPQESPA    | 103  | >NOTCH1-L2 IVPQESPA    | 2422  | 2319  |
| >NOTCH1-L2 ILPQESPAL   | 329  | >NOTCH1-L2 IVPQESPAL   | 5771  | 5442  |
| >NOTCH1-L2 ILPQESPAL   | 159  | >NOTCH1-L2 IVPQESPAL   | 252   | 93    |
| >NOTCH1-L2 ILPQESPA    | 201  | >NOTCH1-L2 IVPQESPA    | 9053  | 8852  |
| >NOTCH1-L2 ILPQESPAL   | 24   | >NOTCH1-L2 IVPQESPAL   | 1829  | 1805  |
| >NOTCH1-L2 ILPQESPAL   | 235  | >NOTCH1-L2 IVPQESPAL   | 11630 | 11395 |
| >NOTCH1-L2 ILPQESPA    | 406  | >NOTCH1-L2 IVPQESPA    | 12025 | 11619 |
| >NOTCH1-L2 ILPQESPAL   | 52   | >NOTCH1-L2 IVPQESPAL   | 5465  | 5413  |
| >NOTCH1-L2 ILPQESPAL   | 157  | >NOTCH1-L2 IVPQESPAL   | 9552  | 9395  |
| >NOTCH1-L2 ILPQESPA    | 27   | >NOTCH1-L2 IVPQESPA    | 5056  | 5029  |
| >NOTCH1-L2 ILPQESPAL   | 10   | >NOTCH1-L2 IVPQESPAL   | 560   | 550   |
| >NOTCH1-L2 ILPQESPALPT | 299  | >NOTCH1-L2 IVPQESPALPT | 16791 | 16492 |
| >NOTCH1-L2 ILPQESPAL   | 154  | >NOTCH1-L2 IVPQESPAL   | 99    | 55    |
| >NOTCH1-L2 GPSSLAVHTI  | 139  | >NOTCH1-L2 GPSSLAVHTI  | 1002  | 863   |
| >NOTCH1-L2 GPSSLAVHTI  | 464  | >NOTCH1-L2 GPSSLAVHTI  | 5046  | 4582  |
| >NOTCH1-L2 GPSSLAVHTI  | 400  | >NOTCH1-L2 GPSSLAVHTI  | 1207  | 807   |
| >NOTCH1-L2 TILPQESPAL  | 214  | >NOTCH1-L2 TIVPQESPAL  | 455   | 241   |
| >NOTCH1-L2 TILPQESPAL  | 498  | >NOTCH1-L2 TIVPQESPAL  | 2725  | 2227  |
| >NOTCH1-L2 TILPQESPAL  | 193  | >NOTCH1-L2 TIVPQESPAL  | 371   | 178   |
| >NOTCH1-L2 TILPQESPAL  | 3364 | >NOTCH1-L2 TIVPQESPAL  | 421   | 2943  |
| >NOTCH1-L2 TILPQESPA   | 2770 | >NOTCH1-L2 TIVPQESPA   | 359   | 2411  |
| >NOTCH1-L2 TILPQESPAL  | 249  | >NOTCH1-L2 TIVPQESPAL  | 956   | 707   |
| >NOTCH1-L2 TILPQESPAL  | 498  | >NOTCH1-L2 TIVPQESPAL  | 444   | 54    |
| >NOTCH1-L2 HTILPQESPA  | 30   | >NOTCH1-L2 HTIVPQESPA  | 32    | 2     |
| >NOTCH1-L2 HTILPQES    | 562  | >NOTCH1-L2 HTIVPQES    | 415   | 147   |
| >NOTCH1-L2 HTILPQESPA  | 132  | >NOTCH1-L2 HTIVPQESPA  | 129   | 3     |

|                         |       |                        |       |       |
|-------------------------|-------|------------------------|-------|-------|
| >NOTCH1-L2. HTILPQESPAI | 91    | >NOTCH1-L2. HTIVPQESPA | 73    | 18    |
| >NOTCH1-L2. HTILPQESPAI | 13    | >NOTCH1-L2. HTIVPQESPA | 11    | 2     |
| >NOTCH1-L2. HTILPQESPAI | 670   | >NOTCH1-L2. HTIVPQESPA | 363   | 307   |
| >NOTCH1-L2. AVHTILPQ    | 121   | >NOTCH1-L2. AVHTIVPQ   | 185   | 64    |
| >NOTCH1-L2. SLAVHTIL    | 219   | >NOTCH1-L2. SLAVHTIV   | 61    | 158   |
| >NOTCH1-L2. SLAVHTIL    | 7     | >NOTCH1-L2. SLAVHTIV   | 6     | 1     |
| >NOTCH1-L2. SLAVHTIL    | 20    | >NOTCH1-L2. SLAVHTIV   | 5     | 15    |
| >NOTCH1-L2. SLAVHTIL    | 765   | >NOTCH1-L2. SLAVHTIV   | 88    | 677   |
| >NOTCH1-L2. SLAVHTIL    | 155   | >NOTCH1-L2. SLAVHTIV   | 13    | 142   |
| >NOTCH1-L2. SLAVHTIL    | 320   | >NOTCH1-L2. SLAVHTIV   | 32    | 288   |
| >NOTCH1-L2. SLAVHTIL    | 37    | >NOTCH1-L2. SLAVHTIV   | 7     | 30    |
| >NOTCH1-L2. SLAVHTIL    | 1501  | >NOTCH1-L2. SLAVHTIV   | 76    | 1425  |
| >NOTCH1-L2. SLAVHTIL    | 10    | >NOTCH1-L2. SLAVHTIV   | 3     | 7     |
| >NOTCH1-L2. SLAVHTILPQ  | 220   | >NOTCH1-L2. SLAVHTIVPQ | 172   | 48    |
| >NOTCH1-L2. SLAVHTIL    | 445   | >NOTCH1-L2. SLAVHTIV   | 1780  | 1335  |
| >NOTCH1-L2. SSLAVHTIL   | 2525  | >NOTCH1-L2. SSLAVHTIV  | 343   | 2182  |
| >NOTCH1-L2. SSLAVHTIL   | 191   | >NOTCH1-L2. SSLAVHTIV  | 5405  | 5214  |
| >NOTCH1-L2. SSLAVHTIL   | 19    | >NOTCH1-L2. SSLAVHTIV  | 50    | 31    |
| >NOTCH1-L2. SSLAVHTIL   | 374   | >NOTCH1-L2. SSLAVHTIV  | 1745  | 1371  |
| >NOTCH1-N1GNSEEEEDAF    | 12340 | >NOTCH1-N1GISEEEEDAP/  | 499   | 11841 |
| >NOTCH1-N1CSGGGLETGI    | 33290 | >NOTCH1-N1CSGGGLETGI   | 479   | 32811 |
| >NOTCH1-P2 PRLSHLPV     | 1306  | >NOTCH1-P2 SRLSHLPV    | 174   | 1132  |
| >NOTCH1-P2 PRLSHLPV     | 2379  | >NOTCH1-P2 SRLSHLPV    | 233   | 2146  |
| >NOTCH1-P2 PPRLSHLPV    | 10500 | >NOTCH1-P2 PSRLSHLPV   | 12    | 10488 |
| >NOTCH1-P2 PPRLSHLPVA   | 12644 | >NOTCH1-P2 PSRLSHLPVA  | 31    | 12613 |
| >NOTCH1-P2 PPRLSHLPV    | 19    | >NOTCH1-P2 PSRLSHLPV   | 11351 | 11332 |
| >NOTCH1-P2 GPPRLSHL     | 250   | >NOTCH1-P2 GPSRLSHL    | 12458 | 12208 |
| >NOTCH1-P2 GPPRLSHL     | 474   | >NOTCH1-P2 GPSRLSHL    | 3960  | 3486  |
| >NOTCH1-P2 GPPRLSHL     | 1232  | >NOTCH1-P2 GPSRLSHL    | 178   | 1054  |
| >NOTCH1-P2 GPPRLSHLPV   | 359   | >NOTCH1-P2 GPSRLSHLPV  | 478   | 119   |
| >NOTCH1-P2 TGPPRLSHL    | 50    | >NOTCH1-P2 TGPSRLSHL   | 34    | 16    |
| >NOTCH1-P2 TGPPRLSHLP   | 342   | >NOTCH1-P2 TGPSRLSHLP  | 213   | 129   |
| >NOTCH1-P2 TGPPRLSHLP'  | 228   | >NOTCH1-P2 TGPSRLSHLP' | 137   | 91    |
| >NOTCH1-P2 TGPPRLSHL    | 706   | >NOTCH1-P2 TGPSRLSHL   | 381   | 325   |
| >NOTCH1-P2 TGPPRLSHL    | 117   | >NOTCH1-P2 TGPSRLSHL   | 137   | 20    |
| >NOTCH1-P2 TGPPRLSHLP'  | 336   | >NOTCH1-P2 TGPSRLSHLP' | 437   | 101   |
| >NOTCH1-P2 ETGPPRLSHL   | 73    | >NOTCH1-P2 ETGPSRLSHL  | 91    | 18    |
| >NOTCH1-P2 ETGPPRLSHL   | 340   | >NOTCH1-P2 ETGPSRLSHL  | 419   | 79    |
| >NOTCH1-P2 ETGPPRLSHL   | 185   | >NOTCH1-P2 ETGPSRLSHL  | 441   | 256   |
| >NOTCH1-P2 ETGPPRLSHL   | 185   | >NOTCH1-P2 ETGPSRLSHL  | 106   | 79    |
| >NOTCH1-P2 FETGPPRL     | 42    | >NOTCH1-P2 FETGPSRL    | 40    | 2     |
| >NOTCH1-P2 FETGPPRLSH   | 65    | >NOTCH1-P2 FETGPSRLSHI | 43    | 22    |
| >NOTCH1-P2 FETGPPRLSH   | 186   | >NOTCH1-P2 FETGPSRLSHI | 140   | 46    |

|                       |       |                       |       |       |
|-----------------------|-------|-----------------------|-------|-------|
| >NOTCH1-P2 AFETGPPR   | 161   | >NOTCH1-P2 AFETGPSR   | 574   | 413   |
| >NOTCH1-P2 LAFETGPPRL | 701   | >NOTCH1-P2 LAFETGPSRL | 307   | 394   |
| >NOTCH1-P2 LAFETGPPRL | 847   | >NOTCH1-P2 LAFETGPSRL | 246   | 601   |
| >NOTCH1-P2 LAFETGPPRL | 63    | >NOTCH1-P2 LAFETGPSRL | 105   | 42    |
| >NOTCH1-P2 LAFETGPPRL | 164   | >NOTCH1-P2 LAFETGPSRL | 279   | 115   |
| >NOTCH1-P2 LAFETGPPR  | 47    | >NOTCH1-P2 LAFETGPSR  | 206   | 159   |
| >NOTCH1-P2 LAFETGPPR  | 370   | >NOTCH1-P2 LAFETGPSR  | 850   | 480   |
| >NOTCH1-P2 LAFETGPPR  | 33    | >NOTCH1-P2 LAFETGPSR  | 30    | 3     |
| >NOTCH1-P2 LAFETGPPRL | 379   | >NOTCH1-P2 LAFETGPSRL | 1250  | 871   |
| >NOTCH1-P2 LAFETGPPR  | 335   | >NOTCH1-P2 LAFETGPSR  | 375   | 40    |
| >NOTCH1-P2 LAFETGPPRL | 314   | >NOTCH1-P2 LAFETGPSRL | 161   | 153   |
| >NOTCH1-P2 LAFETGPPRL | 13    | >NOTCH1-P2 LAFETGPSRL | 10    | 3     |
| >NOTCH1-P2 RLALETGPPR | 128   | >NOTCH1-P2 RLALETGPSR | 456   | 328   |
| >NOTCH1-P2 RLALETGPPR | 24    | >NOTCH1-P2 RLALETGPSR | 14    | 10    |
| >NOTCH1-P2 RLALETGPP  | 2249  | >NOTCH1-P2 RLALETGPS  | 225   | 2024  |
| >NOTCH1-P2 RLALETGPPR | 18    | >NOTCH1-P2 RLALETGPSR | 8     | 10    |
| >NOTCH1-P2 RLALETGPPR | 32    | >NOTCH1-P2 RLALETGPSR | 45    | 13    |
| >NOTCH1-P2 RLALETGPPR | 258   | >NOTCH1-P2 RLALETGPSR | 289   | 31    |
| >NOTCH1-P2 RLALETGPPR | 73    | >NOTCH1-P2 RLALETGPSR | 214   | 141   |
| >NOTCH1-P2 RLALETGPPR | 65    | >NOTCH1-P2 RLALETGPSR | 143   | 78    |
| >NOTCH1-P2 RLALETGPPR | 19    | >NOTCH1-P2 RLALETGPSR | 20    | 1     |
| >NOTCH1-P2 RLALETGPPR | 176   | >NOTCH1-P2 RLALETGPSR | 232   | 56    |
| >NOTCH1-P2 RLALETGPPR | 122   | >NOTCH1-P2 RLALETGPSR | 214   | 92    |
| >NOTCH1-P2 RLALETGPPR | 162   | >NOTCH1-P2 RLALETGPSR | 406   | 244   |
| >NOTCH1-P2 RLALETGPPR | 64    | >NOTCH1-P2 RLALETGPSR | 191   | 127   |
| >NOTCH1-P2 GRLALETGPP | 92    | >NOTCH1-P2 GRLALETGPS | 109   | 17    |
| >NOTCH1-P2 PPPPQPHL   | 59    | >NOTCH1-P2 SPPPQPHL   | 20    | 39    |
| >NOTCH1-P2 PPPPQPHLGV | 10204 | >NOTCH1-P2 SPPPQPHLGV | 325   | 9879  |
| >NOTCH1-P2 PPPPPQPHL  | 292   | >NOTCH1-P2 PSPPPQPHL  | 547   | 255   |
| >NOTCH1-P2 PPPPPQPHL  | 27    | >NOTCH1-P2 PSPPPQPHL  | 14917 | 14890 |
| >NOTCH1-P2 PPPPPQPHL  | 1044  | >NOTCH1-P2 PSPPPQPHL  | 12    | 1032  |
| >NOTCH1-P2 PPPPPQPHLG | 4431  | >NOTCH1-P2 PSPPPQPHLG | 51    | 4380  |
| >NOTCH1-P2 PPPPPQPHL  | 135   | >NOTCH1-P2 PPSPPPQPHL | 591   | 456   |
| >NOTCH1-P2 QPPPPPPQPf | 601   | >NOTCH1-P2 QPPSPPPQPf | 329   | 272   |
| >NOTCH1-P2 QPPPPPPQPf | 105   | >NOTCH1-P2 QPPSPPPQPf | 45    | 60    |
| >NOTCH1-P2 QPPPPPPQPf | 180   | >NOTCH1-P2 QPPSPPPQPf | 227   | 47    |
| >NOTCH1-P2 LQPPPPPPQP | 407   | >NOTCH1-P2 LQPPSPPPQP | 205   | 202   |
| >NOTCH1-P2 SLQPPPPPPQ | 496   | >NOTCH1-P2 SLQPPSPPPQ | 874   | 378   |
| >NOTCH1-P2 SLQPPPPPPQ | 103   | >NOTCH1-P2 SLQPPSPPPQ | 78    | 25    |
| >NOTCH1-P2 PPPPQPHL   | 604   | >NOTCH1-P2 TPPPQPHL   | 426   | 178   |
| >NOTCH1-P2 PPPPQPHL   | 59    | >NOTCH1-P2 TPPPQPHL   | 28    | 31    |
| >NOTCH1-P2 PPPPQPHL   | 3937  | >NOTCH1-P2 TPPPQPHL   | 349   | 3588  |
| >NOTCH1-P2 PPPPPQPHL  | 292   | >NOTCH1-P2 PTPPPQPHL  | 3053  | 2761  |

|                                  |       |                                  |       |       |
|----------------------------------|-------|----------------------------------|-------|-------|
| >NOTCH1-P2 P P P P P Q P H L     | 27    | >NOTCH1-P2 P T P P P Q P H L     | 20620 | 20593 |
| >NOTCH1-P2 P P P P P Q P H L     | 1044  | >NOTCH1-P2 P T P P P Q P H L     | 6     | 1038  |
| >NOTCH1-P2 P P P P P Q P H L C   | 15622 | >NOTCH1-P2 P T P P P Q P H L C   | 201   | 15421 |
| >NOTCH1-P2 P P P P P Q P H L C   | 4431  | >NOTCH1-P2 P T P P P Q P H L C   | 20    | 4411  |
| >NOTCH1-P2 P P P P P Q P H L     | 135   | >NOTCH1-P2 P P T P P P Q P H L   | 331   | 196   |
| >NOTCH1-P2 Q P P P P P P Q P H   | 105   | >NOTCH1-P2 Q P P T P P P Q P H   | 63    | 42    |
| >NOTCH1-P2 Q P P P P P P Q P H   | 180   | >NOTCH1-P2 Q P P T P P P Q P H   | 427   | 247   |
| >NOTCH1-P2 L Q P P P P P P Q F   | 407   | >NOTCH1-P2 L Q P P T P P P Q F   | 282   | 125   |
| >NOTCH1-P2 S L Q P P P P P P Q   | 496   | >NOTCH1-P2 S L Q P P T P P P Q   | 728   | 232   |
| >NOTCH1-P2 S L Q P P P P P P Q   | 103   | >NOTCH1-P2 S L Q P P T P P P Q   | 66    | 37    |
| >NOTCH1-P2 P P P Q P H L G V     | 5719  | >NOTCH1-P2 L P P Q P H L G V     | 303   | 5416  |
| >NOTCH1-P2 P P P Q P H L G V     | 7558  | >NOTCH1-P2 L P P Q P H L G V     | 421   | 7137  |
| >NOTCH1-P2 P P P P Q P H L       | 59    | >NOTCH1-P2 P L P P Q P H L       | 26125 | 26066 |
| >NOTCH1-P2 P P P P Q P H L G \   | 21478 | >NOTCH1-P2 P L P P Q P H L G V   | 18    | 21460 |
| >NOTCH1-P2 P P P P Q P H L       | 25330 | >NOTCH1-P2 P L P P Q P H L       | 225   | 25105 |
| >NOTCH1-P2 P P P P Q P H L G \   | 22105 | >NOTCH1-P2 P L P P Q P H L G V   | 42    | 22063 |
| >NOTCH1-P2 P P P P Q P H L G \   | 25681 | >NOTCH1-P2 P L P P Q P H L G V   | 297   | 25384 |
| >NOTCH1-P2 P P P P Q P H L       | 30657 | >NOTCH1-P2 P L P P Q P H L       | 25    | 30632 |
| >NOTCH1-P2 P P P P Q P H L G \   | 21183 | >NOTCH1-P2 P L P P Q P H L G V   | 8     | 21175 |
| >NOTCH1-P2 Q Q Q Q S L Q P P     | 12291 | >NOTCH1-P2 Q Q Q Q S L Q P P     | 337   | 11954 |
| >NOTCH1-P2 Q Q Q Q S L Q P P     | 3925  | >NOTCH1-P2 Q Q Q Q S L Q P P     | 278   | 3647  |
| >NOTCH1-P2 Q Q Q Q S L Q P P     | 3049  | >NOTCH1-P2 Q Q Q Q S L Q P P     | 81    | 2968  |
| >NOTCH1-P2 Q Q Q Q S L Q P P     | 19530 | >NOTCH1-P2 Q Q Q Q S L Q P P     | 168   | 19362 |
| >NOTCH1-P2 Q Q Q Q S L Q P P     | 19100 | >NOTCH1-P2 Q Q Q Q S L Q P P     | 348   | 18752 |
| >NOTCH1-P2 P P P P P Q P H L     | 292   | >NOTCH1-P2 P P L P P Q P H L     | 22022 | 21730 |
| >NOTCH1-P2 P P P P P Q P H L     | 27    | >NOTCH1-P2 P P L P P Q P H L     | 29    | 2     |
| >NOTCH1-P2 P P P P P Q P H L     | 135   | >NOTCH1-P2 P P P L P P Q P H L   | 567   | 432   |
| >NOTCH1-P2 Q P P P P P P Q P H   | 105   | >NOTCH1-P2 Q P P P L P P Q P H   | 66    | 39    |
| >NOTCH1-P2 Q P P P P P P Q P H   | 180   | >NOTCH1-P2 Q P P P L P P Q P H   | 245   | 65    |
| >NOTCH1-P2 L Q P P P P P P Q     | 4594  | >NOTCH1-P2 L Q P P P L P P Q     | 374   | 4220  |
| >NOTCH1-P2 L Q P P P P P P Q F   | 407   | >NOTCH1-P2 L Q P P P L P P Q F   | 745   | 338   |
| >NOTCH1-P2 S L Q P P P P P P Q   | 496   | >NOTCH1-P2 S L Q P P P L P P Q   | 697   | 201   |
| >NOTCH1-P2 S L Q P P P P P P Q   | 103   | >NOTCH1-P2 S L Q P P P L P P Q   | 94    | 9     |
| >NOTCH1-P2 Q S L Q P P P P       | 7329  | >NOTCH1-P2 Q S L Q P P P L       | 136   | 7193  |
| >NOTCH1-P2 Q S L Q P P P P       | 16502 | >NOTCH1-P2 Q S L Q P P P L       | 17    | 16485 |
| >NOTCH1-P2 Q Q S L Q P P P P     | 6535  | >NOTCH1-P2 Q Q S L Q P P P L     | 170   | 6365  |
| >NOTCH1-P2 Q Q S L Q P P P P     | 18926 | >NOTCH1-P2 Q Q S L Q P P P L     | 115   | 18811 |
| >NOTCH1-P2 Q Q S L Q P P P P     | 15668 | >NOTCH1-P2 Q Q S L Q P P P L     | 203   | 15465 |
| >NOTCH1-P2 Q Q Q S L Q P P P     | 6760  | >NOTCH1-P2 Q Q Q S L Q P P P     | 499   | 6261  |
| >NOTCH1-P2 Q Q Q S L Q P P P     | 3633  | >NOTCH1-P2 Q Q Q S L Q P P P     | 105   | 3528  |
| >NOTCH1-P2 Q Q Q S L Q P P P     | 16619 | >NOTCH1-P2 Q Q Q S L Q P P P     | 109   | 16510 |
| >NOTCH1-P2 Q Q Q S L Q P P P     | 16678 | >NOTCH1-P2 Q Q Q S L Q P P P     | 202   | 16476 |
| >NOTCH1-P2 Q P H L G V S S A A / | 24622 | >NOTCH1-P2 Q L H L G V S S A A / | 253   | 24369 |

|                       |       |                       |       |       |
|-----------------------|-------|-----------------------|-------|-------|
| >NOTCH1-P2 QPHLGVSSA  | 15653 | >NOTCH1-P2 QLHLGVSSA  | 14    | 15639 |
| >NOTCH1-P2 QPHLGVSSA/ | 22604 | >NOTCH1-P2 QLHLGVSSAA | 160   | 22444 |
| >NOTCH1-P2 QPHLGVSSA/ | 28663 | >NOTCH1-P2 QLHLGVSSAA | 433   | 28230 |
| >NOTCH1-P2 QPHLGVSSA  | 35391 | >NOTCH1-P2 QLHLGVSSA  | 46    | 35345 |
| >NOTCH1-P2 QPHLGVSSA/ | 36403 | >NOTCH1-P2 QLHLGVSSAA | 161   | 36242 |
| >NOTCH1-P2 QPHLGVSSA  | 259   | >NOTCH1-P2 QLHLGVSSA  | 21025 | 20766 |
| >NOTCH1-P2 QPHLGVSSA/ | 50    | >NOTCH1-P2 QLHLGVSSAA | 24823 | 24773 |
| >NOTCH1-P2 SLQPPPPPPQ | 21187 | >NOTCH1-P2 SLQPPPPPPQ | 91    | 21096 |
| >NOTCH1-P2 SLQPPPPPPQ | 18352 | >NOTCH1-P2 SLQPPPPPPQ | 400   | 17952 |
| >NOTCH1-P2 SLQPPPPPPQ | 2531  | >NOTCH1-P2 SLQPPPPPPQ | 5     | 2526  |
| >NOTCH1-P2 SLQPPPPPPQ | 19443 | >NOTCH1-P2 SLQPPPPPPQ | 71    | 19372 |
| >NOTCH1-P2 SLQPPPPPPQ | 8392  | >NOTCH1-P2 SLQPPPPPPQ | 19    | 8373  |
| >NOTCH1-P2 SLQPPPPPPQ | 21316 | >NOTCH1-P2 SLQPPPPPPQ | 111   | 21205 |
| >NOTCH1-P2 SLQPPPPPPQ | 2144  | >NOTCH1-P2 SLQPPPPPPQ | 7     | 2137  |
| >NOTCH1-P2 PPPPQPHL   | 59    | >NOTCH1-P2 PPPPQLHL   | 137   | 78    |
| >NOTCH1-P2 PPPPPQPHL  | 292   | >NOTCH1-P2 PPPPPQLHL  | 440   | 148   |
| >NOTCH1-P2 PPPPPQPHL  | 27    | >NOTCH1-P2 PPPPPQLHL  | 113   | 86    |
| >NOTCH1-P2 PPPPPQP    | 36683 | >NOTCH1-P2 PPPPPQL    | 122   | 36561 |
| >NOTCH1-P2 PPPPPQPHL  | 135   | >NOTCH1-P2 PPPPPQLHL  | 335   | 200   |
| >NOTCH1-P2 QPPPPPPQP  | 38394 | >NOTCH1-P2 QPPPPPPQL  | 131   | 38263 |
| >NOTCH1-P2 QPPPPPPQPH | 105   | >NOTCH1-P2 QPPPPPPQLH | 278   | 173   |
| >NOTCH1-P2 QPPPPPPQP  | 20177 | >NOTCH1-P2 QPPPPPPQL  | 207   | 19970 |
| >NOTCH1-P2 QPPPPPPQPH | 180   | >NOTCH1-P2 QPPPPPPQLH | 174   | 6     |
| >NOTCH1-P2 LQPPPPPPQF | 20562 | >NOTCH1-P2 LQPPPPPPQL | 364   | 20198 |
| >NOTCH1-P2 LQPPPPPPQF | 7528  | >NOTCH1-P2 LQPPPPPPQL | 272   | 7256  |
| >NOTCH1-P2 LQPPPPPPQF | 407   | >NOTCH1-P2 LQPPPPPPQL | 1808  | 1401  |
| >NOTCH1-P2 LQPPPPPPQF | 15816 | >NOTCH1-P2 LQPPPPPPQL | 271   | 15545 |
| >NOTCH1-P2 PSQADVQPL  | 10103 | >NOTCH1-P2 LSQADVQPL  | 277   | 9826  |
| >NOTCH1-P2 PSQADVQPL  | 4676  | >NOTCH1-P2 LSQADVQPL  | 451   | 4225  |
| >NOTCH1-P2 PSQADVQPL  | 7189  | >NOTCH1-P2 LSQADVQPL  | 35    | 7154  |
| >NOTCH1-P2 EPSQADVQPI | 23268 | >NOTCH1-P2 ELSQADVQPI | 174   | 23094 |
| >NOTCH1-P2 EPSQADVQPI | 29821 | >NOTCH1-P2 ELSQADVQPI | 466   | 29355 |
| >NOTCH1-P2 EPSQADVQPI | 25305 | >NOTCH1-P2 ELSQADVQPI | 221   | 25084 |
| >NOTCH1-P2 EPSQADVQPI | 23603 | >NOTCH1-P2 ELSQADVQPI | 198   | 23405 |
| >NOTCH1-P2 EPSQADVQPI | 33673 | >NOTCH1-P2 ELSQADVQPI | 22    | 33651 |
| >NOTCH1-P2 EPSQADVQ   | 187   | >NOTCH1-P2 ELSQADVQ   | 12828 | 12641 |
| >NOTCH1-P2 EPSQADVQPI | 189   | >NOTCH1-P2 ELSQADVQPI | 2099  | 1910  |
| >NOTCH1-P2 EPSQADVQPI | 288   | >NOTCH1-P2 ELSQADVQPI | 12291 | 12003 |
| >NOTCH1-P2 HLGRSFLSGE | 12618 | >NOTCH1-P2 HLGRSFLSGE | 156   | 12462 |
| >NOTCH1-P2 HLGRSFLSGE | 18842 | >NOTCH1-P2 HLGRSFLSGE | 261   | 18581 |
| >NOTCH1-P2 HLGRSFLSGE | 20097 | >NOTCH1-P2 HLGRSFLSGE | 272   | 19825 |
| >NOTCH1-P2 HLGRSFLSGE | 21091 | >NOTCH1-P2 HLGRSFLSGE | 492   | 20599 |
| >NOTCH1-P2 HLGRSFLSGE | 16941 | >NOTCH1-P2 HLGRSFLSGE | 27    | 16914 |

|                       |       |                       |     |       |
|-----------------------|-------|-----------------------|-----|-------|
| >NOTCH1-P2 GEPSQADV   | 6143  | >NOTCH1-P2 GELSQADV   | 493 | 5650  |
| >NOTCH1-P2 GEPSQADVQ  | 306   | >NOTCH1-P2 GELSQADVQ  | 20  | 286   |
| >NOTCH1-P2 GEPSQADVQ  | 467   | >NOTCH1-P2 GELSQADVQ  | 38  | 429   |
| >NOTCH1-P2 GEPSQADV   | 3425  | >NOTCH1-P2 GELSQADV   | 134 | 3291  |
| >NOTCH1-P2 GEPSQADVQ  | 54    | >NOTCH1-P2 GELSQADVQ  | 10  | 44    |
| >NOTCH1-P2 FLSGEPSQA  | 86    | >NOTCH1-P2 FLSGELSQA  | 34  | 52    |
| >NOTCH1-P2 FLSGEPSQAD | 22    | >NOTCH1-P2 FLSGELSQAD | 17  | 5     |
| >NOTCH1-P2 FLSGEPSQ   | 77    | >NOTCH1-P2 FLSGELSQ   | 39  | 38    |
| >NOTCH1-P2 FLSGEPSQA  | 5     | >NOTCH1-P2 FLSGELSQA  | 2   | 3     |
| >NOTCH1-P2 FLSGEPSQAD | 3     | >NOTCH1-P2 FLSGELSQAD | 3   | 0     |
| >NOTCH1-P2 FLSGEPSQA  | 4     | >NOTCH1-P2 FLSGELSQA  | 3   | 1     |
| >NOTCH1-P2 FLSGEPSQAD | 3     | >NOTCH1-P2 FLSGELSQAD | 3   | 0     |
| >NOTCH1-P2 FLSGEPSQA  | 1257  | >NOTCH1-P2 FLSGELSQA  | 30  | 1227  |
| >NOTCH1-P2 FLSGEPSQAD | 68    | >NOTCH1-P2 FLSGELSQAD | 20  | 48    |
| >NOTCH1-P2 FLSGEPSQ   | 392   | >NOTCH1-P2 FLSGELSQ   | 669 | 277   |
| >NOTCH1-P2 FLSGEPSQA  | 7     | >NOTCH1-P2 FLSGELSQA  | 8   | 1     |
| >NOTCH1-P2 FLSGEPSQAD | 3     | >NOTCH1-P2 FLSGELSQAD | 4   | 1     |
| >NOTCH1-P2 FLSGEPSQA  | 141   | >NOTCH1-P2 FLSGELSQA  | 59  | 82    |
| >NOTCH1-P2 FLSGEPSQAD | 8     | >NOTCH1-P2 FLSGELSQAD | 6   | 2     |
| >NOTCH1-P2 FLSGEPSQ   | 366   | >NOTCH1-P2 FLSGELSQ   | 813 | 447   |
| >NOTCH1-P2 FLSGEPSQA  | 25    | >NOTCH1-P2 FLSGELSQA  | 20  | 5     |
| >NOTCH1-P2 FLSGEPSQAD | 6     | >NOTCH1-P2 FLSGELSQAD | 6   | 0     |
| >NOTCH1-P2 FLSGEPSQA  | 17    | >NOTCH1-P2 FLSGELSQA  | 11  | 6     |
| >NOTCH1-P2 FLSGEPSQAD | 4     | >NOTCH1-P2 FLSGELSQAD | 4   | 0     |
| >NOTCH1-P2 FLSGEPSQ   | 6     | >NOTCH1-P2 FLSGELSQ   | 5   | 1     |
| >NOTCH1-P2 FLSGEPSQA  | 2     | >NOTCH1-P2 FLSGELSQA  | 2   | 0     |
| >NOTCH1-P2 FLSGEPSQAD | 1145  | >NOTCH1-P2 FLSGELSQAD | 491 | 654   |
| >NOTCH1-P2 FLSGEPSQAD | 1     | >NOTCH1-P2 FLSGELSQAD | 1   | 0     |
| >NOTCH1-P2 RSFLSGEP   | 21684 | >NOTCH1-P2 RSFLSGEL   | 255 | 21429 |
| >NOTCH1-P2 RSFLSGEP   | 3818  | >NOTCH1-P2 RSFLSGEL   | 399 | 3419  |
| >NOTCH1-P2 RSFLSGEPSQ | 229   | >NOTCH1-P2 RSFLSGELSQ | 288 | 59    |
| >NOTCH1-P2 RSFLSGEP   | 10576 | >NOTCH1-P2 RSFLSGEL   | 321 | 10255 |
| >NOTCH1-P2 RSFLSGEP   | 4856  | >NOTCH1-P2 RSFLSGEL   | 158 | 4698  |
| >NOTCH1-P2 RSFLSGEP   | 3379  | >NOTCH1-P2 RSFLSGEL   | 3   | 3376  |
| >NOTCH1-P2 RSFLSGEPS  | 91    | >NOTCH1-P2 RSFLSGELS  | 524 | 433   |
| >NOTCH1-P2 RSFLSGEPSQ | 87    | >NOTCH1-P2 RSFLSGELSQ | 73  | 14    |
| >NOTCH1-P2 RSFLSGEPSQ | 40    | >NOTCH1-P2 RSFLSGELSQ | 48  | 8     |
| >NOTCH1-P2 RSFLSGEP   | 3828  | >NOTCH1-P2 RSFLSGEL   | 120 | 3708  |
| >NOTCH1-P2 RSFLSGEPS  | 5351  | >NOTCH1-P2 RSFLSGELS  | 474 | 4877  |
| >NOTCH1-P2 RSFLSGEPSQ | 332   | >NOTCH1-P2 RSFLSGELSQ | 133 | 199   |
| >NOTCH1-P2 RSFLSGEP   | 13333 | >NOTCH1-P2 RSFLSGEL   | 54  | 13279 |
| >NOTCH1-P2 GRSFLSGEP  | 10826 | >NOTCH1-P2 GRSFLSGEL  | 296 | 10530 |
| >NOTCH1-P2 GRSFLSGEP  | 3715  | >NOTCH1-P2 GRSFLSGEL  | 25  | 3690  |

|                       |       |                       |       |       |
|-----------------------|-------|-----------------------|-------|-------|
| >NOTCH1-P2 LGRSFLSGEP | 19373 | >NOTCH1-P2 LGRSFLSGEL | 348   | 19025 |
| >NOTCH1-P2 PSPEPDQW   | 1946  | >NOTCH1-P2 LSPESPDQW  | 42    | 1904  |
| >NOTCH1-P2 PSPEPDQW   | 1426  | >NOTCH1-P2 LSPESPDQW  | 87    | 1339  |
| >NOTCH1-P2 PSPEPDQW   | 5501  | >NOTCH1-P2 LSPESPDQW  | 55    | 5446  |
| >NOTCH1-P2 PSPEPDQW   | 13001 | >NOTCH1-P2 LSPESPDQW  | 492   | 12509 |
| >NOTCH1-P2 TSPESPQ    | 36319 | >NOTCH1-P2 TSPESPQ    | 354   | 35965 |
| >NOTCH1-P2 TSPESPQW   | 3425  | >NOTCH1-P2 TSPESPQW   | 327   | 3098  |
| >NOTCH1-P2 TSPESPQW   | 3096  | >NOTCH1-P2 TSPESPQW   | 438   | 2658  |
| >NOTCH1-P2 TSPESPQW   | 4716  | >NOTCH1-P2 TSPESPQW   | 171   | 4545  |
| >NOTCH1-P2 TSPESPQW   | 26    | >NOTCH1-P2 TSPESPQW   | 5521  | 5495  |
| >NOTCH1-P2 LQVPEHPFLT | 1010  | >NOTCH1-P2 LQVPEHPFLT | 9     | 1001  |
| >NOTCH1-P2 LQVPEHPFLT | 1939  | >NOTCH1-P2 LQVPEHPFLT | 131   | 1808  |
| >NOTCH1-P2 LQVPEHPFLT | 594   | >NOTCH1-P2 LQVPEHPFLT | 16    | 578   |
| >NOTCH1-P2 LQVPEHPFLT | 25927 | >NOTCH1-P2 LQVPEHPFLT | 276   | 25651 |
| >NOTCH1-P2 LTPSPESPQ  | 58    | >NOTCH1-P2 LTPSPESPQ  | 4     | 54    |
| >NOTCH1-P2 LTPSPESPQ  | 126   | >NOTCH1-P2 LTPSPESPQ  | 44    | 82    |
| >NOTCH1-P2 LTPSPESPQ  | 341   | >NOTCH1-P2 LTPSPESPQ  | 13    | 328   |
| >NOTCH1-P2 LTPSPESPQ  | 386   | >NOTCH1-P2 LTPSPESPQ  | 22949 | 22563 |
| >NOTCH1-P2 LTPSPESPQ  | 60    | >NOTCH1-P2 LTPSPESPQ  | 13032 | 12972 |
| >NOTCH1-P2 LTPSPESPQ  | 1117  | >NOTCH1-P2 LTPSPESPQ  | 68    | 1049  |
| >NOTCH1-P2 LTPSPESPQ  | 4398  | >NOTCH1-P2 LTPSPESPQ  | 358   | 4040  |
| >NOTCH1-P2 FLTPSPES   | 211   | >NOTCH1-P2 FLTPSPES   | 410   | 199   |
| >NOTCH1-P2 FLTPSPES   | 245   | >NOTCH1-P2 FLTPSPES   | 852   | 607   |
| >NOTCH1-P2 FLTPSPES   | 249   | >NOTCH1-P2 FLTPSPES   | 1194  | 945   |
| >NOTCH1-P2 FLTPSPES   | 464   | >NOTCH1-P2 FLTPSPES   | 1235  | 771   |
| >NOTCH1-P2 FLTPSPES   | 19    | >NOTCH1-P2 FLTPSPES   | 148   | 129   |
| >NOTCH1-P2 FLTPSPES   | 468   | >NOTCH1-P2 FLTPSPES   | 5898  | 5430  |
| >NOTCH1-P2 FLTPSPESDC | 13    | >NOTCH1-P2 FLTPSPESDC | 76    | 63    |
| >NOTCH1-P2 HPFLTPSPE  | 266   | >NOTCH1-P2 HPFLTPSPE  | 375   | 109   |
| >NOTCH1-P2 HPFLTPSPE  | 705   | >NOTCH1-P2 HPFLTPSPE  | 250   | 455   |
| >NOTCH1-P2 HPFLTPSPES | 420   | >NOTCH1-P2 HPFLTPSPES | 195   | 225   |
| >NOTCH1-P2 PEHPFLTP   | 11378 | >NOTCH1-P2 PEHPFLTP   | 209   | 11169 |
| >NOTCH1-P2 VPEHPFLTP  | 17619 | >NOTCH1-P2 VPEHPFLTP  | 41    | 17578 |
| >NOTCH1-P2 VPEHPFLTP  | 12009 | >NOTCH1-P2 VPEHPFLTP  | 408   | 11601 |
| >NOTCH1-P2 VPEHPFLTP  | 9541  | >NOTCH1-P2 VPEHPFLTP  | 452   | 9089  |
| >NOTCH1-P2 VPEHPFLTP  | 5222  | >NOTCH1-P2 VPEHPFLTP  | 157   | 5065  |
| >NOTCH1-P2 VPEHPFLTPS | 256   | >NOTCH1-P2 VPEHPFLTPS | 255   | 1     |
| >NOTCH1-P2 VPEHPFLTP  | 8852  | >NOTCH1-P2 VPEHPFLTP  | 71    | 8781  |
| >NOTCH1-P2 QVPEHPFLTP | 21101 | >NOTCH1-P2 QVPEHPFLTP | 407   | 20694 |
| >NOTCH1-P2 QVPEHPFLTP | 16587 | >NOTCH1-P2 QVPEHPFLTP | 451   | 16136 |
| >NOTCH1-P2 QVPEHPFLTP | 10061 | >NOTCH1-P2 QVPEHPFLTP | 316   | 9745  |
| >NOTCH1-P2 QVPEHPFLTP | 15869 | >NOTCH1-P2 QVPEHPFLTP | 452   | 15417 |
| >NOTCH1-P2 QVPEHPFLTP | 6339  | >NOTCH1-P2 QVPEHPFLTP | 25    | 6314  |

|                       |       |                       |       |       |
|-----------------------|-------|-----------------------|-------|-------|
| >NOTCH1-P2 QVPEHPFLTP | 33358 | >NOTCH1-P2 QVPEHPFLTL | 407   | 32951 |
| >NOTCH1-Q1RCTCPQGY    | 584   | >NOTCH1-Q1RCTCPLGY    | 53    | 531   |
| >NOTCH1-Q1YRCTCPQGY   | 1239  | >NOTCH1-Q1YRCTCPLGY   | 74    | 1165  |
| >NOTCH1-Q1YRCTCPQGY   | 2185  | >NOTCH1-Q1YRCTCPLGY   | 43    | 2142  |
| >NOTCH1-Q1YRCTCPQGY   | 62    | >NOTCH1-Q1YRCTCPLGY   | 85    | 23    |
| >NOTCH1-Q1YRCTCPQGY   | 847   | >NOTCH1-Q1YRCTCPLGY   | 195   | 652   |
| >NOTCH1-Q1YRCTCPQGYT  | 928   | >NOTCH1-Q1YRCTCPLGYT  | 487   | 441   |
| >NOTCH1-Q1SYRCTCPQ    | 11896 | >NOTCH1-Q1SYRCTCPL    | 23    | 11873 |
| >NOTCH1-Q1SYRCTCPQ    | 14105 | >NOTCH1-Q1SYRCTCPL    | 228   | 13877 |
| >NOTCH1-Q1SYRCTCPQGY  | 75    | >NOTCH1-Q1SYRCTCPLGY  | 32    | 43    |
| >NOTCH1-Q1SYRCTCPQ    | 32    | >NOTCH1-Q1SYRCTCPL    | 11    | 21    |
| >NOTCH1-Q1SYRCTCPQG   | 66    | >NOTCH1-Q1SYRCTCPLG   | 36    | 30    |
| >NOTCH1-Q1SYRCTCPQGY  | 88    | >NOTCH1-Q1SYRCTCPLGY  | 50    | 38    |
| >NOTCH1-Q1SYRCTCPQGY  | 97    | >NOTCH1-Q1SYRCTCPLGY  | 90    | 7     |
| >NOTCH1-Q1SYRCTCPQGY  | 356   | >NOTCH1-Q1SYRCTCPLGY  | 723   | 367   |
| >NOTCH1-Q1SYRCTCPQGY  | 2594  | >NOTCH1-Q1SYRCTCPLGY  | 162   | 2432  |
| >NOTCH1-Q1SYRCTCPQ    | 1827  | >NOTCH1-Q1SYRCTCPL    | 410   | 1417  |
| >NOTCH1-Q1GSYRCTCPQ   | 10897 | >NOTCH1-Q1GSYRCTCPL   | 114   | 10783 |
| >NOTCH1-Q1GSYRCTCPQC  | 758   | >NOTCH1-Q1GSYRCTCPLG  | 188   | 570   |
| >NOTCH1-Q1GSYRCTCPQC  | 531   | >NOTCH1-Q1GSYRCTCPLG  | 76    | 455   |
| >NOTCH1-Q1GSYRCTCPQC  | 362   | >NOTCH1-Q1GSYRCTCPLG  | 73    | 289   |
| >NOTCH1-Q1GSYRCTCPQC  | 180   | >NOTCH1-Q1GSYRCTCPLG  | 143   | 37    |
| >NOTCH1-Q1GSYRCTCPQ   | 10038 | >NOTCH1-Q1GSYRCTCPL   | 382   | 9656  |
| >NOTCH1-Q1GSYRCTCPQ   | 3737  | >NOTCH1-Q1GSYRCTCPL   | 470   | 3267  |
| >NOTCH1-Q1GSYRCTCPQC  | 251   | >NOTCH1-Q1GSYRCTCPLG  | 189   | 62    |
| >NOTCH1-Q1GSYRCTCPQ   | 4116  | >NOTCH1-Q1GSYRCTCPL   | 307   | 3809  |
| >NOTCH1-Q1GSYRCTCPQC  | 101   | >NOTCH1-Q1GSYRCTCPLG  | 126   | 25    |
| >NOTCH1-Q1GSYRCTCPQ   | 6834  | >NOTCH1-Q1GSYRCTCPL   | 19    | 6815  |
| >NOTCH1-Q1GSYRCTCPQC  | 7     | >NOTCH1-Q1GSYRCTCPLG  | 6     | 1     |
| >NOTCH1-Q1GSYRCTCPQC  | 469   | >NOTCH1-Q1GSYRCTCPLG  | 726   | 257   |
| >NOTCH1-Q1GSYRCTCPQC  | 981   | >NOTCH1-Q1GSYRCTCPLG  | 272   | 709   |
| >NOTCH1-Q1GSYRCTCPQC  | 59    | >NOTCH1-Q1GSYRCTCPLG  | 58    | 1     |
| >NOTCH1-Q1QMIFPYYG    | 1115  | >NOTCH1-Q1KMIFPYYG    | 144   | 971   |
| >NOTCH1-Q1QMIFPYYGR   | 4806  | >NOTCH1-Q1KMIFPYYGR   | 383   | 4423  |
| >NOTCH1-Q1QMIFPYYGR   | 182   | >NOTCH1-Q1KMIFPYYGR   | 36    | 146   |
| >NOTCH1-Q1QMIFPYYGR   | 14    | >NOTCH1-Q1KMIFPYYGR   | 5     | 9     |
| >NOTCH1-Q1QMIFPYYGR   | 150   | >NOTCH1-Q1KMIFPYYGR   | 796   | 646   |
| >NOTCH1-Q1QMIFPYYGR   | 68    | >NOTCH1-Q1KMIFPYYGR   | 611   | 543   |
| >NOTCH1-Q1QMIFPYYGR   | 55    | >NOTCH1-Q1KMIFPYYGR   | 18    | 37    |
| >NOTCH1-Q1QQMIFPYYGI  | 465   | >NOTCH1-Q1QKMIFPYYGF  | 4958  | 4493  |
| >NOTCH1-Q1QQMIFPYY    | 133   | >NOTCH1-Q1QKMIFPYY    | 12885 | 12752 |
| >NOTCH1-Q1QQMIFPYYGI  | 68    | >NOTCH1-Q1QKMIFPYYGF  | 5441  | 5373  |
| >NOTCH1-Q1QQMIFPYY    | 52    | >NOTCH1-Q1QKMIFPYY    | 190   | 138   |



|                      |       |                      |      |       |
|----------------------|-------|----------------------|------|-------|
| >NOTCH1-Q1QQMIFPYY   | 43    | >NOTCH1-Q1QKMIFPYY   | 217  | 174   |
| >NOTCH1-Q1QQMIFPYYGI | 16    | >NOTCH1-Q1QKMIFPYYGF | 58   | 42    |
| >NOTCH1-Q1QQMIFPYYGI | 217   | >NOTCH1-Q1QKMIFPYYGF | 473  | 256   |
| >NOTCH1-Q1QQMIFPYYGI | 34    | >NOTCH1-Q1QKMIFPYYGF | 377  | 343   |
| >NOTCH1-Q1QQMIFPYY   | 98    | >NOTCH1-Q1QKMIFPYY   | 8037 | 7939  |
| >NOTCH1-Q1QQMIFPYY   | 388   | >NOTCH1-Q1QKMIFPYY   | 6799 | 6411  |
| >NOTCH1-Q1QQMIFPYY   | 7     | >NOTCH1-Q1QKMIFPYY   | 6    | 1     |
| >NOTCH1-Q1QQMIFPYYGI | 335   | >NOTCH1-Q1QKMIFPYYGF | 792  | 457   |
| >NOTCH1-Q1QQMIFPYYGI | 26    | >NOTCH1-Q1QKMIFPYYGF | 48   | 22    |
| >NOTCH1-Q1VVFKRDAHG  | 15226 | >NOTCH1-Q1VVFKRDAHG  | 59   | 15167 |
| >NOTCH1-Q1VVFKRDAHG  | 24443 | >NOTCH1-Q1VVFKRDAHG  | 53   | 24390 |
| >NOTCH1-Q1VVFKRDAHG  | 6678  | >NOTCH1-Q1VVFKRDAHG  | 92   | 6586  |
| >NOTCH1-Q1VVFKRDAHG  | 4258  | >NOTCH1-Q1VVFKRDAHG  | 70   | 4188  |
| >NOTCH1-Q1GQQMIFPY   | 270   | >NOTCH1-Q1GQKMIFPY   | 1831 | 1561  |
| >NOTCH1-Q1GQQMIFPYY  | 138   | >NOTCH1-Q1GQKMIFPYY  | 933  | 795   |
| >NOTCH1-Q1GQQMIFPYYC | 287   | >NOTCH1-Q1GQKMIFPYYC | 1891 | 1604  |
| >NOTCH1-Q1GQQMIFPY   | 337   | >NOTCH1-Q1GQKMIFPY   | 622  | 285   |
| >NOTCH1-Q1GQQMIFPYY  | 85    | >NOTCH1-Q1GQKMIFPYY  | 162  | 77    |
| >NOTCH1-Q1GQQMIFPY   | 113   | >NOTCH1-Q1GQKMIFPY   | 132  | 19    |
| >NOTCH1-Q1GQQMIFPYY  | 18    | >NOTCH1-Q1GQKMIFPYY  | 19   | 1     |
| >NOTCH1-Q1GQQMIFPYYC | 16    | >NOTCH1-Q1GQKMIFPYYC | 9    | 7     |
| >NOTCH1-Q1GQQMIFPY   | 43    | >NOTCH1-Q1GQKMIFPY   | 36   | 7     |
| >NOTCH1-Q1GQQMIFPYY  | 50    | >NOTCH1-Q1GQKMIFPYY  | 38   | 12    |
| >NOTCH1-Q1GQQMIFPY   | 76    | >NOTCH1-Q1GQKMIFPY   | 23   | 53    |
| >NOTCH1-Q1GQQMIFPYY  | 76    | >NOTCH1-Q1GQKMIFPYY  | 24   | 52    |
| >NOTCH1-Q1GQQMIFPYY  | 439   | >NOTCH1-Q1GQKMIFPYY  | 2659 | 2220  |
| >NOTCH1-Q1GQQMIFPYYC | 418   | >NOTCH1-Q1GQKMIFPYYC | 341  | 77    |
| >NOTCH1-Q1HGQQMIFPY  | 148   | >NOTCH1-Q1HGQKMIFPY  | 163  | 15    |
| >NOTCH1-Q1HGQQMIFPY  | 213   | >NOTCH1-Q1HGQKMIFPY  | 346  | 133   |
| >NOTCH1-Q1HGQQMIFPY  | 281   | >NOTCH1-Q1HGQKMIFPY  | 97   | 184   |
| >NOTCH1-Q1HGQQMIFPY  | 193   | >NOTCH1-Q1HGQKMIFPY  | 288  | 95    |
| >NOTCH1-Q1HGQQMIFPY  | 475   | >NOTCH1-Q1HGQKMIFPY  | 1482 | 1007  |
| >NOTCH1-Q1HGQQMIFPY  | 48    | >NOTCH1-Q1HGQKMIFPY  | 107  | 59    |
| >NOTCH1-Q1HGQQMIFPY  | 57    | >NOTCH1-Q1HGQKMIFPY  | 43   | 14    |
| >NOTCH1-Q1AHGQQMIFP  | 161   | >NOTCH1-Q1AHGQKMIFP  | 269  | 108   |
| >NOTCH1-Q1AHGQQMIFP  | 136   | >NOTCH1-Q1AHGQKMIFP  | 161  | 25    |
| >NOTCH1-Q1AHGQQMIFP  | 251   | >NOTCH1-Q1AHGQKMIFP  | 307  | 56    |
| >NOTCH1-Q1AHGQQMIFP  | 251   | >NOTCH1-Q1AHGQKMIFP  | 386  | 135   |
| >NOTCH1-Q1AHGQQMIF   | 261   | >NOTCH1-Q1AHGQKMIF   | 630  | 369   |
| >NOTCH1-Q1DAHGQQMIF  | 468   | >NOTCH1-Q1DAHGQKMIF  | 766  | 298   |
| >NOTCH1-Q1DAHGQQMIF  | 194   | >NOTCH1-Q1DAHGQKMIF  | 440  | 246   |
| >NOTCH1-Q1DAHGQQMIF  | 452   | >NOTCH1-Q1DAHGQKMIF  | 924  | 472   |
| >NOTCH1-Q1DAHGQQMIF  | 45    | >NOTCH1-Q1DAHGQKMIF  | 84   | 39    |

|                       |       |                       |       |       |
|-----------------------|-------|-----------------------|-------|-------|
| >NOTCH1-Q1RDAHGGQM    | 1965  | >NOTCH1-Q1RDAHGGQMI   | 474   | 1491  |
| >NOTCH1-Q1RDAHGGQM    | 148   | >NOTCH1-Q1RDAHGGQMI   | 240   | 92    |
| >NOTCH1-Q1RDAHGGQM    | 269   | >NOTCH1-Q1RDAHGGQMI   | 602   | 333   |
| >NOTCH1-Q1RDAHGGQM    | 325   | >NOTCH1-Q1RDAHGGQMI   | 277   | 48    |
| >NOTCH1-Q1RDAHGGQM    | 133   | >NOTCH1-Q1RDAHGGQMI   | 159   | 26    |
| >NOTCH1-Q1KRDAHGGQM   | 135   | >NOTCH1-Q1KRDAHGGQM   | 187   | 52    |
| >NOTCH1-Q1KRDAHGGQM   | 146   | >NOTCH1-Q1KRDAHGGQM   | 299   | 153   |
| >NOTCH1-Q1KRDAHGGQM   | 135   | >NOTCH1-Q1KRDAHGGQM   | 329   | 194   |
| >NOTCH1-Q1KRDAHGGQM   | 375   | >NOTCH1-Q1KRDAHGGQM   | 377   | 2     |
| >NOTCH1-Q1KRDAHGGQM   | 230   | >NOTCH1-Q1KRDAHGGQM   | 774   | 544   |
| >NOTCH1-Q1FKRDAHGGQ   | 17    | >NOTCH1-Q1FKRDAHGGQ   | 19    | 2     |
| >NOTCH1-Q1FKRDAHGGQ   | 43    | >NOTCH1-Q1FKRDAHGGQ   | 57    | 14    |
| >NOTCH1-Q1VFKRDAHGGQ  | 6426  | >NOTCH1-Q1VFKRDAHGGQ  | 104   | 6322  |
| >NOTCH1-R1RNSSFHFLR   | 7     | >NOTCH1-R1RNSSFHFLR   | 337   | 330   |
| >NOTCH1-R1RNSSFHFLR   | 46    | >NOTCH1-R1RNSSFHFLR   | 372   | 326   |
| >NOTCH1-R1RNSSFHFLREI | 466   | >NOTCH1-R1RNSSFHFLREI | 18814 | 18348 |
| >NOTCH1-R1RNSSFHFLR   | 32    | >NOTCH1-R1RNSSFHFLR   | 191   | 159   |
| >NOTCH1-R1LRNSSFHF    | 5715  | >NOTCH1-R1LRNSSFHF    | 9     | 5706  |
| >NOTCH1-R1LRNSSFHFL   | 492   | >NOTCH1-R1LRNSSFHFL   | 4     | 488   |
| >NOTCH1-R1LRNSSFHFLR  | 34    | >NOTCH1-R1LRNSSFHFLR  | 52    | 18    |
| >NOTCH1-R1LRNSSFHFLR  | 112   | >NOTCH1-R1LRNSSFHFLR  | 158   | 46    |
| >NOTCH1-R1LRNSSFHFLR  | 1237  | >NOTCH1-R1LRNSSFHFLR  | 450   | 787   |
| >NOTCH1-R1LRNSSFHF    | 25657 | >NOTCH1-R1LRNSSFHF    | 422   | 25235 |
| >NOTCH1-R1LRNSSFHFL   | 23992 | >NOTCH1-R1LRNSSFHFL   | 97    | 23895 |
| >NOTCH1-R1LRNSSFHF    | 8     | >NOTCH1-R1LRNSSFHF    | 77    | 69    |
| >NOTCH1-R1LRNSSFHFL   | 65    | >NOTCH1-R1LRNSSFHFL   | 1048  | 983   |
| >NOTCH1-R1LRNSSFHF    | 171   | >NOTCH1-R1LRNSSFHF    | 22786 | 22615 |
| >NOTCH1-R1LRNSSFHFL   | 113   | >NOTCH1-R1LRNSSFHFL   | 22905 | 22792 |
| >NOTCH1-R1LRNSSFHFLR  | 304   | >NOTCH1-R1LRNSSFHFLR  | 30030 | 29726 |
| >NOTCH1-R1LRNSSFHF    | 12192 | >NOTCH1-R1LRNSSFHF    | 22    | 12170 |
| >NOTCH1-R1LRNSSFHFL   | 21845 | >NOTCH1-R1LRNSSFHFL   | 325   | 21520 |
| >NOTCH1-R1LRNSSFHFL   | 373   | >NOTCH1-R1LRNSSFHFL   | 896   | 523   |
| >NOTCH1-R1LRNSSFHFL   | 19210 | >NOTCH1-R1LRNSSFHFL   | 277   | 18933 |
| >NOTCH1-R1LRNSSFHF    | 12500 | >NOTCH1-R1LRNSSFHF    | 14    | 12486 |
| >NOTCH1-R1LRNSSFHFL   | 19536 | >NOTCH1-R1LRNSSFHFL   | 30    | 19506 |
| >NOTCH1-R1LRNSSFHFL   | 26580 | >NOTCH1-R1LRNSSFHFL   | 393   | 26187 |
| >NOTCH1-R1LRNSSFHFL   | 2875  | >NOTCH1-R1LRNSSFHFL   | 140   | 2735  |
| >NOTCH1-R1LRNSSFHF    | 15792 | >NOTCH1-R1LRNSSFHF    | 105   | 15687 |
| >NOTCH1-R1LRNSSFHFL   | 29275 | >NOTCH1-R1LRNSSFHFL   | 372   | 28903 |
| >NOTCH1-R1LRNSSFHF    | 9755  | >NOTCH1-R1LRNSSFHF    | 13    | 9742  |
| >NOTCH1-R1LRNSSFHFL   | 19168 | >NOTCH1-R1LRNSSFHFL   | 77    | 19091 |
| >NOTCH1-R1LRNSSFHFL   | 48    | >NOTCH1-R1LRNSSFHFL   | 25895 | 25847 |
| >NOTCH1-R1LRNSSFHFLR  | 285   | >NOTCH1-R1LRNSSFHFLR  | 321   | 36    |

|                       |       |                       |       |       |
|-----------------------|-------|-----------------------|-------|-------|
| >NOTCH1-R1 VVVLMPPEQ  | 177   | >NOTCH1-R1 VVVLMPPEQ  | 34797 | 34620 |
| >NOTCH1-R1 QLRNSSFHFL | 1046  | >NOTCH1-R1 QLPNSSFHFL | 385   | 661   |
| >NOTCH1-R1 QLRNSSFHFL | 43    | >NOTCH1-R1 QLPNSSFHFL | 22    | 21    |
| >NOTCH1-R1 QLRNSSFHFL | 130   | >NOTCH1-R1 QLPNSSFHFL | 123   | 7     |
| >NOTCH1-R1 QLRNSSFHF  | 4605  | >NOTCH1-R1 QLPNSSFHF  | 342   | 4263  |
| >NOTCH1-R1 QLRNSSFHFL | 3991  | >NOTCH1-R1 QLPNSSFHFL | 481   | 3510  |
| >NOTCH1-R1 QLRNSSFHFL | 264   | >NOTCH1-R1 QLPNSSFHFL | 39    | 225   |
| >NOTCH1-R1 QLRNSSFHFL | 132   | >NOTCH1-R1 QLPNSSFHFL | 33    | 99    |
| >NOTCH1-R1 QLRNSSFHFL | 551   | >NOTCH1-R1 QLPNSSFHFL | 31    | 520   |
| >NOTCH1-R1 QLRNSSFHFL | 921   | >NOTCH1-R1 QLPNSSFHFL | 53    | 868   |
| >NOTCH1-R1 QLRNSSFHFL | 11    | >NOTCH1-R1 QLPNSSFHFL | 7     | 4     |
| >NOTCH1-R1 QLRNSSFHFL | 183   | >NOTCH1-R1 QLPNSSFHFL | 1655  | 1472  |
| >NOTCH1-R1 QLRNSSFHF  | 625   | >NOTCH1-R1 QLPNSSFHF  | 411   | 214   |
| >NOTCH1-R1 QLRNSSFHF  | 6769  | >NOTCH1-R1 QLPNSSFHF  | 422   | 6347  |
| >NOTCH1-R1 QLRNSSFHFL | 37    | >NOTCH1-R1 QLPNSSFHFL | 12782 | 12745 |
| >NOTCH1-R1 QLRNSSFHFL | 100   | >NOTCH1-R1 QLPNSSFHFL | 14863 | 14763 |
| >NOTCH1-R1 QLRNSSFHFL | 10    | >NOTCH1-R1 QLPNSSFHFL | 77    | 67    |
| >NOTCH1-R1 QLRNSSFHFL | 49    | >NOTCH1-R1 QLPNSSFHFL | 520   | 471   |
| >NOTCH1-R1 QLRNSSFHFL | 95    | >NOTCH1-R1 QLPNSSFHFL | 66    | 29    |
| >NOTCH1-R1 QLRNSSFHF  | 26    | >NOTCH1-R1 QLPNSSFHF  | 93    | 67    |
| >NOTCH1-R1 QLRNSSFHF  | 102   | >NOTCH1-R1 QLPNSSFHF  | 463   | 361   |
| >NOTCH1-R1 QLRNSSFHF  | 9     | >NOTCH1-R1 QLPNSSFHF  | 130   | 121   |
| >NOTCH1-R1 QLRNSSFHFL | 166   | >NOTCH1-R1 QLPNSSFHFL | 3435  | 3269  |
| >NOTCH1-R1 QLRNSSFHF  | 74    | >NOTCH1-R1 QLPNSSFHF  | 7099  | 7025  |
| >NOTCH1-R1 QLRNSSFHF  | 19578 | >NOTCH1-R1 QLPNSSFHF  | 175   | 19403 |
| >NOTCH1-R1 QLRNSSFHFL | 2745  | >NOTCH1-R1 QLPNSSFHFL | 10    | 2735  |
| >NOTCH1-R1 QLRNSSFHFL | 260   | >NOTCH1-R1 QLPNSSFHFL | 186   | 74    |
| >NOTCH1-R1 EQLRNSSFHF | 189   | >NOTCH1-R1 EQLPNSSFHF | 300   | 111   |
| >NOTCH1-R1 EQLRNSSFHF | 69    | >NOTCH1-R1 EQLPNSSFHF | 29    | 40    |
| >NOTCH1-R1 EQLRNSSFHF | 914   | >NOTCH1-R1 EQLPNSSFHF | 417   | 497   |
| >NOTCH1-R1 EQLRNSSFHF | 979   | >NOTCH1-R1 EQLPNSSFHF | 367   | 612   |
| >NOTCH1-R1 EQLRNSSFHF | 513   | >NOTCH1-R1 EQLPNSSFHF | 419   | 94    |
| >NOTCH1-R1 EQLRNSSFHF | 406   | >NOTCH1-R1 EQLPNSSFHF | 212   | 194   |
| >NOTCH1-R1 EQLRNSSF   | 113   | >NOTCH1-R1 EQLPNSSF   | 80    | 33    |
| >NOTCH1-R1 EQLRNSSFHF | 84    | >NOTCH1-R1 EQLPNSSFHF | 58    | 26    |
| >NOTCH1-R1 EQLRNSSF   | 209   | >NOTCH1-R1 EQLPNSSF   | 115   | 94    |
| >NOTCH1-R1 EQLRNSSF   | 4     | >NOTCH1-R1 EQLPNSSF   | 4     | 0     |
| >NOTCH1-R1 EQLRNSSFHF | 6     | >NOTCH1-R1 EQLPNSSFHF | 6     | 0     |
| >NOTCH1-R1 EQLRNSSFHF | 136   | >NOTCH1-R1 EQLPNSSFHF | 111   | 25    |
| >NOTCH1-R1 EQLRNSSFHF | 230   | >NOTCH1-R1 EQLPNSSFHF | 82    | 148   |
| >NOTCH1-R1 MPPEQLRNS: | 395   | >NOTCH1-R1 MPPEQLPNS: | 104   | 291   |
| >NOTCH1-R1 MPPEQLRNS: | 124   | >NOTCH1-R1 MPPEQLPNS: | 216   | 92    |
| >NOTCH1-R1 MPPEQLRNS: | 34    | >NOTCH1-R1 MPPEQLPNS: | 23    | 11    |

|                       |       |                       |       |       |
|-----------------------|-------|-----------------------|-------|-------|
| >NOTCH1-R1 MPPEQLRNS: | 137   | >NOTCH1-R1 MPPEQLPNS: | 89    | 48    |
| >NOTCH1-R1 MPPEQLRNS  | 1506  | >NOTCH1-R1 MPPEQLPNS  | 417   | 1089  |
| >NOTCH1-R1 LMPPEQLRN: | 3494  | >NOTCH1-R1 LMPPEQLPN: | 426   | 3068  |
| >NOTCH1-R1 LMPPEQLR   | 303   | >NOTCH1-R1 LMPPEQLP   | 35587 | 35284 |
| >NOTCH1-R1 VLMPPEQLRI | 1230  | >NOTCH1-R1 VLMPPEQLPI | 152   | 1078  |
| >NOTCH1-R1 VLMPPEQLR  | 250   | >NOTCH1-R1 VLMPPEQLP  | 23580 | 23330 |
| >NOTCH1-R1 VVLMPEQLI  | 441   | >NOTCH1-R1 VVLMPEQLI  | 31550 | 31109 |
| >NOTCH1-R1 VVLMPEQLI  | 173   | >NOTCH1-R1 VVLMPEQLI  | 33477 | 33304 |
| >NOTCH1-R1 RVLHTNVV   | 399   | >NOTCH1-R1 PVLHTNVV   | 6458  | 6059  |
| >NOTCH1-R1 RVLHTNVV   | 38    | >NOTCH1-R1 PVLHTNVV   | 3850  | 3812  |
| >NOTCH1-R1 RVLHTNVV   | 75    | >NOTCH1-R1 PVLHTNVV   | 2252  | 2177  |
| >NOTCH1-R1 RVLHTNVV   | 103   | >NOTCH1-R1 PVLHTNVV   | 4864  | 4761  |
| >NOTCH1-R1 RVLHTNVV   | 176   | >NOTCH1-R1 PVLHTNVV   | 2002  | 1826  |
| >NOTCH1-R1 RVLHTNVV   | 210   | >NOTCH1-R1 PVLHTNVV   | 1893  | 1683  |
| >NOTCH1-R1 RVLHTNVVFK | 15    | >NOTCH1-R1 PVLHTNVVFK | 210   | 195   |
| >NOTCH1-R1 RVLHTNVVFK | 296   | >NOTCH1-R1 PVLHTNVVFK | 11122 | 10826 |
| >NOTCH1-R1 RVLHTNVVFK | 14    | >NOTCH1-R1 PVLHTNVVFK | 170   | 156   |
| >NOTCH1-R1 RVLHTNVVFK | 63    | >NOTCH1-R1 PVLHTNVVFK | 3799  | 3736  |
| >NOTCH1-R1 RVLHTNVVF  | 436   | >NOTCH1-R1 PVLHTNVVF  | 1329  | 893   |
| >NOTCH1-R1 RVLHTNVVF  | 121   | >NOTCH1-R1 PVLHTNVVF  | 2941  | 2820  |
| >NOTCH1-R1 RVLHTNVV   | 45    | >NOTCH1-R1 PVLHTNVV   | 7096  | 7051  |
| >NOTCH1-R1 RVLHTNVVFK | 4     | >NOTCH1-R1 PVLHTNVVFK | 54    | 50    |
| >NOTCH1-R1 RVLHTNVVFK | 208   | >NOTCH1-R1 PVLHTNVVFK | 10331 | 10123 |
| >NOTCH1-R1 RVLHTNVVFK | 89    | >NOTCH1-R1 PVLHTNVVFK | 3661  | 3572  |
| >NOTCH1-R1 RVLHTNVVFK | 8     | >NOTCH1-R1 PVLHTNVVFK | 522   | 514   |
| >NOTCH1-R1 RVLHTNVV   | 172   | >NOTCH1-R1 PVLHTNVV   | 6904  | 6732  |
| >NOTCH1-R1 RVLHTNVVF  | 7     | >NOTCH1-R1 PVLHTNVVF  | 288   | 281   |
| >NOTCH1-R1 RVLHTNVVFK | 386   | >NOTCH1-R1 PVLHTNVVFK | 2509  | 2123  |
| >NOTCH1-R1 RVLHTNVVFK | 143   | >NOTCH1-R1 PVLHTNVVFK | 1118  | 975   |
| >NOTCH1-R1 RVLHTNVVF  | 71    | >NOTCH1-R1 PVLHTNVVF  | 4671  | 4600  |
| >NOTCH1-R1 RVLHTNVVF  | 8     | >NOTCH1-R1 PVLHTNVVF  | 111   | 103   |
| >NOTCH1-R1 RVLHTNVVF  | 12    | >NOTCH1-R1 PVLHTNVVF  | 6092  | 6080  |
| >NOTCH1-R1 RVLHTNVVF  | 49    | >NOTCH1-R1 PVLHTNVVF  | 16240 | 16191 |
| >NOTCH1-R1 RVLHTNVV   | 317   | >NOTCH1-R1 PVLHTNVV   | 16155 | 15838 |
| >NOTCH1-R1 RVLHTNVVF  | 77    | >NOTCH1-R1 PVLHTNVVF  | 7679  | 7602  |
| >NOTCH1-R1 RVLHTNVVFK | 481   | >NOTCH1-R1 PVLHTNVVFK | 7433  | 6952  |
| >NOTCH1-R1 RVLHTNVVFK | 193   | >NOTCH1-R1 PVLHTNVVFK | 2364  | 2171  |
| >NOTCH1-R1 RVLHTNVVFK | 76    | >NOTCH1-R1 PVLHTNVVFK | 300   | 224   |
| >NOTCH1-R1 SRVLHTNV   | 25150 | >NOTCH1-R1 SPVLHTNV   | 145   | 25005 |
| >NOTCH1-R1 SRVLHTNVV  | 23262 | >NOTCH1-R1 SPVLHTNVV  | 26    | 23236 |
| >NOTCH1-R1 SRVLHTNVVF | 25974 | >NOTCH1-R1 SPVLHTNVVF | 80    | 25894 |
| >NOTCH1-R1 SRVLHTNVVF | 26    | >NOTCH1-R1 SPVLHTNVVF | 386   | 360   |
| >NOTCH1-R1 SRVLHTNVVF | 115   | >NOTCH1-R1 SPVLHTNVVF | 28558 | 28443 |

|                        |       |                        |       |       |
|------------------------|-------|------------------------|-------|-------|
| >NOTCH1-R1 SRVLHTNVVF  | 285   | >NOTCH1-R1 SPVLHTNVVF  | 25825 | 25540 |
| >NOTCH1-R1 SRVLHTNVVF  | 31464 | >NOTCH1-R1 SPVLHTNVVF  | 49    | 31415 |
| >NOTCH1-R1 SRVLHTNVV   | 295   | >NOTCH1-R1 SPVLHTNVV   | 785   | 490   |
| >NOTCH1-R1 SRVLHTNVVF  | 285   | >NOTCH1-R1 SPVLHTNVVF  | 973   | 688   |
| >NOTCH1-R1 SRVLHTNVVF  | 20524 | >NOTCH1-R1 SPVLHTNVVF  | 248   | 20276 |
| >NOTCH1-R1 SRVLHTNVV   | 26278 | >NOTCH1-R1 SPVLHTNVV   | 112   | 26166 |
| >NOTCH1-R1 SRVLHTNVVF  | 9112  | >NOTCH1-R1 SPVLHTNVVF  | 32    | 9080  |
| >NOTCH1-R1 SRVLHTNVVF  | 18427 | >NOTCH1-R1 SPVLHTNVVF  | 50    | 18377 |
| >NOTCH1-R1 SRVLHTNVV   | 283   | >NOTCH1-R1 SPVLHTNVV   | 30273 | 29990 |
| >NOTCH1-R1 SRVLHTNVVF  | 203   | >NOTCH1-R1 SPVLHTNVVF  | 29071 | 28868 |
| >NOTCH1-R1 SSFHFLRELSR | 31    | >NOTCH1-R1 SSFHFLRELSR | 14212 | 14181 |
| >NOTCH1-R1 SSFHFLRELSR | 41    | >NOTCH1-R1 SSFHFLRELSR | 19242 | 19201 |
| >NOTCH1-R1 SSFHFLRELSR | 424   | >NOTCH1-R1 SSFHFLRELSR | 37217 | 36793 |
| >NOTCH1-R1 SSFHFLRELSR | 26    | >NOTCH1-R1 SSFHFLRELSR | 26193 | 26167 |
| >NOTCH1-R1 SSFHFLRELSR | 67    | >NOTCH1-R1 SSFHFLRELSR | 2075  | 2008  |
| >NOTCH1-R1 SSFHFLRELSR | 316   | >NOTCH1-R1 SSFHFLRELSR | 32974 | 32658 |
| >NOTCH1-R1 LSRVLHTNV   | 42    | >NOTCH1-R1 LSPVLHTNV   | 13505 | 13463 |
| >NOTCH1-R1 LSRVLHTNVV  | 35    | >NOTCH1-R1 LSPVLHTNVV  | 12939 | 12904 |
| >NOTCH1-R1 LSRVLHTNVV  | 45    | >NOTCH1-R1 LSPVLHTNVV  | 259   | 214   |
| >NOTCH1-R1 LSRVLHTNV   | 451   | >NOTCH1-R1 LSPVLHTNV   | 4407  | 3956  |
| >NOTCH1-R1 LSRVLHTNVV  | 424   | >NOTCH1-R1 LSPVLHTNVV  | 4714  | 4290  |
| >NOTCH1-R1 LSRVLHTNVV  | 8     | >NOTCH1-R1 LSPVLHTNVV  | 70    | 62    |
| >NOTCH1-R1 LSRVLHTNV   | 103   | >NOTCH1-R1 LSPVLHTNV   | 9929  | 9826  |
| >NOTCH1-R1 LSRVLHTNVV  | 3     | >NOTCH1-R1 LSPVLHTNVV  | 74    | 71    |
| >NOTCH1-R1 LSRVLHTNVV  | 396   | >NOTCH1-R1 LSPVLHTNVV  | 5973  | 5577  |
| >NOTCH1-R1 LSRVLHTNVV  | 344   | >NOTCH1-R1 LSPVLHTNVV  | 3418  | 3074  |
| >NOTCH1-R1 LSRVLHTNV   | 5304  | >NOTCH1-R1 LSPVLHTNV   | 9     | 5295  |
| >NOTCH1-R1 LSRVLHTNVV  | 3667  | >NOTCH1-R1 LSPVLHTNVV  | 6     | 3661  |
| >NOTCH1-R1 LSRVLHTNVV  | 2365  | >NOTCH1-R1 LSPVLHTNVV  | 5     | 2360  |
| >NOTCH1-R1 LSRVLHTNV   | 98    | >NOTCH1-R1 LSPVLHTNV   | 6044  | 5946  |
| >NOTCH1-R1 LSRVLHTNVV  | 153   | >NOTCH1-R1 LSPVLHTNVV  | 350   | 197   |
| >NOTCH1-R1 LSRVLHTNVV  | 15    | >NOTCH1-R1 LSPVLHTNVV  | 489   | 474   |
| >NOTCH1-R1 ELSRVLHTNV  | 322   | >NOTCH1-R1 ELSPVLHTNV  | 178   | 144   |
| >NOTCH1-R1 ELSRVLHTNV  | 63    | >NOTCH1-R1 ELSPVLHTNV  | 29    | 34    |
| >NOTCH1-R1 ELSRVLHTNV  | 97    | >NOTCH1-R1 ELSPVLHTNV  | 90    | 7     |
| >NOTCH1-R1 ELSRVLHTNV  | 77    | >NOTCH1-R1 ELSPVLHTNV  | 32    | 45    |
| >NOTCH1-R1 ELSRVLHTNV  | 1548  | >NOTCH1-R1 ELSPVLHTNV  | 420   | 1128  |
| >NOTCH1-R1 ELSRVLHTNV  | 27    | >NOTCH1-R1 ELSPVLHTNV  | 18    | 9     |
| >NOTCH1-R1 ELSRVLHTNV  | 38    | >NOTCH1-R1 ELSPVLHTNV  | 23    | 15    |
| >NOTCH1-R1 ELSRVLHTNV  | 231   | >NOTCH1-R1 ELSPVLHTNV  | 165   | 66    |
| >NOTCH1-R1 ELSRVLHTNV  | 51    | >NOTCH1-R1 ELSPVLHTNV  | 30    | 21    |
| >NOTCH1-R1 ELSRVLHTNV  | 31    | >NOTCH1-R1 ELSPVLHTNV  | 17    | 14    |
| >NOTCH1-R1 ELSRVLHTNV  | 73    | >NOTCH1-R1 ELSPVLHTNV  | 35    | 38    |

|                        |      |                        |      |      |
|------------------------|------|------------------------|------|------|
| >NOTCH1-R1 ELSRVLHTNV  | 30   | >NOTCH1-R1 ELSPVLHTNV  | 18   | 12   |
| >NOTCH1-R1 ELSRVLHTNV  | 17   | >NOTCH1-R1 ELSPVLHTNV  | 9    | 8    |
| >NOTCH1-R1 ELSRVLHTNV  | 4    | >NOTCH1-R1 ELSPVLHTNV  | 3    | 1    |
| >NOTCH1-R1 ELSRVLHTNV  | 8    | >NOTCH1-R1 ELSPVLHTNV  | 5    | 3    |
| >NOTCH1-R1 ELSRVLHTNV  | 411  | >NOTCH1-R1 ELSPVLHTNV  | 569  | 158  |
| >NOTCH1-R1 ELSRVLHTNV  | 59   | >NOTCH1-R1 ELSPVLHTNV  | 25   | 34   |
| >NOTCH1-R1 ELSRVLHTNV  | 58   | >NOTCH1-R1 ELSPVLHTNV  | 37   | 21   |
| >NOTCH1-R1 ELSRVLHTNV  | 153  | >NOTCH1-R1 ELSPVLHTNV  | 86   | 67   |
| >NOTCH1-R1 RELSRVLHTN  | 466  | >NOTCH1-R1 RELSPVLHTN' | 240  | 226  |
| >NOTCH1-R1 RELSRVLHTN  | 210  | >NOTCH1-R1 RELSPVLHTN' | 86   | 124  |
| >NOTCH1-R1 RELSRVLHT   | 339  | >NOTCH1-R1 RELSPVLHT   | 439  | 100  |
| >NOTCH1-R1 RELSRVLHTN  | 327  | >NOTCH1-R1 RELSPVLHTN  | 237  | 90   |
| >NOTCH1-R1 RELSRVLHTN  | 74   | >NOTCH1-R1 RELSPVLHTN' | 83   | 9    |
| >NOTCH1-R1 RELSRVLHT   | 713  | >NOTCH1-R1 RELSPVLHT   | 336  | 377  |
| >NOTCH1-R1 RELSRVLHTN  | 276  | >NOTCH1-R1 RELSPVLHTN' | 177  | 99   |
| >NOTCH1-R1 RELSRVLHT   | 33   | >NOTCH1-R1 RELSPVLHT   | 53   | 20   |
| >NOTCH1-R1 RELSRVLHTN  | 8    | >NOTCH1-R1 RELSPVLHTN' | 9    | 1    |
| >NOTCH1-R1 LRELSRVL    | 574  | >NOTCH1-R1 LRELSPVL    | 184  | 390  |
| >NOTCH1-R1 FLRELSRV    | 40   | >NOTCH1-R1 FLRELSPV    | 14   | 26   |
| >NOTCH1-R1 FLRELSRVL   | 1079 | >NOTCH1-R1 FLRELSPVL   | 35   | 1044 |
| >NOTCH1-R1 FLRELSRV    | 8    | >NOTCH1-R1 FLRELSPV    | 4    | 4    |
| >NOTCH1-R1 FLRELSRVL   | 89   | >NOTCH1-R1 FLRELSPVL   | 17   | 72   |
| >NOTCH1-R1 FLRELSRVLHT | 566  | >NOTCH1-R1 FLRELSPVLHT | 494  | 72   |
| >NOTCH1-R1 FLRELSRV    | 2    | >NOTCH1-R1 FLRELSPV    | 2    | 0    |
| >NOTCH1-R1 FLRELSRVL   | 11   | >NOTCH1-R1 FLRELSPVL   | 8    | 3    |
| >NOTCH1-R1 FLRELSRVLHT | 29   | >NOTCH1-R1 FLRELSPVLHT | 32   | 3    |
| >NOTCH1-R1 FLRELSRV    | 26   | >NOTCH1-R1 FLRELSPV    | 6    | 20   |
| >NOTCH1-R1 FLRELSRVL   | 1670 | >NOTCH1-R1 FLRELSPVL   | 39   | 1631 |
| >NOTCH1-R1 FLRELSRV    | 2    | >NOTCH1-R1 FLRELSPV    | 2    | 0    |
| >NOTCH1-R1 FLRELSRVL   | 15   | >NOTCH1-R1 FLRELSPVL   | 6    | 9    |
| >NOTCH1-R1 FLRELSRVLHT | 200  | >NOTCH1-R1 FLRELSPVLHT | 66   | 134  |
| >NOTCH1-R1 FLRELSRV    | 6    | >NOTCH1-R1 FLRELSPV    | 3    | 3    |
| >NOTCH1-R1 FLRELSRVL   | 53   | >NOTCH1-R1 FLRELSPVL   | 11   | 42   |
| >NOTCH1-R1 FLRELSRV    | 10   | >NOTCH1-R1 FLRELSPV    | 6    | 4    |
| >NOTCH1-R1 FLRELSRVL   | 200  | >NOTCH1-R1 FLRELSPVL   | 9    | 191  |
| >NOTCH1-R1 FLRELSRVLHT | 627  | >NOTCH1-R1 FLRELSPVLHT | 173  | 454  |
| >NOTCH1-R1 FLRELSRV    | 21   | >NOTCH1-R1 FLRELSPV    | 11   | 10   |
| >NOTCH1-R1 FLRELSRVL   | 1821 | >NOTCH1-R1 FLRELSPVL   | 44   | 1777 |
| >NOTCH1-R1 FLRELSRV    | 1    | >NOTCH1-R1 FLRELSPV    | 1    | 0    |
| >NOTCH1-R1 FLRELSRVL   | 8    | >NOTCH1-R1 FLRELSPVL   | 2    | 6    |
| >NOTCH1-R1 FLRELSRVLHT | 35   | >NOTCH1-R1 FLRELSPVLHT | 14   | 21   |
| >NOTCH1-R1 FLRELSRV    | 1275 | >NOTCH1-R1 FLRELSPV    | 209  | 1066 |
| >NOTCH1-R1 FLRELSRVL   | 282  | >NOTCH1-R1 FLRELSPVL   | 2392 | 2110 |

|                        |       |                        |       |       |
|------------------------|-------|------------------------|-------|-------|
| >NOTCH1-R1 FLRELSRV    | 634   | >NOTCH1-R1 FLRELSPV    | 205   | 429   |
| >NOTCH1-R1 FLRELSRVL   | 65    | >NOTCH1-R1 FLRELSPVL   | 97    | 32    |
| >NOTCH1-R1 FLRELSRV    | 2640  | >NOTCH1-R1 FLRELSPV    | 317   | 2323  |
| >NOTCH1-R1 FLRELSRVL   | 123   | >NOTCH1-R1 FLRELSPVL   | 86    | 37    |
| >NOTCH1-R1 FLRELSRV    | 470   | >NOTCH1-R1 FLRELSPVL   | 1327  | 857   |
| >NOTCH1-R1 FLRELSRV    | 2162  | >NOTCH1-R1 FLRELSPV    | 325   | 1837  |
| >NOTCH1-R1 FLRELSRVL   | 517   | >NOTCH1-R1 FLRELSPVL   | 335   | 182   |
| >NOTCH1-R1 FLRELSRVL   | 2603  | >NOTCH1-R1 FLRELSPVL   | 469   | 2134  |
| >NOTCH1-R1 HFLRELSRVL  | 56    | >NOTCH1-R1 HFLRELSPVL  | 38    | 18    |
| >NOTCH1-R1 HFLRELSR    | 54    | >NOTCH1-R1 HFLRELSP    | 22356 | 22302 |
| >NOTCH1-R1 HFLRELSR    | 37    | >NOTCH1-R1 HFLRELSP    | 29834 | 29797 |
| >NOTCH1-R1 HFLRELSR    | 38    | >NOTCH1-R1 HFLRELSP    | 26492 | 26454 |
| >NOTCH1-R1 FHFLRELSRVL | 652   | >NOTCH1-R1 FHFLRELSPVL | 408   | 244   |
| >NOTCH1-R1 FHFLRELSRV  | 1335  | >NOTCH1-R1 FHFLRELSPV  | 251   | 1084  |
| >NOTCH1-R1 FHFLRELSRV  | 1036  | >NOTCH1-R1 FHFLRELSPV  | 167   | 869   |
| >NOTCH1-R1 FHFLRELSRVL | 251   | >NOTCH1-R1 FHFLRELSPVL | 184   | 67    |
| >NOTCH1-R1 FHFLRELSRV  | 907   | >NOTCH1-R1 FHFLRELSPV  | 451   | 456   |
| >NOTCH1-R1 FHFLRELSRVL | 86    | >NOTCH1-R1 FHFLRELSPVL | 84    | 2     |
| >NOTCH1-R1 FHFLRELSRV  | 1176  | >NOTCH1-R1 FHFLRELSPV  | 111   | 1065  |
| >NOTCH1-R1 FHFLRELSRVL | 13    | >NOTCH1-R1 FHFLRELSPVL | 9     | 4     |
| >NOTCH1-R1 SFHFLRELSRV | 1044  | >NOTCH1-R1 SFHFLRELSPV | 375   | 669   |
| >NOTCH1-R1 SFHFLRELSRV | 2103  | >NOTCH1-R1 SFHFLRELSPV | 417   | 1686  |
| >NOTCH1-R1 SFHFLRELSR  | 24    | >NOTCH1-R1 SFHFLRELSP  | 18270 | 18246 |
| >NOTCH1-R1 SFHFLRELSR  | 70    | >NOTCH1-R1 SFHFLRELSP  | 18390 | 18320 |
| >NOTCH1-R1 SFHFLRELSR  | 211   | >NOTCH1-R1 SFHFLRELSP  | 34153 | 33942 |
| >NOTCH1-R1 SFHFLRELSR  | 358   | >NOTCH1-R1 SFHFLRELSP  | 29451 | 29093 |
| >NOTCH1-R1 SFHFLRELSR  | 74    | >NOTCH1-R1 SFHFLRELSP  | 30721 | 30647 |
| >NOTCH1-R1 SFHFLRELSRV | 683   | >NOTCH1-R1 SFHFLRELSPV | 340   | 343   |
| >NOTCH1-R1 RDAHGQQM    | 148   | >NOTCH1-R1 SDAHGQQM    | 832   | 684   |
| >NOTCH1-R1 RDAHGQQM    | 269   | >NOTCH1-R1 SDAHGQQM    | 1770  | 1501  |
| >NOTCH1-R1 RDAHGQQM    | 325   | >NOTCH1-R1 SDAHGQQM    | 853   | 528   |
| >NOTCH1-R1 RDAHGQQM    | 133   | >NOTCH1-R1 SDAHGQQM    | 125   | 8     |
| >NOTCH1-R1 KRDAHGQQM   | 135   | >NOTCH1-R1 KSDAHGQQM   | 295   | 160   |
| >NOTCH1-R1 KRDAHGQQM   | 17079 | >NOTCH1-R1 KSDAHGQQM   | 7     | 17072 |
| >NOTCH1-R1 KRDAHGQQM   | 24978 | >NOTCH1-R1 KSDAHGQQM   | 56    | 24922 |
| >NOTCH1-R1 KRDAHGQQM   | 21173 | >NOTCH1-R1 KSDAHGQQM   | 10    | 21163 |
| >NOTCH1-R1 KRDAHGQQM   | 146   | >NOTCH1-R1 KSDAHGQQM   | 23334 | 23188 |
| >NOTCH1-R1 KRDAHGQQM   | 20748 | >NOTCH1-R1 KSDAHGQQM   | 102   | 20646 |
| >NOTCH1-R1 KRDAHGQQM   | 20314 | >NOTCH1-R1 KSDAHGQQM   | 149   | 20165 |
| >NOTCH1-R1 KRDAHGQQM   | 14419 | >NOTCH1-R1 KSDAHGQQM   | 17    | 14402 |
| >NOTCH1-R1 KRDAHGQQM   | 12302 | >NOTCH1-R1 KSDAHGQQM   | 487   | 11815 |
| >NOTCH1-R1 KRDAHGQQM   | 135   | >NOTCH1-R1 KSDAHGQQM   | 17102 | 16967 |
| >NOTCH1-R1 KRDAHGQQM   | 375   | >NOTCH1-R1 KSDAHGQQM   | 16924 | 16549 |

|                        |       |                        |       |       |
|------------------------|-------|------------------------|-------|-------|
| >NOTCH1-R1 KRDAHGQQM   | 230   | >NOTCH1-R1 KSDAHGQQM   | 22617 | 22387 |
| >NOTCH1-R1 KRDAHGQQM   | 22827 | >NOTCH1-R1 KSDAHGQQM   | 268   | 22559 |
| >NOTCH1-R1 RVLHTNVVFK  | 296   | >NOTCH1-R1 RVLHTNVVFK  | 14595 | 14299 |
| >NOTCH1-R1 RVLHTNVVFK  | 63    | >NOTCH1-R1 RVLHTNVVFK  | 9881  | 9818  |
| >NOTCH1-R1 RVLHTNVVFK  | 208   | >NOTCH1-R1 RVLHTNVVFK  | 586   | 378   |
| >NOTCH1-R1 RVLHTNVVFK  | 8     | >NOTCH1-R1 RVLHTNVVFK  | 2815  | 2807  |
| >NOTCH1-R1 RVLHTNVVFK  | 143   | >NOTCH1-R1 RVLHTNVVFK  | 28958 | 28815 |
| >NOTCH1-R1 RVLHTNVVFK  | 76    | >NOTCH1-R1 RVLHTNVVFK  | 17408 | 17332 |
| >NOTCH1-R1 FKRDHAGQQ   | 17    | >NOTCH1-R1 FKSDAHGQQ   | 39    | 22    |
| >NOTCH1-R1 FKRDHAGQQ   | 43    | >NOTCH1-R1 FKSDAHGQQ   | 107   | 64    |
| >NOTCH1-R1 NVVFKRDA    | 1343  | >NOTCH1-R1 NVVFKSDA    | 419   | 924   |
| >NOTCH1-R1 HTNVVFKR    | 175   | >NOTCH1-R1 HTNVVFKS    | 16652 | 16477 |
| >NOTCH1-R1 HTNVVFKR    | 7     | >NOTCH1-R1 HTNVVFKS    | 2923  | 2916  |
| >NOTCH1-R1 HTNVVFKR    | 20    | >NOTCH1-R1 HTNVVFKS    | 11972 | 11952 |
| >NOTCH1-R1 HTNVVFKR    | 5     | >NOTCH1-R1 HTNVVFKS    | 3330  | 3325  |
| >NOTCH1-R1 HTNVVFKR    | 321   | >NOTCH1-R1 HTNVVFKS    | 34811 | 34490 |
| >NOTCH1-R1 LHTNVVFKR   | 176   | >NOTCH1-R1 LHTNVVFKS   | 30704 | 30528 |
| >NOTCH1-R1 VLHTNVVFKF  | 2781  | >NOTCH1-R1 VLHTNVVFKS  | 194   | 2587  |
| >NOTCH1-R1 VLHTNVVFKF  | 3443  | >NOTCH1-R1 VLHTNVVFKS  | 433   | 3010  |
| >NOTCH1-R1 VLHTNVVFKF  | 62    | >NOTCH1-R1 VLHTNVVFKS  | 23760 | 23698 |
| >NOTCH1-R1 VLHTNVVFKF  | 381   | >NOTCH1-R1 VLHTNVVFKS  | 26845 | 26464 |
| >NOTCH1-R1 VLHTNVVFKF  | 246   | >NOTCH1-R1 VLHTNVVFKS  | 30419 | 30173 |
| >NOTCH1-R1 RKHPIKRAA   | 452   | >NOTCH1-R1 HKHPIKRAA   | 1777  | 1325  |
| >NOTCH1-R1 FPYYGREEELI | 73    | >NOTCH1-R1 FPYYGREEELI | 9680  | 9607  |
| >NOTCH1-R1 FPYYGREEELI | 3737  | >NOTCH1-R1 FPYYGREEELI | 105   | 3632  |
| >NOTCH1-R1 FPYYGREEELI | 438   | >NOTCH1-R1 FPYYGREEELI | 872   | 434   |
| >NOTCH1-R1 ELRKHPIK    | 467   | >NOTCH1-R1 ELKHPIK     | 518   | 51    |
| >NOTCH1-R1 ELRKHPIK    | 140   | >NOTCH1-R1 ELKHPIK     | 1549  | 1409  |
| >NOTCH1-R1 ELRKHPIKR   | 257   | >NOTCH1-R1 ELKHPIKR    | 1056  | 799   |
| >NOTCH1-R1 ELRKHPIK    | 1801  | >NOTCH1-R1 ELKHPIK     | 319   | 1482  |
| >NOTCH1-R1 ELRKHPIKR   | 534   | >NOTCH1-R1 ELKHPIKR    | 95    | 439   |
| >NOTCH1-R1 ELRKHPIKRA/ | 162   | >NOTCH1-R1 ELKHPIKRA/  | 462   | 300   |
| >NOTCH1-R1 ELRKHPIKR   | 192   | >NOTCH1-R1 ELKHPIKR    | 69    | 123   |
| >NOTCH1-R1 EELRKHPI    | 53    | >NOTCH1-R1 EELKHPI     | 36    | 17    |
| >NOTCH1-R1 EELRKHPI    | 674   | >NOTCH1-R1 EELKHPI     | 348   | 326   |
| >NOTCH1-R1 EELRKHPI    | 523   | >NOTCH1-R1 EELKHPI     | 349   | 174   |
| >NOTCH1-R1 EELRKHPI    | 110   | >NOTCH1-R1 EELKHPI     | 136   | 26    |
| >NOTCH1-R1 EELRKHPIKR/ | 33    | >NOTCH1-R1 EELKHPIKR/  | 43    | 10    |
| >NOTCH1-R1 EELRKHPI    | 395   | >NOTCH1-R1 EELKHPI     | 634   | 239   |
| >NOTCH1-R1 EELRKHPIKR  | 634   | >NOTCH1-R1 EELKHPIKR   | 353   | 281   |
| >NOTCH1-R1 EEELRKHP    | 1165  | >NOTCH1-R1 EEELKHHP    | 419   | 746   |
| >NOTCH1-R1 EEELRKHPI   | 7     | >NOTCH1-R1 EEELKHPI    | 10    | 3     |
| >NOTCH1-R1 EEELRKHPI   | 871   | >NOTCH1-R1 EEELKHPI    | 206   | 665   |



|                         |       |                         |       |       |
|-------------------------|-------|-------------------------|-------|-------|
| >NOTCH1-R1 EEELRKHPI    | 485   | >NOTCH1-R1 EEELHKHPI    | 151   | 334   |
| >NOTCH1-R1 EEELRKHPI    | 1504  | >NOTCH1-R1 EEELHKHPI    | 381   | 1123  |
| >NOTCH1-R1 REEELRKHPI   | 12    | >NOTCH1-R1 REEELHKHPI   | 23    | 11    |
| >NOTCH1-R1 REEELRKHPI   | 48    | >NOTCH1-R1 REEELHKHPI   | 65    | 17    |
| >NOTCH1-R1 REEELRKHPI   | 521   | >NOTCH1-R1 REEELHKHPI   | 349   | 172   |
| >NOTCH1-R1 REEELRKHPI   | 214   | >NOTCH1-R1 REEELHKHPI   | 256   | 42    |
| >NOTCH1-R1 REEELRKHPI   | 27    | >NOTCH1-R1 REEELHKHPI   | 17    | 10    |
| >NOTCH1-R1 YGREEELRK    | 1212  | >NOTCH1-R1 YGREEELHK    | 492   | 720   |
| >NOTCH1-R1 YGREEELRK    | 667   | >NOTCH1-R1 YGREEELHK    | 316   | 351   |
| >NOTCH1-R1 YGREEELR     | 74    | >NOTCH1-R1 YGREEELH     | 27433 | 27359 |
| >NOTCH1-R1 YGREEELRK    | 847   | >NOTCH1-R1 YGREEELHK    | 370   | 477   |
| >NOTCH1-R1 PYYGREEELR   | 64    | >NOTCH1-R1 PYYGREEELH   | 25207 | 25143 |
| >NOTCH1-R1 PYYGREEELR   | 867   | >NOTCH1-R1 PYYGREEELH   | 441   | 426   |
| >NOTCH1-R1 RKHPIKRAA    | 452   | >NOTCH1-R1 QKHPIKRAA    | 2072  | 1620  |
| >NOTCH1-R1 LRKHPIKR     | 8024  | >NOTCH1-R1 LQKHPIKR     | 51    | 7973  |
| >NOTCH1-R1 LRKHPIKRAA   | 21326 | >NOTCH1-R1 LQKHPIKRAA   | 472   | 20854 |
| >NOTCH1-R1 LRKHPIKR     | 1883  | >NOTCH1-R1 LQKHPIKR     | 485   | 1398  |
| >NOTCH1-R1 LRKHPIKRAA   | 1122  | >NOTCH1-R1 LQKHPIKRAA   | 312   | 810   |
| >NOTCH1-R1 FPYYGREEELR  | 73    | >NOTCH1-R1 FPYYGREEELH  | 7566  | 7493  |
| >NOTCH1-R1 FPYYGREEELR  | 438   | >NOTCH1-R1 FPYYGREEELH  | 238   | 200   |
| >NOTCH1-R1 ELRKHPIK     | 467   | >NOTCH1-R1 ELQKHPIK     | 2164  | 1697  |
| >NOTCH1-R1 ELRKHPIK     | 140   | >NOTCH1-R1 ELQKHPIK     | 10788 | 10648 |
| >NOTCH1-R1 ELRKHPIKR    | 257   | >NOTCH1-R1 ELQKHPIKR    | 744   | 487   |
| >NOTCH1-R1 ELRKHPIKR    | 534   | >NOTCH1-R1 ELQKHPIKR    | 291   | 243   |
| >NOTCH1-R1 ELRKHPIKRAA  | 162   | >NOTCH1-R1 ELQKHPIKRAA  | 1299  | 1137  |
| >NOTCH1-R1 ELRKHPIKR    | 192   | >NOTCH1-R1 ELQKHPIKR    | 147   | 45    |
| >NOTCH1-R1 EELRKHPI     | 53    | >NOTCH1-R1 EELQKHPI     | 40    | 13    |
| >NOTCH1-R1 EELRKHPI     | 674   | >NOTCH1-R1 EELQKHPI     | 445   | 229   |
| >NOTCH1-R1 EELRKHPI     | 523   | >NOTCH1-R1 EELQKHPI     | 274   | 249   |
| >NOTCH1-R1 EELRKHPI     | 110   | >NOTCH1-R1 EELQKHPI     | 78    | 32    |
| >NOTCH1-R1 EELRKHPIKRAA | 33    | >NOTCH1-R1 EELQKHPIKRAA | 25    | 8     |
| >NOTCH1-R1 EELRKHPI     | 395   | >NOTCH1-R1 EELQKHPI     | 156   | 239   |
| >NOTCH1-R1 EELRKHPIKR   | 634   | >NOTCH1-R1 EELQKHPIKR   | 223   | 411   |
| >NOTCH1-R1 EEELRKHPI    | 7     | >NOTCH1-R1 EEELQKHPI    | 8     | 1     |
| >NOTCH1-R1 EEELRKHPI    | 871   | >NOTCH1-R1 EEELQKHPI    | 492   | 379   |
| >NOTCH1-R1 EEELRKHPI    | 485   | >NOTCH1-R1 EEELQKHPI    | 465   | 20    |
| >NOTCH1-R1 REEELRKHPI   | 12    | >NOTCH1-R1 REEELQKHPI   | 16    | 4     |
| >NOTCH1-R1 REEELRKHPI   | 48    | >NOTCH1-R1 REEELQKHPI   | 52    | 4     |
| >NOTCH1-R1 REEELRKHPI   | 214   | >NOTCH1-R1 REEELQKHPI   | 578   | 364   |
| >NOTCH1-R1 REEELRKHPI   | 27    | >NOTCH1-R1 REEELQKHPI   | 15    | 12    |
| >NOTCH1-R1 YGREEELRK    | 667   | >NOTCH1-R1 YGREEELQK    | 215   | 452   |
| >NOTCH1-R1 YGREEELR     | 74    | >NOTCH1-R1 YGREEELQ     | 15729 | 15655 |
| >NOTCH1-R1 PYYGREEELR   | 64    | >NOTCH1-R1 PYYGREEELQ   | 13531 | 13467 |

|                        |       |                        |       |       |
|------------------------|-------|------------------------|-------|-------|
| >NOTCH1-R1 RAAEGWAA    | 25    | >NOTCH1-R1 LAAEGWAA    | 26    | 1     |
| >NOTCH1-R1 RAAEGWAAP   | 336   | >NOTCH1-R1 LAAEGWAAP   | 418   | 82    |
| >NOTCH1-R1 RAAEGWAA    | 3514  | >NOTCH1-R1 LAAEGWAA    | 446   | 3068  |
| >NOTCH1-R1 RAAEGWAA    | 10621 | >NOTCH1-R1 LAAEGWAA    | 377   | 10244 |
| >NOTCH1-R1 KRAAEGWA    | 23387 | >NOTCH1-R1 KLAAEGWA    | 287   | 23100 |
| >NOTCH1-R1 KRAAEGWAA   | 21734 | >NOTCH1-R1 KLAAEGWAA   | 24    | 21710 |
| >NOTCH1-R1 KRAAEGWA    | 17379 | >NOTCH1-R1 KLAAEGWA    | 24    | 17355 |
| >NOTCH1-R1 KRAAEGWAA   | 8511  | >NOTCH1-R1 KLAAEGWAA   | 7     | 8504  |
| >NOTCH1-R1 KRAAEGWA    | 17019 | >NOTCH1-R1 KLAAEGWA    | 26    | 16993 |
| >NOTCH1-R1 KRAAEGWAA   | 16195 | >NOTCH1-R1 KLAAEGWAA   | 15    | 16180 |
| >NOTCH1-R1 KRAAEGWA    | 16689 | >NOTCH1-R1 KLAAEGWA    | 434   | 16255 |
| >NOTCH1-R1 KRAAEGWAA   | 3681  | >NOTCH1-R1 KLAAEGWAA   | 10    | 3671  |
| >NOTCH1-R1 KRAAEGWA    | 25084 | >NOTCH1-R1 KLAAEGWA    | 138   | 24946 |
| >NOTCH1-R1 KRAAEGWAA   | 15338 | >NOTCH1-R1 KLAAEGWAA   | 7     | 15331 |
| >NOTCH1-R1 KRAAEGWAA   | 16766 | >NOTCH1-R1 KLAAEGWAA   | 11    | 16755 |
| >NOTCH1-R1 KRAAEGWA    | 23002 | >NOTCH1-R1 KLAAEGWA    | 90    | 22912 |
| >NOTCH1-R1 KRAAEGWAA   | 20175 | >NOTCH1-R1 KLAAEGWAA   | 13    | 20162 |
| >NOTCH1-R1 KRAAEGWAA   | 20026 | >NOTCH1-R1 KLAAEGWAA   | 248   | 19778 |
| >NOTCH1-R1 KRAAEGWA    | 32400 | >NOTCH1-R1 KLAAEGWA    | 36    | 32364 |
| >NOTCH1-R1 KRAAEGWAA   | 29734 | >NOTCH1-R1 KLAAEGWAA   | 8     | 29726 |
| >NOTCH1-R1 EEELRKHPIKF | 21737 | >NOTCH1-R1 EEELRKHPIKL | 459   | 21278 |
| >NOTCH1-R1 IKRAAEGW    | 357   | >NOTCH1-R1 IKLAAEGW    | 550   | 193   |
| >NOTCH1-R1 IKRAAEGWA/  | 213   | >NOTCH1-R1 IKLAAEGWA/  | 304   | 91    |
| >NOTCH1-R1 IKRAAEGW    | 354   | >NOTCH1-R1 IKLAAEGW    | 200   | 154   |
| >NOTCH1-R1 HPIKRAAEGV  | 249   | >NOTCH1-R1 HPIKLAAEGV  | 936   | 687   |
| >NOTCH1-R1 HPIKRAAE    | 1083  | >NOTCH1-R1 HPIKLAAE    | 378   | 705   |
| >NOTCH1-R1 HPIKRAAEG   | 1626  | >NOTCH1-R1 HPIKLAAEG   | 315   | 1311  |
| >NOTCH1-R1 HPIKRAAEGV  | 683   | >NOTCH1-R1 HPIKLAAEGV  | 271   | 412   |
| >NOTCH1-R1 HPIKRAAEGV  | 185   | >NOTCH1-R1 HPIKLAAEGV  | 115   | 70    |
| >NOTCH1-R1 HPIKRAAEGV  | 43    | >NOTCH1-R1 HPIKLAAEGV  | 33    | 10    |
| >NOTCH1-R1 HPIKRAAEGV  | 314   | >NOTCH1-R1 HPIKLAAEGV  | 196   | 118   |
| >NOTCH1-R1 KHPIKRAAEG  | 126   | >NOTCH1-R1 KHPIKLAAEG' | 121   | 5     |
| >NOTCH1-R1 RKHPIKRAA   | 452   | >NOTCH1-R1 RKHPIKLAA   | 277   | 175   |
| >NOTCH1-R1 LRKHPIKR    | 1883  | >NOTCH1-R1 LRKHPIKL    | 185   | 1698  |
| >NOTCH1-R1 ELRKHPIKR   | 257   | >NOTCH1-R1 ELRKHPIKL   | 24449 | 24192 |
| >NOTCH1-R1 ELRKHPIKR   | 11235 | >NOTCH1-R1 ELRKHPIKL   | 79    | 11156 |
| >NOTCH1-R1 ELRKHPIKRA/ | 162   | >NOTCH1-R1 ELRKHPIKLA/ | 157   | 5     |
| >NOTCH1-R1 ELRKHPIKR   | 192   | >NOTCH1-R1 ELRKHPIKL   | 32663 | 32471 |
| >NOTCH1-R1 EELRKHPIKR/ | 33    | >NOTCH1-R1 EELRKHPIKLA | 34    | 1     |
| >NOTCH1-R1 EELRKHPIKR  | 27080 | >NOTCH1-R1 EELRKHPIKL  | 268   | 26812 |
| >NOTCH1-R1 RRRELDPM    | 148   | >NOTCH1-R1 LRRELDPM    | 425   | 277   |
| >NOTCH1-R1 RRRELDPMD'  | 363   | >NOTCH1-R1 LRRELDPMD\  | 782   | 419   |
| >NOTCH1-R1 RRRELDPM    | 58    | >NOTCH1-R1 LRRELDPM    | 526   | 468   |

|                        |       |                        |       |       |
|------------------------|-------|------------------------|-------|-------|
| >NOTCH1-R1 RRRELDPM D' | 34    | >NOTCH1-R1 LRRELDPM D\ | 820   | 786   |
| >NOTCH1-R1 RRRELDPM D' | 285   | >NOTCH1-R1 LRRELDPM D\ | 2705  | 2420  |
| >NOTCH1-R1 RRRELDPM    | 18    | >NOTCH1-R1 LRRELDPM    | 1892  | 1874  |
| >NOTCH1-R1 RRRELDPM D  | 246   | >NOTCH1-R1 LRRELDPM D  | 11943 | 11697 |
| >NOTCH1-R1 RRRELDPM D' | 34    | >NOTCH1-R1 LRRELDPM D\ | 1692  | 1658  |
| >NOTCH1-R1 RRRELDPM D' | 213   | >NOTCH1-R1 LRRELDPM D\ | 10134 | 9921  |
| >NOTCH1-R1 RRRELDPM    | 72    | >NOTCH1-R1 LRRELDPM    | 1282  | 1210  |
| >NOTCH1-R1 RRRELDPM D' | 29    | >NOTCH1-R1 LRRELDPM D\ | 351   | 322   |
| >NOTCH1-R1 RRRRELDPM I | 17845 | >NOTCH1-R1 RLRRELDPM I | 23    | 17822 |
| >NOTCH1-R1 RRRRELDPM I | 26122 | >NOTCH1-R1 RLRRELDPM I | 137   | 25985 |
| >NOTCH1-R1 RRRRELDPM I | 23370 | >NOTCH1-R1 RLRRELDPM I | 198   | 23172 |
| >NOTCH1-R1 RRRRELDPM I | 24010 | >NOTCH1-R1 RLRRELDPM I | 346   | 23664 |
| >NOTCH1-R1 RRRRELDPM I | 21724 | >NOTCH1-R1 RLRRELDPM I | 12    | 21712 |
| >NOTCH1-R1 RRRRELDPM   | 1609  | >NOTCH1-R1 RLRRELDPM   | 61    | 1548  |
| >NOTCH1-R1 RRRRELDPM I | 985   | >NOTCH1-R1 RLRRELDPM I | 56    | 929   |
| >NOTCH1-R1 RRRRELDPM   | 14169 | >NOTCH1-R1 RLRRELDPM   | 125   | 14044 |
| >NOTCH1-R1 RRRRELDPM   | 87    | >NOTCH1-R1 RLRRELDPM   | 392   | 305   |
| >NOTCH1-R1 RRRRELDPM I | 192   | >NOTCH1-R1 RLRRELDPM I | 743   | 551   |
| >NOTCH1-R1 RRRRELDPM   | 82    | >NOTCH1-R1 RLRRELDPM   | 7042  | 6960  |
| >NOTCH1-R1 RRRRELDPM I | 303   | >NOTCH1-R1 RLRRELDPM I | 27818 | 27515 |
| >NOTCH1-R1 RRRRELDPM   | 65    | >NOTCH1-R1 RLRRELDPM   | 6659  | 6594  |
| >NOTCH1-R1 RRRRELDPM   | 134   | >NOTCH1-R1 RLRRELDPM   | 8690  | 8556  |
| >NOTCH1-R1 RRRRELDPM I | 79    | >NOTCH1-R1 RLRRELDPM I | 10567 | 10488 |
| >NOTCH1-R1 RRRRELDPM I | 69    | >NOTCH1-R1 RLRRELDPM I | 7741  | 7672  |
| >NOTCH1-R1 RRRRELDPM I | 340   | >NOTCH1-R1 RLRRELDPM I | 22212 | 21872 |
| >NOTCH1-R1 RRRRELDPM I | 464   | >NOTCH1-R1 RLRRELDPM I | 12483 | 12019 |
| >NOTCH1-R1 LLPGGSEGGR  | 18755 | >NOTCH1-R1 LLPGGSEGGR  | 140   | 18615 |
| >NOTCH1-R1 LLPGGSEGGR  | 19629 | >NOTCH1-R1 LLPGGSEGGR  | 173   | 19456 |
| >NOTCH1-R1 LLPGGSEGGR  | 13031 | >NOTCH1-R1 LLPGGSEGGR  | 34    | 12997 |
| >NOTCH1-R1 LLPGGSEGGR  | 19374 | >NOTCH1-R1 LLPGGSEGGR  | 256   | 19118 |
| >NOTCH1-R1 LLPGGSEGGR  | 4786  | >NOTCH1-R1 LLPGGSEGGR  | 6     | 4780  |
| >NOTCH1-R1 GRRRRELDPM  | 510   | >NOTCH1-R1 GRLRRELDPM  | 361   | 149   |
| >NOTCH1-R1 EGGRRRREL   | 493   | >NOTCH1-R1 EGGRLRREL   | 8130  | 7637  |
| >NOTCH1-R1 SEGGRRRREL  | 254   | >NOTCH1-R1 SEGGRLRREL  | 165   | 89    |
| >NOTCH1-R1 SEGGRRRREL  | 479   | >NOTCH1-R1 SEGGRLRREL  | 572   | 93    |
| >NOTCH1-R2 LRGSVAPGPL  | 23414 | >NOTCH1-R2 LWGSVAPGP   | 481   | 22933 |
| >NOTCH1-R2 LRGSVAPGPL  | 177   | >NOTCH1-R2 LWGSVAPGP   | 13846 | 13669 |
| >NOTCH1-R2 LRGSVAPGPL  | 30015 | >NOTCH1-R2 LWGSVAPGP   | 434   | 29581 |
| >NOTCH1-R2 GMVPNQYNI   | 45    | >NOTCH1-R2 GMVPNQYNI   | 17633 | 17588 |
| >NOTCH1-R2 GMVPNQYNI   | 393   | >NOTCH1-R2 GMVPNQYNI   | 33765 | 33372 |
| >NOTCH1-R2 GMVPNQYNI   | 24184 | >NOTCH1-R2 GMVPNQYNI   | 36    | 24148 |
| >NOTCH1-R2 GMVPNQYNI   | 24962 | >NOTCH1-R2 GMVPNQYNI   | 447   | 24515 |
| >NOTCH1-R2 GMVPNQYNI   | 21117 | >NOTCH1-R2 GMVPNQYNI   | 25    | 21092 |

|                       |       |                       |       |       |
|-----------------------|-------|-----------------------|-------|-------|
| >NOTCH1-R2 GMVFNQYNI  | 33445 | >NOTCH1-R2 GMVFNQYNI  | 451   | 32994 |
| >NOTCH1-R2 GMVFNQYNI  | 188   | >NOTCH1-R2 GMVFNQYNI  | 32394 | 32206 |
| >NOTCH1-R2 PLRGSVAPGF | 1730  | >NOTCH1-R2 PLWGSVAPG  | 18    | 1712  |
| >NOTCH1-R2 PLRGSVAPGF | 7115  | >NOTCH1-R2 PLWGSVAPG  | 57    | 7058  |
| >NOTCH1-R2 PLRGSVAPGF | 10040 | >NOTCH1-R2 PLWGSVAPG  | 72    | 9968  |
| >NOTCH1-R2 PLRGSVAPGF | 230   | >NOTCH1-R2 PLWGSVAPG  | 31    | 199   |
| >NOTCH1-R2 NPLRGSVA   | 225   | >NOTCH1-R2 NPLWGSVA   | 287   | 62    |
| >NOTCH1-R2 NPLRGSVA   | 1970  | >NOTCH1-R2 NPLWGSVA   | 389   | 1581  |
| >NOTCH1-R2 NPLRGSVAP  | 1569  | >NOTCH1-R2 NPLWGSVAP  | 170   | 1399  |
| >NOTCH1-R2 NPLRGSVA   | 89    | >NOTCH1-R2 NPLWGSVA   | 25    | 64    |
| >NOTCH1-R2 NPLRGSVAP  | 1503  | >NOTCH1-R2 NPLWGSVAP  | 262   | 1241  |
| >NOTCH1-R2 QYNPLRGSV  | 6     | >NOTCH1-R2 QYNPLWGSV  | 7     | 1     |
| >NOTCH1-R2 QYNPLRGSV  | 203   | >NOTCH1-R2 QYNPLWGSV  | 408   | 205   |
| >NOTCH1-R2 NQYNPLRGS\ | 376   | >NOTCH1-R2 NQYNPLWGS  | 254   | 122   |
| >NOTCH1-R2 NQYNPLRGS\ | 72    | >NOTCH1-R2 NQYNPLWGS  | 39    | 33    |
| >NOTCH1-R2 NQYNPLRGS\ | 400   | >NOTCH1-R2 NQYNPLWGS  | 228   | 172   |
| >NOTCH1-R2 NQYNPLRGS  | 3389  | >NOTCH1-R2 NQYNPLWGS  | 23    | 3366  |
| >NOTCH1-R2 NQYNPLRGS\ | 332   | >NOTCH1-R2 NQYNPLWGS  | 185   | 147   |
| >NOTCH1-R2 NQYNPLRGS\ | 443   | >NOTCH1-R2 NQYNPLWGS  | 78    | 365   |
| >NOTCH1-R2 NQYNPLRGS\ | 230   | >NOTCH1-R2 NQYNPLWGS  | 26    | 204   |
| >NOTCH1-R2 NQYNPLRGS\ | 1846  | >NOTCH1-R2 NQYNPLWGS  | 275   | 1571  |
| >NOTCH1-R2 NQYNPLRGS\ | 3637  | >NOTCH1-R2 NQYNPLWGS  | 234   | 3403  |
| >NOTCH1-R2 NQYNPLRGS\ | 185   | >NOTCH1-R2 NQYNPLWGS  | 390   | 205   |
| >NOTCH1-R2 NQYNPLRGS\ | 1779  | >NOTCH1-R2 NQYNPLWGS  | 362   | 1417  |
| >NOTCH1-R2 NQYNPLRGS\ | 763   | >NOTCH1-R2 NQYNPLWGS  | 399   | 364   |
| >NOTCH1-R2 NQYNPLRGS\ | 361   | >NOTCH1-R2 NQYNPLWGS  | 407   | 46    |
| >NOTCH1-R2 NQYNPLRGS\ | 346   | >NOTCH1-R2 NQYNPLWGS  | 311   | 35    |
| >NOTCH1-R2 VPNQYNPLR  | 15506 | >NOTCH1-R2 VPNQYNPLW  | 17    | 15489 |
| >NOTCH1-R2 VPNQYNPLR  | 19180 | >NOTCH1-R2 VPNQYNPLW  | 9     | 19171 |
| >NOTCH1-R2 VPNQYNPLR  | 32352 | >NOTCH1-R2 VPNQYNPLW  | 275   | 32077 |
| >NOTCH1-R2 MVPNQYNPL  | 265   | >NOTCH1-R2 MVPNQYNPL  | 29278 | 29013 |
| >NOTCH1-R2 MVPNQYNPL  | 9     | >NOTCH1-R2 MVPNQYNPL  | 23182 | 23173 |
| >NOTCH1-R2 MVPNQYNPL  | 26655 | >NOTCH1-R2 MVPNQYNPL  | 227   | 26428 |
| >NOTCH1-R2 MVPNQYNPL  | 285   | >NOTCH1-R2 MVPNQYNPL  | 29338 | 29053 |
| >NOTCH1-S1 SRVLHTNVVF | 26    | >NOTCH1-S1 IRVLHTNVVF | 15    | 11    |
| >NOTCH1-S1 SRVLHTNVVF | 115   | >NOTCH1-S1 IRVLHTNVVF | 122   | 7     |
| >NOTCH1-S1 SRVLHTNVVF | 285   | >NOTCH1-S1 IRVLHTNVVF | 397   | 112   |
| >NOTCH1-S1 SRVLHTNVV  | 295   | >NOTCH1-S1 IRVLHTNVV  | 1814  | 1519  |
| >NOTCH1-S1 SRVLHTNVVF | 285   | >NOTCH1-S1 IRVLHTNVVF | 1686  | 1401  |
| >NOTCH1-S1 SRVLHTNVV  | 283   | >NOTCH1-S1 IRVLHTNVV  | 500   | 217   |
| >NOTCH1-S1 SRVLHTNVVF | 203   | >NOTCH1-S1 IRVLHTNVVF | 262   | 59    |
| >NOTCH1-S1 LSRVLHTNV  | 5081  | >NOTCH1-S1 LIRVLHTNV  | 192   | 4889  |
| >NOTCH1-S1 LSRVLHTNVV | 7422  | >NOTCH1-S1 LIRVLHTNVV | 386   | 7036  |

|                        |       |                        |       |       |
|------------------------|-------|------------------------|-------|-------|
| >NOTCH1-S1 LSRVLHTNV   | 17304 | >NOTCH1-S1 LIRVLHTNV   | 31    | 17273 |
| >NOTCH1-S1 LSRVLHTNVV  | 19847 | >NOTCH1-S1 LIRVLHTNVV  | 86    | 19761 |
| >NOTCH1-S1 LSRVLHTNV   | 42    | >NOTCH1-S1 LIRVLHTNV   | 113   | 71    |
| >NOTCH1-S1 LSRVLHTNVV  | 35    | >NOTCH1-S1 LIRVLHTNVV  | 89    | 54    |
| >NOTCH1-S1 LSRVLHTNVV  | 45    | >NOTCH1-S1 LIRVLHTNVVI | 51    | 6     |
| >NOTCH1-S1 LSRVLHTNV   | 451   | >NOTCH1-S1 LIRVLHTNV   | 1797  | 1346  |
| >NOTCH1-S1 LSRVLHTNVV  | 424   | >NOTCH1-S1 LIRVLHTNVV  | 1717  | 1293  |
| >NOTCH1-S1 LSRVLHTNVV  | 8     | >NOTCH1-S1 LIRVLHTNVVI | 27    | 19    |
| >NOTCH1-S1 LSRVLHTNV   | 103   | >NOTCH1-S1 LIRVLHTNV   | 11859 | 11756 |
| >NOTCH1-S1 LSRVLHTNVV  | 3     | >NOTCH1-S1 LIRVLHTNVVI | 233   | 230   |
| >NOTCH1-S1 LSRVLHTNVV  | 396   | >NOTCH1-S1 LIRVLHTNVVI | 10652 | 10256 |
| >NOTCH1-S1 LSRVLHTNVV  | 344   | >NOTCH1-S1 LIRVLHTNVVI | 9635  | 9291  |
| >NOTCH1-S1 LSRVLHTNV   | 98    | >NOTCH1-S1 LIRVLHTNV   | 1775  | 1677  |
| >NOTCH1-S1 LSRVLHTNVV  | 153   | >NOTCH1-S1 LIRVLHTNVV  | 3489  | 3336  |
| >NOTCH1-S1 LSRVLHTNVV  | 15    | >NOTCH1-S1 LIRVLHTNVVI | 173   | 158   |
| >NOTCH1-S1 NSSFHFLRELS | 1943  | >NOTCH1-S1 NSSFHFLRELI | 53    | 1890  |
| >NOTCH1-S1 NSSFHFLRELS | 32676 | >NOTCH1-S1 NSSFHFLRELI | 292   | 32384 |
| >NOTCH1-S1 ELSRVLHTNV  | 322   | >NOTCH1-S1 ELIRVLHTNV  | 452   | 130   |
| >NOTCH1-S1 ELSRVLHTNV  | 63    | >NOTCH1-S1 ELIRVLHTNV\ | 183   | 120   |
| >NOTCH1-S1 ELSRVLHTNV  | 97    | >NOTCH1-S1 ELIRVLHTNV  | 74    | 23    |
| >NOTCH1-S1 ELSRVLHTNV  | 77    | >NOTCH1-S1 ELIRVLHTNV\ | 58    | 19    |
| >NOTCH1-S1 ELSRVLHTNV  | 1548  | >NOTCH1-S1 ELIRVLHTNV\ | 307   | 1241  |
| >NOTCH1-S1 ELSRVLHTNV  | 27    | >NOTCH1-S1 ELIRVLHTNV  | 15    | 12    |
| >NOTCH1-S1 ELSRVLHTNV  | 38    | >NOTCH1-S1 ELIRVLHTNV\ | 20    | 18    |
| >NOTCH1-S1 ELSRVLHTNV  | 231   | >NOTCH1-S1 ELIRVLHTNV  | 92    | 139   |
| >NOTCH1-S1 ELSRVLHTNV  | 51    | >NOTCH1-S1 ELIRVLHTNV\ | 15    | 36    |
| >NOTCH1-S1 ELSRVLHTNV  | 31    | >NOTCH1-S1 ELIRVLHTNV  | 35    | 4     |
| >NOTCH1-S1 ELSRVLHTNV  | 73    | >NOTCH1-S1 ELIRVLHTNV\ | 81    | 8     |
| >NOTCH1-S1 ELSRVLHTNV  | 30    | >NOTCH1-S1 ELIRVLHTNV  | 110   | 80    |
| >NOTCH1-S1 ELSRVLHTNV  | 17    | >NOTCH1-S1 ELIRVLHTNV\ | 63    | 46    |
| >NOTCH1-S1 ELSRVLHTNV  | 4     | >NOTCH1-S1 ELIRVLHTNV  | 5     | 1     |
| >NOTCH1-S1 ELSRVLHTNV  | 8     | >NOTCH1-S1 ELIRVLHTNV\ | 10    | 2     |
| >NOTCH1-S1 ELSRVLHTNV  | 7413  | >NOTCH1-S1 ELIRVLHTNV\ | 242   | 7171  |
| >NOTCH1-S1 ELSRVLHTNV  | 411   | >NOTCH1-S1 ELIRVLHTNV  | 384   | 27    |
| >NOTCH1-S1 ELSRVLHTNV  | 59    | >NOTCH1-S1 ELIRVLHTNV\ | 42    | 17    |
| >NOTCH1-S1 ELSRVLHTNV  | 58    | >NOTCH1-S1 ELIRVLHTNV  | 23    | 35    |
| >NOTCH1-S1 ELSRVLHTNV  | 153   | >NOTCH1-S1 ELIRVLHTNV\ | 48    | 105   |
| >NOTCH1-S1 RELSRVLHTN  | 584   | >NOTCH1-S1 RELIRVLHTN\ | 305   | 279   |
| >NOTCH1-S1 RELSRVLHTN  | 466   | >NOTCH1-S1 RELIRVLHTN\ | 1860  | 1394  |
| >NOTCH1-S1 RELSRVLHTN  | 210   | >NOTCH1-S1 RELIRVLHTN\ | 492   | 282   |
| >NOTCH1-S1 RELSRVLHT   | 339   | >NOTCH1-S1 RELIRVLHT   | 220   | 119   |
| >NOTCH1-S1 RELSRVLHTN  | 327   | >NOTCH1-S1 RELIRVLHTN  | 468   | 141   |
| >NOTCH1-S1 RELSRVLHTN  | 74    | >NOTCH1-S1 RELIRVLHTN\ | 50    | 24    |

|                        |       |                        |      |       |
|------------------------|-------|------------------------|------|-------|
| >NOTCH1-S1 RELSRVLHTN  | 276   | >NOTCH1-S1 RELIRVLHTN\ | 338  | 62    |
| >NOTCH1-S1 RELSRVLHT   | 33    | >NOTCH1-S1 RELIRVLHT   | 63   | 30    |
| >NOTCH1-S1 RELSRVLHTN  | 8     | >NOTCH1-S1 RELIRVLHTN\ | 10   | 2     |
| >NOTCH1-S1 LRELSRVL    | 1261  | >NOTCH1-S1 LRELIRVL    | 419  | 842   |
| >NOTCH1-S1 LRELSRVLH   | 2085  | >NOTCH1-S1 LRELIRVLH   | 478  | 1607  |
| >NOTCH1-S1 FLRELSRV    | 40    | >NOTCH1-S1 FLRELIRV    | 20   | 20    |
| >NOTCH1-S1 FLRELSRVL   | 1079  | >NOTCH1-S1 FLRELIRVL   | 301  | 778   |
| >NOTCH1-S1 FLRELSRV    | 8     | >NOTCH1-S1 FLRELIRV    | 13   | 5     |
| >NOTCH1-S1 FLRELSRVL   | 89    | >NOTCH1-S1 FLRELIRVL   | 92   | 3     |
| >NOTCH1-S1 FLRELSRV    | 2     | >NOTCH1-S1 FLRELIRV    | 3    | 1     |
| >NOTCH1-S1 FLRELSRVL   | 11    | >NOTCH1-S1 FLRELIRVL   | 7    | 4     |
| >NOTCH1-S1 FLRELSRVLHT | 29    | >NOTCH1-S1 FLRELIRVLHT | 25   | 4     |
| >NOTCH1-S1 FLRELSRV    | 26    | >NOTCH1-S1 FLRELIRV    | 16   | 10    |
| >NOTCH1-S1 FLRELSRVL   | 1670  | >NOTCH1-S1 FLRELIRVL   | 409  | 1261  |
| >NOTCH1-S1 FLRELSRV    | 2     | >NOTCH1-S1 FLRELIRV    | 2    | 0     |
| >NOTCH1-S1 FLRELSRVL   | 15    | >NOTCH1-S1 FLRELIRVL   | 5    | 10    |
| >NOTCH1-S1 FLRELSRVLHT | 200   | >NOTCH1-S1 FLRELIRVLHT | 86   | 114   |
| >NOTCH1-S1 FLRELSRV    | 6     | >NOTCH1-S1 FLRELIRV    | 5    | 1     |
| >NOTCH1-S1 FLRELSRVL   | 53    | >NOTCH1-S1 FLRELIRVL   | 30   | 23    |
| >NOTCH1-S1 FLRELSRV    | 10    | >NOTCH1-S1 FLRELIRV    | 7    | 3     |
| >NOTCH1-S1 FLRELSRVL   | 200   | >NOTCH1-S1 FLRELIRVL   | 91   | 109   |
| >NOTCH1-S1 FLRELSRVLHT | 627   | >NOTCH1-S1 FLRELIRVLHT | 492  | 135   |
| >NOTCH1-S1 FLRELSRV    | 21    | >NOTCH1-S1 FLRELIRV    | 12   | 9     |
| >NOTCH1-S1 FLRELSRV    | 1     | >NOTCH1-S1 FLRELIRV    | 1    | 0     |
| >NOTCH1-S1 FLRELSRVL   | 8     | >NOTCH1-S1 FLRELIRVL   | 3    | 5     |
| >NOTCH1-S1 FLRELSRVLHT | 35    | >NOTCH1-S1 FLRELIRVLHT | 19   | 16    |
| >NOTCH1-S1 FLRELSRVL   | 282   | >NOTCH1-S1 FLRELIRVL   | 917  | 635   |
| >NOTCH1-S1 FLRELSRVL   | 65    | >NOTCH1-S1 FLRELIRVL   | 75   | 10    |
| >NOTCH1-S1 FLRELSRVL   | 123   | >NOTCH1-S1 FLRELIRVL   | 280  | 157   |
| >NOTCH1-S1 FLRELSRVL   | 470   | >NOTCH1-S1 FLRELIRVL   | 1661 | 1191  |
| >NOTCH1-S1 HFLRELSRVL  | 56    | >NOTCH1-S1 HFLRELIRVL  | 35   | 21    |
| >NOTCH1-S1 HFLRELSR    | 54    | >NOTCH1-S1 HFLRELIR    | 59   | 5     |
| >NOTCH1-S1 HFLRELSR    | 37    | >NOTCH1-S1 HFLRELIR    | 97   | 60    |
| >NOTCH1-S1 HFLRELSR    | 38    | >NOTCH1-S1 HFLRELIR    | 34   | 4     |
| >NOTCH1-S1 FHFLRELSRVL | 251   | >NOTCH1-S1 FHFLRELIRVL | 340  | 89    |
| >NOTCH1-S1 FHFLRELSRVL | 86    | >NOTCH1-S1 FHFLRELIRVL | 86   | 0     |
| >NOTCH1-S1 FHFLRELSRVL | 13    | >NOTCH1-S1 FHFLRELIRVL | 16   | 3     |
| >NOTCH1-S1 FHFLRELS    | 37591 | >NOTCH1-S1 FHFLRELI    | 480  | 37111 |
| >NOTCH1-S1 FHFLRELS    | 10148 | >NOTCH1-S1 FHFLRELI    | 286  | 9862  |
| >NOTCH1-S1 FHFLRELSR   | 536   | >NOTCH1-S1 FHFLRELIR   | 406  | 130   |
| >NOTCH1-S1 SFHFLRELS   | 29314 | >NOTCH1-S1 SFHFLRELI   | 262  | 29052 |
| >NOTCH1-S1 SFHFLRELS   | 12482 | >NOTCH1-S1 SFHFLRELI   | 473  | 12009 |
| >NOTCH1-S1 SFHFLRELSR  | 24    | >NOTCH1-S1 SFHFLRELIR  | 38   | 14    |

|                        |       |                        |       |       |
|------------------------|-------|------------------------|-------|-------|
| >NOTCH1-S1 SFHFLELSR   | 70    | >NOTCH1-S1 SFHFLELIR   | 125   | 55    |
| >NOTCH1-S1 SFHFLELSR   | 211   | >NOTCH1-S1 SFHFLELIR   | 267   | 56    |
| >NOTCH1-S1 SFHFLELSR   | 358   | >NOTCH1-S1 SFHFLELIR   | 562   | 204   |
| >NOTCH1-S1 SFHFLELSR   | 74    | >NOTCH1-S1 SFHFLELIR   | 66    | 8     |
| >NOTCH1-S1 SFHFLELS    | 871   | >NOTCH1-S1 SFHFLELI    | 119   | 752   |
| >NOTCH1-S1 SSFHFLRELS  | 983   | >NOTCH1-S1 SSFHFLRELI  | 305   | 678   |
| >NOTCH1-S1 SSFHFLRELS  | 27137 | >NOTCH1-S1 SSFHFLRELI  | 115   | 27022 |
| >NOTCH1-S1 SSFHFLRELSR | 31    | >NOTCH1-S1 SSFHFLRELIR | 49    | 18    |
| >NOTCH1-S1 SSFHFLRELSR | 41    | >NOTCH1-S1 SSFHFLRELIR | 51    | 10    |
| >NOTCH1-S1 SSFHFLRELS  | 9875  | >NOTCH1-S1 SSFHFLRELI  | 58    | 9817  |
| >NOTCH1-S1 SSFHFLRELSR | 424   | >NOTCH1-S1 SSFHFLRELIR | 1064  | 640   |
| >NOTCH1-S1 SSFHFLRELSR | 26    | >NOTCH1-S1 SSFHFLRELIR | 38    | 12    |
| >NOTCH1-S1 SSFHFLRELS  | 10334 | >NOTCH1-S1 SSFHFLRELI  | 100   | 10234 |
| >NOTCH1-S1 SSFHFLRELS  | 13461 | >NOTCH1-S1 SSFHFLRELI  | 429   | 13032 |
| >NOTCH1-S1 SSFHFLRELSR | 67    | >NOTCH1-S1 SSFHFLRELIR | 61    | 6     |
| >NOTCH1-S1 SSFHFLRELSR | 316   | >NOTCH1-S1 SSFHFLRELIR | 263   | 53    |
| >NOTCH1-S1 SSFHFLRELS  | 33478 | >NOTCH1-S1 SSFHFLRELI  | 111   | 33367 |
| >NOTCH1-S1 SIVYLEIDNR  | 491   | >NOTCH1-S1 PIVYLEIDNR  | 10111 | 9620  |
| >NOTCH1-S1 SIVYLEIDNR  | 33    | >NOTCH1-S1 PIVYLEIDNR  | 956   | 923   |
| >NOTCH1-S1 SIVYLEIDNR  | 272   | >NOTCH1-S1 PIVYLEIDNR  | 714   | 442   |
| >NOTCH1-S1 GSIVYLEIDNR | 263   | >NOTCH1-S1 GPIVYLEIDNF | 8465  | 8202  |
| >NOTCH1-S1 GSIVYLEIDNR | 215   | >NOTCH1-S1 GPIVYLEIDNF | 4062  | 3847  |
| >NOTCH1-S1 GSIVYLEI    | 266   | >NOTCH1-S1 GPIVYLEI    | 22938 | 22672 |
| >NOTCH1-S1 GSIVYLEI    | 15567 | >NOTCH1-S1 GPIVYLEI    | 394   | 15173 |
| >NOTCH1-S1 GSIVYLEI    | 2919  | >NOTCH1-S1 GPIVYLEI    | 438   | 2481  |
| >NOTCH1-S1 GSIVYLEIDNR | 170   | >NOTCH1-S1 GPIVYLEIDNF | 3797  | 3627  |
| >NOTCH1-S1 GSIVYLEI    | 240   | >NOTCH1-S1 GPIVYLEI    | 8195  | 7955  |
| >NOTCH1-S1 RGSIVYLEI   | 321   | >NOTCH1-S1 RGPIVYLEI   | 15498 | 15177 |
| >NOTCH1-S1 RGSIVYLEI   | 17202 | >NOTCH1-S1 RGPIVYLEI   | 268   | 16934 |
| >NOTCH1-S1 RGSIVYLEI   | 213   | >NOTCH1-S1 RGPIVYLEI   | 321   | 108   |
| >NOTCH1-S1 VRGSIVYL    | 446   | >NOTCH1-S1 VRGPIVYL    | 194   | 252   |
| >NOTCH1-S1 VRGSIVYLEI  | 401   | >NOTCH1-S1 VRGPIVYLEI  | 298   | 103   |
| >NOTCH1-S1 DVRGSIVY    | 151   | >NOTCH1-S1 DVRGPIVY    | 599   | 448   |
| >NOTCH1-S1 DVRGSIVY    | 27    | >NOTCH1-S1 DVRGPIVY    | 20    | 7     |
| >NOTCH1-S1 DVRGSIVYL   | 80    | >NOTCH1-S1 DVRGPIVYL   | 58    | 22    |
| >NOTCH1-S1 DVRGSIVY    | 50    | >NOTCH1-S1 DVRGPIVY    | 23    | 27    |
| >NOTCH1-S1 DVRGSIVYL   | 867   | >NOTCH1-S1 DVRGPIVYL   | 352   | 515   |
| >NOTCH1-S1 DVRGSIVYL   | 390   | >NOTCH1-S1 DVRGPIVYL   | 112   | 278   |
| >NOTCH1-S1 DVRGSIVY    | 491   | >NOTCH1-S1 DVRGPIVY    | 1291  | 800   |
| >NOTCH1-S1 MDVRGSIVY   | 70    | >NOTCH1-S1 MDVRGPIVY   | 219   | 149   |
| >NOTCH1-S1 PMDVRGSIV   | 538   | >NOTCH1-S1 PMDVRGPIV   | 270   | 268   |
| >NOTCH1-S1 PMDVRGSIV   | 85    | >NOTCH1-S1 PMDVRGPIV   | 56    | 29    |
| >NOTCH1-S1 PMDVRGSIV   | 221   | >NOTCH1-S1 PMDVRGPIV   | 28    | 193   |

|                       |       |                       |       |       |
|-----------------------|-------|-----------------------|-------|-------|
| >NOTCH1-S1 PMDVRGSIV\ | 150   | >NOTCH1-S1 PMDVRGPIV\ | 93    | 57    |
| >NOTCH1-S1 PMDVRGSIV\ | 284   | >NOTCH1-S1 PMDVRGPIV\ | 228   | 56    |
| >NOTCH1-S1 PMDVRGSIV  | 97    | >NOTCH1-S1 PMDVRGPIV  | 52    | 45    |
| >NOTCH1-S1 PMDVRGSIV\ | 138   | >NOTCH1-S1 PMDVRGPIV\ | 115   | 23    |
| >NOTCH1-S1 PMDVRGSIV\ | 650   | >NOTCH1-S1 PMDVRGPIV\ | 486   | 164   |
| >NOTCH1-S1 DPMDVRGSI  | 631   | >NOTCH1-S1 DPMDVRGPI  | 130   | 501   |
| >NOTCH1-S1 DPMDVRGSI  | 552   | >NOTCH1-S1 DPMDVRGPI  | 246   | 306   |
| >NOTCH1-S1 DPMDVRGSI\ | 1105  | >NOTCH1-S1 DPMDVRGPI\ | 394   | 711   |
| >NOTCH1-S1 DPMDVRGSI  | 106   | >NOTCH1-S1 DPMDVRGPI  | 56    | 50    |
| >NOTCH1-S1 DPMDVRGSI\ | 121   | >NOTCH1-S1 DPMDVRGPI\ | 413   | 292   |
| >NOTCH1-S1 DPMDVRGSI\ | 123   | >NOTCH1-S1 DPMDVRGPI\ | 173   | 50    |
| >NOTCH1-S1 DPMDVRGSI\ | 15    | >NOTCH1-S1 DPMDVRGPI\ | 16    | 1     |
| >NOTCH1-S1 DPMDVRGSI\ | 424   | >NOTCH1-S1 DPMDVRGPI\ | 457   | 33    |
| >NOTCH1-S1 DPMDVRGSI\ | 140   | >NOTCH1-S1 DPMDVRGPI\ | 189   | 49    |
| >NOTCH1-S1 DPMDVRGSI\ | 63    | >NOTCH1-S1 DPMDVRGPI\ | 589   | 526   |
| >NOTCH1-S1 LDPMDVRGS  | 254   | >NOTCH1-S1 LDPMDVRGP  | 375   | 121   |
| >NOTCH1-S1 ELDPMDVRG  | 384   | >NOTCH1-S1 ELDPMDVRG  | 669   | 285   |
| >NOTCH1-S1 ELDPMDVRG  | 927   | >NOTCH1-S1 ELDPMDVRG  | 319   | 608   |
| >NOTCH1-S2 SSGGALNFTV | 373   | >NOTCH1-S2 RSGGALNFTV | 635   | 262   |
| >NOTCH1-S2 SSGGALNFTV | 378   | >NOTCH1-S2 RSGGALNFTV | 1598  | 1220  |
| >NOTCH1-S2 SSGGALNF   | 1189  | >NOTCH1-S2 RSGGALNF   | 91    | 1098  |
| >NOTCH1-S2 SSGGALNFTV | 1523  | >NOTCH1-S2 RSGGALNFTV | 258   | 1265  |
| >NOTCH1-S2 SSGGALNFTV | 413   | >NOTCH1-S2 RSGGALNFTV | 727   | 314   |
| >NOTCH1-S2 SSGGALNFTV | 366   | >NOTCH1-S2 RSGGALNFTV | 3022  | 2656  |
| >NOTCH1-S2 SSGGALNF   | 789   | >NOTCH1-S2 RSGGALNF   | 277   | 512   |
| >NOTCH1-S2 SSGGALNF   | 1733  | >NOTCH1-S2 RSGGALNF   | 267   | 1466  |
| >NOTCH1-S2 SSGGALNF   | 20    | >NOTCH1-S2 RSGGALNF   | 5     | 15    |
| >NOTCH1-S2 SSGGALNFTV | 4394  | >NOTCH1-S2 RSGGALNFTV | 293   | 4101  |
| >NOTCH1-S2 SSGGALNF   | 1564  | >NOTCH1-S2 RSGGALNF   | 35    | 1529  |
| >NOTCH1-S2 SSGGALNF   | 543   | >NOTCH1-S2 RSGGALNF   | 28    | 515   |
| >NOTCH1-S2 SSGGALNFTV | 724   | >NOTCH1-S2 RSGGALNFTV | 363   | 361   |
| >NOTCH1-S2 SSSGGALNFT | 186   | >NOTCH1-S2 SRSGGALNFT | 3444  | 3258  |
| >NOTCH1-S2 SSSGGALNF  | 451   | >NOTCH1-S2 SRSGGALNF  | 3859  | 3408  |
| >NOTCH1-S2 SSSGGALNF  | 423   | >NOTCH1-S2 SRSGGALNF  | 11927 | 11504 |
| >NOTCH1-S2 SSSGGALNFT | 111   | >NOTCH1-S2 SRSGGALNFT | 7363  | 7252  |
| >NOTCH1-S2 SSSGGALNFT | 336   | >NOTCH1-S2 SRSGGALNFT | 12513 | 12177 |
| >NOTCH1-S2 SSSGGALNF  | 434   | >NOTCH1-S2 SRSGGALNF  | 14680 | 14246 |
| >NOTCH1-S2 SSSGGALNF  | 448   | >NOTCH1-S2 SRSGGALNF  | 196   | 252   |
| >NOTCH1-S2 SSSGGALNF  | 3     | >NOTCH1-S2 SRSGGALNF  | 9788  | 9785  |
| >NOTCH1-S2 SSSGGALNFT | 135   | >NOTCH1-S2 SRSGGALNFT | 25439 | 25304 |
| >NOTCH1-S2 SSSGGALNF  | 18230 | >NOTCH1-S2 SRSGGALNF  | 260   | 17970 |
| >NOTCH1-S2 SSSGGALNFT | 20393 | >NOTCH1-S2 SRSGGALNFT | 461   | 19932 |
| >NOTCH1-S2 SSSGGALNFT | 4199  | >NOTCH1-S2 SRSGGALNFT | 154   | 4045  |



|                       |       |                       |       |       |
|-----------------------|-------|-----------------------|-------|-------|
| >NOTCH1-S2 SSSGGALNF  | 132   | >NOTCH1-S2 SRSGGALNF  | 20332 | 20200 |
| >NOTCH1-S2 SSSGGALNF  | 49    | >NOTCH1-S2 SRSGGALNF  | 3442  | 3393  |
| >NOTCH1-S2 SSSGGALNFT | 221   | >NOTCH1-S2 SRSGGALNFT | 9627  | 9406  |
| >NOTCH1-S2 SSSGGALNF  | 28104 | >NOTCH1-S2 SRSGGALNF  | 467   | 27637 |
| >NOTCH1-S2 ASGTSTVLGS | 20687 | >NOTCH1-S2 ASGTSTVLGS | 372   | 20315 |
| >NOTCH1-S2 GSSSGGAL   | 12481 | >NOTCH1-S2 GSRSGGAL   | 330   | 12151 |
| >NOTCH1-S2 GSSSGGALNF | 11408 | >NOTCH1-S2 GSRSGGALNF | 253   | 11155 |
| >NOTCH1-S2 GSSSGGAL   | 8518  | >NOTCH1-S2 GSRSGGAL   | 339   | 8179  |
| >NOTCH1-S2 GSSSGGALNF | 332   | >NOTCH1-S2 GSRSGGALNF | 163   | 169   |
| >NOTCH1-S2 GSSSGGALNF | 171   | >NOTCH1-S2 GSRSGGALNF | 63    | 108   |
| >NOTCH1-S2 GSSSGGAL   | 141   | >NOTCH1-S2 GSRSGGAL   | 26    | 115   |
| >NOTCH1-S2 GSSSGGALNF | 4     | >NOTCH1-S2 GSRSGGALNF | 3     | 1     |
| >NOTCH1-S2 GSSSGGALNF | 495   | >NOTCH1-S2 GSRSGGALNF | 8677  | 8182  |
| >NOTCH1-S2 GSSSGGALN  | 337   | >NOTCH1-S2 GSRSGGALN  | 119   | 218   |
| >NOTCH1-S2 GSSSGGALNF | 61    | >NOTCH1-S2 GSRSGGALNF | 99    | 38    |
| >NOTCH1-S2 GSSSGGALNF | 603   | >NOTCH1-S2 GSRSGGALNF | 192   | 411   |
| >NOTCH1-S2 LGSSSGALN  | 305   | >NOTCH1-S2 LGSRSGGALN | 479   | 174   |
| >NOTCH1-S2 LGSSSGALN  | 174   | >NOTCH1-S2 LGSRSGGALN | 304   | 130   |
| >NOTCH1-S2 LGSSSGALN  | 95    | >NOTCH1-S2 LGSRSGGALN | 254   | 159   |
| >NOTCH1-S2 LGSSSGALN  | 329   | >NOTCH1-S2 LGSRSGGALN | 846   | 517   |
| >NOTCH1-S2 VLGSSSGGAL | 198   | >NOTCH1-S2 VLGSRSGGAL | 607   | 409   |
| >NOTCH1-S2 VLGSSSGGA  | 68    | >NOTCH1-S2 VLGSRSGGA  | 98    | 30    |
| >NOTCH1-S2 VLGSSSGGAL | 320   | >NOTCH1-S2 VLGSRSGGAL | 627   | 307   |
| >NOTCH1-S2 VLGSSSGGA  | 142   | >NOTCH1-S2 VLGSRSGGA  | 268   | 126   |
| >NOTCH1-S2 VLGSSSGGAL | 40    | >NOTCH1-S2 VLGSRSGGAL | 65    | 25    |
| >NOTCH1-S2 VLGSSSGGAL | 133   | >NOTCH1-S2 VLGSRSGGAL | 229   | 96    |
| >NOTCH1-S2 VLGSSSGGA  | 372   | >NOTCH1-S2 VLGSRSGGA  | 856   | 484   |
| >NOTCH1-S2 VLGSSSGGAL | 423   | >NOTCH1-S2 VLGSRSGGAL | 776   | 353   |
| >NOTCH1-S2 VLGSSSGGA  | 54    | >NOTCH1-S2 VLGSRSGGA  | 84    | 30    |
| >NOTCH1-S2 VLGSSSGGAL | 27    | >NOTCH1-S2 VLGSRSGGAL | 36    | 9     |
| >NOTCH1-S2 VLGSSSGGAL | 488   | >NOTCH1-S2 VLGSRSGGAL | 1114  | 626   |
| >NOTCH1-S2 TVLGSSSGGA | 261   | >NOTCH1-S2 TVLGRSNGGA | 595   | 334   |
| >NOTCH1-S2 TVLGSSSGGA | 485   | >NOTCH1-S2 TVLGRSNGGA | 495   | 10    |
| >NOTCH1-S2 TVLGSSSGGA | 170   | >NOTCH1-S2 TVLGRSNGGA | 717   | 547   |
| >NOTCH1-S2 TVLGSSSGGA | 170   | >NOTCH1-S2 TVLGRSNGGA | 508   | 338   |
| >NOTCH1-S2 TVLGSSSGGA | 800   | >NOTCH1-S2 TVLGRSNGGA | 400   | 400   |
| >NOTCH1-S2 TVLGSSSGGA | 495   | >NOTCH1-S2 TVLGRSNGGA | 1522  | 1027  |
| >NOTCH1-S2 TVLGSSSGGA | 490   | >NOTCH1-S2 TVLGRSNGGA | 940   | 450   |
| >NOTCH1-S2 STVLGSSSGG | 191   | >NOTCH1-S2 STVLGRSNGG | 605   | 414   |
| >NOTCH1-S2 STVLGSSSG  | 344   | >NOTCH1-S2 STVLGRSNG  | 5543  | 5199  |
| >NOTCH1-S2 TSTVLGSS   | 20452 | >NOTCH1-S2 TSTVLGSR   | 255   | 20197 |
| >NOTCH1-S2 TSTVLGSS   | 21666 | >NOTCH1-S2 TSTVLGSR   | 31    | 21635 |
| >NOTCH1-S2 TSTVLGSSS  | 514   | >NOTCH1-S2 TSTVLGSR   | 425   | 89    |

|                       |       |                       |      |       |
|-----------------------|-------|-----------------------|------|-------|
| >NOTCH1-S2 GTSTVLGSS  | 19191 | >NOTCH1-S2 GTSTVLGSR  | 261  | 18930 |
| >NOTCH1-S2 GTSTVLGSS  | 20625 | >NOTCH1-S2 GTSTVLGSR  | 243  | 20382 |
| >NOTCH1-S2 GTSTVLGSS  | 26411 | >NOTCH1-S2 GTSTVLGSR  | 53   | 26358 |
| >NOTCH1-S2 GTSTVLGSSS | 317   | >NOTCH1-S2 GTSTVLGSR  | 2775 | 2458  |
| >NOTCH1-S2 SLQPPPPPPQ | 496   | >NOTCH1-S2 NLQPPPPPPC | 2988 | 2492  |
| >NOTCH1-S2 SLQPPPPPPQ | 103   | >NOTCH1-S2 NLQPPPPPPC | 934  | 831   |
| >NOTCH1-S2 QPANIQQQQ  | 116   | >NOTCH1-S2 QPANIQQQQ  | 566  | 450   |
| >NOTCH1-S2 QPANIQQQQ  | 124   | >NOTCH1-S2 QPANIQQQQ  | 881  | 757   |
| >NOTCH1-S2 SQADVQPL   | 76    | >NOTCH1-S2 GQADVQPL   | 155  | 79    |
| >NOTCH1-S2 SQADVQPL   | 28    | >NOTCH1-S2 GQADVQPL   | 37   | 9     |
| >NOTCH1-S2 SQADVQPL   | 121   | >NOTCH1-S2 GQADVQPL   | 167  | 46    |
| >NOTCH1-S2 SQADVQPL   | 10    | >NOTCH1-S2 GQADVQPL   | 24   | 14    |
| >NOTCH1-S2 SQADVQPLG  | 266   | >NOTCH1-S2 GQADVQPLG  | 797  | 531   |
| >NOTCH1-S2 SQADVQPL   | 183   | >NOTCH1-S2 GQADVQPL   | 420  | 237   |
| >NOTCH1-S2 SQADVQPL   | 505   | >NOTCH1-S2 GQADVQPL   | 330  | 175   |
| >NOTCH1-S2 SQADVQPL   | 114   | >NOTCH1-S2 GQADVQPL   | 261  | 147   |
| >NOTCH1-S2 SQADVQPL   | 143   | >NOTCH1-S2 GQADVQPL   | 231  | 88    |
| >NOTCH1-S2 SQADVQPL   | 102   | >NOTCH1-S2 GQADVQPL   | 310  | 208   |
| >NOTCH1-S2 SQADVQPL   | 36    | >NOTCH1-S2 GQADVQPL   | 204  | 168   |
| >NOTCH1-S2 SQADVQPL   | 565   | >NOTCH1-S2 GQADVQPL   | 240  | 325   |
| >NOTCH1-S2 EPSQADVQ   | 187   | >NOTCH1-S2 EPGQADVQ   | 1077 | 890   |
| >NOTCH1-S2 EPSQADVQPI | 189   | >NOTCH1-S2 EPGQADVQP  | 2710 | 2521  |
| >NOTCH1-S2 EPSQADVQPI | 288   | >NOTCH1-S2 EPGQADVQP  | 4894 | 4606  |
| >NOTCH1-S2 GEPSQADVQ  | 306   | >NOTCH1-S2 GEPGQADVC  | 123  | 183   |
| >NOTCH1-S2 GEPSQADVQ  | 467   | >NOTCH1-S2 GEPGQADVC  | 340  | 127   |
| >NOTCH1-S2 GEPSQADVQ  | 54    | >NOTCH1-S2 GEPGQADVC  | 155  | 101   |
| >NOTCH1-S2 FLSGEPSQA  | 86    | >NOTCH1-S2 FLSGEPGQA  | 407  | 321   |
| >NOTCH1-S2 FLSGEPSQAD | 22    | >NOTCH1-S2 FLSGEPGQAE | 33   | 11    |
| >NOTCH1-S2 FLSGEPSQ   | 77    | >NOTCH1-S2 FLSGEPGQ   | 127  | 50    |
| >NOTCH1-S2 FLSGEPSQA  | 5     | >NOTCH1-S2 FLSGEPGQA  | 10   | 5     |
| >NOTCH1-S2 FLSGEPSQAD | 3     | >NOTCH1-S2 FLSGEPGQAE | 5    | 2     |
| >NOTCH1-S2 FLSGEPSQA  | 4     | >NOTCH1-S2 FLSGEPGQA  | 5    | 1     |
| >NOTCH1-S2 FLSGEPSQAD | 3     | >NOTCH1-S2 FLSGEPGQAE | 3    | 0     |
| >NOTCH1-S2 FLSGEPSQAD | 68    | >NOTCH1-S2 FLSGEPGQAE | 89   | 21    |
| >NOTCH1-S2 FLSGEPSQ   | 392   | >NOTCH1-S2 FLSGEPGQ   | 373  | 19    |
| >NOTCH1-S2 FLSGEPSQA  | 7     | >NOTCH1-S2 FLSGEPGQA  | 13   | 6     |
| >NOTCH1-S2 FLSGEPSQAD | 3     | >NOTCH1-S2 FLSGEPGQAE | 3    | 0     |
| >NOTCH1-S2 FLSGEPSQA  | 141   | >NOTCH1-S2 FLSGEPGQA  | 936  | 795   |
| >NOTCH1-S2 FLSGEPSQAD | 8     | >NOTCH1-S2 FLSGEPGQAE | 10   | 2     |
| >NOTCH1-S2 FLSGEPSQ   | 366   | >NOTCH1-S2 FLSGEPGQ   | 346  | 20    |
| >NOTCH1-S2 FLSGEPSQA  | 25    | >NOTCH1-S2 FLSGEPGQA  | 83   | 58    |
| >NOTCH1-S2 FLSGEPSQAD | 6     | >NOTCH1-S2 FLSGEPGQAE | 6    | 0     |
| >NOTCH1-S2 FLSGEPSQA  | 17    | >NOTCH1-S2 FLSGEPGQA  | 155  | 138   |

|                        |       |                        |      |       |
|------------------------|-------|------------------------|------|-------|
| >NOTCH1-S2 FLSGEPSQAD  | 4     | >NOTCH1-S2 FLSGEPGQAE  | 5    | 1     |
| >NOTCH1-S2 FLSGEPSQ    | 6     | >NOTCH1-S2 FLSGEPGQ    | 9    | 3     |
| >NOTCH1-S2 FLSGEPSQA   | 2     | >NOTCH1-S2 FLSGEPGQA   | 5    | 3     |
| >NOTCH1-S2 FLSGEPSQAD  | 1     | >NOTCH1-S2 FLSGEPGQAE  | 2    | 1     |
| >NOTCH1-S2 RSFLSGEPSQ  | 229   | >NOTCH1-S2 RSFLSGEPGQ  | 291  | 62    |
| >NOTCH1-S2 RSFLSGEPS   | 91    | >NOTCH1-S2 RSFLSGEPG   | 195  | 104   |
| >NOTCH1-S2 RSFLSGEPSQ  | 87    | >NOTCH1-S2 RSFLSGEPGQ  | 79   | 8     |
| >NOTCH1-S2 RSFLSGEPSQ  | 40    | >NOTCH1-S2 RSFLSGEPGQ  | 113  | 73    |
| >NOTCH1-S2 RSFLSGEPSQ  | 332   | >NOTCH1-S2 RSFLSGEPGQ  | 1888 | 1556  |
| >NOTCH1-S2 SPESPDQW    | 3296  | >NOTCH1-S2 FPESPDQW    | 275  | 3021  |
| >NOTCH1-S2 SPESPDQWS!  | 3139  | >NOTCH1-S2 FPESPDQWS!  | 241  | 2898  |
| >NOTCH1-S2 SPESPDQW    | 86    | >NOTCH1-S2 FPESPDQW    | 11   | 75    |
| >NOTCH1-S2 SPESPDQW    | 22    | >NOTCH1-S2 FPESPDQW    | 6    | 16    |
| >NOTCH1-S2 QVPEHPFLTP  | 1848  | >NOTCH1-S2 QVPEHPFLTP  | 311  | 1537  |
| >NOTCH1-S2 QVPEHPFLTP  | 11448 | >NOTCH1-S2 QVPEHPFLTP  | 450  | 10998 |
| >NOTCH1-S2 QVPEHPFLTP  | 12277 | >NOTCH1-S2 QVPEHPFLTP  | 62   | 12215 |
| >NOTCH1-S2 QVPEHPFLTP  | 13991 | >NOTCH1-S2 QVPEHPFLTP  | 112  | 13879 |
| >NOTCH1-S2 QVPEHPFLTP  | 15728 | >NOTCH1-S2 QVPEHPFLTP  | 328  | 15400 |
| >NOTCH1-S2 QVPEHPFLTP  | 7146  | >NOTCH1-S2 QVPEHPFLTP  | 91   | 7055  |
| >NOTCH1-S2 TSPESPQV    | 26    | >NOTCH1-S2 TPFESPQV    | 16   | 10    |
| >NOTCH1-S2 TSPESPQV    | 730   | >NOTCH1-S2 TPFESPQV    | 253  | 477   |
| >NOTCH1-S2 LTPSPESPQ'  | 58    | >NOTCH1-S2 LTPFPESPQ'  | 86   | 28    |
| >NOTCH1-S2 LTPSPESPQ'  | 126   | >NOTCH1-S2 LTPFPESPQ'  | 161  | 35    |
| >NOTCH1-S2 LTPSPESPQ'  | 341   | >NOTCH1-S2 LTPFPESPQ'  | 614  | 273   |
| >NOTCH1-S2 LTPSPESPQ   | 386   | >NOTCH1-S2 LTPFPESPQ   | 1153 | 767   |
| >NOTCH1-S2 LTPSPESPQ'  | 60    | >NOTCH1-S2 LTPFPESPQ'  | 162  | 102   |
| >NOTCH1-S2 FLTPSPES    | 1031  | >NOTCH1-S2 FLTPFPES    | 348  | 683   |
| >NOTCH1-S2 FLTPSPES    | 211   | >NOTCH1-S2 FLTPFPES    | 71   | 140   |
| >NOTCH1-S2 FLTPSPESP   | 245   | >NOTCH1-S2 FLTPFPESP   | 60   | 185   |
| >NOTCH1-S2 FLTPSPESPD( | 994   | >NOTCH1-S2 FLTPFPESPD( | 492  | 502   |
| >NOTCH1-S2 FLTPSPES    | 739   | >NOTCH1-S2 FLTPFPES    | 271  | 468   |
| >NOTCH1-S2 FLTPSPES    | 249   | >NOTCH1-S2 FLTPFPES    | 106  | 143   |
| >NOTCH1-S2 FLTPSPESP   | 1888  | >NOTCH1-S2 FLTPFPESP   | 467  | 1421  |
| >NOTCH1-S2 FLTPSPES    | 464   | >NOTCH1-S2 FLTPFPES    | 439  | 25    |
| >NOTCH1-S2 FLTPSPESPD( | 509   | >NOTCH1-S2 FLTPFPESPD( | 398  | 111   |
| >NOTCH1-S2 FLTPSPES    | 19    | >NOTCH1-S2 FLTPFPES    | 15   | 4     |
| >NOTCH1-S2 FLTPSPESP   | 468   | >NOTCH1-S2 FLTPFPESP   | 446  | 22    |
| >NOTCH1-S2 FLTPSPESPD( | 13    | >NOTCH1-S2 FLTPFPESPD( | 11   | 2     |
| >NOTCH1-S2 HPFLTPSPE   | 266   | >NOTCH1-S2 HPFLTPFPE   | 175  | 91    |
| >NOTCH1-S2 HPFLTPSPE   | 705   | >NOTCH1-S2 HPFLTPFPE   | 220  | 485   |
| >NOTCH1-S2 HPFLTPSPES  | 420   | >NOTCH1-S2 HPFLTPFPES  | 309  | 111   |
| >NOTCH1-S2 PEHPFLTPS   | 18518 | >NOTCH1-S2 PEHPFLTPF   | 116  | 18402 |
| >NOTCH1-S2 PEHPFLTPS   | 2157  | >NOTCH1-S2 PEHPFLTPF   | 18   | 2139  |

|                        |       |                        |     |       |
|------------------------|-------|------------------------|-----|-------|
| >NOTCH1-S2 PEHPFLTPS   | 2106  | >NOTCH1-S2 PEHPFLTPF   | 280 | 1826  |
| >NOTCH1-S2 VPEHPFLTPS  | 1294  | >NOTCH1-S2 VPEHPFLTPF  | 41  | 1253  |
| >NOTCH1-S2 VPEHPFLTPS  | 13671 | >NOTCH1-S2 VPEHPFLTPF  | 191 | 13480 |
| >NOTCH1-S2 VPEHPFLTPS  | 10783 | >NOTCH1-S2 VPEHPFLTPF  | 281 | 10502 |
| >NOTCH1-S2 VPEHPFLTPS  | 256   | >NOTCH1-S2 VPEHPFLTPF  | 805 | 549   |
| >NOTCH1-S2 VPEHPFLTPS  | 9818  | >NOTCH1-S2 VPEHPFLTPF  | 32  | 9786  |
| >NOTCH1-T1 TTPLILAA    | 1908  | >NOTCH1-T1 MTPILILAA   | 482 | 1426  |
| >NOTCH1-T1 TTPLILAA    | 1788  | >NOTCH1-T1 MTPILILAA   | 244 | 1544  |
| >NOTCH1-T1 TTPLILAAR   | 57    | >NOTCH1-T1 MTPILILAAR  | 16  | 41    |
| >NOTCH1-T1 TTPLILAAR   | 67    | >NOTCH1-T1 MTPILILAAR  | 34  | 33    |
| >NOTCH1-T1 TTPLILAAR   | 10    | >NOTCH1-T1 MTPILILAAR  | 5   | 5     |
| >NOTCH1-T1 TTPLILAA    | 30    | >NOTCH1-T1 MTPILILAA   | 12  | 18    |
| >NOTCH1-T1 TTPLILAARL  | 123   | >NOTCH1-T1 MTPILILAARL | 91  | 32    |
| >NOTCH1-T1 TTPLILAARLA | 62    | >NOTCH1-T1 MTPILILAARL | 23  | 39    |
| >NOTCH1-T1 TTPLILAARL  | 518   | >NOTCH1-T1 MTPILILAARL | 62  | 456   |
| >NOTCH1-T1 TTPLILAA    | 97    | >NOTCH1-T1 MTPILILAA   | 68  | 29    |
| >NOTCH1-T1 TTPLILAAR   | 56    | >NOTCH1-T1 MTPILILAAR  | 50  | 6     |
| >NOTCH1-T1 TTPLILAARL  | 2     | >NOTCH1-T1 MTPILILAARL | 2   | 0     |
| >NOTCH1-T1 TTPLILAARLA | 9     | >NOTCH1-T1 MTPILILAARL | 8   | 1     |
| >NOTCH1-T1 TTPLILAARL  | 825   | >NOTCH1-T1 MTPILILAARL | 417 | 408   |
| >NOTCH1-T1 GTTPLILA    | 7455  | >NOTCH1-T1 GMTPLILA    | 140 | 7315  |
| >NOTCH1-T1 GTTPLILAA   | 7885  | >NOTCH1-T1 GMTPLILAA   | 105 | 7780  |
| >NOTCH1-T1 GTTPLILAARL | 7819  | >NOTCH1-T1 GMTPLILAAR  | 166 | 7653  |
| >NOTCH1-T1 GTTPLILA    | 4138  | >NOTCH1-T1 GMTPLILA    | 83  | 4055  |
| >NOTCH1-T1 GTTPLILAA   | 3735  | >NOTCH1-T1 GMTPLILAA   | 77  | 3658  |
| >NOTCH1-T1 GTTPLILAARL | 1135  | >NOTCH1-T1 GMTPLILAAR  | 35  | 1100  |
| >NOTCH1-T1 GTTPLILA    | 3213  | >NOTCH1-T1 GMTPLILA    | 51  | 3162  |
| >NOTCH1-T1 GTTPLILAA   | 1723  | >NOTCH1-T1 GMTPLILAA   | 22  | 1701  |
| >NOTCH1-T1 GTTPLILAARL | 4610  | >NOTCH1-T1 GMTPLILAAR  | 79  | 4531  |
| >NOTCH1-T1 GTTPLILA    | 1360  | >NOTCH1-T1 GMTPLILA    | 163 | 1197  |
| >NOTCH1-T1 GTTPLILAA   | 438   | >NOTCH1-T1 GMTPLILAA   | 58  | 380   |
| >NOTCH1-T1 GTTPLILAARL | 2370  | >NOTCH1-T1 GMTPLILAAR  | 373 | 1997  |
| >NOTCH1-T1 GTTPLILA    | 7257  | >NOTCH1-T1 GMTPLILA    | 60  | 7197  |
| >NOTCH1-T1 GTTPLILAA   | 3904  | >NOTCH1-T1 GMTPLILAA   | 25  | 3879  |
| >NOTCH1-T1 GTTPLILAARL | 3241  | >NOTCH1-T1 GMTPLILAAR  | 22  | 3219  |
| >NOTCH1-T1 GTTPLILA    | 14830 | >NOTCH1-T1 GMTPLILA    | 173 | 14657 |
| >NOTCH1-T1 GTTPLILAA   | 11555 | >NOTCH1-T1 GMTPLILAA   | 63  | 11492 |
| >NOTCH1-T1 GTTPLILAARL | 10085 | >NOTCH1-T1 GMTPLILAAR  | 38  | 10047 |
| >NOTCH1-T1 GTTPLILA    | 5942  | >NOTCH1-T1 GMTPLILA    | 32  | 5910  |
| >NOTCH1-T1 GTTPLILAA   | 6180  | >NOTCH1-T1 GMTPLILAA   | 26  | 6154  |
| >NOTCH1-T1 GTTPLILAARL | 4144  | >NOTCH1-T1 GMTPLILAAR  | 27  | 4117  |
| >NOTCH1-T1 GTTPLILA    | 7238  | >NOTCH1-T1 GMTPLILA    | 13  | 7225  |
| >NOTCH1-T1 GTTPLILAA   | 8305  | >NOTCH1-T1 GMTPLILAA   | 8   | 8297  |

|                        |      |                       |      |      |
|------------------------|------|-----------------------|------|------|
| >NOTCH1-T1 GTTPLILAARL | 2060 | >NOTCH1-T1 GMTPLILAAR | 4    | 2056 |
| >NOTCH1-T1 GTTPLILAAR  | 312  | >NOTCH1-T1 GMTPLILAAR | 1203 | 891  |
| >NOTCH1-T1 GTTPLILAAR  | 79   | >NOTCH1-T1 GMTPLILAAR | 61   | 18   |
| >NOTCH1-T1 GTTPLILAAR  | 13   | >NOTCH1-T1 GMTPLILAAR | 64   | 51   |
| >NOTCH1-T1 GTTPLILAARL | 8    | >NOTCH1-T1 GMTPLILAAR | 1030 | 1022 |
| >NOTCH1-T1 GTTPLILAARL | 31   | >NOTCH1-T1 GMTPLILAAR | 2518 | 2487 |
| >NOTCH1-T1 GTTPLILAARL | 27   | >NOTCH1-T1 GMTPLILAAR | 2798 | 2771 |
| >NOTCH1-T1 GTTPLILAAR  | 368  | >NOTCH1-T1 GMTPLILAAR | 4326 | 3958 |
| >NOTCH1-T1 DGTTPLILAA  | 376  | >NOTCH1-T1 DGMTPLILAA | 330  | 46   |
| >NOTCH1-T1 HDGTTPLI    | 92   | >NOTCH1-T1 HDGMTPLI   | 86   | 6    |
| >NOTCH1-T1 MHDGTTPLIL  | 395  | >NOTCH1-T1 MHDGMTPLI  | 517  | 122  |
| >NOTCH1-T1 MHDGTTPL    | 7    | >NOTCH1-T1 MHDGMTPL   | 9    | 2    |
| >NOTCH1-T1 MHDGTTPLI   | 34   | >NOTCH1-T1 MHDGMTPLI  | 89   | 55   |
| >NOTCH1-T1 MHDGTTPLIL  | 6    | >NOTCH1-T1 MHDGMTPLI  | 8    | 2    |
| >NOTCH1-T1 MHDGTTPLI   | 147  | >NOTCH1-T1 MHDGMTPLI  | 218  | 71   |
| >NOTCH1-T1 RMHDGTTPL   | 19   | >NOTCH1-T1 RMHDGMTPL  | 19   | 0    |
| >NOTCH1-T1 RMHDGTTPL   | 126  | >NOTCH1-T1 RMHDGMTPL  | 111  | 15   |
| >NOTCH1-T1 RMHDGTTPL   | 91   | >NOTCH1-T1 RMHDGMTPL  | 96   | 5    |
| >NOTCH1-T1 RMHDGTTPL   | 11   | >NOTCH1-T1 RMHDGMTPL  | 10   | 1    |
| >NOTCH1-T1 RMHDGTTPL   | 33   | >NOTCH1-T1 RMHDGMTPL  | 33   | 0    |
| >NOTCH1-T1 RMHDGTTPL   | 131  | >NOTCH1-T1 RMHDGMTPL  | 143  | 12   |
| >NOTCH1-T1 RMHDGTTPL   | 3    | >NOTCH1-T1 RMHDGMTPL  | 3    | 0    |
| >NOTCH1-T1 RMHDGTTPL   | 74   | >NOTCH1-T1 RMHDGMTPL  | 87   | 13   |
| >NOTCH1-T1 RMHDGTTPL   | 13   | >NOTCH1-T1 RMHDGMTPL  | 13   | 0    |
| >NOTCH1-T1 RMHDGTTPL   | 13   | >NOTCH1-T1 RMHDGMTPL  | 8    | 5    |
| >NOTCH1-T1 RMHDGTTPL   | 389  | >NOTCH1-T1 RMHDGMTPL  | 498  | 109  |
| >NOTCH1-T1 RMHDGTTPL   | 321  | >NOTCH1-T1 RMHDGMTPL  | 244  | 77   |
| >NOTCH1-T1 RMHDGTTPL   | 4    | >NOTCH1-T1 RMHDGMTPL  | 5    | 1    |
| >NOTCH1-T1 RMHDGTTPL   | 4    | >NOTCH1-T1 RMHDGMTPL  | 5    | 1    |
| >NOTCH1-T1 RMHDGTTPL   | 11   | >NOTCH1-T1 RMHDGMTPL  | 12   | 1    |
| >NOTCH1-T1 RMHDGTTPL   | 7    | >NOTCH1-T1 RMHDGMTPL  | 14   | 7    |
| >NOTCH1-T1 RMHDGTTPL   | 15   | >NOTCH1-T1 RMHDGMTPL  | 31   | 16   |
| >NOTCH1-T1 RMHDGTTPL   | 21   | >NOTCH1-T1 RMHDGMTPL  | 33   | 12   |
| >NOTCH1-T1 RMHDGTTPL   | 18   | >NOTCH1-T1 RMHDGMTPL  | 27   | 9    |
| >NOTCH1-T1 RMHDGTTPL   | 20   | >NOTCH1-T1 RMHDGMTPL  | 27   | 7    |
| >NOTCH1-T1 RMHDGTTPL   | 56   | >NOTCH1-T1 RMHDGMTPL  | 69   | 13   |
| >NOTCH1-T1 RMHDGTTPL   | 121  | >NOTCH1-T1 RMHDGMTPL  | 956  | 835  |
| >NOTCH1-T1 RMHDGTTPL   | 103  | >NOTCH1-T1 RMHDGMTPL  | 310  | 207  |
| >NOTCH1-T1 RMHDGTTPL   | 482  | >NOTCH1-T1 RMHDGMTPL  | 1424 | 942  |
| >NOTCH1-T1 RMHDGTTPL   | 3    | >NOTCH1-T1 RMHDGMTPL  | 3    | 0    |
| >NOTCH1-T1 RMHDGTTPL   | 5    | >NOTCH1-T1 RMHDGMTPL  | 6    | 1    |
| >NOTCH1-T1 RMHDGTTPL   | 9    | >NOTCH1-T1 RMHDGMTPL  | 9    | 0    |
| >NOTCH1-T1 RMHDGTTPL   | 67   | >NOTCH1-T1 RMHDGMTPL  | 113  | 46   |

|                        |      |                       |     |      |
|------------------------|------|-----------------------|-----|------|
| >NOTCH1-T1 RMHDGTTPL   | 13   | >NOTCH1-T1 RMHDGMTP   | 18  | 5    |
| >NOTCH1-T1 RMHDGTTPL   | 49   | >NOTCH1-T1 RMHDGMTP   | 63  | 14   |
| >NOTCH1-T1 RMHDGTTPL   | 752  | >NOTCH1-T1 RMHDGMTP   | 477 | 275  |
| >NOTCH1-T1 RMHDGTTPL   | 17   | >NOTCH1-T1 RMHDGMTP   | 98  | 81   |
| >NOTCH1-T1 RMHDGTTPL   | 41   | >NOTCH1-T1 RMHDGMTP   | 80  | 39   |
| >NOTCH1-T1 RMHDGTTPL   | 69   | >NOTCH1-T1 RMHDGMTP   | 171 | 102  |
| >NOTCH1-T1 RMHDGTTPL   | 51   | >NOTCH1-T1 RMHDGMTP   | 88  | 37   |
| >NOTCH1-T1 RMHDGTTPL   | 45   | >NOTCH1-T1 RMHDGMTP   | 55  | 10   |
| >NOTCH1-T1 RMHDGTTPL   | 409  | >NOTCH1-T1 RMHDGMTP   | 556 | 147  |
| >NOTCH1-T1 RMHDGTTPL   | 221  | >NOTCH1-T1 RMHDGMTP   | 216 | 5    |
| >NOTCH1-T1 RMHDGTTPL   | 22   | >NOTCH1-T1 RMHDGMTP   | 33  | 11   |
| >NOTCH1-T1 RMHDGTTPL   | 208  | >NOTCH1-T1 RMHDGMTP   | 452 | 244  |
| >NOTCH1-T1 RMHDGTTPL   | 25   | >NOTCH1-T1 RMHDGMTP   | 32  | 7    |
| >NOTCH1-T1 RMHDGTTPL   | 79   | >NOTCH1-T1 RMHDGMTP   | 22  | 57   |
| >NOTCH1-T1 RMHDGTTPL   | 832  | >NOTCH1-T1 RMHDGMTP   | 489 | 343  |
| >NOTCH1-T1 RMHDGTTPL   | 262  | >NOTCH1-T1 RMHDGMTP   | 118 | 144  |
| >NOTCH1-T1 RMHDGTTPL   | 145  | >NOTCH1-T1 RMHDGMTP   | 252 | 107  |
| >NOTCH1-T1 RMHDGTTPL   | 151  | >NOTCH1-T1 RMHDGMTP   | 237 | 86   |
| >NOTCH1-T1 RMHDGTTPL   | 46   | >NOTCH1-T1 RMHDGMTP   | 49  | 3    |
| >NOTCH1-T1 RMHDGTTPL   | 214  | >NOTCH1-T1 RMHDGMTP   | 241 | 27   |
| >NOTCH1-T1 RMHDGTTPL   | 83   | >NOTCH1-T1 RMHDGMTP   | 84  | 1    |
| >NOTCH1-T1 RMHDGTTPL   | 428  | >NOTCH1-T1 RMHDGMTP   | 561 | 133  |
| >NOTCH1-T1 ARMHDGTPP   | 370  | >NOTCH1-T1 ARMHDGMT   | 310 | 60   |
| >NOTCH1-T1 ARMHDGTPP   | 17   | >NOTCH1-T1 ARMHDGMT   | 22  | 5    |
| >NOTCH1-T1 ARMHDGTPP   | 112  | >NOTCH1-T1 ARMHDGMT   | 160 | 48   |
| >NOTCH1-T1 ARMHDGTPP   | 54   | >NOTCH1-T1 ARMHDGMT   | 94  | 40   |
| >NOTCH1-T1 ARMHDGTPP   | 71   | >NOTCH1-T1 ARMHDGMT   | 72  | 1    |
| >NOTCH1-T1 ARMHDGTPP   | 36   | >NOTCH1-T1 ARMHDGMT   | 33  | 3    |
| >NOTCH1-T1 ARMHDGTPP   | 403  | >NOTCH1-T1 ARMHDGMT   | 396 | 7    |
| >NOTCH1-T1 ARMHDGTPP   | 336  | >NOTCH1-T1 ARMHDGMT   | 262 | 74   |
| >NOTCH1-T1 ARMHDGTPP   | 131  | >NOTCH1-T1 ARMHDGMT   | 86  | 45   |
| >NOTCH1-T1 DARMHDGTI   | 341  | >NOTCH1-T1 DARMHDGM   | 562 | 221  |
| >NOTCH1-T2 TSLPSSLVPPV | 866  | >NOTCH1-T2 MSLPSSLVPP | 99  | 767  |
| >NOTCH1-T2 TSLPSSLV    | 3933 | >NOTCH1-T2 MSLPSSLV   | 485 | 3448 |
| >NOTCH1-T2 TSLPSSLV    | 523  | >NOTCH1-T2 MSLPSSLV   | 93  | 430  |
| >NOTCH1-T2 TSLPSSLVPPV | 130  | >NOTCH1-T2 MSLPSSLVPP | 32  | 98   |
| >NOTCH1-T2 TSLPSSLV    | 3511 | >NOTCH1-T2 MSLPSSLV   | 446 | 3065 |
| >NOTCH1-T2 TSLPSSLVPPV | 984  | >NOTCH1-T2 MSLPSSLVPP | 94  | 890  |
| >NOTCH1-T2 TSLPSSLVPPV | 841  | >NOTCH1-T2 MSLPSSLVPP | 235 | 606  |
| >NOTCH1-T2 TSLPSSLV    | 2343 | >NOTCH1-T2 MSLPSSLV   | 161 | 2182 |
| >NOTCH1-T2 TSLPSSLVPPV | 396  | >NOTCH1-T2 MSLPSSLVPP | 35  | 361  |
| >NOTCH1-T2 TSLPSSLV    | 97   | >NOTCH1-T2 MSLPSSLV   | 31  | 66   |
| >NOTCH1-T2 TSLPSSLVPPV | 190  | >NOTCH1-T2 MSLPSSLVPP | 55  | 135  |

|                        |       |                        |       |       |
|------------------------|-------|------------------------|-------|-------|
| >NOTCH1-T2 TSLPSSLV    | 63    | >NOTCH1-T2 MSLPSSLV    | 43    | 20    |
| >NOTCH1-T2 TSLPSSLVPPV | 15    | >NOTCH1-T2 MSLPSSLVPP  | 11    | 4     |
| >NOTCH1-T2 TSLPSSLV    | 2093  | >NOTCH1-T2 MSLPSSLV    | 214   | 1879  |
| >NOTCH1-T2 TSLPSSLVPPV | 651   | >NOTCH1-T2 MSLPSSLVPP  | 65    | 586   |
| >NOTCH1-T2 TSLPSSLV    | 113   | >NOTCH1-T2 MSLPSSLV    | 24    | 89    |
| >NOTCH1-T2 TSLPSSLVPPV | 58    | >NOTCH1-T2 MSLPSSLVPP  | 18    | 40    |
| >NOTCH1-T2 TSLPSSLV    | 706   | >NOTCH1-T2 MSLPSSLV    | 294   | 412   |
| >NOTCH1-T2 TSLPSSLV    | 628   | >NOTCH1-T2 MSLPSSLV    | 274   | 354   |
| >NOTCH1-T2 PSLPSSLV    | 6170  | >NOTCH1-T2 PMSLPSSLV   | 433   | 5737  |
| >NOTCH1-T2 PSLPSSLV    | 10548 | >NOTCH1-T2 PMSLPSSLV   | 153   | 10395 |
| >NOTCH1-T2 PSLPSSLV    | 13469 | >NOTCH1-T2 PMSLPSSLV   | 214   | 13255 |
| >NOTCH1-T2 PSLPSSLV    | 15429 | >NOTCH1-T2 PMSLPSSLV   | 127   | 15302 |
| >NOTCH1-T2 PSLPSSL     | 22082 | >NOTCH1-T2 PMSLPSSL    | 351   | 21731 |
| >NOTCH1-T2 PSLPSSLV    | 9294  | >NOTCH1-T2 PMSLPSSLV   | 30    | 9264  |
| >NOTCH1-T2 PSLPSSLV    | 451   | >NOTCH1-T2 PMSLPSSLV   | 8441  | 7990  |
| >NOTCH1-T2 PSLPSSLV    | 398   | >NOTCH1-T2 PMSLPSSLV   | 14736 | 14338 |
| >NOTCH1-T2 ILPQESPALPT | 922   | >NOTCH1-T2 ILPQESPALPN | 255   | 667   |
| >NOTCH1-T2 ILPQESPALPT | 299   | >NOTCH1-T2 ILPQESPALPN | 187   | 112   |
| >NOTCH1-T2 ILPQESPALPT | 14646 | >NOTCH1-T2 ILPQESPALPN | 375   | 14271 |
| >NOTCH1-T2 ILPQESPALPT | 11331 | >NOTCH1-T2 ILPQESPALPN | 94    | 11237 |
| >NOTCH1-T2 LPSLPSSL    | 50    | >NOTCH1-T2 LPMSLPSSL   | 30    | 20    |
| >NOTCH1-T2 LPSLPSSLV   | 5273  | >NOTCH1-T2 LPMSLPSSLV  | 487   | 4786  |
| >NOTCH1-T2 LPSLPSSL    | 35    | >NOTCH1-T2 LPMSLPSSL   | 11    | 24    |
| >NOTCH1-T2 LPSLPSSLV   | 405   | >NOTCH1-T2 LPMSLPSSLV  | 93    | 312   |
| >NOTCH1-T2 LPSLPSSL    | 1652  | >NOTCH1-T2 LPMSLPSSL   | 101   | 1551  |
| >NOTCH1-T2 LPSLPSSL    | 1681  | >NOTCH1-T2 LPMSLPSSL   | 283   | 1398  |
| >NOTCH1-T2 LPSLPSSL    | 74    | >NOTCH1-T2 LPMSLPSSL   | 47    | 27    |
| >NOTCH1-T2 LPSLPSSL    | 568   | >NOTCH1-T2 LPMSLPSSL   | 27    | 541   |
| >NOTCH1-T2 LPSLPSSL    | 996   | >NOTCH1-T2 LPMSLPSSL   | 397   | 599   |
| >NOTCH1-T2 LPSLPSSL    | 50    | >NOTCH1-T2 LPMSLPSSL   | 28    | 22    |
| >NOTCH1-T2 LPSLPSS     | 182   | >NOTCH1-T2 LPMSLPSS    | 94    | 88    |
| >NOTCH1-T2 LPSLPSSLV   | 36    | >NOTCH1-T2 LPMSLPSSLV  | 15    | 21    |
| >NOTCH1-T2 LPSLPSSLVP  | 781   | >NOTCH1-T2 LPMSLPSSLV  | 494   | 287   |
| >NOTCH1-T2 LPSLPSSL    | 140   | >NOTCH1-T2 LPMSLPSSL   | 91    | 49    |
| >NOTCH1-T2 ALPSLPSSLV  | 69    | >NOTCH1-T2 ALPMSLPSSL' | 88    | 19    |
| >NOTCH1-T2 ALPSLPSSL   | 21    | >NOTCH1-T2 ALPMSLPSSL  | 28    | 7     |
| >NOTCH1-T2 ALPSLPSSLV  | 25    | >NOTCH1-T2 ALPMSLPSSL' | 37    | 12    |
| >NOTCH1-T2 ALPSLPSSL   | 30    | >NOTCH1-T2 ALPMSLPSSL  | 36    | 6     |
| >NOTCH1-T2 ALPSLPSSLV  | 6     | >NOTCH1-T2 ALPMSLPSSL' | 6     | 0     |
| >NOTCH1-T2 ALPSLPSSL   | 656   | >NOTCH1-T2 ALPMSLPSSL  | 499   | 157   |
| >NOTCH1-T2 ALPSLPSSLV  | 46    | >NOTCH1-T2 ALPMSLPSSL' | 53    | 7     |
| >NOTCH1-T2 ALPSLPSSL   | 29    | >NOTCH1-T2 ALPMSLPSSL  | 23    | 6     |
| >NOTCH1-T2 ALPSLPSSLV  | 8     | >NOTCH1-T2 ALPMSLPSSL' | 7     | 1     |

|                        |       |                        |      |      |
|------------------------|-------|------------------------|------|------|
| >NOTCH1-T2 ALPTSLPSSL  | 132   | >NOTCH1-T2 ALPMSLPSSL  | 235  | 103  |
| >NOTCH1-T2 ALPTSLPSSLV | 23    | >NOTCH1-T2 ALPMSLPSSL' | 37   | 14   |
| >NOTCH1-T2 ALPTSLPSSL  | 78    | >NOTCH1-T2 ALPMSLPSSL  | 60   | 18   |
| >NOTCH1-T2 ALPTSLPSSLV | 11    | >NOTCH1-T2 ALPMSLPSSL' | 10   | 1    |
| >NOTCH1-T2 ALPTSLPSSL  | 267   | >NOTCH1-T2 ALPMSLPSSL  | 386  | 119  |
| >NOTCH1-T2 ALPTSLPSSLV | 42    | >NOTCH1-T2 ALPMSLPSSL' | 65   | 23   |
| >NOTCH1-T2 ALPTSLPSS   | 275   | >NOTCH1-T2 ALPMSLPSS   | 164  | 111  |
| >NOTCH1-T2 ALPTSLPSSL  | 5     | >NOTCH1-T2 ALPMSLPSSL  | 5    | 0    |
| >NOTCH1-T2 ALPTSLPSSLV | 3     | >NOTCH1-T2 ALPMSLPSSL' | 3    | 0    |
| >NOTCH1-T2 ALPTSLPSSL  | 146   | >NOTCH1-T2 ALPMSLPSSL  | 104  | 42   |
| >NOTCH1-T2 ALPTSLPSSLV | 64    | >NOTCH1-T2 ALPMSLPSSL' | 48   | 16   |
| >NOTCH1-T2 SPALPTSL    | 15    | >NOTCH1-T2 SPALPMSL    | 20   | 5    |
| >NOTCH1-T2 SPALPTSL    | 329   | >NOTCH1-T2 SPALPMSL    | 237  | 92   |
| >NOTCH1-T2 ESPALPTSL   | 417   | >NOTCH1-T2 ESPALPMSL   | 324  | 93   |
| >NOTCH1-T2 ESPALPTSL   | 54    | >NOTCH1-T2 ESPALPMSL   | 25   | 29   |
| >NOTCH1-T2 ESPALPTSL   | 71    | >NOTCH1-T2 ESPALPMSL   | 45   | 26   |
| >NOTCH1-T2 QESPALPT    | 1716  | >NOTCH1-T2 QESPALPM    | 232  | 1484 |
| >NOTCH1-T2 QESPALPTSL  | 336   | >NOTCH1-T2 QESPALPMSL  | 346  | 10   |
| >NOTCH1-T2 QESPALPT    | 3051  | >NOTCH1-T2 QESPALPM    | 112  | 2939 |
| >NOTCH1-T2 QESPALPT    | 4536  | >NOTCH1-T2 QESPALPM    | 136  | 4400 |
| >NOTCH1-T2 QESPALPTSL  | 491   | >NOTCH1-T2 QESPALPMSL  | 345  | 146  |
| >NOTCH1-T2 QESPALPTSL  | 108   | >NOTCH1-T2 QESPALPMSL  | 86   | 22   |
| >NOTCH1-T2 QESPALPTSL  | 782   | >NOTCH1-T2 QESPALPMSL  | 457  | 325  |
| >NOTCH1-T2 QESPALPTSL  | 600   | >NOTCH1-T2 QESPALPMSL  | 394  | 206  |
| >NOTCH1-T2 QESPALPT    | 128   | >NOTCH1-T2 QESPALPM    | 1142 | 1014 |
| >NOTCH1-T2 QESPALPTSL  | 270   | >NOTCH1-T2 QESPALPMSL  | 211  | 59   |
| >NOTCH1-T2 QESPALPT    | 10154 | >NOTCH1-T2 QESPALPM    | 333  | 9821 |
| >NOTCH1-T2 QESPALPTSL  | 138   | >NOTCH1-T2 QESPALPMSL  | 63   | 75   |
| >NOTCH1-T2 LPQESPALPT  | 2726  | >NOTCH1-T2 LPQESPALPM  | 126  | 2600 |
| >NOTCH1-T2 LPQESPALPT  | 6006  | >NOTCH1-T2 LPQESPALPM  | 149  | 5857 |
| >NOTCH1-T2 TPPSQHSY    | 105   | >NOTCH1-T2 APPSQHSY    | 294  | 189  |
| >NOTCH1-T2 TPPSQHSY    | 433   | >NOTCH1-T2 APPSQHSY    | 128  | 305  |
| >NOTCH1-T2 LTPPSQHSY   | 338   | >NOTCH1-T2 LAPPSQHSY   | 8981 | 8643 |
| >NOTCH1-T2 LTPPSQHSY   | 134   | >NOTCH1-T2 LAPPSQHSY   | 5752 | 5618 |
| >NOTCH1-T2 LTPPSQHSY   | 235   | >NOTCH1-T2 LAPPSQHSY   | 8989 | 8754 |
| >NOTCH1-T2 LTPPSQHSY   | 70    | >NOTCH1-T2 LAPPSQHSY   | 552  | 482  |
| >NOTCH1-T2 LTPPSQHSY   | 17    | >NOTCH1-T2 LAPPSQHSY   | 40   | 23   |
| >NOTCH1-T2 LTPPSQHSY   | 170   | >NOTCH1-T2 LAPPSQHSY   | 249  | 79   |
| >NOTCH1-T2 LTPPSQHSY   | 415   | >NOTCH1-T2 LAPPSQHSY   | 214  | 201  |
| >NOTCH1-T2 LTPPSQHSY   | 5     | >NOTCH1-T2 LAPPSQHSY   | 24   | 19   |
| >NOTCH1-T2 LTPPSQHSY   | 1926  | >NOTCH1-T2 LAPPSQHSY   | 102  | 1824 |
| >NOTCH1-T2 LTPPSQHSY   | 251   | >NOTCH1-T2 LAPPSQHSY   | 373  | 122  |
| >NOTCH1-T2 LTPPSQHS    | 431   | >NOTCH1-T2 LAPPSQHS    | 9481 | 9050 |



|                        |      |                        |      |      |
|------------------------|------|------------------------|------|------|
| >NOTCH1-T2 LTPPSQHSY   | 15   | >NOTCH1-T2 LAPPSQHSY   | 205  | 190  |
| >NOTCH1-T2 LTPPSQHSYS  | 13   | >NOTCH1-T2 LAPPSQHSYS  | 152  | 139  |
| >NOTCH1-T2 LTPPSQHSYS: | 26   | >NOTCH1-T2 LAPPSQHSYS  | 326  | 300  |
| >NOTCH1-T2 LTPPSQHSY   | 328  | >NOTCH1-T2 LAPPSQHSY   | 4806 | 4478 |
| >NOTCH1-T2 VPPVTAQAFL  | 1333 | >NOTCH1-T2 VPPVTAQAFL  | 57   | 1276 |
| >NOTCH1-T2 FLTPPSQHS   | 1053 | >NOTCH1-T2 FLAPPSQHS   | 120  | 933  |
| >NOTCH1-T2 FLTPPSQHSY: | 144  | >NOTCH1-T2 FLAPPSQHSY: | 20   | 124  |
| >NOTCH1-T2 FLTPPSQHS   | 1724 | >NOTCH1-T2 FLAPPSQHS   | 197  | 1527 |
| >NOTCH1-T2 FLTPPSQHSY: | 391  | >NOTCH1-T2 FLAPPSQHSY: | 45   | 346  |
| >NOTCH1-T2 FLTPPSQHS   | 971  | >NOTCH1-T2 FLAPPSQHS   | 285  | 686  |
| >NOTCH1-T2 FLTPPSQHSY: | 835  | >NOTCH1-T2 FLAPPSQHSY: | 264  | 571  |
| >NOTCH1-T2 FLTPPSQHS   | 402  | >NOTCH1-T2 FLAPPSQHS   | 161  | 241  |
| >NOTCH1-T2 FLTPPSQHSY  | 738  | >NOTCH1-T2 FLAPPSQHSY  | 298  | 440  |
| >NOTCH1-T2 FLTPPSQHSY: | 96   | >NOTCH1-T2 FLAPPSQHSY: | 39   | 57   |
| >NOTCH1-T2 FLTPPSQHS   | 648  | >NOTCH1-T2 FLAPPSQHS   | 290  | 358  |
| >NOTCH1-T2 FLTPPSQHSY: | 935  | >NOTCH1-T2 FLAPPSQHSY: | 395  | 540  |
| >NOTCH1-T2 FLTPPSQHS   | 25   | >NOTCH1-T2 FLAPPSQHS   | 21   | 4    |
| >NOTCH1-T2 FLTPPSQHSY  | 9    | >NOTCH1-T2 FLAPPSQHSY  | 8    | 1    |
| >NOTCH1-T2 FLTPPSQHSY: | 16   | >NOTCH1-T2 FLAPPSQHSY: | 14   | 2    |
| >NOTCH1-T2 FLTPPSQHSY  | 652  | >NOTCH1-T2 FLAPPSQHSY  | 254  | 398  |
| >NOTCH1-T2 FLTPPSQHSY  | 249  | >NOTCH1-T2 FLAPPSQHSY  | 168  | 81   |
| >NOTCH1-T2 FLTPPSQHSY  | 84   | >NOTCH1-T2 FLAPPSQHSY  | 30   | 54   |
| >NOTCH1-T2 FLTPPSQH    | 474  | >NOTCH1-T2 FLAPPSQH    | 294  | 180  |
| >NOTCH1-T2 FLTPPSQHSY  | 14   | >NOTCH1-T2 FLAPPSQHSY  | 12   | 2    |
| >NOTCH1-T2 FLTPPSQHSY  | 29   | >NOTCH1-T2 FLAPPSQHSY  | 15   | 14   |
| >NOTCH1-T2 FLTPPSQHSY  | 88   | >NOTCH1-T2 FLAPPSQHSY  | 62   | 26   |
| >NOTCH1-T2 FLTPPSQHSY  | 327  | >NOTCH1-T2 FLAPPSQHSY  | 83   | 244  |
| >NOTCH1-T2 QFLTTPPSQHS | 14   | >NOTCH1-T2 QFLAPPSQHS  | 12   | 2    |
| >NOTCH1-T2 QFLTTPPSQHS | 187  | >NOTCH1-T2 QFLAPPSQHS  | 217  | 30   |
| >NOTCH1-T2 QFLTTPPSQHS | 1229 | >NOTCH1-T2 QFLAPPSQHS  | 443  | 786  |
| >NOTCH1-T2 QFLTTPPSQHS | 125  | >NOTCH1-T2 QFLAPPSQHS  | 50   | 75   |
| >NOTCH1-T2 AQFLTTPPS   | 498  | >NOTCH1-T2 AQFLAPPS    | 455  | 43   |
| >NOTCH1-T2 AQFLTTPPS   | 318  | >NOTCH1-T2 AQFLAPPS    | 654  | 336  |
| >NOTCH1-T2 AQFLTTPPSQ  | 204  | >NOTCH1-T2 AQFLAPPSQ   | 412  | 208  |
| >NOTCH1-T2 AQFLTTPPSQ+ | 52   | >NOTCH1-T2 AQFLAPPSQ+  | 87   | 35   |
| >NOTCH1-T2 AQFLTTPPSQ+ | 212  | >NOTCH1-T2 AQFLAPPSQ+  | 425  | 213  |
| >NOTCH1-T2 VTAAQFLT    | 2715 | >NOTCH1-T2 VTAAQFLA    | 295  | 2420 |
| >NOTCH1-T2 VTAAQFLT    | 2118 | >NOTCH1-T2 VTAAQFLA    | 171  | 1947 |
| >NOTCH1-T2 VTAAQFLT    | 1265 | >NOTCH1-T2 VTAAQFLA    | 86   | 1179 |
| >NOTCH1-T2 TPPSQHSY    | 786  | >NOTCH1-T2 MPPSQHSY    | 448  | 338  |
| >NOTCH1-T2 TPPSQHSY    | 105  | >NOTCH1-T2 MPPSQHSY    | 15   | 90   |
| >NOTCH1-T2 TPPSQHSY    | 701  | >NOTCH1-T2 MPPSQHSY    | 60   | 641  |
| >NOTCH1-T2 TPPSQHSYS   | 3273 | >NOTCH1-T2 MPPSQHSYS:  | 203  | 3070 |

|                        |       |                       |       |       |
|------------------------|-------|-----------------------|-------|-------|
| >NOTCH1-T2 TPPSQHSY    | 433   | >NOTCH1-T2 MPPSQHSY   | 67    | 366   |
| >NOTCH1-T2 LTPPSQHSY   | 338   | >NOTCH1-T2 LMPPSQHSY  | 5132  | 4794  |
| >NOTCH1-T2 LTPPSQHSYS  | 14776 | >NOTCH1-T2 LMPPSQHSY: | 429   | 14347 |
| >NOTCH1-T2 LTPPSQHS    | 24942 | >NOTCH1-T2 LMPPSQHS   | 391   | 24551 |
| >NOTCH1-T2 LTPPSQHSY   | 17425 | >NOTCH1-T2 LMPPSQHSY  | 59    | 17366 |
| >NOTCH1-T2 LTPPSQHSYS  | 19665 | >NOTCH1-T2 LMPPSQHSY: | 150   | 19515 |
| >NOTCH1-T2 LTPPSQHSY:  | 22053 | >NOTCH1-T2 LMPPSQHSY: | 195   | 21858 |
| >NOTCH1-T2 LTPPSQHSY   | 134   | >NOTCH1-T2 LMPPSQHSY  | 3517  | 3383  |
| >NOTCH1-T2 LTPPSQHSY   | 235   | >NOTCH1-T2 LMPPSQHSY  | 8544  | 8309  |
| >NOTCH1-T2 LTPPSQHSY   | 70    | >NOTCH1-T2 LMPPSQHSY  | 32    | 38    |
| >NOTCH1-T2 LTPPSQHSY   | 17    | >NOTCH1-T2 LMPPSQHSY  | 9     | 8     |
| >NOTCH1-T2 LTPPSQHSY   | 170   | >NOTCH1-T2 LMPPSQHSY  | 48    | 122   |
| >NOTCH1-T2 LTPPSQHSY   | 2648  | >NOTCH1-T2 LMPPSQHSY  | 86    | 2562  |
| >NOTCH1-T2 LTPPSQHSY   | 415   | >NOTCH1-T2 LMPPSQHSY  | 19    | 396   |
| >NOTCH1-T2 LTPPSQHSY   | 5     | >NOTCH1-T2 LMPPSQHSY  | 584   | 579   |
| >NOTCH1-T2 LTPPSQHSY   | 251   | >NOTCH1-T2 LMPPSQHSY  | 4119  | 3868  |
| >NOTCH1-T2 LTPPSQHS    | 431   | >NOTCH1-T2 LMPPSQHS   | 24552 | 24121 |
| >NOTCH1-T2 LTPPSQHSY   | 15    | >NOTCH1-T2 LMPPSQHSY  | 2051  | 2036  |
| >NOTCH1-T2 LTPPSQHSYS  | 13    | >NOTCH1-T2 LMPPSQHSY: | 1463  | 1450  |
| >NOTCH1-T2 LTPPSQHSY:  | 26    | >NOTCH1-T2 LMPPSQHSY: | 2283  | 2257  |
| >NOTCH1-T2 LTPPSQHSY   | 328   | >NOTCH1-T2 LMPPSQHSY  | 10708 | 10380 |
| >NOTCH1-T2 VPPVTAAQFL  | 3970  | >NOTCH1-T2 VPPVTAAQFL | 31    | 3939  |
| >NOTCH1-T2 VPPVTAAQFL  | 2768  | >NOTCH1-T2 VPPVTAAQFL | 13    | 2755  |
| >NOTCH1-T2 FLTPPSQHS   | 8259  | >NOTCH1-T2 FLMPPSQHS  | 499   | 7760  |
| >NOTCH1-T2 FLTPPSQHSY: | 4538  | >NOTCH1-T2 FLMPPSQHS\ | 153   | 4385  |
| >NOTCH1-T2 FLTPPSQHS   | 1053  | >NOTCH1-T2 FLMPPSQHS  | 90    | 963   |
| >NOTCH1-T2 FLTPPSQHSY  | 3266  | >NOTCH1-T2 FLMPPSQHS\ | 323   | 2943  |
| >NOTCH1-T2 FLTPPSQHSY: | 144   | >NOTCH1-T2 FLMPPSQHS\ | 15    | 129   |
| >NOTCH1-T2 FLTPPSQHS   | 1724  | >NOTCH1-T2 FLMPPSQHS  | 131   | 1593  |
| >NOTCH1-T2 FLTPPSQHSY: | 391   | >NOTCH1-T2 FLMPPSQHS\ | 30    | 361   |
| >NOTCH1-T2 FLTPPSQHS   | 971   | >NOTCH1-T2 FLMPPSQHS  | 84    | 887   |
| >NOTCH1-T2 FLTPPSQHSY: | 835   | >NOTCH1-T2 FLMPPSQHS\ | 85    | 750   |
| >NOTCH1-T2 FLTPPSQHS   | 402   | >NOTCH1-T2 FLMPPSQHS  | 70    | 332   |
| >NOTCH1-T2 FLTPPSQHSY  | 738   | >NOTCH1-T2 FLMPPSQHS\ | 120   | 618   |
| >NOTCH1-T2 FLTPPSQHSY: | 96    | >NOTCH1-T2 FLMPPSQHS\ | 17    | 79    |
| >NOTCH1-T2 FLTPPSQHS   | 3027  | >NOTCH1-T2 FLMPPSQHS  | 233   | 2794  |
| >NOTCH1-T2 FLTPPSQHSY  | 3056  | >NOTCH1-T2 FLMPPSQHS\ | 236   | 2820  |
| >NOTCH1-T2 FLTPPSQHSY: | 2682  | >NOTCH1-T2 FLMPPSQHS\ | 199   | 2483  |
| >NOTCH1-T2 FLTPPSQHSY  | 4808  | >NOTCH1-T2 FLMPPSQHS\ | 262   | 4546  |
| >NOTCH1-T2 FLTPPSQHS   | 25    | >NOTCH1-T2 FLMPPSQHS  | 25    | 0     |
| >NOTCH1-T2 FLTPPSQHSY  | 9     | >NOTCH1-T2 FLMPPSQHS\ | 9     | 0     |
| >NOTCH1-T2 FLTPPSQHSY: | 16    | >NOTCH1-T2 FLMPPSQHS\ | 16    | 0     |
| >NOTCH1-T2 FLTPPSQHSY  | 1678  | >NOTCH1-T2 FLMPPSQHS\ | 125   | 1553  |

|                       |       |                        |       |       |
|-----------------------|-------|------------------------|-------|-------|
| >NOTCH1-T2 FLTPPSQHSY | 652   | >NOTCH1-T2 FLMPPSQHSY  | 96    | 556   |
| >NOTCH1-T2 FLTPPSQHSY | 249   | >NOTCH1-T2 FLMPPSQHSY  | 178   | 71    |
| >NOTCH1-T2 FLTPPSQHSY | 84    | >NOTCH1-T2 FLMPPSQHSY  | 29    | 55    |
| >NOTCH1-T2 FLTPPSQH   | 474   | >NOTCH1-T2 FLMPPSQH    | 149   | 325   |
| >NOTCH1-T2 FLTPPSQHSY | 14    | >NOTCH1-T2 FLMPPSQHSY  | 9     | 5     |
| >NOTCH1-T2 FLTPPSQHSY | 29    | >NOTCH1-T2 FLMPPSQHSY  | 8     | 21    |
| >NOTCH1-T2 FLTPPSQHSY | 88    | >NOTCH1-T2 FLMPPSQHSY  | 27    | 61    |
| >NOTCH1-T2 FLTPPSQHSY | 327   | >NOTCH1-T2 FLMPPSQHSY  | 239   | 88    |
| >NOTCH1-T2 QFLTPPSQHS | 14    | >NOTCH1-T2 QFLMPPSQH   | 15    | 1     |
| >NOTCH1-T2 QFLTPPSQHS | 187   | >NOTCH1-T2 QFLMPPSQH   | 195   | 8     |
| >NOTCH1-T2 QFLTPPSQHS | 125   | >NOTCH1-T2 QFLMPPSQH   | 121   | 4     |
| >NOTCH1-T2 AQFLTPPS   | 498   | >NOTCH1-T2 AQFLMPPS    | 542   | 44    |
| >NOTCH1-T2 AQFLTPPS   | 318   | >NOTCH1-T2 AQFLMPPS    | 1033  | 715   |
| >NOTCH1-T2 AQFLTPPSQ  | 204   | >NOTCH1-T2 AQFLMPPSQ   | 819   | 615   |
| >NOTCH1-T2 AQFLTPPSQF | 52    | >NOTCH1-T2 AQFLMPPSQ   | 148   | 96    |
| >NOTCH1-T2 AQFLTPPSQF | 212   | >NOTCH1-T2 AQFLMPPSQ   | 638   | 426   |
| >NOTCH1-T2 VTAAQFLT   | 7083  | >NOTCH1-T2 VTAAQFLM    | 21    | 7062  |
| >NOTCH1-T2 VTAAQFLT   | 9241  | >NOTCH1-T2 VTAAQFLM    | 54    | 9187  |
| >NOTCH1-T2 VTAAQFLT   | 4685  | >NOTCH1-T2 VTAAQFLM    | 10    | 4675  |
| >NOTCH1-T2 VTAAQFLT   | 3913  | >NOTCH1-T2 VTAAQFLM    | 109   | 3804  |
| >NOTCH1-T2 PPVTAAQFLT | 900   | >NOTCH1-T2 PPVTAAQFLM  | 4     | 896   |
| >NOTCH1-T9 TCPAGFSGI  | 227   | >NOTCH1-T9 ICPAGFSGI   | 3726  | 3499  |
| >NOTCH1-T9 CTCPAGFSGI | 716   | >NOTCH1-T9 CICPAGFSGI  | 268   | 448   |
| >NOTCH1-T9 CTCPAGFSGI | 452   | >NOTCH1-T9 CICPAGFSGI  | 3288  | 2836  |
| >NOTCH1-T9 CTCPAGFSGI | 148   | >NOTCH1-T9 CICPAGFSGI  | 12480 | 12332 |
| >NOTCH1-T9 CTCPAGFSGI | 41    | >NOTCH1-T9 CICPAGFSGI  | 598   | 557   |
| >NOTCH1-T9 CTDCVDSYTC | 20448 | >NOTCH1-T9 CTDCVDSYTC  | 27    | 20421 |
| >NOTCH1-T9 TCTCPAGF   | 3271  | >NOTCH1-T9 TCICPAGF    | 195   | 3076  |
| >NOTCH1-T9 TCTCPAGFSG | 203   | >NOTCH1-T9 TCICPAGFSGI | 63    | 140   |
| >NOTCH1-T9 TCTCPAGFSG | 1351  | >NOTCH1-T9 TCICPAGFSGI | 393   | 958   |
| >NOTCH1-T9 YTCTCPAGF  | 45    | >NOTCH1-T9 YTCICPAGF   | 204   | 159   |
| >NOTCH1-T9 YTCTCPAGF  | 480   | >NOTCH1-T9 YTCICPAGF   | 2022  | 1542  |
| >NOTCH1-T9 YTCTCPAGF  | 472   | >NOTCH1-T9 YTCICPAGF   | 463   | 9     |
| >NOTCH1-T9 YTCTCPAGF  | 136   | >NOTCH1-T9 YTCICPAGF   | 386   | 250   |
| >NOTCH1-T9 YTCTCPAGF  | 4     | >NOTCH1-T9 YTCICPAGF   | 3     | 1     |
| >NOTCH1-T9 YTCTCPAGF  | 30    | >NOTCH1-T9 YTCICPAGF   | 51    | 21    |
| >NOTCH1-T9 SYTCTCPAGF | 108   | >NOTCH1-T9 SYTCICPAGF  | 174   | 66    |
| >NOTCH1-T9 SYTCTCPAGF | 47    | >NOTCH1-T9 SYTCICPAGF  | 75    | 28    |
| >NOTCH1-T9 SYTCTCPAGF | 15    | >NOTCH1-T9 SYTCICPAGF  | 14    | 1     |
| >NOTCH1-T9 SYTCTCPAGF | 161   | >NOTCH1-T9 SYTCICPAGF  | 177   | 16    |
| >NOTCH1-T9 SYTCTCPA   | 411   | >NOTCH1-T9 SYTCICPA    | 440   | 29    |
| >NOTCH1-T9 SYTCTCPAG  | 220   | >NOTCH1-T9 SYTCICPAG   | 439   | 219   |
| >NOTCH1-T9 SYTCTCPAGF | 297   | >NOTCH1-T9 SYTCICPAGF  | 493   | 196   |

|                       |       |                        |      |       |
|-----------------------|-------|------------------------|------|-------|
| >NOTCH1-T9 DSYTCTCPAG | 162   | >NOTCH1-T9 DSYTCICPAGI | 124  | 38    |
| >NOTCH1-T9 DSYTCTCPA  | 95    | >NOTCH1-T9 DSYTCICPA   | 115  | 20    |
| >NOTCH1-T9 DSYTCTCPAG | 194   | >NOTCH1-T9 DSYTCICPAGI | 245  | 51    |
| >NOTCH1-T9 DSYTCTCPAG | 24    | >NOTCH1-T9 DSYTCICPAGI | 18   | 6     |
| >NOTCH1-T9 DSYTCTCPAG | 469   | >NOTCH1-T9 DSYTCICPAGI | 901  | 432   |
| >NOTCH1-T9 CVDSYTCTCP | 591   | >NOTCH1-T9 CVDSYTCICP/ | 457  | 134   |
| >NOTCH1-T9 CVDSYTCT   | 36889 | >NOTCH1-T9 CVDSYTCTI   | 437  | 36452 |
| >NOTCH1-T9 TDCVDSYTCT | 6651  | >NOTCH1-T9 TDCVDSYTCTI | 94   | 6557  |
| >NOTCH1-V1 VVVLMPPEQ  | 574   | >NOTCH1-V1 AVVLMPEEQ   | 291  | 283   |
| >NOTCH1-V1 VVVLMPPEQ  | 177   | >NOTCH1-V1 AVVLMPEEQ   | 209  | 32    |
| >NOTCH1-V1 VVVLMPEEQ  | 412   | >NOTCH1-V1 VAVVLMPEEQ  | 6029 | 5617  |
| >NOTCH1-V1 VVVLMPEEQ  | 403   | >NOTCH1-V1 VAVVLMPEEQ  | 37   | 366   |
| >NOTCH1-V1 PERLAAGTLV | 436   | >NOTCH1-V1 PERLAAGTLV  | 8720 | 8284  |
| >NOTCH1-V1 TLVVVLM    | 1053  | >NOTCH1-V1 TLVAVVLM    | 256  | 797   |
| >NOTCH1-V1 TLVVVLM    | 420   | >NOTCH1-V1 TLVAVVLM    | 95   | 325   |
| >NOTCH1-V1 TLVVVLM    | 914   | >NOTCH1-V1 TLVAVVLM    | 251  | 663   |
| >NOTCH1-V1 TLVVVLM    | 441   | >NOTCH1-V1 TLVAVVLM    | 171  | 270   |
| >NOTCH1-V1 TLVVVLM    | 615   | >NOTCH1-V1 TLVAVVLM    | 221  | 394   |
| >NOTCH1-V1 GTLVVVVL   | 397   | >NOTCH1-V1 GTLVAVVL    | 2058 | 1661  |
| >NOTCH1-V1 GTLVVVVL   | 464   | >NOTCH1-V1 GTLVAVVL    | 1173 | 709   |
| >NOTCH1-V1 GTLVVVVL   | 231   | >NOTCH1-V1 GTLVAVVL    | 617  | 386   |
| >NOTCH1-V1 GTLVVVVL   | 89    | >NOTCH1-V1 GTLVAVVL    | 35   | 54    |
| >NOTCH1-V1 GTLVVVVLM  | 105   | >NOTCH1-V1 GTLVAVVLM   | 30   | 75    |
| >NOTCH1-V1 GTLVVVVL   | 2778  | >NOTCH1-V1 GTLVAVVL    | 341  | 2437  |
| >NOTCH1-V1 GTLVVVVLM  | 10    | >NOTCH1-V1 GTLVAVVLM   | 23   | 13    |
| >NOTCH1-V1 AGTLVVVLM  | 126   | >NOTCH1-V1 AGTLVAVVLM  | 113  | 13    |
| >NOTCH1-V1 AAGTLVVV   | 1807  | >NOTCH1-V1 AAGTLVAV    | 377  | 1430  |
| >NOTCH1-V1 AAGTLVVV   | 706   | >NOTCH1-V1 AAGTLVAV    | 342  | 364   |
| >NOTCH1-V1 AAGTLVVV   | 468   | >NOTCH1-V1 AAGTLVAV    | 397  | 71    |
| >NOTCH1-V1 LAAGTLVV   | 433   | >NOTCH1-V1 LAAGTLVA    | 2289 | 1856  |
| >NOTCH1-V1 LAAGTLVVV  | 304   | >NOTCH1-V1 LAAGTLVAV   | 63   | 241   |
| >NOTCH1-V1 LAAGTLVVVV | 681   | >NOTCH1-V1 LAAGTLVAVV  | 472  | 209   |
| >NOTCH1-V1 LAAGTLVVVV | 462   | >NOTCH1-V1 LAAGTLVAVV  | 496  | 34    |
| >NOTCH1-V1 LAAGTLVV   | 303   | >NOTCH1-V1 LAAGTLVA    | 2120 | 1817  |
| >NOTCH1-V1 LAAGTLVVV  | 246   | >NOTCH1-V1 LAAGTLVAV   | 74   | 172   |
| >NOTCH1-V1 LAAGTLVVVV | 346   | >NOTCH1-V1 LAAGTLVAVV  | 137  | 209   |
| >NOTCH1-V1 LAAGTLVV   | 115   | >NOTCH1-V1 LAAGTLVA    | 1201 | 1086  |
| >NOTCH1-V1 LAAGTLVVV  | 58    | >NOTCH1-V1 LAAGTLVAV   | 14   | 44    |
| >NOTCH1-V1 LAAGTLVVVV | 197   | >NOTCH1-V1 LAAGTLVAVV  | 178  | 19    |
| >NOTCH1-V1 LAAGTLVV   | 290   | >NOTCH1-V1 LAAGTLVA    | 7783 | 7493  |
| >NOTCH1-V1 LAAGTLVVV  | 119   | >NOTCH1-V1 LAAGTLVAV   | 55   | 64    |
| >NOTCH1-V1 LAAGTLVVVV | 127   | >NOTCH1-V1 LAAGTLVAVV  | 102  | 25    |
| >NOTCH1-V1 LAAGTLVVV  | 399   | >NOTCH1-V1 LAAGTLVAV   | 456  | 57    |

|                       |      |                       |      |      |
|-----------------------|------|-----------------------|------|------|
| >NOTCH1-V1 LAAGTLVVVV | 349  | >NOTCH1-V1 LAAGTLVAVV | 542  | 193  |
| >NOTCH1-V1 LAAGTLVVVV | 618  | >NOTCH1-V1 LAAGTLVAVV | 305  | 313  |
| >NOTCH1-V1 LAAGTLVV   | 20   | >NOTCH1-V1 LAAGTLVA   | 4890 | 4870 |
| >NOTCH1-V1 LAAGTLVVV  | 13   | >NOTCH1-V1 LAAGTLVAV  | 10   | 3    |
| >NOTCH1-V1 LAAGTLVVVV | 20   | >NOTCH1-V1 LAAGTLVAVV | 16   | 4    |
| >NOTCH1-V1 LAAGTLVV   | 403  | >NOTCH1-V1 LAAGTLVA   | 3351 | 2948 |
| >NOTCH1-V1 LAAGTLVVV  | 249  | >NOTCH1-V1 LAAGTLVAV  | 101  | 148  |
| >NOTCH1-V1 LAAGTLVVVV | 715  | >NOTCH1-V1 LAAGTLVAVV | 373  | 342  |
| >NOTCH1-V1 LAAGTLVVV  | 929  | >NOTCH1-V1 LAAGTLVAV  | 222  | 707  |
| >NOTCH1-V1 LAAGTLVVVV | 666  | >NOTCH1-V1 LAAGTLVAVV | 327  | 339  |
| >NOTCH1-V1 LAAGTLVVVV | 337  | >NOTCH1-V1 LAAGTLVAVV | 229  | 108  |
| >NOTCH1-V1 LAAGTLVVVV | 651  | >NOTCH1-V1 LAAGTLVAVV | 430  | 221  |
| >NOTCH1-V1 LAAGTLVVVV | 424  | >NOTCH1-V1 LAAGTLVAVV | 275  | 149  |
| >NOTCH1-V1 LAAGTLVV   | 2077 | >NOTCH1-V1 LAAGTLVA   | 418  | 1659 |
| >NOTCH1-V1 LAAGTLVVV  | 255  | >NOTCH1-V1 LAAGTLVAV  | 69   | 186  |
| >NOTCH1-V1 LAAGTLVVVV | 220  | >NOTCH1-V1 LAAGTLVAVV | 493  | 273  |
| >NOTCH1-V1 LAAGTLVVVV | 235  | >NOTCH1-V1 LAAGTLVAVV | 255  | 20   |
| >NOTCH1-V1 RLAAGTLVV  | 18   | >NOTCH1-V1 RLAAGTLVA  | 133  | 115  |
| >NOTCH1-V1 RLAAGTLVVV | 30   | >NOTCH1-V1 RLAAGTLVAV | 19   | 11   |
| >NOTCH1-V1 RLAAGTLVVV | 16   | >NOTCH1-V1 RLAAGTLVAV | 16   | 0    |
| >NOTCH1-V1 RLAAGTLVV  | 10   | >NOTCH1-V1 RLAAGTLVA  | 63   | 53   |
| >NOTCH1-V1 RLAAGTLVVV | 18   | >NOTCH1-V1 RLAAGTLVAV | 11   | 7    |
| >NOTCH1-V1 RLAAGTLVVV | 7    | >NOTCH1-V1 RLAAGTLVAV | 6    | 1    |
| >NOTCH1-V1 RLAAGTLVV  | 3    | >NOTCH1-V1 RLAAGTLVA  | 8    | 5    |
| >NOTCH1-V1 RLAAGTLVVV | 15   | >NOTCH1-V1 RLAAGTLVAV | 9    | 6    |
| >NOTCH1-V1 RLAAGTLVVV | 3    | >NOTCH1-V1 RLAAGTLVAV | 3    | 0    |
| >NOTCH1-V1 RLAAGTLVV  | 12   | >NOTCH1-V1 RLAAGTLVA  | 113  | 101  |
| >NOTCH1-V1 RLAAGTLVVV | 131  | >NOTCH1-V1 RLAAGTLVAV | 57   | 74   |
| >NOTCH1-V1 RLAAGTLVVV | 16   | >NOTCH1-V1 RLAAGTLVAV | 15   | 1    |
| >NOTCH1-V1 RLAAGTLVV  | 3    | >NOTCH1-V1 RLAAGTLVA  | 79   | 76   |
| >NOTCH1-V1 RLAAGTLVVV | 3    | >NOTCH1-V1 RLAAGTLVAV | 2    | 1    |
| >NOTCH1-V1 RLAAGTLVVV | 3    | >NOTCH1-V1 RLAAGTLVAV | 3    | 0    |
| >NOTCH1-V1 RLAAGTLVV  | 7    | >NOTCH1-V1 RLAAGTLVA  | 425  | 418  |
| >NOTCH1-V1 RLAAGTLVVV | 5    | >NOTCH1-V1 RLAAGTLVAV | 4    | 1    |
| >NOTCH1-V1 RLAAGTLVVV | 6    | >NOTCH1-V1 RLAAGTLVAV | 5    | 1    |
| >NOTCH1-V1 RLAAGTLVV  | 5    | >NOTCH1-V1 RLAAGTLVA  | 54   | 49   |
| >NOTCH1-V1 RLAAGTLVVV | 5    | >NOTCH1-V1 RLAAGTLVAV | 5    | 0    |
| >NOTCH1-V1 RLAAGTLVVV | 5    | >NOTCH1-V1 RLAAGTLVAV | 6    | 1    |
| >NOTCH1-V1 RLAAGTLVV  | 4    | >NOTCH1-V1 RLAAGTLVA  | 499  | 495  |
| >NOTCH1-V1 RLAAGTLVVV | 3    | >NOTCH1-V1 RLAAGTLVAV | 3    | 0    |
| >NOTCH1-V1 RLAAGTLVVV | 4    | >NOTCH1-V1 RLAAGTLVAV | 3    | 1    |
| >NOTCH1-V1 RLAAGTLVV  | 2    | >NOTCH1-V1 RLAAGTLVA  | 13   | 11   |
| >NOTCH1-V1 RLAAGTLVVV | 2    | >NOTCH1-V1 RLAAGTLVAV | 2    | 0    |

|                       |       |                       |       |       |
|-----------------------|-------|-----------------------|-------|-------|
| >NOTCH1-V1 RLAAGTLVVV | 2     | >NOTCH1-V1 RLAAGTLVAV | 2     | 0     |
| >NOTCH1-V1 RLAAGTLVV  | 248   | >NOTCH1-V1 RLAAGTLVA  | 1636  | 1388  |
| >NOTCH1-V1 RLAAGTLVVV | 253   | >NOTCH1-V1 RLAAGTLVAV | 94    | 159   |
| >NOTCH1-V1 RLAAGTLVVV | 139   | >NOTCH1-V1 RLAAGTLVAV | 412   | 273   |
| >NOTCH1-V1 RLAAGTLVVV | 292   | >NOTCH1-V1 RLAAGTLVAV | 160   | 132   |
| >NOTCH1-V1 RLAAGTLVV  | 252   | >NOTCH1-V1 RLAAGTLVA  | 986   | 734   |
| >NOTCH1-V1 RLAAGTLVV  | 126   | >NOTCH1-V1 RLAAGTLVA  | 156   | 30    |
| >NOTCH1-V1 RLAAGTLVVV | 212   | >NOTCH1-V1 RLAAGTLVAV | 217   | 5     |
| >NOTCH1-V1 RLAAGTLVVV | 179   | >NOTCH1-V1 RLAAGTLVAV | 136   | 43    |
| >NOTCH1-V1 RLAAGTLVVV | 583   | >NOTCH1-V1 RLAAGTLVAV | 387   | 196   |
| >NOTCH1-V1 RLAAGTLVVV | 439   | >NOTCH1-V1 RLAAGTLVAV | 783   | 344   |
| >NOTCH1-V1 ERLAAGTLVV | 304   | >NOTCH1-V1 ERLAAGTLVA | 418   | 114   |
| >NOTCH1-V1 ERLAAGTLVV | 191   | >NOTCH1-V1 ERLAAGTLVA | 4894  | 4703  |
| >NOTCH1-V1 ERLAAGTLVV | 319   | >NOTCH1-V1 ERLAAGTLVA | 233   | 86    |
| >NOTCH1-V1 VVVLMPPE   | 5724  | >NOTCH1-V1 EVVLMPEE   | 216   | 5508  |
| >NOTCH1-V1 VVVLMPPEEQ | 2635  | >NOTCH1-V1 EVVLMPEEQI | 31    | 2604  |
| >NOTCH1-V1 VVVLMPPEEQ | 1901  | >NOTCH1-V1 EVVLMPEEQI | 163   | 1738  |
| >NOTCH1-V1 VVVLMPPEEQ | 177   | >NOTCH1-V1 EVVLMPEEQI | 7     | 170   |
| >NOTCH1-V1 VVVLMPPEEQ | 6869  | >NOTCH1-V1 EVVLMPEEQI | 110   | 6759  |
| >NOTCH1-V1 VVVLMPEEQ  | 412   | >NOTCH1-V1 VEVVLMPEEQ | 19600 | 19188 |
| >NOTCH1-V1 VVVLMPEEQ  | 403   | >NOTCH1-V1 VEVVLMPEEQ | 18110 | 17707 |
| >NOTCH1-V1 VVVLMPEEQ  | 22077 | >NOTCH1-V1 VEVVLMPEEQ | 112   | 21965 |
| >NOTCH1-V1 VVVLMPEEQ  | 34377 | >NOTCH1-V1 VEVVLMPEEQ | 286   | 34091 |
| >NOTCH1-V1 VVVLMPEEQ  | 17791 | >NOTCH1-V1 VEVVLMPEEQ | 14    | 17777 |
| >NOTCH1-V1 PERLAAGTLV | 436   | >NOTCH1-V1 PERLAAGTLV | 20488 | 20052 |
| >NOTCH1-V1 TLVVVVLM   | 1053  | >NOTCH1-V1 TLVEVVLM   | 119   | 934   |
| >NOTCH1-V1 TLVVVVLM   | 420   | >NOTCH1-V1 TLVEVVLM   | 67    | 353   |
| >NOTCH1-V1 TLVVVVLM   | 914   | >NOTCH1-V1 TLVEVVLM   | 154   | 760   |
| >NOTCH1-V1 TLVVVVLM   | 2694  | >NOTCH1-V1 TLVEVVLM   | 272   | 2422  |
| >NOTCH1-V1 TLVVVVLM   | 441   | >NOTCH1-V1 TLVEVVLM   | 40    | 401   |
| >NOTCH1-V1 TLVVVVLM   | 1215  | >NOTCH1-V1 TLVEVVLM   | 257   | 958   |
| >NOTCH1-V1 TLVVVVLM   | 615   | >NOTCH1-V1 TLVEVVLM   | 96    | 519   |
| >NOTCH1-V1 GTLVVVVL   | 397   | >NOTCH1-V1 GTLVEVVL   | 2626  | 2229  |
| >NOTCH1-V1 GTLVVVVL   | 464   | >NOTCH1-V1 GTLVEVVL   | 1916  | 1452  |
| >NOTCH1-V1 GTLVVVVL   | 231   | >NOTCH1-V1 GTLVEVVL   | 1184  | 953   |
| >NOTCH1-V1 GTLVVVVL   | 89    | >NOTCH1-V1 GTLVEVVL   | 113   | 24    |
| >NOTCH1-V1 GTLVVVVLM  | 105   | >NOTCH1-V1 GTLVEVVLM  | 48    | 57    |
| >NOTCH1-V1 GTLVVVVLM  | 10    | >NOTCH1-V1 GTLVEVVLM  | 52    | 42    |
| >NOTCH1-V1 AGTLVVVVLM | 126   | >NOTCH1-V1 AGTLVEVVLM | 189   | 63    |
| >NOTCH1-V1 AAGTLVVV   | 706   | >NOTCH1-V1 AAGTLVEV   | 349   | 357   |
| >NOTCH1-V1 AAGTLVVV   | 468   | >NOTCH1-V1 AAGTLVEV   | 175   | 293   |
| >NOTCH1-V1 LAAGTLVVV  | 1572  | >NOTCH1-V1 LAAGTLVEV  | 209   | 1363  |
| >NOTCH1-V1 LAAGTLVV   | 433   | >NOTCH1-V1 LAAGTLVE   | 22459 | 22026 |

|                       |     |                       |       |       |
|-----------------------|-----|-----------------------|-------|-------|
| >NOTCH1-V1 LAAGTLVVV  | 304 | >NOTCH1-V1 LAAGTLVEV  | 35    | 269   |
| >NOTCH1-V1 LAAGTLVVVV | 681 | >NOTCH1-V1 LAAGTLVEVV | 483   | 198   |
| >NOTCH1-V1 LAAGTLVVVV | 462 | >NOTCH1-V1 LAAGTLVEVV | 590   | 128   |
| >NOTCH1-V1 LAAGTLVV   | 303 | >NOTCH1-V1 LAAGTLVE   | 23751 | 23448 |
| >NOTCH1-V1 LAAGTLVVV  | 246 | >NOTCH1-V1 LAAGTLVEV  | 97    | 149   |
| >NOTCH1-V1 LAAGTLVVVV | 346 | >NOTCH1-V1 LAAGTLVEVV | 376   | 30    |
| >NOTCH1-V1 LAAGTLVV   | 115 | >NOTCH1-V1 LAAGTLVE   | 22017 | 21902 |
| >NOTCH1-V1 LAAGTLVVV  | 58  | >NOTCH1-V1 LAAGTLVEV  | 22    | 36    |
| >NOTCH1-V1 LAAGTLVVVV | 197 | >NOTCH1-V1 LAAGTLVEVV | 211   | 14    |
| >NOTCH1-V1 LAAGTLVV   | 290 | >NOTCH1-V1 LAAGTLVE   | 29896 | 29606 |
| >NOTCH1-V1 LAAGTLVVV  | 119 | >NOTCH1-V1 LAAGTLVEV  | 45    | 74    |
| >NOTCH1-V1 LAAGTLVVVV | 127 | >NOTCH1-V1 LAAGTLVEVV | 115   | 12    |
| >NOTCH1-V1 LAAGTLVVV  | 399 | >NOTCH1-V1 LAAGTLVEV  | 137   | 262   |
| >NOTCH1-V1 LAAGTLVVVV | 349 | >NOTCH1-V1 LAAGTLVEVV | 499   | 150   |
| >NOTCH1-V1 LAAGTLVVV  | 580 | >NOTCH1-V1 LAAGTLVEV  | 487   | 93    |
| >NOTCH1-V1 LAAGTLVVVV | 618 | >NOTCH1-V1 LAAGTLVEVV | 479   | 139   |
| >NOTCH1-V1 LAAGTLVV   | 20  | >NOTCH1-V1 LAAGTLVE   | 31956 | 31936 |
| >NOTCH1-V1 LAAGTLVVV  | 13  | >NOTCH1-V1 LAAGTLVEV  | 5     | 8     |
| >NOTCH1-V1 LAAGTLVVVV | 20  | >NOTCH1-V1 LAAGTLVEVV | 28    | 8     |
| >NOTCH1-V1 LAAGTLVV   | 403 | >NOTCH1-V1 LAAGTLVE   | 21909 | 21506 |
| >NOTCH1-V1 LAAGTLVVV  | 249 | >NOTCH1-V1 LAAGTLVEV  | 67    | 182   |
| >NOTCH1-V1 LAAGTLVVV  | 929 | >NOTCH1-V1 LAAGTLVEV  | 263   | 666   |
| >NOTCH1-V1 LAAGTLVVVV | 337 | >NOTCH1-V1 LAAGTLVEVV | 554   | 217   |
| >NOTCH1-V1 LAAGTLVVVV | 424 | >NOTCH1-V1 LAAGTLVEVV | 1195  | 771   |
| >NOTCH1-V1 LAAGTLVVV  | 255 | >NOTCH1-V1 LAAGTLVEV  | 741   | 486   |
| >NOTCH1-V1 LAAGTLVVVV | 220 | >NOTCH1-V1 LAAGTLVEVV | 504   | 284   |
| >NOTCH1-V1 LAAGTLVVVV | 235 | >NOTCH1-V1 LAAGTLVEVV | 876   | 641   |
| >NOTCH1-V1 RLAAGTLVV  | 18  | >NOTCH1-V1 RLAAGTLVE  | 19824 | 19806 |
| >NOTCH1-V1 RLAAGTLVVV | 30  | >NOTCH1-V1 RLAAGTLVEV | 18    | 12    |
| >NOTCH1-V1 RLAAGTLVVV | 16  | >NOTCH1-V1 RLAAGTLVEV | 23    | 7     |
| >NOTCH1-V1 RLAAGTLVV  | 10  | >NOTCH1-V1 RLAAGTLVE  | 7404  | 7394  |
| >NOTCH1-V1 RLAAGTLVVV | 18  | >NOTCH1-V1 RLAAGTLVEV | 13    | 5     |
| >NOTCH1-V1 RLAAGTLVVV | 7   | >NOTCH1-V1 RLAAGTLVEV | 6     | 1     |
| >NOTCH1-V1 RLAAGTLVV  | 3   | >NOTCH1-V1 RLAAGTLVE  | 8343  | 8340  |
| >NOTCH1-V1 RLAAGTLVVV | 15  | >NOTCH1-V1 RLAAGTLVEV | 11    | 4     |
| >NOTCH1-V1 RLAAGTLVVV | 3   | >NOTCH1-V1 RLAAGTLVEV | 3     | 0     |
| >NOTCH1-V1 RLAAGTLVV  | 12  | >NOTCH1-V1 RLAAGTLVE  | 14539 | 14527 |
| >NOTCH1-V1 RLAAGTLVVV | 131 | >NOTCH1-V1 RLAAGTLVEV | 73    | 58    |
| >NOTCH1-V1 RLAAGTLVVV | 16  | >NOTCH1-V1 RLAAGTLVEV | 16    | 0     |
| >NOTCH1-V1 RLAAGTLVV  | 3   | >NOTCH1-V1 RLAAGTLVE  | 14536 | 14533 |
| >NOTCH1-V1 RLAAGTLVVV | 3   | >NOTCH1-V1 RLAAGTLVEV | 2     | 1     |
| >NOTCH1-V1 RLAAGTLVVV | 3   | >NOTCH1-V1 RLAAGTLVEV | 3     | 0     |
| >NOTCH1-V1 RLAAGTLVV  | 7   | >NOTCH1-V1 RLAAGTLVE  | 22103 | 22096 |

|                        |      |                       |       |       |
|------------------------|------|-----------------------|-------|-------|
| >NOTCH1-V1 RLAAGTLVVV  | 5    | >NOTCH1-V1 RLAAGTLVEV | 5     | 0     |
| >NOTCH1-V1 RLAAGTLVVV  | 6    | >NOTCH1-V1 RLAAGTLVEV | 7     | 1     |
| >NOTCH1-V1 RLAAGTLVV   | 5    | >NOTCH1-V1 RLAAGTLVE  | 16624 | 16619 |
| >NOTCH1-V1 RLAAGTLVVV  | 5    | >NOTCH1-V1 RLAAGTLVEV | 4     | 1     |
| >NOTCH1-V1 RLAAGTLVVV  | 5    | >NOTCH1-V1 RLAAGTLVEV | 6     | 1     |
| >NOTCH1-V1 RLAAGTLVV   | 4    | >NOTCH1-V1 RLAAGTLVE  | 23219 | 23215 |
| >NOTCH1-V1 RLAAGTLVVV  | 3    | >NOTCH1-V1 RLAAGTLVEV | 3     | 0     |
| >NOTCH1-V1 RLAAGTLVVV  | 4    | >NOTCH1-V1 RLAAGTLVEV | 4     | 0     |
| >NOTCH1-V1 RLAAGTLVV   | 2    | >NOTCH1-V1 RLAAGTLVE  | 9472  | 9470  |
| >NOTCH1-V1 RLAAGTLVVV  | 2    | >NOTCH1-V1 RLAAGTLVEV | 2     | 0     |
| >NOTCH1-V1 RLAAGTLVVV  | 2    | >NOTCH1-V1 RLAAGTLVEV | 2     | 0     |
| >NOTCH1-V1 RLAAGTLVV   | 248  | >NOTCH1-V1 RLAAGTLVE  | 2826  | 2578  |
| >NOTCH1-V1 RLAAGTLVVV  | 253  | >NOTCH1-V1 RLAAGTLVEV | 310   | 57    |
| >NOTCH1-V1 RLAAGTLVVV  | 139  | >NOTCH1-V1 RLAAGTLVEV | 291   | 152   |
| >NOTCH1-V1 RLAAGTLVVV  | 292  | >NOTCH1-V1 RLAAGTLVEV | 160   | 132   |
| >NOTCH1-V1 RLAAGTLVV   | 252  | >NOTCH1-V1 RLAAGTLVE  | 16629 | 16377 |
| >NOTCH1-V1 RLAAGTLVV   | 126  | >NOTCH1-V1 RLAAGTLVE  | 1079  | 953   |
| >NOTCH1-V1 RLAAGTLVVV  | 212  | >NOTCH1-V1 RLAAGTLVEV | 626   | 414   |
| >NOTCH1-V1 RLAAGTLVVV  | 179  | >NOTCH1-V1 RLAAGTLVEV | 194   | 15    |
| >NOTCH1-V1 RLAAGTLVVV  | 439  | >NOTCH1-V1 RLAAGTLVEV | 944   | 505   |
| >NOTCH1-V1 ERLAAGTLVV  | 304  | >NOTCH1-V1 ERLAAGTLVE | 2444  | 2140  |
| >NOTCH1-V1 ERLAAGTLVV  | 191  | >NOTCH1-V1 ERLAAGTLVE | 10862 | 10671 |
| >NOTCH1-V1 ERLAAGTLVV  | 319  | >NOTCH1-V1 ERLAAGTLVE | 1834  | 1515  |
| >NOTCH1-V1 VVLMPPPEQL  | 50   | >NOTCH1-V1 AVLMPPEQL  | 71    | 21    |
| >NOTCH1-V1 VVLMPPPEQL  | 559  | >NOTCH1-V1 AVLMPPEQL  | 463   | 96    |
| >NOTCH1-V1 VVLMPPPEQLI | 441  | >NOTCH1-V1 AVLMPPEQLI | 125   | 316   |
| >NOTCH1-V1 VVLMPPPEQLI | 173  | >NOTCH1-V1 AVLMPPEQLI | 94    | 79    |
| >NOTCH1-V1 VVVLMPPEQ   | 177  | >NOTCH1-V1 VAVLMPPEQ  | 281   | 104   |
| >NOTCH1-V1 VVVLMPPEQ   | 947  | >NOTCH1-V1 VAVLMPPEQ  | 61    | 886   |
| >NOTCH1-V1 ERLAAGTLVV  | 319  | >NOTCH1-V1 ERLAAGTLVV | 7084  | 6765  |
| >NOTCH1-V1 VVVVLMPPPEI | 2055 | >NOTCH1-V1 VVAVLMPPEI | 395   | 1660  |
| >NOTCH1-V1 VVVVLMPPPEI | 412  | >NOTCH1-V1 VVAVLMPPEI | 1824  | 1412  |
| >NOTCH1-V1 VVVVLMPPPEI | 403  | >NOTCH1-V1 VVAVLMPPEI | 1056  | 653   |
| >NOTCH1-V1 TLVVVVLM    | 420  | >NOTCH1-V1 TLVVAVLM   | 550   | 130   |
| >NOTCH1-V1 TLVVVVLM    | 441  | >NOTCH1-V1 TLVVAVLM   | 2193  | 1752  |
| >NOTCH1-V1 GTLVVVVL    | 397  | >NOTCH1-V1 GTLVVAVL   | 713   | 316   |
| >NOTCH1-V1 GTLVVVVL    | 464  | >NOTCH1-V1 GTLVVAVL   | 1034  | 570   |
| >NOTCH1-V1 GTLVVVVL    | 231  | >NOTCH1-V1 GTLVVAVL   | 766   | 535   |
| >NOTCH1-V1 GTLVVVVL    | 89   | >NOTCH1-V1 GTLVVAVL   | 45    | 44    |
| >NOTCH1-V1 GTLVVVVLM   | 105  | >NOTCH1-V1 GTLVVAVLM  | 72    | 33    |
| >NOTCH1-V1 GTLVVVVLM   | 10   | >NOTCH1-V1 GTLVVAVLM  | 5     | 5     |
| >NOTCH1-V1 AGTLVVVVLM  | 126  | >NOTCH1-V1 AGTLVVAVLM | 89    | 37    |
| >NOTCH1-V1 AAGTLVVVV   | 566  | >NOTCH1-V1 AAGTLVVAV  | 235   | 331   |



|                       |      |                       |       |       |
|-----------------------|------|-----------------------|-------|-------|
| >NOTCH1-V1 AAGTLVVV   | 468  | >NOTCH1-V1 AAGTLVVA   | 15086 | 14618 |
| >NOTCH1-V1 LAAGTLVVV  | 304  | >NOTCH1-V1 LAAGTLVVA  | 1297  | 993   |
| >NOTCH1-V1 LAAGTLVVVV | 681  | >NOTCH1-V1 LAAGTLVVAV | 365   | 316   |
| >NOTCH1-V1 LAAGTLVVVV | 462  | >NOTCH1-V1 LAAGTLVVAV | 305   | 157   |
| >NOTCH1-V1 LAAGTLVVV  | 246  | >NOTCH1-V1 LAAGTLVVA  | 1781  | 1535  |
| >NOTCH1-V1 LAAGTLVVVV | 346  | >NOTCH1-V1 LAAGTLVVAV | 148   | 198   |
| >NOTCH1-V1 LAAGTLVVV  | 58   | >NOTCH1-V1 LAAGTLVVA  | 575   | 517   |
| >NOTCH1-V1 LAAGTLVVVV | 197  | >NOTCH1-V1 LAAGTLVVAV | 82    | 115   |
| >NOTCH1-V1 LAAGTLVVV  | 119  | >NOTCH1-V1 LAAGTLVVA  | 4785  | 4666  |
| >NOTCH1-V1 LAAGTLVVVV | 127  | >NOTCH1-V1 LAAGTLVVAV | 66    | 61    |
| >NOTCH1-V1 LAAGTLVVV  | 399  | >NOTCH1-V1 LAAGTLVVA  | 11299 | 10900 |
| >NOTCH1-V1 LAAGTLVVVV | 349  | >NOTCH1-V1 LAAGTLVVAV | 391   | 42    |
| >NOTCH1-V1 LAAGTLVVV  | 13   | >NOTCH1-V1 LAAGTLVVA  | 2950  | 2937  |
| >NOTCH1-V1 LAAGTLVVVV | 20   | >NOTCH1-V1 LAAGTLVVAV | 18    | 2     |
| >NOTCH1-V1 LAAGTLVVV  | 249  | >NOTCH1-V1 LAAGTLVVA  | 1957  | 1708  |
| >NOTCH1-V1 LAAGTLVVVV | 715  | >NOTCH1-V1 LAAGTLVVAV | 303   | 412   |
| >NOTCH1-V1 LAAGTLVVVV | 1122 | >NOTCH1-V1 LAAGTLVVAV | 323   | 799   |
| >NOTCH1-V1 LAAGTLVVVV | 337  | >NOTCH1-V1 LAAGTLVVAV | 154   | 183   |
| >NOTCH1-V1 LAAGTLVVVV | 424  | >NOTCH1-V1 LAAGTLVVAV | 516   | 92    |
| >NOTCH1-V1 LAAGTLVVV  | 255  | >NOTCH1-V1 LAAGTLVVA  | 45    | 210   |
| >NOTCH1-V1 LAAGTLVVVV | 220  | >NOTCH1-V1 LAAGTLVVAV | 132   | 88    |
| >NOTCH1-V1 LAAGTLVVVV | 235  | >NOTCH1-V1 LAAGTLVVAV | 108   | 127   |
| >NOTCH1-V1 RLAAGTLVVV | 30   | >NOTCH1-V1 RLAAGTLVVA | 219   | 189   |
| >NOTCH1-V1 RLAAGTLVVV | 16   | >NOTCH1-V1 RLAAGTLVVA | 11    | 5     |
| >NOTCH1-V1 RLAAGTLVVV | 18   | >NOTCH1-V1 RLAAGTLVVA | 50    | 32    |
| >NOTCH1-V1 RLAAGTLVVV | 7    | >NOTCH1-V1 RLAAGTLVVA | 4     | 3     |
| >NOTCH1-V1 RLAAGTLVVV | 15   | >NOTCH1-V1 RLAAGTLVVA | 51    | 36    |
| >NOTCH1-V1 RLAAGTLVVV | 3    | >NOTCH1-V1 RLAAGTLVVA | 3     | 0     |
| >NOTCH1-V1 RLAAGTLVVV | 131  | >NOTCH1-V1 RLAAGTLVVA | 695   | 564   |
| >NOTCH1-V1 RLAAGTLVVV | 16   | >NOTCH1-V1 RLAAGTLVVA | 9     | 7     |
| >NOTCH1-V1 RLAAGTLVVV | 3    | >NOTCH1-V1 RLAAGTLVVA | 40    | 37    |
| >NOTCH1-V1 RLAAGTLVVV | 3    | >NOTCH1-V1 RLAAGTLVVA | 2     | 1     |
| >NOTCH1-V1 RLAAGTLVVV | 5    | >NOTCH1-V1 RLAAGTLVVA | 159   | 154   |
| >NOTCH1-V1 RLAAGTLVVV | 6    | >NOTCH1-V1 RLAAGTLVVA | 4     | 2     |
| >NOTCH1-V1 RLAAGTLVVV | 5    | >NOTCH1-V1 RLAAGTLVVA | 44    | 39    |
| >NOTCH1-V1 RLAAGTLVVV | 5    | >NOTCH1-V1 RLAAGTLVVA | 5     | 0     |
| >NOTCH1-V1 RLAAGTLVVV | 3    | >NOTCH1-V1 RLAAGTLVVA | 321   | 318   |
| >NOTCH1-V1 RLAAGTLVVV | 4    | >NOTCH1-V1 RLAAGTLVVA | 3     | 1     |
| >NOTCH1-V1 RLAAGTLVVV | 2    | >NOTCH1-V1 RLAAGTLVVA | 11    | 9     |
| >NOTCH1-V1 RLAAGTLVVV | 2    | >NOTCH1-V1 RLAAGTLVVA | 2     | 0     |
| >NOTCH1-V1 RLAAGTLVVV | 253  | >NOTCH1-V1 RLAAGTLVVA | 1607  | 1354  |
| >NOTCH1-V1 RLAAGTLVVV | 139  | >NOTCH1-V1 RLAAGTLVVA | 57    | 82    |
| >NOTCH1-V1 RLAAGTLVVV | 292  | >NOTCH1-V1 RLAAGTLVVA | 1058  | 766   |

|                        |      |                       |      |      |
|------------------------|------|-----------------------|------|------|
| >NOTCH1-V1 RLAAGTLVVV  | 1152 | >NOTCH1-V1 RLAAGTLVVA | 432  | 720  |
| >NOTCH1-V1 RLAAGTLVVV  | 212  | >NOTCH1-V1 RLAAGTLVVA | 245  | 33   |
| >NOTCH1-V1 RLAAGTLVVV  | 179  | >NOTCH1-V1 RLAAGTLVVA | 184  | 5    |
| >NOTCH1-V1 RLAAGTLVVV  | 439  | >NOTCH1-V1 RLAAGTLVVA | 286  | 153  |
| >NOTCH1-V1 VLMPPEQL    | 57   | >NOTCH1-V1 ALMPPEQL   | 46   | 11   |
| >NOTCH1-V1 VLMPPEQL    | 19   | >NOTCH1-V1 ALMPPEQL   | 11   | 8    |
| >NOTCH1-V1 VLMPPEQL    | 87   | >NOTCH1-V1 ALMPPEQL   | 58   | 29   |
| >NOTCH1-V1 VLMPPEQL    | 329  | >NOTCH1-V1 ALMPPEQL   | 269  | 60   |
| >NOTCH1-V1 VLMPPEQL    | 5    | >NOTCH1-V1 ALMPPEQL   | 5    | 0    |
| >NOTCH1-V1 VLMPPEQL    | 27   | >NOTCH1-V1 ALMPPEQL   | 32   | 5    |
| >NOTCH1-V1 VLMPPEQL    | 37   | >NOTCH1-V1 ALMPPEQL   | 37   | 0    |
| >NOTCH1-V1 VLMPPEQL    | 6    | >NOTCH1-V1 ALMPPEQL   | 10   | 4    |
| >NOTCH1-V1 VLMPPEQL    | 4    | >NOTCH1-V1 ALMPPEQL   | 4    | 0    |
| >NOTCH1-V1 VLMPPEQLR   | 740  | >NOTCH1-V1 ALMPPEQLR  | 295  | 445  |
| >NOTCH1-V1 VLMPPEQLR   | 250  | >NOTCH1-V1 ALMPPEQLR  | 155  | 95   |
| >NOTCH1-V1 VVLMPPPEQL  | 50   | >NOTCH1-V1 VALMPPEQL  | 292  | 242  |
| >NOTCH1-V1 VVLMPPPEQLI | 441  | >NOTCH1-V1 VALMPPEQLI | 1472 | 1031 |
| >NOTCH1-V1 VVLMPPPEQLI | 173  | >NOTCH1-V1 VALMPPEQLI | 319  | 146  |
| >NOTCH1-V1 VVLMPPPEQL  | 788  | >NOTCH1-V1 VALMPPEQL  | 53   | 735  |
| >NOTCH1-V1 RLAAGTLVVV  | 16   | >NOTCH1-V1 RLAAGTLVVV | 108  | 92   |
| >NOTCH1-V1 RLAAGTLVVV  | 7    | >NOTCH1-V1 RLAAGTLVVV | 30   | 23   |
| >NOTCH1-V1 RLAAGTLVVV  | 3    | >NOTCH1-V1 RLAAGTLVVV | 8    | 5    |
| >NOTCH1-V1 RLAAGTLVVV  | 16   | >NOTCH1-V1 RLAAGTLVVV | 158  | 142  |
| >NOTCH1-V1 RLAAGTLVVV  | 3    | >NOTCH1-V1 RLAAGTLVVV | 43   | 40   |
| >NOTCH1-V1 RLAAGTLVVV  | 6    | >NOTCH1-V1 RLAAGTLVVV | 251  | 245  |
| >NOTCH1-V1 RLAAGTLVVV  | 5    | >NOTCH1-V1 RLAAGTLVVV | 41   | 36   |
| >NOTCH1-V1 RLAAGTLVVV  | 4    | >NOTCH1-V1 RLAAGTLVVV | 398  | 394  |
| >NOTCH1-V1 RLAAGTLVVV  | 2    | >NOTCH1-V1 RLAAGTLVVV | 14   | 12   |
| >NOTCH1-V1 RLAAGTLVVV  | 139  | >NOTCH1-V1 RLAAGTLVVV | 912  | 773  |
| >NOTCH1-V1 RLAAGTLVVV  | 179  | >NOTCH1-V1 RLAAGTLVVV | 211  | 32   |
| >NOTCH1-V1 RLAAGTLVVV  | 439  | >NOTCH1-V1 RLAAGTLVVV | 2242 | 1803 |
| >NOTCH1-V1 VVVLMPPEQ   | 951  | >NOTCH1-V1 VVALMPPEQ  | 496  | 455  |
| >NOTCH1-V1 VVVLMPPEQ   | 177  | >NOTCH1-V1 VVALMPPEQ  | 82   | 95   |
| >NOTCH1-V1 VVVLMPPPEQ  | 635  | >NOTCH1-V1 VVVALMPPEQ | 296  | 339  |
| >NOTCH1-V1 VVVLMPPPEQ  | 412  | >NOTCH1-V1 VVVALMPPEQ | 183  | 229  |
| >NOTCH1-V1 VVVLMPPPEQ  | 403  | >NOTCH1-V1 VVVALMPPEQ | 303  | 100  |
| >NOTCH1-V1 TLVVVVLM    | 420  | >NOTCH1-V1 TLVVVVALM  | 453  | 33   |
| >NOTCH1-V1 TLVVVVLM    | 441  | >NOTCH1-V1 TLVVVVALM  | 723  | 282  |
| >NOTCH1-V1 GTLVVVVL    | 1918 | >NOTCH1-V1 GTLVVVVAL  | 413  | 1505 |
| >NOTCH1-V1 GTLVVVVL    | 397  | >NOTCH1-V1 GTLVVVVAL  | 180  | 217  |
| >NOTCH1-V1 GTLVVVVL    | 464  | >NOTCH1-V1 GTLVVVVAL  | 559  | 95   |
| >NOTCH1-V1 GTLVVVVL    | 231  | >NOTCH1-V1 GTLVVVVAL  | 130  | 101  |
| >NOTCH1-V1 GTLVVVVL    | 89   | >NOTCH1-V1 GTLVVVVAL  | 69   | 20   |

|                        |       |                         |       |       |
|------------------------|-------|-------------------------|-------|-------|
| >NOTCH1-V1 GTLVVVVLM   | 105   | >NOTCH1-V1 GTLVVVVALM   | 33    | 72    |
| >NOTCH1-V1 GTLVVVVLM   | 652   | >NOTCH1-V1 GTLVVVVALM   | 242   | 410   |
| >NOTCH1-V1 GTLVVVVLM   | 1056  | >NOTCH1-V1 GTLVVVVALM   | 388   | 668   |
| >NOTCH1-V1 GTLVVVVLM   | 10    | >NOTCH1-V1 GTLVVVVALM   | 5     | 5     |
| >NOTCH1-V1 AGTLVVVVLM  | 126   | >NOTCH1-V1 AGTLVVVVVALM | 165   | 39    |
| >NOTCH1-V1 LAAGTLVVVV  | 462   | >NOTCH1-V1 LAAGTLVVVVA  | 150   | 312   |
| >NOTCH1-V1 LAAGTLVVVV  | 346   | >NOTCH1-V1 LAAGTLVVVVA  | 1998  | 1652  |
| >NOTCH1-V1 LAAGTLVVVV  | 197   | >NOTCH1-V1 LAAGTLVVVVA  | 995   | 798   |
| >NOTCH1-V1 LAAGTLVVVV  | 855   | >NOTCH1-V1 LAAGTLVVVVA  | 204   | 651   |
| >NOTCH1-V1 LAAGTLVVVV  | 127   | >NOTCH1-V1 LAAGTLVVVVA  | 4808  | 4681  |
| >NOTCH1-V1 LAAGTLVVVV  | 349   | >NOTCH1-V1 LAAGTLVVVVA  | 11187 | 10838 |
| >NOTCH1-V1 LAAGTLVVVV  | 20    | >NOTCH1-V1 LAAGTLVVVVA  | 4006  | 3986  |
| >NOTCH1-V1 LAAGTLVVVV  | 816   | >NOTCH1-V1 LAAGTLVVVVA  | 390   | 426   |
| >NOTCH1-V1 LAAGTLVVVV  | 666   | >NOTCH1-V1 LAAGTLVVVVA  | 195   | 471   |
| >NOTCH1-V1 LAAGTLVVVV  | 337   | >NOTCH1-V1 LAAGTLVVVVA  | 291   | 46    |
| >NOTCH1-V1 LAAGTLVVVV  | 651   | >NOTCH1-V1 LAAGTLVVVVA  | 180   | 471   |
| >NOTCH1-V1 LAAGTLVVVV  | 424   | >NOTCH1-V1 LAAGTLVVVVA  | 309   | 115   |
| >NOTCH1-V1 LAAGTLVVVV  | 220   | >NOTCH1-V1 LAAGTLVVVVA  | 1126  | 906   |
| >NOTCH1-V1 LAAGTLVVVV  | 235   | >NOTCH1-V1 LAAGTLVVVVA  | 294   | 59    |
| >NOTCH1-V1 VLMPPEQL    | 57    | >NOTCH1-V1 ELMPPEQL     | 3018  | 2961  |
| >NOTCH1-V1 VLMPPEQL    | 19    | >NOTCH1-V1 ELMPPEQL     | 169   | 150   |
| >NOTCH1-V1 VLMPPEQL    | 87    | >NOTCH1-V1 ELMPPEQL     | 2536  | 2449  |
| >NOTCH1-V1 VLMPPEQL    | 329   | >NOTCH1-V1 ELMPPEQL     | 5827  | 5498  |
| >NOTCH1-V1 VLMPPEQL    | 5     | >NOTCH1-V1 ELMPPEQL     | 39    | 34    |
| >NOTCH1-V1 VLMPPEQL    | 27    | >NOTCH1-V1 ELMPPEQL     | 677   | 650   |
| >NOTCH1-V1 VLMPPEQL    | 37    | >NOTCH1-V1 ELMPPEQL     | 583   | 546   |
| >NOTCH1-V1 VLMPPEQL    | 6     | >NOTCH1-V1 ELMPPEQL     | 16    | 10    |
| >NOTCH1-V1 VLMPPEQL    | 4     | >NOTCH1-V1 ELMPPEQL     | 19    | 15    |
| >NOTCH1-V1 VLMPPEQLR   | 250   | >NOTCH1-V1 ELMPPEQLR    | 2563  | 2313  |
| >NOTCH1-V1 VLMPPEQLR   | 681   | >NOTCH1-V1 ELMPPEQLR    | 114   | 567   |
| >NOTCH1-V1 VLMPPEQLR   | 869   | >NOTCH1-V1 ELMPPEQLR    | 50    | 819   |
| >NOTCH1-V1 VLMPPEQL    | 5410  | >NOTCH1-V1 ELMPPEQL     | 101   | 5309  |
| >NOTCH1-V1 VLMPPEQL    | 7611  | >NOTCH1-V1 ELMPPEQL     | 98    | 7513  |
| >NOTCH1-V1 VVLMPPPEQL  | 50    | >NOTCH1-V1 VELMPPEQL    | 5311  | 5261  |
| >NOTCH1-V1 VVLMPPPEQLF | 441   | >NOTCH1-V1 VELMPPEQLF   | 25749 | 25308 |
| >NOTCH1-V1 VVLMPPPEQLF | 173   | >NOTCH1-V1 VELMPPEQLF   | 17976 | 17803 |
| >NOTCH1-V1 VVLMPPPEQL  | 22703 | >NOTCH1-V1 VELMPPEQL    | 243   | 22460 |
| >NOTCH1-V1 VVLMPPPEQL  | 25965 | >NOTCH1-V1 VELMPPEQL    | 35    | 25930 |
| >NOTCH1-V1 RLAAGTLVVV  | 16    | >NOTCH1-V1 RLAAGTLVVV   | 18954 | 18938 |
| >NOTCH1-V1 RLAAGTLVVV  | 7     | >NOTCH1-V1 RLAAGTLVVV   | 4267  | 4260  |
| >NOTCH1-V1 RLAAGTLVVV  | 3     | >NOTCH1-V1 RLAAGTLVVV   | 8323  | 8320  |
| >NOTCH1-V1 RLAAGTLVVV  | 16    | >NOTCH1-V1 RLAAGTLVVV   | 13870 | 13854 |
| >NOTCH1-V1 RLAAGTLVVV  | 3     | >NOTCH1-V1 RLAAGTLVVV   | 11289 | 11286 |

|                       |      |                       |       |       |
|-----------------------|------|-----------------------|-------|-------|
| >NOTCH1-V1 RLAAGTLVVV | 6    | >NOTCH1-V1 RLAAGTLVVV | 19178 | 19172 |
| >NOTCH1-V1 RLAAGTLVVV | 5    | >NOTCH1-V1 RLAAGTLVVV | 15340 | 15335 |
| >NOTCH1-V1 RLAAGTLVVV | 4    | >NOTCH1-V1 RLAAGTLVVV | 22891 | 22887 |
| >NOTCH1-V1 RLAAGTLVVV | 2    | >NOTCH1-V1 RLAAGTLVVV | 8923  | 8921  |
| >NOTCH1-V1 RLAAGTLVVV | 139  | >NOTCH1-V1 RLAAGTLVVV | 1720  | 1581  |
| >NOTCH1-V1 RLAAGTLVVV | 179  | >NOTCH1-V1 RLAAGTLVVV | 1695  | 1516  |
| >NOTCH1-V1 RLAAGTLVVV | 439  | >NOTCH1-V1 RLAAGTLVVV | 11674 | 11235 |
| >NOTCH1-V1 VVVLMPPEQ  | 177  | >NOTCH1-V1 VVELMPPEQI | 641   | 464   |
| >NOTCH1-V1 VVVVLMPPEQ | 635  | >NOTCH1-V1 VVVELMPPEQ | 142   | 493   |
| >NOTCH1-V1 VVVVLMPPEQ | 1856 | >NOTCH1-V1 VVVELMPPEQ | 116   | 1740  |
| >NOTCH1-V1 VVVVLMPPEQ | 1843 | >NOTCH1-V1 VVVELMPPEQ | 258   | 1585  |
| >NOTCH1-V1 VVVVLMPPE  | 1698 | >NOTCH1-V1 VVVELMPPE  | 375   | 1323  |
| >NOTCH1-V1 VVVVLMPPEQ | 412  | >NOTCH1-V1 VVVELMPPEQ | 105   | 307   |
| >NOTCH1-V1 VVVVLMPPEQ | 2210 | >NOTCH1-V1 VVVELMPPEQ | 366   | 1844  |
| >NOTCH1-V1 VVVVLMPPEQ | 403  | >NOTCH1-V1 VVVELMPPEQ | 260   | 143   |
| >NOTCH1-V1 TLVVVVLM   | 420  | >NOTCH1-V1 TLVVVELM   | 471   | 51    |
| >NOTCH1-V1 TLVVVVLM   | 441  | >NOTCH1-V1 TLVVVELM   | 978   | 537   |
| >NOTCH1-V1 GTLVVVVL   | 397  | >NOTCH1-V1 GTLVVVEL   | 178   | 219   |
| >NOTCH1-V1 GTLVVVVL   | 464  | >NOTCH1-V1 GTLVVVEL   | 210   | 254   |
| >NOTCH1-V1 GTLVVVVL   | 231  | >NOTCH1-V1 GTLVVVEL   | 349   | 118   |
| >NOTCH1-V1 GTLVVVVL   | 89   | >NOTCH1-V1 GTLVVVEL   | 86    | 3     |
| >NOTCH1-V1 GTLVVVVLM  | 105  | >NOTCH1-V1 GTLVVVELM  | 352   | 247   |
| >NOTCH1-V1 GTLVVVVLM  | 652  | >NOTCH1-V1 GTLVVVELM  | 275   | 377   |
| >NOTCH1-V1 GTLVVVVLM  | 10   | >NOTCH1-V1 GTLVVVELM  | 6     | 4     |
| >NOTCH1-V1 AGTLVVVVLM | 126  | >NOTCH1-V1 AGTLVVVELM | 346   | 220   |
| >NOTCH1-V1 LAAGTLVVVV | 462  | >NOTCH1-V1 LAAGTLVVVE | 92    | 370   |
| >NOTCH1-V1 LAAGTLVVVV | 346  | >NOTCH1-V1 LAAGTLVVVE | 25657 | 25311 |
| >NOTCH1-V1 LAAGTLVVVV | 197  | >NOTCH1-V1 LAAGTLVVVE | 20159 | 19962 |
| >NOTCH1-V1 LAAGTLVVVV | 855  | >NOTCH1-V1 LAAGTLVVVE | 301   | 554   |
| >NOTCH1-V1 LAAGTLVVVV | 127  | >NOTCH1-V1 LAAGTLVVVE | 28277 | 28150 |
| >NOTCH1-V1 LAAGTLVVVV | 349  | >NOTCH1-V1 LAAGTLVVVE | 27712 | 27363 |
| >NOTCH1-V1 LAAGTLVVVV | 20   | >NOTCH1-V1 LAAGTLVVVE | 30796 | 30776 |
| >NOTCH1-V1 LAAGTLVVVV | 831  | >NOTCH1-V1 LAAGTLVVVE | 217   | 614   |
| >NOTCH1-V1 LAAGTLVVVV | 816  | >NOTCH1-V1 LAAGTLVVVE | 299   | 517   |
| >NOTCH1-V1 LAAGTLVVVV | 337  | >NOTCH1-V1 LAAGTLVVVE | 219   | 118   |
| >NOTCH1-V1 LAAGTLVVVV | 424  | >NOTCH1-V1 LAAGTLVVVE | 2666  | 2242  |
| >NOTCH1-V1 LAAGTLVVVV | 220  | >NOTCH1-V1 LAAGTLVVVE | 480   | 260   |
| >NOTCH1-V1 LAAGTLVVVV | 235  | >NOTCH1-V1 LAAGTLVVVE | 575   | 340   |
| >NOTCH1-V1 VLMPPEQL   | 57   | >NOTCH1-V1 GLMPPEQL   | 73    | 16    |
| >NOTCH1-V1 VLMPPEQL   | 19   | >NOTCH1-V1 GLMPPEQL   | 15    | 4     |
| >NOTCH1-V1 VLMPPEQL   | 87   | >NOTCH1-V1 GLMPPEQL   | 90    | 3     |
| >NOTCH1-V1 VLMPPEQL   | 329  | >NOTCH1-V1 GLMPPEQL   | 752   | 423   |
| >NOTCH1-V1 VLMPPEQL   | 5    | >NOTCH1-V1 GLMPPEQL   | 8     | 3     |

|                        |      |                       |       |       |
|------------------------|------|-----------------------|-------|-------|
| >NOTCH1-V1 VLMPPEQL    | 27   | >NOTCH1-V1 GLMPPEQL   | 18    | 9     |
| >NOTCH1-V1 VLMPPEQL    | 37   | >NOTCH1-V1 GLMPPEQL   | 33    | 4     |
| >NOTCH1-V1 VLMPPEQL    | 6    | >NOTCH1-V1 GLMPPEQL   | 19    | 13    |
| >NOTCH1-V1 VLMPPEQL    | 4    | >NOTCH1-V1 GLMPPEQL   | 7     | 3     |
| >NOTCH1-V1 VLMPPEQLR   | 250  | >NOTCH1-V1 GLMPPEQLR  | 340   | 90    |
| >NOTCH1-V1 VVLMPPPEQL  | 50   | >NOTCH1-V1 VGLMPPEQL  | 3794  | 3744  |
| >NOTCH1-V1 VVLMPPPEQLI | 441  | >NOTCH1-V1 VGLMPPEQLI | 25193 | 24752 |
| >NOTCH1-V1 VVLMPPPEQLI | 173  | >NOTCH1-V1 VGLMPPEQLI | 18095 | 17922 |
| >NOTCH1-V1 RLAAGTLVVV  | 16   | >NOTCH1-V1 RLAAGTLVVV | 14435 | 14419 |
| >NOTCH1-V1 RLAAGTLVVV  | 7    | >NOTCH1-V1 RLAAGTLVVV | 1277  | 1270  |
| >NOTCH1-V1 RLAAGTLVVV  | 3    | >NOTCH1-V1 RLAAGTLVVV | 2023  | 2020  |
| >NOTCH1-V1 RLAAGTLVVV  | 16   | >NOTCH1-V1 RLAAGTLVVV | 8847  | 8831  |
| >NOTCH1-V1 RLAAGTLVVV  | 3    | >NOTCH1-V1 RLAAGTLVVV | 3682  | 3679  |
| >NOTCH1-V1 RLAAGTLVVV  | 6    | >NOTCH1-V1 RLAAGTLVVV | 12229 | 12223 |
| >NOTCH1-V1 RLAAGTLVVV  | 5    | >NOTCH1-V1 RLAAGTLVVV | 7258  | 7253  |
| >NOTCH1-V1 RLAAGTLVVV  | 4    | >NOTCH1-V1 RLAAGTLVVV | 19221 | 19217 |
| >NOTCH1-V1 RLAAGTLVVV  | 2    | >NOTCH1-V1 RLAAGTLVVV | 7580  | 7578  |
| >NOTCH1-V1 RLAAGTLVVV  | 139  | >NOTCH1-V1 RLAAGTLVVV | 1657  | 1518  |
| >NOTCH1-V1 RLAAGTLVVV  | 179  | >NOTCH1-V1 RLAAGTLVVV | 344   | 165   |
| >NOTCH1-V1 RLAAGTLVVV  | 439  | >NOTCH1-V1 RLAAGTLVVV | 10515 | 10076 |
| >NOTCH1-V1 VVVLMPPEQ   | 177  | >NOTCH1-V1 VVGLMPPEQ  | 1116  | 939   |
| >NOTCH1-V1 VVVLMPPPEQ  | 635  | >NOTCH1-V1 VVVGLMPPEQ | 394   | 241   |
| >NOTCH1-V1 VVVLMPPPEQ  | 1856 | >NOTCH1-V1 VVVGLMPPEQ | 346   | 1510  |
| >NOTCH1-V1 VVVLMPPPEQ  | 1843 | >NOTCH1-V1 VVVGLMPPEQ | 215   | 1628  |
| >NOTCH1-V1 VVVLMPPPE   | 1698 | >NOTCH1-V1 VVVGLMPPE  | 288   | 1410  |
| >NOTCH1-V1 VVVLMPPPEQ  | 412  | >NOTCH1-V1 VVVGLMPPEQ | 94    | 318   |
| >NOTCH1-V1 VVVLMPPPEQ  | 403  | >NOTCH1-V1 VVVGLMPPEQ | 296   | 107   |
| >NOTCH1-V1 TLVVVVLM    | 420  | >NOTCH1-V1 TLVVVGLM   | 1302  | 882   |
| >NOTCH1-V1 TLVVVVLM    | 441  | >NOTCH1-V1 TLVVVGLM   | 1459  | 1018  |
| >NOTCH1-V1 GTLVVVVL    | 397  | >NOTCH1-V1 GTLVVVGL   | 232   | 165   |
| >NOTCH1-V1 GTLVVVVL    | 464  | >NOTCH1-V1 GTLVVVGL   | 369   | 95    |
| >NOTCH1-V1 GTLVVVVL    | 231  | >NOTCH1-V1 GTLVVVGL   | 715   | 484   |
| >NOTCH1-V1 GTLVVVVL    | 89   | >NOTCH1-V1 GTLVVVGL   | 57    | 32    |
| >NOTCH1-V1 GTLVVVVLM   | 105  | >NOTCH1-V1 GTLVVVGLM  | 218   | 113   |
| >NOTCH1-V1 GTLVVVVLM   | 10   | >NOTCH1-V1 GTLVVVGLM  | 5     | 5     |
| >NOTCH1-V1 AGTLVVVVLM  | 126  | >NOTCH1-V1 AGTLVVVGLM | 109   | 17    |
| >NOTCH1-V1 LAAGTLVVVV  | 462  | >NOTCH1-V1 LAAGTLVVVC | 181   | 281   |
| >NOTCH1-V1 LAAGTLVVVV  | 346  | >NOTCH1-V1 LAAGTLVVVC | 22563 | 22217 |
| >NOTCH1-V1 LAAGTLVVVV  | 197  | >NOTCH1-V1 LAAGTLVVVC | 15897 | 15700 |
| >NOTCH1-V1 LAAGTLVVVV  | 855  | >NOTCH1-V1 LAAGTLVVVC | 235   | 620   |
| >NOTCH1-V1 LAAGTLVVVV  | 127  | >NOTCH1-V1 LAAGTLVVVC | 21899 | 21772 |
| >NOTCH1-V1 LAAGTLVVVV  | 349  | >NOTCH1-V1 LAAGTLVVVC | 25947 | 25598 |
| >NOTCH1-V1 LAAGTLVVVV  | 20   | >NOTCH1-V1 LAAGTLVVVC | 29961 | 29941 |

|                       |       |                       |       |       |
|-----------------------|-------|-----------------------|-------|-------|
| >NOTCH1-V1 LAAGTLVVVV | 831   | >NOTCH1-V1 LAAGTLVVVC | 334   | 497   |
| >NOTCH1-V1 LAAGTLVVVV | 816   | >NOTCH1-V1 LAAGTLVVVC | 309   | 507   |
| >NOTCH1-V1 LAAGTLVVVV | 337   | >NOTCH1-V1 LAAGTLVVVC | 150   | 187   |
| >NOTCH1-V1 LAAGTLVVVV | 424   | >NOTCH1-V1 LAAGTLVVVC | 3499  | 3075  |
| >NOTCH1-V1 LAAGTLVVVV | 220   | >NOTCH1-V1 LAAGTLVVVC | 943   | 723   |
| >NOTCH1-V1 LAAGTLVVVV | 235   | >NOTCH1-V1 LAAGTLVVVC | 436   | 201   |
| >NOTCH1-V1 VVFKRDAH   | 9358  | >NOTCH1-V1 EVFKRDAH   | 295   | 9063  |
| >NOTCH1-V1 VVFKRDAHG  | 4258  | >NOTCH1-V1 EVFKRDAHG  | 125   | 4133  |
| >NOTCH1-V1 NVVFKRDA   | 39540 | >NOTCH1-V1 NEVFKRDA   | 285   | 39255 |
| >NOTCH1-V1 RELSRVLHTN | 466   | >NOTCH1-V1 RELSRVLHTN | 12653 | 12187 |
| >NOTCH1-V1 RELSRVLHTN | 210   | >NOTCH1-V1 RELSRVLHTN | 8071  | 7861  |
| >NOTCH1-V1 RELSRVLHTN | 74    | >NOTCH1-V1 RELSRVLHTN | 1967  | 1893  |
| >NOTCH1-V1 RELSRVLHTN | 276   | >NOTCH1-V1 RELSRVLHTN | 5927  | 5651  |
| >NOTCH1-V1 RELSRVLHTN | 8     | >NOTCH1-V1 RELSRVLHTN | 1489  | 1481  |
| >NOTCH1-V1 HTNVVFKR   | 175   | >NOTCH1-V1 HTNEVFKR   | 219   | 44    |
| >NOTCH1-V1 HTNVVFKR   | 7     | >NOTCH1-V1 HTNEVFKR   | 10    | 3     |
| >NOTCH1-V1 HTNVVFKR   | 20    | >NOTCH1-V1 HTNEVFKR   | 24    | 4     |
| >NOTCH1-V1 HTNVVFKR   | 5     | >NOTCH1-V1 HTNEVFKR   | 5     | 0     |
| >NOTCH1-V1 HTNVVFKR   | 321   | >NOTCH1-V1 HTNEVFKR   | 178   | 143   |
| >NOTCH1-V1 LHTNVVFKR  | 176   | >NOTCH1-V1 LHTNEVFKR  | 1039  | 863   |
| >NOTCH1-V1 VLHTNVVFK  | 32    | >NOTCH1-V1 VLHTNEVFK  | 50    | 18    |
| >NOTCH1-V1 VLHTNVVFK  | 28    | >NOTCH1-V1 VLHTNEVFK  | 71    | 43    |
| >NOTCH1-V1 VLHTNVVFK  | 29    | >NOTCH1-V1 VLHTNEVFK  | 98    | 69    |
| >NOTCH1-V1 VLHTNVVFKR | 62    | >NOTCH1-V1 VLHTNEVFKR | 241   | 179   |
| >NOTCH1-V1 VLHTNVVF   | 385   | >NOTCH1-V1 VLHTNEVF   | 1437  | 1052  |
| >NOTCH1-V1 VLHTNVVFKR | 381   | >NOTCH1-V1 VLHTNEVFKR | 675   | 294   |
| >NOTCH1-V1 VLHTNVVFK  | 278   | >NOTCH1-V1 VLHTNEVFK  | 289   | 11    |
| >NOTCH1-V1 VLHTNVVF   | 87    | >NOTCH1-V1 VLHTNEVF   | 179   | 92    |
| >NOTCH1-V1 VLHTNVVF   | 358   | >NOTCH1-V1 VLHTNEVF   | 443   | 85    |
| >NOTCH1-V1 VLHTNVVF   | 14    | >NOTCH1-V1 VLHTNEVF   | 33    | 19    |
| >NOTCH1-V1 VLHTNVVFKR | 246   | >NOTCH1-V1 VLHTNEVFKR | 256   | 10    |
| >NOTCH1-V1 RVLHTNVV   | 863   | >NOTCH1-V1 RVLHTNEV   | 229   | 634   |
| >NOTCH1-V1 RVLHTNVV   | 1863  | >NOTCH1-V1 RVLHTNEV   | 437   | 1426  |
| >NOTCH1-V1 RVLHTNVV   | 399   | >NOTCH1-V1 RVLHTNEV   | 231   | 168   |
| >NOTCH1-V1 RVLHTNVV   | 38    | >NOTCH1-V1 RVLHTNEV   | 17    | 21    |
| >NOTCH1-V1 RVLHTNVV   | 75    | >NOTCH1-V1 RVLHTNEV   | 33    | 42    |
| >NOTCH1-V1 RVLHTNVV   | 103   | >NOTCH1-V1 RVLHTNEV   | 102   | 1     |
| >NOTCH1-V1 RVLHTNVV   | 176   | >NOTCH1-V1 RVLHTNEV   | 90    | 86    |
| >NOTCH1-V1 RVLHTNVV   | 210   | >NOTCH1-V1 RVLHTNEV   | 70    | 140   |
| >NOTCH1-V1 RVLHTNVVFK | 15    | >NOTCH1-V1 RVLHTNEVFK | 23    | 8     |
| >NOTCH1-V1 RVLHTNVVFK | 296   | >NOTCH1-V1 RVLHTNEVFK | 967   | 671   |
| >NOTCH1-V1 RVLHTNVVFK | 14    | >NOTCH1-V1 RVLHTNEVFK | 20    | 6     |
| >NOTCH1-V1 RVLHTNVVFK | 63    | >NOTCH1-V1 RVLHTNEVFK | 128   | 65    |

|                       |     |                       |       |       |
|-----------------------|-----|-----------------------|-------|-------|
| >NOTCH1-V1 RVLHTNVVF  | 436 | >NOTCH1-V1 RVLHTNEVF  | 566   | 130   |
| >NOTCH1-V1 RVLHTNVVF  | 121 | >NOTCH1-V1 RVLHTNEVF  | 227   | 106   |
| >NOTCH1-V1 RVLHTNVV   | 45  | >NOTCH1-V1 RVLHTNEV   | 84    | 39    |
| >NOTCH1-V1 RVLHTNVVFK | 4   | >NOTCH1-V1 RVLHTNEVFK | 6     | 2     |
| >NOTCH1-V1 RVLHTNVVFK | 208 | >NOTCH1-V1 RVLHTNEVFK | 730   | 522   |
| >NOTCH1-V1 RVLHTNVVFK | 89  | >NOTCH1-V1 RVLHTNEVFK | 173   | 84    |
| >NOTCH1-V1 RVLHTNVVFK | 8   | >NOTCH1-V1 RVLHTNEVFK | 12    | 4     |
| >NOTCH1-V1 RVLHTNVV   | 172 | >NOTCH1-V1 RVLHTNEV   | 264   | 92    |
| >NOTCH1-V1 RVLHTNVVF  | 7   | >NOTCH1-V1 RVLHTNEVF  | 12    | 5     |
| >NOTCH1-V1 RVLHTNVVFK | 386 | >NOTCH1-V1 RVLHTNEVFK | 496   | 110   |
| >NOTCH1-V1 RVLHTNVVFK | 143 | >NOTCH1-V1 RVLHTNEVFK | 254   | 111   |
| >NOTCH1-V1 RVLHTNVV   | 724 | >NOTCH1-V1 RVLHTNEV   | 230   | 494   |
| >NOTCH1-V1 RVLHTNVVF  | 71  | >NOTCH1-V1 RVLHTNEVF  | 64    | 7     |
| >NOTCH1-V1 RVLHTNVVF  | 8   | >NOTCH1-V1 RVLHTNEVF  | 16    | 8     |
| >NOTCH1-V1 RVLHTNVVF  | 12  | >NOTCH1-V1 RVLHTNEVF  | 22    | 10    |
| >NOTCH1-V1 RVLHTNVVF  | 49  | >NOTCH1-V1 RVLHTNEVF  | 32    | 17    |
| >NOTCH1-V1 RVLHTNVV   | 317 | >NOTCH1-V1 RVLHTNEV   | 985   | 668   |
| >NOTCH1-V1 RVLHTNVVF  | 77  | >NOTCH1-V1 RVLHTNEVF  | 28    | 49    |
| >NOTCH1-V1 RVLHTNVVFK | 481 | >NOTCH1-V1 RVLHTNEVFK | 1831  | 1350  |
| >NOTCH1-V1 RVLHTNVVFK | 193 | >NOTCH1-V1 RVLHTNEVFK | 425   | 232   |
| >NOTCH1-V1 RVLHTNVVFK | 76  | >NOTCH1-V1 RVLHTNEVFK | 87    | 11    |
| >NOTCH1-V1 SRVLHTNVVF | 26  | >NOTCH1-V1 SRVLHTNEVF | 55    | 29    |
| >NOTCH1-V1 SRVLHTNVVF | 115 | >NOTCH1-V1 SRVLHTNEVF | 178   | 63    |
| >NOTCH1-V1 SRVLHTNVVF | 285 | >NOTCH1-V1 SRVLHTNEVF | 549   | 264   |
| >NOTCH1-V1 SRVLHTNVV  | 295 | >NOTCH1-V1 SRVLHTNEV  | 2691  | 2396  |
| >NOTCH1-V1 SRVLHTNVVF | 285 | >NOTCH1-V1 SRVLHTNEVF | 1738  | 1453  |
| >NOTCH1-V1 SRVLHTNVV  | 283 | >NOTCH1-V1 SRVLHTNEV  | 241   | 42    |
| >NOTCH1-V1 SRVLHTNVVF | 203 | >NOTCH1-V1 SRVLHTNEVF | 575   | 372   |
| >NOTCH1-V1 LSRVLHTNV  | 42  | >NOTCH1-V1 LSRVLHTNE  | 2837  | 2795  |
| >NOTCH1-V1 LSRVLHTNVV | 35  | >NOTCH1-V1 LSRVLHTNEV | 35    | 0     |
| >NOTCH1-V1 LSRVLHTNVV | 45  | >NOTCH1-V1 LSRVLHTNEV | 45    | 0     |
| >NOTCH1-V1 LSRVLHTNV  | 451 | >NOTCH1-V1 LSRVLHTNE  | 12320 | 11869 |
| >NOTCH1-V1 LSRVLHTNVV | 424 | >NOTCH1-V1 LSRVLHTNEV | 638   | 214   |
| >NOTCH1-V1 LSRVLHTNVV | 8   | >NOTCH1-V1 LSRVLHTNEV | 12    | 4     |
| >NOTCH1-V1 LSRVLHTNV  | 103 | >NOTCH1-V1 LSRVLHTNE  | 3465  | 3362  |
| >NOTCH1-V1 LSRVLHTNVV | 3   | >NOTCH1-V1 LSRVLHTNEV | 4     | 1     |
| >NOTCH1-V1 LSRVLHTNVV | 396 | >NOTCH1-V1 LSRVLHTNEV | 281   | 115   |
| >NOTCH1-V1 LSRVLHTNVV | 344 | >NOTCH1-V1 LSRVLHTNEV | 205   | 139   |
| >NOTCH1-V1 LSRVLHTNV  | 98  | >NOTCH1-V1 LSRVLHTNE  | 2086  | 1988  |
| >NOTCH1-V1 LSRVLHTNVV | 153 | >NOTCH1-V1 LSRVLHTNEV | 131   | 22    |
| >NOTCH1-V1 LSRVLHTNVV | 15  | >NOTCH1-V1 LSRVLHTNEV | 9     | 6     |
| >NOTCH1-V1 ELSRVLHTNV | 322 | >NOTCH1-V1 ELSRVLHTNE | 22965 | 22643 |
| >NOTCH1-V1 ELSRVLHTNV | 63  | >NOTCH1-V1 ELSRVLHTNE | 18    | 45    |

|                       |     |                        |       |       |
|-----------------------|-----|------------------------|-------|-------|
| >NOTCH1-V1 ELSRVLHTNV | 97  | >NOTCH1-V1 ELSRVLHTNE  | 19000 | 18903 |
| >NOTCH1-V1 ELSRVLHTNV | 77  | >NOTCH1-V1 ELSRVLHTNE' | 47    | 30    |
| >NOTCH1-V1 ELSRVLHTNV | 27  | >NOTCH1-V1 ELSRVLHTNE  | 22713 | 22686 |
| >NOTCH1-V1 ELSRVLHTNV | 38  | >NOTCH1-V1 ELSRVLHTNE' | 19    | 19    |
| >NOTCH1-V1 ELSRVLHTNV | 231 | >NOTCH1-V1 ELSRVLHTNE  | 24022 | 23791 |
| >NOTCH1-V1 ELSRVLHTNV | 51  | >NOTCH1-V1 ELSRVLHTNE' | 43    | 8     |
| >NOTCH1-V1 ELSRVLHTNV | 31  | >NOTCH1-V1 ELSRVLHTNE  | 22549 | 22518 |
| >NOTCH1-V1 ELSRVLHTNV | 73  | >NOTCH1-V1 ELSRVLHTNE' | 40    | 33    |
| >NOTCH1-V1 ELSRVLHTNV | 30  | >NOTCH1-V1 ELSRVLHTNE  | 24380 | 24350 |
| >NOTCH1-V1 ELSRVLHTNV | 17  | >NOTCH1-V1 ELSRVLHTNE' | 13    | 4     |
| >NOTCH1-V1 ELSRVLHTNV | 4   | >NOTCH1-V1 ELSRVLHTNE  | 17515 | 17511 |
| >NOTCH1-V1 ELSRVLHTNV | 8   | >NOTCH1-V1 ELSRVLHTNE' | 4     | 4     |
| >NOTCH1-V1 ELSRVLHTNV | 411 | >NOTCH1-V1 ELSRVLHTNE  | 25489 | 25078 |
| >NOTCH1-V1 ELSRVLHTNV | 59  | >NOTCH1-V1 ELSRVLHTNE' | 22    | 37    |
| >NOTCH1-V1 ELSRVLHTNV | 58  | >NOTCH1-V1 ELSRVLHTNE  | 19554 | 19496 |
| >NOTCH1-V1 ELSRVLHTNV | 153 | >NOTCH1-V1 ELSRVLHTNE' | 46    | 107   |
| >NOTCH1-V1 RELSRVLHTN | 466 | >NOTCH1-V1 RELSRVLHTN  | 11867 | 11401 |
| >NOTCH1-V1 RELSRVLHTN | 210 | >NOTCH1-V1 RELSRVLHTN  | 12881 | 12671 |
| >NOTCH1-V1 RELSRVLHTN | 74  | >NOTCH1-V1 RELSRVLHTN  | 4098  | 4024  |
| >NOTCH1-V1 RELSRVLHTN | 276 | >NOTCH1-V1 RELSRVLHTN  | 4881  | 4605  |
| >NOTCH1-V1 RELSRVLHTN | 8   | >NOTCH1-V1 RELSRVLHTN  | 1289  | 1281  |
| >NOTCH1-V1 HTNVVFKR   | 175 | >NOTCH1-V1 HTNGVFKR    | 224   | 49    |
| >NOTCH1-V1 HTNVVFKR   | 7   | >NOTCH1-V1 HTNGVFKR    | 9     | 2     |
| >NOTCH1-V1 HTNVVFKR   | 20  | >NOTCH1-V1 HTNGVFKR    | 25    | 5     |
| >NOTCH1-V1 HTNVVFKR   | 5   | >NOTCH1-V1 HTNGVFKR    | 6     | 1     |
| >NOTCH1-V1 HTNVVFKR   | 321 | >NOTCH1-V1 HTNGVFKR    | 150   | 171   |
| >NOTCH1-V1 LHTNVVFKR  | 176 | >NOTCH1-V1 LHTNGVFKR   | 944   | 768   |
| >NOTCH1-V1 VLHTNVVFK  | 32  | >NOTCH1-V1 VLHTNGVFK   | 36    | 4     |
| >NOTCH1-V1 VLHTNVVFK  | 28  | >NOTCH1-V1 VLHTNGVFK   | 42    | 14    |
| >NOTCH1-V1 VLHTNVVFK  | 29  | >NOTCH1-V1 VLHTNGVFK   | 40    | 11    |
| >NOTCH1-V1 VLHTNVVFKF | 62  | >NOTCH1-V1 VLHTNGVFKF  | 189   | 127   |
| >NOTCH1-V1 VLHTNVVF   | 385 | >NOTCH1-V1 VLHTNGVF    | 4588  | 4203  |
| >NOTCH1-V1 VLHTNVVFKF | 381 | >NOTCH1-V1 VLHTNGVFKF  | 822   | 441   |
| >NOTCH1-V1 VLHTNVVFK  | 278 | >NOTCH1-V1 VLHTNGVFK   | 734   | 456   |
| >NOTCH1-V1 VLHTNVVF   | 87  | >NOTCH1-V1 VLHTNGVF    | 94    | 7     |
| >NOTCH1-V1 VLHTNVVF   | 358 | >NOTCH1-V1 VLHTNGVF    | 105   | 253   |
| >NOTCH1-V1 VLHTNVVF   | 14  | >NOTCH1-V1 VLHTNGVF    | 59    | 45    |
| >NOTCH1-V1 VLHTNVVFKF | 246 | >NOTCH1-V1 VLHTNGVFKF  | 357   | 111   |
| >NOTCH1-V1 RVLHTNVV   | 399 | >NOTCH1-V1 RVLHTNGV    | 143   | 256   |
| >NOTCH1-V1 RVLHTNVV   | 38  | >NOTCH1-V1 RVLHTNGV    | 23    | 15    |
| >NOTCH1-V1 RVLHTNVV   | 75  | >NOTCH1-V1 RVLHTNGV    | 43    | 32    |
| >NOTCH1-V1 RVLHTNVV   | 103 | >NOTCH1-V1 RVLHTNGV    | 75    | 28    |
| >NOTCH1-V1 RVLHTNVV   | 176 | >NOTCH1-V1 RVLHTNGV    | 120   | 56    |



|                       |     |                       |      |      |
|-----------------------|-----|-----------------------|------|------|
| >NOTCH1-V1 RVLHTNVV   | 763 | >NOTCH1-V1 RVLHTNGV   | 372  | 391  |
| >NOTCH1-V1 RVLHTNVV   | 210 | >NOTCH1-V1 RVLHTNGV   | 140  | 70   |
| >NOTCH1-V1 RVLHTNVVFK | 15  | >NOTCH1-V1 RVLHTNGVFK | 13   | 2    |
| >NOTCH1-V1 RVLHTNVVFK | 296 | >NOTCH1-V1 RVLHTNGVFK | 370  | 74   |
| >NOTCH1-V1 RVLHTNVVFK | 14  | >NOTCH1-V1 RVLHTNGVFK | 12   | 2    |
| >NOTCH1-V1 RVLHTNVVFK | 63  | >NOTCH1-V1 RVLHTNGVFK | 127  | 64   |
| >NOTCH1-V1 RVLHTNVVF  | 436 | >NOTCH1-V1 RVLHTNGVF  | 2479 | 2043 |
| >NOTCH1-V1 RVLHTNVVF  | 121 | >NOTCH1-V1 RVLHTNGVF  | 294  | 173  |
| >NOTCH1-V1 RVLHTNVV   | 45  | >NOTCH1-V1 RVLHTNGV   | 80   | 35   |
| >NOTCH1-V1 RVLHTNVVFK | 4   | >NOTCH1-V1 RVLHTNGVFK | 4    | 0    |
| >NOTCH1-V1 RVLHTNVVFK | 208 | >NOTCH1-V1 RVLHTNGVFK | 239  | 31   |
| >NOTCH1-V1 RVLHTNVVFK | 89  | >NOTCH1-V1 RVLHTNGVFK | 84   | 5    |
| >NOTCH1-V1 RVLHTNVVFK | 8   | >NOTCH1-V1 RVLHTNGVFK | 12   | 4    |
| >NOTCH1-V1 RVLHTNVV   | 172 | >NOTCH1-V1 RVLHTNGV   | 463  | 291  |
| >NOTCH1-V1 RVLHTNVVF  | 7   | >NOTCH1-V1 RVLHTNGVF  | 108  | 101  |
| >NOTCH1-V1 RVLHTNVVFK | 386 | >NOTCH1-V1 RVLHTNGVFK | 226  | 160  |
| >NOTCH1-V1 RVLHTNVVFK | 143 | >NOTCH1-V1 RVLHTNGVFK | 357  | 214  |
| >NOTCH1-V1 RVLHTNVV   | 724 | >NOTCH1-V1 RVLHTNGV   | 102  | 622  |
| >NOTCH1-V1 RVLHTNVVF  | 71  | >NOTCH1-V1 RVLHTNGVF  | 83   | 12   |
| >NOTCH1-V1 RVLHTNVVF  | 8   | >NOTCH1-V1 RVLHTNGVF  | 43   | 35   |
| >NOTCH1-V1 RVLHTNVVF  | 12  | >NOTCH1-V1 RVLHTNGVF  | 20   | 8    |
| >NOTCH1-V1 RVLHTNVVF  | 49  | >NOTCH1-V1 RVLHTNGVF  | 106  | 57   |
| >NOTCH1-V1 RVLHTNVV   | 317 | >NOTCH1-V1 RVLHTNGV   | 2885 | 2568 |
| >NOTCH1-V1 RVLHTNVVF  | 77  | >NOTCH1-V1 RVLHTNGVF  | 21   | 56   |
| >NOTCH1-V1 RVLHTNVVFK | 481 | >NOTCH1-V1 RVLHTNGVFK | 1281 | 800  |
| >NOTCH1-V1 RVLHTNVVFK | 193 | >NOTCH1-V1 RVLHTNGVFK | 516  | 323  |
| >NOTCH1-V1 RVLHTNVVFK | 76  | >NOTCH1-V1 RVLHTNGVFK | 118  | 42   |
| >NOTCH1-V1 SRVLHTNVVF | 26  | >NOTCH1-V1 SRVLHTNGVF | 145  | 119  |
| >NOTCH1-V1 SRVLHTNVVF | 115 | >NOTCH1-V1 SRVLHTNGVF | 93   | 22   |
| >NOTCH1-V1 SRVLHTNVVF | 285 | >NOTCH1-V1 SRVLHTNGVF | 309  | 24   |
| >NOTCH1-V1 SRVLHTNVV  | 295 | >NOTCH1-V1 SRVLHTNGV  | 4511 | 4216 |
| >NOTCH1-V1 SRVLHTNVVF | 285 | >NOTCH1-V1 SRVLHTNGVF | 2216 | 1931 |
| >NOTCH1-V1 SRVLHTNVV  | 283 | >NOTCH1-V1 SRVLHTNGV  | 167  | 116  |
| >NOTCH1-V1 SRVLHTNVVF | 203 | >NOTCH1-V1 SRVLHTNGVF | 359  | 156  |
| >NOTCH1-V1 LSRVLHTNV  | 42  | >NOTCH1-V1 LSRVLHTNG  | 364  | 322  |
| >NOTCH1-V1 LSRVLHTNVV | 35  | >NOTCH1-V1 LSRVLHTNGV | 55   | 20   |
| >NOTCH1-V1 LSRVLHTNVV | 45  | >NOTCH1-V1 LSRVLHTNGV | 47   | 2    |
| >NOTCH1-V1 LSRVLHTNV  | 451 | >NOTCH1-V1 LSRVLHTNG  | 9745 | 9294 |
| >NOTCH1-V1 LSRVLHTNVV | 424 | >NOTCH1-V1 LSRVLHTNGV | 1328 | 904  |
| >NOTCH1-V1 LSRVLHTNVV | 8   | >NOTCH1-V1 LSRVLHTNGV | 27   | 19   |
| >NOTCH1-V1 LSRVLHTNV  | 103 | >NOTCH1-V1 LSRVLHTNG  | 4503 | 4400 |
| >NOTCH1-V1 LSRVLHTNVV | 821 | >NOTCH1-V1 LSRVLHTNGV | 372  | 449  |
| >NOTCH1-V1 LSRVLHTNVV | 3   | >NOTCH1-V1 LSRVLHTNGV | 4    | 1    |

|                       |      |                       |       |       |
|-----------------------|------|-----------------------|-------|-------|
| >NOTCH1-V1 LSRVLHTNVV | 396  | >NOTCH1-V1 LSRVLHTNGV | 715   | 319   |
| >NOTCH1-V1 LSRVLHTNVV | 344  | >NOTCH1-V1 LSRVLHTNGV | 677   | 333   |
| >NOTCH1-V1 LSRVLHTNV  | 98   | >NOTCH1-V1 LSRVLHTNG  | 2321  | 2223  |
| >NOTCH1-V1 LSRVLHTNVV | 153  | >NOTCH1-V1 LSRVLHTNGV | 139   | 14    |
| >NOTCH1-V1 LSRVLHTNVV | 15   | >NOTCH1-V1 LSRVLHTNGV | 8     | 7     |
| >NOTCH1-V1 ELSRVLHTNV | 322  | >NOTCH1-V1 ELSRVLHTNG | 19416 | 19094 |
| >NOTCH1-V1 ELSRVLHTNV | 63   | >NOTCH1-V1 ELSRVLHTNG | 24    | 39    |
| >NOTCH1-V1 ELSRVLHTNV | 97   | >NOTCH1-V1 ELSRVLHTNG | 16285 | 16188 |
| >NOTCH1-V1 ELSRVLHTNV | 77   | >NOTCH1-V1 ELSRVLHTNG | 33    | 44    |
| >NOTCH1-V1 ELSRVLHTNV | 1548 | >NOTCH1-V1 ELSRVLHTNG | 428   | 1120  |
| >NOTCH1-V1 ELSRVLHTNV | 27   | >NOTCH1-V1 ELSRVLHTNG | 15476 | 15449 |
| >NOTCH1-V1 ELSRVLHTNV | 38   | >NOTCH1-V1 ELSRVLHTNG | 18    | 20    |
| >NOTCH1-V1 ELSRVLHTNV | 231  | >NOTCH1-V1 ELSRVLHTNG | 20179 | 19948 |
| >NOTCH1-V1 ELSRVLHTNV | 51   | >NOTCH1-V1 ELSRVLHTNG | 25    | 26    |
| >NOTCH1-V1 ELSRVLHTNV | 31   | >NOTCH1-V1 ELSRVLHTNG | 19527 | 19496 |
| >NOTCH1-V1 ELSRVLHTNV | 73   | >NOTCH1-V1 ELSRVLHTNG | 37    | 36    |
| >NOTCH1-V1 ELSRVLHTNV | 30   | >NOTCH1-V1 ELSRVLHTNG | 22681 | 22651 |
| >NOTCH1-V1 ELSRVLHTNV | 17   | >NOTCH1-V1 ELSRVLHTNG | 7     | 10    |
| >NOTCH1-V1 ELSRVLHTNV | 4    | >NOTCH1-V1 ELSRVLHTNG | 16969 | 16965 |
| >NOTCH1-V1 ELSRVLHTNV | 8    | >NOTCH1-V1 ELSRVLHTNG | 5     | 3     |
| >NOTCH1-V1 ELSRVLHTNV | 411  | >NOTCH1-V1 ELSRVLHTNG | 23692 | 23281 |
| >NOTCH1-V1 ELSRVLHTNV | 59   | >NOTCH1-V1 ELSRVLHTNG | 23    | 36    |
| >NOTCH1-V1 ELSRVLHTNV | 58   | >NOTCH1-V1 ELSRVLHTNG | 17927 | 17869 |
| >NOTCH1-V1 ELSRVLHTNV | 153  | >NOTCH1-V1 ELSRVLHTNG | 24    | 129   |
| >NOTCH1-V1 VRGSIVYL   | 808  | >NOTCH1-V1 IRGSIVYL   | 371   | 437   |
| >NOTCH1-V1 VRGSIVYLEI | 586  | >NOTCH1-V1 IRGSIVYLEI | 280   | 306   |
| >NOTCH1-V1 VRGSIVYL   | 446  | >NOTCH1-V1 IRGSIVYL   | 462   | 16    |
| >NOTCH1-V1 VRGSIVYLEI | 401  | >NOTCH1-V1 IRGSIVYLEI | 275   | 126   |
| >NOTCH1-V1 DVRGSIVY   | 151  | >NOTCH1-V1 DIRGSIVY   | 504   | 353   |
| >NOTCH1-V1 DVRGSIVY   | 27   | >NOTCH1-V1 DIRGSIVY   | 87    | 60    |
| >NOTCH1-V1 DVRGSIVYL  | 80   | >NOTCH1-V1 DIRGSIVYL  | 280   | 200   |
| >NOTCH1-V1 DVRGSIVY   | 50   | >NOTCH1-V1 DIRGSIVY   | 169   | 119   |
| >NOTCH1-V1 DVRGSIVYL  | 390  | >NOTCH1-V1 DIRGSIVYL  | 1927  | 1537  |
| >NOTCH1-V1 DVRGSIVY   | 534  | >NOTCH1-V1 DIRGSIVY   | 428   | 106   |
| >NOTCH1-V1 DVRGSIVY   | 491  | >NOTCH1-V1 DIRGSIVY   | 1667  | 1176  |
| >NOTCH1-V1 RRRRELDPMI | 192  | >NOTCH1-V1 RRRRELDPMI | 158   | 34    |
| >NOTCH1-V1 RRRRELDPMI | 899  | >NOTCH1-V1 RRRRELDPMI | 452   | 447   |
| >NOTCH1-V1 RRRRELDPMI | 69   | >NOTCH1-V1 RRRRELDPMI | 49    | 20    |
| >NOTCH1-V1 RRRRELDPMI | 464  | >NOTCH1-V1 RRRRELDPMI | 242   | 222   |
| >NOTCH1-V1 MDVRGSIVY  | 692  | >NOTCH1-V1 MDIRGSIVY  | 322   | 370   |
| >NOTCH1-V1 MDVRGSIVY  | 70   | >NOTCH1-V1 MDIRGSIVY  | 70    | 0     |
| >NOTCH1-V1 MDVRGSIV   | 731  | >NOTCH1-V1 MDIRGSIV   | 445   | 286   |
| >NOTCH1-V1 PMDVRGSIV  | 538  | >NOTCH1-V1 PMDIRGSIV  | 203   | 335   |

|                       |      |                       |       |       |
|-----------------------|------|-----------------------|-------|-------|
| >NOTCH1-V1 PMDVRSIV\  | 85   | >NOTCH1-V1 PMDIRGSIVY | 48    | 37    |
| >NOTCH1-V1 PMDVRSIV   | 221  | >NOTCH1-V1 PMDIRGSIV  | 152   | 69    |
| >NOTCH1-V1 PMDVRSIV\  | 150  | >NOTCH1-V1 PMDIRGSIVY | 111   | 39    |
| >NOTCH1-V1 PMDVRSIV\  | 284  | >NOTCH1-V1 PMDIRGSIVY | 544   | 260   |
| >NOTCH1-V1 PMDVRSIV   | 97   | >NOTCH1-V1 PMDIRGSIV  | 76    | 21    |
| >NOTCH1-V1 PMDVRSIV\  | 138  | >NOTCH1-V1 PMDIRGSIVY | 107   | 31    |
| >NOTCH1-V1 DPMDVRSI   | 631  | >NOTCH1-V1 DPMDIRGSI  | 306   | 325   |
| >NOTCH1-V1 DPMDVRSI   | 106  | >NOTCH1-V1 DPMDIRGSI  | 101   | 5     |
| >NOTCH1-V1 DPMDVRSI\  | 121  | >NOTCH1-V1 DPMDIRGSIV | 102   | 19    |
| >NOTCH1-V1 DPMDVRSI\  | 123  | >NOTCH1-V1 DPMDIRGSIV | 134   | 11    |
| >NOTCH1-V1 DPMDVRSI\  | 15   | >NOTCH1-V1 DPMDIRGSIV | 15    | 0     |
| >NOTCH1-V1 DPMDVRSI\  | 424  | >NOTCH1-V1 DPMDIRGSIV | 367   | 57    |
| >NOTCH1-V1 DPMDVRSI\  | 140  | >NOTCH1-V1 DPMDIRGSIV | 107   | 33    |
| >NOTCH1-V1 DPMDVRSI\  | 63   | >NOTCH1-V1 DPMDIRGSIV | 78    | 15    |
| >NOTCH1-V1 DPMDVRSI\  | 524  | >NOTCH1-V1 DPMDIRGSIV | 419   | 105   |
| >NOTCH1-V1 LDPMDVRS   | 254  | >NOTCH1-V1 LDPMDIRGSI | 292   | 38    |
| >NOTCH1-V1 ELDPMDVRG  | 384  | >NOTCH1-V1 ELDPMDIRGS | 355   | 29    |
| >NOTCH1-V1 ELDPMDVR   | 245  | >NOTCH1-V1 ELDPMDIR   | 268   | 23    |
| >NOTCH1-V1 RELDPMDV   | 106  | >NOTCH1-V1 RELDPMDI   | 49    | 57    |
| >NOTCH1-V1 RELDPMDV   | 326  | >NOTCH1-V1 RELDPMDI   | 242   | 84    |
| >NOTCH1-V1 RELDPMDV   | 408  | >NOTCH1-V1 RELDPMDI   | 1690  | 1282  |
| >NOTCH1-V1 RELDPMDV   | 288  | >NOTCH1-V1 RELDPMDI   | 35    | 253   |
| >NOTCH1-V1 RELDPMDVR  | 323  | >NOTCH1-V1 RELDPMDIR  | 249   | 74    |
| >NOTCH1-V1 RELDPMDVR  | 409  | >NOTCH1-V1 RELDPMDIR  | 418   | 9     |
| >NOTCH1-V1 RRELDPMDV  | 218  | >NOTCH1-V1 RRELDPMDIR | 165   | 53    |
| >NOTCH1-V1 RRELDPMDV  | 161  | >NOTCH1-V1 RRELDPMDI  | 104   | 57    |
| >NOTCH1-V1 RRELDPMDV  | 576  | >NOTCH1-V1 RRELDPMDIR | 427   | 149   |
| >NOTCH1-V1 RRELDPMDV  | 267  | >NOTCH1-V1 RRELDPMDI  | 139   | 128   |
| >NOTCH1-V1 RRELDPMDV  | 509  | >NOTCH1-V1 RRELDPMDIR | 414   | 95    |
| >NOTCH1-V1 RRRELDPMD' | 363  | >NOTCH1-V1 RRRELDPMDI | 280   | 83    |
| >NOTCH1-V1 RRRELDPMD' | 34   | >NOTCH1-V1 RRRELDPMDI | 16    | 18    |
| >NOTCH1-V1 RRRELDPMD' | 285  | >NOTCH1-V1 RRRELDPMDI | 378   | 93    |
| >NOTCH1-V1 RRRELDPMD' | 34   | >NOTCH1-V1 RRRELDPMDI | 24    | 10    |
| >NOTCH1-V1 RRRELDPMD' | 213  | >NOTCH1-V1 RRRELDPMDI | 226   | 13    |
| >NOTCH1-V1 RRRELDPMD' | 29   | >NOTCH1-V1 RRRELDPMDI | 20    | 9     |
| >NOTCH1-V1 VYLEIDNRQC | 428  | >NOTCH1-V1 DYLEIDNRQC | 6073  | 5645  |
| >NOTCH1-V1 VYLEIDNRQC | 294  | >NOTCH1-V1 DYLEIDNRQC | 9582  | 9288  |
| >NOTCH1-V1 VYLEIDNR   | 286  | >NOTCH1-V1 DYLEIDNR   | 3578  | 3292  |
| >NOTCH1-V1 VYLEIDNR   | 120  | >NOTCH1-V1 DYLEIDNR   | 11    | 109   |
| >NOTCH1-V1 VYLEIDNR   | 2451 | >NOTCH1-V1 DYLEIDNR   | 345   | 2106  |
| >NOTCH1-V1 VYLEIDNR   | 43   | >NOTCH1-V1 DYLEIDNR   | 81    | 38    |
| >NOTCH1-V1 IVYLEIDNR  | 353  | >NOTCH1-V1 IDYLEIDNR  | 25337 | 24984 |
| >NOTCH1-V1 IVYLEIDNR  | 39   | >NOTCH1-V1 IDYLEIDNR  | 2686  | 2647  |

|                        |      |                        |       |       |
|------------------------|------|------------------------|-------|-------|
| >NOTCH1-V1 IVYLEIDNR   | 195  | >NOTCH1-V1 IDYLEIDNR   | 757   | 562   |
| >NOTCH1-V1 SIVYLEIDNR  | 491  | >NOTCH1-V1 SIDYLEIDNR  | 1189  | 698   |
| >NOTCH1-V1 SIVYLEIDNR  | 33   | >NOTCH1-V1 SIDYLEIDNR  | 274   | 241   |
| >NOTCH1-V1 SIVYLEIDNR  | 272  | >NOTCH1-V1 SIDYLEIDNR  | 1441  | 1169  |
| >NOTCH1-V1 GSIVYLEIDNR | 263  | >NOTCH1-V1 GSIDYLEIDNF | 400   | 137   |
| >NOTCH1-V1 GSIVYLEIDNR | 215  | >NOTCH1-V1 GSIDYLEIDNF | 100   | 115   |
| >NOTCH1-V1 GSIVYLEI    | 266  | >NOTCH1-V1 GSIDYLEI    | 175   | 91    |
| >NOTCH1-V1 GSIVYLEIDNR | 170  | >NOTCH1-V1 GSIDYLEIDNF | 196   | 26    |
| >NOTCH1-V1 GSIVYLEI    | 240  | >NOTCH1-V1 GSIDYLEI    | 184   | 56    |
| >NOTCH1-V1 RGSIVYLEI   | 321  | >NOTCH1-V1 RGSIDYLEI   | 3861  | 3540  |
| >NOTCH1-V1 RGSIVYLEI   | 213  | >NOTCH1-V1 RGSIDYLEI   | 269   | 56    |
| >NOTCH1-V1 VRGSIVYL    | 446  | >NOTCH1-V1 VRGSIDYL    | 2630  | 2184  |
| >NOTCH1-V1 VRGSIVYLEI  | 401  | >NOTCH1-V1 VRGSIDYLEI  | 1568  | 1167  |
| >NOTCH1-V1 DVRGSIVY    | 151  | >NOTCH1-V1 DVRGSIDY    | 354   | 203   |
| >NOTCH1-V1 DVRGSIVY    | 27   | >NOTCH1-V1 DVRGSIDY    | 41    | 14    |
| >NOTCH1-V1 DVRGSIVYL   | 80   | >NOTCH1-V1 DVRGSIDYL   | 48    | 32    |
| >NOTCH1-V1 DVRGSIVY    | 50   | >NOTCH1-V1 DVRGSIDY    | 40    | 10    |
| >NOTCH1-V1 DVRGSIVYL   | 390  | >NOTCH1-V1 DVRGSIDYL   | 856   | 466   |
| >NOTCH1-V1 DVRGSIVY    | 491  | >NOTCH1-V1 DVRGSIDY    | 1424  | 933   |
| >NOTCH1-V1 MDVRGSIVY   | 1344 | >NOTCH1-V1 MDVRGSIDY   | 499   | 845   |
| >NOTCH1-V1 MDVRGSIVY   | 70   | >NOTCH1-V1 MDVRGSIDY   | 244   | 174   |
| >NOTCH1-V1 PMDVRGSIVY  | 85   | >NOTCH1-V1 PMDVRGSIDY  | 121   | 36    |
| >NOTCH1-V1 PMDVRGSIVY  | 221  | >NOTCH1-V1 PMDVRGSIDY  | 25958 | 25737 |
| >NOTCH1-V1 PMDVRGSIVY  | 150  | >NOTCH1-V1 PMDVRGSIDY  | 223   | 73    |
| >NOTCH1-V1 PMDVRGSIVY  | 284  | >NOTCH1-V1 PMDVRGSIDY  | 343   | 59    |
| >NOTCH1-V1 PMDVRGSIVY  | 97   | >NOTCH1-V1 PMDVRGSIDY  | 34726 | 34629 |
| >NOTCH1-V1 PMDVRGSIVY  | 138  | >NOTCH1-V1 PMDVRGSIDY  | 345   | 207   |
| >NOTCH1-V1 DPMDVRGSIVY | 121  | >NOTCH1-V1 DPMDVRGSII  | 5421  | 5300  |
| >NOTCH1-V1 DPMDVRGSIVY | 123  | >NOTCH1-V1 DPMDVRGSII  | 317   | 194   |
| >NOTCH1-V1 DPMDVRGSIVY | 15   | >NOTCH1-V1 DPMDVRGSII  | 26    | 11    |
| >NOTCH1-V1 DPMDVRGSIVY | 424  | >NOTCH1-V1 DPMDVRGSII  | 542   | 118   |
| >NOTCH1-V1 DPMDVRGSIVY | 140  | >NOTCH1-V1 DPMDVRGSII  | 4409  | 4269  |
| >NOTCH1-V1 DPMDVRGSIVY | 63   | >NOTCH1-V1 DPMDVRGSII  | 589   | 526   |
| >NOTCH1-V1 VYLEIDNRQC  | 428  | >NOTCH1-V1 HYLEIDNRQC  | 1308  | 880   |
| >NOTCH1-V1 VYLEIDNRQC  | 294  | >NOTCH1-V1 HYLEIDNRQC  | 1064  | 770   |
| >NOTCH1-V1 VYLEIDNR    | 1002 | >NOTCH1-V1 HYLEIDNR    | 499   | 503   |
| >NOTCH1-V1 VYLEIDNR    | 286  | >NOTCH1-V1 HYLEIDNR    | 71    | 215   |
| >NOTCH1-V1 VYLEIDNR    | 120  | >NOTCH1-V1 HYLEIDNR    | 22    | 98    |
| >NOTCH1-V1 VYLEIDNR    | 2451 | >NOTCH1-V1 HYLEIDNR    | 369   | 2082  |
| >NOTCH1-V1 VYLEIDNR    | 43   | >NOTCH1-V1 HYLEIDNR    | 13    | 30    |
| >NOTCH1-V1 IVYLEIDNR   | 353  | >NOTCH1-V1 IHYLEIDNR   | 25476 | 25123 |
| >NOTCH1-V1 IVYLEIDNR   | 39   | >NOTCH1-V1 IHYLEIDNR   | 2615  | 2576  |
| >NOTCH1-V1 IVYLEIDNR   | 195  | >NOTCH1-V1 IHYLEIDNR   | 319   | 124   |

|                        |       |                        |       |       |
|------------------------|-------|------------------------|-------|-------|
| >NOTCH1-V1 SIVYLEIDNR  | 491   | >NOTCH1-V1 SIHYLEIDNR  | 1458  | 967   |
| >NOTCH1-V1 SIVYLEIDNR  | 33    | >NOTCH1-V1 SIHYLEIDNR  | 99    | 66    |
| >NOTCH1-V1 SIVYLEIDNR  | 272   | >NOTCH1-V1 SIHYLEIDNR  | 285   | 13    |
| >NOTCH1-V1 GSIVYLEIDNR | 263   | >NOTCH1-V1 GSIHYLEIDNF | 334   | 71    |
| >NOTCH1-V1 GSIVYLEIDNR | 215   | >NOTCH1-V1 GSIHYLEIDNF | 207   | 8     |
| >NOTCH1-V1 GSIVYLEI    | 266   | >NOTCH1-V1 GSIHYLEI    | 179   | 87    |
| >NOTCH1-V1 GSIVYLEIDNR | 170   | >NOTCH1-V1 GSIHYLEIDNF | 145   | 25    |
| >NOTCH1-V1 GSIVYLEI    | 240   | >NOTCH1-V1 GSIHYLEI    | 238   | 2     |
| >NOTCH1-V1 RGSIVYLEI   | 321   | >NOTCH1-V1 RGSIHYLEI   | 2837  | 2516  |
| >NOTCH1-V1 RGSIVYLEI   | 213   | >NOTCH1-V1 RGSIHYLEI   | 244   | 31    |
| >NOTCH1-V1 VRGSIVYL    | 968   | >NOTCH1-V1 VRGSIHYL    | 373   | 595   |
| >NOTCH1-V1 VRGSIVYL    | 446   | >NOTCH1-V1 VRGSIHYL    | 320   | 126   |
| >NOTCH1-V1 VRGSIVYLEI  | 401   | >NOTCH1-V1 VRGSIHYLEI  | 717   | 316   |
| >NOTCH1-V1 DVRGSIVYL   | 1772  | >NOTCH1-V1 DVRGSIHYL   | 452   | 1320  |
| >NOTCH1-V1 DVRGSIVY    | 151   | >NOTCH1-V1 DVRGSIHY    | 152   | 1     |
| >NOTCH1-V1 DVRGSIVY    | 27    | >NOTCH1-V1 DVRGSIHY    | 12    | 15    |
| >NOTCH1-V1 DVRGSIVYL   | 80    | >NOTCH1-V1 DVRGSIHYL   | 28    | 52    |
| >NOTCH1-V1 DVRGSIVY    | 50    | >NOTCH1-V1 DVRGSIHY    | 42    | 8     |
| >NOTCH1-V1 DVRGSIVYL   | 867   | >NOTCH1-V1 DVRGSIHYL   | 380   | 487   |
| >NOTCH1-V1 DVRGSIVY    | 1305  | >NOTCH1-V1 DVRGSIHY    | 453   | 852   |
| >NOTCH1-V1 DVRGSIVYL   | 390   | >NOTCH1-V1 DVRGSIHYL   | 252   | 138   |
| >NOTCH1-V1 DVRGSIVY    | 491   | >NOTCH1-V1 DVRGSIHY    | 2904  | 2413  |
| >NOTCH1-V1 MDVRGSIVY   | 1344  | >NOTCH1-V1 MDVRGSIHY   | 405   | 939   |
| >NOTCH1-V1 MDVRGSIVY   | 70    | >NOTCH1-V1 MDVRGSIHY   | 582   | 512   |
| >NOTCH1-V1 PMDVRGSIV\  | 892   | >NOTCH1-V1 PMDVRGSIH\  | 291   | 601   |
| >NOTCH1-V1 PMDVRGSIV\  | 85    | >NOTCH1-V1 PMDVRGSIH\  | 56    | 29    |
| >NOTCH1-V1 PMDVRGSIV\  | 555   | >NOTCH1-V1 PMDVRGSIH\  | 269   | 286   |
| >NOTCH1-V1 PMDVRGSIV   | 221   | >NOTCH1-V1 PMDVRGSIH   | 26513 | 26292 |
| >NOTCH1-V1 PMDVRGSIV\  | 150   | >NOTCH1-V1 PMDVRGSIH\  | 106   | 44    |
| >NOTCH1-V1 PMDVRGSIV\  | 284   | >NOTCH1-V1 PMDVRGSIH\  | 108   | 176   |
| >NOTCH1-V1 PMDVRGSIV   | 97    | >NOTCH1-V1 PMDVRGSIH   | 33623 | 33526 |
| >NOTCH1-V1 PMDVRGSIV\  | 138   | >NOTCH1-V1 PMDVRGSIH\  | 68    | 70    |
| >NOTCH1-V1 DPMDVRGSIV  | 121   | >NOTCH1-V1 DPMDVRGSII  | 4751  | 4630  |
| >NOTCH1-V1 DPMDVRGSIV  | 123   | >NOTCH1-V1 DPMDVRGSII  | 278   | 155   |
| >NOTCH1-V1 DPMDVRGSIV  | 15    | >NOTCH1-V1 DPMDVRGSII  | 47    | 32    |
| >NOTCH1-V1 DPMDVRGSIV  | 424   | >NOTCH1-V1 DPMDVRGSII  | 449   | 25    |
| >NOTCH1-V1 DPMDVRGSIV  | 140   | >NOTCH1-V1 DPMDVRGSII  | 7771  | 7631  |
| >NOTCH1-V1 DPMDVRGSIV  | 63    | >NOTCH1-V1 DPMDVRGSII  | 618   | 555   |
| >NOTCH1-V1 AVQSETVE    | 39147 | >NOTCH1-V1 AEQSETVE    | 474   | 38673 |
| >NOTCH1-V1 SLNIPYKIEAV | 328   | >NOTCH1-V1 SLNIPYKIEAE | 24476 | 24148 |
| >NOTCH1-V1 SLNIPYKIEAV | 37    | >NOTCH1-V1 SLNIPYKIEAE | 13181 | 13144 |
| >NOTCH1-V1 SLNIPYKIEAV | 11    | >NOTCH1-V1 SLNIPYKIEAE | 17087 | 17076 |
| >NOTCH1-V1 SLNIPYKIEAV | 3     | >NOTCH1-V1 SLNIPYKIEAE | 7934  | 7931  |

|                       |      |                       |       |       |
|-----------------------|------|-----------------------|-------|-------|
| >NOTCH1-V1SLNIPYKIEAV | 28   | >NOTCH1-V1SLNIPYKIEAE | 23274 | 23246 |
| >NOTCH1-V1SLNIPYKIEAV | 13   | >NOTCH1-V1SLNIPYKIEAE | 20436 | 20423 |
| >NOTCH1-V1SLNIPYKIEAV | 159  | >NOTCH1-V1SLNIPYKIEAE | 26941 | 26782 |
| >NOTCH1-V1SLNIPYKIEAV | 4    | >NOTCH1-V1SLNIPYKIEAE | 14701 | 14697 |
| >NOTCH1-V1EAVQSETV    | 48   | >NOTCH1-V1EAEQSETV    | 1397  | 1349  |
| >NOTCH1-V1EAVQSETV    | 60   | >NOTCH1-V1EAEQSETV    | 673   | 613   |
| >NOTCH1-V1IEAVQSETV   | 42   | >NOTCH1-V1IEAEQSETV   | 29    | 13    |
| >NOTCH1-V1IEAVQSETV   | 3658 | >NOTCH1-V1IEAEQSETV   | 359   | 3299  |
| >NOTCH1-V1IEAVQSETV   | 455  | >NOTCH1-V1IEAEQSETV   | 180   | 275   |
| >NOTCH1-V1IEAVQSETV   | 23   | >NOTCH1-V1IEAEQSETV   | 14    | 9     |
| >NOTCH1-V1KIEAVQSETV  | 100  | >NOTCH1-V1KIEAEQSETV  | 233   | 133   |
| >NOTCH1-V1KIEAVQSETV  | 435  | >NOTCH1-V1KIEAEQSETV  | 364   | 71    |
| >NOTCH1-V1KIEAVQSETV  | 394  | >NOTCH1-V1KIEAEQSETV  | 960   | 566   |
| >NOTCH1-V1KIEAVQSETV  | 44   | >NOTCH1-V1KIEAEQSETV  | 36    | 8     |
| >NOTCH1-V1YKIEAVQSET\ | 42   | >NOTCH1-V1YKIEAEQSET\ | 82    | 40    |
| >NOTCH1-V1YKIEAVQSET\ | 62   | >NOTCH1-V1YKIEAEQSET\ | 104   | 42    |
| >NOTCH1-V1YKIEAVQSET\ | 122  | >NOTCH1-V1YKIEAEQSET\ | 167   | 45    |
| >NOTCH1-V1YKIEAVQSET\ | 269  | >NOTCH1-V1YKIEAEQSET\ | 349   | 80    |
| >NOTCH1-V1YKIEAVQSET\ | 103  | >NOTCH1-V1YKIEAEQSET\ | 126   | 23    |
| >NOTCH1-V1YKIEAVQSE   | 488  | >NOTCH1-V1YKIEAEQSE   | 1652  | 1164  |
| >NOTCH1-V1YKIEAVQSET  | 298  | >NOTCH1-V1YKIEAEQSET  | 496   | 198   |
| >NOTCH1-V1YKIEAVQSET\ | 20   | >NOTCH1-V1YKIEAEQSET\ | 29    | 9     |
| >NOTCH1-V1YKIEAVQSET\ | 208  | >NOTCH1-V1YKIEAEQSET\ | 322   | 114   |
| >NOTCH1-V1IPYKIEAV    | 243  | >NOTCH1-V1IPYKIEAE    | 34967 | 34724 |
| >NOTCH1-V1IPYKIEAV    | 150  | >NOTCH1-V1IPYKIEAE    | 15075 | 14925 |
| >NOTCH1-V1IPYKIEAVQ   | 440  | >NOTCH1-V1IPYKIEAEQ   | 410   | 30    |
| >NOTCH1-V1IPYKIEAV    | 149  | >NOTCH1-V1IPYKIEAE    | 13406 | 13257 |
| >NOTCH1-V1IPYKIEAV    | 29   | >NOTCH1-V1IPYKIEAE    | 780   | 751   |
| >NOTCH1-V1IPYKIEAVQ   | 364  | >NOTCH1-V1IPYKIEAEQ   | 848   | 484   |
| >NOTCH1-V1NIPYKIEAV   | 475  | >NOTCH1-V1NIPYKIEAE   | 27907 | 27432 |
| >NOTCH1-V1NIPYKIEAV   | 98   | >NOTCH1-V1NIPYKIEAE   | 23530 | 23432 |
| >NOTCH1-V1NIPYKIEAV   | 144  | >NOTCH1-V1NIPYKIEAE   | 26096 | 25952 |
| >NOTCH1-V1NIPYKIEAV   | 348  | >NOTCH1-V1NIPYKIEAE   | 30644 | 30296 |
| >NOTCH1-V1NIPYKIEAV   | 16   | >NOTCH1-V1NIPYKIEAE   | 18747 | 18731 |
| >NOTCH1-V1LNIPYKIEAV  | 456  | >NOTCH1-V1LNIPYKIEAE  | 25652 | 25196 |
| >NOTCH1-V1SLNIPYKIEAV | 328  | >NOTCH1-V1SLNIPYKIEAG | 22978 | 22650 |
| >NOTCH1-V1SLNIPYKIEAV | 37   | >NOTCH1-V1SLNIPYKIEAG | 6820  | 6783  |
| >NOTCH1-V1SLNIPYKIEAV | 11   | >NOTCH1-V1SLNIPYKIEAG | 8902  | 8891  |
| >NOTCH1-V1SLNIPYKIEAV | 3    | >NOTCH1-V1SLNIPYKIEAG | 2550  | 2547  |
| >NOTCH1-V1SLNIPYKIEAV | 28   | >NOTCH1-V1SLNIPYKIEAG | 18329 | 18301 |
| >NOTCH1-V1SLNIPYKIEAV | 13   | >NOTCH1-V1SLNIPYKIEAG | 15881 | 15868 |
| >NOTCH1-V1SLNIPYKIEAV | 159  | >NOTCH1-V1SLNIPYKIEAG | 26034 | 25875 |
| >NOTCH1-V1SLNIPYKIEAV | 4    | >NOTCH1-V1SLNIPYKIEAG | 14272 | 14268 |

|                        |      |                        |       |       |
|------------------------|------|------------------------|-------|-------|
| >NOTCH1-V1 EAVQSETV    | 48   | >NOTCH1-V1 EAGQSETV    | 669   | 621   |
| >NOTCH1-V1 EAVQSETV    | 60   | >NOTCH1-V1 EAGQSETV    | 188   | 128   |
| >NOTCH1-V1 IEAVQSETV   | 42   | >NOTCH1-V1 IEAGQSETV   | 92    | 50    |
| >NOTCH1-V1 IEAVQSETV   | 455  | >NOTCH1-V1 IEAGQSETV   | 75    | 380   |
| >NOTCH1-V1 IEAVQSETV   | 23   | >NOTCH1-V1 IEAGQSETV   | 69    | 46    |
| >NOTCH1-V1 KIEAVQSETV  | 100  | >NOTCH1-V1 KIEAGQSETV  | 158   | 58    |
| >NOTCH1-V1 KIEAVQSETV  | 435  | >NOTCH1-V1 KIEAGQSETV  | 448   | 13    |
| >NOTCH1-V1 KIEAVQSETV  | 394  | >NOTCH1-V1 KIEAGQSETV  | 530   | 136   |
| >NOTCH1-V1 KIEAVQSETV  | 44   | >NOTCH1-V1 KIEAGQSETV  | 17    | 27    |
| >NOTCH1-V1 YKIEAVQSETV | 42   | >NOTCH1-V1 YKIEAGQSETV | 68    | 26    |
| >NOTCH1-V1 YKIEAVQSETV | 62   | >NOTCH1-V1 YKIEAGQSETV | 85    | 23    |
| >NOTCH1-V1 YKIEAVQSETV | 122  | >NOTCH1-V1 YKIEAGQSETV | 197   | 75    |
| >NOTCH1-V1 YKIEAVQSETV | 269  | >NOTCH1-V1 YKIEAGQSETV | 422   | 153   |
| >NOTCH1-V1 YKIEAVQSETV | 103  | >NOTCH1-V1 YKIEAGQSETV | 123   | 20    |
| >NOTCH1-V1 YKIEAVQSE   | 488  | >NOTCH1-V1 YKIEAGQSE   | 400   | 88    |
| >NOTCH1-V1 YKIEAVQSET  | 298  | >NOTCH1-V1 YKIEAGQSET  | 250   | 48    |
| >NOTCH1-V1 YKIEAVQSETV | 20   | >NOTCH1-V1 YKIEAGQSETV | 23    | 3     |
| >NOTCH1-V1 YKIEAVQSETV | 208  | >NOTCH1-V1 YKIEAGQSETV | 267   | 59    |
| >NOTCH1-V1 IPYKIEAV    | 243  | >NOTCH1-V1 IPYKIEAG    | 30629 | 30386 |
| >NOTCH1-V1 IPYKIEAV    | 150  | >NOTCH1-V1 IPYKIEAG    | 19286 | 19136 |
| >NOTCH1-V1 IPYKIEAVQ   | 440  | >NOTCH1-V1 IPYKIEAGQ   | 1632  | 1192  |
| >NOTCH1-V1 IPYKIEAV    | 149  | >NOTCH1-V1 IPYKIEAG    | 9778  | 9629  |
| >NOTCH1-V1 IPYKIEAV    | 29   | >NOTCH1-V1 IPYKIEAG    | 235   | 206   |
| >NOTCH1-V1 IPYKIEAVQ   | 364  | >NOTCH1-V1 IPYKIEAGQ   | 1320  | 956   |
| >NOTCH1-V1 NIPYKIEAV   | 475  | >NOTCH1-V1 NIPYKIEAG   | 20232 | 19757 |
| >NOTCH1-V1 NIPYKIEAV   | 98   | >NOTCH1-V1 NIPYKIEAG   | 19744 | 19646 |
| >NOTCH1-V1 NIPYKIEAV   | 144  | >NOTCH1-V1 NIPYKIEAG   | 21821 | 21677 |
| >NOTCH1-V1 NIPYKIEAV   | 348  | >NOTCH1-V1 NIPYKIEAG   | 27495 | 27147 |
| >NOTCH1-V1 NIPYKIEAV   | 16   | >NOTCH1-V1 NIPYKIEAG   | 5786  | 5770  |
| >NOTCH1-V1 LNIPYKIEAV  | 456  | >NOTCH1-V1 LNIPYKIEAG  | 22784 | 22328 |
| >NOTCH1-V1 VQSETVEPP   | 1044 | >NOTCH1-V1 MQSETVEPP   | 209   | 835   |
| >NOTCH1-V1 VQSETVEPP   | 1161 | >NOTCH1-V1 MQSETVEPP   | 349   | 812   |
| >NOTCH1-V1 VQSETVEPPP  | 1657 | >NOTCH1-V1 MQSETVEPPI  | 467   | 1190  |
| >NOTCH1-V1 SLNIPYKIEAV | 328  | >NOTCH1-V1 SLNIPYKIEAN | 4853  | 4525  |
| >NOTCH1-V1 SLNIPYKIEAV | 37   | >NOTCH1-V1 SLNIPYKIEAN | 505   | 468   |
| >NOTCH1-V1 SLNIPYKIEAV | 11   | >NOTCH1-V1 SLNIPYKIEAN | 786   | 775   |
| >NOTCH1-V1 SLNIPYKIEAV | 3    | >NOTCH1-V1 SLNIPYKIEAN | 93    | 90    |
| >NOTCH1-V1 SLNIPYKIEAV | 28   | >NOTCH1-V1 SLNIPYKIEAN | 2535  | 2507  |
| >NOTCH1-V1 SLNIPYKIEAV | 13   | >NOTCH1-V1 SLNIPYKIEAN | 2103  | 2090  |
| >NOTCH1-V1 SLNIPYKIEAV | 159  | >NOTCH1-V1 SLNIPYKIEAN | 6458  | 6299  |
| >NOTCH1-V1 SLNIPYKIEAV | 4    | >NOTCH1-V1 SLNIPYKIEAN | 547   | 543   |
| >NOTCH1-V1 EAVQSETV    | 48   | >NOTCH1-V1 EAMQSETV    | 20    | 28    |
| >NOTCH1-V1 EAVQSETV    | 60   | >NOTCH1-V1 EAMQSETV    | 18    | 42    |

|                        |       |                       |       |       |
|------------------------|-------|-----------------------|-------|-------|
| >NOTCH1-V1 IEAVQSETV   | 42    | >NOTCH1-V1 IEAMQSETV  | 20    | 22    |
| >NOTCH1-V1 IEAVQSETV   | 455   | >NOTCH1-V1 IEAMQSETV  | 227   | 228   |
| >NOTCH1-V1 IEAVQSETV   | 23    | >NOTCH1-V1 IEAMQSETV  | 38    | 15    |
| >NOTCH1-V1 KIEAVQSETV  | 100   | >NOTCH1-V1 KIEAMQSETV | 368   | 268   |
| >NOTCH1-V1 KIEAVQSETV  | 435   | >NOTCH1-V1 KIEAMQSETV | 669   | 234   |
| >NOTCH1-V1 KIEAVQSETV  | 394   | >NOTCH1-V1 KIEAMQSETV | 1095  | 701   |
| >NOTCH1-V1 KIEAVQSETV  | 44    | >NOTCH1-V1 KIEAMQSETV | 29    | 15    |
| >NOTCH1-V1 YKIEAVQSETV | 42    | >NOTCH1-V1 YKIEAMQSET | 38    | 4     |
| >NOTCH1-V1 YKIEAVQSETV | 62    | >NOTCH1-V1 YKIEAMQSET | 105   | 43    |
| >NOTCH1-V1 YKIEAVQSETV | 122   | >NOTCH1-V1 YKIEAMQSET | 200   | 78    |
| >NOTCH1-V1 YKIEAVQSETV | 269   | >NOTCH1-V1 YKIEAMQSET | 495   | 226   |
| >NOTCH1-V1 YKIEAVQSETV | 103   | >NOTCH1-V1 YKIEAMQSET | 143   | 40    |
| >NOTCH1-V1 YKIEAVQSE   | 488   | >NOTCH1-V1 YKIEAMQSE  | 1121  | 633   |
| >NOTCH1-V1 YKIEAVQSET  | 298   | >NOTCH1-V1 YKIEAMQSET | 457   | 159   |
| >NOTCH1-V1 YKIEAVQSETV | 20    | >NOTCH1-V1 YKIEAMQSET | 26    | 6     |
| >NOTCH1-V1 YKIEAVQSETV | 208   | >NOTCH1-V1 YKIEAMQSET | 250   | 42    |
| >NOTCH1-V1 IPYKIEAV    | 243   | >NOTCH1-V1 IPYKIEAM   | 27    | 216   |
| >NOTCH1-V1 IPYKIEAV    | 150   | >NOTCH1-V1 IPYKIEAM   | 28    | 122   |
| >NOTCH1-V1 IPYKIEAV    | 831   | >NOTCH1-V1 IPYKIEAM   | 14    | 817   |
| >NOTCH1-V1 IPYKIEAVQ   | 440   | >NOTCH1-V1 IPYKIEAMQ  | 1427  | 987   |
| >NOTCH1-V1 IPYKIEAV    | 149   | >NOTCH1-V1 IPYKIEAM   | 715   | 566   |
| >NOTCH1-V1 IPYKIEAV    | 665   | >NOTCH1-V1 IPYKIEAM   | 111   | 554   |
| >NOTCH1-V1 IPYKIEAV    | 29    | >NOTCH1-V1 IPYKIEAM   | 1487  | 1458  |
| >NOTCH1-V1 IPYKIEAVQ   | 364   | >NOTCH1-V1 IPYKIEAMQ  | 619   | 255   |
| >NOTCH1-V1 IPYKIEAV    | 1262  | >NOTCH1-V1 IPYKIEAM   | 181   | 1081  |
| >NOTCH1-V1 IPYKIEAV    | 644   | >NOTCH1-V1 IPYKIEAM   | 203   | 441   |
| >NOTCH1-V1 NIPYKIEAV   | 475   | >NOTCH1-V1 NIPYKIEAM  | 5760  | 5285  |
| >NOTCH1-V1 NIPYKIEAV   | 98    | >NOTCH1-V1 NIPYKIEAM  | 6416  | 6318  |
| >NOTCH1-V1 NIPYKIEAV   | 144   | >NOTCH1-V1 NIPYKIEAM  | 5141  | 4997  |
| >NOTCH1-V1 NIPYKIEAV   | 348   | >NOTCH1-V1 NIPYKIEAM  | 10256 | 9908  |
| >NOTCH1-V1 NIPYKIEAV   | 10371 | >NOTCH1-V1 NIPYKIEAM  | 370   | 10001 |
| >NOTCH1-V1 NIPYKIEAV   | 16    | >NOTCH1-V1 NIPYKIEAM  | 776   | 760   |
| >NOTCH1-V1 LNIPYKIEAV  | 456   | >NOTCH1-V1 LNIPYKIEAM | 6509  | 6053  |
| >NOTCH1-V2 VLGSSSGGAL  | 198   | >NOTCH1-V2 ILGSSSGGAL | 65    | 133   |
| >NOTCH1-V2 VLGSSSGGA   | 68    | >NOTCH1-V2 ILGSSSGGA  | 51    | 17    |
| >NOTCH1-V2 VLGSSSGGAL  | 320   | >NOTCH1-V2 ILGSSSGGAL | 108   | 212   |
| >NOTCH1-V2 VLGSSSGGA   | 142   | >NOTCH1-V2 ILGSSSGGA  | 175   | 33    |
| >NOTCH1-V2 VLGSSSGGAL  | 40    | >NOTCH1-V2 ILGSSSGGAL | 50    | 10    |
| >NOTCH1-V2 VLGSSSGGAL  | 133   | >NOTCH1-V2 ILGSSSGGAL | 214   | 81    |
| >NOTCH1-V2 VLGSSSGGA   | 372   | >NOTCH1-V2 ILGSSSGGA  | 857   | 485   |
| >NOTCH1-V2 VLGSSSGGAL  | 423   | >NOTCH1-V2 ILGSSSGGAL | 867   | 444   |
| >NOTCH1-V2 VLGSSSGGA   | 54    | >NOTCH1-V2 ILGSSSGGA  | 77    | 23    |
| >NOTCH1-V2 VLGSSSGGAL  | 27    | >NOTCH1-V2 ILGSSSGGAL | 36    | 9     |



|                        |      |                        |      |      |
|------------------------|------|------------------------|------|------|
| >NOTCH1-V2 VLGSSSGGAL  | 488  | >NOTCH1-V2 ILGSSSGGAL  | 338  | 150  |
| >NOTCH1-V2 TVLGSSSGGA  | 261  | >NOTCH1-V2 TILGSSSGGA  | 135  | 126  |
| >NOTCH1-V2 TVLGSSSGGA  | 485  | >NOTCH1-V2 TILGSSSGGAL | 2161 | 1676 |
| >NOTCH1-V2 TVLGSSSGGA  | 170  | >NOTCH1-V2 TILGSSSGGA  | 367  | 197  |
| >NOTCH1-V2 TVLGSSSGGA  | 170  | >NOTCH1-V2 TILGSSSGGAL | 367  | 197  |
| >NOTCH1-V2 TVLGSSSGGA  | 495  | >NOTCH1-V2 TILGSSSGGAL | 1852 | 1357 |
| >NOTCH1-V2 TVLGSSSGGA  | 490  | >NOTCH1-V2 TILGSSSGGAL | 403  | 87   |
| >NOTCH1-V2 HLPVASGTST  | 128  | >NOTCH1-V2 HLPVASGTST  | 657  | 529  |
| >NOTCH1-V2 HLPVASGTST  | 14   | >NOTCH1-V2 HLPVASGTST  | 58   | 44   |
| >NOTCH1-V2 HLPVASGTST  | 278  | >NOTCH1-V2 HLPVASGTST  | 2055 | 1777 |
| >NOTCH1-V2 HLPVASGTST  | 25   | >NOTCH1-V2 HLPVASGTST  | 340  | 315  |
| >NOTCH1-V2 HLPVASGTST  | 18   | >NOTCH1-V2 HLPVASGTST  | 160  | 142  |
| >NOTCH1-V2 HLPVASGTST  | 16   | >NOTCH1-V2 HLPVASGTST  | 319  | 303  |
| >NOTCH1-V2 HLPVASGTST  | 46   | >NOTCH1-V2 HLPVASGTST  | 1385 | 1339 |
| >NOTCH1-V2 HLPVASGTST  | 4    | >NOTCH1-V2 HLPVASGTST  | 71   | 67   |
| >NOTCH1-V2 HLPVASGTST  | 270  | >NOTCH1-V2 HLPVASGTST  | 1577 | 1307 |
| >NOTCH1-V2 STVLGSSSGG  | 191  | >NOTCH1-V2 STILGSSSGG  | 103  | 88   |
| >NOTCH1-V2 STVLGSSSG   | 344  | >NOTCH1-V2 STILGSSSG   | 505  | 161  |
| >NOTCH1-V2 GTSTVLGSSSG | 317  | >NOTCH1-V2 GTSTILGSSSG | 281  | 36   |
| >NOTCH1-V2 ASGTSTVL    | 114  | >NOTCH1-V2 ASGTSTIL    | 209  | 95   |
| >NOTCH1-V2 ASGTSTVL    | 448  | >NOTCH1-V2 ASGTSTIL    | 827  | 379  |
| >NOTCH1-V2 VASGTSTV    | 192  | >NOTCH1-V2 VASGTSTI    | 1377 | 1185 |
| >NOTCH1-V2 VASGTSTV    | 351  | >NOTCH1-V2 VASGTSTI    | 2214 | 1863 |
| >NOTCH1-V2 VASGTSTV    | 245  | >NOTCH1-V2 VASGTSTI    | 3453 | 3208 |
| >NOTCH1-V2 VASGTSTV    | 17   | >NOTCH1-V2 VASGTSTI    | 3534 | 3517 |
| >NOTCH1-V2 VASGTSTV    | 814  | >NOTCH1-V2 VASGTSTI    | 97   | 717  |
| >NOTCH1-V2 VASGTSTVL   | 54   | >NOTCH1-V2 VASGTSTIL   | 137  | 83   |
| >NOTCH1-V2 VASGTSTVL   | 613  | >NOTCH1-V2 VASGTSTIL   | 353  | 260  |
| >NOTCH1-V2 VASGTSTVL   | 168  | >NOTCH1-V2 VASGTSTIL   | 191  | 23   |
| >NOTCH1-V2 VASGTSTV    | 7005 | >NOTCH1-V2 VASGTSTI    | 104  | 6901 |
| >NOTCH1-V2 PVASGTSTV   | 145  | >NOTCH1-V2 PVASGTSTI   | 1033 | 888  |
| >NOTCH1-V2 PVASGTSTV   | 268  | >NOTCH1-V2 PVASGTSTI   | 4723 | 4455 |
| >NOTCH1-V2 PVASGTSTV   | 35   | >NOTCH1-V2 PVASGTSTI   | 6227 | 6192 |
| >NOTCH1-V2 PVASGTSTV   | 390  | >NOTCH1-V2 PVASGTSTI   | 2305 | 1915 |
| >NOTCH1-V2 LPVASGTSTV  | 1561 | >NOTCH1-V2 LPVASGTSTI  | 250  | 1311 |
| >NOTCH1-V2 LPVASGTSTV  | 94   | >NOTCH1-V2 LPVASGTSTI  | 63   | 31   |
| >NOTCH1-V2 LPVASGTSTV  | 40   | >NOTCH1-V2 LPVASGTSTIL | 52   | 12   |
| >NOTCH1-V2 LPVASGTSTV  | 114  | >NOTCH1-V2 LPVASGTSTI  | 160  | 46   |
| >NOTCH1-V2 LPVASGTSTV  | 14   | >NOTCH1-V2 LPVASGTSTIL | 17   | 3    |
| >NOTCH1-V2 LPVASGTSTV  | 419  | >NOTCH1-V2 LPVASGTSTIL | 572  | 153  |
| >NOTCH1-V2 LPVASGTSTV  | 33   | >NOTCH1-V2 LPVASGTSTIL | 52   | 19   |
| >NOTCH1-V2 LPVASGTSTV  | 59   | >NOTCH1-V2 LPVASGTSTIL | 125  | 66   |
| >NOTCH1-V2 LPVASGTSTV  | 594  | >NOTCH1-V2 LPVASGTSTIL | 369  | 225  |

|                       |       |                        |      |      |
|-----------------------|-------|------------------------|------|------|
| >NOTCH1-V2 LPVASGTSTV | 878   | >NOTCH1-V2 LPVASGTSTI  | 419  | 459  |
| >NOTCH1-V2 LPVASGTSTV | 84    | >NOTCH1-V2 LPVASGTSTIL | 73   | 11   |
| >NOTCH1-V2 LPVASGTSTV | 184   | >NOTCH1-V2 LPVASGTSTI  | 1242 | 1058 |
| >NOTCH1-V2 LPVASGTSTV | 142   | >NOTCH1-V2 LPVASGTSTIL | 384  | 242  |
| >NOTCH1-V2 VSSAASGHL  | 4365  | >NOTCH1-V2 MSSAASGHL   | 417  | 3948 |
| >NOTCH1-V2 VSSAASGHLC | 600   | >NOTCH1-V2 MSSAASGHLC  | 234  | 366  |
| >NOTCH1-V2 VSSAASGHL  | 4258  | >NOTCH1-V2 MSSAASGHL   | 312  | 3946 |
| >NOTCH1-V2 VSSAASGHLC | 810   | >NOTCH1-V2 MSSAASGHLC  | 102  | 708  |
| >NOTCH1-V2 VSSAASGHLC | 304   | >NOTCH1-V2 MSSAASGHLC  | 10   | 294  |
| >NOTCH1-V2 VSSAASGHL  | 3940  | >NOTCH1-V2 MSSAASGHL   | 36   | 3904 |
| >NOTCH1-V2 VSSAASGHL  | 459   | >NOTCH1-V2 MSSAASGHL   | 219  | 240  |
| >NOTCH1-V2 VSSAASGH   | 362   | >NOTCH1-V2 MSSAASGH    | 186  | 176  |
| >NOTCH1-V2 VSSAASGHL  | 21    | >NOTCH1-V2 MSSAASGHL   | 13   | 8    |
| >NOTCH1-V2 VSSAASGHL  | 459   | >NOTCH1-V2 MSSAASGHL   | 89   | 370  |
| >NOTCH1-V2 VSSAASGHL  | 448   | >NOTCH1-V2 MSSAASGHL   | 656  | 208  |
| >NOTCH1-V2 VSSAASGHL  | 354   | >NOTCH1-V2 MSSAASGHL   | 90   | 264  |
| >NOTCH1-V2 GVSSAASGHI | 472   | >NOTCH1-V2 GMSSAASGH   | 39   | 433  |
| >NOTCH1-V2 GVSSAASGHI | 1158  | >NOTCH1-V2 GMSSAASGH   | 137  | 1021 |
| >NOTCH1-V2 GVSSAASGHI | 10160 | >NOTCH1-V2 GMSSAASGH   | 184  | 9976 |
| >NOTCH1-V2 GVSSAASGHI | 8473  | >NOTCH1-V2 GMSSAASGH   | 56   | 8417 |
| >NOTCH1-V2 GVSSAASGHI | 5270  | >NOTCH1-V2 GMSSAASGH   | 43   | 5227 |
| >NOTCH1-V2 GVSSAASGHI | 4618  | >NOTCH1-V2 GMSSAASGH   | 35   | 4583 |
| >NOTCH1-V2 GVSSAASGHI | 1705  | >NOTCH1-V2 GMSSAASGH   | 164  | 1541 |
| >NOTCH1-V2 GVSSAASGH  | 116   | >NOTCH1-V2 GMSSAASGH   | 1071 | 955  |
| >NOTCH1-V2 PPPPPQPHLC | 2531  | >NOTCH1-V2 PPPPPQPHLC  | 334  | 2197 |
| >NOTCH1-V2 LGVSSAASGH | 1480  | >NOTCH1-V2 LGMSSAASGI  | 479  | 1001 |
| >NOTCH1-V2 HLGVSSAA   | 422   | >NOTCH1-V2 HLMSSAA     | 433  | 11   |
| >NOTCH1-V2 HLGVSSAA   | 290   | >NOTCH1-V2 HLMSSAA     | 132  | 158  |
| >NOTCH1-V2 HLGVSSAA   | 206   | >NOTCH1-V2 HLMSSAA     | 251  | 45   |
| >NOTCH1-V2 HLGVSSAA   | 133   | >NOTCH1-V2 HLMSSAA     | 55   | 78   |
| >NOTCH1-V2 QPHLGVSSA  | 259   | >NOTCH1-V2 QPHLMSSA    | 120  | 139  |
| >NOTCH1-V2 QPHLGVSSA  | 674   | >NOTCH1-V2 QPHLMSSA    | 254  | 420  |
| >NOTCH1-V2 QPHLGVSSA/ | 50    | >NOTCH1-V2 QPHLMSSA    | 83   | 33   |
| >NOTCH1-V2 VQPLGPSSLA | 159   | >NOTCH1-V2 AQPLGPSSLA  | 108  | 51   |
| >NOTCH1-V2 VQPLGPSSL  | 719   | >NOTCH1-V2 AQPLGPSSL   | 488  | 231  |
| >NOTCH1-V2 VQPLGPSSLA | 29    | >NOTCH1-V2 AQPLGPSSLA  | 21   | 8    |
| >NOTCH1-V2 VQPLGPSSL  | 421   | >NOTCH1-V2 AQPLGPSSL   | 216  | 205  |
| >NOTCH1-V2 VQPLGPSSLA | 560   | >NOTCH1-V2 AQPLGPSSLA  | 326  | 234  |
| >NOTCH1-V2 FLSGEPSQAD | 22    | >NOTCH1-V2 FLSGEPSQAD  | 147  | 125  |
| >NOTCH1-V2 FLSGEPSQAD | 3     | >NOTCH1-V2 FLSGEPSQAD  | 8    | 5    |
| >NOTCH1-V2 FLSGEPSQAD | 3     | >NOTCH1-V2 FLSGEPSQAD  | 7    | 4    |
| >NOTCH1-V2 FLSGEPSQAD | 68    | >NOTCH1-V2 FLSGEPSQAD  | 817  | 749  |
| >NOTCH1-V2 FLSGEPSQAD | 3     | >NOTCH1-V2 FLSGEPSQAD  | 52   | 49   |

|                        |       |                        |      |       |
|------------------------|-------|------------------------|------|-------|
| >NOTCH1-V2 FLSGEPSQAD  | 8     | >NOTCH1-V2 FLSGEPSQAD  | 136  | 128   |
| >NOTCH1-V2 FLSGEPSQAD  | 6     | >NOTCH1-V2 FLSGEPSQAD  | 49   | 43    |
| >NOTCH1-V2 FLSGEPSQAD  | 4     | >NOTCH1-V2 FLSGEPSQAD  | 74   | 70    |
| >NOTCH1-V2 FLSGEPSQAD  | 1     | >NOTCH1-V2 FLSGEPSQAD  | 3    | 2     |
| >NOTCH1-V2 ADVQPLGPS   | 375   | >NOTCH1-V2 ADAQPLGPS   | 470  | 95    |
| >NOTCH1-V2 SQADVQPL    | 76    | >NOTCH1-V2 SQADAQPL    | 220  | 144   |
| >NOTCH1-V2 SQADVQPL    | 28    | >NOTCH1-V2 SQADAQPL    | 67   | 39    |
| >NOTCH1-V2 SQADVQPL    | 121   | >NOTCH1-V2 SQADAQPL    | 284  | 163   |
| >NOTCH1-V2 SQADVQPL    | 10    | >NOTCH1-V2 SQADAQPL    | 16   | 6     |
| >NOTCH1-V2 SQADVQPLG   | 266   | >NOTCH1-V2 SQADAQPLG   | 312  | 46    |
| >NOTCH1-V2 SQADVQPL    | 183   | >NOTCH1-V2 SQADAQPL    | 970  | 787   |
| >NOTCH1-V2 SQADVQPL    | 114   | >NOTCH1-V2 SQADAQPL    | 317  | 203   |
| >NOTCH1-V2 SQADVQPL    | 143   | >NOTCH1-V2 SQADAQPL    | 134  | 9     |
| >NOTCH1-V2 SQADVQPL    | 102   | >NOTCH1-V2 SQADAQPL    | 80   | 22    |
| >NOTCH1-V2 SQADVQPL    | 36    | >NOTCH1-V2 SQADAQPL    | 36   | 0     |
| >NOTCH1-V2 EPSQADVQ    | 187   | >NOTCH1-V2 EPSQADAQ    | 60   | 127   |
| >NOTCH1-V2 EPSQADVQPI  | 189   | >NOTCH1-V2 EPSQADAQPI  | 158  | 31    |
| >NOTCH1-V2 EPSQADVQPI  | 288   | >NOTCH1-V2 EPSQADAQPI  | 760  | 472   |
| >NOTCH1-V2 GEPSQADVQ   | 306   | >NOTCH1-V2 GEPSQADAQ   | 188  | 118   |
| >NOTCH1-V2 GEPSQADVQ   | 467   | >NOTCH1-V2 GEPSQADAQ   | 739  | 272   |
| >NOTCH1-V2 GEPSQADVQ   | 54    | >NOTCH1-V2 GEPSQADAQ   | 108  | 54    |
| >NOTCH1-V2 VSSPPTSM    | 139   | >NOTCH1-V2 ISSPPTSM    | 54   | 85    |
| >NOTCH1-V2 VSSPPTSM    | 7     | >NOTCH1-V2 ISSPPTSM    | 5    | 2     |
| >NOTCH1-V2 VSSPPTSMQ   | 964   | >NOTCH1-V2 ISSPPTSMQ   | 471  | 493   |
| >NOTCH1-V2 VSSPPTSMQ   | 552   | >NOTCH1-V2 ISSPPTSMQ   | 277  | 275   |
| >NOTCH1-V2 VSSPPTSM    | 135   | >NOTCH1-V2 ISSPPTSM    | 66   | 69    |
| >NOTCH1-V2 VSSPPTSM    | 422   | >NOTCH1-V2 ISSPPTSM    | 798  | 376   |
| >NOTCH1-V2 VSSPPTSM    | 203   | >NOTCH1-V2 ISSPPTSM    | 164  | 39    |
| >NOTCH1-V2 VSSPPTSMQ   | 49    | >NOTCH1-V2 ISSPPTSMQ   | 27   | 22    |
| >NOTCH1-V2 VSSPPTSM    | 186   | >NOTCH1-V2 ISSPPTSM    | 103  | 83    |
| >NOTCH1-V2 GVSSPPTSM   | 13    | >NOTCH1-V2 GISSPPTSM   | 41   | 28    |
| >NOTCH1-V2 HSNVSDWSE   | 33    | >NOTCH1-V2 HSNVSDWSE   | 151  | 118   |
| >NOTCH1-V2 HSNVSDWSE   | 330   | >NOTCH1-V2 HSNVSDWSE   | 1325 | 995   |
| >NOTCH1-V2 HSNVSDWSE   | 511   | >NOTCH1-V2 HSNVSDWSE   | 72   | 439   |
| >NOTCH1-V2 HSNVSDWSE   | 5381  | >NOTCH1-V2 HSNVSDWSE   | 192  | 5189  |
| >NOTCH1-V2 HSNVSDWSE   | 6207  | >NOTCH1-V2 HSNVSDWSE   | 87   | 6120  |
| >NOTCH1-V2 SEGVSSPPT   | 315   | >NOTCH1-V2 SEGISSPPT   | 255  | 60    |
| >NOTCH1-V2 SEGVSSPPTSI | 479   | >NOTCH1-V2 SEGISSPPTSM | 410  | 69    |
| >NOTCH1-V2 SEGVSSPPT   | 21    | >NOTCH1-V2 SEGISSPPT   | 25   | 4     |
| >NOTCH1-V2 SEGVSSPPTSI | 329   | >NOTCH1-V2 SEGISSPPTSM | 359  | 30    |
| >NOTCH1-V2 VSDWSEGV    | 222   | >NOTCH1-V2 VSDWSEGI    | 2168 | 1946  |
| >NOTCH1-V2 VSDWSEGV    | 1112  | >NOTCH1-V2 VSDWSEGI    | 211  | 901   |
| >NOTCH1-V2 VSDWSEGV    | 11847 | >NOTCH1-V2 VSDWSEGI    | 212  | 11635 |

|                        |     |                        |       |       |
|------------------------|-----|------------------------|-------|-------|
| >NOTCH1-V2 NVSDWSEGV   | 203 | >NOTCH1-V2 NVSDWSEGI   | 955   | 752   |
| >NOTCH1-V2 NVSDWSEGV   | 44  | >NOTCH1-V2 NVSDWSEGI   | 147   | 103   |
| >NOTCH1-V2 NVSDWSEGV   | 24  | >NOTCH1-V2 NVSDWSEGI   | 140   | 116   |
| >NOTCH1-V2 NVSDWSEGV   | 17  | >NOTCH1-V2 NVSDWSEGI   | 50    | 33    |
| >NOTCH1-V2 NVSDWSEGV   | 18  | >NOTCH1-V2 NVSDWSEGI   | 194   | 176   |
| >NOTCH1-V2 NVSDWSEGV   | 78  | >NOTCH1-V2 NVSDWSEGI   | 831   | 753   |
| >NOTCH1-V2 NVSDWSEGV   | 86  | >NOTCH1-V2 NVSDWSEGI   | 2311  | 2225  |
| >NOTCH1-V2 NVSDWSEGV   | 7   | >NOTCH1-V2 NVSDWSEGI   | 71    | 64    |
| >NOTCH1-V2 NVSDWSEGV   | 7   | >NOTCH1-V2 NVSDWSEGI   | 719   | 712   |
| >NOTCH1-V2 NVSDWSEGV   | 6   | >NOTCH1-V2 NVSDWSEGI   | 9     | 3     |
| >NOTCH1-V2 NVSDWSEGV   | 4   | >NOTCH1-V2 NVSDWSEGI   | 9     | 5     |
| >NOTCH1-Y1 YYGREEEL    | 238 | >NOTCH1-Y1 NYGREEEL    | 1536  | 1298  |
| >NOTCH1-Y1 YYGREEEL    | 338 | >NOTCH1-Y1 NYGREEEL    | 1937  | 1599  |
| >NOTCH1-Y1 YYGREEEL    | 5   | >NOTCH1-Y1 NYGREEEL    | 20    | 15    |
| >NOTCH1-Y1 YYGREEELR   | 74  | >NOTCH1-Y1 NYGREEELR   | 86    | 12    |
| >NOTCH1-Y1 PYYGREEEL   | 87  | >NOTCH1-Y1 PNYGREEEL   | 24506 | 24419 |
| >NOTCH1-Y1 PYYGREEELR  | 64  | >NOTCH1-Y1 PNYGREEELR  | 3501  | 3437  |
| >NOTCH1-Y1 DAHGQQMIF   | 468 | >NOTCH1-Y1 DAHGQQMIF   | 20708 | 20240 |
| >NOTCH1-Y1 DAHGQQMIF   | 194 | >NOTCH1-Y1 DAHGQQMIF   | 30141 | 29947 |
| >NOTCH1-Y1 DAHGQQMIF   | 452 | >NOTCH1-Y1 DAHGQQMIF   | 24467 | 24015 |
| >NOTCH1-Y1 DAHGQQMIF   | 45  | >NOTCH1-Y1 DAHGQQMIF   | 12086 | 12041 |
| >NOTCH1-Y1 FPYYGREEEL  | 25  | >NOTCH1-Y1 FPNYGREEEL  | 114   | 89    |
| >NOTCH1-Y1 FPYYGREEELI | 73  | >NOTCH1-Y1 FPNYGREEEL  | 203   | 130   |
| >NOTCH1-Y1 FPYYGREEEL  | 314 | >NOTCH1-Y1 FPNYGREEEL  | 333   | 19    |
| >NOTCH1-Y1 FPYYGREEEL  | 81  | >NOTCH1-Y1 FPNYGREEEL  | 109   | 28    |
| >NOTCH1-Y1 FPYYGREEEL  | 338 | >NOTCH1-Y1 FPNYGREEEL  | 1447  | 1109  |
| >NOTCH1-Y1 FPYYGREEEL  | 128 | >NOTCH1-Y1 FPNYGREEEL  | 155   | 27    |
| >NOTCH1-Y1 FPYYGREEE   | 175 | >NOTCH1-Y1 FPNYGREEE   | 630   | 455   |
| >NOTCH1-Y1 FPYYGREEE   | 464 | >NOTCH1-Y1 FPNYGREEE   | 1538  | 1074  |
| >NOTCH1-Y1 FPYYGREEEL  | 225 | >NOTCH1-Y1 FPNYGREEEL  | 911   | 686   |
| >NOTCH1-Y1 FPYYGREEELI | 438 | >NOTCH1-Y1 FPNYGREEEL  | 1621  | 1183  |
| >NOTCH1-Y1 FPYYGREEEL  | 48  | >NOTCH1-Y1 FPNYGREEEL  | 163   | 115   |
| >NOTCH1-Y1 IFPYYGREEEL | 180 | >NOTCH1-Y1 IFPNYGREEEL | 107   | 73    |
| >NOTCH1-Y1 MIFPYYGR    | 257 | >NOTCH1-Y1 MIFPNYGR    | 17272 | 17015 |
| >NOTCH1-Y1 MIFPYYGR    | 265 | >NOTCH1-Y1 MIFPNYGR    | 425   | 160   |
| >NOTCH1-Y1 MIFPYYGR    | 23  | >NOTCH1-Y1 MIFPNYGR    | 41    | 18    |
| >NOTCH1-Y1 MIFPYYGR    | 8   | >NOTCH1-Y1 MIFPNYGR    | 13    | 5     |
| >NOTCH1-Y1 MIFPYYGR    | 23  | >NOTCH1-Y1 MIFPNYGR    | 65    | 42    |
| >NOTCH1-Y1 MIFPYYGR    | 4   | >NOTCH1-Y1 MIFPNYGR    | 3     | 1     |
| >NOTCH1-Y1 MIFPYYGR    | 39  | >NOTCH1-Y1 MIFPNYGR    | 30    | 9     |
| >NOTCH1-Y1 QMIFPYYGR   | 182 | >NOTCH1-Y1 QMIFPNYGR   | 421   | 239   |
| >NOTCH1-Y1 QMIFPYYGR   | 14  | >NOTCH1-Y1 QMIFPNYGR   | 43    | 29    |
| >NOTCH1-Y1 QMIFPYYGR   | 150 | >NOTCH1-Y1 QMIFPNYGR   | 220   | 70    |

|                        |     |                        |       |       |
|------------------------|-----|------------------------|-------|-------|
| >NOTCH1-Y1 QMIFPYYGR   | 68  | >NOTCH1-Y1 QMIFPNYGR   | 47    | 21    |
| >NOTCH1-Y1 QMIFPYYGR   | 55  | >NOTCH1-Y1 QMIFPNYGR   | 41    | 14    |
| >NOTCH1-Y1 QQMIFPYYGI  | 465 | >NOTCH1-Y1 QQMIFPNYG   | 781   | 316   |
| >NOTCH1-Y1 QQMIFPYY    | 133 | >NOTCH1-Y1 QQMIFPNY    | 860   | 727   |
| >NOTCH1-Y1 QQMIFPYYGI  | 68  | >NOTCH1-Y1 QQMIFPNYG   | 123   | 55    |
| >NOTCH1-Y1 QQMIFPYY    | 52  | >NOTCH1-Y1 QQMIFPNY    | 366   | 314   |
| >NOTCH1-Y1 QQMIFPYY    | 43  | >NOTCH1-Y1 QQMIFPNY    | 140   | 97    |
| >NOTCH1-Y1 QQMIFPYYGI  | 16  | >NOTCH1-Y1 QQMIFPNYG   | 29    | 13    |
| >NOTCH1-Y1 QQMIFPYYGI  | 217 | >NOTCH1-Y1 QQMIFPNYG   | 507   | 290   |
| >NOTCH1-Y1 QQMIFPYYGI  | 34  | >NOTCH1-Y1 QQMIFPNYG   | 27    | 7     |
| >NOTCH1-Y1 QQMIFPYY    | 98  | >NOTCH1-Y1 QQMIFPNY    | 150   | 52    |
| >NOTCH1-Y1 QQMIFPYY    | 388 | >NOTCH1-Y1 QQMIFPNY    | 360   | 28    |
| >NOTCH1-Y1 QQMIFPYY    | 7   | >NOTCH1-Y1 QQMIFPNY    | 6     | 1     |
| >NOTCH1-Y1 QQMIFPYYGI  | 335 | >NOTCH1-Y1 QQMIFPNYG   | 1048  | 713   |
| >NOTCH1-Y1 QQMIFPYYGI  | 26  | >NOTCH1-Y1 QQMIFPNYG   | 32    | 6     |
| >NOTCH1-Y1 GQQMIFPY    | 270 | >NOTCH1-Y1 GQQMIFPN    | 17022 | 16752 |
| >NOTCH1-Y1 GQQMIFPYY   | 138 | >NOTCH1-Y1 GQQMIFPNY   | 865   | 727   |
| >NOTCH1-Y1 GQQMIFPYYC  | 287 | >NOTCH1-Y1 GQQMIFPNY   | 568   | 281   |
| >NOTCH1-Y1 GQQMIFPY    | 337 | >NOTCH1-Y1 GQQMIFPN    | 24967 | 24630 |
| >NOTCH1-Y1 GQQMIFPYY   | 85  | >NOTCH1-Y1 GQQMIFPNY   | 485   | 400   |
| >NOTCH1-Y1 GQQMIFPY    | 113 | >NOTCH1-Y1 GQQMIFPN    | 24023 | 23910 |
| >NOTCH1-Y1 GQQMIFPYY   | 18  | >NOTCH1-Y1 GQQMIFPNY   | 52    | 34    |
| >NOTCH1-Y1 GQQMIFPYYC  | 16  | >NOTCH1-Y1 GQQMIFPNY   | 33    | 17    |
| >NOTCH1-Y1 GQQMIFPY    | 43  | >NOTCH1-Y1 GQQMIFPN    | 7604  | 7561  |
| >NOTCH1-Y1 GQQMIFPYY   | 50  | >NOTCH1-Y1 GQQMIFPNY   | 77    | 27    |
| >NOTCH1-Y1 GQQMIFPY    | 76  | >NOTCH1-Y1 GQQMIFPN    | 14152 | 14076 |
| >NOTCH1-Y1 GQQMIFPYY   | 76  | >NOTCH1-Y1 GQQMIFPNY   | 55    | 21    |
| >NOTCH1-Y1 GQQMIFPYY   | 439 | >NOTCH1-Y1 GQQMIFPNY   | 714   | 275   |
| >NOTCH1-Y1 GQQMIFPYYC  | 418 | >NOTCH1-Y1 GQQMIFPNY   | 584   | 166   |
| >NOTCH1-Y1 HGQQMIFPY   | 148 | >NOTCH1-Y1 HGQQMIFPN   | 349   | 201   |
| >NOTCH1-Y1 HGQQMIFPY   | 213 | >NOTCH1-Y1 HGQQMIFPN   | 25164 | 24951 |
| >NOTCH1-Y1 HGQQMIFPY   | 281 | >NOTCH1-Y1 HGQQMIFPN   | 376   | 95    |
| >NOTCH1-Y1 HGQQMIFPY   | 193 | >NOTCH1-Y1 HGQQMIFPN   | 18087 | 17894 |
| >NOTCH1-Y1 HGQQMIFPY   | 475 | >NOTCH1-Y1 HGQQMIFPN   | 26112 | 25637 |
| >NOTCH1-Y1 HGQQMIFPY   | 48  | >NOTCH1-Y1 HGQQMIFPN   | 12547 | 12499 |
| >NOTCH1-Y1 HGQQMIFPY   | 57  | >NOTCH1-Y1 HGQQMIFPN   | 23039 | 22982 |
| >NOTCH1-Y1 AHGQQMIFP   | 161 | >NOTCH1-Y1 AHGQQMIFP   | 743   | 582   |
| >NOTCH1-Y1 AHGQQMIFP   | 136 | >NOTCH1-Y1 AHGQQMIFP   | 415   | 279   |
| >NOTCH1-Y1 AHGQQMIFP   | 251 | >NOTCH1-Y1 AHGQQMIFP   | 25333 | 25082 |
| >NOTCH1-Y1 AHGQQMIFP   | 251 | >NOTCH1-Y1 AHGQQMIFP   | 295   | 44    |
| >NOTCH1-Y1 YKIEAVQSET\ | 801 | >NOTCH1-Y1 FKIEAVQSET\ | 186   | 615   |
| >NOTCH1-Y1 YKIEAVQSET\ | 507 | >NOTCH1-Y1 FKIEAVQSET\ | 291   | 216   |
| >NOTCH1-Y1 YKIEAVQSET\ | 42  | >NOTCH1-Y1 FKIEAVQSET\ | 19    | 23    |

|                        |      |                        |       |       |
|------------------------|------|------------------------|-------|-------|
| >NOTCH1-Y1 YKIEAVQSET\ | 62   | >NOTCH1-Y1 FKIEAVQSET\ | 78    | 16    |
| >NOTCH1-Y1 YKIEAVQSET\ | 122  | >NOTCH1-Y1 FKIEAVQSET\ | 189   | 67    |
| >NOTCH1-Y1 YKIEAVQSET\ | 269  | >NOTCH1-Y1 FKIEAVQSET\ | 346   | 77    |
| >NOTCH1-Y1 YKIEAVQSET\ | 103  | >NOTCH1-Y1 FKIEAVQSET\ | 135   | 32    |
| >NOTCH1-Y1 YKIEAVQSE   | 488  | >NOTCH1-Y1 FKIEAVQSE   | 731   | 243   |
| >NOTCH1-Y1 YKIEAVQSET  | 298  | >NOTCH1-Y1 FKIEAVQSET  | 422   | 124   |
| >NOTCH1-Y1 YKIEAVQSET\ | 20   | >NOTCH1-Y1 FKIEAVQSET\ | 24    | 4     |
| >NOTCH1-Y1 YKIEAVQSET\ | 208  | >NOTCH1-Y1 FKIEAVQSET\ | 212   | 4     |
| >NOTCH1-Y1 LASLGLSNIPY | 275  | >NOTCH1-Y1 LASLGLSNIPF | 12881 | 12606 |
| >NOTCH1-Y1 LASLGLSNIPY | 105  | >NOTCH1-Y1 LASLGLSNIPF | 5008  | 4903  |
| >NOTCH1-Y1 LASLGLSNIPY | 101  | >NOTCH1-Y1 LASLGLSNIPF | 93    | 8     |
| >NOTCH1-Y1 LASLGLSNIPY | 334  | >NOTCH1-Y1 LASLGLSNIPF | 66    | 268   |
| >NOTCH1-Y1 LASLGLSNIPY | 16   | >NOTCH1-Y1 LASLGLSNIPF | 13    | 3     |
| >NOTCH1-Y1 LASLGLSNIPY | 10   | >NOTCH1-Y1 LASLGLSNIPF | 15    | 5     |
| >NOTCH1-Y1 LASLGLSNIPY | 1211 | >NOTCH1-Y1 LASLGLSNIPF | 240   | 971   |
| >NOTCH1-Y1 IPYKIEAV    | 243  | >NOTCH1-Y1 IPFKIEAV    | 105   | 138   |
| >NOTCH1-Y1 IPYKIEAV    | 150  | >NOTCH1-Y1 IPFKIEAV    | 694   | 544   |
| >NOTCH1-Y1 IPYKIEAVQ   | 440  | >NOTCH1-Y1 IPFKIEAVQ   | 656   | 216   |
| >NOTCH1-Y1 IPYKIEAV    | 149  | >NOTCH1-Y1 IPFKIEAV    | 643   | 494   |
| >NOTCH1-Y1 IPYKIEAV    | 29   | >NOTCH1-Y1 IPFKIEAV    | 62    | 33    |
| >NOTCH1-Y1 IPYKIEAVQ   | 364  | >NOTCH1-Y1 IPFKIEAVQ   | 827   | 463   |
| >NOTCH1-Y1 NIPYKIEAV   | 475  | >NOTCH1-Y1 NIPFKIEAV   | 447   | 28    |
| >NOTCH1-Y1 NIPYKIEAV   | 98   | >NOTCH1-Y1 NIPFKIEAV   | 54    | 44    |
| >NOTCH1-Y1 NIPYKIEAV   | 144  | >NOTCH1-Y1 NIPFKIEAV   | 167   | 23    |
| >NOTCH1-Y1 NIPYKIEAV   | 348  | >NOTCH1-Y1 NIPFKIEAV   | 135   | 213   |
| >NOTCH1-Y1 NIPYKIEA    | 327  | >NOTCH1-Y1 NIPFKIEA    | 256   | 71    |
| >NOTCH1-Y1 NIPYKIEAV   | 16   | >NOTCH1-Y1 NIPFKIEAV   | 14    | 2     |
| >NOTCH1-Y1 LNIPYKIEAV  | 456  | >NOTCH1-Y1 LNIPFKIEAV  | 226   | 230   |
| >NOTCH1-Y1 SLNIPYKI    | 555  | >NOTCH1-Y1 SLNIPFKI    | 371   | 184   |
| >NOTCH1-Y1 SLNIPYKIEAV | 328  | >NOTCH1-Y1 SLNIPFKIEAV | 257   | 71    |
| >NOTCH1-Y1 SLNIPYKI    | 123  | >NOTCH1-Y1 SLNIPFKI    | 132   | 9     |
| >NOTCH1-Y1 SLNIPYKIEAV | 37   | >NOTCH1-Y1 SLNIPFKIEAV | 33    | 4     |
| >NOTCH1-Y1 SLNIPYKI    | 73   | >NOTCH1-Y1 SLNIPFKI    | 73    | 0     |
| >NOTCH1-Y1 SLNIPYKIEAV | 11   | >NOTCH1-Y1 SLNIPFKIEAV | 11    | 0     |
| >NOTCH1-Y1 SLNIPYKIEAV | 505  | >NOTCH1-Y1 SLNIPFKIEAV | 231   | 274   |
| >NOTCH1-Y1 SLNIPYKI    | 10   | >NOTCH1-Y1 SLNIPFKI    | 9     | 1     |
| >NOTCH1-Y1 SLNIPYKIEA  | 55   | >NOTCH1-Y1 SLNIPFKIEA  | 58    | 3     |
| >NOTCH1-Y1 SLNIPYKIEAV | 3    | >NOTCH1-Y1 SLNIPFKIEAV | 3     | 0     |
| >NOTCH1-Y1 SLNIPYKI    | 181  | >NOTCH1-Y1 SLNIPFKI    | 225   | 44    |
| >NOTCH1-Y1 SLNIPYKIEAV | 28   | >NOTCH1-Y1 SLNIPFKIEAV | 23    | 5     |
| >NOTCH1-Y1 SLNIPYKI    | 44   | >NOTCH1-Y1 SLNIPFKI    | 32    | 12    |
| >NOTCH1-Y1 SLNIPYKIEA  | 168  | >NOTCH1-Y1 SLNIPFKIEA  | 163   | 5     |
| >NOTCH1-Y1 SLNIPYKIEAV | 13   | >NOTCH1-Y1 SLNIPFKIEAV | 13    | 0     |

|                         |     |                         |       |       |
|-------------------------|-----|-------------------------|-------|-------|
| >NOTCH1-Y1 SLNIPYKIEAV  | 159 | >NOTCH1-Y1 SLNIPFKIEAV  | 135   | 24    |
| >NOTCH1-Y1 SLNIPYKI     | 41  | >NOTCH1-Y1 SLNIPFKI     | 26    | 15    |
| >NOTCH1-Y1 SLNIPYKIEA   | 34  | >NOTCH1-Y1 SLNIPFKIEA   | 32    | 2     |
| >NOTCH1-Y1 SLNIPYKIEAV  | 4   | >NOTCH1-Y1 SLNIPFKIEAV  | 4     | 0     |
| >NOTCH1-Y1 SLNIPYKI     | 495 | >NOTCH1-Y1 SLNIPFKI     | 681   | 186   |
| >NOTCH1-Y1 GSLNIPYK     | 169 | >NOTCH1-Y1 GSLNIPFK     | 124   | 45    |
| >NOTCH1-Y1 GSLNIPYK     | 8   | >NOTCH1-Y1 GSLNIPFK     | 8     | 0     |
| >NOTCH1-Y1 GSLNIPYK     | 57  | >NOTCH1-Y1 GSLNIPFK     | 37    | 20    |
| >NOTCH1-Y1 GSLNIPYK     | 157 | >NOTCH1-Y1 GSLNIPFK     | 221   | 64    |
| >NOTCH1-Y1 GSLNIPYKI    | 21  | >NOTCH1-Y1 GSLNIPFKI    | 41    | 20    |
| >NOTCH1-Y1 GSLNIPYKI    | 352 | >NOTCH1-Y1 GSLNIPFKI    | 258   | 94    |
| >NOTCH1-Y1 GSLNIPYK     | 77  | >NOTCH1-Y1 GSLNIPFK     | 86    | 9     |
| >NOTCH1-Y1 GSLNIPYKI    | 104 | >NOTCH1-Y1 GSLNIPFKI    | 50    | 54    |
| >NOTCH1-Y1 LGSLNIPYK    | 483 | >NOTCH1-Y1 LGSLNIPFK    | 453   | 30    |
| >NOTCH1-Y1 LGSLNIPYK    | 585 | >NOTCH1-Y1 LGSLNIPFK    | 373   | 212   |
| >NOTCH1-Y1 LGSLNIPY     | 451 | >NOTCH1-Y1 LGSLNIPF     | 552   | 101   |
| >NOTCH1-Y1 LGSLNIPY     | 58  | >NOTCH1-Y1 LGSLNIPF     | 158   | 100   |
| >NOTCH1-Y1 LGSLNIPYKI   | 450 | >NOTCH1-Y1 LGSLNIPFKI   | 132   | 318   |
| >NOTCH1-Y1 SLGSLNIPYKI  | 57  | >NOTCH1-Y1 SLGSLNIPFKI  | 46    | 11    |
| >NOTCH1-Y1 SLGSLNIPYKI  | 33  | >NOTCH1-Y1 SLGSLNIPFKI  | 42    | 9     |
| >NOTCH1-Y1 SLGSLNIPYKI  | 272 | >NOTCH1-Y1 SLGSLNIPFKI  | 256   | 16    |
| >NOTCH1-Y1 SLGSLNIPYKI  | 9   | >NOTCH1-Y1 SLGSLNIPFKI  | 8     | 1     |
| >NOTCH1-Y1 SLGSLNIPYKI  | 37  | >NOTCH1-Y1 SLGSLNIPFKI  | 45    | 8     |
| >NOTCH1-Y1 SLGSLNIPYKI  | 16  | >NOTCH1-Y1 SLGSLNIPFKI  | 11    | 5     |
| >NOTCH1-Y1 SLGSLNIPYKI  | 152 | >NOTCH1-Y1 SLGSLNIPFKI  | 130   | 22    |
| >NOTCH1-Y1 SLGSLNIPYKI  | 34  | >NOTCH1-Y1 SLGSLNIPFKI  | 19    | 15    |
| >NOTCH1-Y1 SLGSLNIPYK   | 42  | >NOTCH1-Y1 SLGSLNIPFK   | 44    | 2     |
| >NOTCH1-Y1 SLGSLNIPYK   | 36  | >NOTCH1-Y1 SLGSLNIPFK   | 39    | 3     |
| >NOTCH1-Y1 SLGSLNIPY    | 89  | >NOTCH1-Y1 SLGSLNIPF    | 3272  | 3183  |
| >NOTCH1-Y1 SLGSLNIPYK   | 470 | >NOTCH1-Y1 SLGSLNIPFK   | 300   | 170   |
| >NOTCH1-Y1 SLGSLNIPY    | 234 | >NOTCH1-Y1 SLGSLNIPF    | 11144 | 10910 |
| >NOTCH1-Y1 SLGSLNIPY    | 927 | >NOTCH1-Y1 SLGSLNIPF    | 70    | 857   |
| >NOTCH1-Y1 SLGSLNIPYKI  | 67  | >NOTCH1-Y1 SLGSLNIPFKI  | 122   | 55    |
| >NOTCH1-Y1 SLGSLNIPY    | 24  | >NOTCH1-Y1 SLGSLNIPF    | 7603  | 7579  |
| >NOTCH1-Y1 SLGSLNIPY    | 52  | >NOTCH1-Y1 SLGSLNIPF    | 45    | 7     |
| >NOTCH1-Y1 SLGSLNIPY    | 171 | >NOTCH1-Y1 SLGSLNIPF    | 406   | 235   |
| >NOTCH1-Y1 SLGSLNIPY    | 825 | >NOTCH1-Y1 SLGSLNIPF    | 147   | 678   |
| >NOTCH1-Y1 SLGSLNIPYK   | 213 | >NOTCH1-Y1 SLGSLNIPFK   | 270   | 57    |
| >NOTCH1-Y1 SLGSLNIPYK   | 422 | >NOTCH1-Y1 SLGSLNIPFK   | 900   | 478   |
| >NOTCH1-Y1 ASLGS LNIPY  | 303 | >NOTCH1-Y1 ASLGS LNIPF  | 22031 | 21728 |
| >NOTCH1-Y1 ASLGS LNIPYK | 131 | >NOTCH1-Y1 ASLGS LNIPFK | 123   | 8     |
| >NOTCH1-Y1 ASLGS LNIPY  | 75  | >NOTCH1-Y1 ASLGS LNIPF  | 28162 | 28087 |
| >NOTCH1-Y1 ASLGS LNIPYK | 10  | >NOTCH1-Y1 ASLGS LNIPFK | 9     | 1     |

|                        |      |                        |      |      |
|------------------------|------|------------------------|------|------|
| >NOTCH1-Y1 ASLGSLNIPY  | 57   | >NOTCH1-Y1 ASLGSLNIPF  | 138  | 81   |
| >NOTCH1-Y1 ASLGSLNIPY  | 204  | >NOTCH1-Y1 ASLGSLNIPF  | 1838 | 1634 |
| >NOTCH1-Y1 ASLGSLNIPY  | 243  | >NOTCH1-Y1 ASLGSLNIPF  | 1961 | 1718 |
| >NOTCH1-Y1 ASLGSLNIPY  | 495  | >NOTCH1-Y1 ASLGSLNIPF  | 3393 | 2898 |
| >NOTCH1-Y1 ASLGSLNIPYK | 9    | >NOTCH1-Y1 ASLGSLNIPFK | 7    | 2    |
| >NOTCH1-Y1 ASLGSLNIPY  | 87   | >NOTCH1-Y1 ASLGSLNIPF  | 4823 | 4736 |
| >NOTCH1-Y1 ASLGSLNIPYK | 368  | >NOTCH1-Y1 ASLGSLNIPFK | 554  | 186  |
| >NOTCH1-Y1 ASLGSLNIPY  | 596  | >NOTCH1-Y1 ASLGSLNIPF  | 49   | 547  |
| >NOTCH1-Y1 ASLGSLNIPY  | 181  | >NOTCH1-Y1 ASLGSLNIPF  | 217  | 36   |
| >NOTCH1-Y1 ASLGSLNIPY  | 54   | >NOTCH1-Y1 ASLGSLNIPF  | 19   | 35   |
| >NOTCH1-Y1 ASLGSLNIPY  | 4    | >NOTCH1-Y1 ASLGSLNIPF  | 4    | 0    |
| >NOTCH1-Y1 ASLGSLNIPY  | 114  | >NOTCH1-Y1 ASLGSLNIPF  | 128  | 14   |
| >NOTCH1-Y1 ASLGSLNIPYK | 74   | >NOTCH1-Y1 ASLGSLNIPFK | 84   | 10   |
| >NOTCH2-A1 GARCQSSCGC  | 1003 | >NOTCH2-A1 GSRCQSSCGC  | 373  | 630  |
| >NOTCH2-A1 GARCQSSCGC  | 456  | >NOTCH2-A1 GSRCQSSCGC  | 176  | 280  |
| >NOTCH2-A1 GARCQSSCGC  | 457  | >NOTCH2-A1 GSRCQSSCGC  | 63   | 394  |
| >NOTCH2-A1 CPPGFSGA    | 69   | >NOTCH2-A1 CPPGFSGS    | 2404 | 2335 |
| >NOTCH2-A1 CPPGFSGAR   | 317  | >NOTCH2-A1 CPPGFSGSR   | 436  | 119  |
| >NOTCH2-A1 RCPPGFSGAF  | 124  | >NOTCH2-A1 RCPPGFSGSR  | 139  | 15   |
| >NOTCH2-G€ GAICSDQI    | 7885 | >NOTCH2-G€ CAICSDQI    | 369  | 7516 |
| >NOTCH2-G€ GAICSDQI    | 552  | >NOTCH2-G€ CAICSDQI    | 43   | 509  |
| >NOTCH2-G€ MGAICSDQI   | 455  | >NOTCH2-G€ MCAICSDQI   | 210  | 245  |
| >NOTCH2-G€ MGAICSDQI   | 333  | >NOTCH2-G€ MCAICSDQI   | 150  | 183  |
| >NOTCH2-G€ MGAICSDQI   | 202  | >NOTCH2-G€ MCAICSDQI   | 236  | 34   |
| >NOTCH2-G€ YMGAICSDQI  | 153  | >NOTCH2-G€ YMCAICSDQI  | 93   | 60   |
| >NOTCH2-G€ YMGAICSDQI  | 65   | >NOTCH2-G€ YMCAICSDQI  | 60   | 5    |
| >NOTCH2-G€ YMGAICSDQI  | 78   | >NOTCH2-G€ YMCAICSDQI  | 54   | 24   |
| >NOTCH2-G€ YMGAICSDQI  | 158  | >NOTCH2-G€ YMCAICSDQI  | 90   | 68   |
| >NOTCH2-G€ YMGAICSDQI  | 8    | >NOTCH2-G€ YMCAICSDQI  | 9    | 1    |
| >NOTCH2-G€ YMGAICSDQI  | 16   | >NOTCH2-G€ YMCAICSDQI  | 151  | 135  |
| >NOTCH2-G€ YMGAICSDQI  | 17   | >NOTCH2-G€ YMCAICSDQI  | 55   | 38   |
| >NOTCH2-G€ YMGAICSDQI  | 11   | >NOTCH2-G€ YMCAICSDQI  | 36   | 25   |
| >NOTCH2-G€ YMGAICSDQ   | 119  | >NOTCH2-G€ YMCAICSDQ   | 206  | 87   |
| >NOTCH2-G€ YMGAICSDQI  | 8    | >NOTCH2-G€ YMCAICSDQI  | 11   | 3    |
| >NOTCH2-G€ YMGAICSDQI  | 903  | >NOTCH2-G€ YMCAICSDQI  | 270  | 633  |
| >NOTCH2-G€ GYMGAICSDC  | 38   | >NOTCH2-G€ GYMCAICSDC  | 34   | 4    |
| >NOTCH2-G€ GYMGAICSDC  | 144  | >NOTCH2-G€ GYMCAICSDC  | 71   | 73   |
| >NOTCH2-G€ GYMGAICSDC  | 499  | >NOTCH2-G€ GYMCAICSDC  | 472  | 27   |
| >NOTCH2-G€ GYMGAICSDC  | 7    | >NOTCH2-G€ GYMCAICSDC  | 8    | 1    |
| >NOTCH2-G€ NPGYMCAI    | 74   | >NOTCH2-G€ NPGYMCAI    | 342  | 268  |
| >NOTCH2-G€ NPGYMCAI    | 773  | >NOTCH2-G€ NPGYMCAI    | 388  | 385  |
| >NOTCH2-G€ CNPGYMCAI   | 466  | >NOTCH2-G€ CNPGYMCAI   | 1878 | 1412 |
| >NOTCH2-G€ CICNPGYMG/  | 1517 | >NOTCH2-G€ CICNPGYMC/  | 423  | 1094 |



|                       |       |                       |       |       |
|-----------------------|-------|-----------------------|-------|-------|
| >NOTCH2-G6CICNPGYMG,  | 262   | >NOTCH2-G6CICNPGYMC/  | 588   | 326   |
| >NOTCH2-G6TCICNPGYMC  | 321   | >NOTCH2-G6TCICNPGYMC  | 1250  | 929   |
| >NOTCH2-H1VQSDSDHCFK  | 174   | >NOTCH2-H1VQSDSDYCFK  | 101   | 73    |
| >NOTCH2-H1VQSDSDHCF   | 165   | >NOTCH2-H1VQSDSDYCF   | 111   | 54    |
| >NOTCH2-H1CVQSDSDHCFI | 630   | >NOTCH2-H1CVQSDSDYCFI | 387   | 243   |
| >NOTCH2-H1CVQSDSDHCFI | 74    | >NOTCH2-H1CVQSDSDYCFI | 43    | 31    |
| >NOTCH2-H1CVQSDSDHCF  | 335   | >NOTCH2-H1CVQSDSDYCF  | 235   | 100   |
| >NOTCH2-H1CVQSDSDHCFI | 223   | >NOTCH2-H1CVQSDSDYCFI | 309   | 86    |
| >NOTCH2-H1CVQSDSDHCFI | 251   | >NOTCH2-H1CVQSDSDYCFI | 163   | 88    |
| >NOTCH2-H1CVQSDSDHCF  | 370   | >NOTCH2-H1CVQSDSDYCF  | 187   | 183   |
| >NOTCH2-H1CVQSDSDHCFI | 611   | >NOTCH2-H1CVQSDSDYCFI | 346   | 265   |
| >NOTCH2-H1QCVQSDSDHC  | 1999  | >NOTCH2-H1QCVQSDSDYC  | 437   | 1562  |
| >NOTCH2-H1QCVQSDSDH   | 13025 | >NOTCH2-H1QCVQSDSDY   | 237   | 12788 |
| >NOTCH2-H1QCVQSDSDHC  | 226   | >NOTCH2-H1QCVQSDSDYC  | 395   | 169   |
| >NOTCH2-H1RQCVQSDSDH  | 11398 | >NOTCH2-H1RQCVQSDSDY  | 119   | 11279 |
| >NOTCH2-H1RQCVQSDSDH  | 2662  | >NOTCH2-H1RQCVQSDSDY  | 79    | 2583  |
| >NOTCH2-H1RQCVQSDSDH  | 58    | >NOTCH2-H1RQCVQSDSDY  | 61    | 3     |
| >NOTCH2-H1RQCVQSDSDH  | 1712  | >NOTCH2-H1RQCVQSDSDY  | 34    | 1678  |
| >NOTCH2-H1RQCVQSDSDH  | 9     | >NOTCH2-H1RQCVQSDSDY  | 8     | 1     |
| >NOTCH2-R1RCSCPLGY    | 69    | >NOTCH2-R1CCSCPLGY    | 499   | 430   |
| >NOTCH2-R1RCSCPLGY    | 770   | >NOTCH2-R1CCSCPLGY    | 214   | 556   |
| >NOTCH2-R1YRCSCPLGY   | 50    | >NOTCH2-R1YCCSCPLGY   | 30    | 20    |
| >NOTCH2-R1YRCSCPLGY   | 29    | >NOTCH2-R1YCCSCPLGY   | 9     | 20    |
| >NOTCH2-R1YRCSCPLGY   | 55    | >NOTCH2-R1YCCSCPLGY   | 660   | 605   |
| >NOTCH2-R1YRCSCPLGY   | 2188  | >NOTCH2-R1YCCSCPLGY   | 230   | 1958  |
| >NOTCH2-R1YRCSCPLGY   | 352   | >NOTCH2-R1YCCSCPLGY   | 36548 | 36196 |
| >NOTCH2-R1GTCVDGLGT\  | 197   | >NOTCH2-R1GTCVDGLGT\  | 25304 | 25107 |
| >NOTCH2-R1GTCVDGLGT\  | 63    | >NOTCH2-R1GTCVDGLGT\  | 19211 | 19148 |
| >NOTCH2-R1GTCVDGLGT\  | 234   | >NOTCH2-R1GTCVDGLGT\  | 39763 | 39529 |
| >NOTCH2-R1TYRCSCPL    | 112   | >NOTCH2-R1TYCCSCPL    | 26    | 86    |
| >NOTCH2-R1TYRCSCPL    | 615   | >NOTCH2-R1TYCCSCPL    | 142   | 473   |
| >NOTCH2-R1TYRCSCPLGY  | 34    | >NOTCH2-R1TYCCSCPLGY  | 24    | 10    |
| >NOTCH2-R1TYRCSCPL    | 34    | >NOTCH2-R1TYCCSCPL    | 6258  | 6224  |
| >NOTCH2-R1TYRCSCPLG   | 199   | >NOTCH2-R1TYCCSCPLG   | 11022 | 10823 |
| >NOTCH2-R1TYRCSCPLGY  | 314   | >NOTCH2-R1TYCCSCPLGY  | 11208 | 10894 |
| >NOTCH2-R1TYRCSCPLGY  | 442   | >NOTCH2-R1TYCCSCPLGY  | 173   | 269   |
| >NOTCH2-R1GTYRCSCPL   | 215   | >NOTCH2-R1GTYCCSCPL   | 492   | 277   |
| >NOTCH2-R1GTYRCSCPL   | 1197  | >NOTCH2-R1GTYCCSCPL   | 219   | 978   |
| >NOTCH2-R1GTYRCSCPL   | 423   | >NOTCH2-R1GTYCCSCPL   | 174   | 249   |
| >NOTCH2-R1GTYRCSCPL   | 936   | >NOTCH2-R1GTYCCSCPL   | 232   | 704   |
| >NOTCH2-R1GTYRCSCPL   | 675   | >NOTCH2-R1GTYCCSCPL   | 239   | 436   |
| >NOTCH2-R1GTYRCSCPL   | 477   | >NOTCH2-R1GTYCCSCPL   | 227   | 250   |
| >NOTCH2-R1GTYRCSCPL   | 287   | >NOTCH2-R1GTYCCSCPL   | 32    | 255   |

|                        |      |                        |       |       |
|------------------------|------|------------------------|-------|-------|
| >NOTCH2-R1 GTYRCSCPL   | 470  | >NOTCH2-R1 GTYCCSCPL   | 607   | 137   |
| >NOTCH2-R1 GTYRCSCPLG  | 107  | >NOTCH2-R1 GTYCCSCPLG  | 157   | 50    |
| >NOTCH2-R1 GTYRCSCPLG  | 39   | >NOTCH2-R1 GTYCCSCPLG  | 40    | 1     |
| >NOTCH2-R1 GTYRCSCPLG  | 29   | >NOTCH2-R1 GTYCCSCPLG  | 17    | 12    |
| >NOTCH2-R1 GTYRCSCPLG  | 116  | >NOTCH2-R1 GTYCCSCPLG  | 230   | 114   |
| >NOTCH2-R1 GTYRCSCPL   | 222  | >NOTCH2-R1 GTYCCSCPL   | 215   | 7     |
| >NOTCH2-R1 GTYRCSCPL   | 1934 | >NOTCH2-R1 GTYCCSCPL   | 317   | 1617  |
| >NOTCH2-R1 GTYRCSCPLG  | 242  | >NOTCH2-R1 GTYCCSCPLG  | 336   | 94    |
| >NOTCH2-R1 GTYRCSCPL   | 296  | >NOTCH2-R1 GTYCCSCPL   | 167   | 129   |
| >NOTCH2-R1 GTYRCSCPLG  | 172  | >NOTCH2-R1 GTYCCSCPLG  | 124   | 48    |
| >NOTCH2-R1 GTYRCSCPL   | 633  | >NOTCH2-R1 GTYCCSCPL   | 310   | 323   |
| >NOTCH2-R1 GTYRCSCPLG  | 312  | >NOTCH2-R1 GTYCCSCPLG  | 233   | 79    |
| >NOTCH2-R1 GTYRCSCPL   | 9    | >NOTCH2-R1 GTYCCSCPL   | 5     | 4     |
| >NOTCH2-R1 GTYRCSCPLG  | 4    | >NOTCH2-R1 GTYCCSCPLG  | 3     | 1     |
| >NOTCH2-R1 GTYRCSCPL   | 250  | >NOTCH2-R1 GTYCCSCPL   | 159   | 91    |
| >NOTCH2-R1 GTYRCSCPLG  | 14   | >NOTCH2-R1 GTYCCSCPLG  | 14    | 0     |
| >NOTCH2-R1 GTYRCSCPLG  | 836  | >NOTCH2-R1 GTYCCSCPLG  | 428   | 408   |
| >NOTCH2-R1 GTYRCSCPL   | 501  | >NOTCH2-R1 GTYCCSCPL   | 349   | 152   |
| >NOTCH2-R1 LGTYRCSCPL  | 252  | >NOTCH2-R1 LGTYCCSCPL  | 770   | 518   |
| >NOTCH2-R1 GLGTYRCSCP  | 260  | >NOTCH2-R1 GLGTYCCSCP  | 77    | 183   |
| >NOTCH2-R1 GLGTYRCSCP  | 58   | >NOTCH2-R1 GLGTYCCSCP  | 26    | 32    |
| >NOTCH2-R1 GLGTYRCSCP  | 428  | >NOTCH2-R1 GLGTYCCSCP  | 186   | 242   |
| >NOTCH2-R1 GLGTYRCSCP  | 63   | >NOTCH2-R1 GLGTYCCSCP  | 36    | 27    |
| >NOTCH2-R1 GLGTYRCSCP  | 36   | >NOTCH2-R1 GLGTYCCSCP  | 19    | 17    |
| >NOTCH2-R1 GLGTYRCSCP  | 71   | >NOTCH2-R1 GLGTYCCSCP  | 44    | 27    |
| >NOTCH2-R1 GLGTYRCSCP  | 731  | >NOTCH2-R1 GLGTYCCSCP  | 192   | 539   |
| >NOTCH2-R1 GLGTYRCSC   | 40   | >NOTCH2-R1 GLGTYCCSC   | 39    | 1     |
| >NOTCH2-R1 GLGTYRCSCP  | 7    | >NOTCH2-R1 GLGTYCCSCP  | 7     | 0     |
| >NOTCH2-R1 CVDGLGTYR   | 396  | >NOTCH2-R1 CVDGLGTYC   | 24032 | 23636 |
| >NOTCH2-R1 CVDGLGTYR   | 266  | >NOTCH2-R1 CVDGLGTYC   | 37801 | 37535 |
| >NOTCH2-R1 CVDGLGTYR   | 360  | >NOTCH2-R1 CVDGLGTYC   | 35614 | 35254 |
| >NOTCH2-R1 TCVDGLGTYF  | 434  | >NOTCH2-R1 TCVDGLGTYC  | 36350 | 35916 |
| >NOTCH2-R1 TCVDGLGTYF  | 217  | >NOTCH2-R1 TCVDGLGTYC  | 33377 | 33160 |
| >NOTCH2-R1 RNRVTDLDA   | 108  | >NOTCH2-R1 HNRVTDLDA   | 445   | 337   |
| >NOTCH2-R1 RNRVTDLDAI  | 273  | >NOTCH2-R1 HNRVTDLDAI  | 1064  | 791   |
| >NOTCH2-R1 RNRVTDLDAI  | 312  | >NOTCH2-R1 HNRVTDLDAI  | 1523  | 1211  |
| >NOTCH2-R1 IRNRVTDL    | 396  | >NOTCH2-R1 IHNRVTDL    | 773   | 377   |
| >NOTCH2-R1 IRNRVTDL    | 45   | >NOTCH2-R1 IHNRVTDL    | 7178  | 7133  |
| >NOTCH2-R1 DAQGVFQILII | 56   | >NOTCH2-R1 DAQGVFQILII | 15536 | 15480 |
| >NOTCH2-R1 DAQGVFQILII | 101  | >NOTCH2-R1 DAQGVFQILII | 14175 | 14074 |
| >NOTCH2-R1 LIRNRVTDL   | 163  | >NOTCH2-R1 LIHNRVTDL   | 83    | 80    |
| >NOTCH2-R1 LIRNRVTDL   | 246  | >NOTCH2-R1 LIHNRVTDL   | 79    | 167   |
| >NOTCH2-R1 LIRNRVTDLD  | 376  | >NOTCH2-R1 LIHNRVTDLD  | 3039  | 2663  |

|                        |      |                        |      |      |
|------------------------|------|------------------------|------|------|
| >NOTCH2-R1 LIRNRVTDL   | 31   | >NOTCH2-R1 LIHNRVTDL   | 66   | 35   |
| >NOTCH2-R1 ILIRNRVTDL  | 493  | >NOTCH2-R1 ILIHNRVTDL  | 564  | 71   |
| >NOTCH2-R1 ILIRNRVTDL  | 110  | >NOTCH2-R1 ILIHNRVTDL  | 170  | 60   |
| >NOTCH2-R1 ILIRNRVTDL  | 229  | >NOTCH2-R1 ILIHNRVTDL  | 268  | 39   |
| >NOTCH2-R1 ILIRNRVTDL  | 217  | >NOTCH2-R1 ILIHNRVTDL  | 151  | 66   |
| >NOTCH2-R1 ILIRNRVTDL  | 8    | >NOTCH2-R1 ILIHNRVTDL  | 11   | 3    |
| >NOTCH2-R1 ILIRNRVTDL  | 301  | >NOTCH2-R1 ILIHNRVTDL  | 157  | 144  |
| >NOTCH2-R1 QILIRNRV    | 819  | >NOTCH2-R1 QILIHNRV    | 172  | 647  |
| >NOTCH2-R1 QILIRNRV    | 152  | >NOTCH2-R1 QILIHNRV    | 132  | 20   |
| >NOTCH2-R1 QILIRNRV    | 594  | >NOTCH2-R1 QILIHNRV    | 104  | 490  |
| >NOTCH2-R1 QILIRNRVTDI | 177  | >NOTCH2-R1 QILIHNRVTDI | 385  | 208  |
| >NOTCH2-R1 FQILIRNRV   | 257  | >NOTCH2-R1 FQILIHNRV   | 118  | 139  |
| >NOTCH2-R1 FQILIRNRV   | 25   | >NOTCH2-R1 FQILIHNRV   | 14   | 11   |
| >NOTCH2-R1 FQILIRNRV   | 57   | >NOTCH2-R1 FQILIHNRV   | 23   | 34   |
| >NOTCH2-R1 FQILIRNRV   | 8    | >NOTCH2-R1 FQILIHNRV   | 6    | 2    |
| >NOTCH2-R1 FQILIRNRV   | 1910 | >NOTCH2-R1 FQILIHNRV   | 147  | 1763 |
| >NOTCH2-R1 FQILIRNRV   | 1266 | >NOTCH2-R1 FQILIHNRV   | 288  | 978  |
| >NOTCH2-R1 FQILIRNRV   | 665  | >NOTCH2-R1 FQILIHNRV   | 413  | 252  |
| >NOTCH2-R1 FQILIRNR    | 366  | >NOTCH2-R1 FQILIHNR    | 93   | 273  |
| >NOTCH2-R1 FQILIRNR    | 880  | >NOTCH2-R1 FQILIHNR    | 442  | 438  |
| >NOTCH2-R1 FQILIRNR    | 287  | >NOTCH2-R1 FQILIHNR    | 66   | 221  |
| >NOTCH2-R1 FQILIRNRV   | 143  | >NOTCH2-R1 FQILIHNRV   | 293  | 150  |
| >NOTCH2-R1 FQILIRNR    | 502  | >NOTCH2-R1 FQILIHNR    | 168  | 334  |
| >NOTCH2-R1 VFQILIRNR   | 28   | >NOTCH2-R1 VFQILIHNR   | 9    | 19   |
| >NOTCH2-R1 VFQILIRNR   | 308  | >NOTCH2-R1 VFQILIHNR   | 74   | 234  |
| >NOTCH2-R1 VFQILIRNR   | 211  | >NOTCH2-R1 VFQILIHNR   | 51   | 160  |
| >NOTCH2-R1 VFQILIRNRV  | 3290 | >NOTCH2-R1 VFQILIHNRV  | 337  | 2953 |
| >NOTCH2-R1 GVFQILIRNR\ | 466  | >NOTCH2-R1 GVFQILIHNR\ | 359  | 107  |
| >NOTCH2-R1 GVFQILIRNR\ | 68   | >NOTCH2-R1 GVFQILIHNR\ | 46   | 22   |
| >NOTCH2-R1 GVFQILIRNR\ | 190  | >NOTCH2-R1 GVFQILIHNR\ | 116  | 74   |
| >NOTCH2-R1 GVFQILIRNR\ | 179  | >NOTCH2-R1 GVFQILIHNR\ | 97   | 82   |
| >NOTCH2-R1 GVFQILIRNR\ | 97   | >NOTCH2-R1 GVFQILIHNR\ | 27   | 70   |
| >NOTCH2-R1 GVFQILIRNR\ | 155  | >NOTCH2-R1 GVFQILIHNR\ | 67   | 88   |
| >NOTCH2-R1 GVFQILIRNR\ | 17   | >NOTCH2-R1 GVFQILIHNR\ | 13   | 4    |
| >NOTCH2-R1 GVFQILIR    | 66   | >NOTCH2-R1 GVFQILIH    | 1282 | 1216 |
| >NOTCH2-R1 GVFQILIR    | 107  | >NOTCH2-R1 GVFQILIH    | 7650 | 7543 |
| >NOTCH2-R1 GVFQILIRNR  | 161  | >NOTCH2-R1 GVFQILIHNR  | 100  | 61   |
| >NOTCH2-R1 GVFQILIR    | 42   | >NOTCH2-R1 GVFQILIH    | 8307 | 8265 |
| >NOTCH2-R1 GVFQILIRNR  | 649  | >NOTCH2-R1 GVFQILIHNR  | 161  | 488  |
| >NOTCH2-R1 GVFQILIRNR\ | 48   | >NOTCH2-R1 GVFQILIHNR\ | 59   | 11   |
| >NOTCH2-R1 GVFQILIRNR\ | 138  | >NOTCH2-R1 GVFQILIHNR\ | 131  | 7    |
| >NOTCH2-R1 GVFQILIR    | 457  | >NOTCH2-R1 GVFQILIH    | 1810 | 1353 |
| >NOTCH2-R1 GVFQILIRNR  | 376  | >NOTCH2-R1 GVFQILIHNR  | 178  | 198  |

|                        |       |                         |       |       |
|------------------------|-------|-------------------------|-------|-------|
| >NOTCH2-R1 GVFQILIR    | 214   | >NOTCH2-R1 GVFQILIH     | 27888 | 27674 |
| >NOTCH2-R1 GVFQILIRNR  | 312   | >NOTCH2-R1 GVFQILIHNR   | 86    | 226   |
| >NOTCH2-R1 QGVFQILIRN  | 1487  | >NOTCH2-R1 QGVFQILIHN   | 358   | 1129  |
| >NOTCH2-R1 QGVFQILIR   | 160   | >NOTCH2-R1 QGVFQILIH    | 25280 | 25120 |
| >NOTCH2-R1 QGVFQILIRN  | 276   | >NOTCH2-R1 QGVFQILIHN   | 84    | 192   |
| >NOTCH2-R2 QRGP GTHM   | 15975 | >NOTCH2-R2 QQGP GTHM    | 87    | 15888 |
| >NOTCH2-R2 QRGP GTHM   | 1242  | >NOTCH2-R2 QQGP GTHM    | 266   | 976   |
| >NOTCH2-R2 GQRGP GTHM  | 46    | >NOTCH2-R2 GQQGP GTHM   | 72    | 26    |
| >NOTCH2-R2 GQRGP GTHM  | 224   | >NOTCH2-R2 GQQGP GTHM   | 274   | 50    |
| >NOTCH2-R2 GQRGP GTHM  | 64    | >NOTCH2-R2 GQQGP GTHM   | 659   | 595   |
| >NOTCH2-S2 S QLLSHHHI  | 396   | >NOTCH2-S2 I QLLSHHHI   | 634   | 238   |
| >NOTCH2-S2 S QLLSHHHI  | 43    | >NOTCH2-S2 I QLLSHHHI   | 47    | 4     |
| >NOTCH2-S2 S QLLSHHHIV | 213   | >NOTCH2-S2 I QLLSHHHIV  | 284   | 71    |
| >NOTCH2-S2 S QLLSHHHIV | 172   | >NOTCH2-S2 I QLLSHHHIV  | 195   | 23    |
| >NOTCH2-S2 S QLLSHHHIV | 127   | >NOTCH2-S2 I QLLSHHHIV  | 330   | 203   |
| >NOTCH2-S2 S QLLSHHHIV | 115   | >NOTCH2-S2 I QLLSHHHIV  | 609   | 494   |
| >NOTCH2-S2 S QLLSHHH   | 1013  | >NOTCH2-S2 I QLLSHHH    | 323   | 690   |
| >NOTCH2-S2 S QLLSHHHI  | 101   | >NOTCH2-S2 I QLLSHHHI   | 33    | 68    |
| >NOTCH2-S2 S QLLSHHHIV | 99    | >NOTCH2-S2 I QLLSHHHIV  | 32    | 67    |
| >NOTCH2-S2 S QLLSHHHIV | 420   | >NOTCH2-S2 I QLLSHHHIV  | 2252  | 1832  |
| >NOTCH2-S2 VS QLLSHHHI | 6943  | >NOTCH2-S2 VI QLLSHHHI  | 497   | 6446  |
| >NOTCH2-S2 VS QLLSHHHI | 9655  | >NOTCH2-S2 VI QLLSHHHI  | 287   | 9368  |
| >NOTCH2-S2 VS QLLSHHHI | 12931 | >NOTCH2-S2 VI QLLSHHHI  | 241   | 12690 |
| >NOTCH2-S2 VS QLLSHHHI | 16543 | >NOTCH2-S2 VI QLLSHHHI  | 488   | 16055 |
| >NOTCH2-S2 VS QLLSHHHI | 11010 | >NOTCH2-S2 VI QLLSHHHI  | 15    | 10995 |
| >NOTCH2-S2 VS QLLSHHHI | 179   | >NOTCH2-S2 VI QLLSHHHI  | 9824  | 9645  |
| >NOTCH2-S2 VS QLLSHHHI | 185   | >NOTCH2-S2 VI QLLSHHHI  | 3739  | 3554  |
| >NOTCH2-S2 VS QLLSHHHI | 450   | >NOTCH2-S2 VI QLLSHHHI  | 10015 | 9565  |
| >NOTCH2-S2 VS QLLSHHHI | 131   | >NOTCH2-S2 VI QLLSHHHI  | 11703 | 11572 |
| >NOTCH2-S2 HGASTVLPSV  | 28029 | >NOTCH2-S2 HGASTVLPSV   | 318   | 27711 |
| >NOTCH2-S2 SVS QLLSHHH | 414   | >NOTCH2-S2 SVI QLLSHHHI | 871   | 457   |
| >NOTCH2-S2 SVS QLLSHHH | 441   | >NOTCH2-S2 SVI QLLSHHHI | 337   | 104   |
| >NOTCH2-S2 SVS QLLSHHH | 346   | >NOTCH2-S2 SVI QLLSHHHI | 65    | 281   |
| >NOTCH2-S2 SVS QLLSH   | 6723  | >NOTCH2-S2 SVI QLLSH    | 120   | 6603  |
| >NOTCH2-S2 SVS QLLSHH  | 791   | >NOTCH2-S2 SVI QLLSHH   | 8     | 783   |
| >NOTCH2-S2 SVS QLLSHHH | 3231  | >NOTCH2-S2 SVI QLLSHHH  | 59    | 3172  |
| >NOTCH2-S2 SVS QLLSHHH | 2287  | >NOTCH2-S2 SVI QLLSHHHI | 32    | 2255  |
| >NOTCH2-S2 SVS QLLSHHH | 113   | >NOTCH2-S2 SVI QLLSHHHI | 51    | 62    |
| >NOTCH2-S2 SVS QLLSHHH | 571   | >NOTCH2-S2 SVI QLLSHHHI | 154   | 417   |
| >NOTCH2-S2 SVS QLLSHH  | 128   | >NOTCH2-S2 SVI QLLSHH   | 283   | 155   |
| >NOTCH2-S2 SVS QLLSHHH | 311   | >NOTCH2-S2 SVI QLLSHHHI | 373   | 62    |
| >NOTCH2-S2 PSVS QLLSHH | 484   | >NOTCH2-S2 PSVI QLLSHH  | 3487  | 3003  |
| >NOTCH2-S2 LPSVS QLL   | 217   | >NOTCH2-S2 LPSVI QLL    | 828   | 611   |

|                       |      |                       |      |      |
|-----------------------|------|-----------------------|------|------|
| >NOTCH2-S2 LPSVSQLL   | 339  | >NOTCH2-S2 LPSVIQLL   | 425  | 86   |
| >NOTCH2-S2 LPSVSQLL   | 298  | >NOTCH2-S2 LPSVIQLL   | 385  | 87   |
| >NOTCH2-S2 LPSVSQLL   | 105  | >NOTCH2-S2 LPSVIQLL   | 77   | 28   |
| >NOTCH2-S2 LPSVSQLLS  | 1237 | >NOTCH2-S2 LPSVIQLLS  | 448  | 789  |
| >NOTCH2-S2 LPSVSQLL   | 865  | >NOTCH2-S2 LPSVIQLL   | 363  | 502  |
| >NOTCH2-S2 VLPSVSQQL  | 504  | >NOTCH2-S2 VLPSVIQQL  | 464  | 40   |
| >NOTCH2-S2 VLPSVSQQL  | 389  | >NOTCH2-S2 VLPSVIQQL  | 108  | 281  |
| >NOTCH2-S2 VLPSVSQQL  | 230  | >NOTCH2-S2 VLPSVIQQL  | 76   | 154  |
| >NOTCH2-S2 VLPSVSQQL  | 29   | >NOTCH2-S2 VLPSVIQQL  | 40   | 11   |
| >NOTCH2-S2 VLPSVSQQL  | 14   | >NOTCH2-S2 VLPSVIQQL  | 14   | 0    |
| >NOTCH2-S2 VLPSVSQQL  | 25   | >NOTCH2-S2 VLPSVIQQL  | 43   | 18   |
| >NOTCH2-S2 VLPSVSQQL  | 68   | >NOTCH2-S2 VLPSVIQQL  | 28   | 40   |
| >NOTCH2-S2 VLPSVSQQL  | 915  | >NOTCH2-S2 VLPSVIQQL  | 428  | 487  |
| >NOTCH2-S2 VLPSVSQQL  | 571  | >NOTCH2-S2 VLPSVIQQL  | 190  | 381  |
| >NOTCH2-S2 VLPSVSQQL  | 7    | >NOTCH2-S2 VLPSVIQQL  | 4    | 3    |
| >NOTCH2-S2 VLPSVSQQL  | 9    | >NOTCH2-S2 VLPSVIQQL  | 4    | 5    |
| >NOTCH2-S2 VLPSVSQQL  | 241  | >NOTCH2-S2 VLPSVIQQL  | 160  | 81   |
| >NOTCH2-S2 VLPSVSQQL  | 206  | >NOTCH2-S2 VLPSVIQQL  | 128  | 78   |
| >NOTCH2-S2 VLPSVSQQL  | 24   | >NOTCH2-S2 VLPSVIQQL  | 12   | 12   |
| >NOTCH2-S2 VLPSVSQQL  | 19   | >NOTCH2-S2 VLPSVIQQL  | 12   | 7    |
| >NOTCH2-S2 VLPSVSQQL  | 46   | >NOTCH2-S2 VLPSVIQQL  | 26   | 20   |
| >NOTCH2-S2 VLPSVSQQL  | 205  | >NOTCH2-S2 VLPSVIQQL  | 69   | 136  |
| >NOTCH2-S2 VLPSVSQQL  | 4    | >NOTCH2-S2 VLPSVIQQL  | 3    | 1    |
| >NOTCH2-S2 VLPSVSQQL  | 5    | >NOTCH2-S2 VLPSVIQQL  | 3    | 2    |
| >NOTCH2-S2 VLPSVSQQL  | 6    | >NOTCH2-S2 VLPSVIQQL  | 3    | 3    |
| >NOTCH2-S2 TVLPSVSQQL | 615  | >NOTCH2-S2 TVLPSVIQQL | 429  | 186  |
| >NOTCH2-S2 TVLPSVSQQL | 306  | >NOTCH2-S2 TVLPSVIQQL | 1907 | 1601 |
| >NOTCH2-S2 TVLPSVSQQL | 991  | >NOTCH2-S2 TVLPSVIQQL | 490  | 501  |
| >NOTCH2-S2 TVLPSVSQQL | 265  | >NOTCH2-S2 TVLPSVIQQL | 98   | 167  |
| >NOTCH2-S2 TVLPSVSQQL | 711  | >NOTCH2-S2 TVLPSVIQQL | 292  | 419  |
| >NOTCH2-S2 TVLPSVSQQL | 405  | >NOTCH2-S2 TVLPSVIQQL | 224  | 181  |
| >NOTCH2-S2 TVLPSVSQQL | 654  | >NOTCH2-S2 TVLPSVIQQL | 232  | 422  |
| >NOTCH2-S2 TVLPSVSQQL | 1147 | >NOTCH2-S2 TVLPSVIQQL | 464  | 683  |
| >NOTCH2-S2 TVLPSVSQQL | 952  | >NOTCH2-S2 TVLPSVIQQL | 472  | 480  |
| >NOTCH2-S2 TVLPSVSQQL | 362  | >NOTCH2-S2 TVLPSVIQQL | 299  | 63   |
| >NOTCH2-S2 TVLPSVSQQL | 62   | >NOTCH2-S2 TVLPSVIQQL | 78   | 16   |
| >NOTCH2-S2 TVLPSVSQQL | 231  | >NOTCH2-S2 TVLPSVIQQL | 112  | 119  |
| >NOTCH2-S2 TVLPSVSQQL | 273  | >NOTCH2-S2 TVLPSVIQQL | 874  | 601  |
| >NOTCH2-S2 TVLPSVSQQL | 177  | >NOTCH2-S2 TVLPSVIQQL | 226  | 49   |
| >NOTCH2-S2 TVLPSVSQQL | 70   | >NOTCH2-S2 TVLPSVIQQL | 31   | 39   |
| >NOTCH2-S2 TVLPSVSQQL | 106  | >NOTCH2-S2 TVLPSVIQQL | 93   | 13   |
| >NOTCH2-S2 TVLPSVSQQL | 14   | >NOTCH2-S2 TVLPSVIQQL | 35   | 21   |
| >NOTCH2-S2 TVLPSVSQQL | 252  | >NOTCH2-S2 TVLPSVIQQL | 427  | 175  |

|                       |       |                        |      |       |
|-----------------------|-------|------------------------|------|-------|
| >NOTCH2-S2 TVLPSVSQI  | 145   | >NOTCH2-S2 TVLPSVIQL   | 4569 | 4424  |
| >NOTCH2-S2 STVLPSVSQI | 784   | >NOTCH2-S2 STVLPSVIQL  | 424  | 360   |
| >NOTCH2-S2 STVLPSVSQI | 84    | >NOTCH2-S2 STVLPSVIQL  | 160  | 76    |
| >NOTCH2-S2 STVLPSVSQI | 1287  | >NOTCH2-S2 STVLPSVIQLL | 407  | 880   |
| >NOTCH2-S2 STVLPSVS   | 2717  | >NOTCH2-S2 STVLPSVI    | 94   | 2623  |
| >NOTCH2-S2 STVLPSVSQI | 200   | >NOTCH2-S2 STVLPSVIQL  | 163  | 37    |
| >NOTCH2-S2 STVLPSVSQI | 55    | >NOTCH2-S2 STVLPSVIQLL | 55   | 0     |
| >NOTCH2-S2 STVLPSVSQI | 221   | >NOTCH2-S2 STVLPSVIQL  | 162  | 59    |
| >NOTCH2-S2 STVLPSVSQI | 292   | >NOTCH2-S2 STVLPSVIQLL | 455  | 163   |
| >NOTCH2-S2 STVLPSVS   | 4349  | >NOTCH2-S2 STVLPSVI    | 43   | 4306  |
| >NOTCH2-S2 STVLPSVSQI | 4     | >NOTCH2-S2 STVLPSVIQL  | 5    | 1     |
| >NOTCH2-S2 STVLPSVSQI | 19    | >NOTCH2-S2 STVLPSVIQLL | 30   | 11    |
| >NOTCH2-S2 STVLPSVSQI | 82    | >NOTCH2-S2 STVLPSVIQL  | 50   | 32    |
| >NOTCH2-S2 STVLPSVSQI | 26    | >NOTCH2-S2 STVLPSVIQLL | 24   | 2     |
| >NOTCH2-S2 STVLPSVSQI | 100   | >NOTCH2-S2 STVLPSVIQL  | 75   | 25    |
| >NOTCH2-S2 STVLPSVSQI | 31    | >NOTCH2-S2 STVLPSVIQLL | 40   | 9     |
| >NOTCH2-S2 STVLPSVS   | 21524 | >NOTCH2-S2 STVLPSVI    | 20   | 21504 |
| >NOTCH2-S2 STVLPSVSQI | 332   | >NOTCH2-S2 STVLPSVIQL  | 1828 | 1496  |
| >NOTCH2-S2 STVLPSVSQI | 365   | >NOTCH2-S2 STVLPSVIQLL | 477  | 112   |
| >NOTCH2-S2 ASTVLPVS   | 9778  | >NOTCH2-S2 ASTVLPVI    | 218  | 9560  |
| >NOTCH2-S2 ASTVLPVSQ  | 9     | >NOTCH2-S2 ASTVLPVIQL  | 12   | 3     |
| >NOTCH2-S2 ASTVLPVSQ  | 313   | >NOTCH2-S2 ASTVLPVIQL  | 200  | 113   |
| >NOTCH2-S2 ASTVLPVS   | 754   | >NOTCH2-S2 ASTVLPVI    | 45   | 709   |
| >NOTCH2-S2 ASTVLPVSQ  | 31    | >NOTCH2-S2 ASTVLPVIQL  | 404  | 373   |
| >NOTCH2-S2 ASTVLPVS   | 22552 | >NOTCH2-S2 ASTVLPVI    | 43   | 22509 |
| >NOTCH2-S2 GASTVLPVS  | 32918 | >NOTCH2-S2 GASTVLPVI   | 84   | 32834 |
| >NOTCH2-V2 VLTSALSPV  | 16    | >NOTCH2-V2 MLTSALSPV   | 9    | 7     |
| >NOTCH2-V2 VLTSALSPVI | 1030  | >NOTCH2-V2 MLTSALSPVI  | 165  | 865   |
| >NOTCH2-V2 VLTSALSPV  | 6     | >NOTCH2-V2 MLTSALSPV   | 2    | 4     |
| >NOTCH2-V2 VLTSALSPVI | 221   | >NOTCH2-V2 MLTSALSPVI  | 38   | 183   |
| >NOTCH2-V2 VLTSALSPV  | 3     | >NOTCH2-V2 MLTSALSPV   | 2    | 1     |
| >NOTCH2-V2 VLTSALSPVI | 403   | >NOTCH2-V2 MLTSALSPVI  | 83   | 320   |
| >NOTCH2-V2 VLTSALSPV  | 10    | >NOTCH2-V2 MLTSALSPV   | 5    | 5     |
| >NOTCH2-V2 VLTSALSPVI | 1847  | >NOTCH2-V2 MLTSALSPVI  | 303  | 1544  |
| >NOTCH2-V2 VLTSALSPV  | 3     | >NOTCH2-V2 MLTSALSPV   | 3    | 0     |
| >NOTCH2-V2 VLTSALSPVI | 27    | >NOTCH2-V2 MLTSALSPVI  | 15   | 12    |
| >NOTCH2-V2 VLTSALSPV  | 4     | >NOTCH2-V2 MLTSALSPV   | 3    | 1     |
| >NOTCH2-V2 VLTSALSPVI | 54    | >NOTCH2-V2 MLTSALSPVI  | 30   | 24    |
| >NOTCH2-V2 VLTSALSPV  | 6     | >NOTCH2-V2 MLTSALSPV   | 6    | 0     |
| >NOTCH2-V2 VLTSALSPVI | 17    | >NOTCH2-V2 MLTSALSPVI  | 17   | 0     |
| >NOTCH2-V2 VLTSALSPV  | 4     | >NOTCH2-V2 MLTSALSPV   | 3    | 1     |
| >NOTCH2-V2 VLTSALSPVI | 62    | >NOTCH2-V2 MLTSALSPVI  | 34   | 28    |
| >NOTCH2-V2 VLTSALSPV  | 2     | >NOTCH2-V2 MLTSALSPV   | 2    | 0     |

|                        |      |                        |     |      |
|------------------------|------|------------------------|-----|------|
| >NOTCH2-V2 VLTSALSPVI  | 8    | >NOTCH2-V2 MLTSALSPVI  | 5   | 3    |
| >NOTCH2-V2 VLTSALSPVIC | 73   | >NOTCH2-V2 MLTSALSPVIC | 32  | 41   |
| >NOTCH2-V2 VLTSALSPV   | 947  | >NOTCH2-V2 MLTSALSPV   | 20  | 927  |
| >NOTCH2-V2 VLTSALSPV   | 1210 | >NOTCH2-V2 MLTSALSPV   | 44  | 1166 |
| >NOTCH2-V2 VLTSALSPV   | 1206 | >NOTCH2-V2 MLTSALSPV   | 388 | 818  |
| >NOTCH2-V2 TVLTSALSPV  | 94   | >NOTCH2-V2 TMLTSALSPV  | 11  | 83   |
| >NOTCH2-V2 TVLTSALSPVI | 3839 | >NOTCH2-V2 TMLTSALSPV  | 99  | 3740 |
| >NOTCH2-V2 TVLTSALSPV  | 91   | >NOTCH2-V2 TMLTSALSPV  | 14  | 77   |
| >NOTCH2-V2 TVLTSALSPV  | 22   | >NOTCH2-V2 TMLTSALSPV  | 8   | 14   |
| >NOTCH2-V2 TVLTSALSPVI | 5436 | >NOTCH2-V2 TMLTSALSPV  | 371 | 5065 |
| >NOTCH2-V2 TVLTSALSPV  | 27   | >NOTCH2-V2 TMLTSALSPV  | 20  | 7    |
| >NOTCH2-V2 TVLTSALSPVI | 369  | >NOTCH2-V2 TMLTSALSPV  | 150 | 219  |
| >NOTCH2-V2 TVLTSALSPV  | 211  | >NOTCH2-V2 TMLTSALSPV  | 3   | 208  |
| >NOTCH2-V2 TVLTSALSPVI | 3180 | >NOTCH2-V2 TMLTSALSPV  | 27  | 3153 |
| >NOTCH2-V2 TVLTSALSPV  | 224  | >NOTCH2-V2 TMLTSALSPV  | 4   | 220  |
| >NOTCH2-V2 TVLTSALSPVI | 6240 | >NOTCH2-V2 TMLTSALSPV  | 34  | 6206 |
| >NOTCH2-V2 TVLTSALSPV  | 210  | >NOTCH2-V2 TMLTSALSPV  | 7   | 203  |
| >NOTCH2-V2 TVLTSALSPVI | 2902 | >NOTCH2-V2 TMLTSALSPV  | 31  | 2871 |
| >NOTCH2-V2 TVLTSALSPV  | 321  | >NOTCH2-V2 TMLTSALSPV  | 4   | 317  |
| >NOTCH2-V2 TVLTSALSPVI | 4833 | >NOTCH2-V2 TMLTSALSPV  | 45  | 4788 |
| >NOTCH2-V2 TVLTSALSPV  | 56   | >NOTCH2-V2 TMLTSALSPV  | 3   | 53   |
| >NOTCH2-V2 TVLTSALSPVI | 6860 | >NOTCH2-V2 TMLTSALSPV  | 101 | 6759 |
| >NOTCH2-V2 TVLTSALSPVI | 763  | >NOTCH2-V2 TMLTSALSPV  | 432 | 331  |
| >NOTCH2-V2 TVLTSALSPV  | 131  | >NOTCH2-V2 TMLTSALSPV  | 521 | 390  |
| >NOTCH2-V2 TVLTSALSPV  | 7    | >NOTCH2-V2 TMLTSALSPV  | 15  | 8    |
| >NOTCH2-V2 TVLTSALSPVI | 67   | >NOTCH2-V2 TMLTSALSPV  | 310 | 243  |
| >NOTCH2-V2 TVLTSALSPV  | 4163 | >NOTCH2-V2 TMLTSALSPV  | 66  | 4097 |
| >NOTCH2-V2 TVLTSALSPVI | 5214 | >NOTCH2-V2 TMLTSALSPV  | 112 | 5102 |
| >NOTCH2-V2 TVLTSALSPV  | 3704 | >NOTCH2-V2 TMLTSALSPV  | 372 | 3332 |
| >NOTCH2-V2 TVLTSALSPVI | 1368 | >NOTCH2-V2 TMLTSALSPV  | 103 | 1265 |
| >NOTCH2-V2 YNVTPSPPGT  | 1787 | >NOTCH2-V2 YNVTPSPPGT  | 118 | 1669 |
| >NOTCH2-V2 GTVLTSALSP\ | 3183 | >NOTCH2-V2 GTMLTSALSP  | 153 | 3030 |
| >NOTCH2-V2 GTVLTSAL    | 1214 | >NOTCH2-V2 GTMLTSAL    | 197 | 1017 |
| >NOTCH2-V2 GTVLTSALSP\ | 435  | >NOTCH2-V2 GTMLTSALSP  | 66  | 369  |
| >NOTCH2-V2 GTVLTSALSP\ | 66   | >NOTCH2-V2 GTMLTSALSP  | 19  | 47   |
| >NOTCH2-V2 GTVLTSAL    | 1397 | >NOTCH2-V2 GTMLTSAL    | 485 | 912  |
| >NOTCH2-V2 GTVLTSALSP\ | 62   | >NOTCH2-V2 GTMLTSALSP  | 22  | 40   |
| >NOTCH2-V2 GTVLTSALSP\ | 861  | >NOTCH2-V2 GTMLTSALSP  | 246 | 615  |
| >NOTCH2-V2 GTVLTSALSP\ | 316  | >NOTCH2-V2 GTMLTSALSP  | 31  | 285  |
| >NOTCH2-V2 GTVLTSALSP\ | 1145 | >NOTCH2-V2 GTMLTSALSP  | 367 | 778  |
| >NOTCH2-V2 GTVLTSAL    | 1759 | >NOTCH2-V2 GTMLTSAL    | 212 | 1547 |
| >NOTCH2-V2 GTVLTSALSP\ | 218  | >NOTCH2-V2 GTMLTSALSP  | 69  | 149  |
| >NOTCH2-V2 GTVLTSALSP\ | 539  | >NOTCH2-V2 GTMLTSALSP  | 104 | 435  |

|                        |       |                       |       |       |
|------------------------|-------|-----------------------|-------|-------|
| >NOTCH2-V2 GTVLTSAL    | 14    | >NOTCH2-V2 GTMLTSAL   | 16    | 2     |
| >NOTCH2-V2 GTVLTSALSP  | 141   | >NOTCH2-V2 GTMLTSALSP | 149   | 8     |
| >NOTCH2-V2 GTVLTSALS   | 660   | >NOTCH2-V2 GTMLTSALS  | 388   | 272   |
| >NOTCH2-V2 GTVLTSALSP  | 92    | >NOTCH2-V2 GTMLTSALSP | 54    | 38    |
| >NOTCH2-V2 SPPGTVLTSAL | 462   | >NOTCH2-V2 SPPGTMLTSA | 591   | 129   |
| >NOTCH2-V2 SPPGTVLTSAL | 108   | >NOTCH2-V2 SPPGTMLTSA | 182   | 74    |
| >NOTCH2-V2 SPPGTVLTSAL | 81    | >NOTCH2-V2 SPPGTMLTSA | 78    | 3     |
| >NOTCH2-V2 SPPGTVLTSAL | 26    | >NOTCH2-V2 SPPGTMLTSA | 19    | 7     |
| >NOTCH2-V2 SPPGTVLTSAL | 454   | >NOTCH2-V2 SPPGTMLTSA | 537   | 83    |
| >NOTCH2-V2 SPPGTVLTSAL | 166   | >NOTCH2-V2 SPPGTMLTSA | 205   | 39    |
| >NOTCH2-V2 SPPGTVLTSAL | 66    | >NOTCH2-V2 SPPGTMLTSA | 95    | 29    |
| >NOTCH2-V2 SPPGTVLTSAL | 87    | >NOTCH2-V2 SPPGTMLTSA | 63    | 24    |
| >NOTCH2-V2 PSPPGTVL    | 7     | >NOTCH2-V2 PSPPGTML   | 4     | 3     |
| >NOTCH2-V2 TPSPPGTV    | 330   | >NOTCH2-V2 TPSPPGTM   | 58    | 272   |
| >NOTCH2-V2 TPSPPGTVL   | 19    | >NOTCH2-V2 TPSPPGTML  | 34    | 15    |
| >NOTCH2-V2 TPSPPGTV    | 3975  | >NOTCH2-V2 TPSPPGTM   | 64    | 3911  |
| >NOTCH2-V2 TPSPPGTVL   | 133   | >NOTCH2-V2 TPSPPGTML  | 1490  | 1357  |
| >NOTCH2-V2 VTPSPPGTV   | 41    | >NOTCH2-V2 VTPSPPGTM  | 5443  | 5402  |
| >NOTCH2-V2 VTPSPPGTV   | 12107 | >NOTCH2-V2 VTPSPPGTM  | 145   | 11962 |
| >NOTCH2-V2 VTPSPPGTV   | 6419  | >NOTCH2-V2 VTPSPPGTM  | 124   | 6295  |
| >NOTCH2-V2 VTPSPPGTV   | 98    | >NOTCH2-V2 VTPSPPGTM  | 9147  | 9049  |
| >NOTCH2-V2 VTPSPPGTV   | 6962  | >NOTCH2-V2 VTPSPPGTM  | 216   | 6746  |
| >NOTCH2-V2 VTPSPPGTVL  | 319   | >NOTCH2-V2 VTPSPPGTMI | 264   | 55    |
| >NOTCH2-V2 VTPSPPGTV   | 9     | >NOTCH2-V2 VTPSPPGTM  | 4     | 5     |
| >NOTCH2-V2 VTPSPPGTVL  | 2     | >NOTCH2-V2 VTPSPPGTMI | 2     | 0     |
| >NOTCH2-V2 VTPSPPGTVL  | 22    | >NOTCH2-V2 VTPSPPGTMI | 23    | 1     |
| >NOTCH2-V2 VTPSPPGTV   | 693   | >NOTCH2-V2 VTPSPPGTM  | 30    | 663   |
| >NOTCH2-V2 VTPSPPGTVL  | 382   | >NOTCH2-V2 VTPSPPGTMI | 183   | 199   |
| >NOTCH2-V2 VTPSPPGTV   | 1152  | >NOTCH2-V2 VTPSPPGTM  | 335   | 817   |
| >NOTCH2-V2 VTPSPPGTVL  | 45    | >NOTCH2-V2 VTPSPPGTMI | 56    | 11    |
| >NOTCH2-V2 NVTPSPPGTV  | 131   | >NOTCH2-V2 NVTPSPPGTM | 3292  | 3161  |
| >NOTCH2-V2 NVTPSPPGTV  | 204   | >NOTCH2-V2 NVTPSPPGTM | 15158 | 14954 |
| >NOTCH2-V2 NVTPSPPGTV  | 565   | >NOTCH2-V2 NVTPSPPGTM | 337   | 228   |
| >NOTCH2-V2 NVTPSPPGTV  | 69    | >NOTCH2-V2 NVTPSPPGTM | 902   | 833   |
| >NOTCH2-V2 NVTPSPPGTV  | 3434  | >NOTCH2-V2 NVTPSPPGTM | 146   | 3288  |
| >NOTCH2-Y7 GYNCQVNI    | 213   | >NOTCH2-Y7 GCNCQVNI   | 29339 | 29126 |
| >NOTCH2-Y7 GYNCQVNI    | 45    | >NOTCH2-Y7 GCNCQVNI   | 23736 | 23691 |
| >NOTCH2-Y7 RCTCKKGFKE  | 460   | >NOTCH2-Y7 RCTCKKGFKE | 21301 | 20841 |
| >NOTCH2-Y7 KGYNCQVNI   | 88    | >NOTCH2-Y7 KGCNCQVNI  | 258   | 170   |
| >NOTCH2-Y7 FKGYNQV     | 289   | >NOTCH2-Y7 FKGCNCQV   | 318   | 29    |
| >NOTCH2-Y7 FKGYNQVNI   | 53    | >NOTCH2-Y7 FKGCNCQVN  | 52    | 1     |
| >NOTCH2-Y7 GFKGYNCQV   | 252   | >NOTCH2-Y7 GFKGCNCQV  | 503   | 251   |
| >NOTCH2-Y7 KGFKGYNCQV  | 473   | >NOTCH2-Y7 KGFKGCNCQV | 782   | 309   |



|                        |      |                        |       |       |
|------------------------|------|------------------------|-------|-------|
| >NOTCH2-Y7 CKKGFKGY    | 201  | >NOTCH2-Y7 CKKGFKGC    | 11480 | 11279 |
| >NOTCH2-Y7 CTCKKGFKGY  | 333  | >NOTCH2-Y7 CTCKKGFKGC  | 30288 | 29955 |
| >NOTCH2-Y7 CTCKKGFKGY  | 29   | >NOTCH2-Y7 CTCKKGFKGC  | 14539 | 14510 |
| >NOTCH2-Y7 CTCKKGFKGY  | 256  | >NOTCH2-Y7 CTCKKGFKGC  | 24924 | 24668 |
| >NOTCH2-Y7 CTCKKGFKGY  | 34   | >NOTCH2-Y7 CTCKKGFKGC  | 19436 | 19402 |
| >NPM1-G69[ GSPIKVTL    | 459  | >NPM1-G69[ DSPIKVTL    | 810   | 351   |
| >NPM1-G69[ GSPIKVTLATL | 457  | >NPM1-G69[ DSPIKVTLATL | 807   | 350   |
| >NPM1-G69[ GSPIKVTLATL | 191  | >NPM1-G69[ DSPIKVTLATL | 2083  | 1892  |
| >NPM1-G69[ GSPIKVTL    | 239  | >NPM1-G69[ DSPIKVTL    | 9908  | 9669  |
| >NPM1-G69[ GSPIKVTLA   | 422  | >NPM1-G69[ DSPIKVTLA   | 6885  | 6463  |
| >NPM1-G69[ GSPIKVTLATL | 6    | >NPM1-G69[ DSPIKVTLATL | 56    | 50    |
| >NPM1-G69[ EGSPIKVTL   | 353  | >NPM1-G69[ EDSPIKVTL   | 2015  | 1662  |
| >NPM1-G69[ YEGSPIKV    | 966  | >NPM1-G69[ YEDSPIKV    | 339   | 627   |
| >NPM1-G69[ YEGSPIKV    | 590  | >NPM1-G69[ YEDSPIKV    | 199   | 391   |
| >NPM1-G69[ YEGSPIKVTL  | 1515 | >NPM1-G69[ YEDSPIKVTL  | 69    | 1446  |
| >NPM1-G69[ YEGSPIKV    | 1219 | >NPM1-G69[ YEDSPIKV    | 228   | 991   |
| >NPM1-G69[ YEGSPIKVTL  | 111  | >NPM1-G69[ YEDSPIKVTL  | 72    | 39    |
| >NPM1-G69[ YEGSPIKVTL  | 252  | >NPM1-G69[ YEDSPIKVTL  | 211   | 41    |
| >NPM1-G69[ YEGSPIKVTLA | 315  | >NPM1-G69[ YEDSPIKVTLA | 734   | 419   |
| >NPM1-G69[ NYEGSPIKVTI | 101  | >NPM1-G69[ NYEDSPIKVTI | 503   | 402   |
| >NPM1-G69[ NYEGSPIKVTI | 88   | >NPM1-G69[ NYEDSPIKVTI | 260   | 172   |
| >NPM1-G69[ MNYEGSPI    | 383  | >NPM1-G69[ MNYEDSPI    | 1101  | 718   |
| >NPM1-G69[ MNYEGSPIKV  | 385  | >NPM1-G69[ MNYEDSPIKV  | 455   | 70    |
| >NPM1-G69[ MNYEGSPIKV  | 482  | >NPM1-G69[ MNYEDSPIKV  | 539   | 57    |
| >NPM1-G69[ MNYEGSPIKV  | 870  | >NPM1-G69[ MNYEDSPIKV  | 465   | 405   |
| >NPM1-G69[ MNYEGSPIKV  | 131  | >NPM1-G69[ MNYEDSPIKV  | 178   | 47    |
| >NPM1-G69[ MNYEGSPIK   | 198  | >NPM1-G69[ MNYEDSPIK   | 1403  | 1205  |
| >NPM1-G69[ MNYEGSPIK   | 286  | >NPM1-G69[ MNYEDSPIK   | 361   | 75    |
| >NPM1-G69[ MNYEGSPI    | 528  | >NPM1-G69[ MNYEDSPI    | 414   | 114   |
| >NPM1-G69[ MNYEGSPIKV  | 229  | >NPM1-G69[ MNYEDSPIKV  | 274   | 45    |
| >NPM1-G69[ MNYEGSPI    | 276  | >NPM1-G69[ MNYEDSPI    | 544   | 268   |
| >NPM1-G69[ MNYEGSPI    | 35   | >NPM1-G69[ MNYEDSPI    | 61    | 26    |
| >NPM1-G69[ AMNYEGSPIK  | 133  | >NPM1-G69[ AMNYEDSPIK  | 95    | 38    |
| >NPM1-G69[ AMNYEGSPI   | 53   | >NPM1-G69[ AMNYEDSPI   | 59    | 6     |
| >NPM1-G69[ AMNYEGSPIK  | 34   | >NPM1-G69[ AMNYEDSPIK  | 30    | 4     |
| >NPM1-G69[ AMNYEGSPI   | 11   | >NPM1-G69[ AMNYEDSPI   | 22    | 11    |
| >NPM1-G69[ AMNYEGSPIK  | 9    | >NPM1-G69[ AMNYEDSPIK  | 11    | 2     |
| >NPM1-G69[ AMNYEGSPI   | 84   | >NPM1-G69[ AMNYEDSPI   | 293   | 209   |
| >NPM1-G69[ AMNYEGSPIK  | 7    | >NPM1-G69[ AMNYEDSPIK  | 12    | 5     |
| >NPM1-G69[ AMNYEGSPI   | 49   | >NPM1-G69[ AMNYEDSPI   | 46    | 3     |
| >NPM1-G69[ AMNYEGSPIK  | 13   | >NPM1-G69[ AMNYEDSPIK  | 11    | 2     |
| >NPM1-G69[ AMNYEGSPIK  | 14   | >NPM1-G69[ AMNYEDSPIK  | 13    | 1     |
| >NPM1-G69[ AMNYEGSPIK  | 49   | >NPM1-G69[ AMNYEDSPIK  | 53    | 4     |

|                      |      |                      |       |       |
|----------------------|------|----------------------|-------|-------|
| >NPM1-G69[AMNYEGSPI  | 430  | >NPM1-G69[AMNYEDSPI  | 563   | 133   |
| >NPM1-G69[AMNYEGSPIk | 6    | >NPM1-G69[AMNYEDSPIk | 7     | 1     |
| >NPM1-G69[AMNYEGSPIk | 36   | >NPM1-G69[AMNYEDSPIk | 192   | 156   |
| >NPM1-G69[AMNYEGSPIk | 39   | >NPM1-G69[AMNYEDSPIk | 40    | 1     |
| >NPM1-G69[AMNYEGSPIk | 112  | >NPM1-G69[AMNYEDSPIk | 327   | 215   |
| >NPM1-G69[AMNYEGSPI  | 303  | >NPM1-G69[AMNYEDSPI  | 207   | 96    |
| >NPM1-G69[AMNYEGSPI  | 94   | >NPM1-G69[AMNYEDSPI  | 180   | 86    |
| >NPM1-G69[AMNYEGSPI  | 17   | >NPM1-G69[AMNYEDSPI  | 103   | 86    |
| >NPM1-G69[AMNYEGSPIk | 489  | >NPM1-G69[AMNYEDSPIk | 1021  | 532   |
| >NPM1-G69[AMNYEGSPIk | 149  | >NPM1-G69[AMNYEDSPIk | 329   | 180   |
| >NPM1-G69[EAMNYEGSP  | 883  | >NPM1-G69[EAMNYEDSP  | 389   | 494   |
| >NPM1-G69[EAMNYEGSP  | 18   | >NPM1-G69[EAMNYEDSP  | 17    | 1     |
| >NPM1-G69[EAMNYEGSP  | 61   | >NPM1-G69[EAMNYEDSP  | 133   | 72    |
| >NPM1-G69[EAMNYEGSP  | 60   | >NPM1-G69[EAMNYEDSP  | 149   | 89    |
| >NPM1-G69[AEAMNYEGS  | 34   | >NPM1-G69[AEAMNYEDS  | 41    | 7     |
| >NPM1-G69[AEAMNYEGS  | 31   | >NPM1-G69[AEAMNYEDS  | 44    | 13    |
| >NPM1-G69[AEAMNYEGS  | 87   | >NPM1-G69[AEAMNYEDS  | 120   | 33    |
| >NPM1-G69[AEAMNYEG   | 118  | >NPM1-G69[AEAMNYED   | 301   | 183   |
| >NPM1-G69[AEAMNYEGS  | 67   | >NPM1-G69[AEAMNYEDS  | 115   | 48    |
| >NPM1-G69[AEAMNYEGS  | 250  | >NPM1-G69[AEAMNYEDS  | 409   | 159   |
| >NPM1-G69[AEAMNYEGS  | 51   | >NPM1-G69[AEAMNYEDS  | 83    | 32    |
| >NPM1-G69[AEAMNYEGS  | 9    | >NPM1-G69[AEAMNYEDS  | 11    | 2     |
| >NPM1-L287LWQWRKSL   | 244  | >NPM1-L287FWQWRKSL   | 89    | 155   |
| >NPM1-L287LWQWRKSL   | 29   | >NPM1-L287FWQWRKSL   | 49    | 20    |
| >NPM1-L287DLWQWRKSI  | 200  | >NPM1-L287DFWQWRKSI  | 20005 | 19805 |
| >NPM1-L287DLWQWRKSI  | 29   | >NPM1-L287DFWQWRKSI  | 19439 | 19410 |
| >NPM1-L287DLWQWRKSI  | 1552 | >NPM1-L287DFWQWRKSI  | 473   | 1079  |
| >NPM1-L287DLWQWRKSI  | 7090 | >NPM1-L287DFWQWRKSI  | 161   | 6929  |
| >NPM1-L287RMTDQEAIQ  | 96   | >NPM1-L287RMTDQEAIQ  | 8017  | 7921  |
| >NPM1-L287RMTDQEAIQ  | 187  | >NPM1-L287RMTDQEAIQ  | 7068  | 6881  |
| >NPM1-L287RMTDQEAIQ  | 47   | >NPM1-L287RMTDQEAIQ  | 4065  | 4018  |
| >NPM1-L287RMTDQEAIQ  | 40   | >NPM1-L287RMTDQEAIQ  | 7186  | 7146  |
| >NPM1-L287RMTDQEAIQ  | 39   | >NPM1-L287RMTDQEAIQ  | 9070  | 9031  |
| >NPM1-L287RMTDQEAIQ  | 4    | >NPM1-L287RMTDQEAIQ  | 1185  | 1181  |
| >NPM1-L287RMTDQEAIQ  | 1716 | >NPM1-L287RMTDQEAIQ  | 435   | 1281  |
| >NPM1-L287RMTDQEAIQ  | 4881 | >NPM1-L287RMTDQEAIQ  | 281   | 4600  |
| >NPM1-L287RMTDQEAIQ  | 401  | >NPM1-L287RMTDQEAIQ  | 16    | 385   |
| >NPM1-L287RMTDQEAIQ  | 1042 | >NPM1-L287RMTDQEAIQ  | 110   | 932   |
| >NPM1-L287IQDLWQWRk  | 230  | >NPM1-L287IQDFWQWRk  | 247   | 17    |
| >NPM1-L287IQDLWQWRk  | 205  | >NPM1-L287IQDFWQWRk  | 109   | 96    |
| >NPM1-L287IQDLWQWR   | 478  | >NPM1-L287IQDFWQWR   | 255   | 223   |
| >NPM1-L287IQDLWQWRk  | 327  | >NPM1-L287IQDFWQWRk  | 501   | 174   |
| >NPM1-L287IQDLWQWR   | 506  | >NPM1-L287IQDFWQWR   | 416   | 90    |

|                      |      |                      |     |      |
|----------------------|------|----------------------|-----|------|
| >NPM1-L287 AIQDLWQWF | 208  | >NPM1-L287 AIQDFWQWF | 88  | 120  |
| >NPM1-L287 AIQDLWQWF | 57   | >NPM1-L287 AIQDFWQWF | 30  | 27   |
| >NPM1-L287 AIQDLWQWF | 958  | >NPM1-L287 AIQDFWQWF | 441 | 517  |
| >NPM1-L287 AIQDLWQWF | 44   | >NPM1-L287 AIQDFWQWF | 28  | 16   |
| >NPM1-L287 AIQDLWQWF | 226  | >NPM1-L287 AIQDFWQWF | 87  | 139  |
| >NPM1-L287 AIQDLWQWF | 772  | >NPM1-L287 AIQDFWQWF | 482 | 290  |
| >NPM1-L287 AIQDLWQWF | 1560 | >NPM1-L287 AIQDFWQWF | 471 | 1089 |
| >NPM1-L287 AIQDLWQW  | 950  | >NPM1-L287 AIQDFWQW  | 464 | 486  |
| >NPM1-L287 AIQDLWQW  | 178  | >NPM1-L287 AIQDFWQW  | 204 | 26   |
| >NPM1-L287 AIQDLWQWF | 823  | >NPM1-L287 AIQDFWQWF | 216 | 607  |
| >NPM1-L287 AIQDLWQWF | 1092 | >NPM1-L287 AIQDFWQWF | 415 | 677  |
| >NPM1-L287 AIQDLWQWF | 541  | >NPM1-L287 AIQDFWQWF | 250 | 291  |
| >NPM1-L287 AIQDLWQWF | 685  | >NPM1-L287 AIQDFWQWF | 338 | 347  |
| >NPM1-L287 EAIQDLWQ  | 276  | >NPM1-L287 EAIQDFWQ  | 492 | 216  |
| >NPM1-L287 EAIQDLWQW | 42   | >NPM1-L287 EAIQDFWQW | 265 | 223  |
| >NPM1-L287 EAIQDLWQW | 702  | >NPM1-L287 EAIQDFWQW | 151 | 551  |
| >NPM1-L287 EAIQDLWQ  | 1336 | >NPM1-L287 EAIQDFWQ  | 291 | 1045 |
| >NPM1-L287 EAIQDLWQW | 44   | >NPM1-L287 EAIQDFWQW | 31  | 13   |
| >NPM1-L287 EAIQDLWQW | 17   | >NPM1-L287 EAIQDFWQW | 12  | 5    |
| >NPM1-L287 EAIQDLWQW | 179  | >NPM1-L287 EAIQDFWQW | 509 | 330  |
| >NPM1-L287 EAIQDLWQW | 22   | >NPM1-L287 EAIQDFWQW | 13  | 9    |
| >NPM1-L287 EAIQDLWQW | 60   | >NPM1-L287 EAIQDFWQW | 61  | 1    |
| >NPM1-L287 EAIQDLWQW | 16   | >NPM1-L287 EAIQDFWQW | 15  | 1    |
| >NPM1-L287 EAIQDLWQW | 52   | >NPM1-L287 EAIQDFWQW | 14  | 38   |
| >NPM1-L287 EAIQDLWQW | 1385 | >NPM1-L287 EAIQDFWQW | 439 | 946  |
| >NPM1-L287 EAIQDLWQW | 682  | >NPM1-L287 EAIQDFWQW | 224 | 458  |
| >NPM1-L287 QEAIQDLW  | 117  | >NPM1-L287 QEAIQDFW  | 109 | 8    |
| >NPM1-L287 QEAIQDLWQ | 17   | >NPM1-L287 QEAIQDFWQ | 11  | 6    |
| >NPM1-L287 QEAIQDLW  | 72   | >NPM1-L287 QEAIQDFW  | 49  | 23   |
| >NPM1-L287 QEAIQDLWQ | 37   | >NPM1-L287 QEAIQDFWQ | 21  | 16   |
| >NPM1-L287 QEAIQDLWQ | 870  | >NPM1-L287 QEAIQDFWQ | 306 | 564  |
| >NPM1-L287 QEAIQDLWQ | 271  | >NPM1-L287 QEAIQDFWQ | 231 | 40   |
| >NPM1-L287 DQEAIQDLW | 649  | >NPM1-L287 DQEAIQDFW | 324 | 325  |
| >NPM1-L287 MTDQEAIQD | 1907 | >NPM1-L287 MTDQEAIQD | 292 | 1615 |
| >NPM1-L287 MTDQEAIQD | 167  | >NPM1-L287 MTDQEAIQD | 206 | 39   |
| >NPM1-L287 MTDQEAIQD | 37   | >NPM1-L287 MTDQEAIQD | 10  | 27   |
| >NPM1-L287 MTDQEAIQD | 39   | >NPM1-L287 MTDQEAIQD | 53  | 14   |
| >NPM1-L287 MTDQEAIQD | 394  | >NPM1-L287 MTDQEAIQD | 628 | 234  |
| >NPM1-L287 MTDQEAIQD | 80   | >NPM1-L287 MTDQEAIQD | 75  | 5    |
| >NPM1-L287 MTDQEAIQD | 12   | >NPM1-L287 MTDQEAIQD | 13  | 1    |
| >NPM1-L287 MTDQEAIQD | 289  | >NPM1-L287 MTDQEAIQD | 303 | 14   |
| >NPM1-S293 LWQWRKSL  | 244  | >NPM1-S293 LWQWRKPL  | 754 | 510  |
| >NPM1-S293 LWQWRKSL  | 29   | >NPM1-S293 LWQWRKPL  | 43  | 14   |

|                       |     |                       |       |       |
|-----------------------|-----|-----------------------|-------|-------|
| >NPM1-S293 DLWQWRKSI  | 200 | >NPM1-S293 DLWQWRKPI  | 167   | 33    |
| >NPM1-S293 DLWQWRKSI  | 563 | >NPM1-S293 DLWQWRKPI  | 476   | 87    |
| >NPM1-S293 DLWQWRKSI  | 29  | >NPM1-S293 DLWQWRKPI  | 58    | 29    |
| >NPM1-S293 DLWQWRKSI  | 599 | >NPM1-S293 DLWQWRKPI  | 160   | 439   |
| >NPM1-S293 IQDLWQWRK  | 230 | >NPM1-S293 IQDLWQWRK  | 175   | 55    |
| >NPM1-S293 IQDLWQWRK  | 327 | >NPM1-S293 IQDLWQWRK  | 178   | 149   |
| >NPM1-W29 LWQWRKSL    | 244 | >NPM1-W29 LWQGRKSL    | 197   | 47    |
| >NPM1-W29 LWQWRKSL    | 29  | >NPM1-W29 LWQGRKSL    | 119   | 90    |
| >NPM1-W29 DLWQWRKSI   | 200 | >NPM1-W29 DLWQGRKSL   | 1959  | 1759  |
| >NPM1-W29 DLWQWRKSI   | 29  | >NPM1-W29 DLWQGRKSL   | 79    | 50    |
| >NPM1-W29 IQDLWQWRK   | 230 | >NPM1-W29 IQDLWQGRK   | 911   | 681   |
| >NPM1-W29 IQDLWQWRK   | 205 | >NPM1-W29 IQDLWQGRK   | 1796  | 1591  |
| >NPM1-W29 IQDLWQWR    | 478 | >NPM1-W29 IQDLWQGR    | 1819  | 1341  |
| >NPM1-W29 IQDLWQWRK   | 327 | >NPM1-W29 IQDLWQGRK   | 1197  | 870   |
| >NPM1-W29 AIQDLWQWF   | 208 | >NPM1-W29 AIQDLWQGR   | 365   | 157   |
| >NPM1-W29 AIQDLWQWF   | 57  | >NPM1-W29 AIQDLWQGR   | 412   | 355   |
| >NPM1-W29 AIQDLWQWF   | 44  | >NPM1-W29 AIQDLWQGR   | 128   | 84    |
| >NPM1-W29 AIQDLWQWF   | 226 | >NPM1-W29 AIQDLWQGR   | 2592  | 2366  |
| >NPM1-W29 AIQDLWQW    | 178 | >NPM1-W29 AIQDLWQG    | 21605 | 21427 |
| >NPM1-W29 EAIQDLWQW   | 42  | >NPM1-W29 EAIQDLWQG   | 2849  | 2807  |
| >NPM1-W29 EAIQDLWQW   | 44  | >NPM1-W29 EAIQDLWQG   | 124   | 80    |
| >NPM1-W29 EAIQDLWQW   | 17  | >NPM1-W29 EAIQDLWQG   | 31    | 14    |
| >NPM1-W29 EAIQDLWQW   | 179 | >NPM1-W29 EAIQDLWQG   | 22708 | 22529 |
| >NPM1-W29 EAIQDLWQW   | 22  | >NPM1-W29 EAIQDLWQG   | 23524 | 23502 |
| >NPM1-W29 EAIQDLWQW   | 60  | >NPM1-W29 EAIQDLWQG   | 22166 | 22106 |
| >NPM1-W29 EAIQDLWQW   | 16  | >NPM1-W29 EAIQDLWQG   | 18489 | 18473 |
| >NPM1-W29 EAIQDLWQW   | 52  | >NPM1-W29 EAIQDLWQG   | 29212 | 29160 |
| >NPM1-W29 QEAIQDLWQ   | 17  | >NPM1-W29 QEAIQDLWQ   | 1966  | 1949  |
| >NPM1-W29 QEAIQDLWQ   | 37  | >NPM1-W29 QEAIQDLWQ   | 1622  | 1585  |
| >NPM1-W29 QEAIQDLWQ   | 271 | >NPM1-W29 QEAIQDLWQ   | 357   | 86    |
| >NRAS-A11T·MTEYKLVVVC | 78  | >NRAS-A11T·MTEYKLVVVC | 863   | 785   |
| >NRAS-A11T·VVGAGGVGK  | 326 | >NRAS-A11T·VVGTTGGVVK | 459   | 133   |
| >NRAS-A11T·VVGAGGVGK  | 89  | >NRAS-A11T·VVGTTGGVVK | 130   | 41    |
| >NRAS-A11T·VVVGAGGV   | 117 | >NRAS-A11T·VVVGTGGV   | 88    | 29    |
| >NRAS-A11T·VVVGAGGV   | 68  | >NRAS-A11T·VVVGTGGV   | 74    | 6     |
| >NRAS-A11T·VVVGAGGV   | 139 | >NRAS-A11T·VVVGTGGV   | 71    | 68    |
| >NRAS-A11T·VVVGAGGV   | 23  | >NRAS-A11T·VVVGTGGV   | 18    | 5     |
| >NRAS-A11T·VVVGAGGVG  | 76  | >NRAS-A11T·VVVGTGGVG  | 103   | 27    |
| >NRAS-A11T·VVVGAGGVG  | 101 | >NRAS-A11T·VVVGTGGVG  | 126   | 25    |
| >NRAS-A11T·VVVGAGGVG  | 203 | >NRAS-A11T·VVVGTGGVG  | 275   | 72    |
| >NRAS-A11T·VVVGAGGV   | 191 | >NRAS-A11T·VVVGTGGV   | 248   | 57    |
| >NRAS-A11T·LVVVGAGGV  | 180 | >NRAS-A11T·LVVVTGGV   | 75    | 105   |
| >NRAS-A11T·LVVVGAGGV  | 55  | >NRAS-A11T·LVVVTGGV   | 39    | 16    |

|                        |      |                        |      |      |
|------------------------|------|------------------------|------|------|
| >NRAS-A11T·LVVVGAGGV   | 75   | >NRAS-A11T·LVVVGTTGGV  | 42   | 33   |
| >NRAS-A11T·LVVVGAGGV   | 572  | >NRAS-A11T·LVVVGTTGGV  | 420  | 152  |
| >NRAS-A11T·LVVVGAGGV   | 284  | >NRAS-A11T·LVVVGTTGGV  | 255  | 29   |
| >NRAS-A11T·LVVVGAGGV   | 154  | >NRAS-A11T·LVVVGTTGGV  | 55   | 99   |
| >NRAS-A11T·LVVVGAGGV   | 159  | >NRAS-A11T·LVVVGTTGGV  | 112  | 47   |
| >NRAS-A11T·KLVVVGAGG   | 392  | >NRAS-A11T·KLVVVGTTGG  | 231  | 161  |
| >NRAS-A11T·KLVVVGAGG   | 35   | >NRAS-A11T·KLVVVGTTGG  | 17   | 18   |
| >NRAS-A11T·KLVVVGAGG   | 661  | >NRAS-A11T·KLVVVGTTGG  | 274  | 387  |
| >NRAS-A11T·KLVVVGAGG   | 6    | >NRAS-A11T·KLVVVGTTGG  | 5    | 1    |
| >NRAS-A11T·KLVVVGAGG   | 17   | >NRAS-A11T·KLVVVGTTGG  | 16   | 1    |
| >NRAS-A11T·KLVVVGAGG   | 14   | >NRAS-A11T·KLVVVGTTGG  | 12   | 2    |
| >NRAS-A11T·KLVVVGAGG   | 121  | >NRAS-A11T·KLVVVGTTGG  | 91   | 30   |
| >NRAS-A11T·KLVVVGAGG   | 6    | >NRAS-A11T·KLVVVGTTGG  | 6    | 0    |
| >NRAS-A11T·YKLVVVGAGG  | 423  | >NRAS-A11T·YKLVVVGTTGG | 374  | 49   |
| >NRAS-A11T·YKLVVVGAGG  | 220  | >NRAS-A11T·YKLVVVGTTGG | 166  | 54   |
| >NRAS-A11T·YKLVVVGAGG  | 662  | >NRAS-A11T·YKLVVVGTTGG | 397  | 265  |
| >NRAS-A11T·YKLVVVGAG   | 423  | >NRAS-A11T·YKLVVVGTT   | 1945 | 1522 |
| >NRAS-A11T·TEYKLVVVGAG | 303  | >NRAS-A11T·TEYKLVVVGTT | 343  | 40   |
| >NRAS-A11T·TEYKLVVVGAG | 68   | >NRAS-A11T·TEYKLVVVGTT | 300  | 232  |
| >NRAS-A146·AKTRQGVED   | 15   | >NRAS-A146·TKTRQGVED   | 40   | 25   |
| >NRAS-A146·SAKTRQGV    | 318  | >NRAS-A146·STKTRQGV    | 46   | 272  |
| >NRAS-A146·SAKTRQGV    | 3462 | >NRAS-A146·STKTRQGV    | 468  | 2994 |
| >NRAS-A146·TSAKTRQGV   | 42   | >NRAS-A146·TSTKTRQGV   | 215  | 173  |
| >NRAS-A146·TSAKTRQGV   | 451  | >NRAS-A146·TSTKTRQGV   | 2515 | 2064 |
| >NRAS-A146·ETSAKTRQGV  | 13   | >NRAS-A146·ETSTKTRQGV  | 19   | 6    |
| >NRAS-A146·ETSAKTRQGV  | 18   | >NRAS-A146·ETSTKTRQGV  | 38   | 20   |
| >NRAS-A146·IETSAKTRQGV | 243  | >NRAS-A146·IETSTKTRQGV | 234  | 9    |
| >NRAS-A146·IETSAKTRQGV | 263  | >NRAS-A146·IETSTKTRQGV | 356  | 93   |
| >NRAS-A146·IETSAKTRQGV | 97   | >NRAS-A146·IETSTKTRQGV | 142  | 45   |
| >NRAS-A146·FIETSAKTR   | 144  | >NRAS-A146·FIETSTKTR   | 104  | 40   |
| >NRAS-A146·FIETSAKTR   | 727  | >NRAS-A146·FIETSTKTR   | 317  | 410  |
| >NRAS-A146·PFIETSAKTR  | 280  | >NRAS-A146·PFIETSTKTR  | 189  | 91   |
| >NRAS-A146·IPFIETSA    | 519  | >NRAS-A146·IPFIETST    | 446  | 73   |
| >NRAS-A146·IPFIETSAK   | 301  | >NRAS-A146·IPFIETSTK   | 892  | 591  |
| >NRAS-A146·IPFIETSA    | 38   | >NRAS-A146·IPFIETST    | 575  | 537  |
| >NRAS-A146·IPFIETSAKTR | 312  | >NRAS-A146·IPFIETSTKTR | 230  | 82   |
| >NRAS-A146·GIPFIETSAK  | 154  | >NRAS-A146·GIPFIETSTK  | 134  | 20   |
| >NRAS-A146·GIPFIETSAK  | 72   | >NRAS-A146·GIPFIETSTK  | 59   | 13   |
| >NRAS-A146·GIPFIETSAK  | 152  | >NRAS-A146·GIPFIETSTK  | 126  | 26   |
| >NRAS-A146·YGIPFIETSAK | 290  | >NRAS-A146·YGIPFIETSTK | 160  | 130  |
| >NRAS-A18T·ALTIQLIQ    | 273  | >NRAS-A18T·TLTIQLIQ    | 1457 | 1184 |
| >NRAS-A18T·SALTIQLI    | 711  | >NRAS-A18T·STLTIQLI    | 442  | 269  |
| >NRAS-A18T·SALTIQLI    | 1391 | >NRAS-A18T·STLTIQLI    | 391  | 1000 |

|                        |       |                        |      |       |
|------------------------|-------|------------------------|------|-------|
| >NRAS-A18T·SALTIQLI    | 2287  | >NRAS-A18T·STLTIQLI    | 418  | 1869  |
| >NRAS-A18T·SALTIQLI    | 4584  | >NRAS-A18T·STLTIQLI    | 174  | 4410  |
| >NRAS-A18T·SALTIQLI    | 1505  | >NRAS-A18T·STLTIQLI    | 155  | 1350  |
| >NRAS-A18T·SALTIQLI    | 736   | >NRAS-A18T·STLTIQLI    | 132  | 604   |
| >NRAS-A18T·SALTIQLIQNH | 5792  | >NRAS-A18T·STLTIQLIQNH | 365  | 5427  |
| >NRAS-A18T·SALTIQLI    | 127   | >NRAS-A18T·STLTIQLI    | 27   | 100   |
| >NRAS-A18T·KSALTIQLI   | 239   | >NRAS-A18T·KSTLTIQLI   | 184  | 55    |
| >NRAS-A18T·KSALTIQL    | 276   | >NRAS-A18T·KSTLTIQL    | 519  | 243   |
| >NRAS-A18T·KSALTIQL    | 7     | >NRAS-A18T·KSTLTIQL    | 11   | 4     |
| >NRAS-A18T·KSALTIQLI   | 42    | >NRAS-A18T·KSTLTIQLI   | 62   | 20    |
| >NRAS-A18T·KSALTIQL    | 35    | >NRAS-A18T·KSTLTIQL    | 65   | 30    |
| >NRAS-A18T·KSALTIQLI   | 24    | >NRAS-A18T·KSTLTIQLI   | 46   | 22    |
| >NRAS-A18T·KSALTIQL    | 335   | >NRAS-A18T·KSTLTIQL    | 1469 | 1134  |
| >NRAS-A18T·KSALTIQLI   | 73    | >NRAS-A18T·KSTLTIQLI   | 57   | 16    |
| >NRAS-A18T·KSALTIQL    | 770   | >NRAS-A18T·KSTLTIQL    | 371  | 399   |
| >NRAS-A18T·KSALTIQL    | 241   | >NRAS-A18T·KSTLTIQL    | 531  | 290   |
| >NRAS-A18T·KSALTIQLI   | 35    | >NRAS-A18T·KSTLTIQLI   | 60   | 25    |
| >NRAS-A18T·GKSALTIQL   | 414   | >NRAS-A18T·GKSTLTIQL   | 820  | 406   |
| >NRAS-A18T·GKSALTIQLI  | 765   | >NRAS-A18T·GKSTLTIQLI  | 335  | 430   |
| >NRAS-A18T·GVGKSALTI   | 931   | >NRAS-A18T·GVGKSTLTI   | 268  | 663   |
| >NRAS-A18T·VGAGGVGKS   | 1249  | >NRAS-A18T·VGAGGVGKS   | 319  | 930   |
| >NRAS-A59T·AGQEEYSAM   | 1842  | >NRAS-A59T·TGQEEYSAM   | 493  | 1349  |
| >NRAS-A59T·TAGQEEYSAM  | 5120  | >NRAS-A59T·TTGQEEYSAM  | 71   | 5049  |
| >NRAS-A59T·TAGQEEYSAM  | 5722  | >NRAS-A59T·TTGQEEYSAM  | 225  | 5497  |
| >NRAS-A59T·TAGQEEYSAM  | 56    | >NRAS-A59T·TTGQEEYSAM  | 19   | 37    |
| >NRAS-A59T·TAGQEEYSAM  | 11397 | >NRAS-A59T·TTGQEEYSAM  | 341  | 11056 |
| >NRAS-A59T·ETCLLDILDTA | 107   | >NRAS-A59T·ETCLLDILDTT | 1516 | 1409  |
| >NRAS-A59T·DTAGQEEY    | 387   | >NRAS-A59T·DTTGQEEY    | 1392 | 1005  |
| >NRAS-A59T·DTAGQEEY    | 94    | >NRAS-A59T·DTTGQEEY    | 253  | 159   |
| >NRAS-A59T·DTAGQEEYS/  | 491   | >NRAS-A59T·DTTGQEEYSA  | 1194 | 703   |
| >NRAS-A59T·DTAGQEEY    | 28    | >NRAS-A59T·DTTGQEEY    | 121  | 93    |
| >NRAS-A59T·DTAGQEEYS/  | 20    | >NRAS-A59T·DTTGQEEYSA  | 54   | 34    |
| >NRAS-A59T·DTAGQEEY    | 8     | >NRAS-A59T·DTTGQEEY    | 13   | 5     |
| >NRAS-A59T·DTAGQEEYS/  | 6     | >NRAS-A59T·DTTGQEEYSA  | 10   | 4     |
| >NRAS-A59T·DTAGQEEYS/  | 223   | >NRAS-A59T·DTTGQEEYSA  | 188  | 35    |
| >NRAS-A59T·DTAGQEEY    | 245   | >NRAS-A59T·DTTGQEEY    | 498  | 253   |
| >NRAS-A59T·DTAGQEEY    | 89    | >NRAS-A59T·DTTGQEEY    | 309  | 220   |
| >NRAS-A59T·DTAGQEEYS   | 408   | >NRAS-A59T·DTTGQEEYS   | 2458 | 2050  |
| >NRAS-A59T·DTAGQEEYS/  | 389   | >NRAS-A59T·DTTGQEEYSA  | 2266 | 1877  |
| >NRAS-A59T·DTAGQEEYS/  | 449   | >NRAS-A59T·DTTGQEEYSA  | 884  | 435   |
| >NRAS-A59T·ILDTAGQEEY  | 135   | >NRAS-A59T·ILDTTGQEEY  | 113  | 22    |
| >NRAS-A59T·ILDTAGQEEY: | 734   | >NRAS-A59T·ILDTTGQEEY: | 453  | 281   |
| >NRAS-A59T·ILDTAGQEEY  | 571   | >NRAS-A59T·ILDTTGQEEY  | 422  | 149   |

|                        |      |                        |      |      |
|------------------------|------|------------------------|------|------|
| >NRAS-A59T·ILDTAGQEEY  | 349  | >NRAS-A59T·ILDTTGQEEY  | 415  | 66   |
| >NRAS-A59T·ILDTAGQEEY  | 463  | >NRAS-A59T·ILDTTGQEEY  | 313  | 150  |
| >NRAS-A59T·DILDTAGQEE  | 849  | >NRAS-A59T·DILDTTGQEE  | 419  | 430  |
| >NRAS-A59T·DILDTAGQEE  | 150  | >NRAS-A59T·DILDTTGQEE  | 82   | 68   |
| >NRAS-A59T·DILDTAGQEE  | 183  | >NRAS-A59T·DILDTTGQEE  | 185  | 2    |
| >NRAS-A59T·LLDILDTA    | 318  | >NRAS-A59T·LLDILDTT    | 1347 | 1029 |
| >NRAS-A59T·LLDILDTA    | 45   | >NRAS-A59T·LLDILDTT    | 265  | 220  |
| >NRAS-A59T·LLDILDTA    | 149  | >NRAS-A59T·LLDILDTT    | 1918 | 1769 |
| >NRAS-A59T·LLDILDTA    | 42   | >NRAS-A59T·LLDILDTT    | 566  | 524  |
| >NRAS-A59T·LLDILDTA    | 36   | >NRAS-A59T·LLDILDTT    | 390  | 354  |
| >NRAS-A59T·LLDILDTAGQ  | 401  | >NRAS-A59T·LLDILDTTGQ  | 432  | 31   |
| >NRAS-A59T·CLLDILDTA   | 48   | >NRAS-A59T·CLLDILDTT   | 308  | 260  |
| >NRAS-A59T·CLLDILDTA   | 69   | >NRAS-A59T·CLLDILDTT   | 326  | 257  |
| >NRAS-A59T·CLLDILDTA   | 89   | >NRAS-A59T·CLLDILDTT   | 825  | 736  |
| >NRAS-A59T·CLLDILDTA   | 23   | >NRAS-A59T·CLLDILDTT   | 115  | 92   |
| >NRAS-A59T·CLLDILDTA   | 10   | >NRAS-A59T·CLLDILDTT   | 56   | 46   |
| >NRAS-A59T·CLLDILDTA   | 11   | >NRAS-A59T·CLLDILDTT   | 130  | 119  |
| >NRAS-A59T·CLLDILDTA   | 39   | >NRAS-A59T·CLLDILDTT   | 612  | 573  |
| >NRAS-A59T·CLLDILDTA   | 7    | >NRAS-A59T·CLLDILDTT   | 33   | 26   |
| >NRAS-A59T·CLLDILDTAGC | 479  | >NRAS-A59T·CLLDILDTTGC | 1068 | 589  |
| >NRAS-A59T·CLLDILDTA   | 13   | >NRAS-A59T·CLLDILDTT   | 117  | 104  |
| >NRAS-A59T·CLLDILDTAGC | 138  | >NRAS-A59T·CLLDILDTTGC | 179  | 41   |
| >NRAS-C51Y·CLLDILDT    | 904  | >NRAS-C51Y·YLLDILDT    | 22   | 882  |
| >NRAS-C51Y·CLLDILDTA   | 48   | >NRAS-C51Y·YLLDILDTA   | 8    | 40   |
| >NRAS-C51Y·CLLDILDTAG  | 2990 | >NRAS-C51Y·YLLDILDTAG  | 274  | 2716 |
| >NRAS-C51Y·CLLDILDTAGC | 6354 | >NRAS-C51Y·YLLDILDTAGC | 203  | 6151 |
| >NRAS-C51Y·CLLDILDT    | 1560 | >NRAS-C51Y·YLLDILDT    | 147  | 1413 |
| >NRAS-C51Y·CLLDILDTA   | 69   | >NRAS-C51Y·YLLDILDTA   | 5    | 64   |
| >NRAS-C51Y·CLLDILDTAG  | 4093 | >NRAS-C51Y·YLLDILDTAG  | 378  | 3715 |
| >NRAS-C51Y·CLLDILDTAGC | 731  | >NRAS-C51Y·YLLDILDTAGC | 42   | 689  |
| >NRAS-C51Y·CLLDILDT    | 1679 | >NRAS-C51Y·YLLDILDT    | 84   | 1595 |
| >NRAS-C51Y·CLLDILDTA   | 89   | >NRAS-C51Y·YLLDILDTA   | 5    | 84   |
| >NRAS-C51Y·CLLDILDTAGC | 3796 | >NRAS-C51Y·YLLDILDTAGC | 355  | 3441 |
| >NRAS-C51Y·CLLDILDT    | 1503 | >NRAS-C51Y·YLLDILDT    | 29   | 1474 |
| >NRAS-C51Y·CLLDILDTA   | 23   | >NRAS-C51Y·YLLDILDTA   | 4    | 19   |
| >NRAS-C51Y·CLLDILDTAG  | 6482 | >NRAS-C51Y·YLLDILDTAG  | 470  | 6012 |
| >NRAS-C51Y·CLLDILDTAGC | 1926 | >NRAS-C51Y·YLLDILDTAGC | 49   | 1877 |
| >NRAS-C51Y·CLLDILDT    | 667  | >NRAS-C51Y·YLLDILDT    | 9    | 658  |
| >NRAS-C51Y·CLLDILDTA   | 10   | >NRAS-C51Y·YLLDILDTA   | 2    | 8    |
| >NRAS-C51Y·CLLDILDTAG  | 3093 | >NRAS-C51Y·YLLDILDTAG  | 52   | 3041 |
| >NRAS-C51Y·CLLDILDTAGC | 835  | >NRAS-C51Y·YLLDILDTAGC | 12   | 823  |
| >NRAS-C51Y·CLLDILDT    | 2429 | >NRAS-C51Y·YLLDILDT    | 31   | 2398 |
| >NRAS-C51Y·CLLDILDTA   | 11   | >NRAS-C51Y·YLLDILDTA   | 3    | 8    |

|                        |       |                        |     |       |
|------------------------|-------|------------------------|-----|-------|
| >NRAS-C51Y-CLLDILDTAG  | 4659  | >NRAS-C51Y-YLLDILDTAG  | 177 | 4482  |
| >NRAS-C51Y-CLLDILDTAGC | 1277  | >NRAS-C51Y-YLLDILDTAGC | 23  | 1254  |
| >NRAS-C51Y-CLLDILDT    | 2051  | >NRAS-C51Y-YLLDILDT    | 14  | 2037  |
| >NRAS-C51Y-CLLDILDTA   | 39    | >NRAS-C51Y-YLLDILDTA   | 5   | 34    |
| >NRAS-C51Y-CLLDILDTAG  | 12191 | >NRAS-C51Y-YLLDILDTAG  | 341 | 11850 |
| >NRAS-C51Y-CLLDILDTAGC | 3176  | >NRAS-C51Y-YLLDILDTAGC | 28  | 3148  |
| >NRAS-C51Y-CLLDILDT    | 748   | >NRAS-C51Y-YLLDILDT    | 22  | 726   |
| >NRAS-C51Y-CLLDILDTA   | 7     | >NRAS-C51Y-YLLDILDTA   | 2   | 5     |
| >NRAS-C51Y-CLLDILDTAGC | 479   | >NRAS-C51Y-YLLDILDTAGC | 17  | 462   |
| >NRAS-C51Y-CLLDILDT    | 239   | >NRAS-C51Y-YLLDILDT    | 4   | 235   |
| >NRAS-C51Y-CLLDILDTA   | 13    | >NRAS-C51Y-YLLDILDTA   | 2   | 11    |
| >NRAS-C51Y-CLLDILDTAG  | 11181 | >NRAS-C51Y-YLLDILDTAG  | 144 | 11037 |
| >NRAS-C51Y-CLLDILDTAGC | 138   | >NRAS-C51Y-YLLDILDTAGC | 4   | 134   |
| >NRAS-C51Y-CLLDILDTA   | 6908  | >NRAS-C51Y-YLLDILDTA   | 326 | 6582  |
| >NRAS-C51Y-RKQVVIDGET  | 3483  | >NRAS-C51Y-RKQVVIDGET  | 20  | 3463  |
| >NRAS-C51Y-ETCLLDIL    | 80    | >NRAS-C51Y-ETYLLDIL    | 82  | 2     |
| >NRAS-C51Y-ETCLLDIL    | 424   | >NRAS-C51Y-ETYLLDIL    | 69  | 355   |
| >NRAS-C51Y-ETCLLDILDTA | 107   | >NRAS-C51Y-ETYLLDILDTA | 23  | 84    |
| >NRAS-C51Y-ETCLLDIL    | 5801  | >NRAS-C51Y-ETYLLDIL    | 239 | 5562  |
| >NRAS-C51Y-ETCLLDILDTA | 3948  | >NRAS-C51Y-ETYLLDILDTA | 200 | 3748  |
| >NRAS-C51Y-ETCLLDIL    | 3160  | >NRAS-C51Y-ETYLLDIL    | 337 | 2823  |
| >NRAS-C51Y-GETCLLDI    | 1292  | >NRAS-C51Y-GETYLLDI    | 482 | 810   |
| >NRAS-C51Y-GETCLLDIL   | 836   | >NRAS-C51Y-GETYLLDIL   | 163 | 673   |
| >NRAS-C51Y-GETCLLDI    | 67    | >NRAS-C51Y-GETYLLDI    | 39  | 28    |
| >NRAS-C51Y-GETCLLDIL   | 8     | >NRAS-C51Y-GETYLLDIL   | 6   | 2     |
| >NRAS-C51Y-GETCLLDI    | 303   | >NRAS-C51Y-GETYLLDI    | 109 | 194   |
| >NRAS-C51Y-GETCLLDIL   | 192   | >NRAS-C51Y-GETYLLDIL   | 44  | 148   |
| >NRAS-C51Y-GETCLLDILDT | 845   | >NRAS-C51Y-GETYLLDILDT | 339 | 506   |
| >NRAS-C51Y-GETCLLDIL   | 465   | >NRAS-C51Y-GETYLLDIL   | 543 | 78    |
| >NRAS-C51Y-GETCLLDI    | 124   | >NRAS-C51Y-GETYLLDI    | 14  | 110   |
| >NRAS-C51Y-GETCLLDIL   | 9     | >NRAS-C51Y-GETYLLDIL   | 8   | 1     |
| >NRAS-C51Y-GETCLLDILDT | 137   | >NRAS-C51Y-GETYLLDILDT | 106 | 31    |
| >NRAS-C51Y-IDGETCLLDI  | 411   | >NRAS-C51Y-IDGETYLLDI  | 349 | 62    |
| >NRAS-C51Y-IDGETCLL    | 477   | >NRAS-C51Y-IDGETYLL    | 273 | 204   |
| >NRAS-C51Y-IDGETCLLDI  | 248   | >NRAS-C51Y-IDGETYLLDI  | 108 | 140   |
| >NRAS-C51Y-VIDGETCL    | 3503  | >NRAS-C51Y-VIDGETYL    | 423 | 3080  |
| >NRAS-C51Y-VIDGETCLL   | 1091  | >NRAS-C51Y-VIDGETYLL   | 81  | 1010  |
| >NRAS-C51Y-VIDGETCL    | 1041  | >NRAS-C51Y-VIDGETYL    | 99  | 942   |
| >NRAS-C51Y-VIDGETCLL   | 144   | >NRAS-C51Y-VIDGETYLL   | 19  | 125   |
| >NRAS-C51Y-VIDGETCL    | 2255  | >NRAS-C51Y-VIDGETYL    | 199 | 2056  |
| >NRAS-C51Y-VIDGETCLL   | 476   | >NRAS-C51Y-VIDGETYLL   | 214 | 262   |
| >NRAS-C51Y-VIDGETCL    | 647   | >NRAS-C51Y-VIDGETYL    | 38  | 609   |
| >NRAS-C51Y-VIDGETCLL   | 84    | >NRAS-C51Y-VIDGETYLL   | 62  | 22    |



|                        |       |                        |     |       |
|------------------------|-------|------------------------|-----|-------|
| >NRAS-C51Y-VIDGETCLLDI | 781   | >NRAS-C51Y-VIDGETYLLDI | 377 | 404   |
| >NRAS-C51Y-VIDGETCLL   | 1269  | >NRAS-C51Y-VIDGETYLL   | 285 | 984   |
| >NRAS-C51Y-VIDGETCL    | 360   | >NRAS-C51Y-VIDGETYL    | 103 | 257   |
| >NRAS-C51Y-VIDGETCLL   | 137   | >NRAS-C51Y-VIDGETYLL   | 216 | 79    |
| >NRAS-C51Y-VIDGETCL    | 1133  | >NRAS-C51Y-VIDGETYL    | 167 | 966   |
| >NRAS-C51Y-VIDGETCLL   | 265   | >NRAS-C51Y-VIDGETYLL   | 88  | 177   |
| >NRAS-C51Y-VIDGETCL    | 136   | >NRAS-C51Y-VIDGETYL    | 32  | 104   |
| >NRAS-C51Y-VIDGETCLL   | 17    | >NRAS-C51Y-VIDGETYLL   | 41  | 24    |
| >NRAS-C51Y-VVIDGETCL   | 1879  | >NRAS-C51Y-VVIDGETYL   | 147 | 1732  |
| >NRAS-C51Y-VVIDGETCLL  | 1918  | >NRAS-C51Y-VVIDGETYLL  | 430 | 1488  |
| >NRAS-C51Y-VVIDGETCL   | 1748  | >NRAS-C51Y-VVIDGETYL   | 101 | 1647  |
| >NRAS-C51Y-VVIDGETCLL  | 148   | >NRAS-C51Y-VVIDGETYLL  | 52  | 96    |
| >NRAS-C51Y-VVIDGETCL   | 3732  | >NRAS-C51Y-VVIDGETYL   | 261 | 3471  |
| >NRAS-C51Y-VVIDGETCL   | 346   | >NRAS-C51Y-VVIDGETYL   | 15  | 331   |
| >NRAS-C51Y-VVIDGETCLL  | 579   | >NRAS-C51Y-VVIDGETYLL  | 152 | 427   |
| >NRAS-C51Y-VVIDGETCL   | 3452  | >NRAS-C51Y-VVIDGETYL   | 102 | 3350  |
| >NRAS-C51Y-VVIDGETCLL  | 639   | >NRAS-C51Y-VVIDGETYLL  | 282 | 357   |
| >NRAS-C51Y-VVIDGETCLL  | 1559  | >NRAS-C51Y-VVIDGETYLL  | 338 | 1221  |
| >NRAS-C51Y-VVIDGETCL   | 1479  | >NRAS-C51Y-VVIDGETYL   | 378 | 1101  |
| >NRAS-C51Y-VVIDGETCL   | 72    | >NRAS-C51Y-VVIDGETYL   | 9   | 63    |
| >NRAS-C51Y-VVIDGETCLL  | 17    | >NRAS-C51Y-VVIDGETYLL  | 20  | 3     |
| >NRAS-C51Y-VVIDGETC    | 18197 | >NRAS-C51Y-VVIDGETY    | 21  | 18176 |
| >NRAS-C51Y-VVIDGETCL   | 841   | >NRAS-C51Y-VVIDGETYL   | 339 | 502   |
| >NRAS-C51Y-VVIDGETC    | 20426 | >NRAS-C51Y-VVIDGETY    | 25  | 20401 |
| >NRAS-C51Y-VVIDGETC    | 25650 | >NRAS-C51Y-VVIDGETY    | 94  | 25556 |
| >NRAS-C51Y-VVIDGETC    | 25814 | >NRAS-C51Y-VVIDGETY    | 465 | 25349 |
| >NRAS-C51Y-VVIDGETC    | 16216 | >NRAS-C51Y-VVIDGETY    | 142 | 16074 |
| >NRAS-C51Y-VVIDGETC    | 19238 | >NRAS-C51Y-VVIDGETY    | 59  | 19179 |
| >NRAS-C51Y-VVIDGETC    | 18569 | >NRAS-C51Y-VVIDGETY    | 160 | 18409 |
| >NRAS-C51Y-QVVIDGETCL  | 2709  | >NRAS-C51Y-QVVIDGETYL  | 296 | 2413  |
| >NRAS-C51Y-QVVIDGETCL  | 1485  | >NRAS-C51Y-QVVIDGETYL  | 406 | 1079  |
| >NRAS-C51Y-QVVIDGETC   | 24143 | >NRAS-C51Y-QVVIDGETY   | 36  | 24107 |
| >NRAS-C51Y-QVVIDGETC   | 23680 | >NRAS-C51Y-QVVIDGETY   | 122 | 23558 |
| >NRAS-C51Y-QVVIDGETCL  | 962   | >NRAS-C51Y-QVVIDGETYL  | 211 | 751   |
| >NRAS-C51Y-QVVIDGETC   | 24221 | >NRAS-C51Y-QVVIDGETY   | 488 | 23733 |
| >NRAS-C51Y-QVVIDGETC   | 19399 | >NRAS-C51Y-QVVIDGETY   | 240 | 19159 |
| >NRAS-C51Y-QVVIDGETC   | 24515 | >NRAS-C51Y-QVVIDGETY   | 417 | 24098 |
| >NRAS-C51Y-KQVVIDGETC  | 1211  | >NRAS-C51Y-KQVVIDGETY  | 184 | 1027  |
| >NRAS-C51Y-KQVVIDGETC  | 185   | >NRAS-C51Y-KQVVIDGETY  | 25  | 160   |
| >NRAS-C51Y-KQVVIDGETC  | 11351 | >NRAS-C51Y-KQVVIDGETY  | 101 | 11250 |
| >NRAS-C51Y-KQVVIDGETC  | 4065  | >NRAS-C51Y-KQVVIDGETY  | 28  | 4037  |
| >NRAS-C51Y-KQVVIDGETC  | 222   | >NRAS-C51Y-KQVVIDGETY  | 205 | 17    |
| >NRAS-C51Y-KQVVIDGETC  | 458   | >NRAS-C51Y-KQVVIDGETY  | 303 | 155   |

|                        |      |                        |      |      |
|------------------------|------|------------------------|------|------|
| >NRAS-D92N DINLYREQIK  | 1818 | >NRAS-D92N NINLYREQIK  | 426  | 1392 |
| >NRAS-D92N DINLYREQIKF | 1269 | >NRAS-D92N NINLYREQIKF | 317  | 952  |
| >NRAS-D92N DINLYREQIKF | 48   | >NRAS-D92N NINLYREQIKF | 217  | 169  |
| >NRAS-D92N DINLYREQIKF | 53   | >NRAS-D92N NINLYREQIKF | 66   | 13   |
| >NRAS-D92N DINLYREQI   | 751  | >NRAS-D92N NINLYREQI   | 283  | 468  |
| >NRAS-D92N DINLYREQIKF | 1772 | >NRAS-D92N NINLYREQIKF | 431  | 1341 |
| >NRAS-D92N ADINLYREQI  | 83   | >NRAS-D92N ANINLYREQI  | 2943 | 2860 |
| >NRAS-D92N ADINLYREQI  | 75   | >NRAS-D92N ANINLYREQI  | 4151 | 4076 |
| >NRAS-D92N FADINLYREQ  | 909  | >NRAS-D92N FANINLYREQ  | 79   | 830  |
| >NRAS-D92N FADINLYREQ  | 967  | >NRAS-D92N FANINLYREQ  | 310  | 657  |
| >NRAS-D92N FADINLYREQ  | 403  | >NRAS-D92N FANINLYREQ  | 924  | 521  |
| >NRAS-D92N FADINLYREQ  | 374  | >NRAS-D92N FANINLYREQ  | 690  | 316  |
| >NRAS-D92N FADINLYR    | 1908 | >NRAS-D92N FANINLYR    | 59   | 1849 |
| >NRAS-D92N FADINLYR    | 1182 | >NRAS-D92N FANINLYR    | 212  | 970  |
| >NRAS-D92N FADINLYR    | 45   | >NRAS-D92N FANINLYR    | 12   | 33   |
| >NRAS-D92N FADINLYREQ  | 4447 | >NRAS-D92N FANINLYREQ  | 220  | 4227 |
| >NRAS-D92N FADINLYREQ  | 860  | >NRAS-D92N FANINLYREQ  | 495  | 365  |
| >NRAS-D92N FADINLYR    | 576  | >NRAS-D92N FANINLYR    | 215  | 361  |
| >NRAS-D92N FADINLYREQ  | 597  | >NRAS-D92N FANINLYREQ  | 486  | 111  |
| >NRAS-D92N SFADINLYR   | 462  | >NRAS-D92N SFANINLYR   | 411  | 51   |
| >NRAS-D92N SFADINLY    | 9    | >NRAS-D92N SFANINLY    | 10   | 1    |
| >NRAS-D92N SFADINLY    | 59   | >NRAS-D92N SFANINLY    | 52   | 7    |
| >NRAS-D92N SFADINLYR   | 20   | >NRAS-D92N SFANINLYR   | 16   | 4    |
| >NRAS-D92N SFADINLYR   | 111  | >NRAS-D92N SFANINLYR   | 163  | 52   |
| >NRAS-D92N SFADINLYR   | 22   | >NRAS-D92N SFANINLYR   | 20   | 2    |
| >NRAS-D92N SFADINLY    | 64   | >NRAS-D92N SFANINLY    | 41   | 23   |
| >NRAS-D92N SFADINLY    | 662  | >NRAS-D92N SFANINLY    | 244  | 418  |
| >NRAS-D92N SFADINLYR   | 9    | >NRAS-D92N SFANINLYR   | 12   | 3    |
| >NRAS-D92N KSFADINL    | 446  | >NRAS-D92N KSFANINL    | 142  | 304  |
| >NRAS-D92N KSFADINL    | 592  | >NRAS-D92N KSFANINL    | 476  | 116  |
| >NRAS-D92N KSFADINLY   | 177  | >NRAS-D92N KSFANINLY   | 92   | 85   |
| >NRAS-D92N KSFADINLYR  | 151  | >NRAS-D92N KSFANINLYR  | 53   | 98   |
| >NRAS-D92N KSFADINLY   | 58   | >NRAS-D92N KSFANINLY   | 40   | 18   |
| >NRAS-D92N KSFADINLYR  | 21   | >NRAS-D92N KSFANINLYR  | 15   | 6    |
| >NRAS-D92N KSFADINLY   | 143  | >NRAS-D92N KSFANINLY   | 92   | 51   |
| >NRAS-D92N KSFADINL    | 286  | >NRAS-D92N KSFANINL    | 35   | 251  |
| >NRAS-D92N KSFADINLY   | 604  | >NRAS-D92N KSFANINLY   | 57   | 547  |
| >NRAS-D92N KSFADINLYR  | 90   | >NRAS-D92N KSFANINLYR  | 22   | 68   |
| >NRAS-D92N KSFADINLY   | 12   | >NRAS-D92N KSFANINLY   | 13   | 1    |
| >NRAS-D92N KSFADINLYR  | 10   | >NRAS-D92N KSFANINLYR  | 5    | 5    |
| >NRAS-D92N KSFADINL    | 50   | >NRAS-D92N KSFANINL    | 22   | 28   |
| >NRAS-D92N KSFADINLY   | 382  | >NRAS-D92N KSFANINLY   | 175  | 207  |
| >NRAS-D92N KSFADINLYR  | 10   | >NRAS-D92N KSFANINLYR  | 8    | 2    |

|                         |      |                         |       |       |
|-------------------------|------|-------------------------|-------|-------|
| >NRAS-D92N KSFADINLY    | 107  | >NRAS-D92N KSFANINLY    | 99    | 8     |
| >NRAS-D92N KSFADINLY    | 284  | >NRAS-D92N KSFANINLY    | 230   | 54    |
| >NRAS-D92N KSFADINL     | 135  | >NRAS-D92N KSFANINL     | 57    | 78    |
| >NRAS-D92N KSFADINLY    | 40   | >NRAS-D92N KSFANINLY    | 18    | 22    |
| >NRAS-D92N KSFADINL     | 7    | >NRAS-D92N KSFANINL     | 5     | 2     |
| >NRAS-D92N KSFADINLY    | 9    | >NRAS-D92N KSFANINLY    | 5     | 4     |
| >NRAS-D92N KSFADINLY    | 68   | >NRAS-D92N KSFANINLY    | 70    | 2     |
| >NRAS-D92N KSFADINL     | 91   | >NRAS-D92N KSFANINL     | 89    | 2     |
| >NRAS-D92N KSFADINLY    | 22   | >NRAS-D92N KSFANINLY    | 19    | 3     |
| >NRAS-D92N KSFADINLY    | 11   | >NRAS-D92N KSFANINLY    | 16    | 5     |
| >NRAS-D92N KSFADINLY    | 267  | >NRAS-D92N KSFANINLY    | 181   | 86    |
| >NRAS-D92N KSFADINLYR   | 385  | >NRAS-D92N KSFANINLYR   | 337   | 48    |
| >NRAS-D92N KSFADINLYR   | 246  | >NRAS-D92N KSFANINLYR   | 195   | 51    |
| >NRAS-D92N KSFADINLYR   | 14   | >NRAS-D92N KSFANINLYR   | 12    | 2     |
| >NRAS-D92N KSFADINL     | 157  | >NRAS-D92N KSFANINL     | 187   | 30    |
| >NRAS-D92N SKSFADINLY   | 211  | >NRAS-D92N SKSFANINLY   | 126   | 85    |
| >NRAS-D92N SKSFADINLYF  | 247  | >NRAS-D92N SKSFANINLYF  | 192   | 55    |
| >NRAS-D92N SKSFADINL    | 690  | >NRAS-D92N SKSFANINL    | 152   | 538   |
| >NRAS-D92N SKSFADINLY   | 117  | >NRAS-D92N SKSFANINLY   | 45    | 72    |
| >NRAS-D92N SKSFADINLY   | 250  | >NRAS-D92N SKSFANINLY   | 172   | 78    |
| >NRAS-D92N SKSFADINLYF  | 179  | >NRAS-D92N SKSFANINLYF  | 162   | 17    |
| >NRAS-D92N NSKSFADINL'  | 106  | >NRAS-D92N NSKSFANINL'  | 75    | 31    |
| >NRAS-D92N NSKSFADINL'  | 880  | >NRAS-D92N NSKSFANINL'  | 483   | 397   |
| >NRAS-D92N NSKSFADINL'  | 33   | >NRAS-D92N NSKSFANINL'  | 33    | 0     |
| >NRAS-D92N NSKSFADI     | 628  | >NRAS-D92N NSKSFANI     | 339   | 289   |
| >NRAS-D92N AINNSKSFAD   | 188  | >NRAS-D92N AINNSKSFAN   | 63    | 125   |
| >NRAS-E49K- ETCLLDIL    | 80   | >NRAS-E49K- KTCLLDIL    | 4423  | 4343  |
| >NRAS-E49K- ETCLLDIL    | 9556 | >NRAS-E49K- KTCLLDIL    | 209   | 9347  |
| >NRAS-E49K- ETCLLDIL    | 424  | >NRAS-E49K- KTCLLDIL    | 11833 | 11409 |
| >NRAS-E49K- ETCLLDILDTA | 107  | >NRAS-E49K- KTCLLDILDTA | 8879  | 8772  |
| >NRAS-E49K- ETCLLDIL    | 3160 | >NRAS-E49K- KTCLLDIL    | 85    | 3075  |
| >NRAS-E49K- ETCLLDIL    | 6111 | >NRAS-E49K- KTCLLDIL    | 495   | 5616  |
| >NRAS-E49K- GETCLLDI    | 67   | >NRAS-E49K- GKTCLLDI    | 19711 | 19644 |
| >NRAS-E49K- GETCLLDIL   | 8    | >NRAS-E49K- GKTCLLDIL   | 10644 | 10636 |
| >NRAS-E49K- GETCLLDI    | 303  | >NRAS-E49K- GKTCLLDI    | 25743 | 25440 |
| >NRAS-E49K- GETCLLDIL   | 192  | >NRAS-E49K- GKTCLLDIL   | 18389 | 18197 |
| >NRAS-E49K- GETCLLDIL   | 465  | >NRAS-E49K- GKTCLLDIL   | 28160 | 27695 |
| >NRAS-E49K- GETCLLDI    | 124  | >NRAS-E49K- GKTCLLDI    | 6419  | 6295  |
| >NRAS-E49K- GETCLLDIL   | 9    | >NRAS-E49K- GKTCLLDIL   | 4477  | 4468  |
| >NRAS-E49K- GETCLLDILDT | 137  | >NRAS-E49K- GKTCLLDILDT | 24829 | 24692 |
| >NRAS-E49K- SYRKQVVIDG  | 4047 | >NRAS-E49K- SYRKQVVIDG  | 9     | 4038  |
| >NRAS-E49K- IDGETCLLDI  | 411  | >NRAS-E49K- IDGKTCLLDI  | 668   | 257   |
| >NRAS-E49K- IDGETCLL    | 477  | >NRAS-E49K- IDGKTCLL    | 981   | 504   |

|                       |       |                       |      |       |
|-----------------------|-------|-----------------------|------|-------|
| >NRAS-E49K-IDGETCLLDI | 248   | >NRAS-E49K-IDGKTCLLDI | 398  | 150   |
| >NRAS-E49K-VIDGETCLL  | 144   | >NRAS-E49K-VIDGKTCLL  | 326  | 182   |
| >NRAS-E49K-VIDGETCLL  | 476   | >NRAS-E49K-VIDGKTCLL  | 1034 | 558   |
| >NRAS-E49K-VIDGETCLL  | 84    | >NRAS-E49K-VIDGKTCLL  | 76   | 8     |
| >NRAS-E49K-VIDGETCL   | 360   | >NRAS-E49K-VIDGKTCL   | 612  | 252   |
| >NRAS-E49K-VIDGETCLL  | 137   | >NRAS-E49K-VIDGKTCLL  | 184  | 47    |
| >NRAS-E49K-VIDGETCLL  | 265   | >NRAS-E49K-VIDGKTCLL  | 368  | 103   |
| >NRAS-E49K-VIDGETCL   | 136   | >NRAS-E49K-VIDGKTCL   | 155  | 19    |
| >NRAS-E49K-VIDGETCLL  | 17    | >NRAS-E49K-VIDGKTCLL  | 19   | 2     |
| >NRAS-E49K-VVIDGETCLL | 148   | >NRAS-E49K-VVIDGKTCLL | 319  | 171   |
| >NRAS-E49K-VVIDGETCL  | 346   | >NRAS-E49K-VVIDGKTCL  | 516  | 170   |
| >NRAS-E49K-VVIDGETCL  | 72    | >NRAS-E49K-VVIDGKTCL  | 75   | 3     |
| >NRAS-E49K-VVIDGETCLL | 17    | >NRAS-E49K-VVIDGKTCLL | 18   | 1     |
| >NRAS-E49K-KQVVIDGETC | 185   | >NRAS-E49K-KQVVIDGKTC | 294  | 109   |
| >NRAS-E49K-KQVVIDGETC | 222   | >NRAS-E49K-KQVVIDGKTC | 303  | 81    |
| >NRAS-E49K-KQVVIDGETC | 458   | >NRAS-E49K-KQVVIDGKTC | 506  | 48    |
| >NRAS-E49K-RKQVVIDGE  | 3350  | >NRAS-E49K-RKQVVIDGK  | 257  | 3093  |
| >NRAS-G10E-VGAGGVGKS  | 21117 | >NRAS-G10E-VEAGGVGKS  | 223  | 20894 |
| >NRAS-G10E-VGAGGVGKS  | 5134  | >NRAS-G10E-VEAGGVGKS  | 456  | 4678  |
| >NRAS-G10E-VGAGGVGKS  | 21080 | >NRAS-G10E-VEAGGVGKS  | 17   | 21063 |
| >NRAS-G10E-VGAGGVGKS  | 31362 | >NRAS-G10E-VEAGGVGKS  | 183  | 31179 |
| >NRAS-G10E-VVGAGGVGK  | 326   | >NRAS-G10E-VVEAGGVGK  | 1508 | 1182  |
| >NRAS-G10E-VVGAGGVGK  | 89    | >NRAS-G10E-VVEAGGVGK  | 212  | 123   |
| >NRAS-G10E-VVGAGGV    | 117   | >NRAS-G10E-VVVEAGGV   | 63   | 54    |
| >NRAS-G10E-VVGAGGV    | 68    | >NRAS-G10E-VVVEAGGV   | 32   | 36    |
| >NRAS-G10E-VVGAGGV    | 139   | >NRAS-G10E-VVVEAGGV   | 60   | 79    |
| >NRAS-G10E-VVGAGGV    | 707   | >NRAS-G10E-VVVEAGGV   | 339  | 368   |
| >NRAS-G10E-VVGAGGV    | 23    | >NRAS-G10E-VVVEAGGV   | 32   | 9     |
| >NRAS-G10E-VVGAGGVG   | 76    | >NRAS-G10E-VVVEAGGVG  | 237  | 161   |
| >NRAS-G10E-VVGAGGVG   | 101   | >NRAS-G10E-VVVEAGGVG  | 138  | 37    |
| >NRAS-G10E-VVGAGGVG   | 203   | >NRAS-G10E-VVVEAGGVG  | 322  | 119   |
| >NRAS-G10E-VVGAGGV    | 191   | >NRAS-G10E-VVVEAGGV   | 207  | 16    |
| >NRAS-G10E-VVGAGGV    | 649   | >NRAS-G10E-VVVEAGGV   | 134  | 515   |
| >NRAS-G10E-LVVVGAGGV  | 180   | >NRAS-G10E-LVVVEAGGV  | 384  | 204   |
| >NRAS-G10E-LVVVGAGGV  | 55    | >NRAS-G10E-LVVVEAGGV  | 183  | 128   |
| >NRAS-G10E-LVVVGAGGV  | 75    | >NRAS-G10E-LVVVEAGGV  | 336  | 261   |
| >NRAS-G10E-LVVVGAGGV  | 284   | >NRAS-G10E-LVVVEAGGV  | 288  | 4     |
| >NRAS-G10E-LVVVGAGGV  | 154   | >NRAS-G10E-LVVVEAGGV  | 607  | 453   |
| >NRAS-G10E-LVVVGAGGV  | 159   | >NRAS-G10E-LVVVEAGGV  | 482  | 323   |
| >NRAS-G10E-KLVVVGAGG' | 392   | >NRAS-G10E-KLVVVEAGG\ | 301  | 91    |
| >NRAS-G10E-KLVVVGAGG' | 35    | >NRAS-G10E-KLVVVEAGG\ | 53   | 18    |
| >NRAS-G10E-KLVVVGAGG' | 661   | >NRAS-G10E-KLVVVEAGG\ | 411  | 250   |
| >NRAS-G10E-KLVVVGAGG' | 6     | >NRAS-G10E-KLVVVEAGG\ | 8    | 2     |

|                         |      |                         |     |      |
|-------------------------|------|-------------------------|-----|------|
| >NRAS-G10E: KLVVVGAGG\  | 17   | >NRAS-G10E: KLVVVEAGG\  | 25  | 8    |
| >NRAS-G10E: KLVVVGAGG\  | 14   | >NRAS-G10E: KLVVVEAGG\  | 18  | 4    |
| >NRAS-G10E: KLVVVGAGG\  | 121  | >NRAS-G10E: KLVVVEAGG\  | 136 | 15   |
| >NRAS-G10E: KLVVVGAGG\  | 6    | >NRAS-G10E: KLVVVEAGG\  | 8   | 2    |
| >NRAS-G10E: YKLVVVGAGC  | 423  | >NRAS-G10E: YKLVVVEAGC  | 334 | 89   |
| >NRAS-G10E: YKLVVVGAGC  | 220  | >NRAS-G10E: YKLVVVEAGC  | 188 | 32   |
| >NRAS-G10E: YKLVVVGGA   | 423  | >NRAS-G10E: YKLVVVEA    | 137 | 286  |
| >NRAS-G10E: YKLVVVGAGC  | 696  | >NRAS-G10E: YKLVVVEAGC  | 430 | 266  |
| >NRAS-G10E: TEYKLVVVGGA | 691  | >NRAS-G10E: TEYKLVVVEA  | 434 | 257  |
| >NRAS-G10E: TEYKLVVVGGA | 763  | >NRAS-G10E: TEYKLVVVEA  | 217 | 546  |
| >NRAS-G10E: TEYKLVVVGGA | 303  | >NRAS-G10E: TEYKLVVVEA  | 183 | 120  |
| >NRAS-G10E: TEYKLVVVGGA | 556  | >NRAS-G10E: TEYKLVVVEA  | 238 | 318  |
| >NRAS-G10E: TEYKLVVVGGA | 68   | >NRAS-G10E: TEYKLVVVEA  | 40  | 28   |
| >NRAS-G10E: MTEYKLVVVG  | 78   | >NRAS-G10E: MTEYKLVVVE  | 71  | 7    |
| >NRAS-G12A: GGVGKSALTI  | 2287 | >NRAS-G12A: AGVGKSALTI  | 462 | 1825 |
| >NRAS-G12A: AGGVGKSALT  | 8132 | >NRAS-G12A: AAGVGKSALT  | 444 | 7688 |
| >NRAS-G12A: AGGVGKSALT  | 1153 | >NRAS-G12A: AAGVGKSALT  | 225 | 928  |
| >NRAS-G12A: TEYKLVVVGGA | 3297 | >NRAS-G12A: TEYKLVVVGGA | 300 | 2997 |
| >NRAS-G12A: TEYKLVVVGGA | 3172 | >NRAS-G12A: TEYKLVVVGGA | 80  | 3092 |
| >NRAS-G12A: TEYKLVVVGGA | 2108 | >NRAS-G12A: TEYKLVVVGGA | 22  | 2086 |
| >NRAS-G12A: TEYKLVVVGGA | 1689 | >NRAS-G12A: TEYKLVVVGGA | 139 | 1550 |
| >NRAS-G12A: VVGAGGVGK   | 326  | >NRAS-G12A: VVGAAGVGK   | 415 | 89   |
| >NRAS-G12A: VVGAGGVGK   | 89   | >NRAS-G12A: VVGAAGVGK   | 76  | 13   |
| >NRAS-G12A: VVVGAGGV    | 1957 | >NRAS-G12A: VVVGAAAGV   | 491 | 1466 |
| >NRAS-G12A: VVVGAGGV    | 117  | >NRAS-G12A: VVVGAAAGV   | 61  | 56   |
| >NRAS-G12A: VVVGAGGV    | 68   | >NRAS-G12A: VVVGAAAGV   | 18  | 50   |
| >NRAS-G12A: VVVGAGGV    | 139  | >NRAS-G12A: VVVGAAAGV   | 60  | 79   |
| >NRAS-G12A: VVVGAGGV    | 707  | >NRAS-G12A: VVVGAAAGV   | 241 | 466  |
| >NRAS-G12A: VVVGAGGV    | 2371 | >NRAS-G12A: VVVGAAAGV   | 213 | 2158 |
| >NRAS-G12A: VVVGAGGV    | 23   | >NRAS-G12A: VVVGAAAGV   | 8   | 15   |
| >NRAS-G12A: VVVGAGGVG   | 76   | >NRAS-G12A: VVVGAAAGVG  | 69  | 7    |
| >NRAS-G12A: VVVGAGGVG   | 101  | >NRAS-G12A: VVVGAAAGVG  | 66  | 35   |
| >NRAS-G12A: VVVGAGGVG   | 203  | >NRAS-G12A: VVVGAAAGVG  | 108 | 95   |
| >NRAS-G12A: VVVGAGGV    | 191  | >NRAS-G12A: VVVGAAAGV   | 63  | 128  |
| >NRAS-G12A: VVVGAGGV    | 649  | >NRAS-G12A: VVVGAAAGV   | 170 | 479  |
| >NRAS-G12A: LVVVGAGGV   | 180  | >NRAS-G12A: LVVVGAAAGV  | 62  | 118  |
| >NRAS-G12A: LVVVGAGGV   | 55   | >NRAS-G12A: LVVVGAAAGV  | 10  | 45   |
| >NRAS-G12A: LVVVGAGGV   | 1068 | >NRAS-G12A: LVVVGAAAGV  | 265 | 803  |
| >NRAS-G12A: LVVVGAGGV   | 3578 | >NRAS-G12A: LVVVGAAAGV  | 425 | 3153 |
| >NRAS-G12A: LVVVGAGGV   | 3213 | >NRAS-G12A: LVVVGAAAGV  | 278 | 2935 |
| >NRAS-G12A: LVVVGAGGV   | 75   | >NRAS-G12A: LVVVGAAAGV  | 9   | 66   |
| >NRAS-G12A: LVVVGAGGV\  | 572  | >NRAS-G12A: LVVVGAAAGV\ | 414 | 158  |
| >NRAS-G12A: LVVVGAGGV\  | 284  | >NRAS-G12A: LVVVGAAAGV\ | 155 | 129  |

|                       |       |                        |     |       |
|-----------------------|-------|------------------------|-----|-------|
| >NRAS-G12A LVVVGAGGV  | 154   | >NRAS-G12A LVVVGAAAGV  | 54  | 100   |
| >NRAS-G12A LVVVGAGGV  | 159   | >NRAS-G12A LVVVGAAAGV  | 48  | 111   |
| >NRAS-G12A KLVVVGAGG' | 1541  | >NRAS-G12A KLVVVGAAAG' | 492 | 1049  |
| >NRAS-G12A KLVVVGAG   | 4828  | >NRAS-G12A KLVVVGAA    | 367 | 4461  |
| >NRAS-G12A KLVVVGAGG' | 392   | >NRAS-G12A KLVVVGAAAG' | 132 | 260   |
| >NRAS-G12A KLVVVGAG   | 4844  | >NRAS-G12A KLVVVGAA    | 38  | 4806  |
| >NRAS-G12A KLVVVGAGG' | 35    | >NRAS-G12A KLVVVGAAAG' | 28  | 7     |
| >NRAS-G12A KLVVVGAG   | 11214 | >NRAS-G12A KLVVVGAA    | 412 | 10802 |
| >NRAS-G12A KLVVVGAGG' | 661   | >NRAS-G12A KLVVVGAAAG' | 274 | 387   |
| >NRAS-G12A KLVVVGAG   | 4834  | >NRAS-G12A KLVVVGAA    | 59  | 4775  |
| >NRAS-G12A KLVVVGAGG' | 6     | >NRAS-G12A KLVVVGAAAG' | 3   | 3     |
| >NRAS-G12A KLVVVGAG   | 13314 | >NRAS-G12A KLVVVGAA    | 425 | 12889 |
| >NRAS-G12A KLVVVGAGG' | 17    | >NRAS-G12A KLVVVGAAAG' | 6   | 11    |
| >NRAS-G12A KLVVVGAG   | 14961 | >NRAS-G12A KLVVVGAA    | 427 | 14534 |
| >NRAS-G12A KLVVVGAGG' | 14    | >NRAS-G12A KLVVVGAAAG' | 9   | 5     |
| >NRAS-G12A KLVVVGAGG' | 121   | >NRAS-G12A KLVVVGAAAG' | 15  | 106   |
| >NRAS-G12A KLVVVGAGG' | 6     | >NRAS-G12A KLVVVGAAAG' | 4   | 2     |
| >NRAS-G12A YKLVVVGAGC | 423   | >NRAS-G12A YKLVVVGAAAC | 116 | 307   |
| >NRAS-G12A YKLVVVGAGC | 220   | >NRAS-G12A YKLVVVGAAAC | 84  | 136   |
| >NRAS-G12A YKLVVVGAGC | 662   | >NRAS-G12A YKLVVVGAAAC | 216 | 446   |
| >NRAS-G12A YKLVVVGAG  | 5121  | >NRAS-G12A YKLVVVGAA   | 452 | 4669  |
| >NRAS-G12A YKLVVVGAGC | 696   | >NRAS-G12A YKLVVVGAAAC | 177 | 519   |
| >NRAS-G12C TEYKLVVGA  | 3172  | >NRAS-G12C TEYKLVVGA   | 474 | 2698  |
| >NRAS-G12C TEYKLVVGA  | 1689  | >NRAS-G12C TEYKLVVGA   | 137 | 1552  |
| >NRAS-G12C VVGAGGVGK  | 326   | >NRAS-G12C VVGACGVGK   | 302 | 24    |
| >NRAS-G12C VVGAGGVGK  | 89    | >NRAS-G12C VVGACGVGK   | 75  | 14    |
| >NRAS-G12C VVGAGGV    | 117   | >NRAS-G12C VVGACGV     | 142 | 25    |
| >NRAS-G12C VVGAGGV    | 68    | >NRAS-G12C VVGACGV     | 24  | 44    |
| >NRAS-G12C VVGAGGV    | 139   | >NRAS-G12C VVGACGV     | 75  | 64    |
| >NRAS-G12C VVGAGGV    | 707   | >NRAS-G12C VVGACGV     | 151 | 556   |
| >NRAS-G12C VVGAGGV    | 2371  | >NRAS-G12C VVGACGV     | 303 | 2068  |
| >NRAS-G12C VVGAGGV    | 23    | >NRAS-G12C VVGACGV     | 7   | 16    |
| >NRAS-G12C VVGAGGVG   | 76    | >NRAS-G12C VVGACGVG    | 72  | 4     |
| >NRAS-G12C VVGAGGVG   | 101   | >NRAS-G12C VVGACGVG    | 74  | 27    |
| >NRAS-G12C VVGAGGVG   | 203   | >NRAS-G12C VVGACGVG    | 223 | 20    |
| >NRAS-G12C VVGAGGV    | 191   | >NRAS-G12C VVGACGV     | 169 | 22    |
| >NRAS-G12C VVGAGGV    | 649   | >NRAS-G12C VVGACGV     | 445 | 204   |
| >NRAS-G12C LVVVGAGGV  | 180   | >NRAS-G12C LVVVGACGV   | 283 | 103   |
| >NRAS-G12C LVVVGAGGV  | 55    | >NRAS-G12C LVVVGACGV   | 14  | 41    |
| >NRAS-G12C LVVVGAGGV  | 1068  | >NRAS-G12C LVVVGACGV   | 147 | 921   |
| >NRAS-G12C LVVVGAGGV  | 2712  | >NRAS-G12C LVVVGACGV   | 174 | 2538  |
| >NRAS-G12C LVVVGAGGV  | 3213  | >NRAS-G12C LVVVGACGV   | 361 | 2852  |
| >NRAS-G12C LVVVGAGGV  | 75    | >NRAS-G12C LVVVGACGV   | 7   | 68    |

|                       |      |                       |      |      |
|-----------------------|------|-----------------------|------|------|
| >NRAS-G12C LVVVGAGGV\ | 572  | >NRAS-G12C LVVVGACGV\ | 435  | 137  |
| >NRAS-G12C LVVVGAGGV\ | 284  | >NRAS-G12C LVVVGACGV\ | 216  | 68   |
| >NRAS-G12C LVVVGAGGV  | 154  | >NRAS-G12C LVVVGACGV  | 212  | 58   |
| >NRAS-G12C LVVVGAGGV  | 159  | >NRAS-G12C LVVVGACGV  | 83   | 76   |
| >NRAS-G12C KLVVVGAGG\ | 392  | >NRAS-G12C KLVVVGACG\ | 190  | 202  |
| >NRAS-G12C KLVVVGAGG\ | 35   | >NRAS-G12C KLVVVGACG\ | 42   | 7    |
| >NRAS-G12C KLVVVGAGG\ | 661  | >NRAS-G12C KLVVVGACG\ | 283  | 378  |
| >NRAS-G12C KLVVVGAG   | 4834 | >NRAS-G12C KLVVVGAC   | 182  | 4652 |
| >NRAS-G12C KLVVVGAGG\ | 6    | >NRAS-G12C KLVVVGACG\ | 3    | 3    |
| >NRAS-G12C KLVVVGAGG\ | 17   | >NRAS-G12C KLVVVGACG\ | 7    | 10   |
| >NRAS-G12C KLVVVGAGG\ | 14   | >NRAS-G12C KLVVVGACG\ | 6    | 8    |
| >NRAS-G12C KLVVVGAGG\ | 121  | >NRAS-G12C KLVVVGACG\ | 14   | 107  |
| >NRAS-G12C KLVVVGAGG\ | 6    | >NRAS-G12C KLVVVGACG\ | 4    | 2    |
| >NRAS-G12C YKLVVVGAGC | 423  | >NRAS-G12C YKLVVVGACC | 192  | 231  |
| >NRAS-G12C YKLVVVGAGC | 220  | >NRAS-G12C YKLVVVGACC | 61   | 159  |
| >NRAS-G12C YKLVVVGAGC | 662  | >NRAS-G12C YKLVVVGACC | 104  | 558  |
| >NRAS-G12C YKLVVVGAGC | 3921 | >NRAS-G12C YKLVVVGACC | 459  | 3462 |
| >NRAS-G12C YKLVVVGAGC | 696  | >NRAS-G12C YKLVVVGACC | 169  | 527  |
| >NRAS-G12D AGGVGKSAL\ | 8128 | >NRAS-G12D ADGVGKSAL\ | 85   | 8043 |
| >NRAS-G12D TEYKLVVGA  | 3297 | >NRAS-G12D TEYKLVVGA  | 402  | 2895 |
| >NRAS-G12D VVGAGGVGK  | 326  | >NRAS-G12D VVGADGVGK  | 1224 | 898  |
| >NRAS-G12D VVGAGGVGK  | 89   | >NRAS-G12D VVGADGVGK  | 154  | 65   |
| >NRAS-G12D VVVGAGGV   | 117  | >NRAS-G12D VVVGADGV   | 405  | 288  |
| >NRAS-G12D VVVGAGGV   | 68   | >NRAS-G12D VVVGADGV   | 38   | 30   |
| >NRAS-G12D VVVGAGGV   | 139  | >NRAS-G12D VVVGADGV   | 169  | 30   |
| >NRAS-G12D VVVGAGGV   | 707  | >NRAS-G12D VVVGADGV   | 238  | 469  |
| >NRAS-G12D VVVGAGGV   | 23   | >NRAS-G12D VVVGADGV   | 22   | 1    |
| >NRAS-G12D VVVGAGGVG  | 76   | >NRAS-G12D VVVGADGVG  | 403  | 327  |
| >NRAS-G12D VVVGAGGVG  | 101  | >NRAS-G12D VVVGADGVG  | 106  | 5    |
| >NRAS-G12D VVVGAGGVG  | 203  | >NRAS-G12D VVVGADGVG  | 102  | 101  |
| >NRAS-G12D VVVGAGGV   | 191  | >NRAS-G12D VVVGADGV   | 94   | 97   |
| >NRAS-G12D LVVVGAGGV  | 180  | >NRAS-G12D LVVVGADGV  | 500  | 320  |
| >NRAS-G12D LVVVGAGGV  | 55   | >NRAS-G12D LVVVGADGV  | 16   | 39   |
| >NRAS-G12D LVVVGAGGV  | 75   | >NRAS-G12D LVVVGADGV  | 63   | 12   |
| >NRAS-G12D LVVVGAGGV\ | 284  | >NRAS-G12D LVVVGADGV\ | 249  | 35   |
| >NRAS-G12D LVVVGAGGV  | 154  | >NRAS-G12D LVVVGADGV  | 117  | 37   |
| >NRAS-G12D LVVVGAGGV  | 159  | >NRAS-G12D LVVVGADGV  | 255  | 96   |
| >NRAS-G12D KLVVVGAGG\ | 392  | >NRAS-G12D KLVVVGADG\ | 222  | 170  |
| >NRAS-G12D KLVVVGAGG\ | 35   | >NRAS-G12D KLVVVGADG\ | 78   | 43   |
| >NRAS-G12D KLVVVGAGG\ | 661  | >NRAS-G12D KLVVVGADG\ | 331  | 330  |
| >NRAS-G12D KLVVVGAGG\ | 6    | >NRAS-G12D KLVVVGADG\ | 6    | 0    |
| >NRAS-G12D KLVVVGAGG\ | 17   | >NRAS-G12D KLVVVGADG\ | 10   | 7    |
| >NRAS-G12D KLVVVGAGG\ | 14   | >NRAS-G12D KLVVVGADG\ | 9    | 5    |

|                       |      |                       |     |      |
|-----------------------|------|-----------------------|-----|------|
| >NRAS-G12D KLVVVGAGG' | 121  | >NRAS-G12D KLVVVGADG' | 46  | 75   |
| >NRAS-G12D KLVVVGAGG' | 6    | >NRAS-G12D KLVVVGADG' | 8   | 2    |
| >NRAS-G12D YKLVVVGAGC | 423  | >NRAS-G12D YKLVVVGADC | 186 | 237  |
| >NRAS-G12D YKLVVVGAGC | 220  | >NRAS-G12D YKLVVVGADC | 165 | 55   |
| >NRAS-G12D YKLVVVGAGC | 662  | >NRAS-G12D YKLVVVGADC | 217 | 445  |
| >NRAS-G12G VVGAGGVGK  | 326  | >NRAS-G12G VVGAGGVGK  | 326 | 0    |
| >NRAS-G12G VVGAGGVGK  | 89   | >NRAS-G12G VVGAGGVGK  | 89  | 0    |
| >NRAS-G12G VVVGAGGV   | 117  | >NRAS-G12G VVVGAGGV   | 117 | 0    |
| >NRAS-G12G VVVGAGGV   | 68   | >NRAS-G12G VVVGAGGV   | 68  | 0    |
| >NRAS-G12G VVVGAGGV   | 139  | >NRAS-G12G VVVGAGGV   | 139 | 0    |
| >NRAS-G12G VVVGAGGV   | 23   | >NRAS-G12G VVVGAGGV   | 23  | 0    |
| >NRAS-G12G VVVGAGGVG  | 76   | >NRAS-G12G VVVGAGGVG  | 76  | 0    |
| >NRAS-G12G VVVGAGGVG  | 101  | >NRAS-G12G VVVGAGGVG  | 101 | 0    |
| >NRAS-G12G VVVGAGGVG  | 203  | >NRAS-G12G VVVGAGGVG  | 203 | 0    |
| >NRAS-G12G VVVGAGGV   | 191  | >NRAS-G12G VVVGAGGV   | 191 | 0    |
| >NRAS-G12G LVVVGAGGV  | 180  | >NRAS-G12G LVVVGAGGV  | 180 | 0    |
| >NRAS-G12G LVVVGAGGV  | 55   | >NRAS-G12G LVVVGAGGV  | 55  | 0    |
| >NRAS-G12G LVVVGAGGV  | 75   | >NRAS-G12G LVVVGAGGV  | 75  | 0    |
| >NRAS-G12G LVVVGAGGV' | 284  | >NRAS-G12G LVVVGAGGV' | 284 | 0    |
| >NRAS-G12G LVVVGAGGV  | 154  | >NRAS-G12G LVVVGAGGV  | 154 | 0    |
| >NRAS-G12G LVVVGAGGV  | 159  | >NRAS-G12G LVVVGAGGV  | 159 | 0    |
| >NRAS-G12G KLVVVGAGG' | 392  | >NRAS-G12G KLVVVGAGG' | 392 | 0    |
| >NRAS-G12G KLVVVGAGG' | 35   | >NRAS-G12G KLVVVGAGG' | 35  | 0    |
| >NRAS-G12G KLVVVGAGG' | 6    | >NRAS-G12G KLVVVGAGG' | 6   | 0    |
| >NRAS-G12G KLVVVGAGG' | 17   | >NRAS-G12G KLVVVGAGG' | 17  | 0    |
| >NRAS-G12G KLVVVGAGG' | 14   | >NRAS-G12G KLVVVGAGG' | 14  | 0    |
| >NRAS-G12G KLVVVGAGG' | 121  | >NRAS-G12G KLVVVGAGG' | 121 | 0    |
| >NRAS-G12G KLVVVGAGG' | 6    | >NRAS-G12G KLVVVGAGG' | 6   | 0    |
| >NRAS-G12G YKLVVVGAGC | 423  | >NRAS-G12G YKLVVVGAGC | 423 | 0    |
| >NRAS-G12G YKLVVVGAGC | 220  | >NRAS-G12G YKLVVVGAGC | 220 | 0    |
| >NRAS-G12N VVGAGGVGK  | 326  | >NRAS-G12N VVGANGVGK  | 443 | 117  |
| >NRAS-G12N VVGAGGVGK  | 89   | >NRAS-G12N VVGANGVGK  | 82  | 7    |
| >NRAS-G12N VVVGAGGV   | 1957 | >NRAS-G12N VVVGANGV   | 471 | 1486 |
| >NRAS-G12N VVVGAGGV   | 117  | >NRAS-G12N VVVGANGV   | 132 | 15   |
| >NRAS-G12N VVVGAGGV   | 68   | >NRAS-G12N VVVGANGV   | 29  | 39   |
| >NRAS-G12N VVVGAGGV   | 139  | >NRAS-G12N VVVGANGV   | 166 | 27   |
| >NRAS-G12N VVVGAGGV   | 707  | >NRAS-G12N VVVGANGV   | 446 | 261  |
| >NRAS-G12N VVVGAGGV   | 23   | >NRAS-G12N VVVGANGV   | 14  | 9    |
| >NRAS-G12N VVVGAGGVG  | 76   | >NRAS-G12N VVVGANGVG  | 89  | 13   |
| >NRAS-G12N VVVGAGGVG  | 101  | >NRAS-G12N VVVGANGVG  | 78  | 23   |
| >NRAS-G12N VVVGAGGVG  | 203  | >NRAS-G12N VVVGANGVG  | 108 | 95   |
| >NRAS-G12N VVVGAGGV   | 191  | >NRAS-G12N VVVGANGV   | 62  | 129  |
| >NRAS-G12N VVVGAGGV   | 649  | >NRAS-G12N VVVGANGV   | 399 | 250  |



|                       |       |                       |     |       |
|-----------------------|-------|-----------------------|-----|-------|
| >NRAS-G12NLVVVGAGGV   | 180   | >NRAS-G12NLVVVGANGV   | 186 | 6     |
| >NRAS-G12NLVVVGAGGV   | 55    | >NRAS-G12NLVVVGANGV   | 14  | 41    |
| >NRAS-G12NLVVVGAGGV   | 75    | >NRAS-G12NLVVVGANGV   | 26  | 49    |
| >NRAS-G12NLVVVGAGGV   | 572   | >NRAS-G12NLVVVGANGV   | 466 | 106   |
| >NRAS-G12NLVVVGAGGV   | 284   | >NRAS-G12NLVVVGANGV   | 178 | 106   |
| >NRAS-G12NLVVVGAGGV   | 154   | >NRAS-G12NLVVVGANGV   | 77  | 77    |
| >NRAS-G12NLVVVGAGGV   | 159   | >NRAS-G12NLVVVGANGV   | 118 | 41    |
| >NRAS-G12NKLVVVGAGG'  | 392   | >NRAS-G12NKLVVVGANG'  | 199 | 193   |
| >NRAS-G12NKLVVVGAGG'  | 35    | >NRAS-G12NKLVVVGANG'  | 47  | 12    |
| >NRAS-G12NKLVVVGAGG'  | 661   | >NRAS-G12NKLVVVGANG'  | 386 | 275   |
| >NRAS-G12NKLVVVGAGG'  | 6     | >NRAS-G12NKLVVVGANG'  | 6   | 0     |
| >NRAS-G12NKLVVVGAGG'  | 17    | >NRAS-G12NKLVVVGANG'  | 8   | 9     |
| >NRAS-G12NKLVVVGAGG'  | 14    | >NRAS-G12NKLVVVGANG'  | 10  | 4     |
| >NRAS-G12NKLVVVGAGG'  | 121   | >NRAS-G12NKLVVVGANG'  | 40  | 81    |
| >NRAS-G12NKLVVVGAGG'  | 6     | >NRAS-G12NKLVVVGANG'  | 5   | 1     |
| >NRAS-G12NYKLVVVGAGG' | 423   | >NRAS-G12NYKLVVVGANG' | 175 | 248   |
| >NRAS-G12NYKLVVVGAGG' | 220   | >NRAS-G12NYKLVVVGANG' | 221 | 1     |
| >NRAS-G12NYKLVVVGAGG' | 662   | >NRAS-G12NYKLVVVGANG' | 348 | 314   |
| >NRAS-G12NYKLVVVGAGG' | 696   | >NRAS-G12NYKLVVVGANG' | 151 | 545   |
| >NRAS-G12P AGGVGKSAL  | 10826 | >NRAS-G12P APGVGKSAL  | 16  | 10810 |
| >NRAS-G12P AGGVGKSALT | 23419 | >NRAS-G12P APGVGKSALT | 130 | 23289 |
| >NRAS-G12P GAGGVGKSA  | 22859 | >NRAS-G12P GAPGVGKSA  | 327 | 22532 |
| >NRAS-G12P VVGAGGVGK  | 326   | >NRAS-G12P VVGAPGVGK  | 244 | 82    |
| >NRAS-G12P VVGAGGVGK  | 89    | >NRAS-G12P VVGAPGVGK  | 45  | 44    |
| >NRAS-G12P VVVGAGGV   | 117   | >NRAS-G12P VVVGAPGV   | 114 | 3     |
| >NRAS-G12P VVVGAGGV   | 68    | >NRAS-G12P VVVGAPGV   | 30  | 38    |
| >NRAS-G12P VVVGAGGV   | 139   | >NRAS-G12P VVVGAPGV   | 35  | 104   |
| >NRAS-G12P VVVGAGGV   | 707   | >NRAS-G12P VVVGAPGV   | 70  | 637   |
| >NRAS-G12P VVVGAGGV   | 2371  | >NRAS-G12P VVVGAPGV   | 179 | 2192  |
| >NRAS-G12P VVVGAGGV   | 23    | >NRAS-G12P VVVGAPGV   | 8   | 15    |
| >NRAS-G12P VVVGAGGVG  | 76    | >NRAS-G12P VVVGAPGVG  | 70  | 6     |
| >NRAS-G12P VVVGAGGVG  | 101   | >NRAS-G12P VVVGAPGVG  | 63  | 38    |
| >NRAS-G12P VVVGAGGVG  | 203   | >NRAS-G12P VVVGAPGVG  | 110 | 93    |
| >NRAS-G12P VVVGAGGV   | 191   | >NRAS-G12P VVVGAPGV   | 408 | 217   |
| >NRAS-G12P VVVGAGGV   | 649   | >NRAS-G12P VVVGAPGV   | 144 | 505   |
| >NRAS-G12P LVVVGAGGV  | 180   | >NRAS-G12P LVVVGAPGV  | 288 | 108   |
| >NRAS-G12P LVVVGAGGV  | 55    | >NRAS-G12P LVVVGAPGV  | 7   | 48    |
| >NRAS-G12P LVVVGAGGV  | 1068  | >NRAS-G12P LVVVGAPGV  | 216 | 852   |
| >NRAS-G12P LVVVGAGGV  | 2712  | >NRAS-G12P LVVVGAPGV  | 90  | 2622  |
| >NRAS-G12P LVVVGAGGV  | 3213  | >NRAS-G12P LVVVGAPGV  | 228 | 2985  |
| >NRAS-G12P LVVVGAGGV  | 75    | >NRAS-G12P LVVVGAPGV  | 9   | 66    |
| >NRAS-G12P LVVVGAGGV  | 572   | >NRAS-G12P LVVVGAPGV  | 303 | 269   |
| >NRAS-G12P LVVVGAGGV  | 284   | >NRAS-G12P LVVVGAPGV  | 262 | 22    |

|                       |       |                       |      |       |
|-----------------------|-------|-----------------------|------|-------|
| >NRAS-G12P LVVVGAGGV  | 154   | >NRAS-G12P LVVVGAPGV  | 1016 | 862   |
| >NRAS-G12P LVVVGAGGV  | 159   | >NRAS-G12P LVVVGAPGV  | 24   | 135   |
| >NRAS-G12P KLVVVGAGG' | 1541  | >NRAS-G12P KLVVVGAPG\ | 343  | 1198  |
| >NRAS-G12P KLVVVGAGG' | 392   | >NRAS-G12P KLVVVGAPG\ | 272  | 120   |
| >NRAS-G12P KLVVVGAGG' | 35    | >NRAS-G12P KLVVVGAPG\ | 65   | 30    |
| >NRAS-G12P KLVVVGAGG' | 661   | >NRAS-G12P KLVVVGAPG\ | 139  | 522   |
| >NRAS-G12P KLVVVGAGG' | 6     | >NRAS-G12P KLVVVGAPG\ | 3    | 3     |
| >NRAS-G12P KLVVVGAGG' | 17    | >NRAS-G12P KLVVVGAPG\ | 10   | 7     |
| >NRAS-G12P KLVVVGAGG' | 14    | >NRAS-G12P KLVVVGAPG\ | 6    | 8     |
| >NRAS-G12P KLVVVGAGG' | 121   | >NRAS-G12P KLVVVGAPG\ | 16   | 105   |
| >NRAS-G12P KLVVVGAGG' | 6     | >NRAS-G12P KLVVVGAPG\ | 4    | 2     |
| >NRAS-G12P YKLVVVGAGC | 423   | >NRAS-G12P YKLVVVGAPC | 100  | 323   |
| >NRAS-G12P YKLVVVGAGC | 220   | >NRAS-G12P YKLVVVGAPC | 77   | 143   |
| >NRAS-G12P YKLVVVGAGC | 662   | >NRAS-G12P YKLVVVGAPC | 66   | 596   |
| >NRAS-G12P YKLVVVGAGC | 696   | >NRAS-G12P YKLVVVGAPC | 177  | 519   |
| >NRAS-G12R GGVGKSAL   | 7093  | >NRAS-G12R RGVGKSAL   | 243  | 6850  |
| >NRAS-G12R GGVGKSALTI | 2287  | >NRAS-G12R RGVGKSALTI | 53   | 2234  |
| >NRAS-G12R AGGVGKSAL  | 24511 | >NRAS-G12R ARGVGKSAL  | 48   | 24463 |
| >NRAS-G12R AGGVGKSALT | 32893 | >NRAS-G12R ARGVGKSALT | 284  | 32609 |
| >NRAS-G12R TEYKLVVGA  | 39434 | >NRAS-G12R TEYKLVVGA  | 421  | 39013 |
| >NRAS-G12R TEYKLVVGA  | 3297  | >NRAS-G12R TEYKLVVGA  | 364  | 2933  |
| >NRAS-G12R GAGGVGKSA  | 7777  | >NRAS-G12R GARGVGKSA  | 409  | 7368  |
| >NRAS-G12R VVGAGGVGK  | 326   | >NRAS-G12R VVGARGVGK  | 170  | 156   |
| >NRAS-G12R VVGAGGVGK  | 89    | >NRAS-G12R VVGARGVGK  | 71   | 18    |
| >NRAS-G12R VVVGAGGV   | 117   | >NRAS-G12R VVVGARGV   | 375  | 258   |
| >NRAS-G12R VVVGAGGV   | 68    | >NRAS-G12R VVVGARGV   | 171  | 103   |
| >NRAS-G12R VVVGAGGV   | 139   | >NRAS-G12R VVVGARGV   | 371  | 232   |
| >NRAS-G12R VVVGAGGV   | 23    | >NRAS-G12R VVVGARGV   | 27   | 4     |
| >NRAS-G12R VVVGAGGVG  | 76    | >NRAS-G12R VVVGARGVG  | 68   | 8     |
| >NRAS-G12R VVVGAGGVG  | 101   | >NRAS-G12R VVVGARGVG  | 74   | 27    |
| >NRAS-G12R VVVGAGGVG  | 203   | >NRAS-G12R VVVGARGVG  | 152  | 51    |
| >NRAS-G12R VVVGAGGV   | 191   | >NRAS-G12R VVVGARGV   | 255  | 64    |
| >NRAS-G12R LVVVGAGGV  | 180   | >NRAS-G12R LVVVGARGV  | 497  | 317   |
| >NRAS-G12R LVVVGAGGV  | 55    | >NRAS-G12R LVVVGARGV  | 123  | 68    |
| >NRAS-G12R LVVVGAGGV  | 75    | >NRAS-G12R LVVVGARGV  | 131  | 56    |
| >NRAS-G12R LVVVGAGGV\ | 284   | >NRAS-G12R LVVVGARGV\ | 373  | 89    |
| >NRAS-G12R LVVVGAGGV  | 154   | >NRAS-G12R LVVVGARGV  | 912  | 758   |
| >NRAS-G12R LVVVGAGGV  | 159   | >NRAS-G12R LVVVGARGV  | 616  | 457   |
| >NRAS-G12R KLVVVGAGG' | 392   | >NRAS-G12R KLVVVGARG\ | 538  | 146   |
| >NRAS-G12R KLVVVGAGG' | 35    | >NRAS-G12R KLVVVGARG\ | 63   | 28    |
| >NRAS-G12R KLVVVGAGG' | 6     | >NRAS-G12R KLVVVGARG\ | 6    | 0     |
| >NRAS-G12R KLVVVGAGG' | 17    | >NRAS-G12R KLVVVGARG\ | 22   | 5     |
| >NRAS-G12R KLVVVGAGG' | 14    | >NRAS-G12R KLVVVGARG\ | 21   | 7     |

|                        |       |                        |     |       |
|------------------------|-------|------------------------|-----|-------|
| >NRAS-G12R KLVVVGAGG\  | 121   | >NRAS-G12R KLVVVGARG\  | 147 | 26    |
| >NRAS-G12R KLVVVGAGG\  | 6     | >NRAS-G12R KLVVVGARG\  | 7   | 1     |
| >NRAS-G12R KLVVVGAG    | 15037 | >NRAS-G12R KLVVVGAR    | 37  | 15000 |
| >NRAS-G12R KLVVVGAG    | 35568 | >NRAS-G12R KLVVVGAR    | 297 | 35271 |
| >NRAS-G12R YKLVVVGAGC  | 423   | >NRAS-G12R YKLVVVGARC  | 647 | 224   |
| >NRAS-G12R YKLVVVGAGC  | 220   | >NRAS-G12R YKLVVVGARC  | 242 | 22    |
| >NRAS-G12R YKLVVVGAG   | 5121  | >NRAS-G12R YKLVVVGAR   | 396 | 4725  |
| >NRAS-G12R YKLVVVGAGC  | 696   | >NRAS-G12R YKLVVVGARC  | 223 | 473   |
| >NRAS-G12R EYKLVVVGAGC | 24345 | >NRAS-G12R EYKLVVVGAR  | 269 | 24076 |
| >NRAS-G12R EYKLVVVGAGC | 33748 | >NRAS-G12R EYKLVVVGAR  | 200 | 33548 |
| >NRAS-G12S AGGVGKSAL   | 15310 | >NRAS-G12S ASGVGKSAL   | 159 | 15151 |
| >NRAS-G12S AGGVGKSALT  | 8132  | >NRAS-G12S ASGVGKSALT  | 84  | 8048  |
| >NRAS-G12S AGGVGKSALT  | 1153  | >NRAS-G12S ASGVGKSALT  | 53  | 1100  |
| >NRAS-G12S TEYKLVVVGAG | 3297  | >NRAS-G12S TEYKLVVVGAR | 416 | 2881  |
| >NRAS-G12S TEYKLVVVGAG | 3172  | >NRAS-G12S TEYKLVVVGAR | 372 | 2800  |
| >NRAS-G12S VVGAGGVGK   | 326   | >NRAS-G12S VVGASGVGK   | 196 | 130   |
| >NRAS-G12S VVGAGGVGK   | 89    | >NRAS-G12S VVGASGVGK   | 35  | 54    |
| >NRAS-G12S VVVGAGGV    | 117   | >NRAS-G12S VVVGASGV    | 45  | 72    |
| >NRAS-G12S VVVGAGGV    | 68    | >NRAS-G12S VVVGASGV    | 22  | 46    |
| >NRAS-G12S VVVGAGGV    | 139   | >NRAS-G12S VVVGASGV    | 72  | 67    |
| >NRAS-G12S VVVGAGGV    | 707   | >NRAS-G12S VVVGASGV    | 229 | 478   |
| >NRAS-G12S VVVGAGGV    | 2371  | >NRAS-G12S VVVGASGV    | 400 | 1971  |
| >NRAS-G12S VVVGAGGV    | 23    | >NRAS-G12S VVVGASGV    | 8   | 15    |
| >NRAS-G12S VVVGAGGVG   | 76    | >NRAS-G12S VVVGASGVG   | 65  | 11    |
| >NRAS-G12S VVVGAGGVG   | 101   | >NRAS-G12S VVVGASGVG   | 46  | 55    |
| >NRAS-G12S VVVGAGGVG   | 203   | >NRAS-G12S VVVGASGVG   | 64  | 139   |
| >NRAS-G12S VVVGAGGV    | 191   | >NRAS-G12S VVVGASGV    | 75  | 116   |
| >NRAS-G12S VVVGAGGV    | 649   | >NRAS-G12S VVVGASGV    | 355 | 294   |
| >NRAS-G12S LVVVGAGGV   | 180   | >NRAS-G12S LVVVGASGV   | 57  | 123   |
| >NRAS-G12S LVVVGAGGV   | 55    | >NRAS-G12S LVVVGASGV   | 16  | 39    |
| >NRAS-G12S LVVVGAGGV   | 1068  | >NRAS-G12S LVVVGASGV   | 480 | 588   |
| >NRAS-G12S LVVVGAGGV   | 75    | >NRAS-G12S LVVVGASGV   | 12  | 63    |
| >NRAS-G12S LVVVGAGGV\  | 572   | >NRAS-G12S LVVVGASGV\  | 273 | 299   |
| >NRAS-G12S LVVVGAGGV\  | 284   | >NRAS-G12S LVVVGASGV\  | 151 | 133   |
| >NRAS-G12S LVVVGAGGV   | 154   | >NRAS-G12S LVVVGASGV   | 106 | 48    |
| >NRAS-G12S LVVVGAGGV   | 159   | >NRAS-G12S LVVVGASGV   | 136 | 23    |
| >NRAS-G12S KLVVVGAGG\  | 392   | >NRAS-G12S KLVVVGASG\  | 122 | 270   |
| >NRAS-G12S KLVVVGAGG\  | 35    | >NRAS-G12S KLVVVGASG\  | 24  | 11    |
| >NRAS-G12S KLVVVGAGG\  | 661   | >NRAS-G12S KLVVVGASG\  | 277 | 384   |
| >NRAS-G12S KLVVVGAGG\  | 6     | >NRAS-G12S KLVVVGASG\  | 4   | 2     |
| >NRAS-G12S KLVVVGAGG\  | 17    | >NRAS-G12S KLVVVGASG\  | 8   | 9     |
| >NRAS-G12S KLVVVGAGG\  | 14    | >NRAS-G12S KLVVVGASG\  | 9   | 5     |
| >NRAS-G12S KLVVVGAGG\  | 121   | >NRAS-G12S KLVVVGASG\  | 27  | 94    |

|                       |       |                       |     |       |
|-----------------------|-------|-----------------------|-----|-------|
| >NRAS-G12S·KLVVVGAGG\ | 6     | >NRAS-G12S·KLVVVGASG\ | 4   | 2     |
| >NRAS-G12S·YKLVVVGAGC | 423   | >NRAS-G12S·YKLVVVGASC | 187 | 236   |
| >NRAS-G12S·YKLVVVGAGC | 220   | >NRAS-G12S·YKLVVVGASC | 125 | 95    |
| >NRAS-G12S·YKLVVVGAGC | 662   | >NRAS-G12S·YKLVVVGASC | 263 | 399   |
| >NRAS-G12S·YKLVVVGAGC | 696   | >NRAS-G12S·YKLVVVGASC | 86  | 610   |
| >NRAS-G12T·AGGVGKSALT | 20878 | >NRAS-G12T·ATGVGKSALT | 367 | 20511 |
| >NRAS-G12T·AGGVGKSAL  | 15310 | >NRAS-G12T·ATGVGKSAL  | 95  | 15215 |
| >NRAS-G12T·AGGVGKSALT | 8132  | >NRAS-G12T·ATGVGKSALT | 55  | 8077  |
| >NRAS-G12T·AGGVGKSAL  | 5873  | >NRAS-G12T·ATGVGKSAL  | 153 | 5720  |
| >NRAS-G12T·AGGVGKSALT | 8983  | >NRAS-G12T·ATGVGKSALT | 435 | 8548  |
| >NRAS-G12T·AGGVGKSALT | 1153  | >NRAS-G12T·ATGVGKSALT | 36  | 1117  |
| >NRAS-G12T·TEYKLVVGA  | 3172  | >NRAS-G12T·TEYKLVVGA  | 97  | 3075  |
| >NRAS-G12T·TEYKLVVGA  | 2108  | >NRAS-G12T·TEYKLVVGA  | 122 | 1986  |
| >NRAS-G12T·TEYKLVVGA  | 1689  | >NRAS-G12T·TEYKLVVGA  | 90  | 1599  |
| >NRAS-G12T·VVGAGGVGK  | 326   | >NRAS-G12T·VVGATGVGK  | 426 | 100   |
| >NRAS-G12T·VVGAGGVGK  | 89    | >NRAS-G12T·VVGATGVGK  | 61  | 28    |
| >NRAS-G12T·VVVGAGGV   | 1957  | >NRAS-G12T·VVVGATGV   | 372 | 1585  |
| >NRAS-G12T·VVVGAGGV   | 117   | >NRAS-G12T·VVVGATGV   | 38  | 79    |
| >NRAS-G12T·VVVGAGGV   | 68    | >NRAS-G12T·VVVGATGV   | 16  | 52    |
| >NRAS-G12T·VVVGAGGV   | 139   | >NRAS-G12T·VVVGATGV   | 86  | 53    |
| >NRAS-G12T·VVVGAGGV   | 707   | >NRAS-G12T·VVVGATGV   | 169 | 538   |
| >NRAS-G12T·VVVGAGGV   | 2371  | >NRAS-G12T·VVVGATGV   | 406 | 1965  |
| >NRAS-G12T·VVVGAGGV   | 23    | >NRAS-G12T·VVVGATGV   | 7   | 16    |
| >NRAS-G12T·VVVGAGGVG  | 76    | >NRAS-G12T·VVVGATGVG  | 52  | 24    |
| >NRAS-G12T·VVVGAGGVG  | 101   | >NRAS-G12T·VVVGATGVG  | 41  | 60    |
| >NRAS-G12T·VVVGAGGVG  | 203   | >NRAS-G12T·VVVGATGVG  | 98  | 105   |
| >NRAS-G12T·VVVGAGGV   | 191   | >NRAS-G12T·VVVGATGV   | 65  | 126   |
| >NRAS-G12T·VVVGAGGV   | 649   | >NRAS-G12T·VVVGATGV   | 273 | 376   |
| >NRAS-G12T·LVVVGAGGV  | 180   | >NRAS-G12T·LVVVGATGV  | 66  | 114   |
| >NRAS-G12T·LVVVGAGGV  | 55    | >NRAS-G12T·LVVVGATGV  | 11  | 44    |
| >NRAS-G12T·LVVVGAGGV  | 75    | >NRAS-G12T·LVVVGATGV  | 11  | 64    |
| >NRAS-G12T·LVVVGAGGV\ | 572   | >NRAS-G12T·LVVVGATGV\ | 370 | 202   |
| >NRAS-G12T·LVVVGAGGV\ | 284   | >NRAS-G12T·LVVVGATGV\ | 189 | 95    |
| >NRAS-G12T·LVVVGAGGV  | 154   | >NRAS-G12T·LVVVGATGV  | 114 | 40    |
| >NRAS-G12T·LVVVGAGGV  | 159   | >NRAS-G12T·LVVVGATGV  | 116 | 43    |
| >NRAS-G12T·KLVVVGAGG\ | 392   | >NRAS-G12T·KLVVVGATG\ | 145 | 247   |
| >NRAS-G12T·KLVVVGAG   | 4844  | >NRAS-G12T·KLVVVGAT   | 379 | 4465  |
| >NRAS-G12T·KLVVVGAGG\ | 35    | >NRAS-G12T·KLVVVGATG\ | 31  | 4     |
| >NRAS-G12T·KLVVVGAGG\ | 661   | >NRAS-G12T·KLVVVGATG\ | 258 | 403   |
| >NRAS-G12T·KLVVVGAG   | 4834  | >NRAS-G12T·KLVVVGAT   | 475 | 4359  |
| >NRAS-G12T·KLVVVGAGG\ | 6     | >NRAS-G12T·KLVVVGATG\ | 4   | 2     |
| >NRAS-G12T·KLVVVGAGG\ | 17    | >NRAS-G12T·KLVVVGATG\ | 10  | 7     |
| >NRAS-G12T·KLVVVGAGG\ | 14    | >NRAS-G12T·KLVVVGATG\ | 8   | 6     |

|                       |       |                       |     |       |
|-----------------------|-------|-----------------------|-----|-------|
| >NRAS-G12T·KLVVVGAGG' | 121   | >NRAS-G12T·KLVVVGATG\ | 34  | 87    |
| >NRAS-G12T·KLVVVGAGG' | 6     | >NRAS-G12T·KLVVVGATG\ | 4   | 2     |
| >NRAS-G12T·YKLVVVGAGC | 423   | >NRAS-G12T·YKLVVVGATC | 138 | 285   |
| >NRAS-G12T·YKLVVVGAGC | 220   | >NRAS-G12T·YKLVVVGATC | 149 | 71    |
| >NRAS-G12T·YKLVVVGAGC | 662   | >NRAS-G12T·YKLVVVGATC | 202 | 460   |
| >NRAS-G12T·YKLVVVGAGC | 696   | >NRAS-G12T·YKLVVVGATC | 95  | 601   |
| >NRAS-G12V·GGVGKSALTI | 2287  | >NRAS-G12V·VGVGKSALTI | 461 | 1826  |
| >NRAS-G12V·AGGVGKSAL  | 10826 | >NRAS-G12V·AVGVGKSAL  | 453 | 10373 |
| >NRAS-G12V·TEYKLVVGA  | 4607  | >NRAS-G12V·TEYKLVVGA  | 18  | 4589  |
| >NRAS-G12V·TEYKLVVGA  | 3297  | >NRAS-G12V·TEYKLVVGA  | 123 | 3174  |
| >NRAS-G12V·TEYKLVVGA  | 12960 | >NRAS-G12V·TEYKLVVGA  | 156 | 12804 |
| >NRAS-G12V·TEYKLVVGA  | 3172  | >NRAS-G12V·TEYKLVVGA  | 71  | 3101  |
| >NRAS-G12V·TEYKLVVGA  | 2108  | >NRAS-G12V·TEYKLVVGA  | 91  | 2017  |
| >NRAS-G12V·TEYKLVVGA  | 1689  | >NRAS-G12V·TEYKLVVGA  | 8   | 1681  |
| >NRAS-G12V·VVGAGGVGK  | 326   | >NRAS-G12V·VVGAVGVGK  | 203 | 123   |
| >NRAS-G12V·VVGAGGVGK  | 89    | >NRAS-G12V·VVGAVGVGK  | 42  | 47    |
| >NRAS-G12V·VVVGAGGV   | 1957  | >NRAS-G12V·VVVGAVGV   | 473 | 1484  |
| >NRAS-G12V·VVVGAGGV   | 117   | >NRAS-G12V·VVVGAVGV   | 72  | 45    |
| >NRAS-G12V·VVVGAGGV   | 68    | >NRAS-G12V·VVVGAVGV   | 15  | 53    |
| >NRAS-G12V·VVVGAGGV   | 139   | >NRAS-G12V·VVVGAVGV   | 34  | 105   |
| >NRAS-G12V·VVVGAGGV   | 707   | >NRAS-G12V·VVVGAVGV   | 86  | 621   |
| >NRAS-G12V·VVVGAGGV   | 2371  | >NRAS-G12V·VVVGAVGV   | 199 | 2172  |
| >NRAS-G12V·VVVGAGGV   | 23    | >NRAS-G12V·VVVGAVGV   | 6   | 17    |
| >NRAS-G12V·VVVGAGGVG  | 76    | >NRAS-G12V·VVVGAVGVG  | 63  | 13    |
| >NRAS-G12V·VVVGAGGVG  | 101   | >NRAS-G12V·VVVGAVGVG  | 40  | 61    |
| >NRAS-G12V·VVVGAGGVG  | 203   | >NRAS-G12V·VVVGAVGVG  | 58  | 145   |
| >NRAS-G12V·VVVGAGGV   | 191   | >NRAS-G12V·VVVGAVGV   | 60  | 131   |
| >NRAS-G12V·VVVGAGGV   | 649   | >NRAS-G12V·VVVGAVGV   | 301 | 348   |
| >NRAS-G12V·LVVVGAGGV  | 180   | >NRAS-G12V·LVVVGAVGV  | 330 | 150   |
| >NRAS-G12V·LVVVGAGGV  | 55    | >NRAS-G12V·LVVVGAVGV  | 14  | 41    |
| >NRAS-G12V·LVVVGAGGV  | 1068  | >NRAS-G12V·LVVVGAVGV  | 324 | 744   |
| >NRAS-G12V·LVVVGAGGV  | 2712  | >NRAS-G12V·LVVVGAVGV  | 308 | 2404  |
| >NRAS-G12V·LVVVGAGGV  | 75    | >NRAS-G12V·LVVVGAVGV  | 11  | 64    |
| >NRAS-G12V·LVVVGAGGV\ | 572   | >NRAS-G12V·LVVVGAVGV\ | 270 | 302   |
| >NRAS-G12V·LVVVGAGGV\ | 284   | >NRAS-G12V·LVVVGAVGV\ | 125 | 159   |
| >NRAS-G12V·LVVVGAGGV  | 154   | >NRAS-G12V·LVVVGAVGV  | 70  | 84    |
| >NRAS-G12V·LVVVGAGGV  | 159   | >NRAS-G12V·LVVVGAVGV  | 84  | 75    |
| >NRAS-G12V·KLVVVGAG   | 20564 | >NRAS-G12V·KLVVVGAV   | 163 | 20401 |
| >NRAS-G12V·KLVVVGAG   | 4828  | >NRAS-G12V·KLVVVGAV   | 50  | 4778  |
| >NRAS-G12V·KLVVVGAGG' | 392   | >NRAS-G12V·KLVVVGAVG\ | 221 | 171   |
| >NRAS-G12V·KLVVVGAG   | 4844  | >NRAS-G12V·KLVVVGAV   | 9   | 4835  |
| >NRAS-G12V·KLVVVGAGG' | 35    | >NRAS-G12V·KLVVVGAVG\ | 59  | 24    |
| >NRAS-G12V·KLVVVGAG   | 11214 | >NRAS-G12V·KLVVVGAV   | 37  | 11177 |

|                       |       |                       |     |       |
|-----------------------|-------|-----------------------|-----|-------|
| >NRAS-G12V KLVVVGAGG' | 661   | >NRAS-G12V KLVVVGAVG' | 241 | 420   |
| >NRAS-G12V KLVVVGAG   | 4834  | >NRAS-G12V KLVVVGAV   | 3   | 4831  |
| >NRAS-G12V KLVVVGAGG' | 6     | >NRAS-G12V KLVVVGAVG' | 4   | 2     |
| >NRAS-G12V KLVVVGAG   | 13314 | >NRAS-G12V KLVVVGAV   | 10  | 13304 |
| >NRAS-G12V KLVVVGAGG' | 17    | >NRAS-G12V KLVVVGAVG' | 7   | 10    |
| >NRAS-G12V KLVVVGAG   | 14961 | >NRAS-G12V KLVVVGAV   | 16  | 14945 |
| >NRAS-G12V KLVVVGAGG' | 14    | >NRAS-G12V KLVVVGAVG' | 8   | 6     |
| >NRAS-G12V KLVVVGAG   | 25902 | >NRAS-G12V KLVVVGAV   | 134 | 25768 |
| >NRAS-G12V KLVVVGAGG' | 121   | >NRAS-G12V KLVVVGAVG' | 24  | 97    |
| >NRAS-G12V KLVVVGAG   | 24283 | >NRAS-G12V KLVVVGAV   | 7   | 24276 |
| >NRAS-G12V KLVVVGAGG' | 6     | >NRAS-G12V KLVVVGAVG' | 4   | 2     |
| >NRAS-G12V YKLVVVGAG  | 16618 | >NRAS-G12V YKLVVVGAV  | 240 | 16378 |
| >NRAS-G12V YKLVVVGAGC | 423   | >NRAS-G12V YKLVVVGAVC | 151 | 272   |
| >NRAS-G12V YKLVVVGAG  | 17397 | >NRAS-G12V YKLVVVGAV  | 72  | 17325 |
| >NRAS-G12V YKLVVVGAGC | 220   | >NRAS-G12V YKLVVVGAVC | 99  | 121   |
| >NRAS-G12V YKLVVVGAGC | 662   | >NRAS-G12V YKLVVVGAVC | 142 | 520   |
| >NRAS-G12V YKLVVVGAG  | 5121  | >NRAS-G12V YKLVVVGAV  | 97  | 5024  |
| >NRAS-G12V YKLVVVGAGC | 696   | >NRAS-G12V YKLVVVGAVC | 94  | 602   |
| >NRAS-G12V YKLVVVGAG  | 15897 | >NRAS-G12V YKLVVVGAV  | 465 | 15432 |
| >NRAS-G12Y·GGVGKSALTI | 2287  | >NRAS-G12Y·YGVGKSALTI | 183 | 2104  |
| >NRAS-G12Y·AGGVGKSAL  | 7548  | >NRAS-G12Y·AYGVGKSAL  | 16  | 7532  |
| >NRAS-G12Y·AGGVGKSALT | 10208 | >NRAS-G12Y·AYGVGKSALT | 21  | 10187 |
| >NRAS-G12Y·AGGVGKSALT | 22504 | >NRAS-G12Y·AYGVGKSALT | 311 | 22193 |
| >NRAS-G12Y·AGGVGKSAL  | 21694 | >NRAS-G12Y·AYGVGKSAL  | 54  | 21640 |
| >NRAS-G12Y·AGGVGKSALT | 21011 | >NRAS-G12Y·AYGVGKSALT | 18  | 20993 |
| >NRAS-G12Y·TEYKLVVGA  | 4607  | >NRAS-G12Y·TEYKLVVGA  | 258 | 4349  |
| >NRAS-G12Y·TEYKLVVGA  | 11873 | >NRAS-G12Y·TEYKLVVGA  | 184 | 11689 |
| >NRAS-G12Y·TEYKLVVGA  | 20054 | >NRAS-G12Y·TEYKLVVGA  | 340 | 19714 |
| >NRAS-G12Y·TEYKLVVGA  | 3297  | >NRAS-G12Y·TEYKLVVGA  | 9   | 3288  |
| >NRAS-G12Y·TEYKLVVGA  | 6833  | >NRAS-G12Y·TEYKLVVGA  | 287 | 6546  |
| >NRAS-G12Y·TEYKLVVGA  | 5927  | >NRAS-G12Y·TEYKLVVGA  | 148 | 5779  |
| >NRAS-G12Y·TEYKLVVGA  | 34308 | >NRAS-G12Y·TEYKLVVGA  | 306 | 34002 |
| >NRAS-G12Y·GAGGVGKSA  | 7777  | >NRAS-G12Y·GAYGVGKSAI | 137 | 7640  |
| >NRAS-G12Y·GAGGVGKSA  | 9745  | >NRAS-G12Y·GAYGVGKSAI | 403 | 9342  |
| >NRAS-G12Y·VVGAGGVGK  | 326   | >NRAS-G12Y·VVGAYGVGK  | 303 | 23    |
| >NRAS-G12Y·VVGAGGVGK  | 89    | >NRAS-G12Y·VVGAYGVGK  | 45  | 44    |
| >NRAS-G12Y·VVVGAGGV   | 1957  | >NRAS-G12Y·VVVGAYGV   | 249 | 1708  |
| >NRAS-G12Y·VVVGAGGV   | 117   | >NRAS-G12Y·VVVGAYGV   | 97  | 20    |
| >NRAS-G12Y·VVVGAGGV   | 68    | >NRAS-G12Y·VVVGAYGV   | 16  | 52    |
| >NRAS-G12Y·VVVGAGGV   | 139   | >NRAS-G12Y·VVVGAYGV   | 35  | 104   |
| >NRAS-G12Y·VVVGAGGV   | 2897  | >NRAS-G12Y·VVVGAYGV   | 279 | 2618  |
| >NRAS-G12Y·VVVGAGGV   | 707   | >NRAS-G12Y·VVVGAYGV   | 112 | 595   |
| >NRAS-G12Y·VVVGAGGV   | 2371  | >NRAS-G12Y·VVVGAYGV   | 112 | 2259  |

|                       |       |                       |     |       |
|-----------------------|-------|-----------------------|-----|-------|
| >NRAS-G12Y·VVVGAGGV   | 23    | >NRAS-G12Y·VVVGAYGV   | 8   | 15    |
| >NRAS-G12Y·VVVGAGGVG  | 76    | >NRAS-G12Y·VVVGAYGVG  | 86  | 10    |
| >NRAS-G12Y·VVVGAGGVC  | 101   | >NRAS-G12Y·VVVGAYGVG  | 57  | 44    |
| >NRAS-G12Y·VVVGAGGVC  | 203   | >NRAS-G12Y·VVVGAYGVG  | 82  | 121   |
| >NRAS-G12Y·VVVGAGGV   | 191   | >NRAS-G12Y·VVVGAYGV   | 31  | 160   |
| >NRAS-G12Y·VVVGAGGV   | 649   | >NRAS-G12Y·VVVGAYGV   | 173 | 476   |
| >NRAS-G12Y·LVVVGAGGV  | 3498  | >NRAS-G12Y·LVVVGAYGV  | 316 | 3182  |
| >NRAS-G12Y·LVVVGAGGV  | 180   | >NRAS-G12Y·LVVVGAYGV  | 258 | 78    |
| >NRAS-G12Y·LVVVGAGGV  | 55    | >NRAS-G12Y·LVVVGAYGV  | 9   | 46    |
| >NRAS-G12Y·LVVVGAGGV  | 1068  | >NRAS-G12Y·LVVVGAYGV  | 108 | 960   |
| >NRAS-G12Y·LVVVGAGGV  | 3578  | >NRAS-G12Y·LVVVGAYGV  | 98  | 3480  |
| >NRAS-G12Y·LVVVGAGGV  | 2712  | >NRAS-G12Y·LVVVGAYGV  | 232 | 2480  |
| >NRAS-G12Y·LVVVGAGGV  | 3213  | >NRAS-G12Y·LVVVGAYGV  | 100 | 3113  |
| >NRAS-G12Y·LVVVGAGGV  | 75    | >NRAS-G12Y·LVVVGAYGV  | 12  | 63    |
| >NRAS-G12Y·LVVVGAGGV\ | 572   | >NRAS-G12Y·LVVVGAYGV\ | 203 | 369   |
| >NRAS-G12Y·LVVVGAGGV\ | 284   | >NRAS-G12Y·LVVVGAYGV\ | 138 | 146   |
| >NRAS-G12Y·LVVVGAGGV  | 154   | >NRAS-G12Y·LVVVGAYGV  | 27  | 127   |
| >NRAS-G12Y·LVVVGAGGV  | 159   | >NRAS-G12Y·LVVVGAYGV  | 51  | 108   |
| >NRAS-G12Y·KLVVVGAGG\ | 1541  | >NRAS-G12Y·KLVVVGAYG\ | 138 | 1403  |
| >NRAS-G12Y·KLVVVGAGG\ | 392   | >NRAS-G12Y·KLVVVGAYG\ | 66  | 326   |
| >NRAS-G12Y·KLVVVGAGG\ | 35    | >NRAS-G12Y·KLVVVGAYG\ | 65  | 30    |
| >NRAS-G12Y·KLVVVGAGG\ | 661   | >NRAS-G12Y·KLVVVGAYG\ | 77  | 584   |
| >NRAS-G12Y·KLVVVGAGG\ | 6     | >NRAS-G12Y·KLVVVGAYG\ | 3   | 3     |
| >NRAS-G12Y·KLVVVGAGG\ | 17    | >NRAS-G12Y·KLVVVGAYG\ | 4   | 13    |
| >NRAS-G12Y·KLVVVGAGG\ | 14    | >NRAS-G12Y·KLVVVGAYG\ | 7   | 7     |
| >NRAS-G12Y·KLVVVGAGG\ | 121   | >NRAS-G12Y·KLVVVGAYG\ | 8   | 113   |
| >NRAS-G12Y·KLVVVGAGG\ | 6     | >NRAS-G12Y·KLVVVGAYG\ | 4   | 2     |
| >NRAS-G12Y·KLVVVGAG   | 19546 | >NRAS-G12Y·KLVVVGAY   | 403 | 19143 |
| >NRAS-G12Y·KLVVVGAG   | 26416 | >NRAS-G12Y·KLVVVGAY   | 251 | 26165 |
| >NRAS-G12Y·KLVVVGAG   | 21549 | >NRAS-G12Y·KLVVVGAY   | 30  | 21519 |
| >NRAS-G12Y·KLVVVGAG   | 26418 | >NRAS-G12Y·KLVVVGAY   | 81  | 26337 |
| >NRAS-G12Y·KLVVVGAG   | 5603  | >NRAS-G12Y·KLVVVGAY   | 90  | 5513  |
| >NRAS-G12Y·KLVVVGAG   | 30099 | >NRAS-G12Y·KLVVVGAY   | 271 | 29828 |
| >NRAS-G12Y·KLVVVGAG   | 15848 | >NRAS-G12Y·KLVVVGAY   | 329 | 15519 |
| >NRAS-G12Y·KLVVVGAG   | 36437 | >NRAS-G12Y·KLVVVGAY   | 190 | 36247 |
| >NRAS-G12Y·YKLVVVGAGC | 423   | >NRAS-G12Y·YKLVVVGAYC | 116 | 307   |
| >NRAS-G12Y·YKLVVVGAGC | 220   | >NRAS-G12Y·YKLVVVGAYC | 54  | 166   |
| >NRAS-G12Y·YKLVVVGAGC | 2437  | >NRAS-G12Y·YKLVVVGAYC | 264 | 2173  |
| >NRAS-G12Y·YKLVVVGAGC | 662   | >NRAS-G12Y·YKLVVVGAYC | 122 | 540   |
| >NRAS-G12Y·YKLVVVGAGC | 5066  | >NRAS-G12Y·YKLVVVGAYC | 357 | 4709  |
| >NRAS-G12Y·YKLVVVGAG  | 32075 | >NRAS-G12Y·YKLVVVGAY  | 388 | 31687 |
| >NRAS-G12Y·YKLVVVGAG  | 5121  | >NRAS-G12Y·YKLVVVGAY  | 8   | 5113  |
| >NRAS-G12Y·YKLVVVGAGC | 696   | >NRAS-G12Y·YKLVVVGAYC | 165 | 531   |

|                       |       |                       |     |       |
|-----------------------|-------|-----------------------|-----|-------|
| >NRAS-G12Y·YKLVVVGAG  | 38060 | >NRAS-G12Y·YKLVVVGAY  | 264 | 37796 |
| >NRAS-G12Y·EYKLVVVGAC | 17935 | >NRAS-G12Y·EYKLVVVGAY | 157 | 17778 |
| >NRAS-G12Y·EYKLVVVGAC | 20949 | >NRAS-G12Y·EYKLVVVGAY | 292 | 20657 |
| >NRAS-G12Y·EYKLVVVGAC | 26658 | >NRAS-G12Y·EYKLVVVGAY | 124 | 26534 |
| >NRAS-G12Y·EYKLVVVGAC | 27605 | >NRAS-G12Y·EYKLVVVGAY | 68  | 27537 |
| >NRAS-G12Y·EYKLVVVGAC | 24729 | >NRAS-G12Y·EYKLVVVGAY | 47  | 24682 |
| >NRAS-G13A GVGKSALTI  | 931   | >NRAS-G13A AVGKSALTI  | 175 | 756   |
| >NRAS-G13A GGVGKSAL   | 7093  | >NRAS-G13A GAVGKSAL   | 164 | 6929  |
| >NRAS-G13A GGVGKSALTI | 2287  | >NRAS-G13A GAVGKSALTI | 43  | 2244  |
| >NRAS-G13A AGGVGKSALT | 1153  | >NRAS-G13A AGAVGKSALT | 359 | 794   |
| >NRAS-G13A VVGAGGVGK  | 326   | >NRAS-G13A VVGAGAVGK  | 210 | 116   |
| >NRAS-G13A VVGAGGVGK  | 89    | >NRAS-G13A VVGAGAVGK  | 87  | 2     |
| >NRAS-G13A VVVGAGGV   | 117   | >NRAS-G13A VVVGAGAV   | 101 | 16    |
| >NRAS-G13A VVVGAGGV   | 68    | >NRAS-G13A VVVGAGAV   | 39  | 29    |
| >NRAS-G13A VVVGAGGV   | 139   | >NRAS-G13A VVVGAGAV   | 112 | 27    |
| >NRAS-G13A VVVGAGGV   | 23    | >NRAS-G13A VVVGAGAV   | 28  | 5     |
| >NRAS-G13A VVVGAGGVG  | 76    | >NRAS-G13A VVVGAGAVG  | 111 | 35    |
| >NRAS-G13A VVVGAGGVG  | 101   | >NRAS-G13A VVVGAGAVG  | 127 | 26    |
| >NRAS-G13A VVVGAGGVG  | 203   | >NRAS-G13A VVVGAGAVG  | 200 | 3     |
| >NRAS-G13A VVVGAGGV   | 191   | >NRAS-G13A VVVGAGAV   | 189 | 2     |
| >NRAS-G13A LVVVGAGGV  | 180   | >NRAS-G13A LVVVGAGAV  | 169 | 11    |
| >NRAS-G13A LVVVGAGG   | 9304  | >NRAS-G13A LVVVGAGA   | 212 | 9092  |
| >NRAS-G13A LVVVGAGGV  | 55    | >NRAS-G13A LVVVGAGAV  | 44  | 11    |
| >NRAS-G13A LVVVGAGGV  | 75    | >NRAS-G13A LVVVGAGAV  | 187 | 112   |
| >NRAS-G13A LVVVGAGGV  | 284   | >NRAS-G13A LVVVGAGAV  | 159 | 125   |
| >NRAS-G13A LVVVGAGGV  | 154   | >NRAS-G13A LVVVGAGAV  | 213 | 59    |
| >NRAS-G13A LVVVGAGGV  | 159   | >NRAS-G13A LVVVGAGAV  | 250 | 91    |
| >NRAS-G13A KLVVVGAGG  | 4751  | >NRAS-G13A KLVVVGAGA  | 286 | 4465  |
| >NRAS-G13A KLVVVGAGG  | 392   | >NRAS-G13A KLVVVGAGA  | 337 | 55    |
| >NRAS-G13A KLVVVGAGG  | 5824  | >NRAS-G13A KLVVVGAGA  | 45  | 5779  |
| >NRAS-G13A KLVVVGAGG  | 35    | >NRAS-G13A KLVVVGAGA  | 35  | 0     |
| >NRAS-G13A KLVVVGAGG  | 9366  | >NRAS-G13A KLVVVGAGA  | 263 | 9103  |
| >NRAS-G13A KLVVVGAGG  | 3432  | >NRAS-G13A KLVVVGAGA  | 33  | 3399  |
| >NRAS-G13A KLVVVGAGG  | 6     | >NRAS-G13A KLVVVGAGA  | 6   | 0     |
| >NRAS-G13A KLVVVGAGG  | 8199  | >NRAS-G13A KLVVVGAGA  | 120 | 8079  |
| >NRAS-G13A KLVVVGAGG  | 17    | >NRAS-G13A KLVVVGAGA  | 15  | 2     |
| >NRAS-G13A KLVVVGAGG  | 10982 | >NRAS-G13A KLVVVGAGA  | 134 | 10848 |
| >NRAS-G13A KLVVVGAGG  | 14    | >NRAS-G13A KLVVVGAGA  | 25  | 11    |
| >NRAS-G13A KLVVVGAGG  | 121   | >NRAS-G13A KLVVVGAGA  | 259 | 138   |
| >NRAS-G13A KLVVVGAGG  | 19686 | >NRAS-G13A KLVVVGAGA  | 116 | 19570 |
| >NRAS-G13A KLVVVGAGG  | 6     | >NRAS-G13A KLVVVGAGA  | 9   | 3     |
| >NRAS-G13A YKLVVVGAGC | 423   | >NRAS-G13A YKLVVVGAGC | 331 | 92    |
| >NRAS-G13A YKLVVVGAGC | 220   | >NRAS-G13A YKLVVVGAGC | 235 | 15    |



|                       |      |                       |      |      |
|-----------------------|------|-----------------------|------|------|
| >NRAS-G13A YKLVVVGAGC | 696  | >NRAS-G13A YKLVVVGAG/ | 110  | 586  |
| >NRAS-G13A YKLVVVGAGC | 3285 | >NRAS-G13A YKLVVVGAG/ | 272  | 3013 |
| >NRAS-G13C GVGKSALTI  | 1770 | >NRAS-G13C CVGKSALTI  | 113  | 1657 |
| >NRAS-G13C AGGVGKSALT | 1153 | >NRAS-G13C AGCVGKSALT | 393  | 760  |
| >NRAS-G13C VVGAGGVGK  | 326  | >NRAS-G13C VVGAGCVGK  | 280  | 46   |
| >NRAS-G13C VVGAGGVGK  | 89   | >NRAS-G13C VVGAGCVGK  | 105  | 16   |
| >NRAS-G13C VVVGAGGV   | 117  | >NRAS-G13C VVVGAGCV   | 884  | 767  |
| >NRAS-G13C VVVGAGGV   | 68   | >NRAS-G13C VVVGAGCV   | 224  | 156  |
| >NRAS-G13C VVVGAGGV   | 139  | >NRAS-G13C VVVGAGCV   | 478  | 339  |
| >NRAS-G13C VVVGAGGV   | 707  | >NRAS-G13C VVVGAGCV   | 408  | 299  |
| >NRAS-G13C VVVGAGGV   | 23   | >NRAS-G13C VVVGAGCV   | 53   | 30   |
| >NRAS-G13C VVVGAGGVG  | 76   | >NRAS-G13C VVVGAGCVG  | 99   | 23   |
| >NRAS-G13C VVVGAGGVG  | 101  | >NRAS-G13C VVVGAGCVG  | 84   | 17   |
| >NRAS-G13C VVVGAGGVG  | 203  | >NRAS-G13C VVVGAGCVG  | 270  | 67   |
| >NRAS-G13C VVVGAGGV   | 191  | >NRAS-G13C VVVGAGCV   | 666  | 475  |
| >NRAS-G13C LVVVGAGGV  | 180  | >NRAS-G13C LVVVGAGCV  | 1255 | 1075 |
| >NRAS-G13C LVVVGAGGV  | 55   | >NRAS-G13C LVVVGAGCV  | 387  | 332  |
| >NRAS-G13C LVVVGAGGV  | 75   | >NRAS-G13C LVVVGAGCV  | 483  | 408  |
| >NRAS-G13C LVVVGAGGV  | 284  | >NRAS-G13C LVVVGAGCV  | 156  | 128  |
| >NRAS-G13C LVVVGAGGV  | 154  | >NRAS-G13C LVVVGAGCV  | 767  | 613  |
| >NRAS-G13C LVVVGAGGV  | 159  | >NRAS-G13C LVVVGAGCV  | 2355 | 2196 |
| >NRAS-G13C KLVVVGAGG  | 392  | >NRAS-G13C KLVVVGAGC  | 796  | 404  |
| >NRAS-G13C KLVVVGAGG  | 35   | >NRAS-G13C KLVVVGAGC  | 107  | 72   |
| >NRAS-G13C KLVVVGAGG  | 3432 | >NRAS-G13C KLVVVGAGC  | 117  | 3315 |
| >NRAS-G13C KLVVVGAGG  | 6    | >NRAS-G13C KLVVVGAGC  | 17   | 11   |
| >NRAS-G13C KLVVVGAGG  | 17   | >NRAS-G13C KLVVVGAGC  | 27   | 10   |
| >NRAS-G13C KLVVVGAGG  | 14   | >NRAS-G13C KLVVVGAGC  | 15   | 1    |
| >NRAS-G13C KLVVVGAGG  | 121  | >NRAS-G13C KLVVVGAGC  | 184  | 63   |
| >NRAS-G13C KLVVVGAGG  | 6    | >NRAS-G13C KLVVVGAGC  | 18   | 12   |
| >NRAS-G13C YKLVVVGAGC | 423  | >NRAS-G13C YKLVVVGAGC | 1533 | 1110 |
| >NRAS-G13C YKLVVVGAGC | 220  | >NRAS-G13C YKLVVVGAGC | 912  | 692  |
| >NRAS-G13C YKLVVVGAGC | 696  | >NRAS-G13C YKLVVVGAGC | 475  | 221  |
| >NRAS-G13D GVGKSALTIQ | 7997 | >NRAS-G13D DVGKSALTIQ | 377  | 7620 |
| >NRAS-G13D GGVGKSALTI | 6835 | >NRAS-G13D GDVGKSALTI | 83   | 6752 |
| >NRAS-G13D VVGAGGVGK  | 326  | >NRAS-G13D VVGAGDVGK  | 1537 | 1211 |
| >NRAS-G13D VVGAGGVGK  | 89   | >NRAS-G13D VVGAGDVGK  | 252  | 163  |
| >NRAS-G13D VVVGAGGV   | 117  | >NRAS-G13D VVVGAGDV   | 684  | 567  |
| >NRAS-G13D VVVGAGGV   | 68   | >NRAS-G13D VVVGAGDV   | 566  | 498  |
| >NRAS-G13D VVVGAGGV   | 139  | >NRAS-G13D VVVGAGDV   | 1106 | 967  |
| >NRAS-G13D VVVGAGGV   | 23   | >NRAS-G13D VVVGAGDV   | 59   | 36   |
| >NRAS-G13D VVVGAGGVG  | 76   | >NRAS-G13D VVVGAGDVG  | 424  | 348  |
| >NRAS-G13D VVVGAGGVG  | 101  | >NRAS-G13D VVVGAGDVG  | 223  | 122  |
| >NRAS-G13D VVVGAGGVG  | 203  | >NRAS-G13D VVVGAGDVG  | 252  | 49   |

|                        |      |                        |      |      |
|------------------------|------|------------------------|------|------|
| >NRAS-G13D VVVGAGGV    | 191  | >NRAS-G13D VVVGAGDV    | 1192 | 1001 |
| >NRAS-G13D LVVVGAGGV   | 180  | >NRAS-G13D LVVVGAGDV   | 927  | 747  |
| >NRAS-G13D LVVVGAGGV   | 55   | >NRAS-G13D LVVVGAGDV   | 1288 | 1233 |
| >NRAS-G13D LVVVGAGGV   | 75   | >NRAS-G13D LVVVGAGDV   | 315  | 240  |
| >NRAS-G13D LVVVGAGGV   | 284  | >NRAS-G13D LVVVGAGDV   | 191  | 93   |
| >NRAS-G13D LVVVGAGGV   | 154  | >NRAS-G13D LVVVGAGDV   | 1815 | 1661 |
| >NRAS-G13D LVVVGAGGV   | 159  | >NRAS-G13D LVVVGAGDV   | 2708 | 2549 |
| >NRAS-G13D KLVVVGAGG'  | 392  | >NRAS-G13D KLVVVGAGD'  | 1131 | 739  |
| >NRAS-G13D KLVVVGAGG'  | 35   | >NRAS-G13D KLVVVGAGD'  | 86   | 51   |
| >NRAS-G13D KLVVVGAGG'  | 6    | >NRAS-G13D KLVVVGAGD'  | 35   | 29   |
| >NRAS-G13D KLVVVGAGG'  | 17   | >NRAS-G13D KLVVVGAGD'  | 90   | 73   |
| >NRAS-G13D KLVVVGAGG'  | 14   | >NRAS-G13D KLVVVGAGD'  | 30   | 16   |
| >NRAS-G13D KLVVVGAGG'  | 121  | >NRAS-G13D KLVVVGAGD'  | 908  | 787  |
| >NRAS-G13D KLVVVGAGG'  | 6    | >NRAS-G13D KLVVVGAGD'  | 11   | 5    |
| >NRAS-G13D YKLVVVGAGG' | 423  | >NRAS-G13D YKLVVVGAGD' | 2388 | 1965 |
| >NRAS-G13D YKLVVVGAGG' | 220  | >NRAS-G13D YKLVVVGAGD' | 1484 | 1264 |
| >NRAS-G13N GVGKSALTIQ  | 7997 | >NRAS-G13N NVGKSALTIQ  | 360  | 7637 |
| >NRAS-G13N VVGAGGVGK   | 326  | >NRAS-G13N VVGAGNVGK   | 344  | 18   |
| >NRAS-G13N VVGAGGVGK   | 89   | >NRAS-G13N VVGAGNVGK   | 91   | 2    |
| >NRAS-G13N VVVGAGGV    | 117  | >NRAS-G13N VVVGAGNV    | 160  | 43   |
| >NRAS-G13N VVVGAGGV    | 68   | >NRAS-G13N VVVGAGNV    | 172  | 104  |
| >NRAS-G13N VVVGAGGV    | 139  | >NRAS-G13N VVVGAGNV    | 325  | 186  |
| >NRAS-G13N VVVGAGGV    | 23   | >NRAS-G13N VVVGAGNV    | 29   | 6    |
| >NRAS-G13N VVVGAGGVG   | 76   | >NRAS-G13N VVVGAGNVG   | 102  | 26   |
| >NRAS-G13N VVVGAGGVG   | 101  | >NRAS-G13N VVVGAGNVG   | 118  | 17   |
| >NRAS-G13N VVVGAGGVG   | 203  | >NRAS-G13N VVVGAGNVG   | 222  | 19   |
| >NRAS-G13N VVVGAGGV    | 191  | >NRAS-G13N VVVGAGNV    | 240  | 49   |
| >NRAS-G13N LVVVGAGGV   | 180  | >NRAS-G13N LVVVGAGNV   | 238  | 58   |
| >NRAS-G13N LVVVGAGGV   | 55   | >NRAS-G13N LVVVGAGNV   | 292  | 237  |
| >NRAS-G13N LVVVGAGGV   | 75   | >NRAS-G13N LVVVGAGNV   | 149  | 74   |
| >NRAS-G13N LVVVGAGGV   | 284  | >NRAS-G13N LVVVGAGNV   | 155  | 129  |
| >NRAS-G13N LVVVGAGGV   | 154  | >NRAS-G13N LVVVGAGNV   | 258  | 104  |
| >NRAS-G13N LVVVGAGGV   | 159  | >NRAS-G13N LVVVGAGNV   | 274  | 115  |
| >NRAS-G13N KLVVVGAGG'  | 392  | >NRAS-G13N KLVVVGAGN'  | 471  | 79   |
| >NRAS-G13N KLVVVGAGG'  | 35   | >NRAS-G13N KLVVVGAGN'  | 42   | 7    |
| >NRAS-G13N KLVVVGAGG'  | 6    | >NRAS-G13N KLVVVGAGN'  | 11   | 5    |
| >NRAS-G13N KLVVVGAGG'  | 17   | >NRAS-G13N KLVVVGAGN'  | 31   | 14   |
| >NRAS-G13N KLVVVGAGG'  | 14   | >NRAS-G13N KLVVVGAGN'  | 18   | 4    |
| >NRAS-G13N KLVVVGAGG'  | 121  | >NRAS-G13N KLVVVGAGN'  | 253  | 132  |
| >NRAS-G13N KLVVVGAGG'  | 6    | >NRAS-G13N KLVVVGAGN'  | 8    | 2    |
| >NRAS-G13N YKLVVVGAGG' | 423  | >NRAS-G13N YKLVVVGAGD' | 1251 | 828  |
| >NRAS-G13N YKLVVVGAGG' | 220  | >NRAS-G13N YKLVVVGAGD' | 482  | 262  |
| >NRAS-G13N YKLVVVGAGG' | 696  | >NRAS-G13N YKLVVVGAGD' | 309  | 387  |

|                       |       |                       |     |       |
|-----------------------|-------|-----------------------|-----|-------|
| >NRAS-G13R GVGKSALTI  | 7082  | >NRAS-G13R RVGKSALTI  | 228 | 6854  |
| >NRAS-G13R GVGKSALTI  | 931   | >NRAS-G13R RVGKSALTI  | 32  | 899   |
| >NRAS-G13R GVGKSALTIQ | 2938  | >NRAS-G13R RVGKSALTIQ | 164 | 2774  |
| >NRAS-G13R GVGKSALTI  | 3659  | >NRAS-G13R RVGKSALTI  | 103 | 3556  |
| >NRAS-G13R GVGKSALTIQ | 3750  | >NRAS-G13R RVGKSALTIQ | 154 | 3596  |
| >NRAS-G13R GVGKSALTI  | 1770  | >NRAS-G13R RVGKSALTI  | 156 | 1614  |
| >NRAS-G13R GGVGKSAL   | 24066 | >NRAS-G13R GRVGKSAL   | 305 | 23761 |
| >NRAS-G13R GGVGKSALTI | 25754 | >NRAS-G13R GRVGKSALTI | 67  | 25687 |
| >NRAS-G13R GGVGKSAL   | 10361 | >NRAS-G13R GRVGKSAL   | 180 | 10181 |
| >NRAS-G13R EYKLVVVGAC | 22681 | >NRAS-G13R EYKLVVVGAC | 274 | 22407 |
| >NRAS-G13R EYKLVVVGAC | 13124 | >NRAS-G13R EYKLVVVGAC | 13  | 13111 |
| >NRAS-G13R EYKLVVVGAC | 33720 | >NRAS-G13R EYKLVVVGAC | 55  | 33665 |
| >NRAS-G13R EYKLVVVGAC | 33699 | >NRAS-G13R EYKLVVVGAC | 134 | 33565 |
| >NRAS-G13R AGGVGKSA   | 14619 | >NRAS-G13R AGRVGKSA   | 304 | 14315 |
| >NRAS-G13R AGGVGKSALT | 11556 | >NRAS-G13R AGRVGKSALT | 101 | 11455 |
| >NRAS-G13R AGGVGKSAL  | 10826 | >NRAS-G13R AGRVGKSAL  | 203 | 10623 |
| >NRAS-G13R AGGVGKSAL  | 5873  | >NRAS-G13R AGRVGKSAL  | 472 | 5401  |
| >NRAS-G13R VVGAGGVGK  | 326   | >NRAS-G13R VVGAGRVGK  | 177 | 149   |
| >NRAS-G13R VVGAGGVGK  | 89    | >NRAS-G13R VVGAGRVGK  | 71  | 18    |
| >NRAS-G13R VVVGAGGV   | 117   | >NRAS-G13R VVVGAGRV   | 339 | 222   |
| >NRAS-G13R VVVGAGGV   | 68    | >NRAS-G13R VVVGAGRV   | 301 | 233   |
| >NRAS-G13R VVVGAGGV   | 139   | >NRAS-G13R VVVGAGRV   | 204 | 65    |
| >NRAS-G13R VVVGAGGV   | 23    | >NRAS-G13R VVVGAGRV   | 23  | 0     |
| >NRAS-G13R VVVGAGGVG  | 76    | >NRAS-G13R VVVGAGRVG  | 123 | 47    |
| >NRAS-G13R VVVGAGGVG  | 101   | >NRAS-G13R VVVGAGRVG  | 206 | 105   |
| >NRAS-G13R VVVGAGGVG  | 203   | >NRAS-G13R VVVGAGRVG  | 367 | 164   |
| >NRAS-G13R VVVGAGGV   | 191   | >NRAS-G13R VVVGAGRV   | 418 | 227   |
| >NRAS-G13R LVVVGAGGV  | 180   | >NRAS-G13R LVVVGAGRV  | 431 | 251   |
| >NRAS-G13R LVVVGAGGV  | 55    | >NRAS-G13R LVVVGAGRV  | 309 | 254   |
| >NRAS-G13R LVVVGAGGV  | 75    | >NRAS-G13R LVVVGAGRV  | 62  | 13    |
| >NRAS-G13R LVVVGAGG   | 24403 | >NRAS-G13R LVVVGAGR   | 454 | 23949 |
| >NRAS-G13R LVVVGAGG   | 30683 | >NRAS-G13R LVVVGAGR   | 58  | 30625 |
| >NRAS-G13R LVVVGAGGV  | 284   | >NRAS-G13R LVVVGAGRV  | 173 | 111   |
| >NRAS-G13R LVVVGAGGV  | 154   | >NRAS-G13R LVVVGAGRV  | 297 | 143   |
| >NRAS-G13R LVVVGAGGV  | 159   | >NRAS-G13R LVVVGAGRV  | 803 | 644   |
| >NRAS-G13R KLVVVGAGG  | 392   | >NRAS-G13R KLVVVGAGR  | 613 | 221   |
| >NRAS-G13R KLVVVGAGG  | 35    | >NRAS-G13R KLVVVGAGR  | 89  | 54    |
| >NRAS-G13R KLVVVGAGG  | 6     | >NRAS-G13R KLVVVGAGR  | 7   | 1     |
| >NRAS-G13R KLVVVGAGG  | 17    | >NRAS-G13R KLVVVGAGR  | 51  | 34    |
| >NRAS-G13R KLVVVGAGG  | 14    | >NRAS-G13R KLVVVGAGR  | 25  | 11    |
| >NRAS-G13R KLVVVGAGG  | 121   | >NRAS-G13R KLVVVGAGR  | 344 | 223   |
| >NRAS-G13R KLVVVGAGG  | 6     | >NRAS-G13R KLVVVGAGR  | 6   | 0     |
| >NRAS-G13R KLVVVGAGG  | 15957 | >NRAS-G13R KLVVVGAGR  | 33  | 15924 |

|                       |       |                       |      |       |
|-----------------------|-------|-----------------------|------|-------|
| >NRAS-G13R KLVVVGAGG  | 36193 | >NRAS-G13R KLVVVGAGR  | 324  | 35869 |
| >NRAS-G13R YKLVVVGAGC | 423   | >NRAS-G13R YKLVVVGAGF | 1425 | 1002  |
| >NRAS-G13R YKLVVVGAGC | 220   | >NRAS-G13R YKLVVVGAGF | 304  | 84    |
| >NRAS-G13S·GVGKSALTI  | 931   | >NRAS-G13S·SVGKSALTI  | 237  | 694   |
| >NRAS-G13S·GVGKSALTI  | 1770  | >NRAS-G13S·SVGKSALTI  | 427  | 1343  |
| >NRAS-G13S·GGVGKSAL   | 7093  | >NRAS-G13S·GSVGKSAL   | 19   | 7074  |
| >NRAS-G13S·GGVGKSALTI | 2287  | >NRAS-G13S·GSVGKSALTI | 11   | 2276  |
| >NRAS-G13S·GGVGKSALTI | 12759 | >NRAS-G13S·GSVGKSALTI | 118  | 12641 |
| >NRAS-G13S·VVGAGGVGK  | 326   | >NRAS-G13S·VVGAGSVGK  | 139  | 187   |
| >NRAS-G13S·VVGAGGVGK  | 89    | >NRAS-G13S·VVGAGSVGK  | 60   | 29    |
| >NRAS-G13S·VVVGAGGV   | 117   | >NRAS-G13S·VVVGAGSV   | 80   | 37    |
| >NRAS-G13S·VVVGAGGV   | 68    | >NRAS-G13S·VVVGAGSV   | 51   | 17    |
| >NRAS-G13S·VVVGAGGV   | 139   | >NRAS-G13S·VVVGAGSV   | 142  | 3     |
| >NRAS-G13S·VVVGAGGV   | 23    | >NRAS-G13S·VVVGAGSV   | 14   | 9     |
| >NRAS-G13S·VVVGAGGVG  | 76    | >NRAS-G13S·VVVGAGSVG  | 55   | 21    |
| >NRAS-G13S·VVVGAGGVG  | 101   | >NRAS-G13S·VVVGAGSVG  | 80   | 21    |
| >NRAS-G13S·VVVGAGGVG  | 203   | >NRAS-G13S·VVVGAGSVG  | 149  | 54    |
| >NRAS-G13S·VVVGAGGV   | 191   | >NRAS-G13S·VVVGAGSV   | 237  | 46    |
| >NRAS-G13S·LVVVGAGGV  | 180   | >NRAS-G13S·LVVVGAGSV  | 141  | 39    |
| >NRAS-G13S·LVVVGAGGV  | 55    | >NRAS-G13S·LVVVGAGSV  | 54   | 1     |
| >NRAS-G13S·LVVVGAGGV  | 75    | >NRAS-G13S·LVVVGAGSV  | 59   | 16    |
| >NRAS-G13S·LVVVGAGGV\ | 572   | >NRAS-G13S·LVVVGAGSV\ | 429  | 143   |
| >NRAS-G13S·LVVVGAGGV\ | 284   | >NRAS-G13S·LVVVGAGSV\ | 189  | 95    |
| >NRAS-G13S·LVVVGAGGV  | 154   | >NRAS-G13S·LVVVGAGSV  | 226  | 72    |
| >NRAS-G13S·LVVVGAGGV  | 159   | >NRAS-G13S·LVVVGAGSV  | 306  | 147   |
| >NRAS-G13S·KLVVVGAGG\ | 392   | >NRAS-G13S·KLVVVGAGS\ | 248  | 144   |
| >NRAS-G13S·KLVVVGAGG\ | 35    | >NRAS-G13S·KLVVVGAGS\ | 27   | 8     |
| >NRAS-G13S·KLVVVGAGG\ | 6     | >NRAS-G13S·KLVVVGAGS\ | 7    | 1     |
| >NRAS-G13S·KLVVVGAGG\ | 17    | >NRAS-G13S·KLVVVGAGS\ | 19   | 2     |
| >NRAS-G13S·KLVVVGAGG\ | 14    | >NRAS-G13S·KLVVVGAGS\ | 18   | 4     |
| >NRAS-G13S·KLVVVGAGG\ | 121   | >NRAS-G13S·KLVVVGAGS\ | 213  | 92    |
| >NRAS-G13S·KLVVVGAGG\ | 6     | >NRAS-G13S·KLVVVGAGS\ | 6    | 0     |
| >NRAS-G13S·YKLVVVGAGC | 423   | >NRAS-G13S·YKLVVVGAGC | 357  | 66    |
| >NRAS-G13S·YKLVVVGAGC | 220   | >NRAS-G13S·YKLVVVGAGC | 267  | 47    |
| >NRAS-G13S·YKLVVVGAGC | 696   | >NRAS-G13S·YKLVVVGAGC | 152  | 544   |
| >NRAS-G13V GGVGKSALTI | 16334 | >NRAS-G13V GVVGKSALTI | 327  | 16007 |
| >NRAS-G13V GGVGKSALTI | 2287  | >NRAS-G13V GVVGKSALTI | 424  | 1863  |
| >NRAS-G13V VVGAGGVGK  | 326   | >NRAS-G13V VVGAGVVGK  | 194  | 132   |
| >NRAS-G13V VVGAGGVGK  | 89    | >NRAS-G13V VVGAGVVGK  | 52   | 37    |
| >NRAS-G13V VVVGAGGV   | 117   | >NRAS-G13V VVVGAGVV   | 360  | 243   |
| >NRAS-G13V VVVGAGGV   | 68    | >NRAS-G13V VVVGAGVV   | 167  | 99    |
| >NRAS-G13V VVVGAGGV   | 139   | >NRAS-G13V VVVGAGVV   | 257  | 118   |
| >NRAS-G13V VVVGAGGV   | 23    | >NRAS-G13V VVVGAGVV   | 32   | 9     |

|                       |       |                       |      |       |
|-----------------------|-------|-----------------------|------|-------|
| >NRAS-G13V VVVGAGGVG  | 76    | >NRAS-G13V VVVGAGVVG  | 101  | 25    |
| >NRAS-G13V VVVGAGGVG  | 101   | >NRAS-G13V VVVGAGVVG  | 93   | 8     |
| >NRAS-G13V VVVGAGGVG  | 203   | >NRAS-G13V VVVGAGVVG  | 312  | 109   |
| >NRAS-G13V VVVGAGGV   | 191   | >NRAS-G13V VVVGAGVV   | 456  | 265   |
| >NRAS-G13V LVVVGAGG   | 15460 | >NRAS-G13V LVVVGAGV   | 101  | 15359 |
| >NRAS-G13V LVVVGAGGV  | 180   | >NRAS-G13V LVVVGAGVV  | 513  | 333   |
| >NRAS-G13V LVVVGAGG   | 9304  | >NRAS-G13V LVVVGAGV   | 25   | 9279  |
| >NRAS-G13V LVVVGAGGV  | 55    | >NRAS-G13V LVVVGAGVV  | 287  | 232   |
| >NRAS-G13V LVVVGAGG   | 24657 | >NRAS-G13V LVVVGAGV   | 200  | 24457 |
| >NRAS-G13V LVVVGAGG   | 32001 | >NRAS-G13V LVVVGAGV   | 19   | 31982 |
| >NRAS-G13V LVVVGAGGV  | 75    | >NRAS-G13V LVVVGAGVV  | 239  | 164   |
| >NRAS-G13V LVVVGAGGV  | 572   | >NRAS-G13V LVVVGAGVV  | 455  | 117   |
| >NRAS-G13V LVVVGAGGV  | 284   | >NRAS-G13V LVVVGAGVV  | 190  | 94    |
| >NRAS-G13V LVVVGAGG   | 12829 | >NRAS-G13V LVVVGAGV   | 98   | 12731 |
| >NRAS-G13V LVVVGAGGV  | 154   | >NRAS-G13V LVVVGAGVV  | 647  | 493   |
| >NRAS-G13V LVVVGAGG   | 18119 | >NRAS-G13V LVVVGAGV   | 154  | 17965 |
| >NRAS-G13V LVVVGAGGV  | 159   | >NRAS-G13V LVVVGAGVV  | 1087 | 928   |
| >NRAS-G13V KLVVVGAGG  | 21158 | >NRAS-G13V KLVVVGAGV  | 116  | 21042 |
| >NRAS-G13V KLVVVGAGG  | 4751  | >NRAS-G13V KLVVVGAGV  | 35   | 4716  |
| >NRAS-G13V KLVVVGAGG  | 392   | >NRAS-G13V KLVVVGAGV  | 633  | 241   |
| >NRAS-G13V KLVVVGAGG  | 5824  | >NRAS-G13V KLVVVGAGV  | 11   | 5813  |
| >NRAS-G13V KLVVVGAGG  | 35    | >NRAS-G13V KLVVVGAGV  | 69   | 34    |
| >NRAS-G13V KLVVVGAGG  | 9366  | >NRAS-G13V KLVVVGAGV  | 25   | 9341  |
| >NRAS-G13V KLVVVGAGG  | 3432  | >NRAS-G13V KLVVVGAGV  | 3    | 3429  |
| >NRAS-G13V KLVVVGAGG  | 6     | >NRAS-G13V KLVVVGAGV  | 9    | 3     |
| >NRAS-G13V KLVVVGAGG  | 8199  | >NRAS-G13V KLVVVGAGV  | 7    | 8192  |
| >NRAS-G13V KLVVVGAGG  | 17    | >NRAS-G13V KLVVVGAGV  | 24   | 7     |
| >NRAS-G13V KLVVVGAGG  | 10982 | >NRAS-G13V KLVVVGAGV  | 7    | 10975 |
| >NRAS-G13V KLVVVGAGG  | 14    | >NRAS-G13V KLVVVGAGV  | 24   | 10    |
| >NRAS-G13V KLVVVGAGG  | 23960 | >NRAS-G13V KLVVVGAGV  | 23   | 23937 |
| >NRAS-G13V KLVVVGAGG  | 121   | >NRAS-G13V KLVVVGAGV  | 281  | 160   |
| >NRAS-G13V KLVVVGAGG  | 19686 | >NRAS-G13V KLVVVGAGV  | 4    | 19682 |
| >NRAS-G13V KLVVVGAGG  | 6     | >NRAS-G13V KLVVVGAGV  | 11   | 5     |
| >NRAS-G13V YKLVVVGAGG | 17386 | >NRAS-G13V YKLVVVGAGV | 259  | 17127 |
| >NRAS-G13V YKLVVVGAGG | 423   | >NRAS-G13V YKLVVVGAGV | 1182 | 759   |
| >NRAS-G13V YKLVVVGAGG | 16719 | >NRAS-G13V YKLVVVGAGV | 50   | 16669 |
| >NRAS-G13V YKLVVVGAGG | 220   | >NRAS-G13V YKLVVVGAGV | 503  | 283   |
| >NRAS-G13V YKLVVVGAGG | 21323 | >NRAS-G13V YKLVVVGAGV | 164  | 21159 |
| >NRAS-G13V YKLVVVGAGG | 6435  | >NRAS-G13V YKLVVVGAGV | 140  | 6295  |
| >NRAS-G13V YKLVVVGAGG | 696   | >NRAS-G13V YKLVVVGAGV | 206  | 490   |
| >NRAS-G13V YKLVVVGAGG | 3285  | >NRAS-G13V YKLVVVGAGV | 361  | 2924  |
| >NRAS-G13Y·GVGKSALTI  | 6172  | >NRAS-G13Y·YVGKSALTI  | 346  | 5826  |
| >NRAS-G13Y·GVGKSALTI  | 6312  | >NRAS-G13Y·YVGKSALTI  | 449  | 5863  |

|                       |       |                        |     |       |
|-----------------------|-------|------------------------|-----|-------|
| >NRAS-G13Y·GVGKSALTIQ | 3929  | >NRAS-G13Y·YVGKSALTIQI | 292 | 3637  |
| >NRAS-G13Y·GVGKSALTIQ | 2460  | >NRAS-G13Y·YVGKSALTIQI | 334 | 2126  |
| >NRAS-G13Y·GVGKSALTIQ | 11361 | >NRAS-G13Y·YVGKSALTIQI | 467 | 10894 |
| >NRAS-G13Y·GVGKSALTIQ | 1802  | >NRAS-G13Y·YVGKSALTIQI | 41  | 1761  |
| >NRAS-G13Y·GVGKSALTI  | 10637 | >NRAS-G13Y·YVGKSALTI   | 459 | 10178 |
| >NRAS-G13Y·GVGKSALTIQ | 7997  | >NRAS-G13Y·YVGKSALTIQI | 245 | 7752  |
| >NRAS-G13Y·GVGKSALTI  | 3659  | >NRAS-G13Y·YVGKSALTI   | 428 | 3231  |
| >NRAS-G13Y·GGVGKSAL   | 15985 | >NRAS-G13Y·GYVGKSAL    | 110 | 15875 |
| >NRAS-G13Y·GGVGKSALTI | 18747 | >NRAS-G13Y·GYVGKSALTI  | 151 | 18596 |
| >NRAS-G13Y·GGVGKSAL   | 25060 | >NRAS-G13Y·GYVGKSAL    | 102 | 24958 |
| >NRAS-G13Y·GGVGKSALTI | 24245 | >NRAS-G13Y·GYVGKSALTI  | 35  | 24210 |
| >NRAS-G13Y·EYKLVVVGAC | 29041 | >NRAS-G13Y·EYKLVVVGAC  | 493 | 28548 |
| >NRAS-G13Y·AGGVGKSAL  | 10113 | >NRAS-G13Y·AGYVGKSAL   | 431 | 9682  |
| >NRAS-G13Y·AGGVGKSAL  | 8132  | >NRAS-G13Y·AGYVGKSALT  | 368 | 7764  |
| >NRAS-G13Y·AGGVGKSAL  | 1153  | >NRAS-G13Y·AGYVGKSALT  | 90  | 1063  |
| >NRAS-G13Y·VVGAGGVGK  | 326   | >NRAS-G13Y·VVGAGYVGK   | 214 | 112   |
| >NRAS-G13Y·VVGAGGVGK  | 89    | >NRAS-G13Y·VVGAGYVGK   | 45  | 44    |
| >NRAS-G13Y·VVVGAGGV   | 1957  | >NRAS-G13Y·VVVGAGYV    | 278 | 1679  |
| >NRAS-G13Y·VVVGAGGV   | 117   | >NRAS-G13Y·VVVGAGYV    | 95  | 22    |
| >NRAS-G13Y·VVVGAGGV   | 68    | >NRAS-G13Y·VVVGAGYV    | 20  | 48    |
| >NRAS-G13Y·VVVGAGGV   | 139   | >NRAS-G13Y·VVVGAGYV    | 23  | 116   |
| >NRAS-G13Y·VVVGAGGV   | 707   | >NRAS-G13Y·VVVGAGYV    | 143 | 564   |
| >NRAS-G13Y·VVVGAGGV   | 2371  | >NRAS-G13Y·VVVGAGYV    | 348 | 2023  |
| >NRAS-G13Y·VVVGAGGV   | 23    | >NRAS-G13Y·VVVGAGYV    | 12  | 11    |
| >NRAS-G13Y·VVVGAGGVG  | 76    | >NRAS-G13Y·VVVGAGYVG   | 61  | 15    |
| >NRAS-G13Y·VVVGAGGVG  | 101   | >NRAS-G13Y·VVVGAGYVG   | 54  | 47    |
| >NRAS-G13Y·VVVGAGGVG  | 203   | >NRAS-G13Y·VVVGAGYVG   | 241 | 38    |
| >NRAS-G13Y·VVVGAGGV   | 191   | >NRAS-G13Y·VVVGAGYV    | 58  | 133   |
| >NRAS-G13Y·VVVGAGGV   | 649   | >NRAS-G13Y·VVVGAGYV    | 380 | 269   |
| >NRAS-G13Y·LVVVGAGGV  | 180   | >NRAS-G13Y·LVVVGAGYV   | 127 | 53    |
| >NRAS-G13Y·LVVVGAGGV  | 55    | >NRAS-G13Y·LVVVGAGYV   | 22  | 33    |
| >NRAS-G13Y·LVVVGAGGV  | 1068  | >NRAS-G13Y·LVVVGAGYV   | 191 | 877   |
| >NRAS-G13Y·LVVVGAGGV  | 75    | >NRAS-G13Y·LVVVGAGYV   | 45  | 30    |
| >NRAS-G13Y·LVVVGAGGV  | 572   | >NRAS-G13Y·LVVVGAGYV   | 279 | 293   |
| >NRAS-G13Y·LVVVGAGG   | 20544 | >NRAS-G13Y·LVVVGAGY    | 371 | 20173 |
| >NRAS-G13Y·LVVVGAGG   | 30757 | >NRAS-G13Y·LVVVGAGY    | 68  | 30689 |
| >NRAS-G13Y·LVVVGAGG   | 35799 | >NRAS-G13Y·LVVVGAGY    | 404 | 35395 |
| >NRAS-G13Y·LVVVGAGG   | 23839 | >NRAS-G13Y·LVVVGAGY    | 40  | 23799 |
| >NRAS-G13Y·LVVVGAGG   | 31702 | >NRAS-G13Y·LVVVGAGY    | 88  | 31614 |
| >NRAS-G13Y·LVVVGAGGV  | 284   | >NRAS-G13Y·LVVVGAGYV   | 163 | 121   |
| >NRAS-G13Y·LVVVGAGGV  | 154   | >NRAS-G13Y·LVVVGAGYV   | 64  | 90    |
| >NRAS-G13Y·LVVVGAGGV  | 159   | >NRAS-G13Y·LVVVGAGYV   | 109 | 50    |
| >NRAS-G13Y·LVVVGAGG   | 8308  | >NRAS-G13Y·LVVVGAGY    | 136 | 8172  |

|                        |       |                        |      |       |
|------------------------|-------|------------------------|------|-------|
| >NRAS-G13Y·LVVVGAGG    | 31700 | >NRAS-G13Y·LVVVGAGY    | 355  | 31345 |
| >NRAS-G13Y·LVVVGAGG    | 16422 | >NRAS-G13Y·LVVVGAGY    | 25   | 16397 |
| >NRAS-G13Y·LVVVGAGG    | 19779 | >NRAS-G13Y·LVVVGAGY    | 192  | 19587 |
| >NRAS-G13Y·KLVVVGAGG\  | 1541  | >NRAS-G13Y·KLVVVGAGY\  | 250  | 1291  |
| >NRAS-G13Y·KLVVVGAGG\  | 392   | >NRAS-G13Y·KLVVVGAGY\  | 93   | 299   |
| >NRAS-G13Y·KLVVVGAGG\  | 35    | >NRAS-G13Y·KLVVVGAGY\  | 24   | 11    |
| >NRAS-G13Y·KLVVVGAGG\  | 661   | >NRAS-G13Y·KLVVVGAGY\  | 345  | 316   |
| >NRAS-G13Y·KLVVVGAGG\  | 6     | >NRAS-G13Y·KLVVVGAGY\  | 3    | 3     |
| >NRAS-G13Y·KLVVVGAGG\  | 17    | >NRAS-G13Y·KLVVVGAGY\  | 9    | 8     |
| >NRAS-G13Y·KLVVVGAGG\  | 14    | >NRAS-G13Y·KLVVVGAGY\  | 11   | 3     |
| >NRAS-G13Y·KLVVVGAGG\  | 121   | >NRAS-G13Y·KLVVVGAGY\  | 33   | 88    |
| >NRAS-G13Y·KLVVVGAGG\  | 6     | >NRAS-G13Y·KLVVVGAGY\  | 6    | 0     |
| >NRAS-G13Y·KLVVVGAGG   | 18468 | >NRAS-G13Y·KLVVVGAGY   | 478  | 17990 |
| >NRAS-G13Y·KLVVVGAGG   | 26684 | >NRAS-G13Y·KLVVVGAGY   | 365  | 26319 |
| >NRAS-G13Y·KLVVVGAGG   | 22386 | >NRAS-G13Y·KLVVVGAGY   | 35   | 22351 |
| >NRAS-G13Y·KLVVVGAGG   | 26449 | >NRAS-G13Y·KLVVVGAGY   | 170  | 26279 |
| >NRAS-G13Y·KLVVVGAGG   | 6696  | >NRAS-G13Y·KLVVVGAGY   | 103  | 6593  |
| >NRAS-G13Y·KLVVVGAGG   | 29314 | >NRAS-G13Y·KLVVVGAGY   | 194  | 29120 |
| >NRAS-G13Y·KLVVVGAGG   | 16554 | >NRAS-G13Y·KLVVVGAGY   | 494  | 16060 |
| >NRAS-G13Y·KLVVVGAGG   | 20358 | >NRAS-G13Y·KLVVVGAGY   | 75   | 20283 |
| >NRAS-G13Y·YKLVVVGAG\  | 423   | >NRAS-G13Y·YKLVVVGAG\  | 171  | 252   |
| >NRAS-G13Y·YKLVVVGAG\  | 220   | >NRAS-G13Y·YKLVVVGAG\  | 57   | 163   |
| >NRAS-G13Y·YKLVVVGAG\  | 662   | >NRAS-G13Y·YKLVVVGAG\  | 269  | 393   |
| >NRAS-G13Y·YKLVVVGAG\  | 31176 | >NRAS-G13Y·YKLVVVGAG\  | 203  | 30973 |
| >NRAS-G13Y·YKLVVVGAG\  | 34336 | >NRAS-G13Y·YKLVVVGAG\  | 310  | 34026 |
| >NRAS-G13Y·YKLVVVGAG\  | 31790 | >NRAS-G13Y·YKLVVVGAG\  | 338  | 31452 |
| >NRAS-G13Y·YKLVVVGAG\  | 6435  | >NRAS-G13Y·YKLVVVGAG\  | 10   | 6425  |
| >NRAS-G13Y·YKLVVVGAG\  | 696   | >NRAS-G13Y·YKLVVVGAG\  | 320  | 376   |
| >NRAS-G15E·GKSALTIQL   | 414   | >NRAS-G15E·EKSALTIQL   | 79   | 335   |
| >NRAS-G15E·VGKSALTI    | 30770 | >NRAS-G15E·VEKSALTI    | 33   | 30737 |
| >NRAS-G15E·VGKSALTIQLI | 5800  | >NRAS-G15E·VEKSALTIQLI | 26   | 5774  |
| >NRAS-G15E·VGKSALTI    | 23817 | >NRAS-G15E·VEKSALTI    | 229  | 23588 |
| >NRAS-G15E·VGKSALTIQL  | 35012 | >NRAS-G15E·VEKSALTIQL  | 238  | 34774 |
| >NRAS-G15E·VGKSALTI    | 21330 | >NRAS-G15E·VEKSALTI    | 209  | 21121 |
| >NRAS-G15E·VGKSALTIQLI | 15155 | >NRAS-G15E·VEKSALTIQLI | 6    | 15149 |
| >NRAS-G15E·VVGAGGVGK   | 326   | >NRAS-G15E·VVGAGGVEK   | 364  | 38    |
| >NRAS-G15E·VVGAGGVGK   | 89    | >NRAS-G15E·VVGAGGVEK   | 62   | 27    |
| >NRAS-G15E·VVVGAGGVG   | 76    | >NRAS-G15E·VVVGAGGVE   | 85   | 9     |
| >NRAS-G15E·VVVGAGGVG   | 101   | >NRAS-G15E·VVVGAGGVE   | 56   | 45    |
| >NRAS-G15E·VVVGAGGVG   | 203   | >NRAS-G15E·VVVGAGGVE   | 130  | 73    |
| >NRAS-G15E·LVVVGAGGV\  | 572   | >NRAS-G15E·LVVVGAGGV\  | 429  | 143   |
| >NRAS-G15E·LVVVGAGGV\  | 284   | >NRAS-G15E·LVVVGAGGV\  | 248  | 36    |
| >NRAS-G60E·GQEEYSAM    | 497   | >NRAS-G60E·EQEEYSAM    | 3347 | 2850  |

|                        |       |                        |      |       |
|------------------------|-------|------------------------|------|-------|
| >NRAS-G60E·GQEEYSAMR   | 385   | >NRAS-G60E·EQEEYSAMR   | 3869 | 3484  |
| >NRAS-G60E·GQEEYSAMR   | 7538  | >NRAS-G60E·EQEEYSAMR   | 122  | 7416  |
| >NRAS-G60E·GQEEYSAM    | 347   | >NRAS-G60E·EQEEYSAM    | 64   | 283   |
| >NRAS-G60E·AGQEEYSAM   | 23479 | >NRAS-G60E·AEQEEYSAM   | 211  | 23268 |
| >NRAS-G60E·AGQEEYSA    | 37045 | >NRAS-G60E·AEQEEYSA    | 131  | 36914 |
| >NRAS-G60E·AGQEEYSAM   | 34998 | >NRAS-G60E·AEQEEYSAM   | 59   | 34939 |
| >NRAS-G60E·AGQEEYSAM   | 21972 | >NRAS-G60E·AEQEEYSAM   | 324  | 21648 |
| >NRAS-G60E·AGQEEYSAM   | 40252 | >NRAS-G60E·AEQEEYSAM   | 460  | 39792 |
| >NRAS-G60E·AGQEEYSA    | 17692 | >NRAS-G60E·AEQEEYSA    | 6    | 17686 |
| >NRAS-G60E·AGQEEYSAM   | 33137 | >NRAS-G60E·AEQEEYSAM   | 47   | 33090 |
| >NRAS-G60E·AGQEEYSAM   | 32639 | >NRAS-G60E·AEQEEYSAM   | 47   | 32592 |
| >NRAS-G60E·TAGQEEYSAM  | 56    | >NRAS-G60E·TAEQEEYSAM  | 33   | 23    |
| >NRAS-G60E·DTAGQEEY    | 387   | >NRAS-G60E·DTAEQEEY    | 137  | 250   |
| >NRAS-G60E·DTAGQEEY    | 94    | >NRAS-G60E·DTAEQEEY    | 67   | 27    |
| >NRAS-G60E·DTAGQEEYSA  | 491   | >NRAS-G60E·DTAEQEEYSA  | 290  | 201   |
| >NRAS-G60E·DTAGQEEY    | 28    | >NRAS-G60E·DTAEQEEY    | 23   | 5     |
| >NRAS-G60E·DTAGQEEYSA  | 20    | >NRAS-G60E·DTAEQEEYSA  | 15   | 5     |
| >NRAS-G60E·DTAGQEEY    | 8     | >NRAS-G60E·DTAEQEEY    | 9    | 1     |
| >NRAS-G60E·DTAGQEEYSA  | 6     | >NRAS-G60E·DTAEQEEYSA  | 6    | 0     |
| >NRAS-G60E·DTAGQEEYSA  | 223   | >NRAS-G60E·DTAEQEEYSA  | 157  | 66    |
| >NRAS-G60E·DTAGQEEY    | 245   | >NRAS-G60E·DTAEQEEY    | 749  | 504   |
| >NRAS-G60E·DTAGQEEY    | 89    | >NRAS-G60E·DTAEQEEY    | 81   | 8     |
| >NRAS-G60E·DTAGQEEYS   | 408   | >NRAS-G60E·DTAEQEEYS   | 358  | 50    |
| >NRAS-G60E·DTAGQEEYSA  | 613   | >NRAS-G60E·DTAEQEEYSA  | 355  | 258   |
| >NRAS-G60E·DTAGQEEYSA  | 389   | >NRAS-G60E·DTAEQEEYSA  | 340  | 49    |
| >NRAS-G60E·DTAGQEEYSA  | 666   | >NRAS-G60E·DTAEQEEYSA  | 121  | 545   |
| >NRAS-G60E·DTAGQEEYSA  | 449   | >NRAS-G60E·DTAEQEEYSA  | 288  | 161   |
| >NRAS-G60E·ILDTAGQEEY  | 135   | >NRAS-G60E·ILDTAEQEEY  | 115  | 20    |
| >NRAS-G60E·ILDTAGQEEY  | 349   | >NRAS-G60E·ILDTAEQEEY  | 603  | 254   |
| >NRAS-G60E·ILDTAGQEEY  | 463   | >NRAS-G60E·ILDTAEQEEY  | 854  | 391   |
| >NRAS-G60E·DILDTAGQEE  | 150   | >NRAS-G60E·DILDTAEQEE' | 160  | 10    |
| >NRAS-G60E·DILDTAGQEE  | 183   | >NRAS-G60E·DILDTAEQEE' | 323  | 140   |
| >NRAS-G60E·LLDILDTAGQ  | 401   | >NRAS-G60E·LLDILDTAEQ  | 263  | 138   |
| >NRAS-G60E·CLLDILDTAGQ | 479   | >NRAS-G60E·CLLDILDTAEC | 883  | 404   |
| >NRAS-G60E·CLLDILDTAGQ | 138   | >NRAS-G60E·CLLDILDTAEC | 96   | 42    |
| >NRAS-G60R·GQEEYSAM    | 497   | >NRAS-G60R·RQEEYSAM    | 126  | 371   |
| >NRAS-G60R·GQEEYSAMR   | 385   | >NRAS-G60R·RQEEYSAMR   | 27   | 358   |
| >NRAS-G60R·GQEEYSAM    | 562   | >NRAS-G60R·RQEEYSAM    | 118  | 444   |
| >NRAS-G60R·GQEEYSAM    | 658   | >NRAS-G60R·RQEEYSAM    | 32   | 626   |
| >NRAS-G60R·GQEEYSAM    | 347   | >NRAS-G60R·RQEEYSAM    | 163  | 184   |
| >NRAS-G60R·GQEEYSAM    | 2017  | >NRAS-G60R·RQEEYSAM    | 311  | 1706  |
| >NRAS-G60R·GQEEYSAMR   | 7369  | >NRAS-G60R·RQEEYSAMR   | 318  | 7051  |
| >NRAS-G60R·AGQEEYSAM   | 2893  | >NRAS-G60R·ARQEEYSAM   | 56   | 2837  |



|                        |       |                       |       |       |
|------------------------|-------|-----------------------|-------|-------|
| >NRAS-G60R AGQEEYSAM   | 21307 | >NRAS-G60R ARQEEYSAM  | 326   | 20981 |
| >NRAS-G60R AGQEEYSAM   | 31765 | >NRAS-G60R ARQEEYSAM  | 400   | 31365 |
| >NRAS-G60R AGQEEYSAM   | 11447 | >NRAS-G60R ARQEEYSAM  | 215   | 11232 |
| >NRAS-G60R AGQEEYSAM   | 27172 | >NRAS-G60R ARQEEYSAM  | 216   | 26956 |
| >NRAS-G60R TCLLDILDTAG | 34457 | >NRAS-G60R TCLLDILDAR | 316   | 34141 |
| >NRAS-G60R TAGQEEYSAM  | 2222  | >NRAS-G60R TARQEEYSAM | 460   | 1762  |
| >NRAS-G60R TAGQEEYSAM  | 1504  | >NRAS-G60R TARQEEYSAM | 176   | 1328  |
| >NRAS-G60R TAGQEEYSAM  | 56    | >NRAS-G60R TARQEEYSAM | 64    | 8     |
| >NRAS-G60R TAGQEEYSAM  | 6333  | >NRAS-G60R TARQEEYSAM | 245   | 6088  |
| >NRAS-G60R DTAGQEEY    | 387   | >NRAS-G60R DTARQEEY   | 243   | 144   |
| >NRAS-G60R DTAGQEEY    | 94    | >NRAS-G60R DTARQEEY   | 342   | 248   |
| >NRAS-G60R DTAGQEEYS/  | 491   | >NRAS-G60R DTARQEEYS/ | 1167  | 676   |
| >NRAS-G60R DTAGQEEY    | 28    | >NRAS-G60R DTARQEEY   | 96    | 68    |
| >NRAS-G60R DTAGQEEYS/  | 20    | >NRAS-G60R DTARQEEYS/ | 53    | 33    |
| >NRAS-G60R DTAGQEEY    | 8     | >NRAS-G60R DTARQEEY   | 11    | 3     |
| >NRAS-G60R DTAGQEEYS/  | 6     | >NRAS-G60R DTARQEEYS/ | 6     | 0     |
| >NRAS-G60R DTAGQEEYS/  | 223   | >NRAS-G60R DTARQEEYS/ | 601   | 378   |
| >NRAS-G60R DTAGQEEY    | 245   | >NRAS-G60R DTARQEEY   | 1033  | 788   |
| >NRAS-G60R DTAGQEEY    | 89    | >NRAS-G60R DTARQEEY   | 109   | 20    |
| >NRAS-G60R DTAGQEEYS   | 408   | >NRAS-G60R DTARQEEYS  | 1236  | 828   |
| >NRAS-G60R DTAGQEEYS/  | 389   | >NRAS-G60R DTARQEEYS/ | 911   | 522   |
| >NRAS-G60R DTAGQEEYS/  | 449   | >NRAS-G60R DTARQEEYS/ | 885   | 436   |
| >NRAS-G60R ILDTAGQEEY  | 135   | >NRAS-G60R ILDTARQEEY | 178   | 43    |
| >NRAS-G60R ILDTAGQEEY  | 349   | >NRAS-G60R ILDTARQEEY | 394   | 45    |
| >NRAS-G60R ILDTAGQEEY  | 463   | >NRAS-G60R ILDTARQEEY | 855   | 392   |
| >NRAS-G60R DILDTAGQEE  | 150   | >NRAS-G60R DILDARQEE  | 326   | 176   |
| >NRAS-G60R DILDTAGQEE  | 183   | >NRAS-G60R DILDARQEE  | 433   | 250   |
| >NRAS-G60R LLDILDTAGQ  | 401   | >NRAS-G60R LLDILDARQ  | 322   | 79    |
| >NRAS-G60R CLLDILDTAGC | 479   | >NRAS-G60R CLLDILDARC | 1071  | 592   |
| >NRAS-G60R CLLDILDTAGC | 138   | >NRAS-G60R CLLDILDARC | 118   | 20    |
| >NRAS-G60R CLLDILDTAG  | 31609 | >NRAS-G60R CLLDILDAR  | 261   | 31348 |
| >NRAS-G60R CLLDILDTAG  | 33915 | >NRAS-G60R CLLDILDAR  | 126   | 33789 |
| >NRAS-K16N KSALTIQLI   | 1635  | >NRAS-K16N NSALTIQLI  | 299   | 1336  |
| >NRAS-K16N KSALTIQLI   | 239   | >NRAS-K16N NSALTIQLI  | 13030 | 12791 |
| >NRAS-K16N KSALTIQL    | 276   | >NRAS-K16N NSALTIQL   | 12076 | 11800 |
| >NRAS-K16N KSALTIQL    | 9745  | >NRAS-K16N NSALTIQL   | 350   | 9395  |
| >NRAS-K16N KSALTIQLI   | 8531  | >NRAS-K16N NSALTIQLI  | 197   | 8334  |
| >NRAS-K16N KSALTIQL    | 7     | >NRAS-K16N NSALTIQL   | 535   | 528   |
| >NRAS-K16N KSALTIQLI   | 42    | >NRAS-K16N NSALTIQLI  | 5321  | 5279  |
| >NRAS-K16N KSALTIQL    | 35    | >NRAS-K16N NSALTIQL   | 8613  | 8578  |
| >NRAS-K16N KSALTIQLI   | 24    | >NRAS-K16N NSALTIQLI  | 7292  | 7268  |
| >NRAS-K16N KSALTIQL    | 335   | >NRAS-K16N NSALTIQL   | 1140  | 805   |
| >NRAS-K16N KSALTIQLI   | 73    | >NRAS-K16N NSALTIQLI  | 842   | 769   |

|                       |       |                       |       |       |
|-----------------------|-------|-----------------------|-------|-------|
| >NRAS-K16N KSALTIQL   | 241   | >NRAS-K16N NSALTIQL   | 2048  | 1807  |
| >NRAS-K16N KSALTIQLI  | 35    | >NRAS-K16N NSALTIQLI  | 203   | 168   |
| >NRAS-K16N GKSALTIQL  | 414   | >NRAS-K16N GNSALTIQL  | 3553  | 3139  |
| >NRAS-K16N LVVVGAGGV  | 284   | >NRAS-K16N LVVVGAGGV  | 23330 | 23046 |
| >NRAS-K16N GVGKSALTI  | 931   | >NRAS-K16N GVGNSALTI  | 279   | 652   |
| >NRAS-K16N VVGAGGVGK  | 326   | >NRAS-K16N VVGAGGVGM  | 18635 | 18309 |
| >NRAS-K16N VVGAGGVGK  | 89    | >NRAS-K16N VVGAGGVGM  | 25309 | 25220 |
| >NRAS-K16N VVVGAGGVG  | 76    | >NRAS-K16N VVVGAGGVG  | 23479 | 23403 |
| >NRAS-K16N VVVGAGGVG  | 101   | >NRAS-K16N VVVGAGGVG  | 33386 | 33285 |
| >NRAS-K16N VVVGAGGVG  | 203   | >NRAS-K16N VVVGAGGVG  | 29355 | 29152 |
| >NRAS-Q61E QEEYSAMR   | 2046  | >NRAS-Q61E EEEYSAMR   | 168   | 1878  |
| >NRAS-Q61E QEEYSAMRD  | 722   | >NRAS-Q61E EEEYSAMRD  | 315   | 407   |
| >NRAS-Q61E QEEYSAMRD  | 423   | >NRAS-Q61E EEEYSAMRD  | 499   | 76    |
| >NRAS-Q61E GQEEYSAM   | 497   | >NRAS-Q61E GEEEYSAM   | 16619 | 16122 |
| >NRAS-Q61E GQEEYSAMR  | 385   | >NRAS-Q61E GEEEYSAMR  | 10970 | 10585 |
| >NRAS-Q61E GQEEYSAM   | 347   | >NRAS-Q61E GEEEYSAM   | 3284  | 2937  |
| >NRAS-Q61E GQEEYSAM   | 3638  | >NRAS-Q61E GEEEYSAM   | 44    | 3594  |
| >NRAS-Q61E GQEEYSAM   | 12764 | >NRAS-Q61E GEEEYSAM   | 236   | 12528 |
| >NRAS-Q61E CLLDILDTAG | 479   | >NRAS-Q61E CLLDILDTAG | 6428  | 5949  |
| >NRAS-Q61E CLLDILDTAG | 138   | >NRAS-Q61E CLLDILDTAG | 6100  | 5962  |
| >NRAS-Q61E TAGQEEYSAM | 56    | >NRAS-Q61E TAGEEEYSAM | 45    | 11    |
| >NRAS-Q61E DTAGQEEY   | 387   | >NRAS-Q61E DTAGEEEY   | 628   | 241   |
| >NRAS-Q61E DTAGQEEY   | 94    | >NRAS-Q61E DTAGEEEY   | 185   | 91    |
| >NRAS-Q61E DTAGQEEYS  | 491   | >NRAS-Q61E DTAGEEEYSA | 685   | 194   |
| >NRAS-Q61E DTAGQEEY   | 28    | >NRAS-Q61E DTAGEEEY   | 55    | 27    |
| >NRAS-Q61E DTAGQEEYS  | 20    | >NRAS-Q61E DTAGEEEYSA | 22    | 2     |
| >NRAS-Q61E DTAGQEEY   | 8     | >NRAS-Q61E DTAGEEEY   | 9     | 1     |
| >NRAS-Q61E DTAGQEEYS  | 6     | >NRAS-Q61E DTAGEEEYSA | 6     | 0     |
| >NRAS-Q61E DTAGQEEYS  | 223   | >NRAS-Q61E DTAGEEEYSA | 364   | 141   |
| >NRAS-Q61E DTAGQEEY   | 245   | >NRAS-Q61E DTAGEEEY   | 570   | 325   |
| >NRAS-Q61E DTAGQEEY   | 89    | >NRAS-Q61E DTAGEEEY   | 96    | 7     |
| >NRAS-Q61E DTAGQEEYS  | 408   | >NRAS-Q61E DTAGEEEYS  | 1018  | 610   |
| >NRAS-Q61E DTAGQEEYS  | 613   | >NRAS-Q61E DTAGEEEYSA | 364   | 249   |
| >NRAS-Q61E DTAGQEEYS  | 389   | >NRAS-Q61E DTAGEEEYSA | 720   | 331   |
| >NRAS-Q61E DTAGQEEYS  | 449   | >NRAS-Q61E DTAGEEEYSA | 536   | 87    |
| >NRAS-Q61E ILDTAGQEEY | 135   | >NRAS-Q61E ILDTAGEEEY | 173   | 38    |
| >NRAS-Q61E ILDTAGQEEY | 349   | >NRAS-Q61E ILDTAGEEEY | 538   | 189   |
| >NRAS-Q61E ILDTAGQEEY | 463   | >NRAS-Q61E ILDTAGEEEY | 795   | 332   |
| >NRAS-Q61E DILDTAGQEE | 150   | >NRAS-Q61E DILDTAGEEY | 199   | 49    |
| >NRAS-Q61E DILDTAGQEE | 183   | >NRAS-Q61E DILDTAGEEY | 348   | 165   |
| >NRAS-Q61E LLDILDTAGQ | 401   | >NRAS-Q61E LLDILDTAG  | 12124 | 11723 |
| >NRAS-Q61HQEEYSAMR    | 509   | >NRAS-Q61HQEEYSAMR    | 320   | 189   |
| >NRAS-Q61HQEEYSAMRD   | 734   | >NRAS-Q61HQEEYSAMRD   | 358   | 376   |

|                       |       |                       |       |       |
|-----------------------|-------|-----------------------|-------|-------|
| >NRAS-Q61HQEEYSAMRD   | 423   | >NRAS-Q61HHEEYSAMRD   | 1382  | 959   |
| >NRAS-Q61HGQEEYSAM    | 497   | >NRAS-Q61HGHEEYSAM    | 23893 | 23396 |
| >NRAS-Q61HGQEEYSAMR   | 385   | >NRAS-Q61HGHEEYSAMR   | 8603  | 8218  |
| >NRAS-Q61HGQEEYSAM    | 347   | >NRAS-Q61HGHEEYSAM    | 157   | 190   |
| >NRAS-Q61HCLLDILDTAGC | 479   | >NRAS-Q61HCLLDILDTAGH | 8172  | 7693  |
| >NRAS-Q61HCLLDILDTAGC | 138   | >NRAS-Q61HCLLDILDTAGH | 8703  | 8565  |
| >NRAS-Q61HTAGQEEYSAM  | 56    | >NRAS-Q61HTAGHEEYSAM  | 57    | 1     |
| >NRAS-Q61HDTAGQEEY    | 387   | >NRAS-Q61HDTAGHEEY    | 466   | 79    |
| >NRAS-Q61HDTAGQEEY    | 94    | >NRAS-Q61HDTAGHEEY    | 65    | 29    |
| >NRAS-Q61HDTAGQEEYSA  | 491   | >NRAS-Q61HDTAGHEEYSA  | 237   | 254   |
| >NRAS-Q61HDTAGQEEY    | 28    | >NRAS-Q61HDTAGHEEY    | 26    | 2     |
| >NRAS-Q61HDTAGQEEYSA  | 20    | >NRAS-Q61HDTAGHEEYSA  | 16    | 4     |
| >NRAS-Q61HDTAGQEEY    | 8     | >NRAS-Q61HDTAGHEEY    | 5     | 3     |
| >NRAS-Q61HDTAGQEEYSA  | 6     | >NRAS-Q61HDTAGHEEYSA  | 4     | 2     |
| >NRAS-Q61HDTAGQEEYSA  | 223   | >NRAS-Q61HDTAGHEEYSA  | 411   | 188   |
| >NRAS-Q61HDTAGQEEY    | 245   | >NRAS-Q61HDTAGHEEY    | 122   | 123   |
| >NRAS-Q61HDTAGQEEY    | 89    | >NRAS-Q61HDTAGHEEY    | 66    | 23    |
| >NRAS-Q61HDTAGQEEYS   | 408   | >NRAS-Q61HDTAGHEEYS   | 365   | 43    |
| >NRAS-Q61HDTAGQEEYSA  | 613   | >NRAS-Q61HDTAGHEEYSA  | 405   | 208   |
| >NRAS-Q61HDTAGQEEYSA  | 389   | >NRAS-Q61HDTAGHEEYSA  | 392   | 3     |
| >NRAS-Q61HDTAGQEEYSA  | 666   | >NRAS-Q61HDTAGHEEYSA  | 427   | 239   |
| >NRAS-Q61HDTAGQEEYSA  | 449   | >NRAS-Q61HDTAGHEEYSA  | 410   | 39    |
| >NRAS-Q61HILDTAGQEEY  | 135   | >NRAS-Q61HILDTAGHEEY  | 104   | 31    |
| >NRAS-Q61HILDTAGQEEY  | 734   | >NRAS-Q61HILDTAGHEEY  | 442   | 292   |
| >NRAS-Q61HILDTAGQEEY  | 571   | >NRAS-Q61HILDTAGHEEY  | 399   | 172   |
| >NRAS-Q61HILDTAGQEEY  | 349   | >NRAS-Q61HILDTAGHEEY  | 328   | 21    |
| >NRAS-Q61HILDTAGQEEY  | 463   | >NRAS-Q61HILDTAGHEEY  | 206   | 257   |
| >NRAS-Q61HILDTAGQEEY  | 504   | >NRAS-Q61HILDTAGHEEY  | 403   | 101   |
| >NRAS-Q61HDILDTAGQEE  | 150   | >NRAS-Q61HDILDTAGHEE  | 118   | 32    |
| >NRAS-Q61HDILDTAGQEE  | 183   | >NRAS-Q61HDILDTAGHEE  | 120   | 63    |
| >NRAS-Q61HLLDILDTAGQ  | 401   | >NRAS-Q61HLLDILDTAGH  | 15735 | 15334 |
| >NRAS-Q61KQEEYSAMRD   | 423   | >NRAS-Q61KKEEYSAMRD   | 1146  | 723   |
| >NRAS-Q61KQEEYSAMR    | 3059  | >NRAS-Q61KKEEYSAMR    | 470   | 2589  |
| >NRAS-Q61KGQEEYSAM    | 497   | >NRAS-Q61KGKEEYSAM    | 18666 | 18169 |
| >NRAS-Q61KGQEEYSAMR   | 385   | >NRAS-Q61KGKEEYSAMR   | 12307 | 11922 |
| >NRAS-Q61KGQEEYSAM    | 347   | >NRAS-Q61KGKEEYSAM    | 1249  | 902   |
| >NRAS-Q61KCLLDILDTAGC | 479   | >NRAS-Q61KCLLDILDTAGH | 3331  | 2852  |
| >NRAS-Q61KCLLDILDTAGC | 138   | >NRAS-Q61KCLLDILDTAGH | 1684  | 1546  |
| >NRAS-Q61KCLLDILDTAGC | 27746 | >NRAS-Q61KCLLDILDTAGH | 308   | 27438 |
| >NRAS-Q61KTAGQEEYSAM  | 56    | >NRAS-Q61KTAGKEEYSAM  | 53    | 3     |
| >NRAS-Q61KDTAGQEEY    | 387   | >NRAS-Q61KDTAGKEEY    | 1068  | 681   |
| >NRAS-Q61KDTAGQEEY    | 94    | >NRAS-Q61KDTAGKEEY    | 158   | 64    |
| >NRAS-Q61KDTAGQEEYSA  | 491   | >NRAS-Q61KDTAGKEEYSA  | 576   | 85    |

|                        |       |                        |      |       |
|------------------------|-------|------------------------|------|-------|
| >NRAS-Q61K DTAGQEEY    | 28    | >NRAS-Q61K DTAGKEEY    | 60   | 32    |
| >NRAS-Q61K DTAGQEEYS/  | 20    | >NRAS-Q61K DTAGKEEYSA  | 27   | 7     |
| >NRAS-Q61K DTAGQEEY    | 8     | >NRAS-Q61K DTAGKEEY    | 15   | 7     |
| >NRAS-Q61K DTAGQEEYS/  | 6     | >NRAS-Q61K DTAGKEEYSA  | 8    | 2     |
| >NRAS-Q61K DTAGQEEYS/  | 223   | >NRAS-Q61K DTAGKEEYSA  | 119  | 104   |
| >NRAS-Q61K DTAGQEEY    | 245   | >NRAS-Q61K DTAGKEEY    | 616  | 371   |
| >NRAS-Q61K DTAGQEEY    | 89    | >NRAS-Q61K DTAGKEEY    | 123  | 34    |
| >NRAS-Q61K DTAGQEEYS   | 408   | >NRAS-Q61K DTAGKEEYS   | 466  | 58    |
| >NRAS-Q61K DTAGQEEYS/  | 613   | >NRAS-Q61K DTAGKEEYSA  | 455  | 158   |
| >NRAS-Q61K DTAGQEEYS/  | 389   | >NRAS-Q61K DTAGKEEYSA  | 454  | 65    |
| >NRAS-Q61K DTAGQEEYS/  | 449   | >NRAS-Q61K DTAGKEEYSA  | 1195 | 746   |
| >NRAS-Q61K ILDTAGQEEY  | 135   | >NRAS-Q61K ILDTAGKEEY  | 212  | 77    |
| >NRAS-Q61K ILDTAGQEEY  | 571   | >NRAS-Q61K ILDTAGKEEY  | 499  | 72    |
| >NRAS-Q61K ILDTAGQEEY  | 349   | >NRAS-Q61K ILDTAGKEEY  | 561  | 212   |
| >NRAS-Q61K ILDTAGQEEY  | 463   | >NRAS-Q61K ILDTAGKEEY  | 1609 | 1146  |
| >NRAS-Q61K DILDTAGQEE  | 150   | >NRAS-Q61K DILDTAGKEE' | 328  | 178   |
| >NRAS-Q61K DILDTAGQEE  | 183   | >NRAS-Q61K DILDTAGKEE' | 352  | 169   |
| >NRAS-Q61K DILDTAGQ    | 8084  | >NRAS-Q61K DILDTAGK    | 191  | 7893  |
| >NRAS-Q61K LLDILDTAGQ  | 401   | >NRAS-Q61K LLDILDTAGK  | 4614 | 4213  |
| >NRAS-Q61L QEEYSAMRD   | 734   | >NRAS-Q61L LEEYSAMRDC  | 233  | 501   |
| >NRAS-Q61L QEEYSAMRD   | 423   | >NRAS-Q61L LEEYSAMRDC  | 2834 | 2411  |
| >NRAS-Q61L GQEEYSAM    | 6727  | >NRAS-Q61L GLEEYSAM    | 158  | 6569  |
| >NRAS-Q61L GQEEYSAM    | 497   | >NRAS-Q61L GLEEYSAM    | 2825 | 2328  |
| >NRAS-Q61L GQEEYSAM    | 9183  | >NRAS-Q61L GLEEYSAM    | 239  | 8944  |
| >NRAS-Q61L GQEEYSAM    | 5763  | >NRAS-Q61L GLEEYSAM    | 114  | 5649  |
| >NRAS-Q61L GQEEYSAM    | 29319 | >NRAS-Q61L GLEEYSAM    | 175  | 29144 |
| >NRAS-Q61L GQEEYSAMR   | 385   | >NRAS-Q61L GLEEYSAMR   | 513  | 128   |
| >NRAS-Q61L GQEEYSAM    | 347   | >NRAS-Q61L GLEEYSAM    | 7030 | 6683  |
| >NRAS-Q61L CLLDILDTAGC | 6354  | >NRAS-Q61L CLLDILDTAGL | 26   | 6328  |
| >NRAS-Q61L CLLDILDTAGC | 731   | >NRAS-Q61L CLLDILDTAGL | 27   | 704   |
| >NRAS-Q61L CLLDILDTAGC | 3796  | >NRAS-Q61L CLLDILDTAGL | 81   | 3715  |
| >NRAS-Q61L CLLDILDTAGC | 1926  | >NRAS-Q61L CLLDILDTAGL | 31   | 1895  |
| >NRAS-Q61L CLLDILDTAGC | 835   | >NRAS-Q61L CLLDILDTAGL | 8    | 827   |
| >NRAS-Q61L CLLDILDTAGC | 1277  | >NRAS-Q61L CLLDILDTAGL | 6    | 1271  |
| >NRAS-Q61L CLLDILDTAGC | 3176  | >NRAS-Q61L CLLDILDTAGL | 31   | 3145  |
| >NRAS-Q61L CLLDILDTAGC | 479   | >NRAS-Q61L CLLDILDTAGL | 2    | 477   |
| >NRAS-Q61L CLLDILDTAGC | 138   | >NRAS-Q61L CLLDILDTAGL | 5    | 133   |
| >NRAS-Q61L TAGQEEYSAM  | 56    | >NRAS-Q61L TAGLEEYSAM  | 65   | 9     |
| >NRAS-Q61L DTAGQEEY    | 387   | >NRAS-Q61L DTAGLEEY    | 355  | 32    |
| >NRAS-Q61L DTAGQEEY    | 94    | >NRAS-Q61L DTAGLEEY    | 55   | 39    |
| >NRAS-Q61L DTAGQEEYS/  | 491   | >NRAS-Q61L DTAGLEEYSA  | 353  | 138   |
| >NRAS-Q61L DTAGQEEY    | 28    | >NRAS-Q61L DTAGLEEY    | 30   | 2     |
| >NRAS-Q61L DTAGQEEYS/  | 20    | >NRAS-Q61L DTAGLEEYSA  | 31   | 11    |

|                        |       |                        |       |       |
|------------------------|-------|------------------------|-------|-------|
| >NRAS-Q61L·DTAGQEEY    | 8     | >NRAS-Q61L·DTAGLEEY    | 6     | 2     |
| >NRAS-Q61L·DTAGQEEYS/  | 6     | >NRAS-Q61L·DTAGLEEYSA  | 8     | 2     |
| >NRAS-Q61L·DTAGQEEYS/  | 223   | >NRAS-Q61L·DTAGLEEYSA  | 152   | 71    |
| >NRAS-Q61L·DTAGQEEY    | 245   | >NRAS-Q61L·DTAGLEEY    | 179   | 66    |
| >NRAS-Q61L·DTAGQEEY    | 89    | >NRAS-Q61L·DTAGLEEY    | 61    | 28    |
| >NRAS-Q61L·DTAGQEEYS   | 408   | >NRAS-Q61L·DTAGLEEYS   | 114   | 294   |
| >NRAS-Q61L·DTAGQEEYS/  | 613   | >NRAS-Q61L·DTAGLEEYSA  | 151   | 462   |
| >NRAS-Q61L·DTAGQEEYS/  | 389   | >NRAS-Q61L·DTAGLEEYSA  | 168   | 221   |
| >NRAS-Q61L·DTAGQEEYS/  | 666   | >NRAS-Q61L·DTAGLEEYSA  | 401   | 265   |
| >NRAS-Q61L·DTAGQEEYS/  | 449   | >NRAS-Q61L·DTAGLEEYSA  | 480   | 31    |
| >NRAS-Q61L·DTAGQEEYS/  | 805   | >NRAS-Q61L·DTAGLEEYSA  | 278   | 527   |
| >NRAS-Q61L·ILDTAGQEEY  | 135   | >NRAS-Q61L·ILDTAGLEEY  | 54    | 81    |
| >NRAS-Q61L·ILDTAGQEEY  | 349   | >NRAS-Q61L·ILDTAGLEEY  | 261   | 88    |
| >NRAS-Q61L·ILDTAGQEEY  | 463   | >NRAS-Q61L·ILDTAGLEEY  | 103   | 360   |
| >NRAS-Q61L·DILDTAGQ    | 12736 | >NRAS-Q61L·DILDTAGL    | 165   | 12571 |
| >NRAS-Q61L·DILDTAGQEE  | 849   | >NRAS-Q61L·DILDTAGLEE\ | 407   | 442   |
| >NRAS-Q61L·DILDTAGQEE  | 150   | >NRAS-Q61L·DILDTAGLEE\ | 60    | 90    |
| >NRAS-Q61L·DILDTAGQEE  | 183   | >NRAS-Q61L·DILDTAGLEE\ | 146   | 37    |
| >NRAS-Q61L·DILDTAGQ    | 1563  | >NRAS-Q61L·DILDTAGL    | 17    | 1546  |
| >NRAS-Q61L·LDILDTAGQ   | 16524 | >NRAS-Q61L·LDILDTAGL   | 384   | 16140 |
| >NRAS-Q61L·LLDILDTAGQ  | 13423 | >NRAS-Q61L·LLDILDTAGL  | 168   | 13255 |
| >NRAS-Q61L·LLDILDTAGQ  | 10881 | >NRAS-Q61L·LLDILDTAGL  | 60    | 10821 |
| >NRAS-Q61L·LLDILDTAGQ  | 10500 | >NRAS-Q61L·LLDILDTAGL  | 107   | 10393 |
| >NRAS-Q61L·LLDILDTAGQ  | 16137 | >NRAS-Q61L·LLDILDTAGL  | 329   | 15808 |
| >NRAS-Q61L·LLDILDTAGQ  | 2409  | >NRAS-Q61L·LLDILDTAGL  | 21    | 2388  |
| >NRAS-Q61L·LLDILDTAGQ  | 6198  | >NRAS-Q61L·LLDILDTAGL  | 30    | 6168  |
| >NRAS-Q61L·LLDILDTAGQ  | 3175  | >NRAS-Q61L·LLDILDTAGL  | 24    | 3151  |
| >NRAS-Q61L·LLDILDTAGQ  | 13067 | >NRAS-Q61L·LLDILDTAGL  | 91    | 12976 |
| >NRAS-Q61L·LLDILDTAGQ  | 401   | >NRAS-Q61L·LLDILDTAGL  | 8     | 393   |
| >NRAS-Q61P·QEEYSAMRD   | 423   | >NRAS-Q61P·PEEYSAMRD\  | 4511  | 4088  |
| >NRAS-Q61P·GQEEYSAM    | 497   | >NRAS-Q61P·GPEEYSAM    | 23788 | 23291 |
| >NRAS-Q61P·GQEEYSAMR   | 385   | >NRAS-Q61P·GPEEYSAMR   | 10224 | 9839  |
| >NRAS-Q61P·GQEEYSAM    | 21659 | >NRAS-Q61P·GPEEYSAM    | 102   | 21557 |
| >NRAS-Q61P·GQEEYSAM    | 5425  | >NRAS-Q61P·GPEEYSAM    | 51    | 5374  |
| >NRAS-Q61P·GQEEYSAM    | 347   | >NRAS-Q61P·GPEEYSAM    | 1098  | 751   |
| >NRAS-Q61P·CLLDILDTAG\ | 479   | >NRAS-Q61P·CLLDILDTAGF | 4926  | 4447  |
| >NRAS-Q61P·CLLDILDTAG\ | 138   | >NRAS-Q61P·CLLDILDTAGF | 6838  | 6700  |
| >NRAS-Q61P·TAGQEEYSAM  | 56    | >NRAS-Q61P·TAGPEEYSAM  | 63    | 7     |
| >NRAS-Q61P·DTAGQEEY    | 387   | >NRAS-Q61P·DTAGPEEY    | 1046  | 659   |
| >NRAS-Q61P·DTAGQEEY    | 94    | >NRAS-Q61P·DTAGPEEY    | 356   | 262   |
| >NRAS-Q61P·DTAGQEEYS/  | 491   | >NRAS-Q61P·DTAGPEEYSA  | 895   | 404   |
| >NRAS-Q61P·DTAGQEEY    | 28    | >NRAS-Q61P·DTAGPEEY    | 121   | 93    |
| >NRAS-Q61P·DTAGQEEYS/  | 20    | >NRAS-Q61P·DTAGPEEYSA  | 34    | 14    |

|                        |      |                        |       |       |
|------------------------|------|------------------------|-------|-------|
| >NRAS-Q61P DTAGQEEY    | 8    | >NRAS-Q61P DTAGPEEY    | 7     | 1     |
| >NRAS-Q61P DTAGQEEYS/  | 6    | >NRAS-Q61P DTAGPEEYSA  | 5     | 1     |
| >NRAS-Q61P DTAGQEEY    | 1082 | >NRAS-Q61P DTAGPEEY    | 213   | 869   |
| >NRAS-Q61P DTAGQEEYS/  | 223  | >NRAS-Q61P DTAGPEEYSA  | 77    | 146   |
| >NRAS-Q61P DTAGQEEY    | 245  | >NRAS-Q61P DTAGPEEY    | 239   | 6     |
| >NRAS-Q61P DTAGQEEY    | 89   | >NRAS-Q61P DTAGPEEY    | 119   | 30    |
| >NRAS-Q61P DTAGQEEYS   | 408  | >NRAS-Q61P DTAGPEEYS   | 65    | 343   |
| >NRAS-Q61P DTAGQEEYS/  | 613  | >NRAS-Q61P DTAGPEEYSA  | 144   | 469   |
| >NRAS-Q61P DTAGQEEYS/  | 389  | >NRAS-Q61P DTAGPEEYSA  | 123   | 266   |
| >NRAS-Q61P DTAGQEEYS/  | 666  | >NRAS-Q61P DTAGPEEYSA  | 207   | 459   |
| >NRAS-Q61P DTAGQEEYS/  | 449  | >NRAS-Q61P DTAGPEEYSA  | 643   | 194   |
| >NRAS-Q61P DTAGQEEYS/  | 805  | >NRAS-Q61P DTAGPEEYSA  | 284   | 521   |
| >NRAS-Q61P ILDTAGQEEY  | 135  | >NRAS-Q61P ILDTAGPEEY  | 91    | 44    |
| >NRAS-Q61P ILDTAGQEEY/ | 734  | >NRAS-Q61P ILDTAGPEEYS | 437   | 297   |
| >NRAS-Q61P ILDTAGQEEY  | 571  | >NRAS-Q61P ILDTAGPEEY  | 273   | 298   |
| >NRAS-Q61P ILDTAGQEEY  | 349  | >NRAS-Q61P ILDTAGPEEY  | 461   | 112   |
| >NRAS-Q61P ILDTAGQEEY  | 463  | >NRAS-Q61P ILDTAGPEEY  | 365   | 98    |
| >NRAS-Q61P DILDTAGQEE  | 150  | >NRAS-Q61P DILDTAGPEE' | 181   | 31    |
| >NRAS-Q61P DILDTAGQEE  | 183  | >NRAS-Q61P DILDTAGPEE' | 162   | 21    |
| >NRAS-Q61P LLDILDTAGQ  | 401  | >NRAS-Q61P LLDILDTAGP  | 13302 | 12901 |
| >NRAS-Q61C QEEYSAMRD   | 423  | >NRAS-Q61C QEEYSAMRD   | 423   | 0     |
| >NRAS-Q61C GQEEYSAM    | 497  | >NRAS-Q61C GQEEYSAM    | 497   | 0     |
| >NRAS-Q61C GQEEYSAMR   | 385  | >NRAS-Q61C GQEEYSAMR   | 385   | 0     |
| >NRAS-Q61C GQEEYSAM    | 347  | >NRAS-Q61C GQEEYSAM    | 347   | 0     |
| >NRAS-Q61C CLLDILDTAGC | 479  | >NRAS-Q61C CLLDILDTAGC | 479   | 0     |
| >NRAS-Q61C CLLDILDTAGC | 138  | >NRAS-Q61C CLLDILDTAGC | 138   | 0     |
| >NRAS-Q61C TAGQEEYSAM  | 56   | >NRAS-Q61C TAGQEEYSAM  | 56    | 0     |
| >NRAS-Q61C DTAGQEEY    | 387  | >NRAS-Q61C DTAGQEEY    | 387   | 0     |
| >NRAS-Q61C DTAGQEEY    | 94   | >NRAS-Q61C DTAGQEEY    | 94    | 0     |
| >NRAS-Q61C DTAGQEEYS/  | 491  | >NRAS-Q61C DTAGQEEYS/  | 491   | 0     |
| >NRAS-Q61C DTAGQEEY    | 28   | >NRAS-Q61C DTAGQEEY    | 28    | 0     |
| >NRAS-Q61C DTAGQEEYS/  | 20   | >NRAS-Q61C DTAGQEEYS/  | 20    | 0     |
| >NRAS-Q61C DTAGQEEY    | 8    | >NRAS-Q61C DTAGQEEY    | 8     | 0     |
| >NRAS-Q61C DTAGQEEYS/  | 6    | >NRAS-Q61C DTAGQEEYS/  | 6     | 0     |
| >NRAS-Q61C DTAGQEEYS/  | 223  | >NRAS-Q61C DTAGQEEYS/  | 223   | 0     |
| >NRAS-Q61C DTAGQEEY    | 245  | >NRAS-Q61C DTAGQEEY    | 245   | 0     |
| >NRAS-Q61C DTAGQEEY    | 89   | >NRAS-Q61C DTAGQEEY    | 89    | 0     |
| >NRAS-Q61C DTAGQEEYS   | 408  | >NRAS-Q61C DTAGQEEYS   | 408   | 0     |
| >NRAS-Q61C DTAGQEEYS/  | 389  | >NRAS-Q61C DTAGQEEYS/  | 389   | 0     |
| >NRAS-Q61C DTAGQEEYS/  | 449  | >NRAS-Q61C DTAGQEEYS/  | 449   | 0     |
| >NRAS-Q61C ILDTAGQEEY  | 135  | >NRAS-Q61C ILDTAGQEEY  | 135   | 0     |
| >NRAS-Q61C ILDTAGQEEY  | 349  | >NRAS-Q61C ILDTAGQEEY  | 349   | 0     |
| >NRAS-Q61C ILDTAGQEEY  | 463  | >NRAS-Q61C ILDTAGQEEY  | 463   | 0     |

|                        |       |                        |       |       |
|------------------------|-------|------------------------|-------|-------|
| >NRAS-Q61C DILDTAGQEE  | 150   | >NRAS-Q61C DILDTAGQEE  | 150   | 0     |
| >NRAS-Q61C DILDTAGQEE  | 183   | >NRAS-Q61C DILDTAGQEE  | 183   | 0     |
| >NRAS-Q61C LLDILDTAGQ  | 401   | >NRAS-Q61C LLDILDTAGQ  | 401   | 0     |
| >NRAS-Q61R QEEYSAMRD   | 423   | >NRAS-Q61R REEYSAMRD   | 545   | 122   |
| >NRAS-Q61R GQEEYSAM    | 497   | >NRAS-Q61R GREEYSAM    | 23610 | 23113 |
| >NRAS-Q61R GQEEYSAMR   | 385   | >NRAS-Q61R GREEYSAMR   | 15846 | 15461 |
| >NRAS-Q61R GQEEYSAM    | 347   | >NRAS-Q61R GREEYSAM    | 306   | 41    |
| >NRAS-Q61R CLLDILDTAGC | 479   | >NRAS-Q61R CLLDILDTAGF | 6628  | 6149  |
| >NRAS-Q61R CLLDILDTAGC | 138   | >NRAS-Q61R CLLDILDTAGF | 5372  | 5234  |
| >NRAS-Q61R CLLDILDTAGC | 24335 | >NRAS-Q61R CLLDILDTAGF | 470   | 23865 |
| >NRAS-Q61R CLLDILDTAGC | 15438 | >NRAS-Q61R CLLDILDTAGF | 230   | 15208 |
| >NRAS-Q61R CLLDILDTAGC | 8819  | >NRAS-Q61R CLLDILDTAGF | 120   | 8699  |
| >NRAS-Q61R TAGQEEYSAM  | 56    | >NRAS-Q61R TAGREEYSAM  | 61    | 5     |
| >NRAS-Q61R DTAGQEEY    | 387   | >NRAS-Q61R DTAGREEY    | 838   | 451   |
| >NRAS-Q61R DTAGQEEY    | 94    | >NRAS-Q61R DTAGREEY    | 130   | 36    |
| >NRAS-Q61R DTAGQEEYS/  | 491   | >NRAS-Q61R DTAGREEYSA  | 531   | 40    |
| >NRAS-Q61R DTAGQEEY    | 28    | >NRAS-Q61R DTAGREEY    | 38    | 10    |
| >NRAS-Q61R DTAGQEEYS/  | 20    | >NRAS-Q61R DTAGREEYSA  | 22    | 2     |
| >NRAS-Q61R DTAGQEEY    | 8     | >NRAS-Q61R DTAGREEY    | 15    | 7     |
| >NRAS-Q61R DTAGQEEYS/  | 6     | >NRAS-Q61R DTAGREEYSA  | 10    | 4     |
| >NRAS-Q61R DTAGQEEY    | 1082  | >NRAS-Q61R DTAGREEY    | 480   | 602   |
| >NRAS-Q61R DTAGQEEYS/  | 223   | >NRAS-Q61R DTAGREEYSA  | 120   | 103   |
| >NRAS-Q61R DTAGQEEY    | 245   | >NRAS-Q61R DTAGREEY    | 484   | 239   |
| >NRAS-Q61R DTAGQEEY    | 89    | >NRAS-Q61R DTAGREEY    | 62    | 27    |
| >NRAS-Q61R DTAGQEEYS   | 408   | >NRAS-Q61R DTAGREEYS   | 614   | 206   |
| >NRAS-Q61R DTAGQEEYS/  | 613   | >NRAS-Q61R DTAGREEYSA  | 364   | 249   |
| >NRAS-Q61R DTAGQEEYS/  | 389   | >NRAS-Q61R DTAGREEYSA  | 519   | 130   |
| >NRAS-Q61R DTAGQEEYS/  | 449   | >NRAS-Q61R DTAGREEYSA  | 1084  | 635   |
| >NRAS-Q61R ILDTAGQEEY  | 135   | >NRAS-Q61R ILDTAGREEY  | 181   | 46    |
| >NRAS-Q61R ILDTAGQEEY  | 571   | >NRAS-Q61R ILDTAGREEY  | 499   | 72    |
| >NRAS-Q61R ILDTAGQEEY  | 349   | >NRAS-Q61R ILDTAGREEY  | 488   | 139   |
| >NRAS-Q61R ILDTAGQEEY  | 463   | >NRAS-Q61R ILDTAGREEY  | 1310  | 847   |
| >NRAS-Q61R DILDTAGQEE  | 150   | >NRAS-Q61R DILDTAGREE' | 207   | 57    |
| >NRAS-Q61R DILDTAGQEE  | 183   | >NRAS-Q61R DILDTAGREE' | 283   | 100   |
| >NRAS-Q61R DILDTAGQ    | 15309 | >NRAS-Q61R DILDTAGR    | 67    | 15242 |
| >NRAS-Q61R DILDTAGQ    | 8084  | >NRAS-Q61R DILDTAGR    | 49    | 8035  |
| >NRAS-Q61R DILDTAGQ    | 20152 | >NRAS-Q61R DILDTAGR    | 361   | 19791 |
| >NRAS-Q61R LLDILDTAGQ  | 401   | >NRAS-Q61R LLDILDTAGR  | 10970 | 10569 |
| >NRAS-R68T- TAGQEEYSAM | 56    | >NRAS-R68T- TAGQEEYSAM | 26293 | 26237 |
| >NRAS-R68T- AMRDQYMR'  | 166   | >NRAS-R68T- AMTDQYMR'  | 251   | 85    |
| >NRAS-R68T- AMRDQYMR'  | 1017  | >NRAS-R68T- AMTDQYMR'  | 242   | 775   |
| >NRAS-R68T- AMRDQYMR'  | 18    | >NRAS-R68T- AMTDQYMR'  | 7     | 11    |
| >NRAS-R68T- AMRDQYMR   | 156   | >NRAS-R68T- AMTDQYMR   | 11099 | 10943 |

|                      |      |                       |       |       |
|----------------------|------|-----------------------|-------|-------|
| >NRAS-R68T-AMRDQYMR` | 80   | >NRAS-R68T-AMTDQYMR`  | 11455 | 11375 |
| >NRAS-R68T-AMRDQYMR` | 128  | >NRAS-R68T-AMTDQYMR`  | 11384 | 11256 |
| >NRAS-R68T-AMRDQYMR  | 13   | >NRAS-R68T-AMTDQYMR   | 19    | 6     |
| >NRAS-R68T-AMRDQYMR  | 249  | >NRAS-R68T-AMTDQYMR   | 634   | 385   |
| >NRAS-R68T-AMRDQYMR  | 470  | >NRAS-R68T-AMTDQYMR   | 304   | 166   |
| >NRAS-R68T-SAMRDQYM  | 52   | >NRAS-R68T-SAMTDQYM   | 58    | 6     |
| >NRAS-R68T-SAMRDQYMI | 142  | >NRAS-R68T-SAMTDQYMI  | 124   | 18    |
| >NRAS-R68T-SAMRDQYMI | 38   | >NRAS-R68T-SAMTDQYMI  | 59    | 21    |
| >NRAS-R68T-SAMRDQYMI | 27   | >NRAS-R68T-SAMTDQYMI  | 19    | 8     |
| >NRAS-R68T-SAMRDQYM  | 1162 | >NRAS-R68T-SAMTDQYM   | 499   | 663   |
| >NRAS-R68T-SAMRDQYMI | 183  | >NRAS-R68T-SAMTDQYMI  | 228   | 45    |
| >NRAS-R68T-YSAMRDQY  | 37   | >NRAS-R68T-YSAMTDQY   | 22    | 15    |
| >NRAS-R68T-YSAMRDQYM | 322  | >NRAS-R68T-YSAMTDQYM  | 230   | 92    |
| >NRAS-R68T-YSAMRDQY  | 308  | >NRAS-R68T-YSAMTDQY   | 212   | 96    |
| >NRAS-R68T-YSAMRDQY  | 352  | >NRAS-R68T-YSAMTDQY   | 129   | 223   |
| >NRAS-R68T-YSAMRDQYM | 1211 | >NRAS-R68T-YSAMTDQYM  | 483   | 728   |
| >NRAS-R68T-YSAMRDQY  | 130  | >NRAS-R68T-YSAMTDQY   | 62    | 68    |
| >NRAS-R68T-YSAMRDQY  | 365  | >NRAS-R68T-YSAMTDQY   | 287   | 78    |
| >NRAS-R68T-YSAMRDQYM | 173  | >NRAS-R68T-YSAMTDQYM  | 457   | 284   |
| >NRAS-R68T-YSAMRDQY  | 322  | >NRAS-R68T-YSAMTDQY   | 195   | 127   |
| >NRAS-R68T-YSAMRDQYM | 7    | >NRAS-R68T-YSAMTDQYM  | 5     | 2     |
| >NRAS-R68T-YSAMRDQY  | 170  | >NRAS-R68T-YSAMTDQY   | 96    | 74    |
| >NRAS-R68T-YSAMRDQYM | 402  | >NRAS-R68T-YSAMTDQYM  | 225   | 177   |
| >NRAS-R68T-YSAMRDQY  | 626  | >NRAS-R68T-YSAMTDQY   | 260   | 366   |
| >NRAS-R68T-YSAMRDQYM | 736  | >NRAS-R68T-YSAMTDQYM  | 198   | 538   |
| >NRAS-R68T-YSAMRDQY  | 8    | >NRAS-R68T-YSAMTDQY   | 6     | 2     |
| >NRAS-R68T-YSAMRDQYM | 11   | >NRAS-R68T-YSAMTDQYM  | 12    | 1     |
| >NRAS-R68T-YSAMRDQY  | 156  | >NRAS-R68T-YSAMTDQY   | 40    | 116   |
| >NRAS-R68T-YSAMRDQYM | 779  | >NRAS-R68T-YSAMTDQYM  | 213   | 566   |
| >NRAS-R68T-YSAMRDQY  | 466  | >NRAS-R68T-YSAMTDQY   | 61    | 405   |
| >NRAS-R68T-YSAMRDQYM | 367  | >NRAS-R68T-YSAMTDQYM  | 45    | 322   |
| >NRAS-R68T-YSAMRDQYM | 440  | >NRAS-R68T-YSAMTDQYM  | 60    | 380   |
| >NRAS-R68T-YSAMRDQY  | 236  | >NRAS-R68T-YSAMTDQY   | 51    | 185   |
| >NRAS-R68T-YSAMRDQYM | 77   | >NRAS-R68T-YSAMTDQYM  | 26    | 51    |
| >NRAS-R68T-YSAMRDQY  | 444  | >NRAS-R68T-YSAMTDQY   | 442   | 2     |
| >NRAS-R68T-EYSAMRDQY | 133  | >NRAS-R68T-EYSAMTDQY  | 142   | 9     |
| >NRAS-R68T-EYSAMRDQY | 1064 | >NRAS-R68T-EYSAMTDQY  | 281   | 783   |
| >NRAS-R68T-EYSAMRDQY | 1060 | >NRAS-R68T-EYSAMTDQY  | 400   | 660   |
| >NRAS-R68T-EYSAMRDQY | 28   | >NRAS-R68T-EYSAMTDQY  | 43    | 15    |
| >NRAS-R68T-EYSAMRDQY | 14   | >NRAS-R68T-EYSAMTDQY  | 13    | 1     |
| >NRAS-R68T-EYSAMRDQY | 380  | >NRAS-R68T-EYSAMTDQY  | 573   | 193   |
| >NRAS-R68T-EYSAMRDQY | 37   | >NRAS-R68T-EYSAMTDQY  | 25    | 12    |
| >NRAS-R68T-EEYSAMRDQ | 105  | >NRAS-R68T-EEYSAMTDQ` | 98    | 7     |



|                        |      |                        |       |       |
|------------------------|------|------------------------|-------|-------|
| >NRAS-R68T-EEYSAMRDQ   | 49   | >NRAS-R68T-EEYSAMTDQ'  | 64    | 15    |
| >NRAS-R68T-EEYSAMRDQ   | 296  | >NRAS-R68T-EEYSAMTDQ'  | 154   | 142   |
| >NRAS-R68T-EEYSAMRDQ   | 237  | >NRAS-R68T-EEYSAMTDQ'  | 157   | 80    |
| >NRAS-R68T-EEYSAMRDQ   | 625  | >NRAS-R68T-EEYSAMTDQ'  | 376   | 249   |
| >NRAS-R68T-EEYSAMRDQ   | 795  | >NRAS-R68T-EEYSAMTDQ'  | 291   | 504   |
| >NRAS-R68T-EEYSAMRDQ   | 322  | >NRAS-R68T-EEYSAMTDQ'  | 250   | 72    |
| >NRAS-R68T-EEYSAMRDQ   | 64   | >NRAS-R68T-EEYSAMTDQ'  | 63    | 1     |
| >NRAS-R68T-EEYSAMRDQ   | 126  | >NRAS-R68T-EEYSAMTDQ'  | 102   | 24    |
| >NRAS-R68T-QEEYSAMR    | 509  | >NRAS-R68T-QEEYSAMT    | 164   | 345   |
| >NRAS-R68T-QEEYSAMRD   | 686  | >NRAS-R68T-QEEYSAMTDI  | 352   | 334   |
| >NRAS-R68T-QEEYSAMRD   | 722  | >NRAS-R68T-QEEYSAMTDI  | 371   | 351   |
| >NRAS-R68T-QEEYSAMR    | 3282 | >NRAS-R68T-QEEYSAMT    | 123   | 3159  |
| >NRAS-R68T-QEEYSAMRD   | 423  | >NRAS-R68T-QEEYSAMTDI  | 374   | 49    |
| >NRAS-R68T-GQEEYSAMR   | 385  | >NRAS-R68T-GQEEYSAMT   | 23544 | 23159 |
| >NRAS-R97G SKSFADINLYF | 247  | >NRAS-R97G SKSFADINLYC | 38760 | 38513 |
| >NRAS-R97G SKSFADINLYF | 179  | >NRAS-R97G SKSFADINLYC | 28017 | 27838 |
| >NRAS-R97G LYREQIKRV   | 266  | >NRAS-R97G LYGEQIKRV   | 117   | 149   |
| >NRAS-R97G LYREQIKRV   | 1562 | >NRAS-R97G LYGEQIKRV   | 296   | 1266  |
| >NRAS-R97G LYREQIKR    | 251  | >NRAS-R97G LYGEQIKR    | 15943 | 15692 |
| >NRAS-R97G LYREQIKRV   | 225  | >NRAS-R97G LYGEQIKRV   | 15345 | 15120 |
| >NRAS-R97G LYREQIKRVK  | 9    | >NRAS-R97G LYGEQIKRVK  | 5609  | 5600  |
| >NRAS-R97G LYREQIKR    | 105  | >NRAS-R97G LYGEQIKR    | 709   | 604   |
| >NRAS-R97G LYREQIKR    | 107  | >NRAS-R97G LYGEQIKR    | 1052  | 945   |
| >NRAS-R97G LYREQIKR    | 97   | >NRAS-R97G LYGEQIKR    | 42    | 55    |
| >NRAS-R97G NLYREQIKRV  | 506  | >NRAS-R97G NLYGEQIKRV  | 155   | 351   |
| >NRAS-R97G NLYREQIKRV  | 493  | >NRAS-R97G NLYGEQIKRV  | 135   | 358   |
| >NRAS-R97G NLYREQIKRV  | 53   | >NRAS-R97G NLYGEQIKRV  | 37    | 16    |
| >NRAS-R97G NLYREQIKRV  | 5    | >NRAS-R97G NLYGEQIKRV  | 3     | 2     |
| >NRAS-R97G NLYREQIKRV  | 37   | >NRAS-R97G NLYGEQIKRV  | 39    | 2     |
| >NRAS-R97G NLYREQIKRV  | 23   | >NRAS-R97G NLYGEQIKRV  | 12    | 11    |
| >NRAS-R97G NLYREQIKRV  | 68   | >NRAS-R97G NLYGEQIKRV  | 16    | 52    |
| >NRAS-R97G NLYREQIKRV  | 5    | >NRAS-R97G NLYGEQIKRV  | 3     | 2     |
| >NRAS-R97G NLYREQIK    | 161  | >NRAS-R97G NLYGEQIK    | 265   | 104   |
| >NRAS-R97G NLYREQIKR   | 445  | >NRAS-R97G NLYGEQIKR   | 698   | 253   |
| >NRAS-R97G NLYREQIKRV  | 120  | >NRAS-R97G NLYGEQIKRV  | 160   | 40    |
| >NRAS-R97G NLYREQIKR   | 137  | >NRAS-R97G NLYGEQIKR   | 96    | 41    |
| >NRAS-R97G NLYREQIKR   | 148  | >NRAS-R97G NLYGEQIKR   | 69    | 79    |
| >NRAS-R97G INLYREQIKRV | 387  | >NRAS-R97G INLYGEQIKRV | 1894  | 1507  |
| >NRAS-R97G DINLYREQIKF | 48   | >NRAS-R97G DINLYGEQIKF | 98    | 50    |
| >NRAS-R97G DINLYREQIKF | 53   | >NRAS-R97G DINLYGEQIKF | 90    | 37    |
| >NRAS-R97G ADINLYREQI  | 83   | >NRAS-R97G ADINLYGEQI  | 63    | 20    |
| >NRAS-R97G ADINLYREQI  | 75   | >NRAS-R97G ADINLYGEQI  | 38    | 37    |
| >NRAS-R97G FADINLYREQ  | 403  | >NRAS-R97G FADINLYGEQ  | 196   | 207   |

|                       |     |                       |       |       |
|-----------------------|-----|-----------------------|-------|-------|
| >NRAS-R97G FADINLYREQ | 374 | >NRAS-R97G FADINLYGEQ | 132   | 242   |
| >NRAS-R97G FADINLYR   | 45  | >NRAS-R97G FADINLYG   | 31478 | 31433 |
| >NRAS-R97G FADINLYREQ | 554 | >NRAS-R97G FADINLYGEQ | 407   | 147   |
| >NRAS-R97G SFADINLYR  | 462 | >NRAS-R97G SFADINLYG  | 24456 | 23994 |
| >NRAS-R97G SFADINLYR  | 20  | >NRAS-R97G SFADINLYG  | 15205 | 15185 |
| >NRAS-R97G SFADINLYR  | 111 | >NRAS-R97G SFADINLYG  | 29657 | 29546 |
| >NRAS-R97G SFADINLYR  | 22  | >NRAS-R97G SFADINLYG  | 23042 | 23020 |
| >NRAS-R97G SFADINLYR  | 9   | >NRAS-R97G SFADINLYG  | 12495 | 12486 |
| >NRAS-R97G KSFADINLYR | 151 | >NRAS-R97G KSFADINLYG | 17234 | 17083 |
| >NRAS-R97G KSFADINLYR | 21  | >NRAS-R97G KSFADINLYG | 29083 | 29062 |
| >NRAS-R97G KSFADINLYR | 90  | >NRAS-R97G KSFADINLYG | 264   | 174   |
| >NRAS-R97G KSFADINLYR | 10  | >NRAS-R97G KSFADINLYG | 11938 | 11928 |
| >NRAS-R97G KSFADINLYR | 10  | >NRAS-R97G KSFADINLYG | 29313 | 29303 |
| >NRAS-R97G KSFADINLYR | 385 | >NRAS-R97G KSFADINLYG | 32032 | 31647 |
| >NRAS-R97G KSFADINLYR | 246 | >NRAS-R97G KSFADINLYG | 14779 | 14533 |
| >NRAS-R97G KSFADINLYR | 14  | >NRAS-R97G KSFADINLYG | 9215  | 9201  |
| >NRAS-S65C-SAMRDQYM   | 52  | >NRAS-S65C-CAMRDQYM   | 240   | 188   |
| >NRAS-S65C-SAMRDQYMI  | 142 | >NRAS-S65C-CAMRDQYM   | 1073  | 931   |
| >NRAS-S65C-SAMRDQYMI  | 38  | >NRAS-S65C-CAMRDQYM   | 73    | 35    |
| >NRAS-S65C-SAMRDQYMI  | 652 | >NRAS-S65C-CAMRDQYM   | 235   | 417   |
| >NRAS-S65C-SAMRDQYMI  | 27  | >NRAS-S65C-CAMRDQYM   | 30    | 3     |
| >NRAS-S65C-SAMRDQYM   | 545 | >NRAS-S65C-CAMRDQYM   | 216   | 329   |
| >NRAS-S65C-SAMRDQYMI  | 183 | >NRAS-S65C-CAMRDQYM   | 1300  | 1117  |
| >NRAS-S65C-YSAMRDQY   | 37  | >NRAS-S65C-YCAMRDQY   | 4650  | 4613  |
| >NRAS-S65C-YSAMRDQYM  | 322 | >NRAS-S65C-YCAMRDQYM  | 14813 | 14491 |
| >NRAS-S65C-YSAMRDQY   | 308 | >NRAS-S65C-YCAMRDQY   | 2484  | 2176  |
| >NRAS-S65C-YSAMRDQY   | 352 | >NRAS-S65C-YCAMRDQY   | 2074  | 1722  |
| >NRAS-S65C-YSAMRDQY   | 130 | >NRAS-S65C-YCAMRDQY   | 548   | 418   |
| >NRAS-S65C-YSAMRDQY   | 365 | >NRAS-S65C-YCAMRDQY   | 3297  | 2932  |
| >NRAS-S65C-YSAMRDQYM  | 173 | >NRAS-S65C-YCAMRDQYM  | 926   | 753   |
| >NRAS-S65C-YSAMRDQY   | 322 | >NRAS-S65C-YCAMRDQY   | 10322 | 10000 |
| >NRAS-S65C-YSAMRDQYM  | 7   | >NRAS-S65C-YCAMRDQYM  | 335   | 328   |
| >NRAS-S65C-YSAMRDQY   | 170 | >NRAS-S65C-YCAMRDQY   | 7469  | 7299  |
| >NRAS-S65C-YSAMRDQYM  | 402 | >NRAS-S65C-YCAMRDQYM  | 10466 | 10064 |
| >NRAS-S65C-YSAMRDQY   | 8   | >NRAS-S65C-YCAMRDQY   | 3003  | 2995  |
| >NRAS-S65C-YSAMRDQYM  | 11  | >NRAS-S65C-YCAMRDQYM  | 5487  | 5476  |
| >NRAS-S65C-YSAMRDQY   | 156 | >NRAS-S65C-YCAMRDQY   | 629   | 473   |
| >NRAS-S65C-YSAMRDQY   | 466 | >NRAS-S65C-YCAMRDQY   | 18413 | 17947 |
| >NRAS-S65C-YSAMRDQYM  | 367 | >NRAS-S65C-YCAMRDQYM  | 18223 | 17856 |
| >NRAS-S65C-YSAMRDQYM  | 440 | >NRAS-S65C-YCAMRDQYM  | 21438 | 20998 |
| >NRAS-S65C-YSAMRDQY   | 236 | >NRAS-S65C-YCAMRDQY   | 10763 | 10527 |
| >NRAS-S65C-YSAMRDQYM  | 77  | >NRAS-S65C-YCAMRDQYM  | 608   | 531   |
| >NRAS-S65C-YSAMRDQY   | 444 | >NRAS-S65C-YCAMRDQY   | 865   | 421   |

|                        |      |                        |      |      |
|------------------------|------|------------------------|------|------|
| >NRAS-S65C-YSAMRDQYM   | 895  | >NRAS-S65C-YCAMRDQYM   | 222  | 673  |
| >NRAS-S65C-ILDTAGQEEYI | 734  | >NRAS-S65C-ILDTAGQEEYI | 55   | 679  |
| >NRAS-S65C-ILDTAGQEEYI | 3523 | >NRAS-S65C-ILDTAGQEEYI | 167  | 3356 |
| >NRAS-S65C-EYSAMRDQY   | 133  | >NRAS-S65C-EYCAMRDQY   | 65   | 68   |
| >NRAS-S65C-EYSAMRDQY   | 1064 | >NRAS-S65C-EYCAMRDQY   | 236  | 828  |
| >NRAS-S65C-EYSAMRDQY   | 3033 | >NRAS-S65C-EYCAMRDQY   | 364  | 2669 |
| >NRAS-S65C-EYSAMRDQY   | 538  | >NRAS-S65C-EYCAMRDQY   | 282  | 256  |
| >NRAS-S65C-EYSAMRDQY   | 28   | >NRAS-S65C-EYCAMRDQY   | 16   | 12   |
| >NRAS-S65C-EYSAMRDQY   | 14   | >NRAS-S65C-EYCAMRDQY   | 22   | 8    |
| >NRAS-S65C-EYSAMRDQY   | 380  | >NRAS-S65C-EYCAMRDQY   | 847  | 467  |
| >NRAS-S65C-EYSAMRDQY   | 37   | >NRAS-S65C-EYCAMRDQY   | 28   | 9    |
| >NRAS-S65C-EEYSAMRDQ   | 105  | >NRAS-S65C-EEYCAMRDQ   | 184  | 79   |
| >NRAS-S65C-EEYSAMRDQ   | 49   | >NRAS-S65C-EEYCAMRDQ   | 75   | 26   |
| >NRAS-S65C-EEYSAMRDQ   | 296  | >NRAS-S65C-EEYCAMRDQ   | 631  | 335  |
| >NRAS-S65C-EEYSAMRDQ   | 237  | >NRAS-S65C-EEYCAMRDQ   | 528  | 291  |
| >NRAS-S65C-EEYSAMRDQ   | 322  | >NRAS-S65C-EEYCAMRDQ   | 242  | 80   |
| >NRAS-S65C-EEYSAMRDQ   | 562  | >NRAS-S65C-EEYCAMRDQ   | 469  | 93   |
| >NRAS-S65C-EEYSAMRDQ   | 64   | >NRAS-S65C-EEYCAMRDQ   | 57   | 7    |
| >NRAS-S65C-EEYSAMRDQ   | 126  | >NRAS-S65C-EEYCAMRDQ   | 133  | 7    |
| >NRAS-S65C-QEEYSAMRD   | 734  | >NRAS-S65C-QEEYCAMRD   | 417  | 317  |
| >NRAS-S65C-QEEYSAMRD   | 972  | >NRAS-S65C-QEEYCAMRD   | 393  | 579  |
| >NRAS-S65C-QEEYSAMRD   | 423  | >NRAS-S65C-QEEYCAMRD   | 328  | 95   |
| >NRAS-S65C-GQEEYSAM    | 497  | >NRAS-S65C-GQEEYCAM    | 528  | 31   |
| >NRAS-S65C-GQEEYSAMR   | 385  | >NRAS-S65C-GQEEYCAMR   | 411  | 26   |
| >NRAS-S65C-GQEEYSAM    | 347  | >NRAS-S65C-GQEEYCAM    | 1099 | 752  |
| >NRAS-S65C-TAGQEEYSAM  | 56   | >NRAS-S65C-TAGQEEYCAM  | 49   | 7    |
| >NRAS-S65C-DTAGQEEYS/  | 491  | >NRAS-S65C-DTAGQEEYCA/ | 981  | 490  |
| >NRAS-S65C-DTAGQEEYS/  | 20   | >NRAS-S65C-DTAGQEEYCA/ | 27   | 7    |
| >NRAS-S65C-DTAGQEEYS/  | 6    | >NRAS-S65C-DTAGQEEYCA/ | 16   | 10   |
| >NRAS-S65C-DTAGQEEYS/  | 223  | >NRAS-S65C-DTAGQEEYCA/ | 656  | 433  |
| >NRAS-S65C-DTAGQEEYS   | 408  | >NRAS-S65C-DTAGQEEYCA  | 1785 | 1377 |
| >NRAS-S65C-DTAGQEEYS/  | 389  | >NRAS-S65C-DTAGQEEYCA/ | 651  | 262  |
| >NRAS-S65C-DTAGQEEYS/  | 666  | >NRAS-S65C-DTAGQEEYCA/ | 458  | 208  |
| >NRAS-S65C-DTAGQEEYS/  | 449  | >NRAS-S65C-DTAGQEEYCA/ | 796  | 347  |
| >NRAS-S65R-SAMRDQYM    | 52   | >NRAS-S65R-RAMRDQYM    | 115  | 63   |
| >NRAS-S65R-SAMRDQYMI   | 142  | >NRAS-S65R-RAMRDQYMI   | 256  | 114  |
| >NRAS-S65R-SAMRDQYMI   | 38   | >NRAS-S65R-RAMRDQYMI   | 12   | 26   |
| >NRAS-S65R-SAMRDQYMI   | 27   | >NRAS-S65R-RAMRDQYMI   | 203  | 176  |
| >NRAS-S65R-SAMRDQYM    | 1499 | >NRAS-S65R-RAMRDQYM    | 237  | 1262 |
| >NRAS-S65R-SAMRDQYM    | 1104 | >NRAS-S65R-RAMRDQYM    | 49   | 1055 |
| >NRAS-S65R-SAMRDQYM    | 1171 | >NRAS-S65R-RAMRDQYM    | 108  | 1063 |
| >NRAS-S65R-SAMRDQYM    | 545  | >NRAS-S65R-RAMRDQYM    | 23   | 522  |
| >NRAS-S65R-SAMRDQYMI   | 183  | >NRAS-S65R-RAMRDQYMI   | 750  | 567  |

|                      |       |                      |       |       |
|----------------------|-------|----------------------|-------|-------|
| >NRAS-S65R-SAMRDQYMI | 1460  | >NRAS-S65R-RAMRDQYM  | 248   | 1212  |
| >NRAS-S65R-YSAMRDQY  | 37    | >NRAS-S65R-YRAMRDQY  | 13824 | 13787 |
| >NRAS-S65R-YSAMRDQYM | 322   | >NRAS-S65R-YRAMRDQYM | 15806 | 15484 |
| >NRAS-S65R-YSAMRDQY  | 308   | >NRAS-S65R-YRAMRDQY  | 12080 | 11772 |
| >NRAS-S65R-YSAMRDQY  | 352   | >NRAS-S65R-YRAMRDQY  | 15303 | 14951 |
| >NRAS-S65R-YSAMRDQY  | 130   | >NRAS-S65R-YRAMRDQY  | 1164  | 1034  |
| >NRAS-S65R-YSAMRDQY  | 365   | >NRAS-S65R-YRAMRDQY  | 3141  | 2776  |
| >NRAS-S65R-YSAMRDQYM | 173   | >NRAS-S65R-YRAMRDQYM | 1478  | 1305  |
| >NRAS-S65R-YSAMRDQY  | 322   | >NRAS-S65R-YRAMRDQY  | 13219 | 12897 |
| >NRAS-S65R-YSAMRDQYM | 7     | >NRAS-S65R-YRAMRDQYM | 193   | 186   |
| >NRAS-S65R-YSAMRDQY  | 170   | >NRAS-S65R-YRAMRDQY  | 9256  | 9086  |
| >NRAS-S65R-YSAMRDQYM | 402   | >NRAS-S65R-YRAMRDQYM | 13222 | 12820 |
| >NRAS-S65R-YSAMRDQY  | 626   | >NRAS-S65R-YRAMRDQY  | 272   | 354   |
| >NRAS-S65R-YSAMRDQYM | 736   | >NRAS-S65R-YRAMRDQYM | 252   | 484   |
| >NRAS-S65R-YSAMRDQY  | 8     | >NRAS-S65R-YRAMRDQY  | 16395 | 16387 |
| >NRAS-S65R-YSAMRDQYM | 11    | >NRAS-S65R-YRAMRDQYM | 22139 | 22128 |
| >NRAS-S65R-YSAMRDQY  | 19374 | >NRAS-S65R-YRAMRDQY  | 234   | 19140 |
| >NRAS-S65R-YSAMRDQYM | 18666 | >NRAS-S65R-YRAMRDQYM | 125   | 18541 |
| >NRAS-S65R-YSAMRDQYM | 28111 | >NRAS-S65R-YRAMRDQYM | 277   | 27834 |
| >NRAS-S65R-YSAMRDQY  | 156   | >NRAS-S65R-YRAMRDQY  | 5178  | 5022  |
| >NRAS-S65R-YSAMRDQY  | 466   | >NRAS-S65R-YRAMRDQY  | 21275 | 20809 |
| >NRAS-S65R-YSAMRDQYM | 367   | >NRAS-S65R-YRAMRDQYM | 21386 | 21019 |
| >NRAS-S65R-YSAMRDQYM | 440   | >NRAS-S65R-YRAMRDQYM | 31207 | 30767 |
| >NRAS-S65R-YSAMRDQY  | 236   | >NRAS-S65R-YRAMRDQY  | 16716 | 16480 |
| >NRAS-S65R-YSAMRDQYM | 77    | >NRAS-S65R-YRAMRDQYM | 6423  | 6346  |
| >NRAS-S65R-YSAMRDQY  | 444   | >NRAS-S65R-YRAMRDQY  | 1637  | 1193  |
| >NRAS-S65R-EYSAMRDQY | 133   | >NRAS-S65R-EYRAMRDQY | 298   | 165   |
| >NRAS-S65R-EYSAMRDQY | 538   | >NRAS-S65R-EYRAMRDQY | 176   | 362   |
| >NRAS-S65R-EYSAMRDQY | 28    | >NRAS-S65R-EYRAMRDQY | 14    | 14    |
| >NRAS-S65R-EYSAMRDQY | 14    | >NRAS-S65R-EYRAMRDQY | 99    | 85    |
| >NRAS-S65R-EYSAMRDQY | 380   | >NRAS-S65R-EYRAMRDQY | 931   | 551   |
| >NRAS-S65R-EYSAMRDQY | 37    | >NRAS-S65R-EYRAMRDQY | 60    | 23    |
| >NRAS-S65R-EEYSAMRDQ | 105   | >NRAS-S65R-EEYRAMRDQ | 51    | 54    |
| >NRAS-S65R-EEYSAMRDQ | 49    | >NRAS-S65R-EEYRAMRDQ | 24    | 25    |
| >NRAS-S65R-EEYSAMRDQ | 296   | >NRAS-S65R-EEYRAMRDQ | 378   | 82    |
| >NRAS-S65R-EEYSAMRDQ | 237   | >NRAS-S65R-EEYRAMRDQ | 222   | 15    |
| >NRAS-S65R-EEYSAMRDQ | 322   | >NRAS-S65R-EEYRAMRDQ | 426   | 104   |
| >NRAS-S65R-EEYSAMRDQ | 64    | >NRAS-S65R-EEYRAMRDQ | 78    | 14    |
| >NRAS-S65R-EEYSAMRDQ | 126   | >NRAS-S65R-EEYRAMRDQ | 148   | 22    |
| >NRAS-S65R-QEEYSAMRD | 423   | >NRAS-S65R-QEEYRAMRD | 539   | 116   |
| >NRAS-S65R-GQEEYSAM  | 497   | >NRAS-S65R-GQEEYRAM  | 2971  | 2474  |
| >NRAS-S65R-GQEEYSAMR | 385   | >NRAS-S65R-GQEEYRAMR | 85    | 300   |
| >NRAS-S65R-GQEEYSAM  | 347   | >NRAS-S65R-GQEEYRAM  | 1315  | 968   |

|                        |       |                        |       |       |
|------------------------|-------|------------------------|-------|-------|
| >NRAS-S65R-TAGQEEYS    | 24326 | >NRAS-S65R-TAGQEEYR    | 52    | 24274 |
| >NRAS-S65R-TAGQEEYSAM  | 56    | >NRAS-S65R-TAGQEEYRAM  | 48    | 8     |
| >NRAS-S65R-TAGQEEYS    | 33214 | >NRAS-S65R-TAGQEEYR    | 195   | 33019 |
| >NRAS-S65R-DTAGQEEYS/  | 491   | >NRAS-S65R-DTAGQEEYR/  | 988   | 497   |
| >NRAS-S65R-DTAGQEEYS/  | 20    | >NRAS-S65R-DTAGQEEYR/  | 31    | 11    |
| >NRAS-S65R-DTAGQEEYS/  | 6     | >NRAS-S65R-DTAGQEEYR/  | 10    | 4     |
| >NRAS-S65R-DTAGQEEYS/  | 223   | >NRAS-S65R-DTAGQEEYR/  | 247   | 24    |
| >NRAS-S65R-DTAGQEEYS   | 21669 | >NRAS-S65R-DTAGQEEYR   | 64    | 21605 |
| >NRAS-S65R-DTAGQEEYS   | 1646  | >NRAS-S65R-DTAGQEEYR   | 3     | 1643  |
| >NRAS-S65R-DTAGQEEYS   | 408   | >NRAS-S65R-DTAGQEEYR   | 10554 | 10146 |
| >NRAS-S65R-DTAGQEEYS/  | 389   | >NRAS-S65R-DTAGQEEYR/  | 1512  | 1123  |
| >NRAS-S65R-DTAGQEEYS/  | 449   | >NRAS-S65R-DTAGQEEYR/  | 1097  | 648   |
| >NRAS-T20T-TIQLIQNHFV  | 244   | >NRAS-T20T-TIQLIQNHFV  | 244   | 0     |
| >NRAS-T20T-TIQLIQNHFV  | 51    | >NRAS-T20T-TIQLIQNHFV  | 51    | 0     |
| >NRAS-T20T-TIQLIQNHFV  | 231   | >NRAS-T20T-TIQLIQNHFV  | 231   | 0     |
| >NRAS-T20T-LTIQLIQNHF\ | 177   | >NRAS-T20T-LTIQLIQNHF\ | 177   | 0     |
| >NRAS-T20T-LTIQLIQNHF\ | 52    | >NRAS-T20T-LTIQLIQNHF\ | 52    | 0     |
| >NRAS-T20T-LTIQLIQNHF\ | 144   | >NRAS-T20T-LTIQLIQNHF\ | 144   | 0     |
| >NRAS-T20T-LTIQLIQNHF\ | 20    | >NRAS-T20T-LTIQLIQNHF\ | 20    | 0     |
| >NRAS-T20T-LTIQLIQNHF\ | 24    | >NRAS-T20T-LTIQLIQNHF\ | 24    | 0     |
| >NRAS-T20T-LTIQLIQNHF\ | 247   | >NRAS-T20T-LTIQLIQNHF\ | 247   | 0     |
| >NRAS-T20T-LTIQLIQNHF\ | 95    | >NRAS-T20T-LTIQLIQNHF\ | 95    | 0     |
| >NRAS-T20T-LTIQLIQNHF\ | 18    | >NRAS-T20T-LTIQLIQNHF\ | 18    | 0     |
| >NRAS-T20T-LTIQLIQNHF  | 289   | >NRAS-T20T-LTIQLIQNHF  | 289   | 0     |
| >NRAS-T20T-LTIQLIQNH   | 246   | >NRAS-T20T-LTIQLIQNH   | 246   | 0     |
| >NRAS-T20T-LTIQLIQNHF  | 8     | >NRAS-T20T-LTIQLIQNHF  | 8     | 0     |
| >NRAS-T20T-LTIQLIQNHF\ | 322   | >NRAS-T20T-LTIQLIQNHF\ | 322   | 0     |
| >NRAS-T20T-LTIQLIQNHF  | 347   | >NRAS-T20T-LTIQLIQNHF  | 347   | 0     |
| >NRAS-T20T-LTIQLIQNHF\ | 13    | >NRAS-T20T-LTIQLIQNHF\ | 13    | 0     |
| >NRAS-T20T-LTIQLIQNHF\ | 18    | >NRAS-T20T-LTIQLIQNHF\ | 18    | 0     |
| >NRAS-T20T-LTIQLIQNHF  | 69    | >NRAS-T20T-LTIQLIQNHF  | 69    | 0     |
| >NRAS-T20T-LTIQLIQNHF  | 218   | >NRAS-T20T-LTIQLIQNHF  | 218   | 0     |
| >NRAS-T20T-LTIQLIQNH   | 391   | >NRAS-T20T-LTIQLIQNH   | 391   | 0     |
| >NRAS-T20T-LTIQLIQNHF  | 8     | >NRAS-T20T-LTIQLIQNHF  | 8     | 0     |
| >NRAS-T20T-LTIQLIQNHF\ | 296   | >NRAS-T20T-LTIQLIQNHF\ | 296   | 0     |
| >NRAS-T20T-LTIQLIQNHF  | 324   | >NRAS-T20T-LTIQLIQNHF  | 324   | 0     |
| >NRAS-T20T-LTIQLIQNHF  | 27    | >NRAS-T20T-LTIQLIQNHF  | 27    | 0     |
| >NRAS-T20T-LTIQLIQNHF\ | 270   | >NRAS-T20T-LTIQLIQNHF\ | 270   | 0     |
| >NRAS-T20T-LTIQLIQNHF  | 45    | >NRAS-T20T-LTIQLIQNHF  | 45    | 0     |
| >NRAS-T20T-ALTIQLIQ    | 273   | >NRAS-T20T-ALTIQLIQ    | 273   | 0     |
| >NRAS-T20T-SALTIQLI    | 127   | >NRAS-T20T-SALTIQLI    | 127   | 0     |
| >NRAS-T20T-KSALTIQLI   | 239   | >NRAS-T20T-KSALTIQLI   | 239   | 0     |
| >NRAS-T20T-KSALTIQL    | 276   | >NRAS-T20T-KSALTIQL    | 276   | 0     |

|                          |       |                          |       |       |
|--------------------------|-------|--------------------------|-------|-------|
| >NRAS-T20T- KSALTIQL     | 7     | >NRAS-T20T- KSALTIQL     | 7     | 0     |
| >NRAS-T20T- KSALTIQLI    | 42    | >NRAS-T20T- KSALTIQLI    | 42    | 0     |
| >NRAS-T20T- KSALTIQL     | 35    | >NRAS-T20T- KSALTIQL     | 35    | 0     |
| >NRAS-T20T- KSALTIQLI    | 24    | >NRAS-T20T- KSALTIQLI    | 24    | 0     |
| >NRAS-T20T- KSALTIQL     | 335   | >NRAS-T20T- KSALTIQL     | 335   | 0     |
| >NRAS-T20T- KSALTIQLI    | 73    | >NRAS-T20T- KSALTIQLI    | 73    | 0     |
| >NRAS-T20T- KSALTIQL     | 241   | >NRAS-T20T- KSALTIQL     | 241   | 0     |
| >NRAS-T20T- KSALTIQLI    | 35    | >NRAS-T20T- KSALTIQLI    | 35    | 0     |
| >NRAS-T20T- GKSALTIQL    | 414   | >NRAS-T20T- GKSALTIQL    | 414   | 0     |
| >NRAS-T58I-I TAGQEEYSAM  | 56    | >NRAS-T58I-I IAGQEEYSAM  | 162   | 106   |
| >NRAS-T58I-I DTAGQEEY    | 387   | >NRAS-T58I-I DIAGQEEY    | 11659 | 11272 |
| >NRAS-T58I-I DTAGQEEY    | 94    | >NRAS-T58I-I DIAGQEEY    | 643   | 549   |
| >NRAS-T58I-I DTAGQEEYS/  | 491   | >NRAS-T58I-I DIAGQEEYSA  | 1468  | 977   |
| >NRAS-T58I-I DTAGQEEY    | 28    | >NRAS-T58I-I DIAGQEEY    | 208   | 180   |
| >NRAS-T58I-I DTAGQEEYS/  | 20    | >NRAS-T58I-I DIAGQEEYSA  | 60    | 40    |
| >NRAS-T58I-I DTAGQEEY    | 8     | >NRAS-T58I-I DIAGQEEY    | 28    | 20    |
| >NRAS-T58I-I DTAGQEEYS/  | 6     | >NRAS-T58I-I DIAGQEEYSA  | 22    | 16    |
| >NRAS-T58I-I DTAGQEEYS/  | 223   | >NRAS-T58I-I DIAGQEEYSA  | 2686  | 2463  |
| >NRAS-T58I-I DTAGQEEY    | 245   | >NRAS-T58I-I DIAGQEEY    | 399   | 154   |
| >NRAS-T58I-I DTAGQEEY    | 89    | >NRAS-T58I-I DIAGQEEY    | 745   | 656   |
| >NRAS-T58I-I DTAGQEEYS   | 408   | >NRAS-T58I-I DIAGQEEYS   | 3309  | 2901  |
| >NRAS-T58I-I DTAGQEEYS/  | 389   | >NRAS-T58I-I DIAGQEEYSA  | 2932  | 2543  |
| >NRAS-T58I-I DTAGQEEYS/  | 449   | >NRAS-T58I-I DIAGQEEYSA  | 339   | 110   |
| >NRAS-T58I-I GETCLLDILDT | 13343 | >NRAS-T58I-I GETCLLDILDI | 74    | 13269 |
| >NRAS-T58I-I GETCLLDILDT | 5510  | >NRAS-T58I-I GETCLLDILDI | 63    | 5447  |
| >NRAS-T58I-I GETCLLDILDT | 845   | >NRAS-T58I-I GETCLLDILDI | 466   | 379   |
| >NRAS-T58I-I GETCLLDILDT | 3083  | >NRAS-T58I-I GETCLLDILDI | 496   | 2587  |
| >NRAS-T58I-I GETCLLDILDT | 137   | >NRAS-T58I-I GETCLLDILDI | 5     | 132   |
| >NRAS-T58I-I ILDTAGQEEY  | 135   | >NRAS-T58I-I ILDIAGQEEY  | 163   | 28    |
| >NRAS-T58I-I ILDTAGQEEY  | 349   | >NRAS-T58I-I ILDIAGQEEY  | 167   | 182   |
| >NRAS-T58I-I ILDTAGQEEY  | 463   | >NRAS-T58I-I ILDIAGQEEY  | 556   | 93    |
| >NRAS-T58I-I DILDTAGQEE  | 849   | >NRAS-T58I-I DILDIAGQEE\ | 403   | 446   |
| >NRAS-T58I-I DILDTAGQEE  | 150   | >NRAS-T58I-I DILDIAGQEE\ | 196   | 46    |
| >NRAS-T58I-I DILDTAGQEE  | 183   | >NRAS-T58I-I DILDIAGQEE\ | 108   | 75    |
| >NRAS-T58I-I LLDILDTA    | 318   | >NRAS-T58I-I LLDILDIA    | 402   | 84    |
| >NRAS-T58I-I LLDILDTA    | 45    | >NRAS-T58I-I LLDILDIA    | 239   | 194   |
| >NRAS-T58I-I LLDILDTA    | 149   | >NRAS-T58I-I LLDILDIA    | 499   | 350   |
| >NRAS-T58I-I LLDILDTA    | 42    | >NRAS-T58I-I LLDILDIA    | 117   | 75    |
| >NRAS-T58I-I LLDILDTA    | 36    | >NRAS-T58I-I LLDILDIA    | 131   | 95    |
| >NRAS-T58I-I LLDILDITAGQ | 401   | >NRAS-T58I-I LLDILDIAGQ  | 253   | 148   |
| >NRAS-T58I-I CLLDILDT    | 904   | >NRAS-T58I-I CLLDILDI    | 51    | 853   |
| >NRAS-T58I-I CLLDILDTA   | 48    | >NRAS-T58I-I CLLDILDIA   | 115   | 67    |
| >NRAS-T58I-I CLLDILDT    | 1560  | >NRAS-T58I-I CLLDILDI    | 338   | 1222  |

|                          |      |                          |      |      |
|--------------------------|------|--------------------------|------|------|
| >NRAS-T58I-I CLLDILDTA   | 69   | >NRAS-T58I-I CLLDILDIA   | 90   | 21   |
| >NRAS-T58I-I CLLDILDT    | 1679 | >NRAS-T58I-I CLLDILDI    | 192  | 1487 |
| >NRAS-T58I-I CLLDILDTA   | 89   | >NRAS-T58I-I CLLDILDIA   | 140  | 51   |
| >NRAS-T58I-I CLLDILDT    | 1503 | >NRAS-T58I-I CLLDILDI    | 141  | 1362 |
| >NRAS-T58I-I CLLDILDTA   | 23   | >NRAS-T58I-I CLLDILDIA   | 54   | 31   |
| >NRAS-T58I-I CLLDILDT    | 667  | >NRAS-T58I-I CLLDILDI    | 24   | 643  |
| >NRAS-T58I-I CLLDILDTA   | 10   | >NRAS-T58I-I CLLDILDIA   | 94   | 84   |
| >NRAS-T58I-I CLLDILDT    | 2429 | >NRAS-T58I-I CLLDILDI    | 32   | 2397 |
| >NRAS-T58I-I CLLDILDTA   | 11   | >NRAS-T58I-I CLLDILDIA   | 44   | 33   |
| >NRAS-T58I-I CLLDILDT    | 2051 | >NRAS-T58I-I CLLDILDI    | 63   | 1988 |
| >NRAS-T58I-I CLLDILDTA   | 39   | >NRAS-T58I-I CLLDILDIA   | 146  | 107  |
| >NRAS-T58I-I CLLDILDT    | 748  | >NRAS-T58I-I CLLDILDI    | 28   | 720  |
| >NRAS-T58I-I CLLDILDTA   | 7    | >NRAS-T58I-I CLLDILDIA   | 32   | 25   |
| >NRAS-T58I-I CLLDILDTAGC | 479  | >NRAS-T58I-I CLLDILDIAGC | 585  | 106  |
| >NRAS-T58I-I CLLDILDT    | 239  | >NRAS-T58I-I CLLDILDI    | 24   | 215  |
| >NRAS-T58I-I CLLDILDTA   | 13   | >NRAS-T58I-I CLLDILDIA   | 69   | 56   |
| >NRAS-T58I-I CLLDILDTAGC | 138  | >NRAS-T58I-I CLLDILDIAGC | 120  | 18   |
| >NRAS-T58I-I ETCLLDILDTA | 107  | >NRAS-T58I-I ETCLLDILDIA | 255  | 148  |
| >NRAS-V45A VIDGETCLL     | 144  | >NRAS-V45A AIDGETCLL     | 70   | 74   |
| >NRAS-V45A VIDGETCLL     | 476  | >NRAS-V45A AIDGETCLL     | 373  | 103  |
| >NRAS-V45A VIDGETCLL     | 84   | >NRAS-V45A AIDGETCLL     | 121  | 37   |
| >NRAS-V45A VIDGETCL      | 360  | >NRAS-V45A AIDGETCL      | 322  | 38   |
| >NRAS-V45A VIDGETCLL     | 137  | >NRAS-V45A AIDGETCLL     | 135  | 2    |
| >NRAS-V45A VIDGETCLL     | 265  | >NRAS-V45A AIDGETCLL     | 1051 | 786  |
| >NRAS-V45A VIDGETCL      | 136  | >NRAS-V45A AIDGETCL      | 127  | 9    |
| >NRAS-V45A VIDGETCLL     | 17   | >NRAS-V45A AIDGETCLL     | 17   | 0    |
| >NRAS-V45A VIDGETCLLDI   | 587  | >NRAS-V45A AIDGETCLLDI   | 489  | 98   |
| >NRAS-V45A VVIDGETCLL    | 148  | >NRAS-V45A VAIDGETCLL    | 378  | 230  |
| >NRAS-V45A VVIDGETCL     | 346  | >NRAS-V45A VAIDGETCL     | 1922 | 1576 |
| >NRAS-V45A VVIDGETCL     | 72   | >NRAS-V45A VAIDGETCL     | 1470 | 1398 |
| >NRAS-V45A VVIDGETCLL    | 17   | >NRAS-V45A VAIDGETCLL    | 231  | 214  |
| >NRAS-V45A VVIDGETCLL    | 1568 | >NRAS-V45A VAIDGETCLL    | 140  | 1428 |
| >NRAS-V45A TIEDSYRKQV'   | 57   | >NRAS-V45A TIEDSYRKQV'   | 4543 | 4486 |
| >NRAS-V45A QVVIDGETCL    | 1485 | >NRAS-V45A QVAIDGETCL    | 284  | 1201 |
| >NRAS-V45A QVVIDGETCL    | 962  | >NRAS-V45A QVAIDGETCL    | 280  | 682  |
| >NRAS-V45A KQVVIDGETC    | 1211 | >NRAS-V45A KQVAIDGETC    | 373  | 838  |
| >NRAS-V45A KQVVIDGETC    | 185  | >NRAS-V45A KQVAIDGETC    | 82   | 103  |
| >NRAS-V45A KQVVIDGETC    | 222  | >NRAS-V45A KQVAIDGETC    | 171  | 51   |
| >NRAS-V45A KQVVIDGETC    | 458  | >NRAS-V45A KQVAIDGETC    | 165  | 293  |
| >NRAS-V45A SYRKQVVI      | 43   | >NRAS-V45A SYRKQVAI      | 27   | 16   |
| >NRAS-V45A SYRKQVVI      | 407  | >NRAS-V45A SYRKQVAI      | 1191 | 784  |
| >NRAS-V45A SYRKQVVI      | 19   | >NRAS-V45A SYRKQVAI      | 26   | 7    |
| >NRAS-V45A SYRKQVVI      | 13   | >NRAS-V45A SYRKQVAI      | 10   | 3    |

|                          |      |                        |      |      |
|--------------------------|------|------------------------|------|------|
| >NRAS-V45A SYRKQVVID     | 605  | >NRAS-V45A SYRKQVAID   | 418  | 187  |
| >NRAS-V45A SYRKQVVIDG    | 267  | >NRAS-V45A SYRKQVAIDG  | 256  | 11   |
| >NRAS-V45A DSYRKQVVI     | 1145 | >NRAS-V45A DSYRKQVAI   | 475  | 670  |
| >NRAS-V45A DSYRKQVVI     | 1839 | >NRAS-V45A DSYRKQVAI   | 473  | 1366 |
| >NRAS-V45A DSYRKQVVI     | 362  | >NRAS-V45A DSYRKQVAI   | 661  | 299  |
| >NRAS-V45A IEDSYRKQVV    | 145  | >NRAS-V45A IEDSYRKQVA  | 4619 | 4474 |
| >NRAS-V45A IEDSYRKQVV    | 47   | >NRAS-V45A IEDSYRKQVA  | 59   | 12   |
| >NRAS-V45A IEDSYRKQVV    | 227  | >NRAS-V45A IEDSYRKQVA  | 168  | 59   |
| >NRAS-V45A IEDSYRKQVV    | 51   | >NRAS-V45A IEDSYRKQVA  | 43   | 8    |
| >NRAS-V8A-1 VVGAGGVGK    | 326  | >NRAS-V8A-r AVGAGGVGK  | 342  | 16   |
| >NRAS-V8A-1 VVGAGGVGK    | 89   | >NRAS-V8A-r AVGAGGVGK  | 80   | 9    |
| >NRAS-V8A-1 VVGAGGV      | 117  | >NRAS-V8A-r VAVGAGGV   | 1049 | 932  |
| >NRAS-V8A-1 VVGAGGV      | 68   | >NRAS-V8A-r VAVGAGGV   | 397  | 329  |
| >NRAS-V8A-1 VVGAGGV      | 139  | >NRAS-V8A-r VAVGAGGV   | 749  | 610  |
| >NRAS-V8A-1 VVGAGGV      | 23   | >NRAS-V8A-r VAVGAGGV   | 428  | 405  |
| >NRAS-V8A-1 VVGAGGVG     | 76   | >NRAS-V8A-r VAVGAGGVG  | 330  | 254  |
| >NRAS-V8A-1 VVGAGGVG     | 101  | >NRAS-V8A-r VAVGAGGVG  | 348  | 247  |
| >NRAS-V8A-1 VVGAGGVG     | 203  | >NRAS-V8A-r VAVGAGGVG  | 368  | 165  |
| >NRAS-V8A-1 VVGAGGV      | 191  | >NRAS-V8A-r VAVGAGGV   | 928  | 737  |
| >NRAS-V8A-1 LVVVGAGGV    | 180  | >NRAS-V8A-r LVAVGAGGV  | 59   | 121  |
| >NRAS-V8A-1 LVVVGAGGV    | 55   | >NRAS-V8A-r LVAVGAGGV  | 70   | 15   |
| >NRAS-V8A-1 LVVVGAGGV    | 75   | >NRAS-V8A-r LVAVGAGGV  | 36   | 39   |
| >NRAS-V8A-1 LVVVGAGGV    | 1183 | >NRAS-V8A-r LVAVGAGGV  | 340  | 843  |
| >NRAS-V8A-1 LVVVGAGGV    | 572  | >NRAS-V8A-r LVAVGAGGV  | 289  | 283  |
| >NRAS-V8A-1 LVVVGAGGV    | 284  | >NRAS-V8A-r LVAVGAGGV  | 126  | 158  |
| >NRAS-V8A-1 LVVVGAGGV    | 154  | >NRAS-V8A-r LVAVGAGGV  | 50   | 104  |
| >NRAS-V8A-1 LVVVGAGGV    | 159  | >NRAS-V8A-r LVAVGAGGV  | 97   | 62   |
| >NRAS-V8A-1 KLVVVGAGG'   | 392  | >NRAS-V8A-r KLVAVGAGG' | 139  | 253  |
| >NRAS-V8A-1 KLVVVGAGG'   | 35   | >NRAS-V8A-r KLVAVGAGG' | 19   | 16   |
| >NRAS-V8A-1 KLVVVGAGG'   | 6    | >NRAS-V8A-r KLVAVGAGG' | 3    | 3    |
| >NRAS-V8A-1 KLVVVGAGG'   | 17   | >NRAS-V8A-r KLVAVGAGG' | 10   | 7    |
| >NRAS-V8A-1 KLVVVGAGG'   | 14   | >NRAS-V8A-r KLVAVGAGG' | 10   | 4    |
| >NRAS-V8A-1 KLVVVGAGG'   | 121  | >NRAS-V8A-r KLVAVGAGG' | 70   | 51   |
| >NRAS-V8A-1 KLVVVGAGG'   | 6    | >NRAS-V8A-r KLVAVGAGG' | 4    | 2    |
| >NRAS-V8A-1 YKLVVVGAGC   | 423  | >NRAS-V8A-r YKLVAVGAGC | 494  | 71   |
| >NRAS-V8A-1 YKLVVVGAGC   | 220  | >NRAS-V8A-r YKLVAVGAGC | 721  | 501  |
| >NRAS-V8A-1 YKLVVVGAGC   | 423  | >NRAS-V8A-r YKLVAVGAGC | 379  | 44   |
| >NRAS-V8A-1 YKLVVVGAGC   | 696  | >NRAS-V8A-r YKLVAVGAGC | 488  | 208  |
| >NRAS-V8A-1 TEYKLVVV     | 39   | >NRAS-V8A-r TEYKLVAV   | 59   | 20   |
| >NRAS-V8A-1 TEYKLVVVGAGC | 691  | >NRAS-V8A-r TEYKLVAVGA | 455  | 236  |
| >NRAS-V8A-1 TEYKLVVV     | 259  | >NRAS-V8A-r TEYKLVAV   | 111  | 148  |
| >NRAS-V8A-1 TEYKLVVV     | 231  | >NRAS-V8A-r TEYKLVAV   | 145  | 86   |
| >NRAS-V8A-1 TEYKLVVV     | 65   | >NRAS-V8A-r TEYKLVAV   | 61   | 4    |



|                       |      |                        |       |       |
|-----------------------|------|------------------------|-------|-------|
| >NRAS-V8A-l TEYKLVVGA | 303  | >NRAS-V8A-r TEYKLVAVGA | 359   | 56    |
| >NRAS-V8A-l TEYKLVVGA | 556  | >NRAS-V8A-r TEYKLVAVGA | 326   | 230   |
| >NRAS-V8A-l TEYKLVVV  | 93   | >NRAS-V8A-r TEYKLVAV   | 66    | 27    |
| >NRAS-V8A-l TEYKLVVGA | 68   | >NRAS-V8A-r TEYKLVAVGA | 61    | 7     |
| >NRAS-V8A-l TEYKLVVV  | 81   | >NRAS-V8A-r TEYKLVAV   | 65    | 16    |
| >NRAS-V8A-l MTEYKLVVV | 1343 | >NRAS-V8A-r MTEYKLVAV  | 402   | 941   |
| >NRAS-V8A-l MTEYKLVVV | 1130 | >NRAS-V8A-r MTEYKLVAV  | 469   | 661   |
| >NRAS-V8A-l MTEYKLVVV | 616  | >NRAS-V8A-r MTEYKLVAV  | 74    | 542   |
| >NRAS-V8A-l MTEYKLVV  | 144  | >NRAS-V8A-r MTEYKLVAV  | 1871  | 1727  |
| >NRAS-V8A-l MTEYKLVVV | 43   | >NRAS-V8A-r MTEYKLVAV  | 20    | 23    |
| >NRAS-V8A-l MTEYKLVVV | 78   | >NRAS-V8A-r MTEYKLVAV  | 79    | 1     |
| >NRAS-Y64N YSAMRDQY   | 37   | >NRAS-Y64N NSAMRDQY    | 291   | 254   |
| >NRAS-Y64N YSAMRDQYM  | 322  | >NRAS-Y64N NSAMRDQYM   | 469   | 147   |
| >NRAS-Y64N YSAMRDQY   | 308  | >NRAS-Y64N NSAMRDQY    | 3985  | 3677  |
| >NRAS-Y64N YSAMRDQY   | 352  | >NRAS-Y64N NSAMRDQY    | 1907  | 1555  |
| >NRAS-Y64N YSAMRDQY   | 130  | >NRAS-Y64N NSAMRDQY    | 1917  | 1787  |
| >NRAS-Y64N YSAMRDQY   | 365  | >NRAS-Y64N NSAMRDQY    | 616   | 251   |
| >NRAS-Y64N YSAMRDQYM  | 173  | >NRAS-Y64N NSAMRDQYM   | 301   | 128   |
| >NRAS-Y64N YSAMRDQY   | 322  | >NRAS-Y64N NSAMRDQY    | 540   | 218   |
| >NRAS-Y64N YSAMRDQYM  | 7    | >NRAS-Y64N NSAMRDQYM   | 8     | 1     |
| >NRAS-Y64N YSAMRDQY   | 170  | >NRAS-Y64N NSAMRDQY    | 2122  | 1952  |
| >NRAS-Y64N YSAMRDQYM  | 402  | >NRAS-Y64N NSAMRDQYM   | 4971  | 4569  |
| >NRAS-Y64N YSAMRDQY   | 8    | >NRAS-Y64N NSAMRDQY    | 285   | 277   |
| >NRAS-Y64N YSAMRDQYM  | 11   | >NRAS-Y64N NSAMRDQYM   | 626   | 615   |
| >NRAS-Y64N YSAMRDQY   | 156  | >NRAS-Y64N NSAMRDQY    | 1285  | 1129  |
| >NRAS-Y64N YSAMRDQY   | 466  | >NRAS-Y64N NSAMRDQY    | 9413  | 8947  |
| >NRAS-Y64N YSAMRDQYM  | 367  | >NRAS-Y64N NSAMRDQYM   | 8444  | 8077  |
| >NRAS-Y64N YSAMRDQYM  | 440  | >NRAS-Y64N NSAMRDQYM   | 15421 | 14981 |
| >NRAS-Y64N YSAMRDQY   | 236  | >NRAS-Y64N NSAMRDQY    | 3692  | 3456  |
| >NRAS-Y64N YSAMRDQYM  | 77   | >NRAS-Y64N NSAMRDQYM   | 2450  | 2373  |
| >NRAS-Y64N YSAMRDQY   | 444  | >NRAS-Y64N NSAMRDQY    | 1375  | 931   |
| >NRAS-Y64N EYSAMRDQY  | 133  | >NRAS-Y64N ENSAMRDQY   | 15304 | 15171 |
| >NRAS-Y64N EYSAMRDQY  | 28   | >NRAS-Y64N ENSAMRDQY   | 3900  | 3872  |
| >NRAS-Y64N EYSAMRDQY  | 14   | >NRAS-Y64N ENSAMRDQY   | 19    | 5     |
| >NRAS-Y64N EYSAMRDQY  | 380  | >NRAS-Y64N ENSAMRDQY   | 3986  | 3606  |
| >NRAS-Y64N EYSAMRDQY  | 37   | >NRAS-Y64N ENSAMRDQY   | 1369  | 1332  |
| >NRAS-Y64N DILDTAGQEE | 150  | >NRAS-Y64N DILDTAGQEE  | 29326 | 29176 |
| >NRAS-Y64N DILDTAGQEE | 183  | >NRAS-Y64N DILDTAGQEE  | 21715 | 21532 |
| >NRAS-Y64N EEYSAMRDQ  | 105  | >NRAS-Y64N EENSAMRDQ   | 1218  | 1113  |
| >NRAS-Y64N EEYSAMRDQ  | 49   | >NRAS-Y64N EENSAMRDQ   | 440   | 391   |
| >NRAS-Y64N EEYSAMRDQ  | 296  | >NRAS-Y64N EENSAMRDQ   | 1046  | 750   |
| >NRAS-Y64N EEYSAMRDQ  | 237  | >NRAS-Y64N EENSAMRDQ   | 590   | 353   |
| >NRAS-Y64N EEYSAMRDQ  | 322  | >NRAS-Y64N EENSAMRDQ   | 465   | 143   |

|                       |      |                       |       |       |
|-----------------------|------|-----------------------|-------|-------|
| >NRAS-Y64N·EEYSAMRDQ  | 562  | >NRAS-Y64N·EENSAMRDQ  | 426   | 136   |
| >NRAS-Y64N·EEYSAMRDQ  | 64   | >NRAS-Y64N·EENSAMRDQ  | 298   | 234   |
| >NRAS-Y64N·EEYSAMRDQ  | 126  | >NRAS-Y64N·EENSAMRDQ  | 168   | 42    |
| >NRAS-Y64N·QEEYSAMRD  | 423  | >NRAS-Y64N·QEENSAMRD  | 1589  | 1166  |
| >NRAS-Y64N·GQEEYSAM   | 497  | >NRAS-Y64N·GQEENSAM   | 1471  | 974   |
| >NRAS-Y64N·GQEEYSAMR  | 385  | >NRAS-Y64N·GQEENSAMR  | 1912  | 1527  |
| >NRAS-Y64N·GQEEYSAM   | 347  | >NRAS-Y64N·GQEENSAM   | 600   | 253   |
| >NRAS-Y64N·TAGQEEYSAM | 56   | >NRAS-Y64N·TAGQEENSAI | 77    | 21    |
| >NRAS-Y64N·DTAGQEEY   | 387  | >NRAS-Y64N·DTAGQEEN   | 24044 | 23657 |
| >NRAS-Y64N·DTAGQEEY   | 94   | >NRAS-Y64N·DTAGQEEN   | 17000 | 16906 |
| >NRAS-Y64N·DTAGQEEYS/ | 491  | >NRAS-Y64N·DTAGQEENS/ | 1019  | 528   |
| >NRAS-Y64N·DTAGQEEY   | 28   | >NRAS-Y64N·DTAGQEEN   | 16092 | 16064 |
| >NRAS-Y64N·DTAGQEEYS/ | 20   | >NRAS-Y64N·DTAGQEENS/ | 33    | 13    |
| >NRAS-Y64N·DTAGQEEY   | 8    | >NRAS-Y64N·DTAGQEEN   | 11080 | 11072 |
| >NRAS-Y64N·DTAGQEEYS/ | 6    | >NRAS-Y64N·DTAGQEENS/ | 7     | 1     |
| >NRAS-Y64N·DTAGQEEYS/ | 223  | >NRAS-Y64N·DTAGQEENS/ | 108   | 115   |
| >NRAS-Y64N·DTAGQEEY   | 245  | >NRAS-Y64N·DTAGQEEN   | 23251 | 23006 |
| >NRAS-Y64N·DTAGQEEY   | 89   | >NRAS-Y64N·DTAGQEEN   | 3116  | 3027  |
| >NRAS-Y64N·DTAGQEEYS  | 408  | >NRAS-Y64N·DTAGQEENS  | 2084  | 1676  |
| >NRAS-Y64N·DTAGQEEYS/ | 389  | >NRAS-Y64N·DTAGQEENS/ | 623   | 234   |
| >NRAS-Y64N·DTAGQEEYS/ | 449  | >NRAS-Y64N·DTAGQEENS/ | 401   | 48    |
| >NRAS-Y64N·ILDTAGQEEY | 135  | >NRAS-Y64N·ILDTAGQEEN | 25487 | 25352 |
| >NRAS-Y64N·ILDTAGQEEY | 349  | >NRAS-Y64N·ILDTAGQEEN | 29182 | 28833 |
| >NRAS-Y64N·ILDTAGQEEY | 463  | >NRAS-Y64N·ILDTAGQEEN | 25693 | 25230 |
| >NSD1-A167 LAAGSKIL   | 327  | >NSD1-A167 LDAGSKIL   | 22541 | 22214 |
| >NSD1-A167 LAAGSKILA  | 288  | >NSD1-A167 LDAGSKILA  | 9906  | 9618  |
| >NSD1-A167 VAYHANDFCI | 451  | >NSD1-A167 VAYHANDFCI | 6062  | 5611  |
| >NSD1-A167 VAYHANDFCI | 285  | >NSD1-A167 VAYHANDFCI | 20011 | 19726 |
| >NSD1-A167 VAYHANDFCI | 280  | >NSD1-A167 VAYHANDFCI | 9167  | 8887  |
| >NSD1-A167 CLAAGSKI   | 95   | >NSD1-A167 CLDAGSKI   | 1341  | 1246  |
| >NSD1-A167 CLAAGSKIL  | 209  | >NSD1-A167 CLDAGSKIL  | 1667  | 1458  |
| >NSD1-A167 CLAAGSKILA | 156  | >NSD1-A167 CLDAGSKILA | 777   | 621   |
| >NSD1-A167 CLAAGSKI   | 23   | >NSD1-A167 CLDAGSKI   | 986   | 963   |
| >NSD1-A167 CLAAGSKIL  | 141  | >NSD1-A167 CLDAGSKIL  | 3650  | 3509  |
| >NSD1-A167 CLAAGSKI   | 325  | >NSD1-A167 CLDAGSKI   | 130   | 195   |
| >NSD1-A167 CLAAGSKI   | 1058 | >NSD1-A167 CLDAGSKI   | 383   | 675   |
| >NSD1-A167 CLAAGSKI   | 596  | >NSD1-A167 CLDAGSKI   | 482   | 114   |
| >NSD1-A167 CLAAGSKI   | 437  | >NSD1-A167 CLDAGSKI   | 687   | 250   |
| >NSD1-A167 CLAAGSKI   | 80   | >NSD1-A167 CLDAGSKI   | 320   | 240   |
| >NSD1-A167 CLAAGSKIL  | 109  | >NSD1-A167 CLDAGSKIL  | 367   | 258   |
| >NSD1-A167 CLAAGSKILA | 97   | >NSD1-A167 CLDAGSKILA | 287   | 190   |
| >NSD1-A167 CLAAGSKI   | 212  | >NSD1-A167 CLDAGSKI   | 1323  | 1111  |
| >NSD1-A167 FCLAAGSKI  | 287  | >NSD1-A167 FCLDAGSKI  | 243   | 44    |

|                       |       |                       |       |       |
|-----------------------|-------|-----------------------|-------|-------|
| >NSD1-A167\FCLAAGSKI  | 322   | >NSD1-A167\FCLDAGSKI  | 210   | 112   |
| >NSD1-A167\NDFCLAAGSK | 393   | >NSD1-A167\NDFCLDAGSK | 1383  | 990   |
| >NSD1-A167\NDFCLAAGSK | 311   | >NSD1-A167\NDFCLDAGSK | 579   | 268   |
| >NSD1-A167\NDFCLAAGSK | 311   | >NSD1-A167\NDFCLDAGSK | 623   | 312   |
| >NSD1-A167\HANDFCLA   | 407   | >NSD1-A167\HANDFCLD   | 17915 | 17508 |
| >NSD1-A167\HANDFCLAA  | 407   | >NSD1-A167\HANDFCLDA  | 6454  | 6047  |
| >NSD1-A167\AYHANDFCL/ | 74    | >NSD1-A167\AYHANDFCLI | 3685  | 3611  |
| >NSD1-A167\AYHANDFCL/ | 71    | >NSD1-A167\AYHANDFCLI | 359   | 288   |
| >NSD1-A167\AYHANDFCL/ | 124   | >NSD1-A167\AYHANDFCLI | 3643  | 3519  |
| >NSD1-A167\AYHANDFCL/ | 378   | >NSD1-A167\AYHANDFCLI | 10297 | 9919  |
| >NSD1-P242\PPPEKVL    | 9650  | >NSD1-P242\RPEKVL     | 93    | 9557  |
| >NSD1-P242\PPPEKVL    | 1654  | >NSD1-P242\RPEKVL     | 23    | 1631  |
| >NSD1-P242\PPPEKVL    | 1929  | >NSD1-P242\RPEKVL     | 37    | 1892  |
| >NSD1-P242\PPPEKVL    | 2973  | >NSD1-P242\RPEKVL     | 285   | 2688  |
| >NSD1-P242\PHASLSQRLP | 34737 | >NSD1-P242\PHASLSQRLP | 497   | 34240 |
| >NSD1-P242\LPPPEKVL   | 1125  | >NSD1-P242\LPRPEKVL   | 25    | 1100  |
| >NSD1-P242\LPPPEKVL   | 696   | >NSD1-P242\LPRPEKVL   | 24    | 672   |
| >NSD1-P242\LPPPEKVL   | 469   | >NSD1-P242\LPRPEKVL   | 507   | 38    |
| >NSD1-P242\LPPPEKVL   | 468   | >NSD1-P242\LPRPEKVL   | 105   | 363   |
| >NSD1-P242\LPPPEKVL   | 66    | >NSD1-P242\LPRPEKVL   | 26    | 40    |
| >NSD1-P242\RLPPPEKV   | 95    | >NSD1-P242\RLPRPEKV   | 197   | 102   |
| >NSD1-P242\RLPPPEKVL  | 159   | >NSD1-P242\RLPRPEKVL  | 331   | 172   |
| >NSD1-P242\RLPPPEKV   | 4     | >NSD1-P242\RLPRPEKV   | 7     | 3     |
| >NSD1-P242\RLPPPEKVL  | 178   | >NSD1-P242\RLPRPEKVL  | 400   | 222   |
| >NSD1-P242\RLPPPEKVL  | 68    | >NSD1-P242\RLPRPEKVL  | 131   | 63    |
| >NSD1-P242\RLPPPEKV   | 141   | >NSD1-P242\RLPRPEKV   | 274   | 133   |
| >NSD1-P242\RLPPPEKV   | 21    | >NSD1-P242\RLPRPEKV   | 36    | 15    |
| >NSD1-P242\RLPPPEKVL  | 491   | >NSD1-P242\RLPRPEKVL  | 1170  | 679   |
| >NSD1-P242\RLPPPEKV   | 146   | >NSD1-P242\RLPRPEKV   | 545   | 399   |
| >NSD1-P242\RLPPPEKV   | 7     | >NSD1-P242\RLPRPEKV   | 10    | 3     |
| >NSD1-P242\RLPPPEKVL  | 60    | >NSD1-P242\RLPRPEKVL  | 156   | 96    |
| >NSD1-P242\RLPPPEKVL  | 32    | >NSD1-P242\RLPRPEKVL  | 77    | 45    |
| >NSD1-P242\RLPPPEKVL  | 200   | >NSD1-P242\RLPRPEKVL  | 2031  | 1831  |
| >NSD1-P242\QRLPPPEKVL | 252   | >NSD1-P242\QRLPRPEKVL | 425   | 173   |
| >NSD1-P242\QRLPPPEK   | 533   | >NSD1-P242\QRLPRPEK   | 199   | 334   |
| >NSD1-P242\QRLPPPEKV  | 1400  | >NSD1-P242\QRLPRPEKV  | 400   | 1000  |
| >NSD1-P242\QRLPPPEKVL | 211   | >NSD1-P242\QRLPRPEKVL | 122   | 89    |
| >NSD1-P242\QRLPPPEKVL | 406   | >NSD1-P242\QRLPRPEKVL | 239   | 167   |
| >NSD1-P242\QRLPPPEKVL | 243   | >NSD1-P242\QRLPRPEKVL | 149   | 94    |
| >NSD1-P242\SQRLPPPEK  | 11    | >NSD1-P242\SQRLPRPEK  | 6     | 5     |
| >NSD1-P242\SQRLPPPEKV | 439   | >NSD1-P242\SQRLPRPEKV | 738   | 299   |
| >NSD1-P242\SQRLPPPEKV | 51    | >NSD1-P242\SQRLPRPEKV | 60    | 9     |
| >NSD1-P242\LSQRLPPPEK | 193   | >NSD1-P242\LSQRLPRPEK | 436   | 243   |

|                         |       |                         |      |       |
|-------------------------|-------|-------------------------|------|-------|
| >NSD1-P242(LSQRLPPPEK   | 83    | >NSD1-P242(LSQRLPRPEK   | 79   | 4     |
| >NSD1-P242(SLSQRLPPPEI  | 610   | >NSD1-P242(SLSQRLPRPEI  | 498  | 112   |
| >NSD1-P242(SLSQRLPPPEI  | 84    | >NSD1-P242(SLSQRLPRPEI  | 83   | 1     |
| >NSD1-P242(SLSQRLPPPEI  | 54    | >NSD1-P242(SLSQRLPRPEI  | 67   | 13    |
| >NSD1-P242(SLSQRLPP     | 22283 | >NSD1-P242(SLSQRLPR     | 118  | 22165 |
| >NSD1-P242(SLSQRLPP     | 29597 | >NSD1-P242(SLSQRLPR     | 72   | 29525 |
| >NSD1-P242(ASLSQRLPP    | 16326 | >NSD1-P242(ASLSQRLPR    | 47   | 16279 |
| >NSD1-P242(ASLSQRLPP    | 992   | >NSD1-P242(ASLSQRLPR    | 97   | 895   |
| >NSD1-P242(ASLSQRLPP    | 16998 | >NSD1-P242(ASLSQRLPR    | 15   | 16983 |
| >NSD1-P242(ASLSQRLPP    | 8620  | >NSD1-P242(ASLSQRLPR    | 178  | 8442  |
| >NSD1-P242(ASLSQRLPP    | 36082 | >NSD1-P242(ASLSQRLPR    | 320  | 35762 |
| >NSD1-P242(HASLSQRLPP   | 25162 | >NSD1-P242(HASLSQRLPR   | 61   | 25101 |
| >NSD1-P242(HASLSQRLPP   | 30915 | >NSD1-P242(HASLSQRLPR   | 307  | 30608 |
| >NSD1-P242(HASLSQRLPP   | 33671 | >NSD1-P242(HASLSQRLPR   | 32   | 33639 |
| >NSD1-P242(HASLSQRLPP   | 33493 | >NSD1-P242(HASLSQRLPR   | 179  | 33314 |
| >NTRK1-A10' APDAFHFTPR  | 171   | >NTRK1-A10' VPDAFHFTPR  | 149  | 22    |
| >NTRK1-A10' APDAFHFTPR  | 214   | >NTRK1-A10' VPDAFHFTPR  | 458  | 244   |
| >NTRK1-A10' APDAFHFTPR  | 190   | >NTRK1-A10' VPDAFHFTPR  | 532  | 342   |
| >NTRK1-A10' APDAFHFTPR  | 735   | >NTRK1-A10' VPDAFHFTPR  | 283  | 452   |
| >NTRK1-A10' VAPDAFHFT   | 811   | >NTRK1-A10' VVPDAFHFT   | 126  | 685   |
| >NTRK1-A10' VAPDAFHFT   | 90    | >NTRK1-A10' VVPDAFHFT   | 19   | 71    |
| >NTRK1-A10' VAPDAFHFT   | 4751  | >NTRK1-A10' VVPDAFHFT   | 308  | 4443  |
| >NTRK1-A10' VAPDAFHFTF  | 3049  | >NTRK1-A10' VVPDAFHFTF  | 291  | 2758  |
| >NTRK1-A10' VAPDAFHFT   | 552   | >NTRK1-A10' VVPDAFHFT   | 211  | 341   |
| >NTRK1-A10' VAPDAFHFT   | 540   | >NTRK1-A10' VVPDAFHFT   | 170  | 370   |
| >NTRK1-A10' VAPDAFHFTF  | 93    | >NTRK1-A10' VVPDAFHFTF  | 58   | 35    |
| >NTRK1-A10' VAPDAFHFTF  | 525   | >NTRK1-A10' VVPDAFHFTF  | 485  | 40    |
| >NTRK1-A10' VAPDAFHFTF  | 273   | >NTRK1-A10' VVPDAFHFTF  | 193  | 80    |
| >NTRK1-A10' VAPDAFHFT   | 1967  | >NTRK1-A10' VVPDAFHFT   | 396  | 1571  |
| >NTRK1-A10' VAPDAFHFT   | 11    | >NTRK1-A10' VVPDAFHFT   | 10   | 1     |
| >NTRK1-A10' VAPDAFHFT   | 8     | >NTRK1-A10' VVPDAFHFT   | 28   | 20    |
| >NTRK1-A10' VAPDAFHFTF  | 46    | >NTRK1-A10' VVPDAFHFTF  | 296  | 250   |
| >NTRK1-A10' VAPDAFHFTF  | 132   | >NTRK1-A10' VVPDAFHFTF  | 975  | 843   |
| >NTRK1-A10' VAPDAFHFTF  | 123   | >NTRK1-A10' VVPDAFHFTF  | 76   | 47    |
| >NTRK1-A10' TIVKSGLRFV\ | 2526  | >NTRK1-A10' TIVKSGLRFV\ | 224  | 2302  |
| >NTRK1-A10' TIVKSGLRFV\ | 6505  | >NTRK1-A10' TIVKSGLRFV\ | 66   | 6439  |
| >NTRK1-A10' TIVKSGLRFV\ | 921   | >NTRK1-A10' TIVKSGLRFV\ | 117  | 804   |
| >NTRK1-A10' TIVKSGLRFV\ | 6127  | >NTRK1-A10' TIVKSGLRFV\ | 330  | 5797  |
| >NTRK1-A10' FVAPDAFHFT  | 381   | >NTRK1-A10' FVVPDAFHFT  | 1876 | 1495  |
| >NTRK1-A10' FVAPDAFHFT  | 158   | >NTRK1-A10' FVVPDAFHFT  | 384  | 226   |
| >NTRK1-A10' FVAPDAFHFT  | 343   | >NTRK1-A10' FVVPDAFHFT  | 422  | 79    |
| >NTRK1-A10' FVAPDAFHFT  | 10    | >NTRK1-A10' FVVPDAFHFT  | 8    | 2     |
| >NTRK1-A10' FVAPDAFHFT  | 67    | >NTRK1-A10' FVVPDAFHFT  | 46   | 21    |

|                        |      |                        |      |      |
|------------------------|------|------------------------|------|------|
| >NTRK1-A10' FVAPDAFHFT | 253  | >NTRK1-A10' FVVPDAFHFT | 203  | 50   |
| >NTRK1-A10' FVAPDAFHFT | 373  | >NTRK1-A10' FVVPDAFHFT | 1510 | 1137 |
| >NTRK1-A10' FVAPDAFHFT | 410  | >NTRK1-A10' FVVPDAFHFT | 4478 | 4068 |
| >NTRK1-A10' FVAPDAFHFT | 52   | >NTRK1-A10' FVVPDAFHFT | 142  | 90   |
| >NTRK1-A10' FVAPDAFHF  | 476  | >NTRK1-A10' FVVPDAFHF  | 165  | 311  |
| >NTRK1-A10' FVAPDAFHF  | 60   | >NTRK1-A10' FVVPDAFHF  | 92   | 32   |
| >NTRK1-A10' FVAPDAFH   | 1951 | >NTRK1-A10' FVVPDAFH   | 440  | 1511 |
| >NTRK1-A10' FVAPDAFHF  | 173  | >NTRK1-A10' FVVPDAFHF  | 42   | 131  |
| >NTRK1-A10' FVAPDAFH   | 361  | >NTRK1-A10' FVVPDAFH   | 432  | 71   |
| >NTRK1-A10' FVAPDAFHF  | 26   | >NTRK1-A10' FVVPDAFHF  | 33   | 7    |
| >NTRK1-A10' FVAPDAFH   | 237  | >NTRK1-A10' FVVPDAFH   | 633  | 396  |
| >NTRK1-A10' FVAPDAFHFT | 336  | >NTRK1-A10' FVVPDAFHFT | 377  | 41   |
| >NTRK1-A10' FVAPDAFHFT | 137  | >NTRK1-A10' FVVPDAFHFT | 230  | 93   |
| >NTRK1-A10' FVAPDAFHF  | 114  | >NTRK1-A10' FVVPDAFHF  | 156  | 42   |
| >NTRK1-A10' FVAPDAFHF  | 272  | >NTRK1-A10' FVVPDAFHF  | 210  | 62   |
| >NTRK1-A10' FVAPDAFHF  | 44   | >NTRK1-A10' FVVPDAFHF  | 21   | 23   |
| >NTRK1-A10' FVAPDAFHF  | 84   | >NTRK1-A10' FVVPDAFHF  | 100  | 16   |
| >NTRK1-A10' FVAPDAFHF  | 26   | >NTRK1-A10' FVVPDAFHF  | 39   | 13   |
| >NTRK1-A10' RFVAPDAF   | 150  | >NTRK1-A10' RFVVPDAF   | 124  | 26   |
| >NTRK1-A10' RFVAPDAFHF | 18   | >NTRK1-A10' RFVVPDAFHF | 35   | 17   |
| >NTRK1-A10' RFVAPDAFHF | 142  | >NTRK1-A10' RFVVPDAFHF | 216  | 74   |
| >NTRK1-A10' RFVAPDAF   | 22   | >NTRK1-A10' RFVVPDAF   | 30   | 8    |
| >NTRK1-A10' RFVAPDAFHF | 13   | >NTRK1-A10' RFVVPDAFHF | 18   | 5    |
| >NTRK1-A10' RFVAPDAFHF | 489  | >NTRK1-A10' RFVVPDAFHF | 471  | 18   |
| >NTRK1-A10' RFVAPDAFH  | 465  | >NTRK1-A10' RFVVPDAFH  | 434  | 31   |
| >NTRK1-A10' RFVAPDAFHF | 154  | >NTRK1-A10' RFVVPDAFHF | 244  | 90   |
| >NTRK1-A10' RFVAPDAF   | 360  | >NTRK1-A10' RFVVPDAF   | 547  | 187  |
| >NTRK1-A10' RFVAPDAFHF | 270  | >NTRK1-A10' RFVVPDAFHF | 493  | 223  |
| >NTRK1-A10' RFVAPDAFHF | 214  | >NTRK1-A10' RFVVPDAFHF | 349  | 135  |
| >NTRK1-A10' LRFVAPDAF  | 8    | >NTRK1-A10' LRFVVPDAF  | 11   | 3    |
| >NTRK1-A10' LRFVAPDAFH | 11   | >NTRK1-A10' LRFVVPDAFH | 13   | 2    |
| >NTRK1-A10' LRFVAPDAF  | 209  | >NTRK1-A10' LRFVVPDAF  | 186  | 23   |
| >NTRK1-A10' LRFVAPDAFH | 484  | >NTRK1-A10' LRFVVPDAFH | 560  | 76   |
| >NTRK1-A10' LRFVAPDAFH | 61   | >NTRK1-A10' LRFVVPDAFH | 58   | 3    |
| >NTRK1-A10' LRFVAPDA   | 330  | >NTRK1-A10' LRFVVPDA   | 264  | 66   |
| >NTRK1-A10' LRFVAPDAF  | 354  | >NTRK1-A10' LRFVVPDAF  | 197  | 157  |
| >NTRK1-A10' LRFVAPDAFH | 365  | >NTRK1-A10' LRFVVPDAFH | 244  | 121  |
| >NTRK1-A10' LRFVAPDAF  | 39   | >NTRK1-A10' LRFVVPDAF  | 37   | 2    |
| >NTRK1-A10' LRFVAPDAFH | 61   | >NTRK1-A10' LRFVVPDAFH | 61   | 0    |
| >NTRK1-A10' GLRFVAPDA  | 723  | >NTRK1-A10' GLRFVVPDA  | 70   | 653  |
| >NTRK1-A10' GLRFVAPDA  | 1212 | >NTRK1-A10' GLRFVVPDA  | 339  | 873  |
| >NTRK1-A10' GLRFVAPDA  | 503  | >NTRK1-A10' GLRFVVPDA  | 215  | 288  |
| >NTRK1-A10' GLRFVAPDAF | 208  | >NTRK1-A10' GLRFVVPDAF | 179  | 29   |

|                       |       |                       |      |       |
|-----------------------|-------|-----------------------|------|-------|
| >NTRK1-A10`GLRFVAPDAF | 345   | >NTRK1-A10`GLRFVVPDAF | 340  | 5     |
| >NTRK1-A10`SGLRFVAPDA | 236   | >NTRK1-A10`SGLRFVVPDA | 218  | 18    |
| >NTRK1-A10`IVKSGLRFVA | 2389  | >NTRK1-A10`IVKSGLRFVV | 340  | 2049  |
| >NTRK1-A10`IVKSGLRFVA | 6269  | >NTRK1-A10`IVKSGLRFVV | 68   | 6201  |
| >NTRK1-A10`IVKSGLRFVA | 94    | >NTRK1-A10`IVKSGLRFVV | 173  | 79    |
| >NTRK1-D77`DVHARLQAL  | 1314  | >NTRK1-D77`EVHARLQAL  | 172  | 1142  |
| >NTRK1-D77`DVHARLQAL  | 101   | >NTRK1-D77`EVHARLQAL  | 17   | 84    |
| >NTRK1-D77`DVHARLQAL  | 194   | >NTRK1-D77`EVHARLQAL  | 45   | 149   |
| >NTRK1-D77`DVHARLQA   | 2136  | >NTRK1-D77`EVHARLQA   | 216  | 1920  |
| >NTRK1-D77`DVHARLQAL  | 1364  | >NTRK1-D77`EVHARLQAL  | 128  | 1236  |
| >NTRK1-D77`DVHARLQAL  | 92    | >NTRK1-D77`EVHARLQAL  | 41   | 51    |
| >NTRK1-D77`KDVHARLQ   | 4363  | >NTRK1-D77`KEVHARLQ   | 68   | 4295  |
| >NTRK1-D77`KDVHARLQA  | 2797  | >NTRK1-D77`KEVHARLQAL | 314  | 2483  |
| >NTRK1-D77`KDVHARLQA  | 13607 | >NTRK1-D77`KEVHARLQAL | 250  | 13357 |
| >NTRK1-D77`KDVHARLQA  | 1059  | >NTRK1-D77`KEVHARLQA  | 76   | 983   |
| >NTRK1-D77`KDVHARLQA  | 15812 | >NTRK1-D77`KEVHARLQAL | 92   | 15720 |
| >NTRK1-D77`KDVHARLQA  | 3064  | >NTRK1-D77`KEVHARLQAL | 299  | 2765  |
| >NTRK1-D77`KDVHARLQA  | 26405 | >NTRK1-D77`KEVHARLQA  | 498  | 25907 |
| >NTRK1-D77`KDVHARLQA  | 21017 | >NTRK1-D77`KEVHARLQAL | 139  | 20878 |
| >NTRK1-D77`KDVHARLQA  | 13917 | >NTRK1-D77`KEVHARLQA  | 342  | 13575 |
| >NTRK1-D77`KDVHARLQA  | 7980  | >NTRK1-D77`KEVHARLQAL | 90   | 7890  |
| >NTRK1-D77`KDVHARLQA  | 12672 | >NTRK1-D77`KEVHARLQAL | 305  | 12367 |
| >NTRK1-D77`IKDVHARLQA | 699   | >NTRK1-D77`IKEVHARLQA | 363  | 336   |
| >NTRK1-D77`SIKDVHARL  | 496   | >NTRK1-D77`SIKEVHARL  | 727  | 231   |
| >NTRK1-D77`SIKDVHARL  | 201   | >NTRK1-D77`SIKEVHARL  | 193  | 8     |
| >NTRK1-D77`SIKDVHARLQ | 507   | >NTRK1-D77`SIKEVHARLQ | 495  | 12    |
| >NTRK1-D77`SIKDVHARL  | 350   | >NTRK1-D77`SIKEVHARL  | 194  | 156   |
| >NTRK1-D77`SIKDVHARL  | 30    | >NTRK1-D77`SIKEVHARL  | 88   | 58    |
| >NTRK1-D77`SIKDVHARLQ | 452   | >NTRK1-D77`SIKEVHARLQ | 1298 | 846   |
| >NTRK1-D77`SIKDVHARL  | 229   | >NTRK1-D77`SIKEVHARL  | 319  | 90    |
| >NTRK1-D77`SIKDVHARLQ | 35    | >NTRK1-D77`SIKEVHARLQ | 43   | 8     |
| >NTRK1-D77`SIKDVHAR   | 16    | >NTRK1-D77`SIKEVHAR   | 18   | 2     |
| >NTRK1-D77`SIKDVHAR   | 117   | >NTRK1-D77`SIKEVHAR   | 101  | 16    |
| >NTRK1-D77`SIKDVHAR   | 56    | >NTRK1-D77`SIKEVHAR   | 48   | 8     |
| >NTRK1-D77`SIKDVHAR   | 254   | >NTRK1-D77`SIKEVHAR   | 386  | 132   |
| >NTRK1-D77`HSIKDVHARL | 55    | >NTRK1-D77`HSIKEVHARL | 88   | 33    |
| >NTRK1-D77`HSIKDVHAR  | 41    | >NTRK1-D77`HSIKEVHAR  | 50   | 9     |
| >NTRK1-D77`HSIKDVHAR  | 472   | >NTRK1-D77`HSIKEVHAR  | 497  | 25    |
| >NTRK1-D77`HSIKDVHAR  | 12    | >NTRK1-D77`HSIKEVHAR  | 12   | 0     |
| >NTRK1-D77`HSIKDVHARL | 13    | >NTRK1-D77`HSIKEVHARL | 12   | 1     |
| >NTRK1-D77`HSIKDVHAR  | 345   | >NTRK1-D77`HSIKEVHAR  | 451  | 106   |
| >NTRK1-D77`HSIKDVHAR  | 234   | >NTRK1-D77`HSIKEVHAR  | 111  | 123   |
| >NTRK1-D77`RHSIKDVHAR | 481   | >NTRK1-D77`RHSIKEVHAR | 282  | 199   |

|                       |      |                       |      |      |
|-----------------------|------|-----------------------|------|------|
| >NTRK1-D77 RHSIKDVHAR | 166  | >NTRK1-D77 RHSIKEVHAR | 189  | 23   |
| >NTRK1-D77 QRHSIKDVHA | 265  | >NTRK1-D77 QRHSIKEVHA | 255  | 10   |
| >NTRK1-D77 QRHSIKDVHA | 528  | >NTRK1-D77 QRHSIKEVHA | 378  | 150  |
| >NTRK1-D77 QQRHSIKDV  | 943  | >NTRK1-D77 QQRHSIKEV  | 294  | 649  |
| >NTRK1-D77 QQRHSIKDVF | 603  | >NTRK1-D77 QQRHSIKEVF | 487  | 116  |
| >NTRK1-D77 QQRHSIKDV  | 18   | >NTRK1-D77 QQRHSIKEV  | 12   | 6    |
| >NTRK1-D77 QQRHSIKDVF | 239  | >NTRK1-D77 QQRHSIKEVF | 119  | 120  |
| >NTRK1-D77 QQRHSIKDVF | 218  | >NTRK1-D77 QQRHSIKEVF | 152  | 66   |
| >NTRK1-D77 EPQQRHSIKD | 484  | >NTRK1-D77 EPQQRHSIKE | 442  | 42   |
| >NTRK1-G36:GQASASIMA/ | 133  | >NTRK1-G36:CQASASIMA/ | 296  | 163  |
| >NTRK1-G36:GQASASIMA/ | 205  | >NTRK1-G36:CQASASIMA/ | 339  | 134  |
| >NTRK1-G36:GQASASIMA  | 114  | >NTRK1-G36:CQASASIMA  | 259  | 145  |
| >NTRK1-G36:GQASASIMA/ | 456  | >NTRK1-G36:CQASASIMA/ | 442  | 14   |
| >NTRK1-G36:GQASASIMA/ | 129  | >NTRK1-G36:CQASASIMA/ | 240  | 111  |
| >NTRK1-G36:GQASASIM   | 96   | >NTRK1-G36:CQASASIM   | 256  | 160  |
| >NTRK1-G36:GQASASIMA/ | 229  | >NTRK1-G36:CQASASIMA/ | 738  | 509  |
| >NTRK1-G36:GQASASIMA/ | 30   | >NTRK1-G36:CQASASIMA/ | 42   | 12   |
| >NTRK1-G36:GQASASIMA/ | 317  | >NTRK1-G36:CQASASIMA/ | 738  | 421  |
| >NTRK1-G36:GQASASIM   | 30   | >NTRK1-G36:CQASASIM   | 25   | 5    |
| >NTRK1-G36:GQASASIMA/ | 223  | >NTRK1-G36:CQASASIMA/ | 134  | 89   |
| >NTRK1-G36:GQASASIMA/ | 5    | >NTRK1-G36:CQASASIMA/ | 4    | 1    |
| >NTRK1-G36:GQASASIMA/ | 1733 | >NTRK1-G36:CQASASIMA/ | 324  | 1409 |
| >NTRK1-G36:GQASASIM   | 383  | >NTRK1-G36:CQASASIM   | 241  | 142  |
| >NTRK1-G36:FGQASASIM  | 293  | >NTRK1-G36:FCQASASIM  | 1522 | 1229 |
| >NTRK1-G36:FGQASASIM  | 714  | >NTRK1-G36:FCQASASIM  | 478  | 236  |
| >NTRK1-G36:FGQASASIM  | 26   | >NTRK1-G36:FCQASASIM  | 18   | 8    |
| >NTRK1-G36:FGQASASI   | 185  | >NTRK1-G36:FCQASASI   | 363  | 178  |
| >NTRK1-G36:NPFQASASI  | 100  | >NTRK1-G36:NPFCQASASI | 179  | 79   |
| >NTRK1-G36:NPFQASASI  | 61   | >NTRK1-G36:NPFCQASASI | 113  | 52   |
| >NTRK1-G36:NPFQASASI  | 842  | >NTRK1-G36:NPFCQASASI | 389  | 453  |
| >NTRK1-G36:NPFQASASI  | 773  | >NTRK1-G36:NPFCQASASI | 432  | 341  |
| >NTRK1-G36:NPFQASASI  | 66   | >NTRK1-G36:NPFCQASASI | 96   | 30   |
| >NTRK1-G36:NPFQQASA   | 666  | >NTRK1-G36:NPFCQASA   | 371  | 295  |
| >NTRK1-G36:NPFQASAS   | 76   | >NTRK1-G36:NPFCQASAS  | 55   | 21   |
| >NTRK1-G36:NPFQASASI  | 18   | >NTRK1-G36:NPFCQASASI | 15   | 3    |
| >NTRK1-G36:NPFQASASI  | 89   | >NTRK1-G36:NPFCQASASI | 296  | 207  |
| >NTRK1-G36:NPFQASASI  | 33   | >NTRK1-G36:NPFCQASASI | 94   | 61   |
| >NTRK1-G36:NPFQASASI  | 450  | >NTRK1-G36:NPFCQASASI | 728  | 278  |
| >NTRK1-G36:NPFQQASA   | 88   | >NTRK1-G36:NPFCQASA   | 90   | 2    |
| >NTRK1-G36:NPFQASASI  | 109  | >NTRK1-G36:NPFCQASASI | 98   | 11   |
| >NTRK1-G36:ANPFGQASA/ | 391  | >NTRK1-G36:ANPFCQASA/ | 352  | 39   |
| >NTRK1-G36:LAANPFGQA  | 374  | >NTRK1-G36:LAANPFCQA  | 515  | 141  |
| >NTRK1-G36:LAANPFGQA/ | 236  | >NTRK1-G36:LAANPFCQA/ | 196  | 40   |

|                        |       |                        |      |       |
|------------------------|-------|------------------------|------|-------|
| >NTRK1-G36: LAANPFGQA  | 30    | >NTRK1-G36: LAANPFCQA  | 24   | 6     |
| >NTRK1-G36: LAANPFGQA  | 181   | >NTRK1-G36: LAANPFCQA  | 78   | 103   |
| >NTRK1-G36: LLAANPFG   | 228   | >NTRK1-G36: LLAANPFC   | 281  | 53    |
| >NTRK1-G36: LLAANPFGQ  | 124   | >NTRK1-G36: LLAANPFCQ  | 250  | 126   |
| >NTRK1-G36: LLAANPFGQ  | 136   | >NTRK1-G36: LLAANPFCQ  | 73   | 63    |
| >NTRK1-G36: LLAANPFGQ  | 195   | >NTRK1-G36: LLAANPFCQ  | 148  | 47    |
| >NTRK1-G36: LLAANPFGQ  | 50    | >NTRK1-G36: LLAANPFCQ  | 57   | 7     |
| >NTRK1-G36: LLAANPFG   | 1000  | >NTRK1-G36: LLAANPFC   | 35   | 965   |
| >NTRK1-G36: LLAANPFGQ  | 144   | >NTRK1-G36: LLAANPFCQ  | 890  | 746   |
| >NTRK1-G36: LLAANPFGQ  | 21    | >NTRK1-G36: LLAANPFCQ  | 9    | 12    |
| >NTRK1-G36: LLAANPFGQ  | 307   | >NTRK1-G36: LLAANPFCQ  | 808  | 501   |
| >NTRK1-G36: LLAANPFG   | 6937  | >NTRK1-G36: LLAANPFC   | 355  | 6582  |
| >NTRK1-G36: LLAANPFGQ  | 452   | >NTRK1-G36: LLAANPFCQ  | 102  | 350   |
| >NTRK1-G36: LLAANPFG   | 2338  | >NTRK1-G36: LLAANPFC   | 199  | 2139  |
| >NTRK1-G36: LLAANPFGQ  | 134   | >NTRK1-G36: LLAANPFCQ  | 22   | 112   |
| >NTRK1-G36: LLAANPFG   | 12180 | >NTRK1-G36: LLAANPFC   | 69   | 12111 |
| >NTRK1-G36: LLAANPFGQ  | 206   | >NTRK1-G36: LLAANPFCQ  | 24   | 182   |
| >NTRK1-G36: LLAANPFG   | 1233  | >NTRK1-G36: LLAANPFC   | 11   | 1222  |
| >NTRK1-G36: LLAANPFGQ  | 14    | >NTRK1-G36: LLAANPFCQ  | 60   | 46    |
| >NTRK1-G36: LLAANPFGQ  | 8     | >NTRK1-G36: LLAANPFCQ  | 4    | 4     |
| >NTRK1-G36: LLAANPFGQ  | 249   | >NTRK1-G36: LLAANPFCQ  | 312  | 63    |
| >NTRK1-G36: TLLAANPFGC | 495   | >NTRK1-G36: TLLAANPFCQ | 117  | 378   |
| >NTRK1-G36: TLLAANPFGC | 810   | >NTRK1-G36: TLLAANPFCQ | 438  | 372   |
| >NTRK1-G36: TLLAANPFGC | 244   | >NTRK1-G36: TLLAANPFCQ | 345  | 101   |
| >NTRK1-G36: TLLAANPFG  | 2476  | >NTRK1-G36: TLLAANPFC  | 285  | 2191  |
| >NTRK1-G36: TLLAANPFGC | 208   | >NTRK1-G36: TLLAANPFCQ | 57   | 151   |
| >NTRK1-G36: TLLAANPFG  | 2702  | >NTRK1-G36: TLLAANPFC  | 107  | 2595  |
| >NTRK1-G36: TLLAANPFGC | 73    | >NTRK1-G36: TLLAANPFCQ | 20   | 53    |
| >NTRK1-G36: TLLAANPFGC | 1585  | >NTRK1-G36: TLLAANPFCQ | 317  | 1268  |
| >NTRK1-G36: TLLAANPFG  | 1347  | >NTRK1-G36: TLLAANPFC  | 104  | 1243  |
| >NTRK1-G36: TLLAANPFGC | 115   | >NTRK1-G36: TLLAANPFCQ | 19   | 96    |
| >NTRK1-G36: TLLAANPFG  | 11850 | >NTRK1-G36: TLLAANPFC  | 75   | 11775 |
| >NTRK1-G36: TLLAANPFGC | 395   | >NTRK1-G36: TLLAANPFCQ | 50   | 345   |
| >NTRK1-G36: TLLAANPFG  | 7300  | >NTRK1-G36: TLLAANPFC  | 84   | 7216  |
| >NTRK1-G36: TLLAANPFGC | 180   | >NTRK1-G36: TLLAANPFCQ | 497  | 317   |
| >NTRK1-G36: TLLAANPFGC | 56    | >NTRK1-G36: TLLAANPFCQ | 11   | 45    |
| >NTRK1-G36: TLLAANPFGC | 202   | >NTRK1-G36: TLLAANPFCQ | 115  | 87    |
| >NTRK1-G36: YLLAANPFG  | 445   | >NTRK1-G36: YLLAANPFC  | 3624 | 3179  |
| >NTRK1-M37MAAFMDNPI    | 307   | >NTRK1-M37IAAFMDNPF    | 474  | 167   |
| >NTRK1-M37MAAFMDNPI    | 326   | >NTRK1-M37IAAFMDNPF    | 1035 | 709   |
| >NTRK1-M37MAAFMDNPI    | 423   | >NTRK1-M37IAAFMDNPF    | 2654 | 2231  |
| >NTRK1-M37MAAFMDNPI    | 276   | >NTRK1-M37IAAFMDNPF    | 9144 | 8868  |
| >NTRK1-M37MAAFMDNPI    | 85    | >NTRK1-M37IAAFMDNPF    | 160  | 75    |



|                      |      |                        |      |      |
|----------------------|------|------------------------|------|------|
| >NTRK1-M37MAAFMDNPI  | 175  | >NTRK1-M37IAAFMDNPF    | 219  | 44   |
| >NTRK1-M37MAAFMDNPI  | 179  | >NTRK1-M37IAAFMDNPFE   | 226  | 47   |
| >NTRK1-M37MAAFMDNPI  | 37   | >NTRK1-M37IAAFMDNPF    | 55   | 18   |
| >NTRK1-M37MAAFMDNPI  | 16   | >NTRK1-M37IAAFMDNPFE   | 21   | 5    |
| >NTRK1-M37MAAFMDNPI  | 6    | >NTRK1-M37IAAFMDNPF    | 12   | 6    |
| >NTRK1-M37MAAFMDNPI  | 8    | >NTRK1-M37IAAFMDNPFE   | 24   | 16   |
| >NTRK1-M37MAAFMDNPI  | 129  | >NTRK1-M37IAAFMDNPFE   | 467  | 338  |
| >NTRK1-M37MAAFMDNPI  | 198  | >NTRK1-M37IAAFMDNPF    | 496  | 298  |
| >NTRK1-M37MAAFMDNPI  | 33   | >NTRK1-M37IAAFMDNPFE   | 55   | 22   |
| >NTRK1-M37MAAFMDNPI  | 361  | >NTRK1-M37IAAFMDNPF    | 1204 | 843  |
| >NTRK1-M37MAAFMDNPI  | 138  | >NTRK1-M37IAAFMDNPF    | 3703 | 3565 |
| >NTRK1-M37MAAFMDNPI  | 229  | >NTRK1-M37IAAFMDNPFE   | 5239 | 5010 |
| >NTRK1-M37IMAAFMDNPF | 76   | >NTRK1-M37IIAAFMDNPF   | 759  | 683  |
| >NTRK1-M37IMAAFMDNPF | 346  | >NTRK1-M37IIAAFMDNPF   | 2682 | 2336 |
| >NTRK1-M37IMAAFMDNPF | 1864 | >NTRK1-M37IIAAFMDNPF   | 335  | 1529 |
| >NTRK1-M37IMAAFMDNPF | 234  | >NTRK1-M37IIAAFMDNPF   | 1159 | 925  |
| >NTRK1-M37IMAAFMDNPF | 165  | >NTRK1-M37IIAAFMDNPF   | 341  | 176  |
| >NTRK1-M37IMAAFMDNPF | 41   | >NTRK1-M37IIAAFMDNPF   | 124  | 83   |
| >NTRK1-M37IMAAFMDNPF | 57   | >NTRK1-M37IIAAFMDNPF   | 371  | 314  |
| >NTRK1-M37IMAAFMDNPF | 8    | >NTRK1-M37IIAAFMDNPF   | 159  | 151  |
| >NTRK1-M37IMAAFMDNPF | 450  | >NTRK1-M37IIAAFMDNPF   | 1587 | 1137 |
| >NTRK1-M37IMAAFMDNPF | 1652 | >NTRK1-M37IIAAFMDNPF   | 246  | 1406 |
| >NTRK1-M37NPFQASASI  | 61   | >NTRK1-M37NPFQASASI    | 317  | 256  |
| >NTRK1-M37NPFQASASI  | 66   | >NTRK1-M37NPFQASASI    | 390  | 324  |
| >NTRK1-M37NPFQASASI  | 18   | >NTRK1-M37NPFQASASI    | 511  | 493  |
| >NTRK1-M37NPFQASASI  | 33   | >NTRK1-M37NPFQASASI    | 76   | 43   |
| >NTRK1-M37NPFQASASI  | 450  | >NTRK1-M37NPFQASASI    | 249  | 201  |
| >NTRK1-M37NPFQASASI  | 109  | >NTRK1-M37NPFQASASI    | 1734 | 1625 |
| >NTRK1-M37SIMAAFMDN  | 387  | >NTRK1-M37SIIAAFMDNPF  | 450  | 63   |
| >NTRK1-M37SIMAAFMDN  | 134  | >NTRK1-M37SIIAAFMDNPF  | 247  | 113  |
| >NTRK1-M37SIMAAFMDN  | 324  | >NTRK1-M37SIIAAFMDNPF  | 39   | 285  |
| >NTRK1-M37SIMAAFMDN  | 54   | >NTRK1-M37SIIAAFMDNPF  | 226  | 172  |
| >NTRK1-M37SIMAAFMDN  | 35   | >NTRK1-M37SIIAAFMDNPF  | 35   | 0    |
| >NTRK1-M37SIMAAFMDN  | 174  | >NTRK1-M37SIIAAFMDNPF  | 408  | 234  |
| >NTRK1-M37SIMAAFMDN  | 78   | >NTRK1-M37SIIAAFMDNPF  | 153  | 75   |
| >NTRK1-M37SIMAAFMDN  | 229  | >NTRK1-M37SIIAAFMDNPF  | 272  | 43   |
| >NTRK1-M37SIMAAFMDN  | 510  | >NTRK1-M37SIIAAFMDNPF  | 242  | 268  |
| >NTRK1-M37ASIMAAFMDN | 262  | >NTRK1-M37ASIIAAFMDNPF | 576  | 314  |
| >NTRK1-M37ASIMAAFMDN | 279  | >NTRK1-M37ASIIAAFMDNPF | 493  | 214  |
| >NTRK1-M37ASIMAAFMDN | 26   | >NTRK1-M37ASIIAAFMDNPF | 58   | 32   |
| >NTRK1-M37ASIMAAFMDN | 5    | >NTRK1-M37ASIIAAFMDNPF | 5    | 0    |
| >NTRK1-M37ASIMAAFMDN | 488  | >NTRK1-M37ASIIAAFMDNPF | 608  | 120  |
| >NTRK1-M37ASIMAAFMDN | 172  | >NTRK1-M37ASIIAAFMDNPF | 131  | 41   |

|                      |      |                      |      |      |
|----------------------|------|----------------------|------|------|
| >NTRK1-M37SASIMAAF   | 474  | >NTRK1-M37SASIIAAF   | 5860 | 5386 |
| >NTRK1-M37SASIMAAF   | 2924 | >NTRK1-M37SASIIAAF   | 406  | 2518 |
| >NTRK1-M37SASIMAAF   | 288  | >NTRK1-M37SASIIAAF   | 362  | 74   |
| >NTRK1-M37SASIMAAF   | 295  | >NTRK1-M37SASIIAAF   | 239  | 56   |
| >NTRK1-M37SASIMAAF   | 13   | >NTRK1-M37SASIIAAF   | 30   | 17   |
| >NTRK1-M37SASIMAAF   | 28   | >NTRK1-M37SASIIAAF   | 84   | 56   |
| >NTRK1-M37SASIMAAF   | 101  | >NTRK1-M37SASIIAAF   | 102  | 1    |
| >NTRK1-M37SASIMAAF   | 106  | >NTRK1-M37SASIIAAF   | 92   | 14   |
| >NTRK1-M37SASIMAAF   | 85   | >NTRK1-M37SASIIAAF   | 59   | 26   |
| >NTRK1-M37ASASIMAA   | 494  | >NTRK1-M37ASASIIAA   | 603  | 109  |
| >NTRK1-M37ASASIMAAF  | 5    | >NTRK1-M37ASASIIAAF  | 15   | 10   |
| >NTRK1-M37ASASIMAAF  | 21   | >NTRK1-M37ASASIIAAF  | 33   | 12   |
| >NTRK1-M37ASASIMAAF  | 281  | >NTRK1-M37ASASIIAAF  | 574  | 293  |
| >NTRK1-M37ASASIMAAF  | 107  | >NTRK1-M37ASASIIAAF  | 65   | 42   |
| >NTRK1-M37ASASIMAA   | 216  | >NTRK1-M37ASASIIAA   | 495  | 279  |
| >NTRK1-M37ASASIMAAF  | 60   | >NTRK1-M37ASASIIAAF  | 52   | 8    |
| >NTRK1-M37ASASIMAAF  | 17   | >NTRK1-M37ASASIIAAF  | 13   | 4    |
| >NTRK1-M37ASASIMAAF  | 4    | >NTRK1-M37ASASIIAAF  | 6    | 2    |
| >NTRK1-M37ASASIMAAF  | 9    | >NTRK1-M37ASASIIAAF  | 16   | 7    |
| >NTRK1-M37ASASIMAAF  | 591  | >NTRK1-M37ASASIIAAF  | 400  | 191  |
| >NTRK1-M37ASASIMAAF  | 223  | >NTRK1-M37ASASIIAAF  | 1233 | 1010 |
| >NTRK1-M37ASASIMAAF  | 333  | >NTRK1-M37ASASIIAAF  | 186  | 147  |
| >NTRK1-M37ASASIMAAF  | 635  | >NTRK1-M37ASASIIAAF  | 473  | 162  |
| >NTRK1-M37ASASIMAAF  | 34   | >NTRK1-M37ASASIIAAF  | 26   | 8    |
| >NTRK1-M37ASASIMAAF  | 11   | >NTRK1-M37ASASIIAAF  | 10   | 1    |
| >NTRK1-M37ASASIMAAF  | 14   | >NTRK1-M37ASASIIAAF  | 33   | 19   |
| >NTRK1-M37ASASIMAAF  | 22   | >NTRK1-M37ASASIIAAF  | 24   | 2    |
| >NTRK1-M37ASASIMAAF  | 112  | >NTRK1-M37ASASIIAAF  | 72   | 40   |
| >NTRK1-M37QASASIMAA  | 96   | >NTRK1-M37QASASIIAA  | 334  | 238  |
| >NTRK1-M37QASASIMAAF | 612  | >NTRK1-M37QASASIIAAF | 437  | 175  |
| >NTRK1-M37QASASIMAAF | 106  | >NTRK1-M37QASASIIAAF | 106  | 0    |
| >NTRK1-M37QASASIMAAF | 24   | >NTRK1-M37QASASIIAAF | 22   | 2    |
| >NTRK1-M37QASASIMAAF | 13   | >NTRK1-M37QASASIIAAF | 22   | 9    |
| >NTRK1-M37QASASIMAAF | 34   | >NTRK1-M37QASASIIAAF | 53   | 19   |
| >NTRK1-M37QASASIMAAF | 231  | >NTRK1-M37QASASIIAAF | 190  | 41   |
| >NTRK1-M37QASASIMAAF | 392  | >NTRK1-M37QASASIIAAF | 483  | 91   |
| >NTRK1-M37QASASIMAAF | 250  | >NTRK1-M37QASASIIAAF | 200  | 50   |
| >NTRK1-M37QASASIMAAF | 167  | >NTRK1-M37QASASIIAAF | 121  | 46   |
| >NTRK1-M37GQASASIMAA | 133  | >NTRK1-M37GQASASIIAA | 268  | 135  |
| >NTRK1-M37GQASASIM   | 3756 | >NTRK1-M37GQASASII   | 307  | 3449 |
| >NTRK1-M37GQASASIMAA | 205  | >NTRK1-M37GQASASIIAA | 469  | 264  |
| >NTRK1-M37GQASASIM   | 1344 | >NTRK1-M37GQASASII   | 255  | 1089 |
| >NTRK1-M37GQASASIMAA | 114  | >NTRK1-M37GQASASIIAA | 284  | 170  |

|                        |      |                        |       |       |
|------------------------|------|------------------------|-------|-------|
| >NTRK1-M37GQASASIMA/   | 456  | >NTRK1-M37GQASASIAAA   | 734   | 278   |
| >NTRK1-M37GQASASIMA/   | 129  | >NTRK1-M37GQASASIAAAI  | 137   | 8     |
| >NTRK1-M37GQASASIM     | 96   | >NTRK1-M37GQASASII     | 1123  | 1027  |
| >NTRK1-M37GQASASIMA/   | 229  | >NTRK1-M37GQASASIAAA   | 338   | 109   |
| >NTRK1-M37GQASASIMA/   | 30   | >NTRK1-M37GQASASIAAAI  | 30    | 0     |
| >NTRK1-M37GQASASIMA/   | 317  | >NTRK1-M37GQASASIAAAI  | 324   | 7     |
| >NTRK1-M37GQASASIM     | 30   | >NTRK1-M37GQASASII     | 89    | 59    |
| >NTRK1-M37GQASASIMA/   | 223  | >NTRK1-M37GQASASIAAA   | 412   | 189   |
| >NTRK1-M37GQASASIMA/   | 5    | >NTRK1-M37GQASASIAAAI  | 4     | 1     |
| >NTRK1-M37GQASASIM     | 383  | >NTRK1-M37GQASASII     | 1262  | 879   |
| >NTRK1-M37FGQASASIM    | 293  | >NTRK1-M37FGQASASII    | 2961  | 2668  |
| >NTRK1-M37FGQASASIM    | 26   | >NTRK1-M37FGQASASII    | 445   | 419   |
| >NTRK1-M37FGQASASIM    | 6035 | >NTRK1-M37FGQASASII    | 157   | 5878  |
| >NTRK1-R11!RLNLSFNA    | 490  | >NTRK1-R11!HLNLSFNA    | 1057  | 567   |
| >NTRK1-R11!RLNLSFNA    | 56   | >NTRK1-R11!HLNLSFNA    | 40    | 16    |
| >NTRK1-R11!RLNLSFNAL   | 11   | >NTRK1-R11!HLNLSFNAL   | 11    | 0     |
| >NTRK1-R11!RLNLSFNA    | 23   | >NTRK1-R11!HLNLSFNA    | 54    | 31    |
| >NTRK1-R11!RLNLSFNAL   | 17   | >NTRK1-R11!HLNLSFNAL   | 42    | 25    |
| >NTRK1-R11!RLNLSFNAL   | 214  | >NTRK1-R11!HLNLSFNAL   | 440   | 226   |
| >NTRK1-R11!RLNLSFNA    | 187  | >NTRK1-R11!HLNLSFNA    | 823   | 636   |
| >NTRK1-R11!RLNLSFNAL   | 161  | >NTRK1-R11!HLNLSFNAL   | 738   | 577   |
| >NTRK1-R11!RLNLSFNA    | 259  | >NTRK1-R11!HLNLSFNA    | 319   | 60    |
| >NTRK1-R11!RLNLSFNAL   | 55   | >NTRK1-R11!HLNLSFNAL   | 65    | 10    |
| >NTRK1-R11!RLNLSFNA    | 201  | >NTRK1-R11!HLNLSFNA    | 437   | 236   |
| >NTRK1-R11!RLNLSFNA    | 79   | >NTRK1-R11!HLNLSFNA    | 76    | 3     |
| >NTRK1-R11!RLNLSFNAL   | 75   | >NTRK1-R11!HLNLSFNAL   | 75    | 0     |
| >NTRK1-R11!RLNLSFNAL   | 256  | >NTRK1-R11!HLNLSFNAL   | 2525  | 2269  |
| >NTRK1-R11!RLNLSFNAL   | 440  | >NTRK1-R11!HLNLSFNAL   | 390   | 50    |
| >NTRK1-R11!RLNLSFNAL   | 220  | >NTRK1-R11!HLNLSFNAL   | 756   | 536   |
| >NTRK1-R11!RLNLSFNAL   | 72   | >NTRK1-R11!HLNLSFNAL   | 308   | 236   |
| >NTRK1-R11!RLNLSFNAL   | 2926 | >NTRK1-R11!HLNLSFNAL   | 251   | 2675  |
| >NTRK1-R11!SRLNLSFNAL  | 101  | >NTRK1-R11!SHLNLSFNAL  | 200   | 99    |
| >NTRK1-R11!SRLNLSFNA   | 191  | >NTRK1-R11!SHLNLSFNA   | 18997 | 18806 |
| >NTRK1-R11!SRLNLSFNAL  | 30   | >NTRK1-R11!SHLNLSFNAL  | 3403  | 3373  |
| >NTRK1-R11!SRLNLSFNAL  | 30   | >NTRK1-R11!SHLNLSFNAL  | 14    | 16    |
| >NTRK1-R11!SRLNLSFNAL  | 299  | >NTRK1-R11!SHLNLSFNAL  | 21707 | 21408 |
| >NTRK1-R11!SRLNLSFNAL  | 162  | >NTRK1-R11!SHLNLSFNAL  | 19826 | 19664 |
| >NTRK1-R11!DAFHFTPRLS  | 16   | >NTRK1-R11!DAFHFTPRLS  | 5713  | 5697  |
| >NTRK1-R11!DAFHFTPRLS  | 7    | >NTRK1-R11!DAFHFTPRLS  | 1227  | 1220  |
| >NTRK1-R11!DAFHFTPRLS  | 297  | >NTRK1-R11!DAFHFTPRLS  | 27988 | 27691 |
| >NTRK1-R11!LSRLNLSFNAI | 2860 | >NTRK1-R11!LSHLNLSFNAI | 197   | 2663  |
| >NTRK1-R11!LSRLNLSFNAI | 719  | >NTRK1-R11!LSHLNLSFNAI | 278   | 441   |
| >NTRK1-R11!LSRLNLSFN   | 374  | >NTRK1-R11!LSHLNLSFN   | 3347  | 2973  |

|                        |      |                        |      |      |
|------------------------|------|------------------------|------|------|
| >NTRK1-R11!LSRLNLSFNA  | 19   | >NTRK1-R11!LSHLNLSFNA  | 146  | 127  |
| >NTRK1-R11!LSRLNLSFNAI | 42   | >NTRK1-R11!LSHLNLSFNAI | 486  | 444  |
| >NTRK1-R11!LSRLNLSF    | 60   | >NTRK1-R11!LSHLNLSF    | 90   | 30   |
| >NTRK1-R11!LSRLNLSF    | 15   | >NTRK1-R11!LSHLNLSF    | 28   | 13   |
| >NTRK1-R11!LSRLNLSFNAI | 154  | >NTRK1-R11!LSHLNLSFNAI | 293  | 139  |
| >NTRK1-R11!LSRLNLSF    | 3    | >NTRK1-R11!LSHLNLSF    | 4    | 1    |
| >NTRK1-R11!LSRLNLSFNAI | 22   | >NTRK1-R11!LSHLNLSFNAI | 85   | 63   |
| >NTRK1-R11!LSRLNLSF    | 1118 | >NTRK1-R11!LSHLNLSF    | 197  | 921  |
| >NTRK1-R11!LSRLNLSF    | 183  | >NTRK1-R11!LSHLNLSF    | 173  | 10   |
| >NTRK1-R11!LSRLNLSFNA  | 483  | >NTRK1-R11!LSHLNLSFNA  | 918  | 435  |
| >NTRK1-R11!LSRLNLSFNAI | 156  | >NTRK1-R11!LSHLNLSFNAI | 1162 | 1006 |
| >NTRK1-R11!RLSRLNLSFN/ | 185  | >NTRK1-R11!RLSHLNLSFN/ | 96   | 89   |
| >NTRK1-R11!RLSRLNLS    | 852  | >NTRK1-R11!RLSHLNLS    | 421  | 431  |
| >NTRK1-R11!RLSRLNLSFN/ | 33   | >NTRK1-R11!RLSHLNLSFN/ | 19   | 14   |
| >NTRK1-R11!RLSRLNLSFN/ | 52   | >NTRK1-R11!RLSHLNLSFN/ | 25   | 27   |
| >NTRK1-R11!RLSRLNLSFN/ | 508  | >NTRK1-R11!RLSHLNLSFN/ | 293  | 215  |
| >NTRK1-R11!RLSRLNLSFN/ | 146  | >NTRK1-R11!RLSHLNLSFN/ | 175  | 29   |
| >NTRK1-R11!RLSRLNLSFN/ | 265  | >NTRK1-R11!RLSHLNLSFN/ | 173  | 92   |
| >NTRK1-R11!RLSRLNLSFN/ | 129  | >NTRK1-R11!RLSHLNLSFN/ | 105  | 24   |
| >NTRK1-R11!RLSRLNLSFN/ | 36   | >NTRK1-R11!RLSHLNLSFN/ | 73   | 37   |
| >NTRK1-R11!RLSRLNLSFN/ | 312  | >NTRK1-R11!RLSHLNLSFN/ | 551  | 239  |
| >NTRK1-R11!RLSRLNLSF   | 14   | >NTRK1-R11!RLSHLNLSF   | 10   | 4    |
| >NTRK1-R11!RLSRLNLSF   | 39   | >NTRK1-R11!RLSHLNLSF   | 30   | 9    |
| >NTRK1-R11!RLSRLNLSF   | 17   | >NTRK1-R11!RLSHLNLSF   | 10   | 7    |
| >NTRK1-R11!RLSRLNLSF   | 296  | >NTRK1-R11!RLSHLNLSF   | 49   | 247  |
| >NTRK1-R11!RLSRLNLSF   | 64   | >NTRK1-R11!RLSHLNLSF   | 92   | 28   |
| >NTRK1-R11!RLSRLNLSF   | 375  | >NTRK1-R11!RLSHLNLSF   | 416  | 41   |
| >NTRK1-R11!PRLSRLNLSF  | 123  | >NTRK1-R11!PRLSHLNLSF  | 70   | 53   |
| >NTRK1-R11!TPRLSRLNL   | 12   | >NTRK1-R11!TPRLSHLNL   | 14   | 2    |
| >NTRK1-R11!TPRLSRLNLSF | 13   | >NTRK1-R11!TPRLSHLNLSF | 16   | 3    |
| >NTRK1-R11!TPRLSRLNL   | 417  | >NTRK1-R11!TPRLSHLNL   | 625  | 208  |
| >NTRK1-R11!TPRLSRLNLSF | 294  | >NTRK1-R11!TPRLSHLNLSF | 194  | 100  |
| >NTRK1-R11!TPRLSRLNLSF | 169  | >NTRK1-R11!TPRLSHLNLSF | 100  | 69   |
| >NTRK1-R11!FTPRLSRL    | 148  | >NTRK1-R11!FTPRLSHL    | 181  | 33   |
| >NTRK1-R11!FTPRLSRL    | 315  | >NTRK1-R11!FTPRLSHL    | 134  | 181  |
| >NTRK1-R11!FTPRLSRLNL  | 450  | >NTRK1-R11!FTPRLSHLNL  | 349  | 101  |
| >NTRK1-R11!FTPRLSRL    | 583  | >NTRK1-R11!FTPRLSHL    | 378  | 205  |
| >NTRK1-R11!FTPRLSRLNL  | 505  | >NTRK1-R11!FTPRLSHLNL  | 350  | 155  |
| >NTRK1-R11!FTPRLSRL    | 543  | >NTRK1-R11!FTPRLSHL    | 83   | 460  |
| >NTRK1-R11!FTPRLSRLNL  | 225  | >NTRK1-R11!FTPRLSHLNL  | 173  | 52   |
| >NTRK1-R11!FTPRLSRL    | 84   | >NTRK1-R11!FTPRLSHL    | 37   | 47   |
| >NTRK1-R11!FTPRLSRLNL  | 214  | >NTRK1-R11!FTPRLSHLNL  | 161  | 53   |
| >NTRK1-R11!FTPRLSRLNLS | 1437 | >NTRK1-R11!FTPRLSHLNLS | 440  | 997  |

|                        |       |                       |       |       |
|------------------------|-------|-----------------------|-------|-------|
| >NTRK1-R11!FTPRLSRLNL  | 1143  | >NTRK1-R11!FTPRLSHLNL | 451   | 692   |
| >NTRK1-R11!FTPRLSRL    | 13    | >NTRK1-R11!FTPRLSHL   | 15    | 2     |
| >NTRK1-R11!FTPRLSRLN   | 109   | >NTRK1-R11!FTPRLSHLN  | 24    | 85    |
| >NTRK1-R11!FTPRLSRLNL  | 4     | >NTRK1-R11!FTPRLSHLNL | 2     | 2     |
| >NTRK1-R11!FTPRLSRLNLS | 17    | >NTRK1-R11!FTPRLSHLNL | 8     | 9     |
| >NTRK1-R11!FTPRLSRLNL  | 145   | >NTRK1-R11!FTPRLSHLNL | 134   | 11    |
| >NTRK1-R11!FTPRLSRL    | 676   | >NTRK1-R11!FTPRLSHL   | 469   | 207   |
| >NTRK1-R11!HFTPRLSRL   | 373   | >NTRK1-R11!HFTPRLSHL  | 117   | 256   |
| >NTRK1-R11!HFTPRLSRL   | 178   | >NTRK1-R11!HFTPRLSHL  | 77    | 101   |
| >NTRK1-R11!HFTPRLSRLNI | 178   | >NTRK1-R11!HFTPRLSHLN | 132   | 46    |
| >NTRK1-R11!HFTPRLSR    | 23    | >NTRK1-R11!HFTPRLSH   | 5052  | 5029  |
| >NTRK1-R11!HFTPRLSR    | 18    | >NTRK1-R11!HFTPRLSH   | 7809  | 7791  |
| >NTRK1-R11!HFTPRLSR    | 372   | >NTRK1-R11!HFTPRLSH   | 21246 | 20874 |
| >NTRK1-R11!HFTPRLSR    | 40    | >NTRK1-R11!HFTPRLSH   | 15434 | 15394 |
| >NTRK1-R11!HFTPRLSRL   | 992   | >NTRK1-R11!HFTPRLSHL  | 424   | 568   |
| >NTRK1-R11!HFTPRLSRLNI | 753   | >NTRK1-R11!HFTPRLSHLN | 448   | 305   |
| >NTRK1-R11!FHFTPRLSR   | 99    | >NTRK1-R11!FHFTPRLSH  | 77    | 22    |
| >NTRK1-R11!FHFTPRLSRL  | 68    | >NTRK1-R11!FHFTPRLSHL | 22    | 46    |
| >NTRK1-R11!FHFTPRLSRL  | 416   | >NTRK1-R11!FHFTPRLSHL | 334   | 82    |
| >NTRK1-R11!FHFTPRLSRL  | 26    | >NTRK1-R11!FHFTPRLSHL | 33    | 7     |
| >NTRK1-R11!FHFTPRLSR   | 243   | >NTRK1-R11!FHFTPRLSH  | 29279 | 29036 |
| >NTRK1-R11!AFHFTPRLSR  | 88    | >NTRK1-R11!AFHFTPRLSH | 969   | 881   |
| >NTRK1-R11!AFHFTPRLSRI | 394   | >NTRK1-R11!AFHFTPRLSH | 123   | 271   |
| >NTRK1-R11!AFHFTPRLSR  | 50    | >NTRK1-R11!AFHFTPRLSH | 6399  | 6349  |
| >NTRK1-R11!AFHFTPRLSR  | 487   | >NTRK1-R11!AFHFTPRLSH | 15600 | 15113 |
| >NTRK1-R11!AFHFTPRLSR  | 334   | >NTRK1-R11!AFHFTPRLSH | 26233 | 25899 |
| >NTRK1-R11!AFHFTPRLSR  | 399   | >NTRK1-R11!AFHFTPRLSH | 28925 | 28526 |
| >NTRK1-R11!AFHFTPRLSRI | 592   | >NTRK1-R11!AFHFTPRLSH | 295   | 297   |
| >NTRK1-R64!RDLATRNCV   | 1572  | >NTRK1-R64!WDLATRNCV  | 295   | 1277  |
| >NTRK1-R64!RDLATRNCV   | 1881  | >NTRK1-R64!WDLATRNCV  | 178   | 1703  |
| >NTRK1-R64!RDLATRNCV   | 285   | >NTRK1-R64!WDLATRNCV  | 333   | 48    |
| >NTRK1-R64!RDLATRNCV   | 63    | >NTRK1-R64!WDLATRNCV  | 59    | 4     |
| >NTRK1-R64!HRDLATRNCI  | 31    | >NTRK1-R64!HWDLATRNC  | 2639  | 2608  |
| >NTRK1-R64!HRDLATRNCI  | 41    | >NTRK1-R64!HWDLATRNC  | 2753  | 2712  |
| >NTRK1-R64!HRDLATRNCI  | 395   | >NTRK1-R64!HWDLATRNC  | 12701 | 12306 |
| >NTRK1-R64!HRDLATRNCI  | 30249 | >NTRK1-R64!HWDLATRNC  | 398   | 29851 |
| >NTRK1-R64!VYLAGLHFVH  | 596   | >NTRK1-R64!VYLAGLHFVH | 21    | 575   |
| >NTRK1-R64!VYLAGLHFVH  | 3571  | >NTRK1-R64!VYLAGLHFVH | 84    | 3487  |
| >NTRK1-R64!VYLAGLHFVH  | 292   | >NTRK1-R64!VYLAGLHFVH | 6     | 286   |
| >NTRK1-R64!VYLAGLHFVH  | 13    | >NTRK1-R64!VYLAGLHFVH | 10872 | 10859 |
| >NTRK1-R64!VYLAGLHFVH  | 28    | >NTRK1-R64!VYLAGLHFVH | 18639 | 18611 |
| >NTRK1-R64!VYLAGLHFVH  | 31832 | >NTRK1-R64!VYLAGLHFVH | 422   | 31410 |
| >NTRK1-R64!VYLAGLHFVH  | 20    | >NTRK1-R64!VYLAGLHFVH | 5504  | 5484  |

|                       |       |                      |       |       |
|-----------------------|-------|----------------------|-------|-------|
| >NTRK1-R64!VHRDLATRN  | 1579  | >NTRK1-R64!VHWDLATRN | 203   | 1376  |
| >NTRK1-R64!VHRDLATR   | 2401  | >NTRK1-R64!VHWDLATR  | 238   | 2163  |
| >NTRK1-R64!FVHRDLAT   | 562   | >NTRK1-R64!FVHWDLAT  | 156   | 406   |
| >NTRK1-R64!FVHRDLATR  | 398   | >NTRK1-R64!FVHWDLATR | 353   | 45    |
| >NTRK1-R64!FVHRDLATR  | 818   | >NTRK1-R64!FVHWDLATR | 333   | 485   |
| >NTRK1-R64!FVHRDLATR  | 37    | >NTRK1-R64!FVHWDLATR | 16    | 21    |
| >NTRK1-R64!HFVHRDLATF | 68    | >NTRK1-R64!HFVHWDLAT | 52    | 16    |
| >NTRK1-R64!HFVHRDLATF | 149   | >NTRK1-R64!HFVHWDLAT | 169   | 20    |
| >NTRK1-R64!HFVHRDLATF | 59    | >NTRK1-R64!HFVHWDLAT | 42    | 17    |
| >NTRK1-R64!HFVHRDLATF | 846   | >NTRK1-R64!HFVHWDLAT | 399   | 447   |
| >NTRK1-R64!HFVHRDLATF | 32    | >NTRK1-R64!HFVHWDLAT | 25    | 7     |
| >NTRK1-R64!HFVHRDLA   | 1124  | >NTRK1-R64!HFVHWDLA  | 418   | 706   |
| >NTRK1-R64!LHFVHRDL   | 331   | >NTRK1-R64!LHFVHWDL  | 349   | 18    |
| >NTRK1-R64!LHFVHRDL   | 1807  | >NTRK1-R64!LHFVHWDL  | 304   | 1503  |
| >NTRK1-R64!LHFVHRDL   | 1464  | >NTRK1-R64!LHFVHWDL  | 189   | 1275  |
| >NTRK1-R64!LHFVHRDLA  | 300   | >NTRK1-R64!LHFVHWDLA | 115   | 185   |
| >NTRK1-R64!LHFVHRDLAT | 284   | >NTRK1-R64!LHFVHWDLA | 155   | 129   |
| >NTRK1-R64!GLHFVHRDL  | 1873  | >NTRK1-R64!GLHFVHWDL | 71    | 1802  |
| >NTRK1-R64!GLHFVHRDL  | 892   | >NTRK1-R64!GLHFVHWDL | 333   | 559   |
| >NTRK1-R64!GLHFVHRDL  | 307   | >NTRK1-R64!GLHFVHWDL | 9     | 298   |
| >NTRK1-R64!GLHFVHRDLA | 981   | >NTRK1-R64!GLHFVHWDL | 87    | 894   |
| >NTRK1-R64!GLHFVHRDLA | 1940  | >NTRK1-R64!GLHFVHWDL | 228   | 1712  |
| >NTRK1-R64!GLHFVHRDL  | 4434  | >NTRK1-R64!GLHFVHWDL | 55    | 4379  |
| >NTRK1-R64!GLHFVHRDL  | 3207  | >NTRK1-R64!GLHFVHWDL | 21    | 3186  |
| >NTRK1-R64!GLHFVHRDLA | 3381  | >NTRK1-R64!GLHFVHWDL | 241   | 3140  |
| >NTRK1-R64!GLHFVHRDL  | 716   | >NTRK1-R64!GLHFVHWDL | 7     | 709   |
| >NTRK1-R64!GLHFVHRDLA | 1086  | >NTRK1-R64!GLHFVHWDL | 196   | 890   |
| >NTRK1-R64!AGLHFVHR   | 59    | >NTRK1-R64!AGLHFVHW  | 20350 | 20291 |
| >NTRK1-R64!AGLHFVHR   | 25352 | >NTRK1-R64!AGLHFVHW  | 163   | 25189 |
| >NTRK1-R64!AGLHFVHR   | 24882 | >NTRK1-R64!AGLHFVHW  | 460   | 24422 |
| >NTRK1-R64!AGLHFVHR   | 22187 | >NTRK1-R64!AGLHFVHW  | 127   | 22060 |
| >NTRK1-R64!AGLHFVHR   | 28931 | >NTRK1-R64!AGLHFVHW  | 55    | 28876 |
| >NTRK1-R64!AGLHFVHR   | 107   | >NTRK1-R64!AGLHFVHW  | 2470  | 2363  |
| >NTRK1-R64!AGLHFVHR   | 113   | >NTRK1-R64!AGLHFVHW  | 25913 | 25800 |
| >NTRK1-R64!LAGLHFVHR  | 27    | >NTRK1-R64!LAGLHFVHW | 16856 | 16829 |
| >NTRK1-R64!LAGLHFVHR  | 184   | >NTRK1-R64!LAGLHFVHW | 29178 | 28994 |
| >NTRK1-R64!LAGLHFVHR  | 494   | >NTRK1-R64!LAGLHFVHW | 33785 | 33291 |
| >NTRK1-R64!LAGLHFVHR  | 26100 | >NTRK1-R64!LAGLHFVHW | 433   | 25667 |
| >NTRK1-R64!LAGLHFVHR  | 30853 | >NTRK1-R64!LAGLHFVHW | 117   | 30736 |
| >NTRK1-R64!LAGLHFVHR  | 24414 | >NTRK1-R64!LAGLHFVHW | 370   | 24044 |
| >NTRK1-R64!LAGLHFVHR  | 22833 | >NTRK1-R64!LAGLHFVHW | 32    | 22801 |
| >NTRK1-R64!LAGLHFVHR  | 28102 | >NTRK1-R64!LAGLHFVHW | 36    | 28066 |
| >NTRK1-R64!LAGLHFVHR  | 443   | >NTRK1-R64!LAGLHFVHW | 12602 | 12159 |

|                       |       |                       |       |       |
|-----------------------|-------|-----------------------|-------|-------|
| >NTRK1-R64!LAGLHFVHR  | 112   | >NTRK1-R64!LAGLHFVHW  | 24293 | 24181 |
| >NTRK1-R64!YLAGLHFVHR | 88    | >NTRK1-R64!YLAGLHFVHV | 38    | 50    |
| >NTRK1-R64!YLAGLHFVHR | 244   | >NTRK1-R64!YLAGLHFVHV | 242   | 2     |
| >NTRK1-R64!YLAGLHFVHR | 145   | >NTRK1-R64!YLAGLHFVHV | 275   | 130   |
| >NTRK1-R64!YLAGLHFVHR | 57    | >NTRK1-R64!YLAGLHFVHV | 38    | 19    |
| >NTRK1-R64!YLAGLHFVHR | 135   | >NTRK1-R64!YLAGLHFVHV | 22650 | 22515 |
| >NTRK1-R64!YLAGLHFVHR | 407   | >NTRK1-R64!YLAGLHFVHV | 26870 | 26463 |
| >NTRK1-R64!YLAGLHFVHR | 21    | >NTRK1-R64!YLAGLHFVHV | 26144 | 26123 |
| >NTRK1-R64!YLAGLHFVHR | 7304  | >NTRK1-R64!YLAGLHFVHV | 208   | 7096  |
| >NTRK1-R64!YLAGLHFVHR | 25046 | >NTRK1-R64!YLAGLHFVHV | 353   | 24693 |
| >NTRK1-R64!YLAGLHFVHR | 21868 | >NTRK1-R64!YLAGLHFVHV | 47    | 21821 |
| >NTRK1-R64!YLAGLHFVHR | 31207 | >NTRK1-R64!YLAGLHFVHV | 256   | 30951 |
| >NTRK1-R64!YLAGLHFVHR | 175   | >NTRK1-R64!YLAGLHFVHV | 28843 | 28668 |
| >NTRK1-R64!YLAGLHFVHR | 43    | >NTRK1-R64!YLAGLHFVHV | 10107 | 10064 |
| >NTRK1-R78(RLQALAQA   | 380   | >NTRK1-R78(GLQALAQA   | 498   | 118   |
| >NTRK1-R78(RLQALAQAPI | 31    | >NTRK1-R78(GLQALAQAPI | 38    | 7     |
| >NTRK1-R78(RLQALAQA   | 145   | >NTRK1-R78(GLQALAQA   | 111   | 34    |
| >NTRK1-R78(RLQALAQAPI | 57    | >NTRK1-R78(GLQALAQAPI | 46    | 11    |
| >NTRK1-R78(RLQALAQA   | 39    | >NTRK1-R78(GLQALAQA   | 58    | 19    |
| >NTRK1-R78(RLQALAQAPI | 12    | >NTRK1-R78(GLQALAQAPI | 17    | 5     |
| >NTRK1-R78(RLQALAQAPI | 31    | >NTRK1-R78(GLQALAQAPI | 80    | 49    |
| >NTRK1-R78(RLQALAQA   | 61    | >NTRK1-R78(GLQALAQA   | 139   | 78    |
| >NTRK1-R78(RLQALAQAPI | 4     | >NTRK1-R78(GLQALAQAPI | 6     | 2     |
| >NTRK1-R78(RLQALAQA   | 233   | >NTRK1-R78(GLQALAQA   | 125   | 108   |
| >NTRK1-R78(RLQALAQAPI | 6     | >NTRK1-R78(GLQALAQAPI | 5     | 1     |
| >NTRK1-R78(RLQALAQA   | 543   | >NTRK1-R78(GLQALAQA   | 273   | 270   |
| >NTRK1-R78(RLQALAQAPI | 10    | >NTRK1-R78(GLQALAQAPI | 8     | 2     |
| >NTRK1-R78(RLQALAQAPI | 25    | >NTRK1-R78(GLQALAQAPI | 50    | 25    |
| >NTRK1-R78(RLQALAQA   | 17    | >NTRK1-R78(GLQALAQA   | 14    | 3     |
| >NTRK1-R78(RLQALAQAPI | 3     | >NTRK1-R78(GLQALAQAPI | 3     | 0     |
| >NTRK1-R78(RLQALAQAPI | 279   | >NTRK1-R78(GLQALAQAPI | 5436  | 5157  |
| >NTRK1-R78(RLQALAQAPI | 419   | >NTRK1-R78(GLQALAQAPI | 2152  | 1733  |
| >NTRK1-R78(ARLQALAQA  | 300   | >NTRK1-R78(AGLQALAQA  | 24444 | 24144 |
| >NTRK1-R78(QRHSIKDVH# | 265   | >NTRK1-R78(QRHSIKDVH# | 6083  | 5818  |
| >NTRK1-R78(HARLQALA   | 8     | >NTRK1-R78(HAGLQALA   | 5950  | 5942  |
| >NTRK1-R78(HARLQALAQ  | 46    | >NTRK1-R78(HAGLQALAQ  | 11577 | 11531 |
| >NTRK1-R78(HARLQALAQ, | 9     | >NTRK1-R78(HAGLQALAQ, | 6166  | 6157  |
| >NTRK1-R78(HARLQALAQ, | 288   | >NTRK1-R78(HAGLQALAQ, | 15362 | 15074 |
| >NTRK1-R78(VHARLQAL   | 365   | >NTRK1-R78(VHAGLQAL   | 289   | 76    |
| >NTRK1-R78(VHARLQAL   | 178   | >NTRK1-R78(VHAGLQAL   | 38    | 140   |
| >NTRK1-R78(DVHARLQAL  | 101   | >NTRK1-R78(DVHAGLQAL  | 29    | 72    |
| >NTRK1-R78(DVHARLQAL  | 194   | >NTRK1-R78(DVHAGLQAL  | 241   | 47    |
| >NTRK1-R78(DVHARLQAL  | 92    | >NTRK1-R78(DVHAGLQAL  | 9456  | 9364  |

|                        |       |                        |       |       |
|------------------------|-------|------------------------|-------|-------|
| >NTRK1-R78(SIKDVHARL   | 496   | >NTRK1-R78(SIKDVHAGL   | 216   | 280   |
| >NTRK1-R78(SIKDVHARL   | 201   | >NTRK1-R78(SIKDVHAGL   | 64    | 137   |
| >NTRK1-R78(SIKDVHARLQ  | 507   | >NTRK1-R78(SIKDVHAGLQ  | 222   | 285   |
| >NTRK1-R78(SIKDVHARL   | 350   | >NTRK1-R78(SIKDVHAGL   | 213   | 137   |
| >NTRK1-R78(SIKDVHARL   | 30    | >NTRK1-R78(SIKDVHAGL   | 41    | 11    |
| >NTRK1-R78(SIKDVHARLQ  | 452   | >NTRK1-R78(SIKDVHAGLQ  | 517   | 65    |
| >NTRK1-R78(SIKDVHARL   | 229   | >NTRK1-R78(SIKDVHAGL   | 293   | 64    |
| >NTRK1-R78(SIKDVHARLQ  | 35    | >NTRK1-R78(SIKDVHAGLQ  | 73    | 38    |
| >NTRK1-R78(SIKDVHAR    | 16    | >NTRK1-R78(SIKDVHAG    | 16279 | 16263 |
| >NTRK1-R78(SIKDVHAR    | 117   | >NTRK1-R78(SIKDVHAG    | 30284 | 30167 |
| >NTRK1-R78(SIKDVHAR    | 56    | >NTRK1-R78(SIKDVHAG    | 32033 | 31977 |
| >NTRK1-R78(SIKDVHAR    | 254   | >NTRK1-R78(SIKDVHAG    | 33417 | 33163 |
| >NTRK1-R78(HSIKDVHARL  | 55    | >NTRK1-R78(HSIKDVHAGL  | 51    | 4     |
| >NTRK1-R78(HSIKDVHAR   | 41    | >NTRK1-R78(HSIKDVHAG   | 21673 | 21632 |
| >NTRK1-R78(HSIKDVHAR   | 472   | >NTRK1-R78(HSIKDVHAG   | 33832 | 33360 |
| >NTRK1-R78(HSIKDVHAR   | 12    | >NTRK1-R78(HSIKDVHAG   | 19766 | 19754 |
| >NTRK1-R78(HSIKDVHARL  | 13    | >NTRK1-R78(HSIKDVHAGL  | 15    | 2     |
| >NTRK1-R78(HSIKDVHAR   | 345   | >NTRK1-R78(HSIKDVHAG   | 20164 | 19819 |
| >NTRK1-R78(HSIKDVHAR   | 234   | >NTRK1-R78(HSIKDVHAG   | 35745 | 35511 |
| >NTRK1-R78(RHSIKDVHAR  | 481   | >NTRK1-R78(RHSIKDVHAC  | 32721 | 32240 |
| >NTRK1-R78(RHSIKDVHAR  | 166   | >NTRK1-R78(RHSIKDVHAC  | 33703 | 33537 |
| >NTRK1-S32(SFIFTEFL    | 194   | >NTRK1-S32(RFIFTEFL    | 419   | 225   |
| >NTRK1-S32(SFIFTEFL    | 653   | >NTRK1-S32(RFIFTEFL    | 139   | 514   |
| >NTRK1-S32(SFIFTEFL    | 1339  | >NTRK1-S32(RFIFTEFL    | 359   | 980   |
| >NTRK1-S32(SFIFTEFL    | 85    | >NTRK1-S32(RFIFTEFL    | 21    | 64    |
| >NTRK1-S32(SFIFTEFL    | 247   | >NTRK1-S32(RFIFTEFL    | 530   | 283   |
| >NTRK1-S32(SFIFTEFL    | 105   | >NTRK1-S32(RFIFTEFL    | 102   | 3     |
| >NTRK1-S32(SFIFTEFLEPA | 363   | >NTRK1-S32(RFIFTEFLEPA | 341   | 22    |
| >NTRK1-S32(TSFIFTEF    | 134   | >NTRK1-S32(TRFIFTEF    | 6021  | 5887  |
| >NTRK1-S32(TSFIFTEFL   | 71    | >NTRK1-S32(TRFIFTEFL   | 1440  | 1369  |
| >NTRK1-S32(TSFIFTEFL   | 318   | >NTRK1-S32(TRFIFTEFL   | 134   | 184   |
| >NTRK1-S32(TSFIFTEFL   | 81    | >NTRK1-S32(TRFIFTEFL   | 1063  | 982   |
| >NTRK1-S32(TSFIFTEF    | 57    | >NTRK1-S32(TRFIFTEF    | 3953  | 3896  |
| >NTRK1-S32(TSFIFTEFL   | 287   | >NTRK1-S32(TRFIFTEFL   | 13342 | 13055 |
| >NTRK1-S32(TSFIFTEFL   | 10    | >NTRK1-S32(TRFIFTEFL   | 578   | 568   |
| >NTRK1-S32(TSFIFTEFL   | 224   | >NTRK1-S32(TRFIFTEFL   | 12538 | 12314 |
| >NTRK1-S32(TSFIFTEF    | 297   | >NTRK1-S32(TRFIFTEF    | 12538 | 12241 |
| >NTRK1-S32(TSFIFTEF    | 17    | >NTRK1-S32(TRFIFTEF    | 17    | 0     |
| >NTRK1-S32(TSFIFTEFL   | 927   | >NTRK1-S32(TRFIFTEFL   | 466   | 461   |
| >NTRK1-S32(TSFIFTEF    | 6     | >NTRK1-S32(TRFIFTEF    | 20630 | 20624 |
| >NTRK1-S32(TSFIFTEFL   | 45    | >NTRK1-S32(TRFIFTEFL   | 26713 | 26668 |
| >NTRK1-S32(TSFIFTEF    | 17798 | >NTRK1-S32(TRFIFTEF    | 146   | 17652 |
| >NTRK1-S32(TSFIFTEFL   | 21427 | >NTRK1-S32(TRFIFTEFL   | 124   | 21303 |



|                        |       |                        |       |       |
|------------------------|-------|------------------------|-------|-------|
| >NTRK1-S32€TSFIFTEFL   | 9051  | >NTRK1-S32€TRFIFTEFL   | 341   | 8710  |
| >NTRK1-S32€TSFIFTEF    | 196   | >NTRK1-S32€TRFIFTEF    | 22568 | 22372 |
| >NTRK1-S32€TSFIFTEFL   | 471   | >NTRK1-S32€TRFIFTEFL   | 22602 | 22131 |
| >NTRK1-S32€TSFIFTEF    | 222   | >NTRK1-S32€TRFIFTEF    | 21375 | 21153 |
| >NTRK1-S32€TSFIFTEFL   | 62    | >NTRK1-S32€TRFIFTEFL   | 12890 | 12828 |
| >NTRK1-S32€TSFIFTEF    | 206   | >NTRK1-S32€TRFIFTEF    | 9055  | 8849  |
| >NTRK1-S32€TSFIFTEFL   | 186   | >NTRK1-S32€TRFIFTEFL   | 7469  | 7283  |
| >NTRK1-S32€TSFIFTEF    | 22991 | >NTRK1-S32€TRFIFTEF    | 419   | 22572 |
| >NTRK1-S32€TSFIFTEFL   | 9987  | >NTRK1-S32€TRFIFTEFL   | 119   | 9868  |
| >NTRK1-S32€TSFIFTEF    | 17226 | >NTRK1-S32€TRFIFTEF    | 406   | 16820 |
| >NTRK1-S32€TSFIFTEFL   | 17118 | >NTRK1-S32€TRFIFTEFL   | 32    | 17086 |
| >NTRK1-S32€TSFIFTEFL   | 93    | >NTRK1-S32€TRFIFTEFL   | 5220  | 5127  |
| >NTRK1-S32€LFNGSVLNET  | 18232 | >NTRK1-S32€LFNGSVLNET  | 57    | 18175 |
| >NTRK1-S32€LFNGSVLNET  | 30818 | >NTRK1-S32€LFNGSVLNET  | 350   | 30468 |
| >NTRK1-S32€LFNGSVLNET  | 33182 | >NTRK1-S32€LFNGSVLNET  | 487   | 32695 |
| >NTRK1-S32€LFNGSVLNET  | 32824 | >NTRK1-S32€LFNGSVLNET  | 304   | 32520 |
| >NTRK1-S32€ETSFIFTEF   | 170   | >NTRK1-S32€ETRFIFTEF   | 184   | 14    |
| >NTRK1-S32€ETSFIFTEF   | 94    | >NTRK1-S32€ETRFIFTEF   | 113   | 19    |
| >NTRK1-S32€ETSFIFTEF   | 90    | >NTRK1-S32€ETRFIFTEF   | 48    | 42    |
| >NTRK1-S32€ETSFIFTEFL  | 91    | >NTRK1-S32€ETRFIFTEFL  | 51    | 40    |
| >NTRK1-S32€ETSFIFTEFL  | 3784  | >NTRK1-S32€ETRFIFTEFL  | 257   | 3527  |
| >NTRK1-S32€ETSFIFTEF   | 155   | >NTRK1-S32€ETRFIFTEF   | 566   | 411   |
| >NTRK1-S32€ETSFIFTE    | 52    | >NTRK1-S32€ETRFIFTE    | 507   | 455   |
| >NTRK1-S32€ETSFIFTEF   | 57    | >NTRK1-S32€ETRFIFTEF   | 541   | 484   |
| >NTRK1-S32€ETSFIFTEFLE | 25    | >NTRK1-S32€ETRFIFTEFLE | 214   | 189   |
| >NTRK1-S32€ETSFIFTEF   | 23    | >NTRK1-S32€ETRFIFTEF   | 1318  | 1295  |
| >NTRK1-S32€ETSFIFTEFL  | 13    | >NTRK1-S32€ETRFIFTEFL  | 47    | 34    |
| >NTRK1-S32€ETSFIFTEFL  | 16    | >NTRK1-S32€ETRFIFTEFL  | 114   | 98    |
| >NTRK1-S32€ETSFIFTEF   | 636   | >NTRK1-S32€ETRFIFTEF   | 198   | 438   |
| >NTRK1-S32€ETSFIFTEF   | 183   | >NTRK1-S32€ETRFIFTEF   | 31    | 152   |
| >NTRK1-S32€ETSFIFTEFL  | 1756  | >NTRK1-S32€ETRFIFTEFL  | 374   | 1382  |
| >NTRK1-S32€ETSFIFTEFL  | 345   | >NTRK1-S32€ETRFIFTEFL  | 1449  | 1104  |
| >NTRK1-S32€ETSFIFTEF   | 17    | >NTRK1-S32€ETRFIFTEF   | 9     | 8     |
| >NTRK1-S32€ETSFIFTEFL  | 296   | >NTRK1-S32€ETRFIFTEFL  | 686   | 390   |
| >NTRK1-S32€NETSFIFTEF  | 406   | >NTRK1-S32€NETRFIFTEF  | 206   | 200   |
| >NTRK1-S32€NETSFIFTEFL | 18    | >NTRK1-S32€NETRFIFTEFL | 13    | 5     |
| >NTRK1-S32€NETSFIFTEF  | 252   | >NTRK1-S32€NETRFIFTEF  | 444   | 192   |
| >NTRK1-S32€NETSFIFTE   | 154   | >NTRK1-S32€NETRFIFTE   | 255   | 101   |
| >NTRK1-S32€NETSFIFTEF  | 189   | >NTRK1-S32€NETRFIFTEF  | 189   | 0     |
| >NTRK1-S32€NETSFIFTEFL | 104   | >NTRK1-S32€NETRFIFTEFL | 161   | 57    |
| >NTRK1-S32€NETSFIFTEFL | 36    | >NTRK1-S32€NETRFIFTEFL | 69    | 33    |
| >NTRK1-S32€NETSFIFTEF  | 383   | >NTRK1-S32€NETRFIFTEF  | 526   | 143   |
| >NTRK1-S32€NETSFIFTEFL | 258   | >NTRK1-S32€NETRFIFTEFL | 247   | 11    |

|                        |     |                        |      |      |
|------------------------|-----|------------------------|------|------|
| >NTRK1-S32€NETSFIFTEF  | 22  | >NTRK1-S32€NETRFIFTEF  | 27   | 5    |
| >NTRK1-S32€NETSFIFTEF  | 23  | >NTRK1-S32€NETRFIFTEF  | 28   | 5    |
| >NTRK1-S32€NETSFIFTEFL | 90  | >NTRK1-S32€NETRFIFTEFL | 108  | 18   |
| >NTRK1-S32€NETSFIFT    | 34  | >NTRK1-S32€NETRFIFT    | 44   | 10   |
| >NTRK1-S32€NETSFIFTE   | 412 | >NTRK1-S32€NETRFIFTE   | 435  | 23   |
| >NTRK1-S32€NETSFIFTEFL | 476 | >NTRK1-S32€NETRFIFTEFL | 537  | 61   |
| >NTRK1-S32€NETSFIFTEFL | 36  | >NTRK1-S32€NETRFIFTEFL | 60   | 24   |
| >NTRK1-S32€VLNETSFI    | 42  | >NTRK1-S32€VLNETRFI    | 229  | 187  |
| >NTRK1-S32€VLNETSFI    | 7   | >NTRK1-S32€VLNETRFI    | 40   | 33   |
| >NTRK1-S32€VLNETSFIFT  | 471 | >NTRK1-S32€VLNETRFIFT  | 1027 | 556  |
| >NTRK1-S32€VLNETSFI    | 5   | >NTRK1-S32€VLNETRFI    | 17   | 12   |
| >NTRK1-S32€VLNETSFIFT  | 389 | >NTRK1-S32€VLNETRFIFT  | 672  | 283  |
| >NTRK1-S32€VLNETSFI    | 111 | >NTRK1-S32€VLNETRFI    | 707  | 596  |
| >NTRK1-S32€VLNETSFI    | 3   | >NTRK1-S32€VLNETRFI    | 7    | 4    |
| >NTRK1-S32€VLNETSFIF   | 193 | >NTRK1-S32€VLNETRFIF   | 2111 | 1918 |
| >NTRK1-S32€VLNETSFIFT  | 21  | >NTRK1-S32€VLNETRFIFT  | 71   | 50   |
| >NTRK1-S32€VLNETSFIFTE | 253 | >NTRK1-S32€VLNETRFIFTE | 699  | 446  |
| >NTRK1-S32€VLNETSFI    | 5   | >NTRK1-S32€VLNETRFI    | 24   | 19   |
| >NTRK1-S32€VLNETSFIF   | 440 | >NTRK1-S32€VLNETRFIF   | 7057 | 6617 |
| >NTRK1-S32€VLNETSFIFT  | 126 | >NTRK1-S32€VLNETRFIFT  | 1049 | 923  |
| >NTRK1-S32€VLNETSFI    | 9   | >NTRK1-S32€VLNETRFI    | 28   | 19   |
| >NTRK1-S32€VLNETSFIFT  | 57  | >NTRK1-S32€VLNETRFIFT  | 167  | 110  |
| >NTRK1-S32€VLNETSFI    | 4   | >NTRK1-S32€VLNETRFI    | 26   | 22   |
| >NTRK1-S32€VLNETSFIFT  | 104 | >NTRK1-S32€VLNETRFIFT  | 1142 | 1038 |
| >NTRK1-S32€VLNETSFI    | 5   | >NTRK1-S32€VLNETRFI    | 13   | 8    |
| >NTRK1-S32€VLNETSFIFT  | 21  | >NTRK1-S32€VLNETRFIFT  | 30   | 9    |
| >NTRK1-S32€VLNETSFIFTE | 385 | >NTRK1-S32€VLNETRFIFTE | 464  | 79   |
| >NTRK1-S32€VLNETSFIF   | 250 | >NTRK1-S32€VLNETRFIF   | 864  | 614  |
| >NTRK1-S32€VLNETSFIF   | 113 | >NTRK1-S32€VLNETRFIF   | 504  | 391  |
| >NTRK1-S32€VLNETSFIF   | 245 | >NTRK1-S32€VLNETRFIF   | 1194 | 949  |
| >NTRK1-S32€VLNETSFIF   | 43  | >NTRK1-S32€VLNETRFIF   | 60   | 17   |
| >NTRK1-S32€VLNETSFIF   | 129 | >NTRK1-S32€VLNETRFIF   | 458  | 329  |
| >NTRK1-S32€SVLNETSFI   | 291 | >NTRK1-S32€SVLNETRFI   | 2102 | 1811 |
| >NTRK1-S32€SVLNETSFI   | 38  | >NTRK1-S32€SVLNETRFI   | 300  | 262  |
| >NTRK1-S32€SVLNETSFIFT | 138 | >NTRK1-S32€SVLNETRFIFT | 258  | 120  |
| >NTRK1-S32€SVLNETSFI   | 132 | >NTRK1-S32€SVLNETRFI   | 356  | 224  |
| >NTRK1-S32€SVLNETSFI   | 203 | >NTRK1-S32€SVLNETRFI   | 1844 | 1641 |
| >NTRK1-S32€SVLNETSFI   | 66  | >NTRK1-S32€SVLNETRFI   | 572  | 506  |
| >NTRK1-S32€SVLNETSFIF  | 244 | >NTRK1-S32€SVLNETRFIF  | 400  | 156  |
| >NTRK1-S32€SVLNETSFI   | 411 | >NTRK1-S32€SVLNETRFI   | 410  | 1    |
| >NTRK1-S32€SVLNETSF    | 58  | >NTRK1-S32€SVLNETRF    | 216  | 158  |
| >NTRK1-S32€SVLNETSFI   | 829 | >NTRK1-S32€SVLNETRFI   | 447  | 382  |
| >NTRK1-S32€SVLNETSFIF  | 91  | >NTRK1-S32€SVLNETRFIF  | 127  | 36   |

|                        |       |                        |      |       |
|------------------------|-------|------------------------|------|-------|
| >NTRK1-S32(SVLNETSFI   | 76    | >NTRK1-S32(SVLNETRFI   | 456  | 380   |
| >NTRK1-S32(SVLNETSF    | 105   | >NTRK1-S32(SVLNETRF    | 1008 | 903   |
| >NTRK1-S32(SVLNETSFIF  | 154   | >NTRK1-S32(SVLNETRFIF  | 287  | 133   |
| >NTRK1-S32(SVLNETSF    | 392   | >NTRK1-S32(SVLNETRF    | 390  | 2     |
| >NTRK1-S32(SVLNETSFIF  | 418   | >NTRK1-S32(SVLNETRFIF  | 1992 | 1574  |
| >NTRK1-S32(SVLNETSFI   | 242   | >NTRK1-S32(SVLNETRFI   | 5444 | 5202  |
| >NTRK1-S32(SVLNETSFIF  | 192   | >NTRK1-S32(SVLNETRFIF  | 704  | 512   |
| >NTRK1-S32(SVLNETSFI   | 90    | >NTRK1-S32(SVLNETRFI   | 255  | 165   |
| >NTRK1-S32(GSVLNETSFI  | 138   | >NTRK1-S32(GSVLNETRFI  | 809  | 671   |
| >NTRK1-S32(GSVLNETS    | 32488 | >NTRK1-S32(GSVLNETR    | 377  | 32111 |
| >NTRK1-S32(GSVLNETSF   | 219   | >NTRK1-S32(GSVLNETRF   | 1700 | 1481  |
| >NTRK1-S32(GSVLNETSFIF | 313   | >NTRK1-S32(GSVLNETRFIF | 506  | 193   |
| >NTRK1-S32(GSVLNETSF   | 10    | >NTRK1-S32(GSVLNETRF   | 6    | 4     |
| >NTRK1-S32(GSVLNETSFI  | 333   | >NTRK1-S32(GSVLNETRFI  | 779  | 446   |
| >NTRK1-S32(GSVLNETSFIF | 10    | >NTRK1-S32(GSVLNETRFIF | 16   | 6     |
| >NTRK1-S32(GSVLNETSFIF | 192   | >NTRK1-S32(GSVLNETRFIF | 336  | 144   |
| >NTRK1-S32(GSVLNETSF   | 164   | >NTRK1-S32(GSVLNETRF   | 123  | 41    |
| >NTRK1-S32(GSVLNETSFI  | 432   | >NTRK1-S32(GSVLNETRFI  | 1382 | 950   |
| >NTRK1-S32(GSVLNETSFIF | 108   | >NTRK1-S32(GSVLNETRFIF | 136  | 28    |
| >NTRK1-S32(GSVLNETSFI  | 76    | >NTRK1-S32(GSVLNETRFI  | 294  | 218   |
| >NTRK1-S32(NGSVLNETS   | 32601 | >NTRK1-S32(NGSVLNETR   | 282  | 32319 |
| >NTRK1-S32(FNGSVLNETS  | 217   | >NTRK1-S32(FNGSVLNETR  | 1296 | 1079  |
| >NTRK1-V42(VAVGLAVFA   | 2460  | >NTRK1-V42(MAVGLAVFA   | 294  | 2166  |
| >NTRK1-V42(VAVGLAVFAC  | 1476  | >NTRK1-V42(MAVGLAVFA   | 196  | 1280  |
| >NTRK1-V42(VAVGLAVFA   | 267   | >NTRK1-V42(MAVGLAVFA   | 48   | 219   |
| >NTRK1-V42(VAVGLAVFAC  | 415   | >NTRK1-V42(MAVGLAVFA   | 104  | 311   |
| >NTRK1-V42(VAVGLAVF    | 621   | >NTRK1-V42(MAVGLAVF    | 364  | 257   |
| >NTRK1-V42(VAVGLAVFA   | 923   | >NTRK1-V42(MAVGLAVFA   | 13   | 910   |
| >NTRK1-V42(VAVGLAVFAC  | 1297  | >NTRK1-V42(MAVGLAVFA   | 23   | 1274  |
| >NTRK1-V42(VAVGLAVF    | 280   | >NTRK1-V42(MAVGLAVF    | 127  | 153   |
| >NTRK1-V42(VAVGLAVF    | 336   | >NTRK1-V42(MAVGLAVF    | 109  | 227   |
| >NTRK1-V42(VAVGLAVF    | 7     | >NTRK1-V42(MAVGLAVF    | 5    | 2     |
| >NTRK1-V42(VAVGLAVFAC  | 617   | >NTRK1-V42(MAVGLAVFA   | 281  | 336   |
| >NTRK1-V42(VAVGLAVF    | 103   | >NTRK1-V42(MAVGLAVF    | 16   | 87    |
| >NTRK1-V42(VAVGLAVFAC  | 2510  | >NTRK1-V42(MAVGLAVFA   | 148  | 2362  |
| >NTRK1-V42(VAVGLAVFAC  | 1818  | >NTRK1-V42(MAVGLAVFA   | 130  | 1688  |
| >NTRK1-V42(VAVGLAVF    | 2177  | >NTRK1-V42(MAVGLAVF    | 222  | 1955  |
| >NTRK1-V42(VAVGLAVFAC  | 4697  | >NTRK1-V42(MAVGLAVFA   | 462  | 4235  |
| >NTRK1-V42(VAVGLAVFA   | 4514  | >NTRK1-V42(MAVGLAVFA   | 84   | 4430  |
| >NTRK1-V42(VAVGLAVF    | 765   | >NTRK1-V42(MAVGLAVF    | 363  | 402   |
| >NTRK1-V42(VAVGLAVF    | 52    | >NTRK1-V42(MAVGLAVF    | 22   | 30    |
| >NTRK1-V42(VAVGLAVFAC  | 354   | >NTRK1-V42(MAVGLAVFA   | 488  | 134   |
| >NTRK1-V42(VAVGLAVF    | 3492  | >NTRK1-V42(MAVGLAVF    | 134  | 3358  |

|                       |       |                       |       |       |
|-----------------------|-------|-----------------------|-------|-------|
| >NTRK1-V42(SVAVGLAV   | 344   | >NTRK1-V42(SMAVGLAV   | 20    | 324   |
| >NTRK1-V42(SVAVGLAVFA | 4304  | >NTRK1-V42(SMAVGLAVF, | 356   | 3948  |
| >NTRK1-V42(SVAVGLAV   | 155   | >NTRK1-V42(SMAVGLAV   | 8     | 147   |
| >NTRK1-V42(SVAVGLAVFA | 721   | >NTRK1-V42(SMAVGLAVF, | 63    | 658   |
| >NTRK1-V42(SVAVGLAV   | 38    | >NTRK1-V42(SMAVGLAV   | 5     | 33    |
| >NTRK1-V42(SVAVGLAVFA | 1526  | >NTRK1-V42(SMAVGLAVF, | 211   | 1315  |
| >NTRK1-V42(SVAVGLAV   | 15    | >NTRK1-V42(SMAVGLAV   | 16    | 1     |
| >NTRK1-V42(SVAVGLAVFA | 655   | >NTRK1-V42(SMAVGLAVF, | 467   | 188   |
| >NTRK1-V42(SVAVGLAV   | 105   | >NTRK1-V42(SMAVGLAV   | 3     | 102   |
| >NTRK1-V42(SVAVGLAVFA | 3540  | >NTRK1-V42(SMAVGLAVF, | 29    | 3511  |
| >NTRK1-V42(SVAVGLAVFA | 4721  | >NTRK1-V42(SMAVGLAVF, | 40    | 4681  |
| >NTRK1-V42(SVAVGLAV   | 591   | >NTRK1-V42(SMAVGLAV   | 7     | 584   |
| >NTRK1-V42(SVAVGLAVFA | 10323 | >NTRK1-V42(SMAVGLAVF, | 133   | 10190 |
| >NTRK1-V42(SVAVGLAVFA | 10387 | >NTRK1-V42(SMAVGLAVF, | 168   | 10219 |
| >NTRK1-V42(SVAVGLAV   | 40    | >NTRK1-V42(SMAVGLAV   | 5     | 35    |
| >NTRK1-V42(SVAVGLAVFA | 508   | >NTRK1-V42(SMAVGLAVF, | 13    | 495   |
| >NTRK1-V42(SVAVGLAVFA | 8424  | >NTRK1-V42(SMAVGLAVF, | 174   | 8250  |
| >NTRK1-V42(SVAVGLAV   | 1396  | >NTRK1-V42(SMAVGLAV   | 15    | 1381  |
| >NTRK1-V42(SVAVGLAVFA | 8826  | >NTRK1-V42(SMAVGLAVF, | 180   | 8646  |
| >NTRK1-V42(SVAVGLAVFA | 8937  | >NTRK1-V42(SMAVGLAVF, | 285   | 8652  |
| >NTRK1-V42(SVAVGLAV   | 20    | >NTRK1-V42(SMAVGLAV   | 2     | 18    |
| >NTRK1-V42(SVAVGLAVFA | 1161  | >NTRK1-V42(SMAVGLAVF, | 11    | 1150  |
| >NTRK1-V42(SVAVGLAVFA | 4174  | >NTRK1-V42(SMAVGLAVF, | 38    | 4136  |
| >NTRK1-V42(SVAVGLAVF  | 13    | >NTRK1-V42(SMAVGLAVF  | 373   | 360   |
| >NTRK1-V42(SVAVGLAVF  | 1571  | >NTRK1-V42(SMAVGLAVF  | 403   | 1168  |
| >NTRK1-V42(SVAVGLAV   | 37    | >NTRK1-V42(SMAVGLAV   | 912   | 875   |
| >NTRK1-V42(SVAVGLAVFA | 355   | >NTRK1-V42(SMAVGLAVF, | 889   | 534   |
| >NTRK1-V42(SVAVGLAV   | 50    | >NTRK1-V42(SMAVGLAV   | 244   | 194   |
| >NTRK1-V42(SVAVGLAV   | 4549  | >NTRK1-V42(SMAVGLAV   | 348   | 4201  |
| >NTRK1-V42(SVAVGLAVF  | 67    | >NTRK1-V42(SMAVGLAVF  | 28    | 39    |
| >NTRK1-V42(SVAVGLAVF  | 423   | >NTRK1-V42(SMAVGLAVF  | 49    | 374   |
| >NTRK1-V42(SVAVGLAV   | 10087 | >NTRK1-V42(SMAVGLAV   | 493   | 9594  |
| >NTRK1-V42(SVAVGLAVF  | 1339  | >NTRK1-V42(SMAVGLAVF  | 18    | 1321  |
| >NTRK1-V42(SVAVGLAVF  | 100   | >NTRK1-V42(SMAVGLAVF  | 217   | 117   |
| >NTRK1-V42(SVAVGLAVF  | 66    | >NTRK1-V42(SMAVGLAVF  | 717   | 651   |
| >NTRK1-V42(KKDETPFGVS | 471   | >NTRK1-V42(KKDETPFGVS | 7852  | 7381  |
| >NTRK1-V42(KKDETPFGVS | 104   | >NTRK1-V42(KKDETPFGVS | 5752  | 5648  |
| >NTRK1-V42(KKDETPFGVS | 392   | >NTRK1-V42(KKDETPFGVS | 15713 | 15321 |
| >NTRK1-V42(KKDETPFGVS | 456   | >NTRK1-V42(KKDETPFGVS | 107   | 349   |
| >NTRK1-V42(VSVAVGLAV  | 189   | >NTRK1-V42(VSMAVGLAV  | 60    | 129   |
| >NTRK1-V42(VSVAVGLAVF | 905   | >NTRK1-V42(VSMAVGLAV  | 279   | 626   |
| >NTRK1-V42(VSVAVGLAV  | 918   | >NTRK1-V42(VSMAVGLAV  | 260   | 658   |
| >NTRK1-V42(VSVAVGLAVF | 277   | >NTRK1-V42(VSMAVGLAV  | 749   | 472   |

|                       |      |                       |      |      |
|-----------------------|------|-----------------------|------|------|
| >NTRK1-V42(VSVAVGLAVF | 947  | >NTRK1-V42(VSMAVGLAV  | 328  | 619  |
| >NTRK1-V42(VSVAVGLAVF | 3450 | >NTRK1-V42(VSMAVGLAV  | 474  | 2976 |
| >NTRK1-V42(VSVAVGLAVF | 57   | >NTRK1-V42(VSMAVGLAV  | 42   | 15   |
| >NTRK1-V42(VSVAVGLAV  | 732  | >NTRK1-V42(VSMAVGLAV  | 299  | 433  |
| >NTRK1-V42(VSVAVGLAVF | 50   | >NTRK1-V42(VSMAVGLAV  | 21   | 29   |
| >NTRK1-V42(VSVAVGLAV  | 391  | >NTRK1-V42(VSMAVGLAV  | 390  | 1    |
| >NTRK1-V42(VSVAVGLAVF | 4    | >NTRK1-V42(VSMAVGLAV  | 4    | 0    |
| >NTRK1-V42(VSVAVGLAVF | 589  | >NTRK1-V42(VSMAVGLAV  | 320  | 269  |
| >NTRK1-V42(VSVAVGLAVF | 16   | >NTRK1-V42(VSMAVGLAV  | 12   | 4    |
| >NTRK1-V42(VSVAVGLAVF | 326  | >NTRK1-V42(VSMAVGLAV  | 689  | 363  |
| >NTRK1-V42(VSVAVGLAVF | 124  | >NTRK1-V42(VSMAVGLAV  | 57   | 67   |
| >NTRK1-V42(GVSVAVGL   | 487  | >NTRK1-V42(GVSMVAVGL  | 517  | 30   |
| >NTRK1-V42(GVSVAVGLA\ | 460  | >NTRK1-V42(GVSMVAVGLA | 254  | 206  |
| >NTRK1-V42(GVSVAVGLA  | 424  | >NTRK1-V42(GVSMVAVGLA | 150  | 274  |
| >NTRK1-V42(GVSVAVGLA\ | 374  | >NTRK1-V42(GVSMVAVGLA | 273  | 101  |
| >NTRK1-V42(GVSVAVGLA\ | 310  | >NTRK1-V42(GVSMVAVGLA | 209  | 101  |
| >NTRK1-V42(GVSVAVGLA\ | 661  | >NTRK1-V42(GVSMVAVGLA | 327  | 334  |
| >NTRK1-V42(GVSVAVGLA\ | 325  | >NTRK1-V42(GVSMVAVGLA | 247  | 78   |
| >NTRK1-V42(GVSVAVGLA\ | 333  | >NTRK1-V42(GVSMVAVGLA | 143  | 190  |
| >NTRK1-V42(GVSVAVGLA\ | 155  | >NTRK1-V42(GVSMVAVGLA | 99   | 56   |
| >NTRK1-V42(GVSVAVGLA\ | 504  | >NTRK1-V42(GVSMVAVGLA | 410  | 94   |
| >NTRK1-V42(GVSVAVGLA\ | 111  | >NTRK1-V42(GVSMVAVGLA | 80   | 31   |
| >NTRK1-V42(FGVSVAVGL  | 379  | >NTRK1-V42(FGVSMVAVGL | 722  | 343  |
| >NTRK1-V42(FGVSVAVGLA | 446  | >NTRK1-V42(FGVSMVAVGL | 659  | 213  |
| >NTRK1-V42(FGVSVAVGL  | 222  | >NTRK1-V42(FGVSMVAVGL | 700  | 478  |
| >NTRK1-V42(FGVSVAVGLA | 32   | >NTRK1-V42(FGVSMVAVGL | 62   | 30   |
| >NTRK1-V42(FGVSVAVGLA | 321  | >NTRK1-V42(FGVSMVAVGL | 1037 | 716  |
| >NTRK1-V42(TPFGVSVAV  | 48   | >NTRK1-V42(TPFGVSMVAV | 96   | 48   |
| >NTRK1-V42(TPFGVSVAVC | 22   | >NTRK1-V42(TPFGVSMVAV | 25   | 3    |
| >NTRK1-V42(TPFGVSVAV  | 30   | >NTRK1-V42(TPFGVSMVAV | 20   | 10   |
| >NTRK1-V42(TPFGVSVAVC | 210  | >NTRK1-V42(TPFGVSMVAV | 313  | 103  |
| >NTRK1-V42(TPFGVSVAV  | 160  | >NTRK1-V42(TPFGVSMVAV | 104  | 56   |
| >NTRK1-V42(TPFGVSVAV  | 174  | >NTRK1-V42(TPFGVSMVAV | 204  | 30   |
| >NTRK1-V42(TPFGVSVAVC | 660  | >NTRK1-V42(TPFGVSMVAV | 485  | 175  |
| >NTRK1-V42(TPFGVSVAV  | 416  | >NTRK1-V42(TPFGVSMVAV | 1278 | 862  |
| >NTRK1-V42(TPFGVSVAV  | 61   | >NTRK1-V42(TPFGVSMVAV | 106  | 45   |
| >NTRK1-V42(TPFGVSVAVC | 112  | >NTRK1-V42(TPFGVSMVAV | 127  | 15   |
| >NTRK1-V42(TPFGVSVAV  | 19   | >NTRK1-V42(TPFGVSMVAV | 26   | 7    |
| >NTRK1-V42(TPFGVSVAVC | 16   | >NTRK1-V42(TPFGVSMVAV | 18   | 2    |
| >NTRK1-V42(TPFGVSVAV  | 55   | >NTRK1-V42(TPFGVSMVAV | 111  | 56   |
| >NTRK1-V42(TPFGVSVAV  | 24   | >NTRK1-V42(TPFGVSMVAV | 54   | 30   |
| >NTRK1-V42(TPFGVSVAV  | 304  | >NTRK1-V42(TPFGVSMVAV | 743  | 439  |
| >NTRK1-V42(ETPFGVSV   | 1818 | >NTRK1-V42(ETPFGVSM   | 312  | 1506 |

|                       |       |                       |      |       |
|-----------------------|-------|-----------------------|------|-------|
| >NTRK1-V42(ETPFGVSV   | 3836  | >NTRK1-V42(ETPFGVSM   | 93   | 3743  |
| >NTRK1-V42(ETPFGVSV   | 1177  | >NTRK1-V42(ETPFGVSM   | 20   | 1157  |
| >NTRK1-V42(ETPFGVSV   | 2557  | >NTRK1-V42(ETPFGVSM   | 37   | 2520  |
| >NTRK1-V42(ETPFGVSV   | 6     | >NTRK1-V42(ETPFGVSM   | 55   | 49    |
| >NTRK1-V42(ETPFGVSVA  | 21    | >NTRK1-V42(ETPFGVSMA  | 13   | 8     |
| >NTRK1-V42(ETPFGVSVAV | 9     | >NTRK1-V42(ETPFGVSMA\ | 7    | 2     |
| >NTRK1-V42(ETPFGVSV   | 26    | >NTRK1-V42(ETPFGVSM   | 417  | 391   |
| >NTRK1-V42(ETPFGVSVA  | 2803  | >NTRK1-V42(ETPFGVSMA  | 478  | 2325  |
| >NTRK1-V42(ETPFGVSVAV | 22    | >NTRK1-V42(ETPFGVSMA\ | 14   | 8     |
| >NTRK1-V42(ETPFGVSV   | 141   | >NTRK1-V42(ETPFGVSM   | 25   | 116   |
| >NTRK1-V42(ETPFGVSVAV | 129   | >NTRK1-V42(ETPFGVSMA\ | 126  | 3     |
| >NTRK1-V42(DETPFGVSV  | 239   | >NTRK1-V42(DETPFGVSM  | 719  | 480   |
| >NTRK1-V42(DETPFGVSVA | 286   | >NTRK1-V42(DETPFGVSM, | 228  | 58    |
| >NTRK1-V42(DETPFGVSV  | 23    | >NTRK1-V42(DETPFGVSM  | 9    | 14    |
| >NTRK1-V42(DETPFGVSVA | 22    | >NTRK1-V42(DETPFGVSM, | 20   | 2     |
| >NTRK1-V42(DETPFGVSVA | 426   | >NTRK1-V42(DETPFGVSM, | 791  | 365   |
| >NTRK1-V42(KDETPFGVSV | 408   | >NTRK1-V42(KDETPFGVSM | 5121 | 4713  |
| >NTRK1-V42:VGLAVFACLF | 482   | >NTRK1-V42:LGLAVFACLF | 354  | 128   |
| >NTRK1-V42:VGLAVFACLF | 659   | >NTRK1-V42:LGLAVFACLF | 362  | 297   |
| >NTRK1-V42:VGLAVFACLF | 297   | >NTRK1-V42:LGLAVFACLF | 169  | 128   |
| >NTRK1-V42:AVGLAVFACL | 2482  | >NTRK1-V42:ALGLAVFACL | 243  | 2239  |
| >NTRK1-V42:AVGLAVFA   | 2139  | >NTRK1-V42:ALGLAVFA   | 86   | 2053  |
| >NTRK1-V42:AVGLAVFACL | 620   | >NTRK1-V42:ALGLAVFACL | 81   | 539   |
| >NTRK1-V42:AVGLAVFA   | 3337  | >NTRK1-V42:ALGLAVFA   | 370  | 2967  |
| >NTRK1-V42:AVGLAVFACL | 1471  | >NTRK1-V42:ALGLAVFACL | 264  | 1207  |
| >NTRK1-V42:AVGLAVFA   | 6252  | >NTRK1-V42:ALGLAVFA   | 93   | 6159  |
| >NTRK1-V42:AVGLAVFAC  | 5482  | >NTRK1-V42:ALGLAVFAC  | 94   | 5388  |
| >NTRK1-V42:AVGLAVFACL | 4080  | >NTRK1-V42:ALGLAVFACL | 58   | 4022  |
| >NTRK1-V42:AVGLAVFA   | 12387 | >NTRK1-V42:ALGLAVFA   | 288  | 12099 |
| >NTRK1-V42:AVGLAVFAC  | 12124 | >NTRK1-V42:ALGLAVFAC  | 265  | 11859 |
| >NTRK1-V42:AVGLAVFACL | 4934  | >NTRK1-V42:ALGLAVFACL | 32   | 4902  |
| >NTRK1-V42:AVGLAVFA   | 3172  | >NTRK1-V42:ALGLAVFA   | 36   | 3136  |
| >NTRK1-V42:AVGLAVFACL | 1801  | >NTRK1-V42:ALGLAVFACL | 24   | 1777  |
| >NTRK1-V42:AVGLAVFA   | 9592  | >NTRK1-V42:ALGLAVFA   | 276  | 9316  |
| >NTRK1-V42:AVGLAVFAC  | 7486  | >NTRK1-V42:ALGLAVFAC  | 212  | 7274  |
| >NTRK1-V42:AVGLAVFACL | 1649  | >NTRK1-V42:ALGLAVFACL | 25   | 1624  |
| >NTRK1-V42:AVGLAVFA   | 5306  | >NTRK1-V42:ALGLAVFA   | 21   | 5285  |
| >NTRK1-V42:AVGLAVFAC  | 9506  | >NTRK1-V42:ALGLAVFAC  | 64   | 9442  |
| >NTRK1-V42:AVGLAVFACL | 2061  | >NTRK1-V42:ALGLAVFACL | 11   | 2050  |
| >NTRK1-V42:AVGLAVFACL | 913   | >NTRK1-V42:ALGLAVFACL | 303  | 610   |
| >NTRK1-V42:AVGLAVFACL | 898   | >NTRK1-V42:ALGLAVFACL | 149  | 749   |
| >NTRK1-V42:DETPFGVSVA | 286   | >NTRK1-V42:DETPFGVSVA | 709  | 423   |
| >NTRK1-V42:DETPFGVSVA | 22    | >NTRK1-V42:DETPFGVSVA | 10   | 12    |

|                        |     |                        |      |      |
|------------------------|-----|------------------------|------|------|
| >NTRK1-V42: DETPFGVSV  | 646 | >NTRK1-V42: DETPFGVSV  | 70   | 576  |
| >NTRK1-V42: VAVGLAVFA  | 267 | >NTRK1-V42: VALGLAVFA  | 169  | 98   |
| >NTRK1-V42: VAVGLAVFAC | 415 | >NTRK1-V42: VALGLAVFAC | 319  | 96   |
| >NTRK1-V42: VAVGLAVF   | 280 | >NTRK1-V42: VALGLAVF   | 705  | 425  |
| >NTRK1-V42: VAVGLAVF   | 336 | >NTRK1-V42: VALGLAVF   | 210  | 126  |
| >NTRK1-V42: VAVGLAVF   | 7   | >NTRK1-V42: VALGLAVF   | 8    | 1    |
| >NTRK1-V42: VAVGLAVF   | 103 | >NTRK1-V42: VALGLAVF   | 180  | 77   |
| >NTRK1-V42: VAVGLAVF   | 52  | >NTRK1-V42: VALGLAVF   | 61   | 9    |
| >NTRK1-V42: VAVGLAVFAC | 354 | >NTRK1-V42: VALGLAVFAC | 1634 | 1280 |
| >NTRK1-V42: SVAVGLAV   | 344 | >NTRK1-V42: SVALGLAV   | 386  | 42   |
| >NTRK1-V42: SVAVGLAV   | 155 | >NTRK1-V42: SVALGLAV   | 148  | 7    |
| >NTRK1-V42: SVAVGLAVFA | 721 | >NTRK1-V42: SVALGLAVFA | 456  | 265  |
| >NTRK1-V42: SVAVGLAV   | 38  | >NTRK1-V42: SVALGLAV   | 38   | 0    |
| >NTRK1-V42: SVAVGLAV   | 15  | >NTRK1-V42: SVALGLAV   | 20   | 5    |
| >NTRK1-V42: SVAVGLAV   | 105 | >NTRK1-V42: SVALGLAV   | 179  | 74   |
| >NTRK1-V42: SVAVGLAV   | 40  | >NTRK1-V42: SVALGLAV   | 62   | 22   |
| >NTRK1-V42: SVAVGLAV   | 20  | >NTRK1-V42: SVALGLAV   | 26   | 6    |
| >NTRK1-V42: SVAVGLAVF  | 13  | >NTRK1-V42: SVALGLAVF  | 12   | 1    |
| >NTRK1-V42: SVAVGLAV   | 37  | >NTRK1-V42: SVALGLAV   | 44   | 7    |
| >NTRK1-V42: SVAVGLAVFA | 355 | >NTRK1-V42: SVALGLAVFA | 424  | 69   |
| >NTRK1-V42: SVAVGLAV   | 50  | >NTRK1-V42: SVALGLAV   | 64   | 14   |
| >NTRK1-V42: SVAVGLAVF  | 67  | >NTRK1-V42: SVALGLAVF  | 93   | 26   |
| >NTRK1-V42: SVAVGLAVF  | 423 | >NTRK1-V42: SVALGLAVF  | 1083 | 660  |
| >NTRK1-V42: SVAVGLAVF  | 100 | >NTRK1-V42: SVALGLAVF  | 126  | 26   |
| >NTRK1-V42: SVAVGLAVF  | 66  | >NTRK1-V42: SVALGLAVF  | 80   | 14   |
| >NTRK1-V42: VSVAVGLAV  | 189 | >NTRK1-V42: VSVALGLAV  | 331  | 142  |
| >NTRK1-V42: VSVAVGLAVF | 277 | >NTRK1-V42: VSVALGLAVF | 239  | 38   |
| >NTRK1-V42: VSVAVGLAVF | 57  | >NTRK1-V42: VSVALGLAVF | 60   | 3    |
| >NTRK1-V42: VSVAVGLAVF | 50  | >NTRK1-V42: VSVALGLAVF | 57   | 7    |
| >NTRK1-V42: VSVAVGLAV  | 391 | >NTRK1-V42: VSVALGLAV  | 96   | 295  |
| >NTRK1-V42: VSVAVGLAVF | 4   | >NTRK1-V42: VSVALGLAVF | 3    | 1    |
| >NTRK1-V42: VSVAVGLAVF | 16  | >NTRK1-V42: VSVALGLAVF | 22   | 6    |
| >NTRK1-V42: VSVAVGLAVF | 326 | >NTRK1-V42: VSVALGLAVF | 305  | 21   |
| >NTRK1-V42: VSVAVGLAVF | 124 | >NTRK1-V42: VSVALGLAVF | 75   | 49   |
| >NTRK1-V42: GVSVAVGL   | 487 | >NTRK1-V42: GVSVALGL   | 808  | 321  |
| >NTRK1-V42: GVSVAVGLA\ | 460 | >NTRK1-V42: GVSVALGLA\ | 411  | 49   |
| >NTRK1-V42: GVSVAVGLA  | 424 | >NTRK1-V42: GVSVALGLA  | 429  | 5    |
| >NTRK1-V42: GVSVAVGLA\ | 374 | >NTRK1-V42: GVSVALGLA\ | 371  | 3    |
| >NTRK1-V42: GVSVAVGLA\ | 310 | >NTRK1-V42: GVSVALGLA\ | 193  | 117  |
| >NTRK1-V42: GVSVAVGLA\ | 325 | >NTRK1-V42: GVSVALGLA\ | 628  | 303  |
| >NTRK1-V42: GVSVAVGLA\ | 333 | >NTRK1-V42: GVSVALGLA\ | 353  | 20   |
| >NTRK1-V42: GVSVAVGLA\ | 155 | >NTRK1-V42: GVSVALGLA\ | 230  | 75   |
| >NTRK1-V42: GVSVAVGLA\ | 111 | >NTRK1-V42: GVSVALGLA\ | 86   | 25   |

|                        |      |                        |       |       |
|------------------------|------|------------------------|-------|-------|
| >NTRK1-V42:FGVSVAVGL   | 379  | >NTRK1-V42:FGVSVALGL   | 751   | 372   |
| >NTRK1-V42:FGVSVAVGLA  | 446  | >NTRK1-V42:FGVSVALGLA  | 549   | 103   |
| >NTRK1-V42:FGVSVAVGL   | 222  | >NTRK1-V42:FGVSVALGL   | 212   | 10    |
| >NTRK1-V42:FGVSVAVGLA  | 32   | >NTRK1-V42:FGVSVALGLA  | 36    | 4     |
| >NTRK1-V42:FGVSVAVGLA  | 321  | >NTRK1-V42:FGVSVALGLA  | 564   | 243   |
| >NTRK1-V42:TPFGVSVAV   | 48   | >NTRK1-V42:TPFGVSVAL   | 15    | 33    |
| >NTRK1-V42:TPFGVSVAVC  | 22   | >NTRK1-V42:TPFGVSVALG  | 29    | 7     |
| >NTRK1-V42:TPFGVSVAV   | 30   | >NTRK1-V42:TPFGVSVAL   | 227   | 197   |
| >NTRK1-V42:TPFGVSVAVC  | 210  | >NTRK1-V42:TPFGVSVALG  | 948   | 738   |
| >NTRK1-V42:TPFGVSVAV   | 160  | >NTRK1-V42:TPFGVSVAL   | 822   | 662   |
| >NTRK1-V42:TPFGVSVAV   | 174  | >NTRK1-V42:TPFGVSVAL   | 29    | 145   |
| >NTRK1-V42:TPFGVSVAVC  | 660  | >NTRK1-V42:TPFGVSVALG  | 463   | 197   |
| >NTRK1-V42:TPFGVSVAV   | 61   | >NTRK1-V42:TPFGVSVAL   | 20    | 41    |
| >NTRK1-V42:TPFGVSVAVC  | 112  | >NTRK1-V42:TPFGVSVALG  | 118   | 6     |
| >NTRK1-V42:TPFGVSVAV   | 19   | >NTRK1-V42:TPFGVSVAL   | 6     | 13    |
| >NTRK1-V42:TPFGVSVAVC  | 16   | >NTRK1-V42:TPFGVSVALG  | 20    | 4     |
| >NTRK1-V42:TPFGVSVAV   | 24   | >NTRK1-V42:TPFGVSVAL   | 2442  | 2418  |
| >NTRK1-V42:TPFGVSVAV   | 304  | >NTRK1-V42:TPFGVSVAL   | 35    | 269   |
| >NTRK1-V42:TPFGVSVAV   | 653  | >NTRK1-V42:TPFGVSVAL   | 78    | 575   |
| >NTRK1-V42:ETPFGVSVAV  | 1454 | >NTRK1-V42:ETPFGVSVAL  | 336   | 1118  |
| >NTRK1-V42:ETPFGVSVAV  | 529  | >NTRK1-V42:ETPFGVSVAL  | 60    | 469   |
| >NTRK1-V42:ETPFGVSVAV  | 3282 | >NTRK1-V42:ETPFGVSVAL  | 475   | 2807  |
| >NTRK1-V42:ETPFGVSVAV  | 1341 | >NTRK1-V42:ETPFGVSVAL  | 347   | 994   |
| >NTRK1-V42:ETPFGVSVAV  | 9    | >NTRK1-V42:ETPFGVSVAL  | 18    | 9     |
| >NTRK1-V42:ETPFGVSVAV  | 22   | >NTRK1-V42:ETPFGVSVAL  | 221   | 199   |
| >NTRK1-V42:ETPFGVSVAV  | 129  | >NTRK1-V42:ETPFGVSVAL  | 17    | 112   |
| >NTRK1-V42:ETPFGVSVAV  | 1070 | >NTRK1-V42:ETPFGVSVAL  | 241   | 829   |
| >NTRK3-D40:DNFILFDEV   | 80   | >NTRK3-D40:NNFILFDEV   | 40    | 40    |
| >NTRK3-D40:TDNFILFDEV  | 4215 | >NTRK3-D40:TNNFILFDEV  | 381   | 3834  |
| >NTRK3-D40:TDNFILFDEV  | 243  | >NTRK3-D40:TNNFILFDEV  | 10259 | 10016 |
| >NTRK3-D40:STDNFILF    | 33   | >NTRK3-D40:STNNFILF    | 2135  | 2102  |
| >NTRK3-D40:STDNFILFDEV | 155  | >NTRK3-D40:STNNFILFDEV | 6059  | 5904  |
| >NTRK3-D40:STDNFILFDEV | 128  | >NTRK3-D40:STNNFILFDEV | 304   | 176   |
| >NTRK3-D40:STDNFILFDEV | 182  | >NTRK3-D40:STNNFILFDEV | 50    | 132   |
| >NTRK3-D40:STDNFILFDEV | 1499 | >NTRK3-D40:STNNFILFDEV | 72    | 1427  |
| >NTRK3-D40:STDNFILFDEV | 17   | >NTRK3-D40:STNNFILFDEV | 28    | 11    |
| >NTRK3-D40:STDNFILFDEV | 12   | >NTRK3-D40:STNNFILFDEV | 19    | 7     |
| >NTRK3-D40:STDNFILFDEV | 324  | >NTRK3-D40:STNNFILFDEV | 801   | 477   |
| >NTRK3-D40:STDNFILFDEV | 19   | >NTRK3-D40:STNNFILFDEV | 41    | 22    |
| >NTRK3-D40:STDNFILFDEV | 252  | >NTRK3-D40:STNNFILFDEV | 158   | 94    |
| >NTRK3-D40:STDNFILF    | 264  | >NTRK3-D40:STNNFILF    | 51    | 213   |
| >NTRK3-D40:STDNFILFDEV | 68   | >NTRK3-D40:STNNFILFDEV | 9     | 59    |
| >NTRK3-D40:STDNFILFDEV | 12   | >NTRK3-D40:STNNFILFDEV | 21    | 9     |



|                        |      |                        |      |      |
|------------------------|------|------------------------|------|------|
| >NTRK3-D40:STDNFILF    | 2605 | >NTRK3-D40:STNNFILF    | 183  | 2422 |
| >NTRK3-D40:STDNFILF    | 61   | >NTRK3-D40:STNNFILF    | 27   | 34   |
| >NTRK3-D40:STDNFILF    | 2573 | >NTRK3-D40:STNNFILF    | 397  | 2176 |
| >NTRK3-D40:STDNFILF    | 256  | >NTRK3-D40:STNNFILF    | 606  | 350  |
| >NTRK3-D40:STDNFILFDEV | 678  | >NTRK3-D40:STNNFILFDEV | 297  | 381  |
| >NTRK3-D40:STDNFILF    | 486  | >NTRK3-D40:STNNFILF    | 537  | 51   |
| >NTRK3-D40:ESTDNFILF   | 200  | >NTRK3-D40:ESTNNFILF   | 555  | 355  |
| >NTRK3-D40:ESTDNFILF   | 107  | >NTRK3-D40:ESTNNFILF   | 213  | 106  |
| >NTRK3-D40:ESTDNFIL    | 137  | >NTRK3-D40:ESTNNFIL    | 275  | 138  |
| >NTRK3-D40:ESTDNFILF   | 959  | >NTRK3-D40:ESTNNFILF   | 316  | 643  |
| >NTRK3-D40:ESTDNFILF   | 192  | >NTRK3-D40:ESTNNFILF   | 705  | 513  |
| >NTRK3-D40:ESTDNFILF   | 43   | >NTRK3-D40:ESTNNFILF   | 108  | 65   |
| >NTRK3-D40:PESTDNFI    | 738  | >NTRK3-D40:PESTNNFI    | 196  | 542  |
| >NTRK3-D40:PESTDNFIL   | 44   | >NTRK3-D40:PESTNNFIL   | 47   | 3    |
| >NTRK3-D40:FPESTDNFI   | 524  | >NTRK3-D40:FPESTNNFI   | 333  | 191  |
| >NTRK3-D40:FPESTDNF    | 25   | >NTRK3-D40:FPESTNNF    | 45   | 20   |
| >NTRK3-D40:FPESTDNFI   | 38   | >NTRK3-D40:FPESTNNFI   | 70   | 32   |
| >NTRK3-D40:FPESTDNFIL  | 128  | >NTRK3-D40:FPESTNNFIL  | 49   | 79   |
| >NTRK3-D40:FPESTDNFILF | 43   | >NTRK3-D40:FPESTNNFILF | 40   | 3    |
| >NTRK3-D40:FPESTDNF    | 883  | >NTRK3-D40:FPESTNNF    | 318  | 565  |
| >NTRK3-D40:FPESTDNFIL  | 112  | >NTRK3-D40:FPESTNNFIL  | 58   | 54   |
| >NTRK3-D40:FPESTDNF    | 12   | >NTRK3-D40:FPESTNNF    | 15   | 3    |
| >NTRK3-D40:FPESTDNFI   | 397  | >NTRK3-D40:FPESTNNFI   | 1078 | 681  |
| >NTRK3-D40:FPESTDNFIL  | 124  | >NTRK3-D40:FPESTNNFIL  | 85   | 39   |
| >NTRK3-D40:FPESTDNFILF | 12   | >NTRK3-D40:FPESTNNFILF | 16   | 4    |
| >NTRK3-D40:FPESTDNFIL  | 27   | >NTRK3-D40:FPESTNNFIL  | 13   | 14   |
| >NTRK3-D40:FPESTDNFI   | 486  | >NTRK3-D40:FPESTNNFI   | 382  | 104  |
| >NTRK3-D40:FPESTDNF    | 33   | >NTRK3-D40:FPESTNNF    | 41   | 8    |
| >NTRK3-D40:FPESTDNFI   | 40   | >NTRK3-D40:FPESTNNFI   | 62   | 22   |
| >NTRK3-D40:FPESTDNFIL  | 293  | >NTRK3-D40:FPESTNNFIL  | 161  | 132  |
| >NTRK3-D40:FPESTDNFILF | 17   | >NTRK3-D40:FPESTNNFILF | 20   | 3    |
| >NTRK3-D40:FPESTDNFI   | 265  | >NTRK3-D40:FPESTNNFI   | 209  | 56   |
| >NTRK3-D40:FPESTDNFIL  | 659  | >NTRK3-D40:FPESTNNFIL  | 329  | 330  |
| >NTRK3-D40:FPESTDNFILF | 472  | >NTRK3-D40:FPESTNNFILF | 432  | 40   |
| >NTRK3-D40:FPESTDNFILF | 795  | >NTRK3-D40:FPESTNNFILF | 401  | 394  |
| >NTRK3-D40:FPESTDNF    | 11   | >NTRK3-D40:FPESTNNF    | 13   | 2    |
| >NTRK3-D40:FPESTDNFI   | 182  | >NTRK3-D40:FPESTNNFI   | 296  | 114  |
| >NTRK3-D40:FPESTDNFIL  | 43   | >NTRK3-D40:FPESTNNFIL  | 49   | 6    |
| >NTRK3-D40:FPESTDNFILF | 7    | >NTRK3-D40:FPESTNNFILF | 8    | 1    |
| >NTRK3-D40:PFPESTDNF   | 349  | >NTRK3-D40:PFPESTNNF   | 252  | 97   |
| >NTRK3-D40:PFPESTDNF   | 49   | >NTRK3-D40:PFPESTNNF   | 39   | 10   |
| >NTRK3-D40:PFPESTDNFI  | 466  | >NTRK3-D40:PFPESTNNFI  | 427  | 39   |
| >NTRK3-D40:PFPESTDNFIL | 463  | >NTRK3-D40:PFPESTNNFIL | 341  | 122  |

|                        |       |                        |       |       |
|------------------------|-------|------------------------|-------|-------|
| >NTRK3-D40: EPFPESTDNF | 686   | >NTRK3-D40: EPFPESTNNF | 498   | 188   |
| >NTRK3-D40: EPFPESTDNF | 85    | >NTRK3-D40: EPFPESTNNF | 122   | 37    |
| >NTRK3-D40: EPFPESTDNF | 191   | >NTRK3-D40: EPFPESTNNF | 264   | 73    |
| >NTRK3-D40: EPFPESTDNF | 468   | >NTRK3-D40: EPFPESTNNF | 278   | 190   |
| >NTRK3-D40: EPFPESTDNF | 959   | >NTRK3-D40: EPFPESTNNF | 229   | 730   |
| >NTRK3-D40: EPFPESTDNF | 344   | >NTRK3-D40: EPFPESTNNF | 106   | 238   |
| >NTRK3-D40: EPFPESTDNF | 540   | >NTRK3-D40: EPFPESTNNF | 395   | 145   |
| >NTRK3-D40: EPFPESTDNF | 428   | >NTRK3-D40: EPFPESTNNF | 474   | 46    |
| >NTRK3-D40: EPFPESTDNF | 461   | >NTRK3-D40: EPFPESTNNF | 170   | 291   |
| >NTRK3-D40: EPFPESTDNF | 93    | >NTRK3-D40: EPFPESTNNF | 110   | 17    |
| >NTRK3-D40: KEPFPESTDN | 883   | >NTRK3-D40: KEPFPESTNN | 292   | 591   |
| >NTRK3-D58: KDFQREAEL  | 7883  | >NTRK3-D58: KEFQREAEL  | 158   | 7725  |
| >NTRK3-D58: KDFQREAELL | 2780  | >NTRK3-D58: KEFQREAELL | 51    | 2729  |
| >NTRK3-D58: KDFQREAEL  | 15870 | >NTRK3-D58: KEFQREAEL  | 70    | 15800 |
| >NTRK3-D58: KDFQREAELL | 12963 | >NTRK3-D58: KEFQREAELL | 286   | 12677 |
| >NTRK3-D58: KDFQREAEL  | 654   | >NTRK3-D58: KEFQREAEL  | 97    | 557   |
| >NTRK3-D58: KDFQREAELL | 17016 | >NTRK3-D58: KEFQREAELL | 181   | 16835 |
| >NTRK3-D58: KDFQREAELL | 1394  | >NTRK3-D58: KEFQREAELL | 116   | 1278  |
| >NTRK3-D58: KDFQREAEL  | 779   | >NTRK3-D58: KEFQREAEL  | 18    | 761   |
| >NTRK3-D58: KDFQREAELL | 2005  | >NTRK3-D58: KEFQREAELL | 20    | 1985  |
| >NTRK3-D58: KDFQREAELL | 5509  | >NTRK3-D58: KEFQREAELL | 99    | 5410  |
| >NTRK3-D58: KDFQREAELL | 324   | >NTRK3-D58: KEFQREAELL | 11493 | 11169 |
| >NTRK3-D58: RKDFQREAEL | 1016  | >NTRK3-D58: RKEFQREAEL | 437   | 579   |
| >NTRK3-D58: RKDFQREAEL | 1253  | >NTRK3-D58: RKEFQREAEL | 275   | 978   |
| >NTRK3-D58: ARKDFQREAE | 622   | >NTRK3-D58: ARKEFQREAE | 402   | 220   |
| >NTRK3-D58: ARKDFQREAE | 309   | >NTRK3-D58: ARKEFQREAE | 235   | 74    |
| >NTRK3-D58: ARKDFQREAE | 72    | >NTRK3-D58: ARKEFQREAE | 61    | 11    |
| >NTRK3-D58: AARKDFQR   | 576   | >NTRK3-D58: AARKEFQR   | 380   | 196   |
| >NTRK3-D58: AARKDFQRE/ | 56    | >NTRK3-D58: AARKEFQRE/ | 38    | 18    |
| >NTRK3-D58: AARKDFQR   | 36    | >NTRK3-D58: AARKEFQR   | 45    | 9     |
| >NTRK3-D58: LAARKDFQR  | 32    | >NTRK3-D58: LAARKEFQR  | 42    | 10    |
| >NTRK3-D58: LAARKDFQR  | 20    | >NTRK3-D58: LAARKEFQR  | 22    | 2     |
| >NTRK3-D58: TLAARKDFQF | 192   | >NTRK3-D58: TLAARKEFQR | 179   | 13    |
| >NTRK3-D58: TLAARKDFQF | 96    | >NTRK3-D58: TLAARKEFQR | 144   | 48    |
| >NTRK3-D58: TLAARKDF   | 371   | >NTRK3-D58: TLAARKEF   | 338   | 33    |
| >NTRK3-D58: TLAARKDF   | 908   | >NTRK3-D58: TLAARKEF   | 456   | 452   |
| >NTRK3-D58: TLAARKDFQF | 308   | >NTRK3-D58: TLAARKEFQR | 414   | 106   |
| >NTRK3-D58: TLAARKDFQF | 393   | >NTRK3-D58: TLAARKEFQR | 514   | 121   |
| >NTRK3-D58: PTLAARKDFC | 462   | >NTRK3-D58: PTLAARKEFQ | 431   | 31    |
| >NTRK3-D58: PTLAARKDF  | 1259  | >NTRK3-D58: PTLAARKEF  | 285   | 974   |
| >NTRK3-E32: IEFVVRGNPP | 5629  | >NTRK3-E32: IKFVVRGNPP | 243   | 5386  |
| >NTRK3-E32: IEFVVRGNPP | 7882  | >NTRK3-E32: IKFVVRGNPP | 319   | 7563  |
| >NTRK3-E32: HCIEFVVR   | 413   | >NTRK3-E32: HCIEFVVR   | 180   | 233   |

|                        |     |                        |      |      |
|------------------------|-----|------------------------|------|------|
| >NTRK3-E32:HCIEFVVR    | 262 | >NTRK3-E32:HCIKFVVR    | 365  | 103  |
| >NTRK3-E32:HCIEFVVR    | 266 | >NTRK3-E32:HCIKFVVR    | 375  | 109  |
| >NTRK3-E32:HCIEFVVR    | 25  | >NTRK3-E32:HCIKFVVR    | 20   | 5    |
| >NTRK3-E32:EHCIEFVVR   | 121 | >NTRK3-E32:EHCIKFVVR   | 142  | 21   |
| >NTRK3-E32:LEHCIEFV    | 238 | >NTRK3-E32:LEHCIKFV    | 25   | 213  |
| >NTRK3-E32:LEHCIEFVV   | 544 | >NTRK3-E32:LEHCIKFVV   | 109  | 435  |
| >NTRK3-E32:LEHCIEFVV   | 848 | >NTRK3-E32:LEHCIKFVV   | 204  | 644  |
| >NTRK3-E32:LEHCIEFV    | 137 | >NTRK3-E32:LEHCIKFV    | 508  | 371  |
| >NTRK3-E32:LEHCIEFVV   | 53  | >NTRK3-E32:LEHCIKFVV   | 47   | 6    |
| >NTRK3-E32:LEHCIEFV    | 498 | >NTRK3-E32:LEHCIKFV    | 503  | 5    |
| >NTRK3-E32:LEHCIEFVV   | 212 | >NTRK3-E32:LEHCIKFVV   | 319  | 107  |
| >NTRK3-E32:LEHCIEFV    | 250 | >NTRK3-E32:LEHCIKFV    | 389  | 139  |
| >NTRK3-E32:LEHCIEFVV   | 42  | >NTRK3-E32:LEHCIKFVV   | 65   | 23   |
| >NTRK3-E32:LEHCIEFV    | 176 | >NTRK3-E32:LEHCIKFV    | 451  | 275  |
| >NTRK3-E32:LEHCIEFVV   | 47  | >NTRK3-E32:LEHCIKFVV   | 53   | 6    |
| >NTRK3-E32:LEHCIEFVVR  | 272 | >NTRK3-E32:LEHCIKFVVR  | 203  | 69   |
| >NTRK3-E32:RLEHCIEFV   | 31  | >NTRK3-E32:RLEHCIKFV   | 222  | 191  |
| >NTRK3-E32:RLEHCIEFVV  | 81  | >NTRK3-E32:RLEHCIKFVV  | 157  | 76   |
| >NTRK3-E32:RLEHCIEFV   | 6   | >NTRK3-E32:RLEHCIKFV   | 48   | 42   |
| >NTRK3-E32:RLEHCIEFVV  | 125 | >NTRK3-E32:RLEHCIKFVV  | 382  | 257  |
| >NTRK3-E32:RLEHCIEFV   | 26  | >NTRK3-E32:RLEHCIKFV   | 41   | 15   |
| >NTRK3-E32:RLEHCIEFV   | 17  | >NTRK3-E32:RLEHCIKFV   | 163  | 146  |
| >NTRK3-E32:RLEHCIEFV   | 9   | >NTRK3-E32:RLEHCIKFV   | 26   | 17   |
| >NTRK3-E32:RLEHCIEFVV  | 15  | >NTRK3-E32:RLEHCIKFVV  | 25   | 10   |
| >NTRK3-E32:RLEHCIEFV   | 7   | >NTRK3-E32:RLEHCIKFV   | 21   | 14   |
| >NTRK3-E32:RLEHCIEFVV  | 8   | >NTRK3-E32:RLEHCIKFVV  | 15   | 7    |
| >NTRK3-E32:RLEHCIEFV   | 41  | >NTRK3-E32:RLEHCIKFV   | 142  | 101  |
| >NTRK3-E32:RLEHCIEFVV  | 51  | >NTRK3-E32:RLEHCIKFVV  | 118  | 67   |
| >NTRK3-E32:RLEHCIEFV   | 51  | >NTRK3-E32:RLEHCIKFV   | 470  | 419  |
| >NTRK3-E32:RLEHCIEFVV  | 140 | >NTRK3-E32:RLEHCIKFVV  | 393  | 253  |
| >NTRK3-E32:RLEHCIEFV   | 7   | >NTRK3-E32:RLEHCIKFV   | 10   | 3    |
| >NTRK3-E32:RLEHCIEFVV  | 9   | >NTRK3-E32:RLEHCIKFVV  | 10   | 1    |
| >NTRK3-E32:RLEHCIEFVVF | 39  | >NTRK3-E32:RLEHCIKFVVF | 26   | 13   |
| >NTRK3-E32:RLEHCIEF    | 424 | >NTRK3-E32:RLEHCIKF    | 499  | 75   |
| >NTRK3-E32:RLEHCIEF    | 147 | >NTRK3-E32:RLEHCIKF    | 296  | 149  |
| >NTRK3-E32:RLEHCIEFVVF | 42  | >NTRK3-E32:RLEHCIKFVVF | 39   | 3    |
| >NTRK3-E32:LRLEHCIEFV  | 801 | >NTRK3-E32:LRLEHCIKFV  | 356  | 445  |
| >NTRK3-E32:LRLEHCIEFV  | 292 | >NTRK3-E32:LRLEHCIKFV  | 1266 | 974  |
| >NTRK3-E32:LRLEHCIEF   | 18  | >NTRK3-E32:LRLEHCIKF   | 33   | 15   |
| >NTRK3-E32:LRLEHCIEFVV | 678 | >NTRK3-E32:LRLEHCIKFVV | 423  | 255  |
| >NTRK3-E32:LRLEHCIEF   | 140 | >NTRK3-E32:LRLEHCIKF   | 279  | 139  |
| >NTRK3-E32:ELRLEHCIEFV | 273 | >NTRK3-E32:ELRLEHCIKFV | 747  | 474  |
| >NTRK3-E32:ELRLEHCIEFV | 404 | >NTRK3-E32:ELRLEHCIKFV | 1758 | 1354 |

|                        |       |                        |      |       |
|------------------------|-------|------------------------|------|-------|
| >NTRK3-E32:ELRLEHCIEFV | 25    | >NTRK3-E32:ELRLEHCIKFV | 39   | 14    |
| >NTRK3-E32:ELRLEHCIEF  | 316   | >NTRK3-E32:ELRLEHCIKF  | 690  | 374   |
| >NTRK3-E32:PELRLEHCIEF | 171   | >NTRK3-E32:PELRLEHCIKF | 292  | 121   |
| >NTRK3-E32:PELRLEHCIEF | 466   | >NTRK3-E32:PELRLEHCIKF | 617  | 151   |
| >NTRK3-H67'HRDLATRNCI  | 31    | >NTRK3-H67'YRDLATRNCI  | 137  | 106   |
| >NTRK3-H67'HRDLATRNCI  | 41    | >NTRK3-H67'YRDLATRNCI  | 33   | 8     |
| >NTRK3-H67'HRDLATRNCI  | 395   | >NTRK3-H67'YRDLATRNCI  | 2472 | 2077  |
| >NTRK3-H67'VHRDLATR    | 2933  | >NTRK3-H67'VYRDLATR    | 45   | 2888  |
| >NTRK3-H67'VHRDLATR    | 4913  | >NTRK3-H67'VYRDLATR    | 55   | 4858  |
| >NTRK3-H67'VHRDLATR    | 2401  | >NTRK3-H67'VYRDLATR    | 106  | 2295  |
| >NTRK3-H67'MVYLASQHF'  | 322   | >NTRK3-H67'MVYLASQHF'  | 97   | 225   |
| >NTRK3-H67'MVYLASQHF'  | 383   | >NTRK3-H67'MVYLASQHF'  | 62   | 321   |
| >NTRK3-H67'MVYLASQHF'  | 12244 | >NTRK3-H67'MVYLASQHF'  | 315  | 11929 |
| >NTRK3-H67'MVYLASQHF'  | 1014  | >NTRK3-H67'MVYLASQHF'  | 11   | 1003  |
| >NTRK3-H67'MVYLASQHF'  | 3171  | >NTRK3-H67'MVYLASQHF'  | 374  | 2797  |
| >NTRK3-H67'MVYLASQHF'  | 11879 | >NTRK3-H67'MVYLASQHF'  | 99   | 11780 |
| >NTRK3-H67'MVYLASQHF'  | 226   | >NTRK3-H67'MVYLASQHF'  | 36   | 190   |
| >NTRK3-H67'MVYLASQHF'  | 13873 | >NTRK3-H67'MVYLASQHF'  | 66   | 13807 |
| >NTRK3-H67'MVYLASQHF'  | 1606  | >NTRK3-H67'MVYLASQHF'  | 48   | 1558  |
| >NTRK3-H67'MVYLASQHF'  | 8912  | >NTRK3-H67'MVYLASQHF'  | 230  | 8682  |
| >NTRK3-H67'MVYLASQHF'  | 3938  | >NTRK3-H67'MVYLASQHF'  | 146  | 3792  |
| >NTRK3-H67'MVYLASQHF'  | 3707  | >NTRK3-H67'MVYLASQHF'  | 8    | 3699  |
| >NTRK3-H67'MVYLASQHF'  | 195   | >NTRK3-H67'MVYLASQHF'  | 12   | 183   |
| >NTRK3-H67'MVYLASQHF'  | 9224  | >NTRK3-H67'MVYLASQHF'  | 156  | 9068  |
| >NTRK3-H67'MVYLASQHF'  | 2073  | >NTRK3-H67'MVYLASQHF'  | 122  | 1951  |
| >NTRK3-H67'MVYLASQHF'  | 20469 | >NTRK3-H67'MVYLASQHF'  | 65   | 20404 |
| >NTRK3-H67'FVHRDLAT    | 1441  | >NTRK3-H67'FVYRDLAT    | 227  | 1214  |
| >NTRK3-H67'FVHRDLAT    | 562   | >NTRK3-H67'FVYRDLAT    | 49   | 513   |
| >NTRK3-H67'FVHRDLATR   | 398   | >NTRK3-H67'FVYRDLATR   | 164  | 234   |
| >NTRK3-H67'FVHRDLATR   | 818   | >NTRK3-H67'FVYRDLATR   | 268  | 550   |
| >NTRK3-H67'FVHRDLATR   | 37    | >NTRK3-H67'FVYRDLATR   | 12   | 25    |
| >NTRK3-H67'HFVHRDLATF  | 68    | >NTRK3-H67'HFVYRDLATR  | 82   | 14    |
| >NTRK3-H67'HFVHRDLATF  | 149   | >NTRK3-H67'HFVYRDLATR  | 104  | 45    |
| >NTRK3-H67'HFVHRDLATF  | 59    | >NTRK3-H67'HFVYRDLATR  | 21   | 38    |
| >NTRK3-H67'HFVHRDLATF  | 846   | >NTRK3-H67'HFVYRDLATR  | 419  | 427   |
| >NTRK3-H67'HFVHRDLATF  | 32    | >NTRK3-H67'HFVYRDLATR  | 44   | 12    |
| >NTRK3-H67'QHFVHRDL    | 3924  | >NTRK3-H67'QHFVYRDL    | 341  | 3583  |
| >NTRK3-H67'QHFVHRDL    | 647   | >NTRK3-H67'QHFVYRDL    | 389  | 258   |
| >NTRK3-H67'SQHFVHRDL   | 474   | >NTRK3-H67'SQHFVYRDL   | 266  | 208   |
| >NTRK3-H67'ASQHFVHRD   | 368   | >NTRK3-H67'ASQHFVYRDI  | 392  | 24    |
| >NTRK3-H67'ASQHFVHR    | 169   | >NTRK3-H67'ASQHFVYR    | 28   | 141   |
| >NTRK3-H67'ASQHFVHR    | 11    | >NTRK3-H67'ASQHFVYR    | 8    | 3     |
| >NTRK3-H67'ASQHFVHR    | 491   | >NTRK3-H67'ASQHFVYR    | 165  | 326   |

|                       |       |                       |     |       |
|-----------------------|-------|-----------------------|-----|-------|
| >NTRK3-H67 ASQHFVHRD  | 229   | >NTRK3-H67 ASQHFVYRDI | 422 | 193   |
| >NTRK3-H67 ASQHFVHR   | 57    | >NTRK3-H67 ASQHFVYR   | 57  | 0     |
| >NTRK3-H67 ASQHFVHR   | 845   | >NTRK3-H67 ASQHFVYR   | 259 | 586   |
| >NTRK3-H67 LASQHFVH   | 12136 | >NTRK3-H67 LASQHFVY   | 89  | 12047 |
| >NTRK3-H67 LASQHFVH   | 17272 | >NTRK3-H67 LASQHFVY   | 178 | 17094 |
| >NTRK3-H67 LASQHFVHR  | 32    | >NTRK3-H67 LASQHFVYR  | 12  | 20    |
| >NTRK3-H67 LASQHFVHR  | 207   | >NTRK3-H67 LASQHFVYR  | 89  | 118   |
| >NTRK3-H67 LASQHFVHR  | 52    | >NTRK3-H67 LASQHFVYR  | 17  | 35    |
| >NTRK3-H67 LASQHFVH   | 3366  | >NTRK3-H67 LASQHFVY   | 70  | 3296  |
| >NTRK3-H67 LASQHFVH   | 6632  | >NTRK3-H67 LASQHFVY   | 196 | 6436  |
| >NTRK3-H67 LASQHFVH   | 9375  | >NTRK3-H67 LASQHFVY   | 28  | 9347  |
| >NTRK3-H67 LASQHFVH   | 365   | >NTRK3-H67 LASQHFVY   | 18  | 347   |
| >NTRK3-H67 LASQHFVH   | 18333 | >NTRK3-H67 LASQHFVY   | 239 | 18094 |
| >NTRK3-H67 LASQHFVH   | 6981  | >NTRK3-H67 LASQHFVY   | 113 | 6868  |
| >NTRK3-H67 LASQHFVH   | 32309 | >NTRK3-H67 LASQHFVY   | 278 | 32031 |
| >NTRK3-H67 LASQHFVHR  | 142   | >NTRK3-H67 LASQHFVYR  | 140 | 2     |
| >NTRK3-H67 LASQHFVHR  | 104   | >NTRK3-H67 LASQHFVYR  | 38  | 66    |
| >NTRK3-H67 YLASQHFVH  | 17693 | >NTRK3-H67 YLASQHFVY  | 169 | 17524 |
| >NTRK3-H67 YLASQHFVHF | 1993  | >NTRK3-H67 YLASQHFVYR | 288 | 1705  |
| >NTRK3-H67 YLASQHFVHF | 210   | >NTRK3-H67 YLASQHFVYR | 150 | 60    |
| >NTRK3-H67 YLASQHFVH  | 1087  | >NTRK3-H67 YLASQHFVY  | 68  | 1019  |
| >NTRK3-H67 YLASQHFVHF | 307   | >NTRK3-H67 YLASQHFVYR | 127 | 180   |
| >NTRK3-H67 YLASQHFVHF | 137   | >NTRK3-H67 YLASQHFVYR | 564 | 427   |
| >NTRK3-H67 YLASQHFVHF | 966   | >NTRK3-H67 YLASQHFVYR | 339 | 627   |
| >NTRK3-H67 YLASQHFVH  | 17280 | >NTRK3-H67 YLASQHFVY  | 393 | 16887 |
| >NTRK3-H67 YLASQHFVH  | 294   | >NTRK3-H67 YLASQHFVY  | 7   | 287   |
| >NTRK3-H67 YLASQHFVH  | 6648  | >NTRK3-H67 YLASQHFVY  | 39  | 6609  |
| >NTRK3-H67 YLASQHFVHF | 286   | >NTRK3-H67 YLASQHFVYR | 75  | 211   |
| >NTRK3-H67 YLASQHFVHF | 796   | >NTRK3-H67 YLASQHFVYR | 95  | 701   |
| >NTRK3-H67 YLASQHFVH  | 3152  | >NTRK3-H67 YLASQHFVY  | 423 | 2729  |
| >NTRK3-H67 YLASQHFVHF | 50    | >NTRK3-H67 YLASQHFVYR | 10  | 40    |
| >NTRK3-H67 YLASQHFVH  | 4199  | >NTRK3-H67 YLASQHFVY  | 6   | 4193  |
| >NTRK3-H67 YLASQHFVH  | 777   | >NTRK3-H67 YLASQHFVY  | 35  | 742   |
| >NTRK3-H67 YLASQHFVH  | 1367  | >NTRK3-H67 YLASQHFVY  | 25  | 1342  |
| >NTRK3-H67 YLASQHFVH  | 1535  | >NTRK3-H67 YLASQHFVY  | 35  | 1500  |
| >NTRK3-H67 YLASQHFVH  | 1454  | >NTRK3-H67 YLASQHFVY  | 48  | 1406  |
| >NTRK3-H67 YLASQHFVH  | 2749  | >NTRK3-H67 YLASQHFVY  | 199 | 2550  |
| >NTRK3-H67 YLASQHFVH  | 22329 | >NTRK3-H67 YLASQHFVY  | 50  | 22279 |
| >NTRK3-H67 YLASQHFVH  | 4803  | >NTRK3-H67 YLASQHFVY  | 60  | 4743  |
| >NTRK3-H67 YLASQHFVHF | 276   | >NTRK3-H67 YLASQHFVYR | 174 | 102   |
| >NTRK3-H67 YLASQHFVHF | 64    | >NTRK3-H67 YLASQHFVYR | 36  | 28    |
| >NTRK3-H67 VYLASQHFVH | 4219  | >NTRK3-H67 VYLASQHFVY | 75  | 4144  |
| >NTRK3-H67 VYLASQHFVH | 3074  | >NTRK3-H67 VYLASQHFVY | 131 | 2943  |

|                         |       |                         |       |       |
|-------------------------|-------|-------------------------|-------|-------|
| >NTRK3-H67' VYLASQHFV+  | 1442  | >NTRK3-H67' VYLASQHFVY  | 93    | 1349  |
| >NTRK3-H67' VYLASQHFV+  | 430   | >NTRK3-H67' VYLASQHFVY  | 243   | 187   |
| >NTRK3-H67' VYLASQHFV+  | 4913  | >NTRK3-H67' VYLASQHFVY  | 21    | 4892  |
| >NTRK3-H67' VYLASQHFV+  | 14294 | >NTRK3-H67' VYLASQHFVY  | 55    | 14239 |
| >NTRK3-H67' VYLASQHFV+  | 15    | >NTRK3-H67' VYLASQHFVY  | 8     | 7     |
| >NTRK3-H67' VYLASQHFV+  | 43    | >NTRK3-H67' VYLASQHFVY  | 28    | 15    |
| >NTRK3-H67' VYLASQHFV+  | 8839  | >NTRK3-H67' VYLASQHFVY  | 16    | 8823  |
| >NTRK3-H67' VYLASQHFV+  | 14    | >NTRK3-H67' VYLASQHFVY  | 12    | 2     |
| >NTRK3-I488 ITTPSSLDA   | 206   | >NTRK3-I488 TTTTPSSLDA  | 1939  | 1733  |
| >NTRK3-I488 GITTPSSL    | 391   | >NTRK3-I488 GTTTPSSL    | 7303  | 6912  |
| >NTRK3-I488 GITTPSSL    | 9457  | >NTRK3-I488 GTTTPSSL    | 36    | 9421  |
| >NTRK3-I488 GITTPSSLD   | 3939  | >NTRK3-I488 GTTTPSSLD   | 120   | 3819  |
| >NTRK3-I488 GITTPSSL    | 17998 | >NTRK3-I488 GTTTPSSL    | 497   | 17501 |
| >NTRK3-I488 ASPLHHINHG  | 9     | >NTRK3-I488 ASPLHHINHG  | 739   | 730   |
| >NTRK3-I488 ASPLHHINHG  | 372   | >NTRK3-I488 ASPLHHINHG  | 35086 | 34714 |
| >NTRK3-I488 HGITTPSSL   | 138   | >NTRK3-I488 HGTTTPSSL   | 993   | 855   |
| >NTRK3-I488 NHGITTPSSL  | 99    | >NTRK3-I488 NHGTTTPSSL  | 32    | 67    |
| >NTRK3-I488 INHGITTPSSL | 1145  | >NTRK3-I488 INHGTTTPSSI | 461   | 684   |
| >NTRK3-I488 PLHHINHGI   | 331   | >NTRK3-I488 PLHHINHGT   | 5413  | 5082  |
| >NTRK3-I488 PLHHINHGI   | 190   | >NTRK3-I488 PLHHINHGT   | 4169  | 3979  |
| >NTRK3-I488 PLHHINHGI   | 149   | >NTRK3-I488 PLHHINHGT   | 2234  | 2085  |
| >NTRK3-I488 SPLHHINHGI  | 265   | >NTRK3-I488 SPLHHINHGT  | 3255  | 2990  |
| >NTRK3-I488 SPLHHINHGI  | 169   | >NTRK3-I488 SPLHHINHGT  | 3826  | 3657  |
| >NTRK3-I488 SPLHHINHGI  | 290   | >NTRK3-I488 SPLHHINHGT  | 681   | 391   |
| >NTRK3-I769 ITQGRVLER   | 119   | >NTRK3-I769 NTQGRVLER   | 927   | 808   |
| >NTRK3-I769 ITQGRVLER   | 78    | >NTRK3-I769 NTQGRVLER   | 533   | 455   |
| >NTRK3-I769 ITQGRVLERP  | 62    | >NTRK3-I769 NTQGRVLERF  | 352   | 290   |
| >NTRK3-I769 ITQGRVLER   | 130   | >NTRK3-I769 NTQGRVLER   | 70    | 60    |
| >NTRK3-I769 ITQGRVLERP  | 107   | >NTRK3-I769 NTQGRVLERF  | 65    | 42    |
| >NTRK3-I769 ITQGRVLER   | 123   | >NTRK3-I769 NTQGRVLER   | 66    | 57    |
| >NTRK3-I769 ITQGRVLERP  | 300   | >NTRK3-I769 NTQGRVLERF  | 164   | 136   |
| >NTRK3-I769 ITQGRVLER   | 361   | >NTRK3-I769 NTQGRVLER   | 928   | 567   |
| >NTRK3-I769 CITQGRVLER  | 334   | >NTRK3-I769 CNTQGRVLEF  | 4173  | 3839  |
| >NTRK3-I769 CITQGRVLER  | 419   | >NTRK3-I769 CNTQGRVLEF  | 11320 | 10901 |
| >NTRK3-I769 CITQGRVLER  | 144   | >NTRK3-I769 CNTQGRVLEF  | 974   | 830   |
| >NTRK3-I769 QLSNTEVIECI | 79    | >NTRK3-I769 QLSNTEVIECI | 7778  | 7699  |
| >NTRK3-I769 QLSNTEVIECI | 179   | >NTRK3-I769 QLSNTEVIECI | 13953 | 13774 |
| >NTRK3-I769 QLSNTEVIECI | 170   | >NTRK3-I769 QLSNTEVIECI | 20649 | 20479 |
| >NTRK3-I769 QLSNTEVIECI | 196   | >NTRK3-I769 QLSNTEVIECI | 19131 | 18935 |
| >NTRK3-I769 QLSNTEVIECI | 205   | >NTRK3-I769 QLSNTEVIECI | 23154 | 22949 |
| >NTRK3-I769 QLSNTEVIECI | 219   | >NTRK3-I769 QLSNTEVIECI | 20629 | 20410 |
| >NTRK3-I769 ECITQGRVL   | 328   | >NTRK3-I769 ECNTQGRVL   | 10888 | 10560 |
| >NTRK3-I769 ECITQGRV    | 355   | >NTRK3-I769 ECNTQGRV    | 1170  | 815   |

|                         |      |                          |       |       |
|-------------------------|------|--------------------------|-------|-------|
| >NTRK3-I769 IECITQGRV   | 227  | >NTRK3-I769 IECNTQGRV    | 449   | 222   |
| >NTRK3-I769 IECITQGRVL  | 370  | >NTRK3-I769 IECNTQGRVL   | 666   | 296   |
| >NTRK3-I769 IECITQGRV   | 263  | >NTRK3-I769 IECNTQGRV    | 253   | 10    |
| >NTRK3-I769 IECITQGRVL  | 169  | >NTRK3-I769 IECNTQGRVL   | 141   | 28    |
| >NTRK3-I769 VIECITQGRV  | 361  | >NTRK3-I769 VIECNTQGRV   | 278   | 83    |
| >NTRK3-I769 VIECITQGRV  | 92   | >NTRK3-I769 VIECNTQGRV   | 67    | 25    |
| >NTRK3-I769 VIECITQGR   | 196  | >NTRK3-I769 VIECNTQGR    | 760   | 564   |
| >NTRK3-I769 VIECITQGR   | 183  | >NTRK3-I769 VIECNTQGR    | 273   | 90    |
| >NTRK3-I769 EVIECITQGR\ | 152  | >NTRK3-I769 EVIECNTQGR   | 347   | 195   |
| >NTRK3-I769 EVIECITQ    | 579  | >NTRK3-I769 EVIECNTQ     | 486   | 93    |
| >NTRK3-I769 EVIECITQGR\ | 72   | >NTRK3-I769 EVIECNTQGR   | 134   | 62    |
| >NTRK3-I769 EVIECITQ    | 80   | >NTRK3-I769 EVIECNTQ     | 118   | 38    |
| >NTRK3-I769 EVIECITQGR  | 215  | >NTRK3-I769 EVIECNTQGR   | 351   | 136   |
| >NTRK3-I769 EVIECITQGR\ | 35   | >NTRK3-I769 EVIECNTQGR   | 75    | 40    |
| >NTRK3-I769 EVIECITQGR  | 234  | >NTRK3-I769 EVIECNTQGR   | 752   | 518   |
| >NTRK3-I769 EVIECITQGR  | 163  | >NTRK3-I769 EVIECNTQGR   | 640   | 477   |
| >NTRK3-I769 EVIECITQ    | 285  | >NTRK3-I769 EVIECNTQ     | 266   | 19    |
| >NTRK3-I769 EVIECITQGR  | 4    | >NTRK3-I769 EVIECNTQGR   | 8     | 4     |
| >NTRK3-I769 EVIECITQGR\ | 6    | >NTRK3-I769 EVIECNTQGR   | 6     | 0     |
| >NTRK3-I769 EVIECITQGR\ | 10   | >NTRK3-I769 EVIECNTQGR   | 11    | 1     |
| >NTRK3-I769 EVIECITQGR  | 184  | >NTRK3-I769 EVIECNTQGR   | 230   | 46    |
| >NTRK3-I769 NTEVIECI    | 493  | >NTRK3-I769 NTEVIECN     | 20337 | 19844 |
| >NTRK3-I769 SNTEVIECI   | 409  | >NTRK3-I769 SNTEVIECN    | 33606 | 33197 |
| >NTRK3-I769 LSNTVIECI   | 437  | >NTRK3-I769 LSNTVIECN    | 17327 | 16890 |
| >NTRK3-I769 LSNTVIECI   | 134  | >NTRK3-I769 LSNTVIECN    | 35647 | 35513 |
| >NTRK3-L152 LRELQLEQNF  | 257  | >NTRK3-L152 IRELQLEQNF   | 165   | 92    |
| >NTRK3-L152 LRELQLEQNF  | 790  | >NTRK3-L152 IRELQLEQNF   | 366   | 424   |
| >NTRK3-L152 LRELQLEQNF  | 844  | >NTRK3-L152 IRELQLEQNF I | 475   | 369   |
| >NTRK3-L152 SLRELQLEQ   | 100  | >NTRK3-L152 SIRELQLEQ    | 6444  | 6344  |
| >NTRK3-L152 SLRELQLEQN  | 222  | >NTRK3-L152 SIRELQLEQNI  | 599   | 377   |
| >NTRK3-L152 SLRELQLEQN  | 402  | >NTRK3-L152 SIRELQLEQNI  | 2420  | 2018  |
| >NTRK3-L152 SLRELQLEQN  | 89   | >NTRK3-L152 SIRELQLEQNI  | 390   | 301   |
| >NTRK3-L152 SLRELQLEQN  | 501  | >NTRK3-L152 SIRELQLEQNI  | 339   | 162   |
| >NTRK3-L152 LSWQLFQTLS  | 7146 | >NTRK3-L152 LSWQLFQTLS   | 472   | 6674  |
| >NTRK3-L152 LSWQLFQTLS  | 178  | >NTRK3-L152 LSWQLFQTLS   | 78    | 100   |
| >NTRK3-L152 LSWQLFQTLS  | 90   | >NTRK3-L152 LSWQLFQTLS   | 140   | 50    |
| >NTRK3-L152 LSWQLFQTLS  | 10   | >NTRK3-L152 LSWQLFQTLS   | 35    | 25    |
| >NTRK3-L152 LSWQLFQTLS  | 207  | >NTRK3-L152 LSWQLFQTLS   | 113   | 94    |
| >NTRK3-L152 LSWQLFQTLS  | 417  | >NTRK3-L152 LSWQLFQTLS   | 1143  | 726   |
| >NTRK3-L152 LSWQLFQTLS  | 299  | >NTRK3-L152 LSWQLFQTLS   | 596   | 297   |
| >NTRK3-L152 LSWQLFQTLS  | 34   | >NTRK3-L152 LSWQLFQTLS   | 8     | 26    |
| >NTRK3-L152 LSLRELQL    | 28   | >NTRK3-L152 LSIRELQL     | 25    | 3     |
| >NTRK3-L152 LSLRELQL    | 233  | >NTRK3-L152 LSIRELQL     | 116   | 117   |

|                        |      |                        |      |      |
|------------------------|------|------------------------|------|------|
| >NTRK3-L152TSLRELQL    | 231  | >NTRK3-L152TSLSIRELQL  | 177  | 54   |
| >NTRK3-L152TSLRELQL    | 44   | >NTRK3-L152TSLSIRELQL  | 21   | 23   |
| >NTRK3-L152TSLRELQL    | 483  | >NTRK3-L152TSLSIRELQL  | 351  | 132  |
| >NTRK3-L152QTLSLREL    | 649  | >NTRK3-L152QTLSIREL    | 348  | 301  |
| >NTRK3-L152QTLSLRELQL  | 464  | >NTRK3-L152QTLSIRELQL  | 256  | 208  |
| >NTRK3-L152QTLSLRELQ   | 1568 | >NTRK3-L152QTLSIRELQ   | 372  | 1196 |
| >NTRK3-L152QTLSLREL    | 884  | >NTRK3-L152QTLSIREL    | 223  | 661  |
| >NTRK3-L152QTLSLREL    | 264  | >NTRK3-L152QTLSIREL    | 230  | 34   |
| >NTRK3-L152QTLSLRELQL  | 506  | >NTRK3-L152QTLSIRELQL  | 392  | 114  |
| >NTRK3-L152QTLSLREL    | 84   | >NTRK3-L152QTLSIREL    | 121  | 37   |
| >NTRK3-L152QTLSLRELQL  | 46   | >NTRK3-L152QTLSIRELQL  | 66   | 20   |
| >NTRK3-L152QTLSLRELQ   | 296  | >NTRK3-L152QTLSIRELQ   | 253  | 43   |
| >NTRK3-L152FQTLSLREL   | 213  | >NTRK3-L152FQTLSIREL   | 248  | 35   |
| >NTRK3-L152FQTLSLREL   | 285  | >NTRK3-L152FQTLSIREL   | 348  | 63   |
| >NTRK3-L152FQTLSLREL   | 20   | >NTRK3-L152FQTLSIREL   | 33   | 13   |
| >NTRK3-L152FQTLSLRELQI | 53   | >NTRK3-L152FQTLSIRELQL | 67   | 14   |
| >NTRK3-L152FQTLSLREL   | 136  | >NTRK3-L152FQTLSIREL   | 75   | 61   |
| >NTRK3-L152FQTLSLRELQI | 353  | >NTRK3-L152FQTLSIRELQL | 244  | 109  |
| >NTRK3-L152LFQTLSLREL  | 119  | >NTRK3-L152LFQTLSIREL  | 121  | 2    |
| >NTRK3-L152LFQTLSLR    | 24   | >NTRK3-L152LFQTLSIR    | 42   | 18   |
| >NTRK3-L152LFQTLSLR    | 158  | >NTRK3-L152LFQTLSIR    | 549  | 391  |
| >NTRK3-L152LFQTLSLR    | 226  | >NTRK3-L152LFQTLSIR    | 362  | 136  |
| >NTRK3-L152QLFQTLSL    | 71   | >NTRK3-L152QLFQTLSI    | 95   | 24   |
| >NTRK3-L152QLFQTLSLREI | 259  | >NTRK3-L152QLFQTLSIREL | 307  | 48   |
| >NTRK3-L152QLFQTLSL    | 26   | >NTRK3-L152QLFQTLSI    | 65   | 39   |
| >NTRK3-L152QLFQTLSLREI | 48   | >NTRK3-L152QLFQTLSIREL | 67   | 19   |
| >NTRK3-L152QLFQTLSL    | 50   | >NTRK3-L152QLFQTLSI    | 27   | 23   |
| >NTRK3-L152QLFQTLSLREI | 71   | >NTRK3-L152QLFQTLSIREL | 86   | 15   |
| >NTRK3-L152QLFQTLSL    | 166  | >NTRK3-L152QLFQTLSI    | 179  | 13   |
| >NTRK3-L152QLFQTLSL    | 14   | >NTRK3-L152QLFQTLSI    | 12   | 2    |
| >NTRK3-L152QLFQTLSLREI | 17   | >NTRK3-L152QLFQTLSIREL | 14   | 3    |
| >NTRK3-L152QLFQTLSL    | 82   | >NTRK3-L152QLFQTLSI    | 82   | 0    |
| >NTRK3-L152QLFQTLSLREI | 248  | >NTRK3-L152QLFQTLSIREL | 242  | 6    |
| >NTRK3-L152QLFQTLSL    | 59   | >NTRK3-L152QLFQTLSI    | 80   | 21   |
| >NTRK3-L152QLFQTLSLREI | 213  | >NTRK3-L152QLFQTLSIREL | 164  | 49   |
| >NTRK3-L152QLFQTLSL    | 410  | >NTRK3-L152QLFQTLSI    | 761  | 351  |
| >NTRK3-L152QLFQTLSL    | 5    | >NTRK3-L152QLFQTLSI    | 12   | 7    |
| >NTRK3-L152QLFQTLSLREI | 13   | >NTRK3-L152QLFQTLSIREL | 11   | 2    |
| >NTRK3-L152QLFQTLSLR   | 339  | >NTRK3-L152QLFQTLSIR   | 1833 | 1494 |
| >NTRK3-L152QLFQTLSLR   | 144  | >NTRK3-L152QLFQTLSIR   | 428  | 284  |
| >NTRK3-L152QLFQTLSL    | 49   | >NTRK3-L152QLFQTLSI    | 18   | 31   |
| >NTRK3-L152QLFQTLSLR   | 294  | >NTRK3-L152QLFQTLSIR   | 1550 | 1256 |
| >NTRK3-L152QLFQTLSLR   | 19   | >NTRK3-L152QLFQTLSIR   | 76   | 57   |



|                         |      |                         |      |      |
|-------------------------|------|-------------------------|------|------|
| >NTRK3-L152QLFQTLSSL    | 322  | >NTRK3-L152QLFQTLSSI    | 855  | 533  |
| >NTRK3-L152QLFQTLSSL    | 130  | >NTRK3-L152QLFQTLSSI    | 218  | 88   |
| >NTRK3-L152QLFQTLSSLREI | 323  | >NTRK3-L152QLFQTLSSIREL | 214  | 109  |
| >NTRK3-L152QLFQTLSSLR   | 173  | >NTRK3-L152QLFQTLSSIR   | 299  | 126  |
| >NTRK3-L152WQLFQTLSSL   | 2028 | >NTRK3-L152WQLFQTLSSI   | 100  | 1928 |
| >NTRK3-L152WQLFQTLSSL   | 381  | >NTRK3-L152WQLFQTLSSI   | 467  | 86   |
| >NTRK3-L152WQLFQTLSSL   | 14   | >NTRK3-L152WQLFQTLSSI   | 14   | 0    |
| >NTRK3-L152WQLFQTLSSLF  | 492  | >NTRK3-L152WQLFQTLSSIR  | 1177 | 685  |
| >NTRK3-L152WQLFQTLSSLF  | 151  | >NTRK3-L152WQLFQTLSSIR  | 473  | 322  |
| >NTRK3-L152WQLFQTLSSLF  | 348  | >NTRK3-L152WQLFQTLSSIR  | 1226 | 878  |
| >NTRK3-L152WQLFQTLSSL   | 225  | >NTRK3-L152WQLFQTLSSI   | 596  | 371  |
| >NTRK3-L152WQLFQTLSSL   | 24   | >NTRK3-L152WQLFQTLSSI   | 36   | 12   |
| >NTRK3-L152WQLFQTLSSLF  | 452  | >NTRK3-L152WQLFQTLSSIR  | 186  | 266  |
| >NTRK3-L152WQLFQTLSSL   | 27   | >NTRK3-L152WQLFQTLSSI   | 291  | 264  |
| >NTRK3-L152WQLFQTLSSL   | 469  | >NTRK3-L152WQLFQTLSSI   | 1099 | 630  |
| >NTRK3-L152WQLFQTLSSL   | 78   | >NTRK3-L152WQLFQTLSSI   | 417  | 339  |
| >NTRK3-L152WQLFQTLSSL   | 1522 | >NTRK3-L152WQLFQTLSSI   | 463  | 1059 |
| >NTRK3-L152WQLFQTLSSLF  | 220  | >NTRK3-L152WQLFQTLSSIR  | 307  | 87   |
| >NTRK3-L152SWQLFQTLSSL  | 221  | >NTRK3-L152SWQLFQTLSSI  | 615  | 394  |
| >NTRK3-L152SWQLFQTLSSL  | 127  | >NTRK3-L152SWQLFQTLSSI  | 141  | 14   |
| >NTRK3-L152SWQLFQTLSSL  | 84   | >NTRK3-L152SWQLFQTLSSI  | 197  | 113  |
| >NTRK3-L152SWQLFQTLSSL  | 28   | >NTRK3-L152SWQLFQTLSSI  | 39   | 11   |
| >NTRK3-L152SWQLFQTLSSL  | 100  | >NTRK3-L152SWQLFQTLSSI  | 227  | 127  |
| >NTRK3-L152SWQLFQTLSSL  | 222  | >NTRK3-L152SWQLFQTLSSI  | 268  | 46   |
| >NTRK3-L248LQSINTHQTN   | 109  | >NTRK3-L248MQSINTHQTN   | 31   | 78   |
| >NTRK3-L248LQSINTHQTN   | 624  | >NTRK3-L248MQSINTHQTN   | 177  | 447  |
| >NTRK3-L248LQSINTHQTN   | 793  | >NTRK3-L248MQSINTHQTN   | 212  | 581  |
| >NTRK3-L248LQSINTHQTN   | 74   | >NTRK3-L248MQSINTHQTN   | 37   | 37   |
| >NTRK3-L248LQSINTHQTN   | 2601 | >NTRK3-L248MQSINTHQTN   | 274  | 2327 |
| >NTRK3-L248GLQSINTHQTN  | 58   | >NTRK3-L248GMQSINTHQTN  | 110  | 52   |
| >NTRK3-L248LPDVDWIVTC   | 311  | >NTRK3-L248LPDVDWIVTC   | 34   | 277  |
| >NTRK3-L248LPDVDWIVTC   | 147  | >NTRK3-L248LPDVDWIVTC   | 94   | 53   |
| >NTRK3-L248IVTGLQSI     | 264  | >NTRK3-L248IVTGMQSI     | 480  | 216  |
| >NTRK3-L248IVTGLQSI     | 187  | >NTRK3-L248IVTGMQSI     | 154  | 33   |
| >NTRK3-L248IVTGLQSINT   | 185  | >NTRK3-L248IVTGMQSINT   | 213  | 28   |
| >NTRK3-L248WIVTGLQSI    | 458  | >NTRK3-L248WIVTGMQSI    | 666  | 208  |
| >NTRK3-L248WIVTGLQSI    | 29   | >NTRK3-L248WIVTGMQSI    | 42   | 13   |
| >NTRK3-L248WIVTGLQSI    | 14   | >NTRK3-L248WIVTGMQSI    | 23   | 9    |
| >NTRK3-L248WIVTGLQSI    | 333  | >NTRK3-L248WIVTGMQSI    | 796  | 463  |
| >NTRK3-L248WIVTGLQSI    | 109  | >NTRK3-L248WIVTGMQSI    | 206  | 97   |
| >NTRK3-L248WIVTGLQSI    | 928  | >NTRK3-L248WIVTGMQSI    | 312  | 616  |
| >NTRK3-L248WIVTGLQSI    | 619  | >NTRK3-L248WIVTGMQSI    | 234  | 385  |
| >NTRK3-L248WIVTGLQSI    | 703  | >NTRK3-L248WIVTGMQSI    | 372  | 331  |

|                        |      |                        |      |      |
|------------------------|------|------------------------|------|------|
| >NTRK3-L24€VDWIVTGLQ!  | 56   | >NTRK3-L24€VDWIVTGMC   | 71   | 15   |
| >NTRK3-L24€VDWIVTGLQ!  | 83   | >NTRK3-L24€VDWIVTGMC   | 109  | 26   |
| >NTRK3-L24€VDWIVTGLQ!  | 448  | >NTRK3-L24€VDWIVTGMC   | 497  | 49   |
| >NTRK3-L24€VDWIVTGLQ!  | 117  | >NTRK3-L24€VDWIVTGMC   | 91   | 26   |
| >NTRK3-L24€DVDWIVTGL   | 209  | >NTRK3-L24€DVDWIVTGM   | 2027 | 1818 |
| >NTRK3-L24€DVDWIVTGL   | 15   | >NTRK3-L24€DVDWIVTGM   | 20   | 5    |
| >NTRK3-L27C LVNVTSEDNC | 176  | >NTRK3-L27C MVNVTSEDN  | 213  | 37   |
| >NTRK3-L27C LVNVTSEDNC | 579  | >NTRK3-L27C MVNVTSEDN  | 339  | 240  |
| >NTRK3-L27C LVNVTSEDNC | 670  | >NTRK3-L27C MVNVTSEDN  | 274  | 396  |
| >NTRK3-L27C LVNVTSEDNC | 496  | >NTRK3-L27C MVNVTSEDN  | 86   | 410  |
| >NTRK3-L27C LVNVTSEDNC | 884  | >NTRK3-L27C MVNVTSEDN  | 393  | 491  |
| >NTRK3-L27C WTNVHAINL' | 464  | >NTRK3-L27C WTNVHAINL' | 3246 | 2782 |
| >NTRK3-L27C WTNVHAINL' | 230  | >NTRK3-L27C WTNVHAINL' | 301  | 71   |
| >NTRK3-L27C WTNVHAINL' | 17   | >NTRK3-L27C WTNVHAINL' | 13   | 4    |
| >NTRK3-L27C WTNVHAINL' | 2105 | >NTRK3-L27C WTNVHAINL' | 166  | 1939 |
| >NTRK3-L27C WTNVHAINL' | 1664 | >NTRK3-L27C WTNVHAINL' | 479  | 1185 |
| >NTRK3-L27C WTNVHAINL' | 138  | >NTRK3-L27C WTNVHAINL' | 26   | 112  |
| >NTRK3-L27C INLTLVNV   | 84   | >NTRK3-L27C INLTMVNV   | 72   | 12   |
| >NTRK3-L27C AINLTLVNV  | 147  | >NTRK3-L27C AINLTMVNV  | 149  | 2    |
| >NTRK3-L27C AINLTLVNV  | 19   | >NTRK3-L27C AINLTMVNV  | 26   | 7    |
| >NTRK3-L27C AINLTLVNV  | 141  | >NTRK3-L27C AINLTMVNV  | 266  | 125  |
| >NTRK3-L27C AINLTLVNV  | 66   | >NTRK3-L27C AINLTMVNV  | 162  | 96   |
| >NTRK3-L27C AINLTLVNV  | 200  | >NTRK3-L27C AINLTMVNV  | 672  | 472  |
| >NTRK3-L27C AINLTLVNV  | 66   | >NTRK3-L27C AINLTMVNV  | 129  | 63   |
| >NTRK3-L27C AINLTLVNV  | 82   | >NTRK3-L27C AINLTMVNV  | 751  | 669  |
| >NTRK3-L27C AINLTLVNV  | 11   | >NTRK3-L27C AINLTMVNV  | 21   | 10   |
| >NTRK3-L27C HAINLTLVNV | 332  | >NTRK3-L27C HAINLTMVN' | 752  | 420  |
| >NTRK3-L27C HAINLTLV   | 481  | >NTRK3-L27C HAINLTMV   | 908  | 427  |
| >NTRK3-L27C HAINLTLV   | 162  | >NTRK3-L27C HAINLTMV   | 192  | 30   |
| >NTRK3-L27C HAINLTLVNV | 118  | >NTRK3-L27C HAINLTMVN' | 205  | 87   |
| >NTRK3-L27C HAINLTLV   | 60   | >NTRK3-L27C HAINLTMV   | 102  | 42   |
| >NTRK3-L27C HAINLTLVNV | 84   | >NTRK3-L27C HAINLTMVN' | 163  | 79   |
| >NTRK3-L27C HAINLTLV   | 19   | >NTRK3-L27C HAINLTMV   | 20   | 1    |
| >NTRK3-L27C HAINLTLVNV | 132  | >NTRK3-L27C HAINLTMVN' | 85   | 47   |
| >NTRK3-L27C HAINLTLV   | 71   | >NTRK3-L27C HAINLTMV   | 30   | 41   |
| >NTRK3-L27C HAINLTLVNV | 41   | >NTRK3-L27C HAINLTMVN' | 25   | 16   |
| >NTRK3-L27C VHAINLTL   | 418  | >NTRK3-L27C VHAINLTM   | 902  | 484  |
| >NTRK3-L27C VHAINLTL   | 347  | >NTRK3-L27C VHAINLTM   | 1661 | 1314 |
| >NTRK3-L27C NVHAINLTLV | 427  | >NTRK3-L27C NVHAINLTM' | 757  | 330  |
| >NTRK3-L27C NVHAINLTLV | 79   | >NTRK3-L27C NVHAINLTM' | 110  | 31   |
| >NTRK3-L27C NVHAINLTLV | 768  | >NTRK3-L27C NVHAINLTM' | 363  | 405  |
| >NTRK3-L27C NVHAINLTLV | 204  | >NTRK3-L27C NVHAINLTM' | 251  | 47   |
| >NTRK3-L27C NVHAINLTL  | 1307 | >NTRK3-L27C NVHAINLTM  | 213  | 1094 |

|                         |       |                        |       |       |
|-------------------------|-------|------------------------|-------|-------|
| >NTRK3-L27C NVHAINLTL   | 287   | >NTRK3-L27C NVHAINLTM  | 1176  | 889   |
| >NTRK3-L27C NVHAINLTL   | 38    | >NTRK3-L27C NVHAINLTM  | 362   | 324   |
| >NTRK3-L27C NVHAINLTLV  | 120   | >NTRK3-L27C NVHAINLTM' | 211   | 91    |
| >NTRK3-L27C NVHAINLTLV  | 137   | >NTRK3-L27C NVHAINLTM' | 69    | 68    |
| >NTRK3-L27C NVHAINLTL   | 3072  | >NTRK3-L27C NVHAINLTM  | 222   | 2850  |
| >NTRK3-L27C NVHAINLTL   | 356   | >NTRK3-L27C NVHAINLTM  | 2217  | 1861  |
| >NTRK3-L27C TNVHAINLTL' | 112   | >NTRK3-L27C TNVHAINLTM | 185   | 73    |
| >NTRK3-L33C WLHNGQPL    | 321   | >NTRK3-L33C WQHNGQPL   | 4446  | 4125  |
| >NTRK3-L33C WLHNGQPL    | 100   | >NTRK3-L33C WQHNGQPL   | 2954  | 2854  |
| >NTRK3-L33C WLHNGQPL    | 33    | >NTRK3-L33C WQHNGQPL   | 845   | 812   |
| >NTRK3-L33C WLHNGQPL    | 174   | >NTRK3-L33C WQHNGQPL   | 71    | 103   |
| >NTRK3-L33C WLHNGQPL    | 7     | >NTRK3-L33C WQHNGQPL   | 937   | 930   |
| >NTRK3-L33C WLHNGQPL    | 26    | >NTRK3-L33C WQHNGQPL   | 2878  | 2852  |
| >NTRK3-L33C WLHNGQPL    | 36    | >NTRK3-L33C WQHNGQPL   | 3818  | 3782  |
| >NTRK3-L33C WLHNGQPL    | 183   | >NTRK3-L33C WQHNGQPL   | 12246 | 12063 |
| >NTRK3-L33C WLHNGQPL    | 4     | >NTRK3-L33C WQHNGQPL   | 3228  | 3224  |
| >NTRK3-L33C WLHNGQPLR   | 450   | >NTRK3-L33C WQHNGQPLI  | 3302  | 2852  |
| >NTRK3-L33C WLHNGQPL    | 278   | >NTRK3-L33C WQHNGQPL   | 88    | 190   |
| >NTRK3-L33C WLHNGQPL    | 181   | >NTRK3-L33C WQHNGQPL   | 187   | 6     |
| >NTRK3-L33C WLHNGQPL    | 176   | >NTRK3-L33C WQHNGQPL   | 13    | 163   |
| >NTRK3-L33C WLHNGQPL    | 590   | >NTRK3-L33C WQHNGQPL   | 23    | 567   |
| >NTRK3-L33C WLHNGQPL    | 15963 | >NTRK3-L33C WQHNGQPL   | 270   | 15693 |
| >NTRK3-L33C WLHNGQPL    | 2356  | >NTRK3-L33C WQHNGQPL   | 51    | 2305  |
| >NTRK3-L33C RGNPPPTLHV  | 227   | >NTRK3-L33C RGNPPPTLHV | 15737 | 15510 |
| >NTRK3-L33C HWLHNGQPI   | 112   | >NTRK3-L33C HWQHNGQP   | 225   | 113   |
| >NTRK3-L33C HWLHNGQPI   | 12    | >NTRK3-L33C HWQHNGQP   | 18    | 6     |
| >NTRK3-L33C HWLHNGQPI   | 341   | >NTRK3-L33C HWQHNGQP   | 591   | 250   |
| >NTRK3-L33C LHWLHNGQF   | 169   | >NTRK3-L33C LHWQHNGQ   | 94    | 75    |
| >NTRK3-L33C LHWLHNGQF   | 358   | >NTRK3-L33C LHWQHNGQ   | 359   | 1     |
| >NTRK3-L33C LHWLHNGQF   | 687   | >NTRK3-L33C LHWQHNGQ   | 332   | 355   |
| >NTRK3-L33C LHWLHNGQF   | 451   | >NTRK3-L33C LHWQHNGQ   | 281   | 170   |
| >NTRK3-L33C TLHWLHNGC   | 117   | >NTRK3-L33C TLHWQHNGC  | 196   | 79    |
| >NTRK3-L33C TLHWLHNGC   | 98    | >NTRK3-L33C TLHWQHNGC  | 112   | 14    |
| >NTRK3-L33C TLHWLHNGC   | 16    | >NTRK3-L33C TLHWQHNGC  | 21    | 5     |
| >NTRK3-L33C TLHWLHNGC   | 379   | >NTRK3-L33C TLHWQHNGC  | 338   | 41    |
| >NTRK3-L33C TLHWLHNGC   | 153   | >NTRK3-L33C TLHWQHNGC  | 237   | 84    |
| >NTRK3-L33C TLHWLHNGC   | 594   | >NTRK3-L33C TLHWQHNGC  | 482   | 112   |
| >NTRK3-L33C TLHWLHNGC   | 9     | >NTRK3-L33C TLHWQHNGC  | 7     | 2     |
| >NTRK3-L33C PPPTLHWL    | 121   | >NTRK3-L33C PPPTLHWQ   | 14175 | 14054 |
| >NTRK3-L33C PPPTLHWL    | 351   | >NTRK3-L33C PPPTLHWQ   | 24989 | 24638 |
| >NTRK3-L33C NPPPTLHWL   | 208   | >NTRK3-L33C NPPPTLHWQ  | 18318 | 18110 |
| >NTRK3-L33C NPPPTLHWL   | 26    | >NTRK3-L33C NPPPTLHWQ  | 4357  | 4331  |
| >NTRK3-L33C GNPPPTLHW   | 26    | >NTRK3-L33C GNPPPTLHW  | 4307  | 4281  |

|                         |       |                         |       |       |
|-------------------------|-------|-------------------------|-------|-------|
| >NTRK3-L81E LGKATPIYL   | 176   | >NTRK3-L81E FGKATPIYL   | 3481  | 3305  |
| >NTRK3-L81E LGKATPIY    | 245   | >NTRK3-L81E FGKATPIY    | 626   | 381   |
| >NTRK3-L81E LGKATPIY    | 270   | >NTRK3-L81E FGKATPIY    | 312   | 42    |
| >NTRK3-L81E LGKATPIY    | 2331  | >NTRK3-L81E FGKATPIY    | 302   | 2029  |
| >NTRK3-L81E LGKATPIY    | 742   | >NTRK3-L81E FGKATPIY    | 296   | 446   |
| >NTRK3-L81E ALGKATPI    | 370   | >NTRK3-L81E AFGKATPI    | 19663 | 19293 |
| >NTRK3-L81E ALGKATPIYL  | 74    | >NTRK3-L81E AFGKATPIYL  | 10864 | 10790 |
| >NTRK3-L81E ALGKATPI    | 119   | >NTRK3-L81E AFGKATPI    | 7297  | 7178  |
| >NTRK3-L81E ALGKATPIYL  | 24    | >NTRK3-L81E AFGKATPIYL  | 3572  | 3548  |
| >NTRK3-L81E ALGKATPI    | 51    | >NTRK3-L81E AFGKATPI    | 15377 | 15326 |
| >NTRK3-L81E ALGKATPIYL  | 52    | >NTRK3-L81E AFGKATPIYL  | 9028  | 8976  |
| >NTRK3-L81E ALGKATPI    | 53    | >NTRK3-L81E AFGKATPI    | 17330 | 17277 |
| >NTRK3-L81E ALGKATPIYL  | 10    | >NTRK3-L81E AFGKATPIYL  | 5026  | 5016  |
| >NTRK3-L81E ALGKATPI    | 78    | >NTRK3-L81E AFGKATPI    | 18069 | 17991 |
| >NTRK3-L81E ALGKATPIYL  | 16    | >NTRK3-L81E AFGKATPIYL  | 14469 | 14453 |
| >NTRK3-L81E ALGKATPI    | 40    | >NTRK3-L81E AFGKATPI    | 13414 | 13374 |
| >NTRK3-L81E ALGKATPIYL  | 10    | >NTRK3-L81E AFGKATPIYL  | 5752  | 5742  |
| >NTRK3-L81E ALGKATPIYL  | 16    | >NTRK3-L81E AFGKATPIYL  | 13704 | 13688 |
| >NTRK3-L81E ALGKATPI    | 21    | >NTRK3-L81E AFGKATPI    | 22564 | 22543 |
| >NTRK3-L81E ALGKATPIYL  | 8     | >NTRK3-L81E AFGKATPIYL  | 8202  | 8194  |
| >NTRK3-L81E ALGKATPIYL  | 10364 | >NTRK3-L81E AFGKATPIYL  | 113   | 10251 |
| >NTRK3-L81E ALGKATPIY   | 669   | >NTRK3-L81E AFGKATPIY   | 203   | 466   |
| >NTRK3-L81E ALGKATPIY   | 75    | >NTRK3-L81E AFGKATPIY   | 229   | 154   |
| >NTRK3-L81E ALGKATPI    | 391   | >NTRK3-L81E AFGKATPI    | 6334  | 5943  |
| >NTRK3-L81E ALGKATPIY   | 24    | >NTRK3-L81E AFGKATPIY   | 144   | 120   |
| >NTRK3-L81E ALGKATPIY   | 90    | >NTRK3-L81E AFGKATPIY   | 1765  | 1675  |
| >NTRK3-L81E ALGKATPIYL  | 13254 | >NTRK3-L81E AFGKATPIYL  | 226   | 13028 |
| >NTRK3-L81E IKEIYKILHAL | 930   | >NTRK3-L81E IKEIYKILHAF | 42    | 888   |
| >NTRK3-L81E HALGKATPIYI | 2363  | >NTRK3-L81E HAFGKATPIYI | 364   | 1999  |
| >NTRK3-L81E HALGKATPIYI | 539   | >NTRK3-L81E HAFGKATPIYI | 328   | 211   |
| >NTRK3-L81E HALGKATPIY  | 817   | >NTRK3-L81E HAFGKATPIY  | 190   | 627   |
| >NTRK3-L81E HALGKATPIYI | 553   | >NTRK3-L81E HAFGKATPIYI | 309   | 244   |
| >NTRK3-L81E HALGKATPIY  | 329   | >NTRK3-L81E HAFGKATPIY  | 129   | 200   |
| >NTRK3-L81E HALGKATPI   | 439   | >NTRK3-L81E HAFGKATPI   | 55    | 384   |
| >NTRK3-L81E HALGKATPI   | 819   | >NTRK3-L81E HAFGKATPI   | 23    | 796   |
| >NTRK3-L81E HALGKATPIYI | 1939  | >NTRK3-L81E HAFGKATPIYI | 47    | 1892  |
| >NTRK3-L81E HALGKATPI   | 194   | >NTRK3-L81E HAFGKATPI   | 449   | 255   |
| >NTRK3-L81E HALGKATPIYI | 188   | >NTRK3-L81E HAFGKATPIYI | 388   | 200   |
| >NTRK3-L81E HALGKATPIY  | 1937  | >NTRK3-L81E HAFGKATPIY  | 309   | 1628  |
| >NTRK3-L81E HALGKATPIY  | 1293  | >NTRK3-L81E HAFGKATPIY  | 485   | 808   |
| >NTRK3-L81E HALGKATPIY  | 867   | >NTRK3-L81E HAFGKATPIY  | 154   | 713   |
| >NTRK3-L81E HALGKATPI   | 33    | >NTRK3-L81E HAFGKATPI   | 16    | 17    |
| >NTRK3-L81E HALGKATPIY  | 18    | >NTRK3-L81E HAFGKATPIY  | 14    | 4     |

|                         |      |                         |       |       |
|-------------------------|------|-------------------------|-------|-------|
| >NTRK3-L81E HALGKATPIYI | 40   | >NTRK3-L81E HAFGKATPIYI | 21    | 19    |
| >NTRK3-L81E HALGKATPIYI | 730  | >NTRK3-L81E HAFGKATPIYI | 352   | 378   |
| >NTRK3-L81E HALGKATPIY  | 1503 | >NTRK3-L81E HAFGKATPIY  | 431   | 1072  |
| >NTRK3-L81E HALGKATPI   | 512  | >NTRK3-L81E HAFGKATPI   | 102   | 410   |
| >NTRK3-L81E LHALGKATPI  | 691  | >NTRK3-L81E LHAFGKATPI  | 267   | 424   |
| >NTRK3-L81E LHALGKATPI  | 217  | >NTRK3-L81E LHAFGKATPI  | 72    | 145   |
| >NTRK3-L81E LHALGKATPI  | 513  | >NTRK3-L81E LHAFGKATPI  | 326   | 187   |
| >NTRK3-L81E LHALGKATPI  | 304  | >NTRK3-L81E LHAFGKATPI  | 228   | 76    |
| >NTRK3-L81E ILHALGKATPI | 593  | >NTRK3-L81E ILHAFGKATPI | 368   | 225   |
| >NTRK3-L81E ILHALGKA    | 551  | >NTRK3-L81E ILHAFGKA    | 440   | 111   |
| >NTRK3-L81E ILHALGKATPI | 107  | >NTRK3-L81E ILHAFGKATPI | 75    | 32    |
| >NTRK3-L81E ILHALGKA    | 35   | >NTRK3-L81E ILHAFGKA    | 35    | 0     |
| >NTRK3-L81E ILHALGKATPI | 13   | >NTRK3-L81E ILHAFGKATPI | 10    | 3     |
| >NTRK3-L81E ILHALGKA    | 126  | >NTRK3-L81E ILHAFGKA    | 87    | 39    |
| >NTRK3-L81E ILHALGKAT   | 1171 | >NTRK3-L81E ILHAFGKAT   | 352   | 819   |
| >NTRK3-L81E ILHALGKATPI | 24   | >NTRK3-L81E ILHAFGKATPI | 15    | 9     |
| >NTRK3-L81E ILHALGKATPI | 354  | >NTRK3-L81E ILHAFGKATPI | 258   | 96    |
| >NTRK3-L81E ILHALGKA    | 77   | >NTRK3-L81E ILHAFGKA    | 56    | 21    |
| >NTRK3-L81E ILHALGKATPI | 44   | >NTRK3-L81E ILHAFGKATPI | 27    | 17    |
| >NTRK3-L81E ILHALGKATPI | 356  | >NTRK3-L81E ILHAFGKATPI | 288   | 68    |
| >NTRK3-L81E ILHALGKATPI | 383  | >NTRK3-L81E ILHAFGKATPI | 164   | 219   |
| >NTRK3-L81E KILHALGKA   | 366  | >NTRK3-L81E KILHAFGKA   | 992   | 626   |
| >NTRK3-L81E KILHALGKA   | 231  | >NTRK3-L81E KILHAFGKA   | 116   | 115   |
| >NTRK3-L81E KILHALGK    | 49   | >NTRK3-L81E KILHAFGK    | 44    | 5     |
| >NTRK3-L81E KILHALGK    | 59   | >NTRK3-L81E KILHAFGK    | 28    | 31    |
| >NTRK3-L81E KILHALGK    | 12   | >NTRK3-L81E KILHAFGK    | 14    | 2     |
| >NTRK3-L81E KILHALGKA   | 217  | >NTRK3-L81E KILHAFGKA   | 159   | 58    |
| >NTRK3-L81E KILHALGK    | 2123 | >NTRK3-L81E KILHAFGK    | 209   | 1914  |
| >NTRK3-L81E KILHALGK    | 260  | >NTRK3-L81E KILHAFGK    | 128   | 132   |
| >NTRK3-L81E YKILHALGKA  | 583  | >NTRK3-L81E YKILHAFGKA  | 493   | 90    |
| >NTRK3-L81E IYKILHAL    | 441  | >NTRK3-L81E IYKILHAF    | 8378  | 7937  |
| >NTRK3-L81E IYKILHAL    | 285  | >NTRK3-L81E IYKILHAF    | 39    | 246   |
| >NTRK3-L81E IYKILHAL    | 293  | >NTRK3-L81E IYKILHAF    | 82    | 211   |
| >NTRK3-L81E IYKILHAL    | 58   | >NTRK3-L81E IYKILHAF    | 20    | 38    |
| >NTRK3-L81E IYKILHAL    | 464  | >NTRK3-L81E IYKILHAF    | 3976  | 3512  |
| >NTRK3-L81E IYKILHALG   | 378  | >NTRK3-L81E IYKILHAFG   | 72    | 306   |
| >NTRK3-L81E IYKILHALGK  | 10   | >NTRK3-L81E IYKILHAFGK  | 13    | 3     |
| >NTRK3-L81E IYKILHALGKA | 167  | >NTRK3-L81E IYKILHAFGKA | 122   | 45    |
| >NTRK3-L81E IYKILHAL    | 5448 | >NTRK3-L81E IYKILHAF    | 383   | 5065  |
| >NTRK3-L81E IYKILHALGK  | 291  | >NTRK3-L81E IYKILHAFGK  | 230   | 61    |
| >NTRK3-L81E EIYKILHAL   | 136  | >NTRK3-L81E EIYKILHAF   | 5304  | 5168  |
| >NTRK3-L81E EIYKILHAL   | 434  | >NTRK3-L81E EIYKILHAF   | 12061 | 11627 |
| >NTRK3-L81E EIYKILHAL   | 183  | >NTRK3-L81E EIYKILHAF   | 1831  | 1648  |

|                         |       |                         |       |       |
|-------------------------|-------|-------------------------|-------|-------|
| >NTRK3-L81E EIYKILHAL   | 110   | >NTRK3-L81E EIYKILHAF   | 7543  | 7433  |
| >NTRK3-L81E EIYKILHAL   | 147   | >NTRK3-L81E EIYKILHAF   | 21160 | 21013 |
| >NTRK3-L81E EIYKILHALGK | 89    | >NTRK3-L81E EIYKILHAFGK | 92    | 3     |
| >NTRK3-L81E EIYKILHALGK | 144   | >NTRK3-L81E EIYKILHAFGK | 79    | 65    |
| >NTRK3-L81E EIYKILHAL   | 142   | >NTRK3-L81E EIYKILHAF   | 46    | 96    |
| >NTRK3-L81E EIYKILHAL   | 72    | >NTRK3-L81E EIYKILHAF   | 12    | 60    |
| >NTRK3-L81E EIYKILHAL   | 10    | >NTRK3-L81E EIYKILHAF   | 3     | 7     |
| >NTRK3-L81E EIYKILHAL   | 448   | >NTRK3-L81E EIYKILHAF   | 318   | 130   |
| >NTRK3-L81E EIYKILHAL   | 337   | >NTRK3-L81E EIYKILHAF   | 64    | 273   |
| >NTRK3-L81E EIYKILHAL   | 1436  | >NTRK3-L81E EIYKILHAF   | 458   | 978   |
| >NTRK3-L81E EIYKILHALGK | 8     | >NTRK3-L81E EIYKILHAFGK | 4     | 4     |
| >NTRK3-L81E EIYKILHAL   | 18    | >NTRK3-L81E EIYKILHAF   | 2457  | 2439  |
| >NTRK3-L81E EIYKILHAL   | 6     | >NTRK3-L81E EIYKILHAF   | 608   | 602   |
| >NTRK3-L81E EIYKILHAL   | 286   | >NTRK3-L81E EIYKILHAF   | 1275  | 989   |
| >NTRK3-L81E EIYKILHAL   | 3986  | >NTRK3-L81E EIYKILHAF   | 217   | 3769  |
| >NTRK3-L81E EIYKILHAL   | 3873  | >NTRK3-L81E EIYKILHAF   | 221   | 3652  |
| >NTRK3-L81E EIYKILHAL   | 334   | >NTRK3-L81E EIYKILHAF   | 37    | 297   |
| >NTRK3-L81E EIYKILHALGK | 294   | >NTRK3-L81E EIYKILHAFGK | 336   | 42    |
| >NTRK3-L81E KEIYKILHAL  | 979   | >NTRK3-L81E KEIYKILHAF  | 203   | 776   |
| >NTRK3-L81E KEIYKILHAL  | 5805  | >NTRK3-L81E KEIYKILHAF  | 279   | 5526  |
| >NTRK3-L81E KEIYKILHAL  | 1071  | >NTRK3-L81E KEIYKILHAF  | 36    | 1035  |
| >NTRK3-L81E KEIYKILHAL  | 291   | >NTRK3-L81E KEIYKILHAF  | 1443  | 1152  |
| >NTRK3-L81E KEIYKILHAL  | 23    | >NTRK3-L81E KEIYKILHAF  | 47    | 24    |
| >NTRK3-L81E KEIYKILHAL  | 326   | >NTRK3-L81E KEIYKILHAF  | 52    | 274   |
| >NTRK3-L81E KEIYKILHAL  | 280   | >NTRK3-L81E KEIYKILHAF  | 60    | 220   |
| >NTRK3-L81E KEIYKILHAL  | 9     | >NTRK3-L81E KEIYKILHAF  | 16    | 7     |
| >NTRK3-N95: NAVDMELYT   | 1275  | >NTRK3-N95: SAVDMELYT   | 173   | 1102  |
| >NTRK3-N95: NAVDMELYT   | 799   | >NTRK3-N95: SAVDMELYT   | 228   | 571   |
| >NTRK3-N95: NAVDMELY    | 518   | >NTRK3-N95: SAVDMELY    | 245   | 273   |
| >NTRK3-N95: NAVDMELY    | 133   | >NTRK3-N95: SAVDMELY    | 51    | 82    |
| >NTRK3-N95: NAVDMELY    | 312   | >NTRK3-N95: SAVDMELY    | 868   | 556   |
| >NTRK3-N95: NAVDMELYT   | 225   | >NTRK3-N95: SAVDMELYT   | 569   | 344   |
| >NTRK3-N95: NAVDMELYT   | 397   | >NTRK3-N95: SAVDMELYT   | 803   | 406   |
| >NTRK3-N95: NAVDMELY    | 1492  | >NTRK3-N95: SAVDMELY    | 341   | 1151  |
| >NTRK3-N95: NAVDMELY    | 802   | >NTRK3-N95: SAVDMELY    | 44    | 758   |
| >NTRK3-N95: NAVDMELYT   | 2288  | >NTRK3-N95: SAVDMELYT   | 111   | 2177  |
| >NTRK3-N95: NAVDMELY    | 156   | >NTRK3-N95: SAVDMELY    | 288   | 132   |
| >NTRK3-N95: NAVDMELY    | 334   | >NTRK3-N95: SAVDMELY    | 1191  | 857   |
| >NTRK3-N95: LNAVDMELY   | 8026  | >NTRK3-N95: LSAVDMELY   | 21    | 8005  |
| >NTRK3-N95: LNAVDMELY   | 4840  | >NTRK3-N95: LSAVDMELY   | 117   | 4723  |
| >NTRK3-N95: LNAVDMELY   | 212   | >NTRK3-N95: LSAVDMELY   | 61    | 151   |
| >NTRK3-N95: LNAVDMELY   | 807   | >NTRK3-N95: LSAVDMELY   | 69    | 738   |
| >NTRK3-N95: LNAVDMEL    | 21716 | >NTRK3-N95: LSAVDMEL    | 69    | 21647 |

|                        |       |                        |     |       |
|------------------------|-------|------------------------|-----|-------|
| >NTRK3-N95: LNAVDMELY  | 20130 | >NTRK3-N95: LSAVDMELY  | 16  | 20114 |
| >NTRK3-N95: LNAVDMEL   | 15713 | >NTRK3-N95: LSAVDMEL   | 269 | 15444 |
| >NTRK3-N95: LNAVDMELY  | 13981 | >NTRK3-N95: LSAVDMELY  | 68  | 13913 |
| >NTRK3-N95: LNAVDMELY  | 484   | >NTRK3-N95: LSAVDMELY  | 26  | 458   |
| >NTRK3-N95: TLNAVDMEL' | 483   | >NTRK3-N95: TLSAVDMELY | 135 | 348   |
| >NTRK3-N95: TLNAVDMEL  | 95    | >NTRK3-N95: TLSAVDMEL  | 70  | 25    |
| >NTRK3-N95: TLNAVDMEL  | 13    | >NTRK3-N95: TLSAVDMEL  | 8   | 5     |
| >NTRK3-N95: TLNAVDMEL' | 397   | >NTRK3-N95: TLSAVDMELY | 168 | 229   |
| >NTRK3-N95: TLNAVDMEL  | 49    | >NTRK3-N95: TLSAVDMEL  | 74  | 25    |
| >NTRK3-N95: TLNAVDMEL  | 34    | >NTRK3-N95: TLSAVDMEL  | 88  | 54    |
| >NTRK3-N95: TLNAVDMEL' | 392   | >NTRK3-N95: TLSAVDMELY | 944 | 552   |
| >NTRK3-N95: TLNAVDMEL  | 138   | >NTRK3-N95: TLSAVDMEL  | 204 | 66    |
| >NTRK3-N95: TLNAVDMEL  | 28    | >NTRK3-N95: TLSAVDMEL  | 30  | 2     |
| >NTRK3-N95: TLNAVDMEL  | 9     | >NTRK3-N95: TLSAVDMEL  | 8   | 1     |
| >NTRK3-N95: TLNAVDMEL' | 330   | >NTRK3-N95: TLSAVDMELY | 268 | 62    |
| >NTRK3-N95: TLNAVDMEL' | 744   | >NTRK3-N95: TLSAVDMELY | 223 | 521   |
| >NTRK3-N95: TLNAVDMEL' | 184   | >NTRK3-N95: TLSAVDMELY | 118 | 66    |
| >NTRK3-N95: TLNAVDMEL  | 56    | >NTRK3-N95: TLSAVDMEL  | 41  | 15    |
| >NTRK3-N95: TLNAVDMEL' | 16    | >NTRK3-N95: TLSAVDMELY | 20  | 4     |
| >NTRK3-N95: TLNAVDMEL' | 338   | >NTRK3-N95: TLSAVDMELY | 390 | 52    |
| >NTRK3-N95: TLNAVDMEL' | 301   | >NTRK3-N95: TLSAVDMELY | 322 | 21    |
| >NTRK3-N95: HTLNAVDME  | 258   | >NTRK3-N95: HTLSAVDMEI | 341 | 83    |
| >NTRK3-N95: HTLNAVDME  | 123   | >NTRK3-N95: HTLSAVDMEI | 91  | 32    |
| >NTRK3-N95: HTLNAVDME  | 216   | >NTRK3-N95: HTLSAVDMEI | 268 | 52    |
| >NTRK3-N95: HTLNAVDME  | 571   | >NTRK3-N95: HTLSAVDMEI | 474 | 97    |
| >NTRK3-N95: HTLNAVDME  | 251   | >NTRK3-N95: HTLSAVDMEI | 342 | 91    |
| >NTRK3-N95: HTLNAVDME  | 175   | >NTRK3-N95: HTLSAVDMEI | 477 | 302   |
| >NTRK3-N95: HTLNAVDM   | 329   | >NTRK3-N95: HTLSAVDM   | 137 | 192   |
| >NTRK3-N95: HTLNAVDME  | 14    | >NTRK3-N95: HTLSAVDMEI | 8   | 6     |
| >NTRK3-N95: HTLNAVDM   | 254   | >NTRK3-N95: HTLSAVDM   | 227 | 27    |
| >NTRK3-N95: HTLNAVDME  | 271   | >NTRK3-N95: HTLSAVDMEI | 305 | 34    |
| >NTRK3-N95: HTLNAVDME  | 47    | >NTRK3-N95: HTLSAVDMEI | 34  | 13    |
| >NTRK3-N95: HTLNAVDME  | 215   | >NTRK3-N95: HTLSAVDMEI | 133 | 82    |
| >NTRK3-N95: HTLNAVDME  | 243   | >NTRK3-N95: HTLSAVDMEI | 612 | 369   |
| >NTRK3-N95: HTLNAVDME  | 265   | >NTRK3-N95: HTLSAVDMEI | 180 | 85    |
| >NTRK3-N95: HTLNAVDM   | 312   | >NTRK3-N95: HTLSAVDM   | 221 | 91    |
| >NTRK3-N95: HTLNAVDME  | 104   | >NTRK3-N95: HTLSAVDMEI | 70  | 34    |
| >NTRK3-N95: HTLNAVDME  | 61    | >NTRK3-N95: HTLSAVDMEI | 50  | 11    |
| >NTRK3-N95: HTLNAVDM   | 23    | >NTRK3-N95: HTLSAVDM   | 18  | 5     |
| >NTRK3-N95: HTLNAVDME  | 31    | >NTRK3-N95: HTLSAVDMEI | 28  | 3     |
| >NTRK3-N95: HTLNAVDME  | 9     | >NTRK3-N95: HTLSAVDMEI | 8   | 1     |
| >NTRK3-N95: HTLNAVDME  | 484   | >NTRK3-N95: HTLSAVDMEI | 378 | 106   |
| >NTRK3-N95: HTLNAVDM   | 670   | >NTRK3-N95: HTLSAVDM   | 328 | 342   |

|                        |       |                        |      |       |
|------------------------|-------|------------------------|------|-------|
| >NTRK3-N95: HTLNAVDME  | 12    | >NTRK3-N95: HTLSAVDMEI | 10   | 2     |
| >NTRK3-N95: HTLNAVDME  | 1138  | >NTRK3-N95: HTLSAVDMEI | 378  | 760   |
| >NTRK3-N95: SLHTLNAV   | 41    | >NTRK3-N95: SLHTLSAV   | 39   | 2     |
| >NTRK3-N95: SLHTLNAV   | 10    | >NTRK3-N95: SLHTLSAV   | 13   | 3     |
| >NTRK3-N95: SLHTLNAV   | 7     | >NTRK3-N95: SLHTLSAV   | 4    | 3     |
| >NTRK3-N95: SLHTLNAV   | 166   | >NTRK3-N95: SLHTLSAV   | 157  | 9     |
| >NTRK3-N95: SLHTLNAV   | 4     | >NTRK3-N95: SLHTLSAV   | 3    | 1     |
| >NTRK3-N95: SLHTLNAV   | 8     | >NTRK3-N95: SLHTLSAV   | 6    | 2     |
| >NTRK3-N95: SLHTLNAV   | 13    | >NTRK3-N95: SLHTLSAV   | 9    | 4     |
| >NTRK3-N95: SLHTLNAV   | 392   | >NTRK3-N95: SLHTLSAV   | 169  | 223   |
| >NTRK3-N95: SLHTLNAV   | 2     | >NTRK3-N95: SLHTLSAV   | 2    | 0     |
| >NTRK3-N95: SLHTLNAVDM | 487   | >NTRK3-N95: SLHTLSAVDM | 409  | 78    |
| >NTRK3-N95: SLHTLNAVDM | 444   | >NTRK3-N95: SLHTLSAVDM | 338  | 106   |
| >NTRK3-N95: RSLHTLNAV  | 1267  | >NTRK3-N95: RSLHTLSAV  | 457  | 810   |
| >NTRK3-N95: RSLHTLNAV  | 36    | >NTRK3-N95: RSLHTLSAV  | 40   | 4     |
| >NTRK3-N95: RSLHTLNAV  | 1149  | >NTRK3-N95: RSLHTLSAV  | 495  | 654   |
| >NTRK3-N95: RSLHTLNA   | 21    | >NTRK3-N95: RSLHTLSA   | 18   | 3     |
| >NTRK3-N95: RSLHTLNAV  | 29    | >NTRK3-N95: RSLHTLSAV  | 38   | 9     |
| >NTRK3-N95: RSLHTLNAVD | 476   | >NTRK3-N95: RSLHTLSAVD | 457  | 19    |
| >NTRK3-N95: RSLHTLNAV  | 316   | >NTRK3-N95: RSLHTLSAV  | 769  | 453   |
| >NTRK3-N95: RSLHTLNAVD | 297   | >NTRK3-N95: RSLHTLSAVD | 498  | 201   |
| >NTRK3-N95: RSLHTLNA   | 699   | >NTRK3-N95: RSLHTLSA   | 322  | 377   |
| >NTRK3-N95: RSLHTLNAV  | 41    | >NTRK3-N95: RSLHTLSAV  | 24   | 17    |
| >NTRK3-N95: RSLHTLNAVD | 36    | >NTRK3-N95: RSLHTLSAVD | 22   | 14    |
| >NTRK3-N95: RSLHTLNA   | 419   | >NTRK3-N95: RSLHTLSA   | 198  | 221   |
| >NTRK3-N95: RSLHTLNAV  | 119   | >NTRK3-N95: RSLHTLSAV  | 13   | 106   |
| >NTRK3-N95: RSLHTLNAVD | 6     | >NTRK3-N95: RSLHTLSAVD | 4    | 2     |
| >NTRK3-N95: RSLHTLNAVD | 296   | >NTRK3-N95: RSLHTLSAVD | 183  | 113   |
| >NTRK3-N95: RSLHTLNA   | 864   | >NTRK3-N95: RSLHTLSA   | 485  | 379   |
| >NTRK3-N95: RSLHTLNAV  | 376   | >NTRK3-N95: RSLHTLSAV  | 29   | 347   |
| >NTRK3-N95: RSLHTLNAVD | 174   | >NTRK3-N95: RSLHTLSAVD | 59   | 115   |
| >NTRK3-N95: RSLHTLNAV  | 834   | >NTRK3-N95: RSLHTLSAV  | 259  | 575   |
| >NTRK3-N95: WRSHTLNA\  | 500   | >NTRK3-N95: WRSHTLSA\  | 248  | 252   |
| >NTRK3-N95: WRSHTLNA\  | 411   | >NTRK3-N95: WRSHTLSA\  | 277  | 134   |
| >NTRK3-N95: WRSHTLNA\  | 149   | >NTRK3-N95: WRSHTLSA\  | 112  | 37    |
| >NTRK3-N95: WRSHTLNA\  | 613   | >NTRK3-N95: WRSHTLSA\  | 442  | 171   |
| >NTRK3-N95: NWRSLHTLN  | 600   | >NTRK3-N95: NWRSLHTLS  | 466  | 134   |
| >NTRK3-N95: NWRSLHTLN, | 356   | >NTRK3-N95: NWRSLHTLS/ | 621  | 265   |
| >NTRK3-N95: NWRSLHTLN, | 63    | >NTRK3-N95: NWRSLHTLS/ | 74   | 11    |
| >NTRK3-R67: RDLATRNCI  | 285   | >NTRK3-R67: QDLATRNCI  | 2154 | 1869  |
| >NTRK3-R67: RDLATRNCI\ | 63    | >NTRK3-R67: QDLATRNCI\ | 82   | 19    |
| >NTRK3-R67: HRDLATRNCI | 19079 | >NTRK3-R67: HQDLATRNCI | 93   | 18986 |
| >NTRK3-R67: HRDLATRNCI | 31    | >NTRK3-R67: HQDLATRNCI | 1883 | 1852  |



|                        |      |                        |       |       |
|------------------------|------|------------------------|-------|-------|
| >NTRK3-R67:HRLDLATRNCL | 41   | >NTRK3-R67:HQLDLATRNCL | 31    | 10    |
| >NTRK3-R67:HRLDLATRNCL | 395  | >NTRK3-R67:HQLDLATRNCL | 11027 | 10632 |
| >NTRK3-R67:VYLASQHFVF  | 430  | >NTRK3-R67:VYLASQHFVF  | 696   | 266   |
| >NTRK3-R67:VYLASQHFVF  | 15   | >NTRK3-R67:VYLASQHFVF  | 5681  | 5666  |
| >NTRK3-R67:VYLASQHFVF  | 43   | >NTRK3-R67:VYLASQHFVF  | 13077 | 13034 |
| >NTRK3-R67:VYLASQHFVF  | 14   | >NTRK3-R67:VYLASQHFVF  | 411   | 397   |
| >NTRK3-R67:VHRDLATRNCL | 1579 | >NTRK3-R67:VHQDLATRNCL | 204   | 1375  |
| >NTRK3-R67:FVHRDLAT    | 562  | >NTRK3-R67:FVHQDLAT    | 450   | 112   |
| >NTRK3-R67:FVHRDLATR   | 398  | >NTRK3-R67:FVHQDLATR   | 2029  | 1631  |
| >NTRK3-R67:FVHRDLATR   | 37   | >NTRK3-R67:FVHQDLATR   | 38    | 1     |
| >NTRK3-R67:HFVHRDLATF  | 68   | >NTRK3-R67:HFVHQDLATF  | 183   | 115   |
| >NTRK3-R67:HFVHRDLATF  | 149  | >NTRK3-R67:HFVHQDLATF  | 478   | 329   |
| >NTRK3-R67:HFVHRDLATF  | 59   | >NTRK3-R67:HFVHQDLATF  | 75    | 16    |
| >NTRK3-R67:HFVHRDLATF  | 32   | >NTRK3-R67:HFVHQDLATF  | 25    | 7     |
| >NTRK3-R67:QHFVHRDL    | 647  | >NTRK3-R67:QHFVHQDL    | 353   | 294   |
| >NTRK3-R67:QHFVHRDL    | 600  | >NTRK3-R67:QHFVHQDL    | 282   | 318   |
| >NTRK3-R67:QHFVHRDL    | 1007 | >NTRK3-R67:QHFVHQDL    | 491   | 516   |
| >NTRK3-R67:SQHFVHRDL   | 474  | >NTRK3-R67:SQHFVHQDL   | 127   | 347   |
| >NTRK3-R67:ASQHFVHRD   | 368  | >NTRK3-R67:ASQHFVHQD   | 471   | 103   |
| >NTRK3-R67:ASQHFVHR    | 169  | >NTRK3-R67:ASQHFVHQ    | 16290 | 16121 |
| >NTRK3-R67:ASQHFVHR    | 11   | >NTRK3-R67:ASQHFVHQ    | 7574  | 7563  |
| >NTRK3-R67:ASQHFVHR    | 491  | >NTRK3-R67:ASQHFVHQ    | 24004 | 23513 |
| >NTRK3-R67:ASQHFVHRD   | 229  | >NTRK3-R67:ASQHFVHQD   | 147   | 82    |
| >NTRK3-R67:ASQHFVHR    | 57   | >NTRK3-R67:ASQHFVHQ    | 198   | 141   |
| >NTRK3-R67:ASQHFVHRD   | 505  | >NTRK3-R67:ASQHFVHQD   | 485   | 20    |
| >NTRK3-R67:LASQHFVHR   | 32   | >NTRK3-R67:LASQHFVHQ   | 12505 | 12473 |
| >NTRK3-R67:LASQHFVHR   | 207  | >NTRK3-R67:LASQHFVHQ   | 22462 | 22255 |
| >NTRK3-R67:LASQHFVHR   | 52   | >NTRK3-R67:LASQHFVHQ   | 8326  | 8274  |
| >NTRK3-R67:LASQHFVHRL  | 524  | >NTRK3-R67:LASQHFVHQI  | 461   | 63    |
| >NTRK3-R67:LASQHFVHR   | 142  | >NTRK3-R67:LASQHFVHQ   | 1512  | 1370  |
| >NTRK3-R67:LASQHFVHR   | 104  | >NTRK3-R67:LASQHFVHQ   | 11107 | 11003 |
| >NTRK3-R67:YLASQHFVHF  | 210  | >NTRK3-R67:YLASQHFVHC  | 167   | 43    |
| >NTRK3-R67:YLASQHFVHF  | 3255 | >NTRK3-R67:YLASQHFVHC  | 403   | 2852  |
| >NTRK3-R67:YLASQHFVHF  | 5690 | >NTRK3-R67:YLASQHFVHC  | 122   | 5568  |
| >NTRK3-R67:YLASQHFVHF  | 307  | >NTRK3-R67:YLASQHFVHC  | 7     | 300   |
| >NTRK3-R67:YLASQHFVHF  | 137  | >NTRK3-R67:YLASQHFVHC  | 104   | 33    |
| >NTRK3-R67:YLASQHFVHF  | 286  | >NTRK3-R67:YLASQHFVHC  | 25411 | 25125 |
| >NTRK3-R67:YLASQHFVHF  | 50   | >NTRK3-R67:YLASQHFVHC  | 25316 | 25266 |
| >NTRK3-R67:YLASQHFVHF  | 276  | >NTRK3-R67:YLASQHFVHC  | 10731 | 10455 |
| >NTRK3-R67:YLASQHFVHF  | 64   | >NTRK3-R67:YLASQHFVHC  | 3724  | 3660  |
| >NTRK3-R72:RWMPPESI    | 5335 | >NTRK3-R72:FWMPPESI    | 252   | 5083  |
| >NTRK3-R72:RWMPPESI    | 2302 | >NTRK3-R72:FWMPPESI    | 231   | 2071  |
| >NTRK3-R72:RWMPPESI    | 194  | >NTRK3-R72:FWMPPESI    | 804   | 610   |

|                        |       |                        |       |       |
|------------------------|-------|------------------------|-------|-------|
| >NTRK3-R72:RWMPPESI    | 15    | >NTRK3-R72:FWMPPESI    | 19    | 4     |
| >NTRK3-R72:RWMPPESIM   | 403   | >NTRK3-R72:FWMPPESIM   | 568   | 165   |
| >NTRK3-R72:RWMPPESIM   | 229   | >NTRK3-R72:FWMPPESIM   | 339   | 110   |
| >NTRK3-R72:RWMPPESIM   | 444   | >NTRK3-R72:FWMPPESIM   | 540   | 96    |
| >NTRK3-R72:RWMPPESIM   | 165   | >NTRK3-R72:FWMPPESIM   | 89    | 76    |
| >NTRK3-R72:RWMPPESIM   | 34    | >NTRK3-R72:FWMPPESIM   | 152   | 118   |
| >NTRK3-R72:RWMPPESIM   | 20    | >NTRK3-R72:FWMPPESIM   | 235   | 215   |
| >NTRK3-R72:RWMPPESIM   | 1256  | >NTRK3-R72:FWMPPESIM   | 118   | 1138  |
| >NTRK3-R72:RWMPPESIM   | 3817  | >NTRK3-R72:FWMPPESIM   | 202   | 3615  |
| >NTRK3-R72:RWMPPESIM   | 3702  | >NTRK3-R72:FWMPPESIM   | 346   | 3356  |
| >NTRK3-R72:RWMPPESIM   | 346   | >NTRK3-R72:FWMPPESIM   | 282   | 64    |
| >NTRK3-R72:RWMPPESIM   | 47    | >NTRK3-R72:FWMPPESIM   | 74    | 27    |
| >NTRK3-R72:RWMPPESIM   | 320   | >NTRK3-R72:FWMPPESIM   | 983   | 663   |
| >NTRK3-R72:RWMPPESIM   | 12    | >NTRK3-R72:FWMPPESIM   | 21    | 9     |
| >NTRK3-R72:RWMPPESI    | 55    | >NTRK3-R72:FWMPPESI    | 131   | 76    |
| >NTRK3-R72:RWMPPESIM   | 137   | >NTRK3-R72:FWMPPESIM   | 322   | 185   |
| >NTRK3-R72:RWMPPESIM   | 87    | >NTRK3-R72:FWMPPESIM   | 214   | 127   |
| >NTRK3-R72:IRWMPPE\$   | 226   | >NTRK3-R72:IFWMPPE\$   | 8     | 218   |
| >NTRK3-R72:IRWMPPE\$   | 1012  | >NTRK3-R72:IFWMPPE\$   | 376   | 636   |
| >NTRK3-R72:IRWMPPE\$   | 4125  | >NTRK3-R72:IFWMPPE\$   | 474   | 3651  |
| >NTRK3-R72:IRWMPPE\$   | 45    | >NTRK3-R72:IFWMPPE\$   | 1694  | 1649  |
| >NTRK3-R72:IRWMPPE\$   | 22    | >NTRK3-R72:IFWMPPE\$   | 581   | 559   |
| >NTRK3-R72:IRWMPPE\$   | 12    | >NTRK3-R72:IFWMPPE\$   | 407   | 395   |
| >NTRK3-R72:IRWMPPE\$   | 130   | >NTRK3-R72:IFWMPPE\$   | 26561 | 26431 |
| >NTRK3-R72:IRWMPPE\$   | 84    | >NTRK3-R72:IFWMPPE\$   | 24720 | 24636 |
| >NTRK3-R72:IRWMPPE\$   | 165   | >NTRK3-R72:IFWMPPE\$   | 23708 | 23543 |
| >NTRK3-R72:IRWMPPE\$   | 3613  | >NTRK3-R72:IFWMPPE\$   | 223   | 3390  |
| >NTRK3-R72:IRWMPPE\$   | 380   | >NTRK3-R72:IFWMPPE\$   | 25006 | 24626 |
| >NTRK3-R72:IRWMPPE\$   | 226   | >NTRK3-R72:IFWMPPE\$   | 26408 | 26182 |
| >NTRK3-R72:IRWMPPE\$   | 26958 | >NTRK3-R72:IFWMPPE\$   | 354   | 26604 |
| >NTRK3-R72:IRWMPPE\$   | 435   | >NTRK3-R72:IFWMPPE\$   | 921   | 486   |
| >NTRK3-R72:RVGGHTMLP   | 19831 | >NTRK3-R72:RVGGHTMLP   | 303   | 19528 |
| >NTRK3-R72:RVGGHTMLP   | 19381 | >NTRK3-R72:RVGGHTMLP   | 223   | 19158 |
| >NTRK3-R72:RVGGHTMLP   | 35    | >NTRK3-R72:RVGGHTMLP   | 11743 | 11708 |
| >NTRK3-R72:RVGGHTMLP   | 6404  | >NTRK3-R72:RVGGHTMLP   | 57    | 6347  |
| >NTRK3-R72:RVGGHTMLP   | 20537 | >NTRK3-R72:RVGGHTMLP   | 304   | 20233 |
| >NTRK3-R72:RVGGHTMLP   | 21518 | >NTRK3-R72:RVGGHTMLP   | 215   | 21303 |
| >NTRK3-R72:RVGGHTMLP   | 107   | >NTRK3-R72:RVGGHTMLP   | 24918 | 24811 |
| >NTRK3-R72:PIRWMPPE\$  | 6371  | >NTRK3-R72:PIFWMPPE\$  | 116   | 6255  |
| >NTRK3-R72:PIRWMPPE\$  | 2602  | >NTRK3-R72:PIFWMPPE\$  | 46    | 2556  |
| >NTRK3-R72:LPIRWMPPE\$ | 200   | >NTRK3-R72:LPIFWMPPE\$ | 464   | 264   |
| >NTRK3-R72:LPIRWMPPE\$ | 72    | >NTRK3-R72:LPIFWMPPE\$ | 69    | 3     |
| >NTRK3-R72:LPIRWMPPE\$ | 48    | >NTRK3-R72:LPIFWMPPE\$ | 38    | 10    |

|                       |      |                       |      |      |
|-----------------------|------|-----------------------|------|------|
| >NTRK3-R72:LPIRWMPP   | 43   | >NTRK3-R72:LPIFWMP    | 37   | 6    |
| >NTRK3-R72:LPIRWMPPPE | 23   | >NTRK3-R72:LPIFWMPPE  | 18   | 5    |
| >NTRK3-R72:LPIRWMPPES | 638  | >NTRK3-R72:LPIFWMPPE  | 216  | 422  |
| >NTRK3-R72:LPIRWMPPES | 98   | >NTRK3-R72:LPIFWMPPE  | 98   | 0    |
| >NTRK3-R72:MLPIRWMPP  | 1004 | >NTRK3-R72:MLPIFWMP   | 317  | 687  |
| >NTRK3-R72:MLPIRWMPP  | 467  | >NTRK3-R72:MLPIFWMP   | 387  | 80   |
| >NTRK3-R72:TMLPIRWM   | 534  | >NTRK3-R72:TMLPIFWM   | 20   | 514  |
| >NTRK3-R72:TMLPIRWM   | 1201 | >NTRK3-R72:TMLPIFWM   | 117  | 1084 |
| >NTRK3-R72:TMLPIRWM   | 701  | >NTRK3-R72:TMLPIFWM   | 19   | 682  |
| >NTRK3-R72:TMLPIRWMP  | 3718 | >NTRK3-R72:TMLPIFWMP  | 104  | 3614 |
| >NTRK3-R72:TMLPIRWMP  | 2828 | >NTRK3-R72:TMLPIFWMP  | 499  | 2329 |
| >NTRK3-R72:TMLPIRWM   | 54   | >NTRK3-R72:TMLPIFWM   | 8    | 46   |
| >NTRK3-R72:TMLPIRWMP  | 2445 | >NTRK3-R72:TMLPIFWMP  | 239  | 2206 |
| >NTRK3-R72:TMLPIRWM   | 2116 | >NTRK3-R72:TMLPIFWM   | 93   | 2023 |
| >NTRK3-R72:TMLPIRWM   | 571  | >NTRK3-R72:TMLPIFWM   | 26   | 545  |
| >NTRK3-R72:TMLPIRWM   | 534  | >NTRK3-R72:TMLPIFWM   | 17   | 517  |
| >NTRK3-R72:TMLPIRWM   | 121  | >NTRK3-R72:TMLPIFWM   | 15   | 106  |
| >NTRK3-R72:TMLPIRWM   | 1306 | >NTRK3-R72:TMLPIFWM   | 66   | 1240 |
| >NTRK3-R72:HTMLPIRWM  | 410  | >NTRK3-R72:HTMLPIFWM  | 962  | 552  |
| >NTRK3-R72:HTMLPIRWM  | 9    | >NTRK3-R72:HTMLPIFWM  | 10   | 1    |
| >NTRK3-R72:HTMLPIRW   | 656  | >NTRK3-R72:HTMLPIFW   | 243  | 413  |
| >NTRK3-R72:HTMLPIRWM  | 47   | >NTRK3-R72:HTMLPIFWM  | 128  | 81   |
| >NTRK3-R72:HTMLPIRW   | 277  | >NTRK3-R72:HTMLPIFW   | 435  | 158  |
| >NTRK3-R72:HTMLPIRWM  | 464  | >NTRK3-R72:HTMLPIFWM  | 19   | 445  |
| >NTRK3-R72:HTMLPIRWM  | 1954 | >NTRK3-R72:HTMLPIFWM  | 378  | 1576 |
| >NTRK3-R72:HTMLPIRWM  | 321  | >NTRK3-R72:HTMLPIFWM  | 22   | 299  |
| >NTRK3-R72:HTMLPIRW   | 5    | >NTRK3-R72:HTMLPIFW   | 8    | 3    |
| >NTRK3-R72:HTMLPIRWM  | 10   | >NTRK3-R72:HTMLPIFWM  | 5    | 5    |
| >NTRK3-R72:HTMLPIRW   | 35   | >NTRK3-R72:HTMLPIFW   | 37   | 2    |
| >NTRK3-R72:HTMLPIRW   | 19   | >NTRK3-R72:HTMLPIFW   | 13   | 6    |
| >NTRK3-R72:HTMLPIRWM  | 411  | >NTRK3-R72:HTMLPIFWM  | 93   | 318  |
| >NTRK3-R72:HTMLPIRWM  | 33   | >NTRK3-R72:HTMLPIFWM  | 27   | 6    |
| >NTRK3-R72:HTMLPIRWM  | 532  | >NTRK3-R72:HTMLPIFWM  | 249  | 283  |
| >NTRK3-R72:GHTMLPIRW  | 254  | >NTRK3-R72:GHTMLPIFW  | 88   | 166  |
| >NTRK3-R72:VGGHTMLPIF | 114  | >NTRK3-R72:VGGHTMLPIF | 113  | 1    |
| >NTRK3-R72:RWMPPESI   | 194  | >NTRK3-R72:HWMPPE     | 846  | 652  |
| >NTRK3-R72:RWMPPESI   | 15   | >NTRK3-R72:HWMPPE     | 39   | 24   |
| >NTRK3-R72:RWMPPESIM  | 403  | >NTRK3-R72:HWMPPE     | 1262 | 859  |
| >NTRK3-R72:RWMPPESIM  | 229  | >NTRK3-R72:HWMPPE     | 694  | 465  |
| >NTRK3-R72:RWMPPESIM  | 444  | >NTRK3-R72:HWMPPE     | 1173 | 729  |
| >NTRK3-R72:RWMPPESIM  | 165  | >NTRK3-R72:HWMPPE     | 103  | 62   |
| >NTRK3-R72:RWMPPESIM  | 34   | >NTRK3-R72:HWMPPE     | 105  | 71   |
| >NTRK3-R72:RWMPPESIM  | 20   | >NTRK3-R72:HWMPPE     | 34   | 14   |

|                             |      |                             |       |       |
|-----------------------------|------|-----------------------------|-------|-------|
| >NTRK3-R72:RWMPPESIM        | 1256 | >NTRK3-R72:HWMPPE\$IM       | 71    | 1185  |
| >NTRK3-R72:RWMPPESIM        | 3817 | >NTRK3-R72:HWMPPE\$IM       | 365   | 3452  |
| >NTRK3-R72:RWMPPESIM        | 346  | >NTRK3-R72:HWMPPE\$IM       | 1147  | 801   |
| >NTRK3-R72:RWMPPESIM        | 47   | >NTRK3-R72:HWMPPE\$IM       | 225   | 178   |
| >NTRK3-R72:RWMPPESIM        | 320  | >NTRK3-R72:HWMPPE\$IM       | 3892  | 3572  |
| >NTRK3-R72:RWMPPESIM        | 12   | >NTRK3-R72:HWMPPE\$IM       | 12    | 0     |
| >NTRK3-R72:RWMPPESI         | 55   | >NTRK3-R72:HWMPPE\$IM       | 108   | 53    |
| >NTRK3-R72:RWMPPESIM        | 137  | >NTRK3-R72:HWMPPE\$IM       | 272   | 135   |
| >NTRK3-R72:RWMPPESIM        | 87   | >NTRK3-R72:HWMPPE\$IM       | 190   | 103   |
| >NTRK3-R72:IRWMPPE\$IM      | 226  | >NTRK3-R72:IHWMPPE\$IM      | 62    | 164   |
| >NTRK3-R72:IRWMPPE\$IM      | 45   | >NTRK3-R72:IHWMPPE\$IM      | 96    | 51    |
| >NTRK3-R72:IRWMPPE\$IM      | 22   | >NTRK3-R72:IHWMPPE\$IM      | 33    | 11    |
| >NTRK3-R72:IRWMPPE\$IM      | 12   | >NTRK3-R72:IHWMPPE\$IM      | 17    | 5     |
| >NTRK3-R72:IRWMPPE\$IM      | 130  | >NTRK3-R72:IHWMPPE\$IM      | 22163 | 22033 |
| >NTRK3-R72:IRWMPPE\$IM      | 84   | >NTRK3-R72:IHWMPPE\$IM      | 4537  | 4453  |
| >NTRK3-R72:IRWMPPE\$IM      | 165  | >NTRK3-R72:IHWMPPE\$IM      | 19219 | 19054 |
| >NTRK3-R72:IRWMPPE\$IM      | 380  | >NTRK3-R72:IHWMPPE\$IM      | 19513 | 19133 |
| >NTRK3-R72:IRWMPPE\$IM      | 226  | >NTRK3-R72:IHWMPPE\$IM      | 18696 | 18470 |
| >NTRK3-R72:IRWMPPE\$IM      | 435  | >NTRK3-R72:IHWMPPE\$IM      | 940   | 505   |
| >NTRK3-R72:RVGGHTMLP        | 35   | >NTRK3-R72:RVGGHTMLP        | 5209  | 5174  |
| >NTRK3-R72:RVGGHTMLP        | 107  | >NTRK3-R72:RVGGHTMLP        | 15715 | 15608 |
| >NTRK3-R72:LPIRWMPPE\$IM    | 200  | >NTRK3-R72:LPIHWMPPE\$IM    | 207   | 7     |
| >NTRK3-R72:LPIRWMPPE\$IM    | 967  | >NTRK3-R72:LPIHWMPPE\$IM    | 295   | 672   |
| >NTRK3-R72:LPIRWMPPE\$IM    | 72   | >NTRK3-R72:LPIHWMPPE\$IM    | 55    | 17    |
| >NTRK3-R72:LPIRWMPPE\$IM    | 48   | >NTRK3-R72:LPIHWMPPE\$IM    | 32    | 16    |
| >NTRK3-R72:LPIRWMPPE\$IM    | 43   | >NTRK3-R72:LPIHWMPPE\$IM    | 29    | 14    |
| >NTRK3-R72:LPIRWMPPE\$IM    | 23   | >NTRK3-R72:LPIHWMPPE\$IM    | 19    | 4     |
| >NTRK3-R72:LPIRWMPPE\$IM    | 638  | >NTRK3-R72:LPIHWMPPE\$IM    | 87    | 551   |
| >NTRK3-R72:LPIRWMPPE\$IM    | 98   | >NTRK3-R72:LPIHWMPPE\$IM    | 62    | 36    |
| >NTRK3-R72:MLPIRWMPPE\$IM   | 467  | >NTRK3-R72:MLPIHWMPPE\$IM   | 466   | 1     |
| >NTRK3-R72:TMLPIRWMPPE\$IM  | 534  | >NTRK3-R72:TMLPIHWMPPE\$IM  | 57    | 477   |
| >NTRK3-R72:TMLPIRWMPPE\$IM  | 1201 | >NTRK3-R72:TMLPIHWMPPE\$IM  | 200   | 1001  |
| >NTRK3-R72:TMLPIRWMPPE\$IM  | 701  | >NTRK3-R72:TMLPIHWMPPE\$IM  | 94    | 607   |
| >NTRK3-R72:TMLPIRWMPPE\$IM  | 54   | >NTRK3-R72:TMLPIHWMPPE\$IM  | 8     | 46    |
| >NTRK3-R72:TMLPIRWMPPE\$IM  | 2445 | >NTRK3-R72:TMLPIHWMPPE\$IM  | 208   | 2237  |
| >NTRK3-R72:TMLPIRWMPPE\$IM  | 2116 | >NTRK3-R72:TMLPIHWMPPE\$IM  | 150   | 1966  |
| >NTRK3-R72:TMLPIRWMPPE\$IM  | 571  | >NTRK3-R72:TMLPIHWMPPE\$IM  | 48    | 523   |
| >NTRK3-R72:TMLPIRWMPPE\$IM  | 534  | >NTRK3-R72:TMLPIHWMPPE\$IM  | 27    | 507   |
| >NTRK3-R72:TMLPIRWMPPE\$IM  | 121  | >NTRK3-R72:TMLPIHWMPPE\$IM  | 11    | 110   |
| >NTRK3-R72:TMLPIRWMPPE\$IM  | 1306 | >NTRK3-R72:TMLPIHWMPPE\$IM  | 103   | 1203  |
| >NTRK3-R72:HTMLPIRWMPPE\$IM | 410  | >NTRK3-R72:HTMLPIHWMPPE\$IM | 462   | 52    |
| >NTRK3-R72:HTMLPIRWMPPE\$IM | 9    | >NTRK3-R72:HTMLPIHWMPPE\$IM | 5     | 4     |
| >NTRK3-R72:HTMLPIRWMPPE\$IM | 656  | >NTRK3-R72:HTMLPIHWMPPE\$IM | 458   | 198   |

|                         |       |                         |      |       |
|-------------------------|-------|-------------------------|------|-------|
| >NTRK3-R72: HTMLPIRWN   | 47    | >NTRK3-R72: HTMLPIHWN   | 35   | 12    |
| >NTRK3-R72: HTMLPIRW    | 277   | >NTRK3-R72: HTMLPIHW    | 442  | 165   |
| >NTRK3-R72: HTMLPIRWN   | 464   | >NTRK3-R72: HTMLPIHWN   | 23   | 441   |
| >NTRK3-R72: HTMLPIRWN   | 321   | >NTRK3-R72: HTMLPIHWN   | 27   | 294   |
| >NTRK3-R72: HTMLPIRW    | 5     | >NTRK3-R72: HTMLPIHW    | 5    | 0     |
| >NTRK3-R72: HTMLPIRWN   | 10    | >NTRK3-R72: HTMLPIHWN   | 8    | 2     |
| >NTRK3-R72: HTMLPIRW    | 35    | >NTRK3-R72: HTMLPIHW    | 35   | 0     |
| >NTRK3-R72: HTMLPIRW    | 19    | >NTRK3-R72: HTMLPIHW    | 11   | 8     |
| >NTRK3-R72: HTMLPIRWN   | 411   | >NTRK3-R72: HTMLPIHWN   | 80   | 331   |
| >NTRK3-R72: HTMLPIRWN   | 33    | >NTRK3-R72: HTMLPIHWN   | 31   | 2     |
| >NTRK3-R72: GHTMLPIRW   | 254   | >NTRK3-R72: GHTMLPIHW   | 334  | 80    |
| >NTRK3-R72: VGGHTMLPIF  | 114   | >NTRK3-R72: VGGHTMLPIH  | 73   | 41    |
| >NTRK3-R73: RKFTTESDV   | 5     | >NTRK3-R73: WKFTTESDV   | 7    | 2     |
| >NTRK3-R73: RKFTTESDV\  | 9     | >NTRK3-R73: WKFTTESDV\  | 24   | 15    |
| >NTRK3-R73: RKFTTESDV\  | 242   | >NTRK3-R73: WKFTTESDV\  | 579  | 337   |
| >NTRK3-R73: RKFTTESDV\  | 1988  | >NTRK3-R73: WKFTTESDV\  | 234  | 1754  |
| >NTRK3-R73: RKFTTESDV\  | 146   | >NTRK3-R73: WKFTTESDV\  | 260  | 114   |
| >NTRK3-R73: YRKFTTESDV' | 15969 | >NTRK3-R73: YWKFTTESDV\ | 441  | 15528 |
| >NTRK3-R73: YRKFTTESDV' | 17860 | >NTRK3-R73: YWKFTTESDV\ | 349  | 17511 |
| >NTRK3-R73: YRKFTTESDV' | 17867 | >NTRK3-R73: YWKFTTESDV\ | 90   | 17777 |
| >NTRK3-R73: YRKFTTESDV  | 231   | >NTRK3-R73: YWKFTTESDV  | 4922 | 4691  |
| >NTRK3-R73: YRKFTTESDV' | 80    | >NTRK3-R73: YWKFTTESDV\ | 4174 | 4094  |
| >NTRK3-R73: RWMPPESIM   | 7964  | >NTRK3-R73: RWMPPESIM   | 233  | 7731  |
| >NTRK3-R73: RWMPPESIM   | 444   | >NTRK3-R73: RWMPPESIM   | 9    | 435   |
| >NTRK3-R73: RWMPPESIM   | 20    | >NTRK3-R73: RWMPPESIM   | 7189 | 7169  |
| >NTRK3-R73: RWMPPESIM   | 25670 | >NTRK3-R73: RWMPPESIM   | 291  | 25379 |
| >NTRK3-R73: RWMPPESIM   | 23970 | >NTRK3-R73: RWMPPESIM   | 403  | 23567 |
| >NTRK3-R73: RWMPPESIM   | 21359 | >NTRK3-R73: RWMPPESIM   | 33   | 21326 |
| >NTRK3-R73: RWMPPESIM   | 32922 | >NTRK3-R73: RWMPPESIM   | 492  | 32430 |
| >NTRK3-R73: RWMPPESIM   | 12    | >NTRK3-R73: RWMPPESIM   | 564  | 552   |
| >NTRK3-R73: RWMPPESIM   | 87    | >NTRK3-R73: RWMPPESIM   | 44   | 43    |
| >NTRK3-R73: MYRKFTTESC  | 2457  | >NTRK3-R73: MYWKFTTES   | 217  | 2240  |
| >NTRK3-R73: MYRKFTTES   | 1553  | >NTRK3-R73: MYWKFTTES   | 474  | 1079  |
| >NTRK3-R73: MYRKFTTESC  | 638   | >NTRK3-R73: MYWKFTTES   | 131  | 507   |
| >NTRK3-R73: MYRKFTTES   | 60    | >NTRK3-R73: MYWKFTTES   | 9079 | 9019  |
| >NTRK3-R73: MYRKFTTESC  | 38    | >NTRK3-R73: MYWKFTTES   | 7155 | 7117  |
| >NTRK3-R73: MYRKFTTE    | 5973  | >NTRK3-R73: MYWKFTTE    | 429  | 5544  |
| >NTRK3-R73: MYRKFTTESC  | 997   | >NTRK3-R73: MYWKFTTES   | 306  | 691   |
| >NTRK3-R73: IMYRKFTTE   | 133   | >NTRK3-R73: IMYWKFTTE   | 110  | 23    |
| >NTRK3-R73: IMYRKFTT    | 616   | >NTRK3-R73: IMYWKFTT    | 93   | 523   |
| >NTRK3-R73: IMYRKFTT    | 122   | >NTRK3-R73: IMYWKFTT    | 61   | 61    |
| >NTRK3-R73: IMYRKFTT    | 494   | >NTRK3-R73: IMYWKFTT    | 249  | 245   |
| >NTRK3-R73: IMYRKFTT    | 18    | >NTRK3-R73: IMYWKFTT    | 4    | 14    |

|                        |       |                       |       |       |
|------------------------|-------|-----------------------|-------|-------|
| >NTRK3-R73:IMYRKFTTE   | 3388  | >NTRK3-R73:IMYWKFTTE  | 434   | 2954  |
| >NTRK3-R73:IMYRKFTTES  | 167   | >NTRK3-R73:IMYWKFTTES | 27    | 140   |
| >NTRK3-R73:IMYRKFTTESI | 2342  | >NTRK3-R73:IMYWKFTTES | 381   | 1961  |
| >NTRK3-R73:IMYRKFTT    | 508   | >NTRK3-R73:IMYWKFTT   | 304   | 204   |
| >NTRK3-R73:IMYRKFTT    | 288   | >NTRK3-R73:IMYWKFTT   | 45    | 243   |
| >NTRK3-R73:IMYRKFTT    | 28    | >NTRK3-R73:IMYWKFTT   | 10    | 18    |
| >NTRK3-R73:IMYRKFTTES  | 349   | >NTRK3-R73:IMYWKFTTES | 102   | 247   |
| >NTRK3-R73:IMYRKFTTE   | 459   | >NTRK3-R73:IMYWKFTTE  | 2051  | 1592  |
| >NTRK3-R73:IMYRKFTTES  | 229   | >NTRK3-R73:IMYWKFTTES | 963   | 734   |
| >NTRK3-R73:SIMYRKFTT   | 2678  | >NTRK3-R73:SIMYWKFTT  | 231   | 2447  |
| >NTRK3-R73:ESIMYRK     | 202   | >NTRK3-R73:ESIMYWK    | 432   | 230   |
| >NTRK3-R73:ESIMYRK     | 1052  | >NTRK3-R73:ESIMYWK    | 315   | 737   |
| >NTRK3-R73:ESIMYRK     | 21    | >NTRK3-R73:ESIMYWK    | 12    | 9     |
| >NTRK3-R73:ESIMYRK     | 245   | >NTRK3-R73:ESIMYWK    | 258   | 13    |
| >NTRK3-R73:ESIMYRK     | 16    | >NTRK3-R73:ESIMYWK    | 12    | 4     |
| >NTRK3-R73:PESIMYRK    | 447   | >NTRK3-R73:PESIMYWK   | 42    | 405   |
| >NTRK3-R73:PESIMYRK    | 1537  | >NTRK3-R73:PESIMYWK   | 396   | 1141  |
| >NTRK3-R73:PPESIMYR    | 16991 | >NTRK3-R73:PPESIMYW   | 25    | 16966 |
| >NTRK3-R73:PPESIMYR    | 19149 | >NTRK3-R73:PPESIMYW   | 12    | 19137 |
| >NTRK3-R73:PPESIMYRK   | 139   | >NTRK3-R73:PPESIMYWK  | 104   | 35    |
| >NTRK3-R73:PPESIMYR    | 368   | >NTRK3-R73:PPESIMYW   | 32781 | 32413 |
| >NTRK3-R73:MPPESIMYR   | 233   | >NTRK3-R73:MPPESIMYW  | 117   | 116   |
| >NTRK3-R73:MPPESIMYR   | 1730  | >NTRK3-R73:MPPESIMYW  | 171   | 1559  |
| >NTRK3-R73:MPPESIMYR   | 54    | >NTRK3-R73:MPPESIMYW  | 24364 | 24310 |
| >NTRK3-R73:MPPESIMYR   | 383   | >NTRK3-R73:MPPESIMYW  | 136   | 247   |
| >NTRK3-R73:MPPESIMYR   | 85    | >NTRK3-R73:MPPESIMYW  | 55    | 30    |
| >NTRK3-R73:MPPESIMYR   | 11702 | >NTRK3-R73:MPPESIMYW  | 454   | 11248 |
| >NTRK3-R73:MPPESIMYR   | 9759  | >NTRK3-R73:MPPESIMYW  | 8     | 9751  |
| >NTRK3-R73:MPPESIMYR   | 146   | >NTRK3-R73:MPPESIMYW  | 35    | 111   |
| >NTRK3-R73:MPPESIMYR   | 3651  | >NTRK3-R73:MPPESIMYW  | 112   | 3539  |
| >NTRK3-R73:MPPESIMYR   | 123   | >NTRK3-R73:MPPESIMYW  | 37    | 86    |
| >NTRK3-R73:MPPESIMYR   | 485   | >NTRK3-R73:MPPESIMYW  | 969   | 484   |
| >NTRK3-R73:MPPESIMYR   | 17024 | >NTRK3-R73:MPPESIMYW  | 8     | 17016 |
| >NTRK3-R73:MPPESIMYR   | 93    | >NTRK3-R73:MPPESIMYW  | 59    | 34    |
| >NTRK3-R73:MPPESIMYR   | 10651 | >NTRK3-R73:MPPESIMYW  | 22    | 10629 |
| >NTRK3-R73:MPPESIMYR   | 57    | >NTRK3-R73:MPPESIMYW  | 22512 | 22455 |
| >NTRK3-R73:WMPPEIMY    | 438   | >NTRK3-R73:WMPPEIMY   | 30898 | 30460 |
| >NTRK3-R73:WMPPEIMY    | 4015  | >NTRK3-R73:WMPPEIMY   | 51    | 3964  |
| >NTRK3-R73:WMPPEIMY    | 310   | >NTRK3-R73:WMPPEIMY   | 26016 | 25706 |
| >NTRK3-R73:WMPPEIMY    | 338   | >NTRK3-R73:WMPPEIMY   | 27863 | 27525 |
| >NTRK3-R73:WMPPEIMY    | 32    | >NTRK3-R73:WMPPEIMY   | 26368 | 26336 |
| >NTRK3-R73:WMPPEIMY    | 27630 | >NTRK3-R73:WMPPEIMY   | 189   | 27441 |
| >NTRK3-R73:WMPPEIMY    | 24199 | >NTRK3-R73:WMPPEIMY   | 448   | 23751 |

|                        |       |                        |       |       |
|------------------------|-------|------------------------|-------|-------|
| >NTRK3-R73: WMPPESIMY  | 7314  | >NTRK3-R73: WMPPESIMY  | 348   | 6966  |
| >NTRK3-R73: WMPPESIMY  | 21638 | >NTRK3-R73: WMPPESIMY  | 159   | 21479 |
| >NTRK3-R73: WMPPESIMY  | 15    | >NTRK3-R73: WMPPESIMY  | 8491  | 8476  |
| >NTRK3-R73: WMPPESIMY  | 28    | >NTRK3-R73: WMPPESIMY  | 9747  | 9719  |
| >NTRK3-R73: WMPPESIMY  | 563   | >NTRK3-R73: WMPPESIMY  | 405   | 158   |
| >NTRK3-S184 SQNLYCINA  | 467   | >NTRK3-S184 CQNLYCINA  | 2644  | 2177  |
| >NTRK3-S184 NSQNLYCI   | 393   | >NTRK3-S184 NCQNLYCI   | 6875  | 6482  |
| >NTRK3-S184 KLNSQNLYCI | 259   | >NTRK3-S184 KLNCQNLYCI | 225   | 34    |
| >NTRK3-S184 KLNSQNLYCI | 55    | >NTRK3-S184 KLNCQNLYCI | 145   | 90    |
| >NTRK3-S184 KLNSQNLYCI | 226   | >NTRK3-S184 KLNCQNLYCI | 498   | 272   |
| >NTRK3-S184 KLNSQNLYC  | 68    | >NTRK3-S184 KLNCQNLYC  | 60    | 8     |
| >NTRK3-S184 KLNSQNLYCI | 20    | >NTRK3-S184 KLNCQNLYCI | 18    | 2     |
| >NTRK3-S184 KLNSQNLYC  | 681   | >NTRK3-S184 KLNCQNLYC  | 89    | 592   |
| >NTRK3-S184 KLNSQNLYCI | 10    | >NTRK3-S184 KLNCQNLYCI | 5     | 5     |
| >NTRK3-S184 KLNSQNLYCI | 34    | >NTRK3-S184 KLNCQNLYCI | 70    | 36    |
| >NTRK3-S184 KLNSQNLYCI | 49    | >NTRK3-S184 KLNCQNLYCI | 117   | 68    |
| >NTRK3-S184 KLNSQNLYC  | 186   | >NTRK3-S184 KLNCQNLYC  | 1549  | 1363  |
| >NTRK3-S184 KLNSQNLYCI | 72    | >NTRK3-S184 KLNCQNLYCI | 312   | 240   |
| >NTRK3-S184 KLNSQNLY   | 70    | >NTRK3-S184 KLNCQNLY   | 100   | 30    |
| >NTRK3-S184 KLNSQNLY   | 74    | >NTRK3-S184 KLNCQNLY   | 85    | 11    |
| >NTRK3-S184 KLNSQNLY   | 12    | >NTRK3-S184 KLNCQNLY   | 47    | 35    |
| >NTRK3-S184 KLNSQNLYCI | 88    | >NTRK3-S184 KLNCQNLYCI | 85    | 3     |
| >NTRK3-S184 KLNSQNLY   | 10    | >NTRK3-S184 KLNCQNLY   | 11    | 1     |
| >NTRK3-S184 KLNSQNLY   | 228   | >NTRK3-S184 KLNCQNLY   | 264   | 36    |
| >NTRK3-S184 KLNSQNLY   | 177   | >NTRK3-S184 KLNCQNLY   | 277   | 100   |
| >NTRK3-S184 KLNSQNLY   | 179   | >NTRK3-S184 KLNCQNLY   | 126   | 53    |
| >NTRK3-S184 AKLNSQNLY  | 234   | >NTRK3-S184 AKLNCQNLY  | 67    | 167   |
| >NTRK3-S184 AKLNSQNL   | 10    | >NTRK3-S184 AKLNCQNL   | 25    | 15    |
| >NTRK3-S184 AKLNSQNLY  | 5     | >NTRK3-S184 AKLNCQNLY  | 11    | 6     |
| >NTRK3-S184 AKLNSQNLYC | 403   | >NTRK3-S184 AKLNCQNLYC | 1077  | 674   |
| >NTRK3-S184 AKLNSQNLYC | 27    | >NTRK3-S184 AKLNCQNLYC | 58    | 31    |
| >NTRK3-S184 AKLNSQNLY  | 728   | >NTRK3-S184 AKLNCQNLY  | 289   | 439   |
| >NTRK3-S184 GEAKLNSQNI | 835   | >NTRK3-S184 GEAKLNCQNI | 431   | 404   |
| >NTRK3-S184 GEAKLNSQNI | 270   | >NTRK3-S184 GEAKLNCQNI | 440   | 170   |
| >NTRK3-S184 GEAKLNSQNI | 331   | >NTRK3-S184 GEAKLNCQNI | 351   | 20    |
| >NTRK3-S184 GEAKLNSQNI | 160   | >NTRK3-S184 GEAKLNCQNI | 158   | 2     |
| >NTRK3-S184 GEAKLNSQNI | 121   | >NTRK3-S184 GEAKLNCQNI | 337   | 216   |
| >NTRK3-S184 GEAKLNSQNI | 142   | >NTRK3-S184 GEAKLNCQNI | 50    | 92    |
| >NTRK3-T144 TSLSLRELQL | 231   | >NTRK3-T144 RLSLRELQL  | 192   | 39    |
| >NTRK3-T144 TSLSLRELQL | 44    | >NTRK3-T144 RLSLRELQL  | 37    | 7     |
| >NTRK3-T144 TSLSLRELQL | 483   | >NTRK3-T144 RLSLRELQL  | 389   | 94    |
| >NTRK3-T144 QTLSLRELQL | 464   | >NTRK3-T144 QRLSLRELQL | 19949 | 19485 |
| >NTRK3-T144 QTLSLREL   | 264   | >NTRK3-T144 QRLSLREL   | 18681 | 18417 |

|                         |       |                        |       |       |
|-------------------------|-------|------------------------|-------|-------|
| >NTRK3-T14☹QTLSLREL     | 3060  | >NTRK3-T14☹QRLSLREL    | 448   | 2612  |
| >NTRK3-T14☹QTLSLREL     | 84    | >NTRK3-T14☹QRLSLREL    | 26208 | 26124 |
| >NTRK3-T14☹QTLSLRELQL   | 46    | >NTRK3-T14☹QRLSLRELQL  | 24613 | 24567 |
| >NTRK3-T14☹QTLSLREL     | 19381 | >NTRK3-T14☹QRLSLREL    | 75    | 19306 |
| >NTRK3-T14☹QTLSLRELQL   | 17235 | >NTRK3-T14☹QRLSLRELQL  | 29    | 17206 |
| >NTRK3-T14☹QTLSLRELQ    | 296   | >NTRK3-T14☹QRLSLRELQ   | 18002 | 17706 |
| >NTRK3-T14☹QTLSLRELQL   | 20433 | >NTRK3-T14☹QRLSLRELQL  | 229   | 20204 |
| >NTRK3-T14☹QTLSLREL     | 9075  | >NTRK3-T14☹QRLSLREL    | 121   | 8954  |
| >NTRK3-T14☹QTLSLRELQL   | 15333 | >NTRK3-T14☹QRLSLRELQL  | 83    | 15250 |
| >NTRK3-T14☹LTTLSWQLFC   | 22635 | >NTRK3-T14☹LTTLSWQLFC  | 498   | 22137 |
| >NTRK3-T14☹LTTLSWQLFC   | 11062 | >NTRK3-T14☹LTTLSWQLFC  | 26    | 11036 |
| >NTRK3-T14☹LTTLSWQLFC   | 22889 | >NTRK3-T14☹LTTLSWQLFC  | 82    | 22807 |
| >NTRK3-T14☹LTTLSWQLFC   | 14289 | >NTRK3-T14☹LTTLSWQLFC  | 17    | 14272 |
| >NTRK3-T14☹LTTLSWQLFC   | 6435  | >NTRK3-T14☹LTTLSWQLFC  | 489   | 5946  |
| >NTRK3-T14☹FQTLSSLREL   | 213   | >NTRK3-T14☹FQRLSLREL   | 1570  | 1357  |
| >NTRK3-T14☹FQTLSSLREL   | 285   | >NTRK3-T14☹FQRLSLREL   | 173   | 112   |
| >NTRK3-T14☹FQTLSSLREL   | 20    | >NTRK3-T14☹FQRLSLREL   | 113   | 93    |
| >NTRK3-T14☹FQTLSSLRELQI | 53    | >NTRK3-T14☹FQRLSLRELQI | 336   | 283   |
| >NTRK3-T14☹FQTLSSLREL   | 6004  | >NTRK3-T14☹FQRLSLREL   | 467   | 5537  |
| >NTRK3-T14☹FQTLSSLREL   | 136   | >NTRK3-T14☹FQRLSLREL   | 21    | 115   |
| >NTRK3-T14☹FQTLSSLRELQI | 353   | >NTRK3-T14☹FQRLSLRELQI | 44    | 309   |
| >NTRK3-T14☹LFQTLSSLREL  | 119   | >NTRK3-T14☹LFQRLSLREL  | 57    | 62    |
| >NTRK3-T14☹LFQTLSLR     | 24    | >NTRK3-T14☹LFQRLSLR    | 16    | 8     |
| >NTRK3-T14☹LFQTLSLR     | 158   | >NTRK3-T14☹LFQRLSLR    | 92    | 66    |
| >NTRK3-T14☹LFQTLSLR     | 226   | >NTRK3-T14☹LFQRLSLR    | 510   | 284   |
| >NTRK3-T14☹QLFQTLSL     | 71    | >NTRK3-T14☹QLFQRLSL    | 196   | 125   |
| >NTRK3-T14☹QLFQTLSLREI  | 259   | >NTRK3-T14☹QLFQRLSLREI | 275   | 16    |
| >NTRK3-T14☹QLFQTLSL     | 26    | >NTRK3-T14☹QLFQRLSL    | 35    | 9     |
| >NTRK3-T14☹QLFQTLSLREI  | 48    | >NTRK3-T14☹QLFQRLSLREI | 36    | 12    |
| >NTRK3-T14☹QLFQTLSL     | 50    | >NTRK3-T14☹QLFQRLSL    | 123   | 73    |
| >NTRK3-T14☹QLFQTLSLREI  | 71    | >NTRK3-T14☹QLFQRLSLREI | 66    | 5     |
| >NTRK3-T14☹QLFQTLSL     | 166   | >NTRK3-T14☹QLFQRLSL    | 286   | 120   |
| >NTRK3-T14☹QLFQTLSL     | 14    | >NTRK3-T14☹QLFQRLSL    | 62    | 48    |
| >NTRK3-T14☹QLFQTLSLREI  | 17    | >NTRK3-T14☹QLFQRLSLREI | 32    | 15    |
| >NTRK3-T14☹QLFQTLSL     | 82    | >NTRK3-T14☹QLFQRLSL    | 663   | 581   |
| >NTRK3-T14☹QLFQTLSLREI  | 248   | >NTRK3-T14☹QLFQRLSLREI | 577   | 329   |
| >NTRK3-T14☹QLFQTLSL     | 59    | >NTRK3-T14☹QLFQRLSL    | 269   | 210   |
| >NTRK3-T14☹QLFQTLSLREI  | 213   | >NTRK3-T14☹QLFQRLSLREI | 462   | 249   |
| >NTRK3-T14☹QLFQTLSL     | 410   | >NTRK3-T14☹QLFQRLSL    | 4006  | 3596  |
| >NTRK3-T14☹QLFQTLSL     | 5     | >NTRK3-T14☹QLFQRLSL    | 7     | 2     |
| >NTRK3-T14☹QLFQTLSLREI  | 13    | >NTRK3-T14☹QLFQRLSLREI | 15    | 2     |
| >NTRK3-T14☹QLFQTLSLR    | 339   | >NTRK3-T14☹QLFQRLSLR   | 122   | 217   |
| >NTRK3-T14☹QLFQTLSLR    | 144   | >NTRK3-T14☹QLFQRLSLR   | 51    | 93    |



|                                                  |       |                                                  |      |       |
|--------------------------------------------------|-------|--------------------------------------------------|------|-------|
| >NTRK3-T14 <sup>ϵ</sup> QLFQTL <sup>S</sup> L    | 49    | >NTRK3-T14 <sup>ϵ</sup> QLFQRL <sup>S</sup> L    | 104  | 55    |
| >NTRK3-T14 <sup>ϵ</sup> QLFQTL <sup>S</sup> LR   | 294   | >NTRK3-T14 <sup>ϵ</sup> QLFQRL <sup>S</sup> LR   | 53   | 241   |
| >NTRK3-T14 <sup>ϵ</sup> QLFQTL <sup>S</sup> LR   | 19    | >NTRK3-T14 <sup>ϵ</sup> QLFQRL <sup>S</sup> LR   | 43   | 24    |
| >NTRK3-T14 <sup>ϵ</sup> QLFQTL <sup>S</sup> L    | 914   | >NTRK3-T14 <sup>ϵ</sup> QLFQRL <sup>S</sup> L    | 69   | 845   |
| >NTRK3-T14 <sup>ϵ</sup> QLFQTL <sup>S</sup> LREI | 5113  | >NTRK3-T14 <sup>ϵ</sup> QLFQRL <sup>S</sup> LREI | 447  | 4666  |
| >NTRK3-T14 <sup>ϵ</sup> QLFQTL <sup>S</sup> L    | 322   | >NTRK3-T14 <sup>ϵ</sup> QLFQRL <sup>S</sup> L    | 707  | 385   |
| >NTRK3-T14 <sup>ϵ</sup> QLFQTL <sup>S</sup> L    | 130   | >NTRK3-T14 <sup>ϵ</sup> QLFQRL <sup>S</sup> L    | 309  | 179   |
| >NTRK3-T14 <sup>ϵ</sup> QLFQTL <sup>S</sup> LREI | 323   | >NTRK3-T14 <sup>ϵ</sup> QLFQRL <sup>S</sup> LREI | 809  | 486   |
| >NTRK3-T14 <sup>ϵ</sup> QLFQTL <sup>S</sup> LR   | 173   | >NTRK3-T14 <sup>ϵ</sup> QLFQRL <sup>S</sup> LR   | 186  | 13    |
| >NTRK3-T14 <sup>ϵ</sup> WQLFQTL <sup>S</sup> L   | 381   | >NTRK3-T14 <sup>ϵ</sup> WQLFQRL <sup>S</sup> L   | 4905 | 4524  |
| >NTRK3-T14 <sup>ϵ</sup> WQLFQTL <sup>S</sup> L   | 14    | >NTRK3-T14 <sup>ϵ</sup> WQLFQRL <sup>S</sup> L   | 56   | 42    |
| >NTRK3-T14 <sup>ϵ</sup> WQLFQTL <sup>S</sup> LF  | 492   | >NTRK3-T14 <sup>ϵ</sup> WQLFQRL <sup>S</sup> LF  | 645  | 153   |
| >NTRK3-T14 <sup>ϵ</sup> WQLFQTL <sup>S</sup> LF  | 151   | >NTRK3-T14 <sup>ϵ</sup> WQLFQRL <sup>S</sup> LF  | 94   | 57    |
| >NTRK3-T14 <sup>ϵ</sup> WQLFQTL <sup>S</sup> LF  | 546   | >NTRK3-T14 <sup>ϵ</sup> WQLFQRL <sup>S</sup> LF  | 379  | 167   |
| >NTRK3-T14 <sup>ϵ</sup> WQLFQTL <sup>S</sup> LF  | 348   | >NTRK3-T14 <sup>ϵ</sup> WQLFQRL <sup>S</sup> LF  | 404  | 56    |
| >NTRK3-T14 <sup>ϵ</sup> WQLFQTL <sup>S</sup> L   | 225   | >NTRK3-T14 <sup>ϵ</sup> WQLFQRL <sup>S</sup> L   | 532  | 307   |
| >NTRK3-T14 <sup>ϵ</sup> WQLFQTL <sup>S</sup> L   | 24    | >NTRK3-T14 <sup>ϵ</sup> WQLFQRL <sup>S</sup> L   | 23   | 1     |
| >NTRK3-T14 <sup>ϵ</sup> WQLFQTL <sup>S</sup> LF  | 452   | >NTRK3-T14 <sup>ϵ</sup> WQLFQRL <sup>S</sup> LF  | 770  | 318   |
| >NTRK3-T14 <sup>ϵ</sup> WQLFQTL <sup>S</sup> L   | 27    | >NTRK3-T14 <sup>ϵ</sup> WQLFQRL <sup>S</sup> L   | 42   | 15    |
| >NTRK3-T14 <sup>ϵ</sup> WQLFQTL <sup>S</sup> L   | 469   | >NTRK3-T14 <sup>ϵ</sup> WQLFQRL <sup>S</sup> L   | 435  | 34    |
| >NTRK3-T14 <sup>ϵ</sup> WQLFQTL <sup>S</sup> L   | 78    | >NTRK3-T14 <sup>ϵ</sup> WQLFQRL <sup>S</sup> L   | 111  | 33    |
| >NTRK3-T14 <sup>ϵ</sup> WQLFQTL <sup>S</sup> L   | 761   | >NTRK3-T14 <sup>ϵ</sup> WQLFQRL <sup>S</sup> L   | 465  | 296   |
| >NTRK3-T14 <sup>ϵ</sup> WQLFQTL <sup>S</sup> LF  | 220   | >NTRK3-T14 <sup>ϵ</sup> WQLFQRL <sup>S</sup> LF  | 269  | 49    |
| >NTRK3-T14 <sup>ϵ</sup> SWQLFQTL                 | 1240  | >NTRK3-T14 <sup>ϵ</sup> SWQLFQRL                 | 273  | 967   |
| >NTRK3-T14 <sup>ϵ</sup> SWQLFQTL <sup>S</sup> L  | 221   | >NTRK3-T14 <sup>ϵ</sup> SWQLFQRL <sup>S</sup> L  | 313  | 92    |
| >NTRK3-T14 <sup>ϵ</sup> SWQLFQTL                 | 478   | >NTRK3-T14 <sup>ϵ</sup> SWQLFQRL                 | 1413 | 935   |
| >NTRK3-T14 <sup>ϵ</sup> SWQLFQTL                 | 76    | >NTRK3-T14 <sup>ϵ</sup> SWQLFQRL                 | 203  | 127   |
| >NTRK3-T14 <sup>ϵ</sup> SWQLFQTL <sup>S</sup> L  | 127   | >NTRK3-T14 <sup>ϵ</sup> SWQLFQRL <sup>S</sup> L  | 280  | 153   |
| >NTRK3-T14 <sup>ϵ</sup> SWQLFQTL <sup>S</sup> L  | 84    | >NTRK3-T14 <sup>ϵ</sup> SWQLFQRL <sup>S</sup> L  | 89   | 5     |
| >NTRK3-T14 <sup>ϵ</sup> SWQLFQTL <sup>S</sup> L  | 28    | >NTRK3-T14 <sup>ϵ</sup> SWQLFQRL <sup>S</sup> L  | 31   | 3     |
| >NTRK3-T14 <sup>ϵ</sup> SWQLFQTL                 | 58    | >NTRK3-T14 <sup>ϵ</sup> SWQLFQRL                 | 121  | 63    |
| >NTRK3-T14 <sup>ϵ</sup> SWQLFQTL <sup>S</sup>    | 285   | >NTRK3-T14 <sup>ϵ</sup> SWQLFQRL <sup>S</sup>    | 389  | 104   |
| >NTRK3-T14 <sup>ϵ</sup> SWQLFQTL <sup>S</sup> L  | 100   | >NTRK3-T14 <sup>ϵ</sup> SWQLFQRL <sup>S</sup> L  | 77   | 23    |
| >NTRK3-T14 <sup>ϵ</sup> SWQLFQTL <sup>S</sup> L  | 222   | >NTRK3-T14 <sup>ϵ</sup> SWQLFQRL <sup>S</sup> L  | 284  | 62    |
| >NTRK3-T14 <sup>ϵ</sup> LSWQLFQTL                | 114   | >NTRK3-T14 <sup>ϵ</sup> LSWQLFQRL                | 53   | 61    |
| >NTRK3-T14 <sup>ϵ</sup> LSWQLFQTL <sup>S</sup>   | 579   | >NTRK3-T14 <sup>ϵ</sup> LSWQLFQRL <sup>S</sup>   | 434  | 145   |
| >NTRK3-T14 <sup>ϵ</sup> LSWQLFQT                 | 9546  | >NTRK3-T14 <sup>ϵ</sup> LSWQLFQR                 | 12   | 9534  |
| >NTRK3-T14 <sup>ϵ</sup> LSWQLFQTL                | 314   | >NTRK3-T14 <sup>ϵ</sup> LSWQLFQRL                | 3478 | 3164  |
| >NTRK3-T14 <sup>ϵ</sup> LSWQLFQTL <sup>S</sup>   | 178   | >NTRK3-T14 <sup>ϵ</sup> LSWQLFQRL <sup>S</sup>   | 666  | 488   |
| >NTRK3-T14 <sup>ϵ</sup> LSWQLFQT                 | 23308 | >NTRK3-T14 <sup>ϵ</sup> LSWQLFQR                 | 107  | 23201 |
| >NTRK3-T14 <sup>ϵ</sup> LSWQLFQT                 | 31579 | >NTRK3-T14 <sup>ϵ</sup> LSWQLFQR                 | 202  | 31377 |
| >NTRK3-T14 <sup>ϵ</sup> LSWQLFQTL                | 88    | >NTRK3-T14 <sup>ϵ</sup> LSWQLFQRL                | 408  | 320   |
| >NTRK3-T14 <sup>ϵ</sup> LSWQLFQTL <sup>S</sup>   | 90    | >NTRK3-T14 <sup>ϵ</sup> LSWQLFQRL <sup>S</sup>   | 136  | 46    |

|                                                             |       |                                                             |       |       |
|-------------------------------------------------------------|-------|-------------------------------------------------------------|-------|-------|
| >NTRK3-T14 <sup>ϵ</sup> LSWQLFQTL                           | 18    | >NTRK3-T14 <sup>ϵ</sup> LSWQLFQRL                           | 18    | 0     |
| >NTRK3-T14 <sup>ϵ</sup> LSWQLFQTL <sup>S</sup>              | 10    | >NTRK3-T14 <sup>ϵ</sup> LSWQLFQRL <sup>S</sup>              | 13    | 3     |
| >NTRK3-T14 <sup>ϵ</sup> LSWQLFQTL                           | 496   | >NTRK3-T14 <sup>ϵ</sup> LSWQLFQRL                           | 3919  | 3423  |
| >NTRK3-T14 <sup>ϵ</sup> LSWQLFQTL                           | 435   | >NTRK3-T14 <sup>ϵ</sup> LSWQLFQRL                           | 790   | 355   |
| >NTRK3-T14 <sup>ϵ</sup> LSWQLFQTL                           | 326   | >NTRK3-T14 <sup>ϵ</sup> LSWQLFQRL                           | 819   | 493   |
| >NTRK3-T14 <sup>ϵ</sup> LSWQLFQTL <sup>S</sup>              | 207   | >NTRK3-T14 <sup>ϵ</sup> LSWQLFQRL <sup>S</sup>              | 501   | 294   |
| >NTRK3-T14 <sup>ϵ</sup> LSWQLFQTL                           | 184   | >NTRK3-T14 <sup>ϵ</sup> LSWQLFQRL                           | 358   | 174   |
| >NTRK3-T14 <sup>ϵ</sup> LSWQLFQTL <sup>S</sup>              | 417   | >NTRK3-T14 <sup>ϵ</sup> LSWQLFQRL <sup>S</sup>              | 671   | 254   |
| >NTRK3-T14 <sup>ϵ</sup> LSWQLFQTL                           | 60    | >NTRK3-T14 <sup>ϵ</sup> LSWQLFQRL                           | 101   | 41    |
| >NTRK3-T14 <sup>ϵ</sup> LSWQLFQTL <sup>S</sup>              | 299   | >NTRK3-T14 <sup>ϵ</sup> LSWQLFQRL <sup>S</sup>              | 290   | 9     |
| >NTRK3-T14 <sup>ϵ</sup> LSWQLFQT                            | 8953  | >NTRK3-T14 <sup>ϵ</sup> LSWQLFQR                            | 452   | 8501  |
| >NTRK3-T14 <sup>ϵ</sup> LSWQLFQT                            | 25979 | >NTRK3-T14 <sup>ϵ</sup> LSWQLFQR                            | 170   | 25809 |
| >NTRK3-T14 <sup>ϵ</sup> LSWQLFQTL                           | 42    | >NTRK3-T14 <sup>ϵ</sup> LSWQLFQRL                           | 98    | 56    |
| >NTRK3-T14 <sup>ϵ</sup> LSWQLFQTL <sup>S</sup>              | 34    | >NTRK3-T14 <sup>ϵ</sup> LSWQLFQRL <sup>S</sup>              | 58    | 24    |
| >NTRK3-T14 <sup>ϵ</sup> TL <sup>S</sup> WQLFQT              | 240   | >NTRK3-T14 <sup>ϵ</sup> TL <sup>S</sup> WQLFQR              | 16952 | 16712 |
| >NTRK3-T14 <sup>ϵ</sup> TL <sup>S</sup> WQLFQTL             | 172   | >NTRK3-T14 <sup>ϵ</sup> TL <sup>S</sup> WQLFQRI             | 637   | 465   |
| >NTRK3-T14 <sup>ϵ</sup> TL <sup>S</sup> WQLFQT              | 110   | >NTRK3-T14 <sup>ϵ</sup> TL <sup>S</sup> WQLFQR              | 3348  | 3238  |
| >NTRK3-T14 <sup>ϵ</sup> TL <sup>S</sup> WQLFQTL             | 67    | >NTRK3-T14 <sup>ϵ</sup> TL <sup>S</sup> WQLFQRI             | 151   | 84    |
| >NTRK3-T14 <sup>ϵ</sup> TL <sup>S</sup> WQLFQTL             | 299   | >NTRK3-T14 <sup>ϵ</sup> TL <sup>S</sup> WQLFQRI             | 1610  | 1311  |
| >NTRK3-T14 <sup>ϵ</sup> TL <sup>S</sup> WQLFQT              | 157   | >NTRK3-T14 <sup>ϵ</sup> TL <sup>S</sup> WQLFQR              | 13167 | 13010 |
| >NTRK3-T14 <sup>ϵ</sup> TL <sup>S</sup> WQLFQTL             | 91    | >NTRK3-T14 <sup>ϵ</sup> TL <sup>S</sup> WQLFQRI             | 318   | 227   |
| >NTRK3-T14 <sup>ϵ</sup> TL <sup>S</sup> WQLFQT              | 118   | >NTRK3-T14 <sup>ϵ</sup> TL <sup>S</sup> WQLFQR              | 6320  | 6202  |
| >NTRK3-T14 <sup>ϵ</sup> TL <sup>S</sup> WQLFQTL             | 15    | >NTRK3-T14 <sup>ϵ</sup> TL <sup>S</sup> WQLFQRI             | 24    | 9     |
| >NTRK3-T14 <sup>ϵ</sup> TL <sup>S</sup> WQLFQTL             | 67    | >NTRK3-T14 <sup>ϵ</sup> TL <sup>S</sup> WQLFQRI             | 394   | 327   |
| >NTRK3-T14 <sup>ϵ</sup> TL <sup>S</sup> WQLFQT              | 216   | >NTRK3-T14 <sup>ϵ</sup> TL <sup>S</sup> WQLFQR              | 13013 | 12797 |
| >NTRK3-T14 <sup>ϵ</sup> TL <sup>S</sup> WQLFQTL             | 24    | >NTRK3-T14 <sup>ϵ</sup> TL <sup>S</sup> WQLFQRI             | 49    | 25    |
| >NTRK3-T14 <sup>ϵ</sup> TL <sup>S</sup> WQLFQT              | 319   | >NTRK3-T14 <sup>ϵ</sup> TL <sup>S</sup> WQLFQR              | 20344 | 20025 |
| >NTRK3-T14 <sup>ϵ</sup> TL <sup>S</sup> WQLFQTL             | 46    | >NTRK3-T14 <sup>ϵ</sup> TL <sup>S</sup> WQLFQRI             | 96    | 50    |
| >NTRK3-T14 <sup>ϵ</sup> TL <sup>S</sup> WQLFQT              | 9     | >NTRK3-T14 <sup>ϵ</sup> TL <sup>S</sup> WQLFQR              | 1051  | 1042  |
| >NTRK3-T14 <sup>ϵ</sup> TL <sup>S</sup> WQLFQTL             | 3     | >NTRK3-T14 <sup>ϵ</sup> TL <sup>S</sup> WQLFQRI             | 3     | 0     |
| >NTRK3-T14 <sup>ϵ</sup> TL <sup>S</sup> WQLFQT              | 17245 | >NTRK3-T14 <sup>ϵ</sup> TL <sup>S</sup> WQLFQR              | 318   | 16927 |
| >NTRK3-T14 <sup>ϵ</sup> TL <sup>S</sup> WQLFQT              | 17121 | >NTRK3-T14 <sup>ϵ</sup> TL <sup>S</sup> WQLFQR              | 85    | 17036 |
| >NTRK3-T14 <sup>ϵ</sup> TL <sup>S</sup> WQLFQT              | 15425 | >NTRK3-T14 <sup>ϵ</sup> TL <sup>S</sup> WQLFQR              | 15    | 15410 |
| >NTRK3-T14 <sup>ϵ</sup> TL <sup>S</sup> WQLFQT              | 27227 | >NTRK3-T14 <sup>ϵ</sup> TL <sup>S</sup> WQLFQR              | 103   | 27124 |
| >NTRK3-T14 <sup>ϵ</sup> TL <sup>S</sup> WQLFQT              | 17084 | >NTRK3-T14 <sup>ϵ</sup> TL <sup>S</sup> WQLFQR              | 16    | 17068 |
| >NTRK3-T14 <sup>ϵ</sup> TL <sup>S</sup> WQLFQT              | 32199 | >NTRK3-T14 <sup>ϵ</sup> TL <sup>S</sup> WQLFQR              | 213   | 31986 |
| >NTRK3-T14 <sup>ϵ</sup> TTL <sup>S</sup> WQLFQ <sup>†</sup> | 133   | >NTRK3-T14 <sup>ϵ</sup> TTL <sup>S</sup> WQLFQ <sup>F</sup> | 79    | 54    |
| >NTRK3-T14 <sup>ϵ</sup> TTL <sup>S</sup> WQLFQ <sup>†</sup> | 155   | >NTRK3-T14 <sup>ϵ</sup> TTL <sup>S</sup> WQLFQ <sup>F</sup> | 4075  | 3920  |
| >NTRK3-T14 <sup>ϵ</sup> TTL <sup>S</sup> WQLFQ <sup>†</sup> | 182   | >NTRK3-T14 <sup>ϵ</sup> TTL <sup>S</sup> WQLFQ <sup>F</sup> | 747   | 565   |
| >NTRK3-T14 <sup>ϵ</sup> TTL <sup>S</sup> WQLFQ <sup>†</sup> | 183   | >NTRK3-T14 <sup>ϵ</sup> TTL <sup>S</sup> WQLFQ <sup>F</sup> | 348   | 165   |
| >NTRK3-T14 <sup>ϵ</sup> TTL <sup>S</sup> WQLFQ <sup>†</sup> | 13707 | >NTRK3-T14 <sup>ϵ</sup> TTL <sup>S</sup> WQLFQ <sup>F</sup> | 393   | 13314 |
| >NTRK3-T14 <sup>ϵ</sup> TTL <sup>S</sup> WQLFQ <sup>†</sup> | 23959 | >NTRK3-T14 <sup>ϵ</sup> TTL <sup>S</sup> WQLFQ <sup>F</sup> | 29    | 23930 |
| >NTRK3-T14 <sup>ϵ</sup> TTL <sup>S</sup> WQLFQ <sup>†</sup> | 413   | >NTRK3-T14 <sup>ϵ</sup> TTL <sup>S</sup> WQLFQ <sup>F</sup> | 361   | 52    |

|                        |       |                        |       |       |
|------------------------|-------|------------------------|-------|-------|
| >NTRK3-T14:TTLSWQLFQI  | 12171 | >NTRK3-T14:TTLSWQLFQI  | 32    | 12139 |
| >NTRK3-T14:TTLSWQLFQI  | 149   | >NTRK3-T14:TTLSWQLFQI  | 1614  | 1465  |
| >NTRK3-T14:TTLSWQLFQI  | 17395 | >NTRK3-T14:TTLSWQLFQI  | 137   | 17258 |
| >NTRK3-T14:TTLSWQLFQI  | 23141 | >NTRK3-T14:TTLSWQLFQI  | 11    | 23130 |
| >NTRK3-T14:TTLSWQLFQI  | 270   | >NTRK3-T14:TTLSWQLFQI  | 194   | 76    |
| >NTRK3-T14:TTLSWQLFQI  | 33    | >NTRK3-T14:TTLSWQLFQI  | 1742  | 1709  |
| >NTRK3-T14:TTLSWQLFQI  | 11    | >NTRK3-T14:TTLSWQLFQI  | 17    | 6     |
| >NTRK3-T14:TTLSWQLFQI  | 40    | >NTRK3-T14:TTLSWQLFQI  | 54    | 14    |
| >NTRK3-T14:TTLSWQLFQI  | 245   | >NTRK3-T14:TTLSWQLFQI  | 506   | 261   |
| >NTRK3-T14:TTLSWQLFQI  | 30    | >NTRK3-T14:TTLSWQLFQI  | 42    | 12    |
| >NTRK3-T14:TTLSWQLFQI  | 1163  | >NTRK3-T14:TTLSWQLFQI  | 102   | 1061  |
| >NTRK3-T14:TTLSWQLFQI  | 29300 | >NTRK3-T14:TTLSWQLFQI  | 293   | 29007 |
| >NTRK3-T14:TTLSWQLFQI  | 429   | >NTRK3-T14:TTLSWQLFQI  | 1105  | 676   |
| >NTRK3-T28:TCIAENVVGM  | 214   | >NTRK3-T28:KCIAENVVGM  | 1501  | 1287  |
| >NTRK3-T28:LTCIAENV    | 279   | >NTRK3-T28:LKCIAENV    | 16400 | 16121 |
| >NTRK3-T28:LTCIAENVVG  | 5250  | >NTRK3-T28:LKCIAENVVG  | 200   | 5050  |
| >NTRK3-T28:LTCIAENVVG  | 24    | >NTRK3-T28:LKCIAENVVG  | 18587 | 18563 |
| >NTRK3-T28:VTSEDNGFTL  | 20456 | >NTRK3-T28:VTSEDNGFTL  | 126   | 20330 |
| >NTRK3-T28:VTSEDNGFTL  | 20481 | >NTRK3-T28:VTSEDNGFTL  | 20    | 20461 |
| >NTRK3-T28:VTSEDNGFTL  | 19535 | >NTRK3-T28:VTSEDNGFTL  | 75    | 19460 |
| >NTRK3-T28:TLTCIAENV   | 231   | >NTRK3-T28:TLKCIAENV   | 2036  | 1805  |
| >NTRK3-T28:TLTCIAENV   | 8     | >NTRK3-T28:TLKCIAENV   | 22    | 14    |
| >NTRK3-T28:TLTCIAENVV  | 188   | >NTRK3-T28:TLKCIAENVV  | 309   | 121   |
| >NTRK3-T28:TLTCIAENV   | 22    | >NTRK3-T28:TLKCIAENV   | 10    | 12    |
| >NTRK3-T28:TLTCIAENVV  | 295   | >NTRK3-T28:TLKCIAENVV  | 238   | 57    |
| >NTRK3-T28:TLTCIAENV   | 180   | >NTRK3-T28:TLKCIAENV   | 1870  | 1690  |
| >NTRK3-T28:TLTCIAENV   | 18    | >NTRK3-T28:TLKCIAENV   | 142   | 124   |
| >NTRK3-T28:TLTCIAENVV  | 69    | >NTRK3-T28:TLKCIAENVV  | 595   | 526   |
| >NTRK3-T28:TLTCIAENV   | 14    | >NTRK3-T28:TLKCIAENV   | 66    | 52    |
| >NTRK3-T28:TLTCIAENVV  | 23    | >NTRK3-T28:TLKCIAENVV  | 116   | 93    |
| >NTRK3-T28:TLTCIAENV   | 29    | >NTRK3-T28:TLKCIAENV   | 1056  | 1027  |
| >NTRK3-T28:TLTCIAENVV  | 40    | >NTRK3-T28:TLKCIAENVV  | 1976  | 1936  |
| >NTRK3-T28:TLTCIAENV   | 20    | >NTRK3-T28:TLKCIAENV   | 422   | 402   |
| >NTRK3-T28:TLTCIAENVV  | 150   | >NTRK3-T28:TLKCIAENVV  | 3024  | 2874  |
| >NTRK3-T28:TLTCIAENV   | 6     | >NTRK3-T28:TLKCIAENV   | 21    | 15    |
| >NTRK3-T28:TLTCIAENVV  | 11    | >NTRK3-T28:TLKCIAENVV  | 40    | 29    |
| >NTRK3-T28:TLTCIAENV   | 16    | >NTRK3-T28:TLKCIAENV   | 94    | 78    |
| >NTRK3-T28:TLTCIAENV   | 116   | >NTRK3-T28:TLKCIAENV   | 955   | 839   |
| >NTRK3-T28:FTLTCIAENV  | 78    | >NTRK3-T28:FTLKCIAENV  | 166   | 88    |
| >NTRK3-T28:FTLTCIAENV\ | 68    | >NTRK3-T28:FTLKCIAENV\ | 92    | 24    |
| >NTRK3-T28:FTLTCIAENV  | 41    | >NTRK3-T28:FTLKCIAENV  | 93    | 52    |
| >NTRK3-T28:FTLTCIAENV\ | 114   | >NTRK3-T28:FTLKCIAENV\ | 125   | 11    |
| >NTRK3-T28:FTLTCIAENV  | 62    | >NTRK3-T28:FTLKCIAENV  | 74    | 12    |

|                        |       |                        |      |       |
|------------------------|-------|------------------------|------|-------|
| >NTRK3-T28:FTLTCAENV\  | 194   | >NTRK3-T28:FTLKCIAENV\ | 259  | 65    |
| >NTRK3-T28:FTLTCAENV   | 28    | >NTRK3-T28:FTLKCIAENV  | 44   | 16    |
| >NTRK3-T28:FTLTCAENV\  | 19    | >NTRK3-T28:FTLKCIAENV\ | 21   | 2     |
| >NTRK3-T28:FTLTCAENV   | 9     | >NTRK3-T28:FTLKCIAENV  | 9    | 0     |
| >NTRK3-T28:FTLTCAENV\  | 32    | >NTRK3-T28:FTLKCIAENV\ | 30   | 2     |
| >NTRK3-T28:FTLTCAENV   | 20    | >NTRK3-T28:FTLKCIAENV  | 25   | 5     |
| >NTRK3-T28:FTLTCAENV\  | 38    | >NTRK3-T28:FTLKCIAENV\ | 47   | 9     |
| >NTRK3-T28:FTLTCAENV   | 25    | >NTRK3-T28:FTLKCIAENV  | 18   | 7     |
| >NTRK3-T28:FTLTCAENV\  | 44    | >NTRK3-T28:FTLKCIAENV\ | 29   | 15    |
| >NTRK3-T28:FTLTCAENV   | 33    | >NTRK3-T28:FTLKCIAENV  | 47   | 14    |
| >NTRK3-T28:FTLTCAENV\  | 181   | >NTRK3-T28:FTLKCIAENV\ | 281  | 100   |
| >NTRK3-T28:FTLTCAENV   | 22    | >NTRK3-T28:FTLKCIAENV  | 28   | 6     |
| >NTRK3-T28:FTLTCAENV\  | 37    | >NTRK3-T28:FTLKCIAENV\ | 45   | 8     |
| >NTRK3-T28:FTLTCAENV   | 42    | >NTRK3-T28:FTLKCIAENV  | 95   | 53    |
| >NTRK3-T28:FTLTCAENV\  | 35    | >NTRK3-T28:FTLKCIAENV\ | 64   | 29    |
| >NTRK3-T28:FTLTCAENV   | 8     | >NTRK3-T28:FTLKCIAENV  | 7    | 1     |
| >NTRK3-T28:FTLTCAENV\  | 89    | >NTRK3-T28:FTLKCIAENV\ | 81   | 8     |
| >NTRK3-T28:FTLTCAENV\  | 196   | >NTRK3-T28:FTLKCIAENV\ | 151  | 45    |
| >NTRK3-T28:EDNGFTLTCI  | 294   | >NTRK3-T28:EDNGFTLKCI  | 108  | 186   |
| >NTRK3-T28:EDNGFTLT    | 28844 | >NTRK3-T28:EDNGFTLK    | 426  | 28418 |
| >NTRK3-T28:EDNGFTLTCI  | 418   | >NTRK3-T28:EDNGFTLKCI  | 658  | 240   |
| >NTRK3-T28:SEDNGFTLTC  | 28    | >NTRK3-T28:SEDNGFTLKC  | 13   | 15    |
| >NTRK3-T28:SEDNGFTLTC  | 169   | >NTRK3-T28:SEDNGFTLKC  | 426  | 257   |
| >NTRK3-T28:SEDNGFTLTC  | 315   | >NTRK3-T28:SEDNGFTLKC  | 639  | 324   |
| >NTRK3-T28:SEDNGFTLT   | 311   | >NTRK3-T28:SEDNGFTLK   | 4174 | 3863  |
| >NTRK3-T28:SEDNGFTLTC  | 28    | >NTRK3-T28:SEDNGFTLKC  | 49   | 21    |
| >NTRK3-T28:TSEDNGFTLT  | 28038 | >NTRK3-T28:TSEDNGFTLK  | 492  | 27546 |
| >NTRK3-T28:TSEDNGFTLT  | 33236 | >NTRK3-T28:TSEDNGFTLK  | 66   | 33170 |
| >NTRK3-T28:TSEDNGFTLT  | 34000 | >NTRK3-T28:TSEDNGFTLK  | 368  | 33632 |
| >NTRK3-T28:TSEDNGFTLT  | 14621 | >NTRK3-T28:TSEDNGFTLK  | 409  | 14212 |
| >NTRK3-V30:VVSLEEPEL   | 823   | >NTRK3-V30:LVSLEEPEL   | 493  | 330   |
| >NTRK3-V30:VVSLEEPELR  | 91    | >NTRK3-V30:LVSLEEPELR  | 33   | 58    |
| >NTRK3-V30:RVVSLEEPEL  | 4268  | >NTRK3-V30:RLVSLEEPEL  | 188  | 4080  |
| >NTRK3-V30:RVVSLEEPEL  | 568   | >NTRK3-V30:RLVSLEEPEL  | 45   | 523   |
| >NTRK3-V30:RVVSLEEPEL  | 3120  | >NTRK3-V30:RLVSLEEPEL  | 411  | 2709  |
| >NTRK3-V30:RVVSLEEPEL  | 655   | >NTRK3-V30:RLVSLEEPEL  | 476  | 179   |
| >NTRK3-V30:RVVSLEEPEL  | 2962  | >NTRK3-V30:RLVSLEEPEL  | 35   | 2927  |
| >NTRK3-V30:RVVSLEEPEL  | 9013  | >NTRK3-V30:RLVSLEEPEL  | 262  | 8751  |
| >NTRK3-V30:RVVSLEEPEL  | 4705  | >NTRK3-V30:RLVSLEEPEL  | 49   | 4656  |
| >NTRK3-V30:RVVSLEEPEL  | 2329  | >NTRK3-V30:RLVSLEEPEL  | 17   | 2312  |
| >NTRK3-V30:RVVSLEEPELF | 49    | >NTRK3-V30:RLVSLEEPELR | 75   | 26    |
| >NTRK3-V30:RVVSLEEPELF | 67    | >NTRK3-V30:RLVSLEEPELR | 749  | 682   |
| >NTRK3-V30:RVVSLEEPEL  | 465   | >NTRK3-V30:RLVSLEEPEL  | 3671 | 3206  |

|                        |      |                        |      |      |
|------------------------|------|------------------------|------|------|
| >NTRK3-V30`RVVSLEEPELF | 136  | >NTRK3-V30`RLVSLEEPELR | 86   | 50   |
| >NTRK3-V30`VALTVYYPPR` | 234  | >NTRK3-V30`VALTVYYPPR` | 88   | 146  |
| >NTRK3-V30`VALTVYYPPR` | 250  | >NTRK3-V30`VALTVYYPPR` | 1496 | 1246 |
| >NTRK3-V30`VALTVYYPPR` | 235  | >NTRK3-V30`VALTVYYPPR` | 1343 | 1108 |
| >NTRK3-V30`VALTVYYPPR` | 18   | >NTRK3-V30`VALTVYYPPR` | 281  | 263  |
| >NTRK3-V30`VALTVYYPPR` | 138  | >NTRK3-V30`VALTVYYPPR` | 3078 | 2940 |
| >NTRK3-V30`VALTVYYPPR` | 262  | >NTRK3-V30`VALTVYYPPR` | 4041 | 3779 |
| >NTRK3-V30`VALTVYYPPR` | 148  | >NTRK3-V30`VALTVYYPPR` | 4446 | 4298 |
| >NTRK3-V30`VALTVYYPPR` | 181  | >NTRK3-V30`VALTVYYPPR` | 1783 | 1602 |
| >NTRK3-V30`VALTVYYPPR` | 5572 | >NTRK3-V30`VALTVYYPPR` | 363  | 5209 |
| >NTRK3-V30`YPPRVVSL    | 36   | >NTRK3-V30`YPPRLVSL    | 59   | 23   |
| >NTRK3-V30`YPPRVVSL    | 53   | >NTRK3-V30`YPPRLVSL    | 44   | 9    |
| >NTRK3-V30`YPPRVVSL    | 498  | >NTRK3-V30`YPPRLVSL    | 334  | 164  |
| >NTRK3-V30`YPPRVVSL    | 267  | >NTRK3-V30`YPPRLVSL    | 372  | 105  |
| >NTRK3-V30`YPPRVVSL    | 740  | >NTRK3-V30`YPPRLVSL    | 223  | 517  |
| >NTRK3-V30`YPPRVVSL    | 203  | >NTRK3-V30`YPPRLVSL    | 204  | 1    |
| >NTRK3-V30`YPPRVVSL    | 835  | >NTRK3-V30`YPPRLVSL    | 356  | 479  |
| >NTRK3-V30`YPPRVVSL    | 32   | >NTRK3-V30`YPPRLVSL    | 40   | 8    |
| >NTRK3-V30`YPPRVVS     | 105  | >NTRK3-V30`YPPRLVS     | 116  | 11   |
| >NTRK3-V30`YPPRVVSL    | 4    | >NTRK3-V30`YPPRLVSL    | 3    | 1    |
| >NTRK3-V30`YPPRVVSLE   | 135  | >NTRK3-V30`YPPRLVSLE   | 148  | 13   |
| >NTRK3-V30`YPPRVVSLEI  | 55   | >NTRK3-V30`YPPRLVSLEE  | 59   | 4    |
| >NTRK3-V30`YPPRVVSL    | 94   | >NTRK3-V30`YPPRLVSL    | 86   | 8    |
| >NTRK3-V30`YPPRVVSL    | 726  | >NTRK3-V30`YPPRLVSL    | 279  | 447  |
| >NTRK3-V30`VYYPPRVVSL  | 338  | >NTRK3-V30`VYYPPRLVSL  | 459  | 121  |
| >NTRK3-V30`VYYPPRVV    | 394  | >NTRK3-V30`VYYPPRLV    | 374  | 20   |
| >NTRK3-V30`VYYPPRVV    | 407  | >NTRK3-V30`VYYPPRLV    | 296  | 111  |
| >NTRK3-V30`VYYPPRVVSL  | 291  | >NTRK3-V30`VYYPPRLVSL  | 388  | 97   |
| >NTRK3-V30`VYYPPRVVSL  | 212  | >NTRK3-V30`VYYPPRLVSL  | 291  | 79   |
| >NTRK3-V30`VYYPPRVVSL  | 10   | >NTRK3-V30`VYYPPRLVSL  | 10   | 0    |
| >NTRK3-V30`VYYPPRVVSL  | 421  | >NTRK3-V30`VYYPPRLVSL  | 729  | 308  |
| >NTRK3-V30`VYYPPRVVSL  | 1143 | >NTRK3-V30`VYYPPRLVSL  | 239  | 904  |
| >NTRK3-V30`VYYPPRVV    | 436  | >NTRK3-V30`VYYPPRLV    | 292  | 144  |
| >NTRK3-V30`VYYPPRVVSL  | 53   | >NTRK3-V30`VYYPPRLVSL  | 44   | 9    |
| >NTRK3-V30`TVYYPPRV    | 604  | >NTRK3-V30`TVYYPPRL    | 158  | 446  |
| >NTRK3-V30`TVYYPPRVVS  | 149  | >NTRK3-V30`TVYYPPRLVSI | 99   | 50   |
| >NTRK3-V30`TVYYPPRV    | 390  | >NTRK3-V30`TVYYPPRL    | 1739 | 1349 |
| >NTRK3-V30`TVYYPPRV    | 105  | >NTRK3-V30`TVYYPPRL    | 1282 | 1177 |
| >NTRK3-V30`TVYYPPRVV   | 343  | >NTRK3-V30`TVYYPPRLV   | 146  | 197  |
| >NTRK3-V30`TVYYPPRVVS  | 370  | >NTRK3-V30`TVYYPPRLVSI | 335  | 35   |
| >NTRK3-V30`TVYYPPRV    | 34   | >NTRK3-V30`TVYYPPRL    | 543  | 509  |
| >NTRK3-V30`TVYYPPRVV   | 217  | >NTRK3-V30`TVYYPPRLV   | 199  | 18   |
| >NTRK3-V30`TVYYPPRV    | 333  | >NTRK3-V30`TVYYPPRL    | 3585 | 3252 |

|                        |      |                         |      |      |
|------------------------|------|-------------------------|------|------|
| >NTRK3-V30: TVYYPPRV   | 88   | >NTRK3-V30: TVYYPPRL    | 1332 | 1244 |
| >NTRK3-V30: TVYYPPRVVS | 54   | >NTRK3-V30: TVYYPPRLVSI | 86   | 32   |
| >NTRK3-V30: TVYYPPRV   | 21   | >NTRK3-V30: TVYYPPRL    | 144  | 123  |
| >NTRK3-V30: TVYYPPRVV  | 22   | >NTRK3-V30: TVYYPPRLV   | 11   | 11   |
| >NTRK3-V30: TVYYPPRVVS | 37   | >NTRK3-V30: TVYYPPRLVSI | 33   | 4    |
| >NTRK3-V30: TVYYPPRV   | 12   | >NTRK3-V30: TVYYPPRL    | 88   | 76   |
| >NTRK3-V30: TVYYPPRVV  | 153  | >NTRK3-V30: TVYYPPRLV   | 64   | 89   |
| >NTRK3-V30: TVYYPPRVVS | 224  | >NTRK3-V30: TVYYPPRLVSI | 187  | 37   |
| >NTRK3-V30: TVYYPPRVVS | 467  | >NTRK3-V30: TVYYPPRLVSI | 620  | 153  |
| >NTRK3-V30: LTVYYPPRV  | 1110 | >NTRK3-V30: LTVYYPPRL   | 273  | 837  |
| >NTRK3-V30: LTVYYPPRV  | 208  | >NTRK3-V30: LTVYYPPRL   | 1388 | 1180 |
| >NTRK3-V30: LTVYYPPRV  | 318  | >NTRK3-V30: LTVYYPPRL   | 3590 | 3272 |
| >NTRK3-V30: LTVYYPPRVV | 193  | >NTRK3-V30: LTVYYPPRLV  | 125  | 68   |
| >NTRK3-V30: LTVYYPPRV  | 328  | >NTRK3-V30: LTVYYPPRL   | 2211 | 1883 |
| >NTRK3-V30: LTVYYPPRVV | 653  | >NTRK3-V30: LTVYYPPRLV  | 363  | 290  |
| >NTRK3-V30: LTVYYPPRV  | 72   | >NTRK3-V30: LTVYYPPRL   | 1292 | 1220 |
| >NTRK3-V30: LTVYYPPRVV | 411  | >NTRK3-V30: LTVYYPPRLV  | 394  | 17   |
| >NTRK3-V30: LTVYYPPRV  | 227  | >NTRK3-V30: LTVYYPPRL   | 5805 | 5578 |
| >NTRK3-V30: LTVYYPPRV  | 3330 | >NTRK3-V30: LTVYYPPRL   | 228  | 3102 |
| >NTRK3-V30: LTVYYPPRV  | 206  | >NTRK3-V30: LTVYYPPRL   | 1612 | 1406 |
| >NTRK3-V30: LTVYYPPRVV | 442  | >NTRK3-V30: LTVYYPPRLV  | 238  | 204  |
| >NTRK3-V30: LTVYYPPRV  | 42   | >NTRK3-V30: LTVYYPPRL   | 536  | 494  |
| >NTRK3-V30: LTVYYPPRVV | 364  | >NTRK3-V30: LTVYYPPRLV  | 186  | 178  |
| >NTRK3-V30: LTVYYPPRV  | 71   | >NTRK3-V30: LTVYYPPRL   | 5    | 66   |
| >NTRK3-V30: LTVYYPPRVV | 326  | >NTRK3-V30: LTVYYPPRLV  | 466  | 140  |
| >NTRK3-V30: LTVYYPPRV  | 1168 | >NTRK3-V30: LTVYYPPRL   | 198  | 970  |
| >NTRK3-V30: LTVYYPPRVV | 1341 | >NTRK3-V30: LTVYYPPRLV  | 395  | 946  |
| >NTRK3-V30: LTVYYPPRV  | 560  | >NTRK3-V30: LTVYYPPRL   | 158  | 402  |
| >NTRK3-V30: LTVYYPPRVV | 77   | >NTRK3-V30: LTVYYPPRLV  | 56   | 21   |
| >NTRK3-V30: ALTVYYPPRV | 160  | >NTRK3-V30: ALTVYYPPRL  | 732  | 572  |
| >NTRK3-V30: ALTVYYPPRV | 455  | >NTRK3-V30: ALTVYYPPRL  | 177  | 278  |
| >NTRK3-V30: ALTVYYPPRV | 108  | >NTRK3-V30: ALTVYYPPRL  | 106  | 2    |
| >NTRK3-V30: ALTVYYPPRV | 270  | >NTRK3-V30: ALTVYYPPRL  | 80   | 190  |
| >NTRK3-V30: ALTVYYPPRV | 85   | >NTRK3-V30: ALTVYYPPRL  | 480  | 395  |
| >NTRK3-V30: ALTVYYPPRV | 60   | >NTRK3-V30: ALTVYYPPRL  | 33   | 27   |
| >NTRK3-V30: ALTVYYPPRV | 833  | >NTRK3-V30: ALTVYYPPRL  | 481  | 352  |
| >NTRK3-V30: ALTVYYPPRV | 4    | >NTRK3-V30: ALTVYYPPRL  | 25   | 21   |
| >NTRK3-V30: ALTVYYPPRV | 10   | >NTRK3-V30: ALTVYYPPRL  | 10   | 0    |
| >NTRK3-V30: ALTVYYPPRV | 39   | >NTRK3-V30: ALTVYYPPRL  | 313  | 274  |
| >NTRK3-V30: ALTVYYPPRV | 76   | >NTRK3-V30: ALTVYYPPRL  | 124  | 48   |
| >NTRK3-V30: ALTVYYPPRV | 6    | >NTRK3-V30: ALTVYYPPRL  | 39   | 33   |
| >NTRK3-V30: ALTVYYPPRV | 42   | >NTRK3-V30: ALTVYYPPRL  | 32   | 10   |
| >NTRK3-V30: ALTVYYPPRV | 16   | >NTRK3-V30: ALTVYYPPRL  | 592  | 576  |

|                       |      |                       |       |       |
|-----------------------|------|-----------------------|-------|-------|
| >NTRK3-V30`ALTVYYPPRV | 316  | >NTRK3-V30`ALTVYYPPRL | 395   | 79    |
| >NTRK3-V30`ALTVYYPPRV | 2    | >NTRK3-V30`ALTVYYPPRL | 5     | 3     |
| >NTRK3-V30`ALTVYYPPRV | 6    | >NTRK3-V30`ALTVYYPPRL | 5     | 1     |
| >NUMA1-D3.DCSIFIKIIDR | 769  | >NUMA1-D3.NCSIFIKIIDR | 221   | 548   |
| >NUMA1-D3.QDCSIFIKII  | 325  | >NUMA1-D3.QNCSIFIKII  | 1334  | 1009  |
| >NUMA1-D3.QDCSIFIKI   | 363  | >NUMA1-D3.QNCSIFIKI   | 6581  | 6218  |
| >NUMA1-D3.QDCSIFIKII  | 321  | >NUMA1-D3.QNCSIFIKII  | 8305  | 7984  |
| >NUMA1-D3.QDCSIFIKI   | 2081 | >NUMA1-D3.QNCSIFIKI   | 434   | 1647  |
| >NUMA1-D3.QDCSIFIKI   | 328  | >NUMA1-D3.QNCSIFIKI   | 13248 | 12920 |
| >NUMA1-D3.QDCSIFIKII  | 241  | >NUMA1-D3.QNCSIFIKII  | 9642  | 9401  |
| >NUMA1-D3.LQDCSIFI    | 106  | >NUMA1-D3.LQNCSIFI    | 264   | 158   |
| >NUMA1-D3.LQDCSIFI    | 498  | >NUMA1-D3.LQNCSIFI    | 139   | 359   |
| >NUMA1-D3.LQDCSIFI    | 1647 | >NUMA1-D3.LQNCSIFI    | 94    | 1553  |
| >NUMA1-D3.LQDCSIFIKII | 2540 | >NUMA1-D3.LQNCSIFIKII | 148   | 2392  |
| >NUMA1-D3.LQDCSIFI    | 11   | >NUMA1-D3.LQNCSIFI    | 16    | 5     |
| >NUMA1-D3.LQDCSIFIKI  | 234  | >NUMA1-D3.LQNCSIFIKI  | 395   | 161   |
| >NUMA1-D3.LQDCSIFIKII | 148  | >NUMA1-D3.LQNCSIFIKII | 249   | 101   |
| >NUMA1-D3.LQDCSIFI    | 186  | >NUMA1-D3.LQNCSIFI    | 328   | 142   |
| >NUMA1-D3.LQDCSIFIKI  | 361  | >NUMA1-D3.LQNCSIFIKI  | 627   | 266   |
| >NUMA1-D3.LQDCSIFI    | 102  | >NUMA1-D3.LQNCSIFI    | 220   | 118   |
| >NUMA1-D3.LQDCSIFIKI  | 375  | >NUMA1-D3.LQNCSIFIKI  | 727   | 352   |
| >NUMA1-D3.LQDCSIFIK   | 2766 | >NUMA1-D3.LQNCSIFIK   | 276   | 2490  |
| >NUMA1-D3.LQDCSIFIK   | 70   | >NUMA1-D3.LQNCSIFIK   | 27    | 43    |
| >NUMA1-D3.LQDCSIFIK   | 2729 | >NUMA1-D3.LQNCSIFIK   | 100   | 2629  |
| >NUMA1-D3.LQDCSIFI    | 7227 | >NUMA1-D3.LQNCSIFI    | 388   | 6839  |
| >NUMA1-D3.LQDCSIFI    | 1062 | >NUMA1-D3.LQNCSIFI    | 36    | 1026  |
| >NUMA1-D3.LQDCSIFIK   | 2113 | >NUMA1-D3.LQNCSIFIK   | 156   | 1957  |
| >NUMA1-D3.LQDCSIFIKI  | 888  | >NUMA1-D3.LQNCSIFIKI  | 37    | 851   |
| >NUMA1-D3.LQDCSIFIKII | 461  | >NUMA1-D3.LQNCSIFIKII | 19    | 442   |
| >NUMA1-D3.LQDCSIFI    | 17   | >NUMA1-D3.LQNCSIFI    | 55    | 38    |
| >NUMA1-D3.LQDCSIFIKI  | 67   | >NUMA1-D3.LQNCSIFIKI  | 230   | 163   |
| >NUMA1-D3.LQDCSIFI    | 13   | >NUMA1-D3.LQNCSIFI    | 62    | 49    |
| >NUMA1-D3.LQDCSIFIKI  | 53   | >NUMA1-D3.LQNCSIFIKI  | 240   | 187   |
| >NUMA1-D3.LQDCSIFI    | 127  | >NUMA1-D3.LQNCSIFI    | 420   | 293   |
| >NUMA1-D3.LQDCSIFIKI  | 314  | >NUMA1-D3.LQNCSIFIKI  | 769   | 455   |
| >NUMA1-D3.LQDCSIFI    | 46   | >NUMA1-D3.LQNCSIFI    | 289   | 243   |
| >NUMA1-D3.LQDCSIFIKI  | 208  | >NUMA1-D3.LQNCSIFIKI  | 800   | 592   |
| >NUMA1-D3.LQDCSIFI    | 64   | >NUMA1-D3.LQNCSIFI    | 174   | 110   |
| >NUMA1-D3.LQDCSIFIKI  | 130  | >NUMA1-D3.LQNCSIFIKI  | 318   | 188   |
| >NUMA1-D3.LQDCSIFI    | 7    | >NUMA1-D3.LQNCSIFI    | 12    | 5     |
| >NUMA1-D3.LQDCSIFIKI  | 36   | >NUMA1-D3.LQNCSIFIKI  | 67    | 31    |
| >NUMA1-D3.LQDCSIFI    | 174  | >NUMA1-D3.LQNCSIFI    | 362   | 188   |
| >NUMA1-D3.LQDCSIFI    | 13   | >NUMA1-D3.LQNCSIFI    | 119   | 106   |

|                        |      |                         |     |      |
|------------------------|------|-------------------------|-----|------|
| >NUMA1-D3: QLQDCSIFIKI | 102  | >NUMA1-D3: QLQNC SIFIKI | 537 | 435  |
| >NUMA1-D3: QLQDCSIFI   | 15   | >NUMA1-D3: QLQNC SIFI   | 132 | 117  |
| >NUMA1-D3: QLQDCSIFIKI | 20   | >NUMA1-D3: QLQNC SIFIKI | 134 | 114  |
| >NUMA1-D3: QLQDCSIFIK  | 110  | >NUMA1-D3: QLQNC SIFIK  | 84  | 26   |
| >NUMA1-D3: QLQDCSIFIK  | 99   | >NUMA1-D3: QLQNC SIFIK  | 94  | 5    |
| >NUMA1-D3: QLQDCSIFIKI | 863  | >NUMA1-D3: QLQNC SIFIKI | 301 | 562  |
| >NUMA1-D3: QLQDCSIF    | 212  | >NUMA1-D3: QLQNC SIF    | 179 | 33   |
| >NUMA1-D3: QLQDCSIF    | 341  | >NUMA1-D3: QLQNC SIF    | 182 | 159  |
| >NUMA1-D3: QLQDCSIF    | 134  | >NUMA1-D3: QLQNC SIF    | 52  | 82   |
| >NUMA1-D3: QLQDCSIFIK  | 274  | >NUMA1-D3: QLQNC SIFIK  | 238 | 36   |
| >NUMA1-D3: LQLQDCSIFI  | 4632 | >NUMA1-D3: LQLQNC SIFI  | 197 | 4435 |
| >NUMA1-D3: LQLQDCSIFI  | 72   | >NUMA1-D3: LQLQNC SIFI  | 43  | 29   |
| >NUMA1-D3: LQLQDCSIFI  | 120  | >NUMA1-D3: LQLQNC SIFI  | 170 | 50   |
| >NUMA1-D3: LQLQDCSIFI  | 218  | >NUMA1-D3: LQLQNC SIFI  | 356 | 138  |
| >NUMA1-D3: LQLQDCSIFI  | 547  | >NUMA1-D3: LQLQNC SIFI  | 464 | 83   |
| >NUMA1-D3: LQLQDCSI    | 48   | >NUMA1-D3: LQLQNC SI    | 46  | 2    |
| >NUMA1-D3: LQLQDCSIFI  | 44   | >NUMA1-D3: LQLQNC SIFI  | 65  | 21   |
| >NUMA1-D3: LQLQDCSI    | 1037 | >NUMA1-D3: LQLQNC SI    | 494 | 543  |
| >NUMA1-D3: LQLQDCSIFI  | 653  | >NUMA1-D3: LQLQNC SIFI  | 466 | 187  |
| >NUMA1-D3: LQLQDCSIFI  | 533  | >NUMA1-D3: LQLQNC SIFI  | 350 | 183  |
| >NUMA1-D3: LQLQDCSIFIK | 406  | >NUMA1-D3: LQLQNC SIFIK | 268 | 138  |
| >NUMA1-D3: LQLQDCSIF   | 1851 | >NUMA1-D3: LQLQNC SIF   | 460 | 1391 |
| >NUMA1-D3: LQLQDCSI    | 487  | >NUMA1-D3: LQLQNC SI    | 350 | 137  |
| >NUMA1-D3: LQLQDCSIF   | 50   | >NUMA1-D3: LQLQNC SIF   | 44  | 6    |
| >NUMA1-D3: LQLQDCSIF   | 365  | >NUMA1-D3: LQLQNC SIF   | 166 | 199  |
| >NUMA1-D3: LQLQDCSI    | 83   | >NUMA1-D3: LQLQNC SI    | 42  | 41   |
| >NUMA1-D3: LQLQDCSIF   | 3    | >NUMA1-D3: LQLQNC SIF   | 3   | 0    |
| >NUMA1-D3: LQLQDCSIFI  | 68   | >NUMA1-D3: LQLQNC SIFI  | 44  | 24   |
| >NUMA1-D3: LQLQDCSIFIK | 345  | >NUMA1-D3: LQLQNC SIFIK | 277 | 68   |
| >NUMA1-D3: LQLQDCSIF   | 187  | >NUMA1-D3: LQLQNC SIF   | 329 | 142  |
| >NUMA1-D3: VLQLQDCSIFI | 323  | >NUMA1-D3: VLQLQNC SIFI | 235 | 88   |
| >NUMA1-D3: VLQLQDCSIFI | 258  | >NUMA1-D3: VLQLQNC SIFI | 187 | 71   |
| >NUMA1-D3: VLQLQDCSI   | 318  | >NUMA1-D3: VLQLQNC SI   | 140 | 178  |
| >NUMA1-D3: VLQLQDCSIFI | 106  | >NUMA1-D3: VLQLQNC SIFI | 79  | 27   |
| >NUMA1-D3: VLQLQDCSI   | 59   | >NUMA1-D3: VLQLQNC SI   | 63  | 4    |
| >NUMA1-D3: VLQLQDCSIFI | 26   | >NUMA1-D3: VLQLQNC SIFI | 28  | 2    |
| >NUMA1-D3: VLQLQDCSI   | 354  | >NUMA1-D3: VLQLQNC SI   | 615 | 261  |
| >NUMA1-D3: VLQLQDCSIFI | 91   | >NUMA1-D3: VLQLQNC SIFI | 129 | 38   |
| >NUMA1-D3: VLQLQDCSI   | 1486 | >NUMA1-D3: VLQLQNC SI   | 369 | 1117 |
| >NUMA1-D3: VLQLQDCSIFI | 190  | >NUMA1-D3: VLQLQNC SIFI | 110 | 80   |
| >NUMA1-D3: VLQLQDCSI   | 38   | >NUMA1-D3: VLQLQNC SI   | 24  | 14   |
| >NUMA1-D3: VLQLQDCSIFI | 38   | >NUMA1-D3: VLQLQNC SIFI | 37  | 1    |
| >NUMA1-D3: VLQLQDCSIF  | 309  | >NUMA1-D3: VLQLQNC SIF  | 252 | 57   |



|                       |       |                        |       |       |
|-----------------------|-------|------------------------|-------|-------|
| >NUMA1-D3: VLQLQDCSIF | 449   | >NUMA1-D3: VLQLQNC SIF | 306   | 143   |
| >NUMA1-D3: VLQLQDCSIF | 412   | >NUMA1-D3: VLQLQNC SIF | 177   | 235   |
| >NUMA1-D3: VLQLQDCSIF | 703   | >NUMA1-D3: VLQLQNC SIF | 463   | 240   |
| >NUMA1-D3: AVLQLQDCSI | 711   | >NUMA1-D3: AVLQLQNC SI | 426   | 285   |
| >NUMA1-D3: AVLQLQDCSI | 233   | >NUMA1-D3: AVLQLQNC SI | 300   | 67    |
| >NUMA1-D3: AVLQLQDCSI | 176   | >NUMA1-D3: AVLQLQNC SI | 91    | 85    |
| >NUMA1-D3: AVLQLQDCSI | 285   | >NUMA1-D3: AVLQLQNC SI | 167   | 118   |
| >NUMA1-D3: AVLQLQDCSI | 926   | >NUMA1-D3: AVLQLQNC SI | 455   | 471   |
| >NUMA1-D3: AVLQLQDCSI | 33    | >NUMA1-D3: AVLQLQNC SI | 28    | 5     |
| >NUMA1-D3: AVLQLQDCSI | 721   | >NUMA1-D3: AVLQLQNC SI | 247   | 474   |
| >NUMA1-D3: EAVLQLQDCS | 646   | >NUMA1-D3: EAVLQLQNC S | 419   | 227   |
| >NUMA1-D3: EAVLQLQDCS | 1986  | >NUMA1-D3: EAVLQLQNC S | 396   | 1590  |
| >NUMA1-E1: ETASNSARA  | 6847  | >NUMA1-E1: KTASNSARA   | 432   | 6415  |
| >NUMA1-E1: ETASNSAR   | 12830 | >NUMA1-E1: KTASNSAR    | 433   | 12397 |
| >NUMA1-E1: ETASNSAR   | 5563  | >NUMA1-E1: KTASNSAR    | 209   | 5354  |
| >NUMA1-E1: ETASNSARAA | 468   | >NUMA1-E1: KTASNSARAA  | 14098 | 13630 |
| >NUMA1-E1: ETASNSARA  | 14929 | >NUMA1-E1: KTASNSARA   | 101   | 14828 |
| >NUMA1-E1: ETASNSARAA | 15340 | >NUMA1-E1: KTASNSARAA  | 139   | 15201 |
| >NUMA1-E1: ETASNSAR   | 979   | >NUMA1-E1: KTASNSAR    | 13    | 966   |
| >NUMA1-E1: ETASNSAR   | 107   | >NUMA1-E1: KTASNSAR    | 5605  | 5498  |
| >NUMA1-E1: ETASNSAR   | 1     | >NUMA1-E1: KTASNSAR    | 18    | 17    |
| >NUMA1-E1: ETASNSARAA | 152   | >NUMA1-E1: KTASNSARAA  | 9011  | 8859  |
| >NUMA1-E1: ETASNSARA  | 8     | >NUMA1-E1: KTASNSARA   | 474   | 466   |
| >NUMA1-E1: ETASNSARAA | 67    | >NUMA1-E1: KTASNSARAA  | 2824  | 2757  |
| >NUMA1-E1: ETASNSARA  | 26    | >NUMA1-E1: KTASNSARA   | 4535  | 4509  |
| >NUMA1-E1: ETASNSARAA | 76    | >NUMA1-E1: KTASNSARAA  | 5929  | 5853  |
| >NUMA1-E1: ETASNSARA  | 7489  | >NUMA1-E1: KTASNSARA   | 320   | 7169  |
| >NUMA1-E1: ETASNSAR   | 2821  | >NUMA1-E1: KTASNSAR    | 199   | 2622  |
| >NUMA1-E1: AETASNSA   | 7680  | >NUMA1-E1: AKTASNSA    | 239   | 7441  |
| >NUMA1-E1: AETASNSAR  | 2016  | >NUMA1-E1: AKTASNSAR   | 64    | 1952  |
| >NUMA1-E1: AETASNSARA | 4757  | >NUMA1-E1: AKTASNSARA  | 149   | 4608  |
| >NUMA1-E1: AETASNSA   | 76    | >NUMA1-E1: AKTASNSA    | 24761 | 24685 |
| >NUMA1-E1: AETASNSARA | 79    | >NUMA1-E1: AKTASNSARA  | 25650 | 25571 |
| >NUMA1-E1: AETASNSARA | 312   | >NUMA1-E1: AKTASNSARA  | 16948 | 16636 |
| >NUMA1-E1: AETASNSA   | 9     | >NUMA1-E1: AKTASNSA    | 6114  | 6105  |
| >NUMA1-E1: AETASNSAR  | 331   | >NUMA1-E1: AKTASNSAR   | 27759 | 27428 |
| >NUMA1-E1: AETASNSARA | 230   | >NUMA1-E1: AKTASNSARA  | 15162 | 14932 |
| >NUMA1-E1: AETASNSARA | 5     | >NUMA1-E1: AKTASNSARA  | 2669  | 2664  |
| >NUMA1-E1: QAETASNSA  | 7388  | >NUMA1-E1: QAKTASNSA   | 36    | 7352  |
| >NUMA1-E1: QAETASNSAF | 13085 | >NUMA1-E1: QAKTASNSAF  | 487   | 12598 |
| >NUMA1-E1: QAETASNSAF | 9779  | >NUMA1-E1: QAKTASNSAF  | 106   | 9673  |
| >NUMA1-E1: QAETASNSAF | 1751  | >NUMA1-E1: QAKTASNSAF  | 210   | 1541  |
| >NUMA1-E1: QAETASNSAF | 223   | >NUMA1-E1: QAKTASNSAF  | 76    | 147   |

|                       |       |                        |      |       |
|-----------------------|-------|------------------------|------|-------|
| >NUMA1-E1:LQAETASNSA  | 338   | >NUMA1-E1:LQAKTASNSA   | 1343 | 1005  |
| >NUMA1-E1:LQAETASNSA  | 435   | >NUMA1-E1:LQAKTASNSA   | 264  | 171   |
| >NUMA1-E1:LQAETASNSA  | 320   | >NUMA1-E1:LQAKTASNSA   | 427  | 107   |
| >NUMA1-E1:LQAETASNSA  | 178   | >NUMA1-E1:LQAKTASNSA   | 161  | 17    |
| >NUMA1-E1:LQAETASNS   | 943   | >NUMA1-E1:LQAKTASNS    | 481  | 462   |
| >NUMA1-E1:LQAETASNSA  | 120   | >NUMA1-E1:LQAKTASNSA   | 80   | 40    |
| >NUMA1-E1:LQAETASNSA  | 46    | >NUMA1-E1:LQAKTASNSA   | 28   | 18    |
| >NUMA1-E1:LLQAETASNS  | 321   | >NUMA1-E1:LLQAKTASNS   | 377  | 56    |
| >NUMA1-E1:LLQAETASNS  | 26    | >NUMA1-E1:LLQAKTASNS   | 41   | 15    |
| >NUMA1-E1:LLQAETASNS  | 23    | >NUMA1-E1:LLQAKTASNS   | 17   | 6     |
| >NUMA1-E1:LLQAETASNS  | 340   | >NUMA1-E1:LLQAKTASNS   | 320  | 20    |
| >NUMA1-E1:LLQAETASNS  | 61    | >NUMA1-E1:LLQAKTASNS   | 68   | 7     |
| >NUMA1-E1:LLQAETASNS  | 11    | >NUMA1-E1:LLQAKTASNS   | 12   | 1     |
| >NUMA1-E1:LLQAETASNS  | 411   | >NUMA1-E1:LLQAKTASNS   | 451  | 40    |
| >NUMA1-E1:RLLQAETA    | 236   | >NUMA1-E1:RLLQAKTA     | 1431 | 1195  |
| >NUMA1-E1:RLLQAETA    | 17    | >NUMA1-E1:RLLQAKTA     | 43   | 26    |
| >NUMA1-E1:RLLQAETA    | 92    | >NUMA1-E1:RLLQAKTA     | 349  | 257   |
| >NUMA1-E1:RLLQAETA    | 30    | >NUMA1-E1:RLLQAKTA     | 99   | 69    |
| >NUMA1-E1:RLLQAETA    | 285   | >NUMA1-E1:RLLQAKTA     | 1866 | 1581  |
| >NUMA1-E1:RLLQAETA    | 27    | >NUMA1-E1:RLLQAKTA     | 43   | 16    |
| >NUMA1-E1:RLRLLQAETA  | 313   | >NUMA1-E1:RLRLLQAKTA   | 969  | 656   |
| >NUMA1-E1:RLRLLQAE    | 17247 | >NUMA1-E1:RLRLLQAK     | 54   | 17193 |
| >NUMA1-E1:RLRLLQAE    | 1063  | >NUMA1-E1:RLRLLQAK     | 4    | 1059  |
| >NUMA1-E1:RLRLLQAE    | 211   | >NUMA1-E1:RLRLLQAKT    | 330  | 119   |
| >NUMA1-E1:RLRLLQAETA  | 47    | >NUMA1-E1:RLRLLQAKTA   | 15   | 32    |
| >NUMA1-E1:RLRLLQAETA  | 386   | >NUMA1-E1:RLRLLQAKTA   | 274  | 112   |
| >NUMA1-E1:RLRLLQAE    | 8516  | >NUMA1-E1:RLRLLQAK     | 92   | 8424  |
| >NUMA1-E1:ERLRLQAE    | 9331  | >NUMA1-E1:ERLRLQAK     | 167  | 9164  |
| >NUMA1-E1:EERLRLQAE   | 260   | >NUMA1-E1:EERLRLQAK    | 583  | 323   |
| >NUMA1-R6:ERVAQEKDQ   | 12633 | >NUMA1-R6:ESVAQEKDQI   | 198  | 12435 |
| >NUMA1-R6:KERVAQEK    | 51    | >NUMA1-R6:KESVAQEK     | 5620 | 5569  |
| >NUMA1-R6:KERVAQEKC   | 1012  | >NUMA1-R6:KESVAQEKC    | 58   | 954   |
| >NUMA1-R6:KERVAQEKC   | 106   | >NUMA1-R6:KESVAQEKC    | 251  | 145   |
| >NUMA1-R6:KERVAQEKC   | 28    | >NUMA1-R6:KESVAQEKC    | 54   | 26    |
| >NUMA1-R6:ATEKERVAQE  | 267   | >NUMA1-R6:ATEKESVAQE   | 242  | 25    |
| >NUMA1-R6:ATEKERVAQE  | 397   | >NUMA1-R6:ATEKESVAQE   | 544  | 147   |
| >NUMA1-R6:KATEKERV    | 1799  | >NUMA1-R6:KATEKESV     | 483  | 1316  |
| >NUMA1-R6:KATEKERV    | 593   | >NUMA1-R6:KATEKESV     | 342  | 251   |
| >NUMA1-R6:QKATEKERV   | 2945  | >NUMA1-R6:QKATEKESV    | 412  | 2533  |
| >NUMA1-R6:QQKATEKER   | 493   | >NUMA1-R6:QQKATEKES    | 2509 | 2016  |
| >NUMA1-R6:QQKATEKER\  | 739   | >NUMA1-R6:QQKATEKES\   | 140  | 599   |
| >NUMA1-R6:QQKATEKER\  | 1143  | >NUMA1-R6:QQKATEKES\   | 458  | 685   |
| >NUP214-A1 ATTTSVAPPA | 133   | >NUP214-A1 VTTTTSVAPPA | 1302 | 1169  |

|                         |       |                        |      |       |
|-------------------------|-------|------------------------|------|-------|
| >NUP214-A1 ATTTSVAPPA   | 155   | >NUP214-A1 VTTTSVAPPA  | 1600 | 1445  |
| >NUP214-A1 ATTTSVAPPA   | 344   | >NUP214-A1 VTTTSVAPPA  | 487  | 143   |
| >NUP214-A1 SATTTSVAPP,  | 1062  | >NUP214-A1 SVTTTSVAPP, | 210  | 852   |
| >NUP214-A1 SATTTSVAPP,  | 1027  | >NUP214-A1 SVTTTSVAPP, | 286  | 741   |
| >NUP214-A1 SATTTSVAPP,  | 1605  | >NUP214-A1 SVTTTSVAPP, | 344  | 1261  |
| >NUP214-A1 SSATTTTSV    | 369   | >NUP214-A1 SSVTTTSV    | 1700 | 1331  |
| >NUP214-A1 SSATTTTSV    | 418   | >NUP214-A1 SSVTTTSV    | 919  | 501   |
| >NUP214-A1 SSATTTTSV    | 518   | >NUP214-A1 SSVTTTSV    | 311  | 207   |
| >NUP214-A1 SSATTTTSV    | 31    | >NUP214-A1 SSVTTTSV    | 92   | 61    |
| >NUP214-A1 SSATTTTSV    | 218   | >NUP214-A1 SSVTTTSV    | 392  | 174   |
| >NUP214-A1 SSATTTTSV    | 584   | >NUP214-A1 SSVTTTSV    | 470  | 114   |
| >NUP214-A1 SSATTTTSVA   | 131   | >NUP214-A1 SSVTTTSVA   | 175  | 44    |
| >NUP214-A1 SSATTTTSV    | 273   | >NUP214-A1 SSVTTTSV    | 1108 | 835   |
| >NUP214-A1 TSSATTTTSV   | 399   | >NUP214-A1 TSSVTTTSV   | 2310 | 1911  |
| >NUP214-A1 TSSATTTTSV   | 457   | >NUP214-A1 TSSVTTTSV   | 1901 | 1444  |
| >NUP214-A1 TSSATTTTSV   | 17    | >NUP214-A1 TSSVTTTSV   | 58   | 41    |
| >NUP214-A1 TSSATTTTSVA  | 293   | >NUP214-A1 TSSVTTTSVA  | 2067 | 1774  |
| >NUP214-A1 TSSATTTTSV   | 180   | >NUP214-A1 TSSVTTTSV   | 564  | 384   |
| >NUP214-A1 VTSSATTTTSV  | 102   | >NUP214-A1 VTSSVTTTSV  | 119  | 17    |
| >NUP214-A1 VTSSATTTTSV  | 43    | >NUP214-A1 VTSSVTTTSV  | 46   | 3     |
| >NUP214-A1 VTSSATTTTSV, | 563   | >NUP214-A1 VTSSVTTTSV, | 478  | 85    |
| >NUP214-A1 VTSSATTTTSV  | 483   | >NUP214-A1 VTSSVTTTSV  | 425  | 58    |
| >NUP214-A1 VTSSATTTTSV  | 304   | >NUP214-A1 VTSSVTTTSV  | 101  | 203   |
| >NUP214-A1 VTSSATTTTSV  | 285   | >NUP214-A1 VTSSVTTTSV  | 168  | 117   |
| >NUP214-A1 VTSSATTTTSV  | 31    | >NUP214-A1 VTSSVTTTSV  | 49   | 18    |
| >NUP214-A1 VTSSATTTTSV  | 903   | >NUP214-A1 VTSSVTTTSV  | 458  | 445   |
| >NUP214-A1 VTSSATTTTSV  | 33    | >NUP214-A1 VTSSVTTTSV  | 45   | 12    |
| >NUP214-A1 VTSSATTTTSV, | 989   | >NUP214-A1 VTSSVTTTSV, | 452  | 537   |
| >NUP214-A1 VTSSATTTTSV  | 197   | >NUP214-A1 VTSSVTTTSV  | 288  | 91    |
| >NUP214-A1 VTSSATTTTSV  | 294   | >NUP214-A1 VTSSVTTTSV  | 795  | 501   |
| >NUP214-A1 VTSSATTTTSV  | 135   | >NUP214-A1 VTSSVTTTSV  | 267  | 132   |
| >NUP214-A1 VTSSATTTTS   | 377   | >NUP214-A1 VTSSVTTTS   | 123  | 254   |
| >NUP214-A1 VTSSATTTTSV  | 57    | >NUP214-A1 VTSSVTTTSV  | 75   | 18    |
| >NUP214-A1 VTSSATTTTSV, | 86    | >NUP214-A1 VTSSVTTTSV, | 43   | 43    |
| >NUP214-A1 VTSSATTTTSV  | 393   | >NUP214-A1 VTSSVTTTSV  | 1483 | 1090  |
| >NUP214-A1 PVTSSATTTTS\ | 129   | >NUP214-A1 PVTSSVTTTS\ | 97   | 32    |
| >NUP214-A1 TEPPVTSSA    | 278   | >NUP214-A1 TEPPVTSSV   | 12   | 266   |
| >NUP214-A1 TEPPVTSSA    | 3009  | >NUP214-A1 TEPPVTSSV   | 262  | 2747  |
| >NUP214-A1 TEPPVTSSA    | 3945  | >NUP214-A1 TEPPVTSSV   | 118  | 3827  |
| >NUP214-A1 HTEPPVTSSA   | 3005  | >NUP214-A1 HTEPPVTSSV  | 485  | 2520  |
| >NUP214-A1 HTEPPVTSSA   | 10751 | >NUP214-A1 HTEPPVTSSV  | 320  | 10431 |
| >NUP214-A1 HTEPPVTSSA   | 3203  | >NUP214-A1 HTEPPVTSSV  | 243  | 2960  |
| >NUP214-A1 HTEPPVTSSA   | 2293  | >NUP214-A1 HTEPPVTSSV  | 59   | 2234  |

|                       |       |                       |      |       |
|-----------------------|-------|-----------------------|------|-------|
| >NUP214-A1 HTEPPVTSSA | 1904  | >NUP214-A1 HTEPPVTSSV | 147  | 1757  |
| >NUP214-A1 HTEPPVTSSA | 1018  | >NUP214-A1 HTEPPVTSSV | 296  | 722   |
| >NUP214-G4 GERQPKSPG  | 726   | >NUP214-G4 AERQPKSPG  | 466  | 260   |
| >NUP214-G4 GERQPKSPG  | 2075  | >NUP214-G4 AERQPKSPG  | 184  | 1891  |
| >NUP214-G4 GERQPKSPG  | 304   | >NUP214-G4 AERQPKSPG  | 303  | 1     |
| >NUP214-G4 LSLEGERQPK | 187   | >NUP214-G4 LSLEAERQPK | 121  | 66    |
| >NUP214-G4 LSLEGERQPK | 173   | >NUP214-G4 LSLEAERQPK | 73   | 100   |
| >NUP214-G4 RLSLEGERQP | 165   | >NUP214-G4 RLSLEAERQP | 125  | 40    |
| >NUP214-G4 RLSLEGERQP | 227   | >NUP214-G4 RLSLEAERQP | 183  | 44    |
| >NUP214-G4 RLSLEGERQP | 183   | >NUP214-G4 RLSLEAERQP | 164  | 19    |
| >NUP214-G4 RLSLEGER   | 323   | >NUP214-G4 RLSLEAER   | 129  | 194   |
| >NUP214-G4 RLSLEGER   | 453   | >NUP214-G4 RLSLEAER   | 170  | 283   |
| >NUP214-G4 KTPERLSLEG | 14169 | >NUP214-G4 KTPERLSLEA | 417  | 13752 |
| >NUP214-G4 KTPERLSLEG | 754   | >NUP214-G4 KTPERLSLEA | 401  | 353   |
| >NUP214-P1 PVLGKHTEPP | 6941  | >NUP214-P1 LVLGKHTEPP | 170  | 6771  |
| >NUP214-P1 PVLGKHTEPP | 8305  | >NUP214-P1 LVLGKHTEPP | 494  | 7811  |
| >NUP214-P1 PVLGKHTEPP | 2341  | >NUP214-P1 LVLGKHTEPP | 25   | 2316  |
| >NUP214-P1 PVLGKHTEPP | 334   | >NUP214-P1 LVLGKHTEPP | 15   | 319   |
| >NUP214-P1 PVLGKHTEPP | 6514  | >NUP214-P1 LVLGKHTEPP | 341  | 6173  |
| >NUP214-P1 PVLGKHTEPP | 254   | >NUP214-P1 LVLGKHTEPP | 31   | 223   |
| >NUP214-P1 PVLGKHTEPP | 931   | >NUP214-P1 LVLGKHTEPP | 150  | 781   |
| >NUP214-P1 PVLGKHTEPP | 130   | >NUP214-P1 LVLGKHTEPP | 6    | 124   |
| >NUP214-P1 PVLGKHTEPP | 780   | >NUP214-P1 LVLGKHTEPP | 80   | 700   |
| >NUP214-P1 VPSGFNFTAP | 11720 | >NUP214-P1 VPSGFNFTAP | 22   | 11698 |
| >NUP214-P1 VPSGFNFTAP | 1420  | >NUP214-P1 VPSGFNFTAP | 41   | 1379  |
| >NUP214-P1 VPSGFNFTAP | 17452 | >NUP214-P1 VPSGFNFTAP | 57   | 17395 |
| >NUP214-P1 VPSGFNFTAP | 8990  | >NUP214-P1 VPSGFNFTAP | 366  | 8624  |
| >NUP214-P1 VPSGFNFTAP | 21135 | >NUP214-P1 VPSGFNFTAP | 334  | 20801 |
| >NUP214-P1 VPSGFNFTAP | 18242 | >NUP214-P1 VPSGFNFTAP | 258  | 17984 |
| >NUP214-P1 TAPPVLGK   | 232   | >NUP214-P1 TAPLVLGK   | 350  | 118   |
| >NUP214-P1 TAPPVLGK   | 353   | >NUP214-P1 TAPLVLGK   | 377  | 24    |
| >NUP214-P1 FTAPPVLGK  | 177   | >NUP214-P1 FTAPLVLGK  | 294  | 117   |
| >NUP214-P1 FTAPPVLGK  | 18    | >NUP214-P1 FTAPLVLGK  | 20   | 2     |
| >NUP214-P1 FTAPPVLGK  | 17    | >NUP214-P1 FTAPLVLGK  | 11   | 6     |
| >NUP214-P1 FTAPPVLG   | 270   | >NUP214-P1 FTAPLVLG   | 305  | 35    |
| >NUP214-P1 FTAPPVLGKH | 240   | >NUP214-P1 FTAPLVLGKH | 566  | 326   |
| >NUP214-P1 FTAPPVLG   | 173   | >NUP214-P1 FTAPLVLG   | 1961 | 1788  |
| >NUP214-P1 FTAPPVLGK  | 777   | >NUP214-P1 FTAPLVLGK  | 319  | 458   |
| >NUP214-P1 NFTAPPVLGK | 122   | >NUP214-P1 NFTAPLVLGK | 163  | 41    |
| >NUP214-P1 FNFTAPPV   | 282   | >NUP214-P1 FNFTAPLV   | 1136 | 854   |
| >NUP214-P1 FNFTAPPVL  | 59    | >NUP214-P1 FNFTAPLVL  | 332  | 273   |
| >NUP214-P1 FNFTAPPV   | 237   | >NUP214-P1 FNFTAPLV   | 486  | 249   |
| >NUP214-P1 FNFTAPPV   | 389   | >NUP214-P1 FNFTAPLV   | 712  | 323   |

|                       |       |                       |       |       |
|-----------------------|-------|-----------------------|-------|-------|
| >NUP214-P1.FNFTAPPVLG | 327   | >NUP214-P1.FNFTAPLVLG | 289   | 38    |
| >NUP214-P1.FNFTAPPV   | 276   | >NUP214-P1.FNFTAPLV   | 568   | 292   |
| >NUP214-P1.FNFTAPPV   | 211   | >NUP214-P1.FNFTAPLV   | 1160  | 949   |
| >NUP214-P1.FNFTAPPV   | 253   | >NUP214-P1.FNFTAPLV   | 1142  | 889   |
| >NUP214-P1.FNFTAPPVL  | 142   | >NUP214-P1.FNFTAPLVL  | 99    | 43    |
| >NUP214-P1.FNFTAPPVL  | 22    | >NUP214-P1.FNFTAPLVL  | 17    | 5     |
| >NUP214-P1.SGFNFTAPP  | 327   | >NUP214-P1.SGFNFTAPL  | 12    | 315   |
| >NUP214-P1.SGFNFTAPPV | 717   | >NUP214-P1.SGFNFTAPLV | 427   | 290   |
| >NUP214-P1.SGFNFTAPPV | 135   | >NUP214-P1.SGFNFTAPLV | 280   | 145   |
| >NUP214-P1.SGFNFTAPP  | 11350 | >NUP214-P1.SGFNFTAPL  | 118   | 11232 |
| >NUP214-P1.SGFNFTAPPV | 129   | >NUP214-P1.SGFNFTAPLV | 230   | 101   |
| >NUP214-P1.SGFNFTAPPV | 83    | >NUP214-P1.SGFNFTAPLV | 104   | 21    |
| >NUP214-P1.SGFNFTAPP  | 9987  | >NUP214-P1.SGFNFTAPL  | 220   | 9767  |
| >NUP214-P1.SGFNFTAPP  | 11067 | >NUP214-P1.SGFNFTAPL  | 114   | 10953 |
| >NUP214-P1.SGFNFTAPPV | 356   | >NUP214-P1.SGFNFTAPLV | 643   | 287   |
| >NUP214-P1.SGFNFTAPPV | 53    | >NUP214-P1.SGFNFTAPLV | 262   | 209   |
| >NUP214-P1.SGFNFTAPP  | 5720  | >NUP214-P1.SGFNFTAPL  | 367   | 5353  |
| >NUP214-P1.SGFNFTAPPV | 528   | >NUP214-P1.SGFNFTAPLV | 384   | 144   |
| >NUP214-P1.SGFNFTAPP  | 22248 | >NUP214-P1.SGFNFTAPL  | 217   | 22031 |
| >NUP214-P1.SGFNFTAPPV | 504   | >NUP214-P1.SGFNFTAPLV | 445   | 59    |
| >NUP214-Q1.QAPAVNTL   | 159   | >NUP214-Q1.EAPAVNTL   | 24    | 135   |
| >NUP214-Q1.QAPAVNTLT  | 1260  | >NUP214-Q1.EAPAVNTLT  | 155   | 1105  |
| >NUP214-Q1.QAPAVNTLTE | 2545  | >NUP214-Q1.EAPAVNTLTE | 399   | 2146  |
| >NUP214-Q1.SQAPAVNTL  | 450   | >NUP214-Q1.SEAPAVNTL  | 886   | 436   |
| >NUP214-Q1.SQAPAVNTL  | 2788  | >NUP214-Q1.SEAPAVNTL  | 25    | 2763  |
| >NUP214-Q1.SQAPAVNTL  | 22    | >NUP214-Q1.SEAPAVNTL  | 1467  | 1445  |
| >NUP214-Q1.SQAPAVNTL  | 46    | >NUP214-Q1.SEAPAVNTL  | 8308  | 8262  |
| >NUP214-Q1.SQAPAVNT   | 332   | >NUP214-Q1.SEAPAVNT   | 15265 | 14933 |
| >NUP214-Q1.SQAPAVNTL  | 8     | >NUP214-Q1.SEAPAVNTL  | 1583  | 1575  |
| >NUP214-Q1.SQAPAVNTL  | 293   | >NUP214-Q1.SEAPAVNTL  | 8341  | 8048  |
| >NUP214-Q1.SQAPAVNTL  | 97    | >NUP214-Q1.SEAPAVNTL  | 4273  | 4176  |
| >NUP214-Q1.SQAPAVNTL  | 46    | >NUP214-Q1.SEAPAVNTL  | 1807  | 1761  |
| >NUP214-Q1.SQAPAVNTL  | 12095 | >NUP214-Q1.SEAPAVNTL  | 267   | 11828 |
| >NUP214-Q1.SQAPAVNTL  | 21    | >NUP214-Q1.SEAPAVNTL  | 159   | 138   |
| >NUP214-Q1.SQAPAVNTL  | 4514  | >NUP214-Q1.SEAPAVNTL  | 66    | 4448  |
| >NUP214-Q1.SQAPAVNTL  | 20864 | >NUP214-Q1.SEAPAVNTL  | 463   | 20401 |
| >NUP214-Q1.SQAPAVNTLT | 16728 | >NUP214-Q1.SEAPAVNTLT | 333   | 16395 |
| >NUP214-Q1.SQAPAVNT   | 15549 | >NUP214-Q1.SEAPAVNT   | 143   | 15406 |
| >NUP214-Q1.SQAPAVNTLT | 8898  | >NUP214-Q1.SEAPAVNTLT | 167   | 8731  |
| >NUP214-Q1.SQAPAVNTL  | 8568  | >NUP214-Q1.SEAPAVNTL  | 127   | 8441  |
| >NUP214-Q1.ASQAPAVNTI | 349   | >NUP214-Q1.ASEAPAVNTL | 1058  | 709   |
| >NUP214-Q1.ASQAPAVNTI | 16    | >NUP214-Q1.ASEAPAVNTL | 27    | 11    |
| >NUP214-Q1.ASQAPAVNTI | 205   | >NUP214-Q1.ASEAPAVNTL | 125   | 80    |

|                      |      |                      |     |      |
|----------------------|------|----------------------|-----|------|
| >NUP214-Q1 MASQAPAV  | 1978 | >NUP214-Q1 MASEAPAV  | 304 | 1674 |
| >NUP214-Q1 MASQAPAV  | 400  | >NUP214-Q1 MASEAPAV  | 120 | 280  |
| >NUP214-Q1 MASQAPAV\ | 141  | >NUP214-Q1 MASEAPAVN | 42  | 99   |
| >NUP214-Q1 MASQAPAV  | 249  | >NUP214-Q1 MASEAPAV  | 65  | 184  |
| >NUP214-Q1 MASQAPAV\ | 754  | >NUP214-Q1 MASEAPAVN | 159 | 595  |
| >NUP214-Q1 MASQAPAV  | 139  | >NUP214-Q1 MASEAPAV  | 39  | 100  |
| >NUP214-Q1 MASQAPAV\ | 1152 | >NUP214-Q1 MASEAPAVN | 203 | 949  |
| >NUP214-Q1 MASQAPAV  | 260  | >NUP214-Q1 MASEAPAV  | 54  | 206  |
| >NUP214-Q1 MASQAPAV  | 1520 | >NUP214-Q1 MASEAPAV  | 415 | 1105 |
| >NUP214-Q1 MASQAPAV  | 1766 | >NUP214-Q1 MASEAPAV  | 293 | 1473 |
| >NUP214-Q1 MASQAPAV  | 72   | >NUP214-Q1 MASEAPAV  | 32  | 40   |
| >NUP214-Q1 MASQAPAV  | 81   | >NUP214-Q1 MASEAPAV  | 40  | 41   |
| >NUP214-Q1 MASQAPAV\ | 1243 | >NUP214-Q1 MASEAPAVN | 407 | 836  |
| >NUP214-Q1 MASQAPAV\ | 100  | >NUP214-Q1 MASEAPAVN | 27  | 73   |
| >NUP214-Q1 MASQAPAV  | 45   | >NUP214-Q1 MASEAPAV  | 15  | 30   |
| >NUP214-Q1 MASQAPAV\ | 1521 | >NUP214-Q1 MASEAPAVN | 318 | 1203 |
| >NUP214-Q1 MASQAPAV\ | 453  | >NUP214-Q1 MASEAPAVN | 421 | 32   |
| >NUP214-Q1 MASQAPAV\ | 31   | >NUP214-Q1 MASEAPAVN | 37  | 6    |
| >NUP214-Q1 MASQAPAV  | 119  | >NUP214-Q1 MASEAPAV  | 99  | 20   |
| >NUP214-Q1 MASQAPAV\ | 31   | >NUP214-Q1 MASEAPAVN | 24  | 7    |
| >NUP214-Q1 MASQAPAV\ | 155  | >NUP214-Q1 MASEAPAVN | 117 | 38   |
| >NUP214-Q1 MASQAPAV\ | 201  | >NUP214-Q1 MASEAPAVN | 257 | 56   |
| >NUP214-Q1 MASQAPAV\ | 536  | >NUP214-Q1 MASEAPAVN | 481 | 55   |
| >NUP214-Q1 QMASQAPA  | 465  | >NUP214-Q1 QMASEAPA  | 554 | 89   |
| >NUP214-Q1 QMASQAPA\ | 75   | >NUP214-Q1 QMASEAPAV | 59  | 16   |
| >NUP214-Q1 QMASQAPA  | 51   | >NUP214-Q1 QMASEAPA  | 55  | 4    |
| >NUP214-Q1 QMASQAPA\ | 29   | >NUP214-Q1 QMASEAPAV | 23  | 6    |
| >NUP214-Q1 QMASQAPA  | 21   | >NUP214-Q1 QMASEAPA  | 36  | 15   |
| >NUP214-Q1 QMASQAPA\ | 17   | >NUP214-Q1 QMASEAPAV | 18  | 1    |
| >NUP214-Q1 QMASQAPA  | 247  | >NUP214-Q1 QMASEAPA  | 295 | 48   |
| >NUP214-Q1 QMASQAPA\ | 33   | >NUP214-Q1 QMASEAPAV | 31  | 2    |
| >NUP214-Q1 QMASQAPA  | 356  | >NUP214-Q1 QMASEAPA  | 455 | 99   |
| >NUP214-Q1 QMASQAPA\ | 8    | >NUP214-Q1 QMASEAPAV | 9   | 1    |
| >NUP214-Q1 QMASQAPA\ | 25   | >NUP214-Q1 QMASEAPAV | 28  | 3    |
| >NUP214-Q1 QMASQAPA\ | 9    | >NUP214-Q1 QMASEAPAV | 11  | 2    |
| >NUP214-Q1 QMASQAPA\ | 7    | >NUP214-Q1 QMASEAPAV | 5   | 2    |
| >NUP214-Q1 QMASQAPA  | 75   | >NUP214-Q1 QMASEAPA  | 130 | 55   |
| >NUP214-Q1 QMASQAPA\ | 5    | >NUP214-Q1 QMASEAPAV | 5   | 0    |
| >NUP214-Q1 QMASQAPA\ | 20   | >NUP214-Q1 QMASEAPAV | 29  | 9    |
| >NUP214-Q1 QMASQAPA\ | 136  | >NUP214-Q1 QMASEAPAV | 133 | 3    |
| >NUP214-Q1 RQMASQAPA | 108  | >NUP214-Q1 RQMASEAPA | 222 | 114  |
| >NUP214-Q1 RQMASQAPA | 189  | >NUP214-Q1 RQMASEAPA | 142 | 47   |
| >NUP214-Q1 RQMASQAPA | 201  | >NUP214-Q1 RQMASEAPA | 600 | 399  |

|                        |       |                        |      |       |
|------------------------|-------|------------------------|------|-------|
| >NUP214-Q1 RQMASQAP#   | 141   | >NUP214-Q1 RQMASEAPA   | 95   | 46    |
| >NUP214-Q1 RQMASQAP#   | 31    | >NUP214-Q1 RQMASEAPA   | 102  | 71    |
| >NUP214-Q1 RQMASQAP#   | 97    | >NUP214-Q1 RQMASEAPA   | 76   | 21    |
| >NUP214-Q1 RQMASQAP#   | 7     | >NUP214-Q1 RQMASEAPA   | 10   | 3     |
| >NUP214-Q1 RQMASQAP#   | 134   | >NUP214-Q1 RQMASEAPA   | 76   | 58    |
| >NUP214-Q1 RQMASQAP#   | 53    | >NUP214-Q1 RQMASEAPA   | 70   | 17    |
| >NUP214-Q1 RQMASQAP#   | 28    | >NUP214-Q1 RQMASEAPA   | 38   | 10    |
| >NUP214-Q1 RQMASQAP#   | 353   | >NUP214-Q1 RQMASEAPA   | 441  | 88    |
| >NUP214-Q1 RQMASQAP#   | 193   | >NUP214-Q1 RQMASEAPA   | 381  | 188   |
| >NUP214-Q1 RQMASQAP#   | 53    | >NUP214-Q1 RQMASEAPA   | 308  | 255   |
| >NUP214-Q1 RQMASQAP#   | 257   | >NUP214-Q1 RQMASEAPA   | 990  | 733   |
| >NUP214-Q1 RQMASQAP    | 225   | >NUP214-Q1 RQMASEAP    | 333  | 108   |
| >NUP214-Q1 RQMASQAP#   | 55    | >NUP214-Q1 RQMASEAPA   | 71   | 16    |
| >NUP214-Q1 RQMASQAP#   | 76    | >NUP214-Q1 RQMASEAPA   | 97   | 21    |
| >NUP214-Q1 RQMASQAP#   | 351   | >NUP214-Q1 RQMASEAPA   | 556  | 205   |
| >NUP214-Q1 RQMASQAP    | 43    | >NUP214-Q1 RQMASEAP    | 96   | 53    |
| >NUP214-Q1 RQMASQAP#   | 15    | >NUP214-Q1 RQMASEAPA   | 17   | 2     |
| >NUP214-Q1 RQMASQAP#   | 6     | >NUP214-Q1 RQMASEAPA   | 6    | 0     |
| >NUP214-Q1 RQMASQAP#   | 294   | >NUP214-Q1 RQMASEAPA   | 360  | 66    |
| >NUP214-Q1 RQMASQAP#   | 207   | >NUP214-Q1 RQMASEAPA   | 685  | 478   |
| >NUP214-Q1 RQMASQAP#   | 42    | >NUP214-Q1 RQMASEAPA   | 52   | 10    |
| >NUP214-Q1 RQMASQAP#   | 245   | >NUP214-Q1 RQMASEAPA   | 425  | 180   |
| >NUP214-Q1 RQMASQAP#   | 172   | >NUP214-Q1 RQMASEAPA   | 200  | 28    |
| >NUP214-Q1 RQMASQAP#   | 72    | >NUP214-Q1 RQMASEAPA   | 84   | 12    |
| >NUP214-Q1 RRQMASQAF   | 406   | >NUP214-Q1 RRQMASEAP   | 744  | 338   |
| >NUP214-Q1 RRQMASQAF   | 112   | >NUP214-Q1 RRQMASEAP   | 163  | 51    |
| >NUP214-Q1 RRQMASQA    | 158   | >NUP214-Q1 RRQMASEA    | 244  | 86    |
| >NUP214-Q1 RRQMASQAF   | 76    | >NUP214-Q1 RRQMASEAP   | 88   | 12    |
| >NUP214-Q1 RRQMASQAF   | 100   | >NUP214-Q1 RRQMASEAP   | 134  | 34    |
| >NUP214-Q1 RRQMASQA    | 82    | >NUP214-Q1 RRQMASEA    | 119  | 37    |
| >NUP214-Q1 RRQMASQAF   | 89    | >NUP214-Q1 RRQMASEAP   | 73   | 16    |
| >NUP214-Q1 RRQMASQAF   | 65    | >NUP214-Q1 RRQMASEAP   | 85   | 20    |
| >NUP214-Q1 RRQMASQA    | 388   | >NUP214-Q1 RRQMASEA    | 656  | 268   |
| >NUP214-Q1 RRQMASQAF   | 111   | >NUP214-Q1 RRQMASEAP   | 115  | 4     |
| >NUP214-Q1 RRQMASQAF   | 117   | >NUP214-Q1 RRQMASEAP   | 175  | 58    |
| >NUP214-Q1 ALRRQMASQ   | 156   | >NUP214-Q1 ALRRQMASE   | 8333 | 8177  |
| >NUP214-Q1 ALRRQMASQ   | 14    | >NUP214-Q1 ALRRQMASE   | 14   | 0     |
| >NUP214-Q1 ALRRQMASQ   | 38    | >NUP214-Q1 ALRRQMASE   | 390  | 352   |
| >NUP214-Q1 ALRRQMASQ   | 28    | >NUP214-Q1 ALRRQMASE   | 28   | 0     |
| >NUP214-Q1 ALRRQMASQ   | 127   | >NUP214-Q1 ALRRQMASE   | 753  | 626   |
| >NUP98-G16 GFLEDLAPPEI | 309   | >NUP98-G16 VFLEDLAPPEI | 241  | 68    |
| >NUP98-G16 GFLEDLAPPEI | 1849  | >NUP98-G16 VFLEDLAPPEI | 404  | 1445  |
| >NUP98-G16 IINENYDYLKV | 22786 | >NUP98-G16 IINENYDYLKV | 376  | 22410 |

|                        |       |                        |      |       |
|------------------------|-------|------------------------|------|-------|
| >NUP98-G16 IINENYDYLKC | 14393 | >NUP98-G16 IINENYDYLKV | 98   | 14295 |
| >NUP98-G16 IINENYDYLKC | 14120 | >NUP98-G16 IINENYDYLKV | 16   | 14104 |
| >NUP98-G16 IINENYDYLKC | 19246 | >NUP98-G16 IINENYDYLKV | 116  | 19130 |
| >NUP98-G16 IINENYDYLKC | 9353  | >NUP98-G16 IINENYDYLKV | 14   | 9339  |
| >NUP98-G16 IINENYDYLKC | 20744 | >NUP98-G16 IINENYDYLKV | 148  | 20596 |
| >NUP98-G16 IINENYDYLKC | 20918 | >NUP98-G16 IINENYDYLKV | 68   | 20850 |
| >NUP98-G16 IINENYDYLKC | 22951 | >NUP98-G16 IINENYDYLKV | 40   | 22911 |
| >NUP98-G16 IINENYDYLKC | 25174 | >NUP98-G16 IINENYDYLKV | 8    | 25166 |
| >NUP98-G16 IINENYDYLKC | 20376 | >NUP98-G16 IINENYDYLKV | 463  | 19913 |
| >NUP98-G16 LKGFLEDL    | 2110  | >NUP98-G16 LKVLEDL     | 372  | 1738  |
| >NUP98-G16 YLKGLEDL    | 128   | >NUP98-G16 YLKVLEDL    | 415  | 287   |
| >NUP98-G16 YLKGLEDLA   | 224   | >NUP98-G16 YLKVLEDLA   | 536  | 312   |
| >NUP98-G16 YLKGLEDL    | 10    | >NUP98-G16 YLKVLEDL    | 29   | 19    |
| >NUP98-G16 YLKGLEDLA   | 18    | >NUP98-G16 YLKVLEDLA   | 45   | 27    |
| >NUP98-G16 YLKGLEDL    | 7     | >NUP98-G16 YLKVLEDL    | 18   | 11    |
| >NUP98-G16 YLKGLEDLA   | 59    | >NUP98-G16 YLKVLEDLA   | 140  | 81    |
| >NUP98-G16 YLKGLEDL    | 201   | >NUP98-G16 YLKVLEDL    | 359  | 158   |
| >NUP98-G16 YLKGLEDLA   | 456   | >NUP98-G16 YLKVLEDLA   | 900  | 444   |
| >NUP98-G16 YLKGLEDL    | 21    | >NUP98-G16 YLKVLEDL    | 156  | 135   |
| >NUP98-G16 YLKGLEDLA   | 129   | >NUP98-G16 YLKVLEDLA   | 680  | 551   |
| >NUP98-G16 YLKGLEDL    | 112   | >NUP98-G16 YLKVLEDL    | 143  | 31    |
| >NUP98-G16 YLKGLEDL    | 317   | >NUP98-G16 YLKVLEDL    | 1231 | 914   |
| >NUP98-G16 YLKGLEDL    | 411   | >NUP98-G16 YLKVLEDL    | 1926 | 1515  |
| >NUP98-G16 YLKGLEDL    | 3     | >NUP98-G16 YLKVLEDL    | 6    | 3     |
| >NUP98-G16 YLKGLEDLA   | 10    | >NUP98-G16 YLKVLEDLA   | 38   | 28    |
| >NUP98-G16 YLKGLEDL    | 1021  | >NUP98-G16 YLKVLEDL    | 259  | 762   |
| >NUP98-G16 DYLKGLEDL   | 1224  | >NUP98-G16 DYLKVLEDL   | 250  | 974   |
| >NUP98-G16 DYLKGLEDL   | 43    | >NUP98-G16 DYLKVLEDL   | 35   | 8     |
| >NUP98-G16 YDYLGKFL    | 58    | >NUP98-G16 YDYLVFL     | 152  | 94    |
| >NUP98-G16 YDYLGKFLED  | 671   | >NUP98-G16 YDYLVFLEDI  | 290  | 381   |
| >NUP98-G16 YDYLGKFL    | 651   | >NUP98-G16 YDYLVFL     | 298  | 353   |
| >NUP98-G16 YDYLGKFLED  | 622   | >NUP98-G16 YDYLVFLEDI  | 452  | 170   |
| >NUP98-G16 YDYLGKFL    | 232   | >NUP98-G16 YDYLVFL     | 66   | 166   |
| >NUP98-G16 YDYLGKFLED  | 102   | >NUP98-G16 YDYLVFLEDI  | 32   | 70    |
| >NUP98-G16 YDYLGKFLED  | 513   | >NUP98-G16 YDYLVFLEDI  | 130  | 383   |
| >NUP98-G16 YDYLGKFL    | 402   | >NUP98-G16 YDYLVFL     | 529  | 127   |
| >NUP98-G16 NYDYLGKFL   | 1705  | >NUP98-G16 NYDYLVFL    | 398  | 1307  |
| >NUP98-G16 NYDYLGKFL   | 83    | >NUP98-G16 NYDYLVFL    | 41   | 42    |
| >NUP98-G16 NYDYLGKFL   | 321   | >NUP98-G16 NYDYLVFL    | 155  | 166   |
| >NUP98-G16 NYDYLGKFL   | 371   | >NUP98-G16 NYDYLVFL    | 516  | 145   |
| >NUP98-G16 ENYDYLGKFL  | 461   | >NUP98-G16 ENYDYLVFL   | 749  | 288   |
| >NUP98-G16 ENYDYLGKFL  | 380   | >NUP98-G16 ENYDYLVFL   | 613  | 233   |
| >NUP98-G16 ENYDYLGKFL  | 227   | >NUP98-G16 ENYDYLVFL   | 441  | 214   |



|                        |       |                       |       |       |
|------------------------|-------|-----------------------|-------|-------|
| >NUP98-G16 ENYDYLKGF   | 257   | >NUP98-G16 ENYDYLKVF  | 294   | 37    |
| >NUP98-G16 ENYDYLKG    | 15926 | >NUP98-G16 ENYDYLKV   | 145   | 15781 |
| >NUP98-G16 ENYDYLKGF   | 685   | >NUP98-G16 ENYDYLKVF  | 222   | 463   |
| >NUP98-G16 NENYDYLKG   | 18069 | >NUP98-G16 NENYDYLKV  | 196   | 17873 |
| >NUP98-G16 NENYDYLKGF  | 191   | >NUP98-G16 NENYDYLKVF | 256   | 65    |
| >NUP98-G16 NENYDYLKGF  | 23    | >NUP98-G16 NENYDYLKVF | 28    | 5     |
| >NUP98-G16 NENYDYLKGF  | 904   | >NUP98-G16 NENYDYLKVF | 319   | 585   |
| >NUP98-G16 NENYDYLKGF  | 737   | >NUP98-G16 NENYDYLKVF | 330   | 407   |
| >NUP98-G16 NENYDYLKGF  | 149   | >NUP98-G16 NENYDYLKVF | 72    | 77    |
| >NUP98-G16 NENYDYLKGF  | 327   | >NUP98-G16 NENYDYLKVF | 521   | 194   |
| >NUP98-G16 NENYDYLKGF  | 570   | >NUP98-G16 NENYDYLKVF | 300   | 270   |
| >NUP98-G16 NENYDYLKG   | 3767  | >NUP98-G16 NENYDYLKV  | 185   | 3582  |
| >NUP98-G16 NENYDYLKGF  | 164   | >NUP98-G16 NENYDYLKVF | 318   | 154   |
| >NUP98-G41 GTGLGAGF    | 7949  | >NUP98-G41 ETGLGAGF   | 41    | 7908  |
| >NUP98-G41 GTGLGAGF    | 7672  | >NUP98-G41 ETGLGAGF   | 55    | 7617  |
| >NUP98-G41 GTGLGAGFG   | 14914 | >NUP98-G41 ETGLGAGFG  | 379   | 14535 |
| >NUP98-G41 GTGLGAGF    | 15    | >NUP98-G41 ETGLGAGF   | 33    | 18    |
| >NUP98-G41 LGTGLGAGF   | 474   | >NUP98-G41 LETGLGAGF  | 11972 | 11498 |
| >NUP98-G41 LGTGLGAGF   | 16530 | >NUP98-G41 LETGLGAGF  | 19    | 16511 |
| >NUP98-G41 LGTGLGAGF   | 23920 | >NUP98-G41 LETGLGAGF  | 46    | 23874 |
| >NUP98-G41 LGTGLGAGF   | 33695 | >NUP98-G41 LETGLGAGF  | 89    | 33606 |
| >NUP98-G41 LGTGLGAGF   | 383   | >NUP98-G41 LETGLGAGF  | 2542  | 2159  |
| >NUP98-G41 TLGTGLGA    | 219   | >NUP98-G41 TLETGLGA   | 834   | 615   |
| >NUP98-G41 TLGTGLGA    | 68    | >NUP98-G41 TLETGLGA   | 208   | 140   |
| >NUP98-G41 TLGTGLGAGF  | 280   | >NUP98-G41 TLETGLGAGF | 2622  | 2342  |
| >NUP98-G41 TLGTGLGAGF  | 256   | >NUP98-G41 TLETGLGAGF | 209   | 47    |
| >NUP98-G41 GTLTGTGLGA  | 1068  | >NUP98-G41 GTLETGLGA  | 271   | 797   |
| >NUP98-G41 GTLTGTGLGA  | 982   | >NUP98-G41 GTLETGLGA  | 278   | 704   |
| >NUP98-G41 GTLTGTGLGAC | 518   | >NUP98-G41 GTLETGLGAC | 413   | 105   |
| >NUP98-G41 GTLTGTGLGAC | 258   | >NUP98-G41 GTLETGLGAC | 615   | 357   |
| >NUP98-G41 GTLTGTGLGAC | 4     | >NUP98-G41 GTLETGLGAC | 4     | 0     |
| >NUP98-G41 GTLTGTGLGAC | 11    | >NUP98-G41 GTLETGLGAC | 26    | 15    |
| >NUP98-G41 APGTLGTGL   | 77    | >NUP98-G41 APGTLETGL  | 971   | 894   |
| >NUP98-G41 PAPGTLGTGL  | 250   | >NUP98-G41 PAPGTLETGL | 717   | 467   |
| >NUP98-G41 KPAPGTLTGT  | 110   | >NUP98-G41 KPAPGTLET  | 59    | 51    |
| >NUP98-G41 KPAPGTLTGT  | 12    | >NUP98-G41 KPAPGTLETG | 21    | 9     |
| >NUP98-G41 LGAGFGTAL   | 243   | >NUP98-G41 LDAGFGTAL  | 1307  | 1064  |
| >NUP98-G41 GLGAGFGTAL  | 35    | >NUP98-G41 GLDAGFGTAL | 44    | 9     |
| >NUP98-G41 GLGAGFGTA   | 66    | >NUP98-G41 GLDAGFGTA  | 143   | 77    |
| >NUP98-G41 GLGAGFGTAL  | 259   | >NUP98-G41 GLDAGFGTAL | 433   | 174   |
| >NUP98-G41 GLGAGFGT    | 2086  | >NUP98-G41 GLDAGFGT   | 330   | 1756  |
| >NUP98-G41 GLGAGFGTA   | 1288  | >NUP98-G41 GLDAGFGTA  | 192   | 1096  |
| >NUP98-G41 GLGAGFGT    | 312   | >NUP98-G41 GLDAGFGT   | 103   | 209   |

|                        |      |                        |       |       |
|------------------------|------|------------------------|-------|-------|
| >NUP98-G41 GLGAGFGTA   | 119  | >NUP98-G41 GLDAGFGTA   | 39    | 80    |
| >NUP98-G41 GLGAGFGTAI  | 24   | >NUP98-G41 GLDAGFGTAI  | 11    | 13    |
| >NUP98-G41 GLGAGFGT    | 777  | >NUP98-G41 GLDAGFGT    | 335   | 442   |
| >NUP98-G41 GLGAGFGTA   | 220  | >NUP98-G41 GLDAGFGTA   | 75    | 145   |
| >NUP98-G41 GLGAGFGTAI  | 34   | >NUP98-G41 GLDAGFGTAI  | 15    | 19    |
| >NUP98-G41 GLGAGFGT    | 364  | >NUP98-G41 GLDAGFGT    | 126   | 238   |
| >NUP98-G41 GLGAGFGTA   | 138  | >NUP98-G41 GLDAGFGTA   | 52    | 86    |
| >NUP98-G41 GLGAGFGTAI  | 55   | >NUP98-G41 GLDAGFGTAI  | 23    | 32    |
| >NUP98-G41 GLGAGFGT    | 122  | >NUP98-G41 GLDAGFGT    | 182   | 60    |
| >NUP98-G41 GLGAGFGTA   | 26   | >NUP98-G41 GLDAGFGTA   | 41    | 15    |
| >NUP98-G41 GLGAGFGTAI  | 7    | >NUP98-G41 GLDAGFGTAI  | 10    | 3     |
| >NUP98-G41 GTGLGAGF    | 15   | >NUP98-G41 GTGLDAGF    | 48    | 33    |
| >NUP98-G41 LGTGLGAGF   | 474  | >NUP98-G41 LGTGLDAGF   | 729   | 255   |
| >NUP98-G41 LGTGLGAGF   | 1188 | >NUP98-G41 LGTGLDAGF   | 229   | 959   |
| >NUP98-G41 LGTGLGAGF   | 383  | >NUP98-G41 LGTGLDAGF   | 1840  | 1457  |
| >NUP98-G41 TLGTGLGA    | 219  | >NUP98-G41 TLGTGLDA    | 915   | 696   |
| >NUP98-G41 TLGTGLGA    | 68   | >NUP98-G41 TLGTGLDA    | 193   | 125   |
| >NUP98-G41 TLGTGLGAGF  | 280  | >NUP98-G41 TLGTGLDAGF  | 526   | 246   |
| >NUP98-G41 TLGTGLGAGF  | 256  | >NUP98-G41 TLGTGLDAGF  | 545   | 289   |
| >NUP98-G41 GTLGTGLGAC  | 258  | >NUP98-G41 GTLGTGLDAC  | 233   | 25    |
| >NUP98-G41 GTLGTGLGAC  | 4    | >NUP98-G41 GTLGTGLDAC  | 4     | 0     |
| >NUP98-G41 GTLGTGLGAC  | 11   | >NUP98-G41 GTLGTGLDAC  | 21    | 10    |
| >NUP98-R53 RPATRVRPK   | 65   | >NUP98-R53 HPATRVRPK   | 236   | 171   |
| >NUP98-R53 RPATRVRPKA  | 86   | >NUP98-R53 HPATRVRPKA  | 681   | 595   |
| >NUP98-R53 RPATRVRPKA  | 7    | >NUP98-R53 HPATRVRPKA  | 9     | 2     |
| >NUP98-R53 RPATRVRPKA  | 39   | >NUP98-R53 HPATRVRPKA  | 40    | 1     |
| >NUP98-R53 RPATRVRPKA  | 2284 | >NUP98-R53 HPATRVRPKA  | 177   | 2107  |
| >NUP98-R53 RPATRVRPKA  | 413  | >NUP98-R53 HPATRVRPKA  | 32    | 381   |
| >NUP98-R53 RPATRVRPKA  | 1449 | >NUP98-R53 HPATRVRPKA  | 126   | 1323  |
| >NUP98-R53 RPATRVRPKA  | 940  | >NUP98-R53 HPATRVRPKA  | 366   | 574   |
| >NUP98-R53 TTPTHYKLTPI | 47   | >NUP98-R53 TTPTHYKLTPI | 8533  | 8486  |
| >NUP98-R53 TTPTHYKLTPI | 55   | >NUP98-R53 TTPTHYKLTPI | 12323 | 12268 |
| >NUP98-R53 TTPTHYKLTPI | 323  | >NUP98-R53 TTPTHYKLTPI | 172   | 151   |
| >NUP98-R53 TTPTHYKLTPI | 307  | >NUP98-R53 TTPTHYKLTPI | 30122 | 29815 |
| >NUP98-R53 TPRPATRV    | 3936 | >NUP98-R53 TPHPATRV    | 67    | 3869  |
| >NUP98-R53 TPRPATRV    | 38   | >NUP98-R53 TPHPATRV    | 296   | 258   |
| >NUP98-R53 TPRPATRV    | 381  | >NUP98-R53 TPHPATRV    | 6177  | 5796  |
| >NUP98-R53 TPRPATRV    | 207  | >NUP98-R53 TPHPATRV    | 3536  | 3329  |
| >NUP98-R53 LTPRPATRV   | 471  | >NUP98-R53 LTPHPATRV   | 573   | 102   |
| >NUP98-R53 LTPRPATRV   | 119  | >NUP98-R53 LTPHPATRV   | 329   | 210   |
| >NUP98-R53 LTPRPATR    | 396  | >NUP98-R53 LTPHPATR    | 588   | 192   |
| >NUP98-R53 LTPRPATR    | 181  | >NUP98-R53 LTPHPATR    | 171   | 10    |
| >NUP98-R53 LTPRPATRV   | 529  | >NUP98-R53 LTPHPATRV   | 330   | 199   |

|                        |      |                        |       |       |
|------------------------|------|------------------------|-------|-------|
| >NUP98-R53.LTPRPATRV   | 42   | >NUP98-R53.LTPHPATRV   | 22    | 20    |
| >NUP98-R53.LTPRPATRV   | 9    | >NUP98-R53.LTPHPATRV   | 9     | 0     |
| >NUP98-R53.LTPRPATRV   | 254  | >NUP98-R53.LTPHPATRV   | 239   | 15    |
| >NUP98-R53.LTPRPATRV   | 439  | >NUP98-R53.LTPHPATRV   | 410   | 29    |
| >NUP98-R53.KLTPRPATRV  | 223  | >NUP98-R53.KLTPHPATRV  | 135   | 88    |
| >NUP98-R53.KLTPRPAT    | 1421 | >NUP98-R53.KLTPHPAT    | 497   | 924   |
| >NUP98-R53.KLTPRPATRV  | 181  | >NUP98-R53.KLTPHPATRV  | 115   | 66    |
| >NUP98-R53.KLTPRPAT    | 1280 | >NUP98-R53.KLTPHPAT    | 291   | 989   |
| >NUP98-R53.KLTPRPATRV  | 6    | >NUP98-R53.KLTPHPATRV  | 5     | 1     |
| >NUP98-R53.KLTPRPATRV  | 28   | >NUP98-R53.KLTPHPATRV  | 20    | 8     |
| >NUP98-R53.KLTPRPATRV  | 12   | >NUP98-R53.KLTPHPATRV  | 13    | 1     |
| >NUP98-R53.KLTPRPATRV  | 70   | >NUP98-R53.KLTPHPATRV  | 61    | 9     |
| >NUP98-R53.KLTPRPAT    | 102  | >NUP98-R53.KLTPHPAT    | 95    | 7     |
| >NUP98-R53.KLTPRPATRV  | 2    | >NUP98-R53.KLTPHPATRV  | 2     | 0     |
| >NUP98-R53.KLTPRPATR   | 197  | >NUP98-R53.KLTPHPATR   | 172   | 25    |
| >NUP98-R53.KLTPRPATRV  | 467  | >NUP98-R53.KLTPHPATRV  | 410   | 57    |
| >NUP98-R53.KLTPRPATR   | 12   | >NUP98-R53.KLTPHPATR   | 12    | 0     |
| >NUP98-R53.KLTPRPATRV  | 44   | >NUP98-R53.KLTPHPATRV  | 44    | 0     |
| >NUP98-R53.KLTPRPATR   | 44   | >NUP98-R53.KLTPHPATR   | 39    | 5     |
| >NUP98-R53.KLTPRPATRV  | 60   | >NUP98-R53.KLTPHPATRV  | 56    | 4     |
| >NUP98-R53.YKLTPRPATR' | 563  | >NUP98-R53.YKLTPHPATR' | 174   | 389   |
| >NUP98-R53.YKLTPRPA    | 71   | >NUP98-R53.YKLTPHPA    | 60    | 11    |
| >NUP98-R53.YKLTPRPAT   | 159  | >NUP98-R53.YKLTPHPAT   | 130   | 29    |
| >NUP98-R53.YKLTPRPATR  | 67   | >NUP98-R53.YKLTPHPATR  | 46    | 21    |
| >NUP98-R53.YKLTPRPATR' | 34   | >NUP98-R53.YKLTPHPATR' | 30    | 4     |
| >NUP98-R53.HYKLTPRP    | 451  | >NUP98-R53.HYKLTPHP    | 150   | 301   |
| >NUP98-R53.HYKLTPRPA   | 7    | >NUP98-R53.HYKLTPHPA   | 7     | 0     |
| >NUP98-R53.HYKLTPRPAT  | 61   | >NUP98-R53.HYKLTPHPAT  | 49    | 12    |
| >NUP98-R53.HYKLTPRPAT  | 21   | >NUP98-R53.HYKLTPHPAT  | 21    | 0     |
| >NUP98-R53.HYKLTPRPAT  | 14   | >NUP98-R53.HYKLTPHPAT  | 10    | 4     |
| >NUP98-R53.HYKLTPRPAT  | 16   | >NUP98-R53.HYKLTPHPAT  | 15    | 1     |
| >NUP98-R53.HYKLTPRPAT  | 24   | >NUP98-R53.HYKLTPHPAT  | 18    | 6     |
| >NUP98-R53.THYKLTPR    | 453  | >NUP98-R53.THYKLTPH    | 23034 | 22581 |
| >NUP98-R53.THYKLTPR    | 93   | >NUP98-R53.THYKLTPH    | 20232 | 20139 |
| >NUP98-R53.PTHYKLTPRP, | 343  | >NUP98-R53.PTHYKLTPHP  | 317   | 26    |
| >NUP98-R53.PTHYKLTPR   | 75   | >NUP98-R53.PTHYKLTPH   | 10964 | 10889 |
| >NUP98-R53.PTHYKLTPR   | 295  | >NUP98-R53.PTHYKLTPH   | 25953 | 25658 |
| >NUP98-Y49:YSPFGDSPL   | 161  | >NUP98-Y49:FSPFGDSPL   | 325   | 164   |
| >NUP98-Y49:YSPFGDSPLFI | 23   | >NUP98-Y49:FSPFGDSPLFI | 29    | 6     |
| >NUP98-Y49:YSPFGDSPL   | 91   | >NUP98-Y49:FSPFGDSPL   | 45    | 46    |
| >NUP98-Y49:YSPFGDSPLF  | 469  | >NUP98-Y49:FSPFGDSPLF  | 858   | 389   |
| >NUP98-Y49:YSPFGDSPL   | 63   | >NUP98-Y49:FSPFGDSPL   | 212   | 149   |
| >NUP98-Y49:YSPFGDSPLF  | 28   | >NUP98-Y49:FSPFGDSPLF  | 74    | 46    |

|                         |       |                         |       |       |
|-------------------------|-------|-------------------------|-------|-------|
| >NUP98-Y49: YSPFGDSPL   | 19    | >NUP98-Y49: FSPFGDSPL   | 53    | 34    |
| >NUP98-Y49: YSPFGDSPLF  | 6     | >NUP98-Y49: FSPFGDSPLF  | 10    | 4     |
| >NUP98-Y49: YSPFGDSPLF  | 32    | >NUP98-Y49: FSPFGDSPLF  | 51    | 19    |
| >NUP98-Y49: TYSPFGDSPL  | 31    | >NUP98-Y49: TFSPFGDSPL  | 1497  | 1466  |
| >NUP98-Y49: TYSPFGDSPLI | 116   | >NUP98-Y49: TFSPFGDSPLI | 232   | 116   |
| >NUP98-Y49: TYSPFGDSPL  | 148   | >NUP98-Y49: TFSPFGDSPL  | 3772  | 3624  |
| >NUP98-Y49: TYSPFGDSPLI | 56    | >NUP98-Y49: TFSPFGDSPLI | 221   | 165   |
| >NUP98-Y49: TYSPFGDSPL  | 45    | >NUP98-Y49: TFSPFGDSPL  | 924   | 879   |
| >NUP98-Y49: TYSPFGDSPLI | 7     | >NUP98-Y49: TFSPFGDSPLI | 23    | 16    |
| >NUP98-Y49: TYSPFGDSPLI | 241   | >NUP98-Y49: TFSPFGDSPLI | 119   | 122   |
| >NUP98-Y49: TYSPFGDSP   | 487   | >NUP98-Y49: TFSPFGDSP   | 522   | 35    |
| >NUP98-Y49: TYSPFGDSPL  | 177   | >NUP98-Y49: TFSPFGDSPL  | 239   | 62    |
| >NUP98-Y49: VLQQHINSLT  | 19448 | >NUP98-Y49: VLQQHINSLT  | 289   | 19159 |
| >NUP98-Y49: VLQQHINSLT  | 69    | >NUP98-Y49: VLQQHINSLT  | 2548  | 2479  |
| >NUP98-Y49: VLQQHINSLT  | 88    | >NUP98-Y49: VLQQHINSLT  | 7700  | 7612  |
| >NUP98-Y49: VLQQHINSLT  | 2569  | >NUP98-Y49: VLQQHINSLT  | 157   | 2412  |
| >NUP98-Y49: VLQQHINSLT  | 110   | >NUP98-Y49: VLQQHINSLT  | 12465 | 12355 |
| >NUP98-Y49: VLQQHINSLT  | 45    | >NUP98-Y49: VLQQHINSLT  | 39    | 6     |
| >NUP98-Y49: VLQQHINSLT  | 66    | >NUP98-Y49: VLQQHINSLT  | 142   | 76    |
| >NUP98-Y49: VLQQHINSLT  | 437   | >NUP98-Y49: VLQQHINSLT  | 96    | 341   |
| >NUP98-Y49: VLQQHINSLT  | 287   | >NUP98-Y49: VLQQHINSLT  | 233   | 54    |
| >NUP98-Y49: LTYSFGDSPI  | 147   | >NUP98-Y49: LTFSPFGDSPI | 329   | 182   |
| >NUP98-Y49: LTYSFGDSPI  | 754   | >NUP98-Y49: LTFSPFGDSPI | 370   | 384   |
| >NUP98-Y49: LTYSFGDSPI  | 309   | >NUP98-Y49: LTFSPFGDSPI | 763   | 454   |
| >NUP98-Y49: LTYSFGDSPI  | 369   | >NUP98-Y49: LTFSPFGDSPI | 551   | 182   |
| >NUP98-Y49: LTYSFGDSPI  | 377   | >NUP98-Y49: LTFSPFGDSPI | 2976  | 2599  |
| >NUP98-Y49: LTYSFGDSPI  | 44    | >NUP98-Y49: LTFSPFGDSPI | 16    | 28    |
| >NUP98-Y49: LTYSFGDSPI  | 179   | >NUP98-Y49: LTFSPFGDSPI | 292   | 113   |
| >NUP98-Y49: LTYSFGDSPI  | 229   | >NUP98-Y49: LTFSPFGDSPI | 208   | 21    |
| >NUP98-Y49: LTYSFGDSPI  | 155   | >NUP98-Y49: LTFSPFGDSPI | 110   | 45    |
| >NUP98-Y49: LTYSFGDSPI  | 9     | >NUP98-Y49: LTFSPFGDSPI | 10    | 1     |
| >NUP98-Y49: LTYSFGDSPI  | 139   | >NUP98-Y49: LTFSPFGDSPI | 180   | 41    |
| >NUP98-Y49: LTYSFGDS    | 843   | >NUP98-Y49: LTFSPFGDS   | 327   | 516   |
| >NUP98-Y49: LTYSFGDSPI  | 13    | >NUP98-Y49: LTFSPFGDSPI | 7     | 6     |
| >NUP98-Y49: LTYSFGDSPI  | 31    | >NUP98-Y49: LTFSPFGDSPI | 29    | 2     |
| >NUP98-Y49: NSLTYSPP    | 14    | >NUP98-Y49: NSLTFSPF    | 13    | 1     |
| >NUP98-Y49: NSLTYSPP    | 18    | >NUP98-Y49: NSLTFSPF    | 28    | 10    |
| >NUP98-Y49: NSLTYSPP    | 217   | >NUP98-Y49: NSLTFSPF    | 216   | 1     |
| >NUP98-Y49: INSLTYSPP   | 170   | >NUP98-Y49: INSLTFSPF   | 299   | 129   |
| >NUP98-Y49: INSLTYSPP   | 565   | >NUP98-Y49: INSLTFSPF   | 188   | 377   |
| >NUP98-Y49: INSLTYSPP   | 15    | >NUP98-Y49: INSLTFSPF   | 14    | 1     |
| >NUP98-Y49: INSLTYSPP   | 160   | >NUP98-Y49: INSLTFSPF   | 80    | 80    |
| >NUP98-Y49: HINSLTYSPP  | 132   | >NUP98-Y49: HINSLTFSPF  | 100   | 32    |

|                         |       |                         |       |       |
|-------------------------|-------|-------------------------|-------|-------|
| >NUP98-Y49: HINSLTYSPF  | 42    | >NUP98-Y49: HINSLTFSPF  | 35    | 7     |
| >NUP98-Y49: HINSLTYSPF  | 481   | >NUP98-Y49: HINSLTFSPF  | 476   | 5     |
| >NUP98-Y49: HINSLTYSPF  | 36    | >NUP98-Y49: HINSLTFSPF  | 41    | 5     |
| >NUP98-Y49: HINSLTYSPF  | 57    | >NUP98-Y49: HINSLTFSPF  | 68    | 11    |
| >NUP98-Y49: QHINSLTY    | 21483 | >NUP98-Y49: QHINSLTF    | 240   | 21243 |
| >NUP98-Y49: QHINSLTY    | 135   | >NUP98-Y49: QHINSLTF    | 4909  | 4774  |
| >NUP98-Y49: QHINSLTY    | 26    | >NUP98-Y49: QHINSLTF    | 9     | 17    |
| >NUP98-Y49: QHINSLTYSPI | 4     | >NUP98-Y49: QHINSLTFSPF | 4     | 0     |
| >NUP98-Y49: QQHINSLTY   | 107   | >NUP98-Y49: QQHINSLTF   | 5934  | 5827  |
| >NUP98-Y49: QQHINSLTY   | 400   | >NUP98-Y49: QQHINSLTF   | 16985 | 16585 |
| >NUP98-Y49: QQHINSLTY   | 2807  | >NUP98-Y49: QQHINSLTF   | 170   | 2637  |
| >NUP98-Y49: QQHINSLTY   | 256   | >NUP98-Y49: QQHINSLTF   | 15037 | 14781 |
| >NUP98-Y49: QQHINSLTY   | 49    | >NUP98-Y49: QQHINSLTF   | 42    | 7     |
| >NUP98-Y49: QQHINSLTY   | 82    | >NUP98-Y49: QQHINSLTF   | 158   | 76    |
| >NUP98-Y49: QQHINSLTY   | 7     | >NUP98-Y49: QQHINSLTF   | 3     | 4     |
| >NUP98-Y49: QQHINSLTY   | 511   | >NUP98-Y49: QQHINSLTF   | 439   | 72    |
| >NUP98-Y49: LQQHINSLTY  | 437   | >NUP98-Y49: LQQHINSLTF  | 3518  | 3081  |
| >NUP98-Y49: LQQHINSLTY  | 435   | >NUP98-Y49: LQQHINSLTF  | 13337 | 12902 |
| >NUP98-Y49: LQQHINSLTY  | 4242  | >NUP98-Y49: LQQHINSLTF  | 430   | 3812  |
| >NUP98-Y49: LQQHINSLTY  | 385   | >NUP98-Y49: LQQHINSLTF  | 15921 | 15536 |
| >NUP98-Y49: LQQHINSLTY  | 37    | >NUP98-Y49: LQQHINSLTF  | 31    | 6     |
| >NUP98-Y49: LQQHINSLTY  | 123   | >NUP98-Y49: LQQHINSLTF  | 261   | 138   |
| >NUP98-Y49: LQQHINSLTY  | 9     | >NUP98-Y49: LQQHINSLTF  | 4     | 5     |
| >NUP98-Y49: LQQHINSLTY  | 492   | >NUP98-Y49: LQQHINSLTF  | 677   | 185   |
| >OMD-I7M-v IYVIFFFGV    | 633   | >OMD-I7M-n MYVIFFFGV    | 330   | 303   |
| >OMD-I7M-v IYVIFFFGV    | 120   | >OMD-I7M-n MYVIFFFGV    | 71    | 49    |
| >OMD-I7M-v IYVIFFFGV    | 219   | >OMD-I7M-n MYVIFFFGV    | 87    | 132   |
| >OMD-I7M-v IYVIFFFGV    | 353   | >OMD-I7M-n MYVIFFFGV    | 94    | 259   |
| >OMD-I7M-v IYVIFFFGVK   | 742   | >OMD-I7M-n MYVIFFFGV    | 250   | 492   |
| >OMD-I7M-v IYVIFFFF     | 12    | >OMD-I7M-n MYVIFFFF     | 11    | 1     |
| >OMD-I7M-v IYVIFFFGV    | 821   | >OMD-I7M-n MYVIFFFGV    | 386   | 435   |
| >OMD-I7M-v IYVIFFFGVK   | 216   | >OMD-I7M-n MYVIFFFGV    | 148   | 68    |
| >OMD-I7M-v IYVIFFFF     | 11    | >OMD-I7M-n MYVIFFFF     | 21    | 10    |
| >OMD-I7M-v IYVIFFFF     | 14    | >OMD-I7M-n MYVIFFFF     | 9     | 5     |
| >OMD-I7M-v IYVIFFFG     | 1084  | >OMD-I7M-n MYVIFFFG     | 226   | 858   |
| >OMD-I7M-v IYVIFFFGV    | 228   | >OMD-I7M-n MYVIFFFGV    | 46    | 182   |
| >OMD-I7M-v IYVIFFFGVK   | 1600  | >OMD-I7M-n MYVIFFFGV    | 451   | 1149  |
| >OMD-I7M-v IYVIFFFF     | 90    | >OMD-I7M-n MYVIFFFF     | 36    | 54    |
| >OMD-I7M-v IYVIFFFGVK   | 520   | >OMD-I7M-n MYVIFFFGV    | 68    | 452   |
| >OMD-I7M-v IYVIFFFF     | 1149  | >OMD-I7M-n MYVIFFFF     | 232   | 917   |
| >OMD-I7M-v IYVIFFFGV    | 1173  | >OMD-I7M-n MYVIFFFGV    | 488   | 685   |
| >OMD-I7M-v IYVIFFFGVK   | 337   | >OMD-I7M-n MYVIFFFGV    | 89    | 248   |
| >OMD-I7M-v IYVIFFFGV    | 970   | >OMD-I7M-n MYVIFFFGV    | 497   | 473   |

|                       |      |                       |      |      |
|-----------------------|------|-----------------------|------|------|
| >OMD-I7M-v IYVIFFFGVK | 664  | >OMD-I7M-n MYVIFFFGV  | 277  | 387  |
| >OMD-I7M-v IYVIFFFGVK | 458  | >OMD-I7M-n MYVIFFFGV  | 61   | 397  |
| >OMD-I7M-v IYVIFFFGV  | 782  | >OMD-I7M-n MYVIFFFGV  | 102  | 680  |
| >OMD-I7M-v IYVIFFFGV  | 2082 | >OMD-I7M-n MYVIFFFGV  | 73   | 2009 |
| >OMD-I7M-v IYVIFFF    | 285  | >OMD-I7M-n MYVIFFF    | 257  | 28   |
| >OMD-I7M-v IYVIFFFGVK | 258  | >OMD-I7M-n MYVIFFFGV  | 382  | 124  |
| >OMD-I7M-v IYVIFFFGVK | 41   | >OMD-I7M-n MYVIFFFGV  | 29   | 12   |
| >OMD-I7M-v IYVIFFF    | 189  | >OMD-I7M-n MYVIFFF    | 162  | 27   |
| >OMD-I7M-v IYVIFFFGV  | 30   | >OMD-I7M-n MYVIFFFGV  | 25   | 5    |
| >OMD-I7M-v IYVIFFF    | 334  | >OMD-I7M-n MYVIFFF    | 67   | 267  |
| >OMD-I7M-v IYVIFFFG   | 460  | >OMD-I7M-n MYVIFFFG   | 77   | 383  |
| >OMD-I7M-v IYVIFFFGVK | 1513 | >OMD-I7M-n MYVIFFFGV  | 267  | 1246 |
| >OMD-I7M-v PIYVIFFF   | 842  | >OMD-I7M-n PMYVIFFF   | 274  | 568  |
| >OMD-I7M-v PIYVIFFFGV | 343  | >OMD-I7M-n PMYVIFFFG' | 135  | 208  |
| >OMD-I7M-v PIYVIFFFGV | 295  | >OMD-I7M-n PMYVIFFFG' | 27   | 268  |
| >OMD-I7M-v PIYVIFFFGV | 196  | >OMD-I7M-n PMYVIFFFG' | 27   | 169  |
| >OMD-I7M-v PIYVIFFFGV | 395  | >OMD-I7M-n PMYVIFFFG' | 65   | 330  |
| >OMD-I7M-v PIYVIFFFGV | 24   | >OMD-I7M-n PMYVIFFFG' | 16   | 8    |
| >OMD-I7M-v PIYVIFFF   | 6587 | >OMD-I7M-n PMYVIFFF   | 365  | 6222 |
| >OMD-I7M-v PIYVIFFFGV | 15   | >OMD-I7M-n PMYVIFFFG' | 2    | 13   |
| >OMD-I7M-v PIYVIFFFGV | 708  | >OMD-I7M-n PMYVIFFFG' | 20   | 688  |
| >OMD-I7M-v PIYVIFFFGV | 28   | >OMD-I7M-n PMYVIFFFG' | 7    | 21   |
| >OMD-I7M-v PIYVIFFFGV | 58   | >OMD-I7M-n PMYVIFFFG' | 4    | 54   |
| >OMD-I7M-v PIYVIFFFGV | 21   | >OMD-I7M-n PMYVIFFFG' | 4    | 17   |
| >OMD-I7M-v PIYVIFFF   | 327  | >OMD-I7M-n PMYVIFFF   | 72   | 255  |
| >OMD-I7M-v PIYVIFFF   | 94   | >OMD-I7M-n PMYVIFFF   | 29   | 65   |
| >OMD-I7M-v PIYVIFFF   | 1408 | >OMD-I7M-n PMYVIFFF   | 323  | 1085 |
| >OMD-I7M-v PIYVIFFF   | 311  | >OMD-I7M-n PMYVIFFF   | 78   | 233  |
| >OMD-I7M-v PIYVIFFF   | 1720 | >OMD-I7M-n PMYVIFFF   | 219  | 1501 |
| >OMD-I7M-v PIYVIFFF   | 477  | >OMD-I7M-n PMYVIFFF   | 79   | 398  |
| >OMD-I7M-v PIYVIFFF   | 107  | >OMD-I7M-n PMYVIFFF   | 28   | 79   |
| >OMD-I7M-v PIYVIFFFGV | 166  | >OMD-I7M-n PMYVIFFFG' | 1162 | 996  |
| >OMD-I7M-v PIYVIFFFGV | 16   | >OMD-I7M-n PMYVIFFFG' | 35   | 19   |
| >OMD-I7M-v PIYVIFFF   | 962  | >OMD-I7M-n PMYVIFFF   | 46   | 916  |
| >OMD-I7M-v PIYVIFFF   | 673  | >OMD-I7M-n PMYVIFFF   | 39   | 634  |
| >OMD-I7M-v SPIYVIF    | 5    | >OMD-I7M-n SPMYVIF    | 8    | 3    |
| >OMD-I7M-v SPIYVIF    | 3    | >OMD-I7M-n SPMYVIF    | 4    | 1    |
| >OMD-I7M-v SPIYVIF    | 3    | >OMD-I7M-n SPMYVIF    | 4    | 1    |
| >OMD-I7M-v SPIYVIF    | 211  | >OMD-I7M-n SPMYVIF    | 111  | 100  |
| >OMD-I7M-v SPIYVIF    | 145  | >OMD-I7M-n SPMYVIF    | 1121 | 976  |
| >OMD-I7M-v SPIYVIF    | 126  | >OMD-I7M-n SPMYVIF    | 1090 | 964  |
| >OMD-I7M-v SPIYVIF    | 301  | >OMD-I7M-n SPMYVIF    | 2299 | 1998 |
| >OMD-I7M-v SPIYVIF    | 300  | >OMD-I7M-n SPMYVIF    | 203  | 97   |

|                        |      |                        |     |      |
|------------------------|------|------------------------|-----|------|
| >OMD-I7M-v SPIYVIFFF   | 2040 | >OMD-I7M-n SPMYVIFFF   | 492 | 1548 |
| >OMD-I7M-v SPIYVIFFFF  | 279  | >OMD-I7M-n SPMYVIFFFF  | 84  | 195  |
| >OMD-I7M-v SPIYVIFFF   | 589  | >OMD-I7M-n SPMYVIFFF   | 309 | 280  |
| >OMD-I7M-v SPIYVIFFF   | 53   | >OMD-I7M-n SPMYVIFFF   | 60  | 7    |
| >OMD-I7M-v SPIYVIFFFF  | 70   | >OMD-I7M-n SPMYVIFFFF  | 78  | 8    |
| >OMD-I7M-v SPIYVIFFFF  | 138  | >OMD-I7M-n SPMYVIFFFF  | 106 | 32   |
| >OMD-I7M-v SPIYVIFFFF  | 408  | >OMD-I7M-n SPMYVIFFFF  | 444 | 36   |
| >OMD-I7M-v SPIYVIFFF   | 123  | >OMD-I7M-n SPMYVIFFF   | 102 | 21   |
| >OMD-I7M-v SPIYVIFFFF  | 63   | >OMD-I7M-n SPMYVIFFFF  | 56  | 7    |
| >OMD-I7M-v SPIYVIFFFF  | 141  | >OMD-I7M-n SPMYVIFFFF  | 132 | 9    |
| >OMD-I7M-v SPIYVIFFFF  | 704  | >OMD-I7M-n SPMYVIFFFF  | 341 | 363  |
| >OMD-I7M-v SPIYVIFFFF  | 390  | >OMD-I7M-n SPMYVIFFFF  | 434 | 44   |
| >OMD-I7M-v SPIYVIFFF   | 1137 | >OMD-I7M-n SPMYVIFFF   | 487 | 650  |
| >OMD-I7M-v SPIYVIFFF   | 62   | >OMD-I7M-n SPMYVIFFF   | 135 | 73   |
| >OMD-I7M-v SPIYVIFFF   | 36   | >OMD-I7M-n SPMYVIFFF   | 77  | 41   |
| >OMD-I7M-v SPIYVIFFFF  | 50   | >OMD-I7M-n SPMYVIFFFF  | 108 | 58   |
| >OMD-I7M-v SPIYVIFFF   | 36   | >OMD-I7M-n SPMYVIFFF   | 53  | 17   |
| >OMD-I7M-v SPIYVIFFF   | 36   | >OMD-I7M-n SPMYVIFFF   | 51  | 15   |
| >OMD-I7M-v SPIYVIFFFF  | 28   | >OMD-I7M-n SPMYVIFFFF  | 38  | 10   |
| >OMD-I7M-v SPIYVIFFFF  | 132  | >OMD-I7M-n SPMYVIFFFF  | 68  | 64   |
| >OMD-I7M-v LSPIYVIFFF  | 338  | >OMD-I7M-n LSPMYVIFFF  | 290 | 48   |
| >OMD-I7M-v LSPIYVIFFF  | 433  | >OMD-I7M-n LSPMYVIFFF  | 337 | 96   |
| >OMD-I7M-v LSPIYVIFFFF | 192  | >OMD-I7M-n LSPMYVIFFFF | 193 | 1    |
| >OMD-I7M-v LSPIYVIF    | 467  | >OMD-I7M-n LSPMYVIF    | 673 | 206  |
| >OMD-I7M-v LSPIYVIFFF  | 199  | >OMD-I7M-n LSPMYVIFFF  | 266 | 67   |
| >OMD-I7M-v LSPIYVIFFFF | 117  | >OMD-I7M-n LSPMYVIFFFF | 161 | 44   |
| >OMD-I7M-v LSPIYVIFFF  | 129  | >OMD-I7M-n LSPMYVIFFF  | 90  | 39   |
| >OMD-I7M-v LSPIYVIF    | 128  | >OMD-I7M-n LSPMYVIF    | 49  | 79   |
| >OMD-I7M-v LSPIYVIFFF  | 309  | >OMD-I7M-n LSPMYVIFFF  | 89  | 220  |
| >OMD-I7M-v LSPIYVIFFF  | 628  | >OMD-I7M-n LSPMYVIFFF  | 261 | 367  |
| >OMD-I7M-v LSPIYVIFFFF | 437  | >OMD-I7M-n LSPMYVIFFFF | 174 | 263  |
| >OMD-I7M-v LSPIYVIF    | 114  | >OMD-I7M-n LSPMYVIF    | 140 | 26   |
| >OMD-I7M-v LSPIYVIFFF  | 28   | >OMD-I7M-n LSPMYVIFFF  | 43  | 15   |
| >OMD-I7M-v LSPIYVIFFF  | 49   | >OMD-I7M-n LSPMYVIFFF  | 68  | 19   |
| >OMD-I7M-v LSPIYVIFFFF | 70   | >OMD-I7M-n LSPMYVIFFFF | 101 | 31   |
| >OMD-I7M-v LSPIYVIF    | 9    | >OMD-I7M-n LSPMYVIF    | 13  | 4    |
| >OMD-I7M-v LSPIYVIFFF  | 2    | >OMD-I7M-n LSPMYVIFFF  | 2   | 0    |
| >OMD-I7M-v LSPIYVIFFF  | 2    | >OMD-I7M-n LSPMYVIFFF  | 2   | 0    |
| >OMD-I7M-v LSPIYVIFFFF | 2    | >OMD-I7M-n LSPMYVIFFFF | 1   | 1    |
| >OMD-I7M-v LSPIYVIFFF  | 34   | >OMD-I7M-n LSPMYVIFFF  | 53  | 19   |
| >OMD-I7M-v FLSPYVI     | 11   | >OMD-I7M-n FLSPMYVI    | 13  | 2    |
| >OMD-I7M-v FLSPYVIFFF  | 132  | >OMD-I7M-n FLSPMYVIFFF | 106 | 26   |
| >OMD-I7M-v FLSPYVIFFF  | 74   | >OMD-I7M-n FLSPMYVIFFF | 96  | 22   |

|                        |     |                        |     |     |
|------------------------|-----|------------------------|-----|-----|
| >OMD-I7M-v FLSPIYVI    | 2   | >OMD-I7M-n FLSPMYVI    | 3   | 1   |
| >OMD-I7M-v FLSPIYVIF   | 9   | >OMD-I7M-n FLSPMYVIF   | 26  | 17  |
| >OMD-I7M-v FLSPIYVIFF  | 87  | >OMD-I7M-n FLSPMYVIFF  | 121 | 34  |
| >OMD-I7M-v FLSPIYVIFFF | 4   | >OMD-I7M-n FLSPMYVIFFF | 6   | 2   |
| >OMD-I7M-v FLSPIYVI    | 4   | >OMD-I7M-n FLSPMYVI    | 4   | 0   |
| >OMD-I7M-v FLSPIYVIF   | 254 | >OMD-I7M-n FLSPMYVIF   | 338 | 84  |
| >OMD-I7M-v FLSPIYVIFFF | 83  | >OMD-I7M-n FLSPMYVIFFF | 95  | 12  |
| >OMD-I7M-v FLSPIYVI    | 14  | >OMD-I7M-n FLSPMYVI    | 16  | 2   |
| >OMD-I7M-v FLSPIYVIF   | 218 | >OMD-I7M-n FLSPMYVIF   | 280 | 62  |
| >OMD-I7M-v FLSPIYVIFFF | 44  | >OMD-I7M-n FLSPMYVIFFF | 46  | 2   |
| >OMD-I7M-v FLSPIYVI    | 3   | >OMD-I7M-n FLSPMYVI    | 5   | 2   |
| >OMD-I7M-v FLSPIYVIFF  | 61  | >OMD-I7M-n FLSPMYVIFF  | 113 | 52  |
| >OMD-I7M-v FLSPIYVIFFF | 36  | >OMD-I7M-n FLSPMYVIFFF | 63  | 27  |
| >OMD-I7M-v FLSPIYVI    | 5   | >OMD-I7M-n FLSPMYVI    | 6   | 1   |
| >OMD-I7M-v FLSPIYVIFFF | 477 | >OMD-I7M-n FLSPMYVIFFF | 653 | 176 |
| >OMD-I7M-v FLSPIYVI    | 9   | >OMD-I7M-n FLSPMYVI    | 14  | 5   |
| >OMD-I7M-v FLSPIYVIFFF | 152 | >OMD-I7M-n FLSPMYVIFFF | 209 | 57  |
| >OMD-I7M-v FLSPIYVI    | 6   | >OMD-I7M-n FLSPMYVI    | 16  | 10  |
| >OMD-I7M-v FLSPIYVIFFF | 297 | >OMD-I7M-n FLSPMYVIFFF | 444 | 147 |
| >OMD-I7M-v FLSPIYVI    | 2   | >OMD-I7M-n FLSPMYVI    | 3   | 1   |
| >OMD-I7M-v FLSPIYVIF   | 119 | >OMD-I7M-n FLSPMYVIF   | 94  | 25  |
| >OMD-I7M-v FLSPIYVIFF  | 46  | >OMD-I7M-n FLSPMYVIFF  | 36  | 10  |
| >OMD-I7M-v FLSPIYVIFFF | 34  | >OMD-I7M-n FLSPMYVIFFF | 28  | 6   |
| >OMD-I7M-v FLSPIYVIF   | 425 | >OMD-I7M-n FLSPMYVIF   | 445 | 20  |
| >OMD-I7M-v FLSPIYVIFFF | 389 | >OMD-I7M-n FLSPMYVIFFF | 411 | 22  |
| >OMD-I7M-v FLSPIYVIF   | 35  | >OMD-I7M-n FLSPMYVIF   | 51  | 16  |
| >OMD-I7M-v FLSPIYVIFF  | 74  | >OMD-I7M-n FLSPMYVIFF  | 100 | 26  |
| >OMD-I7M-v FLSPIYVIFFF | 32  | >OMD-I7M-n FLSPMYVIFFF | 40  | 8   |
| >OMD-I7M-v FLSPIYVIF   | 294 | >OMD-I7M-n FLSPMYVIF   | 396 | 102 |
| >OMD-I7M-v FLSPIYVIFF  | 418 | >OMD-I7M-n FLSPMYVIFF  | 414 | 4   |
| >OMD-I7M-v FLSPIYVIFFF | 57  | >OMD-I7M-n FLSPMYVIFFF | 69  | 12  |
| >OMD-I7M-v FLSPIYVI    | 55  | >OMD-I7M-n FLSPMYVI    | 156 | 101 |
| >OMD-I7M-v FLSPIYVIF   | 142 | >OMD-I7M-n FLSPMYVIF   | 90  | 52  |
| >OMD-I7M-v FLSPIYVIFF  | 119 | >OMD-I7M-n FLSPMYVIFF  | 79  | 40  |
| >OMD-I7M-v FLSPIYVIFFF | 126 | >OMD-I7M-n FLSPMYVIFFF | 94  | 32  |
| >OMD-I7M-v FLSPIYVIF   | 488 | >OMD-I7M-n FLSPMYVIF   | 469 | 19  |
| >OMD-I7M-v FLSPIYVIF   | 10  | >OMD-I7M-n FLSPMYVIF   | 11  | 1   |
| >OMD-I7M-v FLSPIYVIFF  | 22  | >OMD-I7M-n FLSPMYVIFF  | 20  | 2   |
| >OMD-I7M-v FLSPIYVIFFF | 41  | >OMD-I7M-n FLSPMYVIFFF | 42  | 1   |
| >OMD-I7M-v FLSPIYVIF   | 240 | >OMD-I7M-n FLSPMYVIF   | 223 | 17  |
| >OMD-I7M-v FLSPIYVIFFF | 370 | >OMD-I7M-n FLSPMYVIFFF | 389 | 19  |
| >OMD-I7M-v FLSPIYVIFFF | 337 | >OMD-I7M-n FLSPMYVIFFF | 362 | 25  |
| >OMD-I7M-v FLSPIYVIF   | 154 | >OMD-I7M-n FLSPMYVIF   | 87  | 67  |



|                        |      |                       |       |       |
|------------------------|------|-----------------------|-------|-------|
| >OMD-I7M-v GFLSPIYV    | 31   | >OMD-I7M-n GFLSPMYV   | 74    | 43    |
| >OMD-I7M-v GFLSPIYV    | 61   | >OMD-I7M-n GFLSPMYV   | 127   | 66    |
| >OMD-I7M-v GFLSPIYV    | 448  | >OMD-I7M-n GFLSPMYV   | 663   | 215   |
| >OMD-I7M-v GFLSPIYVI   | 163  | >OMD-I7M-n GFLSPMYVI  | 275   | 112   |
| >OMD-I7M-v GFLSPIYVIF  | 72   | >OMD-I7M-n GFLSPMYVIF | 55    | 17    |
| >OMD-I7M-v GFLSPIYVIF  | 109  | >OMD-I7M-n GFLSPMYVIF | 149   | 40    |
| >OMD-I7M-v GFLSPIYVI   | 45   | >OMD-I7M-n GFLSPMYVI  | 69    | 24    |
| >OMD-I7M-v GFLSPIYVIF  | 8    | >OMD-I7M-n GFLSPMYVIF | 9     | 1     |
| >OMD-I7M-v GFLSPIYVIF  | 9    | >OMD-I7M-n GFLSPMYVIF | 11    | 2     |
| >OMD-I7M-v GFLSPIYVIF  | 286  | >OMD-I7M-n GFLSPMYVIF | 254   | 32    |
| >OMD-I7M-v GFLSPIYVIF  | 174  | >OMD-I7M-n GFLSPMYVIF | 124   | 50    |
| >OMD-I7M-v GFLSPIYVIF  | 493  | >OMD-I7M-n GFLSPMYVIF | 615   | 122   |
| >OMD-I7M-v GFLSPIYVIF  | 658  | >OMD-I7M-n GFLSPMYVIF | 367   | 291   |
| >OMD-I7M-v MGFLSPIYV   | 112  | >OMD-I7M-n MGFLSPMYV  | 176   | 64    |
| >OMD-I7M-v MGFLSPIY    | 173  | >OMD-I7M-n MGFLSPMY   | 59    | 114   |
| >OMD-I7M-v MGFLSPIYV   | 562  | >OMD-I7M-n MGFLSPMYV  | 353   | 209   |
| >OMD-I7M-v MGFLSPIY    | 196  | >OMD-I7M-n MGFLSPMY   | 199   | 3     |
| >OMD-I7M-v MGFLSPIYV   | 39   | >OMD-I7M-n MGFLSPMYV  | 16    | 23    |
| >OMD-I7M-v MGFLSPIY    | 643  | >OMD-I7M-n MGFLSPMY   | 480   | 163   |
| >OMD-I7M-v MGFLSPIY    | 101  | >OMD-I7M-n MGFLSPMY   | 133   | 32    |
| >OMD-I7M-v MGFLSPIYVIF | 12   | >OMD-I7M-n MGFLSPMYV  | 10    | 2     |
| >OMD-I7M-v MGFLSPIY    | 74   | >OMD-I7M-n MGFLSPMY   | 35    | 39    |
| >OMD-I7M-v MGFLSPIYVIF | 169  | >OMD-I7M-n MGFLSPMYV  | 123   | 46    |
| >OMD-I7M-v MGFLSPIY    | 36   | >OMD-I7M-n MGFLSPMY   | 59    | 23    |
| >OMD-I7M-v MGFLSPIYVIF | 106  | >OMD-I7M-n MGFLSPMYV  | 147   | 41    |
| >OMD-I7M-v MGFLSPIYVIF | 426  | >OMD-I7M-n MGFLSPMYV  | 285   | 141   |
| >OMD-I7M-v MGFLSPIYVIF | 389  | >OMD-I7M-n MGFLSPMYV  | 311   | 78    |
| >OMD-P232f PSSLMYLSL   | 9375 | >OMD-P232f HSSLMYLSL  | 421   | 8954  |
| >OMD-P232f PSSLMYLSL   | 3293 | >OMD-P232f HSSLMYLSL  | 17    | 3276  |
| >OMD-P232f LPSSLMYL    | 28   | >OMD-P232f LHSSLMYL   | 22290 | 22262 |
| >OMD-P232f LPSSLMYLSL  | 125  | >OMD-P232f LHSSLMYLSL | 34695 | 34570 |
| >OMD-P232f LPSSLMYL    | 3717 | >OMD-P232f LHSSLMYL   | 374   | 3343  |
| >OMD-P232f LPSSLMYL    | 122  | >OMD-P232f LHSSLMYL   | 25506 | 25384 |
| >OMD-P232f LPSSLMYLSL  | 227  | >OMD-P232f LHSSLMYLSL | 20765 | 20538 |
| >OMD-P232f LPSSLMYL    | 3414 | >OMD-P232f LHSSLMYL   | 376   | 3038  |
| >OMD-P232f LPSSLMYLSL  | 2373 | >OMD-P232f LHSSLMYLSL | 299   | 2074  |
| >OMD-P232f LPSSLMYL    | 386  | >OMD-P232f LHSSLMYL   | 20604 | 20218 |
| >OMD-P232f LPSSLMYLSL  | 478  | >OMD-P232f LHSSLMYLSL | 36904 | 36426 |
| >OMD-P232f LPSSLMYL    | 2178 | >OMD-P232f LHSSLMYL   | 436   | 1742  |
| >OMD-P232f LPSSLMYLSL  | 260  | >OMD-P232f LHSSLMYLSL | 50    | 210   |
| >OMD-P232f LPSSLMYL    | 55   | >OMD-P232f LHSSLMYL   | 11465 | 11410 |
| >OMD-P232f LPSSLMYLSL  | 326  | >OMD-P232f LHSSLMYLSL | 21666 | 21340 |
| >OMD-P232f LPSSLMYLS   | 82   | >OMD-P232f LHSSLMYLS  | 12794 | 12712 |

|                       |       |                      |       |       |
|-----------------------|-------|----------------------|-------|-------|
| >OMD-P232†LPSSLMYLSL  | 345   | >OMD-P232†LHSSLMYLSL | 21255 | 20910 |
| >OMD-P232†LPSSLMYL    | 372   | >OMD-P232†LHSSLMYL   | 23528 | 23156 |
| >OMD-P232†LPSSLMYLSL  | 104   | >OMD-P232†LHSSLMYLSL | 16793 | 16689 |
| >OMD-P232†LPSSLMYL    | 6261  | >OMD-P232†LHSSLMYL   | 277   | 5984  |
| >OMD-P232†GLPSSLMYL   | 22    | >OMD-P232†GLHSSLMYL  | 20    | 2     |
| >OMD-P232†GLPSSLMYLSI | 108   | >OMD-P232†GLHSSLMYLS | 89    | 19    |
| >OMD-P232†GLPSSLMYL   | 6     | >OMD-P232†GLHSSLMYL  | 6     | 0     |
| >OMD-P232†GLPSSLMYLSI | 42    | >OMD-P232†GLHSSLMYLS | 36    | 6     |
| >OMD-P232†GLPSSLMYL   | 6     | >OMD-P232†GLHSSLMYL  | 5     | 1     |
| >OMD-P232†GLPSSLMYLSI | 25    | >OMD-P232†GLHSSLMYLS | 19    | 6     |
| >OMD-P232†GLPSSLMYL   | 47    | >OMD-P232†GLHSSLMYL  | 202   | 155   |
| >OMD-P232†GLPSSLMYLSI | 306   | >OMD-P232†GLHSSLMYLS | 1142  | 836   |
| >OMD-P232†GLPSSLMYL   | 9     | >OMD-P232†GLHSSLMYL  | 5     | 4     |
| >OMD-P232†GLPSSLMYLSI | 56    | >OMD-P232†GLHSSLMYLS | 29    | 27    |
| >OMD-P232†GLPSSLMYL   | 9     | >OMD-P232†GLHSSLMYL  | 5     | 4     |
| >OMD-P232†GLPSSLMYLSI | 98    | >OMD-P232†GLHSSLMYLS | 47    | 51    |
| >OMD-P232†GLPSSLMYL   | 11    | >OMD-P232†GLHSSLMYL  | 15    | 4     |
| >OMD-P232†GLPSSLMYLSI | 39    | >OMD-P232†GLHSSLMYLS | 64    | 25    |
| >OMD-P232†GLPSSLMYL   | 68    | >OMD-P232†GLHSSLMYL  | 168   | 100   |
| >OMD-P232†GLPSSLMYL   | 4     | >OMD-P232†GLHSSLMYL  | 3     | 1     |
| >OMD-P232†GLPSSLMYLSI | 6     | >OMD-P232†GLHSSLMYLS | 5     | 1     |
| >OMD-P232†GLPSSLMY    | 1260  | >OMD-P232†GLHSSLMY   | 168   | 1092  |
| >OMD-P232†GLPSSLMY    | 53    | >OMD-P232†GLHSSLMY   | 23    | 30    |
| >OMD-P232†GLPSSLMYL   | 13445 | >OMD-P232†GLHSSLMYL  | 396   | 13049 |
| >OMD-P232†GLPSSLMY    | 487   | >OMD-P232†GLHSSLMY   | 163   | 324   |
| >OMD-P232†GLPSSLMY    | 1115  | >OMD-P232†GLHSSLMY   | 170   | 945   |
| >OMD-P232†GLPSSLMY    | 312   | >OMD-P232†GLHSSLMY   | 72    | 240   |
| >OMD-P232†GLPSSLMY    | 359   | >OMD-P232†GLHSSLMY   | 97    | 262   |
| >OMD-P232†GLPSSLMY    | 1860  | >OMD-P232†GLHSSLMY   | 169   | 1691  |
| >OMD-P232†GLPSSLMYLSI | 3364  | >OMD-P232†GLHSSLMYLS | 471   | 2893  |
| >OMD-P232†GLPSSLMYL   | 9     | >OMD-P232†GLHSSLMYL  | 5320  | 5311  |
| >OMD-P232†GLPSSLMYLS  | 485   | >OMD-P232†GLHSSLMYLS | 21210 | 20725 |
| >OMD-P232†GLPSSLMYLSI | 45    | >OMD-P232†GLHSSLMYLS | 9892  | 9847  |
| >OMD-P232†PGLPSSLMY   | 126   | >OMD-P232†PGLHSSLMY  | 216   | 90    |
| >OMD-P232†PPGLPSSL    | 717   | >OMD-P232†PPGLHSSL   | 278   | 439   |
| >OMD-P232†MPPGLPSSL   | 45    | >OMD-P232†MPPGLHSSL  | 31    | 14    |
| >OMD-P232†MPPGLPSSLN  | 125   | >OMD-P232†MPPGLHSSLN | 126   | 1     |
| >OMD-P232†MPPGLPSSLN  | 174   | >OMD-P232†MPPGLHSSLN | 149   | 25    |
| >OMD-P232†MPPGLPSSL   | 43    | >OMD-P232†MPPGLHSSL  | 16    | 27    |
| >OMD-P232†MPPGLPSSLN  | 217   | >OMD-P232†MPPGLHSSLN | 194   | 23    |
| >OMD-P232†MPPGLPSSL   | 134   | >OMD-P232†MPPGLHSSL  | 114   | 20    |
| >OMD-P232†MPPGLPSSLN  | 14    | >OMD-P232†MPPGLHSSLN | 13    | 1     |
| >OMD-P232†MPPGLPSSL   | 200   | >OMD-P232†MPPGLHSSL  | 360   | 160   |

|                       |      |                       |     |      |
|-----------------------|------|-----------------------|-----|------|
| >OMD-P232f MPPGLPSSL  | 172  | >OMD-P232f MPPGLHSSL  | 636 | 464  |
| >OMD-P232f MPPGLPSSLN | 41   | >OMD-P232f MPPGLHSSLN | 67  | 26   |
| >OMD-P232f MPPGLPSS   | 130  | >OMD-P232f MPPGLHSS   | 135 | 5    |
| >OMD-P232f MPPGLPSSL  | 1313 | >OMD-P232f MPPGLHSSL  | 104 | 1209 |
| >OMD-P232f MPPGLPSSLN | 74   | >OMD-P232f MPPGLHSSLN | 26  | 48   |
| >OMD-P232f SMPPGLPSSL | 230  | >OMD-P232f SMPPGLHSSL | 415 | 185  |
| >OMD-P232f SMPPGLPSSL | 606  | >OMD-P232f SMPPGLHSSL | 471 | 135  |
| >OMD-P232f SMPPGLPSSL | 19   | >OMD-P232f SMPPGLHSSL | 25  | 6    |
| >OMD-P232f SMPPGLPSSL | 765  | >OMD-P232f SMPPGLHSSL | 193 | 572  |
| >OMD-P232f SMPPGLPSS  | 609  | >OMD-P232f SMPPGLHSS  | 223 | 386  |
| >OMD-P232f SMPPGLPSSL | 28   | >OMD-P232f SMPPGLHSSL | 67  | 39   |
| >OMD-P232f SMPPGLPSSL | 131  | >OMD-P232f SMPPGLHSSL | 46  | 85   |
| >OMD-P232f SMPPGLPSS  | 106  | >OMD-P232f SMPPGLHSS  | 127 | 21   |
| >OMD-P232f SMPPGLPSSL | 165  | >OMD-P232f SMPPGLHSSL | 246 | 81   |
| >OMD-P232f SMPPGLPSSL | 235  | >OMD-P232f SMPPGLHSSL | 194 | 41   |
| >OMD-P232f SMPPGLPSS  | 334  | >OMD-P232f SMPPGLHSS  | 180 | 154  |
| >OMD-P232f SMPPGLPSSL | 5    | >OMD-P232f SMPPGLHSSL | 7   | 2    |
| >OMD-P232f SMPPGLPSSL | 80   | >OMD-P232f SMPPGLHSSL | 82  | 2    |
| >OMD-P232f SMPPGLPSSL | 37   | >OMD-P232f SMPPGLHSSL | 60  | 23   |
| >OMD-P232f SMPPGLPSS  | 478  | >OMD-P232f SMPPGLHSS  | 699 | 221  |
| >OMD-P232f SMPPGLPSSL | 13   | >OMD-P232f SMPPGLHSSL | 19  | 6    |
| >OMD-P232f SMPPGLPSSL | 113  | >OMD-P232f SMPPGLHSSL | 151 | 38   |
| >OMD-P232f SMPPGLPSSL | 127  | >OMD-P232f SMPPGLHSSL | 235 | 108  |
| >OMD-P232f SMPPGLPSS  | 74   | >OMD-P232f SMPPGLHSS  | 20  | 54   |
| >OMD-P232f SMPPGLPSSL | 3    | >OMD-P232f SMPPGLHSSL | 3   | 0    |
| >OMD-P232f SMPPGLPSSL | 47   | >OMD-P232f SMPPGLHSSL | 37  | 10   |
| >OMD-P232f SMPPGLPSSL | 980  | >OMD-P232f SMPPGLHSSL | 376 | 604  |
| >OMD-P232f SMPPGLPSSL | 496  | >OMD-P232f SMPPGLHSSL | 406 | 90   |
| >OMD-P232f SMPPGLPSSL | 140  | >OMD-P232f SMPPGLHSSL | 34  | 106  |
| >OMD-P232f SMPPGLPSSL | 13   | >OMD-P232f SMPPGLHSSL | 11  | 2    |
| >OMD-P232f SMPPGLPSSL | 3134 | >OMD-P232f SMPPGLHSSL | 381 | 2753 |
| >OMD-P232f ESMPPGLPSS | 263  | >OMD-P232f ESMPPGLHSS | 180 | 83   |
| >OMD-P232f ESMPPGLPSS | 464  | >OMD-P232f ESMPPGLHSS | 626 | 162  |
| >OMD-P232f ESMPPGLPSS | 27   | >OMD-P232f ESMPPGLHSS | 34  | 7    |
| >OMD-P232f ESMPPGLPSS | 108  | >OMD-P232f ESMPPGLHSS | 113 | 5    |
| >OMD-P232f ESMPPGLPSS | 357  | >OMD-P232f ESMPPGLHSS | 410 | 53   |
| >OMD-P232f ESMPPGLPSS | 13   | >OMD-P232f ESMPPGLHSS | 12  | 1    |
| >OMD-P232f ESMPPGLPSS | 205  | >OMD-P232f ESMPPGLHSS | 114 | 91   |
| >OMD-P232f ESMPPGLPSS | 191  | >OMD-P232f ESMPPGLHSS | 182 | 9    |
| >PAFAH1B2- LDTDGGFV   | 131  | >PAFAH1B2- L DSDGGFV  | 215 | 84   |
| >PAFAH1B2- LLDTDGGFV  | 381  | >PAFAH1B2- LL DSDGGFV | 229 | 152  |
| >PAFAH1B2- LLDTDGGFV  | 62   | >PAFAH1B2- LL DSDGGFV | 36  | 26   |
| >PAFAH1B2- LLDTDGGFV  | 80   | >PAFAH1B2- LL DSDGGFV | 47  | 33   |

|                        |      |                        |       |       |
|------------------------|------|------------------------|-------|-------|
| >PAFAH1B2-`LLDTDGGFV   | 123  | >PAFAH1B2-`LLSDGGFV    | 105   | 18    |
| >PAFAH1B2-`LLDTDGGFV   | 5    | >PAFAH1B2-`LLSDGGFV    | 3     | 2     |
| >PAFAH1B2-`LLDTDGGFV   | 8    | >PAFAH1B2-`LLSDGGFV    | 8     | 0     |
| >PAFAH1B2-`LLDTDGGFV   | 9    | >PAFAH1B2-`LLSDGGFV    | 7     | 2     |
| >PAFAH1B2-`LLDTDGGFV   | 17   | >PAFAH1B2-`LLSDGGFV    | 10    | 7     |
| >PAFAH1B2-`LLDTDGGFV   | 7    | >PAFAH1B2-`LLSDGGFV    | 5     | 2     |
| >PAFAH1B2-`QLLDTDGGF\  | 34   | >PAFAH1B2-`QLLSDGGF\   | 34    | 0     |
| >PAFAH1B2-`QLLDTDGGF\  | 89   | >PAFAH1B2-`QLLSDGGF\   | 68    | 21    |
| >PAFAH1B2-`QLLDTDGGF\  | 58   | >PAFAH1B2-`QLLSDGGF\   | 60    | 2     |
| >PAFAH1B2-`QLLDTDGGF\  | 111  | >PAFAH1B2-`QLLSDGGF\   | 180   | 69    |
| >PAFAH1B2-`QLLDTDGGF\  | 4    | >PAFAH1B2-`QLLSDGGF\   | 5     | 1     |
| >PAFAH1B2-`QLLDTDGGF\  | 7    | >PAFAH1B2-`QLLSDGGF\   | 9     | 2     |
| >PAFAH1B2-`QLLDTDGGF\  | 9    | >PAFAH1B2-`QLLSDGGF\   | 9     | 0     |
| >PAFAH1B2-`QLLDTDGGF\  | 9    | >PAFAH1B2-`QLLSDGGF\   | 9     | 0     |
| >PAFAH1B2-`QLLDTDGGF\  | 5    | >PAFAH1B2-`QLLSDGGF\   | 5     | 0     |
| >PAFAH1B2-`QLLDTDGGF\  | 126  | >PAFAH1B2-`QLLSDGGF\   | 156   | 30    |
| >PAFAH1B2-`QLLDTDGGF   | 62   | >PAFAH1B2-`QLLSDGGF    | 41    | 21    |
| >PAFAH1B2-`QLLDTDGGF   | 593  | >PAFAH1B2-`QLLSDGGF    | 189   | 404   |
| >PAFAH1B2-`VQLLDTDGGI  | 10   | >PAFAH1B2-`VQLLSDGGI   | 11    | 1     |
| >PAFAH1B2-`VQLLDTDGGI  | 185  | >PAFAH1B2-`VQLLSDGGI   | 170   | 15    |
| >PAFAH1B2-`VQLLDTDGGI  | 141  | >PAFAH1B2-`VQLLSDGGI   | 143   | 2     |
| >PAFAH1B2-`VQLLDTDGGI  | 141  | >PAFAH1B2-`VQLLSDGGI   | 130   | 11    |
| >PAFAH1B2-`VQLLDTDGGI  | 534  | >PAFAH1B2-`VQLLSDGGI   | 334   | 200   |
| >PAFAH1B2-`VQLLDTDGGI  | 681  | >PAFAH1B2-`VQLLSDGGI   | 482   | 199   |
| >PAFAH1B2-`VQLLDTDGGI  | 136  | >PAFAH1B2-`VQLLSDGGI   | 106   | 30    |
| >PAFAH1B2-`KLANVQLLDT  | 413  | >PAFAH1B2-`KLANVQLLDS  | 3118  | 2705  |
| >PAFAH1B2-`KLANVQLLDT  | 298  | >PAFAH1B2-`KLANVQLLDS  | 4093  | 3795  |
| >PAFAH1B2-`KLANVQLLDT  | 352  | >PAFAH1B2-`KLANVQLLDS  | 3049  | 2697  |
| >PAFAH1B2-`KLANVQLLDT  | 499  | >PAFAH1B2-`KLANVQLLDS  | 5222  | 4723  |
| >PALB2-D11;`DSHLLAGQK  | 6964 | >PALB2-D11;`GSHLLAGQK  | 135   | 6829  |
| >PALB2-D11;`DSHLLAGQK  | 4813 | >PALB2-D11;`GSHLLAGQK  | 193   | 4620  |
| >PALB2-D11;`DSHLLAGQK  | 189  | >PALB2-D11;`GSHLLAGQK  | 3063  | 2874  |
| >PALB2-D11;`HWSFVKWSC  | 403  | >PALB2-D11;`HWSFVKWSC  | 252   | 151   |
| >PALB2-D11;`GTDSHLLA   | 296  | >PALB2-D11;`GTGSHLLA   | 12785 | 12489 |
| >PALB2-D11;`GTDSHLLAGC | 491  | >PALB2-D11;`GTGSHLLAGC | 254   | 237   |
| >PALB2-D11;`GTDSHLLAGC | 47   | >PALB2-D11;`GTGSHLLAGC | 50    | 3     |
| >PALB2-D11;`GTDSHLLAGC | 213  | >PALB2-D11;`GTGSHLLAGC | 220   | 7     |
| >PALB2-D11;`WSGTDSHL   | 969  | >PALB2-D11;`WSGTGSHL   | 200   | 769   |
| >PALB2-D11;`WSGTDSHLL  | 3002 | >PALB2-D11;`WSGTGSHLL  | 347   | 2655  |
| >PALB2-D11;`WSGTDSHLL  | 551  | >PALB2-D11;`WSGTGSHLL  | 177   | 374   |
| >PALB2-D11;`KWSGTDSHL  | 345  | >PALB2-D11;`KWSGTGSHL  | 366   | 21    |
| >PALB2-D11;`KWSGTDSHL  | 385  | >PALB2-D11;`KWSGTGSHL  | 222   | 163   |
| >PALB2-D11;`KWSGTDSHL  | 569  | >PALB2-D11;`KWSGTGSHL  | 287   | 282   |

|                         |       |                         |       |       |
|-------------------------|-------|-------------------------|-------|-------|
| >PALB2-D11;KWSGTDSHL    | 357   | >PALB2-D11;KWSGTGSHL    | 248   | 109   |
| >PALB2-D11;KWSGTDSHLI   | 209   | >PALB2-D11;KWSGTGSHLI   | 150   | 59    |
| >PALB2-D11;KWSGTDSH     | 139   | >PALB2-D11;KWSGTGSH     | 166   | 27    |
| >PALB2-D11;KWSGTDSHL    | 119   | >PALB2-D11;KWSGTGSHL    | 119   | 0     |
| >PALB2-D11;KWSGTDSHLI   | 117   | >PALB2-D11;KWSGTGSHLI   | 113   | 4     |
| >PALB2-D11;KWSGTDSHLI   | 87    | >PALB2-D11;KWSGTGSHLI   | 91    | 4     |
| >PALB2-D11;VKWSGTDSH    | 131   | >PALB2-D11;VKWSGTGSH    | 194   | 63    |
| >PALB2-D11;VKWSGTDSH    | 18    | >PALB2-D11;VKWSGTGSH    | 12    | 6     |
| >PALB2-D11;VKWSGTDSH    | 38    | >PALB2-D11;VKWSGTGSH    | 42    | 4     |
| >PALB2-D11;FVKWSGTDSI   | 119   | >PALB2-D11;FVKWSGTGSI   | 43    | 76    |
| >PALB2-D11;FVKWSGTDSI   | 519   | >PALB2-D11;FVKWSGTGSI   | 273   | 246   |
| >PALB2-D11;FVKWSGTDSI   | 83    | >PALB2-D11;FVKWSGTGSI   | 56    | 27    |
| >PALB2-D11;FVKWSGTDSI   | 607   | >PALB2-D11;FVKWSGTGSI   | 354   | 253   |
| >PALB2-D11;FVKWSGTDSI   | 860   | >PALB2-D11;FVKWSGTGSI   | 488   | 372   |
| >PALB2-D11;FVKWSGTDSI   | 641   | >PALB2-D11;FVKWSGTGSI   | 295   | 346   |
| >PALB2-D11;SFVKWSGTD    | 920   | >PALB2-D11;SFVKWSGTG    | 392   | 528   |
| >PALB2-E15A EKLKEKLAF   | 9     | >PALB2-E15A AKLKEKLAF   | 3     | 6     |
| >PALB2-E15A EKLKEKLAFI  | 1463  | >PALB2-E15A AKLKEKLAFI  | 135   | 1328  |
| >PALB2-E15A KEKLKEKLAFI | 75    | >PALB2-E15A KAKLKEKLAFI | 23340 | 23265 |
| >PALB2-E15A KEKLKEKLA   | 9743  | >PALB2-E15A KAKLKEKLA   | 173   | 9570  |
| >PALB2-E15A KEKLKEKLAFI | 4307  | >PALB2-E15A KAKLKEKLAFI | 35    | 4272  |
| >PALB2-E15A KEKLKEKLAF  | 246   | >PALB2-E15A KAKLKEKLAF  | 165   | 81    |
| >PALB2-E15A KEKLKEKL    | 24460 | >PALB2-E15A KAKLKEKL    | 399   | 24061 |
| >PALB2-E15A KEKLKEKLAF  | 17428 | >PALB2-E15A KAKLKEKLAF  | 45    | 17383 |
| >PALB2-E15A KEKLKEKLAFI | 20991 | >PALB2-E15A KAKLKEKLAFI | 70    | 20921 |
| >PALB2-E15A KEKLKEKL    | 353   | >PALB2-E15A KAKLKEKL    | 37869 | 37516 |
| >PALB2-E15A KEKLKEKLAFI | 287   | >PALB2-E15A KAKLKEKLAFI | 36270 | 35983 |
| >PALB2-E15A KEKLKEKLAFI | 95    | >PALB2-E15A KAKLKEKLAFI | 23380 | 23285 |
| >PALB2-E15A EKEKLKEKLAF | 595   | >PALB2-E15A EKAKLKEKLAI | 38    | 557   |
| >PALB2-E15A EEKEKLKEKL  | 408   | >PALB2-E15A EEKAKLKEKL  | 945   | 537   |
| >PALB2-E15A EEKEKLKEKLA | 110   | >PALB2-E15A EEKAKLKEKLA | 72    | 38    |
| >PALB2-E15A CEEKEKLIK   | 2132  | >PALB2-E15A CEEKAKLIK   | 171   | 1961  |
| >PALB2-E15A CEEKEKLKEKI | 396   | >PALB2-E15A CEEKAKLKEKI | 99    | 297   |
| >PALB2-E15A LSCEEKEKL   | 379   | >PALB2-E15A LSCEEKAKL   | 61    | 318   |
| >PALB2-E15A LSCEEKEKL   | 554   | >PALB2-E15A LSCEEKAKL   | 407   | 147   |
| >PALB2-E15A KPLSCEEKEKI | 1023  | >PALB2-E15A KPLSCEEKAKI | 334   | 689   |
| >PALB2-K48€ KVSSPAGPT   | 11196 | >PALB2-K48€ EVSSPAGPT   | 64    | 11132 |
| >PALB2-K48€ KVSSPAGPT   | 10869 | >PALB2-K48€ EVSSPAGPT   | 203   | 10666 |
| >PALB2-K48€ RTSQKLLSLTK | 58    | >PALB2-K48€ RTSQKLLSLTE | 15434 | 15376 |
| >PALB2-K48€ RTSQKLLSLTK | 18    | >PALB2-K48€ RTSQKLLSLTE | 15772 | 15754 |
| >PALB2-K48€ RTSQKLLSLTK | 8     | >PALB2-K48€ RTSQKLLSLTE | 5108  | 5100  |
| >PALB2-K48€ RTSQKLLSLTK | 685   | >PALB2-K48€ RTSQKLLSLTE | 248   | 437   |
| >PALB2-K48€ RTSQKLLSLTK | 357   | >PALB2-K48€ RTSQKLLSLTE | 9778  | 9421  |

|                         |      |                         |       |       |
|-------------------------|------|-------------------------|-------|-------|
| >PALB2-K48€ LTKVSSPA    | 13   | >PALB2-K48€ LTEVSSPA    | 2692  | 2679  |
| >PALB2-K48€ LTKVSSPAG   | 35   | >PALB2-K48€ LTEVSSPAG   | 6904  | 6869  |
| >PALB2-K48€ LTKVSSPAGP' | 340  | >PALB2-K48€ LTEVSSPAGP' | 11348 | 11008 |
| >PALB2-K48€ SLTKVSSPA   | 623  | >PALB2-K48€ SLTEVSSPA   | 57    | 566   |
| >PALB2-K48€ SLTKVSSPA   | 79   | >PALB2-K48€ SLTEVSSPA   | 18    | 61    |
| >PALB2-K48€ SLTKVSSPA   | 22   | >PALB2-K48€ SLTEVSSPA   | 7     | 15    |
| >PALB2-K48€ SLTKVSSPA   | 595  | >PALB2-K48€ SLTEVSSPA   | 44    | 551   |
| >PALB2-K48€ SLTKVSSPA   | 76   | >PALB2-K48€ SLTEVSSPA   | 6     | 70    |
| >PALB2-K48€ SLTKVSSPA   | 320  | >PALB2-K48€ SLTEVSSPA   | 30    | 290   |
| >PALB2-K48€ SLTKVSSPA   | 19   | >PALB2-K48€ SLTEVSSPA   | 9     | 10    |
| >PALB2-K48€ SLTKVSSPA   | 30   | >PALB2-K48€ SLTEVSSPA   | 6     | 24    |
| >PALB2-K48€ SLTKVSSPA   | 835  | >PALB2-K48€ SLTEVSSPA   | 243   | 592   |
| >PALB2-K48€ LLSLTKVSSPA | 86   | >PALB2-K48€ LLSLTEVSSPA | 48    | 38    |
| >PALB2-K48€ LLSLTKVSSPA | 41   | >PALB2-K48€ LLSLTEVSSPA | 37    | 4     |
| >PALB2-K48€ LLSLTKVSSPA | 407  | >PALB2-K48€ LLSLTEVSSPA | 265   | 142   |
| >PALB2-K48€ LLSLTKVSSPA | 496  | >PALB2-K48€ LLSLTEVSSPA | 234   | 262   |
| >PALB2-K48€ LLSLTKVSSPA | 388  | >PALB2-K48€ LLSLTEVSSPA | 194   | 194   |
| >PALB2-K48€ LLSLTKVSSPA | 30   | >PALB2-K48€ LLSLTEVSSPA | 23    | 7     |
| >PALB2-K48€ KLLSLTKV    | 11   | >PALB2-K48€ KLLSLTEV    | 8     | 3     |
| >PALB2-K48€ KLLSLTKV    | 14   | >PALB2-K48€ KLLSLTEV    | 5     | 9     |
| >PALB2-K48€ KLLSLTKV    | 10   | >PALB2-K48€ KLLSLTEV    | 8     | 2     |
| >PALB2-K48€ KLLSLTKV    | 14   | >PALB2-K48€ KLLSLTEV    | 6     | 8     |
| >PALB2-K48€ KLLSLTKV    | 2    | >PALB2-K48€ KLLSLTEV    | 2     | 0     |
| >PALB2-K48€ KLLSLTKV    | 5    | >PALB2-K48€ KLLSLTEV    | 4     | 1     |
| >PALB2-K48€ KLLSLTKV    | 5    | >PALB2-K48€ KLLSLTEV    | 4     | 1     |
| >PALB2-K48€ KLLSLTKV    | 3    | >PALB2-K48€ KLLSLTEV    | 2     | 1     |
| >PALB2-K48€ KLLSLTKV    | 2    | >PALB2-K48€ KLLSLTEV    | 2     | 0     |
| >PALB2-K48€ KLLSLTKV    | 282  | >PALB2-K48€ KLLSLTEV    | 242   | 40    |
| >PALB2-K48€ KLLSLTKVVS  | 1841 | >PALB2-K48€ KLLSLTEVVS  | 429   | 1412  |
| >PALB2-K48€ KLLSLTKVSS  | 796  | >PALB2-K48€ KLLSLTEVSS  | 414   | 382   |
| >PALB2-K48€ QKLLSLTKV   | 224  | >PALB2-K48€ QKLLSLTEV   | 80    | 144   |
| >PALB2-K48€ SQKLLSLTKV  | 71   | >PALB2-K48€ SQKLLSLTEV  | 46    | 25    |
| >PALB2-K48€ SQKLLSLTKV  | 477  | >PALB2-K48€ SQKLLSLTEV  | 238   | 239   |
| >PALB2-K48€ SQKLLSLTK   | 85   | >PALB2-K48€ SQKLLSLTE   | 24863 | 24778 |
| >PALB2-K48€ SQKLLSLTK   | 15   | >PALB2-K48€ SQKLLSLTE   | 8163  | 8148  |
| >PALB2-K48€ SQKLLSLTKV  | 841  | >PALB2-K48€ SQKLLSLTEV  | 354   | 487   |
| >PALB2-K48€ TSQKLLSLTK  | 186  | >PALB2-K48€ TSQKLLSLTE  | 25854 | 25668 |
| >PALB2-K48€ TSQKLLSLTK  | 18   | >PALB2-K48€ TSQKLLSLTE  | 28964 | 28946 |
| >PALB2-K48€ TSQKLLSLTK  | 390  | >PALB2-K48€ TSQKLLSLTE  | 15685 | 15295 |
| >PALB2-K48€ TSQKLLSLTK  | 259  | >PALB2-K48€ TSQKLLSLTE  | 30183 | 29924 |
| >PALB2-K48€ TSQKLLSLTKV | 1030 | >PALB2-K48€ TSQKLLSLTEV | 365   | 665   |
| >PALB2-K48€ TSQKLLSLTKV | 306  | >PALB2-K48€ TSQKLLSLTEV | 424   | 118   |
| >PALB2-L9F-1 LSCEEKEKL  | 379  | >PALB2-L9F-1 FSCEEKEKL  | 485   | 106   |

|                          |       |                          |       |       |
|--------------------------|-------|--------------------------|-------|-------|
| >PALB2-L9F-1 KPLSCEEKEKI | 535   | >PALB2-L9F-1 KPFSCEEKEKI | 158   | 377   |
| >PALB2-L9F-1 DEPPGKPL    | 342   | >PALB2-L9F-1 DEPPGKPF    | 1890  | 1548  |
| >PALB2-L9F-1 DEPPGKPL    | 184   | >PALB2-L9F-1 DEPPGKPF    | 19    | 165   |
| >PALB2-P10C PPEETILTF    | 3941  | >PALB2-P10C LPEETILTF    | 438   | 3503  |
| >PALB2-P10C PPEETILTF    | 137   | >PALB2-P10C LPEETILTF    | 10    | 127   |
| >PALB2-P10C PPEETILTFAE  | 5828  | >PALB2-P10C LPEETILTFAE  | 242   | 5586  |
| >PALB2-P10C PPEETILTF    | 58    | >PALB2-P10C LPEETILTF    | 12    | 46    |
| >PALB2-P10C PPEETILTFA   | 1898  | >PALB2-P10C LPEETILTFA   | 31    | 1867  |
| >PALB2-P10C PPEETILTF    | 172   | >PALB2-P10C LPEETILTF    | 21    | 151   |
| >PALB2-P10C PPEETILTF    | 32    | >PALB2-P10C LPEETILTF    | 6     | 26    |
| >PALB2-P10C MPPEETILTF   | 324   | >PALB2-P10C MLPEETILTF   | 34835 | 34511 |
| >PALB2-P10C MPPEETIL     | 21898 | >PALB2-P10C MLPEETIL     | 98    | 21800 |
| >PALB2-P10C MPPEETILT    | 22675 | >PALB2-P10C MLPEETILT    | 105   | 22570 |
| >PALB2-P10C MPPEETILTF/  | 19820 | >PALB2-P10C MLPEETILTF/  | 18    | 19802 |
| >PALB2-P10C MPPEETIL     | 21530 | >PALB2-P10C MLPEETIL     | 9     | 21521 |
| >PALB2-P10C MPPEETILT    | 29913 | >PALB2-P10C MLPEETILT    | 46    | 29867 |
| >PALB2-P10C MPPEETILTF/  | 11162 | >PALB2-P10C MLPEETILTF/  | 4     | 11158 |
| >PALB2-P10C MPPEETIL     | 21449 | >PALB2-P10C MLPEETIL     | 26    | 21423 |
| >PALB2-P10C MPPEETILT    | 22081 | >PALB2-P10C MLPEETILT    | 84    | 21997 |
| >PALB2-P10C MPPEETILTF/  | 10834 | >PALB2-P10C MLPEETILTF/  | 4     | 10830 |
| >PALB2-P10C MPPEETIL     | 13418 | >PALB2-P10C MLPEETIL     | 147   | 13271 |
| >PALB2-P10C MPPEETILT    | 20033 | >PALB2-P10C MLPEETILT    | 150   | 19883 |
| >PALB2-P10C MPPEETILTF/  | 4423  | >PALB2-P10C MLPEETILTF/  | 11    | 4412  |
| >PALB2-P10C MPPEETIL     | 21322 | >PALB2-P10C MLPEETIL     | 34    | 21288 |
| >PALB2-P10C MPPEETILT    | 25034 | >PALB2-P10C MLPEETILT    | 78    | 24956 |
| >PALB2-P10C MPPEETILTF   | 24177 | >PALB2-P10C MLPEETILTF   | 73    | 24104 |
| >PALB2-P10C MPPEETILTF/  | 16896 | >PALB2-P10C MLPEETILTF/  | 10    | 16886 |
| >PALB2-P10C MPPEETIL     | 24554 | >PALB2-P10C MLPEETIL     | 72    | 24482 |
| >PALB2-P10C MPPEETILTF/  | 23478 | >PALB2-P10C MLPEETILTF/  | 61    | 23417 |
| >PALB2-P10C MPPEETIL     | 23034 | >PALB2-P10C MLPEETIL     | 53    | 22981 |
| >PALB2-P10C MPPEETILT    | 25101 | >PALB2-P10C MLPEETILT    | 448   | 24653 |
| >PALB2-P10C MPPEETILTF/  | 20926 | >PALB2-P10C MLPEETILTF/  | 16    | 20910 |
| >PALB2-P10C MPPEETIL     | 25345 | >PALB2-P10C MLPEETIL     | 232   | 25113 |
| >PALB2-P10C MPPEETILTF/  | 23283 | >PALB2-P10C MLPEETILTF/  | 64    | 23219 |
| >PALB2-P10C MPPEETIL     | 24693 | >PALB2-P10C MLPEETIL     | 5     | 24688 |
| >PALB2-P10C MPPEETILT    | 33544 | >PALB2-P10C MLPEETILT    | 18    | 33526 |
| >PALB2-P10C MPPEETILTF   | 35673 | >PALB2-P10C MLPEETILTF   | 137   | 35536 |
| >PALB2-P10C MPPEETILTF/  | 27030 | >PALB2-P10C MLPEETILTF/  | 4     | 27026 |
| >PALB2-P10C MPPEETILTF   | 1076  | >PALB2-P10C MLPEETILTF   | 62    | 1014  |
| >PALB2-P10C MPPEETILTF   | 7750  | >PALB2-P10C MLPEETILTF   | 84    | 7666  |
| >PALB2-P10C MPPEETILTF/  | 1310  | >PALB2-P10C MLPEETILTF/  | 162   | 1148  |
| >PALB2-P10C MPPEETILTF   | 12735 | >PALB2-P10C MLPEETILTF   | 271   | 12464 |
| >PALB2-P10C MPPEETILTF   | 1030  | >PALB2-P10C MLPEETILTF   | 149   | 881   |

|                         |      |                         |       |       |
|-------------------------|------|-------------------------|-------|-------|
| >PALB2-P10C MPPEETIL    | 101  | >PALB2-P10C MLPEETIL    | 8232  | 8131  |
| >PALB2-P10C MPPEETILT   | 299  | >PALB2-P10C MLPEETILT   | 16299 | 16000 |
| >PALB2-P10C MPPEETILTF  | 110  | >PALB2-P10C MLPEETILTF  | 34385 | 34275 |
| >PALB2-P10C MPPEETIL    | 112  | >PALB2-P10C MLPEETIL    | 27481 | 27369 |
| >PALB2-P10C MPPEETILTF  | 264  | >PALB2-P10C MLPEETILTF  | 18105 | 17841 |
| >PALB2-P10C MPPEETILT   | 417  | >PALB2-P10C MLPEETILT   | 31887 | 31470 |
| >PALB2-P10C MPPEETILTF/ | 33   | >PALB2-P10C MLPEETILTF/ | 20411 | 20378 |
| >PALB2-P10C MPPEETILTF  | 78   | >PALB2-P10C MLPEETILTF  | 39    | 39    |
| >PALB2-P10C MPPEETILTF  | 134  | >PALB2-P10C MLPEETILTF  | 8000  | 7866  |
| >PALB2-P10C MPPEETILTF  | 46   | >PALB2-P10C MLPEETILTF  | 14907 | 14861 |
| >PALB2-P10C LMPPEETI    | 1220 | >PALB2-P10C LMLPEETI    | 99    | 1121  |
| >PALB2-P10C LMPPEETIL   | 2598 | >PALB2-P10C LMLPEETIL   | 248   | 2350  |
| >PALB2-P10C LMPPEETILT  | 1717 | >PALB2-P10C LMLPEETILT  | 108   | 1609  |
| >PALB2-P10C LMPPEETI    | 287  | >PALB2-P10C LMLPEETI    | 313   | 26    |
| >PALB2-P10C LMPPEETIL   | 91   | >PALB2-P10C LMLPEETIL   | 127   | 36    |
| >PALB2-P10C LMPPEETILT  | 430  | >PALB2-P10C LMLPEETILT  | 173   | 257   |
| >PALB2-P10C LMPPEETI    | 252  | >PALB2-P10C LMLPEETI    | 429   | 177   |
| >PALB2-P10C LMPPEETIL   | 434  | >PALB2-P10C LMLPEETIL   | 780   | 346   |
| >PALB2-P10C LMPPEETILT  | 699  | >PALB2-P10C LMLPEETILT  | 224   | 475   |
| >PALB2-P10C LMPPEETI    | 381  | >PALB2-P10C LMLPEETI    | 78    | 303   |
| >PALB2-P10C LMPPEETIL   | 1663 | >PALB2-P10C LMLPEETIL   | 331   | 1332  |
| >PALB2-P10C LMPPEETILT  | 632  | >PALB2-P10C LMLPEETILT  | 158   | 474   |
| >PALB2-P10C LMPPEETILTF | 1332 | >PALB2-P10C LMLPEETILTF | 400   | 932   |
| >PALB2-P10C LMPPEETI    | 20   | >PALB2-P10C LMLPEETI    | 5     | 15    |
| >PALB2-P10C LMPPEETIL   | 609  | >PALB2-P10C LMLPEETIL   | 61    | 548   |
| >PALB2-P10C LMPPEETILT  | 1007 | >PALB2-P10C LMLPEETILT  | 139   | 868   |
| >PALB2-P10C LMPPEETILTF | 776  | >PALB2-P10C LMLPEETILTF | 127   | 649   |
| >PALB2-P10C LMPPEETI    | 134  | >PALB2-P10C LMLPEETI    | 9     | 125   |
| >PALB2-P10C LMPPEETIL   | 1128 | >PALB2-P10C LMLPEETIL   | 33    | 1095  |
| >PALB2-P10C LMPPEETI    | 137  | >PALB2-P10C LMLPEETI    | 17    | 120   |
| >PALB2-P10C LMPPEETIL   | 380  | >PALB2-P10C LMLPEETIL   | 34    | 346   |
| >PALB2-P10C LMPPEETILT  | 2362 | >PALB2-P10C LMLPEETILT  | 263   | 2099  |
| >PALB2-P10C LMPPEETI    | 692  | >PALB2-P10C LMLPEETI    | 19    | 673   |
| >PALB2-P10C LMPPEETIL   | 3300 | >PALB2-P10C LMLPEETIL   | 103   | 3197  |
| >PALB2-P10C LMPPEETI    | 15   | >PALB2-P10C LMLPEETI    | 9     | 6     |
| >PALB2-P10C LMPPEETIL   | 12   | >PALB2-P10C LMLPEETIL   | 8     | 4     |
| >PALB2-P10C LMPPEETILT  | 79   | >PALB2-P10C LMLPEETILT  | 44    | 35    |
| >PALB2-P10C LMPPEETILTF | 661  | >PALB2-P10C LMLPEETILTF | 334   | 327   |
| >PALB2-P10C LMPPEETILTF | 872  | >PALB2-P10C LMLPEETILTF | 203   | 669   |
| >PALB2-P10C LMPPEETILTF | 335  | >PALB2-P10C LMLPEETILTF | 777   | 442   |
| >PALB2-P10C LMPPEETILTF | 24   | >PALB2-P10C LMLPEETILTF | 34    | 10    |
| >PALB2-P10C LMPPEETILTF | 2080 | >PALB2-P10C LMLPEETILTF | 298   | 1782  |
| >PALB2-P10C LMPPEETILTF | 974  | >PALB2-P10C LMLPEETILTF | 315   | 659   |



|                         |      |                         |       |       |
|-------------------------|------|-------------------------|-------|-------|
| >PALB2-P10C LMPPEETILTF | 99   | >PALB2-P10C LMLPEETILTF | 63    | 36    |
| >PALB2-P10C LMPPEETI    | 1735 | >PALB2-P10C LMLPEETI    | 143   | 1592  |
| >PALB2-P10C LMPPEETIL   | 691  | >PALB2-P10C LMLPEETIL   | 45    | 646   |
| >PALB2-P10C LMPPEETILTF | 14   | >PALB2-P10C LMLPEETILTF | 4     | 10    |
| >PALB2-P10C LMPPEETILTF | 822  | >PALB2-P10C LMLPEETILTF | 28    | 794   |
| >PALB2-P10C LMPPEETILTF | 862  | >PALB2-P10C LMLPEETILTF | 134   | 728   |
| >PALB2-P10C LMPPEETILTF | 5749 | >PALB2-P10C LMLPEETILTF | 66    | 5683  |
| >PALB2-P10C LMPPEETIL   | 189  | >PALB2-P10C LMLPEETIL   | 24349 | 24160 |
| >PALB2-P10C LMPPEETILTF | 112  | >PALB2-P10C LMLPEETILTF | 14734 | 14622 |
| >PALB2-P10C LMPPEETI    | 707  | >PALB2-P10C LMLPEETI    | 409   | 298   |
| >PALB2-P10C FLMPPEET    | 30   | >PALB2-P10C FLMLPEET    | 66    | 36    |
| >PALB2-P10C FLMPPEETI   | 14   | >PALB2-P10C FLMLPEETI   | 34    | 20    |
| >PALB2-P10C FLMPPEETIL  | 24   | >PALB2-P10C FLMLPEETIL  | 31    | 7     |
| >PALB2-P10C FLMPPEETILT | 24   | >PALB2-P10C FLMLPEETILT | 70    | 46    |
| >PALB2-P10C FLMPPEET    | 15   | >PALB2-P10C FLMLPEET    | 24    | 9     |
| >PALB2-P10C FLMPPEETI   | 8    | >PALB2-P10C FLMLPEETI   | 22    | 14    |
| >PALB2-P10C FLMPPEETIL  | 8    | >PALB2-P10C FLMLPEETIL  | 11    | 3     |
| >PALB2-P10C FLMPPEETILT | 11   | >PALB2-P10C FLMLPEETILT | 26    | 15    |
| >PALB2-P10C FLMPPEET    | 43   | >PALB2-P10C FLMLPEET    | 108   | 65    |
| >PALB2-P10C FLMPPEETI   | 11   | >PALB2-P10C FLMLPEETI   | 41    | 30    |
| >PALB2-P10C FLMPPEETIL  | 26   | >PALB2-P10C FLMLPEETIL  | 37    | 11    |
| >PALB2-P10C FLMPPEETILT | 37   | >PALB2-P10C FLMLPEETILT | 133   | 96    |
| >PALB2-P10C FLMPPEET    | 73   | >PALB2-P10C FLMLPEET    | 507   | 434   |
| >PALB2-P10C FLMPPEETI   | 15   | >PALB2-P10C FLMLPEETI   | 189   | 174   |
| >PALB2-P10C FLMPPEETIL  | 84   | >PALB2-P10C FLMLPEETIL  | 99    | 15    |
| >PALB2-P10C FLMPPEETILT | 31   | >PALB2-P10C FLMLPEETILT | 295   | 264   |
| >PALB2-P10C FLMPPEET    | 9    | >PALB2-P10C FLMLPEET    | 36    | 27    |
| >PALB2-P10C FLMPPEETI   | 2    | >PALB2-P10C FLMLPEETI   | 4     | 2     |
| >PALB2-P10C FLMPPEETIL  | 11   | >PALB2-P10C FLMLPEETIL  | 35    | 24    |
| >PALB2-P10C FLMPPEETILT | 15   | >PALB2-P10C FLMLPEETILT | 71    | 56    |
| >PALB2-P10C FLMPPEET    | 105  | >PALB2-P10C FLMLPEET    | 346   | 241   |
| >PALB2-P10C FLMPPEETI   | 4    | >PALB2-P10C FLMLPEETI   | 7     | 3     |
| >PALB2-P10C FLMPPEETIL  | 7    | >PALB2-P10C FLMLPEETIL  | 15    | 8     |
| >PALB2-P10C FLMPPEETILT | 76   | >PALB2-P10C FLMLPEETILT | 304   | 228   |
| >PALB2-P10C FLMPPEET    | 154  | >PALB2-P10C FLMLPEET    | 566   | 412   |
| >PALB2-P10C FLMPPEETI   | 11   | >PALB2-P10C FLMLPEETI   | 38    | 27    |
| >PALB2-P10C FLMPPEETIL  | 18   | >PALB2-P10C FLMLPEETIL  | 48    | 30    |
| >PALB2-P10C FLMPPEETILT | 110  | >PALB2-P10C FLMLPEETILT | 536   | 426   |
| >PALB2-P10C FLMPPEET    | 50   | >PALB2-P10C FLMLPEET    | 151   | 101   |
| >PALB2-P10C FLMPPEETI   | 5    | >PALB2-P10C FLMLPEETI   | 9     | 4     |
| >PALB2-P10C FLMPPEETIL  | 8    | >PALB2-P10C FLMLPEETIL  | 14    | 6     |
| >PALB2-P10C FLMPPEETILT | 49   | >PALB2-P10C FLMLPEETILT | 171   | 122   |
| >PALB2-P10C FLMPPEET    | 9    | >PALB2-P10C FLMLPEET    | 41    | 32    |

|                         |       |                         |      |       |
|-------------------------|-------|-------------------------|------|-------|
| >PALB2-P10C FLMPPEETI   | 3     | >PALB2-P10C FLMLPEETI   | 11   | 8     |
| >PALB2-P10C FLMPPEETIL  | 3     | >PALB2-P10C FLMLPEETIL  | 7    | 4     |
| >PALB2-P10C FLMPPEETILT | 7     | >PALB2-P10C FLMLPEETILT | 33   | 26    |
| >PALB2-P10C FLMPPEETI   | 184   | >PALB2-P10C FLMLPEETI   | 1035 | 851   |
| >PALB2-P10C FLMPPEETI   | 397   | >PALB2-P10C FLMLPEETI   | 1332 | 935   |
| >PALB2-P10C FLMPPEETIL  | 135   | >PALB2-P10C FLMLPEETIL  | 497  | 362   |
| >PALB2-P10C QFLMPPEETI  | 4523  | >PALB2-P10C QFLMLPEETI  | 400  | 4123  |
| >PALB2-P10C QFLMPPEETI  | 352   | >PALB2-P10C QFLMLPEETI  | 273  | 79    |
| >PALB2-P10C NQFLMPPEE   | 507   | >PALB2-P10C NQFLMLPEET  | 221  | 286   |
| >PALB2-P10C NQFLMPPEE   | 316   | >PALB2-P10C NQFLMLPEET  | 108  | 208   |
| >PALB2-P10C NQFLMPPEE   | 381   | >PALB2-P10C NQFLMLPEET  | 639  | 258   |
| >PALB2-P10C NQFLMPPEE   | 1009  | >PALB2-P10C NQFLMLPEET  | 386  | 623   |
| >PALB2-P10C KENQFLMP    | 4864  | >PALB2-P10C KENQFLML    | 144  | 4720  |
| >PALB2-P10C KENQFLMP    | 4658  | >PALB2-P10C KENQFLML    | 17   | 4641  |
| >PALB2-P10C KENQFLMP    | 473   | >PALB2-P10C KENQFLML    | 13   | 460   |
| >PALB2-P10C KENQFLMPP   | 127   | >PALB2-P10C KENQFLMLP   | 750  | 623   |
| >PALB2-P10C KENQFLMPP   | 335   | >PALB2-P10C KENQFLMLP   | 334  | 1     |
| >PALB2-P10C KENQFLMP    | 3845  | >PALB2-P10C KENQFLML    | 191  | 3654  |
| >PALB2-P10C KENQFLMPP   | 536   | >PALB2-P10C KENQFLMLP   | 418  | 118   |
| >PALB2-P10C KENQFLMPP   | 770   | >PALB2-P10C KENQFLMLP   | 346  | 424   |
| >PALB2-P10C KENQFLMP    | 2110  | >PALB2-P10C KENQFLML    | 77   | 2033  |
| >PALB2-P10C GKENQFLMP   | 13778 | >PALB2-P10C GKENQFLML   | 95   | 13683 |
| >PAX3-N125INPGMFSWEI    | 3071  | >PAX3-N125IKPGMFSWEI    | 480  | 2591  |
| >PAX3-N125INPGMFSWEI    | 98    | >PAX3-N125IKPGMFSWEI    | 337  | 239   |
| >PAX3-N125INPGMFSWEI    | 462   | >PAX3-N125IKPGMFSWEI    | 67   | 395   |
| >PAX3-N125IENPGMFSWE    | 198   | >PAX3-N125IEKPGMFSWE    | 780  | 582   |
| >PAX3-N125IENPGMFSWE    | 482   | >PAX3-N125IEKPGMFSWE    | 3411 | 2929  |
| >PAX3-N125IRENPGMFSW    | 33    | >PAX3-N125IREKPGMFSW    | 54   | 21    |
| >PAX3-N125IRENPGMFSW    | 351   | >PAX3-N125IREKPGMFSW    | 1610 | 1259  |
| >PAX3-N125IRENPGMFSW    | 79    | >PAX3-N125IREKPGMFSW    | 65   | 14    |
| >PAX3-N125IRENPGMFSW    | 234   | >PAX3-N125IREKPGMFSW    | 430  | 196   |
| >PAX3-N125IRENPGMFSW    | 22    | >PAX3-N125IREKPGMFSW    | 47   | 25    |
| >PAX3-N125IRENPGMFSW    | 214   | >PAX3-N125IREKPGMFSW    | 264  | 50    |
| >PAX3-N125IRENPGMFSW    | 20    | >PAX3-N125IREKPGMFSW    | 24   | 4     |
| >PAX3-N125IRENPGMFSW    | 132   | >PAX3-N125IREKPGMFSW    | 229  | 97    |
| >PAX3-N125IRENPGMFSW    | 49    | >PAX3-N125IREKPGMFSW    | 100  | 51    |
| >PAX3-N125IRENPGMFS     | 454   | >PAX3-N125IREKPGMFS     | 720  | 266   |
| >PAX3-N125IRENPGMFSW    | 59    | >PAX3-N125IREKPGMFSW    | 88   | 29    |
| >PAX3-N125IRENPGMFSW    | 439   | >PAX3-N125IREKPGMFSW    | 382  | 57    |
| >PAX3-N125IRENPGMFSW    | 34    | >PAX3-N125IREKPGMFSW    | 1223 | 1189  |
| >PAX3-N125IRENPGMFSW    | 73    | >PAX3-N125IREKPGMFSW    | 27   | 46    |
| >PAX3-N125IRENPGMFSW    | 9     | >PAX3-N125IREKPGMFSW    | 5    | 4     |
| >PAX3-N125IRENPGMFSW    | 151   | >PAX3-N125IREKPGMFSW    | 310  | 159   |

|                         |      |                         |      |      |
|-------------------------|------|-------------------------|------|------|
| >PAX3-N125IKRENPGMF     | 257  | >PAX3-N125IKREKPGMF     | 363  | 106  |
| >PAX3-N125IKRENPGMFS'   | 75   | >PAX3-N125IKREKPGMFS\   | 113  | 38   |
| >PAX3-N125IYKRENPGM     | 21   | >PAX3-N125IYKREKPGM     | 66   | 45   |
| >PAX3-N125IYKRENPGMF    | 4    | >PAX3-N125IYKREKPGMF    | 11   | 7    |
| >PAX3-N125IYKRENPGMF:   | 65   | >PAX3-N125IYKREKPGMF:   | 178  | 113  |
| >PAX3-N125IYKRENPGMF:   | 399  | >PAX3-N125IYKREKPGMF:   | 398  | 1    |
| >PAX3-N125IEYKRENPGM    | 209  | >PAX3-N125IEYKREKPGMI   | 435  | 226  |
| >PAX3-N125IEYKRENPGM    | 126  | >PAX3-N125IEYKREKPGMI   | 296  | 170  |
| >PAX3-N125IEYKRENPGM    | 24   | >PAX3-N125IEYKREKPGMI   | 39   | 15   |
| >PAX3-N125IEEYKRENPGM   | 204  | >PAX3-N125IEEYKREKPGM   | 69   | 135  |
| >PAX3-N125IEEYKRENPGM   | 183  | >PAX3-N125IEEYKREKPGM   | 126  | 57   |
| >PAX3-N125IEEYKRENPGM   | 266  | >PAX3-N125IEEYKREKPGM   | 238  | 28   |
| >PAX3-N125IEEYKRENPGI   | 285  | >PAX3-N125IEEYKREKPGI   | 420  | 135  |
| >PAX3-R236I RAFERTHYPD  | 392  | >PAX3-R236I HAFERTHYPC  | 458  | 66   |
| >PAX3-R236I RAFERTHYPD  | 293  | >PAX3-R236I HAFERTHYPC  | 866  | 573  |
| >PAX3-R236I RAFERTHY    | 346  | >PAX3-R236I HAFERTHY    | 953  | 607  |
| >PAX3-R236I RAFERTHY    | 701  | >PAX3-R236I HAFERTHY    | 356  | 345  |
| >PAX3-R236I RAFERTHYPD  | 86   | >PAX3-R236I HAFERTHYPC  | 329  | 243  |
| >PAX3-R236I RAFERTHY    | 188  | >PAX3-R236I HAFERTHY    | 412  | 224  |
| >PAX3-R236I RAFERTHYPD  | 179  | >PAX3-R236I HAFERTHYPC  | 1811 | 1632 |
| >PAX3-R236I RAFERTHY    | 2098 | >PAX3-R236I HAFERTHY    | 104  | 1994 |
| >PAX3-R236I RAFERTHYPD  | 1735 | >PAX3-R236I HAFERTHYPC  | 109  | 1626 |
| >PAX3-R236I RAFERTHY    | 166  | >PAX3-R236I HAFERTHY    | 452  | 286  |
| >PAX3-R236I RAFERTHY    | 64   | >PAX3-R236I HAFERTHY    | 114  | 50   |
| >PAX3-R236I RAFERTHY    | 21   | >PAX3-R236I HAFERTHY    | 67   | 46   |
| >PAX3-R236I RAFERTHYPD  | 290  | >PAX3-R236I HAFERTHYPC  | 1254 | 964  |
| >PAX3-R236I RAFERTHY    | 4    | >PAX3-R236I HAFERTHY    | 12   | 8    |
| >PAX3-R236I RAFERTHYPD  | 63   | >PAX3-R236I HAFERTHYPC  | 507  | 444  |
| >PAX3-R236I RAFERTHY    | 899  | >PAX3-R236I HAFERTHY    | 56   | 843  |
| >PAX3-R236I RAFERTHY    | 97   | >PAX3-R236I HAFERTHY    | 231  | 134  |
| >PAX3-R236I RAFERTHY    | 48   | >PAX3-R236I HAFERTHY    | 846  | 798  |
| >PAX3-R236I RAFERTHYPD  | 18   | >PAX3-R236I HAFERTHYPC  | 62   | 44   |
| >PAX3-R236I FTAEQLEELEI | 6    | >PAX3-R236I FTAEQLEELEI | 1720 | 1714 |
| >PAX3-R236I LERAFERTHY  | 176  | >PAX3-R236I LEHAFERTHY  | 289  | 113  |
| >PAX3-R236I LERAFERTHY  | 81   | >PAX3-R236I LEHAFERTHY  | 143  | 62   |
| >PAX3-R236I LERAFERTHY  | 355  | >PAX3-R236I LEHAFERTHY  | 316  | 39   |
| >PAX3-R236I LERAFERT    | 503  | >PAX3-R236I LEHAFERT    | 342  | 161  |
| >PAX3-R236I LERAFERTHY  | 549  | >PAX3-R236I LEHAFERTHY  | 228  | 321  |
| >PAX3-R236I LERAFERT    | 922  | >PAX3-R236I LEHAFERT    | 185  | 737  |
| >PAX3-R236I ELERAFER    | 224  | >PAX3-R236I ELEHAFER    | 213  | 11   |
| >PAX3-R236I ELERAFER    | 30   | >PAX3-R236I ELEHAFER    | 30   | 0    |
| >PAX3-R236I EELERAFER   | 266  | >PAX3-R236I EELEHAFER   | 226  | 40   |
| >PAX3-R236I EELERAFERTI | 1032 | >PAX3-R236I EELEHAFERTI | 413  | 619  |

|                         |      |                         |      |      |
|-------------------------|------|-------------------------|------|------|
| >PAX3-R236I EELERAFER   | 611  | >PAX3-R236I EELEHAFER   | 358  | 253  |
| >PAX3-R236I EELERAFER   | 852  | >PAX3-R236I EELEHAFER   | 368  | 484  |
| >PAX3-R236I LEELERAF    | 314  | >PAX3-R236I LEELEHAF    | 468  | 154  |
| >PAX3-R236I LEELERAF    | 53   | >PAX3-R236I LEELEHAF    | 21   | 32   |
| >PAX3-R236I LEELERAF    | 1215 | >PAX3-R236I LEELEHAF    | 235  | 980  |
| >PAX3-R236I QLEELERA    | 763  | >PAX3-R236I QLEELEHA    | 422  | 341  |
| >PAX3-R236I QLEELERA    | 239  | >PAX3-R236I QLEELEHA    | 156  | 83   |
| >PAX3-R236I QLEELERAFEI | 570  | >PAX3-R236I QLEELEHAFEI | 314  | 256  |
| >PAX3-R236I QLEELERAF   | 849  | >PAX3-R236I QLEELEHAF   | 220  | 629  |
| >PAX3-R236I QLEELERAFEI | 841  | >PAX3-R236I QLEELEHAFEI | 437  | 404  |
| >PAX3-R236I EQLEELERA   | 143  | >PAX3-R236I EQLEELEHA   | 63   | 80   |
| >PAX3-R236I EQLEELERAF  | 220  | >PAX3-R236I EQLEELEHAF  | 84   | 136  |
| >PAX3-R236I EQLEELERAF  | 28   | >PAX3-R236I EQLEELEHAF  | 20   | 8    |
| >PAX3-R236I AEQLEELERA  | 1301 | >PAX3-R236I AEQLEELEHA  | 410  | 891  |
| >PAX3-R236I AEQLEELERA  | 152  | >PAX3-R236I AEQLEELEHA  | 103  | 49   |
| >PAX3-R236I AEQLEELERA  | 167  | >PAX3-R236I AEQLEELEHA  | 161  | 6    |
| >PAX3-R236I AEQLEELERA  | 237  | >PAX3-R236I AEQLEELEHA  | 165  | 72   |
| >PAX3-R236I AEQLEELERA  | 170  | >PAX3-R236I AEQLEELEHA  | 91   | 79   |
| >PAX3-R236I AEQLEELERA  | 247  | >PAX3-R236I AEQLEELEHA  | 107  | 140  |
| >PAX3-S364I SSYTDSFV    | 148  | >PAX3-S364I ASYTDSFV    | 154  | 6    |
| >PAX3-S364I SSYTDSFV    | 396  | >PAX3-S364I ASYTDSFV    | 544  | 148  |
| >PAX3-S364I SSYTDSFV    | 186  | >PAX3-S364I ASYTDSFV    | 556  | 370  |
| >PAX3-S364I SSYTDSFV    | 59   | >PAX3-S364I ASYTDSFV    | 520  | 461  |
| >PAX3-S364I SSYTDSFV    | 336  | >PAX3-S364I ASYTDSFV    | 2486 | 2150 |
| >PAX3-S364I SSYTDSFV    | 842  | >PAX3-S364I ASYTDSFV    | 435  | 407  |
| >PAX3-S364I SSYTDSFV    | 462  | >PAX3-S364I ASYTDSFV    | 254  | 208  |
| >PAX3-S364I SSYTDSFV    | 165  | >PAX3-S364I ASYTDSFV    | 376  | 211  |
| >PAX3-S364I FSSYTDSFV   | 31   | >PAX3-S364I FASYTDSFV   | 14   | 17   |
| >PAX3-S364I FSSYTDSFV   | 349  | >PAX3-S364I FASYTDSFV   | 52   | 297  |
| >PAX3-S364I FSSYTDSFV   | 99   | >PAX3-S364I FASYTDSFV   | 20   | 79   |
| >PAX3-S364I FSSYTDSFV   | 2250 | >PAX3-S364I FASYTDSFV   | 289  | 1961 |
| >PAX3-S364I FSSYTDSFV   | 6811 | >PAX3-S364I FASYTDSFV   | 298  | 6513 |
| >PAX3-S364I FSSYTDSFV   | 18   | >PAX3-S364I FASYTDSFV   | 19   | 1    |
| >PAX3-S364I FSSYTDSF    | 72   | >PAX3-S364I FASYTDSF    | 115  | 43   |
| >PAX3-S364I FSSYTDSF    | 12   | >PAX3-S364I FASYTDSF    | 17   | 5    |
| >PAX3-S364I FSSYTDSF    | 11   | >PAX3-S364I FASYTDSF    | 50   | 39   |
| >PAX3-S364I FSSYTDSF    | 93   | >PAX3-S364I FASYTDSF    | 19   | 74   |
| >PAX3-S364I FSSYTDSF    | 1459 | >PAX3-S364I FASYTDSF    | 431  | 1028 |
| >PAX3-S364I FSSYTDSF    | 3643 | >PAX3-S364I FASYTDSF    | 247  | 3396 |
| >PAX3-S364I FSSYTDSF    | 47   | >PAX3-S364I FASYTDSF    | 104  | 57   |
| >PAX3-S364I FSSYTDSF    | 30   | >PAX3-S364I FASYTDSF    | 437  | 407  |
| >PAX3-S364I FSSYTDSFV   | 36   | >PAX3-S364I FASYTDSFV   | 297  | 261  |
| >PAX3-S364I FSSYTDSF    | 1015 | >PAX3-S364I FASYTDSF    | 365  | 650  |

|                         |      |                         |      |      |
|-------------------------|------|-------------------------|------|------|
| >PAX3-S364# FSSYTDSFV   | 378  | >PAX3-S364# FASYTDSFV   | 1605 | 1227 |
| >PAX3-S364# GFSSYTDSFV  | 315  | >PAX3-S364# GFASYTDSFV  | 348  | 33   |
| >PAX3-S364# GFSSYTDSFV  | 1522 | >PAX3-S364# GFASYTDSFV  | 484  | 1038 |
| >PAX3-S364# GFSSYTDSF   | 322  | >PAX3-S364# GFASYTDSF   | 143  | 179  |
| >PAX3-S364# GFSSYTDSF   | 15   | >PAX3-S364# GFASYTDSF   | 15   | 0    |
| >PAX3-S364# GFSSYTDSFV  | 304  | >PAX3-S364# GFASYTDSFV  | 184  | 120  |
| >PAX3-S364# HGFSSYTDSF' | 94   | >PAX3-S364# HGFASYTDSF  | 57   | 37   |
| >PAX3-S364# HGFSSYTDSF  | 209  | >PAX3-S364# HGFASYTDSF  | 172  | 37   |
| >PAX3-S364# HGFSSYTDSF  | 563  | >PAX3-S364# HGFASYTDSF  | 322  | 241  |
| >PAX3-S364# HGFSSYTDSF  | 11   | >PAX3-S364# HGFASYTDSF  | 17   | 6    |
| >PAX3-S364# HGFSSYTDSF  | 303  | >PAX3-S364# HGFASYTDSF  | 219  | 84   |
| >PAX3-S364# HGFSSYTDSF' | 438  | >PAX3-S364# HGFASYTDSF  | 1469 | 1031 |
| >PAX3-S364# RHGFSSYTDS  | 333  | >PAX3-S364# RHGFASYTDS  | 212  | 121  |
| >PAX3-S364# RHGFSSYTDS  | 470  | >PAX3-S364# RHGFASYTDS  | 365  | 105  |
| >PAX3-S364# RHGFSSYTDS  | 36   | >PAX3-S364# RHGFASYTDS  | 79   | 43   |
| >PAX3-S364# RHGFSSYTDS  | 415  | >PAX3-S364# RHGFASYTDS  | 588  | 173  |
| >PAX3-S364# TRHGFSSY    | 440  | >PAX3-S364# TRHGFASY    | 451  | 11   |
| >PAX3-S364# TRHGFSSY    | 390  | >PAX3-S364# TRHGFASY    | 926  | 536  |
| >PAX3-S364# TRHGFSSY    | 102  | >PAX3-S364# TRHGFASY    | 220  | 118  |
| >PAX3-S364# TRHGFSSY    | 407  | >PAX3-S364# TRHGFASY    | 267  | 140  |
| >PAX3-S364# STRHGFSSY   | 439  | >PAX3-S364# STRHGFASY   | 579  | 140  |
| >PAX3-S364# STRHGFSSY   | 21   | >PAX3-S364# STRHGFASY   | 21   | 0    |
| >PAX3-S364# STRHGFSSY   | 43   | >PAX3-S364# STRHGFASY   | 43   | 0    |
| >PAX3-S364# STRHGFSSY   | 24   | >PAX3-S364# STRHGFASY   | 21   | 3    |
| >PAX3-S364# STRHGFSSY   | 17   | >PAX3-S364# STRHGFASY   | 18   | 1    |
| >PAX3-S364# STRHGFSSY   | 43   | >PAX3-S364# STRHGFASY   | 33   | 10   |
| >PAX3-S364# STRHGFSS    | 36   | >PAX3-S364# STRHGFAS    | 41   | 5    |
| >PAX3-S364# STRHGFSSY   | 13   | >PAX3-S364# STRHGFASY   | 9    | 4    |
| >PAX3-S364# STRHGFSSYT  | 22   | >PAX3-S364# STRHGFASYT  | 31   | 9    |
| >PAX3-S364# STRHGFSSYTI | 254  | >PAX3-S364# STRHGFASYT  | 209  | 45   |
| >PAX3-S364# STRHGFSSY   | 12   | >PAX3-S364# STRHGFASY   | 11   | 1    |
| >PAX3-S364# STRHGFSSY   | 131  | >PAX3-S364# STRHGFASY   | 218  | 87   |
| >PAX3-S364# STRHGFSSY   | 28   | >PAX3-S364# STRHGFASY   | 29   | 1    |
| >PAX3-S364# STRHGFSSY   | 117  | >PAX3-S364# STRHGFASY   | 258  | 141  |
| >PAX3-S364# STRHGFSSY   | 33   | >PAX3-S364# STRHGFASY   | 69   | 36   |
| >PAX3-S364# STRHGFSSY   | 4    | >PAX3-S364# STRHGFASY   | 3    | 1    |
| >PAX3-S364# STRHGFSSY   | 2    | >PAX3-S364# STRHGFASY   | 4    | 2    |
| >PAX3-S364# STRHGFSSYT  | 490  | >PAX3-S364# STRHGFASYT  | 1442 | 952  |
| >PAX3-S364# PSTRHGFSSY  | 381  | >PAX3-S364# PSTRHGFASY  | 297  | 84   |
| >PAX3-S364# PSTRHGFSSY  | 289  | >PAX3-S364# PSTRHGFASY  | 249  | 40   |
| >PAX3-S364# PSTRHGFSSY  | 223  | >PAX3-S364# PSTRHGFASY  | 270  | 47   |
| >PAX3-S364# LPSTRHGFSS' | 368  | >PAX3-S364# LPSTRHGFAS' | 350  | 18   |
| >PAX3-S364# LPSTRHGFSS' | 18   | >PAX3-S364# LPSTRHGFAS' | 19   | 1    |

|                        |       |                        |       |       |
|------------------------|-------|------------------------|-------|-------|
| >PAX3-S364/LPSTRHGFSS' | 90    | >PAX3-S364/LPSTRHGFAS' | 82    | 8     |
| >PAX3-S364/LPSTRHGFS   | 3151  | >PAX3-S364/LPSTRHGFA   | 146   | 3005  |
| >PAX3-S364/LPSTRHGFSS' | 88    | >PAX3-S364/LPSTRHGFAS' | 541   | 453   |
| >PAX3-S364/LPSTRHGFSS' | 181   | >PAX3-S364/LPSTRHGFAS' | 126   | 55    |
| >PAX3-S364/LPSTRHGFSS' | 230   | >PAX3-S364/LPSTRHGFAS' | 192   | 38    |
| >PAX3-S364/CLPSTRHGFS  | 10812 | >PAX3-S364/CLPSTRHGFA  | 491   | 10321 |
| >PAX3-Y354FYCLPSTRHGF  | 379   | >PAX3-Y354FCLPSTRHGF   | 522   | 143   |
| >PAX3-Y354FYCLPSTRHGF  | 47    | >PAX3-Y354FCLPSTRHGF   | 53    | 6     |
| >PAX3-Y354FYCLPSTRHGF  | 210   | >PAX3-Y354FCLPSTRHGF   | 497   | 287   |
| >PAX3-Y354FAYCLPSTRHG  | 14    | >PAX3-Y354FAFCLPSTRHG  | 131   | 117   |
| >PAX3-Y354FAYCLPSTR    | 93    | >PAX3-Y354FAFCLPSTR    | 52    | 41    |
| >PAX3-Y354FAYCLPSTR    | 239   | >PAX3-Y354FAFCLPSTR    | 275   | 36    |
| >PAX3-Y354FAYCLPSTR    | 230   | >PAX3-Y354FAFCLPSTR    | 638   | 408   |
| >PAX3-Y354FIPSNPDSSSA\ | 26071 | >PAX3-Y354FIPSNPDSSSAF | 382   | 25689 |
| >PAX3-Y354FIPSNPDSSSA\ | 344   | >PAX3-Y354FIPSNPDSSSAF | 17893 | 17549 |
| >PAX3-Y354FIPSNPDSSSA\ | 492   | >PAX3-Y354FIPSNPDSSSAF | 18    | 474   |
| >PAX3-Y354FIPSNPDSSSA\ | 96    | >PAX3-Y354FIPSNPDSSSAF | 238   | 142   |
| >PAX3-Y354FIPSNPDSSSA\ | 130   | >PAX3-Y354FIPSNPDSSSAF | 26    | 104   |
| >PAX3-Y354FIPSNPDSSSA\ | 8     | >PAX3-Y354FIPSNPDSSSAF | 12    | 4     |
| >PAX3-Y354FIPSNPDSSSA\ | 96    | >PAX3-Y354FIPSNPDSSSAF | 115   | 19    |
| >PAX3-Y354FIPSNPDSSSA\ | 30    | >PAX3-Y354FIPSNPDSSSAF | 43    | 13    |
| >PAX3-Y354FIPSNPDSSSA\ | 8     | >PAX3-Y354FIPSNPDSSSAF | 15    | 7     |
| >PAX3-Y354FIPSNPDSSSA\ | 224   | >PAX3-Y354FIPSNPDSSSAF | 63    | 161   |
| >PAX3-Y354FSAYCLPSTR   | 312   | >PAX3-Y354FAFCLPSTR    | 202   | 110   |
| >PAX3-Y354FSAYCLPSTR   | 52    | >PAX3-Y354FAFCLPSTR    | 43    | 9     |
| >PAX3-Y354FSAYCLPSTR   | 347   | >PAX3-Y354FAFCLPSTR    | 236   | 111   |
| >PAX3-Y354FSAYCLPSTR   | 22    | >PAX3-Y354FAFCLPSTR    | 12    | 10    |
| >PAX3-Y354FSAYCLPSTR   | 445   | >PAX3-Y354FAFCLPSTR    | 169   | 276   |
| >PAX3-Y354FSAYCLPSTR   | 462   | >PAX3-Y354FAFCLPSTR    | 217   | 245   |
| >PAX3-Y354FSAYCLPSTR   | 460   | >PAX3-Y354FAFCLPSTR    | 315   | 145   |
| >PAX3-Y354FSSAYCLPSTR  | 94    | >PAX3-Y354FSSAFCLPSTR  | 61    | 33    |
| >PAX3-Y354FSSAYCLPSTR  | 82    | >PAX3-Y354FSSAFCLPSTR  | 37    | 45    |
| >PAX3-Y354FSSAYCLPSTR  | 13    | >PAX3-Y354FSSAFCLPSTR  | 8     | 5     |
| >PAX3-Y354FSSAYCLPSTR† | 54    | >PAX3-Y354FSSAFCLPSTR† | 59    | 5     |
| >PAX3-Y354FSSAYCLPSTR  | 163   | >PAX3-Y354FSSAFCLPSTR  | 159   | 4     |
| >PAX3-Y354FSSAYCLPSTR† | 102   | >PAX3-Y354FSSAFCLPSTR  | 68    | 34    |
| >PAX3-Y354FSSAYCLPSTR† | 72    | >PAX3-Y354FSSAFCLPSTR  | 76    | 4     |
| >PAX3-Y354FSSAYCLPSTR† | 33    | >PAX3-Y354FSSAFCLPSTR  | 22    | 11    |
| >PAX3-Y354FSSAYCLPST   | 666   | >PAX3-Y354FSSAFCLPST   | 339   | 327   |
| >PAX3-Y354FSSAYCLPSTR† | 646   | >PAX3-Y354FSSAFCLPSTR† | 466   | 180   |
| >PAX3-Y354FSSAYCLPSTR† | 198   | >PAX3-Y354FSSAFCLPSTR† | 159   | 39    |
| >PAX3-Y354FPDSSSAFCL   | 103   | >PAX3-Y354FPDSSSAFCL   | 85    | 18    |
| >PAX3-Y354FNPDSSSAFCL  | 1345  | >PAX3-Y354FNPDSSSAFCL  | 399   | 946   |

|                          |      |                          |       |       |
|--------------------------|------|--------------------------|-------|-------|
| >PAX3-Y354F NPDSSSAY     | 2828 | >PAX3-Y354F NPDSSSAF     | 59    | 2769  |
| >PAX3-Y354F NPDSSSAYCL   | 319  | >PAX3-Y354F NPDSSSAFCL   | 547   | 228   |
| >PAX3-Y354F NPDSSSAY     | 395  | >PAX3-Y354F NPDSSSAF     | 1077  | 682   |
| >PAX3-Y354F NPDSSSAY     | 10   | >PAX3-Y354F NPDSSSAF     | 15    | 5     |
| >PAX3-Y354F NPDSSSAY     | 7596 | >PAX3-Y354F NPDSSSAF     | 261   | 7335  |
| >PAX3-Y354F NPDSSSAYCL   | 14   | >PAX3-Y354F NPDSSSAFCL   | 13    | 1     |
| >PAX3-Y354F NPDSSSAY     | 153  | >PAX3-Y354F NPDSSSAF     | 218   | 65    |
| >PAX3-Y354F NPDSSSAY     | 9    | >PAX3-Y354F NPDSSSAF     | 19    | 10    |
| >PAX3-Y354F NPDSSSAY     | 673  | >PAX3-Y354F NPDSSSAF     | 187   | 486   |
| >PAX3-Y354F SNPDSSSAY    | 221  | >PAX3-Y354F SNPDSSSAF    | 266   | 45    |
| >PAX3-Y354F SNPDSSSAY    | 142  | >PAX3-Y354F SNPDSSSAF    | 360   | 218   |
| >PAX3-Y354F SNPDSSSAY    | 700  | >PAX3-Y354F SNPDSSSAF    | 141   | 559   |
| >PAX3-Y354F SNPDSSSAYC   | 247  | >PAX3-Y354F SNPDSSSAFC   | 292   | 45    |
| >PAX3-Y354F PSNPDSSSAY   | 374  | >PAX3-Y354F PSNPDSSSAF   | 477   | 103   |
| >PAX3-Y354F PSNPDSSSAY   | 206  | >PAX3-Y354F PSNPDSSSAF   | 50    | 156   |
| >PAX3-Y354F PSNPDSSSAY   | 124  | >PAX3-Y354F PSNPDSSSAF   | 62    | 62    |
| >PAX5-Y346C YSHPQYSSY    | 28   | >PAX5-Y346C CSHPQYSSY    | 1713  | 1685  |
| >PAX5-Y346C YSHPQYSSY    | 147  | >PAX5-Y346C CSHPQYSSY    | 3132  | 2985  |
| >PAX5-Y346C YSHPQYSSY    | 105  | >PAX5-Y346C CSHPQYSSY    | 815   | 710   |
| >PAX5-Y346C YSHPQYSSY    | 38   | >PAX5-Y346C CSHPQYSSY    | 341   | 303   |
| >PAX5-Y346C YSHPQYSSY    | 315  | >PAX5-Y346C CSHPQYSSY    | 253   | 62    |
| >PAX5-Y346C YSHPQYSSY    | 86   | >PAX5-Y346C CSHPQYSSY    | 54    | 32    |
| >PAX5-Y346C YSHPQYSSY    | 37   | >PAX5-Y346C CSHPQYSSY    | 202   | 165   |
| >PAX5-Y346C YSHPQYSSY    | 204  | >PAX5-Y346C CSHPQYSSY    | 5319  | 5115  |
| >PAX5-Y346C YSHPQYSSY    | 6    | >PAX5-Y346C CSHPQYSSY    | 23    | 17    |
| >PAX5-Y346C YSHPQYSSY    | 3    | >PAX5-Y346C CSHPQYSSY    | 8     | 5     |
| >PAX5-Y346C YSHPQYSSY    | 71   | >PAX5-Y346C CSHPQYSSY    | 682   | 611   |
| >PAX5-Y346C YSHPQYSSY    | 6    | >PAX5-Y346C CSHPQYSSY    | 103   | 97    |
| >PAX5-Y346C PYSHPQYSSY   | 366  | >PAX5-Y346C PCSHPQYSSY   | 546   | 180   |
| >PAX5-Y346C PYSHPQYSSY   | 162  | >PAX5-Y346C PCSHPQYSSY   | 2524  | 2362  |
| >PAX5-Y346C PYSHPQYSSY   | 47   | >PAX5-Y346C PCSHPQYSSY   | 189   | 142   |
| >PAX5-Y346C VPGSEFSGSP   | 19   | >PAX5-Y346C VPGSEFSGSP   | 4883  | 4864  |
| >PAX5-Y346C VPGSEFSGSP   | 461  | >PAX5-Y346C VPGSEFSGSP   | 18999 | 18538 |
| >PAX5-Y346C VPGSEFSGSP   | 378  | >PAX5-Y346C VPGSEFSGSP   | 35243 | 34865 |
| >PAX5-Y346C SPYSHQPQY    | 158  | >PAX5-Y346C SPCSHQPQY    | 800   | 642   |
| >PAX5-Y346C SPYSHQPQYSS' | 288  | >PAX5-Y346C SPCSHQPQYSS' | 1449  | 1161  |
| >PAX5-Y346C SPYSHQPQY    | 421  | >PAX5-Y346C SPCSHQPQY    | 4775  | 4354  |
| >PAX5-Y346C SPYSHQPQYSS' | 122  | >PAX5-Y346C SPCSHQPQYSS' | 1347  | 1225  |
| >PAX5-Y346C SPYSHQPQY    | 412  | >PAX5-Y346C SPCSHQPQY    | 3759  | 3347  |
| >PAX5-Y346C SPYSHQPQYSS' | 48   | >PAX5-Y346C SPCSHQPQYSS' | 667   | 619   |
| >PAX5-Y346C SPYSHQPQY    | 18   | >PAX5-Y346C SPCSHQPQY    | 92    | 74    |
| >PAX5-Y346C SPYSHQPQYSS' | 15   | >PAX5-Y346C SPCSHQPQYSS' | 41    | 26    |
| >PAX5-Y346C SPYSHQPQY    | 345  | >PAX5-Y346C SPCSHQPQY    | 3438  | 3093  |

|                          |      |                          |       |       |
|--------------------------|------|--------------------------|-------|-------|
| >PAX5-Y346C SPYSHQPQYSS' | 132  | >PAX5-Y346C SPCSHQPQYSS' | 1638  | 1506  |
| >PAX5-Y346C SPYSHQPQYSS  | 232  | >PAX5-Y346C SPCSHQPQYSS  | 2139  | 1907  |
| >PAX5-Y346C SPYSHQPQYSS' | 125  | >PAX5-Y346C SPCSHQPQYSS' | 461   | 336   |
| >PAX5-Y346C SPYSHQPQY    | 140  | >PAX5-Y346C SPCSHQPQY    | 3232  | 3092  |
| >PAX5-Y346C SPYSHQPQYSS' | 47   | >PAX5-Y346C SPCSHQPQYSS' | 883   | 836   |
| >PAX5-Y346C SPYSHQPQY    | 395  | >PAX5-Y346C SPCSHQPQY    | 4222  | 3827  |
| >PAX5-Y346C SPYSHQPQYSS' | 183  | >PAX5-Y346C SPCSHQPQYSS' | 1646  | 1463  |
| >PAX5-Y346C GSPYSHQPQY   | 321  | >PAX5-Y346C GSPCSHPQY    | 3684  | 3363  |
| >PAX5-Y346C GSPYSHQPQY   | 190  | >PAX5-Y346C GSPCSHPQY    | 343   | 153   |
| >PAX5-Y346C GSPYSHQPQY   | 216  | >PAX5-Y346C GSPCSHPQY    | 1535  | 1319  |
| >PAX5-Y346C GSPYSHQPQY   | 53   | >PAX5-Y346C GSPCSHPQY    | 45    | 8     |
| >PAX5-Y346C GSPYSHQPQ    | 488  | >PAX5-Y346C GSPCSHPQ     | 2767  | 2279  |
| >PAX5-Y346C GSPYSHQPQY   | 216  | >PAX5-Y346C GSPCSHPQY    | 481   | 265   |
| >PAX5-Y346C GSPYSHQPQY   | 236  | >PAX5-Y346C GSPCSHPQY    | 326   | 90    |
| >PAX5-Y346C SGSPYSHQPQY  | 307  | >PAX5-Y346C SGSPCSHPQY   | 436   | 129   |
| >PAX5-Y346C SGSPYSHQPQY  | 413  | >PAX5-Y346C SGSPCSHPQY   | 682   | 269   |
| >PAX5-Y346C SGSPYSHQPQY  | 239  | >PAX5-Y346C SGSPCSHPQY   | 310   | 71    |
| >PAX5-Y346C SGSPYSHQPQY  | 62   | >PAX5-Y346C SGSPCSHPQY   | 122   | 60    |
| >PAX5-Y346C SGSPYSHQPQY  | 445  | >PAX5-Y346C SGSPCSHPQY   | 637   | 192   |
| >PAX5-Y346C FSGSPYSHQPQ  | 189  | >PAX5-Y346C FSGSPCSHPQ   | 357   | 168   |
| >PAX5-Y346C FSGSPYSHQPQ  | 31   | >PAX5-Y346C FSGSPCSHPQ   | 39    | 8     |
| >PAX5-Y346C FSGSPYSHQPQ  | 324  | >PAX5-Y346C FSGSPCSHPQ   | 322   | 2     |
| >PAX5-Y346C FSGSPYSHQPQ  | 105  | >PAX5-Y346C FSGSPCSHPQ   | 94    | 11    |
| >PAX5-Y346C FSGSPYSHQPQ  | 71   | >PAX5-Y346C FSGSPCSHPQ   | 120   | 49    |
| >PAX5-Y346C FSGSPYSHQPQ  | 12   | >PAX5-Y346C FSGSPCSHPQ   | 14    | 2     |
| >PAX5-Y346C FSGSPYSHQPQ  | 447  | >PAX5-Y346C FSGSPCSHPQ   | 1123  | 676   |
| >PAX5-Y346C FSGSPYSHQPQ  | 29   | >PAX5-Y346C FSGSPCSHPQ   | 25    | 4     |
| >PAX5-Y346C SEFSGSPY     | 299  | >PAX5-Y346C SEFSGSPC     | 25695 | 25396 |
| >PAX5-Y346C SEFSGSPY     | 262  | >PAX5-Y346C SEFSGSPC     | 28165 | 27903 |
| >PAX5-Y346C SEFSGSPY     | 48   | >PAX5-Y346C SEFSGSPC     | 11290 | 11242 |
| >PAX5-Y346C SEFSGSPY     | 37   | >PAX5-Y346C SEFSGSPC     | 11514 | 11477 |
| >PAX5-Y346C SEFSGSPY     | 13   | >PAX5-Y346C SEFSGSPC     | 3052  | 3039  |
| >PAX5-Y346C SEFSGSPY     | 15   | >PAX5-Y346C SEFSGSPC     | 2697  | 2682  |
| >PAX5-Y346C SEFSGSPY     | 1964 | >PAX5-Y346C SEFSGSPC     | 339   | 1625  |
| >PAX5-Y346C SEFSGSPY     | 731  | >PAX5-Y346C SEFSGSPC     | 215   | 516   |
| >PAX5-Y346C SEFSGSPYS    | 483  | >PAX5-Y346C SEFSGSPCS    | 368   | 115   |
| >PAX5-Y346C SEFSGSPY     | 259  | >PAX5-Y346C SEFSGSPC     | 4415  | 4156  |
| >PAX5-Y346C SEFSGSPY     | 52   | >PAX5-Y346C SEFSGSPC     | 2202  | 2150  |
| >PAX5-Y346C SEFSGSPY     | 1664 | >PAX5-Y346C SEFSGSPC     | 398   | 1266  |
| >PAX5-Y346C SEFSGSPYS    | 247  | >PAX5-Y346C SEFSGSPCS    | 109   | 138   |
| >PAX5-Y346C GSEFSGSPY    | 90   | >PAX5-Y346C GSEFSGSPC    | 20083 | 19993 |
| >PAX5-Y346C GSEFSGSPY    | 221  | >PAX5-Y346C GSEFSGSPC    | 27869 | 27648 |
| >PAX5-Y346C GSEFSGSPY    | 199  | >PAX5-Y346C GSEFSGSPC    | 16942 | 16743 |



|                         |       |                         |       |       |
|-------------------------|-------|-------------------------|-------|-------|
| >PAX5-Y346C GSEFSGSPY   | 6     | >PAX5-Y346C GSEFSGSPC   | 8076  | 8070  |
| >PAX5-Y346C GSEFSGSPY   | 6     | >PAX5-Y346C GSEFSGSPC   | 1936  | 1930  |
| >PAX5-Y346C GSEFSGSPYSI | 449   | >PAX5-Y346C GSEFSGSPCSI | 615   | 166   |
| >PAX5-Y346C GSEFSGSPY   | 431   | >PAX5-Y346C GSEFSGSPC   | 38855 | 38424 |
| >PAX7-V60L- VEMAHHGI    | 145   | >PAX7-V60L- LEMAHHGI    | 113   | 32    |
| >PAX7-V60L- VEMAHHGI    | 619   | >PAX7-V60L- LEMAHHGI    | 194   | 425   |
| >PAX7-V60L- VEMAHHGI    | 49    | >PAX7-V60L- LEMAHHGI    | 34    | 15    |
| >PAX7-V60L- VEMAHHGI    | 147   | >PAX7-V60L- LEMAHHGI    | 119   | 28    |
| >PAX7-V60L- VEMAHHGIR   | 414   | >PAX7-V60L- LEMAHHGIRI  | 276   | 138   |
| >PAX7-V60L- VEMAHHGI    | 185   | >PAX7-V60L- LEMAHHGI    | 255   | 70    |
| >PAX7-V60L- VEMAHHGIR   | 454   | >PAX7-V60L- LEMAHHGIRI  | 612   | 158   |
| >PAX7-V60L- VEMAHHGI    | 91    | >PAX7-V60L- LEMAHHGI    | 44    | 47    |
| >PAX7-V60L- VEMAHHGIR   | 206   | >PAX7-V60L- LEMAHHGIRI  | 236   | 30    |
| >PAX7-V60L- IVEMAHHGI   | 7879  | >PAX7-V60L- ILEMAHHGI   | 216   | 7663  |
| >PAX7-V60L- IVEMAHHGI   | 5461  | >PAX7-V60L- ILEMAHHGI   | 73    | 5388  |
| >PAX7-V60L- IVEMAHHGI   | 11348 | >PAX7-V60L- ILEMAHHGI   | 316   | 11032 |
| >PAX7-V60L- IVEMAHHGI   | 1838  | >PAX7-V60L- ILEMAHHGI   | 9     | 1829  |
| >PAX7-V60L- PLPNHIRHKI\ | 291   | >PAX7-V60L- PLPNHIRHKIL | 3334  | 3043  |
| >PAX7-V60L- PLPNHIRHKI\ | 46    | >PAX7-V60L- PLPNHIRHKIL | 884   | 838   |
| >PAX7-V60L- KIVEMAHHG   | 2954  | >PAX7-V60L- KILEMAHHGI  | 443   | 2511  |
| >PAX7-V60L- KIVEMAHHG   | 383   | >PAX7-V60L- KILEMAHHGI  | 270   | 113   |
| >PAX7-V60L- KIVEMAHHG   | 430   | >PAX7-V60L- KILEMAHHGI  | 181   | 249   |
| >PAX7-V60L- KIVEMAHHG   | 56    | >PAX7-V60L- KILEMAHHGI  | 10    | 46    |
| >PAX7-V60L- KIVEMAHHG   | 137   | >PAX7-V60L- KILEMAHHGI  | 27    | 110   |
| >PAX7-V60L- KIVEMAHHG   | 317   | >PAX7-V60L- KILEMAHHGI  | 35    | 282   |
| >PAX7-V60L- KIVEMAHHG   | 1663  | >PAX7-V60L- KILEMAHHGI  | 38    | 1625  |
| >PAX7-V60L- KIVEMAHHG   | 88    | >PAX7-V60L- KILEMAHHGI  | 44    | 44    |
| >PAX7-V60L- KIVEMAHHG   | 1478  | >PAX7-V60L- KILEMAHHGI  | 310   | 1168  |
| >PAX7-V60L- KIVEMAHHG   | 60    | >PAX7-V60L- KILEMAHHGI  | 29    | 31    |
| >PAX7-V60L- KIVEMAHHG   | 87    | >PAX7-V60L- KILEMAHHGI  | 26    | 61    |
| >PAX7-V60L- KIVEMAHHG   | 249   | >PAX7-V60L- KILEMAHHGI  | 59    | 190   |
| >PAX7-V60L- KIVEMAHHG   | 47    | >PAX7-V60L- KILEMAHHGI  | 33    | 14    |
| >PAX7-V60L- HKIVEMAH    | 358   | >PAX7-V60L- HKILEMAH    | 764   | 406   |
| >PAX7-V60L- HKIVEMAHH   | 428   | >PAX7-V60L- HKILEMAHHC  | 962   | 534   |
| >PAX7-V60L- IRHKIVEM    | 89    | >PAX7-V60L- IRHKILEM    | 178   | 89    |
| >PAX7-V60L- IRHKIVEM    | 108   | >PAX7-V60L- IRHKILEM    | 100   | 8     |
| >PAX7-V60L- IRHKIVEM    | 615   | >PAX7-V60L- IRHKILEM    | 323   | 292   |
| >PAX7-V60L- HIRHKIVE    | 740   | >PAX7-V60L- HIRHKILE    | 381   | 359   |
| >PAX7-V60L- HIRHKIVEM   | 25    | >PAX7-V60L- HIRHKILEM   | 15    | 10    |
| >PAX7-V60L- HIRHKIVEMA  | 63    | >PAX7-V60L- HIRHKILEMA  | 54    | 9     |
| >PAX7-V60L- HIRHKIVEMA  | 223   | >PAX7-V60L- HIRHKILEMA  | 174   | 49    |
| >PAX7-V60L- HIRHKIVEM   | 314   | >PAX7-V60L- HIRHKILEM   | 183   | 131   |
| >PAX7-V60L- HIRHKIVEM   | 326   | >PAX7-V60L- HIRHKILEM   | 111   | 215   |

|                         |      |                         |      |      |
|-------------------------|------|-------------------------|------|------|
| >PAX7-V60L- NHIRHKIV    | 1055 | >PAX7-V60L- NHIRHKIL    | 319  | 736  |
| >PAX7-V60L- NHIRHKIV    | 1446 | >PAX7-V60L- NHIRHKIL    | 66   | 1380 |
| >PAX7-V60L- NHIRHKIVEM  | 213  | >PAX7-V60L- NHIRHKILEM  | 372  | 159  |
| >PAX7-V60L- LPNHIRHKIV  | 165  | >PAX7-V60L- LPNHIRHKIL  | 112  | 53   |
| >PAX7-V60L- LPNHIRHKIV  | 32   | >PAX7-V60L- LPNHIRHKIL  | 1287 | 1255 |
| >PAX7-V60L- LPNHIRHKIVE | 449  | >PAX7-V60L- LPNHIRHKILE | 317  | 132  |
| >PAX7-V60L- LPNHIRHKIV  | 2814 | >PAX7-V60L- LPNHIRHKIL  | 465  | 2349 |
| >PBRM1-A59 ARHYNEEGSC   | 421  | >PBRM1-A59 DRHYNEEGSC   | 4847 | 4426 |
| >PBRM1-A59 MFRNARHY     | 35   | >PBRM1-A59 MFRNDRHY     | 36   | 1    |
| >PBRM1-A59 MFRNARHY     | 23   | >PBRM1-A59 MFRNDRHY     | 181  | 158  |
| >PBRM1-A59 MFRNARHYN    | 20   | >PBRM1-A59 MFRNDRHYN    | 395  | 375  |
| >PBRM1-A59 MFRNARHYN    | 138  | >PBRM1-A59 MFRNDRHYN    | 1090 | 952  |
| >PBRM1-A59 MFRNARHYN    | 192  | >PBRM1-A59 MFRNDRHYN    | 1263 | 1071 |
| >PBRM1-A59 MFRNARHY     | 372  | >PBRM1-A59 MFRNDRHY     | 271  | 101  |
| >PBRM1-A59 MFRNARHY     | 292  | >PBRM1-A59 MFRNDRHY     | 490  | 198  |
| >PBRM1-A59 MFRNARHY     | 441  | >PBRM1-A59 MFRNDRHY     | 509  | 68   |
| >PBRM1-A59 MFRNARHYN    | 364  | >PBRM1-A59 MFRNDRHYN    | 670  | 306  |
| >PBRM1-A59 LMFRNARHY    | 465  | >PBRM1-A59 LMFRNDRHY    | 686  | 221  |
| >PBRM1-A59 LMFRNARHY    | 230  | >PBRM1-A59 LMFRNDRHY    | 2156 | 1926 |
| >PBRM1-A59 LMFRNARHY    | 18   | >PBRM1-A59 LMFRNDRHY    | 25   | 7    |
| >PBRM1-A59 LMFRNARHY    | 74   | >PBRM1-A59 LMFRNDRHY    | 57   | 17   |
| >PBRM1-A59 LMFRNARHY    | 341  | >PBRM1-A59 LMFRNDRHY    | 1999 | 1658 |
| >PBRM1-A59 LMFRNARHY    | 37   | >PBRM1-A59 LMFRNDRHY    | 33   | 4    |
| >PBRM1-A59 LMFRNARHY    | 104  | >PBRM1-A59 LMFRNDRHY    | 69   | 35   |
| >PBRM1-A59 LMFRNARH     | 365  | >PBRM1-A59 LMFRNDRH     | 1456 | 1091 |
| >PBRM1-A59 LMFRNARHY    | 4    | >PBRM1-A59 LMFRNDRHY    | 8    | 4    |
| >PBRM1-A59 LMFRNARHY    | 214  | >PBRM1-A59 LMFRNDRHY    | 733  | 519  |
| >PBRM1-A59 KLMFRNAR     | 78   | >PBRM1-A59 KLMFRNDR     | 206  | 128  |
| >PBRM1-A59 KLMFRNARH    | 103  | >PBRM1-A59 KLMFRNDRH    | 1042 | 939  |
| >PBRM1-A59 KLMFRNARH    | 21   | >PBRM1-A59 KLMFRNDRH    | 50   | 29   |
| >PBRM1-A59 KLMFRNAR     | 224  | >PBRM1-A59 KLMFRNDR     | 673  | 449  |
| >PBRM1-A59 KLMFRNARH    | 481  | >PBRM1-A59 KLMFRNDRH    | 561  | 80   |
| >PBRM1-A59 KLMFRNARH    | 84   | >PBRM1-A59 KLMFRNDRH    | 74   | 10   |
| >PBRM1-A59 KLMFRNAR     | 9    | >PBRM1-A59 KLMFRNDR     | 26   | 17   |
| >PBRM1-A59 KLMFRNARH    | 467  | >PBRM1-A59 KLMFRNDRH    | 4271 | 3804 |
| >PBRM1-A59 KLMFRNARH    | 229  | >PBRM1-A59 KLMFRNDRH    | 616  | 387  |
| >PBRM1-A59 KLMFRNARH    | 389  | >PBRM1-A59 KLMFRNDRH    | 712  | 323  |
| >PBRM1-A59 KLMFRNAR     | 433  | >PBRM1-A59 KLMFRNDR     | 2038 | 1605 |
| >PBRM1-A59 KLMFRNARH    | 41   | >PBRM1-A59 KLMFRNDRH    | 91   | 50   |
| >PBRM1-A59 KLMFRNARH    | 75   | >PBRM1-A59 KLMFRNDRH    | 92   | 17   |
| >PBRM1-A59 KLMFRNARH    | 185  | >PBRM1-A59 KLMFRNDRH    | 638  | 453  |
| >PBRM1-A59 KLMFRNARH    | 152  | >PBRM1-A59 KLMFRNDRH    | 781  | 629  |
| >PBRM1-A59 KLMFRNAR     | 40   | >PBRM1-A59 KLMFRNDR     | 65   | 25   |

|                        |       |                        |      |       |
|------------------------|-------|------------------------|------|-------|
| >PBRM1-A59 MKLMFRNAF   | 297   | >PBRM1-A59 MKLMFRNDF   | 2548 | 2251  |
| >PBRM1-A59 MKLMFRNAF   | 342   | >PBRM1-A59 MKLMFRNDF   | 1508 | 1166  |
| >PBRM1-A59 MKLMFRNAF   | 294   | >PBRM1-A59 MKLMFRNDF   | 553  | 259   |
| >PBRM1-A59 MKLMFRNA    | 106   | >PBRM1-A59 MKLMFRND    | 3132 | 3026  |
| >PBRM1-A59 MKLMFRNAF   | 34    | >PBRM1-A59 MKLMFRNDF   | 114  | 80    |
| >PBRM1-A59 MKLMFRNAF   | 206   | >PBRM1-A59 MKLMFRNDF   | 665  | 459   |
| >PBRM1-A59 MKLMFRNAF   | 4     | >PBRM1-A59 MKLMFRNDF   | 6    | 2     |
| >PBRM1-A59 MKLMFRNAF   | 195   | >PBRM1-A59 MKLMFRNDF   | 285  | 90    |
| >PBRM1-A59 DMKLMFRN/   | 17    | >PBRM1-A59 DMKLMFRN/   | 28   | 11    |
| >PBRM1-A59 DMKLMFRN/   | 32    | >PBRM1-A59 DMKLMFRN/   | 98   | 66    |
| >PBRM1-A59 DMKLMFRN/   | 433   | >PBRM1-A59 DMKLMFRN/   | 944  | 511   |
| >PBRM1-A59 EDMKLMFRN   | 95    | >PBRM1-A59 EDMKLMFRN   | 154  | 59    |
| >PBRM1-D12 DDEIYYFRKPI | 199   | >PBRM1-D12 GDEIYYFRKPI | 246  | 47    |
| >PBRM1-D12 DDEIYYFR    | 440   | >PBRM1-D12 GDEIYYFR    | 4918 | 4478  |
| >PBRM1-D12 DDEIYYFRKPI | 12434 | >PBRM1-D12 GDEIYYFRKPI | 293  | 12141 |
| >PBRM1-D12 DDEIYYFRKPI | 435   | >PBRM1-D12 GDEIYYFRKPI | 166  | 269   |
| >PBRM1-D12 VDDEIYYFR   | 2582  | >PBRM1-D12 VGDEIYYFR   | 97   | 2485  |
| >PBRM1-D12 VDDEIYYFR   | 713   | >PBRM1-D12 VGDEIYYFR   | 176  | 537   |
| >PBRM1-D12 KRFSLSAKVVI | 723   | >PBRM1-D12 KRFSLSAKVVI | 492  | 231   |
| >PBRM1-D12 KRFSLSAKVVI | 524   | >PBRM1-D12 KRFSLSAKVVI | 383  | 141   |
| >PBRM1-D12 VVDDEIYY    | 44    | >PBRM1-D12 VVGDEIYY    | 4905 | 4861  |
| >PBRM1-D12 VVDDEIYYF   | 58    | >PBRM1-D12 VVGDEIYYF   | 384  | 326   |
| >PBRM1-D12 VVDDEIYYF   | 217   | >PBRM1-D12 VVGDEIYYF   | 675  | 458   |
| >PBRM1-D12 VVDDEIYY    | 382   | >PBRM1-D12 VVGDEIYY    | 437  | 55    |
| >PBRM1-D12 VVDDEIYYFR  | 106   | >PBRM1-D12 VVGDEIYYFR  | 132  | 26    |
| >PBRM1-D12 VVDDEIYYFRI | 11    | >PBRM1-D12 VVGDEIYYFRI | 12   | 1     |
| >PBRM1-D12 VVDDEIYYF   | 995   | >PBRM1-D12 VVGDEIYYF   | 187  | 808   |
| >PBRM1-D12 VVDDEIYY    | 3521  | >PBRM1-D12 VVGDEIYY    | 264  | 3257  |
| >PBRM1-D12 VVDDEIYYF   | 2962  | >PBRM1-D12 VVGDEIYYF   | 191  | 2771  |
| >PBRM1-D12 VVDDEIYY    | 309   | >PBRM1-D12 VVGDEIYY    | 36   | 273   |
| >PBRM1-D12 VVDDEIYYF   | 1409  | >PBRM1-D12 VVGDEIYYF   | 228  | 1181  |
| >PBRM1-D12 VVDDEIYY    | 203   | >PBRM1-D12 VVGDEIYY    | 86   | 117   |
| >PBRM1-D12 VVDDEIYYFR  | 54    | >PBRM1-D12 VVGDEIYYFR  | 32   | 22    |
| >PBRM1-D12 VVDDEIYYFR  | 104   | >PBRM1-D12 VVGDEIYYFR  | 68   | 36    |
| >PBRM1-D12 VVDDEIYYFR  | 25    | >PBRM1-D12 VVGDEIYYFR  | 26   | 1     |
| >PBRM1-D12 VVDDEIYYFRI | 877   | >PBRM1-D12 VVGDEIYYFRI | 446  | 431   |
| >PBRM1-D12 VVDDEIYY    | 245   | >PBRM1-D12 VVGDEIYY    | 45   | 200   |
| >PBRM1-D12 VVDDEIYYFR  | 132   | >PBRM1-D12 VVGDEIYYFR  | 52   | 80    |
| >PBRM1-D12 KVVDDEIYY   | 196   | >PBRM1-D12 KVVGDEIYY   | 454  | 258   |
| >PBRM1-D12 KVVDDEIYYFI | 52    | >PBRM1-D12 KVVGDEIYYFI | 84   | 32    |
| >PBRM1-D12 KVVDDEIY    | 56    | >PBRM1-D12 KVVGDEIY    | 32   | 24    |
| >PBRM1-D12 KVVDDEIYY   | 26    | >PBRM1-D12 KVVGDEIYY   | 14   | 12    |
| >PBRM1-D12 KVVDDEIYYF  | 29    | >PBRM1-D12 KVVGDEIYYF  | 18   | 11    |

|                       |      |                       |     |      |
|-----------------------|------|-----------------------|-----|------|
| >PBRM1-D12KVVDDEIY    | 408  | >PBRM1-D12KVVGDEIY    | 358 | 50   |
| >PBRM1-D12KVVDDEIYY   | 78   | >PBRM1-D12KVVGDEIYY   | 95  | 17   |
| >PBRM1-D12KVVDDEIY    | 136  | >PBRM1-D12KVVGDEIY    | 144 | 8    |
| >PBRM1-D12KVVDDEIYY   | 86   | >PBRM1-D12KVVGDEIYY   | 91  | 5    |
| >PBRM1-D12KVVDDEIYYFI | 16   | >PBRM1-D12KVVGDEIYYFI | 20  | 4    |
| >PBRM1-D12KVVDDEIYYF  | 391  | >PBRM1-D12KVVGDEIYYF  | 140 | 251  |
| >PBRM1-D12KVVDDEIYYFI | 28   | >PBRM1-D12KVVGDEIYYFI | 35  | 7    |
| >PBRM1-D12KVVDDEIY    | 538  | >PBRM1-D12KVVGDEIY    | 487 | 51   |
| >PBRM1-D12KVVDDEIYY   | 262  | >PBRM1-D12KVVGDEIYY   | 285 | 23   |
| >PBRM1-D12KVVDDEIYY   | 167  | >PBRM1-D12KVVGDEIYY   | 299 | 132  |
| >PBRM1-D12KVVDDEIYYF  | 71   | >PBRM1-D12KVVGDEIYYF  | 110 | 39   |
| >PBRM1-D12KVVDDEIYYF  | 1171 | >PBRM1-D12KVVGDEIYYF  | 435 | 736  |
| >PBRM1-D12KVVDDEIY    | 667  | >PBRM1-D12KVVGDEIY    | 344 | 323  |
| >PBRM1-D12KVVDDEIYY   | 447  | >PBRM1-D12KVVGDEIYY   | 241 | 206  |
| >PBRM1-D12KVVDDEIYYF  | 52   | >PBRM1-D12KVVGDEIYYF  | 40  | 12   |
| >PBRM1-D12KVVDDEIYY   | 2402 | >PBRM1-D12KVVGDEIYY   | 283 | 2119 |
| >PBRM1-D12KVVDDEIYYFI | 17   | >PBRM1-D12KVVGDEIYYFI | 19  | 2    |
| >PBRM1-D12AKVVDDEI    | 758  | >PBRM1-D12AKVVGDEI    | 426 | 332  |
| >PBRM1-D12AKVVDDEIY   | 59   | >PBRM1-D12AKVVGDEIY   | 52  | 7    |
| >PBRM1-D12AKVVDDEIYY  | 41   | >PBRM1-D12AKVVGDEIYY  | 42  | 1    |
| >PBRM1-D12AKVVDDEIYY  | 10   | >PBRM1-D12AKVVGDEIYY  | 9   | 1    |
| >PBRM1-D12SAKVVDDEIY' | 173  | >PBRM1-D12SAKVVGDEIY' | 206 | 33   |
| >PBRM1-D12SAKVVDDEIY  | 942  | >PBRM1-D12SAKVVGDEIY  | 463 | 479  |
| >PBRM1-D12SAKVVDDEI   | 534  | >PBRM1-D12SAKVVGDEI   | 491 | 43   |
| >PBRM1-D12LSAKVVDDEI' | 110  | >PBRM1-D12LSAKVVGDEI' | 99  | 11   |
| >PBRM1-D12LSAKVVDDEI' | 145  | >PBRM1-D12LSAKVVGDEI' | 72  | 73   |
| >PBRM1-D12LSAKVVDDEI' | 229  | >PBRM1-D12LSAKVVGDEI' | 132 | 97   |
| >PBRM1-D12LSAKVVDDEI' | 212  | >PBRM1-D12LSAKVVGDEI' | 70  | 142  |
| >PBRM1-D12LSAKVVDDEI' | 415  | >PBRM1-D12LSAKVVGDEI' | 552 | 137  |
| >PBRM1-D12LSAKVVDDEI  | 89   | >PBRM1-D12LSAKVVGDEI  | 231 | 142  |
| >PBRM1-D12LSAKVVDDEI' | 37   | >PBRM1-D12LSAKVVGDEI' | 40  | 3    |
| >PBRM1-D12LSAKVVDDEI' | 44   | >PBRM1-D12LSAKVVGDEI' | 23  | 21   |
| >PBRM1-D12LSAKVVDDEI  | 1643 | >PBRM1-D12LSAKVVGDEI  | 380 | 1263 |
| >PBRM1-D12SLSAKVVDDE  | 171  | >PBRM1-D12SLSAKVVGDE  | 169 | 2    |
| >PBRM1-D12SLSAKVVDDE  | 12   | >PBRM1-D12SLSAKVVGDE  | 9   | 3    |
| >PBRM1-D12SLSAKVVDDE  | 48   | >PBRM1-D12SLSAKVVGDE  | 23  | 25   |
| >PBRM1-D12SLSAKVVDDE  | 35   | >PBRM1-D12SLSAKVVGDE  | 14  | 21   |
| >PBRM1-D12SLSAKVVDDE  | 102  | >PBRM1-D12SLSAKVVGDE  | 74  | 28   |
| >PBRM1-D12SLSAKVVDDE  | 22   | >PBRM1-D12SLSAKVVGDE  | 19  | 3    |
| >PBRM1-D12SLSAKVVDDE  | 951  | >PBRM1-D12SLSAKVVGDE  | 472 | 479  |
| >PBRM1-D12SLSAKVVDDE  | 34   | >PBRM1-D12SLSAKVVGDE  | 25  | 9    |
| >PBRM1-D67DKRGRRLSA   | 698  | >PBRM1-D67EKRGRRLSA   | 249 | 449  |
| >PBRM1-D67DKRGRRLSAI  | 1735 | >PBRM1-D67EKRGRRLSAI  | 460 | 1275 |

|                       |       |                       |      |       |
|-----------------------|-------|-----------------------|------|-------|
| >PBRM1-D67DKRGRRLSAIF | 123   | >PBRM1-D67EKRGRRLSAIF | 28   | 95    |
| >PBRM1-D67TDKRGRRL    | 1622  | >PBRM1-D67TEKRGRRL    | 18   | 1604  |
| >PBRM1-D67TDKRGRRLSA  | 868   | >PBRM1-D67TEKRGRRLSA  | 19   | 849   |
| >PBRM1-D67TDKRGRRLSA  | 2646  | >PBRM1-D67TEKRGRRLSA  | 221  | 2425  |
| >PBRM1-D67TDKRGRRLSA  | 1374  | >PBRM1-D67TEKRGRRLSA  | 24   | 1350  |
| >PBRM1-D67YTDKRGRRLS  | 471   | >PBRM1-D67YTEKRGRRLS  | 4068 | 3597  |
| >PBRM1-D67YTDKRGRR    | 144   | >PBRM1-D67YTEKRGRR    | 56   | 88    |
| >PBRM1-D67YTDKRGRRL   | 25    | >PBRM1-D67YTEKRGRRL   | 29   | 4     |
| >PBRM1-D67YTDKRGRRL   | 170   | >PBRM1-D67YTEKRGRRL   | 71   | 99    |
| >PBRM1-D67NYTDKRGR    | 92    | >PBRM1-D67NYTEKRGR    | 77   | 15    |
| >PBRM1-D67NYTDKRGRR   | 48    | >PBRM1-D67NYTEKRGRR   | 34   | 14    |
| >PBRM1-D67NYTDKRGR    | 71    | >PBRM1-D67NYTEKRGR    | 95   | 24    |
| >PBRM1-D67NYTDKRGRR   | 91    | >PBRM1-D67NYTEKRGRR   | 182  | 91    |
| >PBRM1-D67KNYTDKRGRF  | 682   | >PBRM1-D67KNYTEKRGRF  | 414  | 268   |
| >PBRM1-D67KNYTDKRGRF  | 360   | >PBRM1-D67KNYTEKRGRF  | 408  | 48    |
| >PBRM1-D67KNYTDKRGR   | 139   | >PBRM1-D67KNYTEKRGR   | 67   | 72    |
| >PBRM1-D67KNYTDKRGRF  | 134   | >PBRM1-D67KNYTEKRGRF  | 88   | 46    |
| >PBRM1-D67AVKNYTDK    | 543   | >PBRM1-D67AVKNYTEK    | 349  | 194   |
| >PBRM1-D67AVKNYTDK    | 160   | >PBRM1-D67AVKNYTEK    | 56   | 104   |
| >PBRM1-D67AVKNYTDK    | 13    | >PBRM1-D67AVKNYTEK    | 8    | 5     |
| >PBRM1-D67AVKNYTDK    | 617   | >PBRM1-D67AVKNYTEK    | 72   | 545   |
| >PBRM1-D67AVKNYTDKR   | 30    | >PBRM1-D67AVKNYTEKR   | 15   | 15    |
| >PBRM1-D67AVKNYTDKRC  | 61    | >PBRM1-D67AVKNYTEKRC  | 51   | 10    |
| >PBRM1-D67AVKNYTDKR   | 143   | >PBRM1-D67AVKNYTEKR   | 117  | 26    |
| >PBRM1-D67AVKNYTDK    | 448   | >PBRM1-D67AVKNYTEK    | 413  | 35    |
| >PBRM1-D67EAVKNYTDK   | 36    | >PBRM1-D67EAVKNYTEK   | 14   | 22    |
| >PBRM1-D67EAVKNYTDKF  | 44    | >PBRM1-D67EAVKNYTEKR  | 23   | 21    |
| >PBRM1-D67YEAVKNYTDK  | 519   | >PBRM1-D67YEAVKNYTEK  | 452  | 67    |
| >PBRM1-F84FQEHMFEV    | 38    | >PBRM1-F84LQEHMFEV    | 445  | 407   |
| >PBRM1-F84FQEHMFEV    | 21    | >PBRM1-F84LQEHMFEV    | 182  | 161   |
| >PBRM1-F84FQEHMFEVL   | 154   | >PBRM1-F84LQEHMFEVL   | 1407 | 1253  |
| >PBRM1-F84FQEHMFEV    | 56    | >PBRM1-F84LQEHMFEV    | 644  | 588   |
| >PBRM1-F84FQEHMFEV    | 3     | >PBRM1-F84LQEHMFEV    | 8    | 5     |
| >PBRM1-F84FQEHMFEVL   | 12    | >PBRM1-F84LQEHMFEVL   | 145  | 133   |
| >PBRM1-F84FQEHMFEV    | 181   | >PBRM1-F84LQEHMFEV    | 1309 | 1128  |
| >PBRM1-F84FQEHMFEV    | 94    | >PBRM1-F84LQEHMFEV    | 1213 | 1119  |
| >PBRM1-F84FQEHMFEV    | 119   | >PBRM1-F84LQEHMFEV    | 864  | 745   |
| >PBRM1-F84FQEHMFEVL   | 334   | >PBRM1-F84LQEHMFEVL   | 251  | 83    |
| >PBRM1-F84FQEHMFEVL   | 151   | >PBRM1-F84LQEHMFEVL   | 264  | 113   |
| >PBRM1-F84FQEHMFEVL   | 38    | >PBRM1-F84LQEHMFEVL   | 669  | 631   |
| >PBRM1-F84FQEHMFEVL   | 202   | >PBRM1-F84LQEHMFEVL   | 357  | 155   |
| >PBRM1-F84LFQEHMFEV   | 218   | >PBRM1-F84LLQEHMFEV   | 6    | 212   |
| >PBRM1-F84LFQEHMFEVI  | 19967 | >PBRM1-F84LLQEHMFEVI  | 442  | 19525 |

|                        |       |                        |      |       |
|------------------------|-------|------------------------|------|-------|
| >PBRM1-F84 LFQEHMFEEV  | 57    | >PBRM1-F84 LLQEHMFEEV  | 3    | 54    |
| >PBRM1-F84 LFQEHMFEEVI | 6634  | >PBRM1-F84 LLQEHMFEEVI | 57   | 6577  |
| >PBRM1-F84 LFQEHMFEEV  | 1975  | >PBRM1-F84 LLQEHMFEEV  | 3    | 1972  |
| >PBRM1-F84 LFQEHMFEEVI | 17585 | >PBRM1-F84 LLQEHMFEEVI | 264  | 17321 |
| >PBRM1-F84 LFQEHMFEEV  | 250   | >PBRM1-F84 LLQEHMFEEV  | 4    | 246   |
| >PBRM1-F84 LFQEHMFEEV  | 160   | >PBRM1-F84 LLQEHMFEEV  | 1    | 159   |
| >PBRM1-F84 LFQEHMFEEVI | 6833  | >PBRM1-F84 LLQEHMFEEVI | 12   | 6821  |
| >PBRM1-F84 LFQEHMFEEV  | 853   | >PBRM1-F84 LLQEHMFEEV  | 2    | 851   |
| >PBRM1-F84 LFQEHMFEEVI | 11955 | >PBRM1-F84 LLQEHMFEEVI | 10   | 11945 |
| >PBRM1-F84 LFQEHMFEEV  | 1511  | >PBRM1-F84 LLQEHMFEEV  | 6    | 1505  |
| >PBRM1-F84 LFQEHMFEEVI | 17603 | >PBRM1-F84 LLQEHMFEEVI | 187  | 17416 |
| >PBRM1-F84 LFQEHMFEEV  | 7561  | >PBRM1-F84 LLQEHMFEEV  | 3    | 7558  |
| >PBRM1-F84 LFQEHMFEEVI | 17403 | >PBRM1-F84 LLQEHMFEEVI | 100  | 17303 |
| >PBRM1-F84 LFQEHMFEEV  | 55    | >PBRM1-F84 LLQEHMFEEV  | 1    | 54    |
| >PBRM1-F84 LFQEHMFEEVI | 7378  | >PBRM1-F84 LLQEHMFEEVI | 5    | 7373  |
| >PBRM1-F84 LFQEHMFEEVI | 21    | >PBRM1-F84 LLQEHMFEEVI | 5378 | 5357  |
| >PBRM1-F84 LFQEHMFEEV  | 1807  | >PBRM1-F84 LLQEHMFEEV  | 79   | 1728  |
| >PBRM1-F84 LFQEHMFEEVI | 4505  | >PBRM1-F84 LLQEHMFEEVI | 215  | 4290  |
| >PBRM1-F84 DLFQEHMFEE\ | 44    | >PBRM1-F84 DLLQEHMFEE\ | 50   | 6     |
| >PBRM1-F84 DLFQEHMFEE\ | 86    | >PBRM1-F84 DLLQEHMFEE\ | 261  | 175   |
| >PBRM1-F84 DLFQEHMFEE\ | 121   | >PBRM1-F84 DLLQEHMFEE\ | 280  | 159   |
| >PBRM1-F84 DLFQEHMFEE\ | 590   | >PBRM1-F84 DLLQEHMFEE\ | 356  | 234   |
| >PBRM1-F84 DLFQEHMFEE\ | 5     | >PBRM1-F84 DLLQEHMFEE\ | 6    | 1     |
| >PBRM1-F84 DLFQEHMFEE\ | 274   | >PBRM1-F84 DLLQEHMFEE\ | 501  | 227   |
| >PBRM1-F84 DLFQEHMFEE\ | 81    | >PBRM1-F84 DLLQEHMFEE\ | 57   | 24    |
| >PBRM1-F84 DLFQEHMFEE\ | 9     | >PBRM1-F84 DLLQEHMFEE\ | 9    | 0     |
| >PBRM1-F84 DLFQEHMFEE\ | 45    | >PBRM1-F84 DLLQEHMFEE\ | 10   | 35    |
| >PBRM1-F84 DLFQEHMFEE\ | 2972  | >PBRM1-F84 DLLQEHMFEE\ | 473  | 2499  |
| >PBRM1-F84 DLFQEHMFEE\ | 5     | >PBRM1-F84 DLLQEHMFEE\ | 6    | 1     |
| >PBRM1-F84 DLFQEHMFEE\ | 73    | >PBRM1-F84 DLLQEHMFEE\ | 167  | 94    |
| >PBRM1-F84 DLFQEHMFEE\ | 27    | >PBRM1-F84 DLLQEHMFEE\ | 18   | 9     |
| >PBRM1-F84 DLFQEHMF    | 375   | >PBRM1-F84 DLLQEHMF    | 1882 | 1507  |
| >PBRM1-F84 LDLFQEHEM   | 681   | >PBRM1-F84 LDLLQEHEM   | 265  | 416   |
| >PBRM1-F84 LDLFQEHEMFI | 75    | >PBRM1-F84 LDLLQEHEMFI | 28   | 47    |
| >PBRM1-F84 RLDLFQEHEM  | 190   | >PBRM1-F84 RLDLLQEHEM  | 584  | 394   |
| >PBRM1-F84 RLDLFQEHEM  | 778   | >PBRM1-F84 RLDLLQEHEM  | 498  | 280   |
| >PBRM1-F84 RLDLFQEHEMI | 325   | >PBRM1-F84 RLDLLQEHEMI | 624  | 299   |
| >PBRM1-F84 RRLDLFQEHE  | 417   | >PBRM1-F84 RRLDLLQEHE  | 1287 | 870   |
| >PBRM1-F84 RRLDLFQEHEM | 96    | >PBRM1-F84 RRLDLLQEHEM | 230  | 134   |
| >PBRM1-F84 RRLDLFQEHEM | 14    | >PBRM1-F84 RRLDLLQEHEM | 22   | 8     |
| >PBRM1-F84 RRLDLFQE    | 337   | >PBRM1-F84 RRLDLLQE    | 446  | 109   |
| >PBRM1-F84 RRLDLFQEHE  | 47    | >PBRM1-F84 RRLDLLQEHE  | 55   | 8     |
| >PBRM1-F84 RRLDLFQEHEM | 16    | >PBRM1-F84 RRLDLLQEHEM | 15   | 1     |

|                        |      |                        |      |      |
|------------------------|------|------------------------|------|------|
| >PBRM1-F84 RRLDLFQEHN  | 21   | >PBRM1-F84 RRLDLLQEHN  | 20   | 1    |
| >PBRM1-F84 RRLDLFQE    | 132  | >PBRM1-F84 RRLDLLQE    | 69   | 63   |
| >PBRM1-F84 RRLDLFQEH   | 109  | >PBRM1-F84 RRLDLLQEH   | 148  | 39   |
| >PBRM1-F84 RRLDLFQEHN  | 86   | >PBRM1-F84 RRLDLLQEHN  | 109  | 23   |
| >PBRM1-F84 RRLDLFQEHN  | 77   | >PBRM1-F84 RRLDLLQEHN  | 94   | 17   |
| >PBRM1-F84 RRLDLFQE    | 289  | >PBRM1-F84 RRLDLLQE    | 155  | 134  |
| >PBRM1-F84 RRLDLFQEH   | 60   | >PBRM1-F84 RRLDLLQEH   | 186  | 126  |
| >PBRM1-F84 RRLDLFQEHN  | 39   | >PBRM1-F84 RRLDLLQEHN  | 39   | 0    |
| >PBRM1-F84 RRLDLFQEHN  | 21   | >PBRM1-F84 RRLDLLQEHN  | 31   | 10   |
| >PBRM1-F84 YRRDLFQEH   | 330  | >PBRM1-F84 YRRDLLQEH   | 384  | 54   |
| >PBRM1-F84 YRRDLFQEH   | 429  | >PBRM1-F84 YRRDLLQEH   | 601  | 172  |
| >PBRM1-F84 YRRDLFQEH   | 72   | >PBRM1-F84 YRRDLLQEH   | 75   | 3    |
| >PBRM1-F84 RYRRDLF     | 68   | >PBRM1-F84 RYRRDLL     | 738  | 670  |
| >PBRM1-F84 RYRRDLF     | 59   | >PBRM1-F84 RYRRDLL     | 242  | 183  |
| >PBRM1-F84 RYRRDLF     | 5    | >PBRM1-F84 RYRRDLL     | 11   | 6    |
| >PBRM1-F84 RYRRDLF     | 88   | >PBRM1-F84 RYRRDLL     | 11   | 77   |
| >PBRM1-F84 RYRRDLFQ    | 6    | >PBRM1-F84 RYRRDLLQ    | 11   | 5    |
| >PBRM1-F84 RYRRDLFQE   | 148  | >PBRM1-F84 RYRRDLLQE   | 122  | 26   |
| >PBRM1-F84 RYRRDLFQE   | 33   | >PBRM1-F84 RYRRDLLQE   | 44   | 11   |
| >PBRM1-F84 RYRRDLFQE   | 483  | >PBRM1-F84 RYRRDLLQE   | 983  | 500  |
| >PBRM1-F84 RYRRDLF     | 2754 | >PBRM1-F84 RYRRDLL     | 456  | 2298 |
| >PBRM1-F84 RYRRDLFQ    | 155  | >PBRM1-F84 RYRRDLLQ    | 474  | 319  |
| >PBRM1-F84 RYRRDLF     | 959  | >PBRM1-F84 RYRRDLL     | 287  | 672  |
| >PBRM1-F84 NRYRRDLF    | 616  | >PBRM1-F84 NRYRRDLL    | 163  | 453  |
| >PBRM1-F84 NRYRRDLF    | 407  | >PBRM1-F84 NRYRRDLL    | 2799 | 2392 |
| >PBRM1-F84 NRYRRDLF    | 197  | >PBRM1-F84 NRYRRDLL    | 117  | 80   |
| >PBRM1-F84 NRYRRDLFQ   | 212  | >PBRM1-F84 NRYRRDLLQ   | 276  | 64   |
| >PBRM1-F84 NRYRRDLF    | 206  | >PBRM1-F84 NRYRRDLL    | 63   | 143  |
| >PBRM1-F84 NRYRRDLFQ   | 98   | >PBRM1-F84 NRYRRDLLQ   | 116  | 18   |
| >PBRM1-F84 NRYRRDLF    | 30   | >PBRM1-F84 NRYRRDLL    | 12   | 18   |
| >PBRM1-F84 NRYRRDLFQ   | 275  | >PBRM1-F84 NRYRRDLLQ   | 393  | 118  |
| >PBRM1-G2C GRLISELF    | 181  | >PBRM1-G2C VRLISELF    | 60   | 121  |
| >PBRM1-G2C GRLISELFQKL | 1256 | >PBRM1-G2C VRLISELFQKL | 384  | 872  |
| >PBRM1-G2C GRLISELF    | 229  | >PBRM1-G2C VRLISELF    | 768  | 539  |
| >PBRM1-G2C GRLISELFQK  | 223  | >PBRM1-G2C VRLISELFQK  | 973  | 750  |
| >PBRM1-G2C GRLISELFQKL | 101  | >PBRM1-G2C VRLISELFQKL | 324  | 223  |
| >PBRM1-G2C GRLISELFQKL | 285  | >PBRM1-G2C VRLISELFQKL | 1142 | 857  |
| >PBRM1-G2C GRLISELFQKL | 26   | >PBRM1-G2C VRLISELFQKL | 132  | 106  |
| >PBRM1-G2C SGRLISELFQK | 5622 | >PBRM1-G2C SVRLISELFQK | 218  | 5404 |
| >PBRM1-G2C SGRLISELFQK | 2042 | >PBRM1-G2C SVRLISELFQK | 46   | 1996 |
| >PBRM1-G2C SGRLISEL    | 2285 | >PBRM1-G2C SVRLISEL    | 83   | 2202 |
| >PBRM1-G2C SGRLISELFQ  | 981  | >PBRM1-G2C SVRLISELFQ  | 65   | 916  |
| >PBRM1-G2C SGRLISELFQK | 40   | >PBRM1-G2C SVRLISELFQK | 6    | 34   |

|                        |       |                        |     |       |
|------------------------|-------|------------------------|-----|-------|
| >PBRM1-G2C SGRLISELFQK | 2876  | >PBRM1-G2C SVRLISELFQK | 207 | 2669  |
| >PBRM1-G2C SGRLISELFQK | 5845  | >PBRM1-G2C SVRLISELFQK | 154 | 5691  |
| >PBRM1-G2C SGRLISELF   | 38    | >PBRM1-G2C SVRLISELF   | 15  | 23    |
| >PBRM1-G2C EAIVVATNPS' | 6164  | >PBRM1-G2C EAIVVATNPS' | 38  | 6126  |
| >PBRM1-G2C EAIVVATNPS' | 9013  | >PBRM1-G2C EAIVVATNPS' | 8   | 9005  |
| >PBRM1-G2C PSGRLISEL   | 10858 | >PBRM1-G2C PSVRLISEL   | 495 | 10363 |
| >PBRM1-G2C PSGRLISELF  | 381   | >PBRM1-G2C PSVRLISELF  | 243 | 138   |
| >PBRM1-G2C NPSGRLISEL  | 358   | >PBRM1-G2C NPSVRLISEL  | 463 | 105   |
| >PBRM1-G2C NPSGRLISELF | 132   | >PBRM1-G2C NPSVRLISELF | 232 | 100   |
| >PBRM1-G2C NPSGRLISEL  | 310   | >PBRM1-G2C NPSVRLISEL  | 714 | 404   |
| >PBRM1-G2C NPSGRLISELF | 145   | >PBRM1-G2C NPSVRLISELF | 160 | 15    |
| >PBRM1-G2C NPSGRLISELF | 371   | >PBRM1-G2C NPSVRLISELF | 274 | 97    |
| >PBRM1-G2C TNPSGRLISEL | 1219  | >PBRM1-G2C TNPSVRLISEL | 480 | 739   |
| >PBRM1-G2C ATNPSGRLI   | 1991  | >PBRM1-G2C ATNPSVRLI   | 176 | 1815  |
| >PBRM1-G2C ATNPSGRLI   | 196   | >PBRM1-G2C ATNPSVRLI   | 121 | 75    |
| >PBRM1-G2C ATNPSGRL    | 7     | >PBRM1-G2C ATNPSVRL    | 5   | 2     |
| >PBRM1-G2C ATNPSGRLI   | 29    | >PBRM1-G2C ATNPSVRLI   | 21  | 8     |
| >PBRM1-G2C ATNPSGRL    | 2781  | >PBRM1-G2C ATNPSVRL    | 246 | 2535  |
| >PBRM1-G2C ATNPSGRLI   | 89    | >PBRM1-G2C ATNPSVRLI   | 58  | 31    |
| >PBRM1-G2C ATNPSGRLI   | 279   | >PBRM1-G2C ATNPSVRLI   | 789 | 510   |
| >PBRM1-G2C ATNPSGRL    | 296   | >PBRM1-G2C ATNPSVRL    | 600 | 304   |
| >PBRM1-G2C ATNPSGRLI   | 16    | >PBRM1-G2C ATNPSVRLI   | 29  | 13    |
| >PBRM1-G2C VATNPSGR    | 214   | >PBRM1-G2C VATNPSVR    | 210 | 4     |
| >PBRM1-G2C VATNPSGRL   | 230   | >PBRM1-G2C VATNPSVRL   | 106 | 124   |
| >PBRM1-G2C VATNPSGRL   | 1414  | >PBRM1-G2C VATNPSVRL   | 354 | 1060  |
| >PBRM1-G2C VATNPSGRLI  | 407   | >PBRM1-G2C VATNPSVRLI  | 217 | 190   |
| >PBRM1-G2C VATNPSGRL   | 269   | >PBRM1-G2C VATNPSVRL   | 838 | 569   |
| >PBRM1-G2C VATNPSGRLI  | 78    | >PBRM1-G2C VATNPSVRLI  | 189 | 111   |
| >PBRM1-G2C VVATNPSG    | 22958 | >PBRM1-G2C VVATNPSV    | 394 | 22564 |
| >PBRM1-G2C VVATNPSG    | 21898 | >PBRM1-G2C VVATNPSV    | 412 | 21486 |
| >PBRM1-G2C VVATNPSG    | 16310 | >PBRM1-G2C VVATNPSV    | 46  | 16264 |
| >PBRM1-G2C VVATNPSGRI  | 422   | >PBRM1-G2C VVATNPSVRL  | 158 | 264   |
| >PBRM1-G2C VVATNPSG    | 16379 | >PBRM1-G2C VVATNPSV    | 84  | 16295 |
| >PBRM1-G2C VVATNPSG    | 22359 | >PBRM1-G2C VVATNPSV    | 65  | 22294 |
| >PBRM1-G2C VVATNPSG    | 22412 | >PBRM1-G2C VVATNPSV    | 476 | 21936 |
| >PBRM1-G2C VVATNPSG    | 23040 | >PBRM1-G2C VVATNPSV    | 106 | 22934 |
| >PBRM1-G2C VVATNPSG    | 22900 | >PBRM1-G2C VVATNPSV    | 45  | 22855 |
| >PBRM1-G2C VVATNPSG    | 29514 | >PBRM1-G2C VVATNPSV    | 9   | 29505 |
| >PBRM1-G2C VVATNPSGRI  | 1402  | >PBRM1-G2C VVATNPSVRL  | 287 | 1115  |
| >PBRM1-G2C VVATNPSGR   | 41    | >PBRM1-G2C VVATNPSVR   | 71  | 30    |
| >PBRM1-G2C VVATNPSG    | 17316 | >PBRM1-G2C VVATNPSV    | 190 | 17126 |
| >PBRM1-G2C VVATNPSG    | 20208 | >PBRM1-G2C VVATNPSV    | 295 | 19913 |
| >PBRM1-G2C IVVATNPSG   | 22834 | >PBRM1-G2C IVVATNPSV   | 209 | 22625 |



|                      |       |                      |      |       |
|----------------------|-------|----------------------|------|-------|
| >PBRM1-G2CIVVATNPSG  | 22056 | >PBRM1-G2CIVVATNPSV  | 369  | 21687 |
| >PBRM1-G2CIVVATNPSG  | 20372 | >PBRM1-G2CIVVATNPSV  | 116  | 20256 |
| >PBRM1-G2CIVVATNPSG  | 6047  | >PBRM1-G2CIVVATNPSV  | 9    | 6038  |
| >PBRM1-G2CIVVATNPSGR | 852   | >PBRM1-G2CIVVATNPSVR | 207  | 645   |
| >PBRM1-G2CIVVATNPSG  | 21843 | >PBRM1-G2CIVVATNPSV  | 63   | 21780 |
| >PBRM1-G2CIVVATNPSG  | 24775 | >PBRM1-G2CIVVATNPSV  | 171  | 24604 |
| >PBRM1-G2CIVVATNPSG  | 23394 | >PBRM1-G2CIVVATNPSV  | 418  | 22976 |
| >PBRM1-G2CIVVATNPSG  | 28724 | >PBRM1-G2CIVVATNPSV  | 11   | 28713 |
| >PBRM1-G2CIVVATNPSGR | 1652  | >PBRM1-G2CIVVATNPSVR | 409  | 1243  |
| >PBRM1-G2CIVVATNPSGR | 39    | >PBRM1-G2CIVVATNPSVR | 62   | 23    |
| >PBRM1-G2CIVVATNPSG  | 16237 | >PBRM1-G2CIVVATNPSV  | 44   | 16193 |
| >PBRM1-G2CIVVATNPSGR | 151   | >PBRM1-G2CIVVATNPSVR | 102  | 49    |
| >PBRM1-G2CIVVATNPSGR | 422   | >PBRM1-G2CIVVATNPSVR | 1000 | 578   |
| >PBRM1-G2CIVVATNPSGR | 412   | >PBRM1-G2CIVVATNPSVR | 504  | 92    |
| >PBRM1-G2CAIVVATNPSG | 21790 | >PBRM1-G2CAIVVATNPSV | 485  | 21305 |
| >PBRM1-G2CAIVVATNPSG | 19766 | >PBRM1-G2CAIVVATNPSV | 138  | 19628 |
| >PBRM1-G2CAIVVATNPSG | 13551 | >PBRM1-G2CAIVVATNPSV | 94   | 13457 |
| >PBRM1-G2CAIVVATNPSG | 24473 | >PBRM1-G2CAIVVATNPSV | 159  | 24314 |
| >PBRM1-G2CAIVVATNPSG | 23334 | >PBRM1-G2CAIVVATNPSV | 449  | 22885 |
| >PBRM1-G2CAIVVATNPSG | 23077 | >PBRM1-G2CAIVVATNPSV | 80   | 22997 |
| >PBRM1-G2CAIVVATNPSG | 27733 | >PBRM1-G2CAIVVATNPSV | 10   | 27723 |
| >PBRM1-G2CAIVVATNPSG | 217   | >PBRM1-G2CAIVVATNPSV | 259  | 42    |
| >PBRM1-G2CAIVVATNPSG | 20636 | >PBRM1-G2CAIVVATNPSV | 198  | 20438 |
| >PBRM1-H12HEPTKMFYK  | 232   | >PBRM1-H12PEPTKMFYK  | 3075 | 2843  |
| >PBRM1-H12HEPTKMFYK  | 304   | >PBRM1-H12PEPTKMFYKK | 3168 | 2864  |
| >PBRM1-H12EHEPTKMF   | 13748 | >PBRM1-H12EPEPTKMF   | 169  | 13579 |
| >PBRM1-H12EHEPTKMFY  | 12473 | >PBRM1-H12EPEPTKMFY  | 231  | 12242 |
| >PBRM1-H12EHEPTKMFY  | 18137 | >PBRM1-H12EPEPTKMFY  | 195  | 17942 |
| >PBRM1-H12EHEPTKMF   | 17331 | >PBRM1-H12EPEPTKMF   | 128  | 17203 |
| >PBRM1-H12TEHEPTKMF  | 368   | >PBRM1-H12TEPEPTKMF  | 474  | 106   |
| >PBRM1-H12TEHEPTKMFY | 238   | >PBRM1-H12TEPEPTKMFY | 325  | 87    |
| >PBRM1-H12TEHEPTKMF  | 297   | >PBRM1-H12TEPEPTKMF  | 2632 | 2335  |
| >PBRM1-H12TEHEPTKMF  | 117   | >PBRM1-H12TEPEPTKMF  | 1401 | 1284  |
| >PBRM1-H12TEHEPTKMF  | 132   | >PBRM1-H12TEPEPTKMF  | 367  | 235   |
| >PBRM1-H12TEHEPTKMFY | 316   | >PBRM1-H12TEPEPTKMFY | 1197 | 881   |
| >PBRM1-H12TEHEPTKMF  | 172   | >PBRM1-H12TEPEPTKMF  | 1598 | 1426  |
| >PBRM1-H12TEHEPTKMFY | 309   | >PBRM1-H12TEPEPTKMFY | 765  | 456   |
| >PBRM1-H12TEHEPTKMF  | 167   | >PBRM1-H12TEPEPTKMF  | 1232 | 1065  |
| >PBRM1-H12ETEHEPTKMF | 26    | >PBRM1-H12ETEPEPTKMF | 27   | 1     |
| >PBRM1-H12ETEHEPTKMF | 381   | >PBRM1-H12ETEPEPTKMF | 503  | 122   |
| >PBRM1-H12ETEHEPTKMF | 153   | >PBRM1-H12ETEPEPTKMF | 218  | 65    |
| >PBRM1-H12ETEHEPTK   | 36    | >PBRM1-H12ETEPEPTK   | 43   | 7     |
| >PBRM1-H12ETEHEPTKMF | 188   | >PBRM1-H12ETEPEPTKMF | 186  | 2     |

|                        |      |                        |       |       |
|------------------------|------|------------------------|-------|-------|
| >PBRM1-H12 ETEHEPTKM   | 631  | >PBRM1-H12 ETEPEPTKM   | 135   | 496   |
| >PBRM1-H12 ETEHEPTKMF  | 49   | >PBRM1-H12 ETEPEPTKMF  | 17    | 32    |
| >PBRM1-H12 ETEHEPTKMF  | 170  | >PBRM1-H12 ETEPEPTKMF  | 50    | 120   |
| >PBRM1-H12 ETEHEPTKMF  | 329  | >PBRM1-H12 ETEPEPTKMF  | 246   | 83    |
| >PBRM1-H12 ETEHEPTKMF  | 357  | >PBRM1-H12 ETEPEPTKMF  | 388   | 31    |
| >PBRM1-H12 EETEHEPTKN  | 313  | >PBRM1-H12 EETEPEPTKM  | 817   | 504   |
| >PBRM1-H12 EETEHEPTKN  | 443  | >PBRM1-H12 EETEPEPTKM  | 264   | 179   |
| >PBRM1-H12 EETEHEPTKN  | 73   | >PBRM1-H12 EETEPEPTKM  | 124   | 51    |
| >PBRM1-H12 EETEHEPT    | 55   | >PBRM1-H12 EETEPEPT    | 139   | 84    |
| >PBRM1-I15(IEGLSAESNSI | 10   | >PBRM1-I15(NEGLSAESNS  | 9     | 1     |
| >PBRM1-I15(IEGLSAESNSI | 34   | >PBRM1-I15(NEGLSAESNS  | 179   | 145   |
| >PBRM1-I15(LLHSEAYLKYY | 101  | >PBRM1-I15(LLHSEAYLKYY | 20298 | 20197 |
| >PBRM1-I15(LLHSEAYLKYY | 32   | >PBRM1-I15(LLHSEAYLKYY | 4620  | 4588  |
| >PBRM1-I15(LLHSEAYLKYY | 22   | >PBRM1-I15(LLHSEAYLKYY | 11844 | 11822 |
| >PBRM1-I15(LLHSEAYLKYY | 7    | >PBRM1-I15(LLHSEAYLKYY | 2038  | 2031  |
| >PBRM1-I15(LLHSEAYLKYY | 34   | >PBRM1-I15(LLHSEAYLKYY | 16073 | 16039 |
| >PBRM1-I15(LLHSEAYLKYY | 225  | >PBRM1-I15(LLHSEAYLKYY | 18888 | 18663 |
| >PBRM1-I15(LLHSEAYLKYY | 339  | >PBRM1-I15(LLHSEAYLKYY | 22556 | 22217 |
| >PBRM1-I15(LLHSEAYLKYY | 11   | >PBRM1-I15(LLHSEAYLKYY | 7263  | 7252  |
| >PBRM1-I15(KYIEGLSA    | 478  | >PBRM1-I15(KYNEGLSA    | 3324  | 2846  |
| >PBRM1-I15(KYIEGLSA    | 533  | >PBRM1-I15(KYNEGLSA    | 183   | 350   |
| >PBRM1-I15(KYIEGLSA    | 197  | >PBRM1-I15(KYNEGLSA    | 352   | 155   |
| >PBRM1-I15(LKYIEGLSA   | 52   | >PBRM1-I15(LKYNEGLSA   | 14    | 38    |
| >PBRM1-I15(LKYIEGLSAE  | 766  | >PBRM1-I15(LKYNEGLSAE  | 259   | 507   |
| >PBRM1-I15(LKYIEGLSAES | 876  | >PBRM1-I15(LKYNEGLSAE  | 264   | 612   |
| >PBRM1-I15(YLKYYIEGL   | 141  | >PBRM1-I15(YLKYYNEGL   | 527   | 386   |
| >PBRM1-I15(YLKYYIEGLSA | 240  | >PBRM1-I15(YLKYYNEGLSA | 245   | 5     |
| >PBRM1-I15(YLKYYIEGL   | 8    | >PBRM1-I15(YLKYYNEGL   | 17    | 9     |
| >PBRM1-I15(YLKYYIEGLSA | 83   | >PBRM1-I15(YLKYYNEGLSA | 119   | 36    |
| >PBRM1-I15(YLKYYIEGL   | 11   | >PBRM1-I15(YLKYYNEGL   | 23    | 12    |
| >PBRM1-I15(YLKYYIEGLSA | 43   | >PBRM1-I15(YLKYYNEGLSA | 38    | 5     |
| >PBRM1-I15(YLKYYIEGL   | 294  | >PBRM1-I15(YLKYYNEGL   | 850   | 556   |
| >PBRM1-I15(YLKYYIEGLSA | 287  | >PBRM1-I15(YLKYYNEGLSA | 520   | 233   |
| >PBRM1-I15(YLKYYIEGL   | 59   | >PBRM1-I15(YLKYYNEGL   | 102   | 43    |
| >PBRM1-I15(YLKYYIEGL   | 42   | >PBRM1-I15(YLKYYNEGL   | 28    | 14    |
| >PBRM1-I15(YLKYYIEGLSA | 1536 | >PBRM1-I15(YLKYYNEGLSA | 428   | 1108  |
| >PBRM1-I15(YLKYYIEGL   | 428  | >PBRM1-I15(YLKYYNEGL   | 1424  | 996   |
| >PBRM1-I15(YLKYYIEGL   | 286  | >PBRM1-I15(YLKYYNEGL   | 818   | 532   |
| >PBRM1-I15(YLKYYIEGL   | 7    | >PBRM1-I15(YLKYYNEGL   | 8     | 1     |
| >PBRM1-I15(YLKYYIEGLSA | 52   | >PBRM1-I15(YLKYYNEGLSA | 38    | 14    |
| >PBRM1-I15(YLKYYIEGL   | 332  | >PBRM1-I15(YLKYYNEGL   | 542   | 210   |
| >PBRM1-I15(AYLKYYIEG   | 346  | >PBRM1-I15(AYLKYYNEG   | 413   | 67    |
| >PBRM1-I15(AYLKYYIEGL  | 6    | >PBRM1-I15(AYLKYYNEGL  | 10    | 4     |

|                        |       |                        |       |       |
|------------------------|-------|------------------------|-------|-------|
| >PBRM1-I15(AYLKYEGLSA  | 406   | >PBRM1-I15(AYLKYNEGLS  | 711   | 305   |
| >PBRM1-I15(AYLKYEGL    | 298   | >PBRM1-I15(AYLKYNEGL   | 953   | 655   |
| >PBRM1-I15(EAYLKYEGL   | 93    | >PBRM1-I15(EAYLKYNEGL  | 124   | 31    |
| >PBRM1-I15(EAYLKYEGL   | 421   | >PBRM1-I15(EAYLKYNEGL  | 1008  | 587   |
| >PBRM1-I15(SEAYLKYI    | 8     | >PBRM1-I15(SEAYLKYN    | 456   | 448   |
| >PBRM1-I15(SEAYLKYEGL  | 58    | >PBRM1-I15(SEAYLKYNEG  | 79    | 21    |
| >PBRM1-I15(SEAYLKYI    | 309   | >PBRM1-I15(SEAYLKYN    | 11998 | 11689 |
| >PBRM1-I15(SEAYLKYEGL  | 29    | >PBRM1-I15(SEAYLKYNEG  | 30    | 1     |
| >PBRM1-I15(SEAYLKYEGL  | 332   | >PBRM1-I15(SEAYLKYNEG  | 503   | 171   |
| >PBRM1-I15(SEAYLKYEGL  | 357   | >PBRM1-I15(SEAYLKYNEG  | 450   | 93    |
| >PBRM1-I15(SEAYLKYEGL  | 271   | >PBRM1-I15(SEAYLKYNEG  | 322   | 51    |
| >PBRM1-I15(SEAYLKYI    | 373   | >PBRM1-I15(SEAYLKYN    | 1973  | 1600  |
| >PBRM1-I15(SEAYLKYEGL  | 110   | >PBRM1-I15(SEAYLKYNEG  | 146   | 36    |
| >PBRM1-I15(SEAYLKYEGL  | 432   | >PBRM1-I15(SEAYLKYNEG  | 587   | 155   |
| >PBRM1-I15(SEAYLKYI    | 261   | >PBRM1-I15(SEAYLKYN    | 1119  | 858   |
| >PBRM1-I15(SEAYLKYEGL  | 62    | >PBRM1-I15(SEAYLKYNEG  | 83    | 21    |
| >PBRM1-I15(SEAYLKYEGL  | 466   | >PBRM1-I15(SEAYLKYNEG  | 666   | 200   |
| >PBRM1-I15(SEAYLKYI    | 93    | >PBRM1-I15(SEAYLKYN    | 24238 | 24145 |
| >PBRM1-I15(SEAYLKYEGL  | 59    | >PBRM1-I15(SEAYLKYNEG  | 169   | 110   |
| >PBRM1-I15(HSEAYLKYI   | 306   | >PBRM1-I15(HSEAYLKYN   | 32644 | 32338 |
| >PBRM1-I15(HSEAYLKYI   | 227   | >PBRM1-I15(HSEAYLKYN   | 11467 | 11240 |
| >PBRM1-I15(HSEAYLKYI   | 103   | >PBRM1-I15(HSEAYLKYN   | 34610 | 34507 |
| >PBRM1-I15(LHSEAYLKYI  | 177   | >PBRM1-I15(LHSEAYLKYN  | 30641 | 30464 |
| >PBRM1-K62 KRKELGPL    | 162   | >PBRM1-K62 ERKELGPL    | 2055  | 1893  |
| >PBRM1-K62 KRKELGPL    | 68    | >PBRM1-K62 ERKELGPL    | 5235  | 5167  |
| >PBRM1-K62 KRKELGPLPD  | 158   | >PBRM1-K62 ERKELGPLPD  | 3868  | 3710  |
| >PBRM1-K62 KRKELGPL    | 355   | >PBRM1-K62 ERKELGPL    | 3345  | 2990  |
| >PBRM1-K62 EKRKELGPL   | 32320 | >PBRM1-K62 EERKELGPL   | 422   | 31898 |
| >PBRM1-K62 EKRKELGPL   | 22435 | >PBRM1-K62 EERKELGPL   | 114   | 22321 |
| >PBRM1-K62 KEKRKELGPL  | 243   | >PBRM1-K62 KEERKELGPL  | 269   | 26    |
| >PBRM1-K62 KEKRKELGPL  | 240   | >PBRM1-K62 KEERKELGPL  | 81    | 159   |
| >PBRM1-K62 LLKEKRKEL   | 306   | >PBRM1-K62 LLKEERKEL   | 537   | 231   |
| >PBRM1-K62 LLKEKRKEL   | 13    | >PBRM1-K62 LLKEERKEL   | 12    | 1     |
| >PBRM1-K62 LLKEKRKEL   | 17    | >PBRM1-K62 LLKEERKEL   | 175   | 158   |
| >PBRM1-K62 KLLKEKRKEL  | 126   | >PBRM1-K62 KLLKEERKEL  | 121   | 5     |
| >PBRM1-K62 KLLKEKRKEL  | 287   | >PBRM1-K62 KLLKEERKEL  | 167   | 120   |
| >PBRM1-K62 KLLKEKRKEL  | 62    | >PBRM1-K62 KLLKEERKEL  | 59    | 3     |
| >PBRM1-K62 KLLKEKRK    | 106   | >PBRM1-K62 KLLKEERK    | 186   | 80    |
| >PBRM1-K62 KLLKEKRK    | 494   | >PBRM1-K62 KLLKEERK    | 1702  | 1208  |
| >PBRM1-K62 HILEKLLKEK  | 227   | >PBRM1-K62 HILEKLLKEE  | 23071 | 22844 |
| >PBRM1-K62 HILEKLLKEK  | 451   | >PBRM1-K62 HILEKLLKEE  | 35314 | 34863 |
| >PBRM1-K62 HILEKLLKEK  | 114   | >PBRM1-K62 HILEKLLKEE  | 14525 | 14411 |
| >PBRM1-K62 HILEKLLKEKR | 74    | >PBRM1-K62 HILEKLLKEER | 62    | 12    |

|                        |      |                        |       |       |
|------------------------|------|------------------------|-------|-------|
| >PBRM1-K62 HILEKLLKEKR | 189  | >PBRM1-K62 HILEKLLKEER | 110   | 79    |
| >PBRM1-K62 HILEKLLKEKR | 310  | >PBRM1-K62 HILEKLLKEER | 237   | 73    |
| >PBRM1-K62 HILEKLLKEKR | 51   | >PBRM1-K62 HILEKLLKEER | 85    | 34    |
| >PBRM1-K66 KLNEVYEA    | 19   | >PBRM1-K66 NLNEVYEA    | 82    | 63    |
| >PBRM1-K66 KLNEVYEA    | 14   | >PBRM1-K66 NLNEVYEA    | 56    | 42    |
| >PBRM1-K66 KLNEVYEA    | 6    | >PBRM1-K66 NLNEVYEA    | 10    | 4     |
| >PBRM1-K66 KLNEVYEA    | 3    | >PBRM1-K66 NLNEVYEA    | 4     | 1     |
| >PBRM1-K66 KLNEVYEA    | 6    | >PBRM1-K66 NLNEVYEA    | 12    | 6     |
| >PBRM1-K66 KLNEVYEA    | 3    | >PBRM1-K66 NLNEVYEA    | 4     | 1     |
| >PBRM1-K66 KLNEVYEA    | 68   | >PBRM1-K66 NLNEVYEA    | 429   | 361   |
| >PBRM1-K66 KLNEVYEA    | 7    | >PBRM1-K66 NLNEVYEA    | 24    | 17    |
| >PBRM1-K66 KLNEVYEA    | 4    | >PBRM1-K66 NLNEVYEA    | 11    | 7     |
| >PBRM1-K66 KLNEVYEA    | 1    | >PBRM1-K66 NLNEVYEA    | 2     | 1     |
| >PBRM1-K66 KLNEVYEA    | 12   | >PBRM1-K66 NLNEVYEA    | 38    | 26    |
| >PBRM1-K66 KLNEVYEA    | 3    | >PBRM1-K66 NLNEVYEA    | 5     | 2     |
| >PBRM1-K66 KLNEVYEA    | 13   | >PBRM1-K66 NLNEVYEA    | 76    | 63    |
| >PBRM1-K66 KLNEVYEA    | 6    | >PBRM1-K66 NLNEVYEA    | 11    | 5     |
| >PBRM1-K66 KLNEVYEA    | 47   | >PBRM1-K66 NLNEVYEA    | 73    | 26    |
| >PBRM1-K66 KLNEVYEA    | 4    | >PBRM1-K66 NLNEVYEA    | 6     | 2     |
| >PBRM1-K66 KLNEVYEA    | 9    | >PBRM1-K66 NLNEVYEA    | 37    | 28    |
| >PBRM1-K66 KLNEVYEA    | 2    | >PBRM1-K66 NLNEVYEA    | 4     | 2     |
| >PBRM1-K66 KLNEVYEA    | 332  | >PBRM1-K66 NLNEVYEA    | 2565  | 2233  |
| >PBRM1-K66 KLNEVYEA    | 192  | >PBRM1-K66 NLNEVYEA    | 11248 | 11056 |
| >PBRM1-K66 KLNEVYEA    | 155  | >PBRM1-K66 NLNEVYEA    | 10943 | 10788 |
| >PBRM1-K66 KLNEVYEA    | 7019 | >PBRM1-K66 NLNEVYEA    | 190   | 6829  |
| >PBRM1-K66 KLNEVYEA    | 773  | >PBRM1-K66 NLNEVYEA    | 22    | 751   |
| >PBRM1-K66 KLNEVYEA    | 900  | >PBRM1-K66 NLNEVYEA    | 25    | 875   |
| >PBRM1-K66 QKLNEVYEA   | 421  | >PBRM1-K66 QNLNEVYEA   | 13691 | 13270 |
| >PBRM1-K66 QKLNEVYEA   | 45   | >PBRM1-K66 QNLNEVYEA   | 3859  | 3814  |
| >PBRM1-K66 QKLNEVYEA   | 451  | >PBRM1-K66 QNLNEVYEA   | 12807 | 12356 |
| >PBRM1-K66 KSKYMTPMC   | 163  | >PBRM1-K66 KSKYMTPMC   | 20712 | 20549 |
| >PBRM1-K66 KSKYMTPMC   | 85   | >PBRM1-K66 KSKYMTPMC   | 23257 | 23172 |
| >PBRM1-K66 KSKYMTPMC   | 4    | >PBRM1-K66 KSKYMTPMC   | 203   | 199   |
| >PBRM1-K66 KSKYMTPMC   | 33   | >PBRM1-K66 KSKYMTPMC   | 6362  | 6329  |
| >PBRM1-K66 QQKLNEVYEA  | 435  | >PBRM1-K66 QQNLNEVYEA  | 87    | 348   |
| >PBRM1-K66 QQKLNEVY    | 88   | >PBRM1-K66 QQNLNEVY    | 114   | 26    |
| >PBRM1-K66 QQKLNEVY    | 458  | >PBRM1-K66 QQNLNEVY    | 799   | 341   |
| >PBRM1-K66 QQKLNEVY    | 31   | >PBRM1-K66 QQNLNEVY    | 46    | 15    |
| >PBRM1-K66 QQKLNEVYEA  | 273  | >PBRM1-K66 QQNLNEVYEA  | 377   | 104   |
| >PBRM1-K66 MQQKLNEV    | 105  | >PBRM1-K66 MQQNLNEV    | 63    | 42    |
| >PBRM1-K66 MQQKLNEV    | 354  | >PBRM1-K66 MQQNLNEV    | 229   | 125   |
| >PBRM1-K66 MQQKLNEV    | 85   | >PBRM1-K66 MQQNLNEV    | 71    | 14    |
| >PBRM1-K66 MQQKLNEV    | 365  | >PBRM1-K66 MQQNLNEV    | 340   | 25    |

|                      |      |                      |     |      |
|----------------------|------|----------------------|-----|------|
| >PBRM1-K66 MQQKLNEV  | 154  | >PBRM1-K66 MQQNLNEV  | 85  | 69   |
| >PBRM1-K66 MQQKLNEV  | 15   | >PBRM1-K66 MQQNLNEV  | 10  | 5    |
| >PBRM1-K66 MQQKLNEVY | 117  | >PBRM1-K66 MQQNLNEVY | 59  | 58   |
| >PBRM1-K66 MQQKLNEV  | 404  | >PBRM1-K66 MQQNLNEV  | 126 | 278  |
| >PBRM1-K66 MQQKLNEV  | 425  | >PBRM1-K66 MQQNLNEV  | 101 | 324  |
| >PBRM1-K66 MQQKLNEV  | 1249 | >PBRM1-K66 MQQNLNEV  | 378 | 871  |
| >PBRM1-K66 MQQKLNEVY | 288  | >PBRM1-K66 MQQNLNEVY | 146 | 142  |
| >PBRM1-K66 MQQKLNEVY | 30   | >PBRM1-K66 MQQNLNEVY | 30  | 0    |
| >PBRM1-K66 MQQKLNEVY | 156  | >PBRM1-K66 MQQNLNEVY | 114 | 42   |
| >PBRM1-K66 MQQKLNEV  | 364  | >PBRM1-K66 MQQNLNEV  | 214 | 150  |
| >PBRM1-K66 MQQKLNEVY | 12   | >PBRM1-K66 MQQNLNEVY | 11  | 1    |
| >PBRM1-K66 PMQQKLNEV | 459  | >PBRM1-K66 PMQQNLNEV | 444 | 15   |
| >PBRM1-K66 PMQQKLNEV | 45   | >PBRM1-K66 PMQQNLNEV | 18  | 27   |
| >PBRM1-K66 PMQQKLNEV | 221  | >PBRM1-K66 PMQQNLNEV | 41  | 180  |
| >PBRM1-K66 PMQQKLNEV | 211  | >PBRM1-K66 PMQQNLNEV | 148 | 63   |
| >PBRM1-K66 PMQQKLNEV | 234  | >PBRM1-K66 PMQQNLNEV | 57  | 177  |
| >PBRM1-K66 PMQQKLNEV | 10   | >PBRM1-K66 PMQQNLNEV | 5   | 5    |
| >PBRM1-K66 PMQQKLNEV | 422  | >PBRM1-K66 PMQQNLNEV | 291 | 131  |
| >PBRM1-K66 PMQQKLNEV | 1047 | >PBRM1-K66 PMQQNLNEV | 420 | 627  |
| >PBRM1-K66 TPMQQKLNE | 572  | >PBRM1-K66 TPMQQNLNE | 180 | 392  |
| >PBRM1-K66 TPMQQKLNE | 160  | >PBRM1-K66 TPMQQNLNE | 114 | 46   |
| >PBRM1-K66 TPMQQKLNE | 24   | >PBRM1-K66 TPMQQNLNE | 17  | 7    |
| >PBRM1-K66 TPMQQKLNE | 44   | >PBRM1-K66 TPMQQNLNE | 42  | 2    |
| >PBRM1-K66 TPMQQKLNE | 83   | >PBRM1-K66 TPMQQNLNE | 81  | 2    |
| >PBRM1-K66 TPMQQKLNE | 84   | >PBRM1-K66 TPMQQNLNE | 78  | 6    |
| >PBRM1-K66 TPMQQKLNE | 522  | >PBRM1-K66 TPMQQNLNE | 212 | 310  |
| >PBRM1-K66 MTPMQQKLI | 422  | >PBRM1-K66 MTPMQQNL  | 154 | 268  |
| >PBRM1-K66 MTPMQQKLI | 241  | >PBRM1-K66 MTPMQQNL  | 185 | 56   |
| >PBRM1-K66 MTPMQQKLI | 382  | >PBRM1-K66 MTPMQQNL  | 171 | 211  |
| >PBRM1-K66 MTPMQQKLI | 461  | >PBRM1-K66 MTPMQQNL  | 282 | 179  |
| >PBRM1-K66 MTPMQQKLI | 142  | >PBRM1-K66 MTPMQQNL  | 72  | 70   |
| >PBRM1-K66 MTPMQQKL  | 132  | >PBRM1-K66 MTPMQQNL  | 44  | 88   |
| >PBRM1-K66 MTPMQQKLI | 13   | >PBRM1-K66 MTPMQQNL  | 7   | 6    |
| >PBRM1-K66 MTPMQQKL  | 262  | >PBRM1-K66 MTPMQQNL  | 429 | 167  |
| >PBRM1-K66 MTPMQQKL  | 20   | >PBRM1-K66 MTPMQQNL  | 82  | 62   |
| >PBRM1-K66 MTPMQQKLI | 1250 | >PBRM1-K66 MTPMQQNL  | 231 | 1019 |
| >PBRM1-K66 MTPMQQKLI | 31   | >PBRM1-K66 MTPMQQNL  | 15  | 16   |
| >PBRM1-K66 YMTMQQKI  | 72   | >PBRM1-K66 YMTMQQN   | 47  | 25   |
| >PBRM1-K66 YMTMQQKI  | 12   | >PBRM1-K66 YMTMQQN   | 8   | 4    |
| >PBRM1-K66 YMTMQQKI  | 37   | >PBRM1-K66 YMTMQQN   | 19  | 18   |
| >PBRM1-K66 YMTMQQKI  | 236  | >PBRM1-K66 YMTMQQN   | 147 | 89   |
| >PBRM1-K66 YMTMQQKI  | 14   | >PBRM1-K66 YMTMQQN   | 13  | 1    |
| >PBRM1-K66 YMTMQQKI  | 16   | >PBRM1-K66 YMTMQQN   | 11  | 5    |

|                       |       |                       |       |       |
|-----------------------|-------|-----------------------|-------|-------|
| >PBRM1-K66 YMTPMQQKI  | 9     | >PBRM1-K66 YMTPMQQN   | 9     | 0     |
| >PBRM1-K66 YMTPMQQKI  | 25    | >PBRM1-K66 YMTPMQQN   | 19    | 6     |
| >PBRM1-K66 YMTPMQQK   | 19    | >PBRM1-K66 YMTPMQQN   | 127   | 108   |
| >PBRM1-K66 YMTPMQQKI  | 2     | >PBRM1-K66 YMTPMQQN   | 2     | 0     |
| >PBRM1-K66 YMTPMQQK   | 364   | >PBRM1-K66 YMTPMQQN   | 21417 | 21053 |
| >PBRM1-K66 YMTPMQQK   | 308   | >PBRM1-K66 YMTPMQQN   | 26535 | 26227 |
| >PBRM1-K66 YMTPMQQK   | 313   | >PBRM1-K66 YMTPMQQN   | 23079 | 22766 |
| >PBRM1-K66 YMTPMQQKI  | 347   | >PBRM1-K66 YMTPMQQN   | 167   | 180   |
| >PBRM1-K66 YMTPMQQKI  | 350   | >PBRM1-K66 YMTPMQQN   | 405   | 55    |
| >PBRM1-K66 KYMTPMQQI  | 23    | >PBRM1-K66 KYMTPMQQI  | 16    | 7     |
| >PBRM1-K66 KYMTPMQQI  | 183   | >PBRM1-K66 KYMTPMQQI  | 26524 | 26341 |
| >PBRM1-K66 KYMTPMQQI  | 1349  | >PBRM1-K66 KYMTPMQQI  | 419   | 930   |
| >PBRM1-K66 KYMTPMQQI  | 10    | >PBRM1-K66 KYMTPMQQI  | 11    | 1     |
| >PBRM1-K66 KYMTPMQQI  | 14    | >PBRM1-K66 KYMTPMQQI  | 5726  | 5712  |
| >PBRM1-K66 KYMTPMQQI  | 770   | >PBRM1-K66 KYMTPMQQI  | 387   | 383   |
| >PBRM1-K66 KYMTPMQQI  | 71    | >PBRM1-K66 KYMTPMQQI  | 9180  | 9109  |
| >PBRM1-K66 KYMTPMQQI  | 180   | >PBRM1-K66 KYMTPMQQI  | 6976  | 6796  |
| >PBRM1-K66 KYMTPMQQI  | 296   | >PBRM1-K66 KYMTPMQQI  | 62    | 234   |
| >PBRM1-K66 SKYMTPMQC  | 115   | >PBRM1-K66 SKYMTPMQC  | 1209  | 1094  |
| >PBRM1-K66 SKYMTPMQC  | 14    | >PBRM1-K66 SKYMTPMQC  | 9     | 5     |
| >PBRM1-L25 LLAKNAKT   | 84    | >PBRM1-L25 PLAKNAKT   | 5491  | 5407  |
| >PBRM1-L25 LLAKNAKTY  | 295   | >PBRM1-L25 PLAKNAKTY  | 1054  | 759   |
| >PBRM1-L25 LLAKNAKTY  | 349   | >PBRM1-L25 PLAKNAKTY  | 1661  | 1312  |
| >PBRM1-L25 LLAKNAKTY  | 102   | >PBRM1-L25 PLAKNAKTY  | 5229  | 5127  |
| >PBRM1-L25 LLAKNAKTY  | 89    | >PBRM1-L25 PLAKNAKTY  | 445   | 356   |
| >PBRM1-L25 LLAKNAKTY  | 64    | >PBRM1-L25 PLAKNAKTY  | 1610  | 1546  |
| >PBRM1-L25 LLAKNAKTY  | 202   | >PBRM1-L25 PLAKNAKTY  | 12154 | 11952 |
| >PBRM1-L25 LLAKNAKTY  | 425   | >PBRM1-L25 PLAKNAKTY  | 3555  | 3130  |
| >PBRM1-L25 LLAKNAKTY  | 288   | >PBRM1-L25 PLAKNAKTY  | 382   | 94    |
| >PBRM1-L25 DLLAKNAKTY | 143   | >PBRM1-L25 DPLAKNAKTY | 2068  | 1925  |
| >PBRM1-L25 DLLAKNAKTY | 11153 | >PBRM1-L25 DPLAKNAKTY | 330   | 10823 |
| >PBRM1-L25 DLLAKNAKTY | 22253 | >PBRM1-L25 DPLAKNAKTY | 365   | 21888 |
| >PBRM1-L25 MAKDIDLL   | 259   | >PBRM1-L25 MAKDIDPL   | 314   | 55    |
| >PBRM1-L25 MAKDIDLLAK | 139   | >PBRM1-L25 MAKDIDPLAK | 217   | 78    |
| >PBRM1-L25 MAKDIDLLA  | 138   | >PBRM1-L25 MAKDIDPLA  | 78    | 60    |
| >PBRM1-L25 MAKDIDLLAK | 10    | >PBRM1-L25 MAKDIDPLAK | 9     | 1     |
| >PBRM1-L25 MAKDIDLLAK | 67    | >PBRM1-L25 MAKDIDPLAK | 124   | 57    |
| >PBRM1-L25 MAKDIDLL   | 220   | >PBRM1-L25 MAKDIDPL   | 101   | 119   |
| >PBRM1-L25 MAKDIDLLA  | 382   | >PBRM1-L25 MAKDIDPLA  | 1010  | 628   |
| >PBRM1-L25 MAKDIDLL   | 1683  | >PBRM1-L25 MAKDIDPL   | 189   | 1494  |
| >PBRM1-L25 MAKDIDLLA  | 970   | >PBRM1-L25 MAKDIDPLA  | 257   | 713   |
| >PBRM1-L25 AMAKDIDLL  | 3613  | >PBRM1-L25 AMAKDIDPL  | 259   | 3354  |
| >PBRM1-L25 AMAKDIDL   | 264   | >PBRM1-L25 AMAKDIDP   | 22453 | 22189 |

|                        |      |                         |       |       |
|------------------------|------|-------------------------|-------|-------|
| >PBRM1-L25 AMAKDIDLL   | 45   | >PBRM1-L25 AMAKDIDPL    | 31    | 14    |
| >PBRM1-L25 AMAKDIDLLA  | 340  | >PBRM1-L25 AMAKDIDPLA   | 587   | 247   |
| >PBRM1-L25 AMAKDIDL    | 37   | >PBRM1-L25 AMAKDIDP     | 8690  | 8653  |
| >PBRM1-L25 AMAKDIDLL   | 3    | >PBRM1-L25 AMAKDIDPL    | 3     | 0     |
| >PBRM1-L25 AMAKDIDLLA  | 42   | >PBRM1-L25 AMAKDIDPLA   | 88    | 46    |
| >PBRM1-L25 AMAKDIDL    | 178  | >PBRM1-L25 AMAKDIDP     | 13809 | 13631 |
| >PBRM1-L25 AMAKDIDLL   | 20   | >PBRM1-L25 AMAKDIDPL    | 9     | 11    |
| >PBRM1-L25 AMAKDIDLLA  | 210  | >PBRM1-L25 AMAKDIDPLA   | 627   | 417   |
| >PBRM1-L25 AMAKDIDLL   | 65   | >PBRM1-L25 AMAKDIDPL    | 24    | 41    |
| >PBRM1-L25 AMAKDIDL    | 158  | >PBRM1-L25 AMAKDIDP     | 15920 | 15762 |
| >PBRM1-L25 AMAKDIDLL   | 24   | >PBRM1-L25 AMAKDIDPL    | 12    | 12    |
| >PBRM1-L25 AMAKDIDLLA  | 155  | >PBRM1-L25 AMAKDIDPLA   | 82    | 73    |
| >PBRM1-L25 AMAKDIDL    | 137  | >PBRM1-L25 AMAKDIDP     | 21075 | 20938 |
| >PBRM1-L25 AMAKDIDLL   | 38   | >PBRM1-L25 AMAKDIDPL    | 10    | 28    |
| >PBRM1-L25 AMAKDIDLLA  | 788  | >PBRM1-L25 AMAKDIDPLA   | 342   | 446   |
| >PBRM1-L25 AMAKDIDL    | 29   | >PBRM1-L25 AMAKDIDP     | 14896 | 14867 |
| >PBRM1-L25 AMAKDIDLL   | 17   | >PBRM1-L25 AMAKDIDPL    | 13    | 4     |
| >PBRM1-L25 AMAKDIDLLA  | 50   | >PBRM1-L25 AMAKDIDPLA   | 23    | 27    |
| >PBRM1-L25 AMAKDIDLL   | 85   | >PBRM1-L25 AMAKDIDPL    | 49    | 36    |
| >PBRM1-L25 AMAKDIDL    | 14   | >PBRM1-L25 AMAKDIDP     | 16076 | 16062 |
| >PBRM1-L25 AMAKDIDLL   | 15   | >PBRM1-L25 AMAKDIDPL    | 10    | 5     |
| >PBRM1-L25 AMAKDIDLLA  | 37   | >PBRM1-L25 AMAKDIDPLA   | 24    | 13    |
| >PBRM1-L25 AMAKDIDLLA  | 101  | >PBRM1-L25 AMAKDIDPLA   | 115   | 14    |
| >PBRM1-L25 AMAKDIDLLA  | 40   | >PBRM1-L25 AMAKDIDPLA   | 40    | 0     |
| >PBRM1-L25 AMAKDIDLL   | 4570 | >PBRM1-L25 AMAKDIDPL    | 322   | 4248  |
| >PBRM1-L25 AMAKDIDLL   | 1573 | >PBRM1-L25 AMAKDIDPL    | 278   | 1295  |
| >PBRM1-L25 AMAKDIDLLA  | 489  | >PBRM1-L25 AMAKDIDPLA   | 406   | 83    |
| >PBRM1-L25 HAMA KDIDL  | 434  | >PBRM1-L25 HAMA KDIDP   | 330   | 104   |
| >PBRM1-L25 HAMA KDIDL  | 252  | >PBRM1-L25 HAMA KDIDP   | 453   | 201   |
| >PBRM1-L25 HAMA KDIDL  | 309  | >PBRM1-L25 HAMA KDIDP   | 22780 | 22471 |
| >PBRM1-L25 HAMA KDIDL  | 801  | >PBRM1-L25 HAMA KDIDP   | 283   | 518   |
| >PBRM1-L25 HAMA KDIDL  | 1451 | >PBRM1-L25 HAMA KDIDP   | 361   | 1090  |
| >PBRM1-M5: MKILFN VV   | 484  | >PBRM1-M5: IKILFN VV    | 7540  | 7056  |
| >PBRM1-M5: MKILFN VV   | 42   | >PBRM1-M5: IKILFN VV    | 53    | 11    |
| >PBRM1-M5: MKILFN VVL  | 13   | >PBRM1-M5: IKILFN VVL   | 16    | 3     |
| >PBRM1-M5: MKILFN VVLE | 151  | >PBRM1-M5: IKILFN VVLEA | 201   | 50    |
| >PBRM1-M5: MKILFN VV   | 482  | >PBRM1-M5: IKILFN VV    | 5547  | 5065  |
| >PBRM1-M5: MKILFN VVL  | 15   | >PBRM1-M5: IKILFN VVL   | 119   | 104   |
| >PBRM1-M5: RMKILFN V   | 157  | >PBRM1-M5: RIKILFN V    | 1539  | 1382  |
| >PBRM1-M5: RMKILFN V   | 50   | >PBRM1-M5: RIKILFN V    | 536   | 486   |
| >PBRM1-M5: RMKILFN VV  | 299  | >PBRM1-M5: RIKILFN VV   | 1823  | 1524  |
| >PBRM1-M5: RMKILFN VVL | 262  | >PBRM1-M5: RIKILFN VVL  | 1258  | 996   |
| >PBRM1-M5: RMKILFN V   | 7    | >PBRM1-M5: RIKILFN V    | 41    | 34    |

|                      |      |                      |      |      |
|----------------------|------|----------------------|------|------|
| >PBRM1-M5:RMKILFNVV  | 13   | >PBRM1-M5:RIKILFNVV  | 123  | 110  |
| >PBRM1-M5:RMKILFNVL  | 473  | >PBRM1-M5:RIKILFNVL  | 1779 | 1306 |
| >PBRM1-M5:RMKILFNV   | 50   | >PBRM1-M5:RIKILFNV   | 109  | 59   |
| >PBRM1-M5:RMKILFNVV  | 185  | >PBRM1-M5:RIKILFNVV  | 396  | 211  |
| >PBRM1-M5:RMKILFNV   | 15   | >PBRM1-M5:RIKILFNV   | 498  | 483  |
| >PBRM1-M5:RMKILFNVV  | 77   | >PBRM1-M5:RIKILFNVV  | 3299 | 3222 |
| >PBRM1-M5:RMKILFNV   | 29   | >PBRM1-M5:RIKILFNV   | 1973 | 1944 |
| >PBRM1-M5:RMKILFNVV  | 137  | >PBRM1-M5:RIKILFNVV  | 6207 | 6070 |
| >PBRM1-M5:RMKILFNV   | 46   | >PBRM1-M5:RIKILFNV   | 1626 | 1580 |
| >PBRM1-M5:RMKILFNVV  | 406  | >PBRM1-M5:RIKILFNVV  | 9724 | 9318 |
| >PBRM1-M5:RMKILFNV   | 322  | >PBRM1-M5:RIKILFNV   | 5070 | 4748 |
| >PBRM1-M5:RMKILFNV   | 5    | >PBRM1-M5:RIKILFNV   | 75   | 70   |
| >PBRM1-M5:RMKILFNVV  | 21   | >PBRM1-M5:RIKILFNVV  | 839  | 818  |
| >PBRM1-M5:RMKILFNVL  | 340  | >PBRM1-M5:RIKILFNVL  | 6676 | 6336 |
| >PBRM1-M5:RMKILFNV   | 41   | >PBRM1-M5:RIKILFNV   | 30   | 11   |
| >PBRM1-M5:RMKILFNVV  | 47   | >PBRM1-M5:RIKILFNVV  | 34   | 13   |
| >PBRM1-M5:RMKILFNVL  | 64   | >PBRM1-M5:RIKILFNVL  | 46   | 18   |
| >PBRM1-M5:RMKILFNV   | 106  | >PBRM1-M5:RIKILFNV   | 345  | 239  |
| >PBRM1-M5:RMKILFNVV  | 340  | >PBRM1-M5:RIKILFNVV  | 1588 | 1248 |
| >PBRM1-M5:RMKILFNVL  | 164  | >PBRM1-M5:RIKILFNVL  | 329  | 165  |
| >PBRM1-M5:RMKILFNVV  | 77   | >PBRM1-M5:RIKILFNVV  | 150  | 73   |
| >PBRM1-M5:RMKILFNVV  | 109  | >PBRM1-M5:RIKILFNVV  | 1233 | 1124 |
| >PBRM1-M5:RMKILFNVL  | 66   | >PBRM1-M5:RIKILFNVL  | 530  | 464  |
| >PBRM1-M5:RMKILFNV   | 398  | >PBRM1-M5:RIKILFNV   | 5849 | 5451 |
| >PBRM1-M5:RMKILFNVV  | 87   | >PBRM1-M5:RIKILFNVV  | 2303 | 2216 |
| >PBRM1-M5:RMKILFNVL  | 36   | >PBRM1-M5:RIKILFNVL  | 952  | 916  |
| >PBRM1-M5:RMKILFNVL  | 241  | >PBRM1-M5:RIKILFNVL  | 5571 | 5330 |
| >PBRM1-M5:KSKKNIRKQR | 27   | >PBRM1-M5:KSKKNIRKQR | 13   | 14   |
| >PBRM1-M5:KSKKNIRKQR | 16   | >PBRM1-M5:KSKKNIRKQR | 82   | 66   |
| >PBRM1-M5:KSKKNIRKQR | 302  | >PBRM1-M5:KSKKNIRKQR | 1674 | 1372 |
| >PBRM1-M5:KSKKNIRKQR | 229  | >PBRM1-M5:KSKKNIRKQR | 2922 | 2693 |
| >PBRM1-M5:KSKKNIRKQR | 5359 | >PBRM1-M5:KSKKNIRKQR | 275  | 5084 |
| >PBRM1-M5:QRMKILFNV  | 299  | >PBRM1-M5:QRIKILFNV  | 574  | 275  |
| >PBRM1-M5:QRMKILFN\  | 437  | >PBRM1-M5:QRIKILFNVV | 752  | 315  |
| >PBRM1-M5:QRMKILFN\  | 168  | >PBRM1-M5:QRIKILFNVL | 299  | 131  |
| >PBRM1-M5:QRMKILFN   | 282  | >PBRM1-M5:QRIKILFN   | 1135 | 853  |
| >PBRM1-M5:QRMKILFNV  | 25   | >PBRM1-M5:QRIKILFNV  | 75   | 50   |
| >PBRM1-M5:QRMKILFN\  | 441  | >PBRM1-M5:QRIKILFNVV | 369  | 72   |
| >PBRM1-M5:QRMKILFN\  | 18   | >PBRM1-M5:QRIKILFNVL | 50   | 32   |
| >PBRM1-M5:QRMKILFN\  | 435  | >PBRM1-M5:QRIKILFNVV | 1186 | 751  |
| >PBRM1-M5:QRMKILFN\  | 26   | >PBRM1-M5:QRIKILFNVL | 51   | 25   |
| >PBRM1-M5:QRMKILFNV  | 432  | >PBRM1-M5:QRIKILFNV  | 544  | 112  |
| >PBRM1-M5:QRMKILFN\  | 51   | >PBRM1-M5:QRIKILFNVL | 64   | 13   |



|                       |     |                       |      |     |
|-----------------------|-----|-----------------------|------|-----|
| >PBRM1-M5:QRMKILFNV   | 251 | >PBRM1-M5:QRIKILFNV   | 519  | 268 |
| >PBRM1-M5:QRMKILFNV\  | 490 | >PBRM1-M5:QRIKILFNVV  | 571  | 81  |
| >PBRM1-M5:QRMKILFNV\  | 19  | >PBRM1-M5:QRIKILFNVVL | 30   | 11  |
| >PBRM1-M5:KQRMKILFNV  | 328 | >PBRM1-M5:KQRIKILFNV  | 366  | 38  |
| >PBRM1-M5:KQRMKILFNV  | 177 | >PBRM1-M5:KQRIKILFNV\ | 288  | 111 |
| >PBRM1-M5:KQRMKILFNV  | 207 | >PBRM1-M5:KQRIKILFNV  | 209  | 2   |
| >PBRM1-M5:KQRMKILFNV  | 65  | >PBRM1-M5:KQRIKILFNV\ | 86   | 21  |
| >PBRM1-M5:KQRMKILF    | 238 | >PBRM1-M5:KQRIKILF    | 384  | 146 |
| >PBRM1-M5:KQRMKILFN   | 57  | >PBRM1-M5:KQRIKILFN   | 81   | 24  |
| >PBRM1-M5:KQRMKILFNV  | 16  | >PBRM1-M5:KQRIKILFNV  | 19   | 3   |
| >PBRM1-M5:KQRMKILFNV  | 18  | >PBRM1-M5:KQRIKILFNV\ | 23   | 5   |
| >PBRM1-M5:KQRMKILF    | 95  | >PBRM1-M5:KQRIKILF    | 181  | 86  |
| >PBRM1-M5:KQRMKILFNV  | 262 | >PBRM1-M5:KQRIKILFNV\ | 541  | 279 |
| >PBRM1-M5:KQRMKILF    | 6   | >PBRM1-M5:KQRIKILF    | 8    | 2   |
| >PBRM1-M5:KQRMKILFNV  | 105 | >PBRM1-M5:KQRIKILFNV  | 276  | 171 |
| >PBRM1-M5:KQRMKILFNV  | 35  | >PBRM1-M5:KQRIKILFNV\ | 79   | 44  |
| >PBRM1-M5:KQRMKILF    | 243 | >PBRM1-M5:KQRIKILF    | 199  | 44  |
| >PBRM1-M5:RKQRMKIL    | 95  | >PBRM1-M5:RKQRIKIL    | 78   | 17  |
| >PBRM1-M5:RKQRMKILF   | 23  | >PBRM1-M5:RKQRIKILF   | 22   | 1   |
| >PBRM1-M5:RKQRMKILF   | 533 | >PBRM1-M5:RKQRIKILF   | 399  | 134 |
| >PBRM1-M5:RKQRMKIL    | 401 | >PBRM1-M5:RKQRIKIL    | 160  | 241 |
| >PBRM1-M5:RKQRMKILF   | 79  | >PBRM1-M5:RKQRIKILF   | 101  | 22  |
| >PBRM1-M5:RKQRMKILFN  | 281 | >PBRM1-M5:RKQRIKILFN  | 295  | 14  |
| >PBRM1-M5:RKQRMKILFN  | 285 | >PBRM1-M5:RKQRIKILFNV | 339  | 54  |
| >PBRM1-M5:RKQRMKILF   | 23  | >PBRM1-M5:RKQRIKILF   | 33   | 10  |
| >PBRM1-M5:RKQRMKILFN  | 186 | >PBRM1-M5:RKQRIKILFNV | 253  | 67  |
| >PBRM1-M5:IRKQRMKIL   | 113 | >PBRM1-M5:IRKQRIKIL   | 69   | 44  |
| >PBRM1-M5:IRKQRMKIL   | 471 | >PBRM1-M5:IRKQRIKIL   | 352  | 119 |
| >PBRM1-M5:IRKQRMKILF  | 108 | >PBRM1-M5:IRKQRIKILF  | 90   | 18  |
| >PBRM1-M5:IRKQRMKI    | 584 | >PBRM1-M5:IRKQRIKI    | 288  | 296 |
| >PBRM1-M5:IRKQRMKILF  | 118 | >PBRM1-M5:IRKQRIKILF  | 50   | 68  |
| >PBRM1-M5:IRKQRMKIL   | 848 | >PBRM1-M5:IRKQRIKIL   | 367  | 481 |
| >PBRM1-M5:IRKQRMKILF  | 181 | >PBRM1-M5:IRKQRIKILF  | 165  | 16  |
| >PBRM1-M5:IRKQRMKIL   | 78  | >PBRM1-M5:IRKQRIKIL   | 31   | 47  |
| >PBRM1-M5:IRKQRMKILF  | 105 | >PBRM1-M5:IRKQRIKILF  | 81   | 24  |
| >PBRM1-M5:NIRKQRMK    | 29  | >PBRM1-M5:NIRKQRIK    | 25   | 4   |
| >PBRM1-M5:NIRKQRMKI   | 81  | >PBRM1-M5:NIRKQRIKI   | 126  | 45  |
| >PBRM1-M5:NIRKQRMKI   | 144 | >PBRM1-M5:NIRKQRIKI   | 557  | 413 |
| >PBRM1-M5:KNIRKQRMK   | 419 | >PBRM1-M5:KNIRKQRIK   | 294  | 125 |
| >PBRM1-M5:KKNIRKQRMKI | 450 | >PBRM1-M5:KKNIRKQRIKI | 844  | 394 |
| >PBRM1-M5:SKKNIRKQRN  | 420 | >PBRM1-M5:SKKNIRKQRIK | 322  | 98  |
| >PBRM1-M5:SKKNIRKQRN  | 342 | >PBRM1-M5:SKKNIRKQRI  | 1070 | 728 |
| >PBRM1-R54RRLCDLFMV   | 354 | >PBRM1-R54GRLCDLFMV   | 895  | 541 |

|                       |      |                       |       |       |
|-----------------------|------|-----------------------|-------|-------|
| >PBRM1-R54 RRLCDLFMV  | 805  | >PBRM1-R54 GRLCDLFMV  | 446   | 359   |
| >PBRM1-R54 RRLCDLFM   | 94   | >PBRM1-R54 GRLCDLFM   | 1199  | 1105  |
| >PBRM1-R54 RRLCDLFMV  | 311  | >PBRM1-R54 GRLCDLFMV  | 2635  | 2324  |
| >PBRM1-R54 RRLCDLFMVk | 292  | >PBRM1-R54 GRLCDLFMVI | 3146  | 2854  |
| >PBRM1-R54 RRLCDLFM   | 22   | >PBRM1-R54 GRLCDLFM   | 73    | 51    |
| >PBRM1-R54 RRLCDLFMV  | 21   | >PBRM1-R54 GRLCDLFMV  | 80    | 59    |
| >PBRM1-R54 RRLCDLFMVk | 23   | >PBRM1-R54 GRLCDLFMVI | 159   | 136   |
| >PBRM1-R54 RRLCDLFMVk | 110  | >PBRM1-R54 GRLCDLFMVI | 926   | 816   |
| >PBRM1-R54 RRLCDLFM   | 24   | >PBRM1-R54 GRLCDLFM   | 1563  | 1539  |
| >PBRM1-R54 RRLCDLFMV  | 71   | >PBRM1-R54 GRLCDLFMV  | 876   | 805   |
| >PBRM1-R54 RRLCDLFMVk | 32   | >PBRM1-R54 GRLCDLFMVI | 922   | 890   |
| >PBRM1-R54 RRLCDLFMVk | 375  | >PBRM1-R54 GRLCDLFMVI | 6243  | 5868  |
| >PBRM1-R54 RRLCDLFM   | 114  | >PBRM1-R54 GRLCDLFM   | 3421  | 3307  |
| >PBRM1-R54 RRLCDLFMV  | 214  | >PBRM1-R54 GRLCDLFMV  | 729   | 515   |
| >PBRM1-R54 RRLCDLFMVk | 28   | >PBRM1-R54 GRLCDLFMVI | 390   | 362   |
| >PBRM1-R54 GRRLCDLFM\ | 571  | >PBRM1-R54 GGRLCDLFM' | 87    | 484   |
| >PBRM1-R54 GRRLCDLFM\ | 191  | >PBRM1-R54 GGRLCDLFM' | 28796 | 28605 |
| >PBRM1-R54 GRRLCDLFM  | 1594 | >PBRM1-R54 GGRLCDLFM  | 345   | 1249  |
| >PBRM1-R54 GRRLCDLFM  | 346  | >PBRM1-R54 GGRLCDLFM  | 24660 | 24314 |
| >PBRM1-R54 GRRLCDLFM  | 82   | >PBRM1-R54 GGRLCDLFM  | 19761 | 19679 |
| >PBRM1-R54 GRRLCDLFM\ | 78   | >PBRM1-R54 GGRLCDLFM' | 15769 | 15691 |
| >PBRM1-R54 SGRRLCDF   | 18   | >PBRM1-R54 SGGRLCDF   | 271   | 253   |
| >PBRM1-R54 SGRRLCDFM  | 77   | >PBRM1-R54 SGGRLCDFM  | 213   | 136   |
| >PBRM1-R54 GSGRRLCDF  | 1446 | >PBRM1-R54 GSGGRLCDF  | 469   | 977   |
| >PBRM1-R54 GSGRRLCDF  | 575  | >PBRM1-R54 GSGGRLCDF  | 478   | 97    |
| >PBRM1-R54 EPGSGRRL   | 364  | >PBRM1-R54 EPGSGGRL   | 604   | 240   |
| >PBRM1-R54 REPGSGRRL  | 192  | >PBRM1-R54 REPGSGGRL  | 84    | 108   |
| >PBRM1-R54 AREPGSGRRL | 701  | >PBRM1-R54 AREPGSGGRI | 360   | 341   |
| >PBRM1-R54 EAREPGSGRF | 355  | >PBRM1-R54 EAREPGSGGF | 500   | 145   |
| >PBRM1-R54 EAREPGSGR  | 152  | >PBRM1-R54 EAREPGSGG  | 32084 | 31932 |
| >PBRM1-R54 EAREPGSGR  | 66   | >PBRM1-R54 EAREPGSGG  | 34636 | 34570 |
| >PBRM1-R54 EAREPGSGRF | 70   | >PBRM1-R54 EAREPGSGGF | 85    | 15    |
| >PBRM1-R54 RRLCDLFMV  | 354  | >PBRM1-R54 SRLCDLFMV  | 334   | 20    |
| >PBRM1-R54 RRLCDLFMV  | 606  | >PBRM1-R54 SRLCDLFMV  | 499   | 107   |
| >PBRM1-R54 RRLCDLFMVk | 741  | >PBRM1-R54 SRLCDLFMVk | 322   | 419   |
| >PBRM1-R54 RRLCDLFM   | 94   | >PBRM1-R54 SRLCDLFM   | 534   | 440   |
| >PBRM1-R54 RRLCDLFMV  | 311  | >PBRM1-R54 SRLCDLFMV  | 1314  | 1003  |
| >PBRM1-R54 RRLCDLFMVk | 292  | >PBRM1-R54 SRLCDLFMVk | 1483  | 1191  |
| >PBRM1-R54 RRLCDLFM   | 22   | >PBRM1-R54 SRLCDLFM   | 108   | 86    |
| >PBRM1-R54 RRLCDLFMV  | 21   | >PBRM1-R54 SRLCDLFMV  | 133   | 112   |
| >PBRM1-R54 RRLCDLFMVk | 23   | >PBRM1-R54 SRLCDLFMVk | 317   | 294   |
| >PBRM1-R54 RRLCDLFMVk | 110  | >PBRM1-R54 SRLCDLFMVk | 1484  | 1374  |
| >PBRM1-R54 RRLCDLFM   | 24   | >PBRM1-R54 SRLCDLFM   | 1668  | 1644  |

|                       |       |                       |       |       |
|-----------------------|-------|-----------------------|-------|-------|
| >PBRM1-R54 RRLCDLFMV  | 71    | >PBRM1-R54 SRLCDLFMV  | 1022  | 951   |
| >PBRM1-R54 RRLCDLFMVk | 32    | >PBRM1-R54 SRLCDLFMVk | 1336  | 1304  |
| >PBRM1-R54 RRLCDLFMVk | 375   | >PBRM1-R54 SRLCDLFMVk | 7240  | 6865  |
| >PBRM1-R54 RRLCDLFM   | 114   | >PBRM1-R54 SRLCDLFM   | 2382  | 2268  |
| >PBRM1-R54 RRLCDLFMV  | 214   | >PBRM1-R54 SRLCDLFMV  | 1890  | 1676  |
| >PBRM1-R54 RRLCDLFMVk | 28    | >PBRM1-R54 SRLCDLFMVk | 594   | 566   |
| >PBRM1-R54 GRRLCDLFM\ | 18717 | >PBRM1-R54 GSRLCDLFM\ | 465   | 18252 |
| >PBRM1-R54 GRRLCDLFM\ | 18001 | >PBRM1-R54 GSRLCDLFM\ | 171   | 17830 |
| >PBRM1-R54 GRRLCDLFM  | 9006  | >PBRM1-R54 GSRLCDLFM  | 236   | 8770  |
| >PBRM1-R54 GRRLCDLFM\ | 571   | >PBRM1-R54 GSRLCDLFM\ | 9     | 562   |
| >PBRM1-R54 GRRLCDLF   | 23325 | >PBRM1-R54 GSRLCDF    | 27    | 23298 |
| >PBRM1-R54 GRRLCDLFM  | 23607 | >PBRM1-R54 GSRLCDLFM  | 20    | 23587 |
| >PBRM1-R54 GRRLCDLFM\ | 191   | >PBRM1-R54 GSRLCDLFM\ | 25730 | 25539 |
| >PBRM1-R54 GRRLCDLF   | 19029 | >PBRM1-R54 GSRLCDF    | 234   | 18795 |
| >PBRM1-R54 GRRLCDLFM  | 1594  | >PBRM1-R54 GSRLCDLFM  | 26    | 1568  |
| >PBRM1-R54 GRRLCDLFM\ | 21704 | >PBRM1-R54 GSRLCDLFM\ | 472   | 21232 |
| >PBRM1-R54 GRRLCDLFM  | 346   | >PBRM1-R54 GSRLCDLFM  | 16765 | 16419 |
| >PBRM1-R54 GRRLCDLFM  | 82    | >PBRM1-R54 GSRLCDLFM  | 15344 | 15262 |
| >PBRM1-R54 GRRLCDLFM\ | 78    | >PBRM1-R54 GSRLCDLFM\ | 11721 | 11643 |
| >PBRM1-R54 SGRRLCDF   | 18    | >PBRM1-R54 SGSRLCDF   | 48    | 30    |
| >PBRM1-R54 SGRRLCDFM  | 77    | >PBRM1-R54 SGSRLCDFM  | 51    | 26    |
| >PBRM1-R54 GSGRRLCDF  | 575   | >PBRM1-R54 GSGRRLCDF  | 233   | 342   |
| >PBRM1-R54 EPGSGRRL   | 364   | >PBRM1-R54 EPGSGSRL   | 834   | 470   |
| >PBRM1-R54 REPGSGRRL  | 192   | >PBRM1-R54 REPGSGSRL  | 92    | 100   |
| >PBRM1-R54 REPGSGRRL  | 997   | >PBRM1-R54 REPGSGSRL  | 314   | 683   |
| >PBRM1-R54 EAREPGSGRF | 355   | >PBRM1-R54 EAREPGSGSR | 348   | 7     |
| >PBRM1-R54 EAREPGSGR  | 152   | >PBRM1-R54 EAREPGSGS  | 28362 | 28210 |
| >PBRM1-R54 EAREPGSGR  | 66    | >PBRM1-R54 EAREPGSGS  | 25966 | 25900 |
| >PBRM1-R54 EAREPGSGRF | 70    | >PBRM1-R54 EAREPGSGSR | 32    | 38    |
| >PBRM1-R54 EAREPGSGRF | 3262  | >PBRM1-R54 EAREPGSGSR | 408   | 2854  |
| >PBRM1-T23 TIAQRIQNGS | 103   | >PBRM1-T23 PIAQRIQNGS | 495   | 392   |
| >PBRM1-T23 TIAQRIQNGS | 81    | >PBRM1-T23 PIAQRIQNGS | 2355  | 2274  |
| >PBRM1-T23 TIAQRIQNGS | 78    | >PBRM1-T23 PIAQRIQNGS | 481   | 403   |
| >PBRM1-T23 TIAQRIQNGS | 328   | >PBRM1-T23 PIAQRIQNGS | 946   | 618   |
| >PBRM1-T23 TIAQRIQNGS | 68    | >PBRM1-T23 PIAQRIQNGS | 215   | 147   |
| >PBRM1-T23 TIAQRIQNGS | 197   | >PBRM1-T23 PIAQRIQNGS | 2945  | 2748  |
| >PBRM1-T23 TIAQRIQNGS | 205   | >PBRM1-T23 PIAQRIQNGS | 1855  | 1650  |
| >PBRM1-T23 KTIAQRIQNG | 385   | >PBRM1-T23 KPIAQRIQNG | 17692 | 17307 |
| >PBRM1-T23 DLKTIAQR   | 435   | >PBRM1-T23 DLKPIAQR   | 357   | 78    |
| >PBRM1-T23 DLKTIAQR   | 24    | >PBRM1-T23 DLKPIAQR   | 24    | 0     |
| >PBRM1-T23 DLKTIAQR   | 49    | >PBRM1-T23 DLKPIAQR   | 97    | 48    |
| >PBRM1-T23 IDLKTIAQRI | 319   | >PBRM1-T23 IDLKPIAQRI | 1986  | 1667  |
| >PBRM1-T23 IDLKTIAQRI | 166   | >PBRM1-T23 IDLKPIAQRI | 330   | 164   |

|                        |     |                        |       |       |
|------------------------|-----|------------------------|-------|-------|
| >PBRM1-T23 IDLKTIAQRI  | 60  | >PBRM1-T23 IDLKPIAQRI  | 135   | 75    |
| >PBRM1-T23 EPIDLKTIAQR | 438 | >PBRM1-T23 EPIDLKPIAQR | 588   | 150   |
| >PBRM1-T23 EPIDLKTIAQR | 30  | >PBRM1-T23 EPIDLKPIAQR | 50    | 20    |
| >PBRM1-T23 EPIDLKTI    | 791 | >PBRM1-T23 EPIDLKPI    | 221   | 570   |
| >PBRM1-T23 EPIDLKTI    | 496 | >PBRM1-T23 EPIDLKPI    | 616   | 120   |
| >PBRM1-T23 EPIDLKTI    | 93  | >PBRM1-T23 EPIDLKPI    | 252   | 159   |
| >PBRM1-T23 EPIDLKTIA   | 51  | >PBRM1-T23 EPIDLKPIA   | 24    | 27    |
| >PBRM1-T23 KEPIDLKTI   | 23  | >PBRM1-T23 KEPIDLKPI   | 30    | 7     |
| >PBRM1-T23 KEPIDLKTI   | 23  | >PBRM1-T23 KEPIDLKPI   | 16    | 7     |
| >PBRM1-T23 IIKEPIDLKTI | 140 | >PBRM1-T23 IIKEPIDLKPI | 66    | 74    |
| >PBRM1-Y96 VVYVEPAEAN  | 239 | >PBRM1-Y96 HVYVEPAEAN  | 549   | 310   |
| >PBRM1-Y96 VVYVEPAEA   | 153 | >PBRM1-Y96 HVYVEPAEA   | 6052  | 5899  |
| >PBRM1-Y96 VVYVEPAEAN  | 135 | >PBRM1-Y96 HVYVEPAEAN  | 5708  | 5573  |
| >PBRM1-Y96 VVYVEPAEA   | 222 | >PBRM1-Y96 HVYVEPAEA   | 1654  | 1432  |
| >PBRM1-Y96 VVYVEPAEAN  | 75  | >PBRM1-Y96 HVYVEPAEAN  | 521   | 446   |
| >PBRM1-Y96 VVYVEPAEA   | 27  | >PBRM1-Y96 HVYVEPAEA   | 377   | 350   |
| >PBRM1-Y96 VVYVEPAEAN  | 71  | >PBRM1-Y96 HVYVEPAEAN  | 1126  | 1055  |
| >PBRM1-Y96 VVYVEPAEA   | 279 | >PBRM1-Y96 HVYVEPAEA   | 4356  | 4077  |
| >PBRM1-Y96 VVYVEPAEAN  | 159 | >PBRM1-Y96 HVYVEPAEAN  | 3964  | 3805  |
| >PBRM1-Y96 VVYVEPAEA   | 59  | >PBRM1-Y96 HVYVEPAEA   | 3018  | 2959  |
| >PBRM1-Y96 VVYVEPAEAN  | 65  | >PBRM1-Y96 HVYVEPAEAN  | 2679  | 2614  |
| >PBRM1-Y96 VVYVEPAEAN  | 188 | >PBRM1-Y96 HVYVEPAEAN  | 3390  | 3202  |
| >PBRM1-Y96 VVYVEPAEA   | 480 | >PBRM1-Y96 HVYVEPAEA   | 7374  | 6894  |
| >PBRM1-Y96 VVYVEPAEAN  | 175 | >PBRM1-Y96 HVYVEPAEAN  | 3986  | 3811  |
| >PBRM1-Y96 VVYVEPAEAN  | 332 | >PBRM1-Y96 HVYVEPAEAN  | 9693  | 9361  |
| >PBRM1-Y96 VVYVEPAEA   | 95  | >PBRM1-Y96 HVYVEPAEA   | 3375  | 3280  |
| >PBRM1-Y96 VVYVEPAEAN  | 27  | >PBRM1-Y96 HVYVEPAEAN  | 782   | 755   |
| >PBRM1-Y96 VVYVEPAEA   | 680 | >PBRM1-Y96 HVYVEPAEA   | 360   | 320   |
| >PBRM1-Y96 VVYVEPAEAN  | 510 | >PBRM1-Y96 HVYVEPAEAN  | 289   | 221   |
| >PBRM1-Y96 VVYVEPAEAN  | 205 | >PBRM1-Y96 HVYVEPAEAN  | 468   | 263   |
| >PBRM1-Y96 VVYVEPAEAN  | 38  | >PBRM1-Y96 HVYVEPAEAN  | 83    | 45    |
| >PBRM1-Y96 FKNSMYHVG   | 267 | >PBRM1-Y96 FKNSMYHVG   | 14426 | 14159 |
| >PBRM1-Y96 FKNSMYHVG   | 441 | >PBRM1-Y96 FKNSMYHVG   | 21228 | 20787 |
| >PBRM1-Y96 FKNSMYHVG   | 13  | >PBRM1-Y96 FKNSMYHVG   | 501   | 488   |
| >PBRM1-Y96 GDYVYVEPA   | 257 | >PBRM1-Y96 GDHVYVEPA   | 304   | 47    |
| >PBRM1-Y96 GDYVYVEPA   | 321 | >PBRM1-Y96 GDHVYVEPA   | 1822  | 1501  |
| >PBRM1-Y96 HVG DYVYV   | 70  | >PBRM1-Y96 HVG DHVYV   | 220   | 150   |
| >PBRM1-Y96 HVG DYVYV   | 33  | >PBRM1-Y96 HVG DHVYV   | 67    | 34    |
| >PBRM1-Y96 HVG DYVYVEI | 174 | >PBRM1-Y96 HVG DHVYVE  | 322   | 148   |
| >PBRM1-Y96 HVG DYVYV   | 113 | >PBRM1-Y96 HVG DHVYV   | 151   | 38    |
| >PBRM1-Y96 HVG DYVYVEI | 387 | >PBRM1-Y96 HVG DHVYVE  | 287   | 100   |
| >PBRM1-Y96 HVG DYVYV   | 27  | >PBRM1-Y96 HVG DHVYV   | 72    | 45    |
| >PBRM1-Y96 HVG DYVYVEI | 254 | >PBRM1-Y96 HVG DHVYVE  | 436   | 182   |

|                       |     |                      |      |     |
|-----------------------|-----|----------------------|------|-----|
| >PBRM1-Y96 HVGDYVYV   | 11  | >PBRM1-Y96 HVGDHVYV  | 17   | 6   |
| >PBRM1-Y96 HVGDYVYV   | 28  | >PBRM1-Y96 HVGDHVYV  | 57   | 29  |
| >PBRM1-Y96 HVGDYVYV   | 37  | >PBRM1-Y96 HVGDHVYV  | 80   | 43  |
| >PBRM1-Y96 HVGDYVYV   | 27  | >PBRM1-Y96 HVGDHVYV  | 101  | 74  |
| >PBRM1-Y96 HVGDYVYV   | 6   | >PBRM1-Y96 HVGDHVYV  | 8    | 2   |
| >PBRM1-Y96 HVGDYVYV   | 13  | >PBRM1-Y96 HVGDHVYV  | 19   | 6   |
| >PBRM1-Y96 HVGDYVYVEI | 50  | >PBRM1-Y96 HVGDHVYVE | 79   | 29  |
| >PBRM1-Y96 HVGDYVYV   | 13  | >PBRM1-Y96 HVGDHVYV  | 20   | 7   |
| >PBRM1-Y96 HVGDYVYVEI | 257 | >PBRM1-Y96 HVGDHVYVE | 436  | 179 |
| >PBRM1-Y96 YHVGDYVYV  | 305 | >PBRM1-Y96 YHVGDHVYV | 1025 | 720 |
| >PBRM1-Y96 YHVGDYVYV  | 175 | >PBRM1-Y96 YHVGDHVYV | 167  | 8   |
| >PBRM1-Y96 YHVGDYVYV  | 136 | >PBRM1-Y96 YHVGDHVYV | 156  | 20  |
| >PBRM1-Y96 YHVGDYVY   | 27  | >PBRM1-Y96 YHVGDHVY  | 37   | 10  |
| >PBRM1-Y96 YHVGDYVY   | 858 | >PBRM1-Y96 YHVGDHVY  | 382  | 476 |
| >PBRM1-Y96 YHVGDYVY   | 151 | >PBRM1-Y96 YHVGDHVY  | 218  | 67  |
| >PBRM1-Y96 YHVGDYVYV  | 695 | >PBRM1-Y96 YHVGDHVYV | 396  | 299 |
| >PBRM1-Y96 YHVGDYVY   | 178 | >PBRM1-Y96 YHVGDHVY  | 264  | 86  |
| >PBRM1-Y96 YHVGDYVYV  | 218 | >PBRM1-Y96 YHVGDHVYV | 196  | 22  |
| >PBRM1-Y96 MYHVGDYVY  | 436 | >PBRM1-Y96 MYHVGDHV\ | 445  | 9   |
| >PBRM1-Y96 MYHVGDYVY  | 184 | >PBRM1-Y96 MYHVGDHV\ | 101  | 83  |
| >PBRM1-Y96 MYHVGDYV   | 66  | >PBRM1-Y96 MYHVGDHV  | 120  | 54  |
| >PBRM1-Y96 MYHVGDYVY  | 321 | >PBRM1-Y96 MYHVGDHV\ | 240  | 81  |
| >PBRM1-Y96 MYHVGDYVY  | 26  | >PBRM1-Y96 MYHVGDHV\ | 43   | 17  |
| >PBRM1-Y96 MYHVGDYVY  | 10  | >PBRM1-Y96 MYHVGDHV\ | 18   | 8   |
| >PBRM1-Y96 MYHVGDYV   | 324 | >PBRM1-Y96 MYHVGDHV  | 636  | 312 |
| >PBRM1-Y96 MYHVGDYVY  | 69  | >PBRM1-Y96 MYHVGDHV\ | 56   | 13  |
| >PBRM1-Y96 MYHVGDYVY  | 15  | >PBRM1-Y96 MYHVGDHV\ | 11   | 4   |
| >PBRM1-Y96 MYHVGDYVY  | 292 | >PBRM1-Y96 MYHVGDHV\ | 135  | 157 |
| >PBRM1-Y96 MYHVGDYVY  | 108 | >PBRM1-Y96 MYHVGDHV\ | 211  | 103 |
| >PBRM1-Y96 MYHVGDYVY  | 185 | >PBRM1-Y96 MYHVGDHV\ | 558  | 373 |
| >PBRM1-Y96 MYHVGDYV   | 111 | >PBRM1-Y96 MYHVGDHV  | 370  | 259 |
| >PBRM1-Y96 MYHVGDYVY  | 140 | >PBRM1-Y96 MYHVGDHV\ | 107  | 33  |
| >PBRM1-Y96 SMYHVGDYV  | 180 | >PBRM1-Y96 SMYHVGDHV | 359  | 179 |
| >PBRM1-Y96 SMYHVGDYV  | 14  | >PBRM1-Y96 SMYHVGDHV | 46   | 32  |
| >PBRM1-Y96 SMYHVGDYV  | 10  | >PBRM1-Y96 SMYHVGDHV | 14   | 4   |
| >PBRM1-Y96 SMYHVGDYV  | 5   | >PBRM1-Y96 SMYHVGDHV | 13   | 8   |
| >PBRM1-Y96 SMYHVGDYV  | 5   | >PBRM1-Y96 SMYHVGDHV | 6    | 1   |
| >PBRM1-Y96 SMYHVGDYV  | 7   | >PBRM1-Y96 SMYHVGDHV | 9    | 2   |
| >PBRM1-Y96 SMYHVGDYV  | 5   | >PBRM1-Y96 SMYHVGDHV | 7    | 2   |
| >PBRM1-Y96 SMYHVGDYV  | 21  | >PBRM1-Y96 SMYHVGDHV | 21   | 0   |
| >PBRM1-Y96 SMYHVGDYV  | 14  | >PBRM1-Y96 SMYHVGDHV | 18   | 4   |
| >PBRM1-Y96 SMYHVGDYV  | 1   | >PBRM1-Y96 SMYHVGDHV | 2    | 1   |
| >PBRM1-Y96 SMYHVGDYV  | 341 | >PBRM1-Y96 SMYHVGDHV | 560  | 219 |

|                      |     |                      |       |       |
|----------------------|-----|----------------------|-------|-------|
| >PBRM1-Y96 SMYHVGDYV | 1   | >PBRM1-Y96 SMYHVGDHV | 1     | 0     |
| >PBRM1-Y96 SMYHVGDYV | 3   | >PBRM1-Y96 SMYHVGDHV | 4     | 1     |
| >PBRM1-Y96 SMYHVGDYV | 3   | >PBRM1-Y96 SMYHVGDHV | 3     | 0     |
| >PBRM1-Y96 SMYHVGDYV | 4   | >PBRM1-Y96 SMYHVGDHV | 4     | 0     |
| >PBRM1-Y96 SMYHVGDYV | 4   | >PBRM1-Y96 SMYHVGDHV | 4     | 0     |
| >PBRM1-Y96 SMYHVGDYV | 29  | >PBRM1-Y96 SMYHVGDHV | 400   | 371   |
| >PBRM1-Y96 SMYHVGDYV | 12  | >PBRM1-Y96 SMYHVGDHV | 26    | 14    |
| >PBRM1-Y96 SMYHVGDYV | 4   | >PBRM1-Y96 SMYHVGDHV | 6     | 2     |
| >PBRM1-Y96 SMYHVGDYV | 2   | >PBRM1-Y96 SMYHVGDHV | 2     | 0     |
| >PBRM1-Y96 SMYHVGDY  | 106 | >PBRM1-Y96 SMYHVGDH  | 377   | 271   |
| >PBRM1-Y96 SMYHVGDYV | 252 | >PBRM1-Y96 SMYHVGDHV | 450   | 198   |
| >PBRM1-Y96 SMYHVGDYV | 277 | >PBRM1-Y96 SMYHVGDHV | 1357  | 1080  |
| >PBRM1-Y96 SMYHVGDY  | 15  | >PBRM1-Y96 SMYHVGDH  | 1654  | 1639  |
| >PBRM1-Y96 SMYHVGDYV | 14  | >PBRM1-Y96 SMYHVGDHV | 42    | 28    |
| >PBRM1-Y96 SMYHVGDY  | 19  | >PBRM1-Y96 SMYHVGDH  | 3068  | 3049  |
| >PBRM1-Y96 SMYHVGDYV | 16  | >PBRM1-Y96 SMYHVGDHV | 24    | 8     |
| >PBRM1-Y96 SMYHVGDYV | 385 | >PBRM1-Y96 SMYHVGDHV | 1317  | 932   |
| >PBRM1-Y96 SMYHVGDYV | 257 | >PBRM1-Y96 SMYHVGDHV | 816   | 559   |
| >PBRM1-Y96 SMYHVGDYV | 138 | >PBRM1-Y96 SMYHVGDHV | 225   | 87    |
| >PBRM1-Y96 SMYHVGDYV | 173 | >PBRM1-Y96 SMYHVGDHV | 935   | 762   |
| >PBRM1-Y96 SMYHVGDYV | 50  | >PBRM1-Y96 SMYHVGDHV | 82    | 32    |
| >PBRM1-Y96 SMYHVGDY  | 32  | >PBRM1-Y96 SMYHVGDH  | 12310 | 12278 |
| >PBRM1-Y96 SMYHVGDYV | 45  | >PBRM1-Y96 SMYHVGDHV | 37    | 8     |
| >PBRM1-Y96 SMYHVGDY  | 43  | >PBRM1-Y96 SMYHVGDH  | 1592  | 1549  |
| >PBRM1-Y96 SMYHVGDYV | 896 | >PBRM1-Y96 SMYHVGDHV | 259   | 637   |
| >PBRM1-Y96 SMYHVGDYV | 35  | >PBRM1-Y96 SMYHVGDHV | 32    | 3     |
| >PBRM1-Y96 SMYHVGDYV | 780 | >PBRM1-Y96 SMYHVGDHV | 491   | 289   |
| >PBRM1-Y96 SMYHVGDY  | 26  | >PBRM1-Y96 SMYHVGDH  | 679   | 653   |
| >PBRM1-Y96 SMYHVGDYV | 15  | >PBRM1-Y96 SMYHVGDHV | 13    | 2     |
| >PBRM1-Y96 SMYHVGDY  | 22  | >PBRM1-Y96 SMYHVGDH  | 1387  | 1365  |
| >PBRM1-Y96 SMYHVGDYV | 158 | >PBRM1-Y96 SMYHVGDHV | 162   | 4     |
| >PBRM1-Y96 SMYHVGDYV | 14  | >PBRM1-Y96 SMYHVGDHV | 14    | 0     |
| >PBRM1-Y96 SMYHVGDYV | 54  | >PBRM1-Y96 SMYHVGDHV | 68    | 14    |
| >PBRM1-Y96 SMYHVGDYV | 309 | >PBRM1-Y96 SMYHVGDHV | 230   | 79    |
| >PBRM1-Y96 NSMYHVGDI | 404 | >PBRM1-Y96 NSMYHVGDI | 1472  | 1068  |
| >PBRM1-Y96 NSMYHVGDI | 445 | >PBRM1-Y96 NSMYHVGDI | 14150 | 13705 |
| >PBRM1-Y96 NSMYHVGDI | 338 | >PBRM1-Y96 NSMYHVGDI | 11279 | 10941 |
| >PBRM1-Y96 NSMYHVGDI | 15  | >PBRM1-Y96 NSMYHVGDI | 1944  | 1929  |
| >PBRM1-Y96 NSMYHVGDI | 53  | >PBRM1-Y96 NSMYHVGDI | 38    | 15    |
| >PBRM1-Y96 NSMYHVGDI | 237 | >PBRM1-Y96 NSMYHVGDI | 13249 | 13012 |
| >PBRM1-Y96 NSMYHVGDI | 128 | >PBRM1-Y96 NSMYHVGDI | 249   | 121   |
| >PBRM1-Y96 NSMYHVGDI | 165 | >PBRM1-Y96 NSMYHVGDI | 17271 | 17106 |
| >PBRM1-Y96 NSMYHVGDI | 62  | >PBRM1-Y96 NSMYHVGDI | 44    | 18    |

|                       |      |                        |       |       |
|-----------------------|------|------------------------|-------|-------|
| >PBRM1-Y96 NSMYHVG DY | 454  | >PBRM1-Y96 NSMYHVG D F | 433   | 21    |
| >PBRM1-Y96 NSMYHVG DY | 20   | >PBRM1-Y96 NSMYHVG D F | 38    | 18    |
| >PBRM1-Y96 NSMYHVG DY | 133  | >PBRM1-Y96 NSMYHVG D F | 407   | 274   |
| >PBRM1-Y96 NSMYHVG DY | 261  | >PBRM1-Y96 NSMYHVG D F | 13143 | 12882 |
| >PBRM1-Y96 NSMYHVG DY | 108  | >PBRM1-Y96 NSMYHVG D F | 110   | 2     |
| >PBRM1-Y96 NSMYHVG DY | 434  | >PBRM1-Y96 NSMYHVG D F | 559   | 125   |
| >PBRM1-Y96 NSMYHVG DY | 443  | >PBRM1-Y96 NSMYHVG D F | 17785 | 17342 |
| >PBRM1-Y96 NSMYHVG DY | 107  | >PBRM1-Y96 NSMYHVG D F | 70    | 37    |
| >PBRM1-Y96 NSMYHVG DY | 124  | >PBRM1-Y96 NSMYHVG D F | 191   | 67    |
| >PBRM1-Y96 KNSMYHVGC  | 87   | >PBRM1-Y96 KNSMYHVGC   | 17340 | 17253 |
| >PCM1-I169 ITVKQRCK   | 350  | >PCM1-I169 ITVKQRCK    | 713   | 363   |
| >PCM1-I169 ITVKQRCKRK | 481  | >PCM1-I169 ITVKQRCKRK  | 634   | 153   |
| >PCM1-I169 ITVKQRCK   | 452  | >PCM1-I169 ITVKQRCK    | 460   | 8     |
| >PCM1-I169 ITVKQRCKR  | 33   | >PCM1-I169 ITVKQRCKR   | 43    | 10    |
| >PCM1-I169 ITVKQRCKR  | 248  | >PCM1-I169 ITVKQRCKR   | 489   | 241   |
| >PCM1-I169 ITVKQRCK   | 146  | >PCM1-I169 ITVKQRCK    | 180   | 34    |
| >PCM1-I169 ITVKQRCKR  | 17   | >PCM1-I169 ITVKQRCKR   | 24    | 7     |
| >PCM1-I169 ITVKQRCKRK | 128  | >PCM1-I169 ITVKQRCKRK  | 317   | 189   |
| >PCM1-I169 ITVKQRCKR  | 143  | >PCM1-I169 ITVKQRCKR   | 245   | 102   |
| >PCM1-I169 ITVKQRCKRK | 301  | >PCM1-I169 ITVKQRCKRK  | 161   | 140   |
| >PCM1-I169 SITVKQRC   | 7406 | >PCM1-I169 SLTVKQRC    | 112   | 7294  |
| >PCM1-I169 SITVKQRCKR | 58   | >PCM1-I169 SLTVKQRCKR  | 83    | 25    |
| >PCM1-I169 SITVKQRCKR | 244  | >PCM1-I169 SLTVKQRCKR  | 1826  | 1582  |
| >PCM1-I169 SITVKQRCKR | 863  | >PCM1-I169 SLTVKQRCKR  | 305   | 558   |
| >PCM1-I169 KLMQDL DNN | 20   | >PCM1-I169 KLMQDL DNN  | 18    | 2     |
| >PCM1-I169 KLMQDL DNN | 6    | >PCM1-I169 KLMQDL DNN  | 4     | 2     |
| >PCM1-I169 KLMQDL DNN | 11   | >PCM1-I169 KLMQDL DNN  | 16    | 5     |
| >PCM1-I169 KLMQDL DNN | 31   | >PCM1-I169 KLMQDL DNN  | 35    | 4     |
| >PCM1-I169 KLMQDL DNN | 26   | >PCM1-I169 KLMQDL DNN  | 29    | 3     |
| >PCM1-I169 KLMQDL DNN | 7    | >PCM1-I169 KLMQDL DNN  | 7     | 0     |
| >PCM1-I169 KLMQDL DNN | 101  | >PCM1-I169 KLMQDL DNN  | 74    | 27    |
| >PCM1-I169 KLMQDL DNN | 20   | >PCM1-I169 KLMQDL DNN  | 11    | 9     |
| >PCM1-I169 KLMQDL DNN | 32   | >PCM1-I169 KLMQDL DNN  | 10    | 22    |
| >PCM1-I169 KLMQDL DNN | 20   | >PCM1-I169 KLMQDL DNN  | 45    | 25    |
| >PCM1-I169 NSITVKQR   | 632  | >PCM1-I169 NSLTVKQR    | 425   | 207   |
| >PCM1-I169 NSITVKQRCK | 194  | >PCM1-I169 NSLTVKQRCK  | 129   | 65    |
| >PCM1-I169 NSITVKQRCK | 291  | >PCM1-I169 NSLTVKQRCK  | 249   | 42    |
| >PCM1-I169 NSITVKQR   | 17   | >PCM1-I169 NSLTVKQR    | 120   | 103   |
| >PCM1-I169 NSITVKQRCK | 15   | >PCM1-I169 NSLTVKQRCK  | 102   | 87    |
| >PCM1-I169 DNNSITVK   | 346  | >PCM1-I169 DNNSLTVK    | 948   | 602   |
| >PCM1-I169 LDNNSITV   | 160  | >PCM1-I169 LDNNSLTV    | 132   | 28    |
| >PCM1-I169 DLDNNSITV  | 7    | >PCM1-I169 DLDNNSLTV   | 9     | 2     |
| >PCM1-I169 DLDNNSITV  | 5    | >PCM1-I169 DLDNNSLTV   | 8     | 3     |

|                       |      |                       |      |      |
|-----------------------|------|-----------------------|------|------|
| >PCM1-I169€DLDNNSITV  | 9    | >PCM1-I169€DLDNNSLTV  | 11   | 2    |
| >PCM1-I169€DLDNNSITV  | 5    | >PCM1-I169€DLDNNSLTV  | 6    | 1    |
| >PCM1-I169€DLDNNSITV  | 10   | >PCM1-I169€DLDNNSLTV  | 10   | 0    |
| >PCM1-I169€DLDNNSITV  | 75   | >PCM1-I169€DLDNNSLTV  | 115  | 40   |
| >PCM1-I169€QDLDNNSI   | 343  | >PCM1-I169€QDLDNNSL   | 9218 | 8875 |
| >PCM1-I169€QDLDNNSI   | 128  | >PCM1-I169€QDLDNNSL   | 1724 | 1596 |
| >PCM1-I169€QDLDNNSITV | 98   | >PCM1-I169€QDLDNNSLTV | 62   | 36   |
| >PCM1-I169€MQDLDNNSI' | 127  | >PCM1-I169€MQDLDNNSL  | 139  | 12   |
| >PCM1-I169€MQDLDNNSI  | 858  | >PCM1-I169€MQDLDNNSL  | 243  | 615  |
| >PCM1-I169€MQDLDNNSI  | 39   | >PCM1-I169€MQDLDNNSL  | 43   | 4    |
| >PCM1-I169€MQDLDNNSI' | 7    | >PCM1-I169€MQDLDNNSL  | 7    | 0    |
| >PCM1-I169€MQDLDNNSI' | 122  | >PCM1-I169€MQDLDNNSL  | 166  | 44   |
| >PCM1-I169€MQDLDNNSI' | 35   | >PCM1-I169€MQDLDNNSL  | 55   | 20   |
| >PCM1-I169€MQDLDNNSI' | 297  | >PCM1-I169€MQDLDNNSL  | 373  | 76   |
| >PCM1-I169€MQDLDNNSI' | 487  | >PCM1-I169€MQDLDNNSL  | 750  | 263  |
| >PCM1-I169€MQDLDNNSI  | 344  | >PCM1-I169€MQDLDNNSL  | 25   | 319  |
| >PCM1-I169€MQDLDNNSI' | 173  | >PCM1-I169€MQDLDNNSL  | 233  | 60   |
| >PCM1-I169€LMQDLDNNS  | 65   | >PCM1-I169€LMQDLDNNS  | 36   | 29   |
| >PCM1-I169€LMQDLDNNS  | 1692 | >PCM1-I169€LMQDLDNNS  | 438  | 1254 |
| >PCM1-I169€LMQDLDNNS  | 160  | >PCM1-I169€LMQDLDNNS  | 229  | 69   |
| >PCM1-I169€LMQDLDNNS  | 406  | >PCM1-I169€LMQDLDNNS  | 459  | 53   |
| >PCM1-I169€LMQDLDNNS  | 55   | >PCM1-I169€LMQDLDNNS  | 62   | 7    |
| >PCM1-I169€LMQDLDNNS  | 10   | >PCM1-I169€LMQDLDNNS  | 10   | 0    |
| >PCM1-I169€LMQDLDNNS  | 401  | >PCM1-I169€LMQDLDNNS  | 294  | 107  |
| >PCM1-I169€LMQDLDNNS  | 285  | >PCM1-I169€LMQDLDNNS  | 188  | 97   |
| >PCM1-I169€LMQDLDNNS  | 16   | >PCM1-I169€LMQDLDNNS  | 6    | 10   |
| >PCM1-I169€LMQDLDNNS  | 103  | >PCM1-I169€LMQDLDNNS  | 43   | 60   |
| >PCM1-I169€LMQDLDNNS  | 528  | >PCM1-I169€LMQDLDNNS  | 222  | 306  |
| >PCM1-Q43€SSPQRSVDQF  | 299  | >PCM1-Q43€SSPERSVDQR  | 163  | 136  |
| >PCM1-Q43€SSSPQRSVDC  | 274  | >PCM1-Q43€SSSPERSVDQ  | 393  | 119  |
| >PCM1-Q43€SSSPQRSVDC  | 199  | >PCM1-Q43€SSSPERSVDQ  | 601  | 402  |
| >PCM1-Q43€SSSPQRSVDC  | 43   | >PCM1-Q43€SSSPERSVDQ  | 40   | 3    |
| >PCM1-Q43€SSSPQRSV    | 323  | >PCM1-Q43€SSSPERSV    | 1112 | 789  |
| >PCM1-Q43€SSSPQRSVDC  | 356  | >PCM1-Q43€SSSPERSVDQ  | 402  | 46   |
| >PCM1-Q43€SSSSPQRSV   | 351  | >PCM1-Q43€SSSSPERSV   | 2001 | 1650 |
| >PCM1-Q43€SSSSPQRSV   | 309  | >PCM1-Q43€SSSSPERSV   | 473  | 164  |
| >PCM1-Q43€NSSSSPQR    | 19   | >PCM1-Q43€NSSSSPER    | 15   | 4    |
| >PCM1-Q43€NSSSSPQRSV  | 175  | >PCM1-Q43€NSSSSPERSV  | 210  | 35   |
| >PCM1-Q43€NNSSSSPQR   | 90   | >PCM1-Q43€NNSSSSPER   | 103  | 13   |
| >PCM1-Q43€HLNNSSSSPQ  | 84   | >PCM1-Q43€HLNNSSSSPE  | 121  | 37   |
| >PCM1-Q43€HLNNSSSSPQ  | 30   | >PCM1-Q43€HLNNSSSSPE  | 30   | 0    |
| >PCM1-Q43€HLNNSSSSPQ  | 67   | >PCM1-Q43€HLNNSSSSPE  | 65   | 2    |
| >PCM1-Q43€HLNNSSSSPQ  | 403  | >PCM1-Q43€HLNNSSSSPE  | 1594 | 1191 |



|                        |       |                        |      |       |
|------------------------|-------|------------------------|------|-------|
| >PDE4DIP-G1GRGSTSNFY   | 130   | >PDE4DIP-G1ARGSTSNFY   | 79   | 51    |
| >PDE4DIP-G1GRGSTSNFY   | 2284  | >PDE4DIP-G1ARGSTSNFY   | 267  | 2017  |
| >PDE4DIP-G1GRGSTSNF    | 75    | >PDE4DIP-G1ARGSTSNF    | 17   | 58    |
| >PDE4DIP-G1GRGSTSNFY   | 580   | >PDE4DIP-G1ARGSTSNFY   | 133  | 447   |
| >PDE4DIP-G1GRGSTSNFY   | 497   | >PDE4DIP-G1ARGSTSNFY   | 1526 | 1029  |
| >PDE4DIP-G1RGRGSTSNFY  | 1881  | >PDE4DIP-G1RARGSTSNFY  | 499  | 1382  |
| >PDE4DIP-G1RGRGSTSN    | 672   | >PDE4DIP-G1RARGSTSN    | 107  | 565   |
| >PDE4DIP-G1RGRGSTSNF   | 280   | >PDE4DIP-G1RARGSTSNF   | 36   | 244   |
| >PDE4DIP-G1RGRGSTSNFY  | 10    | >PDE4DIP-G1RARGSTSNFY  | 5    | 5     |
| >PDE4DIP-G1RGRGSTSNFY  | 29    | >PDE4DIP-G1RARGSTSNFY  | 8    | 21    |
| >PDE4DIP-G1RGRGSTSNFY  | 87    | >PDE4DIP-G1RARGSTSNFY  | 50   | 37    |
| >PDE4DIP-G1RGRGSTSNFY  | 1066  | >PDE4DIP-G1RARGSTSNFY  | 321  | 745   |
| >PDE4DIP-G1RGRGSTSNF   | 879   | >PDE4DIP-G1RARGSTSNF   | 18   | 861   |
| >PDE4DIP-G1RGRGSTSNF   | 148   | >PDE4DIP-G1RARGSTSNF   | 65   | 83    |
| >PDE4DIP-G1RGRGSTSNFY  | 125   | >PDE4DIP-G1RARGSTSNFY  | 70   | 55    |
| >PDE4DIP-G1RGRGSTSNF   | 22    | >PDE4DIP-G1RARGSTSNF   | 6    | 16    |
| >PDE4DIP-G1RGRGSTSNFY  | 260   | >PDE4DIP-G1RARGSTSNFY  | 29   | 231   |
| >PDE4DIP-G1RGRGSTSNF   | 8     | >PDE4DIP-G1RARGSTSNF   | 3    | 5     |
| >PDE4DIP-G1RGRGSTSNFY  | 31    | >PDE4DIP-G1RARGSTSNFY  | 5    | 26    |
| >PDE4DIP-G1RGRGSTSNF   | 2178  | >PDE4DIP-G1RARGSTSNF   | 141  | 2037  |
| >PDE4DIP-G1RGRGSTSNFY  | 1567  | >PDE4DIP-G1RARGSTSNFY  | 124  | 1443  |
| >PDE4DIP-G1RGRGSTSNF   | 8264  | >PDE4DIP-G1RARGSTSNF   | 377  | 7887  |
| >PDE4DIP-G1RGRGSTSNF   | 19    | >PDE4DIP-G1RARGSTSNF   | 13   | 6     |
| >PDE4DIP-G1RGRGSTSNFY  | 46    | >PDE4DIP-G1RARGSTSNFY  | 51   | 5     |
| >PDE4DIP-G1LEHRLTSTAR/ | 6533  | >PDE4DIP-G1LEHRLTSTAR/ | 111  | 6422  |
| >PDE4DIP-G1LEHRLTSTAR/ | 2236  | >PDE4DIP-G1LEHRLTSTAR/ | 316  | 1920  |
| >PDE4DIP-G1ARGRGSTSNF  | 347   | >PDE4DIP-G1ARARGSTSNF  | 125  | 222   |
| >PDE4DIP-G1ARGRGSTSNF  | 387   | >PDE4DIP-G1ARARGSTSNF  | 789  | 402   |
| >PDE4DIP-G1ARGRGSTSNF  | 23    | >PDE4DIP-G1ARARGSTSNF  | 7    | 16    |
| >PDE4DIP-G1ARGRGSTSNF  | 223   | >PDE4DIP-G1ARARGSTSNF  | 37   | 186   |
| >PDE4DIP-G1ARGRGSTSNF  | 441   | >PDE4DIP-G1ARARGSTSNF  | 256  | 185   |
| >PDE4DIP-G1TARGRGSTSN  | 296   | >PDE4DIP-G1TARARGSTSN  | 334  | 38    |
| >PDE4DIP-G1TARGRGSTSN  | 463   | >PDE4DIP-G1TARARGSTSN  | 234  | 229   |
| >PDE4DIP-G1TARGRGSTSN  | 323   | >PDE4DIP-G1TARARGSTSN  | 252  | 71    |
| >PDE4DIP-G1TARGRGSTSN  | 93    | >PDE4DIP-G1TARARGSTSN  | 29   | 64    |
| >PDE4DIP-G1TARGRGSTSN  | 7     | >PDE4DIP-G1TARARGSTSN  | 6    | 1     |
| >PDE4DIP-G1TARGRGSTSN  | 38    | >PDE4DIP-G1TARARGSTSN  | 63   | 25    |
| >PDE4DIP-G1LTSTARGR    | 618   | >PDE4DIP-G1LTSTARAR    | 159  | 459   |
| >PDE4DIP-G1LTSTARGR    | 26    | >PDE4DIP-G1LTSTARAR    | 25   | 1     |
| >PDE4DIP-G1RLTSTARG    | 8677  | >PDE4DIP-G1RLTSTARA    | 77   | 8600  |
| >PDE4DIP-G1RLTSTARG    | 7925  | >PDE4DIP-G1RLTSTARA    | 154  | 7771  |
| >PDE4DIP-G1RLTSTARG    | 15662 | >PDE4DIP-G1RLTSTARA    | 459  | 15203 |
| >PDE4DIP-G1RLTSTARG    | 7455  | >PDE4DIP-G1RLTSTARA    | 23   | 7432  |

|                          |      |                          |      |      |
|--------------------------|------|--------------------------|------|------|
| >PDE4DIP-G1RLTSTARGR     | 200  | >PDE4DIP-G1RLTSTARAR     | 56   | 144  |
| >PDE4DIP-G1RLTSTARGR     | 363  | >PDE4DIP-G1RLTSTARAR     | 458  | 95   |
| >PDE4DIP-G1HRLTSTARGR    | 27   | >PDE4DIP-G1HRLTSTARAR    | 25   | 2    |
| >PDE4DIP-G1HRLTSTARGR    | 127  | >PDE4DIP-G1HRLTSTARAR    | 182  | 55   |
| >PDE4DIP-V€ VQALMERNNS   | 660  | >PDE4DIP-V€ LQALMERNNSI  | 216  | 444  |
| >PDE4DIP-V€ VQALMERNNS   | 328  | >PDE4DIP-V€ LQALMERNNSI  | 194  | 134  |
| >PDE4DIP-V€ LVQALMER     | 248  | >PDE4DIP-V€ LLQALMER     | 2448 | 2200 |
| >PDE4DIP-V€ LVQALMER     | 40   | >PDE4DIP-V€ LLQALMER     | 64   | 24   |
| >PDE4DIP-V€ LVQALMER     | 445  | >PDE4DIP-V€ LLQALMER     | 581  | 136  |
| >PDE4DIP-V€ LVQALMER     | 157  | >PDE4DIP-V€ LLQALMER     | 805  | 648  |
| >PDE4DIP-V€ QESQAAA EKI  | 16   | >PDE4DIP-V€ QESQAAA EKI  | 31   | 15   |
| >PDE4DIP-V€ QESQAAA EKI  | 625  | >PDE4DIP-V€ QESQAAA EKI  | 54   | 571  |
| >PDE4DIP-V€ QESQAAA EKI  | 173  | >PDE4DIP-V€ QESQAAA EKI  | 1989 | 1816 |
| >PDE4DIP-V€ QESQAAA EKI  | 169  | >PDE4DIP-V€ QESQAAA EKI  | 333  | 164  |
| >PDE4DIP-V€ KLVQALMER    | 630  | >PDE4DIP-V€ KLLQALMER    | 234  | 396  |
| >PDE4DIP-V€ KLVQALMER    | 126  | >PDE4DIP-V€ KLLQALMER    | 51   | 75   |
| >PDE4DIP-V€ KLVQALMER    | 49   | >PDE4DIP-V€ KLLQALMER    | 37   | 12   |
| >PDE4DIP-V€ AEKLVQAL     | 28   | >PDE4DIP-V€ AEKLLQAL     | 85   | 57   |
| >PDE4DIP-V€ AEKLVQALM    | 241  | >PDE4DIP-V€ AEKLLQALM    | 312  | 71   |
| >PDE4DIP-V€ AEKLVQAL     | 60   | >PDE4DIP-V€ AEKLLQAL     | 60   | 0    |
| >PDE4DIP-V€ AEKLVQAL     | 35   | >PDE4DIP-V€ AEKLLQAL     | 19   | 16   |
| >PDE4DIP-V€ AEKLVQALM    | 343  | >PDE4DIP-V€ AEKLLQALM    | 95   | 248  |
| >PDE4DIP-V€ AEKLVQAL     | 212  | >PDE4DIP-V€ AEKLLQAL     | 228  | 16   |
| >PDE4DIP-V€ AEKLVQALM    | 325  | >PDE4DIP-V€ AEKLLQALM    | 332  | 7    |
| >PDE4DIP-V€ AEKLVQAL     | 108  | >PDE4DIP-V€ AEKLLQAL     | 95   | 13   |
| >PDE4DIP-V€ AEKLVQALM    | 484  | >PDE4DIP-V€ AEKLLQALM    | 417  | 67   |
| >PDE4DIP-V€ AEKLVQAL     | 118  | >PDE4DIP-V€ AEKLLQAL     | 160  | 42   |
| >PDE4DIP-V€ AEKLVQALM    | 19   | >PDE4DIP-V€ AEKLLQALM    | 19   | 0    |
| >PDE4DIP-V€ AEKLVQALMI   | 518  | >PDE4DIP-V€ AEKLLQALME   | 447  | 71   |
| >PDE4DIP-V€ AAAEKLVQA    | 476  | >PDE4DIP-V€ AAAEKLLQA    | 387  | 89   |
| >PDE4DIP-V€ AAAEKLVQA    | 360  | >PDE4DIP-V€ AAAEKLLQA    | 415  | 55   |
| >PDE4DIP-V€ AAAEKLVQAL   | 127  | >PDE4DIP-V€ AAAEKLLQAL   | 124  | 3    |
| >PDE4DIP-V€ AAAEKLVQAL   | 155  | >PDE4DIP-V€ AAAEKLLQAL   | 73   | 82   |
| >PDE4DIP-V€ QAAA EKL V   | 398  | >PDE4DIP-V€ QAAA EKL L   | 4058 | 3660 |
| >PDE4DIP-V€ SQAAA EKL V  | 482  | >PDE4DIP-V€ SQAAA EKL L  | 552  | 70   |
| >PDE4DIP-V€ SQAAA EKL VC | 534  | >PDE4DIP-V€ SQAAA EKL LC | 475  | 59   |
| >PDE4DIP-V€ SQAAA EKL V  | 108  | >PDE4DIP-V€ SQAAA EKL L  | 827  | 719  |
| >PDE4DIP-V€ SQAAA EKL VC | 122  | >PDE4DIP-V€ SQAAA EKL LC | 129  | 7    |
| >PDE4DIP-V€ SQAAA EKL V  | 426  | >PDE4DIP-V€ SQAAA EKL L  | 8096 | 7670 |
| >PDE4DIP-V€ SQAAA EKL V  | 6964 | >PDE4DIP-V€ SQAAA EKL L  | 498  | 6466 |
| >PDE4DIP-V€ SQAAA EKL V  | 9877 | >PDE4DIP-V€ SQAAA EKL L  | 434  | 9443 |
| >PDGFRA-A2 ATSELDLEM     | 14   | >PDGFRA-A2 VTSELDLEM     | 10   | 4    |
| >PDGFRA-A2 ATSELDLEM     | 566  | >PDGFRA-A2 VTSELDLEM     | 202  | 364  |

|                        |      |                        |      |      |
|------------------------|------|------------------------|------|------|
| >PDGFRA-A2 ATSELDLEM   | 518  | >PDGFRA-A2 VTSELDLEM   | 85   | 433  |
| >PDGFRA-A2 ATSELDLEM   | 257  | >PDGFRA-A2 VTSELDLEM   | 150  | 107  |
| >PDGFRA-A2 KATSELDL    | 488  | >PDGFRA-A2 KVTSELDL    | 4148 | 3660 |
| >PDGFRA-A2 KATSELDLEM  | 155  | >PDGFRA-A2 KVTSELDLEM  | 1207 | 1052 |
| >PDGFRA-A2 KATSELDLEM  | 67   | >PDGFRA-A2 KVTSELDLEM  | 315  | 248  |
| >PDGFRA-A2 TIPFNVYALK/ | 1492 | >PDGFRA-A2 TIPFNVYALK\ | 159  | 1333 |
| >PDGFRA-A2 TIPFNVYALK/ | 5479 | >PDGFRA-A2 TIPFNVYALK\ | 164  | 5315 |
| >PDGFRA-A2 TIPFNVYALK/ | 8716 | >PDGFRA-A2 TIPFNVYALK\ | 77   | 8639 |
| >PDGFRA-A2 TIPFNVYALK/ | 437  | >PDGFRA-A2 TIPFNVYALK\ | 50   | 387  |
| >PDGFRA-A2 LKATSELDL   | 27   | >PDGFRA-A2 LKVTSELDL   | 23   | 4    |
| >PDGFRA-A2 LKATSELDLEM | 27   | >PDGFRA-A2 LKVTSELDLEM | 22   | 5    |
| >PDGFRA-A2 ALKATSEL    | 17   | >PDGFRA-A2 ALKVTSEL    | 52   | 35   |
| >PDGFRA-A2 ALKATSELDL  | 148  | >PDGFRA-A2 ALKVTSELDL  | 428  | 280  |
| >PDGFRA-A2 ALKATSEL    | 13   | >PDGFRA-A2 ALKVTSEL    | 44   | 31   |
| >PDGFRA-A2 ALKATSELDL  | 312  | >PDGFRA-A2 ALKVTSELDL  | 743  | 431  |
| >PDGFRA-A2 ALKATSEL    | 259  | >PDGFRA-A2 ALKVTSEL    | 563  | 304  |
| >PDGFRA-A2 ALKATSEL    | 288  | >PDGFRA-A2 ALKVTSEL    | 490  | 202  |
| >PDGFRA-A2 ALKATSEL    | 5    | >PDGFRA-A2 ALKVTSEL    | 9    | 4    |
| >PDGFRA-A2 ALKATSELDL  | 25   | >PDGFRA-A2 ALKVTSELDL  | 65   | 40   |
| >PDGFRA-A2 ALKATSEL    | 424  | >PDGFRA-A2 ALKVTSEL    | 823  | 399  |
| >PDGFRA-A2 ALKATSEL    | 234  | >PDGFRA-A2 ALKVTSEL    | 572  | 338  |
| >PDGFRA-A2 ALKATSEL    | 285  | >PDGFRA-A2 ALKVTSEL    | 444  | 159  |
| >PDGFRA-A2 YALKATSEL   | 65   | >PDGFRA-A2 YALKVTSEL   | 504  | 439  |
| >PDGFRA-A2 YALKATSEL   | 605  | >PDGFRA-A2 YALKVTSEL   | 313  | 292  |
| >PDGFRA-A2 YALKATSEL   | 276  | >PDGFRA-A2 YALKVTSEL   | 193  | 83   |
| >PDGFRA-A2 YALKATSEL   | 57   | >PDGFRA-A2 YALKVTSEL   | 47   | 10   |
| >PDGFRA-A2 YALKATSEL   | 367  | >PDGFRA-A2 YALKVTSEL   | 54   | 313  |
| >PDGFRA-A2 YALKATSEL   | 442  | >PDGFRA-A2 YALKVTSEL   | 150  | 292  |
| >PDGFRA-A2 YALKATSEL   | 275  | >PDGFRA-A2 YALKVTSEL   | 427  | 152  |
| >PDGFRA-A2 YALKATSEL   | 60   | >PDGFRA-A2 YALKVTSEL   | 85   | 25   |
| >PDGFRA-A2 YALKATSEL   | 392  | >PDGFRA-A2 YALKVTSEL   | 974  | 582  |
| >PDGFRA-A2 YALKATSEL   | 91   | >PDGFRA-A2 YALKVTSEL   | 163  | 72   |
| >PDGFRA-A2 YALKATSELDI | 230  | >PDGFRA-A2 YALKVTSELDI | 354  | 124  |
| >PDGFRA-A2 YALKATSEL   | 21   | >PDGFRA-A2 YALKVTSEL   | 112  | 91   |
| >PDGFRA-A2 YALKATSELDI | 83   | >PDGFRA-A2 YALKVTSELDI | 294  | 211  |
| >PDGFRA-A2 YALKATSEL   | 51   | >PDGFRA-A2 YALKVTSEL   | 107  | 56   |
| >PDGFRA-A2 YALKATSELDI | 365  | >PDGFRA-A2 YALKVTSELDI | 618  | 253  |
| >PDGFRA-A2 YALKATSEL   | 539  | >PDGFRA-A2 YALKVTSEL   | 446  | 93   |
| >PDGFRA-A2 YALKATSEL   | 543  | >PDGFRA-A2 YALKVTSEL   | 210  | 333  |
| >PDGFRA-A2 YALKATSEL   | 114  | >PDGFRA-A2 YALKVTSEL   | 48   | 66   |
| >PDGFRA-A2 VYALKATSEL  | 50   | >PDGFRA-A2 VYALKVTSEL  | 40   | 10   |
| >PDGFRA-A2 VYALKATSEL  | 218  | >PDGFRA-A2 VYALKVTSEL  | 258  | 40   |
| >PDGFRA-A2 VYALKATSEL  | 30   | >PDGFRA-A2 VYALKVTSEL  | 21   | 9    |

|                       |       |                       |       |       |
|-----------------------|-------|-----------------------|-------|-------|
| >PDGFRA-A2 NVYALKATSE | 111   | >PDGFRA-A2 NVYALKVTSE | 121   | 10    |
| >PDGFRA-A2 NVYALKATSE | 207   | >PDGFRA-A2 NVYALKVTSE | 284   | 77    |
| >PDGFRA-A2 NVYALKATSE | 492   | >PDGFRA-A2 NVYALKVTSE | 459   | 33    |
| >PDGFRA-A2 NVYALKATSE | 19    | >PDGFRA-A2 NVYALKVTSE | 17    | 2     |
| >PDGFRA-A2 NVYALKATSE | 46    | >PDGFRA-A2 NVYALKVTSE | 66    | 20    |
| >PDGFRA-A2 IPFNVYALKA | 3947  | >PDGFRA-A2 IPFNVYALKV | 76    | 3871  |
| >PDGFRA-A2 IPFNVYALKA | 19    | >PDGFRA-A2 IPFNVYALKV | 38    | 19    |
| >PDGFRA-A2 IPFNVYALKA | 21    | >PDGFRA-A2 IPFNVYALKV | 45    | 24    |
| >PDGFRA-A5 AENRELKLV  | 20    | >PDGFRA-A5 DENRELKLV  | 14    | 6     |
| >PDGFRA-A5 AENRELKL   | 16680 | >PDGFRA-A5 DENRELKL   | 407   | 16273 |
| >PDGFRA-A5 AENRELKL   | 271   | >PDGFRA-A5 DENRELKL   | 4928  | 4657  |
| >PDGFRA-A5 AENRELKL   | 229   | >PDGFRA-A5 DENRELKL   | 5897  | 5668  |
| >PDGFRA-A5 AENRELKL   | 360   | >PDGFRA-A5 DENRELKL   | 2320  | 1960  |
| >PDGFRA-A5 AENRELKLV  | 300   | >PDGFRA-A5 DENRELKLV  | 2221  | 1921  |
| >PDGFRA-A5 AENRELKLV  | 197   | >PDGFRA-A5 DENRELKLV  | 12835 | 12638 |
| >PDGFRA-A5 AENRELKLVA | 49    | >PDGFRA-A5 DENRELKLVA | 1112  | 1063  |
| >PDGFRA-A5 AENRELKLV  | 23    | >PDGFRA-A5 DENRELKLV  | 3399  | 3376  |
| >PDGFRA-A5 GAENRELKLV | 32015 | >PDGFRA-A5 GDENRELKLV | 277   | 31738 |
| >PDGFRA-A5 LLGAENREL  | 67    | >PDGFRA-A5 LLGDENREL  | 32    | 35    |
| >PDGFRA-A5 LLGAENRELK | 179   | >PDGFRA-A5 LLGDENRELK | 96    | 83    |
| >PDGFRA-A5 LLGAENREL  | 111   | >PDGFRA-A5 LLGDENREL  | 32    | 79    |
| >PDGFRA-A5 LLGAENRELK | 166   | >PDGFRA-A5 LLGDENRELK | 57    | 109   |
| >PDGFRA-A5 LLGAENREL  | 706   | >PDGFRA-A5 LLGDENREL  | 122   | 584   |
| >PDGFRA-A5 LLGAENRELK | 761   | >PDGFRA-A5 LLGDENRELK | 180   | 581   |
| >PDGFRA-A5 LLGAENREL  | 1394  | >PDGFRA-A5 LLGDENREL  | 484   | 910   |
| >PDGFRA-A5 LLGAENRELK | 350   | >PDGFRA-A5 LLGDENRELK | 146   | 204   |
| >PDGFRA-A5 LLGAENREL  | 1916  | >PDGFRA-A5 LLGDENREL  | 379   | 1537  |
| >PDGFRA-A5 LLGAENRELK | 1460  | >PDGFRA-A5 LLGDENRELK | 352   | 1108  |
| >PDGFRA-A5 LLGAENREL  | 17    | >PDGFRA-A5 LLGDENREL  | 5     | 12    |
| >PDGFRA-A5 LLGAENRELK | 10    | >PDGFRA-A5 LLGDENRELK | 4     | 6     |
| >PDGFRA-A5 NLLGAENREL | 473   | >PDGFRA-A5 NLLGDENREL | 366   | 107   |
| >PDGFRA-A5 NLLGAENREL | 143   | >PDGFRA-A5 NLLGDENREL | 127   | 16    |
| >PDGFRA-A5 NLLGAENREL | 381   | >PDGFRA-A5 NLLGDENREL | 436   | 55    |
| >PDGFRA-A5 NLLGAENREL | 106   | >PDGFRA-A5 NLLGDENREL | 86    | 20    |
| >PDGFRA-A5 NLLGAENREL | 452   | >PDGFRA-A5 NLLGDENREL | 237   | 215   |
| >PDGFRA-A5 NLLGAENREL | 293   | >PDGFRA-A5 NLLGDENREL | 388   | 95    |
| >PDGFRA-A5 NLLGAENREL | 141   | >PDGFRA-A5 NLLGDENREL | 114   | 27    |
| >PDGFRA-A5 NLLGAENREL | 43    | >PDGFRA-A5 NLLGDENREL | 30    | 13    |
| >PDGFRA-A5 NLLGAENR   | 429   | >PDGFRA-A5 NLLGDENR   | 800   | 371   |
| >PDGFRA-A5 NLLGAENR   | 457   | >PDGFRA-A5 NLLGDENR   | 683   | 226   |
| >PDGFRA-A5 KNLLGAENR  | 320   | >PDGFRA-A5 KNLLGDENR  | 293   | 27    |
| >PDGFRA-A5 LAKNLLGAEN | 66    | >PDGFRA-A5 LAKNLLGDEN | 95    | 29    |
| >PDGFRA-A5 LAKNLLGAEN | 261   | >PDGFRA-A5 LAKNLLGDEN | 363   | 102   |

|                         |       |                        |       |       |
|-------------------------|-------|------------------------|-------|-------|
| >PDGFRA-A5 CLAKNLLGA    | 231   | >PDGFRA-A5 CLAKNLLGD   | 11107 | 10876 |
| >PDGFRA-A5 CLAKNLLGA    | 37    | >PDGFRA-A5 CLAKNLLGD   | 10728 | 10691 |
| >PDGFRA-A5 CLAKNLLGA    | 311   | >PDGFRA-A5 CLAKNLLGD   | 23426 | 23115 |
| >PDGFRA-A5 CLAKNLLGA    | 371   | >PDGFRA-A5 CLAKNLLGD   | 19386 | 19015 |
| >PDGFRA-A5 CLAKNLLGA    | 359   | >PDGFRA-A5 CLAKNLLGD   | 18944 | 18585 |
| >PDGFRA-A5 CLAKNLLGA    | 60    | >PDGFRA-A5 CLAKNLLGD   | 21358 | 21298 |
| >PDGFRA-C2 CAVFNNEV     | 1179  | >PDGFRA-C2 YAVFNNEV    | 201   | 978   |
| >PDGFRA-C2 CAVFNNEVV    | 172   | >PDGFRA-C2 YAVFNNEVV   | 22    | 150   |
| >PDGFRA-C2 CAVFNNEVVI   | 1245  | >PDGFRA-C2 YAVFNNEVVI  | 219   | 1026  |
| >PDGFRA-C2 CAVFNNEV     | 1106  | >PDGFRA-C2 YAVFNNEV    | 103   | 1003  |
| >PDGFRA-C2 CAVFNNEV     | 2773  | >PDGFRA-C2 YAVFNNEV    | 210   | 2563  |
| >PDGFRA-C2 CAVFNNEV     | 2178  | >PDGFRA-C2 YAVFNNEV    | 37    | 2141  |
| >PDGFRA-C2 CAVFNNEVV    | 6027  | >PDGFRA-C2 YAVFNNEVV   | 215   | 5812  |
| >PDGFRA-C2 CAVFNNEV     | 7006  | >PDGFRA-C2 YAVFNNEV    | 120   | 6886  |
| >PDGFRA-C2 CAVFNNEVV    | 8717  | >PDGFRA-C2 YAVFNNEVV   | 177   | 8540  |
| >PDGFRA-C2 CAVFNNEV     | 8425  | >PDGFRA-C2 YAVFNNEV    | 73    | 8352  |
| >PDGFRA-C2 CAVFNNEVV    | 13941 | >PDGFRA-C2 YAVFNNEVV   | 371   | 13570 |
| >PDGFRA-C2 CAVFNNEV     | 28    | >PDGFRA-C2 YAVFNNEV    | 17    | 11    |
| >PDGFRA-C2 CAVFNNEVV    | 59    | >PDGFRA-C2 YAVFNNEVV   | 29    | 30    |
| >PDGFRA-C2 CAVFNNEV     | 2046  | >PDGFRA-C2 YAVFNNEV    | 51    | 1995  |
| >PDGFRA-C2 CAVFNNEVV    | 6971  | >PDGFRA-C2 YAVFNNEVV   | 274   | 6697  |
| >PDGFRA-C2 CAVFNNEVVI   | 5063  | >PDGFRA-C2 YAVFNNEVVI  | 276   | 4787  |
| >PDGFRA-C2 TCAVFNNEV    | 23312 | >PDGFRA-C2 TYAVFNNEV   | 107   | 23205 |
| >PDGFRA-C2 TCAVFNNEV\   | 22192 | >PDGFRA-C2 TYAVFNNEV\  | 129   | 22063 |
| >PDGFRA-C2 TCAVFNNEV    | 213   | >PDGFRA-C2 TYAVFNNEV   | 164   | 49    |
| >PDGFRA-C2 TCAVFNNEV    | 25028 | >PDGFRA-C2 TYAVFNNEV   | 267   | 24761 |
| >PDGFRA-C2 TCAVFNNEV    | 32    | >PDGFRA-C2 TYAVFNNEV   | 92    | 60    |
| >PDGFRA-C2 TCAVFNNEV    | 277   | >PDGFRA-C2 TYAVFNNEV   | 3569  | 3292  |
| >PDGFRA-C2 YKSGETIVVT(\ | 25328 | >PDGFRA-C2 YKSGETIVVTY | 427   | 24901 |
| >PDGFRA-C2 YKSGETIVVT(\ | 1258  | >PDGFRA-C2 YKSGETIVVTY | 6     | 1252  |
| >PDGFRA-C2 YKSGETIVVT(\ | 18191 | >PDGFRA-C2 YKSGETIVVTY | 156   | 18035 |
| >PDGFRA-C2 YKSGETIVVT(\ | 33954 | >PDGFRA-C2 YKSGETIVVTY | 127   | 33827 |
| >PDGFRA-C2 VTCAVFNNE\   | 1472  | >PDGFRA-C2 VTYAVFNNE\  | 227   | 1245  |
| >PDGFRA-C2 VTCAVFNNE\   | 1348  | >PDGFRA-C2 VTYAVFNNE\  | 283   | 1065  |
| >PDGFRA-C2 VTCAVFNNE\   | 922   | >PDGFRA-C2 VTYAVFNNE\  | 134   | 788   |
| >PDGFRA-C2 VTCAVFNNE\   | 2057  | >PDGFRA-C2 VTYAVFNNE\  | 164   | 1893  |
| >PDGFRA-C2 VTCAVFNNE\   | 303   | >PDGFRA-C2 VTYAVFNNE\  | 118   | 185   |
| >PDGFRA-C2 VTCAVFNNE\   | 357   | >PDGFRA-C2 VTYAVFNNE\  | 76    | 281   |
| >PDGFRA-C2 VTCAVFNNE\   | 103   | >PDGFRA-C2 VTYAVFNNE\  | 9     | 94    |
| >PDGFRA-C2 VTCAVFNNE\   | 109   | >PDGFRA-C2 VTYAVFNNE\  | 10    | 99    |
| >PDGFRA-C2 VTCAVFNNE\   | 2186  | >PDGFRA-C2 VTYAVFNNE\  | 50    | 2136  |
| >PDGFRA-C2 VTCAVFNNE\   | 3823  | >PDGFRA-C2 VTYAVFNNE\  | 104   | 3719  |
| >PDGFRA-C2 VTCAVFNNE\   | 739   | >PDGFRA-C2 VTYAVFNNE\  | 54    | 685   |

|                       |       |                        |      |       |
|-----------------------|-------|------------------------|------|-------|
| >PDGFRA-C2 VTCAVFNNE\ | 1793  | >PDGFRA-C2 VTYAVFNNE\  | 137  | 1656  |
| >PDGFRA-C2 VTCAVFNNE\ | 66    | >PDGFRA-C2 VTYAVFNNE\  | 22   | 44    |
| >PDGFRA-C2 VTCAVFNNE\ | 67    | >PDGFRA-C2 VTYAVFNNE\  | 16   | 51    |
| >PDGFRA-C2 VTCAVFNNE\ | 1077  | >PDGFRA-C2 VTYAVFNNE\  | 26   | 1051  |
| >PDGFRA-C2 VTCAVFNNE\ | 3306  | >PDGFRA-C2 VTYAVFNNE\  | 130  | 3176  |
| >PDGFRA-C2 VTCAVFNNE\ | 1011  | >PDGFRA-C2 VTYAVFNNE\  | 278  | 733   |
| >PDGFRA-C2 VTCAVFNNE\ | 1383  | >PDGFRA-C2 VTYAVFNNE\  | 413  | 970   |
| >PDGFRA-C2 VTCAVFNNE\ | 2151  | >PDGFRA-C2 VTYAVFNNE\  | 496  | 1655  |
| >PDGFRA-C2 VTCAVFNNE\ | 597   | >PDGFRA-C2 VTYAVFNNE\  | 115  | 482   |
| >PDGFRA-C2 VVTCAVFNNI | 331   | >PDGFRA-C2 VVTYAVFNNE\ | 424  | 93    |
| >PDGFRA-C2 VVTCAVFNNI | 119   | >PDGFRA-C2 VVTYAVFNNE\ | 111  | 8     |
| >PDGFRA-C2 VVTCAVFNNI | 159   | >PDGFRA-C2 VVTYAVFNNE\ | 265  | 106   |
| >PDGFRA-C2 VVTCAVFNNI | 39    | >PDGFRA-C2 VVTYAVFNNE\ | 56   | 17    |
| >PDGFRA-C2 VVTCAVFNNI | 151   | >PDGFRA-C2 VVTYAVFNNE\ | 684  | 533   |
| >PDGFRA-C2 VVTCAVFNNI | 230   | >PDGFRA-C2 VVTYAVFNNE\ | 1151 | 921   |
| >PDGFRA-C2 VVTCAVFNNI | 204   | >PDGFRA-C2 VVTYAVFNNE\ | 294  | 90    |
| >PDGFRA-C2 VVTCAVFNNI | 448   | >PDGFRA-C2 VVTYAVFNNE\ | 820  | 372   |
| >PDGFRA-C2 VVTCAVFNNI | 31    | >PDGFRA-C2 VVTYAVFNNE\ | 35   | 4     |
| >PDGFRA-C2 VVTCAVFNNI | 23    | >PDGFRA-C2 VVTYAVFNNE\ | 27   | 4     |
| >PDGFRA-C2 VVTCAVFNNI | 339   | >PDGFRA-C2 VVTYAVFNNE\ | 766  | 427   |
| >PDGFRA-C2 IVVTCAVF   | 10570 | >PDGFRA-C2 IVVTYAVF    | 355  | 10215 |
| >PDGFRA-C2 IVVTCAVF   | 199   | >PDGFRA-C2 IVVTYAVF    | 69   | 130   |
| >PDGFRA-C2 IVVTCAVF   | 210   | >PDGFRA-C2 IVVTYAVF    | 181  | 29    |
| >PDGFRA-C2 IVVTCAVF   | 78    | >PDGFRA-C2 IVVTYAVF    | 45   | 33    |
| >PDGFRA-C2 IVVTCAVF   | 49    | >PDGFRA-C2 IVVTYAVF    | 34   | 15    |
| >PDGFRA-C2 IVVTCAVF   | 250   | >PDGFRA-C2 IVVTYAVF    | 235  | 15    |
| >PDGFRA-C2 IVVTCAVF   | 516   | >PDGFRA-C2 IVVTYAVF    | 205  | 311   |
| >PDGFRA-C2 TIVVTCAV   | 541   | >PDGFRA-C2 TIVVTYAV    | 147  | 394   |
| >PDGFRA-C2 TIVVTCAV   | 114   | >PDGFRA-C2 TIVVTYAV    | 81   | 33    |
| >PDGFRA-C2 TIVVTCAV   | 52    | >PDGFRA-C2 TIVVTYAV    | 37   | 15    |
| >PDGFRA-C2 TIVVTCAV   | 221   | >PDGFRA-C2 TIVVTYAV    | 100  | 121   |
| >PDGFRA-C2 TIVVTCAV   | 768   | >PDGFRA-C2 TIVVTYAV    | 179  | 589   |
| >PDGFRA-C2 TIVVTCAV   | 522   | >PDGFRA-C2 TIVVTYAV    | 393  | 129   |
| >PDGFRA-C2 TIVVTCAV   | 42    | >PDGFRA-C2 TIVVTYAV    | 63   | 21    |
| >PDGFRA-C2 TIVVTCAVF  | 343   | >PDGFRA-C2 TIVVTYAVF   | 187  | 156   |
| >PDGFRA-C2 TIVVTCAVF  | 668   | >PDGFRA-C2 TIVVTYAVF   | 164  | 504   |
| >PDGFRA-C2 TIVVTCAV   | 87    | >PDGFRA-C2 TIVVTYAV    | 24   | 63    |
| >PDGFRA-C2 TIVVTCAV   | 68    | >PDGFRA-C2 TIVVTYAV    | 30   | 38    |
| >PDGFRA-C2 TIVVTCAVF  | 118   | >PDGFRA-C2 TIVVTYAVF   | 144  | 26    |
| >PDGFRA-C2 TIVVTCAVF  | 296   | >PDGFRA-C2 TIVVTYAVF   | 154  | 142   |
| >PDGFRA-C2 TIVVTCAVF  | 425   | >PDGFRA-C2 TIVVTYAVF   | 1020 | 595   |
| >PDGFRA-C2 ETIVVTCAV  | 570   | >PDGFRA-C2 ETIVVTYAV   | 206  | 364   |
| >PDGFRA-C2 ETIVVTCAV  | 437   | >PDGFRA-C2 ETIVVTYAV   | 318  | 119   |

|                      |       |                       |     |       |
|----------------------|-------|-----------------------|-----|-------|
| >PDGFRA-C2 ETIVVTCVF | 458   | >PDGFRA-C2 ETIVVTYAV  | 680 | 222   |
| >PDGFRA-C2 ETIVVTCVF | 191   | >PDGFRA-C2 ETIVVTYAVF | 85  | 106   |
| >PDGFRA-C2 ETIVVTCVF | 36    | >PDGFRA-C2 ETIVVTYAV  | 62  | 26    |
| >PDGFRA-C2 ETIVVTCVF | 52    | >PDGFRA-C2 ETIVVTYAVF | 39  | 13    |
| >PDGFRA-C2 ETIVVTCVF | 535   | >PDGFRA-C2 ETIVVTYAV  | 246 | 289   |
| >PDGFRA-C2 ETIVVTCVF | 209   | >PDGFRA-C2 ETIVVTYAVF | 44  | 165   |
| >PDGFRA-C2 ETIVVTCVF | 7     | >PDGFRA-C2 ETIVVTYAVF | 4   | 3     |
| >PDGFRA-C2 ETIVVTCVF | 680   | >PDGFRA-C2 ETIVVTYAVF | 453 | 227   |
| >PDGFRA-C2 ETIVVTCVF | 551   | >PDGFRA-C2 ETIVVTYAV  | 192 | 359   |
| >PDGFRA-C2 ETIVVTCVF | 99    | >PDGFRA-C2 ETIVVTYAVF | 63  | 36    |
| >PDGFRA-C2 ETIVVTCVF | 1294  | >PDGFRA-C2 ETIVVTYAV  | 161 | 1133  |
| >PDGFRA-C2 ETIVVTCVF | 510   | >PDGFRA-C2 ETIVVTYAVF | 356 | 154   |
| >PDGFRA-C2 ETIVVTCVF | 843   | >PDGFRA-C2 ETIVVTYAV  | 183 | 660   |
| >PDGFRA-C2 ETIVVTCVF | 1116  | >PDGFRA-C2 ETIVVTYAV  | 345 | 771   |
| >PDGFRA-C2 ETIVVTCVF | 81    | >PDGFRA-C2 ETIVVTYAVF | 45  | 36    |
| >PDGFRA-C2 ETIVVTCVF | 14    | >PDGFRA-C2 ETIVVTYAV  | 6   | 8     |
| >PDGFRA-C2 ETIVVTCVF | 5     | >PDGFRA-C2 ETIVVTYAV  | 4   | 1     |
| >PDGFRA-C2 ETIVVTCVF | 428   | >PDGFRA-C2 ETIVVTYAVF | 235 | 193   |
| >PDGFRA-C2 ETIVVTCVF | 512   | >PDGFRA-C2 ETIVVTYAV  | 27  | 485   |
| >PDGFRA-C2 ETIVVTCVF | 4     | >PDGFRA-C2 ETIVVTYAV  | 4   | 0     |
| >PDGFRA-C2 ETIVVTCVF | 162   | >PDGFRA-C2 ETIVVTYAVF | 249 | 87    |
| >PDGFRA-C2 ETIVVTCVF | 452   | >PDGFRA-C2 ETIVVTYAVF | 316 | 136   |
| >PDGFRA-C2 ETIVVTCVF | 13    | >PDGFRA-C2 ETIVVTYAVF | 15  | 2     |
| >PDGFRA-C2 ETIVVTCVF | 278   | >PDGFRA-C2 ETIVVTYAVF | 125 | 153   |
| >PDGFRA-C2 ETIVVTCVF | 1467  | >PDGFRA-C2 ETIVVTYAVF | 440 | 1027  |
| >PDGFRA-C2 ETIVVTCVF | 51    | >PDGFRA-C2 ETIVVTYAV  | 94  | 43    |
| >PDGFRA-C2 ETIVVTCVF | 15933 | >PDGFRA-C2 ETIVVTYAV  | 292 | 15641 |
| >PDGFRA-C2 ETIVVTCVF | 213   | >PDGFRA-C2 ETIVVTYAVF | 95  | 118   |
| >PDGFRA-C2 ETIVVTCVF | 167   | >PDGFRA-C2 ETIVVTYAV  | 285 | 118   |
| >PDGFRA-C2 ETIVVTCVF | 1857  | >PDGFRA-C2 ETIVVTYAV  | 194 | 1663  |
| >PDGFRA-C2 ETIVVTCVF | 276   | >PDGFRA-C2 ETIVVTYAVF | 314 | 38    |
| >PDGFRA-C2 ETIVVTCVF | 5116  | >PDGFRA-C2 ETIVVTYAV  | 219 | 4897  |
| >PDGFRA-C2 ETIVVTCVF | 286   | >PDGFRA-C2 ETIVVTYAVF | 264 | 22    |
| >PDGFRA-C2 ETIVVTCVF | 4239  | >PDGFRA-C2 ETIVVTYAV  | 130 | 4109  |
| >PDGFRA-C2 ETIVVTCVF | 297   | >PDGFRA-C2 ETIVVTYAVF | 191 | 106   |
| >PDGFRA-C2 ETIVVTCVF | 34    | >PDGFRA-C2 ETIVVTYAV  | 56  | 22    |
| >PDGFRA-C2 ETIVVTCVF | 154   | >PDGFRA-C2 ETIVVTYAV  | 131 | 23    |
| >PDGFRA-C2 ETIVVTCVF | 927   | >PDGFRA-C2 ETIVVTYAV  | 265 | 662   |
| >PDGFRA-C2 ETIVVTCVF | 72    | >PDGFRA-C2 ETIVVTYAVF | 84  | 12    |
| >PDGFRA-C2 SGETIVVTC | 33214 | >PDGFRA-C2 SGETIVVTY  | 457 | 32757 |
| >PDGFRA-C2 SGETIVVTC | 23103 | >PDGFRA-C2 SGETIVVTY  | 461 | 22642 |
| >PDGFRA-C2 SGETIVVTC | 21319 | >PDGFRA-C2 SGETIVVTY  | 357 | 20962 |
| >PDGFRA-C2 SGETIVVTC | 33138 | >PDGFRA-C2 SGETIVVTY  | 383 | 32755 |

|                       |       |                       |      |       |
|-----------------------|-------|-----------------------|------|-------|
| >PDGFRA-C2 KSGETIVVTC | 32217 | >PDGFRA-C2 KSGETIVVTY | 490  | 31727 |
| >PDGFRA-C2 KSGETIVVTC | 29628 | >PDGFRA-C2 KSGETIVVTY | 166  | 29462 |
| >PDGFRA-C2 KSGETIVVTC | 236   | >PDGFRA-C2 KSGETIVVTY | 38   | 198   |
| >PDGFRA-C2 KSGETIVVTC | 16292 | >PDGFRA-C2 KSGETIVVTY | 164  | 16128 |
| >PDGFRA-C2 KSGETIVVTC | 10043 | >PDGFRA-C2 KSGETIVVTY | 109  | 9934  |
| >PDGFRA-C2 KSGETIVVTC | 5759  | >PDGFRA-C2 KSGETIVVTY | 8    | 5751  |
| >PDGFRA-C2 KSGETIVVTC | 15264 | >PDGFRA-C2 KSGETIVVTY | 331  | 14933 |
| >PDGFRA-C2 KSGETIVVTC | 3632  | >PDGFRA-C2 KSGETIVVTY | 28   | 3604  |
| >PDGFRA-C2 KSGETIVVTC | 21226 | >PDGFRA-C2 KSGETIVVTY | 132  | 21094 |
| >PDGFRA-D1 DMMDDIGI   | 1171  | >PDGFRA-D1 NMMDDIGI   | 19   | 1152  |
| >PDGFRA-D1 DMMDDIGI   | 760   | >PDGFRA-D1 NMMDDIGI   | 18   | 742   |
| >PDGFRA-D1 DMMDDIGID  | 5834  | >PDGFRA-D1 NMMDDIGID  | 320  | 5514  |
| >PDGFRA-D1 DMMDDIGI   | 539   | >PDGFRA-D1 NMMDDIGI   | 13   | 526   |
| >PDGFRA-D1 DMMDDIGID  | 6158  | >PDGFRA-D1 NMMDDIGID  | 188  | 5970  |
| >PDGFRA-D1 DMMDDIGI   | 685   | >PDGFRA-D1 NMMDDIGI   | 16   | 669   |
| >PDGFRA-D1 DMMDDIGID  | 8233  | >PDGFRA-D1 NMMDDIGID  | 376  | 7857  |
| >PDGFRA-D1 DMMDDIGI   | 51    | >PDGFRA-D1 NMMDDIGI   | 11   | 40    |
| >PDGFRA-D1 DMMDDIGI   | 35    | >PDGFRA-D1 NMMDDIGI   | 4    | 31    |
| >PDGFRA-D1 DMMDDIGI   | 303   | >PDGFRA-D1 NMMDDIGI   | 95   | 208   |
| >PDGFRA-D1 DMMDDIGI   | 13    | >PDGFRA-D1 NMMDDIGI   | 7    | 6     |
| >PDGFRA-D1 DMMDDIGI   | 148   | >PDGFRA-D1 NMMDDIGI   | 34   | 114   |
| >PDGFRA-D1 DMMDDIGI   | 743   | >PDGFRA-D1 NMMDDIGI   | 354  | 389   |
| >PDGFRA-D1 DMMDDIGI   | 178   | >PDGFRA-D1 NMMDDIGI   | 160  | 18    |
| >PDGFRA-D1 IDMMDDIGI  | 299   | >PDGFRA-D1 INMMDDIGI  | 6763 | 6464  |
| >PDGFRA-D1 IDMMDDIGI  | 196   | >PDGFRA-D1 INMMDDIGI  | 8061 | 7865  |
| >PDGFRA-D1 EDIDMMDDI  | 236   | >PDGFRA-D1 EDINMMDDI  | 258  | 22    |
| >PDGFRA-D1 EDIDMMDDI  | 58    | >PDGFRA-D1 EDINMMDDI  | 85   | 27    |
| >PDGFRA-D1 EDIDMMDDI  | 125   | >PDGFRA-D1 EDINMMDDI  | 178  | 53    |
| >PDGFRA-D1 IEDIDMMDD  | 49    | >PDGFRA-D1 IEDINMMDD  | 26   | 23    |
| >PDGFRA-D1 IEDIDMMDD  | 27    | >PDGFRA-D1 IEDINMMDD  | 19   | 8     |
| >PDGFRA-D1 ETIEDIDM   | 405   | >PDGFRA-D1 ETIEDINM   | 320  | 85    |
| >PDGFRA-D1 ETIEDIDMM  | 56    | >PDGFRA-D1 ETIEDINMM  | 20   | 36    |
| >PDGFRA-D1 ETIEDIDM   | 15    | >PDGFRA-D1 ETIEDINM   | 10   | 5     |
| >PDGFRA-D1 ETIEDIDMM  | 8     | >PDGFRA-D1 ETIEDINMM  | 5    | 3     |
| >PDGFRA-D1 ETIEDIDM   | 3     | >PDGFRA-D1 ETIEDINM   | 2    | 1     |
| >PDGFRA-D1 ETIEDIDMM  | 1     | >PDGFRA-D1 ETIEDINMM  | 1    | 0     |
| >PDGFRA-D1 ETIEDIDMMI | 346   | >PDGFRA-D1 ETIEDINMMI | 383  | 37    |
| >PDGFRA-D1 ETIEDIDM   | 8     | >PDGFRA-D1 ETIEDINM   | 4    | 4     |
| >PDGFRA-D1 ETIEDIDMM  | 14    | >PDGFRA-D1 ETIEDINMM  | 4    | 10    |
| >PDGFRA-D1 ETIEDIDM   | 442   | >PDGFRA-D1 ETIEDINM   | 64   | 378   |
| >PDGFRA-D1 ETIEDIDMM  | 42    | >PDGFRA-D1 ETIEDINMM  | 28   | 14    |
| >PDGFRA-D1 ETIEDIDM   | 148   | >PDGFRA-D1 ETIEDINM   | 29   | 119   |
| >PDGFRA-D1 ETIEDIDMM  | 13    | >PDGFRA-D1 ETIEDINMM  | 10   | 3     |



|                        |       |                        |      |       |
|------------------------|-------|------------------------|------|-------|
| >PDGFRA-D1 ETIEDIDM    | 709   | >PDGFRA-D1 ETIEDINM    | 180  | 529   |
| >PDGFRA-D1 DETIEDIDM   | 457   | >PDGFRA-D1 DETIEDINM   | 239  | 218   |
| >PDGFRA-D1 REDETIEDIDM | 45    | >PDGFRA-D1 REDETIEDINM | 34   | 11    |
| >PDGFRA-D1 REDETIEDIDM | 191   | >PDGFRA-D1 REDETIEDINM | 183  | 8     |
| >PDGFRA-D4 DRSTVEGR    | 1012  | >PDGFRA-D4 ERSTVEGR    | 247  | 765   |
| >PDGFRA-D4 DRSTVEGRVT  | 549   | >PDGFRA-D4 ERSTVEGRVT  | 246  | 303   |
| >PDGFRA-D4 RDRSTVEGRV  | 5170  | >PDGFRA-D4 RERSTVEGRV  | 333  | 4837  |
| >PDGFRA-D4 RDRSTVEGRV  | 27749 | >PDGFRA-D4 RERSTVEGRV  | 381  | 27368 |
| >PDGFRA-D4 RDRSTVEGR   | 13710 | >PDGFRA-D4 RERSTVEGR   | 348  | 13362 |
| >PDGFRA-D4 RDRSTVEGRV  | 1309  | >PDGFRA-D4 RERSTVEGRV  | 41   | 1268  |
| >PDGFRA-D4 RDRSTVEGRV  | 10359 | >PDGFRA-D4 RERSTVEGRV  | 364  | 9995  |
| >PDGFRA-D4 RDRSTVEGRV  | 147   | >PDGFRA-D4 RERSTVEGRV  | 6401 | 6254  |
| >PDGFRA-D4 HSRDRSTV    | 9     | >PDGFRA-D4 HSRERSTV    | 9    | 0     |
| >PDGFRA-D4 HSRDRSTVEC  | 24    | >PDGFRA-D4 HSRERSTVEC  | 28   | 4     |
| >PDGFRA-D4 HSRDRSTVEC  | 110   | >PDGFRA-D4 HSRERSTVEC  | 136  | 26    |
| >PDGFRA-D4 HSRDRSTVEC  | 47    | >PDGFRA-D4 HSRERSTVEC  | 57   | 10    |
| >PDGFRA-D4 HSRDRSTVEC  | 133   | >PDGFRA-D4 HSRERSTVEC  | 117  | 16    |
| >PDGFRA-D4 HSRDRSTVEC  | 132   | >PDGFRA-D4 HSRERSTVEC  | 177  | 45    |
| >PDGFRA-D4 HSRDRSTV    | 44    | >PDGFRA-D4 HSRERSTV    | 58   | 14    |
| >PDGFRA-D4 IHSRDRSTV   | 319   | >PDGFRA-D4 IHSRERSTV   | 320  | 1     |
| >PDGFRA-D4 EIHSRDRSTV  | 265   | >PDGFRA-D4 EIHSRERSTV  | 241  | 24    |
| >PDGFRA-D4 EIHSRDRSTV  | 510   | >PDGFRA-D4 EIHSRERSTV  | 384  | 126   |
| >PDGFRA-D4 TEIHSRDRSTV | 116   | >PDGFRA-D4 TEIHSRERSTV | 133  | 17    |
| >PDGFRA-D4 TEIHSRDRSTV | 295   | >PDGFRA-D4 TEIHSRERSTV | 386  | 91    |
| >PDGFRA-D4 TEIHSRDRSTV | 55    | >PDGFRA-D4 TEIHSRERSTV | 46   | 9     |
| >PDGFRA-D4 ITEIHSRDR   | 2517  | >PDGFRA-D4 ITEIHSRER   | 320  | 2197  |
| >PDGFRA-D4 ITEIHSRDR   | 1064  | >PDGFRA-D4 ITEIHSRER   | 338  | 726   |
| >PDGFRA-D4 IITEIHSRDR  | 655   | >PDGFRA-D4 IITEIHSRER  | 306  | 349   |
| >PDGFRA-D4 IITEIHSRDR  | 887   | >PDGFRA-D4 IITEIHSRER  | 310  | 577   |
| >PDGFRA-D4 NIITEIHSRDR | 100   | >PDGFRA-D4 NIITEIHSRER | 40   | 60    |
| >PDGFRA-D4 NIITEIHSRDR | 501   | >PDGFRA-D4 NIITEIHSRER | 442  | 59    |
| >PDGFRA-D5 DSRWEFPR    | 193   | >PDGFRA-D5 GSRWEFPR    | 19   | 174   |
| >PDGFRA-D5 DSRWEFPR    | 13    | >PDGFRA-D5 GSRWEFPR    | 396  | 383   |
| >PDGFRA-D5 DSRWEFPR    | 54    | >PDGFRA-D5 GSRWEFPR    | 1252 | 1198  |
| >PDGFRA-D5 DSRWEFPRD   | 2088  | >PDGFRA-D5 GSRWEFPRD   | 189  | 1899  |
| >PDGFRA-D5 DSRWEFPRD   | 8377  | >PDGFRA-D5 GSRWEFPRD   | 495  | 7882  |
| >PDGFRA-D5 DSRWEFPR    | 2697  | >PDGFRA-D5 GSRWEFPR    | 453  | 2244  |
| >PDGFRA-D5 YDSRWEFPR   | 2895  | >PDGFRA-D5 YGSRWEFPR   | 127  | 2768  |
| >PDGFRA-D5 YDSRWEFPR   | 506   | >PDGFRA-D5 YGSRWEFPR   | 157  | 349   |
| >PDGFRA-D5 YDSRWEFPR   | 698   | >PDGFRA-D5 YGSRWEFPR   | 159  | 539   |
| >PDGFRA-D5 PYDSRWEF    | 90    | >PDGFRA-D5 PYGSRWEF    | 27   | 63    |
| >PDGFRA-D5 PYDSRWEF    | 354   | >PDGFRA-D5 PYGSRWEF    | 103  | 251   |
| >PDGFRA-D5 PYDSRWEF    | 45    | >PDGFRA-D5 PYGSRWEF    | 17   | 28    |

|                       |     |                       |     |     |
|-----------------------|-----|-----------------------|-----|-----|
| >PDGFRA-D5 PYDSRWEFPF | 83  | >PDGFRA-D5 PYGSRWEFPF | 30  | 53  |
| >PDGFRA-D5 LPYDSRWEF  | 60  | >PDGFRA-D5 LPYGSRWEF  | 17  | 43  |
| >PDGFRA-D5 LPYDSRWEF  | 446 | >PDGFRA-D5 LPYGSRWEF  | 457 | 11  |
| >PDGFRA-D5 LPYDSRWEFF | 214 | >PDGFRA-D5 LPYGSRWEFF | 290 | 76  |
| >PDGFRA-D5 LPYDSRWEFF | 138 | >PDGFRA-D5 LPYGSRWEFF | 185 | 47  |
| >PDGFRA-D5 LPYDSRWEFF | 170 | >PDGFRA-D5 LPYGSRWEFF | 242 | 72  |
| >PDGFRA-D5 LPYDSRWEF  | 37  | >PDGFRA-D5 LPYGSRWEF  | 22  | 15  |
| >PDGFRA-D5 LPYDSRWEF  | 48  | >PDGFRA-D5 LPYGSRWEF  | 99  | 51  |
| >PDGFRA-D5 LPYDSRWEF  | 243 | >PDGFRA-D5 LPYGSRWEF  | 206 | 37  |
| >PDGFRA-D5 LPYDSRWEF  | 11  | >PDGFRA-D5 LPYGSRWEF  | 13  | 2   |
| >PDGFRA-D5 LPYDSRWEFF | 242 | >PDGFRA-D5 LPYGSRWEFF | 307 | 65  |
| >PDGFRA-D5 LPYDSRWEF  | 17  | >PDGFRA-D5 LPYGSRWEF  | 22  | 5   |
| >PDGFRA-D5 LPYDSRWEFF | 109 | >PDGFRA-D5 LPYGSRWEFF | 90  | 19  |
| >PDGFRA-D5 LPYDSRWEF  | 26  | >PDGFRA-D5 LPYGSRWEF  | 59  | 33  |
| >PDGFRA-D5 LPYDSRWEF  | 13  | >PDGFRA-D5 LPYGSRWEF  | 18  | 5   |
| >PDGFRA-D5 LPYDSRWEFF | 140 | >PDGFRA-D5 LPYGSRWEFF | 173 | 33  |
| >PDGFRA-D5 QLPYDSRWEI | 464 | >PDGFRA-D5 QLPYGSRWEI | 690 | 226 |
| >PDGFRA-D5 QLPYDSRWEI | 497 | >PDGFRA-D5 QLPYGSRWEI | 617 | 120 |
| >PDGFRA-D5 QLPYDSRWEI | 406 | >PDGFRA-D5 QLPYGSRWEI | 291 | 115 |
| >PDGFRA-D5 QLPYDSRWEI | 752 | >PDGFRA-D5 QLPYGSRWEI | 475 | 277 |
| >PDGFRA-D5 QLPYDSRWEI | 438 | >PDGFRA-D5 QLPYGSRWEI | 535 | 97  |
| >PDGFRA-D5 MQLPYDSRM  | 12  | >PDGFRA-D5 MQLPYGSRM  | 12  | 0   |
| >PDGFRA-D5 MQLPYDSRM  | 50  | >PDGFRA-D5 MQLPYGSRM  | 58  | 8   |
| >PDGFRA-D5 MQLPYDSRM  | 61  | >PDGFRA-D5 MQLPYGSRM  | 44  | 17  |
| >PDGFRA-D5 MQLPYDSR   | 31  | >PDGFRA-D5 MQLPYGSR   | 23  | 8   |
| >PDGFRA-D5 MQLPYDSRM  | 827 | >PDGFRA-D5 MQLPYGSRM  | 333 | 494 |
| >PDGFRA-D5 MQLPYDSRM  | 81  | >PDGFRA-D5 MQLPYGSRM  | 74  | 7   |
| >PDGFRA-D5 MQLPYDSRM  | 652 | >PDGFRA-D5 MQLPYGSRM  | 363 | 289 |
| >PDGFRA-D5 MQLPYDSR   | 141 | >PDGFRA-D5 MQLPYGSR   | 91  | 50  |
| >PDGFRA-D5 MQLPYDSRM  | 159 | >PDGFRA-D5 MQLPYGSRM  | 26  | 133 |
| >PDGFRA-D5 MQLPYDSRM  | 4   | >PDGFRA-D5 MQLPYGSRM  | 3   | 1   |
| >PDGFRA-D5 MQLPYDSRM  | 21  | >PDGFRA-D5 MQLPYGSRM  | 19  | 2   |
| >PDGFRA-D5 MQLPYDSRM  | 261 | >PDGFRA-D5 MQLPYGSRM  | 238 | 23  |
| >PDGFRA-D5 MQLPYDSRM  | 215 | >PDGFRA-D5 MQLPYGSRM  | 162 | 53  |
| >PDGFRA-D5 MQLPYDSRM  | 157 | >PDGFRA-D5 MQLPYGSRM  | 309 | 152 |
| >PDGFRA-D5 MQLPYDSRM  | 729 | >PDGFRA-D5 MQLPYGSRM  | 437 | 292 |
| >PDGFRA-D5 MQLPYDSRM  | 424 | >PDGFRA-D5 MQLPYGSRM  | 365 | 59  |
| >PDGFRA-D5 MQLPYDSRM  | 323 | >PDGFRA-D5 MQLPYGSRM  | 461 | 138 |
| >PDGFRA-D5 MQLPYDSRM  | 47  | >PDGFRA-D5 MQLPYGSRM  | 176 | 129 |
| >PDGFRA-D5 MQLPYDSRM  | 133 | >PDGFRA-D5 MQLPYGSRM  | 530 | 397 |
| >PDGFRA-D5 MQLPYDSRM  | 8   | >PDGFRA-D5 MQLPYGSRM  | 9   | 1   |
| >PDGFRA-D5 MQLPYDSRM  | 134 | >PDGFRA-D5 MQLPYGSRM  | 151 | 17  |
| >PDGFRA-D5 MQLPYDSR   | 297 | >PDGFRA-D5 MQLPYGSR   | 408 | 111 |

|                       |      |                       |       |       |
|-----------------------|------|-----------------------|-------|-------|
| >PDGFRA-D5 DPMQLPYDS  | 36   | >PDGFRA-D5 DPMQLPYGS  | 66    | 30    |
| >PDGFRA-D5 DPMQLPYDS  | 26   | >PDGFRA-D5 DPMQLPYGS  | 43    | 17    |
| >PDGFRA-D5 RDGLVLGRV  | 383  | >PDGFRA-D5 RHGLVLGRV  | 7464  | 7081  |
| >PDGFRA-D5 RDGLVLGR   | 615  | >PDGFRA-D5 RHGLVLGR   | 211   | 404   |
| >PDGFRA-D5 RDGLVLGRV  | 460  | >PDGFRA-D5 RHGLVLGRV  | 25434 | 24974 |
| >PDGFRA-D5 PRDGLVLGR  | 2457 | >PDGFRA-D5 PRHGLVLGR  | 381   | 2076  |
| >PDGFRA-D5 PRDGLVLGR\ | 986  | >PDGFRA-D5 PRHGLVLGR\ | 274   | 712   |
| >PDGFRA-D5 PRDGLVLGR  | 2939 | >PDGFRA-D5 PRHGLVLGR  | 391   | 2548  |
| >PDGFRA-D5 FPRDGLVL   | 766  | >PDGFRA-D5 FPRHGLVL   | 399   | 367   |
| >PDGFRA-D5 FPRDGLVL   | 15   | >PDGFRA-D5 FPRHGLVL   | 10    | 5     |
| >PDGFRA-D5 FPRDGLVLGR | 40   | >PDGFRA-D5 FPRHGLVLGR | 27    | 13    |
| >PDGFRA-D5 FPRDGLVL   | 1348 | >PDGFRA-D5 FPRHGLVL   | 169   | 1179  |
| >PDGFRA-D5 FPRDGLVL   | 108  | >PDGFRA-D5 FPRHGLVL   | 113   | 5     |
| >PDGFRA-D5 FPRDGLVL   | 252  | >PDGFRA-D5 FPRHGLVL   | 321   | 69    |
| >PDGFRA-D5 FPRDGLVLGR | 254  | >PDGFRA-D5 FPRHGLVLGR | 347   | 93    |
| >PDGFRA-D5 FPRDGLVL   | 426  | >PDGFRA-D5 FPRHGLVL   | 664   | 238   |
| >PDGFRA-D5 FPRDGLVL   | 528  | >PDGFRA-D5 FPRHGLVL   | 353   | 175   |
| >PDGFRA-D5 FPRDGLVLG  | 16   | >PDGFRA-D5 FPRHGLVLG  | 13    | 3     |
| >PDGFRA-D5 FPRDGLVLGR | 917  | >PDGFRA-D5 FPRHGLVLGR | 372   | 545   |
| >PDGFRA-D5 FPRDGLVLGR | 11   | >PDGFRA-D5 FPRHGLVLGR | 10    | 1     |
| >PDGFRA-D5 FPRDGLVL   | 599  | >PDGFRA-D5 FPRHGLVL   | 330   | 269   |
| >PDGFRA-D5 EFPRDGLVL  | 400  | >PDGFRA-D5 EFPRHGLVL  | 356   | 44    |
| >PDGFRA-D5 EFPRDGLVLG | 140  | >PDGFRA-D5 EFPRHGLVLG | 98    | 42    |
| >PDGFRA-D5 WEFPRDGLV  | 20   | >PDGFRA-D5 WEFPRHGLV  | 16    | 4     |
| >PDGFRA-D5 WEFPRDGLV\ | 215  | >PDGFRA-D5 WEFPRHGLV\ | 129   | 86    |
| >PDGFRA-D5 WEFPRDGLV\ | 462  | >PDGFRA-D5 WEFPRHGLV\ | 208   | 254   |
| >PDGFRA-D5 WEFPRDGL   | 143  | >PDGFRA-D5 WEFPRHGL   | 19    | 124   |
| >PDGFRA-D5 WEFPRDGLV  | 1418 | >PDGFRA-D5 WEFPRHGLV  | 359   | 1059  |
| >PDGFRA-D5 WEFPRDGL   | 2270 | >PDGFRA-D5 WEFPRHGL   | 342   | 1928  |
| >PDGFRA-D5 WEFPRDGLV\ | 238  | >PDGFRA-D5 WEFPRHGLV\ | 104   | 134   |
| >PDGFRA-D5 WEFPRDGL   | 14   | >PDGFRA-D5 WEFPRHGL   | 12    | 2     |
| >PDGFRA-D5 WEFPRDGLV  | 251  | >PDGFRA-D5 WEFPRHGLV  | 153   | 98    |
| >PDGFRA-D5 WEFPRDGLV\ | 124  | >PDGFRA-D5 WEFPRHGLV\ | 136   | 12    |
| >PDGFRA-D5 WEFPRDGL   | 113  | >PDGFRA-D5 WEFPRHGL   | 75    | 38    |
| >PDGFRA-D5 WEFPRDGLV  | 638  | >PDGFRA-D5 WEFPRHGLV  | 269   | 369   |
| >PDGFRA-D5 WEFPRDGLV\ | 568  | >PDGFRA-D5 WEFPRHGLV\ | 424   | 144   |
| >PDGFRA-D5 WEFPRDGL   | 163  | >PDGFRA-D5 WEFPRHGL   | 185   | 22    |
| >PDGFRA-D5 WEFPRDGLV  | 15   | >PDGFRA-D5 WEFPRHGLV  | 14    | 1     |
| >PDGFRA-D5 WEFPRDGLV\ | 55   | >PDGFRA-D5 WEFPRHGLV\ | 33    | 22    |
| >PDGFRA-D5 WEFPRDGLV\ | 280  | >PDGFRA-D5 WEFPRHGLV\ | 285   | 5     |
| >PDGFRA-D5 RWEFPRDGL  | 155  | >PDGFRA-D5 RWEFPRHGL  | 143   | 12    |
| >PDGFRA-D5 RWEFPRDGL' | 125  | >PDGFRA-D5 RWEFPRHGL' | 83    | 42    |
| >PDGFRA-D5 RWEFPRDGL' | 290  | >PDGFRA-D5 RWEFPRHGL' | 231   | 59    |

|                       |       |                       |     |       |
|-----------------------|-------|-----------------------|-----|-------|
| >PDGFRA-D5 SRWEFPRDG  | 704   | >PDGFRA-D5 SRWEFPRHG  | 399 | 305   |
| >PDGFRA-D5 SRWEFPRD   | 1545  | >PDGFRA-D5 SRWEFPRH   | 83  | 1462  |
| >PDGFRA-D5 SRWEFPRDG  | 2681  | >PDGFRA-D5 SRWEFPRHG  | 477 | 2204  |
| >PDGFRA-D5 SRWEFPRDG  | 83    | >PDGFRA-D5 SRWEFPRHG  | 31  | 52    |
| >PDGFRA-D5 SRWEFPRDG  | 66    | >PDGFRA-D5 SRWEFPRHG  | 43  | 23    |
| >PDGFRA-D5 SRWEFPRDG  | 2298  | >PDGFRA-D5 SRWEFPRHG  | 480 | 1818  |
| >PDGFRA-D5 SRWEFPRD   | 265   | >PDGFRA-D5 SRWEFPRH   | 927 | 662   |
| >PDGFRA-D5 SRWEFPRD   | 653   | >PDGFRA-D5 SRWEFPRH   | 329 | 324   |
| >PDGFRA-D5 SRWEFPRDG  | 754   | >PDGFRA-D5 SRWEFPRHG  | 152 | 602   |
| >PDGFRA-D5 SRWEFPRDG  | 294   | >PDGFRA-D5 SRWEFPRHG  | 164 | 130   |
| >PDGFRA-D5 SRWEFPRDG  | 946   | >PDGFRA-D5 SRWEFPRHG  | 280 | 666   |
| >PDGFRA-D5 SRWEFPRDG  | 683   | >PDGFRA-D5 SRWEFPRHG  | 135 | 548   |
| >PDGFRA-D5 SRWEFPRDG  | 37    | >PDGFRA-D5 SRWEFPRHG  | 15  | 22    |
| >PDGFRA-D8 DIMHDSNYV  | 4240  | >PDGFRA-D8 FIMHDSNYV  | 7   | 4233  |
| >PDGFRA-D8 DIMHDSNYV  | 334   | >PDGFRA-D8 FIMHDSNYV  | 2   | 332   |
| >PDGFRA-D8 DIMHDSNYV  | 639   | >PDGFRA-D8 FIMHDSNYV  | 2   | 637   |
| >PDGFRA-D8 DIMHDSNYV  | 507   | >PDGFRA-D8 FIMHDSNYV  | 3   | 504   |
| >PDGFRA-D8 DIMHDSNYV: | 16118 | >PDGFRA-D8 FIMHDSNYV: | 496 | 15622 |
| >PDGFRA-D8 DIMHDSNYV  | 656   | >PDGFRA-D8 FIMHDSNYV  | 3   | 653   |
| >PDGFRA-D8 DIMHDSNYV  | 299   | >PDGFRA-D8 FIMHDSNYV  | 3   | 296   |
| >PDGFRA-D8 DIMHDSNYV  | 742   | >PDGFRA-D8 FIMHDSNYV  | 12  | 730   |
| >PDGFRA-D8 DIMHDSNYV  | 22    | >PDGFRA-D8 FIMHDSNYV  | 3   | 19    |
| >PDGFRA-D8 DIMHDSNYV  | 825   | >PDGFRA-D8 FIMHDSNYV  | 3   | 822   |
| >PDGFRA-D8 DIMHDSNYV: | 2763  | >PDGFRA-D8 FIMHDSNYV: | 177 | 2586  |
| >PDGFRA-D8 DIMHDSNYV: | 643   | >PDGFRA-D8 FIMHDSNYV: | 46  | 597   |
| >PDGFRA-D8 DIMHDSNY   | 105   | >PDGFRA-D8 FIMHDSNY   | 120 | 15    |
| >PDGFRA-D8 DIMHDSNY   | 26    | >PDGFRA-D8 FIMHDSNY   | 68  | 42    |
| >PDGFRA-D8 DIMHDSNY   | 560   | >PDGFRA-D8 FIMHDSNY   | 30  | 530   |
| >PDGFRA-D8 DIMHDSNY   | 468   | >PDGFRA-D8 FIMHDSNY   | 225 | 243   |
| >PDGFRA-D8 DIMHDSNYV: | 43    | >PDGFRA-D8 FIMHDSNYV: | 38  | 5     |
| >PDGFRA-D8 DIMHDSNYV  | 15    | >PDGFRA-D8 FIMHDSNYV  | 9   | 6     |
| >PDGFRA-D8 DIMHDSNYV  | 12    | >PDGFRA-D8 FIMHDSNYV  | 9   | 3     |
| >PDGFRA-D8 DIMHDSNY   | 5942  | >PDGFRA-D8 FIMHDSNY   | 424 | 5518  |
| >PDGFRA-D8 DIMHDSNY   | 3615  | >PDGFRA-D8 FIMHDSNY   | 78  | 3537  |
| >PDGFRA-D8 DIMHDSNY   | 486   | >PDGFRA-D8 FIMHDSNY   | 46  | 440   |
| >PDGFRA-D8 DIMHDSNY   | 3508  | >PDGFRA-D8 FIMHDSNY   | 84  | 3424  |
| >PDGFRA-D8 DIMHDSNY   | 9691  | >PDGFRA-D8 FIMHDSNY   | 481 | 9210  |
| >PDGFRA-D8 DIMHDSNY   | 576   | >PDGFRA-D8 FIMHDSNY   | 76  | 500   |
| >PDGFRA-D8 RDIMHDSNY  | 3198  | >PDGFRA-D8 RFIMHDSNY  | 396 | 2802  |
| >PDGFRA-D8 RDIMHDSNY  | 2762  | >PDGFRA-D8 RFIMHDSNY  | 30  | 2732  |
| >PDGFRA-D8 RDIMHDSNY  | 3139  | >PDGFRA-D8 RFIMHDSNY  | 368 | 2771  |
| >PDGFRA-D8 RDIMHDSNY  | 1587  | >PDGFRA-D8 RFIMHDSNY  | 318 | 1269  |
| >PDGFRA-D8 RDIMHDSNY' | 25006 | >PDGFRA-D8 RFIMHDSNY  | 164 | 24842 |

|                       |       |                        |       |       |
|-----------------------|-------|------------------------|-------|-------|
| >PDGFRA-D8 RDIMHDSNY  | 173   | >PDGFRA-D8 RFIMHDSNY   | 23769 | 23596 |
| >PDGFRA-D8 VKICDFGLAR | 19748 | >PDGFRA-D8 VKICDFGLAR  | 14    | 19734 |
| >PDGFRA-D8 ARDIMHDSN  | 330   | >PDGFRA-D8 ARFIMHDSN   | 72    | 258   |
| >PDGFRA-D8 ARDIMHDSN  | 1777  | >PDGFRA-D8 ARFIMHDSN   | 40    | 1737  |
| >PDGFRA-D8 ARDIMHDSN  | 7405  | >PDGFRA-D8 ARFIMHDSN   | 226   | 7179  |
| >PDGFRA-D8 ARDIMHDSN  | 230   | >PDGFRA-D8 ARFIMHDSN   | 39    | 191   |
| >PDGFRA-D8 ARDIMHDSN  | 10678 | >PDGFRA-D8 ARFIMHDSN   | 496   | 10182 |
| >PDGFRA-D8 ARDIMHDSN  | 1754  | >PDGFRA-D8 ARFIMHDSN   | 224   | 1530  |
| >PDGFRA-D8 LARDIMHDS  | 292   | >PDGFRA-D8 LARFIMHDS   | 230   | 62    |
| >PDGFRA-D8 LARDIMHDS  | 146   | >PDGFRA-D8 LARFIMHDS   | 111   | 35    |
| >PDGFRA-D8 LARDIMHDS  | 202   | >PDGFRA-D8 LARFIMHDS   | 292   | 90    |
| >PDGFRA-D8 LARDIMHDS  | 258   | >PDGFRA-D8 LARFIMHDS   | 293   | 35    |
| >PDGFRA-D8 LARDIMHDS  | 6     | >PDGFRA-D8 LARFIMHDS   | 9     | 3     |
| >PDGFRA-D8 LARDIMHDS  | 104   | >PDGFRA-D8 LARFIMHDS   | 162   | 58    |
| >PDGFRA-D8 LARDIMHDS  | 53    | >PDGFRA-D8 LARFIMHDS   | 45    | 8     |
| >PDGFRA-D8 GLARDIMHD  | 480   | >PDGFRA-D8 GLARFIMHD   | 737   | 257   |
| >PDGFRA-D8 CDFGLARDI  | 970   | >PDGFRA-D8 CDFGLARFI   | 40    | 930   |
| >PDGFRA-D8 CDFGLARDI  | 1651  | >PDGFRA-D8 CDFGLARFI   | 301   | 1350  |
| >PDGFRA-D8 CDFGLARDI  | 84    | >PDGFRA-D8 CDFGLARFI   | 39    | 45    |
| >PDGFRA-D8 ICDFGLARD  | 22037 | >PDGFRA-D8 ICDFGLARF   | 178   | 21859 |
| >PDGFRA-D8 ICDFGLARDI | 428   | >PDGFRA-D8 ICDFGLARFIM | 402   | 26    |
| >PDGFRA-D8 KICDFGLARD | 1817  | >PDGFRA-D8 KICDFGLARFI | 174   | 1643  |
| >PDGFRA-D8 KICDFGLARD | 997   | >PDGFRA-D8 KICDFGLARFI | 106   | 891   |
| >PDGFRA-D8 KICDFGLARD | 3284  | >PDGFRA-D8 KICDFGLARFI | 275   | 3009  |
| >PDGFRA-D8 KICDFGLARD | 14521 | >PDGFRA-D8 KICDFGLARF  | 132   | 14389 |
| >PDGFRA-D8 KICDFGLARD | 109   | >PDGFRA-D8 KICDFGLARFI | 329   | 220   |
| >PDGFRA-D8 KICDFGLARD | 19581 | >PDGFRA-D8 KICDFGLARF  | 207   | 19374 |
| >PDGFRA-D8 KICDFGLARD | 19830 | >PDGFRA-D8 KICDFGLARF  | 62    | 19768 |
| >PDGFRA-D8 KICDFGLARD | 1636  | >PDGFRA-D8 KICDFGLARFI | 461   | 1175  |
| >PDGFRA-D8 DIMHDSNYV  | 4240  | >PDGFRA-D8 IIMHDSNYV   | 21    | 4219  |
| >PDGFRA-D8 DIMHDSNYV  | 334   | >PDGFRA-D8 IIMHDSNYV   | 4     | 330   |
| >PDGFRA-D8 DIMHDSNYV  | 639   | >PDGFRA-D8 IIMHDSNYV   | 6     | 633   |
| >PDGFRA-D8 DIMHDSNYV  | 507   | >PDGFRA-D8 IIMHDSNYV   | 9     | 498   |
| >PDGFRA-D8 DIMHDSNYV  | 656   | >PDGFRA-D8 IIMHDSNYV   | 12    | 644   |
| >PDGFRA-D8 DIMHDSNYV  | 299   | >PDGFRA-D8 IIMHDSNYV   | 9     | 290   |
| >PDGFRA-D8 DIMHDSNYV  | 742   | >PDGFRA-D8 IIMHDSNYV   | 63    | 679   |
| >PDGFRA-D8 DIMHDSNYV  | 22    | >PDGFRA-D8 IIMHDSNYV   | 4     | 18    |
| >PDGFRA-D8 DIMHDSNYV  | 825   | >PDGFRA-D8 IIMHDSNYV   | 12    | 813   |
| >PDGFRA-D8 DIMHDSNYV: | 2763  | >PDGFRA-D8 IIMHDSNYVS  | 47    | 2716  |
| >PDGFRA-D8 DIMHDSNYV: | 643   | >PDGFRA-D8 IIMHDSNYVS  | 20    | 623   |
| >PDGFRA-D8 DIMHDSNY   | 105   | >PDGFRA-D8 IIMHDSNY    | 6628  | 6523  |
| >PDGFRA-D8 DIMHDSNY   | 26    | >PDGFRA-D8 IIMHDSNY    | 291   | 265   |
| >PDGFRA-D8 DIMHDSNY   | 560   | >PDGFRA-D8 IIMHDSNY    | 95    | 465   |

|                       |       |                       |       |       |
|-----------------------|-------|-----------------------|-------|-------|
| >PDGFRA-D8 DIMHDSNYV: | 6193  | >PDGFRA-D8 IIMHDSNYVS | 159   | 6034  |
| >PDGFRA-D8 DIMHDSNY   | 468   | >PDGFRA-D8 IIMHDSNY   | 47    | 421   |
| >PDGFRA-D8 DIMHDSNYV: | 43    | >PDGFRA-D8 IIMHDSNYVS | 106   | 63    |
| >PDGFRA-D8 DIMHDSNYV  | 15    | >PDGFRA-D8 IIMHDSNYV  | 29    | 14    |
| >PDGFRA-D8 DIMHDSNYV  | 12    | >PDGFRA-D8 IIMHDSNYV  | 162   | 150   |
| >PDGFRA-D8 DIMHDSNY   | 5942  | >PDGFRA-D8 IIMHDSNY   | 341   | 5601  |
| >PDGFRA-D8 DIMHDSNY   | 3615  | >PDGFRA-D8 IIMHDSNY   | 126   | 3489  |
| >PDGFRA-D8 DIMHDSNY   | 486   | >PDGFRA-D8 IIMHDSNY   | 223   | 263   |
| >PDGFRA-D8 DIMHDSNY   | 3508  | >PDGFRA-D8 IIMHDSNY   | 127   | 3381  |
| >PDGFRA-D8 DIMHDSNY   | 9691  | >PDGFRA-D8 IIMHDSNY   | 266   | 9425  |
| >PDGFRA-D8 DIMHDSNY   | 576   | >PDGFRA-D8 IIMHDSNY   | 430   | 146   |
| >PDGFRA-D8 RDIMHDSNY' | 15712 | >PDGFRA-D8 RIIMHDSNYV | 134   | 15578 |
| >PDGFRA-D8 RDIMHDSNY' | 8387  | >PDGFRA-D8 RIIMHDSNYV | 160   | 8227  |
| >PDGFRA-D8 RDIMHDSNY' | 9780  | >PDGFRA-D8 RIIMHDSNYV | 53    | 9727  |
| >PDGFRA-D8 RDIMHDSNY' | 5155  | >PDGFRA-D8 RIIMHDSNYV | 110   | 5045  |
| >PDGFRA-D8 RDIMHDSNY' | 13207 | >PDGFRA-D8 RIIMHDSNYV | 37    | 13170 |
| >PDGFRA-D8 RDIMHDSNY' | 15517 | >PDGFRA-D8 RIIMHDSNYV | 75    | 15442 |
| >PDGFRA-D8 RDIMHDSNY' | 19226 | >PDGFRA-D8 RIIMHDSNYV | 236   | 18990 |
| >PDGFRA-D8 RDIMHDSNY' | 23957 | >PDGFRA-D8 RIIMHDSNYV | 49    | 23908 |
| >PDGFRA-D8 RDIMHDSNY  | 3198  | >PDGFRA-D8 RIIMHDSNY  | 17    | 3181  |
| >PDGFRA-D8 RDIMHDSNY  | 2762  | >PDGFRA-D8 RIIMHDSNY  | 142   | 2620  |
| >PDGFRA-D8 RDIMHDSNY  | 3139  | >PDGFRA-D8 RIIMHDSNY  | 180   | 2959  |
| >PDGFRA-D8 RDIMHDSNY  | 6187  | >PDGFRA-D8 RIIMHDSNY  | 486   | 5701  |
| >PDGFRA-D8 RDIMHDSNY  | 1587  | >PDGFRA-D8 RIIMHDSNY  | 64    | 1523  |
| >PDGFRA-D8 RDIMHDSNY  | 976   | >PDGFRA-D8 RIIMHDSNY  | 295   | 681   |
| >PDGFRA-D8 RDIMHDSNY  | 2249  | >PDGFRA-D8 RIIMHDSNY  | 22    | 2227  |
| >PDGFRA-D8 RDIMHDSNY' | 173   | >PDGFRA-D8 RIIMHDSNYV | 21959 | 21786 |
| >PDGFRA-D8 ARDIMHDSN  | 330   | >PDGFRA-D8 ARIIMHDSNY | 155   | 175   |
| >PDGFRA-D8 ARDIMHDSN  | 1777  | >PDGFRA-D8 ARIIMHDSNY | 142   | 1635  |
| >PDGFRA-D8 ARDIMHDSN  | 230   | >PDGFRA-D8 ARIIMHDSNY | 41    | 189   |
| >PDGFRA-D8 ARDIMHDSN  | 1754  | >PDGFRA-D8 ARIIMHDSNY | 471   | 1283  |
| >PDGFRA-D8 LARDIMHDSN | 292   | >PDGFRA-D8 LARIIMHDSN | 535   | 243   |
| >PDGFRA-D8 LARDIMHDSN | 146   | >PDGFRA-D8 LARIIMHDSN | 145   | 1     |
| >PDGFRA-D8 LARDIMHDSN | 202   | >PDGFRA-D8 LARIIMHDSN | 457   | 255   |
| >PDGFRA-D8 LARDIMHDSN | 258   | >PDGFRA-D8 LARIIMHDSN | 368   | 110   |
| >PDGFRA-D8 LARDIMHDSN | 6     | >PDGFRA-D8 LARIIMHDSN | 6     | 0     |
| >PDGFRA-D8 LARDIMHDSN | 104   | >PDGFRA-D8 LARIIMHDSN | 189   | 85    |
| >PDGFRA-D8 LARDIMHDSN | 53    | >PDGFRA-D8 LARIIMHDSN | 94    | 41    |
| >PDGFRA-D8 GLARDIMHDS | 480   | >PDGFRA-D8 GLARIIMHDS | 820   | 340   |
| >PDGFRA-D8 CDFGLARDI  | 970   | >PDGFRA-D8 CDFGLARII  | 321   | 649   |
| >PDGFRA-D8 CDFGLARD   | 41836 | >PDGFRA-D8 CDFGLARI   | 305   | 41531 |
| >PDGFRA-D8 CDFGLARDI  | 1651  | >PDGFRA-D8 CDFGLARII  | 460   | 1191  |
| >PDGFRA-D8 CDFGLARD   | 22993 | >PDGFRA-D8 CDFGLARI   | 73    | 22920 |

|                        |       |                        |      |       |
|------------------------|-------|------------------------|------|-------|
| >PDGFRA-D8 CDFGLARDI   | 84    | >PDGFRA-D8 CDFGLARII   | 42   | 42    |
| >PDGFRA-D8 ICDFGLARDIM | 428   | >PDGFRA-D8 ICDFGLARIIM | 501  | 73    |
| >PDGFRA-D8 KICDFGLARD  | 15591 | >PDGFRA-D8 KICDFGLARI  | 155  | 15436 |
| >PDGFRA-D8 KICDFGLARD  | 13579 | >PDGFRA-D8 KICDFGLARI  | 66   | 13513 |
| >PDGFRA-D8 KICDFGLARD  | 17356 | >PDGFRA-D8 KICDFGLARI  | 250  | 17106 |
| >PDGFRA-D8 KICDFGLARD  | 16074 | >PDGFRA-D8 KICDFGLARI  | 48   | 16026 |
| >PDGFRA-D8 KICDFGLARD  | 25897 | >PDGFRA-D8 KICDFGLARI  | 253  | 25644 |
| >PDGFRA-D8 KICDFGLARD  | 14521 | >PDGFRA-D8 KICDFGLARI  | 257  | 14264 |
| >PDGFRA-D8 KICDFGLARD  | 109   | >PDGFRA-D8 KICDFGLARII | 96   | 13    |
| >PDGFRA-D8 DIMHDSNYV   | 4240  | >PDGFRA-D8 VIMHDSNYV   | 27   | 4213  |
| >PDGFRA-D8 DIMHDSNYV   | 334   | >PDGFRA-D8 VIMHDSNYV   | 6    | 328   |
| >PDGFRA-D8 DIMHDSNYV   | 639   | >PDGFRA-D8 VIMHDSNYV   | 6    | 633   |
| >PDGFRA-D8 DIMHDSNYV   | 507   | >PDGFRA-D8 VIMHDSNYV   | 9    | 498   |
| >PDGFRA-D8 DIMHDSNYV   | 656   | >PDGFRA-D8 VIMHDSNYV   | 10   | 646   |
| >PDGFRA-D8 DIMHDSNYV   | 299   | >PDGFRA-D8 VIMHDSNYV   | 7    | 292   |
| >PDGFRA-D8 DIMHDSNYV   | 742   | >PDGFRA-D8 VIMHDSNYV   | 38   | 704   |
| >PDGFRA-D8 DIMHDSNYV   | 22    | >PDGFRA-D8 VIMHDSNYV   | 4    | 18    |
| >PDGFRA-D8 DIMHDSNYV   | 825   | >PDGFRA-D8 VIMHDSNYV   | 9    | 816   |
| >PDGFRA-D8 DIMHDSNYV:  | 2763  | >PDGFRA-D8 VIMHDSNYV:  | 57   | 2706  |
| >PDGFRA-D8 DIMHDSNYV:  | 643   | >PDGFRA-D8 VIMHDSNYV:  | 17   | 626   |
| >PDGFRA-D8 DIMHDSNY    | 105   | >PDGFRA-D8 VIMHDSNY    | 9619 | 9514  |
| >PDGFRA-D8 DIMHDSNY    | 26    | >PDGFRA-D8 VIMHDSNY    | 192  | 166   |
| >PDGFRA-D8 DIMHDSNY    | 560   | >PDGFRA-D8 VIMHDSNY    | 135  | 425   |
| >PDGFRA-D8 DIMHDSNYV:  | 6193  | >PDGFRA-D8 VIMHDSNYV:  | 454  | 5739  |
| >PDGFRA-D8 DIMHDSNY    | 468   | >PDGFRA-D8 VIMHDSNY    | 44   | 424   |
| >PDGFRA-D8 DIMHDSNYV:  | 43    | >PDGFRA-D8 VIMHDSNYV:  | 415  | 372   |
| >PDGFRA-D8 DIMHDSNYV   | 15    | >PDGFRA-D8 VIMHDSNYV   | 46   | 31    |
| >PDGFRA-D8 DIMHDSNYV   | 12    | >PDGFRA-D8 VIMHDSNYV   | 194  | 182   |
| >PDGFRA-D8 DIMHDSNY    | 5942  | >PDGFRA-D8 VIMHDSNY    | 202  | 5740  |
| >PDGFRA-D8 DIMHDSNY    | 3615  | >PDGFRA-D8 VIMHDSNY    | 148  | 3467  |
| >PDGFRA-D8 DIMHDSNY    | 486   | >PDGFRA-D8 VIMHDSNY    | 244  | 242   |
| >PDGFRA-D8 DIMHDSNY    | 3508  | >PDGFRA-D8 VIMHDSNY    | 289  | 3219  |
| >PDGFRA-D8 DIMHDSNY    | 9691  | >PDGFRA-D8 VIMHDSNY    | 455  | 9236  |
| >PDGFRA-D8 RDIMHDSNY\  | 15712 | >PDGFRA-D8 RVIMHDSNY\  | 338  | 15374 |
| >PDGFRA-D8 RDIMHDSNY\  | 8387  | >PDGFRA-D8 RVIMHDSNY\  | 221  | 8166  |
| >PDGFRA-D8 RDIMHDSNY\  | 9780  | >PDGFRA-D8 RVIMHDSNY\  | 84   | 9696  |
| >PDGFRA-D8 RDIMHDSNY\  | 5155  | >PDGFRA-D8 RVIMHDSNY\  | 113  | 5042  |
| >PDGFRA-D8 RDIMHDSNY\  | 13207 | >PDGFRA-D8 RVIMHDSNY\  | 115  | 13092 |
| >PDGFRA-D8 RDIMHDSNY\  | 15517 | >PDGFRA-D8 RVIMHDSNY\  | 157  | 15360 |
| >PDGFRA-D8 RDIMHDSNY\  | 23957 | >PDGFRA-D8 RVIMHDSNY\  | 132  | 23825 |
| >PDGFRA-D8 RDIMHDSNY   | 3198  | >PDGFRA-D8 RVIMHDSNY   | 7    | 3191  |
| >PDGFRA-D8 RDIMHDSNY   | 2762  | >PDGFRA-D8 RVIMHDSNY   | 75   | 2687  |
| >PDGFRA-D8 RDIMHDSNY\  | 12882 | >PDGFRA-D8 RVIMHDSNY\  | 234  | 12648 |

|                         |       |                         |       |       |
|-------------------------|-------|-------------------------|-------|-------|
| >PDGFRA-D8 RDIMHDSNY    | 3139  | >PDGFRA-D8 RVIMHDSNY    | 148   | 2991  |
| >PDGFRA-D8 RDIMHDSNY'   | 18775 | >PDGFRA-D8 RVIMHDSNY'   | 397   | 18378 |
| >PDGFRA-D8 RDIMHDSNY    | 6187  | >PDGFRA-D8 RVIMHDSNY    | 193   | 5994  |
| >PDGFRA-D8 RDIMHDSNY    | 1587  | >PDGFRA-D8 RVIMHDSNY    | 68    | 1519  |
| >PDGFRA-D8 RDIMHDSNY    | 976   | >PDGFRA-D8 RVIMHDSNY    | 343   | 633   |
| >PDGFRA-D8 RDIMHDSNY    | 2249  | >PDGFRA-D8 RVIMHDSNY    | 10    | 2239  |
| >PDGFRA-D8 RDIMHDSNY    | 3790  | >PDGFRA-D8 RVIMHDSNY    | 384   | 3406  |
| >PDGFRA-D8 RDIMHDSNY    | 2529  | >PDGFRA-D8 RVIMHDSNY    | 221   | 2308  |
| >PDGFRA-D8 RDIMHDSNY'   | 173   | >PDGFRA-D8 RVIMHDSNY'   | 23826 | 23653 |
| >PDGFRA-D8 ARDIMHDSN    | 330   | >PDGFRA-D8 ARVIMHDSN'   | 266   | 64    |
| >PDGFRA-D8 ARDIMHDSN'   | 1777  | >PDGFRA-D8 ARVIMHDSN'   | 187   | 1590  |
| >PDGFRA-D8 ARDIMHDSN    | 230   | >PDGFRA-D8 ARVIMHDSN'   | 62    | 168   |
| >PDGFRA-D8 LARDIMHDSN'  | 292   | >PDGFRA-D8 LARVIMHDSN'  | 687   | 395   |
| >PDGFRA-D8 LARDIMHDSN'  | 146   | >PDGFRA-D8 LARVIMHDSN'  | 165   | 19    |
| >PDGFRA-D8 LARDIMHDSN'  | 202   | >PDGFRA-D8 LARVIMHDSN'  | 367   | 165   |
| >PDGFRA-D8 LARDIMHDSN'  | 258   | >PDGFRA-D8 LARVIMHDSN'  | 189   | 69    |
| >PDGFRA-D8 LARDIMHDSN'  | 6     | >PDGFRA-D8 LARVIMHDSN'  | 8     | 2     |
| >PDGFRA-D8 LARDIMHDSN'  | 104   | >PDGFRA-D8 LARVIMHDSN'  | 174   | 70    |
| >PDGFRA-D8 LARDIMHDSN'  | 53    | >PDGFRA-D8 LARVIMHDSN'  | 80    | 27    |
| >PDGFRA-D8 GLARDIMHDSN' | 480   | >PDGFRA-D8 GLARVIMHDSN' | 1216  | 736   |
| >PDGFRA-D8 CDFGLARDI    | 970   | >PDGFRA-D8 CDFGLARVI    | 378   | 592   |
| >PDGFRA-D8 CDFGLARDI    | 2057  | >PDGFRA-D8 CDFGLARVI    | 450   | 1607  |
| >PDGFRA-D8 CDFGLARDI    | 1651  | >PDGFRA-D8 CDFGLARVI    | 329   | 1322  |
| >PDGFRA-D8 CDFGLARD     | 22993 | >PDGFRA-D8 CDFGLARV     | 141   | 22852 |
| >PDGFRA-D8 CDFGLARDI    | 84    | >PDGFRA-D8 CDFGLARVI    | 47    | 37    |
| >PDGFRA-D8 ICDFGLARD    | 29870 | >PDGFRA-D8 ICDFGLARV    | 395   | 29475 |
| >PDGFRA-D8 ICDFGLARDIM  | 428   | >PDGFRA-D8 ICDFGLARVIM  | 543   | 115   |
| >PDGFRA-D8 KICDFGLARD   | 21510 | >PDGFRA-D8 KICDFGLARV   | 100   | 21410 |
| >PDGFRA-D8 KICDFGLARD   | 15591 | >PDGFRA-D8 KICDFGLARV   | 81    | 15510 |
| >PDGFRA-D8 KICDFGLARD   | 13579 | >PDGFRA-D8 KICDFGLARV   | 26    | 13553 |
| >PDGFRA-D8 KICDFGLARD   | 17356 | >PDGFRA-D8 KICDFGLARV   | 78    | 17278 |
| >PDGFRA-D8 KICDFGLARD   | 16074 | >PDGFRA-D8 KICDFGLARV   | 6     | 16068 |
| >PDGFRA-D8 KICDFGLARD   | 997   | >PDGFRA-D8 KICDFGLARVI  | 282   | 715   |
| >PDGFRA-D8 KICDFGLARD   | 25536 | >PDGFRA-D8 KICDFGLARV   | 179   | 25357 |
| >PDGFRA-D8 KICDFGLARD   | 26345 | >PDGFRA-D8 KICDFGLARV   | 474   | 25871 |
| >PDGFRA-D8 KICDFGLARD   | 25897 | >PDGFRA-D8 KICDFGLARV   | 5     | 25892 |
| >PDGFRA-D8 KICDFGLARD   | 109   | >PDGFRA-D8 KICDFGLARVI  | 76    | 33    |
| >PDGFRA-D8 DIMHDSNYV    | 4240  | >PDGFRA-D8 YIMHDSNYV    | 8     | 4232  |
| >PDGFRA-D8 DIMHDSNYV    | 334   | >PDGFRA-D8 YIMHDSNYV    | 2     | 332   |
| >PDGFRA-D8 DIMHDSNYV    | 639   | >PDGFRA-D8 YIMHDSNYV    | 3     | 636   |
| >PDGFRA-D8 DIMHDSNYV    | 507   | >PDGFRA-D8 YIMHDSNYV    | 4     | 503   |
| >PDGFRA-D8 DIMHDSNYV    | 656   | >PDGFRA-D8 YIMHDSNYV    | 3     | 653   |
| >PDGFRA-D8 DIMHDSNYV    | 299   | >PDGFRA-D8 YIMHDSNYV    | 3     | 296   |



|                        |       |                        |       |       |
|------------------------|-------|------------------------|-------|-------|
| >PDGFRA-D8 DIMHDSNYV   | 742   | >PDGFRA-D8 YIMHDSNYV   | 11    | 731   |
| >PDGFRA-D8 DIMHDSNYV   | 22    | >PDGFRA-D8 YIMHDSNYV   | 2     | 20    |
| >PDGFRA-D8 DIMHDSNYV   | 825   | >PDGFRA-D8 YIMHDSNYV   | 3     | 822   |
| >PDGFRA-D8 DIMHDSNYV:  | 2763  | >PDGFRA-D8 YIMHDSNYV:  | 119   | 2644  |
| >PDGFRA-D8 DIMHDSNYV:  | 643   | >PDGFRA-D8 YIMHDSNYV:  | 29    | 614   |
| >PDGFRA-D8 DIMHDSNY    | 982   | >PDGFRA-D8 YIMHDSNY    | 234   | 748   |
| >PDGFRA-D8 DIMHDSNY    | 105   | >PDGFRA-D8 YIMHDSNY    | 179   | 74    |
| >PDGFRA-D8 DIMHDSNY    | 26    | >PDGFRA-D8 YIMHDSNY    | 24    | 2     |
| >PDGFRA-D8 DIMHDSNY    | 560   | >PDGFRA-D8 YIMHDSNY    | 23    | 537   |
| >PDGFRA-D8 DIMHDSNY    | 468   | >PDGFRA-D8 YIMHDSNY    | 165   | 303   |
| >PDGFRA-D8 DIMHDSNYV:  | 43    | >PDGFRA-D8 YIMHDSNYV:  | 31    | 12    |
| >PDGFRA-D8 DIMHDSNYV   | 15    | >PDGFRA-D8 YIMHDSNYV   | 13    | 2     |
| >PDGFRA-D8 DIMHDSNYV   | 12    | >PDGFRA-D8 YIMHDSNYV   | 8     | 4     |
| >PDGFRA-D8 DIMHDSNY    | 5942  | >PDGFRA-D8 YIMHDSNY    | 97    | 5845  |
| >PDGFRA-D8 DIMHDSNY    | 3615  | >PDGFRA-D8 YIMHDSNY    | 60    | 3555  |
| >PDGFRA-D8 DIMHDSNY    | 486   | >PDGFRA-D8 YIMHDSNY    | 47    | 439   |
| >PDGFRA-D8 DIMHDSNY    | 3508  | >PDGFRA-D8 YIMHDSNY    | 70    | 3438  |
| >PDGFRA-D8 DIMHDSNY    | 9691  | >PDGFRA-D8 YIMHDSNY    | 153   | 9538  |
| >PDGFRA-D8 DIMHDSNY    | 576   | >PDGFRA-D8 YIMHDSNY    | 66    | 510   |
| >PDGFRA-D8 RDIMHDSNY'  | 24863 | >PDGFRA-D8 RYIMHDSNY   | 57    | 24806 |
| >PDGFRA-D8 RDIMHDSNY   | 3198  | >PDGFRA-D8 RYIMHDSNY   | 158   | 3040  |
| >PDGFRA-D8 RDIMHDSNY   | 2762  | >PDGFRA-D8 RYIMHDSNY   | 75    | 2687  |
| >PDGFRA-D8 RDIMHDSNY'  | 12882 | >PDGFRA-D8 RYIMHDSNY   | 310   | 12572 |
| >PDGFRA-D8 RDIMHDSNY   | 3139  | >PDGFRA-D8 RYIMHDSNY   | 168   | 2971  |
| >PDGFRA-D8 RDIMHDSNY   | 976   | >PDGFRA-D8 RYIMHDSNY   | 491   | 485   |
| >PDGFRA-D8 RDIMHDSNY'  | 25006 | >PDGFRA-D8 RYIMHDSNY   | 125   | 24881 |
| >PDGFRA-D8 RDIMHDSNY'  | 173   | >PDGFRA-D8 RYIMHDSNY   | 23518 | 23345 |
| >PDGFRA-D8 VKICDFGLAR' | 34637 | >PDGFRA-D8 VKICDFGLAR' | 332   | 34305 |
| >PDGFRA-D8 VKICDFGLAR' | 26510 | >PDGFRA-D8 VKICDFGLAR' | 388   | 26122 |
| >PDGFRA-D8 VKICDFGLAR' | 30174 | >PDGFRA-D8 VKICDFGLAR' | 324   | 29850 |
| >PDGFRA-D8 VKICDFGLAR' | 19748 | >PDGFRA-D8 VKICDFGLAR' | 54    | 19694 |
| >PDGFRA-D8 ARDIMHDSN   | 330   | >PDGFRA-D8 ARYIMHDSN'  | 76    | 254   |
| >PDGFRA-D8 ARDIMHDSN   | 1777  | >PDGFRA-D8 ARYIMHDSN'  | 50    | 1727  |
| >PDGFRA-D8 ARDIMHDSN   | 7405  | >PDGFRA-D8 ARYIMHDSN'  | 275   | 7130  |
| >PDGFRA-D8 ARDIMHDSN   | 230   | >PDGFRA-D8 ARYIMHDSN'  | 38    | 192   |
| >PDGFRA-D8 ARDIMHDSN   | 1754  | >PDGFRA-D8 ARYIMHDSN'  | 116   | 1638  |
| >PDGFRA-D8 LARDIMHDSN' | 292   | >PDGFRA-D8 LARYIMHDSN  | 250   | 42    |
| >PDGFRA-D8 LARDIMHDSN' | 146   | >PDGFRA-D8 LARYIMHDSN  | 87    | 59    |
| >PDGFRA-D8 LARDIMHDSN' | 202   | >PDGFRA-D8 LARYIMHDSN  | 195   | 7     |
| >PDGFRA-D8 LARDIMHDSN' | 258   | >PDGFRA-D8 LARYIMHDSN  | 86    | 172   |
| >PDGFRA-D8 LARDIMHDSN' | 6     | >PDGFRA-D8 LARYIMHDSN  | 10    | 4     |
| >PDGFRA-D8 LARDIMHDSN' | 104   | >PDGFRA-D8 LARYIMHDSN  | 136   | 32    |
| >PDGFRA-D8 LARDIMHDSN' | 53    | >PDGFRA-D8 LARYIMHDSN  | 41    | 12    |

|                        |       |                        |      |       |
|------------------------|-------|------------------------|------|-------|
| >PDGFRA-D8 GLARDIMHD:  | 480   | >PDGFRA-D8 GLARYIMHDS  | 664  | 184   |
| >PDGFRA-D8 CDFGLARDI   | 970   | >PDGFRA-D8 CDFGLARYI   | 180  | 790   |
| >PDGFRA-D8 CDFGLARD    | 38205 | >PDGFRA-D8 CDFGLARY    | 415  | 37790 |
| >PDGFRA-D8 CDFGLARDI   | 84    | >PDGFRA-D8 CDFGLARYI   | 71   | 13    |
| >PDGFRA-D8 ICDFGLARD   | 23535 | >PDGFRA-D8 ICDFGLARY   | 433  | 23102 |
| >PDGFRA-D8 ICDFGLARD   | 29492 | >PDGFRA-D8 ICDFGLARY   | 328  | 29164 |
| >PDGFRA-D8 ICDFGLARD   | 22037 | >PDGFRA-D8 ICDFGLARY   | 123  | 21914 |
| >PDGFRA-D8 ICDFGLARDIM | 428   | >PDGFRA-D8 ICDFGLARYIM | 488  | 60    |
| >PDGFRA-D8 KICDFGLARD  | 1817  | >PDGFRA-D8 KICDFGLARYI | 185  | 1632  |
| >PDGFRA-D8 KICDFGLARD  | 997   | >PDGFRA-D8 KICDFGLARYI | 40   | 957   |
| >PDGFRA-D8 KICDFGLARD  | 14395 | >PDGFRA-D8 KICDFGLARY  | 102  | 14293 |
| >PDGFRA-D8 KICDFGLARD  | 33996 | >PDGFRA-D8 KICDFGLARY  | 326  | 33670 |
| >PDGFRA-D8 KICDFGLARD  | 3284  | >PDGFRA-D8 KICDFGLARYI | 419  | 2865  |
| >PDGFRA-D8 KICDFGLARD  | 32006 | >PDGFRA-D8 KICDFGLARY  | 374  | 31632 |
| >PDGFRA-D8 KICDFGLARD  | 109   | >PDGFRA-D8 KICDFGLARYI | 267  | 158   |
| >PDGFRA-D8 KICDFGLARD  | 24872 | >PDGFRA-D8 KICDFGLARY  | 38   | 24834 |
| >PDGFRA-D8 KICDFGLARD  | 19581 | >PDGFRA-D8 KICDFGLARY  | 183  | 19398 |
| >PDGFRA-D8 KICDFGLARD  | 19830 | >PDGFRA-D8 KICDFGLARY  | 75   | 19755 |
| >PDGFRA-D8 DSNYVSKGST  | 1038  | >PDGFRA-D8 YSNYVSKGST  | 315  | 723   |
| >PDGFRA-D8 DSNYVSKGST  | 2919  | >PDGFRA-D8 YSNYVSKGST  | 39   | 2880  |
| >PDGFRA-D8 DSNYVSKGST  | 465   | >PDGFRA-D8 YSNYVSKGST  | 7    | 458   |
| >PDGFRA-D8 DSNYVSKGST  | 193   | >PDGFRA-D8 YSNYVSKGST  | 4    | 189   |
| >PDGFRA-D8 DSNYVSKGST  | 1372  | >PDGFRA-D8 YSNYVSKGST  | 183  | 1189  |
| >PDGFRA-D8 DSNYVSKGST  | 7845  | >PDGFRA-D8 YSNYVSKGST  | 104  | 7741  |
| >PDGFRA-D8 DSNYVSKGST  | 92    | >PDGFRA-D8 YSNYVSKGST  | 5    | 87    |
| >PDGFRA-D8 DSNYVSKGST  | 8669  | >PDGFRA-D8 YSNYVSKGST  | 306  | 8363  |
| >PDGFRA-D8 HDSNYVSK    | 26586 | >PDGFRA-D8 HYSNYVSK    | 470  | 26116 |
| >PDGFRA-D8 HDSNYVSK    | 5588  | >PDGFRA-D8 HYSNYVSK    | 20   | 5568  |
| >PDGFRA-D8 HDSNYVSK    | 13403 | >PDGFRA-D8 HYSNYVSK    | 244  | 13159 |
| >PDGFRA-D8 HDSNYVSK    | 2161  | >PDGFRA-D8 HYSNYVSK    | 349  | 1812  |
| >PDGFRA-D8 HDSNYVSK    | 14083 | >PDGFRA-D8 HYSNYVSK    | 123  | 13960 |
| >PDGFRA-D8 DFGLARDIMI  | 25709 | >PDGFRA-D8 DFGLARDIMI  | 411  | 25298 |
| >PDGFRA-D8 MHDSNYVSK   | 4370  | >PDGFRA-D8 MHYSNYVSK   | 151  | 4219  |
| >PDGFRA-D8 MHDSNYVSK   | 3716  | >PDGFRA-D8 MHYSNYVSK   | 36   | 3680  |
| >PDGFRA-D8 IMHDSNYV    | 14    | >PDGFRA-D8 IMHYSNYV    | 17   | 3     |
| >PDGFRA-D8 IMHDSNYV    | 3     | >PDGFRA-D8 IMHYSNYV    | 4    | 1     |
| >PDGFRA-D8 IMHDSNYV    | 3     | >PDGFRA-D8 IMHYSNYV    | 6    | 3     |
| >PDGFRA-D8 IMHDSNYV    | 15    | >PDGFRA-D8 IMHYSNYV    | 52   | 37    |
| >PDGFRA-D8 IMHDSNYV    | 2     | >PDGFRA-D8 IMHYSNYV    | 3    | 1     |
| >PDGFRA-D8 IMHDSNYVS   | 324   | >PDGFRA-D8 IMHYSNYVS   | 5512 | 5188  |
| >PDGFRA-D8 IMHDSNYV    | 3     | >PDGFRA-D8 IMHYSNYV    | 5    | 2     |
| >PDGFRA-D8 IMHDSNYV    | 7     | >PDGFRA-D8 IMHYSNYV    | 17   | 10    |
| >PDGFRA-D8 IMHDSNYV    | 3     | >PDGFRA-D8 IMHYSNYV    | 12   | 9     |

|                       |       |                       |      |       |
|-----------------------|-------|-----------------------|------|-------|
| >PDGFRA-D8 IMHDSNYV   | 2     | >PDGFRA-D8 IMHYSNYV   | 4    | 2     |
| >PDGFRA-D8 IMHDSNYVSK | 399   | >PDGFRA-D8 IMHYSNYVSK | 9048 | 8649  |
| >PDGFRA-D8 IMHDSNYVSK | 35    | >PDGFRA-D8 IMHYSNYVSK | 18   | 17    |
| >PDGFRA-D8 IMHDSNYVSK | 80    | >PDGFRA-D8 IMHYSNYVSK | 57   | 23    |
| >PDGFRA-D8 IMHDSNYV   | 527   | >PDGFRA-D8 IMHYSNYV   | 216  | 311   |
| >PDGFRA-D8 IMHDSNYVSK | 15    | >PDGFRA-D8 IMHYSNYVSK | 11   | 4     |
| >PDGFRA-D8 IMHDSNYV   | 93    | >PDGFRA-D8 IMHYSNYV   | 32   | 61    |
| >PDGFRA-D8 IMHDSNYVS  | 1028  | >PDGFRA-D8 IMHYSNYVS  | 257  | 771   |
| >PDGFRA-D8 IMHDSNYVSK | 89    | >PDGFRA-D8 IMHYSNYVSK | 42   | 47    |
| >PDGFRA-D8 DIMHDSNYV  | 334   | >PDGFRA-D8 DIMHYSNYV  | 52   | 282   |
| >PDGFRA-D8 DIMHDSNYV  | 639   | >PDGFRA-D8 DIMHYSNYV  | 204  | 435   |
| >PDGFRA-D8 DIMHDSNYV  | 507   | >PDGFRA-D8 DIMHYSNYV  | 150  | 357   |
| >PDGFRA-D8 DIMHDSNYV  | 656   | >PDGFRA-D8 DIMHYSNYV  | 136  | 520   |
| >PDGFRA-D8 DIMHDSNYV  | 299   | >PDGFRA-D8 DIMHYSNYV  | 258  | 41    |
| >PDGFRA-D8 DIMHDSNYV  | 22    | >PDGFRA-D8 DIMHYSNYV  | 26   | 4     |
| >PDGFRA-D8 DIMHDSNYV: | 643   | >PDGFRA-D8 DIMHYSNYV: | 218  | 425   |
| >PDGFRA-D8 DIMHDSNY   | 982   | >PDGFRA-D8 DIMHYSNY   | 262  | 720   |
| >PDGFRA-D8 DIMHDSNY   | 105   | >PDGFRA-D8 DIMHYSNY   | 40   | 65    |
| >PDGFRA-D8 DIMHDSNY   | 26    | >PDGFRA-D8 DIMHYSNY   | 33   | 7     |
| >PDGFRA-D8 DIMHDSNY   | 560   | >PDGFRA-D8 DIMHYSNY   | 305  | 255   |
| >PDGFRA-D8 DIMHDSNY   | 468   | >PDGFRA-D8 DIMHYSNY   | 725  | 257   |
| >PDGFRA-D8 DIMHDSNYV: | 686   | >PDGFRA-D8 DIMHYSNYV: | 227  | 459   |
| >PDGFRA-D8 DIMHDSNYV: | 43    | >PDGFRA-D8 DIMHYSNYV: | 25   | 18    |
| >PDGFRA-D8 DIMHDSNYV  | 15    | >PDGFRA-D8 DIMHYSNYV  | 10   | 5     |
| >PDGFRA-D8 DIMHDSNYV  | 12    | >PDGFRA-D8 DIMHYSNYV  | 6    | 6     |
| >PDGFRA-D8 DIMHDSNY   | 486   | >PDGFRA-D8 DIMHYSNY   | 712  | 226   |
| >PDGFRA-D8 RDIMHDSNY  | 976   | >PDGFRA-D8 RDIMHYSNY  | 164  | 812   |
| >PDGFRA-D8 RDIMHDSNY' | 836   | >PDGFRA-D8 RDIMHYSNY' | 147  | 689   |
| >PDGFRA-D8 RDIMHDSNY' | 173   | >PDGFRA-D8 RDIMHYSNY' | 101  | 72    |
| >PDGFRA-D8 ARDIMHDSN  | 330   | >PDGFRA-D8 ARDIMHYSN' | 334  | 4     |
| >PDGFRA-D8 ARDIMHDSN  | 230   | >PDGFRA-D8 ARDIMHYSN' | 164  | 66    |
| >PDGFRA-D8 LARDIMHD   | 26398 | >PDGFRA-D8 LARDIMHY   | 183  | 26215 |
| >PDGFRA-D8 LARDIMHDSN | 292   | >PDGFRA-D8 LARDIMHYSN | 196  | 96    |
| >PDGFRA-D8 LARDIMHD   | 2811  | >PDGFRA-D8 LARDIMHY   | 261  | 2550  |
| >PDGFRA-D8 LARDIMHDS  | 5906  | >PDGFRA-D8 LARDIMHYS  | 400  | 5506  |
| >PDGFRA-D8 LARDIMHDSN | 1429  | >PDGFRA-D8 LARDIMHYSN | 250  | 1179  |
| >PDGFRA-D8 LARDIMHD   | 31927 | >PDGFRA-D8 LARDIMHY   | 267  | 31660 |
| >PDGFRA-D8 LARDIMHDSN | 146   | >PDGFRA-D8 LARDIMHYSN | 166  | 20    |
| >PDGFRA-D8 LARDIMHD   | 18134 | >PDGFRA-D8 LARDIMHY   | 81   | 18053 |
| >PDGFRA-D8 LARDIMHDSN | 202   | >PDGFRA-D8 LARDIMHYSN | 177  | 25    |
| >PDGFRA-D8 LARDIMHD   | 24949 | >PDGFRA-D8 LARDIMHY   | 192  | 24757 |
| >PDGFRA-D8 LARDIMHDSN | 258   | >PDGFRA-D8 LARDIMHYSN | 84   | 174   |
| >PDGFRA-D8 LARDIMHD   | 15328 | >PDGFRA-D8 LARDIMHY   | 10   | 15318 |

|                        |       |                         |      |       |
|------------------------|-------|-------------------------|------|-------|
| >PDGFRA-D8 LARDIMHDSM  | 6     | >PDGFRA-D8 LARDIMHYSM   | 6    | 0     |
| >PDGFRA-D8 LARDIMHDSM  | 104   | >PDGFRA-D8 LARDIMHYSM   | 205  | 101   |
| >PDGFRA-D8 LARDIMHDSM  | 21332 | >PDGFRA-D8 LARDIMHYM    | 468  | 20864 |
| >PDGFRA-D8 LARDIMHDSM  | 53    | >PDGFRA-D8 LARDIMHYSM   | 26   | 27    |
| >PDGFRA-D8 GLARDIMHDSM | 6634  | >PDGFRA-D8 GLARDIMHYM   | 363  | 6271  |
| >PDGFRA-D8 GLARDIMHDSM | 480   | >PDGFRA-D8 GLARDIMHYM   | 91   | 389   |
| >PDGFRA-D8 GLARDIMHDSM | 18870 | >PDGFRA-D8 GLARDIMHYM   | 329  | 18541 |
| >PDGFRA-D8 GLARDIMHDSM | 24917 | >PDGFRA-D8 GLARDIMHYM   | 66   | 24851 |
| >PDGFRA-D8 GLARDIMHDSM | 32042 | >PDGFRA-D8 GLARDIMHYM   | 253  | 31789 |
| >PDGFRA-D8 GLARDIMHDSM | 25876 | >PDGFRA-D8 GLARDIMHYM   | 99   | 25777 |
| >PDGFRA-D8 GLARDIMHDSM | 18859 | >PDGFRA-D8 GLARDIMHYM   | 85   | 18774 |
| >PDGFRA-E3: EVRAYPPP   | 2320  | >PDGFRA-E3: QVRAYPPP    | 64   | 2256  |
| >PDGFRA-E3: EVRAYPPPR  | 314   | >PDGFRA-E3: QVRAYPPPR   | 10   | 304   |
| >PDGFRA-E3: EVRAYPPPRI | 482   | >PDGFRA-E3: QVRAYPPPRI  | 12   | 470   |
| >PDGFRA-E3: EVRAYPPPRI | 4545  | >PDGFRA-E3: QVRAYPPPRI  | 155  | 4390  |
| >PDGFRA-E3: EVRAYPPPR  | 156   | >PDGFRA-E3: QVRAYPPPR   | 29   | 127   |
| >PDGFRA-E3: EVRAYPPPR  | 47    | >PDGFRA-E3: QVRAYPPPR   | 466  | 419   |
| >PDGFRA-E3: EVRAYPPPR  | 39    | >PDGFRA-E3: QVRAYPPPR   | 653  | 614   |
| >PDGFRA-E3: EVRAYPPPRI | 135   | >PDGFRA-E3: QVRAYPPPRI  | 1424 | 1289  |
| >PDGFRA-E3: EVRAYPPPR  | 345   | >PDGFRA-E3: QVRAYPPPR   | 226  | 119   |
| >PDGFRA-E3: EVRAYPPPRI | 888   | >PDGFRA-E3: QVRAYPPPRI  | 163  | 725   |
| >PDGFRA-E3: VEVRAYPPPR | 270   | >PDGFRA-E3: VQVRAYPPPF  | 6399 | 6129  |
| >PDGFRA-E3: VEVRAYPPPR | 10325 | >PDGFRA-E3: VQVRAYPPPF  | 153  | 10172 |
| >PDGFRA-E3: VEVRAYPPPR | 5266  | >PDGFRA-E3: VQVRAYPPPF  | 116  | 5150  |
| >PDGFRA-E3: VEVRAYPPPR | 4107  | >PDGFRA-E3: VQVRAYPPPF  | 193  | 3914  |
| >PDGFRA-E3: VEVRAYPPPR | 437   | >PDGFRA-E3: VQVRAYPPPF  | 7897 | 7460  |
| >PDGFRA-E3: VEVRAYPPPR | 8     | >PDGFRA-E3: VQVRAYPPPF  | 1981 | 1973  |
| >PDGFRA-E3: VVEVRAYPPP | 905   | >PDGFRA-E3: VVQVRAYPPPF | 127  | 778   |
| >PDGFRA-E3: VVEVRAYPPP | 103   | >PDGFRA-E3: VVQVRAYPPPF | 29   | 74    |
| >PDGFRA-E3: VVEVRAYPPP | 1025  | >PDGFRA-E3: VVQVRAYPPPF | 329  | 696   |
| >PDGFRA-E3: FVVEVRAYP  | 385   | >PDGFRA-E3: FVVQVRAYP   | 3294 | 2909  |
| >PDGFRA-E3: FVVEVRAYPP | 187   | >PDGFRA-E3: FVVQVRAYPF  | 1086 | 899   |
| >PDGFRA-E3: FVVEVRAY   | 88    | >PDGFRA-E3: FVVQVRAY    | 90   | 2     |
| >PDGFRA-E3: FVVEVRAY   | 10    | >PDGFRA-E3: FVVQVRAY    | 18   | 8     |
| >PDGFRA-E3: FVVEVRAY   | 8     | >PDGFRA-E3: FVVQVRAY    | 8    | 0     |
| >PDGFRA-E3: FVVEVRAY   | 200   | >PDGFRA-E3: FVVQVRAY    | 168  | 32    |
| >PDGFRA-E3: FVVEVRAY   | 40    | >PDGFRA-E3: FVVQVRAY    | 33   | 7     |
| >PDGFRA-E3: FVVEVRAYP  | 374   | >PDGFRA-E3: FVVQVRAYP   | 1425 | 1051  |
| >PDGFRA-E3: FVVEVRAY   | 120   | >PDGFRA-E3: FVVQVRAY    | 86   | 34    |
| >PDGFRA-E3: FVVEVRAY   | 229   | >PDGFRA-E3: FVVQVRAY    | 196  | 33    |
| >PDGFRA-E3: FVVEVRAY   | 433   | >PDGFRA-E3: FVVQVRAY    | 347  | 86    |
| >PDGFRA-E3: FVVEVRAY   | 26    | >PDGFRA-E3: FVVQVRAY    | 30   | 4     |
| >PDGFRA-E3: FVVEVRAY   | 16    | >PDGFRA-E3: FVVQVRAY    | 19   | 3     |

|                         |       |                         |       |       |
|-------------------------|-------|-------------------------|-------|-------|
| >PDGFRA-E3: HFVVEVRAY   | 246   | >PDGFRA-E3: HFVVQVRAY   | 221   | 25    |
| >PDGFRA-E3: HFVVEVRAY   | 261   | >PDGFRA-E3: HFVVQVRAY   | 142   | 119   |
| >PDGFRA-E3: HFVVEVRAY   | 653   | >PDGFRA-E3: HFVVQVRAY   | 295   | 358   |
| >PDGFRA-E3: HFVVEVRAY   | 166   | >PDGFRA-E3: HFVVQVRAY   | 112   | 54    |
| >PDGFRA-E3: HFVVEVRAY   | 40    | >PDGFRA-E3: HFVVQVRAY   | 22    | 18    |
| >PDGFRA-E3: KHFVVEVR    | 353   | >PDGFRA-E3: KHFVVQVR    | 169   | 184   |
| >PDGFRA-E3: KHFVVEVRAY  | 17    | >PDGFRA-E3: KHFVVQVRA'  | 13    | 4     |
| >PDGFRA-E3: KHFVVEVRAY  | 732   | >PDGFRA-E3: KHFVVQVRA'  | 301   | 431   |
| >PDGFRA-E3: KHFVVEVR    | 165   | >PDGFRA-E3: KHFVVQVR    | 119   | 46    |
| >PDGFRA-E3: VKHFVVEV    | 137   | >PDGFRA-E3: VKHFVVQV    | 187   | 50    |
| >PDGFRA-E3: VKHFVVEVR   | 1358  | >PDGFRA-E3: VKHFVVQVR   | 451   | 907   |
| >PDGFRA-E3: VKHFVVEVRA' | 12    | >PDGFRA-E3: VKHFVVQVR,  | 9     | 3     |
| >PDGFRA-E3: EVKHFVVEVR  | 227   | >PDGFRA-E3: EVKHFVVQVI  | 179   | 48    |
| >PDGFRA-E3: EVKHFVVEVR  | 351   | >PDGFRA-E3: EVKHFVVQVI  | 512   | 161   |
| >PDGFRA-E3: EVKHFVVEVR  | 47    | >PDGFRA-E3: EVKHFVVQVI  | 92    | 45    |
| >PDGFRA-E3: EVKHFVVEV   | 9     | >PDGFRA-E3: EVKHFVVQV   | 12    | 3     |
| >PDGFRA-E3: EVKHFVVEVR  | 119   | >PDGFRA-E3: EVKHFVVQVI  | 56    | 63    |
| >PDGFRA-E3: EVKHFVVEV   | 44    | >PDGFRA-E3: EVKHFVVQV   | 29    | 15    |
| >PDGFRA-E3: HEVKHFVVE\  | 159   | >PDGFRA-E3: HEVKHFVVQ'  | 165   | 6     |
| >PDGFRA-E3: HEVKHFVVE   | 1313  | >PDGFRA-E3: HEVKHFVVQ   | 355   | 958   |
| >PDGFRA-E3: HEVKHFVVE\  | 255   | >PDGFRA-E3: HEVKHFVVQ'  | 211   | 44    |
| >PDGFRA-E3: HEVKHFVVE\  | 473   | >PDGFRA-E3: HEVKHFVVQ'  | 572   | 99    |
| >PDGFRA-E3: HEVKHFVVE\  | 142   | >PDGFRA-E3: HEVKHFVVQ'  | 108   | 34    |
| >PDGFRA-E5: EIRWRVIESI  | 2052  | >PDGFRA-E5: KIRWRVIESI  | 490   | 1562  |
| >PDGFRA-E5: EIRWRVIESI  | 2557  | >PDGFRA-E5: KIRWRVIESI  | 174   | 2383  |
| >PDGFRA-E5: EIRWRVIE    | 15128 | >PDGFRA-E5: KIRWRVIE    | 358   | 14770 |
| >PDGFRA-E5: EIRWRVIES   | 11022 | >PDGFRA-E5: KIRWRVIES   | 23    | 10999 |
| >PDGFRA-E5: EIRWRVIESI  | 6792  | >PDGFRA-E5: KIRWRVIESI  | 17    | 6775  |
| >PDGFRA-E5: EIRWRVIESIS | 13637 | >PDGFRA-E5: KIRWRVIESIS | 102   | 13535 |
| >PDGFRA-E5: EIRWRVIESI  | 1586  | >PDGFRA-E5: KIRWRVIESI  | 25    | 1561  |
| >PDGFRA-E5: YEIRWRVI    | 10    | >PDGFRA-E5: YKIRWRVI    | 5979  | 5969  |
| >PDGFRA-E5: YEIRWRVIESI | 12    | >PDGFRA-E5: YKIRWRVIESI | 416   | 404   |
| >PDGFRA-E5: YEIRWRVIESI | 366   | >PDGFRA-E5: YKIRWRVIESI | 605   | 239   |
| >PDGFRA-E5: YEIRWRVI    | 1113  | >PDGFRA-E5: YKIRWRVI    | 29    | 1084  |
| >PDGFRA-E5: YEIRWRVIESI | 564   | >PDGFRA-E5: YKIRWRVIESI | 17    | 547   |
| >PDGFRA-E5: YEIRWRVIESI | 404   | >PDGFRA-E5: YKIRWRVIESI | 21738 | 21334 |
| >PDGFRA-E5: YEIRWRVI    | 1181  | >PDGFRA-E5: YKIRWRVI    | 381   | 800   |
| >PDGFRA-E5: YEIRWRVIESI | 1180  | >PDGFRA-E5: YKIRWRVIESI | 458   | 722   |
| >PDGFRA-E5: YEIRWRVI    | 117   | >PDGFRA-E5: YKIRWRVI    | 19519 | 19402 |
| >PDGFRA-E5: YEIRWRVIESI | 41    | >PDGFRA-E5: YKIRWRVIESI | 16978 | 16937 |
| >PDGFRA-E5: YEIRWRVI    | 99    | >PDGFRA-E5: YKIRWRVI    | 16904 | 16805 |
| >PDGFRA-E5: YEIRWRVIESI | 114   | >PDGFRA-E5: YKIRWRVIESI | 20269 | 20155 |
| >PDGFRA-E5: YEIRWRVI    | 35    | >PDGFRA-E5: YKIRWRVI    | 1339  | 1304  |

|                        |       |                        |       |       |
|------------------------|-------|------------------------|-------|-------|
| >PDGFRA-E5:YEIRWRVIE   | 232   | >PDGFRA-E5:YKIRWRVIE   | 24158 | 23926 |
| >PDGFRA-E5:YEIRWRVIESI | 3     | >PDGFRA-E5:YKIRWRVIESI | 176   | 173   |
| >PDGFRA-E5:VVIWKQKPR\  | 20049 | >PDGFRA-E5:VVIWKQKPR\  | 175   | 19874 |
| >PDGFRA-E5:VVIWKQKPR\  | 23911 | >PDGFRA-E5:VVIWKQKPR\  | 35    | 23876 |
| >PDGFRA-E5:VVIWKQKPR\  | 23026 | >PDGFRA-E5:VVIWKQKPR\  | 356   | 22670 |
| >PDGFRA-E5:RYEIRWRVI   | 137   | >PDGFRA-E5:RYKIRWRVI   | 99    | 38    |
| >PDGFRA-E5:RYEIRWRV    | 698   | >PDGFRA-E5:RYKIRWRV    | 324   | 374   |
| >PDGFRA-E5:RYEIRWRVI   | 72    | >PDGFRA-E5:RYKIRWRVI   | 40    | 32    |
| >PDGFRA-E5:RYEIRWRV    | 384   | >PDGFRA-E5:RYKIRWRV    | 246   | 138   |
| >PDGFRA-E5:RYEIRWRVI   | 116   | >PDGFRA-E5:RYKIRWRVI   | 71    | 45    |
| >PDGFRA-E5:RYEIRWRV    | 2821  | >PDGFRA-E5:RYKIRWRV    | 15    | 2806  |
| >PDGFRA-E5:RYEIRWRVI   | 552   | >PDGFRA-E5:RYKIRWRVI   | 6     | 546   |
| >PDGFRA-E5:RYEIRWRVIE  | 9657  | >PDGFRA-E5:RYKIRWRVIE  | 187   | 9470  |
| >PDGFRA-E5:RYEIRWRVIE\ | 4814  | >PDGFRA-E5:RYKIRWRVIE\ | 20    | 4794  |
| >PDGFRA-E5:RYEIRWRV    | 3569  | >PDGFRA-E5:RYKIRWRV    | 273   | 3296  |
| >PDGFRA-E5:RYEIRWRV    | 454   | >PDGFRA-E5:RYKIRWRV    | 749   | 295   |
| >PDGFRA-E5:PRYEIRWRV   | 385   | >PDGFRA-E5:PRYKIRWRV   | 312   | 73    |
| >PDGFRA-E5:PRYEIRWRV   | 348   | >PDGFRA-E5:PRYKIRWRV   | 329   | 19    |
| >PDGFRA-E5:PRYEIRWRVI  | 355   | >PDGFRA-E5:PRYKIRWRVI  | 539   | 184   |
| >PDGFRA-E5:PRYEIRWR    | 423   | >PDGFRA-E5:PRYKIRWR    | 256   | 167   |
| >PDGFRA-E5:KPRYEIRWR   | 2288  | >PDGFRA-E5:KPRYKIRWR   | 298   | 1990  |
| >PDGFRA-E5:KPRYEIRW    | 566   | >PDGFRA-E5:KPRYKIRW    | 64    | 502   |
| >PDGFRA-E5:KPRYEIRWRV  | 765   | >PDGFRA-E5:KPRYKIRWRV  | 104   | 661   |
| >PDGFRA-E5:KPRYEIRWRV  | 21    | >PDGFRA-E5:KPRYKIRWRV  | 11    | 10    |
| >PDGFRA-E5:KPRYEIRWRV  | 717   | >PDGFRA-E5:KPRYKIRWRV  | 91    | 626   |
| >PDGFRA-E5:KPRYEIRW    | 159   | >PDGFRA-E5:KPRYKIRW    | 433   | 274   |
| >PDGFRA-E5:KPRYEIRW    | 83    | >PDGFRA-E5:KPRYKIRW    | 112   | 29    |
| >PDGFRA-E5:KPRYEIRWR   | 393   | >PDGFRA-E5:KPRYKIRWR   | 471   | 78    |
| >PDGFRA-E5:KQKPRYEI    | 319   | >PDGFRA-E5:KQKPRYKI    | 1327  | 1008  |
| >PDGFRA-E5:KQKPRYEI    | 55    | >PDGFRA-E5:KQKPRYKI    | 49    | 6     |
| >PDGFRA-E5:KQKPRYEIR   | 813   | >PDGFRA-E5:KQKPRYKIR   | 105   | 708   |
| >PDGFRA-E5:KQKPRYEIRW  | 728   | >PDGFRA-E5:KQKPRYKIRW  | 267   | 461   |
| >PDGFRA-E5:KQKPRYEIR   | 9     | >PDGFRA-E5:KQKPRYKIR   | 9     | 0     |
| >PDGFRA-E5:KQKPRYEIRW  | 12    | >PDGFRA-E5:KQKPRYKIRW  | 10    | 2     |
| >PDGFRA-E5:KQKPRYEI    | 61    | >PDGFRA-E5:KQKPRYKI    | 107   | 46    |
| >PDGFRA-E5:KQKPRYEIR   | 252   | >PDGFRA-E5:KQKPRYKIR   | 124   | 128   |
| >PDGFRA-E5:KQKPRYEIRW  | 471   | >PDGFRA-E5:KQKPRYKIRW  | 455   | 16    |
| >PDGFRA-E5:KQKPRYEIRW  | 540   | >PDGFRA-E5:KQKPRYKIRW  | 462   | 78    |
| >PDGFRA-E5:KQKPRYEIRW  | 181   | >PDGFRA-E5:KQKPRYKIRW  | 224   | 43    |
| >PDGFRA-E5:KQKPRYEIR   | 112   | >PDGFRA-E5:KQKPRYKIR   | 78    | 34    |
| >PDGFRA-E5:KQKPRYEIRW  | 93    | >PDGFRA-E5:KQKPRYKIRW  | 88    | 5     |
| >PDGFRA-E5:WKQKPRYEI   | 98    | >PDGFRA-E5:WKQKPRYKI   | 323   | 225   |
| >PDGFRA-E5:IWKQKPRYE   | 13218 | >PDGFRA-E5:IWKQKPRYK   | 82    | 13136 |

|                         |       |                         |       |       |
|-------------------------|-------|-------------------------|-------|-------|
| >PDGFRA-E5: IWKQKPRYEI  | 186   | >PDGFRA-E5: IWKQKPRYKI  | 242   | 56    |
| >PDGFRA-E5: IWKQKPRYE   | 6170  | >PDGFRA-E5: IWKQKPRYK   | 35    | 6135  |
| >PDGFRA-E5: IWKQKPRYEI  | 26    | >PDGFRA-E5: IWKQKPRYKI  | 22    | 4     |
| >PDGFRA-E5: IWKQKPRYEI  | 490   | >PDGFRA-E5: IWKQKPRYKI  | 811   | 321   |
| >PDGFRA-E5: VIWKQKPRYE  | 464   | >PDGFRA-E5: VIWKQKPRYK  | 1822  | 1358  |
| >PDGFRA-E5: VIWKQKPRYE  | 73    | >PDGFRA-E5: VIWKQKPRYK  | 178   | 105   |
| >PDGFRA-E5: VIWKQKPRYE  | 326   | >PDGFRA-E5: VIWKQKPRYK  | 653   | 327   |
| >PDGFRA-E5: VIWKQKPRYE  | 265   | >PDGFRA-E5: VIWKQKPRYK  | 585   | 320   |
| >PDGFRA-E5: VIWKQKPRYE  | 27361 | >PDGFRA-E5: VIWKQKPRYK  | 223   | 27138 |
| >PDGFRA-E5: VIWKQKPRYE  | 17992 | >PDGFRA-E5: VIWKQKPRYK  | 259   | 17733 |
| >PDGFRA-E5: ESISPDGHEY  | 204   | >PDGFRA-E5: KSISPDGHEY  | 844   | 640   |
| >PDGFRA-E5: ESISPDGHEY  | 270   | >PDGFRA-E5: KSISPDGHEY  | 7490  | 7220  |
| >PDGFRA-E5: ESISPDGH    | 65    | >PDGFRA-E5: KSISPDGH    | 5608  | 5543  |
| >PDGFRA-E5: ESISPDGHE   | 147   | >PDGFRA-E5: KSISPDGHE   | 11799 | 11652 |
| >PDGFRA-E5: ESISPDGHEY  | 3     | >PDGFRA-E5: KSISPDGHEY  | 43    | 40    |
| >PDGFRA-E5: ESISPDGHEYI | 22    | >PDGFRA-E5: KSISPDGHEYI | 1407  | 1385  |
| >PDGFRA-E5: ESISPDGHEY  | 35    | >PDGFRA-E5: KSISPDGHEY  | 1386  | 1351  |
| >PDGFRA-E5: ESISPDGHEY  | 75    | >PDGFRA-E5: KSISPDGHEY  | 29    | 46    |
| >PDGFRA-E5: ESISPDGHEY  | 150   | >PDGFRA-E5: KSISPDGHEY  | 4079  | 3929  |
| >PDGFRA-E5: ESISPDGHEYI | 13    | >PDGFRA-E5: KSISPDGHEYI | 1321  | 1308  |
| >PDGFRA-E5: ESISPDGHEYI | 178   | >PDGFRA-E5: KSISPDGHEYI | 8031  | 7853  |
| >PDGFRA-E5: ESISPDGHEY  | 8304  | >PDGFRA-E5: KSISPDGHEY  | 394   | 7910  |
| >PDGFRA-E5: ESISPDGHEY  | 691   | >PDGFRA-E5: KSISPDGHEY  | 136   | 555   |
| >PDGFRA-E5: ESISPDGHEY  | 943   | >PDGFRA-E5: KSISPDGHEY  | 88    | 855   |
| >PDGFRA-E5: ESISPDGHEY  | 26    | >PDGFRA-E5: KSISPDGHEY  | 5     | 21    |
| >PDGFRA-E5: ESISPDGHEYI | 2022  | >PDGFRA-E5: KSISPDGHEYI | 50    | 1972  |
| >PDGFRA-E5: ESISPDGHEY  | 7512  | >PDGFRA-E5: KSISPDGHEY  | 159   | 7353  |
| >PDGFRA-E5: ESISPDGHEY  | 5153  | >PDGFRA-E5: KSISPDGHEY  | 24    | 5129  |
| >PDGFRA-E5: ESISPDGHEYI | 4990  | >PDGFRA-E5: KSISPDGHEYI | 24    | 4966  |
| >PDGFRA-E5: ESISPDGHEYI | 3756  | >PDGFRA-E5: KSISPDGHEYI | 383   | 3373  |
| >PDGFRA-E5: ESISPDGHEYI | 187   | >PDGFRA-E5: KSISPDGHEYI | 19    | 168   |
| >PDGFRA-E5: IESISPDGHEY | 324   | >PDGFRA-E5: IKSISPDGHEY | 156   | 168   |
| >PDGFRA-E5: IESISPDGHEY | 452   | >PDGFRA-E5: IKSISPDGHEY | 11    | 441   |
| >PDGFRA-E5: IESISPDGHEY | 68    | >PDGFRA-E5: IKSISPDGHEY | 9213  | 9145  |
| >PDGFRA-E5: IESISPDGHEY | 313   | >PDGFRA-E5: IKSISPDGHEY | 14804 | 14491 |
| >PDGFRA-E5: IESISPDGHEY | 461   | >PDGFRA-E5: IKSISPDGHEY | 27148 | 26687 |
| >PDGFRA-E5: PRYEIRWRVII | 8476  | >PDGFRA-E5: PRYEIRWRVII | 204   | 8272  |
| >PDGFRA-E5: RVIESISPDGH | 444   | >PDGFRA-E5: RVIKSISPDGH | 915   | 471   |
| >PDGFRA-E5: RWRVIESI    | 312   | >PDGFRA-E5: RWRVIKSI    | 655   | 343   |
| >PDGFRA-E5: RWRVIESI    | 92    | >PDGFRA-E5: RWRVIKSI    | 27    | 65    |
| >PDGFRA-E5: RWRVIESIS   | 1021  | >PDGFRA-E5: RWRVIKSIS   | 452   | 569   |
| >PDGFRA-E5: RWRVIESISP  | 310   | >PDGFRA-E5: RWRVIKSISP  | 143   | 167   |
| >PDGFRA-E5: RWRVIESI    | 96    | >PDGFRA-E5: RWRVIKSI    | 87    | 9     |

|                        |       |                        |       |       |
|------------------------|-------|------------------------|-------|-------|
| >PDGFRA-E5 IRWRVIESI   | 100   | >PDGFRA-E5 IRWRVIKSI   | 30    | 70    |
| >PDGFRA-E5 IRWRVIESI   | 109   | >PDGFRA-E5 IRWRVIKSI   | 57    | 52    |
| >PDGFRA-E5 IRWRVIES    | 265   | >PDGFRA-E5 IRWRVIKS    | 164   | 101   |
| >PDGFRA-E5 IRWRVIESI   | 34    | >PDGFRA-E5 IRWRVIKSI   | 29    | 5     |
| >PDGFRA-E5 IRWRVIESISP | 566   | >PDGFRA-E5 IRWRVIKSISP | 456   | 110   |
| >PDGFRA-E5 IRWRVIES    | 472   | >PDGFRA-E5 IRWRVIKS    | 280   | 192   |
| >PDGFRA-E5 IRWRVIESI   | 541   | >PDGFRA-E5 IRWRVIKSI   | 382   | 159   |
| >PDGFRA-E5 IRWRVIESIS  | 390   | >PDGFRA-E5 IRWRVIKSIS  | 306   | 84    |
| >PDGFRA-E5 IRWRVIESISP | 247   | >PDGFRA-E5 IRWRVIKSISP | 207   | 40    |
| >PDGFRA-E5 IRWRVIES    | 485   | >PDGFRA-E5 IRWRVIKS    | 606   | 121   |
| >PDGFRA-E5 IRWRVIESI   | 220   | >PDGFRA-E5 IRWRVIKSI   | 268   | 48    |
| >PDGFRA-E5 IRWRVIESI   | 43    | >PDGFRA-E5 IRWRVIKSI   | 34    | 9     |
| >PDGFRA-E5 EIRWRVIE    | 15128 | >PDGFRA-E5 EIRWRVIK    | 355   | 14773 |
| >PDGFRA-E5 EIRWRVIE    | 9909  | >PDGFRA-E5 EIRWRVIK    | 349   | 9560  |
| >PDGFRA-E5 EIRWRVIE    | 11942 | >PDGFRA-E5 EIRWRVIK    | 78    | 11864 |
| >PDGFRA-E5 YEIRWRVIESI | 12    | >PDGFRA-E5 YEIRWRVIKSI | 8     | 4     |
| >PDGFRA-E5 YEIRWRVIESI | 366   | >PDGFRA-E5 YEIRWRVIKSI | 1776  | 1410  |
| >PDGFRA-E5 YEIRWRVIESI | 564   | >PDGFRA-E5 YEIRWRVIKSI | 380   | 184   |
| >PDGFRA-E5 YEIRWRVIESI | 404   | >PDGFRA-E5 YEIRWRVIKSI | 386   | 18    |
| >PDGFRA-E5 YEIRWRVIESI | 41    | >PDGFRA-E5 YEIRWRVIKSI | 163   | 122   |
| >PDGFRA-E5 YEIRWRVIESI | 114   | >PDGFRA-E5 YEIRWRVIKSI | 122   | 8     |
| >PDGFRA-E5 YEIRWRVIE   | 232   | >PDGFRA-E5 YEIRWRVIK   | 178   | 54    |
| >PDGFRA-E5 YEIRWRVIESI | 3     | >PDGFRA-E5 YEIRWRVIKSI | 3     | 0     |
| >PDGFRA-E5 RYEIRWRVIE  | 9657  | >PDGFRA-E5 RYEIRWRVIK  | 24    | 9633  |
| >PDGFRA-E5 RYEIRWRVIE  | 8396  | >PDGFRA-E5 RYEIRWRVIK  | 141   | 8255  |
| >PDGFRA-E9 EEDKCLKDW   | 275   | >PDGFRA-E9 KEDKCLKDW   | 221   | 54    |
| >PDGFRA-E9 EEDKCLKDW   | 73    | >PDGFRA-E9 KEDKCLKDW   | 166   | 93    |
| >PDGFRA-E9 EEDKCLKDWE  | 358   | >PDGFRA-E9 KEDKCLKDWE  | 925   | 567   |
| >PDGFRA-E9 NEEDKCLKDW  | 318   | >PDGFRA-E9 NKEDKCLKDW  | 17504 | 17186 |
| >PDGFRA-E9 NEEDKCLKDW  | 90    | >PDGFRA-E9 NKEDKCLKDW  | 10546 | 10456 |
| >PDGFRA-E9 NEEDKCLKDW  | 75    | >PDGFRA-E9 NKEDKCLKDW  | 11329 | 11254 |
| >PDGFRA-E9 NAYIGVITYKN | 11866 | >PDGFRA-E9 NAYIGVITYKN | 133   | 11733 |
| >PDGFRA-E9 KNEEDKLK    | 10547 | >PDGFRA-E9 KNKEDKLK    | 149   | 10398 |
| >PDGFRA-E9 YKNEEDKL    | 466   | >PDGFRA-E9 YKNKEDKL    | 313   | 153   |
| >PDGFRA-E9 YKNEEDKCLKD | 413   | >PDGFRA-E9 YKNKEDKCLKD | 619   | 206   |
| >PDGFRA-E9 TYKNEEDKL   | 48    | >PDGFRA-E9 TYKNKEDKL   | 115   | 67    |
| >PDGFRA-E9 TYKNEEDKLK  | 724   | >PDGFRA-E9 TYKNKEDKLK  | 315   | 409   |
| >PDGFRA-E9 VTYKNEEDK   | 1006  | >PDGFRA-E9 VTYKNKEDK   | 424   | 582   |
| >PDGFRA-E9 VTYKNEEDKL  | 257   | >PDGFRA-E9 VTYKNKEDKL  | 175   | 82    |
| >PDGFRA-E9 VTYKNEEDK   | 159   | >PDGFRA-E9 VTYKNKEDK   | 120   | 39    |
| >PDGFRA-E9 VTYKNEEDKL  | 61    | >PDGFRA-E9 VTYKNKEDKL  | 56    | 5     |
| >PDGFRA-E9 VTYKNEEDK   | 86    | >PDGFRA-E9 VTYKNKEDK   | 145   | 59    |
| >PDGFRA-E9 VTYKNEEDKL  | 86    | >PDGFRA-E9 VTYKNKEDKL  | 115   | 29    |



|                       |       |                       |      |       |
|-----------------------|-------|-----------------------|------|-------|
| >PDGFRA-E9:VTYKNEEDKL | 63    | >PDGFRA-E9:VTYKNKEDKL | 56   | 7     |
| >PDGFRA-E9:VTYKNEEDK  | 822   | >PDGFRA-E9:VTYKNKEDK  | 481  | 341   |
| >PDGFRA-E9:GVTYKNEEDK | 580   | >PDGFRA-E9:GVTYKNKEDK | 494  | 86    |
| >PDGFRA-E9:AYIGVTYKNE | 1042  | >PDGFRA-E9:AYIGVTYKNK | 406  | 636   |
| >PDGFRA-E9:AYIGVTYKNE | 13189 | >PDGFRA-E9:AYIGVTYKNK | 125  | 13064 |
| >PDGFRA-F8:FLASKNCV   | 13    | >PDGFRA-F8:LLASKNCV   | 82   | 69    |
| >PDGFRA-F8:FLASKNCV   | 3     | >PDGFRA-F8:LLASKNCV   | 8    | 5     |
| >PDGFRA-F8:FLASKNCVHR | 145   | >PDGFRA-F8:LLASKNCVHR | 1570 | 1425  |
| >PDGFRA-F8:FLASKNCV   | 4     | >PDGFRA-F8:LLASKNCV   | 16   | 12    |
| >PDGFRA-F8:FLASKNCV   | 23    | >PDGFRA-F8:LLASKNCV   | 426  | 403   |
| >PDGFRA-F8:FLASKNCV   | 4     | >PDGFRA-F8:LLASKNCV   | 16   | 12    |
| >PDGFRA-F8:FLASKNCV   | 5     | >PDGFRA-F8:LLASKNCV   | 18   | 13    |
| >PDGFRA-F8:FLASKNCV   | 6     | >PDGFRA-F8:LLASKNCV   | 10   | 4     |
| >PDGFRA-F8:FLASKNCV   | 4     | >PDGFRA-F8:LLASKNCV   | 7    | 3     |
| >PDGFRA-F8:FLASKNCV   | 2     | >PDGFRA-F8:LLASKNCV   | 3    | 1     |
| >PDGFRA-F8:FLASKNCVHR | 256   | >PDGFRA-F8:LLASKNCVHR | 1538 | 1282  |
| >PDGFRA-F8:FLASKNCVHR | 407   | >PDGFRA-F8:LLASKNCVHR | 237  | 170   |
| >PDGFRA-F8:FLASKNCVHR | 45    | >PDGFRA-F8:LLASKNCVHR | 187  | 142   |
| >PDGFRA-F8:FLASKNCV   | 215   | >PDGFRA-F8:LLASKNCV   | 1623 | 1408  |
| >PDGFRA-F8:FLASKNCV   | 348   | >PDGFRA-F8:LLASKNCV   | 951  | 603   |
| >PDGFRA-F8:FLASKNCVHR | 155   | >PDGFRA-F8:LLASKNCVHR | 181  | 26    |
| >PDGFRA-F8:EFLASKNCV  | 16487 | >PDGFRA-F8:ELLASKNCV  | 101  | 16386 |
| >PDGFRA-F8:EFLASKNCV  | 19819 | >PDGFRA-F8:ELLASKNCV  | 163  | 19656 |
| >PDGFRA-F8:EFLASKNCV  | 13871 | >PDGFRA-F8:ELLASKNCV  | 26   | 13845 |
| >PDGFRA-F8:EFLASKNCV  | 14903 | >PDGFRA-F8:ELLASKNCV  | 19   | 14884 |
| >PDGFRA-F8:EFLASKNCV  | 15478 | >PDGFRA-F8:ELLASKNCV  | 19   | 15459 |
| >PDGFRA-F8:EFLASKNCVH | 143   | >PDGFRA-F8:ELLASKNCVH | 539  | 396   |
| >PDGFRA-F8:EFLASKNCVH | 25    | >PDGFRA-F8:ELLASKNCVH | 84   | 59    |
| >PDGFRA-F8:EFLASKNCVH | 70    | >PDGFRA-F8:ELLASKNCVH | 38   | 32    |
| >PDGFRA-F8:EFLASKNCV  | 4934  | >PDGFRA-F8:ELLASKNCV  | 172  | 4762  |
| >PDGFRA-F8:EFLASKNCVH | 32    | >PDGFRA-F8:ELLASKNCVH | 84   | 52    |
| >PDGFRA-F8:FTYQVARGM  | 14860 | >PDGFRA-F8:FTYQVARGM  | 299  | 14561 |
| >PDGFRA-F8:FTYQVARGM  | 3103  | >PDGFRA-F8:FTYQVARGM  | 71   | 3032  |
| >PDGFRA-F8:FTYQVARGM  | 5299  | >PDGFRA-F8:FTYQVARGM  | 88   | 5211  |
| >PDGFRA-F8:FTYQVARGM  | 475   | >PDGFRA-F8:FTYQVARGM  | 52   | 423   |
| >PDGFRA-F8:FTYQVARGM  | 1663  | >PDGFRA-F8:FTYQVARGM  | 14   | 1649  |
| >PDGFRA-F8:FTYQVARGM  | 12893 | >PDGFRA-F8:FTYQVARGM  | 141  | 12752 |
| >PDGFRA-F8:FTYQVARGM  | 20026 | >PDGFRA-F8:FTYQVARGM  | 125  | 19901 |
| >PDGFRA-F8:FTYQVARGM  | 61    | >PDGFRA-F8:FTYQVARGM  | 1252 | 1191  |
| >PDGFRA-F8:FTYQVARGM  | 146   | >PDGFRA-F8:FTYQVARGM  | 1558 | 1412  |
| >PDGFRA-F8:FTYQVARGM  | 310   | >PDGFRA-F8:FTYQVARGM  | 7483 | 7173  |
| >PDGFRA-F8:FTYQVARGM  | 323   | >PDGFRA-F8:FTYQVARGM  | 1664 | 1341  |
| >PDGFRA-F8:FTYQVARGM  | 5787  | >PDGFRA-F8:FTYQVARGM  | 58   | 5729  |

|                       |       |                       |      |       |
|-----------------------|-------|-----------------------|------|-------|
| >PDGFRA-F8IFTYQVARGM  | 3333  | >PDGFRA-F8IFTYQVARGM  | 58   | 3275  |
| >PDGFRA-F8IFTYQVARGM  | 74    | >PDGFRA-F8IFTYQVARGM  | 1875 | 1801  |
| >PDGFRA-F8IFTYQVARGM  | 216   | >PDGFRA-F8IFTYQVARGM  | 4033 | 3817  |
| >PDGFRA-F8IFTYQVARGM  | 11    | >PDGFRA-F8IFTYQVARGM  | 204  | 193   |
| >PDGFRA-F8IFTYQVARGM  | 4     | >PDGFRA-F8IFTYQVARGM  | 16   | 12    |
| >PDGFRA-F8IFTYQVARGM  | 359   | >PDGFRA-F8IFTYQVARGM  | 4597 | 4238  |
| >PDGFRA-F8IFTYQVARGM  | 242   | >PDGFRA-F8IFTYQVARGM  | 1992 | 1750  |
| >PDGFRA-F8IFTYQVARGM  | 75    | >PDGFRA-F8IFTYQVARGM  | 1330 | 1255  |
| >PDGFRA-F8IFTYQVARGM  | 735   | >PDGFRA-F8IFTYQVARGM  | 378  | 357   |
| >PDGFRA-F8IFTYQVARGM  | 10    | >PDGFRA-F8IFTYQVARGM  | 49   | 39    |
| >PDGFRA-F8IFTYQVARGM  | 3686  | >PDGFRA-F8IFTYQVARGM  | 112  | 3574  |
| >PDGFRA-F8IMEFLASKNC  | 351   | >PDGFRA-F8IMELLASKNC  | 670  | 319   |
| >PDGFRA-F8IMEFLASKNC\ | 6     | >PDGFRA-F8IMELLASKNC\ | 9    | 3     |
| >PDGFRA-F8IMEFLASKNC\ | 334   | >PDGFRA-F8IMELLASKNC\ | 770  | 436   |
| >PDGFRA-F8IMEFLASKNC\ | 402   | >PDGFRA-F8IMELLASKNC\ | 1408 | 1006  |
| >PDGFRA-F8IMEFLASKNC\ | 372   | >PDGFRA-F8IMELLASKNC\ | 1499 | 1127  |
| >PDGFRA-F8IMEFLASKNC  | 313   | >PDGFRA-F8IMELLASKNC  | 645  | 332   |
| >PDGFRA-F8IMEFLASKNC\ | 72    | >PDGFRA-F8IMELLASKNC\ | 64   | 8     |
| >PDGFRA-F8IGMEFLASKNC | 253   | >PDGFRA-F8IGMELLASKNC | 498  | 245   |
| >PDGFRA-F8IGMEFLASKNC | 342   | >PDGFRA-F8IGMELLASKNC | 818  | 476   |
| >PDGFRA-F8IGMEFLASKNC | 46    | >PDGFRA-F8IGMELLASKNC | 74   | 28    |
| >PDGFRA-F8IGMEFLASKNC | 145   | >PDGFRA-F8IGMELLASKNC | 174  | 29    |
| >PDGFRA-F8IGMEFLASKNC | 32    | >PDGFRA-F8IGMELLASKNC | 40   | 8     |
| >PDGFRA-F8IGMEFLASK   | 403   | >PDGFRA-F8IGMELLASK   | 928  | 525   |
| >PDGFRA-F8IGMEFLASK   | 95    | >PDGFRA-F8IGMELLASK   | 221  | 126   |
| >PDGFRA-F8IRGMEFLASK  | 237   | >PDGFRA-F8IRGMELLASK  | 389  | 152   |
| >PDGFRA-F8IRGMEFLASK  | 37    | >PDGFRA-F8IRGMELLASK  | 99   | 62    |
| >PDGFRA-F8IRGMEFLASK  | 25    | >PDGFRA-F8IRGMELLASK  | 62   | 37    |
| >PDGFRA-F8IRGMEFLASK  | 334   | >PDGFRA-F8IRGMELLASK  | 509  | 175   |
| >PDGFRA-F8IVARGMEFLA  | 934   | >PDGFRA-F8IVARGMELLA  | 471  | 463   |
| >PDGFRA-F8IVARGMEFLA' | 13    | >PDGFRA-F8IVARGMELLA' | 13   | 0     |
| >PDGFRA-F8IVARGMEFL   | 71    | >PDGFRA-F8IVARGMELL   | 77   | 6     |
| >PDGFRA-F8IQVARGMEFL  | 54    | >PDGFRA-F8IQVARGMELL  | 146  | 92    |
| >PDGFRA-F8IQVARGMEFL  | 53    | >PDGFRA-F8IQVARGMELL  | 302  | 249   |
| >PDGFRA-F8IQVARGMEF   | 104   | >PDGFRA-F8IQVARGMEL   | 594  | 490   |
| >PDGFRA-F8IQVARGMEFL  | 8     | >PDGFRA-F8IQVARGMELL  | 56   | 48    |
| >PDGFRA-F8IQVARGMEF   | 7514  | >PDGFRA-F8IQVARGMEL   | 48   | 7466  |
| >PDGFRA-F8IQVARGMEFL  | 16    | >PDGFRA-F8IQVARGMELL  | 26   | 10    |
| >PDGFRA-F8IQVARGMEFL  | 155   | >PDGFRA-F8IQVARGMELL  | 357  | 202   |
| >PDGFRA-F8IQVARGMEF   | 411   | >PDGFRA-F8IQVARGMEL   | 5635 | 5224  |
| >PDGFRA-F8IYQVARGMEF  | 15373 | >PDGFRA-F8IYQVARGMEL  | 297  | 15076 |
| >PDGFRA-F8IYQVARGMEF  | 180   | >PDGFRA-F8IYQVARGMEL  | 761  | 581   |
| >PDGFRA-F8IYQVARGMEF  | 7577  | >PDGFRA-F8IYQVARGMEL  | 128  | 7449  |

|                       |       |                       |      |       |
|-----------------------|-------|-----------------------|------|-------|
| >PDGFRA-F8IYQVARGMEF  | 77    | >PDGFRA-F8IYQVARGMEL  | 105  | 28    |
| >PDGFRA-F8IYQVARGMEF  | 231   | >PDGFRA-F8IYQVARGMEL  | 1055 | 824   |
| >PDGFRA-F8IYQVARGMEF  | 4118  | >PDGFRA-F8IYQVARGMEL  | 107  | 4011  |
| >PDGFRA-F8IYQVARGMEF  | 218   | >PDGFRA-F8IYQVARGMEL  | 277  | 59    |
| >PDGFRA-F8IYQVARGMEF  | 247   | >PDGFRA-F8IYQVARGMEL  | 252  | 5     |
| >PDGFRA-F8IYQVARGMEF  | 20    | >PDGFRA-F8IYQVARGMEL  | 7    | 13    |
| >PDGFRA-F8IYQVARGMEF  | 227   | >PDGFRA-F8IYQVARGMEL  | 336  | 109   |
| >PDGFRA-F8IYQVARGMEF  | 6     | >PDGFRA-F8IYQVARGMEL  | 11   | 5     |
| >PDGFRA-F8IYQVARGMEF  | 249   | >PDGFRA-F8IYQVARGMEL  | 791  | 542   |
| >PDGFRA-F8IYQVARGMEF  | 432   | >PDGFRA-F8IYQVARGMEL  | 1660 | 1228  |
| >PDGFRA-F8IYQVARGMEF  | 35    | >PDGFRA-F8IYQVARGMEL  | 107  | 72    |
| >PDGFRA-F8IYQVARGMEF  | 151   | >PDGFRA-F8IYQVARGMEL  | 217  | 66    |
| >PDGFRA-F8IYQVARGMEF  | 34    | >PDGFRA-F8IYQVARGMEL  | 394  | 360   |
| >PDGFRA-F8IYQVARGMEF  | 2     | >PDGFRA-F8IYQVARGMEL  | 9    | 7     |
| >PDGFRA-F8IYQVARGMEF  | 39    | >PDGFRA-F8IYQVARGMEL  | 56   | 17    |
| >PDGFRA-F8IYQVARGMEF  | 447   | >PDGFRA-F8IYQVARGMEL  | 20   | 427   |
| >PDGFRA-F8IYQVARGMEF  | 54    | >PDGFRA-F8IYQVARGMEL  | 31   | 23    |
| >PDGFRA-F8IYQVARGMEF  | 3051  | >PDGFRA-F8IYQVARGMEL  | 139  | 2912  |
| >PDGFRA-F8IYQVARGMEF  | 660   | >PDGFRA-F8IYQVARGMEL  | 171  | 489   |
| >PDGFRA-F8ITYQVARGME  | 1158  | >PDGFRA-F8ITYQVARGME  | 19   | 1139  |
| >PDGFRA-F8ITYQVARGME  | 11    | >PDGFRA-F8ITYQVARGME  | 26   | 15    |
| >PDGFRA-F8ITYQVARGME  | 150   | >PDGFRA-F8ITYQVARGME  | 2614 | 2464  |
| >PDGFRA-F8ITYQVARGME  | 167   | >PDGFRA-F8ITYQVARGME  | 113  | 54    |
| >PDGFRA-F8ITYQVARGME  | 85    | >PDGFRA-F8ITYQVARGME  | 912  | 827   |
| >PDGFRA-F8ITYQVARGME  | 500   | >PDGFRA-F8ITYQVARGME  | 409  | 91    |
| >PDGFRA-F8ITYQVARGME  | 4     | >PDGFRA-F8ITYQVARGME  | 7    | 3     |
| >PDGFRA-F8ITYQVARGME  | 8     | >PDGFRA-F8ITYQVARGME  | 12   | 4     |
| >PDGFRA-F8ITYQVARGME  | 414   | >PDGFRA-F8ITYQVARGME  | 5877 | 5463  |
| >PDGFRA-F8ITYQVARGME  | 285   | >PDGFRA-F8ITYQVARGME  | 952  | 667   |
| >PDGFRA-G8GKIVKICDF   | 44    | >PDGFRA-G8RKIVKICDF   | 6    | 38    |
| >PDGFRA-G8GKIVKICDFGL | 2314  | >PDGFRA-G8RKIVKICDFGL | 170  | 2144  |
| >PDGFRA-G8GKIVKICDFGL | 6119  | >PDGFRA-G8RKIVKICDFGL | 498  | 5621  |
| >PDGFRA-G8QGKIVKICDF  | 4039  | >PDGFRA-G8QRKIVKICDF  | 218  | 3821  |
| >PDGFRA-G8LAARNVLLAC  | 20018 | >PDGFRA-G8LAARNVLLAC  | 130  | 19888 |
| >PDGFRA-G8LAARNVLLAC  | 25633 | >PDGFRA-G8LAARNVLLAC  | 24   | 25609 |
| >PDGFRA-G8AQQKIVKI    | 14512 | >PDGFRA-G8AQRKIVKI    | 226  | 14286 |
| >PDGFRA-G8AQQKIVKICD  | 102   | >PDGFRA-G8AQRKIVKICDI | 53   | 49    |
| >PDGFRA-G8AQQKIVKI    | 831   | >PDGFRA-G8AQRKIVKI    | 65   | 766   |
| >PDGFRA-G8AQQKIVKICD  | 29    | >PDGFRA-G8AQRKIVKICDI | 5    | 24    |
| >PDGFRA-G8AQQKIVKI    | 267   | >PDGFRA-G8AQRKIVKI    | 64   | 203   |
| >PDGFRA-G8LAQKIVK     | 628   | >PDGFRA-G8LAQRKIVK    | 441  | 187   |
| >PDGFRA-G8LAQKIVKI    | 234   | >PDGFRA-G8LAQRKIVKI   | 158  | 76    |
| >PDGFRA-G8LLAQKIV     | 100   | >PDGFRA-G8LLAQRKIV    | 136  | 36    |

|                        |       |                        |      |       |
|------------------------|-------|------------------------|------|-------|
| >PDGFRA-G8 LLAQGKIVKI  | 87    | >PDGFRA-G8 LLAQRKIVKI  | 277  | 190   |
| >PDGFRA-G8 LLAQGKIV    | 17    | >PDGFRA-G8 LLAQRKIV    | 35   | 18    |
| >PDGFRA-G8 LLAQGKIVKI  | 124   | >PDGFRA-G8 LLAQRKIVKI  | 180  | 56    |
| >PDGFRA-G8 LLAQGKIV    | 18    | >PDGFRA-G8 LLAQRKIV    | 73   | 55    |
| >PDGFRA-G8 LLAQGKIVKI  | 17    | >PDGFRA-G8 LLAQRKIVKI  | 38   | 21    |
| >PDGFRA-G8 LLAQGKIV    | 75    | >PDGFRA-G8 LLAQRKIV    | 388  | 313   |
| >PDGFRA-G8 LLAQGKIVKI  | 263   | >PDGFRA-G8 LLAQRKIVKI  | 483  | 220   |
| >PDGFRA-G8 LLAQGKIV    | 15    | >PDGFRA-G8 LLAQRKIV    | 44   | 29    |
| >PDGFRA-G8 LLAQGKIVKI  | 25    | >PDGFRA-G8 LLAQRKIVKI  | 73   | 48    |
| >PDGFRA-G8 LLAQGKIV    | 54    | >PDGFRA-G8 LLAQRKIV    | 418  | 364   |
| >PDGFRA-G8 LLAQGKIVKI  | 91    | >PDGFRA-G8 LLAQRKIVKI  | 499  | 408   |
| >PDGFRA-G8 LLAQGKIV    | 3     | >PDGFRA-G8 LLAQRKIV    | 3    | 0     |
| >PDGFRA-G8 LLAQGKIVKI  | 4     | >PDGFRA-G8 LLAQRKIVKI  | 6    | 2     |
| >PDGFRA-G8 LLAQGKIVKIC | 80    | >PDGFRA-G8 LLAQRKIVKIC | 156  | 76    |
| >PDGFRA-G8 LLAQGKIVK   | 131   | >PDGFRA-G8 LLAQRKIVK   | 74   | 57    |
| >PDGFRA-G8 LLAQGKIV    | 9108  | >PDGFRA-G8 LLAQRKIV    | 368  | 8740  |
| >PDGFRA-G8 VLLAQGKIVK  | 301   | >PDGFRA-G8 VLLAQRKIVKI | 453  | 152   |
| >PDGFRA-G8 VLLAQGKI    | 376   | >PDGFRA-G8 VLLAQRKI    | 1110 | 734   |
| >PDGFRA-G8 VLLAQGKIV   | 163   | >PDGFRA-G8 VLLAQRKIV   | 591  | 428   |
| >PDGFRA-G8 VLLAQGKIVK  | 336   | >PDGFRA-G8 VLLAQRKIVKI | 607  | 271   |
| >PDGFRA-G8 VLLAQGKI    | 14    | >PDGFRA-G8 VLLAQRKI    | 34   | 20    |
| >PDGFRA-G8 VLLAQGKIV   | 9     | >PDGFRA-G8 VLLAQRKIV   | 60   | 51    |
| >PDGFRA-G8 VLLAQGKIVK  | 9     | >PDGFRA-G8 VLLAQRKIVKI | 29   | 20    |
| >PDGFRA-G8 VLLAQGKI    | 144   | >PDGFRA-G8 VLLAQRKI    | 496  | 352   |
| >PDGFRA-G8 VLLAQGKIV   | 18    | >PDGFRA-G8 VLLAQRKIV   | 240  | 222   |
| >PDGFRA-G8 VLLAQGKIVK  | 52    | >PDGFRA-G8 VLLAQRKIVKI | 197  | 145   |
| >PDGFRA-G8 VLLAQGKI    | 44    | >PDGFRA-G8 VLLAQRKI    | 137  | 93    |
| >PDGFRA-G8 VLLAQGKIV   | 13    | >PDGFRA-G8 VLLAQRKIV   | 44   | 31    |
| >PDGFRA-G8 VLLAQGKIVK  | 24    | >PDGFRA-G8 VLLAQRKIVKI | 70   | 46    |
| >PDGFRA-G8 VLLAQGKI    | 250   | >PDGFRA-G8 VLLAQRKI    | 500  | 250   |
| >PDGFRA-G8 VLLAQGKIV   | 67    | >PDGFRA-G8 VLLAQRKIV   | 555  | 488   |
| >PDGFRA-G8 VLLAQGKIVK  | 88    | >PDGFRA-G8 VLLAQRKIVKI | 235  | 147   |
| >PDGFRA-G8 VLLAQGKI    | 32    | >PDGFRA-G8 VLLAQRKI    | 39   | 7     |
| >PDGFRA-G8 VLLAQGKIV   | 7     | >PDGFRA-G8 VLLAQRKIV   | 7    | 0     |
| >PDGFRA-G8 VLLAQGKIVK  | 14    | >PDGFRA-G8 VLLAQRKIVKI | 15   | 1     |
| >PDGFRA-G8 VLLAQGKIVK  | 67    | >PDGFRA-G8 VLLAQRKIVK  | 59   | 8     |
| >PDGFRA-G8 VLLAQGKIVK  | 238   | >PDGFRA-G8 VLLAQRKIVK  | 184  | 54    |
| >PDGFRA-G8 NVLLAQGK    | 387   | >PDGFRA-G8 NVLLAQRK    | 571  | 184   |
| >PDGFRA-G8 NVLLAQGKI   | 468   | >PDGFRA-G8 NVLLAQRKI   | 2083 | 1615  |
| >PDGFRA-G8 RNVLLAQG    | 21467 | >PDGFRA-G8 RNVLLAQR    | 249  | 21218 |
| >PDGFRA-G8 RNVLLAQG    | 34449 | >PDGFRA-G8 RNVLLAQR    | 183  | 34266 |
| >PDGFRA-G8 ARNVLLAQG   | 3676  | >PDGFRA-G8 ARNVLLAQR   | 72   | 3604  |
| >PDGFRA-G8 ARNVLLAQGI  | 172   | >PDGFRA-G8 ARNVLLAQRK  | 115  | 57    |

|                        |       |                        |       |       |
|------------------------|-------|------------------------|-------|-------|
| >PDGFRA-G8 ARNVLLAQGI  | 91    | >PDGFRA-G8 ARNVLLAQRH  | 82    | 9     |
| >PDGFRA-G8 ARNVLLAQGI  | 400   | >PDGFRA-G8 ARNVLLAQRH  | 201   | 199   |
| >PDGFRA-G8 AARNVLLAQG  | 202   | >PDGFRA-G8 AARNVLLAQF  | 63    | 139   |
| >PDGFRA-G8 AARNVLLAQG  | 6     | >PDGFRA-G8 AARNVLLAQF  | 6     | 0     |
| >PDGFRA-G8 AARNVLLAQG  | 25073 | >PDGFRA-G8 AARNVLLAQF  | 38    | 25035 |
| >PDGFRA-G8 AARNVLLAQG  | 37858 | >PDGFRA-G8 AARNVLLAQF  | 346   | 37512 |
| >PDGFRA-H8 HRDLAARNVI  | 62    | >PDGFRA-H8 YRDLAARNVI  | 418   | 356   |
| >PDGFRA-H8 HRDLAARNVI  | 371   | >PDGFRA-H8 YRDLAARNVI  | 254   | 117   |
| >PDGFRA-H8 HRDLAARNVI  | 21    | >PDGFRA-H8 YRDLAARNVI  | 18    | 3     |
| >PDGFRA-H8 HRDLAARNVI  | 49    | >PDGFRA-H8 YRDLAARNVI  | 36    | 13    |
| >PDGFRA-H8 HRDLAARNVI  | 347   | >PDGFRA-H8 YRDLAARNVI  | 2352  | 2005  |
| >PDGFRA-H8 HRDLAARNVI  | 60    | >PDGFRA-H8 YRDLAARNVI  | 144   | 84    |
| >PDGFRA-H8 VHRDLAARNV  | 20920 | >PDGFRA-H8 VYRDLAARNV  | 141   | 20779 |
| >PDGFRA-H8 VHRDLAARNV  | 10143 | >PDGFRA-H8 VYRDLAARNV  | 238   | 9905  |
| >PDGFRA-H8 VHRDLAARNV  | 9227  | >PDGFRA-H8 VYRDLAARNV  | 194   | 9033  |
| >PDGFRA-H8 VHRDLAAR    | 2598  | >PDGFRA-H8 VYRDLAAR    | 30    | 2568  |
| >PDGFRA-H8 VHRDLAAR    | 4332  | >PDGFRA-H8 VYRDLAAR    | 37    | 4295  |
| >PDGFRA-H8 VHRDLAARNV  | 471   | >PDGFRA-H8 VYRDLAARNV  | 11894 | 11423 |
| >PDGFRA-H8 VHRDLAAR    | 2418  | >PDGFRA-H8 VYRDLAAR    | 127   | 2291  |
| >PDGFRA-H8 MEFLASKNCV  | 2623  | >PDGFRA-H8 MEFLASKNCV  | 89    | 2534  |
| >PDGFRA-H8 MEFLASKNCV  | 4790  | >PDGFRA-H8 MEFLASKNCV  | 109   | 4681  |
| >PDGFRA-H8 MEFLASKNCV  | 1990  | >PDGFRA-H8 MEFLASKNCV  | 35    | 1955  |
| >PDGFRA-H8 MEFLASKNCV  | 334   | >PDGFRA-H8 MEFLASKNCV  | 13    | 321   |
| >PDGFRA-H8 MEFLASKNCV  | 2760  | >PDGFRA-H8 MEFLASKNCV  | 233   | 2527  |
| >PDGFRA-H8 MEFLASKNCV  | 778   | >PDGFRA-H8 MEFLASKNCV  | 56    | 722   |
| >PDGFRA-H8 CVHRDLAARNV | 519   | >PDGFRA-H8 CVYRDLAARNV | 111   | 408   |
| >PDGFRA-H8 CVHRDLAARNV | 3463  | >PDGFRA-H8 CVYRDLAARNV | 480   | 2983  |
| >PDGFRA-H8 CVHRDLAARNV | 1087  | >PDGFRA-H8 CVYRDLAARNV | 277   | 810   |
| >PDGFRA-H8 CVHRDLAAR   | 70    | >PDGFRA-H8 CVYRDLAAR   | 29    | 41    |
| >PDGFRA-H8 CVHRDLAAR   | 841   | >PDGFRA-H8 CVYRDLAAR   | 251   | 590   |
| >PDGFRA-H8 CVHRDLAAR   | 159   | >PDGFRA-H8 CVYRDLAAR   | 41    | 118   |
| >PDGFRA-H8 CVHRDLAARNV | 723   | >PDGFRA-H8 CVYRDLAARNV | 392   | 331   |
| >PDGFRA-H8 KNCVHRDLAAR | 51    | >PDGFRA-H8 KNCVYRDLAAR | 44    | 7     |
| >PDGFRA-H8 KNCVHRDLAAR | 540   | >PDGFRA-H8 KNCVYRDLAAR | 453   | 87    |
| >PDGFRA-H8 SKNCVHRDL   | 171   | >PDGFRA-H8 SKNCVYRDL   | 109   | 62    |
| >PDGFRA-H8 ASKNCVHR    | 3002  | >PDGFRA-H8 ASKNCVYR    | 466   | 2536  |
| >PDGFRA-H8 ASKNCVHR    | 435   | >PDGFRA-H8 ASKNCVYR    | 219   | 216   |
| >PDGFRA-H8 ASKNCVHRDI  | 184   | >PDGFRA-H8 ASKNCVYRDI  | 209   | 25    |
| >PDGFRA-H8 ASKNCVHR    | 12    | >PDGFRA-H8 ASKNCVYR    | 8     | 4     |
| >PDGFRA-H8 ASKNCVHR    | 608   | >PDGFRA-H8 ASKNCVYR    | 229   | 379   |
| >PDGFRA-H8 ASKNCVHRDI  | 409   | >PDGFRA-H8 ASKNCVYRDI  | 747   | 338   |
| >PDGFRA-H8 ASKNCVHR    | 175   | >PDGFRA-H8 ASKNCVYR    | 164   | 11    |
| >PDGFRA-H8 LASKNCVH    | 23131 | >PDGFRA-H8 LASKNCVY    | 365   | 22766 |

|                         |       |                         |      |       |
|-------------------------|-------|-------------------------|------|-------|
| >PDGFRA-H8 LASKNCVHR    | 203   | >PDGFRA-H8 LASKNCVYR    | 41   | 162   |
| >PDGFRA-H8 LASKNCVHR    | 894   | >PDGFRA-H8 LASKNCVYR    | 360  | 534   |
| >PDGFRA-H8 LASKNCVHR    | 48    | >PDGFRA-H8 LASKNCVYR    | 14   | 34    |
| >PDGFRA-H8 LASKNCVH     | 5139  | >PDGFRA-H8 LASKNCVY     | 89   | 5050  |
| >PDGFRA-H8 LASKNCVH     | 5926  | >PDGFRA-H8 LASKNCVY     | 145  | 5781  |
| >PDGFRA-H8 LASKNCVH     | 13488 | >PDGFRA-H8 LASKNCVY     | 71   | 13417 |
| >PDGFRA-H8 LASKNCVH     | 1544  | >PDGFRA-H8 LASKNCVY     | 47   | 1497  |
| >PDGFRA-H8 LASKNCVHR    | 504   | >PDGFRA-H8 LASKNCVYR    | 112  | 392   |
| >PDGFRA-H8 FLASKNCVHR   | 3191  | >PDGFRA-H8 FLASKNCVYR   | 486  | 2705  |
| >PDGFRA-H8 FLASKNCVHR   | 145   | >PDGFRA-H8 FLASKNCVYR   | 101  | 44    |
| >PDGFRA-H8 FLASKNCVH    | 3017  | >PDGFRA-H8 FLASKNCVY    | 214  | 2803  |
| >PDGFRA-H8 FLASKNCVHR   | 1043  | >PDGFRA-H8 FLASKNCVYR   | 438  | 605   |
| >PDGFRA-H8 FLASKNCVHR   | 256   | >PDGFRA-H8 FLASKNCVYR   | 1046 | 790   |
| >PDGFRA-H8 FLASKNCVHR   | 1312  | >PDGFRA-H8 FLASKNCVYR   | 407  | 905   |
| >PDGFRA-H8 FLASKNCVH    | 15634 | >PDGFRA-H8 FLASKNCVY    | 191  | 15443 |
| >PDGFRA-H8 FLASKNCVH    | 20431 | >PDGFRA-H8 FLASKNCVY    | 294  | 20137 |
| >PDGFRA-H8 FLASKNCVHR   | 407   | >PDGFRA-H8 FLASKNCVYR   | 122  | 285   |
| >PDGFRA-H8 FLASKNCVHR   | 709   | >PDGFRA-H8 FLASKNCVYR   | 92   | 617   |
| >PDGFRA-H8 FLASKNCVHR   | 45    | >PDGFRA-H8 FLASKNCVYR   | 10   | 35    |
| >PDGFRA-H8 FLASKNCVH    | 912   | >PDGFRA-H8 FLASKNCVY    | 33   | 879   |
| >PDGFRA-H8 FLASKNCVH    | 1957  | >PDGFRA-H8 FLASKNCVY    | 31   | 1926  |
| >PDGFRA-H8 FLASKNCVH    | 3181  | >PDGFRA-H8 FLASKNCVY    | 50   | 3131  |
| >PDGFRA-H8 FLASKNCVHR   | 155   | >PDGFRA-H8 FLASKNCVYR   | 63   | 92    |
| >PDGFRA-H8 EFLASKNCVH   | 12902 | >PDGFRA-H8 EFLASKNCVY   | 481  | 12421 |
| >PDGFRA-H8 EFLASKNCVH   | 19544 | >PDGFRA-H8 EFLASKNCVY   | 318  | 19226 |
| >PDGFRA-H8 EFLASKNCVH   | 21522 | >PDGFRA-H8 EFLASKNCVY   | 484  | 21038 |
| >PDGFRA-H8 EFLASKNCVH   | 143   | >PDGFRA-H8 EFLASKNCVY   | 55   | 88    |
| >PDGFRA-H8 EFLASKNCVH   | 25    | >PDGFRA-H8 EFLASKNCVY   | 18   | 7     |
| >PDGFRA-H8 EFLASKNCVH   | 70    | >PDGFRA-H8 EFLASKNCVY   | 26   | 44    |
| >PDGFRA-H8 EFLASKNCVH   | 11556 | >PDGFRA-H8 EFLASKNCVY   | 466  | 11090 |
| >PDGFRA-H8 EFLASKNCVH   | 32    | >PDGFRA-H8 EFLASKNCVY   | 18   | 14    |
| >PDGFRA-I1C IETGSSSSTFI | 8     | >PDGFRA-I1C TETGSSSSTFI | 7    | 1     |
| >PDGFRA-I1C IETGSSSSTF  | 359   | >PDGFRA-I1C TETGSSSSTF  | 281  | 78    |
| >PDGFRA-I1C IETGSSSSTF  | 18    | >PDGFRA-I1C TETGSSSSTF  | 112  | 94    |
| >PDGFRA-I1C IETGSSSSTFI | 35    | >PDGFRA-I1C TETGSSSSTFI | 53   | 18    |
| >PDGFRA-I1C IETGSSSST   | 730   | >PDGFRA-I1C TETGSSSST   | 417  | 313   |
| >PDGFRA-I1C IETGSSSSTF  | 281   | >PDGFRA-I1C TETGSSSSTF  | 309  | 28    |
| >PDGFRA-I1C IETGSSSSTFI | 485   | >PDGFRA-I1C TETGSSSSTFI | 278  | 207   |
| >PDGFRA-I1C IETGSSSSTF  | 263   | >PDGFRA-I1C TETGSSSSTF  | 141  | 122   |
| >PDGFRA-I1C IETGSSSST   | 1682  | >PDGFRA-I1C TETGSSSST   | 294  | 1388  |
| >PDGFRA-I1C IETGSSSSTFI | 29    | >PDGFRA-I1C TETGSSSSTFI | 89   | 60    |
| >PDGFRA-I1C AIETGSSSSTF | 927   | >PDGFRA-I1C ATETGSSSSTF | 300  | 627   |
| >PDGFRA-I1C AIETGSSSSTF | 336   | >PDGFRA-I1C ATETGSSSSTF | 440  | 104   |

|                         |       |                         |       |       |
|-------------------------|-------|-------------------------|-------|-------|
| >PDGFRA-I1C AIETGSSSSTF | 326   | >PDGFRA-I1C ATETGSSSSTF | 1634  | 1308  |
| >PDGFRA-I1C AIETGSSSSTF | 422   | >PDGFRA-I1C ATETGSSSSTF | 215   | 207   |
| >PDGFRA-I1C AIETGSSSSTF | 83    | >PDGFRA-I1C ATETGSSSSTF | 3     | 80    |
| >PDGFRA-I1C AIETGSSSS   | 8410  | >PDGFRA-I1C ATETGSSSS   | 320   | 8090  |
| >PDGFRA-I1C AIETGSSSSTF | 29    | >PDGFRA-I1C ATETGSSSSTF | 3     | 26    |
| >PDGFRA-I1C HSSQTSEESA  | 120   | >PDGFRA-I1C HSSQTSEESA  | 5597  | 5477  |
| >PDGFRA-I1C HSSQTSEESA  | 56    | >PDGFRA-I1C HSSQTSEESA  | 27626 | 27570 |
| >PDGFRA-I1C EESAIETGS   | 295   | >PDGFRA-I1C EESATETGS   | 254   | 41    |
| >PDGFRA-I1C EESAIETGSS  | 302   | >PDGFRA-I1C EESATETGSS  | 284   | 18    |
| >PDGFRA-I1C SEESAIET    | 92    | >PDGFRA-I1C SEESATET    | 202   | 110   |
| >PDGFRA-I1C SEESAIETGS  | 356   | >PDGFRA-I1C SEESATETGS  | 834   | 478   |
| >PDGFRA-I1C QTSEESAI    | 158   | >PDGFRA-I1C QTSEESAT    | 4448  | 4290  |
| >PDGFRA-I1C QTSEESAI    | 463   | >PDGFRA-I1C QTSEESAT    | 6494  | 6031  |
| >PDGFRA-I1C QTSEESAI    | 276   | >PDGFRA-I1C QTSEESAT    | 8633  | 8357  |
| >PDGFRA-I1C QTSEESAI    | 164   | >PDGFRA-I1C QTSEESAT    | 30578 | 30414 |
| >PDGFRA-I1C SQTSEESAI   | 62    | >PDGFRA-I1C SQTSEESAT   | 3160  | 3098  |
| >PDGFRA-I1C SSQTSEESAI  | 193   | >PDGFRA-I1C SSQTSEESAT  | 28125 | 27932 |
| >PDGFRA-K6.KIMTHLGPHL   | 255   | >PDGFRA-K6.EIMTHLGPHL   | 3198  | 2943  |
| >PDGFRA-K6.KIMTHLGPHL   | 184   | >PDGFRA-K6.EIMTHLGPHL   | 1297  | 1113  |
| >PDGFRA-K6.KIMTHLGPHL   | 414   | >PDGFRA-K6.EIMTHLGPHL   | 1832  | 1418  |
| >PDGFRA-K6.KIMTHLGPHL   | 104   | >PDGFRA-K6.EIMTHLGPHL   | 500   | 396   |
| >PDGFRA-K6.KIMTHLGPHL   | 445   | >PDGFRA-K6.EIMTHLGPHL   | 4799  | 4354  |
| >PDGFRA-K6.KIMTHLGPHL   | 369   | >PDGFRA-K6.EIMTHLGPHL   | 6789  | 6420  |
| >PDGFRA-K6.KIMTHLGPH    | 175   | >PDGFRA-K6.EIMTHLGPH    | 9077  | 8902  |
| >PDGFRA-K6.KIMTHLGPH    | 14153 | >PDGFRA-K6.EIMTHLGPH    | 40    | 14113 |
| >PDGFRA-K6.KIMTHLGPH    | 541   | >PDGFRA-K6.EIMTHLGPH    | 8     | 533   |
| >PDGFRA-K6.KIMTHLGPHL   | 538   | >PDGFRA-K6.EIMTHLGPHL   | 14    | 524   |
| >PDGFRA-K6.KIMTHLGPHL   | 238   | >PDGFRA-K6.EIMTHLGPHL   | 15325 | 15087 |
| >PDGFRA-K6.KIMTHLGPHL   | 4135  | >PDGFRA-K6.EIMTHLGPHL   | 27    | 4108  |
| >PDGFRA-K6.LKIMTHLGPH   | 282   | >PDGFRA-K6.LEIMTHLGPH   | 6164  | 5882  |
| >PDGFRA-K6.LKIMTHLGPH   | 17    | >PDGFRA-K6.LEIMTHLGPH   | 609   | 592   |
| >PDGFRA-K6.LKIMTHLGPH   | 21832 | >PDGFRA-K6.LEIMTHLGPH   | 178   | 21654 |
| >PDGFRA-K6.LKIMTHLGPH   | 12453 | >PDGFRA-K6.LEIMTHLGPH   | 15    | 12438 |
| >PDGFRA-K6.LKIMTHLGPH   | 21043 | >PDGFRA-K6.LEIMTHLGPH   | 106   | 20937 |
| >PDGFRA-K6.LKIMTHLGPH   | 16334 | >PDGFRA-K6.LEIMTHLGPH   | 67    | 16267 |
| >PDGFRA-K6.ELKIMTHL     | 129   | >PDGFRA-K6.ELEIMTHL     | 105   | 24    |
| >PDGFRA-K6.ELKIMTHL     | 126   | >PDGFRA-K6.ELEIMTHL     | 4236  | 4110  |
| >PDGFRA-K6.SELKIMTHL    | 67    | >PDGFRA-K6.SELEIMTHL    | 43    | 24    |
| >PDGFRA-K6.SELKIMTHL    | 2334  | >PDGFRA-K6.SELEIMTHL    | 296   | 2038  |
| >PDGFRA-K6.SELKIMTH     | 628   | >PDGFRA-K6.SELEIMTH     | 210   | 418   |
| >PDGFRA-K6.SELKIMTHL    | 1002  | >PDGFRA-K6.SELEIMTHL    | 274   | 728   |
| >PDGFRA-K6.SELKIMTHL    | 70    | >PDGFRA-K6.SELEIMTHL    | 49    | 21    |
| >PDGFRA-K6.SELKIMTHL    | 91    | >PDGFRA-K6.SELEIMTHL    | 57    | 34    |

|                       |      |                       |     |      |
|-----------------------|------|-----------------------|-----|------|
| >PDGFRA-K6.SELKIMTHL  | 425  | >PDGFRA-K6.SELEIMTHL  | 231 | 194  |
| >PDGFRA-K6.SELKIMTHL  | 12   | >PDGFRA-K6.SELEIMTHL  | 9   | 3    |
| >PDGFRA-K6.MSELKIMTHL | 40   | >PDGFRA-K6.MSELEIMTHL | 62  | 22   |
| >PDGFRA-K6.LMSELKIM   | 1873 | >PDGFRA-K6.LMSELEIM   | 333 | 1540 |
| >PDGFRA-K6.LMSELKIMT  | 1589 | >PDGFRA-K6.LMSELEIMT  | 436 | 1153 |
| >PDGFRA-K6.LMSELKIMTH | 49   | >PDGFRA-K6.LMSELEIMTH | 26  | 23   |
| >PDGFRA-K6.LMSELKIM   | 318  | >PDGFRA-K6.LMSELEIM   | 42  | 276  |
| >PDGFRA-K6.LMSELKIMT  | 919  | >PDGFRA-K6.LMSELEIMT  | 376 | 543  |
| >PDGFRA-K6.LMSELKIMTH | 6    | >PDGFRA-K6.LMSELEIMTH | 4   | 2    |
| >PDGFRA-K6.LMSELKIM   | 438  | >PDGFRA-K6.LMSELEIM   | 329 | 109  |
| >PDGFRA-K6.LMSELKIMTH | 20   | >PDGFRA-K6.LMSELEIMTH | 17  | 3    |
| >PDGFRA-K6.LMSELKIMTH | 51   | >PDGFRA-K6.LMSELEIMTH | 31  | 20   |
| >PDGFRA-K6.LMSELKIM   | 336  | >PDGFRA-K6.LMSELEIM   | 120 | 216  |
| >PDGFRA-K6.LMSELKIMT  | 74   | >PDGFRA-K6.LMSELEIMT  | 63  | 11   |
| >PDGFRA-K6.LMSELKIMTH | 14   | >PDGFRA-K6.LMSELEIMTH | 9   | 5    |
| >PDGFRA-K6.LMSELKIM   | 811  | >PDGFRA-K6.LMSELEIM   | 205 | 606  |
| >PDGFRA-K6.LMSELKIMTH | 30   | >PDGFRA-K6.LMSELEIMTH | 13  | 17   |
| >PDGFRA-K6.LMSELKIM   | 1632 | >PDGFRA-K6.LMSELEIM   | 467 | 1165 |
| >PDGFRA-K6.LMSELKIMT  | 516  | >PDGFRA-K6.LMSELEIMT  | 211 | 305  |
| >PDGFRA-K6.LMSELKIMTH | 18   | >PDGFRA-K6.LMSELEIMTH | 12  | 6    |
| >PDGFRA-K6.LMSELKIM   | 1736 | >PDGFRA-K6.LMSELEIM   | 263 | 1473 |
| >PDGFRA-K6.LMSELKIMTH | 129  | >PDGFRA-K6.LMSELEIMTH | 51  | 78   |
| >PDGFRA-K6.LMSELKIM   | 203  | >PDGFRA-K6.LMSELEIM   | 81  | 122  |
| >PDGFRA-K6.LMSELKIMT  | 80   | >PDGFRA-K6.LMSELEIMT  | 74  | 6    |
| >PDGFRA-K6.LMSELKIMTH | 4    | >PDGFRA-K6.LMSELEIMTH | 3   | 1    |
| >PDGFRA-K6.LMSELKIM   | 364  | >PDGFRA-K6.LMSELEIM   | 217 | 147  |
| >PDGFRA-K6.LMSELKIMTH | 242  | >PDGFRA-K6.LMSELEIMTH | 290 | 48   |
| >PDGFRA-K6.LMSELKIM   | 264  | >PDGFRA-K6.LMSELEIM   | 274 | 10   |
| >PDGFRA-K6.LMSELKIMTH | 485  | >PDGFRA-K6.LMSELEIMTH | 403 | 82   |
| >PDGFRA-K6.ALMSELKI   | 31   | >PDGFRA-K6.ALMSELEI   | 14  | 17   |
| >PDGFRA-K6.ALMSELKIM  | 678  | >PDGFRA-K6.ALMSELEIM  | 65  | 613  |
| >PDGFRA-K6.ALMSELKIMT | 170  | >PDGFRA-K6.ALMSELEIMT | 83  | 87   |
| >PDGFRA-K6.ALMSELKI   | 17   | >PDGFRA-K6.ALMSELEI   | 7   | 10   |
| >PDGFRA-K6.ALMSELKIM  | 131  | >PDGFRA-K6.ALMSELEIM  | 9   | 122  |
| >PDGFRA-K6.ALMSELKIMT | 81   | >PDGFRA-K6.ALMSELEIMT | 33  | 48   |
| >PDGFRA-K6.ALMSELKI   | 19   | >PDGFRA-K6.ALMSELEI   | 13  | 6    |
| >PDGFRA-K6.ALMSELKIM  | 128  | >PDGFRA-K6.ALMSELEIM  | 74  | 54   |
| >PDGFRA-K6.ALMSELKIMT | 181  | >PDGFRA-K6.ALMSELEIMT | 201 | 20   |
| >PDGFRA-K6.ALMSELKI   | 184  | >PDGFRA-K6.ALMSELEI   | 52  | 132  |
| >PDGFRA-K6.ALMSELKIM  | 2039 | >PDGFRA-K6.ALMSELEIM  | 128 | 1911 |
| >PDGFRA-K6.ALMSELKI   | 22   | >PDGFRA-K6.ALMSELEI   | 9   | 13   |
| >PDGFRA-K6.ALMSELKIM  | 1370 | >PDGFRA-K6.ALMSELEIM  | 248 | 1122 |
| >PDGFRA-K6.ALMSELKIMT | 296  | >PDGFRA-K6.ALMSELEIMT | 161 | 135  |



|                       |      |                       |       |       |
|-----------------------|------|-----------------------|-------|-------|
| >PDGFRA-K6.ALMSELKI   | 41   | >PDGFRA-K6.ALMSELEI   | 16    | 25    |
| >PDGFRA-K6.ALMSELKIM  | 867  | >PDGFRA-K6.ALMSELEIM  | 110   | 757   |
| >PDGFRA-K6.ALMSELKI   | 82   | >PDGFRA-K6.ALMSELEI   | 34    | 48    |
| >PDGFRA-K6.ALMSELKI   | 43   | >PDGFRA-K6.ALMSELEI   | 22    | 21    |
| >PDGFRA-K6.ALMSELKIM  | 898  | >PDGFRA-K6.ALMSELEIM  | 62    | 836   |
| >PDGFRA-K6.ALMSELKI   | 9    | >PDGFRA-K6.ALMSELEI   | 6     | 3     |
| >PDGFRA-K6.ALMSELKIM  | 399  | >PDGFRA-K6.ALMSELEIM  | 105   | 294   |
| >PDGFRA-K6.ALMSELKIMT | 135  | >PDGFRA-K6.ALMSELEIMT | 82    | 53    |
| >PDGFRA-K6.ALMSELKIM  | 432  | >PDGFRA-K6.ALMSELEIM  | 135   | 297   |
| >PDGFRA-K6.ALMSELKI   | 315  | >PDGFRA-K6.ALMSELEI   | 252   | 63    |
| >PDGFRA-K6.ALMSELKIM  | 1363 | >PDGFRA-K6.ALMSELEIM  | 417   | 946   |
| >PDGFRA-K6.ALMSELKI   | 1017 | >PDGFRA-K6.ALMSELEI   | 493   | 524   |
| >PDGFRA-K6.ALMSELKIM  | 176  | >PDGFRA-K6.ALMSELEIM  | 334   | 158   |
| >PDGFRA-K6.QALMSELK   | 106  | >PDGFRA-K6.QALMSELE   | 25566 | 25460 |
| >PDGFRA-K6.QALMSELK   | 251  | >PDGFRA-K6.QALMSELE   | 18779 | 18528 |
| >PDGFRA-K6.QALMSELKI  | 125  | >PDGFRA-K6.QALMSELEI  | 157   | 32    |
| >PDGFRA-K6.QALMSELKIM | 159  | >PDGFRA-K6.QALMSELEIM | 355   | 196   |
| >PDGFRA-K6.KQALMSELKI | 779  | >PDGFRA-K6.KQALMSELEI | 350   | 429   |
| >PDGFRA-K6.KQALMSELKI | 1221 | >PDGFRA-K6.KQALMSELEI | 316   | 905   |
| >PDGFRA-K6.KQALMSELK  | 314  | >PDGFRA-K6.KQALMSELE  | 21338 | 21024 |
| >PDGFRA-K6.KQALMSELK  | 55   | >PDGFRA-K6.KQALMSELE  | 24724 | 24669 |
| >PDGFRA-K6.KQALMSELKI | 411  | >PDGFRA-K6.KQALMSELEI | 424   | 13    |
| >PDGFRA-K6.KQALMSELKI | 564  | >PDGFRA-K6.KQALMSELEI | 280   | 284   |
| >PDGFRA-K6.KQALMSELKI | 430  | >PDGFRA-K6.KQALMSELEI | 196   | 234   |
| >PDGFRA-K6.KQALMSELKI | 91   | >PDGFRA-K6.KQALMSELEI | 142   | 51    |
| >PDGFRA-L5!LPYDSRWEF  | 60   | >PDGFRA-L5!MPYDSRWEF  | 43    | 17    |
| >PDGFRA-L5!LPYDSRWEF  | 446  | >PDGFRA-L5!MPYDSRWEF  | 107   | 339   |
| >PDGFRA-L5!LPYDSRWEFF | 214  | >PDGFRA-L5!MPYDSRWEF  | 51    | 163   |
| >PDGFRA-L5!LPYDSRWEFF | 138  | >PDGFRA-L5!MPYDSRWEF  | 52    | 86    |
| >PDGFRA-L5!LPYDSRWEFF | 170  | >PDGFRA-L5!MPYDSRWEF  | 21    | 149   |
| >PDGFRA-L5!LPYDSRWEF  | 37   | >PDGFRA-L5!MPYDSRWEF  | 17    | 20    |
| >PDGFRA-L5!LPYDSRWEF  | 48   | >PDGFRA-L5!MPYDSRWEF  | 28    | 20    |
| >PDGFRA-L5!LPYDSRWEF  | 243  | >PDGFRA-L5!MPYDSRWEF  | 163   | 80    |
| >PDGFRA-L5!LPYDSRWEF  | 11   | >PDGFRA-L5!MPYDSRWEF  | 8     | 3     |
| >PDGFRA-L5!LPYDSRWEFF | 242  | >PDGFRA-L5!MPYDSRWEF  | 48    | 194   |
| >PDGFRA-L5!LPYDSRWEF  | 17   | >PDGFRA-L5!MPYDSRWEF  | 11    | 6     |
| >PDGFRA-L5!LPYDSRWEFF | 109  | >PDGFRA-L5!MPYDSRWEF  | 42    | 67    |
| >PDGFRA-L5!LPYDSRWEF  | 26   | >PDGFRA-L5!MPYDSRWEF  | 12    | 14    |
| >PDGFRA-L5!LPYDSRWEF  | 13   | >PDGFRA-L5!MPYDSRWEF  | 15    | 2     |
| >PDGFRA-L5!LPYDSRWEF  | 1297 | >PDGFRA-L5!MPYDSRWEF  | 201   | 1096  |
| >PDGFRA-L5!LPYDSRWEFF | 140  | >PDGFRA-L5!MPYDSRWEF  | 49    | 91    |
| >PDGFRA-L5!QLPYDSRWEI | 464  | >PDGFRA-L5!QMPYDSRWI  | 216   | 248   |
| >PDGFRA-L5!QLPYDSRWEI | 497  | >PDGFRA-L5!QMPYDSRWI  | 197   | 300   |

|                       |      |                       |      |      |
|-----------------------|------|-----------------------|------|------|
| >PDGFRA-L5!QLPYDSRWEI | 406  | >PDGFRA-L5!QMPYDSRWI  | 86   | 320  |
| >PDGFRA-L5!QLPYDSRWEI | 752  | >PDGFRA-L5!QMPYDSRWI  | 489  | 263  |
| >PDGFRA-L5!QLPYDSRWEI | 438  | >PDGFRA-L5!QMPYDSRWI  | 49   | 389  |
| >PDGFRA-L5!HEYIYVDPMC | 56   | >PDGFRA-L5!HEYIYVDPMC | 58   | 2    |
| >PDGFRA-L5!HEYIYVDPMC | 245  | >PDGFRA-L5!HEYIYVDPMC | 183  | 62   |
| >PDGFRA-L5!HEYIYVDPMC | 172  | >PDGFRA-L5!HEYIYVDPMC | 1013 | 841  |
| >PDGFRA-L5!HEYIYVDPMC | 28   | >PDGFRA-L5!HEYIYVDPMC | 123  | 95   |
| >PDGFRA-L5!HEYIYVDPMC | 36   | >PDGFRA-L5!HEYIYVDPMC | 60   | 24   |
| >PDGFRA-L5!HEYIYVDPMC | 5    | >PDGFRA-L5!HEYIYVDPMC | 8    | 3    |
| >PDGFRA-L5!MQLPYDSRV  | 12   | >PDGFRA-L5!MQMPYDSR\  | 8    | 4    |
| >PDGFRA-L5!MQLPYDSR   | 1684 | >PDGFRA-L5!MQMPYDSR   | 238  | 1446 |
| >PDGFRA-L5!MQLPYDSRV  | 50   | >PDGFRA-L5!MQMPYDSR\  | 61   | 11   |
| >PDGFRA-L5!MQLPYDSRV  | 61   | >PDGFRA-L5!MQMPYDSR\  | 54   | 7    |
| >PDGFRA-L5!MQLPYDSR   | 31   | >PDGFRA-L5!MQMPYDSR   | 28   | 3    |
| >PDGFRA-L5!MQLPYDSR   | 792  | >PDGFRA-L5!MQMPYDSR   | 113  | 679  |
| >PDGFRA-L5!MQLPYDSRV  | 827  | >PDGFRA-L5!MQMPYDSR\  | 115  | 712  |
| >PDGFRA-L5!MQLPYDSRV  | 81   | >PDGFRA-L5!MQMPYDSR\  | 37   | 44   |
| >PDGFRA-L5!MQLPYDSRV  | 652  | >PDGFRA-L5!MQMPYDSR\  | 368  | 284  |
| >PDGFRA-L5!MQLPYDSR   | 141  | >PDGFRA-L5!MQMPYDSR   | 72   | 69   |
| >PDGFRA-L5!MQLPYDSRV  | 159  | >PDGFRA-L5!MQMPYDSR\  | 99   | 60   |
| >PDGFRA-L5!MQLPYDSRV  | 4    | >PDGFRA-L5!MQMPYDSR\  | 3    | 1    |
| >PDGFRA-L5!MQLPYDSRV  | 21   | >PDGFRA-L5!MQMPYDSR\  | 20   | 1    |
| >PDGFRA-L5!MQLPYDSRV  | 261  | >PDGFRA-L5!MQMPYDSR\  | 206  | 55   |
| >PDGFRA-L5!MQLPYDSRV  | 215  | >PDGFRA-L5!MQMPYDSR\  | 234  | 19   |
| >PDGFRA-L5!MQLPYDSRV  | 157  | >PDGFRA-L5!MQMPYDSR\  | 102  | 55   |
| >PDGFRA-L5!MQLPYDSRV  | 729  | >PDGFRA-L5!MQMPYDSR\  | 187  | 542  |
| >PDGFRA-L5!MQLPYDSRV  | 424  | >PDGFRA-L5!MQMPYDSR\  | 307  | 117  |
| >PDGFRA-L5!MQLPYDSRV  | 323  | >PDGFRA-L5!MQMPYDSR\  | 219  | 104  |
| >PDGFRA-L5!MQLPYDSRV  | 47   | >PDGFRA-L5!MQMPYDSR\  | 24   | 23   |
| >PDGFRA-L5!MQLPYDSRV  | 1123 | >PDGFRA-L5!MQMPYDSR\  | 385  | 738  |
| >PDGFRA-L5!MQLPYDSRV  | 133  | >PDGFRA-L5!MQMPYDSR\  | 220  | 87   |
| >PDGFRA-L5!MQLPYDSRV  | 8    | >PDGFRA-L5!MQMPYDSR\  | 10   | 2    |
| >PDGFRA-L5!MQLPYDSRV  | 134  | >PDGFRA-L5!MQMPYDSR\  | 341  | 207  |
| >PDGFRA-L5!MQLPYDSR   | 297  | >PDGFRA-L5!MQMPYDSR   | 380  | 83   |
| >PDGFRA-L5!DPMQLPYDS  | 558  | >PDGFRA-L5!DPMQMPYD!  | 472  | 86   |
| >PDGFRA-L5!DPMQLPYDS  | 36   | >PDGFRA-L5!DPMQMPYD!  | 26   | 10   |
| >PDGFRA-L5!DPMQLPYDS  | 26   | >PDGFRA-L5!DPMQMPYD!  | 20   | 6    |
| >PDGFRA-L5!YVDPMQLPY  | 8    | >PDGFRA-L5!YVDPMQMP'  | 10   | 2    |
| >PDGFRA-L5!YVDPMQLPY  | 478  | >PDGFRA-L5!YVDPMQMP'  | 368  | 110  |
| >PDGFRA-L5!YVDPMQLPY  | 318  | >PDGFRA-L5!YVDPMQMP'  | 225  | 93   |
| >PDGFRA-L5!YVDPMQLPY  | 12   | >PDGFRA-L5!YVDPMQMP'  | 24   | 12   |
| >PDGFRA-L5!YVDPMQLPY  | 5    | >PDGFRA-L5!YVDPMQMP'  | 9    | 4    |
| >PDGFRA-L5!YVDPMQLPY  | 198  | >PDGFRA-L5!YVDPMQMP'  | 277  | 79   |

|                       |     |                        |      |      |
|-----------------------|-----|------------------------|------|------|
| >PDGFRA-L5:YVDPMQLPY  | 20  | >PDGFRA-L5:YVDPMQMP'   | 44   | 24   |
| >PDGFRA-L5:YVDPMQLPY  | 16  | >PDGFRA-L5:YVDPMQMP'   | 21   | 5    |
| >PDGFRA-L5:YVDPMQLPY  | 78  | >PDGFRA-L5:YVDPMQMP'   | 53   | 25   |
| >PDGFRA-L5:YVDPMQLPY  | 141 | >PDGFRA-L5:YVDPMQMP'   | 211  | 70   |
| >PDGFRA-L5:IYVDPMQL   | 169 | >PDGFRA-L5:IYVDPMQM    | 1249 | 1080 |
| >PDGFRA-L5:IYVDPMQL   | 38  | >PDGFRA-L5:IYVDPMQM    | 481  | 443  |
| >PDGFRA-L5:IYVDPMQLPY | 198 | >PDGFRA-L5:IYVDPMQMP   | 158  | 40   |
| >PDGFRA-L5:IYVDPMQLPY | 26  | >PDGFRA-L5:IYVDPMQMP   | 36   | 10   |
| >PDGFRA-L5:IYVDPMQLPY | 143 | >PDGFRA-L5:IYVDPMQMP   | 92   | 51   |
| >PDGFRA-L5:IYVDPMQLPY | 84  | >PDGFRA-L5:IYVDPMQMP   | 235  | 151  |
| >PDGFRA-L5:YIYVDPMQL  | 68  | >PDGFRA-L5:YIYVDPMQM   | 458  | 390  |
| >PDGFRA-L5:YIYVDPMQL  | 116 | >PDGFRA-L5:YIYVDPMQM   | 1354 | 1238 |
| >PDGFRA-L5:YIYVDPMQL  | 20  | >PDGFRA-L5:YIYVDPMQM   | 183  | 163  |
| >PDGFRA-L5:YIYVDPMQL  | 261 | >PDGFRA-L5:YIYVDPMQM   | 1492 | 1231 |
| >PDGFRA-L5:YIYVDPMQL  | 10  | >PDGFRA-L5:YIYVDPMQM   | 58   | 48   |
| >PDGFRA-L5:YIYVDPMQL  | 144 | >PDGFRA-L5:YIYVDPMQM   | 1973 | 1829 |
| >PDGFRA-L5:YIYVDPMQL  | 22  | >PDGFRA-L5:YIYVDPMQM   | 335  | 313  |
| >PDGFRA-L5:YIYVDPMQL  | 72  | >PDGFRA-L5:YIYVDPMQM   | 513  | 441  |
| >PDGFRA-L5:YIYVDPMQL  | 8   | >PDGFRA-L5:YIYVDPMQM   | 121  | 113  |
| >PDGFRA-L5:YIYVDPMQLF | 257 | >PDGFRA-L5:YIYVDPMQM   | 233  | 24   |
| >PDGFRA-L5:YIYVDPMQLF | 253 | >PDGFRA-L5:YIYVDPMQM   | 208  | 45   |
| >PDGFRA-L5:YIYVDPMQLF | 227 | >PDGFRA-L5:YIYVDPMQM   | 208  | 19   |
| >PDGFRA-L5:YIYVDPMQLF | 6   | >PDGFRA-L5:YIYVDPMQM   | 8    | 2    |
| >PDGFRA-L5:YIYVDPMQLF | 922 | >PDGFRA-L5:YIYVDPMQM   | 441  | 481  |
| >PDGFRA-L5:YIYVDPMQL  | 133 | >PDGFRA-L5:YIYVDPMQM   | 173  | 40   |
| >PDGFRA-L5:YIYVDPMQLF | 12  | >PDGFRA-L5:YIYVDPMQM   | 23   | 11   |
| >PDGFRA-L5:YIYVDPMQLF | 58  | >PDGFRA-L5:YIYVDPMQM   | 63   | 5    |
| >PDGFRA-L5:YIYVDPMQLF | 53  | >PDGFRA-L5:YIYVDPMQM   | 54   | 1    |
| >PDGFRA-L5:YIYVDPMQL  | 444 | >PDGFRA-L5:YIYVDPMQM   | 179  | 265  |
| >PDGFRA-L5:YIYVDPMQLF | 32  | >PDGFRA-L5:YIYVDPMQM   | 21   | 11   |
| >PDGFRA-L5:YIYVDPMQL  | 515 | >PDGFRA-L5:YIYVDPMQM   | 289  | 226  |
| >PDGFRA-L5:YIYVDPMQLF | 27  | >PDGFRA-L5:YIYVDPMQM   | 47   | 20   |
| >PDGFRA-L5:YIYVDPMQLF | 40  | >PDGFRA-L5:YIYVDPMQM   | 52   | 12   |
| >PDGFRA-L5:YIYVDPMQLF | 464 | >PDGFRA-L5:YIYVDPMQM   | 618  | 154  |
| >PDGFRA-L5:YIYVDPMQLF | 406 | >PDGFRA-L5:YIYVDPMQM   | 327  | 79   |
| >PDGFRA-L5:YIYVDPMQLF | 449 | >PDGFRA-L5:YIYVDPMQM   | 595  | 146  |
| >PDGFRA-L5:EYIYVDPMQL | 40  | >PDGFRA-L5:EYIYVDPMQI' | 533  | 493  |
| >PDGFRA-L5:EYIYVDPMQL | 494 | >PDGFRA-L5:EYIYVDPMQI' | 61   | 433  |
| >PDGFRA-M:MTDYLIV     | 214 | >PDGFRA-M:KTDYLIV      | 1629 | 1415 |
| >PDGFRA-M:MTDYLIV     | 84  | >PDGFRA-M:KTDYLIV      | 172  | 88   |
| >PDGFRA-M:MTDYLIV     | 212 | >PDGFRA-M:KTDYLIV      | 921  | 709  |
| >PDGFRA-M:MTDYLIV     | 48  | >PDGFRA-M:KTDYLIV      | 90   | 42   |
| >PDGFRA-M:MTDYLIV     | 101 | >PDGFRA-M:KTDYLIV      | 212  | 111  |

|                       |      |                       |       |       |
|-----------------------|------|-----------------------|-------|-------|
| >PDGFRA-M1MTDYLVIV    | 397  | >PDGFRA-M1KTDYLVIV    | 319   | 78    |
| >PDGFRA-M1MTDYLVIV    | 260  | >PDGFRA-M1KTDYLVIV    | 194   | 66    |
| >PDGFRA-M1MTDYLVIV    | 1221 | >PDGFRA-M1KTDYLVIV    | 172   | 1049  |
| >PDGFRA-M1MTDYLVIV    | 31   | >PDGFRA-M1KTDYLVIV    | 3839  | 3808  |
| >PDGFRA-M1MTDYLVIV    | 28   | >PDGFRA-M1KTDYLVIV    | 1236  | 1208  |
| >PDGFRA-M1GMTDYLVI    | 57   | >PDGFRA-M1GKTDYLVIV   | 20738 | 20681 |
| >PDGFRA-M1GMTDYLVIV   | 9    | >PDGFRA-M1GKTDYLVIV   | 12277 | 12268 |
| >PDGFRA-M1GMTDYLVI    | 59   | >PDGFRA-M1GKTDYLVIV   | 17033 | 16974 |
| >PDGFRA-M1GMTDYLVIV   | 5    | >PDGFRA-M1GKTDYLVIV   | 4660  | 4655  |
| >PDGFRA-M1GMTDYLVI    | 28   | >PDGFRA-M1GKTDYLVIV   | 15434 | 15406 |
| >PDGFRA-M1GMTDYLVIV   | 4    | >PDGFRA-M1GKTDYLVIV   | 5386  | 5382  |
| >PDGFRA-M1GMTDYLVI    | 88   | >PDGFRA-M1GKTDYLVIV   | 8954  | 8866  |
| >PDGFRA-M1GMTDYLVIV   | 6    | >PDGFRA-M1GKTDYLVIV   | 1216  | 1210  |
| >PDGFRA-M1GMTDYLVI    | 14   | >PDGFRA-M1GKTDYLVIV   | 12043 | 12029 |
| >PDGFRA-M1GMTDYLVIV   | 3    | >PDGFRA-M1GKTDYLVIV   | 2688  | 2685  |
| >PDGFRA-M1GMTDYLVI    | 11   | >PDGFRA-M1GKTDYLVIV   | 16791 | 16780 |
| >PDGFRA-M1GMTDYLVIV   | 2    | >PDGFRA-M1GKTDYLVIV   | 5261  | 5259  |
| >PDGFRA-M1GMTDYLVI    | 23   | >PDGFRA-M1GKTDYLVIV   | 17907 | 17884 |
| >PDGFRA-M1GMTDYLVIV   | 5    | >PDGFRA-M1GKTDYLVIV   | 4967  | 4962  |
| >PDGFRA-M1GMTDYLVIV   | 7    | >PDGFRA-M1GKTDYLVIV   | 17362 | 17355 |
| >PDGFRA-M1GMTDYLVI    | 9    | >PDGFRA-M1GKTDYLVIV   | 19408 | 19399 |
| >PDGFRA-M1GMTDYLVIV   | 2    | >PDGFRA-M1GKTDYLVIV   | 870   | 868   |
| >PDGFRA-M1DPDVAFVPLC  | 139  | >PDGFRA-M1DPDVAFVPLC  | 11071 | 10932 |
| >PDGFRA-M1LGMTDYLV    | 434  | >PDGFRA-M1LGKTDYLV    | 8135  | 7701  |
| >PDGFRA-M1LGMTDYLVI   | 195  | >PDGFRA-M1LGKTDYLVIV  | 1126  | 931   |
| >PDGFRA-M1PLGMTDYLV   | 603  | >PDGFRA-M1PLGKTDYLV   | 478   | 125   |
| >PDGFRA-M1PLGMTDYLV   | 249  | >PDGFRA-M1PLGKTDYLV   | 312   | 63    |
| >PDGFRA-M1PLGMTDYLV   | 65   | >PDGFRA-M1PLGKTDYLV   | 100   | 35    |
| >PDGFRA-M1PLGMTDYLVIV | 84   | >PDGFRA-M1PLGKTDYLVIV | 115   | 31    |
| >PDGFRA-M1PLGMTDYLV   | 210  | >PDGFRA-M1PLGKTDYLV   | 199   | 11    |
| >PDGFRA-M1PLGMTDYLVIV | 182  | >PDGFRA-M1PLGKTDYLVIV | 176   | 6     |
| >PDGFRA-M1PLGMTDYLV   | 263  | >PDGFRA-M1PLGKTDYLV   | 266   | 3     |
| >PDGFRA-M1PLGMTDYLV   | 39   | >PDGFRA-M1PLGKTDYLV   | 36    | 3     |
| >PDGFRA-M1PLGMTDYLVIV | 44   | >PDGFRA-M1PLGKTDYLVIV | 42    | 2     |
| >PDGFRA-M1PLGMTDYLV   | 248  | >PDGFRA-M1PLGKTDYLV   | 417   | 169   |
| >PDGFRA-M1PLGMTDYLV   | 113  | >PDGFRA-M1PLGKTDYLV   | 164   | 51    |
| >PDGFRA-M1PLGMTDYLVIV | 111  | >PDGFRA-M1PLGKTDYLVIV | 150   | 39    |
| >PDGFRA-M1PLGMTDYLV   | 131  | >PDGFRA-M1PLGKTDYLV   | 250   | 119   |
| >PDGFRA-M1PLGMTDYLV   | 19   | >PDGFRA-M1PLGKTDYLV   | 27    | 8     |
| >PDGFRA-M1PLGMTDYLVIV | 15   | >PDGFRA-M1PLGKTDYLVIV | 20    | 5     |
| >PDGFRA-M1VPLGMTDYLV  | 11   | >PDGFRA-M1VPLGKTDYLV  | 24    | 13    |
| >PDGFRA-M1VPLGMTDYLV  | 248  | >PDGFRA-M1VPLGKTDYLV  | 420   | 172   |
| >PDGFRA-M1VPLGMTDYLV  | 140  | >PDGFRA-M1VPLGKTDYLV  | 333   | 193   |

|                      |       |                       |       |       |
|----------------------|-------|-----------------------|-------|-------|
| >PDGFRA-M:VPLGMTDYL  | 97    | >PDGFRA-M:VPLGKTDYL   | 115   | 18    |
| >PDGFRA-M:VPLGMTDYL  | 321   | >PDGFRA-M:VPLGKTDYLV  | 310   | 11    |
| >PDGFRA-M:VPLGMTDY   | 26    | >PDGFRA-M:VPLGKTDY    | 85    | 59    |
| >PDGFRA-M:VPLGMTDYL  | 303   | >PDGFRA-M:VPLGKTDYLV  | 317   | 14    |
| >PDGFRA-M:VPLGMTDY   | 159   | >PDGFRA-M:VPLGKTDY    | 400   | 241   |
| >PDGFRA-M:VPLGMTDYL  | 324   | >PDGFRA-M:VPLGKTDYL   | 1709  | 1385  |
| >PDGFRA-M:VPLGMTDYL  | 84    | >PDGFRA-M:VPLGKTDYLV  | 312   | 228   |
| >PDGFRA-M:VPLGMTDYL  | 61    | >PDGFRA-M:VPLGKTDYLV  | 77    | 16    |
| >PDGFRA-M:VPLGMTDY   | 235   | >PDGFRA-M:VPLGKTDY    | 807   | 572   |
| >PDGFRA-M:VPLGMTDYL  | 250   | >PDGFRA-M:VPLGKTDYL   | 793   | 543   |
| >PDGFRA-M:VPLGMTDYL  | 273   | >PDGFRA-M:VPLGKTDYLV  | 548   | 275   |
| >PDGFRA-M:FVPLGMTDYI | 99    | >PDGFRA-M:FVPLGKTDYL' | 296   | 197   |
| >PDGFRA-M:FVPLGMTDYI | 38    | >PDGFRA-M:FVPLGKTDYL  | 78    | 40    |
| >PDGFRA-M:FVPLGMTDYI | 48    | >PDGFRA-M:FVPLGKTDYL' | 144   | 96    |
| >PDGFRA-M:FVPLGMTDYI | 228   | >PDGFRA-M:FVPLGKTDYL  | 422   | 194   |
| >PDGFRA-M:FVPLGMTDYI | 43    | >PDGFRA-M:FVPLGKTDYL' | 170   | 127   |
| >PDGFRA-M:FVPLGMTDYI | 79    | >PDGFRA-M:FVPLGKTDYL  | 134   | 55    |
| >PDGFRA-M:FVPLGMTDYI | 10    | >PDGFRA-M:FVPLGKTDYL' | 24    | 14    |
| >PDGFRA-M:FVPLGMTDYI | 153   | >PDGFRA-M:FVPLGKTDYL' | 228   | 75    |
| >PDGFRA-M:FVPLGMTDYI | 299   | >PDGFRA-M:FVPLGKTDYL' | 498   | 199   |
| >PDGFRA-M:FVPLGMTDYI | 74    | >PDGFRA-M:FVPLGKTDYL' | 117   | 43    |
| >PDGFRA-M:FVPLGMTDYI | 147   | >PDGFRA-M:FVPLGKTDYL  | 220   | 73    |
| >PDGFRA-M:FVPLGMTDYI | 11    | >PDGFRA-M:FVPLGKTDYL' | 14    | 3     |
| >PDGFRA-M:FVPLGMTDY  | 22    | >PDGFRA-M:FVPLGKTDY   | 426   | 404   |
| >PDGFRA-M:FVPLGMTDY  | 427   | >PDGFRA-M:FVPLGKTDY   | 4134  | 3707  |
| >PDGFRA-M:FVPLGMTDY  | 33    | >PDGFRA-M:FVPLGKTDY   | 5536  | 5503  |
| >PDGFRA-M:FVPLGMTDY  | 32    | >PDGFRA-M:FVPLGKTDY   | 140   | 108   |
| >PDGFRA-M:FVPLGMTDYI | 287   | >PDGFRA-M:FVPLGKTDYL  | 263   | 24    |
| >PDGFRA-M:FVPLGMTDYI | 13    | >PDGFRA-M:FVPLGKTDYL' | 25    | 12    |
| >PDGFRA-M:FVPLGMTDYI | 24    | >PDGFRA-M:FVPLGKTDYL  | 196   | 172   |
| >PDGFRA-M:FVPLGMTDYI | 114   | >PDGFRA-M:FVPLGKTDYL' | 555   | 441   |
| >PDGFRA-M:AFVPLGMTD' | 182   | >PDGFRA-M:AFVPLGKTDY  | 338   | 156   |
| >PDGFRA-M:AFVPLGMTD' | 42    | >PDGFRA-M:AFVPLGKTDY  | 101   | 59    |
| >PDGFRA-M:AFVPLGMTD' | 243   | >PDGFRA-M:AFVPLGKTDY  | 255   | 12    |
| >PDGFRA-M:AFVPLGMTD' | 424   | >PDGFRA-M:AFVPLGKTDY  | 4193  | 3769  |
| >PDGFRA-M:AFVPLGMTD' | 100   | >PDGFRA-M:AFVPLGKTDY  | 141   | 41    |
| >PDGFRA-M:VAFVPLGM   | 496   | >PDGFRA-M:VAFVPLGK    | 17018 | 16522 |
| >PDGFRA-M:VAFVPLGM   | 18610 | >PDGFRA-M:VAFVPLGK    | 144   | 18466 |
| >PDGFRA-M:VAFVPLGM   | 19823 | >PDGFRA-M:VAFVPLGK    | 29    | 19794 |
| >PDGFRA-M:VAFVPLGMTI | 160   | >PDGFRA-M:VAFVPLGKTD  | 383   | 223   |
| >PDGFRA-M:VAFVPLGMTI | 122   | >PDGFRA-M:VAFVPLGKTD  | 164   | 42    |
| >PDGFRA-M:VAFVPLGM   | 26240 | >PDGFRA-M:VAFVPLGK    | 318   | 25922 |
| >PDGFRA-M:VAFVPLGMTI | 186   | >PDGFRA-M:VAFVPLGKTD  | 266   | 80    |

|                       |       |                        |       |       |
|-----------------------|-------|------------------------|-------|-------|
| >PDGFRA-M1 VAFVPLGM   | 23    | >PDGFRA-M1 VAFVPLGK    | 11643 | 11620 |
| >PDGFRA-M1 VAFVPLGMTI | 13    | >PDGFRA-M1 VAFVPLGKTD  | 28    | 15    |
| >PDGFRA-M1 VAFVPLGMTI | 72    | >PDGFRA-M1 VAFVPLGKTD  | 120   | 48    |
| >PDGFRA-M1 DVAFVPLGM  | 27135 | >PDGFRA-M1 DVAFVPLGK   | 288   | 26847 |
| >PDGFRA-M1 DVAFVPLGM  | 385   | >PDGFRA-M1 DVAFVPLGK   | 23428 | 23043 |
| >PDGFRA-M1 DVAFVPLGM  | 4539  | >PDGFRA-M1 DVAFVPLGK   | 8     | 4531  |
| >PDGFRA-M1 DVAFVPLGM  | 127   | >PDGFRA-M1 DVAFVPLGK   | 11580 | 11453 |
| >PDGFRA-M1 DVAFVPLGM  | 118   | >PDGFRA-M1 DVAFVPLGK   | 9315  | 9197  |
| >PDGFRA-N6 NLLGACTK   | 2104  | >PDGFRA-N6 KLLGACTK    | 315   | 1789  |
| >PDGFRA-N6 NLLGACTK   | 850   | >PDGFRA-N6 KLLGACTK    | 49    | 801   |
| >PDGFRA-N6 NLLGACTK   | 3183  | >PDGFRA-N6 KLLGACTK    | 226   | 2957  |
| >PDGFRA-N6 NLLGACTK   | 6929  | >PDGFRA-N6 KLLGACTK    | 42    | 6887  |
| >PDGFRA-N6 NLLGACTK   | 5628  | >PDGFRA-N6 KLLGACTK    | 406   | 5222  |
| >PDGFRA-N6 IVNLLGACTK | 73    | >PDGFRA-N6 IVKLLGACTK  | 129   | 56    |
| >PDGFRA-N6 IVNLLGACTK | 69    | >PDGFRA-N6 IVKLLGACTK  | 269   | 200   |
| >PDGFRA-N6 IVNLLGACTK | 240   | >PDGFRA-N6 IVKLLGACTK  | 13    | 227   |
| >PDGFRA-N6 IVNLLGACTK | 414   | >PDGFRA-N6 IVKLLGACTK  | 586   | 172   |
| >PDGFRA-N6 NIVNLLGA   | 188   | >PDGFRA-N6 NIVKLLGA    | 359   | 171   |
| >PDGFRA-N6 NIVNLLGA   | 135   | >PDGFRA-N6 NIVKLLGA    | 302   | 167   |
| >PDGFRA-N6 NIVNLLGACT | 107   | >PDGFRA-N6 NIVKLLGACTI | 145   | 38    |
| >PDGFRA-N6 HLNIVNLL   | 10    | >PDGFRA-N6 HLNIVKLL    | 78    | 68    |
| >PDGFRA-N6 HLNIVNLLGA | 394   | >PDGFRA-N6 HLNIVKLLGA  | 836   | 442   |
| >PDGFRA-N6 HLNIVNLL   | 62    | >PDGFRA-N6 HLNIVKLL    | 203   | 141   |
| >PDGFRA-N6 HLNIVNLLGA | 184   | >PDGFRA-N6 HLNIVKLLGA  | 264   | 80    |
| >PDGFRA-N6 HLNIVNLL   | 68    | >PDGFRA-N6 HLNIVKLL    | 112   | 44    |
| >PDGFRA-N6 HLNIVNLLGA | 123   | >PDGFRA-N6 HLNIVKLLGA  | 228   | 105   |
| >PDGFRA-N6 HLNIVNLL   | 321   | >PDGFRA-N6 HLNIVKLL    | 1758  | 1437  |
| >PDGFRA-N6 HLNIVNLL   | 134   | >PDGFRA-N6 HLNIVKLL    | 359   | 225   |
| >PDGFRA-N6 HLNIVNLLGA | 304   | >PDGFRA-N6 HLNIVKLLGA  | 437   | 133   |
| >PDGFRA-N6 HLNIVNLL   | 24    | >PDGFRA-N6 HLNIVKLL    | 41    | 17    |
| >PDGFRA-N6 HLNIVNLLGA | 71    | >PDGFRA-N6 HLNIVKLLGA  | 102   | 31    |
| >PDGFRA-N6 GPHLNIVNL  | 41    | >PDGFRA-N6 GPHLNIVKL   | 295   | 254   |
| >PDGFRA-N6 LGPHLNIVNL | 113   | >PDGFRA-N6 LGPHLNIVKL  | 178   | 65    |
| >PDGFRA-N6 LGPHLNIVNL | 175   | >PDGFRA-N6 LGPHLNIVKLI | 123   | 52    |
| >PDGFRA-N6 LGPHLNIVNL | 135   | >PDGFRA-N6 LGPHLNIVKL  | 136   | 1     |
| >PDGFRA-N6 LGPHLNIVNL | 15    | >PDGFRA-N6 LGPHLNIVKLI | 33    | 18    |
| >PDGFRA-N6 HLGPHLNIVN | 408   | >PDGFRA-N6 HLGPHLNIVK  | 673   | 265   |
| >PDGFRA-N6 HLGPHLNIVN | 18    | >PDGFRA-N6 HLGPHLNIVK  | 29    | 11    |
| >PDGFRA-N6 HLGPHLNIVN | 94    | >PDGFRA-N6 HLGPHLNIVK  | 167   | 73    |
| >PDGFRA-N6 HLGPHLNIVN | 65    | >PDGFRA-N6 HLGPHLNIVK  | 62    | 3     |
| >PDGFRA-N6 HLGPHLNIVN | 19    | >PDGFRA-N6 HLGPHLNIVK  | 27    | 8     |
| >PDGFRA-N6 HLGPHLNIVN | 150   | >PDGFRA-N6 HLGPHLNIVK  | 195   | 45    |
| >PDGFRA-N6 HLGPHLNIVN | 241   | >PDGFRA-N6 HLGPHLNIVK  | 374   | 133   |

|                       |       |                        |     |       |
|-----------------------|-------|------------------------|-----|-------|
| >PDGFRA-N6 HLGPHLNIVN | 6     | >PDGFRA-N6 HLGPHLNIVK  | 6   | 0     |
| >PDGFRA-N6 HLGPHLNIVN | 20061 | >PDGFRA-N6 HLGPHLNIVK  | 105 | 19956 |
| >PDGFRA-N6 HLGPHLNIVN | 35260 | >PDGFRA-N6 HLGPHLNIVK  | 481 | 34779 |
| >PDGFRA-N6 HLGPHLNIVN | 16133 | >PDGFRA-N6 HLGPHLNIVK  | 447 | 15686 |
| >PDGFRA-N6 NLLGACTK   | 5131  | >PDGFRA-N6 YLLGACTK    | 117 | 5014  |
| >PDGFRA-N6 NLLGACTKS  | 9974  | >PDGFRA-N6 YLLGACTKS   | 363 | 9611  |
| >PDGFRA-N6 NLLGACTK   | 8937  | >PDGFRA-N6 YLLGACTK    | 307 | 8630  |
| >PDGFRA-N6 NLLGACTKS  | 9758  | >PDGFRA-N6 YLLGACTKS   | 458 | 9300  |
| >PDGFRA-N6 NLLGACTK   | 2104  | >PDGFRA-N6 YLLGACTK    | 11  | 2093  |
| >PDGFRA-N6 NLLGACTKS  | 7182  | >PDGFRA-N6 YLLGACTKS   | 24  | 7158  |
| >PDGFRA-N6 NLLGACTKSG | 17630 | >PDGFRA-N6 YLLGACTKSG  | 252 | 17378 |
| >PDGFRA-N6 NLLGACTKSG | 15570 | >PDGFRA-N6 YLLGACTKSG  | 306 | 15264 |
| >PDGFRA-N6 NLLGACTK   | 850   | >PDGFRA-N6 YLLGACTK    | 277 | 573   |
| >PDGFRA-N6 VNLLGACTK  | 6720  | >PDGFRA-N6 VYLLGACTK   | 393 | 6327  |
| >PDGFRA-N6 THLGPHLNIV | 21641 | >PDGFRA-N6 THLGPHLNIV  | 205 | 21436 |
| >PDGFRA-N6 IVNLLGAC   | 12299 | >PDGFRA-N6 IVYLLGAC    | 237 | 12062 |
| >PDGFRA-N6 IVNLLGACTK | 73    | >PDGFRA-N6 IVYLLGACTK  | 21  | 52    |
| >PDGFRA-N6 IVNLLGACTK | 69    | >PDGFRA-N6 IVYLLGACTK  | 35  | 34    |
| >PDGFRA-N6 IVNLLGACTK | 240   | >PDGFRA-N6 IVYLLGACTK  | 195 | 45    |
| >PDGFRA-N6 IVNLLGACTK | 955   | >PDGFRA-N6 IVYLLGACTK  | 406 | 549   |
| >PDGFRA-N6 IVNLLGACTK | 414   | >PDGFRA-N6 IVYLLGACTK  | 72  | 342   |
| >PDGFRA-N6 NIVNLLGA   | 188   | >PDGFRA-N6 NIVYLLGA    | 225 | 37    |
| >PDGFRA-N6 NIVNLLGA   | 135   | >PDGFRA-N6 NIVYLLGA    | 226 | 91    |
| >PDGFRA-N6 NIVNLLGACT | 107   | >PDGFRA-N6 NIVYLLGACTI | 61  | 46    |
| >PDGFRA-N6 NIVNLLGA   | 895   | >PDGFRA-N6 NIVYLLGA    | 302 | 593   |
| >PDGFRA-N6 HLNIVNLL   | 568   | >PDGFRA-N6 HLNIVYLL    | 138 | 430   |
| >PDGFRA-N6 HLNIVNLLGA | 845   | >PDGFRA-N6 HLNIVYLLGA  | 497 | 348   |
| >PDGFRA-N6 HLNIVNLL   | 10    | >PDGFRA-N6 HLNIVYLL    | 9   | 1     |
| >PDGFRA-N6 HLNIVNLLGA | 394   | >PDGFRA-N6 HLNIVYLLGA  | 206 | 188   |
| >PDGFRA-N6 HLNIVNLL   | 62    | >PDGFRA-N6 HLNIVYLL    | 52  | 10    |
| >PDGFRA-N6 HLNIVNLLGA | 184   | >PDGFRA-N6 HLNIVYLLGA  | 155 | 29    |
| >PDGFRA-N6 HLNIVNLL   | 68    | >PDGFRA-N6 HLNIVYLL    | 16  | 52    |
| >PDGFRA-N6 HLNIVNLLGA | 123   | >PDGFRA-N6 HLNIVYLLGA  | 65  | 58    |
| >PDGFRA-N6 HLNIVNLL   | 321   | >PDGFRA-N6 HLNIVYLL    | 79  | 242   |
| >PDGFRA-N6 HLNIVNLL   | 134   | >PDGFRA-N6 HLNIVYLL    | 47  | 87    |
| >PDGFRA-N6 HLNIVNLLGA | 304   | >PDGFRA-N6 HLNIVYLLGA  | 201 | 103   |
| >PDGFRA-N6 HLNIVNLL   | 1542  | >PDGFRA-N6 HLNIVYLL    | 363 | 1179  |
| >PDGFRA-N6 HLNIVNLL   | 24    | >PDGFRA-N6 HLNIVYLL    | 12  | 12    |
| >PDGFRA-N6 HLNIVNLLGA | 71    | >PDGFRA-N6 HLNIVYLLGA  | 47  | 24    |
| >PDGFRA-N6 HLNIVNLL   | 982   | >PDGFRA-N6 HLNIVYLL    | 427 | 555   |
| >PDGFRA-N6 GPHLNIVNL  | 41    | >PDGFRA-N6 GPHLNIVYL   | 12  | 29    |
| >PDGFRA-N6 GPHLNIVNLL | 1058  | >PDGFRA-N6 GPHLNIVYLL  | 361 | 697   |
| >PDGFRA-N6 GPHLNIVN   | 14162 | >PDGFRA-N6 GPHLNIVY    | 168 | 13994 |

|                       |       |                        |      |       |
|-----------------------|-------|------------------------|------|-------|
| >PDGFRA-N6 GPHLNIVN   | 33613 | >PDGFRA-N6 GPHLNIVY    | 481  | 33132 |
| >PDGFRA-N6 LGPHLNIVN  | 1024  | >PDGFRA-N6 LGPHLNIVY   | 84   | 940   |
| >PDGFRA-N6 LGPHLNIVNL | 113   | >PDGFRA-N6 LGPHLNIVYL  | 90   | 23    |
| >PDGFRA-N6 LGPHLNIVNL | 175   | >PDGFRA-N6 LGPHLNIVYLL | 257  | 82    |
| >PDGFRA-N6 LGPHLNIVNL | 135   | >PDGFRA-N6 LGPHLNIVYL  | 25   | 110   |
| >PDGFRA-N6 LGPHLNIVNL | 15    | >PDGFRA-N6 LGPHLNIVYLL | 11   | 4     |
| >PDGFRA-N6 HLGPHLNIVN | 408   | >PDGFRA-N6 HLGPHLNIVY  | 86   | 322   |
| >PDGFRA-N6 HLGPHLNIVN | 18    | >PDGFRA-N6 HLGPHLNIVY  | 9    | 9     |
| >PDGFRA-N6 HLGPHLNIVN | 94    | >PDGFRA-N6 HLGPHLNIVY  | 66   | 28    |
| >PDGFRA-N6 HLGPHLNIVN | 961   | >PDGFRA-N6 HLGPHLNIVY  | 167  | 794   |
| >PDGFRA-N6 HLGPHLNIVN | 65    | >PDGFRA-N6 HLGPHLNIVY  | 14   | 51    |
| >PDGFRA-N6 HLGPHLNIVN | 19    | >PDGFRA-N6 HLGPHLNIVY  | 8    | 11    |
| >PDGFRA-N6 HLGPHLNIVN | 150   | >PDGFRA-N6 HLGPHLNIVY  | 45   | 105   |
| >PDGFRA-N6 HLGPHLNIVN | 241   | >PDGFRA-N6 HLGPHLNIVY  | 37   | 204   |
| >PDGFRA-N6 HLGPHLNIVN | 6     | >PDGFRA-N6 HLGPHLNIVY  | 5    | 1     |
| >PDGFRA-N6 HLGPHLNIVN | 26504 | >PDGFRA-N6 HLGPHLNIVY  | 100  | 26404 |
| >PDGFRA-N6 HLGPHLNIVN | 14723 | >PDGFRA-N6 HLGPHLNIVY  | 84   | 14639 |
| >PDGFRA-N6 HLGPHLNIVN | 24804 | >PDGFRA-N6 HLGPHLNIVY  | 254  | 24550 |
| >PDGFRA-N8 NYVSKGSTF  | 354   | >PDGFRA-N8 KYVSKGSTF   | 88   | 266   |
| >PDGFRA-N8 NYVSKGSTFL | 20    | >PDGFRA-N8 KYVSKGSTFL  | 8    | 12    |
| >PDGFRA-N8 NYVSKGSTF  | 72    | >PDGFRA-N8 KYVSKGSTF   | 37   | 35    |
| >PDGFRA-N8 NYVSKGSTFL | 403   | >PDGFRA-N8 KYVSKGSTFL  | 580  | 177   |
| >PDGFRA-N8 NYVSKGSTF  | 150   | >PDGFRA-N8 KYVSKGSTF   | 43   | 107   |
| >PDGFRA-N8 NYVSKGSTF  | 17    | >PDGFRA-N8 KYVSKGSTF   | 9    | 8     |
| >PDGFRA-N8 NYVSKGSTFL | 71    | >PDGFRA-N8 KYVSKGSTFL  | 31   | 40    |
| >PDGFRA-N8 NYVSKGSTF  | 564   | >PDGFRA-N8 KYVSKGSTF   | 66   | 498   |
| >PDGFRA-N8 NYVSKGSTF  | 330   | >PDGFRA-N8 KYVSKGSTF   | 42   | 288   |
| >PDGFRA-N8 NYVSKGST   | 3141  | >PDGFRA-N8 KYVSKGST    | 364  | 2777  |
| >PDGFRA-N8 NYVSKGSTF  | 3546  | >PDGFRA-N8 KYVSKGSTF   | 467  | 3079  |
| >PDGFRA-N8 NYVSKGSTFL | 374   | >PDGFRA-N8 KYVSKGSTFL  | 203  | 171   |
| >PDGFRA-N8 SNYVSKGSTF | 275   | >PDGFRA-N8 SKYVSKGSTFI | 2150 | 1875  |
| >PDGFRA-N8 SNYVSKGSTF | 488   | >PDGFRA-N8 SKYVSKGSTFI | 305  | 183   |
| >PDGFRA-N8 SNYVSKGSTF | 431   | >PDGFRA-N8 SKYVSKGSTF  | 2232 | 1801  |
| >PDGFRA-N8 SNYVSKGSTF | 144   | >PDGFRA-N8 SKYVSKGSTF  | 300  | 156   |
| >PDGFRA-N8 SNYVSKGSTF | 40    | >PDGFRA-N8 SKYVSKGSTF  | 3    | 37    |
| >PDGFRA-N8 SNYVSKGSTF | 1780  | >PDGFRA-N8 SKYVSKGSTFI | 22   | 1758  |
| >PDGFRA-N8 GLARDIMHD: | 20110 | >PDGFRA-N8 GLARDIMHD:  | 328  | 19782 |
| >PDGFRA-N8 GLARDIMHD: | 25859 | >PDGFRA-N8 GLARDIMHD:  | 184  | 25675 |
| >PDGFRA-N8 DSNYVSKGST | 465   | >PDGFRA-N8 DSKYVSKGST  | 360  | 105   |
| >PDGFRA-N8 DSNYVSKGST | 193   | >PDGFRA-N8 DSKYVSKGST  | 182  | 11    |
| >PDGFRA-N8 DSNYVSKGST | 92    | >PDGFRA-N8 DSKYVSKGST  | 57   | 35    |
| >PDGFRA-N8 IMHDSNYV   | 14    | >PDGFRA-N8 IMHDSKYV    | 41   | 27    |
| >PDGFRA-N8 IMHDSNYV   | 3     | >PDGFRA-N8 IMHDSKYV    | 16   | 13    |



|                       |      |                       |      |      |
|-----------------------|------|-----------------------|------|------|
| >PDGFRA-N8 IMHDSNYV   | 3    | >PDGFRA-N8 IMHDSKYV   | 6    | 3    |
| >PDGFRA-N8 IMHDSNYV   | 15   | >PDGFRA-N8 IMHDSKYV   | 80   | 65   |
| >PDGFRA-N8 IMHDSNYV   | 2    | >PDGFRA-N8 IMHDSKYV   | 2    | 0    |
| >PDGFRA-N8 IMHDSNYVS  | 324  | >PDGFRA-N8 IMHDSKYVS  | 518  | 194  |
| >PDGFRA-N8 IMHDSNYV   | 3    | >PDGFRA-N8 IMHDSKYV   | 5    | 2    |
| >PDGFRA-N8 IMHDSNYV   | 7    | >PDGFRA-N8 IMHDSKYV   | 10   | 3    |
| >PDGFRA-N8 IMHDSNYV   | 3    | >PDGFRA-N8 IMHDSKYV   | 6    | 3    |
| >PDGFRA-N8 IMHDSNYV   | 2    | >PDGFRA-N8 IMHDSKYV   | 2    | 0    |
| >PDGFRA-N8 IMHDSNYVSK | 399  | >PDGFRA-N8 IMHDSKYVSK | 544  | 145  |
| >PDGFRA-N8 IMHDSNYVSK | 35   | >PDGFRA-N8 IMHDSKYVSK | 33   | 2    |
| >PDGFRA-N8 IMHDSNYVSK | 80   | >PDGFRA-N8 IMHDSKYVSK | 85   | 5    |
| >PDGFRA-N8 IMHDSNYVSK | 15   | >PDGFRA-N8 IMHDSKYVSK | 24   | 9    |
| >PDGFRA-N8 IMHDSNYV   | 93   | >PDGFRA-N8 IMHDSKYV   | 140  | 47   |
| >PDGFRA-N8 IMHDSNYVSK | 89   | >PDGFRA-N8 IMHDSKYVSK | 199  | 110  |
| >PDGFRA-N8 DIMHDSNYV  | 334  | >PDGFRA-N8 DIMHDSKYV  | 3548 | 3214 |
| >PDGFRA-N8 DIMHDSNYV  | 299  | >PDGFRA-N8 DIMHDSKYV  | 1524 | 1225 |
| >PDGFRA-N8 DIMHDSNYV  | 22   | >PDGFRA-N8 DIMHDSKYV  | 85   | 63   |
| >PDGFRA-N8 DIMHDSNY   | 982  | >PDGFRA-N8 DIMHDSKY   | 303  | 679  |
| >PDGFRA-N8 DIMHDSNY   | 105  | >PDGFRA-N8 DIMHDSKY   | 85   | 20   |
| >PDGFRA-N8 DIMHDSNY   | 26   | >PDGFRA-N8 DIMHDSKY   | 52   | 26   |
| >PDGFRA-N8 DIMHDSNY   | 468  | >PDGFRA-N8 DIMHDSKY   | 560  | 92   |
| >PDGFRA-N8 DIMHDSNYV  | 43   | >PDGFRA-N8 DIMHDSKYV  | 100  | 57   |
| >PDGFRA-N8 DIMHDSNYV  | 15   | >PDGFRA-N8 DIMHDSKYV  | 81   | 66   |
| >PDGFRA-N8 DIMHDSNYV  | 12   | >PDGFRA-N8 DIMHDSKYV  | 55   | 43   |
| >PDGFRA-N8 DIMHDSNY   | 486  | >PDGFRA-N8 DIMHDSKY   | 475  | 11   |
| >PDGFRA-N8 RDIMHDSNY  | 173  | >PDGFRA-N8 RDIMHDSKY  | 259  | 86   |
| >PDGFRA-N8 ARDIMHDSN  | 330  | >PDGFRA-N8 ARDIMHDSK  | 301  | 29   |
| >PDGFRA-N8 ARDIMHDSN  | 230  | >PDGFRA-N8 ARDIMHDSK  | 163  | 67   |
| >PDGFRA-N8 LARDIMHDS  | 292  | >PDGFRA-N8 LARDIMHDS  | 275  | 17   |
| >PDGFRA-N8 LARDIMHDS  | 6060 | >PDGFRA-N8 LARDIMHDS  | 15   | 6045 |
| >PDGFRA-N8 LARDIMHDS  | 146  | >PDGFRA-N8 LARDIMHDS  | 111  | 35   |
| >PDGFRA-N8 LARDIMHDS  | 202  | >PDGFRA-N8 LARDIMHDS  | 368  | 166  |
| >PDGFRA-N8 LARDIMHDS  | 258  | >PDGFRA-N8 LARDIMHDS  | 604  | 346  |
| >PDGFRA-N8 LARDIMHDS  | 6    | >PDGFRA-N8 LARDIMHDS  | 6    | 0    |
| >PDGFRA-N8 LARDIMHDS  | 104  | >PDGFRA-N8 LARDIMHDS  | 93   | 11   |
| >PDGFRA-N8 LARDIMHDS  | 53   | >PDGFRA-N8 LARDIMHDS  | 31   | 22   |
| >PDGFRA-N8 NLYTTLSDV  | 134  | >PDGFRA-N8 SLYTTLSDV  | 26   | 108  |
| >PDGFRA-N8 NLYTTLSDV  | 80   | >PDGFRA-N8 SLYTTLSDV  | 38   | 42   |
| >PDGFRA-N8 NLYTTLSDV  | 4    | >PDGFRA-N8 SLYTTLSDV  | 3    | 1    |
| >PDGFRA-N8 NLYTTLSDV  | 128  | >PDGFRA-N8 SLYTTLSDV  | 58   | 70   |
| >PDGFRA-N8 NLYTTLSDV  | 7    | >PDGFRA-N8 SLYTTLSDV  | 2    | 5    |
| >PDGFRA-N8 NLYTTLSDV  | 7    | >PDGFRA-N8 SLYTTLSDV  | 5    | 2    |
| >PDGFRA-N8 NLYTTLSDV  | 12   | >PDGFRA-N8 SLYTTLSDV  | 5    | 7    |

|                        |       |                        |     |       |
|------------------------|-------|------------------------|-----|-------|
| >PDGFRA-N8 NLYTTLSDV   | 37    | >PDGFRA-N8 SLYTTLSDV   | 46  | 9     |
| >PDGFRA-N8 NLYTTLSDV   | 4     | >PDGFRA-N8 SLYTTLSDV   | 2   | 2     |
| >PDGFRA-N8 NLYTTLSDVVM | 3688  | >PDGFRA-N8 SLYTTLSDVVM | 256 | 3432  |
| >PDGFRA-N8 NLYTTLSDVVM | 3281  | >PDGFRA-N8 SLYTTLSDVVM | 379 | 2902  |
| >PDGFRA-N8 NLYTTLSDV   | 421   | >PDGFRA-N8 SLYTTLSDV   | 957 | 536   |
| >PDGFRA-N8 NLYTTLSDV   | 947   | >PDGFRA-N8 SLYTTLSDV   | 292 | 655   |
| >PDGFRA-N8 NLYTTLSDVVM | 1241  | >PDGFRA-N8 SLYTTLSDVVM | 316 | 925   |
| >PDGFRA-N8 NLYTTLSDVVM | 1640  | >PDGFRA-N8 SLYTTLSDVVM | 256 | 1384  |
| >PDGFRA-N8 DNLYTTLSDV  | 4651  | >PDGFRA-N8 DSLYTTLSDV  | 311 | 4340  |
| >PDGFRA-N8 DNLYTTLSDV  | 12479 | >PDGFRA-N8 DSLYTTLSDV\ | 185 | 12294 |
| >PDGFRA-N8 DNLYTTLSDV  | 17486 | >PDGFRA-N8 DSLYTTLSDV\ | 438 | 17048 |
| >PDGFRA-N8 DNLYTTLSDV  | 8896  | >PDGFRA-N8 DSLYTTLSDV\ | 101 | 8795  |
| >PDGFRA-N8 DNLYTTLSDV  | 445   | >PDGFRA-N8 DSLYTTLSDV\ | 310 | 135   |
| >PDGFRA-N8 KWMAPESIFI  | 364   | >PDGFRA-N8 KWMAPESIFI  | 270 | 94    |
| >PDGFRA-N8 FDNLYTTLSD' | 245   | >PDGFRA-N8 FDSLYTTLSD\ | 387 | 142   |
| >PDGFRA-N8 FDNLYTTL    | 848   | >PDGFRA-N8 FDSLYTTL    | 460 | 388   |
| >PDGFRA-N8 FDNLYTTL    | 188   | >PDGFRA-N8 FDSLYTTL    | 402 | 214   |
| >PDGFRA-N8 FDNLYTTLSD' | 467   | >PDGFRA-N8 FDSLYTTLSD\ | 218 | 249   |
| >PDGFRA-N8 FDNLYTTL    | 215   | >PDGFRA-N8 FDSLYTTL    | 191 | 24    |
| >PDGFRA-N8 FDNLYTTLSD' | 75    | >PDGFRA-N8 FDSLYTTLSD\ | 67  | 8     |
| >PDGFRA-N8 IFDNLYTTL   | 515   | >PDGFRA-N8 IFDSLYTTL   | 455 | 60    |
| >PDGFRA-N8 SIFDNLYT    | 143   | >PDGFRA-N8 SIFDSLYT    | 117 | 26    |
| >PDGFRA-N8 SIFDNLYTT   | 72    | >PDGFRA-N8 SIFDSLYTT   | 61  | 11    |
| >PDGFRA-N8 SIFDNLYTTL  | 125   | >PDGFRA-N8 SIFDSLYTTL  | 109 | 16    |
| >PDGFRA-N8 SIFDNLYT    | 314   | >PDGFRA-N8 SIFDSLYT    | 207 | 107   |
| >PDGFRA-N8 SIFDNLYTT   | 185   | >PDGFRA-N8 SIFDSLYTT   | 105 | 80    |
| >PDGFRA-N8 SIFDNLYTTL  | 29    | >PDGFRA-N8 SIFDSLYTTL  | 21  | 8     |
| >PDGFRA-N8 SIFDNLYTTLS | 272   | >PDGFRA-N8 SIFDSLYTTLS | 188 | 84    |
| >PDGFRA-N8 SIFDNLYT    | 593   | >PDGFRA-N8 SIFDSLYT    | 288 | 305   |
| >PDGFRA-N8 SIFDNLYTT   | 180   | >PDGFRA-N8 SIFDSLYTT   | 92  | 88    |
| >PDGFRA-N8 SIFDNLYTTL  | 34    | >PDGFRA-N8 SIFDSLYTTL  | 34  | 0     |
| >PDGFRA-N8 SIFDNLYT    | 76    | >PDGFRA-N8 SIFDSLYT    | 55  | 21    |
| >PDGFRA-N8 SIFDNLYTT   | 34    | >PDGFRA-N8 SIFDSLYTT   | 27  | 7     |
| >PDGFRA-N8 SIFDNLYTTL  | 95    | >PDGFRA-N8 SIFDSLYTTL  | 74  | 21    |
| >PDGFRA-N8 SIFDNLYTTLS | 365   | >PDGFRA-N8 SIFDSLYTTLS | 260 | 105   |
| >PDGFRA-N8 SIFDNLYT    | 48    | >PDGFRA-N8 SIFDSLYT    | 58  | 10    |
| >PDGFRA-N8 SIFDNLYTT   | 12    | >PDGFRA-N8 SIFDSLYTT   | 22  | 10    |
| >PDGFRA-N8 SIFDNLYTTL  | 6     | >PDGFRA-N8 SIFDSLYTTL  | 8   | 2     |
| >PDGFRA-N8 SIFDNLYTT   | 51    | >PDGFRA-N8 SIFDSLYTT   | 207 | 156   |
| >PDGFRA-N8 SIFDNLYTTL  | 30    | >PDGFRA-N8 SIFDSLYTTL  | 59  | 29    |
| >PDGFRA-N8 SIFDNLYT    | 624   | >PDGFRA-N8 SIFDSLYT    | 320 | 304   |
| >PDGFRA-N8 SIFDNLYTT   | 342   | >PDGFRA-N8 SIFDSLYTT   | 204 | 138   |
| >PDGFRA-N8 SIFDNLYTTL  | 15    | >PDGFRA-N8 SIFDSLYTTL  | 15  | 0     |

|                        |      |                        |     |     |
|------------------------|------|------------------------|-----|-----|
| >PDGFRA-N8 SIFDNLYTTL  | 491  | >PDGFRA-N8 SIFDSLYTTL  | 626 | 135 |
| >PDGFRA-N8 SIFDNLYT    | 146  | >PDGFRA-N8 SIFDSLYT    | 147 | 1   |
| >PDGFRA-N8 SIFDNLYTT   | 26   | >PDGFRA-N8 SIFDSLYTT   | 33  | 7   |
| >PDGFRA-N8 SIFDNLYTTL  | 4    | >PDGFRA-N8 SIFDSLYTTL  | 4   | 0   |
| >PDGFRA-N8 SIFDNLYTT   | 289  | >PDGFRA-N8 SIFDSLYTT   | 708 | 419 |
| >PDGFRA-N8 SIFDNLYTTL  | 20   | >PDGFRA-N8 SIFDSLYTTL  | 37  | 17  |
| >PDGFRA-N8 SIFDNLYTTL  | 719  | >PDGFRA-N8 SIFDSLYTTL  | 421 | 298 |
| >PDGFRA-N8 SIFDNLYTTL  | 152  | >PDGFRA-N8 SIFDSLYTTL  | 161 | 9   |
| >PDGFRA-N8 SIFDNLYTTL  | 1243 | >PDGFRA-N8 SIFDSLYTTL  | 325 | 918 |
| >PDGFRA-N8 ESIFDNLY    | 161  | >PDGFRA-N8 ESIFDSLY    | 62  | 99  |
| >PDGFRA-N8 ESIFDNLY    | 7    | >PDGFRA-N8 ESIFDSLY    | 7   | 0   |
| >PDGFRA-N8 ESIFDNLYTT  | 319  | >PDGFRA-N8 ESIFDSLYTT  | 473 | 154 |
| >PDGFRA-N8 ESIFDNLYTTL | 60   | >PDGFRA-N8 ESIFDSLYTTL | 61  | 1   |
| >PDGFRA-N8 ESIFDNLY    | 119  | >PDGFRA-N8 ESIFDSLY    | 332 | 213 |
| >PDGFRA-N8 ESIFDNLY    | 113  | >PDGFRA-N8 ESIFDSLY    | 77  | 36  |
| >PDGFRA-N8 ESIFDNLY    | 166  | >PDGFRA-N8 ESIFDSLY    | 173 | 7   |
| >PDGFRA-N8 ESIFDNLY    | 49   | >PDGFRA-N8 ESIFDSLY    | 40  | 9   |
| >PDGFRA-N8 ESIFDNLYTT  | 185  | >PDGFRA-N8 ESIFDSLYTT  | 188 | 3   |
| >PDGFRA-N8 ESIFDNLYTTL | 55   | >PDGFRA-N8 ESIFDSLYTTL | 52  | 3   |
| >PDGFRA-N8 ESIFDNLYTTL | 465  | >PDGFRA-N8 ESIFDSLYTTL | 361 | 104 |
| >PDGFRA-N8 ESIFDNLY    | 190  | >PDGFRA-N8 ESIFDSLY    | 30  | 160 |
| >PDGFRA-N8 ESIFDNLYTTL | 165  | >PDGFRA-N8 ESIFDSLYTTL | 88  | 77  |
| >PDGFRA-N8 ESIFDNLY    | 572  | >PDGFRA-N8 ESIFDSLY    | 359 | 213 |
| >PDGFRA-N8 PESIFDNL    | 525  | >PDGFRA-N8 PESIFDSL    | 310 | 215 |
| >PDGFRA-N8 APESIFDNL   | 10   | >PDGFRA-N8 APESIFDSL   | 32  | 22  |
| >PDGFRA-N8 APESIFDNL   | 642  | >PDGFRA-N8 APESIFDSL   | 116 | 526 |
| >PDGFRA-N8 APESIFDNLY  | 418  | >PDGFRA-N8 APESIFDSLY  | 313 | 105 |
| >PDGFRA-N8 APESIFDNL   | 352  | >PDGFRA-N8 APESIFDSL   | 481 | 129 |
| >PDGFRA-N8 APESIFDNLY  | 202  | >PDGFRA-N8 APESIFDSLY  | 209 | 7   |
| >PDGFRA-N8 APESIFDNL   | 101  | >PDGFRA-N8 APESIFDSL   | 86  | 15  |
| >PDGFRA-N8 APESIFDNLY  | 81   | >PDGFRA-N8 APESIFDSLY  | 59  | 22  |
| >PDGFRA-N8 MAPESIFDNL  | 467  | >PDGFRA-N8 MAPESIFDSL  | 251 | 216 |
| >PDGFRA-N8 MAPESIFDNL  | 247  | >PDGFRA-N8 MAPESIFDSL  | 176 | 71  |
| >PDGFRA-N8 MAPESIFDNL  | 193  | >PDGFRA-N8 MAPESIFDSL' | 159 | 34  |
| >PDGFRA-N8 MAPESIFDNL  | 450  | >PDGFRA-N8 MAPESIFDSL' | 420 | 30  |
| >PDGFRA-N8 MAPESIFDNL  | 286  | >PDGFRA-N8 MAPESIFDSL' | 202 | 84  |
| >PDGFRA-N8 MAPESIFDNL  | 52   | >PDGFRA-N8 MAPESIFDSL  | 46  | 6   |
| >PDGFRA-N8 MAPESIFDNL  | 424  | >PDGFRA-N8 MAPESIFDSL' | 104 | 320 |
| >PDGFRA-N8 MAPESIFDNL  | 34   | >PDGFRA-N8 MAPESIFDSL' | 29  | 5   |
| >PDGFRA-N8 MAPESIFDNL  | 521  | >PDGFRA-N8 MAPESIFDSL' | 374 | 147 |
| >PDGFRA-N8 MAPESIFDNL  | 4    | >PDGFRA-N8 MAPESIFDSL  | 4   | 0   |
| >PDGFRA-N8 MAPESIFDNL  | 71   | >PDGFRA-N8 MAPESIFDSL' | 106 | 35  |
| >PDGFRA-N8 MAPESIFDNL  | 694  | >PDGFRA-N8 MAPESIFDSL' | 446 | 248 |

|                       |      |                       |     |      |
|-----------------------|------|-----------------------|-----|------|
| >PDGFRA-N8 WMAPESIFDI | 50   | >PDGFRA-N8 WMAPESIFDI | 34  | 16   |
| >PDGFRA-N8 WMAPESIFDI | 3    | >PDGFRA-N8 WMAPESIFDI | 3   | 0    |
| >PDGFRA-N8 WMAPESIFDI | 14   | >PDGFRA-N8 WMAPESIFDI | 10  | 4    |
| >PDGFRA-N8 WMAPESIFDI | 17   | >PDGFRA-N8 WMAPESIFDI | 8   | 9    |
| >PDGFRA-N8 WMAPESIFDI | 21   | >PDGFRA-N8 WMAPESIFDI | 12  | 9    |
| >PDGFRA-N8 WMAPESIFDI | 27   | >PDGFRA-N8 WMAPESIFDI | 17  | 10   |
| >PDGFRA-N8 WMAPESIFDI | 14   | >PDGFRA-N8 WMAPESIFDI | 15  | 1    |
| >PDGFRA-N8 WMAPESIFDI | 10   | >PDGFRA-N8 WMAPESIFDI | 9   | 1    |
| >PDGFRA-N8 WMAPESIFDI | 2062 | >PDGFRA-N8 WMAPESIFDI | 213 | 1849 |
| >PDGFRA-N8 WMAPESIFDI | 6    | >PDGFRA-N8 WMAPESIFDI | 4   | 2    |
| >PDGFRA-N8 WMAPESIFDI | 524  | >PDGFRA-N8 WMAPESIFDI | 394 | 130  |
| >PDGFRA-N8 WMAPESIFDI | 462  | >PDGFRA-N8 WMAPESIFDI | 461 | 1    |
| >PDGFRA-N8 WMAPESIFDI | 1106 | >PDGFRA-N8 WMAPESIFDI | 191 | 915  |
| >PDGFRA-N8 WMAPESIFDI | 208  | >PDGFRA-N8 WMAPESIFDI | 100 | 108  |
| >PDGFRA-N8 WMAPESIFDI | 582  | >PDGFRA-N8 WMAPESIFDI | 96  | 486  |
| >PDGFRA-P1 PLGMTDYL   | 9190 | >PDGFRA-P1 SLGMTDYL   | 206 | 8984 |
| >PDGFRA-P1 PLGMTDYLVI | 3899 | >PDGFRA-P1 SLGMTDYLVI | 43  | 3856 |
| >PDGFRA-P1 PLGMTDYLVI | 8759 | >PDGFRA-P1 SLGMTDYLVI | 367 | 8392 |
| >PDGFRA-P1 PLGMTDYLVI | 2771 | >PDGFRA-P1 SLGMTDYLVI | 70  | 2701 |
| >PDGFRA-P1 PLGMTDYL   | 691  | >PDGFRA-P1 SLGMTDYL   | 31  | 660  |
| >PDGFRA-P1 PLGMTDYLVI | 603  | >PDGFRA-P1 SLGMTDYLVI | 30  | 573  |
| >PDGFRA-P1 PLGMTDYLVI | 3420 | >PDGFRA-P1 SLGMTDYLVI | 147 | 3273 |
| >PDGFRA-P1 PLGMTDYLVI | 1133 | >PDGFRA-P1 SLGMTDYLVI | 58  | 1075 |
| >PDGFRA-P1 PLGMTDYLVI | 6198 | >PDGFRA-P1 SLGMTDYLVI | 196 | 6002 |
| >PDGFRA-P1 PLGMTDYLVI | 4199 | >PDGFRA-P1 SLGMTDYLVI | 166 | 4033 |
| >PDGFRA-P1 PLGMTDYLVI | 2441 | >PDGFRA-P1 SLGMTDYLVI | 86  | 2355 |
| >PDGFRA-P1 PLGMTDYLVI | 5529 | >PDGFRA-P1 SLGMTDYLVI | 370 | 5159 |
| >PDGFRA-P1 PLGMTDYL   | 249  | >PDGFRA-P1 SLGMTDYL   | 10  | 239  |
| >PDGFRA-P1 PLGMTDYLVI | 65   | >PDGFRA-P1 SLGMTDYLVI | 4   | 61   |
| >PDGFRA-P1 PLGMTDYLVI | 1787 | >PDGFRA-P1 SLGMTDYLVI | 51  | 1736 |
| >PDGFRA-P1 PLGMTDYLVI | 84   | >PDGFRA-P1 SLGMTDYLVI | 6   | 78   |
| >PDGFRA-P1 PLGMTDYL   | 1270 | >PDGFRA-P1 SLGMTDYL   | 15  | 1255 |
| >PDGFRA-P1 PLGMTDYLVI | 210  | >PDGFRA-P1 SLGMTDYLVI | 5   | 205  |
| >PDGFRA-P1 PLGMTDYLVI | 3950 | >PDGFRA-P1 SLGMTDYLVI | 91  | 3859 |
| >PDGFRA-P1 PLGMTDYLVI | 182  | >PDGFRA-P1 SLGMTDYLVI | 6   | 176  |
| >PDGFRA-P1 PLGMTDYL   | 263  | >PDGFRA-P1 SLGMTDYL   | 12  | 251  |
| >PDGFRA-P1 PLGMTDYLVI | 39   | >PDGFRA-P1 SLGMTDYLVI | 6   | 33   |
| >PDGFRA-P1 PLGMTDYLVI | 1777 | >PDGFRA-P1 SLGMTDYLVI | 35  | 1742 |
| >PDGFRA-P1 PLGMTDYLVI | 44   | >PDGFRA-P1 SLGMTDYLVI | 6   | 38   |
| >PDGFRA-P1 PLGMTDYL   | 248  | >PDGFRA-P1 SLGMTDYL   | 71  | 177  |
| >PDGFRA-P1 PLGMTDYLVI | 113  | >PDGFRA-P1 SLGMTDYLVI | 24  | 89   |
| >PDGFRA-P1 PLGMTDYLVI | 111  | >PDGFRA-P1 SLGMTDYLVI | 28  | 83   |
| >PDGFRA-P1 PLGMTDYL   | 131  | >PDGFRA-P1 SLGMTDYL   | 9   | 122  |

|                       |       |                       |       |       |
|-----------------------|-------|-----------------------|-------|-------|
| >PDGFRA-P1 PLGMDTYLV  | 19    | >PDGFRA-P1 SLGMDTYLV  | 3     | 16    |
| >PDGFRA-P1 PLGMDTYLVI | 1346  | >PDGFRA-P1 SLGMDTYLVI | 56    | 1290  |
| >PDGFRA-P1 PLGMDTYLVI | 15    | >PDGFRA-P1 SLGMDTYLVI | 3     | 12    |
| >PDGFRA-P1 VPLGMDTYL  | 10408 | >PDGFRA-P1 VSLGMDTYL  | 307   | 10101 |
| >PDGFRA-P1 VPLGMDTYL  | 11    | >PDGFRA-P1 VSLGMDTYL  | 1127  | 1116  |
| >PDGFRA-P1 VPLGMDTYL\ | 248   | >PDGFRA-P1 VSLGMDTYL\ | 18717 | 18469 |
| >PDGFRA-P1 VPLGMDTYL\ | 140   | >PDGFRA-P1 VSLGMDTYL\ | 14276 | 14136 |
| >PDGFRA-P1 VPLGMDTYL\ | 3910  | >PDGFRA-P1 VSLGMDTYL\ | 348   | 3562  |
| >PDGFRA-P1 VPLGMDTYL\ | 1215  | >PDGFRA-P1 VSLGMDTYL\ | 168   | 1047  |
| >PDGFRA-P1 VPLGMDTYL\ | 4071  | >PDGFRA-P1 VSLGMDTYL\ | 458   | 3613  |
| >PDGFRA-P1 VPLGMDTY   | 5631  | >PDGFRA-P1 VSLGMDTY   | 471   | 5160  |
| >PDGFRA-P1 VPLGMDTY   | 792   | >PDGFRA-P1 VSLGMDTY   | 74    | 718   |
| >PDGFRA-P1 VPLGMDTY   | 3019  | >PDGFRA-P1 VSLGMDTY   | 148   | 2871  |
| >PDGFRA-P1 VPLGMDTYL\ | 14677 | >PDGFRA-P1 VSLGMDTYL\ | 373   | 14304 |
| >PDGFRA-P1 VPLGMDTY   | 3195  | >PDGFRA-P1 VSLGMDTY   | 457   | 2738  |
| >PDGFRA-P1 VPLGMDTYL  | 97    | >PDGFRA-P1 VSLGMDTYL  | 22814 | 22717 |
| >PDGFRA-P1 VPLGMDTYL\ | 321   | >PDGFRA-P1 VSLGMDTYL\ | 21506 | 21185 |
| >PDGFRA-P1 VPLGMDTY   | 9821  | >PDGFRA-P1 VSLGMDTY   | 7     | 9814  |
| >PDGFRA-P1 VPLGMDTYL  | 21411 | >PDGFRA-P1 VSLGMDTYL  | 62    | 21349 |
| >PDGFRA-P1 VPLGMDTYL\ | 20445 | >PDGFRA-P1 VSLGMDTYL\ | 189   | 20256 |
| >PDGFRA-P1 VPLGMDTY   | 26    | >PDGFRA-P1 VSLGMDTY   | 1588  | 1562  |
| >PDGFRA-P1 VPLGMDTYL\ | 303   | >PDGFRA-P1 VSLGMDTYL\ | 13884 | 13581 |
| >PDGFRA-P1 VPLGMDTY   | 159   | >PDGFRA-P1 VSLGMDTY   | 12158 | 11999 |
| >PDGFRA-P1 VPLGMDTYL  | 324   | >PDGFRA-P1 VSLGMDTYL  | 12767 | 12443 |
| >PDGFRA-P1 VPLGMDTYL\ | 84    | >PDGFRA-P1 VSLGMDTYL\ | 7802  | 7718  |
| >PDGFRA-P1 VPLGMDTYL\ | 61    | >PDGFRA-P1 VSLGMDTYL\ | 15160 | 15099 |
| >PDGFRA-P1 VPLGMDTYL  | 20918 | >PDGFRA-P1 VSLGMDTYL  | 321   | 20597 |
| >PDGFRA-P1 VPLGMDTYL\ | 19095 | >PDGFRA-P1 VSLGMDTYL\ | 108   | 18987 |
| >PDGFRA-P1 VPLGMDTYL  | 6426  | >PDGFRA-P1 VSLGMDTYL  | 368   | 6058  |
| >PDGFRA-P1 VPLGMDTY   | 235   | >PDGFRA-P1 VSLGMDTY   | 15795 | 15560 |
| >PDGFRA-P1 VPLGMDTYL  | 250   | >PDGFRA-P1 VSLGMDTYL  | 18063 | 17813 |
| >PDGFRA-P1 VPLGMDTYL\ | 273   | >PDGFRA-P1 VSLGMDTYL\ | 16393 | 16120 |
| >PDGFRA-P1 VPLGMDTYL\ | 4357  | >PDGFRA-P1 VSLGMDTYL\ | 82    | 4275  |
| >PDGFRA-P1 YVPDPDVAF\ | 5922  | >PDGFRA-P1 YVPDPDVAF\ | 382   | 5540  |
| >PDGFRA-P1 FVPLGMDTYI | 598   | >PDGFRA-P1 FVSLGMDTYI | 200   | 398   |
| >PDGFRA-P1 FVPLGMDTYI | 99    | >PDGFRA-P1 FVSLGMDTYI | 45    | 54    |
| >PDGFRA-P1 FVPLGMDTYI | 38    | >PDGFRA-P1 FVSLGMDTYI | 17    | 21    |
| >PDGFRA-P1 FVPLGMDTYI | 48    | >PDGFRA-P1 FVSLGMDTYI | 9     | 39    |
| >PDGFRA-P1 FVPLGMDTYI | 228   | >PDGFRA-P1 FVSLGMDTYI | 89    | 139   |
| >PDGFRA-P1 FVPLGMDTYI | 43    | >PDGFRA-P1 FVSLGMDTYI | 16    | 27    |
| >PDGFRA-P1 FVPLGMDTYI | 79    | >PDGFRA-P1 FVSLGMDTYI | 80    | 1     |
| >PDGFRA-P1 FVPLGMDTYI | 10    | >PDGFRA-P1 FVSLGMDTYI | 9     | 1     |
| >PDGFRA-P1 FVPLGMDTYI | 153   | >PDGFRA-P1 FVSLGMDTYI | 176   | 23    |

|                       |      |                       |      |      |
|-----------------------|------|-----------------------|------|------|
| >PDGFRA-P1 FVPLGMDYI  | 299  | >PDGFRA-P1 FVSLGMDYI  | 108  | 191  |
| >PDGFRA-P1 FVPLGMDYI  | 565  | >PDGFRA-P1 FVSLGMDYI  | 427  | 138  |
| >PDGFRA-P1 FVPLGMDYI  | 74   | >PDGFRA-P1 FVSLGMDYI  | 62   | 12   |
| >PDGFRA-P1 FVPLGMDYI  | 1213 | >PDGFRA-P1 FVSLGMDYI  | 271  | 942  |
| >PDGFRA-P1 FVPLGMDYI  | 1029 | >PDGFRA-P1 FVSLGMDYI  | 205  | 824  |
| >PDGFRA-P1 FVPLGMDYI  | 147  | >PDGFRA-P1 FVSLGMDYI  | 84   | 63   |
| >PDGFRA-P1 FVPLGMDYI  | 11   | >PDGFRA-P1 FVSLGMDYI  | 8    | 3    |
| >PDGFRA-P1 FVPLGMDY   | 22   | >PDGFRA-P1 FVSLGMDY   | 34   | 12   |
| >PDGFRA-P1 FVPLGMDY   | 427  | >PDGFRA-P1 FVSLGMDY   | 515  | 88   |
| >PDGFRA-P1 FVPLGMDY   | 33   | >PDGFRA-P1 FVSLGMDY   | 89   | 56   |
| >PDGFRA-P1 FVPLGMDY   | 32   | >PDGFRA-P1 FVSLGMDY   | 14   | 18   |
| >PDGFRA-P1 FVPLGMDYI  | 287  | >PDGFRA-P1 FVSLGMDYI  | 248  | 39   |
| >PDGFRA-P1 FVPLGMDYI  | 13   | >PDGFRA-P1 FVSLGMDYI  | 13   | 0    |
| >PDGFRA-P1 FVPLGMDYI  | 1158 | >PDGFRA-P1 FVSLGMDYI  | 354  | 804  |
| >PDGFRA-P1 FVPLGMDY   | 1662 | >PDGFRA-P1 FVSLGMDY   | 303  | 1359 |
| >PDGFRA-P1 FVPLGMDY   | 593  | >PDGFRA-P1 FVSLGMDY   | 384  | 209  |
| >PDGFRA-P1 FVPLGMDY   | 5469 | >PDGFRA-P1 FVSLGMDY   | 183  | 5286 |
| >PDGFRA-P1 FVPLGMDY   | 1530 | >PDGFRA-P1 FVSLGMDY   | 179  | 1351 |
| >PDGFRA-P1 FVPLGMDYI  | 24   | >PDGFRA-P1 FVSLGMDYI  | 3933 | 3909 |
| >PDGFRA-P1 FVPLGMDYI  | 114  | >PDGFRA-P1 FVSLGMDYI  | 7891 | 7777 |
| >PDGFRA-P1 FVPLGMDY   | 2752 | >PDGFRA-P1 FVSLGMDY   | 166  | 2586 |
| >PDGFRA-P1 AFVPLGMD'  | 182  | >PDGFRA-P1 AFVSLGMD'  | 148  | 34   |
| >PDGFRA-P1 AFVPLGMD'  | 42   | >PDGFRA-P1 AFVSLGMD'  | 81   | 39   |
| >PDGFRA-P1 AFVPLGMD'  | 243  | >PDGFRA-P1 AFVSLGMD'  | 154  | 89   |
| >PDGFRA-P1 AFVPLGMD'  | 694  | >PDGFRA-P1 AFVSLGMD'  | 350  | 344  |
| >PDGFRA-P1 AFVPLGMD'  | 424  | >PDGFRA-P1 AFVSLGMD'  | 343  | 81   |
| >PDGFRA-P1 AFVPLGMD'  | 987  | >PDGFRA-P1 AFVSLGMD'  | 466  | 521  |
| >PDGFRA-P1 AFVPLGMD'  | 100  | >PDGFRA-P1 AFVSLGMD'  | 162  | 62   |
| >PDGFRA-P1 VAFVPLGM   | 496  | >PDGFRA-P1 VAFVSLGM   | 531  | 35   |
| >PDGFRA-P1 VAFVPLGMTI | 160  | >PDGFRA-P1 VAFVSLGMTI | 201  | 41   |
| >PDGFRA-P1 VAFVPLGMTI | 122  | >PDGFRA-P1 VAFVSLGMTI | 92   | 30   |
| >PDGFRA-P1 VAFVPLGM   | 708  | >PDGFRA-P1 VAFVSLGM   | 373  | 335  |
| >PDGFRA-P1 VAFVPLGMTI | 186  | >PDGFRA-P1 VAFVSLGMTI | 99   | 87   |
| >PDGFRA-P1 VAFVPLGM   | 23   | >PDGFRA-P1 VAFVSLGM   | 11   | 12   |
| >PDGFRA-P1 VAFVPLGMTI | 13   | >PDGFRA-P1 VAFVSLGMTI | 8    | 5    |
| >PDGFRA-P1 VAFVPLGM   | 950  | >PDGFRA-P1 VAFVSLGM   | 371  | 579  |
| >PDGFRA-P1 VAFVPLGMTI | 662  | >PDGFRA-P1 VAFVSLGMTI | 400  | 262  |
| >PDGFRA-P1 VAFVPLGM   | 864  | >PDGFRA-P1 VAFVSLGM   | 435  | 429  |
| >PDGFRA-P1 VAFVPLGMTI | 72   | >PDGFRA-P1 VAFVSLGMTI | 117  | 45   |
| >PDGFRA-P1 DVAFVPLGM  | 592  | >PDGFRA-P1 DVAFVSLGM  | 24   | 568  |
| >PDGFRA-P1 DVAFVPLGM  | 385  | >PDGFRA-P1 DVAFVSLGM  | 676  | 291  |
| >PDGFRA-P1 DVAFVPLGM  | 127  | >PDGFRA-P1 DVAFVSLGM  | 60   | 67   |
| >PDGFRA-P1 DVAFVPLGM  | 118  | >PDGFRA-P1 DVAFVSLGM  | 58   | 60   |

|                       |       |                       |       |       |
|-----------------------|-------|-----------------------|-------|-------|
| >PDGFRA-P1 DVAFVPLGM  | 1557  | >PDGFRA-P1 DVAFVSLGM  | 473   | 1084  |
| >PDGFRA-P1 DPDVAFVPL  | 1924  | >PDGFRA-P1 DPDVAFVSL  | 260   | 1664  |
| >PDGFRA-P1 DPDVAFVPL  | 310   | >PDGFRA-P1 DPDVAFVSL  | 1313  | 1003  |
| >PDGFRA-P1 DPDVAFVPL  | 213   | >PDGFRA-P1 DPDVAFVSL  | 657   | 444   |
| >PDGFRA-P1 DPDVAFVPLC | 139   | >PDGFRA-P1 DPDVAFVSLC | 96    | 43    |
| >PDGFRA-P1 DPDVAFVPL  | 318   | >PDGFRA-P1 DPDVAFVSL  | 722   | 404   |
| >PDGFRA-P1 DPDVAFVPL  | 495   | >PDGFRA-P1 DPDVAFVSL  | 435   | 60    |
| >PDGFRA-P1 VPDVAFVFI  | 539   | >PDGFRA-P1 VPDVAFVFI  | 179   | 360   |
| >PDGFRA-P1 VPDVAFVFI  | 87    | >PDGFRA-P1 VPDVAFVFI  | 148   | 61    |
| >PDGFRA-P1 VPDVAFVFI  | 186   | >PDGFRA-P1 VPDVAFVFI  | 537   | 351   |
| >PDGFRA-P1 VPDVAFVFI  | 234   | >PDGFRA-P1 VPDVAFVFI  | 453   | 219   |
| >PDGFRA-P1 VPDVAFVFI  | 681   | >PDGFRA-P1 VPDVAFVFI  | 375   | 306   |
| >PDGFRA-P1 VPDVAFVFI  | 429   | >PDGFRA-P1 VPDVAFVFI  | 386   | 43    |
| >PDGFRA-P5 PYDSRWEF   | 90    | >PDGFRA-P5 SYDSRWEF   | 102   | 12    |
| >PDGFRA-P5 PYDSRWEF   | 354   | >PDGFRA-P5 SYDSRWEF   | 172   | 182   |
| >PDGFRA-P5 PYDSRWEF   | 45    | >PDGFRA-P5 SYDSRWEF   | 9     | 36    |
| >PDGFRA-P5 PYDSRWEFFI | 956   | >PDGFRA-P5 SYDSRWEFFI | 99    | 857   |
| >PDGFRA-P5 PYDSRWEFFI | 834   | >PDGFRA-P5 SYDSRWEFFI | 106   | 728   |
| >PDGFRA-P5 PYDSRWEFFI | 83    | >PDGFRA-P5 SYDSRWEFFI | 38    | 45    |
| >PDGFRA-P5 PYDSRWEF   | 3693  | >PDGFRA-P5 SYDSRWEF   | 414   | 3279  |
| >PDGFRA-P5 LPYDSRWEF  | 60    | >PDGFRA-P5 LSYDSRWEF  | 17381 | 17321 |
| >PDGFRA-P5 LPYDSRWEFF | 9788  | >PDGFRA-P5 LSYDSRWEFF | 29    | 9759  |
| >PDGFRA-P5 LPYDSRWEF  | 446   | >PDGFRA-P5 LSYDSRWEF  | 99    | 347   |
| >PDGFRA-P5 LPYDSRWEF  | 2620  | >PDGFRA-P5 LSYDSRWEF  | 406   | 2214  |
| >PDGFRA-P5 LPYDSRWEFF | 214   | >PDGFRA-P5 LSYDSRWEFF | 7     | 207   |
| >PDGFRA-P5 LPYDSRWEFF | 138   | >PDGFRA-P5 LSYDSRWEFF | 32    | 106   |
| >PDGFRA-P5 LPYDSRWEFF | 170   | >PDGFRA-P5 LSYDSRWEFF | 9     | 161   |
| >PDGFRA-P5 LPYDSRWEF  | 37    | >PDGFRA-P5 LSYDSRWEF  | 18420 | 18383 |
| >PDGFRA-P5 LPYDSRWEF  | 8703  | >PDGFRA-P5 LSYDSRWEF  | 130   | 8573  |
| >PDGFRA-P5 LPYDSRWEF  | 48    | >PDGFRA-P5 LSYDSRWEF  | 8     | 40    |
| >PDGFRA-P5 LPYDSRWEF  | 1349  | >PDGFRA-P5 LSYDSRWEF  | 3     | 1346  |
| >PDGFRA-P5 LPYDSRWEF  | 243   | >PDGFRA-P5 LSYDSRWEF  | 1234  | 991   |
| >PDGFRA-P5 LPYDSRWEF  | 11    | >PDGFRA-P5 LSYDSRWEF  | 294   | 283   |
| >PDGFRA-P5 LPYDSRWEFF | 242   | >PDGFRA-P5 LSYDSRWEFF | 11613 | 11371 |
| >PDGFRA-P5 LPYDSRWEF  | 17    | >PDGFRA-P5 LSYDSRWEF  | 2437  | 2420  |
| >PDGFRA-P5 LPYDSRWEFF | 109   | >PDGFRA-P5 LSYDSRWEFF | 19412 | 19303 |
| >PDGFRA-P5 LPYDSRWEF  | 10455 | >PDGFRA-P5 LSYDSRWEF  | 84    | 10371 |
| >PDGFRA-P5 LPYDSRWEF  | 11016 | >PDGFRA-P5 LSYDSRWEF  | 21    | 10995 |
| >PDGFRA-P5 LPYDSRWEF  | 5327  | >PDGFRA-P5 LSYDSRWEF  | 422   | 4905  |
| >PDGFRA-P5 LPYDSRWEF  | 26    | >PDGFRA-P5 LSYDSRWEF  | 5404  | 5378  |
| >PDGFRA-P5 LPYDSRWEF  | 13    | >PDGFRA-P5 LSYDSRWEF  | 4001  | 3988  |
| >PDGFRA-P5 LPYDSRWEFF | 140   | >PDGFRA-P5 LSYDSRWEFF | 177   | 37    |
| >PDGFRA-P5 QLPYDSRWEI | 464   | >PDGFRA-P5 QLSYDSRWEI | 883   | 419   |

|                       |      |                       |      |      |
|-----------------------|------|-----------------------|------|------|
| >PDGFRA-P5.QLPYDSRWEI | 497  | >PDGFRA-P5.QLSYDSRWEI | 1574 | 1077 |
| >PDGFRA-P5.QLPYDSRWEI | 406  | >PDGFRA-P5.QLSYDSRWEI | 2036 | 1630 |
| >PDGFRA-P5.QLPYDSRWEI | 438  | >PDGFRA-P5.QLSYDSRWEI | 76   | 362  |
| >PDGFRA-P5.QLPYDSRWEI | 1506 | >PDGFRA-P5.QLSYDSRWEI | 338  | 1168 |
| >PDGFRA-P5.MQLPYDSRW  | 12   | >PDGFRA-P5.MQLSYDSRW  | 22   | 10   |
| >PDGFRA-P5.MQLPYDSRW  | 50   | >PDGFRA-P5.MQLSYDSRW  | 44   | 6    |
| >PDGFRA-P5.MQLPYDSRW  | 61   | >PDGFRA-P5.MQLSYDSRW  | 113  | 52   |
| >PDGFRA-P5.MQLPYDSR   | 31   | >PDGFRA-P5.MQLSYDSR   | 24   | 7    |
| >PDGFRA-P5.MQLPYDSR   | 792  | >PDGFRA-P5.MQLSYDSR   | 313  | 479  |
| >PDGFRA-P5.MQLPYDSRW  | 81   | >PDGFRA-P5.MQLSYDSRW  | 82   | 1    |
| >PDGFRA-P5.MQLPYDSR   | 141  | >PDGFRA-P5.MQLSYDSR   | 67   | 74   |
| >PDGFRA-P5.MQLPYDSRW  | 159  | >PDGFRA-P5.MQLSYDSRW  | 55   | 104  |
| >PDGFRA-P5.MQLPYDSRW  | 4    | >PDGFRA-P5.MQLSYDSRW  | 3    | 1    |
| >PDGFRA-P5.MQLPYDSRW  | 21   | >PDGFRA-P5.MQLSYDSRW  | 185  | 164  |
| >PDGFRA-P5.MQLPYDSRW  | 261  | >PDGFRA-P5.MQLSYDSRW  | 1661 | 1400 |
| >PDGFRA-P5.MQLPYDSRW  | 215  | >PDGFRA-P5.MQLSYDSRW  | 243  | 28   |
| >PDGFRA-P5.MQLPYDSRW  | 157  | >PDGFRA-P5.MQLSYDSRW  | 187  | 30   |
| >PDGFRA-P5.MQLPYDSRW  | 729  | >PDGFRA-P5.MQLSYDSRW  | 462  | 267  |
| >PDGFRA-P5.MQLPYDSRW  | 424  | >PDGFRA-P5.MQLSYDSRW  | 273  | 151  |
| >PDGFRA-P5.MQLPYDSRW  | 323  | >PDGFRA-P5.MQLSYDSRW  | 1629 | 1306 |
| >PDGFRA-P5.MQLPYDSRW  | 47   | >PDGFRA-P5.MQLSYDSRW  | 102  | 55   |
| >PDGFRA-P5.MQLPYDSRW  | 133  | >PDGFRA-P5.MQLSYDSRW  | 98   | 35   |
| >PDGFRA-P5.MQLPYDSRW  | 8    | >PDGFRA-P5.MQLSYDSRW  | 11   | 3    |
| >PDGFRA-P5.MQLPYDSRW  | 134  | >PDGFRA-P5.MQLSYDSRW  | 303  | 169  |
| >PDGFRA-P5.MQLPYDSR   | 297  | >PDGFRA-P5.MQLSYDSR   | 311  | 14   |
| >PDGFRA-P5.DPMQLPYDS  | 1458 | >PDGFRA-P5.DPMQLSYDS  | 459  | 999  |
| >PDGFRA-P5.DPMQLPYDS  | 558  | >PDGFRA-P5.DPMQLSYDSI | 304  | 254  |
| >PDGFRA-P5.DPMQLPYDS  | 36   | >PDGFRA-P5.DPMQLSYDSI | 34   | 2    |
| >PDGFRA-P5.DPMQLPYDS  | 26   | >PDGFRA-P5.DPMQLSYDSI | 12   | 14   |
| >PDGFRA-P5.YVDPMQLPY  | 8    | >PDGFRA-P5.YVDPMQLSY  | 10   | 2    |
| >PDGFRA-P5.YVDPMQLPY  | 478  | >PDGFRA-P5.YVDPMQLSY  | 1151 | 673  |
| >PDGFRA-P5.YVDPMQLPY  | 318  | >PDGFRA-P5.YVDPMQLSY  | 40   | 278  |
| >PDGFRA-P5.YVDPMQLPY  | 12   | >PDGFRA-P5.YVDPMQLSY  | 15   | 3    |
| >PDGFRA-P5.YVDPMQLPY  | 822  | >PDGFRA-P5.YVDPMQLSY  | 304  | 518  |
| >PDGFRA-P5.YVDPMQLPY  | 5    | >PDGFRA-P5.YVDPMQLSY  | 6    | 1    |
| >PDGFRA-P5.YVDPMQLPY  | 198  | >PDGFRA-P5.YVDPMQLSY  | 315  | 117  |
| >PDGFRA-P5.YVDPMQLPY  | 20   | >PDGFRA-P5.YVDPMQLSY  | 17   | 3    |
| >PDGFRA-P5.YVDPMQLPY  | 16   | >PDGFRA-P5.YVDPMQLSY  | 40   | 24   |
| >PDGFRA-P5.YVDPMQLPY  | 854  | >PDGFRA-P5.YVDPMQLSY  | 216  | 638  |
| >PDGFRA-P5.YVDPMQLPY  | 900  | >PDGFRA-P5.YVDPMQLSY  | 194  | 706  |
| >PDGFRA-P5.YVDPMQLPY  | 78   | >PDGFRA-P5.YVDPMQLSY  | 111  | 33   |
| >PDGFRA-P5.YVDPMQLPY  | 141  | >PDGFRA-P5.YVDPMQLSY  | 72   | 69   |
| >PDGFRA-P5.IYVDPMQLPY | 198  | >PDGFRA-P5.IYVDPMQLSY | 298  | 100  |



|                       |       |                       |       |       |
|-----------------------|-------|-----------------------|-------|-------|
| >PDGFRA-P5.IYVDPMQLPY | 26    | >PDGFRA-P5.IYVDPMQLSY | 34    | 8     |
| >PDGFRA-P5.IYVDPMQLPY | 143   | >PDGFRA-P5.IYVDPMQLSY | 117   | 26    |
| >PDGFRA-P5.IYVDPMQLPY | 84    | >PDGFRA-P5.IYVDPMQLSY | 95    | 11    |
| >PDGFRA-P5.YIYVDPMQLF | 257   | >PDGFRA-P5.YIYVDPMQLS | 244   | 13    |
| >PDGFRA-P5.YIYVDPMQLF | 253   | >PDGFRA-P5.YIYVDPMQLS | 528   | 275   |
| >PDGFRA-P5.YIYVDPMQLF | 1559  | >PDGFRA-P5.YIYVDPMQLS | 238   | 1321  |
| >PDGFRA-P5.YIYVDPMQLF | 227   | >PDGFRA-P5.YIYVDPMQLS | 397   | 170   |
| >PDGFRA-P5.YIYVDPMQLF | 6     | >PDGFRA-P5.YIYVDPMQLS | 6     | 0     |
| >PDGFRA-P5.YIYVDPMQLF | 669   | >PDGFRA-P5.YIYVDPMQLS | 251   | 418   |
| >PDGFRA-P5.YIYVDPMQLF | 12    | >PDGFRA-P5.YIYVDPMQLS | 13    | 1     |
| >PDGFRA-P5.YIYVDPMQLF | 58    | >PDGFRA-P5.YIYVDPMQLS | 64    | 6     |
| >PDGFRA-P5.YIYVDPMQLF | 53    | >PDGFRA-P5.YIYVDPMQLS | 65    | 12    |
| >PDGFRA-P5.YIYVDPMQLF | 32    | >PDGFRA-P5.YIYVDPMQLS | 36    | 4     |
| >PDGFRA-P5.YIYVDPMQLF | 27    | >PDGFRA-P5.YIYVDPMQLS | 28    | 1     |
| >PDGFRA-P5.YIYVDPMQLF | 40    | >PDGFRA-P5.YIYVDPMQLS | 99    | 59    |
| >PDGFRA-P5.YIYVDPMQLF | 464   | >PDGFRA-P5.YIYVDPMQLS | 1113  | 649   |
| >PDGFRA-P5.YIYVDPMQLF | 1030  | >PDGFRA-P5.YIYVDPMQLS | 387   | 643   |
| >PDGFRA-P5.YIYVDPMQLF | 1291  | >PDGFRA-P5.YIYVDPMQLS | 387   | 904   |
| >PDGFRA-P5.YIYVDPMQLF | 406   | >PDGFRA-P5.YIYVDPMQLS | 576   | 170   |
| >PDGFRA-P5.YIYVDPMQLF | 449   | >PDGFRA-P5.YIYVDPMQLS | 262   | 187   |
| >PDGFRA-P5.PRDGLVLGR  | 2457  | >PDGFRA-P5.SRDGLVLGR  | 319   | 2138  |
| >PDGFRA-P5.PRDGLVLGR\ | 2884  | >PDGFRA-P5.SRDGLVLGRV | 77    | 2807  |
| >PDGFRA-P5.PRDGLVLGR\ | 2435  | >PDGFRA-P5.SRDGLVLGRV | 389   | 2046  |
| >PDGFRA-P5.PRDGLVLGR\ | 986   | >PDGFRA-P5.SRDGLVLGRV | 114   | 872   |
| >PDGFRA-P5.FPRDGLVLGR | 4465  | >PDGFRA-P5.FSRDGLVLGR | 137   | 4328  |
| >PDGFRA-P5.FPRDGLVLGR | 4320  | >PDGFRA-P5.FSRDGLVLGR | 276   | 4044  |
| >PDGFRA-P5.FPRDGLVLGR | 1753  | >PDGFRA-P5.FSRDGLVLGR | 292   | 1461  |
| >PDGFRA-P5.FPRDGLVLGR | 2608  | >PDGFRA-P5.FSRDGLVLGR | 129   | 2479  |
| >PDGFRA-P5.FPRDGLVLGR | 4309  | >PDGFRA-P5.FSRDGLVLGR | 147   | 4162  |
| >PDGFRA-P5.FPRDGLVL   | 15    | >PDGFRA-P5.FSRDGLVL   | 599   | 584   |
| >PDGFRA-P5.FPRDGLVLGR | 40    | >PDGFRA-P5.FSRDGLVLGR | 14255 | 14215 |
| >PDGFRA-P5.FPRDGLVL   | 13014 | >PDGFRA-P5.FSRDGLVL   | 346   | 12668 |
| >PDGFRA-P5.FPRDGLVL   | 2159  | >PDGFRA-P5.FSRDGLVL   | 221   | 1938  |
| >PDGFRA-P5.FPRDGLVL   | 11785 | >PDGFRA-P5.FSRDGLVL   | 8     | 11777 |
| >PDGFRA-P5.FPRDGLVLGR | 23212 | >PDGFRA-P5.FSRDGLVLGR | 193   | 23019 |
| >PDGFRA-P5.FPRDGLVL   | 108   | >PDGFRA-P5.FSRDGLVL   | 8913  | 8805  |
| >PDGFRA-P5.FPRDGLVL   | 252   | >PDGFRA-P5.FSRDGLVL   | 3371  | 3119  |
| >PDGFRA-P5.FPRDGLVLGR | 254   | >PDGFRA-P5.FSRDGLVLGR | 17952 | 17698 |
| >PDGFRA-P5.FPRDGLVL   | 426   | >PDGFRA-P5.FSRDGLVL   | 21698 | 21272 |
| >PDGFRA-P5.FPRDGLVLG  | 16    | >PDGFRA-P5.FSRDGLVLG  | 11156 | 11140 |
| >PDGFRA-P5.FPRDGLVLGR | 11    | >PDGFRA-P5.FSRDGLVLGR | 7811  | 7800  |
| >PDGFRA-P5.FPRDGLVL   | 6708  | >PDGFRA-P5.FSRDGLVL   | 73    | 6635  |
| >PDGFRA-P5.FPRDGLVLGR | 3504  | >PDGFRA-P5.FSRDGLVLGR | 125   | 3379  |

|                       |       |                       |      |       |
|-----------------------|-------|-----------------------|------|-------|
| >PDGFRA-P5.EFPRDGLVL  | 400   | >PDGFRA-P5.EFSRDGLVL  | 2489 | 2089  |
| >PDGFRA-P5.EFPRDGLVLG | 2112  | >PDGFRA-P5.EFSRDGLVLG | 468  | 1644  |
| >PDGFRA-P5.EFPRDGLVLG | 997   | >PDGFRA-P5.EFSRDGLVLG | 222  | 775   |
| >PDGFRA-P5.EFPRDGLVLG | 140   | >PDGFRA-P5.EFSRDGLVLG | 178  | 38    |
| >PDGFRA-P5.WEFPRDGLV  | 20    | >PDGFRA-P5.WEFSRDGLV  | 20   | 0     |
| >PDGFRA-P5.WEFPRDGLV  | 215   | >PDGFRA-P5.WEFSRDGLVI | 291  | 76    |
| >PDGFRA-P5.WEFPRDGLV  | 462   | >PDGFRA-P5.WEFSRDGLVI | 319  | 143   |
| >PDGFRA-P5.WEFPRDGL   | 143   | >PDGFRA-P5.WEFSRDGL   | 157  | 14    |
| >PDGFRA-P5.WEFPRDGLV  | 238   | >PDGFRA-P5.WEFSRDGLVI | 155  | 83    |
| >PDGFRA-P5.WEFPRDGL   | 14    | >PDGFRA-P5.WEFSRDGL   | 9    | 5     |
| >PDGFRA-P5.WEFPRDGLV  | 251   | >PDGFRA-P5.WEFSRDGLV  | 111  | 140   |
| >PDGFRA-P5.WEFPRDGLV  | 124   | >PDGFRA-P5.WEFSRDGLVI | 320  | 196   |
| >PDGFRA-P5.WEFPRDGL   | 113   | >PDGFRA-P5.WEFSRDGL   | 103  | 10    |
| >PDGFRA-P5.WEFPRDGLV  | 568   | >PDGFRA-P5.WEFSRDGLVI | 434  | 134   |
| >PDGFRA-P5.WEFPRDGL   | 163   | >PDGFRA-P5.WEFSRDGL   | 333  | 170   |
| >PDGFRA-P5.WEFPRDGLV  | 15    | >PDGFRA-P5.WEFSRDGLV  | 7    | 8     |
| >PDGFRA-P5.WEFPRDGLV  | 55    | >PDGFRA-P5.WEFSRDGLVI | 30   | 25    |
| >PDGFRA-P5.WEFPRDGLV  | 280   | >PDGFRA-P5.WEFSRDGLVI | 155  | 125   |
| >PDGFRA-P5.RWEFPRDGL  | 532   | >PDGFRA-P5.RWEFSRDGL  | 421  | 111   |
| >PDGFRA-P5.RWEFPRDGL  | 155   | >PDGFRA-P5.RWEFSRDGL  | 68   | 87    |
| >PDGFRA-P5.RWEFPRDGL  | 125   | >PDGFRA-P5.RWEFSRDGL  | 364  | 239   |
| >PDGFRA-P5.RWEFPRDGL  | 290   | >PDGFRA-P5.RWEFSRDGL  | 176  | 114   |
| >PDGFRA-P5.SRWEFPRDG  | 704   | >PDGFRA-P5.SRWEFSRDGI | 479  | 225   |
| >PDGFRA-P5.SRWEFPRDG  | 83    | >PDGFRA-P5.SRWEFSRDGI | 75   | 8     |
| >PDGFRA-P5.SRWEFPRDG  | 66    | >PDGFRA-P5.SRWEFSRDGI | 64   | 2     |
| >PDGFRA-P5.SRWEFPRD   | 265   | >PDGFRA-P5.SRWEFSRD   | 329  | 64    |
| >PDGFRA-P5.SRWEFPRDG  | 294   | >PDGFRA-P5.SRWEFSRDGI | 359  | 65    |
| >PDGFRA-P5.SRWEFPRDG  | 37    | >PDGFRA-P5.SRWEFSRDGI | 68   | 31    |
| >PDGFRA-P5.DSRWEFPR   | 193   | >PDGFRA-P5.DSRWEFSR   | 563  | 370   |
| >PDGFRA-P5.DSRWEFPR   | 13    | >PDGFRA-P5.DSRWEFSR   | 13   | 0     |
| >PDGFRA-P5.DSRWEFPR   | 54    | >PDGFRA-P5.DSRWEFSR   | 42   | 12    |
| >PDGFRA-P5.YDSRWEFPR  | 506   | >PDGFRA-P5.YDSRWEFSR  | 460  | 46    |
| >PDGFRA-P5.PYDSRWEFPR | 83    | >PDGFRA-P5.PYDSRWEFSF | 229  | 146   |
| >PDGFRA-P5.LPYDSRWEFF | 214   | >PDGFRA-P5.LPYDSRWEFS | 728  | 514   |
| >PDGFRA-P5.LPYDSRWEFF | 138   | >PDGFRA-P5.LPYDSRWEFS | 257  | 119   |
| >PDGFRA-P5.LPYDSRWEFF | 170   | >PDGFRA-P5.LPYDSRWEFS | 167  | 3     |
| >PDGFRA-P5.LPYDSRWEFF | 242   | >PDGFRA-P5.LPYDSRWEFS | 795  | 553   |
| >PDGFRA-P5.LPYDSRWEFF | 109   | >PDGFRA-P5.LPYDSRWEFS | 408  | 299   |
| >PDGFRA-P5.LPYDSRWEFF | 140   | >PDGFRA-P5.LPYDSRWEFS | 610  | 470   |
| >PDGFRA-Q4.QTVRCTAEGT | 6587  | >PDGFRA-Q4.RTVRCTAEGT | 463  | 6124  |
| >PDGFRA-Q4.GGQTVRCTA  | 11484 | >PDGFRA-Q4.GGRTVRCTA  | 229  | 11255 |
| >PDGFRA-Q4.STGGQTVR   | 204   | >PDGFRA-Q4.STGGRTVR   | 78   | 126   |
| >PDGFRA-Q4.STGGQTVR   | 157   | >PDGFRA-Q4.STGGRTVR   | 117  | 40    |

|                       |       |                       |       |       |
|-----------------------|-------|-----------------------|-------|-------|
| >PDGFRA-Q4 GSTGGQTVR  | 861   | >PDGFRA-Q4 GSTGGRTVR  | 229   | 632   |
| >PDGFRA-Q4 HHGSTGGQT  | 200   | >PDGFRA-Q4 HHGSTGGRTV | 299   | 99    |
| >PDGFRA-Q4 HHGSTGGQ   | 25408 | >PDGFRA-Q4 HHGSTGGR   | 328   | 25080 |
| >PDGFRA-Q4 DHHGSTGGC  | 454   | >PDGFRA-Q4 DHHGSTGGR  | 612   | 158   |
| >PDGFRA-R8 ARNVLLAQGI | 8073  | >PDGFRA-R8 ASNVLLAQGI | 55    | 8018  |
| >PDGFRA-R8 ARNVLLAQGI | 6991  | >PDGFRA-R8 ASNVLLAQGI | 120   | 6871  |
| >PDGFRA-R8 ARNVLLAQGI | 26444 | >PDGFRA-R8 ASNVLLAQGI | 341   | 26103 |
| >PDGFRA-R8 ARNVLLAQGI | 172   | >PDGFRA-R8 ASNVLLAQGI | 26194 | 26022 |
| >PDGFRA-R8 ARNVLLAQGI | 91    | >PDGFRA-R8 ASNVLLAQGI | 18088 | 17997 |
| >PDGFRA-R8 ARNVLLAQGI | 400   | >PDGFRA-R8 ASNVLLAQGI | 31595 | 31195 |
| >PDGFRA-R8 ARNVLLAQGI | 6124  | >PDGFRA-R8 ASNVLLAQGI | 84    | 6040  |
| >PDGFRA-R8 KNCVHRDLA  | 51    | >PDGFRA-R8 KNCVHRDLA  | 15677 | 15626 |
| >PDGFRA-R8 AARNVLLAQ  | 1599  | >PDGFRA-R8 AASNVLLAQ  | 93    | 1506  |
| >PDGFRA-R8 AARNVLLA   | 13    | >PDGFRA-R8 AASNVLLA   | 2894  | 2881  |
| >PDGFRA-R8 AARNVLLAQ  | 114   | >PDGFRA-R8 AASNVLLAQ  | 9046  | 8932  |
| >PDGFRA-R8 AARNVLLAQ  | 202   | >PDGFRA-R8 AASNVLLAQ  | 11232 | 11030 |
| >PDGFRA-R8 AARNVLLAQ  | 6     | >PDGFRA-R8 AASNVLLAQ  | 642   | 636   |
| >PDGFRA-R8 LAARNVLL   | 418   | >PDGFRA-R8 LAASNVLL   | 95    | 323   |
| >PDGFRA-R8 LAARNVLL   | 1431  | >PDGFRA-R8 LAASNVLL   | 480   | 951   |
| >PDGFRA-R8 LAARNVLL   | 458   | >PDGFRA-R8 LAASNVLL   | 602   | 144   |
| >PDGFRA-R8 LAARNVLL   | 601   | >PDGFRA-R8 LAASNVLL   | 389   | 212   |
| >PDGFRA-R8 DLAARNVL   | 862   | >PDGFRA-R8 DLAASNVL   | 273   | 589   |
| >PDGFRA-R8 DLAARNVLL  | 109   | >PDGFRA-R8 DLAASNVLL  | 54    | 55    |
| >PDGFRA-R8 DLAARNVLLA | 687   | >PDGFRA-R8 DLAASNVLLA | 257   | 430   |
| >PDGFRA-R8 DLAARNVLLA | 637   | >PDGFRA-R8 DLAASNVLLA | 345   | 292   |
| >PDGFRA-R8 DLAARNVL   | 326   | >PDGFRA-R8 DLAASNVL   | 251   | 75    |
| >PDGFRA-R8 DLAARNVLL  | 121   | >PDGFRA-R8 DLAASNVLL  | 88    | 33    |
| >PDGFRA-R8 DLAARNVLLA | 441   | >PDGFRA-R8 DLAASNVLLA | 357   | 84    |
| >PDGFRA-R8 DLAARNVLL  | 562   | >PDGFRA-R8 DLAASNVLL  | 146   | 416   |
| >PDGFRA-R8 RDLAARNVL  | 97    | >PDGFRA-R8 RDLAASNVL  | 99    | 2     |
| >PDGFRA-R8 RDLAARNV   | 187   | >PDGFRA-R8 RDLAASNVL  | 472   | 285   |
| >PDGFRA-R8 RDLAARNV   | 210   | >PDGFRA-R8 RDLAASNVL  | 77    | 133   |
| >PDGFRA-R8 RDLAARNVL  | 1619  | >PDGFRA-R8 RDLAASNVL  | 338   | 1281  |
| >PDGFRA-R8 RDLAARNVLL | 499   | >PDGFRA-R8 RDLAASNVLL | 185   | 314   |
| >PDGFRA-R8 HRDLAARNVI | 62    | >PDGFRA-R8 HRDLAASNVI | 66    | 4     |
| >PDGFRA-R8 HRDLAARNVI | 371   | >PDGFRA-R8 HRDLAASNVI | 527   | 156   |
| >PDGFRA-R8 HRDLAARNVI | 21    | >PDGFRA-R8 HRDLAASNVI | 12    | 9     |
| >PDGFRA-R8 HRDLAARNVI | 49    | >PDGFRA-R8 HRDLAASNVI | 23    | 26    |
| >PDGFRA-R8 HRDLAARNVI | 347   | >PDGFRA-R8 HRDLAASNVI | 444   | 97    |
| >PDGFRA-R8 HRDLAARNVI | 60    | >PDGFRA-R8 HRDLAASNVI | 85    | 25    |
| >PDGFRA-R8 VHRDLAARNV | 471   | >PDGFRA-R8 VHRDLAASN  | 216   | 255   |
| >PDGFRA-R8 CVHRDLAARN | 519   | >PDGFRA-R8 CVHRDLAASN | 143   | 376   |
| >PDGFRA-R8 CVHRDLAARN | 1087  | >PDGFRA-R8 CVHRDLAASN | 272   | 815   |

|                          |       |                          |       |       |
|--------------------------|-------|--------------------------|-------|-------|
| >PDGFRA-R8 CVHRDLAAR     | 70    | >PDGFRA-R8 CVHRDLAAS     | 20582 | 20512 |
| >PDGFRA-R8 CVHRDLAAR     | 159   | >PDGFRA-R8 CVHRDLAAS     | 28881 | 28722 |
| >PDGFRA-R8 CVHRDLAARI    | 723   | >PDGFRA-R8 CVHRDLAAS'    | 170   | 553   |
| >PDGFRA-R8 RDIMHDSNY'    | 173   | >PDGFRA-R8 SDIMHDSNY\    | 157   | 16    |
| >PDGFRA-R8 ARDIMHDSN'    | 4620  | >PDGFRA-R8 ASDIMHDSN'    | 32    | 4588  |
| >PDGFRA-R8 ARDIMHDSN'    | 330   | >PDGFRA-R8 ASDIMHDSN'    | 37    | 293   |
| >PDGFRA-R8 ARDIMHDSN'    | 16293 | >PDGFRA-R8 ASDIMHDSN'    | 11    | 16282 |
| >PDGFRA-R8 ARDIMHDSN'    | 230   | >PDGFRA-R8 ASDIMHDSN'    | 26214 | 25984 |
| >PDGFRA-R8 ARDIMHDSN'    | 11881 | >PDGFRA-R8 ASDIMHDSN'    | 136   | 11745 |
| >PDGFRA-R8 IVKICDFGLAR   | 21    | >PDGFRA-R8 IVKICDFGLAS   | 12880 | 12859 |
| >PDGFRA-R8 IVKICDFGLAR   | 136   | >PDGFRA-R8 IVKICDFGLAS   | 25285 | 25149 |
| >PDGFRA-R8 IVKICDFGLAR   | 147   | >PDGFRA-R8 IVKICDFGLAS   | 27534 | 27387 |
| >PDGFRA-R8 IVKICDFGLAR   | 120   | >PDGFRA-R8 IVKICDFGLAS   | 29299 | 29179 |
| >PDGFRA-R8 LARDIMHDSN'   | 292   | >PDGFRA-R8 LASDIMHDSN'   | 137   | 155   |
| >PDGFRA-R8 LARDIMHDSN'   | 146   | >PDGFRA-R8 LASDIMHDSN'   | 59    | 87    |
| >PDGFRA-R8 LARDIMHDSN'   | 202   | >PDGFRA-R8 LASDIMHDSN'   | 383   | 181   |
| >PDGFRA-R8 LARDIMHDSN'   | 258   | >PDGFRA-R8 LASDIMHDSN'   | 838   | 580   |
| >PDGFRA-R8 LARDIMHDSN'   | 6     | >PDGFRA-R8 LASDIMHDSN'   | 16    | 10    |
| >PDGFRA-R8 LARDIMHDSN'   | 104   | >PDGFRA-R8 LASDIMHDSN'   | 29    | 75    |
| >PDGFRA-R8 LARDIMHDSN'   | 3178  | >PDGFRA-R8 LASDIMHDSN'   | 310   | 2868  |
| >PDGFRA-R8 LARDIMHDSN'   | 53    | >PDGFRA-R8 LASDIMHDSN'   | 143   | 90    |
| >PDGFRA-R8 GLARDIMHDSN'  | 480   | >PDGFRA-R8 GLASDIMHDSN'  | 436   | 44    |
| >PDGFRA-R8 FGLARDIMHDSN' | 608   | >PDGFRA-R8 FGLASDIMHDSN' | 95    | 513   |
| >PDGFRA-R8 CDFGLARDI     | 1604  | >PDGFRA-R8 CDFGLASDI     | 304   | 1300  |
| >PDGFRA-R8 CDFGLARDI     | 84    | >PDGFRA-R8 CDFGLASDI     | 47    | 37    |
| >PDGFRA-R8 CDFGLARDIM    | 1083  | >PDGFRA-R8 CDFGLASDIM    | 453   | 630   |
| >PDGFRA-R8 ICDFGLARDIM   | 428   | >PDGFRA-R8 ICDFGLASDIM   | 328   | 100   |
| >PDGFRA-R8 KICDFGLAR     | 53    | >PDGFRA-R8 KICDFGLAS     | 9246  | 9193  |
| >PDGFRA-R8 KICDFGLAR     | 30    | >PDGFRA-R8 KICDFGLAS     | 12457 | 12427 |
| >PDGFRA-R8 KICDFGLARD    | 109   | >PDGFRA-R8 KICDFGLASDI   | 154   | 45    |
| >PDGFRA-R8 KICDFGLAR     | 14    | >PDGFRA-R8 KICDFGLAS     | 7783  | 7769  |
| >PDGFRA-R8 VKICDFGLAR    | 155   | >PDGFRA-R8 VKICDFGLAS    | 709   | 554   |
| >PDGFRA-S4' HSRDRSTV     | 9     | >PDGFRA-S4' HPRDRSTV     | 8747  | 8738  |
| >PDGFRA-S4' HSRDRSTVEC   | 24    | >PDGFRA-S4' HPRDRSTVEC   | 12369 | 12345 |
| >PDGFRA-S4' HSRDRSTVEC   | 110   | >PDGFRA-S4' HPRDRSTVEC   | 15162 | 15052 |
| >PDGFRA-S4' HSRDRSTVEC   | 47    | >PDGFRA-S4' HPRDRSTVEC   | 4245  | 4198  |
| >PDGFRA-S4' HSRDRSTVEC   | 133   | >PDGFRA-S4' HPRDRSTVEC   | 791   | 658   |
| >PDGFRA-S4' HSRDRSTVEC   | 132   | >PDGFRA-S4' HPRDRSTVEC   | 2833  | 2701  |
| >PDGFRA-S4' HSRDRSTV     | 3830  | >PDGFRA-S4' HPRDRSTV     | 8     | 3822  |
| >PDGFRA-S4' HSRDRSTVE    | 19031 | >PDGFRA-S4' HPRDRSTVE    | 47    | 18984 |
| >PDGFRA-S4' HSRDRSTV     | 3324  | >PDGFRA-S4' HPRDRSTV     | 249   | 3075  |
| >PDGFRA-S4' HSRDRSTV     | 44    | >PDGFRA-S4' HPRDRSTV     | 20513 | 20469 |
| >PDGFRA-S4' IHSRDRSTV    | 319   | >PDGFRA-S4' IHSRDRSTV    | 1917  | 1598  |

|                         |       |                         |       |       |
|-------------------------|-------|-------------------------|-------|-------|
| >PDGFRA-S4' EIHSRDRSTV  | 265   | >PDGFRA-S4' EIHPRDRSTV  | 108   | 157   |
| >PDGFRA-S4' TEIHSRDRSTV | 116   | >PDGFRA-S4' TEIHPRDRSTV | 966   | 850   |
| >PDGFRA-S4' TEIHSRDRSTV | 295   | >PDGFRA-S4' TEIHPRDRSTV | 375   | 80    |
| >PDGFRA-S4' TEIHSRDRSTV | 55    | >PDGFRA-S4' TEIHPRDRSTV | 65    | 10    |
| >PDGFRA-S4' ITEIHSRDR   | 622   | >PDGFRA-S4' ITEIHRDR    | 305   | 317   |
| >PDGFRA-S4' IITEIHSR    | 96    | >PDGFRA-S4' IITEIHR     | 37    | 59    |
| >PDGFRA-S4' IITEIHSR    | 75    | >PDGFRA-S4' IITEIHR     | 64    | 11    |
| >PDGFRA-S4' IITEIHSR    | 16    | >PDGFRA-S4' IITEIHR     | 20    | 4     |
| >PDGFRA-S4' IITEIHSR    | 134   | >PDGFRA-S4' IITEIHR     | 45    | 89    |
| >PDGFRA-S4' NIITEIHSR   | 1849  | >PDGFRA-S4' NIITEIHR    | 439   | 1410  |
| >PDGFRA-S4' NIITEIHSR   | 337   | >PDGFRA-S4' NIITEIHR    | 215   | 122   |
| >PDGFRA-S4' NIITEIHSR   | 12    | >PDGFRA-S4' NIITEIHR    | 13    | 1     |
| >PDGFRA-S4' NIITEIHSRDR | 100   | >PDGFRA-S4' NIITEIHRDR  | 140   | 40    |
| >PDGFRA-S4' NIITEIHSR   | 59    | >PDGFRA-S4' NIITEIHR    | 19    | 40    |
| >PDGFRA-S4' NIITEIHSRDR | 501   | >PDGFRA-S4' NIITEIHRDR  | 387   | 114   |
| >PDGFRA-S4' SNIITEIHSR  | 634   | >PDGFRA-S4' SNIITEIHR   | 181   | 453   |
| >PDGFRA-S4' VSNIITEIHSR | 581   | >PDGFRA-S4' VSNIITEIHR  | 223   | 358   |
| >PDGFRA-S4' VSNIITEIHSR | 37    | >PDGFRA-S4' VSNIITEIHR  | 18    | 19    |
| >PDGFRA-S4' VSNIITEIHSR | 91    | >PDGFRA-S4' VSNIITEIHR  | 91    | 0     |
| >PDGFRA-S8' SKGSTFLPV   | 30    | >PDGFRA-S8' WKGSTFLPV   | 16    | 14    |
| >PDGFRA-S8' SKGSTFLPVK  | 805   | >PDGFRA-S8' WKGSTFLPVK  | 439   | 366   |
| >PDGFRA-S8' SKGSTFLPVK  | 456   | >PDGFRA-S8' WKGSTFLPVK  | 201   | 255   |
| >PDGFRA-S8' VSKGSTFLPV  | 314   | >PDGFRA-S8' VWKGSTFLPV  | 12766 | 12452 |
| >PDGFRA-S8' VSKGSTFLPV  | 63    | >PDGFRA-S8' VWKGSTFLPV  | 8859  | 8796  |
| >PDGFRA-S8' VSKGSTFL    | 406   | >PDGFRA-S8' VWKGSTFL    | 3037  | 2631  |
| >PDGFRA-S8' VSKGSTFLPV  | 64    | >PDGFRA-S8' VWKGSTFLPV  | 738   | 674   |
| >PDGFRA-S8' VSKGSTFLPV  | 8     | >PDGFRA-S8' VWKGSTFLPV  | 67    | 59    |
| >PDGFRA-S8' VSKGSTFL    | 11    | >PDGFRA-S8' VWKGSTFL    | 24315 | 24304 |
| >PDGFRA-S8' VSKGSTFLPV  | 170   | >PDGFRA-S8' VWKGSTFLPV  | 26308 | 26138 |
| >PDGFRA-S8' VSKGSTFL    | 366   | >PDGFRA-S8' VWKGSTFL    | 16696 | 16330 |
| >PDGFRA-S8' VSKGSTFLPV  | 439   | >PDGFRA-S8' VWKGSTFLPV  | 16165 | 15726 |
| >PDGFRA-S8' VSKGSTFLPV  | 16626 | >PDGFRA-S8' VWKGSTFLPV  | 290   | 16336 |
| >PDGFRA-S8' VSKGSTFL    | 30084 | >PDGFRA-S8' VWKGSTFL    | 121   | 29963 |
| >PDGFRA-S8' VSKGSTFLPV  | 24864 | >PDGFRA-S8' VWKGSTFLPV  | 92    | 24772 |
| >PDGFRA-S8' YVSKGSTFL   | 4039  | >PDGFRA-S8' YVWKGSTFL   | 409   | 3630  |
| >PDGFRA-S8' YVSKGSTFL   | 131   | >PDGFRA-S8' YVWKGSTFL   | 14    | 117   |
| >PDGFRA-S8' YVSKGSTFLPV | 28    | >PDGFRA-S8' YVWKGSTFLPV | 8     | 20    |
| >PDGFRA-S8' YVSKGSTFL   | 10    | >PDGFRA-S8' YVWKGSTFL   | 27    | 17    |
| >PDGFRA-S8' YVSKGSTFLPV | 28    | >PDGFRA-S8' YVWKGSTFLPV | 85    | 57    |
| >PDGFRA-S8' YVSKGSTFL   | 22    | >PDGFRA-S8' YVWKGSTFL   | 141   | 119   |
| >PDGFRA-S8' YVSKGSTFLPV | 5     | >PDGFRA-S8' YVWKGSTFLPV | 17    | 12    |
| >PDGFRA-S8' YVSKGSTFL   | 10    | >PDGFRA-S8' YVWKGSTFL   | 6     | 4     |
| >PDGFRA-S8' YVSKGSTFLPV | 4     | >PDGFRA-S8' YVWKGSTFLPV | 4     | 0     |

|                        |      |                       |      |      |
|------------------------|------|-----------------------|------|------|
| >PDGFRA-S8:YVSKGSTFL   | 415  | >PDGFRA-S8:YVWKGSTFL  | 16   | 399  |
| >PDGFRA-S8:YVSKGSTFLP\ | 22   | >PDGFRA-S8:YVWKGSTFLF | 3    | 19   |
| >PDGFRA-S8:YVSKGSTFL   | 764  | >PDGFRA-S8:YVWKGSTFL  | 47   | 717  |
| >PDGFRA-S8:YVSKGSTFLP\ | 43   | >PDGFRA-S8:YVWKGSTFLF | 7    | 36   |
| >PDGFRA-S8:YVSKGSTFL   | 52   | >PDGFRA-S8:YVWKGSTFL  | 9    | 43   |
| >PDGFRA-S8:YVSKGSTFLP\ | 15   | >PDGFRA-S8:YVWKGSTFLF | 5    | 10   |
| >PDGFRA-S8:YVSKGSTFL   | 196  | >PDGFRA-S8:YVWKGSTFL  | 12   | 184  |
| >PDGFRA-S8:YVSKGSTFLP\ | 44   | >PDGFRA-S8:YVWKGSTFLF | 6    | 38   |
| >PDGFRA-S8:YVSKGSTFL   | 19   | >PDGFRA-S8:YVWKGSTFL  | 9    | 10   |
| >PDGFRA-S8:YVSKGSTFLP\ | 4    | >PDGFRA-S8:YVWKGSTFLF | 3    | 1    |
| >PDGFRA-S8:YVSKGSTF    | 2730 | >PDGFRA-S8:YVWKGSTF   | 242  | 2488 |
| >PDGFRA-S8:YVSKGSTF    | 371  | >PDGFRA-S8:YVWKGSTF   | 293  | 78   |
| >PDGFRA-S8:YVSKGSTF    | 1174 | >PDGFRA-S8:YVWKGSTF   | 118  | 1056 |
| >PDGFRA-S8:YVSKGSTFLP\ | 2463 | >PDGFRA-S8:YVWKGSTFLF | 398  | 2065 |
| >PDGFRA-S8:YVSKGSTF    | 2651 | >PDGFRA-S8:YVWKGSTF   | 181  | 2470 |
| >PDGFRA-S8:YVSKGSTFL   | 77   | >PDGFRA-S8:YVWKGSTFL  | 124  | 47   |
| >PDGFRA-S8:YVSKGSTFLP\ | 18   | >PDGFRA-S8:YVWKGSTFLF | 24   | 6    |
| >PDGFRA-S8:YVSKGSTFL   | 273  | >PDGFRA-S8:YVWKGSTFL  | 23   | 250  |
| >PDGFRA-S8:YVSKGSTFLP\ | 11   | >PDGFRA-S8:YVWKGSTFLF | 4    | 7    |
| >PDGFRA-S8:YVSKGSTFLP\ | 870  | >PDGFRA-S8:YVWKGSTFLF | 456  | 414  |
| >PDGFRA-S8:YVSKGSTF    | 42   | >PDGFRA-S8:YVWKGSTF   | 56   | 14   |
| >PDGFRA-S8:YVSKGSTFLP\ | 287  | >PDGFRA-S8:YVWKGSTFLF | 532  | 245  |
| >PDGFRA-S8:YVSKGSTF    | 72   | >PDGFRA-S8:YVWKGSTF   | 37   | 35   |
| >PDGFRA-S8:YVSKGSTF    | 33   | >PDGFRA-S8:YVWKGSTF   | 12   | 21   |
| >PDGFRA-S8:YVSKGSTFL   | 2403 | >PDGFRA-S8:YVWKGSTFL  | 498  | 1905 |
| >PDGFRA-S8:YVSKGSTFLP\ | 922  | >PDGFRA-S8:YVWKGSTFLF | 184  | 738  |
| >PDGFRA-S8:YVSKGSTF    | 15   | >PDGFRA-S8:YVWKGSTF   | 8    | 7    |
| >PDGFRA-S8:YVSKGSTFL   | 577  | >PDGFRA-S8:YVWKGSTFL  | 87   | 490  |
| >PDGFRA-S8:YVSKGSTF    | 43   | >PDGFRA-S8:YVWKGSTF   | 18   | 25   |
| >PDGFRA-S8:YVSKGSTFL   | 2230 | >PDGFRA-S8:YVWKGSTFL  | 470  | 1760 |
| >PDGFRA-S8:YVSKGSTF    | 194  | >PDGFRA-S8:YVWKGSTF   | 534  | 340  |
| >PDGFRA-S8:YVSKGSTFL   | 49   | >PDGFRA-S8:YVWKGSTFL  | 78   | 29   |
| >PDGFRA-S8:YVSKGSTF    | 79   | >PDGFRA-S8:YVWKGSTF   | 200  | 121  |
| >PDGFRA-S8:NYVSKGSTF   | 354  | >PDGFRA-S8:NYVWKGSTF  | 1398 | 1044 |
| >PDGFRA-S8:NYVSKGSTFL  | 20   | >PDGFRA-S8:NYVWKGSTFL | 46   | 26   |
| >PDGFRA-S8:NYVSKGSTF   | 72   | >PDGFRA-S8:NYVWKGSTF  | 96   | 24   |
| >PDGFRA-S8:NYVSKGSTFL  | 403  | >PDGFRA-S8:NYVWKGSTFL | 516  | 113  |
| >PDGFRA-S8:NYVSKGSTF   | 150  | >PDGFRA-S8:NYVWKGSTF  | 92   | 58   |
| >PDGFRA-S8:NYVSKGSTF   | 17   | >PDGFRA-S8:NYVWKGSTF  | 16   | 1    |
| >PDGFRA-S8:NYVSKGSTFL  | 71   | >PDGFRA-S8:NYVWKGSTFL | 60   | 11   |
| >PDGFRA-S8:NYVSKGSTF   | 330  | >PDGFRA-S8:NYVWKGSTF  | 956  | 626  |
| >PDGFRA-S8:NYVSKGSTFL  | 374  | >PDGFRA-S8:NYVWKGSTFL | 169  | 205  |
| >PDGFRA-S8:SNYVSKGSTF  | 275  | >PDGFRA-S8:SNYVWKGSTF | 78   | 197  |

|                       |       |                       |      |       |
|-----------------------|-------|-----------------------|------|-------|
| >PDGFRA-S8!SNYVSKGSTF | 488   | >PDGFRA-S8!SNYVWKGST  | 452  | 36    |
| >PDGFRA-S8!SNYVSKGSTF | 431   | >PDGFRA-S8!SNYVWKGST  | 569  | 138   |
| >PDGFRA-S8!SNYVSKGSTF | 144   | >PDGFRA-S8!SNYVWKGST  | 465  | 321   |
| >PDGFRA-S8!SNYVSKGSTF | 40    | >PDGFRA-S8!SNYVWKGST  | 137  | 97    |
| >PDGFRA-S8!DSNYVSKGST | 465   | >PDGFRA-S8!DSNYVWKGS  | 730  | 265   |
| >PDGFRA-S8!DSNYVSKGST | 193   | >PDGFRA-S8!DSNYVWKGS  | 366  | 173   |
| >PDGFRA-S8!DSNYVSKGST | 92    | >PDGFRA-S8!DSNYVWKGS  | 129  | 37    |
| >PDGFRA-S8!MHDSNYVS   | 2112  | >PDGFRA-S8!MHDSNYVW   | 366  | 1746  |
| >PDGFRA-S8!MHDSNYVS   | 33422 | >PDGFRA-S8!MHDSNYVW   | 253  | 33169 |
| >PDGFRA-S8!MHDSNYVS   | 33799 | >PDGFRA-S8!MHDSNYVW   | 344  | 33455 |
| >PDGFRA-S8!MHDSNYVS   | 16755 | >PDGFRA-S8!MHDSNYVW   | 18   | 16737 |
| >PDGFRA-S8!IMHDSNYVS  | 324   | >PDGFRA-S8!IMHDSNYVW  | 3405 | 3081  |
| >PDGFRA-S8!IMHDSNYVS† | 542   | >PDGFRA-S8!IMHDSNYVW  | 97   | 445   |
| >PDGFRA-S8!IMHDSNYVS† | 399   | >PDGFRA-S8!IMHDSNYVW  | 281  | 118   |
| >PDGFRA-S8!IMHDSNYVS† | 2479  | >PDGFRA-S8!IMHDSNYVW  | 443  | 2036  |
| >PDGFRA-S8!IMHDSNYVS† | 35    | >PDGFRA-S8!IMHDSNYVW  | 26   | 9     |
| >PDGFRA-S8!IMHDSNYVS† | 80    | >PDGFRA-S8!IMHDSNYVW  | 58   | 22    |
| >PDGFRA-S8!IMHDSNYVS† | 15    | >PDGFRA-S8!IMHDSNYVW  | 33   | 18    |
| >PDGFRA-S8!IMHDSNYVS  | 16380 | >PDGFRA-S8!IMHDSNYVW  | 313  | 16067 |
| >PDGFRA-S8!IMHDSNYVS† | 893   | >PDGFRA-S8!IMHDSNYVW  | 239  | 654   |
| >PDGFRA-S8!IMHDSNYVS  | 1918  | >PDGFRA-S8!IMHDSNYVW  | 130  | 1788  |
| >PDGFRA-S8!IMHDSNYVS  | 1028  | >PDGFRA-S8!IMHDSNYVW  | 65   | 963   |
| >PDGFRA-S8!IMHDSNYVS† | 89    | >PDGFRA-S8!IMHDSNYVW  | 600  | 511   |
| >PDGFRA-S8!IMHDSNYVS  | 17611 | >PDGFRA-S8!IMHDSNYVW  | 25   | 17586 |
| >PDGFRA-S8!IMHDSNYVS  | 24026 | >PDGFRA-S8!IMHDSNYVW  | 142  | 23884 |
| >PDGFRA-S8!IMHDSNYVS  | 21225 | >PDGFRA-S8!IMHDSNYVW  | 26   | 21199 |
| >PDGFRA-S8!IMHDSNYVS  | 31618 | >PDGFRA-S8!IMHDSNYVW  | 86   | 31532 |
| >PDGFRA-S8!IMHDSNYVS† | 554   | >PDGFRA-S8!IMHDSNYVW  | 230  | 324   |
| >PDGFRA-S8!DIMHDSNYV' | 43    | >PDGFRA-S8!DIMHDSNYV' | 25   | 18    |
| >PDGFRA-T6' TEYCFYGD  | 121   | >PDGFRA-T6' IEYCFYGD  | 62   | 59    |
| >PDGFRA-T6' TEYCFYGD  | 42    | >PDGFRA-T6' IEYCFYGD  | 34   | 8     |
| >PDGFRA-T6' TEYCFYGD  | 13    | >PDGFRA-T6' IEYCFYGD  | 13   | 0     |
| >PDGFRA-T6' TEYCFYGD  | 1787  | >PDGFRA-T6' IEYCFYGD  | 356  | 1431  |
| >PDGFRA-T6' TEYCFYGD  | 408   | >PDGFRA-T6' IEYCFYGD  | 262  | 146   |
| >PDGFRA-T6' TEYCFYGD  | 388   | >PDGFRA-T6' IEYCFYGD  | 242  | 146   |
| >PDGFRA-T6' TEYCFYGD  | 26    | >PDGFRA-T6' IEYCFYGD  | 16   | 10    |
| >PDGFRA-T6' TEYCFYGD  | 260   | >PDGFRA-T6' IEYCFYGD  | 169  | 91    |
| >PDGFRA-T6' TEYCFYGD  | 198   | >PDGFRA-T6' IEYCFYGD  | 430  | 232   |
| >PDGFRA-T6' TEYCFYGD  | 370   | >PDGFRA-T6' IEYCFYGD  | 560  | 190   |
| >PDGFRA-T6' TEYCFYGD  | 146   | >PDGFRA-T6' IEYCFYGD  | 162  | 16    |
| >PDGFRA-T6' TEYCFYGD  | 421   | >PDGFRA-T6' IEYCFYGD  | 454  | 33    |
| >PDGFRA-T6' TEYCFYGD  | 32    | >PDGFRA-T6' IEYCFYGD  | 18   | 14    |
| >PDGFRA-T6' TEYCFYGD  | 35    | >PDGFRA-T6' IEYCFYGD  | 43   | 8     |

|                         |       |                         |       |       |
|-------------------------|-------|-------------------------|-------|-------|
| >PDGFRA-T6' ITEYCFYGDV  | 293   | >PDGFRA-T6' IIEYCFYGDV  | 63    | 230   |
| >PDGFRA-T6' ITEYCFYGDV  | 296   | >PDGFRA-T6' IIEYCFYGDV  | 117   | 179   |
| >PDGFRA-T6' ITEYCFYGDV  | 7396  | >PDGFRA-T6' IIEYCFYGDV  | 319   | 7077  |
| >PDGFRA-T6' ITEYCFYGDV  | 189   | >PDGFRA-T6' IIEYCFYGDV  | 843   | 654   |
| >PDGFRA-T6' ITEYCFYGDV  | 369   | >PDGFRA-T6' IIEYCFYGDV  | 11508 | 11139 |
| >PDGFRA-T6' ITEYCFYGDV  | 195   | >PDGFRA-T6' IIEYCFYGDV  | 8614  | 8419  |
| >PDGFRA-T6' ITEYCFYGDV  | 59    | >PDGFRA-T6' IIEYCFYGDV  | 2767  | 2708  |
| >PDGFRA-T6' CTKSGPIYIIT | 1119  | >PDGFRA-T6' CTKSGPIYIII | 39    | 1080  |
| >PDGFRA-T6' CTKSGPIYIIT | 20126 | >PDGFRA-T6' CTKSGPIYIII | 17    | 20109 |
| >PDGFRA-T6' IITEYCFY    | 4610  | >PDGFRA-T6' IIIEYCFY    | 468   | 4142  |
| >PDGFRA-T6' IITEYCFYGDV | 279   | >PDGFRA-T6' IIIEYCFYGDV | 64    | 215   |
| >PDGFRA-T6' IITEYCFYGDV | 956   | >PDGFRA-T6' IIIEYCFYGDV | 346   | 610   |
| >PDGFRA-T6' IITEYCFYGDV | 864   | >PDGFRA-T6' IIIEYCFYGDV | 305   | 559   |
| >PDGFRA-T6' IITEYCFYGDV | 380   | >PDGFRA-T6' IIIEYCFYGDV | 184   | 196   |
| >PDGFRA-T6' IITEYCFYGDV | 788   | >PDGFRA-T6' IIIEYCFYGDV | 124   | 664   |
| >PDGFRA-T6' IITEYCFYGDV | 276   | >PDGFRA-T6' IIIEYCFYGDV | 60    | 216   |
| >PDGFRA-T6' IITEYCFYGDV | 654   | >PDGFRA-T6' IIIEYCFYGDV | 206   | 448   |
| >PDGFRA-T6' IITEYCFYGDV | 967   | >PDGFRA-T6' IIIEYCFYGDV | 349   | 618   |
| >PDGFRA-T6' IITEYCFYGDV | 193   | >PDGFRA-T6' IIIEYCFYGDV | 257   | 64    |
| >PDGFRA-T6' IITEYCFY    | 1237  | >PDGFRA-T6' IIIEYCFY    | 352   | 885   |
| >PDGFRA-T6' IITEYCFY    | 1433  | >PDGFRA-T6' IIIEYCFY    | 64    | 1369  |
| >PDGFRA-T6' IITEYCFY    | 83    | >PDGFRA-T6' IIIEYCFY    | 26    | 57    |
| >PDGFRA-T6' IITEYCFY    | 144   | >PDGFRA-T6' IIIEYCFY    | 119   | 25    |
| >PDGFRA-T6' IITEYCFY    | 817   | >PDGFRA-T6' IIIEYCFY    | 297   | 520   |
| >PDGFRA-T6' IITEYCFY    | 246   | >PDGFRA-T6' IIIEYCFY    | 184   | 62    |
| >PDGFRA-T6' IITEYCFY    | 2144  | >PDGFRA-T6' IIIEYCFY    | 156   | 1988  |
| >PDGFRA-T6' IITEYCFY    | 1253  | >PDGFRA-T6' IIIEYCFY    | 373   | 880   |
| >PDGFRA-T6' IITEYCFY    | 1669  | >PDGFRA-T6' IIIEYCFY    | 482   | 1187  |
| >PDGFRA-T6' IITEYCFY    | 1024  | >PDGFRA-T6' IIIEYCFY    | 377   | 647   |
| >PDGFRA-T6' YIITEYCFY   | 414   | >PDGFRA-T6' YIIIEYCFY   | 308   | 106   |
| >PDGFRA-T6' YIITEYCFY   | 433   | >PDGFRA-T6' YIIIEYCFY   | 367   | 66    |
| >PDGFRA-T6' YIITEYCF    | 271   | >PDGFRA-T6' YIIIEYCF    | 201   | 70    |
| >PDGFRA-T6' YIITEYCFY   | 644   | >PDGFRA-T6' YIIIEYCFY   | 409   | 235   |
| >PDGFRA-T6' YIITEYCFY   | 13    | >PDGFRA-T6' YIIIEYCFY   | 21    | 8     |
| >PDGFRA-T6' YIITEYCF    | 28    | >PDGFRA-T6' YIIIEYCF    | 137   | 109   |
| >PDGFRA-T6' YIITEYCFY   | 7     | >PDGFRA-T6' YIIIEYCFY   | 38    | 31    |
| >PDGFRA-T6' YIITEYCFY   | 23    | >PDGFRA-T6' YIIIEYCFY   | 19    | 4     |
| >PDGFRA-T6' YIITEYCFY   | 212   | >PDGFRA-T6' YIIIEYCFY   | 305   | 93    |
| >PDGFRA-T6' YIITEYCFY   | 159   | >PDGFRA-T6' YIIIEYCFY   | 207   | 48    |
| >PDGFRA-T6' YIITEYCF    | 273   | >PDGFRA-T6' YIIIEYCF    | 344   | 71    |
| >PDGFRA-T6' YIITEYCFY   | 104   | >PDGFRA-T6' YIIIEYCFY   | 115   | 11    |
| >PDGFRA-T6' YIITEYCF    | 40    | >PDGFRA-T6' YIIIEYCF    | 140   | 100   |
| >PDGFRA-T6' YIITEYCFY   | 103   | >PDGFRA-T6' YIIIEYCFY   | 351   | 248   |



|                         |       |                         |      |       |
|-------------------------|-------|-------------------------|------|-------|
| >PDGFRA-T6' YIITEYCFY   | 1665  | >PDGFRA-T6' YIIIEYCFY   | 400  | 1265  |
| >PDGFRA-T6' YIITEYCF    | 288   | >PDGFRA-T6' YIIIEYCF    | 362  | 74    |
| >PDGFRA-T6' IYIITEYCFY  | 421   | >PDGFRA-T6' IYIIIEYCFY  | 856  | 435   |
| >PDGFRA-T6' IYIITEYCF   | 13    | >PDGFRA-T6' IYIIIEYCF   | 11   | 2     |
| >PDGFRA-T6' IYIITEYCF   | 34    | >PDGFRA-T6' IYIIIEYCF   | 23   | 11    |
| >PDGFRA-T6' IYIITEYCF   | 60    | >PDGFRA-T6' IYIIIEYCF   | 58   | 2     |
| >PDGFRA-T6' IYIITEYCFY  | 14    | >PDGFRA-T6' IYIIIEYCFY  | 15   | 1     |
| >PDGFRA-T6' IYIITEYCFY  | 12    | >PDGFRA-T6' IYIIIEYCFY  | 12   | 0     |
| >PDGFRA-T6' IYIITEYCFY  | 402   | >PDGFRA-T6' IYIIIEYCFY  | 157  | 245   |
| >PDGFRA-T6' IYIITEYCF   | 408   | >PDGFRA-T6' IYIIIEYCF   | 1115 | 707   |
| >PDGFRA-T6' PIYIITEYC   | 1030  | >PDGFRA-T6' PIYIIIEYC   | 216  | 814   |
| >PDGFRA-T6' PIYIITEY    | 84    | >PDGFRA-T6' PIYIIIEY    | 89   | 5     |
| >PDGFRA-T6' PIYIITEYCFY | 60    | >PDGFRA-T6' PIYIIIEYCFY | 84   | 24    |
| >PDGFRA-T6' PIYIITEYCFY | 447   | >PDGFRA-T6' PIYIIIEYCFY | 478  | 31    |
| >PDGFRA-T6' GPIYIITEY   | 580   | >PDGFRA-T6' GPIYIIIEY   | 298  | 282   |
| >PDGFRA-T6' GPIYIITEY   | 29    | >PDGFRA-T6' GPIYIIIEY   | 21   | 8     |
| >PDGFRA-T6' GPIYIITEYCF | 79    | >PDGFRA-T6' GPIYIIIEYCF | 57   | 22    |
| >PDGFRA-T6' GPIYIITEY   | 90    | >PDGFRA-T6' GPIYIIIEY   | 89   | 1     |
| >PDGFRA-T6' GPIYIITEYCF | 133   | >PDGFRA-T6' GPIYIIIEYCF | 149  | 16    |
| >PDGFRA-T6' GPIYIITEY   | 274   | >PDGFRA-T6' GPIYIIIEY   | 1785 | 1511  |
| >PDGFRA-T6' GPIYIITEY   | 15    | >PDGFRA-T6' GPIYIIIEY   | 15   | 0     |
| >PDGFRA-T6' GPIYIITEYCF | 391   | >PDGFRA-T6' GPIYIIIEYCF | 310  | 81    |
| >PDGFRA-T6' GPIYIITEY   | 121   | >PDGFRA-T6' GPIYIIIEY   | 54   | 67    |
| >PDGFRA-T6' GPIYIITEYCF | 128   | >PDGFRA-T6' GPIYIIIEYCF | 84   | 44    |
| >PDGFRA-T6' SGPIYIIT    | 3608  | >PDGFRA-T6' SGPIYIII    | 328  | 3280  |
| >PDGFRA-T6' SGPIYIITEY  | 309   | >PDGFRA-T6' SGPIYIIIEY  | 369  | 60    |
| >PDGFRA-T6' SGPIYIITEY  | 400   | >PDGFRA-T6' SGPIYIIIEY  | 685  | 285   |
| >PDGFRA-T6' SGPIYIITEYC | 283   | >PDGFRA-T6' SGPIYIIIEYC | 114  | 169   |
| >PDGFRA-T6' SGPIYIITEY  | 269   | >PDGFRA-T6' SGPIYIIIEY  | 164  | 105   |
| >PDGFRA-T6' KSGPIYIITEY | 862   | >PDGFRA-T6' KSGPIYIIIEY | 322  | 540   |
| >PDGFRA-T6' KSGPIYIITEY | 382   | >PDGFRA-T6' KSGPIYIIIEY | 249  | 133   |
| >PDGFRA-T6' KSGPIYIIT   | 3434  | >PDGFRA-T6' KSGPIYIII   | 183  | 3251  |
| >PDGFRA-T6' KSGPIYIITEY | 53    | >PDGFRA-T6' KSGPIYIIIEY | 56   | 3     |
| >PDGFRA-T6' KSGPIYIIT   | 11883 | >PDGFRA-T6' KSGPIYIII   | 284  | 11599 |
| >PDGFRA-T6' KSGPIYIITEY | 85    | >PDGFRA-T6' KSGPIYIIIEY | 59   | 26    |
| >PDGFRA-T6' KSGPIYIITEY | 292   | >PDGFRA-T6' KSGPIYIIIEY | 421  | 129   |
| >PDGFRA-T6' KSGPIYIITEY | 15    | >PDGFRA-T6' KSGPIYIIIEY | 16   | 1     |
| >PDGFRA-T6' KSGPIYIITEY | 357   | >PDGFRA-T6' KSGPIYIIIEY | 349  | 8     |
| >PDGFRA-T6' KSGPIYIIT   | 9854  | >PDGFRA-T6' KSGPIYIII   | 34   | 9820  |
| >PDGFRA-T6' KSGPIYIITEY | 32    | >PDGFRA-T6' KSGPIYIIIEY | 35   | 3     |
| >PDGFRA-T6' KSGPIYIIT   | 9679  | >PDGFRA-T6' KSGPIYIII   | 375  | 9304  |
| >PDGFRA-T6' KSGPIYIITEY | 53    | >PDGFRA-T6' KSGPIYIIIEY | 196  | 143   |
| >PDGFRA-T6' KSGPIYIIT   | 16401 | >PDGFRA-T6' KSGPIYIII   | 12   | 16389 |

|                        |      |                        |      |      |
|------------------------|------|------------------------|------|------|
| >PDGFRA-V1 VKGKKFQTI   | 343  | >PDGFRA-V1 IKGKKFQTI   | 130  | 213  |
| >PDGFRA-V1 VKGKKFQTIP  | 9    | >PDGFRA-V1 IKGKKFQTIPF | 5    | 4    |
| >PDGFRA-V1 TVKGKKFQTI  | 436  | >PDGFRA-V1 TIKGKKFQTI  | 1366 | 930  |
| >PDGFRA-V1 TVGPYICEAT  | 456  | >PDGFRA-V1 TVGPYICEATI | 2363 | 1907 |
| >PDGFRA-V1 TVGPYICEAT  | 432  | >PDGFRA-V1 TVGPYICEATI | 1928 | 1496 |
| >PDGFRA-V1 TVGPYICEAT  | 326  | >PDGFRA-V1 TVGPYICEATI | 1725 | 1399 |
| >PDGFRA-V1 TVGPYICEAT  | 119  | >PDGFRA-V1 TVGPYICEATI | 738  | 619  |
| >PDGFRA-V1 TVGPYICEAT  | 77   | >PDGFRA-V1 TVGPYICEATI | 736  | 659  |
| >PDGFRA-V1 TVGPYICEAT  | 285  | >PDGFRA-V1 TVGPYICEATI | 2741 | 2456 |
| >PDGFRA-V1 TVGPYICEAT  | 222  | >PDGFRA-V1 TVGPYICEATI | 4423 | 4201 |
| >PDGFRA-V1 TVGPYICEAT  | 255  | >PDGFRA-V1 TVGPYICEATI | 4106 | 3851 |
| >PDGFRA-V1 TVGPYICEAT  | 9    | >PDGFRA-V1 TVGPYICEATI | 551  | 542  |
| >PDGFRA-V1 TVGPYICEAT  | 51   | >PDGFRA-V1 TVGPYICEATI | 261  | 210  |
| >PDGFRA-V1 TVGPYICEAT  | 193  | >PDGFRA-V1 TVGPYICEATI | 1027 | 834  |
| >PDGFRA-V1 ATVKGKKF    | 117  | >PDGFRA-V1 ATIKGKKF    | 48   | 69   |
| >PDGFRA-V1 ATVKGKKFQ   | 524  | >PDGFRA-V1 ATIKGKKFQ   | 253  | 271  |
| >PDGFRA-V1 ATVKGKKF    | 297  | >PDGFRA-V1 ATIKGKKF    | 211  | 86   |
| >PDGFRA-V1 ATVKGKKF    | 4    | >PDGFRA-V1 ATIKGKKF    | 4    | 0    |
| >PDGFRA-V1 ATVKGKKFQ   | 66   | >PDGFRA-V1 ATIKGKKFQ   | 66   | 0    |
| >PDGFRA-V1 ATVKGKKF    | 88   | >PDGFRA-V1 ATIKGKKF    | 123  | 35   |
| >PDGFRA-V1 ATVKGKKFQ   | 286  | >PDGFRA-V1 ATIKGKKFQ   | 421  | 135  |
| >PDGFRA-V1 ATVKGKKFQ   | 79   | >PDGFRA-V1 ATIKGKKFQ   | 53   | 26   |
| >PDGFRA-V1 EATVKGKK    | 110  | >PDGFRA-V1 EATIKGKK    | 116  | 6    |
| >PDGFRA-V1 EATVKGKKF   | 155  | >PDGFRA-V1 EATIKGKKF   | 84   | 71   |
| >PDGFRA-V1 YICEATVKGK  | 474  | >PDGFRA-V1 YICEATIKGK  | 362  | 112  |
| >PDGFRA-V1 YICEATVK    | 229  | >PDGFRA-V1 YICEATIK    | 207  | 22   |
| >PDGFRA-V1 YICEATVKGK  | 405  | >PDGFRA-V1 YICEATIKGK  | 322  | 83   |
| >PDGFRA-V1 YICEATVKGKI | 249  | >PDGFRA-V1 YICEATIKGKK | 229  | 20   |
| >PDGFRA-V1 YICEATVK    | 77   | >PDGFRA-V1 YICEATIK    | 85   | 8    |
| >PDGFRA-V1 YICEATVKGKI | 73   | >PDGFRA-V1 YICEATIKGKK | 80   | 7    |
| >PDGFRA-V1 PYICEATV    | 3928 | >PDGFRA-V1 PYICEATI    | 344  | 3584 |
| >PDGFRA-V1 PYICEATV    | 715  | >PDGFRA-V1 PYICEATI    | 55   | 660  |
| >PDGFRA-V1 PYICEATV    | 1854 | >PDGFRA-V1 PYICEATI    | 216  | 1638 |
| >PDGFRA-V1 PYICEATV    | 2246 | >PDGFRA-V1 PYICEATI    | 143  | 2103 |
| >PDGFRA-V1 GPYICEATV   | 792  | >PDGFRA-V1 GPYICEATI   | 92   | 700  |
| >PDGFRA-V1 GPYICEATV   | 51   | >PDGFRA-V1 GPYICEATI   | 238  | 187  |
| >PDGFRA-V1 VGPYICEATV  | 70   | >PDGFRA-V1 VGPYICEATI  | 40   | 30   |
| >PDGFRA-V4 VSNIITEIHSR | 581  | >PDGFRA-V4 ASNIITEIHSR | 216  | 365  |
| >PDGFRA-V4 VSNIITEIHSR | 37   | >PDGFRA-V4 ASNIITEIHSR | 26   | 11   |
| >PDGFRA-V4 VSNIITEI    | 774  | >PDGFRA-V4 ASNIITEI    | 185  | 589  |
| >PDGFRA-V4 VSNIITEIHSR | 91   | >PDGFRA-V4 ASNIITEIHSR | 101  | 10   |
| >PDGFRA-V4 VSNIITEI    | 304  | >PDGFRA-V4 ASNIITEI    | 345  | 41   |
| >PDGFRA-V4 VSNIITEI    | 435  | >PDGFRA-V4 ASNIITEI    | 2716 | 2281 |

|                         |      |                         |      |      |
|-------------------------|------|-------------------------|------|------|
| >PDGFRA-V4 VSNIITEIHSR  | 1673 | >PDGFRA-V4 ASNIITEIHSR  | 262  | 1411 |
| >PDGFRA-V4 VSNIITEI     | 142  | >PDGFRA-V4 ASNIITEI     | 99   | 43   |
| >PDGFRA-V4 NVSNIITEI    | 35   | >PDGFRA-V4 NASNIITEI    | 229  | 194  |
| >PDGFRA-V4 NVSNIITEI    | 42   | >PDGFRA-V4 NASNIITEI    | 435  | 393  |
| >PDGFRA-V4 NVSNIITEI    | 162  | >PDGFRA-V4 NASNIITEI    | 933  | 771  |
| >PDGFRA-V4 NVSNIITEI    | 6    | >PDGFRA-V4 NASNIITEI    | 11   | 5    |
| >PDGFRA-V4 NVSNIITEI    | 413  | >PDGFRA-V4 NASNIITEI    | 1128 | 715  |
| >PDGFRA-V4 ETSWTILANN   | 7    | >PDGFRA-V4 ETSWTILANN   | 26   | 19   |
| >PDGFRA-V4 ETSWTILANN   | 5    | >PDGFRA-V4 ETSWTILANN   | 41   | 36   |
| >PDGFRA-V4 LANNVSNII    | 395  | >PDGFRA-V4 LANNASNII    | 1971 | 1576 |
| >PDGFRA-V4 LANNVSNII    | 161  | >PDGFRA-V4 LANNASNI     | 149  | 12   |
| >PDGFRA-V4 LANNVSNII    | 148  | >PDGFRA-V4 LANNASNII    | 143  | 5    |
| >PDGFRA-V4 ILANNVSNII   | 102  | >PDGFRA-V4 ILANNASNI    | 726  | 624  |
| >PDGFRA-V4 ILANNVSNII   | 9    | >PDGFRA-V4 ILANNASNI    | 32   | 23   |
| >PDGFRA-V4 ILANNVSNII   | 60   | >PDGFRA-V4 ILANNASNII   | 69   | 9    |
| >PDGFRA-V4 ILANNVSNII   | 3    | >PDGFRA-V4 ILANNASNI    | 10   | 7    |
| >PDGFRA-V4 ILANNVSNII   | 73   | >PDGFRA-V4 ILANNASNII   | 110  | 37   |
| >PDGFRA-V4 ILANNVSNIIIT | 208  | >PDGFRA-V4 ILANNASNIIIT | 442  | 234  |
| >PDGFRA-V4 ILANNVSNII   | 494  | >PDGFRA-V4 ILANNASNI    | 972  | 478  |
| >PDGFRA-V4 ILANNVSNII   | 6    | >PDGFRA-V4 ILANNASNI    | 20   | 14   |
| >PDGFRA-V4 ILANNVSNII   | 24   | >PDGFRA-V4 ILANNASNII   | 97   | 73   |
| >PDGFRA-V4 ILANNVSNII   | 9    | >PDGFRA-V4 ILANNASNI    | 17   | 8    |
| >PDGFRA-V4 ILANNVSNII   | 15   | >PDGFRA-V4 ILANNASNII   | 22   | 7    |
| >PDGFRA-V4 ILANNVSNII   | 21   | >PDGFRA-V4 ILANNASNI    | 84   | 63   |
| >PDGFRA-V4 ILANNVSNII   | 45   | >PDGFRA-V4 ILANNASNII   | 112  | 67   |
| >PDGFRA-V4 ILANNVSNII   | 6    | >PDGFRA-V4 ILANNASNI    | 23   | 17   |
| >PDGFRA-V4 ILANNVSNII   | 34   | >PDGFRA-V4 ILANNASNII   | 59   | 25   |
| >PDGFRA-V4 ILANNVSNII   | 5    | >PDGFRA-V4 ILANNASNI    | 8    | 3    |
| >PDGFRA-V4 ILANNVSNII   | 18   | >PDGFRA-V4 ILANNASNII   | 22   | 4    |
| >PDGFRA-V4 ILANNVSNIIIT | 116  | >PDGFRA-V4 ILANNASNIIIT | 153  | 37   |
| >PDGFRA-V4 ILANNVSNII   | 158  | >PDGFRA-V4 ILANNASNI    | 305  | 147  |
| >PDGFRA-V4 ILANNVSNII   | 301  | >PDGFRA-V4 ILANNASNII   | 326  | 25   |
| >PDGFRA-V4 TILANNVSNII  | 67   | >PDGFRA-V4 TILANNASNI   | 154  | 87   |
| >PDGFRA-V4 TILANNVSNII  | 235  | >PDGFRA-V4 TILANNASNI   | 531  | 296  |
| >PDGFRA-V4 TILANNVSNII  | 255  | >PDGFRA-V4 TILANNASNII  | 703  | 448  |
| >PDGFRA-V4 TILANNVSNII  | 61   | >PDGFRA-V4 TILANNASNI   | 41   | 20   |
| >PDGFRA-V4 TILANNVSNII  | 245  | >PDGFRA-V4 TILANNASNII  | 178  | 67   |
| >PDGFRA-V4 WTILANNV     | 429  | >PDGFRA-V4 WTILANNA     | 2906 | 2477 |
| >PDGFRA-V4 WTILANNV     | 415  | >PDGFRA-V4 WTILANNA     | 2699 | 2284 |
| >PDGFRA-V4 WTILANNV     | 88   | >PDGFRA-V4 WTILANNA     | 1291 | 1203 |
| >PDGFRA-V4 WTILANNVSP   | 498  | >PDGFRA-V4 WTILANNASPI  | 1612 | 1114 |
| >PDGFRA-V4 WTILANNV     | 8    | >PDGFRA-V4 WTILANNA     | 32   | 24   |
| >PDGFRA-V4 WTILANNVS    | 1125 | >PDGFRA-V4 WTILANNAS    | 386  | 739  |

|                        |       |                        |      |       |
|------------------------|-------|------------------------|------|-------|
| >PDGFRA-V4 WTILANNVSM  | 17    | >PDGFRA-V4 WTILANNAST  | 20   | 3     |
| >PDGFRA-V4 WTILANNV    | 23    | >PDGFRA-V4 WTILANNA    | 741  | 718   |
| >PDGFRA-V4 WTILANNVSM  | 191   | >PDGFRA-V4 WTILANNAST  | 120  | 71    |
| >PDGFRA-V4 WTILANNVSM  | 78    | >PDGFRA-V4 WTILANNAST  | 66   | 12    |
| >PDGFRA-V4 WTILANNV    | 452   | >PDGFRA-V4 WTILANNA    | 2538 | 2086  |
| >PDGFRA-V4 WTILANNVSM  | 446   | >PDGFRA-V4 WTILANNAST  | 648  | 202   |
| >PDGFRA-V4 WTILANNVSM  | 135   | >PDGFRA-V4 WTILANNAST  | 107  | 28    |
| >PDGFRA-V4 WTILANNVSM  | 145   | >PDGFRA-V4 WTILANNAST  | 132  | 13    |
| >PDGFRA-V4 SWTILANNV   | 114   | >PDGFRA-V4 SWTILANNA   | 125  | 11    |
| >PDGFRA-V4 SWTILANNVS  | 265   | >PDGFRA-V4 SWTILANNAS  | 342  | 77    |
| >PDGFRA-V4 TSWTILANNV  | 125   | >PDGFRA-V4 TSWTILANNA  | 1384 | 1259  |
| >PDGFRA-V4 TSWTILANNV  | 32    | >PDGFRA-V4 TSWTILANNA  | 1189 | 1157  |
| >PDGFRA-V5 VIVIISLIVLV | 250   | >PDGFRA-V5 EIVIISLIVLV | 5179 | 4929  |
| >PDGFRA-V5 VIVIISLI    | 436   | >PDGFRA-V5 EIVIISLI    | 2049 | 1613  |
| >PDGFRA-V5 VIVIISLIVLV | 153   | >PDGFRA-V5 EIVIISLIVLV | 827  | 674   |
| >PDGFRA-V5 VIVIISLI    | 183   | >PDGFRA-V5 EIVIISLI    | 1974 | 1791  |
| >PDGFRA-V5 VIVIISLIV   | 294   | >PDGFRA-V5 EIVIISLIV   | 2198 | 1904  |
| >PDGFRA-V5 VIVIISLIVLV | 119   | >PDGFRA-V5 EIVIISLIVLV | 1229 | 1110  |
| >PDGFRA-V5 VIVIISLI    | 366   | >PDGFRA-V5 EIVIISLI    | 3497 | 3131  |
| >PDGFRA-V5 VIVIISLIV   | 141   | >PDGFRA-V5 EIVIISLIV   | 2085 | 1944  |
| >PDGFRA-V5 VIVIISLIVL  | 463   | >PDGFRA-V5 EIVIISLIVL  | 872  | 409   |
| >PDGFRA-V5 VIVIISLIVLV | 50    | >PDGFRA-V5 EIVIISLIVLV | 484  | 434   |
| >PDGFRA-V5 VIVIISLI    | 489   | >PDGFRA-V5 EIVIISLI    | 5019 | 4530  |
| >PDGFRA-V5 VIVIISLIV   | 267   | >PDGFRA-V5 EIVIISLIV   | 3507 | 3240  |
| >PDGFRA-V5 VIVIISLIVLV | 32    | >PDGFRA-V5 EIVIISLIVLV | 532  | 500   |
| >PDGFRA-V5 VIVIISLIV   | 172   | >PDGFRA-V5 EIVIISLIV   | 2053 | 1881  |
| >PDGFRA-V5 VIVIISLIVLV | 54    | >PDGFRA-V5 EIVIISLIVLV | 650  | 596   |
| >PDGFRA-V5 VIVIISLIV   | 35    | >PDGFRA-V5 EIVIISLIV   | 885  | 850   |
| >PDGFRA-V5 VIVIISLIVL  | 499   | >PDGFRA-V5 EIVIISLIVL  | 5818 | 5319  |
| >PDGFRA-V5 VIVIISLIVLV | 10    | >PDGFRA-V5 EIVIISLIVLV | 154  | 144   |
| >PDGFRA-V5 VIVIISLIVL  | 7885  | >PDGFRA-V5 EIVIISLIVL  | 307  | 7578  |
| >PDGFRA-V5 VIVIISLI    | 771   | >PDGFRA-V5 EIVIISLI    | 22   | 749   |
| >PDGFRA-V5 VIVIISLIV   | 1390  | >PDGFRA-V5 EIVIISLIV   | 52   | 1338  |
| >PDGFRA-V5 VIVIISLIVL  | 2563  | >PDGFRA-V5 EIVIISLIVL  | 215  | 2348  |
| >PDGFRA-V5 VIVIISLIVLV | 201   | >PDGFRA-V5 EIVIISLIVLV | 11   | 190   |
| >PDGFRA-V5 VIVIISLI    | 7730  | >PDGFRA-V5 EIVIISLI    | 95   | 7635  |
| >PDGFRA-V5 VIVIISLIV   | 3838  | >PDGFRA-V5 EIVIISLIV   | 28   | 3810  |
| >PDGFRA-V5 VIVIISLIVL  | 10172 | >PDGFRA-V5 EIVIISLIVL  | 336  | 9836  |
| >PDGFRA-V5 VIVIISLIVLV | 1538  | >PDGFRA-V5 EIVIISLIVLV | 13   | 1525  |
| >PDGFRA-V5 LVIVIISL    | 40004 | >PDGFRA-V5 LEIVIISL    | 436  | 39568 |
| >PDGFRA-V5 LVIVIISLI   | 2940  | >PDGFRA-V5 LEIVIISLI   | 7    | 2933  |
| >PDGFRA-V5 LVIVIISLIV  | 19469 | >PDGFRA-V5 LEIVIISLIV  | 79   | 19390 |
| >PDGFRA-V5 LVIVIISLIVL | 27355 | >PDGFRA-V5 LEIVIISLIVL | 268  | 27087 |

|                        |       |                        |       |       |
|------------------------|-------|------------------------|-------|-------|
| >PDGFRA-V5 LVIVIISL    | 335   | >PDGFRA-V5 LEIVIISL    | 16578 | 16243 |
| >PDGFRA-V5 LVIVIISL    | 327   | >PDGFRA-V5 LEIVIISL    | 2749  | 2422  |
| >PDGFRA-V5 LVIVIISLI   | 145   | >PDGFRA-V5 LEIVIISLI   | 1555  | 1410  |
| >PDGFRA-V5 LVIVIISLIV  | 449   | >PDGFRA-V5 LEIVIISLIV  | 4790  | 4341  |
| >PDGFRA-V5 LVIVIISL    | 399   | >PDGFRA-V5 LEIVIISL    | 7934  | 7535  |
| >PDGFRA-V5 LVIVIISLI   | 65    | >PDGFRA-V5 LEIVIISLI   | 4008  | 3943  |
| >PDGFRA-V5 LVIVIISLIV  | 178   | >PDGFRA-V5 LEIVIISLIV  | 5237  | 5059  |
| >PDGFRA-V5 LVIVIISL    | 55    | >PDGFRA-V5 LEIVIISL    | 1131  | 1076  |
| >PDGFRA-V5 LVIVIISLI   | 78    | >PDGFRA-V5 LEIVIISLI   | 1927  | 1849  |
| >PDGFRA-V5 LVIVIISLIV  | 118   | >PDGFRA-V5 LEIVIISLIV  | 1632  | 1514  |
| >PDGFRA-V5 LVIVIISLIVL | 129   | >PDGFRA-V5 LEIVIISLIVL | 3617  | 3488  |
| >PDGFRA-V5 LVIVIISLIV  | 475   | >PDGFRA-V5 LEIVIISLIV  | 10592 | 10117 |
| >PDGFRA-V5 LVIVIISL    | 119   | >PDGFRA-V5 LEIVIISL    | 18949 | 18830 |
| >PDGFRA-V5 LVIVIISLIV  | 38    | >PDGFRA-V5 LEIVIISLIV  | 9908  | 9870  |
| >PDGFRA-V5 LVIVIISLIVL | 395   | >PDGFRA-V5 LEIVIISLIVL | 21548 | 21153 |
| >PDGFRA-V5 LVIVIISLIVL | 336   | >PDGFRA-V5 LEIVIISLIVL | 20647 | 20311 |
| >PDGFRA-V5 LVIVIISL    | 110   | >PDGFRA-V5 LEIVIISL    | 9721  | 9611  |
| >PDGFRA-V5 LVIVIISLI   | 24    | >PDGFRA-V5 LEIVIISLI   | 6451  | 6427  |
| >PDGFRA-V5 LVIVIISLIVL | 308   | >PDGFRA-V5 LEIVIISLIVL | 12486 | 12178 |
| >PDGFRA-V5 LVIVIISL    | 17314 | >PDGFRA-V5 LEIVIISL    | 45    | 17269 |
| >PDGFRA-V5 LVIVIISLIVL | 18302 | >PDGFRA-V5 LEIVIISLIVL | 78    | 18224 |
| >PDGFRA-V5 LVIVIISL    | 19557 | >PDGFRA-V5 LEIVIISL    | 11    | 19546 |
| >PDGFRA-V5 LVIVIISLI   | 23715 | >PDGFRA-V5 LEIVIISLI   | 86    | 23629 |
| >PDGFRA-V5 LVIVIISLIVL | 19579 | >PDGFRA-V5 LEIVIISLIVL | 11    | 19568 |
| >PDGFRA-V5 LVIVIISL    | 28629 | >PDGFRA-V5 LEIVIISL    | 47    | 28582 |
| >PDGFRA-V5 LVIVIISLI   | 36620 | >PDGFRA-V5 LEIVIISLI   | 133   | 36487 |
| >PDGFRA-V5 LVIVIISLIV  | 34341 | >PDGFRA-V5 LEIVIISLIV  | 342   | 33999 |
| >PDGFRA-V5 LVIVIISLIVL | 27136 | >PDGFRA-V5 LEIVIISLIVL | 54    | 27082 |
| >PDGFRA-V5 LVIVIISL    | 38422 | >PDGFRA-V5 LEIVIISL    | 246   | 38176 |
| >PDGFRA-V5 LVIVIISLI   | 39306 | >PDGFRA-V5 LEIVIISLI   | 308   | 38998 |
| >PDGFRA-V5 LVIVIISLIVL | 39118 | >PDGFRA-V5 LEIVIISLIVL | 391   | 38727 |
| >PDGFRA-V5 LVIVIISLI   | 89    | >PDGFRA-V5 LEIVIISLI   | 2428  | 2339  |
| >PDGFRA-V5 LVIVIISL    | 27469 | >PDGFRA-V5 LEIVIISL    | 407   | 27062 |
| >PDGFRA-V5 LVIVIISLI   | 4885  | >PDGFRA-V5 LEIVIISLI   | 3     | 4882  |
| >PDGFRA-V5 LVIVIISLIV  | 30660 | >PDGFRA-V5 LEIVIISLIV  | 104   | 30556 |
| >PDGFRA-V5 LVIVIISLIVL | 14671 | >PDGFRA-V5 LEIVIISLIVL | 8     | 14663 |
| >PDGFRA-V5 LVIVIISLI   | 267   | >PDGFRA-V5 LEIVIISLI   | 1700  | 1433  |
| >PDGFRA-V5 TVAAAVLVLL  | 70    | >PDGFRA-V5 TVAAAVLVLL  | 22822 | 22752 |
| >PDGFRA-V5 TVAAAVLVLL  | 37    | >PDGFRA-V5 TVAAAVLVLL  | 16539 | 16502 |
| >PDGFRA-V5 TVAAAVLVLL  | 19    | >PDGFRA-V5 TVAAAVLVLL  | 16851 | 16832 |
| >PDGFRA-V5 TVAAAVLVLL  | 22    | >PDGFRA-V5 TVAAAVLVLL  | 19408 | 19386 |
| >PDGFRA-V5 TVAAAVLVLL  | 367   | >PDGFRA-V5 TVAAAVLVLL  | 30293 | 29926 |
| >PDGFRA-V5 TVAAAVLVLL  | 84    | >PDGFRA-V5 TVAAAVLVLL  | 24912 | 24828 |

|                        |     |                        |       |       |
|------------------------|-----|------------------------|-------|-------|
| >PDGFRA-V5 TVAAAVLVLL  | 376 | >PDGFRA-V5 TVAAAVLVLL  | 27130 | 26754 |
| >PDGFRA-V5 TVAAAVLVLL  | 32  | >PDGFRA-V5 TVAAAVLVLL  | 32839 | 32807 |
| >PDGFRA-V5 TVAAAVLVLL  | 6   | >PDGFRA-V5 TVAAAVLVLL  | 11575 | 11569 |
| >PDGFRA-V5 TVAAAVLVLL  | 16  | >PDGFRA-V5 TVAAAVLVLL  | 17298 | 17282 |
| >PDGFRA-V5 LLVIVIISL   | 62  | >PDGFRA-V5 LLEIVIISL   | 271   | 209   |
| >PDGFRA-V5 LLVIVIISLI  | 309 | >PDGFRA-V5 LLEIVIISLI  | 653   | 344   |
| >PDGFRA-V5 LLVIVIISLIV | 83  | >PDGFRA-V5 LLEIVIISLIV | 379   | 296   |
| >PDGFRA-V5 LLVIVIISL   | 137 | >PDGFRA-V5 LLEIVIISL   | 217   | 80    |
| >PDGFRA-V5 LLVIVIISLI  | 63  | >PDGFRA-V5 LLEIVIISLI  | 105   | 42    |
| >PDGFRA-V5 LLVIVIISLIV | 171 | >PDGFRA-V5 LLEIVIISLIV | 319   | 148   |
| >PDGFRA-V5 LLVIVIISL   | 112 | >PDGFRA-V5 LLEIVIISL   | 1089  | 977   |
| >PDGFRA-V5 LLVIVIISLI  | 76  | >PDGFRA-V5 LLEIVIISLI  | 183   | 107   |
| >PDGFRA-V5 LLVIVIISLIV | 38  | >PDGFRA-V5 LLEIVIISLIV | 378   | 340   |
| >PDGFRA-V5 LLVIVIISL   | 173 | >PDGFRA-V5 LLEIVIISL   | 1346  | 1173  |
| >PDGFRA-V5 LLVIVIISLI  | 190 | >PDGFRA-V5 LLEIVIISLI  | 880   | 690   |
| >PDGFRA-V5 LLVIVIISLIV | 70  | >PDGFRA-V5 LLEIVIISLIV | 777   | 707   |
| >PDGFRA-V5 LLVIVIISL   | 3   | >PDGFRA-V5 LLEIVIISL   | 11    | 8     |
| >PDGFRA-V5 LLVIVIISLI  | 6   | >PDGFRA-V5 LLEIVIISLI  | 32    | 26    |
| >PDGFRA-V5 LLVIVIISLIV | 5   | >PDGFRA-V5 LLEIVIISLIV | 18    | 13    |
| >PDGFRA-V5 LLVIVIISL   | 79  | >PDGFRA-V5 LLEIVIISL   | 232   | 153   |
| >PDGFRA-V5 LLVIVIISLI  | 180 | >PDGFRA-V5 LLEIVIISLI  | 587   | 407   |
| >PDGFRA-V5 LLVIVIISLIV | 18  | >PDGFRA-V5 LLEIVIISLIV | 49    | 31    |
| >PDGFRA-V5 LLVIVIISL   | 18  | >PDGFRA-V5 LLEIVIISL   | 123   | 105   |
| >PDGFRA-V5 LLVIVIISLI  | 47  | >PDGFRA-V5 LLEIVIISLI  | 471   | 424   |
| >PDGFRA-V5 LLVIVIISLIV | 9   | >PDGFRA-V5 LLEIVIISLIV | 34    | 25    |
| >PDGFRA-V5 LLVIVIISL   | 397 | >PDGFRA-V5 LLEIVIISL   | 3414  | 3017  |
| >PDGFRA-V5 LLVIVIISLIV | 61  | >PDGFRA-V5 LLEIVIISLIV | 598   | 537   |
| >PDGFRA-V5 LLVIVIISL   | 3   | >PDGFRA-V5 LLEIVIISL   | 4     | 1     |
| >PDGFRA-V5 LLVIVIISLI  | 7   | >PDGFRA-V5 LLEIVIISLI  | 13    | 6     |
| >PDGFRA-V5 LLVIVIISLIV | 3   | >PDGFRA-V5 LLEIVIISLIV | 3     | 0     |
| >PDGFRA-V5 VLLVIVII    | 76  | >PDGFRA-V5 VLLEIVII    | 20    | 56    |
| >PDGFRA-V5 VLLVIVIISL  | 69  | >PDGFRA-V5 VLLEIVIISL  | 25    | 44    |
| >PDGFRA-V5 VLLVIVIISLI | 57  | >PDGFRA-V5 VLLEIVIISLI | 16    | 41    |
| >PDGFRA-V5 VLLVIVII    | 630 | >PDGFRA-V5 VLLEIVII    | 110   | 520   |
| >PDGFRA-V5 VLLVIVIISL  | 97  | >PDGFRA-V5 VLLEIVIISL  | 37    | 60    |
| >PDGFRA-V5 VLLVIVIISLI | 241 | >PDGFRA-V5 VLLEIVIISLI | 37    | 204   |
| >PDGFRA-V5 VLLVIVII    | 449 | >PDGFRA-V5 VLLEIVII    | 65    | 384   |
| >PDGFRA-V5 VLLVIVIISL  | 221 | >PDGFRA-V5 VLLEIVIISL  | 91    | 130   |
| >PDGFRA-V5 VLLVIVIISLI | 125 | >PDGFRA-V5 VLLEIVIISLI | 19    | 106   |
| >PDGFRA-V5 VLLVIVII    | 393 | >PDGFRA-V5 VLLEIVII    | 32    | 361   |
| >PDGFRA-V5 VLLVIVIISL  | 169 | >PDGFRA-V5 VLLEIVIISL  | 93    | 76    |
| >PDGFRA-V5 VLLVIVIISLI | 397 | >PDGFRA-V5 VLLEIVIISLI | 28    | 369   |
| >PDGFRA-V5 VLLVIVII    | 9   | >PDGFRA-V5 VLLEIVII    | 3     | 6     |

|                        |      |                         |      |      |
|------------------------|------|-------------------------|------|------|
| >PDGFRA-V5 VLLVIVIIS   | 1343 | >PDGFRA-V5 VLLLEIVIIS   | 39   | 1304 |
| >PDGFRA-V5 VLLVIVIISL  | 3    | >PDGFRA-V5 VLLLEIVIISL  | 1    | 2    |
| >PDGFRA-V5 VLLVIVIISLI | 5    | >PDGFRA-V5 VLLLEIVIISLI | 2    | 3    |
| >PDGFRA-V5 VLLVIVII    | 30   | >PDGFRA-V5 VLLLEIVII    | 6    | 24   |
| >PDGFRA-V5 VLLVIVIISL  | 21   | >PDGFRA-V5 VLLLEIVIISL  | 5    | 16   |
| >PDGFRA-V5 VLLVIVIISLI | 49   | >PDGFRA-V5 VLLLEIVIISLI | 8    | 41   |
| >PDGFRA-V5 VLLVIVII    | 13   | >PDGFRA-V5 VLLLEIVII    | 7    | 6    |
| >PDGFRA-V5 VLLVIVIIS   | 2374 | >PDGFRA-V5 VLLLEIVIIS   | 205  | 2169 |
| >PDGFRA-V5 VLLVIVIISL  | 8    | >PDGFRA-V5 VLLLEIVIISL  | 5    | 3    |
| >PDGFRA-V5 VLLVIVIISLI | 13   | >PDGFRA-V5 VLLLEIVIISLI | 6    | 7    |
| >PDGFRA-V5 VLLVIVII    | 15   | >PDGFRA-V5 VLLLEIVII    | 5    | 10   |
| >PDGFRA-V5 VLLVIVIISL  | 6    | >PDGFRA-V5 VLLLEIVIISL  | 3    | 3    |
| >PDGFRA-V5 VLLVIVIISLI | 9    | >PDGFRA-V5 VLLLEIVIISLI | 3    | 6    |
| >PDGFRA-V5 VLLVIVII    | 15   | >PDGFRA-V5 VLLLEIVII    | 5    | 10   |
| >PDGFRA-V5 VLLVIVIIS   | 3156 | >PDGFRA-V5 VLLLEIVIIS   | 313  | 2843 |
| >PDGFRA-V5 VLLVIVIISL  | 4    | >PDGFRA-V5 VLLLEIVIISL  | 2    | 2    |
| >PDGFRA-V5 VLLVIVIISLI | 10   | >PDGFRA-V5 VLLLEIVIISLI | 4    | 6    |
| >PDGFRA-V5 VLLVIVII    | 293  | >PDGFRA-V5 VLLLEIVII    | 209  | 84   |
| >PDGFRA-V5 VLLVIVIISL  | 391  | >PDGFRA-V5 VLLLEIVIISL  | 225  | 166  |
| >PDGFRA-V5 LVLLVIVIISL | 318  | >PDGFRA-V5 LVLLEIVIISL  | 520  | 202  |
| >PDGFRA-V5 LVLLVIVI    | 346  | >PDGFRA-V5 LVLLEIVI     | 589  | 243  |
| >PDGFRA-V5 LVLLVIVII   | 399  | >PDGFRA-V5 LVLLEIVII    | 398  | 1    |
| >PDGFRA-V5 LVLLVIVIISL | 122  | >PDGFRA-V5 LVLLEIVIISL  | 125  | 3    |
| >PDGFRA-V5 LVLLVIVI    | 165  | >PDGFRA-V5 LVLLEIVI     | 1270 | 1105 |
| >PDGFRA-V5 LVLLVIVII   | 334  | >PDGFRA-V5 LVLLEIVII    | 2110 | 1776 |
| >PDGFRA-V5 LVLLVIVIISL | 57   | >PDGFRA-V5 LVLLEIVIISL  | 217  | 160  |
| >PDGFRA-V5 LVLLVIVIISL | 212  | >PDGFRA-V5 LVLLEIVIISL  | 778  | 566  |
| >PDGFRA-V5 LVLLVIVIISL | 146  | >PDGFRA-V5 LVLLEIVIISL  | 143  | 3    |
| >PDGFRA-V5 VLVLLVIV    | 100  | >PDGFRA-V5 VLVLLEIV     | 317  | 217  |
| >PDGFRA-V5 VLVLLVIVI   | 446  | >PDGFRA-V5 VLVLLEIVI    | 2311 | 1865 |
| >PDGFRA-V5 VLVLLVIV    | 184  | >PDGFRA-V5 VLVLLEIV     | 165  | 19   |
| >PDGFRA-V5 VLVLLVIV    | 45   | >PDGFRA-V5 VLVLLEIV     | 114  | 69   |
| >PDGFRA-V5 VLVLLVIVI   | 339  | >PDGFRA-V5 VLVLLEIVI    | 2166 | 1827 |
| >PDGFRA-V5 VLVLLVIVII  | 425  | >PDGFRA-V5 VLVLLEIVII   | 505  | 80   |
| >PDGFRA-V5 VLVLLVIV    | 91   | >PDGFRA-V5 VLVLLEIV     | 113  | 22   |
| >PDGFRA-V5 VLVLLVIV    | 9    | >PDGFRA-V5 VLVLLEIV     | 17   | 8    |
| >PDGFRA-V5 VLVLLVIVI   | 26   | >PDGFRA-V5 VLVLLEIVI    | 253  | 227  |
| >PDGFRA-V5 VLVLLVIVII  | 47   | >PDGFRA-V5 VLVLLEIVII   | 274  | 227  |
| >PDGFRA-V5 VLVLLVIV    | 13   | >PDGFRA-V5 VLVLLEIV     | 28   | 15   |
| >PDGFRA-V5 VLVLLVIVI   | 207  | >PDGFRA-V5 VLVLLEIVI    | 727  | 520  |
| >PDGFRA-V5 VLVLLVIVII  | 196  | >PDGFRA-V5 VLVLLEIVII   | 425  | 229  |
| >PDGFRA-V5 VLVLLVIV    | 11   | >PDGFRA-V5 VLVLLEIV     | 18   | 7    |
| >PDGFRA-V5 VLVLLVIVI   | 96   | >PDGFRA-V5 VLVLLEIVI    | 334  | 238  |

|                        |      |                       |       |       |
|------------------------|------|-----------------------|-------|-------|
| >PDGFRA-V5 VLVLLVIVII  | 99   | >PDGFRA-V5 VLVLLEIVII | 329   | 230   |
| >PDGFRA-V5 VLVLLVIV    | 24   | >PDGFRA-V5 VLVLLEIV   | 60    | 36    |
| >PDGFRA-V5 VLVLLVIV    | 3    | >PDGFRA-V5 VLVLLEIV   | 5     | 2     |
| >PDGFRA-V5 VLVLLVIVI   | 77   | >PDGFRA-V5 VLVLLEIVI  | 255   | 178   |
| >PDGFRA-V5 VLVLLVIVII  | 60   | >PDGFRA-V5 VLVLLEIVII | 118   | 58    |
| >PDGFRA-V5 AVLVLLVI    | 1141 | >PDGFRA-V5 AVLVLEI    | 345   | 796   |
| >PDGFRA-V5 AVLVLLVIV   | 214  | >PDGFRA-V5 AVLVLEIV   | 523   | 309   |
| >PDGFRA-V5 AVLVLLVI    | 142  | >PDGFRA-V5 AVLVLEI    | 61    | 81    |
| >PDGFRA-V5 AVLVLLVIV   | 24   | >PDGFRA-V5 AVLVLEIV   | 15    | 9     |
| >PDGFRA-V5 AVLVLLVIVI  | 302  | >PDGFRA-V5 AVLVLEIVI  | 494   | 192   |
| >PDGFRA-V5 AVLVLLVIVII | 258  | >PDGFRA-V5 AVLVLEIVII | 203   | 55    |
| >PDGFRA-V5 AVLVLLVI    | 677  | >PDGFRA-V5 AVLVLEI    | 321   | 356   |
| >PDGFRA-V5 AVLVLLVIV   | 162  | >PDGFRA-V5 AVLVLEIV   | 165   | 3     |
| >PDGFRA-V5 AVLVLLVIV   | 177  | >PDGFRA-V5 AVLVLEIV   | 359   | 182   |
| >PDGFRA-V5 AVLVLLVIV   | 40   | >PDGFRA-V5 AVLVLEIV   | 84    | 44    |
| >PDGFRA-V5 AVLVLLVIV   | 414  | >PDGFRA-V5 AVLVLEIV   | 271   | 143   |
| >PDGFRA-V5 AVLVLLVIV   | 40   | >PDGFRA-V5 AVLVLEIV   | 76    | 36    |
| >PDGFRA-V5 AVLVLLVI    | 186  | >PDGFRA-V5 AVLVLEI    | 271   | 85    |
| >PDGFRA-V5 AVLVLLVIVI  | 104  | >PDGFRA-V5 AVLVLEIVI  | 314   | 210   |
| >PDGFRA-V5 AVLVLLVIVII | 89   | >PDGFRA-V5 AVLVLEIVII | 220   | 131   |
| >PDGFRA-V5 AAVLVLV     | 66   | >PDGFRA-V5 AAVLLE     | 20104 | 20038 |
| >PDGFRA-V5 AAVLVLVI    | 1101 | >PDGFRA-V5 AAVLLEI    | 381   | 720   |
| >PDGFRA-V5 AAVLVLVIV   | 257  | >PDGFRA-V5 AAVLLEIV   | 271   | 14    |
| >PDGFRA-V5 AAVLVLV     | 211  | >PDGFRA-V5 AAVLLE     | 21282 | 21071 |
| >PDGFRA-V5 AAVLVLVVI   | 417  | >PDGFRA-V5 AAVLLEIV   | 275   | 142   |
| >PDGFRA-V5 AAVLVLV     | 335  | >PDGFRA-V5 AAVLLE     | 20696 | 20361 |
| >PDGFRA-V5 AAVLVLVI    | 811  | >PDGFRA-V5 AAVLLEI    | 460   | 351   |
| >PDGFRA-V5 AAVLVLV     | 179  | >PDGFRA-V5 AAVLLE     | 24088 | 23909 |
| >PDGFRA-V5 AAVLVLVVI   | 292  | >PDGFRA-V5 AAVLLEIV   | 236   | 56    |
| >PDGFRA-V5 AAVLVLV     | 447  | >PDGFRA-V5 AAVLLE     | 26599 | 26152 |
| >PDGFRA-V5 AAVLVLV     | 379  | >PDGFRA-V5 AAVLLE     | 36014 | 35635 |
| >PDGFRA-V5 AAVLVLVI    | 163  | >PDGFRA-V5 AAVLLEI    | 315   | 152   |
| >PDGFRA-V5 AAVLVLVI    | 188  | >PDGFRA-V5 AAVLLEI    | 600   | 412   |
| >PDGFRA-V5 VAAAVLVLV   | 437  | >PDGFRA-V5 VAAAVLLE   | 23954 | 23517 |
| >PDGFRA-V5 VAAAVLVLV   | 1033 | >PDGFRA-V5 VAAAVLLE   | 265   | 768   |
| >PDGFRA-V5 VAAAVLVLV   | 427  | >PDGFRA-V5 VAAAVLLE   | 24151 | 23724 |
| >PDGFRA-V5 VAAAVLVLV   | 412  | >PDGFRA-V5 VAAAVLLE   | 152   | 260   |
| >PDGFRA-V5 VAAAVLVLV   | 114  | >PDGFRA-V5 VAAAVLLE   | 28132 | 28018 |
| >PDGFRA-V5 VAAAVLVLV   | 158  | >PDGFRA-V5 VAAAVLLE   | 26196 | 26038 |
| >PDGFRA-V5 VAAAVLVLV   | 100  | >PDGFRA-V5 VAAAVLLE   | 34346 | 34246 |
| >PDGFRA-V5 VAAAVLVLV   | 748  | >PDGFRA-V5 VAAAVLLE   | 261   | 487   |
| >PDGFRA-V5 VAAAVLVLV   | 38   | >PDGFRA-V5 VAAAVLLE   | 62    | 24    |
| >PDGFRA-V5 VAAAVLVLV   | 344  | >PDGFRA-V5 VAAAVLLE   | 7062  | 6718  |



|                        |     |                        |       |       |
|------------------------|-----|------------------------|-------|-------|
| >PDGFRA-V5 VAAAVLVLLV  | 207 | >PDGFRA-V5 VAAAVLVLLE  | 340   | 133   |
| >PDGFRA-V5 RVIESISPDGF | 444 | >PDGFRA-V5 RDIESISPDGF | 24061 | 23617 |
| >PDGFRA-V5 RWRVIESI    | 312 | >PDGFRA-V5 RWRDIESI    | 414   | 102   |
| >PDGFRA-V5 RWRVIESI    | 92  | >PDGFRA-V5 RWRDIESI    | 166   | 74    |
| >PDGFRA-V5 RWRVIESISP  | 310 | >PDGFRA-V5 RWRDIESISP  | 432   | 122   |
| >PDGFRA-V5 RWRVIESI    | 96  | >PDGFRA-V5 RWRDIESI    | 94    | 2     |
| >PDGFRA-V5 IRWRVIESI   | 100 | >PDGFRA-V5 IRWRDIESI   | 807   | 707   |
| >PDGFRA-V5 IRWRVIESI   | 109 | >PDGFRA-V5 IRWRDIESI   | 79    | 30    |
| >PDGFRA-V5 IRWRVIES    | 265 | >PDGFRA-V5 IRWRDIES    | 546   | 281   |
| >PDGFRA-V5 IRWRVIESI   | 34  | >PDGFRA-V5 IRWRDIESI   | 49    | 15    |
| >PDGFRA-V5 IRWRVIES    | 472 | >PDGFRA-V5 IRWRDIES    | 621   | 149   |
| >PDGFRA-V5 IRWRVIESIS  | 390 | >PDGFRA-V5 IRWRDIESIS  | 623   | 233   |
| >PDGFRA-V5 IRWRVIESISP | 247 | >PDGFRA-V5 IRWRDIESISP | 378   | 131   |
| >PDGFRA-V5 IRWRVIES    | 485 | >PDGFRA-V5 IRWRDIES    | 609   | 124   |
| >PDGFRA-V5 IRWRVIESI   | 220 | >PDGFRA-V5 IRWRDIESI   | 720   | 500   |
| >PDGFRA-V5 IRWRVIESI   | 43  | >PDGFRA-V5 IRWRDIESI   | 131   | 88    |
| >PDGFRA-V5 YEIRWRVI    | 10  | >PDGFRA-V5 YEIRWRDI    | 34    | 24    |
| >PDGFRA-V5 YEIRWRVIESI | 12  | >PDGFRA-V5 YEIRWRDIESI | 15    | 3     |
| >PDGFRA-V5 YEIRWRVIESI | 366 | >PDGFRA-V5 YEIRWRDIESI | 546   | 180   |
| >PDGFRA-V5 YEIRWRVIESI | 404 | >PDGFRA-V5 YEIRWRDIESI | 1042  | 638   |
| >PDGFRA-V5 YEIRWRVI    | 117 | >PDGFRA-V5 YEIRWRDI    | 311   | 194   |
| >PDGFRA-V5 YEIRWRVIESI | 41  | >PDGFRA-V5 YEIRWRDIESI | 51    | 10    |
| >PDGFRA-V5 YEIRWRVI    | 99  | >PDGFRA-V5 YEIRWRDI    | 267   | 168   |
| >PDGFRA-V5 YEIRWRVIESI | 114 | >PDGFRA-V5 YEIRWRDIESI | 140   | 26    |
| >PDGFRA-V5 YEIRWRVI    | 35  | >PDGFRA-V5 YEIRWRDI    | 72    | 37    |
| >PDGFRA-V5 YEIRWRVIE   | 232 | >PDGFRA-V5 YEIRWRDIE   | 198   | 34    |
| >PDGFRA-V5 YEIRWRVIESI | 3   | >PDGFRA-V5 YEIRWRDIESI | 3     | 0     |
| >PDGFRA-V5 RYEIRWRVI   | 137 | >PDGFRA-V5 RYEIRWRDI   | 348   | 211   |
| >PDGFRA-V5 RYEIRWRVI   | 72  | >PDGFRA-V5 RYEIRWRDI   | 163   | 91    |
| >PDGFRA-V5 RYEIRWRV    | 384 | >PDGFRA-V5 RYEIRWRD    | 3126  | 2742  |
| >PDGFRA-V5 RYEIRWRVI   | 116 | >PDGFRA-V5 RYEIRWRDI   | 226   | 110   |
| >PDGFRA-V5 RYEIRWRV    | 454 | >PDGFRA-V5 RYEIRWRD    | 2565  | 2111  |
| >PDGFRA-V5 PRYEIRWRV   | 385 | >PDGFRA-V5 PRYEIRWRD   | 5594  | 5209  |
| >PDGFRA-V5 PRYEIRWRV   | 348 | >PDGFRA-V5 PRYEIRWRD   | 384   | 36    |
| >PDGFRA-V5 PRYEIRWRVI  | 355 | >PDGFRA-V5 PRYEIRWRDI  | 521   | 166   |
| >PDGFRA-V5 KPRYEIRWRV  | 21  | >PDGFRA-V5 KPRYEIRWRD  | 45    | 24    |
| >PDGFRA-V8 VLLAQQKIVK  | 301 | >PDGFRA-V8 LLLAQQKIVKI | 228   | 73    |
| >PDGFRA-V8 VLLAQQKIVK  | 543 | >PDGFRA-V8 LLLAQQKIVKI | 257   | 286   |
| >PDGFRA-V8 VLLAQQKI    | 376 | >PDGFRA-V8 LLLAQQKI    | 238   | 138   |
| >PDGFRA-V8 VLLAQQKIV   | 163 | >PDGFRA-V8 LLLAQQKIV   | 110   | 53    |
| >PDGFRA-V8 VLLAQQKIVK  | 336 | >PDGFRA-V8 LLLAQQKIVKI | 221   | 115   |
| >PDGFRA-V8 VLLAQQKIVK  | 647 | >PDGFRA-V8 LLLAQQKIVKI | 430   | 217   |
| >PDGFRA-V8 VLLAQQKI    | 14  | >PDGFRA-V8 LLLAQQKI    | 17    | 3     |

|                       |      |                        |      |      |
|-----------------------|------|------------------------|------|------|
| >PDGFRA-V8 VLLAQGKIV  | 9    | >PDGFRA-V8 LLLAQGKIV   | 10   | 1    |
| >PDGFRA-V8 VLLAQGKIVK | 9    | >PDGFRA-V8 LLLAQGKIVKI | 10   | 1    |
| >PDGFRA-V8 VLLAQGKI   | 144  | >PDGFRA-V8 LLLAQGKI    | 124  | 20   |
| >PDGFRA-V8 VLLAQGKIV  | 18   | >PDGFRA-V8 LLLAQGKIV   | 16   | 2    |
| >PDGFRA-V8 VLLAQGKIVK | 52   | >PDGFRA-V8 LLLAQGKIVKI | 45   | 7    |
| >PDGFRA-V8 VLLAQGKI   | 44   | >PDGFRA-V8 LLLAQGKI    | 67   | 23   |
| >PDGFRA-V8 VLLAQGKIV  | 13   | >PDGFRA-V8 LLLAQGKIV   | 15   | 2    |
| >PDGFRA-V8 VLLAQGKIVK | 24   | >PDGFRA-V8 LLLAQGKIVKI | 31   | 7    |
| >PDGFRA-V8 VLLAQGKI   | 250  | >PDGFRA-V8 LLLAQGKI    | 344  | 94   |
| >PDGFRA-V8 VLLAQGKIV  | 67   | >PDGFRA-V8 LLLAQGKIV   | 77   | 10   |
| >PDGFRA-V8 VLLAQGKIVK | 88   | >PDGFRA-V8 LLLAQGKIVKI | 104  | 16   |
| >PDGFRA-V8 VLLAQGKI   | 32   | >PDGFRA-V8 LLLAQGKI    | 22   | 10   |
| >PDGFRA-V8 VLLAQGKIV  | 7    | >PDGFRA-V8 LLLAQGKIV   | 6    | 1    |
| >PDGFRA-V8 VLLAQGKIVK | 14   | >PDGFRA-V8 LLLAQGKIVKI | 11   | 3    |
| >PDGFRA-V8 VLLAQGKIVK | 67   | >PDGFRA-V8 LLLAQGKIVK  | 64   | 3    |
| >PDGFRA-V8 VLLAQGKIVK | 238  | >PDGFRA-V8 LLLAQGKIVK  | 275  | 37   |
| >PDGFRA-V8 NVLLAQGKIV | 3295 | >PDGFRA-V8 NLLLAQGKIV  | 497  | 2798 |
| >PDGFRA-V8 NVLLAQGKIV | 7766 | >PDGFRA-V8 NLLLAQGKIV  | 226  | 7540 |
| >PDGFRA-V8 NVLLAQGKIV | 7309 | >PDGFRA-V8 NLLLAQGKIV  | 144  | 7165 |
| >PDGFRA-V8 NVLLAQGKIV | 5828 | >PDGFRA-V8 NLLLAQGKIV  | 86   | 5742 |
| >PDGFRA-V8 NVLLAQGKIV | 4649 | >PDGFRA-V8 NLLLAQGKIV  | 77   | 4572 |
| >PDGFRA-V8 NVLLAQGKIV | 5787 | >PDGFRA-V8 NLLLAQGKIV  | 55   | 5732 |
| >PDGFRA-V8 NVLLAQGK   | 387  | >PDGFRA-V8 NLLLAQGK    | 3085 | 2698 |
| >PDGFRA-V8 NVLLAQGKI  | 468  | >PDGFRA-V8 NLLLAQGKI   | 2492 | 2024 |
| >PDGFRA-V8 ARNVLLAQGI | 172  | >PDGFRA-V8 ARNLLLAQGI  | 99   | 73   |
| >PDGFRA-V8 ARNVLLAQGI | 91   | >PDGFRA-V8 ARNLLLAQGI  | 101  | 10   |
| >PDGFRA-V8 ARNVLLAQGI | 400  | >PDGFRA-V8 ARNLLLAQGI  | 447  | 47   |
| >PDGFRA-V8 AARNVLLA   | 13   | >PDGFRA-V8 AARNLLLA    | 13   | 0    |
| >PDGFRA-V8 AARNVLLAQ  | 114  | >PDGFRA-V8 AARNLLLAQ   | 112  | 2    |
| >PDGFRA-V8 AARNVLLAQ  | 202  | >PDGFRA-V8 AARNLLLAQ   | 223  | 21   |
| >PDGFRA-V8 AARNVLLAQ  | 6    | >PDGFRA-V8 AARNLLLAQ   | 6    | 0    |
| >PDGFRA-V8 LAARNVLL   | 418  | >PDGFRA-V8 LAARNLLL    | 691  | 273  |
| >PDGFRA-V8 LAARNVLLA  | 1656 | >PDGFRA-V8 LAARNLLLA   | 389  | 1267 |
| >PDGFRA-V8 LAARNVLL   | 458  | >PDGFRA-V8 LAARNLLL    | 209  | 249  |
| >PDGFRA-V8 DLAARNVL   | 862  | >PDGFRA-V8 DLAARNLL    | 268  | 594  |
| >PDGFRA-V8 DLAARNVLL  | 109  | >PDGFRA-V8 DLAARNLLL   | 323  | 214  |
| >PDGFRA-V8 DLAARNVLLA | 687  | >PDGFRA-V8 DLAARNLLLA  | 335  | 352  |
| >PDGFRA-V8 DLAARNVLLA | 637  | >PDGFRA-V8 DLAARNLLLA  | 303  | 334  |
| >PDGFRA-V8 DLAARNVL   | 326  | >PDGFRA-V8 DLAARNLL    | 227  | 99   |
| >PDGFRA-V8 DLAARNVLL  | 121  | >PDGFRA-V8 DLAARNLLL   | 202  | 81   |
| >PDGFRA-V8 DLAARNVLLA | 441  | >PDGFRA-V8 DLAARNLLLA  | 531  | 90   |
| >PDGFRA-V8 RDLAARNV   | 948  | >PDGFRA-V8 RDLAARNL    | 307  | 641  |
| >PDGFRA-V8 RDLAARNVL  | 97   | >PDGFRA-V8 RDLAARNLL   | 226  | 129  |

|                        |      |                        |       |       |
|------------------------|------|------------------------|-------|-------|
| >PDGFRA-V8 RDLAARNV    | 187  | >PDGFRA-V8 RDLAARNL    | 761   | 574   |
| >PDGFRA-V8 RDLAARNVL   | 656  | >PDGFRA-V8 RDLAARNLL   | 260   | 396   |
| >PDGFRA-V8 RDLAARNV    | 210  | >PDGFRA-V8 RDLAARNL    | 1263  | 1053  |
| >PDGFRA-V8 RDLAARNVLL  | 499  | >PDGFRA-V8 RDLAARNLLL  | 320   | 179   |
| >PDGFRA-V8 HRDLAARNV   | 1246 | >PDGFRA-V8 HRDLAARNL   | 389   | 857   |
| >PDGFRA-V8 HRDLAARNV   | 62   | >PDGFRA-V8 HRDLAARNLL  | 52    | 10    |
| >PDGFRA-V8 HRDLAARNV   | 371  | >PDGFRA-V8 HRDLAARNLL  | 339   | 32    |
| >PDGFRA-V8 HRDLAARNV   | 5019 | >PDGFRA-V8 HRDLAARNL   | 349   | 4670  |
| >PDGFRA-V8 HRDLAARNV   | 21   | >PDGFRA-V8 HRDLAARNLL  | 57    | 36    |
| >PDGFRA-V8 HRDLAARNV   | 49   | >PDGFRA-V8 HRDLAARNLL  | 67    | 18    |
| >PDGFRA-V8 HRDLAARNV   | 347  | >PDGFRA-V8 HRDLAARNLL  | 269   | 78    |
| >PDGFRA-V8 HRDLAARNV   | 2312 | >PDGFRA-V8 HRDLAARNL   | 167   | 2145  |
| >PDGFRA-V8 HRDLAARNV   | 60   | >PDGFRA-V8 HRDLAARNLL  | 36    | 24    |
| >PDGFRA-V8 VHRDLAARN   | 471  | >PDGFRA-V8 VHRDLAARN   | 2594  | 2123  |
| >PDGFRA-W: WLKNNLTL    | 198  | >PDGFRA-W: CLKNNLTL    | 1013  | 815   |
| >PDGFRA-W: WLKNNLTLI   | 46   | >PDGFRA-W: CLKNNLTLI   | 309   | 263   |
| >PDGFRA-W: WLKNNLTL    | 28   | >PDGFRA-W: CLKNNLTL    | 181   | 153   |
| >PDGFRA-W: WLKNNLTLI   | 4    | >PDGFRA-W: CLKNNLTLI   | 11    | 7     |
| >PDGFRA-W: WLKNNLTLI   | 303  | >PDGFRA-W: CLKNNLTLI   | 5212  | 4909  |
| >PDGFRA-W: WLKNNLTL    | 101  | >PDGFRA-W: CLKNNLTL    | 1342  | 1241  |
| >PDGFRA-W: WLKNNLTLI   | 139  | >PDGFRA-W: CLKNNLTLI   | 1937  | 1798  |
| >PDGFRA-W: WLKNNLTL    | 39   | >PDGFRA-W: CLKNNLTL    | 199   | 160   |
| >PDGFRA-W: WLKNNLTLI   | 76   | >PDGFRA-W: CLKNNLTLI   | 494   | 418   |
| >PDGFRA-W: WLKNNLTL    | 6    | >PDGFRA-W: CLKNNLTL    | 37    | 31    |
| >PDGFRA-W: WLKNNLTLI   | 10   | >PDGFRA-W: CLKNNLTLI   | 155   | 145   |
| >PDGFRA-W: WLKNNLTL    | 151  | >PDGFRA-W: CLKNNLTL    | 555   | 404   |
| >PDGFRA-W: WLKNNLTL    | 451  | >PDGFRA-W: CLKNNLTL    | 3302  | 2851  |
| >PDGFRA-W: WLKNNLTL    | 316  | >PDGFRA-W: CLKNNLTL    | 1463  | 1147  |
| >PDGFRA-W: SWLKNNLTL   | 5792 | >PDGFRA-W: SCLKNNLTL   | 140   | 5652  |
| >PDGFRA-W: SWLKNNLTLI  | 276  | >PDGFRA-W: SCLKNNLTLI  | 71    | 205   |
| >PDGFRA-W: SWLKNNLTL   | 409  | >PDGFRA-W: SCLKNNLTL   | 10001 | 9592  |
| >PDGFRA-W: SWLKNNLTLI  | 239  | >PDGFRA-W: SCLKNNLTLI  | 6546  | 6307  |
| >PDGFRA-W: SWLKNNLTL   | 216  | >PDGFRA-W: SCLKNNLTL   | 15717 | 15501 |
| >PDGFRA-W: SWLKNNLTLI  | 97   | >PDGFRA-W: SCLKNNLTLI  | 16004 | 15907 |
| >PDGFRA-W: SWLKNNLTL   | 235  | >PDGFRA-W: SCLKNNLTL   | 12642 | 12407 |
| >PDGFRA-W: SWLKNNLTLI  | 360  | >PDGFRA-W: SCLKNNLTLI  | 22781 | 22421 |
| >PDGFRA-W: SWLKNNLTL   | 14   | >PDGFRA-W: SCLKNNLTL   | 9769  | 9755  |
| >PDGFRA-W: SWLKNNLTLI  | 54   | >PDGFRA-W: SCLKNNLTLI  | 13505 | 13451 |
| >PDGFRA-W: SWLKNNLTL   | 221  | >PDGFRA-W: SCLKNNLTL   | 32469 | 32248 |
| >PDGFRA-W: SWLKNNLTL   | 63   | >PDGFRA-W: SCLKNNLTL   | 28197 | 28134 |
| >PDGFRA-W: SWLKNNLTLI  | 37   | >PDGFRA-W: SCLKNNLTLI  | 17423 | 17386 |
| >PDGFRA-W: SWLKNNLTLI  | 426  | >PDGFRA-W: SCLKNNLTLIE | 35466 | 35040 |
| >PDGFRA-W: VRAYPPPRIS\ | 336  | >PDGFRA-W: VRAYPPPRIS\ | 36179 | 35843 |

|                      |      |                       |       |       |
|----------------------|------|-----------------------|-------|-------|
| >PDGFRA-W:ISWLKNNL   | 119  | >PDGFRA-W:ISCLKNNL    | 2055  | 1936  |
| >PDGFRA-W:ISWLKNNLTL | 288  | >PDGFRA-W:ISCLKNNLTLI | 2797  | 2509  |
| >PDGFRA-W:ISWLKNNLTL | 294  | >PDGFRA-W:ISCLKNNLTLI | 1344  | 1050  |
| >PDGFRA-W:ISWLKNNLTL | 197  | >PDGFRA-W:ISCLKNNLTL  | 1847  | 1650  |
| >PDGFRA-W:ISWLKNNL   | 25   | >PDGFRA-W:ISCLKNNL    | 135   | 110   |
| >PDGFRA-W:ISWLKNNLTL | 7    | >PDGFRA-W:ISCLKNNLTL  | 17    | 10    |
| >PDGFRA-W:ISWLKNNLTL | 68   | >PDGFRA-W:ISCLKNNLTLI | 326   | 258   |
| >PDGFRA-W:ISWLKNNLTL | 346  | >PDGFRA-W:ISCLKNNLTLI | 586   | 240   |
| >PDGFRA-W:ISWLKNNLTL | 82   | >PDGFRA-W:ISCLKNNLTL  | 157   | 75    |
| >PDGFRA-W:ISWLKNNLTL | 46   | >PDGFRA-W:ISCLKNNLTLI | 116   | 70    |
| >PDGFRA-W:ISWLKNNL   | 344  | >PDGFRA-W:ISCLKNNL    | 204   | 140   |
| >PDGFRA-W:RISWLKNNLT | 281  | >PDGFRA-W:RISCLKNNLTL | 3411  | 3130  |
| >PDGFRA-W:RISWLKNNL  | 275  | >PDGFRA-W:RISCLKNNL   | 1029  | 754   |
| >PDGFRA-W:RISWLKNNLT | 34   | >PDGFRA-W:RISCLKNNLTL | 75    | 41    |
| >PDGFRA-W:PRISWLKNNL | 484  | >PDGFRA-W:PRISCLKNNL  | 426   | 58    |
| >PDGFRA-W:PPRISWLKNN | 111  | >PDGFRA-W:PPRISCLKNNI | 182   | 71    |
| >PDGFRA-W:PPRISWL    | 450  | >PDGFRA-W:PPRISCL     | 495   | 45    |
| >PDGFRA-W:YPPRISWL   | 97   | >PDGFRA-W:YPPRISCL    | 135   | 38    |
| >PDGFRA-W:YPPRISWL   | 132  | >PDGFRA-W:YPPRISCL    | 1361  | 1229  |
| >PDGFRA-W:YPPRISWLK  | 91   | >PDGFRA-W:YPPRISCLK   | 208   | 117   |
| >PDGFRA-W:YPPRISW    | 258  | >PDGFRA-W:YPPRISC     | 1094  | 836   |
| >PDGFRA-W:YPPRISWL   | 83   | >PDGFRA-W:YPPRISCL    | 142   | 59    |
| >PDGFRA-W:YPPRISWL   | 972  | >PDGFRA-W:YPPRISCL    | 71    | 901   |
| >PDGFRA-W:YPPRISW    | 62   | >PDGFRA-W:YPPRISC     | 21401 | 21339 |
| >PDGFRA-W:YPPRISWL   | 6    | >PDGFRA-W:YPPRISCL    | 42    | 36    |
| >PDGFRA-W:YPPRISW    | 19   | >PDGFRA-W:YPPRISC     | 19051 | 19032 |
| >PDGFRA-W:AYPPRISWL  | 1142 | >PDGFRA-W:AYPPRISCL   | 333   | 809   |
| >PDGFRA-W:AYPPRISWL  | 1063 | >PDGFRA-W:AYPPRISCL   | 208   | 855   |
| >PDGFRA-W:AYPPRISW   | 8    | >PDGFRA-W:AYPPRISC    | 860   | 852   |
| >PDGFRA-W:AYPPRISWL  | 6    | >PDGFRA-W:AYPPRISCL   | 15    | 9     |
| >PDGFRA-W:AYPPRISWL  | 147  | >PDGFRA-W:AYPPRISCLK  | 788   | 641   |
| >PDGFRA-W:AYPPRISWL  | 202  | >PDGFRA-W:AYPPRISCLK  | 72    | 130   |
| >PDGFRA-W:AYPPRISWL  | 50   | >PDGFRA-W:AYPPRISCL   | 511   | 461   |
| >PDGFRA-W:AYPPRISWL  | 94   | >PDGFRA-W:AYPPRISCL   | 140   | 46    |
| >PDGFRA-W:AYPPRISWL  | 27   | >PDGFRA-W:AYPPRISCL   | 82    | 55    |
| >PDGFRA-W:RAYPPRISW  | 207  | >PDGFRA-W:RAYPPRISCL  | 850   | 643   |
| >PDGFRA-W:RAYPPRISW  | 286  | >PDGFRA-W:RAYPPRISC   | 5955  | 5669  |
| >PDGFRA-W:RAYPPRISW  | 255  | >PDGFRA-W:RAYPPRISCL  | 778   | 523   |
| >PDGFRA-W:RAYPPRISW  | 166  | >PDGFRA-W:RAYPPRISC   | 1977  | 1811  |
| >PDGFRA-W:RAYPPRISW  | 229  | >PDGFRA-W:RAYPPRISCL  | 53    | 176   |
| >PDGFRA-W:RAYPPRISW  | 3    | >PDGFRA-W:RAYPPRISC   | 689   | 686   |
| >PDGFRA-W:RAYPPRISW  | 4    | >PDGFRA-W:RAYPPRISCL  | 6     | 2     |
| >PDGFRA-W:RAYPPRISW  | 26   | >PDGFRA-W:RAYPPRISC   | 5409  | 5383  |

|                        |      |                        |       |       |
|------------------------|------|------------------------|-------|-------|
| >PDGFRA-W:RAYPPPRISW   | 255  | >PDGFRA-W:RAYPPPRISCL  | 1090  | 835   |
| >PDGFRA-W:RAYPPPRISW   | 9    | >PDGFRA-W:RAYPPPRISC   | 6392  | 6383  |
| >PDGFRA-W:RAYPPPRISW   | 428  | >PDGFRA-W:RAYPPPRISCL  | 2325  | 1897  |
| >PDGFRA-W:RAYPPPRISW   | 78   | >PDGFRA-W:RAYPPPRISCL  | 453   | 375   |
| >PDGFRA-W:RAYPPPRISW   | 439  | >PDGFRA-W:RAYPPPRISCL  | 634   | 195   |
| >PDGFRA-W:RAYPPPRISW   | 207  | >PDGFRA-W:RAYPPPRISCL  | 425   | 218   |
| >PDGFRA-W:RAYPPPRISW   | 25   | >PDGFRA-W:RAYPPPRISCL  | 29    | 4     |
| >PDGFRA-Y5:YEIRWRVI    | 10   | >PDGFRA-Y5:CEIRWRVI    | 112   | 102   |
| >PDGFRA-Y5:YEIRWRVIESI | 12   | >PDGFRA-Y5:CEIRWRVIESI | 37    | 25    |
| >PDGFRA-Y5:YEIRWRVIESI | 366  | >PDGFRA-Y5:CEIRWRVIESI | 6923  | 6557  |
| >PDGFRA-Y5:YEIRWRVIESI | 404  | >PDGFRA-Y5:CEIRWRVIESI | 1695  | 1291  |
| >PDGFRA-Y5:YEIRWRVI    | 117  | >PDGFRA-Y5:CEIRWRVI    | 911   | 794   |
| >PDGFRA-Y5:YEIRWRVIESI | 41   | >PDGFRA-Y5:CEIRWRVIESI | 264   | 223   |
| >PDGFRA-Y5:YEIRWRVI    | 99   | >PDGFRA-Y5:CEIRWRVI    | 180   | 81    |
| >PDGFRA-Y5:YEIRWRVIESI | 114  | >PDGFRA-Y5:CEIRWRVIESI | 214   | 100   |
| >PDGFRA-Y5:YEIRWRVI    | 1890 | >PDGFRA-Y5:CEIRWRVI    | 331   | 1559  |
| >PDGFRA-Y5:YEIRWRVIESI | 2436 | >PDGFRA-Y5:CEIRWRVIESI | 438   | 1998  |
| >PDGFRA-Y5:YEIRWRVI    | 35   | >PDGFRA-Y5:CEIRWRVI    | 374   | 339   |
| >PDGFRA-Y5:YEIRWRVIE   | 232  | >PDGFRA-Y5:CEIRWRVIE   | 1799  | 1567  |
| >PDGFRA-Y5:YEIRWRVIESI | 3    | >PDGFRA-Y5:CEIRWRVIESI | 7     | 4     |
| >PDGFRA-Y5:RYEIRWRVI   | 137  | >PDGFRA-Y5:RCEIRWRVI   | 27151 | 27014 |
| >PDGFRA-Y5:RYEIRWRVI   | 72   | >PDGFRA-Y5:RCEIRWRVI   | 12184 | 12112 |
| >PDGFRA-Y5:RYEIRWRV    | 384  | >PDGFRA-Y5:RCEIRWRV    | 23875 | 23491 |
| >PDGFRA-Y5:RYEIRWRVI   | 116  | >PDGFRA-Y5:RCEIRWRVI   | 22878 | 22762 |
| >PDGFRA-Y5:RYEIRWRV    | 454  | >PDGFRA-Y5:RCEIRWRV    | 31871 | 31417 |
| >PDGFRA-Y5:RYEIRWRVI   | 1076 | >PDGFRA-Y5:RCEIRWRVI   | 442   | 634   |
| >PDGFRA-Y5:LVVIWKQKPF  | 199  | >PDGFRA-Y5:LVVIWKQKPF  | 32590 | 32391 |
| >PDGFRA-Y5:LVVIWKQKPF  | 50   | >PDGFRA-Y5:LVVIWKQKPF  | 22312 | 22262 |
| >PDGFRA-Y5:LVVIWKQKPF  | 98   | >PDGFRA-Y5:LVVIWKQKPF  | 27056 | 26958 |
| >PDGFRA-Y5:LVVIWKQKPF  | 79   | >PDGFRA-Y5:LVVIWKQKPF  | 19640 | 19561 |
| >PDGFRA-Y5:LVVIWKQKPF  | 395  | >PDGFRA-Y5:LVVIWKQKPF  | 22843 | 22448 |
| >PDGFRA-Y5:PRYEIRWRV   | 385  | >PDGFRA-Y5:PRCEIRWRV   | 4553  | 4168  |
| >PDGFRA-Y5:PRYEIRWRV   | 348  | >PDGFRA-Y5:PRCEIRWRV   | 5883  | 5535  |
| >PDGFRA-Y5:PRYEIRWRVI  | 355  | >PDGFRA-Y5:PRCEIRWRVI  | 1276  | 921   |
| >PDGFRA-Y5:PRYEIRWR    | 423  | >PDGFRA-Y5:PRCEIRWR    | 1403  | 980   |
| >PDGFRA-Y5:KPRYEIRW    | 566  | >PDGFRA-Y5:KPRCEIRW    | 467   | 99    |
| >PDGFRA-Y5:KPRYEIRWRV  | 765  | >PDGFRA-Y5:KPRCEIRWRV  | 325   | 440   |
| >PDGFRA-Y5:KPRYEIRWRV  | 21   | >PDGFRA-Y5:KPRCEIRWRV  | 18    | 3     |
| >PDGFRA-Y5:KPRYEIRW    | 159  | >PDGFRA-Y5:KPRCEIRW    | 240   | 81    |
| >PDGFRA-Y5:KPRYEIRW    | 83   | >PDGFRA-Y5:KPRCEIRW    | 113   | 30    |
| >PDGFRA-Y5:KPRYEIRWR   | 393  | >PDGFRA-Y5:KPRCEIRWR   | 148   | 245   |
| >PDGFRA-Y5:KQKPRYEI    | 319  | >PDGFRA-Y5:KQKPRCEI    | 573   | 254   |
| >PDGFRA-Y5:KQKPRYEI    | 55   | >PDGFRA-Y5:KQKPRCEI    | 79    | 24    |

|                       |      |                       |       |       |
|-----------------------|------|-----------------------|-------|-------|
| >PDGFRA-Y5:KQKPRYEIR  | 9    | >PDGFRA-Y5:KQKPRCEIR  | 26    | 17    |
| >PDGFRA-Y5:KQKPRYEIRW | 12   | >PDGFRA-Y5:KQKPRCEIRW | 20    | 8     |
| >PDGFRA-Y5:KQKPRYEI   | 61   | >PDGFRA-Y5:KQKPRCEI   | 123   | 62    |
| >PDGFRA-Y5:KQKPRYEIR  | 252  | >PDGFRA-Y5:KQKPRCEIR  | 579   | 327   |
| >PDGFRA-Y5:KQKPRYEIRW | 471  | >PDGFRA-Y5:KQKPRCEIRW | 816   | 345   |
| >PDGFRA-Y5:KQKPRYEIRW | 181  | >PDGFRA-Y5:KQKPRCEIRW | 254   | 73    |
| >PDGFRA-Y5:KQKPRYEIR  | 112  | >PDGFRA-Y5:KQKPRCEIR  | 148   | 36    |
| >PDGFRA-Y5:KQKPRYEIRW | 93   | >PDGFRA-Y5:KQKPRCEIRW | 91    | 2     |
| >PDGFRA-Y5:WKQKPRYEI  | 98   | >PDGFRA-Y5:WKQKPRCEI  | 141   | 43    |
| >PDGFRA-Y5:IWKQKPRY   | 139  | >PDGFRA-Y5:IWKQKPRC   | 24399 | 24260 |
| >PDGFRA-Y5:IWKQKPRYEI | 186  | >PDGFRA-Y5:IWKQKPRCEI | 630   | 444   |
| >PDGFRA-Y5:IWKQKPRYEI | 26   | >PDGFRA-Y5:IWKQKPRCEI | 34    | 8     |
| >PDGFRA-Y5:IWKQKPRYEI | 490  | >PDGFRA-Y5:IWKQKPRCEI | 1615  | 1125  |
| >PDGFRA-Y5:VIWKQKPRYE | 464  | >PDGFRA-Y5:VIWKQKPRCE | 2210  | 1746  |
| >PDGFRA-Y5:VIWKQKPRYE | 73   | >PDGFRA-Y5:VIWKQKPRCE | 93    | 20    |
| >PDGFRA-Y5:VIWKQKPRYE | 326  | >PDGFRA-Y5:VIWKQKPRCE | 215   | 111   |
| >PDGFRA-Y5:VIWKQKPRYE | 265  | >PDGFRA-Y5:VIWKQKPRCE | 131   | 134   |
| >PDGFRA-Y5:VIWKQKPRY  | 112  | >PDGFRA-Y5:VIWKQKPRC  | 24028 | 23916 |
| >PDGFRA-Y5:VIWKQKPRY  | 33   | >PDGFRA-Y5:VIWKQKPRC  | 15175 | 15142 |
| >PDGFRA-Y5:VIWKQKPRY  | 445  | >PDGFRA-Y5:VIWKQKPRC  | 25963 | 25518 |
| >PDGFRA-Y5:VVIWKQKPR' | 28   | >PDGFRA-Y5:VVIWKQKPR' | 23016 | 22988 |
| >PDGFRA-Y5:VVIWKQKPR' | 308  | >PDGFRA-Y5:VVIWKQKPR' | 30546 | 30238 |
| >PDGFRA-Y5:VVIWKQKPR' | 82   | >PDGFRA-Y5:VVIWKQKPR' | 17209 | 17127 |
| >PDGFRA-Y5:YPMSEEESSD | 428  | >PDGFRA-Y5:NPMSEEESSD | 3633  | 3205  |
| >PDGFRA-Y5:YPMSEEESSD | 341  | >PDGFRA-Y5:NPMSEEESSD | 1891  | 1550  |
| >PDGFRA-Y5:YPMSEEEES  | 125  | >PDGFRA-Y5:NPMSEEEES  | 1365  | 1240  |
| >PDGFRA-Y5:YPMSEEEES  | 139  | >PDGFRA-Y5:NPMSEEEES  | 1529  | 1390  |
| >PDGFRA-Y5:YPMSEEESSD | 230  | >PDGFRA-Y5:NPMSEEESSD | 2033  | 1803  |
| >PDGFRA-Y5:YPMSEEESSD | 344  | >PDGFRA-Y5:NPMSEEESSD | 596   | 252   |
| >PDGFRA-Y5:CFGSEVSWC  | 78   | >PDGFRA-Y5:CFGSEVSWC  | 15631 | 15553 |
| >PDGFRA-Y5:CFGSEVSWC  | 233  | >PDGFRA-Y5:CFGSEVSWC  | 22478 | 22245 |
| >PDGFRA-Y5:CFGSEVSWC  | 118  | >PDGFRA-Y5:CFGSEVSWC  | 25284 | 25166 |
| >PDGFRA-Y5:WQYPMSEEE  | 345  | >PDGFRA-Y5:WQNPMSEEE  | 1969  | 1624  |
| >PDGFRA-Y5:WQYPMSEEE  | 457  | >PDGFRA-Y5:WQNPMSEEE  | 2736  | 2279  |
| >PDGFRA-Y5:SWQYPMSE   | 249  | >PDGFRA-Y5:SWQNPMSE   | 357   | 108   |
| >PDGFRA-Y5:VSWQYPM    | 64   | >PDGFRA-Y5:VSWQNPM    | 10764 | 10700 |
| >PDGFRA-Y5:VSWQYPM    | 243  | >PDGFRA-Y5:VSWQNPM    | 303   | 60    |
| >PDGFRA-Y5:VSWQYPM    | 22   | >PDGFRA-Y5:VSWQNPM    | 28    | 6     |
| >PDGFRA-Y5:VSWQYPM    | 1536 | >PDGFRA-Y5:VSWQNPM    | 412   | 1124  |
| >PDGFRA-Y5:VSWQYPM    | 53   | >PDGFRA-Y5:VSWQNPM    | 104   | 51    |
| >PDGFRA-Y5:VSWQYPM    | 11   | >PDGFRA-Y5:VSWQNPM    | 22    | 11    |
| >PDGFRA-Y5:VSWQYPM    | 31   | >PDGFRA-Y5:VSWQNPM    | 49    | 18    |
| >PDGFRA-Y5:SEVSWQYPM  | 52   | >PDGFRA-Y5:SEVSWQNPM  | 605   | 553   |

|                        |     |                        |       |       |
|------------------------|-----|------------------------|-------|-------|
| >PDGFRA-Y5:SEVSWQYPM   | 73  | >PDGFRA-Y5:SEVSWQNPM   | 141   | 68    |
| >PDGFRA-Y5:SEVSWQYPM   | 269 | >PDGFRA-Y5:SEVSWQNPM   | 670   | 401   |
| >PDGFRA-Y5:SEVSWQYPM   | 28  | >PDGFRA-Y5:SEVSWQNPM   | 63    | 35    |
| >PDGFRA-Y5:SEVSWQYPM   | 304 | >PDGFRA-Y5:SEVSWQNPM   | 1267  | 963   |
| >PDGFRA-Y5:SEVSWQYPM   | 116 | >PDGFRA-Y5:SEVSWQNPM   | 340   | 224   |
| >PDGFRA-Y5:SEVSWQYPM   | 25  | >PDGFRA-Y5:SEVSWQNPM   | 40    | 15    |
| >PDGFRA-Y5:ESEVSWQY    | 27  | >PDGFRA-Y5:ESEVSWQN    | 18687 | 18660 |
| >PDGFRA-Y5:ESEVSWQY    | 33  | >PDGFRA-Y5:ESEVSWQN    | 17173 | 17140 |
| >PDGFRA-Y5:ESEVSWQYPI  | 299 | >PDGFRA-Y5:ESEVSWQNP   | 712   | 413   |
| >PDGFRA-Y5:ESEVSWQY    | 208 | >PDGFRA-Y5:ESEVSWQN    | 31849 | 31641 |
| >PDGFRA-Y5:GESEVSWQY   | 499 | >PDGFRA-Y5:GESEVSWQN   | 24613 | 24114 |
| >PDGFRA-Y5:GESEVSWQY   | 26  | >PDGFRA-Y5:GESEVSWQN   | 4848  | 4822  |
| >PDGFRA-Y5:GESEVSWQY   | 128 | >PDGFRA-Y5:GESEVSWQN   | 700   | 572   |
| >PDGFRA-Y5:GESEVSWQY   | 46  | >PDGFRA-Y5:GESEVSWQN   | 77    | 31    |
| >PDGFRA-Y5:GESEVSWQY   | 30  | >PDGFRA-Y5:GESEVSWQN   | 50    | 20    |
| >PDGFRA-Y5:GESEVSWQY   | 86  | >PDGFRA-Y5:GESEVSWQN   | 1113  | 1027  |
| >PDGFRA-Y5:GESEVSWQY   | 380 | >PDGFRA-Y5:GESEVSWQN   | 922   | 542   |
| >PDGFRA-Y5:GESEVSWQY   | 37  | >PDGFRA-Y5:GESEVSWQN   | 2273  | 2236  |
| >PDGFRA-Y5:GESEVSWQY   | 267 | >PDGFRA-Y5:GESEVSWQN   | 667   | 400   |
| >PDGFRA-Y5:GESEVSWQY   | 313 | >PDGFRA-Y5:GESEVSWQN   | 639   | 326   |
| >PDGFRA-Y5:GESEVSWQY   | 13  | >PDGFRA-Y5:GESEVSWQN   | 20    | 7     |
| >PDGFRA-Y5:FGSEVSWQY   | 331 | >PDGFRA-Y5:FGSEVSWQY   | 31249 | 30918 |
| >PDGFRA-Y8:YVSKGSTFL   | 131 | >PDGFRA-Y8:CVSKGSTFL   | 5659  | 5528  |
| >PDGFRA-Y8:YVSKGSTFLP\ | 28  | >PDGFRA-Y8:CVSKGSTFLP\ | 988   | 960   |
| >PDGFRA-Y8:YVSKGSTFL   | 10  | >PDGFRA-Y8:CVSKGSTFL   | 165   | 155   |
| >PDGFRA-Y8:YVSKGSTFLP\ | 28  | >PDGFRA-Y8:CVSKGSTFLP\ | 488   | 460   |
| >PDGFRA-Y8:YVSKGSTFL   | 22  | >PDGFRA-Y8:CVSKGSTFL   | 698   | 676   |
| >PDGFRA-Y8:YVSKGSTFLP\ | 5   | >PDGFRA-Y8:CVSKGSTFLP\ | 78    | 73    |
| >PDGFRA-Y8:YVSKGSTFL   | 10  | >PDGFRA-Y8:CVSKGSTFL   | 634   | 624   |
| >PDGFRA-Y8:YVSKGSTFLP\ | 4   | >PDGFRA-Y8:CVSKGSTFLP\ | 45    | 41    |
| >PDGFRA-Y8:YVSKGSTFL   | 415 | >PDGFRA-Y8:CVSKGSTFL   | 12152 | 11737 |
| >PDGFRA-Y8:YVSKGSTFLP\ | 22  | >PDGFRA-Y8:CVSKGSTFLP\ | 2455  | 2433  |
| >PDGFRA-Y8:YVSKGSTFLP\ | 43  | >PDGFRA-Y8:CVSKGSTFLP\ | 1973  | 1930  |
| >PDGFRA-Y8:YVSKGSTFL   | 52  | >PDGFRA-Y8:CVSKGSTFL   | 6194  | 6142  |
| >PDGFRA-Y8:YVSKGSTFLP\ | 15  | >PDGFRA-Y8:CVSKGSTFLP\ | 1775  | 1760  |
| >PDGFRA-Y8:YVSKGSTFL   | 196 | >PDGFRA-Y8:CVSKGSTFL   | 3716  | 3520  |
| >PDGFRA-Y8:YVSKGSTFLP\ | 44  | >PDGFRA-Y8:CVSKGSTFLP\ | 1198  | 1154  |
| >PDGFRA-Y8:YVSKGSTFL   | 19  | >PDGFRA-Y8:CVSKGSTFL   | 4146  | 4127  |
| >PDGFRA-Y8:YVSKGSTFLP\ | 4   | >PDGFRA-Y8:CVSKGSTFLP\ | 332   | 328   |
| >PDGFRA-Y8:YVSKGSTF    | 371 | >PDGFRA-Y8:CVSKGSTF    | 541   | 170   |
| >PDGFRA-Y8:YVSKGSTFL   | 77  | >PDGFRA-Y8:CVSKGSTFL   | 239   | 162   |
| >PDGFRA-Y8:YVSKGSTFLP\ | 18  | >PDGFRA-Y8:CVSKGSTFLP\ | 34    | 16    |
| >PDGFRA-Y8:YVSKGSTFL   | 273 | >PDGFRA-Y8:CVSKGSTFL   | 8038  | 7765  |

|                        |     |                        |       |       |
|------------------------|-----|------------------------|-------|-------|
| >PDGFRA-Y8.YVSKGSTFLP\ | 11  | >PDGFRA-Y8.CVSKGSTFLP\ | 383   | 372   |
| >PDGFRA-Y8.YVSKGSTF    | 42  | >PDGFRA-Y8.CVSKGSTF    | 410   | 368   |
| >PDGFRA-Y8.YVSKGSTFLP\ | 287 | >PDGFRA-Y8.CVSKGSTFLP\ | 4793  | 4506  |
| >PDGFRA-Y8.YVSKGSTF    | 72  | >PDGFRA-Y8.CVSKGSTF    | 1965  | 1893  |
| >PDGFRA-Y8.YVSKGSTF    | 33  | >PDGFRA-Y8.CVSKGSTF    | 318   | 285   |
| >PDGFRA-Y8.YVSKGSTF    | 15  | >PDGFRA-Y8.CVSKGSTF    | 355   | 340   |
| >PDGFRA-Y8.YVSKGSTF    | 43  | >PDGFRA-Y8.CVSKGSTF    | 363   | 320   |
| >PDGFRA-Y8.YVSKGSTF    | 194 | >PDGFRA-Y8.CVSKGSTF    | 1924  | 1730  |
| >PDGFRA-Y8.YVSKGSTFL   | 49  | >PDGFRA-Y8.CVSKGSTFL   | 1403  | 1354  |
| >PDGFRA-Y8.YVSKGSTF    | 79  | >PDGFRA-Y8.CVSKGSTF    | 816   | 737   |
| >PDGFRA-Y8.NYVSKGSTF   | 354 | >PDGFRA-Y8.NCVSKGSTF   | 31659 | 31305 |
| >PDGFRA-Y8.NYVSKGSTFL  | 20  | >PDGFRA-Y8.NCVSKGSTFL  | 16435 | 16415 |
| >PDGFRA-Y8.NYVSKGSTF   | 72  | >PDGFRA-Y8.NCVSKGSTF   | 6986  | 6914  |
| >PDGFRA-Y8.NYVSKGSTFL  | 403 | >PDGFRA-Y8.NCVSKGSTFL  | 19961 | 19558 |
| >PDGFRA-Y8.NYVSKGSTF   | 150 | >PDGFRA-Y8.NCVSKGSTF   | 10877 | 10727 |
| >PDGFRA-Y8.NYVSKGSTF   | 17  | >PDGFRA-Y8.NCVSKGSTF   | 13946 | 13929 |
| >PDGFRA-Y8.NYVSKGSTFL  | 71  | >PDGFRA-Y8.NCVSKGSTFL  | 22700 | 22629 |
| >PDGFRA-Y8.NYVSKGSTF   | 330 | >PDGFRA-Y8.NCVSKGSTF   | 33    | 297   |
| >PDGFRA-Y8.NYVSKGSTFL  | 374 | >PDGFRA-Y8.NCVSKGSTFL  | 24155 | 23781 |
| >PDGFRA-Y8.LARDIMHDS\  | 292 | >PDGFRA-Y8.LARDIMHDS\  | 26071 | 25779 |
| >PDGFRA-Y8.LARDIMHDS\  | 146 | >PDGFRA-Y8.LARDIMHDS\  | 28637 | 28491 |
| >PDGFRA-Y8.LARDIMHDS\  | 202 | >PDGFRA-Y8.LARDIMHDS\  | 18260 | 18058 |
| >PDGFRA-Y8.LARDIMHDS\  | 258 | >PDGFRA-Y8.LARDIMHDS\  | 14852 | 14594 |
| >PDGFRA-Y8.LARDIMHDS\  | 6   | >PDGFRA-Y8.LARDIMHDS\  | 7225  | 7219  |
| >PDGFRA-Y8.LARDIMHDS\  | 104 | >PDGFRA-Y8.LARDIMHDS\  | 16539 | 16435 |
| >PDGFRA-Y8.LARDIMHDS\  | 53  | >PDGFRA-Y8.LARDIMHDS\  | 8750  | 8697  |
| >PDGFRA-Y8.SNYVSKGSTF  | 275 | >PDGFRA-Y8.SNCVSKGSTF  | 12480 | 12205 |
| >PDGFRA-Y8.SNYVSKGSTF  | 488 | >PDGFRA-Y8.SNCVSKGSTF  | 5301  | 4813  |
| >PDGFRA-Y8.SNYVSKGSTF  | 431 | >PDGFRA-Y8.SNCVSKGSTF  | 1235  | 804   |
| >PDGFRA-Y8.SNYVSKGSTF  | 144 | >PDGFRA-Y8.SNCVSKGSTF  | 1645  | 1501  |
| >PDGFRA-Y8.SNYVSKGSTF  | 40  | >PDGFRA-Y8.SNCVSKGSTF  | 490   | 450   |
| >PDGFRA-Y8.DSNYVSKGST  | 465 | >PDGFRA-Y8.DSNYVSKGST  | 496   | 31    |
| >PDGFRA-Y8.DSNYVSKGST  | 193 | >PDGFRA-Y8.DSNYVSKGST  | 214   | 21    |
| >PDGFRA-Y8.DSNYVSKGST  | 92  | >PDGFRA-Y8.DSNYVSKGST  | 108   | 16    |
| >PDGFRA-Y8.IMHDSNYV    | 14  | >PDGFRA-Y8.IMHDSNCV    | 46    | 32    |
| >PDGFRA-Y8.IMHDSNYV    | 3   | >PDGFRA-Y8.IMHDSNCV    | 13    | 10    |
| >PDGFRA-Y8.IMHDSNYV    | 3   | >PDGFRA-Y8.IMHDSNCV    | 10    | 7     |
| >PDGFRA-Y8.IMHDSNYV    | 15  | >PDGFRA-Y8.IMHDSNCV    | 108   | 93    |
| >PDGFRA-Y8.IMHDSNYV    | 2   | >PDGFRA-Y8.IMHDSNCV    | 4     | 2     |
| >PDGFRA-Y8.IMHDSNYVS   | 324 | >PDGFRA-Y8.IMHDSNCVS   | 418   | 94    |
| >PDGFRA-Y8.IMHDSNYV    | 3   | >PDGFRA-Y8.IMHDSNCV    | 5     | 2     |
| >PDGFRA-Y8.IMHDSNYV    | 7   | >PDGFRA-Y8.IMHDSNCV    | 11    | 4     |
| >PDGFRA-Y8.IMHDSNYV    | 3   | >PDGFRA-Y8.IMHDSNCV    | 8     | 5     |



|                       |      |                       |       |       |
|-----------------------|------|-----------------------|-------|-------|
| >PDGFRA-Y8·IMHDSNYV   | 2    | >PDGFRA-Y8·IMHDSNCV   | 3     | 1     |
| >PDGFRA-Y8·IMHDSNYVS  | 959  | >PDGFRA-Y8·IMHDSNCVS  | 260   | 699   |
| >PDGFRA-Y8·IMHDSNYVSI | 399  | >PDGFRA-Y8·IMHDSNCVSI | 333   | 66    |
| >PDGFRA-Y8·IMHDSNYVSI | 35   | >PDGFRA-Y8·IMHDSNCVSI | 53    | 18    |
| >PDGFRA-Y8·IMHDSNYVSI | 80   | >PDGFRA-Y8·IMHDSNCVSI | 116   | 36    |
| >PDGFRA-Y8·IMHDSNYVSI | 15   | >PDGFRA-Y8·IMHDSNCVSI | 30    | 15    |
| >PDGFRA-Y8·IMHDSNYV   | 93   | >PDGFRA-Y8·IMHDSNCV   | 114   | 21    |
| >PDGFRA-Y8·IMHDSNYVS  | 1028 | >PDGFRA-Y8·IMHDSNCVS  | 442   | 586   |
| >PDGFRA-Y8·IMHDSNYVSI | 89   | >PDGFRA-Y8·IMHDSNCVSI | 136   | 47    |
| >PDGFRA-Y8·DIMHDSNYV  | 334  | >PDGFRA-Y8·DIMHDSNCV  | 2514  | 2180  |
| >PDGFRA-Y8·DIMHDSNYV  | 299  | >PDGFRA-Y8·DIMHDSNCV  | 1733  | 1434  |
| >PDGFRA-Y8·DIMHDSNYV  | 22   | >PDGFRA-Y8·DIMHDSNCV  | 150   | 128   |
| >PDGFRA-Y8·DIMHDSNY   | 105  | >PDGFRA-Y8·DIMHDSNC   | 15875 | 15770 |
| >PDGFRA-Y8·DIMHDSNY   | 26   | >PDGFRA-Y8·DIMHDSNC   | 19527 | 19501 |
| >PDGFRA-Y8·DIMHDSNY   | 468  | >PDGFRA-Y8·DIMHDSNC   | 32892 | 32424 |
| >PDGFRA-Y8·DIMHDSNYV  | 43   | >PDGFRA-Y8·DIMHDSNCV  | 54    | 11    |
| >PDGFRA-Y8·DIMHDSNYV  | 15   | >PDGFRA-Y8·DIMHDSNCV  | 54    | 39    |
| >PDGFRA-Y8·DIMHDSNYV  | 12   | >PDGFRA-Y8·DIMHDSNCV  | 301   | 289   |
| >PDGFRA-Y8·DIMHDSNY   | 486  | >PDGFRA-Y8·DIMHDSNC   | 28543 | 28057 |
| >PDGFRA-Y8·RDIMHDSNY  | 173  | >PDGFRA-Y8·RDIMHDSNC  | 273   | 100   |
| >PDGFRA-Y8·ARDIMHDSN  | 330  | >PDGFRA-Y8·ARDIMHDSN  | 31737 | 31407 |
| >PDGFRA-Y8·ARDIMHDSN  | 230  | >PDGFRA-Y8·ARDIMHDSN  | 6708  | 6478  |
| >PDGFRB-A7·AKAQDGTf   | 15   | >PDGFRB-A7·TKAQDGTf   | 55    | 40    |
| >PDGFRB-A7·AKAQDGTfSS | 26   | >PDGFRB-A7·TKAQDGTfSS | 120   | 94    |
| >PDGFRB-A7·MAKAQDGTf  | 1131 | >PDGFRB-A7·MTKAQDGTf  | 215   | 916   |
| >PDGFRB-A7·MAKAQDGTf  | 405  | >PDGFRB-A7·MTKAQDGTf  | 70    | 335   |
| >PDGFRB-A7·MAKAQDGTf  | 109  | >PDGFRB-A7·MTKAQDGTf  | 83    | 26    |
| >PDGFRB-A7·MAKAQDGTf  | 10   | >PDGFRB-A7·MTKAQDGTf  | 4     | 6     |
| >PDGFRB-A7·MAKAQDGTf  | 17   | >PDGFRB-A7·MTKAQDGTf  | 218   | 201   |
| >PDGFRB-A7·MAKAQDGTf  | 332  | >PDGFRB-A7·MTKAQDGTf  | 199   | 133   |
| >PDGFRB-A7·MAKAQDGTf  | 1357 | >PDGFRB-A7·MTKAQDGTf  | 59    | 1298  |
| >PDGFRB-A7·MAKAQDGTf  | 143  | >PDGFRB-A7·MTKAQDGTf  | 2498  | 2355  |
| >PDGFRB-A7·RMSQEPPQE  | 388  | >PDGFRB-A7·RMSQEPPQE  | 2878  | 2490  |
| >PDGFRB-A7·RMSQEPPQE  | 203  | >PDGFRB-A7·RMSQEPPQE  | 2459  | 2256  |
| >PDGFRB-A7·RMSQEPPQE  | 33   | >PDGFRB-A7·RMSQEPPQE  | 236   | 203   |
| >PDGFRB-A7·RMSQEPPQE  | 252  | >PDGFRB-A7·RMSQEPPQE  | 2572  | 2320  |
| >PDGFRB-A7·RMSQEPPQE  | 80   | >PDGFRB-A7·RMSQEPPQE  | 813   | 733   |
| >PDGFRB-A7·EMAKAQDGT  | 198  | >PDGFRB-A7·EMTKAQDGT  | 532   | 334   |
| >PDGFRB-A7·EMAKAQDGT  | 159  | >PDGFRB-A7·EMTKAQDGT  | 1724  | 1565  |
| >PDGFRB-A7·EMAKAQDGT  | 206  | >PDGFRB-A7·EMTKAQDGT  | 351   | 145   |
| >PDGFRB-A7·EMAKAQDGT  | 289  | >PDGFRB-A7·EMTKAQDGT  | 594   | 305   |
| >PDGFRB-A7·QEMAKAQDC  | 199  | >PDGFRB-A7·QEMTKAQDC  | 217   | 18    |
| >PDGFRB-A7·QEMAKAQDC  | 358  | >PDGFRB-A7·QEMTKAQDC  | 618   | 260   |

|                         |      |                        |     |      |
|-------------------------|------|------------------------|-----|------|
| >PDGFRB-A7 QEMAKAQDC    | 279  | >PDGFRB-A7 QEMTKAQDC   | 459 | 180  |
| >PDGFRB-A7 QEMAKAQDC    | 139  | >PDGFRB-A7 QEMTKAQDC   | 153 | 14   |
| >PDGFRB-A7 QEMAKAQDC    | 496  | >PDGFRB-A7 QEMTKAQDC   | 238 | 258  |
| >PDGFRB-A7 SQEPPQEMA    | 321  | >PDGFRB-A7 SQEPPQEMT   | 174 | 147  |
| >PDGFRB-A7 MSQEPPQEM    | 23   | >PDGFRB-A7 MSQEPPQEN   | 30  | 7    |
| >PDGFRB-A7 MSQEPPQEM    | 81   | >PDGFRB-A7 MSQEPPQEN   | 80  | 1    |
| >PDGFRB-A7 MSQEPPQEM    | 307  | >PDGFRB-A7 MSQEPPQEN   | 207 | 100  |
| >PDGFRB-I18 IFEDRSYICK  | 2285 | >PDGFRB-I18 MFEDRSYICK | 426 | 1859 |
| >PDGFRB-I18 IFEDRSYICK  | 755  | >PDGFRB-I18 MFEDRSYICK | 273 | 482  |
| >PDGFRB-I18 IFEDRSYICK  | 307  | >PDGFRB-I18 MFEDRSYICK | 181 | 126  |
| >PDGFRB-I18 IFEDRSYI    | 2038 | >PDGFRB-I18 MFEDRSYI   | 332 | 1706 |
| >PDGFRB-I18 GIFEDRSYI   | 336  | >PDGFRB-I18 GMFEDRSYI  | 26  | 310  |
| >PDGFRB-I18 GIFEDRSYI   | 124  | >PDGFRB-I18 GMFEDRSYI  | 13  | 111  |
| >PDGFRB-I18 GIFEDRSYI   | 67   | >PDGFRB-I18 GMFEDRSYI  | 9   | 58   |
| >PDGFRB-I18 GIFEDRSYI   | 122  | >PDGFRB-I18 GMFEDRSYI  | 52  | 70   |
| >PDGFRB-I18 GIFEDRSYI   | 31   | >PDGFRB-I18 GMFEDRSYI  | 3   | 28   |
| >PDGFRB-I18 GIFEDRSYIC  | 1094 | >PDGFRB-I18 GMFEDRSYIC | 33  | 1061 |
| >PDGFRB-I18 GIFEDRSYI   | 230  | >PDGFRB-I18 GMFEDRSYI  | 7   | 223  |
| >PDGFRB-I18 GIFEDRSYIC  | 1391 | >PDGFRB-I18 GMFEDRSYIC | 27  | 1364 |
| >PDGFRB-I18 GIFEDRSYI   | 134  | >PDGFRB-I18 GMFEDRSYI  | 8   | 126  |
| >PDGFRB-I18 GIFEDRSYIC  | 6903 | >PDGFRB-I18 GMFEDRSYIC | 275 | 6628 |
| >PDGFRB-I18 GIFEDRSYI   | 6553 | >PDGFRB-I18 GMFEDRSYI  | 144 | 6409 |
| >PDGFRB-I18 GIFEDRSYI   | 72   | >PDGFRB-I18 GMFEDRSYI  | 8   | 64   |
| >PDGFRB-I18 GIFEDRSYIC  | 2568 | >PDGFRB-I18 GMFEDRSYIC | 51  | 2517 |
| >PDGFRB-I18 GIFEDRSYICK | 90   | >PDGFRB-I18 GMFEDRSYIC | 47  | 43   |
| >PDGFRB-I18 GIFEDRSYICK | 17   | >PDGFRB-I18 GMFEDRSYIC | 14  | 3    |
| >PDGFRB-I18 GIFEDRSY    | 158  | >PDGFRB-I18 GMFEDRSY   | 31  | 127  |
| >PDGFRB-I18 GIFEDRSY    | 132  | >PDGFRB-I18 GMFEDRSY   | 34  | 98   |
| >PDGFRB-I18 GIFEDRSYICK | 1227 | >PDGFRB-I18 GMFEDRSYIC | 265 | 962  |
| >PDGFRB-I18 GIFEDRSYICK | 143  | >PDGFRB-I18 GMFEDRSYIC | 427 | 284  |
| >PDGFRB-I18 GIFEDRSY    | 190  | >PDGFRB-I18 GMFEDRSY   | 49  | 141  |
| >PDGFRB-I18 GIFEDRSY    | 389  | >PDGFRB-I18 GMFEDRSY   | 53  | 336  |
| >PDGFRB-I18 GIFEDRSY    | 1278 | >PDGFRB-I18 GMFEDRSY   | 23  | 1255 |
| >PDGFRB-I18 GIFEDRSYI   | 4854 | >PDGFRB-I18 GMFEDRSYI  | 144 | 4710 |
| >PDGFRB-I18 SGIFEDRSYI  | 97   | >PDGFRB-I18 SGMFEDRSYI | 117 | 20   |
| >PDGFRB-I18 SGIFEDRSY   | 176  | >PDGFRB-I18 SGMFEDRSY  | 153 | 23   |
| >PDGFRB-I18 FSGIFEDRSY  | 270  | >PDGFRB-I18 FSGMFEDRSY | 256 | 14   |
| >PDGFRB-I18 FSGIFEDRSY  | 392  | >PDGFRB-I18 FSGMFEDRSY | 292 | 100  |
| >PDGFRB-I18 FSGIFEDRSY  | 168  | >PDGFRB-I18 FSGMFEDRSY | 159 | 9    |
| >PDGFRB-I18 FSGIFEDR    | 96   | >PDGFRB-I18 FSGMFEDR   | 87  | 9    |
| >PDGFRB-I18 FSGIFEDRSY  | 837  | >PDGFRB-I18 FSGMFEDRSY | 386 | 451  |
| >PDGFRB-I18 FSGIFEDRSY  | 93   | >PDGFRB-I18 FSGMFEDRSY | 142 | 49   |
| >PDGFRB-I18 FSGIFEDRSY  | 95   | >PDGFRB-I18 FSGMFEDRSY | 277 | 182  |

|                         |       |                         |       |       |
|-------------------------|-------|-------------------------|-------|-------|
| >PDGFRB-I18 FSGIFEDRSYI | 43    | >PDGFRB-I18 FSGMFEDRSY  | 49    | 6     |
| >PDGFRB-I18 GFSGIFEDRSY | 28    | >PDGFRB-I18 GFSGMFEDRS  | 32    | 4     |
| >PDGFRB-I18 GFSGIFEDRSY | 307   | >PDGFRB-I18 GFSGMFEDRS  | 506   | 199   |
| >PDGFRB-I18 GFSGIFEDR   | 331   | >PDGFRB-I18 GFSGMFEDR   | 622   | 291   |
| >PDGFRB-I18 GFSGIFEDR   | 361   | >PDGFRB-I18 GFSGMFEDR   | 697   | 336   |
| >PDGFRB-I18 RGFSGIFEDR  | 199   | >PDGFRB-I18 RGFSGMFED   | 326   | 127   |
| >PDGFRB-I18 RGFSGIFEDR  | 700   | >PDGFRB-I18 RGFSGMFED   | 381   | 319   |
| >PDGFRB-I18 RGFSGIFEDR  | 87    | >PDGFRB-I18 RGFSGMFED   | 130   | 43    |
| >PDGFRB-I18 QRGFSGIF    | 265   | >PDGFRB-I18 QRGFSGMF    | 249   | 16    |
| >PDGFRB-I18 HQRGFSGI    | 422   | >PDGFRB-I18 HQRGFSGM    | 1887  | 1465  |
| >PDGFRB-I18 HQRGFSGI    | 3601  | >PDGFRB-I18 HQRGFSGM    | 113   | 3488  |
| >PDGFRB-I18 HQRGFSGI    | 72    | >PDGFRB-I18 HQRGFSGM    | 219   | 147   |
| >PDGFRB-I18 HQRGFSGIFE  | 347   | >PDGFRB-I18 HQRGFSGMF   | 272   | 75    |
| >PDGFRB-I18 HQRGFSGI    | 429   | >PDGFRB-I18 HQRGFSGM    | 61    | 368   |
| >PDGFRB-I18 HQRGFSGIF   | 48    | >PDGFRB-I18 HQRGFSGMF   | 45    | 3     |
| >PDGFRB-I18 HQRGFSGI    | 407   | >PDGFRB-I18 HQRGFSGM    | 63    | 344   |
| >PDGFRB-I18 HQRGFSGIF   | 21    | >PDGFRB-I18 HQRGFSGMF   | 20    | 1     |
| >PDGFRB-I18 HQRGFSGI    | 172   | >PDGFRB-I18 HQRGFSGM    | 53    | 119   |
| >PDGFRB-I18 HQRGFSGIF   | 13    | >PDGFRB-I18 HQRGFSGMF   | 16    | 3     |
| >PDGFRB-I18 HQRGFSGIF   | 724   | >PDGFRB-I18 HQRGFSGMF   | 380   | 344   |
| >PDGFRB-I18 YDHQRGFSGI  | 396   | >PDGFRB-I18 YDHQRGFSGI  | 5453  | 5057  |
| >PDGFRB-I18 YDHQRGFSGI  | 5653  | >PDGFRB-I18 YDHQRGFSGI  | 347   | 5306  |
| >PDGFRB-I18 YDHQRGFSGI  | 537   | >PDGFRB-I18 YDHQRGFSGI  | 303   | 234   |
| >PDGFRB-L98 LRSQARLPGF  | 101   | >PDGFRB-L98 FRSQARLPGF  | 52    | 49    |
| >PDGFRB-L98 LRSQARLPGF  | 293   | >PDGFRB-L98 FRSQARLPGF  | 222   | 71    |
| >PDGFRB-L98 LRSQARLPGF  | 404   | >PDGFRB-L98 FRSQARLPGF  | 172   | 232   |
| >PDGFRB-L98 LRSQARLPGF  | 575   | >PDGFRB-L98 FRSQARLPGF  | 451   | 124   |
| >PDGFRB-L98 ILRSQARL    | 371   | >PDGFRB-L98 IFRSQARL    | 210   | 161   |
| >PDGFRB-L98 ILRSQARL    | 255   | >PDGFRB-L98 IFRSQARL    | 13129 | 12874 |
| >PDGFRB-L98 ILRSQARL    | 169   | >PDGFRB-L98 IFRSQARL    | 17761 | 17592 |
| >PDGFRB-L98 ILRSQARL    | 375   | >PDGFRB-L98 IFRSQARL    | 21868 | 21493 |
| >PDGFRB-L98 ILRSQARL    | 11    | >PDGFRB-L98 IFRSQARL    | 14384 | 14373 |
| >PDGFRB-L98 ILRSQARLPGI | 15188 | >PDGFRB-L98 IFRSQARLPGI | 400   | 14788 |
| >PDGFRB-L98 ILRSQARL    | 730   | >PDGFRB-L98 IFRSQARL    | 329   | 401   |
| >PDGFRB-L98 ILRSQARLPG  | 232   | >PDGFRB-L98 IFRSQARLPG  | 109   | 123   |
| >PDGFRB-L98 ILRSQARLPGI | 117   | >PDGFRB-L98 IFRSQARLPGI | 2529  | 2412  |
| >PDGFRB-L98 ILRSQARLPGI | 449   | >PDGFRB-L98 IFRSQARLPGI | 1915  | 1466  |
| >PDGFRB-L98 ILRSQARLPGI | 27    | >PDGFRB-L98 IFRSQARLPGI | 551   | 524   |
| >PDGFRB-L98 ILRSQARLPGI | 48    | >PDGFRB-L98 IFRSQARLPGI | 5870  | 5822  |
| >PDGFRB-L98 EFLRSDHPAIL | 1406  | >PDGFRB-L98 EFLRSDHPAIF | 80    | 1326  |
| >PDGFRB-L98 EFLRSDHPAIL | 3132  | >PDGFRB-L98 EFLRSDHPAIF | 250   | 2882  |
| >PDGFRB-L98 AILRSQARL   | 624   | >PDGFRB-L98 AIFRSQARL   | 128   | 496   |
| >PDGFRB-L98 AILRSQARL   | 1272  | >PDGFRB-L98 AIFRSQARL   | 116   | 1156  |

|                        |      |                        |       |       |
|------------------------|------|------------------------|-------|-------|
| >PDGFRB-L9{AILRSQARL   | 3327 | >PDGFRB-L9{AIFRSQARL   | 420   | 2907  |
| >PDGFRB-L9{AILRSQARL   | 274  | >PDGFRB-L9{AIFRSQARL   | 156   | 118   |
| >PDGFRB-L9{AILRSQARL   | 20   | >PDGFRB-L9{AIFRSQARL   | 14    | 6     |
| >PDGFRB-L9{AILRSQAR    | 2160 | >PDGFRB-L9{AIFRSQAR    | 313   | 1847  |
| >PDGFRB-L9{AILRSQAR    | 882  | >PDGFRB-L9{AIFRSQAR    | 150   | 732   |
| >PDGFRB-L9{AILRSQARL   | 951  | >PDGFRB-L9{AIFRSQARL   | 475   | 476   |
| >PDGFRB-L9{AILRSQARLP{ | 523  | >PDGFRB-L9{AIFRSQARLP{ | 268   | 255   |
| >PDGFRB-L9{AILRSQAR    | 46   | >PDGFRB-L9{AIFRSQAR    | 20    | 26    |
| >PDGFRB-L9{AILRSQAR    | 2207 | >PDGFRB-L9{AIFRSQAR    | 113   | 2094  |
| >PDGFRB-L9{AILRSQARL   | 1041 | >PDGFRB-L9{AIFRSQARL   | 362   | 679   |
| >PDGFRB-L9{HPAILRSQAR  | 216  | >PDGFRB-L9{HPAIFRSQAR  | 136   | 80    |
| >PDGFRB-L9{HPAILRSQ    | 311  | >PDGFRB-L9{HPAIFRSQ    | 286   | 25    |
| >PDGFRB-L9{HPAILRSQA   | 42   | >PDGFRB-L9{HPAIFRSQA   | 33    | 9     |
| >PDGFRB-L9{HPAILRSQAR  | 28   | >PDGFRB-L9{HPAIFRSQAR  | 26    | 2     |
| >PDGFRB-L9{HPAILRSQAR  | 412  | >PDGFRB-L9{HPAIFRSQAR  | 353   | 59    |
| >PDGFRB-L9{HPAILRSQAR  | 305  | >PDGFRB-L9{HPAIFRSQAR  | 285   | 20    |
| >PDGFRB-L9{HPAILRSQA   | 23   | >PDGFRB-L9{HPAIFRSQA   | 26    | 3     |
| >PDGFRB-L9{HPAILRSQAR  | 164  | >PDGFRB-L9{HPAIFRSQAR  | 168   | 4     |
| >PDGFRB-L9{HPAILRSQAR  | 506  | >PDGFRB-L9{HPAIFRSQAR  | 254   | 252   |
| >PDGFRB-L9{RSDHPAILR   | 609  | >PDGFRB-L9{RSDHPAIFR   | 329   | 280   |
| >PDGFRB-L9{RSDHPAILR   | 419  | >PDGFRB-L9{RSDHPAIFR   | 140   | 279   |
| >PDGFRB-L9{RSDHPAILR   | 357  | >PDGFRB-L9{RSDHPAIFR   | 82    | 275   |
| >PDGFRB-L9{RSDHPAIL    | 1228 | >PDGFRB-L9{RSDHPAIF    | 306   | 922   |
| >PDGFRB-L9{RSDHPAIL    | 3380 | >PDGFRB-L9{RSDHPAIF    | 152   | 3228  |
| >PDGFRB-L9{RSDHPAIL    | 8    | >PDGFRB-L9{RSDHPAIF    | 4     | 4     |
| >PDGFRB-L9{RSDHPAIL    | 287  | >PDGFRB-L9{RSDHPAIF    | 27    | 260   |
| >PDGFRB-L9{RSDHPAIL    | 62   | >PDGFRB-L9{RSDHPAIF    | 22    | 40    |
| >PDGFRB-L9{RSDHPAILR   | 1118 | >PDGFRB-L9{RSDHPAIFR   | 424   | 694   |
| >PDGFRB-L9{RSDHPAIL    | 247  | >PDGFRB-L9{RSDHPAIF    | 6544  | 6297  |
| >PDGFRB-L9{LRSDHPAILR  | 938  | >PDGFRB-L9{LRSDHPAIFR  | 311   | 627   |
| >PDGFRB-L9{LRSDHPAILR  | 528  | >PDGFRB-L9{LRSDHPAIFR  | 315   | 213   |
| >PDGFRB-L9{LRSDHPAIL   | 484  | >PDGFRB-L9{LRSDHPAIF   | 35    | 449   |
| >PDGFRB-L9{LRSDHPAIL   | 71   | >PDGFRB-L9{LRSDHPAIF   | 2249  | 2178  |
| >PDGFRB-L9{LRSDHPAIL   | 75   | >PDGFRB-L9{LRSDHPAIF   | 252   | 177   |
| >PDGFRB-L9{LRSDHPAIL   | 1062 | >PDGFRB-L9{LRSDHPAIF   | 102   | 960   |
| >PDGFRB-L9{LRSDHPAILR  | 851  | >PDGFRB-L9{LRSDHPAIFR  | 390   | 461   |
| >PDGFRB-L9{FLRSDHPAIL  | 443  | >PDGFRB-L9{FLRSDHPAIF  | 9680  | 9237  |
| >PDGFRB-L9{FLRSDHPAIL  | 18   | >PDGFRB-L9{FLRSDHPAIF  | 2431  | 2413  |
| >PDGFRB-L9{FLRSDHPAIL  | 30   | >PDGFRB-L9{FLRSDHPAIF  | 4672  | 4642  |
| >PDGFRB-L9{FLRSDHPAIL  | 34   | >PDGFRB-L9{FLRSDHPAIF  | 3281  | 3247  |
| >PDGFRB-L9{FLRSDHPAIL  | 61   | >PDGFRB-L9{FLRSDHPAIF  | 10384 | 10323 |
| >PDGFRB-L9{FLRSDHPAIL  | 331  | >PDGFRB-L9{FLRSDHPAIF  | 14232 | 13901 |
| >PDGFRB-L9{FLRSDHPAIL  | 5    | >PDGFRB-L9{FLRSDHPAIF  | 876   | 871   |

|                        |      |                        |       |       |
|------------------------|------|------------------------|-------|-------|
| >PDGFRB-L9{FLRSDHPAILF | 567  | >PDGFRB-L9{FLRSDHPAIF  | 175   | 392   |
| >PDGFRB-L9{FLRSDHPAILF | 265  | >PDGFRB-L9{FLRSDHPAIF  | 86    | 179   |
| >PDGFRB-L9{FLRSDHPAILF | 197  | >PDGFRB-L9{FLRSDHPAIF  | 92    | 105   |
| >PDGFRB-L9{FLRSDHPAIL  | 781  | >PDGFRB-L9{FLRSDHPAIF  | 55    | 726   |
| >PDGFRB-L9{FLRSDHPAIL  | 966  | >PDGFRB-L9{FLRSDHPAIF  | 48    | 918   |
| >PDGFRB-L9{FLRSDHPAIL  | 79   | >PDGFRB-L9{FLRSDHPAIF  | 5     | 74    |
| >PDGFRB-L9{FLRSDHPAIL  | 1295 | >PDGFRB-L9{FLRSDHPAIF  | 123   | 1172  |
| >PDGFRB-R8.RDIMRDSNYI  | 374  | >PDGFRB-R8.GDIMRDSNYI  | 1571  | 1197  |
| >PDGFRB-R8.RDIMRDSNYI  | 109  | >PDGFRB-R8.GDIMRDSNYI  | 163   | 54    |
| >PDGFRB-R8.ARDIMRDSN'  | 247  | >PDGFRB-R8.AGDIMRDSN'  | 132   | 115   |
| >PDGFRB-R8.ARDIMRDSN'  | 188  | >PDGFRB-R8.AGDIMRDSN'  | 29011 | 28823 |
| >PDGFRB-R8.LVKICDFGLAF | 25   | >PDGFRB-R8.LVKICDFGLAC | 16732 | 16707 |
| >PDGFRB-R8.LVKICDFGLAF | 236  | >PDGFRB-R8.LVKICDFGLAC | 31849 | 31613 |
| >PDGFRB-R8.LVKICDFGLAF | 213  | >PDGFRB-R8.LVKICDFGLAC | 35747 | 35534 |
| >PDGFRB-R8.LVKICDFGLAF | 300  | >PDGFRB-R8.LVKICDFGLAC | 35277 | 34977 |
| >PDGFRB-R8.LARDIMRDSN' | 934  | >PDGFRB-R8.LAGDIMRDSN' | 435   | 499   |
| >PDGFRB-R8.LARDIMRDSN' | 367  | >PDGFRB-R8.LAGDIMRDSN' | 345   | 22    |
| >PDGFRB-R8.LARDIMRDSN' | 272  | >PDGFRB-R8.LAGDIMRDSN' | 872   | 600   |
| >PDGFRB-R8.LARDIMRDSN' | 372  | >PDGFRB-R8.LAGDIMRDSN' | 3655  | 3283  |
| >PDGFRB-R8.LARDIMRDSN' | 7    | >PDGFRB-R8.LAGDIMRDSN' | 126   | 119   |
| >PDGFRB-R8.LARDIMRDSN' | 280  | >PDGFRB-R8.LAGDIMRDSN' | 290   | 10    |
| >PDGFRB-R8.LARDIMRDSN' | 39   | >PDGFRB-R8.LAGDIMRDSN' | 485   | 446   |
| >PDGFRB-R8.GLARDIMR    | 525  | >PDGFRB-R8.GLAGDIMR    | 442   | 83    |
| >PDGFRB-R8.FGLARDIMR   | 608  | >PDGFRB-R8.FGLAGDIMR   | 138   | 470   |
| >PDGFRB-R8.FGLARDIMR   | 305  | >PDGFRB-R8.FGLAGDIMR   | 909   | 604   |
| >PDGFRB-R8.DFGLARDIMF  | 49   | >PDGFRB-R8.DFGLAGDIMI  | 88    | 39    |
| >PDGFRB-R8.DFGLARDIMF  | 377  | >PDGFRB-R8.DFGLAGDIMI  | 513   | 136   |
| >PDGFRB-R8.DFGLARDIMF  | 414  | >PDGFRB-R8.DFGLAGDIMI  | 955   | 541   |
| >PDGFRB-R8.CDFGLARDIN  | 457  | >PDGFRB-R8.CDFGLAGDIM  | 641   | 184   |
| >PDGFRB-R8.CDFGLARDI   | 84   | >PDGFRB-R8.CDFGLAGDI   | 27    | 57    |
| >PDGFRB-R8.CDFGLARDIN  | 1083 | >PDGFRB-R8.CDFGLAGDIM  | 458   | 625   |
| >PDGFRB-R8.ICDFGLARDIN | 428  | >PDGFRB-R8.ICDFGLAGDIM | 350   | 78    |
| >PDGFRB-R8.KICDFGLAR   | 53   | >PDGFRB-R8.KICDFGLAG   | 16854 | 16801 |
| >PDGFRB-R8.KICDFGLAR   | 30   | >PDGFRB-R8.KICDFGLAG   | 16224 | 16194 |
| >PDGFRB-R8.KICDFGLARD  | 109  | >PDGFRB-R8.KICDFGLAGD  | 347   | 238   |
| >PDGFRB-R8.KICDFGLAR   | 14   | >PDGFRB-R8.KICDFGLAG   | 16057 | 16043 |
| >PDGFRB-R8.VKICDFGLAR  | 155  | >PDGFRB-R8.VKICDFGLAG  | 1877  | 1722  |
| >PDGFRB-T5.TIISLIIL    | 1112 | >PDGFRB-T5.IIISLIIL    | 160   | 952   |
| >PDGFRB-T5.TIISLIILIML | 802  | >PDGFRB-T5.IIISLIILIML | 364   | 438   |
| >PDGFRB-T5.TIISLIIL    | 377  | >PDGFRB-T5.IIISLIIL    | 146   | 231   |
| >PDGFRB-T5.TIISLIILI   | 84   | >PDGFRB-T5.IIISLIILI   | 51    | 33    |
| >PDGFRB-T5.TIISLIILIML | 117  | >PDGFRB-T5.IIISLIILIML | 63    | 54    |
| >PDGFRB-T5.TIISLIIL    | 363  | >PDGFRB-T5.IIISLIIL    | 204   | 159   |

|                        |      |                        |      |      |
|------------------------|------|------------------------|------|------|
| >PDGFRB-T5·TIISLIILI   | 199  | >PDGFRB-T5·IIISLIILI   | 108  | 91   |
| >PDGFRB-T5·TIISLIILIM  | 400  | >PDGFRB-T5·IIISLIILIM  | 296  | 104  |
| >PDGFRB-T5·TIISLIILIML | 143  | >PDGFRB-T5·IIISLIILIML | 90   | 53   |
| >PDGFRB-T5·TIISLIIL    | 329  | >PDGFRB-T5·IIISLIIL    | 208  | 121  |
| >PDGFRB-T5·TIISLIILI   | 106  | >PDGFRB-T5·IIISLIILI   | 69   | 37   |
| >PDGFRB-T5·TIISLIILIM  | 421  | >PDGFRB-T5·IIISLIILIM  | 460  | 39   |
| >PDGFRB-T5·TIISLIILIML | 286  | >PDGFRB-T5·IIISLIILIML | 199  | 87   |
| >PDGFRB-T5·TIISLIIL    | 215  | >PDGFRB-T5·IIISLIIL    | 106  | 109  |
| >PDGFRB-T5·TIISLIILI   | 92   | >PDGFRB-T5·IIISLIILI   | 54   | 38   |
| >PDGFRB-T5·TIISLIILIM  | 505  | >PDGFRB-T5·IIISLIILIM  | 450  | 55   |
| >PDGFRB-T5·TIISLIILIML | 109  | >PDGFRB-T5·IIISLIILIML | 63   | 46   |
| >PDGFRB-T5·TIISLIILI   | 386  | >PDGFRB-T5·IIISLIILI   | 71   | 315  |
| >PDGFRB-T5·TIISLIILIML | 337  | >PDGFRB-T5·IIISLIILIML | 67   | 270  |
| >PDGFRB-T5·TIISLIIL    | 740  | >PDGFRB-T5·IIISLIIL    | 219  | 521  |
| >PDGFRB-T5·TIISLIILI   | 1418 | >PDGFRB-T5·IIISLIILI   | 442  | 976  |
| >PDGFRB-T5·TIISLIILIML | 480  | >PDGFRB-T5·IIISLIILIML | 116  | 364  |
| >PDGFRB-T5·TIISLIIL    | 97   | >PDGFRB-T5·IIISLIIL    | 723  | 626  |
| >PDGFRB-T5·TIISLIILIM  | 26   | >PDGFRB-T5·IIISLIILIM  | 201  | 175  |
| >PDGFRB-T5·TIISLIILIML | 115  | >PDGFRB-T5·IIISLIILIML | 847  | 732  |
| >PDGFRB-T5·TIISLIIL    | 308  | >PDGFRB-T5·IIISLIIL    | 3004 | 2696 |
| >PDGFRB-T5·TIISLIILI   | 19   | >PDGFRB-T5·IIISLIILI   | 256  | 237  |
| >PDGFRB-T5·TIISLIILIML | 61   | >PDGFRB-T5·IIISLIILIML | 905  | 844  |
| >PDGFRB-T5·TIISLIILI   | 175  | >PDGFRB-T5·IIISLIILI   | 2405 | 2230 |
| >PDGFRB-T5·TIISLIILIML | 124  | >PDGFRB-T5·IIISLIILIML | 1767 | 1643 |
| >PDGFRB-T5·TIISLIIL    | 376  | >PDGFRB-T5·IIISLIIL    | 4534 | 4158 |
| >PDGFRB-T5·TIISLIILIM  | 254  | >PDGFRB-T5·IIISLIILIM  | 473  | 219  |
| >PDGFRB-T5·LTIISLIILI  | 470  | >PDGFRB-T5·LIIISLIILI  | 258  | 212  |
| >PDGFRB-T5·LTIISLIILI  | 284  | >PDGFRB-T5·LIIISLIILI  | 180  | 104  |
| >PDGFRB-T5·LTIISLII    | 1336 | >PDGFRB-T5·LIIISLII    | 283  | 1053 |
| >PDGFRB-T5·LTIISLIILI  | 461  | >PDGFRB-T5·LIIISLIILI  | 254  | 207  |
| >PDGFRB-T5·LTIISLII    | 694  | >PDGFRB-T5·LIIISLII    | 277  | 417  |
| >PDGFRB-T5·LTIISLIIL   | 580  | >PDGFRB-T5·LIIISLIIL   | 230  | 350  |
| >PDGFRB-T5·LTIISLIILI  | 83   | >PDGFRB-T5·LIIISLIILI  | 81   | 2    |
| >PDGFRB-T5·LTIISLIILI  | 1020 | >PDGFRB-T5·LIIISLIILI  | 272  | 748  |
| >PDGFRB-T5·LTIISLIIL   | 4456 | >PDGFRB-T5·LIIISLIIL   | 186  | 4270 |
| >PDGFRB-T5·LTIISLIILI  | 7218 | >PDGFRB-T5·LIIISLIILI  | 332  | 6886 |
| >PDGFRB-T5·LTIISLIIL   | 248  | >PDGFRB-T5·LIIISLIIL   | 2221 | 1973 |
| >PDGFRB-T5·LTIISLIILIM | 73   | >PDGFRB-T5·LIIISLIILIM | 560  | 487  |
| >PDGFRB-T5·LTIISLIILI  | 209  | >PDGFRB-T5·LIIISLIILI  | 910  | 701  |
| >PDGFRB-T5·LTIISLII    | 15   | >PDGFRB-T5·LIIISLII    | 4572 | 4557 |
| >PDGFRB-T5·LTIISLIIL   | 6    | >PDGFRB-T5·LIIISLIIL   | 1892 | 1886 |
| >PDGFRB-T5·LTIISLIILI  | 23   | >PDGFRB-T5·LIIISLIILI  | 6230 | 6207 |
| >PDGFRB-T5·LTIISLIILIM | 6    | >PDGFRB-T5·LIIISLIILIM | 1227 | 1221 |

|                         |       |                        |       |       |
|-------------------------|-------|------------------------|-------|-------|
| >PDGFRB-T5·LTIISLII     | 139   | >PDGFRB-T5·LIIISLII    | 2190  | 2051  |
| >PDGFRB-T5·LTIISLIIL    | 467   | >PDGFRB-T5·LIIISLIIL   | 7066  | 6599  |
| >PDGFRB-T5·LTIISLIILI   | 206   | >PDGFRB-T5·LIIISLIILI  | 2618  | 2412  |
| >PDGFRB-T5·LTIISLIILIM  | 98    | >PDGFRB-T5·LIIISLIILIM | 1242  | 1144  |
| >PDGFRB-T5·LTIISLII     | 64    | >PDGFRB-T5·LIIISLII    | 11507 | 11443 |
| >PDGFRB-T5·LTIISLIIL    | 97    | >PDGFRB-T5·LIIISLIIL   | 5736  | 5639  |
| >PDGFRB-T5·LTIISLIILI   | 86    | >PDGFRB-T5·LIIISLIILI  | 5399  | 5313  |
| >PDGFRB-T5·LTIISLIILIM  | 139   | >PDGFRB-T5·LIIISLIILIM | 6844  | 6705  |
| >PDGFRB-T5·LTIISLIIL    | 312   | >PDGFRB-T5·LIIISLIIL   | 7278  | 6966  |
| >PDGFRB-T5·LTIISLIILI   | 68    | >PDGFRB-T5·LIIISLIILI  | 2614  | 2546  |
| >PDGFRB-T5·LTIISLIILIM  | 32    | >PDGFRB-T5·LIIISLIILIM | 1631  | 1599  |
| >PDGFRB-T5·LTIISLII     | 24    | >PDGFRB-T5·LIIISLII    | 2625  | 2601  |
| >PDGFRB-T5·LTIISLIIL    | 329   | >PDGFRB-T5·LIIISLIIL   | 17239 | 16910 |
| >PDGFRB-T5·LTIISLIILI   | 128   | >PDGFRB-T5·LIIISLIILI  | 5349  | 5221  |
| >PDGFRB-T5·ISAILALVVLT  | 1874  | >PDGFRB-T5·ISAILALVVLI | 33    | 1841  |
| >PDGFRB-T5·ISAILALVVLT  | 9134  | >PDGFRB-T5·ISAILALVVLI | 46    | 9088  |
| >PDGFRB-T5·ISAILALVVLT  | 3220  | >PDGFRB-T5·ISAILALVVLI | 46    | 3174  |
| >PDGFRB-T5·ISAILALVVLT  | 2442  | >PDGFRB-T5·ISAILALVVLI | 265   | 2177  |
| >PDGFRB-T5·ISAILALVVLT  | 29500 | >PDGFRB-T5·ISAILALVVLI | 52    | 29448 |
| >PDGFRB-T5·VLTIIISLI    | 399   | >PDGFRB-T5·VLIISLI     | 86    | 313   |
| >PDGFRB-T5·VLTIIISLII   | 1146  | >PDGFRB-T5·VLIISLII    | 200   | 946   |
| >PDGFRB-T5·VLTIIISLIIL  | 770   | >PDGFRB-T5·VLIISLIIL   | 217   | 553   |
| >PDGFRB-T5·VLTIIISLIILI | 207   | >PDGFRB-T5·VLIISLIILI  | 61    | 146   |
| >PDGFRB-T5·VLTIIISLI    | 54    | >PDGFRB-T5·VLIISLI     | 40    | 14    |
| >PDGFRB-T5·VLTIIISLII   | 370   | >PDGFRB-T5·VLIISLII    | 282   | 88    |
| >PDGFRB-T5·VLTIIISLIIL  | 226   | >PDGFRB-T5·VLIISLIIL   | 142   | 84    |
| >PDGFRB-T5·VLTIIISLIILI | 113   | >PDGFRB-T5·VLIISLIILI  | 87    | 26    |
| >PDGFRB-T5·VLTIIISLI    | 58    | >PDGFRB-T5·VLIISLI     | 20    | 38    |
| >PDGFRB-T5·VLTIIISLII   | 443   | >PDGFRB-T5·VLIISLII    | 130   | 313   |
| >PDGFRB-T5·VLTIIISLIIL  | 424   | >PDGFRB-T5·VLIISLIIL   | 223   | 201   |
| >PDGFRB-T5·VLTIIISLIILI | 233   | >PDGFRB-T5·VLIISLIILI  | 64    | 169   |
| >PDGFRB-T5·VLTIIISLI    | 1240  | >PDGFRB-T5·VLIISLI     | 406   | 834   |
| >PDGFRB-T5·VLTIIISLIIL  | 1086  | >PDGFRB-T5·VLIISLIIL   | 304   | 782   |
| >PDGFRB-T5·VLTIIISLIILI | 1381  | >PDGFRB-T5·VLIISLIILI  | 468   | 913   |
| >PDGFRB-T5·VLTIIISLI    | 32    | >PDGFRB-T5·VLIISLI     | 12    | 20    |
| >PDGFRB-T5·VLTIIISLII   | 296   | >PDGFRB-T5·VLIISLII    | 81    | 215   |
| >PDGFRB-T5·VLTIIISLIIL  | 196   | >PDGFRB-T5·VLIISLIIL   | 58    | 138   |
| >PDGFRB-T5·VLTIIISLIILI | 34    | >PDGFRB-T5·VLIISLIILI  | 14    | 20    |
| >PDGFRB-T5·VLTIIISLI    | 421   | >PDGFRB-T5·VLIISLI     | 87    | 334   |
| >PDGFRB-T5·VLTIIISLII   | 804   | >PDGFRB-T5·VLIISLII    | 160   | 644   |
| >PDGFRB-T5·VLTIIISLIIL  | 286   | >PDGFRB-T5·VLIISLIIL   | 69    | 217   |
| >PDGFRB-T5·VLTIIISLIILI | 437   | >PDGFRB-T5·VLIISLIILI  | 100   | 337   |
| >PDGFRB-T5·VLTIIISLI    | 40    | >PDGFRB-T5·VLIISLI     | 54    | 14    |

|                         |      |                        |      |      |
|-------------------------|------|------------------------|------|------|
| >PDGFRB-T5·VLTIIISLII   | 74   | >PDGFRB-T5·VLIISLII    | 112  | 38   |
| >PDGFRB-T5·VLTIIISLIIL  | 45   | >PDGFRB-T5·VLIISLIIL   | 62   | 17   |
| >PDGFRB-T5·VLTIIISLIILI | 29   | >PDGFRB-T5·VLIISLIILI  | 40   | 11   |
| >PDGFRB-T5·VLTIIISLI    | 9    | >PDGFRB-T5·VLIISLI     | 12   | 3    |
| >PDGFRB-T5·VLTIIISLII   | 35   | >PDGFRB-T5·VLIISLII    | 64   | 29   |
| >PDGFRB-T5·VLTIIISLIIL  | 8    | >PDGFRB-T5·VLIISLIIL   | 12   | 4    |
| >PDGFRB-T5·VLTIIISLIILI | 11   | >PDGFRB-T5·VLIISLIILI  | 16   | 5    |
| >PDGFRB-T5·VVLTIISL     | 210  | >PDGFRB-T5·VVLIIISL    | 263  | 53   |
| >PDGFRB-T5·VVLTIISL     | 217  | >PDGFRB-T5·VVLIIISL    | 413  | 196  |
| >PDGFRB-T5·VVLTIISLI    | 295  | >PDGFRB-T5·VVLIIISLI   | 886  | 591  |
| >PDGFRB-T5·VVLTIISLI    | 189  | >PDGFRB-T5·VVLIIISLI   | 477  | 288  |
| >PDGFRB-T5·VVLTIISL     | 62   | >PDGFRB-T5·VVLIIISL    | 115  | 53   |
| >PDGFRB-T5·VVLTIISLI    | 73   | >PDGFRB-T5·VVLIIISLI   | 204  | 131  |
| >PDGFRB-T5·VVLTIISLII   | 446  | >PDGFRB-T5·VVLIIISLII  | 418  | 28   |
| >PDGFRB-T5·VVLTIISLIIL  | 167  | >PDGFRB-T5·VVLIIISLIIL | 340  | 173  |
| >PDGFRB-T5·VVLTIISL     | 72   | >PDGFRB-T5·VVLIIISL    | 52   | 20   |
| >PDGFRB-T5·VVLTIISLI    | 131  | >PDGFRB-T5·VVLIIISLI   | 87   | 44   |
| >PDGFRB-T5·VVLTIISLIIL  | 611  | >PDGFRB-T5·VVLIIISLIIL | 423  | 188  |
| >PDGFRB-T5·VVLTIISL     | 346  | >PDGFRB-T5·VVLIIISL    | 240  | 106  |
| >PDGFRB-T5·VVLTIISL     | 156  | >PDGFRB-T5·VVLIIISL    | 389  | 233  |
| >PDGFRB-T5·VVLTIISLI    | 478  | >PDGFRB-T5·VVLIIISLI   | 1351 | 873  |
| >PDGFRB-T5·VVLTIISL     | 64   | >PDGFRB-T5·VVLIIISL    | 66   | 2    |
| >PDGFRB-T5·VVLTIISLIIL  | 420  | >PDGFRB-T5·VVLIIISLIIL | 410  | 10   |
| >PDGFRB-T5·VVLTIISLII   | 454  | >PDGFRB-T5·VVLIIISLII  | 904  | 450  |
| >PDGFRB-T5·VVLTIISLI    | 216  | >PDGFRB-T5·VVLIIISLI   | 537  | 321  |
| >PDGFRB-T5·VVLTIISLI    | 47   | >PDGFRB-T5·VVLIIISLI   | 77   | 30   |
| >PDGFRB-T5·VVLTIISLIIL  | 348  | >PDGFRB-T5·VVLIIISLIIL | 550  | 202  |
| >PDGFRB-T5·LVVLTIIISLI  | 323  | >PDGFRB-T5·LVVLIISLI   | 305  | 18   |
| >PDGFRB-T5·LVVLTIIISLI  | 282  | >PDGFRB-T5·LVVLIISLI   | 350  | 68   |
| >PDGFRB-T5·LVVLTIIISL   | 172  | >PDGFRB-T5·LVVLIISL    | 131  | 41   |
| >PDGFRB-T5·LVVLTIIISLI  | 179  | >PDGFRB-T5·LVVLIISLI   | 246  | 67   |
| >PDGFRB-T5·LVVLTIIISL   | 225  | >PDGFRB-T5·LVVLIISL    | 199  | 26   |
| >PDGFRB-T5·LVVLTIIISL   | 1233 | >PDGFRB-T5·LVVLIISL    | 135  | 1098 |
| >PDGFRB-T5·LVVLTIIISLI  | 559  | >PDGFRB-T5·LVVLIISLI   | 372  | 187  |
| >PDGFRB-T5·LVVLTIIISLII | 1560 | >PDGFRB-T5·LVVLIISLII  | 415  | 1145 |
| >PDGFRB-T5·LVVLTIIISLI  | 98   | >PDGFRB-T5·LVVLIISLI   | 160  | 62   |
| >PDGFRB-T5·ALVVLTII     | 424  | >PDGFRB-T5·ALVVLIIL    | 218  | 206  |
| >PDGFRB-T5·ALVVLTIIISL  | 128  | >PDGFRB-T5·ALVVLIISL   | 131  | 3    |
| >PDGFRB-T5·ALVVLTIIISLI | 169  | >PDGFRB-T5·ALVVLIISLI  | 136  | 33   |
| >PDGFRB-T5·ALVVLTII     | 112  | >PDGFRB-T5·ALVVLIIL    | 294  | 182  |
| >PDGFRB-T5·ALVVLTIIISL  | 64   | >PDGFRB-T5·ALVVLIISL   | 64   | 0    |
| >PDGFRB-T5·ALVVLTIIISLI | 44   | >PDGFRB-T5·ALVVLIISLI  | 70   | 26   |
| >PDGFRB-T5·ALVVLTII     | 49   | >PDGFRB-T5·ALVVLIIL    | 137  | 88   |



|                         |      |                        |      |      |
|-------------------------|------|------------------------|------|------|
| >PDGFRB-T5·ALVVLTIIISL  | 82   | >PDGFRB-T5·ALVVLIISL   | 107  | 25   |
| >PDGFRB-T5·ALVVLTIIISLI | 36   | >PDGFRB-T5·ALVVLIISLI  | 38   | 2    |
| >PDGFRB-T5·ALVVLTII     | 300  | >PDGFRB-T5·ALVVLI      | 329  | 29   |
| >PDGFRB-T5·ALVVLTIIISL  | 128  | >PDGFRB-T5·ALVVLIISL   | 171  | 43   |
| >PDGFRB-T5·ALVVLTIIISLI | 416  | >PDGFRB-T5·ALVVLIISLI  | 428  | 12   |
| >PDGFRB-T5·ALVVLTII     | 169  | >PDGFRB-T5·ALVVLI      | 57   | 112  |
| >PDGFRB-T5·ALVVLTIIISL  | 34   | >PDGFRB-T5·ALVVLIISL   | 17   | 17   |
| >PDGFRB-T5·ALVVLTIIISLI | 57   | >PDGFRB-T5·ALVVLIISLI  | 26   | 31   |
| >PDGFRB-T5·ALVVLTII     | 222  | >PDGFRB-T5·ALVVLI      | 128  | 94   |
| >PDGFRB-T5·ALVVLTIIISL  | 69   | >PDGFRB-T5·ALVVLIISL   | 87   | 18   |
| >PDGFRB-T5·ALVVLTIIISLI | 197  | >PDGFRB-T5·ALVVLIISLI  | 235  | 38   |
| >PDGFRB-T5·ALVVLTII     | 184  | >PDGFRB-T5·ALVVLI      | 106  | 78   |
| >PDGFRB-T5·ALVVLTIIISL  | 52   | >PDGFRB-T5·ALVVLIISL   | 41   | 11   |
| >PDGFRB-T5·ALVVLTIIISLI | 118  | >PDGFRB-T5·ALVVLIISLI  | 80   | 38   |
| >PDGFRB-T5·ALVVLTII     | 39   | >PDGFRB-T5·ALVVLI      | 33   | 6    |
| >PDGFRB-T5·ALVVLTIIISL  | 5    | >PDGFRB-T5·ALVVLIISL   | 4    | 1    |
| >PDGFRB-T5·ALVVLTIIISLI | 20   | >PDGFRB-T5·ALVVLIISLI  | 15   | 5    |
| >PDGFRB-T5·ALVVLTIIISL  | 418  | >PDGFRB-T5·ALVVLIISL   | 645  | 227  |
| >PDGFRB-T5·LALVVLTII    | 325  | >PDGFRB-T5·LALVVLII    | 933  | 608  |
| >PDGFRB-T5·LALVVLTIIISL | 221  | >PDGFRB-T5·LALVVLIIISL | 231  | 10   |
| >PDGFRB-T5·LALVVLTII    | 488  | >PDGFRB-T5·LALVVLII    | 2118 | 1630 |
| >PDGFRB-T5·LALVVLTII    | 423  | >PDGFRB-T5·LALVVLII    | 2672 | 2249 |
| >PDGFRB-T5·LALVVLTIIISL | 297  | >PDGFRB-T5·LALVVLIIISL | 541  | 244  |
| >PDGFRB-T5·LALVVLTII    | 362  | >PDGFRB-T5·LALVVLII    | 280  | 82   |
| >PDGFRB-T5·LALVVLTII    | 259  | >PDGFRB-T5·LALVVLIII   | 121  | 138  |
| >PDGFRB-T5·LALVVLTII    | 257  | >PDGFRB-T5·LALVVLII    | 478  | 221  |
| >PDGFRB-T5·LALVVLTII    | 73   | >PDGFRB-T5·LALVVLII    | 93   | 20   |
| >PDGFRB-T5·LALVVLTII    | 130  | >PDGFRB-T5·LALVVLIII   | 179  | 49   |
| >PDGFRB-T5·LALVVLTII    | 464  | >PDGFRB-T5·LALVVLIII   | 2340 | 1876 |
| >PDGFRB-T5·LALVVLTII    | 88   | >PDGFRB-T5·LALVVLII    | 140  | 52   |
| >PDGFRB-T5·LALVVLTII    | 127  | >PDGFRB-T5·LALVVLIII   | 146  | 19   |
| >PDGFRB-T5·ILALVVLT     | 597  | >PDGFRB-T5·ILALVVLI    | 65   | 532  |
| >PDGFRB-T5·ILALVVLTII   | 93   | >PDGFRB-T5·ILALVVLI    | 137  | 44   |
| >PDGFRB-T5·ILALVVLTII   | 240  | >PDGFRB-T5·ILALVVLI    | 159  | 81   |
| >PDGFRB-T5·ILALVVLT     | 88   | >PDGFRB-T5·ILALVVLI    | 14   | 74   |
| >PDGFRB-T5·ILALVVLTII   | 129  | >PDGFRB-T5·ILALVVLI    | 126  | 3    |
| >PDGFRB-T5·ILALVVLTII   | 77   | >PDGFRB-T5·ILALVVLI    | 77   | 0    |
| >PDGFRB-T5·ILALVVLT     | 191  | >PDGFRB-T5·ILALVVLI    | 21   | 170  |
| >PDGFRB-T5·ILALVVLTII   | 31   | >PDGFRB-T5·ILALVVLI    | 37   | 6    |
| >PDGFRB-T5·ILALVVLTII   | 96   | >PDGFRB-T5·ILALVVLI    | 174  | 78   |
| >PDGFRB-T5·ILALVVLT     | 2298 | >PDGFRB-T5·ILALVVLI    | 435  | 1863 |
| >PDGFRB-T5·ILALVVLTII   | 694  | >PDGFRB-T5·ILALVVLI    | 461  | 233  |
| >PDGFRB-T5·ILALVVLT     | 395  | >PDGFRB-T5·ILALVVLI    | 14   | 381  |

|                         |       |                        |      |       |
|-------------------------|-------|------------------------|------|-------|
| >PDGFRB-T5·ILALVVLT I   | 6     | >PDGFRB-T5·ILALVVLII   | 41   | 35    |
| >PDGFRB-T5·ILALVVLTII   | 43    | >PDGFRB-T5·ILALVVLIII  | 35   | 8     |
| >PDGFRB-T5·ILALVVLT     | 11205 | >PDGFRB-T5·ILALVVLI    | 309  | 10896 |
| >PDGFRB-T5·ILALVVLT I   | 119   | >PDGFRB-T5·ILALVVLII   | 548  | 429   |
| >PDGFRB-T5·ILALVVLTII   | 332   | >PDGFRB-T5·ILALVVLIII  | 250  | 82    |
| >PDGFRB-T5·ILALVVLT     | 630   | >PDGFRB-T5·ILALVVLI    | 26   | 604   |
| >PDGFRB-T5·ILALVVLT I   | 17    | >PDGFRB-T5·ILALVVLII   | 45   | 28    |
| >PDGFRB-T5·ILALVVLTII   | 45    | >PDGFRB-T5·ILALVVLIII  | 43   | 2     |
| >PDGFRB-T5·ILALVVLT     | 2783  | >PDGFRB-T5·ILALVVLI    | 46   | 2737  |
| >PDGFRB-T5·ILALVVLT I   | 29    | >PDGFRB-T5·ILALVVLII   | 131  | 102   |
| >PDGFRB-T5·ILALVVLTII   | 125   | >PDGFRB-T5·ILALVVLIII  | 124  | 1     |
| >PDGFRB-T5·ILALVVLT     | 152   | >PDGFRB-T5·ILALVVLI    | 16   | 136   |
| >PDGFRB-T5·ILALVVLT I   | 16    | >PDGFRB-T5·ILALVVLII   | 71   | 55    |
| >PDGFRB-T5·ILALVVLTII   | 36    | >PDGFRB-T5·ILALVVLIII  | 54   | 18    |
| >PDGFRB-T5·ILALVVLT I   | 65    | >PDGFRB-T5·ILALVVLII   | 932  | 867   |
| >PDGFRB-T5·AILALVVLT    | 747   | >PDGFRB-T5·AILALVVLI   | 44   | 703   |
| >PDGFRB-T5·AILALVVLT I  | 136   | >PDGFRB-T5·AILALVVLII  | 488  | 352   |
| >PDGFRB-T5·AILALVVLTII  | 172   | >PDGFRB-T5·AILALVVLIII | 129  | 43    |
| >PDGFRB-T5·AILALVVLT    | 1685  | >PDGFRB-T5·AILALVVLI   | 186  | 1499  |
| >PDGFRB-T5·AILALVVLT I  | 156   | >PDGFRB-T5·AILALVVLII  | 439  | 283   |
| >PDGFRB-T5·AILALVVLT    | 2615  | >PDGFRB-T5·AILALVVLI   | 269  | 2346  |
| >PDGFRB-T5·AILALVVLT I  | 74    | >PDGFRB-T5·AILALVVLII  | 200  | 126   |
| >PDGFRB-T5·AILALVVLTII  | 199   | >PDGFRB-T5·AILALVVLIII | 670  | 471   |
| >PDGFRB-T5·AILALVVLT    | 657   | >PDGFRB-T5·AILALVVLI   | 55   | 602   |
| >PDGFRB-T5·AILALVVLT I  | 150   | >PDGFRB-T5·AILALVVLII  | 341  | 191   |
| >PDGFRB-T5·AILALVVLTII  | 65    | >PDGFRB-T5·AILALVVLIII | 98   | 33    |
| >PDGFRB-T5·AILALVVLT    | 888   | >PDGFRB-T5·AILALVVLI   | 24   | 864   |
| >PDGFRB-T5·AILALVVLT I  | 12    | >PDGFRB-T5·AILALVVLII  | 88   | 76    |
| >PDGFRB-T5·AILALVVLTII  | 136   | >PDGFRB-T5·AILALVVLIII | 72   | 64    |
| >PDGFRB-T5·AILALVVLT I  | 466   | >PDGFRB-T5·AILALVVLII  | 2005 | 1539  |
| >PDGFRB-T5·AILALVVLT    | 2427  | >PDGFRB-T5·AILALVVLI   | 65   | 2362  |
| >PDGFRB-T5·AILALVVLT I  | 45    | >PDGFRB-T5·AILALVVLII  | 146  | 101   |
| >PDGFRB-T5·AILALVVLTII  | 202   | >PDGFRB-T5·AILALVVLIII | 140  | 62    |
| >PDGFRB-T5·AILALVVLT    | 2735  | >PDGFRB-T5·AILALVVLI   | 180  | 2555  |
| >PDGFRB-T5·AILALVVLT I  | 174   | >PDGFRB-T5·AILALVVLII  | 860  | 686   |
| >PDGFRB-T5·AILALVVLT    | 3612  | >PDGFRB-T5·AILALVVLI   | 43   | 3569  |
| >PDGFRB-T5·AILALVVLT I  | 17    | >PDGFRB-T5·AILALVVLII  | 68   | 51    |
| >PDGFRB-T5·AILALVVLTII  | 99    | >PDGFRB-T5·AILALVVLIII | 103  | 4     |
| >PDGFRB-T5·SAILALVVLT I | 320   | >PDGFRB-T5·SAILALVVLII | 1087 | 767   |
| >PDGFRB-T5·SAILALVVLT   | 1464  | >PDGFRB-T5·SAILALVVLI  | 365  | 1099  |
| >PDGFRB-T5·SAILALVVLT I | 280   | >PDGFRB-T5·SAILALVVLII | 1968 | 1688  |
| >PDGFRB-T5·SAILALVVLT   | 33342 | >PDGFRB-T5·SAILALVVLI  | 401  | 32941 |
| >PDGFRB-T5·SAILALVVLT I | 156   | >PDGFRB-T5·SAILALVVLII | 234  | 78    |

|                       |      |                        |      |      |
|-----------------------|------|------------------------|------|------|
| >PDGFRB-T8:TLSDVWSFGI | 52   | >PDGFRB-T8:ILSDVWSFGI  | 34   | 18   |
| >PDGFRB-T8:TLSDVWSFGI | 355  | >PDGFRB-T8:ILSDVWSFGIL | 153  | 202  |
| >PDGFRB-T8:TLSDVWSF   | 91   | >PDGFRB-T8:ILSDVWSF    | 40   | 51   |
| >PDGFRB-T8:TLSDVWSFG  | 165  | >PDGFRB-T8:ILSDVWSFG   | 60   | 105  |
| >PDGFRB-T8:TLSDVWSFGI | 25   | >PDGFRB-T8:ILSDVWSFGI  | 17   | 8    |
| >PDGFRB-T8:TLSDVWSFGI | 15   | >PDGFRB-T8:ILSDVWSFGIL | 10   | 5    |
| >PDGFRB-T8:TLSDVWSFGI | 102  | >PDGFRB-T8:ILSDVWSFGI  | 88   | 14   |
| >PDGFRB-T8:TLSDVWSFGI | 19   | >PDGFRB-T8:ILSDVWSFGIL | 12   | 7    |
| >PDGFRB-T8:TLSDVWSF   | 169  | >PDGFRB-T8:ILSDVWSF    | 75   | 94   |
| >PDGFRB-T8:TLSDVWSFGI | 158  | >PDGFRB-T8:ILSDVWSFGI  | 123  | 35   |
| >PDGFRB-T8:TLSDVWSFGI | 283  | >PDGFRB-T8:ILSDVWSFGIL | 115  | 168  |
| >PDGFRB-T8:TLSDVWSF   | 284  | >PDGFRB-T8:ILSDVWSF    | 53   | 231  |
| >PDGFRB-T8:TLSDVWSFG  | 1219 | >PDGFRB-T8:ILSDVWSFG   | 269  | 950  |
| >PDGFRB-T8:TLSDVWSFGI | 5    | >PDGFRB-T8:ILSDVWSFGI  | 3    | 2    |
| >PDGFRB-T8:TLSDVWSFGI | 109  | >PDGFRB-T8:ILSDVWSFGIL | 26   | 83   |
| >PDGFRB-T8:TLSDVWSFGI | 13   | >PDGFRB-T8:ILSDVWSFGI  | 8    | 5    |
| >PDGFRB-T8:TLSDVWSFGI | 369  | >PDGFRB-T8:ILSDVWSFGIL | 169  | 200  |
| >PDGFRB-T8:TLSDVWSFGI | 9    | >PDGFRB-T8:ILSDVWSFGI  | 7    | 2    |
| >PDGFRB-T8:TLSDVWSFGI | 107  | >PDGFRB-T8:ILSDVWSFGIL | 65   | 42   |
| >PDGFRB-T8:TLSDVWSFGI | 7    | >PDGFRB-T8:ILSDVWSFGI  | 3    | 4    |
| >PDGFRB-T8:TLSDVWSFGI | 581  | >PDGFRB-T8:ILSDVWSFGIL | 112  | 469  |
| >PDGFRB-T8:TLSDVWSF   | 215  | >PDGFRB-T8:ILSDVWSF    | 66   | 149  |
| >PDGFRB-T8:TLSDVWSFGI | 6    | >PDGFRB-T8:ILSDVWSFGI  | 3    | 3    |
| >PDGFRB-T8:TLSDVWSFGI | 13   | >PDGFRB-T8:ILSDVWSFGIL | 5    | 8    |
| >PDGFRB-T8:TLSDVWSFGI | 99   | >PDGFRB-T8:ILSDVWSFGI  | 954  | 855  |
| >PDGFRB-T8:TLSDVWSF   | 164  | >PDGFRB-T8:ILSDVWSF    | 94   | 70   |
| >PDGFRB-T8:TLSDVWSF   | 364  | >PDGFRB-T8:ILSDVWSF    | 50   | 314  |
| >PDGFRB-T8:TTLSDVWSFC | 121  | >PDGFRB-T8:TILSDVWSFG  | 30   | 91   |
| >PDGFRB-T8:TTLSDVWSFC | 1576 | >PDGFRB-T8:TILSDVWSFG  | 454  | 1122 |
| >PDGFRB-T8:TTLSDVWSFC | 2046 | >PDGFRB-T8:TILSDVWSFG  | 416  | 1630 |
| >PDGFRB-T8:TTLSDVWSF  | 156  | >PDGFRB-T8:TILSDVWSF   | 65   | 91   |
| >PDGFRB-T8:TTLSDVWSFC | 27   | >PDGFRB-T8:TILSDVWSFG  | 12   | 15   |
| >PDGFRB-T8:TTLSDVWSFC | 62   | >PDGFRB-T8:TILSDVWSFG  | 15   | 47   |
| >PDGFRB-T8:TTLSDVWSFC | 212  | >PDGFRB-T8:TILSDVWSFG  | 44   | 168  |
| >PDGFRB-T8:TTLSDVWSFC | 224  | >PDGFRB-T8:TILSDVWSFG  | 46   | 178  |
| >PDGFRB-T8:TTLSDVWSFC | 241  | >PDGFRB-T8:TILSDVWSFG  | 9    | 232  |
| >PDGFRB-T8:TTLSDVWSFC | 3979 | >PDGFRB-T8:TILSDVWSFG  | 122  | 3857 |
| >PDGFRB-T8:TTLSDVWSF  | 270  | >PDGFRB-T8:TILSDVWSF   | 326  | 56   |
| >PDGFRB-T8:TTLSDVWSF  | 29   | >PDGFRB-T8:TILSDVWSF   | 125  | 96   |
| >PDGFRB-T8:TTLSDVWSF  | 6    | >PDGFRB-T8:TILSDVWSF   | 34   | 28   |
| >PDGFRB-T8:TTLSDVWSF  | 386  | >PDGFRB-T8:TILSDVWSF   | 3746 | 3360 |
| >PDGFRB-T8:TTLSDVWSF  | 47   | >PDGFRB-T8:TILSDVWSF   | 160  | 113  |
| >PDGFRB-T8:TTLSDVWSFC | 147  | >PDGFRB-T8:TILSDVWSFG  | 498  | 351  |

|                        |       |                        |       |       |
|------------------------|-------|------------------------|-------|-------|
| >PDGFRB-T8:TTLSDVWSFC  | 25    | >PDGFRB-T8:TILSDVWSFG  | 183   | 158   |
| >PDGFRB-T8:TTLSDVWSFC  | 4     | >PDGFRB-T8:TILSDVWSFG  | 7     | 3     |
| >PDGFRB-T8:TTLSDVWSF   | 74    | >PDGFRB-T8:TILSDVWSF   | 130   | 56    |
| >PDGFRB-T8:TTLSDVWSF   | 13    | >PDGFRB-T8:TILSDVWSF   | 3342  | 3329  |
| >PDGFRB-T8:TTLSDVWSFC  | 133   | >PDGFRB-T8:TILSDVWSFG  | 13344 | 13211 |
| >PDGFRB-T8:TTLSDVWSF   | 88    | >PDGFRB-T8:TILSDVWSF   | 2248  | 2160  |
| >PDGFRB-T8:TTLSDVWSF   | 57    | >PDGFRB-T8:TILSDVWSF   | 766   | 709   |
| >PDGFRB-T8:TTLSDVWSF   | 268   | >PDGFRB-T8:TILSDVWSF   | 5376  | 5108  |
| >PDGFRB-T8:TTLSDVWSFC  | 57    | >PDGFRB-T8:TILSDVWSFG  | 5741  | 5684  |
| >PDGFRB-T8:PESIFNSLYTT | 15230 | >PDGFRB-T8:PESIFNSLYTI | 88    | 15142 |
| >PDGFRB-T8:PESIFNSLYTT | 5066  | >PDGFRB-T8:PESIFNSLYTI | 86    | 4980  |
| >PDGFRB-T8:YTTLSDVWSF  | 172   | >PDGFRB-T8:YTILSDVWSF  | 86    | 86    |
| >PDGFRB-T8:YTTLSDVWSF  | 435   | >PDGFRB-T8:YTILSDVWSF  | 96    | 339   |
| >PDGFRB-T8:YTTLSDVWSF  | 1867  | >PDGFRB-T8:YTILSDVWSF  | 364   | 1503  |
| >PDGFRB-T8:YTTLSDVW    | 5838  | >PDGFRB-T8:YTILSDVW    | 405   | 5433  |
| >PDGFRB-T8:YTTLSDVWSF  | 67    | >PDGFRB-T8:YTILSDVWSF  | 8     | 59    |
| >PDGFRB-T8:YTTLSDVWSF  | 4555  | >PDGFRB-T8:YTILSDVWSF  | 430   | 4125  |
| >PDGFRB-T8:YTTLSDVWSF  | 525   | >PDGFRB-T8:YTILSDVWSF  | 267   | 258   |
| >PDGFRB-T8:YTTLSDVWSF  | 1255  | >PDGFRB-T8:YTILSDVWSF  | 328   | 927   |
| >PDGFRB-T8:YTTLSDVWSF  | 1445  | >PDGFRB-T8:YTILSDVWSF  | 100   | 1345  |
| >PDGFRB-T8:YTTLSDVWSF  | 96    | >PDGFRB-T8:YTILSDVWSF  | 29    | 67    |
| >PDGFRB-T8:YTTLSDVW    | 6     | >PDGFRB-T8:YTILSDVW    | 4     | 2     |
| >PDGFRB-T8:YTTLSDVWS   | 1305  | >PDGFRB-T8:YTILSDVWS   | 365   | 940   |
| >PDGFRB-T8:YTTLSDVWSF  | 5     | >PDGFRB-T8:YTILSDVWSF  | 3     | 2     |
| >PDGFRB-T8:YTTLSDVW    | 117   | >PDGFRB-T8:YTILSDVW    | 71    | 46    |
| >PDGFRB-T8:YTTLSDVWSF  | 562   | >PDGFRB-T8:YTILSDVWSF  | 279   | 283   |
| >PDGFRB-T8:YTTLSDVW    | 14    | >PDGFRB-T8:YTILSDVW    | 11    | 3     |
| >PDGFRB-T8:YTTLSDVWSF  | 81    | >PDGFRB-T8:YTILSDVWSF  | 43    | 38    |
| >PDGFRB-T8:YTTLSDVWSF  | 28    | >PDGFRB-T8:YTILSDVWSF  | 174   | 146   |
| >PDGFRB-T8:YTTLSDVW    | 67    | >PDGFRB-T8:YTILSDVW    | 276   | 209   |
| >PDGFRB-T8:YTTLSDVWSF  | 18    | >PDGFRB-T8:YTILSDVWSF  | 21    | 3     |
| >PDGFRB-T8:YTTLSDVW    | 381   | >PDGFRB-T8:YTILSDVW    | 190   | 191   |
| >PDGFRB-T8:LYTTLSDV    | 49    | >PDGFRB-T8:LYTILSDV    | 156   | 107   |
| >PDGFRB-T8:LYTTLSDVWS  | 187   | >PDGFRB-T8:LYTILSDVWSI | 114   | 73    |
| >PDGFRB-T8:LYTTLSDVWS  | 98    | >PDGFRB-T8:LYTILSDVWSI | 92    | 6     |
| >PDGFRB-T8:LYTTLSDV    | 712   | >PDGFRB-T8:LYTILSDV    | 477   | 235   |
| >PDGFRB-T8:LYTTLSDVW   | 17    | >PDGFRB-T8:LYTILSDVW   | 14    | 3     |
| >PDGFRB-T8:LYTTLSDVWS  | 6     | >PDGFRB-T8:LYTILSDVWSI | 8     | 2     |
| >PDGFRB-T8:LYTTLSDVW   | 36    | >PDGFRB-T8:LYTILSDVW   | 63    | 27    |
| >PDGFRB-T8:LYTTLSDVWS  | 393   | >PDGFRB-T8:LYTILSDVWSI | 431   | 38    |
| >PDGFRB-T8:SLYTTLSDV   | 26    | >PDGFRB-T8:SLYTILSDV   | 14    | 12    |
| >PDGFRB-T8:SLYTTLSDV   | 38    | >PDGFRB-T8:SLYTILSDV   | 8     | 30    |
| >PDGFRB-T8:SLYTTLSDVW  | 1214  | >PDGFRB-T8:SLYTILSDVW  | 394   | 820   |

|                        |       |                        |      |       |
|------------------------|-------|------------------------|------|-------|
| >PDGFRB-T8:SLYTTLSDV   | 3     | >PDGFRB-T8:SLYTILSDV   | 3    | 0     |
| >PDGFRB-T8:SLYTTLSDVW  | 617   | >PDGFRB-T8:SLYTILSDVW: | 419  | 198   |
| >PDGFRB-T8:SLYTTLSDV   | 58    | >PDGFRB-T8:SLYTILSDV   | 32   | 26    |
| >PDGFRB-T8:SLYTTLSDV   | 2     | >PDGFRB-T8:SLYTILSDV   | 2    | 0     |
| >PDGFRB-T8:SLYTTLSDV   | 5     | >PDGFRB-T8:SLYTILSDV   | 7    | 2     |
| >PDGFRB-T8:SLYTTLSDV   | 5     | >PDGFRB-T8:SLYTILSDV   | 5    | 0     |
| >PDGFRB-T8:SLYTTLSDV   | 46    | >PDGFRB-T8:SLYTILSDV   | 27   | 19    |
| >PDGFRB-T8:SLYTTLSDV   | 2     | >PDGFRB-T8:SLYTILSDV   | 2    | 0     |
| >PDGFRB-T8:SLYTTLSDVW  | 256   | >PDGFRB-T8:SLYTILSDVW: | 251  | 5     |
| >PDGFRB-T8:SLYTTLSDVW  | 379   | >PDGFRB-T8:SLYTILSDVW  | 154  | 225   |
| >PDGFRB-T8:SLYTTLSDV   | 292   | >PDGFRB-T8:SLYTILSDV   | 1243 | 951   |
| >PDGFRB-T8:SLYTTLSDVW  | 316   | >PDGFRB-T8:SLYTILSDVW  | 578  | 262   |
| >PDGFRB-T8:SLYTTLSDVW  | 256   | >PDGFRB-T8:SLYTILSDVW  | 418  | 162   |
| >PDGFRB-T8:NSLYTTLSDV  | 489   | >PDGFRB-T8:NSLYTILSDV  | 556  | 67    |
| >PDGFRB-T8:NSLYTTLSDV  | 339   | >PDGFRB-T8:NSLYTILSDV  | 238  | 101   |
| >PDGFRB-T8:NSLYTTLSDV  | 257   | >PDGFRB-T8:NSLYTILSDV  | 329  | 72    |
| >PDGFRB-T8:NSLYTTLSDV\ | 56    | >PDGFRB-T8:NSLYTILSDVV | 45   | 11    |
| >PDGFRB-T8:NSLYTTLSDV\ | 207   | >PDGFRB-T8:NSLYTILSDVV | 196  | 11    |
| >PDGFRB-T8:NSLYTTLSDV\ | 21    | >PDGFRB-T8:NSLYTILSDVV | 22   | 1     |
| >PDGFRB-T8:NSLYTTLSDV\ | 301   | >PDGFRB-T8:NSLYTILSDVV | 310  | 9     |
| >PDGFRB-T8:FNSLYTTL    | 134   | >PDGFRB-T8:FNSLYTIL    | 444  | 310   |
| >PDGFRB-T8:FNSLYTTL    | 217   | >PDGFRB-T8:FNSLYTIL    | 457  | 240   |
| >PDGFRB-T8:FNSLYTTL    | 577   | >PDGFRB-T8:FNSLYTIL    | 499  | 78    |
| >PDGFRB-T8:IFNSLYTTL   | 311   | >PDGFRB-T8:IFNSLYTIL   | 545  | 234   |
| >PDGFRB-T8:IFNSLYTT    | 23475 | >PDGFRB-T8:IFNSLYTI    | 466  | 23009 |
| >PDGFRB-T8:IFNSLYTTL   | 43    | >PDGFRB-T8:IFNSLYTIL   | 1867 | 1824  |
| >PDGFRB-T8:IFNSLYTTL   | 326   | >PDGFRB-T8:IFNSLYTIL   | 626  | 300   |
| >PDGFRB-T8:IFNSLYTT    | 12256 | >PDGFRB-T8:IFNSLYTI    | 87   | 12169 |
| >PDGFRB-T8:IFNSLYTTL   | 322   | >PDGFRB-T8:IFNSLYTIL   | 992  | 670   |
| >PDGFRB-T8:IFNSLYTT    | 12451 | >PDGFRB-T8:IFNSLYTI    | 181  | 12270 |
| >PDGFRB-T8:IFNSLYTTL   | 424   | >PDGFRB-T8:IFNSLYTIL   | 1202 | 778   |
| >PDGFRB-T8:IFNSLYTT    | 16465 | >PDGFRB-T8:IFNSLYTI    | 411  | 16054 |
| >PDGFRB-T8:IFNSLYTTL   | 217   | >PDGFRB-T8:IFNSLYTIL   | 997  | 780   |
| >PDGFRB-T8:IFNSLYTTL   | 307   | >PDGFRB-T8:IFNSLYTIL   | 467  | 160   |
| >PDGFRB-T8:SIFNSLYTTL  | 282   | >PDGFRB-T8:SIFNSLYTIL  | 3060 | 2778  |
| >PDGFRB-T8:SIFNSLYTT   | 224   | >PDGFRB-T8:SIFNSLYTI   | 34   | 190   |
| >PDGFRB-T8:SIFNSLYTTL  | 153   | >PDGFRB-T8:SIFNSLYTIL  | 511  | 358   |
| >PDGFRB-T8:SIFNSLYTT   | 459   | >PDGFRB-T8:SIFNSLYTI   | 51   | 408   |
| >PDGFRB-T8:SIFNSLYTTL  | 22    | >PDGFRB-T8:SIFNSLYTIL  | 50   | 28    |
| >PDGFRB-T8:SIFNSLYTT   | 302   | >PDGFRB-T8:SIFNSLYTI   | 24   | 278   |
| >PDGFRB-T8:SIFNSLYTTL  | 34    | >PDGFRB-T8:SIFNSLYTIL  | 79   | 45    |
| >PDGFRB-T8:SIFNSLYTT   | 161   | >PDGFRB-T8:SIFNSLYTI   | 29   | 132   |
| >PDGFRB-T8:SIFNSLYTTL  | 102   | >PDGFRB-T8:SIFNSLYTIL  | 243  | 141   |

|                        |       |                        |       |       |
|------------------------|-------|------------------------|-------|-------|
| >PDGFRB-T8:SIFNSLYTT   | 66    | >PDGFRB-T8:SIFNSLYTI   | 5     | 61    |
| >PDGFRB-T8:SIFNSLYTTL  | 13    | >PDGFRB-T8:SIFNSLYTIL  | 98    | 85    |
| >PDGFRB-T8:SIFNSLYTT   | 454   | >PDGFRB-T8:SIFNSLYTI   | 11    | 443   |
| >PDGFRB-T8:SIFNSLYTTL  | 105   | >PDGFRB-T8:SIFNSLYTIL  | 428   | 323   |
| >PDGFRB-T8:SIFNSLYTT   | 491   | >PDGFRB-T8:SIFNSLYTI   | 19    | 472   |
| >PDGFRB-T8:SIFNSLYTTL  | 22    | >PDGFRB-T8:SIFNSLYTIL  | 64    | 42    |
| >PDGFRB-T8:SIFNSLYTT   | 7048  | >PDGFRB-T8:SIFNSLYTI   | 356   | 6692  |
| >PDGFRB-T8:SIFNSLYTT   | 581   | >PDGFRB-T8:SIFNSLYTI   | 29    | 552   |
| >PDGFRB-T8:SIFNSLYTTL  | 10    | >PDGFRB-T8:SIFNSLYTIL  | 50    | 40    |
| >PDGFRB-T8:SIFNSLYTT   | 244   | >PDGFRB-T8:SIFNSLYTI   | 6     | 238   |
| >PDGFRB-T8:SIFNSLYTTL  | 21    | >PDGFRB-T8:SIFNSLYTIL  | 126   | 105   |
| >PDGFRB-T8:SIFNSLYTT   | 2612  | >PDGFRB-T8:SIFNSLYTI   | 47    | 2565  |
| >PDGFRB-T8:SIFNSLYTTL  | 476   | >PDGFRB-T8:SIFNSLYTIL  | 1226  | 750   |
| >PDGFRB-T8:SIFNSLYTT   | 4900  | >PDGFRB-T8:SIFNSLYTI   | 186   | 4714  |
| >PDGFRB-T8:SIFNSLYTTL  | 214   | >PDGFRB-T8:SIFNSLYTIL  | 204   | 10    |
| >PDGFRB-T8:SIFNSLYTT   | 37221 | >PDGFRB-T8:SIFNSLYTI   | 174   | 37047 |
| >PDGFRB-T8:ESIFNSLYTT  | 13384 | >PDGFRB-T8:ESIFNSLYTI  | 328   | 13056 |
| >PDGFRB-T8:ESIFNSLYTTL | 270   | >PDGFRB-T8:ESIFNSLYTIL | 642   | 372   |
| >PDGFRB-T8:ESIFNSLYTT  | 753   | >PDGFRB-T8:ESIFNSLYTI  | 113   | 640   |
| >PDGFRB-T8:ESIFNSLYTTL | 97    | >PDGFRB-T8:ESIFNSLYTIL | 127   | 30    |
| >PDGFRB-T8:ESIFNSLYTT  | 9291  | >PDGFRB-T8:ESIFNSLYTI  | 131   | 9160  |
| >PDGFRB-T8:ESIFNSLYTT  | 158   | >PDGFRB-T8:ESIFNSLYTI  | 31    | 127   |
| >PDGFRB-T8:ESIFNSLYTTL | 33    | >PDGFRB-T8:ESIFNSLYTIL | 75    | 42    |
| >PDGFRB-T8:ESIFNSLYTT  | 3344  | >PDGFRB-T8:ESIFNSLYTI  | 95    | 3249  |
| >PDGFRB-T8:ESIFNSLYTTL | 274   | >PDGFRB-T8:ESIFNSLYTIL | 985   | 711   |
| >PDGFRB-T8:ESIFNSLYTT  | 4858  | >PDGFRB-T8:ESIFNSLYTI  | 92    | 4766  |
| >PDGFRB-T8:ESIFNSLYTTL | 39    | >PDGFRB-T8:ESIFNSLYTIL | 289   | 250   |
| >PDGFRB-T8:ESIFNSLYTT  | 25834 | >PDGFRB-T8:ESIFNSLYTI  | 110   | 25724 |
| >PDGFRB-Y5:YDSTWELPR   | 217   | >PDGFRB-Y5:HDSTWELPR   | 53    | 164   |
| >PDGFRB-Y5:PYDSTWEL    | 328   | >PDGFRB-Y5:PHDSTWEL    | 13248 | 12920 |
| >PDGFRB-Y5:PYDSTWEL    | 101   | >PDGFRB-Y5:PHDSTWEL    | 16687 | 16586 |
| >PDGFRB-Y5:PYDSTWELPF  | 71    | >PDGFRB-Y5:PHDSTWELPF  | 1933  | 1862  |
| >PDGFRB-Y5:YIYVDPMQLF  | 257   | >PDGFRB-Y5:YIYVDPMQLF  | 1064  | 807   |
| >PDGFRB-Y5:YIYVDPMQLF  | 253   | >PDGFRB-Y5:YIYVDPMQLF  | 2531  | 2278  |
| >PDGFRB-Y5:YIYVDPMQLF  | 227   | >PDGFRB-Y5:YIYVDPMQLF  | 13744 | 13517 |
| >PDGFRB-Y5:YIYVDPMQLF  | 6     | >PDGFRB-Y5:YIYVDPMQLF  | 266   | 260   |
| >PDGFRB-Y5:YIYVDPMQLF  | 12    | >PDGFRB-Y5:YIYVDPMQLF  | 5240  | 5228  |
| >PDGFRB-Y5:YIYVDPMQLF  | 58    | >PDGFRB-Y5:YIYVDPMQLF  | 1811  | 1753  |
| >PDGFRB-Y5:YIYVDPMQLF  | 53    | >PDGFRB-Y5:YIYVDPMQLF  | 1685  | 1632  |
| >PDGFRB-Y5:YIYVDPMQLF  | 32    | >PDGFRB-Y5:YIYVDPMQLF  | 1230  | 1198  |
| >PDGFRB-Y5:YIYVDPMQLF  | 27    | >PDGFRB-Y5:YIYVDPMQLF  | 7908  | 7881  |
| >PDGFRB-Y5:YIYVDPMQLF  | 40    | >PDGFRB-Y5:YIYVDPMQLF  | 966   | 926   |
| >PDGFRB-Y5:YIYVDPMQLF  | 464   | >PDGFRB-Y5:YIYVDPMQLF  | 4594  | 4130  |

|                       |     |                       |       |       |
|-----------------------|-----|-----------------------|-------|-------|
| >PDGFRB-Y5:YIYVDPMQLF | 406 | >PDGFRB-Y5:YIYVDPMQLF | 25599 | 25193 |
| >PDGFRB-Y5:YIYVDPMQLF | 449 | >PDGFRB-Y5:YIYVDPMQLF | 16341 | 15892 |
| >PDGFRB-Y5:LPYDSTWEL  | 240 | >PDGFRB-Y5:LPHDSTWEL  | 293   | 53    |
| >PDGFRB-Y5:LPYDSTWEL  | 475 | >PDGFRB-Y5:LPHDSTWEL  | 2618  | 2143  |
| >PDGFRB-Y5:LPYDSTWELP | 423 | >PDGFRB-Y5:LPHDSTWELF | 1512  | 1089  |
| >PDGFRB-Y5:LPYDSTWEL  | 185 | >PDGFRB-Y5:LPHDSTWEL  | 3396  | 3211  |
| >PDGFRB-Y5:LPYDSTWEL  | 23  | >PDGFRB-Y5:LPHDSTWEL  | 24    | 1     |
| >PDGFRB-Y5:LPYDSTWEL  | 20  | >PDGFRB-Y5:LPHDSTWEL  | 48    | 28    |
| >PDGFRB-Y5:LPYDSTWELP | 108 | >PDGFRB-Y5:LPHDSTWELF | 644   | 536   |
| >PDGFRB-Y5:LPYDSTWEL  | 98  | >PDGFRB-Y5:LPHDSTWEL  | 182   | 84    |
| >PDGFRB-Y5:LPYDSTWEL  | 104 | >PDGFRB-Y5:LPHDSTWEL  | 1963  | 1859  |
| >PDGFRB-Y5:LPYDSTWEL  | 33  | >PDGFRB-Y5:LPHDSTWEL  | 76    | 43    |
| >PDGFRB-Y5:LPYDSTWELP | 371 | >PDGFRB-Y5:LPHDSTWELF | 2090  | 1719  |
| >PDGFRB-Y5:LPYDSTWEL  | 267 | >PDGFRB-Y5:LPHDSTWEL  | 1865  | 1598  |
| >PDGFRB-Y5:LPYDSTWEL  | 16  | >PDGFRB-Y5:LPHDSTWEL  | 59    | 43    |
| >PDGFRB-Y5:LPYDSTWELP | 71  | >PDGFRB-Y5:LPHDSTWELF | 135   | 64    |
| >PDGFRB-Y5:QLPYDSTWEI | 257 | >PDGFRB-Y5:QLPHDSTWE  | 454   | 197   |
| >PDGFRB-Y5:QLPYDSTWEI | 55  | >PDGFRB-Y5:QLPHDSTWE  | 145   | 90    |
| >PDGFRB-Y5:QLPYDSTWEI | 420 | >PDGFRB-Y5:QLPHDSTWE  | 697   | 277   |
| >PDGFRB-Y5:QLPYDSTWEI | 391 | >PDGFRB-Y5:QLPHDSTWE  | 759   | 368   |
| >PDGFRB-Y5:QLPYDSTWEI | 146 | >PDGFRB-Y5:QLPHDSTWE  | 73    | 73    |
| >PDGFRB-Y5:QLPYDSTWEI | 90  | >PDGFRB-Y5:QLPHDSTWE  | 62    | 28    |
| >PDGFRB-Y5:QLPYDSTWEI | 215 | >PDGFRB-Y5:QLPHDSTWE  | 107   | 108   |
| >PDGFRB-Y5:QLPYDSTWEI | 227 | >PDGFRB-Y5:QLPHDSTWE  | 237   | 10    |
| >PDGFRB-Y5:QLPYDSTWEI | 15  | >PDGFRB-Y5:QLPHDSTWE  | 8     | 7     |
| >PDGFRB-Y5:QLPYDSTW   | 445 | >PDGFRB-Y5:QLPHDSTW   | 1074  | 629   |
| >PDGFRB-Y5:QLPYDSTWEI | 482 | >PDGFRB-Y5:QLPHDSTWE  | 1016  | 534   |
| >PDGFRB-Y5:MQLPYDSTW  | 14  | >PDGFRB-Y5:MQLPHDSTW  | 27    | 13    |
| >PDGFRB-Y5:MQLPYDSTW  | 16  | >PDGFRB-Y5:MQLPHDSTW  | 26    | 10    |
| >PDGFRB-Y5:MQLPYDSTW  | 449 | >PDGFRB-Y5:MQLPHDSTW  | 320   | 129   |
| >PDGFRB-Y5:MQLPYDST   | 33  | >PDGFRB-Y5:MQLPHDST   | 73    | 40    |
| >PDGFRB-Y5:MQLPYDSTW  | 4   | >PDGFRB-Y5:MQLPHDSTW  | 6     | 2     |
| >PDGFRB-Y5:MQLPYDSTW  | 21  | >PDGFRB-Y5:MQLPHDSTW  | 41    | 20    |
| >PDGFRB-Y5:MQLPYDSTW  | 23  | >PDGFRB-Y5:MQLPHDSTW  | 36    | 13    |
| >PDGFRB-Y5:MQLPYDSTW  | 99  | >PDGFRB-Y5:MQLPHDSTW  | 177   | 78    |
| >PDGFRB-Y5:MQLPYDSTW  | 207 | >PDGFRB-Y5:MQLPHDSTW  | 430   | 223   |
| >PDGFRB-Y5:MQLPYDSTW  | 88  | >PDGFRB-Y5:MQLPHDSTW  | 152   | 64    |
| >PDGFRB-Y5:MQLPYDSTW  | 436 | >PDGFRB-Y5:MQLPHDSTW  | 406   | 30    |
| >PDGFRB-Y5:MQLPYDSTW  | 272 | >PDGFRB-Y5:MQLPHDSTW  | 211   | 61    |
| >PDGFRB-Y5:MQLPYDSTW  | 25  | >PDGFRB-Y5:MQLPHDSTW  | 35    | 10    |
| >PDGFRB-Y5:MQLPYDSTW  | 17  | >PDGFRB-Y5:MQLPHDSTW  | 19    | 2     |
| >PDGFRB-Y5:MQLPYDSTW  | 17  | >PDGFRB-Y5:MQLPHDSTW  | 24    | 7     |
| >PDGFRB-Y5:MQLPYDSTW  | 19  | >PDGFRB-Y5:MQLPHDSTW  | 28    | 9     |

|                       |      |                       |       |       |
|-----------------------|------|-----------------------|-------|-------|
| >PDGFRB-Y5:MQLPYDSTW  | 304  | >PDGFRB-Y5:MQLPHDSTW  | 684   | 380   |
| >PDGFRB-Y5:MQLPYDSTW  | 141  | >PDGFRB-Y5:MQLPHDSTW  | 158   | 17    |
| >PDGFRB-Y5:MQLPYDSTW  | 208  | >PDGFRB-Y5:MQLPHDSTW  | 416   | 208   |
| >PDGFRB-Y5:MQLPYDSTW  | 29   | >PDGFRB-Y5:MQLPHDSTW  | 42    | 13    |
| >PDGFRB-Y5:MQLPYDSTW  | 40   | >PDGFRB-Y5:MQLPHDSTW  | 41    | 1     |
| >PDGFRB-Y5:MQLPYDSTW  | 7    | >PDGFRB-Y5:MQLPHDSTW  | 11    | 4     |
| >PDGFRB-Y5:PMQLPYDSTW | 308  | >PDGFRB-Y5:PMQLPHDSTW | 558   | 250   |
| >PDGFRB-Y5:DPMQLPYDS  | 135  | >PDGFRB-Y5:DPMQLPHDS  | 165   | 30    |
| >PDGFRB-Y5:DPMQLPYDS  | 26   | >PDGFRB-Y5:DPMQLPHDS  | 34    | 8     |
| >PDGFRB-Y5:DPMQLPYDS  | 15   | >PDGFRB-Y5:DPMQLPHDS  | 12    | 3     |
| >PDGFRB-Y5:YVDPMQLPY  | 8    | >PDGFRB-Y5:YVDPMQLPH  | 1090  | 1082  |
| >PDGFRB-Y5:YVDPMQLPY  | 478  | >PDGFRB-Y5:YVDPMQLPH  | 3657  | 3179  |
| >PDGFRB-Y5:YVDPMQLPY  | 318  | >PDGFRB-Y5:YVDPMQLPH  | 11885 | 11567 |
| >PDGFRB-Y5:YVDPMQLPY  | 12   | >PDGFRB-Y5:YVDPMQLPH  | 539   | 527   |
| >PDGFRB-Y5:YVDPMQLPY  | 5    | >PDGFRB-Y5:YVDPMQLPH  | 2488  | 2483  |
| >PDGFRB-Y5:YVDPMQLPY  | 198  | >PDGFRB-Y5:YVDPMQLPH  | 12218 | 12020 |
| >PDGFRB-Y5:YVDPMQLPY  | 20   | >PDGFRB-Y5:YVDPMQLPH  | 8982  | 8962  |
| >PDGFRB-Y5:YVDPMQLPY  | 16   | >PDGFRB-Y5:YVDPMQLPH  | 473   | 457   |
| >PDGFRB-Y5:YVDPMQLPY  | 78   | >PDGFRB-Y5:YVDPMQLPH  | 24991 | 24913 |
| >PDGFRB-Y5:YVDPMQLPY  | 141  | >PDGFRB-Y5:YVDPMQLPH  | 9218  | 9077  |
| >PDGFRB-Y5:IYVDPMQLPY | 198  | >PDGFRB-Y5:IYVDPMQLPH | 8867  | 8669  |
| >PDGFRB-Y5:IYVDPMQLPY | 26   | >PDGFRB-Y5:IYVDPMQLPH | 4497  | 4471  |
| >PDGFRB-Y5:IYVDPMQLPY | 143  | >PDGFRB-Y5:IYVDPMQLPH | 12836 | 12693 |
| >PDGFRB-Y5:IYVDPMQLPY | 84   | >PDGFRB-Y5:IYVDPMQLPH | 12931 | 12847 |
| >PER1-D218:DTFSVAVSFL | 203  | >PER1-D218:NTFSVAVSFL | 56    | 147   |
| >PER1-D218:DTFSVAVSFL | 640  | >PER1-D218:NTFSVAVSFL | 150   | 490   |
| >PER1-D218:DTFSVAVSFL | 2329 | >PER1-D218:NTFSVAVSFL | 331   | 1998  |
| >PER1-D218:DTFSVAVSF  | 5146 | >PER1-D218:NTFSVAVSF  | 409   | 4737  |
| >PER1-D218:DTFSVAVSF  | 211  | >PER1-D218:NTFSVAVSF  | 1758  | 1547  |
| >PER1-D218:DTFSVAVSFL | 383  | >PER1-D218:NTFSVAVSFL | 1437  | 1054  |
| >PER1-D218:DTFSVAVSFL | 221  | >PER1-D218:NTFSVAVSFL | 1144  | 923   |
| >PER1-D218:DTFSVAVSF  | 11   | >PER1-D218:NTFSVAVSF  | 9     | 2     |
| >PER1-D218:DTFSVAVS   | 282  | >PER1-D218:NTFSVAVS   | 354   | 72    |
| >PER1-D218:DTFSVAVSF  | 62   | >PER1-D218:NTFSVAVSF  | 75    | 13    |
| >PER1-D218:DTFSVAVSFL | 49   | >PER1-D218:NTFSVAVSFL | 59    | 10    |
| >PER1-D218:DTFSVAVS   | 185  | >PER1-D218:NTFSVAVS   | 78    | 107   |
| >PER1-D218:DTFSVAVSF  | 689  | >PER1-D218:NTFSVAVSF  | 281   | 408   |
| >PER1-D218:DTFSVAVSFL | 43   | >PER1-D218:NTFSVAVSFL | 22    | 21    |
| >PER1-D218:DTFSVAVSFL | 26   | >PER1-D218:NTFSVAVSFL | 15    | 11    |
| >PER1-D218:DTFSVAVSFL | 28   | >PER1-D218:NTFSVAVSFL | 28    | 0     |
| >PER1-D218:DTFSVAVSFL | 187  | >PER1-D218:NTFSVAVSFL | 171   | 16    |
| >PER1-D218:DTFSVAVSF  | 2087 | >PER1-D218:NTFSVAVSF  | 145   | 1942  |
| >PER1-D218:DTFSVAVSF  | 78   | >PER1-D218:NTFSVAVSF  | 18    | 60    |



|                       |      |                       |       |       |
|-----------------------|------|-----------------------|-------|-------|
| >PER1-D218!DTFSVAVSF  | 44   | >PER1-D218!NTFSVAVSF  | 19    | 25    |
| >PER1-D218!DTFSVAVSFL | 296  | >PER1-D218!NTFSVAVSFL | 119   | 177   |
| >PER1-D218!DTFSVAVSF  | 213  | >PER1-D218!NTFSVAVSF  | 794   | 581   |
| >PER1-D218!DTFSVAVSFL | 1026 | >PER1-D218!NTFSVAVSFL | 286   | 740   |
| >PER1-D218!DTFSVAVSF  | 33   | >PER1-D218!NTFSVAVSF  | 10    | 23    |
| >PER1-D218!DTFSVAVSFL | 1180 | >PER1-D218!NTFSVAVSFL | 340   | 840   |
| >PER1-D218!QDTFSVAV   | 2145 | >PER1-D218!QNTFSVAV   | 334   | 1811  |
| >PER1-D218!QDTFSVAVSF | 772  | >PER1-D218!QNTFSVAVSF | 161   | 611   |
| >PER1-D218!QDTFSVAV   | 315  | >PER1-D218!QNTFSVAV   | 11228 | 10913 |
| >PER1-D218!NQDTFSVAV  | 239  | >PER1-D218!NQNTFSVAV  | 662   | 423   |
| >PER1-D218!NQDTFSVAV  | 399  | >PER1-D218!NQNTFSVAV  | 136   | 263   |
| >PER1-D218!NQDTFSVAV  | 1805 | >PER1-D218!NQNTFSVAV  | 70    | 1735  |
| >PER1-D218!NQDTFSVA   | 260  | >PER1-D218!NQNTFSVA   | 573   | 313   |
| >PER1-D218!NQDTFSVAV  | 10   | >PER1-D218!NQNTFSVAV  | 16    | 6     |
| >PER1-D218!NQDTFSVAV! | 321  | >PER1-D218!NQNTFSVAV! | 770   | 449   |
| >PER1-D218!NQDTFSVAV  | 257  | >PER1-D218!NQNTFSVAV  | 471   | 214   |
| >PER1-D218!NQDTFSVAV  | 176  | >PER1-D218!NQNTFSVAV  | 464   | 288   |
| >PER1-D218!NQDTFSVAV! | 1110 | >PER1-D218!NQNTFSVAV! | 228   | 882   |
| >PER1-D218!NQDTFSVAV  | 4562 | >PER1-D218!NQNTFSVAV  | 475   | 4087  |
| >PER1-D218!NQDTFSVAV! | 841  | >PER1-D218!NQNTFSVAV! | 58    | 783   |
| >PER1-D218!NQDTFSVAV! | 1203 | >PER1-D218!NQNTFSVAV! | 436   | 767   |
| >PER1-D218!NQDTFSVAV  | 877  | >PER1-D218!NQNTFSVAV  | 35    | 842   |
| >PER1-D218!NQDTFSVAV! | 39   | >PER1-D218!NQNTFSVAV! | 4     | 35    |
| >PER1-D218!NQDTFSVAV! | 606  | >PER1-D218!NQNTFSVAV! | 226   | 380   |
| >PER1-D218!NQDTFSVAV  | 21   | >PER1-D218!NQNTFSVAV  | 40    | 19    |
| >PER1-D218!NQDTFSVAV! | 57   | >PER1-D218!NQNTFSVAV! | 148   | 91    |
| >PER1-D218!LQNQDTFSV  | 52   | >PER1-D218!LQNQNTFSV  | 70    | 18    |
| >PER1-D218!LQNQDTFSV/ | 205  | >PER1-D218!LQNQNTFSV/ | 257   | 52    |
| >PER1-D218!LQNQDTFSV  | 45   | >PER1-D218!LQNQNTFSV  | 45    | 0     |
| >PER1-D218!LQNQDTFSV/ | 70   | >PER1-D218!LQNQNTFSV/ | 71    | 1     |
| >PER1-D218!LQNQDTFSV  | 31   | >PER1-D218!LQNQNTFSV  | 30    | 1     |
| >PER1-D218!LQNQDTFSV/ | 41   | >PER1-D218!LQNQNTFSV/ | 40    | 1     |
| >PER1-D218!LQNQDTFSV  | 5    | >PER1-D218!LQNQNTFSV  | 6     | 1     |
| >PER1-D218!LQNQDTFSV/ | 9    | >PER1-D218!LQNQNTFSV/ | 10    | 1     |
| >PER1-D218!LQNQDTFSV  | 39   | >PER1-D218!LQNQNTFSV  | 20    | 19    |
| >PER1-D218!LQNQDTFSV/ | 58   | >PER1-D218!LQNQNTFSV/ | 36    | 22    |
| >PER1-D218!LQNQDTFSV  | 51   | >PER1-D218!LQNQNTFSV  | 21    | 30    |
| >PER1-D218!LQNQDTFSV/ | 115  | >PER1-D218!LQNQNTFSV/ | 63    | 52    |
| >PER1-D218!LQNQDTFSV  | 81   | >PER1-D218!LQNQNTFSV  | 118   | 37    |
| >PER1-D218!LQNQDTFSV/ | 391  | >PER1-D218!LQNQNTFSV/ | 471   | 80    |
| >PER1-D218!LQNQDTFSV  | 61   | >PER1-D218!LQNQNTFSV  | 42    | 19    |
| >PER1-D218!LQNQDTFSV  | 31   | >PER1-D218!LQNQNTFSV  | 23    | 8     |
| >PER1-D218!LQNQDTFSV/ | 216  | >PER1-D218!LQNQNTFSV/ | 158   | 58    |

|                        |      |                        |     |      |
|------------------------|------|------------------------|-----|------|
| >PER1-D218I LQNQDTFSV  | 221  | >PER1-D218I LQNQNTFSV  | 150 | 71   |
| >PER1-D218I LQNQDTFSV/ | 105  | >PER1-D218I LQNQNTFSV/ | 84  | 21   |
| >PER1-D218I LQNQDTFSV/ | 127  | >PER1-D218I LQNQNTFSV/ | 103 | 24   |
| >PER1-D218I LQNQDTFSV  | 163  | >PER1-D218I LQNQNTFSV  | 100 | 63   |
| >PER1-D218I LQNQDTFSV/ | 224  | >PER1-D218I LQNQNTFSV/ | 119 | 105  |
| >PER1-D218I LQNQDTFSV/ | 33   | >PER1-D218I LQNQNTFSV/ | 25  | 8    |
| >PER1-D218I LQNQDTFSV/ | 591  | >PER1-D218I LQNQNTFSV/ | 449 | 142  |
| >PER1-D218I TLQNQDTFS\ | 80   | >PER1-D218I TLQNQNTFS\ | 94  | 14   |
| >PER1-D218I TLQNQDTFS\ | 61   | >PER1-D218I TLQNQNTFS\ | 56  | 5    |
| >PER1-D218I TLQNQDTFS\ | 64   | >PER1-D218I TLQNQNTFS\ | 50  | 14   |
| >PER1-D218I TLQNQDTFS\ | 283  | >PER1-D218I TLQNQNTFS\ | 193 | 90   |
| >PER1-D218I TLQNQDTFS\ | 333  | >PER1-D218I TLQNQNTFS\ | 464 | 131  |
| >PER1-D218I TLQNQDTFS\ | 12   | >PER1-D218I TLQNQNTFS\ | 7   | 5    |
| >PER1-D218I TLQNQDTFS\ | 5    | >PER1-D218I TLQNQNTFS\ | 5   | 0    |
| >PER1-D218I TLQNQDTFS\ | 429  | >PER1-D218I TLQNQNTFS\ | 490 | 61   |
| >PER1-D218I TLQNQDTFS\ | 12   | >PER1-D218I TLQNQNTFS\ | 14  | 2    |
| >PER1-D218I TLQNQDTFS\ | 19   | >PER1-D218I TLQNQNTFS\ | 9   | 10   |
| >PER1-D218I TLQNQDTFS\ | 2    | >PER1-D218I TLQNQNTFS\ | 2   | 0    |
| >PER1-D218I TLQNQDTFS\ | 83   | >PER1-D218I TLQNQNTFS\ | 100 | 17   |
| >PER1-D218I TLQNQDTF   | 357  | >PER1-D218I TLQNQNTF   | 207 | 150  |
| >PER1-D218I TLQNQDTFS\ | 667  | >PER1-D218I TLQNQNTFS\ | 268 | 399  |
| >PER1-D218I TLQNQDTF   | 405  | >PER1-D218I TLQNQNTF   | 229 | 176  |
| >PER1-D218I TLQNQDTF   | 177  | >PER1-D218I TLQNQNTF   | 117 | 60   |
| >PER1-D218I TLQNQDTF   | 1180 | >PER1-D218I TLQNQNTF   | 272 | 908  |
| >PER1-D218I YTLQNQDTF  | 17   | >PER1-D218I YTLQNQNTF  | 66  | 49   |
| >PER1-D218I YTLQNQDTFS | 163  | >PER1-D218I YTLQNQNTFS | 53  | 110  |
| >PER1-D218I YTLQNQDTFS | 39   | >PER1-D218I YTLQNQNTFS | 35  | 4    |
| >PER1-D218I YTLQNQDTFS | 121  | >PER1-D218I YTLQNQNTFS | 115 | 6    |
| >PER1-D218I YTLQNQDTFS | 335  | >PER1-D218I YTLQNQNTFS | 242 | 93   |
| >PER1-D218I YTLQNQDTFS | 11   | >PER1-D218I YTLQNQNTFS | 10  | 1    |
| >PER1-D218I YTLQNQDTFS | 3    | >PER1-D218I YTLQNQNTFS | 3   | 0    |
| >PER1-D218I YTLQNQDTFS | 6    | >PER1-D218I YTLQNQNTFS | 5   | 1    |
| >PER1-D218I YTLQNQDTFS | 9    | >PER1-D218I YTLQNQNTFS | 10  | 1    |
| >PER1-D218I YTLQNQDTFS | 7    | >PER1-D218I YTLQNQNTFS | 8   | 1    |
| >PER1-D218I YTLQNQDTFS | 4    | >PER1-D218I YTLQNQNTFS | 3   | 1    |
| >PER1-D218I YTLQNQDTF  | 679  | >PER1-D218I YTLQNQNTF  | 481 | 198  |
| >PER1-D218I YTLQNQDTF  | 19   | >PER1-D218I YTLQNQNTF  | 18  | 1    |
| >PER1-D218I YTLQNQDTF  | 81   | >PER1-D218I YTLQNQNTF  | 27  | 54   |
| >PER1-D218I YTLQNQDTF  | 19   | >PER1-D218I YTLQNQNTF  | 19  | 0    |
| >PER1-D218I YTLQNQDTF  | 1771 | >PER1-D218I YTLQNQNTF  | 177 | 1594 |
| >PER1-D218I YTLQNQDTF  | 73   | >PER1-D218I YTLQNQNTF  | 61  | 12   |
| >PER1-D218I YTLQNQDTFS | 46   | >PER1-D218I YTLQNQNTFS | 30  | 16   |
| >PER1-D218I YTLQNQDTFS | 5    | >PER1-D218I YTLQNQNTFS | 4   | 1    |

|                        |       |                        |       |       |
|------------------------|-------|------------------------|-------|-------|
| >PER1-D218I YTLQIQDTF  | 723   | >PER1-D218I YTLQIQNTF  | 311   | 412   |
| >PER1-D218I YTLQIQDTF  | 877   | >PER1-D218I YTLQIQNTF  | 479   | 398   |
| >PER1-D218I YTLQIQDTF  | 71    | >PER1-D218I YTLQIQNTF  | 18    | 53    |
| >PER1-D218I YTLQIQDTF  | 4     | >PER1-D218I YTLQIQNTF  | 4     | 0     |
| >PER1-D218I YTLQIQDTFS | 154   | >PER1-D218I YTLQIQNTFS | 101   | 53    |
| >PER1-D218I YTLQIQDTF  | 73    | >PER1-D218I YTLQIQNTF  | 94    | 21    |
| >PER1-D218I YTLQIQDTF  | 40    | >PER1-D218I YTLQIQNTF  | 49    | 9     |
| >PER1-D218I YTLQIQDTF  | 17    | >PER1-D218I YTLQIQNTF  | 8     | 9     |
| >PER1-D218I YTLQIQDTFS | 462   | >PER1-D218I YTLQIQNTFS | 418   | 44    |
| >PER1-D218I EYTLQIQDTF | 328   | >PER1-D218I EYTLQIQNTF | 91    | 237   |
| >PER1-D218I EYTLQIQDTF | 272   | >PER1-D218I EYTLQIQNTF | 115   | 157   |
| >PER1-D218I EYTLQIQDTF | 29    | >PER1-D218I EYTLQIQNTF | 27    | 2     |
| >PER1-D218I SEYTLQIQDT | 52    | >PER1-D218I SEYTLQIQNT | 40    | 12    |
| >PER1-D218I SEYTLQIQDT | 82    | >PER1-D218I SEYTLQIQNT | 28    | 54    |
| >PER1-D218I SEYTLQIQDT | 48    | >PER1-D218I SEYTLQIQNT | 33    | 15    |
| >PER1-D218I SEYTLQIQDT | 389   | >PER1-D218I SEYTLQIQNT | 751   | 362   |
| >PER1-D218I SEYTLQIQDT | 139   | >PER1-D218I SEYTLQIQNT | 118   | 21    |
| >PER1-D218I SEYTLQIQDT | 188   | >PER1-D218I SEYTLQIQNT | 235   | 47    |
| >PER1-D218I SEYTLQIQDT | 431   | >PER1-D218I SEYTLQIQNT | 537   | 106   |
| >PER1-D218I SEYTLQIQDT | 91    | >PER1-D218I SEYTLQIQNT | 108   | 17    |
| >PER1-D218I SEYTLQIQD  | 248   | >PER1-D218I SEYTLQIQN  | 420   | 172   |
| >PER1-D218I SEYTLQIQDT | 37    | >PER1-D218I SEYTLQIQNT | 46    | 9     |
| >PER1-E696C EPVVGGL    | 574   | >PER1-E696C QPVVGGL    | 445   | 129   |
| >PER1-E696C EPVVGGLSP  | 453   | >PER1-E696C QPVVGGLSF  | 1995  | 1542  |
| >PER1-E696C EPVVGGL    | 290   | >PER1-E696C QPVVGGL    | 71    | 219   |
| >PER1-E696C EPVVGGLSP  | 62    | >PER1-E696C QPVVGGLSF  | 28    | 34    |
| >PER1-E696C EPVVGGL    | 204   | >PER1-E696C QPVVGGL    | 411   | 207   |
| >PER1-E696C EPVVGGLSP  | 85    | >PER1-E696C QPVVGGLSF  | 162   | 77    |
| >PER1-E696C EPVVGGLSP  | 150   | >PER1-E696C QPVVGGLSF  | 194   | 44    |
| >PER1-E696C KEPVVGGL   | 15027 | >PER1-E696C KQPVGGL    | 357   | 14670 |
| >PER1-E696C KEPVVGGL   | 238   | >PER1-E696C KQPVGGL    | 7711  | 7473  |
| >PER1-E696C KEPVVGGL   | 137   | >PER1-E696C KQPVGGL    | 13322 | 13185 |
| >PER1-E696C RKEPVVGGL  | 1653  | >PER1-E696C RKQPVGGL   | 287   | 1366  |
| >PER1-E696C RKEPVVGGL  | 1646  | >PER1-E696C RKQPVGGL   | 353   | 1293  |
| >PER1-E696C RKEPVVGGL  | 537   | >PER1-E696C RKQPVGGL   | 77    | 460   |
| >PER1-E696C RKEPVVGGL  | 457   | >PER1-E696C RKQPVGGL   | 86    | 371   |
| >PER1-E696C TPRKEPVV   | 271   | >PER1-E696C TPRKQPVV   | 132   | 139   |
| >PER1-E696C ATPRKEPV   | 595   | >PER1-E696C ATPRKQPV   | 232   | 363   |
| >PER1-E696C ATPRKEPVV  | 252   | >PER1-E696C ATPRKQPVV  | 138   | 114   |
| >PER1-E696C ATPRKEPV   | 270   | >PER1-E696C ATPRKQPV   | 448   | 178   |
| >PER1-E696C ATPRKEPV   | 555   | >PER1-E696C ATPRKQPV   | 440   | 115   |
| >PER1-E696C ATPRKEPVV  | 843   | >PER1-E696C ATPRKQPVV  | 196   | 647   |
| >PER1-E696C GATPRKEPV  | 616   | >PER1-E696C GATPRKQPV  | 178   | 438   |

|                        |       |                        |      |       |
|------------------------|-------|------------------------|------|-------|
| >PER1-E696C GATPRKEPV\ | 301   | >PER1-E696C GATPRKQPV\ | 146  | 155   |
| >PER1-E696C GEGATPRKEF | 243   | >PER1-E696C GEGATPRKQI | 169  | 74    |
| >PER1-E696C GEGATPRKEF | 118   | >PER1-E696C GEGATPRKQI | 160  | 42    |
| >PER1-N985\NLLQLEEL    | 193   | >PER1-N985\SLLQLEEL    | 41   | 152   |
| >PER1-N985\NLLQLEELPR\ | 444   | >PER1-N985\SLLQLEELPRA | 99   | 345   |
| >PER1-N985\NLLQLEEL    | 66    | >PER1-N985\SLLQLEEL    | 36   | 30    |
| >PER1-N985\NLLQLEELPR\ | 993   | >PER1-N985\SLLQLEELPRA | 495  | 498   |
| >PER1-N985\NLLQLEEL    | 314   | >PER1-N985\SLLQLEEL    | 165  | 149   |
| >PER1-N985\NLLQLEELPR\ | 466   | >PER1-N985\SLLQLEELPRA | 280  | 186   |
| >PER1-N985\NLLQLEEL    | 21    | >PER1-N985\SLLQLEEL    | 4    | 17    |
| >PER1-N985\NLLQLEELPR\ | 70    | >PER1-N985\SLLQLEELPRA | 10   | 60    |
| >PER1-N985\NLLQLEEL    | 75    | >PER1-N985\SLLQLEEL    | 32   | 43    |
| >PER1-N985\NLLQLEELPR\ | 557   | >PER1-N985\SLLQLEELPRA | 258  | 299   |
| >PER1-N985\NLLQLEEL    | 45    | >PER1-N985\SLLQLEEL    | 7    | 38    |
| >PER1-N985\NLLQLEELPR\ | 90    | >PER1-N985\SLLQLEELPRA | 10   | 80    |
| >PER1-N985\NLLQLEEL    | 50    | >PER1-N985\SLLQLEEL    | 80   | 30    |
| >PER1-N985\NLLQLEELPR\ | 229   | >PER1-N985\SLLQLEELPRA | 542  | 313   |
| >PER1-N985\NLLQLEEL    | 23    | >PER1-N985\SLLQLEEL    | 4    | 19    |
| >PER1-N985\NLLQLEELPR\ | 63    | >PER1-N985\SLLQLEELPRA | 8    | 55    |
| >PER1-N985\NLLQLEELPR  | 2855  | >PER1-N985\SLLQLEELPR  | 279  | 2576  |
| >PER1-N985\NLLQLEELPR  | 806   | >PER1-N985\SLLQLEELPR  | 242  | 564   |
| >PER1-N985\NLLQLEELPR  | 334   | >PER1-N985\SLLQLEELPR  | 657  | 323   |
| >PER1-N985\NLLQLEELPR  | 366   | >PER1-N985\SLLQLEELPR  | 813  | 447   |
| >PER1-N985\NLLQLEELPR  | 56    | >PER1-N985\SLLQLEELPR  | 46   | 10    |
| >PER1-N985\LNLLQLEELPF | 3791  | >PER1-N985\LSLLQLEELPR | 252  | 3539  |
| >PER1-N985\LNLLQLEEL   | 21535 | >PER1-N985\LSLLQLEEL   | 63   | 21472 |
| >PER1-N985\LNLLQLEELPF | 401   | >PER1-N985\LSLLQLEELPR | 549  | 148   |
| >PER1-N985\QLNLLQLEEL  | 566   | >PER1-N985\QLSLLQLEEL  | 246  | 320   |
| >PER1-N985\QLNLLQLEEL  | 146   | >PER1-N985\QLSLLQLEEL  | 50   | 96    |
| >PER1-N985\QLNLLQLEEL  | 357   | >PER1-N985\QLSLLQLEEL  | 200  | 157   |
| >PER1-N985\QLNLLQLEEL  | 434   | >PER1-N985\QLSLLQLEEL  | 1007 | 573   |
| >PER1-N985\QLNLLQLEEL  | 57    | >PER1-N985\QLSLLQLEEL  | 46   | 11    |
| >PER1-N985\LQLNLLQL    | 241   | >PER1-N985\LQLSLLQL    | 156  | 85    |
| >PER1-N985\LQLNLLQLEEI | 166   | >PER1-N985\LQLSLLQLEEL | 113  | 53    |
| >PER1-N985\LQLNLLQL    | 566   | >PER1-N985\LQLSLLQL    | 292  | 274   |
| >PER1-N985\LQLNLLQLEEI | 143   | >PER1-N985\LQLSLLQLEEL | 70   | 73    |
| >PER1-N985\LQLNLLQL    | 13    | >PER1-N985\LQLSLLQL    | 15   | 2     |
| >PER1-N985\LQLNLLQLEEI | 8     | >PER1-N985\LQLSLLQLEEL | 10   | 2     |
| >PER1-N985\LQLNLLQL    | 183   | >PER1-N985\LQLSLLQL    | 311  | 128   |
| >PER1-N985\LQLNLLQLEEI | 193   | >PER1-N985\LQLSLLQLEEL | 273  | 80    |
| >PER1-N985\LQLNLLQLEEI | 414   | >PER1-N985\LQLSLLQLEEL | 930  | 516   |
| >PER1-N985\LQLNLLQL    | 563   | >PER1-N985\LQLSLLQL    | 493  | 70    |
| >PER1-N985\LQLNLLQL    | 57    | >PER1-N985\LQLSLLQL    | 32   | 25    |

|                        |       |                        |      |       |
|------------------------|-------|------------------------|------|-------|
| >PER1-N985!LQLNLLQLEEI | 82    | >PER1-N985!LQLSLLQLEEL | 58   | 24    |
| >PER1-N985!LQLNLLQL    | 294   | >PER1-N985!LQLSLLQL    | 347  | 53    |
| >PER1-N985!LQLNLLQL    | 471   | >PER1-N985!LQLSLLQL    | 912  | 441   |
| >PER1-N985!PLQLNLLQL   | 76    | >PER1-N985!PLQLSLLQL   | 92   | 16    |
| >PER1-N985!SPLQLNLL    | 402   | >PER1-N985!SPLQLSLL    | 201  | 201   |
| >PER1-N985!SPLQLNLLQL  | 39    | >PER1-N985!SPLQLSLLQL  | 39   | 0     |
| >PER1-N985!SPLQLNLL    | 222   | >PER1-N985!SPLQLSLL    | 112  | 110   |
| >PER1-N985!SPLQLNLLQL  | 377   | >PER1-N985!SPLQLSLLQL  | 390  | 13    |
| >PER1-N985!SPLQLNLL    | 358   | >PER1-N985!SPLQLSLL    | 357  | 1     |
| >PER1-N985!SPLQLNLLQL  | 404   | >PER1-N985!SPLQLSLLQL  | 282  | 122   |
| >PER1-N985!SPLQLNLLQL  | 309   | >PER1-N985!SPLQLSLLQL  | 532  | 223   |
| >PER1-N985!SSPLQLNL    | 343   | >PER1-N985!SSPLQLSL    | 668  | 325   |
| >PER1-N985!SSPLQLNLL   | 352   | >PER1-N985!SSPLQLSLL   | 422  | 70    |
| >PER1-N985!SSPLQLNLLQI | 810   | >PER1-N985!SSPLQLSLLQL | 269  | 541   |
| >PER1-N985!SSPLQLNL    | 605   | >PER1-N985!SSPLQLSL    | 89   | 516   |
| >PER1-N985!SSPLQLNLL   | 3     | >PER1-N985!SSPLQLSLL   | 3    | 0     |
| >PER1-N985!SSPLQLNLLQ  | 88    | >PER1-N985!SSPLQLSLLQ  | 81   | 7     |
| >PER1-N985!SSPLQLNLLQI | 5     | >PER1-N985!SSPLQLSLLQL | 5    | 0     |
| >PER1-N985!SSPLQLNLL   | 4312  | >PER1-N985!SSPLQLSLL   | 385  | 3927  |
| >PER1-N985!CSSPLQLNL   | 84    | >PER1-N985!CSSPLQLSL   | 60   | 24    |
| >PER1-N985!CSSPLQLNLL  | 775   | >PER1-N985!CSSPLQLSLL  | 150  | 625   |
| >PER1-N985!CSSPLQLNL   | 48    | >PER1-N985!CSSPLQLSL   | 28   | 20    |
| >PER1-N985!CSSPLQLNLL  | 433   | >PER1-N985!CSSPLQLSLL  | 278  | 155   |
| >PER1-N985!CSSPLQLNLL  | 144   | >PER1-N985!CSSPLQLSLL  | 194  | 50    |
| >PER1-N985!CSSPLQLNLL  | 414   | >PER1-N985!CSSPLQLSLL  | 238  | 176   |
| >PER1-N985!CSSPLQLNL   | 87    | >PER1-N985!CSSPLQLSL   | 30   | 57    |
| >PER1-N985!CSSPLQLNLL  | 411   | >PER1-N985!CSSPLQLSLL  | 56   | 355   |
| >PER1-N985!RCSSPLQLNLI | 112   | >PER1-N985!RCSSPLQLSLL | 26   | 86    |
| >PER1-N985!SRCSSPLQLN  | 354   | >PER1-N985!SRCSSPLQLSL | 206  | 148   |
| >PER1-N985!SRCSSPLQLN  | 269   | >PER1-N985!SRCSSPLQLSL | 55   | 214   |
| >PER1-N985!SRCSSPLQLN  | 387   | >PER1-N985!SRCSSPLQLSL | 385  | 2     |
| >PER1-N985!SRCSSPLQLN  | 49    | >PER1-N985!SRCSSPLQLSL | 49   | 0     |
| >PER1-S1060 ASGSLGSGL  | 4565  | >PER1-S1060 ALGSLGSGL  | 37   | 4528  |
| >PER1-S1060 ASGSLGSGL  | 11859 | >PER1-S1060 ALGSLGSGL  | 84   | 11775 |
| >PER1-S1060 ASGSLGSGL  | 13958 | >PER1-S1060 ALGSLGSGL  | 17   | 13941 |
| >PER1-S1060 ASGSLGSGL  | 19827 | >PER1-S1060 ALGSLGSGL  | 68   | 19759 |
| >PER1-S1060 ASGSLGSGL  | 17542 | >PER1-S1060 ALGSLGSGL  | 32   | 17510 |
| >PER1-S1060 ASGSLGSGL  | 23135 | >PER1-S1060 ALGSLGSGL  | 457  | 22678 |
| >PER1-S1060 ASGSLGSGL  | 22368 | >PER1-S1060 ALGSLGSGL  | 6    | 22362 |
| >PER1-S1060 ASGSLGSGL  | 83    | >PER1-S1060 ALGSLGSGL  | 8096 | 8013  |
| >PER1-S1060 ASGSLGSGL  | 69    | >PER1-S1060 ALGSLGSGL  | 1673 | 1604  |
| >PER1-S1060 DSRSGTGSA^ | 11357 | >PER1-S1060 DSRSGTGSA^ | 235  | 11122 |
| >PER1-S1060 AASGSLGSGL | 1634  | >PER1-S1060 AALGSLGSGL | 260  | 1374  |

|                        |       |                        |       |       |
|------------------------|-------|------------------------|-------|-------|
| >PER1-S1060 AASGSLGSL  | 31    | >PER1-S1060 AALGSLGSL  | 15    | 16    |
| >PER1-S1060 SAASGSLGSG | 497   | >PER1-S1060 SAALGSLGSG | 962   | 465   |
| >PER1-S1060 SAASGSLGSG | 478   | >PER1-S1060 SAALGSLGSG | 1251  | 773   |
| >PER1-S1060 SAASGSLGSG | 79    | >PER1-S1060 SAALGSLGSG | 69    | 10    |
| >PER1-S1060 SAASGSLGSG | 184   | >PER1-S1060 SAALGSLGSG | 617   | 433   |
| >PER1-S1060 GSAASGSL   | 23    | >PER1-S1060 GSAALGSL   | 108   | 85    |
| >PER1-S1060 GSAASGSL   | 440   | >PER1-S1060 GSAALGSL   | 878   | 438   |
| >PER1-S1060 GSAASGSLG  | 315   | >PER1-S1060 GSAALGSLG  | 155   | 160   |
| >PER1-S1060 GSAASGSL   | 272   | >PER1-S1060 GSAALGSL   | 449   | 177   |
| >PER1-S1060 GTGSAASGSL | 814   | >PER1-S1060 GTGSAALGSL | 328   | 486   |
| >PER1-S1060 GTGSAASGSL | 1564  | >PER1-S1060 GTGSAALGSL | 461   | 1103  |
| >PER1-S1060 GTGSAASGSL | 228   | >PER1-S1060 GTGSAALGSL | 308   | 80    |
| >PER1-S1060 GTGSAASGSL | 86    | >PER1-S1060 GTGSAALGSL | 126   | 40    |
| >PER1-S1060 GTGSAASGSL | 310   | >PER1-S1060 GTGSAALGSL | 537   | 227   |
| >PER1-S1060 RSGTGSAAS  | 8023  | >PER1-S1060 RSGTGSAAL  | 251   | 7772  |
| >PER1-S1060 RSGTGSAAS  | 6566  | >PER1-S1060 RSGTGSAAL  | 301   | 6265  |
| >PER1-S1060 RSGTGSAAS  | 1920  | >PER1-S1060 RSGTGSAAL  | 7     | 1913  |
| >PER1-S1060 RSGTGSAAS  | 22594 | >PER1-S1060 RSGTGSAAL  | 160   | 22434 |
| >PER1-S1060 SRSGTGSAAS | 5519  | >PER1-S1060 SRSGTGSAAL | 298   | 5221  |
| >PER1-S1060 SRSGTGSAAS | 4105  | >PER1-S1060 SRSGTGSAAL | 11    | 4094  |
| >PHOX2B-A2 SPAGAPGA    | 342   | >PHOX2B-A2 SPAGPPGA    | 477   | 135   |
| >PHOX2B-A2 SPAGAPGAA   | 28    | >PHOX2B-A2 SPAGPPGAA   | 21    | 7     |
| >PHOX2B-A2 SPAGAPGAA   | 370   | >PHOX2B-A2 SPAGPPGAA   | 1508  | 1138  |
| >PHOX2B-A2 SPAGAPGA    | 322   | >PHOX2B-A2 SPAGPPGA    | 260   | 62    |
| >PHOX2B-A2 SPAGAPGAA   | 42    | >PHOX2B-A2 SPAGPPGAA   | 36    | 6     |
| >PHOX2B-A2 GPSPAGAPG/  | 122   | >PHOX2B-A2 GPSPAGPPG/  | 137   | 15    |
| >PHOX2B-A2 GPSPAGAPG/  | 371   | >PHOX2B-A2 GPSPAGPPG/  | 284   | 87    |
| >PHOX2B-A2 GGPSPAGA    | 173   | >PHOX2B-A2 GGPSPAGP    | 236   | 63    |
| >PHOX2B-A2 GGPSPAGAP   | 153   | >PHOX2B-A2 GGPSPAGPP   | 348   | 195   |
| >PHOX2B-A2 GGPSPAGAP/  | 201   | >PHOX2B-A2 GGPSPAGPP/  | 285   | 84    |
| >PHOX2B-E1 ELERVFAETH' | 2819  | >PHOX2B-E1 QLERVFAETH  | 433   | 2386  |
| >PHOX2B-E1 KELERVFA    | 15616 | >PHOX2B-E1 KQLERVFA    | 104   | 15512 |
| >PHOX2B-E1 KELERVFA    | 676   | >PHOX2B-E1 KQLERVFA    | 8     | 668   |
| >PHOX2B-E1 KELERVFAE   | 7909  | >PHOX2B-E1 KQLERVFAE   | 79    | 7830  |
| >PHOX2B-E1 KELERVFAET  | 9793  | >PHOX2B-E1 KQLERVFAET  | 283   | 9510  |
| >PHOX2B-E1 KELERVFA    | 6713  | >PHOX2B-E1 KQLERVFA    | 275   | 6438  |
| >PHOX2B-E1 KELERVFAET  | 9170  | >PHOX2B-E1 KQLERVFAET  | 400   | 8770  |
| >PHOX2B-E1 KELERVFA    | 11695 | >PHOX2B-E1 KQLERVFA    | 445   | 11250 |
| >PHOX2B-E1 KELERVFA    | 8226  | >PHOX2B-E1 KQLERVFA    | 304   | 7922  |
| >PHOX2B-E1 KELERVFA    | 7412  | >PHOX2B-E1 KQLERVFA    | 348   | 7064  |
| >PHOX2B-E1 KELERVFAETI | 3952  | >PHOX2B-E1 KQLERVFAET  | 489   | 3463  |
| >PHOX2B-E1 KELERVFAETI | 5257  | >PHOX2B-E1 KQLERVFAET  | 183   | 5074  |
| >PHOX2B-E1 KELERVFA    | 101   | >PHOX2B-E1 KQLERVFA    | 11260 | 11159 |

|                        |      |                        |       |       |
|------------------------|------|------------------------|-------|-------|
| >PHOX2B-E1 KELERVFA    | 34   | >PHOX2B-E1 KQLERVFA    | 6697  | 6663  |
| >PHOX2B-E1 KELERVFAE   | 297  | >PHOX2B-E1 KQLERVFAE   | 18476 | 18179 |
| >PHOX2B-E1 RTTFTSAQLKI | 2683 | >PHOX2B-E1 RTTFTSAQLKI | 432   | 2251  |
| >PHOX2B-E1 RTTFTSAQLKI | 660  | >PHOX2B-E1 RTTFTSAQLKI | 264   | 396   |
| >PHOX2B-E1 LKELERVF    | 166  | >PHOX2B-E1 LKQLERVF    | 18    | 148   |
| >PHOX2B-E1 QLKELERV    | 135  | >PHOX2B-E1 QLKQLERV    | 318   | 183   |
| >PHOX2B-E1 QLKELERV    | 47   | >PHOX2B-E1 QLKQLERV    | 180   | 133   |
| >PHOX2B-E1 QLKELERV    | 58   | >PHOX2B-E1 QLKQLERV    | 258   | 200   |
| >PHOX2B-E1 QLKELERV    | 362  | >PHOX2B-E1 QLKQLERV    | 2163  | 1801  |
| >PHOX2B-E1 QLKELERV    | 6    | >PHOX2B-E1 QLKQLERV    | 10    | 4     |
| >PHOX2B-E1 QLKELERVF   | 279  | >PHOX2B-E1 QLKQLERVF   | 153   | 126   |
| >PHOX2B-E1 QLKELERVF   | 265  | >PHOX2B-E1 QLKQLERVF   | 293   | 28    |
| >PHOX2B-E1 AQLKELERV   | 234  | >PHOX2B-E1 AQLKQLERV   | 272   | 38    |
| >PHOX2B-E1 AQLKELERV   | 12   | >PHOX2B-E1 AQLKQLERV   | 13    | 1     |
| >PHOX2B-E1 AQLKELERVF  | 35   | >PHOX2B-E1 AQLKQLERVF  | 38    | 3     |
| >PHOX2B-E1 AQLKELERV   | 64   | >PHOX2B-E1 AQLKQLERV   | 55    | 9     |
| >PHOX2B-E1 AQLKELERV   | 411  | >PHOX2B-E1 AQLKQLERV   | 389   | 22    |
| >PHOX2B-E1 AQLKELERV   | 218  | >PHOX2B-E1 AQLKQLERV   | 164   | 54    |
| >PHOX2B-E1 AQLKELERV   | 679  | >PHOX2B-E1 AQLKQLERV   | 477   | 202   |
| >PHOX2B-E1 AQLKELER    | 517  | >PHOX2B-E1 AQLKQLER    | 95    | 422   |
| >PHOX2B-E1 AQLKELERVF  | 122  | >PHOX2B-E1 AQLKQLERVF  | 95    | 27    |
| >PHOX2B-E1 AQLKELERVF  | 5    | >PHOX2B-E1 AQLKQLERVF  | 5     | 0     |
| >PHOX2B-E1 AQLKELERV   | 623  | >PHOX2B-E1 AQLKQLERV   | 493   | 130   |
| >PHOX2B-E1 SAQLKELER   | 992  | >PHOX2B-E1 SAQLKQLER   | 264   | 728   |
| >PHOX2B-E1 SAQLKELERV  | 406  | >PHOX2B-E1 SAQLKQLERV  | 345   | 61    |
| >PHOX2B-E1 TSAQLKELER  | 636  | >PHOX2B-E1 TSAQLKQLER  | 435   | 201   |
| >PHOX2B-E1 TSAQLKELER  | 823  | >PHOX2B-E1 TSAQLKQLER  | 437   | 386   |
| >PHOX2B-E1 TSAQLKELER  | 39   | >PHOX2B-E1 TSAQLKQLER  | 41    | 2     |
| >PHOX2B-E1 TSAQLKELER' | 29   | >PHOX2B-E1 TSAQLKQLER  | 35    | 6     |
| >PHOX2B-E1 TSAQLKEL    | 223  | >PHOX2B-E1 TSAQLKQL    | 85    | 138   |
| >PHOX2B-E1 TSAQLKEL    | 363  | >PHOX2B-E1 TSAQLKQL    | 607   | 244   |
| >PHOX2B-E1 FTSAQLKEL   | 17   | >PHOX2B-E1 FTSAQLKQL   | 28    | 11    |
| >PHOX2B-E1 FTSAQLKEL   | 82   | >PHOX2B-E1 FTSAQLKQL   | 101   | 19    |
| >PHOX2B-E1 FTSAQLKEL   | 198  | >PHOX2B-E1 FTSAQLKQL   | 616   | 418   |
| >PHOX2B-E1 FTSAQLKELEF | 20   | >PHOX2B-E1 FTSAQLKQLE  | 21    | 1     |
| >PHOX2B-E1 FTSAQLKEL   | 240  | >PHOX2B-E1 FTSAQLKQL   | 754   | 514   |
| >PHOX2B-E1 FTSAQLKEL   | 25   | >PHOX2B-E1 FTSAQLKQL   | 17    | 8     |
| >PHOX2B-E1 TFTAQLKEL   | 165  | >PHOX2B-E1 TFTAQLKQL   | 224   | 59    |
| >PHOX2B-E1 TTFTAQLKEI  | 34   | >PHOX2B-E1 TTFTAQLKQ   | 78    | 44    |
| >PHOX2B-E1 TTFTAQLKEI  | 602  | >PHOX2B-E1 TTFTAQLKQ   | 437   | 165   |
| >PHOX2B-E1 TTFTAQLKEI  | 8    | >PHOX2B-E1 TTFTAQLKQ   | 6     | 2     |
| >PHOX2B-E1 TTFTAQLKEI  | 707  | >PHOX2B-E1 TTFTAQLKQ   | 378   | 329   |
| >PHOX2B-E1 TTFTAQLKEI  | 125  | >PHOX2B-E1 TTFTAQLKQ   | 68    | 57    |

|                        |      |                       |      |      |
|------------------------|------|-----------------------|------|------|
| >PHOX2B-E1 TTFTSAQLKEI | 542  | >PHOX2B-E1 TTFTSAQLKQ | 241  | 301  |
| >PHOX2B-F1.FQNRRAKFR   | 105  | >PHOX2B-F1.CQNRRAKFR  | 37   | 68   |
| >PHOX2B-F1.FQNRRAKF    | 111  | >PHOX2B-F1.CQNRRAKF   | 1007 | 896  |
| >PHOX2B-F1.FQNRRAKF    | 407  | >PHOX2B-F1.CQNRRAKF   | 6531 | 6124 |
| >PHOX2B-F1.FQNRRAKF    | 5    | >PHOX2B-F1.CQNRRAKF   | 21   | 16   |
| >PHOX2B-F1.FQNRRAKFR   | 705  | >PHOX2B-F1.CQNRRAKFR  | 253  | 452  |
| >PHOX2B-F1.WFQNRRAKF   | 79   | >PHOX2B-F1.WCQNRRAKF  | 3197 | 3118 |
| >PHOX2B-F1.WFQNRRAKF   | 15   | >PHOX2B-F1.WCQNRRAKF  | 4397 | 4382 |
| >PHOX2B-F1.WFQNRRAKF   | 31   | >PHOX2B-F1.WCQNRRAKF  | 328  | 297  |
| >PHOX2B-F1.WFQNRRAKF   | 367  | >PHOX2B-F1.WCQNRRAKF  | 7638 | 7271 |
| >PHOX2B-F1.WFQNRRAKF   | 30   | >PHOX2B-F1.WCQNRRAKF  | 693  | 663  |
| >PHOX2B-F1.WFQNRRAKF   | 1093 | >PHOX2B-F1.WCQNRRAKF  | 180  | 913  |
| >PHOX2B-F1.WFQNRRAKF   | 32   | >PHOX2B-F1.WCQNRRAKF  | 424  | 392  |
| >PHOX2B-F1.WFQNRRAKF   | 93   | >PHOX2B-F1.WCQNRRAKF  | 395  | 302  |
| >PHOX2B-F1.VWFQNRRAK   | 23   | >PHOX2B-F1.VWCQNRRAK  | 72   | 49   |
| >PHOX2B-F1.VWFQNRRAK   | 39   | >PHOX2B-F1.VWCQNRRAK  | 89   | 50   |
| >PHOX2B-F1.VWFQNRRAK   | 18   | >PHOX2B-F1.VWCQNRRAK  | 38   | 20   |
| >PHOX2B-F1.VWFQNRRAK   | 230  | >PHOX2B-F1.VWCQNRRAK  | 2330 | 2100 |
| >PHOX2B-F1.VWFQNRRAK   | 194  | >PHOX2B-F1.VWCQNRRAK  | 626  | 432  |
| >PHOX2B-F1.VWFQNRRAK   | 318  | >PHOX2B-F1.VWCQNRRAK  | 3945 | 3627 |
| >PHOX2B-F1.VWFQNRRAK   | 110  | >PHOX2B-F1.VWCQNRRAK  | 356  | 246  |
| >PHOX2B-F1.VWFQNRRAK   | 15   | >PHOX2B-F1.VWCQNRRAK  | 20   | 5    |
| >PHOX2B-F1.VWFQNRRAK   | 202  | >PHOX2B-F1.VWCQNRRAK  | 593  | 391  |
| >PHOX2B-F1.VWFQNRRAK   | 129  | >PHOX2B-F1.VWCQNRRAK  | 355  | 226  |
| >PHOX2B-F1.VWFQNRRAK   | 98   | >PHOX2B-F1.VWCQNRRAK  | 264  | 166  |
| >PHOX2B-F1.QVWFQNRRI   | 277  | >PHOX2B-F1.QVWCQNRRI  | 850  | 573  |
| >PHOX2B-F1.QVWFQNRRI   | 251  | >PHOX2B-F1.QVWCQNRRI  | 330  | 79   |
| >PHOX2B-F1.QVWFQNRRI   | 56   | >PHOX2B-F1.QVWCQNRRI  | 106  | 50   |
| >PHOX2B-F1.QVWFQNRRI   | 78   | >PHOX2B-F1.QVWCQNRRI  | 139  | 61   |
| >PHOX2B-F1.QVWFQNRRI   | 224  | >PHOX2B-F1.QVWCQNRRI  | 399  | 175  |
| >PHOX2B-F1.QVWFQNRRI   | 67   | >PHOX2B-F1.QVWCQNRRI  | 166  | 99   |
| >PHOX2B-F1.QVWFQNRRI   | 923  | >PHOX2B-F1.QVWCQNRRI  | 327  | 596  |
| >PHOX2B-F1.QVWFQNRRI   | 147  | >PHOX2B-F1.QVWCQNRRI  | 236  | 89   |
| >PHOX2B-F1.QVWFQNRRI   | 849  | >PHOX2B-F1.QVWCQNRRI  | 418  | 431  |
| >PHOX2B-F1.QVWFQNRRI   | 92   | >PHOX2B-F1.QVWCQNRRI  | 59   | 33   |
| >PHOX2B-F1.VQVWFQNRRI  | 389  | >PHOX2B-F1.VQVWCQNRRI | 999  | 610  |
| >PHOX2B-F1.VQVWFQNRRI  | 58   | >PHOX2B-F1.VQVWCQNRRI | 152  | 94   |
| >PHOX2B-F1.VQVWFQNRRI  | 127  | >PHOX2B-F1.VQVWCQNRRI | 189  | 62   |
| >PHOX2B-F1.VQVWFQNRRI  | 82   | >PHOX2B-F1.VQVWCQNRRI | 147  | 65   |
| >PHOX2B-F1.VQVWFQNRRI  | 122  | >PHOX2B-F1.VQVWCQNRRI | 110  | 12   |
| >PHOX2B-F1.RVQVWFQNI   | 123  | >PHOX2B-F1.RVQVWCQNI  | 615  | 492  |
| >PHOX2B-F1.RVQVWFQNI   | 445  | >PHOX2B-F1.RVQVWCQNI  | 852  | 407  |
| >PHOX2B-F1.RVQVWFQNI   | 8    | >PHOX2B-F1.RVQVWCQNI  | 24   | 16   |



|                        |       |                        |       |       |
|------------------------|-------|------------------------|-------|-------|
| >PHOX2B-F1.RVQVWFQNI   | 12    | >PHOX2B-F1.RVQVWCQNI   | 15    | 3     |
| >PHOX2B-F1.RVQVWFQNI   | 176   | >PHOX2B-F1.RVQVWCQNI   | 407   | 231   |
| >PHOX2B-F1.RVQVWFQNI   | 2910  | >PHOX2B-F1.RVQVWCQNI   | 470   | 2440  |
| >PHOX2B-F1.RVQVWFQNI   | 454   | >PHOX2B-F1.RVQVWCQNI   | 3531  | 3077  |
| >PHOX2B-F1.RVQVWFQNI   | 148   | >PHOX2B-F1.RVQVWCQNI   | 568   | 420   |
| >PHOX2B-F1.RVQVWFQNI   | 158   | >PHOX2B-F1.RVQVWCQNI   | 322   | 164   |
| >PHOX2B-F1.ARVQVWFQNI  | 441   | >PHOX2B-F1.ARVQVWCQNI  | 1126  | 685   |
| >PHOX2B-F1.ARVQVWFQNI  | 24    | >PHOX2B-F1.ARVQVWCQNI  | 45    | 21    |
| >PHOX2B-F1.ARVQVWFQNI  | 128   | >PHOX2B-F1.ARVQVWCQNI  | 312   | 184   |
| >PHOX2B-F1.ARVQVWFQNI  | 377   | >PHOX2B-F1.ARVQVWCQNI  | 974   | 597   |
| >PHOX2B-F1.EARVQVWF    | 183   | >PHOX2B-F1.EARVQVWC    | 674   | 491   |
| >PHOX2B-F1.EARVQVWF    | 25    | >PHOX2B-F1.EARVQVWC    | 39    | 14    |
| >PHOX2B-F1.EARVQVWF    | 62    | >PHOX2B-F1.EARVQVWC    | 89    | 27    |
| >PHOX2B-F1.EARVQVWF    | 66    | >PHOX2B-F1.EARVQVWC    | 18822 | 18756 |
| >PHOX2B-F1.TEARVQVWF   | 153   | >PHOX2B-F1.TEARVQVWC   | 3812  | 3659  |
| >PHOX2B-F1.TEARVQVWF   | 195   | >PHOX2B-F1.TEARVQVWC   | 15206 | 15011 |
| >PHOX2B-F1.TEARVQVWF   | 424   | >PHOX2B-F1.TEARVQVWC   | 2312  | 1888  |
| >PHOX2B-F1.TEARVQVWF   | 227   | >PHOX2B-F1.TEARVQVWC   | 5709  | 5482  |
| >PHOX2B-F1.TEARVQVWF   | 101   | >PHOX2B-F1.TEARVQVWC   | 4621  | 4520  |
| >PHOX2B-F1.TEARVQVWF   | 828   | >PHOX2B-F1.TEARVQVWC   | 305   | 523   |
| >PHOX2B-F1.LTEARVQVW   | 496   | >PHOX2B-F1.LTEARVQVW   | 21205 | 20709 |
| >PHOX2B-F1.LTEARVQVW   | 15    | >PHOX2B-F1.LTEARVQVW   | 11039 | 11024 |
| >PHOX2B-F1.LTEARVQVW   | 294   | >PHOX2B-F1.LTEARVQVW   | 3115  | 2821  |
| >PHOX2B-F1.LTEARVQVW   | 17    | >PHOX2B-F1.LTEARVQVW   | 647   | 630   |
| >PHOX2B-S7.SYLNSSAY    | 254   | >PHOX2B-S7.YYLNSSAY    | 44    | 210   |
| >PHOX2B-S7.SYLNSSAYE   | 1432  | >PHOX2B-S7.YYLNSSAYE   | 324   | 1108  |
| >PHOX2B-S7.SYLNSSAYES  | 639   | >PHOX2B-S7.YYLNSSAYES  | 119   | 520   |
| >PHOX2B-S7.SYLNSSAYESC | 229   | >PHOX2B-S7.YYLNSSAYESC | 41    | 188   |
| >PHOX2B-S7.SYLNSSAY    | 3645  | >PHOX2B-S7.YYLNSSAY    | 292   | 3353  |
| >PHOX2B-S7.SYLNSSAY    | 38    | >PHOX2B-S7.YYLNSSAY    | 12    | 26    |
| >PHOX2B-S7.SYLNSSAY    | 55    | >PHOX2B-S7.YYLNSSAY    | 158   | 103   |
| >PHOX2B-S7.SYLNSSAY    | 410   | >PHOX2B-S7.YYLNSSAY    | 195   | 215   |
| >PHOX2B-S7.SYLNSSAY    | 89    | >PHOX2B-S7.YYLNSSAY    | 31    | 58    |
| >PHOX2B-S7.SYLNSSAY    | 211   | >PHOX2B-S7.YYLNSSAY    | 28    | 183   |
| >PHOX2B-S7.SYLNSSAY    | 1038  | >PHOX2B-S7.YYLNSSAY    | 69    | 969   |
| >PHOX2B-S7.SYLNSSAY    | 1078  | >PHOX2B-S7.YYLNSSAY    | 189   | 889   |
| >PHOX2B-S7.SYLNSSAYESC | 287   | >PHOX2B-S7.YYLNSSAYESC | 826   | 539   |
| >PHOX2B-S7.YSYLNSSAY   | 134   | >PHOX2B-S7.YYYLNSSAY   | 14892 | 14758 |
| >PHOX2B-S7.YSYLNSSAY   | 20751 | >PHOX2B-S7.YYYLNSSAY   | 124   | 20627 |
| >PHOX2B-S7.YSYLNSSAYES | 22888 | >PHOX2B-S7.YYYLNSSAYES | 333   | 22555 |
| >PHOX2B-S7.YSYLNSSAY   | 81    | >PHOX2B-S7.YYYLNSSAY   | 91    | 10    |
| >PHOX2B-S7.YSYLNSSAY   | 386   | >PHOX2B-S7.YYYLNSSAY   | 3786  | 3400  |
| >PHOX2B-S7.YSYLNSSAY   | 65    | >PHOX2B-S7.YYYLNSSAY   | 528   | 463   |

|                         |      |                          |       |       |
|-------------------------|------|--------------------------|-------|-------|
| >PHOX2B-S7' YSYLNSSAY   | 18   | >PHOX2B-S7' YYYYLNSSAY   | 9     | 9     |
| >PHOX2B-S7' YSYLNSSAY   | 78   | >PHOX2B-S7' YYYYLNSSAY   | 160   | 82    |
| >PHOX2B-S7' YSYLNSSAY   | 214  | >PHOX2B-S7' YYYYLNSSAY   | 2388  | 2174  |
| >PHOX2B-S7' YSYLNSSAY   | 32   | >PHOX2B-S7' YYYYLNSSAY   | 295   | 263   |
| >PHOX2B-S7' YSYLNSSAY   | 28   | >PHOX2B-S7' YYYYLNSSAY   | 21    | 7     |
| >PHOX2B-S7' YSYLNSSA    | 327  | >PHOX2B-S7' YYYYLNSSA    | 3592  | 3265  |
| >PHOX2B-S7' YSYLNSSAY   | 5    | >PHOX2B-S7' YYYYLNSSAY   | 36    | 31    |
| >PHOX2B-S7' YSYLNSSA    | 278  | >PHOX2B-S7' YYYYLNSSA    | 25398 | 25120 |
| >PHOX2B-S7' YSYLNSSAY   | 3    | >PHOX2B-S7' YYYYLNSSAY   | 1373  | 1370  |
| >PHOX2B-S7' YSYLNSSAYE  | 260  | >PHOX2B-S7' YYYYLNSSAYE  | 23854 | 23594 |
| >PHOX2B-S7' YSYLNSSAYES | 253  | >PHOX2B-S7' YYYYLNSSAYES | 25140 | 24887 |
| >PHOX2B-S7' YSYLNSSAY   | 10   | >PHOX2B-S7' YYYYLNSSAY   | 26    | 16    |
| >PHOX2B-S7' YSYLNSSAY   | 203  | >PHOX2B-S7' YYYYLNSSAY   | 3032  | 2829  |
| >PHOX2B-S7' YSYLNSSAY   | 6    | >PHOX2B-S7' YYYYLNSSAY   | 199   | 193   |
| >PHOX2B-S7' YSYLNSSAYE  | 287  | >PHOX2B-S7' YYYYLNSSAYE  | 21624 | 21337 |
| >PHOX2B-S7' YSYLNSSAY   | 91   | >PHOX2B-S7' YYYYLNSSAY   | 150   | 59    |
| >PHOX2B-S7' YSYLNSSAY   | 930  | >PHOX2B-S7' YYYYLNSSAY   | 222   | 708   |
| >PHOX2B-S7' EYSYLNSSAY  | 288  | >PHOX2B-S7' EYYYYLNSSAY  | 875   | 587   |
| >PHOX2B-S7' EYSYLNSSAY  | 128  | >PHOX2B-S7' EYYYYLNSSAY  | 130   | 2     |
| >PHOX2B-S7' EYSYLNSSAY  | 494  | >PHOX2B-S7' EYYYYLNSSAY  | 423   | 71    |
| >PHOX2B-S7' EYSYLNSSAY  | 190  | >PHOX2B-S7' EYYYYLNSSAY  | 52    | 138   |
| >PHOX2B-S7' EYSYLNSSAY  | 4718 | >PHOX2B-S7' EYYYYLNSSAY  | 420   | 4298  |
| >PHOX2B-S7' EYSYLNSSAY  | 32   | >PHOX2B-S7' EYYYYLNSSAY  | 31    | 1     |
| >PHOX2B-S7' EYSYLNSSAY  | 214  | >PHOX2B-S7' EYYYYLNSSAY  | 105   | 109   |
| >PHOX2B-S7' EYSYLNSSAY  | 1329 | >PHOX2B-S7' EYYYYLNSSAY  | 189   | 1140  |
| >PHOX2B-S7' EYSYLNSSAY  | 1680 | >PHOX2B-S7' EYYYYLNSSAY  | 300   | 1380  |
| >PHOX2B-S7' EYSYLNSSA   | 712  | >PHOX2B-S7' EYYYYLNSSA   | 456   | 256   |
| >PHOX2B-S7' MEYSYLNSS   | 336  | >PHOX2B-S7' MEYYYYLNSS   | 112   | 224   |
| >PHOX2B-S7' MEYSYLNSSA  | 127  | >PHOX2B-S7' MEYYYYLNSSA  | 56    | 71    |
| >PHOX2B-S7' MEYSYLNSSA  | 67   | >PHOX2B-S7' MEYYYYLNSSA  | 39    | 28    |
| >PHOX2B-S7' MEYSYLNSSA  | 92   | >PHOX2B-S7' MEYYYYLNSSA  | 69    | 23    |
| >PHOX2B-S7' MEYSYLNSSA  | 197  | >PHOX2B-S7' MEYYYYLNSSA  | 195   | 2     |
| >PHOX2B-S7' MEYSYLNSSA  | 50   | >PHOX2B-S7' MEYYYYLNSSA  | 51    | 1     |
| >PHOX2B-S7' MEYSYLNSSA  | 129  | >PHOX2B-S7' MEYYYYLNSSA  | 153   | 24    |
| >PHOX2B-S7' MEYSYLNSSA  | 215  | >PHOX2B-S7' MEYYYYLNSSA  | 279   | 64    |
| >PHOX2B-S7' MEYSYLNSSA  | 5    | >PHOX2B-S7' MEYYYYLNSSA  | 7     | 2     |
| >PHOX2B-S7' MEYSYLNSS   | 237  | >PHOX2B-S7' MEYYYYLNSS   | 222   | 15    |
| >PHOX2B-S7' MEYSYLNSSA  | 5    | >PHOX2B-S7' MEYYYYLNSSA  | 5     | 0     |
| >PHOX2B-S7' MEYSYLNSSA  | 36   | >PHOX2B-S7' MEYYYYLNSSA  | 41    | 5     |
| >PHOX2B-S7' MEYSYLNSSA  | 860  | >PHOX2B-S7' MEYYYYLNSSA  | 463   | 397   |
| >PHOX2B-S7' MEYSYLNSS   | 331  | >PHOX2B-S7' MEYYYYLNS    | 255   | 76    |
| >PHOX2B-S7' MEYSYLNSS   | 159  | >PHOX2B-S7' MEYYYYLNSS   | 143   | 16    |
| >PHOX2B-S7' MEYSYLNSSA  | 373  | >PHOX2B-S7' MEYYYYLNSSA  | 161   | 212   |

|                         |      |                          |      |      |
|-------------------------|------|--------------------------|------|------|
| >PHOX2B-S7' MEYSYLNSSA  | 631  | >PHOX2B-S7' MEYYYYLNSSA  | 494  | 137  |
| >PHOX2B-S7' MEYSYLNSSA  | 437  | >PHOX2B-S7' MEYYYYLNSSA  | 243  | 194  |
| >PHOX2B-S7' MEYSYLNSSA  | 121  | >PHOX2B-S7' MEYYYYLNSSA  | 198  | 77   |
| >PHOX2B-S7' MEYSYLNSSA  | 234  | >PHOX2B-S7' MEYYYYLNSSA  | 114  | 120  |
| >PHOX2B-S7' MEYSYLNSSA  | 34   | >PHOX2B-S7' MEYYYYLNSSA  | 39   | 5    |
| >PHOX2B-S7' MEYSYLNSS   | 86   | >PHOX2B-S7' MEYYYYLNSS   | 66   | 20   |
| >PHOX2B-S7' MEYSYLNSS   | 72   | >PHOX2B-S7' MEYYYYLNSS   | 58   | 14   |
| >PHOX2B-S7' MEYSYLNSSA  | 24   | >PHOX2B-S7' MEYYYYLNSSA  | 17   | 7    |
| >PHOX2B-S7' MEYSYLNSSA  | 240  | >PHOX2B-S7' MEYYYYLNSSA  | 211  | 29   |
| >PHOX2B-S7' MEYSYLNSSA  | 1423 | >PHOX2B-S7' MEYYYYLNSSA  | 351  | 1072 |
| >PHOX2B-S7' MEYSYLNSSA  | 157  | >PHOX2B-S7' MEYYYYLNSSA  | 267  | 110  |
| >PHOX2B-S7' MEYSYLNSS   | 71   | >PHOX2B-S7' MEYYYYLNSS   | 82   | 11   |
| >PHOX2B-S7' MEYSYLNSSA  | 790  | >PHOX2B-S7' MEYYYYLNSSA  | 423  | 367  |
| >PHOX2B-S7' MEYSYLNSSA  | 170  | >PHOX2B-S7' MEYYYYLNSSA  | 201  | 31   |
| >PHOX2B-S7' MEYSYLNSSA  | 198  | >PHOX2B-S7' MEYYYYLNSSA  | 313  | 115  |
| >PHOX2B-S7' KMEYSYLNSS  | 462  | >PHOX2B-S7' KMEYYYYLNSS  | 167  | 295  |
| >PHOX2B-S7' KMEYSYLNSS  | 262  | >PHOX2B-S7' KMEYYYYLNSS  | 200  | 62   |
| >PHOX2B-S7' YKMEYSYL    | 179  | >PHOX2B-S7' YKMEYYYYL    | 333  | 154  |
| >PHOX2B-S7' YKMEYSYL    | 600  | >PHOX2B-S7' YKMEYYYYL    | 135  | 465  |
| >PHOX2B-S7' YKMEYSYL    | 25   | >PHOX2B-S7' YKMEYYYYL    | 13   | 12   |
| >PHOX2B-S7' YKMEYSYL    | 46   | >PHOX2B-S7' YKMEYYYYL    | 29   | 17   |
| >PHOX2B-S7' YKMEYSYL    | 92   | >PHOX2B-S7' YKMEYYYYL    | 44   | 48   |
| >PHOX2B-S7' YKMEYSYL    | 235  | >PHOX2B-S7' YKMEYYYYL    | 84   | 151  |
| >PHOX2B-S7' YKMEYSYL    | 588  | >PHOX2B-S7' YKMEYYYYL    | 250  | 338  |
| >PHOX2B-S7' YKMEYSYL    | 6    | >PHOX2B-S7' YKMEYYYYL    | 8    | 2    |
| >PHOX2B-S7' YKMEYSYLNSS | 96   | >PHOX2B-S7' YKMEYYYYLNSS | 94   | 2    |
| >PHOX2B-S7' YKMEYSYLNSS | 122  | >PHOX2B-S7' YKMEYYYYLNSS | 110  | 12   |
| >PHOX2B-S7' YKMEYSYL    | 17   | >PHOX2B-S7' YKMEYYYYL    | 14   | 3    |
| >PHOX2B-S7' MYKMEYSYL   | 1816 | >PHOX2B-S7' MYKMEYYYYL   | 344  | 1472 |
| >PHOX2B-S7' MYKMEYSYL   | 175  | >PHOX2B-S7' MYKMEYYYYL   | 53   | 122  |
| >PHOX2B-S7' MYKMEYSYL   | 319  | >PHOX2B-S7' MYKMEYYYYL   | 138  | 181  |
| >PHOX2B-S7' MYKMEYSY    | 544  | >PHOX2B-S7' MYKMEYYYY    | 244  | 300  |
| >PHOX2B-S7' MYKMEYSYL   | 7    | >PHOX2B-S7' MYKMEYYYYL   | 7    | 0    |
| >PHOX2B-S7' MYKMEYSY    | 65   | >PHOX2B-S7' MYKMEYYYY    | 19   | 46   |
| >PHOX2B-S7' MYKMEYSY    | 250  | >PHOX2B-S7' MYKMEYYYY    | 123  | 127  |
| >PHOX2B-S7' MYKMEYSYL   | 21   | >PHOX2B-S7' MYKMEYYYYL   | 24   | 3    |
| >PHOX2B-S7' MYKMEYSYLI  | 73   | >PHOX2B-S7' MYKMEYYYYLI  | 86   | 13   |
| >PHOX2B-S7' MYKMEYSY    | 43   | >PHOX2B-S7' MYKMEYYYY    | 30   | 13   |
| >PHOX2B-S7' MYKMEYSY    | 2683 | >PHOX2B-S7' MYKMEYYYY    | 244  | 2439 |
| >PHOX2B-S7' MYKMEYSYL   | 764  | >PHOX2B-S7' MYKMEYYYYL   | 96   | 668  |
| >PHOX2B-S7' MYKMEYSYL   | 501  | >PHOX2B-S7' MYKMEYYYYL   | 350  | 151  |
| >PHOX2B-S7' MYKMEYSY    | 492  | >PHOX2B-S7' MYKMEYYYY    | 1089 | 597  |
| >PHOX2B-S7' MYKMEYSY    | 174  | >PHOX2B-S7' MYKMEYYYY    | 67   | 107  |

|                        |      |                        |      |      |
|------------------------|------|------------------------|------|------|
| >PHOX2B-S7' MYKMEYSYL  | 1423 | >PHOX2B-S7' MYKMEYYL   | 444  | 979  |
| >PHOX2B-S7' MYKMEYSYL  | 243  | >PHOX2B-S7' MYKMEYYL   | 150  | 93   |
| >PICALM-V6:VMRPPNPF    | 11   | >PICALM-V6:IMRPPNPF    | 9    | 2    |
| >PICALM-V6:VMRPPNPF    | 135  | >PICALM-V6:IMRPPNPF    | 116  | 19   |
| >PICALM-V6:VMRPPNPF    | 5    | >PICALM-V6:IMRPPNPF    | 6    | 1    |
| >PICALM-V6:VMRPPNPF    | 74   | >PICALM-V6:IMRPPNPF    | 121  | 47   |
| >PICALM-V6:VMRPPNPF    | 76   | >PICALM-V6:IMRPPNPF    | 127  | 51   |
| >PICALM-V6:VMRPPNPF    | 4    | >PICALM-V6:IMRPPNPF    | 5    | 1    |
| >PICALM-V6:VMRPPNPF    | 100  | >PICALM-V6:IMRPPNPF    | 33   | 67   |
| >PICALM-V6:VMRPPNPF    | 95   | >PICALM-V6:IMRPPNPF    | 34   | 61   |
| >PICALM-V6:VMRPPNPF    | 32   | >PICALM-V6:IMRPPNPF    | 31   | 1    |
| >PICALM-V6:VMRPPNPF    | 246  | >PICALM-V6:IMRPPNPF    | 200  | 46   |
| >PICALM-V6:VMRPPNPF    | 43   | >PICALM-V6:IMRPPNPF    | 39   | 4    |
| >PICALM-V6:VMRPPNPF    | 558  | >PICALM-V6:IMRPPNPF    | 480  | 78   |
| >PICALM-V6:VMRPPNPF    | 4    | >PICALM-V6:IMRPPNPF    | 3    | 1    |
| >PICALM-V6:VMRPPNPF    | 126  | >PICALM-V6:IMRPPNPF    | 54   | 72   |
| >PICALM-V6:VMRPPNPF    | 39   | >PICALM-V6:IMRPPNPF    | 23   | 16   |
| >PICALM-V6:PVMRPPNPF   | 89   | >PICALM-V6:PIMRPPNPF   | 332  | 243  |
| >PICALM-V6:PVMRPPNPF   | 373  | >PICALM-V6:PIMRPPNPF   | 441  | 68   |
| >PICALM-V6:PVMRPPNPF   | 276  | >PICALM-V6:PIMRPPNPF   | 177  | 99   |
| >PICALM-V6:TQPTLIYSQP\ | 2015 | >PICALM-V6:TQPTLIYSQPI | 215  | 1800 |
| >PICALM-V6:TQPTLIYSQP\ | 318  | >PICALM-V6:TQPTLIYSQPI | 1782 | 1464 |
| >PICALM-V6:TQPTLIYSQP\ | 469  | >PICALM-V6:TQPTLIYSQPI | 1629 | 1160 |
| >PICALM-V6:TQPTLIYSQP\ | 84   | >PICALM-V6:TQPTLIYSQPI | 669  | 585  |
| >PICALM-V6:TQPTLIYSQP\ | 13   | >PICALM-V6:TQPTLIYSQPI | 49   | 36   |
| >PICALM-V6:TQPTLIYSQP\ | 425  | >PICALM-V6:TQPTLIYSQPI | 4060 | 3635 |
| >PICALM-V6:TQPTLIYSQP\ | 219  | >PICALM-V6:TQPTLIYSQPI | 1139 | 920  |
| >PICALM-V6:QPVMRPPNPF  | 310  | >PICALM-V6:QPIMRPPNPF  | 213  | 97   |
| >PICALM-V6:QPVMRPPNPF  | 239  | >PICALM-V6:QPIMRPPNPF  | 168  | 71   |
| >PICALM-V6:QPVMRPPNPF  | 142  | >PICALM-V6:QPIMRPPNPF  | 125  | 17   |
| >PICALM-V6:SQPVMRPPNPF | 126  | >PICALM-V6:SQPIMRPPNPF | 155  | 29   |
| >PICALM-V6:SQPVMRPPNPF | 18   | >PICALM-V6:SQPIMRPPNPF | 26   | 8    |
| >PICALM-V6:IYSQPVMR    | 364  | >PICALM-V6:IYSQPIMR    | 391  | 27   |
| >PICALM-V6:IYSQPVMR    | 185  | >PICALM-V6:IYSQPIMR    | 144  | 41   |
| >PICALM-V6:IYSQPVMR    | 462  | >PICALM-V6:IYSQPIMR    | 537  | 75   |
| >PICALM-V6:IYSQPVMR    | 29   | >PICALM-V6:IYSQPIMR    | 27   | 2    |
| >PICALM-V6:LIYSQPVM    | 332  | >PICALM-V6:LIYSQPIM    | 856  | 524  |
| >PICALM-V6:LIYSQPVMR   | 177  | >PICALM-V6:LIYSQPIMR   | 105  | 72   |
| >PICALM-V6:LIYSQPVMR   | 401  | >PICALM-V6:LIYSQPIMR   | 176  | 225  |
| >PICALM-V6:LIYSQPVMR   | 37   | >PICALM-V6:LIYSQPIMR   | 67   | 30   |
| >PICALM-V6:LIYSQPVMR   | 33   | >PICALM-V6:LIYSQPIMR   | 45   | 12   |
| >PICALM-V6:LIYSQPVM    | 153  | >PICALM-V6:LIYSQPIM    | 677  | 524  |
| >PICALM-V6:LIYSQPVM    | 142  | >PICALM-V6:LIYSQPIM    | 172  | 30   |

|                         |      |                         |      |      |
|-------------------------|------|-------------------------|------|------|
| >PICALM-V6: LIYSQPVMR   | 126  | >PICALM-V6: LIYSQPIMR   | 129  | 3    |
| >PICALM-V6: TLIYSQPV    | 17   | >PICALM-V6: TLIYSQPI    | 55   | 38   |
| >PICALM-V6: TLIYSQPV    | 10   | >PICALM-V6: TLIYSQPI    | 39   | 29   |
| >PICALM-V6: TLIYSQPV    | 7    | >PICALM-V6: TLIYSQPI    | 22   | 15   |
| >PICALM-V6: TLIYSQPV    | 24   | >PICALM-V6: TLIYSQPI    | 197  | 173  |
| >PICALM-V6: TLIYSQPV    | 17   | >PICALM-V6: TLIYSQPI    | 180  | 163  |
| >PICALM-V6: TLIYSQPV    | 8    | >PICALM-V6: TLIYSQPI    | 42   | 34   |
| >PICALM-V6: TLIYSQPV    | 20   | >PICALM-V6: TLIYSQPI    | 631  | 611  |
| >PICALM-V6: TLIYSQPV    | 95   | >PICALM-V6: TLIYSQPI    | 3172 | 3077 |
| >PICALM-V6: TLIYSQPV    | 5    | >PICALM-V6: TLIYSQPI    | 120  | 115  |
| >PICALM-V6: TLIYSQPVMR  | 371  | >PICALM-V6: TLIYSQPIMR  | 308  | 63   |
| >PICALM-V6: TLIYSQPVMR  | 171  | >PICALM-V6: TLIYSQPIMR  | 101  | 70   |
| >PICALM-V6: TLIYSQPVM   | 68   | >PICALM-V6: TLIYSQPIM   | 114  | 46   |
| >PICALM-V6: TLIYSQPVMR  | 203  | >PICALM-V6: TLIYSQPIMR  | 231  | 28   |
| >PICALM-V6: TLIYSQPV    | 4276 | >PICALM-V6: TLIYSQPI    | 447  | 3829 |
| >PICALM-V6: TLIYSQPVMR  | 26   | >PICALM-V6: TLIYSQPIMR  | 27   | 1    |
| >PICALM-V6: TLIYSQPV    | 51   | >PICALM-V6: TLIYSQPI    | 149  | 98   |
| >PICALM-V6: TLIYSQPV    | 87   | >PICALM-V6: TLIYSQPI    | 589  | 502  |
| >PICALM-V6: TLIYSQPVM   | 124  | >PICALM-V6: TLIYSQPIM   | 730  | 606  |
| >PICALM-V6: TLIYSQPVM   | 391  | >PICALM-V6: TLIYSQPIM   | 430  | 39   |
| >PICALM-V6: TLIYSQPVMR  | 165  | >PICALM-V6: TLIYSQPIMR  | 132  | 33   |
| >PICALM-V6: PTLIYSQPV   | 221  | >PICALM-V6: PTLIYSQPI   | 2960 | 2739 |
| >PICALM-V6: PTLIYSQPV   | 31   | >PICALM-V6: PTLIYSQPI   | 244  | 213  |
| >PICALM-V6: PTLIYSQPVM  | 219  | >PICALM-V6: PTLIYSQPIM  | 454  | 235  |
| >PICALM-V6: PTLIYSQPVM  | 135  | >PICALM-V6: PTLIYSQPIM  | 103  | 32   |
| >PICALM-V6: QPTLIYSQPV  | 59   | >PICALM-V6: QPTLIYSQPI  | 66   | 7    |
| >PICALM-V6: QPTLIYSQPVI | 54   | >PICALM-V6: QPTLIYSQPIM | 81   | 27   |
| >PICALM-V6: QPTLIYSQPV  | 302  | >PICALM-V6: QPTLIYSQPI  | 1901 | 1599 |
| >PIK3R1-D46 DRLYEEYTR   | 5212 | >PIK3R1-D46 HRLYEEYTR   | 242  | 4970 |
| >PIK3R1-D46 DRLYEEYTRT  | 5706 | >PIK3R1-D46 HRLYEEYTRT  | 96   | 5610 |
| >PIK3R1-D46 DRLYEEYTR   | 1430 | >PIK3R1-D46 HRLYEEYTR   | 67   | 1363 |
| >PIK3R1-D46 YDRLYEEY    | 1763 | >PIK3R1-D46 YHRLYEEY    | 42   | 1721 |
| >PIK3R1-D46 EYDRLYEEY   | 930  | >PIK3R1-D46 EYHRLYEEY   | 107  | 823  |
| >PIK3R1-D46 EYDRLYEEY   | 7575 | >PIK3R1-D46 EYHRLYEEY   | 173  | 7402 |
| >PIK3R1-D46 EYDRLYEEYTF | 2357 | >PIK3R1-D46 EYHRLYEEYTF | 233  | 2124 |
| >PIK3R1-D46 EYDRLYEEYTF | 58   | >PIK3R1-D46 EYHRLYEEYTF | 22   | 36   |
| >PIK3R1-D46 EYDRLYEEYTF | 256  | >PIK3R1-D46 EYHRLYEEYTF | 46   | 210  |
| >PIK3R1-D46 EYDRLYEEYTF | 76   | >PIK3R1-D46 EYHRLYEEYTF | 31   | 45   |
| >PIK3R1-D46 REYDRLYEEY  | 327  | >PIK3R1-D46 REYHRLYEEY  | 111  | 216  |
| >PIK3R1-D46 REYDRLYEEY  | 1209 | >PIK3R1-D46 REYHRLYEEY  | 345  | 864  |
| >PIK3R1-D46 REYDRLYEEY  | 152  | >PIK3R1-D46 REYHRLYEEY  | 170  | 18   |
| >PIK3R1-D46 REYDRLYEEY  | 511  | >PIK3R1-D46 REYHRLYEEY  | 178  | 333  |
| >PIK3R1-D46 REYDRLYEEY  | 176  | >PIK3R1-D46 REYHRLYEEY  | 152  | 24   |

|                         |       |                         |     |       |
|-------------------------|-------|-------------------------|-----|-------|
| >PIK3R1-D46 REYDRLYEEY  | 74    | >PIK3R1-D46 REYHRLYEEY  | 24  | 50    |
| >PIK3R1-D46 REYDRLYEEY  | 233   | >PIK3R1-D46 REYHRLYEEY  | 263 | 30    |
| >PIK3R1-D46 REYDRLYEE   | 600   | >PIK3R1-D46 REYHRLYEE   | 492 | 108   |
| >PIK3R1-D46 REYDRLYEEY  | 352   | >PIK3R1-D46 REYHRLYEEY  | 226 | 126   |
| >PIK3R1-D46 REYDRLYEEY  | 158   | >PIK3R1-D46 REYHRLYEEY  | 148 | 10    |
| >PIK3R1-D46 REYDRLYEEY  | 111   | >PIK3R1-D46 REYHRLYEEY  | 64  | 47    |
| >PIK3R1-D46 REYDRLYEEY  | 40    | >PIK3R1-D46 REYHRLYEEY  | 28  | 12    |
| >PIK3R1-D46 REYDRLYEEY  | 184   | >PIK3R1-D46 REYHRLYEEY  | 191 | 7     |
| >PIK3R1-D46 REYDRLYEE   | 83    | >PIK3R1-D46 REYHRLYEE   | 183 | 100   |
| >PIK3R1-D46 REYDRLYEEY  | 29    | >PIK3R1-D46 REYHRLYEEY  | 47  | 18    |
| >PIK3R1-D46 SREYDRLYEE  | 848   | >PIK3R1-D46 SREYHRLYEE  | 392 | 456   |
| >PIK3R1-D46 KSREYDRL    | 168   | >PIK3R1-D46 KSREYHRL    | 30  | 138   |
| >PIK3R1-D46 KSREYDRL    | 54    | >PIK3R1-D46 KSREYHRL    | 8   | 46    |
| >PIK3R1-D46 KSREYDRLY   | 22    | >PIK3R1-D46 KSREYHRLY   | 5   | 17    |
| >PIK3R1-D46 KSREYDRLYE  | 72    | >PIK3R1-D46 KSREYHRLYE  | 12  | 60    |
| >PIK3R1-D46 KSREYDRLYEI | 444   | >PIK3R1-D46 KSREYHRLYEI | 94  | 350   |
| >PIK3R1-D46 KSREYDRLY   | 189   | >PIK3R1-D46 KSREYHRLY   | 267 | 78    |
| >PIK3R1-D46 KSREYDRLY   | 674   | >PIK3R1-D46 KSREYHRLY   | 383 | 291   |
| >PIK3R1-D46 KSREYDRLY   | 486   | >PIK3R1-D46 KSREYHRLY   | 76  | 410   |
| >PIK3R1-D46 KSREYDRL    | 8     | >PIK3R1-D46 KSREYHRL    | 4   | 4     |
| >PIK3R1-D46 KSREYDRLY   | 6     | >PIK3R1-D46 KSREYHRLY   | 4   | 2     |
| >PIK3R1-D46 KSREYDRL    | 1102  | >PIK3R1-D46 KSREYHRL    | 263 | 839   |
| >PIK3R1-D46 KSREYDRLY   | 62    | >PIK3R1-D46 KSREYHRLY   | 49  | 13    |
| >PIK3R1-D46 KSREYDRLY   | 49    | >PIK3R1-D46 KSREYHRLY   | 14  | 35    |
| >PIK3R1-D46 EKSREYDR    | 647   | >PIK3R1-D46 EKSREYHR    | 270 | 377   |
| >PIK3R1-D46 EKSREYDRLY  | 663   | >PIK3R1-D46 EKSREYHRLY  | 213 | 450   |
| >PIK3R1-D46 QEKSREYDR   | 3476  | >PIK3R1-D46 QEKSREYHR   | 290 | 3186  |
| >PIK3R1-D46 QEKSREYDRL  | 591   | >PIK3R1-D46 QEKSREYHRL  | 144 | 447   |
| >PIK3R1-D46 QEKSREYDRL  | 474   | >PIK3R1-D46 QEKSREYHRL  | 664 | 190   |
| >PIK3R1-D46 QEKSREYDR   | 930   | >PIK3R1-D46 QEKSREYHR   | 133 | 797   |
| >PIK3R1-D46 FQEKSREYDR  | 517   | >PIK3R1-D46 FQEKSREYHR  | 355 | 162   |
| >PIK3R1-D46 FQEKSREYDR  | 330   | >PIK3R1-D46 FQEKSREYHR  | 163 | 167   |
| >PIK3R1-D46 FQEKSREYDR  | 546   | >PIK3R1-D46 FQEKSREYHR  | 92  | 454   |
| >PIK3R1-D46 FQEKSREYDR  | 862   | >PIK3R1-D46 FQEKSREYHR  | 231 | 631   |
| >PIK3R1-D46 QFQEKSREYD  | 360   | >PIK3R1-D46 QFQEKSREYH  | 50  | 310   |
| >PIK3R1-D46 QFQEKSREYD  | 205   | >PIK3R1-D46 QFQEKSREYH  | 69  | 136   |
| >PIK3R1-D46 QFQEKSREYD  | 247   | >PIK3R1-D46 QFQEKSREYH  | 105 | 142   |
| >PIK3R1-D56 DKRMNSIK    | 3032  | >PIK3R1-D56 YKRMNSIK    | 219 | 2813  |
| >PIK3R1-D56 DKRMNSIK    | 2288  | >PIK3R1-D56 YKRMNSIK    | 59  | 2229  |
| >PIK3R1-D56 DKRMNSIKP   | 11185 | >PIK3R1-D56 YKRMNSIKP   | 338 | 10847 |
| >PIK3R1-D56 DKRMNSIKPC  | 1284  | >PIK3R1-D56 YKRMNSIKPC  | 21  | 1263  |
| >PIK3R1-D56 IDKRMNSI    | 6980  | >PIK3R1-D56 IYKRMNSI    | 6   | 6974  |
| >PIK3R1-D56 IDKRMNSI    | 22986 | >PIK3R1-D56 IYKRMNSI    | 250 | 22736 |

|                        |       |                         |     |       |
|------------------------|-------|-------------------------|-----|-------|
| >PIK3R1-D56 IDKRMNSI   | 18066 | >PIK3R1-D56 IYKRMNSI    | 84  | 17982 |
| >PIK3R1-D56 IDKRMNSI   | 26049 | >PIK3R1-D56 IYKRMNSI    | 64  | 25985 |
| >PIK3R1-D56 IDKRMNSI   | 8349  | >PIK3R1-D56 IYKRMNSI    | 43  | 8306  |
| >PIK3R1-D56 IDKRMNSIK  | 1656  | >PIK3R1-D56 IYKRMNSIK   | 7   | 1649  |
| >PIK3R1-D56 IDKRMNSIK  | 14216 | >PIK3R1-D56 IYKRMNSIK   | 283 | 13933 |
| >PIK3R1-D56 KKQAAEYREI | 32262 | >PIK3R1-D56 KKQAAEYREI' | 345 | 31917 |
| >PIK3R1-D56 KKQAAEYREI | 12943 | >PIK3R1-D56 KKQAAEYREI' | 17  | 12926 |
| >PIK3R1-D56 EIDKRMNSIK | 1288  | >PIK3R1-D56 EIYKRMNSIK  | 62  | 1226  |
| >PIK3R1-D56 EIDKRMNSIK | 2333  | >PIK3R1-D56 EIYKRMNSIK  | 394 | 1939  |
| >PIK3R1-D56 EIDKRMNSI  | 212   | >PIK3R1-D56 EIYKRMNSI   | 47  | 165   |
| >PIK3R1-D56 EIDKRMNSI  | 13498 | >PIK3R1-D56 EIYKRMNSI   | 319 | 13179 |
| >PIK3R1-D56 EIDKRMNSI  | 11602 | >PIK3R1-D56 EIYKRMNSI   | 189 | 11413 |
| >PIK3R1-D56 EIDKRMNSI  | 3951  | >PIK3R1-D56 EIYKRMNSI   | 442 | 3509  |
| >PIK3R1-D56 EIDKRMNSIK | 415   | >PIK3R1-D56 EIYKRMNSIK  | 26  | 389   |
| >PIK3R1-D56 EIDKRMNSI  | 2312  | >PIK3R1-D56 EIYKRMNSI   | 81  | 2231  |
| >PIK3R1-D56 EIDKRMNSI  | 177   | >PIK3R1-D56 EIYKRMNSI   | 51  | 126   |
| >PIK3R1-D56 EIDKRMNSI  | 1473  | >PIK3R1-D56 EIYKRMNSI   | 52  | 1421  |
| >PIK3R1-D56 REIDKRMNSI | 77    | >PIK3R1-D56 REIYKRMNSI  | 33  | 44    |
| >PIK3R1-D56 REIDKRMNSI | 1408  | >PIK3R1-D56 REIYKRMNSI  | 493 | 915   |
| >PIK3R1-D56 REIDKRMNSI | 144   | >PIK3R1-D56 REIYKRMNSI  | 54  | 90    |
| >PIK3R1-D56 REIDKRMNSI | 974   | >PIK3R1-D56 REIYKRMNSI  | 322 | 652   |
| >PIK3R1-D56 REIDKRMNSI | 11    | >PIK3R1-D56 REIYKRMNSI  | 6   | 5     |
| >PIK3R1-D56 YREIDKRMNS | 638   | >PIK3R1-D56 YREIYKRMNS  | 223 | 415   |
| >PIK3R1-D56 EYREIDKR   | 2881  | >PIK3R1-D56 EYREIYKR    | 137 | 2744  |
| >PIK3R1-D56 EYREIDKR   | 25    | >PIK3R1-D56 EYREIYKR    | 9   | 16    |
| >PIK3R1-D56 EYREIDKR   | 214   | >PIK3R1-D56 EYREIYKR    | 129 | 85    |
| >PIK3R1-D56 EYREIDKR   | 85    | >PIK3R1-D56 EYREIYKR    | 26  | 59    |
| >PIK3R1-D56 AEYREIDKRM | 324   | >PIK3R1-D56 AEYREIYKRM  | 155 | 169   |
| >PIK3R1-D56 AEYREIDKRM | 1368  | >PIK3R1-D56 AEYREIYKRM  | 400 | 968   |
| >PIK3R1-D56 AEYREIDKRM | 816   | >PIK3R1-D56 AEYREIYKRM  | 383 | 433   |
| >PIK3R1-D56 AEYREIDKRM | 944   | >PIK3R1-D56 AEYREIYKRM  | 489 | 455   |
| >PIK3R1-D56 AEYREIDK   | 651   | >PIK3R1-D56 AEYREIYK    | 282 | 369   |
| >PIK3R1-D56 AEYREIDKRM | 873   | >PIK3R1-D56 AEYREIYKRM  | 346 | 527   |
| >PIK3R1-D56 AEYREIDKR  | 250   | >PIK3R1-D56 AEYREIYKR   | 251 | 1     |
| >PIK3R1-D56 AEYREIDKRM | 39    | >PIK3R1-D56 AEYREIYKRM  | 22  | 17    |
| >PIK3R1-D56 AEYREIDKR  | 2977  | >PIK3R1-D56 AEYREIYKR   | 415 | 2562  |
| >PIK3R1-D56 AAAYREIDK  | 1857  | >PIK3R1-D56 AAAYREIYK   | 90  | 1767  |
| >PIK3R1-D56 AAAYREIDK  | 4504  | >PIK3R1-D56 AAAYREIYK   | 341 | 4163  |
| >PIK3R1-D56 QAAAYREIDK | 1092  | >PIK3R1-D56 QAAAYREIYK  | 116 | 976   |
| >PIK3R1-D56 QAAAYREIDK | 1966  | >PIK3R1-D56 QAAAYREIYK  | 186 | 1780  |
| >PIK3R1-D56 QAAAYREIDK | 189   | >PIK3R1-D56 QAAAYREIYK  | 16  | 173   |
| >PIK3R1-D56 QAAAYREIDK | 17    | >PIK3R1-D56 QAAAYREIYK  | 12  | 5     |
| >PIK3R1-D56 QAAAYREID  | 26271 | >PIK3R1-D56 QAAAYREIY   | 411 | 25860 |

|                         |       |                         |     |       |
|-------------------------|-------|-------------------------|-----|-------|
| >PIK3R1-D56 QAAEYREID   | 21822 | >PIK3R1-D56 QAAEYREIY   | 105 | 21717 |
| >PIK3R1-D56 QAAEYREIDK  | 2281  | >PIK3R1-D56 QAAEYREIYKI | 372 | 1909  |
| >PIK3R1-D56 KQAAEYREID  | 501   | >PIK3R1-D56 KQAAEYREIYI | 101 | 400   |
| >PIK3R1-D56 KQAAEYREID  | 346   | >PIK3R1-D56 KQAAEYREIYI | 40  | 306   |
| >PIK3R1-D56 KQAAEYREID  | 1169  | >PIK3R1-D56 KQAAEYREIYI | 118 | 1051  |
| >PIK3R1-D56 KQAAEYREID  | 4837  | >PIK3R1-D56 KQAAEYREIYI | 179 | 4658  |
| >PIK3R1-D56 KQAAEYREID  | 15698 | >PIK3R1-D56 KQAAEYREIY  | 71  | 15627 |
| >PIK3R1-D56 KQAAEYREID  | 8750  | >PIK3R1-D56 KQAAEYREIY  | 6   | 8744  |
| >PIK3R1-D56 KQAAEYREID  | 2589  | >PIK3R1-D56 KQAAEYREIYI | 181 | 2408  |
| >PIK3R1-G37 GNNKLIKIFHF | 93    | >PIK3R1-G37 RNNKLIKIFHF | 18  | 75    |
| >PIK3R1-G37 GNNKLIKIF   | 1073  | >PIK3R1-G37 RNNKLIKIF   | 62  | 1011  |
| >PIK3R1-G37 GNNKLIKIFHF | 1183  | >PIK3R1-G37 RNNKLIKIFHF | 49  | 1134  |
| >PIK3R1-G37 GGNNKLIKIF  | 4361  | >PIK3R1-G37 GRNNKLIKIF  | 195 | 4166  |
| >PIK3R1-G37 GGNNKLIK    | 21769 | >PIK3R1-G37 GRNNKLIK    | 258 | 21511 |
| >PIK3R1-G37 GGNNKLIKI   | 21594 | >PIK3R1-G37 GRNNKLIKI   | 132 | 21462 |
| >PIK3R1-G37 GGNNKLIKIF  | 26567 | >PIK3R1-G37 GRNNKLIKIF  | 77  | 26490 |
| >PIK3R1-G37 GGNNKLIKI   | 29962 | >PIK3R1-G37 GRNNKLIKI   | 386 | 29576 |
| >PIK3R1-G37 KGGNNKLI    | 8941  | >PIK3R1-G37 KGRNNKLI    | 24  | 8917  |
| >PIK3R1-G37 KGGNNKLIK   | 1071  | >PIK3R1-G37 KGRNNKLIK   | 4   | 1067  |
| >PIK3R1-G37 KGGNNKLIKI  | 8398  | >PIK3R1-G37 KGRNNKLIKI  | 20  | 8378  |
| >PIK3R1-G37 KGGNNKLIKIF | 1479  | >PIK3R1-G37 KGRNNKLIKIF | 77  | 1402  |
| >PIK3R1-G37 KGGNNKLIKIF | 3473  | >PIK3R1-G37 KGRNNKLIKIF | 266 | 3207  |
| >PIK3R1-G37 RKGGNNKL    | 532   | >PIK3R1-G37 RKGRNNKL    | 165 | 367   |
| >PIK3R1-G37 RKGGNNKLI   | 1440  | >PIK3R1-G37 RKGRNNKLI   | 238 | 1202  |
| >PIK3R1-G37 RKGGNNKL    | 2029  | >PIK3R1-G37 RKGRNNKL    | 373 | 1656  |
| >PIK3R1-G37 LRKGGNNK    | 835   | >PIK3R1-G37 LRKGRNNK    | 409 | 426   |
| >PIK3R1-G37 LRKGGNNKLI  | 606   | >PIK3R1-G37 LRKGRNNKLI  | 371 | 235   |
| >PIK3R1-G37 LRKGGNNKL   | 1174  | >PIK3R1-G37 LRKGRNNKL   | 477 | 697   |
| >PIK3R1-G37 TLRKGGNNKI  | 107   | >PIK3R1-G37 TLRKGRNNKI  | 129 | 22    |
| >PIK3R1-G37 TLRKGGNNK   | 89    | >PIK3R1-G37 TLRKGRNNK   | 77  | 12    |
| >PIK3R1-G37 TLRKGGNNK   | 19    | >PIK3R1-G37 TLRKGRNNK   | 8   | 11    |
| >PIK3R1-G37 TLRKGGNNKI  | 477   | >PIK3R1-G37 TLRKGRNNKI  | 152 | 325   |
| >PIK3R1-G37 LTLRKGGNNK  | 172   | >PIK3R1-G37 LTLRKGRNNK  | 307 | 135   |
| >PIK3R1-G37 LTLRKGGNNK  | 159   | >PIK3R1-G37 LTLRKGRNNK  | 301 | 142   |
| >PIK3R1-G37 LTLRKGGNNK  | 43    | >PIK3R1-G37 LTLRKGRNNK  | 22  | 21    |
| >PIK3R1-G37 LTLRKGGNNK  | 46    | >PIK3R1-G37 LTLRKGRNNK  | 49  | 3     |
| >PIK3R1-G37 LTLRKGGNNK  | 118   | >PIK3R1-G37 LTLRKGRNNK  | 204 | 86    |
| >PIK3R1-G37 TLTLRKGGNN  | 238   | >PIK3R1-G37 TLTLRKGRNN  | 181 | 57    |
| >PIK3R1-G37 TLTLRKGG    | 22569 | >PIK3R1-G37 TLTLRKGR    | 489 | 22080 |
| >PIK3R1-G37 TLTLRKGG    | 36589 | >PIK3R1-G37 TLTLRKGR    | 397 | 36192 |
| >PIK3R1-G37 TLTLRKGG    | 40455 | >PIK3R1-G37 TLTLRKGR    | 314 | 40141 |
| >PIK3R1-G37 YTLTLRKGG   | 20327 | >PIK3R1-G37 YTLTLRKGR   | 127 | 20200 |
| >PIK3R1-G37 YTLTLRKGG   | 33933 | >PIK3R1-G37 YTLTLRKGR   | 170 | 33763 |



|                        |       |                        |       |       |
|------------------------|-------|------------------------|-------|-------|
| >PIK3R1-G37YTLTLRKGG   | 33009 | >PIK3R1-G37YTLTLRKGR   | 27    | 32982 |
| >PIK3R1-G37YTLTLRKGG   | 33918 | >PIK3R1-G37YTLTLRKGR   | 156   | 33762 |
| >PIK3R1-G37DYTLTLRKGG  | 25182 | >PIK3R1-G37DYTLTLRKGR  | 246   | 24936 |
| >PIK3R1-G37DYTLTLRKGG  | 32712 | >PIK3R1-G37DYTLTLRKGR  | 230   | 32482 |
| >PIK3R1-K45KSREYDRL    | 168   | >PIK3R1-K45ESREYDRL    | 2959  | 2791  |
| >PIK3R1-K45KSREYDRLY   | 18172 | >PIK3R1-K45ESREYDRLY   | 439   | 17733 |
| >PIK3R1-K45KSREYDRLY   | 10590 | >PIK3R1-K45ESREYDRLY   | 220   | 10370 |
| >PIK3R1-K45KSREYDRLY   | 1713  | >PIK3R1-K45ESREYDRLY   | 56    | 1657  |
| >PIK3R1-K45KSREYDRL    | 54    | >PIK3R1-K45ESREYDRL    | 12370 | 12316 |
| >PIK3R1-K45KSREYDRLY   | 22    | >PIK3R1-K45ESREYDRLY   | 9812  | 9790  |
| >PIK3R1-K45KSREYDRLYE  | 72    | >PIK3R1-K45ESREYDRLYE  | 10909 | 10837 |
| >PIK3R1-K45KSREYDRLYEI | 444   | >PIK3R1-K45ESREYDRLYEI | 15051 | 14607 |
| >PIK3R1-K45KSREYDRLY   | 189   | >PIK3R1-K45ESREYDRLY   | 2510  | 2321  |
| >PIK3R1-K45KSREYDRLY   | 486   | >PIK3R1-K45ESREYDRLY   | 3066  | 2580  |
| >PIK3R1-K45KSREYDRL    | 8     | >PIK3R1-K45ESREYDRL    | 188   | 180   |
| >PIK3R1-K45KSREYDRLY   | 6     | >PIK3R1-K45ESREYDRLY   | 20    | 14    |
| >PIK3R1-K45KSREYDRLY   | 62    | >PIK3R1-K45ESREYDRLY   | 3948  | 3886  |
| >PIK3R1-K45KSREYDRLY   | 49    | >PIK3R1-K45ESREYDRLY   | 586   | 537   |
| >PIK3R1-K45EKSREYDRLY  | 13693 | >PIK3R1-K45EESREYDRLY  | 168   | 13525 |
| >PIK3R1-K45EKSREYDRLY  | 16188 | >PIK3R1-K45EESREYDRLY  | 204   | 15984 |
| >PIK3R1-K45QEKSREYDRL  | 474   | >PIK3R1-K45QEESEYDRL   | 506   | 32    |
| >PIK3R1-K45FQEKSREYDR  | 517   | >PIK3R1-K45FQEESEYDR   | 171   | 346   |
| >PIK3R1-K45FQEKSREYDR  | 330   | >PIK3R1-K45FQEESEYDR   | 59    | 271   |
| >PIK3R1-K45FQEKSREY    | 173   | >PIK3R1-K45FQEESEY     | 178   | 5     |
| >PIK3R1-K45FQEKSREY    | 100   | >PIK3R1-K45FQEESEY     | 79    | 21    |
| >PIK3R1-K45FQEKSREY    | 47    | >PIK3R1-K45FQEESEY     | 60    | 13    |
| >PIK3R1-K45FQEKSREYDR  | 546   | >PIK3R1-K45FQEESEYDR   | 190   | 356   |
| >PIK3R1-K45QFQEKSREYD  | 360   | >PIK3R1-K45QFQEESEYD   | 1304  | 944   |
| >PIK3R1-K45QFQEKSREYD  | 205   | >PIK3R1-K45QFQEESEYD   | 431   | 226   |
| >PIK3R1-K45QFQEKSREY   | 412   | >PIK3R1-K45QFQEESEY    | 479   | 67    |
| >PIK3R1-K45QFQEKSREY   | 231   | >PIK3R1-K45QFQEESEY    | 297   | 66    |
| >PIK3R1-K45QFQEKSREYD  | 247   | >PIK3R1-K45QFQEESEYD   | 205   | 42    |
| >PIK3R1-K45TQFQEKS     | 508   | >PIK3R1-K45TQFQEESR    | 183   | 325   |
| >PIK3R1-K45TQFQEKSREY  | 66    | >PIK3R1-K45TQFQEESREY  | 70    | 4     |
| >PIK3R1-K45TQFQEKSREY  | 125   | >PIK3R1-K45TQFQEESREY  | 163   | 38    |
| >PIK3R1-K45TQFQEKSREY  | 19    | >PIK3R1-K45TQFQEESREY  | 15    | 4     |
| >PIK3R1-K45TQFQEKS     | 199   | >PIK3R1-K45TQFQEESR    | 341   | 142   |
| >PIK3R1-K45NTQFQEKS    | 375   | >PIK3R1-K45NTQFQEESR   | 209   | 166   |
| >PIK3R1-K45NTQFQEKS    | 135   | >PIK3R1-K45NTQFQEESR   | 24    | 111   |
| >PIK3R1-K45NTQFQEKSRE  | 266   | >PIK3R1-K45NTQFQEESRE  | 552   | 286   |
| >PIK3R1-K45EYNTQFQEKS  | 85    | >PIK3R1-K45EYNTQFQEES  | 57    | 28    |
| >PIK3R1-K45EYNTQFQEKS  | 276   | >PIK3R1-K45EYNTQFQEES  | 99    | 177   |
| >PIK3R1-K45EYNTQFQEKS  | 48    | >PIK3R1-K45EYNTQFQEES  | 71    | 23    |

|                         |      |                         |       |       |
|-------------------------|------|-------------------------|-------|-------|
| >PIK3R1-K45 HEYNTQFQEI  | 278  | >PIK3R1-K45 HEYNTQFQEI  | 85    | 193   |
| >PIK3R1-K45 HEYNTQFQEI  | 777  | >PIK3R1-K45 HEYNTQFQEI  | 350   | 427   |
| >PIK3R1-K45 HEYNTQFQEI  | 222  | >PIK3R1-K45 HEYNTQFQEI  | 316   | 94    |
| >PIK3R1-L57(LIQLRKTR    | 84   | >PIK3R1-L57(PIQLRKTR    | 2370  | 2286  |
| >PIK3R1-L57(LIQLRKTR    | 326  | >PIK3R1-L57(PIQLRKTR    | 1864  | 1538  |
| >PIK3R1-L57(DLIQLRKTR   | 34   | >PIK3R1-L57(DPIQLRKTR   | 310   | 276   |
| >PIK3R1-L57(DLIQLRKTR   | 135  | >PIK3R1-L57(DPIQLRKTR   | 777   | 642   |
| >PIK3R1-L57(KPDLIQLR    | 350  | >PIK3R1-L57(KPDPIQLR    | 334   | 16    |
| >PIK3R1-L57(KPDLIQLRKTF | 385  | >PIK3R1-L57(KPDPIQLRKTI | 277   | 108   |
| >PIK3R1-L57(IKPDLIQLR   | 360  | >PIK3R1-L57(IKPDPIQLR   | 1008  | 648   |
| >PIK3R1-L57(SIKPDLIQL   | 198  | >PIK3R1-L57(SIKPDPIQL   | 938   | 740   |
| >PIK3R1-L57(SIKPDLIQL   | 49   | >PIK3R1-L57(SIKPDPIQL   | 205   | 156   |
| >PIK3R1-L57(SIKPDLIQLRK | 213  | >PIK3R1-L57(SIKPDPIQLRK | 193   | 20    |
| >PIK3R1-L57(SIKPDLIQLRK | 57   | >PIK3R1-L57(SIKPDPIQLRK | 62    | 5     |
| >PIK3R1-L57(SIKPDLIQLRK | 16   | >PIK3R1-L57(SIKPDPIQLRK | 14    | 2     |
| >PIK3R1-L57(SIKPDLIQLR  | 263  | >PIK3R1-L57(SIKPDPIQLR  | 1080  | 817   |
| >PIK3R1-L57(SIKPDLIQLR  | 330  | >PIK3R1-L57(SIKPDPIQLR  | 286   | 44    |
| >PIK3R1-L57(SIKPDLIQLR  | 999  | >PIK3R1-L57(SIKPDPIQLR  | 242   | 757   |
| >PIK3R1-L57(SIKPDLIQLR  | 411  | >PIK3R1-L57(SIKPDPIQLR  | 432   | 21    |
| >PIK3R1-L57(NSIKPDLIQL  | 450  | >PIK3R1-L57(NSIKPDPIQL  | 1173  | 723   |
| >PIK3R1-L57(NSIKPDLIQLR | 463  | >PIK3R1-L57(NSIKPDPIQLF | 600   | 137   |
| >PIK3R1-L57(NSIKPDLIQLR | 33   | >PIK3R1-L57(NSIKPDPIQLF | 48    | 15    |
| >PIK3R1-L57(NSIKPDLI    | 231  | >PIK3R1-L57(NSIKPDPI    | 96    | 135   |
| >PIK3R1-L57(NSIKPDLIQL  | 400  | >PIK3R1-L57(NSIKPDPIQL  | 601   | 201   |
| >PIK3R1-L57(NSIKPDLI    | 188  | >PIK3R1-L57(NSIKPDPI    | 276   | 88    |
| >PIK3R1-L57(RMNSIKPDL   | 348  | >PIK3R1-L57(RMNSIKPDP   | 20399 | 20051 |
| >PIK3R1-L57(RMNSIKPDLI  | 139  | >PIK3R1-L57(RMNSIKPDPI  | 130   | 9     |
| >PIK3R1-L57(RMNSIKPDL   | 493  | >PIK3R1-L57(RMNSIKPDP   | 17925 | 17432 |
| >PIK3R1-L57(RMNSIKPDLI  | 155  | >PIK3R1-L57(RMNSIKPDPI  | 121   | 34    |
| >PIK3R1-L57(RMNSIKPDL   | 84   | >PIK3R1-L57(RMNSIKPDP   | 16361 | 16277 |
| >PIK3R1-L57(RMNSIKPDLI  | 26   | >PIK3R1-L57(RMNSIKPDPI  | 18    | 8     |
| >PIK3R1-L57(RMNSIKPDLI  | 353  | >PIK3R1-L57(RMNSIKPDPI  | 80    | 273   |
| >PIK3R1-L57(RMNSIKPDL   | 66   | >PIK3R1-L57(RMNSIKPDP   | 18055 | 17989 |
| >PIK3R1-L57(RMNSIKPDLI  | 156  | >PIK3R1-L57(RMNSIKPDPI  | 97    | 59    |
| >PIK3R1-L57(RMNSIKPDL   | 32   | >PIK3R1-L57(RMNSIKPDP   | 18176 | 18144 |
| >PIK3R1-L57(RMNSIKPDLI  | 356  | >PIK3R1-L57(RMNSIKPDPI  | 519   | 163   |
| >PIK3R1-L57(RMNSIKPDLI  | 1156 | >PIK3R1-L57(RMNSIKPDPI  | 415   | 741   |
| >PIK3R1-L57(RMNSIKPDL   | 244  | >PIK3R1-L57(RMNSIKPDP   | 9796  | 9552  |
| >PIK3R1-L57(RMNSIKPDLI  | 75   | >PIK3R1-L57(RMNSIKPDPI  | 21    | 54    |
| >PIK3R1-L57(RMNSIKPDL   | 195  | >PIK3R1-L57(RMNSIKPDP   | 4600  | 4405  |
| >PIK3R1-L57(RMNSIKPDLI  | 1055 | >PIK3R1-L57(RMNSIKPDPI  | 276   | 779   |
| >PIK3R1-L57(RMNSIKPDL   | 123  | >PIK3R1-L57(RMNSIKPDP   | 10362 | 10239 |
| >PIK3R1-L57(RMNSIKPDLI  | 563  | >PIK3R1-L57(RMNSIKPDPI  | 369   | 194   |

|                         |      |                         |      |      |
|-------------------------|------|-------------------------|------|------|
| >PIK3R1-L57(KRMNSIKPDL  | 59   | >PIK3R1-L57(KRMNSIKPDF  | 1421 | 1362 |
| >PIK3R1-L57(KRMNSIKPDL  | 227  | >PIK3R1-L57(KRMNSIKPDF  | 64   | 163  |
| >PIK3R1-L57(KRMNSIKPDL  | 17   | >PIK3R1-L57(KRMNSIKPDF  | 1947 | 1930 |
| >PIK3R1-L57(KRMNSIKPDL  | 36   | >PIK3R1-L57(KRMNSIKPDF  | 33   | 3    |
| >PIK3R1-L57(KRMNSIKPDL  | 43   | >PIK3R1-L57(KRMNSIKPDF  | 1866 | 1823 |
| >PIK3R1-L57(KRMNSIKPDL  | 98   | >PIK3R1-L57(KRMNSIKPDF  | 223  | 125  |
| >PIK3R1-L57(KRMNSIKPDL  | 49   | >PIK3R1-L57(KRMNSIKPDF  | 3591 | 3542 |
| >PIK3R1-L57(KRMNSIKPDL  | 117  | >PIK3R1-L57(KRMNSIKPDF  | 397  | 280  |
| >PIK3R1-N56 NSIKPDLIQL  | 450  | >PIK3R1-N56 DSIKPDLIQL  | 80   | 370  |
| >PIK3R1-N56 NSIKPDLIQLR | 463  | >PIK3R1-N56 DSIKPDLIQLR | 91   | 372  |
| >PIK3R1-N56 NSIKPDLIQLR | 33   | >PIK3R1-N56 DSIKPDLIQLR | 27   | 6    |
| >PIK3R1-N56 NSIKPDLI    | 231  | >PIK3R1-N56 DSIKPDLI    | 552  | 321  |
| >PIK3R1-N56 NSIKPDLIQL  | 400  | >PIK3R1-N56 DSIKPDLIQL  | 1087 | 687  |
| >PIK3R1-N56 NSIKPDLI    | 188  | >PIK3R1-N56 DSIKPDLI    | 1111 | 923  |
| >PIK3R1-N56 MNSIKPDLI   | 1608 | >PIK3R1-N56 MDSIKPDLI   | 479  | 1129 |
| >PIK3R1-N56 MNSIKPDLI   | 8421 | >PIK3R1-N56 MDSIKPDLI   | 447  | 7974 |
| >PIK3R1-N56 MNSIKPDLI   | 2225 | >PIK3R1-N56 MDSIKPDLI   | 36   | 2189 |
| >PIK3R1-N56 RMNSIKPDL   | 348  | >PIK3R1-N56 RMDSIKPDL   | 1266 | 918  |
| >PIK3R1-N56 RMNSIKPDLI  | 139  | >PIK3R1-N56 RMDSIKPDLI  | 148  | 9    |
| >PIK3R1-N56 RMNSIKPDL   | 493  | >PIK3R1-N56 RMDSIKPDL   | 7047 | 6554 |
| >PIK3R1-N56 RMNSIKPDLI  | 155  | >PIK3R1-N56 RMDSIKPDLI  | 305  | 150  |
| >PIK3R1-N56 RMNSIKPDL   | 84   | >PIK3R1-N56 RMDSIKPDL   | 45   | 39   |
| >PIK3R1-N56 RMNSIKPDLI  | 26   | >PIK3R1-N56 RMDSIKPDLI  | 16   | 10   |
| >PIK3R1-N56 RMNSIKPDLI  | 353  | >PIK3R1-N56 RMDSIKPDLI  | 147  | 206  |
| >PIK3R1-N56 RMNSIKPDL   | 66   | >PIK3R1-N56 RMDSIKPDL   | 27   | 39   |
| >PIK3R1-N56 RMNSIKPDLI  | 156  | >PIK3R1-N56 RMDSIKPDLI  | 49   | 107  |
| >PIK3R1-N56 RMNSIKPDL   | 32   | >PIK3R1-N56 RMDSIKPDL   | 49   | 17   |
| >PIK3R1-N56 RMNSIKPDLI  | 356  | >PIK3R1-N56 RMDSIKPDLI  | 447  | 91   |
| >PIK3R1-N56 RMNSIKPDL   | 244  | >PIK3R1-N56 RMDSIKPDL   | 1249 | 1005 |
| >PIK3R1-N56 RMNSIKPDLI  | 75   | >PIK3R1-N56 RMDSIKPDLI  | 315  | 240  |
| >PIK3R1-N56 RMNSIKPDL   | 195  | >PIK3R1-N56 RMDSIKPDL   | 2440 | 2245 |
| >PIK3R1-N56 RMNSIKPDL   | 123  | >PIK3R1-N56 RMDSIKPDL   | 494  | 371  |
| >PIK3R1-N56 KRMNSIKPDL  | 59   | >PIK3R1-N56 KRMDSIKPDL  | 110  | 51   |
| >PIK3R1-N56 KRMNSIKPDL  | 227  | >PIK3R1-N56 KRMDSIKPDL  | 467  | 240  |
| >PIK3R1-N56 KRMNSIKP    | 322  | >PIK3R1-N56 KRMDSIKP    | 700  | 378  |
| >PIK3R1-N56 KRMNSIKPD   | 458  | >PIK3R1-N56 KRMDSIKPD   | 1085 | 627  |
| >PIK3R1-N56 KRMNSIKPDL  | 17   | >PIK3R1-N56 KRMDSIKPDL  | 19   | 2    |
| >PIK3R1-N56 KRMNSIKPDL  | 36   | >PIK3R1-N56 KRMDSIKPDL  | 63   | 27   |
| >PIK3R1-N56 KRMNSIKPDL  | 43   | >PIK3R1-N56 KRMDSIKPDL  | 83   | 40   |
| >PIK3R1-N56 KRMNSIKPDL  | 98   | >PIK3R1-N56 KRMDSIKPDL  | 144  | 46   |
| >PIK3R1-N56 KRMNSIKPDL  | 49   | >PIK3R1-N56 KRMDSIKPDL  | 67   | 18   |
| >PIK3R1-N56 KRMNSIKPDL  | 117  | >PIK3R1-N56 KRMDSIKPDL  | 164  | 47   |
| >PIK3R1-N56 EIDKRMNSI   | 212  | >PIK3R1-N56 EIDKRMDSI   | 1026 | 814  |

|                         |       |                         |      |       |
|-------------------------|-------|-------------------------|------|-------|
| >PIK3R1-N56 EIDKRMNSIK  | 415   | >PIK3R1-N56 EIDKRMDSIK  | 476  | 61    |
| >PIK3R1-N56 EIDKRMNSI   | 177   | >PIK3R1-N56 EIDKRMDSI   | 390  | 213   |
| >PIK3R1-N56 REIDKRMNSI  | 77    | >PIK3R1-N56 REIDKRMDSI  | 78   | 1     |
| >PIK3R1-N56 REIDKRMNSI  | 144   | >PIK3R1-N56 REIDKRMDSI  | 120  | 24    |
| >PIK3R1-N56 REIDKRMNSI  | 11    | >PIK3R1-N56 REIDKRMDSI  | 15   | 4     |
| >PIK3R1-N56 NSIKPDLIQLR | 4194  | >PIK3R1-N56 KSIKPDLIQLR | 350  | 3844  |
| >PIK3R1-N56 NSIKPDLIQL  | 450   | >PIK3R1-N56 KSIKPDLIQL  | 1146 | 696   |
| >PIK3R1-N56 NSIKPDLIQLR | 841   | >PIK3R1-N56 KSIKPDLIQLR | 36   | 805   |
| >PIK3R1-N56 NSIKPDLI    | 15489 | >PIK3R1-N56 KSIKPDLI    | 358  | 15131 |
| >PIK3R1-N56 NSIKPDLIQLR | 463   | >PIK3R1-N56 KSIKPDLIQLR | 7897 | 7434  |
| >PIK3R1-N56 NSIKPDLIQLR | 33    | >PIK3R1-N56 KSIKPDLIQLR | 553  | 520   |
| >PIK3R1-N56 NSIKPDLI    | 231   | >PIK3R1-N56 KSIKPDLI    | 9161 | 8930  |
| >PIK3R1-N56 NSIKPDLI    | 9048  | >PIK3R1-N56 KSIKPDLI    | 153  | 8895  |
| >PIK3R1-N56 NSIKPDLIQL  | 400   | >PIK3R1-N56 KSIKPDLIQL  | 7    | 393   |
| >PIK3R1-N56 NSIKPDLI    | 9226  | >PIK3R1-N56 KSIKPDLI    | 39   | 9187  |
| >PIK3R1-N56 NSIKPDLIQL  | 9003  | >PIK3R1-N56 KSIKPDLIQL  | 40   | 8963  |
| >PIK3R1-N56 NSIKPDLIQLR | 991   | >PIK3R1-N56 KSIKPDLIQLR | 78   | 913   |
| >PIK3R1-N56 NSIKPDLI    | 188   | >PIK3R1-N56 KSIKPDLI    | 26   | 162   |
| >PIK3R1-N56 MNSIKPDL    | 9266  | >PIK3R1-N56 MNSIKPDL    | 424  | 8842  |
| >PIK3R1-N56 MNSIKPDLIQL | 9425  | >PIK3R1-N56 MNSIKPDLIQL | 489  | 8936  |
| >PIK3R1-N56 RMNSIKPDL   | 348   | >PIK3R1-N56 RMNSIKPDL   | 2864 | 2516  |
| >PIK3R1-N56 RMNSIKPDLI  | 139   | >PIK3R1-N56 RMNSIKPDLI  | 203  | 64    |
| >PIK3R1-N56 RMNSIKPDL   | 493   | >PIK3R1-N56 RMNSIKPDL   | 1025 | 532   |
| >PIK3R1-N56 RMNSIKPDLI  | 155   | >PIK3R1-N56 RMNSIKPDLI  | 134  | 21    |
| >PIK3R1-N56 RMNSIKPDL   | 84    | >PIK3R1-N56 RMNSIKPDL   | 2062 | 1978  |
| >PIK3R1-N56 RMNSIKPDLI  | 26    | >PIK3R1-N56 RMNSIKPDLI  | 583  | 557   |
| >PIK3R1-N56 RMNSIKPDLI  | 353   | >PIK3R1-N56 RMNSIKPDLI  | 3291 | 2938  |
| >PIK3R1-N56 RMNSIKPDL   | 66    | >PIK3R1-N56 RMNSIKPDL   | 3450 | 3384  |
| >PIK3R1-N56 RMNSIKPDLI  | 156   | >PIK3R1-N56 RMNSIKPDLI  | 5897 | 5741  |
| >PIK3R1-N56 RMNSIKPDL   | 32    | >PIK3R1-N56 RMNSIKPDL   | 104  | 72    |
| >PIK3R1-N56 RMNSIKPDLI  | 356   | >PIK3R1-N56 RMNSIKPDLI  | 1200 | 844   |
| >PIK3R1-N56 RMNSIKPDL   | 4094  | >PIK3R1-N56 RMNSIKPDL   | 220  | 3874  |
| >PIK3R1-N56 RMNSIKPDLI  | 2314  | >PIK3R1-N56 RMNSIKPDLI  | 117  | 2197  |
| >PIK3R1-N56 RMNSIKPDL   | 244   | >PIK3R1-N56 RMNSIKPDL   | 1863 | 1619  |
| >PIK3R1-N56 RMNSIKPDLI  | 75    | >PIK3R1-N56 RMNSIKPDLI  | 520  | 445   |
| >PIK3R1-N56 RMNSIKPDL   | 195   | >PIK3R1-N56 RMNSIKPDL   | 173  | 22    |
| >PIK3R1-N56 RMNSIKPDL   | 123   | >PIK3R1-N56 RMNSIKPDL   | 185  | 62    |
| >PIK3R1-N56 KRMNSIKPDL  | 59    | >PIK3R1-N56 KRMNSIKPDL  | 72   | 13    |
| >PIK3R1-N56 KRMNSIKPDL  | 227   | >PIK3R1-N56 KRMNSIKPDL  | 293  | 66    |
| >PIK3R1-N56 KRMNSIKP    | 322   | >PIK3R1-N56 KRMNSIKP    | 364  | 42    |
| >PIK3R1-N56 KRMNSIKPD   | 458   | >PIK3R1-N56 KRMNSIKPD   | 482  | 24    |
| >PIK3R1-N56 KRMNSIKPDL  | 17    | >PIK3R1-N56 KRMNSIKPDL  | 19   | 2     |
| >PIK3R1-N56 KRMNSIKPDL  | 36    | >PIK3R1-N56 KRMNSIKPDL  | 37   | 1     |

|                         |       |                        |      |       |
|-------------------------|-------|------------------------|------|-------|
| >PIK3R1-N56 KRMNSIKP    | 1461  | >PIK3R1-N56 KRMKSIKP   | 473  | 988   |
| >PIK3R1-N56 KRMNSIKPDL  | 43    | >PIK3R1-N56 KRMKSIKPDL | 44   | 1     |
| >PIK3R1-N56 KRMNSIKPDL  | 98    | >PIK3R1-N56 KRMKSIKPDL | 72   | 26    |
| >PIK3R1-N56 KRMNSIKPDL  | 49    | >PIK3R1-N56 KRMKSIKPDL | 56   | 7     |
| >PIK3R1-N56 KRMNSIKPDL  | 117   | >PIK3R1-N56 KRMKSIKPDL | 108  | 9     |
| >PIK3R1-N56 EIDKRMNSI   | 212   | >PIK3R1-N56 EIDKRMKSI  | 1609 | 1397  |
| >PIK3R1-N56 EIDKRMNSIK  | 415   | >PIK3R1-N56 EIDKRMKSIK | 871  | 456   |
| >PIK3R1-N56 EIDKRMNSI   | 177   | >PIK3R1-N56 EIDKRMKSI  | 1463 | 1286  |
| >PIK3R1-N56 REIDKRMNSI  | 77    | >PIK3R1-N56 REIDKRMKSI | 48   | 29    |
| >PIK3R1-N56 REIDKRMNSI  | 144   | >PIK3R1-N56 REIDKRMKSI | 144  | 0     |
| >PIK3R1-N56 REIDKRMNSI  | 11    | >PIK3R1-N56 REIDKRMKSI | 11   | 0     |
| >PIK3R1-N56 YREIDKRMNSI | 638   | >PIK3R1-N56 YREIDKRMKS | 331  | 307   |
| >PIM1-N178:NRGELKLIDF   | 1167  | >PIM1-N178:SRGELKLIDF  | 293  | 874   |
| >PIM1-N178:LNRGELKLI    | 5708  | >PIM1-N178:LSRGELKLI   | 237  | 5471  |
| >PIM1-N178:LNRGELKLIDF  | 1232  | >PIM1-N178:LSRGELKLIDF | 215  | 1017  |
| >PIM1-N178:LNRGELKL     | 11263 | >PIM1-N178:LSRGELKL    | 8    | 11255 |
| >PIM1-N178:LNRGELKLI    | 19541 | >PIM1-N178:LSRGELKLI   | 90   | 19451 |
| >PIM1-N178:LNRGELKLIDF  | 9239  | >PIM1-N178:LSRGELKLIDF | 8    | 9231  |
| >PIM1-N178:LNRGELKLI    | 4410  | >PIM1-N178:LSRGELKLI   | 276  | 4134  |
| >PIM1-N178:LNRGELKLIDF  | 3373  | >PIM1-N178:LSRGELKLIDF | 257  | 3116  |
| >PIM1-N178:LNRGELKLI    | 1871  | >PIM1-N178:LSRGELKLI   | 96   | 1775  |
| >PIM1-N178:DLNRGELKL    | 275   | >PIM1-N178:DLSRGELKL   | 232  | 43    |
| >PIM1-N178:DLNRGELK     | 727   | >PIM1-N178:DLSRGELK    | 413  | 314   |
| >PIM1-N178:IDLNRGELKLI  | 63    | >PIM1-N178:IDLSRGELKLI | 75   | 12    |
| >PIM1-N178:IDLNRGELKLI  | 255   | >PIM1-N178:IDLSRGELKLI | 231  | 24    |
| >PIM1-N178:IDLNRGELKLI  | 68    | >PIM1-N178:IDLSRGELKLI | 54   | 14    |
| >PIM1-N178:LIDLNRGELK   | 431   | >PIM1-N178:LIDLNRGELK  | 481  | 50    |
| >PIM1-N178:LIDLNRGELK   | 201   | >PIM1-N178:LIDLNRGELK  | 192  | 9     |
| >PIM1-N178:ILIDLNRGEL   | 200   | >PIM1-N178:ILIDLNRGEL  | 180  | 20    |
| >PIM1-N178:ILIDLNRG     | 472   | >PIM1-N178:ILIDLNRG    | 625  | 153   |
| >PIM1-N178:ILIDLNRGEL   | 52    | >PIM1-N178:ILIDLNRGEL  | 43   | 9     |
| >PIM1-N178:ILIDLNRGEL   | 62    | >PIM1-N178:ILIDLNRGEL  | 44   | 18    |
| >PIM1-N178:ILIDLNRGEL   | 741   | >PIM1-N178:ILIDLNRGEL  | 474  | 267   |
| >PIM1-N178:ILIDLNRGEL   | 44    | >PIM1-N178:ILIDLNRGEL  | 45   | 1     |
| >PIM1-N178:ILIDLNRGEL   | 155   | >PIM1-N178:ILIDLNRGEL  | 149  | 6     |
| >PIM1-N178:ILIDLNRGEL   | 728   | >PIM1-N178:ILIDLNRGEL  | 395  | 333   |
| >PIM1-N178:ILIDLNRGEL   | 8     | >PIM1-N178:ILIDLNRGEL  | 7    | 1     |
| >PIM1-N178:ILIDLNRGELK  | 349   | >PIM1-N178:ILIDLNRGELK | 209  | 140   |
| >PIM1-N178:ILIDLNRGELK  | 131   | >PIM1-N178:ILIDLNRGELK | 101  | 30    |
| >PIM1-N178:ILIDLNRGELK  | 353   | >PIM1-N178:ILIDLNRGELK | 330  | 23    |
| >PIM1-N178:NILIDLNR     | 450   | >PIM1-N178:NILIDLNR    | 371  | 79    |
| >PIM1-N178:NILIDLNR     | 203   | >PIM1-N178:NILIDLNR    | 206  | 3     |
| >PIM1-N178:NILIDLNR     | 134   | >PIM1-N178:NILIDLNR    | 248  | 114   |

|                        |      |                        |       |       |
|------------------------|------|------------------------|-------|-------|
| >PIM1-N178!ENILIDLNR   | 36   | >PIM1-N178!ENILIDLSR   | 34    | 2     |
| >PIM1-N178!ENILIDLNR   | 274  | >PIM1-N178!ENILIDLSR   | 579   | 305   |
| >PIM1-N178!KDENILIDLNF | 474  | >PIM1-N178!KDENILIDLSR | 817   | 343   |
| >PIM1-Y53H-YSGIRVSDNL  | 112  | >PIM1-Y53H-HSGIRVSDNL  | 263   | 151   |
| >PIM1-Y53H-VYSGIRVSDN  | 114  | >PIM1-Y53H-VHSGIRVSDN  | 11000 | 10886 |
| >PIM1-Y53H-VYSGIRVSDN  | 13   | >PIM1-Y53H-VHSGIRVSDN  | 13745 | 13732 |
| >PIM1-Y53H-LLGSGGFGSV  | 41   | >PIM1-Y53H-LLGSGGFGSV  | 6222  | 6181  |
| >PIM1-Y53H-LLGSGGFGSV  | 39   | >PIM1-Y53H-LLGSGGFGSV  | 7932  | 7893  |
| >PIM1-Y53H-LLGSGGFGSV  | 104  | >PIM1-Y53H-LLGSGGFGSV  | 16423 | 16319 |
| >PIM1-Y53H-LLGSGGFGSV  | 38   | >PIM1-Y53H-LLGSGGFGSV  | 594   | 556   |
| >PIM1-Y53H-LLGSGGFGSV  | 29   | >PIM1-Y53H-LLGSGGFGSV  | 1147  | 1118  |
| >PIM1-Y53H-LLGSGGFGSV  | 227  | >PIM1-Y53H-LLGSGGFGSV  | 5005  | 4778  |
| >PIM1-Y53H-LLGSGGFGSV  | 58   | >PIM1-Y53H-LLGSGGFGSV  | 1043  | 985   |
| >PIM1-Y53H-SVYSGIRV    | 103  | >PIM1-Y53H-SVHSGIRV    | 1311  | 1208  |
| >PIM1-Y53H-SVYSGIRV    | 486  | >PIM1-Y53H-SVHSGIRV    | 2970  | 2484  |
| >PIM1-Y53H-SVYSGIRV    | 24   | >PIM1-Y53H-SVHSGIRV    | 110   | 86    |
| >PIM1-Y53H-SVYSGIRV    | 43   | >PIM1-Y53H-SVHSGIRV    | 397   | 354   |
| >PIM1-Y53H-SVYSGIRV    | 6    | >PIM1-Y53H-SVHSGIRV    | 30    | 24    |
| >PIM1-Y53H-SVYSGIRV    | 339  | >PIM1-Y53H-SVHSGIRV    | 2524  | 2185  |
| >PIM1-Y53H-SVYSGIRV    | 13   | >PIM1-Y53H-SVHSGIRV    | 179   | 166   |
| >PIM1-Y53H-SVYSGIRV    | 5    | >PIM1-Y53H-SVHSGIRV    | 11    | 6     |
| >PIM1-Y53H-SVYSGIRV    | 2711 | >PIM1-Y53H-SVHSGIRV    | 222   | 2489  |
| >PIM1-Y53H-SVYSGIRV    | 55   | >PIM1-Y53H-SVHSGIRV    | 110   | 55    |
| >PIM1-Y53H-SVYSGIRV    | 31   | >PIM1-Y53H-SVHSGIRV    | 873   | 842   |
| >PIM1-Y53H-GSVYSGIR    | 388  | >PIM1-Y53H-GSVHSGIR    | 1150  | 762   |
| >PIM1-Y53H-GSVYSGIRV   | 158  | >PIM1-Y53H-GSVHSGIRV   | 92    | 66    |
| >PIM1-Y53H-GSVYSGIRV   | 411  | >PIM1-Y53H-GSVHSGIRV   | 721   | 310   |
| >PIM1-Y53H-GSVYSGIR    | 481  | >PIM1-Y53H-GSVHSGIR    | 339   | 142   |
| >PIM1-Y53H-FGSVYSGI    | 486  | >PIM1-Y53H-FGSVHSGI    | 1482  | 996   |
| >PIM1-Y53H-GFGSVYSGI   | 88   | >PIM1-Y53H-GFGSVHSGI   | 628   | 540   |
| >PIM1-Y53H-SGGFSGSVY   | 103  | >PIM1-Y53H-SGGFSGSVH   | 12301 | 12198 |
| >PIM1-Y53H-SGGFSGSVY   | 218  | >PIM1-Y53H-SGGFSGSVH   | 11268 | 11050 |
| >PIM1-Y53H-GSGGFGSVY   | 326  | >PIM1-Y53H-GSGGFGSVH   | 15492 | 15166 |
| >PIM1-Y53H-GSGGFGSVY   | 103  | >PIM1-Y53H-GSGGFGSVH   | 11400 | 11297 |
| >PIM1-Y53H-GSGGFGSVY   | 94   | >PIM1-Y53H-GSGGFGSVH   | 7491  | 7397  |
| >PIM1-Y53H-GSGGFGSVY   | 61   | >PIM1-Y53H-GSGGFGSVH   | 13273 | 13212 |
| >PIM1-Y53H-GSGGFGSVY   | 3    | >PIM1-Y53H-GSGGFGSVH   | 28    | 25    |
| >PIM1-Y53H-LGSGGFGSVY  | 412  | >PIM1-Y53H-LGSGGFGSVH  | 24756 | 24344 |
| >PIM1-Y53H-LGSGGFGSVY  | 289  | >PIM1-Y53H-LGSGGFGSVH  | 24993 | 24704 |
| >PIM1-Y53H-LGSGGFGSVY  | 84   | >PIM1-Y53H-LGSGGFGSVH  | 4816  | 4732  |
| >PIM1-Y53H-LGSGGFGSVY  | 245  | >PIM1-Y53H-LGSGGFGSVH  | 10790 | 10545 |
| >PIM1-Y53H-LGSGGFGSVY  | 112  | >PIM1-Y53H-LGSGGFGSVH  | 15986 | 15874 |
| >PLAG1-M36MELQGGVP     | 59   | >PLAG1-M36IELQGGVP     | 118   | 59    |

|                       |      |                       |       |       |
|-----------------------|------|-----------------------|-------|-------|
| >PLAG1-M36MELQGGVPS   | 162  | >PLAG1-M36IELQGGVPS   | 304   | 142   |
| >PLAG1-M36MELQGGVPS   | 178  | >PLAG1-M36IELQGGVPS   | 495   | 317   |
| >PLAG1-M36MELQGGVPS   | 401  | >PLAG1-M36IELQGGVPSS! | 1125  | 724   |
| >PLAG1-M36MELQGGVPS   | 47   | >PLAG1-M36IELQGGVPS   | 1595  | 1548  |
| >PLAG1-M36MELQGGVPS   | 221  | >PLAG1-M36IELQGGVPSS! | 5462  | 5241  |
| >PLAG1-M36LMELQGGV    | 397  | >PLAG1-M36LIELQGGV    | 2947  | 2550  |
| >PLAG1-M36LMELQGGV    | 264  | >PLAG1-M36LIELQGGV    | 1861  | 1597  |
| >PLAG1-M36LMELQGGV    | 64   | >PLAG1-M36LIELQGGV    | 2589  | 2525  |
| >PLAG1-M36LMELQGGV    | 90   | >PLAG1-M36LIELQGGV    | 6262  | 6172  |
| >PLAG1-M36LMELQGGV    | 420  | >PLAG1-M36LIELQGGV    | 8054  | 7634  |
| >PLAG1-M36LMELQGGV    | 10   | >PLAG1-M36LIELQGGV    | 148   | 138   |
| >PLAG1-M36PLKGEIESYLI | 1475 | >PLAG1-M36PLKGEIESYLI | 396   | 1079  |
| >PLAG1-M36PLKGEIESYLI | 2198 | >PLAG1-M36PLKGEIESYLI | 358   | 1840  |
| >PLAG1-M36YLMELQGGV   | 8    | >PLAG1-M36YLIELQGGV   | 12    | 4     |
| >PLAG1-M36YLMELQGGV   | 68   | >PLAG1-M36YLIELQGGVP! | 232   | 164   |
| >PLAG1-M36YLMELQGG    | 32   | >PLAG1-M36YLIELQGG    | 123   | 91    |
| >PLAG1-M36YLMELQGGV   | 3    | >PLAG1-M36YLIELQGGV   | 5     | 2     |
| >PLAG1-M36YLMELQGGV   | 35   | >PLAG1-M36YLIELQGGVP! | 135   | 100   |
| >PLAG1-M36YLMELQGG    | 97   | >PLAG1-M36YLIELQGG    | 226   | 129   |
| >PLAG1-M36YLMELQGGV   | 2    | >PLAG1-M36YLIELQGGV   | 2     | 0     |
| >PLAG1-M36YLMELQGGV   | 30   | >PLAG1-M36YLIELQGGVP! | 69    | 39    |
| >PLAG1-M36YLMELQGG    | 193  | >PLAG1-M36YLIELQGG    | 368   | 175   |
| >PLAG1-M36YLMELQGGV   | 4    | >PLAG1-M36YLIELQGGV   | 5     | 1     |
| >PLAG1-M36YLMELQGGV   | 43   | >PLAG1-M36YLIELQGGVP! | 81    | 38    |
| >PLAG1-M36YLMELQGG    | 37   | >PLAG1-M36YLIELQGG    | 74    | 37    |
| >PLAG1-M36YLMELQGGV   | 1    | >PLAG1-M36YLIELQGGV   | 1     | 0     |
| >PLAG1-M36YLMELQGGV   | 22   | >PLAG1-M36YLIELQGGVP! | 41    | 19    |
| >PLAG1-M36YLMELQGG    | 95   | >PLAG1-M36YLIELQGG    | 224   | 129   |
| >PLAG1-M36YLMELQGGV   | 2    | >PLAG1-M36YLIELQGGV   | 3     | 1     |
| >PLAG1-M36YLMELQGGV   | 69   | >PLAG1-M36YLIELQGGVP! | 158   | 89    |
| >PLAG1-M36YLMELQGGV   | 4    | >PLAG1-M36YLIELQGGV   | 5     | 1     |
| >PLAG1-M36YLMELQGGV   | 242  | >PLAG1-M36YLIELQGGVP! | 488   | 246   |
| >PLAG1-M36YLMELQGGV   | 2    | >PLAG1-M36YLIELQGGV   | 4     | 2     |
| >PLAG1-M36YLMELQGGV   | 462  | >PLAG1-M36YLIELQGGVP! | 10722 | 10260 |
| >PLAG1-M36YLMELQGG    | 100  | >PLAG1-M36YLIELQGG    | 188   | 88    |
| >PLAG1-M36YLMELQGGV   | 1    | >PLAG1-M36YLIELQGGV   | 2     | 1     |
| >PLAG1-M36YLMELQGGV   | 44   | >PLAG1-M36YLIELQGGVP! | 72    | 28    |
| >PLAG1-M36YLMELQGGV   | 53   | >PLAG1-M36YLIELQGGV   | 100   | 47    |
| >PLAG1-M36YLMELQGGV   | 9    | >PLAG1-M36YLIELQGGV   | 16    | 7     |
| >PLAG1-M36SYLMELQGG\  | 190  | >PLAG1-M36SYLIELQGGV  | 314   | 124   |
| >PLAG1-M36SYLMELQGG\  | 488  | >PLAG1-M36SYLIELQGGV  | 437   | 51    |
| >PLAG1-M36SYLMELQGG\  | 185  | >PLAG1-M36SYLIELQGGV  | 151   | 34    |
| >PLAG1-M36ESYLMELQ    | 304  | >PLAG1-M36ESYLIELQ    | 151   | 153   |

|                        |       |                        |      |       |
|------------------------|-------|------------------------|------|-------|
| >PLAG1-M36 ESYLMELQGC  | 72    | >PLAG1-M36 ESYLIELQGG\ | 19   | 53    |
| >PLAG1-M36 ESYLMELQGC  | 104   | >PLAG1-M36 ESYLIELQGG\ | 50   | 54    |
| >PLAG1-M36 IESYLMEL    | 158   | >PLAG1-M36 IESYLIEL    | 129  | 29    |
| >PLAG1-M36 IESYLMEL    | 13    | >PLAG1-M36 IESYLIEL    | 11   | 2     |
| >PLAG1-M36 IESYLMEL    | 160   | >PLAG1-M36 IESYLIEL    | 165  | 5     |
| >PLAG1-M36 IESYLMELQG  | 337   | >PLAG1-M36 IESYLIELQG  | 406  | 69    |
| >PLAG1-M36 IESYLMELQG  | 571   | >PLAG1-M36 IESYLIELQG  | 479  | 92    |
| >PLAG1-M36 EIESYLMEL   | 140   | >PLAG1-M36 EIESYLIEL   | 181  | 41    |
| >PLAG1-M36 GEIESYLM    | 326   | >PLAG1-M36 GEIESYLI    | 70   | 256   |
| >PLAG1-M36 GEIESYLM    | 28    | >PLAG1-M36 GEIESYLI    | 20   | 8     |
| >PLAG1-M36 GEIESYLMEL  | 224   | >PLAG1-M36 GEIESYLIEL  | 395  | 171   |
| >PLAG1-M36 GEIESYLM    | 69    | >PLAG1-M36 GEIESYLI    | 57   | 12    |
| >PLAG1-M36 GEIESYLMEL  | 77    | >PLAG1-M36 GEIESYLIEL  | 127  | 50    |
| >PLAG1-M36 GEIESYLM    | 434   | >PLAG1-M36 GEIESYLI    | 502  | 68    |
| >PLAG1-M36 GEIESYLM    | 108   | >PLAG1-M36 GEIESYLI    | 168  | 60    |
| >PLAG1-M36 GEIESYLMEL  | 133   | >PLAG1-M36 GEIESYLIEL  | 258  | 125   |
| >PLAG1-M36 GEIESYLMELC | 477   | >PLAG1-M36 GEIESYLIELQ | 349  | 128   |
| >PLAG1-M36 GEIESYLM    | 1287  | >PLAG1-M36 GEIESYLI    | 382  | 905   |
| >PLAG1-M36 GEIESYLM    | 17    | >PLAG1-M36 GEIESYLI    | 6    | 11    |
| >PLAG1-M36 GEIESYLMEL  | 11    | >PLAG1-M36 GEIESYLIEL  | 23   | 12    |
| >PLAG1-M36 GEIESYLMELC | 216   | >PLAG1-M36 GEIESYLIELQ | 201  | 15    |
| >PML-E420V·EEAERVKAQ\  | 11    | >PML-E420V·VEAERVKAQ\  | 14   | 3     |
| >PML-E420V·EEAERVKA    | 28    | >PML-E420V·VEAERVKA    | 300  | 272   |
| >PML-E420V·LPEEAERVKA  | 606   | >PML-E420V·LPVEAERVKA  | 164  | 442   |
| >PML-E420V·LPEEAERV    | 995   | >PML-E420V·LPVEAERV    | 239  | 756   |
| >PML-E420V·LPEEAERV    | 2791  | >PML-E420V·LPVEAERV    | 201  | 2590  |
| >PML-E420V·LPEEAERVKA  | 178   | >PML-E420V·LPVEAERVKA  | 92   | 86    |
| >PML-E420V·LPEEAERVKA  | 3345  | >PML-E420V·LPVEAERVKA  | 407  | 2938  |
| >PML-E420V·DLPEEAERV   | 38    | >PML-E420V·DLPVEAERV   | 887  | 849   |
| >PML-E420V·DLPEEAERV   | 109   | >PML-E420V·DLPVEAERV   | 1220 | 1111  |
| >PML-E420V·DLPEEAERV   | 54    | >PML-E420V·DLPVEAERV   | 703  | 649   |
| >PML-E420V·DLPEEAERV   | 16    | >PML-E420V·DLPVEAERV   | 51   | 35    |
| >PML-E420V·DLPEEAER    | 534   | >PML-E420V·DLPVEAER    | 431  | 103   |
| >PML-E420V·DLPEEAER    | 371   | >PML-E420V·DLPVEAER    | 305  | 66    |
| >PML-E420V·VDLPEEAERV  | 36    | >PML-E420V·VDLPVEAERV  | 56   | 20    |
| >PML-E420V·DVDLPEEAER  | 811   | >PML-E420V·DVDLPVEAEF  | 410  | 401   |
| >PML-E420V·DVDLPEEAER  | 86    | >PML-E420V·DVDLPVEAEF  | 48   | 38    |
| >PML-E420V·DVDLPEEAER  | 977   | >PML-E420V·DVDLPVEAEF  | 389  | 588   |
| >PML-E420V·DVDLPEEAER  | 161   | >PML-E420V·DVDLPVEAEF  | 56   | 105   |
| >PML-E420V·PIDVDLPE    | 24752 | >PML-E420V·PIDVDLPV    | 354  | 24398 |
| >PML-E420V·DPIDVDLPE   | 24705 | >PML-E420V·DPIDVDLPV   | 223  | 24482 |
| >PML-E420V·DPIDVDLPE   | 19813 | >PML-E420V·DPIDVDLPV   | 487  | 19326 |
| >PML-E420V·DPIDVDLPE   | 147   | >PML-E420V·DPIDVDLPV   | 91   | 56    |



|                        |       |                        |       |       |
|------------------------|-------|------------------------|-------|-------|
| >PML-E420V·DPIDVDLPEE, | 555   | >PML-E420V·DPIDVDLPVE, | 275   | 280   |
| >PML-E420V·DPIDVDLPEE, | 1208  | >PML-E420V·DPIDVDLPVE, | 228   | 980   |
| >PML-P96T-v PLGADTPAL  | 5186  | >PML-P96T-r TLGADTPAL  | 103   | 5083  |
| >PML-P96T-v PLGADTPA   | 3986  | >PML-P96T-r TLGADTPA   | 281   | 3705  |
| >PML-P96T-v PLGADTPAL  | 981   | >PML-P96T-r TLGADTPAL  | 38    | 943   |
| >PML-P96T-v PLGADTPA   | 4266  | >PML-P96T-r TLGADTPA   | 109   | 4157  |
| >PML-P96T-v PLGADTPAL  | 5608  | >PML-P96T-r TLGADTPAL  | 190   | 5418  |
| >PML-P96T-v PLGADTPAL  | 9470  | >PML-P96T-r TLGADTPAL  | 331   | 9139  |
| >PML-P96T-v PLGADTPAL  | 252   | >PML-P96T-r TLGADTPAL  | 42    | 210   |
| >PML-P96T-v PLGADTPAL  | 780   | >PML-P96T-r TLGADTPAL  | 27    | 753   |
| >PML-P96T-v PLGADTPA   | 1727  | >PML-P96T-r TLGADTPA   | 265   | 1462  |
| >PML-P96T-v PLGADTPAL  | 290   | >PML-P96T-r TLGADTPAL  | 36    | 254   |
| >PML-P96T-v PLGADTPAL  | 61    | >PML-P96T-r TLGADTPAL  | 16    | 45    |
| >PML-P96T-v PLGADTPA   | 491   | >PML-P96T-r TLGADTPA   | 61    | 430   |
| >PML-P96T-v PLGADTPAL  | 38    | >PML-P96T-r TLGADTPAL  | 10    | 28    |
| >PML-P96T-v WPLGADTPA  | 81    | >PML-P96T-r WTLGADTPA  | 17865 | 17784 |
| >PML-P96T-v WPLGADTPA  | 13829 | >PML-P96T-r WTLGADTPA  | 399   | 13430 |
| >PML-P96T-v WPLGADTPA  | 7104  | >PML-P96T-r WTLGADTPA  | 97    | 7007  |
| >PML-P96T-v WPLGADTPA  | 3536  | >PML-P96T-r WTLGADTPA  | 94    | 3442  |
| >PML-P96T-v WPLGADTPA  | 13293 | >PML-P96T-r WTLGADTPA  | 285   | 13008 |
| >PML-P96T-v WPLGADTPA  | 13870 | >PML-P96T-r WTLGADTPA  | 425   | 13445 |
| >PML-P96T-v WPLGADTPA  | 17330 | >PML-P96T-r WTLGADTPA  | 440   | 16890 |
| >PML-P96T-v WPLGADTPA  | 12253 | >PML-P96T-r WTLGADTPA  | 56    | 12197 |
| >PML-P96T-v WPLGADTPA  | 915   | >PML-P96T-r WTLGADTPA  | 42    | 873   |
| >PML-P96T-v WPLGADTPA  | 283   | >PML-P96T-r WTLGADTPA  | 16027 | 15744 |
| >PML-P96T-v WPLGADTPA  | 19541 | >PML-P96T-r WTLGADTPA  | 21    | 19520 |
| >PML-P96T-v WPLGADTP   | 352   | >PML-P96T-r WTLGADTP   | 14796 | 14444 |
| >PML-P96T-v WPLGADTPA  | 15    | >PML-P96T-r WTLGADTPA  | 717   | 702   |
| >PML-P96T-v WPLGADTPA  | 18    | >PML-P96T-r WTLGADTPA  | 257   | 239   |
| >PML-P96T-v WPLGADTPA  | 10    | >PML-P96T-r WTLGADTPA  | 8839  | 8829  |
| >PML-P96T-v WPLGADTPA  | 21695 | >PML-P96T-r WTLGADTPA  | 241   | 21454 |
| >PML-P96T-v WPLGADTPA  | 132   | >PML-P96T-r WTLGADTPA  | 10580 | 10448 |
| >PML-P96T-v MQCPICQAP' | 3006  | >PML-P96T-r MQCPICQAP' | 195   | 2811  |
| >PML-P96T-v PWPLGADTP, | 360   | >PML-P96T-r PWTLGADTP, | 2133  | 1773  |
| >PML-P96T-v APWPLGADT  | 59    | >PML-P96T-r APWTLGADT  | 101   | 42    |
| >PML-P96T-v APWPLGADT  | 93    | >PML-P96T-r APWTLGADT  | 134   | 41    |
| >PML-P96T-v APWPLGADT  | 30    | >PML-P96T-r APWTLGADT  | 28    | 2     |
| >PML-P96T-v CQAPWPLGA  | 249   | >PML-P96T-r CQAPWTLGA  | 156   | 93    |
| >PML-P96T-v CQAPWPLGA  | 94    | >PML-P96T-r CQAPWTLGA  | 19    | 75    |
| >PML-P96T-v PICQAPWPL  | 627   | >PML-P96T-r PICQAPWTL  | 443   | 184   |
| >PML-P96T-v PICQAPWPL  | 1483  | >PML-P96T-r PICQAPWTL  | 480   | 1003  |
| >PML-P96T-v CPICQAPWPI | 1239  | >PML-P96T-r CPICQAPWTL | 315   | 924   |
| >PML-P96T-v CPICQAPWPI | 306   | >PML-P96T-r CPICQAPWTL | 1400  | 1094  |

|                        |       |                        |      |       |
|------------------------|-------|------------------------|------|-------|
| >PML-P96T-v CPICQAPWPI | 386   | >PML-P96T-r CPICQAPWTL | 451  | 65    |
| >PML-P96T-v CPICQAPWPI | 133   | >PML-P96T-r CPICQAPWTL | 246  | 113   |
| >PML-P96T-v CPICQAPWPI | 162   | >PML-P96T-r CPICQAPWTL | 291  | 129   |
| >PMS1-P676 PKLDELLQSQ  | 2353  | >PMS1-P676 RKLDELLQSQ  | 88   | 2265  |
| >PMS1-P676 PKLDELLQSQ  | 11172 | >PMS1-P676 RKLDELLQSQ  | 410  | 10762 |
| >PMS1-P676 PKLDELLQSQ  | 12054 | >PMS1-P676 RKLDELLQSQ  | 342  | 11712 |
| >PMS1-P676 HKLKTSLSNQ  | 904   | >PMS1-P676 HKLKTSLSNQ  | 243  | 661   |
| >PMS1-P676 HKLKTSLSNQ  | 34550 | >PMS1-P676 HKLKTSLSNQ  | 124  | 34426 |
| >PMS1-P676 LSNQPKLDEL  | 127   | >PMS1-P676 LSNQRKLDEL  | 267  | 140   |
| >PMS1-P676 LSNQPKLDEL  | 317   | >PMS1-P676 LSNQRKLDEL  | 383  | 66    |
| >PMS1-P676 LSNQPKLDEL  | 341   | >PMS1-P676 LSNQRKLDEL  | 527  | 186   |
| >PMS1-P676 LSNQPKLDEL  | 269   | >PMS1-P676 LSNQRKLDEL  | 616  | 347   |
| >PMS1-P676 SLSNQPKL    | 290   | >PMS1-P676 SLSNQRKL    | 4387 | 4097  |
| >PMS1-P676 SLSNQPKLDE  | 228   | >PMS1-P676 SLSNQRKLDE  | 664  | 436   |
| >PMS1-P676 SLSNQPKL    | 51    | >PMS1-P676 SLSNQRKL    | 125  | 74    |
| >PMS1-P676 SLSNQPKLDE  | 14    | >PMS1-P676 SLSNQRKLDE  | 26   | 12    |
| >PMS1-P676 SLSNQPKL    | 126   | >PMS1-P676 SLSNQRKL    | 420  | 294   |
| >PMS1-P676 SLSNQPKLDE  | 44    | >PMS1-P676 SLSNQRKLDE  | 144  | 100   |
| >PMS1-P676 SLSNQPKL    | 32    | >PMS1-P676 SLSNQRKL    | 284  | 252   |
| >PMS1-P676 SLSNQPKLDE  | 26    | >PMS1-P676 SLSNQRKLDE  | 154  | 128   |
| >PMS1-P676 SLSNQPKL    | 138   | >PMS1-P676 SLSNQRKL    | 1142 | 1004  |
| >PMS1-P676 SLSNQPKLDE  | 55    | >PMS1-P676 SLSNQRKLDE  | 233  | 178   |
| >PMS1-P676 SLSNQPKL    | 18    | >PMS1-P676 SLSNQRKL    | 294  | 276   |
| >PMS1-P676 SLSNQPKLDE  | 31    | >PMS1-P676 SLSNQRKLDE  | 95   | 64    |
| >PMS1-P676 SLSNQPKL    | 209   | >PMS1-P676 SLSNQRKL    | 4338 | 4129  |
| >PMS1-P676 SLSNQPKL    | 6     | >PMS1-P676 SLSNQRKL    | 12   | 6     |
| >PMS1-P676 SLSNQPKLDE  | 9     | >PMS1-P676 SLSNQRKLDE  | 9    | 0     |
| >PMS1-P676 TSLSNQPKL   | 126   | >PMS1-P676 TSLSNQRKL   | 259  | 133   |
| >PMS1-P676 TSLSNQPK    | 25    | >PMS1-P676 TSLSNQRK    | 66   | 41    |
| >PMS1-P676 TSLSNQPK    | 51    | >PMS1-P676 TSLSNQRK    | 387  | 336   |
| >PMS1-P676 TSLSNQPK    | 277   | >PMS1-P676 TSLSNQRK    | 357  | 80    |
| >PMS1-P676 TSLSNQPKL   | 95    | >PMS1-P676 TSLSNQRKL   | 186  | 91    |
| >PMS1-P676 TSLSNQPK    | 481   | >PMS1-P676 TSLSNQRK    | 401  | 80    |
| >PMS1-P676 KTSLSNQPK   | 127   | >PMS1-P676 KTSLSNQRK   | 121  | 6     |
| >PMS1-P676 KTSLSNQP    | 21733 | >PMS1-P676 KTSLSNQR    | 178  | 21555 |
| >PMS1-P676 KTSLSNQPK   | 16    | >PMS1-P676 KTSLSNQRK   | 34   | 18    |
| >PMS1-P676 KTSLSNQPK   | 5     | >PMS1-P676 KTSLSNQRK   | 10   | 5     |
| >PMS1-P676 KTSLSNQPKL  | 142   | >PMS1-P676 KTSLSNQRKL  | 631  | 489   |
| >PMS1-P676 KTSLSNQP    | 18849 | >PMS1-P676 KTSLSNQR    | 20   | 18829 |
| >PMS1-P676 KTSLSNQPK   | 147   | >PMS1-P676 KTSLSNQRK   | 578  | 431   |
| >PMS1-P676 KTSLSNQP    | 33255 | >PMS1-P676 KTSLSNQR    | 67   | 33188 |
| >PMS1-P676 KTSLSNQPKL  | 6     | >PMS1-P676 KTSLSNQRKL  | 8    | 2     |
| >PMS1-P676 KTSLSNQPKL  | 224   | >PMS1-P676 KTSLSNQRKL  | 1481 | 1257  |

|                        |       |                        |       |       |
|------------------------|-------|------------------------|-------|-------|
| >PMS1-P676 KTSLSNQPKL  | 392   | >PMS1-P676 KTSLSNQPKL  | 994   | 602   |
| >PMS1-P676 KTSLSNQPKL  | 52    | >PMS1-P676 KTSLSNQPKL  | 56    | 4     |
| >PMS1-P676 KTSLSNQP    | 33027 | >PMS1-P676 KTSLSNQR    | 281   | 32746 |
| >PMS1-P676 LKTSLSNQPK  | 213   | >PMS1-P676 LKTSLSNQPK  | 1554  | 1341  |
| >PMS1-P676 LKTSLSNQPK  | 127   | >PMS1-P676 LKTSLSNQPK  | 166   | 39    |
| >PMS1-P676 KLKTSLSNQPK | 47    | >PMS1-P676 KLKTSLSNQPK | 50    | 3     |
| >PMS1-P676 KLKTSLSNQPK | 248   | >PMS1-P676 KLKTSLSNQPK | 681   | 433   |
| >PMS1-P676 KLKTSLSNQPK | 818   | >PMS1-P676 KLKTSLSNQPK | 80    | 738   |
| >PMS1-P676 KLKTSLSNQPK | 4     | >PMS1-P676 KLKTSLSNQPK | 5     | 1     |
| >PMS1-P676 KLKTSLSNQPK | 25024 | >PMS1-P676 KLKTSLSNQPK | 44    | 24980 |
| >PMS1-P676 KLKTSLSNQPK | 49    | >PMS1-P676 KLKTSLSNQPK | 113   | 64    |
| >PMS1-P676 KLKTSLSNQPK | 30272 | >PMS1-P676 KLKTSLSNQPK | 158   | 30114 |
| >PMS1-T142 TVTALRLF    | 64    | >PMS1-T142 NVTALRLF    | 187   | 123   |
| >PMS1-T142 TVTALRLF    | 10    | >PMS1-T142 NVTALRLF    | 25    | 15    |
| >PMS1-T142 TVTALRLF    | 20    | >PMS1-T142 NVTALRLF    | 158   | 138   |
| >PMS1-T142 TVTALRLF    | 189   | >PMS1-T142 NVTALRLF    | 890   | 701   |
| >PMS1-T142 TVTALRLF    | 657   | >PMS1-T142 NVTALRLF    | 358   | 299   |
| >PMS1-T142 TVTALRLF    | 8     | >PMS1-T142 NVTALRLF    | 11    | 3     |
| >PMS1-T142 TVTALRLFKN  | 91    | >PMS1-T142 NVTALRLFKN  | 137   | 46    |
| >PMS1-T142 TVTALRLF    | 131   | >PMS1-T142 NVTALRLF    | 847   | 716   |
| >PMS1-T142 TTVTALRLF   | 28    | >PMS1-T142 TNVTALRLF   | 2402  | 2374  |
| >PMS1-T142 TTVTALRLF   | 7     | >PMS1-T142 TNVTALRLF   | 1278  | 1271  |
| >PMS1-T142 TTVTALRLF   | 118   | >PMS1-T142 TNVTALRLF   | 10501 | 10383 |
| >PMS1-T142 TTVTALRLF   | 68    | >PMS1-T142 TNVTALRLF   | 11615 | 11547 |
| >PMS1-T142 TTVTALRLF   | 5     | >PMS1-T142 TNVTALRLF   | 2024  | 2019  |
| >PMS1-T142 TTVTALRLF   | 27    | >PMS1-T142 TNVTALRLF   | 1873  | 1846  |
| >PMS1-T142 TTVTALRLF   | 277   | >PMS1-T142 TNVTALRLF   | 2976  | 2699  |
| >PMS1-T142 TTVTALRLF   | 8     | >PMS1-T142 TNVTALRLF   | 1309  | 1301  |
| >PMS1-T142 TTVTALRLF   | 108   | >PMS1-T142 TNVTALRLF   | 8935  | 8827  |
| >PMS1-T142 TTVTALRLF   | 13    | >PMS1-T142 TNVTALRLF   | 14847 | 14834 |
| >PMS1-T142 TTVTALRLF   | 11    | >PMS1-T142 TNVTALRLF   | 17742 | 17731 |
| >PMS1-T142 TTVTALRLF   | 371   | >PMS1-T142 TNVTALRLF   | 16605 | 16234 |
| >PMS1-T142 TTVTALRLF   | 42    | >PMS1-T142 TNVTALRLF   | 19617 | 19575 |
| >PMS1-T142 TTVTALRLF   | 50    | >PMS1-T142 TNVTALRLF   | 6221  | 6171  |
| >PMS1-T142 TTVTALRLF   | 30    | >PMS1-T142 TNVTALRLF   | 1922  | 1892  |
| >PMS1-T142 GTTVTALRLF  | 146   | >PMS1-T142 GTNVTALRLF  | 62    | 84    |
| >PMS1-T142 GTTVTALR    | 248   | >PMS1-T142 GTNVTALR    | 75    | 173   |
| >PMS1-T142 GTTVTALRLF  | 13    | >PMS1-T142 GTNVTALRLF  | 10    | 3     |
| >PMS1-T142 GTTVTALRLF  | 29    | >PMS1-T142 GTNVTALRLF  | 12    | 17    |
| >PMS1-T142 GTTVTALR    | 94    | >PMS1-T142 GTNVTALR    | 25    | 69    |
| >PMS1-T142 GTTVTALRLF  | 790   | >PMS1-T142 GTNVTALRLF  | 190   | 600   |
| >PMS1-T142 GTTVTALR    | 24    | >PMS1-T142 GTNVTALR    | 41    | 17    |
| >PMS1-T142 GTTVTALRLF  | 105   | >PMS1-T142 GTNVTALRLF  | 180   | 75    |

|                         |       |                         |      |       |
|-------------------------|-------|-------------------------|------|-------|
| >PMS1-T142 GTTVTALRL    | 8     | >PMS1-T142 GTNVTALRL    | 8    | 0     |
| >PMS1-T142 GTTVTALRLF   | 13    | >PMS1-T142 GTNVTALRLF   | 12   | 1     |
| >PMS1-T142 GTTVTALRL    | 145   | >PMS1-T142 GTNVTALRL    | 1150 | 1005  |
| >PMS1-T142 GTTVTALRLF   | 81    | >PMS1-T142 GTNVTALRLF   | 548  | 467   |
| >PMS1-T142 GTTVTALRL    | 36    | >PMS1-T142 GTNVTALRL    | 70   | 34    |
| >PMS1-T142 GTTVTALRLF   | 32    | >PMS1-T142 GTNVTALRLF   | 76   | 44    |
| >PMS1-T142 GTTVTALRLF   | 253   | >PMS1-T142 GTNVTALRLF   | 297  | 44    |
| >PMS1-T142 QGTTVTALR    | 53    | >PMS1-T142 QGNTVTALR    | 45   | 8     |
| >PMS1-T142 QGTTVTALRL   | 735   | >PMS1-T142 QGNTVTALRI   | 388  | 347   |
| >PMS1-T142 QGTTVTALR    | 231   | >PMS1-T142 QGNTVTALR    | 641  | 410   |
| >PMS1-T142 GQGTTVTAL    | 22021 | >PMS1-T142 GQGNTVTAL    | 345  | 21676 |
| >PMS1-T142 GQGTTVTAL    | 324   | >PMS1-T142 GQGNTVTAL    | 724  | 400   |
| >PMS1-T142 GQGTTVTAL    | 265   | >PMS1-T142 GQGNTVTAL    | 429  | 164   |
| >PMS1-T142 GQGTTVTAL    | 56    | >PMS1-T142 GQGNTVTAL    | 106  | 50    |
| >PMS1-T142 GQGTTVTAL    | 428   | >PMS1-T142 GQGNTVTAL    | 1129 | 701   |
| >PMS1-T142 LGQGTTVTAL   | 421   | >PMS1-T142 LGQGNVTAL    | 481  | 60    |
| >PMS1-T142 HLGQGTTV     | 92    | >PMS1-T142 HLGQGNV      | 54   | 38    |
| >PMS1-T142 HLGQGTTVT/   | 233   | >PMS1-T142 HLGQGNVT.    | 292  | 59    |
| >PMS1-T142 HLGQGTTVT/   | 40    | >PMS1-T142 HLGQGNVT.    | 35   | 5     |
| >PMS1-T142 HLGQGTTV     | 24    | >PMS1-T142 HLGQGNV      | 32   | 8     |
| >PMS1-T142 HLGQGTTVT/   | 246   | >PMS1-T142 HLGQGNVT.    | 736  | 490   |
| >PMS1-T142 HLGQGTTVT/   | 69    | >PMS1-T142 HLGQGNVT.    | 107  | 38    |
| >PMS1-T142 HLGQGTTV     | 7     | >PMS1-T142 HLGQGNV      | 16   | 9     |
| >PMS1-T142 HLGQGTTVT/   | 136   | >PMS1-T142 HLGQGNVT.    | 244  | 108   |
| >PMS1-T142 HLGQGTTVT/   | 55    | >PMS1-T142 HLGQGNVT.    | 60   | 5     |
| >PMS1-T142 HLGQGTTV     | 11    | >PMS1-T142 HLGQGNV      | 26   | 15    |
| >PMS1-T142 HLGQGTTVT/   | 90    | >PMS1-T142 HLGQGNVT.    | 140  | 50    |
| >PMS1-T142 HLGQGTTVT/   | 44    | >PMS1-T142 HLGQGNVT.    | 29   | 15    |
| >PMS1-T142 HLGQGTTV     | 8     | >PMS1-T142 HLGQGNV      | 11   | 3     |
| >PMS1-T142 HLGQGTTVT/   | 96    | >PMS1-T142 HLGQGNVT.    | 181  | 85    |
| >PMS1-T142 HLGQGTTVT/   | 81    | >PMS1-T142 HLGQGNVT.    | 128  | 47    |
| >PMS1-T142 HLGQGTTV     | 35    | >PMS1-T142 HLGQGNV      | 51   | 16    |
| >PMS1-T142 HLGQGTTVT/   | 249   | >PMS1-T142 HLGQGNVT.    | 247  | 2     |
| >PMS1-T142 HLGQGTTV     | 2     | >PMS1-T142 HLGQGNV      | 3    | 1     |
| >PMS1-T142 HLGQGTTVT    | 163   | >PMS1-T142 HLGQGNVT     | 709  | 546   |
| >PMS1-T142 HLGQGTTVT/   | 7     | >PMS1-T142 HLGQGNVT.    | 13   | 6     |
| >PMS1-T142 HLGQGTTVT/   | 6     | >PMS1-T142 HLGQGNVT.    | 7    | 1     |
| >PMS1-T142 HLGQGTTVT/   | 368   | >PMS1-T142 HLGQGNVT.    | 544  | 176   |
| >PMS1-T142 SHLGQTTV     | 472   | >PMS1-T142 SHLGQGNV     | 4989 | 4517  |
| >PMS1-T142 KPSHLGQTT    | 31    | >PMS1-T142 KPSHLGQGN    | 59   | 28    |
| >PPARG-T4S- TLGDSPIDPE  | 802   | >PPARG-T4S- SLGDSPIDPE  | 175  | 627   |
| >PPARG-T4S- ETLGDSP     | 86    | >PPARG-T4S- ESLGDSP     | 758  | 672   |
| >PPARG-T4S- ETLGDSPIDPE | 187   | >PPARG-T4S- ESLGDSPIDPE | 1440 | 1253  |

|                        |     |                        |       |       |
|------------------------|-----|------------------------|-------|-------|
| >PPARG-T4S- ETLGDSPI   | 29  | >PPARG-T4S- ESLGDSPI   | 247   | 218   |
| >PPARG-T4S- ETLGDSPI   | 10  | >PPARG-T4S- ESLGDSPI   | 95    | 85    |
| >PPARG-T4S- ETLGDSPI   | 255 | >PPARG-T4S- ESLGDSPI   | 451   | 196   |
| >PPARG-T4S- ETLGDSPI   | 211 | >PPARG-T4S- ESLGDSPI   | 315   | 104   |
| >PPARG-T4S- GETLGDSPI  | 155 | >PPARG-T4S- GESLGDSPI  | 202   | 47    |
| >PPARG-T4S- GETLGDSPI  | 33  | >PPARG-T4S- GESLGDSPI  | 30    | 3     |
| >PPARG-T4S- GETLGDSPI  | 64  | >PPARG-T4S- GESLGDSPI  | 78    | 14    |
| >PPARG-T4S- GETLGDSPI  | 9   | >PPARG-T4S- GESLGDSPI  | 8     | 1     |
| >PPP2R1A-E{EVLLALAEQ   | 172 | >PPP2R1A-E{DVLLALAEQ   | 1203  | 1031  |
| >PPP2R1A-E{EVLLALAEQL  | 89  | >PPP2R1A-E{DVLLALAEQL  | 449   | 360   |
| >PPP2R1A-E{EVLLALAEQL  | 11  | >PPP2R1A-E{DVLLALAEQL  | 48    | 37    |
| >PPP2R1A-E{DEVLLALA    | 124 | >PPP2R1A-E{DDVLLALA    | 5176  | 5052  |
| >PPP2R1A-E{DEVLLALAEQ  | 68  | >PPP2R1A-E{DDVLLALAEQ  | 3835  | 3767  |
| >PPP2R1A-E{DEVLLALA    | 90  | >PPP2R1A-E{DDVLLALA    | 12120 | 12030 |
| >PPP2R1A-E{DEVLLALAE   | 23  | >PPP2R1A-E{DDVLLALAE   | 5675  | 5652  |
| >PPP2R1A-E{DEVLLALAEQ  | 14  | >PPP2R1A-E{DDVLLALAEQ  | 2844  | 2830  |
| >PPP2R1A-E{DEVLLALAEQ  | 216 | >PPP2R1A-E{DDVLLALAEQ  | 16018 | 15802 |
| >PPP2R1A-E{FLTDTIYDEDE | 250 | >PPP2R1A-E{FLTDTIYDEDE | 585   | 335   |
| >PPP2R1A-E{DEDEVLLA    | 163 | >PPP2R1A-E{DEDDVLLA    | 291   | 128   |
| >PPP2R1A-E{DEDEVLLAL   | 411 | >PPP2R1A-E{DEDDVLLAL   | 1437  | 1026  |
| >PPP2R1A-E{DEDEVLLA    | 405 | >PPP2R1A-E{DEDDVLLA    | 899   | 494   |
| >PPP2R1A-E{DEDEVLLAL   | 7   | >PPP2R1A-E{DEDDVLLAL   | 11    | 4     |
| >PPP2R1A-E{DEDEVLLALA  | 63  | >PPP2R1A-E{DEDDVLLALA  | 136   | 73    |
| >PPP2R1A-E{DEDEVLLAL   | 55  | >PPP2R1A-E{DEDDVLLAL   | 46    | 9     |
| >PPP2R1A-E{DEDEVLLALA  | 352 | >PPP2R1A-E{DEDDVLLALA  | 329   | 23    |
| >PPP2R1A-E{YDEDEVLL    | 417 | >PPP2R1A-E{YDEDDVLL    | 1187  | 770   |
| >PPP2R1A-E{YDEDEVLL    | 448 | >PPP2R1A-E{YDEDDVLL    | 634   | 186   |
| >PPP2R1A-E{IYDEDEVL    | 299 | >PPP2R1A-E{IYDEDDVL    | 325   | 26    |
| >PPP2R1A-E{IYDEDEVLL   | 339 | >PPP2R1A-E{IYDEDDVLL   | 463   | 124   |
| >PPP2R1A-E{IYDEDEVLLAL | 164 | >PPP2R1A-E{IYDEDDVLLAI | 220   | 56    |
| >PPP2R1A-E{TIYDEDEV    | 188 | >PPP2R1A-E{TIYDEDDV    | 1515  | 1327  |
| >PPP2R1A-E{TIYDEDEVLL  | 268 | >PPP2R1A-E{TIYDEDDVLL  | 200   | 68    |
| >PPP2R1A-E{TIYDEDEVLLA | 483 | >PPP2R1A-E{TIYDEDDVLLA | 487   | 4     |
| >PPP2R1A-E{TIYDEDEV    | 40  | >PPP2R1A-E{TIYDEDDV    | 394   | 354   |
| >PPP2R1A-E{TIYDEDEVL   | 268 | >PPP2R1A-E{TIYDEDDVL   | 315   | 47    |
| >PPP2R1A-E{TIYDEDEVLL  | 55  | >PPP2R1A-E{TIYDEDDVLL  | 47    | 8     |
| >PPP2R1A-E{TIYDEDEVLLA | 430 | >PPP2R1A-E{TIYDEDDVLLA | 536   | 106   |
| >PPP2R1A-E{TIYDEDEV    | 85  | >PPP2R1A-E{TIYDEDDV    | 291   | 206   |
| >PPP2R1A-E{TIYDEDEVLLA | 116 | >PPP2R1A-E{TIYDEDDVLLA | 119   | 3     |
| >PPP2R1A-E{TIYDEDEV    | 68  | >PPP2R1A-E{TIYDEDDV    | 511   | 443   |
| >PPP2R1A-E{TIYDEDEVLL  | 937 | >PPP2R1A-E{TIYDEDDVLL  | 466   | 471   |
| >PPP2R1A-E{TIYDEDEVLLA | 160 | >PPP2R1A-E{TIYDEDDVLLA | 157   | 3     |
| >PPP2R1A-E{TIYDEDEV    | 15  | >PPP2R1A-E{TIYDEDDV    | 119   | 104   |

|                        |      |                         |       |       |
|------------------------|------|-------------------------|-------|-------|
| >PPP2R1A-E€TIYDEDEVL   | 462  | >PPP2R1A-E€TIYDEDDVL    | 887   | 425   |
| >PPP2R1A-E€TIYDEDEVLL  | 285  | >PPP2R1A-E€TIYDEDDVLL   | 443   | 158   |
| >PPP2R1A-E€TIYDEDEVLLA | 443  | >PPP2R1A-E€TIYDEDDVLLA  | 499   | 56    |
| >PPP2R1A-E€TIYDEDEV    | 235  | >PPP2R1A-E€TIYDEDDV     | 869   | 634   |
| >PPP2R1A-E€TIYDEDEV    | 22   | >PPP2R1A-E€TIYDEDDV     | 53    | 31    |
| >PPP2R1A-E€TIYDEDEVLL  | 410  | >PPP2R1A-E€TIYDEDDVLL   | 374   | 36    |
| >PPP2R1A-E€TIYDEDEV    | 8    | >PPP2R1A-E€TIYDEDDV     | 19    | 11    |
| >PPP2R1A-E€TIYDEDEVL   | 124  | >PPP2R1A-E€TIYDEDDVL    | 350   | 226   |
| >PPP2R1A-E€TIYDEDEVLL  | 45   | >PPP2R1A-E€TIYDEDDVLL   | 73    | 28    |
| >PPP2R1A-E€TIYDEDEVLLA | 143  | >PPP2R1A-E€TIYDEDDVLLA  | 185   | 42    |
| >PPP2R1A-E€TIYDEDEV    | 47   | >PPP2R1A-E€TIYDEDDV     | 468   | 421   |
| >PPP2R1A-E€TIYDEDEV    | 228  | >PPP2R1A-E€TIYDEDDV     | 1309  | 1081  |
| >PPP2R1A-E€TIYDEDEV    | 420  | >PPP2R1A-E€TIYDEDDV     | 374   | 46    |
| >PPP2R1A-E€TIYDEDEVL   | 99   | >PPP2R1A-E€TIYDEDDVL    | 63    | 36    |
| >PPP2R1A-E€TIYDEDEVLL  | 152  | >PPP2R1A-E€TIYDEDDVLL   | 155   | 3     |
| >PPP2R1A-E€DTIYDEDEV   | 83   | >PPP2R1A-E€DTIYDEDDV    | 195   | 112   |
| >PPP2R1A-E€DTIYDEDEVL  | 11   | >PPP2R1A-E€DTIYDEDDVL   | 12    | 1     |
| >PPP2R1A-E€DTIYDEDEVLI | 35   | >PPP2R1A-E€DTIYDEDDVLI  | 37    | 2     |
| >PPP2R1A-E€DTIYDEDEV   | 22   | >PPP2R1A-E€DTIYDEDDV    | 166   | 144   |
| >PPP2R1A-E€DTIYDEDEVLI | 107  | >PPP2R1A-E€DTIYDEDDVLI  | 93    | 14    |
| >PPP2R1A-E€TDTIYDEDEV  | 45   | >PPP2R1A-E€TDTIYDEDDV   | 57    | 12    |
| >PPP2R1A-E€TDTIYDEDEVI | 99   | >PPP2R1A-E€TDTIYDEDDVI  | 97    | 2     |
| >PPP2R1A-E€LTDTIYDEDE\ | 286  | >PPP2R1A-E€LTDTIYDEDD\' | 419   | 133   |
| >PPP2R1A-E€LTDTIYDEDE\ | 257  | >PPP2R1A-E€LTDTIYDEDD\' | 1957  | 1700  |
| >PPP2R1A-E€LTDTIYDEDE\ | 240  | >PPP2R1A-E€LTDTIYDEDD\' | 1712  | 1472  |
| >PPP2R1A-E€LTDTIYDEDE\ | 374  | >PPP2R1A-E€LTDTIYDEDD\' | 1280  | 906   |
| >PPP2R1A-E€LTDTIYDEDE\ | 220  | >PPP2R1A-E€LTDTIYDEDD\' | 983   | 763   |
| >PPP2R1A-E€EVLLALAEQ   | 172  | >PPP2R1A-E€GVLLALAEQ    | 18329 | 18157 |
| >PPP2R1A-E€EVLLALAEQL  | 89   | >PPP2R1A-E€GVLLALAEQL   | 10342 | 10253 |
| >PPP2R1A-E€EVLLALAEQL  | 11   | >PPP2R1A-E€GVLLALAEQL   | 5098  | 5087  |
| >PPP2R1A-E€DEVLLALA    | 124  | >PPP2R1A-E€DGVLLALA     | 37636 | 37512 |
| >PPP2R1A-E€DEVLLALAEQ  | 68   | >PPP2R1A-E€DGVLLALAEQ   | 23773 | 23705 |
| >PPP2R1A-E€DEVLLALA    | 90   | >PPP2R1A-E€DGVLLALA     | 20185 | 20095 |
| >PPP2R1A-E€DEVLLALAE   | 23   | >PPP2R1A-E€DGVLLALAE    | 15492 | 15469 |
| >PPP2R1A-E€DEVLLALAEQ  | 14   | >PPP2R1A-E€DGVLLALAEQ   | 12534 | 12520 |
| >PPP2R1A-E€DEVLLALAEQ  | 216  | >PPP2R1A-E€DGVLLALAEQ   | 21786 | 21570 |
| >PPP2R1A-E€FLTDTIYDEDE | 1206 | >PPP2R1A-E€FLTDTIYDEDC  | 287   | 919   |
| >PPP2R1A-E€FLTDTIYDEDE | 250  | >PPP2R1A-E€FLTDTIYDEDC  | 180   | 70    |
| >PPP2R1A-E€DEDEVLLA    | 163  | >PPP2R1A-E€DEDGVLLA     | 440   | 277   |
| >PPP2R1A-E€DEDEVLLAL   | 411  | >PPP2R1A-E€DEDGVLLAL    | 2042  | 1631  |
| >PPP2R1A-E€DEDEVLLA    | 405  | >PPP2R1A-E€DEDGVLLA     | 569   | 164   |
| >PPP2R1A-E€DEDEVLLAL   | 7    | >PPP2R1A-E€DEDGVLLAL    | 10    | 3     |
| >PPP2R1A-E€DEDEVLLALA  | 63   | >PPP2R1A-E€DEDGVLLALA   | 108   | 45    |

|                        |      |                        |      |      |
|------------------------|------|------------------------|------|------|
| >PPP2R1A-E€DEDEVLLAL   | 55   | >PPP2R1A-E€DEDGVLLAL   | 23   | 32   |
| >PPP2R1A-E€DEDEVLLALA  | 352  | >PPP2R1A-E€DEDGVLLALA  | 414  | 62   |
| >PPP2R1A-E€YDEDEVLL    | 2727 | >PPP2R1A-E€YDEDEVLL    | 140  | 2587 |
| >PPP2R1A-E€YDEDEVLLAL  | 642  | >PPP2R1A-E€YDEDEVLLAL  | 291  | 351  |
| >PPP2R1A-E€YDEDEVLL    | 417  | >PPP2R1A-E€YDEDEVLL    | 5491 | 5074 |
| >PPP2R1A-E€YDEDEVLL    | 448  | >PPP2R1A-E€YDEDEVLL    | 1482 | 1034 |
| >PPP2R1A-E€IYDEDEVL    | 299  | >PPP2R1A-E€IYDEDEVL    | 358  | 59   |
| >PPP2R1A-E€IYDEDEVLL   | 339  | >PPP2R1A-E€IYDEDEVLL   | 344  | 5    |
| >PPP2R1A-E€IYDEDEVLLAI | 164  | >PPP2R1A-E€IYDEDEVLLAI | 156  | 8    |
| >PPP2R1A-E€TIYDEDEV    | 188  | >PPP2R1A-E€TIYDEDEV    | 488  | 300  |
| >PPP2R1A-E€TIYDEDEVLL  | 268  | >PPP2R1A-E€TIYDEDEVLL  | 385  | 117  |
| >PPP2R1A-E€TIYDEDEVLLA | 483  | >PPP2R1A-E€TIYDEDEVLLA | 539  | 56   |
| >PPP2R1A-E€TIYDEDEV    | 40   | >PPP2R1A-E€TIYDEDEV    | 102  | 62   |
| >PPP2R1A-E€TIYDEDEVL   | 268  | >PPP2R1A-E€TIYDEDEVL   | 1594 | 1326 |
| >PPP2R1A-E€TIYDEDEVLL  | 55   | >PPP2R1A-E€TIYDEDEVLL  | 93   | 38   |
| >PPP2R1A-E€TIYDEDEVLLA | 430  | >PPP2R1A-E€TIYDEDEVLLA | 944  | 514  |
| >PPP2R1A-E€TIYDEDEV    | 85   | >PPP2R1A-E€TIYDEDEV    | 57   | 28   |
| >PPP2R1A-E€TIYDEDEVLL  | 595  | >PPP2R1A-E€TIYDEDEVLL  | 402  | 193  |
| >PPP2R1A-E€TIYDEDEVLLA | 116  | >PPP2R1A-E€TIYDEDEVLLA | 76   | 40   |
| >PPP2R1A-E€TIYDEDEV    | 68   | >PPP2R1A-E€TIYDEDEV    | 88   | 20   |
| >PPP2R1A-E€TIYDEDEVLL  | 937  | >PPP2R1A-E€TIYDEDEVLL  | 328  | 609  |
| >PPP2R1A-E€TIYDEDEVLLA | 160  | >PPP2R1A-E€TIYDEDEVLLA | 231  | 71   |
| >PPP2R1A-E€TIYDEDEV    | 15   | >PPP2R1A-E€TIYDEDEV    | 19   | 4    |
| >PPP2R1A-E€TIYDEDEVL   | 462  | >PPP2R1A-E€TIYDEDEVL   | 1286 | 824  |
| >PPP2R1A-E€TIYDEDEVLL  | 285  | >PPP2R1A-E€TIYDEDEVLL  | 270  | 15   |
| >PPP2R1A-E€TIYDEDEVLLA | 443  | >PPP2R1A-E€TIYDEDEVLLA | 442  | 1    |
| >PPP2R1A-E€TIYDEDEV    | 235  | >PPP2R1A-E€TIYDEDEV    | 180  | 55   |
| >PPP2R1A-E€TIYDEDEV    | 22   | >PPP2R1A-E€TIYDEDEV    | 27   | 5    |
| >PPP2R1A-E€TIYDEDEVLL  | 410  | >PPP2R1A-E€TIYDEDEVLL  | 526  | 116  |
| >PPP2R1A-E€TIYDEDEV    | 8    | >PPP2R1A-E€TIYDEDEV    | 10   | 2    |
| >PPP2R1A-E€TIYDEDEVL   | 124  | >PPP2R1A-E€TIYDEDEVL   | 696  | 572  |
| >PPP2R1A-E€TIYDEDEVLL  | 45   | >PPP2R1A-E€TIYDEDEVLL  | 77   | 32   |
| >PPP2R1A-E€TIYDEDEVLLA | 143  | >PPP2R1A-E€TIYDEDEVLLA | 172  | 29   |
| >PPP2R1A-E€TIYDEDEV    | 47   | >PPP2R1A-E€TIYDEDEV    | 65   | 18   |
| >PPP2R1A-E€TIYDEDEV    | 228  | >PPP2R1A-E€TIYDEDEV    | 123  | 105  |
| >PPP2R1A-E€TIYDEDEV    | 420  | >PPP2R1A-E€TIYDEDEV    | 1009 | 589  |
| >PPP2R1A-E€TIYDEDEVL   | 99   | >PPP2R1A-E€TIYDEDEVL   | 628  | 529  |
| >PPP2R1A-E€TIYDEDEVLL  | 152  | >PPP2R1A-E€TIYDEDEVLL  | 741  | 589  |
| >PPP2R1A-E€DTIYDEDEV   | 83   | >PPP2R1A-E€DTIYDEDEV   | 58   | 25   |
| >PPP2R1A-E€DTIYDEDEVL  | 11   | >PPP2R1A-E€DTIYDEDEVL  | 11   | 0    |
| >PPP2R1A-E€DTIYDEDEVLI | 35   | >PPP2R1A-E€DTIYDEDEVLI | 38   | 3    |
| >PPP2R1A-E€DTIYDEDEV   | 22   | >PPP2R1A-E€DTIYDEDEV   | 22   | 0    |
| >PPP2R1A-E€DTIYDEDEVLI | 107  | >PPP2R1A-E€DTIYDEDEVLI | 107  | 0    |

|                        |       |                        |       |       |
|------------------------|-------|------------------------|-------|-------|
| >PPP2R1A-E€DTIYDEDEV   | 933   | >PPP2R1A-E€DTIYDEDEV   | 406   | 527   |
| >PPP2R1A-E€TDTIYDEDEV  | 45    | >PPP2R1A-E€TDTIYDEDEV  | 54    | 9     |
| >PPP2R1A-E€TDTIYDEDEV  | 99    | >PPP2R1A-E€TDTIYDEDEV  | 80    | 19    |
| >PPP2R1A-E€LTDTIYDEDEV | 286   | >PPP2R1A-E€LTDTIYDEDEV | 333   | 47    |
| >PPP2R1A-E€LTDTIYDEDEV | 257   | >PPP2R1A-E€LTDTIYDEDEV | 443   | 186   |
| >PPP2R1A-E€LTDTIYDEDEV | 526   | >PPP2R1A-E€LTDTIYDEDEV | 430   | 96    |
| >PPP2R1A-E€LTDTIYDEDEV | 240   | >PPP2R1A-E€LTDTIYDEDEV | 232   | 8     |
| >PPP2R1A-E€LTDTIYDEDEV | 374   | >PPP2R1A-E€LTDTIYDEDEV | 435   | 61    |
| >PPP2R1A-E€LTDTIYDEDEV | 220   | >PPP2R1A-E€LTDTIYDEDEV | 225   | 5     |
| >PPP2R1A-E€LTDTIYDEDEV | 757   | >PPP2R1A-E€LTDTIYDEDEV | 433   | 324   |
| >PPP2R1A-R: RRAAASKL   | 127   | >PPP2R1A-R: RRAAASKL   | 301   | 174   |
| >PPP2R1A-R: RRAAASKLGE | 31    | >PPP2R1A-R: RRAAASKLGE | 105   | 74    |
| >PPP2R1A-R: RRAAASKL   | 24    | >PPP2R1A-R: RRAAASKL   | 96    | 72    |
| >PPP2R1A-R: RRAAASKLGE | 322   | >PPP2R1A-R: RRAAASKLGE | 1844  | 1522  |
| >PPP2R1A-R: RRAAASKLGE | 45    | >PPP2R1A-R: RRAAASKLGE | 191   | 146   |
| >PPP2R1A-R: RRAAASKL   | 445   | >PPP2R1A-R: RRAAASKL   | 44    | 401   |
| >PPP2R1A-R: RRAAASKL   | 16    | >PPP2R1A-R: RRAAASKL   | 208   | 192   |
| >PPP2R1A-R: RRAAASKLGE | 166   | >PPP2R1A-R: RRAAASKLGE | 1177  | 1011  |
| >PPP2R1A-R: RRAAASKLGE | 111   | >PPP2R1A-R: RRAAASKLGE | 3501  | 3390  |
| >PPP2R1A-R: RRAAASKL   | 34    | >PPP2R1A-R: RRAAASKL   | 340   | 306   |
| >PPP2R1A-R: RRAAASKLGE | 58    | >PPP2R1A-R: RRAAASKLGE | 229   | 171   |
| >PPP2R1A-R: VRAAASK    | 86    | >PPP2R1A-R: VRAAASK    | 16    | 70    |
| >PPP2R1A-R: VRAAASKL   | 196   | >PPP2R1A-R: VRAAASKL   | 6739  | 6543  |
| >PPP2R1A-R: VRAAASK    | 328   | >PPP2R1A-R: VRAAASK    | 19077 | 18749 |
| >PPP2R1A-R: VRAAASKL   | 470   | >PPP2R1A-R: VRAAASKL   | 22876 | 22406 |
| >PPP2R1A-R: VRAAASKL   | 74    | >PPP2R1A-R: VRAAASKL   | 25979 | 25905 |
| >PPP2R1A-R: NLCSDDTPM' | 362   | >PPP2R1A-R: NLCSDDTPM' | 32678 | 32316 |
| >PPP2R1A-R: NLCSDDTPM' | 207   | >PPP2R1A-R: NLCSDDTPM' | 31081 | 30874 |
| >PPP2R1A-R: NLCSDDTPM' | 349   | >PPP2R1A-R: NLCSDDTPM' | 32246 | 31897 |
| >PPP2R1A-R: MVRRAAASK  | 10530 | >PPP2R1A-R: MVRRAAASK  | 214   | 10316 |
| >PPP2R1A-R: MVRRAAASK  | 17210 | >PPP2R1A-R: MVRRAAASK  | 411   | 16799 |
| >PPP2R1A-R: MVRRAAASK  | 740   | >PPP2R1A-R: MVRRAAASK  | 46    | 694   |
| >PPP2R1A-R: MVRRAAASK  | 53    | >PPP2R1A-R: MVRRAAASK  | 54    | 1     |
| >PPP2R1A-R: MVRRAAASK  | 389   | >PPP2R1A-R: MVRRAAASK  | 33    | 356   |
| >PPP2R1A-R: MVRRAAAS   | 11    | >PPP2R1A-R: MVRRAAAS   | 3191  | 3180  |
| >PPP2R1A-R: MVRRAAASK  | 3     | >PPP2R1A-R: MVRRAAASK  | 9     | 6     |
| >PPP2R1A-R: MVRRAAASK  | 7     | >PPP2R1A-R: MVRRAAASK  | 1400  | 1393  |
| >PPP2R1A-R: MVRRAAASK  | 8     | >PPP2R1A-R: MVRRAAASK  | 2019  | 2011  |
| >PPP2R1A-R: MVRRAAASK  | 333   | >PPP2R1A-R: MVRRAAASK  | 113   | 220   |
| >PPP2R1A-R: MVRRAAASK  | 35    | >PPP2R1A-R: MVRRAAASK  | 20    | 15    |
| >PPP2R1A-R: MVRRAAASK  | 2387  | >PPP2R1A-R: MVRRAAASK  | 244   | 2143  |
| >PPP2R1A-R: MVRRAAASK  | 5405  | >PPP2R1A-R: MVRRAAASK  | 46    | 5359  |
| >PPP2R1A-R: MVRRAAASK  | 33    | >PPP2R1A-R: MVRRAAASK  | 50    | 17    |



|                        |       |                        |       |       |
|------------------------|-------|------------------------|-------|-------|
| >PPP2R1A-R: PMVRRAAAS  | 2042  | >PPP2R1A-R: PMVWRAAA!  | 347   | 1695  |
| >PPP2R1A-R: PMVRRAAA   | 1208  | >PPP2R1A-R: PMVWRAAA   | 279   | 929   |
| >PPP2R1A-R: PMVRRAAAS  | 241   | >PPP2R1A-R: PMVWRAAA!  | 78    | 163   |
| >PPP2R1A-R: PMVRRAAAS  | 742   | >PPP2R1A-R: PMVWRAAA!  | 321   | 421   |
| >PPP2R1A-R: TPMVRRAA   | 45    | >PPP2R1A-R: TPMVWRAA   | 143   | 98    |
| >PPP2R1A-R: TPMVRRAAA  | 33    | >PPP2R1A-R: TPMVWRAA/  | 73    | 40    |
| >PPP2R1A-R: TPMVRRAAA  | 423   | >PPP2R1A-R: TPMVWRAA/  | 513   | 90    |
| >PPP2R1A-R: TPMVRRAA   | 164   | >PPP2R1A-R: TPMVWRAA   | 2380  | 2216  |
| >PPP2R1A-R: TPMVRRAAA  | 31    | >PPP2R1A-R: TPMVWRAA/  | 756   | 725   |
| >PPP2R1A-R: TPMVRRAAA  | 2836  | >PPP2R1A-R: TPMVWRAA/  | 439   | 2397  |
| >PPP2R1A-R: TPMVRRAA   | 44    | >PPP2R1A-R: TPMVWRAA   | 18    | 26    |
| >PPP2R1A-R: TPMVRRAAA  | 34    | >PPP2R1A-R: TPMVWRAA/  | 13    | 21    |
| >PPP2R1A-R: TPMVRRAAA  | 261   | >PPP2R1A-R: TPMVWRAA/  | 120   | 141   |
| >PPP2R1A-R: DTPMVRRRA  | 521   | >PPP2R1A-R: DTPMVWRA   | 68    | 453   |
| >PPP2R1A-R: DTPMVRRAA  | 330   | >PPP2R1A-R: DTPMVWRA/  | 333   | 3     |
| >PPP2R1A-R: DTPMVRRAA  | 242   | >PPP2R1A-R: DTPMVWRA/  | 403   | 161   |
| >PPP2R1A-R: CSDDTPMVR  | 1691  | >PPP2R1A-R: CSDDTPMVV  | 143   | 1548  |
| >PPP2R1A-R: CSDDTPMVR  | 762   | >PPP2R1A-R: CSDDTPMVV  | 95    | 667   |
| >PPP2R1A-R: CSDDTPMVR  | 638   | >PPP2R1A-R: CSDDTPMVV  | 143   | 495   |
| >PPP2R1A-R: CSDDTPMVR  | 23272 | >PPP2R1A-R: CSDDTPMVV  | 28    | 23244 |
| >PPP2R1A-R: CSDDTPMVR  | 24737 | >PPP2R1A-R: CSDDTPMVV  | 189   | 24548 |
| >PPP2R1A-R: CSDDTPMVR  | 17330 | >PPP2R1A-R: CSDDTPMVV  | 10    | 17320 |
| >PPP2R1A-R: CSDDTPMVR  | 33599 | >PPP2R1A-R: CSDDTPMVV  | 432   | 33167 |
| >PPP2R1A-R: LCSDDTPMVI | 22510 | >PPP2R1A-R: LCSDDTPMV\ | 152   | 22358 |
| >PPP2R1A-R: LCSDDTPMVI | 31644 | >PPP2R1A-R: LCSDDTPMV\ | 264   | 31380 |
| >PPP2R1A-R: LCSDDTPMVI | 691   | >PPP2R1A-R: LCSDDTPMV\ | 378   | 313   |
| >PPP2R1A-R: RAAASKLGEF | 175   | >PPP2R1A-R: GAAASKLGEF | 791   | 616   |
| >PPP2R1A-R: RAAASKLGEF | 104   | >PPP2R1A-R: GAAASKLGEF | 1597  | 1493  |
| >PPP2R1A-R: RAAASKLGEF | 5     | >PPP2R1A-R: GAAASKLGEF | 47    | 42    |
| >PPP2R1A-R: RAAASKLGEF | 36    | >PPP2R1A-R: GAAASKLGEF | 1596  | 1560  |
| >PPP2R1A-R: RAAASKLGEF | 206   | >PPP2R1A-R: GAAASKLGEF | 1323  | 1117  |
| >PPP2R1A-R: RRAAASKLGE | 6361  | >PPP2R1A-R: RGAAASKLGE | 366   | 5995  |
| >PPP2R1A-R: RRAAASKL   | 127   | >PPP2R1A-R: RGAAASKL   | 4926  | 4799  |
| >PPP2R1A-R: RRAAASKLGE | 31    | >PPP2R1A-R: RGAAASKLGE | 898   | 867   |
| >PPP2R1A-R: RRAAASKL   | 15796 | >PPP2R1A-R: RGAAASKL   | 274   | 15522 |
| >PPP2R1A-R: RRAAASKLGE | 11282 | >PPP2R1A-R: RGAAASKLGE | 102   | 11180 |
| >PPP2R1A-R: RRAAASKL   | 24    | >PPP2R1A-R: RGAAASKL   | 15640 | 15616 |
| >PPP2R1A-R: RRAAASKLGE | 322   | >PPP2R1A-R: RGAAASKLGE | 27899 | 27577 |
| >PPP2R1A-R: RRAAASKLGE | 45    | >PPP2R1A-R: RGAAASKLGE | 17259 | 17214 |
| >PPP2R1A-R: RRAAASKL   | 445   | >PPP2R1A-R: RGAAASKL   | 10912 | 10467 |
| >PPP2R1A-R: RRAAASKL   | 16    | >PPP2R1A-R: RGAAASKL   | 5880  | 5864  |
| >PPP2R1A-R: RRAAASKLGE | 166   | >PPP2R1A-R: RGAAASKLGE | 23217 | 23051 |
| >PPP2R1A-R: RRAAASKLGE | 111   | >PPP2R1A-R: RGAAASKLGE | 14893 | 14782 |

|                        |       |                        |       |       |
|------------------------|-------|------------------------|-------|-------|
| >PPP2R1A-R: RRAAASKL   | 34    | >PPP2R1A-R: RGAAASKL   | 2548  | 2514  |
| >PPP2R1A-R: RRAAASKLGE | 58    | >PPP2R1A-R: RGAAASKLGE | 19846 | 19788 |
| >PPP2R1A-R: VRRAAASK   | 86    | >PPP2R1A-R: VRGAAASK   | 12179 | 12093 |
| >PPP2R1A-R: VRRAAASKL  | 196   | >PPP2R1A-R: VRGAAASKL  | 1618  | 1422  |
| >PPP2R1A-R: VRRAAASK   | 328   | >PPP2R1A-R: VRGAAASK   | 564   | 236   |
| >PPP2R1A-R: VRRAAASKL  | 470   | >PPP2R1A-R: VRGAAASKL  | 4152  | 3682  |
| >PPP2R1A-R: VRRAAASKL  | 74    | >PPP2R1A-R: VRGAAASKL  | 516   | 442   |
| >PPP2R1A-R: MVRRAAASK  | 740   | >PPP2R1A-R: MVRGAAASK  | 151   | 589   |
| >PPP2R1A-R: MVRRAAASK  | 53    | >PPP2R1A-R: MVRGAAASK  | 65    | 12    |
| >PPP2R1A-R: MVRRAAASK  | 389   | >PPP2R1A-R: MVRGAAASK  | 521   | 132   |
| >PPP2R1A-R: MVRRAAAS   | 11    | >PPP2R1A-R: MVRGAAAS   | 27    | 16    |
| >PPP2R1A-R: MVRRAAASK  | 3     | >PPP2R1A-R: MVRGAAASK  | 3     | 0     |
| >PPP2R1A-R: MVRRAAASK  | 7     | >PPP2R1A-R: MVRGAAASK  | 13    | 6     |
| >PPP2R1A-R: MVRRAAASK  | 8     | >PPP2R1A-R: MVRGAAASK  | 15    | 7     |
| >PPP2R1A-R: MVRRAAASK  | 333   | >PPP2R1A-R: MVRGAAASK  | 1112  | 779   |
| >PPP2R1A-R: MVRRAAASK  | 35    | >PPP2R1A-R: MVRGAAASK  | 29    | 6     |
| >PPP2R1A-R: MVRRAAASK  | 33    | >PPP2R1A-R: MVRGAAASK  | 13    | 20    |
| >PPP2R1A-R: PMVRRAAAS  | 241   | >PPP2R1A-R: PMVRGAAAS  | 129   | 112   |
| >PPP2R1A-R: TPMVRRAA   | 45    | >PPP2R1A-R: TPMVRGAA   | 65    | 20    |
| >PPP2R1A-R: TPMVRRAAA  | 33    | >PPP2R1A-R: TPMVRGAAA  | 34    | 1     |
| >PPP2R1A-R: TPMVRRAAA  | 423   | >PPP2R1A-R: TPMVRGAAA  | 316   | 107   |
| >PPP2R1A-R: TPMVRRAA   | 164   | >PPP2R1A-R: TPMVRGAA   | 605   | 441   |
| >PPP2R1A-R: TPMVRRAAA  | 31    | >PPP2R1A-R: TPMVRGAAA  | 119   | 88    |
| >PPP2R1A-R: TPMVRRAA   | 44    | >PPP2R1A-R: TPMVRGAA   | 30    | 14    |
| >PPP2R1A-R: TPMVRRAAA  | 34    | >PPP2R1A-R: TPMVRGAAA  | 19    | 15    |
| >PPP2R1A-R: TPMVRRAAA  | 261   | >PPP2R1A-R: TPMVRGAAA  | 177   | 84    |
| >PPP2R1A-R: DTPMVRRRA  | 521   | >PPP2R1A-R: DTPMVRGA   | 206   | 315   |
| >PPP2R1A-R: DTPMVRRRA  | 330   | >PPP2R1A-R: DTPMVRGAA  | 49    | 281   |
| >PPP2R1A-R: DTPMVRRRA  | 242   | >PPP2R1A-R: DTPMVRGAA  | 320   | 78    |
| >PPP2R1A-R: RAAASKLGEF | 3917  | >PPP2R1A-R: QAAASKLGEF | 173   | 3744  |
| >PPP2R1A-R: RAAASKLGEF | 175   | >PPP2R1A-R: QAAASKLGEF | 915   | 740   |
| >PPP2R1A-R: RAAASKLGEF | 104   | >PPP2R1A-R: QAAASKLGEF | 519   | 415   |
| >PPP2R1A-R: RAAASKLGEF | 5     | >PPP2R1A-R: QAAASKLGEF | 39    | 34    |
| >PPP2R1A-R: RAAASKLGEF | 36    | >PPP2R1A-R: QAAASKLGEF | 822   | 786   |
| >PPP2R1A-R: RAAASKLGEF | 206   | >PPP2R1A-R: QAAASKLGEF | 1068  | 862   |
| >PPP2R1A-R: RRAAASKL   | 14603 | >PPP2R1A-R: RQAAASKL   | 312   | 14291 |
| >PPP2R1A-R: RRAAASKL   | 18328 | >PPP2R1A-R: RQAAASKL   | 490   | 17838 |
| >PPP2R1A-R: RRAAASKL   | 19907 | >PPP2R1A-R: RQAAASKL   | 92    | 19815 |
| >PPP2R1A-R: RRAAASKLGE | 21910 | >PPP2R1A-R: RQAAASKLGE | 210   | 21700 |
| >PPP2R1A-R: RRAAASKL   | 19450 | >PPP2R1A-R: RQAAASKL   | 191   | 19259 |
| >PPP2R1A-R: RRAAASKLGE | 6361  | >PPP2R1A-R: RQAAASKLGE | 38    | 6323  |
| >PPP2R1A-R: RRAAASKL   | 127   | >PPP2R1A-R: RQAAASKL   | 20    | 107   |
| >PPP2R1A-R: RRAAASKLGE | 31    | >PPP2R1A-R: RQAAASKLGE | 6     | 25    |

|                        |       |                        |       |       |
|------------------------|-------|------------------------|-------|-------|
| >PPP2R1A-R: RRAAASKL   | 24    | >PPP2R1A-R: RQAAASKL   | 319   | 295   |
| >PPP2R1A-R: RRAAASKLGE | 322   | >PPP2R1A-R: RQAAASKLGE | 12910 | 12588 |
| >PPP2R1A-R: RRAAASKLGE | 45    | >PPP2R1A-R: RQAAASKLGE | 903   | 858   |
| >PPP2R1A-R: RRAAASKL   | 445   | >PPP2R1A-R: RQAAASKL   | 351   | 94    |
| >PPP2R1A-R: RRAAASKL   | 14749 | >PPP2R1A-R: RQAAASKL   | 459   | 14290 |
| >PPP2R1A-R: RRAAASKL   | 1417  | >PPP2R1A-R: RQAAASKL   | 75    | 1342  |
| >PPP2R1A-R: RRAAASKL   | 16    | >PPP2R1A-R: RQAAASKL   | 153   | 137   |
| >PPP2R1A-R: RRAAASKLGE | 166   | >PPP2R1A-R: RQAAASKLGE | 5465  | 5299  |
| >PPP2R1A-R: RRAAASKLGE | 111   | >PPP2R1A-R: RQAAASKLGE | 1862  | 1751  |
| >PPP2R1A-R: RRAAASKL   | 34    | >PPP2R1A-R: RQAAASKL   | 200   | 166   |
| >PPP2R1A-R: RRAAASKLGE | 58    | >PPP2R1A-R: RQAAASKLGE | 2286  | 2228  |
| >PPP2R1A-R: VRRAAASK   | 86    | >PPP2R1A-R: VRQAAASK   | 9113  | 9027  |
| >PPP2R1A-R: VRRAAASKL  | 196   | >PPP2R1A-R: VRQAAASKL  | 732   | 536   |
| >PPP2R1A-R: VRRAAASK   | 328   | >PPP2R1A-R: VRQAAASK   | 118   | 210   |
| >PPP2R1A-R: VRRAAASKL  | 545   | >PPP2R1A-R: VRQAAASKL  | 141   | 404   |
| >PPP2R1A-R: VRRAAASKL  | 470   | >PPP2R1A-R: VRQAAASKL  | 348   | 122   |
| >PPP2R1A-R: VRRAAASKL  | 74    | >PPP2R1A-R: VRQAAASKL  | 26    | 48    |
| >PPP2R1A-R: MVRRAAASK  | 53    | >PPP2R1A-R: MVRQAAASK  | 92    | 39    |
| >PPP2R1A-R: MVRRAAASK  | 389   | >PPP2R1A-R: MVRQAAASK  | 882   | 493   |
| >PPP2R1A-R: MVRRAAAS   | 11    | >PPP2R1A-R: MVRQAAAS   | 41    | 30    |
| >PPP2R1A-R: MVRRAAASK  | 3     | >PPP2R1A-R: MVRQAAASK  | 3     | 0     |
| >PPP2R1A-R: MVRRAAASK  | 7     | >PPP2R1A-R: MVRQAAASK  | 21    | 14    |
| >PPP2R1A-R: MVRRAAASK  | 8     | >PPP2R1A-R: MVRQAAASK  | 25    | 17    |
| >PPP2R1A-R: MVRRAAASK  | 333   | >PPP2R1A-R: MVRQAAASK  | 2051  | 1718  |
| >PPP2R1A-R: MVRRAAASK  | 35    | >PPP2R1A-R: MVRQAAASK  | 30    | 5     |
| >PPP2R1A-R: MVRRAAASK  | 33    | >PPP2R1A-R: MVRQAAASK  | 11    | 22    |
| >PPP2R1A-R: PMVRRAAAS  | 241   | >PPP2R1A-R: PMVRQAAAS  | 210   | 31    |
| >PPP2R1A-R: TPMVRRAA   | 45    | >PPP2R1A-R: TPMVRQAA   | 170   | 125   |
| >PPP2R1A-R: TPMVRRAAA  | 33    | >PPP2R1A-R: TPMVRQAAA  | 253   | 220   |
| >PPP2R1A-R: TPMVRRAAA  | 423   | >PPP2R1A-R: TPMVRQAAA  | 1262  | 839   |
| >PPP2R1A-R: TPMVRRAA   | 164   | >PPP2R1A-R: TPMVRQAA   | 219   | 55    |
| >PPP2R1A-R: TPMVRRAAA  | 31    | >PPP2R1A-R: TPMVRQAAA  | 70    | 39    |
| >PPP2R1A-R: TPMVRRAA   | 44    | >PPP2R1A-R: TPMVRQAA   | 53    | 9     |
| >PPP2R1A-R: TPMVRRAAA  | 34    | >PPP2R1A-R: TPMVRQAAA  | 32    | 2     |
| >PPP2R1A-R: TPMVRRAAA  | 261   | >PPP2R1A-R: TPMVRQAAA  | 120   | 141   |
| >PPP2R1A-R: DTPMVRRAA  | 330   | >PPP2R1A-R: DTPMVRQAA  | 98    | 232   |
| >PPP2R1A-R: DTPMVRRAA  | 242   | >PPP2R1A-R: DTPMVRQAA  | 390   | 148   |
| >PPP2R1A-R: RAAASKLGEF | 3917  | >PPP2R1A-R: WAAASKLGEF | 114   | 3803  |
| >PPP2R1A-R: RAAASKLGEF | 175   | >PPP2R1A-R: WAAASKLGEF | 275   | 100   |
| >PPP2R1A-R: RAAASKLGEF | 104   | >PPP2R1A-R: WAAASKLGEF | 228   | 124   |
| >PPP2R1A-R: RAAASKLGEF | 5     | >PPP2R1A-R: WAAASKLGEF | 18    | 13    |
| >PPP2R1A-R: RAAASKLGEF | 36    | >PPP2R1A-R: WAAASKLGEF | 489   | 453   |
| >PPP2R1A-R: RAAASKLGEF | 206   | >PPP2R1A-R: WAAASKLGEF | 141   | 65    |

|                        |       |                        |       |       |
|------------------------|-------|------------------------|-------|-------|
| >PPP2R1A-R: RRAAASKLGE | 9627  | >PPP2R1A-R: RWAAASKLG  | 141   | 9486  |
| >PPP2R1A-R: RRAAASKLGE | 8729  | >PPP2R1A-R: RWAAASKLG  | 163   | 8566  |
| >PPP2R1A-R: RRAAASKL   | 18175 | >PPP2R1A-R: RWAAASKL   | 49    | 18126 |
| >PPP2R1A-R: RRAAASKLGE | 5801  | >PPP2R1A-R: RWAAASKLG  | 6     | 5795  |
| >PPP2R1A-R: RRAAASKL   | 127   | >PPP2R1A-R: RWAAASKL   | 5193  | 5066  |
| >PPP2R1A-R: RRAAASKLGE | 31    | >PPP2R1A-R: RWAAASKLG  | 1064  | 1033  |
| >PPP2R1A-R: RRAAASKL   | 24    | >PPP2R1A-R: RWAAASKL   | 6174  | 6150  |
| >PPP2R1A-R: RRAAASKLGE | 322   | >PPP2R1A-R: RWAAASKLG  | 13620 | 13298 |
| >PPP2R1A-R: RRAAASKLGE | 45    | >PPP2R1A-R: RWAAASKLG  | 8890  | 8845  |
| >PPP2R1A-R: RRAAASKL   | 445   | >PPP2R1A-R: RWAAASKL   | 11024 | 10579 |
| >PPP2R1A-R: RRAAASKL   | 16    | >PPP2R1A-R: RWAAASKL   | 2604  | 2588  |
| >PPP2R1A-R: RRAAASKLGE | 166   | >PPP2R1A-R: RWAAASKLG  | 6743  | 6577  |
| >PPP2R1A-R: RRAAASKLGE | 111   | >PPP2R1A-R: RWAAASKLG  | 7755  | 7644  |
| >PPP2R1A-R: RRAAASKL   | 34    | >PPP2R1A-R: RWAAASKL   | 1543  | 1509  |
| >PPP2R1A-R: RRAAASKLGE | 58    | >PPP2R1A-R: RWAAASKLG  | 14670 | 14612 |
| >PPP2R1A-R: RRAAASKL   | 29704 | >PPP2R1A-R: RWAAASKL   | 232   | 29472 |
| >PPP2R1A-R: RRAAASKLGE | 34393 | >PPP2R1A-R: RWAAASKLG  | 241   | 34152 |
| >PPP2R1A-R: LCSDDTPMVI | 31448 | >PPP2R1A-R: LCSDDTPMVI | 177   | 31271 |
| >PPP2R1A-R: VRRAAASK   | 86    | >PPP2R1A-R: VRWAAASK   | 9461  | 9375  |
| >PPP2R1A-R: VRRAAASKL  | 196   | >PPP2R1A-R: VRWAAASKL  | 143   | 53    |
| >PPP2R1A-R: VRRAAASK   | 328   | >PPP2R1A-R: VRWAAASK   | 39    | 289   |
| >PPP2R1A-R: VRRAAASKL  | 545   | >PPP2R1A-R: VRWAAASKL  | 55    | 490   |
| >PPP2R1A-R: VRRAAASKLC | 4105  | >PPP2R1A-R: VRWAAASKL  | 390   | 3715  |
| >PPP2R1A-R: VRRAAASK   | 3042  | >PPP2R1A-R: VRWAAASK   | 483   | 2559  |
| >PPP2R1A-R: VRRAAASKL  | 470   | >PPP2R1A-R: VRWAAASKL  | 247   | 223   |
| >PPP2R1A-R: VRRAAASKL  | 74    | >PPP2R1A-R: VRWAAASKL  | 19    | 55    |
| >PPP2R1A-R: MVRRAAASK  | 740   | >PPP2R1A-R: MVRWAAASI  | 168   | 572   |
| >PPP2R1A-R: MVRRAAASK  | 53    | >PPP2R1A-R: MVRWAAASI  | 49    | 4     |
| >PPP2R1A-R: MVRRAAASK  | 389   | >PPP2R1A-R: MVRWAAASI  | 168   | 221   |
| >PPP2R1A-R: MVRRAAAS   | 11    | >PPP2R1A-R: MVRWAAAS   | 43    | 32    |
| >PPP2R1A-R: MVRRAAASK  | 3     | >PPP2R1A-R: MVRWAAASI  | 3     | 0     |
| >PPP2R1A-R: MVRRAAASK  | 7     | >PPP2R1A-R: MVRWAAASI  | 18    | 11    |
| >PPP2R1A-R: MVRRAAASK  | 8     | >PPP2R1A-R: MVRWAAASI  | 22    | 14    |
| >PPP2R1A-R: MVRRAAASK  | 333   | >PPP2R1A-R: MVRWAAASI  | 326   | 7     |
| >PPP2R1A-R: MVRRAAASK  | 35    | >PPP2R1A-R: MVRWAAASI  | 10    | 25    |
| >PPP2R1A-R: MVRRAAASK  | 33    | >PPP2R1A-R: MVRWAAASI  | 16    | 17    |
| >PPP2R1A-R: PMVRRAAA   | 4428  | >PPP2R1A-R: PMVRWAAA   | 254   | 4174  |
| >PPP2R1A-R: PMVRRAAAS  | 2042  | >PPP2R1A-R: PMVRWAAA   | 206   | 1836  |
| >PPP2R1A-R: PMVRRAAA   | 1208  | >PPP2R1A-R: PMVRWAAA   | 339   | 869   |
| >PPP2R1A-R: PMVRRAAAS  | 241   | >PPP2R1A-R: PMVRWAAA   | 64    | 177   |
| >PPP2R1A-R: PMVRRAAAS  | 742   | >PPP2R1A-R: PMVRWAAA   | 402   | 340   |
| >PPP2R1A-R: TPMVRRAA   | 45    | >PPP2R1A-R: TPMVRWAA   | 200   | 155   |
| >PPP2R1A-R: TPMVRRAAA  | 33    | >PPP2R1A-R: TPMVRWAA   | 70    | 37    |

|                       |       |                       |       |       |
|-----------------------|-------|-----------------------|-------|-------|
| >PPP2R1A-R:TPMVRRAAA  | 423   | >PPP2R1A-R:TPMVRWAA/  | 900   | 477   |
| >PPP2R1A-R:TPMVRRAA   | 164   | >PPP2R1A-R:TPMVRWAA   | 182   | 18    |
| >PPP2R1A-R:TPMVRRAAA  | 31    | >PPP2R1A-R:TPMVRWAA/  | 80    | 49    |
| >PPP2R1A-R:TPMVRRAA   | 44    | >PPP2R1A-R:TPMVRWAA   | 28    | 16    |
| >PPP2R1A-R:TPMVRRAAA  | 34    | >PPP2R1A-R:TPMVRWAA/  | 21    | 13    |
| >PPP2R1A-R:TPMVRRAAA  | 261   | >PPP2R1A-R:TPMVRWAA/  | 314   | 53    |
| >PPP2R1A-R:DTPMVRRA   | 521   | >PPP2R1A-R:DTPMVRWA   | 340   | 181   |
| >PPP2R1A-R:DTPMVRRAA  | 330   | >PPP2R1A-R:DTPMVRWA/  | 16    | 314   |
| >PPP2R1A-R:DTPMVRRAA  | 242   | >PPP2R1A-R:DTPMVRWA/  | 362   | 120   |
| >PPP2R1A-R:DTPMVRRAA  | 2202  | >PPP2R1A-R:DTPMVRWA/  | 480   | 1722  |
| >PPP2R1A-R:CSDDTPMVR  | 16954 | >PPP2R1A-R:CSDDTPMVR  | 15    | 16939 |
| >PPP2R1A-R:CSDDTPMVR  | 24822 | >PPP2R1A-R:CSDDTPMVR  | 288   | 24534 |
| >PPP2R1A-R:CSDDTPMVR  | 20412 | >PPP2R1A-R:CSDDTPMVR  | 22    | 20390 |
| >PPP2R1A-R:RYMVADKFTI | 86    | >PPP2R1A-R:CYMVADKFTI | 62    | 24    |
| >PPP2R1A-R:RYMVADKF   | 34    | >PPP2R1A-R:CYMVADKF   | 35    | 1     |
| >PPP2R1A-R:RYMVADKFTI | 75    | >PPP2R1A-R:CYMVADKFTI | 89    | 14    |
| >PPP2R1A-R:RYMVADKF   | 66    | >PPP2R1A-R:CYMVADKF   | 172   | 106   |
| >PPP2R1A-R:RYMVADKFTI | 180   | >PPP2R1A-R:CYMVADKFTI | 504   | 324   |
| >PPP2R1A-R:RYMVADKF   | 4     | >PPP2R1A-R:CYMVADKF   | 4     | 0     |
| >PPP2R1A-R:RYMVADKFT  | 293   | >PPP2R1A-R:CYMVADKFT  | 436   | 143   |
| >PPP2R1A-R:RYMVADKFTI | 409   | >PPP2R1A-R:CYMVADKFTI | 565   | 156   |
| >PPP2R1A-R:RYMVADKFTI | 5     | >PPP2R1A-R:CYMVADKFTI | 5     | 0     |
| >PPP2R1A-R:RYMVADKF   | 284   | >PPP2R1A-R:CYMVADKF   | 12706 | 12422 |
| >PPP2R1A-R:VRYMVADKF  | 64    | >PPP2R1A-R:VCYMVADKF  | 1294  | 1230  |
| >PPP2R1A-R:VRYMVADK   | 272   | >PPP2R1A-R:VCYMVADK   | 27574 | 27302 |
| >PPP2R1A-R:VRYMVADKF  | 282   | >PPP2R1A-R:VCYMVADKF  | 25539 | 25257 |
| >PPP2R1A-R:VRYMVADKF  | 412   | >PPP2R1A-R:VCYMVADKF  | 25864 | 25452 |
| >PPP2R1A-R:VRYMVADKF  | 1515  | >PPP2R1A-R:VCYMVADKF  | 113   | 1402  |
| >PPP2R1A-R:VRYMVADKF  | 359   | >PPP2R1A-R:VCYMVADKF  | 16844 | 16485 |
| >PPP2R1A-R:QAAEDKSWR  | 115   | >PPP2R1A-R:QAAEDKSWR  | 36235 | 36120 |
| >PPP2R1A-R:RVRYMVADK  | 87    | >PPP2R1A-R:RVCYMVADK  | 180   | 93    |
| >PPP2R1A-R:RVRYMVADK  | 565   | >PPP2R1A-R:RVCYMVADK  | 37    | 528   |
| >PPP2R1A-R:RVRYMVAD   | 90    | >PPP2R1A-R:RVCYMVAD   | 4837  | 4747  |
| >PPP2R1A-R:RVRYMVADK  | 3     | >PPP2R1A-R:RVCYMVADK  | 26    | 23    |
| >PPP2R1A-R:RVRYMVADK  | 299   | >PPP2R1A-R:RVCYMVADK  | 10738 | 10439 |
| >PPP2R1A-R:RVRYMVADK  | 13    | >PPP2R1A-R:RVCYMVADK  | 2246  | 2233  |
| >PPP2R1A-R:RVRYMVADK  | 98    | >PPP2R1A-R:RVCYMVADK  | 184   | 86    |
| >PPP2R1A-R:RVRYMVADK  | 44    | >PPP2R1A-R:RVCYMVADK  | 20    | 24    |
| >PPP2R1A-R:RVRYMVADK  | 1793  | >PPP2R1A-R:RVCYMVADK  | 297   | 1496  |
| >PPP2R1A-R:RVRYMVADK  | 357   | >PPP2R1A-R:RVCYMVADK  | 744   | 387   |
| >PPP2R1A-R:RVRYMVADK  | 225   | >PPP2R1A-R:RVCYMVADK  | 1069  | 844   |
| >PPP2R1A-R:RVRYMVADK  | 26    | >PPP2R1A-R:RVCYMVADK  | 90    | 64    |
| >PPP2R1A-R:RVRYMVADK  | 144   | >PPP2R1A-R:RVCYMVADK  | 416   | 272   |

|                       |      |                       |      |      |
|-----------------------|------|-----------------------|------|------|
| >PPP2R1A-R; WRVRYMVA  | 590  | >PPP2R1A-R; WRVCYMVA  | 289  | 301  |
| >PPP2R1A-R; WRVRYMVAI | 59   | >PPP2R1A-R; WRVCYMVAI | 33   | 26   |
| >PPP2R1A-R; WRVRYMVAI | 67   | >PPP2R1A-R; WRVCYMVAI | 149  | 82   |
| >PPP2R1A-R; WRVRYMVAI | 108  | >PPP2R1A-R; WRVCYMVAI | 153  | 45   |
| >PPP2R1A-R; WRVRYMVAI | 235  | >PPP2R1A-R; WRVCYMVAI | 464  | 229  |
| >PPP2R1A-R; WRVRYMVAI | 347  | >PPP2R1A-R; WRVCYMVAI | 978  | 631  |
| >PPP2R1A-R; SWRVRYMV  | 143  | >PPP2R1A-R; SWRVRYMV  | 748  | 605  |
| >PPP2R1A-R; SWRVRYMV/ | 14   | >PPP2R1A-R; SWRVRYMV/ | 49   | 35   |
| >PPP2R1A-R; SWRVRYMV/ | 9    | >PPP2R1A-R; SWRVRYMV/ | 16   | 7    |
| >PPP2R1A-R; SWRVRYMV/ | 316  | >PPP2R1A-R; SWRVRYMV/ | 9158 | 8842 |
| >PPP2R1A-R; SWRVRYMV/ | 1446 | >PPP2R1A-R; SWRVRYMV/ | 465  | 981  |
| >PPP2R1A-R; SWRVRYMV  | 117  | >PPP2R1A-R; SWRVRYMV  | 115  | 2    |
| >PPP2R1A-R; SWRVRYMV/ | 213  | >PPP2R1A-R; SWRVRYMV/ | 307  | 94   |
| >PPP2R1A-R; KSWRVRYM  | 175  | >PPP2R1A-R; KSWRVRYM  | 109  | 66   |
| >PPP2R1A-R; KSWRVRYMV | 531  | >PPP2R1A-R; KSWRVRYMV | 68   | 463  |
| >PPP2R1A-R; KSWRVRYMV | 2047 | >PPP2R1A-R; KSWRVRYMV | 393  | 1654 |
| >PPP2R1A-R; KSWRVRYMV | 169  | >PPP2R1A-R; KSWRVRYMV | 70   | 99   |
| >PPP2R1A-R; KSWRVRYMV | 732  | >PPP2R1A-R; KSWRVRYMV | 259  | 473  |
| >PPP2R1A-R; KSWRVRYM  | 216  | >PPP2R1A-R; KSWRVRYM  | 296  | 80   |
| >PPP2R1A-R; KSWRVRYMV | 325  | >PPP2R1A-R; KSWRVRYMV | 2603 | 2278 |
| >PPP2R1A-R; KSWRVRYMV | 45   | >PPP2R1A-R; KSWRVRYMV | 228  | 183  |
| >PPP2R1A-R; KSWRVRYMV | 481  | >PPP2R1A-R; KSWRVRYMV | 646  | 165  |
| >PPP2R1A-R; KSWRVRYM  | 300  | >PPP2R1A-R; KSWRVRYM  | 254  | 46   |
| >PPP2R1A-R; KSWRVRYMV | 71   | >PPP2R1A-R; KSWRVRYMV | 160  | 89   |
| >PPP2R1A-R; KSWRVRYM  | 430  | >PPP2R1A-R; KSWRVRYM  | 395  | 35   |
| >PPP2R1A-R; KSWRVRYMV | 79   | >PPP2R1A-R; KSWRVRYMV | 105  | 26   |
| >PPP2R1A-R; KSWRVRYMV | 380  | >PPP2R1A-R; KSWRVRYMV | 401  | 21   |
| >PPP2R1A-R; KSWRVRYMV | 495  | >PPP2R1A-R; KSWRVRYMV | 1399 | 904  |
| >PPP2R1A-R; KSWRVRYM  | 169  | >PPP2R1A-R; KSWRVRYM  | 117  | 52   |
| >PPP2R1A-R; KSWRVRYM  | 21   | >PPP2R1A-R; KSWRVRYM  | 14   | 7    |
| >PPP2R1A-R; KSWRVRYM  | 46   | >PPP2R1A-R; KSWRVRYM  | 62   | 16   |
| >PPP2R1A-R; KSWRVRYMV | 173  | >PPP2R1A-R; KSWRVRYMV | 530  | 357  |
| >PPP2R1A-R; KSWRVRYM  | 38   | >PPP2R1A-R; KSWRVRYM  | 18   | 20   |
| >PPP2R1A-R; KSWRVRYMV | 484  | >PPP2R1A-R; KSWRVRYMV | 198  | 286  |
| >PPP2R1A-R; KSWRVRYM  | 273  | >PPP2R1A-R; KSWRVRYM  | 331  | 58   |
| >PPP2R1A-R; KSWRVRYMV | 490  | >PPP2R1A-R; KSWRVRYMV | 298  | 192  |
| >PPP2R1A-R; AEDKSWRV  | 418  | >PPP2R1A-R; AEDKSWRV  | 253  | 165  |
| >PPP2R1A-R; AEDKSWRV  | 548  | >PPP2R1A-R; AEDKSWRV  | 378  | 170  |
| >PPP2R1A-R; AEDKSWRV  | 215  | >PPP2R1A-R; AEDKSWRV  | 205  | 10   |
| >PPP2R1A-R; AEDKSWRV  | 252  | >PPP2R1A-R; AEDKSWRV  | 161  | 91   |
| >PPP2R1A-R; AEDKSWRV  | 372  | >PPP2R1A-R; AEDKSWRV  | 471  | 99   |
| >PPP2R1A-R; AEDKSWRV  | 1323 | >PPP2R1A-R; AEDKSWRV  | 177  | 1146 |
| >PPP2R1A-R; AEDKSWRV  | 327  | >PPP2R1A-R; AEDKSWRV  | 119  | 208  |

|                       |       |                       |       |       |
|-----------------------|-------|-----------------------|-------|-------|
| >PPP2R1A-R:AAEDKSWRV  | 354   | >PPP2R1A-R:AAEDKSWRV  | 803   | 449   |
| >PPP2R1A-R:AAEDKSWRV  | 443   | >PPP2R1A-R:AAEDKSWRV  | 986   | 543   |
| >PPP2R1A-R:AAEDKSWRV  | 36    | >PPP2R1A-R:AAEDKSWRV  | 436   | 400   |
| >PPP2R1A-R:RVRLAIEY   | 313   | >PPP2R1A-R:WVRLAIEY   | 10067 | 9754  |
| >PPP2R1A-R:RVRLAIEY   | 356   | >PPP2R1A-R:WVRLAIEY   | 230   | 126   |
| >PPP2R1A-R:RVRLAIEYM  | 573   | >PPP2R1A-R:WVRLAIEYM  | 296   | 277   |
| >PPP2R1A-R:RVRLAIEY   | 1250  | >PPP2R1A-R:WVRLAIEY   | 270   | 980   |
| >PPP2R1A-R:RVRLAIE    | 47    | >PPP2R1A-R:WVRLAIE    | 7877  | 7830  |
| >PPP2R1A-R:RVRLAIEY   | 5     | >PPP2R1A-R:WVRLAIEY   | 1134  | 1129  |
| >PPP2R1A-R:RVRLAIEYM  | 7     | >PPP2R1A-R:WVRLAIEYM  | 1905  | 1898  |
| >PPP2R1A-R:RVRLAIEYMF | 69    | >PPP2R1A-R:WVRLAIEYM  | 8376  | 8307  |
| >PPP2R1A-R:RVRLAIEY   | 437   | >PPP2R1A-R:WVRLAIEY   | 6365  | 5928  |
| >PPP2R1A-R:RVRLAIEY   | 143   | >PPP2R1A-R:WVRLAIEY   | 248   | 105   |
| >PPP2R1A-R:RVRLAIEYM  | 470   | >PPP2R1A-R:WVRLAIEYM  | 902   | 432   |
| >PPP2R1A-R:RVRLAIEY   | 11    | >PPP2R1A-R:WVRLAIEY   | 69    | 58    |
| >PPP2R1A-R:RVRLAIEYM  | 77    | >PPP2R1A-R:WVRLAIEYM  | 1073  | 996   |
| >PPP2R1A-R:RVRLAIEY   | 1507  | >PPP2R1A-R:WVRLAIEY   | 66    | 1441  |
| >PPP2R1A-R:RVRLAIEY   | 318   | >PPP2R1A-R:WVRLAIEY   | 227   | 91    |
| >PPP2R1A-R:RVRLAIEYM  | 41    | >PPP2R1A-R:WVRLAIEYM  | 33    | 8     |
| >PPP2R1A-R:WRVRLAII   | 15254 | >PPP2R1A-R:WWVRLAII   | 488   | 14766 |
| >PPP2R1A-R:WRVRLAII   | 23180 | >PPP2R1A-R:WWVRLAII   | 311   | 22869 |
| >PPP2R1A-R:WRVRLAIEY  | 5427  | >PPP2R1A-R:WWVRLAIEY  | 457   | 4970  |
| >PPP2R1A-R:WRVRLAIEY  | 3946  | >PPP2R1A-R:WWVRLAIEY  | 283   | 3663  |
| >PPP2R1A-R:WRVRLAIEY  | 86    | >PPP2R1A-R:WWVRLAIEY  | 2682  | 2596  |
| >PPP2R1A-R:WRVRLAIEYI | 330   | >PPP2R1A-R:WWVRLAIEY  | 7761  | 7431  |
| >PPP2R1A-R:WRVRLAII   | 108   | >PPP2R1A-R:WWVRLAII   | 11295 | 11187 |
| >PPP2R1A-R:WRVRLAIEY  | 20    | >PPP2R1A-R:WWVRLAIEY  | 1740  | 1720  |
| >PPP2R1A-R:WRVRLAIEYI | 35    | >PPP2R1A-R:WWVRLAIEY  | 8949  | 8914  |
| >PPP2R1A-R:WRVRLAII   | 293   | >PPP2R1A-R:WWVRLAII   | 15495 | 15202 |
| >PPP2R1A-R:WRVRLAIEY  | 419   | >PPP2R1A-R:WWVRLAIEY  | 709   | 290   |
| >PPP2R1A-R:WRVRLAII   | 146   | >PPP2R1A-R:WWVRLAII   | 16106 | 15960 |
| >PPP2R1A-R:WRVRLAIEYI | 207   | >PPP2R1A-R:WWVRLAIEY  | 16736 | 16529 |
| >PPP2R1A-R:WRVRLAII   | 34284 | >PPP2R1A-R:WWVRLAII   | 494   | 33790 |
| >PPP2R1A-R:WRVRLAIEYI | 29564 | >PPP2R1A-R:WWVRLAIEY  | 161   | 29403 |
| >PPP2R1A-R:IVELAEDAKW | 220   | >PPP2R1A-R:IVELAEDAKW | 31570 | 31350 |
| >PPP2R1A-R:IVELAEDAKW | 24930 | >PPP2R1A-R:IVELAEDAKW | 345   | 24585 |
| >PPP2R1A-R:KWRVRLAI   | 3146  | >PPP2R1A-R:KWVRLAI    | 317   | 2829  |
| >PPP2R1A-R:KWRVRLAII  | 2215  | >PPP2R1A-R:KWVRLAII   | 205   | 2010  |
| >PPP2R1A-R:KWRVRLAII  | 613   | >PPP2R1A-R:KWVRLAII   | 244   | 369   |
| >PPP2R1A-R:KWRVRLAIE' | 1668  | >PPP2R1A-R:KWVRLAIE   | 104   | 1564  |
| >PPP2R1A-R:KWRVRLAI   | 8     | >PPP2R1A-R:KWVRLAI    | 1853  | 1845  |
| >PPP2R1A-R:KWRVRLAII  | 8     | >PPP2R1A-R:KWVRLAII   | 2444  | 2436  |
| >PPP2R1A-R:KWRVRLAIE' | 18    | >PPP2R1A-R:KWVRLAIE   | 5141  | 5123  |

|                        |       |                        |       |       |
|------------------------|-------|------------------------|-------|-------|
| >PPP2R1A-R<KWRVRLAIIE' | 321   | >PPP2R1A-R<KWWVRLAIIIE | 81    | 240   |
| >PPP2R1A-R<KWRVRLAIIIE | 6379  | >PPP2R1A-R<KWWVRLAIIIE | 384   | 5995  |
| >PPP2R1A-R<KWRVRLAIIE' | 4354  | >PPP2R1A-R<KWWVRLAIIIE | 327   | 4027  |
| >PPP2R1A-R<KWRVRLAI    | 37    | >PPP2R1A-R<KWWVRLAI    | 20    | 17    |
| >PPP2R1A-R<KWRVRLAII   | 123   | >PPP2R1A-R<KWWVRLAII   | 48    | 75    |
| >PPP2R1A-R<KWRVRLAIIE' | 265   | >PPP2R1A-R<KWWVRLAIIIE | 84    | 181   |
| >PPP2R1A-R<AKWRVRLAI   | 779   | >PPP2R1A-R<AKWWVRLAI   | 298   | 481   |
| >PPP2R1A-R<AKWRVRLAI   | 15    | >PPP2R1A-R<AKWWVRLAI   | 64    | 49    |
| >PPP2R1A-R<AKWRVRLAII  | 37    | >PPP2R1A-R<AKWWVRLAI   | 143   | 106   |
| >PPP2R1A-R<AKWRVRLAI   | 367   | >PPP2R1A-R<AKWWVRLAI   | 445   | 78    |
| >PPP2R1A-R<AKWRVRLAI   | 208   | >PPP2R1A-R<AKWWVRLAI   | 221   | 13    |
| >PPP2R1A-R<AKWRVRLAI   | 1156  | >PPP2R1A-R<AKWWVRLAI   | 452   | 704   |
| >PPP2R1A-R<DAKWRVRLA   | 280   | >PPP2R1A-R<DAKWWVRLA   | 2510  | 2230  |
| >PPP2R1A-R<EDAKWRVR    | 528   | >PPP2R1A-R<EDAKWWVR    | 285   | 243   |
| >PPP2R1A-R<EDAKWRVR    | 2053  | >PPP2R1A-R<EDAKWWVR    | 469   | 1584  |
| >PPP2R1A-R<AEDAKWRV    | 2805  | >PPP2R1A-R<AEDAKWWV    | 460   | 2345  |
| >PPP2R1A-R<AEDAKWRV    | 465   | >PPP2R1A-R<AEDAKWWV    | 112   | 353   |
| >PPP2R1A-R<AEDAKWRVR   | 276   | >PPP2R1A-R<AEDAKWWV    | 207   | 69    |
| >PPP2R1A-R<AEDAKWRVR   | 603   | >PPP2R1A-R<AEDAKWWV    | 43    | 560   |
| >PPP2R1A-R<AEDAKWRVR   | 1992  | >PPP2R1A-R<AEDAKWWV    | 411   | 1581  |
| >PPP2R1A-R<AEDAKWRV    | 91    | >PPP2R1A-R<AEDAKWWV    | 38    | 53    |
| >PPP2R1A-R<AEDAKWRVR   | 56    | >PPP2R1A-R<AEDAKWWV    | 37    | 19    |
| >PPP2R1A-R<AEDAKWRVR   | 321   | >PPP2R1A-R<AEDAKWWV    | 420   | 99    |
| >PPP2R1A-R<LAEDAKWRV   | 449   | >PPP2R1A-R<LAEDAKWW\   | 140   | 309   |
| >PPP2R1A-R<LAEDAKWRV   | 448   | >PPP2R1A-R<LAEDAKWW\   | 337   | 111   |
| >PPP2R1A-R<LAEDAKWRV   | 9     | >PPP2R1A-R<LAEDAKWW\   | 7     | 2     |
| >PPP2R1A-R<LAEDAKWRV   | 365   | >PPP2R1A-R<LAEDAKWW\   | 391   | 26    |
| >PPP2R1A-R<LAEDAKWR    | 278   | >PPP2R1A-R<LAEDAKWW    | 32435 | 32157 |
| >PPP2R1A-R<LAEDAKWR    | 21358 | >PPP2R1A-R<LAEDAKWW    | 73    | 21285 |
| >PPP2R1A-R<LAEDAKWR    | 31834 | >PPP2R1A-R<LAEDAKWW    | 137   | 31697 |
| >PPP2R1A-R<LAEDAKWR    | 24796 | >PPP2R1A-R<LAEDAKWW    | 100   | 24696 |
| >PPP2R1A-R<LAEDAKWR    | 30085 | >PPP2R1A-R<LAEDAKWW    | 142   | 29943 |
| >PPP2R1A-R<LAEDAKWR    | 31094 | >PPP2R1A-R<LAEDAKWW    | 269   | 30825 |
| >PPP2R1A-R<ELAEDAKWR'  | 401   | >PPP2R1A-R<ELAEDAKWW   | 201   | 200   |
| >PPP2R1A-R<ELAEDAKWR'  | 211   | >PPP2R1A-R<ELAEDAKWW   | 187   | 24    |
| >PPP2R1A-R<ELAEDAKWR'  | 1556  | >PPP2R1A-R<ELAEDAKWW   | 481   | 1075  |
| >PPP2R1A-R<ELAEDAKWR'  | 6     | >PPP2R1A-R<ELAEDAKWW   | 5     | 1     |
| >PPP2R1A-R<ELAEDAKWR'  | 40    | >PPP2R1A-R<ELAEDAKWW   | 53    | 13    |
| >PPP2R1A-R<ELAEDAKWR'  | 10    | >PPP2R1A-R<ELAEDAKWW   | 8     | 2     |
| >PPP2R1A-R<ELAEDAKWR'  | 4     | >PPP2R1A-R<ELAEDAKWW   | 4     | 0     |
| >PPP2R1A-R<ELAEDAKWR'  | 3     | >PPP2R1A-R<ELAEDAKWW   | 3     | 0     |
| >PPP2R1A-R<ELAEDAKWR'  | 1638  | >PPP2R1A-R<ELAEDAKWW   | 314   | 1324  |
| >PPP2R1A-R<ELAEDAKWR   | 22    | >PPP2R1A-R<ELAEDAKWW   | 18558 | 18536 |



|                        |       |                        |       |       |
|------------------------|-------|------------------------|-------|-------|
| >PPP2R1A-R' ELAEDAKWR' | 76    | >PPP2R1A-R' ELAEDAKWM  | 28    | 48    |
| >PPP2R1A-R' ELAEDAKWR' | 289   | >PPP2R1A-R' ELAEDAKWM  | 707   | 418   |
| >PPP2R1A-R' ELAEDAKWR' | 12    | >PPP2R1A-R' ELAEDAKWM  | 10    | 2     |
| >PPP2R1A-R' ELAEDAKWR' | 1699  | >PPP2R1A-R' ELAEDAKWM  | 294   | 1405  |
| >PPP2R1A-R' VELAEDAKW  | 26776 | >PPP2R1A-R' VELAEDAKW' | 309   | 26467 |
| >PPP2R1A-R' VELAEDAKW  | 115   | >PPP2R1A-R' VELAEDAKW' | 510   | 395   |
| >PPP2R1A-W WRVRYMVAI   | 59    | >PPP2R1A-W CRVRYMVAD   | 154   | 95    |
| >PPP2R1A-W WRVRYMVAI   | 67    | >PPP2R1A-W CRVRYMVAD   | 240   | 173   |
| >PPP2R1A-W WRVRYMVAI   | 108   | >PPP2R1A-W CRVRYMVAD   | 455   | 347   |
| >PPP2R1A-W WRVRYMVAI   | 235   | >PPP2R1A-W CRVRYMVAD   | 906   | 671   |
| >PPP2R1A-W WRVRYMVAI   | 347   | >PPP2R1A-W CRVRYMVAD   | 697   | 350   |
| >PPP2R1A-W WRVRYMVAI   | 841   | >PPP2R1A-W CRVRYMVAD   | 207   | 634   |
| >PPP2R1A-W SWRVRYMV    | 143   | >PPP2R1A-W SCRVRVMV    | 137   | 6     |
| >PPP2R1A-W SWRVRYMV/   | 14    | >PPP2R1A-W SCRVRYMVA   | 12    | 2     |
| >PPP2R1A-W SWRVRYMV/   | 9     | >PPP2R1A-W SCRVRYMVA   | 9     | 0     |
| >PPP2R1A-W SWRVRYMV/   | 316   | >PPP2R1A-W SCRVRYMVA   | 113   | 203   |
| >PPP2R1A-W SWRVRYMV    | 117   | >PPP2R1A-W SCRVRVMV    | 33617 | 33500 |
| >PPP2R1A-W SWRVRYMV/   | 213   | >PPP2R1A-W SCRVRYMVA   | 34226 | 34013 |
| >PPP2R1A-W TLRQAAEDKS  | 305   | >PPP2R1A-W TLRQAAEDKS  | 25032 | 24727 |
| >PPP2R1A-W TLRQAAEDKS  | 207   | >PPP2R1A-W TLRQAAEDKS  | 24341 | 24134 |
| >PPP2R1A-W KSWRVRYM    | 175   | >PPP2R1A-W KSCRVRYM    | 2621  | 2446  |
| >PPP2R1A-W KSWRVRYMV   | 169   | >PPP2R1A-W KSCRVRVMV   | 2779  | 2610  |
| >PPP2R1A-W KSWRVRYM    | 216   | >PPP2R1A-W KSCRVRYM    | 145   | 71    |
| >PPP2R1A-W KSWRVRYMV   | 325   | >PPP2R1A-W KSCRVRVMV   | 238   | 87    |
| >PPP2R1A-W KSWRVRYMV   | 45    | >PPP2R1A-W KSCRVRVMV/  | 32    | 13    |
| >PPP2R1A-W KSWRVRYMV   | 481   | >PPP2R1A-W KSCRVRVMV   | 1331  | 850   |
| >PPP2R1A-W KSWRVRYM    | 300   | >PPP2R1A-W KSCRVRYM    | 1755  | 1455  |
| >PPP2R1A-W KSWRVRYMV   | 71    | >PPP2R1A-W KSCRVRVMV   | 389   | 318   |
| >PPP2R1A-W KSWRVRYM    | 430   | >PPP2R1A-W KSCRVRYM    | 3453  | 3023  |
| >PPP2R1A-W KSWRVRYMV   | 79    | >PPP2R1A-W KSCRVRVMV   | 455   | 376   |
| >PPP2R1A-W KSWRVRYMV   | 380   | >PPP2R1A-W KSCRVRVMV/  | 2592  | 2212  |
| >PPP2R1A-W KSWRVRYMV   | 495   | >PPP2R1A-W KSCRVRVMV   | 1742  | 1247  |
| >PPP2R1A-W KSWRVRYM    | 169   | >PPP2R1A-W KSCRVRYM    | 1625  | 1456  |
| >PPP2R1A-W KSWRVRYM    | 21    | >PPP2R1A-W KSCRVRYM    | 102   | 81    |
| >PPP2R1A-W KSWRVRYM    | 46    | >PPP2R1A-W KSCRVRYM    | 367   | 321   |
| >PPP2R1A-W KSWRVRYMV   | 173   | >PPP2R1A-W KSCRVRVMV   | 4213  | 4040  |
| >PPP2R1A-W KSWRVRYM    | 38    | >PPP2R1A-W KSCRVRYM    | 124   | 86    |
| >PPP2R1A-W KSWRVRYMV   | 484   | >PPP2R1A-W KSCRVRVMV   | 895   | 411   |
| >PPP2R1A-W KSWRVRYM    | 273   | >PPP2R1A-W KSCRVRYM    | 854   | 581   |
| >PPP2R1A-W KSWRVRYMV   | 490   | >PPP2R1A-W KSCRVRVMV   | 1661  | 1171  |
| >PPP2R1A-W AEDKSWRV    | 412   | >PPP2R1A-W AEDKSCRV    | 1259  | 847   |
| >PPP2R1A-W AEDKSWRVR   | 418   | >PPP2R1A-W AEDKSCRVRV  | 869   | 451   |
| >PPP2R1A-W AEDKSWRVR   | 215   | >PPP2R1A-W AEDKSCRVRV  | 68    | 147   |

|                      |      |                      |       |       |
|----------------------|------|----------------------|-------|-------|
| >PPP2R1A-WAEDKSWRVR  | 252  | >PPP2R1A-WAEDKSCRVR  | 101   | 151   |
| >PPP2R1A-WAEDKSWRVR  | 372  | >PPP2R1A-WAEDKSCRVR  | 785   | 413   |
| >PPP2R1A-WAEDKSWRV   | 81   | >PPP2R1A-WAEDKSCR    | 574   | 493   |
| >PPP2R1A-WAEDKSWRV   | 311  | >PPP2R1A-WAEDKSCR    | 1382  | 1071  |
| >PPP2R1A-WAEDKSWRVR  | 327  | >PPP2R1A-WAEDKSCRVR  | 509   | 182   |
| >PPP2R1A-WAAEDKSWRV  | 354  | >PPP2R1A-WAAEDKSCR   | 1483  | 1129  |
| >PPP2R1A-WAAEDKSWRV  | 241  | >PPP2R1A-WAAEDKSCR   | 2521  | 2280  |
| >PPP2R1A-WAAEDKSWRV  | 193  | >PPP2R1A-WAAEDKSCR   | 1096  | 903   |
| >PPP2R1A-WAAEDKSWRV  | 9    | >PPP2R1A-WAAEDKSCR   | 24    | 15    |
| >PPP2R1A-WAAEDKSWRV  | 443  | >PPP2R1A-WAAEDKSCR   | 1298  | 855   |
| >PPP2R1A-WAAEDKSWR   | 407  | >PPP2R1A-WAAEDKSCR   | 850   | 443   |
| >PPP2R1A-WAAEDKSWRV  | 36   | >PPP2R1A-WAAEDKSCR   | 39    | 3     |
| >PPP2R1A-WQAAEDKSWR  | 304  | >PPP2R1A-WQAAEDKSCR  | 1193  | 889   |
| >PPP2R1A-WQAAEDKSWR  | 55   | >PPP2R1A-WQAAEDKSCR  | 184   | 129   |
| >PPP2R1A-WQAAEDKSWR  | 22   | >PPP2R1A-WQAAEDKSCR  | 41    | 19    |
| >PPP2R1A-WQAAEDKSWR  | 115  | >PPP2R1A-WQAAEDKSCR  | 108   | 7     |
| >PPP2R1A-WQAAEDKSWR  | 283  | >PPP2R1A-WQAAEDKSCR  | 644   | 361   |
| >PPP2R1A-WQAAEDKSWR  | 36   | >PPP2R1A-WQAAEDKSCR  | 141   | 105   |
| >PPP2R1A-WQAAEDKSW   | 138  | >PPP2R1A-WQAAEDKSC   | 23147 | 23009 |
| >PPP2R1A-WQAAEDKSW   | 178  | >PPP2R1A-WQAAEDKSC   | 30635 | 30457 |
| >PPP2R1A-WQAAEDKSW   | 157  | >PPP2R1A-WQAAEDKSC   | 24194 | 24037 |
| >PPP2R1A-WQAAEDKSW   | 87   | >PPP2R1A-WQAAEDKSC   | 21603 | 21516 |
| >PPP2R1A-WQAAEDKSW   | 339  | >PPP2R1A-WQAAEDKSC   | 30201 | 29862 |
| >PPP2R1A-WRQAAEDKSW  | 150  | >PPP2R1A-WRQAAEDKSC  | 1031  | 881   |
| >PPP2R1A-WRQAAEDKSW  | 238  | >PPP2R1A-WRQAAEDKSC  | 553   | 315   |
| >PPP2R1A-WRQAAEDKSW  | 173  | >PPP2R1A-WRQAAEDKSC  | 229   | 56    |
| >PPP2R1A-WRQAAEDKSW  | 24   | >PPP2R1A-WRQAAEDKSC  | 69    | 45    |
| >PPP2R1A-WRQAAEDKSW  | 139  | >PPP2R1A-WRQAAEDKSC  | 372   | 233   |
| >PPP2R1A-WRQAAEDKSW  | 223  | >PPP2R1A-WRQAAEDKSC  | 1541  | 1318  |
| >PPP2R1A-WRQAAEDKSW  | 206  | >PPP2R1A-WRQAAEDKSC  | 537   | 331   |
| >PPP2R1A-WRQAAEDKSW  | 391  | >PPP2R1A-WRQAAEDKSC  | 818   | 427   |
| >PPP2R1A-WRQAAEDKSW  | 276  | >PPP2R1A-WRQAAEDKSC  | 6165  | 5889  |
| >PPP2R1A-WRQAAEDKSW  | 1584 | >PPP2R1A-WRQAAEDKSC  | 423   | 1161  |
| >PPP2R1A-WRQAAEDKSW  | 124  | >PPP2R1A-WRQAAEDKSC  | 1614  | 1490  |
| >PPP2R1A-WRQAAEDKSW  | 1325 | >PPP2R1A-WRQAAEDKSC  | 487   | 838   |
| >PPP2R1A-WRQAAEDKSW  | 484  | >PPP2R1A-WRQAAEDKSC  | 319   | 165   |
| >PPP2R1A-WRQAAEDKSW  | 263  | >PPP2R1A-WRQAAEDKSC  | 23688 | 23425 |
| >PPP2R1A-WRQAAEDKSW  | 84   | >PPP2R1A-WRQAAEDKSC  | 22049 | 21965 |
| >PPP2R1A-WRQAAEDKSW  | 161  | >PPP2R1A-WRQAAEDKSC  | 34567 | 34406 |
| >PPP2R1A-WRQAAEDKSW  | 144  | >PPP2R1A-WRQAAEDKSC  | 436   | 292   |
| >PPP2R1A-WLRQAAEDKSV | 111  | >PPP2R1A-WLRQAAEDKSC | 23648 | 23537 |
| >PRCC-G449IGQQRKHQI  | 300  | >PRCC-G449IDQQRKHQI  | 383   | 83    |
| >PRCC-G449IGQQRKHQI  | 132  | >PRCC-G449IDQQRKHQI  | 1808  | 1676  |

|                        |       |                        |       |       |
|------------------------|-------|------------------------|-------|-------|
| >PRCC-G449IGQQRKHKQI'  | 186   | >PRCC-G449IDQQRKHKQI'  | 1233  | 1047  |
| >PRCC-G449IGQQRKHKQI'  | 12749 | >PRCC-G449IDQQRKHKQI'  | 297   | 12452 |
| >PRCC-G449IGQQRKHKQI   | 193   | >PRCC-G449IDQQRKHKQI   | 9036  | 8843  |
| >PRCC-G449IGQQRKHKQI'  | 445   | >PRCC-G449IDQQRKHKQI'  | 10862 | 10417 |
| >PRCC-G449ITGQQRKHC    | 1468  | >PRCC-G449ITDQQRKHC    | 106   | 1362  |
| >PRCC-G449IKGEQPTGQQ   | 554   | >PRCC-G449IKGEQPTDQQ   | 355   | 199   |
| >PRCC-G449IKGEQPTGQQ   | 389   | >PRCC-G449IKGEQPTDQQ   | 396   | 7     |
| >PRCC-G449IKKGEQPTGQI  | 480   | >PRCC-G449IKKGEQPTDQI  | 358   | 122   |
| >PRDM16-N1NQAGAGSWI    | 128   | >PRDM16-N1DQAGAGSWI    | 4675  | 4547  |
| >PRDM16-N1NQAGAGSWI    | 411   | >PRDM16-N1DQAGAGSWI    | 7541  | 7130  |
| >PRDM16-N1NQAGAGSWI    | 229   | >PRDM16-N1DQAGAGSWI    | 6393  | 6164  |
| >PRDM16-N1NQAGAGSWI    | 216   | >PRDM16-N1DQAGAGSWI    | 916   | 700   |
| >PRDM16-N1NQAGAGSWI    | 214   | >PRDM16-N1DQAGAGSWI    | 772   | 558   |
| >PRDM16-N1NQAGAGSWI    | 162   | >PRDM16-N1DQAGAGSWI    | 290   | 128   |
| >PRDM16-N1NQAGAGSWI    | 37    | >PRDM16-N1DQAGAGSWI    | 74    | 37    |
| >PRDM16-N1NQAGAGSWI    | 109   | >PRDM16-N1DQAGAGSWI    | 883   | 774   |
| >PRDM16-N1NQAGAGSWI    | 457   | >PRDM16-N1DQAGAGSWI    | 1910  | 1453  |
| >PRDM16-N1NQAGAGSWI    | 31    | >PRDM16-N1DQAGAGSWI    | 73    | 42    |
| >PRDM16-N1NQAGAGSWI    | 271   | >PRDM16-N1DQAGAGSWI    | 1090  | 819   |
| >PRDM16-N1NQAGAGSWI    | 613   | >PRDM16-N1DQAGAGSWI    | 183   | 430   |
| >PRDM16-N1NQAGAGSWI    | 192   | >PRDM16-N1DQAGAGSWI    | 2740  | 2548  |
| >PRDM16-N1NQAGAGSW     | 489   | >PRDM16-N1DQAGAGSW     | 2684  | 2195  |
| >PRDM16-N1NQAGAGSWI    | 428   | >PRDM16-N1DQAGAGSWI    | 410   | 18    |
| >PRDM16-N1SEKFCVDANC   | 86    | >PRDM16-N1SEKFCVDADC   | 89    | 3     |
| >PRDM16-S1SLAGKSQDDI'  | 106   | >PRDM16-S1NLAGKSQDDI'  | 716   | 610   |
| >PRDM16-S1SLAGKSQDDI'  | 11    | >PRDM16-S1NLAGKSQDDI'  | 17    | 6     |
| >PRDM16-S1SLAGKSQDDI'  | 14    | >PRDM16-S1NLAGKSQDDI'  | 27    | 13    |
| >PRDM16-S1SLAGKSQDDI'  | 220   | >PRDM16-S1NLAGKSQDDI'  | 475   | 255   |
| >PRDM16-S1SLAGKSQDDI'  | 5     | >PRDM16-S1NLAGKSQDDI'  | 26    | 21    |
| >PRDM16-S1SLAGKSQDDI'  | 11    | >PRDM16-S1NLAGKSQDDI'  | 19    | 8     |
| >PRDM16-S1SLAGKSQDDI'  | 6     | >PRDM16-S1NLAGKSQDDI'  | 16    | 10    |
| >PRDM16-S1SLAGKSQDDI'  | 26    | >PRDM16-S1NLAGKSQDDI'  | 13    | 13    |
| >PRDM16-S1SLAGKSQDDI'  | 204   | >PRDM16-S1NLAGKSQDDI'  | 2786  | 2582  |
| >PRDM16-S1SLAGKSQDDI'  | 2     | >PRDM16-S1NLAGKSQDDI'  | 6     | 4     |
| >PRDM16-S1SLAGKSQDDI'  | 716   | >PRDM16-S1NLAGKSQDDI'  | 233   | 483   |
| >PRDM16-S1EEDDEDL      | 257   | >PRDM16-S1EEDDEDNL     | 444   | 187   |
| >PRDM16-S1LEEDDEDL     | 19    | >PRDM16-S1LEEDDEDNL    | 29    | 10    |
| >PRF1-R123F RSIRNDWKV  | 225   | >PRF1-R123F HSIRNDWKV  | 382   | 157   |
| >PRF1-R123F RSIRNDWK   | 49    | >PRF1-R123F HSIRNDWK   | 284   | 235   |
| >PRF1-R123F RSIRNDWK   | 84    | >PRF1-R123F HSIRNDWK   | 331   | 247   |
| >PRF1-R123F RSIRNDWKV( | 294   | >PRF1-R123F HSIRNDWKV( | 3187  | 2893  |
| >PRF1-R123F RSIRNDWK   | 631   | >PRF1-R123F HSIRNDWK   | 28    | 603   |
| >PRF1-R123F RSIRNDWKV  | 2277  | >PRF1-R123F HSIRNDWKV  | 38    | 2239  |

|                        |      |                        |       |       |
|------------------------|------|------------------------|-------|-------|
| >PRF1-R123F RSIRNDWKV  | 7116 | >PRF1-R123F HSIRNDWKV  | 179   | 6937  |
| >PRF1-R123F RSIRNDWKV  | 213  | >PRF1-R123F HSIRNDWKV  | 1772  | 1559  |
| >PRF1-R123F RSIRNDWKV  | 9    | >PRF1-R123F HSIRNDWKV  | 41    | 32    |
| >PRF1-R123F RSIRNDWKV  | 261  | >PRF1-R123F HSIRNDWKV  | 983   | 722   |
| >PRF1-R123F RSIRNDWKV  | 95   | >PRF1-R123F HSIRNDWKV  | 1045  | 950   |
| >PRF1-R123F RSIRNDWKV  | 149  | >PRF1-R123F HSIRNDWKV  | 1017  | 868   |
| >PRF1-R123F ARSIRNDWK  | 461  | >PRF1-R123F AHSIRNDWK  | 17861 | 17400 |
| >PRF1-R123F ARSIRNDWK  | 438  | >PRF1-R123F AHSIRNDWK  | 18839 | 18401 |
| >PRF1-R123F ARSIRNDW   | 992  | >PRF1-R123F AHSIRNDW   | 235   | 757   |
| >PRF1-R123F STEAVARDA  | 158  | >PRF1-R123F STEAVARDA  | 12477 | 12319 |
| >PRF1-R123F STEAVARDA  | 25   | >PRF1-R123F STEAVARDA  | 8591  | 8566  |
| >PRF1-R123F AARSIRNDW  | 270  | >PRF1-R123F AAHSIRNDW  | 104   | 166   |
| >PRF1-R123F AARSIRNDW  | 497  | >PRF1-R123F AAHSIRNDW  | 534   | 37    |
| >PRF1-R123F AARSIRNDW  | 389  | >PRF1-R123F AAHSIRNDW  | 248   | 141   |
| >PRF1-R123F AARSIRNDW  | 11   | >PRF1-R123F AAHSIRNDW  | 54    | 43    |
| >PRF1-R123F AARSIRNDW  | 152  | >PRF1-R123F AAHSIRNDW  | 1428  | 1276  |
| >PRF1-R123F AARSIRNDW  | 1231 | >PRF1-R123F AAHSIRNDW  | 413   | 818   |
| >PRF1-R123F AARSIRNDW  | 5867 | >PRF1-R123F AAHSIRNDW  | 375   | 5492  |
| >PRF1-R123F AARSIRNDW  | 127  | >PRF1-R123F AAHSIRNDW  | 270   | 143   |
| >PRF1-R123F DAARSIRNDV | 21   | >PRF1-R123F DAAHSIRNDV | 20    | 1     |
| >PRF1-R123F DAARSIRNDV | 369  | >PRF1-R123F DAAHSIRNDV | 655   | 286   |
| >PRF1-R123F DAARSIRNDV | 497  | >PRF1-R123F DAAHSIRNDV | 277   | 220   |
| >PRF1-R123F ARDAARSI   | 1027 | >PRF1-R123F ARDAAHSI   | 210   | 817   |
| >PRF1-R123F VARDAARSI  | 101  | >PRF1-R123F VARDAAHSI  | 83    | 18    |
| >PRF1-R123F VARDAARSIR | 356  | >PRF1-R123F VARDAAHSIR | 277   | 79    |
| >PRF1-R123F VARDAARSIR | 244  | >PRF1-R123F VARDAAHSIR | 415   | 171   |
| >PRF1-R123F VARDAARSI  | 102  | >PRF1-R123F VARDAAHSI  | 229   | 127   |
| >PRF1-R123F VARDAARSI  | 43   | >PRF1-R123F VARDAAHSI  | 23    | 20    |
| >PRF1-R123F VARDAARSI  | 291  | >PRF1-R123F VARDAAHSI  | 368   | 77    |
| >PRF1-R123F AVARDAARSI | 2344 | >PRF1-R123F AVARDAAHSI | 143   | 2201  |
| >PRF1-R123F AVARDAAR   | 137  | >PRF1-R123F AVARDAAH   | 13550 | 13413 |
| >PRF1-R123F AVARDAARSI | 310  | >PRF1-R123F AVARDAAHSI | 228   | 82    |
| >PRF1-R123F AVARDAARSI | 573  | >PRF1-R123F AVARDAAHSI | 412   | 161   |
| >PRF1-R123F AVARDAAR   | 65   | >PRF1-R123F AVARDAAH   | 15015 | 14950 |
| >PRF1-R123F AVARDAARSI | 63   | >PRF1-R123F AVARDAAHSI | 58    | 5     |
| >PRF1-R123F AVARDAARSI | 2525 | >PRF1-R123F AVARDAAHSI | 341   | 2184  |
| >PRF1-R123F EAVARDAAR  | 40   | >PRF1-R123F EAVARDAAH  | 14975 | 14935 |
| >PRF1-R123F EAVARDAAR  | 7    | >PRF1-R123F EAVARDAAH  | 2499  | 2492  |
| >PRF1-R123F EAVARDAAR  | 148  | >PRF1-R123F EAVARDAAH  | 22    | 126   |
| >PRF1-R123F EAVARDAAR  | 963  | >PRF1-R123F EAVARDAAH  | 137   | 826   |
| >PRF1-R123F EAVARDAAR  | 3591 | >PRF1-R123F EAVARDAAH  | 100   | 3491  |
| >PRF1-R385V RDCSRPCPPC | 171  | >PRF1-R385V RDCSRPCPPC | 29328 | 29157 |
| >PRF1-R385V PGRQKSPR   | 2993 | >PRF1-R385V PGWQKSPR   | 160   | 2833  |

|                        |       |                        |       |       |
|------------------------|-------|------------------------|-------|-------|
| >PRF1-R385\CPPGRQKSP   | 98    | >PRF1-R385\CPPGWQKSP   | 81    | 17    |
| >PRF1-R385\CPPGRQKSPF  | 601   | >PRF1-R385\CPPGWQKSP   | 226   | 375   |
| >PRF1-R385\CSRPCPPGR   | 301   | >PRF1-R385\CSRPCPPGW   | 4979  | 4678  |
| >PRF1-R385\CSRPCPPGRC  | 10    | >PRF1-R385\CSRPCPPGW   | 13    | 3     |
| >PRF1-R385\CSRPCPPGR   | 344   | >PRF1-R385\CSRPCPPGW   | 21990 | 21646 |
| >PRF1-R385\CSRPCPPGR   | 8452  | >PRF1-R385\CSRPCPPGW   | 4     | 8448  |
| >PRF1-R385\CSRPCPPGR   | 21379 | >PRF1-R385\CSRPCPPGW   | 33    | 21346 |
| >PRF1-R385\CSRPCPPGR   | 21867 | >PRF1-R385\CSRPCPPGW   | 32    | 21835 |
| >PRF1-R385\CSRPCPPGR   | 32952 | >PRF1-R385\CSRPCPPGW   | 289   | 32663 |
| >PRKAR1A-A ATVKAKTNV\  | 294   | >PRKAR1A-A DTVKAKTNV\  | 5832  | 5538  |
| >PRKAR1A-A ATVKAKTNV\  | 48    | >PRKAR1A-A DTVKAKTNV\  | 806   | 758   |
| >PRKAR1A-A ATVKAKTNV\  | 68    | >PRKAR1A-A DTVKAKTNV\  | 7455  | 7387  |
| >PRKAR1A-A ATVKAKTNV\  | 795   | >PRKAR1A-A DTVKAKTNV\  | 181   | 614   |
| >PRKAR1A-A ATVKAKTNV   | 286   | >PRKAR1A-A DTVKAKTNV   | 38    | 248   |
| >PRKAR1A-A ATVKAKTNV\  | 2251  | >PRKAR1A-A DTVKAKTNV\  | 244   | 2007  |
| >PRKAR1A-A ATVKAKTNV   | 856   | >PRKAR1A-A DTVKAKTNV   | 38    | 818   |
| >PRKAR1A-A ATVKAKTNV\  | 5733  | >PRKAR1A-A DTVKAKTNV\  | 477   | 5256  |
| >PRKAR1A-A ATVKAKTNV\  | 25    | >PRKAR1A-A DTVKAKTNV\  | 1772  | 1747  |
| >PRKAR1A-A ATVKAKTNV\  | 364   | >PRKAR1A-A DTVKAKTNV\  | 4400  | 4036  |
| >PRKAR1A-A ATVKAKTNV\  | 439   | >PRKAR1A-A DTVKAKTNV\  | 5132  | 4693  |
| >PRKAR1A-A AATVKAKTN\  | 23721 | >PRKAR1A-A ADTVKAKTN\  | 74    | 23647 |
| >PRKAR1A-A LALIYGTPRAL | 132   | >PRKAR1A-A LALIYGTPRAL | 9013  | 8881  |
| >PRKAR1A-A RAATVKAK    | 321   | >PRKAR1A-A RADTVKAK    | 2067  | 1746  |
| >PRKAR1A-A RAATVKAK    | 222   | >PRKAR1A-A RADTVKAK    | 549   | 327   |
| >PRKAR1A-A RAATVKAK    | 117   | >PRKAR1A-A RADTVKAK    | 2529  | 2412  |
| >PRKAR1A-A RAATVKAKT\  | 332   | >PRKAR1A-A RADTVKAKT\  | 9117  | 8785  |
| >PRKAR1A-A TPRAATVKA   | 111   | >PRKAR1A-A TPRADTVKA   | 329   | 218   |
| >PRKAR1A-A TPRAATVKA   | 128   | >PRKAR1A-A TPRADTVKA   | 805   | 677   |
| >PRKAR1A-A GTPRAATV    | 275   | >PRKAR1A-A GTPRADTV    | 1196  | 921   |
| >PRKAR1A-A GTPRAATVK   | 372   | >PRKAR1A-A GTPRADTVK   | 1159  | 787   |
| >PRKAR1A-A GTPRAATV    | 60    | >PRKAR1A-A GTPRADTV    | 361   | 301   |
| >PRKAR1A-A GTPRAATVK\  | 404   | >PRKAR1A-A GTPRADTVK\  | 3006  | 2602  |
| >PRKAR1A-A YGTPRAATV   | 182   | >PRKAR1A-A YGTPRADTV   | 315   | 133   |
| >PRKAR1A-A YGTPRAATV   | 45    | >PRKAR1A-A YGTPRADTV   | 493   | 448   |
| >PRKAR1A-A LIYGTPRADT\ | 174   | >PRKAR1A-A LIYGTPRADT\ | 532   | 358   |
| >PRKAR1A-A LIYGTPRADT\ | 191   | >PRKAR1A-A LIYGTPRADT\ | 200   | 9     |
| >PRKAR1A-A LIYGTPRAA   | 63    | >PRKAR1A-A LIYGTPRAD   | 19922 | 19859 |
| >PRKAR1A-A LIYGTPRAA   | 164   | >PRKAR1A-A LIYGTPRADT  | 531   | 367   |
| >PRKAR1A-A LIYGTPRAA\  | 9     | >PRKAR1A-A LIYGTPRADT\ | 16    | 7     |
| >PRKAR1A-A LIYGTPRAA\  | 86    | >PRKAR1A-A LIYGTPRADT\ | 100   | 14    |
| >PRKAR1A-A LIYGTPRAA   | 37    | >PRKAR1A-A LIYGTPRAD   | 11468 | 11431 |
| >PRKAR1A-A LIYGTPRAA\  | 3     | >PRKAR1A-A LIYGTPRADT\ | 3     | 0     |
| >PRKAR1A-A LIYGTPRAA\  | 34    | >PRKAR1A-A LIYGTPRADT\ | 59    | 25    |

|                        |       |                        |       |       |
|------------------------|-------|------------------------|-------|-------|
| >PRKAR1A-A LIYGTBRAAT\ | 20    | >PRKAR1A-A LIYGTBRAAD\ | 24    | 4     |
| >PRKAR1A-A LIYGTBRAAT\ | 70    | >PRKAR1A-A LIYGTBRAAD\ | 207   | 137   |
| >PRKAR1A-A LIYGTBRAAT\ | 3     | >PRKAR1A-A LIYGTBRAAD\ | 5     | 2     |
| >PRKAR1A-A LIYGTBRAAT\ | 206   | >PRKAR1A-A LIYGTBRAAD\ | 714   | 508   |
| >PRKAR1A-A ALIYGTBRAA  | 200   | >PRKAR1A-A ALIYGTBRAA  | 12109 | 11909 |
| >PRKAR1A-A ALIYGTBRAA  | 45    | >PRKAR1A-A ALIYGTBRAA  | 7808  | 7763  |
| >PRKAR1A-A ALIYGTBRAA  | 218   | >PRKAR1A-A ALIYGTBRAA  | 912   | 694   |
| >PRKAR1A-A ALIYGTBRAA  | 147   | >PRKAR1A-A ALIYGTBRAA  | 13758 | 13611 |
| >PRKAR1A-A ALIYGTBRAA  | 298   | >PRKAR1A-A ALIYGTBRAA  | 18849 | 18551 |
| >PRKAR1A-A ALIYGTBRAA  | 129   | >PRKAR1A-A ALIYGTBRAA  | 18880 | 18751 |
| >PRKAR1A-A ALIYGTBRAA  | 192   | >PRKAR1A-A ALIYGTBRAA  | 309   | 117   |
| >PRKAR1A-K: KLWGIDRDSY | 298   | >PRKAR1A-K: ELWGIDRDSY | 9637  | 9339  |
| >PRKAR1A-K: KLWGIDRDSY | 171   | >PRKAR1A-K: ELWGIDRDSY | 598   | 427   |
| >PRKAR1A-K: KLWGIDRDSY | 12    | >PRKAR1A-K: ELWGIDRDSY | 178   | 166   |
| >PRKAR1A-K: KLWGIDRDSY | 40    | >PRKAR1A-K: ELWGIDRDSY | 1030  | 990   |
| >PRKAR1A-K: KLWGIDRDSY | 457   | >PRKAR1A-K: ELWGIDRDSY | 17    | 440   |
| >PRKAR1A-K: KLWGIDRDSY | 1255  | >PRKAR1A-K: ELWGIDRDSY | 18    | 1237  |
| >PRKAR1A-K: KLWGIDRDSY | 486   | >PRKAR1A-K: ELWGIDRDSY | 8121  | 7635  |
| >PRKAR1A-K: KLWGIDRDSY | 534   | >PRKAR1A-K: ELWGIDRDSY | 332   | 202   |
| >PRKAR1A-K: KLWGIDRDSY | 13    | >PRKAR1A-K: ELWGIDRDSY | 33    | 20    |
| >PRKAR1A-K: VKLWGIDRD  | 150   | >PRKAR1A-K: VELWGIDRD  | 340   | 190   |
| >PRKAR1A-K: VKLWGIDRD  | 112   | >PRKAR1A-K: VELWGIDRD  | 3522  | 3410  |
| >PRKAR1A-K: VKLWGIDRD  | 5824  | >PRKAR1A-K: VELWGIDRD  | 32    | 5792  |
| >PRKAR1A-K: VKLWGIDRD  | 22117 | >PRKAR1A-K: VELWGIDRD  | 367   | 21750 |
| >PRKAR1A-K: NVKLWGIDR  | 55    | >PRKAR1A-K: NVELWGIDR  | 341   | 286   |
| >PRKAR1A-K: NVKLWGIDR  | 374   | >PRKAR1A-K: NVELWGIDR  | 416   | 42    |
| >PRKAR1A-K: TNVKLWGI   | 155   | >PRKAR1A-K: TNVELWGI   | 313   | 158   |
| >PRKAR1A-K: KTNVKLWGI  | 981   | >PRKAR1A-K: KTNVELWGI  | 432   | 549   |
| >PRKAR1A-K: KTNVKLWGI  | 395   | >PRKAR1A-K: KTNVELWGI  | 572   | 177   |
| >PRKAR1A-K: KTNVKLWGI  | 57    | >PRKAR1A-K: KTNVELWGI  | 30    | 27    |
| >PRKAR1A-K: KTNVKLWGI  | 224   | >PRKAR1A-K: KTNVELWGI  | 249   | 25    |
| >PRKAR1A-K: KTNVKLWGI  | 287   | >PRKAR1A-K: KTNVELWGI  | 242   | 45    |
| >PRKAR1A-K: KTNVKLWGII | 314   | >PRKAR1A-K: KTNVELWGII | 328   | 14    |
| >PRKAR1A-K: KTNVKLWGI  | 400   | >PRKAR1A-K: KTNVELWGI  | 1203  | 803   |
| >PRKAR1A-K: KTNVKLWGII | 16    | >PRKAR1A-K: KTNVELWGII | 32    | 16    |
| >PRKAR1A-K: KTNVKLWGI  | 97    | >PRKAR1A-K: KTNVELWGI  | 114   | 17    |
| >PRKAR1A-K: KTNVKLWGI  | 24    | >PRKAR1A-K: KTNVELWGI  | 49    | 25    |
| >PRKAR1A-K: KTNVKLWGI  | 65    | >PRKAR1A-K: KTNVELWGI  | 41    | 24    |
| >PRKAR1A-K: KTNVKLWGII | 524   | >PRKAR1A-K: KTNVELWGII | 422   | 102   |
| >PRKAR1A-K: KTNVKLWGI  | 160   | >PRKAR1A-K: KTNVELWGI  | 95    | 65    |
| >PRKAR1A-K: AKTNVKLWG  | 917   | >PRKAR1A-K: AKTNVELWG  | 354   | 563   |
| >PRKAR1A-K: AKTNVKLW   | 4001  | >PRKAR1A-K: AKTNVELW   | 353   | 3648  |
| >PRKAR1A-K: KAKTNVKL   | 58    | >PRKAR1A-K: KAKTNVEL   | 63    | 5     |

|                        |      |                        |       |       |
|------------------------|------|------------------------|-------|-------|
| >PRKAR1A-K: KAKTNVKLW  | 332  | >PRKAR1A-K: KAKTNVELW  | 892   | 560   |
| >PRKAR1A-K: KAKTNVKLW  | 53   | >PRKAR1A-K: KAKTNVELW  | 145   | 92    |
| >PRKAR1A-K: KAKTNVKL   | 584  | >PRKAR1A-K: KAKTNVEL   | 322   | 262   |
| >PRKAR1A-K: KAKTNVKL   | 100  | >PRKAR1A-K: KAKTNVEL   | 125   | 25    |
| >PRKAR1A-K: KAKTNVKLW  | 22   | >PRKAR1A-K: KAKTNVELW  | 59    | 37    |
| >PRKAR1A-K: KAKTNVKLW  | 296  | >PRKAR1A-K: KAKTNVELW  | 602   | 306   |
| >PRKAR1A-K: KAKTNVKLW  | 36   | >PRKAR1A-K: KAKTNVELW  | 37    | 1     |
| >PRKAR1A-K: KAKTNVKLW  | 32   | >PRKAR1A-K: KAKTNVELW  | 15    | 17    |
| >PRKAR1A-K: VKAKTNVKL  | 39   | >PRKAR1A-K: VKAKTNVEL  | 22    | 17    |
| >PRKAR1A-K: VKAKTNVKLV | 225  | >PRKAR1A-K: VKAKTNVELV | 302   | 77    |
| >PRKAR1A-K: VKAKTNVKLV | 543  | >PRKAR1A-K: VKAKTNVELV | 347   | 196   |
| >PRKAR1A-K: VKAKTNVKLV | 4518 | >PRKAR1A-K: VKAKTNVELV | 317   | 4201  |
| >PRKAR1A-K: TVKAKTNVK  | 340  | >PRKAR1A-K: TVKAKTNVE  | 21066 | 20726 |
| >PRKAR1A-K: TVKAKTNVK  | 117  | >PRKAR1A-K: TVKAKTNVE  | 23462 | 23345 |
| >PRKAR1A-K: TVKAKTNVK  | 8    | >PRKAR1A-K: TVKAKTNVE  | 6330  | 6322  |
| >PRKAR1A-K: TVKAKTNVKL | 465  | >PRKAR1A-K: TVKAKTNVEL | 316   | 149   |
| >PRKAR1A-K: TVKAKTNVK  | 122  | >PRKAR1A-K: TVKAKTNVE  | 15884 | 15762 |
| >PRKAR1A-K: TVKAKTNVKL | 239  | >PRKAR1A-K: TVKAKTNVEL | 289   | 50    |
| >PRKAR1A-K: ATVKAKTNVK | 294  | >PRKAR1A-K: ATVKAKTNVE | 26935 | 26641 |
| >PRKAR1A-K: ATVKAKTNVK | 48   | >PRKAR1A-K: ATVKAKTNVE | 30514 | 30466 |
| >PRKAR1A-K: ATVKAKTNVK | 68   | >PRKAR1A-K: ATVKAKTNVE | 12059 | 11991 |
| >PRKAR1A-K: ATVKAKTNVK | 25   | >PRKAR1A-K: ATVKAKTNVE | 28    | 3     |
| >PRKAR1A-K: ATVKAKTNVK | 364  | >PRKAR1A-K: ATVKAKTNVE | 491   | 127   |
| >PRKAR1A-K: ATVKAKTNVK | 439  | >PRKAR1A-K: ATVKAKTNVE | 8500  | 8061  |
| >PRRX1-V18(VPRPAPRPT   | 20   | >PRRX1-V18(IPRPAPRPT   | 17    | 3     |
| >PRRX1-V18(VPRPAPRPTC  | 639  | >PRRX1-V18(IPRPAPRPTD' | 307   | 332   |
| >PRRX1-V18(VPRPAPRPTC  | 141  | >PRRX1-V18(IPRPAPRPTD' | 83    | 58    |
| >PRRX1-V18(VPRPAPRPT   | 1301 | >PRRX1-V18(IPRPAPRPT   | 227   | 1074  |
| >PRRX1-V18(IVPRPAPR    | 245  | >PRRX1-V18(IIPRPAPR    | 452   | 207   |
| >PRRX1-V18(IVPRPAPR    | 301  | >PRRX1-V18(IIPRPAPR    | 606   | 305   |
| >PRRX1-V18(IVPRPAPR    | 352  | >PRRX1-V18(IIPRPAPR    | 150   | 202   |
| >PRRX1-V18(GDVTAVEQP   | 159  | >PRRX1-V18(GDVTAVEQP   | 37    | 122   |
| >PRRX1-V18(GDVTAVEQP   | 160  | >PRRX1-V18(GDVTAVEQP   | 90    | 70    |
| >PRRX1-V18(PIVPRPAPR   | 913  | >PRRX1-V18(PIIPRPAPR   | 380   | 533   |
| >PRRX1-V18(PIVPRPAPR   | 231  | >PRRX1-V18(PIIPRPAPR   | 285   | 54    |
| >PRRX1-V18(QPIVPRPAPR  | 756  | >PRRX1-V18(QPIIPRPAPR  | 455   | 301   |
| >PRRX1-V18(QPIVPRPAPR  | 489  | >PRRX1-V18(QPIIPRPAPR  | 349   | 140   |
| >PRRX1-V18(QPIVPRPA    | 29   | >PRRX1-V18(QPIIPRPA    | 26    | 3     |
| >PRRX1-V18(QPIVPRPAP   | 321  | >PRRX1-V18(QPIIPRPA    | 311   | 10    |
| >PRRX1-V18(EQPIVPRPAP  | 386  | >PRRX1-V18(EQPIIPRPA   | 162   | 224   |
| >PRRX1-V18(VEQPIVPRPA  | 93   | >PRRX1-V18(VEQPIIPRPA  | 99    | 6     |
| >PRRX1-V18(VEQPIVPR    | 506  | >PRRX1-V18(VEQPIIPR    | 485   | 21    |
| >PRRX1-V18(AVEQPIVPR   | 716  | >PRRX1-V18(AVEQPIIPR   | 336   | 380   |

|                        |      |                        |       |       |
|------------------------|------|------------------------|-------|-------|
| >PRRX1-V18(AVEQPIVPR   | 162  | >PRRX1-V18(AVEQPIIPR   | 328   | 166   |
| >PRRX1-V18(AVEQPIVPR   | 331  | >PRRX1-V18(AVEQPIIPR   | 429   | 98    |
| >PRRX1-V18(TAVEQPIVPR  | 32   | >PRRX1-V18(TAVEQPIIPR  | 30    | 2     |
| >PRRX1-V18(TAVEQPIV    | 87   | >PRRX1-V18(TAVEQPPII   | 691   | 604   |
| >PRRX1-V18(TAVEQPIVPR  | 156  | >PRRX1-V18(TAVEQPIIPR  | 185   | 29    |
| >PRRX1-V18(VTAVEQPIV   | 327  | >PRRX1-V18(VTAVEQPPII  | 6644  | 6317  |
| >PRRX1-V18(VTAVEQPIV   | 231  | >PRRX1-V18(VTAVEQPPII  | 15278 | 15047 |
| >PRRX1-V18(VTAVEQPIVP  | 353  | >PRRX1-V18(VTAVEQPIIPF | 221   | 132   |
| >PRRX1-V18(VTAVEQPIVP  | 129  | >PRRX1-V18(VTAVEQPIIPF | 202   | 73    |
| >PRRX1-V18(VTAVEQPIVP  | 48   | >PRRX1-V18(VTAVEQPIIPF | 53    | 5     |
| >PRRX1-V18(VTAVEQPIV   | 4090 | >PRRX1-V18(VTAVEQPPII  | 113   | 3977  |
| >PRRX1-V18(VTAVEQPIV   | 611  | >PRRX1-V18(VTAVEQPPII  | 350   | 261   |
| >PRRX1-V18(VTAVEQPIV   | 3691 | >PRRX1-V18(VTAVEQPPII  | 32    | 3659  |
| >PTCH1-A11(ALAFLTAI    | 43   | >PTCH1-A11(SLAFLTAI    | 43    | 0     |
| >PTCH1-A11(ALAFLTAI    | 4    | >PTCH1-A11(SLAFLTAI    | 4     | 0     |
| >PTCH1-A11(ALAFLTAIG   | 354  | >PTCH1-A11(SLAFLTAIG   | 390   | 36    |
| >PTCH1-A11(ALAFLTAI    | 4    | >PTCH1-A11(SLAFLTAI    | 5     | 1     |
| >PTCH1-A11(ALAFLTAI    | 103  | >PTCH1-A11(SLAFLTAI    | 162   | 59    |
| >PTCH1-A11(ALAFLTAI    | 17   | >PTCH1-A11(SLAFLTAI    | 13    | 4     |
| >PTCH1-A11(ALAFLTAI    | 48   | >PTCH1-A11(SLAFLTAI    | 41    | 7     |
| >PTCH1-A11(ALAFLTAI    | 48   | >PTCH1-A11(SLAFLTAI    | 21    | 27    |
| >PTCH1-A11(ALAFLTAI    | 88   | >PTCH1-A11(SLAFLTAI    | 150   | 62    |
| >PTCH1-A11(ALAFLTAI    | 10   | >PTCH1-A11(SLAFLTAI    | 13    | 3     |
| >PTCH1-A11(ALAFLTAIGDI | 66   | >PTCH1-A11(SLAFLTAIGDK | 76    | 10    |
| >PTCH1-A11(ALAFLTAIGDI | 158  | >PTCH1-A11(SLAFLTAIGDK | 93    | 65    |
| >PTCH1-A11(ALAFLTAI    | 38   | >PTCH1-A11(SLAFLTAI    | 46    | 8     |
| >PTCH1-A11(ALAFLTAIGDI | 1556 | >PTCH1-A11(SLAFLTAIGDK | 309   | 1247  |
| >PTCH1-A11(ALAFLTAI    | 1095 | >PTCH1-A11(SLAFLTAI    | 178   | 917   |
| >PTCH1-A11(VALAFLTAI   | 64   | >PTCH1-A11(VSLAFLTAI   | 140   | 76    |
| >PTCH1-A11(VALAFLTA    | 1348 | >PTCH1-A11(VSLAFLTA    | 296   | 1052  |
| >PTCH1-A11(VALAFLTAI   | 66   | >PTCH1-A11(VSLAFLTAI   | 63    | 3     |
| >PTCH1-A11(VALAFLTA    | 106  | >PTCH1-A11(VSLAFLTA    | 321   | 215   |
| >PTCH1-A11(VALAFLTAI   | 28   | >PTCH1-A11(VSLAFLTAI   | 91    | 63    |
| >PTCH1-A11(VALAFLTAI   | 204  | >PTCH1-A11(VSLAFLTAI   | 1254  | 1050  |
| >PTCH1-A11(VALAFLTAI   | 807  | >PTCH1-A11(VSLAFLTAI   | 72    | 735   |
| >PTCH1-A11(VALAFLTAI   | 260  | >PTCH1-A11(VSLAFLTAI   | 693   | 433   |
| >PTCH1-A11(VALAFLTAI   | 279  | >PTCH1-A11(VSLAFLTAI   | 162   | 117   |
| >PTCH1-A11(VALAFLTAI   | 428  | >PTCH1-A11(VSLAFLTAI   | 49    | 379   |
| >PTCH1-A11(VALAFLTAI   | 1450 | >PTCH1-A11(VSLAFLTAI   | 275   | 1175  |
| >PTCH1-A11(VALAFLTAI   | 341  | >PTCH1-A11(VSLAFLTAI   | 73    | 268   |
| >PTCH1-A11(HVALAFLTAI  | 360  | >PTCH1-A11(HVSLAFLTAI  | 343   | 17    |
| >PTCH1-A11(HVALAFLTAI  | 324  | >PTCH1-A11(HVSLAFLTAI  | 295   | 29    |
| >PTCH1-A11(HVALAFLTA   | 328  | >PTCH1-A11(HVSLAFLTA   | 762   | 434   |



|                       |     |                        |     |     |
|-----------------------|-----|------------------------|-----|-----|
| >PTCH1-A11(HVALAFLTAI | 283 | >PTCH1-A11(HVSLAFLTAI  | 302 | 19  |
| >PTCH1-A11(HVALAFLTA  | 244 | >PTCH1-A11(HVSLAFLTA   | 94  | 150 |
| >PTCH1-A11(HVALAFLTAI | 278 | >PTCH1-A11(HVSLAFLTAI  | 316 | 38  |
| >PTCH1-A11(HVALAFLT   | 192 | >PTCH1-A11(HVSLAFLT    | 864 | 672 |
| >PTCH1-A11(HVALAFLTA  | 51  | >PTCH1-A11(HVSLAFLTA   | 301 | 250 |
| >PTCH1-A11(HVALAFLTAI | 457 | >PTCH1-A11(HVSLAFLTAI  | 589 | 132 |
| >PTCH1-A11(HVALAFLTAI | 75  | >PTCH1-A11(HVSLAFLTAI  | 368 | 293 |
| >PTCH1-A11(HVALAFLTAI | 147 | >PTCH1-A11(HVSLAFLTAI  | 197 | 50  |
| >PTCH1-A11(VHVALAFL   | 300 | >PTCH1-A11(VHVSLAFL    | 246 | 54  |
| >PTCH1-A11(VHVALAFLTA | 839 | >PTCH1-A11(VHVSLAFLTA  | 488 | 351 |
| >PTCH1-A11(VHVALAFL   | 133 | >PTCH1-A11(VHVSLAFL    | 182 | 49  |
| >PTCH1-A11(VHVALAFLTA | 205 | >PTCH1-A11(VHVSLAFLTA  | 292 | 87  |
| >PTCH1-A11(TVHVALAFL  | 223 | >PTCH1-A11(TVHVSLAFL   | 345 | 122 |
| >PTCH1-A11(TVHVALAFL  | 389 | >PTCH1-A11(TVHVSLAFL   | 271 | 118 |
| >PTCH1-A11(TVHVALAFL  | 208 | >PTCH1-A11(TVHVSLAFL   | 288 | 80  |
| >PTCH1-A11(TVHVALAF   | 225 | >PTCH1-A11(TVHVSLAF    | 308 | 83  |
| >PTCH1-A11(TVHVALAFL  | 41  | >PTCH1-A11(TVHVSLAFL   | 49  | 8   |
| >PTCH1-A11(TVHVALAFL  | 30  | >PTCH1-A11(TVHVSLAFL   | 41  | 11  |
| >PTCH1-A11(TVHVALAFLT | 36  | >PTCH1-A11(TVHVSLAFLT) | 44  | 8   |
| >PTCH1-A11(TVHVALAFL  | 20  | >PTCH1-A11(TVHVSLAFL   | 25  | 5   |
| >PTCH1-A11(TVHVALAFLT | 246 | >PTCH1-A11(TVHVSLAFLT) | 346 | 100 |
| >PTCH1-A11(TVHVALAF   | 241 | >PTCH1-A11(TVHVSLAF    | 139 | 102 |
| >PTCH1-A11(TVHVALAF   | 655 | >PTCH1-A11(TVHVSLAF    | 275 | 380 |
| >PTCH1-A11(TVHVALAF   | 256 | >PTCH1-A11(TVHVSLAF    | 111 | 145 |
| >PTCH1-A11(TVHVALAF   | 332 | >PTCH1-A11(TVHVSLAF    | 333 | 1   |
| >PTCH1-A11(TVHVALAF   | 606 | >PTCH1-A11(TVHVSLAF    | 491 | 115 |
| >PTCH1-A11(FTVHVALAFL | 247 | >PTCH1-A11(FTVHVSLAFL  | 341 | 94  |
| >PTCH1-A11(FTVHVALA   | 86  | >PTCH1-A11(FTVHVSLA    | 84  | 2   |
| >PTCH1-A11(FTVHVALAFL | 116 | >PTCH1-A11(FTVHVSLAFL  | 116 | 0   |
| >PTCH1-A11(FTVHVALAFL | 590 | >PTCH1-A11(FTVHVSLAFL  | 398 | 192 |
| >PTCH1-A11(FTVHVALA   | 53  | >PTCH1-A11(FTVHVSLA    | 41  | 12  |
| >PTCH1-A11(FTVHVALAFL | 176 | >PTCH1-A11(FTVHVSLAFL  | 125 | 51  |
| >PTCH1-A11(FTVHVALA   | 25  | >PTCH1-A11(FTVHVSLA    | 32  | 7   |
| >PTCH1-A11(FTVHVALAF  | 113 | >PTCH1-A11(FTVHVSLAF   | 103 | 10  |
| >PTCH1-A11(FTVHVALAFL | 58  | >PTCH1-A11(FTVHVSLAFL  | 62  | 4   |
| >PTCH1-A11(FTVHVALAFL | 58  | >PTCH1-A11(FTVHVSLAFL  | 58  | 0   |
| >PTCH1-A11(FTVHVALAFL | 111 | >PTCH1-A11(FTVHVSLAFL  | 92  | 19  |
| >PTCH1-A11(FTVHVALAFL | 413 | >PTCH1-A11(FTVHVSLAFL  | 264 | 149 |
| >PTCH1-A11(FTVHVALAFL | 509 | >PTCH1-A11(FTVHVSLAFL  | 484 | 25  |
| >PTCH1-A11(FTVHVALAF  | 723 | >PTCH1-A11(FTVHVSLAF   | 291 | 432 |
| >PTCH1-A11(FTVHVALAF  | 35  | >PTCH1-A11(FTVHVSLAF   | 15  | 20  |
| >PTCH1-A11(FTVHVALAF  | 98  | >PTCH1-A11(FTVHVSLAF   | 165 | 67  |
| >PTCH1-A11(FTVHVALAFL | 47  | >PTCH1-A11(FTVHVSLAFL  | 62  | 15  |

|                       |      |                       |     |      |
|-----------------------|------|-----------------------|-----|------|
| >PTCH1-A11(FTVHVALAF  | 47   | >PTCH1-A11(FTVHVSLAF  | 54  | 7    |
| >PTCH1-A11(FTVHVALAF  | 132  | >PTCH1-A11(FTVHVSLAF  | 95  | 37   |
| >PTCH1-A11(FTVHVALA   | 17   | >PTCH1-A11(FTVHVSLA   | 22  | 5    |
| >PTCH1-A11(FTVHVALAFL | 45   | >PTCH1-A11(FTVHVSLAFL | 36  | 9    |
| >PTCH1-A11(FTVHVALAFL | 101  | >PTCH1-A11(FTVHVSLAFL | 85  | 16   |
| >PTCH1-A11(FTVHVALA   | 355  | >PTCH1-A11(FTVHVSLA   | 665 | 310  |
| >PTCH1-A11(FTVHVALAFL | 41   | >PTCH1-A11(FTVHVSLAFL | 47  | 6    |
| >PTCH1-A11(FTVHVALAF  | 60   | >PTCH1-A11(FTVHVSLAF  | 30  | 30   |
| >PTCH1-A11(FTVHVALAF  | 27   | >PTCH1-A11(FTVHVSLAF  | 19  | 8    |
| >PTCH1-A11(FTVHVALAF  | 3    | >PTCH1-A11(FTVHVSLAF  | 3   | 0    |
| >PTCH1-A11(FTVHVALAFL | 12   | >PTCH1-A11(FTVHVSLAFL | 10  | 2    |
| >PTCH1-A11(FTVHVALAF  | 68   | >PTCH1-A11(FTVHVSLAF  | 45  | 23   |
| >PTCH1-A11(FTVHVALAF  | 98   | >PTCH1-A11(FTVHVSLAF  | 90  | 8    |
| >PTCH1-A11(FTVHVALAF  | 22   | >PTCH1-A11(FTVHVSLAF  | 21  | 1    |
| >PTCH1-A11(FTVHVALAFL | 325  | >PTCH1-A11(FTVHVSLAFL | 263 | 62   |
| >PTCH1-A11(FTVHVALAF  | 526  | >PTCH1-A11(FTVHVSLAF  | 421 | 105  |
| >PTCH1-A11(FTVHVALAFL | 31   | >PTCH1-A11(FTVHVSLAFL | 29  | 2    |
| >PTCH1-A11(FTVHVALAF  | 26   | >PTCH1-A11(FTVHVSLAF  | 34  | 8    |
| >PTCH1-A11(FTVHVALAFL | 167  | >PTCH1-A11(FTVHVSLAFL | 178 | 11   |
| >PTCH1-A11(FTVHVALAFL | 528  | >PTCH1-A11(FTVHVSLAFL | 443 | 85   |
| >PTCH1-A11(FTVHVALAF  | 1280 | >PTCH1-A11(FTVHVSLAF  | 122 | 1158 |
| >PTCH1-A11(FTVHVALAF  | 460  | >PTCH1-A11(FTVHVSLAF  | 363 | 97   |
| >PTCH1-A11(FTVHVALAFL | 1074 | >PTCH1-A11(FTVHVSLAFL | 326 | 748  |
| >PTCH1-A11(EFTVHVALAF | 262  | >PTCH1-A11(EFTVHVSLAF | 247 | 15   |
| >PTCH1-A11(EFTVHVALAF | 366  | >PTCH1-A11(EFTVHVSLAF | 393 | 27   |
| >PTCH1-A11(EFTVHVAL   | 532  | >PTCH1-A11(EFTVHVSL   | 426 | 106  |
| >PTCH1-A11(EFTVHVALAF | 428  | >PTCH1-A11(EFTVHVSLAF | 431 | 3    |
| >PTCH1-A11(VEFTVHVAL  | 399  | >PTCH1-A11(VEFTVHVSL  | 114 | 285  |
| >PTCH1-A11(VEFTVHVALA | 395  | >PTCH1-A11(VEFTVHVSLA | 355 | 40   |
| >PTCH1-A11(VEFTVHVALA | 238  | >PTCH1-A11(VEFTVHVSLA | 206 | 32   |
| >PTCH1-A11(VEFTVHVALA | 214  | >PTCH1-A11(VEFTVHVSLA | 116 | 98   |
| >PTCH1-A11(VEFTVHVAL  | 75   | >PTCH1-A11(VEFTVHVSL  | 76  | 1    |
| >PTCH1-A11(VEFTVHVALA | 7    | >PTCH1-A11(VEFTVHVSLA | 6   | 1    |
| >PTCH1-A11(VEFTVHVA   | 220  | >PTCH1-A11(VEFTVHVS   | 312 | 92   |
| >PTCH1-A11(VEFTVHVAL  | 16   | >PTCH1-A11(VEFTVHVSL  | 22  | 6    |
| >PTCH1-A11(VEFTVHVALA | 6    | >PTCH1-A11(VEFTVHVSLA | 7   | 1    |
| >PTCH1-A11(VEFTVHVAL  | 62   | >PTCH1-A11(VEFTVHVSL  | 245 | 183  |
| >PTCH1-A11(VEFTVHVAL  | 7    | >PTCH1-A11(VEFTVHVSL  | 9   | 2    |
| >PTCH1-A11(VEFTVHVALA | 19   | >PTCH1-A11(VEFTVHVSLA | 25  | 6    |
| >PTCH1-A11(VEFTVHVA   | 183  | >PTCH1-A11(VEFTVHVS   | 860 | 677  |
| >PTCH1-A11(VEFTVHVAL  | 45   | >PTCH1-A11(VEFTVHVSL  | 39  | 6    |
| >PTCH1-A11(VEFTVHVALA | 133  | >PTCH1-A11(VEFTVHVSLA | 96  | 37   |
| >PTCH1-A11(VEFTVHVALA | 295  | >PTCH1-A11(VEFTVHVSLA | 267 | 28   |

|                        |      |                        |      |      |
|------------------------|------|------------------------|------|------|
| >PTCH1-A11(VEFTVHVAL   | 339  | >PTCH1-A11(VEFTVHVSL   | 373  | 34   |
| >PTCH1-A11(VEFTVHVALA  | 34   | >PTCH1-A11(VEFTVHVSLA  | 41   | 7    |
| >PTCH1-A11(VEFTVHVA    | 78   | >PTCH1-A11(VEFTVHVS    | 1624 | 1546 |
| >PTCH1-A11(VEFTVHVALA  | 153  | >PTCH1-A11(VEFTVHVSLA  | 169  | 16   |
| >PTCH1-A11(VEFTVHVAL   | 19   | >PTCH1-A11(VEFTVHVSL   | 19   | 0    |
| >PTCH1-A11(VEFTVHVALA  | 88   | >PTCH1-A11(VEFTVHVSLA  | 64   | 24   |
| >PTCH1-A11(IGVEFTVHVA  | 204  | >PTCH1-A11(IGVEFTVHVS  | 272  | 68   |
| >PTCH1-A11(AIGDKNRRA\  | 161  | >PTCH1-A11(VIGDKNRRA\  | 121  | 40   |
| >PTCH1-A11(AIGDKNRRA\  | 23   | >PTCH1-A11(VIGDKNRRA\  | 27   | 4    |
| >PTCH1-A11(AIGDKNRRA\  | 124  | >PTCH1-A11(VIGDKNRRA\  | 131  | 7    |
| >PTCH1-A11(TAIGDKNRRA  | 3898 | >PTCH1-A11(TVIGDKNRRA  | 335  | 3563 |
| >PTCH1-A11(TAIGDKNRRA  | 9397 | >PTCH1-A11(TVIGDKNRRA  | 467  | 8930 |
| >PTCH1-A11(TAIGDKNR    | 42   | >PTCH1-A11(TVIGDKNR    | 25   | 17   |
| >PTCH1-A11(TAIGDKNRR   | 28   | >PTCH1-A11(TVIGDKNRR   | 18   | 10   |
| >PTCH1-A11(TAIGDKNRRA  | 85   | >PTCH1-A11(TVIGDKNRRA  | 22   | 63   |
| >PTCH1-A11(TVHVALAFLT  | 890  | >PTCH1-A11(TVHVALAFLT  | 171  | 719  |
| >PTCH1-A11(TVHVALAFLT  | 1467 | >PTCH1-A11(TVHVALAFLT  | 73   | 1394 |
| >PTCH1-A11(TVHVALAFLT  | 9205 | >PTCH1-A11(TVHVALAFLT  | 72   | 9133 |
| >PTCH1-A11(TVHVALAFLT  | 36   | >PTCH1-A11(TVHVALAFLT  | 66   | 30   |
| >PTCH1-A11(TVHVALAFLT  | 246  | >PTCH1-A11(TVHVALAFLT  | 24   | 222  |
| >PTCH1-A11(TVHVALAFLT  | 3949 | >PTCH1-A11(TVHVALAFLT  | 113  | 3836 |
| >PTCH1-A11(LTAIGDKNR   | 93   | >PTCH1-A11(LTVIGDKNR   | 177  | 84   |
| >PTCH1-A11(LTAIGDKNRR  | 39   | >PTCH1-A11(LTVIGDKNRR  | 63   | 24   |
| >PTCH1-A11(FLTAIGDKN   | 374  | >PTCH1-A11(FLTVIGDKN   | 1782 | 1408 |
| >PTCH1-A11(FLTAIGDK    | 287  | >PTCH1-A11(FLTVIGDK    | 262  | 25   |
| >PTCH1-A11(FLTAIGDKNR  | 381  | >PTCH1-A11(FLTVIGDKNR  | 632  | 251  |
| >PTCH1-A11(FLTAIGDKNR  | 53   | >PTCH1-A11(FLTVIGDKNR  | 66   | 13   |
| >PTCH1-A11(AFLTAIGDK   | 319  | >PTCH1-A11(AFLTVIGDK   | 1352 | 1033 |
| >PTCH1-A11(AFLTAIGDKN  | 151  | >PTCH1-A11(AFLTVIGDKN  | 82   | 69   |
| >PTCH1-A11(AFLTAIGDKN  | 228  | >PTCH1-A11(AFLTVIGDKN  | 290  | 62   |
| >PTCH1-A11(LAFLTAIGDK  | 649  | >PTCH1-A11(LAFLTVIGDK  | 387  | 262  |
| >PTCH1-A11(ALAFLTAI    | 43   | >PTCH1-A11(ALAFLTVI    | 68   | 25   |
| >PTCH1-A11(ALAFLTAI    | 4    | >PTCH1-A11(ALAFLTVI    | 7    | 3    |
| >PTCH1-A11(ALAFLTAIG   | 354  | >PTCH1-A11(ALAFLTVIG   | 585  | 231  |
| >PTCH1-A11(ALAFLTAI    | 4    | >PTCH1-A11(ALAFLTVI    | 8    | 4    |
| >PTCH1-A11(ALAFLTAI    | 103  | >PTCH1-A11(ALAFLTVI    | 253  | 150  |
| >PTCH1-A11(ALAFLTAI    | 17   | >PTCH1-A11(ALAFLTVI    | 32   | 15   |
| >PTCH1-A11(ALAFLTAI    | 48   | >PTCH1-A11(ALAFLTVI    | 108  | 60   |
| >PTCH1-A11(ALAFLTAI    | 48   | >PTCH1-A11(ALAFLTVI    | 41   | 7    |
| >PTCH1-A11(ALAFLTAI    | 88   | >PTCH1-A11(ALAFLTVI    | 113  | 25   |
| >PTCH1-A11(ALAFLTAI    | 10   | >PTCH1-A11(ALAFLTVI    | 11   | 1    |
| >PTCH1-A11(ALAFLTAIGDI | 66   | >PTCH1-A11(ALAFLTVIGDI | 59   | 7    |
| >PTCH1-A11(ALAFLTAIGDI | 158  | >PTCH1-A11(ALAFLTVIGDI | 106  | 52   |

|                        |       |                        |       |       |
|------------------------|-------|------------------------|-------|-------|
| >PTCH1-A11(ALAFLTAI    | 38    | >PTCH1-A11(ALAFLTVI    | 73    | 35    |
| >PTCH1-A11(VALAFLTAI   | 64    | >PTCH1-A11(VALAFLTVI   | 79    | 15    |
| >PTCH1-A11(VALAFLTA    | 1348  | >PTCH1-A11(VALAFLTV    | 124   | 1224  |
| >PTCH1-A11(VALAFLTAI   | 66    | >PTCH1-A11(VALAFLTVI   | 276   | 210   |
| >PTCH1-A11(VALAFLTA    | 2914  | >PTCH1-A11(VALAFLTV    | 178   | 2736  |
| >PTCH1-A11(VALAFLTA    | 106   | >PTCH1-A11(VALAFLTV    | 13    | 93    |
| >PTCH1-A11(VALAFLTAI   | 28    | >PTCH1-A11(VALAFLTVI   | 138   | 110   |
| >PTCH1-A11(VALAFLTA    | 1216  | >PTCH1-A11(VALAFLTV    | 21    | 1195  |
| >PTCH1-A11(VALAFLTAI   | 204   | >PTCH1-A11(VALAFLTVI   | 491   | 287   |
| >PTCH1-A11(VALAFLTA    | 6775  | >PTCH1-A11(VALAFLTV    | 107   | 6668  |
| >PTCH1-A11(VALAFLTA    | 9441  | >PTCH1-A11(VALAFLTV    | 498   | 8943  |
| >PTCH1-A11(VALAFLTA    | 7128  | >PTCH1-A11(VALAFLTV    | 31    | 7097  |
| >PTCH1-A11(VALAFLTA    | 2569  | >PTCH1-A11(VALAFLTV    | 86    | 2483  |
| >PTCH1-A11(VALAFLTAI   | 260   | >PTCH1-A11(VALAFLTVI   | 1290  | 1030  |
| >PTCH1-A11(VALAFLTAI   | 279   | >PTCH1-A11(VALAFLTVI   | 458   | 179   |
| >PTCH1-A11(VALAFLTAI   | 428   | >PTCH1-A11(VALAFLTVI   | 609   | 181   |
| >PTCH1-A11(VALAFLTAI   | 1942  | >PTCH1-A11(VALAFLTVI   | 258   | 1684  |
| >PTCH1-A11(VALAFLTAI   | 1450  | >PTCH1-A11(VALAFLTVI   | 460   | 990   |
| >PTCH1-A11(VALAFLTAI   | 341   | >PTCH1-A11(VALAFLTVI   | 299   | 42    |
| >PTCH1-A11(HVALAFLTA   | 1881  | >PTCH1-A11(HVALAFLTV   | 329   | 1552  |
| >PTCH1-A11(HVALAFLTAI  | 360   | >PTCH1-A11(HVALAFLTVI  | 634   | 274   |
| >PTCH1-A11(HVALAFLTA   | 739   | >PTCH1-A11(HVALAFLTV   | 139   | 600   |
| >PTCH1-A11(HVALAFLTAI  | 324   | >PTCH1-A11(HVALAFLTVI  | 669   | 345   |
| >PTCH1-A11(HVALAFLTA   | 328   | >PTCH1-A11(HVALAFLTV   | 18    | 310   |
| >PTCH1-A11(HVALAFLTAI  | 283   | >PTCH1-A11(HVALAFLTVI  | 744   | 461   |
| >PTCH1-A11(HVALAFLTA   | 8215  | >PTCH1-A11(HVALAFLTV   | 241   | 7974  |
| >PTCH1-A11(HVALAFLTA   | 10196 | >PTCH1-A11(HVALAFLTV   | 61    | 10135 |
| >PTCH1-A11(HVALAFLTA   | 244   | >PTCH1-A11(HVALAFLTV   | 504   | 260   |
| >PTCH1-A11(HVALAFLTAI  | 278   | >PTCH1-A11(HVALAFLTVI  | 835   | 557   |
| >PTCH1-A11(HVALAFLTA   | 51    | >PTCH1-A11(HVALAFLTV   | 10    | 41    |
| >PTCH1-A11(HVALAFLTAI  | 457   | >PTCH1-A11(HVALAFLTVI  | 906   | 449   |
| >PTCH1-A11(HVALAFLTA   | 603   | >PTCH1-A11(HVALAFLTV   | 21    | 582   |
| >PTCH1-A11(HVALAFLTAI  | 75    | >PTCH1-A11(HVALAFLTVI  | 315   | 240   |
| >PTCH1-A11(HVALAFLTAI  | 147   | >PTCH1-A11(HVALAFLTVI  | 87    | 60    |
| >PTCH1-A11(VHVALAFLTA  | 7374  | >PTCH1-A11(VHVALAFLTV  | 283   | 7091  |
| >PTCH1-A11(VHVALAFLTA  | 205   | >PTCH1-A11(VHVALAFLTV  | 247   | 42    |
| >PTCH1-A12'AQQGAGGP/   | 444   | >PTCH1-A12'GQQGAGGP/   | 1485  | 1041  |
| >PTCH1-A12'AQQGAGGP/   | 151   | >PTCH1-A12'GQQGAGGP/   | 296   | 145   |
| >PTCH1-A12'AQQGAGGP/   | 187   | >PTCH1-A12'GQQGAGGP/   | 392   | 205   |
| >PTCH1-A12'EAQQGAGGF   | 497   | >PTCH1-A12'EGQQGAGGF   | 4226  | 3729  |
| >PTCH1-A12'GLSEELRHYE/ | 175   | >PTCH1-A12'GLSEELRHYE( | 12080 | 11905 |
| >PTCH1-A12'GLSEELRHYE/ | 21    | >PTCH1-A12'GLSEELRHYE( | 638   | 617   |
| >PTCH1-A12'GLSEELRHYE/ | 32    | >PTCH1-A12'GLSEELRHYE( | 5969  | 5937  |

|                        |      |                        |      |      |
|------------------------|------|------------------------|------|------|
| >PTCH1-A12:GLSEELRHYE/ | 42   | >PTCH1-A12:GLSEELRHYE( | 2728 | 2686 |
| >PTCH1-A12:GLSEELRHYE/ | 46   | >PTCH1-A12:GLSEELRHYE( | 3457 | 3411 |
| >PTCH1-A12:GLSEELRHYE/ | 85   | >PTCH1-A12:GLSEELRHYE( | 8713 | 8628 |
| >PTCH1-A12:GLSEELRHYE/ | 15   | >PTCH1-A12:GLSEELRHYE( | 7647 | 7632 |
| >PTCH1-A12:YEAQQGAGG   | 228  | >PTCH1-A12:YEQQQGAGC   | 315  | 87   |
| >PTCH1-A12:ELRHYEAQQ(  | 393  | >PTCH1-A12:ELRHYEGQQ(  | 611  | 218  |
| >PTCH1-A12:EELRHYEA    | 372  | >PTCH1-A12:EELRHYEG    | 8935 | 8563 |
| >PTCH1-A12:EELRHYEA    | 7    | >PTCH1-A12:EELRHYEG    | 261  | 254  |
| >PTCH1-A12:EELRHYEAQ   | 177  | >PTCH1-A12:EELRHYEGQ   | 702  | 525  |
| >PTCH1-A12:SEELRHYEA   | 13   | >PTCH1-A12:SEELRHYEG   | 710  | 697  |
| >PTCH1-A12:SEELRHYEAQ  | 430  | >PTCH1-A12:SEELRHYEGQ  | 1161 | 731  |
| >PTCH1-A13:AVHPPPVP    | 159  | >PTCH1-A13:VVHPPPVP    | 1649 | 1490 |
| >PTCH1-A13:AVHPPPVP    | 228  | >PTCH1-A13:VVHPPPVP    | 1915 | 1687 |
| >PTCH1-A13:VAVHPPP     | 782  | >PTCH1-A13:VVVHPPP     | 79   | 703  |
| >PTCH1-A13:VAVHPPP     | 219  | >PTCH1-A13:VVVHPPP     | 41   | 178  |
| >PTCH1-A13:VAVHPPP     | 171  | >PTCH1-A13:VVVHPPP     | 30   | 141  |
| >PTCH1-A13:VAVHPPP     | 4314 | >PTCH1-A13:VVVHPPP     | 485  | 3829 |
| >PTCH1-A13:VAVHPPP     | 2343 | >PTCH1-A13:VVVHPPP     | 247  | 2096 |
| >PTCH1-A13:VAVHPPP     | 707  | >PTCH1-A13:VVVHPPP     | 51   | 656  |
| >PTCH1-A13:VAVHPPP     | 857  | >PTCH1-A13:VVVHPPP     | 222  | 635  |
| >PTCH1-A13:VAVHPPP     | 165  | >PTCH1-A13:VVVHPPP     | 62   | 103  |
| >PTCH1-A13:TVTASASVTV  | 858  | >PTCH1-A13:TVTASASVTV  | 85   | 773  |
| >PTCH1-A13:TVTASASVTV  | 3723 | >PTCH1-A13:TVTASASVTV  | 317  | 3406 |
| >PTCH1-A13:TVTASASVTV  | 6039 | >PTCH1-A13:TVTASASVTV  | 45   | 5994 |
| >PTCH1-A13:TVTASASVTV  | 108  | >PTCH1-A13:TVTASASVTV  | 13   | 95   |
| >PTCH1-A13:TVTASASVTV  | 8033 | >PTCH1-A13:TVTASASVTV  | 408  | 7625 |
| >PTCH1-A13:TVAVHPPP    | 204  | >PTCH1-A13:TVVVHPPP    | 796  | 592  |
| >PTCH1-A13:TVAVHPPP    | 24   | >PTCH1-A13:TVVVHPPP    | 64   | 40   |
| >PTCH1-A13:TVAVHPPP    | 65   | >PTCH1-A13:TVVVHPPP    | 52   | 13   |
| >PTCH1-A13:TVAVHPPP    | 394  | >PTCH1-A13:TVVVHPPP    | 503  | 109  |
| >PTCH1-A13:TVAVHPPP    | 370  | >PTCH1-A13:TVVVHPPP    | 1315 | 945  |
| >PTCH1-A13:TVAVHPPP    | 138  | >PTCH1-A13:TVVVHPPP    | 283  | 145  |
| >PTCH1-A13:TVAVHPPP    | 22   | >PTCH1-A13:TVVVHPPP    | 67   | 45   |
| >PTCH1-A13:TVAVHPPP    | 5    | >PTCH1-A13:TVVVHPPP    | 8    | 3    |
| >PTCH1-A13:VTVAVHPPP\  | 331  | >PTCH1-A13:VTVVHPPP\   | 690  | 359  |
| >PTCH1-A13:VTVAVHPPP\  | 184  | >PTCH1-A13:VTVVHPPP\   | 176  | 8    |
| >PTCH1-A13:VTVAVHPPP\  | 18   | >PTCH1-A13:VTVVHPPP\   | 52   | 34   |
| >PTCH1-A13:VTVAVHPPP\  | 127  | >PTCH1-A13:VTVVHPPP\   | 243  | 116  |
| >PTCH1-A13:VTVAVHPPP\  | 206  | >PTCH1-A13:VTVVHPPP\   | 656  | 450  |
| >PTCH1-A13:VTVAVHPPP\  | 336  | >PTCH1-A13:VTVVHPPP\   | 2331 | 1995 |
| >PTCH1-A13:VTVAVHPPP\  | 17   | >PTCH1-A13:VTVVHPPP\   | 32   | 15   |
| >PTCH1-A13:VTVAVHPPP\  | 166  | >PTCH1-A13:VTVVHPPP\   | 204  | 38   |
| >PTCH1-A13:VTVAVHPPP\  | 244  | >PTCH1-A13:VTVVHPPP\   | 524  | 280  |

|                       |      |                       |      |      |
|-----------------------|------|-----------------------|------|------|
| >PTCH1-A13{SVTVAVHPPF | 246  | >PTCH1-A13{SVTVVVHPPF | 167  | 79   |
| >PTCH1-A13{SVTVAVHPPF | 88   | >PTCH1-A13{SVTVVVHPPF | 86   | 2    |
| >PTCH1-A13{SVTVAVHPPF | 33   | >PTCH1-A13{SVTVVVHPPF | 36   | 3    |
| >PTCH1-A13{SVTVAVHPPF | 156  | >PTCH1-A13{SVTVVVHPPF | 47   | 109  |
| >PTCH1-A13{SVTVAVHPPF | 376  | >PTCH1-A13{SVTVVVHPPF | 303  | 73   |
| >PTCH1-A13{SVTVAVHPPF | 24   | >PTCH1-A13{SVTVVVHPPF | 19   | 5    |
| >PTCH1-A13{SVTVAVHPPF | 19   | >PTCH1-A13{SVTVVVHPPF | 22   | 3    |
| >PTCH1-A13{SVTVAVHPPF | 450  | >PTCH1-A13{SVTVVVHPPF | 1069 | 619  |
| >PTCH1-A13{SVTVAVHPPF | 68   | >PTCH1-A13{SVTVVVHPPF | 50   | 18   |
| >PTCH1-A13{SVTVAVHPPF | 16   | >PTCH1-A13{SVTVVVHPPF | 18   | 2    |
| >PTCH1-A13{SASVTVAV   | 417  | >PTCH1-A13{SASVTVVV   | 1237 | 820  |
| >PTCH1-A13{SASVTVAV   | 183  | >PTCH1-A13{SASVTVVV   | 717  | 534  |
| >PTCH1-A13{SASVTVAV   | 473  | >PTCH1-A13{SASVTVVV   | 931  | 458  |
| >PTCH1-A13{SASVTVAV   | 451  | >PTCH1-A13{SASVTVVV   | 467  | 16   |
| >PTCH1-A13{SASVTVAV   | 93   | >PTCH1-A13{SASVTVVV   | 195  | 102  |
| >PTCH1-A13{SASVTVAV   | 298  | >PTCH1-A13{SASVTVVV   | 1237 | 939  |
| >PTCH1-A13{ASASVTVA   | 2002 | >PTCH1-A13{ASASVTVV   | 236  | 1766 |
| >PTCH1-A13{ASASVTVAV  | 57   | >PTCH1-A13{ASASVTVVV  | 224  | 167  |
| >PTCH1-A13{ASASVTVAV  | 487  | >PTCH1-A13{ASASVTVVV  | 1585 | 1098 |
| >PTCH1-A13{ASASVTVAV  | 143  | >PTCH1-A13{ASASVTVVV  | 1204 | 1061 |
| >PTCH1-A13{ASASVTVAV  | 107  | >PTCH1-A13{ASASVTVVV  | 366  | 259  |
| >PTCH1-A13{ASASVTVA   | 1500 | >PTCH1-A13{ASASVTVV   | 124  | 1376 |
| >PTCH1-A13{ASASVTVAV  | 16   | >PTCH1-A13{ASASVTVVV  | 32   | 16   |
| >PTCH1-A13{ASASVTVAV  | 476  | >PTCH1-A13{ASASVTVVV  | 2323 | 1847 |
| >PTCH1-A13{ASASVTVA   | 1552 | >PTCH1-A13{ASASVTVV   | 371  | 1181 |
| >PTCH1-A13{ASASVTVAV  | 238  | >PTCH1-A13{ASASVTVVV  | 369  | 131  |
| >PTCH1-A13{ASASVTVAV  | 773  | >PTCH1-A13{ASASVTVVV  | 447  | 326  |
| >PTCH1-A13{ASASVTVA   | 3829 | >PTCH1-A13{ASASVTVV   | 379  | 3450 |
| >PTCH1-A13{TASASVTVA  | 728  | >PTCH1-A13{TASASVTVV  | 57   | 671  |
| >PTCH1-A13{TASASVTVAV | 96   | >PTCH1-A13{TASASVTVVV | 215  | 119  |
| >PTCH1-A13{TASASVTVA  | 343  | >PTCH1-A13{TASASVTVV  | 24   | 319  |
| >PTCH1-A13{TASASVTVAV | 21   | >PTCH1-A13{TASASVTVVV | 34   | 13   |
| >PTCH1-A13{TASASVTVAV | 111  | >PTCH1-A13{TASASVTVVV | 472  | 361  |
| >PTCH1-A13{VTASASVTVA | 287  | >PTCH1-A13{VTASASVTVV | 765  | 478  |
| >PTCH1-A13{VTASASVTVA | 2903 | >PTCH1-A13{VTASASVTVV | 477  | 2426 |
| >PTCH1-A13{VTASASVTVA | 36   | >PTCH1-A13{VTASASVTVV | 116  | 80   |
| >PTCH1-A13{VTASASVTVA | 1348 | >PTCH1-A13{VTASASVTVV | 188  | 1160 |
| >PTCH1-A13{VTASASVTVA | 52   | >PTCH1-A13{VTASASVTVV | 160  | 108  |
| >PTCH1-A13{VTASASVTVA | 33   | >PTCH1-A13{VTASASVTVV | 156  | 123  |
| >PTCH1-A13{VTASASVTVA | 5881 | >PTCH1-A13{VTASASVTVV | 147  | 5734 |
| >PTCH1-A13{VTASASVTVA | 46   | >PTCH1-A13{VTASASVTVV | 93   | 47   |
| >PTCH1-A13{VTASASVTVA | 5907 | >PTCH1-A13{VTASASVTVV | 99   | 5808 |
| >PTCH1-A13{VTASASVTVA | 63   | >PTCH1-A13{VTASASVTVV | 58   | 5    |

|                       |      |                       |     |      |
|-----------------------|------|-----------------------|-----|------|
| >PTCH1-A13{VTASASVTVA | 317  | >PTCH1-A13{VTASASVTVV | 322 | 5    |
| >PTCH1-A13{VTASASVTVA | 9870 | >PTCH1-A13{VTASASVTVV | 63  | 9807 |
| >PTCH1-A13{VTASASVTVA | 69   | >PTCH1-A13{VTASASVTVV | 86  | 17   |
| >PTCH1-A13{VTASASVTVA | 363  | >PTCH1-A13{VTASASVTVV | 793 | 430  |
| >PTCH1-A13{VTASASVTVA | 369  | >PTCH1-A13{VTASASVTVV | 65  | 304  |
| >PTCH1-A13{VTASASVTVA | 10   | >PTCH1-A13{VTASASVTVV | 14  | 4    |
| >PTCH1-A13{VTASASVTVA | 5741 | >PTCH1-A13{VTASASVTVV | 295 | 5446 |
| >PTCH1-A13{VTASASVTVA | 36   | >PTCH1-A13{VTASASVTVV | 142 | 106  |
| >PTCH1-A13{VTASASVTVA | 2813 | >PTCH1-A13{VTASASVTVV | 214 | 2599 |
| >PTCH1-A13{VTASASVTVA | 1141 | >PTCH1-A13{VTASASVTVV | 44  | 1097 |
| >PTCH1-A13{VTASASVTVA | 51   | >PTCH1-A13{VTASASVTVV | 39  | 12   |
| >PTCH1-A13{VTASASVTVA | 1857 | >PTCH1-A13{VTASASVTVV | 233 | 1624 |
| >PTCH1-A13{VTASASVTVA | 574  | >PTCH1-A13{VTASASVTVV | 145 | 429  |
| >PTCH1-A13{VTASASVTVA | 7036 | >PTCH1-A13{VTASASVTVV | 144 | 6892 |
| >PTCH1-A47{ALSVAAGL   | 11   | >PTCH1-A47{VLSVAAGL   | 21  | 10   |
| >PTCH1-A47{ALSVAAGLGL | 48   | >PTCH1-A47{VLSVAAGLGL | 103 | 55   |
| >PTCH1-A47{ALSVAAGL   | 40   | >PTCH1-A47{VLSVAAGL   | 59  | 19   |
| >PTCH1-A47{ALSVAAGLGL | 199  | >PTCH1-A47{VLSVAAGLGL | 413 | 214  |
| >PTCH1-A47{ALSVAAGL   | 468  | >PTCH1-A47{VLSVAAGL   | 544 | 76   |
| >PTCH1-A47{ALSVAAGL   | 103  | >PTCH1-A47{VLSVAAGL   | 75  | 28   |
| >PTCH1-A47{ALSVAAGLGL | 270  | >PTCH1-A47{VLSVAAGLGL | 201 | 69   |
| >PTCH1-A47{ALSVAAGL   | 110  | >PTCH1-A47{VLSVAAGL   | 109 | 1    |
| >PTCH1-A47{ALSVAAGLGL | 439  | >PTCH1-A47{VLSVAAGLGL | 386 | 53   |
| >PTCH1-A47{ALSVAAGL   | 73   | >PTCH1-A47{VLSVAAGL   | 76  | 3    |
| >PTCH1-A47{ALSVAAGLGL | 91   | >PTCH1-A47{VLSVAAGLGL | 86  | 5    |
| >PTCH1-A47{ALSVAAGL   | 66   | >PTCH1-A47{VLSVAAGL   | 28  | 38   |
| >PTCH1-A47{ALSVAAGLGL | 469  | >PTCH1-A47{VLSVAAGLGL | 156 | 313  |
| >PTCH1-A47{ALSVAAGL   | 7    | >PTCH1-A47{VLSVAAGL   | 8   | 1    |
| >PTCH1-A47{ALSVAAGLGL | 12   | >PTCH1-A47{VLSVAAGLGL | 13  | 1    |
| >PTCH1-A47{VALSVAAGL  | 257  | >PTCH1-A47{VLSVAAGL   | 44  | 213  |
| >PTCH1-A47{VALSVAAGLC | 337  | >PTCH1-A47{VLSVAAGLC  | 62  | 275  |
| >PTCH1-A47{VALSVAAGL  | 181  | >PTCH1-A47{VLSVAAGL   | 29  | 152  |
| >PTCH1-A47{VALSVAAGLC | 486  | >PTCH1-A47{VLSVAAGLC  | 81  | 405  |
| >PTCH1-A47{VALSVAAGL  | 4506 | >PTCH1-A47{VLSVAAGL   | 398 | 4108 |
| >PTCH1-A47{VALSVAAGL  | 1822 | >PTCH1-A47{VLSVAAGL   | 155 | 1667 |
| >PTCH1-A47{VALSVAAGLC | 1854 | >PTCH1-A47{VLSVAAGLC  | 189 | 1665 |
| >PTCH1-A47{VALSVAAGL  | 913  | >PTCH1-A47{VLSVAAGL   | 54  | 859  |
| >PTCH1-A47{VALSVAAGLC | 2712 | >PTCH1-A47{VLSVAAGLC  | 302 | 2410 |
| >PTCH1-A47{VALSVAAGL  | 3711 | >PTCH1-A47{VLSVAAGL   | 175 | 3536 |
| >PTCH1-A47{VALSVAAGLC | 5638 | >PTCH1-A47{VLSVAAGLC  | 376 | 5262 |
| >PTCH1-A47{VALSVAAGL  | 350  | >PTCH1-A47{VLSVAAGL   | 151 | 199  |
| >PTCH1-A47{VALSVAAGLC | 921  | >PTCH1-A47{VLSVAAGLC  | 425 | 496  |
| >PTCH1-A47{VALSVAAGL  | 31   | >PTCH1-A47{VLSVAAGL   | 444 | 413  |

|                       |      |                       |      |      |
|-----------------------|------|-----------------------|------|------|
| >PTCH1-A47:VALSVAAGLC | 32   | >PTCH1-A47:VVLSVAAGLC | 402  | 370  |
| >PTCH1-A47:VALSVAAGL  | 901  | >PTCH1-A47:VVLSVAAGL  | 464  | 437  |
| >PTCH1-A47:AVGLAGVLLV | 9628 | >PTCH1-A47:AVGLAGVLLV | 291  | 9337 |
| >PTCH1-A47:AVGLAGVLLV | 8389 | >PTCH1-A47:AVGLAGVLLV | 104  | 8285 |
| >PTCH1-A47:LVALSVAA   | 253  | >PTCH1-A47:LVVLSVAA   | 1277 | 1024 |
| >PTCH1-A47:LVALSVAAGL | 227  | >PTCH1-A47:LVVLSVAAGL | 399  | 172  |
| >PTCH1-A47:LVALSVAA   | 172  | >PTCH1-A47:LVVLSVAA   | 468  | 296  |
| >PTCH1-A47:LVALSVAA   | 228  | >PTCH1-A47:LVVLSVAA   | 176  | 52   |
| >PTCH1-A47:LVALSVAAGL | 878  | >PTCH1-A47:LVVLSVAAGL | 470  | 408  |
| >PTCH1-A47:LVALSVAAGL | 446  | >PTCH1-A47:LVVLSVAAGL | 3620 | 3174 |
| >PTCH1-A47:LVALSVAAGL | 191  | >PTCH1-A47:LVVLSVAAGL | 474  | 283  |
| >PTCH1-A47:LVALSVAAGL | 2425 | >PTCH1-A47:LVVLSVAAGL | 482  | 1943 |
| >PTCH1-A47:LVALSVAA   | 146  | >PTCH1-A47:LVVLSVAA   | 537  | 391  |
| >PTCH1-A47:LVALSVAAGL | 254  | >PTCH1-A47:LVVLSVAAGL | 337  | 83   |
| >PTCH1-A47:LVALSVAAGL | 211  | >PTCH1-A47:LVVLSVAAGL | 76   | 135  |
| >PTCH1-A47:LVALSVAA   | 935  | >PTCH1-A47:LVVLSVAA   | 480  | 455  |
| >PTCH1-A47:LLVALSVAA  | 141  | >PTCH1-A47:LLVVLSVAA  | 911  | 770  |
| >PTCH1-A47:LLVALSVAAG | 69   | >PTCH1-A47:LLVVLSVAAG | 296  | 227  |
| >PTCH1-A47:LLVALSVA   | 73   | >PTCH1-A47:LLVVLSVA   | 309  | 236  |
| >PTCH1-A47:LLVALSVAA  | 22   | >PTCH1-A47:LLVVLSVAA  | 128  | 106  |
| >PTCH1-A47:LLVALSVAAG | 13   | >PTCH1-A47:LLVVLSVAAG | 43   | 30   |
| >PTCH1-A47:LLVALSVA   | 19   | >PTCH1-A47:LLVVLSVA   | 77   | 58   |
| >PTCH1-A47:LLVALSVAA  | 27   | >PTCH1-A47:LLVVLSVAA  | 173  | 146  |
| >PTCH1-A47:LLVALSVAAG | 22   | >PTCH1-A47:LLVVLSVAAG | 93   | 71   |
| >PTCH1-A47:LLVALSVA   | 137  | >PTCH1-A47:LLVVLSVA   | 490  | 353  |
| >PTCH1-A47:LLVALSVAA  | 58   | >PTCH1-A47:LLVVLSVAA  | 298  | 240  |
| >PTCH1-A47:LLVALSVAAG | 39   | >PTCH1-A47:LLVVLSVAAG | 125  | 86   |
| >PTCH1-A47:LLVALSVA   | 84   | >PTCH1-A47:LLVVLSVA   | 231  | 147  |
| >PTCH1-A47:LLVALSVAA  | 36   | >PTCH1-A47:LLVVLSVAA  | 194  | 158  |
| >PTCH1-A47:LLVALSVAAG | 8    | >PTCH1-A47:LLVVLSVAAG | 25   | 17   |
| >PTCH1-A47:LLVALSVA   | 270  | >PTCH1-A47:LLVVLSVA   | 536  | 266  |
| >PTCH1-A47:LLVALSVAA  | 87   | >PTCH1-A47:LLVVLSVAA  | 247  | 160  |
| >PTCH1-A47:LLVALSVAAG | 17   | >PTCH1-A47:LLVVLSVAAG | 37   | 20   |
| >PTCH1-A47:LLVALSVA   | 340  | >PTCH1-A47:LLVVLSVA   | 613  | 273  |
| >PTCH1-A47:LLVALSVAA  | 186  | >PTCH1-A47:LLVVLSVAA  | 476  | 290  |
| >PTCH1-A47:LLVALSVAAG | 36   | >PTCH1-A47:LLVVLSVAAG | 69   | 33   |
| >PTCH1-A47:LLVALSVAAG | 53   | >PTCH1-A47:LLVVLSVAAG | 108  | 55   |
| >PTCH1-A47:LLVALSVA   | 11   | >PTCH1-A47:LLVVLSVA   | 29   | 18   |
| >PTCH1-A47:LLVALSVAA  | 13   | >PTCH1-A47:LLVVLSVAA  | 43   | 30   |
| >PTCH1-A47:LLVALSVAAG | 4    | >PTCH1-A47:LLVVLSVAAG | 6    | 2    |
| >PTCH1-A47:LLVALSVA   | 353  | >PTCH1-A47:LLVVLSVA   | 907  | 554  |
| >PTCH1-A47:LLVALSVAA  | 181  | >PTCH1-A47:LLVVLSVAA  | 436  | 255  |
| >PTCH1-A47:LLVALSVAAG | 282  | >PTCH1-A47:LLVVLSVAAG | 574  | 292  |



|                       |      |                       |     |      |
|-----------------------|------|-----------------------|-----|------|
| >PTCH1-A47:LLVALSVAAG | 307  | >PTCH1-A47:LLVVLSVAAG | 665 | 358  |
| >PTCH1-A47:VLLVALSV   | 22   | >PTCH1-A47:VLLVVLSV   | 17  | 5    |
| >PTCH1-A47:VLLVALSVAA | 328  | >PTCH1-A47:VLLVVLSVAA | 434 | 106  |
| >PTCH1-A47:VLLVALSV   | 136  | >PTCH1-A47:VLLVVLSV   | 147 | 11   |
| >PTCH1-A47:VLLVALSVAA | 479  | >PTCH1-A47:VLLVVLSVAA | 624 | 145  |
| >PTCH1-A47:VLLVALSV   | 53   | >PTCH1-A47:VLLVVLSV   | 43  | 10   |
| >PTCH1-A47:VLLVALSVA  | 126  | >PTCH1-A47:VLLVVLSVA  | 146 | 20   |
| >PTCH1-A47:VLLVALSVAA | 383  | >PTCH1-A47:VLLVVLSVAA | 489 | 106  |
| >PTCH1-A47:VLLVALSV   | 19   | >PTCH1-A47:VLLVVLSV   | 26  | 7    |
| >PTCH1-A47:VLLVALSVA  | 180  | >PTCH1-A47:VLLVVLSVA  | 304 | 124  |
| >PTCH1-A47:VLLVALSVAA | 259  | >PTCH1-A47:VLLVVLSVAA | 291 | 32   |
| >PTCH1-A47:VLLVALSV   | 2    | >PTCH1-A47:VLLVVLSV   | 2   | 0    |
| >PTCH1-A47:VLLVALSVA  | 54   | >PTCH1-A47:VLLVVLSVA  | 10  | 44   |
| >PTCH1-A47:VLLVALSVAA | 21   | >PTCH1-A47:VLLVVLSVAA | 10  | 11   |
| >PTCH1-A47:VLLVALSVAA | 1500 | >PTCH1-A47:VLLVVLSVAA | 497 | 1003 |
| >PTCH1-A47:VLLVALSV   | 6    | >PTCH1-A47:VLLVVLSV   | 5   | 1    |
| >PTCH1-A47:VLLVALSVA  | 113  | >PTCH1-A47:VLLVVLSVA  | 80  | 33   |
| >PTCH1-A47:VLLVALSVAA | 57   | >PTCH1-A47:VLLVVLSVAA | 54  | 3    |
| >PTCH1-A47:VLLVALSV   | 5    | >PTCH1-A47:VLLVVLSV   | 4   | 1    |
| >PTCH1-A47:VLLVALSVA  | 46   | >PTCH1-A47:VLLVVLSVA  | 28  | 18   |
| >PTCH1-A47:VLLVALSVAA | 30   | >PTCH1-A47:VLLVVLSVAA | 24  | 6    |
| >PTCH1-A47:VLLVALSV   | 3    | >PTCH1-A47:VLLVVLSV   | 2   | 1    |
| >PTCH1-A47:VLLVALSVA  | 84   | >PTCH1-A47:VLLVVLSVA  | 77  | 7    |
| >PTCH1-A47:VLLVALSVAA | 63   | >PTCH1-A47:VLLVVLSVAA | 73  | 10   |
| >PTCH1-A47:VLLVALSV   | 2    | >PTCH1-A47:VLLVVLSV   | 2   | 0    |
| >PTCH1-A47:VLLVALSVA  | 19   | >PTCH1-A47:VLLVVLSVA  | 19  | 0    |
| >PTCH1-A47:VLLVALSVAA | 18   | >PTCH1-A47:VLLVVLSVAA | 22  | 4    |
| >PTCH1-A47:GVLLVALSV  | 614  | >PTCH1-A47:GVLLVVLSV  | 131 | 483  |
| >PTCH1-A47:GVLLVALSV  | 822  | >PTCH1-A47:GVLLVVLSV  | 326 | 496  |
| >PTCH1-A47:GVLLVALSV  | 51   | >PTCH1-A47:GVLLVVLSV  | 58  | 7    |
| >PTCH1-A47:GVLLVALSVA | 358  | >PTCH1-A47:GVLLVVLSVA | 517 | 159  |
| >PTCH1-A47:GVLLVALSV  | 69   | >PTCH1-A47:GVLLVVLSV  | 14  | 55   |
| >PTCH1-A47:GVLLVALSV  | 317  | >PTCH1-A47:GVLLVVLSV  | 142 | 175  |
| >PTCH1-A47:GVLLVALSV  | 33   | >PTCH1-A47:GVLLVVLSV  | 18  | 15   |
| >PTCH1-A47:GVLLVALSV  | 1192 | >PTCH1-A47:GVLLVVLSV  | 214 | 978  |
| >PTCH1-A47:GVLLVALSV  | 134  | >PTCH1-A47:GVLLVVLSV  | 43  | 91   |
| >PTCH1-A47:LAGVLLVALS | 633  | >PTCH1-A47:LAGVLLVLS  | 355 | 278  |
| >PTCH1-A47:GLAGVLLVA  | 91   | >PTCH1-A47:GLAGVLLVV  | 17  | 74   |
| >PTCH1-A47:GLAGVLLVAL | 142  | >PTCH1-A47:GLAGVLLVVL | 226 | 84   |
| >PTCH1-A47:GLAGVLLVA  | 20   | >PTCH1-A47:GLAGVLLVV  | 8   | 12   |
| >PTCH1-A47:GLAGVLLVAL | 17   | >PTCH1-A47:GLAGVLLVVL | 28  | 11   |
| >PTCH1-A47:GLAGVLLVAL | 54   | >PTCH1-A47:GLAGVLLVVL | 62  | 8    |
| >PTCH1-A47:GLAGVLLVA  | 14   | >PTCH1-A47:GLAGVLLVV  | 5   | 9    |

|                        |       |                        |      |       |
|------------------------|-------|------------------------|------|-------|
| >PTCH1-A47:GLAGVLLVAL  | 65    | >PTCH1-A47:GLAGVLLVVL  | 140  | 75    |
| >PTCH1-A47:GLAGVLLVAL  | 182   | >PTCH1-A47:GLAGVLLVVL  | 582  | 400   |
| >PTCH1-A47:GLAGVLLVA   | 286   | >PTCH1-A47:GLAGVLLVV   | 20   | 266   |
| >PTCH1-A47:GLAGVLLVAL  | 229   | >PTCH1-A47:GLAGVLLVVL  | 660  | 431   |
| >PTCH1-A47:GLAGVLLVA   | 18    | >PTCH1-A47:GLAGVLLVV   | 2    | 16    |
| >PTCH1-A47:GLAGVLLVAL  | 7     | >PTCH1-A47:GLAGVLLVVL  | 11   | 4     |
| >PTCH1-A47:GLAGVLLVA   | 244   | >PTCH1-A47:GLAGVLLVV   | 5    | 239   |
| >PTCH1-A47:GLAGVLLVAL  | 12    | >PTCH1-A47:GLAGVLLVVL  | 20   | 8     |
| >PTCH1-A47:GLAGVLLVA   | 16    | >PTCH1-A47:GLAGVLLVV   | 4    | 12    |
| >PTCH1-A47:GLAGVLLVAL  | 10    | >PTCH1-A47:GLAGVLLVVL  | 10   | 0     |
| >PTCH1-A47:GLAGVLLVA   | 840   | >PTCH1-A47:GLAGVLLVV   | 7    | 833   |
| >PTCH1-A47:GLAGVLLVAL  | 61    | >PTCH1-A47:GLAGVLLVVL  | 71   | 10    |
| >PTCH1-A47:GLAGVLLVA   | 7     | >PTCH1-A47:GLAGVLLVV   | 2    | 5     |
| >PTCH1-A47:GLAGVLLVAL  | 3     | >PTCH1-A47:GLAGVLLVVL  | 4    | 1     |
| >PTCH1-A47:GLAGVLLVAL  | 396   | >PTCH1-A47:GLAGVLLVVL  | 1122 | 726   |
| >PTCH1-A47:VGLAGVLLVA  | 8791  | >PTCH1-A47:VGLAGVLLVV  | 444  | 8347  |
| >PTCH1-A47:VGLAGVLLVA  | 10993 | >PTCH1-A47:VGLAGVLLVV  | 401  | 10592 |
| >PTCH1-A56:ALIPIPAL    | 16    | >PTCH1-A56:VLIPIPAL    | 19   | 3     |
| >PTCH1-A56:ALIPIPAL    | 9     | >PTCH1-A56:VLIPIPAL    | 17   | 8     |
| >PTCH1-A56:ALIPIPALRA  | 159   | >PTCH1-A56:VLIPIPALRA  | 385  | 226   |
| >PTCH1-A56:ALIPIPALRAF | 388   | >PTCH1-A56:VLIPIPALRAF | 848  | 460   |
| >PTCH1-A56:ALIPIPAL    | 8     | >PTCH1-A56:VLIPIPAL    | 11   | 3     |
| >PTCH1-A56:ALIPIPALRA  | 165   | >PTCH1-A56:VLIPIPALRA  | 330  | 165   |
| >PTCH1-A56:ALIPIPAL    | 21    | >PTCH1-A56:VLIPIPAL    | 27   | 6     |
| >PTCH1-A56:ALIPIPALRAF | 499   | >PTCH1-A56:VLIPIPALRAF | 720  | 221   |
| >PTCH1-A56:ALIPIPAL    | 4     | >PTCH1-A56:VLIPIPAL    | 4    | 0     |
| >PTCH1-A56:ALIPIPALRA  | 34    | >PTCH1-A56:VLIPIPALRA  | 26   | 8     |
| >PTCH1-A56:ALIPIPAL    | 9     | >PTCH1-A56:VLIPIPAL    | 9    | 0     |
| >PTCH1-A56:ALIPIPALRA  | 376   | >PTCH1-A56:VLIPIPALRA  | 387  | 11    |
| >PTCH1-A56:ALIPIPAL    | 21    | >PTCH1-A56:VLIPIPAL    | 19   | 2     |
| >PTCH1-A56:ALIPIPALRA  | 251   | >PTCH1-A56:VLIPIPALRA  | 236  | 15    |
| >PTCH1-A56:ALIPIPAL    | 60    | >PTCH1-A56:VLIPIPAL    | 21   | 39    |
| >PTCH1-A56:ALIPIPAL    | 3     | >PTCH1-A56:VLIPIPAL    | 3    | 0     |
| >PTCH1-A56:ALIPIPALRA  | 10    | >PTCH1-A56:VLIPIPALRA  | 10   | 0     |
| >PTCH1-A56:ALIPIPALR   | 456   | >PTCH1-A56:VLIPIPALR   | 470  | 14    |
| >PTCH1-A56:ALIPIPALR   | 154   | >PTCH1-A56:VLIPIPALR   | 340  | 186   |
| >PTCH1-A56:ALIPIPALRAF | 1435  | >PTCH1-A56:VLIPIPALRAF | 184  | 1251  |
| >PTCH1-A56:ALIPIPALRAF | 189   | >PTCH1-A56:VLIPIPALRAF | 786  | 597   |
| >PTCH1-A56:ALIPIPALR   | 20    | >PTCH1-A56:VLIPIPALR   | 33   | 13    |
| >PTCH1-A56:ALIPIPAL    | 474   | >PTCH1-A56:VLIPIPAL    | 1912 | 1438  |
| >PTCH1-A56:ALIPIPALRAF | 117   | >PTCH1-A56:VLIPIPALRAF | 396  | 279   |
| >PTCH1-A56:ALIPIPALR   | 488   | >PTCH1-A56:VLIPIPALR   | 147  | 341   |
| >PTCH1-A56:ALIPIPALR   | 82    | >PTCH1-A56:VLIPIPALR   | 42   | 40    |

|                         |      |                         |     |      |
|-------------------------|------|-------------------------|-----|------|
| >PTCH1-A56: ALIPIPALRAF | 63   | >PTCH1-A56: VLIPIPALRAF | 85  | 22   |
| >PTCH1-A56: ALIPIPALRAF | 32   | >PTCH1-A56: VLIPIPALRAF | 48  | 16   |
| >PTCH1-A56: ALIPIPALRAF | 112  | >PTCH1-A56: VLIPIPALRAF | 140 | 28   |
| >PTCH1-A56: ALIPIPALR   | 457  | >PTCH1-A56: VLIPIPALR   | 227 | 230  |
| >PTCH1-A56: AALIPIPA    | 977  | >PTCH1-A56: AVLIPIPA    | 212 | 765  |
| >PTCH1-A56: AALIPIPAL   | 122  | >PTCH1-A56: AVLIPIPAL   | 26  | 96   |
| >PTCH1-A56: AALIPIPA    | 1294 | >PTCH1-A56: AVLIPIPA    | 253 | 1041 |
| >PTCH1-A56: AALIPIPAL   | 109  | >PTCH1-A56: AVLIPIPAL   | 24  | 85   |
| >PTCH1-A56: AALIPIPAL   | 2016 | >PTCH1-A56: AVLIPIPAL   | 285 | 1731 |
| >PTCH1-A56: AALIPIPAL   | 1389 | >PTCH1-A56: AVLIPIPAL   | 96  | 1293 |
| >PTCH1-A56: AALIPIPALR  | 1473 | >PTCH1-A56: AVLIPIPALR  | 335 | 1138 |
| >PTCH1-A56: AALIPIPALR  | 337  | >PTCH1-A56: AVLIPIPALR  | 148 | 189  |
| >PTCH1-A56: AALIPIPAL   | 2795 | >PTCH1-A56: AVLIPIPAL   | 241 | 2554 |
| >PTCH1-A56: AALIPIPA    | 721  | >PTCH1-A56: AVLIPIPA    | 189 | 532  |
| >PTCH1-A56: AALIPIPALR  | 26   | >PTCH1-A56: AVLIPIPALR  | 20  | 6    |
| >PTCH1-A56: AALIPIPALR  | 18   | >PTCH1-A56: AVLIPIPALR  | 13  | 5    |
| >PTCH1-A56: AALIPIPAL   | 325  | >PTCH1-A56: AVLIPIPAL   | 113 | 212  |
| >PTCH1-A56: AALIPIPAL   | 17   | >PTCH1-A56: AVLIPIPAL   | 198 | 181  |
| >PTCH1-A56: ISNVTAFFMA  | 2036 | >PTCH1-A56: ISNVTAFFMA  | 174 | 1862 |
| >PTCH1-A56: ISNVTAFFMA  | 379  | >PTCH1-A56: ISNVTAFFMA  | 742 | 363  |
| >PTCH1-A56: ISNVTAFFMA  | 2650 | >PTCH1-A56: ISNVTAFFMA  | 345 | 2305 |
| >PTCH1-A56: ISNVTAFFMA  | 535  | >PTCH1-A56: ISNVTAFFMA  | 144 | 391  |
| >PTCH1-A56: MAALIPIPAL  | 295  | >PTCH1-A56: MAVLIPIPAL  | 581 | 286  |
| >PTCH1-A56: MAALIPIPAL  | 172  | >PTCH1-A56: MAVLIPIPAL  | 104 | 68   |
| >PTCH1-A56: MAALIPIPALF | 335  | >PTCH1-A56: MAVLIPIPALF | 643 | 308  |
| >PTCH1-A56: MAALIPIPALF | 20   | >PTCH1-A56: MAVLIPIPALF | 21  | 1    |
| >PTCH1-A56: MAALIPIPALF | 70   | >PTCH1-A56: MAVLIPIPALF | 49  | 21   |
| >PTCH1-A56: MAALIPIPALF | 2    | >PTCH1-A56: MAVLIPIPALF | 3   | 1    |
| >PTCH1-A56: MAALIPIPA   | 7    | >PTCH1-A56: MAVLIPIPA   | 15  | 8    |
| >PTCH1-A56: MAALIPIPAL  | 117  | >PTCH1-A56: MAVLIPIPAL  | 179 | 62   |
| >PTCH1-A56: MAALIPIPAL  | 161  | >PTCH1-A56: MAVLIPIPAL  | 59  | 102  |
| >PTCH1-A56: MAALIPIPA   | 73   | >PTCH1-A56: MAVLIPIPA   | 86  | 13   |
| >PTCH1-A56: MAALIPIPAL  | 268  | >PTCH1-A56: MAVLIPIPAL  | 274 | 6    |
| >PTCH1-A56: MAALIPIPA   | 17   | >PTCH1-A56: MAVLIPIPA   | 11  | 6    |
| >PTCH1-A56: MAALIPIPALF | 205  | >PTCH1-A56: MAVLIPIPALF | 152 | 53   |
| >PTCH1-A56: FMAALIPI    | 185  | >PTCH1-A56: FMAVLIPI    | 137 | 48   |
| >PTCH1-A56: FMAALIPI    | 6    | >PTCH1-A56: FMAVLIPI    | 8   | 2    |
| >PTCH1-A56: FMAALIPIPA  | 14   | >PTCH1-A56: FMAVLIPIPA  | 25  | 11   |
| >PTCH1-A56: FMAALIPIPAL | 7    | >PTCH1-A56: FMAVLIPIPAL | 9   | 2    |
| >PTCH1-A56: FMAALIPI    | 2    | >PTCH1-A56: FMAVLIPI    | 3   | 1    |
| >PTCH1-A56: FMAALIPIP   | 44   | >PTCH1-A56: FMAVLIPIP   | 260 | 216  |
| >PTCH1-A56: FMAALIPIPA  | 8    | >PTCH1-A56: FMAVLIPIPA  | 15  | 7    |
| >PTCH1-A56: FMAALIPIPAL | 2    | >PTCH1-A56: FMAVLIPIPAL | 3   | 1    |

|                        |     |                        |      |      |
|------------------------|-----|------------------------|------|------|
| >PTCH1-A56:FMAALIPI    | 2   | >PTCH1-A56:FMAVLIPI    | 4    | 2    |
| >PTCH1-A56:FMAALIPIP   | 252 | >PTCH1-A56:FMAVLIPIP   | 1622 | 1370 |
| >PTCH1-A56:FMAALIPIPA  | 11  | >PTCH1-A56:FMAVLIPIPA  | 22   | 11   |
| >PTCH1-A56:FMAALIPIPAL | 3   | >PTCH1-A56:FMAVLIPIPAL | 5    | 2    |
| >PTCH1-A56:FMAALIPI    | 4   | >PTCH1-A56:FMAVLIPI    | 9    | 5    |
| >PTCH1-A56:FMAALIPIPA  | 34  | >PTCH1-A56:FMAVLIPIPA  | 42   | 8    |
| >PTCH1-A56:FMAALIPIPAL | 4   | >PTCH1-A56:FMAVLIPIPAL | 7    | 3    |
| >PTCH1-A56:FMAALIPI    | 2   | >PTCH1-A56:FMAVLIPI    | 3    | 1    |
| >PTCH1-A56:FMAALIPIPA  | 3   | >PTCH1-A56:FMAVLIPIPA  | 6    | 3    |
| >PTCH1-A56:FMAALIPIPAL | 2   | >PTCH1-A56:FMAVLIPIPAL | 2    | 0    |
| >PTCH1-A56:FMAALIPI    | 5   | >PTCH1-A56:FMAVLIPI    | 7    | 2    |
| >PTCH1-A56:FMAALIPIPA  | 15  | >PTCH1-A56:FMAVLIPIPA  | 28   | 13   |
| >PTCH1-A56:FMAALIPIPAL | 6   | >PTCH1-A56:FMAVLIPIPAL | 10   | 4    |
| >PTCH1-A56:FMAALIPI    | 5   | >PTCH1-A56:FMAVLIPI    | 6    | 1    |
| >PTCH1-A56:FMAALIPIPA  | 7   | >PTCH1-A56:FMAVLIPIPA  | 9    | 2    |
| >PTCH1-A56:FMAALIPIPAL | 5   | >PTCH1-A56:FMAVLIPIPAL | 5    | 0    |
| >PTCH1-A56:FMAALIPI    | 6   | >PTCH1-A56:FMAVLIPI    | 8    | 2    |
| >PTCH1-A56:FMAALIPIPA  | 15  | >PTCH1-A56:FMAVLIPIPA  | 25   | 10   |
| >PTCH1-A56:FMAALIPIPAL | 3   | >PTCH1-A56:FMAVLIPIPAL | 4    | 1    |
| >PTCH1-A56:FMAALIPI    | 3   | >PTCH1-A56:FMAVLIPI    | 4    | 1    |
| >PTCH1-A56:FMAALIPIPA  | 4   | >PTCH1-A56:FMAVLIPIPA  | 7    | 3    |
| >PTCH1-A56:FMAALIPIPAL | 2   | >PTCH1-A56:FMAVLIPIPAL | 2    | 0    |
| >PTCH1-A56:FMAALIPI    | 92  | >PTCH1-A56:FMAVLIPI    | 223  | 131  |
| >PTCH1-A56:FMAALIPIPA  | 261 | >PTCH1-A56:FMAVLIPIPA  | 1733 | 1472 |
| >PTCH1-A56:FMAALIPI    | 37  | >PTCH1-A56:FMAVLIPI    | 92   | 55   |
| >PTCH1-A56:FMAALIPIPA  | 250 | >PTCH1-A56:FMAVLIPIPA  | 601  | 351  |
| >PTCH1-A56:FMAALIPIPAL | 58  | >PTCH1-A56:FMAVLIPIPAL | 134  | 76   |
| >PTCH1-A56:FMAALIPI    | 143 | >PTCH1-A56:FMAVLIPI    | 326  | 183  |
| >PTCH1-A56:FMAALIPIPA  | 419 | >PTCH1-A56:FMAVLIPIPA  | 855  | 436  |
| >PTCH1-A56:FMAALIPIPAL | 92  | >PTCH1-A56:FMAVLIPIPAL | 163  | 71   |
| >PTCH1-A56:FMAALIPI    | 91  | >PTCH1-A56:FMAVLIPI    | 138  | 47   |
| >PTCH1-A56:FMAALIPIPAL | 40  | >PTCH1-A56:FMAVLIPIPAL | 55   | 15   |
| >PTCH1-A56:FMAALIPIPAL | 460 | >PTCH1-A56:FMAVLIPIPAL | 796  | 336  |
| >PTCH1-A56:FMAALIPI    | 134 | >PTCH1-A56:FMAVLIPI    | 429  | 295  |
| >PTCH1-A56:FMAALIPIPAL | 13  | >PTCH1-A56:FMAVLIPIPAL | 26   | 13   |
| >PTCH1-A56:FMAALIPIPAL | 151 | >PTCH1-A56:FMAVLIPIPAL | 459  | 308  |
| >PTCH1-A56:FMAALIPI    | 318 | >PTCH1-A56:FMAVLIPI    | 624  | 306  |
| >PTCH1-A56:FFMAALIPI   | 82  | >PTCH1-A56:FFMAVLIPI   | 39   | 43   |
| >PTCH1-A56:FFMAALIPI   | 40  | >PTCH1-A56:FFMAVLIPI   | 38   | 2    |
| >PTCH1-A56:FFMAALIPIPA | 142 | >PTCH1-A56:FFMAVLIPIPA | 123  | 19   |
| >PTCH1-A56:FFMAALIPI   | 8   | >PTCH1-A56:FFMAVLIPI   | 10   | 2    |
| >PTCH1-A56:FFMAALIPIPA | 29  | >PTCH1-A56:FFMAVLIPIPA | 29   | 0    |
| >PTCH1-A56:FFMAALIPI   | 322 | >PTCH1-A56:FFMAVLIPI   | 300  | 22   |

|                         |      |                         |      |      |
|-------------------------|------|-------------------------|------|------|
| >PTCH1-A56: FFMAALIPI   | 16   | >PTCH1-A56: FFMAVLIPI   | 22   | 6    |
| >PTCH1-A56: FFMAALIPIPA | 100  | >PTCH1-A56: FFMAVLIPIPA | 112  | 12   |
| >PTCH1-A56: FFMAALIPI   | 669  | >PTCH1-A56: FFMAVLIPI   | 91   | 578  |
| >PTCH1-A56: FFMAALIPI   | 430  | >PTCH1-A56: FFMAVLIPI   | 378  | 52   |
| >PTCH1-A56: FFMAALIPI   | 244  | >PTCH1-A56: FFMAVLIPI   | 257  | 13   |
| >PTCH1-A56: FFMAALIPI   | 31   | >PTCH1-A56: FFMAVLIPI   | 28   | 3    |
| >PTCH1-A56: FFMAALIPI   | 511  | >PTCH1-A56: FFMAVLIPI   | 217  | 294  |
| >PTCH1-A56: FFMAALIPI   | 327  | >PTCH1-A56: FFMAVLIPI   | 397  | 70   |
| >PTCH1-A56: FFMAALIPIPA | 72   | >PTCH1-A56: FFMAVLIPIPA | 71   | 1    |
| >PTCH1-A56: AFFMAALI    | 395  | >PTCH1-A56: AFFMAVLI    | 164  | 231  |
| >PTCH1-A56: AFFMAALIPI  | 512  | >PTCH1-A56: AFFMAVLIPI  | 362  | 150  |
| >PTCH1-A56: AFFMAALI    | 498  | >PTCH1-A56: AFFMAVLI    | 581  | 83   |
| >PTCH1-A56: AFFMAALIPI  | 60   | >PTCH1-A56: AFFMAVLIPI  | 79   | 19   |
| >PTCH1-A56: AFFMAALIPI  | 396  | >PTCH1-A56: AFFMAVLIPI  | 220  | 176  |
| >PTCH1-A56: AFFMAALIPI  | 785  | >PTCH1-A56: AFFMAVLIPI  | 429  | 356  |
| >PTCH1-A56: AFFMAALIPI  | 377  | >PTCH1-A56: AFFMAVLIPI  | 463  | 86   |
| >PTCH1-A56: TAFFMAAL    | 115  | >PTCH1-A56: TAFFMAVL    | 338  | 223  |
| >PTCH1-A56: TAFFMAALI   | 156  | >PTCH1-A56: TAFFMAVLI   | 309  | 153  |
| >PTCH1-A56: TAFFMAALIP  | 140  | >PTCH1-A56: TAFFMAVLIP  | 244  | 104  |
| >PTCH1-A56: TAFFMAAL    | 469  | >PTCH1-A56: TAFFMAVL    | 1254 | 785  |
| >PTCH1-A56: TAFFMAALIP  | 391  | >PTCH1-A56: TAFFMAVLIP  | 417  | 26   |
| >PTCH1-A56: TAFFMAALI   | 638  | >PTCH1-A56: TAFFMAVLI   | 103  | 535  |
| >PTCH1-A56: TAFFMAALIP  | 220  | >PTCH1-A56: TAFFMAVLIP  | 76   | 144  |
| >PTCH1-A56: TAFFMAAL    | 18   | >PTCH1-A56: TAFFMAVL    | 32   | 14   |
| >PTCH1-A56: TAFFMAALI   | 10   | >PTCH1-A56: TAFFMAVLI   | 12   | 2    |
| >PTCH1-A56: TAFFMAALIP  | 8    | >PTCH1-A56: TAFFMAVLIP  | 8    | 0    |
| >PTCH1-A56: TAFFMAAL    | 195  | >PTCH1-A56: TAFFMAVL    | 767  | 572  |
| >PTCH1-A56: TAFFMAALI   | 244  | >PTCH1-A56: TAFFMAVLI   | 462  | 218  |
| >PTCH1-A56: TAFFMAALIP  | 53   | >PTCH1-A56: TAFFMAVLIP  | 73   | 20   |
| >PTCH1-A56: TAFFMAAL    | 40   | >PTCH1-A56: TAFFMAVL    | 67   | 27   |
| >PTCH1-A56: TAFFMAALI   | 231  | >PTCH1-A56: TAFFMAVLI   | 780  | 549  |
| >PTCH1-A56: TAFFMAALIP  | 241  | >PTCH1-A56: TAFFMAVLIP  | 663  | 422  |
| >PTCH1-A56: TAFFMAAL    | 453  | >PTCH1-A56: TAFFMAVL    | 1398 | 945  |
| >PTCH1-A56: TAFFMAAL    | 192  | >PTCH1-A56: TAFFMAVL    | 241  | 49   |
| >PTCH1-A56: TAFFMAALI   | 170  | >PTCH1-A56: TAFFMAVLI   | 478  | 308  |
| >PTCH1-A56: TAFFMAALI   | 91   | >PTCH1-A56: TAFFMAVLI   | 136  | 45   |
| >PTCH1-A56: TAFFMAALIP  | 115  | >PTCH1-A56: TAFFMAVLIP  | 148  | 33   |
| >PTCH1-A56: VTAFFMAA    | 3939 | >PTCH1-A56: VTAFFMAV    | 312  | 3627 |
| >PTCH1-A56: VTAFFMAAL   | 73   | >PTCH1-A56: VTAFFMAVL   | 258  | 185  |
| >PTCH1-A56: VTAFFMAALI  | 376  | >PTCH1-A56: VTAFFMAVLI  | 634  | 258  |
| >PTCH1-A56: VTAFFMAA    | 3945 | >PTCH1-A56: VTAFFMAV    | 248  | 3697 |
| >PTCH1-A56: VTAFFMAA    | 428  | >PTCH1-A56: VTAFFMAV    | 42   | 386  |
| >PTCH1-A56: VTAFFMAAL   | 21   | >PTCH1-A56: VTAFFMAVL   | 96   | 75   |

|                       |       |                       |      |       |
|-----------------------|-------|-----------------------|------|-------|
| >PTCH1-A56:VTAFFMAA   | 196   | >PTCH1-A56:VTAFFMAV   | 30   | 166   |
| >PTCH1-A56:VTAFFMAAL  | 92    | >PTCH1-A56:VTAFFMAVL  | 366  | 274   |
| >PTCH1-A56:VTAFFMAA   | 305   | >PTCH1-A56:VTAFFMAV   | 31   | 274   |
| >PTCH1-A56:VTAFFMAAL  | 211   | >PTCH1-A56:VTAFFMAVL  | 1063 | 852   |
| >PTCH1-A56:VTAFFMAA   | 2933  | >PTCH1-A56:VTAFFMAV   | 56   | 2877  |
| >PTCH1-A56:VTAFFMAA   | 12068 | >PTCH1-A56:VTAFFMAV   | 181  | 11887 |
| >PTCH1-A56:VTAFFMAAL  | 21    | >PTCH1-A56:VTAFFMAVL  | 43   | 22    |
| >PTCH1-A56:VTAFFMAAL  | 250   | >PTCH1-A56:VTAFFMAVL  | 1028 | 778   |
| >PTCH1-A56:VTAFFMAALI | 310   | >PTCH1-A56:VTAFFMAVLI | 112  | 198   |
| >PTCH1-A56:VTAFFMAA   | 20    | >PTCH1-A56:VTAFFMAV   | 8    | 12    |
| >PTCH1-A56:VTAFFMAAL  | 13    | >PTCH1-A56:VTAFFMAVL  | 23   | 10    |
| >PTCH1-A56:VTAFFMAALI | 27    | >PTCH1-A56:VTAFFMAVLI | 43   | 16    |
| >PTCH1-A56:VTAFFMAA   | 449   | >PTCH1-A56:VTAFFMAV   | 21   | 428   |
| >PTCH1-A56:VTAFFMAAL  | 84    | >PTCH1-A56:VTAFFMAVL  | 290  | 206   |
| >PTCH1-A56:VTAFFMAALI | 185   | >PTCH1-A56:VTAFFMAVLI | 340  | 155   |
| >PTCH1-A56:VTAFFMAAL  | 6     | >PTCH1-A56:VTAFFMAVL  | 6    | 0     |
| >PTCH1-A56:VTAFFMAALI | 18    | >PTCH1-A56:VTAFFMAVLI | 37   | 19    |
| >PTCH1-A56:VTAFFMAA   | 7347  | >PTCH1-A56:VTAFFMAV   | 154  | 7193  |
| >PTCH1-A56:VTAFFMAAL  | 7     | >PTCH1-A56:VTAFFMAVL  | 7    | 0     |
| >PTCH1-A56:VTAFFMAALI | 8     | >PTCH1-A56:VTAFFMAVLI | 15   | 7     |
| >PTCH1-A56:VTAFFMAAL  | 37    | >PTCH1-A56:VTAFFMAVL  | 12   | 25    |
| >PTCH1-A56:VTAFFMAALI | 68    | >PTCH1-A56:VTAFFMAVLI | 55   | 13    |
| >PTCH1-A56:VTAFFMAAL  | 603   | >PTCH1-A56:VTAFFMAVL  | 444  | 159   |
| >PTCH1-A56:VTAFFMAALI | 22    | >PTCH1-A56:VTAFFMAVLI | 30   | 8     |
| >PTCH1-A56:NVTAFFMAA  | 5799  | >PTCH1-A56:NVTAFFMAV  | 411  | 5388  |
| >PTCH1-A56:NVTAFFMAA  | 934   | >PTCH1-A56:NVTAFFMAV  | 105  | 829   |
| >PTCH1-A56:NVTAFFMAA  | 230   | >PTCH1-A56:NVTAFFMAV  | 446  | 216   |
| >PTCH1-A56:NVTAFFMAA  | 377   | >PTCH1-A56:NVTAFFMAV  | 558  | 181   |
| >PTCH1-A56:NVTAFFMAA  | 422   | >PTCH1-A56:NVTAFFMAV  | 63   | 359   |
| >PTCH1-A56:NVTAFFMAA  | 175   | >PTCH1-A56:NVTAFFMAV  | 399  | 224   |
| >PTCH1-A56:NVTAFFMAA  | 42    | >PTCH1-A56:NVTAFFMAV  | 8    | 34    |
| >PTCH1-A56:NVTAFFMAA  | 492   | >PTCH1-A56:NVTAFFMAV  | 1454 | 962   |
| >PTCH1-A56:NVTAFFMAA  | 224   | >PTCH1-A56:NVTAFFMAV  | 229  | 5     |
| >PTCH1-A56:NVTAFFMAA  | 10713 | >PTCH1-A56:NVTAFFMAV  | 425  | 10288 |
| >PTCH1-A56:NVTAFFMAA  | 8743  | >PTCH1-A56:NVTAFFMAV  | 80   | 8663  |
| >PTCH1-A56:NVTAFFMAA  | 316   | >PTCH1-A56:NVTAFFMAV  | 573  | 257   |
| >PTCH1-A56:NVTAFFMAA  | 8     | >PTCH1-A56:NVTAFFMAV  | 5    | 3     |
| >PTCH1-A56:NVTAFFMAA  | 21    | >PTCH1-A56:NVTAFFMAV  | 33   | 12    |
| >PTCH1-A56:NVTAFFMAA  | 9     | >PTCH1-A56:NVTAFFMAV  | 9    | 0     |
| >PTCH1-A56:NVTAFFMAA  | 70    | >PTCH1-A56:NVTAFFMAV  | 6    | 64    |
| >PTCH1-A56:NVTAFFMAA  | 31    | >PTCH1-A56:NVTAFFMAV  | 115  | 84    |
| >PTCH1-A56:NVTAFFMAA  | 62    | >PTCH1-A56:NVTAFFMAV  | 88   | 26    |
| >PTCH1-A56:NVTAFFMAA  | 387   | >PTCH1-A56:NVTAFFMAV  | 467  | 80    |

|                        |      |                        |      |      |
|------------------------|------|------------------------|------|------|
| >PTCH1-A56:SNVTAFFMA   | 136  | >PTCH1-A56:SNVTAFFMA'  | 308  | 172  |
| >PTCH1-A56:SNVTAFFMA   | 262  | >PTCH1-A56:SNVTAFFMA'  | 71   | 191  |
| >PTCH1-A56:SNVTAFFMA   | 607  | >PTCH1-A56:SNVTAFFMA'  | 68   | 539  |
| >PTCH1-A56:SNVTAFFMA   | 330  | >PTCH1-A56:SNVTAFFMA'  | 394  | 64   |
| >PTCH1-A73(AEKHYAPFL   | 31   | >PTCH1-A73(VEKHYAPFL   | 16   | 15   |
| >PTCH1-A73(AEKHYAPFLL  | 242  | >PTCH1-A73(VEKHYAPFLL  | 103  | 139  |
| >PTCH1-A73(AEKHYAPFLLI | 211  | >PTCH1-A73(VEKHYAPFLLI | 1894 | 1683 |
| >PTCH1-A73(AEKHYAPF    | 88   | >PTCH1-A73(VEKHYAPF    | 128  | 40   |
| >PTCH1-A73(AEKHYAPF    | 16   | >PTCH1-A73(VEKHYAPF    | 24   | 8    |
| >PTCH1-A73(AEKHYAPF    | 917  | >PTCH1-A73(VEKHYAPF    | 96   | 821  |
| >PTCH1-A73(AEKHYAPF    | 266  | >PTCH1-A73(VEKHYAPF    | 871  | 605  |
| >PTCH1-A73(AEKHYAPFL   | 30   | >PTCH1-A73(VEKHYAPFL   | 140  | 110  |
| >PTCH1-A73(AEKHYAPF    | 54   | >PTCH1-A73(VEKHYAPF    | 299  | 245  |
| >PTCH1-A73(AEKHYAPFL   | 25   | >PTCH1-A73(VEKHYAPFL   | 96   | 71   |
| >PTCH1-A73(AEKHYAPFLL  | 64   | >PTCH1-A73(VEKHYAPFLL  | 120  | 56   |
| >PTCH1-A73(AEKHYAPF    | 294  | >PTCH1-A73(VEKHYAPF    | 1437 | 1143 |
| >PTCH1-A73(AEKHYAPFLL  | 59   | >PTCH1-A73(VEKHYAPFLL  | 1491 | 1432 |
| >PTCH1-A73(AEKHYAPF    | 64   | >PTCH1-A73(VEKHYAPF    | 311  | 247  |
| >PTCH1-A73(AEKHYAPFL   | 44   | >PTCH1-A73(VEKHYAPFL   | 257  | 213  |
| >PTCH1-A73(AEKHYAPFLL  | 337  | >PTCH1-A73(VEKHYAPFLL  | 4187 | 3850 |
| >PTCH1-A73(AEKHYAPF    | 162  | >PTCH1-A73(VEKHYAPF    | 4293 | 4131 |
| >PTCH1-A73(AEKHYAPFL   | 61   | >PTCH1-A73(VEKHYAPFL   | 2141 | 2080 |
| >PTCH1-A73(AEKHYAPFLL  | 405  | >PTCH1-A73(VEKHYAPFLL  | 5127 | 4722 |
| >PTCH1-A73(AEKHYAPFLLI | 333  | >PTCH1-A73(VEKHYAPFLLI | 5718 | 5385 |
| >PTCH1-A73(AEKHYAPFL   | 20   | >PTCH1-A73(VEKHYAPFL   | 66   | 46   |
| >PTCH1-A73(AEKHYAPFLL  | 86   | >PTCH1-A73(VEKHYAPFLL  | 538  | 452  |
| >PTCH1-A73(FAEKHYAPF   | 412  | >PTCH1-A73(FVEKHYAPF   | 393  | 19   |
| >PTCH1-A73(FAEKHYAPFLI | 2244 | >PTCH1-A73(FVEKHYAPFLI | 280  | 1964 |
| >PTCH1-A73(FAEKHYAPFLI | 123  | >PTCH1-A73(FVEKHYAPFLI | 25   | 98   |
| >PTCH1-A73(FAEKHYAPF   | 1529 | >PTCH1-A73(FVEKHYAPF   | 411  | 1118 |
| >PTCH1-A73(FAEKHYAPFLI | 295  | >PTCH1-A73(FVEKHYAPFLI | 61   | 234  |
| >PTCH1-A73(FAEKHYAPFL  | 2101 | >PTCH1-A73(FVEKHYAPFL  | 158  | 1943 |
| >PTCH1-A73(FAEKHYAPFLI | 3542 | >PTCH1-A73(FVEKHYAPFLI | 302  | 3240 |
| >PTCH1-A73(FAEKHYAPF   | 5045 | >PTCH1-A73(FVEKHYAPF   | 315  | 4730 |
| >PTCH1-A73(FAEKHYAPFL  | 606  | >PTCH1-A73(FVEKHYAPFL  | 218  | 388  |
| >PTCH1-A73(FAEKHYAPF   | 135  | >PTCH1-A73(FVEKHYAPF   | 240  | 105  |
| >PTCH1-A73(FAEKHYAPF   | 245  | >PTCH1-A73(FVEKHYAPF   | 151  | 94   |
| >PTCH1-A73(FAEKHYAPF   | 1705 | >PTCH1-A73(FVEKHYAPF   | 492  | 1213 |
| >PTCH1-A73(FAEKHYAPF   | 58   | >PTCH1-A73(FVEKHYAPF   | 315  | 257  |
| >PTCH1-A73(FAEKHYAPF   | 60   | >PTCH1-A73(FVEKHYAPF   | 922  | 862  |
| >PTCH1-A73(FAEKHYAPF   | 28   | >PTCH1-A73(FVEKHYAPF   | 71   | 43   |
| >PTCH1-A73(FAEKHYAPFL  | 135  | >PTCH1-A73(FVEKHYAPFL  | 829  | 694  |
| >PTCH1-A73(FAEKHYAPFLI | 165  | >PTCH1-A73(FVEKHYAPFLI | 1004 | 839  |

|                        |      |                        |      |      |
|------------------------|------|------------------------|------|------|
| >PTCH1-A73(FAEKHYAPF   | 886  | >PTCH1-A73(FVEKHYAPF   | 412  | 474  |
| >PTCH1-A73(FAEKHYAPF   | 62   | >PTCH1-A73(FVEKHYAPF   | 360  | 298  |
| >PTCH1-A73(SFAEKHYAPF  | 116  | >PTCH1-A73(SFVEKHYAPF  | 623  | 507  |
| >PTCH1-A73(SFAEKHYAPF  | 39   | >PTCH1-A73(SFVEKHYAPF  | 60   | 21   |
| >PTCH1-A73(SFAEKHYAPF  | 392  | >PTCH1-A73(SFVEKHYAPF  | 634  | 242  |
| >PTCH1-A73(SFAEKHYAPF  | 2012 | >PTCH1-A73(SFVEKHYAPF  | 418  | 1594 |
| >PTCH1-A73(SFAEKHYAPF  | 411  | >PTCH1-A73(SFVEKHYAPF  | 524  | 113  |
| >PTCH1-A73(SFAEKHYAPF  | 458  | >PTCH1-A73(SFVEKHYAPF  | 811  | 353  |
| >PTCH1-A73(SFAEKHYAPF  | 359  | >PTCH1-A73(SFVEKHYAPF  | 583  | 224  |
| >PTCH1-A73(SFAEKHYAPF  | 472  | >PTCH1-A73(SFVEKHYAPF  | 380  | 92   |
| >PTCH1-A73(SFAEKHYA    | 346  | >PTCH1-A73(SFVEKHYA    | 273  | 73   |
| >PTCH1-A73(SFAEKHYAPF  | 202  | >PTCH1-A73(SFVEKHYAPF  | 163  | 39   |
| >PTCH1-A73(SSFAEKHYAP  | 127  | >PTCH1-A73(SSFVEKHYAP  | 71   | 56   |
| >PTCH1-A73(SSFAEKHY    | 468  | >PTCH1-A73(SSFVEKHY    | 709  | 241  |
| >PTCH1-A73(SSFAEKHY    | 72   | >PTCH1-A73(SSFVEKHY    | 65   | 7    |
| >PTCH1-A73(SSFAEKHYAP  | 150  | >PTCH1-A73(SSFVEKHYAP  | 312  | 162  |
| >PTCH1-A73(SSFAEKHYA   | 256  | >PTCH1-A73(SSFVEKHYA   | 1180 | 924  |
| >PTCH1-A73(SSFAEKHY    | 144  | >PTCH1-A73(SSFVEKHY    | 315  | 171  |
| >PTCH1-A73(SSFAEKHYAP  | 54   | >PTCH1-A73(SSFVEKHYAP  | 87   | 33   |
| >PTCH1-A73(SSFAEKHY    | 87   | >PTCH1-A73(SSFVEKHY    | 145  | 58   |
| >PTCH1-A73(SSFAEKHYAP  | 8    | >PTCH1-A73(SSFVEKHYAP  | 9    | 1    |
| >PTCH1-A73(SSFAEKHY    | 9    | >PTCH1-A73(SSFVEKHY    | 10   | 1    |
| >PTCH1-A73(SSFAEKHYAP  | 6    | >PTCH1-A73(SSFVEKHYAP  | 6    | 0    |
| >PTCH1-A73(SSFAEKHY    | 217  | >PTCH1-A73(SSFVEKHY    | 287  | 70   |
| >PTCH1-A73(SSFAEKHYAP  | 261  | >PTCH1-A73(SSFVEKHYAP  | 350  | 89   |
| >PTCH1-A73(SSFAEKHYAP  | 225  | >PTCH1-A73(SSFVEKHYAP  | 378  | 153  |
| >PTCH1-A73(SSFAEKHYAP  | 141  | >PTCH1-A73(SSFVEKHYAP  | 135  | 6    |
| >PTCH1-A73(LSSFAEKHY   | 174  | >PTCH1-A73(LSSFVEKHY   | 147  | 27   |
| >PTCH1-A73(LSSFAEKHYA  | 447  | >PTCH1-A73(LSSFVEKHYA  | 568  | 121  |
| >PTCH1-A73(LSSFAEKHY   | 232  | >PTCH1-A73(LSSFVEKHY   | 414  | 182  |
| >PTCH1-A73(LSSFAEKHY   | 13   | >PTCH1-A73(LSSFVEKHY   | 48   | 35   |
| >PTCH1-A73(LSSFAEKHY   | 1046 | >PTCH1-A73(LSSFVEKHY   | 255  | 791  |
| >PTCH1-A73(LSSFAEKHY   | 394  | >PTCH1-A73(LSSFVEKHY   | 158  | 236  |
| >PTCH1-A73(LSSFAEKHY   | 451  | >PTCH1-A73(LSSFVEKHY   | 411  | 40   |
| >PTCH1-A73(TLSSFAEKHY  | 306  | >PTCH1-A73(TLSSFVEKHY  | 370  | 64   |
| >PTCH1-A73(TLSSFAEKHY/ | 329  | >PTCH1-A73(TLSSFVEKHY/ | 202  | 127  |
| >PTCH1-A73(TLSSFAEKHY/ | 14   | >PTCH1-A73(TLSSFVEKHY/ | 11   | 3    |
| >PTCH1-A73(TLSSFAEKHY/ | 68   | >PTCH1-A73(TLSSFVEKHY/ | 43   | 25   |
| >PTCH1-A73(TLSSFAEKHY/ | 61   | >PTCH1-A73(TLSSFVEKHY/ | 41   | 20   |
| >PTCH1-A73(TLSSFAEKHY/ | 493  | >PTCH1-A73(TLSSFVEKHY/ | 371  | 122  |
| >PTCH1-A73(TLSSFAEKHY/ | 186  | >PTCH1-A73(TLSSFVEKHY/ | 138  | 48   |
| >PTCH1-A73(TLSSFAEKHY/ | 188  | >PTCH1-A73(TLSSFVEKHY/ | 94   | 94   |
| >PTCH1-A73(TLSSFAEKHY/ | 12   | >PTCH1-A73(TLSSFVEKHY/ | 11   | 1    |



|                        |       |                        |     |       |
|------------------------|-------|------------------------|-----|-------|
| >PTCH1-A73(TLSSFAEK    | 75    | >PTCH1-A73(TLSSFVEK    | 74  | 1     |
| >PTCH1-A73(TLSSFAEK    | 21    | >PTCH1-A73(TLSSFVEK    | 18  | 3     |
| >PTCH1-A73(TLSSFAEKHY  | 387   | >PTCH1-A73(TLSSFVEKHY  | 325 | 62    |
| >PTCH1-A73(TLSSFAEKHY  | 562   | >PTCH1-A73(TLSSFVEKHY  | 438 | 124   |
| >PTCH1-A73(TLSSFAEK    | 34    | >PTCH1-A73(TLSSFVEK    | 38  | 4     |
| >PTCH1-A73(TLSSFAEKHY/ | 386   | >PTCH1-A73(TLSSFVEKHY/ | 378 | 8     |
| >PTCH1-A73(TLSSFAEKHY  | 323   | >PTCH1-A73(TLSSFVEKHY  | 270 | 53    |
| >PTCH1-A73(TLSSFAEKHY  | 342   | >PTCH1-A73(TLSSFVEKHY  | 294 | 48    |
| >PTCH1-A73(WTLSSFAEK   | 42    | >PTCH1-A73(WTLSSFVEK   | 29  | 13    |
| >PTCH1-A73(WTLSSFAEKH  | 49    | >PTCH1-A73(WTLSSFVEKH  | 104 | 55    |
| >PTCH1-A73(WTLSSFAEKH  | 170   | >PTCH1-A73(WTLSSFVEKH  | 220 | 50    |
| >PTCH1-A73(WTLSSFAEKH  | 77    | >PTCH1-A73(WTLSSFVEKH  | 81  | 4     |
| >PTCH1-A73(WTLSSFAEKH  | 268   | >PTCH1-A73(WTLSSFVEKH  | 416 | 148   |
| >PTCH1-A73(WTLSSFAEK   | 491   | >PTCH1-A73(WTLSSFVEK   | 589 | 98    |
| >PTCH1-A73(WTLSSFAEK   | 34    | >PTCH1-A73(WTLSSFVEK   | 46  | 12    |
| >PTCH1-A73(WTLSSFAEKH  | 250   | >PTCH1-A73(WTLSSFVEKH  | 355 | 105   |
| >PTCH1-A73(WTLSSFAEK   | 806   | >PTCH1-A73(WTLSSFVEK   | 367 | 439   |
| >PTCH1-A73(WTLSSFAEKH  | 46    | >PTCH1-A73(WTLSSFVEKH  | 50  | 4     |
| >PTCH1-A73(WTLSSFAEKH  | 7     | >PTCH1-A73(WTLSSFVEKH  | 10  | 3     |
| >PTCH1-A73(WTLSSFAEK   | 310   | >PTCH1-A73(WTLSSFVEK   | 894 | 584   |
| >PTCH1-A73(WTLSSFAEKH  | 13    | >PTCH1-A73(WTLSSFVEKH  | 12  | 1     |
| >PTCH1-A73(WTLSSFAEK   | 192   | >PTCH1-A73(WTLSSFVEK   | 101 | 91    |
| >PTCH1-A73(KWTLSSFAEK  | 81    | >PTCH1-A73(KWTLSSFVEK  | 128 | 47    |
| >PTCH1-A73(KWTLSSFAEK  | 195   | >PTCH1-A73(KWTLSSFVEK  | 226 | 31    |
| >PTCH1-A73(KWTLSSFAEK  | 52    | >PTCH1-A73(KWTLSSFVEK  | 35  | 17    |
| >PTCH1-A73(KWTLSSFA    | 22    | >PTCH1-A73(KWTLSSFV    | 20  | 2     |
| >PTCH1-A73(KWTLSSFAE   | 107   | >PTCH1-A73(KWTLSSFVE   | 303 | 196   |
| >PTCH1-A73(KWTLSSFAEK  | 246   | >PTCH1-A73(KWTLSSFVEK  | 236 | 10    |
| >PTCH1-A73(TKWLSSFA    | 1696  | >PTCH1-A73(TKWLSSFV    | 44  | 1652  |
| >PTCH1-A73(TKWLSSFA    | 468   | >PTCH1-A73(TKWLSSFV    | 74  | 394   |
| >PTCH1-A73(TKWLSSFAE   | 297   | >PTCH1-A73(TKWLSSFVE   | 170 | 127   |
| >PTCH1-A73(CTKWTLSSFA  | 1918  | >PTCH1-A73(CTKWTLSSFV  | 319 | 1599  |
| >PTCH1-A73(CTKWTLSSFA  | 33    | >PTCH1-A73(CTKWTLSSFV  | 61  | 28    |
| >PTCH1-A73(CTKWTLSSFA  | 1154  | >PTCH1-A73(CTKWTLSSFV  | 190 | 964   |
| >PTCH1-A73(CTKWTLSSFA  | 1485  | >PTCH1-A73(CTKWTLSSFV  | 204 | 1281  |
| >PTCH1-A73(CTKWTLSSFA  | 12373 | >PTCH1-A73(CTKWTLSSFV  | 367 | 12006 |
| >PTCH1-D13(DPPREGLWP   | 4134  | >PTCH1-D13(YPPREGLWPF  | 46  | 4088  |
| >PTCH1-D13(DPPREGLWP   | 1943  | >PTCH1-D13(YPPREGLWPF  | 162 | 1781  |
| >PTCH1-D13(DPPREGLW    | 926   | >PTCH1-D13(YPPREGLW    | 94  | 832   |
| >PTCH1-D13(DPPREGLWP   | 12618 | >PTCH1-D13(YPPREGLWPF  | 142 | 12476 |
| >PTCH1-D13(DPPREGLW    | 162   | >PTCH1-D13(YPPREGLW    | 39  | 123   |
| >PTCH1-D13(DPPREGLW    | 5805  | >PTCH1-D13(YPPREGLW    | 354 | 5451  |
| >PTCH1-D13(RDPPREGL    | 27151 | >PTCH1-D13(RYPPREGL    | 494 | 26657 |

|                        |       |                        |       |       |
|------------------------|-------|------------------------|-------|-------|
| >PTCH1-D13(RDPPREGLW   | 13851 | >PTCH1-D13(RYPPREGLW   | 75    | 13776 |
| >PTCH1-D13(RDPPREGL    | 18091 | >PTCH1-D13(RYPPREGL    | 5     | 18086 |
| >PTCH1-D13(RDPPREGLW   | 15889 | >PTCH1-D13(RYPPREGLW   | 6     | 15883 |
| >PTCH1-D13(RDPPREGLW   | 19412 | >PTCH1-D13(RYPPREGLWI  | 379   | 19033 |
| >PTCH1-D13(RDPPREGLW   | 19507 | >PTCH1-D13(RYPPREGLWI  | 230   | 19277 |
| >PTCH1-D13(RDPPREGLW   | 1325  | >PTCH1-D13(RYPPREGLW   | 146   | 1179  |
| >PTCH1-D13(RRDPPREGL   | 2416  | >PTCH1-D13(RRYPPREGL   | 92    | 2324  |
| >PTCH1-D13(RRDPPREGL   | 954   | >PTCH1-D13(RRYPPREGL   | 37    | 917   |
| >PTCH1-D13(RRDPPREGLV  | 243   | >PTCH1-D13(RRYPPREGLV  | 36    | 207   |
| >PTCH1-D13(RRDPPREG    | 644   | >PTCH1-D13(RRYPPREG    | 77    | 567   |
| >PTCH1-D13(RRDPPREGL   | 69    | >PTCH1-D13(RRYPPREGL   | 19    | 50    |
| >PTCH1-D13(RRDPPREGLV  | 241   | >PTCH1-D13(RRYPPREGLV  | 69    | 172   |
| >PTCH1-D13(RRDPPREGLV  | 983   | >PTCH1-D13(RRYPPREGLV  | 97    | 886   |
| >PTCH1-D13(RRDPPREG    | 2457  | >PTCH1-D13(RRYPPREG    | 433   | 2024  |
| >PTCH1-D13(RRDPPREGL   | 33    | >PTCH1-D13(RRYPPREGL   | 7     | 26    |
| >PTCH1-D13(RRDPPREGLV  | 89    | >PTCH1-D13(RRYPPREGLV  | 35    | 54    |
| >PTCH1-D13(RRDPPREGLV  | 3205  | >PTCH1-D13(RRYPPREGLV  | 181   | 3024  |
| >PTCH1-D13(RRDPPREGLV  | 55    | >PTCH1-D13(RRYPPREGLV  | 23    | 32    |
| >PTCH1-D13(PRRDPPREGL  | 995   | >PTCH1-D13(PRRYPPREGL  | 381   | 614   |
| >PTCH1-D13(QPRRDPPREC  | 100   | >PTCH1-D13(QPRRYPPREC  | 50    | 50    |
| >PTCH1-D13(QQPRRDPPR   | 1243  | >PTCH1-D13(QQPRRYPPR   | 104   | 1139  |
| >PTCH1-D13(QQPRRDPPR   | 226   | >PTCH1-D13(QQPRRYPPR   | 157   | 69    |
| >PTCH1-D13(GQQPRRDPP   | 1372  | >PTCH1-D13(GQQPRRYPPI  | 281   | 1091  |
| >PTCH1-D13(QGQQPRRDF   | 1029  | >PTCH1-D13(QGQQPRRYP   | 418   | 611   |
| >PTCH1-D13(RQGQQPRRD   | 25932 | >PTCH1-D13(RQGQQPRRY   | 244   | 25688 |
| >PTCH1-D13(RQGQQPRRD   | 18906 | >PTCH1-D13(RQGQQPRRY   | 119   | 18787 |
| >PTCH1-D13(RQGQQPRRD   | 24108 | >PTCH1-D13(RQGQQPRRY   | 159   | 23949 |
| >PTCH1-D13(GRQGQQPRF   | 1612  | >PTCH1-D13(GRQGQQPRF   | 21    | 1591  |
| >PTCH1-D39(DKAAAILEA   | 24222 | >PTCH1-D39(YKAAAILEA   | 332   | 23890 |
| >PTCH1-D39(DKAAAILEA   | 6892  | >PTCH1-D39(YKAAAILEA   | 133   | 6759  |
| >PTCH1-D39(DKAAAILEAW  | 4069  | >PTCH1-D39(YKAAAILEAW  | 69    | 4000  |
| >PTCH1-D39(DKAAAILEAW  | 631   | >PTCH1-D39(YKAAAILEAW  | 120   | 511   |
| >PTCH1-D39(DKAAAILEAW  | 1236  | >PTCH1-D39(YKAAAILEAW  | 82    | 1154  |
| >PTCH1-D39(EDKAAAIL    | 429   | >PTCH1-D39(EYKAAAIL    | 28949 | 28520 |
| >PTCH1-D39(EDKAAAIL    | 26759 | >PTCH1-D39(EYKAAAIL    | 435   | 26324 |
| >PTCH1-D39(EDKAAAILEA' | 26059 | >PTCH1-D39(EYKAAAILEA\ | 207   | 25852 |
| >PTCH1-D39(EYVSHINWNI  | 14139 | >PTCH1-D39(EYVSHINWNI  | 91    | 14048 |
| >PTCH1-D39(EYVSHINWNI  | 7789  | >PTCH1-D39(EYVSHINWNI  | 7     | 7782  |
| >PTCH1-D39(EYVSHINWNI  | 24713 | >PTCH1-D39(EYVSHINWNI  | 243   | 24470 |
| >PTCH1-D39(NEDKAAAI    | 22    | >PTCH1-D39(NEYKAAAI    | 11    | 11    |
| >PTCH1-D39(NEDKAAAIL   | 224   | >PTCH1-D39(NEYKAAAIL   | 17    | 207   |
| >PTCH1-D39(NEDKAAAILE. | 5011  | >PTCH1-D39(NEYKAAAILE/ | 222   | 4789  |
| >PTCH1-D39(NEDKAAAI    | 757   | >PTCH1-D39(NEYKAAAI    | 51    | 706   |

|                       |       |                        |     |       |
|-----------------------|-------|------------------------|-----|-------|
| >PTCH1-D39(NEDKAAAIL  | 195   | >PTCH1-D39(NEYKAAAIL   | 16  | 179   |
| >PTCH1-D39(NEDKAAAILE | 1002  | >PTCH1-D39(NEYKAAAILE/ | 61  | 941   |
| >PTCH1-D39(NEDKAAAIL  | 53    | >PTCH1-D39(NEYKAAAIL   | 46  | 7     |
| >PTCH1-D39(NEDKAAAI   | 331   | >PTCH1-D39(NEYKAAAI    | 162 | 169   |
| >PTCH1-D39(NEDKAAAIL  | 51    | >PTCH1-D39(NEYKAAAIL   | 35  | 16    |
| >PTCH1-D39(NEDKAAAILE | 4201  | >PTCH1-D39(NEYKAAAILE/ | 411 | 3790  |
| >PTCH1-D39(NEDKAAAIL  | 1485  | >PTCH1-D39(NEYKAAAIL   | 259 | 1226  |
| >PTCH1-D39(NEDKAAAI   | 4534  | >PTCH1-D39(NEYKAAAI    | 338 | 4196  |
| >PTCH1-D39(NEDKAAAILE | 243   | >PTCH1-D39(NEYKAAAILE/ | 29  | 214   |
| >PTCH1-D39(NEDKAAAI   | 133   | >PTCH1-D39(NEYKAAAI    | 14  | 119   |
| >PTCH1-D39(NEDKAAAIL  | 1729  | >PTCH1-D39(NEYKAAAIL   | 42  | 1687  |
| >PTCH1-D39(WNEDKAAAI  | 328   | >PTCH1-D39(WNEYKAAAIL  | 627 | 299   |
| >PTCH1-D39(NWNEDKAA   | 643   | >PTCH1-D39(NWNEYKAA    | 230 | 413   |
| >PTCH1-D39(NWNEDKAA/  | 806   | >PTCH1-D39(NWNEYKAA/   | 219 | 587   |
| >PTCH1-D39(INWNEDKAA  | 305   | >PTCH1-D39(INWNEYKAA/  | 248 | 57    |
| >PTCH1-D39(HINWNEDK   | 908   | >PTCH1-D39(HINWNEYK    | 111 | 797   |
| >PTCH1-D39(HINWNEDK   | 471   | >PTCH1-D39(HINWNEYK    | 36  | 435   |
| >PTCH1-D39(HINWNEDK   | 4100  | >PTCH1-D39(HINWNEYK    | 321 | 3779  |
| >PTCH1-D39(HINWNEDK   | 5745  | >PTCH1-D39(HINWNEYK    | 97  | 5648  |
| >PTCH1-D39(HINWNEDK   | 92    | >PTCH1-D39(HINWNEYK    | 15  | 77    |
| >PTCH1-D39(HINWNEDK   | 3700  | >PTCH1-D39(HINWNEYK    | 177 | 3523  |
| >PTCH1-D39(SHINWNED   | 24832 | >PTCH1-D39(SHINWNEY    | 90  | 24742 |
| >PTCH1-D39(SHINWNED   | 25682 | >PTCH1-D39(SHINWNEY    | 183 | 25499 |
| >PTCH1-D39(SHINWNED   | 22067 | >PTCH1-D39(SHINWNEY    | 147 | 21920 |
| >PTCH1-D39(VSHINWNED  | 882   | >PTCH1-D39(VSHINWNEYI  | 104 | 778   |
| >PTCH1-D39(VSHINWNED  | 27299 | >PTCH1-D39(VSHINWNEY   | 325 | 26974 |
| >PTCH1-D39(VSHINWNED  | 370   | >PTCH1-D39(VSHINWNEYI  | 44  | 326   |
| >PTCH1-D39(VSHINWNED  | 16961 | >PTCH1-D39(VSHINWNEY   | 53  | 16908 |
| >PTCH1-D39(VSHINWNED  | 3734  | >PTCH1-D39(VSHINWNEYI  | 189 | 3545  |
| >PTCH1-D39(VSHINWNED  | 25780 | >PTCH1-D39(VSHINWNEY   | 308 | 25472 |
| >PTCH1-D39(VSHINWNED  | 15963 | >PTCH1-D39(VSHINWNEY   | 9   | 15954 |
| >PTCH1-D39(VSHINWNED  | 732   | >PTCH1-D39(VSHINWNEYI  | 491 | 241   |
| >PTCH1-D39(YVSHINWNEI | 31325 | >PTCH1-D39(YVSHINWNE`  | 318 | 31007 |
| >PTCH1-D39(YVSHINWNEI | 2498  | >PTCH1-D39(YVSHINWNE`  | 394 | 2104  |
| >PTCH1-D39(YVSHINWNEI | 182   | >PTCH1-D39(YVSHINWNE`  | 24  | 158   |
| >PTCH1-D39(YVSHINWNEI | 19549 | >PTCH1-D39(YVSHINWNE`  | 217 | 19332 |
| >PTCH1-D39(YVSHINWNEI | 36955 | >PTCH1-D39(YVSHINWNE`  | 297 | 36658 |
| >PTCH1-D39(YVSHINWNEI | 28094 | >PTCH1-D39(YVSHINWNE`  | 132 | 27962 |
| >PTCH1-D39(YVSHINWNEI | 24112 | >PTCH1-D39(YVSHINWNE`  | 66  | 24046 |
| >PTCH1-D39(YVSHINWNEI | 24900 | >PTCH1-D39(YVSHINWNE`  | 499 | 24401 |
| >PTCH1-D39(YVSHINWNEI | 15    | >PTCH1-D39(YVSHINWNE`  | 4   | 11    |
| >PTCH1-D39(YVSHINWNEI | 20861 | >PTCH1-D39(YVSHINWNE`  | 40  | 20821 |
| >PTCH1-D39(YVSHINWNEI | 20251 | >PTCH1-D39(YVSHINWNE`  | 257 | 19994 |

|                        |       |                        |       |       |
|------------------------|-------|------------------------|-------|-------|
| >PTCH1-D39(YVSHINWNEI  | 31098 | >PTCH1-D39(YVSHINWNE`  | 320   | 30778 |
| >PTCH1-D39(YVSHINWNEI  | 27210 | >PTCH1-D39(YVSHINWNE`  | 355   | 26855 |
| >PTCH1-D39(YVSHINWNEI  | 25041 | >PTCH1-D39(YVSHINWNE`  | 407   | 24634 |
| >PTCH1-D39(YVSHINWNEI  | 25277 | >PTCH1-D39(YVSHINWNE`  | 172   | 25105 |
| >PTCH1-D39(YVSHINWNEI  | 22990 | >PTCH1-D39(YVSHINWNE`  | 46    | 22944 |
| >PTCH1-D89:DISQLTKQRL\ | 8325  | >PTCH1-D89:GISQLTKQRL\ | 368   | 7957  |
| >PTCH1-D89:DISQLTKQRL\ | 6828  | >PTCH1-D89:GISQLTKQRL\ | 187   | 6641  |
| >PTCH1-D89:DISQLTKQRL  | 6981  | >PTCH1-D89:GISQLTKQRL  | 375   | 6606  |
| >PTCH1-D89:DISQLTKQRL\ | 2939  | >PTCH1-D89:GISQLTKQRL\ | 83    | 2856  |
| >PTCH1-D89:DISQLTKQR   | 303   | >PTCH1-D89:GISQLTKQR   | 13923 | 13620 |
| >PTCH1-D89:DISQLTKQR   | 49    | >PTCH1-D89:GISQLTKQR   | 895   | 846   |
| >PTCH1-D89:DISQLTKQR   | 381   | >PTCH1-D89:GISQLTKQR   | 474   | 93    |
| >PTCH1-D89:KPIDISQL    | 1300  | >PTCH1-D89:KPIGISQL    | 91    | 1209  |
| >PTCH1-D89:KPIDISQL    | 59    | >PTCH1-D89:KPIGISQL    | 32    | 27    |
| >PTCH1-D89:SRDKPIDISQL | 527   | >PTCH1-D89:SRDKPIGISQL | 408   | 119   |
| >PTCH1-D89:SRDKPIDISQL | 293   | >PTCH1-D89:SRDKPIGISQL | 185   | 108   |
| >PTCH1-D89:GSRDKPIDI   | 170   | >PTCH1-D89:GSRDKPIGI   | 66    | 104   |
| >PTCH1-D89:GSRDKPIDISC | 611   | >PTCH1-D89:GSRDKPIGISC | 317   | 294   |
| >PTCH1-D89:GSRDKPIDI   | 403   | >PTCH1-D89:GSRDKPIGI   | 55    | 348   |
| >PTCH1-D89:QTGSRDKPID  | 577   | >PTCH1-D89:QTGSRDKPIG  | 278   | 299   |
| >PTCH1-E12:ELRHYESAQQC | 3069  | >PTCH1-E12:KLRHYESAQQC | 65    | 3004  |
| >PTCH1-E12:ELRHYESAQQC | 4595  | >PTCH1-E12:KLRHYESAQQC | 473   | 4122  |
| >PTCH1-E12:ELRHYESAQQC | 393   | >PTCH1-E12:KLRHYESAQQC | 45    | 348   |
| >PTCH1-E12:ELRHYESAQ   | 14371 | >PTCH1-E12:KLRHYESAQ   | 280   | 14091 |
| >PTCH1-E12:ELRHYESAQQ  | 14810 | >PTCH1-E12:KLRHYESAQQ  | 148   | 14662 |
| >PTCH1-E12:ELRHYESAQQC | 16322 | >PTCH1-E12:KLRHYESAQQC | 215   | 16107 |
| >PTCH1-E12:ELRHYESAQQC | 9025  | >PTCH1-E12:KLRHYESAQQC | 13    | 9012  |
| >PTCH1-E12:EELRHYESA   | 372   | >PTCH1-E12:EKLRHYESA   | 30238 | 29866 |
| >PTCH1-E12:EELRHYESA   | 7     | >PTCH1-E12:EKLRHYESA   | 5166  | 5159  |
| >PTCH1-E12:EELRHYESAQ  | 177   | >PTCH1-E12:EKLRHYESAQ  | 26428 | 26251 |
| >PTCH1-E12:SQTTVSGLSEI | 25614 | >PTCH1-E12:SQTTVSGLSEI | 75    | 25539 |
| >PTCH1-E12:SEELRHYESA  | 5817  | >PTCH1-E12:SEKLRHYESA  | 366   | 5451  |
| >PTCH1-E12:SEELRHYESA  | 794   | >PTCH1-E12:SEKLRHYESA  | 129   | 665   |
| >PTCH1-E12:SEELRHYESA  | 13    | >PTCH1-E12:SEKLRHYESA  | 10    | 3     |
| >PTCH1-E12:SEELRHYESAQ | 430   | >PTCH1-E12:SEKLRHYESAQ | 1588  | 1158  |
| >PTCH1-E12:LSEELRHY    | 40    | >PTCH1-E12:LSEKLRHY    | 70    | 30    |
| >PTCH1-E12:LSEELRHY    | 320   | >PTCH1-E12:LSEKLRHY    | 313   | 7     |
| >PTCH1-E12:LSEELRHY    | 45    | >PTCH1-E12:LSEKLRHY    | 77    | 32    |
| >PTCH1-E12:LSEELRHY    | 1240  | >PTCH1-E12:LSEKLRHY    | 152   | 1088  |
| >PTCH1-E12:GLSEELRHYE/ | 175   | >PTCH1-E12:GLSEKLRHYE/ | 194   | 19    |
| >PTCH1-E12:GLSEELRHYE/ | 21    | >PTCH1-E12:GLSEKLRHYE/ | 30    | 9     |
| >PTCH1-E12:GLSEELRHYE/ | 32    | >PTCH1-E12:GLSEKLRHYE/ | 25    | 7     |
| >PTCH1-E12:GLSEELRHYE/ | 42    | >PTCH1-E12:GLSEKLRHYE/ | 40    | 2     |

|                        |       |                        |     |       |
|------------------------|-------|------------------------|-----|-------|
| >PTCH1-E12:GLSEELRHYE/ | 46    | >PTCH1-E12:GLSEKLRHYE/ | 45  | 1     |
| >PTCH1-E12:GLSEELRHYE/ | 85    | >PTCH1-E12:GLSEKLRHYE/ | 96  | 11    |
| >PTCH1-E12:GLSEELRHYE/ | 15    | >PTCH1-E12:GLSEKLRHYE/ | 16  | 1     |
| >PTCH1-E12:GLSEELRHY   | 342   | >PTCH1-E12:GLSEKLRHY   | 382 | 40    |
| >PTCH1-E12:GLSEELRHY   | 327   | >PTCH1-E12:GLSEKLRHY   | 415 | 88    |
| >PTCH1-E12:GLSEELRHY   | 205   | >PTCH1-E12:GLSEKLRHY   | 243 | 38    |
| >PTCH1-E12:SGLSEELR    | 773   | >PTCH1-E12:SGLSEKLR    | 459 | 314   |
| >PTCH1-E12:VSGLSEELRH' | 438   | >PTCH1-E12:VSGLSEKLRH' | 552 | 114   |
| >PTCH1-E12:VSGLSEEL    | 208   | >PTCH1-E12:VSGLSEKL    | 142 | 66    |
| >PTCH1-E12:VSGLSEELRH' | 44    | >PTCH1-E12:VSGLSEKLRH' | 24  | 20    |
| >PTCH1-E12:TVSGLSEEL   | 21    | >PTCH1-E12:TVSGLSEKL   | 76  | 55    |
| >PTCH1-E12:TVSGLSEE    | 19800 | >PTCH1-E12:TVSGLSEK    | 263 | 19537 |
| >PTCH1-E12:TVSGLSEE    | 16969 | >PTCH1-E12:TVSGLSEK    | 19  | 16950 |
| >PTCH1-E12:TVSGLSEELR  | 293   | >PTCH1-E12:TVSGLSEKLR  | 683 | 390   |
| >PTCH1-E12:TVSGLSEELR  | 97    | >PTCH1-E12:TVSGLSEKLR  | 97  | 0     |
| >PTCH1-E12:TVSGLSEELR  | 492   | >PTCH1-E12:TVSGLSEKLR  | 819 | 327   |
| >PTCH1-E12:TVSGLSEE    | 5680  | >PTCH1-E12:TVSGLSEK    | 23  | 5657  |
| >PTCH1-E12:TVSGLSEELR  | 4     | >PTCH1-E12:TVSGLSEKLR  | 9   | 5     |
| >PTCH1-E12:TVSGLSEEL   | 9     | >PTCH1-E12:TVSGLSEKL   | 19  | 10    |
| >PTCH1-E12:TTVSGLSEEL  | 266   | >PTCH1-E12:TTVSGLSEKL  | 412 | 146   |
| >PTCH1-E12:TTVSGLSEE   | 22091 | >PTCH1-E12:TTVSGLSEK   | 465 | 21626 |
| >PTCH1-E12:TTVSGLSEE   | 22119 | >PTCH1-E12:TTVSGLSEK   | 26  | 22093 |
| >PTCH1-E12:TTVSGLSEELF | 319   | >PTCH1-E12:TTVSGLSEKLF | 680 | 361   |
| >PTCH1-E12:TTVSGLSEE   | 84    | >PTCH1-E12:TTVSGLSEK   | 207 | 123   |
| >PTCH1-E12:TTVSGLSEEL  | 29    | >PTCH1-E12:TTVSGLSEKL  | 39  | 10    |
| >PTCH1-E12:TTVSGLSEELF | 140   | >PTCH1-E12:TTVSGLSEKLF | 172 | 32    |
| >PTCH1-E12:TTVSGLSEELF | 281   | >PTCH1-E12:TTVSGLSEKLF | 437 | 156   |
| >PTCH1-E12:TTVSGLSEE   | 2483  | >PTCH1-E12:TTVSGLSEK   | 8   | 2475  |
| >PTCH1-E12:TTVSGLSEELF | 4     | >PTCH1-E12:TTVSGLSEKLF | 7   | 3     |
| >PTCH1-E12:TTVSGLSEEL  | 155   | >PTCH1-E12:TTVSGLSEKL  | 325 | 170   |
| >PTCH1-E12:TTVSGLSEEL  | 143   | >PTCH1-E12:TTVSGLSEKL  | 229 | 86    |
| >PTCH1-E12:TTVSGLSEEL  | 23    | >PTCH1-E12:TTVSGLSEKL  | 21  | 2     |
| >PTCH1-E12:TTVSGLSEEL  | 875   | >PTCH1-E12:TTVSGLSEKL  | 466 | 409   |
| >PTCH1-E12:TTVSGLSEE   | 393   | >PTCH1-E12:TTVSGLSEK   | 318 | 75    |
| >PTCH1-E12:TTVSGLSEEL  | 580   | >PTCH1-E12:TTVSGLSEKL  | 365 | 215   |
| >PTCH1-E12:QTTVSGLSEE  | 24003 | >PTCH1-E12:QTTVSGLSEK  | 276 | 23727 |
| >PTCH1-E12:QTTVSGLSEE  | 31828 | >PTCH1-E12:QTTVSGLSEK  | 50  | 31778 |
| >PTCH1-E12:QTTVSGLSEE  | 15183 | >PTCH1-E12:QTTVSGLSEK  | 381 | 14802 |
| >PTCH1-E12:QTTVSGLSEE  | 24421 | >PTCH1-E12:QTTVSGLSEK  | 93  | 24328 |
| >PTCH1-E12:QTTVSGLSEE  | 221   | >PTCH1-E12:QTTVSGLSEK  | 546 | 325   |
| >PTCH1-E12:QTTVSGLSEE  | 23    | >PTCH1-E12:QTTVSGLSEK  | 19  | 4     |
| >PTCH1-E12:QTTVSGLSEE  | 327   | >PTCH1-E12:QTTVSGLSEK  | 162 | 165   |
| >PTCH1-E12:QTTVSGLSEE  | 363   | >PTCH1-E12:QTTVSGLSEK  | 248 | 115   |

|                         |       |                         |       |       |
|-------------------------|-------|-------------------------|-------|-------|
| >PTCH1-E123;QTTVSGLSEE  | 13255 | >PTCH1-E123;QTTVSGLSEK  | 401   | 12854 |
| >PTCH1-E124;EAQQGAGGF   | 497   | >PTCH1-E124;KAQQGAGGF   | 3846  | 3349  |
| >PTCH1-E124;YEAQQGAGG   | 228   | >PTCH1-E124;YKAQQGAGC   | 30377 | 30149 |
| >PTCH1-E124;SGLSEELRHYI | 23771 | >PTCH1-E124;SGLSEELRHYI | 101   | 23670 |
| >PTCH1-E124;HYEAQQGA    | 4531  | >PTCH1-E124;HYKAQQGA    | 17    | 4514  |
| >PTCH1-E124;HYEAQQGAG   | 10429 | >PTCH1-E124;HYKAQQGAG   | 94    | 10335 |
| >PTCH1-E124;HYEAQQGAG   | 11525 | >PTCH1-E124;HYKAQQGAG   | 202   | 11323 |
| >PTCH1-E124;ELRHYEAAQQC | 393   | >PTCH1-E124;ELRHYEAAQQC | 571   | 178   |
| >PTCH1-E124;EELRHYEA    | 372   | >PTCH1-E124;EELRHYKA    | 1172  | 800   |
| >PTCH1-E124;EELRHYEA    | 7     | >PTCH1-E124;EELRHYKA    | 11    | 4     |
| >PTCH1-E124;EELRHYEAQ   | 177   | >PTCH1-E124;EELRHYKAQ   | 315   | 138   |
| >PTCH1-E124;SEELRHYEA   | 13    | >PTCH1-E124;SEELRHYKA   | 25    | 12    |
| >PTCH1-E124;SEELRHYEAQ  | 430   | >PTCH1-E124;SEELRHYKAQ  | 488   | 58    |
| >PTCH1-E124;LSEELRHYE   | 23548 | >PTCH1-E124;LSEELRHYK   | 47    | 23501 |
| >PTCH1-E124;LSEELRHYE   | 16483 | >PTCH1-E124;LSEELRHYK   | 464   | 16019 |
| >PTCH1-E124;LSEELRHYE   | 9474  | >PTCH1-E124;LSEELRHYK   | 92    | 9382  |
| >PTCH1-E124;LSEELRHYE   | 14901 | >PTCH1-E124;LSEELRHYK   | 95    | 14806 |
| >PTCH1-E124;GLSEELRHYE/ | 175   | >PTCH1-E124;GLSEELRHYK/ | 538   | 363   |
| >PTCH1-E124;GLSEELRHYE/ | 21    | >PTCH1-E124;GLSEELRHYK/ | 40    | 19    |
| >PTCH1-E124;GLSEELRHYE/ | 32    | >PTCH1-E124;GLSEELRHYK/ | 49    | 17    |
| >PTCH1-E124;GLSEELRHYE/ | 42    | >PTCH1-E124;GLSEELRHYK/ | 81    | 39    |
| >PTCH1-E124;GLSEELRHYE/ | 46    | >PTCH1-E124;GLSEELRHYK/ | 89    | 43    |
| >PTCH1-E124;GLSEELRHYE/ | 85    | >PTCH1-E124;GLSEELRHYK/ | 129   | 44    |
| >PTCH1-E124;GLSEELRHYE  | 2144  | >PTCH1-E124;GLSEELRHYK  | 445   | 1699  |
| >PTCH1-E124;GLSEELRHYE/ | 15    | >PTCH1-E124;GLSEELRHYK/ | 25    | 10    |
| >PTCH1-E124;GLSEELRHYE  | 24662 | >PTCH1-E124;GLSEELRHYK  | 175   | 24487 |
| >PTCH1-E124;GLSEELRHYE  | 32025 | >PTCH1-E124;GLSEELRHYK  | 94    | 31931 |
| >PTCH1-E23;EGAKLQSGT/   | 1112  | >PTCH1-E23;KGAKLQSGT/   | 69    | 1043  |
| >PTCH1-E23;EGAKLQSGT/   | 1045  | >PTCH1-E23;KGAKLQSGT/   | 237   | 808   |
| >PTCH1-E23;EGAKLQSGT/   | 2640  | >PTCH1-E23;KGAKLQSGT/   | 270   | 2370  |
| >PTCH1-E23;EGAKLQSGT/   | 84    | >PTCH1-E23;KGAKLQSGT/   | 864   | 780   |
| >PTCH1-E23;EGAKLQSGT/   | 994   | >PTCH1-E23;KGAKLQSGT/   | 70    | 924   |
| >PTCH1-E23;EGAKLQSGT/   | 153   | >PTCH1-E23;KGAKLQSGT/   | 86    | 67    |
| >PTCH1-E23;LIITPLDCFWE  | 22564 | >PTCH1-E23;LIITPLDCFWK  | 52    | 22512 |
| >PTCH1-E23;LIITPLDCFWE  | 12124 | >PTCH1-E23;LIITPLDCFWK  | 73    | 12051 |
| >PTCH1-E23;CFWEGAKL     | 103   | >PTCH1-E23;CFWKGAKL     | 80    | 23    |
| >PTCH1-E23;PLDCFWEGA    | 76    | >PTCH1-E23;PLDCFWKGA    | 389   | 313   |
| >PTCH1-E23;PLDCFWEGA/   | 71    | >PTCH1-E23;PLDCFWKGA    | 116   | 45    |
| >PTCH1-E23;TPLDCFWE     | 192   | >PTCH1-E23;TPLDCFWKG    | 329   | 137   |
| >PTCH1-E23;TPLDCFWE/    | 32    | >PTCH1-E23;TPLDCFWKG/   | 37    | 5     |
| >PTCH1-E23;ITPLDCFWE    | 25645 | >PTCH1-E23;ITPLDCFWK    | 165   | 25480 |
| >PTCH1-E23;ITPLDCFWE    | 12612 | >PTCH1-E23;ITPLDCFWK    | 63    | 12549 |
| >PTCH1-E23;ITPLDCFWE    | 83    | >PTCH1-E23;ITPLDCFWK    | 191   | 108   |

|                        |       |                        |       |       |
|------------------------|-------|------------------------|-------|-------|
| >PTCH1-E23;ITPLDCFWE   | 90    | >PTCH1-E23;ITPLDCFWK   | 51    | 39    |
| >PTCH1-E23;ITPLDCFWE   | 6875  | >PTCH1-E23;ITPLDCFWK   | 325   | 6550  |
| >PTCH1-E23;IITPLDCFWE  | 20570 | >PTCH1-E23;IITPLDCFWK  | 202   | 20368 |
| >PTCH1-E23;IITPLDCFWE  | 28375 | >PTCH1-E23;IITPLDCFWK  | 28    | 28347 |
| >PTCH1-E23;IITPLDCFWE  | 18946 | >PTCH1-E23;IITPLDCFWK  | 38    | 18908 |
| >PTCH1-E66;EYDPHPTHVY  | 61    | >PTCH1-E66;AYDPHPTHV\  | 66    | 5     |
| >PTCH1-E66;EYDPHPTHV   | 4354  | >PTCH1-E66;AYDPHPTHV   | 265   | 4089  |
| >PTCH1-E66;EYDPHPTHVY  | 2983  | >PTCH1-E66;AYDPHPTHVY  | 376   | 2607  |
| >PTCH1-E66;EYDPHPTHVY  | 3388  | >PTCH1-E66;AYDPHPTHVY  | 484   | 2904  |
| >PTCH1-E66;EYDPHPTHVY  | 253   | >PTCH1-E66;AYDPHPTHVY  | 7288  | 7035  |
| >PTCH1-E66;EYDPHPTHVY  | 733   | >PTCH1-E66;AYDPHPTHVY  | 279   | 454   |
| >PTCH1-E66;EYDPHPTHVY  | 55    | >PTCH1-E66;AYDPHPTHVY  | 31    | 24    |
| >PTCH1-E66;EYDPHPTHVY  | 430   | >PTCH1-E66;AYDPHPTHVY  | 106   | 324   |
| >PTCH1-E66;EYDPHPTHVY  | 507   | >PTCH1-E66;AYDPHPTHVY  | 158   | 349   |
| >PTCH1-E66;EYDPHPTHVY  | 1417  | >PTCH1-E66;AYDPHPTHVY  | 276   | 1141  |
| >PTCH1-E66;EYDPHPTHVY  | 2035  | >PTCH1-E66;AYDPHPTHVY  | 418   | 1617  |
| >PTCH1-E66;EYDPHPTHVY  | 129   | >PTCH1-E66;AYDPHPTHVY  | 123   | 6     |
| >PTCH1-E66;TEYDPHPTHV  | 4951  | >PTCH1-E66;TAYDPHPTHV  | 189   | 4762  |
| >PTCH1-E66;TEYDPHPTHV  | 6317  | >PTCH1-E66;TAYDPHPTHV  | 349   | 5968  |
| >PTCH1-E66;TEYDPHPTHV  | 1202  | >PTCH1-E66;TAYDPHPTHV  | 140   | 1062  |
| >PTCH1-E66;TEYDPHPTHV  | 896   | >PTCH1-E66;TAYDPHPTHV  | 44    | 852   |
| >PTCH1-E66;TEYDPHPTHV  | 1736  | >PTCH1-E66;TAYDPHPTHV  | 25    | 1711  |
| >PTCH1-E66;TEYDPHPTHVY | 8561  | >PTCH1-E66;TAYDPHPTHV\ | 75    | 8486  |
| >PTCH1-E66;TEYDPHPTHVY | 2356  | >PTCH1-E66;TAYDPHPTHV\ | 132   | 2224  |
| >PTCH1-E66;TEYDPHPTHVY | 4885  | >PTCH1-E66;TAYDPHPTHV\ | 391   | 4494  |
| >PTCH1-E66;TEYDPHPTHVY | 87    | >PTCH1-E66;TAYDPHPTHV\ | 23    | 64    |
| >PTCH1-E66;TEYDPHPTHVY | 341   | >PTCH1-E66;TAYDPHPTHV\ | 105   | 236   |
| >PTCH1-E66;TEYDPHPTHVY | 2732  | >PTCH1-E66;TAYDPHPTHV\ | 36    | 2696  |
| >PTCH1-E66;TEYDPHPTHV  | 1356  | >PTCH1-E66;TAYDPHPTHV  | 10    | 1346  |
| >PTCH1-E66;TEYDPHPTHV  | 1532  | >PTCH1-E66;TAYDPHPTHV  | 8     | 1524  |
| >PTCH1-E66;TEYDPHPTHVY | 132   | >PTCH1-E66;TAYDPHPTHV\ | 88    | 44    |
| >PTCH1-E66;TEYDPHPTHVY | 346   | >PTCH1-E66;TAYDPHPTHV\ | 202   | 144   |
| >PTCH1-E66;TEYDPHPTHVY | 181   | >PTCH1-E66;TAYDPHPTHV\ | 174   | 7     |
| >PTCH1-E66;TEYDPHPTHVY | 198   | >PTCH1-E66;TAYDPHPTHV\ | 136   | 62    |
| >PTCH1-E66;TEYDPHPTHVY | 116   | >PTCH1-E66;TAYDPHPTHV\ | 77    | 39    |
| >PTCH1-E66;TEYDPHPTHVY | 9590  | >PTCH1-E66;TAYDPHPTHV\ | 6     | 9584  |
| >PTCH1-E66;TEYDPHPTHVY | 7700  | >PTCH1-E66;TAYDPHPTHV\ | 6     | 7694  |
| >PTCH1-E66;TEYDPHPTH   | 210   | >PTCH1-E66;TAYDPHPTH   | 19860 | 19650 |
| >PTCH1-E66;TEYDPHPTHVY | 131   | >PTCH1-E66;TAYDPHPTHV\ | 24035 | 23904 |
| >PTCH1-E66;TEYDPHPTHVY | 19    | >PTCH1-E66;TAYDPHPTHV\ | 6950  | 6931  |
| >PTCH1-E66;TEYDPHPTHVY | 6160  | >PTCH1-E66;TAYDPHPTHV\ | 114   | 6046  |
| >PTCH1-E66;TEYDPHPTHV  | 382   | >PTCH1-E66;TAYDPHPTHV  | 23539 | 23157 |
| >PTCH1-E66;TEYDPHPTHVY | 253   | >PTCH1-E66;TAYDPHPTHV\ | 17654 | 17401 |

|                        |       |                        |       |       |
|------------------------|-------|------------------------|-------|-------|
| >PTCH1-E66;TEYDPHTHV\  | 139   | >PTCH1-E66;TAYDPHTHV\  | 21113 | 20974 |
| >PTCH1-E66;TEYDPHTHV\  | 197   | >PTCH1-E66;TAYDPHTHV\  | 27077 | 26880 |
| >PTCH1-E66;TEYDPHTHV   | 314   | >PTCH1-E66;TAYDPHTHV   | 36149 | 35835 |
| >PTCH1-E66;TEYDPHTHV\  | 20620 | >PTCH1-E66;TAYDPHTHV\  | 486   | 20134 |
| >PTCH1-E66;TEYDPHTHV\  | 19326 | >PTCH1-E66;TAYDPHTHV\  | 369   | 18957 |
| >PTCH1-E66;TEYDPHTHV\  | 1833  | >PTCH1-E66;TAYDPHTHV\  | 155   | 1678  |
| >PTCH1-E66;TEYDPHTHV   | 59    | >PTCH1-E66;TAYDPHTHV   | 25985 | 25926 |
| >PTCH1-E66;TMQSTVQLR'  | 18741 | >PTCH1-E66;TMQSTVQLR'  | 74    | 18667 |
| >PTCH1-E66;TMQSTVQLR'  | 15928 | >PTCH1-E66;TMQSTVQLR'  | 191   | 15737 |
| >PTCH1-E66;TMQSTVQLR'  | 17195 | >PTCH1-E66;TMQSTVQLR'  | 282   | 16913 |
| >PTCH1-E66;TMQSTVQLR'  | 18592 | >PTCH1-E66;TMQSTVQLR'  | 184   | 18408 |
| >PTCH1-E66;RTEYDPHTHV\ | 28    | >PTCH1-E66;RTAYDPHTHV\ | 72    | 44    |
| >PTCH1-E66;RTEYDPHTHV\ | 2401  | >PTCH1-E66;RTAYDPHTHV\ | 432   | 1969  |
| >PTCH1-E66;RTEYDPHTHV\ | 2763  | >PTCH1-E66;RTAYDPHTHV\ | 345   | 2418  |
| >PTCH1-E66;RTEYDPHTHV\ | 1880  | >PTCH1-E66;RTAYDPHTHV\ | 212   | 1668  |
| >PTCH1-E66;RTEYDPHTHV\ | 483   | >PTCH1-E66;RTAYDPHTHV\ | 15    | 468   |
| >PTCH1-E66;RTEYDPHTHV\ | 314   | >PTCH1-E66;RTAYDPHTHV\ | 25    | 289   |
| >PTCH1-E66;RTEYDPHTH   | 1514  | >PTCH1-E66;RTAYDPHTH   | 436   | 1078  |
| >PTCH1-E66;RTEYDPHTHV\ | 17    | >PTCH1-E66;RTAYDPHTHV\ | 7     | 10    |
| >PTCH1-E66;RTEYDPHTH   | 621   | >PTCH1-E66;RTAYDPHTH   | 258   | 363   |
| >PTCH1-E66;RTEYDPHTHV\ | 159   | >PTCH1-E66;RTAYDPHTHV\ | 48    | 111   |
| >PTCH1-E66;RTEYDPHTHV\ | 227   | >PTCH1-E66;RTAYDPHTHV\ | 21    | 206   |
| >PTCH1-E66;RTEYDPHTHV\ | 2886  | >PTCH1-E66;RTAYDPHTHV\ | 226   | 2660  |
| >PTCH1-E66;RTEYDPHTHV\ | 69    | >PTCH1-E66;RTAYDPHTHV\ | 12    | 57    |
| >PTCH1-E66;RTEYDPHTHV\ | 784   | >PTCH1-E66;RTAYDPHTHV\ | 79    | 705   |
| >PTCH1-E66;RTEYDPHTHV\ | 1355  | >PTCH1-E66;RTAYDPHTHV\ | 113   | 1242  |
| >PTCH1-E66;RTEYDPHTH   | 1014  | >PTCH1-E66;RTAYDPHTH   | 230   | 784   |
| >PTCH1-E66;RTEYDPHTHV\ | 500   | >PTCH1-E66;RTAYDPHTHV\ | 129   | 371   |
| >PTCH1-E66;RTEYDPHTHV\ | 9     | >PTCH1-E66;RTAYDPHTHV\ | 6     | 3     |
| >PTCH1-E66;RTEYDPHTHV\ | 902   | >PTCH1-E66;RTAYDPHTHV\ | 116   | 786   |
| >PTCH1-E66;RTEYDPHTHV\ | 479   | >PTCH1-E66;RTAYDPHTHV\ | 16    | 463   |
| >PTCH1-E66;RTEYDPHTH   | 392   | >PTCH1-E66;RTAYDPHTH   | 239   | 153   |
| >PTCH1-E66;RTEYDPHTHV\ | 340   | >PTCH1-E66;RTAYDPHTHV\ | 125   | 215   |
| >PTCH1-E66;RTEYDPHTHV\ | 33    | >PTCH1-E66;RTAYDPHTHV\ | 22    | 11    |
| >PTCH1-E66;RTEYDPHTHV\ | 157   | >PTCH1-E66;RTAYDPHTHV\ | 166   | 9     |
| >PTCH1-E66;RTEYDPHTH   | 1751  | >PTCH1-E66;RTAYDPHTH   | 376   | 1375  |
| >PTCH1-E66;VQLRTEYDPH  | 617   | >PTCH1-E66;VQLRTEYDPH  | 343   | 274   |
| >PTCH1-E66;VQLRTEYDPH  | 390   | >PTCH1-E66;VQLRTEYDPH  | 272   | 118   |
| >PTCH1-E66;TVQLRTEY    | 459   | >PTCH1-E66;TVQLRTAY    | 419   | 40    |
| >PTCH1-E66;TVQLRTEY    | 415   | >PTCH1-E66;TVQLRTAY    | 334   | 81    |
| >PTCH1-E66;TVQLRTEY    | 987   | >PTCH1-E66;TVQLRTAY    | 498   | 489   |
| >PTCH1-E66;TVQLRTEY    | 1519  | >PTCH1-E66;TVQLRTAY    | 495   | 1024  |
| >PTCH1-E66;STVQLRTEY   | 120   | >PTCH1-E66;STVQLRTAY   | 62    | 58    |



|                        |       |                        |       |       |
|------------------------|-------|------------------------|-------|-------|
| >PTCH1-E667STVQLRTEY   | 293   | >PTCH1-E667STVQLRTAY   | 94    | 199   |
| >PTCH1-E667STVQLRTEY   | 32    | >PTCH1-E667STVQLRTAY   | 12    | 20    |
| >PTCH1-E667STVQLRTEY   | 245   | >PTCH1-E667STVQLRTAY   | 40    | 205   |
| >PTCH1-E667STVQLRTEY   | 142   | >PTCH1-E667STVQLRTAY   | 111   | 31    |
| >PTCH1-E667STVQLRTEY   | 164   | >PTCH1-E667STVQLRTAY   | 96    | 68    |
| >PTCH1-E667STVQLRTEY   | 224   | >PTCH1-E667STVQLRTAY   | 390   | 166   |
| >PTCH1-E667STVQLRTEY   | 428   | >PTCH1-E667STVQLRTAY   | 1326  | 898   |
| >PTCH1-E667STVQLRTEY   | 223   | >PTCH1-E667STVQLRTAY   | 82    | 141   |
| >PTCH1-E667STVQLRTEY   | 9     | >PTCH1-E667STVQLRTAY   | 12    | 3     |
| >PTCH1-E667STVQLRTEY   | 1354  | >PTCH1-E667STVQLRTAY   | 314   | 1040  |
| >PTCH1-E667STVQLRTEY   | 5     | >PTCH1-E667STVQLRTAY   | 6     | 1     |
| >PTCH1-E667STVQLRTEY   | 136   | >PTCH1-E667STVQLRTAY   | 52    | 84    |
| >PTCH1-E667QSTVQLRTEY  | 947   | >PTCH1-E667QSTVQLRTAY  | 426   | 521   |
| >PTCH1-E667QSTVQLRTEY  | 29    | >PTCH1-E667QSTVQLRTAY  | 46    | 17    |
| >PTCH1-E667QSTVQLRTEY  | 46    | >PTCH1-E667QSTVQLRTAY  | 71    | 25    |
| >PTCH1-E667MQSTVQLRT   | 18924 | >PTCH1-E667MQSTVQLRT   | 289   | 18635 |
| >PTCH1-E667MQSTVQLRT   | 237   | >PTCH1-E667MQSTVQLRT   | 203   | 34    |
| >PTCH1-E667MQSTVQLRT   | 74    | >PTCH1-E667MQSTVQLRT   | 57    | 17    |
| >PTCH1-E667MQSTVQLRT   | 58    | >PTCH1-E667MQSTVQLRT   | 44    | 14    |
| >PTCH1-E667MQSTVQLRT   | 8     | >PTCH1-E667MQSTVQLRT   | 5     | 3     |
| >PTCH1-E667MQSTVQLRT   | 834   | >PTCH1-E667MQSTVQLRT   | 276   | 558   |
| >PTCH1-E667MQSTVQLRT   | 145   | >PTCH1-E667MQSTVQLRT   | 58    | 87    |
| >PTCH1-E992EKVRTICSNY  | 117   | >PTCH1-E992GKVRTICSNY  | 10998 | 10881 |
| >PTCH1-E992EKVRTICSNY  | 331   | >PTCH1-E992GKVRTICSNY  | 250   | 81    |
| >PTCH1-E992EKVRTICSNY  | 20    | >PTCH1-E992GKVRTICSNY  | 15    | 5     |
| >PTCH1-E992IEKVRTICSNY | 1796  | >PTCH1-E992IGKVRTICSNY | 290   | 1506  |
| >PTCH1-E992IEKVRTICSNY | 198   | >PTCH1-E992IGKVRTICSNY | 1140  | 942   |
| >PTCH1-E992IEKVRTICSNY | 367   | >PTCH1-E992IGKVRTICSNY | 23278 | 22911 |
| >PTCH1-E992IEKVRTICSNY | 413   | >PTCH1-E992IGKVRTICSNY | 21295 | 20882 |
| >PTCH1-E992IEKVRTICSNY | 878   | >PTCH1-E992IGKVRTICSNY | 177   | 701   |
| >PTCH1-E992AIEKVRTI    | 522   | >PTCH1-E992AIGKVRTI    | 257   | 265   |
| >PTCH1-E992EAIEKVRTI   | 625   | >PTCH1-E992EAIGKVRTI   | 400   | 225   |
| >PTCH1-E992EAIEKVRTI   | 344   | >PTCH1-E992EAIGKVRTI   | 406   | 62    |
| >PTCH1-E992EAIEKVRTI   | 406   | >PTCH1-E992EAIGKVRTI   | 3122  | 2716  |
| >PTCH1-E992VEAIEKVR    | 3695  | >PTCH1-E992VEAIGKVR    | 275   | 3420  |
| >PTCH1-E992VEAIEKVRTI  | 22    | >PTCH1-E992VEAIGKVRTI  | 21    | 1     |
| >PTCH1-E992VEAIEKVRTI  | 77    | >PTCH1-E992VEAIGKVRTI  | 215   | 138   |
| >PTCH1-E992FVEAIEKV    | 54    | >PTCH1-E992FVEAIGKV    | 147   | 93    |
| >PTCH1-E992FVEAIEKV    | 384   | >PTCH1-E992FVEAIGKV    | 133   | 251   |
| >PTCH1-E992FVEAIEKV    | 48    | >PTCH1-E992FVEAIGKV    | 74    | 26    |
| >PTCH1-E992FVEAIEKV    | 136   | >PTCH1-E992FVEAIGKV    | 219   | 83    |
| >PTCH1-E992FVEAIEKV    | 10    | >PTCH1-E992FVEAIGKV    | 15    | 5     |
| >PTCH1-E992FVEAIEKVR   | 51    | >PTCH1-E992FVEAIGKVR   | 118   | 67    |

|                         |       |                         |      |       |
|-------------------------|-------|-------------------------|------|-------|
| >PTCH1-E992FVEAIEKV     | 62    | >PTCH1-E992FVEAIGKV     | 103  | 41    |
| >PTCH1-E992DFVEAIEKVR   | 355   | >PTCH1-E992DFVEAIGKVR   | 204  | 151   |
| >PTCH1-E992DFVEAIEK     | 309   | >PTCH1-E992DFVEAIGK     | 469  | 160   |
| >PTCH1-E992DFVEAIEKVR   | 365   | >PTCH1-E992DFVEAIGKVR   | 184  | 181   |
| >PTCH1-E992SDFVEAIEKV   | 172   | >PTCH1-E992SDFVEAIGKV   | 744  | 572   |
| >PTCH1-E992SDFVEAIEKV   | 43    | >PTCH1-E992SDFVEAIGKV   | 35   | 8     |
| >PTCH1-E992TSDFVEAIEK   | 30    | >PTCH1-E992TSDFVEAIGK   | 57   | 27    |
| >PTCH1-E992TSDFVEAIEK   | 36    | >PTCH1-E992TSDFVEAIGK   | 41   | 5     |
| >PTCH1-E992TSDFVEAIEK\  | 172   | >PTCH1-E992TSDFVEAIG\   | 392  | 220   |
| >PTCH1-E992DTSDVFVEAIEI | 220   | >PTCH1-E992DTSDVFVEAIGI | 356  | 136   |
| >PTCH1-E992DTSDVFVEAIEI | 7     | >PTCH1-E992DTSDVFVEAIGI | 9    | 2     |
| >PTCH1-E992DTSDVFVEAIEI | 474   | >PTCH1-E992DTSDVFVEAIGI | 655  | 181   |
| >PTCH1-F743FLLKPKAKV    | 27    | >PTCH1-F743LLLKPKAKV    | 276  | 249   |
| >PTCH1-F743FLLKPKAKVV\  | 23    | >PTCH1-F743LLLKPKAKVV\  | 250  | 227   |
| >PTCH1-F743FLLKPKAKV    | 46    | >PTCH1-F743LLLKPKAKV    | 525  | 479   |
| >PTCH1-F743FLLKPKAKVV   | 429   | >PTCH1-F743LLLKPKAKVV   | 1801 | 1372  |
| >PTCH1-F743FLLKPKAKVV\  | 64    | >PTCH1-F743LLLKPKAKVV\  | 646  | 582   |
| >PTCH1-F743FLLKPKAKV    | 31    | >PTCH1-F743LLLKPKAKV    | 346  | 315   |
| >PTCH1-F743FLLKPKAKVV   | 50    | >PTCH1-F743LLLKPKAKVV   | 197  | 147   |
| >PTCH1-F743FLLKPKAKVV\  | 59    | >PTCH1-F743LLLKPKAKVV\  | 623  | 564   |
| >PTCH1-F743FLLKPKAKV    | 31    | >PTCH1-F743LLLKPKAKV    | 554  | 523   |
| >PTCH1-F743FLLKPKAKVV\  | 19    | >PTCH1-F743LLLKPKAKVV\  | 294  | 275   |
| >PTCH1-F743FLLKPKAKV    | 2     | >PTCH1-F743LLLKPKAKV    | 3    | 1     |
| >PTCH1-F743FLLKPKAKVV   | 2     | >PTCH1-F743LLLKPKAKVV   | 4    | 2     |
| >PTCH1-F743FLLKPKAKVV\  | 2     | >PTCH1-F743LLLKPKAKVV\  | 3    | 1     |
| >PTCH1-F743FLLKPKAKV    | 5     | >PTCH1-F743LLLKPKAKV    | 18   | 13    |
| >PTCH1-F743FLLKPKAKVV   | 6     | >PTCH1-F743LLLKPKAKVV   | 22   | 16    |
| >PTCH1-F743FLLKPKAKVV\  | 4     | >PTCH1-F743LLLKPKAKVV\  | 12   | 8     |
| >PTCH1-F743FLLKPKAKV    | 5     | >PTCH1-F743LLLKPKAKV    | 9    | 4     |
| >PTCH1-F743FLLKPKAKVV   | 7     | >PTCH1-F743LLLKPKAKVV   | 17   | 10    |
| >PTCH1-F743FLLKPKAKVV\  | 5     | >PTCH1-F743LLLKPKAKVV\  | 8    | 3     |
| >PTCH1-F743FLLKPKAKV    | 6     | >PTCH1-F743LLLKPKAKV    | 8    | 2     |
| >PTCH1-F743FLLKPKAKVV   | 6     | >PTCH1-F743LLLKPKAKVV   | 20   | 14    |
| >PTCH1-F743FLLKPKAKVV\  | 4     | >PTCH1-F743LLLKPKAKVV\  | 10   | 6     |
| >PTCH1-F743FLLKPKAKV    | 2     | >PTCH1-F743LLLKPKAKV    | 3    | 1     |
| >PTCH1-F743FLLKPKAKVV   | 3     | >PTCH1-F743LLLKPKAKVV   | 6    | 3     |
| >PTCH1-F743FLLKPKAKVV\  | 2     | >PTCH1-F743LLLKPKAKVV\  | 4    | 2     |
| >PTCH1-F743FLLKPKAK     | 428   | >PTCH1-F743LLLKPKAK     | 151  | 277   |
| >PTCH1-F743FLLKPKAKV    | 24    | >PTCH1-F743LLLKPKAKV    | 332  | 308   |
| >PTCH1-F743FLLKPKAKVV   | 421   | >PTCH1-F743LLLKPKAKVV   | 3020 | 2599  |
| >PTCH1-F743FLLKPKAKVV\  | 108   | >PTCH1-F743LLLKPKAKVV\  | 1351 | 1243  |
| >PTCH1-F743PFLKPKAKV    | 13183 | >PTCH1-F743PLLLKPKAKV   | 58   | 13125 |
| >PTCH1-F743PFLKPKAKV\   | 17967 | >PTCH1-F743PLLLKPKAKV\  | 173  | 17794 |

|                         |       |                        |      |       |
|-------------------------|-------|------------------------|------|-------|
| >PTCH1-F74:PFLLLPKAKV   | 14679 | >PTCH1-F74:PLLLLPKAKV  | 175  | 14504 |
| >PTCH1-F74:PFLLLPKAKV   | 17579 | >PTCH1-F74:PLLLLPKAKV  | 79   | 17500 |
| >PTCH1-F74:PFLLLPKAKV\  | 19900 | >PTCH1-F74:PLLLLPKAKV\ | 161  | 19739 |
| >PTCH1-F74:PFLLLPKAKV   | 17732 | >PTCH1-F74:PLLLLPKAKV  | 37   | 17695 |
| >PTCH1-F74:PFLLLPKAKV\  | 23524 | >PTCH1-F74:PLLLLPKAKV\ | 78   | 23446 |
| >PTCH1-F74:SSFAEKHYAP   | 127   | >PTCH1-F74:SSFAEKHYAP  | 83   | 44    |
| >PTCH1-F74:SSFAEKHYAP   | 9279  | >PTCH1-F74:SSFAEKHYAP  | 179  | 9100  |
| >PTCH1-F74:SSFAEKHYAP   | 3148  | >PTCH1-F74:SSFAEKHYAP  | 394  | 2754  |
| >PTCH1-F74:SSFAEKHYAP   | 150   | >PTCH1-F74:SSFAEKHYAP  | 625  | 475   |
| >PTCH1-F74:SSFAEKHYAP   | 8710  | >PTCH1-F74:SSFAEKHYAP  | 71   | 8639  |
| >PTCH1-F74:SSFAEKHYAP   | 10903 | >PTCH1-F74:SSFAEKHYAP  | 494  | 10409 |
| >PTCH1-F74:SSFAEKHYAP   | 54    | >PTCH1-F74:SSFAEKHYAP  | 674  | 620   |
| >PTCH1-F74:SSFAEKHYAP   | 8     | >PTCH1-F74:SSFAEKHYAP  | 137  | 129   |
| >PTCH1-F74:SSFAEKHYAP   | 6     | >PTCH1-F74:SSFAEKHYAP  | 15   | 9     |
| >PTCH1-F74:SSFAEKHYAP   | 6509  | >PTCH1-F74:SSFAEKHYAP  | 289  | 6220  |
| >PTCH1-F74:SSFAEKHYAP   | 261   | >PTCH1-F74:SSFAEKHYAP  | 3284 | 3023  |
| >PTCH1-F74:SSFAEKHYAP   | 225   | >PTCH1-F74:SSFAEKHYAP  | 4562 | 4337  |
| >PTCH1-F74:SSFAEKHYAP   | 510   | >PTCH1-F74:SSFAEKHYAP  | 295  | 215   |
| >PTCH1-F74:SSFAEKHYAP   | 141   | >PTCH1-F74:SSFAEKHYAP  | 1200 | 1059  |
| >PTCH1-F74:SSFAEKHYAP   | 2849  | >PTCH1-F74:SSFAEKHYAP  | 142  | 2707  |
| >PTCH1-F74:APFLLLPKA    | 183   | >PTCH1-F74:APLLLPKA    | 245  | 62    |
| >PTCH1-F74:HYAPFLLLK    | 173   | >PTCH1-F74:HYAPLLLK    | 522  | 349   |
| >PTCH1-F74:HYAPFLLLK    | 391   | >PTCH1-F74:HYAPLLLK    | 636  | 245   |
| >PTCH1-F74:HYAPFLLLK    | 20    | >PTCH1-F74:HYAPLLLK    | 35   | 15    |
| >PTCH1-F74:HYAPFLLLKPK  | 23    | >PTCH1-F74:HYAPLLLKPK  | 42   | 19    |
| >PTCH1-F74:HYAPFLLLK    | 241   | >PTCH1-F74:HYAPLLLK    | 505  | 264   |
| >PTCH1-F74:HYAPFLLLK    | 141   | >PTCH1-F74:HYAPLLLK    | 341  | 200   |
| >PTCH1-F74:HYAPFLLLK    | 21    | >PTCH1-F74:HYAPLLLK    | 45   | 24    |
| >PTCH1-F74:HYAPFLLLKPK  | 25    | >PTCH1-F74:HYAPLLLKPK  | 39   | 14    |
| >PTCH1-F74:KHYAPFLLLK   | 51    | >PTCH1-F74:KHYAPLLLK   | 70   | 19    |
| >PTCH1-F74:KHYAPFLLLKPI | 422   | >PTCH1-F74:KHYAPLLLKPI | 604  | 182   |
| >PTCH1-F74:KHYAPFLLLK   | 104   | >PTCH1-F74:KHYAPLLLK   | 254  | 150   |
| >PTCH1-F74:KHYAPFLLLK   | 309   | >PTCH1-F74:KHYAPLLLK   | 420  | 111   |
| >PTCH1-F74:KHYAPFLLLKPI | 475   | >PTCH1-F74:KHYAPLLLKPI | 629  | 154   |
| >PTCH1-F74:KHYAPFLL     | 149   | >PTCH1-F74:KHYAPLLL    | 167  | 18    |
| >PTCH1-F74:KHYAPFLLLKPI | 445   | >PTCH1-F74:KHYAPLLLKPI | 874  | 429   |
| >PTCH1-F74:KHYAPFLL     | 371   | >PTCH1-F74:KHYAPLLL    | 474  | 103   |
| >PTCH1-F74:KHYAPFLL     | 75    | >PTCH1-F74:KHYAPLLL    | 139  | 64    |
| >PTCH1-F74:KHYAPFLL     | 445   | >PTCH1-F74:KHYAPLLL    | 535  | 90    |
| >PTCH1-F74:KHYAPFLLLK   | 45    | >PTCH1-F74:KHYAPLLLK   | 276  | 231   |
| >PTCH1-F74:KHYAPFLLLKPI | 102   | >PTCH1-F74:KHYAPLLLKPI | 251  | 149   |
| >PTCH1-F74:EKHYAPFL     | 356   | >PTCH1-F74:EKHYAPLL    | 428  | 72    |
| >PTCH1-F74:EKHYAPFLL    | 597   | >PTCH1-F74:EKHYAPLLL   | 290  | 307   |

|                         |       |                         |      |       |
|-------------------------|-------|-------------------------|------|-------|
| >PTCH1-F74E EKHYAPFLL   | 417   | >PTCH1-F74E EKHYAPLLL   | 722  | 305   |
| >PTCH1-F74E AEKHYAPF    | 2262  | >PTCH1-F74E AEKHYAPL    | 420  | 1842  |
| >PTCH1-F74E AEKHYAPFL   | 31    | >PTCH1-F74E AEKHYAPLL   | 163  | 132   |
| >PTCH1-F74E AEKHYAPFLL  | 242   | >PTCH1-F74E AEKHYAPLLL  | 359  | 117   |
| >PTCH1-F74E AEKHYAPFLLI | 211   | >PTCH1-F74E AEKHYAPLLLI | 323  | 112   |
| >PTCH1-F74E AEKHYAPF    | 88    | >PTCH1-F74E AEKHYAPL    | 1497 | 1409  |
| >PTCH1-F74E AEKHYAPF    | 16    | >PTCH1-F74E AEKHYAPL    | 263  | 247   |
| >PTCH1-F74E AEKHYAPF    | 266   | >PTCH1-F74E AEKHYAPL    | 28   | 238   |
| >PTCH1-F74E AEKHYAPFL   | 30    | >PTCH1-F74E AEKHYAPLL   | 29   | 1     |
| >PTCH1-F74E AEKHYAPF    | 54    | >PTCH1-F74E AEKHYAPL    | 24   | 30    |
| >PTCH1-F74E AEKHYAPFL   | 25    | >PTCH1-F74E AEKHYAPLL   | 39   | 14    |
| >PTCH1-F74E AEKHYAPFLL  | 64    | >PTCH1-F74E AEKHYAPLLL  | 165  | 101   |
| >PTCH1-F74E AEKHYAPF    | 294   | >PTCH1-F74E AEKHYAPL    | 1457 | 1163  |
| >PTCH1-F74E AEKHYAPFLL  | 59    | >PTCH1-F74E AEKHYAPLLL  | 109  | 50    |
| >PTCH1-F74E AEKHYAPF    | 64    | >PTCH1-F74E AEKHYAPL    | 342  | 278   |
| >PTCH1-F74E AEKHYAPFL   | 44    | >PTCH1-F74E AEKHYAPLL   | 68   | 24    |
| >PTCH1-F74E AEKHYAPFLL  | 337   | >PTCH1-F74E AEKHYAPLLL  | 316  | 21    |
| >PTCH1-F74E AEKHYAPF    | 162   | >PTCH1-F74E AEKHYAPL    | 67   | 95    |
| >PTCH1-F74E AEKHYAPFL   | 61    | >PTCH1-F74E AEKHYAPLL   | 134  | 73    |
| >PTCH1-F74E AEKHYAPFLL  | 405   | >PTCH1-F74E AEKHYAPLLL  | 429  | 24    |
| >PTCH1-F74E AEKHYAPFLLI | 333   | >PTCH1-F74E AEKHYAPLLLI | 786  | 453   |
| >PTCH1-F74E AEKHYAPFL   | 20    | >PTCH1-F74E AEKHYAPLL   | 9    | 11    |
| >PTCH1-F74E AEKHYAPFLL  | 86    | >PTCH1-F74E AEKHYAPLLL  | 152  | 66    |
| >PTCH1-F74E FAEKHYAPF   | 412   | >PTCH1-F74E FAEKHYAPL   | 274  | 138   |
| >PTCH1-F74E FAEKHYAPF   | 10763 | >PTCH1-F74E FAEKHYAPL   | 150  | 10613 |
| >PTCH1-F74E FAEKHYAPFLI | 123   | >PTCH1-F74E FAEKHYAPLLI | 563  | 440   |
| >PTCH1-F74E FAEKHYAPF   | 1529  | >PTCH1-F74E FAEKHYAPL   | 204  | 1325  |
| >PTCH1-F74E FAEKHYAPFLI | 295   | >PTCH1-F74E FAEKHYAPLLI | 1257 | 962   |
| >PTCH1-F74E FAEKHYAPF   | 135   | >PTCH1-F74E FAEKHYAPL   | 47   | 88    |
| >PTCH1-F74E FAEKHYAPF   | 245   | >PTCH1-F74E FAEKHYAPL   | 6075 | 5830  |
| >PTCH1-F74E FAEKHYAPF   | 58    | >PTCH1-F74E FAEKHYAPL   | 1670 | 1612  |
| >PTCH1-F74E FAEKHYAPF   | 60    | >PTCH1-F74E FAEKHYAPL   | 1334 | 1274  |
| >PTCH1-F74E FAEKHYAPF   | 28    | >PTCH1-F74E FAEKHYAPL   | 159  | 131   |
| >PTCH1-F74E FAEKHYAPF   | 7014  | >PTCH1-F74E FAEKHYAPL   | 212  | 6802  |
| >PTCH1-F74E FAEKHYAPF   | 672   | >PTCH1-F74E FAEKHYAPL   | 348  | 324   |
| >PTCH1-F74E FAEKHYAPFL  | 135   | >PTCH1-F74E FAEKHYAPLL  | 147  | 12    |
| >PTCH1-F74E FAEKHYAPFLI | 165   | >PTCH1-F74E FAEKHYAPLLI | 318  | 153   |
| >PTCH1-F74E FAEKHYAPF   | 62    | >PTCH1-F74E FAEKHYAPL   | 580  | 518   |
| >PTCH1-F74E SFAEKHYAPF  | 116   | >PTCH1-F74E SFAEKHYAPLI | 243  | 127   |
| >PTCH1-F74E SFAEKHYAPF  | 39    | >PTCH1-F74E SFAEKHYAPL  | 658  | 619   |
| >PTCH1-F74E SFAEKHYAPF  | 392   | >PTCH1-F74E SFAEKHYAPLI | 923  | 531   |
| >PTCH1-F74E SFAEKHYAPF  | 411   | >PTCH1-F74E SFAEKHYAPL  | 7347 | 6936  |
| >PTCH1-F74E SFAEKHYAPF  | 458   | >PTCH1-F74E SFAEKHYAPL  | 6545 | 6087  |

|                        |       |                        |      |       |
|------------------------|-------|------------------------|------|-------|
| >PTCH1-F74!SFAEKHYAPF  | 359   | >PTCH1-F74!SFAEKHYAPL  | 4314 | 3955  |
| >PTCH1-F74!SFAEKHYAPF  | 472   | >PTCH1-F74!SFAEKHYAPL  | 501  | 29    |
| >PTCH1-F74!SFAEKHYAPF  | 1567  | >PTCH1-F74!SFAEKHYAPL  | 329  | 1238  |
| >PTCH1-F74!SFAEKHYAPF  | 202   | >PTCH1-F74!SFAEKHYAPL  | 645  | 443   |
| >PTCH1-G11!GLKAANLETN  | 842   | >PTCH1-G11!KLKAANLETN  | 237  | 605   |
| >PTCH1-G11!GLKAANLETN  | 47    | >PTCH1-G11!KLKAANLETN  | 33   | 14    |
| >PTCH1-G11!GLKAANLETN  | 8     | >PTCH1-G11!KLKAANLETN  | 6    | 2     |
| >PTCH1-G11!GLKAANLETN  | 257   | >PTCH1-G11!KLKAANLETN  | 111  | 146   |
| >PTCH1-G11!GLKAANLETN  | 142   | >PTCH1-G11!KLKAANLETN  | 143  | 1     |
| >PTCH1-G11!GLKAANLETN  | 73    | >PTCH1-G11!KLKAANLETN  | 65   | 8     |
| >PTCH1-G11!GLKAANLETN  | 5     | >PTCH1-G11!KLKAANLETN  | 5    | 0     |
| >PTCH1-G11!GLKAANLET   | 4624  | >PTCH1-G11!KLKAANLET   | 86   | 4538  |
| >PTCH1-G11!GLKAANLETN  | 2411  | >PTCH1-G11!KLKAANLETN  | 97   | 2314  |
| >PTCH1-G11!VGLKAANL    | 50    | >PTCH1-G11!VKLKAANL    | 370  | 320   |
| >PTCH1-G11!VGLKAANL    | 6695  | >PTCH1-G11!VKLKAANL    | 67   | 6628  |
| >PTCH1-G11!GLLIFGAFAVL | 19947 | >PTCH1-G11!GLLIFGAFAVL | 127  | 19820 |
| >PTCH1-G11!GLLIFGAFAVL | 26416 | >PTCH1-G11!GLLIFGAFAVL | 64   | 26352 |
| >PTCH1-G11!AVGLKAANL   | 9076  | >PTCH1-G11!AVKLKAANL   | 115  | 8961  |
| >PTCH1-G11!AVGLKAANL   | 1094  | >PTCH1-G11!AVKLKAANL   | 203  | 891   |
| >PTCH1-G11!FAVGLKAA    | 116   | >PTCH1-G11!FAVKLKAA    | 374  | 258   |
| >PTCH1-G11!FAVGLKAANL  | 272   | >PTCH1-G11!FAVKLKAANL  | 1052 | 780   |
| >PTCH1-G11!FAVGLKAANL  | 496   | >PTCH1-G11!FAVKLKAANL  | 3246 | 2750  |
| >PTCH1-G11!FAVGLKAANL  | 277   | >PTCH1-G11!FAVKLKAANL  | 660  | 383   |
| >PTCH1-G11!FAVGLKAANL  | 41    | >PTCH1-G11!FAVKLKAANL  | 83   | 42    |
| >PTCH1-G11!FAVGLKAA    | 17    | >PTCH1-G11!FAVKLKAA    | 33   | 16    |
| >PTCH1-G11!GAFAVGLK    | 93    | >PTCH1-G11!GAFAVKLK    | 172  | 79    |
| >PTCH1-G11!GAFAVGLK    | 13    | >PTCH1-G11!GAFAVKLK    | 19   | 6     |
| >PTCH1-G11!GAFAVGLK    | 357   | >PTCH1-G11!GAFAVKLK    | 475  | 118   |
| >PTCH1-G11!GAFAVGLK    | 71    | >PTCH1-G11!GAFAVKLK    | 106  | 35    |
| >PTCH1-G11!FGAFAVGL    | 76    | >PTCH1-G11!FGAFAVKL    | 145  | 69    |
| >PTCH1-G11!FGAFAVGLK   | 104   | >PTCH1-G11!FGAFAVKLK   | 240  | 136   |
| >PTCH1-G11!FGAFAVGL    | 252   | >PTCH1-G11!FGAFAVKL    | 919  | 667   |
| >PTCH1-G11!IFGAFAVGLK  | 267   | >PTCH1-G11!IFGAFAVKLK  | 532  | 265   |
| >PTCH1-G11!IFGAFAVGL   | 492   | >PTCH1-G11!IFGAFAVKL   | 193  | 299   |
| >PTCH1-G11!IFGAFAVGLK  | 90    | >PTCH1-G11!IFGAFAVKLK  | 87   | 3     |
| >PTCH1-G11!IFGAFAVG    | 22813 | >PTCH1-G11!IFGAFAVK    | 115  | 22698 |
| >PTCH1-G11!IFGAFAVGLK  | 278   | >PTCH1-G11!IFGAFAVKLK  | 155  | 123   |
| >PTCH1-G11!LIFGAFAVGL  | 469   | >PTCH1-G11!LIFGAFAVKL  | 1292 | 823   |
| >PTCH1-G11!LIFGAFAVGL  | 48    | >PTCH1-G11!LIFGAFAVKL  | 66   | 18    |
| >PTCH1-G11!LIFGAFAVGL  | 129   | >PTCH1-G11!LIFGAFAVKL  | 277  | 148   |
| >PTCH1-G11!LIFGAFAVGL  | 126   | >PTCH1-G11!LIFGAFAVKL  | 311  | 185   |
| >PTCH1-G11!LIFGAFAVGL  | 17    | >PTCH1-G11!LIFGAFAVKL  | 36   | 19    |
| >PTCH1-G11!LIFGAFAVGL  | 103   | >PTCH1-G11!LIFGAFAVKL  | 188  | 85    |

|                       |       |                         |      |       |
|-----------------------|-------|-------------------------|------|-------|
| >PTCH1-G11!LIFGAFVGL  | 372   | >PTCH1-G11!LIFGAFVKL    | 1174 | 802   |
| >PTCH1-G11!LIFGAFVGL  | 6     | >PTCH1-G11!LIFGAFVKL    | 8    | 2     |
| >PTCH1-G11!LIFGAFVGL  | 18434 | >PTCH1-G11!LIFGAFVAVK   | 54   | 18380 |
| >PTCH1-G11!LIFGAFVGLI | 43    | >PTCH1-G11!LIFGAFVAVKLK | 63   | 20    |
| >PTCH1-G11!LIFGAFVGL  | 24851 | >PTCH1-G11!LIFGAFVAVK   | 31   | 24820 |
| >PTCH1-G11!LIFGAFVGLI | 24    | >PTCH1-G11!LIFGAFVAVKLK | 34   | 10    |
| >PTCH1-G11!LIFGAFVGL  | 7163  | >PTCH1-G11!LIFGAFVAVK   | 46   | 7117  |
| >PTCH1-G11!LIFGAFVGLI | 59    | >PTCH1-G11!LIFGAFVAVKLK | 69   | 10    |
| >PTCH1-G11!LIFGAFVGL  | 197   | >PTCH1-G11!LIFGAFVAVKL  | 175  | 22    |
| >PTCH1-G11!LIFGAFVGL  | 18090 | >PTCH1-G11!LIFGAFVAVK   | 29   | 18061 |
| >PTCH1-G11!LIFGAFVGLI | 19    | >PTCH1-G11!LIFGAFVAVKLK | 32   | 13    |
| >PTCH1-G11!LIFGAFVGL  | 258   | >PTCH1-G11!LIFGAFVAVKL  | 498  | 240   |
| >PTCH1-G11!LIFGAFVGL  | 278   | >PTCH1-G11!LIFGAFVAVKL  | 926  | 648   |
| >PTCH1-G11!LIFGAFVGL  | 259   | >PTCH1-G11!LIFGAFVAVK   | 3178 | 2919  |
| >PTCH1-G11!LIFGAFVGL  | 490   | >PTCH1-G11!LIFGAFVAVKL  | 1602 | 1112  |
| >PTCH1-G11!LLIFGAFVGL | 36    | >PTCH1-G11!LLIFGAFVAVKL | 55   | 19    |
| >PTCH1-G11!LLIFGAFVGL | 18    | >PTCH1-G11!LLIFGAFVAVKL | 21   | 3     |
| >PTCH1-G11!LLIFGAFVGL | 27    | >PTCH1-G11!LLIFGAFVAVKL | 44   | 17    |
| >PTCH1-G11!LLIFGAFVGL | 26    | >PTCH1-G11!LLIFGAFVAVKL | 72   | 46    |
| >PTCH1-G11!LLIFGAFVGL | 9     | >PTCH1-G11!LLIFGAFVAVKL | 18   | 9     |
| >PTCH1-G11!LLIFGAFVGL | 10    | >PTCH1-G11!LLIFGAFVAVKL | 28   | 18    |
| >PTCH1-G11!LLIFGAFVGL | 45    | >PTCH1-G11!LLIFGAFVAVKL | 68   | 23    |
| >PTCH1-G11!LLIFGAFVGL | 37    | >PTCH1-G11!LLIFGAFVAVKL | 115  | 78    |
| >PTCH1-G11!LLIFGAFVGL | 3     | >PTCH1-G11!LLIFGAFVAVKL | 4    | 1     |
| >PTCH1-G11!LLIFGAFVGL | 8598  | >PTCH1-G11!LLIFGAFVAVK  | 24   | 8574  |
| >PTCH1-G11!LLIFGAFVGL | 32764 | >PTCH1-G11!LLIFGAFVAVK  | 73   | 32691 |
| >PTCH1-G11!LLIFGAFVGL | 25387 | >PTCH1-G11!LLIFGAFVAVK  | 145  | 25242 |
| >PTCH1-G11!LLIFGAFVGL | 333   | >PTCH1-G11!LLIFGAFVAVK  | 3367 | 3034  |
| >PTCH1-G11!GVLNGLVLL  | 170   | >PTCH1-G11!SVLNGLVLL    | 84   | 86    |
| >PTCH1-G11!GVLNGLVLLP | 29    | >PTCH1-G11!SVLNGLVLLP   | 18   | 11    |
| >PTCH1-G11!GVLNGLVLL  | 711   | >PTCH1-G11!SVLNGLVLL    | 496  | 215   |
| >PTCH1-G11!GVLNGLVLLP | 659   | >PTCH1-G11!SVLNGLVLLP   | 475  | 184   |
| >PTCH1-G11!GVLNGLVLLP | 76    | >PTCH1-G11!SVLNGLVLLP   | 56   | 20    |
| >PTCH1-G11!GVLNGLVLL  | 307   | >PTCH1-G11!SVLNGLVLL    | 101  | 206   |
| >PTCH1-G11!GVLNGLVLL  | 23    | >PTCH1-G11!SVLNGLVLL    | 11   | 12    |
| >PTCH1-G11!GVLNGLVLLP | 7     | >PTCH1-G11!SVLNGLVLLP   | 5    | 2     |
| >PTCH1-G11!GVLNGLVLL  | 530   | >PTCH1-G11!SVLNGLVLL    | 209  | 321   |
| >PTCH1-G11!GVLNGLVLL  | 229   | >PTCH1-G11!SVLNGLVLL    | 91   | 138   |
| >PTCH1-G11!GVLNGLVLLP | 10    | >PTCH1-G11!SVLNGLVLLP   | 6    | 4     |
| >PTCH1-G11!GVLNGLVLL  | 398   | >PTCH1-G11!SVLNGLVLL    | 673  | 275   |
| >PTCH1-G11!GVLNGLVLL  | 156   | >PTCH1-G11!SVLNGLVLL    | 332  | 176   |
| >PTCH1-G11!GVLNGLVLLP | 14    | >PTCH1-G11!SVLNGLVLLP   | 21   | 7     |
| >PTCH1-G11!GVLNGLVLL  | 397   | >PTCH1-G11!SVLNGLVLL    | 165  | 232   |

|                        |      |                        |     |      |
|------------------------|------|------------------------|-----|------|
| >PTCH1-G11 GVLNGLVLL   | 101  | >PTCH1-G11 SVLNGLVLL   | 42  | 59   |
| >PTCH1-G11 GVLNGLVLLP  | 11   | >PTCH1-G11 SVLNGLVLLP  | 8   | 3    |
| >PTCH1-G11 GVLNGLVLLP  | 140  | >PTCH1-G11 SVLNGLVLLP  | 122 | 18   |
| >PTCH1-G11 GVLNGLVL    | 629  | >PTCH1-G11 SVLNGLVL    | 269 | 360  |
| >PTCH1-G11 GVLNGLVLL   | 106  | >PTCH1-G11 SVLNGLVLL   | 48  | 58   |
| >PTCH1-G11 GVLNGLVLLP  | 14   | >PTCH1-G11 SVLNGLVLLP  | 9   | 5    |
| >PTCH1-G11 GVLNGLVLLP  | 2195 | >PTCH1-G11 SVLNGLVLLP  | 444 | 1751 |
| >PTCH1-G11 GVLNGLVLLP  | 3756 | >PTCH1-G11 SVLNGLVLLP  | 83  | 3673 |
| >PTCH1-G11 GVLNGLVLL   | 5537 | >PTCH1-G11 SVLNGLVLL   | 141 | 5396 |
| >PTCH1-G11 GVLNGLVLLP  | 167  | >PTCH1-G11 SVLNGLVLLP  | 7   | 160  |
| >PTCH1-G11 GVLNGLVLL   | 245  | >PTCH1-G11 SVLNGLVLL   | 251 | 6    |
| >PTCH1-G11 LGVNGLVL    | 99   | >PTCH1-G11 LSVLNGLVL   | 43  | 56   |
| >PTCH1-G11 LGVNGLVL    | 5297 | >PTCH1-G11 LSVLNGLVL   | 453 | 4844 |
| >PTCH1-G11 LGVNGLVL    | 2114 | >PTCH1-G11 LSVLNGLVL   | 11  | 2103 |
| >PTCH1-G11 LGVNGLVLL   | 4557 | >PTCH1-G11 LSVLNGLVLL  | 17  | 4540 |
| >PTCH1-G11 LGVNGLVLL   | 5107 | >PTCH1-G11 LSVLNGLVLL  | 240 | 4867 |
| >PTCH1-G11 LGVNGLVLL   | 893  | >PTCH1-G11 LSVLNGLVLL  | 60  | 833  |
| >PTCH1-G11 ILGVLNGL    | 919  | >PTCH1-G11 ILSVLNGL    | 347 | 572  |
| >PTCH1-G11 ILGVLNGLV   | 1215 | >PTCH1-G11 ILSVLNGLV   | 462 | 753  |
| >PTCH1-G11 ILGVLNGLVL  | 654  | >PTCH1-G11 ILSVLNGLVL  | 469 | 185  |
| >PTCH1-G11 ILGVLNGLVLL | 381  | >PTCH1-G11 ILSVLNGLVLL | 156 | 225  |
| >PTCH1-G11 ILGVLNGL    | 58   | >PTCH1-G11 ILSVLNGL    | 7   | 51   |
| >PTCH1-G11 ILGVLNGLV   | 97   | >PTCH1-G11 ILSVLNGLV   | 10  | 87   |
| >PTCH1-G11 ILGVLNGLVL  | 210  | >PTCH1-G11 ILSVLNGLVL  | 100 | 110  |
| >PTCH1-G11 ILGVLNGLVLL | 56   | >PTCH1-G11 ILSVLNGLVLL | 7   | 49   |
| >PTCH1-G11 ILGVLNGL    | 538  | >PTCH1-G11 ILSVLNGL    | 63  | 475  |
| >PTCH1-G11 ILGVLNGLV   | 187  | >PTCH1-G11 ILSVLNGLV   | 22  | 165  |
| >PTCH1-G11 ILGVLNGLVL  | 649  | >PTCH1-G11 ILSVLNGLVL  | 322 | 327  |
| >PTCH1-G11 ILGVLNGLVLL | 777  | >PTCH1-G11 ILSVLNGLVLL | 95  | 682  |
| >PTCH1-G11 ILGVLNGL    | 912  | >PTCH1-G11 ILSVLNGL    | 334 | 578  |
| >PTCH1-G11 ILGVLNGLVLL | 1426 | >PTCH1-G11 ILSVLNGLVLL | 491 | 935  |
| >PTCH1-G11 ILGVLNGL    | 69   | >PTCH1-G11 ILSVLNGL    | 112 | 43   |
| >PTCH1-G11 ILGVLNGLV   | 36   | >PTCH1-G11 ILSVLNGLV   | 61  | 25   |
| >PTCH1-G11 ILGVLNGLVL  | 303  | >PTCH1-G11 ILSVLNGLVL  | 461 | 158  |
| >PTCH1-G11 ILGVLNGLVLL | 111  | >PTCH1-G11 ILSVLNGLVLL | 172 | 61   |
| >PTCH1-G11 ILGVLNGL    | 131  | >PTCH1-G11 ILSVLNGL    | 176 | 45   |
| >PTCH1-G11 ILGVLNGLV   | 423  | >PTCH1-G11 ILSVLNGLV   | 617 | 194  |
| >PTCH1-G11 ILGVLNGLVLL | 333  | >PTCH1-G11 ILSVLNGLVLL | 444 | 111  |
| >PTCH1-G11 ILGVLNGL    | 150  | >PTCH1-G11 ILSVLNGL    | 188 | 38   |
| >PTCH1-G11 ILGVLNGLV   | 65   | >PTCH1-G11 ILSVLNGLV   | 72  | 7    |
| >PTCH1-G11 ILGVLNGLVLL | 143  | >PTCH1-G11 ILSVLNGLVLL | 173 | 30   |
| >PTCH1-G11 ILGVLNGL    | 140  | >PTCH1-G11 ILSVLNGL    | 107 | 33   |
| >PTCH1-G11 ILGVLNGLV   | 260  | >PTCH1-G11 ILSVLNGLV   | 205 | 55   |

|                        |     |                        |      |     |
|------------------------|-----|------------------------|------|-----|
| >PTCH1-G11 ILGVLNGLVLL | 377 | >PTCH1-G11 ILSVLNGLVLL | 274  | 103 |
| >PTCH1-G11 ILGVLNGL    | 21  | >PTCH1-G11 ILSVLNGL    | 15   | 6   |
| >PTCH1-G11 ILGVLNGLV   | 9   | >PTCH1-G11 ILSVLNGLV   | 8    | 1   |
| >PTCH1-G11 ILGVLNGLVL  | 77  | >PTCH1-G11 ILSVLNGLVL  | 53   | 24  |
| >PTCH1-G11 ILGVLNGLVLL | 20  | >PTCH1-G11 ILSVLNGLVLL | 15   | 5   |
| >PTCH1-G11 TILGVLNGL   | 311 | >PTCH1-G11 TILSVLNGL   | 236  | 75  |
| >PTCH1-G11 TILGVLNGLV  | 247 | >PTCH1-G11 TILSVLNGLV  | 310  | 63  |
| >PTCH1-G11 TILGVLNGL   | 137 | >PTCH1-G11 TILSVLNGL   | 112  | 25  |
| >PTCH1-G11 TILGVLNGLV  | 289 | >PTCH1-G11 TILSVLNGLV  | 173  | 116 |
| >PTCH1-G11 TILGVLNGL   | 349 | >PTCH1-G11 TILSVLNGL   | 238  | 111 |
| >PTCH1-G11 TILGVLNGLV  | 74  | >PTCH1-G11 TILSVLNGLV  | 59   | 15  |
| >PTCH1-G11 TILGVLNGL   | 26  | >PTCH1-G11 TILSVLNGL   | 32   | 6   |
| >PTCH1-G11 TILGVLNGLV  | 80  | >PTCH1-G11 TILSVLNGLV  | 101  | 21  |
| >PTCH1-G11 TILGVLNGLVI | 339 | >PTCH1-G11 TILSVLNGLVL | 419  | 80  |
| >PTCH1-G11 TILGVLNGL   | 37  | >PTCH1-G11 TILSVLNGL   | 84   | 47  |
| >PTCH1-G11 TILGVLNGLV  | 29  | >PTCH1-G11 TILSVLNGLV  | 45   | 16  |
| >PTCH1-G11 TILGVLNGLVI | 173 | >PTCH1-G11 TILSVLNGLVL | 328  | 155 |
| >PTCH1-G11 TILGVLNGL   | 592 | >PTCH1-G11 TILSVLNGL   | 497  | 95  |
| >PTCH1-G11 TILGVLNGL   | 147 | >PTCH1-G11 TILSVLNGL   | 273  | 126 |
| >PTCH1-G11 TILGVLNGLV  | 67  | >PTCH1-G11 TILSVLNGLV  | 94   | 27  |
| >PTCH1-G11 TILGVLNGL   | 136 | >PTCH1-G11 TILSVLNGL   | 334  | 198 |
| >PTCH1-G11 TILGVLNGLV  | 272 | >PTCH1-G11 TILSVLNGLV  | 361  | 89  |
| >PTCH1-G11 TILGVLNGL   | 153 | >PTCH1-G11 TILSVLNGL   | 572  | 419 |
| >PTCH1-G11 TILGVLNGLV  | 37  | >PTCH1-G11 TILSVLNGLV  | 113  | 76  |
| >PTCH1-G11 TILGVLNGLVI | 459 | >PTCH1-G11 TILSVLNGLVL | 1392 | 933 |
| >PTCH1-G11 TILGVLNGL   | 272 | >PTCH1-G11 TILSVLNGL   | 406  | 134 |
| >PTCH1-G11 TILGVLNGL   | 158 | >PTCH1-G11 TILSVLNGL   | 194  | 36  |
| >PTCH1-G11 TILGVLNGL   | 98  | >PTCH1-G11 TILSVLNGL   | 58   | 40  |
| >PTCH1-G11 TILGVLNGLV  | 27  | >PTCH1-G11 TILSVLNGLV  | 20   | 7   |
| >PTCH1-G11 TILGVLNGLVI | 464 | >PTCH1-G11 TILSVLNGLVL | 489  | 25  |
| >PTCH1-G11 LTILGVLNGL  | 210 | >PTCH1-G11 LTILSVLNGL  | 238  | 28  |
| >PTCH1-G11 LTILGVLNGL  | 377 | >PTCH1-G11 LTILSVLNGL  | 345  | 32  |
| >PTCH1-G11 LTILGVLNGL\ | 229 | >PTCH1-G11 LTILSVLNGLV | 219  | 10  |
| >PTCH1-G11 LTILGVLNGL  | 133 | >PTCH1-G11 LTILSVLNGL  | 104  | 29  |
| >PTCH1-G11 LTILGVLNGL\ | 185 | >PTCH1-G11 LTILSVLNGLV | 274  | 89  |
| >PTCH1-G11 LTILGVLNGL  | 54  | >PTCH1-G11 LTILSVLNGL  | 71   | 17  |
| >PTCH1-G11 LTILGVLNGL  | 213 | >PTCH1-G11 LTILSVLNGL  | 245  | 32  |
| >PTCH1-G11 LTILGVLNGL  | 496 | >PTCH1-G11 LTILSVLNGL  | 494  | 2   |
| >PTCH1-G11 LTILGVLNGL\ | 47  | >PTCH1-G11 LTILSVLNGLV | 42   | 5   |
| >PTCH1-G11 LTILGVLNGL\ | 218 | >PTCH1-G11 LTILSVLNGLV | 291  | 73  |
| >PTCH1-G11 LTILGVLNGL  | 16  | >PTCH1-G11 LTILSVLNGL  | 14   | 2   |
| >PTCH1-G11 LTILGVLNGL\ | 431 | >PTCH1-G11 LTILSVLNGLV | 250  | 181 |
| >PTCH1-G11 LTILGVLNGL  | 783 | >PTCH1-G11 LTILSVLNGL  | 246  | 537 |



|                        |      |                        |     |      |
|------------------------|------|------------------------|-----|------|
| >PTCH1-G11 LTILGVLNGL  | 76   | >PTCH1-G11 LTILSVLNGL  | 57  | 19   |
| >PTCH1-G11 LTILGVLNGL\ | 290  | >PTCH1-G11 LTILSVLNGLV | 358 | 68   |
| >PTCH1-G11 ILTILGVLNGL | 646  | >PTCH1-G11 ILTILSVLNGL | 316 | 330  |
| >PTCH1-G11 ILTILGVL    | 230  | >PTCH1-G11 ILTILSVL    | 66  | 164  |
| >PTCH1-G11 ILTILGVLNGL | 34   | >PTCH1-G11 ILTILSVLNGL | 18  | 16   |
| >PTCH1-G11 ILTILGVL    | 419  | >PTCH1-G11 ILTILSVL    | 199 | 220  |
| >PTCH1-G11 ILTILGVLNGL | 203  | >PTCH1-G11 ILTILSVLNGL | 152 | 51   |
| >PTCH1-G11 ILTILGVLNGL | 331  | >PTCH1-G11 ILTILSVLNGL | 256 | 75   |
| >PTCH1-G11 ILTILGVL    | 130  | >PTCH1-G11 ILTILSVL    | 76  | 54   |
| >PTCH1-G11 ILTILGVLNGL | 39   | >PTCH1-G11 ILTILSVLNGL | 40  | 1    |
| >PTCH1-G11 ILTILGVL    | 1174 | >PTCH1-G11 ILTILSVL    | 278 | 896  |
| >PTCH1-G11 ILTILGVLNGL | 264  | >PTCH1-G11 ILTILSVLNGL | 162 | 102  |
| >PTCH1-G11 ILTILGVL    | 251  | >PTCH1-G11 ILTILSVL    | 84  | 167  |
| >PTCH1-G11 ILTILGVLNGL | 42   | >PTCH1-G11 ILTILSVLNGL | 32  | 10   |
| >PTCH1-G11 ILTILGVLNGL | 913  | >PTCH1-G11 ILTILSVLNGL | 434 | 479  |
| >PTCH1-G11 ILTILGVL    | 17   | >PTCH1-G11 ILTILSVL    | 7   | 10   |
| >PTCH1-G11 ILTILGVLNGL | 7    | >PTCH1-G11 ILTILSVLNGL | 7   | 0    |
| >PTCH1-G11 AILTILGV    | 35   | >PTCH1-G11 AILTILSV    | 23  | 12   |
| >PTCH1-G11 AILTILGVL   | 1613 | >PTCH1-G11 AILTILSVL   | 379 | 1234 |
| >PTCH1-G11 AILTILGV    | 249  | >PTCH1-G11 AILTILSV    | 151 | 98   |
| >PTCH1-G11 AILTILGVL   | 844  | >PTCH1-G11 AILTILSVL   | 273 | 571  |
| >PTCH1-G11 AILTILGV    | 53   | >PTCH1-G11 AILTILSV    | 39  | 14   |
| >PTCH1-G11 AILTILGVL   | 538  | >PTCH1-G11 AILTILSVL   | 210 | 328  |
| >PTCH1-G11 AILTILGV    | 10   | >PTCH1-G11 AILTILSV    | 10  | 0    |
| >PTCH1-G11 AILTILGVL   | 338  | >PTCH1-G11 AILTILSVL   | 98  | 240  |
| >PTCH1-G11 AILTILGV    | 6    | >PTCH1-G11 AILTILSV    | 6   | 0    |
| >PTCH1-G11 AILTILGVL   | 460  | >PTCH1-G11 AILTILSVL   | 189 | 271  |
| >PTCH1-G11 AILTILGV    | 39   | >PTCH1-G11 AILTILSV    | 38  | 1    |
| >PTCH1-G11 AILTILGV    | 14   | >PTCH1-G11 AILTILSV    | 14  | 0    |
| >PTCH1-G11 AILTILGV    | 15   | >PTCH1-G11 AILTILSV    | 13  | 2    |
| >PTCH1-G11 AILTILGV    | 5    | >PTCH1-G11 AILTILSV    | 3   | 2    |
| >PTCH1-G11 AILTILGVL   | 867  | >PTCH1-G11 AILTILSVL   | 108 | 759  |
| >PTCH1-G11 AILTILGVL   | 441  | >PTCH1-G11 AILTILSVL   | 343 | 98   |
| >PTCH1-G11 AILTILGV    | 126  | >PTCH1-G11 AILTILSV    | 252 | 126  |
| >PTCH1-G11 AILTILGVL   | 1142 | >PTCH1-G11 AILTILSVL   | 93  | 1049 |
| >PTCH1-G11 LAILTILGVL  | 877  | >PTCH1-G11 LAILTILSVL  | 437 | 440  |
| >PTCH1-G11 LAILTILGV   | 347  | >PTCH1-G11 LAILTILSV   | 325 | 22   |
| >PTCH1-G11 LAILTILGV   | 38   | >PTCH1-G11 LAILTILSV   | 48  | 10   |
| >PTCH1-G11 LAILTILGVL  | 515  | >PTCH1-G11 LAILTILSVL  | 327 | 188  |
| >PTCH1-G11 LAILTILGV   | 248  | >PTCH1-G11 LAILTILSV   | 334 | 86   |
| >PTCH1-G11 LAILTILGV   | 136  | >PTCH1-G11 LAILTILSV   | 95  | 41   |
| >PTCH1-G11 LAILTILGV   | 280  | >PTCH1-G11 LAILTILSV   | 594 | 314  |
| >PTCH1-G11 LAILTILGV   | 423  | >PTCH1-G11 LAILTILSV   | 546 | 123  |

|                        |      |                        |     |      |
|------------------------|------|------------------------|-----|------|
| >PTCH1-G11 LAILTILGVL  | 205  | >PTCH1-G11 LAILTILSVL  | 69  | 136  |
| >PTCH1-G11 VLAILTILGV  | 39   | >PTCH1-G11 VLAILTILSV  | 30  | 9    |
| >PTCH1-G11 VLAILTILGVL | 414  | >PTCH1-G11 VLAILTILSVL | 166 | 248  |
| >PTCH1-G11 VLAILTILG   | 950  | >PTCH1-G11 VLAILTILS   | 487 | 463  |
| >PTCH1-G11 VLAILTILGV  | 54   | >PTCH1-G11 VLAILTILSV  | 44  | 10   |
| >PTCH1-G11 VLAILTILGVL | 37   | >PTCH1-G11 VLAILTILSVL | 16  | 21   |
| >PTCH1-G11 VLAILTILGV  | 24   | >PTCH1-G11 VLAILTILSV  | 21  | 3    |
| >PTCH1-G11 VLAILTILGVL | 58   | >PTCH1-G11 VLAILTILSVL | 32  | 26   |
| >PTCH1-G11 VLAILTILGV  | 83   | >PTCH1-G11 VLAILTILSV  | 83  | 0    |
| >PTCH1-G11 VLAILTILGV  | 2    | >PTCH1-G11 VLAILTILSV  | 3   | 1    |
| >PTCH1-G11 VLAILTILGVL | 43   | >PTCH1-G11 VLAILTILSVL | 26  | 17   |
| >PTCH1-G11 VLAILTILGV  | 12   | >PTCH1-G11 VLAILTILSV  | 14  | 2    |
| >PTCH1-G11 VLAILTILGVL | 416  | >PTCH1-G11 VLAILTILSVL | 116 | 300  |
| >PTCH1-G11 VLAILTILGV  | 4    | >PTCH1-G11 VLAILTILSV  | 5   | 1    |
| >PTCH1-G11 VLAILTILGVL | 51   | >PTCH1-G11 VLAILTILSVL | 24  | 27   |
| >PTCH1-G11 VLAILTILGV  | 4    | >PTCH1-G11 VLAILTILSV  | 5   | 1    |
| >PTCH1-G11 VLAILTILGVL | 214  | >PTCH1-G11 VLAILTILSVL | 49  | 165  |
| >PTCH1-G11 VLAILTILGV  | 2    | >PTCH1-G11 VLAILTILSV  | 2   | 0    |
| >PTCH1-G11 VLAILTILGVL | 10   | >PTCH1-G11 VLAILTILSVL | 5   | 5    |
| >PTCH1-G11 VLAILTILGV  | 339  | >PTCH1-G11 VLAILTILSV  | 504 | 165  |
| >PTCH1-G11 AVLAILTILGV | 31   | >PTCH1-G11 AVLAILTILSV | 28  | 3    |
| >PTCH1-G11 AVLAILTILGV | 190  | >PTCH1-G11 AVLAILTILSV | 151 | 39   |
| >PTCH1-G11 AVLAILTILGV | 54   | >PTCH1-G11 AVLAILTILSV | 50  | 4    |
| >PTCH1-G11 AVLAILTILGV | 6    | >PTCH1-G11 AVLAILTILSV | 7   | 1    |
| >PTCH1-G11 AVLAILTILGV | 9    | >PTCH1-G11 AVLAILTILSV | 10  | 1    |
| >PTCH1-G11 AVLAILTILGV | 54   | >PTCH1-G11 AVLAILTILSV | 82  | 28   |
| >PTCH1-G11 AVLAILTILGV | 14   | >PTCH1-G11 AVLAILTILSV | 19  | 5    |
| >PTCH1-G11 AVLAILTILGV | 15   | >PTCH1-G11 AVLAILTILSV | 23  | 8    |
| >PTCH1-G11 AVLAILTILGV | 6    | >PTCH1-G11 AVLAILTILSV | 5   | 1    |
| >PTCH1-G11 AVLAILTILGV | 1111 | >PTCH1-G11 AVLAILTILSV | 335 | 776  |
| >PTCH1-G11 AVLAILTILGV | 1730 | >PTCH1-G11 AVLAILTILSV | 446 | 1284 |
| >PTCH1-G11 AVLAILTILGV | 347  | >PTCH1-G11 AVLAILTILSV | 476 | 129  |
| >PTCH1-G11 AVLAILTILGV | 35   | >PTCH1-G11 AVLAILTILSV | 62  | 27   |
| >PTCH1-G11 GLVLLPV     | 408  | >PTCH1-G11 RLVLLPV     | 304 | 104  |
| >PTCH1-G11 GLVLLPVLL   | 340  | >PTCH1-G11 RLVLLPVLL   | 258 | 82   |
| >PTCH1-G11 GLVLLPV     | 286  | >PTCH1-G11 RLVLLPV     | 311 | 25   |
| >PTCH1-G11 GLVLLPVLL   | 146  | >PTCH1-G11 RLVLLPVLL   | 159 | 13   |
| >PTCH1-G11 GLVLLPV     | 370  | >PTCH1-G11 RLVLLPV     | 210 | 160  |
| >PTCH1-G11 GLVLLPVLL   | 542  | >PTCH1-G11 RLVLLPVLL   | 292 | 250  |
| >PTCH1-G11 GLVLLPV     | 786  | >PTCH1-G11 RLVLLPV     | 337 | 449  |
| >PTCH1-G11 GLVLLPV     | 95   | >PTCH1-G11 RLVLLPV     | 45  | 50   |
| >PTCH1-G11 GLVLLPVLL   | 151  | >PTCH1-G11 RLVLLPVLL   | 71  | 80   |
| >PTCH1-G11 GLVLLPV     | 84   | >PTCH1-G11 RLVLLPV     | 155 | 71   |

|                        |       |                        |      |       |
|------------------------|-------|------------------------|------|-------|
| >PTCH1-G11 GLVLLPVLL   | 206   | >PTCH1-G11 RLVLLPVLL   | 415  | 209   |
| >PTCH1-G11 GLVLLPV     | 65    | >PTCH1-G11 RLVLLPV     | 120  | 55    |
| >PTCH1-G11 GLVLLPVLL   | 118   | >PTCH1-G11 RLVLLPVLL   | 227  | 109   |
| >PTCH1-G11 GLVLLPV     | 34    | >PTCH1-G11 RLVLLPV     | 41   | 7     |
| >PTCH1-G11 GLVLLPVLL   | 54    | >PTCH1-G11 RLVLLPVLL   | 69   | 15    |
| >PTCH1-G11 GLVLLPV     | 7066  | >PTCH1-G11 RLVLLPV     | 286  | 6780  |
| >PTCH1-G11 GLVLLPVLL   | 2339  | >PTCH1-G11 RLVLLPVLL   | 57   | 2282  |
| >PTCH1-G11 GLVLLPVLLSF | 311   | >PTCH1-G11 RLVLLPVLLSF | 14   | 297   |
| >PTCH1-G11 GLVLLPVLLSF | 335   | >PTCH1-G11 RLVLLPVLLSF | 107  | 228   |
| >PTCH1-G11 GLVLLPVLLSF | 604   | >PTCH1-G11 RLVLLPVLLSF | 46   | 558   |
| >PTCH1-G11 GLVLLPVLLSF | 1585  | >PTCH1-G11 RLVLLPVLLSF | 58   | 1527  |
| >PTCH1-G11 GLVLLPVLLSF | 8248  | >PTCH1-G11 RLVLLPVLLSF | 195  | 8053  |
| >PTCH1-G11 GLVLLPVLL   | 971   | >PTCH1-G11 RLVLLPVLL   | 129  | 842   |
| >PTCH1-G11 NGLVLLPV    | 458   | >PTCH1-G11 NRLVLLPV    | 2925 | 2467  |
| >PTCH1-G11 NGLVLLPV    | 330   | >PTCH1-G11 NRLVLLPV    | 5056 | 4726  |
| >PTCH1-G11 NGLVLLPV    | 22955 | >PTCH1-G11 NRLVLLPV    | 193  | 22762 |
| >PTCH1-G11 NGLVLLPV    | 23628 | >PTCH1-G11 NRLVLLPV    | 158  | 23470 |
| >PTCH1-G11 NGLVLLPVLL  | 19849 | >PTCH1-G11 NRLVLLPVLL  | 36   | 19813 |
| >PTCH1-G11 NGLVLLPV    | 4851  | >PTCH1-G11 NRLVLLPV    | 56   | 4795  |
| >PTCH1-G11 NGLVLLPVLL  | 5378  | >PTCH1-G11 NRLVLLPVLL  | 79   | 5299  |
| >PTCH1-G11 NGLVLLPV    | 20255 | >PTCH1-G11 NRLVLLPV    | 85   | 20170 |
| >PTCH1-G11 NGLVLLPVLL  | 25743 | >PTCH1-G11 NRLVLLPVLL  | 214  | 25529 |
| >PTCH1-G11 NGLVLLPV    | 17136 | >PTCH1-G11 NRLVLLPV    | 217  | 16919 |
| >PTCH1-G11 NGLVLLPV    | 15886 | >PTCH1-G11 NRLVLLPV    | 12   | 15874 |
| >PTCH1-G11 NGLVLLPVLL  | 21517 | >PTCH1-G11 NRLVLLPVLL  | 79   | 21438 |
| >PTCH1-G11 AILTILGVLNG | 23437 | >PTCH1-G11 AILTILGVLNR | 157  | 23280 |
| >PTCH1-G11 AILTILGVLNG | 19839 | >PTCH1-G11 AILTILGVLNR | 125  | 19714 |
| >PTCH1-G11 AILTILGVLNG | 34038 | >PTCH1-G11 AILTILGVLNR | 304  | 33734 |
| >PTCH1-G11 VLNGLVLL    | 43    | >PTCH1-G11 VLNRLVLL    | 112  | 69    |
| >PTCH1-G11 VLNGLVLLPV  | 23    | >PTCH1-G11 VLNRLVLLPV  | 48   | 25    |
| >PTCH1-G11 VLNGLVLLPV  | 58    | >PTCH1-G11 VLNRLVLLPVI | 147  | 89    |
| >PTCH1-G11 VLNGLVLL    | 8     | >PTCH1-G11 VLNRLVLL    | 16   | 8     |
| >PTCH1-G11 VLNGLVLLPV  | 28    | >PTCH1-G11 VLNRLVLLPV  | 70   | 42    |
| >PTCH1-G11 VLNGLVLLPV  | 31    | >PTCH1-G11 VLNRLVLLPVI | 77   | 46    |
| >PTCH1-G11 VLNGLVLL    | 18    | >PTCH1-G11 VLNRLVLL    | 29   | 11    |
| >PTCH1-G11 VLNGLVLLPV  | 16    | >PTCH1-G11 VLNRLVLLPV  | 22   | 6     |
| >PTCH1-G11 VLNGLVLLPV  | 32    | >PTCH1-G11 VLNRLVLLPVI | 53   | 21    |
| >PTCH1-G11 VLNGLVLLPV  | 76    | >PTCH1-G11 VLNRLVLLPV  | 168  | 92    |
| >PTCH1-G11 VLNGLVLL    | 6     | >PTCH1-G11 VLNRLVLL    | 14   | 8     |
| >PTCH1-G11 VLNGLVLLPV  | 2     | >PTCH1-G11 VLNRLVLLPV  | 2    | 0     |
| >PTCH1-G11 VLNGLVLLPV  | 6     | >PTCH1-G11 VLNRLVLLPVI | 11   | 5     |
| >PTCH1-G11 VLNGLVLL    | 59    | >PTCH1-G11 VLNRLVLL    | 64   | 5     |
| >PTCH1-G11 VLNGLVLLPV  | 6     | >PTCH1-G11 VLNRLVLLPV  | 6    | 0     |

|                        |     |                        |      |      |
|------------------------|-----|------------------------|------|------|
| >PTCH1-G11 VLNGLVLLPV  | 69  | >PTCH1-G11 VLNRLVLLPV  | 59   | 10   |
| >PTCH1-G11 VLNGLVLL    | 14  | >PTCH1-G11 VLNRLVLL    | 34   | 20   |
| >PTCH1-G11 VLNGLVLLPV  | 5   | >PTCH1-G11 VLNRLVLLPV  | 6    | 1    |
| >PTCH1-G11 VLNGLVLLPV  | 11  | >PTCH1-G11 VLNRLVLLPV  | 20   | 9    |
| >PTCH1-G11 VLNGLVLL    | 18  | >PTCH1-G11 VLNRLVLL    | 156  | 138  |
| >PTCH1-G11 VLNGLVLLPV  | 4   | >PTCH1-G11 VLNRLVLLPV  | 7    | 3    |
| >PTCH1-G11 VLNGLVLLPV  | 11  | >PTCH1-G11 VLNRLVLLPV  | 43   | 32   |
| >PTCH1-G11 VLNGLVLL    | 2   | >PTCH1-G11 VLNRLVLL    | 5    | 3    |
| >PTCH1-G11 VLNGLVLLPV  | 2   | >PTCH1-G11 VLNRLVLLPV  | 2    | 0    |
| >PTCH1-G11 VLNGLVLLPV  | 3   | >PTCH1-G11 VLNRLVLLPV  | 6    | 3    |
| >PTCH1-G11 GVLNGLVLL   | 170 | >PTCH1-G11 GVLNRLVLL   | 305  | 135  |
| >PTCH1-G11 GVLNGLVLLPV | 29  | >PTCH1-G11 GVLNRLVLLPV | 41   | 12   |
| >PTCH1-G11 GVLNGLVLLPV | 76  | >PTCH1-G11 GVLNRLVLLPV | 86   | 10   |
| >PTCH1-G11 GVLNGLVLL   | 307 | >PTCH1-G11 GVLNRLVLL   | 659  | 352  |
| >PTCH1-G11 GVLNGLVLL   | 23  | >PTCH1-G11 GVLNRLVLL   | 34   | 11   |
| >PTCH1-G11 GVLNGLVLLPV | 7   | >PTCH1-G11 GVLNRLVLLPV | 8    | 1    |
| >PTCH1-G11 GVLNGLVLL   | 229 | >PTCH1-G11 GVLNRLVLL   | 692  | 463  |
| >PTCH1-G11 GVLNGLVLLPV | 10  | >PTCH1-G11 GVLNRLVLLPV | 18   | 8    |
| >PTCH1-G11 GVLNGLVLL   | 398 | >PTCH1-G11 GVLNRLVLL   | 1395 | 997  |
| >PTCH1-G11 GVLNGLVLL   | 156 | >PTCH1-G11 GVLNRLVLL   | 429  | 273  |
| >PTCH1-G11 GVLNGLVLLPV | 14  | >PTCH1-G11 GVLNRLVLLPV | 19   | 5    |
| >PTCH1-G11 GVLNGLVLL   | 397 | >PTCH1-G11 GVLNRLVLL   | 1654 | 1257 |
| >PTCH1-G11 GVLNGLVLL   | 101 | >PTCH1-G11 GVLNRLVLL   | 413  | 312  |
| >PTCH1-G11 GVLNGLVLLPV | 11  | >PTCH1-G11 GVLNRLVLLPV | 18   | 7    |
| >PTCH1-G11 GVLNGLVLLPV | 140 | >PTCH1-G11 GVLNRLVLLPV | 560  | 420  |
| >PTCH1-G11 GVLNGLVLL   | 106 | >PTCH1-G11 GVLNRLVLL   | 299  | 193  |
| >PTCH1-G11 GVLNGLVLLPV | 14  | >PTCH1-G11 GVLNRLVLLPV | 27   | 13   |
| >PTCH1-G11 GVLNGLVLLPV | 167 | >PTCH1-G11 GVLNRLVLLPV | 583  | 416  |
| >PTCH1-G11 GVLNGLVLL   | 245 | >PTCH1-G11 GVLNRLVLL   | 559  | 314  |
| >PTCH1-G11 LGVLNGLVLL  | 99  | >PTCH1-G11 LGVLNRLVLL  | 213  | 114  |
| >PTCH1-G11 ILGVLNGLVLL | 381 | >PTCH1-G11 ILGVLNRLVLL | 473  | 92   |
| >PTCH1-G11 ILGVLNGLVLL | 58  | >PTCH1-G11 ILGVLNRLVLL | 96   | 38   |
| >PTCH1-G11 ILGVLNGLVLL | 97  | >PTCH1-G11 ILGVLNRLVLL | 184  | 87   |
| >PTCH1-G11 ILGVLNGLVLL | 210 | >PTCH1-G11 ILGVLNRLVLL | 185  | 25   |
| >PTCH1-G11 ILGVLNGLVLL | 56  | >PTCH1-G11 ILGVLNRLVLL | 72   | 16   |
| >PTCH1-G11 ILGVLNGLVLL | 187 | >PTCH1-G11 ILGVLNRLVLL | 585  | 398  |
| >PTCH1-G11 ILGVLNGLVLL | 69  | >PTCH1-G11 ILGVLNRLVLL | 101  | 32   |
| >PTCH1-G11 ILGVLNGLVLL | 36  | >PTCH1-G11 ILGVLNRLVLL | 39   | 3    |
| >PTCH1-G11 ILGVLNGLVLL | 303 | >PTCH1-G11 ILGVLNRLVLL | 916  | 613  |
| >PTCH1-G11 ILGVLNGLVLL | 111 | >PTCH1-G11 ILGVLNRLVLL | 161  | 50   |
| >PTCH1-G11 ILGVLNGLVLL | 131 | >PTCH1-G11 ILGVLNRLVLL | 416  | 285  |
| >PTCH1-G11 ILGVLNGLVLL | 423 | >PTCH1-G11 ILGVLNRLVLL | 499  | 76   |
| >PTCH1-G11 ILGVLNGLVLL | 333 | >PTCH1-G11 ILGVLNRLVLL | 454  | 121  |

|                        |       |                        |      |       |
|------------------------|-------|------------------------|------|-------|
| >PTCH1-G11 ILGVLNGL    | 150   | >PTCH1-G11 ILGVLNRL    | 441  | 291   |
| >PTCH1-G11 ILGVLNGLV   | 65    | >PTCH1-G11 ILGVLNRLV   | 133  | 68    |
| >PTCH1-G11 ILGVLNGLVLI | 143   | >PTCH1-G11 ILGVLNRLVLL | 280  | 137   |
| >PTCH1-G11 ILGVLNGL    | 140   | >PTCH1-G11 ILGVLNRL    | 453  | 313   |
| >PTCH1-G11 ILGVLNGLV   | 260   | >PTCH1-G11 ILGVLNRLV   | 259  | 1     |
| >PTCH1-G11 ILGVLNGLVLI | 377   | >PTCH1-G11 ILGVLNRLVLL | 783  | 406   |
| >PTCH1-G11 ILGVLNGL    | 21    | >PTCH1-G11 ILGVLNRL    | 20   | 1     |
| >PTCH1-G11 ILGVLNGLV   | 9     | >PTCH1-G11 ILGVLNRLV   | 13   | 4     |
| >PTCH1-G11 ILGVLNGLVL  | 77    | >PTCH1-G11 ILGVLNRLVL  | 84   | 7     |
| >PTCH1-G11 ILGVLNGLVLI | 20    | >PTCH1-G11 ILGVLNRLVLL | 29   | 9     |
| >PTCH1-G11 TILGVLNGL   | 311   | >PTCH1-G11 TILGVLNRL   | 483  | 172   |
| >PTCH1-G11 TILGVLNGLV  | 247   | >PTCH1-G11 TILGVLNRLV  | 372  | 125   |
| >PTCH1-G11 TILGVLNGL   | 137   | >PTCH1-G11 TILGVLNRL   | 181  | 44    |
| >PTCH1-G11 TILGVLNGLV  | 289   | >PTCH1-G11 TILGVLNRLV  | 389  | 100   |
| >PTCH1-G11 TILGVLNGL   | 349   | >PTCH1-G11 TILGVLNRL   | 1026 | 677   |
| >PTCH1-G11 TILGVLNGLV  | 74    | >PTCH1-G11 TILGVLNRLV  | 132  | 58    |
| >PTCH1-G11 TILGVLNGL   | 26    | >PTCH1-G11 TILGVLNRL   | 116  | 90    |
| >PTCH1-G11 TILGVLNGLV  | 80    | >PTCH1-G11 TILGVLNRLV  | 102  | 22    |
| >PTCH1-G11 TILGVLNGLVI | 339   | >PTCH1-G11 TILGVLNRLVI | 587  | 248   |
| >PTCH1-G11 TILGVLNGL   | 37    | >PTCH1-G11 TILGVLNRL   | 59   | 22    |
| >PTCH1-G11 TILGVLNGLV  | 29    | >PTCH1-G11 TILGVLNRLV  | 32   | 3     |
| >PTCH1-G11 TILGVLNGLVI | 173   | >PTCH1-G11 TILGVLNRLVI | 473  | 300   |
| >PTCH1-G11 TILGVLNGL   | 147   | >PTCH1-G11 TILGVLNRL   | 435  | 288   |
| >PTCH1-G11 TILGVLNGLV  | 67    | >PTCH1-G11 TILGVLNRLV  | 115  | 48    |
| >PTCH1-G11 TILGVLNGL   | 136   | >PTCH1-G11 TILGVLNRL   | 729  | 593   |
| >PTCH1-G11 TILGVLNGLV  | 272   | >PTCH1-G11 TILGVLNRLV  | 313  | 41    |
| >PTCH1-G11 TILGVLNGL   | 153   | >PTCH1-G11 TILGVLNRL   | 112  | 41    |
| >PTCH1-G11 TILGVLNGLV  | 37    | >PTCH1-G11 TILGVLNRLV  | 47   | 10    |
| >PTCH1-G11 TILGVLNGLVI | 459   | >PTCH1-G11 TILGVLNRLVI | 404  | 55    |
| >PTCH1-G11 TILGVLNG    | 23635 | >PTCH1-G11 TILGVLNR    | 120  | 23515 |
| >PTCH1-G11 TILGVLNGL   | 272   | >PTCH1-G11 TILGVLNRL   | 320  | 48    |
| >PTCH1-G11 TILGVLNG    | 22320 | >PTCH1-G11 TILGVLNR    | 192  | 22128 |
| >PTCH1-G11 TILGVLNG    | 34153 | >PTCH1-G11 TILGVLNR    | 174  | 33979 |
| >PTCH1-G11 TILGVLNG    | 35190 | >PTCH1-G11 TILGVLNR    | 67   | 35123 |
| >PTCH1-G11 TILGVLNGL   | 158   | >PTCH1-G11 TILGVLNRL   | 266  | 108   |
| >PTCH1-G11 TILGVLNGL   | 98    | >PTCH1-G11 TILGVLNRL   | 516  | 418   |
| >PTCH1-G11 TILGVLNGLV  | 27    | >PTCH1-G11 TILGVLNRLV  | 84   | 57    |
| >PTCH1-G11 TILGVLNGLVI | 464   | >PTCH1-G11 TILGVLNRLVI | 381  | 83    |
| >PTCH1-G11 TILGVLNG    | 33321 | >PTCH1-G11 TILGVLNR    | 136  | 33185 |
| >PTCH1-G11 LTILGVLNGL  | 210   | >PTCH1-G11 LTILGVLNRL  | 263  | 53    |
| >PTCH1-G11 LTILGVLNGL  | 377   | >PTCH1-G11 LTILGVLNRL  | 852  | 475   |
| >PTCH1-G11 LTILGVLNGL\ | 229   | >PTCH1-G11 LTILGVLNRLV | 394  | 165   |
| >PTCH1-G11 LTILGVLNGL  | 133   | >PTCH1-G11 LTILGVLNRL  | 332  | 199   |

|                        |       |                        |      |       |
|------------------------|-------|------------------------|------|-------|
| >PTCH1-G11 LTILGVLNGL  | 185   | >PTCH1-G11 LTILGVLNRLV | 305  | 120   |
| >PTCH1-G11 LTILGVLNG   | 25453 | >PTCH1-G11 LTILGVLNR   | 162  | 25291 |
| >PTCH1-G11 LTILGVLNGL  | 54    | >PTCH1-G11 LTILGVLNRL  | 59   | 5     |
| >PTCH1-G11 LTILGVLNGL  | 213   | >PTCH1-G11 LTILGVLNRL  | 1574 | 1361  |
| >PTCH1-G11 LTILGVLNG   | 20376 | >PTCH1-G11 LTILGVLNR   | 191  | 20185 |
| >PTCH1-G11 LTILGVLNG   | 34128 | >PTCH1-G11 LTILGVLNR   | 292  | 33836 |
| >PTCH1-G11 LTILGVLNG   | 28944 | >PTCH1-G11 LTILGVLNR   | 44   | 28900 |
| >PTCH1-G11 LTILGVLNGL  | 496   | >PTCH1-G11 LTILGVLNRL  | 448  | 48    |
| >PTCH1-G11 LTILGVLNGL  | 47    | >PTCH1-G11 LTILGVLNRLV | 124  | 77    |
| >PTCH1-G11 LTILGVLNGL  | 218   | >PTCH1-G11 LTILGVLNRLV | 551  | 333   |
| >PTCH1-G11 LTILGVLNGL  | 16    | >PTCH1-G11 LTILGVLNRL  | 15   | 1     |
| >PTCH1-G11 LTILGVLNGL  | 431   | >PTCH1-G11 LTILGVLNRLV | 364  | 67    |
| >PTCH1-G11 LTILGVLNGL  | 76    | >PTCH1-G11 LTILGVLNRL  | 115  | 39    |
| >PTCH1-G11 LTILGVLNGL  | 290   | >PTCH1-G11 LTILGVLNRLV | 574  | 284   |
| >PTCH1-G11 LTILGVLNG   | 15540 | >PTCH1-G11 LTILGVLNR   | 412  | 15128 |
| >PTCH1-G11 LTILGVLNGL  | 34    | >PTCH1-G11 LTILGVLNRL  | 49   | 15    |
| >PTCH1-G11 LTILGVLNGL  | 203   | >PTCH1-G11 LTILGVLNRL  | 396  | 193   |
| >PTCH1-G11 LTILGVLNGL  | 331   | >PTCH1-G11 LTILGVLNRL  | 912  | 581   |
| >PTCH1-G11 LTILGVLNGL  | 39    | >PTCH1-G11 LTILGVLNRL  | 57   | 18    |
| >PTCH1-G11 LTILGVLNGL  | 264   | >PTCH1-G11 LTILGVLNRL  | 869  | 605   |
| >PTCH1-G11 LTILGVLNGL  | 42    | >PTCH1-G11 LTILGVLNRL  | 108  | 66    |
| >PTCH1-G11 LTILGVLNGL  | 7     | >PTCH1-G11 LTILGVLNRL  | 7    | 0     |
| >PTCH1-G11 LTILGVLNG   | 28373 | >PTCH1-G11 LTILGVLNR   | 251  | 28122 |
| >PTCH1-G11 LTILGVLNG   | 31099 | >PTCH1-G11 LTILGVLNR   | 406  | 30693 |
| >PTCH1-G11 LTILGVLNG   | 34987 | >PTCH1-G11 LTILGVLNR   | 174  | 34813 |
| >PTCH1-G11 GLVLLPVV    | 408   | >PTCH1-G11 WLVLLPVV    | 255  | 153   |
| >PTCH1-G11 GLVLLPVLL   | 340   | >PTCH1-G11 WLVLLPVLL   | 198  | 142   |
| >PTCH1-G11 GLVLLPVV    | 286   | >PTCH1-G11 WLVLLPVV    | 245  | 41    |
| >PTCH1-G11 GLVLLPVLL   | 146   | >PTCH1-G11 WLVLLPVLL   | 125  | 21    |
| >PTCH1-G11 GLVLLPVV    | 370   | >PTCH1-G11 WLVLLPVV    | 194  | 176   |
| >PTCH1-G11 GLVLLPVLL   | 542   | >PTCH1-G11 WLVLLPVLL   | 277  | 265   |
| >PTCH1-G11 GLVLLPVV    | 786   | >PTCH1-G11 WLVLLPVV    | 172  | 614   |
| >PTCH1-G11 GLVLLPVV    | 95    | >PTCH1-G11 WLVLLPVV    | 41   | 54    |
| >PTCH1-G11 GLVLLPVLL   | 151   | >PTCH1-G11 WLVLLPVLL   | 66   | 85    |
| >PTCH1-G11 GLVLLPVV    | 84    | >PTCH1-G11 WLVLLPVV    | 129  | 45    |
| >PTCH1-G11 GLVLLPVLL   | 206   | >PTCH1-G11 WLVLLPVLL   | 329  | 123   |
| >PTCH1-G11 GLVLLPVV    | 65    | >PTCH1-G11 WLVLLPVV    | 77   | 12    |
| >PTCH1-G11 GLVLLPVLL   | 118   | >PTCH1-G11 WLVLLPVLL   | 144  | 26    |
| >PTCH1-G11 GLVLLPVV    | 2071  | >PTCH1-G11 WLVLLPVV    | 126  | 1945  |
| >PTCH1-G11 GLVLLPVV    | 34    | >PTCH1-G11 WLVLLPVV    | 19   | 15    |
| >PTCH1-G11 GLVLLPVLL   | 54    | >PTCH1-G11 WLVLLPVLL   | 34   | 20    |
| >PTCH1-G11 GLVLLPVLLSF | 648   | >PTCH1-G11 WLVLLPVLLS  | 406  | 242   |
| >PTCH1-G11 GLVLLPVLLSF | 311   | >PTCH1-G11 WLVLLPVLLS  | 2226 | 1915  |

|                        |       |                        |      |       |
|------------------------|-------|------------------------|------|-------|
| >PTCH1-G11 GLVLLPVLLSF | 335   | >PTCH1-G11 WLVLLPVLLS  | 172  | 163   |
| >PTCH1-G11 GLVLLPVLLSF | 604   | >PTCH1-G11 WLVLLPVLLS  | 57   | 547   |
| >PTCH1-G11 GLVLLPVLLSF | 11601 | >PTCH1-G11 WLVLLPVLLS  | 490  | 11111 |
| >PTCH1-G11 GLVLLPVLL   | 6685  | >PTCH1-G11 WLVLLPVLL   | 321  | 6364  |
| >PTCH1-G11 GLVLLPVLL   | 7099  | >PTCH1-G11 WLVLLPVLL   | 337  | 6762  |
| >PTCH1-G11 NGLVLLPV    | 458   | >PTCH1-G11 NWLVLLPV    | 249  | 209   |
| >PTCH1-G11 NGLVLLPVLL  | 32807 | >PTCH1-G11 NWLVLLPVLL  | 320  | 32487 |
| >PTCH1-G11 NGLVLLPVLL  | 16687 | >PTCH1-G11 NWLVLLPVLL  | 117  | 16570 |
| >PTCH1-G11 NGLVLLPVLL  | 20677 | >PTCH1-G11 NWLVLLPVLL  | 237  | 20440 |
| >PTCH1-G11 NGLVLLPV    | 330   | >PTCH1-G11 NWLVLLPV    | 1307 | 977   |
| >PTCH1-G11 NGLVLLPV    | 31982 | >PTCH1-G11 NWLVLLPV    | 120  | 31862 |
| >PTCH1-G11 NGLVLLPVLL  | 31624 | >PTCH1-G11 NWLVLLPVLL  | 146  | 31478 |
| >PTCH1-G11 NGLVLLPVLL  | 27383 | >PTCH1-G11 NWLVLLPVLL  | 104  | 27279 |
| >PTCH1-G11 AILTILGVLNG | 21706 | >PTCH1-G11 AILTILGVLNV | 157  | 21549 |
| >PTCH1-G11 AILTILGVLNG | 22197 | >PTCH1-G11 AILTILGVLNV | 179  | 22018 |
| >PTCH1-G11 VLNGLVLL    | 43    | >PTCH1-G11 VLNWLVLL    | 28   | 15    |
| >PTCH1-G11 VLNGLVLLPV  | 23    | >PTCH1-G11 VLNWLVLLPV  | 22   | 1     |
| >PTCH1-G11 VLNGLVLLPV  | 58    | >PTCH1-G11 VLNWLVLLPV  | 43   | 15    |
| >PTCH1-G11 VLNGLVLL    | 8     | >PTCH1-G11 VLNWLVLL    | 11   | 3     |
| >PTCH1-G11 VLNGLVLLPV  | 28    | >PTCH1-G11 VLNWLVLLPV  | 46   | 18    |
| >PTCH1-G11 VLNGLVLLPV  | 31    | >PTCH1-G11 VLNWLVLLPV  | 45   | 14    |
| >PTCH1-G11 VLNGLVLL    | 18    | >PTCH1-G11 VLNWLVLL    | 21   | 3     |
| >PTCH1-G11 VLNGLVLLPV  | 16    | >PTCH1-G11 VLNWLVLLPV  | 27   | 11    |
| >PTCH1-G11 VLNGLVLLPV  | 32    | >PTCH1-G11 VLNWLVLLPV  | 34   | 2     |
| >PTCH1-G11 VLNGLVLL    | 543   | >PTCH1-G11 VLNWLVLL    | 499  | 44    |
| >PTCH1-G11 VLNGLVLLPV  | 76    | >PTCH1-G11 VLNWLVLLPV  | 111  | 35    |
| >PTCH1-G11 VLNGLVLL    | 6     | >PTCH1-G11 VLNWLVLL    | 4    | 2     |
| >PTCH1-G11 VLNGLVLLPV  | 2     | >PTCH1-G11 VLNWLVLLPV  | 2    | 0     |
| >PTCH1-G11 VLNGLVLLPV  | 6     | >PTCH1-G11 VLNWLVLLPV  | 4    | 2     |
| >PTCH1-G11 VLNGLVLL    | 59    | >PTCH1-G11 VLNWLVLL    | 62   | 3     |
| >PTCH1-G11 VLNGLVLLPV  | 6     | >PTCH1-G11 VLNWLVLLPV  | 7    | 1     |
| >PTCH1-G11 VLNGLVLLPV  | 69    | >PTCH1-G11 VLNWLVLLPV  | 80   | 11    |
| >PTCH1-G11 VLNGLVLL    | 14    | >PTCH1-G11 VLNWLVLL    | 11   | 3     |
| >PTCH1-G11 VLNGLVLLPV  | 5     | >PTCH1-G11 VLNWLVLLPV  | 5    | 0     |
| >PTCH1-G11 VLNGLVLLPV  | 11    | >PTCH1-G11 VLNWLVLLPV  | 10   | 1     |
| >PTCH1-G11 VLNGLVLL    | 18    | >PTCH1-G11 VLNWLVLL    | 15   | 3     |
| >PTCH1-G11 VLNGLVLLPV  | 4     | >PTCH1-G11 VLNWLVLLPV  | 4    | 0     |
| >PTCH1-G11 VLNGLVLLPV  | 11    | >PTCH1-G11 VLNWLVLLPV  | 11   | 0     |
| >PTCH1-G11 VLNGLVLL    | 2     | >PTCH1-G11 VLNWLVLL    | 2    | 0     |
| >PTCH1-G11 VLNGLVLLPV  | 2     | >PTCH1-G11 VLNWLVLLPV  | 2    | 0     |
| >PTCH1-G11 VLNGLVLLPV  | 3     | >PTCH1-G11 VLNWLVLLPV  | 3    | 0     |
| >PTCH1-G11 VLNGLVLLPV  | 1370  | >PTCH1-G11 VLNWLVLLPV  | 361  | 1009  |
| >PTCH1-G11 VLNGLVLLPV  | 1177  | >PTCH1-G11 VLNWLVLLPV  | 162  | 1015  |

|                        |      |                       |     |      |
|------------------------|------|-----------------------|-----|------|
| >PTCH1-G11 GVLNGLVL    | 2261 | >PTCH1-G11 GVLNWLVL   | 443 | 1818 |
| >PTCH1-G11 GVLNGLVLL   | 170  | >PTCH1-G11 GVLNWLVLL  | 41  | 129  |
| >PTCH1-G11 GVLNGLVLLP  | 29   | >PTCH1-G11 GVLNWLVLFF | 17  | 12   |
| >PTCH1-G11 GVLNGLVLL   | 711  | >PTCH1-G11 GVLNWLVLL  | 457 | 254  |
| >PTCH1-G11 GVLNGLVLLP  | 659  | >PTCH1-G11 GVLNWLVLFF | 480 | 179  |
| >PTCH1-G11 GVLNGLVLLP  | 76   | >PTCH1-G11 GVLNWLVLFF | 82  | 6    |
| >PTCH1-G11 GVLNGLVL    | 307  | >PTCH1-G11 GVLNWLVL   | 86  | 221  |
| >PTCH1-G11 GVLNGLVLL   | 23   | >PTCH1-G11 GVLNWLVLL  | 19  | 4    |
| >PTCH1-G11 GVLNGLVLLP  | 7    | >PTCH1-G11 GVLNWLVLFF | 6   | 1    |
| >PTCH1-G11 GVLNGLVL    | 530  | >PTCH1-G11 GVLNWLVL   | 95  | 435  |
| >PTCH1-G11 GVLNGLVLL   | 229  | >PTCH1-G11 GVLNWLVLL  | 20  | 209  |
| >PTCH1-G11 GVLNGLVLLP  | 10   | >PTCH1-G11 GVLNWLVLFF | 5   | 5    |
| >PTCH1-G11 GVLNGLVL    | 398  | >PTCH1-G11 GVLNWLVL   | 226 | 172  |
| >PTCH1-G11 GVLNGLVLL   | 156  | >PTCH1-G11 GVLNWLVLL  | 31  | 125  |
| >PTCH1-G11 GVLNGLVLLP  | 14   | >PTCH1-G11 GVLNWLVLFF | 8   | 6    |
| >PTCH1-G11 GVLNGLVL    | 397  | >PTCH1-G11 GVLNWLVL   | 130 | 267  |
| >PTCH1-G11 GVLNGLVLL   | 101  | >PTCH1-G11 GVLNWLVLL  | 32  | 69   |
| >PTCH1-G11 GVLNGLVLLP  | 11   | >PTCH1-G11 GVLNWLVLFF | 9   | 2    |
| >PTCH1-G11 GVLNGLVLL   | 993  | >PTCH1-G11 GVLNWLVLL  | 294 | 699  |
| >PTCH1-G11 GVLNGLVLLP  | 140  | >PTCH1-G11 GVLNWLVLFF | 56  | 84   |
| >PTCH1-G11 GVLNGLVL    | 629  | >PTCH1-G11 GVLNWLVL   | 217 | 412  |
| >PTCH1-G11 GVLNGLVLL   | 106  | >PTCH1-G11 GVLNWLVLL  | 24  | 82   |
| >PTCH1-G11 GVLNGLVLLP  | 14   | >PTCH1-G11 GVLNWLVLFF | 10  | 4    |
| >PTCH1-G11 GVLNGLVLL   | 1585 | >PTCH1-G11 GVLNWLVLL  | 495 | 1090 |
| >PTCH1-G11 GVLNGLVLLP  | 167  | >PTCH1-G11 GVLNWLVLFF | 36  | 131  |
| >PTCH1-G11 GVLNGLVLL   | 245  | >PTCH1-G11 GVLNWLVLL  | 156 | 89   |
| >PTCH1-G11 LGVLNGLVL   | 99   | >PTCH1-G11 LGVLNWLVL  | 124 | 25   |
| >PTCH1-G11 LGVLNGLV    | 5823 | >PTCH1-G11 LGVLNWLVL  | 365 | 5458 |
| >PTCH1-G11 ILGVLNGL    | 919  | >PTCH1-G11 ILGVLNWL   | 251 | 668  |
| >PTCH1-G11 ILGVLNGLV   | 1215 | >PTCH1-G11 ILGVLNWLVL | 24  | 1191 |
| >PTCH1-G11 ILGVLNGLVLL | 381  | >PTCH1-G11 ILGVLNWLVL | 68  | 313  |
| >PTCH1-G11 ILGVLNGL    | 58   | >PTCH1-G11 ILGVLNWL   | 28  | 30   |
| >PTCH1-G11 ILGVLNGLV   | 97   | >PTCH1-G11 ILGVLNWLVL | 6   | 91   |
| >PTCH1-G11 ILGVLNGLVL  | 210  | >PTCH1-G11 ILGVLNWLVL | 213 | 3    |
| >PTCH1-G11 ILGVLNGLVLL | 56   | >PTCH1-G11 ILGVLNWLVL | 22  | 34   |
| >PTCH1-G11 ILGVLNGL    | 538  | >PTCH1-G11 ILGVLNWL   | 492 | 46   |
| >PTCH1-G11 ILGVLNGLV   | 187  | >PTCH1-G11 ILGVLNWLVL | 171 | 16   |
| >PTCH1-G11 ILGVLNGLV   | 2009 | >PTCH1-G11 ILGVLNWLVL | 59  | 1950 |
| >PTCH1-G11 ILGVLNGL    | 69   | >PTCH1-G11 ILGVLNWL   | 46  | 23   |
| >PTCH1-G11 ILGVLNGLV   | 36   | >PTCH1-G11 ILGVLNWLVL | 3   | 33   |
| >PTCH1-G11 ILGVLNGLVL  | 303  | >PTCH1-G11 ILGVLNWLVL | 70  | 233  |
| >PTCH1-G11 ILGVLNGLVLL | 111  | >PTCH1-G11 ILGVLNWLVL | 21  | 90   |
| >PTCH1-G11 ILGVLNGL    | 131  | >PTCH1-G11 ILGVLNWL   | 196 | 65   |



|                        |       |                        |     |       |
|------------------------|-------|------------------------|-----|-------|
| >PTCH1-G11 ILGVLNGLV   | 423   | >PTCH1-G11 ILGVLNWLVL  | 6   | 417   |
| >PTCH1-G11 ILGVLNGLVL  | 638   | >PTCH1-G11 ILGVLNWLVL  | 212 | 426   |
| >PTCH1-G11 ILGVLNGLVLI | 333   | >PTCH1-G11 ILGVLNWLVL  | 49  | 284   |
| >PTCH1-G11 ILGVLNGL    | 150   | >PTCH1-G11 ILGVLNWL    | 74  | 76    |
| >PTCH1-G11 ILGVLNGLV   | 65    | >PTCH1-G11 ILGVLNWLVL  | 6   | 59    |
| >PTCH1-G11 ILGVLNGLVL  | 643   | >PTCH1-G11 ILGVLNWLVL  | 91  | 552   |
| >PTCH1-G11 ILGVLNGLVLI | 143   | >PTCH1-G11 ILGVLNWLVL  | 31  | 112   |
| >PTCH1-G11 ILGVLNGL    | 140   | >PTCH1-G11 ILGVLNWL    | 142 | 2     |
| >PTCH1-G11 ILGVLNGLV   | 260   | >PTCH1-G11 ILGVLNWLVL  | 4   | 256   |
| >PTCH1-G11 ILGVLNGLVL  | 1787  | >PTCH1-G11 ILGVLNWLVL  | 219 | 1568  |
| >PTCH1-G11 ILGVLNGLVLI | 377   | >PTCH1-G11 ILGVLNWLVL  | 48  | 329   |
| >PTCH1-G11 ILGVLNGL    | 21    | >PTCH1-G11 ILGVLNWL    | 8   | 13    |
| >PTCH1-G11 ILGVLNGLV   | 9     | >PTCH1-G11 ILGVLNWLVL  | 2   | 7     |
| >PTCH1-G11 ILGVLNGLVL  | 77    | >PTCH1-G11 ILGVLNWLVL  | 24  | 53    |
| >PTCH1-G11 ILGVLNGLVLI | 20    | >PTCH1-G11 ILGVLNWLVL  | 6   | 14    |
| >PTCH1-G11 ILGVLNGLVL  | 1633  | >PTCH1-G11 ILGVLNWLVL  | 69  | 1564  |
| >PTCH1-G11 TILGVLNGL   | 311   | >PTCH1-G11 TILGVLNWL   | 197 | 114   |
| >PTCH1-G11 TILGVLNGLV  | 247   | >PTCH1-G11 TILGVLNWLVL | 29  | 218   |
| >PTCH1-G11 TILGVLNGL   | 137   | >PTCH1-G11 TILGVLNWL   | 109 | 28    |
| >PTCH1-G11 TILGVLNGLV  | 289   | >PTCH1-G11 TILGVLNWLVL | 72  | 217   |
| >PTCH1-G11 TILGVLNGL   | 349   | >PTCH1-G11 TILGVLNWL   | 412 | 63    |
| >PTCH1-G11 TILGVLNGLV  | 74    | >PTCH1-G11 TILGVLNWLVL | 154 | 80    |
| >PTCH1-G11 TILGVLNGL   | 26    | >PTCH1-G11 TILGVLNWL   | 44  | 18    |
| >PTCH1-G11 TILGVLNGLV  | 80    | >PTCH1-G11 TILGVLNWLVL | 27  | 53    |
| >PTCH1-G11 TILGVLNGLVI | 339   | >PTCH1-G11 TILGVLNWLVL | 144 | 195   |
| >PTCH1-G11 TILGVLNGL   | 37    | >PTCH1-G11 TILGVLNWL   | 55  | 18    |
| >PTCH1-G11 TILGVLNGLV  | 29    | >PTCH1-G11 TILGVLNWLVL | 5   | 24    |
| >PTCH1-G11 TILGVLNGLVI | 173   | >PTCH1-G11 TILGVLNWLVL | 149 | 24    |
| >PTCH1-G11 TILGVLNGLV  | 1161  | >PTCH1-G11 TILGVLNWLVL | 59  | 1102  |
| >PTCH1-G11 TILGVLNGL   | 147   | >PTCH1-G11 TILGVLNWL   | 180 | 33    |
| >PTCH1-G11 TILGVLNGLV  | 67    | >PTCH1-G11 TILGVLNWLVL | 10  | 57    |
| >PTCH1-G11 TILGVLNGLVI | 541   | >PTCH1-G11 TILGVLNWLVL | 379 | 162   |
| >PTCH1-G11 TILGVLNGL   | 136   | >PTCH1-G11 TILGVLNWL   | 644 | 508   |
| >PTCH1-G11 TILGVLNGLV  | 272   | >PTCH1-G11 TILGVLNWLVL | 15  | 257   |
| >PTCH1-G11 TILGVLNGL   | 153   | >PTCH1-G11 TILGVLNWL   | 71  | 82    |
| >PTCH1-G11 TILGVLNGLV  | 37    | >PTCH1-G11 TILGVLNWLVL | 5   | 32    |
| >PTCH1-G11 TILGVLNGLVI | 459   | >PTCH1-G11 TILGVLNWLVL | 355 | 104   |
| >PTCH1-G11 TILGVLNGL   | 272   | >PTCH1-G11 TILGVLNWL   | 110 | 162   |
| >PTCH1-G11 TILGVLNGL   | 158   | >PTCH1-G11 TILGVLNWL   | 358 | 200   |
| >PTCH1-G11 TILGVLNGL   | 98    | >PTCH1-G11 TILGVLNWL   | 357 | 259   |
| >PTCH1-G11 TILGVLNGLV  | 27    | >PTCH1-G11 TILGVLNWLVL | 10  | 17    |
| >PTCH1-G11 TILGVLNGLVI | 464   | >PTCH1-G11 TILGVLNWLVL | 390 | 74    |
| >PTCH1-G11 TILGVLNG    | 21894 | >PTCH1-G11 TILGVLNW    | 60  | 21834 |

|                       |       |                       |      |       |
|-----------------------|-------|-----------------------|------|-------|
| >PTCH1-G11 LTILGVLNGL | 1746  | >PTCH1-G11 LTILGVLNWL | 81   | 1665  |
| >PTCH1-G11 LTILGVLNGL | 210   | >PTCH1-G11 LTILGVLNWL | 257  | 47    |
| >PTCH1-G11 LTILGVLNGL | 826   | >PTCH1-G11 LTILGVLNWL | 145  | 681   |
| >PTCH1-G11 LTILGVLNGL | 377   | >PTCH1-G11 LTILGVLNWL | 751  | 374   |
| >PTCH1-G11 LTILGVLNGL | 229   | >PTCH1-G11 LTILGVLNWL | 228  | 1     |
| >PTCH1-G11 LTILGVLNGL | 133   | >PTCH1-G11 LTILGVLNWL | 162  | 29    |
| >PTCH1-G11 LTILGVLNGL | 185   | >PTCH1-G11 LTILGVLNWL | 17   | 168   |
| >PTCH1-G11 LTILGVLNGL | 1197  | >PTCH1-G11 LTILGVLNWL | 107  | 1090  |
| >PTCH1-G11 LTILGVLNGL | 5559  | >PTCH1-G11 LTILGVLNWL | 344  | 5215  |
| >PTCH1-G11 LTILGVLNGL | 2990  | >PTCH1-G11 LTILGVLNWL | 219  | 2771  |
| >PTCH1-G11 LTILGVLNGL | 1161  | >PTCH1-G11 LTILGVLNWL | 56   | 1105  |
| >PTCH1-G11 LTILGVLNGL | 54    | >PTCH1-G11 LTILGVLNWL | 25   | 29    |
| >PTCH1-G11 LTILGVLNG  | 25190 | >PTCH1-G11 LTILGVLNW  | 459  | 24731 |
| >PTCH1-G11 LTILGVLNGL | 213   | >PTCH1-G11 LTILGVLNWL | 467  | 254   |
| >PTCH1-G11 LTILGVLNGL | 496   | >PTCH1-G11 LTILGVLNWL | 1000 | 504   |
| >PTCH1-G11 LTILGVLNGL | 47    | >PTCH1-G11 LTILGVLNWL | 30   | 17    |
| >PTCH1-G11 LTILGVLNGL | 218   | >PTCH1-G11 LTILGVLNWL | 44   | 174   |
| >PTCH1-G11 LTILGVLNG  | 1958  | >PTCH1-G11 LTILGVLNW  | 3    | 1955  |
| >PTCH1-G11 LTILGVLNGL | 16    | >PTCH1-G11 LTILGVLNWL | 17   | 1     |
| >PTCH1-G11 LTILGVLNGL | 431   | >PTCH1-G11 LTILGVLNWL | 343  | 88    |
| >PTCH1-G11 LTILGVLNG  | 30459 | >PTCH1-G11 LTILGVLNW  | 128  | 30331 |
| >PTCH1-G11 LTILGVLNG  | 25003 | >PTCH1-G11 LTILGVLNW  | 117  | 24886 |
| >PTCH1-G11 LTILGVLNG  | 11721 | >PTCH1-G11 LTILGVLNW  | 12   | 11709 |
| >PTCH1-G11 LTILGVLNGL | 783   | >PTCH1-G11 LTILGVLNWL | 191  | 592   |
| >PTCH1-G11 LTILGVLNGL | 76    | >PTCH1-G11 LTILGVLNWL | 29   | 47    |
| >PTCH1-G11 LTILGVLNGL | 290   | >PTCH1-G11 LTILGVLNWL | 1353 | 1063  |
| >PTCH1-G11 LTILGVLNG  | 27890 | >PTCH1-G11 LTILGVLNW  | 74   | 27816 |
| >PTCH1-G11 LTILGVLNGL | 646   | >PTCH1-G11 LTILGVLNWL | 425  | 221   |
| >PTCH1-G11 LTILGVLNGL | 34    | >PTCH1-G11 LTILGVLNWL | 33   | 1     |
| >PTCH1-G11 LTILGVLNGL | 203   | >PTCH1-G11 LTILGVLNWL | 192  | 11    |
| >PTCH1-G11 LTILGVLNGL | 331   | >PTCH1-G11 LTILGVLNWL | 508  | 177   |
| >PTCH1-G11 LTILGVLNGL | 39    | >PTCH1-G11 LTILGVLNWL | 55   | 16    |
| >PTCH1-G11 LTILGVLNGL | 264   | >PTCH1-G11 LTILGVLNWL | 991  | 727   |
| >PTCH1-G11 LTILGVLNGL | 42    | >PTCH1-G11 LTILGVLNWL | 50   | 8     |
| >PTCH1-G11 LTILGVLNGL | 7     | >PTCH1-G11 LTILGVLNWL | 6    | 1     |
| >PTCH1-G11 LTILGVLNG  | 19386 | >PTCH1-G11 LTILGVLNW  | 157  | 19229 |
| >PTCH1-G11 LTILGVLNG  | 22161 | >PTCH1-G11 LTILGVLNW  | 106  | 22055 |
| >PTCH1-G11 LTILGVLNGL | 2020  | >PTCH1-G11 LTILGVLNWL | 459  | 1561  |
| >PTCH1-G12:MPPGHTHSG  | 270   | >PTCH1-G12:MPPSHTHSG  | 226  | 44    |
| >PTCH1-G12:MPPGHTHSG  | 254   | >PTCH1-G12:MPPSHTHSG  | 389  | 135   |
| >PTCH1-G12:MPPGHTHSG  | 434   | >PTCH1-G12:MPPSHTHSG  | 193  | 241   |
| >PTCH1-G12:AMPPGHTHS  | 404   | >PTCH1-G12:AMPPSHTHS  | 898  | 494   |
| >PTCH1-G12:AMPPGHTHS  | 426   | >PTCH1-G12:AMPPSHTHS  | 911  | 485   |

|                       |       |                       |      |       |
|-----------------------|-------|-----------------------|------|-------|
| >PTCH1-G12:FAMPPGHT   | 699   | >PTCH1-G12:FAMPPSHT   | 265  | 434   |
| >PTCH1-G12:FAMPPGHT   | 1203  | >PTCH1-G12:FAMPPSHT   | 399  | 804   |
| >PTCH1-G12:FAMPPGHTH  | 494   | >PTCH1-G12:FAMPPSHTH  | 610  | 116   |
| >PTCH1-G12:FAMPPGHTH  | 252   | >PTCH1-G12:FAMPPSHTH  | 161  | 91    |
| >PTCH1-G12:FAMPPGHTH  | 122   | >PTCH1-G12:FAMPPSHTH  | 51   | 71    |
| >PTCH1-G12:VRFAMPPGH  | 485   | >PTCH1-G12:VRFAMPPSH  | 427  | 58    |
| >PTCH1-G12:VRFAMPPGH  | 219   | >PTCH1-G12:VRFAMPPSH  | 257  | 38    |
| >PTCH1-G12:VRFAMPPGH  | 156   | >PTCH1-G12:VRFAMPPSH  | 206  | 50    |
| >PTCH1-G12:VRFAMPPGH  | 254   | >PTCH1-G12:VRFAMPPSH  | 288  | 34    |
| >PTCH1-G12:VRFAMPPG   | 464   | >PTCH1-G12:VRFAMPPS   | 955  | 491   |
| >PTCH1-G12:VRFAMPPGH  | 246   | >PTCH1-G12:VRFAMPPSH  | 713  | 467   |
| >PTCH1-G12:VRFAMPPG   | 18    | >PTCH1-G12:VRFAMPPS   | 19   | 1     |
| >PTCH1-G12:VRFAMPPG   | 395   | >PTCH1-G12:VRFAMPPSI  | 111  | 284   |
| >PTCH1-G12:VRFAMPPG   | 292   | >PTCH1-G12:VRFAMPPSI  | 242  | 50    |
| >PTCH1-G13:GLCPGYPET  | 230   | >PTCH1-G13:RLCPGYPET  | 107  | 123   |
| >PTCH1-G13:GLCPGYPET  | 385   | >PTCH1-G13:RLCPGYPET  | 659  | 274   |
| >PTCH1-G13:GLCPGYPET  | 24    | >PTCH1-G13:RLCPGYPET  | 26   | 2     |
| >PTCH1-G13:RGGLCPGY   | 15067 | >PTCH1-G13:RGRLCPGY   | 486  | 14581 |
| >PTCH1-G13:RGGLCPGYPE | 14451 | >PTCH1-G13:RGRLCPGYPE | 363  | 14088 |
| >PTCH1-G13:RGGLCPGY   | 144   | >PTCH1-G13:RGRLCPGY   | 169  | 25    |
| >PTCH1-G13:RGGLCPGY   | 3287  | >PTCH1-G13:RGRLCPGY   | 94   | 3193  |
| >PTCH1-G13:NPRGGLCPG  | 10974 | >PTCH1-G13:NPRGRLCPG  | 148  | 10826 |
| >PTCH1-G13:GRNPRGGL   | 348   | >PTCH1-G13:GRNPRGRL   | 393  | 45    |
| >PTCH1-G13:GRNPRGGLC  | 407   | >PTCH1-G13:GRNPRGRLC  | 209  | 198   |
| >PTCH1-G13:PGPGRNPRG  | 103   | >PTCH1-G13:PGPGRNPRG  | 183  | 80    |
| >PTCH1-G28:EVGHGYMDF  | 174   | >PTCH1-G28:EVDHGYMDF  | 272  | 98    |
| >PTCH1-G28:EVGHGYMDF  | 71    | >PTCH1-G28:EVDHGYMDF  | 81   | 10    |
| >PTCH1-G28:AEVGHGYM   | 454   | >PTCH1-G28:AEVDHGYM   | 315  | 139   |
| >PTCH1-G28:AEVGHGYM   | 26    | >PTCH1-G28:AEVDHGYM   | 50   | 24    |
| >PTCH1-G28:AEVGHGYM   | 197   | >PTCH1-G28:AEVDHGYM   | 320  | 123   |
| >PTCH1-G28:AEVGHGYM   | 135   | >PTCH1-G28:AEVDHGYM   | 144  | 9     |
| >PTCH1-G28:AEVGHGYME  | 307   | >PTCH1-G28:AEVDHGYME  | 344  | 37    |
| >PTCH1-G28:AEVGHGYM   | 212   | >PTCH1-G28:AEVDHGYM   | 646  | 434   |
| >PTCH1-G28:AEVGHGYME  | 289   | >PTCH1-G28:AEVDHGYME  | 733  | 444   |
| >PTCH1-G28:KAEVGHGY   | 46    | >PTCH1-G28:KAEVDHGY   | 47   | 1     |
| >PTCH1-G28:KAEVGHGYM  | 169   | >PTCH1-G28:KAEVDHGYM  | 307  | 138   |
| >PTCH1-G28:KAEVGHGY   | 22    | >PTCH1-G28:KAEVDHGY   | 83   | 61    |
| >PTCH1-G28:KAEVGHGYM  | 84    | >PTCH1-G28:KAEVDHGYM  | 956  | 872   |
| >PTCH1-G28:KAEVGHGYM  | 265   | >PTCH1-G28:KAEVDHGYM  | 935  | 670   |
| >PTCH1-G28:NKAEVGHGY  | 441   | >PTCH1-G28:NKAEVDHGY  | 319  | 122   |
| >PTCH1-G28:NKAEVGHGY  | 394   | >PTCH1-G28:NKAEVDHGY  | 908  | 514   |
| >PTCH1-G28:NKAEVGHGY  | 339   | >PTCH1-G28:NKAEVDHGY  | 1646 | 1307  |
| >PTCH1-G28:NKAEVGHGY  | 439   | >PTCH1-G28:NKAEVDHGY  | 820  | 381   |

|                        |       |                        |     |       |
|------------------------|-------|------------------------|-----|-------|
| >PTCH1-G28:LNKAEVGHG'  | 284   | >PTCH1-G28:LNKAEVDHG'  | 523 | 239   |
| >PTCH1-G28:MLNKAEVGH   | 385   | >PTCH1-G28:MLNKAEVDH   | 999 | 614   |
| >PTCH1-G28:MLNKAEVGH   | 170   | >PTCH1-G28:MLNKAEVDH   | 177 | 7     |
| >PTCH1-G28:MLNKAEVGH   | 34    | >PTCH1-G28:MLNKAEVDH   | 32  | 2     |
| >PTCH1-G28:MLNKAEVGH   | 84    | >PTCH1-G28:MLNKAEVDH   | 123 | 39    |
| >PTCH1-G28:MLNKAEVGH   | 79    | >PTCH1-G28:MLNKAEVDH   | 107 | 28    |
| >PTCH1-G28:MLNKAEVGH   | 96    | >PTCH1-G28:MLNKAEVDH   | 147 | 51    |
| >PTCH1-G28:MLNKAEVGH   | 251   | >PTCH1-G28:MLNKAEVDH   | 517 | 266   |
| >PTCH1-G28:MLNKAEVGH   | 216   | >PTCH1-G28:MLNKAEVDH   | 117 | 99    |
| >PTCH1-G28:MLNKAEVGH   | 553   | >PTCH1-G28:MLNKAEVDH   | 482 | 71    |
| >PTCH1-G48:GLGLCSLIGI  | 127   | >PTCH1-G48:RLGLCSLIGI  | 73  | 54    |
| >PTCH1-G48:GLGLCSLI    | 184   | >PTCH1-G48:RLGLCSLI    | 215 | 31    |
| >PTCH1-G48:GLGLCSLIGI  | 49    | >PTCH1-G48:RLGLCSLIGI  | 48  | 1     |
| >PTCH1-G48:GLGLCSLI    | 331   | >PTCH1-G48:RLGLCSLI    | 186 | 145   |
| >PTCH1-G48:GLGLCSLIGI  | 92    | >PTCH1-G48:RLGLCSLIGI  | 58  | 34    |
| >PTCH1-G48:GLGLCSLIGI  | 647   | >PTCH1-G48:RLGLCSLIGI  | 243 | 404   |
| >PTCH1-G48:GLGLCSLI    | 849   | >PTCH1-G48:RLGLCSLI    | 426 | 423   |
| >PTCH1-G48:GLGLCSLIGI  | 169   | >PTCH1-G48:RLGLCSLIGI  | 93  | 76    |
| >PTCH1-G48:GLGLCSLI    | 208   | >PTCH1-G48:RLGLCSLI    | 388 | 180   |
| >PTCH1-G48:GLGLCSLIGI  | 21    | >PTCH1-G48:RLGLCSLIGI  | 32  | 11    |
| >PTCH1-G48:GLGLCSLI    | 355   | >PTCH1-G48:RLGLCSLI    | 683 | 328   |
| >PTCH1-G48:GLGLCSLIGI  | 117   | >PTCH1-G48:RLGLCSLIGI  | 217 | 100   |
| >PTCH1-G48:GLGLCSLIGI  | 414   | >PTCH1-G48:RLGLCSLIGI  | 176 | 238   |
| >PTCH1-G48:GLGLCSLI    | 150   | >PTCH1-G48:RLGLCSLI    | 199 | 49    |
| >PTCH1-G48:GLGLCSLIGI  | 124   | >PTCH1-G48:RLGLCSLIGI  | 173 | 49    |
| >PTCH1-G48:GLGLCSLIGI  | 8474  | >PTCH1-G48:RLGLCSLIGI  | 452 | 8022  |
| >PTCH1-G48:AGLGLCSL    | 22135 | >PTCH1-G48:ARLGLCSL    | 95  | 22040 |
| >PTCH1-G48:AGLGLCSLI   | 20045 | >PTCH1-G48:ARLGLCSLI   | 169 | 19876 |
| >PTCH1-G48:AGLGLCSLIGI | 20792 | >PTCH1-G48:ARLGLCSLIGI | 84  | 20708 |
| >PTCH1-G48:AGLGLCSL    | 11682 | >PTCH1-G48:ARLGLCSL    | 252 | 11430 |
| >PTCH1-G48:AGLGLCSLI   | 78    | >PTCH1-G48:ARLGLCSLI   | 460 | 382   |
| >PTCH1-G48:AGLGLCSLI   | 27418 | >PTCH1-G48:ARLGLCSLI   | 455 | 26963 |
| >PTCH1-G48:AGLGLCSLI   | 23820 | >PTCH1-G48:ARLGLCSLI   | 45  | 23775 |
| >PTCH1-G48:AGLGLCSLIGI | 27738 | >PTCH1-G48:ARLGLCSLIGI | 105 | 27633 |
| >PTCH1-G48:VLLVALSVAA  | 18650 | >PTCH1-G48:VLLVALSVAA  | 87  | 18563 |
| >PTCH1-G48:VLLVALSVAA  | 34428 | >PTCH1-G48:VLLVALSVAA  | 444 | 33984 |
| >PTCH1-G48:AAGLGLCSL   | 10976 | >PTCH1-G48:AARLGLCSL   | 28  | 10948 |
| >PTCH1-G48:AAGLGLCSLI  | 10488 | >PTCH1-G48:AARLGLCSLI  | 44  | 10444 |
| >PTCH1-G48:AAGLGLCSLIC | 14610 | >PTCH1-G48:AARLGLCSLIC | 172 | 14438 |
| >PTCH1-G48:AAGLGLCSL   | 4882  | >PTCH1-G48:AARLGLCSL   | 80  | 4802  |
| >PTCH1-G48:AAGLGLCSL   | 339   | >PTCH1-G48:AARLGLCSL   | 11  | 328   |
| >PTCH1-G48:AAGLGLCSLI  | 4265  | >PTCH1-G48:AARLGLCSLI  | 175 | 4090  |
| >PTCH1-G48:VAAGLGLCSL  | 448   | >PTCH1-G48:VAARLGLCSL  | 682 | 234   |

|                       |     |                       |      |      |
|-----------------------|-----|-----------------------|------|------|
| >PTCH1-G48·VAAGLGLCSL | 461 | >PTCH1-G48·VAARLGLCSL | 1401 | 940  |
| >PTCH1-G48·VAAGLGLCSL | 96  | >PTCH1-G48·VAARLGLCSL | 304  | 208  |
| >PTCH1-G48·VAAGLGLCSL | 158 | >PTCH1-G48·VAARLGLCSL | 166  | 8    |
| >PTCH1-G48·VAAGLGLCSL | 282 | >PTCH1-G48·VAARLGLCSL | 180  | 102  |
| >PTCH1-G48·SVAAGLGLCS | 398 | >PTCH1-G48·SVAARLGLCS | 582  | 184  |
| >PTCH1-G48·SVAAGLGL   | 141 | >PTCH1-G48·SVAARLGL   | 193  | 52   |
| >PTCH1-G48·SVAAGLGLCS | 44  | >PTCH1-G48·SVAARLGLCS | 47   | 3    |
| >PTCH1-G48·SVAAGLGL   | 131 | >PTCH1-G48·SVAARLGL   | 226  | 95   |
| >PTCH1-G48·SVAAGLGLCS | 35  | >PTCH1-G48·SVAARLGLCS | 42   | 7    |
| >PTCH1-G48·SVAAGLGL   | 49  | >PTCH1-G48·SVAARLGL   | 120  | 71   |
| >PTCH1-G48·SVAAGLGLCS | 19  | >PTCH1-G48·SVAARLGLCS | 32   | 13   |
| >PTCH1-G48·SVAAGLGL   | 382 | >PTCH1-G48·SVAARLGL   | 2055 | 1673 |
| >PTCH1-G48·SVAAGLGLCS | 268 | >PTCH1-G48·SVAARLGLCS | 710  | 442  |
| >PTCH1-G48·SVAAGLGL   | 198 | >PTCH1-G48·SVAARLGL   | 361  | 163  |
| >PTCH1-G48·SVAAGLGLCS | 36  | >PTCH1-G48·SVAARLGLCS | 64   | 28   |
| >PTCH1-G48·SVAAGLGLCS | 319 | >PTCH1-G48·SVAARLGLCS | 728  | 409  |
| >PTCH1-G48·SVAAGLGL   | 110 | >PTCH1-G48·SVAARLGL   | 83   | 27   |
| >PTCH1-G48·SVAAGLGLCS | 72  | >PTCH1-G48·SVAARLGLCS | 130  | 58   |
| >PTCH1-G48·SVAAGLGL   | 199 | >PTCH1-G48·SVAARLGL   | 720  | 521  |
| >PTCH1-G48·SVAAGLGLCS | 176 | >PTCH1-G48·SVAARLGLCS | 652  | 476  |
| >PTCH1-G48·SVAAGLGL   | 615 | >PTCH1-G48·SVAARLGL   | 419  | 196  |
| >PTCH1-G48·SVAAGLGLCS | 288 | >PTCH1-G48·SVAARLGLCS | 211  | 77   |
| >PTCH1-G48·LSVAAGLGL  | 406 | >PTCH1-G48·LSVAARLGL  | 1405 | 999  |
| >PTCH1-G48·LSVAAGLGL  | 5   | >PTCH1-G48·LSVAARLGL  | 8    | 3    |
| >PTCH1-G48·LSVAAGLGL  | 590 | >PTCH1-G48·LSVAARLGL  | 406  | 184  |
| >PTCH1-G48·LSVAAGLGL  | 163 | >PTCH1-G48·LSVAARLGL  | 366  | 203  |
| >PTCH1-G48·ALSVAAGL   | 11  | >PTCH1-G48·ALSVAARL   | 18   | 7    |
| >PTCH1-G48·ALSVAAGLGL | 48  | >PTCH1-G48·ALSVAARLGL | 41   | 7    |
| >PTCH1-G48·ALSVAAGL   | 40  | >PTCH1-G48·ALSVAARL   | 97   | 57   |
| >PTCH1-G48·ALSVAAGLGL | 199 | >PTCH1-G48·ALSVAARLGL | 187  | 12   |
| >PTCH1-G48·ALSVAAGL   | 468 | >PTCH1-G48·ALSVAARL   | 2169 | 1701 |
| >PTCH1-G48·ALSVAAGL   | 103 | >PTCH1-G48·ALSVAARL   | 153  | 50   |
| >PTCH1-G48·ALSVAAGLGL | 270 | >PTCH1-G48·ALSVAARLGL | 831  | 561  |
| >PTCH1-G48·ALSVAAGL   | 110 | >PTCH1-G48·ALSVAARL   | 421  | 311  |
| >PTCH1-G48·ALSVAAGLGL | 439 | >PTCH1-G48·ALSVAARLGL | 1526 | 1087 |
| >PTCH1-G48·ALSVAAGL   | 73  | >PTCH1-G48·ALSVAARL   | 216  | 143  |
| >PTCH1-G48·ALSVAAGLGL | 91  | >PTCH1-G48·ALSVAARLGL | 289  | 198  |
| >PTCH1-G48·ALSVAAGL   | 66  | >PTCH1-G48·ALSVAARL   | 184  | 118  |
| >PTCH1-G48·ALSVAAGLGL | 469 | >PTCH1-G48·ALSVAARLGL | 1214 | 745  |
| >PTCH1-G48·ALSVAAGL   | 7   | >PTCH1-G48·ALSVAARL   | 8    | 1    |
| >PTCH1-G48·ALSVAAGLGL | 12  | >PTCH1-G48·ALSVAARLGL | 13   | 1    |
| >PTCH1-G48·VALSVAAGL  | 628 | >PTCH1-G48·VALSVAARL  | 379  | 249  |
| >PTCH1-G48·VALSVAAGL  | 257 | >PTCH1-G48·VALSVAARL  | 1443 | 1186 |

|                       |       |                        |      |       |
|-----------------------|-------|------------------------|------|-------|
| >PTCH1-G48·VALSVAAGLC | 337   | >PTCH1-G48·VALSVAARLG  | 777  | 440   |
| >PTCH1-G48·VALSVAAGL  | 181   | >PTCH1-G48·VALSVAARL   | 301  | 120   |
| >PTCH1-G48·VALSVAAGLC | 486   | >PTCH1-G48·VALSVAARLG  | 1273 | 787   |
| >PTCH1-G48·VALSVAAG   | 20076 | >PTCH1-G48·VALSVAAR    | 40   | 20036 |
| >PTCH1-G48·VALSVAAG   | 33040 | >PTCH1-G48·VALSVAAR    | 216  | 32824 |
| >PTCH1-G48·VALSVAAG   | 35848 | >PTCH1-G48·VALSVAAR    | 118  | 35730 |
| >PTCH1-G48·VALSVAAGL  | 350   | >PTCH1-G48·VALSVAARL   | 1606 | 1256  |
| >PTCH1-G48·VALSVAAGL  | 31    | >PTCH1-G48·VALSVAARL   | 25   | 6     |
| >PTCH1-G48·VALSVAAGLC | 32    | >PTCH1-G48·VALSVAARLG  | 71   | 39    |
| >PTCH1-G48·VALSVAAGL  | 901   | >PTCH1-G48·VALSVAARL   | 135  | 766   |
| >PTCH1-G48·LVALSVAAGL | 227   | >PTCH1-G48·LVALSVAARL  | 294  | 67    |
| >PTCH1-G48·LVALSVAAGL | 446   | >PTCH1-G48·LVALSVAARL  | 1336 | 890   |
| >PTCH1-G48·LVALSVAAGL | 191   | >PTCH1-G48·LVALSVAARL  | 161  | 30    |
| >PTCH1-G48·LVALSVAAG  | 20658 | >PTCH1-G48·LVALSVAAR   | 56   | 20602 |
| >PTCH1-G48·LVALSVAAG  | 19467 | >PTCH1-G48·LVALSVAAR   | 14   | 19453 |
| >PTCH1-G48·LVALSVAAGL | 254   | >PTCH1-G48·LVALSVAARL  | 267  | 13    |
| >PTCH1-G48·LVALSVAAGL | 211   | >PTCH1-G48·LVALSVAARL  | 184  | 27    |
| >PTCH1-G48·LLVALSVAAG | 69    | >PTCH1-G48·LLVALSVAAR  | 84   | 15    |
| >PTCH1-G48·LLVALSVAAG | 13    | >PTCH1-G48·LLVALSVAAR  | 17   | 4     |
| >PTCH1-G48·LLVALSVAAG | 22    | >PTCH1-G48·LLVALSVAAR  | 37   | 15    |
| >PTCH1-G48·LLVALSVAAG | 39    | >PTCH1-G48·LLVALSVAAR  | 164  | 125   |
| >PTCH1-G48·LLVALSVAAG | 8     | >PTCH1-G48·LLVALSVAAR  | 11   | 3     |
| >PTCH1-G48·LLVALSVAAG | 17    | >PTCH1-G48·LLVALSVAAR  | 49   | 32    |
| >PTCH1-G48·LLVALSVAAG | 36    | >PTCH1-G48·LLVALSVAAR  | 90   | 54    |
| >PTCH1-G48·LLVALSVAAG | 53    | >PTCH1-G48·LLVALSVAAR  | 176  | 123   |
| >PTCH1-G48·LLVALSVAAG | 4     | >PTCH1-G48·LLVALSVAAR  | 4    | 0     |
| >PTCH1-G48·LLVALSVAAG | 21743 | >PTCH1-G48·LLVALSVAAR  | 73   | 21670 |
| >PTCH1-G48·LLVALSVAAG | 28836 | >PTCH1-G48·LLVALSVAAR  | 475  | 28361 |
| >PTCH1-G48·LLVALSVAAG | 29769 | >PTCH1-G48·LLVALSVAAR  | 45   | 29724 |
| >PTCH1-G48·LLVALSVAAG | 282   | >PTCH1-G48·LLVALSVAAR  | 4058 | 3776  |
| >PTCH1-G48·LLVALSVAAG | 307   | >PTCH1-G48·LLVALSVAAR  | 427  | 120   |
| >PTCH1-G48·LLVALSVAAG | 30763 | >PTCH1-G48·LLVALSVAAR  | 309  | 30454 |
| >PTCH1-G48·LLVALSVAAG | 35827 | >PTCH1-G48·LLVALSVAAR  | 351  | 35476 |
| >PTCH1-G54!GASVALTSI  | 10024 | >PTCH1-G54!EASVALTSI   | 78   | 9946  |
| >PTCH1-G54!GASVALTSI  | 13425 | >PTCH1-G54!EASVALTSI   | 233  | 13192 |
| >PTCH1-G54!GASVALTSI  | 134   | >PTCH1-G54!EASVALTSI   | 326  | 192   |
| >PTCH1-G54!TGASVALT   | 38460 | >PTCH1-G54!TEASVALT    | 209  | 38251 |
| >PTCH1-G54!TGASVALTSI | 2503  | >PTCH1-G54!TEASVALTSI  | 6    | 2497  |
| >PTCH1-G54!TGASVALTSI | 34385 | >PTCH1-G54!TEASVALTSI  | 160  | 34225 |
| >PTCH1-G54!TGASVALT   | 40983 | >PTCH1-G54!TEASVALT    | 263  | 40720 |
| >PTCH1-G54!TGASVALTSI | 19849 | >PTCH1-G54!TEASVALTSI  | 11   | 19838 |
| >PTCH1-G54!RTGASVALTS | 294   | >PTCH1-G54!RTEASVALTSI | 1324 | 1030  |
| >PTCH1-G54!RTGASVAL   | 426   | >PTCH1-G54!RTEASVAL    | 548  | 122   |

|                       |     |                        |      |      |
|-----------------------|-----|------------------------|------|------|
| >PTCH1-G54!RTGASVALTS | 208 | >PTCH1-G54!RTEASVALTSI | 257  | 49   |
| >PTCH1-G54!RTGASVAL   | 40  | >PTCH1-G54!RTEASVAL    | 70   | 30   |
| >PTCH1-G54!RTGASVALTS | 36  | >PTCH1-G54!RTEASVALTSI | 70   | 34   |
| >PTCH1-G54!RTGASVAL   | 386 | >PTCH1-G54!RTEASVAL    | 3627 | 3241 |
| >PTCH1-G54!RTGASVAL   | 6   | >PTCH1-G54!RTEASVAL    | 4    | 2    |
| >PTCH1-G54!RTGASVALT  | 327 | >PTCH1-G54!RTEASVALT   | 176  | 151  |
| >PTCH1-G54!RTGASVALTS | 385 | >PTCH1-G54!RTEASVALTS  | 210  | 175  |
| >PTCH1-G54!RTGASVALTS | 12  | >PTCH1-G54!RTEASVALTSI | 8    | 4    |
| >PTCH1-G54!RTGASVALTS | 89  | >PTCH1-G54!RTEASVALTSI | 1349 | 1260 |
| >PTCH1-G54!RTGASVALTS | 257 | >PTCH1-G54!RTEASVALTSI | 137  | 120  |
| >PTCH1-G54!RTGASVAL   | 45  | >PTCH1-G54!RTEASVAL    | 40   | 5    |
| >PTCH1-G54!RTGASVALTS | 386 | >PTCH1-G54!RTEASVALTSI | 120  | 266  |
| >PTCH1-G54!RTGASVAL   | 243 | >PTCH1-G54!RTEASVAL    | 450  | 207  |
| >PTCH1-G54!RTGASVALTS | 11  | >PTCH1-G54!RTEASVALTSI | 15   | 4    |
| >PTCH1-G54!KRTGASVAL  | 283 | >PTCH1-G54!KRTEASVAL   | 82   | 201  |
| >PTCH1-G54!KRTGASVAL  | 66  | >PTCH1-G54!KRTEASVAL   | 110  | 44   |
| >PTCH1-G54!KRTGASVALT | 568 | >PTCH1-G54!KRTEASVALT  | 454  | 114  |
| >PTCH1-G54!KRTGASVAL  | 61  | >PTCH1-G54!KRTEASVAL   | 51   | 10   |
| >PTCH1-G54!KRTGASVAL  | 142 | >PTCH1-G54!KRTEASVAL   | 139  | 3    |
| >PTCH1-G54!KRTGASVAL  | 240 | >PTCH1-G54!KRTEASVAL   | 107  | 133  |
| >PTCH1-G54!LKRTGASV   | 17  | >PTCH1-G54!LKRTEASV    | 21   | 4    |
| >PTCH1-G54!LKRTGASVA  | 67  | >PTCH1-G54!LKRTEASVA   | 58   | 9    |
| >PTCH1-G54!LKRTGASVAL | 6   | >PTCH1-G54!LKRTEASVAL  | 5    | 1    |
| >PTCH1-G54!LKRTGASVAL | 406 | >PTCH1-G54!LKRTEASVAL  | 892  | 486  |
| >PTCH1-G54!CLKRTGASV  | 19  | >PTCH1-G54!CLKRTEASV   | 69   | 50   |
| >PTCH1-G54!CLKRTGASVA | 352 | >PTCH1-G54!CLKRTEASVA  | 553  | 201  |
| >PTCH1-G54!CLKRTGASV  | 184 | >PTCH1-G54!CLKRTEASV   | 393  | 209  |
| >PTCH1-G54!CLKRTGASV  | 122 | >PTCH1-G54!CLKRTEASV   | 200  | 78   |
| >PTCH1-G54!CLKRTGASV  | 8   | >PTCH1-G54!CLKRTEASV   | 8    | 0    |
| >PTCH1-G54!CLKRTGASVA | 118 | >PTCH1-G54!CLKRTEASVA  | 116  | 2    |
| >PTCH1-G54!CLKRTGASV  | 374 | >PTCH1-G54!CLKRTEASV   | 1173 | 799  |
| >PTCH1-G54!CLKRTGASVA | 250 | >PTCH1-G54!CLKRTEASVA  | 225  | 25   |
| >PTCH1-G54!CLKRTGASVA | 332 | >PTCH1-G54!CLKRTEASVA  | 511  | 179  |
| >PTCH1-G54!ECLKRTGASV | 72  | >PTCH1-G54!ECLKRTEASV  | 162  | 90   |
| >PTCH1-G54!GECLKRTGAS | 417 | >PTCH1-G54!GECLKRTEAS' | 389  | 28   |
| >PTCH1-G54!GECLKRTGAS | 449 | >PTCH1-G54!GECLKRTEAS' | 827  | 378  |
| >PTCH1-G54!GECLKRTGA  | 297 | >PTCH1-G54!GECLKRTEA   | 236  | 61   |
| >PTCH1-G54!GECLKRTGAS | 57  | >PTCH1-G54!GECLKRTEAS' | 75   | 18   |
| >PTCH1-G77·GLDLTDIV   | 424 | >PTCH1-G77·ELDLTDIV    | 6485 | 6061 |
| >PTCH1-G77·GLDLTDIV   | 173 | >PTCH1-G77·ELDLTDIV    | 1335 | 1162 |
| >PTCH1-G77·GLDLTDIV   | 27  | >PTCH1-G77·ELDLTDIV    | 178  | 151  |
| >PTCH1-G77·GLDLTDIV   | 5   | >PTCH1-G77·ELDLTDIV    | 99   | 94   |
| >PTCH1-G77·GLDLTDIV   | 8   | >PTCH1-G77·ELDLTDIV    | 34   | 26   |

|                       |       |                       |      |       |
|-----------------------|-------|-----------------------|------|-------|
| >PTCH1-G77·GLDLTDIV   | 73    | >PTCH1-G77·ELDLDIV    | 35   | 38    |
| >PTCH1-G77·GLDLTDIV   | 18    | >PTCH1-G77·ELDLDIV    | 66   | 48    |
| >PTCH1-G77·GLDLTDIVPR | 3973  | >PTCH1-G77·ELDLDIVPR  | 418  | 3555  |
| >PTCH1-G77·GLDLTDIV   | 12727 | >PTCH1-G77·ELDLDIV    | 373  | 12354 |
| >PTCH1-G77·GLDLTDIVPR | 1707  | >PTCH1-G77·ELDLDIVPR  | 258  | 1449  |
| >PTCH1-G77·DGLDLTDIV  | 12691 | >PTCH1-G77·DELDLDIV   | 20   | 12671 |
| >PTCH1-G77·DGLDLTDIVP | 913   | >PTCH1-G77·DELDLDIVP  | 494  | 419   |
| >PTCH1-G77·DGLDLTDI   | 23201 | >PTCH1-G77·DELDLDI    | 156  | 23045 |
| >PTCH1-G77·DGLDLTDIV  | 20966 | >PTCH1-G77·DELDLDIV   | 73   | 20893 |
| >PTCH1-G77·DGLDLTDIVP | 15570 | >PTCH1-G77·DELDLDIVP  | 43   | 15527 |
| >PTCH1-G77·DGLDLTDI   | 16373 | >PTCH1-G77·DELDLDI    | 191  | 16182 |
| >PTCH1-G77·DGLDLTDIV  | 30647 | >PTCH1-G77·DELDLDIV   | 78   | 30569 |
| >PTCH1-G77·DGLDLTDIVP | 169   | >PTCH1-G77·DELDLDIVP  | 213  | 44    |
| >PTCH1-G77·RDGLDLTDI  | 195   | >PTCH1-G77·RDELDLDI   | 148  | 47    |
| >PTCH1-G77·RDGLDLTDI  | 546   | >PTCH1-G77·RDELDLDI   | 147  | 399   |
| >PTCH1-G77·RDGLDLTDIV | 223   | >PTCH1-G77·RDELDLDIV  | 76   | 147   |
| >PTCH1-G77·RVRDGLDLTE | 255   | >PTCH1-G77·RVRDELDLD  | 436  | 181   |
| >PTCH1-G77·RVRDGLDL   | 23    | >PTCH1-G77·RVRDELDL   | 63   | 40    |
| >PTCH1-G77·RVRDGLDLT  | 222   | >PTCH1-G77·RVRDELDLT  | 728  | 506   |
| >PTCH1-G77·RVRDGLDLTE | 281   | >PTCH1-G77·RVRDELDLTD | 464  | 183   |
| >PTCH1-G77·RVRDGLDLTE | 39    | >PTCH1-G77·RVRDELDLTD | 79   | 40    |
| >PTCH1-G77·RVRDGLDL   | 32    | >PTCH1-G77·RVRDELDL   | 438  | 406   |
| >PTCH1-G77·RVRDGLDL   | 57    | >PTCH1-G77·RVRDELDL   | 198  | 141   |
| >PTCH1-G77·TRVRDGLDL  | 481   | >PTCH1-G77·TRVRDELDL  | 768  | 287   |
| >PTCH1-G77·TTRVRDGL   | 86    | >PTCH1-G77·TTRVRDEL   | 145  | 59    |
| >PTCH1-G77·TTRVRDGLDL | 54    | >PTCH1-G77·TTRVRDELDL | 109  | 55    |
| >PTCH1-G77·TTRVRDGLDL | 316   | >PTCH1-G77·TTRVRDELDL | 453  | 137   |
| >PTCH1-G77·GTTRVRDGL  | 322   | >PTCH1-G77·GTTRVRDEL  | 128  | 194   |
| >PTCH1-G77·GTTRVRDGLI | 458   | >PTCH1-G77·GTTRVRDELC | 778  | 320   |
| >PTCH1-G77·LYGTTRVRDE | 104   | >PTCH1-G77·LYGTTRVRDE | 49   | 55    |
| >PTCH1-G77·LYGTTRVRDE | 21    | >PTCH1-G77·LYGTTRVRDE | 10   | 11    |
| >PTCH1-H67·HTHVYYTTA  | 1217  | >PTCH1-H67·YTHVYYTTA  | 86   | 1131  |
| >PTCH1-H67·HTHVYYTTA  | 5107  | >PTCH1-H67·YTHVYYTTA  | 449  | 4658  |
| >PTCH1-H67·HTHVYYTT   | 216   | >PTCH1-H67·YTHVYYTT   | 3419 | 3203  |
| >PTCH1-H67·HTHVYYTTA  | 15    | >PTCH1-H67·YTHVYYTTA  | 304  | 289   |
| >PTCH1-H67·HTHVYYTTAE | 178   | >PTCH1-H67·YTHVYYTTAE | 2968 | 2790  |
| >PTCH1-H67·HTHVYYTTA  | 159   | >PTCH1-H67·YTHVYYTTA  | 298  | 139   |
| >PTCH1-H67·HTHVYYTTA  | 2300  | >PTCH1-H67·YTHVYYTTA  | 498  | 1802  |
| >PTCH1-H67·HTHVYYTTA  | 2970  | >PTCH1-H67·YTHVYYTTA  | 353  | 2617  |
| >PTCH1-H67·TVQLRTEYDP | 1860  | >PTCH1-H67·TVQLRTEYDP | 227  | 1633  |
| >PTCH1-H67·TVQLRTEYDP | 13124 | >PTCH1-H67·TVQLRTEYDP | 165  | 12959 |
| >PTCH1-H67·DPHTHVYY   | 307   | >PTCH1-H67·DPYTHVYY   | 193  | 114   |
| >PTCH1-H67·DPHTHVYY   | 195   | >PTCH1-H67·DPYTHVYY   | 87   | 108   |



|                        |      |                        |     |      |
|------------------------|------|------------------------|-----|------|
| >PTCH1-H67:DPHPTHVYY   | 83   | >PTCH1-H67:DPYTHVYYY   | 28  | 55   |
| >PTCH1-H67:DPHPTHVYYTT | 2101 | >PTCH1-H67:DPYTHVYYTT  | 344 | 1757 |
| >PTCH1-H67:DPHPTHVYY   | 1028 | >PTCH1-H67:DPYTHVYYY   | 212 | 816  |
| >PTCH1-H67:DPHPTHVYYTT | 511  | >PTCH1-H67:DPYTHVYYTT  | 83  | 428  |
| >PTCH1-H67:DPHPTHVYY   | 1397 | >PTCH1-H67:DPYTHVYYY   | 309 | 1088 |
| >PTCH1-H67:DPHPTHVYY   | 720  | >PTCH1-H67:DPYTHVYYY   | 104 | 616  |
| >PTCH1-H67:YDPHPTHVYY  | 180  | >PTCH1-H67:YDPYTHVYYY  | 139 | 41   |
| >PTCH1-H67:EYDPHPTHVYY | 61   | >PTCH1-H67:EYDPYTHVYYY | 81  | 20   |
| >PTCH1-H67:EYDPHPTHVY  | 253  | >PTCH1-H67:EYDPYTHVY   | 437 | 184  |
| >PTCH1-H67:EYDPHPTHVYY | 731  | >PTCH1-H67:EYDPYTHVYYY | 473 | 258  |
| >PTCH1-H67:EYDPHPTHVYY | 55   | >PTCH1-H67:EYDPYTHVYYY | 15  | 40   |
| >PTCH1-H67:EYDPHPTHVY  | 430  | >PTCH1-H67:EYDPYTHVY   | 215 | 215  |
| >PTCH1-H67:EYDPHPTHVYY | 507  | >PTCH1-H67:EYDPYTHVYYY | 170 | 337  |
| >PTCH1-H67:EYDPHPTHV   | 687  | >PTCH1-H67:EYDPYTHV    | 415 | 272  |
| >PTCH1-H67:EYDPHPTHVY  | 1417 | >PTCH1-H67:EYDPYTHVY   | 473 | 944  |
| >PTCH1-H67:EYDPHPTHVY  | 129  | >PTCH1-H67:EYDPYTHVY   | 102 | 27   |
| >PTCH1-H67:TEYDPHPTHVY | 87   | >PTCH1-H67:TEYDPYTHVY  | 106 | 19   |
| >PTCH1-H67:TEYDPHPTHVY | 341  | >PTCH1-H67:TEYDPYTHVY  | 334 | 7    |
| >PTCH1-H67:TEYDPHPTHVY | 132  | >PTCH1-H67:TEYDPYTHVY  | 175 | 43   |
| >PTCH1-H67:TEYDPHPTHVY | 346  | >PTCH1-H67:TEYDPYTHVY  | 462 | 116  |
| >PTCH1-H67:TEYDPHPTHVY | 181  | >PTCH1-H67:TEYDPYTHVY  | 273 | 92   |
| >PTCH1-H67:TEYDPHPTHVY | 198  | >PTCH1-H67:TEYDPYTHVY  | 142 | 56   |
| >PTCH1-H67:TEYDPHPTHVY | 116  | >PTCH1-H67:TEYDPYTHVY  | 100 | 16   |
| >PTCH1-H67:TEYDPHPTH   | 210  | >PTCH1-H67:TEYDPYTH    | 277 | 67   |
| >PTCH1-H67:TEYDPHPTHVY | 131  | >PTCH1-H67:TEYDPYTHVY  | 162 | 31   |
| >PTCH1-H67:TEYDPHPTHVY | 19   | >PTCH1-H67:TEYDPYTHVY  | 22  | 3    |
| >PTCH1-H67:TEYDPHPTHV  | 382  | >PTCH1-H67:TEYDPYTHV   | 319 | 63   |
| >PTCH1-H67:TEYDPHPTHVY | 801  | >PTCH1-H67:TEYDPYTHVY  | 407 | 394  |
| >PTCH1-H67:TEYDPHPTHVY | 539  | >PTCH1-H67:TEYDPYTHVY  | 440 | 99   |
| >PTCH1-H67:TEYDPHPTHVY | 253  | >PTCH1-H67:TEYDPYTHVY  | 207 | 46   |
| >PTCH1-H67:TEYDPHPTHVY | 139  | >PTCH1-H67:TEYDPYTHVY  | 92  | 47   |
| >PTCH1-H67:TEYDPHPTHVY | 197  | >PTCH1-H67:TEYDPYTHVY  | 157 | 40   |
| >PTCH1-H67:TEYDPHPTHV  | 314  | >PTCH1-H67:TEYDPYTHV   | 290 | 24   |
| >PTCH1-H67:TEYDPHPTHV  | 59   | >PTCH1-H67:TEYDPYTHV   | 25  | 34   |
| >PTCH1-H67:RTEYDPHPTHV | 28   | >PTCH1-H67:RTEYDPYTHV  | 25  | 3    |
| >PTCH1-H67:RTEYDPHPTHV | 483  | >PTCH1-H67:RTEYDPYTHV  | 844 | 361  |
| >PTCH1-H67:RTEYDPHPTHV | 314  | >PTCH1-H67:RTEYDPYTHV  | 205 | 109  |
| >PTCH1-H67:RTEYDPHPTHV | 17   | >PTCH1-H67:RTEYDPYTHV  | 16  | 1    |
| >PTCH1-H67:RTEYDPHPTH  | 621  | >PTCH1-H67:RTEYDPYTH   | 145 | 476  |
| >PTCH1-H67:RTEYDPHPTHV | 159  | >PTCH1-H67:RTEYDPYTHV  | 107 | 52   |
| >PTCH1-H67:RTEYDPHPTHV | 227  | >PTCH1-H67:RTEYDPYTHV  | 355 | 128  |
| >PTCH1-H67:RTEYDPHPTHV | 69   | >PTCH1-H67:RTEYDPYTHV  | 49  | 20   |
| >PTCH1-H67:RTEYDPHPTHV | 9    | >PTCH1-H67:RTEYDPYTHV  | 10  | 1    |

|                        |       |                        |      |       |
|------------------------|-------|------------------------|------|-------|
| >PTCH1-H67:RTEYDPHTHV  | 479   | >PTCH1-H67:RTEYDPYTHV  | 580  | 101   |
| >PTCH1-H67:RTEYDPHTH   | 392   | >PTCH1-H67:RTEYDPYTH   | 472  | 80    |
| >PTCH1-H67:RTEYDPHTHV  | 340   | >PTCH1-H67:RTEYDPYTHV  | 252  | 88    |
| >PTCH1-H67:RTEYDPHTHV  | 33    | >PTCH1-H67:RTEYDPYTHV  | 22   | 11    |
| >PTCH1-H67:RTEYDPHTHV  | 157   | >PTCH1-H67:RTEYDPYTHV  | 101  | 56    |
| >PTCH1-H67:LRTEYDPH    | 3676  | >PTCH1-H67:LRTEYDPY    | 258  | 3418  |
| >PTCH1-H67:LRTEYDPH    | 4264  | >PTCH1-H67:LRTEYDPY    | 72   | 4192  |
| >PTCH1-H67:QLRTEYDPH   | 9253  | >PTCH1-H67:QLRTEYDPY   | 170  | 9083  |
| >PTCH1-H67:QLRTEYDPH   | 9098  | >PTCH1-H67:QLRTEYDPY   | 323  | 8775  |
| >PTCH1-H67:QLRTEYDPH   | 5410  | >PTCH1-H67:QLRTEYDPY   | 136  | 5274  |
| >PTCH1-H67:VQLRTEYDPH  | 617   | >PTCH1-H67:VQLRTEYDPY  | 236  | 381   |
| >PTCH1-H67:VQLRTEYDPH  | 21797 | >PTCH1-H67:VQLRTEYDPY  | 415  | 21382 |
| >PTCH1-H67:VQLRTEYDPH  | 6994  | >PTCH1-H67:VQLRTEYDPY  | 162  | 6832  |
| >PTCH1-H67:VQLRTEYDPH  | 390   | >PTCH1-H67:VQLRTEYDPY  | 7    | 383   |
| >PTCH1-I159:IQTPKEEGAN | 569   | >PTCH1-I159:LQTPKEEGAN | 495  | 74    |
| >PTCH1-I159:IQTPKEEGA  | 367   | >PTCH1-I159:LQTPKEEGA  | 375  | 8     |
| >PTCH1-I159:IQTPKEEGAN | 92    | >PTCH1-I159:LQTPKEEGAN | 89   | 3     |
| >PTCH1-I159:IQTPKEEGAN | 465   | >PTCH1-I159:LQTPKEEGAN | 197  | 268   |
| >PTCH1-I159:MIQTPKEEGA | 2774  | >PTCH1-I159:MLQTPKEEGA | 112  | 2662  |
| >PTCH1-I159:MIQTPKEEGA | 2331  | >PTCH1-I159:MLQTPKEEGA | 26   | 2305  |
| >PTCH1-I159:EEAMFNPQLI | 17    | >PTCH1-I159:EEAMFNPQLI | 209  | 192   |
| >PTCH1-I159:EEAMFNPQLI | 267   | >PTCH1-I159:EEAMFNPQLI | 81   | 186   |
| >PTCH1-I159:EEAMFNPQLI | 478   | >PTCH1-I159:EEAMFNPQLI | 225  | 253   |
| >PTCH1-I159:EEAMFNPQLI | 647   | >PTCH1-I159:EEAMFNPQLI | 378  | 269   |
| >PTCH1-I159:EEAMFNPQLI | 80    | >PTCH1-I159:EEAMFNPQLI | 203  | 123   |
| >PTCH1-I159:EEAMFNPQLI | 115   | >PTCH1-I159:EEAMFNPQLI | 691  | 576   |
| >PTCH1-I159:LMIQTPKEEG | 455   | >PTCH1-I159:LMLQTPKEEG | 1670 | 1215  |
| >PTCH1-I159:LMIQTPKEEG | 87    | >PTCH1-I159:LMLQTPKEEG | 729  | 642   |
| >PTCH1-I159:LMIQTPKEEG | 29    | >PTCH1-I159:LMLQTPKEEG | 9    | 20    |
| >PTCH1-I159:LMIQTPKEEG | 194   | >PTCH1-I159:LMLQTPKEEG | 107  | 87    |
| >PTCH1-I159:LMIQTPKEEG | 363   | >PTCH1-I159:LMLQTPKEEG | 45   | 318   |
| >PTCH1-I159:LMIQTPKEEG | 2828  | >PTCH1-I159:LMLQTPKEEG | 76   | 2752  |
| >PTCH1-I159:LMIQTPKEEG | 38    | >PTCH1-I159:LMLQTPKEEG | 25   | 13    |
| >PTCH1-I159:QLMIQTPK   | 70    | >PTCH1-I159:QLMLQTPK   | 69   | 1     |
| >PTCH1-I159:QLMIQTPK   | 59    | >PTCH1-I159:QLMLQTPK   | 44   | 15    |
| >PTCH1-I159:MFNPQLMI   | 1376  | >PTCH1-I159:MFNPQLML   | 449  | 927   |
| >PTCH1-I159:MFNPQLMI   | 53    | >PTCH1-I159:MFNPQLML   | 45   | 8     |
| >PTCH1-I159:MFNPQLMIQ  | 4212  | >PTCH1-I159:MFNPQLMLC  | 451  | 3761  |
| >PTCH1-I159:AMFNPQLMI  | 1115  | >PTCH1-I159:AMFNPQLMI  | 378  | 737   |
| >PTCH1-I159:AMFNPQLMI  | 35    | >PTCH1-I159:AMFNPQLMI  | 28   | 7     |
| >PTCH1-I159:AMFNPQLMI  | 329   | >PTCH1-I159:AMFNPQLMI  | 353  | 24    |
| >PTCH1-I159:AMFNPQLMI  | 255   | >PTCH1-I159:AMFNPQLMI  | 58   | 197   |
| >PTCH1-I159:AMFNPQLMI  | 79    | >PTCH1-I159:AMFNPQLMI  | 141  | 62    |

|                         |      |                        |      |      |
|-------------------------|------|------------------------|------|------|
| >PTCH1-I159 AMFNPQLMI   | 476  | >PTCH1-I159 AMFNPQLMI  | 374  | 102  |
| >PTCH1-I159 AMFNPQLMI   | 384  | >PTCH1-I159 AMFNPQLMI  | 316  | 68   |
| >PTCH1-I159 AMFNPQLMI   | 2    | >PTCH1-I159 AMFNPQLMI  | 2    | 0    |
| >PTCH1-I159 AMFNPQLMI   | 595  | >PTCH1-I159 AMFNPQLMI  | 196  | 399  |
| >PTCH1-I159 AMFNPQLMI   | 12   | >PTCH1-I159 AMFNPQLMI  | 17   | 5    |
| >PTCH1-I159 AMFNPQLMI   | 59   | >PTCH1-I159 AMFNPQLMI  | 49   | 10   |
| >PTCH1-I159 AMFNPQLMI   | 12   | >PTCH1-I159 AMFNPQLMI  | 10   | 2    |
| >PTCH1-I159 AMFNPQLMI   | 133  | >PTCH1-I159 AMFNPQLMI  | 172  | 39   |
| >PTCH1-I159 AMFNPQLMI   | 520  | >PTCH1-I159 AMFNPQLMI  | 256  | 264  |
| >PTCH1-I159 AMFNPQLMI   | 11   | >PTCH1-I159 AMFNPQLMI  | 5    | 6    |
| >PTCH1-I159 AMFNPQLMI   | 90   | >PTCH1-I159 AMFNPQLMI  | 51   | 39   |
| >PTCH1-I159 AMFNPQLMI   | 34   | >PTCH1-I159 AMFNPQLMI  | 38   | 4    |
| >PTCH1-I159 AMFNPQLMI   | 29   | >PTCH1-I159 AMFNPQLMI  | 73   | 44   |
| >PTCH1-I159 AMFNPQLMI   | 680  | >PTCH1-I159 AMFNPQLMI  | 256  | 424  |
| >PTCH1-I159 AMFNPQLMI   | 12   | >PTCH1-I159 AMFNPQLMI  | 9    | 3    |
| >PTCH1-I159 AMFNPQLMI   | 191  | >PTCH1-I159 AMFNPQLMI  | 491  | 300  |
| >PTCH1-I159 AMFNPQLMI   | 2662 | >PTCH1-I159 AMFNPQLMI  | 455  | 2207 |
| >PTCH1-I159 AMFNPQLMI   | 186  | >PTCH1-I159 AMFNPQLMI  | 3599 | 3413 |
| >PTCH1-I159 EAMFNPQLV   | 622  | >PTCH1-I159 EAMFNPQLV  | 256  | 366  |
| >PTCH1-I159 EAMFNPQLV   | 209  | >PTCH1-I159 EAMFNPQLV  | 487  | 278  |
| >PTCH1-I159 EAMFNPQLV   | 23   | >PTCH1-I159 EAMFNPQLV  | 38   | 15   |
| >PTCH1-I791 IAAQFKYFSFY | 670  | >PTCH1-I791 TAAQFKYFSF | 181  | 489  |
| >PTCH1-I791 IAAQFKYFSFY | 947  | >PTCH1-I791 TAAQFKYFSF | 144  | 803  |
| >PTCH1-I791 IAAQFKYFSFY | 39   | >PTCH1-I791 TAAQFKYFSF | 47   | 8    |
| >PTCH1-I791 IAAQFKYFSFY | 12   | >PTCH1-I791 TAAQFKYFSF | 22   | 10   |
| >PTCH1-I791 IAAQFKYFSFY | 54   | >PTCH1-I791 TAAQFKYFSF | 16   | 38   |
| >PTCH1-I791 IAAQFKYFS   | 2915 | >PTCH1-I791 TAAQFKYFS  | 200  | 2715 |
| >PTCH1-I791 IAAQFKYFSFY | 96   | >PTCH1-I791 TAAQFKYFSF | 107  | 11   |
| >PTCH1-I791 IAAQFKYFSFY | 372  | >PTCH1-I791 TAAQFKYFSF | 728  | 356  |
| >PTCH1-I791 IAAQFKYF    | 45   | >PTCH1-I791 TAAQFKYF   | 352  | 307  |
| >PTCH1-I791 IAAQFKYFSF  | 46   | >PTCH1-I791 TAAQFKYFSF | 355  | 309  |
| >PTCH1-I791 IAAQFKYFSFY | 91   | >PTCH1-I791 TAAQFKYFSF | 638  | 547  |
| >PTCH1-I791 IAAQFKYF    | 38   | >PTCH1-I791 TAAQFKYF   | 270  | 232  |
| >PTCH1-I791 IAAQFKYFSF  | 23   | >PTCH1-I791 TAAQFKYFSF | 129  | 106  |
| >PTCH1-I791 IAAQFKYFSFY | 79   | >PTCH1-I791 TAAQFKYFSF | 555  | 476  |
| >PTCH1-I791 IAAQFKYFSFY | 103  | >PTCH1-I791 TAAQFKYFSF | 120  | 17   |
| >PTCH1-I791 IAAQFKYFSFY | 493  | >PTCH1-I791 TAAQFKYFSF | 1195 | 702  |
| >PTCH1-I791 IAAQFKYF    | 76   | >PTCH1-I791 TAAQFKYF   | 197  | 121  |
| >PTCH1-I791 IAAQFKYFSF  | 127  | >PTCH1-I791 TAAQFKYFSF | 330  | 203  |
| >PTCH1-I791 IAAQFKYFSFY | 177  | >PTCH1-I791 TAAQFKYFSF | 555  | 378  |
| >PTCH1-I791 IAAQFKYF    | 72   | >PTCH1-I791 TAAQFKYF   | 577  | 505  |
| >PTCH1-I791 IAAQFKYFSF  | 25   | >PTCH1-I791 TAAQFKYFSF | 111  | 86   |
| >PTCH1-I791 IAAQFKYFSFY | 194  | >PTCH1-I791 TAAQFKYFSF | 1623 | 1429 |

|                         |      |                         |      |      |
|-------------------------|------|-------------------------|------|------|
| >PTCH1-I791 IAAQFKYFSFY | 15   | >PTCH1-I791 TAAQFKYFSF' | 40   | 25   |
| >PTCH1-I791 IAAQFKYFSFY | 332  | >PTCH1-I791 TAAQFKYFSF' | 843  | 511  |
| >PTCH1-I791 FIAAQFKY    | 1015 | >PTCH1-I791 FTAAQFKY    | 30   | 985  |
| >PTCH1-I791 FIAAQFKYF   | 139  | >PTCH1-I791 FTAAQFKYF   | 593  | 454  |
| >PTCH1-I791 FIAAQFKYFSF | 59   | >PTCH1-I791 FTAAQFKYFS  | 221  | 162  |
| >PTCH1-I791 FIAAQFKYF   | 49   | >PTCH1-I791 FTAAQFKYF   | 87   | 38   |
| >PTCH1-I791 FIAAQFKYFSF | 36   | >PTCH1-I791 FTAAQFKYFS  | 56   | 20   |
| >PTCH1-I791 FIAAQFKYF   | 260  | >PTCH1-I791 FTAAQFKYF   | 58   | 202  |
| >PTCH1-I791 FIAAQFKYFSF | 148  | >PTCH1-I791 FTAAQFKYFS  | 37   | 111  |
| >PTCH1-I791 FIAAQFKY    | 414  | >PTCH1-I791 FTAAQFKY    | 78   | 336  |
| >PTCH1-I791 FIAAQFKYFSF | 1357 | >PTCH1-I791 FTAAQFKYFS  | 303  | 1054 |
| >PTCH1-I791 FIAAQFKY    | 265  | >PTCH1-I791 FTAAQFKY    | 36   | 229  |
| >PTCH1-I791 FIAAQFKYF   | 348  | >PTCH1-I791 FTAAQFKYF   | 39   | 309  |
| >PTCH1-I791 FIAAQFKYFSF | 525  | >PTCH1-I791 FTAAQFKYFS  | 65   | 460  |
| >PTCH1-I791 FIAAQFKY    | 412  | >PTCH1-I791 FTAAQFKY    | 57   | 355  |
| >PTCH1-I791 FIAAQFKYF   | 462  | >PTCH1-I791 FTAAQFKYF   | 70   | 392  |
| >PTCH1-I791 FIAAQFKYFSF | 1720 | >PTCH1-I791 FTAAQFKYFS  | 235  | 1485 |
| >PTCH1-I791 FIAAQFKY    | 12   | >PTCH1-I791 FTAAQFKY    | 9    | 3    |
| >PTCH1-I791 FIAAQFKYF   | 361  | >PTCH1-I791 FTAAQFKYF   | 231  | 130  |
| >PTCH1-I791 FIAAQFKYFSF | 213  | >PTCH1-I791 FTAAQFKYFS  | 132  | 81   |
| >PTCH1-I791 FIAAQFKY    | 164  | >PTCH1-I791 FTAAQFKY    | 104  | 60   |
| >PTCH1-I791 FIAAQFKY    | 323  | >PTCH1-I791 FTAAQFKY    | 54   | 269  |
| >PTCH1-I791 FIAAQFKY    | 101  | >PTCH1-I791 FTAAQFKY    | 60   | 41   |
| >PTCH1-I791 FIAAQFKYFSF | 232  | >PTCH1-I791 FTAAQFKYFS  | 1746 | 1514 |
| >PTCH1-I791 FIAAQFKY    | 369  | >PTCH1-I791 FTAAQFKY    | 488  | 119  |
| >PTCH1-I791 FIAAQFKYF   | 112  | >PTCH1-I791 FTAAQFKYF   | 155  | 43   |
| >PTCH1-I791 FIAAQFKYFSF | 72   | >PTCH1-I791 FTAAQFKYFS  | 91   | 19   |
| >PTCH1-I791 FIAAQFKY    | 132  | >PTCH1-I791 FTAAQFKY    | 564  | 432  |
| >PTCH1-I791 FIAAQFKYF   | 318  | >PTCH1-I791 FTAAQFKYF   | 1355 | 1037 |
| >PTCH1-I791 FIAAQFKYFSF | 417  | >PTCH1-I791 FTAAQFKYFS  | 1748 | 1331 |
| >PTCH1-I791 FIAAQFKYF   | 43   | >PTCH1-I791 FTAAQFKYF   | 24   | 19   |
| >PTCH1-I791 FIAAQFKYFSF | 40   | >PTCH1-I791 FTAAQFKYFS  | 25   | 15   |
| >PTCH1-I791 FIAAQFKY    | 1610 | >PTCH1-I791 FTAAQFKY    | 6    | 1604 |
| >PTCH1-I791 FIAAQFKYF   | 2578 | >PTCH1-I791 FTAAQFKYF   | 8    | 2570 |
| >PTCH1-I791 FIAAQFKYFSF | 1006 | >PTCH1-I791 FTAAQFKYFS  | 6    | 1000 |
| >PTCH1-I791 FIAAQFKY    | 177  | >PTCH1-I791 FTAAQFKY    | 230  | 53   |
| >PTCH1-I791 FIAAQFKYFSF | 394  | >PTCH1-I791 FTAAQFKYFS  | 499  | 105  |
| >PTCH1-I791 FIAAQFKY    | 1014 | >PTCH1-I791 FTAAQFKY    | 107  | 907  |
| >PTCH1-I791 FIAAQFKYF   | 3775 | >PTCH1-I791 FTAAQFKYF   | 136  | 3639 |
| >PTCH1-I791 FIAAQFKYFSF | 571  | >PTCH1-I791 FTAAQFKYFS  | 52   | 519  |
| >PTCH1-I791 FIAAQFKYF   | 2758 | >PTCH1-I791 FTAAQFKYF   | 17   | 2741 |
| >PTCH1-I791 FIAAQFKYFSF | 6643 | >PTCH1-I791 FTAAQFKYFS  | 50   | 6593 |
| >PTCH1-I791 FIAAQFKY    | 2490 | >PTCH1-I791 FTAAQFKY    | 112  | 2378 |

|                         |      |                        |      |      |
|-------------------------|------|------------------------|------|------|
| >PTCH1-I791 FIAAQFKYF   | 2369 | >PTCH1-I791 FTAAQFKYF  | 70   | 2299 |
| >PTCH1-I791 FIAAQFKYFSF | 2729 | >PTCH1-I791 FTAAQFKYFS | 98   | 2631 |
| >PTCH1-I791 FIAAQFKY    | 77   | >PTCH1-I791 FTAAQFKY   | 251  | 174  |
| >PTCH1-I791 FIAAQFKYFSF | 237  | >PTCH1-I791 FTAAQFKYFS | 816  | 579  |
| >PTCH1-I791 FIAAQFKY    | 138  | >PTCH1-I791 FTAAQFKY   | 141  | 3    |
| >PTCH1-I791 VPRETREYDF  | 211  | >PTCH1-I791 VPRETREYDF | 1634 | 1423 |
| >PTCH1-I791 DFIAAQFKYF  | 75   | >PTCH1-I791 DFTAAQFKYF | 132  | 57   |
| >PTCH1-I791 DFIAAQFKYF  | 100  | >PTCH1-I791 DFTAAQFKYF | 197  | 97   |
| >PTCH1-I791 DFIAAQFKY   | 383  | >PTCH1-I791 DFTAAQFKY  | 5410 | 5027 |
| >PTCH1-I791 DFIAAQFKYF  | 308  | >PTCH1-I791 DFTAAQFKYF | 6081 | 5773 |
| >PTCH1-I791 DFIAAQFKY   | 14   | >PTCH1-I791 DFTAAQFKY  | 33   | 19   |
| >PTCH1-I791 DFIAAQFKYF  | 403  | >PTCH1-I791 DFTAAQFKYF | 749  | 346  |
| >PTCH1-I791 DFIAAQFKY   | 480  | >PTCH1-I791 DFTAAQFKY  | 519  | 39   |
| >PTCH1-I791 DFIAAQFK    | 119  | >PTCH1-I791 DFTAAQFK   | 116  | 3    |
| >PTCH1-I791 DFIAAQFK    | 67   | >PTCH1-I791 DFTAAQFK   | 114  | 47   |
| >PTCH1-I791 DFIAAQFKY   | 445  | >PTCH1-I791 DFTAAQFKY  | 1287 | 842  |
| >PTCH1-I791 DFIAAQFKY   | 90   | >PTCH1-I791 DFTAAQFKY  | 36   | 54   |
| >PTCH1-I791 YDFIAAQFKYI | 316  | >PTCH1-I791 YDFTAAQFKY | 290  | 26   |
| >PTCH1-I791 YDFIAAQFKYI | 1802 | >PTCH1-I791 YDFTAAQFKY | 251  | 1551 |
| >PTCH1-I791 YDFIAAQFKY  | 105  | >PTCH1-I791 YDFTAAQFKY | 97   | 8    |
| >PTCH1-I791 YDFIAAQFKY  | 295  | >PTCH1-I791 YDFTAAQFKY | 412  | 117  |
| >PTCH1-I791 YDFIAAQFK   | 272  | >PTCH1-I791 YDFTAAQFK  | 170  | 102  |
| >PTCH1-I791 YDFIAAQF    | 182  | >PTCH1-I791 YDFTAAQF   | 46   | 136  |
| >PTCH1-I791 YDFIAAQFKY  | 863  | >PTCH1-I791 YDFTAAQFKY | 359  | 504  |
| >PTCH1-I791 YDFIAAQFKYI | 59   | >PTCH1-I791 YDFTAAQFKY | 22   | 37   |
| >PTCH1-I791 YDFIAAQF    | 357  | >PTCH1-I791 YDFTAAQF   | 347  | 10   |
| >PTCH1-I791 YDFIAAQFKYI | 511  | >PTCH1-I791 YDFTAAQFKY | 473  | 38   |
| >PTCH1-I791 YDFIAAQFKY  | 321  | >PTCH1-I791 YDFTAAQFKY | 683  | 362  |
| >PTCH1-I791 YDFIAAQFKYI | 415  | >PTCH1-I791 YDFTAAQFKY | 244  | 171  |
| >PTCH1-I791 EYDFIAAQF   | 292  | >PTCH1-I791 EYDFTAAQF  | 439  | 147  |
| >PTCH1-I791 EYDFIAAQF   | 359  | >PTCH1-I791 EYDFTAAQF  | 635  | 276  |
| >PTCH1-I791 EYDFIAAQF   | 59   | >PTCH1-I791 EYDFTAAQF  | 63   | 4    |
| >PTCH1-I791 EYDFIAAQFK' | 191  | >PTCH1-I791 EYDFTAAQFK | 300  | 109  |
| >PTCH1-I791 EYDFIAAQFK' | 359  | >PTCH1-I791 EYDFTAAQFK | 490  | 131  |
| >PTCH1-I791 EYDFIAAQFK' | 22   | >PTCH1-I791 EYDFTAAQFK | 18   | 4    |
| >PTCH1-I791 REYDFIAAQF  | 311  | >PTCH1-I791 REYDFTAAQF | 172  | 139  |
| >PTCH1-I791 REYDFIAA    | 168  | >PTCH1-I791 REYDFTAA   | 228  | 60   |
| >PTCH1-I791 REYDFIAAQFI | 524  | >PTCH1-I791 REYDFTAAQF | 422  | 102  |
| >PTCH1-I791 REYDFIAAQFI | 488  | >PTCH1-I791 REYDFTAAQF | 342  | 146  |
| >PTCH1-I791 REYDFIAAQF  | 77   | >PTCH1-I791 REYDFTAAQF | 67   | 10   |
| >PTCH1-I791 REYDFIAAQF  | 126  | >PTCH1-I791 REYDFTAAQF | 96   | 30   |
| >PTCH1-I791 REYDFIAAQF  | 16   | >PTCH1-I791 REYDFTAAQF | 10   | 6    |
| >PTCH1-I791 REYDFIAAQF  | 64   | >PTCH1-I791 REYDFTAAQF | 47   | 17   |

|                         |      |                        |       |       |
|-------------------------|------|------------------------|-------|-------|
| >PTCH1-I791 REYDFIAAQ   | 138  | >PTCH1-I791 REYDFTAAQ  | 205   | 67    |
| >PTCH1-I791 REYDFIAAQF  | 137  | >PTCH1-I791 REYDFTAAQF | 504   | 367   |
| >PTCH1-I791 REYDFIAA    | 108  | >PTCH1-I791 REYDFTAA   | 175   | 67    |
| >PTCH1-I791 REYDFIAAQF  | 448  | >PTCH1-I791 REYDFTAAQF | 466   | 18    |
| >PTCH1-I791 REYDFIAA    | 20   | >PTCH1-I791 REYDFTAA   | 25    | 5     |
| >PTCH1-I791 REYDFIAAQ   | 193  | >PTCH1-I791 REYDFTAAQ  | 404   | 211   |
| >PTCH1-I791 REYDFIAAQF  | 132  | >PTCH1-I791 REYDFTAAQF | 166   | 34    |
| >PTCH1-I791 REYDFIAAQF  | 14   | >PTCH1-I791 REYDFTAAQF | 19    | 5     |
| >PTCH1-I791 REYDFIAAQF  | 14   | >PTCH1-I791 REYDFTAAQF | 19    | 5     |
| >PTCH1-I791 REYDFIAA    | 5    | >PTCH1-I791 REYDFTAA   | 7     | 2     |
| >PTCH1-I791 REYDFIAAQ   | 176  | >PTCH1-I791 REYDFTAAQ  | 209   | 33    |
| >PTCH1-I791 REYDFIAAQF  | 96   | >PTCH1-I791 REYDFTAAQF | 201   | 105   |
| >PTCH1-I791 REYDFIAAQF  | 433  | >PTCH1-I791 REYDFTAAQF | 502   | 69    |
| >PTCH1-I791 REYDFIAAQF  | 400  | >PTCH1-I791 REYDFTAAQF | 680   | 280   |
| >PTCH1-I791 REYDFIAAQF  | 318  | >PTCH1-I791 REYDFTAAQF | 488   | 170   |
| >PTCH1-I791 REYDFIAAQ   | 75   | >PTCH1-I791 REYDFTAAQ  | 79    | 4     |
| >PTCH1-I791 REYDFIAAQF  | 147  | >PTCH1-I791 REYDFTAAQF | 127   | 20    |
| >PTCH1-I791 REYDFIAAQF  | 147  | >PTCH1-I791 REYDFTAAQF | 135   | 12    |
| >PTCH1-I791 REYDFIAAQF  | 148  | >PTCH1-I791 REYDFTAAQF | 107   | 41    |
| >PTCH1-I791 TREYDFIAAQ  | 426  | >PTCH1-I791 TREYDFTAAC | 705   | 279   |
| >PTCH1-I791 ETREYDFI    | 174  | >PTCH1-I791 ETREYDFT   | 1003  | 829   |
| >PTCH1-I791 ETREYDFIAA  | 171  | >PTCH1-I791 ETREYDFTAA | 286   | 115   |
| >PTCH1-I791 ETREYDFI    | 471  | >PTCH1-I791 ETREYDFT   | 2787  | 2316  |
| >PTCH1-I791 ETREYDFIAA  | 478  | >PTCH1-I791 ETREYDFTAA | 985   | 507   |
| >PTCH1-I791 ETREYDFIAA  | 154  | >PTCH1-I791 ETREYDFTAA | 53    | 101   |
| >PTCH1-I791 ETREYDFIAA  | 592  | >PTCH1-I791 ETREYDFTAA | 444   | 148   |
| >PTCH1-I791 ETREYDFI    | 67   | >PTCH1-I791 ETREYDFT   | 2881  | 2814  |
| >PTCH1-I791 ETREYDFIA   | 736  | >PTCH1-I791 ETREYDFTA  | 206   | 530   |
| >PTCH1-I791 ETREYDFIAA  | 134  | >PTCH1-I791 ETREYDFTAA | 240   | 106   |
| >PTCH1-I791 ETREYDFI    | 146  | >PTCH1-I791 ETREYDFT   | 3570  | 3424  |
| >PTCH1-I791 ETREYDFIA   | 1779 | >PTCH1-I791 ETREYDFTA  | 438   | 1341  |
| >PTCH1-I791 ETREYDFIAA  | 404  | >PTCH1-I791 ETREYDFTAA | 486   | 82    |
| >PTCH1-I791 ETREYDFI    | 436  | >PTCH1-I791 ETREYDFT   | 34408 | 33972 |
| >PTCH1-I791 RETREYDFI   | 6    | >PTCH1-I791 RETREYDFT  | 1457  | 1451  |
| >PTCH1-I791 RETREYDFI   | 36   | >PTCH1-I791 RETREYDFT  | 3146  | 3110  |
| >PTCH1-I791 RETREYDFIA/ | 357  | >PTCH1-I791 RETREYDFTA | 756   | 399   |
| >PTCH1-I791 RETREYDFI   | 312  | >PTCH1-I791 RETREYDFT  | 736   | 424   |
| >PTCH1-I791 RETREYDFIA  | 250  | >PTCH1-I791 RETREYDFTA | 119   | 131   |
| >PTCH1-I791 RETREYDFIA/ | 147  | >PTCH1-I791 RETREYDFTA | 155   | 8     |
| >PTCH1-I791 RETREYDFI   | 745  | >PTCH1-I791 RETREYDFT  | 192   | 553   |
| >PTCH1-I791 RETREYDFIA  | 325  | >PTCH1-I791 RETREYDFTA | 124   | 201   |
| >PTCH1-I791 RETREYDFIA/ | 12   | >PTCH1-I791 RETREYDFTA | 16    | 4     |
| >PTCH1-I791 RETREYDFI   | 14   | >PTCH1-I791 RETREYDFT  | 1694  | 1680  |

|                        |      |                       |       |       |
|------------------------|------|-----------------------|-------|-------|
| >PTCH1-L101LFWWEQYIGL  | 1853 | >PTCH1-L101FFWEQYIGL  | 119   | 1734  |
| >PTCH1-L101LFWWEQYIGL  | 1893 | >PTCH1-L101FFWEQYIGL  | 180   | 1713  |
| >PTCH1-L101LFWWEQYIGL  | 4621 | >PTCH1-L101FFWEQYIGL  | 357   | 4264  |
| >PTCH1-L101LFWWEQYIGL  | 268  | >PTCH1-L101FFWEQYIGL  | 35    | 233   |
| >PTCH1-L101LFWWEQYIGL  | 3120 | >PTCH1-L101FFWEQYIGL  | 326   | 2794  |
| >PTCH1-L101LFWWEQYIGL  | 791  | >PTCH1-L101FFWEQYIGL  | 58    | 733   |
| >PTCH1-L101LFWWEQYIGL  | 770  | >PTCH1-L101FFWEQYIGL  | 103   | 667   |
| >PTCH1-L101LFWWEQYIGL  | 45   | >PTCH1-L101FFWEQYIGL  | 23    | 22    |
| >PTCH1-L101LFWWEQYIGLR | 136  | >PTCH1-L101FFWEQYIGLR | 44    | 92    |
| >PTCH1-L101LFWWEQYIGLR | 189  | >PTCH1-L101FFWEQYIGLR | 315   | 126   |
| >PTCH1-L101LFWWEQYIGLR | 209  | >PTCH1-L101FFWEQYIGLR | 89    | 120   |
| >PTCH1-L101LFWWEQYIGLR | 49   | >PTCH1-L101FFWEQYIGLR | 37    | 12    |
| >PTCH1-L101FLFWWEQYI   | 7    | >PTCH1-L101FFFWEQYI   | 449   | 442   |
| >PTCH1-L101FLFWWEQYIGL | 8    | >PTCH1-L101FFFWEQYIGL | 752   | 744   |
| >PTCH1-L101FLFWWEQYI   | 2    | >PTCH1-L101FFFWEQYI   | 30    | 28    |
| >PTCH1-L101FLFWWEQYIG  | 29   | >PTCH1-L101FFFWEQYIG  | 3866  | 3837  |
| >PTCH1-L101FLFWWEQYIGL | 8    | >PTCH1-L101FFFWEQYIGL | 418   | 410   |
| >PTCH1-L101FLFWWEQYIGL | 163  | >PTCH1-L101FFFWEQYIGL | 8348  | 8185  |
| >PTCH1-L101FLFWWEQYI   | 6    | >PTCH1-L101FFFWEQYI   | 4492  | 4486  |
| >PTCH1-L101FLFWWEQYIGL | 26   | >PTCH1-L101FFFWEQYIGL | 2617  | 2591  |
| >PTCH1-L101FLFWWEQYI   | 18   | >PTCH1-L101FFFWEQYI   | 442   | 424   |
| >PTCH1-L101FLFWWEQYIGL | 48   | >PTCH1-L101FFFWEQYIGL | 954   | 906   |
| >PTCH1-L101FLFWWEQYI   | 1    | >PTCH1-L101FFFWEQYI   | 24    | 23    |
| >PTCH1-L101FLFWWEQYIG  | 94   | >PTCH1-L101FFFWEQYIG  | 15113 | 15019 |
| >PTCH1-L101FLFWWEQYIGL | 2    | >PTCH1-L101FFFWEQYIGL | 88    | 86    |
| >PTCH1-L101FLFWWEQYIGL | 198  | >PTCH1-L101FFFWEQYIGL | 19409 | 19211 |
| >PTCH1-L101FLFWWEQYI   | 4    | >PTCH1-L101FFFWEQYI   | 2639  | 2635  |
| >PTCH1-L101FLFWWEQYIGL | 5    | >PTCH1-L101FFFWEQYIGL | 2347  | 2342  |
| >PTCH1-L101FLFWWEQYI   | 4    | >PTCH1-L101FFFWEQYI   | 172   | 168   |
| >PTCH1-L101FLFWWEQYIGL | 4    | >PTCH1-L101FFFWEQYIGL | 261   | 257   |
| >PTCH1-L101FLFWWEQYI   | 5    | >PTCH1-L101FFFWEQYI   | 5133  | 5128  |
| >PTCH1-L101FLFWWEQYIGL | 5    | >PTCH1-L101FFFWEQYIGL | 6593  | 6588  |
| >PTCH1-L101FLFWWEQYI   | 2    | >PTCH1-L101FFFWEQYI   | 439   | 437   |
| >PTCH1-L101FLFWWEQYIG  | 173  | >PTCH1-L101FFFWEQYIG  | 31366 | 31193 |
| >PTCH1-L101FLFWWEQYIGL | 2    | >PTCH1-L101FFFWEQYIGL | 201   | 199   |
| >PTCH1-L101FLFWWEQYIGL | 179  | >PTCH1-L101FFFWEQYIGL | 30788 | 30609 |
| >PTCH1-L101FLFWWEQYI   | 4225 | >PTCH1-L101FFFWEQYI   | 206   | 4019  |
| >PTCH1-L101FLFWWEQYI   | 4612 | >PTCH1-L101FFFWEQYI   | 16    | 4596  |
| >PTCH1-L101FLFWWEQYIGL | 3806 | >PTCH1-L101FFFWEQYIGL | 22    | 3784  |
| >PTCH1-L101FLFWWEQYIGL | 289  | >PTCH1-L101FFFWEQYIGL | 81    | 208   |
| >PTCH1-L101FLFWWEQYIGL | 69   | >PTCH1-L101FFFWEQYIGL | 21    | 48    |
| >PTCH1-L101FLFWWEQYIGL | 8    | >PTCH1-L101FFFWEQYIGL | 15    | 7     |
| >PTCH1-L101FLFWWEQYI   | 403  | >PTCH1-L101FFFWEQYI   | 4720  | 4317  |

|                        |      |                        |      |      |
|------------------------|------|------------------------|------|------|
| >PTCH1-L101FLFWEQYI    | 153  | >PTCH1-L101FFFWEQYI    | 5189 | 5036 |
| >PTCH1-L101FLFWEQYIGL  | 114  | >PTCH1-L101FFFWEQYIGL  | 3230 | 3116 |
| >PTCH1-L101FLFWEQYIGL  | 248  | >PTCH1-L101FFFWEQYIGL  | 1941 | 1693 |
| >PTCH1-L101FLFWEQYIGL  | 65   | >PTCH1-L101FFFWEQYIGL  | 26   | 39   |
| >PTCH1-L101FLFWEQYI    | 6503 | >PTCH1-L101FFFWEQYI    | 184  | 6319 |
| >PTCH1-L101LSSYPNGYPFI | 4591 | >PTCH1-L101LSSYPNGYPFI | 170  | 4421 |
| >PTCH1-L101LSSYPNGYPFI | 1088 | >PTCH1-L101LSSYPNGYPFI | 43   | 1045 |
| >PTCH1-L101LSSYPNGYPFI | 59   | >PTCH1-L101LSSYPNGYPFI | 11   | 48   |
| >PTCH1-L101LSSYPNGYPFI | 1119 | >PTCH1-L101LSSYPNGYPFI | 64   | 1055 |
| >PTCH1-L101LSSYPNGYPFI | 66   | >PTCH1-L101LSSYPNGYPFI | 123  | 57   |
| >PTCH1-L101LSSYPNGYPFI | 91   | >PTCH1-L101LSSYPNGYPFI | 15   | 76   |
| >PTCH1-L101LSSYPNGYPFI | 69   | >PTCH1-L101LSSYPNGYPFI | 2271 | 2202 |
| >PTCH1-L101PFLFWEQYI   | 137  | >PTCH1-L101PFFFWEQYI   | 125  | 12   |
| >PTCH1-L101PFLFWEQY    | 15   | >PTCH1-L101PFFFWEQY    | 10   | 5    |
| >PTCH1-L101PFLFWEQY    | 1141 | >PTCH1-L101PFFFWEQY    | 132  | 1009 |
| >PTCH1-L101YPFLFWEQYI  | 411  | >PTCH1-L101YPFFFWEQYI  | 789  | 378  |
| >PTCH1-L101YPFLFWEQYI  | 82   | >PTCH1-L101YPFFFWEQYI  | 53   | 29   |
| >PTCH1-L101YPFLFWEQYI  | 1005 | >PTCH1-L101YPFFFWEQYI  | 471  | 534  |
| >PTCH1-L101YPFLFWEQY   | 54   | >PTCH1-L101YPFFFWEQY   | 25   | 29   |
| >PTCH1-L101YPFLFWEQYI  | 534  | >PTCH1-L101YPFFFWEQYI  | 259  | 275  |
| >PTCH1-L101YPFLFWEQY   | 112  | >PTCH1-L101YPFFFWEQY   | 73   | 39   |
| >PTCH1-L101YPFLFWEQY   | 336  | >PTCH1-L101YPFFFWEQY   | 147  | 189  |
| >PTCH1-L101YPFLFWEQY   | 175  | >PTCH1-L101YPFFFWEQY   | 187  | 12   |
| >PTCH1-L101YPFLFWEQ    | 106  | >PTCH1-L101YPFFFWEQ    | 107  | 1    |
| >PTCH1-L101YPFLFWEQY   | 9    | >PTCH1-L101YPFFFWEQY   | 9    | 0    |
| >PTCH1-L101YPFLFWEQYI  | 166  | >PTCH1-L101YPFFFWEQYI  | 152  | 14   |
| >PTCH1-L101YPFLFWEQY   | 54   | >PTCH1-L101YPFFFWEQY   | 50   | 4    |
| >PTCH1-L101YPFLFWEQYI  | 486  | >PTCH1-L101YPFFFWEQYI  | 472  | 14   |
| >PTCH1-L101YPFLFWEQ    | 375  | >PTCH1-L101YPFFFWEQ    | 558  | 183  |
| >PTCH1-L101YPFLFWEQYI  | 195  | >PTCH1-L101YPFFFWEQYI  | 300  | 105  |
| >PTCH1-L101YPFLFWEQYI  | 140  | >PTCH1-L101YPFFFWEQYI  | 229  | 89   |
| >PTCH1-L101YPFLFWEQY   | 96   | >PTCH1-L101YPFFFWEQY   | 35   | 61   |
| >PTCH1-L101YPFLFWEQY   | 11   | >PTCH1-L101YPFFFWEQY   | 12   | 1    |
| >PTCH1-L101YPFLFWEQY   | 31   | >PTCH1-L101YPFFFWEQY   | 28   | 3    |
| >PTCH1-L101GYPFLFWEQ`  | 94   | >PTCH1-L101GYPFFFWEQ`  | 100  | 6    |
| >PTCH1-L101GYPFLFWEQ`  | 72   | >PTCH1-L101GYPFFFWEQ`  | 70   | 2    |
| >PTCH1-L101GYPFLFWE    | 362  | >PTCH1-L101GYPFFFWE    | 269  | 93   |
| >PTCH1-L101GYPFLFWEQ   | 53   | >PTCH1-L101GYPFFFWEQ   | 56   | 3    |
| >PTCH1-L101GYPFLFWEQ`  | 43   | >PTCH1-L101GYPFFFWEQ`  | 43   | 0    |
| >PTCH1-L101GYPFLFWEQ`  | 6    | >PTCH1-L101GYPFFFWEQ`  | 6    | 0    |
| >PTCH1-L101GYPFLFWEQ`  | 27   | >PTCH1-L101GYPFFFWEQ`  | 17   | 10   |
| >PTCH1-L101GYPFLFWEQ`  | 185  | >PTCH1-L101GYPFFFWEQ`  | 86   | 99   |
| >PTCH1-L101GYPFLFWEQ   | 1575 | >PTCH1-L101GYPFFFWEQ   | 449  | 1126 |



|                        |      |                        |       |       |
|------------------------|------|------------------------|-------|-------|
| >PTCH1-L101GYPFLWEQ'   | 344  | >PTCH1-L101GYPFFFWEQ'  | 321   | 23    |
| >PTCH1-L101NGYPFLWEQ'  | 147  | >PTCH1-L101NGYPFFFWEQ' | 89    | 58    |
| >PTCH1-L101NGYPFLWEQ'  | 382  | >PTCH1-L101NGYPFFFWEQ' | 310   | 72    |
| >PTCH1-L101NGYPFLFW    | 144  | >PTCH1-L101NGYPFFFW    | 264   | 120   |
| >PTCH1-L101NGYPFLWEQ'  | 566  | >PTCH1-L101NGYPFFFWEQ' | 389   | 177   |
| >PTCH1-L101NGYPFLFW    | 182  | >PTCH1-L101NGYPFFFW    | 124   | 58    |
| >PTCH1-L101NGYPFLFW    | 199  | >PTCH1-L101NGYPFFFW    | 140   | 59    |
| >PTCH1-L101NGYPFLWEQ'  | 658  | >PTCH1-L101NGYPFFFWEQ' | 474   | 184   |
| >PTCH1-L101NGYPFLFW    | 443  | >PTCH1-L101NGYPFFFW    | 160   | 283   |
| >PTCH1-L101YPNGYPFL    | 28   | >PTCH1-L101YPNGYPFF    | 26    | 2     |
| >PTCH1-L101YPNGYPFLF   | 240  | >PTCH1-L101YPNGYPFFF   | 21    | 219   |
| >PTCH1-L101YPNGYPFLF   | 241  | >PTCH1-L101YPNGYPFFF   | 441   | 200   |
| >PTCH1-L101YPNGYPFL    | 141  | >PTCH1-L101YPNGYPFF    | 488   | 347   |
| >PTCH1-L101YPNGYPFL    | 5967 | >PTCH1-L101YPNGYPFF    | 343   | 5624  |
| >PTCH1-L101YPNGYPFL    | 106  | >PTCH1-L101YPNGYPFF    | 12    | 94    |
| >PTCH1-L101YPNGYPFLF   | 11   | >PTCH1-L101YPNGYPFFF   | 11    | 0     |
| >PTCH1-L101YPNGYPFL    | 71   | >PTCH1-L101YPNGYPFF    | 2904  | 2833  |
| >PTCH1-L101YPNGYPFLF   | 311  | >PTCH1-L101YPNGYPFFF   | 827   | 516   |
| >PTCH1-L101YPNGYPFL    | 145  | >PTCH1-L101YPNGYPFF    | 57    | 88    |
| >PTCH1-L101YPNGYPFLF   | 16   | >PTCH1-L101YPNGYPFFF   | 29    | 13    |
| >PTCH1-L101YPNGYPFLFM  | 87   | >PTCH1-L101YPNGYPFFFWM | 142   | 55    |
| >PTCH1-L101YPNGYPFLFM  | 691  | >PTCH1-L101YPNGYPFFFWM | 490   | 201   |
| >PTCH1-L101YPNGYPFL    | 4696 | >PTCH1-L101YPNGYPFF    | 491   | 4205  |
| >PTCH1-L101YPNGYPFL    | 805  | >PTCH1-L101YPNGYPFF    | 75    | 730   |
| >PTCH1-L101YPNGYPFLF   | 120  | >PTCH1-L101YPNGYPFFF   | 228   | 108   |
| >PTCH1-L101YPNGYPFLFM  | 10   | >PTCH1-L101YPNGYPFFFWM | 10    | 0     |
| >PTCH1-L101YPNGYPFLFM  | 762  | >PTCH1-L101YPNGYPFFFWM | 192   | 570   |
| >PTCH1-L101SYPNGYPFL   | 494  | >PTCH1-L101SYPNGYPFF   | 16106 | 15612 |
| >PTCH1-L101SYPNGYPFL   | 1050 | >PTCH1-L101SYPNGYPFF   | 110   | 940   |
| >PTCH1-L101SYPNGYPFLF  | 8    | >PTCH1-L101SYPNGYPFFF  | 8     | 0     |
| >PTCH1-L101SYPNGYPFLF' | 412  | >PTCH1-L101SYPNGYPFFF' | 206   | 206   |
| >PTCH1-L101SYPNGYPFL   | 70   | >PTCH1-L101SYPNGYPFF   | 21    | 49    |
| >PTCH1-L101SYPNGYPFLF  | 17   | >PTCH1-L101SYPNGYPFFF  | 17    | 0     |
| >PTCH1-L101SYPNGYPFLF' | 34   | >PTCH1-L101SYPNGYPFFF' | 23    | 11    |
| >PTCH1-L101SYPNGYPFL   | 4    | >PTCH1-L101SYPNGYPFF   | 3     | 1     |
| >PTCH1-L101SYPNGYPFLF  | 4    | >PTCH1-L101SYPNGYPFFF  | 4     | 0     |
| >PTCH1-L101SYPNGYPFLF' | 4    | >PTCH1-L101SYPNGYPFFF' | 4     | 0     |
| >PTCH1-L101SYPNGYPFLF  | 148  | >PTCH1-L101SYPNGYPFFF  | 63    | 85    |
| >PTCH1-L101SYPNGYPFL   | 213  | >PTCH1-L101SYPNGYPFF   | 473   | 260   |
| >PTCH1-L101SYPNGYPFLF  | 165  | >PTCH1-L101SYPNGYPFFF  | 274   | 109   |
| >PTCH1-L101SYPNGYPFL   | 313  | >PTCH1-L101SYPNGYPFF   | 465   | 152   |
| >PTCH1-L101SYPNGYPFLF  | 160  | >PTCH1-L101SYPNGYPFFF  | 168   | 8     |
| >PTCH1-L101SYPNGYPFLF' | 205  | >PTCH1-L101SYPNGYPFFF' | 218   | 13    |

|                         |      |                         |       |       |
|-------------------------|------|-------------------------|-------|-------|
| >PTCH1-L101SSYPNGYPFL   | 123  | >PTCH1-L101SSYPNGYPFF   | 276   | 153   |
| >PTCH1-L101SSYPNGYPFLF  | 194  | >PTCH1-L101SSYPNGYPFFF  | 80    | 114   |
| >PTCH1-L101SSYPNGYPFLF' | 256  | >PTCH1-L101SSYPNGYPFFF' | 239   | 17    |
| >PTCH1-L101SSYPNGYPFL   | 94   | >PTCH1-L101SSYPNGYPFF   | 427   | 333   |
| >PTCH1-L101SSYPNGYPFL   | 346  | >PTCH1-L101SSYPNGYPFF   | 346   | 0     |
| >PTCH1-L101SSYPNGYPFLI  | 108  | >PTCH1-L101SSYPNGYPFFI  | 348   | 240   |
| >PTCH1-L101SSYPNGYPFL   | 376  | >PTCH1-L101SSYPNGYPFF   | 325   | 51    |
| >PTCH1-L101SSYPNGYPFL   | 419  | >PTCH1-L101SSYPNGYPFF   | 11731 | 11312 |
| >PTCH1-L101SSYPNGYPFLI  | 172  | >PTCH1-L101SSYPNGYPFFI  | 288   | 116   |
| >PTCH1-L101SSYPNGYPFLI  | 342  | >PTCH1-L101SSYPNGYPFFI  | 482   | 140   |
| >PTCH1-L101SSYPNGYPFL   | 5022 | >PTCH1-L101SSYPNGYPFF   | 416   | 4606  |
| >PTCH1-L101SSYPNGYPFL   | 1093 | >PTCH1-L101SSYPNGYPFF   | 177   | 916   |
| >PTCH1-L101SSYPNGYPFLI  | 3251 | >PTCH1-L101SSYPNGYPFFI  | 381   | 2870  |
| >PTCH1-L101SSYPNGYPFL   | 4639 | >PTCH1-L101SSYPNGYPFF   | 300   | 4339  |
| >PTCH1-L101SSYPNGYPFLI  | 51   | >PTCH1-L101SSYPNGYPFFI  | 69    | 18    |
| >PTCH1-L101SSYPNGYPFL   | 150  | >PTCH1-L101SSYPNGYPFF   | 1724  | 1574  |
| >PTCH1-L101SSYPNGYPFL   | 2168 | >PTCH1-L101SSYPNGYPFF   | 499   | 1669  |
| >PTCH1-L101SSYPNGYPFLI  | 120  | >PTCH1-L101SSYPNGYPFFI  | 281   | 161   |
| >PTCH1-L101SSYPNGYPFL   | 247  | >PTCH1-L101SSYPNGYPFF   | 7858  | 7611  |
| >PTCH1-L101SSYPNGYPFL   | 1960 | >PTCH1-L101SSYPNGYPFF   | 108   | 1852  |
| >PTCH1-L101SSYPNGYPFLI  | 350  | >PTCH1-L101SSYPNGYPFFI  | 245   | 105   |
| >PTCH1-L101SSYPNGYPFL   | 151  | >PTCH1-L101SSYPNGYPFF   | 8     | 143   |
| >PTCH1-L101SSYPNGYPFLI  | 16   | >PTCH1-L101SSYPNGYPFFI  | 12    | 4     |
| >PTCH1-L101SSYPNGYPFL   | 7    | >PTCH1-L101SSYPNGYPFF   | 3     | 4     |
| >PTCH1-L101SSYPNGYPFLI  | 3    | >PTCH1-L101SSYPNGYPFFI  | 3     | 0     |
| >PTCH1-L101SSYPNGYPFL   | 3483 | >PTCH1-L101SSYPNGYPFF   | 387   | 3096  |
| >PTCH1-L101SSYPNGYPFLI  | 102  | >PTCH1-L101SSYPNGYPFFI  | 92    | 10    |
| >PTCH1-L101SSYPNGYPFL   | 1320 | >PTCH1-L101SSYPNGYPFF   | 63    | 1257  |
| >PTCH1-L101SSYPNGYPFLI  | 30   | >PTCH1-L101SSYPNGYPFFI  | 35    | 5     |
| >PTCH1-L101SSYPNGYPFL   | 43   | >PTCH1-L101SSYPNGYPFF   | 76    | 33    |
| >PTCH1-L101SSYPNGYPFLI  | 61   | >PTCH1-L101SSYPNGYPFFI  | 58    | 3     |
| >PTCH1-L101SSYPNGYPFL   | 172  | >PTCH1-L101SSYPNGYPFF   | 39    | 133   |
| >PTCH1-L101SSYPNGYPFLI  | 30   | >PTCH1-L101SSYPNGYPFFI  | 51    | 21    |
| >PTCH1-L101SSYPNGYPFLI  | 396  | >PTCH1-L101SSYPNGYPFFI  | 352   | 44    |
| >PTCH1-L101SSYPNGYPFLI  | 411  | >PTCH1-L101SSYPNGYPFFI  | 297   | 114   |
| >PTCH1-L131LYRPRRDAFE   | 235  | >PTCH1-L131PYRPRRDAFE   | 1896  | 1661  |
| >PTCH1-L131LYRPRRDAF    | 259  | >PTCH1-L131PYRPRRDAF    | 506   | 247   |
| >PTCH1-L131LYRPRRDAFE   | 465  | >PTCH1-L131PYRPRRDAFE   | 669   | 204   |
| >PTCH1-L131LYRPRRDAFE   | 423  | >PTCH1-L131PYRPRRDAFE   | 1037  | 614   |
| >PTCH1-L131LYRPRRDAF    | 10   | >PTCH1-L131PYRPRRDAF    | 71    | 61    |
| >PTCH1-L131LYRPRRDAFE   | 14   | >PTCH1-L131PYRPRRDAFE   | 138   | 124   |
| >PTCH1-L131LYRPRRDA     | 50   | >PTCH1-L131PYRPRRDA     | 477   | 427   |
| >PTCH1-L131LYRPRRDAFE   | 440  | >PTCH1-L131PYRPRRDAFE   | 2520  | 2080  |

|                        |       |                        |      |       |
|------------------------|-------|------------------------|------|-------|
| >PTCH1-L131LYRPRRDAFE  | 46    | >PTCH1-L131PYRPRRDAFE  | 330  | 284   |
| >PTCH1-L131LYRPRRDAF   | 397   | >PTCH1-L131PYRPRRDAF   | 2916 | 2519  |
| >PTCH1-L131LYRPRRDAF   | 329   | >PTCH1-L131PYRPRRDAF   | 2366 | 2037  |
| >PTCH1-L131PLYRPRRDAF  | 33124 | >PTCH1-L131PPYRPRRDAF  | 183  | 32941 |
| >PTCH1-L131PLYRPRRDAF  | 490   | >PTCH1-L131PPYRPRRDAF  | 5673 | 5183  |
| >PTCH1-L131PLYRPRRDAF  | 145   | >PTCH1-L131PPYRPRRDAF  | 1048 | 903   |
| >PTCH1-L131PLYRPRRDAF  | 7591  | >PTCH1-L131PPYRPRRDAF  | 152  | 7439  |
| >PTCH1-L131PPLYRPRRDA  | 26406 | >PTCH1-L131PPPYRPRRDA  | 488  | 25918 |
| >PTCH1-L131PPLYRPRRDA  | 8917  | >PTCH1-L131PPPYRPRRDA  | 60   | 8857  |
| >PTCH1-L131WPPLYRPRRI  | 193   | >PTCH1-L131WPPPYRPRRI  | 429  | 236   |
| >PTCH1-L131WPPLYRPR    | 301   | >PTCH1-L131WPPPYRPR    | 344  | 43    |
| >PTCH1-L131LWPPLYRPR   | 332   | >PTCH1-L131LWPPPYRPR   | 726  | 394   |
| >PTCH1-L131LWPPLYRPRF  | 303   | >PTCH1-L131LWPPPYRPRF  | 383  | 80    |
| >PTCH1-L131LWPPLYRPR   | 32    | >PTCH1-L131LWPPPYRPR   | 55   | 23    |
| >PTCH1-L131LWPPLYRPRF  | 43    | >PTCH1-L131LWPPPYRPRF  | 65   | 22    |
| >PTCH1-L131LWPPLYRP    | 443   | >PTCH1-L131LWPPPYRP    | 670  | 227   |
| >PTCH1-L131LWPPLYRPR   | 335   | >PTCH1-L131LWPPPYRPR   | 684  | 349   |
| >PTCH1-L131GLWPPLYR    | 285   | >PTCH1-L131GLWPPPYR    | 165  | 120   |
| >PTCH1-L131GLWPPLYRP   | 134   | >PTCH1-L131GLWPPPYRP   | 141  | 7     |
| >PTCH1-L131GLWPPLYR    | 192   | >PTCH1-L131GLWPPPYR    | 295  | 103   |
| >PTCH1-L131GLWPPLYR    | 135   | >PTCH1-L131GLWPPPYR    | 316  | 181   |
| >PTCH1-L131GLWPPLYR    | 16    | >PTCH1-L131GLWPPPYR    | 16   | 0     |
| >PTCH1-L131GLWPPLYRPF  | 132   | >PTCH1-L131GLWPPPYRPF  | 405  | 273   |
| >PTCH1-L131GLWPPLYRPF  | 21    | >PTCH1-L131GLWPPPYRPF  | 25   | 4     |
| >PTCH1-L131GLWPPLYRPF  | 237   | >PTCH1-L131GLWPPPYRPF  | 73   | 164   |
| >PTCH1-L131GLWPPLYR    | 49    | >PTCH1-L131GLWPPPYR    | 72   | 23    |
| >PTCH1-L131GLWPPLYRPF  | 205   | >PTCH1-L131GLWPPPYRPF  | 226  | 21    |
| >PTCH1-L131GLWPPLYRPF  | 335   | >PTCH1-L131GLWPPPYRPF  | 276  | 59    |
| >PTCH1-L131EGLWPPLY    | 340   | >PTCH1-L131EGLWPPPY    | 1631 | 1291  |
| >PTCH1-L131EGLWPPLYR   | 271   | >PTCH1-L131EGLWPPPYR   | 238  | 33    |
| >PTCH1-L131EGLWPPLY    | 674   | >PTCH1-L131EGLWPPPY    | 84   | 590   |
| >PTCH1-L131EGLWPPLYR   | 18    | >PTCH1-L131EGLWPPPYR   | 55   | 37    |
| >PTCH1-L131EGLWPPLYRPF | 71    | >PTCH1-L131EGLWPPPYRPF | 139  | 68    |
| >PTCH1-L131REGLWPPLY   | 159   | >PTCH1-L131REGLWPPPY   | 867  | 708   |
| >PTCH1-L131REGLWPPLYF  | 469   | >PTCH1-L131REGLWPPPYF  | 1385 | 916   |
| >PTCH1-L131REGLWPPLY   | 120   | >PTCH1-L131REGLWPPPY   | 969  | 849   |
| >PTCH1-L131REGLWPPLY   | 4812  | >PTCH1-L131REGLWPPPY   | 437  | 4375  |
| >PTCH1-L131REGLWPPLY   | 2767  | >PTCH1-L131REGLWPPPY   | 464  | 2303  |
| >PTCH1-L131REGLWPPPL   | 78    | >PTCH1-L131REGLWPPP    | 5836 | 5758  |
| >PTCH1-L131REGLWPPPL   | 29    | >PTCH1-L131REGLWPPP    | 869  | 840   |
| >PTCH1-L131REGLWPPPLY  | 77    | >PTCH1-L131REGLWPPPY   | 117  | 40    |
| >PTCH1-L131REGLWPPPLYF | 156   | >PTCH1-L131REGLWPPPYF  | 267  | 111   |
| >PTCH1-L131REGLWPPPLYF | 19    | >PTCH1-L131REGLWPPPYF  | 26   | 7     |

|                        |      |                        |       |       |
|------------------------|------|------------------------|-------|-------|
| >PTCH1-L131PREGLWPPLY  | 264  | >PTCH1-L131PREGLWPPP^  | 423   | 159   |
| >PTCH1-L131PREGLWPPL   | 380  | >PTCH1-L131PREGLWPPP   | 26129 | 25749 |
| >PTCH1-L131PREGLWPPLY  | 261  | >PTCH1-L131PREGLWPPP^  | 588   | 327   |
| >PTCH1-L131PPREGLWPPI  | 742  | >PTCH1-L131PPREGLWPPI  | 79    | 663   |
| >PTCH1-L175LLQHLDOSA   | 755  | >PTCH1-L175FLQHLDOSA   | 48    | 707   |
| >PTCH1-L175LLQHLDOSAL  | 967  | >PTCH1-L175FLQHLDOSAL  | 46    | 921   |
| >PTCH1-L175LLQHLDOSALQ | 1373 | >PTCH1-L175FLQHLDOSALQ | 71    | 1302  |
| >PTCH1-L175LLQHLDOSA   | 161  | >PTCH1-L175FLQHLDOSA   | 12    | 149   |
| >PTCH1-L175LLQHLDOSAL  | 79   | >PTCH1-L175FLQHLDOSAL  | 7     | 72    |
| >PTCH1-L175LLQHLDOSALQ | 756  | >PTCH1-L175FLQHLDOSALQ | 42    | 714   |
| >PTCH1-L175LLQHLDOSA   | 88   | >PTCH1-L175FLQHLDOSA   | 10    | 78    |
| >PTCH1-L175LLQHLDOSAL  | 205  | >PTCH1-L175FLQHLDOSAL  | 16    | 189   |
| >PTCH1-L175LLQHLDOSALQ | 195  | >PTCH1-L175FLQHLDOSALQ | 19    | 176   |
| >PTCH1-L175LLQHLDOSA   | 929  | >PTCH1-L175FLQHLDOSA   | 97    | 832   |
| >PTCH1-L175LLQHLDOSAL  | 2255 | >PTCH1-L175FLQHLDOSAL  | 121   | 2134  |
| >PTCH1-L175LLQHLDOSALQ | 3098 | >PTCH1-L175FLQHLDOSALQ | 324   | 2774  |
| >PTCH1-L175LLQHLDOSA   | 367  | >PTCH1-L175FLQHLDOSA   | 42    | 325   |
| >PTCH1-L175LLQHLDOSAL  | 241  | >PTCH1-L175FLQHLDOSAL  | 29    | 212   |
| >PTCH1-L175LLQHLDOSALQ | 503  | >PTCH1-L175FLQHLDOSALQ | 58    | 445   |
| >PTCH1-L175LLQHLDOSA   | 126  | >PTCH1-L175FLQHLDOSA   | 14    | 112   |
| >PTCH1-L175LLQHLDOSAL  | 23   | >PTCH1-L175FLQHLDOSAL  | 5     | 18    |
| >PTCH1-L175LLQHLDOSALQ | 522  | >PTCH1-L175FLQHLDOSALQ | 46    | 476   |
| >PTCH1-L175LLQHLDOSA   | 1437 | >PTCH1-L175FLQHLDOSA   | 107   | 1330  |
| >PTCH1-L175LLQHLDOSAL  | 1349 | >PTCH1-L175FLQHLDOSAL  | 106   | 1243  |
| >PTCH1-L175LLQHLDOSALQ | 969  | >PTCH1-L175FLQHLDOSALQ | 82    | 887   |
| >PTCH1-L175LLQHLDOSA   | 42   | >PTCH1-L175FLQHLDOSA   | 9     | 33    |
| >PTCH1-L175LLQHLDOSAL  | 21   | >PTCH1-L175FLQHLDOSAL  | 7     | 14    |
| >PTCH1-L175LLQHLDOSALQ | 690  | >PTCH1-L175FLQHLDOSALQ | 97    | 593   |
| >PTCH1-L175LLQHLDOSALQ | 23   | >PTCH1-L175FLQHLDOSALQ | 7     | 16    |
| >PTCH1-L175LLQHLDOSAL  | 1246 | >PTCH1-L175FLQHLDOSAL  | 434   | 812   |
| >PTCH1-L175LLQHLDOSAL  | 146  | >PTCH1-L175FLQHLDOSAL  | 184   | 38    |
| >PTCH1-L175LLQHLDOSAL  | 1173 | >PTCH1-L175FLQHLDOSAL  | 145   | 1028  |
| >PTCH1-L175ALLQHLDOSA  | 88   | >PTCH1-L175AFLQHLDOSA  | 18062 | 17974 |
| >PTCH1-L175ALLQHLDOSAL | 105  | >PTCH1-L175AFLQHLDOSAL | 11851 | 11746 |
| >PTCH1-L175ALLQHLDOSA  | 51   | >PTCH1-L175AFLQHLDOSA  | 4841  | 4790  |
| >PTCH1-L175ALLQHLDOSAL | 29   | >PTCH1-L175AFLQHLDOSAL | 2723  | 2694  |
| >PTCH1-L175ALLQHLDOSA  | 19   | >PTCH1-L175AFLQHLDOSA  | 11410 | 11391 |
| >PTCH1-L175ALLQHLDOSAL | 88   | >PTCH1-L175AFLQHLDOSAL | 10479 | 10391 |
| >PTCH1-L175ALLQHLDOSA  | 24   | >PTCH1-L175AFLQHLDOSA  | 3296  | 3272  |
| >PTCH1-L175ALLQHLDOSAL | 321  | >PTCH1-L175AFLQHLDOSAL | 8072  | 7751  |
| >PTCH1-L175ALLQHLDOSA  | 11   | >PTCH1-L175AFLQHLDOSA  | 10880 | 10869 |
| >PTCH1-L175ALLQHLDOSAL | 8    | >PTCH1-L175AFLQHLDOSAL | 6797  | 6789  |
| >PTCH1-L175ALLQHLDOSA  | 56   | >PTCH1-L175AFLQHLDOSA  | 17465 | 17409 |

|                        |       |                        |       |       |
|------------------------|-------|------------------------|-------|-------|
| >PTCH1-L175 ALLQHLSAL  | 13    | >PTCH1-L175 AFLQHLSAL  | 13858 | 13845 |
| >PTCH1-L175 ALLQHLSA   | 48    | >PTCH1-L175 AFLQHLSA   | 17615 | 17567 |
| >PTCH1-L175 ALLQHLSAL  | 25    | >PTCH1-L175 AFLQHLSAL  | 13614 | 13589 |
| >PTCH1-L175 ALLQHLSA   | 413   | >PTCH1-L175 AFLQHLSA   | 19880 | 19467 |
| >PTCH1-L175 ALLQHLSAL  | 179   | >PTCH1-L175 AFLQHLSAL  | 19556 | 19377 |
| >PTCH1-L175 ALLQHLSA   | 11    | >PTCH1-L175 AFLQHLSA   | 19592 | 19581 |
| >PTCH1-L175 ALLQHLSAL  | 6     | >PTCH1-L175 AFLQHLSAL  | 12068 | 12062 |
| >PTCH1-L175 ALLQHLSAL  | 87    | >PTCH1-L175 AFLQHLSAL  | 27066 | 26979 |
| >PTCH1-L175 ALLQHLSAL  | 10053 | >PTCH1-L175 AFLQHLSAL  | 85    | 9968  |
| >PTCH1-L175 ALLQHLSAL  | 12624 | >PTCH1-L175 AFLQHLSAL  | 182   | 12442 |
| >PTCH1-L175 EGANVLTTEA | 174   | >PTCH1-L175 EGANVLTTEA | 11482 | 11308 |
| >PTCH1-L175 EGANVLTTEA | 3772  | >PTCH1-L175 EGANVLTTEA | 246   | 3526  |
| >PTCH1-L175 EALLQHLSA  | 2721  | >PTCH1-L175 EAFLQHLSA  | 197   | 2524  |
| >PTCH1-L175 EALLQHLSA  | 993   | >PTCH1-L175 EAFLQHLSA  | 338   | 655   |
| >PTCH1-L175 EALLQHLSA  | 239   | >PTCH1-L175 EAFLQHLSA  | 166   | 73    |
| >PTCH1-L175 TEALLQHL   | 63    | >PTCH1-L175 TEAFLQHL   | 260   | 197   |
| >PTCH1-L175 TEALLQHLS  | 390   | >PTCH1-L175 TEAFLQHLS  | 1249  | 859   |
| >PTCH1-L175 TEALLQHL   | 142   | >PTCH1-L175 TEAFLQHL   | 89    | 53    |
| >PTCH1-L175 TEALLQHL   | 262   | >PTCH1-L175 TEAFLQHL   | 334   | 72    |
| >PTCH1-L175 TEALLQHLS  | 224   | >PTCH1-L175 TEAFLQHLS  | 276   | 52    |
| >PTCH1-L175 TEALLQHLS  | 31    | >PTCH1-L175 TEAFLQHLS  | 29    | 2     |
| >PTCH1-L175 TTEALLQHL  | 745   | >PTCH1-L175 TTEAFLQHL  | 397   | 348   |
| >PTCH1-L175 TTEALLQHL  | 506   | >PTCH1-L175 TTEAFLQHL  | 337   | 169   |
| >PTCH1-L175 TTEALLQHL  | 407   | >PTCH1-L175 TTEAFLQHL  | 145   | 262   |
| >PTCH1-L175 LTTEALLQHL | 290   | >PTCH1-L175 LTTEAFLQHL | 286   | 4     |
| >PTCH1-L175 LTTEALLQHL | 311   | >PTCH1-L175 LTTEAFLQHL | 723   | 412   |
| >PTCH1-L175 LTTEALLQHL | 179   | >PTCH1-L175 LTTEAFLQHL | 74    | 105   |
| >PTCH1-L175 LTTEALLQHL | 643   | >PTCH1-L175 LTTEAFLQHL | 312   | 331   |
| >PTCH1-L175 LTTEALLQH  | 239   | >PTCH1-L175 LTTEAFLQH  | 697   | 458   |
| >PTCH1-L175 LTTEALLQHL | 25    | >PTCH1-L175 LTTEAFLQHL | 38    | 13    |
| >PTCH1-L175 LTTEALLQHL | 313   | >PTCH1-L175 LTTEAFLQHL | 420   | 107   |
| >PTCH1-L175 LTTEALLQHL | 42    | >PTCH1-L175 LTTEAFLQHL | 18    | 24    |
| >PTCH1-L175 LTTEALLQHL | 217   | >PTCH1-L175 LTTEAFLQHL | 188   | 29    |
| >PTCH1-L175 LTTEALLQHL | 179   | >PTCH1-L175 LTTEAFLQHL | 212   | 33    |
| >PTCH1-L175 VLTTEALL   | 544   | >PTCH1-L175 VLTTEAFL   | 195   | 349   |
| >PTCH1-L175 VLTTEALLQH | 690   | >PTCH1-L175 VLTTEAFLQH | 250   | 440   |
| >PTCH1-L175 VLTTEALL   | 48    | >PTCH1-L175 VLTTEAFL   | 18    | 30    |
| >PTCH1-L175 VLTTEALLQH | 61    | >PTCH1-L175 VLTTEAFLQH | 26    | 35    |
| >PTCH1-L175 VLTTEALL   | 424   | >PTCH1-L175 VLTTEAFL   | 326   | 98    |
| >PTCH1-L175 VLTTEALLQH | 291   | >PTCH1-L175 VLTTEAFLQH | 234   | 57    |
| >PTCH1-L175 VLTTEALL   | 1611  | >PTCH1-L175 VLTTEAFL   | 425   | 1186  |
| >PTCH1-L175 VLTTEALLQH | 332   | >PTCH1-L175 VLTTEAFLQH | 132   | 200   |
| >PTCH1-L175 VLTTEALL   | 234   | >PTCH1-L175 VLTTEAFL   | 53    | 181   |

|                        |      |                        |       |       |
|------------------------|------|------------------------|-------|-------|
| >PTCH1-L175 VLTTEALLQH | 162  | >PTCH1-L175 VLTTEAFLQH | 70    | 92    |
| >PTCH1-L175 VLTTEALL   | 237  | >PTCH1-L175 VLTTEAFL   | 37    | 200   |
| >PTCH1-L175 VLTTEALLQH | 106  | >PTCH1-L175 VLTTEAFLQH | 36    | 70    |
| >PTCH1-L175 VLTTEALL   | 116  | >PTCH1-L175 VLTTEAFL   | 24    | 92    |
| >PTCH1-L175 VLTTEALLQH | 50   | >PTCH1-L175 VLTTEAFLQH | 30    | 20    |
| >PTCH1-L175 VLTTEALL   | 758  | >PTCH1-L175 VLTTEAFL   | 57    | 701   |
| >PTCH1-L175 VLTTEALLQH | 747  | >PTCH1-L175 VLTTEAFLQH | 208   | 539   |
| >PTCH1-L175 VLTTEALL   | 7    | >PTCH1-L175 VLTTEAFL   | 5     | 2     |
| >PTCH1-L175 VLTTEALLQ  | 429  | >PTCH1-L175 VLTTEAFLQ  | 109   | 320   |
| >PTCH1-L175 VLTTEALLQH | 6    | >PTCH1-L175 VLTTEAFLQH | 4     | 2     |
| >PTCH1-L175 NVLTTEALL  | 2153 | >PTCH1-L175 NVLTTEAFL  | 488   | 1665  |
| >PTCH1-L175 NVLTTEAL   | 1814 | >PTCH1-L175 NVLTTEAF   | 191   | 1623  |
| >PTCH1-L175 NVLTTEAL   | 196  | >PTCH1-L175 NVLTTEAF   | 7663  | 7467  |
| >PTCH1-L175 NVLTTEALL  | 899  | >PTCH1-L175 NVLTTEAFL  | 326   | 573   |
| >PTCH1-L175 NVLTTEAL   | 6251 | >PTCH1-L175 NVLTTEAF   | 384   | 5867  |
| >PTCH1-L175 NVLTTEAL   | 2717 | >PTCH1-L175 NVLTTEAF   | 164   | 2553  |
| >PTCH1-L175 NVLTTEAL   | 456  | >PTCH1-L175 NVLTTEAF   | 9178  | 8722  |
| >PTCH1-L175 ANVLTTEAL  | 2198 | >PTCH1-L175 ANVLTTEAF  | 104   | 2094  |
| >PTCH1-L175 GANVLTTEAL | 6505 | >PTCH1-L175 GANVLTTEAF | 239   | 6266  |
| >PTCH1-L175 GANVLTTEAL | 4653 | >PTCH1-L175 GANVLTTEAF | 254   | 4399  |
| >PTCH1-L175 GANVLTTEAL | 3311 | >PTCH1-L175 GANVLTTEAF | 324   | 2987  |
| >PTCH1-L175 GANVLTTEAL | 8166 | >PTCH1-L175 GANVLTTEAF | 487   | 7679  |
| >PTCH1-L341 LIVGGTVKNS | 3573 | >PTCH1-L341 FIVGGTVKNS | 487   | 3086  |
| >PTCH1-L341 LIVGGTVKNS | 1756 | >PTCH1-L341 FIVGGTVKNS | 136   | 1620  |
| >PTCH1-L341 LIVGGTVKNS | 1128 | >PTCH1-L341 FIVGGTVKNS | 237   | 891   |
| >PTCH1-L341 LIVGGTVK   | 531  | >PTCH1-L341 FIVGGTVK   | 115   | 416   |
| >PTCH1-L341 ELIVGGTV   | 199  | >PTCH1-L341 EFIVGGTV   | 13226 | 13027 |
| >PTCH1-L341 ELIVGGTV   | 35   | >PTCH1-L341 EFIVGGTV   | 12661 | 12626 |
| >PTCH1-L341 ELIVGGTV   | 104  | >PTCH1-L341 EFIVGGTV   | 17319 | 17215 |
| >PTCH1-L341 ELIVGGTV   | 76   | >PTCH1-L341 EFIVGGTV   | 13030 | 12954 |
| >PTCH1-L341 ELIVGGTV   | 473  | >PTCH1-L341 EFIVGGTV   | 19997 | 19524 |
| >PTCH1-L341 ELIVGGTV   | 11   | >PTCH1-L341 EFIVGGTV   | 13939 | 13928 |
| >PTCH1-L341 ELIVGGTVK  | 286  | >PTCH1-L341 EFIVGGTVK  | 498   | 212   |
| >PTCH1-L341 ELIVGGTV   | 275  | >PTCH1-L341 EFIVGGTV   | 4694  | 4419  |
| >PTCH1-L341 ELIVGGTV   | 111  | >PTCH1-L341 EFIVGGTV   | 4517  | 4406  |
| >PTCH1-L341 SRKYMHWQI  | 685  | >PTCH1-L341 SRKYMHWQI  | 39    | 646   |
| >PTCH1-L341 SRKYMHWQI  | 118  | >PTCH1-L341 SRKYMHWQI  | 459   | 341   |
| >PTCH1-L341 SRKYMHWQI  | 190  | >PTCH1-L341 SRKYMHWQI  | 619   | 429   |
| >PTCH1-L341 EELIVGGT   | 159  | >PTCH1-L341 EEFIVGGT   | 198   | 39    |
| >PTCH1-L341 EELIVGGTV  | 53   | >PTCH1-L341 EEFIVGGTV  | 29    | 24    |
| >PTCH1-L341 EELIVGGTV  | 739  | >PTCH1-L341 EEFIVGGTV  | 154   | 585   |
| >PTCH1-L341 EELIVGGTV  | 896  | >PTCH1-L341 EEFIVGGTV  | 363   | 533   |
| >PTCH1-L341 EELIVGGT   | 199  | >PTCH1-L341 EEFIVGGT   | 227   | 28    |

|                       |     |                       |      |      |
|-----------------------|-----|-----------------------|------|------|
| >PTCH1-L341EELIVGGTV  | 170 | >PTCH1-L341EEFIVGGTV  | 242  | 72   |
| >PTCH1-L341EELIVGGTV  | 413 | >PTCH1-L341EEFIVGGTV  | 184  | 229  |
| >PTCH1-L341QEELIVGGTV | 40  | >PTCH1-L341QEEFIVGGTV | 127  | 87   |
| >PTCH1-L341QEELIVGGTV | 217 | >PTCH1-L341QEEFIVGGTV | 159  | 58   |
| >PTCH1-L341QEELIVGGTV | 400 | >PTCH1-L341QEEFIVGGTV | 155  | 245  |
| >PTCH1-L341QEELIVGGTV | 714 | >PTCH1-L341QEEFIVGGTV | 319  | 395  |
| >PTCH1-L341QEELIVGGTV | 59  | >PTCH1-L341QEEFIVGGTV | 61   | 2    |
| >PTCH1-L341WQEELIVGG` | 490 | >PTCH1-L341WQEEFIVGG` | 367  | 123  |
| >PTCH1-L341WQEELIVGG  | 685 | >PTCH1-L341WQEEFIVGG  | 402  | 283  |
| >PTCH1-L341WQEELIVGG` | 20  | >PTCH1-L341WQEEFIVGG` | 16   | 4    |
| >PTCH1-L341WQEELIVGG` | 102 | >PTCH1-L341WQEEFIVGG` | 61   | 41   |
| >PTCH1-L341WQEELIVGG` | 406 | >PTCH1-L341WQEEFIVGG` | 350  | 56   |
| >PTCH1-L341HWQEELIV   | 498 | >PTCH1-L341HWQEEFIV   | 402  | 96   |
| >PTCH1-L341MHWQEELIV  | 465 | >PTCH1-L341MHWQEEFIV  | 929  | 464  |
| >PTCH1-L341MHWQEELI   | 61  | >PTCH1-L341MHWQEEFI   | 54   | 7    |
| >PTCH1-L341MHWQEELIV  | 385 | >PTCH1-L341MHWQEEFIV  | 155  | 230  |
| >PTCH1-L341YMHWQEEL   | 27  | >PTCH1-L341YMHWQEEF   | 2877 | 2850 |
| >PTCH1-L341YMHWQEELI  | 53  | >PTCH1-L341YMHWQEEFI  | 32   | 21   |
| >PTCH1-L341YMHWQEELI' | 24  | >PTCH1-L341YMHWQEEFI  | 16   | 8    |
| >PTCH1-L341YMHWQEEL   | 8   | >PTCH1-L341YMHWQEEF   | 1038 | 1030 |
| >PTCH1-L341YMHWQEELI  | 31  | >PTCH1-L341YMHWQEEFI  | 12   | 19   |
| >PTCH1-L341YMHWQEELI' | 43  | >PTCH1-L341YMHWQEEFI  | 27   | 16   |
| >PTCH1-L341YMHWQEEL   | 24  | >PTCH1-L341YMHWQEEF   | 2794 | 2770 |
| >PTCH1-L341YMHWQEELI  | 41  | >PTCH1-L341YMHWQEEFI  | 30   | 11   |
| >PTCH1-L341YMHWQEELI' | 40  | >PTCH1-L341YMHWQEEFI  | 105  | 65   |
| >PTCH1-L341YMHWQEEL   | 170 | >PTCH1-L341YMHWQEEF   | 2069 | 1899 |
| >PTCH1-L341YMHWQEELI  | 465 | >PTCH1-L341YMHWQEEFI  | 130  | 335  |
| >PTCH1-L341YMHWQEELI' | 164 | >PTCH1-L341YMHWQEEFI  | 121  | 43   |
| >PTCH1-L341YMHWQEEL   | 2   | >PTCH1-L341YMHWQEEF   | 20   | 18   |
| >PTCH1-L341YMHWQEELI  | 3   | >PTCH1-L341YMHWQEEFI  | 2    | 1    |
| >PTCH1-L341YMHWQEELI' | 2   | >PTCH1-L341YMHWQEEFI  | 2    | 0    |
| >PTCH1-L341YMHWQEELI' | 107 | >PTCH1-L341YMHWQEEFI  | 116  | 9    |
| >PTCH1-L341YMHWQEEL   | 13  | >PTCH1-L341YMHWQEEF   | 3683 | 3670 |
| >PTCH1-L341YMHWQEELI  | 47  | >PTCH1-L341YMHWQEEFI  | 14   | 33   |
| >PTCH1-L341YMHWQEELI' | 9   | >PTCH1-L341YMHWQEEFI  | 4    | 5    |
| >PTCH1-L341YMHWQEEL   | 10  | >PTCH1-L341YMHWQEEF   | 2471 | 2461 |
| >PTCH1-L341YMHWQEELI  | 18  | >PTCH1-L341YMHWQEEFI  | 9    | 9    |
| >PTCH1-L341YMHWQEELI' | 6   | >PTCH1-L341YMHWQEEFI  | 5    | 1    |
| >PTCH1-L341YMHWQEEL   | 24  | >PTCH1-L341YMHWQEEF   | 7016 | 6992 |
| >PTCH1-L341YMHWQEELI  | 250 | >PTCH1-L341YMHWQEEFI  | 29   | 221  |
| >PTCH1-L341YMHWQEELI' | 19  | >PTCH1-L341YMHWQEEFI  | 4    | 15   |
| >PTCH1-L341YMHWQEEL   | 2   | >PTCH1-L341YMHWQEEF   | 81   | 79   |
| >PTCH1-L341YMHWQEELI  | 5   | >PTCH1-L341YMHWQEEFI  | 5    | 0    |

|                       |      |                       |       |       |
|-----------------------|------|-----------------------|-------|-------|
| >PTCH1-L341YMHWWQEELI | 2    | >PTCH1-L341YMHWWQEEFI | 2     | 0     |
| >PTCH1-L341YMHWWQEEL  | 1076 | >PTCH1-L341YMHWWQEEF  | 41    | 1035  |
| >PTCH1-L341YMHWWQEEL  | 7971 | >PTCH1-L341YMHWWQEEF  | 201   | 7770  |
| >PTCH1-L341YMHWWQEEL  | 1054 | >PTCH1-L341YMHWWQEEF  | 75    | 979   |
| >PTCH1-L341YMHWWQEEL  | 3307 | >PTCH1-L341YMHWWQEEF  | 213   | 3094  |
| >PTCH1-L341YMHWWQEEL  | 235  | >PTCH1-L341YMHWWQEEF  | 13    | 222   |
| >PTCH1-L341YMHWWQEEL  | 4190 | >PTCH1-L341YMHWWQEEF  | 327   | 3863  |
| >PTCH1-L341YMHWWQEEL  | 2239 | >PTCH1-L341YMHWWQEEF  | 134   | 2105  |
| >PTCH1-L341KYMHWQEEI  | 223  | >PTCH1-L341KYMHWQEEI  | 11369 | 11146 |
| >PTCH1-L341KYMHWQEEI  | 1080 | >PTCH1-L341KYMHWQEEI  | 324   | 756   |
| >PTCH1-L341KYMHWQEEI  | 24   | >PTCH1-L341KYMHWQEEI  | 11    | 13    |
| >PTCH1-L341KYMHWQEEI  | 322  | >PTCH1-L341KYMHWQEEI  | 155   | 167   |
| >PTCH1-L341KYMHWQEEI  | 49   | >PTCH1-L341KYMHWQEEI  | 18    | 31    |
| >PTCH1-L341KYMHWQEEI  | 199  | >PTCH1-L341KYMHWQEEI  | 120   | 79    |
| >PTCH1-L341KYMHWQEEI  | 6    | >PTCH1-L341KYMHWQEEI  | 4     | 2     |
| >PTCH1-L341KYMHWQEEI  | 8    | >PTCH1-L341KYMHWQEEI  | 6     | 2     |
| >PTCH1-L341KYMHWQEEI  | 103  | >PTCH1-L341KYMHWQEEI  | 58    | 45    |
| >PTCH1-L341KYMHWQEEI  | 135  | >PTCH1-L341KYMHWQEEI  | 27    | 108   |
| >PTCH1-L341KYMHWQEEI  | 140  | >PTCH1-L341KYMHWQEEI  | 290   | 150   |
| >PTCH1-L341KYMHWQEEI  | 2036 | >PTCH1-L341KYMHWQEEI  | 71    | 1965  |
| >PTCH1-L341KYMHWQEEI  | 7266 | >PTCH1-L341KYMHWQEEI  | 399   | 6867  |
| >PTCH1-L341KYMHWQEEI  | 130  | >PTCH1-L341KYMHWQEEI  | 198   | 68    |
| >PTCH1-L341KYMHWQEEI  | 273  | >PTCH1-L341KYMHWQEEI  | 309   | 36    |
| >PTCH1-L341KYMHWQEEI  | 97   | >PTCH1-L341KYMHWQEEI  | 335   | 238   |
| >PTCH1-L341KYMHWQEEI  | 261  | >PTCH1-L341KYMHWQEEI  | 120   | 141   |
| >PTCH1-L341KYMHWQEEI  | 313  | >PTCH1-L341KYMHWQEEI  | 304   | 9     |
| >PTCH1-L341RKYMHWQEI  | 221  | >PTCH1-L341RKYMHWQEI  | 97    | 124   |
| >PTCH1-L341RKYMHWQEI  | 7    | >PTCH1-L341RKYMHWQEI  | 2     | 5     |
| >PTCH1-L341RKYMHWQEI  | 29   | >PTCH1-L341RKYMHWQEI  | 20    | 9     |
| >PTCH1-L341RKYMHWQEI  | 93   | >PTCH1-L341RKYMHWQEI  | 167   | 74    |
| >PTCH1-L341RKYMHWQEI  | 108  | >PTCH1-L341RKYMHWQEI  | 1342  | 1234  |
| >PTCH1-L341RKYMHWQEI  | 267  | >PTCH1-L341RKYMHWQEI  | 1200  | 933   |
| >PTCH1-L341RKYMHWQEI  | 232  | >PTCH1-L341RKYMHWQEI  | 502   | 270   |
| >PTCH1-L341RKYMHWQEI  | 393  | >PTCH1-L341RKYMHWQEI  | 2576  | 2183  |
| >PTCH1-L341RKYMHWQEI  | 214  | >PTCH1-L341RKYMHWQEI  | 289   | 75    |
| >PTCH1-L341RKYMHWQEI  | 212  | >PTCH1-L341RKYMHWQEI  | 210   | 2     |
| >PTCH1-L431LKSFSVSV   | 37   | >PTCH1-L431QKSFSVSV   | 82    | 45    |
| >PTCH1-L431LKSFSVSVI  | 21   | >PTCH1-L431QKSFSVSVI  | 39    | 18    |
| >PTCH1-L431LKSFSVSVIR | 314  | >PTCH1-L431QKSFSVSVII | 578   | 264   |
| >PTCH1-L431LKSFSVSVI  | 373  | >PTCH1-L431QKSFSVSVI  | 375   | 2     |
| >PTCH1-L431ILKSFSVSV  | 88   | >PTCH1-L431IQKSFSVSV  | 1480  | 1392  |
| >PTCH1-L431ILKSFSVDV  | 65   | >PTCH1-L431IQKSFSVDV  | 2652  | 2587  |
| >PTCH1-L431ILKSFSVSV  | 12   | >PTCH1-L431IQKSFSVSV  | 73    | 61    |



|                         |      |                         |       |       |
|-------------------------|------|-------------------------|-------|-------|
| >PTCH1-L431ILKSFSDVSVI  | 99   | >PTCH1-L431IQKSFSDVSVI  | 3779  | 3680  |
| >PTCH1-L431ILKSFSDV     | 5    | >PTCH1-L431IQKSFSDV     | 57    | 52    |
| >PTCH1-L431ILKSFSDVSV   | 13   | >PTCH1-L431IQKSFSDVSV   | 70    | 57    |
| >PTCH1-L431ILKSFSDVSVI  | 11   | >PTCH1-L431IQKSFSDVSVI  | 197   | 186   |
| >PTCH1-L431ILKSFSDV     | 1111 | >PTCH1-L431IQKSFSDV     | 305   | 806   |
| >PTCH1-L431ILKSFSDV     | 81   | >PTCH1-L431IQKSFSDV     | 6571  | 6490  |
| >PTCH1-L431ILKSFSDVSV   | 28   | >PTCH1-L431IQKSFSDVSV   | 2927  | 2899  |
| >PTCH1-L431ILKSFSDVSVI  | 213  | >PTCH1-L431IQKSFSDVSVI  | 9978  | 9765  |
| >PTCH1-L431ILKSFSDV     | 230  | >PTCH1-L431IQKSFSDV     | 9062  | 8832  |
| >PTCH1-L431ILKSFSDVSV   | 46   | >PTCH1-L431IQKSFSDVSV   | 5079  | 5033  |
| >PTCH1-L431ILKSFSDV     | 443  | >PTCH1-L431IQKSFSDV     | 14759 | 14316 |
| >PTCH1-L431ILKSFSDVSV   | 139  | >PTCH1-L431IQKSFSDVSV   | 12229 | 12090 |
| >PTCH1-L431ILKSFSDVSV   | 238  | >PTCH1-L431IQKSFSDVSV   | 13749 | 13511 |
| >PTCH1-L431ILKSFSDV     | 3    | >PTCH1-L431IQKSFSDV     | 5653  | 5650  |
| >PTCH1-L431ILKSFSDVSV   | 3    | >PTCH1-L431IQKSFSDVSV   | 4277  | 4274  |
| >PTCH1-L431ILKSFSDVSVI  | 91   | >PTCH1-L431IQKSFSDVSVI  | 25205 | 25114 |
| >PTCH1-L431ILKSFSDVSV   | 807  | >PTCH1-L431IQKSFSDVSV   | 171   | 636   |
| >PTCH1-L431ILKSFSDVSVI  | 424  | >PTCH1-L431IQKSFSDVSVI  | 100   | 324   |
| >PTCH1-L431ILKSFSDV     | 236  | >PTCH1-L431IQKSFSDV     | 16    | 220   |
| >PTCH1-L431ILKSFSDVS    | 4832 | >PTCH1-L431IQKSFSDVS    | 490   | 4342  |
| >PTCH1-L431ILKSFSDVSV   | 187  | >PTCH1-L431IQKSFSDVSV   | 13    | 174   |
| >PTCH1-L431ILKSFSDVSVI  | 100  | >PTCH1-L431IQKSFSDVSVI  | 8     | 92    |
| >PTCH1-L431ILKSFSDVSVI  | 304  | >PTCH1-L431IQKSFSDVSVI  | 1739  | 1435  |
| >PTCH1-L431SFTTTTLLDDIL | 280  | >PTCH1-L431SFTTTTLLDDIC | 1681  | 1401  |
| >PTCH1-L431DILKSFSDVSV  | 471  | >PTCH1-L431DIKSFSDVS'   | 6925  | 6454  |
| >PTCH1-L431DILKSFSDVSV  | 433  | >PTCH1-L431DIKSFSDVS'   | 923   | 490   |
| >PTCH1-L431DILKSFSDVSV  | 379  | >PTCH1-L431DIKSFSDVS'   | 587   | 208   |
| >PTCH1-L431DILKSFSDV    | 103  | >PTCH1-L431DIKSFSDV     | 1813  | 1710  |
| >PTCH1-L431DILKSFSDVSV  | 69   | >PTCH1-L431DIKSFSDVS'   | 1023  | 954   |
| >PTCH1-L431DDILKSFSDV   | 358  | >PTCH1-L431DDIQKSFSDV   | 859   | 501   |
| >PTCH1-L431LDDILKSFSDV  | 297  | >PTCH1-L431LDDIQKSFSD'  | 198   | 99    |
| >PTCH1-L431TTLDDILK     | 14   | >PTCH1-L431TTLDDIQK     | 21    | 7     |
| >PTCH1-L431TTLDDILKSF   | 154  | >PTCH1-L431TTLDDIQKSF   | 253   | 99    |
| >PTCH1-L431TTLDDILKSF   | 20   | >PTCH1-L431TTLDDIQKSF   | 54    | 34    |
| >PTCH1-L431TTLDDILKSF   | 187  | >PTCH1-L431TTLDDIQKSF   | 255   | 68    |
| >PTCH1-L431TTLDDILK     | 36   | >PTCH1-L431TTLDDIQK     | 51    | 15    |
| >PTCH1-L431TTLDDILKSF   | 521  | >PTCH1-L431TTLDDIQKSF   | 407   | 114   |
| >PTCH1-L431TTLDDILKSF   | 7    | >PTCH1-L431TTLDDIQKSF   | 9     | 2     |
| >PTCH1-L431TTLDDILKSF   | 115  | >PTCH1-L431TTLDDIQKSF   | 94    | 21    |
| >PTCH1-L431TTLDDILK     | 255  | >PTCH1-L431TTLDDIQK     | 277   | 22    |
| >PTCH1-L431TTTLDDILK    | 42   | >PTCH1-L431TTTLDDIQK    | 68    | 26    |
| >PTCH1-L431TTTLDDILKSF  | 143  | >PTCH1-L431TTTLDDIQKSF  | 413   | 270   |
| >PTCH1-L431TTTLDDILK    | 11   | >PTCH1-L431TTTLDDIQK    | 16    | 5     |

|                         |     |                         |       |       |
|-------------------------|-----|-------------------------|-------|-------|
| >PTCH1-L431TTTTLDDILKSF | 42  | >PTCH1-L431TTTTLDDIQKSF | 45    | 3     |
| >PTCH1-L431TTTTLDDILKSF | 195 | >PTCH1-L431TTTTLDDIQKSF | 311   | 116   |
| >PTCH1-L431TTTTLDDILK   | 20  | >PTCH1-L431TTTTLDDIQK   | 35    | 15    |
| >PTCH1-L431TTTTLDDILK   | 9   | >PTCH1-L431TTTTLDDIQK   | 19    | 10    |
| >PTCH1-L431TTTTLDDIL    | 117 | >PTCH1-L431TTTTLDDIQ    | 11953 | 11836 |
| >PTCH1-L431TTTTLDDIL    | 223 | >PTCH1-L431TTTTLDDIQ    | 11267 | 11044 |
| >PTCH1-L431TTTTLDDIL    | 322 | >PTCH1-L431TTTTLDDIQ    | 5037  | 4715  |
| >PTCH1-L431FTTTTTLDDIL  | 370 | >PTCH1-L431FTTTTTLDDIQ  | 18621 | 18251 |
| >PTCH1-L431FTTTTTLDDIL  | 198 | >PTCH1-L431FTTTTTLDDIQ  | 13965 | 13767 |
| >PTCH1-L431FTTTTTLDDILK | 125 | >PTCH1-L431FTTTTTLDDIQ  | 247   | 122   |
| >PTCH1-L431FTTTTTLDDILK | 10  | >PTCH1-L431FTTTTTLDDIQ  | 14    | 4     |
| >PTCH1-L431FTTTTTLDDIL  | 55  | >PTCH1-L431FTTTTTLDDIQ  | 3844  | 3789  |
| >PTCH1-M11MLAGSEFDFI    | 28  | >PTCH1-M11ILAGSEFDFI    | 55    | 27    |
| >PTCH1-M11MLAGSEFDFI    | 10  | >PTCH1-M11ILAGSEFDFIV   | 17    | 7     |
| >PTCH1-M11MLAGSEFDF     | 153 | >PTCH1-M11ILAGSEFDF     | 671   | 518   |
| >PTCH1-M11MLAGSEFDF     | 169 | >PTCH1-M11ILAGSEFDF     | 802   | 633   |
| >PTCH1-M11MLAGSEFDFI    | 11  | >PTCH1-M11ILAGSEFDFI    | 16    | 5     |
| >PTCH1-M11MLAGSEFDFI    | 3   | >PTCH1-M11ILAGSEFDFIV   | 5     | 2     |
| >PTCH1-M11MLAGSEFDFI    | 34  | >PTCH1-M11ILAGSEFDFI    | 56    | 22    |
| >PTCH1-M11MLAGSEFDFI    | 6   | >PTCH1-M11ILAGSEFDFIV   | 15    | 9     |
| >PTCH1-M11MLAGSEFDFI    | 67  | >PTCH1-M11ILAGSEFDFI    | 128   | 61    |
| >PTCH1-M11MLAGSEFDFI    | 8   | >PTCH1-M11ILAGSEFDFIV   | 18    | 10    |
| >PTCH1-M11MLAGSEFDFI    | 9   | >PTCH1-M11ILAGSEFDFI    | 18    | 9     |
| >PTCH1-M11MLAGSEFDFI    | 3   | >PTCH1-M11ILAGSEFDFIV   | 5     | 2     |
| >PTCH1-M11MLAGSEFDFI    | 31  | >PTCH1-M11ILAGSEFDFI    | 82    | 51    |
| >PTCH1-M11MLAGSEFDFI    | 5   | >PTCH1-M11ILAGSEFDFIV   | 8     | 3     |
| >PTCH1-M11MLAGSEFDFI    | 11  | >PTCH1-M11ILAGSEFDFI    | 15    | 4     |
| >PTCH1-M11MLAGSEFDFI    | 5   | >PTCH1-M11ILAGSEFDFIV   | 5     | 0     |
| >PTCH1-M11MLAGSEFDFI    | 10  | >PTCH1-M11ILAGSEFDFI    | 14    | 4     |
| >PTCH1-M11MLAGSEFDFI    | 3   | >PTCH1-M11ILAGSEFDFIV   | 3     | 0     |
| >PTCH1-M11MLAGSEFDF     | 180 | >PTCH1-M11ILAGSEFDF     | 728   | 548   |
| >PTCH1-M11MLAGSEFDFI    | 5   | >PTCH1-M11ILAGSEFDFI    | 9     | 4     |
| >PTCH1-M11MLAGSEFDFI    | 2   | >PTCH1-M11ILAGSEFDFIV   | 2     | 0     |
| >PTCH1-M11MLAGSEFDF     | 361 | >PTCH1-M11ILAGSEFDF     | 596   | 235   |
| >PTCH1-M11MLAGSEFDF     | 307 | >PTCH1-M11ILAGSEFDF     | 1082  | 775   |
| >PTCH1-M11MLAGSEFDFI    | 142 | >PTCH1-M11ILAGSEFDFI    | 1212  | 1070  |
| >PTCH1-M11MLAGSEFDFI    | 43  | >PTCH1-M11ILAGSEFDFIV   | 991   | 948   |
| >PTCH1-M11MLAGSEFDFI    | 428 | >PTCH1-M11ILAGSEFDFIV   | 4269  | 3841  |
| >PTCH1-M11MLAGSEFDF     | 365 | >PTCH1-M11ILAGSEFDF     | 600   | 235   |
| >PTCH1-M11MLAGSEFDF     | 131 | >PTCH1-M11ILAGSEFDF     | 171   | 40    |
| >PTCH1-M11MLAGSEFDF     | 112 | >PTCH1-M11ILAGSEFDF     | 1631  | 1519  |
| >PTCH1-M11MLAGSEFDF     | 366 | >PTCH1-M11ILAGSEFDF     | 8444  | 8078  |
| >PTCH1-M11LMLAGSEFDF    | 17  | >PTCH1-M11LILAGSEFDFI   | 151   | 134   |

|                        |     |                        |      |      |
|------------------------|-----|------------------------|------|------|
| >PTCH1-M11 LMLAGSEFDF  | 13  | >PTCH1-M11 LILAGSEFDFI | 74   | 61   |
| >PTCH1-M11 LMLAGSEFDF  | 57  | >PTCH1-M11 LILAGSEFDFI | 650  | 593  |
| >PTCH1-M11 LMLAGSEF    | 239 | >PTCH1-M11 LILAGSEF    | 480  | 241  |
| >PTCH1-M11 LMLAGSEFDF  | 7   | >PTCH1-M11 LILAGSEFDFI | 9    | 2    |
| >PTCH1-M11 LMLAGSEF    | 145 | >PTCH1-M11 LILAGSEF    | 4993 | 4848 |
| >PTCH1-M11 LMLAGSEFDF  | 3   | >PTCH1-M11 LILAGSEFDFI | 37   | 34   |
| >PTCH1-M11 LMLAGSEFDF  | 6   | >PTCH1-M11 LILAGSEFDFI | 381  | 375  |
| >PTCH1-M11 LMLAGSEFDF  | 9   | >PTCH1-M11 LILAGSEFDFI | 85   | 76   |
| >PTCH1-M11 LMLAGSEFDF  | 4   | >PTCH1-M11 LILAGSEFDFI | 92   | 88   |
| >PTCH1-M11 LMLAGSEFDF  | 17  | >PTCH1-M11 LILAGSEFDFI | 397  | 380  |
| >PTCH1-M11 LMLAGSEF    | 74  | >PTCH1-M11 LILAGSEF    | 1051 | 977  |
| >PTCH1-M11 LMLAGSEFDF  | 109 | >PTCH1-M11 LILAGSEFDF  | 1416 | 1307 |
| >PTCH1-M11 LMLAGSEF    | 300 | >PTCH1-M11 LILAGSEF    | 2033 | 1733 |
| >PTCH1-M11 LMLAGSEFDF  | 653 | >PTCH1-M11 LILAGSEFDFI | 297  | 356  |
| >PTCH1-M11 LMLAGSEF    | 32  | >PTCH1-M11 LILAGSEF    | 74   | 42   |
| >PTCH1-M11 LMLAGSEFDF  | 102 | >PTCH1-M11 LILAGSEFDF  | 581  | 479  |
| >PTCH1-M11 LMLAGSEF    | 23  | >PTCH1-M11 LILAGSEF    | 144  | 121  |
| >PTCH1-M11 LMLAGSEFDF  | 102 | >PTCH1-M11 LILAGSEFDF  | 834  | 732  |
| >PTCH1-M11 LMLAGSEF    | 4   | >PTCH1-M11 LILAGSEF    | 53   | 49   |
| >PTCH1-M11 LMLAGSEFDF  | 8   | >PTCH1-M11 LILAGSEFDF  | 303  | 295  |
| >PTCH1-M11 LMLAGSEFDF  | 408 | >PTCH1-M11 LILAGSEFDFI | 5709 | 5301 |
| >PTCH1-M11 LMLAGSEF    | 43  | >PTCH1-M11 LILAGSEF    | 92   | 49   |
| >PTCH1-M11 LMLAGSEFDF  | 221 | >PTCH1-M11 LILAGSEFDF  | 448  | 227  |
| >PTCH1-M11 LMLAGSEF    | 167 | >PTCH1-M11 LILAGSEF    | 412  | 245  |
| >PTCH1-M11 LMLAGSEFDF  | 222 | >PTCH1-M11 LILAGSEFDF  | 814  | 592  |
| >PTCH1-M11 GAVSTLLGVL  | 253 | >PTCH1-M11 GAVSTLLGVL  | 1935 | 1682 |
| >PTCH1-M11 GAVSTLLGVL  | 53  | >PTCH1-M11 GAVSTLLGVL  | 688  | 635  |
| >PTCH1-M11 VLMLAGSEFDF | 666 | >PTCH1-M11 VLILAGSEFDF | 320  | 346  |
| >PTCH1-M11 VLMLAGSEF   | 62  | >PTCH1-M11 VLILAGSEF   | 66   | 4    |
| >PTCH1-M11 VLMLAGSEFDF | 395 | >PTCH1-M11 VLILAGSEFDF | 516  | 121  |
| >PTCH1-M11 VLMLAGSEF   | 59  | >PTCH1-M11 VLILAGSEF   | 152  | 93   |
| >PTCH1-M11 VLMLAGSEFDF | 352 | >PTCH1-M11 VLILAGSEFDF | 910  | 558  |
| >PTCH1-M11 VLMLAGSEF   | 16  | >PTCH1-M11 VLILAGSEF   | 31   | 15   |
| >PTCH1-M11 VLMLAGSEFDF | 67  | >PTCH1-M11 VLILAGSEFDF | 134  | 67   |
| >PTCH1-M11 VLMLAGSEF   | 112 | >PTCH1-M11 VLILAGSEF   | 112  | 0    |
| >PTCH1-M11 VLMLAGSEF   | 121 | >PTCH1-M11 VLILAGSEF   | 310  | 189  |
| >PTCH1-M11 GVLMLAGSEF  | 114 | >PTCH1-M11 GVLILAGSEF  | 82   | 32   |
| >PTCH1-M11 LGVLMLAGSEF | 102 | >PTCH1-M11 LGVLILAGSEF | 209  | 107  |
| >PTCH1-M11 LGVLMLAGSEF | 496 | >PTCH1-M11 LGVLILAGSEF | 519  | 23   |
| >PTCH1-M11 LGVLMLAGSEF | 171 | >PTCH1-M11 LGVLILAGSEF | 145  | 26   |
| >PTCH1-M11 LLGVLMMLA   | 553 | >PTCH1-M11 LLGVLILA    | 379  | 174  |
| >PTCH1-M11 LLGVLMMLA   | 235 | >PTCH1-M11 LLGVLILA    | 294  | 59   |
| >PTCH1-M11 LLGVLMMLA   | 248 | >PTCH1-M11 LLGVLILA    | 510  | 262  |

|                      |      |                       |      |      |
|----------------------|------|-----------------------|------|------|
| >PTCH1-M11LLGVLMLA   | 228  | >PTCH1-M11LLGVLILA    | 81   | 147  |
| >PTCH1-M11LLGVLMLA   | 239  | >PTCH1-M11LLGVLILA    | 126  | 113  |
| >PTCH1-M11LLGVLMLA   | 17   | >PTCH1-M11LLGVLILA    | 13   | 4    |
| >PTCH1-M11TLLGVLML   | 23   | >PTCH1-M11TLLGVLIL    | 39   | 16   |
| >PTCH1-M11TLLGVLMLA  | 27   | >PTCH1-M11TLLGVLILA   | 35   | 8    |
| >PTCH1-M11TLLGVLMLAC | 785  | >PTCH1-M11TLLGVLILAG  | 445  | 340  |
| >PTCH1-M11TLLGVLML   | 99   | >PTCH1-M11TLLGVLIL    | 178  | 79   |
| >PTCH1-M11TLLGVLMLA  | 66   | >PTCH1-M11TLLGVLILA   | 85   | 19   |
| >PTCH1-M11TLLGVLML   | 203  | >PTCH1-M11TLLGVLIL    | 286  | 83   |
| >PTCH1-M11TLLGVLMLA  | 36   | >PTCH1-M11TLLGVLILA   | 117  | 81   |
| >PTCH1-M11TLLGVLML   | 94   | >PTCH1-M11TLLGVLIL    | 130  | 36   |
| >PTCH1-M11TLLGVLMLA  | 54   | >PTCH1-M11TLLGVLILA   | 51   | 3    |
| >PTCH1-M11TLLGVLML   | 3    | >PTCH1-M11TLLGVLIL    | 10   | 7    |
| >PTCH1-M11TLLGVLMLA  | 7    | >PTCH1-M11TLLGVLILA   | 6    | 1    |
| >PTCH1-M11TLLGVLMLAC | 994  | >PTCH1-M11TLLGVLILAG  | 395  | 599  |
| >PTCH1-M11TLLGVLMLAC | 220  | >PTCH1-M11TLLGVLILAGS | 136  | 84   |
| >PTCH1-M11TLLGVLML   | 49   | >PTCH1-M11TLLGVLIL    | 36   | 13   |
| >PTCH1-M11TLLGVLMLA  | 182  | >PTCH1-M11TLLGVLILA   | 188  | 6    |
| >PTCH1-M11TLLGVLML   | 9    | >PTCH1-M11TLLGVLIL    | 13   | 4    |
| >PTCH1-M11TLLGVLMLA  | 15   | >PTCH1-M11TLLGVLILA   | 14   | 1    |
| >PTCH1-M11TLLGVLML   | 12   | >PTCH1-M11TLLGVLIL    | 22   | 10   |
| >PTCH1-M11TLLGVLMLA  | 87   | >PTCH1-M11TLLGVLILA   | 84   | 3    |
| >PTCH1-M11TLLGVLML   | 4    | >PTCH1-M11TLLGVLIL    | 5    | 1    |
| >PTCH1-M11TLLGVLMLA  | 5    | >PTCH1-M11TLLGVLILA   | 7    | 2    |
| >PTCH1-M11TLLGVLMLAC | 477  | >PTCH1-M11TLLGVLILAGS | 651  | 174  |
| >PTCH1-M11TLLGVLML   | 352  | >PTCH1-M11TLLGVLIL    | 2071 | 1719 |
| >PTCH1-M11TLLGVLML   | 1312 | >PTCH1-M11TLLGVLIL    | 402  | 910  |
| >PTCH1-M11STLLGVLMLA | 188  | >PTCH1-M11STLLGVLILA  | 222  | 34   |
| >PTCH1-M11STLLGVLMLA | 246  | >PTCH1-M11STLLGVLILA  | 373  | 127  |
| >PTCH1-M11STLLGVLMLA | 288  | >PTCH1-M11STLLGVLILA  | 546  | 258  |
| >PTCH1-M11STLLGVLMLA | 93   | >PTCH1-M11STLLGVLILA  | 115  | 22   |
| >PTCH1-M11STLLGVLML  | 395  | >PTCH1-M11STLLGVLIL   | 2541 | 2146 |
| >PTCH1-M11STLLGVLML  | 276  | >PTCH1-M11STLLGVLIL   | 865  | 589  |
| >PTCH1-M11STLLGVLMLA | 273  | >PTCH1-M11STLLGVLILA  | 356  | 83   |
| >PTCH1-M11STLLGVLML  | 2799 | >PTCH1-M11STLLGVLI    | 161  | 2638 |
| >PTCH1-M11STLLGVLML  | 502  | >PTCH1-M11STLLGVLIL   | 475  | 27   |
| >PTCH1-M11STLLGVLMLA | 433  | >PTCH1-M11STLLGVLILA  | 693  | 260  |
| >PTCH1-M11STLLGVLML  | 365  | >PTCH1-M11STLLGVLI    | 169  | 196  |
| >PTCH1-M11STLLGVLML  | 76   | >PTCH1-M11STLLGVLIL   | 675  | 599  |
| >PTCH1-M11STLLGVLMLA | 271  | >PTCH1-M11STLLGVLILA  | 444  | 173  |
| >PTCH1-M11STLLGVLML  | 13   | >PTCH1-M11STLLGVLI    | 83   | 70   |
| >PTCH1-M11STLLGVLML  | 5    | >PTCH1-M11STLLGVLIL   | 9    | 4    |
| >PTCH1-M11STLLGVLML  | 126  | >PTCH1-M11STLLGVLI    | 334  | 208  |

|                       |       |                       |       |       |
|-----------------------|-------|-----------------------|-------|-------|
| >PTCH1-M11STLLGVLM    | 130   | >PTCH1-M11STLLGVLI    | 994   | 864   |
| >PTCH1-M11STLLGVML    | 44    | >PTCH1-M11STLLGVLIL   | 88    | 44    |
| >PTCH1-M11STLLGVMLA   | 460   | >PTCH1-M11STLLGVLILA  | 306   | 154   |
| >PTCH1-M11STLLGVLM    | 5399  | >PTCH1-M11STLLGVLI    | 383   | 5016  |
| >PTCH1-M11STLLGVLM    | 662   | >PTCH1-M11STLLGVLI    | 26    | 636   |
| >PTCH1-M11STLLGVML    | 462   | >PTCH1-M11STLLGVLIL   | 387   | 75    |
| >PTCH1-M11VSTLLGVLM   | 54    | >PTCH1-M11VSTLLGVLI   | 552   | 498   |
| >PTCH1-M11VSTLLGVML   | 20    | >PTCH1-M11VSTLLGVLIL  | 50    | 30    |
| >PTCH1-M11VSTLLGVLM   | 29    | >PTCH1-M11VSTLLGVLI   | 58    | 29    |
| >PTCH1-M11VSTLLGVML   | 52    | >PTCH1-M11VSTLLGVLIL  | 59    | 7     |
| >PTCH1-M11VSTLLGVLM   | 25    | >PTCH1-M11VSTLLGVLI   | 362   | 337   |
| >PTCH1-M11VSTLLGVML   | 81    | >PTCH1-M11VSTLLGVLIL  | 114   | 33    |
| >PTCH1-M11VSTLLGVLM   | 7609  | >PTCH1-M11VSTLLGVLI   | 277   | 7332  |
| >PTCH1-M11VSTLLGVML   | 333   | >PTCH1-M11VSTLLGVLIL  | 274   | 59    |
| >PTCH1-M11AVSTLLGVLM  | 949   | >PTCH1-M11AVSTLLGVLI  | 461   | 488   |
| >PTCH1-M11AVSTLLGVLM  | 281   | >PTCH1-M11AVSTLLGVLIL | 552   | 271   |
| >PTCH1-M11AVSTLLGVLM  | 319   | >PTCH1-M11AVSTLLGVLIL | 406   | 87    |
| >PTCH1-M11AVSTLLGVLM  | 86    | >PTCH1-M11AVSTLLGVLI  | 3974  | 3888  |
| >PTCH1-M11AVSTLLGVLM  | 16768 | >PTCH1-M11AVSTLLGVLI  | 207   | 16561 |
| >PTCH1-M56MAALIPIPAL  | 295   | >PTCH1-M56RAALIPIPAL  | 793   | 498   |
| >PTCH1-M56MAALIPIPAL  | 172   | >PTCH1-M56RAALIPIPAL  | 379   | 207   |
| >PTCH1-M56MAALIPIPALF | 335   | >PTCH1-M56RAALIPIPALR | 477   | 142   |
| >PTCH1-M56MAALIPIPA   | 1484  | >PTCH1-M56RAALIPIPA   | 263   | 1221  |
| >PTCH1-M56MAALIPIPALF | 20    | >PTCH1-M56RAALIPIPALR | 14    | 6     |
| >PTCH1-M56MAALIPIPALF | 70    | >PTCH1-M56RAALIPIPALR | 1493  | 1423  |
| >PTCH1-M56MAALIPIPALF | 2     | >PTCH1-M56RAALIPIPALR | 36    | 34    |
| >PTCH1-M56MAALIPIPA   | 7     | >PTCH1-M56RAALIPIPA   | 765   | 758   |
| >PTCH1-M56MAALIPIPAL  | 117   | >PTCH1-M56RAALIPIPAL  | 2963  | 2846  |
| >PTCH1-M56MAALIPIPAL  | 161   | >PTCH1-M56RAALIPIPAL  | 40    | 121   |
| >PTCH1-M56MAALIPIPA   | 73    | >PTCH1-M56RAALIPIPA   | 4198  | 4125  |
| >PTCH1-M56MAALIPIPAL  | 268   | >PTCH1-M56RAALIPIPAL  | 1530  | 1262  |
| >PTCH1-M56MAALIPIPAL  | 1055  | >PTCH1-M56RAALIPIPAL  | 295   | 760   |
| >PTCH1-M56MAALIPIPA   | 17    | >PTCH1-M56RAALIPIPA   | 2785  | 2768  |
| >PTCH1-M56MAALIPIPALF | 205   | >PTCH1-M56RAALIPIPALR | 69    | 136   |
| >PTCH1-M56FMAALIPI    | 185   | >PTCH1-M56FRAALIPI    | 14564 | 14379 |
| >PTCH1-M56FMAALIPI    | 6     | >PTCH1-M56FRAALIPI    | 6643  | 6637  |
| >PTCH1-M56FMAALIPIPA  | 14    | >PTCH1-M56FRAALIPIPA  | 5390  | 5376  |
| >PTCH1-M56FMAALIPIPAL | 7     | >PTCH1-M56FRAALIPIPAL | 9349  | 9342  |
| >PTCH1-M56FMAALIPI    | 2     | >PTCH1-M56FRAALIPI    | 482   | 480   |
| >PTCH1-M56FMAALIPIP   | 44    | >PTCH1-M56FRAALIPIP   | 19159 | 19115 |
| >PTCH1-M56FMAALIPIPA  | 8     | >PTCH1-M56FRAALIPIPA  | 2296  | 2288  |
| >PTCH1-M56FMAALIPIPAL | 2     | >PTCH1-M56FRAALIPIPAL | 456   | 454   |
| >PTCH1-M56FMAALIPI    | 2     | >PTCH1-M56FRAALIPI    | 3840  | 3838  |

|                        |       |                        |       |       |
|------------------------|-------|------------------------|-------|-------|
| >PTCH1-M56 FMAALIPIP   | 252   | >PTCH1-M56 FRAALIPIP   | 22914 | 22662 |
| >PTCH1-M56 FMAALIPIPA  | 11    | >PTCH1-M56 FRAALIPIPA  | 3404  | 3393  |
| >PTCH1-M56 FMAALIPIPAL | 3     | >PTCH1-M56 FRAALIPIPAL | 9277  | 9274  |
| >PTCH1-M56 FMAALIPI    | 4     | >PTCH1-M56 FRAALIPI    | 612   | 608   |
| >PTCH1-M56 FMAALIPIPA  | 34    | >PTCH1-M56 FRAALIPIPA  | 869   | 835   |
| >PTCH1-M56 FMAALIPIPAL | 4     | >PTCH1-M56 FRAALIPIPAL | 728   | 724   |
| >PTCH1-M56 FMAALIPI    | 2     | >PTCH1-M56 FRAALIPI    | 5532  | 5530  |
| >PTCH1-M56 FMAALIPIPA  | 3     | >PTCH1-M56 FRAALIPIPA  | 9874  | 9871  |
| >PTCH1-M56 FMAALIPIPAL | 2     | >PTCH1-M56 FRAALIPIPAL | 2826  | 2824  |
| >PTCH1-M56 FMAALIPI    | 5     | >PTCH1-M56 FRAALIPI    | 12335 | 12330 |
| >PTCH1-M56 FMAALIPIPA  | 15    | >PTCH1-M56 FRAALIPIPA  | 17539 | 17524 |
| >PTCH1-M56 FMAALIPIPAL | 6     | >PTCH1-M56 FRAALIPIPAL | 15181 | 15175 |
| >PTCH1-M56 FMAALIPI    | 5     | >PTCH1-M56 FRAALIPI    | 10178 | 10173 |
| >PTCH1-M56 FMAALIPIPA  | 7     | >PTCH1-M56 FRAALIPIPA  | 12438 | 12431 |
| >PTCH1-M56 FMAALIPIPAL | 5     | >PTCH1-M56 FRAALIPIPAL | 7482  | 7477  |
| >PTCH1-M56 FMAALIPI    | 6     | >PTCH1-M56 FRAALIPI    | 18850 | 18844 |
| >PTCH1-M56 FMAALIPIPA  | 15    | >PTCH1-M56 FRAALIPIPA  | 18201 | 18186 |
| >PTCH1-M56 FMAALIPIPAL | 3     | >PTCH1-M56 FRAALIPIPAL | 17105 | 17102 |
| >PTCH1-M56 FMAALIPI    | 3     | >PTCH1-M56 FRAALIPI    | 14502 | 14499 |
| >PTCH1-M56 FMAALIPIPA  | 4     | >PTCH1-M56 FRAALIPIPA  | 18506 | 18502 |
| >PTCH1-M56 FMAALIPIPAL | 2     | >PTCH1-M56 FRAALIPIPAL | 5500  | 5498  |
| >PTCH1-M56 FMAALIPI    | 92    | >PTCH1-M56 FRAALIPI    | 1133  | 1041  |
| >PTCH1-M56 FMAALIPIPA  | 261   | >PTCH1-M56 FRAALIPIPA  | 8046  | 7785  |
| >PTCH1-M56 FMAALIPI    | 37    | >PTCH1-M56 FRAALIPI    | 8211  | 8174  |
| >PTCH1-M56 FMAALIPIPA  | 250   | >PTCH1-M56 FRAALIPIPA  | 13408 | 13158 |
| >PTCH1-M56 FMAALIPIPAL | 58    | >PTCH1-M56 FRAALIPIPAL | 9391  | 9333  |
| >PTCH1-M56 FMAALIPI    | 143   | >PTCH1-M56 FRAALIPI    | 17576 | 17433 |
| >PTCH1-M56 FMAALIPIPA  | 419   | >PTCH1-M56 FRAALIPIPA  | 19295 | 18876 |
| >PTCH1-M56 FMAALIPIPAL | 92    | >PTCH1-M56 FRAALIPIPAL | 15832 | 15740 |
| >PTCH1-M56 FMAALIPI    | 91    | >PTCH1-M56 FRAALIPI    | 267   | 176   |
| >PTCH1-M56 FMAALIPIPAL | 40    | >PTCH1-M56 FRAALIPIPAL | 105   | 65    |
| >PTCH1-M56 FMAALIPI    | 4817  | >PTCH1-M56 FRAALIPI    | 32    | 4785  |
| >PTCH1-M56 FMAALIPIPA  | 23886 | >PTCH1-M56 FRAALIPIPA  | 130   | 23756 |
| >PTCH1-M56 FMAALIPIPAL | 7852  | >PTCH1-M56 FRAALIPIPAL | 51    | 7801  |
| >PTCH1-M56 FMAALIPIPAL | 460   | >PTCH1-M56 FRAALIPIPAL | 9708  | 9248  |
| >PTCH1-M56 FMAALIPI    | 134   | >PTCH1-M56 FRAALIPI    | 42    | 92    |
| >PTCH1-M56 FMAALIPIPAL | 13    | >PTCH1-M56 FRAALIPIPAL | 9     | 4     |
| >PTCH1-M56 FMAALIPIPAL | 151   | >PTCH1-M56 FRAALIPIPAL | 1505  | 1354  |
| >PTCH1-M56 FMAALIPI    | 318   | >PTCH1-M56 FRAALIPI    | 850   | 532   |
| >PTCH1-M56 FMAALIPI    | 14894 | >PTCH1-M56 FRAALIPI    | 142   | 14752 |
| >PTCH1-M56 FMAALIPIPAL | 6100  | >PTCH1-M56 FRAALIPIPAL | 82    | 6018  |
| >PTCH1-M56 FMAALIPI    | 14803 | >PTCH1-M56 FRAALIPI    | 363   | 14440 |
| >PTCH1-M56 FMAALIPIPAL | 8955  | >PTCH1-M56 FRAALIPIPAL | 27    | 8928  |

|                        |       |                        |       |       |
|------------------------|-------|------------------------|-------|-------|
| >PTCH1-M56 TSISNVTAFFM | 35    | >PTCH1-M56 TSISNVTAFFF | 17671 | 17636 |
| >PTCH1-M56 TSISNVTAFFM | 224   | >PTCH1-M56 TSISNVTAFFF | 38326 | 38102 |
| >PTCH1-M56 TSISNVTAFFM | 4239  | >PTCH1-M56 TSISNVTAFFF | 32    | 4207  |
| >PTCH1-M56 TSISNVTAFFM | 11    | >PTCH1-M56 TSISNVTAFFF | 3327  | 3316  |
| >PTCH1-M56 TSISNVTAFFM | 9520  | >PTCH1-M56 TSISNVTAFFF | 11    | 9509  |
| >PTCH1-M56 TSISNVTAFFM | 23899 | >PTCH1-M56 TSISNVTAFFF | 169   | 23730 |
| >PTCH1-M56 TSISNVTAFFM | 1117  | >PTCH1-M56 TSISNVTAFFF | 2     | 1115  |
| >PTCH1-M56 TSISNVTAFFM | 290   | >PTCH1-M56 TSISNVTAFFF | 12115 | 11825 |
| >PTCH1-M56 TSISNVTAFFM | 420   | >PTCH1-M56 TSISNVTAFFF | 16024 | 15604 |
| >PTCH1-M56 TSISNVTAFFM | 16    | >PTCH1-M56 TSISNVTAFFF | 8678  | 8662  |
| >PTCH1-M56 TSISNVTAFFM | 104   | >PTCH1-M56 TSISNVTAFFF | 15128 | 15024 |
| >PTCH1-M56 TSISNVTAFFM | 137   | >PTCH1-M56 TSISNVTAFFF | 11284 | 11147 |
| >PTCH1-M56 TSISNVTAFFM | 118   | >PTCH1-M56 TSISNVTAFFF | 12829 | 12711 |
| >PTCH1-M56 TSISNVTAFFM | 2737  | >PTCH1-M56 TSISNVTAFFF | 222   | 2515  |
| >PTCH1-M56 FFMAALIPI   | 82    | >PTCH1-M56 FFRAALIPI   | 1485  | 1403  |
| >PTCH1-M56 FFMAALIPI   | 40    | >PTCH1-M56 FFRAALIPI   | 6122  | 6082  |
| >PTCH1-M56 FFMAALIPIPA | 142   | >PTCH1-M56 FFRAALIPIPA | 11938 | 11796 |
| >PTCH1-M56 FFMAALIPI   | 8     | >PTCH1-M56 FFRAALIPI   | 817   | 809   |
| >PTCH1-M56 FFMAALIPIPA | 29    | >PTCH1-M56 FFRAALIPIPA | 2360  | 2331  |
| >PTCH1-M56 FFMAALIPI   | 322   | >PTCH1-M56 FFRAALIPI   | 1636  | 1314  |
| >PTCH1-M56 FFMAALIPI   | 16    | >PTCH1-M56 FFRAALIPI   | 1032  | 1016  |
| >PTCH1-M56 FFMAALIPIPA | 100   | >PTCH1-M56 FFRAALIPIPA | 4025  | 3925  |
| >PTCH1-M56 FFMAALIPI   | 430   | >PTCH1-M56 FFRAALIPI   | 11354 | 10924 |
| >PTCH1-M56 FFMAALIPI   | 244   | >PTCH1-M56 FFRAALIPI   | 1365  | 1121  |
| >PTCH1-M56 FFMAALIPI   | 31    | >PTCH1-M56 FFRAALIPI   | 728   | 697   |
| >PTCH1-M56 FFMAALIPI   | 3688  | >PTCH1-M56 FFRAALIPI   | 46    | 3642  |
| >PTCH1-M56 FFMAALIPIPA | 4414  | >PTCH1-M56 FFRAALIPIPA | 75    | 4339  |
| >PTCH1-M56 FFMAALIPI   | 327   | >PTCH1-M56 FFRAALIPI   | 9082  | 8755  |
| >PTCH1-M56 FFMAALIPIPA | 72    | >PTCH1-M56 FFRAALIPIPA | 202   | 130   |
| >PTCH1-M56 AFFMAALI    | 395   | >PTCH1-M56 AFFRAALI    | 220   | 175   |
| >PTCH1-M56 AFFMAALIPI  | 512   | >PTCH1-M56 AFFRAALIPI  | 247   | 265   |
| >PTCH1-M56 AFFMAALI    | 498   | >PTCH1-M56 AFFRAALI    | 224   | 274   |
| >PTCH1-M56 AFFMAALIPI  | 60    | >PTCH1-M56 AFFRAALIPI  | 32    | 28    |
| >PTCH1-M56 AFFMAALIPI  | 396   | >PTCH1-M56 AFFRAALIPI  | 267   | 129   |
| >PTCH1-M56 AFFMAALIPI  | 377   | >PTCH1-M56 AFFRAALIPI  | 258   | 119   |
| >PTCH1-M56 TAFFMAAL    | 115   | >PTCH1-M56 TAFFRAAL    | 549   | 434   |
| >PTCH1-M56 TAFFMAALI   | 156   | >PTCH1-M56 TAFFRAALI   | 70    | 86    |
| >PTCH1-M56 TAFFMAALIP  | 140   | >PTCH1-M56 TAFFRAALIPI | 81    | 59    |
| >PTCH1-M56 TAFFMAAL    | 469   | >PTCH1-M56 TAFFRAAL    | 1014  | 545   |
| >PTCH1-M56 TAFFMAALIP  | 391   | >PTCH1-M56 TAFFRAALIPI | 332   | 59    |
| >PTCH1-M56 TAFFMAALIP  | 220   | >PTCH1-M56 TAFFRAALIPI | 459   | 239   |
| >PTCH1-M56 TAFFMAAL    | 18    | >PTCH1-M56 TAFFRAAL    | 32    | 14    |
| >PTCH1-M56 TAFFMAALI   | 10    | >PTCH1-M56 TAFFRAALI   | 18    | 8     |

|                       |      |                       |      |      |
|-----------------------|------|-----------------------|------|------|
| >PTCH1-M56 TAFFMAALIP | 8    | >PTCH1-M56 TAFFRAALIP | 12   | 4    |
| >PTCH1-M56 TAFFMAAL   | 195  | >PTCH1-M56 TAFFRAAL   | 771  | 576  |
| >PTCH1-M56 TAFFMAALI  | 244  | >PTCH1-M56 TAFFRAALI  | 758  | 514  |
| >PTCH1-M56 TAFFMAALIP | 53   | >PTCH1-M56 TAFFRAALIP | 103  | 50   |
| >PTCH1-M56 TAFFMAAL   | 4733 | >PTCH1-M56 TAFFRAAL   | 465  | 4268 |
| >PTCH1-M56 TAFFMAAL   | 40   | >PTCH1-M56 TAFFRAAL   | 100  | 60   |
| >PTCH1-M56 TAFFMAALI  | 231  | >PTCH1-M56 TAFFRAALI  | 202  | 29   |
| >PTCH1-M56 TAFFMAALIP | 241  | >PTCH1-M56 TAFFRAALIP | 220  | 21   |
| >PTCH1-M56 TAFFMAAL   | 453  | >PTCH1-M56 TAFFRAAL   | 1412 | 959  |
| >PTCH1-M56 TAFFMAAL   | 192  | >PTCH1-M56 TAFFRAAL   | 297  | 105  |
| >PTCH1-M56 TAFFMAALI  | 170  | >PTCH1-M56 TAFFRAALI  | 544  | 374  |
| >PTCH1-M56 TAFFMAALI  | 91   | >PTCH1-M56 TAFFRAALI  | 85   | 6    |
| >PTCH1-M56 TAFFMAALIP | 115  | >PTCH1-M56 TAFFRAALIP | 104  | 11   |
| >PTCH1-M56 VTAFFMAAL  | 73   | >PTCH1-M56 VTAFFRAAL  | 106  | 33   |
| >PTCH1-M56 VTAFFMAALI | 376  | >PTCH1-M56 VTAFFRAALI | 417  | 41   |
| >PTCH1-M56 VTAFFMAA   | 428  | >PTCH1-M56 VTAFFRAA   | 3034 | 2606 |
| >PTCH1-M56 VTAFFMAAL  | 21   | >PTCH1-M56 VTAFFRAAL  | 146  | 125  |
| >PTCH1-M56 VTAFFMAA   | 196  | >PTCH1-M56 VTAFFRAA   | 1216 | 1020 |
| >PTCH1-M56 VTAFFMAAL  | 92   | >PTCH1-M56 VTAFFRAAL  | 1163 | 1071 |
| >PTCH1-M56 VTAFFMAA   | 305  | >PTCH1-M56 VTAFFRAA   | 1850 | 1545 |
| >PTCH1-M56 VTAFFMAAL  | 211  | >PTCH1-M56 VTAFFRAAL  | 1355 | 1144 |
| >PTCH1-M56 VTAFFMAAL  | 21   | >PTCH1-M56 VTAFFRAAL  | 2017 | 1996 |
| >PTCH1-M56 VTAFFMAAL  | 250  | >PTCH1-M56 VTAFFRAAL  | 248  | 2    |
| >PTCH1-M56 VTAFFMAALI | 310  | >PTCH1-M56 VTAFFRAALI | 482  | 172  |
| >PTCH1-M56 VTAFFMAA   | 20   | >PTCH1-M56 VTAFFRAA   | 100  | 80   |
| >PTCH1-M56 VTAFFMAAL  | 13   | >PTCH1-M56 VTAFFRAAL  | 17   | 4    |
| >PTCH1-M56 VTAFFMAALI | 27   | >PTCH1-M56 VTAFFRAALI | 21   | 6    |
| >PTCH1-M56 VTAFFMAA   | 449  | >PTCH1-M56 VTAFFRAA   | 2048 | 1599 |
| >PTCH1-M56 VTAFFMAAL  | 84   | >PTCH1-M56 VTAFFRAAL  | 443  | 359  |
| >PTCH1-M56 VTAFFMAALI | 185  | >PTCH1-M56 VTAFFRAALI | 562  | 377  |
| >PTCH1-M56 VTAFFMAAL  | 6    | >PTCH1-M56 VTAFFRAAL  | 26   | 20   |
| >PTCH1-M56 VTAFFMAALI | 18   | >PTCH1-M56 VTAFFRAALI | 63   | 45   |
| >PTCH1-M56 VTAFFMAAL  | 7    | >PTCH1-M56 VTAFFRAAL  | 17   | 10   |
| >PTCH1-M56 VTAFFMAALI | 8    | >PTCH1-M56 VTAFFRAALI | 20   | 12   |
| >PTCH1-M56 VTAFFMAAL  | 37   | >PTCH1-M56 VTAFFRAAL  | 82   | 45   |
| >PTCH1-M56 VTAFFMAALI | 68   | >PTCH1-M56 VTAFFRAALI | 106  | 38   |
| >PTCH1-M56 VTAFFMAAL  | 603  | >PTCH1-M56 VTAFFRAAL  | 413  | 190  |
| >PTCH1-M56 VTAFFMAALI | 22   | >PTCH1-M56 VTAFFRAALI | 36   | 14   |
| >PTCH1-M56 NVTAFFMAA  | 230  | >PTCH1-M56 NVTAFFRAAL | 437  | 207  |
| >PTCH1-M56 NVTAFFMAA  | 377  | >PTCH1-M56 NVTAFFRAAL | 869  | 492  |
| >PTCH1-M56 NVTAFFMAA  | 422  | >PTCH1-M56 NVTAFFRAA  | 1701 | 1279 |
| >PTCH1-M56 NVTAFFMAA  | 175  | >PTCH1-M56 NVTAFFRAAL | 550  | 375  |
| >PTCH1-M56 NVTAFFMA   | 62   | >PTCH1-M56 NVTAFFRA   | 181  | 119  |



|                       |       |                        |       |       |
|-----------------------|-------|------------------------|-------|-------|
| >PTCH1-M56 NVTAFFMAA  | 42    | >PTCH1-M56 NVTAFFRAA   | 418   | 376   |
| >PTCH1-M56 NVTAFFMAA  | 492   | >PTCH1-M56 NVTAFFRAAL  | 1262  | 770   |
| >PTCH1-M56 NVTAFFMAA  | 224   | >PTCH1-M56 NVTAFFRAAL  | 481   | 257   |
| >PTCH1-M56 NVTAFFMAA  | 316   | >PTCH1-M56 NVTAFFRAAL  | 3003  | 2687  |
| >PTCH1-M56 NVTAFFMA   | 14    | >PTCH1-M56 NVTAFFRA    | 21    | 7     |
| >PTCH1-M56 NVTAFFMAA  | 8     | >PTCH1-M56 NVTAFFRAA   | 65    | 57    |
| >PTCH1-M56 NVTAFFMAA  | 21    | >PTCH1-M56 NVTAFFRAAL  | 20    | 1     |
| >PTCH1-M56 NVTAFFMAA  | 9     | >PTCH1-M56 NVTAFFRAAL  | 19    | 10    |
| >PTCH1-M56 NVTAFFMA   | 74    | >PTCH1-M56 NVTAFFRA    | 445   | 371   |
| >PTCH1-M56 NVTAFFMAA  | 70    | >PTCH1-M56 NVTAFFRAA   | 847   | 777   |
| >PTCH1-M56 NVTAFFMAA  | 31    | >PTCH1-M56 NVTAFFRAAL  | 177   | 146   |
| >PTCH1-M56 NVTAFFMAA  | 62    | >PTCH1-M56 NVTAFFRAAL  | 210   | 148   |
| >PTCH1-M56 NVTAFFMAA  | 387   | >PTCH1-M56 NVTAFFRAAL  | 863   | 476   |
| >PTCH1-M56 SNVTAFFMA, | 136   | >PTCH1-M56 SNVTAFFRAA  | 136   | 0     |
| >PTCH1-M56 SNVTAFFM   | 142   | >PTCH1-M56 SNVTAFFR    | 33744 | 33602 |
| >PTCH1-M56 SNVTAFFMA, | 262   | >PTCH1-M56 SNVTAFFRAA  | 2031  | 1769  |
| >PTCH1-M56 SNVTAFFM   | 19707 | >PTCH1-M56 SNVTAFFR    | 145   | 19562 |
| >PTCH1-M56 SNVTAFFM   | 20328 | >PTCH1-M56 SNVTAFFR    | 31    | 20297 |
| >PTCH1-M56 SNVTAFFMA, | 330   | >PTCH1-M56 SNVTAFFRAA  | 406   | 76    |
| >PTCH1-M56 SNVTAFFM   | 22681 | >PTCH1-M56 SNVTAFFR    | 105   | 22576 |
| >PTCH1-M56 ISNVTAFFM  | 7238  | >PTCH1-M56 ISNVTAFFR   | 25    | 7213  |
| >PTCH1-M56 ISNVTAFFMA | 379   | >PTCH1-M56 ISNVTAFFRA, | 1179  | 800   |
| >PTCH1-M56 ISNVTAFFM  | 4266  | >PTCH1-M56 ISNVTAFFR   | 6     | 4260  |
| >PTCH1-M56 ISNVTAFFM  | 20984 | >PTCH1-M56 ISNVTAFFR   | 77    | 20907 |
| >PTCH1-M56 ISNVTAFFM  | 7939  | >PTCH1-M56 ISNVTAFFR   | 5     | 7934  |
| >PTCH1-M56 ISNVTAFFM  | 494   | >PTCH1-M56 ISNVTAFFR   | 4116  | 3622  |
| >PTCH1-M56 ISNVTAFFM  | 6     | >PTCH1-M56 ISNVTAFFR   | 4518  | 4512  |
| >PTCH1-M56 ISNVTAFFM  | 206   | >PTCH1-M56 ISNVTAFFR   | 11543 | 11337 |
| >PTCH1-M56 ISNVTAFFM  | 15    | >PTCH1-M56 ISNVTAFFR   | 7546  | 7531  |
| >PTCH1-M56 ISNVTAFFM  | 41    | >PTCH1-M56 ISNVTAFFR   | 8287  | 8246  |
| >PTCH1-M56 ISNVTAFFM  | 25    | >PTCH1-M56 ISNVTAFFR   | 5924  | 5899  |
| >PTCH1-M56 SISNVTAFFM | 256   | >PTCH1-M56 SISNVTAFFR/ | 371   | 115   |
| >PTCH1-M56 SISNVTAFFM | 69    | >PTCH1-M56 SISNVTAFFR  | 5287  | 5218  |
| >PTCH1-M56 SISNVTAFFM | 58    | >PTCH1-M56 SISNVTAFFR/ | 89    | 31    |
| >PTCH1-M56 SISNVTAFFM | 83    | >PTCH1-M56 SISNVTAFFR/ | 112   | 29    |
| >PTCH1-M56 SISNVTAFFM | 62    | >PTCH1-M56 SISNVTAFFR/ | 114   | 52    |
| >PTCH1-M56 SISNVTAFFM | 351   | >PTCH1-M56 SISNVTAFFR  | 15536 | 15185 |
| >PTCH1-M56 SISNVTAFFM | 209   | >PTCH1-M56 SISNVTAFFR/ | 304   | 95    |
| >PTCH1-M56 SISNVTAFFM | 156   | >PTCH1-M56 SISNVTAFFR  | 16098 | 15942 |
| >PTCH1-M56 SISNVTAFFM | 103   | >PTCH1-M56 SISNVTAFFR/ | 200   | 97    |
| >PTCH1-M56 SISNVTAFFM | 369   | >PTCH1-M56 SISNVTAFFR/ | 187   | 182   |
| >PTCH1-M56 SISNVTAFFM | 8550  | >PTCH1-M56 SISNVTAFFR  | 103   | 8447  |
| >PTCH1-M56 SISNVTAFFM | 16806 | >PTCH1-M56 SISNVTAFFR  | 11    | 16795 |

|                       |       |                       |       |       |
|-----------------------|-------|-----------------------|-------|-------|
| >PTCH1-M56 SISNVTAFM  | 2458  | >PTCH1-M56 SISNVTAFR  | 6     | 2452  |
| >PTCH1-M56 SISNVTAFM  | 7666  | >PTCH1-M56 SISNVTAFR  | 34    | 7632  |
| >PTCH1-M56 SISNVTAFM  | 13623 | >PTCH1-M56 SISNVTAFR  | 5     | 13618 |
| >PTCH1-M56 SISNVTAFM  | 70    | >PTCH1-M56 SISNVTAFR  | 60    | 10    |
| >PTCH1-M56 SISNVTAFM  | 265   | >PTCH1-M56 SISNVTAFR  | 16994 | 16729 |
| >PTCH1-M56 SISNVTAFM  | 59    | >PTCH1-M56 SISNVTAFR  | 19211 | 19152 |
| >PTCH1-M56 SISNVTAFM  | 16473 | >PTCH1-M56 SISNVTAFR  | 59    | 16414 |
| >PTCH1-M56 SISNVTAFM  | 26521 | >PTCH1-M56 SISNVTAFR  | 121   | 26400 |
| >PTCH1-P11;PVLDGAVSTL | 9079  | >PTCH1-P11;LVLDGAVSTL | 418   | 8661  |
| >PTCH1-P11;PVLDGAVSTL | 7856  | >PTCH1-P11;LVLDGAVSTL | 115   | 7741  |
| >PTCH1-P11;PVLDGAVSTL | 1408  | >PTCH1-P11;LVLDGAVSTL | 54    | 1354  |
| >PTCH1-P11;PVLDGAVSTL | 2564  | >PTCH1-P11;LVLDGAVSTL | 110   | 2454  |
| >PTCH1-P11;PVLDGAVSTL | 2752  | >PTCH1-P11;LVLDGAVSTL | 126   | 2626  |
| >PTCH1-P11;PVLDGAVST  | 6423  | >PTCH1-P11;LVLDGAVST  | 49    | 6374  |
| >PTCH1-P11;PVLDGAVSTL | 7583  | >PTCH1-P11;LVLDGAVSTL | 113   | 7470  |
| >PTCH1-P11;PVLDGAVSTL | 1430  | >PTCH1-P11;LVLDGAVSTL | 12    | 1418  |
| >PTCH1-P11;PVLDGAVSTL | 810   | >PTCH1-P11;LVLDGAVSTL | 27    | 783   |
| >PTCH1-P11;PVLDGAVSTL | 2478  | >PTCH1-P11;LVLDGAVSTL | 111   | 2367  |
| >PTCH1-P11;PVLDGAVSTL | 4850  | >PTCH1-P11;LVLDGAVSTL | 85    | 4765  |
| >PTCH1-P11;PVLDGAVSTL | 1232  | >PTCH1-P11;LVLDGAVSTL | 93    | 1139  |
| >PTCH1-P11;PVLDGAVSTL | 2114  | >PTCH1-P11;LVLDGAVSTL | 169   | 1945  |
| >PTCH1-P11;PVLDGAVSTL | 418   | >PTCH1-P11;LVLDGAVSTL | 30    | 388   |
| >PTCH1-P11;PVLDGAVSTL | 1412  | >PTCH1-P11;LVLDGAVSTL | 230   | 1182  |
| >PTCH1-P11;PVLDGAVST  | 8860  | >PTCH1-P11;LVLDGAVST  | 168   | 8692  |
| >PTCH1-P11;PVLDGAVSTL | 238   | >PTCH1-P11;LVLDGAVSTL | 5     | 233   |
| >PTCH1-P11;PVLDGAVSTL | 820   | >PTCH1-P11;LVLDGAVSTL | 14    | 806   |
| >PTCH1-P11;PVLDGAVSTL | 1813  | >PTCH1-P11;LVLDGAVSTL | 196   | 1617  |
| >PTCH1-P11;PVLDGAVSTL | 1633  | >PTCH1-P11;LVLDGAVSTL | 167   | 1466  |
| >PTCH1-P11;PVLDGAVSTL | 4550  | >PTCH1-P11;LVLDGAVSTL | 39    | 4511  |
| >PTCH1-P11;PVLDGAVSTL | 11657 | >PTCH1-P11;LVLDGAVSTL | 403   | 11254 |
| >PTCH1-P11;PVLDGAVSTL | 7484  | >PTCH1-P11;LVLDGAVSTL | 145   | 7339  |
| >PTCH1-P11;APVLDGAV   | 25860 | >PTCH1-P11;ALVLDGAV   | 109   | 25751 |
| >PTCH1-P11;APVLDGAVST | 21891 | >PTCH1-P11;ALVLDGAVST | 125   | 21766 |
| >PTCH1-P11;APVLDGAV   | 18203 | >PTCH1-P11;ALVLDGAV   | 22    | 18181 |
| >PTCH1-P11;APVLDGAVST | 18105 | >PTCH1-P11;ALVLDGAVST | 43    | 18062 |
| >PTCH1-P11;APVLDGAV   | 12051 | >PTCH1-P11;ALVLDGAV   | 135   | 11916 |
| >PTCH1-P11;APVLDGAV   | 21789 | >PTCH1-P11;ALVLDGAV   | 18    | 21771 |
| >PTCH1-P11;APVLDGAVST | 24473 | >PTCH1-P11;ALVLDGAVST | 44    | 24429 |
| >PTCH1-P11;APVLDGAV   | 22207 | >PTCH1-P11;ALVLDGAV   | 24    | 22183 |
| >PTCH1-P11;APVLDGAVST | 22424 | >PTCH1-P11;ALVLDGAVST | 35    | 22389 |
| >PTCH1-P11;APVLDGAV   | 23349 | >PTCH1-P11;ALVLDGAV   | 51    | 23298 |
| >PTCH1-P11;APVLDGAVST | 24699 | >PTCH1-P11;ALVLDGAVST | 110   | 24589 |
| >PTCH1-P11;APVLDGAVST | 24691 | >PTCH1-P11;ALVLDGAVST | 259   | 24432 |

|                       |       |                       |       |       |
|-----------------------|-------|-----------------------|-------|-------|
| >PTCH1-P11:APVLDGAV   | 27896 | >PTCH1-P11:ALVLDGAV   | 6     | 27890 |
| >PTCH1-P11:APVLDGAVST | 35686 | >PTCH1-P11:ALVLDGAVST | 145   | 35541 |
| >PTCH1-P11:APVLDGAVST | 28590 | >PTCH1-P11:ALVLDGAVST | 7     | 28583 |
| >PTCH1-P11:APVLDGAV   | 73    | >PTCH1-P11:ALVLDGAV   | 17937 | 17864 |
| >PTCH1-P11:APVLDGAVST | 39    | >PTCH1-P11:ALVLDGAVST | 11306 | 11267 |
| >PTCH1-P11:APVLDGAVST | 304   | >PTCH1-P11:ALVLDGAVST | 12892 | 12588 |
| >PTCH1-P11:APVLDGAVST | 228   | >PTCH1-P11:ALVLDGAVST | 3121  | 2893  |
| >PTCH1-P11:APVLDGAVST | 219   | >PTCH1-P11:ALVLDGAVST | 9907  | 9688  |
| >PTCH1-P11:AVLALEHMF/ | 18908 | >PTCH1-P11:AVLALEHMF/ | 71    | 18837 |
| >PTCH1-P11:AVLALEHMF/ | 9972  | >PTCH1-P11:AVLALEHMF/ | 90    | 9882  |
| >PTCH1-P11:AVLALEHMF/ | 1527  | >PTCH1-P11:AVLALEHMF/ | 16    | 1511  |
| >PTCH1-P11:AVLALEHMF/ | 13976 | >PTCH1-P11:AVLALEHMF/ | 69    | 13907 |
| >PTCH1-P11:AVLALEHMF/ | 17995 | >PTCH1-P11:AVLALEHMF/ | 312   | 17683 |
| >PTCH1-P11:AVLALEHMF/ | 20643 | >PTCH1-P11:AVLALEHMF/ | 239   | 20404 |
| >PTCH1-P11:AVLALEHMF/ | 27404 | >PTCH1-P11:AVLALEHMF/ | 131   | 27273 |
| >PTCH1-P11:AVLALEHMF/ | 11373 | >PTCH1-P11:AVLALEHMF/ | 273   | 11100 |
| >PTCH1-P11:AVLALEHMF/ | 6256  | >PTCH1-P11:AVLALEHMF/ | 188   | 6068  |
| >PTCH1-P11:AVLALEHMF/ | 10487 | >PTCH1-P11:AVLALEHMF/ | 161   | 10326 |
| >PTCH1-P11:AVLALEHMF/ | 22494 | >PTCH1-P11:AVLALEHMF/ | 284   | 22210 |
| >PTCH1-P11:FAPVLDGA   | 246   | >PTCH1-P11:FALVLDGA   | 68    | 178   |
| >PTCH1-P11:FAPVLDGAV  | 313   | >PTCH1-P11:FALVLDGAV  | 52    | 261   |
| >PTCH1-P11:FAPVLDGAV  | 2129  | >PTCH1-P11:FALVLDGAV  | 311   | 1818  |
| >PTCH1-P11:FAPVLDGA   | 404   | >PTCH1-P11:FALVLDGA   | 2324  | 1920  |
| >PTCH1-P11:FAPVLDGAV  | 61    | >PTCH1-P11:FALVLDGAV  | 394   | 333   |
| >PTCH1-P11:FAPVLDGAV  | 7686  | >PTCH1-P11:FALVLDGAV  | 320   | 7366  |
| >PTCH1-P11:FAPVLDGAV  | 1908  | >PTCH1-P11:FALVLDGAV  | 273   | 1635  |
| >PTCH1-P11:FAPVLDGA   | 838   | >PTCH1-P11:FALVLDGA   | 128   | 710   |
| >PTCH1-P11:FAPVLDGAV  | 900   | >PTCH1-P11:FALVLDGAV  | 140   | 760   |
| >PTCH1-P11:MFAPVLDGA  | 54    | >PTCH1-P11:MFALVLDGA  | 156   | 102   |
| >PTCH1-P11:MFAPVLDGA  | 287   | >PTCH1-P11:MFALVLDGA  | 1211  | 924   |
| >PTCH1-P11:MFAPVLDGA  | 128   | >PTCH1-P11:MFALVLDGA  | 204   | 76    |
| >PTCH1-P11:MFAPVLDGA  | 497   | >PTCH1-P11:MFALVLDGA  | 1600  | 1103  |
| >PTCH1-P11:HMFAPVLDG  | 275   | >PTCH1-P11:HMFALVLDG  | 95    | 180   |
| >PTCH1-P11:HMFAPVLDG  | 67    | >PTCH1-P11:HMFALVLDG  | 46    | 21    |
| >PTCH1-P11:HMFAPVLDG  | 51    | >PTCH1-P11:HMFALVLDG  | 42    | 9     |
| >PTCH1-P11:HMFAPVLDG  | 27    | >PTCH1-P11:HMFALVLDG  | 16    | 11    |
| >PTCH1-P11:HMFAPVLDG  | 37    | >PTCH1-P11:HMFALVLDG  | 39    | 2     |
| >PTCH1-P11:HMFAPVLDG  | 11    | >PTCH1-P11:HMFALVLDG  | 9     | 2     |
| >PTCH1-P11:HMFAPVLDG  | 185   | >PTCH1-P11:HMFALVLDG  | 166   | 19    |
| >PTCH1-P11:HMFAPVLDG  | 76    | >PTCH1-P11:HMFALVLDG  | 54    | 22    |
| >PTCH1-P11:HMFAPVLDG  | 6     | >PTCH1-P11:HMFALVLDG  | 10    | 4     |
| >PTCH1-P11:HMFAPVLDG  | 3     | >PTCH1-P11:HMFALVLDG  | 4     | 1     |
| >PTCH1-P11:HMFAPVLDG  | 55    | >PTCH1-P11:HMFALVLDG  | 65    | 10    |

|                       |       |                       |     |       |
|-----------------------|-------|-----------------------|-----|-------|
| >PTCH1-P11;HMFAPVLDG  | 9     | >PTCH1-P11;HMFALVLDG  | 10  | 1     |
| >PTCH1-P11;HMFAPVLDG  | 37    | >PTCH1-P11;HMFALVLDG  | 30  | 7     |
| >PTCH1-P11;HMFAPVLDG  | 12    | >PTCH1-P11;HMFALVLDG  | 11  | 1     |
| >PTCH1-P11;HMFAPVLDG  | 227   | >PTCH1-P11;HMFALVLDG  | 221 | 6     |
| >PTCH1-P11;HMFAPVLDG  | 33    | >PTCH1-P11;HMFALVLDG  | 49  | 16    |
| >PTCH1-P11;HMFAPVLDG  | 6     | >PTCH1-P11;HMFALVLDG  | 6   | 0     |
| >PTCH1-P11;HMFAPVLDG  | 824   | >PTCH1-P11;HMFALVLDG  | 391 | 433   |
| >PTCH1-P11;HMFAPVLDG  | 131   | >PTCH1-P11;HMFALVLDG  | 180 | 49    |
| >PTCH1-P11;HMFAPVLDG  | 66    | >PTCH1-P11;HMFALVLDG  | 102 | 36    |
| >PTCH1-P11;HMFAPVLDG  | 158   | >PTCH1-P11;HMFALVLDG  | 295 | 137   |
| >PTCH1-P11;HMFAPVLDG  | 237   | >PTCH1-P11;HMFALVLDG  | 192 | 45    |
| >PTCH1-P11;HMFAPVLDG  | 104   | >PTCH1-P11;HMFALVLDG  | 346 | 242   |
| >PTCH1-P11;HMFAPVLDG  | 122   | >PTCH1-P11;HMFALVLDG  | 247 | 125   |
| >PTCH1-P11;HMFAPVLDG  | 630   | >PTCH1-P11;HMFALVLDG  | 383 | 247   |
| >PTCH1-P11;EHMFAPVL   | 205   | >PTCH1-P11;EHMFALVL   | 540 | 335   |
| >PTCH1-P11;EHMFAPVL   | 13    | >PTCH1-P11;EHMFALVL   | 18  | 5     |
| >PTCH1-P11;LEHMFAPV   | 191   | >PTCH1-P11;LEHMFALV   | 18  | 173   |
| >PTCH1-P11;LEHMFAPVL  | 47    | >PTCH1-P11;LEHMFALVL  | 36  | 11    |
| >PTCH1-P11;LEHMFAPVL  | 384   | >PTCH1-P11;LEHMFALVL  | 242 | 142   |
| >PTCH1-P11;LEHMFAPV   | 100   | >PTCH1-P11;LEHMFALV   | 657 | 557   |
| >PTCH1-P11;LEHMFAPVL  | 52    | >PTCH1-P11;LEHMFALVL  | 45  | 7     |
| >PTCH1-P11;LEHMFAPVL  | 490   | >PTCH1-P11;LEHMFALVL  | 374 | 116   |
| >PTCH1-P11;LEHMFAPV   | 65    | >PTCH1-P11;LEHMFALV   | 108 | 43    |
| >PTCH1-P11;LEHMFAPVL  | 10    | >PTCH1-P11;LEHMFALVL  | 9   | 1     |
| >PTCH1-P11;LEHMFAPV   | 41    | >PTCH1-P11;LEHMFALV   | 125 | 84    |
| >PTCH1-P11;LEHMFAPVL  | 24    | >PTCH1-P11;LEHMFALVL  | 23  | 1     |
| >PTCH1-P11;LEHMFAPVL  | 694   | >PTCH1-P11;LEHMFALVL  | 443 | 251   |
| >PTCH1-P11;LEHMFAPV   | 41    | >PTCH1-P11;LEHMFALV   | 137 | 96    |
| >PTCH1-P11;LEHMFAPVL  | 264   | >PTCH1-P11;LEHMFALVL  | 462 | 198   |
| >PTCH1-P11;LEHMFAPV   | 172   | >PTCH1-P11;LEHMFALV   | 346 | 174   |
| >PTCH1-P11;LEHMFAPVL  | 22    | >PTCH1-P11;LEHMFALVL  | 116 | 94    |
| >PTCH1-P11;ALEHMFAP   | 21804 | >PTCH1-P11;ALEHMFAL   | 179 | 21625 |
| >PTCH1-P11;ALEHMFAPV  | 48    | >PTCH1-P11;ALEHMFALV  | 65  | 17    |
| >PTCH1-P11;ALEHMFAP   | 4339  | >PTCH1-P11;ALEHMFAL   | 19  | 4320  |
| >PTCH1-P11;ALEHMFAPV  | 17    | >PTCH1-P11;ALEHMFALV  | 16  | 1     |
| >PTCH1-P11;ALEHMFAP   | 16094 | >PTCH1-P11;ALEHMFAL   | 247 | 15847 |
| >PTCH1-P11;ALEHMFAPV  | 9     | >PTCH1-P11;ALEHMFALV  | 19  | 10    |
| >PTCH1-P11;ALEHMFAP   | 10027 | >PTCH1-P11;ALEHMFAL   | 96  | 9931  |
| >PTCH1-P11;ALEHMFAPV  | 12    | >PTCH1-P11;ALEHMFALV  | 26  | 14    |
| >PTCH1-P11;ALEHMFAP   | 16561 | >PTCH1-P11;ALEHMFAL   | 176 | 16385 |
| >PTCH1-P11;ALEHMFAPV  | 27    | >PTCH1-P11;ALEHMFALV  | 53  | 26    |
| >PTCH1-P11;ALEHMFAPVI | 469   | >PTCH1-P11;ALEHMFALVI | 837 | 368   |
| >PTCH1-P11;ALEHMFAP   | 15285 | >PTCH1-P11;ALEHMFAL   | 52  | 15233 |

|                       |       |                       |     |       |
|-----------------------|-------|-----------------------|-----|-------|
| >PTCH1-P11;ALEHMFAPV  | 8     | >PTCH1-P11;ALEHMFALV  | 22  | 14    |
| >PTCH1-P11;ALEHMFAPVI | 274   | >PTCH1-P11;ALEHMFALVI | 565 | 291   |
| >PTCH1-P11;ALEHMFAPV  | 87    | >PTCH1-P11;ALEHMFALV  | 107 | 20    |
| >PTCH1-P11;ALEHMFAP   | 14004 | >PTCH1-P11;ALEHMFAL   | 8   | 13996 |
| >PTCH1-P11;ALEHMFAPV  | 2     | >PTCH1-P11;ALEHMFALV  | 3   | 1     |
| >PTCH1-P11;ALEHMFAPVI | 12    | >PTCH1-P11;ALEHMFALVI | 18  | 6     |
| >PTCH1-P11;LALEHMFAP  | 6120  | >PTCH1-P11;LALEHMFAL  | 267 | 5853  |
| >PTCH1-P11;LALEHMFAP\ | 361   | >PTCH1-P11;LALEHMFAL\ | 717 | 356   |
| >PTCH1-P11;LALEHMFAP  | 19306 | >PTCH1-P11;LALEHMFAL  | 45  | 19261 |
| >PTCH1-P11;LALEHMFAP\ | 80    | >PTCH1-P11;LALEHMFAL\ | 117 | 37    |
| >PTCH1-P11;LALEHMFAP  | 12145 | >PTCH1-P11;LALEHMFAL  | 87  | 12058 |
| >PTCH1-P11;LALEHMFAP\ | 186   | >PTCH1-P11;LALEHMFAL\ | 226 | 40    |
| >PTCH1-P11;LALEHMFAP\ | 63    | >PTCH1-P11;LALEHMFAL\ | 93  | 30    |
| >PTCH1-P11;LALEHMFAP  | 477   | >PTCH1-P11;LALEHMFAL  | 8   | 469   |
| >PTCH1-P11;LALEHMFAP\ | 32    | >PTCH1-P11;LALEHMFAL\ | 49  | 17    |
| >PTCH1-P11;LALEHMFAP\ | 74    | >PTCH1-P11;LALEHMFAL\ | 116 | 42    |
| >PTCH1-P11;LALEHMFAP  | 10956 | >PTCH1-P11;LALEHMFAL  | 45  | 10911 |
| >PTCH1-P11;LALEHMFAP\ | 15    | >PTCH1-P11;LALEHMFAL\ | 23  | 8     |
| >PTCH1-P11;LALEHMFAP\ | 199   | >PTCH1-P11;LALEHMFAL\ | 353 | 154   |
| >PTCH1-P11;LALEHMFAP  | 16619 | >PTCH1-P11;LALEHMFAL  | 380 | 16239 |
| >PTCH1-P11;LALEHMFAP\ | 59    | >PTCH1-P11;LALEHMFAL\ | 216 | 157   |
| >PTCH1-P11;LALEHMFAP\ | 220   | >PTCH1-P11;LALEHMFAL\ | 264 | 44    |
| >PTCH1-P11;LALEHMFAP\ | 402   | >PTCH1-P11;LALEHMFAL\ | 459 | 57    |
| >PTCH1-P11;LALEHMFAP\ | 23    | >PTCH1-P11;LALEHMFAL\ | 24  | 1     |
| >PTCH1-P11;LALEHMFAP\ | 433   | >PTCH1-P11;LALEHMFAL\ | 910 | 477   |
| >PTCH1-P11;LALEHMFAP  | 3389  | >PTCH1-P11;LALEHMFAL  | 16  | 3373  |
| >PTCH1-P11;LALEHMFAP\ | 7     | >PTCH1-P11;LALEHMFAL\ | 13  | 6     |
| >PTCH1-P11;LALEHMFAP\ | 83    | >PTCH1-P11;LALEHMFAL\ | 205 | 122   |
| >PTCH1-P11;LALEHMFAP  | 11498 | >PTCH1-P11;LALEHMFAL  | 458 | 11040 |
| >PTCH1-P11;LALEHMFAP  | 15100 | >PTCH1-P11;LALEHMFAL  | 21  | 15079 |
| >PTCH1-P11;LALEHMFAP\ | 30    | >PTCH1-P11;LALEHMFAL\ | 22  | 8     |
| >PTCH1-P11;LALEHMFAP  | 4422  | >PTCH1-P11;LALEHMFAL  | 64  | 4358  |
| >PTCH1-P11;LALEHMFAP\ | 213   | >PTCH1-P11;LALEHMFAL\ | 246 | 33    |
| >PTCH1-P11;LALEHMFAP  | 24785 | >PTCH1-P11;LALEHMFAL  | 335 | 24450 |
| >PTCH1-P11;LALEHMFAP\ | 559   | >PTCH1-P11;LALEHMFAL\ | 441 | 118   |
| >PTCH1-P11;VLALEHMFAL | 5752  | >PTCH1-P11;VLALEHMFAL | 84  | 5668  |
| >PTCH1-P11;VLALEHMFAL | 30    | >PTCH1-P11;VLALEHMFAL | 42  | 12    |
| >PTCH1-P11;VLALEHMFAL | 7107  | >PTCH1-P11;VLALEHMFAL | 31  | 7076  |
| >PTCH1-P11;VLALEHMFAL | 6     | >PTCH1-P11;VLALEHMFAL | 6   | 0     |
| >PTCH1-P11;VLALEHMFAL | 6     | >PTCH1-P11;VLALEHMFAL | 9   | 3     |
| >PTCH1-P11;VLALEHMFAL | 25    | >PTCH1-P11;VLALEHMFAL | 43  | 18    |
| >PTCH1-P11;VLALEHMFAL | 6768  | >PTCH1-P11;VLALEHMFAL | 24  | 6744  |
| >PTCH1-P11;VLALEHMFAL | 6     | >PTCH1-P11;VLALEHMFAL | 10  | 4     |

|                        |       |                        |       |       |
|------------------------|-------|------------------------|-------|-------|
| >PTCH1-P11;VLALEHMFAL  | 12146 | >PTCH1-P11;VLALEHMFAL  | 52    | 12094 |
| >PTCH1-P11;VLALEHMFAL  | 13    | >PTCH1-P11;VLALEHMFAL  | 34    | 21    |
| >PTCH1-P11;VLALEHMFAL  | 14708 | >PTCH1-P11;VLALEHMFAL  | 40    | 14668 |
| >PTCH1-P11;VLALEHMFAL  | 8     | >PTCH1-P11;VLALEHMFAL  | 10    | 2     |
| >PTCH1-P11;VLALEHMFAL  | 22334 | >PTCH1-P11;VLALEHMFAL  | 40    | 22294 |
| >PTCH1-P11;VLALEHMFAL  | 5     | >PTCH1-P11;VLALEHMFAL  | 6     | 1     |
| >PTCH1-P11;VLALEHMFAL  | 10818 | >PTCH1-P11;VLALEHMFAL  | 6     | 10812 |
| >PTCH1-P11;VLALEHMFAL  | 2     | >PTCH1-P11;VLALEHMFAL  | 2     | 0     |
| >PTCH1-P11;PSPEPPPSV   | 2068  | >PTCH1-P11;SSPEPPPSV   | 77    | 1991  |
| >PTCH1-P11;PSPEPPPSVV  | 4692  | >PTCH1-P11;SSPEPPPSVV  | 308   | 4384  |
| >PTCH1-P11;PSPEPPPSV   | 11204 | >PTCH1-P11;SSPEPPPSV   | 436   | 10768 |
| >PTCH1-P11;PSPEPPPSV   | 2846  | >PTCH1-P11;SSPEPPPSV   | 67    | 2779  |
| >PTCH1-P11;PSPEPPPSV   | 256   | >PTCH1-P11;SSPEPPPSV   | 23    | 233   |
| >PTCH1-P11;PSPEPPPSVV  | 171   | >PTCH1-P11;SSPEPPPSVV  | 14    | 157   |
| >PTCH1-P11;PSPEPPPSVV  | 4977  | >PTCH1-P11;SSPEPPPSVV  | 264   | 4713  |
| >PTCH1-P11;PSPEPPPSVV  | 4001  | >PTCH1-P11;SSPEPPPSVV  | 420   | 3581  |
| >PTCH1-P11;TPSPEPPPSV\ | 5766  | >PTCH1-P11;TSSPEPPPSV\ | 251   | 5515  |
| >PTCH1-P11;TPSPEPPPSV  | 455   | >PTCH1-P11;TSSPEPPPSV  | 188   | 267   |
| >PTCH1-P11;TPSPEPPPS   | 302   | >PTCH1-P11;TSSPEPPPS   | 12564 | 12262 |
| >PTCH1-P11;TPSPEPPPSV  | 15850 | >PTCH1-P11;TSSPEPPPSV  | 286   | 15564 |
| >PTCH1-P11;PTPSPEPPPS\ | 1101  | >PTCH1-P11;PTSSPEPPPS\ | 309   | 792   |
| >PTCH1-P11;PTPSPEPPPS\ | 69    | >PTCH1-P11;PTSSPEPPPS\ | 5638  | 5569  |
| >PTCH1-P11;LPTPSPEPPPS | 178   | >PTCH1-P11;LPTSSPEPPPS | 206   | 28    |
| >PTCH1-P11;LPTPSPEPPPS | 255   | >PTCH1-P11;LPTSSPEPPPS | 234   | 21    |
| >PTCH1-P11;GLNRLPTPS   | 444   | >PTCH1-P11;GLNRLPTSS   | 664   | 220   |
| >PTCH1-P12(PSVVRFAM    | 12716 | >PTCH1-P12(LSVVRFAM    | 436   | 12280 |
| >PTCH1-P12(PSVVRFAM    | 3784  | >PTCH1-P12(LSVVRFAM    | 364   | 3420  |
| >PTCH1-P12(PSVVRFAM    | 3666  | >PTCH1-P12(LSVVRFAM    | 20    | 3646  |
| >PTCH1-P12(PSVVRFAM    | 16432 | >PTCH1-P12(LSVVRFAM    | 337   | 16095 |
| >PTCH1-P12(PSVVRFAM    | 1058  | >PTCH1-P12(LSVVRFAM    | 189   | 869   |
| >PTCH1-P12(PPSVVRFAM   | 185   | >PTCH1-P12(PLSVVRFAM   | 36086 | 35901 |
| >PTCH1-P12(PPSVVRFAM   | 64    | >PTCH1-P12(PLSVVRFAM   | 17097 | 17033 |
| >PTCH1-P12(PPSVVRFAM   | 87    | >PTCH1-P12(PLSVVRFAM   | 8396  | 8309  |
| >PTCH1-P12(PPSVVRFAM   | 259   | >PTCH1-P12(PLSVVRFAM   | 28574 | 28315 |
| >PTCH1-P12(PPSVVRFAM   | 185   | >PTCH1-P12(PLSVVRFAM   | 10744 | 10559 |
| >PTCH1-P12(RLPTPSPEPPI | 22747 | >PTCH1-P12(RLPTPSPEPPI | 224   | 22523 |
| >PTCH1-P12(RLPTPSPEPPI | 15850 | >PTCH1-P12(RLPTPSPEPPI | 313   | 15537 |
| >PTCH1-P12(RLPTPSPEPPI | 9136  | >PTCH1-P12(RLPTPSPEPPI | 21    | 9115  |
| >PTCH1-P12(RLPTPSPEPPI | 20236 | >PTCH1-P12(RLPTPSPEPPI | 320   | 19916 |
| >PTCH1-P12(RLPTPSPEPPI | 14872 | >PTCH1-P12(RLPTPSPEPPI | 39    | 14833 |
| >PTCH1-P12(RLPTPSPEPPI | 12918 | >PTCH1-P12(RLPTPSPEPPI | 20    | 12898 |
| >PTCH1-P12(RLPTPSPEPPI | 14285 | >PTCH1-P12(RLPTPSPEPPI | 66    | 14219 |
| >PTCH1-P12(PPSVVRF     | 331   | >PTCH1-P12(PPLSVVRF    | 21964 | 21633 |

|                        |       |                        |      |       |
|------------------------|-------|------------------------|------|-------|
| >PTCH1-P12(PPPSVVRF    | 59    | >PTCH1-P12(PPLSVVRF    | 60   | 1     |
| >PTCH1-P12(PPPSVVRFAM  | 20    | >PTCH1-P12(PPLSVVRFAM  | 19   | 1     |
| >PTCH1-P12(PPPSVVRFAM  | 163   | >PTCH1-P12(PPLSVVRFAM  | 236  | 73    |
| >PTCH1-P12(PPPSVVRF    | 1908  | >PTCH1-P12(PPLSVVRF    | 280  | 1628  |
| >PTCH1-P12(PPPSVVRF    | 1090  | >PTCH1-P12(PPLSVVRF    | 65   | 1025  |
| >PTCH1-P12(EPPPSVVRF   | 423   | >PTCH1-P12(EPPLSVVRF   | 1140 | 717   |
| >PTCH1-P12(EPPPSVVRF   | 167   | >PTCH1-P12(EPPLSVVRF   | 1701 | 1534  |
| >PTCH1-P12(EPPPSVVRFA  | 52    | >PTCH1-P12(EPPLSVVRFA  | 269  | 217   |
| >PTCH1-P12(EPPPSVVRF   | 268   | >PTCH1-P12(EPPLSVVRF   | 402  | 134   |
| >PTCH1-P12(EPPPSVVRFA  | 47    | >PTCH1-P12(EPPLSVVRFA  | 58   | 11    |
| >PTCH1-P12(EPPPSVVRF   | 308   | >PTCH1-P12(EPPLSVVRF   | 542  | 234   |
| >PTCH1-P12(SPEPPPSVVR  | 327   | >PTCH1-P12(SPEPPLSVVRI | 490  | 163   |
| >PTCH1-P12(SPEPPPSV    | 251   | >PTCH1-P12(SPEPPLSV    | 96   | 155   |
| >PTCH1-P12(SPEPPPSVV   | 101   | >PTCH1-P12(SPEPPLSVV   | 66   | 35    |
| >PTCH1-P12(SPEPPPSVVR  | 460   | >PTCH1-P12(SPEPPLSVVRI | 352  | 108   |
| >PTCH1-P12(SPEPPPSVVR  | 212   | >PTCH1-P12(SPEPPLSVVRI | 250  | 38    |
| >PTCH1-P12(SPEPPPSVV   | 814   | >PTCH1-P12(SPEPPLSVV   | 364  | 450   |
| >PTCH1-P12(SPEPPPSVVR  | 590   | >PTCH1-P12(SPEPPLSVVRI | 447  | 143   |
| >PTCH1-P12(SPEPPPSVVR  | 1297  | >PTCH1-P12(SPEPPLSVVRI | 467  | 830   |
| >PTCH1-P12(SPEPPPSVVR  | 388   | >PTCH1-P12(SPEPPLSVVRI | 185  | 203   |
| >PTCH1-P12(PSPEPPPSV   | 256   | >PTCH1-P12(PSPEPPLSV   | 270  | 14    |
| >PTCH1-P12(PSPEPPPSVV  | 171   | >PTCH1-P12(PSPEPPLSVV  | 70   | 101   |
| >PTCH1-P12(TPSPEPPPSV  | 455   | >PTCH1-P12(TPSPEPPLSV  | 1399 | 944   |
| >PTCH1-P12(TPSPEPPP    | 24228 | >PTCH1-P12(TPSPEPPL    | 452  | 23776 |
| >PTCH1-P12(TPSPEPPP    | 3351  | >PTCH1-P12(TPSPEPPL    | 125  | 3226  |
| >PTCH1-P12(TPSPEPPPS   | 302   | >PTCH1-P12(TPSPEPPLS   | 3872 | 3570  |
| >PTCH1-P12(TPSPEPPP    | 15906 | >PTCH1-P12(TPSPEPPL    | 96   | 15810 |
| >PTCH1-P12(PTPSPEPPP   | 5928  | >PTCH1-P12(PTPSPEPPL   | 14   | 5914  |
| >PTCH1-P12(PTPSPEPPPS\ | 69    | >PTCH1-P12(PTPSPEPPLS\ | 66   | 3     |
| >PTCH1-P12(LPTPSPEPPP  | 40379 | >PTCH1-P12(LPTPSPEPPL  | 335  | 40044 |
| >PTCH1-P12(LPTPSPEPPP  | 8307  | >PTCH1-P12(LPTPSPEPPL  | 156  | 8151  |
| >PTCH1-P12(LPTPSPEPPPS | 178   | >PTCH1-P12(LPTPSPEPPLS | 1877 | 1699  |
| >PTCH1-P12(LPTPSPEPPPS | 255   | >PTCH1-P12(LPTPSPEPPLS | 418  | 163   |
| >PTCH1-P12;PESRHHPPS   | 2311  | >PTCH1-P12;LESRHHPPS   | 389  | 1922  |
| >PTCH1-P12;PVFAHSTVVF  | 11154 | >PTCH1-P12;PVFAHSTVVF  | 488  | 10666 |
| >PTCH1-P12;TVVHPESRH   | 397   | >PTCH1-P12;TVVHLESRH   | 1504 | 1107  |
| >PTCH1-P12;TVVHPESR    | 910   | >PTCH1-P12;TVVHLESR    | 326  | 584   |
| >PTCH1-P12;TVVHPESR    | 22    | >PTCH1-P12;TVVHLESR    | 13   | 9     |
| >PTCH1-P12;TVVHPESRH   | 419   | >PTCH1-P12;TVVHLESRH   | 363  | 56    |
| >PTCH1-P12;STVVHPESRH  | 423   | >PTCH1-P12;STVVHLESRH  | 144  | 279   |
| >PTCH1-P12;STVVHPESRH  | 881   | >PTCH1-P12;STVVHLESRH  | 214  | 667   |
| >PTCH1-P12;STVVHPESR   | 127   | >PTCH1-P12;STVVHLESR   | 45   | 82    |
| >PTCH1-P12;STVVHPESR   | 23    | >PTCH1-P12;STVVHLESR   | 15   | 8     |

|                        |       |                        |       |       |
|------------------------|-------|------------------------|-------|-------|
| >PTCH1-P12;STVVHPESR   | 77    | >PTCH1-P12;STVVHLESR   | 111   | 34    |
| >PTCH1-P12;STVVHPESRH  | 392   | >PTCH1-P12;STVVHLESRH  | 568   | 176   |
| >PTCH1-P12;HSTVVHPESR  | 30    | >PTCH1-P12;HSTVVHLESR  | 21    | 9     |
| >PTCH1-P12;HSTVVHPESR  | 230   | >PTCH1-P12;HSTVVHLESR  | 197   | 33    |
| >PTCH1-P12;AHSTVVHP    | 15456 | >PTCH1-P12;AHSTVVHL    | 78    | 15378 |
| >PTCH1-P12;FAHSTVVHP   | 13437 | >PTCH1-P12;FAHSTVVHL   | 151   | 13286 |
| >PTCH1-P12;FAHSTVVHP   | 16424 | >PTCH1-P12;FAHSTVVHL   | 331   | 16093 |
| >PTCH1-P12;FAHSTVVHP   | 12318 | >PTCH1-P12;FAHSTVVHL   | 125   | 12193 |
| >PTCH1-P12;FAHSTVVHP   | 15932 | >PTCH1-P12;FAHSTVVHL   | 184   | 15748 |
| >PTCH1-P12;FAHSTVVHP   | 27485 | >PTCH1-P12;FAHSTVVHL   | 263   | 27222 |
| >PTCH1-P12;FAHSTVVHP   | 11635 | >PTCH1-P12;FAHSTVVHL   | 350   | 11285 |
| >PTCH1-P12;FAHSTVVHP   | 1057  | >PTCH1-P12;FAHSTVVHL   | 30    | 1027  |
| >PTCH1-P12;FAHSTVVHP   | 21404 | >PTCH1-P12;FAHSTVVHL   | 200   | 21204 |
| >PTCH1-P12;FAHSTVVHP   | 20668 | >PTCH1-P12;FAHSTVVHL   | 300   | 20368 |
| >PTCH1-P12;VFAHSTVVHF  | 14814 | >PTCH1-P12;VFAHSTVVHL  | 176   | 14638 |
| >PTCH1-P12;VFAHSTVVHF  | 13768 | >PTCH1-P12;VFAHSTVVHL  | 176   | 13592 |
| >PTCH1-P13(PRRDPPREGL  | 5344  | >PTCH1-P13(HRRDPPREGL  | 52    | 5292  |
| >PTCH1-P13(PRRDPPREGL  | 995   | >PTCH1-P13(HRRDPPREGL  | 125   | 870   |
| >PTCH1-P13(PRRDPPREGL  | 1121  | >PTCH1-P13(HRRDPPREGL  | 271   | 850   |
| >PTCH1-P13(PRRDPPREGL  | 777   | >PTCH1-P13(HRRDPPREGL  | 75    | 702   |
| >PTCH1-P13(QPRRDPPREGL | 100   | >PTCH1-P13(QHRRDPPREGL | 18041 | 17941 |
| >PTCH1-P13(QQPRRDPPR   | 1243  | >PTCH1-P13(QQHRRDPPR   | 78    | 1165  |
| >PTCH1-P13(QQPRRDPPR   | 226   | >PTCH1-P13(QQHRRDPPR   | 251   | 25    |
| >PTCH1-P13(QGQQPRRDF   | 1029  | >PTCH1-P13(QGQQHRRDF   | 477   | 552   |
| >PTCH1-P13(RQGQQPRR    | 203   | >PTCH1-P13(RQGQQHRR    | 42    | 161   |
| >PTCH1-P13(RQGQQPRR    | 65    | >PTCH1-P13(RQGQQHRR    | 35    | 30    |
| >PTCH1-P13(GRQGQQPR    | 195   | >PTCH1-P13(GRQGQQHR    | 163   | 32    |
| >PTCH1-P13(GRQGQQPRF   | 203   | >PTCH1-P13(GRQGQQHRF   | 70    | 133   |
| >PTCH1-P13(PPREGLWPPI  | 857   | >PTCH1-P13(SPREGLWPPI  | 258   | 599   |
| >PTCH1-P13(PPREGLWPPI  | 840   | >PTCH1-P13(SPREGLWPPI  | 32    | 808   |
| >PTCH1-P13(PPREGLWPPI  | 742   | >PTCH1-P13(SPREGLWPPI  | 100   | 642   |
| >PTCH1-P13(PPREGLWPPI  | 4133  | >PTCH1-P13(SPREGLWPPI  | 306   | 3827  |
| >PTCH1-P13(DPPREGLWP   | 12618 | >PTCH1-P13(DSPREGLWPI  | 294   | 12324 |
| >PTCH1-P13(DPPREGLW    | 162   | >PTCH1-P13(DSPREGLW    | 11076 | 10914 |
| >PTCH1-P13(RDPPREGLW   | 1325  | >PTCH1-P13(RDSPREGLW   | 158   | 1167  |
| >PTCH1-P13(RRDPPREGLV  | 243   | >PTCH1-P13(RRDSPREGLV  | 157   | 86    |
| >PTCH1-P13(RRDPPREGL   | 69    | >PTCH1-P13(RRDSPREGL   | 70    | 1     |
| >PTCH1-P13(RRDPPREGLV  | 241   | >PTCH1-P13(RRDSPREGLV  | 278   | 37    |
| >PTCH1-P13(RRDPPREGL   | 33    | >PTCH1-P13(RRDSPREGL   | 81    | 48    |
| >PTCH1-P13(RRDPPREGLV  | 89    | >PTCH1-P13(RRDSPREGLV  | 125   | 36    |
| >PTCH1-P13(RRDPPREGLV  | 55    | >PTCH1-P13(RRDSPREGLV  | 50    | 5     |
| >PTCH1-P13(PRRDPPREGL  | 777   | >PTCH1-P13(PRRDSPREGL  | 446   | 331   |
| >PTCH1-P13(QPRRDPPREGL | 100   | >PTCH1-P13(QPRRDSPREGL | 50    | 50    |



|                       |       |                       |     |      |
|-----------------------|-------|-----------------------|-----|------|
| >PTCH1-P13CQQPRRDPPR  | 226   | >PTCH1-P13CQQPRRDSPR  | 368 | 142  |
| >PTCH1-P15!PQLMIQTPK  | 7287  | >PTCH1-P15!SQLMIQTPK  | 475 | 6812 |
| >PTCH1-P15!PQLMIQTPK  | 2648  | >PTCH1-P15!SQLMIQTPK  | 21  | 2627 |
| >PTCH1-P15!PQLMIQTPK  | 3355  | >PTCH1-P15!SQLMIQTPK  | 92  | 3263 |
| >PTCH1-P15!PQLMIQTPK  | 1777  | >PTCH1-P15!SQLMIQTPK  | 264 | 1513 |
| >PTCH1-P15!PQLMIQTPK  | 3357  | >PTCH1-P15!SQLMIQTPK  | 483 | 2874 |
| >PTCH1-P15!NPQLMIQTPI | 10191 | >PTCH1-P15!NSQLMIQTPI | 452 | 9739 |
| >PTCH1-P15!NPQLMIQTPI | 9912  | >PTCH1-P15!NSQLMIQTPI | 72  | 9840 |
| >PTCH1-P15!NPQLMIQTPI | 2348  | >PTCH1-P15!NSQLMIQTPI | 81  | 2267 |
| >PTCH1-P15!FNPQLMIQTF | 2461  | >PTCH1-P15!FNSQLMIQTF | 443 | 2018 |
| >PTCH1-P15!MFNPQLMI   | 53    | >PTCH1-P15!MFNSQLMI   | 76  | 23   |
| >PTCH1-P15!AMFNPQLM   | 123   | >PTCH1-P15!AMFNSQLM   | 83  | 40   |
| >PTCH1-P15!AMFNPQLMI  | 35    | >PTCH1-P15!AMFNSQLMI  | 25  | 10   |
| >PTCH1-P15!AMFNPQLMI  | 329   | >PTCH1-P15!AMFNSQLMI  | 215 | 114  |
| >PTCH1-P15!AMFNPQLM   | 260   | >PTCH1-P15!AMFNSQLM   | 63  | 197  |
| >PTCH1-P15!AMFNPQLMI  | 255   | >PTCH1-P15!AMFNSQLMI  | 62  | 193  |
| >PTCH1-P15!AMFNPQLMI  | 1272  | >PTCH1-P15!AMFNSQLMI  | 481 | 791  |
| >PTCH1-P15!AMFNPQLM   | 318   | >PTCH1-P15!AMFNSQLM   | 153 | 165  |
| >PTCH1-P15!AMFNPQLMI  | 79    | >PTCH1-P15!AMFNSQLMI  | 26  | 53   |
| >PTCH1-P15!AMFNPQLMI  | 476   | >PTCH1-P15!AMFNSQLMI  | 209 | 267  |
| >PTCH1-P15!AMFNPQLMI  | 384   | >PTCH1-P15!AMFNSQLMI  | 172 | 212  |
| >PTCH1-P15!AMFNPQLM   | 7     | >PTCH1-P15!AMFNSQLM   | 15  | 8    |
| >PTCH1-P15!AMFNPQLMI  | 2     | >PTCH1-P15!AMFNSQLMI  | 4   | 2    |
| >PTCH1-P15!AMFNPQLMI  | 12    | >PTCH1-P15!AMFNSQLMI  | 22  | 10   |
| >PTCH1-P15!AMFNPQLM   | 211   | >PTCH1-P15!AMFNSQLM   | 104 | 107  |
| >PTCH1-P15!AMFNPQLMI  | 59    | >PTCH1-P15!AMFNSQLMI  | 28  | 31   |
| >PTCH1-P15!AMFNPQLM   | 95    | >PTCH1-P15!AMFNSQLM   | 60  | 35   |
| >PTCH1-P15!AMFNPQLMI  | 12    | >PTCH1-P15!AMFNSQLMI  | 9   | 3    |
| >PTCH1-P15!AMFNPQLMI  | 133   | >PTCH1-P15!AMFNSQLMI  | 89  | 44   |
| >PTCH1-P15!AMFNPQLMI  | 520   | >PTCH1-P15!AMFNSQLMI  | 177 | 343  |
| >PTCH1-P15!AMFNPQLM   | 33    | >PTCH1-P15!AMFNSQLM   | 18  | 15   |
| >PTCH1-P15!AMFNPQLMI  | 11    | >PTCH1-P15!AMFNSQLMI  | 7   | 4    |
| >PTCH1-P15!AMFNPQLMI  | 90    | >PTCH1-P15!AMFNSQLMI  | 79  | 11   |
| >PTCH1-P15!AMFNPQLMI  | 34    | >PTCH1-P15!AMFNSQLMI  | 24  | 10   |
| >PTCH1-P15!AMFNPQLMI  | 1622  | >PTCH1-P15!AMFNSQLMI  | 402 | 1220 |
| >PTCH1-P15!AMFNPQLM   | 481   | >PTCH1-P15!AMFNSQLM   | 594 | 113  |
| >PTCH1-P15!AMFNPQLMI  | 29    | >PTCH1-P15!AMFNSQLMI  | 39  | 10   |
| >PTCH1-P15!AMFNPQLM   | 135   | >PTCH1-P15!AMFNSQLM   | 51  | 84   |
| >PTCH1-P15!AMFNPQLMI  | 680   | >PTCH1-P15!AMFNSQLMI  | 258 | 422  |
| >PTCH1-P15!AMFNPQLM   | 313   | >PTCH1-P15!AMFNSQLM   | 253 | 60   |
| >PTCH1-P15!AMFNPQLM   | 8     | >PTCH1-P15!AMFNSQLM   | 6   | 2    |
| >PTCH1-P15!AMFNPQLMI  | 12    | >PTCH1-P15!AMFNSQLMI  | 8   | 4    |
| >PTCH1-P15!AMFNPQLMI  | 191   | >PTCH1-P15!AMFNSQLMI  | 100 | 91   |

|                       |      |                       |     |      |
|-----------------------|------|-----------------------|-----|------|
| >PTCH1-P15!AMFNPQLMI  | 910  | >PTCH1-P15!AMFNSQLMI  | 499 | 411  |
| >PTCH1-P15!AMFNPQLM   | 1078 | >PTCH1-P15!AMFNSQLM   | 432 | 646  |
| >PTCH1-P15!AMFNPQLMI  | 186  | >PTCH1-P15!AMFNSQLMI  | 297 | 111  |
| >PTCH1-P15!EAMFNPQLM  | 5727 | >PTCH1-P15!EAMFNSQLM  | 264 | 5463 |
| >PTCH1-P15!EAMFNPQLM  | 622  | >PTCH1-P15!EAMFNSQLM  | 441 | 181  |
| >PTCH1-P15!EAMFNPQL   | 81   | >PTCH1-P15!EAMFNSQL   | 18  | 63   |
| >PTCH1-P15!EAMFNPQLM  | 329  | >PTCH1-P15!EAMFNSQLM  | 145 | 184  |
| >PTCH1-P15!EAMFNPQLM  | 209  | >PTCH1-P15!EAMFNSQLM  | 235 | 26   |
| >PTCH1-P15!EAMFNPQL   | 20   | >PTCH1-P15!EAMFNSQL   | 30  | 10   |
| >PTCH1-P15!EAMFNPQLM  | 186  | >PTCH1-P15!EAMFNSQLM  | 90  | 96   |
| >PTCH1-P15!EAMFNPQLM  | 23   | >PTCH1-P15!EAMFNSQLM  | 22  | 1    |
| >PTCH1-P15!EAMFNPQL   | 653  | >PTCH1-P15!EAMFNSQL   | 311 | 342  |
| >PTCH1-P15!EAMFNPQLM  | 515  | >PTCH1-P15!EAMFNSQLM  | 163 | 352  |
| >PTCH1-P15!EAMFNPQLM  | 731  | >PTCH1-P15!EAMFNSQLM  | 482 | 249  |
| >PTCH1-P15!EEAMFNPQL  | 69   | >PTCH1-P15!EEAMFNSQL  | 30  | 39   |
| >PTCH1-P15!EEAMFNPQLI | 118  | >PTCH1-P15!EEAMFNSQLI | 31  | 87   |
| >PTCH1-P15!EEAMFNPQLI | 17   | >PTCH1-P15!EEAMFNSQLI | 7   | 10   |
| >PTCH1-P15!EEAMFNPQL  | 104  | >PTCH1-P15!EEAMFNSQL  | 156 | 52   |
| >PTCH1-P15!EEAMFNPQLI | 267  | >PTCH1-P15!EEAMFNSQLI | 262 | 5    |
| >PTCH1-P15!EEAMFNPQL  | 112  | >PTCH1-P15!EEAMFNSQL  | 144 | 32   |
| >PTCH1-P15!EEAMFNPQLI | 478  | >PTCH1-P15!EEAMFNSQLI | 287 | 191  |
| >PTCH1-P15!EEAMFNPQLI | 436  | >PTCH1-P15!EEAMFNSQLI | 282 | 154  |
| >PTCH1-P15!EEAMFNPQL  | 416  | >PTCH1-P15!EEAMFNSQL  | 578 | 162  |
| >PTCH1-P15!EEAMFNPQLI | 379  | >PTCH1-P15!EEAMFNSQLI | 394 | 15   |
| >PTCH1-P15!EEAMFNPQLI | 647  | >PTCH1-P15!EEAMFNSQLI | 495 | 152  |
| >PTCH1-P15!EEAMFNPQ   | 143  | >PTCH1-P15!EEAMFNSQ   | 278 | 135  |
| >PTCH1-P15!EEAMFNPQL  | 169  | >PTCH1-P15!EEAMFNSQL  | 538 | 369  |
| >PTCH1-P15!EEAMFNPQLI | 80   | >PTCH1-P15!EEAMFNSQLI | 74  | 6    |
| >PTCH1-P15!EEAMFNPQL  | 154  | >PTCH1-P15!EEAMFNSQL  | 286 | 132  |
| >PTCH1-P15!EEAMFNPQLI | 57   | >PTCH1-P15!EEAMFNSQLI | 114 | 57   |
| >PTCH1-P15!EEAMFNPQLI | 115  | >PTCH1-P15!EEAMFNSQLI | 117 | 2    |
| >PTCH1-P15!GEEAMFNPO  | 887  | >PTCH1-P15!GEEAMFNSQ  | 423 | 464  |
| >PTCH1-P15!GEEAMFNPO  | 820  | >PTCH1-P15!GEEAMFNSQ  | 415 | 405  |
| >PTCH1-P15!GEEAMFNPO  | 168  | >PTCH1-P15!GEEAMFNSQ  | 142 | 26   |
| >PTCH1-P15!GEEAMFNPO  | 78   | >PTCH1-P15!GEEAMFNSQ  | 52  | 26   |
| >PTCH1-P15!GEEAMFNPO  | 319  | >PTCH1-P15!GEEAMFNSQ  | 592 | 273  |
| >PTCH1-P15!GEEAMFNPO  | 119  | >PTCH1-P15!GEEAMFNSQ  | 116 | 3    |
| >PTCH1-P15!GEEAMFNPO  | 240  | >PTCH1-P15!GEEAMFNSQ  | 182 | 58   |
| >PTCH1-P15!GEEAMFNPO  | 234  | >PTCH1-P15!GEEAMFNSQ  | 122 | 112  |
| >PTCH1-P15!GEEAMFNPO  | 237  | >PTCH1-P15!GEEAMFNSQ  | 108 | 129  |
| >PTCH1-P15!GEEAMFNP   | 2969 | >PTCH1-P15!GEEAMFNS   | 396 | 2573 |
| >PTCH1-P15!GEEAMFNPO  | 319  | >PTCH1-P15!GEEAMFNSQ  | 277 | 42   |
| >PTCH1-P15!GEEAMFNPO  | 45   | >PTCH1-P15!GEEAMFNSQ  | 37  | 8    |

|                       |       |                       |       |       |
|-----------------------|-------|-----------------------|-------|-------|
| >PTCH1-P25:PPLRWTNF   | 190   | >PTCH1-P25:SPLRWTNF   | 57    | 133   |
| >PTCH1-P25:PPLRWTNFDI | 1334  | >PTCH1-P25:SPLRWTNFDI | 410   | 924   |
| >PTCH1-P25:PPLRWTNFDI | 2430  | >PTCH1-P25:SPLRWTNFDI | 156   | 2274  |
| >PTCH1-P25:PPLRWTNF   | 4720  | >PTCH1-P25:SPLRWTNF   | 169   | 4551  |
| >PTCH1-P25:PPLRWTNFDI | 441   | >PTCH1-P25:SPLRWTNFDI | 31    | 410   |
| >PTCH1-P25:PPLRWTNFDI | 3494  | >PTCH1-P25:SPLRWTNFDI | 451   | 3043  |
| >PTCH1-P25:PPLRWTNF   | 1676  | >PTCH1-P25:SPLRWTNF   | 355   | 1321  |
| >PTCH1-P25:PPLRWTNF   | 1017  | >PTCH1-P25:SPLRWTNF   | 125   | 892   |
| >PTCH1-P25:PPLRWTNFDI | 1529  | >PTCH1-P25:SPLRWTNFDI | 256   | 1273  |
| >PTCH1-P25:PPLRWTNFDI | 4599  | >PTCH1-P25:SPLRWTNFDI | 145   | 4454  |
| >PTCH1-P25:PPLRWTNF   | 287   | >PTCH1-P25:SPLRWTNF   | 331   | 44    |
| >PTCH1-P25:PPLRWTNF   | 209   | >PTCH1-P25:SPLRWTNF   | 71    | 138   |
| >PTCH1-P25:PPLRWTNFDI | 971   | >PTCH1-P25:SPLRWTNFDI | 300   | 671   |
| >PTCH1-P25:KPPLRWTNF  | 174   | >PTCH1-P25:KSPLRWTNF  | 333   | 159   |
| >PTCH1-P25:KPPLRWTNF  | 4695  | >PTCH1-P25:KSPLRWTNF  | 191   | 4504  |
| >PTCH1-P25:KPPLRWTNF  | 439   | >PTCH1-P25:KSPLRWTNF  | 29464 | 29025 |
| >PTCH1-P25:KPPLRWTNF  | 190   | >PTCH1-P25:KSPLRWTNF  | 22797 | 22607 |
| >PTCH1-P25:KPPLRWTNF  | 15653 | >PTCH1-P25:KSPLRWTNF  | 24    | 15629 |
| >PTCH1-P25:KPPLRWTNF  | 6671  | >PTCH1-P25:KSPLRWTNF  | 94    | 6577  |
| >PTCH1-P25:GKPPLRWTN  | 173   | >PTCH1-P25:GKSPLRWTN  | 35    | 138   |
| >PTCH1-P25:LGKPPLRWTN | 439   | >PTCH1-P25:LGKSPLRWTN | 260   | 179   |
| >PTCH1-P25:LGKPPLRW   | 37    | >PTCH1-P25:LGKSPLRW   | 196   | 159   |
| >PTCH1-P25:LGKPPLRWTN | 150   | >PTCH1-P25:LGKSPLRWTN | 1109  | 959   |
| >PTCH1-P25:LGKPPLRW   | 92    | >PTCH1-P25:LGKSPLRW   | 245   | 153   |
| >PTCH1-P25:LGKPPLRW   | 487   | >PTCH1-P25:LGKSPLRW   | 694   | 207   |
| >PTCH1-P25:LGKPPLRWTN | 423   | >PTCH1-P25:LGKSPLRWTN | 212   | 211   |
| >PTCH1-P25:LLGKPPLRWT | 419   | >PTCH1-P25:LLGKSPLRWT | 413   | 6     |
| >PTCH1-P25:LLGKPPLRW  | 890   | >PTCH1-P25:LLGKSPLRW  | 324   | 566   |
| >PTCH1-P25:LLGKPPLRW  | 203   | >PTCH1-P25:LLGKSPLRW  | 73    | 130   |
| >PTCH1-P25:LLGKPPLR   | 306   | >PTCH1-P25:LLGKSPLR   | 323   | 17    |
| >PTCH1-P25:YLLGKPPL   | 8     | >PTCH1-P25:YLLGKSPL   | 12    | 4     |
| >PTCH1-P25:YLLGKPPLRW | 123   | >PTCH1-P25:YLLGKSPLRW | 116   | 7     |
| >PTCH1-P25:YLLGKPPL   | 28    | >PTCH1-P25:YLLGKSPL   | 14    | 14    |
| >PTCH1-P25:YLLGKPPL   | 28    | >PTCH1-P25:YLLGKSPL   | 13    | 15    |
| >PTCH1-P25:YLLGKPPLRW | 184   | >PTCH1-P25:YLLGKSPLRW | 200   | 16    |
| >PTCH1-P25:YLLGKPPL   | 13    | >PTCH1-P25:YLLGKSPL   | 13    | 0     |
| >PTCH1-P25:YLLGKPPLRW | 558   | >PTCH1-P25:YLLGKSPLRW | 292   | 266   |
| >PTCH1-P25:YLLGKPPL   | 2     | >PTCH1-P25:YLLGKSPL   | 2     | 0     |
| >PTCH1-P25:YLLGKPPLR  | 210   | >PTCH1-P25:YLLGKSPLR  | 399   | 189   |
| >PTCH1-P25:YLLGKPPLRW | 183   | >PTCH1-P25:YLLGKSPLRW | 365   | 182   |
| >PTCH1-P25:YLLGKPPLRW | 6     | >PTCH1-P25:YLLGKSPLRW | 8     | 2     |
| >PTCH1-P25:YLLGKPPL   | 5     | >PTCH1-P25:YLLGKSPL   | 4     | 1     |
| >PTCH1-P25:YLLGKPPL   | 4     | >PTCH1-P25:YLLGKSPL   | 5     | 1     |

|                        |       |                        |       |       |
|------------------------|-------|------------------------|-------|-------|
| >PTCH1-P25;YLLGKPPLRW  | 77    | >PTCH1-P25;YLLGKSPLRW  | 78    | 1     |
| >PTCH1-P25;YLLGKPPL    | 3     | >PTCH1-P25;YLLGKSPL    | 3     | 0     |
| >PTCH1-P25;YLLGKPPLRW  | 106   | >PTCH1-P25;YLLGKSPLRW  | 98    | 8     |
| >PTCH1-P25;YLLGKPPL    | 2     | >PTCH1-P25;YLLGKSPL    | 2     | 0     |
| >PTCH1-P25;YLLGKPPLR   | 129   | >PTCH1-P25;YLLGKSPLR   | 90    | 39    |
| >PTCH1-P25;YLLGKPPLRW  | 525   | >PTCH1-P25;YLLGKSPLRW  | 410   | 115   |
| >PTCH1-P25;YLLGKPPLRW  | 8     | >PTCH1-P25;YLLGKSPLRW  | 7     | 1     |
| >PTCH1-P25;YLLGKPPLR   | 451   | >PTCH1-P25;YLLGKSPLR   | 310   | 141   |
| >PTCH1-P25;YLLGKPPLR   | 413   | >PTCH1-P25;YLLGKSPLR   | 399   | 14    |
| >PTCH1-P25;YLLGKPPLR   | 665   | >PTCH1-P25;YLLGKSPLR   | 311   | 354   |
| >PTCH1-P25;YLLGKPPL    | 158   | >PTCH1-P25;YLLGKSPL    | 370   | 212   |
| >PTCH1-P25;YLLGKPPL    | 206   | >PTCH1-P25;YLLGKSPL    | 109   | 97    |
| >PTCH1-P25;YLLGKPPL    | 807   | >PTCH1-P25;YLLGKSPL    | 178   | 629   |
| >PTCH1-P25;YLLGKPPLRW  | 29    | >PTCH1-P25;YLLGKSPLRW  | 16    | 13    |
| >PTCH1-P25;YLLGKPPL    | 245   | >PTCH1-P25;YLLGKSPL    | 204   | 41    |
| >PTCH1-P25;YLLGKPPLRW  | 122   | >PTCH1-P25;YLLGKSPLRW  | 102   | 20    |
| >PTCH1-P25;YLLGKPPLR   | 150   | >PTCH1-P25;YLLGKSPLR   | 158   | 8     |
| >PTCH1-P25;AYLLGKPPL   | 311   | >PTCH1-P25;AYLLGKSPL   | 5     | 306   |
| >PTCH1-P25;AYLLGKPPLR\ | 550   | >PTCH1-P25;AYLLGKSPLR\ | 448   | 102   |
| >PTCH1-P25;AYLLGKPPL   | 58    | >PTCH1-P25;AYLLGKSPL   | 57    | 1     |
| >PTCH1-P25;AYLLGKPPLR\ | 32    | >PTCH1-P25;AYLLGKSPLR\ | 33    | 1     |
| >PTCH1-P25;AYLLGKPPLR  | 200   | >PTCH1-P25;AYLLGKSPLR  | 190   | 10    |
| >PTCH1-P25;AYLLGKPPLR  | 119   | >PTCH1-P25;AYLLGKSPLR  | 127   | 8     |
| >PTCH1-P25;TAYLLGKPPLF | 447   | >PTCH1-P25;TAYLLGKSPLF | 485   | 38    |
| >PTCH1-P25;TAYLLGKPPLF | 81    | >PTCH1-P25;TAYLLGKSPLF | 89    | 8     |
| >PTCH1-P25;TAYLLGKPPLF | 260   | >PTCH1-P25;TAYLLGKSPLF | 277   | 17    |
| >PTCH1-P25;TAYLLGKPPLF | 30    | >PTCH1-P25;TAYLLGKSPLF | 25    | 5     |
| >PTCH1-P25;TAYLLGKPPL  | 276   | >PTCH1-P25;TAYLLGKSPL  | 1089  | 813   |
| >PTCH1-P25;TAYLLGKPPL  | 58    | >PTCH1-P25;TAYLLGKSPL  | 43    | 15    |
| >PTCH1-P25;TAYLLGKPPLF | 448   | >PTCH1-P25;TAYLLGKSPLF | 602   | 154   |
| >PTCH1-P25;GTAYLLGKPP  | 587   | >PTCH1-P25;GTAYLLGKSP  | 369   | 218   |
| >PTCH1-P25;GTAYLLGKPP  | 1326  | >PTCH1-P25;GTAYLLGKSP  | 342   | 984   |
| >PTCH1-P25;GTAYLLGKPP  | 105   | >PTCH1-P25;GTAYLLGKSP  | 72    | 33    |
| >PTCH1-P25;GTAYLLGKPP  | 179   | >PTCH1-P25;GTAYLLGKSP  | 18    | 161   |
| >PTCH1-P36;PKQMYEHF    | 101   | >PTCH1-P36;LKQMYEHF    | 8     | 93    |
| >PTCH1-P36;PKQMYEHFK\  | 465   | >PTCH1-P36;LKQMYEHFK\  | 21    | 444   |
| >PTCH1-P36;TPKQMYEHF   | 192   | >PTCH1-P36;TLKQMYEHF   | 34970 | 34778 |
| >PTCH1-P36;TPKQMYEHF\  | 14821 | >PTCH1-P36;TLKQMYEHF\  | 224   | 14597 |
| >PTCH1-P36;TPKQMYEHF\  | 6679  | >PTCH1-P36;TLKQMYEHF\  | 122   | 6557  |
| >PTCH1-P36;TPKQMYEHF   | 1959  | >PTCH1-P36;TLKQMYEHF   | 179   | 1780  |
| >PTCH1-P36;TPKQMYEHF\  | 10075 | >PTCH1-P36;TLKQMYEHF\  | 134   | 9941  |
| >PTCH1-P36;TPKQMYEHF\  | 2978  | >PTCH1-P36;TLKQMYEHF\  | 359   | 2619  |
| >PTCH1-P36;TPKQMYEHF   | 7219  | >PTCH1-P36;TLKQMYEHF   | 42    | 7177  |

|                                   |       |                                   |       |       |
|-----------------------------------|-------|-----------------------------------|-------|-------|
| >PTCH1-P36 <sup>ϵ</sup> TPKQMYEHF | 73    | >PTCH1-P36 <sup>ϵ</sup> TLKQMYEHF | 17696 | 17623 |
| >PTCH1-P36 <sup>ϵ</sup> ALQTMFQLM | 21383 | >PTCH1-P36 <sup>ϵ</sup> ALQTMFQLM | 71    | 21312 |
| >PTCH1-P36 <sup>ϵ</sup> ALQTMFQLM | 7993  | >PTCH1-P36 <sup>ϵ</sup> ALQTMFQLM | 56    | 7937  |
| >PTCH1-P36 <sup>ϵ</sup> ALQTMFQLM | 8830  | >PTCH1-P36 <sup>ϵ</sup> ALQTMFQLM | 65    | 8765  |
| >PTCH1-P36 <sup>ϵ</sup> ALQTMFQLM | 13938 | >PTCH1-P36 <sup>ϵ</sup> ALQTMFQLM | 71    | 13867 |
| >PTCH1-P36 <sup>ϵ</sup> ALQTMFQLM | 11218 | >PTCH1-P36 <sup>ϵ</sup> ALQTMFQLM | 16    | 11202 |
| >PTCH1-P36 <sup>ϵ</sup> ALQTMFQLM | 19316 | >PTCH1-P36 <sup>ϵ</sup> ALQTMFQLM | 200   | 19116 |
| >PTCH1-P36 <sup>ϵ</sup> ALQTMFQLM | 24833 | >PTCH1-P36 <sup>ϵ</sup> ALQTMFQLM | 325   | 24508 |
| >PTCH1-P36 <sup>ϵ</sup> ALQTMFQLM | 5110  | >PTCH1-P36 <sup>ϵ</sup> ALQTMFQLM | 3     | 5107  |
| >PTCH1-P36 <sup>ϵ</sup> ALQTMFQLM | 10999 | >PTCH1-P36 <sup>ϵ</sup> ALQTMFQLM | 278   | 10721 |
| >PTCH1-P36 <sup>ϵ</sup> MTPKQMYEH | 302   | >PTCH1-P36 <sup>ϵ</sup> MTLKQMYEH | 83    | 219   |
| >PTCH1-P36 <sup>ϵ</sup> MTPKQMYEH | 4169  | >PTCH1-P36 <sup>ϵ</sup> MTLKQMYEH | 363   | 3806  |
| >PTCH1-P36 <sup>ϵ</sup> MTPKQMYEH | 19    | >PTCH1-P36 <sup>ϵ</sup> MTLKQMYEH | 9     | 10    |
| >PTCH1-P36 <sup>ϵ</sup> MTPKQMYEH | 15    | >PTCH1-P36 <sup>ϵ</sup> MTLKQMYEH | 19    | 4     |
| >PTCH1-P36 <sup>ϵ</sup> MTPKQMYEH | 44    | >PTCH1-P36 <sup>ϵ</sup> MTLKQMYEH | 33    | 11    |
| >PTCH1-P36 <sup>ϵ</sup> MTPKQMYEH | 63    | >PTCH1-P36 <sup>ϵ</sup> MTLKQMYEH | 8     | 55    |
| >PTCH1-P36 <sup>ϵ</sup> MTPKQMYEH | 1854  | >PTCH1-P36 <sup>ϵ</sup> MTLKQMYEH | 171   | 1683  |
| >PTCH1-P36 <sup>ϵ</sup> MTPKQMYEH | 96    | >PTCH1-P36 <sup>ϵ</sup> MTLKQMYEH | 16    | 80    |
| >PTCH1-P36 <sup>ϵ</sup> MTPKQMYEH | 751   | >PTCH1-P36 <sup>ϵ</sup> MTLKQMYEH | 252   | 499   |
| >PTCH1-P36 <sup>ϵ</sup> MTPKQMYEH | 1375  | >PTCH1-P36 <sup>ϵ</sup> MTLKQMYEH | 172   | 1203  |
| >PTCH1-P36 <sup>ϵ</sup> MTPKQMYEH | 6     | >PTCH1-P36 <sup>ϵ</sup> MTLKQMYEH | 5     | 1     |
| >PTCH1-P36 <sup>ϵ</sup> MTPKQMYEH | 619   | >PTCH1-P36 <sup>ϵ</sup> MTLKQMYEH | 257   | 362   |
| >PTCH1-P36 <sup>ϵ</sup> MTPKQMYEH | 700   | >PTCH1-P36 <sup>ϵ</sup> MTLKQMYEH | 45    | 655   |
| >PTCH1-P36 <sup>ϵ</sup> MTPKQMYEH | 8388  | >PTCH1-P36 <sup>ϵ</sup> MTLKQMYEH | 191   | 8197  |
| >PTCH1-P36 <sup>ϵ</sup> MTPKQMYEH | 71    | >PTCH1-P36 <sup>ϵ</sup> MTLKQMYEH | 5     | 66    |
| >PTCH1-P36 <sup>ϵ</sup> MTPKQMYEH | 1267  | >PTCH1-P36 <sup>ϵ</sup> MTLKQMYEH | 134   | 1133  |
| >PTCH1-P36 <sup>ϵ</sup> MTPKQMYEH | 3661  | >PTCH1-P36 <sup>ϵ</sup> MTLKQMYEH | 35    | 3626  |
| >PTCH1-P36 <sup>ϵ</sup> MTPKQMYEH | 443   | >PTCH1-P36 <sup>ϵ</sup> MTLKQMYEH | 25920 | 25477 |
| >PTCH1-P36 <sup>ϵ</sup> MTPKQMYEH | 6     | >PTCH1-P36 <sup>ϵ</sup> MTLKQMYEH | 4174  | 4168  |
| >PTCH1-P36 <sup>ϵ</sup> MTPKQMYEH | 197   | >PTCH1-P36 <sup>ϵ</sup> MTLKQMYEH | 15879 | 15682 |
| >PTCH1-P36 <sup>ϵ</sup> MTPKQMYEH | 134   | >PTCH1-P36 <sup>ϵ</sup> MTLKQMYEH | 120   | 14    |
| >PTCH1-P36 <sup>ϵ</sup> MTPKQMYEH | 2678  | >PTCH1-P36 <sup>ϵ</sup> MTLKQMYEH | 385   | 2293  |
| >PTCH1-P36 <sup>ϵ</sup> MTPKQMYEH | 453   | >PTCH1-P36 <sup>ϵ</sup> MTLKQMYEH | 132   | 321   |
| >PTCH1-P36 <sup>ϵ</sup> MTPKQMYEH | 1023  | >PTCH1-P36 <sup>ϵ</sup> MTLKQMYEH | 434   | 589   |
| >PTCH1-P36 <sup>ϵ</sup> LMTPKQMYE | 978   | >PTCH1-P36 <sup>ϵ</sup> LMTLKQMYE | 401   | 577   |
| >PTCH1-P36 <sup>ϵ</sup> LMTPKQMYE | 70    | >PTCH1-P36 <sup>ϵ</sup> LMTLKQMYE | 352   | 282   |
| >PTCH1-P36 <sup>ϵ</sup> LMTPKQMY  | 30    | >PTCH1-P36 <sup>ϵ</sup> LMTLKQMY  | 41    | 11    |
| >PTCH1-P36 <sup>ϵ</sup> LMTPKQMYE | 487   | >PTCH1-P36 <sup>ϵ</sup> LMTLKQMYE | 1167  | 680   |
| >PTCH1-P36 <sup>ϵ</sup> LMTPKQMY  | 95    | >PTCH1-P36 <sup>ϵ</sup> LMTLKQMY  | 206   | 111   |
| >PTCH1-P36 <sup>ϵ</sup> LMTPKQMY  | 221   | >PTCH1-P36 <sup>ϵ</sup> LMTLKQMY  | 762   | 541   |
| >PTCH1-P36 <sup>ϵ</sup> LMTPKQMYE | 72    | >PTCH1-P36 <sup>ϵ</sup> LMTLKQMYE | 214   | 142   |
| >PTCH1-P36 <sup>ϵ</sup> LMTPKQMY  | 229   | >PTCH1-P36 <sup>ϵ</sup> LMTLKQMY  | 835   | 606   |
| >PTCH1-P36 <sup>ϵ</sup> LMTPKQMY  | 61    | >PTCH1-P36 <sup>ϵ</sup> LMTLKQMY  | 313   | 252   |

|                                    |       |                                   |      |       |
|------------------------------------|-------|-----------------------------------|------|-------|
| >PTCH1-P36 <sup>9</sup> LMTPKQMYE  | 27    | >PTCH1-P36 <sup>9</sup> LMTLKQMYE | 69   | 42    |
| >PTCH1-P36 <sup>9</sup> LMTPKQMY   | 304   | >PTCH1-P36 <sup>9</sup> LMTLKQMY  | 1913 | 1609  |
| >PTCH1-P36 <sup>9</sup> LMTPKQMYE  | 498   | >PTCH1-P36 <sup>9</sup> LMTLKQMYE | 2298 | 1800  |
| >PTCH1-P36 <sup>9</sup> LMTPKQMYE  | 48    | >PTCH1-P36 <sup>9</sup> LMTLKQMYE | 191  | 143   |
| >PTCH1-P36 <sup>9</sup> QLMTPKQM\  | 460   | >PTCH1-P36 <sup>9</sup> QLMTLKQMY | 252  | 208   |
| >PTCH1-P36 <sup>9</sup> QLMTPKQM\  | 554   | >PTCH1-P36 <sup>9</sup> QLMTLKQMY | 382  | 172   |
| >PTCH1-P36 <sup>9</sup> QLMTPKQM\  | 30    | >PTCH1-P36 <sup>9</sup> QLMTLKQMY | 179  | 149   |
| >PTCH1-P36 <sup>9</sup> QLMTPKQM\  | 133   | >PTCH1-P36 <sup>9</sup> QLMTLKQMY | 259  | 126   |
| >PTCH1-P36 <sup>9</sup> QLMTPKQM\  | 512   | >PTCH1-P36 <sup>9</sup> QLMTLKQMY | 499  | 13    |
| >PTCH1-P36 <sup>9</sup> FQLMTPKQMV | 950   | >PTCH1-P36 <sup>9</sup> FQLMTLKQM | 91   | 859   |
| >PTCH1-P36 <sup>9</sup> FQLMTPKQMV | 793   | >PTCH1-P36 <sup>9</sup> FQLMTLKQM | 62   | 731   |
| >PTCH1-P36 <sup>9</sup> FQLMTPKQMV | 252   | >PTCH1-P36 <sup>9</sup> FQLMTLKQM | 441  | 189   |
| >PTCH1-P36 <sup>9</sup> FQLMTPKQMV | 1242  | >PTCH1-P36 <sup>9</sup> FQLMTLKQM | 396  | 846   |
| >PTCH1-P36 <sup>9</sup> FQLMTPKQMV | 150   | >PTCH1-P36 <sup>9</sup> FQLMTLKQM | 100  | 50    |
| >PTCH1-P36 <sup>9</sup> FQLMTPKQMV | 45    | >PTCH1-P36 <sup>9</sup> FQLMTLKQM | 86   | 41    |
| >PTCH1-P36 <sup>9</sup> FQLMTPKQMV | 7     | >PTCH1-P36 <sup>9</sup> FQLMTLKQM | 9    | 2     |
| >PTCH1-P36 <sup>9</sup> FQLMTPKQMV | 4     | >PTCH1-P36 <sup>9</sup> FQLMTLKQM | 4    | 0     |
| >PTCH1-P36 <sup>9</sup> FQLMTPKQMV | 262   | >PTCH1-P36 <sup>9</sup> FQLMTLKQM | 1485 | 1223  |
| >PTCH1-P36 <sup>9</sup> MFQLMTPK   | 138   | >PTCH1-P36 <sup>9</sup> MFQLMTLK  | 100  | 38    |
| >PTCH1-P36 <sup>9</sup> MFQLMTPKC  | 24    | >PTCH1-P36 <sup>9</sup> MFQLMTLKC | 17   | 7     |
| >PTCH1-P36 <sup>9</sup> MFQLMTPK   | 188   | >PTCH1-P36 <sup>9</sup> MFQLMTLK  | 470  | 282   |
| >PTCH1-P36 <sup>9</sup> MFQLMTPK   | 43    | >PTCH1-P36 <sup>9</sup> MFQLMTLK  | 57   | 14    |
| >PTCH1-P36 <sup>9</sup> MFQLMTPK   | 307   | >PTCH1-P36 <sup>9</sup> MFQLMTLK  | 388  | 81    |
| >PTCH1-P36 <sup>9</sup> MFQLMTPK   | 739   | >PTCH1-P36 <sup>9</sup> MFQLMTLK  | 351  | 388   |
| >PTCH1-P36 <sup>9</sup> MFQLMTPKC  | 2756  | >PTCH1-P36 <sup>9</sup> MFQLMTLKC | 453  | 2303  |
| >PTCH1-P36 <sup>9</sup> MFQLMTPKC  | 316   | >PTCH1-P36 <sup>9</sup> MFQLMTLKC | 988  | 672   |
| >PTCH1-P36 <sup>9</sup> TMFQLMTP   | 20524 | >PTCH1-P36 <sup>9</sup> TMFQLMTL  | 162  | 20362 |
| >PTCH1-P36 <sup>9</sup> TMFQLMTPK  | 96    | >PTCH1-P36 <sup>9</sup> TMFQLMTLK | 50   | 46    |
| >PTCH1-P36 <sup>9</sup> TMFQLMTP   | 16594 | >PTCH1-P36 <sup>9</sup> TMFQLMTL  | 24   | 16570 |
| >PTCH1-P36 <sup>9</sup> TMFQLMTP   | 2518  | >PTCH1-P36 <sup>9</sup> TMFQLMTL  | 20   | 2498  |
| >PTCH1-P36 <sup>9</sup> TMFQLMTPK  | 593   | >PTCH1-P36 <sup>9</sup> TMFQLMTLK | 359  | 234   |
| >PTCH1-P36 <sup>9</sup> TMFQLMTP   | 4052  | >PTCH1-P36 <sup>9</sup> TMFQLMTL  | 17   | 4035  |
| >PTCH1-P36 <sup>9</sup> TMFQLMTPK  | 371   | >PTCH1-P36 <sup>9</sup> TMFQLMTLK | 271  | 100   |
| >PTCH1-P36 <sup>9</sup> TMFQLMTP   | 7038  | >PTCH1-P36 <sup>9</sup> TMFQLMTL  | 119  | 6919  |
| >PTCH1-P36 <sup>9</sup> TMFQLMTP   | 2781  | >PTCH1-P36 <sup>9</sup> TMFQLMTL  | 5    | 2776  |
| >PTCH1-P36 <sup>9</sup> TMFQLMTPK  | 68    | >PTCH1-P36 <sup>9</sup> TMFQLMTLK | 84   | 16    |
| >PTCH1-P36 <sup>9</sup> TMFQLMTP   | 9769  | >PTCH1-P36 <sup>9</sup> TMFQLMTL  | 26   | 9743  |
| >PTCH1-P36 <sup>9</sup> TMFQLMTP   | 10987 | >PTCH1-P36 <sup>9</sup> TMFQLMTL  | 14   | 10973 |
| >PTCH1-P36 <sup>9</sup> TMFQLMTP   | 23794 | >PTCH1-P36 <sup>9</sup> TMFQLMTL  | 350  | 23444 |
| >PTCH1-P36 <sup>9</sup> TMFQLMTP   | 8564  | >PTCH1-P36 <sup>9</sup> TMFQLMTL  | 4    | 8560  |
| >PTCH1-P36 <sup>9</sup> TMFQLMTPK  | 398   | >PTCH1-P36 <sup>9</sup> TMFQLMTLK | 855  | 457   |
| >PTCH1-P36 <sup>9</sup> TMFQLMTPK  | 566   | >PTCH1-P36 <sup>9</sup> TMFQLMTLK | 278  | 288   |
| >PTCH1-P36 <sup>9</sup> TMFQLMTPK  | 35    | >PTCH1-P36 <sup>9</sup> TMFQLMTLK | 30   | 5     |

|                                    |       |                                    |       |       |
|------------------------------------|-------|------------------------------------|-------|-------|
| >PTCH1-P36 <sup>ϵ</sup> TMFQLMTPK  | 7     | >PTCH1-P36 <sup>ϵ</sup> TMFQLMTLK  | 7     | 0     |
| >PTCH1-P36 <sup>ϵ</sup> TMFQLMTPK  | 49    | >PTCH1-P36 <sup>ϵ</sup> TMFQLMTLK  | 78    | 29    |
| >PTCH1-P36 <sup>ϵ</sup> TMFQLMTP   | 2414  | >PTCH1-P36 <sup>ϵ</sup> TMFQLMTL   | 55    | 2359  |
| >PTCH1-P36 <sup>ϵ</sup> TMFQLMTPK  | 359   | >PTCH1-P36 <sup>ϵ</sup> TMFQLMTLK  | 451   | 92    |
| >PTCH1-P36 <sup>ϵ</sup> TMFQLMTPK  | 37    | >PTCH1-P36 <sup>ϵ</sup> TMFQLMTLK  | 16    | 21    |
| >PTCH1-P36 <sup>ϵ</sup> TMFQLMTP   | 5446  | >PTCH1-P36 <sup>ϵ</sup> TMFQLMTL   | 262   | 5184  |
| >PTCH1-P36 <sup>ϵ</sup> TMFQLMTPK  | 222   | >PTCH1-P36 <sup>ϵ</sup> TMFQLMTLK  | 174   | 48    |
| >PTCH1-P36 <sup>ϵ</sup> TMFQLMTP   | 2875  | >PTCH1-P36 <sup>ϵ</sup> TMFQLMTL   | 100   | 2775  |
| >PTCH1-P36 <sup>ϵ</sup> TMFQLMTPK  | 61    | >PTCH1-P36 <sup>ϵ</sup> TMFQLMTLK  | 122   | 61    |
| >PTCH1-P36 <sup>ϵ</sup> TMFQLMTPK  | 243   | >PTCH1-P36 <sup>ϵ</sup> TMFQLMTLK  | 278   | 35    |
| >PTCH1-P36 <sup>ϵ</sup> TMFQLMTP   | 19738 | >PTCH1-P36 <sup>ϵ</sup> TMFQLMTL   | 67    | 19671 |
| >PTCH1-P36 <sup>ϵ</sup> TMFQLMTPK  | 455   | >PTCH1-P36 <sup>ϵ</sup> TMFQLMTLK  | 184   | 271   |
| >PTCH1-P36 <sup>ϵ</sup> TMFQLMTPK  | 79    | >PTCH1-P36 <sup>ϵ</sup> TMFQLMTLK  | 196   | 117   |
| >PTCH1-P36 <sup>ϵ</sup> QTMFQLMTF  | 16561 | >PTCH1-P36 <sup>ϵ</sup> QTMFQLMTL  | 344   | 16217 |
| >PTCH1-P36 <sup>ϵ</sup> QTMFQLMTF  | 11441 | >PTCH1-P36 <sup>ϵ</sup> QTMFQLMTL  | 379   | 11062 |
| >PTCH1-P36 <sup>ϵ</sup> QTMFQLMTF  | 14818 | >PTCH1-P36 <sup>ϵ</sup> QTMFQLMTL  | 155   | 14663 |
| >PTCH1-P36 <sup>ϵ</sup> QTMFQLMTF  | 13    | >PTCH1-P36 <sup>ϵ</sup> QTMFQLMTL  | 13    | 0     |
| >PTCH1-P36 <sup>ϵ</sup> QTMFQLMTF  | 7     | >PTCH1-P36 <sup>ϵ</sup> QTMFQLMTL  | 8     | 1     |
| >PTCH1-P36 <sup>ϵ</sup> QTMFQLMTF  | 14842 | >PTCH1-P36 <sup>ϵ</sup> QTMFQLMTL  | 100   | 14742 |
| >PTCH1-P36 <sup>ϵ</sup> QTMFQLMTF  | 51    | >PTCH1-P36 <sup>ϵ</sup> QTMFQLMTL  | 95    | 44    |
| >PTCH1-P36 <sup>ϵ</sup> QTMFQLMTF  | 503   | >PTCH1-P36 <sup>ϵ</sup> QTMFQLMTL  | 474   | 29    |
| >PTCH1-P36 <sup>ϵ</sup> QTMFQLMTF  | 1221  | >PTCH1-P36 <sup>ϵ</sup> QTMFQLMTL  | 16    | 1205  |
| >PTCH1-P36 <sup>ϵ</sup> QTMFQLMTF  | 18    | >PTCH1-P36 <sup>ϵ</sup> QTMFQLMTL  | 15    | 3     |
| >PTCH1-P36 <sup>ϵ</sup> QTMFQLMTF  | 5841  | >PTCH1-P36 <sup>ϵ</sup> QTMFQLMTL  | 17    | 5824  |
| >PTCH1-P36 <sup>ϵ</sup> QTMFQLMTF  | 9357  | >PTCH1-P36 <sup>ϵ</sup> QTMFQLMTL  | 51    | 9306  |
| >PTCH1-P36 <sup>ϵ</sup> QTMFQLMTF  | 12253 | >PTCH1-P36 <sup>ϵ</sup> QTMFQLMTL  | 11    | 12242 |
| >PTCH1-P36 <sup>ϵ</sup> QTMFQLMTF  | 8256  | >PTCH1-P36 <sup>ϵ</sup> QTMFQLMTL  | 95    | 8161  |
| >PTCH1-P36 <sup>ϵ</sup> QTMFQLMTF  | 71    | >PTCH1-P36 <sup>ϵ</sup> QTMFQLMTL  | 72    | 1     |
| >PTCH1-P36 <sup>ϵ</sup> LQTMFQLMT  | 12403 | >PTCH1-P36 <sup>ϵ</sup> LQTMFQLMT  | 459   | 11944 |
| >PTCH1-P36 <sup>ϵ</sup> LQTMFQLMT  | 9093  | >PTCH1-P36 <sup>ϵ</sup> LQTMFQLMT  | 60    | 9033  |
| >PTCH1-P36 <sup>ϵ</sup> LQTMFQLMT  | 10019 | >PTCH1-P36 <sup>ϵ</sup> LQTMFQLMT  | 149   | 9870  |
| >PTCH1-P36 <sup>ϵ</sup> LQTMFQLMT  | 7329  | >PTCH1-P36 <sup>ϵ</sup> LQTMFQLMT  | 94    | 7235  |
| >PTCH1-P36 <sup>ϵ</sup> LQTMFQLMT  | 78    | >PTCH1-P36 <sup>ϵ</sup> LQTMFQLMT  | 68    | 10    |
| >PTCH1-P36 <sup>ϵ</sup> LQTMFQLMT  | 1972  | >PTCH1-P36 <sup>ϵ</sup> LQTMFQLMT  | 44    | 1928  |
| >PTCH1-P36 <sup>ϵ</sup> LQTMFQLMT  | 371   | >PTCH1-P36 <sup>ϵ</sup> LQTMFQLMT  | 1885  | 1514  |
| >PTCH1-P36 <sup>ϵ</sup> LQTMFQLMT  | 19109 | >PTCH1-P36 <sup>ϵ</sup> LQTMFQLMT  | 390   | 18719 |
| >PTCH1-P50 <sup>Δ</sup> LPFLALGV   | 126   | >PTCH1-P50 <sup>Δ</sup> LQFLALGV   | 27125 | 26999 |
| >PTCH1-P50 <sup>Δ</sup> LPFLALGVGV | 81    | >PTCH1-P50 <sup>Δ</sup> LQFLALGVGV | 26164 | 26083 |
| >PTCH1-P50 <sup>Δ</sup> LPFLALGV   | 17474 | >PTCH1-P50 <sup>Δ</sup> LQFLALGV   | 99    | 17375 |
| >PTCH1-P50 <sup>Δ</sup> LPFLALGVGV | 8066  | >PTCH1-P50 <sup>Δ</sup> LQFLALGVGV | 340   | 7726  |
| >PTCH1-P50 <sup>Δ</sup> LPFLALGV   | 9483  | >PTCH1-P50 <sup>Δ</sup> LQFLALGV   | 159   | 9324  |
| >PTCH1-P50 <sup>Δ</sup> LPFLALGVGV | 6228  | >PTCH1-P50 <sup>Δ</sup> LQFLALGVGV | 168   | 6060  |
| >PTCH1-P50 <sup>Δ</sup> LPFLALGV   | 6856  | >PTCH1-P50 <sup>Δ</sup> LQFLALGV   | 50    | 6806  |

|                       |       |                       |       |       |
|-----------------------|-------|-----------------------|-------|-------|
| >PTCH1-P50<LPFLALGVGV | 6936  | >PTCH1-P50<LQFLALGVGV | 158   | 6778  |
| >PTCH1-P50<LPFLALGV   | 2871  | >PTCH1-P50<LQFLALGV   | 7     | 2864  |
| >PTCH1-P50<LPFLALGVGV | 1365  | >PTCH1-P50<LQFLALGVGV | 52    | 1313  |
| >PTCH1-P50<LPFLALGV   | 8121  | >PTCH1-P50<LQFLALGV   | 69    | 8052  |
| >PTCH1-P50<LPFLALGVGV | 7116  | >PTCH1-P50<LQFLALGVGV | 68    | 7048  |
| >PTCH1-P50<LPFLALGV   | 17517 | >PTCH1-P50<LQFLALGV   | 268   | 17249 |
| >PTCH1-P50<LPFLALGVGV | 15980 | >PTCH1-P50<LQFLALGVGV | 195   | 15785 |
| >PTCH1-P50<LPFLALGV   | 12309 | >PTCH1-P50<LQFLALGV   | 126   | 12183 |
| >PTCH1-P50<LPFLALGVGV | 11445 | >PTCH1-P50<LQFLALGVGV | 145   | 11300 |
| >PTCH1-P50<LPFLALGV   | 15237 | >PTCH1-P50<LQFLALGV   | 498   | 14739 |
| >PTCH1-P50<LPFLALGVGV | 387   | >PTCH1-P50<LQFLALGVGV | 26784 | 26397 |
| >PTCH1-P50<LPFLALGV   | 21275 | >PTCH1-P50<LQFLALGV   | 413   | 20862 |
| >PTCH1-P50<LPFLALGVG  | 20203 | >PTCH1-P50<LQFLALGVG  | 227   | 19976 |
| >PTCH1-P50<LPFLALGVGV | 19336 | >PTCH1-P50<LQFLALGVGV | 262   | 19074 |
| >PTCH1-P50<LPFLALGV   | 8054  | >PTCH1-P50<LQFLALGV   | 145   | 7909  |
| >PTCH1-P50<LPFLALGVGV | 5259  | >PTCH1-P50<LQFLALGVGV | 100   | 5159  |
| >PTCH1-P50<LPFLALGV   | 248   | >PTCH1-P50<LQFLALGV   | 18439 | 18191 |
| >PTCH1-P50<LPFLALGV   | 45    | >PTCH1-P50<LQFLALGV   | 17214 | 17169 |
| >PTCH1-P50<LPFLALGVG  | 45    | >PTCH1-P50<LQFLALGVG  | 15537 | 15492 |
| >PTCH1-P50<LPFLALGVGV | 21    | >PTCH1-P50<LQFLALGVGV | 12186 | 12165 |
| >PTCH1-P50<LPFLALGVGV | 191   | >PTCH1-P50<LQFLALGVGV | 18839 | 18648 |
| >PTCH1-P50<LPFLALGV   | 793   | >PTCH1-P50<LQFLALGV   | 485   | 308   |
| >PTCH1-P50<VLPFLALGV  | 195   | >PTCH1-P50<VLQFLALGV  | 87    | 108   |
| >PTCH1-P50<VLPFLALGVG | 225   | >PTCH1-P50<VLQFLALGVG | 99    | 126   |
| >PTCH1-P50<VLPFLALGV  | 185   | >PTCH1-P50<VLQFLALGV  | 224   | 39    |
| >PTCH1-P50<VLPFLALGVG | 98    | >PTCH1-P50<VLQFLALGVG | 118   | 20    |
| >PTCH1-P50<VLPFLALGV  | 29    | >PTCH1-P50<VLQFLALGV  | 57    | 28    |
| >PTCH1-P50<VLPFLALGVG | 28    | >PTCH1-P50<VLQFLALGVG | 55    | 27    |
| >PTCH1-P50<VLPFLALGV  | 90    | >PTCH1-P50<VLQFLALGV  | 197   | 107   |
| >PTCH1-P50<VLPFLALGVG | 100   | >PTCH1-P50<VLQFLALGVG | 202   | 102   |
| >PTCH1-P50<VLPFLALGV  | 5     | >PTCH1-P50<VLQFLALGV  | 5     | 0     |
| >PTCH1-P50<VLPFLALGVG | 4     | >PTCH1-P50<VLQFLALGVG | 4     | 0     |
| >PTCH1-P50<VLPFLALGV  | 45    | >PTCH1-P50<VLQFLALGV  | 9     | 36    |
| >PTCH1-P50<VLPFLALGVG | 28    | >PTCH1-P50<VLQFLALGVG | 7     | 21    |
| >PTCH1-P50<VLPFLALGV  | 9     | >PTCH1-P50<VLQFLALGV  | 13    | 4     |
| >PTCH1-P50<VLPFLALGVG | 7     | >PTCH1-P50<VLQFLALGVG | 11    | 4     |
| >PTCH1-P50<VLPFLALGV  | 13    | >PTCH1-P50<VLQFLALGV  | 9     | 4     |
| >PTCH1-P50<VLPFLALGVG | 18    | >PTCH1-P50<VLQFLALGVG | 9     | 9     |
| >PTCH1-P50<VLPFLALGV  | 3     | >PTCH1-P50<VLQFLALGV  | 3     | 0     |
| >PTCH1-P50<VLPFLALGVG | 3     | >PTCH1-P50<VLQFLALGVG | 3     | 0     |
| >PTCH1-P50<QVLPFLAL   | 391   | >PTCH1-P50<QVLQFLAL   | 110   | 281   |
| >PTCH1-P50<QVLPFLALGV | 129   | >PTCH1-P50<QVLQFLALGV | 198   | 69    |
| >PTCH1-P50<QVLPFLALGV | 245   | >PTCH1-P50<QVLQFLALGV | 250   | 5     |



|                       |      |                       |      |      |
|-----------------------|------|-----------------------|------|------|
| >PTCH1-P50ˆQVLPFLALGV | 76   | >PTCH1-P50ˆQVLQFLALGV | 76   | 0    |
| >PTCH1-P50ˆQVLPFLAL   | 13   | >PTCH1-P50ˆQVLQFLAL   | 32   | 19   |
| >PTCH1-P50ˆQVLPFLALGV | 33   | >PTCH1-P50ˆQVLQFLALGV | 45   | 12   |
| >PTCH1-P50ˆQVLPFLALGV | 46   | >PTCH1-P50ˆQVLQFLALGV | 55   | 9    |
| >PTCH1-P50ˆQVLPFLALGV | 361  | >PTCH1-P50ˆQVLQFLALGV | 798  | 437  |
| >PTCH1-P50ˆQVLPFLALGV | 164  | >PTCH1-P50ˆQVLQFLALGV | 240  | 76   |
| >PTCH1-P50ˆQVLPFLALGV | 91   | >PTCH1-P50ˆQVLQFLALGV | 146  | 55   |
| >PTCH1-P50ˆQVLPFLALGV | 30   | >PTCH1-P50ˆQVLQFLALGV | 62   | 32   |
| >PTCH1-P50ˆQVLPFLAL   | 803  | >PTCH1-P50ˆQVLQFLAL   | 448  | 355  |
| >PTCH1-P50ˆQVLPFLAL   | 1723 | >PTCH1-P50ˆQVLQFLAL   | 420  | 1303 |
| >PTCH1-P50ˆQVLPFLAL   | 269  | >PTCH1-P50ˆQVLQFLAL   | 174  | 95   |
| >PTCH1-P50ˆQVLPFLAL   | 369  | >PTCH1-P50ˆQVLQFLAL   | 1804 | 1435 |
| >PTCH1-P50ˆQVLPFLAL   | 26   | >PTCH1-P50ˆQVLQFLAL   | 41   | 15   |
| >PTCH1-P50ˆQVLPFLALGV | 5    | >PTCH1-P50ˆQVLQFLALGV | 5    | 0    |
| >PTCH1-P50ˆTQVLPFLALG | 443  | >PTCH1-P50ˆTQVLQFLALG | 312  | 131  |
| >PTCH1-P50ˆTQVLPFLA   | 50   | >PTCH1-P50ˆTQVLQFLA   | 36   | 14   |
| >PTCH1-P50ˆTQVLPFLAL  | 18   | >PTCH1-P50ˆTQVLQFLAL  | 16   | 2    |
| >PTCH1-P50ˆTQVLPFLALG | 8    | >PTCH1-P50ˆTQVLQFLALG | 8    | 0    |
| >PTCH1-P50ˆTQVLPFLAL  | 458  | >PTCH1-P50ˆTQVLQFLAL  | 368  | 90   |
| >PTCH1-P50ˆTQVLPFLAL  | 57   | >PTCH1-P50ˆTQVLQFLAL  | 125  | 68   |
| >PTCH1-P50ˆTQVLPFLAL  | 21   | >PTCH1-P50ˆTQVLQFLAL  | 20   | 1    |
| >PTCH1-P50ˆTQVLPFLAL  | 190  | >PTCH1-P50ˆTQVLQFLAL  | 433  | 243  |
| >PTCH1-P50ˆTTQVLPFLAL | 487  | >PTCH1-P50ˆTTQVLQFLAL | 701  | 214  |
| >PTCH1-P50ˆTTQVLPFL   | 424  | >PTCH1-P50ˆTTQVLQFL   | 148  | 276  |
| >PTCH1-P50ˆTTQVLPFLA  | 147  | >PTCH1-P50ˆTTQVLQFLA  | 81   | 66   |
| >PTCH1-P50ˆTTQVLPFL   | 356  | >PTCH1-P50ˆTTQVLQFL   | 1373 | 1017 |
| >PTCH1-P50ˆTTQVLPFL   | 312  | >PTCH1-P50ˆTTQVLQFL   | 440  | 128  |
| >PTCH1-P50ˆTTQVLPFLAL | 209  | >PTCH1-P50ˆTTQVLQFLAL | 286  | 77   |
| >PTCH1-P50ˆTTQVLPFLAL | 193  | >PTCH1-P50ˆTTQVLQFLAL | 347  | 154  |
| >PTCH1-P50ˆTTQVLPFLAL | 208  | >PTCH1-P50ˆTTQVLQFLAL | 400  | 192  |
| >PTCH1-P50ˆATTQVLPFL  | 218  | >PTCH1-P50ˆATTQVLQFL  | 133  | 85   |
| >PTCH1-P50ˆATTQVLPFL  | 24   | >PTCH1-P50ˆATTQVLQFL  | 83   | 59   |
| >PTCH1-P50ˆATTQVLPFLA | 97   | >PTCH1-P50ˆATTQVLQFLA | 152  | 55   |
| >PTCH1-P50ˆATTQVLPFL  | 253  | >PTCH1-P50ˆATTQVLQFL  | 376  | 123  |
| >PTCH1-P50ˆATTQVLPFL  | 61   | >PTCH1-P50ˆATTQVLQFL  | 295  | 234  |
| >PTCH1-P50ˆATTQVLPF   | 28   | >PTCH1-P50ˆATTQVLQF   | 56   | 28   |
| >PTCH1-P50ˆATTQVLPFL  | 18   | >PTCH1-P50ˆATTQVLQFL  | 32   | 14   |
| >PTCH1-P50ˆATTQVLPFLA | 172  | >PTCH1-P50ˆATTQVLQFLA | 272  | 100  |
| >PTCH1-P50ˆATTQVLPF   | 73   | >PTCH1-P50ˆATTQVLQF   | 176  | 103  |
| >PTCH1-P50ˆATTQVLPF   | 392  | >PTCH1-P50ˆATTQVLQF   | 2060 | 1668 |
| >PTCH1-P50ˆATTQVLPF   | 287  | >PTCH1-P50ˆATTQVLQF   | 837  | 550  |
| >PTCH1-P50ˆATTQVLPF   | 5    | >PTCH1-P50ˆATTQVLQF   | 5    | 0    |
| >PTCH1-P50ˆATTQVLPFL  | 70   | >PTCH1-P50ˆATTQVLQFL  | 105  | 35   |

|                        |       |                        |       |       |
|------------------------|-------|------------------------|-------|-------|
| >PTCH1-P50<ATTQVLPFLA  | 46    | >PTCH1-P50<ATTQVLQFLA  | 59    | 13    |
| >PTCH1-P50<ATTQVLPF    | 145   | >PTCH1-P50<ATTQVLQF    | 62    | 83    |
| >PTCH1-P50<ATTQVLPFL   | 18    | >PTCH1-P50<ATTQVLQFL   | 25    | 7     |
| >PTCH1-P50<ATTQVLPFLA  | 32    | >PTCH1-P50<ATTQVLQFLA  | 69    | 37    |
| >PTCH1-P50<ATTQVLPF    | 144   | >PTCH1-P50<ATTQVLQF    | 139   | 5     |
| >PTCH1-P50<ATTQVLPFL   | 96    | >PTCH1-P50<ATTQVLQFL   | 70    | 26    |
| >PTCH1-P50<ATTQVLPFLA  | 176   | >PTCH1-P50<ATTQVLQFLA  | 300   | 124   |
| >PTCH1-P50<ATTQVLPFL   | 305   | >PTCH1-P50<ATTQVLQFL   | 388   | 83    |
| >PTCH1-P50<AATTQVLPF   | 30    | >PTCH1-P50<AATTQVLQF   | 149   | 119   |
| >PTCH1-P50<AATTQVLPF   | 9     | >PTCH1-P50<AATTQVLQF   | 7     | 2     |
| >PTCH1-P50<AATTQVLPF   | 91    | >PTCH1-P50<AATTQVLQF   | 1174  | 1083  |
| >PTCH1-P50<AATTQVLPF   | 523   | >PTCH1-P50<AATTQVLQF   | 120   | 403   |
| >PTCH1-P50<AATTQVLPFL  | 221   | >PTCH1-P50<AATTQVLQFL  | 475   | 254   |
| >PTCH1-P50<NAATTQVLPF  | 377   | >PTCH1-P50<NAATTQVLQ   | 260   | 117   |
| >PTCH1-P50<NAATTQVLPF  | 380   | >PTCH1-P50<NAATTQVLQ   | 972   | 592   |
| >PTCH1-P50<NAATTQVLPF  | 149   | >PTCH1-P50<NAATTQVLQ   | 68    | 81    |
| >PTCH1-P50<NAATTQVLPF  | 169   | >PTCH1-P50<NAATTQVLQ   | 531   | 362   |
| >PTCH1-P50<NAATTQVLPF  | 483   | >PTCH1-P50<NAATTQVLQ   | 2802  | 2319  |
| >PTCH1-P50<NAATTQVLPF  | 77    | >PTCH1-P50<NAATTQVLQ   | 333   | 256   |
| >PTCH1-P50<NAATTQVLPF  | 420   | >PTCH1-P50<NAATTQVLQ   | 222   | 198   |
| >PTCH1-P50<NAATTQVLPF  | 793   | >PTCH1-P50<NAATTQVLQ   | 172   | 621   |
| >PTCH1-P50<FNAATTQVLF  | 61    | >PTCH1-P50<FNAATTQVLC  | 233   | 172   |
| >PTCH1-P50<FNAATTQVLF  | 182   | >PTCH1-P50<FNAATTQVLC  | 578   | 396   |
| >PTCH1-P50<FNAATTQVLF  | 12    | >PTCH1-P50<FNAATTQVLC  | 44    | 32    |
| >PTCH1-P50<FNAATTQVLF  | 147   | >PTCH1-P50<FNAATTQVLC  | 1082  | 935   |
| >PTCH1-P56&PALRAFSL    | 5557  | >PTCH1-P56&LALRAFSL    | 57    | 5500  |
| >PTCH1-P56&PALRAFSLQA  | 13019 | >PTCH1-P56&LALRAFSLQA  | 299   | 12720 |
| >PTCH1-P56&PALRAFSLQA  | 10529 | >PTCH1-P56&LALRAFSLQA, | 141   | 10388 |
| >PTCH1-P56&PALRAFSL    | 3608  | >PTCH1-P56&LALRAFSL    | 336   | 3272  |
| >PTCH1-P56&PALRAFSL    | 5047  | >PTCH1-P56&LALRAFSL    | 408   | 4639  |
| >PTCH1-P56&PALRAFSL    | 8523  | >PTCH1-P56&LALRAFSL    | 159   | 8364  |
| >PTCH1-P56&PALRAFSLQA  | 6431  | >PTCH1-P56&LALRAFSLQA, | 97    | 6334  |
| >PTCH1-P56&PALRAFSL    | 9100  | >PTCH1-P56&LALRAFSL    | 487   | 8613  |
| >PTCH1-P56&IPALRAFSL   | 402   | >PTCH1-P56&ILALRAFSL   | 38086 | 37684 |
| >PTCH1-P56&IPALRAFSL   | 22324 | >PTCH1-P56&ILALRAFSL   | 45    | 22279 |
| >PTCH1-P56&IPALRAFSLQ/ | 22830 | >PTCH1-P56&ILALRAFSLQA | 270   | 22560 |
| >PTCH1-P56&IPALRAFS    | 32703 | >PTCH1-P56&ILALRAFS    | 411   | 32292 |
| >PTCH1-P56&IPALRAFSL   | 15046 | >PTCH1-P56&ILALRAFSL   | 9     | 15037 |
| >PTCH1-P56&IPALRAFSLQ/ | 23273 | >PTCH1-P56&ILALRAFSLQA | 44    | 23229 |
| >PTCH1-P56&IPALRAFSL   | 19985 | >PTCH1-P56&ILALRAFSL   | 42    | 19943 |
| >PTCH1-P56&IPALRAFSLQ/ | 18465 | >PTCH1-P56&ILALRAFSLQA | 32    | 18433 |
| >PTCH1-P56&IPALRAFSL   | 10574 | >PTCH1-P56&ILALRAFSL   | 53    | 10521 |
| >PTCH1-P56&IPALRAFSL   | 26284 | >PTCH1-P56&ILALRAFSL   | 51    | 26233 |

|                        |       |                         |       |       |
|------------------------|-------|-------------------------|-------|-------|
| >PTCH1-P56ËIPALRAFSLQ/ | 27564 | >PTCH1-P56ËILALRAFSLQA  | 219   | 27345 |
| >PTCH1-P56ËIPALRAFSL   | 23588 | >PTCH1-P56ËILALRAFSL    | 69    | 23519 |
| >PTCH1-P56ËIPALRAFSL   | 24434 | >PTCH1-P56ËILALRAFSL    | 39    | 24395 |
| >PTCH1-P56ËIPALRAFSLQ/ | 25240 | >PTCH1-P56ËILALRAFSLQA  | 185   | 25055 |
| >PTCH1-P56ËIPALRAFSL   | 23728 | >PTCH1-P56ËILALRAFSL    | 18    | 23710 |
| >PTCH1-P56ËIPALRAFSLQ/ | 23501 | >PTCH1-P56ËILALRAFSLQA  | 294   | 23207 |
| >PTCH1-P56ËIPALRAFSL   | 30436 | >PTCH1-P56ËILALRAFSL    | 5     | 30431 |
| >PTCH1-P56ËIPALRAFSLQ  | 37474 | >PTCH1-P56ËILALRAFSLQ   | 288   | 37186 |
| >PTCH1-P56ËIPALRAFSLQ/ | 34721 | >PTCH1-P56ËILALRAFSLQA  | 17    | 34704 |
| >PTCH1-P56ËIPALRAFSL   | 11    | >PTCH1-P56ËILALRAFSL    | 2015  | 2004  |
| >PTCH1-P56ËIPALRAFSLQ/ | 135   | >PTCH1-P56ËILALRAFSLQA  | 17681 | 17546 |
| >PTCH1-P56ËIPALRAFSL   | 128   | >PTCH1-P56ËILALRAFSL    | 121   | 7     |
| >PTCH1-P56ËIPALRAFSL   | 438   | >PTCH1-P56ËILALRAFSL    | 16014 | 15576 |
| >PTCH1-P56ËIPALRAFSL   | 401   | >PTCH1-P56ËILALRAFSL    | 4109  | 3708  |
| >PTCH1-P56ËIPALRAFSL   | 379   | >PTCH1-P56ËILALRAFSL    | 27989 | 27610 |
| >PTCH1-P56ËIPALRAFSLQ/ | 31    | >PTCH1-P56ËILALRAFSLQA  | 18400 | 18369 |
| >PTCH1-P56ËAFFMAALIPIF | 18468 | >PTCH1-P56ËAFFMAALIPIIL | 285   | 18183 |
| >PTCH1-P56ËIPIPALRAF   | 10    | >PTCH1-P56ËIPIPALRAF    | 66    | 56    |
| >PTCH1-P56ËIPIPALRAFSL | 6     | >PTCH1-P56ËIPIPALRAFSL  | 15    | 9     |
| >PTCH1-P56ËIPIPALRAF   | 14    | >PTCH1-P56ËIPIPALRAF    | 17    | 3     |
| >PTCH1-P56ËIPIPALRAFSL | 13    | >PTCH1-P56ËIPIPALRAFSL  | 16    | 3     |
| >PTCH1-P56ËIPIPALRAF   | 113   | >PTCH1-P56ËIPIPALRAF    | 435   | 322   |
| >PTCH1-P56ËIPIPALRAF   | 456   | >PTCH1-P56ËIPIPALRAF    | 336   | 120   |
| >PTCH1-P56ËIPIPALRAF   | 11    | >PTCH1-P56ËIPIPALRAF    | 15    | 4     |
| >PTCH1-P56ËIPIPALRAFSL | 120   | >PTCH1-P56ËIPIPALRAFSL  | 189   | 69    |
| >PTCH1-P56ËIPIPALRAFSL | 398   | >PTCH1-P56ËIPIPALRAFSL  | 737   | 339   |
| >PTCH1-P56ËIPIPALRAFSL | 435   | >PTCH1-P56ËIPIPALRAFSL  | 787   | 352   |
| >PTCH1-P56ËIPIPALRAFSL | 338   | >PTCH1-P56ËIPIPALRAFSL  | 363   | 25    |
| >PTCH1-P56ËIPIPALRA    | 34    | >PTCH1-P56ËIPIPALRA     | 24    | 10    |
| >PTCH1-P56ËIPIPALRAF   | 6     | >PTCH1-P56ËIPIPALRAF    | 9     | 3     |
| >PTCH1-P56ËIPIPALRAFSL | 197   | >PTCH1-P56ËIPIPALRAFSL  | 478   | 281   |
| >PTCH1-P56ËIPIPALRAF   | 37    | >PTCH1-P56ËIPIPALRAF    | 79    | 42    |
| >PTCH1-P56ËIPIPALRAFSL | 434   | >PTCH1-P56ËIPIPALRAFSL  | 836   | 402   |
| >PTCH1-P56ËLIPIPALR    | 1134  | >PTCH1-P56ËLIPILALR     | 470   | 664   |
| >PTCH1-P56ËLIPIPALR    | 262   | >PTCH1-P56ËLIPILALR     | 229   | 33    |
| >PTCH1-P56ËLIPIPALRAF  | 72    | >PTCH1-P56ËLIPILALRAF   | 152   | 80    |
| >PTCH1-P56ËLIPIPALR    | 305   | >PTCH1-P56ËLIPILALR     | 209   | 96    |
| >PTCH1-P56ËALIPIPAL    | 16    | >PTCH1-P56ËALIPIPAL     | 19    | 3     |
| >PTCH1-P56ËALIPIPALRA  | 666   | >PTCH1-P56ËALIPIPALRA   | 384   | 282   |
| >PTCH1-P56ËALIPIPAL    | 9     | >PTCH1-P56ËALIPIPAL     | 8     | 1     |
| >PTCH1-P56ËALIPIPALR   | 552   | >PTCH1-P56ËALIPIPALR    | 112   | 440   |
| >PTCH1-P56ËALIPIPALRA  | 159   | >PTCH1-P56ËALIPIPALRA   | 159   | 0     |
| >PTCH1-P56ËALIPIPALRAF | 388   | >PTCH1-P56ËALIPIPALRAF  | 244   | 144   |

|                         |       |                         |      |       |
|-------------------------|-------|-------------------------|------|-------|
| >PTCH1-P56\xALIPIPAL    | 8     | >PTCH1-P56\xALIPILAL    | 7    | 1     |
| >PTCH1-P56\xALIPIPALRA  | 165   | >PTCH1-P56\xALIPILALRA  | 169  | 4     |
| >PTCH1-P56\xALIPIPALRAF | 671   | >PTCH1-P56\xALIPILALRAF | 436  | 235   |
| >PTCH1-P56\xALIPIPAL    | 21    | >PTCH1-P56\xALIPILAL    | 11   | 10    |
| >PTCH1-P56\xALIPIPALRA  | 1029  | >PTCH1-P56\xALIPILALRA  | 336  | 693   |
| >PTCH1-P56\xALIPIPALRAF | 499   | >PTCH1-P56\xALIPILALRAF | 175  | 324   |
| >PTCH1-P56\xALIPIPAL    | 4     | >PTCH1-P56\xALIPILAL    | 5    | 1     |
| >PTCH1-P56\xALIPIPALRA  | 34    | >PTCH1-P56\xALIPILALRA  | 43   | 9     |
| >PTCH1-P56\xALIPIPAL    | 9     | >PTCH1-P56\xALIPILAL    | 10   | 1     |
| >PTCH1-P56\xALIPIPALRA  | 376   | >PTCH1-P56\xALIPILALRA  | 222  | 154   |
| >PTCH1-P56\xALIPIPAL    | 21    | >PTCH1-P56\xALIPILAL    | 32   | 11    |
| >PTCH1-P56\xALIPIPALRA  | 251   | >PTCH1-P56\xALIPILALRA  | 142  | 109   |
| >PTCH1-P56\xALIPIPAL    | 60    | >PTCH1-P56\xALIPILAL    | 182  | 122   |
| >PTCH1-P56\xALIPIPAL    | 3     | >PTCH1-P56\xALIPILAL    | 3    | 0     |
| >PTCH1-P56\xALIPIPALRA  | 10    | >PTCH1-P56\xALIPILALRA  | 6    | 4     |
| >PTCH1-P56\xALIPIPALR   | 456   | >PTCH1-P56\xALIPILALR   | 592  | 136   |
| >PTCH1-P56\xALIPIPALR   | 154   | >PTCH1-P56\xALIPILALR   | 134  | 20    |
| >PTCH1-P56\xALIPIPALRAF | 189   | >PTCH1-P56\xALIPILALRAF | 42   | 147   |
| >PTCH1-P56\xALIPIPALR   | 20    | >PTCH1-P56\xALIPILALR   | 12   | 8     |
| >PTCH1-P56\xALIPIPAL    | 474   | >PTCH1-P56\xALIPILAL    | 367  | 107   |
| >PTCH1-P56\xALIPIPALRAF | 117   | >PTCH1-P56\xALIPILALRAF | 171  | 54    |
| >PTCH1-P56\xALIPIPALR   | 488   | >PTCH1-P56\xALIPILALR   | 264  | 224   |
| >PTCH1-P56\xALIPIPALR   | 82    | >PTCH1-P56\xALIPILALR   | 58   | 24    |
| >PTCH1-P56\xALIPIPAL    | 720   | >PTCH1-P56\xALIPILAL    | 367  | 353   |
| >PTCH1-P56\xALIPIPALRAF | 63    | >PTCH1-P56\xALIPILALRAF | 54   | 9     |
| >PTCH1-P56\xALIPIPALRAF | 32    | >PTCH1-P56\xALIPILALRAF | 54   | 22    |
| >PTCH1-P56\xALIPIPALRAF | 112   | >PTCH1-P56\xALIPILALRAF | 149  | 37    |
| >PTCH1-P56\xALIPIPALRAF | 819   | >PTCH1-P56\xALIPILALRAF | 260  | 559   |
| >PTCH1-P56\xALIPIPALR   | 457   | >PTCH1-P56\xALIPILALR   | 766  | 309   |
| >PTCH1-P56\xAALIPIPAL   | 122   | >PTCH1-P56\xAALIPILAL   | 454  | 332   |
| >PTCH1-P56\xAALIPIPAL   | 109   | >PTCH1-P56\xAALIPILAL   | 266  | 157   |
| >PTCH1-P56\xAALIPIPALR  | 337   | >PTCH1-P56\xAALIPILALR  | 321  | 16    |
| >PTCH1-P56\xAALIPIPALR  | 26    | >PTCH1-P56\xAALIPILALR  | 18   | 8     |
| >PTCH1-P56\xAALIPIPALR  | 1626  | >PTCH1-P56\xAALIPILALR  | 335  | 1291  |
| >PTCH1-P56\xAALIPIPALR  | 18    | >PTCH1-P56\xAALIPILALR  | 13   | 5     |
| >PTCH1-P56\xAALIPIPAL   | 325   | >PTCH1-P56\xAALIPILAL   | 1299 | 974   |
| >PTCH1-P56\xAALIPIPAL   | 648   | >PTCH1-P56\xAALIPILAL   | 395  | 253   |
| >PTCH1-P56\xAALIPIPAL   | 17    | >PTCH1-P56\xAALIPILAL   | 13   | 4     |
| >PTCH1-P56\xMAALIPIP    | 14235 | >PTCH1-P56\xMAALIPIL    | 254  | 13981 |
| >PTCH1-P56\xMAALIPIPAL  | 295   | >PTCH1-P56\xMAALIPILAL  | 177  | 118   |
| >PTCH1-P56\xMAALIPIPAL  | 835   | >PTCH1-P56\xMAALIPILAL  | 447  | 388   |
| >PTCH1-P56\xMAALIPIPAL  | 172   | >PTCH1-P56\xMAALIPILAL  | 258  | 86    |
| >PTCH1-P56\xMAALIPIPALF | 335   | >PTCH1-P56\xMAALIPILALF | 333  | 2     |

|                        |       |                        |      |       |
|------------------------|-------|------------------------|------|-------|
| >PTCH1-P56ξMAALIPIPALF | 20    | >PTCH1-P56ξMAALIPILALF | 17   | 3     |
| >PTCH1-P56ξMAALIPIPALF | 70    | >PTCH1-P56ξMAALIPILALF | 57   | 13    |
| >PTCH1-P56ξMAALIPIPALF | 2     | >PTCH1-P56ξMAALIPILALF | 2    | 0     |
| >PTCH1-P56ξMAALIPIP    | 10890 | >PTCH1-P56ξMAALIPIIL   | 141  | 10749 |
| >PTCH1-P56ξMAALIPIPA   | 7     | >PTCH1-P56ξMAALIPIILA  | 15   | 8     |
| >PTCH1-P56ξMAALIPIPAL  | 117   | >PTCH1-P56ξMAALIPILAL  | 379  | 262   |
| >PTCH1-P56ξMAALIPIPAL  | 161   | >PTCH1-P56ξMAALIPILAL  | 140  | 21    |
| >PTCH1-P56ξMAALIPIP    | 8490  | >PTCH1-P56ξMAALIPIIL   | 183  | 8307  |
| >PTCH1-P56ξMAALIPIPA   | 73    | >PTCH1-P56ξMAALIPIILA  | 1831 | 1758  |
| >PTCH1-P56ξMAALIPIPAL  | 268   | >PTCH1-P56ξMAALIPILAL  | 295  | 27    |
| >PTCH1-P56ξMAALIPIPA   | 17    | >PTCH1-P56ξMAALIPIILA  | 31   | 14    |
| >PTCH1-P56ξMAALIPIP    | 17708 | >PTCH1-P56ξMAALIPIIL   | 434  | 17274 |
| >PTCH1-P56ξMAALIPIPALF | 205   | >PTCH1-P56ξMAALIPILALF | 330  | 125   |
| >PTCH1-P56ξFMAALIPIP   | 2697  | >PTCH1-P56ξFMAALIPIIL  | 7    | 2690  |
| >PTCH1-P56ξFMAALIPIPA  | 14    | >PTCH1-P56ξFMAALIPIILA | 20   | 6     |
| >PTCH1-P56ξFMAALIPIPAL | 7     | >PTCH1-P56ξFMAALIPILAL | 8    | 1     |
| >PTCH1-P56ξFMAALIPIP   | 44    | >PTCH1-P56ξFMAALIPIIL  | 2    | 42    |
| >PTCH1-P56ξFMAALIPIPA  | 8     | >PTCH1-P56ξFMAALIPIILA | 10   | 2     |
| >PTCH1-P56ξFMAALIPIPAL | 2     | >PTCH1-P56ξFMAALIPILAL | 2    | 0     |
| >PTCH1-P56ξFMAALIPIP   | 252   | >PTCH1-P56ξFMAALIPIIL  | 3    | 249   |
| >PTCH1-P56ξFMAALIPIPA  | 11    | >PTCH1-P56ξFMAALIPIILA | 17   | 6     |
| >PTCH1-P56ξFMAALIPIPAL | 3     | >PTCH1-P56ξFMAALIPILAL | 3    | 0     |
| >PTCH1-P56ξFMAALIPIP   | 664   | >PTCH1-P56ξFMAALIPIIL  | 5    | 659   |
| >PTCH1-P56ξFMAALIPIPA  | 34    | >PTCH1-P56ξFMAALIPIILA | 72   | 38    |
| >PTCH1-P56ξFMAALIPIPAL | 4     | >PTCH1-P56ξFMAALIPILAL | 7    | 3     |
| >PTCH1-P56ξFMAALIPIP   | 684   | >PTCH1-P56ξFMAALIPIIL  | 2    | 682   |
| >PTCH1-P56ξFMAALIPIPA  | 3     | >PTCH1-P56ξFMAALIPIILA | 4    | 1     |
| >PTCH1-P56ξFMAALIPIPAL | 2     | >PTCH1-P56ξFMAALIPILAL | 2    | 0     |
| >PTCH1-P56ξFMAALIPIP   | 6487  | >PTCH1-P56ξFMAALIPIIL  | 7    | 6480  |
| >PTCH1-P56ξFMAALIPIPA  | 15    | >PTCH1-P56ξFMAALIPIILA | 41   | 26    |
| >PTCH1-P56ξFMAALIPIPAL | 6     | >PTCH1-P56ξFMAALIPILAL | 7    | 1     |
| >PTCH1-P56ξFMAALIPIP   | 622   | >PTCH1-P56ξFMAALIPIIL  | 4    | 618   |
| >PTCH1-P56ξFMAALIPIPA  | 7     | >PTCH1-P56ξFMAALIPIILA | 9    | 2     |
| >PTCH1-P56ξFMAALIPIPAL | 5     | >PTCH1-P56ξFMAALIPILAL | 6    | 1     |
| >PTCH1-P56ξFMAALIPIP   | 12234 | >PTCH1-P56ξFMAALIPIIL  | 4    | 12230 |
| >PTCH1-P56ξFMAALIPIPA  | 15    | >PTCH1-P56ξFMAALIPIILA | 21   | 6     |
| >PTCH1-P56ξFMAALIPIPAL | 3     | >PTCH1-P56ξFMAALIPILAL | 7    | 4     |
| >PTCH1-P56ξFMAALIPIP   | 787   | >PTCH1-P56ξFMAALIPIIL  | 2    | 785   |
| >PTCH1-P56ξFMAALIPIPA  | 4     | >PTCH1-P56ξFMAALIPIILA | 4    | 0     |
| >PTCH1-P56ξFMAALIPIPAL | 2     | >PTCH1-P56ξFMAALIPILAL | 2    | 0     |
| >PTCH1-P56ξFMAALIPIPA  | 261   | >PTCH1-P56ξFMAALIPIILA | 554  | 293   |
| >PTCH1-P56ξFMAALIPIP   | 17887 | >PTCH1-P56ξFMAALIPIIL  | 366  | 17521 |
| >PTCH1-P56ξFMAALIPIPA  | 250   | >PTCH1-P56ξFMAALIPIILA | 1144 | 894   |

|                        |       |                        |       |       |
|------------------------|-------|------------------------|-------|-------|
| >PTCH1-P56\FMAALIPIPA  | 58    | >PTCH1-P56\FMAALIPIPAL | 171   | 113   |
| >PTCH1-P56\FMAALIPIP   | 4369  | >PTCH1-P56\FMAALIPIIL  | 203   | 4166  |
| >PTCH1-P56\FMAALIPIPA  | 419   | >PTCH1-P56\FMAALIPILA  | 2658  | 2239  |
| >PTCH1-P56\FMAALIPIPAL | 92    | >PTCH1-P56\FMAALIPIPAL | 71    | 21    |
| >PTCH1-P56\FMAALIPIPAL | 830   | >PTCH1-P56\FMAALIPIPAL | 460   | 370   |
| >PTCH1-P56\FMAALIPIP   | 3164  | >PTCH1-P56\FMAALIPIIL  | 83    | 3081  |
| >PTCH1-P56\FMAALIPIPAL | 40    | >PTCH1-P56\FMAALIPIPAL | 32    | 8     |
| >PTCH1-P56\FMAALIPIPAL | 460   | >PTCH1-P56\FMAALIPIPAL | 510   | 50    |
| >PTCH1-P56\FMAALIPIP   | 9964  | >PTCH1-P56\FMAALIPIIL  | 15    | 9949  |
| >PTCH1-P56\FMAALIPIPAL | 13    | >PTCH1-P56\FMAALIPIPAL | 12    | 1     |
| >PTCH1-P56\FMAALIPIP   | 17896 | >PTCH1-P56\FMAALIPIIL  | 294   | 17602 |
| >PTCH1-P56\FMAALIPIPAL | 151   | >PTCH1-P56\FMAALIPIPAL | 190   | 39    |
| >PTCH1-P56\FMAALIPIP   | 19512 | >PTCH1-P56\FMAALIPIIL  | 392   | 19120 |
| >PTCH1-P56\FFMAALIPIP  | 10747 | >PTCH1-P56\FFMAALIPIIL | 383   | 10364 |
| >PTCH1-P56\FFMAALIPIPA | 142   | >PTCH1-P56\FFMAALIPILA | 221   | 79    |
| >PTCH1-P56\FFMAALIPIP  | 18130 | >PTCH1-P56\FFMAALIPIIL | 144   | 17986 |
| >PTCH1-P56\FFMAALIPIPA | 29    | >PTCH1-P56\FFMAALIPILA | 27    | 2     |
| >PTCH1-P56\FFMAALIPIP  | 10504 | >PTCH1-P56\FFMAALIPIIL | 212   | 10292 |
| >PTCH1-P56\FFMAALIPIPA | 100   | >PTCH1-P56\FFMAALIPILA | 213   | 113   |
| >PTCH1-P56\FFMAALIPIP  | 8364  | >PTCH1-P56\FFMAALIPIIL | 21    | 8343  |
| >PTCH1-P56\FFMAALIPIP  | 21010 | >PTCH1-P56\FFMAALIPIIL | 136   | 20874 |
| >PTCH1-P56\FFMAALIPIPA | 72    | >PTCH1-P56\FFMAALIPILA | 149   | 77    |
| >PTCH1-P56\FFMAALIPIP  | 8288  | >PTCH1-P56\FFMAALIPIIL | 171   | 8117  |
| >PTCH1-P64\PPPPYSSHSF  | 105   | >PTCH1-P64\LPPPYSSHSF  | 30    | 75    |
| >PTCH1-P64\PPPPYSSHSF  | 1930  | >PTCH1-P64\LPPPYSSHSF  | 204   | 1726  |
| >PTCH1-P64\PPPPYSSH    | 7021  | >PTCH1-P64\LPPPYSSH    | 320   | 6701  |
| >PTCH1-P64\PPPPYSSHSF  | 13433 | >PTCH1-P64\LPPPYSSHSF  | 335   | 13098 |
| >PTCH1-P64\PPPPYSSHSF  | 5153  | >PTCH1-P64\LPPPYSSHSF  | 431   | 4722  |
| >PTCH1-P64\PPPPYSSHSF  | 5762  | >PTCH1-P64\LPPPYSSHSF  | 77    | 5685  |
| >PTCH1-P64\PPPPYSSHSF  | 978   | >PTCH1-P64\LPPPYSSHSF  | 44    | 934   |
| >PTCH1-P64\PPPPYSSHSF  | 1574  | >PTCH1-P64\LPPPYSSHSF  | 223   | 1351  |
| >PTCH1-P64\PPPPYSSHSF  | 2755  | >PTCH1-P64\LPPPYSSHSF  | 132   | 2623  |
| >PTCH1-P64\SPPPYSSHSF  | 21    | >PTCH1-P64\SLPPPYSSHSF | 20683 | 20662 |
| >PTCH1-P64\SPPPYSS     | 29278 | >PTCH1-P64\SLPPPYSS    | 497   | 28781 |
| >PTCH1-P64\SPPPYSSHSF  | 34988 | >PTCH1-P64\SLPPPYSSHSF | 353   | 34635 |
| >PTCH1-P64\SPPPYSSHSF  | 1079  | >PTCH1-P64\SLPPPYSSHSF | 84    | 995   |
| >PTCH1-P64\SPPPYSSHSF  | 70    | >PTCH1-P64\SLPPPYSSHSF | 13873 | 13803 |
| >PTCH1-P64\SPPPYSSHSF  | 10591 | >PTCH1-P64\SLPPPYSSHSF | 95    | 10496 |
| >PTCH1-P64\SPPPYSSHSF  | 872   | >PTCH1-P64\SLPPPYSSHSF | 67    | 805   |
| >PTCH1-P64\SPPPYSSHSF  | 428   | >PTCH1-P64\SLPPPYSSHSF | 57    | 371   |
| >PTCH1-P64\SPPPYSSHSF  | 363   | >PTCH1-P64\SLPPPYSSHSF | 5959  | 5596  |
| >PTCH1-P64\SPPPYSSHSF  | 46    | >PTCH1-P64\SLPPPYSSHSF | 19    | 27    |
| >PTCH1-P64\SPPPYSSHSF  | 491   | >PTCH1-P64\SLPPPYSSHSF | 11761 | 11270 |

|                        |       |                        |       |       |
|------------------------|-------|------------------------|-------|-------|
| >PTCH1-P64:YSPPPPYSSH  | 1559  | >PTCH1-P64:YSLPPPYSSH  | 136   | 1423  |
| >PTCH1-P64:YSPPPPYSSH  | 2142  | >PTCH1-P64:YSLPPPYSSH  | 42    | 2100  |
| >PTCH1-P64:YSPPPPYSSH: | 6728  | >PTCH1-P64:YSLPPPYSSH: | 408   | 6320  |
| >PTCH1-P64:YSPPPPYSS   | 35    | >PTCH1-P64:YSLPPPYSS   | 7073  | 7038  |
| >PTCH1-P64:YSPPPPYSSH  | 49    | >PTCH1-P64:YSLPPPYSSH  | 11284 | 11235 |
| >PTCH1-P64:YSPPPPYSSH: | 35    | >PTCH1-P64:YSLPPPYSSH: | 10798 | 10763 |
| >PTCH1-P64:RYSPPPPY    | 54    | >PTCH1-P64:RYSLPPPY    | 91    | 37    |
| >PTCH1-P64:RYSPPPPY    | 162   | >PTCH1-P64:RYSLPPPY    | 369   | 207   |
| >PTCH1-P64:RYSPPPPYS   | 200   | >PTCH1-P64:RYSLPPPY    | 584   | 384   |
| >PTCH1-P64:RYSPPPPY    | 75    | >PTCH1-P64:RYSLPPPY    | 186   | 111   |
| >PTCH1-P64:RYSPPPPY    | 489   | >PTCH1-P64:RYSLPPPY    | 508   | 19    |
| >PTCH1-P64:RYSPPPPY    | 331   | >PTCH1-P64:RYSLPPPY    | 1121  | 790   |
| >PTCH1-P64:RYSPPPPY    | 203   | >PTCH1-P64:RYSLPPPY    | 419   | 216   |
| >PTCH1-P64:RYSPPPPYS   | 453   | >PTCH1-P64:RYSLPPPY    | 1269  | 816   |
| >PTCH1-P64:RYSPPPPYSS  | 247   | >PTCH1-P64:RYSLPPPYSS  | 762   | 515   |
| >PTCH1-P64:TRYSPPPPY   | 277   | >PTCH1-P64:TRYSLPPPY   | 143   | 134   |
| >PTCH1-P64:TRYSPPPPY   | 852   | >PTCH1-P64:TRYSLPPPY   | 448   | 404   |
| >PTCH1-P64:TRYSPPPPY   | 369   | >PTCH1-P64:TRYSLPPPY   | 2970  | 2601  |
| >PTCH1-P64:TRYSPPPPY   | 9     | >PTCH1-P64:TRYSLPPPY   | 20    | 11    |
| >PTCH1-P64:TRYSPPPPY   | 547   | >PTCH1-P64:TRYSLPPPY   | 89    | 458   |
| >PTCH1-P64:TRYSPPPPY   | 2364  | >PTCH1-P64:TRYSLPPPY   | 441   | 1923  |
| >PTCH1-P64:NTRYSPPPPY  | 38    | >PTCH1-P64:NTRYSLPPPY  | 21    | 17    |
| >PTCH1-P64:NTRYSPPPPY  | 89    | >PTCH1-P64:NTRYSLPPPY  | 160   | 71    |
| >PTCH1-P64:NTRYSPPPPY  | 451   | >PTCH1-P64:NTRYSLPPPY  | 747   | 296   |
| >PTCH1-P64:NTRYSPPPP   | 260   | >PTCH1-P64:NTRYSLPPP   | 292   | 32    |
| >PTCH1-P64:NTRYSPPPPY  | 40    | >PTCH1-P64:NTRYSLPPPY  | 39    | 1     |
| >PTCH1-P64:NTRYSPPPPY  | 90    | >PTCH1-P64:NTRYSLPPPY: | 115   | 25    |
| >PTCH1-P64:NTRYSPPPPY  | 164   | >PTCH1-P64:NTRYSLPPPY  | 112   | 52    |
| >PTCH1-P64:NTRYSPPPPY  | 87    | >PTCH1-P64:NTRYSLPPPY  | 163   | 76    |
| >PTCH1-P64:NTRYSPPPPY  | 9     | >PTCH1-P64:NTRYSLPPPY  | 11    | 2     |
| >PTCH1-P64:NTRYSPPPPY  | 46    | >PTCH1-P64:NTRYSLPPPY  | 58    | 12    |
| >PTCH1-P64:HDNTRYSP    | 12530 | >PTCH1-P64:HDNTRYSL    | 493   | 12037 |
| >PTCH1-P64:THDNTRYSP   | 3833  | >PTCH1-P64:THDNTRYSL   | 7     | 3826  |
| >PTCH1-P64:DTHDNTRYSF  | 19152 | >PTCH1-P64:DTHDNTRYSL  | 370   | 18782 |
| >PTCH1-P64:DTHDNTRYSF  | 15337 | >PTCH1-P64:DTHDNTRYSL  | 166   | 15171 |
| >PTCH1-P64:DTHDNTRYSF  | 22700 | >PTCH1-P64:DTHDNTRYSL  | 174   | 22526 |
| >PTCH1-P64:DTHDNTRYSF  | 12135 | >PTCH1-P64:DTHDNTRYSL  | 476   | 11659 |
| >PTCH1-P67(DPHTHVYY    | 307   | >PTCH1-P67(DSHTHVYY    | 14    | 293   |
| >PTCH1-P67(DPHTHVYY    | 2245  | >PTCH1-P67(DSHTHVYY    | 311   | 1934  |
| >PTCH1-P67(DPHTHVYY    | 7083  | >PTCH1-P67(DSHTHVYY    | 427   | 6656  |
| >PTCH1-P67(DPHTHVYY    | 24337 | >PTCH1-P67(DSHTHVYY    | 330   | 24007 |
| >PTCH1-P67(DPHTHVYY    | 195   | >PTCH1-P67(DSHTHVYY    | 1114  | 919   |
| >PTCH1-P67(DPHTHVYY    | 83    | >PTCH1-P67(DSHTHVYY    | 2494  | 2411  |

|                       |      |                       |     |      |
|-----------------------|------|-----------------------|-----|------|
| >PTCH1-P67(YDPHTHVY   | 766  | >PTCH1-P67(YDSHTHVY   | 209 | 557  |
| >PTCH1-P67(YDPHTHVYY  | 180  | >PTCH1-P67(YDSHTHVYY  | 61  | 119  |
| >PTCH1-P67(YDPHTHVY   | 1704 | >PTCH1-P67(YDSHTHVY   | 354 | 1350 |
| >PTCH1-P67(YDPHTHVYY  | 715  | >PTCH1-P67(YDSHTHVYY  | 125 | 590  |
| >PTCH1-P67(YDPHTHVY   | 1631 | >PTCH1-P67(YDSHTHVY   | 207 | 1424 |
| >PTCH1-P67(YDPHTHVY   | 2334 | >PTCH1-P67(YDSHTHVY   | 387 | 1947 |
| >PTCH1-P67(YDPHTHVYY  | 4805 | >PTCH1-P67(YDSHTHVYY  | 380 | 4425 |
| >PTCH1-P67(EYDPHTHVYY | 61   | >PTCH1-P67(EYDSHTHVYY | 35  | 26   |
| >PTCH1-P67(EYDPHTHVY  | 253  | >PTCH1-P67(EYDSHTHVY  | 523 | 270  |
| >PTCH1-P67(EYDPHTHVY  | 961  | >PTCH1-P67(EYDSHTHVY  | 309 | 652  |
| >PTCH1-P67(EYDPHTHVYY | 55   | >PTCH1-P67(EYDSHTHVYY | 41  | 14   |
| >PTCH1-P67(EYDPHTHVY  | 430  | >PTCH1-P67(EYDSHTHVY  | 252 | 178  |
| >PTCH1-P67(EYDPHTHVYY | 507  | >PTCH1-P67(EYDSHTHVYY | 341 | 166  |
| >PTCH1-P67(EYDPHTHVY  | 129  | >PTCH1-P67(EYDSHTHVY  | 105 | 24   |
| >PTCH1-P67(EYDPHTHV   | 900  | >PTCH1-P67(EYDSHTHV   | 450 | 450  |
| >PTCH1-P67(TEYDPHTHV  | 3647 | >PTCH1-P67(TEYDSHTHV  | 204 | 3443 |
| >PTCH1-P67(TEYDPHTHVY | 87   | >PTCH1-P67(TEYDSHTHVY | 113 | 26   |
| >PTCH1-P67(TEYDPHTHVY | 341  | >PTCH1-P67(TEYDSHTHVY | 478 | 137  |
| >PTCH1-P67(TEYDPHTHVY | 132  | >PTCH1-P67(TEYDSHTHVY | 92  | 40   |
| >PTCH1-P67(TEYDPHTHVY | 346  | >PTCH1-P67(TEYDSHTHVY | 214 | 132  |
| >PTCH1-P67(TEYDPHTHVY | 181  | >PTCH1-P67(TEYDSHTHVY | 243 | 62   |
| >PTCH1-P67(TEYDPHTHVY | 198  | >PTCH1-P67(TEYDSHTHVY | 97  | 101  |
| >PTCH1-P67(TEYDPHTHVY | 116  | >PTCH1-P67(TEYDSHTHVY | 57  | 59   |
| >PTCH1-P67(TEYDPHTH   | 210  | >PTCH1-P67(TEYDSHTH   | 102 | 108  |
| >PTCH1-P67(TEYDPHTHVY | 131  | >PTCH1-P67(TEYDSHTHVY | 66  | 65   |
| >PTCH1-P67(TEYDPHTHVY | 19   | >PTCH1-P67(TEYDSHTHVY | 13  | 6    |
| >PTCH1-P67(TEYDPHTHV  | 382  | >PTCH1-P67(TEYDSHTHV  | 187 | 195  |
| >PTCH1-P67(TEYDPHTHV  | 569  | >PTCH1-P67(TEYDSHTHV  | 188 | 381  |
| >PTCH1-P67(TEYDPHTHVY | 253  | >PTCH1-P67(TEYDSHTHVY | 252 | 1    |
| >PTCH1-P67(TEYDPHTHVY | 139  | >PTCH1-P67(TEYDSHTHVY | 120 | 19   |
| >PTCH1-P67(TEYDPHTHVY | 197  | >PTCH1-P67(TEYDSHTHVY | 87  | 110  |
| >PTCH1-P67(TEYDPHTHV  | 314  | >PTCH1-P67(TEYDSHTHV  | 146 | 168  |
| >PTCH1-P67(TEYDPHTHV  | 59   | >PTCH1-P67(TEYDSHTHV  | 40  | 19   |
| >PTCH1-P67(RTEYDPHTHV | 28   | >PTCH1-P67(RTEYDSHTHV | 25  | 3    |
| >PTCH1-P67(RTEYDPHTHV | 483  | >PTCH1-P67(RTEYDSHTHV | 459 | 24   |
| >PTCH1-P67(RTEYDPHTHV | 314  | >PTCH1-P67(RTEYDSHTHV | 354 | 40   |
| >PTCH1-P67(RTEYDPHTHV | 17   | >PTCH1-P67(RTEYDSHTHV | 13  | 4    |
| >PTCH1-P67(RTEYDPHTHV | 159  | >PTCH1-P67(RTEYDSHTHV | 138 | 21   |
| >PTCH1-P67(RTEYDPHTHV | 227  | >PTCH1-P67(RTEYDSHTHV | 220 | 7    |
| >PTCH1-P67(RTEYDPHTHV | 69   | >PTCH1-P67(RTEYDSHTHV | 64  | 5    |
| >PTCH1-P67(RTEYDPHTHV | 784  | >PTCH1-P67(RTEYDSHTHV | 254 | 530  |
| >PTCH1-P67(RTEYDPHTH  | 1014 | >PTCH1-P67(RTEYDSHTH  | 344 | 670  |
| >PTCH1-P67(RTEYDPHTHV | 500  | >PTCH1-P67(RTEYDSHTHV | 198 | 302  |



|                       |       |                        |       |       |
|-----------------------|-------|------------------------|-------|-------|
| >PTCH1-P67(RTEYDPHTHV | 9     | >PTCH1-P67(RTEYDSHTHV  | 6     | 3     |
| >PTCH1-P67(RTEYDPHTHV | 479   | >PTCH1-P67(RTEYDSHTHV  | 731   | 252   |
| >PTCH1-P67(RTEYDPHTH  | 392   | >PTCH1-P67(RTEYDSHTH   | 150   | 242   |
| >PTCH1-P67(RTEYDPHTHV | 340   | >PTCH1-P67(RTEYDSHTHV  | 337   | 3     |
| >PTCH1-P67(RTEYDPHTHV | 33    | >PTCH1-P67(RTEYDSHTHV  | 19    | 14    |
| >PTCH1-P67(RTEYDPHTHV | 2718  | >PTCH1-P67(RTEYDSHTHV  | 448   | 2270  |
| >PTCH1-P67(RTEYDPHTHV | 157   | >PTCH1-P67(RTEYDSHTHV  | 172   | 15    |
| >PTCH1-P67(VQLRTEYDPH | 390   | >PTCH1-P67(VQLRTEYDSH  | 421   | 31    |
| >PTCH1-P68:PRSEISVQPV | 1828  | >PTCH1-P68:LRSEISVQPV  | 166   | 1662  |
| >PTCH1-P68:EPREISV    | 22166 | >PTCH1-P68:ELRSEISV    | 416   | 21750 |
| >PTCH1-P68:EPREISVQP\ | 18855 | >PTCH1-P68:ELRSEISVQP\ | 44    | 18811 |
| >PTCH1-P68:EPREISV    | 26622 | >PTCH1-P68:ELRSEISV    | 120   | 26502 |
| >PTCH1-P68:EPREISVQP\ | 24676 | >PTCH1-P68:ELRSEISVQP\ | 50    | 24626 |
| >PTCH1-P68:EPREISV    | 25784 | >PTCH1-P68:ELRSEISV    | 487   | 25297 |
| >PTCH1-P68:EPREISVQP\ | 24835 | >PTCH1-P68:ELRSEISVQP\ | 293   | 24542 |
| >PTCH1-P68:EPREISVQP\ | 24093 | >PTCH1-P68:ELRSEISVQP\ | 484   | 23609 |
| >PTCH1-P68:EPREISV    | 26149 | >PTCH1-P68:ELRSEISV    | 7     | 26142 |
| >PTCH1-P68:EPREISVQP\ | 26511 | >PTCH1-P68:ELRSEISVQP\ | 5     | 26506 |
| >PTCH1-P68:EPREISVQP\ | 206   | >PTCH1-P68:ELRSEISVQP\ | 14322 | 14116 |
| >PTCH1-P68:EPREISVQP\ | 496   | >PTCH1-P68:ELRSEISVQP\ | 467   | 29    |
| >PTCH1-P68:HTHVYYTTAE | 178   | >PTCH1-P68:HTHVYYTTAE  | 18    | 160   |
| >PTCH1-P68:HTHVYYTTAE | 7079  | >PTCH1-P68:HTHVYYTTAE  | 28    | 7051  |
| >PTCH1-P68:HTHVYYTTAE | 15480 | >PTCH1-P68:HTHVYYTTAE  | 467   | 15013 |
| >PTCH1-P68:HTHVYYTTAE | 12561 | >PTCH1-P68:HTHVYYTTAE  | 7     | 12554 |
| >PTCH1-P68:HTHVYYTTAE | 25702 | >PTCH1-P68:HTHVYYTTAE  | 305   | 25397 |
| >PTCH1-P68:AEPREISV   | 1169  | >PTCH1-P68:AELRSEISV   | 417   | 752   |
| >PTCH1-P68:AEPREISV   | 2884  | >PTCH1-P68:AELRSEISV   | 84    | 2800  |
| >PTCH1-P68:AEPREISV   | 872   | >PTCH1-P68:AELRSEISV   | 52    | 820   |
| >PTCH1-P68:AEPREIS    | 5345  | >PTCH1-P68:AELRSEIS    | 120   | 5225  |
| >PTCH1-P68:AEPREISV   | 411   | >PTCH1-P68:AELRSEISV   | 13    | 398   |
| >PTCH1-P68:AEPREISV   | 85    | >PTCH1-P68:AELRSEISV   | 21    | 64    |
| >PTCH1-P68:TAEPREI    | 197   | >PTCH1-P68:TAELRSEI    | 1046  | 849   |
| >PTCH1-P68:TTAEPREISV | 1643  | >PTCH1-P68:TTAELRSEISV | 414   | 1229  |
| >PTCH1-P68:TTAEPREISV | 912   | >PTCH1-P68:TTAELRSEISV | 431   | 481   |
| >PTCH1-P68:TTAEPREISV | 505   | >PTCH1-P68:TTAELRSEISV | 321   | 184   |
| >PTCH1-P68:TTAEPREISV | 323   | >PTCH1-P68:TTAELRSEISV | 503   | 180   |
| >PTCH1-P68:TTAEPREISV | 834   | >PTCH1-P68:TTAELRSEISV | 445   | 389   |
| >PTCH1-P68:TTAEPREISV | 172   | >PTCH1-P68:TTAELRSEISV | 179   | 7     |
| >PTCH1-P68:TTAEPREI   | 5     | >PTCH1-P68:TTAELRSEI   | 5     | 0     |
| >PTCH1-P68:TTAEPREISV | 6     | >PTCH1-P68:TTAELRSEISV | 6     | 0     |
| >PTCH1-P68:TTAEPREI   | 17    | >PTCH1-P68:TTAELRSEI   | 37    | 20    |
| >PTCH1-P68:TTAEPREISV | 11    | >PTCH1-P68:TTAELRSEISV | 14    | 3     |
| >PTCH1-P68:TTAEPREI   | 328   | >PTCH1-P68:TTAELRSEI   | 703   | 375   |

|                          |       |                           |     |       |
|--------------------------|-------|---------------------------|-----|-------|
| >PTCH1-P68:TTAEP RSEI    | 104   | >PTCH1-P68:TTAELRSEI      | 93  | 11    |
| >PTCH1-P68:TTAEP RSEI    | 37    | >PTCH1-P68:TTAELRSEI      | 70  | 33    |
| >PTCH1-P68:YT TAEPRSEI   | 319   | >PTCH1-P68:YT TAE LRSEI   | 241 | 78    |
| >PTCH1-P68:YT TAEPRSEI   | 973   | >PTCH1-P68:YT TAE LRSEI   | 259 | 714   |
| >PTCH1-P68:YT TAEPRSEI   | 41    | >PTCH1-P68:YT TAE LRSEI   | 58  | 17    |
| >PTCH1-P68:YT TAEPRSEI   | 65    | >PTCH1-P68:YT TAE LRSEI   | 76  | 11    |
| >PTCH1-P68:YT TAEPRSEI   | 201   | >PTCH1-P68:YT TAE LRSEI   | 156 | 45    |
| >PTCH1-P68:YT TAEPRSEI   | 104   | >PTCH1-P68:YT TAE LRSEI   | 126 | 22    |
| >PTCH1-P68:YT TAEPRSEI   | 27    | >PTCH1-P68:YT TAE LRSEI   | 31  | 4     |
| >PTCH1-P68:YY T TAEPRSEI | 23    | >PTCH1-P68:YY T TAE LRSEI | 10  | 13    |
| >PTCH1-P68:YY T TAEPRSEI | 614   | >PTCH1-P68:YY T TAE LRSEI | 368 | 246   |
| >PTCH1-P68:YY T TAEPRSEI | 756   | >PTCH1-P68:YY T TAE LRSEI | 470 | 286   |
| >PTCH1-P68:YY T TAEPRSEI | 9     | >PTCH1-P68:YY T TAE LRSEI | 7   | 2     |
| >PTCH1-P68:YY T TAEPR    | 193   | >PTCH1-P68:YY T TAE LR    | 218 | 25    |
| >PTCH1-P68:YY T TAEPR    | 85    | >PTCH1-P68:YY T TAE LR    | 38  | 47    |
| >PTCH1-P68:YY T TAEPR    | 27    | >PTCH1-P68:YY T TAE LR    | 35  | 8     |
| >PTCH1-P68:VYY T TAEPR   | 8085  | >PTCH1-P68:VYY T TAE LR   | 22  | 8063  |
| >PTCH1-P68:VYY T TAEPR   | 27397 | >PTCH1-P68:VYY T TAE LR   | 167 | 27230 |
| >PTCH1-P68:VYY T TAEPR   | 11221 | >PTCH1-P68:VYY T TAE LR   | 80  | 11141 |
| >PTCH1-P68:VYY T TAEPR   | 10695 | >PTCH1-P68:VYY T TAE LR   | 415 | 10280 |
| >PTCH1-P68:VYY T TAEPR   | 3958  | >PTCH1-P68:VYY T TAE LR   | 13  | 3945  |
| >PTCH1-P68:VYY T TAEPR   | 87    | >PTCH1-P68:VYY T TAE LR   | 150 | 63    |
| >PTCH1-P68:VYY T TAEPR   | 565   | >PTCH1-P68:VYY T TAE LR   | 211 | 354   |
| >PTCH1-P68:VYY T TAEPR   | 18    | >PTCH1-P68:VYY T TAE LR   | 25  | 7     |
| >PTCH1-P68:HVYY T TAEPR  | 6222  | >PTCH1-P68:HVYY T TAE LR  | 179 | 6043  |
| >PTCH1-P68:HVYY T TAEPR  | 21997 | >PTCH1-P68:HVYY T TAE LR  | 453 | 21544 |
| >PTCH1-P68:HVYY T TAEPR  | 7988  | >PTCH1-P68:HVYY T TAE LR  | 91  | 7897  |
| >PTCH1-P68:HVYY T TAEPR  | 9070  | >PTCH1-P68:HVYY T TAE LR  | 90  | 8980  |
| >PTCH1-P68:HVYY T TAEPR  | 11061 | >PTCH1-P68:HVYY T TAE LR  | 359 | 10702 |
| >PTCH1-P68:HVYY T TAEPR  | 18189 | >PTCH1-P68:HVYY T TAE LR  | 463 | 17726 |
| >PTCH1-P68:HVYY T TAEPR  | 187   | >PTCH1-P68:HVYY T TAE LR  | 181 | 6     |
| >PTCH1-P68:HVYY T TAEPR  | 232   | >PTCH1-P68:HVYY T TAE LR  | 193 | 39    |
| >PTCH1-P68:HVYY T TAEPR  | 20049 | >PTCH1-P68:HVYY T TAE LR  | 340 | 19709 |
| >PTCH1-P68:HVYY T TAEPR  | 1703  | >PTCH1-P68:HVYY T TAE LR  | 111 | 1592  |
| >PTCH1-P68:HVYY T TAEPR  | 63    | >PTCH1-P68:HVYY T TAE LR  | 65  | 2     |
| >PTCH1-P68:HVYY T TAEPR  | 3217  | >PTCH1-P68:HVYY T TAE LR  | 31  | 3186  |
| >PTCH1-P68:HVYY T TAEPR  | 147   | >PTCH1-P68:HVYY T TAE LR  | 194 | 47    |
| >PTCH1-P68:HVYY T TAEPR  | 4     | >PTCH1-P68:HVYY T TAE LR  | 3   | 1     |
| >PTCH1-P68:HVYY T TAEPR  | 3489  | >PTCH1-P68:HVYY T TAE LR  | 13  | 3476  |
| >PTCH1-P68:HVYY T TAEPR  | 6275  | >PTCH1-P68:HVYY T TAE LR  | 30  | 6245  |
| >PTCH1-P68:HVYY T TAEPR  | 25072 | >PTCH1-P68:HVYY T TAE LR  | 468 | 24604 |
| >PTCH1-P68:HVYY T TAEPR  | 9846  | >PTCH1-P68:HVYY T TAE LR  | 347 | 9499  |
| >PTCH1-P68:HVYY T TAEPR  | 19592 | >PTCH1-P68:HVYY T TAE LR  | 29  | 19563 |

|                        |       |                        |       |       |
|------------------------|-------|------------------------|-------|-------|
| >PTCH1-P68:HVYYTTAEP   | 8272  | >PTCH1-P68:HVYYTTAEL   | 286   | 7986  |
| >PTCH1-P68:HVYYTTAEP   | 23212 | >PTCH1-P68:HVYYTTAEL   | 260   | 22952 |
| >PTCH1-P68:HVYYTTAEP   | 1171  | >PTCH1-P68:HVYYTTAELR  | 388   | 783   |
| >PTCH1-P68:HVYYTTAEP   | 36    | >PTCH1-P68:HVYYTTAELR  | 59    | 23    |
| >PTCH1-P68:THVYYTTAEP  | 166   | >PTCH1-P68:THVYYTTAEL  | 72    | 94    |
| >PTCH1-P68:THVYYTTAEP  | 11151 | >PTCH1-P68:THVYYTTAEL  | 476   | 10675 |
| >PTCH1-P68:THVYYTTAEP  | 9685  | >PTCH1-P68:THVYYTTAEL  | 13    | 9672  |
| >PTCH1-P68:THVYYTTAEP  | 400   | >PTCH1-P68:THVYYTTAEL  | 802   | 402   |
| >PTCH1-P68:QPVTVTQDTI  | 407   | >PTCH1-P68:QLVTVTQDTL  | 37030 | 36623 |
| >PTCH1-P68:QPVTVTQDTI  | 21879 | >PTCH1-P68:QLVTVTQDTL  | 91    | 21788 |
| >PTCH1-P68:QPVTVTQDTI  | 28671 | >PTCH1-P68:QLVTVTQDTL  | 216   | 28455 |
| >PTCH1-P68:QPVTVTQDTI  | 24001 | >PTCH1-P68:QLVTVTQDTL  | 181   | 23820 |
| >PTCH1-P68:QPVTVTQDTI  | 35081 | >PTCH1-P68:QLVTVTQDTL  | 63    | 35018 |
| >PTCH1-P68:QPVTVTQDTI  | 17693 | >PTCH1-P68:QLVTVTQDTL  | 342   | 17351 |
| >PTCH1-P68:QPVTVTQDTI  | 491   | >PTCH1-P68:QLVTVTQDTL  | 32021 | 31530 |
| >PTCH1-P68:QPVTVTQDTI  | 276   | >PTCH1-P68:QLVTVTQDTL  | 38068 | 37792 |
| >PTCH1-P68:QPVTVTQDTI  | 302   | >PTCH1-P68:QLVTVTQDTL  | 3134  | 2832  |
| >PTCH1-P68:QPVTVTQDTI  | 468   | >PTCH1-P68:QLVTVTQDTL  | 15795 | 15327 |
| >PTCH1-P68:AEPRSEISVQI | 16083 | >PTCH1-P68:AEPRSEISVQI | 456   | 15627 |
| >PTCH1-P68:AEPRSEISVQI | 3495  | >PTCH1-P68:AEPRSEISVQI | 44    | 3451  |
| >PTCH1-P68:VQPVTVTQD   | 278   | >PTCH1-P68:VQLVTVTQD   | 71    | 207   |
| >PTCH1-P68:VQPVTVTQD   | 464   | >PTCH1-P68:VQLVTVTQD   | 49    | 415   |
| >PTCH1-P68:VQPVTVTQD   | 5368  | >PTCH1-P68:VQLVTVTQD   | 313   | 5055  |
| >PTCH1-P68:ISVQPVTV    | 894   | >PTCH1-P68:ISVQLVTV    | 209   | 685   |
| >PTCH1-P68:ISVQPVTV    | 1193  | >PTCH1-P68:ISVQLVTV    | 179   | 1014  |
| >PTCH1-P68:ISVQPVTV    | 455   | >PTCH1-P68:ISVQLVTV    | 1033  | 578   |
| >PTCH1-P68:ISVQPVTV    | 33    | >PTCH1-P68:ISVQLVTV    | 51    | 18    |
| >PTCH1-P68:ISVQPVTVT   | 366   | >PTCH1-P68:ISVQLVTVT   | 1062  | 696   |
| >PTCH1-P68:ISVQPVTVTQ  | 396   | >PTCH1-P68:ISVQLVTVTQ  | 1083  | 687   |
| >PTCH1-P68:EISVQPVTV   | 159   | >PTCH1-P68:EISVQLVTV   | 59    | 100   |
| >PTCH1-P68:EISVQPVTV   | 59    | >PTCH1-P68:EISVQLVTV   | 47    | 12    |
| >PTCH1-P68:EISVQPVTV   | 102   | >PTCH1-P68:EISVQLVTV   | 61    | 41    |
| >PTCH1-P68:SEISVQPV    | 100   | >PTCH1-P68:SEISVQLV    | 11    | 89    |
| >PTCH1-P68:SEISVQPVTV  | 760   | >PTCH1-P68:SEISVQLVTV  | 240   | 520   |
| >PTCH1-P68:SEISVQPV    | 417   | >PTCH1-P68:SEISVQLV    | 907   | 490   |
| >PTCH1-P68:SEISVQPV    | 84    | >PTCH1-P68:SEISVQLV    | 138   | 54    |
| >PTCH1-P68:SEISVQPV    | 95    | >PTCH1-P68:SEISVQLV    | 324   | 229   |
| >PTCH1-P68:SEISVQPVT   | 241   | >PTCH1-P68:SEISVQLVT   | 135   | 106   |
| >PTCH1-P68:SEISVQPVTV  | 124   | >PTCH1-P68:SEISVQLVTV  | 113   | 11    |
| >PTCH1-P68:SEISVQPVTV  | 270   | >PTCH1-P68:SEISVQLVTV  | 131   | 139   |
| >PTCH1-P68:SEISVQPV    | 403   | >PTCH1-P68:SEISVQLV    | 335   | 68    |
| >PTCH1-P68:SEISVQPV    | 304   | >PTCH1-P68:SEISVQLV    | 141   | 163   |
| >PTCH1-P68:SEISVQPVTV  | 293   | >PTCH1-P68:SEISVQLVTV  | 336   | 43    |

|                        |       |                        |       |       |
|------------------------|-------|------------------------|-------|-------|
| >PTCH1-P68!SEISVQPV    | 29    | >PTCH1-P68!SEISVQLV    | 93    | 64    |
| >PTCH1-P68!SEISVQPVT   | 27    | >PTCH1-P68!SEISVQLVT   | 42    | 15    |
| >PTCH1-P68!SEISVQPVTV  | 104   | >PTCH1-P68!SEISVQLVTV  | 101   | 3     |
| >PTCH1-P68!SEISVQPVTV  | 51    | >PTCH1-P68!SEISVQLVTVI | 45    | 6     |
| >PTCH1-P68!SEISVQPV    | 87    | >PTCH1-P68!SEISVQLV    | 177   | 90    |
| >PTCH1-P68!SEISVQPVT   | 137   | >PTCH1-P68!SEISVQLVT   | 684   | 547   |
| >PTCH1-P68!SEISVQPVTV  | 26    | >PTCH1-P68!SEISVQLVTV  | 32    | 6     |
| >PTCH1-P68!SEISVQPVTV  | 157   | >PTCH1-P68!SEISVQLVTVI | 202   | 45    |
| >PTCH1-P68!RSEISVQP    | 4943  | >PTCH1-P68!RSEISVQL    | 4     | 4939  |
| >PTCH1-P68!RSEISVQPV   | 13    | >PTCH1-P68!RSEISVQLV   | 38    | 25    |
| >PTCH1-P68!RSEISVQPVT  | 22    | >PTCH1-P68!RSEISVQLVT  | 25    | 3     |
| >PTCH1-P68!RSEISVQPV   | 2570  | >PTCH1-P68!RSEISVQLV   | 415   | 2155  |
| >PTCH1-P68!RSEISVQP    | 9015  | >PTCH1-P68!RSEISVQL    | 186   | 8829  |
| >PTCH1-P68!RSEISVQP    | 21480 | >PTCH1-P68!RSEISVQL    | 242   | 21238 |
| >PTCH1-P68!EPRSEISVQP\ | 206   | >PTCH1-P68!EPRSEISVQLV | 2848  | 2642  |
| >PTCH1-P68!EPRSEISVQP\ | 496   | >PTCH1-P68!EPRSEISVQLV | 2585  | 2089  |
| >PTCH1-P70!PESTSSTRDL  | 2146  | >PTCH1-P70!LESTSSTRDL  | 129   | 2017  |
| >PTCH1-P70!PESTSSTRDLL | 724   | >PTCH1-P70!LESTSSTRDLL | 45    | 679   |
| >PTCH1-P70!PESTSSTRDLL | 388   | >PTCH1-P70!LESTSSTRDLL | 24    | 364   |
| >PTCH1-P70!PESTSSTRDL  | 1104  | >PTCH1-P70!LESTSSTRDL  | 427   | 677   |
| >PTCH1-P70!PESTSSTRDL  | 1286  | >PTCH1-P70!LESTSSTRDL  | 89    | 1197  |
| >PTCH1-P70!PESTSSTRDLL | 641   | >PTCH1-P70!LESTSSTRDLL | 35    | 606   |
| >PTCH1-P70!SPESTSSTRDL | 90    | >PTCH1-P70!SLESTSSTRDL | 31772 | 31682 |
| >PTCH1-P70!SPESTSSTRDL | 33339 | >PTCH1-P70!SLESTSSTRDL | 340   | 32999 |
| >PTCH1-P70!SPESTSST    | 35266 | >PTCH1-P70!SLESTSST    | 194   | 35072 |
| >PTCH1-P70!SPESTSSTRDL | 31851 | >PTCH1-P70!SLESTSSTRDL | 62    | 31789 |
| >PTCH1-P70!SPESTSSTR   | 9029  | >PTCH1-P70!SLESTSSTR   | 347   | 8682  |
| >PTCH1-P70!SPESTSSTR   | 1061  | >PTCH1-P70!SLESTSSTR   | 142   | 919   |
| >PTCH1-P70!SPESTSSTRDL | 40    | >PTCH1-P70!SLESTSSTRDL | 13891 | 13851 |
| >PTCH1-P70!VTQDTLSCQS  | 28462 | >PTCH1-P70!VTQDTLSCQS  | 433   | 28029 |
| >PTCH1-P70!VTQDTLSCQS  | 13809 | >PTCH1-P70!VTQDTLSCQS  | 16    | 13793 |
| >PTCH1-P70!VTQDTLSCQS  | 18817 | >PTCH1-P70!VTQDTLSCQS  | 281   | 18536 |
| >PTCH1-P70!VTQDTLSCQS  | 4655  | >PTCH1-P70!VTQDTLSCQS  | 60    | 4595  |
| >PTCH1-P70!VTQDTLSCQS  | 24631 | >PTCH1-P70!VTQDTLSCQS  | 470   | 24161 |
| >PTCH1-P70!QSPESTSSTR  | 830   | >PTCH1-P70!QSLESTSSTR  | 302   | 528   |
| >PTCH1-P70!QSPESTSSTR  | 1299  | >PTCH1-P70!QSLESTSSTR  | 287   | 1012  |
| >PTCH1-P70!QSPESTSSTR  | 33    | >PTCH1-P70!QSLESTSSTR  | 56    | 23    |
| >PTCH1-P70!CQSPESTSSTF | 274   | >PTCH1-P70!CQSLESTSSTF | 967   | 693   |
| >PTCH1-P70!TLSCQSPEST  | 665   | >PTCH1-P70!TLSCQSLEST  | 301   | 364   |
| >PTCH1-P70!TLSCQSPEST  | 235   | >PTCH1-P70!TLSCQSLEST  | 141   | 94    |
| >PTCH1-P70!DTLSCQSP    | 11873 | >PTCH1-P70!DTLSCQSL    | 215   | 11658 |
| >PTCH1-P70!TQDTLSCQSP  | 12798 | >PTCH1-P70!TQDTLSCQSL  | 42    | 12756 |
| >PTCH1-P72!PPCTKWTL    | 659   | >PTCH1-P72!SPCTKWTL    | 162   | 497   |

|                         |       |                         |       |       |
|-------------------------|-------|-------------------------|-------|-------|
| >PTCH1-P72! PPCTKWTLSS  | 185   | >PTCH1-P72! SPCTKWTLSS  | 40    | 145   |
| >PTCH1-P72! PPCTKWTLSS  | 6704  | >PTCH1-P72! SPCTKWTLSS  | 498   | 6206  |
| >PTCH1-P72! PPCTKWTL    | 4001  | >PTCH1-P72! SPCTKWTL    | 489   | 3512  |
| >PTCH1-P72! PPCTKWTLSS  | 1381  | >PTCH1-P72! SPCTKWTLSS  | 244   | 1137  |
| >PTCH1-P72! PPCTKWTL    | 7322  | >PTCH1-P72! SPCTKWTL    | 345   | 6977  |
| >PTCH1-P72! PPCTKWTLSS  | 10880 | >PTCH1-P72! SPCTKWTLSS  | 322   | 10558 |
| >PTCH1-P72! EPPCTKWTL   | 6965  | >PTCH1-P72! ESPCTKWTL   | 141   | 6824  |
| >PTCH1-P72! EPPCTKWTL   | 8158  | >PTCH1-P72! ESPCTKWTL   | 109   | 8049  |
| >PTCH1-P72! LEPPCTKWT   | 305   | >PTCH1-P72! LESPCTKWT   | 321   | 16    |
| >PTCH1-P72! LEPPCTKWTL  | 167   | >PTCH1-P72! LESPCTKWTL  | 186   | 19    |
| >PTCH1-P72! LEPPCTKW    | 2705  | >PTCH1-P72! LESPCTKW    | 309   | 2396  |
| >PTCH1-P72! LEPPCTKWTL  | 82    | >PTCH1-P72! LESPCTKWTL  | 56    | 26    |
| >PTCH1-P72! LEPPCTKW    | 913   | >PTCH1-P72! LESPCTKW    | 147   | 766   |
| >PTCH1-P72! LEPPCTKW    | 702   | >PTCH1-P72! LESPCTKW    | 108   | 594   |
| >PTCH1-P72! LEPPCTKWTL  | 257   | >PTCH1-P72! LESPCTKWTL  | 51    | 206   |
| >PTCH1-P72! LEPPCTKW    | 2207  | >PTCH1-P72! LESPCTKW    | 375   | 1832  |
| >PTCH1-P72! LEPPCTKW    | 2011  | >PTCH1-P72! LESPCTKW    | 220   | 1791  |
| >PTCH1-P72! CLEPPCTKWT  | 366   | >PTCH1-P72! CLESPCTKWT  | 406   | 40    |
| >PTCH1-P72! CLEPPCTKWT  | 191   | >PTCH1-P72! CLESPCTKWT  | 247   | 56    |
| >PTCH1-P72! CLEPPCTKWT  | 16    | >PTCH1-P72! CLESPCTKWT  | 28    | 12    |
| >PTCH1-P72! HCLEPPCTK   | 194   | >PTCH1-P72! HCLESPCTK   | 52    | 142   |
| >PTCH1-P72! HCLEPPCTKW  | 320   | >PTCH1-P72! HCLESPCTKW  | 250   | 70    |
| >PTCH1-P72! LHCLEPPCTK\ | 39    | >PTCH1-P72! LHCLESPCTK\ | 37    | 2     |
| >PTCH1-P72! SLHCLEPPC   | 99    | >PTCH1-P72! SLHCLESPC   | 220   | 121   |
| >PTCH1-P72! SLHCLEPPCTH | 189   | >PTCH1-P72! SLHCLESPCTH | 154   | 35    |
| >PTCH1-P72! SLHCLEPPCTH | 125   | >PTCH1-P72! SLHCLESPCTH | 100   | 25    |
| >PTCH1-P72! SLHCLEPPCTH | 34    | >PTCH1-P72! SLHCLESPCTH | 41    | 7     |
| >PTCH1-P91! PSAFYIYL    | 2057  | >PTCH1-P91! HSAFYIYL    | 282   | 1775  |
| >PTCH1-P91! PSAFYIYL    | 1061  | >PTCH1-P91! HSAFYIYL    | 68    | 993   |
| >PTCH1-P91! PSAFYIYLT   | 5264  | >PTCH1-P91! HSAFYIYLT   | 416   | 4848  |
| >PTCH1-P91! PSAFYIYLTA  | 9835  | >PTCH1-P91! HSAFYIYLTA  | 453   | 9382  |
| >PTCH1-P91! PSAFYIYL    | 1609  | >PTCH1-P91! HSAFYIYL    | 12    | 1597  |
| >PTCH1-P91! PSAFYIYLT   | 7282  | >PTCH1-P91! HSAFYIYLT   | 47    | 7235  |
| >PTCH1-P91! PSAFYIYLTA  | 4227  | >PTCH1-P91! HSAFYIYLTA  | 314   | 3913  |
| >PTCH1-P91! PSAFYIYL    | 4867  | >PTCH1-P91! HSAFYIYL    | 157   | 4710  |
| >PTCH1-P91! PSAFYIYL    | 5800  | >PTCH1-P91! HSAFYIYL    | 38    | 5762  |
| >PTCH1-P91! PSAFYIYLTAV | 449   | >PTCH1-P91! HSAFYIYLTAV | 13    | 436   |
| >PTCH1-P91! PSAFYIYLTAV | 2862  | >PTCH1-P91! HSAFYIYLTAV | 92    | 2770  |
| >PTCH1-P91! PSAFYIYLTAV | 945   | >PTCH1-P91! HSAFYIYLTAV | 13    | 932   |
| >PTCH1-P91! PSAFYIYL    | 3120  | >PTCH1-P91! HSAFYIYL    | 464   | 2656  |
| >PTCH1-P91! PSAFYIYLTAV | 3618  | >PTCH1-P91! HSAFYIYLTAV | 126   | 3492  |
| >PTCH1-P91! NPSAFYIYL   | 40    | >PTCH1-P91! NHSAFYIYL   | 28948 | 28908 |
| >PTCH1-P91! NPSAFYIY    | 908   | >PTCH1-P91! NHSAFYIY    | 298   | 610   |

|                         |      |                         |       |       |
|-------------------------|------|-------------------------|-------|-------|
| >PTCH1-P91(NPSAFYIYL    | 227  | >PTCH1-P91(NHSAFYIYL    | 13087 | 12860 |
| >PTCH1-P91(NPSAFYIY     | 2432 | >PTCH1-P91(NHSAFYIY     | 302   | 2130  |
| >PTCH1-P91(NPSAFYIY     | 247  | >PTCH1-P91(NHSAFYIY     | 1181  | 934   |
| >PTCH1-P91(NPSAFYIY     | 12   | >PTCH1-P91(NHSAFYIY     | 2031  | 2019  |
| >PTCH1-P91(NPSAFYIYL    | 497  | >PTCH1-P91(NHSAFYIYL    | 15382 | 14885 |
| >PTCH1-P91(NPSAFYIYLTA  | 355  | >PTCH1-P91(NHSAFYIYLTA  | 21607 | 21252 |
| >PTCH1-P91(NPSAFYIYL    | 134  | >PTCH1-P91(NHSAFYIYL    | 28    | 106   |
| >PTCH1-P91(NPSAFYIY     | 35   | >PTCH1-P91(NHSAFYIY     | 5528  | 5493  |
| >PTCH1-P91(NPSAFYIYL    | 123  | >PTCH1-P91(NHSAFYIYL    | 14822 | 14699 |
| >PTCH1-P91(NPSAFYIYLTA  | 104  | >PTCH1-P91(NHSAFYIYLTA  | 23547 | 23443 |
| >PTCH1-P91(NPSAFYIY     | 10   | >PTCH1-P91(NHSAFYIY     | 1317  | 1307  |
| >PTCH1-P91(NPSAFYIY     | 195  | >PTCH1-P91(NHSAFYIY     | 21347 | 21152 |
| >PTCH1-P91(NPSAFYIYL    | 216  | >PTCH1-P91(NHSAFYIYL    | 21180 | 20964 |
| >PTCH1-P91(INPSAFYI     | 84   | >PTCH1-P91(INHSAFYI     | 48    | 36    |
| >PTCH1-P91(INPSAFYIYL   | 73   | >PTCH1-P91(INHSAFYIYL   | 44    | 29    |
| >PTCH1-P91(INPSAFYIYL   | 361  | >PTCH1-P91(INHSAFYIYL   | 335   | 26    |
| >PTCH1-P91(INPSAFYIY    | 228  | >PTCH1-P91(INHSAFYIY    | 69    | 159   |
| >PTCH1-P91(INPSAFYIY    | 141  | >PTCH1-P91(INHSAFYIY    | 44    | 97    |
| >PTCH1-P91(INPSAFYIY    | 411  | >PTCH1-P91(INHSAFYIY    | 56    | 355   |
| >PTCH1-P91(INPSAFYIYL   | 2496 | >PTCH1-P91(INHSAFYIYL   | 397   | 2099  |
| >PTCH1-P91(INPSAFYI     | 420  | >PTCH1-P91(INHSAFYI     | 20650 | 20230 |
| >PTCH1-P91(INPSAFYIY    | 46   | >PTCH1-P91(INHSAFYIY    | 12987 | 12941 |
| >PTCH1-P91(INPSAFYIYL   | 3    | >PTCH1-P91(INHSAFYIYL   | 1240  | 1237  |
| >PTCH1-P91(INPSAFYIYLTA | 122  | >PTCH1-P91(INHSAFYIYLTA | 17462 | 17340 |
| >PTCH1-P91(INPSAFYIY    | 2026 | >PTCH1-P91(INHSAFYIY    | 292   | 1734  |
| >PTCH1-P91(INPSAFYI     | 786  | >PTCH1-P91(INHSAFYI     | 474   | 312   |
| >PTCH1-P91(IINPSAFYIYL  | 528  | >PTCH1-P91(IINHSAFYIYL  | 356   | 172   |
| >PTCH1-P91(IINPSAFYI    | 94   | >PTCH1-P91(IINHSAFYI    | 156   | 62    |
| >PTCH1-P91(IINPSAFYIYL  | 111  | >PTCH1-P91(IINHSAFYIYL  | 166   | 55    |
| >PTCH1-P91(IINPSAFYI    | 21   | >PTCH1-P91(IINHSAFYI    | 38    | 17    |
| >PTCH1-P91(IINPSAFYIYL  | 14   | >PTCH1-P91(IINHSAFYIYL  | 21    | 7     |
| >PTCH1-P91(IINPSAFYI    | 40   | >PTCH1-P91(IINHSAFYI    | 49    | 9     |
| >PTCH1-P91(IINPSAFYIYL  | 77   | >PTCH1-P91(IINHSAFYIYL  | 84    | 7     |
| >PTCH1-P91(IINPSAFYI    | 10   | >PTCH1-P91(IINHSAFYI    | 25    | 15    |
| >PTCH1-P91(IINPSAFYIYL  | 39   | >PTCH1-P91(IINHSAFYIYL  | 94    | 55    |
| >PTCH1-P91(IINPSAFYI    | 18   | >PTCH1-P91(IINHSAFYI    | 40    | 22    |
| >PTCH1-P91(IINPSAFYIYL  | 23   | >PTCH1-P91(IINHSAFYIYL  | 44    | 21    |
| >PTCH1-P91(IINPSAFYI    | 221  | >PTCH1-P91(IINHSAFYI    | 258   | 37    |
| >PTCH1-P91(IINPSAFYI    | 106  | >PTCH1-P91(IINHSAFYI    | 380   | 274   |
| >PTCH1-P91(IINPSAFYIYL  | 190  | >PTCH1-P91(IINHSAFYIYL  | 478   | 288   |
| >PTCH1-P91(IINPSAFYI    | 27   | >PTCH1-P91(IINHSAFYI    | 134   | 107   |
| >PTCH1-P91(IINPSAFYIYL  | 107  | >PTCH1-P91(IINHSAFYIYL  | 366   | 259   |
| >PTCH1-P91(IINPSAFYI    | 41   | >PTCH1-P91(IINHSAFYI    | 576   | 535   |

|                        |      |                        |      |      |
|------------------------|------|------------------------|------|------|
| >PTCH1-P91€IINPSAFYIYL | 18   | >PTCH1-P91€IINHSAFYIYL | 116  | 98   |
| >PTCH1-P91€IINPSAFY    | 98   | >PTCH1-P91€IINHSAFY    | 79   | 19   |
| >PTCH1-P91€IINPSAFYIY  | 407  | >PTCH1-P91€IINHSAFYIY  | 471  | 64   |
| >PTCH1-P91€IINPSAFY    | 127  | >PTCH1-P91€IINHSAFY    | 260  | 133  |
| >PTCH1-P91€IINPSAFYIY  | 482  | >PTCH1-P91€IINHSAFYIY  | 593  | 111  |
| >PTCH1-P91€IINPSAFY    | 31   | >PTCH1-P91€IINHSAFY    | 34   | 3    |
| >PTCH1-P91€IINPSAFYIY  | 255  | >PTCH1-P91€IINHSAFYIY  | 178  | 77   |
| >PTCH1-P91€IINPSAFY    | 17   | >PTCH1-P91€IINHSAFY    | 16   | 1    |
| >PTCH1-P91€IINPSAFYIY  | 111  | >PTCH1-P91€IINHSAFYIY  | 118  | 7    |
| >PTCH1-P91€IINPSAFYI   | 166  | >PTCH1-P91€IINHSAFYI   | 172  | 6    |
| >PTCH1-P91€IINPSAFYIYL | 436  | >PTCH1-P91€IINHSAFYIYL | 437  | 1    |
| >PTCH1-P91€IINPSAFYI   | 275  | >PTCH1-P91€IINHSAFYI   | 607  | 332  |
| >PTCH1-P91€IINPSAFY    | 74   | >PTCH1-P91€IINHSAFY    | 44   | 30   |
| >PTCH1-P91€IINPSAFYIY  | 69   | >PTCH1-P91€IINHSAFYIY  | 44   | 25   |
| >PTCH1-P91€IINPSAFY    | 108  | >PTCH1-P91€IINHSAFY    | 113  | 5    |
| >PTCH1-P91€IINPSAFYIY  | 121  | >PTCH1-P91€IINHSAFYIY  | 136  | 15   |
| >PTCH1-P91€IINPSAFY    | 404  | >PTCH1-P91€IINHSAFY    | 258  | 146  |
| >PTCH1-P91€IINPSAFYIY  | 130  | >PTCH1-P91€IINHSAFYIY  | 92   | 38   |
| >PTCH1-P91€IINPSAFY    | 26   | >PTCH1-P91€IINHSAFY    | 108  | 82   |
| >PTCH1-P91€IINPSAFYI   | 245  | >PTCH1-P91€IINHSAFYI   | 1709 | 1464 |
| >PTCH1-P91€IINPSAFYIY  | 197  | >PTCH1-P91€IINHSAFYIY  | 673  | 476  |
| >PTCH1-P91€IINPSAFY    | 384  | >PTCH1-P91€IINHSAFY    | 790  | 406  |
| >PTCH1-P91€IINPSAFYI   | 40   | >PTCH1-P91€IINHSAFYI   | 78   | 38   |
| >PTCH1-P91€IINPSAFYIY  | 149  | >PTCH1-P91€IINHSAFYIY  | 302  | 153  |
| >PTCH1-P91€IINPSAFYIYL | 387  | >PTCH1-P91€IINHSAFYIYL | 801  | 414  |
| >PTCH1-P91€IINPSAFY    | 344  | >PTCH1-P91€IINHSAFY    | 445  | 101  |
| >PTCH1-P91€IINPSAFYIY  | 141  | >PTCH1-P91€IINHSAFYIY  | 196  | 55   |
| >PTCH1-P91€GIINPSAFYI  | 327  | >PTCH1-P91€GIINHSAFYI  | 159  | 168  |
| >PTCH1-P91€GIINPSAFYI  | 52   | >PTCH1-P91€GIINHSAFYI  | 49   | 3    |
| >PTCH1-P91€GIINPSAFYI  | 189  | >PTCH1-P91€GIINHSAFYI  | 197  | 8    |
| >PTCH1-P91€GIINPSAFYI  | 247  | >PTCH1-P91€GIINHSAFYI  | 332  | 85   |
| >PTCH1-P91€GIINPSAFYI  | 23   | >PTCH1-P91€GIINHSAFYI  | 41   | 18   |
| >PTCH1-P91€GIINPSAFYI  | 24   | >PTCH1-P91€GIINHSAFYI  | 18   | 6    |
| >PTCH1-P91€GIINPSAFYI  | 167  | >PTCH1-P91€GIINHSAFYI  | 257  | 90   |
| >PTCH1-P91€GIINPSAFYI  | 375  | >PTCH1-P91€GIINHSAFYI  | 562  | 187  |
| >PTCH1-P91€GIINPSAFY   | 391  | >PTCH1-P91€GIINHSAFY   | 190  | 201  |
| >PTCH1-P91€GIINPSAFY   | 85   | >PTCH1-P91€GIINHSAFY   | 84   | 1    |
| >PTCH1-P91€GIINPSAFYIY | 150  | >PTCH1-P91€GIINHSAFYIY | 143  | 7    |
| >PTCH1-P91€GIINPSAFY   | 92   | >PTCH1-P91€GIINHSAFY   | 28   | 64   |
| >PTCH1-P91€GIINPSAFYIY | 1043 | >PTCH1-P91€GIINHSAFYIY | 435  | 608  |
| >PTCH1-P91€GIINPSAF    | 370  | >PTCH1-P91€GIINHSAF    | 200  | 170  |
| >PTCH1-P91€GIINPSAFY   | 40   | >PTCH1-P91€GIINHSAFY   | 22   | 18   |
| >PTCH1-P91€GIINPSAFYIY | 175  | >PTCH1-P91€GIINHSAFYIY | 118  | 57   |

|                        |       |                        |       |       |
|------------------------|-------|------------------------|-------|-------|
| >PTCH1-P91(GIINPSAFY   | 20    | >PTCH1-P91(GIINHSAFY   | 13    | 7     |
| >PTCH1-P91(GIINPSAFYIY | 20    | >PTCH1-P91(GIINHSAFYIY | 14    | 6     |
| >PTCH1-P91(GIINPSAFY   | 44    | >PTCH1-P91(GIINHSAFY   | 71    | 27    |
| >PTCH1-P91(GIINPSAFYIY | 49    | >PTCH1-P91(GIINHSAFYIY | 67    | 18    |
| >PTCH1-P91(GIINPSAFYI  | 151   | >PTCH1-P91(GIINHSAFYI  | 453   | 302   |
| >PTCH1-P91(GIINPSAF    | 78    | >PTCH1-P91(GIINHSAF    | 40    | 38    |
| >PTCH1-P91(GIINPSAFY   | 85    | >PTCH1-P91(GIINHSAFY   | 56    | 29    |
| >PTCH1-P91(GIINPSAFYIY | 107   | >PTCH1-P91(GIINHSAFYIY | 76    | 31    |
| >PTCH1-P91(GIINPSAF    | 322   | >PTCH1-P91(GIINHSAF    | 543   | 221   |
| >PTCH1-P91(GIINPSAFY   | 311   | >PTCH1-P91(GIINHSAFY   | 988   | 677   |
| >PTCH1-P91(GIINPSAF    | 107   | >PTCH1-P91(GIINHSAF    | 113   | 6     |
| >PTCH1-P91(GIINPSAFY   | 486   | >PTCH1-P91(GIINHSAFY   | 940   | 454   |
| >PTCH1-P91(GIINPSAFY   | 68    | >PTCH1-P91(GIINHSAFY   | 707   | 639   |
| >PTCH1-P91(GIINPSAFYIY | 126   | >PTCH1-P91(GIINHSAFYIY | 569   | 443   |
| >PTCH1-P91(GIINPSAFY   | 309   | >PTCH1-P91(GIINHSAFY   | 219   | 90    |
| >PTCH1-P91(GIINPSAFYIY | 137   | >PTCH1-P91(GIINHSAFYIY | 100   | 37    |
| >PTCH1-P91(DGIINPSAFY  | 234   | >PTCH1-P91(DGIINHSAFY  | 569   | 335   |
| >PTCH1-P91(DGIINPSAFY  | 368   | >PTCH1-P91(DGIINHSAFY  | 282   | 86    |
| >PTCH1-P91(DGIINPSAF   | 410   | >PTCH1-P91(DGIINHSAF   | 417   | 7     |
| >PTCH1-P91(DGIINPSAFY  | 269   | >PTCH1-P91(DGIINHSAFY  | 316   | 47    |
| >PTCH1-P91(ADGIINPSAF) | 423   | >PTCH1-P91(ADGIINHSAF  | 339   | 84    |
| >PTCH1-P91(DADGIINPSA  | 105   | >PTCH1-P91(DADGIINHSA  | 179   | 74    |
| >PTCH1-Q12:RQQPHLDSG:  | 88    | >PTCH1-Q12:RHQPHLDSG:  | 12381 | 12293 |
| >PTCH1-Q12:RQQPHLDSG   | 441   | >PTCH1-Q12:RHQPHLDSG   | 21132 | 20691 |
| >PTCH1-Q12:RQQPHLDSG:  | 93    | >PTCH1-Q12:RHQPHLDSG:  | 15734 | 15641 |
| >PTCH1-Q12:RQQPHLDSG:  | 172   | >PTCH1-Q12:RHQPHLDSG:  | 1777  | 1605  |
| >PTCH1-Q12:RQQPHLDSG:  | 307   | >PTCH1-Q12:RHQPHLDSG:  | 11112 | 10805 |
| >PTCH1-Q12:RQQPHLDSG:  | 395   | >PTCH1-Q12:RHQPHLDSG:  | 1200  | 805   |
| >PTCH1-Q12:RQQPHLDSG:  | 91    | >PTCH1-Q12:RHQPHLDSG:  | 787   | 696   |
| >PTCH1-Q12:NPRQQPHL    | 45    | >PTCH1-Q12:NPRHQPHL    | 38    | 7     |
| >PTCH1-Q12:NPRQQPHL    | 163   | >PTCH1-Q12:NPRHQPHL    | 164   | 1     |
| >PTCH1-Q12:SNPRQQPHL   | 663   | >PTCH1-Q12:SNPRHQPHL   | 189   | 474   |
| >PTCH1-Q12:PPSNPRQQPI  | 138   | >PTCH1-Q12:PPSNPRHQPI  | 114   | 24    |
| >PTCH1-Q12:HPPSNPRQQ   | 439   | >PTCH1-Q12:HPPSNPRHQI  | 479   | 40    |
| >PTCH1-Q36 QTMFQLMTF   | 13    | >PTCH1-Q36 PTMFQLMTP   | 39    | 26    |
| >PTCH1-Q36 QTMFQLMTF   | 7     | >PTCH1-Q36 PTMFQLMTP   | 20    | 13    |
| >PTCH1-Q36 QTMFQLMTF   | 51    | >PTCH1-Q36 PTMFQLMTP   | 217   | 166   |
| >PTCH1-Q36 QTMFQLMTF   | 18    | >PTCH1-Q36 PTMFQLMTP   | 340   | 322   |
| >PTCH1-Q36 QTMFQLMTF   | 71    | >PTCH1-Q36 PTMFQLMTP   | 491   | 420   |
| >PTCH1-Q36 LQTMFQLM    | 313   | >PTCH1-Q36 LPTMFQLM    | 22027 | 21714 |
| >PTCH1-Q36 LQTMFQLMT   | 78    | >PTCH1-Q36 LPTMFQLMT   | 7227  | 7149  |
| >PTCH1-Q36 LQTMFQLM    | 22780 | >PTCH1-Q36 LPTMFQLM    | 251   | 22529 |
| >PTCH1-Q36 LQTMFQLM    | 56    | >PTCH1-Q36 LPTMFQLM    | 5207  | 5151  |



|                      |       |                       |       |       |
|----------------------|-------|-----------------------|-------|-------|
| >PTCH1-Q36 LQTMFQLMT | 371   | >PTCH1-Q36 LPTMFQLMT  | 14386 | 14015 |
| >PTCH1-Q36 LQTMFQLM  | 6816  | >PTCH1-Q36 LPTMFQLM   | 46    | 6770  |
| >PTCH1-Q36 LQTMFQLM  | 15412 | >PTCH1-Q36 LPTMFQLM   | 50    | 15362 |
| >PTCH1-Q36 LQTMFQLMT | 24211 | >PTCH1-Q36 LPTMFQLMT  | 57    | 24154 |
| >PTCH1-Q36 LQTMFQLMT | 27593 | >PTCH1-Q36 LPTMFQLMT  | 494   | 27099 |
| >PTCH1-Q36 LQTMFQLM  | 22367 | >PTCH1-Q36 LPTMFQLM   | 353   | 22014 |
| >PTCH1-Q36 ALQTMFQLM | 1031  | >PTCH1-Q36 ALPTMFQLM  | 460   | 571   |
| >PTCH1-Q36 ALQTMFQL  | 45    | >PTCH1-Q36 ALPTMFQL   | 78    | 33    |
| >PTCH1-Q36 ALQTMFQL  | 19    | >PTCH1-Q36 ALPTMFQL   | 19    | 0     |
| >PTCH1-Q36 ALQTMFQLM | 302   | >PTCH1-Q36 ALPTMFQLM  | 281   | 21    |
| >PTCH1-Q36 ALQTMFQL  | 132   | >PTCH1-Q36 ALPTMFQL   | 59    | 73    |
| >PTCH1-Q36 ALQTMFQL  | 273   | >PTCH1-Q36 ALPTMFQL   | 91    | 182   |
| >PTCH1-Q36 ALQTMFQLM | 1922  | >PTCH1-Q36 ALPTMFQLM  | 493   | 1429  |
| >PTCH1-Q36 ALQTMFQL  | 42    | >PTCH1-Q36 ALPTMFQL   | 34    | 8     |
| >PTCH1-Q36 ALQTMFQL  | 33    | >PTCH1-Q36 ALPTMFQL   | 229   | 196   |
| >PTCH1-Q36 ALQTMFQL  | 91    | >PTCH1-Q36 ALPTMFQL   | 39    | 52    |
| >PTCH1-Q36 ALQTMFQL  | 87    | >PTCH1-Q36 ALPTMFQL   | 179   | 92    |
| >PTCH1-Q36 ALQTMFQL  | 3     | >PTCH1-Q36 ALPTMFQL   | 3     | 0     |
| >PTCH1-Q36 ALQTMFQLM | 43    | >PTCH1-Q36 ALPTMFQLM  | 50    | 7     |
| >PTCH1-Q36 ALQTMFQLM | 127   | >PTCH1-Q36 ALPTMFQLM  | 135   | 8     |
| >PTCH1-Q36 ALQTMFQLM | 2327  | >PTCH1-Q36 ALPTMFQLM  | 5     | 2322  |
| >PTCH1-Q36 HALQTMFQL | 236   | >PTCH1-Q36 HALPTMFQL  | 49    | 187   |
| >PTCH1-Q36 HALQTMFQ  | 1041  | >PTCH1-Q36 HALPTMFQ   | 428   | 613   |
| >PTCH1-Q36 HALQTMFQL | 16    | >PTCH1-Q36 HALPTMFQL  | 13    | 3     |
| >PTCH1-Q36 HALQTMFQL | 174   | >PTCH1-Q36 HALPTMFQLI | 138   | 36    |
| >PTCH1-Q36 HALQTMFQL | 6     | >PTCH1-Q36 HALPTMFQL  | 5     | 1     |
| >PTCH1-Q36 HALQTMFQL | 52    | >PTCH1-Q36 HALPTMFQLI | 30    | 22    |
| >PTCH1-Q36 HALQTMFQL | 111   | >PTCH1-Q36 HALPTMFQL  | 166   | 55    |
| >PTCH1-Q36 HALQTMFQL | 1688  | >PTCH1-Q36 HALPTMFQL  | 449   | 1239  |
| >PTCH1-Q36 HALQTMFQL | 1336  | >PTCH1-Q36 HALPTMFQLI | 442   | 894   |
| >PTCH1-Q36 HALQTMFQL | 191   | >PTCH1-Q36 HALPTMFQL  | 68    | 123   |
| >PTCH1-Q36 HALQTMFQL | 537   | >PTCH1-Q36 HALPTMFQLI | 250   | 287   |
| >PTCH1-Q36 HALQTMFQL | 1569  | >PTCH1-Q36 HALPTMFQL  | 255   | 1314  |
| >PTCH1-Q36 AHALQTMF  | 90    | >PTCH1-Q36 AHALPTMF   | 40    | 50    |
| >PTCH1-Q36 AHALQTMFQ | 68    | >PTCH1-Q36 AHALPTMFQ  | 77    | 9     |
| >PTCH1-Q36 SAHALQTM  | 213   | >PTCH1-Q36 SAHALPTM   | 291   | 78    |
| >PTCH1-Q36 SAHALQTM  | 671   | >PTCH1-Q36 SAHALPTM   | 293   | 378   |
| >PTCH1-Q36 SAHALQTMF | 220   | >PTCH1-Q36 SAHALPTMF  | 302   | 82    |
| >PTCH1-Q36 SAHALQTMF | 478   | >PTCH1-Q36 SAHALPTMF  | 495   | 17    |
| >PTCH1-Q36 SAHALQTMF | 412   | >PTCH1-Q36 SAHALPTMF  | 764   | 352   |
| >PTCH1-Q36 SAHALQTMF | 84    | >PTCH1-Q36 SAHALPTMF  | 49    | 35    |
| >PTCH1-Q36 SAHALQTM  | 118   | >PTCH1-Q36 SAHALPTM   | 106   | 12    |
| >PTCH1-Q36 SAHALQTMF | 76    | >PTCH1-Q36 SAHALPTMF  | 58    | 18    |

|                        |     |                       |       |       |
|------------------------|-----|-----------------------|-------|-------|
| >PTCH1-Q36 SAHALQTMF   | 66  | >PTCH1-Q36 SAHALPTMFC | 52    | 14    |
| >PTCH1-Q36 SAHALQTM    | 383 | >PTCH1-Q36 SAHALPTM   | 313   | 70    |
| >PTCH1-Q36 SAHALQTMF   | 63  | >PTCH1-Q36 SAHALPTMF  | 84    | 21    |
| >PTCH1-Q36 VSAHALQTM   | 284 | >PTCH1-Q36 VSAHALPTM  | 239   | 45    |
| >PTCH1-Q36 VSAHALQTM   | 243 | >PTCH1-Q36 VSAHALPTM  | 117   | 126   |
| >PTCH1-Q36 VSAHALQTM   | 371 | >PTCH1-Q36 VSAHALPTM  | 445   | 74    |
| >PTCH1-Q36 VSAHALQTM   | 189 | >PTCH1-Q36 VSAHALPTMI | 276   | 87    |
| >PTCH1-Q36 VSAHALQTM   | 191 | >PTCH1-Q36 VSAHALPTM  | 436   | 245   |
| >PTCH1-Q36 VSAHALQTM   | 30  | >PTCH1-Q36 VSAHALPTMI | 27    | 3     |
| >PTCH1-Q36 VSAHALQTM   | 6   | >PTCH1-Q36 VSAHALPTM  | 5     | 1     |
| >PTCH1-Q36 VSAHALQTM   | 5   | >PTCH1-Q36 VSAHALPTMI | 4     | 1     |
| >PTCH1-Q36 VSAHALQTM   | 469 | >PTCH1-Q36 VSAHALPTMI | 613   | 144   |
| >PTCH1-Q36 VSAHALQTM   | 88  | >PTCH1-Q36 VSAHALPTM  | 51    | 37    |
| >PTCH1-Q36 VSAHALQTM   | 24  | >PTCH1-Q36 VSAHALPTMI | 27    | 3     |
| >PTCH1-Q36 VSAHALQTM   | 445 | >PTCH1-Q36 VSAHALPTM  | 113   | 332   |
| >PTCH1-Q36 VSAHALQTM   | 385 | >PTCH1-Q36 VSAHALPTMI | 283   | 102   |
| >PTCH1-Q36 VSAHALQTM   | 32  | >PTCH1-Q36 VSAHALPTM  | 41    | 9     |
| >PTCH1-Q36 VSAHALQTM   | 45  | >PTCH1-Q36 VSAHALPTMI | 29    | 16    |
| >PTCH1-Q36 VSAHALQTM   | 561 | >PTCH1-Q36 VSAHALPTM  | 375   | 186   |
| >PTCH1-Q36 LVSAHALQTM  | 599 | >PTCH1-Q36 LVSAHALPTM | 454   | 145   |
| >PTCH1-Q36 LVSAHALQTM  | 523 | >PTCH1-Q36 LVSAHALPTM | 467   | 56    |
| >PTCH1-Q36 LVSAHALQTM  | 128 | >PTCH1-Q36 LVSAHALPTM | 115   | 13    |
| >PTCH1-Q36 LVSAHALQTM  | 97  | >PTCH1-Q36 LVSAHALPTM | 101   | 4     |
| >PTCH1-Q36 LVSAHALQTM  | 249 | >PTCH1-Q36 LVSAHALPTM | 148   | 101   |
| >PTCH1-Q36 LVSAHALQTM  | 151 | >PTCH1-Q36 LVSAHALPTM | 152   | 1     |
| >PTCH1-Q36 LVSAHALQTM  | 103 | >PTCH1-Q36 LVSAHALPTM | 97    | 6     |
| >PTCH1-Q36 LVSAHALQTM  | 288 | >PTCH1-Q36 LVSAHALPTM | 207   | 81    |
| >PTCH1-Q36 LVSAHALQTM  | 105 | >PTCH1-Q36 LVSAHALPTM | 199   | 94    |
| >PTCH1-Q36 LVSAHALQTM  | 106 | >PTCH1-Q36 LVSAHALPTM | 77    | 29    |
| >PTCH1-Q36 LVSAHALQTM  | 84  | >PTCH1-Q36 LVSAHALPTM | 125   | 41    |
| >PTCH1-Q36 KLVSahalQTM | 536 | >PTCH1-Q36 KLVSahalPT | 163   | 373   |
| >PTCH1-Q36 KLVSahalQTM | 778 | >PTCH1-Q36 KLVSahalPT | 176   | 602   |
| >PTCH1-Q36 KLVSahalQTM | 137 | >PTCH1-Q36 KLVSahalPT | 183   | 46    |
| >PTCH1-Q36 KLVSahalQTM | 939 | >PTCH1-Q36 KLVSahalPT | 269   | 670   |
| >PTCH1-Q36 KLVSahalQTM | 134 | >PTCH1-Q36 KLVSahalPT | 139   | 5     |
| >PTCH1-Q36 KLVSahalQTM | 277 | >PTCH1-Q36 KLVSahalPT | 123   | 154   |
| >PTCH1-Q36 KLVSahalQTM | 78  | >PTCH1-Q36 KLVSahalPT | 61    | 17    |
| >PTCH1-Q36 KLVSahalQTM | 165 | >PTCH1-Q36 KLVSahalPT | 171   | 6     |
| >PTCH1-Q36 KLVSahalQTM | 570 | >PTCH1-Q36 KLVSahalPT | 179   | 391   |
| >PTCH1-Q36 KLVSahalQ   | 388 | >PTCH1-Q36 KLVSahalP  | 13543 | 13155 |
| >PTCH1-Q36 KLVSahalQTM | 266 | >PTCH1-Q36 KLVSahalPT | 702   | 436   |
| >PTCH1-Q36 KLVSahalQTM | 52  | >PTCH1-Q36 KLVSahalPT | 52    | 0     |
| >PTCH1-Q36 KLVSahalQTM | 862 | >PTCH1-Q36 KLVSahalPT | 489   | 373   |

|                        |       |                        |       |       |
|------------------------|-------|------------------------|-------|-------|
| >PTCH1-Q36 KLVSAHALQT  | 144   | >PTCH1-Q36 KLVSAHALPT  | 171   | 27    |
| >PTCH1-Q36 KLVSAHALQT  | 122   | >PTCH1-Q36 KLVSAHALPT  | 190   | 68    |
| >PTCH1-Q36 KLVSAHALQT  | 161   | >PTCH1-Q36 KLVSAHALPT  | 150   | 11    |
| >PTCH1-Q36 KLVSAHALQT  | 231   | >PTCH1-Q36 KLVSAHALPT  | 287   | 56    |
| >PTCH1-Q68:QPVTVTQDTI  | 407   | >PTCH1-Q68:KPVTVTQDTL  | 351   | 56    |
| >PTCH1-Q68:QPVTVTQDTI  | 491   | >PTCH1-Q68:KPVTVTQDTL  | 222   | 269   |
| >PTCH1-Q68:QPVTVTQDTI  | 276   | >PTCH1-Q68:KPVTVTQDTL  | 1209  | 933   |
| >PTCH1-Q68:QPVTVTQDTI  | 302   | >PTCH1-Q68:KPVTVTQDTL  | 724   | 422   |
| >PTCH1-Q68:QPVTVTQDTI  | 468   | >PTCH1-Q68:KPVTVTQDTL  | 363   | 105   |
| >PTCH1-Q68:VQPVTVTQD   | 278   | >PTCH1-Q68:VKPVTVTQD   | 12884 | 12606 |
| >PTCH1-Q68:VQPVTVTQD   | 464   | >PTCH1-Q68:VKPVTVTQD   | 444   | 20    |
| >PTCH1-Q68:TAEPRSEISVK | 10066 | >PTCH1-Q68:TAEPRSEISVK | 407   | 9659  |
| >PTCH1-Q68:SVQPVTVTQ   | 5963  | >PTCH1-Q68:SVKPVTVTQ   | 242   | 5721  |
| >PTCH1-Q68:ISVQPVTV    | 455   | >PTCH1-Q68:ISVKPVTV    | 294   | 161   |
| >PTCH1-Q68:ISVQPVTV    | 33    | >PTCH1-Q68:ISVKPVTV    | 68    | 35    |
| >PTCH1-Q68:ISVQPVTVT   | 366   | >PTCH1-Q68:ISVKPVTVT   | 1250  | 884   |
| >PTCH1-Q68:ISVQPVTVTQ  | 396   | >PTCH1-Q68:ISVKPVTVTQ  | 1036  | 640   |
| >PTCH1-Q68:ISVQPVTVT   | 559   | >PTCH1-Q68:ISVKPVTVT   | 497   | 62    |
| >PTCH1-Q68:EISVQPVTV   | 159   | >PTCH1-Q68:EISVKPVTV   | 240   | 81    |
| >PTCH1-Q68:EISVQPVTV   | 59    | >PTCH1-Q68:EISVKPVTV   | 55    | 4     |
| >PTCH1-Q68:EISVQPVTV   | 102   | >PTCH1-Q68:EISVKPVTV   | 294   | 192   |
| >PTCH1-Q68:SEISVQPV    | 100   | >PTCH1-Q68:SEISVKPV    | 26    | 74    |
| >PTCH1-Q68:SEISVQPV    | 417   | >PTCH1-Q68:SEISVKPV    | 1720  | 1303  |
| >PTCH1-Q68:SEISVQPV    | 84    | >PTCH1-Q68:SEISVKPV    | 159   | 75    |
| >PTCH1-Q68:SEISVQPV    | 95    | >PTCH1-Q68:SEISVKPV    | 272   | 177   |
| >PTCH1-Q68:SEISVQPVT   | 241   | >PTCH1-Q68:SEISVKPVT   | 743   | 502   |
| >PTCH1-Q68:SEISVQPVTV  | 124   | >PTCH1-Q68:SEISVKPVTV  | 158   | 34    |
| >PTCH1-Q68:SEISVQPVTV  | 270   | >PTCH1-Q68:SEISVKPVTVT | 525   | 255   |
| >PTCH1-Q68:SEISVQPV    | 403   | >PTCH1-Q68:SEISVKPV    | 1162  | 759   |
| >PTCH1-Q68:SEISVQPVTV  | 802   | >PTCH1-Q68:SEISVKPVTV  | 317   | 485   |
| >PTCH1-Q68:SEISVQPV    | 304   | >PTCH1-Q68:SEISVKPV    | 343   | 39    |
| >PTCH1-Q68:SEISVQPVTV  | 293   | >PTCH1-Q68:SEISVKPVTV  | 126   | 167   |
| >PTCH1-Q68:SEISVQPV    | 29    | >PTCH1-Q68:SEISVKPV    | 63    | 34    |
| >PTCH1-Q68:SEISVQPVT   | 27    | >PTCH1-Q68:SEISVKPVT   | 62    | 35    |
| >PTCH1-Q68:SEISVQPVTV  | 104   | >PTCH1-Q68:SEISVKPVTV  | 64    | 40    |
| >PTCH1-Q68:SEISVQPVTV  | 51    | >PTCH1-Q68:SEISVKPVTVT | 86    | 35    |
| >PTCH1-Q68:SEISVQPV    | 87    | >PTCH1-Q68:SEISVKPV    | 139   | 52    |
| >PTCH1-Q68:SEISVQPVT   | 137   | >PTCH1-Q68:SEISVKPVT   | 446   | 309   |
| >PTCH1-Q68:SEISVQPVTV  | 26    | >PTCH1-Q68:SEISVKPVTV  | 46    | 20    |
| >PTCH1-Q68:SEISVQPVTV  | 157   | >PTCH1-Q68:SEISVKPVTVT | 301   | 144   |
| >PTCH1-Q68:RSEISVQPV   | 13    | >PTCH1-Q68:RSEISVKPV   | 16    | 3     |
| >PTCH1-Q68:RSEISVQPVT  | 22    | >PTCH1-Q68:RSEISVKPVT  | 20    | 2     |
| >PTCH1-Q68:EPRSEISVQP  | 206   | >PTCH1-Q68:EPRSEISVKPV | 330   | 124   |

|                         |       |                         |      |       |
|-------------------------|-------|-------------------------|------|-------|
| >PTCH1-Q68: EPRSEISVQPV | 496   | >PTCH1-Q68: EPRSEISVKPV | 509  | 13    |
| >PTCH1-Q81: QHLLYDLHRS  | 73    | >PTCH1-Q81: LHLLYDLHRSI | 39   | 34    |
| >PTCH1-Q81: QHLLYDLHR   | 64    | >PTCH1-Q81: LHLLYDLHR   | 180  | 116   |
| >PTCH1-Q81: IQHLLYDL    | 3927  | >PTCH1-Q81: ILHLLYDL    | 416  | 3511  |
| >PTCH1-Q81: IQHLLYDL    | 1121  | >PTCH1-Q81: ILHLLYDL    | 103  | 1018  |
| >PTCH1-Q81: IQHLLYDL    | 2667  | >PTCH1-Q81: ILHLLYDL    | 327  | 2340  |
| >PTCH1-Q81: IQHLLYDL    | 8304  | >PTCH1-Q81: ILHLLYDL    | 114  | 8190  |
| >PTCH1-Q81: IQHLLYDL    | 7710  | >PTCH1-Q81: ILHLLYDL    | 252  | 7458  |
| >PTCH1-Q81: IQHLLYDL    | 14550 | >PTCH1-Q81: ILHLLYDL    | 420  | 14130 |
| >PTCH1-Q81: IQHLLYDL    | 21287 | >PTCH1-Q81: ILHLLYDL    | 32   | 21255 |
| >PTCH1-Q81: IQHLLYDLHR  | 386   | >PTCH1-Q81: ILHLLYDLHR  | 234  | 152   |
| >PTCH1-Q81: IQHLLYDLHR  | 1338  | >PTCH1-Q81: ILHLLYDLHR  | 479  | 859   |
| >PTCH1-Q81: IQHLLYDL    | 183   | >PTCH1-Q81: ILHLLYDL    | 2789 | 2606  |
| >PTCH1-Q81: IQHLLYDLHR  | 10912 | >PTCH1-Q81: ILHLLYDLHR  | 450  | 10462 |
| >PTCH1-Q81: IQHLLYDLHR  | 90    | >PTCH1-Q81: ILHLLYDLHR  | 52   | 38    |
| >PTCH1-Q81: VTQKADYPNI  | 19319 | >PTCH1-Q81: VTQKADYPNI  | 445  | 18874 |
| >PTCH1-Q81: VTQKADYPNI  | 11013 | >PTCH1-Q81: VTQKADYPNI  | 203  | 10810 |
| >PTCH1-Q81: VTQKADYPNI  | 3909  | >PTCH1-Q81: VTQKADYPNI  | 306  | 3603  |
| >PTCH1-Q81: NIQHLLYDL   | 2464  | >PTCH1-Q81: NILHLLYDL   | 476  | 1988  |
| >PTCH1-Q81: NIQHLLYDL   | 4511  | >PTCH1-Q81: NILHLLYDL   | 492  | 4019  |
| >PTCH1-Q81: NIQHLLYDL   | 1177  | >PTCH1-Q81: NILHLLYDL   | 364  | 813   |
| >PTCH1-Q81: NIQHLLYDLH  | 397   | >PTCH1-Q81: NILHLLYDLHF | 352  | 45    |
| >PTCH1-Q81: NIQHLLYDLH  | 93    | >PTCH1-Q81: NILHLLYDLHF | 85   | 8     |
| >PTCH1-Q81: NIQHLLYDLH  | 284   | >PTCH1-Q81: NILHLLYDLHF | 238  | 46    |
| >PTCH1-Q81: NIQHLLYDLH  | 79    | >PTCH1-Q81: NILHLLYDLHF | 27   | 52    |
| >PTCH1-Q81: PNIQHLLY    | 38    | >PTCH1-Q81: PNILHLLY    | 40   | 2     |
| >PTCH1-Q81: YPNIQHLLYD  | 410   | >PTCH1-Q81: YPNILHLLYDL | 361  | 49    |
| >PTCH1-Q81: YPNIQHLLY   | 16    | >PTCH1-Q81: YPNILHLLY   | 12   | 4     |
| >PTCH1-Q81: YPNIQHLLY   | 17    | >PTCH1-Q81: YPNILHLLY   | 10   | 7     |
| >PTCH1-Q81: YPNIQHLL    | 98    | >PTCH1-Q81: YPNILHLL    | 80   | 18    |
| >PTCH1-Q81: YPNIQHLLYD  | 125   | >PTCH1-Q81: YPNILHLLYDL | 135  | 10    |
| >PTCH1-Q81: YPNIQHLL    | 181   | >PTCH1-Q81: YPNILHLL    | 174  | 7     |
| >PTCH1-Q81: YPNIQHLLY   | 11    | >PTCH1-Q81: YPNILHLLY   | 11   | 0     |
| >PTCH1-Q81: YPNIQHLLYD  | 105   | >PTCH1-Q81: YPNILHLLYDL | 97   | 8     |
| >PTCH1-Q81: YPNIQHLL    | 271   | >PTCH1-Q81: YPNILHLL    | 219  | 52    |
| >PTCH1-Q81: YPNIQHLL    | 77    | >PTCH1-Q81: YPNILHLL    | 91   | 14    |
| >PTCH1-Q81: YPNIQHLLY   | 31    | >PTCH1-Q81: YPNILHLLY   | 47   | 16    |
| >PTCH1-Q81: YPNIQHLLYD  | 95    | >PTCH1-Q81: YPNILHLLYDL | 99   | 4     |
| >PTCH1-Q81: YPNIQHLLYD  | 1360  | >PTCH1-Q81: YPNILHLLYD  | 276  | 1084  |
| >PTCH1-Q81: YPNIQHLLY   | 1201  | >PTCH1-Q81: YPNILHLLY   | 271  | 930   |
| >PTCH1-Q81: YPNIQHLLY   | 119   | >PTCH1-Q81: YPNILHLLY   | 114  | 5     |
| >PTCH1-Q81: YPNIQHLLY   | 362   | >PTCH1-Q81: YPNILHLLY   | 340  | 22    |
| >PTCH1-Q81: DYPNIQHLL   | 569   | >PTCH1-Q81: DYPNILHLL   | 114  | 455   |

|                       |       |                       |       |       |
|-----------------------|-------|-----------------------|-------|-------|
| >PTCH1-Q81 DYPNIQHL   | 438   | >PTCH1-Q81 DYPNHLHL   | 327   | 111   |
| >PTCH1-Q81 DYPNIQHLL  | 130   | >PTCH1-Q81 DYPNHLHLL  | 71    | 59    |
| >PTCH1-Q81 DYPNIQHL   | 45    | >PTCH1-Q81 DYPNHLHL   | 31    | 14    |
| >PTCH1-Q81 DYPNIQHLL  | 58    | >PTCH1-Q81 DYPNHLHLL  | 26    | 32    |
| >PTCH1-Q81 DYPNIQHLLY | 27    | >PTCH1-Q81 DYPNHLHLLY | 32    | 5     |
| >PTCH1-Q81 DYPNIQHLLY | 283   | >PTCH1-Q81 DYPNHLHLLY | 184   | 99    |
| >PTCH1-Q81 DYPNIQHL   | 509   | >PTCH1-Q81 DYPNHLHL   | 186   | 323   |
| >PTCH1-Q81 DYPNIQHLL  | 630   | >PTCH1-Q81 DYPNHLHLL  | 166   | 464   |
| >PTCH1-Q81 DYPNIQHLLY | 1297  | >PTCH1-Q81 DYPNHLHLLY | 428   | 869   |
| >PTCH1-Q81 ADYPNIQHLL | 58    | >PTCH1-Q81 ADYPNHLHLL | 21    | 37    |
| >PTCH1-Q81 ADYPNIQHLL | 760   | >PTCH1-Q81 ADYPNHLHLL | 241   | 519   |
| >PTCH1-Q81 ADYPNIQHL  | 797   | >PTCH1-Q81 ADYPNHLHL  | 468   | 329   |
| >PTCH1-Q81 ADYPNIQHL  | 330   | >PTCH1-Q81 ADYPNHLHL  | 390   | 60    |
| >PTCH1-Q81 ADYPNIQHL  | 609   | >PTCH1-Q81 ADYPNHLHL  | 230   | 379   |
| >PTCH1-Q81 ADYPNIQHLL | 124   | >PTCH1-Q81 ADYPNHLHLL | 142   | 18    |
| >PTCH1-Q81 KADYPNIQHL | 2467  | >PTCH1-Q81 KADYPNHLHL | 492   | 1975  |
| >PTCH1-Q81 KADYPNIQHL | 161   | >PTCH1-Q81 KADYPNHLHL | 141   | 20    |
| >PTCH1-Q81 KADYPNIQHL | 956   | >PTCH1-Q81 KADYPNHLHL | 329   | 627   |
| >PTCH1-Q81 KADYPNIQHL | 273   | >PTCH1-Q81 KADYPNHLHL | 526   | 253   |
| >PTCH1-Q81 KADYPNIQHL | 880   | >PTCH1-Q81 KADYPNHLHL | 398   | 482   |
| >PTCH1-Q81 QKADYPNIQ  | 2394  | >PTCH1-Q81 QKADYPNHL  | 57    | 2337  |
| >PTCH1-Q81 QKADYPNIQ  | 62    | >PTCH1-Q81 QKADYPNHL  | 83    | 21    |
| >PTCH1-Q81 QKADYPNIQ  | 10618 | >PTCH1-Q81 QKADYPNHL  | 45    | 10573 |
| >PTCH1-Q81 TQKADYPNIC | 3792  | >PTCH1-Q81 TQKADYPNHL | 132   | 3660  |
| >PTCH1-Q81 TQKADYPNIC | 19626 | >PTCH1-Q81 TQKADYPNHL | 380   | 19246 |
| >PTCH1-R11 RAVLALEHM  | 879   | >PTCH1-R11 WAVLALEHM  | 373   | 506   |
| >PTCH1-R11 RAVLALEHMI | 632   | >PTCH1-R11 WAVLALEHM  | 288   | 344   |
| >PTCH1-R11 RAVLALEHM  | 273   | >PTCH1-R11 WAVLALEHM  | 172   | 101   |
| >PTCH1-R11 RAVLALEHMI | 138   | >PTCH1-R11 WAVLALEHM  | 12328 | 12190 |
| >PTCH1-R11 RAVLALEHMI | 6042  | >PTCH1-R11 WAVLALEHM  | 310   | 5732  |
| >PTCH1-R11 RAVLALEHMI | 234   | >PTCH1-R11 WAVLALEHM  | 273   | 39    |
| >PTCH1-R11 RAVLALEH   | 330   | >PTCH1-R11 WAVLALEH   | 4316  | 3986  |
| >PTCH1-R11 RAVLALEHM  | 25    | >PTCH1-R11 WAVLALEHM  | 300   | 275   |
| >PTCH1-R11 RAVLALEHMI | 7     | >PTCH1-R11 WAVLALEHM  | 34    | 27    |
| >PTCH1-R11 RAVLALEH   | 3090  | >PTCH1-R11 WAVLALEH   | 295   | 2795  |
| >PTCH1-R11 RAVLALEHM  | 7013  | >PTCH1-R11 WAVLALEHM  | 444   | 6569  |
| >PTCH1-R11 RAVLALEHMI | 120   | >PTCH1-R11 WAVLALEHM  | 1457  | 1337  |
| >PTCH1-R11 RAVLALEHM  | 66    | >PTCH1-R11 WAVLALEHM  | 2361  | 2295  |
| >PTCH1-R11 RAVLALEHMI | 25    | >PTCH1-R11 WAVLALEHM  | 331   | 306   |
| >PTCH1-R11 RRAVLALEHM | 5342  | >PTCH1-R11 RWAVLALEH  | 95    | 5247  |
| >PTCH1-R11 RRAVLALEHM | 4687  | >PTCH1-R11 RWAVLALEH  | 58    | 4629  |
| >PTCH1-R11 RRAVLALEHM | 4966  | >PTCH1-R11 RWAVLALEH  | 6     | 4960  |
| >PTCH1-R11 RRAVLALEHM | 271   | >PTCH1-R11 RWAVLALEH  | 6924  | 6653  |

|                       |       |                       |       |       |
|-----------------------|-------|-----------------------|-------|-------|
| >PTCH1-R11:RRAVLALEHM | 26    | >PTCH1-R11:RWAVLALEHI | 942   | 916   |
| >PTCH1-R11:RRAVLALE   | 414   | >PTCH1-R11:RWAVLALE   | 14828 | 14414 |
| >PTCH1-R11:RRAVLALEH  | 28    | >PTCH1-R11:RWAVLALEH  | 8799  | 8771  |
| >PTCH1-R11:RRAVLALEHM | 35    | >PTCH1-R11:RWAVLALEHI | 3935  | 3900  |
| >PTCH1-R11:RRAVLALEHM | 15    | >PTCH1-R11:RWAVLALEHI | 4657  | 4642  |
| >PTCH1-R11:RRAVLALE   | 32    | >PTCH1-R11:RWAVLALE   | 6169  | 6137  |
| >PTCH1-R11:RRAVLALEH  | 39    | >PTCH1-R11:RWAVLALEH  | 2708  | 2669  |
| >PTCH1-R11:RRAVLALEHM | 99    | >PTCH1-R11:RWAVLALEHI | 3139  | 3040  |
| >PTCH1-R11:RRAVLALEHM | 34    | >PTCH1-R11:RWAVLALEHI | 1969  | 1935  |
| >PTCH1-R11:RRAVLALE   | 318   | >PTCH1-R11:RWAVLALE   | 12081 | 11763 |
| >PTCH1-R11:RRAVLALEH  | 36    | >PTCH1-R11:RWAVLALEH  | 10503 | 10467 |
| >PTCH1-R11:RRAVLALEHM | 57    | >PTCH1-R11:RWAVLALEHI | 2905  | 2848  |
| >PTCH1-R11:RRAVLALEHM | 12    | >PTCH1-R11:RWAVLALEHI | 3241  | 3229  |
| >PTCH1-R11:RRAVLALE   | 33303 | >PTCH1-R11:RWAVLALE   | 390   | 32913 |
| >PTCH1-R11:RRAVLALEHM | 23048 | >PTCH1-R11:RWAVLALEHI | 125   | 22923 |
| >PTCH1-R11:RRAVLALEHM | 32772 | >PTCH1-R11:RWAVLALEHI | 137   | 32635 |
| >PTCH1-R11:FLTAIGDKNR | 53    | >PTCH1-R11:FLTAIGDKNR | 24801 | 24748 |
| >PTCH1-R11:NRRAVLAL   | 504   | >PTCH1-R11:NRWAVLAL   | 355   | 149   |
| >PTCH1-R11:NRRAVLAL   | 953   | >PTCH1-R11:NRWAVLAL   | 41    | 912   |
| >PTCH1-R11:NRRAVLALEH | 1433  | >PTCH1-R11:NRWAVLALEH | 411   | 1022  |
| >PTCH1-R11:NRRAVLALEH | 587   | >PTCH1-R11:NRWAVLALEH | 35    | 552   |
| >PTCH1-R11:NRRAVLAL   | 126   | >PTCH1-R11:NRWAVLAL   | 25    | 101   |
| >PTCH1-R11:NRRAVLAL   | 5554  | >PTCH1-R11:NRWAVLAL   | 307   | 5247  |
| >PTCH1-R11:NRRAVLALE  | 3205  | >PTCH1-R11:NRWAVLALE  | 182   | 3023  |
| >PTCH1-R11:NRRAVLAL   | 1133  | >PTCH1-R11:NRWAVLAL   | 200   | 933   |
| >PTCH1-R11:NRRAVLAL   | 572   | >PTCH1-R11:NRWAVLAL   | 224   | 348   |
| >PTCH1-R11:NRRAVLALEH | 788   | >PTCH1-R11:NRWAVLALEH | 134   | 654   |
| >PTCH1-R11:KNRRAVLA   | 10    | >PTCH1-R11:KNRWAVLA   | 38    | 28    |
| >PTCH1-R11:KNRRAVLAL  | 9     | >PTCH1-R11:KNRWAVLAL  | 35    | 26    |
| >PTCH1-R11:KNRRAVLALE | 330   | >PTCH1-R11:KNRWAVLAL  | 1634  | 1304  |
| >PTCH1-R11:KNRRAVLALE | 256   | >PTCH1-R11:KNRWAVLAL  | 1381  | 1125  |
| >PTCH1-R11:KNRRAVLAL  | 261   | >PTCH1-R11:KNRWAVLAL  | 298   | 37    |
| >PTCH1-R11:KNRRAVLAL  | 193   | >PTCH1-R11:KNRWAVLAL  | 1148  | 955   |
| >PTCH1-R11:DKNRRAVLAI | 1883  | >PTCH1-R11:DKNRWAVLA  | 341   | 1542  |
| >PTCH1-R11:GDKNRRAVL  | 361   | >PTCH1-R11:GDKNRWAVL  | 1439  | 1078  |
| >PTCH1-R11:GDKNRRAVL  | 415   | >PTCH1-R11:GDKNRWAVL  | 259   | 156   |
| >PTCH1-R11:GDKNRRAV   | 2906  | >PTCH1-R11:GDKNRWAV   | 455   | 2451  |
| >PTCH1-R11:AIGDKNRRAV | 161   | >PTCH1-R11:AIGDKNRWA  | 18    | 143   |
| >PTCH1-R11:AIGDKNRRAV | 2026  | >PTCH1-R11:AIGDKNRWA  | 88    | 1938  |
| >PTCH1-R11:AIGDKNRRAV | 4242  | >PTCH1-R11:AIGDKNRWA  | 138   | 4104  |
| >PTCH1-R11:AIGDKNRRAV | 6995  | >PTCH1-R11:AIGDKNRWA  | 286   | 6709  |
| >PTCH1-R11:AIGDKNRRAV | 23    | >PTCH1-R11:AIGDKNRWA  | 5     | 18    |
| >PTCH1-R11:AIGDKNRRAV | 124   | >PTCH1-R11:AIGDKNRWA  | 129   | 5     |

|                        |       |                        |       |       |
|------------------------|-------|------------------------|-------|-------|
| >PTCH1-R11:TAIGDKNRRRA | 4141  | >PTCH1-R11:TAIGDKNRW   | 174   | 3967  |
| >PTCH1-R11:TAIGDKNRRRA | 3898  | >PTCH1-R11:TAIGDKNRW   | 170   | 3728  |
| >PTCH1-R11:TAIGDKNRR   | 28    | >PTCH1-R11:TAIGDKNRW   | 20551 | 20523 |
| >PTCH1-R11:TAIGDKNRRRA | 85    | >PTCH1-R11:TAIGDKNRW   | 19    | 66    |
| >PTCH1-R11:TAIGDKNRRRA | 1874  | >PTCH1-R11:TAIGDKNRW   | 109   | 1765  |
| >PTCH1-R11:TAIGDKNRR   | 32265 | >PTCH1-R11:TAIGDKNRW   | 127   | 32138 |
| >PTCH1-R11:TAIGDKNRR   | 22743 | >PTCH1-R11:TAIGDKNRW   | 49    | 22694 |
| >PTCH1-R11:TAIGDKNRR   | 23219 | >PTCH1-R11:TAIGDKNRW   | 109   | 23110 |
| >PTCH1-R11:LTAIGDKNRR  | 39    | >PTCH1-R11:LTAIGDKNRW  | 26934 | 26895 |
| >PTCH1-R11:LTAIGDKNRR  | 9336  | >PTCH1-R11:LTAIGDKNRW  | 11    | 9325  |
| >PTCH1-R11:LTAIGDKNRR  | 23886 | >PTCH1-R11:LTAIGDKNRW  | 64    | 23822 |
| >PTCH1-R11:LTAIGDKNRR  | 22338 | >PTCH1-R11:LTAIGDKNRW  | 25    | 22313 |
| >PTCH1-R13(REGLWPPLY   | 159   | >PTCH1-R13(GEGLWPPLY   | 61    | 98    |
| >PTCH1-R13(REGLWPPLYF  | 469   | >PTCH1-R13(GEGLWPPLYF  | 4245  | 3776  |
| >PTCH1-R13(REGLWPPLY   | 120   | >PTCH1-R13(GEGLWPPLY   | 4254  | 4134  |
| >PTCH1-R13(REGLWPPL    | 78    | >PTCH1-R13(GEGLWPPL    | 176   | 98    |
| >PTCH1-R13(REGLWPPL    | 29    | >PTCH1-R13(GEGLWPPL    | 38    | 9     |
| >PTCH1-R13(REGLWPPLY   | 77    | >PTCH1-R13(GEGLWPPLY   | 103   | 26    |
| >PTCH1-R13(REGLWPPLYF  | 156   | >PTCH1-R13(GEGLWPPLYF  | 1257  | 1101  |
| >PTCH1-R13(REGLWPPLYF  | 19    | >PTCH1-R13(GEGLWPPLYF  | 256   | 237   |
| >PTCH1-R13(PREGLWPPLY  | 264   | >PTCH1-R13(PGEGLWPPLY  | 26793 | 26529 |
| >PTCH1-R13(PREGLWPPL   | 380   | >PTCH1-R13(PGEGLWPPL   | 35927 | 35547 |
| >PTCH1-R13(PREGLWPPLY  | 261   | >PTCH1-R13(PGEGLWPPLY  | 196   | 65    |
| >PTCH1-R13(PPREGLWPPI  | 857   | >PTCH1-R13(PPGEGLWPPI  | 428   | 429   |
| >PTCH1-R13(PPREGLWPPI  | 727   | >PTCH1-R13(PPGEGLWPPI  | 295   | 432   |
| >PTCH1-R13(DPPREGLW    | 926   | >PTCH1-R13(DPPGEGLW    | 431   | 495   |
| >PTCH1-R13(DPPREGLW    | 162   | >PTCH1-R13(DPPGEGLW    | 164   | 2     |
| >PTCH1-R13(RDPPREGLW   | 1325  | >PTCH1-R13(RDPPGEGLW   | 237   | 1088  |
| >PTCH1-R13(RRDPPREGLV  | 243   | >PTCH1-R13(RRDPPGEGLV  | 277   | 34    |
| >PTCH1-R13(RRDPPREGL   | 69    | >PTCH1-R13(RRDPPGEGL   | 134   | 65    |
| >PTCH1-R13(RRDPPREGLV  | 241   | >PTCH1-R13(RRDPPGEGLV  | 196   | 45    |
| >PTCH1-R13(RRDPPREGL   | 33    | >PTCH1-R13(RRDPPGEGL   | 118   | 85    |
| >PTCH1-R13(RRDPPREGLV  | 89    | >PTCH1-R13(RRDPPGEGLV  | 103   | 14    |
| >PTCH1-R13(RRDPPREGLV  | 55    | >PTCH1-R13(RRDPPGEGLV  | 47    | 8     |
| >PTCH1-R13(PRRDPPREGL  | 777   | >PTCH1-R13(PRRDPPGEGL  | 162   | 615   |
| >PTCH1-R13(QPRRDPPREGL | 100   | >PTCH1-R13(QPRRDPPGEGL | 139   | 39    |
| >PTCH1-R13(QQPRRDPPR   | 226   | >PTCH1-R13(QQPRRDPPG   | 35779 | 35553 |
| >PTCH1-R19:RQWKLEHL    | 291   | >PTCH1-R19:RQWKLEHL    | 114   | 177   |
| >PTCH1-R19:RQWKLEHL    | 44    | >PTCH1-R19:RQWKLEHL    | 36    | 8     |
| >PTCH1-R19:RQWKLEHL    | 417   | >PTCH1-R19:RQWKLEHL    | 388   | 29    |
| >PTCH1-R19:RQWKLEHL    | 521   | >PTCH1-R19:RQWKLEHL    | 192   | 329   |
| >PTCH1-R19:RQWKLEHLC'  | 110   | >PTCH1-R19:RQWKLEHLC'  | 103   | 7     |
| >PTCH1-R19:RQWKLEHLC'  | 26    | >PTCH1-R19:RQWKLEHLC'  | 32    | 6     |

|                        |      |                        |      |      |
|------------------------|------|------------------------|------|------|
| >PTCH1-R19! RQWKLEHLC' | 122  | >PTCH1-R19! KQWKLEHLC' | 130  | 8    |
| >PTCH1-R19! RQWKLEHLC' | 122  | >PTCH1-R19! KQWKLEHLC' | 368  | 246  |
| >PTCH1-R19! RQWKLEHLC' | 10   | >PTCH1-R19! KQWKLEHLC' | 11   | 1    |
| >PTCH1-R19! RQWKLEHLC' | 12   | >PTCH1-R19! KQWKLEHLC' | 14   | 2    |
| >PTCH1-R19! RQWKLEHL   | 385  | >PTCH1-R19! KQWKLEHL   | 1135 | 750  |
| >PTCH1-R19! RQWKLEHLC' | 76   | >PTCH1-R19! KQWKLEHLC' | 159  | 83   |
| >PTCH1-R19! RQWKLEHL   | 24   | >PTCH1-R19! KQWKLEHL   | 44   | 20   |
| >PTCH1-R19! RQWKLEHLC' | 4    | >PTCH1-R19! KQWKLEHLC' | 6    | 2    |
| >PTCH1-R19! RQWKLEHLC' | 172  | >PTCH1-R19! KQWKLEHLC' | 363  | 191  |
| >PTCH1-R19! RQWKLEHL   | 44   | >PTCH1-R19! KQWKLEHL   | 239  | 195  |
| >PTCH1-R19! RQWKLEHLC' | 48   | >PTCH1-R19! KQWKLEHLC' | 221  | 173  |
| >PTCH1-R19! RQWKLEHLC' | 47   | >PTCH1-R19! KQWKLEHLC' | 225  | 178  |
| >PTCH1-R19! RQWKLEHL   | 62   | >PTCH1-R19! KQWKLEHL   | 149  | 87   |
| >PTCH1-R19! RQWKLEHLC  | 318  | >PTCH1-R19! KQWKLEHLC  | 1712 | 1394 |
| >PTCH1-R19! RQWKLEHL   | 23   | >PTCH1-R19! KQWKLEHL   | 59   | 36   |
| >PTCH1-R19! RQWKLEHLC  | 206  | >PTCH1-R19! KQWKLEHLC  | 648  | 442  |
| >PTCH1-R19! RQWKLEHL   | 65   | >PTCH1-R19! KQWKLEHL   | 276  | 211  |
| >PTCH1-R19! RQWKLEHLC  | 128  | >PTCH1-R19! KQWKLEHLC  | 1317 | 1189 |
| >PTCH1-R19! RQWKLEHLC' | 195  | >PTCH1-R19! KQWKLEHLC' | 1457 | 1262 |
| >PTCH1-R19! RQWKLEHLC' | 22   | >PTCH1-R19! KQWKLEHLC' | 18   | 4    |
| >PTCH1-R19! NRQWKLEHL  | 438  | >PTCH1-R19! NKQWKLEHL  | 9106 | 8668 |
| >PTCH1-R19! NRQWKLEHL  | 69   | >PTCH1-R19! NKQWKLEHL  | 4288 | 4219 |
| >PTCH1-R19! ASRVHVYMY  | 3918 | >PTCH1-R19! ASRVHVYMY  | 170  | 3748 |
| >PTCH1-R19! ASRVHVYMY  | 1269 | >PTCH1-R19! ASRVHVYMY  | 43   | 1226 |
| >PTCH1-R19! ASRVHVYMY  | 28   | >PTCH1-R19! ASRVHVYMY  | 4    | 24   |
| >PTCH1-R19! ASRVHVYMY  | 7    | >PTCH1-R19! ASRVHVYMY  | 25   | 18   |
| >PTCH1-R19! ASRVHVYMY  | 410  | >PTCH1-R19! ASRVHVYMY  | 8184 | 7774 |
| >PTCH1-R19! ASRVHVYMY  | 75   | >PTCH1-R19! ASRVHVYMY  | 60   | 15   |
| >PTCH1-R19! MYNRQWKL   | 367  | >PTCH1-R19! MYNKQWKL   | 383  | 16   |
| >PTCH1-R19! MYNRQWKL   | 373  | >PTCH1-R19! MYNKQWKL   | 396  | 23   |
| >PTCH1-R19! MYNRQWKL   | 428  | >PTCH1-R19! MYNKQWKL   | 578  | 150  |
| >PTCH1-R19! MYNRQWKL   | 11   | >PTCH1-R19! MYNKQWKL   | 10   | 1    |
| >PTCH1-R19! MYNRQWKL   | 14   | >PTCH1-R19! MYNKQWKL   | 13   | 1    |
| >PTCH1-R19! MYNRQWKL   | 362  | >PTCH1-R19! MYNKQWKL   | 484  | 122  |
| >PTCH1-R19! YMYNRQWKL  | 167  | >PTCH1-R19! YMYNKQWKL  | 344  | 177  |
| >PTCH1-R19! YMYNRQWKL  | 7    | >PTCH1-R19! YMYNKQWKL  | 7    | 0    |
| >PTCH1-R19! YMYNRQWKL  | 5    | >PTCH1-R19! YMYNKQWKL  | 5    | 0    |
| >PTCH1-R19! YMYNRQWKL  | 11   | >PTCH1-R19! YMYNKQWKL  | 10   | 1    |
| >PTCH1-R19! YMYNRQWKL  | 7    | >PTCH1-R19! YMYNKQWKL  | 9    | 2    |
| >PTCH1-R19! YMYNRQWKL  | 95   | >PTCH1-R19! YMYNKQWKL  | 50   | 45   |
| >PTCH1-R19! YMYNRQWKL  | 1    | >PTCH1-R19! YMYNKQWKL  | 1    | 0    |
| >PTCH1-R19! YMYNRQWKL  | 463  | >PTCH1-R19! YMYNKQWKL  | 416  | 47   |
| >PTCH1-R19! YMYNRQWKL  | 135  | >PTCH1-R19! YMYNKQWKL  | 113  | 22   |



|                      |     |                      |      |     |
|----------------------|-----|----------------------|------|-----|
| >PTCH1-R19!YMYNRQWKI | 2   | >PTCH1-R19!YMYNKQWKI | 2    | 0   |
| >PTCH1-R19!YMYNRQWKI | 4   | >PTCH1-R19!YMYNKQWKI | 4    | 0   |
| >PTCH1-R19!YMYNRQWKI | 4   | >PTCH1-R19!YMYNKQWKI | 3    | 1   |
| >PTCH1-R19!YMYNRQWK  | 16  | >PTCH1-R19!YMYNKQWK  | 18   | 2   |
| >PTCH1-R19!YMYNRQWKI | 2   | >PTCH1-R19!YMYNKQWKI | 2    | 0   |
| >PTCH1-R19!YMYNRQWKI | 159 | >PTCH1-R19!YMYNKQWKI | 191  | 32  |
| >PTCH1-R19!YMYNRQWK  | 33  | >PTCH1-R19!YMYNKQWK  | 41   | 8   |
| >PTCH1-R19!YMYNRQWKI | 271 | >PTCH1-R19!YMYNKQWKI | 497  | 226 |
| >PTCH1-R19!YMYNRQWK  | 61  | >PTCH1-R19!YMYNKQWK  | 106  | 45  |
| >PTCH1-R19!YMYNRQWKI | 411 | >PTCH1-R19!YMYNKQWKI | 377  | 34  |
| >PTCH1-R19!YMYNRQWKI | 259 | >PTCH1-R19!YMYNKQWKI | 298  | 39  |
| >PTCH1-R19!YMYNRQWKI | 49  | >PTCH1-R19!YMYNKQWKI | 53   | 4   |
| >PTCH1-R19!YMYNRQWK  | 101 | >PTCH1-R19!YMYNKQWK  | 173  | 72  |
| >PTCH1-R19!YMYNRQWK  | 450 | >PTCH1-R19!YMYNKQWK  | 1326 | 876 |
| >PTCH1-R19!YMYNRQWK  | 62  | >PTCH1-R19!YMYNKQWK  | 113  | 51  |
| >PTCH1-R19!YMYNRQWKI | 27  | >PTCH1-R19!YMYNKQWKI | 38   | 11  |
| >PTCH1-R19!YMYNRQWKI | 394 | >PTCH1-R19!YMYNKQWKI | 994  | 600 |
| >PTCH1-R19!YMYNRQWKI | 429 | >PTCH1-R19!YMYNKQWKI | 813  | 384 |
| >PTCH1-R19!YMYNRQWK  | 289 | >PTCH1-R19!YMYNKQWK  | 601  | 312 |
| >PTCH1-R19!YMYNRQWKI | 27  | >PTCH1-R19!YMYNKQWKI | 48   | 21  |
| >PTCH1-R19!YMYNRQWKI | 127 | >PTCH1-R19!YMYNKQWKI | 190  | 63  |
| >PTCH1-R19!YMYNRQWKI | 401 | >PTCH1-R19!YMYNKQWKI | 386  | 15  |
| >PTCH1-R19!YMYNRQWKI | 282 | >PTCH1-R19!YMYNKQWKI | 798  | 516 |
| >PTCH1-R19!YMYNRQWKI | 180 | >PTCH1-R19!YMYNKQWKI | 301  | 121 |
| >PTCH1-R19!VYMYNRQW  | 128 | >PTCH1-R19!VYMYNKQW  | 404  | 276 |
| >PTCH1-R19!VYMYNRQW  | 47  | >PTCH1-R19!VYMYNKQW  | 44   | 3   |
| >PTCH1-R19!VYMYNRQW  | 113 | >PTCH1-R19!VYMYNKQW  | 192  | 79  |
| >PTCH1-R19!VYMYNRQW  | 156 | >PTCH1-R19!VYMYNKQW  | 238  | 82  |
| >PTCH1-R19!VYMYNRQW  | 134 | >PTCH1-R19!VYMYNKQW  | 135  | 1   |
| >PTCH1-R19!VYMYNRQW  | 112 | >PTCH1-R19!VYMYNKQW  | 156  | 44  |
| >PTCH1-R19!VYMYNRQW  | 19  | >PTCH1-R19!VYMYNKQW  | 18   | 1   |
| >PTCH1-R19!VYMYNRQW  | 8   | >PTCH1-R19!VYMYNKQW  | 10   | 2   |
| >PTCH1-R19!VYMYNRQW  | 176 | >PTCH1-R19!VYMYNKQW  | 1062 | 886 |
| >PTCH1-R19!VYMYNRQW  | 377 | >PTCH1-R19!VYMYNKQW  | 659  | 282 |
| >PTCH1-R19!HVYMYNRQV | 301 | >PTCH1-R19!HVYMYNKQV | 408  | 107 |
| >PTCH1-R19!HVYMYNRQV | 297 | >PTCH1-R19!HVYMYNKQV | 309  | 12  |
| >PTCH1-R19!HVYMYNRQV | 447 | >PTCH1-R19!HVYMYNKQV | 618  | 171 |
| >PTCH1-R19!HVYMYNRQV | 307 | >PTCH1-R19!HVYMYNKQV | 308  | 1   |
| >PTCH1-R19!HVYMYNRQV | 145 | >PTCH1-R19!HVYMYNKQV | 132  | 13  |
| >PTCH1-R19!HVYMYNRQV | 23  | >PTCH1-R19!HVYMYNKQV | 25   | 2   |
| >PTCH1-R19!HVYMYNRQV | 24  | >PTCH1-R19!HVYMYNKQV | 28   | 4   |
| >PTCH1-R19!HVYMYNRQV | 12  | >PTCH1-R19!HVYMYNKQV | 24   | 12  |
| >PTCH1-R19!HVYMYNRQV | 71  | >PTCH1-R19!HVYMYNKQV | 220  | 149 |

|                        |      |                       |      |      |
|------------------------|------|-----------------------|------|------|
| >PTCH1-R19! HVYMYNRQV  | 9    | >PTCH1-R19! HVYMYNKQV | 11   | 2    |
| >PTCH1-R19! HVYMYNRQV  | 291  | >PTCH1-R19! HVYMYNKQV | 294  | 3    |
| >PTCH1-R19! HVYMYNRQV  | 231  | >PTCH1-R19! HVYMYNKQV | 257  | 26   |
| >PTCH1-R19! HVYMYNRQV  | 13   | >PTCH1-R19! HVYMYNKQV | 8    | 5    |
| >PTCH1-R19! HVYMYNRQV  | 145  | >PTCH1-R19! HVYMYNKQV | 118  | 27   |
| >PTCH1-R19! HVYMYNRQV  | 155  | >PTCH1-R19! HVYMYNKQV | 161  | 6    |
| >PTCH1-R19! HVYMYNRQV  | 96   | >PTCH1-R19! HVYMYNKQV | 62   | 34   |
| >PTCH1-R19! HVYMYNRQV  | 337  | >PTCH1-R19! HVYMYNKQV | 319  | 18   |
| >PTCH1-R19! VHVYMYNRC  | 471  | >PTCH1-R19! VHVYMYNKC | 454  | 17   |
| >PTCH1-R19! VHVYMYNRC  | 402  | >PTCH1-R19! VHVYMYNKC | 440  | 38   |
| >PTCH1-R19! RVHVYMYNR  | 471  | >PTCH1-R19! RVHVYMYNK | 55   | 416  |
| >PTCH1-R19! RVHVYMYNR  | 40   | >PTCH1-R19! RVHVYMYNK | 11   | 29   |
| >PTCH1-R19! RVHVYMYNR  | 24   | >PTCH1-R19! RVHVYMYNK | 4    | 20   |
| >PTCH1-R19! RVHVYMYNR  | 65   | >PTCH1-R19! RVHVYMYNK | 64   | 1    |
| >PTCH1-R19! RVHVYMYNR  | 6    | >PTCH1-R19! RVHVYMYNK | 8    | 2    |
| >PTCH1-R19! RVHVYMYNR  | 281  | >PTCH1-R19! RVHVYMYNK | 362  | 81   |
| >PTCH1-R19! RVHVYMYNR  | 285  | >PTCH1-R19! RVHVYMYNK | 6159 | 5874 |
| >PTCH1-R19! RVHVYMYNR  | 103  | >PTCH1-R19! RVHVYMYNK | 372  | 269  |
| >PTCH1-R19! RVHVYMYNR  | 15   | >PTCH1-R19! RVHVYMYNK | 11   | 4    |
| >PTCH1-R19! RVHVYMYNR  | 87   | >PTCH1-R19! RVHVYMYNK | 84   | 3    |
| >PTCH1-R19! RVHVYMYNR  | 44   | >PTCH1-R19! RVHVYMYNK | 34   | 10   |
| >PTCH1-R19! RVHVYMYNR  | 225  | >PTCH1-R19! RVHVYMYNK | 167  | 58   |
| >PTCH1-R19! RVHVYMYNR  | 39   | >PTCH1-R19! RVHVYMYNK | 490  | 451  |
| >PTCH1-R19! SRVHVYMYN  | 4580 | >PTCH1-R19! SRVHVYMYN | 391  | 4189 |
| >PTCH1-R19! SRVHVYMYN  | 102  | >PTCH1-R19! SRVHVYMYN | 1058 | 956  |
| >PTCH1-R19! SRVHVYMYN  | 202  | >PTCH1-R19! SRVHVYMYN | 285  | 83   |
| >PTCH1-R19! SRVHVYMYN  | 207  | >PTCH1-R19! SRVHVYMYN | 3989 | 3782 |
| >PTCH1-R19! RQWKLEHL   | 291  | >PTCH1-R19! MQWKLEHL  | 59   | 232  |
| >PTCH1-R19! RQWKLEHL   | 1655 | >PTCH1-R19! MQWKLEHL  | 126  | 1529 |
| >PTCH1-R19! RQWKLEHL   | 44   | >PTCH1-R19! MQWKLEHL  | 22   | 22   |
| >PTCH1-R19! RQWKLEHL   | 417  | >PTCH1-R19! MQWKLEHL  | 175  | 242  |
| >PTCH1-R19! RQWKLEHL   | 521  | >PTCH1-R19! MQWKLEHL  | 277  | 244  |
| >PTCH1-R19! RQWKLEHLC' | 110  | >PTCH1-R19! MQWKLEHLC | 161  | 51   |
| >PTCH1-R19! RQWKLEHLC' | 26   | >PTCH1-R19! MQWKLEHLC | 24   | 2    |
| >PTCH1-R19! RQWKLEHLC' | 856  | >PTCH1-R19! MQWKLEHLC | 486  | 370  |
| >PTCH1-R19! RQWKLEHLC' | 122  | >PTCH1-R19! MQWKLEHLC | 488  | 366  |
| >PTCH1-R19! RQWKLEHLC' | 122  | >PTCH1-R19! MQWKLEHLC | 326  | 204  |
| >PTCH1-R19! RQWKLEHLC' | 10   | >PTCH1-R19! MQWKLEHLC | 13   | 3    |
| >PTCH1-R19! RQWKLEHLC' | 12   | >PTCH1-R19! MQWKLEHLC | 24   | 12   |
| >PTCH1-R19! RQWKLEHL   | 385  | >PTCH1-R19! MQWKLEHL  | 592  | 207  |
| >PTCH1-R19! RQWKLEHLC' | 76   | >PTCH1-R19! MQWKLEHLC | 89   | 13   |
| >PTCH1-R19! RQWKLEHL   | 24   | >PTCH1-R19! MQWKLEHL  | 29   | 5    |
| >PTCH1-R19! RQWKLEHLC' | 4    | >PTCH1-R19! MQWKLEHLC | 6    | 2    |

|                        |       |                       |       |       |
|------------------------|-------|-----------------------|-------|-------|
| >PTCH1-R19! RQWKLEHLC' | 172   | >PTCH1-R19! MQWKLEHLC | 241   | 69    |
| >PTCH1-R19! RQWKLEHL   | 44    | >PTCH1-R19! MQWKLEHL  | 765   | 721   |
| >PTCH1-R19! RQWKLEHLC' | 48    | >PTCH1-R19! MQWKLEHLC | 372   | 324   |
| >PTCH1-R19! RQWKLEHLC' | 47    | >PTCH1-R19! MQWKLEHLC | 693   | 646   |
| >PTCH1-R19! RQWKLEHL   | 62    | >PTCH1-R19! MQWKLEHL  | 122   | 60    |
| >PTCH1-R19! RQWKLEHLC  | 318   | >PTCH1-R19! MQWKLEHLC | 995   | 677   |
| >PTCH1-R19! RQWKLEHL   | 23    | >PTCH1-R19! MQWKLEHL  | 1467  | 1444  |
| >PTCH1-R19! RQWKLEHLC  | 206   | >PTCH1-R19! MQWKLEHLC | 8564  | 8358  |
| >PTCH1-R19! RQWKLEHL   | 65    | >PTCH1-R19! MQWKLEHL  | 1299  | 1234  |
| >PTCH1-R19! RQWKLEHLC  | 128   | >PTCH1-R19! MQWKLEHLC | 6807  | 6679  |
| >PTCH1-R19! RQWKLEHLC' | 195   | >PTCH1-R19! MQWKLEHLC | 7540  | 7345  |
| >PTCH1-R19! RQWKLEHLC' | 22    | >PTCH1-R19! MQWKLEHLC | 38    | 16    |
| >PTCH1-R19! NRQWKLEHL  | 23163 | >PTCH1-R19! NMQWKLEHL | 404   | 22759 |
| >PTCH1-R19! NRQWKLEHL  | 23367 | >PTCH1-R19! NMQWKLEHL | 97    | 23270 |
| >PTCH1-R19! NRQWKLEHL  | 20709 | >PTCH1-R19! NMQWKLEHL | 223   | 20486 |
| >PTCH1-R19! NRQWKLEHL  | 16556 | >PTCH1-R19! NMQWKLEHL | 328   | 16228 |
| >PTCH1-R19! NRQWKLEHL  | 25986 | >PTCH1-R19! NMQWKLEHL | 30    | 25956 |
| >PTCH1-R19! NRQWKLEHL  | 29714 | >PTCH1-R19! NMQWKLEHL | 486   | 29228 |
| >PTCH1-R19! NRQWKLEHL  | 23600 | >PTCH1-R19! NMQWKLEHL | 53    | 23547 |
| >PTCH1-R19! NRQWKLEHL  | 26368 | >PTCH1-R19! NMQWKLEHL | 353   | 26015 |
| >PTCH1-R19! NRQWKLEHL  | 24420 | >PTCH1-R19! NMQWKLEHL | 174   | 24246 |
| >PTCH1-R19! NRQWKLEHL  | 31050 | >PTCH1-R19! NMQWKLEHL | 30    | 31020 |
| >PTCH1-R19! NRQWKLEHL  | 4059  | >PTCH1-R19! NMQWKLEHL | 54    | 4005  |
| >PTCH1-R19! NRQWKLEHL  | 6224  | >PTCH1-R19! NMQWKLEHL | 399   | 5825  |
| >PTCH1-R19! NRQWKLEHL  | 2248  | >PTCH1-R19! NMQWKLEHL | 172   | 2076  |
| >PTCH1-R19! NRQWKLEHL  | 17796 | >PTCH1-R19! NMQWKLEHL | 284   | 17512 |
| >PTCH1-R19! NRQWKLEHL  | 438   | >PTCH1-R19! NMQWKLEHL | 16948 | 16510 |
| >PTCH1-R19! NRQWKLEHL  | 69    | >PTCH1-R19! NMQWKLEHL | 9467  | 9398  |
| >PTCH1-R19! ASRVHVYMY  | 14864 | >PTCH1-R19! ASRVHVYMY | 87    | 14777 |
| >PTCH1-R19! ASRVHVYMY  | 28    | >PTCH1-R19! ASRVHVYMY | 19    | 9     |
| >PTCH1-R19! ASRVHVYMY  | 7     | >PTCH1-R19! ASRVHVYMY | 4108  | 4101  |
| >PTCH1-R19! ASRVHVYMY  | 410   | >PTCH1-R19! ASRVHVYMY | 30297 | 29887 |
| >PTCH1-R19! ASRVHVYMY  | 2661  | >PTCH1-R19! ASRVHVYMY | 139   | 2522  |
| >PTCH1-R19! ASRVHVYMY  | 3089  | >PTCH1-R19! ASRVHVYMY | 5     | 3084  |
| >PTCH1-R19! ASRVHVYMY  | 16940 | >PTCH1-R19! ASRVHVYMY | 310   | 16630 |
| >PTCH1-R19! ASRVHVYMY  | 75    | >PTCH1-R19! ASRVHVYMY | 419   | 344   |
| >PTCH1-R19! YNRQWKLEH  | 11969 | >PTCH1-R19! YNMQWKLEH | 285   | 11684 |
| >PTCH1-R19! YNRQWKLEH  | 3474  | >PTCH1-R19! YNMQWKLEH | 171   | 3303  |
| >PTCH1-R19! YNRQWKLEH  | 8951  | >PTCH1-R19! YNMQWKLEH | 245   | 8706  |
| >PTCH1-R19! MYNRQWKL   | 367   | >PTCH1-R19! MYNMQWKL  | 524   | 157   |
| >PTCH1-R19! MYNRQWKL   | 373   | >PTCH1-R19! MYNMQWKL  | 751   | 378   |
| >PTCH1-R19! MYNRQWKL   | 428   | >PTCH1-R19! MYNMQWKL  | 713   | 285   |
| >PTCH1-R19! MYNRQWKL   | 11    | >PTCH1-R19! MYNMQWKL  | 21    | 10    |

|                      |      |                     |      |     |
|----------------------|------|---------------------|------|-----|
| >PTCH1-R19!MYNRQWKL  | 14   | >PTCH1-R19!MYNMQWKL | 32   | 18  |
| >PTCH1-R19!MYNRQWKL  | 362  | >PTCH1-R19!MYNMQWKL | 225  | 137 |
| >PTCH1-R19!MYNRQWKL  | 668  | >PTCH1-R19!MYNMQWKL | 474  | 194 |
| >PTCH1-R19!YMYNRQWKL | 167  | >PTCH1-R19!YMYNMQWk | 294  | 127 |
| >PTCH1-R19!YMYNRQWKL | 7    | >PTCH1-R19!YMYNMQWk | 7    | 0   |
| >PTCH1-R19!YMYNRQWKL | 5    | >PTCH1-R19!YMYNMQWk | 3    | 2   |
| >PTCH1-R19!YMYNRQWKL | 11   | >PTCH1-R19!YMYNMQWk | 8    | 3   |
| >PTCH1-R19!YMYNRQWKL | 7    | >PTCH1-R19!YMYNMQWk | 7    | 0   |
| >PTCH1-R19!YMYNRQWk  | 95   | >PTCH1-R19!YMYNMQWk | 43   | 52  |
| >PTCH1-R19!YMYNRQWKL | 1    | >PTCH1-R19!YMYNMQWk | 1    | 0   |
| >PTCH1-R19!YMYNRQWKL | 463  | >PTCH1-R19!YMYNMQWk | 455  | 8   |
| >PTCH1-R19!YMYNRQWKL | 135  | >PTCH1-R19!YMYNMQWk | 131  | 4   |
| >PTCH1-R19!YMYNRQWKL | 2    | >PTCH1-R19!YMYNMQWk | 2    | 0   |
| >PTCH1-R19!YMYNRQWk  | 1022 | >PTCH1-R19!YMYNMQWk | 469  | 553 |
| >PTCH1-R19!YMYNRQWKL | 4    | >PTCH1-R19!YMYNMQWk | 4    | 0   |
| >PTCH1-R19!YMYNRQWKL | 4    | >PTCH1-R19!YMYNMQWk | 3    | 1   |
| >PTCH1-R19!YMYNRQWk  | 16   | >PTCH1-R19!YMYNMQWk | 11   | 5   |
| >PTCH1-R19!YMYNRQWKL | 2    | >PTCH1-R19!YMYNMQWk | 2    | 0   |
| >PTCH1-R19!YMYNRQWKL | 641  | >PTCH1-R19!YMYNMQWk | 495  | 146 |
| >PTCH1-R19!YMYNRQWKL | 159  | >PTCH1-R19!YMYNMQWk | 109  | 50  |
| >PTCH1-R19!YMYNRQWk  | 33   | >PTCH1-R19!YMYNMQWk | 35   | 2   |
| >PTCH1-R19!YMYNRQWKL | 271  | >PTCH1-R19!YMYNMQWk | 415  | 144 |
| >PTCH1-R19!YMYNRQWk  | 61   | >PTCH1-R19!YMYNMQWk | 28   | 33  |
| >PTCH1-R19!YMYNRQWKL | 411  | >PTCH1-R19!YMYNMQWk | 146  | 265 |
| >PTCH1-R19!YMYNRQWKL | 259  | >PTCH1-R19!YMYNMQWk | 191  | 68  |
| >PTCH1-R19!YMYNRQWKL | 984  | >PTCH1-R19!YMYNMQWk | 303  | 681 |
| >PTCH1-R19!YMYNRQWKL | 49   | >PTCH1-R19!YMYNMQWk | 27   | 22  |
| >PTCH1-R19!YMYNRQWk  | 101  | >PTCH1-R19!YMYNMQWk | 169  | 68  |
| >PTCH1-R19!YMYNRQWKL | 553  | >PTCH1-R19!YMYNMQWk | 179  | 374 |
| >PTCH1-R19!YMYNRQWk  | 450  | >PTCH1-R19!YMYNMQWk | 1136 | 686 |
| >PTCH1-R19!YMYNRQWk  | 62   | >PTCH1-R19!YMYNMQWk | 33   | 29  |
| >PTCH1-R19!YMYNRQWKL | 655  | >PTCH1-R19!YMYNMQWk | 203  | 452 |
| >PTCH1-R19!YMYNRQWKL | 27   | >PTCH1-R19!YMYNMQWk | 288  | 261 |
| >PTCH1-R19!YMYNRQWKL | 394  | >PTCH1-R19!YMYNMQWk | 776  | 382 |
| >PTCH1-R19!YMYNRQWKL | 429  | >PTCH1-R19!YMYNMQWk | 690  | 261 |
| >PTCH1-R19!YMYNRQWk  | 289  | >PTCH1-R19!YMYNMQWk | 384  | 95  |
| >PTCH1-R19!YMYNRQWKL | 27   | >PTCH1-R19!YMYNMQWk | 43   | 16  |
| >PTCH1-R19!YMYNRQWKL | 127  | >PTCH1-R19!YMYNMQWk | 138  | 11  |
| >PTCH1-R19!YMYNRQWKL | 401  | >PTCH1-R19!YMYNMQWk | 483  | 82  |
| >PTCH1-R19!YMYNRQWKL | 282  | >PTCH1-R19!YMYNMQWk | 149  | 133 |
| >PTCH1-R19!YMYNRQWKL | 180  | >PTCH1-R19!YMYNMQWk | 162  | 18  |
| >PTCH1-R19!VYMYNRQW  | 128  | >PTCH1-R19!VYMYNMQW | 115  | 13  |
| >PTCH1-R19!VYMYNRQW  | 47   | >PTCH1-R19!VYMYNMQW | 27   | 20  |

|                       |       |                       |       |       |
|-----------------------|-------|-----------------------|-------|-------|
| >PTCH1-R19! VYMYNRQW  | 113   | >PTCH1-R19! VYMYNMQM  | 118   | 5     |
| >PTCH1-R19! VYMYNRQW  | 156   | >PTCH1-R19! VYMYNMQM  | 122   | 34    |
| >PTCH1-R19! VYMYNRQW  | 134   | >PTCH1-R19! VYMYNMQM  | 69    | 65    |
| >PTCH1-R19! VYMYNRQW  | 112   | >PTCH1-R19! VYMYNMQM  | 81    | 31    |
| >PTCH1-R19! VYMYNRQW  | 19    | >PTCH1-R19! VYMYNMQM  | 8     | 11    |
| >PTCH1-R19! VYMYNRQW  | 8     | >PTCH1-R19! VYMYNMQM  | 7     | 1     |
| >PTCH1-R19! VYMYNRQW  | 945   | >PTCH1-R19! VYMYNMQM  | 229   | 716   |
| >PTCH1-R19! VYMYNRQW  | 176   | >PTCH1-R19! VYMYNMQM  | 540   | 364   |
| >PTCH1-R19! VYMYNRQW  | 377   | >PTCH1-R19! VYMYNMQM  | 569   | 192   |
| >PTCH1-R19! VYMYNRQW  | 718   | >PTCH1-R19! VYMYNMQM  | 293   | 425   |
| >PTCH1-R19! VYMYNRQW  | 531   | >PTCH1-R19! VYMYNMQM  | 290   | 241   |
| >PTCH1-R19! HVYMYNRQV | 301   | >PTCH1-R19! HVYMYNMQ  | 323   | 22    |
| >PTCH1-R19! HVYMYNRQV | 824   | >PTCH1-R19! HVYMYNMQ  | 289   | 535   |
| >PTCH1-R19! HVYMYNRQV | 297   | >PTCH1-R19! HVYMYNMQ  | 137   | 160   |
| >PTCH1-R19! HVYMYNRQV | 447   | >PTCH1-R19! HVYMYNMQ  | 211   | 236   |
| >PTCH1-R19! HVYMYNRQV | 307   | >PTCH1-R19! HVYMYNMQ  | 212   | 95    |
| >PTCH1-R19! HVYMYNRQV | 145   | >PTCH1-R19! HVYMYNMQ  | 41    | 104   |
| >PTCH1-R19! HVYMYNRQV | 23    | >PTCH1-R19! HVYMYNMQ  | 16    | 7     |
| >PTCH1-R19! HVYMYNRQV | 24    | >PTCH1-R19! HVYMYNMQ  | 13    | 11    |
| >PTCH1-R19! HVYMYNRQV | 12    | >PTCH1-R19! HVYMYNMQ  | 12    | 0     |
| >PTCH1-R19! HVYMYNRQV | 71    | >PTCH1-R19! HVYMYNMQ  | 413   | 342   |
| >PTCH1-R19! HVYMYNRQV | 541   | >PTCH1-R19! HVYMYNMQ  | 206   | 335   |
| >PTCH1-R19! HVYMYNRQV | 778   | >PTCH1-R19! HVYMYNMQ  | 389   | 389   |
| >PTCH1-R19! HVYMYNRQ  | 746   | >PTCH1-R19! HVYMYNMQ  | 217   | 529   |
| >PTCH1-R19! HVYMYNRQV | 9     | >PTCH1-R19! HVYMYNMQ  | 8     | 1     |
| >PTCH1-R19! HVYMYNRQV | 291   | >PTCH1-R19! HVYMYNMQ  | 69    | 222   |
| >PTCH1-R19! HVYMYNRQV | 231   | >PTCH1-R19! HVYMYNMQ  | 63    | 168   |
| >PTCH1-R19! HVYMYNRQV | 13    | >PTCH1-R19! HVYMYNMQ  | 8     | 5     |
| >PTCH1-R19! HVYMYNRQV | 145   | >PTCH1-R19! HVYMYNMQ  | 139   | 6     |
| >PTCH1-R19! HVYMYNRQV | 155   | >PTCH1-R19! HVYMYNMQ  | 145   | 10    |
| >PTCH1-R19! HVYMYNRQV | 96    | >PTCH1-R19! HVYMYNMQ  | 12    | 84    |
| >PTCH1-R19! HVYMYNRQV | 337   | >PTCH1-R19! HVYMYNMQ  | 140   | 197   |
| >PTCH1-R19! HVYMYNRQV | 7175  | >PTCH1-R19! HVYMYNMQ  | 117   | 7058  |
| >PTCH1-R19! VHVMYNR   | 471   | >PTCH1-R19! VHVMYNR   | 229   | 242   |
| >PTCH1-R19! VHVMYNR   | 402   | >PTCH1-R19! VHVMYNR   | 100   | 302   |
| >PTCH1-R19! RVHVYMYNR | 15560 | >PTCH1-R19! RVHVYMYNR | 234   | 15326 |
| >PTCH1-R19! RVHVYMYNR | 471   | >PTCH1-R19! RVHVYMYNR | 14450 | 13979 |
| >PTCH1-R19! RVHVYMYNR | 40    | >PTCH1-R19! RVHVYMYNR | 5850  | 5810  |
| >PTCH1-R19! RVHVYMYNR | 12930 | >PTCH1-R19! RVHVYMYNR | 42    | 12888 |
| >PTCH1-R19! RVHVYMYNR | 24    | >PTCH1-R19! RVHVYMYNR | 17    | 7     |
| >PTCH1-R19! RVHVYMYNR | 65    | >PTCH1-R19! RVHVYMYNR | 58    | 7     |
| >PTCH1-R19! RVHVYMYNR | 1118  | >PTCH1-R19! RVHVYMYNR | 360   | 758   |
| >PTCH1-R19! RVHVYMYNR | 6     | >PTCH1-R19! RVHVYMYNR | 177   | 171   |

|                       |       |                       |       |       |
|-----------------------|-------|-----------------------|-------|-------|
| >PTCH1-R19!RVHVYMYNR  | 281   | >PTCH1-R19!RVHVYMYNN  | 172   | 109   |
| >PTCH1-R19!RVHVYMYNR  | 285   | >PTCH1-R19!RVHVYMYNN  | 26947 | 26662 |
| >PTCH1-R19!RVHVYMYNR  | 103   | >PTCH1-R19!RVHVYMYNN  | 29684 | 29581 |
| >PTCH1-R19!RVHVYMYNR  | 10764 | >PTCH1-R19!RVHVYMYNN  | 24    | 10740 |
| >PTCH1-R19!RVHVYMYNR  | 15    | >PTCH1-R19!RVHVYMYNN  | 11    | 4     |
| >PTCH1-R19!RVHVYMYNR  | 87    | >PTCH1-R19!RVHVYMYNN  | 87    | 0     |
| >PTCH1-R19!RVHVYMYNR  | 44    | >PTCH1-R19!RVHVYMYNN  | 14    | 30    |
| >PTCH1-R19!RVHVYMYNR  | 3696  | >PTCH1-R19!RVHVYMYNN  | 264   | 3432  |
| >PTCH1-R19!RVHVYMYNR  | 225   | >PTCH1-R19!RVHVYMYNN  | 4560  | 4335  |
| >PTCH1-R19!RVHVYMYNR  | 39    | >PTCH1-R19!RVHVYMYNN  | 15015 | 14976 |
| >PTCH1-R19!SRVHVYMYN  | 102   | >PTCH1-R19!SRVHVYMYN  | 13901 | 13799 |
| >PTCH1-R19!SRVHVYMYN  | 1578  | >PTCH1-R19!SRVHVYMYN  | 111   | 1467  |
| >PTCH1-R19!SRVHVYMYN  | 202   | >PTCH1-R19!SRVHVYMYN  | 203   | 1     |
| >PTCH1-R19!SRVHVYMYN  | 207   | >PTCH1-R19!SRVHVYMYN  | 25368 | 25161 |
| >PTCH1-R29!KAEVGHGYM  | 169   | >PTCH1-R29!KAEVGHGYM  | 22006 | 21837 |
| >PTCH1-R29!MDRPLNPA   | 422   | >PTCH1-R29!MDCPCLNPA  | 2556  | 2134  |
| >PTCH1-R29!MDRPLNPA   | 105   | >PTCH1-R29!MDCPCLNPA  | 162   | 57    |
| >PTCH1-R29!YMDRPLNPA  | 88    | >PTCH1-R29!YMDCPCLNPA | 39    | 49    |
| >PTCH1-R29!YMDRPLNPA  | 148   | >PTCH1-R29!YMDCPCLNPA | 73    | 75    |
| >PTCH1-R29!YMDRPLNPA  | 44    | >PTCH1-R29!YMDCPCLNPA | 49    | 5     |
| >PTCH1-R29!YMDRPLNPA  | 52    | >PTCH1-R29!YMDCPCLNPA | 34    | 18    |
| >PTCH1-R29!YMDRPLN    | 363   | >PTCH1-R29!YMDCPCLN   | 230   | 133   |
| >PTCH1-R29!YMDRPLNPA  | 8     | >PTCH1-R29!YMDCPCLNPA | 6     | 2     |
| >PTCH1-R29!YMDRPLNPA  | 18    | >PTCH1-R29!YMDCPCLNPA | 7     | 11    |
| >PTCH1-R29!YMDRPLNPA  | 23    | >PTCH1-R29!YMDCPCLNPA | 26    | 3     |
| >PTCH1-R29!YMDRPLNPA  | 127   | >PTCH1-R29!YMDCPCLNPA | 96    | 31    |
| >PTCH1-R29!YMDRPLNPA  | 10    | >PTCH1-R29!YMDCPCLNPA | 36    | 26    |
| >PTCH1-R29!YMDRPLNPA  | 1209  | >PTCH1-R29!YMDCPCLNPA | 427   | 782   |
| >PTCH1-R29!GYMDRPLN   | 1174  | >PTCH1-R29!GYMDCPCLN  | 465   | 709   |
| >PTCH1-R29!GYMDRPL    | 966   | >PTCH1-R29!GYMDCPCL   | 194   | 772   |
| >PTCH1-R29!GYMDRPL    | 257   | >PTCH1-R29!GYMDCPCL   | 186   | 71    |
| >PTCH1-R29!EVGHGYMDF  | 174   | >PTCH1-R29!EVGHGYMDC  | 36503 | 36329 |
| >PTCH1-R29!EVGHGYMDF  | 71    | >PTCH1-R29!EVGHGYMDC  | 35939 | 35868 |
| >PTCH1-R29!AEVGHGYME  | 1048  | >PTCH1-R29!AEVGHGYME  | 382   | 666   |
| >PTCH1-R29!AEVGHGYME  | 612   | >PTCH1-R29!AEVGHGYME  | 195   | 417   |
| >PTCH1-R66!RTEYDPHTH\ | 28    | >PTCH1-R66!GTEYDPHTH\ | 35    | 7     |
| >PTCH1-R66!RTEYDPHTH\ | 483   | >PTCH1-R66!GTEYDPHTH\ | 1553  | 1070  |
| >PTCH1-R66!RTEYDPHTH\ | 314   | >PTCH1-R66!GTEYDPHTH\ | 84    | 230   |
| >PTCH1-R66!RTEYDPHTH\ | 17    | >PTCH1-R66!GTEYDPHTH\ | 34    | 17    |
| >PTCH1-R66!RTEYDPHTH\ | 159   | >PTCH1-R66!GTEYDPHTH\ | 4531  | 4372  |
| >PTCH1-R66!RTEYDPHTH\ | 227   | >PTCH1-R66!GTEYDPHTH\ | 1013  | 786   |
| >PTCH1-R66!RTEYDPHTH\ | 69    | >PTCH1-R66!GTEYDPHTH\ | 2623  | 2554  |
| >PTCH1-R66!RTEYDPHTH\ | 9     | >PTCH1-R66!GTEYDPHTH\ | 87    | 78    |

|                       |      |                       |       |       |
|-----------------------|------|-----------------------|-------|-------|
| >PTCH1-R66!RTEYDPHTH\ | 479  | >PTCH1-R66!GTEYDPHTH\ | 12802 | 12323 |
| >PTCH1-R66!RTEYDPHTH  | 392  | >PTCH1-R66!GTEYDPHTH  | 524   | 132   |
| >PTCH1-R66!RTEYDPHTH\ | 340  | >PTCH1-R66!GTEYDPHTH\ | 2434  | 2094  |
| >PTCH1-R66!RTEYDPHTH\ | 33   | >PTCH1-R66!GTEYDPHTH\ | 39    | 6     |
| >PTCH1-R66!RTEYDPHTH\ | 157  | >PTCH1-R66!GTEYDPHTH\ | 183   | 26    |
| >PTCH1-R66!QITMQSTVQ  | 64   | >PTCH1-R66!QITMQSTVQ  | 32882 | 32818 |
| >PTCH1-R66!QITMQSTVQ  | 284  | >PTCH1-R66!QITMQSTVQ  | 35982 | 35698 |
| >PTCH1-R66!VQLRTEYDP† | 617  | >PTCH1-R66!VQLGTEYDP† | 294   | 323   |
| >PTCH1-R66!VQLRTEYDP† | 390  | >PTCH1-R66!VQLGTEYDP† | 1459  | 1069  |
| >PTCH1-R66!TVQLRTEY   | 459  | >PTCH1-R66!TVQLGTEY   | 701   | 242   |
| >PTCH1-R66!TVQLRTEY   | 415  | >PTCH1-R66!TVQLGTEY   | 111   | 304   |
| >PTCH1-R66!TVQLRTEY   | 726  | >PTCH1-R66!TVQLGTEY   | 428   | 298   |
| >PTCH1-R66!STVQLRTEY  | 120  | >PTCH1-R66!STVQLGTEY  | 900   | 780   |
| >PTCH1-R66!STVQLRTEY  | 293  | >PTCH1-R66!STVQLGTEY  | 186   | 107   |
| >PTCH1-R66!STVQLRTEY  | 32   | >PTCH1-R66!STVQLGTEY  | 39    | 7     |
| >PTCH1-R66!STVQLRTEY  | 245  | >PTCH1-R66!STVQLGTEY  | 99    | 146   |
| >PTCH1-R66!STVQLRTEY  | 142  | >PTCH1-R66!STVQLGTEY  | 75    | 67    |
| >PTCH1-R66!STVQLRTEY  | 164  | >PTCH1-R66!STVQLGTEY  | 415   | 251   |
| >PTCH1-R66!STVQLRTEY  | 224  | >PTCH1-R66!STVQLGTEY  | 722   | 498   |
| >PTCH1-R66!STVQLRTEY  | 428  | >PTCH1-R66!STVQLGTEY  | 92    | 336   |
| >PTCH1-R66!STVQLRTEY  | 223  | >PTCH1-R66!STVQLGTEY  | 96    | 127   |
| >PTCH1-R66!STVQLRTEY  | 9    | >PTCH1-R66!STVQLGTEY  | 5     | 4     |
| >PTCH1-R66!STVQLRTEY  | 5    | >PTCH1-R66!STVQLGTEY  | 3     | 2     |
| >PTCH1-R66!STVQLRTEY  | 136  | >PTCH1-R66!STVQLGTEY  | 143   | 7     |
| >PTCH1-R66!QSTVQLRTEY | 601  | >PTCH1-R66!QSTVQLGTEY | 434   | 167   |
| >PTCH1-R66!QSTVQLRTEY | 29   | >PTCH1-R66!QSTVQLGTEY | 16    | 13    |
| >PTCH1-R66!QSTVQLRTEY | 46   | >PTCH1-R66!QSTVQLGTEY | 43    | 3     |
| >PTCH1-R66!MQSTVQLRT  | 2270 | >PTCH1-R66!MQSTVQLGT  | 353   | 1917  |
| >PTCH1-R66!MQSTVQLRT  | 237  | >PTCH1-R66!MQSTVQLGT  | 151   | 86    |
| >PTCH1-R66!MQSTVQLRT  | 74   | >PTCH1-R66!MQSTVQLGT  | 109   | 35    |
| >PTCH1-R66!MQSTVQLR   | 32   | >PTCH1-R66!MQSTVQLG   | 19024 | 18992 |
| >PTCH1-R66!MQSTVQLR   | 58   | >PTCH1-R66!MQSTVQLG   | 33720 | 33662 |
| >PTCH1-R66!MQSTVQLRT  | 785  | >PTCH1-R66!MQSTVQLGT  | 466   | 319   |
| >PTCH1-R66!MQSTVQLRT  | 58   | >PTCH1-R66!MQSTVQLGT  | 50    | 8     |
| >PTCH1-R66!MQSTVQLRT  | 8    | >PTCH1-R66!MQSTVQLGT  | 6     | 2     |
| >PTCH1-R66!MQSTVQLRT  | 145  | >PTCH1-R66!MQSTVQLGT  | 91    | 54    |
| >PTCH1-R66!MQSTVQLR   | 304  | >PTCH1-R66!MQSTVQLG   | 34629 | 34325 |
| >PTCH1-R66!TMQSTVQLR  | 497  | >PTCH1-R66!TMQSTVQLG  | 23615 | 23118 |
| >PTCH1-R66!TMQSTVQLR  | 17   | >PTCH1-R66!TMQSTVQLG  | 18256 | 18239 |
| >PTCH1-R66!TMQSTVQLR  | 388  | >PTCH1-R66!TMQSTVQLG  | 35128 | 34740 |
| >PTCH1-R66!TMQSTVQLR  | 91   | >PTCH1-R66!TMQSTVQLG  | 35707 | 35616 |
| >PTCH1-R66!ITMQSTVQLF | 43   | >PTCH1-R66!ITMQSTVQLC | 28289 | 28246 |
| >PTCH1-R66!ITMQSTVQLF | 42   | >PTCH1-R66!ITMQSTVQLC | 25336 | 25294 |

|                        |       |                        |       |       |
|------------------------|-------|------------------------|-------|-------|
| >PTCH1-R66:ITMQSTVQLF  | 478   | >PTCH1-R66:ITMQSTVQLC  | 29653 | 29175 |
| >PTCH1-R66:ITMQSTVQLF  | 18    | >PTCH1-R66:ITMQSTVQLC  | 25348 | 25330 |
| >PTCH1-R66:ITMQSTVQLF  | 169   | >PTCH1-R66:ITMQSTVQLC  | 219   | 50    |
| >PTCH1-R66:ITMQSTVQLF  | 292   | >PTCH1-R66:ITMQSTVQLC  | 12925 | 12633 |
| >PTCH1-R66:ITMQSTVQLF  | 230   | >PTCH1-R66:ITMQSTVQLC  | 33898 | 33668 |
| >PTCH1-R68:RSEISVQPV   | 13    | >PTCH1-R68:RSEISVQPV   | 86    | 73    |
| >PTCH1-R68:RSEISVQPVTV | 22    | >PTCH1-R68:RSEISVQPVTV | 173   | 151   |
| >PTCH1-R68:RSEISVQPV   | 18830 | >PTCH1-R68:RSEISVQPV   | 356   | 18474 |
| >PTCH1-R68:RSEISVQPV   | 18505 | >PTCH1-R68:RSEISVQPV   | 230   | 18275 |
| >PTCH1-R68:RSEISVQPV   | 13668 | >PTCH1-R68:RSEISVQPV   | 7     | 13661 |
| >PTCH1-R68:RSEISVQPV   | 20485 | >PTCH1-R68:RSEISVQPV   | 53    | 20432 |
| >PTCH1-R68:RSEISVQPV   | 15452 | >PTCH1-R68:RSEISVQPV   | 10    | 15442 |
| >PTCH1-R68:RSEISVQPV   | 18639 | >PTCH1-R68:RSEISVQPV   | 6     | 18633 |
| >PTCH1-R68:RSEISVQPV   | 15090 | >PTCH1-R68:RSEISVQPV   | 3     | 15087 |
| >PTCH1-R68:THVYYTTAEP  | 166   | >PTCH1-R68:THVYYTTAEP  | 32113 | 31947 |
| >PTCH1-R68:THVYYTTAEP  | 4186  | >PTCH1-R68:THVYYTTAEP  | 353   | 3833  |
| >PTCH1-R68:THVYYTTAEP  | 3965  | >PTCH1-R68:THVYYTTAEP  | 9     | 3956  |
| >PTCH1-R68:THVYYTTAEP  | 400   | >PTCH1-R68:THVYYTTAEP  | 32139 | 31739 |
| >PTCH1-R68:RSEISV      | 5910  | >PTCH1-R68:RSEISV      | 77    | 5833  |
| >PTCH1-R68:RSEISVQPV   | 2134  | >PTCH1-R68:RSEISVQPV   | 28    | 2106  |
| >PTCH1-R68:RSEISVQPV   | 206   | >PTCH1-R68:RSEISVQPV   | 4591  | 4385  |
| >PTCH1-R68:RSEISVQPV   | 496   | >PTCH1-R68:RSEISVQPV   | 2721  | 2225  |
| >PTCH1-R68:AEPRSEISV   | 411   | >PTCH1-R68:AEPRSEISV   | 503   | 92    |
| >PTCH1-R68:AEPRSEISV   | 85    | >PTCH1-R68:AEPRSEISV   | 39    | 46    |
| >PTCH1-R68:TAEPREI     | 197   | >PTCH1-R68:TAEPREI     | 171   | 26    |
| >PTCH1-R68:TTAEPRSEI   | 4659  | >PTCH1-R68:TTAEPRSEI   | 464   | 4195  |
| >PTCH1-R68:TTAEPRSEISV | 1643  | >PTCH1-R68:TTAEPRSEISV | 403   | 1240  |
| >PTCH1-R68:TTAEPRSEI   | 2182  | >PTCH1-R68:TTAEPRSEI   | 95    | 2087  |
| >PTCH1-R68:TTAEPRSEISV | 912   | >PTCH1-R68:TTAEPRSEISV | 162   | 750   |
| >PTCH1-R68:TTAEPRSEI   | 4783  | >PTCH1-R68:TTAEPRSEI   | 116   | 4667  |
| >PTCH1-R68:TTAEPRSEISV | 505   | >PTCH1-R68:TTAEPRSEISV | 75    | 430   |
| >PTCH1-R68:TTAEPRSEI   | 4126  | >PTCH1-R68:TTAEPRSEI   | 284   | 3842  |
| >PTCH1-R68:TTAEPRSEISV | 323   | >PTCH1-R68:TTAEPRSEISV | 75    | 248   |
| >PTCH1-R68:TTAEPRSEISV | 834   | >PTCH1-R68:TTAEPRSEISV | 270   | 564   |
| >PTCH1-R68:TTAEPRSEISV | 172   | >PTCH1-R68:TTAEPRSEISV | 126   | 46    |
| >PTCH1-R68:TTAEPRSEI   | 1311  | >PTCH1-R68:TTAEPRSEI   | 47    | 1264  |
| >PTCH1-R68:TTAEPRSEI   | 5     | >PTCH1-R68:TTAEPRSEI   | 5     | 0     |
| >PTCH1-R68:TTAEPRSEISV | 6     | >PTCH1-R68:TTAEPRSEISV | 7     | 1     |
| >PTCH1-R68:TTAEPRSEI   | 17    | >PTCH1-R68:TTAEPRSEI   | 8     | 9     |
| >PTCH1-R68:TTAEPRSEISV | 11    | >PTCH1-R68:TTAEPRSEISV | 10    | 1     |
| >PTCH1-R68:TTAEPRSEI   | 328   | >PTCH1-R68:TTAEPRSEI   | 73    | 255   |
| >PTCH1-R68:TTAEPRSEI   | 1289  | >PTCH1-R68:TTAEPRSEI   | 297   | 992   |
| >PTCH1-R68:TTAEPRSEI   | 104   | >PTCH1-R68:TTAEPRSEI   | 69    | 35    |



|                          |       |                          |       |       |
|--------------------------|-------|--------------------------|-------|-------|
| >PTCH1-R68:TTAEP RSEI    | 37    | >PTCH1-R68:TTAEP LSEI    | 20    | 17    |
| >PTCH1-R68:YT TAEPRSEI   | 585   | >PTCH1-R68:YT TAEPLSEI   | 121   | 464   |
| >PTCH1-R68:YT TAEPRSEI   | 319   | >PTCH1-R68:YT TAEPLSEI   | 45    | 274   |
| >PTCH1-R68:YT TAEPRSEI   | 973   | >PTCH1-R68:YT TAEPLSEI   | 99    | 874   |
| >PTCH1-R68:YT TAEPRSEI   | 969   | >PTCH1-R68:YT TAEPLSEI   | 157   | 812   |
| >PTCH1-R68:YT TAEPRSEI   | 41    | >PTCH1-R68:YT TAEPLSEI   | 32    | 9     |
| >PTCH1-R68:YT TAEPRSEI   | 576   | >PTCH1-R68:YT TAEPLSEI   | 173   | 403   |
| >PTCH1-R68:YT TAEPRSEI   | 65    | >PTCH1-R68:YT TAEPLSEI   | 23    | 42    |
| >PTCH1-R68:YT TAEPRSEI   | 201   | >PTCH1-R68:YT TAEPLSEI   | 125   | 76    |
| >PTCH1-R68:YT TAEPRSEI   | 104   | >PTCH1-R68:YT TAEPLSEI   | 62    | 42    |
| >PTCH1-R68:YT TAEPRSEI   | 27    | >PTCH1-R68:YT TAEPLSEI   | 24    | 3     |
| >PTCH1-R68:YY TTAEP R    | 20466 | >PTCH1-R68:YY TTAEP L    | 40    | 20426 |
| >PTCH1-R68:YY TTAEP RSEI | 23    | >PTCH1-R68:YY TTAEP LSEI | 40    | 17    |
| >PTCH1-R68:YY TTAEP RSEI | 614   | >PTCH1-R68:YY TTAEP LSEI | 453   | 161   |
| >PTCH1-R68:YY TTAEP RSEI | 756   | >PTCH1-R68:YY TTAEP LSEI | 318   | 438   |
| >PTCH1-R68:YY TTAEP R    | 2561  | >PTCH1-R68:YY TTAEP L    | 15    | 2546  |
| >PTCH1-R68:YY TTAEP RSEI | 9     | >PTCH1-R68:YY TTAEP LSEI | 7     | 2     |
| >PTCH1-R68:YY TTAEP R    | 193   | >PTCH1-R68:YY TTAEP L    | 24552 | 24359 |
| >PTCH1-R68:YY TTAEP R    | 85    | >PTCH1-R68:YY TTAEP L    | 29589 | 29504 |
| >PTCH1-R68:YY TTAEP R    | 27    | >PTCH1-R68:YY TTAEP L    | 22046 | 22019 |
| >PTCH1-R68:VYY TTAEP R   | 13862 | >PTCH1-R68:VYY TTAEP L   | 150   | 13712 |
| >PTCH1-R68:VYY TTAEP R   | 22202 | >PTCH1-R68:VYY TTAEP L   | 24    | 22178 |
| >PTCH1-R68:VYY TTAEP R   | 9622  | >PTCH1-R68:VYY TTAEP L   | 452   | 9170  |
| >PTCH1-R68:VYY TTAEP R   | 7724  | >PTCH1-R68:VYY TTAEP L   | 438   | 7286  |
| >PTCH1-R68:VYY TTAEP R   | 8473  | >PTCH1-R68:VYY TTAEP L   | 69    | 8404  |
| >PTCH1-R68:VYY TTAEP R   | 87    | >PTCH1-R68:VYY TTAEP L   | 13864 | 13777 |
| >PTCH1-R68:VYY TTAEP R   | 18    | >PTCH1-R68:VYY TTAEP L   | 15689 | 15671 |
| >PTCH1-R68:VYY TTAEP R   | 1479  | >PTCH1-R68:VYY TTAEP L   | 235   | 1244  |
| >PTCH1-R68:HVYY TTAEP R  | 14140 | >PTCH1-R68:HVYY TTAEP L  | 116   | 14024 |
| >PTCH1-R68:HVYY TTAEP R  | 187   | >PTCH1-R68:HVYY TTAEP L  | 11315 | 11128 |
| >PTCH1-R68:HVYY TTAEP R  | 232   | >PTCH1-R68:HVYY TTAEP L  | 29838 | 29606 |
| >PTCH1-R68:HVYY TTAEP R  | 14089 | >PTCH1-R68:HVYY TTAEP L  | 384   | 13705 |
| >PTCH1-R68:HVYY TTAEP R  | 668   | >PTCH1-R68:HVYY TTAEP L  | 454   | 214   |
| >PTCH1-R68:HVYY TTAEP R  | 63    | >PTCH1-R68:HVYY TTAEP L  | 12632 | 12569 |
| >PTCH1-R68:HVYY TTAEP R  | 1166  | >PTCH1-R68:HVYY TTAEP L  | 20    | 1146  |
| >PTCH1-R68:HVYY TTAEP R  | 147   | >PTCH1-R68:HVYY TTAEP L  | 14462 | 14315 |
| >PTCH1-R68:HVYY TTAEP R  | 4     | >PTCH1-R68:HVYY TTAEP L  | 8373  | 8369  |
| >PTCH1-R68:HVYY TTAEP R  | 14935 | >PTCH1-R68:HVYY TTAEP L  | 67    | 14868 |
| >PTCH1-R68:HVYY TTAEP R  | 5778  | >PTCH1-R68:HVYY TTAEP L  | 30    | 5748  |
| >PTCH1-R68:HVYY TTAEP R  | 11959 | >PTCH1-R68:HVYY TTAEP L  | 409   | 11550 |
| >PTCH1-R68:HVYY TTAEP R  | 2912  | >PTCH1-R68:HVYY TTAEP L  | 276   | 2636  |
| >PTCH1-R68:HVYY TTAEP R  | 16753 | >PTCH1-R68:HVYY TTAEP L  | 59    | 16694 |
| >PTCH1-R68:HVYY TTAEP R  | 16998 | >PTCH1-R68:HVYY TTAEP L  | 109   | 16889 |

|                        |       |                        |       |       |
|------------------------|-------|------------------------|-------|-------|
| >PTCH1-R68:HVYYTTAEPR  | 36    | >PTCH1-R68:HVYYTTAEPL  | 23179 | 23143 |
| >PTCH1-R99:RTICSNYTSL  | 290   | >PTCH1-R99:STICSNYTSL  | 181   | 109   |
| >PTCH1-R99:RTICSNYTSL  | 405   | >PTCH1-R99:STICSNYTSL  | 265   | 140   |
| >PTCH1-R99:RTICSNYTSL  | 528   | >PTCH1-R99:STICSNYTSL  | 304   | 224   |
| >PTCH1-R99:RTICSNYTSL  | 666   | >PTCH1-R99:STICSNYTSL  | 107   | 559   |
| >PTCH1-R99:RTICSNYTSL  | 635   | >PTCH1-R99:STICSNYTSL  | 369   | 266   |
| >PTCH1-R99:RTICSNYTSL  | 221   | >PTCH1-R99:STICSNYTSL  | 3043  | 2822  |
| >PTCH1-R99:RTICSNYTS   | 207   | >PTCH1-R99:STICSNYTS   | 1340  | 1133  |
| >PTCH1-R99:RTICSNYTSL  | 24    | >PTCH1-R99:STICSNYTSL  | 174   | 150   |
| >PTCH1-R99:RTICSNYT    | 1448  | >PTCH1-R99:STICSNYT    | 65    | 1383  |
| >PTCH1-R99:RTICSNYTS   | 1868  | >PTCH1-R99:STICSNYTS   | 70    | 1798  |
| >PTCH1-R99:RTICSNYTSL  | 229   | >PTCH1-R99:STICSNYTSL  | 117   | 112   |
| >PTCH1-R99:RTICSNYTSL  | 1214  | >PTCH1-R99:STICSNYTSL  | 86    | 1128  |
| >PTCH1-R99:RTICSNYTSL  | 290   | >PTCH1-R99:STICSNYTSL  | 730   | 440   |
| >PTCH1-R99:RTICSNYTSL  | 32    | >PTCH1-R99:STICSNYTSL  | 151   | 119   |
| >PTCH1-R99:RTICSNYT    | 470   | >PTCH1-R99:STICSNYT    | 4095  | 3625  |
| >PTCH1-R99:RTICSNYTS   | 143   | >PTCH1-R99:STICSNYTS   | 1228  | 1085  |
| >PTCH1-R99:RTICSNYTSL  | 3     | >PTCH1-R99:STICSNYTSL  | 12    | 9     |
| >PTCH1-R99:RTICSNYTSL  | 204   | >PTCH1-R99:STICSNYTSL  | 6438  | 6234  |
| >PTCH1-R99:RTICSNYTSL  | 389   | >PTCH1-R99:STICSNYTSL  | 349   | 40    |
| >PTCH1-R99:RTICSNYTSL  | 100   | >PTCH1-R99:STICSNYTSL  | 159   | 59    |
| >PTCH1-R99:RTICSNYTSLG | 360   | >PTCH1-R99:STICSNYTSLG | 477   | 117   |
| >PTCH1-R99:RTICSNYTSL  | 174   | >PTCH1-R99:STICSNYTSL  | 219   | 45    |
| >PTCH1-R99:VRTICSNYTSL | 4157  | >PTCH1-R99:VSTICSNYTSL | 471   | 3686  |
| >PTCH1-R99:VRTICSNY    | 171   | >PTCH1-R99:VSTICSNY    | 23    | 148   |
| >PTCH1-R99:VRTICSNY    | 290   | >PTCH1-R99:VSTICSNY    | 542   | 252   |
| >PTCH1-R99:VRTICSNYTSL | 411   | >PTCH1-R99:VSTICSNYTSL | 835   | 424   |
| >PTCH1-R99:VRTICSNY    | 18970 | >PTCH1-R99:VSTICSNY    | 8     | 18962 |
| >PTCH1-R99:VRTICSNYTSL | 23390 | >PTCH1-R99:VSTICSNYTSL | 27    | 23363 |
| >PTCH1-R99:VRTICSNYTSL | 18063 | >PTCH1-R99:VSTICSNYTSL | 52    | 18011 |
| >PTCH1-R99:VRTICSNY    | 7258  | >PTCH1-R99:VSTICSNY    | 95    | 7163  |
| >PTCH1-R99:VRTICSNYTSL | 7657  | >PTCH1-R99:VSTICSNYTSL | 155   | 7502  |
| >PTCH1-R99:VRTICSNYTSL | 168   | >PTCH1-R99:VSTICSNYTSL | 29871 | 29703 |
| >PTCH1-R99:KVRTICSNY   | 98    | >PTCH1-R99:KVSTICSNY   | 99    | 1     |
| >PTCH1-R99:KVRTICSNY   | 5043  | >PTCH1-R99:KVSTICSNY   | 252   | 4791  |
| >PTCH1-R99:KVRTICSNY   | 313   | >PTCH1-R99:KVSTICSNY   | 91    | 222   |
| >PTCH1-R99:KVRTICSN    | 39    | >PTCH1-R99:KVSTICSN    | 4038  | 3999  |
| >PTCH1-R99:KVRTICSNY   | 16    | >PTCH1-R99:KVSTICSNY   | 3169  | 3153  |
| >PTCH1-R99:KVRTICSNYT  | 15    | >PTCH1-R99:KVSTICSNYT  | 2528  | 2513  |
| >PTCH1-R99:KVRTICSNYTS | 17    | >PTCH1-R99:KVSTICSNYTS | 2798  | 2781  |
| >PTCH1-R99:KVRTICSNY   | 24    | >PTCH1-R99:KVSTICSNY   | 9     | 15    |
| >PTCH1-R99:KVRTICSNY   | 68    | >PTCH1-R99:KVSTICSNY   | 31    | 37    |
| >PTCH1-R99:KVRTICSNY   | 220   | >PTCH1-R99:KVSTICSNY   | 613   | 393   |

|                        |       |                        |       |       |
|------------------------|-------|------------------------|-------|-------|
| >PTCH1-R99!KVRTICSNY   | 139   | >PTCH1-R99!KVSTICSNY   | 468   | 329   |
| >PTCH1-R99!KVRTICSNY   | 4     | >PTCH1-R99!KVSTICSNY   | 6     | 2     |
| >PTCH1-R99!KVRTICSNY   | 788   | >PTCH1-R99!KVSTICSNY   | 367   | 421   |
| >PTCH1-R99!EKVRTICSNY  | 1295  | >PTCH1-R99!EKVSTICSNY  | 336   | 959   |
| >PTCH1-R99!EKVRTICSNY  | 117   | >PTCH1-R99!EKVSTICSNY  | 90    | 27    |
| >PTCH1-R99!EKVRTICSNY  | 331   | >PTCH1-R99!EKVSTICSNY  | 328   | 3     |
| >PTCH1-R99!EKVRTICSNY  | 20    | >PTCH1-R99!EKVSTICSNY  | 13    | 7     |
| >PTCH1-R99!IEKVRTICSNY | 198   | >PTCH1-R99!IEKVSTICSNY | 53    | 145   |
| >PTCH1-R99!IEKVRTICSNY | 367   | >PTCH1-R99!IEKVSTICSNY | 216   | 151   |
| >PTCH1-R99!IEKVRTICSNY | 413   | >PTCH1-R99!IEKVSTICSNY | 313   | 100   |
| >PTCH1-R99!AIEKVRTI    | 522   | >PTCH1-R99!AIEKVSTI    | 472   | 50    |
| >PTCH1-R99!EAIEKVRTI   | 625   | >PTCH1-R99!EAIEKVSTI   | 126   | 499   |
| >PTCH1-R99!EAIEKVRTI   | 344   | >PTCH1-R99!EAIEKVSTI   | 38    | 306   |
| >PTCH1-R99!EAIEKVRTI   | 406   | >PTCH1-R99!EAIEKVSTI   | 74    | 332   |
| >PTCH1-R99!EAIEKVRTI   | 1189  | >PTCH1-R99!EAIEKVSTI   | 250   | 939   |
| >PTCH1-R99!VEAIEKVRTI  | 22    | >PTCH1-R99!VEAIEKVSTI  | 21    | 1     |
| >PTCH1-R99!VEAIEKVRTI  | 616   | >PTCH1-R99!VEAIEKVSTI  | 499   | 117   |
| >PTCH1-R99!VEAIEKVRTI  | 77    | >PTCH1-R99!VEAIEKVSTI  | 61    | 16    |
| >PTCH1-R99!FVEAIEKVRTI | 946   | >PTCH1-R99!FVEAIEKVSTI | 283   | 663   |
| >PTCH1-R99!FVEAIEKVRTI | 1033  | >PTCH1-R99!FVEAIEKVSTI | 265   | 768   |
| >PTCH1-R99!FVEAIEKVRTI | 1390  | >PTCH1-R99!FVEAIEKVSTI | 394   | 996   |
| >PTCH1-R99!FVEAIEKVR   | 51    | >PTCH1-R99!FVEAIEKVS   | 21316 | 21265 |
| >PTCH1-R99!DFVEAIEKVR  | 355   | >PTCH1-R99!DFVEAIEKVS  | 29957 | 29602 |
| >PTCH1-R99!DFVEAIEKVR  | 365   | >PTCH1-R99!DFVEAIEKVS  | 36483 | 36118 |
| >PTCH1-S107SAVPVVIL    | 431   | >PTCH1-S107IAVPVVIL    | 595   | 164   |
| >PTCH1-S107SAVPVVILI   | 84    | >PTCH1-S107IAVPVVILI   | 92    | 8     |
| >PTCH1-S107SAVPVVILIA  | 420   | >PTCH1-S107IAVPVVILIA  | 688   | 268   |
| >PTCH1-S107SAVPVVILI   | 465   | >PTCH1-S107IAVPVVILI   | 589   | 124   |
| >PTCH1-S107SAVPVVIL    | 323   | >PTCH1-S107IAVPVVIL    | 1356  | 1033  |
| >PTCH1-S107SAVPVVILI   | 39    | >PTCH1-S107IAVPVVILI   | 161   | 122   |
| >PTCH1-S107SAVPVVIL    | 201   | >PTCH1-S107IAVPVVIL    | 46    | 155   |
| >PTCH1-S107SAVPVVILI   | 1256  | >PTCH1-S107IAVPVVILI   | 239   | 1017  |
| >PTCH1-S107SAVPVVILI   | 4640  | >PTCH1-S107IAVPVVILI   | 485   | 4155  |
| >PTCH1-S107SAVPVVIL    | 2225  | >PTCH1-S107IAVPVVIL    | 177   | 2048  |
| >PTCH1-S107SAVPVVILI   | 164   | >PTCH1-S107IAVPVVILI   | 24    | 140   |
| >PTCH1-S107SAVPVVILI   | 161   | >PTCH1-S107IAVPVVILI   | 141   | 20    |
| >PTCH1-S107SAVPVVILI   | 54    | >PTCH1-S107IAVPVVILI   | 104   | 50    |
| >PTCH1-S107LSAVPVVIL   | 2971  | >PTCH1-S107LIAVPVVIL   | 391   | 2580  |
| >PTCH1-S107LSAVPVVILI  | 2191  | >PTCH1-S107LIAVPVVILI  | 276   | 1915  |
| >PTCH1-S107LSAVPVVVI   | 11154 | >PTCH1-S107LIAVPVVVI   | 418   | 10736 |
| >PTCH1-S107LSAVPVVILI  | 7662  | >PTCH1-S107LIAVPVVILI  | 237   | 7425  |
| >PTCH1-S107LSAVPVVIL   | 21213 | >PTCH1-S107LIAVPVVIL   | 208   | 21005 |
| >PTCH1-S107LSAVPVVILI  | 25086 | >PTCH1-S107LIAVPVVILI  | 432   | 24654 |

|                        |       |                        |       |       |
|------------------------|-------|------------------------|-------|-------|
| >PTCH1-S107LSAVPVVI    | 540   | >PTCH1-S107LIAVPVVI    | 410   | 130   |
| >PTCH1-S107LSAVPVVILI  | 376   | >PTCH1-S107LIAVPVVILI  | 368   | 8     |
| >PTCH1-S107LSAVPVVI    | 474   | >PTCH1-S107LIAVPVVI    | 2156  | 1682  |
| >PTCH1-S107LSAVPVVIL   | 286   | >PTCH1-S107LIAVPVVIL   | 1455  | 1169  |
| >PTCH1-S107LSAVPVVI    | 211   | >PTCH1-S107LIAVPVVI    | 13444 | 13233 |
| >PTCH1-S107LSAVPVVIL   | 44    | >PTCH1-S107LIAVPVVIL   | 8438  | 8394  |
| >PTCH1-S107LSAVPVVILI  | 219   | >PTCH1-S107LIAVPVVILI  | 13662 | 13443 |
| >PTCH1-S107LSAVPVVI    | 83    | >PTCH1-S107LIAVPVVI    | 3011  | 2928  |
| >PTCH1-S107LSAVPVVIL   | 205   | >PTCH1-S107LIAVPVVIL   | 7908  | 7703  |
| >PTCH1-S107LSAVPVVILI  | 63    | >PTCH1-S107LIAVPVVILI  | 1188  | 1125  |
| >PTCH1-S107LSAVPVVI    | 21    | >PTCH1-S107LIAVPVVI    | 4729  | 4708  |
| >PTCH1-S107LSAVPVVIL   | 40    | >PTCH1-S107LIAVPVVIL   | 2488  | 2448  |
| >PTCH1-S107LSAVPVVILI  | 35    | >PTCH1-S107LIAVPVVILI  | 2426  | 2391  |
| >PTCH1-S107LSAVPVVI    | 158   | >PTCH1-S107LIAVPVVI    | 4023  | 3865  |
| >PTCH1-S107LSAVPVVIL   | 455   | >PTCH1-S107LIAVPVVIL   | 4065  | 3610  |
| >PTCH1-S107LSAVPVVILI  | 211   | >PTCH1-S107LIAVPVVILI  | 4774  | 4563  |
| >PTCH1-S107LSAVPVVI    | 15    | >PTCH1-S107LIAVPVVI    | 689   | 674   |
| >PTCH1-S107LSAVPVVIL   | 141   | >PTCH1-S107LIAVPVVIL   | 10446 | 10305 |
| >PTCH1-S107LSAVPVVILI  | 42    | >PTCH1-S107LIAVPVVILI  | 1148  | 1106  |
| >PTCH1-S107GMMGLIGIKI  | 4854  | >PTCH1-S107GMMGLIGIKI  | 37    | 4817  |
| >PTCH1-S107GMMGLIGIKI  | 628   | >PTCH1-S107GMMGLIGIKI  | 23    | 605   |
| >PTCH1-S107GMMGLIGIKI  | 455   | >PTCH1-S107GMMGLIGIKI  | 7     | 448   |
| >PTCH1-S107GMMGLIGIKI  | 6118  | >PTCH1-S107GMMGLIGIKI  | 189   | 5929  |
| >PTCH1-S107GMMGLIGIKI  | 957   | >PTCH1-S107GMMGLIGIKI  | 8     | 949   |
| >PTCH1-S107GMMGLIGIKI  | 8926  | >PTCH1-S107GMMGLIGIKI  | 25    | 8901  |
| >PTCH1-S107GMMGLIGIKI  | 7275  | >PTCH1-S107GMMGLIGIKI  | 49    | 7226  |
| >PTCH1-S107GMMGLIGIKI  | 12352 | >PTCH1-S107GMMGLIGIKI  | 86    | 12266 |
| >PTCH1-S107GMMGLIGIKI  | 3289  | >PTCH1-S107GMMGLIGIKI  | 20    | 3269  |
| >PTCH1-S107GMMGLIGIKI  | 23792 | >PTCH1-S107GMMGLIGIKI  | 375   | 23417 |
| >PTCH1-S107KLSAVPVV    | 13    | >PTCH1-S107KLIAVPVV    | 9     | 4     |
| >PTCH1-S107KLSAVPVVI   | 40    | >PTCH1-S107KLIAVPVVI   | 22    | 18    |
| >PTCH1-S107KLSAVPVVIL  | 543   | >PTCH1-S107KLIAVPVVIL  | 270   | 273   |
| >PTCH1-S107KLSAVPVVILI | 20    | >PTCH1-S107KLIAVPVVILI | 16    | 4     |
| >PTCH1-S107KLSAVPVV    | 7     | >PTCH1-S107KLIAVPVV    | 15    | 8     |
| >PTCH1-S107KLSAVPVVI   | 19    | >PTCH1-S107KLIAVPVVI   | 72    | 53    |
| >PTCH1-S107KLSAVPVVIL  | 26    | >PTCH1-S107KLIAVPVVIL  | 40    | 14    |
| >PTCH1-S107KLSAVPVVILI | 7     | >PTCH1-S107KLIAVPVVILI | 19    | 12    |
| >PTCH1-S107KLSAVPVV    | 4     | >PTCH1-S107KLIAVPVV    | 4     | 0     |
| >PTCH1-S107KLSAVPVVI   | 20    | >PTCH1-S107KLIAVPVVI   | 20    | 0     |
| >PTCH1-S107KLSAVPVVIL  | 101   | >PTCH1-S107KLIAVPVVIL  | 95    | 6     |
| >PTCH1-S107KLSAVPVVILI | 10    | >PTCH1-S107KLIAVPVVILI | 10    | 0     |
| >PTCH1-S107KLSAVPVV    | 32    | >PTCH1-S107KLIAVPVV    | 11    | 21    |
| >PTCH1-S107KLSAVPVVI   | 1006  | >PTCH1-S107KLIAVPVVI   | 248   | 758   |

|                        |     |                        |      |     |
|------------------------|-----|------------------------|------|-----|
| >PTCH1-S107KLSAVPVVILI | 212 | >PTCH1-S107KLIAVPVVILI | 57   | 155 |
| >PTCH1-S107KLSAVPVV    | 2   | >PTCH1-S107KLIAVPVV    | 2    | 0   |
| >PTCH1-S107KLSAVPVVI   | 7   | >PTCH1-S107KLIAVPVVI   | 5    | 2   |
| >PTCH1-S107KLSAVPVVIL  | 16  | >PTCH1-S107KLIAVPVVIL  | 9    | 7   |
| >PTCH1-S107KLSAVPVVILI | 5   | >PTCH1-S107KLIAVPVVILI | 4    | 1   |
| >PTCH1-S107KLSAVPVV    | 6   | >PTCH1-S107KLIAVPVV    | 4    | 2   |
| >PTCH1-S107KLSAVPVVI   | 29  | >PTCH1-S107KLIAVPVVI   | 13   | 16  |
| >PTCH1-S107KLSAVPVVIL  | 32  | >PTCH1-S107KLIAVPVVIL  | 14   | 18  |
| >PTCH1-S107KLSAVPVVILI | 32  | >PTCH1-S107KLIAVPVVILI | 14   | 18  |
| >PTCH1-S107KLSAVPVV    | 5   | >PTCH1-S107KLIAVPVV    | 6    | 1   |
| >PTCH1-S107KLSAVPVVI   | 21  | >PTCH1-S107KLIAVPVVI   | 28   | 7   |
| >PTCH1-S107KLSAVPVVIL  | 25  | >PTCH1-S107KLIAVPVVIL  | 32   | 7   |
| >PTCH1-S107KLSAVPVVILI | 14  | >PTCH1-S107KLIAVPVVILI | 18   | 4   |
| >PTCH1-S107KLSAVPVV    | 4   | >PTCH1-S107KLIAVPVV    | 9    | 5   |
| >PTCH1-S107KLSAVPVVI   | 254 | >PTCH1-S107KLIAVPVVI   | 1165 | 911 |
| >PTCH1-S107KLSAVPVVIL  | 139 | >PTCH1-S107KLIAVPVVIL  | 1054 | 915 |
| >PTCH1-S107KLSAVPVVILI | 151 | >PTCH1-S107KLIAVPVVILI | 871  | 720 |
| >PTCH1-S107KLSAVPVV    | 3   | >PTCH1-S107KLIAVPVV    | 4    | 1   |
| >PTCH1-S107KLSAVPVVI   | 98  | >PTCH1-S107KLIAVPVVI   | 94   | 4   |
| >PTCH1-S107KLSAVPVVIL  | 22  | >PTCH1-S107KLIAVPVVIL  | 26   | 4   |
| >PTCH1-S107KLSAVPVVILI | 33  | >PTCH1-S107KLIAVPVVILI | 38   | 5   |
| >PTCH1-S107KLSAVPVV    | 678 | >PTCH1-S107KLIAVPVV    | 345  | 333 |
| >PTCH1-S107KLSAVPVVI   | 8   | >PTCH1-S107KLIAVPVVI   | 7    | 1   |
| >PTCH1-S107KLSAVPVVIL  | 33  | >PTCH1-S107KLIAVPVVIL  | 22   | 11  |
| >PTCH1-S107KLSAVPVVILI | 23  | >PTCH1-S107KLIAVPVVILI | 16   | 7   |
| >PTCH1-S107KLSAVPVVI   | 564 | >PTCH1-S107KLIAVPVVI   | 404  | 160 |
| >PTCH1-S107KLSAVPVVIL  | 263 | >PTCH1-S107KLIAVPVVIL  | 158  | 105 |
| >PTCH1-S107KLSAVPVVI   | 209 | >PTCH1-S107KLIAVPVVI   | 101  | 108 |
| >PTCH1-S107KLSAVPVVILI | 161 | >PTCH1-S107KLIAVPVVILI | 94   | 67  |
| >PTCH1-S107IKLSAVPV    | 8   | >PTCH1-S107IKLIAVPV    | 29   | 21  |
| >PTCH1-S107IKLSAVPVV   | 12  | >PTCH1-S107IKLIAVPVV   | 43   | 31  |
| >PTCH1-S107IKLSAVPVVI  | 8   | >PTCH1-S107IKLIAVPVVI  | 22   | 14  |
| >PTCH1-S107IKLSAVPVVIL | 5   | >PTCH1-S107IKLIAVPVVIL | 12   | 7   |
| >PTCH1-S107IKLSAVPVVIL | 240 | >PTCH1-S107IKLIAVPVVIL | 1150 | 910 |
| >PTCH1-S107GIKLSAVPV   | 83  | >PTCH1-S107GIKLIAVPV   | 81   | 2   |
| >PTCH1-S107GIKLSAVPV   | 207 | >PTCH1-S107GIKLIAVPV   | 270  | 63  |
| >PTCH1-S107GIKLSAVPVV  | 87  | >PTCH1-S107GIKLIAVPVV  | 111  | 24  |
| >PTCH1-S107GIKLSAVPV   | 480 | >PTCH1-S107GIKLIAVPV   | 1306 | 826 |
| >PTCH1-S107IGIKLSAV    | 705 | >PTCH1-S107IGIKLIAV    | 358  | 347 |
| >PTCH1-S107LIGIKLSAVPV | 516 | >PTCH1-S107LIGIKLIAVPV | 447  | 69  |
| >PTCH1-S107LIGIKLSAV   | 28  | >PTCH1-S107LIGIKLIAV   | 218  | 190 |
| >PTCH1-S107LIGIKLSAVPV | 108 | >PTCH1-S107LIGIKLIAVPV | 207  | 99  |
| >PTCH1-S107LIGIKLSAV   | 223 | >PTCH1-S107LIGIKLIAV   | 227  | 4   |

|                        |       |                        |      |       |
|------------------------|-------|------------------------|------|-------|
| >PTCH1-S107LIGIKLSAVPV | 228   | >PTCH1-S107LIGIKLIAVPV | 213  | 15    |
| >PTCH1-S107LIGIKLSAV   | 42    | >PTCH1-S107LIGIKLIAV   | 26   | 16    |
| >PTCH1-S107LIGIKLSAVPV | 62    | >PTCH1-S107LIGIKLIAVPV | 43   | 19    |
| >PTCH1-S107LIGIKLSAV   | 289   | >PTCH1-S107LIGIKLIAV   | 214  | 75    |
| >PTCH1-S107LIGIKLSAVPV | 251   | >PTCH1-S107LIGIKLIAVPV | 239  | 12    |
| >PTCH1-S107LIGIKLSAV   | 731   | >PTCH1-S107LIGIKLIAV   | 232  | 499   |
| >PTCH1-S107LIGIKLSAVPV | 254   | >PTCH1-S107LIGIKLIAVPV | 138  | 116   |
| >PTCH1-S107LIGIKLSAV   | 9     | >PTCH1-S107LIGIKLIAV   | 11   | 2     |
| >PTCH1-S107LIGIKLSAVPV | 11    | >PTCH1-S107LIGIKLIAVPV | 11   | 0     |
| >PTCH1-S107LIGIKLSAV   | 348   | >PTCH1-S107LIGIKLIAV   | 1489 | 1141  |
| >PTCH1-S107GLIGIKLS    | 11797 | >PTCH1-S107GLIGIKLI    | 225  | 11572 |
| >PTCH1-S107GLIGIKLSA   | 373   | >PTCH1-S107GLIGIKLIA   | 1355 | 982   |
| >PTCH1-S107GLIGIKLSAV  | 49    | >PTCH1-S107GLIGIKLIAV  | 28   | 21    |
| >PTCH1-S107GLIGIKLS    | 1394  | >PTCH1-S107GLIGIKLI    | 59   | 1335  |
| >PTCH1-S107GLIGIKLSA   | 108   | >PTCH1-S107GLIGIKLIA   | 427  | 319   |
| >PTCH1-S107GLIGIKLSAV  | 33    | >PTCH1-S107GLIGIKLIAV  | 38   | 5     |
| >PTCH1-S107GLIGIKLS    | 3111  | >PTCH1-S107GLIGIKLI    | 39   | 3072  |
| >PTCH1-S107GLIGIKLSA   | 107   | >PTCH1-S107GLIGIKLIA   | 352  | 245   |
| >PTCH1-S107GLIGIKLSAV  | 11    | >PTCH1-S107GLIGIKLIAV  | 20   | 9     |
| >PTCH1-S107GLIGIKLSA   | 62    | >PTCH1-S107GLIGIKLIAV  | 48   | 14    |
| >PTCH1-S107GLIGIKLS    | 4717  | >PTCH1-S107GLIGIKLI    | 33   | 4684  |
| >PTCH1-S107GLIGIKLSA   | 135   | >PTCH1-S107GLIGIKLIA   | 985  | 850   |
| >PTCH1-S107GLIGIKLSAV  | 4     | >PTCH1-S107GLIGIKLIAV  | 4    | 0     |
| >PTCH1-S107GLIGIKLS    | 14778 | >PTCH1-S107GLIGIKLI    | 120  | 14658 |
| >PTCH1-S107GLIGIKLSAV  | 6     | >PTCH1-S107GLIGIKLIAV  | 6    | 0     |
| >PTCH1-S107GLIGIKLS    | 11388 | >PTCH1-S107GLIGIKLI    | 134  | 11254 |
| >PTCH1-S107GLIGIKLSA   | 183   | >PTCH1-S107GLIGIKLIA   | 412  | 229   |
| >PTCH1-S107GLIGIKLSAV  | 10    | >PTCH1-S107GLIGIKLIAV  | 9    | 1     |
| >PTCH1-S107GLIGIKLSAV  | 102   | >PTCH1-S107GLIGIKLIAV  | 114  | 12    |
| >PTCH1-S107GLIGIKLS    | 2279  | >PTCH1-S107GLIGIKLI    | 21   | 2258  |
| >PTCH1-S107GLIGIKLSA   | 10    | >PTCH1-S107GLIGIKLIA   | 47   | 37    |
| >PTCH1-S107GLIGIKLSAV  | 2     | >PTCH1-S107GLIGIKLIAV  | 2    | 0     |
| >PTCH1-S107MGLIGIKLSA\ | 259   | >PTCH1-S107MGLIGIKLIAV | 214  | 45    |
| >PTCH1-S107MGLIGIKLSA\ | 465   | >PTCH1-S107MGLIGIKLIAV | 325  | 140   |
| >PTCH1-S107MMGLIGIKLS  | 6216  | >PTCH1-S107MMGLIGIKLI  | 238  | 5978  |
| >PTCH1-S107MMGLIGIKLS  | 189   | >PTCH1-S107MMGLIGIKLI  | 494  | 305   |
| >PTCH1-S107MMGLIGIKLS  | 3375  | >PTCH1-S107MMGLIGIKLI  | 75   | 3300  |
| >PTCH1-S107MMGLIGIKLS  | 264   | >PTCH1-S107MMGLIGIKLI  | 662  | 398   |
| >PTCH1-S107MMGLIGIKLS  | 3712  | >PTCH1-S107MMGLIGIKLI  | 28   | 3684  |
| >PTCH1-S107MMGLIGIKLS  | 91    | >PTCH1-S107MMGLIGIKLI  | 442  | 351   |
| >PTCH1-S107MMGLIGIKLS  | 17037 | >PTCH1-S107MMGLIGIKLI  | 284  | 16753 |
| >PTCH1-S107MMGLIGIKLS  | 13888 | >PTCH1-S107MMGLIGIKLI  | 183  | 13705 |
| >PTCH1-S107MMGLIGIKLS  | 312   | >PTCH1-S107MMGLIGIKLI  | 625  | 313   |

|                        |       |                        |       |       |
|------------------------|-------|------------------------|-------|-------|
| >PTCH1-S107MMGLIGIKLS  | 18001 | >PTCH1-S107MMGLIGIKLI  | 349   | 17652 |
| >PTCH1-S107MMGLIGIKLS  | 8074  | >PTCH1-S107MMGLIGIKLI  | 64    | 8010  |
| >PTCH1-S107MMGLIGIKLS  | 35    | >PTCH1-S107MMGLIGIKLI  | 138   | 103   |
| >PTCH1-S119SPEPPPSVVR  | 327   | >PTCH1-S119FPEPPPSVVR  | 378   | 51    |
| >PTCH1-S119SPEPPPSV    | 251   | >PTCH1-S119FPEPPPSV    | 254   | 3     |
| >PTCH1-S119SPEPPPSVV   | 101   | >PTCH1-S119FPEPPPSVV   | 104   | 3     |
| >PTCH1-S119SPEPPPSVVR  | 460   | >PTCH1-S119FPEPPPSVVR  | 417   | 43    |
| >PTCH1-S119SPEPPPSVVR  | 212   | >PTCH1-S119FPEPPPSVVR  | 24    | 188   |
| >PTCH1-S119SPEPPPSVV   | 2254  | >PTCH1-S119FPEPPPSVV   | 304   | 1950  |
| >PTCH1-S119SPEPPPSV    | 2436  | >PTCH1-S119FPEPPPSV    | 189   | 2247  |
| >PTCH1-S119SPEPPPSVV   | 1885  | >PTCH1-S119FPEPPPSVV   | 181   | 1704  |
| >PTCH1-S119SPEPPPSVVR  | 1321  | >PTCH1-S119FPEPPPSVVR  | 59    | 1262  |
| >PTCH1-S119SPEPPPSV    | 5283  | >PTCH1-S119FPEPPPSV    | 24    | 5259  |
| >PTCH1-S119SPEPPPSVV   | 7402  | >PTCH1-S119FPEPPPSVV   | 29    | 7373  |
| >PTCH1-S119SPEPPPSVVR  | 388   | >PTCH1-S119FPEPPPSVVR  | 30    | 358   |
| >PTCH1-S119PSPEPPPSV   | 256   | >PTCH1-S119PFPEPPPSV   | 15191 | 14935 |
| >PTCH1-S119PSPEPPPSVV  | 171   | >PTCH1-S119PFPEPPPSVV  | 14357 | 14186 |
| >PTCH1-S119PSPEPPPSVVR | 7215  | >PTCH1-S119PFPEPPPSVVR | 368   | 6847  |
| >PTCH1-S119TPSPEPPPSV  | 4176  | >PTCH1-S119TPFPEPPPSV  | 73    | 4103  |
| >PTCH1-S119TPSPEPPPSV  | 455   | >PTCH1-S119TPFPEPPPSV  | 89    | 366   |
| >PTCH1-S119TPSPEPPPS   | 302   | >PTCH1-S119TPFPEPPPS   | 237   | 65    |
| >PTCH1-S119TPSPEPPPSV  | 1244  | >PTCH1-S119TPFPEPPPSV  | 438   | 806   |
| >PTCH1-S119TPSPEPPPSV  | 590   | >PTCH1-S119TPFPEPPPSV  | 188   | 402   |
| >PTCH1-S119TPSPEPPPSV  | 1141  | >PTCH1-S119TPFPEPPPSV  | 375   | 766   |
| >PTCH1-S119PTPSPEPPPS  | 69    | >PTCH1-S119PTPFPEPPPS  | 223   | 154   |
| >PTCH1-S119LPTPSPEPPPS | 178   | >PTCH1-S119LPTPFPEPPPS | 158   | 20    |
| >PTCH1-S119LPTPSPEP    | 921   | >PTCH1-S119LPTPFPEP    | 261   | 660   |
| >PTCH1-S119LPTPSPEPPPS | 255   | >PTCH1-S119LPTPFPEPPPS | 192   | 63    |
| >PTCH1-S119LNRLPTPS    | 17561 | >PTCH1-S119LNRLLPTPF   | 389   | 17172 |
| >PTCH1-S119LNRLPTPS    | 17048 | >PTCH1-S119LNRLLPTPF   | 39    | 17009 |
| >PTCH1-S119GLNRLPTPS   | 444   | >PTCH1-S119GLNRLLPTPF  | 1023  | 579   |
| >PTCH1-S119GLNRLPTPS   | 11584 | >PTCH1-S119GLNRLLPTPF  | 74    | 11510 |
| >PTCH1-S119GLNRLPTPS   | 14430 | >PTCH1-S119GLNRLLPTPF  | 86    | 14344 |
| >PTCH1-S119GLNRLPTPS   | 16203 | >PTCH1-S119GLNRLLPTPF  | 73    | 16130 |
| >PTCH1-S129SLPPGRQGGQ  | 27    | >PTCH1-S129FLPPGRQGGQ  | 5     | 22    |
| >PTCH1-S129SLPPGRQGGQ  | 108   | >PTCH1-S129FLPPGRQGGQ  | 12    | 96    |
| >PTCH1-S129SLPPGRQGGQ  | 2224  | >PTCH1-S129FLPPGRQGGQ  | 183   | 2041  |
| >PTCH1-S129PRQQPHLDS   | 12610 | >PTCH1-S129PRQQPHLDS   | 275   | 12335 |
| >PTCH1-S129SGSLPPGR    | 1548  | >PTCH1-S129SGFLPPGR    | 268   | 1280  |
| >PTCH1-S129DSGSLPPGR   | 231   | >PTCH1-S129DSGFLPPGR   | 167   | 64    |
| >PTCH1-S129HLDSGSLPPG  | 399   | >PTCH1-S129HLDSGFLPPG  | 205   | 194   |
| >PTCH1-S129QPHLDSGSL   | 43    | >PTCH1-S129QPHLDSGFL   | 519   | 476   |
| >PTCH1-S129QPHLDSGS    | 4668  | >PTCH1-S129QPHLDSGF    | 65    | 4603  |

|                       |       |                       |      |       |
|-----------------------|-------|-----------------------|------|-------|
| >PTCH1-S129QQPHLDSGS  | 15791 | >PTCH1-S129QQPHLDSGF  | 143  | 15648 |
| >PTCH1-S129QQPHLDSGS  | 20272 | >PTCH1-S129QQPHLDSGF  | 376  | 19896 |
| >PTCH1-S129QQPHLDSGS  | 15626 | >PTCH1-S129QQPHLDSGF  | 50   | 15576 |
| >PTCH1-S129RQQPHLDSG  | 88    | >PTCH1-S129RQQPHLDSG  | 43   | 45    |
| >PTCH1-S129RQQPHLDSG  | 15998 | >PTCH1-S129RQQPHLDSG  | 434  | 15564 |
| >PTCH1-S129RQQPHLDSG  | 2587  | >PTCH1-S129RQQPHLDSG  | 30   | 2557  |
| >PTCH1-S129RQQPHLDSG  | 93    | >PTCH1-S129RQQPHLDSG  | 231  | 138   |
| >PTCH1-S129RQQPHLDSG  | 4957  | >PTCH1-S129RQQPHLDSG  | 9    | 4948  |
| >PTCH1-S129RQQPHLDSG  | 172   | >PTCH1-S129RQQPHLDSG  | 413  | 241   |
| >PTCH1-S129RQQPHLDSG  | 23570 | >PTCH1-S129RQQPHLDSG  | 370  | 23200 |
| >PTCH1-S129RQQPHLDSG  | 307   | >PTCH1-S129RQQPHLDSG  | 1153 | 846   |
| >PTCH1-S129RQQPHLDSG  | 395   | >PTCH1-S129RQQPHLDSG  | 173  | 222   |
| >PTCH1-S129RQQPHLDSG  | 91    | >PTCH1-S129RQQPHLDSG  | 37   | 54    |
| >PTCH1-S331SRKYMHWQI  | 685   | >PTCH1-S331FRKYMHWQI  | 199  | 486   |
| >PTCH1-S331SRKYMHWQI  | 938   | >PTCH1-S331FRKYMHWQI  | 261  | 677   |
| >PTCH1-S331SRKYMHWQI  | 118   | >PTCH1-S331FRKYMHWQI  | 131  | 13    |
| >PTCH1-S331SRKYMHWQI  | 190   | >PTCH1-S331FRKYMHWQI  | 545  | 355   |
| >PTCH1-S331LSRKYMHW   | 11112 | >PTCH1-S331LFRKYMHW   | 345  | 10767 |
| >PTCH1-S331LSRKYMHW   | 14062 | >PTCH1-S331LFRKYMHW   | 139  | 13923 |
| >PTCH1-S331LSRKYMHWC  | 477   | >PTCH1-S331LFRKYMHWC  | 1591 | 1114  |
| >PTCH1-S331LSRKYMHW   | 5     | >PTCH1-S331LFRKYMHW   | 5428 | 5423  |
| >PTCH1-S331LSRKYMHW   | 32    | >PTCH1-S331LFRKYMHW   | 6324 | 6292  |
| >PTCH1-S331LSRKYMHW   | 18    | >PTCH1-S331LFRKYMHW   | 1982 | 1964  |
| >PTCH1-S331LSRKYMHWC  | 385   | >PTCH1-S331LFRKYMHWC  | 7614 | 7229  |
| >PTCH1-S331LSRKYMHW   | 161   | >PTCH1-S331LFRKYMHW   | 2794 | 2633  |
| >PTCH1-S331LVLNGGCHGI | 9619  | >PTCH1-S331LVLNGGCHGI | 280  | 9339  |
| >PTCH1-S331LVLNGGCHGI | 15404 | >PTCH1-S331LVLNGGCHGI | 325  | 15079 |
| >PTCH1-S331LVLNGGCHGI | 19480 | >PTCH1-S331LVLNGGCHGI | 260  | 19220 |
| >PTCH1-S331LVLNGGCHGI | 3454  | >PTCH1-S331LVLNGGCHGI | 25   | 3429  |
| >PTCH1-S331GLSRKYMHW  | 71    | >PTCH1-S331GLFRKYMHW  | 31   | 40    |
| >PTCH1-S331GLSRKYMHW  | 1866  | >PTCH1-S331GLFRKYMHW  | 334  | 1532  |
| >PTCH1-S331GLSRKYMHW  | 180   | >PTCH1-S331GLFRKYMHW  | 127  | 53    |
| >PTCH1-S331HGLSRKYMHW | 131   | >PTCH1-S331HGLFRKYMHW | 195  | 64    |
| >PTCH1-S331HGLSRKYMHW | 113   | >PTCH1-S331HGLFRKYMHW | 195  | 82    |
| >PTCH1-S331CHGLSRKYMI | 136   | >PTCH1-S331CHGLFRKYMI | 128  | 8     |
| >PTCH1-S331GCHGLSRKY  | 185   | >PTCH1-S331GCHGLFRKY  | 159  | 26    |
| >PTCH1-S331GGCHGLSRK  | 3515  | >PTCH1-S331GGCHGLFRK  | 495  | 3020  |
| >PTCH1-S331NGGCHGLSR  | 561   | >PTCH1-S331NGGCHGLFR  | 131  | 430   |
| >PTCH1-S331LNGGCHGLSF | 1558  | >PTCH1-S331LNGGCHGLFF | 401  | 1157  |
| >PTCH1-S331LNGGCHGLSF | 2370  | >PTCH1-S331LNGGCHGLFF | 302  | 2068  |
| >PTCH1-S331LNGGCHGLS  | 15063 | >PTCH1-S331LNGGCHGLF  | 209  | 14854 |
| >PTCH1-S331LNGGCHGLSF | 570   | >PTCH1-S331LNGGCHGLFF | 156  | 414   |
| >PTCH1-S331VLNGGCHGLI | 292   | >PTCH1-S331VLNGGCHGLI | 128  | 164   |



|                         |       |                         |       |       |
|-------------------------|-------|-------------------------|-------|-------|
| >PTCH1-S331VLNGGCHGLI   | 492   | >PTCH1-S331VLNGGCHGLI   | 77    | 415   |
| >PTCH1-S331VLNGGCHGLI   | 1456  | >PTCH1-S331VLNGGCHGLI   | 354   | 1102  |
| >PTCH1-S331VLNGGCHGLI   | 18773 | >PTCH1-S331VLNGGCHGLI   | 313   | 18460 |
| >PTCH1-S331VLNGGCHGLI   | 21011 | >PTCH1-S331VLNGGCHGLI   | 369   | 20642 |
| >PTCH1-S41C(SVAQNSTQK'  | 176   | >PTCH1-S41C(NVAQNSTQK   | 458   | 282   |
| >PTCH1-S41C(SVAQNSTQK'  | 117   | >PTCH1-S41C(NVAQNSTQK   | 1036  | 919   |
| >PTCH1-S41C(SVAQNSTQK'  | 37    | >PTCH1-S41C(NVAQNSTQK   | 981   | 944   |
| >PTCH1-S41C(SVAQNSTQK'  | 408   | >PTCH1-S41C(NVAQNSTQK   | 295   | 113   |
| >PTCH1-S41C(SVAQNSTQK'  | 5     | >PTCH1-S41C(NVAQNSTQK   | 43    | 38    |
| >PTCH1-S41C(SVAQNSTQK   | 147   | >PTCH1-S41C(NVAQNSTQK   | 941   | 794   |
| >PTCH1-S41C(SVAQNSTQK   | 30    | >PTCH1-S41C(NVAQNSTQK   | 546   | 516   |
| >PTCH1-S41C(SVAQNSTQK   | 27    | >PTCH1-S41C(NVAQNSTQK   | 16    | 11    |
| >PTCH1-S41C(SVAQNSTQK'  | 180   | >PTCH1-S41C(NVAQNSTQK   | 149   | 31    |
| >PTCH1-S41C(SVAQNSTQK'  | 33    | >PTCH1-S41C(NVAQNSTQK   | 17    | 16    |
| >PTCH1-S41C(SVAQNSTQK   | 381   | >PTCH1-S41C(NVAQNSTQK   | 4231  | 3850  |
| >PTCH1-S41C(QSVAQNSTQ   | 466   | >PTCH1-S41C(QNVAQNSTC   | 12273 | 11807 |
| >PTCH1-S41C(QSVAQNSTQ   | 137   | >PTCH1-S41C(QNVAQNSTC   | 12784 | 12647 |
| >PTCH1-S41C(QSVAQNSTQ   | 181   | >PTCH1-S41C(QNVAQNSTC   | 7687  | 7506  |
| >PTCH1-S41C(QSVAQNSTQ   | 165   | >PTCH1-S41C(QNVAQNSTC   | 2207  | 2042  |
| >PTCH1-S41C(QSVAQNSTQ   | 259   | >PTCH1-S41C(QNVAQNSTC   | 23941 | 23682 |
| >PTCH1-S41C(HQSVAQNST   | 451   | >PTCH1-S41C(HQNVAQNST   | 343   | 108   |
| >PTCH1-S41C(HQSVAQNST   | 443   | >PTCH1-S41C(HQNVAQNST   | 227   | 216   |
| >PTCH1-S41C(EVVHQSVQA   | 387   | >PTCH1-S41C(EVVHQNVAC   | 207   | 180   |
| >PTCH1-S41C(EVVHQSVQA   | 60    | >PTCH1-S41C(EVVHQNVAC   | 47    | 13    |
| >PTCH1-S41C(EVVHQSVQA   | 422   | >PTCH1-S41C(EVVHQNVAC   | 461   | 39    |
| >PTCH1-S41C(VEVVHQSV    | 305   | >PTCH1-S41C(VEVVHQNV    | 775   | 470   |
| >PTCH1-S41C(VEVVHQSV    | 344   | >PTCH1-S41C(VEVVHQNV    | 753   | 409   |
| >PTCH1-S41C(VEVVHQSVQA  | 429   | >PTCH1-S41C(VEVVHQNVAC  | 496   | 67    |
| >PTCH1-S41C(VEVVHQSV    | 491   | >PTCH1-S41C(VEVVHQNV    | 835   | 344   |
| >PTCH1-S41C(VEVVHQSVQA  | 102   | >PTCH1-S41C(VEVVHQNVAC  | 79    | 23    |
| >PTCH1-S41C(YVEVVHQSV   | 145   | >PTCH1-S41C(YVEVVHQNV   | 541   | 396   |
| >PTCH1-S41C(YVEVVHQSV   | 61    | >PTCH1-S41C(YVEVVHQNV   | 130   | 69    |
| >PTCH1-S41C(YVEVVHQSV   | 7     | >PTCH1-S41C(YVEVVHQNV   | 11    | 4     |
| >PTCH1-S41C(YVEVVHQSV   | 349   | >PTCH1-S41C(YVEVVHQNV   | 376   | 27    |
| >PTCH1-S41C(YVEVVHQSV   | 368   | >PTCH1-S41C(YVEVVHQNV   | 353   | 15    |
| >PTCH1-S41C(TYVEVVHQSV  | 56    | >PTCH1-S41C(TYVEVVHQNV  | 190   | 134   |
| >PTCH1-S41C(TYVEVVHQSV  | 225   | >PTCH1-S41C(TYVEVVHQNV  | 408   | 183   |
| >PTCH1-S41C(TYVEVVHQSV  | 295   | >PTCH1-S41C(TYVEVVHQNV  | 590   | 295   |
| >PTCH1-S41C(TYVEVVHQSV  | 183   | >PTCH1-S41C(TYVEVVHQNV  | 229   | 46    |
| >PTCH1-S41C(TYVEVVHQSV  | 409   | >PTCH1-S41C(TYVEVVHQNV  | 558   | 149   |
| >PTCH1-S41C(RTYVEVVHQSV | 109   | >PTCH1-S41C(RTYVEVVHQNV | 171   | 62    |
| >PTCH1-S41C(RTYVEVVHQSV | 92    | >PTCH1-S41C(RTYVEVVHQNV | 288   | 196   |
| >PTCH1-S41C(RTYVEVVHQSV | 16    | >PTCH1-S41C(RTYVEVVHQNV | 27    | 11    |

|                       |       |                       |       |       |
|-----------------------|-------|-----------------------|-------|-------|
| >PTCH1-S41C RTYVEVVHQ | 96    | >PTCH1-S41C RTYVEVVHQ | 96    | 0     |
| >PTCH1-S41C RTYVEVVHQ | 124   | >PTCH1-S41C RTYVEVVHQ | 245   | 121   |
| >PTCH1-S41C RTYVEVVHQ | 61    | >PTCH1-S41C RTYVEVVHQ | 88    | 27    |
| >PTCH1-S41C RTYVEVVHQ | 68    | >PTCH1-S41C RTYVEVVHQ | 169   | 101   |
| >PTCH1-S41C RTYVEVVHQ | 317   | >PTCH1-S41C RTYVEVVHQ | 277   | 40    |
| >PTCH1-S41C RTYVEVVHQ | 144   | >PTCH1-S41C RTYVEVVHQ | 274   | 130   |
| >PTCH1-S41C RTYVEVVHQ | 117   | >PTCH1-S41C RTYVEVVHQ | 212   | 95    |
| >PTCH1-S41C RTYVEVVHQ | 14    | >PTCH1-S41C RTYVEVVHQ | 15    | 1     |
| >PTCH1-S41C RTYVEVVHQ | 455   | >PTCH1-S41C RTYVEVVHQ | 1228  | 773   |
| >PTCH1-S41C RTYVEVVHQ | 128   | >PTCH1-S41C RTYVEVVHQ | 339   | 211   |
| >PTCH1-S49 SFNAATTQV  | 27    | >PTCH1-S49 FFNAATTQV  | 92    | 65    |
| >PTCH1-S49 SFNAATTQVL | 26    | >PTCH1-S49 FFNAATTQVL | 94    | 68    |
| >PTCH1-S49 SFNAATTQV  | 195   | >PTCH1-S49 FFNAATTQV  | 11    | 184   |
| >PTCH1-S49 SFNAATTQV  | 1630  | >PTCH1-S49 FFNAATTQV  | 152   | 1478  |
| >PTCH1-S49 SFNAATTQV  | 2265  | >PTCH1-S49 FFNAATTQV  | 392   | 1873  |
| >PTCH1-S49 SFNAATTQV  | 615   | >PTCH1-S49 FFNAATTQV  | 230   | 385   |
| >PTCH1-S49 SFNAATTQV  | 244   | >PTCH1-S49 FFNAATTQV  | 20    | 224   |
| >PTCH1-S49 SFNAATTQVL | 281   | >PTCH1-S49 FFNAATTQVL | 54    | 227   |
| >PTCH1-S49 SFNAATTQVL | 3132  | >PTCH1-S49 FFNAATTQVL | 487   | 2645  |
| >PTCH1-S49 ISFNAATTQV | 138   | >PTCH1-S49 IFFNAATTQV | 1043  | 905   |
| >PTCH1-S49 ISFNAATTQV | 214   | >PTCH1-S49 IFFNAATTQV | 2028  | 1814  |
| >PTCH1-S49 ISFNAATTQV | 495   | >PTCH1-S49 IFFNAATTQV | 1075  | 580   |
| >PTCH1-S49 ISFNAATTQV | 586   | >PTCH1-S49 IFFNAATTQV | 351   | 235   |
| >PTCH1-S49 ISFNAATTQV | 1991  | >PTCH1-S49 IFFNAATTQV | 448   | 1543  |
| >PTCH1-S49 ISFNAATTQV | 1229  | >PTCH1-S49 IFFNAATTQV | 105   | 1124  |
| >PTCH1-S49 ISFNAATTQV | 7915  | >PTCH1-S49 IFFNAATTQV | 164   | 7751  |
| >PTCH1-S49 ISFNAATTQV | 15135 | >PTCH1-S49 IFFNAATTQV | 86    | 15049 |
| >PTCH1-S49 ISFNAATTQV | 82    | >PTCH1-S49 IFFNAATTQV | 1148  | 1066  |
| >PTCH1-S49 ISFNAATTQV | 200   | >PTCH1-S49 IFFNAATTQV | 6188  | 5988  |
| >PTCH1-S49 ISFNAATTQV | 292   | >PTCH1-S49 IFFNAATTQV | 2771  | 2479  |
| >PTCH1-S49 ISFNAATTQV | 71    | >PTCH1-S49 IFFNAATTQV | 2009  | 1938  |
| >PTCH1-S49 ISFNAATTQV | 13    | >PTCH1-S49 IFFNAATTQV | 381   | 368   |
| >PTCH1-S49 ISFNAATT   | 96    | >PTCH1-S49 IFFNAATT   | 25343 | 25247 |
| >PTCH1-S49 ISFNAATTQ  | 156   | >PTCH1-S49 IFFNAATTQ  | 25832 | 25676 |
| >PTCH1-S49 ISFNAATTQV | 29    | >PTCH1-S49 IFFNAATTQV | 23089 | 23060 |
| >PTCH1-S49 ISFNAATTQV | 6     | >PTCH1-S49 IFFNAATTQV | 18537 | 18531 |
| >PTCH1-S49 ISFNAATTQV | 315   | >PTCH1-S49 IFFNAATTQV | 23443 | 23128 |
| >PTCH1-S49 ISFNAATTQV | 230   | >PTCH1-S49 IFFNAATTQV | 13597 | 13367 |
| >PTCH1-S49 ISFNAATTQV | 424   | >PTCH1-S49 IFFNAATTQV | 15205 | 14781 |
| >PTCH1-S49 ISFNAATTQ  | 30    | >PTCH1-S49 IFFNAATTQ  | 1344  | 1314  |
| >PTCH1-S49 ISFNAATTQV | 16    | >PTCH1-S49 IFFNAATTQV | 401   | 385   |
| >PTCH1-S49 ISFNAATTQV | 60    | >PTCH1-S49 IFFNAATTQV | 9644  | 9584  |
| >PTCH1-S49 GISFNAATTQ | 1592  | >PTCH1-S49 GIFFNAATTQ | 143   | 1449  |

|                        |      |                        |      |      |
|------------------------|------|------------------------|------|------|
| >PTCH1-S49¿GISFNAATTQ  | 51   | >PTCH1-S49¿GIFFNAATTQ  | 25   | 26   |
| >PTCH1-S49¿GISFNAATTQ  | 12   | >PTCH1-S49¿GIFFNAATTQ  | 10   | 2    |
| >PTCH1-S49¿GISFNAATTQ  | 574  | >PTCH1-S49¿GIFFNAATTQ  | 97   | 477  |
| >PTCH1-S49¿GISFNAATTQ  | 160  | >PTCH1-S49¿GIFFNAATTQ  | 11   | 149  |
| >PTCH1-S49¿GISFNAATTQ  | 286  | >PTCH1-S49¿GIFFNAATTQ  | 69   | 217  |
| >PTCH1-S49¿GISFNAATTQ  | 143  | >PTCH1-S49¿GIFFNAATTQ  | 20   | 123  |
| >PTCH1-S49¿GISFNAATTQ  | 91   | >PTCH1-S49¿GIFFNAATTQ  | 108  | 17   |
| >PTCH1-S49¿GISFNAATTQ  | 10   | >PTCH1-S49¿GIFFNAATTQ  | 7    | 3    |
| >PTCH1-S49¿GISFNAATTQ  | 1705 | >PTCH1-S49¿GIFFNAATTQ  | 306  | 1399 |
| >PTCH1-S49¿IGISFNAA    | 375  | >PTCH1-S49¿IGIFFNAA    | 745  | 370  |
| >PTCH1-S49¿SLIGISFNA   | 14   | >PTCH1-S49¿SLIGIFFNA   | 13   | 1    |
| >PTCH1-S49¿SLIGISFNAA  | 215  | >PTCH1-S49¿SLIGIFFNAA  | 148  | 67   |
| >PTCH1-S49¿SLIGISFNAAT | 110  | >PTCH1-S49¿SLIGIFFNAAT | 107  | 3    |
| >PTCH1-S49¿SLIGISFN    | 323  | >PTCH1-S49¿SLIGIFFN    | 144  | 179  |
| >PTCH1-S49¿SLIGISFNA   | 4    | >PTCH1-S49¿SLIGIFFNA   | 4    | 0    |
| >PTCH1-S49¿SLIGISFNAA  | 50   | >PTCH1-S49¿SLIGIFFNAA  | 48   | 2    |
| >PTCH1-S49¿SLIGISFNAAT | 19   | >PTCH1-S49¿SLIGIFFNAAT | 20   | 1    |
| >PTCH1-S49¿SLIGISFNA   | 10   | >PTCH1-S49¿SLIGIFFNA   | 10   | 0    |
| >PTCH1-S49¿SLIGISFNAA  | 23   | >PTCH1-S49¿SLIGIFFNAA  | 27   | 4    |
| >PTCH1-S49¿SLIGISFNAAT | 61   | >PTCH1-S49¿SLIGIFFNAAT | 60   | 1    |
| >PTCH1-S49¿SLIGISFNA   | 36   | >PTCH1-S49¿SLIGIFFNA   | 9    | 27   |
| >PTCH1-S49¿SLIGISFNAA  | 56   | >PTCH1-S49¿SLIGIFFNAA  | 36   | 20   |
| >PTCH1-S49¿SLIGISFNAAT | 491  | >PTCH1-S49¿SLIGIFFNAAT | 215  | 276  |
| >PTCH1-S49¿SLIGISFN    | 1036 | >PTCH1-S49¿SLIGIFFN    | 349  | 687  |
| >PTCH1-S49¿SLIGISFNA   | 9    | >PTCH1-S49¿SLIGIFFNA   | 9    | 0    |
| >PTCH1-S49¿SLIGISFNAA  | 26   | >PTCH1-S49¿SLIGIFFNAA  | 16   | 10   |
| >PTCH1-S49¿SLIGISFNAAT | 47   | >PTCH1-S49¿SLIGIFFNAAT | 52   | 5    |
| >PTCH1-S49¿SLIGISFNA   | 17   | >PTCH1-S49¿SLIGIFFNA   | 27   | 10   |
| >PTCH1-S49¿SLIGISFNAA  | 36   | >PTCH1-S49¿SLIGIFFNAA  | 47   | 11   |
| >PTCH1-S49¿SLIGISFNAAT | 347  | >PTCH1-S49¿SLIGIFFNAAT | 510  | 163  |
| >PTCH1-S49¿SLIGISFNA   | 10   | >PTCH1-S49¿SLIGIFFNA   | 10   | 0    |
| >PTCH1-S49¿SLIGISFNAA  | 63   | >PTCH1-S49¿SLIGIFFNAA  | 63   | 0    |
| >PTCH1-S49¿SLIGISFNA   | 79   | >PTCH1-S49¿SLIGIFFNA   | 208  | 129  |
| >PTCH1-S49¿SLIGISFNA   | 4    | >PTCH1-S49¿SLIGIFFNA   | 3    | 1    |
| >PTCH1-S49¿SLIGISFNAA  | 10   | >PTCH1-S49¿SLIGIFFNAA  | 8    | 2    |
| >PTCH1-S49¿SLIGISFNAAT | 29   | >PTCH1-S49¿SLIGIFFNAAT | 34   | 5    |
| >PTCH1-S49¿SLIGISFNA   | 86   | >PTCH1-S49¿SLIGIFFNA   | 54   | 32   |
| >PTCH1-S49¿SLIGISFNA   | 482  | >PTCH1-S49¿SLIGIFFNA   | 295  | 187  |
| >PTCH1-S49¿CSLIGISF    | 618  | >PTCH1-S49¿CSLIGIFF    | 331  | 287  |
| >PTCH1-S49¿CSLIGISF    | 69   | >PTCH1-S49¿CSLIGIFF    | 332  | 263  |
| >PTCH1-S49¿CSLIGISF    | 7    | >PTCH1-S49¿CSLIGIFF    | 8    | 1    |
| >PTCH1-S49¿CSLIGISF    | 380  | >PTCH1-S49¿CSLIGIFF    | 237  | 143  |
| >PTCH1-S49¿LCSLIGISF   | 449  | >PTCH1-S49¿LCSLIGIFF   | 1671 | 1222 |

|                        |       |                        |      |       |
|------------------------|-------|------------------------|------|-------|
| >PTCH1-S49¿LCSLIGISF   | 237   | >PTCH1-S49¿LCSLIGIFF   | 186  | 51    |
| >PTCH1-S49¿GLCSLIGIS   | 16549 | >PTCH1-S49¿GLCSLIGIF   | 300  | 16249 |
| >PTCH1-S49¿GLCSLIGISF  | 125   | >PTCH1-S49¿GLCSLIGIFF  | 428  | 303   |
| >PTCH1-S49¿GLCSLIGIS   | 14059 | >PTCH1-S49¿GLCSLIGIF   | 189  | 13870 |
| >PTCH1-S49¿GLCSLIGISF  | 559   | >PTCH1-S49¿GLCSLIGIFF  | 388  | 171   |
| >PTCH1-S49¿LGLCSLIGIS  | 21021 | >PTCH1-S49¿LGLCSLIGIF  | 348  | 20673 |
| >PTCH1-S49¿LGLCSLIGISF | 54    | >PTCH1-S49¿LGLCSLIGIFF | 189  | 135   |
| >PTCH1-S49¿LGLCSLIGISF | 331   | >PTCH1-S49¿LGLCSLIGIFF | 683  | 352   |
| >PTCH1-S49¿LGLCSLIGISF | 326   | >PTCH1-S49¿LGLCSLIGIFF | 1221 | 895   |
| >PTCH1-S49¿LGLCSLIGISF | 541   | >PTCH1-S49¿LGLCSLIGIFF | 439  | 102   |
| >PTCH1-S61€SPCVSRVIQV  | 77    | >PTCH1-S61€NPCVSRVIQV  | 730  | 653   |
| >PTCH1-S61€SPCVSRVIQV  | 416   | >PTCH1-S61€NPCVSRVIQV  | 2876 | 2460  |
| >PTCH1-S61€SPCVSRVI    | 410   | >PTCH1-S61€NPCVSRVI    | 3179 | 2769  |
| >PTCH1-S61€TSPCVSRV    | 13    | >PTCH1-S61€TNPCVSRV    | 90   | 77    |
| >PTCH1-S61€TSPCVSRVI   | 203   | >PTCH1-S61€TNPCVSRVI   | 3293 | 3090  |
| >PTCH1-S61€TSPCVSRVIQ' | 32    | >PTCH1-S61€TNPCVSRVIQ  | 301  | 269   |
| >PTCH1-S61€TSPCVSRVI   | 16    | >PTCH1-S61€TNPCVSRVI   | 4520 | 4504  |
| >PTCH1-S61€TSPCVSRVIQ' | 25    | >PTCH1-S61€TNPCVSRVIQ  | 6047 | 6022  |
| >PTCH1-S61€TSPCVSRVI   | 113   | >PTCH1-S61€TNPCVSRVI   | 1402 | 1289  |
| >PTCH1-S61€RRLDIFCCFTS | 297   | >PTCH1-S61€RRLDIFCCFTM | 512  | 215   |
| >PTCH1-S61€RRLDIFCCFTS | 205   | >PTCH1-S61€RRLDIFCCFTM | 133  | 72    |
| >PTCH1-S61€RRLDIFCCFTS | 393   | >PTCH1-S61€RRLDIFCCFTM | 276  | 117   |
| >PTCH1-S61€FTSPCVSRV   | 31    | >PTCH1-S61€FTNPCVSRV   | 39   | 8     |
| >PTCH1-S61€FTSPCVSRV   | 5     | >PTCH1-S61€FTNPCVSRV   | 8    | 3     |
| >PTCH1-S61€FTSPCVSRVI  | 267   | >PTCH1-S61€FTNPCVSRVI  | 955  | 688   |
| >PTCH1-S61€FTSPCVSRV   | 4     | >PTCH1-S61€FTNPCVSRV   | 3    | 1     |
| >PTCH1-S61€FTSPCVSRVI  | 251   | >PTCH1-S61€FTNPCVSRVI  | 507  | 256   |
| >PTCH1-S61€FTSPCVSRV   | 16    | >PTCH1-S61€FTNPCVSRV   | 18   | 2     |
| >PTCH1-S61€FTSPCVSRVI  | 302   | >PTCH1-S61€FTNPCVSRVI  | 750  | 448   |
| >PTCH1-S61€FTSPCVSRV   | 23    | >PTCH1-S61€FTNPCVSRV   | 13   | 10    |
| >PTCH1-S61€FTSPCVSRVI  | 724   | >PTCH1-S61€FTNPCVSRVI  | 310  | 414   |
| >PTCH1-S61€FTSPCVSRV   | 211   | >PTCH1-S61€FTNPCVSRV   | 161  | 50    |
| >PTCH1-S61€FTSPCVSRV   | 94    | >PTCH1-S61€FTNPCVSRV   | 74   | 20    |
| >PTCH1-S61€FTSPCVSRV   | 103   | >PTCH1-S61€FTNPCVSRV   | 91   | 12    |
| >PTCH1-S61€FTSPCVSRV   | 3     | >PTCH1-S61€FTNPCVSRV   | 4    | 1     |
| >PTCH1-S61€FTSPCVSR    | 399   | >PTCH1-S61€FTNPCVSR    | 95   | 304   |
| >PTCH1-S61€FTSPCVSR    | 183   | >PTCH1-S61€FTNPCVSR    | 161  | 22    |
| >PTCH1-S61€FTSPCVSR    | 9     | >PTCH1-S61€FTNPCVSR    | 14   | 5     |
| >PTCH1-S61€FTSPCVSRV   | 5     | >PTCH1-S61€FTNPCVSRV   | 6    | 1     |
| >PTCH1-S61€FTSPCVSRVI  | 356   | >PTCH1-S61€FTNPCVSRVI  | 998  | 642   |
| >PTCH1-S61€FTSPCVSRV   | 200   | >PTCH1-S61€FTNPCVSRV   | 122  | 78    |
| >PTCH1-S61€FTSPCVSRV   | 29    | >PTCH1-S61€FTNPCVSRV   | 41   | 12    |
| >PTCH1-S61€FTSPCVSRVI  | 78    | >PTCH1-S61€FTNPCVSRVI  | 107  | 29    |

|                        |       |                        |       |       |
|------------------------|-------|------------------------|-------|-------|
| >PTCH1-S61€FTSPCVSRV   | 267   | >PTCH1-S61€FTNPCVSRV   | 640   | 373   |
| >PTCH1-S61€FTSPCVSRVI  | 157   | >PTCH1-S61€FTNPCVSRVI  | 363   | 206   |
| >PTCH1-S61€FTSPCVSRV   | 8     | >PTCH1-S61€FTNPCVSRV   | 15    | 7     |
| >PTCH1-S61€FTSPCVSRVI  | 239   | >PTCH1-S61€FTNPCVSRVI  | 2080  | 1841  |
| >PTCH1-S61€FTSPCVSRVIC | 467   | >PTCH1-S61€FTNPCVSRVIC | 872   | 405   |
| >PTCH1-S61€FTSPCVSRV   | 451   | >PTCH1-S61€FTNPCVSRV   | 825   | 374   |
| >PTCH1-S61€FTSPCVSRVI  | 68    | >PTCH1-S61€FTNPCVSRVI  | 77    | 9     |
| >PTCH1-S61€CFTSPCVSRV  | 178   | >PTCH1-S61€CFTNPCVSRV  | 205   | 27    |
| >PTCH1-S61€CFTSPCVSR   | 139   | >PTCH1-S61€CFTNPCVSR   | 189   | 50    |
| >PTCH1-S61€CFTSPCVSR   | 97    | >PTCH1-S61€CFTNPCVSR   | 98    | 1     |
| >PTCH1-S61€CFTSPCVSR   | 284   | >PTCH1-S61€CFTNPCVSR   | 390   | 106   |
| >PTCH1-S61€CFTSPCVSR   | 137   | >PTCH1-S61€CFTNPCVSR   | 211   | 74    |
| >PTCH1-S61€CCFTSPCVSR  | 49    | >PTCH1-S61€CCFTNPCVSR  | 42    | 7     |
| >PTCH1-S61€DIFCCFTSPCV | 225   | >PTCH1-S61€DIFCCFTNPCV | 359   | 134   |
| >PTCH1-S61€DIFCCFTSPCV | 446   | >PTCH1-S61€DIFCCFTNPCV | 726   | 280   |
| >PTCH1-S61€DIFCCFTSPCV | 58    | >PTCH1-S61€DIFCCFTNPCV | 57    | 1     |
| >PTCH1-S61€DIFCCFTSPCV | 35    | >PTCH1-S61€DIFCCFTNPCV | 41    | 6     |
| >PTCH1-S707STRDLLSQF   | 227   | >PTCH1-S707FTRDLLSQF   | 83    | 144   |
| >PTCH1-S707STRDLLSQF   | 210   | >PTCH1-S707FTRDLLSQF   | 31    | 179   |
| >PTCH1-S707STRDLLSQF   | 12    | >PTCH1-S707FTRDLLSQF   | 22    | 10    |
| >PTCH1-S707STRDLLSQ    | 70    | >PTCH1-S707FTRDLLSQ    | 2879  | 2809  |
| >PTCH1-S707STRDLLSQFS  | 21    | >PTCH1-S707FTRDLLSQFS  | 1043  | 1022  |
| >PTCH1-S707STRDLLSQFSI | 452   | >PTCH1-S707FTRDLLSQFSI | 4583  | 4131  |
| >PTCH1-S707STRDLLSQF   | 105   | >PTCH1-S707FTRDLLSQF   | 70    | 35    |
| >PTCH1-S707STRDLLSQF   | 352   | >PTCH1-S707FTRDLLSQF   | 51    | 301   |
| >PTCH1-S707STRDLLSQF   | 3     | >PTCH1-S707FTRDLLSQF   | 3     | 0     |
| >PTCH1-S707STRDLLSQF   | 1022  | >PTCH1-S707FTRDLLSQF   | 65    | 957   |
| >PTCH1-S707STRDLLSQF   | 2     | >PTCH1-S707FTRDLLSQF   | 2     | 0     |
| >PTCH1-S707SSTRDLLSQF  | 4949  | >PTCH1-S707SFTRDLLSQF  | 13    | 4936  |
| >PTCH1-S707SSTRDLLSQF  | 38    | >PTCH1-S707SFTRDLLSQF  | 1114  | 1076  |
| >PTCH1-S707SSTRDLLSQF  | 282   | >PTCH1-S707SFTRDLLSQF  | 3521  | 3239  |
| >PTCH1-S707SSTRDLLSQF  | 20    | >PTCH1-S707SFTRDLLSQF  | 20629 | 20609 |
| >PTCH1-S707SSTRDLLSQF  | 127   | >PTCH1-S707SFTRDLLSQF  | 11912 | 11785 |
| >PTCH1-S707SSTRDLLSQF  | 33    | >PTCH1-S707SFTRDLLSQF  | 1434  | 1401  |
| >PTCH1-S707SSTRDLLSQF  | 13165 | >PTCH1-S707SFTRDLLSQF  | 321   | 12844 |
| >PTCH1-S707LSCQSPESTS€ | 6362  | >PTCH1-S707LSCQSPESTS€ | 37    | 6325  |
| >PTCH1-S707LSCQSPESTS€ | 7460  | >PTCH1-S707LSCQSPESTS€ | 18    | 7442  |
| >PTCH1-S707LSCQSPESTS€ | 3400  | >PTCH1-S707LSCQSPESTS€ | 4     | 3396  |
| >PTCH1-S707LSCQSPESTS€ | 18280 | >PTCH1-S707LSCQSPESTS€ | 68    | 18212 |
| >PTCH1-S707LSCQSPESTS€ | 7370  | >PTCH1-S707LSCQSPESTS€ | 62    | 7308  |
| >PTCH1-S707TSSTRDLLSQF | 3946  | >PTCH1-S707TSFTRDLLSQF | 141   | 3805  |
| >PTCH1-S707TSSTRDLL    | 881   | >PTCH1-S707TSFTRDLL    | 167   | 714   |
| >PTCH1-S707TSSTRDLLSQF | 1403  | >PTCH1-S707TSFTRDLLSQF | 448   | 955   |

|                        |       |                        |      |       |
|------------------------|-------|------------------------|------|-------|
| >PTCH1-S707TSSTRDLLSQI | 560   | >PTCH1-S707TSFTRDLLSQI | 67   | 493   |
| >PTCH1-S707TSSTRDLL    | 1374  | >PTCH1-S707TSFTRDLL    | 264  | 1110  |
| >PTCH1-S707TSSTRDLLSQI | 8     | >PTCH1-S707TSFTRDLLSQI | 4    | 4     |
| >PTCH1-S707TSSTRDLLSQI | 1445  | >PTCH1-S707TSFTRDLLSQI | 309  | 1136  |
| >PTCH1-S707TSSTRDLLSQI | 173   | >PTCH1-S707TSFTRDLLSQI | 148  | 25    |
| >PTCH1-S707TSSTRDLLSQI | 30    | >PTCH1-S707TSFTRDLLSQI | 12   | 18    |
| >PTCH1-S707TSSTRDLL    | 2413  | >PTCH1-S707TSFTRDLL    | 432  | 1981  |
| >PTCH1-S707STSSTRDLL   | 97    | >PTCH1-S707STSSTRDLL   | 45   | 52    |
| >PTCH1-S707STSSTRDL    | 488   | >PTCH1-S707STSSTRDL    | 490  | 2     |
| >PTCH1-S707STSSTRDLL   | 35    | >PTCH1-S707STSSTRDLL   | 141  | 106   |
| >PTCH1-S707STSSTRDLL   | 13    | >PTCH1-S707STSSTRDLL   | 19   | 6     |
| >PTCH1-S707STSSTRDLLSC | 459   | >PTCH1-S707STSSTRDLLSC | 778  | 319   |
| >PTCH1-S707STSSTRDLL   | 329   | >PTCH1-S707STSSTRDLL   | 346  | 17    |
| >PTCH1-S707ESTSSTRDLL  | 136   | >PTCH1-S707ESTSSTRDLL  | 52   | 84    |
| >PTCH1-S707ESTSSTRDLL  | 331   | >PTCH1-S707ESTSSTRDLL  | 246  | 85    |
| >PTCH1-S707PESTSSTRDLL | 388   | >PTCH1-S707PESTSSTRDLL | 246  | 142   |
| >PTCH1-S707PESTSSTRDL  | 641   | >PTCH1-S707PESTSSTRDL  | 441  | 200   |
| >PTCH1-S707SPESTSSTRDL | 90    | >PTCH1-S707SPESTSSTRDL | 139  | 49    |
| >PTCH1-S707SPESTSSTRDL | 40    | >PTCH1-S707SPESTSSTRDL | 62   | 22    |
| >PTCH1-S707QSPESTSSTR  | 830   | >PTCH1-S707QSPESTSSTR  | 196  | 634   |
| >PTCH1-S707QSPESTSSTR  | 1299  | >PTCH1-S707QSPESTSSTR  | 324  | 975   |
| >PTCH1-S707QSPESTSS    | 22039 | >PTCH1-S707QSPESTSS    | 359  | 21680 |
| >PTCH1-S707QSPESTSSTR  | 33    | >PTCH1-S707QSPESTSSTR  | 25   | 8     |
| >PTCH1-S707QSPESTSS    | 15976 | >PTCH1-S707QSPESTSS    | 72   | 15904 |
| >PTCH1-S707QSPESTSS    | 15234 | >PTCH1-S707QSPESTSS    | 40   | 15194 |
| >PTCH1-S707QSPESTSS    | 19469 | >PTCH1-S707QSPESTSS    | 63   | 19406 |
| >PTCH1-S707QSPESTSST   | 2308  | >PTCH1-S707QSPESTSST   | 282  | 2026  |
| >PTCH1-S707CQSPESTSSTI | 1212  | >PTCH1-S707CQSPESTSSTI | 273  | 939   |
| >PTCH1-S707CQSPESTSS   | 6965  | >PTCH1-S707CQSPESTSS   | 44   | 6921  |
| >PTCH1-S707CQSPESTSS   | 2085  | >PTCH1-S707CQSPESTSS   | 4    | 2081  |
| >PTCH1-S707CQSPESTSSTI | 274   | >PTCH1-S707CQSPESTSSTI | 784  | 510   |
| >PTCH1-S707CQSPESTSSTI | 1028  | >PTCH1-S707CQSPESTSSTI | 287  | 741   |
| >PTCH1-S707SCQSPESTSS  | 18368 | >PTCH1-S707SCQSPESTSS  | 200  | 18168 |
| >PTCH1-S707SCQSPESTSS  | 24267 | >PTCH1-S707SCQSPESTSS  | 320  | 23947 |
| >PTCH1-T119TPSPEPPPSV  | 455   | >PTCH1-T119IPSPEPPPSV  | 3756 | 3301  |
| >PTCH1-T119TPSPEPPPSV\ | 1928  | >PTCH1-T119IPSPEPPPSV\ | 446  | 1482  |
| >PTCH1-T119TPSPEPPPS   | 302   | >PTCH1-T119IPSPEPPPS   | 206  | 96    |
| >PTCH1-T119TPSPEPPPSV\ | 898   | >PTCH1-T119IPSPEPPPSV\ | 217  | 681   |
| >PTCH1-T119PTPSPEPPPS\ | 867   | >PTCH1-T119PIPSPEPPPS\ | 210  | 657   |
| >PTCH1-T119PTPSPEPPPS\ | 1821  | >PTCH1-T119PIPSPEPPPS\ | 86   | 1735  |
| >PTCH1-T119PTPSPEPPPS\ | 69    | >PTCH1-T119PIPSPEPPPS\ | 9985 | 9916  |
| >PTCH1-T119SPANGLNRLF  | 53    | >PTCH1-T119SPANGLNRLF  | 17   | 36    |
| >PTCH1-T119LPTPSPEPPPS | 178   | >PTCH1-T119LPIPSPEPPPS | 114  | 64    |

|                        |       |                        |      |       |
|------------------------|-------|------------------------|------|-------|
| >PTCH1-T119LPTPSPEP    | 921   | >PTCH1-T119LPIPSPEP    | 471  | 450   |
| >PTCH1-T119LPTPSPEPPPS | 255   | >PTCH1-T119LPIPSPEPPPS | 123  | 132   |
| >PTCH1-T119GLNRLPTPS   | 444   | >PTCH1-T119GLNRLPIPS   | 2579 | 2135  |
| >PTCH1-T119ANGLNRLPT   | 16397 | >PTCH1-T119ANGLNRLPI   | 166  | 16231 |
| >PTCH1-T119TPSPEPPPSV  | 455   | >PTCH1-T119SPSPEPPPSV  | 654  | 199   |
| >PTCH1-T119TPSPEPPPSV\ | 1928  | >PTCH1-T119SPSPEPPPSV\ | 414  | 1514  |
| >PTCH1-T119TPSPEPPPS   | 302   | >PTCH1-T119SPSPEPPPS   | 517  | 215   |
| >PTCH1-T119PTPSPEPPPS\ | 69    | >PTCH1-T119PSPSPEPPPS\ | 241  | 172   |
| >PTCH1-T119SPANGLNRLF  | 53    | >PTCH1-T119SPANGLNRLF  | 319  | 266   |
| >PTCH1-T119LPTPSPEPPPS | 178   | >PTCH1-T119LPSPSPEPPPS | 115  | 63    |
| >PTCH1-T119LPTPSPEPPPS | 255   | >PTCH1-T119LPSPSPEPPPS | 816  | 561   |
| >PTCH1-T119GLNRLPTPS   | 444   | >PTCH1-T119GLNRLSPS    | 483  | 39    |
| >PTCH1-T121THSGSDSS    | 19570 | >PTCH1-T121MHSGSDSS    | 305  | 19265 |
| >PTCH1-T121THSGSDSSD   | 23573 | >PTCH1-T121MHSGSDSSD   | 407  | 23166 |
| >PTCH1-T121THSGSDSSDS  | 17963 | >PTCH1-T121MHSGSDSSD.  | 285  | 17678 |
| >PTCH1-T121VRFAMPPG    | 12956 | >PTCH1-T121VRFAMPPG    | 102  | 12854 |
| >PTCH1-T121VRFAMPPG    | 292   | >PTCH1-T121VRFAMPPG    | 43   | 249   |
| >PTCH1-T121VRFAMPPG    | 13156 | >PTCH1-T121VRFAMPPG    | 258  | 12898 |
| >PTCH1-T121VRFAMPPG    | 11540 | >PTCH1-T121VRFAMPPG    | 193  | 11347 |
| >PTCH1-T121MPPGHTHSG   | 270   | >PTCH1-T121MPPGHMHS\   | 1691 | 1421  |
| >PTCH1-T121MPPGHTHS    | 630   | >PTCH1-T121MPPGHMHS    | 492  | 138   |
| >PTCH1-T121MPPGHTHSG   | 254   | >PTCH1-T121MPPGHMHS\   | 134  | 120   |
| >PTCH1-T121MPPGHTHSG   | 434   | >PTCH1-T121MPPGHMHS\   | 258  | 176   |
| >PTCH1-T121AMPPGHTHS   | 404   | >PTCH1-T121AMPPGHMH    | 270  | 134   |
| >PTCH1-T121AMPPGHTHS   | 426   | >PTCH1-T121AMPPGHMH    | 549  | 123   |
| >PTCH1-T121AMPPGHTHS   | 550   | >PTCH1-T121AMPPGHMH    | 442  | 108   |
| >PTCH1-T121AMPPGHTH    | 2625  | >PTCH1-T121AMPPGHMH    | 207  | 2418  |
| >PTCH1-T121FAMPPGHT    | 699   | >PTCH1-T121FAMPPGHM    | 279  | 420   |
| >PTCH1-T121FAMPPGHT    | 1203  | >PTCH1-T121FAMPPGHM    | 442  | 761   |
| >PTCH1-T121FAMPPGHT    | 1946  | >PTCH1-T121FAMPPGHM    | 154  | 1792  |
| >PTCH1-T121FAMPPGHT    | 13989 | >PTCH1-T121FAMPPGHM    | 392  | 13597 |
| >PTCH1-T121FAMPPGHT    | 10798 | >PTCH1-T121FAMPPGHM    | 300  | 10498 |
| >PTCH1-T121FAMPPGHTH   | 494   | >PTCH1-T121FAMPPGHMI   | 1108 | 614   |
| >PTCH1-T121FAMPPGHTH   | 7413  | >PTCH1-T121FAMPPGHM    | 42   | 7371  |
| >PTCH1-T121FAMPPGHTH   | 252   | >PTCH1-T121FAMPPGHMI   | 770  | 518   |
| >PTCH1-T121FAMPPGHTH   | 7841  | >PTCH1-T121FAMPPGHM    | 237  | 7604  |
| >PTCH1-T121FAMPPGHTH   | 122   | >PTCH1-T121FAMPPGHMI   | 660  | 538   |
| >PTCH1-T121FAMPPGHTH   | 16361 | >PTCH1-T121FAMPPGHM    | 295  | 16066 |
| >PTCH1-T121FAMPPGHTH   | 605   | >PTCH1-T121FAMPPGHMI   | 494  | 111   |
| >PTCH1-T121FAMPPGHTH   | 18119 | >PTCH1-T121FAMPPGHM    | 221  | 17898 |
| >PTCH1-T121VRFAMPPGH   | 5412  | >PTCH1-T121VRFAMPPGH   | 231  | 5181  |
| >PTCH1-T121VRFAMPPGH   | 485   | >PTCH1-T121VRFAMPPGH   | 726  | 241   |
| >PTCH1-T121VRFAMPPGH   | 156   | >PTCH1-T121VRFAMPPGH   | 43   | 113   |

|                        |      |                        |     |      |
|------------------------|------|------------------------|-----|------|
| >PTCH1-T121VRFAMPPGH   | 254  | >PTCH1-T121VRFAMPPGH   | 196 | 58   |
| >PTCH1-T121VRFAMPPGH   | 791  | >PTCH1-T121VRFAMPPGH   | 227 | 564  |
| >PTCH1-T362TMFQLMTPK   | 96   | >PTCH1-T362IMFQLMTPK   | 47  | 49   |
| >PTCH1-T362TMFQLMTPK   | 593  | >PTCH1-T362IMFQLMTPK   | 354 | 239  |
| >PTCH1-T362TMFQLMTPK   | 371  | >PTCH1-T362IMFQLMTPK   | 216 | 155  |
| >PTCH1-T362TMFQLMTPK   | 68   | >PTCH1-T362IMFQLMTPK   | 15  | 53   |
| >PTCH1-T362TMFQLMTPK   | 729  | >PTCH1-T362IMFQLMTPK   | 360 | 369  |
| >PTCH1-T362TMFQLMTPK   | 398  | >PTCH1-T362IMFQLMTPK   | 121 | 277  |
| >PTCH1-T362TMFQLMTPK   | 566  | >PTCH1-T362IMFQLMTPK   | 147 | 419  |
| >PTCH1-T362TMFQLMTPK   | 35   | >PTCH1-T362IMFQLMTPK   | 29  | 6    |
| >PTCH1-T362TMFQLMTPK   | 7    | >PTCH1-T362IMFQLMTPK   | 9   | 2    |
| >PTCH1-T362TMFQLMTPK   | 49   | >PTCH1-T362IMFQLMTPK   | 45  | 4    |
| >PTCH1-T362TMFQLMTPK   | 359  | >PTCH1-T362IMFQLMTPK   | 312 | 47   |
| >PTCH1-T362TMFQLMTPK   | 37   | >PTCH1-T362IMFQLMTPK   | 120 | 83   |
| >PTCH1-T362TMFQLMTPK   | 222  | >PTCH1-T362IMFQLMTPK   | 115 | 107  |
| >PTCH1-T362TMFQLMTPK   | 669  | >PTCH1-T362IMFQLMTPK   | 82  | 587  |
| >PTCH1-T362TMFQLMTPK   | 61   | >PTCH1-T362IMFQLMTPK   | 11  | 50   |
| >PTCH1-T362TMFQLMTPK   | 243  | >PTCH1-T362IMFQLMTPK   | 47  | 196  |
| >PTCH1-T362TMFQLMTPK   | 455  | >PTCH1-T362IMFQLMTPK   | 116 | 339  |
| >PTCH1-T362TMFQLMTPK   | 79   | >PTCH1-T362IMFQLMTPK   | 67  | 12   |
| >PTCH1-T362QTMFQLMTF   | 13   | >PTCH1-T362QIMFQLMTP   | 12  | 1    |
| >PTCH1-T362QTMFQLMTF   | 7    | >PTCH1-T362QIMFQLMTP   | 11  | 4    |
| >PTCH1-T362QTMFQLMTF   | 51   | >PTCH1-T362QIMFQLMTP   | 202 | 151  |
| >PTCH1-T362QTMFQLMTF   | 18   | >PTCH1-T362QIMFQLMTP   | 42  | 24   |
| >PTCH1-T362QTMFQLMTF   | 71   | >PTCH1-T362QIMFQLMTP   | 892 | 821  |
| >PTCH1-T362GKLVSAAHALC | 5811 | >PTCH1-T362GKLVSAAHALC | 206 | 5605 |
| >PTCH1-T362LQTMFQLM    | 3088 | >PTCH1-T362LQIMFQLM    | 417 | 2671 |
| >PTCH1-T362LQTMFQLM    | 313  | >PTCH1-T362LQIMFQLM    | 73  | 240  |
| >PTCH1-T362LQTMFQLMT   | 78   | >PTCH1-T362LQIMFQLMTI  | 35  | 43   |
| >PTCH1-T362LQTMFQLMT   | 616  | >PTCH1-T362LQIMFQLMTI  | 393 | 223  |
| >PTCH1-T362LQTMFQLM    | 736  | >PTCH1-T362LQIMFQLM    | 63  | 673  |
| >PTCH1-T362LQTMFQLM    | 56   | >PTCH1-T362LQIMFQLM    | 14  | 42   |
| >PTCH1-T362LQTMFQLMT   | 1972 | >PTCH1-T362LQIMFQLMTI  | 463 | 1509 |
| >PTCH1-T362LQTMFQLMT   | 371  | >PTCH1-T362LQIMFQLMTI  | 82  | 289  |
| >PTCH1-T362ALQTMFQL    | 45   | >PTCH1-T362ALQIMFQL    | 82  | 37   |
| >PTCH1-T362ALQTMFQL    | 19   | >PTCH1-T362ALQIMFQL    | 34  | 15   |
| >PTCH1-T362ALQTMFQLM   | 302  | >PTCH1-T362ALQIMFQLM   | 655 | 353  |
| >PTCH1-T362ALQTMFQL    | 132  | >PTCH1-T362ALQIMFQL    | 272 | 140  |
| >PTCH1-T362ALQTMFQL    | 273  | >PTCH1-T362ALQIMFQL    | 575 | 302  |
| >PTCH1-T362ALQTMFQL    | 42   | >PTCH1-T362ALQIMFQL    | 33  | 9    |
| >PTCH1-T362ALQTMFQL    | 33   | >PTCH1-T362ALQIMFQL    | 91  | 58   |
| >PTCH1-T362ALQTMFQL    | 91   | >PTCH1-T362ALQIMFQL    | 72  | 19   |
| >PTCH1-T362ALQTMFQL    | 87   | >PTCH1-T362ALQIMFQL    | 230 | 143  |



|                       |       |                        |      |       |
|-----------------------|-------|------------------------|------|-------|
| >PTCH1-T362ALQTMFQL   | 3     | >PTCH1-T362ALQIMFQL    | 3    | 0     |
| >PTCH1-T362ALQTMFQLM  | 43    | >PTCH1-T362ALQIMFQLM   | 46   | 3     |
| >PTCH1-T362ALQTMFQLM  | 127   | >PTCH1-T362ALQIMFQLM   | 130  | 3     |
| >PTCH1-T362HALQTMFQL  | 1865  | >PTCH1-T362HALQIMFQL   | 402  | 1463  |
| >PTCH1-T362HALQTMFQL  | 236   | >PTCH1-T362HALQIMFQL   | 191  | 45    |
| >PTCH1-T362HALQTMFQL  | 3069  | >PTCH1-T362HALQIMFQL   | 109  | 2960  |
| >PTCH1-T362HALQTMFQL  | 16    | >PTCH1-T362HALQIMFQL   | 13   | 3     |
| >PTCH1-T362HALQTMFQL  | 174   | >PTCH1-T362HALQIMFQLM  | 172  | 2     |
| >PTCH1-T362HALQTMFQL  | 6     | >PTCH1-T362HALQIMFQL   | 9    | 3     |
| >PTCH1-T362HALQTMFQL  | 52    | >PTCH1-T362HALQIMFQLM  | 78   | 26    |
| >PTCH1-T362HALQTMFQL  | 111   | >PTCH1-T362HALQIMFQL   | 317  | 206   |
| >PTCH1-T362HALQTMFQL  | 191   | >PTCH1-T362HALQIMFQL   | 408  | 217   |
| >PTCH1-T362AHALQTMF   | 90    | >PTCH1-T362AHALQIMF    | 161  | 71    |
| >PTCH1-T362AHALQTMFC  | 68    | >PTCH1-T362AHALQIMFQI  | 127  | 59    |
| >PTCH1-T362SAHALQTM   | 213   | >PTCH1-T362SAHALQIM    | 706  | 493   |
| >PTCH1-T362SAHALQTMFI | 674   | >PTCH1-T362SAHALQIMFC  | 447  | 227   |
| >PTCH1-T362SAHALQTMFI | 220   | >PTCH1-T362SAHALQIMFC  | 155  | 65    |
| >PTCH1-T362SAHALQTMFI | 478   | >PTCH1-T362SAHALQIMFC  | 183  | 295   |
| >PTCH1-T362SAHALQTMF  | 412   | >PTCH1-T362SAHALQIMF   | 908  | 496   |
| >PTCH1-T362SAHALQTMF  | 84    | >PTCH1-T362SAHALQIMF   | 165  | 81    |
| >PTCH1-T362SAHALQTM   | 118   | >PTCH1-T362SAHALQIM    | 1087 | 969   |
| >PTCH1-T362SAHALQTMF  | 76    | >PTCH1-T362SAHALQIMF   | 133  | 57    |
| >PTCH1-T362SAHALQTMFI | 66    | >PTCH1-T362SAHALQIMFC  | 120  | 54    |
| >PTCH1-T362SAHALQTM   | 383   | >PTCH1-T362SAHALQIM    | 908  | 525   |
| >PTCH1-T362SAHALQTMF  | 63    | >PTCH1-T362SAHALQIMF   | 527  | 464   |
| >PTCH1-T362VSAHALQTM  | 284   | >PTCH1-T362VSAHALQIM   | 415  | 131   |
| >PTCH1-T362VSAHALQTM  | 243   | >PTCH1-T362VSAHALQIM   | 358  | 115   |
| >PTCH1-T362VSAHALQTM  | 371   | >PTCH1-T362VSAHALQIM   | 1267 | 896   |
| >PTCH1-T362VSAHALQTM  | 189   | >PTCH1-T362VSAHALQIMFI | 403  | 214   |
| >PTCH1-T362VSAHALQTM  | 191   | >PTCH1-T362VSAHALQIM   | 337  | 146   |
| >PTCH1-T362VSAHALQTM  | 30    | >PTCH1-T362VSAHALQIMFI | 45   | 15    |
| >PTCH1-T362VSAHALQT   | 1440  | >PTCH1-T362VSAHALQI    | 22   | 1418  |
| >PTCH1-T362VSAHALQTM  | 6     | >PTCH1-T362VSAHALQIM   | 28   | 22    |
| >PTCH1-T362VSAHALQTM  | 5     | >PTCH1-T362VSAHALQIMFI | 6    | 1     |
| >PTCH1-T362VSAHALQTM  | 469   | >PTCH1-T362VSAHALQIMFI | 636  | 167   |
| >PTCH1-T362VSAHALQT   | 10965 | >PTCH1-T362VSAHALQI    | 60   | 10905 |
| >PTCH1-T362VSAHALQTM  | 88    | >PTCH1-T362VSAHALQIM   | 117  | 29    |
| >PTCH1-T362VSAHALQTM  | 24    | >PTCH1-T362VSAHALQIMFI | 29   | 5     |
| >PTCH1-T362VSAHALQT   | 13355 | >PTCH1-T362VSAHALQI    | 60   | 13295 |
| >PTCH1-T362VSAHALQTM  | 445   | >PTCH1-T362VSAHALQIM   | 225  | 220   |
| >PTCH1-T362VSAHALQTM  | 385   | >PTCH1-T362VSAHALQIMFI | 178  | 207   |
| >PTCH1-T362VSAHALQTM  | 32    | >PTCH1-T362VSAHALQIM   | 45   | 13    |
| >PTCH1-T362VSAHALQTM  | 45    | >PTCH1-T362VSAHALQIMFI | 33   | 12    |

|                        |       |                         |      |       |
|------------------------|-------|-------------------------|------|-------|
| >PTCH1-T362VSAHALQT    | 28742 | >PTCH1-T362VSAHALQI     | 33   | 28709 |
| >PTCH1-T362LVSAHALQT   | 6317  | >PTCH1-T362LVSAHALQI    | 359  | 5958  |
| >PTCH1-T362LVSAHALQT   | 2859  | >PTCH1-T362LVSAHALQI    | 122  | 2737  |
| >PTCH1-T362LVSAHALQT   | 5796  | >PTCH1-T362LVSAHALQI    | 435  | 5361  |
| >PTCH1-T362LVSAHALQTM  | 523   | >PTCH1-T362LVSAHALQIM   | 346  | 177   |
| >PTCH1-T362LVSAHALQTM  | 128   | >PTCH1-T362LVSAHALQIM   | 317  | 189   |
| >PTCH1-T362LVSAHALQTM  | 97    | >PTCH1-T362LVSAHALQIM   | 144  | 47    |
| >PTCH1-T362LVSAHALQTM  | 249   | >PTCH1-T362LVSAHALQIM   | 368  | 119   |
| >PTCH1-T362LVSAHALQTM  | 151   | >PTCH1-T362LVSAHALQIM   | 1404 | 1253  |
| >PTCH1-T362LVSAHALQTM  | 103   | >PTCH1-T362LVSAHALQIM   | 168  | 65    |
| >PTCH1-T362LVSAHALQTM  | 288   | >PTCH1-T362LVSAHALQIM   | 211  | 77    |
| >PTCH1-T362LVSAHALQT   | 16722 | >PTCH1-T362LVSAHALQI    | 342  | 16380 |
| >PTCH1-T362LVSAHALQTM  | 105   | >PTCH1-T362LVSAHALQIM   | 114  | 9     |
| >PTCH1-T362LVSAHALQTM  | 106   | >PTCH1-T362LVSAHALQIM   | 93   | 13    |
| >PTCH1-T362LVSAHALQTM  | 84    | >PTCH1-T362LVSAHALQIM   | 310  | 226   |
| >PTCH1-T362LVSAHALQT   | 39065 | >PTCH1-T362LVSAHALQI    | 324  | 38741 |
| >PTCH1-T362KLVSAAHALQT | 778   | >PTCH1-T362KLVSAAHALQI  | 71   | 707   |
| >PTCH1-T362KLVSAAHALQT | 137   | >PTCH1-T362KLVSAAHALQII | 189  | 52    |
| >PTCH1-T362KLVSAAHALQT | 939   | >PTCH1-T362KLVSAAHALQI  | 183  | 756   |
| >PTCH1-T362KLVSAAHALQT | 134   | >PTCH1-T362KLVSAAHALQII | 248  | 114   |
| >PTCH1-T362KLVSAAHALQT | 277   | >PTCH1-T362KLVSAAHALQII | 506  | 229   |
| >PTCH1-T362KLVSAAHALQT | 784   | >PTCH1-T362KLVSAAHALQI  | 22   | 762   |
| >PTCH1-T362KLVSAAHALQT | 78    | >PTCH1-T362KLVSAAHALQII | 739  | 661   |
| >PTCH1-T362KLVSAAHALQT | 8674  | >PTCH1-T362KLVSAAHALQI  | 233  | 8441  |
| >PTCH1-T362KLVSAAHALQT | 165   | >PTCH1-T362KLVSAAHALQII | 766  | 601   |
| >PTCH1-T362KLVSAAHALQT | 3238  | >PTCH1-T362KLVSAAHALQI  | 126  | 3112  |
| >PTCH1-T362KLVSAAHALQT | 266   | >PTCH1-T362KLVSAAHALQI  | 26   | 240   |
| >PTCH1-T362KLVSAAHALQT | 52    | >PTCH1-T362KLVSAAHALQII | 303  | 251   |
| >PTCH1-T362KLVSAAHALQT | 9301  | >PTCH1-T362KLVSAAHALQI  | 90   | 9211  |
| >PTCH1-T362KLVSAAHALQT | 144   | >PTCH1-T362KLVSAAHALQII | 386  | 242   |
| >PTCH1-T362KLVSAAHALQT | 122   | >PTCH1-T362KLVSAAHALQII | 112  | 10    |
| >PTCH1-T362KLVSAAHALQT | 161   | >PTCH1-T362KLVSAAHALQII | 1432 | 1271  |
| >PTCH1-T362KLVSAAHALQT | 231   | >PTCH1-T362KLVSAAHALQII | 335  | 104   |
| >PTCH1-T362TMFQLMTPK   | 96    | >PTCH1-T362NMFQLMTPK    | 706  | 610   |
| >PTCH1-T362TMFQLMTPK   | 371   | >PTCH1-T362NMFQLMTPK    | 452  | 81    |
| >PTCH1-T362TMFQLMTPK   | 68    | >PTCH1-T362NMFQLMTPK    | 110  | 42    |
| >PTCH1-T362TMFQLMTPK   | 398   | >PTCH1-T362NMFQLMTPK    | 1632 | 1234  |
| >PTCH1-T362TMFQLMTPK   | 35    | >PTCH1-T362NMFQLMTPK    | 78   | 43    |
| >PTCH1-T362TMFQLMTPK   | 7     | >PTCH1-T362NMFQLMTPK    | 20   | 13    |
| >PTCH1-T362TMFQLMTPK   | 49    | >PTCH1-T362NMFQLMTPK    | 214  | 165   |
| >PTCH1-T362TMFQLMTPK   | 359   | >PTCH1-T362NMFQLMTPK    | 144  | 215   |
| >PTCH1-T362TMFQLMTPK   | 37    | >PTCH1-T362NMFQLMTPK    | 57   | 20    |
| >PTCH1-T362TMFQLMTPK   | 222   | >PTCH1-T362NMFQLMTPK    | 328  | 106   |

|                      |      |                          |      |      |
|----------------------|------|--------------------------|------|------|
| >PTCH1-T362TMFQLMTPK | 638  | >PTCH1-T362NMFQLMTPK     | 410  | 228  |
| >PTCH1-T362TMFQLMTPK | 61   | >PTCH1-T362NMFQLMTPK     | 98   | 37   |
| >PTCH1-T362TMFQLMTPK | 243  | >PTCH1-T362NMFQLMTPK     | 2083 | 1840 |
| >PTCH1-T362TMFQLMTPK | 455  | >PTCH1-T362NMFQLMTPK     | 1533 | 1078 |
| >PTCH1-T362TMFQLMTPK | 79   | >PTCH1-T362NMFQLMTPK     | 86   | 7    |
| >PTCH1-T362QTMFQLMTF | 13   | >PTCH1-T362QNMFLMFTI     | 459  | 446  |
| >PTCH1-T362QTMFQLMTF | 7    | >PTCH1-T362QNMFLMFTI     | 893  | 886  |
| >PTCH1-T362QTMFQLMTF | 51   | >PTCH1-T362QNMFLMFTI     | 2115 | 2064 |
| >PTCH1-T362QTMFQLMTF | 18   | >PTCH1-T362QNMFLMFTI     | 1892 | 1874 |
| >PTCH1-T362QTMFQLMTF | 71   | >PTCH1-T362QNMFLMFTI     | 1050 | 979  |
| >PTCH1-T362LQTMFQLM  | 313  | >PTCH1-T362LQNMFLMFTI    | 444  | 131  |
| >PTCH1-T362LQTMFQLMT | 1137 | >PTCH1-T362LQNMFLMFTI    | 266  | 871  |
| >PTCH1-T362LQTMFQLMT | 78   | >PTCH1-T362LQNMFLMFTI    | 33   | 45   |
| >PTCH1-T362LQTMFQLMT | 616  | >PTCH1-T362LQNMFLMFTI    | 119  | 497  |
| >PTCH1-T362LQTMFQLM  | 736  | >PTCH1-T362LQNMFLMFTI    | 87   | 649  |
| >PTCH1-T362LQTMFQLM  | 56   | >PTCH1-T362LQNMFLMFTI    | 24   | 32   |
| >PTCH1-T362LQTMFQLMT | 371  | >PTCH1-T362LQNMFLMFTI    | 156  | 215  |
| >PTCH1-T362ALQTMFQL  | 45   | >PTCH1-T362ALQNMFLMFTI   | 44   | 1    |
| >PTCH1-T362ALQTMFQL  | 19   | >PTCH1-T362ALQNMFLMFTI   | 20   | 1    |
| >PTCH1-T362ALQTMFQLM | 302  | >PTCH1-T362ALQNMFLMFTI   | 321  | 19   |
| >PTCH1-T362ALQTMFQL  | 132  | >PTCH1-T362ALQNMFLMFTI   | 101  | 31   |
| >PTCH1-T362ALQTMFQL  | 273  | >PTCH1-T362ALQNMFLMFTI   | 153  | 120  |
| >PTCH1-T362ALQTMFQL  | 42   | >PTCH1-T362ALQNMFLMFTI   | 16   | 26   |
| >PTCH1-T362ALQTMFQL  | 33   | >PTCH1-T362ALQNMFLMFTI   | 14   | 19   |
| >PTCH1-T362ALQTMFQL  | 91   | >PTCH1-T362ALQNMFLMFTI   | 41   | 50   |
| >PTCH1-T362ALQTMFQL  | 87   | >PTCH1-T362ALQNMFLMFTI   | 45   | 42   |
| >PTCH1-T362ALQTMFQL  | 3    | >PTCH1-T362ALQNMFLMFTI   | 2    | 1    |
| >PTCH1-T362ALQTMFQLM | 43   | >PTCH1-T362ALQNMFLMFTI   | 20   | 23   |
| >PTCH1-T362ALQTMFQLM | 127  | >PTCH1-T362ALQNMFLMFTI   | 61   | 66   |
| >PTCH1-T362ALQTMFQL  | 1091 | >PTCH1-T362ALQNMFLMFTI   | 466  | 625  |
| >PTCH1-T362ALQTMFQLM | 856  | >PTCH1-T362ALQNMFLMFTI   | 295  | 561  |
| >PTCH1-T362ALQTMFQLM | 577  | >PTCH1-T362ALQNMFLMFTI   | 278  | 299  |
| >PTCH1-T362HALQTMFQL | 4643 | >PTCH1-T362HALQNMFLMFTI  | 28   | 4615 |
| >PTCH1-T362HALQTMFQL | 1801 | >PTCH1-T362HALQNMFLMFTI  | 81   | 1720 |
| >PTCH1-T362HALQTMFQL | 236  | >PTCH1-T362HALQNMFLMFTI  | 488  | 252  |
| >PTCH1-T362HALQTMFQL | 16   | >PTCH1-T362HALQNMFLMFTI  | 17   | 1    |
| >PTCH1-T362HALQTMFQL | 174  | >PTCH1-T362HALQNMFLMFTI  | 193  | 19   |
| >PTCH1-T362HALQTMFQL | 6    | >PTCH1-T362HALQNMFLMFTI  | 6    | 0    |
| >PTCH1-T362HALQTMFQL | 52   | >PTCH1-T362HALQNMFLMFTI  | 60   | 8    |
| >PTCH1-T362HALQTMFQL | 111  | >PTCH1-T362HALQNMFLMFTI  | 297  | 186  |
| >PTCH1-T362HALQTMFQL | 191  | >PTCH1-T362HALQNMFLMFTI  | 668  | 477  |
| >PTCH1-T362AHALQTMF  | 90   | >PTCH1-T362AHALQNMFLMFTI | 156  | 66   |
| >PTCH1-T362AHALQTMFC | 630  | >PTCH1-T362AHALQNMFLMFTI | 466  | 164  |

|                       |      |                        |       |       |
|-----------------------|------|------------------------|-------|-------|
| >PTCH1-T362AHALQTMFC  | 68   | >PTCH1-T362AHALQNMFC   | 108   | 40    |
| >PTCH1-T362SAHALQTM   | 213  | >PTCH1-T362SAHALQNM    | 1337  | 1124  |
| >PTCH1-T362SAHALQTMFI | 2059 | >PTCH1-T362SAHALQNMFI  | 428   | 1631  |
| >PTCH1-T362SAHALQTMFI | 220  | >PTCH1-T362SAHALQNMFI  | 174   | 46    |
| >PTCH1-T362SAHALQTMFI | 478  | >PTCH1-T362SAHALQNMFI  | 331   | 147   |
| >PTCH1-T362SAHALQTMF  | 412  | >PTCH1-T362SAHALQNMF   | 768   | 356   |
| >PTCH1-T362SAHALQTMF  | 84   | >PTCH1-T362SAHALQNMF   | 165   | 81    |
| >PTCH1-T362SAHALQTM   | 118  | >PTCH1-T362SAHALQNM    | 378   | 260   |
| >PTCH1-T362SAHALQTMF  | 76   | >PTCH1-T362SAHALQNMFI  | 459   | 383   |
| >PTCH1-T362SAHALQTMFI | 66   | >PTCH1-T362SAHALQNMFI  | 112   | 46    |
| >PTCH1-T362SAHALQTM   | 383  | >PTCH1-T362SAHALQNM    | 2682  | 2299  |
| >PTCH1-T362SAHALQTMF  | 63   | >PTCH1-T362SAHALQNMFI  | 136   | 73    |
| >PTCH1-T362VSAHALQTM  | 284  | >PTCH1-T362VSAHALQNM   | 369   | 85    |
| >PTCH1-T362VSAHALQTM  | 243  | >PTCH1-T362VSAHALQNM   | 187   | 56    |
| >PTCH1-T362VSAHALQTM  | 371  | >PTCH1-T362VSAHALQNM   | 1989  | 1618  |
| >PTCH1-T362VSAHALQTM  | 189  | >PTCH1-T362VSAHALQNM   | 373   | 184   |
| >PTCH1-T362VSAHALQTM  | 191  | >PTCH1-T362VSAHALQNM   | 319   | 128   |
| >PTCH1-T362VSAHALQTM  | 30   | >PTCH1-T362VSAHALQNM   | 47    | 17    |
| >PTCH1-T362VSAHALQTM  | 6    | >PTCH1-T362VSAHALQNM   | 9     | 3     |
| >PTCH1-T362VSAHALQTM  | 5    | >PTCH1-T362VSAHALQNM   | 9     | 4     |
| >PTCH1-T362VSAHALQTM  | 469  | >PTCH1-T362VSAHALQNM   | 659   | 190   |
| >PTCH1-T362VSAHALQTM  | 88   | >PTCH1-T362VSAHALQNM   | 327   | 239   |
| >PTCH1-T362VSAHALQTM  | 24   | >PTCH1-T362VSAHALQNM   | 40    | 16    |
| >PTCH1-T362VSAHALQTM  | 445  | >PTCH1-T362VSAHALQNM   | 739   | 294   |
| >PTCH1-T362VSAHALQTM  | 385  | >PTCH1-T362VSAHALQNM   | 247   | 138   |
| >PTCH1-T362VSAHALQTM  | 32   | >PTCH1-T362VSAHALQNM   | 255   | 223   |
| >PTCH1-T362VSAHALQTM  | 45   | >PTCH1-T362VSAHALQNM   | 53    | 8     |
| >PTCH1-T362LVSAHALQTM | 128  | >PTCH1-T362LVSAHALQNM  | 404   | 276   |
| >PTCH1-T362LVSAHALQTM | 97   | >PTCH1-T362LVSAHALQNM  | 133   | 36    |
| >PTCH1-T362LVSAHALQTM | 249  | >PTCH1-T362LVSAHALQNM  | 390   | 141   |
| >PTCH1-T362LVSAHALQTM | 151  | >PTCH1-T362LVSAHALQNM  | 382   | 231   |
| >PTCH1-T362LVSAHALQTM | 103  | >PTCH1-T362LVSAHALQNM  | 324   | 221   |
| >PTCH1-T362LVSAHALQTM | 288  | >PTCH1-T362LVSAHALQNM  | 344   | 56    |
| >PTCH1-T362LVSAHALQTM | 105  | >PTCH1-T362LVSAHALQNM  | 198   | 93    |
| >PTCH1-T362LVSAHALQTM | 106  | >PTCH1-T362LVSAHALQNM  | 157   | 51    |
| >PTCH1-T362LVSAHALQTM | 84   | >PTCH1-T362LVSAHALQNM  | 141   | 57    |
| >PTCH1-T362KLVSahalQT | 137  | >PTCH1-T362KLVSahalQNM | 61    | 76    |
| >PTCH1-T362KLVSahalQT | 134  | >PTCH1-T362KLVSahalQNM | 135   | 1     |
| >PTCH1-T362KLVSahalQT | 277  | >PTCH1-T362KLVSahalQNM | 408   | 131   |
| >PTCH1-T362KLVSahalQT | 78   | >PTCH1-T362KLVSahalQNM | 250   | 172   |
| >PTCH1-T362KLVSahalQT | 165  | >PTCH1-T362KLVSahalQNM | 661   | 496   |
| >PTCH1-T362KLVSahalQT | 266  | >PTCH1-T362KLVSahalQNM | 14209 | 13943 |
| >PTCH1-T362KLVSahalQT | 52   | >PTCH1-T362KLVSahalQNM | 145   | 93    |

|                       |      |                       |      |      |
|-----------------------|------|-----------------------|------|------|
| >PTCH1-T362KLVSAHALQT | 144  | >PTCH1-T362KLVSAHALQN | 486  | 342  |
| >PTCH1-T362KLVSAHALQT | 122  | >PTCH1-T362KLVSAHALQN | 144  | 22   |
| >PTCH1-T362KLVSAHALQT | 161  | >PTCH1-T362KLVSAHALQN | 420  | 259  |
| >PTCH1-T362KLVSAHALQT | 231  | >PTCH1-T362KLVSAHALQN | 1324 | 1093 |
| >PTCH1-T41€STQKVLSF   | 325  | >PTCH1-T41€SSQKVLSF   | 1409 | 1084 |
| >PTCH1-T41€STQKVLSF   | 233  | >PTCH1-T41€SSQKVLSF   | 2104 | 1871 |
| >PTCH1-T41€STQKVLSF   | 74   | >PTCH1-T41€SSQKVLSF   | 272  | 198  |
| >PTCH1-T41€STQKVLSF   | 103  | >PTCH1-T41€SSQKVLSF   | 89   | 14   |
| >PTCH1-T41€STQKVLSF   | 368  | >PTCH1-T41€SSQKVLSF   | 116  | 252  |
| >PTCH1-T41€STQKVLSF   | 17   | >PTCH1-T41€SSQKVLSF   | 21   | 4    |
| >PTCH1-T41€STQKVLSF   | 610  | >PTCH1-T41€SSQKVLSF   | 262  | 348  |
| >PTCH1-T41€STQKVLSF   | 143  | >PTCH1-T41€SSQKVLSF   | 109  | 34   |
| >PTCH1-T41€STQKVLSFT  | 49   | >PTCH1-T41€SSQKVLSFT  | 130  | 81   |
| >PTCH1-T41€STQKVLSFTT | 93   | >PTCH1-T41€SSQKVLSFTT | 249  | 156  |
| >PTCH1-T41€NSTQKVLSF  | 1721 | >PTCH1-T41€NSSQKVLSF  | 166  | 1555 |
| >PTCH1-T41€NSTQKVLSF  | 697  | >PTCH1-T41€NSSQKVLSF  | 327  | 370  |
| >PTCH1-T41€NSTQKVLSF  | 12   | >PTCH1-T41€NSSQKVLSF  | 9    | 3    |
| >PTCH1-T41€QNSTQKVLSF | 350  | >PTCH1-T41€QNSSQKVLSF | 215  | 135  |
| >PTCH1-T41€AQNSTQKV   | 100  | >PTCH1-T41€AQNSSQKV   | 99   | 1    |
| >PTCH1-T41€AQNSTQKV   | 212  | >PTCH1-T41€AQNSSQKV   | 252  | 40   |
| >PTCH1-T41€AQNSTQKV   | 286  | >PTCH1-T41€AQNSSQKV   | 418  | 132  |
| >PTCH1-T41€AQNSTQKV   | 495  | >PTCH1-T41€AQNSSQKV   | 798  | 303  |
| >PTCH1-T41€AQNSTQKV   | 481  | >PTCH1-T41€AQNSSQKV   | 568  | 87   |
| >PTCH1-T41€AQNSTQKVL  | 401  | >PTCH1-T41€AQNSSQKVL  | 701  | 300  |
| >PTCH1-T41€AQNSTQKVL  | 277  | >PTCH1-T41€AQNSSQKVL  | 206  | 71   |
| >PTCH1-T41€AQNSTQKVL  | 27   | >PTCH1-T41€AQNSSQKVL  | 26   | 1    |
| >PTCH1-T41€AQNSTQKV   | 49   | >PTCH1-T41€AQNSSQKV   | 30   | 19   |
| >PTCH1-T41€AQNSTQKVL  | 10   | >PTCH1-T41€AQNSSQKVL  | 7    | 3    |
| >PTCH1-T41€AQNSTQKVL  | 2    | >PTCH1-T41€AQNSSQKVL  | 2    | 0    |
| >PTCH1-T41€AQNSTQKVL  | 123  | >PTCH1-T41€AQNSSQKVL  | 217  | 94   |
| >PTCH1-T41€VAQNSTQKV  | 93   | >PTCH1-T41€VAQNSSQKV  | 161  | 68   |
| >PTCH1-T41€VAQNSTQK   | 79   | >PTCH1-T41€VAQNSSQK   | 76   | 3    |
| >PTCH1-T41€VAQNSTQKV  | 409  | >PTCH1-T41€VAQNSSQKV  | 179  | 230  |
| >PTCH1-T41€SVAQNSTQK  | 176  | >PTCH1-T41€SVAQNSSQK  | 301  | 125  |
| >PTCH1-T41€SVAQNSTQK  | 117  | >PTCH1-T41€SVAQNSSQK  | 114  | 3    |
| >PTCH1-T41€SVAQNSTQK  | 37   | >PTCH1-T41€SVAQNSSQK  | 45   | 8    |
| >PTCH1-T41€SVAQNSTQK  | 408  | >PTCH1-T41€SVAQNSSQK  | 466  | 58   |
| >PTCH1-T41€SVAQNSTQK  | 5    | >PTCH1-T41€SVAQNSSQK  | 6    | 1    |
| >PTCH1-T41€SVAQNSTQK  | 147  | >PTCH1-T41€SVAQNSSQK  | 121  | 26   |
| >PTCH1-T41€SVAQNSTQK  | 30   | >PTCH1-T41€SVAQNSSQK  | 23   | 7    |
| >PTCH1-T41€SVAQNSTQK  | 1512 | >PTCH1-T41€SVAQNSSQK  | 477  | 1035 |
| >PTCH1-T41€SVAQNSTQK  | 27   | >PTCH1-T41€SVAQNSSQK  | 18   | 9    |
| >PTCH1-T41€SVAQNSTQK  | 180  | >PTCH1-T41€SVAQNSSQK  | 267  | 87   |

|                       |       |                       |       |       |
|-----------------------|-------|-----------------------|-------|-------|
| >PTCH1-T41€SVAQNSTQK\ | 33    | >PTCH1-T41€SVAQNSSQK\ | 41    | 8     |
| >PTCH1-T41€SVAQNSTQK  | 381   | >PTCH1-T41€SVAQNSSQK  | 493   | 112   |
| >PTCH1-T41€QSVAQNSTQ  | 466   | >PTCH1-T41€QSVAQNSSQ  | 296   | 170   |
| >PTCH1-T41€QSVAQNSTQ  | 137   | >PTCH1-T41€QSVAQNSSQ  | 143   | 6     |
| >PTCH1-T41€QSVAQNSTQ  | 986   | >PTCH1-T41€QSVAQNSSQ  | 473   | 513   |
| >PTCH1-T41€QSVAQNSTQ  | 181   | >PTCH1-T41€QSVAQNSSQ  | 164   | 17    |
| >PTCH1-T41€QSVAQNSTQ  | 165   | >PTCH1-T41€QSVAQNSSQ  | 216   | 51    |
| >PTCH1-T41€QSVAQNSTQ  | 259   | >PTCH1-T41€QSVAQNSSQ  | 206   | 53    |
| >PTCH1-T41€HQSVAQNST  | 451   | >PTCH1-T41€HQSVAQNSS\ | 388   | 63    |
| >PTCH1-T41€HQSVAQNST  | 443   | >PTCH1-T41€HQSVAQNSS\ | 207   | 236   |
| >PTCH1-T67€TAEPREISV  | 1738  | >PTCH1-T67€IAEPREISV  | 478   | 1260  |
| >PTCH1-T67€TAEPREI    | 3804  | >PTCH1-T67€IAEPREI    | 440   | 3364  |
| >PTCH1-T67€TAEPREI    | 197   | >PTCH1-T67€IAEPREI    | 111   | 86    |
| >PTCH1-T67€TTAEPREISV | 1643  | >PTCH1-T67€TIAEPREISV | 367   | 1276  |
| >PTCH1-T67€TTAEPREI   | 2182  | >PTCH1-T67€TIAEPREI   | 296   | 1886  |
| >PTCH1-T67€TTAEPREISV | 912   | >PTCH1-T67€TIAEPREISV | 97    | 815   |
| >PTCH1-T67€TTAEPREISV | 505   | >PTCH1-T67€TIAEPREISV | 132   | 373   |
| >PTCH1-T67€TTAEPREISV | 323   | >PTCH1-T67€TIAEPREISV | 79    | 244   |
| >PTCH1-T67€TTAEPREISV | 834   | >PTCH1-T67€TIAEPREISV | 130   | 704   |
| >PTCH1-T67€TTAEPREISV | 172   | >PTCH1-T67€TIAEPREISV | 8     | 164   |
| >PTCH1-T67€TTAEPREI   | 5     | >PTCH1-T67€TIAEPREI   | 8     | 3     |
| >PTCH1-T67€TTAEPREISV | 6     | >PTCH1-T67€TIAEPREISV | 15    | 9     |
| >PTCH1-T67€TTAEPREI   | 17    | >PTCH1-T67€TIAEPREI   | 50    | 33    |
| >PTCH1-T67€TTAEPREISV | 11    | >PTCH1-T67€TIAEPREISV | 24    | 13    |
| >PTCH1-T67€TTAEPREI   | 328   | >PTCH1-T67€TIAEPREI   | 17284 | 16956 |
| >PTCH1-T67€TTAEPREI   | 104   | >PTCH1-T67€TIAEPREI   | 3955  | 3851  |
| >PTCH1-T67€TTAEPREI   | 37    | >PTCH1-T67€TIAEPREI   | 2715  | 2678  |
| >PTCH1-T67€YDPHTHVYYT | 17719 | >PTCH1-T67€YDPHTHVYYT | 384   | 17335 |
| >PTCH1-T67€YDPHTHVYYT | 8537  | >PTCH1-T67€YDPHTHVYYT | 185   | 8352  |
| >PTCH1-T67€YTIAEPREI  | 585   | >PTCH1-T67€YTIAEPREI  | 170   | 415   |
| >PTCH1-T67€YTIAEPREI  | 319   | >PTCH1-T67€YTIAEPREI  | 87    | 232   |
| >PTCH1-T67€YTIAEPREI  | 973   | >PTCH1-T67€YTIAEPREI  | 166   | 807   |
| >PTCH1-T67€YTIAEPREI  | 969   | >PTCH1-T67€YTIAEPREI  | 286   | 683   |
| >PTCH1-T67€YTIAEPREI  | 4322  | >PTCH1-T67€YTIAEPREI  | 173   | 4149  |
| >PTCH1-T67€YTIAEPREI  | 41    | >PTCH1-T67€YTIAEPREI  | 22    | 19    |
| >PTCH1-T67€YTIAEPREI  | 576   | >PTCH1-T67€YTIAEPREI  | 142   | 434   |
| >PTCH1-T67€YTIAEPREI  | 65    | >PTCH1-T67€YTIAEPREI  | 23    | 42    |
| >PTCH1-T67€YTIAEPREI  | 201   | >PTCH1-T67€YTIAEPREI  | 1561  | 1360  |
| >PTCH1-T67€YTIAEPREI  | 104   | >PTCH1-T67€YTIAEPREI  | 176   | 72    |
| >PTCH1-T67€YTIAEPREI  | 27    | >PTCH1-T67€YTIAEPREI  | 35    | 8     |
| >PTCH1-T67€YYTIAEPREI | 23    | >PTCH1-T67€YYTIAEPREI | 45    | 22    |
| >PTCH1-T67€YYTIAEPREI | 614   | >PTCH1-T67€YYTIAEPREI | 348   | 266   |
| >PTCH1-T67€YYTIAEPREI | 9     | >PTCH1-T67€YYTIAEPREI | 8     | 1     |

|                       |       |                        |      |       |
|-----------------------|-------|------------------------|------|-------|
| >PTCH1-T67EYTTAEPR    | 666   | >PTCH1-T67EYTTIAEPR    | 465  | 201   |
| >PTCH1-T67EYTTAEPR    | 193   | >PTCH1-T67EYTTIAEPR    | 118  | 75    |
| >PTCH1-T67EYTTAEPR    | 85    | >PTCH1-T67EYTTIAEPR    | 81   | 4     |
| >PTCH1-T67EYTTAEPR    | 27    | >PTCH1-T67EYTTIAEPR    | 35   | 8     |
| >PTCH1-T67EVYTTAEPR   | 87    | >PTCH1-T67EVYTTIAEPR   | 36   | 51    |
| >PTCH1-T67EVYTTAEPR   | 507   | >PTCH1-T67EVYTTIAEPR   | 141  | 366   |
| >PTCH1-T67EVYTTAEPR   | 565   | >PTCH1-T67EVYTTIAEPR   | 194  | 371   |
| >PTCH1-T67EVYTTAEPR   | 18    | >PTCH1-T67EVYTTIAEPR   | 15   | 3     |
| >PTCH1-T67EHVYTTAEPR  | 187   | >PTCH1-T67EHVYTTIAEPR  | 189  | 2     |
| >PTCH1-T67EHVYTTAEPR  | 232   | >PTCH1-T67EHVYTTIAEPR  | 286  | 54    |
| >PTCH1-T67EHVYTTAEPR  | 63    | >PTCH1-T67EHVYTTIAEPR  | 41   | 22    |
| >PTCH1-T67EHVYTTAEPR  | 147   | >PTCH1-T67EHVYTTIAEPR  | 79   | 68    |
| >PTCH1-T67EHVYTTAEPR  | 4     | >PTCH1-T67EHVYTTIAEPR  | 3    | 1     |
| >PTCH1-T67EHVYTTAEPR  | 36    | >PTCH1-T67EHVYTTIAEPR  | 36   | 0     |
| >PTCH1-T67ETHVYTTAEPR | 166   | >PTCH1-T67ETHVYTTIAEPR | 122  | 44    |
| >PTCH1-T67ETHVYTTAEPR | 400   | >PTCH1-T67ETHVYTTIAEPR | 275  | 125   |
| >PTCH1-T67ETHVYTT     | 216   | >PTCH1-T67ETHVYTTI     | 13   | 203   |
| >PTCH1-T67ETHVYTTA    | 15    | >PTCH1-T67ETHVYTTIA    | 19   | 4     |
| >PTCH1-T67ETHVYTTAE   | 1441  | >PTCH1-T67ETHVYTTIAE   | 356  | 1085  |
| >PTCH1-T67ETHVYTTAE   | 178   | >PTCH1-T67ETHVYTTIAEI  | 255  | 77    |
| >PTCH1-T67ETHVYTT     | 6079  | >PTCH1-T67ETHVYTTI     | 107  | 5972  |
| >PTCH1-T67ETHVYTT     | 653   | >PTCH1-T67ETHVYTTI     | 21   | 632   |
| >PTCH1-T67ETHVYTTA    | 159   | >PTCH1-T67ETHVYTTIA    | 467  | 308   |
| >PTCH1-T67ETHVYTT     | 6440  | >PTCH1-T67ETHVYTTI     | 404  | 6036  |
| >PTCH1-T67ETHVYTT     | 4205  | >PTCH1-T67ETHVYTTI     | 53   | 4152  |
| >PTCH1-T67ETHVYTT     | 26818 | >PTCH1-T67ETHVYTTI     | 19   | 26799 |
| >PTCH1-T67EDPHTHVYTT  | 511   | >PTCH1-T67EDPHTHVYTTI  | 440  | 71    |
| >PTCH1-T691VTVTQDTL   | 405   | >PTCH1-T691VIVTQDTL    | 2729 | 2324  |
| >PTCH1-T691VTVTQDTL   | 16    | >PTCH1-T691VIVTQDTL    | 6437 | 6421  |
| >PTCH1-T691QPVTVTQDTI | 407   | >PTCH1-T691QPVIVTQDTL  | 4997 | 4590  |
| >PTCH1-T691QPVTVTQDTI | 491   | >PTCH1-T691QPVIVTQDTL  | 631  | 140   |
| >PTCH1-T691QPVTVTQDTI | 276   | >PTCH1-T691QPVIVTQDTL  | 223  | 53    |
| >PTCH1-T691QPVTVTQDTI | 302   | >PTCH1-T691QPVIVTQDTL  | 1010 | 708   |
| >PTCH1-T691QPVTVTQDTI | 468   | >PTCH1-T691QPVIVTQDTL  | 529  | 61    |
| >PTCH1-T691VQPVTVTQD  | 278   | >PTCH1-T691VQPVIVTQDT  | 209  | 69    |
| >PTCH1-T691VQPVTVTQD  | 464   | >PTCH1-T691VQPVIVTQDT  | 1008 | 544   |
| >PTCH1-T691ISVQPVTV   | 455   | >PTCH1-T691ISVQPVIV    | 641  | 186   |
| >PTCH1-T691ISVQPVTV   | 33    | >PTCH1-T691ISVQPVIV    | 196  | 163   |
| >PTCH1-T691ISVQPVTVT  | 366   | >PTCH1-T691ISVQPVIVT   | 690  | 324   |
| >PTCH1-T691ISVQPVTVTQ | 396   | >PTCH1-T691ISVQPVIVTQ  | 427  | 31    |
| >PTCH1-T691EISVQPVTV  | 159   | >PTCH1-T691EISVQPVIV   | 612  | 453   |
| >PTCH1-T691EISVQPVTV  | 59    | >PTCH1-T691EISVQPVIV   | 234  | 175   |
| >PTCH1-T691EISVQPVTV  | 102   | >PTCH1-T691EISVQPVIV   | 451  | 349   |

|                       |       |                       |     |       |
|-----------------------|-------|-----------------------|-----|-------|
| >PTCH1-T691SEISVQPVT  | 12236 | >PTCH1-T691SEISVQPVI  | 38  | 12198 |
| >PTCH1-T691SEISVQPVT  | 3774  | >PTCH1-T691SEISVQPVI  | 36  | 3738  |
| >PTCH1-T691SEISVQPVT  | 241   | >PTCH1-T691SEISVQPVI  | 143 | 98    |
| >PTCH1-T691SEISVQPVTV | 124   | >PTCH1-T691SEISVQPVI  | 296 | 172   |
| >PTCH1-T691SEISVQPVTV | 270   | >PTCH1-T691SEISVQPVI  | 285 | 15    |
| >PTCH1-T691SEISVQPVT  | 2536  | >PTCH1-T691SEISVQPVI  | 337 | 2199  |
| >PTCH1-T691SEISVQPVT  | 1428  | >PTCH1-T691SEISVQPVI  | 323 | 1105  |
| >PTCH1-T691SEISVQPVTV | 293   | >PTCH1-T691SEISVQPVI  | 533 | 240   |
| >PTCH1-T691SEISVQPVT  | 27    | >PTCH1-T691SEISVQPVI  | 74  | 47    |
| >PTCH1-T691SEISVQPVTV | 104   | >PTCH1-T691SEISVQPVI  | 234 | 130   |
| >PTCH1-T691SEISVQPVTV | 51    | >PTCH1-T691SEISVQPVI  | 28  | 23    |
| >PTCH1-T691SEISVQPVT  | 137   | >PTCH1-T691SEISVQPVI  | 6   | 131   |
| >PTCH1-T691SEISVQPVTV | 26    | >PTCH1-T691SEISVQPVI  | 29  | 3     |
| >PTCH1-T691SEISVQPVTV | 157   | >PTCH1-T691SEISVQPVI  | 142 | 15    |
| >PTCH1-T691RSEISVQPVT | 904   | >PTCH1-T691RSEISVQPVI | 27  | 877   |
| >PTCH1-T691RSEISVQPVT | 22    | >PTCH1-T691RSEISVQPVI | 123 | 101   |
| >PTCH1-T691RSEISVQPVT | 5341  | >PTCH1-T691RSEISVQPVI | 463 | 4878  |
| >PTCH1-V111VLNGLVLL   | 43    | >PTCH1-V111ILNGLVLL   | 34  | 9     |
| >PTCH1-V111VLNGLVLLPV | 23    | >PTCH1-V111ILNGLVLLPV | 16  | 7     |
| >PTCH1-V111VLNGLVLLPV | 58    | >PTCH1-V111ILNGLVLLPV | 42  | 16    |
| >PTCH1-V111VLNGLVLL   | 8     | >PTCH1-V111ILNGLVLL   | 5   | 3     |
| >PTCH1-V111VLNGLVLLP  | 1019  | >PTCH1-V111ILNGLVLLP  | 481 | 538   |
| >PTCH1-V111VLNGLVLLPV | 28    | >PTCH1-V111ILNGLVLLPV | 16  | 12    |
| >PTCH1-V111VLNGLVLLPV | 31    | >PTCH1-V111ILNGLVLLPV | 18  | 13    |
| >PTCH1-V111VLNGLVLL   | 18    | >PTCH1-V111ILNGLVLL   | 15  | 3     |
| >PTCH1-V111VLNGLVLLPV | 16    | >PTCH1-V111ILNGLVLLPV | 11  | 5     |
| >PTCH1-V111VLNGLVLLPV | 32    | >PTCH1-V111ILNGLVLLPV | 25  | 7     |
| >PTCH1-V111VLNGLVLL   | 543   | >PTCH1-V111ILNGLVLL   | 344 | 199   |
| >PTCH1-V111VLNGLVLLPV | 76    | >PTCH1-V111ILNGLVLLPV | 51  | 25    |
| >PTCH1-V111VLNGLVLLPV | 605   | >PTCH1-V111ILNGLVLLPV | 395 | 210   |
| >PTCH1-V111VLNGLVLL   | 6     | >PTCH1-V111ILNGLVLL   | 7   | 1     |
| >PTCH1-V111VLNGLVLLPV | 2     | >PTCH1-V111ILNGLVLLPV | 2   | 0     |
| >PTCH1-V111VLNGLVLLPV | 6     | >PTCH1-V111ILNGLVLLPV | 7   | 1     |
| >PTCH1-V111VLNGLVLL   | 59    | >PTCH1-V111ILNGLVLL   | 84  | 25    |
| >PTCH1-V111VLNGLVLLPV | 6     | >PTCH1-V111ILNGLVLLPV | 7   | 1     |
| >PTCH1-V111VLNGLVLLPV | 69    | >PTCH1-V111ILNGLVLLPV | 95  | 26    |
| >PTCH1-V111VLNGLVLL   | 14    | >PTCH1-V111ILNGLVLL   | 20  | 6     |
| >PTCH1-V111VLNGLVLLPV | 5     | >PTCH1-V111ILNGLVLLPV | 5   | 0     |
| >PTCH1-V111VLNGLVLLPV | 11    | >PTCH1-V111ILNGLVLLPV | 15  | 4     |
| >PTCH1-V111VLNGLVLL   | 18    | >PTCH1-V111ILNGLVLL   | 18  | 0     |
| >PTCH1-V111VLNGLVLLPV | 4     | >PTCH1-V111ILNGLVLLPV | 4   | 0     |
| >PTCH1-V111VLNGLVLLPV | 11    | >PTCH1-V111ILNGLVLLPV | 11  | 0     |
| >PTCH1-V111VLNGLVLL   | 2     | >PTCH1-V111ILNGLVLL   | 3   | 1     |



|                        |      |                        |      |      |
|------------------------|------|------------------------|------|------|
| >PTCH1-V11{VLNGLVLLPV  | 2    | >PTCH1-V11{ILNGLVLLPV  | 2    | 0    |
| >PTCH1-V11{VLNGLVLLPV  | 3    | >PTCH1-V11{ILNGLVLLPVL | 3    | 0    |
| >PTCH1-V11{GVLNGLVLL   | 170  | >PTCH1-V11{GILNGLVLL   | 87   | 83   |
| >PTCH1-V11{GVLNGLVLLP  | 29   | >PTCH1-V11{GILNGLVLLP\ | 19   | 10   |
| >PTCH1-V11{GVLNGLVLL   | 711  | >PTCH1-V11{GILNGLVLL   | 329  | 382  |
| >PTCH1-V11{GVLNGLVLLP  | 659  | >PTCH1-V11{GILNGLVLLP\ | 315  | 344  |
| >PTCH1-V11{GVLNGLVLLP  | 76   | >PTCH1-V11{GILNGLVLLP\ | 41   | 35   |
| >PTCH1-V11{GVLNGLVL    | 307  | >PTCH1-V11{GILNGLVL    | 334  | 27   |
| >PTCH1-V11{GVLNGLVLL   | 23   | >PTCH1-V11{GILNGLVLL   | 26   | 3    |
| >PTCH1-V11{GVLNGLVLLP  | 7    | >PTCH1-V11{GILNGLVLLP\ | 8    | 1    |
| >PTCH1-V11{GVLNGLVL    | 530  | >PTCH1-V11{GILNGLVL    | 137  | 393  |
| >PTCH1-V11{GVLNGLVLL   | 229  | >PTCH1-V11{GILNGLVLL   | 55   | 174  |
| >PTCH1-V11{GVLNGLVLLP  | 10   | >PTCH1-V11{GILNGLVLLP\ | 5    | 5    |
| >PTCH1-V11{GVLNGLVL    | 398  | >PTCH1-V11{GILNGLVL    | 176  | 222  |
| >PTCH1-V11{GVLNGLVLL   | 156  | >PTCH1-V11{GILNGLVLL   | 66   | 90   |
| >PTCH1-V11{GVLNGLVLLP  | 14   | >PTCH1-V11{GILNGLVLLP\ | 8    | 6    |
| >PTCH1-V11{GVLNGLVL    | 397  | >PTCH1-V11{GILNGLVL    | 137  | 260  |
| >PTCH1-V11{GVLNGLVLL   | 101  | >PTCH1-V11{GILNGLVLL   | 38   | 63   |
| >PTCH1-V11{GVLNGLVLLP  | 11   | >PTCH1-V11{GILNGLVLLP\ | 7    | 4    |
| >PTCH1-V11{GVLNGLVLLP  | 140  | >PTCH1-V11{GILNGLVLLP\ | 56   | 84   |
| >PTCH1-V11{GVLNGLVL    | 629  | >PTCH1-V11{GILNGLVL    | 179  | 450  |
| >PTCH1-V11{GVLNGLVLL   | 106  | >PTCH1-V11{GILNGLVLL   | 30   | 76   |
| >PTCH1-V11{GVLNGLVLLP  | 14   | >PTCH1-V11{GILNGLVLLP\ | 7    | 7    |
| >PTCH1-V11{GVLNGLVLLP  | 167  | >PTCH1-V11{GILNGLVLLP\ | 363  | 196  |
| >PTCH1-V11{GVLNGLVLL   | 245  | >PTCH1-V11{GILNGLVLL   | 950  | 705  |
| >PTCH1-V11{AVLAILTILGV | 31   | >PTCH1-V11{AVLAILTILGI | 149  | 118  |
| >PTCH1-V11{AVLAILTILGV | 190  | >PTCH1-V11{AVLAILTILGI | 624  | 434  |
| >PTCH1-V11{AVLAILTILGV | 54   | >PTCH1-V11{AVLAILTILGI | 257  | 203  |
| >PTCH1-V11{AVLAILTILGV | 6    | >PTCH1-V11{AVLAILTILGI | 22   | 16   |
| >PTCH1-V11{AVLAILTILGV | 9    | >PTCH1-V11{AVLAILTILGI | 95   | 86   |
| >PTCH1-V11{AVLAILTILGV | 54   | >PTCH1-V11{AVLAILTILGI | 1114 | 1060 |
| >PTCH1-V11{AVLAILTILGV | 14   | >PTCH1-V11{AVLAILTILGI | 373  | 359  |
| >PTCH1-V11{AVLAILTILGV | 15   | >PTCH1-V11{AVLAILTILGI | 779  | 764  |
| >PTCH1-V11{AVLAILTILGV | 6    | >PTCH1-V11{AVLAILTILGI | 451  | 445  |
| >PTCH1-V11{AVLAILTILGV | 1730 | >PTCH1-V11{AVLAILTILGI | 98   | 1632 |
| >PTCH1-V11{AVLAILTILGV | 347  | >PTCH1-V11{AVLAILTILGI | 1563 | 1216 |
| >PTCH1-V11{AVLAILTILGV | 35   | >PTCH1-V11{AVLAILTILGI | 267  | 232  |
| >PTCH1-V11{LGVLNGLVL   | 99   | >PTCH1-V11{LGILNGLVL   | 56   | 43   |
| >PTCH1-V11{ILGVLNGLVL  | 654  | >PTCH1-V11{ILGILNGLVL  | 396  | 258  |
| >PTCH1-V11{ILGVLNGLVLL | 381  | >PTCH1-V11{ILGILNGLVLL | 374  | 7    |
| >PTCH1-V11{ILGVLNGL    | 58   | >PTCH1-V11{ILGILNGL    | 58   | 0    |
| >PTCH1-V11{ILGVLNGLV   | 97   | >PTCH1-V11{ILGILNGLV   | 121  | 24   |
| >PTCH1-V11{ILGVLNGLVL  | 210  | >PTCH1-V11{ILGILNGLVL  | 162  | 48   |

|                         |     |                         |     |     |
|-------------------------|-----|-------------------------|-----|-----|
| >PTCH1-V11{ILGVLNGLVLL  | 56  | >PTCH1-V11{ILGILNGLVLL  | 63  | 7   |
| >PTCH1-V11{ILGVLNGL     | 538 | >PTCH1-V11{ILGILNGL     | 445 | 93  |
| >PTCH1-V11{ILGVLNGLV    | 187 | >PTCH1-V11{ILGILNGLV    | 154 | 33  |
| >PTCH1-V11{ILGVLNGL     | 69  | >PTCH1-V11{ILGILNGL     | 38  | 31  |
| >PTCH1-V11{ILGVLNGLV    | 36  | >PTCH1-V11{ILGILNGLV    | 16  | 20  |
| >PTCH1-V11{ILGVLNGLVLL  | 303 | >PTCH1-V11{ILGILNGLVLL  | 140 | 163 |
| >PTCH1-V11{ILGVLNGLVLL  | 111 | >PTCH1-V11{ILGILNGLVLL  | 53  | 58  |
| >PTCH1-V11{ILGVLNGL     | 131 | >PTCH1-V11{ILGILNGL     | 195 | 64  |
| >PTCH1-V11{ILGVLNGLV    | 423 | >PTCH1-V11{ILGILNGLV    | 737 | 314 |
| >PTCH1-V11{ILGVLNGLVLL  | 333 | >PTCH1-V11{ILGILNGLVLL  | 484 | 151 |
| >PTCH1-V11{ILGVLNGL     | 150 | >PTCH1-V11{ILGILNGL     | 118 | 32  |
| >PTCH1-V11{ILGVLNGLV    | 65  | >PTCH1-V11{ILGILNGLV    | 44  | 21  |
| >PTCH1-V11{ILGVLNGLVLL  | 643 | >PTCH1-V11{ILGILNGLVLL  | 449 | 194 |
| >PTCH1-V11{ILGVLNGLVLL  | 143 | >PTCH1-V11{ILGILNGLVLL  | 102 | 41  |
| >PTCH1-V11{ILGVLNGL     | 140 | >PTCH1-V11{ILGILNGL     | 236 | 96  |
| >PTCH1-V11{ILGVLNGLV    | 260 | >PTCH1-V11{ILGILNGLV    | 583 | 323 |
| >PTCH1-V11{ILGVLNGLVLL  | 377 | >PTCH1-V11{ILGILNGLVLL  | 690 | 313 |
| >PTCH1-V11{ILGVLNGL     | 21  | >PTCH1-V11{ILGILNGL     | 15  | 6   |
| >PTCH1-V11{ILGVLNGLV    | 9   | >PTCH1-V11{ILGILNGLV    | 7   | 2   |
| >PTCH1-V11{ILGVLNGLVLL  | 77  | >PTCH1-V11{ILGILNGLVLL  | 54  | 23  |
| >PTCH1-V11{ILGVLNGLVLL  | 20  | >PTCH1-V11{ILGILNGLVLL  | 15  | 5   |
| >PTCH1-V11{TILGVLNGL    | 311 | >PTCH1-V11{TILGILNGL    | 226 | 85  |
| >PTCH1-V11{TILGVLNGLV   | 247 | >PTCH1-V11{TILGILNGLV   | 199 | 48  |
| >PTCH1-V11{TILGVLNGL    | 137 | >PTCH1-V11{TILGILNGL    | 49  | 88  |
| >PTCH1-V11{TILGVLNGLV   | 289 | >PTCH1-V11{TILGILNGLV   | 282 | 7   |
| >PTCH1-V11{TILGVLNGL    | 349 | >PTCH1-V11{TILGILNGL    | 280 | 69  |
| >PTCH1-V11{TILGVLNGLV   | 74  | >PTCH1-V11{TILGILNGLV   | 58  | 16  |
| >PTCH1-V11{TILGVLNGL    | 26  | >PTCH1-V11{TILGILNGL    | 27  | 1   |
| >PTCH1-V11{TILGVLNGLV   | 80  | >PTCH1-V11{TILGILNGLV   | 67  | 13  |
| >PTCH1-V11{TILGVLNGLVLL | 339 | >PTCH1-V11{TILGILNGLVLL | 349 | 10  |
| >PTCH1-V11{TILGVLNGL    | 37  | >PTCH1-V11{TILGILNGL    | 124 | 87  |
| >PTCH1-V11{TILGVLNGLV   | 29  | >PTCH1-V11{TILGILNGLV   | 44  | 15  |
| >PTCH1-V11{TILGVLNGLVLL | 173 | >PTCH1-V11{TILGILNGLVLL | 396 | 223 |
| >PTCH1-V11{TILGVLNGL    | 147 | >PTCH1-V11{TILGILNGL    | 399 | 252 |
| >PTCH1-V11{TILGVLNGLV   | 67  | >PTCH1-V11{TILGILNGLV   | 94  | 27  |
| >PTCH1-V11{TILGVLNGL    | 136 | >PTCH1-V11{TILGILNGL    | 63  | 73  |
| >PTCH1-V11{TILGVLNGLV   | 272 | >PTCH1-V11{TILGILNGLV   | 190 | 82  |
| >PTCH1-V11{TILGVLNGL    | 153 | >PTCH1-V11{TILGILNGL    | 79  | 74  |
| >PTCH1-V11{TILGVLNGLV   | 37  | >PTCH1-V11{TILGILNGLV   | 28  | 9   |
| >PTCH1-V11{TILGVLNGLVLL | 459 | >PTCH1-V11{TILGILNGLVLL | 319 | 140 |
| >PTCH1-V11{TILGVLNGL    | 272 | >PTCH1-V11{TILGILNGL    | 236 | 36  |
| >PTCH1-V11{TILGVLNGL    | 158 | >PTCH1-V11{TILGILNGL    | 77  | 81  |
| >PTCH1-V11{TILGVLNGLV   | 660 | >PTCH1-V11{TILGILNGLV   | 498 | 162 |

|                        |      |                        |      |      |
|------------------------|------|------------------------|------|------|
| >PTCH1-V11{TILGVLNGL   | 98   | >PTCH1-V11{TILGILNGL   | 59   | 39   |
| >PTCH1-V11{TILGVLNGLV  | 27   | >PTCH1-V11{TILGILNGLV  | 20   | 7    |
| >PTCH1-V11{TILGVLNGLVI | 464  | >PTCH1-V11{TILGILNGLVL | 594  | 130  |
| >PTCH1-V11{LTILGVLNGL  | 210  | >PTCH1-V11{LTILGILNGL  | 186  | 24   |
| >PTCH1-V11{LTILGVLNGL  | 377  | >PTCH1-V11{LTILGILNGL  | 341  | 36   |
| >PTCH1-V11{LTILGVLNGL\ | 229  | >PTCH1-V11{LTILGILNGLV | 252  | 23   |
| >PTCH1-V11{LTILGVLNGL  | 133  | >PTCH1-V11{LTILGILNGL  | 134  | 1    |
| >PTCH1-V11{LTILGVLNGL\ | 185  | >PTCH1-V11{LTILGILNGLV | 138  | 47   |
| >PTCH1-V11{LTILGVLNGL  | 54   | >PTCH1-V11{LTILGILNGL  | 56   | 2    |
| >PTCH1-V11{LTILGVLNGL  | 213  | >PTCH1-V11{LTILGILNGL  | 291  | 78   |
| >PTCH1-V11{LTILGVLNGL  | 496  | >PTCH1-V11{LTILGILNGL  | 425  | 71   |
| >PTCH1-V11{LTILGVLNGL\ | 47   | >PTCH1-V11{LTILGILNGLV | 36   | 11   |
| >PTCH1-V11{LTILGVLNGL\ | 218  | >PTCH1-V11{LTILGILNGLV | 212  | 6    |
| >PTCH1-V11{LTILGVLNGL  | 16   | >PTCH1-V11{LTILGILNGL  | 15   | 1    |
| >PTCH1-V11{LTILGVLNGL\ | 431  | >PTCH1-V11{LTILGILNGLV | 438  | 7    |
| >PTCH1-V11{LTILGVLNGL  | 76   | >PTCH1-V11{LTILGILNGL  | 63   | 13   |
| >PTCH1-V11{LTILGVLNGL\ | 290  | >PTCH1-V11{LTILGILNGLV | 310  | 20   |
| >PTCH1-V11{ILTILGVL    | 230  | >PTCH1-V11{ILTILGIL    | 250  | 20   |
| >PTCH1-V11{ILTILGVLNGL | 34   | >PTCH1-V11{ILTILGILNGL | 36   | 2    |
| >PTCH1-V11{ILTILGVL    | 419  | >PTCH1-V11{ILTILGIL    | 400  | 19   |
| >PTCH1-V11{ILTILGVLNGL | 203  | >PTCH1-V11{ILTILGILNGL | 199  | 4    |
| >PTCH1-V11{ILTILGVLNGL | 331  | >PTCH1-V11{ILTILGILNGL | 348  | 17   |
| >PTCH1-V11{ILTILGVL    | 130  | >PTCH1-V11{ILTILGIL    | 363  | 233  |
| >PTCH1-V11{ILTILGVLNGL | 39   | >PTCH1-V11{ILTILGILNGL | 50   | 11   |
| >PTCH1-V11{ILTILGVLNGL | 264  | >PTCH1-V11{ILTILGILNGL | 281  | 17   |
| >PTCH1-V11{ILTILGVL    | 251  | >PTCH1-V11{ILTILGIL    | 305  | 54   |
| >PTCH1-V11{ILTILGVLNGL | 42   | >PTCH1-V11{ILTILGILNGL | 52   | 10   |
| >PTCH1-V11{ILTILGVL    | 17   | >PTCH1-V11{ILTILGIL    | 24   | 7    |
| >PTCH1-V11{ILTILGVLNGL | 7    | >PTCH1-V11{ILTILGILNGL | 7    | 0    |
| >PTCH1-V11{AILTILGV    | 35   | >PTCH1-V11{AILTILGI    | 168  | 133  |
| >PTCH1-V11{AILTILGV    | 249  | >PTCH1-V11{AILTILGI    | 1004 | 755  |
| >PTCH1-V11{AILTILGV    | 53   | >PTCH1-V11{AILTILGI    | 291  | 238  |
| >PTCH1-V11{AILTILGVL   | 538  | >PTCH1-V11{AILTILGIL   | 482  | 56   |
| >PTCH1-V11{AILTILGV    | 10   | >PTCH1-V11{AILTILGI    | 50   | 40   |
| >PTCH1-V11{AILTILGVL   | 338  | >PTCH1-V11{AILTILGIL   | 395  | 57   |
| >PTCH1-V11{AILTILGV    | 6    | >PTCH1-V11{AILTILGI    | 52   | 46   |
| >PTCH1-V11{AILTILGVL   | 460  | >PTCH1-V11{AILTILGIL   | 1587 | 1127 |
| >PTCH1-V11{AILTILGV    | 39   | >PTCH1-V11{AILTILGI    | 776  | 737  |
| >PTCH1-V11{AILTILGV    | 14   | >PTCH1-V11{AILTILGI    | 295  | 281  |
| >PTCH1-V11{AILTILGV    | 15   | >PTCH1-V11{AILTILGI    | 665  | 650  |
| >PTCH1-V11{AILTILGV    | 5    | >PTCH1-V11{AILTILGI    | 313  | 308  |
| >PTCH1-V11{AILTILGVL   | 441  | >PTCH1-V11{AILTILGIL   | 787  | 346  |
| >PTCH1-V11{AILTILGV    | 3820 | >PTCH1-V11{AILTILGI    | 317  | 3503 |

|                        |       |                        |       |       |
|------------------------|-------|------------------------|-------|-------|
| >PTCH1-V11{AILTILGV    | 126   | >PTCH1-V11{AILTILGI    | 1068  | 942   |
| >PTCH1-V11{LAILTILGV   | 347   | >PTCH1-V11{LAILTILGI   | 1381  | 1034  |
| >PTCH1-V11{LAILTILGV   | 38    | >PTCH1-V11{LAILTILGI   | 317   | 279   |
| >PTCH1-V11{LAILTILGV   | 248   | >PTCH1-V11{LAILTILGI   | 3136  | 2888  |
| >PTCH1-V11{LAILTILGV   | 136   | >PTCH1-V11{LAILTILGI   | 11751 | 11615 |
| >PTCH1-V11{LAILTILGV   | 280   | >PTCH1-V11{LAILTILGI   | 1613  | 1333  |
| >PTCH1-V11{LAILTILGV   | 423   | >PTCH1-V11{LAILTILGI   | 66    | 357   |
| >PTCH1-V11{LAILTILGVL  | 205   | >PTCH1-V11{LAILTILGIL  | 382   | 177   |
| >PTCH1-V11{LAILTILGV   | 6526  | >PTCH1-V11{LAILTILGI   | 297   | 6229  |
| >PTCH1-V11{LAILTILGV   | 12875 | >PTCH1-V11{LAILTILGI   | 432   | 12443 |
| >PTCH1-V11{VLAILTILGV  | 39    | >PTCH1-V11{VLAILTILGI  | 121   | 82    |
| >PTCH1-V11{VLAILTILGVL | 414   | >PTCH1-V11{VLAILTILGIL | 432   | 18    |
| >PTCH1-V11{VLAILTILGV  | 54    | >PTCH1-V11{VLAILTILGI  | 83    | 29    |
| >PTCH1-V11{VLAILTILGVL | 37    | >PTCH1-V11{VLAILTILGIL | 33    | 4     |
| >PTCH1-V11{VLAILTILGV  | 24    | >PTCH1-V11{VLAILTILGI  | 65    | 41    |
| >PTCH1-V11{VLAILTILGVL | 58    | >PTCH1-V11{VLAILTILGIL | 53    | 5     |
| >PTCH1-V11{VLAILTILGV  | 83    | >PTCH1-V11{VLAILTILGI  | 205   | 122   |
| >PTCH1-V11{VLAILTILGV  | 2     | >PTCH1-V11{VLAILTILGI  | 10    | 8     |
| >PTCH1-V11{VLAILTILGVL | 43    | >PTCH1-V11{VLAILTILGIL | 116   | 73    |
| >PTCH1-V11{VLAILTILGV  | 12    | >PTCH1-V11{VLAILTILGI  | 161   | 149   |
| >PTCH1-V11{VLAILTILGVL | 416   | >PTCH1-V11{VLAILTILGIL | 526   | 110   |
| >PTCH1-V11{VLAILTILGV  | 4     | >PTCH1-V11{VLAILTILGI  | 12    | 8     |
| >PTCH1-V11{VLAILTILGVL | 51    | >PTCH1-V11{VLAILTILGIL | 63    | 12    |
| >PTCH1-V11{VLAILTILGV  | 4     | >PTCH1-V11{VLAILTILGI  | 50    | 46    |
| >PTCH1-V11{VLAILTILGVL | 214   | >PTCH1-V11{VLAILTILGIL | 402   | 188   |
| >PTCH1-V11{VLAILTILGV  | 2     | >PTCH1-V11{VLAILTILGI  | 8     | 6     |
| >PTCH1-V11{VLAILTILGVL | 10    | >PTCH1-V11{VLAILTILGIL | 14    | 4     |
| >PTCH1-V11{VLAILTILGV  | 339   | >PTCH1-V11{VLAILTILGI  | 1113  | 774   |
| >PTCH1-V43{VIRVASGYLLM | 487   | >PTCH1-V43{AIRVASGYLLM | 1458  | 971   |
| >PTCH1-V43{VIRVASGY    | 1015  | >PTCH1-V43{AIRVASGY    | 105   | 910   |
| >PTCH1-V43{VIRVASGYL   | 31    | >PTCH1-V43{AIRVASGYL   | 6     | 25    |
| >PTCH1-V43{VIRVASGYLL  | 123   | >PTCH1-V43{AIRVASGYLL  | 15    | 108   |
| >PTCH1-V43{VIRVASGYLLM | 44    | >PTCH1-V43{AIRVASGYLLM | 8     | 36    |
| >PTCH1-V43{VIRVASGY    | 81    | >PTCH1-V43{AIRVASGY    | 132   | 51    |
| >PTCH1-V43{VIRVASGY    | 144   | >PTCH1-V43{AIRVASGY    | 107   | 37    |
| >PTCH1-V43{VIRVASGY    | 161   | >PTCH1-V43{AIRVASGY    | 233   | 72    |
| >PTCH1-V43{VIRVASGY    | 66    | >PTCH1-V43{AIRVASGY    | 45    | 21    |
| >PTCH1-V43{VIRVASGYLLM | 158   | >PTCH1-V43{AIRVASGYLLM | 262   | 104   |
| >PTCH1-V43{SVIRVASGYL  | 316   | >PTCH1-V43{SAIRVASGYL  | 822   | 506   |
| >PTCH1-V43{SVIRVASGYLL | 188   | >PTCH1-V43{SAIRVASGYLL | 859   | 671   |
| >PTCH1-V43{SVIRVASGYL  | 139   | >PTCH1-V43{SAIRVASGYL  | 434   | 295   |
| >PTCH1-V43{SVIRVASGYLL | 138   | >PTCH1-V43{SAIRVASGYLL | 682   | 544   |
| >PTCH1-V43{SVIRVASGYL  | 481   | >PTCH1-V43{SAIRVASGYL  | 2346  | 1865  |

|                        |      |                        |       |       |
|------------------------|------|------------------------|-------|-------|
| >PTCH1-V43!SVIRVASGY   | 115  | >PTCH1-V43!SAIRVASGY   | 959   | 844   |
| >PTCH1-V43!SVIRVASGY   | 12   | >PTCH1-V43!SAIRVASGY   | 119   | 107   |
| >PTCH1-V43!SVIRVASGY   | 7    | >PTCH1-V43!SAIRVASGY   | 108   | 101   |
| >PTCH1-V43!SVIRVASGYL  | 59   | >PTCH1-V43!SAIRVASGYL  | 1557  | 1498  |
| >PTCH1-V43!SVIRVASGYLL | 305  | >PTCH1-V43!SAIRVASGYLL | 7094  | 6789  |
| >PTCH1-V43!SVIRVASGY   | 103  | >PTCH1-V43!SAIRVASGY   | 1289  | 1186  |
| >PTCH1-V43!SVIRVASGY   | 97   | >PTCH1-V43!SAIRVASGY   | 807   | 710   |
| >PTCH1-V43!SVIRVASGY   | 113  | >PTCH1-V43!SAIRVASGY   | 206   | 93    |
| >PTCH1-V43!SVIRVASGY   | 86   | >PTCH1-V43!SAIRVASGY   | 200   | 114   |
| >PTCH1-V43!SVIRVASGYL  | 132  | >PTCH1-V43!SAIRVASGYL  | 290   | 158   |
| >PTCH1-V43!SVIRVASGYLL | 33   | >PTCH1-V43!SAIRVASGYLL | 151   | 118   |
| >PTCH1-V43!SVIRVASGYL  | 223  | >PTCH1-V43!SAIRVASGYL  | 614   | 391   |
| >PTCH1-V43!SVIRVASGY   | 24   | >PTCH1-V43!SAIRVASGY   | 490   | 466   |
| >PTCH1-V43!SVIRVASGY   | 163  | >PTCH1-V43!SAIRVASGY   | 248   | 85    |
| >PTCH1-V43!SVIRVASGY   | 389  | >PTCH1-V43!SAIRVASGY   | 1415  | 1026  |
| >PTCH1-V43!SVIRVASGY   | 349  | >PTCH1-V43!SAIRVASGY   | 37    | 312   |
| >PTCH1-V43!SVIRVASGY   | 1560 | >PTCH1-V43!SAIRVASGY   | 203   | 1357  |
| >PTCH1-V43!SVIRVASGY   | 11   | >PTCH1-V43!SAIRVASGY   | 17    | 6     |
| >PTCH1-V43!SVIRVASGYL  | 274  | >PTCH1-V43!SAIRVASGYL  | 511   | 237   |
| >PTCH1-V43!SVIRVASGYLL | 231  | >PTCH1-V43!SAIRVASGYLL | 400   | 169   |
| >PTCH1-V43!DILKSFSDVSV | 471  | >PTCH1-V43!DILKSFSDVSA | 11693 | 11222 |
| >PTCH1-V43!DILKSFSDVSV | 433  | >PTCH1-V43!DILKSFSDVSA | 13869 | 13436 |
| >PTCH1-V43!DILKSFSDVSV | 379  | >PTCH1-V43!DILKSFSDVSA | 4100  | 3721  |
| >PTCH1-V43!DILKSFSDVSV | 69   | >PTCH1-V43!DILKSFSDVSA | 2207  | 2138  |
| >PTCH1-V43!VSVIRVASGY  | 127  | >PTCH1-V43!VSAIRVASGY  | 419   | 292   |
| >PTCH1-V43!VSVIRVASGY  | 236  | >PTCH1-V43!VSAIRVASGY  | 52    | 184   |
| >PTCH1-V43!VSVIRVASGY  | 353  | >PTCH1-V43!VSAIRVASGY  | 1496  | 1143  |
| >PTCH1-V43!VSVIRVASGY  | 848  | >PTCH1-V43!VSAIRVASGY  | 461   | 387   |
| >PTCH1-V43!VSVIRVASGY  | 36   | >PTCH1-V43!VSAIRVASGY  | 33    | 3     |
| >PTCH1-V43!VSVIRVASGY  | 352  | >PTCH1-V43!VSAIRVASGY  | 272   | 80    |
| >PTCH1-V43!VSVIRVASGY  | 3    | >PTCH1-V43!VSAIRVASGY  | 4     | 1     |
| >PTCH1-V43!VSVIRVASGY  | 7    | >PTCH1-V43!VSAIRVASGY  | 10    | 3     |
| >PTCH1-V43!VSVIRVASGY  | 679  | >PTCH1-V43!VSAIRVASGY  | 371   | 308   |
| >PTCH1-V43!VSVIRVASGY  | 226  | >PTCH1-V43!VSAIRVASGY  | 73    | 153   |
| >PTCH1-V43!VSVIRVASGY  | 48   | >PTCH1-V43!VSAIRVASGY  | 30    | 18    |
| >PTCH1-V43!DVSIRVASG   | 91   | >PTCH1-V43!DVSIRVASG   | 40    | 51    |
| >PTCH1-V43!DVSIRVASG   | 362  | >PTCH1-V43!DVSIRVASG   | 157   | 205   |
| >PTCH1-V43!DVSIRVASG   | 608  | >PTCH1-V43!DVSIRVASG   | 439   | 169   |
| >PTCH1-V43!DVSIRVASG   | 187  | >PTCH1-V43!DVSIRVASG   | 183   | 4     |
| >PTCH1-V43!DVSIRVASG   | 73   | >PTCH1-V43!DVSIRVASG   | 55    | 18    |
| >PTCH1-V43!DVSIRVA     | 361  | >PTCH1-V43!DVSIRVA     | 179   | 182   |
| >PTCH1-V43!DVSIRVAS    | 311  | >PTCH1-V43!DVSIRVAS    | 68    | 243   |
| >PTCH1-V43!DVSIRVASG   | 503  | >PTCH1-V43!DVSIRVASG   | 345   | 158   |

|                        |      |                        |      |      |
|------------------------|------|------------------------|------|------|
| >PTCH1-V43!SDVSVIRV    | 277  | >PTCH1-V43!SDVSAIRV    | 140  | 137  |
| >PTCH1-V43!FSDVSVIRV   | 89   | >PTCH1-V43!FSDVSAIRV   | 68   | 21   |
| >PTCH1-V43!FSDVSVIRV   | 483  | >PTCH1-V43!FSDVSAIRV   | 3131 | 2648 |
| >PTCH1-V43!FSDVSVIRV   | 223  | >PTCH1-V43!FSDVSAIRV   | 323  | 100  |
| >PTCH1-V43!FSDVSVIRV   | 169  | >PTCH1-V43!FSDVSAIRV   | 769  | 600  |
| >PTCH1-V43!FSDVSVIR    | 151  | >PTCH1-V43!FSDVSAIR    | 112  | 39   |
| >PTCH1-V43!FSDVSVIRV   | 346  | >PTCH1-V43!FSDVSAIRV   | 214  | 132  |
| >PTCH1-V43!FSDVSVIRV   | 188  | >PTCH1-V43!FSDVSAIRV   | 103  | 85   |
| >PTCH1-V43!SFSDVSVI    | 543  | >PTCH1-V43!SFSDVSAI    | 306  | 237  |
| >PTCH1-V43!SFSDVSVI    | 1180 | >PTCH1-V43!SFSDVSAI    | 392  | 788  |
| >PTCH1-V43!SFSDVSVIRV  | 338  | >PTCH1-V43!SFSDVSAIRV  | 608  | 270  |
| >PTCH1-V43!SFSDVSVIRV  | 202  | >PTCH1-V43!SFSDVSAIRV  | 470  | 268  |
| >PTCH1-V43!SFSDVSVIRV  | 94   | >PTCH1-V43!SFSDVSAIRV  | 130  | 36   |
| >PTCH1-V43!SFSDVSVI    | 372  | >PTCH1-V43!SFSDVSAI    | 647  | 275  |
| >PTCH1-V43!SFSDVSVIR   | 46   | >PTCH1-V43!SFSDVSAIR   | 34   | 12   |
| >PTCH1-V43!SFSDVSVIR   | 344  | >PTCH1-V43!SFSDVSAIR   | 177  | 167  |
| >PTCH1-V43!SFSDVSVIR   | 85   | >PTCH1-V43!SFSDVSAIR   | 69   | 16   |
| >PTCH1-V43!SFSDVSVIR   | 78   | >PTCH1-V43!SFSDVSAIR   | 169  | 91   |
| >PTCH1-V43!SFSDVSVI    | 811  | >PTCH1-V43!SFSDVSAI    | 422  | 389  |
| >PTCH1-V43!KSFSDVSV    | 498  | >PTCH1-V43!KSFSDVSA    | 6522 | 6024 |
| >PTCH1-V43!KSFSDVSVIR\ | 410  | >PTCH1-V43!KSFSDVSAIR\ | 892  | 482  |
| >PTCH1-V43!KSFSDVSV    | 347  | >PTCH1-V43!KSFSDVSA    | 2680 | 2333 |
| >PTCH1-V43!KSFSDVSVI   | 1680 | >PTCH1-V43!KSFSDVSAI   | 499  | 1181 |
| >PTCH1-V43!KSFSDVSV    | 185  | >PTCH1-V43!KSFSDVSA    | 1707 | 1522 |
| >PTCH1-V43!KSFSDVSV    | 415  | >PTCH1-V43!KSFSDVSA    | 8832 | 8417 |
| >PTCH1-V43!KSFSDVSVIR\ | 160  | >PTCH1-V43!KSFSDVSAIR\ | 310  | 150  |
| >PTCH1-V43!KSFSDVSVIR  | 86   | >PTCH1-V43!KSFSDVSAIR  | 227  | 141  |
| >PTCH1-V43!KSFSDVSV    | 431  | >PTCH1-V43!KSFSDVSA    | 221  | 210  |
| >PTCH1-V43!KSFSDVSVI   | 797  | >PTCH1-V43!KSFSDVSAI   | 477  | 320  |
| >PTCH1-V43!KSFSDVSVIR\ | 322  | >PTCH1-V43!KSFSDVSAIR\ | 353  | 31   |
| >PTCH1-V43!KSFSDVSVIR  | 37   | >PTCH1-V43!KSFSDVSAIR  | 30   | 7    |
| >PTCH1-V43!KSFSDVSV    | 76   | >PTCH1-V43!KSFSDVSA    | 363  | 287  |
| >PTCH1-V43!KSFSDVSVI   | 27   | >PTCH1-V43!KSFSDVSAI   | 13   | 14   |
| >PTCH1-V43!KSFSDVSVIR\ | 300  | >PTCH1-V43!KSFSDVSAIR\ | 301  | 1    |
| >PTCH1-V43!KSFSDVSVIR  | 49   | >PTCH1-V43!KSFSDVSAIR  | 43   | 6    |
| >PTCH1-V43!KSFSDVSV    | 32   | >PTCH1-V43!KSFSDVSA    | 208  | 176  |
| >PTCH1-V43!KSFSDVSVI   | 16   | >PTCH1-V43!KSFSDVSAI   | 9    | 7    |
| >PTCH1-V43!KSFSDVSVIR  | 171  | >PTCH1-V43!KSFSDVSAIR  | 263  | 92   |
| >PTCH1-V43!KSFSDVSVIR\ | 99   | >PTCH1-V43!KSFSDVSAIR\ | 118  | 19   |
| >PTCH1-V43!KSFSDVSV    | 66   | >PTCH1-V43!KSFSDVSA    | 940  | 874  |
| >PTCH1-V43!KSFSDVSVI   | 10   | >PTCH1-V43!KSFSDVSAI   | 11   | 1    |
| >PTCH1-V43!KSFSDVSVIR\ | 30   | >PTCH1-V43!KSFSDVSAIR\ | 24   | 6    |
| >PTCH1-V43!KSFSDVSVI   | 32   | >PTCH1-V43!KSFSDVSAI   | 106  | 74   |

|                         |     |                         |      |      |
|-------------------------|-----|-------------------------|------|------|
| >PTCH1-V43!KSFSDVSVI    | 7   | >PTCH1-V43!KSFSDVSAI    | 19   | 12   |
| >PTCH1-V43!KSFSDVSVIR\  | 89  | >PTCH1-V43!KSFSDVSAIR\  | 64   | 25   |
| >PTCH1-V43!KSFSDVSVIR   | 307 | >PTCH1-V43!KSFSDVSAIR   | 576  | 269  |
| >PTCH1-V43!KSFSDVSVIR   | 89  | >PTCH1-V43!KSFSDVSAIR   | 133  | 44   |
| >PTCH1-V43!KSFSDVSV     | 171 | >PTCH1-V43!KSFSDVSA     | 1338 | 1167 |
| >PTCH1-V43!KSFSDVSVI    | 7   | >PTCH1-V43!KSFSDVSAI    | 8    | 1    |
| >PTCH1-V43!KSFSDVSVIR\  | 406 | >PTCH1-V43!KSFSDVSAIR\  | 356  | 50   |
| >PTCH1-V43!LKSFSFDVSV   | 37  | >PTCH1-V43!LKSFSFDVSA   | 246  | 209  |
| >PTCH1-V43!LKSFSFDVSVI  | 21  | >PTCH1-V43!LKSFSFDVSAI  | 13   | 8    |
| >PTCH1-V43!LKSFSFDVSVIR | 314 | >PTCH1-V43!LKSFSFDVSAIR | 551  | 237  |
| >PTCH1-V43!LKSFSFDVSVI  | 373 | >PTCH1-V43!LKSFSFDVSAI  | 927  | 554  |
| >PTCH1-V43!ILKSFSFDVSV  | 88  | >PTCH1-V43!ILKSFSFDVSA  | 1037 | 949  |
| >PTCH1-V43!ILKSFSFDVSV  | 12  | >PTCH1-V43!ILKSFSFDVSA  | 39   | 27   |
| >PTCH1-V43!ILKSFSFDVSVI | 99  | >PTCH1-V43!ILKSFSFDVSAI | 33   | 66   |
| >PTCH1-V43!ILKSFSFDVSV  | 13  | >PTCH1-V43!ILKSFSFDVSA  | 49   | 36   |
| >PTCH1-V43!ILKSFSFDVSVI | 11  | >PTCH1-V43!ILKSFSFDVSAI | 7    | 4    |
| >PTCH1-V43!ILKSFSFDVSV  | 28  | >PTCH1-V43!ILKSFSFDVSA  | 1488 | 1460 |
| >PTCH1-V43!ILKSFSFDVSVI | 213 | >PTCH1-V43!ILKSFSFDVSAI | 97   | 116  |
| >PTCH1-V43!ILKSFSFDVSV  | 46  | >PTCH1-V43!ILKSFSFDVSA  | 2489 | 2443 |
| >PTCH1-V43!ILKSFSFDVSVI | 549 | >PTCH1-V43!ILKSFSFDVSAI | 243  | 306  |
| >PTCH1-V43!ILKSFSFDVSV  | 139 | >PTCH1-V43!ILKSFSFDVSA  | 7136 | 6997 |
| >PTCH1-V43!ILKSFSFDVSV  | 238 | >PTCH1-V43!ILKSFSFDVSA  | 9091 | 8853 |
| >PTCH1-V43!ILKSFSFDVSV  | 3   | >PTCH1-V43!ILKSFSFDVSA  | 79   | 76   |
| >PTCH1-V43!ILKSFSFDVSVI | 91  | >PTCH1-V43!ILKSFSFDVSAI | 73   | 18   |
| >PTCH1-V43!ILKSFSFDVSVI | 424 | >PTCH1-V43!ILKSFSFDVSAI | 444  | 20   |
| >PTCH1-V43!ILKSFSFDVSV  | 187 | >PTCH1-V43!ILKSFSFDVSA  | 719  | 532  |
| >PTCH1-V43!ILKSFSFDVSVI | 100 | >PTCH1-V43!ILKSFSFDVSAI | 67   | 33   |
| >PTCH1-V43!ILKSFSFDVSVI | 304 | >PTCH1-V43!ILKSFSFDVSAI | 988  | 684  |
| >PTCH1-V47!VLLVALSV     | 22  | >PTCH1-V47!ILLVALSV     | 20   | 2    |
| >PTCH1-V47!VLLVALSVA    | 811 | >PTCH1-V47!ILLVALSVA    | 497  | 314  |
| >PTCH1-V47!VLLVALSVAA   | 328 | >PTCH1-V47!ILLVALSVAA   | 185  | 143  |
| >PTCH1-V47!VLLVALSV     | 136 | >PTCH1-V47!ILLVALSV     | 71   | 65   |
| >PTCH1-V47!VLLVALSVAA   | 479 | >PTCH1-V47!ILLVALSVAA   | 194  | 285  |
| >PTCH1-V47!VLLVALSV     | 53  | >PTCH1-V47!ILLVALSV     | 41   | 12   |
| >PTCH1-V47!VLLVALSVA    | 126 | >PTCH1-V47!ILLVALSVA    | 91   | 35   |
| >PTCH1-V47!VLLVALSVAA   | 383 | >PTCH1-V47!ILLVALSVAA   | 170  | 213  |
| >PTCH1-V47!VLLVALSV     | 19  | >PTCH1-V47!ILLVALSV     | 15   | 4    |
| >PTCH1-V47!VLLVALSVA    | 180 | >PTCH1-V47!ILLVALSVA    | 117  | 63   |
| >PTCH1-V47!VLLVALSVAA   | 259 | >PTCH1-V47!ILLVALSVAA   | 138  | 121  |
| >PTCH1-V47!VLLVALSV     | 2   | >PTCH1-V47!ILLVALSV     | 3    | 1    |
| >PTCH1-V47!VLLVALSVA    | 54  | >PTCH1-V47!ILLVALSVA    | 66   | 12   |
| >PTCH1-V47!VLLVALSVAA   | 21  | >PTCH1-V47!ILLVALSVAA   | 25   | 4    |
| >PTCH1-V47!VLLVALSV     | 6   | >PTCH1-V47!ILLVALSV     | 7    | 1    |

|                        |      |                        |      |      |
|------------------------|------|------------------------|------|------|
| >PTCH1-V47·VLLVALSVA   | 113  | >PTCH1-V47·ILLVALSVA   | 150  | 37   |
| >PTCH1-V47·VLLVALSVAA  | 57   | >PTCH1-V47·ILLVALSVAA  | 73   | 16   |
| >PTCH1-V47·VLLVALSV    | 5    | >PTCH1-V47·ILLVALSV    | 5    | 0    |
| >PTCH1-V47·VLLVALSVA   | 46   | >PTCH1-V47·ILLVALSVA   | 84   | 38   |
| >PTCH1-V47·VLLVALSVAA  | 30   | >PTCH1-V47·ILLVALSVAA  | 51   | 21   |
| >PTCH1-V47·VLLVALSV    | 3    | >PTCH1-V47·ILLVALSV    | 2    | 1    |
| >PTCH1-V47·VLLVALSVA   | 84   | >PTCH1-V47·ILLVALSVA   | 82   | 2    |
| >PTCH1-V47·VLLVALSVAA  | 63   | >PTCH1-V47·ILLVALSVAA  | 64   | 1    |
| >PTCH1-V47·VLLVALSV    | 2    | >PTCH1-V47·ILLVALSV    | 2    | 0    |
| >PTCH1-V47·VLLVALSVA   | 19   | >PTCH1-V47·ILLVALSVA   | 25   | 6    |
| >PTCH1-V47·VLLVALSVAA  | 18   | >PTCH1-V47·ILLVALSVAA  | 24   | 6    |
| >PTCH1-V47·GVLLVALSV   | 614  | >PTCH1-V47·GILLVALSV   | 317  | 297  |
| >PTCH1-V47·GVLLVALSV   | 51   | >PTCH1-V47·GILLVALSV   | 61   | 10   |
| >PTCH1-V47·GVLLVALSVA  | 358  | >PTCH1-V47·GILLVALSVA  | 440  | 82   |
| >PTCH1-V47·GVLLVALSV   | 69   | >PTCH1-V47·GILLVALSV   | 19   | 50   |
| >PTCH1-V47·GVLLVALSV   | 317  | >PTCH1-V47·GILLVALSV   | 137  | 180  |
| >PTCH1-V47·GVLLVALSV   | 33   | >PTCH1-V47·GILLVALSV   | 17   | 16   |
| >PTCH1-V47·GVLLVALSV   | 1192 | >PTCH1-V47·GILLVALSV   | 423  | 769  |
| >PTCH1-V47·GVLLVALSV   | 134  | >PTCH1-V47·GILLVALSV   | 39   | 95   |
| >PTCH1-V47·KSQGAVGLA   | 361  | >PTCH1-V47·KSQGAVGLA   | 2073 | 1712 |
| >PTCH1-V47·KSQGAVGLA   | 4470 | >PTCH1-V47·KSQGAVGLA   | 371  | 4099 |
| >PTCH1-V47·KSQGAVGLA   | 84   | >PTCH1-V47·KSQGAVGLA   | 18   | 66   |
| >PTCH1-V47·KSQGAVGLA   | 6782 | >PTCH1-V47·KSQGAVGLA   | 149  | 6633 |
| >PTCH1-V47·KSQGAVGLA   | 2533 | >PTCH1-V47·KSQGAVGLA   | 35   | 2498 |
| >PTCH1-V47·LAGVLLVALSV | 633  | >PTCH1-V47·LAGILLVALSV | 403  | 230  |
| >PTCH1-V47·GLAGVLLV    | 12   | >PTCH1-V47·GLAGILLV    | 11   | 1    |
| >PTCH1-V47·GLAGVLLVA   | 91   | >PTCH1-V47·GLAGILLVA   | 70   | 21   |
| >PTCH1-V47·GLAGVLLVAL  | 142  | >PTCH1-V47·GLAGILLVAL  | 122  | 20   |
| >PTCH1-V47·GLAGVLLV    | 4    | >PTCH1-V47·GLAGILLV    | 3    | 1    |
| >PTCH1-V47·GLAGVLLVA   | 20   | >PTCH1-V47·GLAGILLVA   | 9    | 11   |
| >PTCH1-V47·GLAGVLLVAL  | 17   | >PTCH1-V47·GLAGILLVAL  | 16   | 1    |
| >PTCH1-V47·GLAGVLLVAL  | 54   | >PTCH1-V47·GLAGILLVALS | 28   | 26   |
| >PTCH1-V47·GLAGVLLV    | 4    | >PTCH1-V47·GLAGILLV    | 4    | 0    |
| >PTCH1-V47·GLAGVLLVA   | 14   | >PTCH1-V47·GLAGILLVA   | 12   | 2    |
| >PTCH1-V47·GLAGVLLVAL  | 65   | >PTCH1-V47·GLAGILLVAL  | 53   | 12   |
| >PTCH1-V47·GLAGVLLVAL  | 182  | >PTCH1-V47·GLAGILLVALS | 145  | 37   |
| >PTCH1-V47·GLAGVLLV    | 21   | >PTCH1-V47·GLAGILLV    | 16   | 5    |
| >PTCH1-V47·GLAGVLLVA   | 286  | >PTCH1-V47·GLAGILLVA   | 288  | 2    |
| >PTCH1-V47·GLAGVLLVAL  | 229  | >PTCH1-V47·GLAGILLVAL  | 194  | 35   |
| >PTCH1-V47·GLAGVLLV    | 2    | >PTCH1-V47·GLAGILLV    | 3    | 1    |
| >PTCH1-V47·GLAGVLLVA   | 18   | >PTCH1-V47·GLAGILLVA   | 50   | 32   |
| >PTCH1-V47·GLAGVLLVAL  | 7    | >PTCH1-V47·GLAGILLVAL  | 10   | 3    |
| >PTCH1-V47·GLAGVLLV    | 7    | >PTCH1-V47·GLAGILLV    | 7    | 0    |



|                       |      |                        |       |       |
|-----------------------|------|------------------------|-------|-------|
| >PTCH1-V47:GLAGVLLVA  | 244  | >PTCH1-V47:GLAGILLVA   | 284   | 40    |
| >PTCH1-V47:GLAGVLLVAL | 12   | >PTCH1-V47:GLAGILLVAL  | 15    | 3     |
| >PTCH1-V47:GLAGVLLV   | 4    | >PTCH1-V47:GLAGILLV    | 4     | 0     |
| >PTCH1-V47:GLAGVLLVA  | 16   | >PTCH1-V47:GLAGILLVA   | 25    | 9     |
| >PTCH1-V47:GLAGVLLVAL | 10   | >PTCH1-V47:GLAGILLVAL  | 11    | 1     |
| >PTCH1-V47:GLAGVLLV   | 6    | >PTCH1-V47:GLAGILLV    | 5     | 1     |
| >PTCH1-V47:GLAGVLLVA  | 840  | >PTCH1-V47:GLAGILLVA   | 486   | 354   |
| >PTCH1-V47:GLAGVLLVAL | 61   | >PTCH1-V47:GLAGILLVAL  | 40    | 21    |
| >PTCH1-V47:GLAGVLLV   | 2    | >PTCH1-V47:GLAGILLV    | 2     | 0     |
| >PTCH1-V47:GLAGVLLVA  | 7    | >PTCH1-V47:GLAGILLVA   | 7     | 0     |
| >PTCH1-V47:GLAGVLLVAL | 3    | >PTCH1-V47:GLAGILLVAL  | 3     | 0     |
| >PTCH1-V47:GLAGVLLVAL | 502  | >PTCH1-V47:GLAGILLVALS | 357   | 145   |
| >PTCH1-V47:GLAGVLLVAL | 396  | >PTCH1-V47:GLAGILLVAL  | 248   | 148   |
| >PTCH1-V47:VGLAGVLLV  | 291  | >PTCH1-V47:VGLAGILLV   | 129   | 162   |
| >PTCH1-V47:VGLAGVLLV  | 511  | >PTCH1-V47:VGLAGILLV   | 319   | 192   |
| >PTCH1-V47:VGLAGVLLV  | 245  | >PTCH1-V47:VGLAGILLV   | 241   | 4     |
| >PTCH1-V47:AVGLAGVLLV | 503  | >PTCH1-V47:AVGLAGILLV  | 326   | 177   |
| >PTCH1-V47:AVGLAGVLLV | 189  | >PTCH1-V47:AVGLAGILLV  | 128   | 61    |
| >PTCH1-V47:AVGLAGVLLV | 816  | >PTCH1-V47:AVGLAGILLV  | 367   | 449   |
| >PTCH1-V47:AVGLAGVLLV | 590  | >PTCH1-V47:AVGLAGILLV  | 460   | 130   |
| >PTCH1-V47:AVGLAGVLLV | 173  | >PTCH1-V47:AVGLAGILLV  | 165   | 8     |
| >PTCH1-V47:AVGLAGVLLV | 50   | >PTCH1-V47:AVGLAGILLV  | 48    | 2     |
| >PTCH1-V47:GAVGLAGV   | 317  | >PTCH1-V47:GAVGLAGI    | 1551  | 1234  |
| >PTCH1-V47:GAVGLAGV   | 99   | >PTCH1-V47:GAVGLAGI    | 527   | 428   |
| >PTCH1-V47:GAVGLAGVLI | 242  | >PTCH1-V47:GAVGLAGILL' | 177   | 65    |
| >PTCH1-V47:GAVGLAGV   | 392  | >PTCH1-V47:GAVGLAGI    | 4230  | 3838  |
| >PTCH1-V47:GAVGLAGV   | 162  | >PTCH1-V47:GAVGLAGI    | 10999 | 10837 |
| >PTCH1-V47:GAVGLAGVLI | 492  | >PTCH1-V47:GAVGLAGILL' | 372   | 120   |
| >PTCH1-V47:GAVGLAGV   | 3146 | >PTCH1-V47:GAVGLAGI    | 443   | 2703  |
| >PTCH1-V47:GAVGLAGVL  | 447  | >PTCH1-V47:GAVGLAGIL   | 1248  | 801   |
| >PTCH1-V47:GAVGLAGVL  | 211  | >PTCH1-V47:GAVGLAGIL   | 235   | 24    |
| >PTCH1-V47:QGAVGLAGV  | 364  | >PTCH1-V47:QGAVGLAGI   | 2248  | 1884  |
| >PTCH1-V47:SQGAVGLAG' | 237  | >PTCH1-V47:SQGAVGLAG   | 610   | 373   |
| >PTCH1-V47:SQGAVGLAG' | 30   | >PTCH1-V47:SQGAVGLAG   | 92    | 62    |
| >PTCH1-V47:SQGAVGLAG' | 143  | >PTCH1-V47:SQGAVGLAG   | 587   | 444   |
| >PTCH1-V47:SQGAVGLAG' | 30   | >PTCH1-V47:SQGAVGLAG   | 405   | 375   |
| >PTCH1-V47:SQGAVGLAG' | 105  | >PTCH1-V47:SQGAVGLAG   | 1076  | 971   |
| >PTCH1-V47:SQGAVGLAG' | 43   | >PTCH1-V47:SQGAVGLAG   | 1210  | 1167  |
| >PTCH1-V47:SQGAVGLAG' | 535  | >PTCH1-V47:SQGAVGLAG   | 460   | 75    |
| >PTCH1-V47:SQGAVGLAG' | 152  | >PTCH1-V47:SQGAVGLAG   | 648   | 496   |
| >PTCH1-V47:SQGAVGLAG' | 170  | >PTCH1-V47:SQGAVGLAG   | 381   | 211   |
| >PTCH1-V76:VSLYGTTRVR | 733  | >PTCH1-V76:ISLYGTTRVR  | 334   | 399   |
| >PTCH1-V76:VSLYGTTR   | 47   | >PTCH1-V76:ISLYGTTR    | 30    | 17    |

|                        |      |                        |      |      |
|------------------------|------|------------------------|------|------|
| >PTCH1-V76:VSLYGTTRVR  | 152  | >PTCH1-V76:ISLYGTTRVR  | 116  | 36   |
| >PTCH1-V76:VSLYGTTR    | 490  | >PTCH1-V76:ISLYGTTR    | 193  | 297  |
| >PTCH1-V76:VSLYGTTR    | 545  | >PTCH1-V76:ISLYGTTR    | 133  | 412  |
| >PTCH1-V76:VSLYGTTRV   | 105  | >PTCH1-V76:ISLYGTTRV   | 57   | 48   |
| >PTCH1-V76:VSLYGTTRV   | 165  | >PTCH1-V76:ISLYGTTRV   | 89   | 76   |
| >PTCH1-V76:GVSLYGTTRV  | 438  | >PTCH1-V76:GISLYGTTRV  | 275  | 163  |
| >PTCH1-V76:GVSLYGTTRV  | 158  | >PTCH1-V76:GISLYGTTRV  | 94   | 64   |
| >PTCH1-V76:GVSLYGTTRV  | 1410 | >PTCH1-V76:GISLYGTTRV  | 426  | 984  |
| >PTCH1-V76:GVSLYGTTRV  | 1011 | >PTCH1-V76:GISLYGTTRV  | 291  | 720  |
| >PTCH1-V76:GVSLYGTTRV  | 48   | >PTCH1-V76:GISLYGTTRV  | 18   | 30   |
| >PTCH1-V76:GVSLYGTTR   | 135  | >PTCH1-V76:GISLYGTTR   | 243  | 108  |
| >PTCH1-V76:GVSLYGTTRV  | 471  | >PTCH1-V76:GISLYGTTRVF | 804  | 333  |
| >PTCH1-V76:GVSLYGTTR   | 464  | >PTCH1-V76:GISLYGTTR   | 826  | 362  |
| >PTCH1-V76:VIFLFLGLLGV | 83   | >PTCH1-V76:VIFLFLGLLGI | 78   | 5    |
| >PTCH1-V76:VIFLFLGLLGV | 48   | >PTCH1-V76:VIFLFLGLLGI | 275  | 227  |
| >PTCH1-V76:VIFLFLGLLGV | 198  | >PTCH1-V76:VIFLFLGLLGI | 727  | 529  |
| >PTCH1-V76:VIFLFLGLLGV | 34   | >PTCH1-V76:VIFLFLGLLGI | 132  | 98   |
| >PTCH1-V76:VIFLFLGLLGV | 38   | >PTCH1-V76:VIFLFLGLLGI | 226  | 188  |
| >PTCH1-V76:VIFLFLGLLGV | 6    | >PTCH1-V76:VIFLFLGLLGI | 58   | 52   |
| >PTCH1-V76:VIFLFLGLLGV | 207  | >PTCH1-V76:VIFLFLGLLGI | 2441 | 2234 |
| >PTCH1-V76:VIFLFLGLLGV | 23   | >PTCH1-V76:VIFLFLGLLGI | 909  | 886  |
| >PTCH1-V76:VIFLFLGLLGV | 112  | >PTCH1-V76:VIFLFLGLLGI | 4290 | 4178 |
| >PTCH1-V76:VIFLFLGLLGV | 7    | >PTCH1-V76:VIFLFLGLLGI | 541  | 534  |
| >PTCH1-V76:VIFLFLGLLGV | 221  | >PTCH1-V76:VIFLFLGLLGI | 1370 | 1149 |
| >PTCH1-V76:LLGVSLYGT   | 379  | >PTCH1-V76:LLGISLYGT   | 342  | 37   |
| >PTCH1-V76:LLGVSLYGTT  | 279  | >PTCH1-V76:LLGISLYGTT  | 237  | 42   |
| >PTCH1-V76:LLGVSLYGT   | 264  | >PTCH1-V76:LLGISLYGT   | 89   | 175  |
| >PTCH1-V76:LLGVSLYGTT  | 879  | >PTCH1-V76:LLGISLYGTT  | 399  | 480  |
| >PTCH1-V76:LLGVSLYGT   | 237  | >PTCH1-V76:LLGISLYGT   | 374  | 137  |
| >PTCH1-V76:LLGVSLYGT   | 497  | >PTCH1-V76:LLGISLYGT   | 1221 | 724  |
| >PTCH1-V76:LLGVSLYGT   | 54   | >PTCH1-V76:LLGISLYGT   | 34   | 20   |
| >PTCH1-V76:LLGVSLYGTT  | 271  | >PTCH1-V76:LLGISLYGTT  | 180  | 91   |
| >PTCH1-V76:LLGVSLYGTTF | 151  | >PTCH1-V76:LLGISLYGTTR | 176  | 25   |
| >PTCH1-V76:GLLGVSLYGT  | 101  | >PTCH1-V76:GLLGISLYGT  | 85   | 16   |
| >PTCH1-V76:GLLGVSLYG   | 1400 | >PTCH1-V76:GLLGISLYG   | 470  | 930  |
| >PTCH1-V76:GLLGVSLYGT  | 88   | >PTCH1-V76:GLLGISLYGT  | 74   | 14   |
| >PTCH1-V76:GLLGVSLYGT  | 144  | >PTCH1-V76:GLLGISLYGT  | 120  | 24   |
| >PTCH1-V76:GLLGVSLYGT  | 145  | >PTCH1-V76:GLLGISLYGT  | 122  | 23   |
| >PTCH1-V76:GLLGVSLYG   | 46   | >PTCH1-V76:GLLGISLYG   | 131  | 85   |
| >PTCH1-V76:GLLGVSLYGT  | 12   | >PTCH1-V76:GLLGISLYGT  | 17   | 5    |
| >PTCH1-V76:GLLGVSLYGT  | 33   | >PTCH1-V76:GLLGISLYGTT | 62   | 29   |
| >PTCH1-V76:GLLGVSLYGT  | 47   | >PTCH1-V76:GLLGISLYGT  | 53   | 6    |
| >PTCH1-V76:GLLGVSLYG   | 209  | >PTCH1-V76:GLLGISLYG   | 400  | 191  |

|                         |      |                         |      |      |
|-------------------------|------|-------------------------|------|------|
| >PTCH1-V76: GLLGVSlyGT  | 28   | >PTCH1-V76: GLLGISlyGT  | 37   | 9    |
| >PTCH1-V76: GLLGVSlyGT  | 84   | >PTCH1-V76: GLLGISlyGTT | 128  | 44   |
| >PTCH1-V76: GLLGVSlyGT  | 142  | >PTCH1-V76: GLLGISlyGT  | 105  | 37   |
| >PTCH1-V76: GLLGVSlyGT  | 36   | >PTCH1-V76: GLLGISlyGT  | 26   | 10   |
| >PTCH1-V76: GLLGVSlyGT  | 150  | >PTCH1-V76: GLLGISlyGTT | 114  | 36   |
| >PTCH1-V76: GLLGVSly    | 217  | >PTCH1-V76: GLLGISly    | 244  | 27   |
| >PTCH1-V76: GLLGVSly    | 13   | >PTCH1-V76: GLLGISly    | 10   | 3    |
| >PTCH1-V76: GLLGVSly    | 209  | >PTCH1-V76: GLLGISly    | 127  | 82   |
| >PTCH1-V76: GLLGVSly    | 250  | >PTCH1-V76: GLLGISly    | 162  | 88   |
| >PTCH1-V76: GLLGVSly    | 391  | >PTCH1-V76: GLLGISly    | 644  | 253  |
| >PTCH1-V76: GLLGVSly    | 109  | >PTCH1-V76: GLLGISly    | 134  | 25   |
| >PTCH1-V76: GLLGVSly    | 381  | >PTCH1-V76: GLLGISly    | 620  | 239  |
| >PTCH1-V76: LGLLGVSly   | 225  | >PTCH1-V76: LGLLGISly   | 208  | 17   |
| >PTCH1-V76: LGLLGVSly   | 411  | >PTCH1-V76: LGLLGISly   | 257  | 154  |
| >PTCH1-V76: LGLLGVSly   | 232  | >PTCH1-V76: LGLLGISly   | 286  | 54   |
| >PTCH1-V76: LGLLGVSly   | 12   | >PTCH1-V76: LGLLGISly   | 12   | 0    |
| >PTCH1-V76: FLGLLGVSly  | 288  | >PTCH1-V76: FLGLLGISly  | 252  | 36   |
| >PTCH1-V76: FLGLLGVSL   | 98   | >PTCH1-V76: FLGLLGISL   | 86   | 12   |
| >PTCH1-V76: FLGLLGVSL   | 30   | >PTCH1-V76: FLGLLGISL   | 56   | 26   |
| >PTCH1-V76: FLGLLGVSlyC | 454  | >PTCH1-V76: FLGLLGISlyG | 399  | 55   |
| >PTCH1-V76: FLGLLGVSL   | 172  | >PTCH1-V76: FLGLLGISL   | 227  | 55   |
| >PTCH1-V76: FLGLLGVSL   | 13   | >PTCH1-V76: FLGLLGISL   | 11   | 2    |
| >PTCH1-V76: FLGLLGVSlyC | 394  | >PTCH1-V76: FLGLLGISlyG | 528  | 134  |
| >PTCH1-V76: FLGLLGVSL   | 16   | >PTCH1-V76: FLGLLGISL   | 18   | 2    |
| >PTCH1-V76: FLGLLGVSL   | 15   | >PTCH1-V76: FLGLLGISL   | 15   | 0    |
| >PTCH1-V76: FLGLLGVSL   | 47   | >PTCH1-V76: FLGLLGISL   | 63   | 16   |
| >PTCH1-V76: FLGLLGVSL   | 4    | >PTCH1-V76: FLGLLGISL   | 4    | 0    |
| >PTCH1-V76: FLGLLGVSly  | 293  | >PTCH1-V76: FLGLLGISly  | 320  | 27   |
| >PTCH1-V76: FLGLLGVSly  | 110  | >PTCH1-V76: FLGLLGISly  | 98   | 12   |
| >PTCH1-V76: FLGLLGVSly  | 40   | >PTCH1-V76: FLGLLGISly  | 37   | 3    |
| >PTCH1-V76: FLGLLGVSly  | 156  | >PTCH1-V76: FLGLLGISly  | 220  | 64   |
| >PTCH1-V76: FLGLLGVSly  | 127  | >PTCH1-V76: FLGLLGISly  | 138  | 11   |
| >PTCH1-V76: FLGLLGVSly  | 506  | >PTCH1-V76: FLGLLGISly  | 304  | 202  |
| >PTCH1-V76: LFLGLLGV    | 130  | >PTCH1-V76: LFLGLLGI    | 1985 | 1855 |
| >PTCH1-V76: LFLGLLGV    | 224  | >PTCH1-V76: LFLGLLGI    | 4803 | 4579 |
| >PTCH1-V76: LFLGLLGV    | 69   | >PTCH1-V76: LFLGLLGI    | 7567 | 7498 |
| >PTCH1-V76: LFLGLLGV    | 1477 | >PTCH1-V76: LFLGLLGI    | 34   | 1443 |
| >PTCH1-V76: LFLGLLGVSL  | 20   | >PTCH1-V76: LFLGLLGISL  | 33   | 13   |
| >PTCH1-V76: LFLGLLGVSly | 7    | >PTCH1-V76: LFLGLLGISly | 7    | 0    |
| >PTCH1-V76: LFLGLLGVSly | 288  | >PTCH1-V76: LFLGLLGISly | 235  | 53   |
| >PTCH1-V76: LFLGLLGVSly | 357  | >PTCH1-V76: LFLGLLGISly | 411  | 54   |
| >PTCH1-V76: LFLGLLGVSly | 31   | >PTCH1-V76: LFLGLLGISly | 31   | 0    |
| >PTCH1-V76: LFLGLLGV    | 367  | >PTCH1-V76: LFLGLLGI    | 360  | 7    |

|                        |      |                        |      |      |
|------------------------|------|------------------------|------|------|
| >PTCH1-V76:LFLGLLGVSL  | 286  | >PTCH1-V76:LFLGLLGISL  | 335  | 49   |
| >PTCH1-V76:FLFLGLLGV   | 7    | >PTCH1-V76:FLFLGLLGI   | 11   | 4    |
| >PTCH1-V76:FLFLGLLGVS  | 230  | >PTCH1-V76:FLFLGLLGIS  | 326  | 96   |
| >PTCH1-V76:FLFLGLLGVSL | 12   | >PTCH1-V76:FLFLGLLGISL | 13   | 1    |
| >PTCH1-V76:FLFLGLLGV   | 5    | >PTCH1-V76:FLFLGLLGI   | 13   | 8    |
| >PTCH1-V76:FLFLGLLGVS  | 243  | >PTCH1-V76:FLFLGLLGIS  | 272  | 29   |
| >PTCH1-V76:FLFLGLLGVSL | 7    | >PTCH1-V76:FLFLGLLGISL | 10   | 3    |
| >PTCH1-V76:FLFLGLLGV   | 3    | >PTCH1-V76:FLFLGLLGI   | 6    | 3    |
| >PTCH1-V76:FLFLGLLGVS  | 302  | >PTCH1-V76:FLFLGLLGIS  | 291  | 11   |
| >PTCH1-V76:FLFLGLLGVSL | 11   | >PTCH1-V76:FLFLGLLGISL | 12   | 1    |
| >PTCH1-V76:FLFLGLLGV   | 5    | >PTCH1-V76:FLFLGLLGI   | 21   | 16   |
| >PTCH1-V76:FLFLGLLGVSL | 42   | >PTCH1-V76:FLFLGLLGISL | 41   | 1    |
| >PTCH1-V76:FLFLGLLGV   | 1    | >PTCH1-V76:FLFLGLLGI   | 2    | 1    |
| >PTCH1-V76:FLFLGLLGVS  | 159  | >PTCH1-V76:FLFLGLLGIS  | 396  | 237  |
| >PTCH1-V76:FLFLGLLGVSL | 3    | >PTCH1-V76:FLFLGLLGISL | 3    | 0    |
| >PTCH1-V76:FLFLGLLGV   | 3    | >PTCH1-V76:FLFLGLLGI   | 8    | 5    |
| >PTCH1-V76:FLFLGLLGVSL | 8    | >PTCH1-V76:FLFLGLLGISL | 8    | 0    |
| >PTCH1-V76:FLFLGLLGV   | 3    | >PTCH1-V76:FLFLGLLGI   | 7    | 4    |
| >PTCH1-V76:FLFLGLLGVSL | 6    | >PTCH1-V76:FLFLGLLGISL | 6    | 0    |
| >PTCH1-V76:FLFLGLLGV   | 2    | >PTCH1-V76:FLFLGLLGI   | 11   | 9    |
| >PTCH1-V76:FLFLGLLGVSL | 18   | >PTCH1-V76:FLFLGLLGISL | 20   | 2    |
| >PTCH1-V76:FLFLGLLGV   | 1    | >PTCH1-V76:FLFLGLLGI   | 3    | 2    |
| >PTCH1-V76:FLFLGLLGVS  | 245  | >PTCH1-V76:FLFLGLLGIS  | 332  | 87   |
| >PTCH1-V76:FLFLGLLGVSL | 2    | >PTCH1-V76:FLFLGLLGISL | 2    | 0    |
| >PTCH1-V76:FLFLGLLGV   | 399  | >PTCH1-V76:FLFLGLLGI   | 1819 | 1420 |
| >PTCH1-V76:FLFLGLLGV   | 36   | >PTCH1-V76:FLFLGLLGI   | 284  | 248  |
| >PTCH1-V76:FLFLGLLGVSL | 245  | >PTCH1-V76:FLFLGLLGISL | 351  | 106  |
| >PTCH1-V76:FLFLGLLGVSL | 382  | >PTCH1-V76:FLFLGLLGISL | 449  | 67   |
| >PTCH1-V76:FLFLGLLGVSL | 68   | >PTCH1-V76:FLFLGLLGISL | 121  | 53   |
| >PTCH1-V76:FLFLGLLGVSL | 201  | >PTCH1-V76:FLFLGLLGISL | 210  | 9    |
| >PTCH1-V76:IFLFLGLLGV  | 459  | >PTCH1-V76:IFLFLGLLGI  | 1740 | 1281 |
| >PTCH1-V76:IFLFLGLLGV  | 6531 | >PTCH1-V76:IFLFLGLLGI  | 360  | 6171 |
| >PTCH1-V76:IFLFLGLLGV  | 189  | >PTCH1-V76:IFLFLGLLGI  | 563  | 374  |
| >PTCH1-V82:VKYVMLEENI  | 1029 | >PTCH1-V82:MKYVMLEEN   | 321  | 708  |
| >PTCH1-V82:NVKYVMLEEI  | 33   | >PTCH1-V82:NMKYVMLEE   | 217  | 184  |
| >PTCH1-V82:SNVKYVML    | 13   | >PTCH1-V82:SNMKYVML    | 8    | 5    |
| >PTCH1-V82:SNVKYVML    | 6313 | >PTCH1-V82:SNMKYVML    | 454  | 5859 |
| >PTCH1-V82:FSNVKYVML   | 89   | >PTCH1-V82:FSNMKYVML   | 94   | 5    |
| >PTCH1-V82:FSNVKYVML   | 1540 | >PTCH1-V82:FSNMKYVML   | 434  | 1106 |
| >PTCH1-V82:FSNVKYVM    | 654  | >PTCH1-V82:FSNMKYVM    | 496  | 158  |
| >PTCH1-V82:FSNVKYVML   | 618  | >PTCH1-V82:FSNMKYVML   | 345  | 273  |
| >PTCH1-V82:FSNVKYVM    | 209  | >PTCH1-V82:FSNMKYVM    | 113  | 96   |
| >PTCH1-V82:FSNVKYVML   | 105  | >PTCH1-V82:FSNMKYVML   | 68   | 37   |

|                       |      |                       |      |      |
|-----------------------|------|-----------------------|------|------|
| >PTCH1-V82!FSNVKYVM   | 217  | >PTCH1-V82!FSNMKYVM   | 504  | 287  |
| >PTCH1-V82!SFSNVKYV   | 398  | >PTCH1-V82!SFSNMKYV   | 1963 | 1565 |
| >PTCH1-V82!SFSNVKYV   | 463  | >PTCH1-V82!SFSNMKYV   | 1993 | 1530 |
| >PTCH1-V82!SFSNVKYVMI | 40   | >PTCH1-V82!SFSNMKYVM  | 66   | 26   |
| >PTCH1-V82!SFSNVKYVM  | 365  | >PTCH1-V82!SFSNMKYVM  | 448  | 83   |
| >PTCH1-V82!SFSNVKYV   | 241  | >PTCH1-V82!SFSNMKYV   | 262  | 21   |
| >PTCH1-V82!RSFSNVKYV  | 118  | >PTCH1-V82!RSFSNMKYV  | 63   | 55   |
| >PTCH1-V82!RSFSNVKYVM | 122  | >PTCH1-V82!RSFSNMKYVI | 96   | 26   |
| >PTCH1-V82!RSFSNVKYV  | 38   | >PTCH1-V82!RSFSNMKYV  | 152  | 114  |
| >PTCH1-V82!RSFSNVKY   | 247  | >PTCH1-V82!RSFSNMKY   | 150  | 97   |
| >PTCH1-V82!RSFSNVKY   | 131  | >PTCH1-V82!RSFSNMKY   | 52   | 79   |
| >PTCH1-V82!RSFSNVKY   | 333  | >PTCH1-V82!RSFSNMKY   | 136  | 197  |
| >PTCH1-V82!RSFSNVKY   | 371  | >PTCH1-V82!RSFSNMKY   | 153  | 218  |
| >PTCH1-V82!RSFSNVKYV  | 40   | >PTCH1-V82!RSFSNMKYV  | 36   | 4    |
| >PTCH1-V82!RSFSNVKYVM | 338  | >PTCH1-V82!RSFSNMKYVI | 280  | 58   |
| >PTCH1-V82!RSFSNVKYVM | 115  | >PTCH1-V82!RSFSNMKYVI | 107  | 8    |
| >PTCH1-V82!RSFSNVKY   | 38   | >PTCH1-V82!RSFSNMKY   | 28   | 10   |
| >PTCH1-V82!RSFSNVKYV  | 800  | >PTCH1-V82!RSFSNMKYV  | 420  | 380  |
| >PTCH1-V82!RSFSNVKY   | 49   | >PTCH1-V82!RSFSNMKY   | 144  | 95   |
| >PTCH1-V82!RSFSNVKYVM | 66   | >PTCH1-V82!RSFSNMKYVI | 114  | 48   |
| >PTCH1-V82!RSFSNVKYVM | 52   | >PTCH1-V82!RSFSNMKYVI | 80   | 28   |
| >PTCH1-V82!RSFSNVKY   | 2007 | >PTCH1-V82!RSFSNMKY   | 200  | 1807 |
| >PTCH1-V82!RSFSNVKY   | 120  | >PTCH1-V82!RSFSNMKY   | 136  | 16   |
| >PTCH1-V82!RSFSNVKYVM | 151  | >PTCH1-V82!RSFSNMKYVI | 187  | 36   |
| >PTCH1-V82!RSFSNVKY   | 5    | >PTCH1-V82!RSFSNMKY   | 6    | 1    |
| >PTCH1-V82!RSFSNVKYV  | 18   | >PTCH1-V82!RSFSNMKYV  | 41   | 23   |
| >PTCH1-V82!RSFSNVKYVM | 12   | >PTCH1-V82!RSFSNMKYVI | 16   | 4    |
| >PTCH1-V82!RSFSNVKYVM | 11   | >PTCH1-V82!RSFSNMKYVI | 14   | 3    |
| >PTCH1-V82!RSFSNVKY   | 3    | >PTCH1-V82!RSFSNMKY   | 3    | 0    |
| >PTCH1-V82!RSFSNVKYV  | 33   | >PTCH1-V82!RSFSNMKYV  | 20   | 13   |
| >PTCH1-V82!RSFSNVKYVM | 7    | >PTCH1-V82!RSFSNMKYVI | 5    | 2    |
| >PTCH1-V82!RSFSNVKYVM | 4    | >PTCH1-V82!RSFSNMKYVI | 4    | 0    |
| >PTCH1-V82!RSFSNVKY   | 84   | >PTCH1-V82!RSFSNMKY   | 72   | 12   |
| >PTCH1-V82!RSFSNVKYVM | 90   | >PTCH1-V82!RSFSNMKYVI | 121  | 31   |
| >PTCH1-V82!RSFSNVKY   | 42   | >PTCH1-V82!RSFSNMKY   | 39   | 3    |
| >PTCH1-V82!RSFSNVKYVM | 31   | >PTCH1-V82!RSFSNMKYVI | 57   | 26   |
| >PTCH1-V82!RSFSNVKYVM | 304  | >PTCH1-V82!RSFSNMKYVI | 703  | 399  |
| >PTCH1-V82!RSFSNVKYVM | 458  | >PTCH1-V82!RSFSNMKYVI | 351  | 107  |
| >PTCH1-V82!RSFSNVKY   | 60   | >PTCH1-V82!RSFSNMKY   | 41   | 19   |
| >PTCH1-V82!RSFSNVKYV  | 309  | >PTCH1-V82!RSFSNMKYV  | 106  | 203  |
| >PTCH1-V82!RSFSNVKYVM | 41   | >PTCH1-V82!RSFSNMKYVI | 32   | 9    |
| >PTCH1-V82!RSFSNVKYVM | 53   | >PTCH1-V82!RSFSNMKYVI | 31   | 22   |
| >PTCH1-V82!RSFSNVKY   | 579  | >PTCH1-V82!RSFSNMKY   | 376  | 203  |

|                        |       |                        |       |       |
|------------------------|-------|------------------------|-------|-------|
| >PTCH1-V82!RSFSNVKYV   | 258   | >PTCH1-V82!RSFSNMKYV   | 184   | 74    |
| >PTCH1-V82!RSFSNVKYVM  | 45    | >PTCH1-V82!RSFSNMKYVI  | 42    | 3     |
| >PTCH1-V82!HRSFSNVKY   | 56    | >PTCH1-V82!HRSFSNMKY   | 54    | 2     |
| >PTCH1-V82!HRSFSNVKYV  | 315   | >PTCH1-V82!HRSFSNMKY\  | 331   | 16    |
| >PTCH1-V82!HRSFSNVK    | 532   | >PTCH1-V82!HRSFSNMK    | 458   | 74    |
| >PTCH1-V82!HRSFSNVKYV  | 271   | >PTCH1-V82!HRSFSNMKY\  | 586   | 315   |
| >PTCH1-V82!HRSFSNVKYV  | 187   | >PTCH1-V82!HRSFSNMKY\  | 220   | 33    |
| >PTCH1-V82!HRSFSNVKYV  | 51    | >PTCH1-V82!HRSFSNMKY\  | 65    | 14    |
| >PTCH1-V82!HRSFSNVKY   | 2328  | >PTCH1-V82!HRSFSNMKY   | 169   | 2159  |
| >PTCH1-V82!HRSFSNVKY   | 1614  | >PTCH1-V82!HRSFSNMKY   | 470   | 1144  |
| >PTCH1-V82!LHRSFSNV    | 391   | >PTCH1-V82!LHRSFSNM    | 247   | 144   |
| >PTCH1-V82!LHRSFSNVK   | 77    | >PTCH1-V82!LHRSFSNMK   | 84    | 7     |
| >PTCH1-V82!LHRSFSNV    | 54    | >PTCH1-V82!LHRSFSNM    | 15    | 39    |
| >PTCH1-V82!LHRSFSNVK   | 425   | >PTCH1-V82!LHRSFSNMK   | 761   | 336   |
| >PTCH1-V82!LHRSFSNVKY  | 10    | >PTCH1-V82!LHRSFSNMK\  | 11    | 1     |
| >PTCH1-V82!LHRSFSNVKY  | 89    | >PTCH1-V82!LHRSFSNMK\  | 150   | 61    |
| >PTCH1-V82!DLHRSFSNV   | 254   | >PTCH1-V82!DLHRSFSNM   | 8466  | 8212  |
| >PTCH1-V82!DLHRSFSNV   | 189   | >PTCH1-V82!DLHRSFSNM   | 8657  | 8468  |
| >PTCH1-V82!DLHRSFSNV   | 378   | >PTCH1-V82!DLHRSFSNM   | 15341 | 14963 |
| >PTCH1-V82!DLHRSFSNV   | 14    | >PTCH1-V82!DLHRSFSNM   | 2785  | 2771  |
| >PTCH1-V82!DLHRSFSNV   | 11814 | >PTCH1-V82!DLHRSFSNM   | 364   | 11450 |
| >PTCH1-V82!DLHRSFSNV   | 2122  | >PTCH1-V82!DLHRSFSNM   | 28    | 2094  |
| >PTCH1-V82!DLHRSFSNVK  | 488   | >PTCH1-V82!DLHRSFSNMI  | 502   | 14    |
| >PTCH1-V82!DLHRSFSNVK  | 199   | >PTCH1-V82!DLHRSFSNMI  | 172   | 27    |
| >PTCH1-V82!YDLHRSFSNV  | 462   | >PTCH1-V82!YDLHRSFSNM  | 1248  | 786   |
| >PTCH1-V82!YDLHRSFSNV  | 1535  | >PTCH1-V82!YDLHRSFSNM  | 403   | 1132  |
| >PTCH1-V82!YDLHRSFSNV  | 81    | >PTCH1-V82!YDLHRSFSNM  | 1230  | 1149  |
| >PTCH1-V98!VEAIEKVRTI  | 22    | >PTCH1-V98!EEAIEKVRTI  | 18    | 4     |
| >PTCH1-V98!VEAIEKVRTI  | 2237  | >PTCH1-V98!EEAIEKVRTI  | 371   | 1866  |
| >PTCH1-V98!VEAIEKVRT   | 4128  | >PTCH1-V98!EEAIEKVRT   | 300   | 3828  |
| >PTCH1-V98!VEAIEKVRTI  | 77    | >PTCH1-V98!EEAIEKVRTI  | 295   | 218   |
| >PTCH1-V98!FVEAIEKVRTI | 5031  | >PTCH1-V98!FEEAIEKVRTI | 12    | 5019  |
| >PTCH1-V98!FVEAIEKV    | 54    | >PTCH1-V98!FEEAIEKV    | 3282  | 3228  |
| >PTCH1-V98!FVEAIEKV    | 384   | >PTCH1-V98!FEEAIEKV    | 13121 | 12737 |
| >PTCH1-V98!FVEAIEKV    | 48    | >PTCH1-V98!FEEAIEKV    | 2248  | 2200  |
| >PTCH1-V98!FVEAIEKV    | 136   | >PTCH1-V98!FEEAIEKV    | 6586  | 6450  |
| >PTCH1-V98!FVEAIEKV    | 10    | >PTCH1-V98!FEEAIEKV    | 5289  | 5279  |
| >PTCH1-V98!FVEAIEKVR   | 51    | >PTCH1-V98!FEEAIEKVR   | 4507  | 4456  |
| >PTCH1-V98!FVEAIEKV    | 62    | >PTCH1-V98!FEEAIEKV    | 13772 | 13710 |
| >PTCH1-V98!FVEAIEKV    | 20886 | >PTCH1-V98!FEEAIEKV    | 104   | 20782 |
| >PTCH1-V98!FVEAIEKVRTI | 21559 | >PTCH1-V98!FEEAIEKVRTI | 101   | 21458 |
| >PTCH1-V98!FVEAIEKV    | 23628 | >PTCH1-V98!FEEAIEKV    | 465   | 23163 |
| >PTCH1-V98!FVEAIEKVRTI | 26459 | >PTCH1-V98!FEEAIEKVRTI | 51    | 26408 |

|                        |     |                        |       |       |
|------------------------|-----|------------------------|-------|-------|
| >PTCH1-V98{DFVEAIEKVR  | 355 | >PTCH1-V98{DFEEAIEKVR  | 1316  | 961   |
| >PTCH1-V98{DFVEAIEK    | 309 | >PTCH1-V98{DFEEAIEK    | 1293  | 984   |
| >PTCH1-V98{DFVEAIEKVR  | 365 | >PTCH1-V98{DFEEAIEKVR  | 4756  | 4391  |
| >PTCH1-V98{SDFVEAIEKV  | 172 | >PTCH1-V98{SDFEEAIEKV  | 325   | 153   |
| >PTCH1-V98{SDFVEAIEKV  | 43  | >PTCH1-V98{SDFEEAIEKV  | 51    | 8     |
| >PTCH1-V98{TSDFVEAIEK  | 30  | >PTCH1-V98{TSDFEEAIEK  | 50    | 20    |
| >PTCH1-V98{TSDFVEAIEK  | 36  | >PTCH1-V98{TSDFEEAIEK  | 177   | 141   |
| >PTCH1-V98{TSDFVEAIEK\ | 172 | >PTCH1-V98{TSDFEEAIEK\ | 1228  | 1056  |
| >PTCH1-V98{TSDFVEAI    | 383 | >PTCH1-V98{TSDFEEAI    | 716   | 333   |
| >PTCH1-V98{DTSDFVEAIEI | 220 | >PTCH1-V98{DTSDFEEAIEI | 371   | 151   |
| >PTCH1-V98{DTSDFVEAI   | 225 | >PTCH1-V98{DTSDFEEAI   | 1401  | 1176  |
| >PTCH1-V98{DTSDFVEAIEI | 7   | >PTCH1-V98{DTSDFEEAIEI | 7     | 0     |
| >PTCH1-V98{DTSDFVEA    | 16  | >PTCH1-V98{DTSDFEEA    | 31    | 15    |
| >PTCH1-V98{DTSDFVEAI   | 7   | >PTCH1-V98{DTSDFEEAI   | 22    | 15    |
| >PTCH1-V98{DTSDFVEA    | 187 | >PTCH1-V98{DTSDFEEA    | 830   | 643   |
| >PTCH1-V98{DTSDFVEAI   | 21  | >PTCH1-V98{DTSDFEEAI   | 272   | 251   |
| >PTCH1-V98{DTSDFVEAIEI | 474 | >PTCH1-V98{DTSDFEEAIEI | 878   | 404   |
| >PTCH1-V98{RDTSDFVEAI  | 479 | >PTCH1-V98{RDTSDFEEAI  | 1334  | 855   |
| >PTCH1-V98{RDTSDFVEAI  | 43  | >PTCH1-V98{RDTSDFEEAI  | 44    | 1     |
| >PTCH1-V98{GLRDTSDFV   | 393 | >PTCH1-V98{GLRDTSDFE   | 24142 | 23749 |
| >PTCH1-V98{GLRDTSDFV   | 12  | >PTCH1-V98{GLRDTSDFE   | 6682  | 6670  |
| >PTCH1-V98{GLRDTSDFVE  | 171 | >PTCH1-V98{GLRDTSDFEE  | 152   | 19    |
| >PTCH1-V98{GLRDTSDFV   | 7   | >PTCH1-V98{GLRDTSDFE   | 17561 | 17554 |
| >PTCH1-V98{GLRDTSDFVE  | 50  | >PTCH1-V98{GLRDTSDFEE  | 58    | 8     |
| >PTCH1-V98{GLRDTSDFV   | 153 | >PTCH1-V98{GLRDTSDFE   | 24696 | 24543 |
| >PTCH1-V98{GLRDTSDFV   | 5   | >PTCH1-V98{GLRDTSDFE   | 15888 | 15883 |
| >PTCH1-V98{GLRDTSDFVE  | 229 | >PTCH1-V98{GLRDTSDFEE  | 227   | 2     |
| >PTCH1-V98{GLRDTSDFV   | 4   | >PTCH1-V98{GLRDTSDFE   | 15735 | 15731 |
| >PTCH1-V98{GLRDTSDFVE  | 166 | >PTCH1-V98{GLRDTSDFEE  | 308   | 142   |
| >PTCH1-V98{GLRDTSDFV   | 8   | >PTCH1-V98{GLRDTSDFE   | 15608 | 15600 |
| >PTCH1-V98{GLRDTSDFVE  | 212 | >PTCH1-V98{GLRDTSDFEE  | 391   | 179   |
| >PTCH1-V98{GLRDTSDFV   | 31  | >PTCH1-V98{GLRDTSDFE   | 23148 | 23117 |
| >PTCH1-V98{GLRDTSDFV   | 3   | >PTCH1-V98{GLRDTSDFE   | 11692 | 11689 |
| >PTCH1-V98{GLRDTSDFVE  | 11  | >PTCH1-V98{GLRDTSDFEE  | 17    | 6     |
| >PTCH1-V98{GLRDTSDFV   | 302 | >PTCH1-V98{GLRDTSDFE   | 6981  | 6679  |
| >PTCH1-VL11\VLDGAVSTL  | 71  | >PTCH1-VL11\LLDGAVSTL  | 52    | 19    |
| >PTCH1-VL11\VLDGAVSTLL | 223 | >PTCH1-VL11\LLDGAVSTLL | 137   | 86    |
| >PTCH1-VL11\VLDGAVSTL  | 56  | >PTCH1-VL11\LLDGAVSTL  | 32    | 24    |
| >PTCH1-VL11\VLDGAVSTLL | 49  | >PTCH1-VL11\LLDGAVSTLL | 20    | 29    |
| >PTCH1-VL11\VLDGAVSTL  | 66  | >PTCH1-VL11\LLDGAVSTL  | 47    | 19    |
| >PTCH1-VL11\VLDGAVSTLL | 293 | >PTCH1-VL11\LLDGAVSTLL | 108   | 185   |
| >PTCH1-VL11\VLDGAVSTL  | 474 | >PTCH1-VL11\LLDGAVSTL  | 253   | 221   |
| >PTCH1-VL11\VLDGAVST   | 53  | >PTCH1-VL11\LLDGAVST   | 64    | 11    |

|                       |       |                       |      |       |
|-----------------------|-------|-----------------------|------|-------|
| >PTCH1-VL11VLDGAVSTL  | 3     | >PTCH1-VL11LLDGAVSTL  | 3    | 0     |
| >PTCH1-VL11VLDGAVSTLL | 5     | >PTCH1-VL11LLDGAVSTLL | 6    | 1     |
| >PTCH1-VL11VLDGAVSTL  | 8     | >PTCH1-VL11LLDGAVSTL  | 7    | 1     |
| >PTCH1-VL11VLDGAVSTLL | 36    | >PTCH1-VL11LLDGAVSTLL | 29   | 7     |
| >PTCH1-VL11VLDGAVST   | 135   | >PTCH1-VL11LLDGAVST   | 204  | 69    |
| >PTCH1-VL11VLDGAVSTL  | 7     | >PTCH1-VL11LLDGAVSTL  | 7    | 0     |
| >PTCH1-VL11VLDGAVSTLL | 8     | >PTCH1-VL11LLDGAVSTLL | 9    | 1     |
| >PTCH1-VL11VLDGAVST   | 356   | >PTCH1-VL11LLDGAVST   | 486  | 130   |
| >PTCH1-VL11VLDGAVSTL  | 4     | >PTCH1-VL11LLDGAVSTL  | 4    | 0     |
| >PTCH1-VL11VLDGAVSTLL | 12    | >PTCH1-VL11LLDGAVSTLL | 13   | 1     |
| >PTCH1-VL11VLDGAVST   | 17    | >PTCH1-VL11LLDGAVST   | 12   | 5     |
| >PTCH1-VL11VLDGAVSTL  | 2     | >PTCH1-VL11LLDGAVSTL  | 2    | 0     |
| >PTCH1-VL11VLDGAVSTLL | 3     | >PTCH1-VL11LLDGAVSTLL | 3    | 0     |
| >PTCH1-VL11PVLDGAVSTL | 1408  | >PTCH1-VL11PLLDGAVSTL | 137  | 1271  |
| >PTCH1-VL11PVLDGAVSTL | 2564  | >PTCH1-VL11PLLDGAVSTL | 163  | 2401  |
| >PTCH1-VL11PVLDGAVSTL | 2752  | >PTCH1-VL11PLLDGAVSTL | 392  | 2360  |
| >PTCH1-VL11PVLDGAVST  | 10812 | >PTCH1-VL11PLLDGAVST  | 486  | 10326 |
| >PTCH1-VL11PVLDGAVSTL | 810   | >PTCH1-VL11PLLDGAVSTL | 10   | 800   |
| >PTCH1-VL11PVLDGAVSTL | 2478  | >PTCH1-VL11PLLDGAVSTL | 33   | 2445  |
| >PTCH1-VL11PVLDGAVSTL | 4850  | >PTCH1-VL11PLLDGAVSTL | 61   | 4789  |
| >PTCH1-VL11PVLDGAVSTL | 1232  | >PTCH1-VL11PLLDGAVSTL | 18   | 1214  |
| >PTCH1-VL11PVLDGAVSTL | 2114  | >PTCH1-VL11PLLDGAVSTL | 32   | 2082  |
| >PTCH1-VL11PVLDGAVST  | 6329  | >PTCH1-VL11PLLDGAVST  | 339  | 5990  |
| >PTCH1-VL11PVLDGAVSTL | 418   | >PTCH1-VL11PLLDGAVSTL | 5    | 413   |
| >PTCH1-VL11PVLDGAVSTL | 1412  | >PTCH1-VL11PLLDGAVSTL | 26   | 1386  |
| >PTCH1-VL11PVLDGAVST  | 8860  | >PTCH1-VL11PLLDGAVST  | 48   | 8812  |
| >PTCH1-VL11PVLDGAVSTL | 238   | >PTCH1-VL11PLLDGAVSTL | 4    | 234   |
| >PTCH1-VL11PVLDGAVSTL | 820   | >PTCH1-VL11PLLDGAVSTL | 9    | 811   |
| >PTCH1-VL11VLALEHMFAF | 30    | >PTCH1-VL11VLALEHMFAF | 109  | 79    |
| >PTCH1-VL11VLALEHMFAF | 6     | >PTCH1-VL11VLALEHMFAF | 9    | 3     |
| >PTCH1-VL11VLALEHMFAF | 6     | >PTCH1-VL11VLALEHMFAF | 24   | 18    |
| >PTCH1-VL11VLALEHMFAF | 25    | >PTCH1-VL11VLALEHMFAF | 143  | 118   |
| >PTCH1-VL11VLALEHMFAF | 6     | >PTCH1-VL11VLALEHMFAF | 60   | 54    |
| >PTCH1-VL11VLALEHMFAF | 13    | >PTCH1-VL11VLALEHMFAF | 94   | 81    |
| >PTCH1-VL11VLALEHMFAF | 8     | >PTCH1-VL11VLALEHMFAF | 68   | 60    |
| >PTCH1-VL11VLALEHMFAF | 5     | >PTCH1-VL11VLALEHMFAF | 63   | 58    |
| >PTCH1-VL11VLALEHMFAF | 2     | >PTCH1-VL11VLALEHMFAF | 6    | 4     |
| >PTCH1-VL11APVLDGAV   | 73    | >PTCH1-VL11APLLDGAV   | 113  | 40    |
| >PTCH1-VL11APVLDGAVST | 39    | >PTCH1-VL11APLLDGAVST | 44   | 5     |
| >PTCH1-VL11APVLDGAVST | 304   | >PTCH1-VL11APLLDGAVST | 682  | 378   |
| >PTCH1-VL11APVLDGAVST | 228   | >PTCH1-VL11APLLDGAVST | 244  | 16    |
| >PTCH1-VL11APVLDGAVST | 219   | >PTCH1-VL11APLLDGAVST | 1412 | 1193  |
| >PTCH1-VL11FAPVLDGA   | 246   | >PTCH1-VL11FAPLLDGA   | 297  | 51    |



|                      |     |                      |      |      |
|----------------------|-----|----------------------|------|------|
| >PTCH1-VL11FAPVLDGAV | 313 | >PTCH1-VL11FAPLLDGAV | 309  | 4    |
| >PTCH1-VL11FAPVLDGA  | 404 | >PTCH1-VL11FAPLLDGA  | 527  | 123  |
| >PTCH1-VL11FAPVLDGAV | 61  | >PTCH1-VL11FAPLLDGAV | 68   | 7    |
| >PTCH1-VL11MFAPVLDGA | 54  | >PTCH1-VL11MFAPLLDGA | 46   | 8    |
| >PTCH1-VL11MFAPVLDGA | 287 | >PTCH1-VL11MFAPLLDGA | 869  | 582  |
| >PTCH1-VL11MFAPVLDGA | 128 | >PTCH1-VL11MFAPLLDGA | 82   | 46   |
| >PTCH1-VL11MFAPVLDGA | 497 | >PTCH1-VL11MFAPLLDGA | 259  | 238  |
| >PTCH1-VL11HMFAPVLDG | 275 | >PTCH1-VL11HMFAPLLDG | 289  | 14   |
| >PTCH1-VL11HMFAPVLDG | 67  | >PTCH1-VL11HMFAPLLDG | 61   | 6    |
| >PTCH1-VL11HMFAPVLDG | 51  | >PTCH1-VL11HMFAPLLDG | 48   | 3    |
| >PTCH1-VL11HMFAPVLDG | 27  | >PTCH1-VL11HMFAPLLDG | 24   | 3    |
| >PTCH1-VL11HMFAPVLDG | 37  | >PTCH1-VL11HMFAPLLDG | 38   | 1    |
| >PTCH1-VL11HMFAPVLDG | 11  | >PTCH1-VL11HMFAPLLDG | 11   | 0    |
| >PTCH1-VL11HMFAPVLDG | 185 | >PTCH1-VL11HMFAPLLDG | 117  | 68   |
| >PTCH1-VL11HMFAPVLDG | 76  | >PTCH1-VL11HMFAPLLDG | 48   | 28   |
| >PTCH1-VL11HMFAPVLDG | 6   | >PTCH1-VL11HMFAPLLDG | 9    | 3    |
| >PTCH1-VL11HMFAPVLDG | 3   | >PTCH1-VL11HMFAPLLDG | 3    | 0    |
| >PTCH1-VL11HMFAPVLDG | 55  | >PTCH1-VL11HMFAPLLDG | 50   | 5    |
| >PTCH1-VL11HMFAPVLDG | 9   | >PTCH1-VL11HMFAPLLDG | 9    | 0    |
| >PTCH1-VL11HMFAPVLDG | 37  | >PTCH1-VL11HMFAPLLDG | 55   | 18   |
| >PTCH1-VL11HMFAPVLDG | 12  | >PTCH1-VL11HMFAPLLDG | 14   | 2    |
| >PTCH1-VL11HMFAPVLDG | 227 | >PTCH1-VL11HMFAPLLDG | 326  | 99   |
| >PTCH1-VL11HMFAPVLDG | 33  | >PTCH1-VL11HMFAPLLDG | 33   | 0    |
| >PTCH1-VL11HMFAPVLDG | 6   | >PTCH1-VL11HMFAPLLDG | 6    | 0    |
| >PTCH1-VL11HMFAPVLDG | 131 | >PTCH1-VL11HMFAPLLDG | 393  | 262  |
| >PTCH1-VL11HMFAPVLDG | 66  | >PTCH1-VL11HMFAPLLDG | 78   | 12   |
| >PTCH1-VL11HMFAPVLDG | 158 | >PTCH1-VL11HMFAPLLDG | 161  | 3    |
| >PTCH1-VL11HMFAPVLDG | 237 | >PTCH1-VL11HMFAPLLDG | 380  | 143  |
| >PTCH1-VL11HMFAPVLDG | 104 | >PTCH1-VL11HMFAPLLDG | 127  | 23   |
| >PTCH1-VL11HMFAPVLDG | 122 | >PTCH1-VL11HMFAPLLDG | 207  | 85   |
| >PTCH1-VL11EHMFAPVL  | 205 | >PTCH1-VL11EHMFAPLL  | 393  | 188  |
| >PTCH1-VL11EHMFAPVL  | 13  | >PTCH1-VL11EHMFAPLL  | 34   | 21   |
| >PTCH1-VL11LEHMFAPV  | 643 | >PTCH1-VL11LEHMFAPL  | 126  | 517  |
| >PTCH1-VL11LEHMFAPV  | 191 | >PTCH1-VL11LEHMFAPL  | 148  | 43   |
| >PTCH1-VL11LEHMFAPVL | 47  | >PTCH1-VL11LEHMFAPLL | 15   | 32   |
| >PTCH1-VL11LEHMFAPV  | 857 | >PTCH1-VL11LEHMFAPL  | 319  | 538  |
| >PTCH1-VL11LEHMFAPVL | 384 | >PTCH1-VL11LEHMFAPLL | 1596 | 1212 |
| >PTCH1-VL11LEHMFAPV  | 100 | >PTCH1-VL11LEHMFAPL  | 30   | 70   |
| >PTCH1-VL11LEHMFAPVL | 52  | >PTCH1-VL11LEHMFAPLL | 141  | 89   |
| >PTCH1-VL11LEHMFAPVL | 490 | >PTCH1-VL11LEHMFAPLL | 2636 | 2146 |
| >PTCH1-VL11LEHMFAPV  | 65  | >PTCH1-VL11LEHMFAPL  | 11   | 54   |
| >PTCH1-VL11LEHMFAPVL | 10  | >PTCH1-VL11LEHMFAPLL | 11   | 1    |
| >PTCH1-VL11LEHMFAPV  | 41  | >PTCH1-VL11LEHMFAPL  | 20   | 21   |

|                       |      |                       |      |      |
|-----------------------|------|-----------------------|------|------|
| >PTCH1-VL11LEHMFAPVL  | 24   | >PTCH1-VL11LEHMFAPLL  | 30   | 6    |
| >PTCH1-VL11LEHMFAPVL  | 694  | >PTCH1-VL11LEHMFAPLL  | 297  | 397  |
| >PTCH1-VL11LEHMFAPV   | 41   | >PTCH1-VL11LEHMFAPL   | 372  | 331  |
| >PTCH1-VL11LEHMFAPVL  | 264  | >PTCH1-VL11LEHMFAPLL  | 808  | 544  |
| >PTCH1-VL11LEHMFAPV   | 172  | >PTCH1-VL11LEHMFAPL   | 327  | 155  |
| >PTCH1-VL11LEHMFAPVL  | 22   | >PTCH1-VL11LEHMFAPLL  | 9    | 13   |
| >PTCH1-VL11ALEHMFAPV  | 48   | >PTCH1-VL11ALEHMFAPL  | 159  | 111  |
| >PTCH1-VL11ALEHMFAPV  | 17   | >PTCH1-VL11ALEHMFAPL  | 23   | 6    |
| >PTCH1-VL11ALEHMFAPV  | 9    | >PTCH1-VL11ALEHMFAPL  | 62   | 53   |
| >PTCH1-VL11ALEHMFAPV  | 12   | >PTCH1-VL11ALEHMFAPL  | 77   | 65   |
| >PTCH1-VL11ALEHMFAPV  | 27   | >PTCH1-VL11ALEHMFAPL  | 402  | 375  |
| >PTCH1-VL11ALEHMFAPVI | 469  | >PTCH1-VL11ALEHMFAPLL | 458  | 11   |
| >PTCH1-VL11ALEHMFAPV  | 8    | >PTCH1-VL11ALEHMFAPL  | 57   | 49   |
| >PTCH1-VL11ALEHMFAPVI | 274  | >PTCH1-VL11ALEHMFAPLL | 461  | 187  |
| >PTCH1-VL11ALEHMFAPV  | 87   | >PTCH1-VL11ALEHMFAPL  | 1826 | 1739 |
| >PTCH1-VL11ALEHMFAPV  | 2    | >PTCH1-VL11ALEHMFAPL  | 7    | 5    |
| >PTCH1-VL11ALEHMFAPVI | 12   | >PTCH1-VL11ALEHMFAPLL | 9    | 3    |
| >PTCH1-VL11ALEHMFAPV  | 1857 | >PTCH1-VL11ALEHMFAPL  | 483  | 1374 |
| >PTCH1-VL11LAEHMFAP\  | 361  | >PTCH1-VL11LAEHMFAPL  | 112  | 249  |
| >PTCH1-VL11LAEHMFAP\  | 80   | >PTCH1-VL11LAEHMFAPL  | 297  | 217  |
| >PTCH1-VL11LAEHMFAP\  | 633  | >PTCH1-VL11LAEHMFAPL  | 168  | 465  |
| >PTCH1-VL11LAEHMFAP\  | 186  | >PTCH1-VL11LAEHMFAPL  | 179  | 7    |
| >PTCH1-VL11LAEHMFAP\  | 1584 | >PTCH1-VL11LAEHMFAPL  | 491  | 1093 |
| >PTCH1-VL11LAEHMFAP\  | 63   | >PTCH1-VL11LAEHMFAPL  | 313  | 250  |
| >PTCH1-VL11LAEHMFAP\  | 32   | >PTCH1-VL11LAEHMFAPL  | 77   | 45   |
| >PTCH1-VL11LAEHMFAP\  | 74   | >PTCH1-VL11LAEHMFAPL  | 29   | 45   |
| >PTCH1-VL11LAEHMFAP\  | 15   | >PTCH1-VL11LAEHMFAPL  | 161  | 146  |
| >PTCH1-VL11LAEHMFAP\  | 199  | >PTCH1-VL11LAEHMFAPL  | 181  | 18   |
| >PTCH1-VL11LAEHMFAP\  | 59   | >PTCH1-VL11LAEHMFAPL  | 704  | 645  |
| >PTCH1-VL11LAEHMFAP\  | 220  | >PTCH1-VL11LAEHMFAPL  | 4245 | 4025 |
| >PTCH1-VL11LAEHMFAP\  | 402  | >PTCH1-VL11LAEHMFAPL  | 3993 | 3591 |
| >PTCH1-VL11LAEHMFAP\  | 23   | >PTCH1-VL11LAEHMFAPL  | 855  | 832  |
| >PTCH1-VL11LAEHMFAP\  | 433  | >PTCH1-VL11LAEHMFAPL  | 2683 | 2250 |
| >PTCH1-VL11LAEHMFAP\  | 7    | >PTCH1-VL11LAEHMFAPL  | 26   | 19   |
| >PTCH1-VL11LAEHMFAP\  | 83   | >PTCH1-VL11LAEHMFAPL  | 34   | 49   |
| >PTCH1-VL11LAEHMFAP\  | 950  | >PTCH1-VL11LAEHMFAPL  | 392  | 558  |
| >PTCH1-VL11LAEHMFAP\  | 729  | >PTCH1-VL11LAEHMFAPL  | 27   | 702  |
| >PTCH1-VL11LAEHMFAP\  | 30   | >PTCH1-VL11LAEHMFAPL  | 39   | 9    |
| >PTCH1-VL11LAEHMFAP\  | 213  | >PTCH1-VL11LAEHMFAPL  | 731  | 518  |
| >PTCH1-VL11LAEHMFAP\  | 1200 | >PTCH1-VL11LAEHMFAPL  | 352  | 848  |
| >PTCH1-W84WLHYFRDWL   | 26   | >PTCH1-W84CLHYFRDWL   | 172  | 146  |
| >PTCH1-W84WLHYFRDWL   | 367  | >PTCH1-W84CLHYFRDWL   | 1586 | 1219 |
| >PTCH1-W84WLHYFRDWL   | 321  | >PTCH1-W84CLHYFRDWL   | 2795 | 2474 |

|                      |     |                      |       |       |
|----------------------|-----|----------------------|-------|-------|
| >PTCH1-W84WLHYFRDWL  | 45  | >PTCH1-W84CLHYFRDWL  | 403   | 358   |
| >PTCH1-W84WLHYFRDWL  | 366 | >PTCH1-W84CLHYFRDWL  | 4047  | 3681  |
| >PTCH1-W84WLHYFRDWL  | 83  | >PTCH1-W84CLHYFRDWL  | 757   | 674   |
| >PTCH1-W84MWLHYFRDV  | 84  | >PTCH1-W84MCLHYFRDW  | 6628  | 6544  |
| >PTCH1-W84MWLHYFRDV  | 316 | >PTCH1-W84MCLHYFRDW  | 21250 | 20934 |
| >PTCH1-W84MWLHYFRDV  | 54  | >PTCH1-W84MCLHYFRDW  | 12710 | 12656 |
| >PTCH1-W84MWLHYFRDV  | 22  | >PTCH1-W84MCLHYFRDW  | 9810  | 9788  |
| >PTCH1-W84MWLHYFRDV  | 135 | >PTCH1-W84MCLHYFRDW  | 25    | 110   |
| >PTCH1-W84MWLHYFRDV  | 114 | >PTCH1-W84MCLHYFRDW  | 2439  | 2325  |
| >PTCH1-W84MWLHYFRD   | 210 | >PTCH1-W84MCLHYFRD   | 31164 | 30954 |
| >PTCH1-W84MWLHYFRDV  | 67  | >PTCH1-W84MCLHYFRDW  | 29054 | 28987 |
| >PTCH1-W84MWLHYFRDV  | 25  | >PTCH1-W84MCLHYFRDW  | 9870  | 9845  |
| >PTCH1-W84MWLHYFRDV  | 56  | >PTCH1-W84MCLHYFRDW  | 23872 | 23816 |
| >PTCH1-W84LEENKQLPKM | 103 | >PTCH1-W84LEENKQLPKM | 8332  | 8229  |
| >PTCH1-W84LEENKQLPKM | 111 | >PTCH1-W84LEENKQLPKM | 14241 | 14130 |
| >PTCH1-W84KMWLHYFRC  | 123 | >PTCH1-W84KMCLHYFRD\ | 1196  | 1073  |
| >PTCH1-W84KMWLHYFRC  | 22  | >PTCH1-W84KMCLHYFRD\ | 298   | 276   |
| >PTCH1-W84KMWLHYFRC  | 36  | >PTCH1-W84KMCLHYFRD\ | 35    | 1     |
| >PTCH1-W84KMWLHYFRC  | 350 | >PTCH1-W84KMCLHYFRD\ | 316   | 34    |
| >PTCH1-W84KMWLHYFRC  | 170 | >PTCH1-W84KMCLHYFRD\ | 492   | 322   |
| >PTCH1-W84KMWLHYFRC  | 11  | >PTCH1-W84KMCLHYFRD\ | 99    | 88    |
| >PTCH1-W84KMWLHYFRC  | 115 | >PTCH1-W84KMCLHYFRD\ | 1605  | 1490  |
| >PTCH1-W84KMWLHYFRC  | 30  | >PTCH1-W84KMCLHYFRD\ | 1281  | 1251  |
| >PTCH1-W84KMWLHYFRC  | 167 | >PTCH1-W84KMCLHYFRD\ | 4527  | 4360  |
| >PTCH1-W84KMWLHYFRC  | 30  | >PTCH1-W84KMCLHYFRD\ | 130   | 100   |
| >PTCH1-W84KMWLHYFR   | 66  | >PTCH1-W84KMCLHYFR   | 132   | 66    |
| >PTCH1-W84KMWLHYFR   | 36  | >PTCH1-W84KMCLHYFR   | 32    | 4     |
| >PTCH1-W84KMWLHYFR   | 4   | >PTCH1-W84KMCLHYFR   | 5     | 1     |
| >PTCH1-W84KMWLHYFRC  | 438 | >PTCH1-W84KMCLHYFRD  | 1375  | 937   |
| >PTCH1-W84KMWLHYFRC  | 238 | >PTCH1-W84KMCLHYFRD\ | 1026  | 788   |
| >PTCH1-W84KMWLHYFRC  | 69  | >PTCH1-W84KMCLHYFRD\ | 480   | 411   |
| >PTCH1-W84KMWLHYFRC  | 77  | >PTCH1-W84KMCLHYFRD\ | 601   | 524   |
| >PTCH1-W84KMWLHYFR   | 30  | >PTCH1-W84KMCLHYFR   | 66    | 36    |
| >PTCH1-W84KMWLHYFRC  | 239 | >PTCH1-W84KMCLHYFRD\ | 1468  | 1229  |
| >PTCH1-W84KMWLHYFRC  | 460 | >PTCH1-W84KMCLHYFRD\ | 2931  | 2471  |
| >PTCH1-W84KMWLHYFRC  | 255 | >PTCH1-W84KMCLHYFRD\ | 557   | 302   |
| >PTCH1-W84KMWLHYFRC  | 81  | >PTCH1-W84KMCLHYFRD\ | 1227  | 1146  |
| >PTCH1-W84KMWLHYFRC  | 124 | >PTCH1-W84KMCLHYFRD\ | 467   | 343   |
| >PTCH1-W84KMWLHYFRC  | 306 | >PTCH1-W84KMCLHYFRD\ | 3646  | 3340  |
| >PTCH1-W84KMWLHYFRC  | 416 | >PTCH1-W84KMCLHYFRD\ | 2322  | 1906  |
| >PTCH1-W84KMWLHYFRC  | 226 | >PTCH1-W84KMCLHYFRD\ | 742   | 516   |
| >PTCH1-W84KMWLHYFR   | 9   | >PTCH1-W84KMCLHYFR   | 12    | 3     |
| >PTCH1-W84PKMWLHYF   | 80  | >PTCH1-W84PKMCLHYF   | 19    | 61    |

|                     |      |                      |      |      |
|---------------------|------|----------------------|------|------|
| >PTCH1-W84PKMWLHYFR | 40   | >PTCH1-W84PKMCLHYFR  | 48   | 8    |
| >PTCH1-W84LPKMWLHYF | 261  | >PTCH1-W84LPKMCLHYF  | 13   | 248  |
| >PTCH1-W84LPKMWLHYF | 14   | >PTCH1-W84LPKMCLHYFR | 17   | 3    |
| >PTCH1-W84LPKMWLHYF | 58   | >PTCH1-W84LPKMCLHYFR | 35   | 23   |
| >PTCH1-W84LPKMWLHYF | 548  | >PTCH1-W84LPKMCLHYFR | 343  | 205  |
| >PTCH1-W84LPKMWLHYF | 1010 | >PTCH1-W84LPKMCLHYF  | 251  | 759  |
| >PTCH1-W84LPKMWLHYF | 404  | >PTCH1-W84LPKMCLHYF  | 606  | 202  |
| >PTCH1-W84LPKMWLHYF | 609  | >PTCH1-W84LPKMCLHYF  | 331  | 278  |
| >PTCH1-W84LPKMWLHY  | 84   | >PTCH1-W84LPKMCLHY   | 121  | 37   |
| >PTCH1-W84LPKMWLHYF | 523  | >PTCH1-W84LPKMCLHYF  | 479  | 44   |
| >PTCH1-W84LPKMWLHY  | 100  | >PTCH1-W84LPKMCLHY   | 187  | 87   |
| >PTCH1-W84LPKMWLHYF | 141  | >PTCH1-W84LPKMCLHYF  | 106  | 35   |
| >PTCH1-W84LPKMWLHY  | 227  | >PTCH1-W84LPKMCLHY   | 528  | 301  |
| >PTCH1-W84LPKMWLHYF | 64   | >PTCH1-W84LPKMCLHYF  | 138  | 74   |
| >PTCH1-W84LPKMWLHYF | 112  | >PTCH1-W84LPKMCLHYFR | 75   | 37   |
| >PTCH1-W84QLPKMWLHY | 249  | >PTCH1-W84QLPKMCLHYI | 293  | 44   |
| >PTCH1-W84QLPKMWLHY | 26   | >PTCH1-W84QLPKMCLHY  | 41   | 15   |
| >PTCH1-W84QLPKMWLHY | 57   | >PTCH1-W84QLPKMCLHYI | 128  | 71   |
| >PTCH1-W84QLPKMWLHY | 273  | >PTCH1-W84QLPKMCLHYI | 402  | 129  |
| >PTCH1-W84QLPKMWLHY | 141  | >PTCH1-W84QLPKMCLHYI | 134  | 7    |
| >PTCH1-W84QLPKMWLHY | 28   | >PTCH1-W84QLPKMCLHY  | 19   | 9    |
| >PTCH1-W84QLPKMWLHY | 175  | >PTCH1-W84QLPKMCLHY  | 178  | 3    |
| >PTCH1-W84QLPKMWLHY | 484  | >PTCH1-W84QLPKMCLHY  | 3162 | 2678 |
| >PTCH1-W84QLPKMWLHY | 51   | >PTCH1-W84QLPKMCLHYI | 38   | 13   |
| >PTCH1-W84QLPKMWLHY | 26   | >PTCH1-W84QLPKMCLHYI | 32   | 6    |
| >PTCH1-W84QLPKMWLHY | 321  | >PTCH1-W84QLPKMCLHYI | 910  | 589  |
| >PTCH1-W84KQLPKMWL  | 232  | >PTCH1-W84KQLPKMCL   | 949  | 717  |
| >PTCH1-W84KQLPKMWL  | 26   | >PTCH1-W84KQLPKMCL   | 84   | 58   |
| >PTCH1-W84KQLPKMWLF | 494  | >PTCH1-W84KQLPKMCLH  | 3038 | 2544 |
| >PTCH1-W84KQLPKMWLF | 9    | >PTCH1-W84KQLPKMCLH' | 14   | 5    |
| >PTCH1-W84KQLPKMWL  | 386  | >PTCH1-W84KQLPKMCL   | 1774 | 1388 |
| >PTCH1-W84KQLPKMWLF | 206  | >PTCH1-W84KQLPKMCLH' | 112  | 94   |
| >PTCH1-W84KQLPKMWLF | 88   | >PTCH1-W84KQLPKMCLH' | 329  | 241  |
| >PTCH1-W84KQLPKMWLF | 337  | >PTCH1-W84KQLPKMCLH' | 1061 | 724  |
| >PTCH1-W84KQLPKMWLF | 91   | >PTCH1-W84KQLPKMCLH' | 305  | 214  |
| >PTCH1-W84KQLPKMWLF | 372  | >PTCH1-W84KQLPKMCLH' | 684  | 312  |
| >PTCH1-W84KQLPKMWLF | 452  | >PTCH1-W84KQLPKMCLH' | 1000 | 548  |
| >PTCH1-W84KQLPKMWLF | 110  | >PTCH1-W84KQLPKMCLH  | 304  | 194  |
| >PTCH1-W84KQLPKMWLF | 189  | >PTCH1-W84KQLPKMCLH' | 295  | 106  |
| >PTCH1-W84KQLPKMWLF | 10   | >PTCH1-W84KQLPKMCLH' | 26   | 16   |
| >PTCH1-W84KQLPKMWLF | 78   | >PTCH1-W84KQLPKMCLH' | 48   | 30   |
| >PTCH1-W84KQLPKMWLF | 216  | >PTCH1-W84KQLPKMCLH' | 133  | 83   |
| >PTCH1-W84KQLPKMWL  | 173  | >PTCH1-W84KQLPKMCL   | 49   | 124  |

|                        |       |                       |       |       |
|------------------------|-------|-----------------------|-------|-------|
| >PTCH1-W84KQLPKMWLF    | 14    | >PTCH1-W84KQLPKMCLH'  | 15    | 1     |
| >PTCH1-W84KQLPKMWLF    | 7     | >PTCH1-W84KQLPKMCLH'  | 6     | 1     |
| >PTCH1-W84KQLPKMWLF    | 125   | >PTCH1-W84KQLPKMCLH'  | 167   | 42    |
| >PTCH1-W84KQLPKMWLF    | 141   | >PTCH1-W84KQLPKMCLH'  | 130   | 11    |
| >PTCH1-W84KQLPKMWLF    | 185   | >PTCH1-W84KQLPKMCLH'  | 340   | 155   |
| >PTCH1-W84KQLPKMWL     | 399   | >PTCH1-W84KQLPKMCL    | 3123  | 2724  |
| >PTCH1-W84EENKQLPKM'   | 91    | >PTCH1-W84EENKQLPKM'  | 21769 | 21678 |
| >PTCH1-W84EENKQLPKM'   | 96    | >PTCH1-W84EENKQLPKM'  | 20307 | 20211 |
| >PTCH1-Y95EYMPETRLRI   | 46    | >PTCH1-Y95EHMPETRLRI  | 2287  | 2241  |
| >PTCH1-Y95EYMPETRLRIP, | 49    | >PTCH1-Y95EHMPETRLRIP | 1871  | 1822  |
| >PTCH1-Y95EYMPETRLRI   | 497   | >PTCH1-Y95EHMPETRLRI  | 2699  | 2202  |
| >PTCH1-Y95EYMPETRLRIP, | 323   | >PTCH1-Y95EHMPETRLRIP | 2450  | 2127  |
| >PTCH1-Y95EYMPETRLRI   | 38    | >PTCH1-Y95EHMPETRLRI  | 602   | 564   |
| >PTCH1-Y95EYMPETRLRIP, | 23    | >PTCH1-Y95EHMPETRLRIP | 380   | 357   |
| >PTCH1-Y95EYMPETRLRI   | 88    | >PTCH1-Y95EHMPETRLRI  | 1999  | 1911  |
| >PTCH1-Y95EYMPETRLRIP, | 28    | >PTCH1-Y95EHMPETRLRIP | 541   | 513   |
| >PTCH1-Y95EYMPETRLRI   | 4     | >PTCH1-Y95EHMPETRLRI  | 89    | 85    |
| >PTCH1-Y95EYMPETRLRIP, | 10    | >PTCH1-Y95EHMPETRLRIP | 304   | 294   |
| >PTCH1-Y95EYMPETRLRI   | 57    | >PTCH1-Y95EHMPETRLRI  | 1112  | 1055  |
| >PTCH1-Y95EYMPETRLRIP, | 95    | >PTCH1-Y95EHMPETRLRIP | 1087  | 992   |
| >PTCH1-Y95EYMPETRLRI   | 19    | >PTCH1-Y95EHMPETRLRI  | 403   | 384   |
| >PTCH1-Y95EYMPETRLRIP, | 22    | >PTCH1-Y95EHMPETRLRIP | 480   | 458   |
| >PTCH1-Y95EYMPETRLRI   | 143   | >PTCH1-Y95EHMPETRLRI  | 7638  | 7495  |
| >PTCH1-Y95EYMPETRLRI   | 3     | >PTCH1-Y95EHMPETRLRI  | 35    | 32    |
| >PTCH1-Y95EYMPETRLRIP, | 4     | >PTCH1-Y95EHMPETRLRIP | 78    | 74    |
| >PTCH1-Y95EYMPETRLR    | 715   | >PTCH1-Y95EHMPETRLR   | 147   | 568   |
| >PTCH1-Y95EYMPETRLR    | 667   | >PTCH1-Y95EHMPETRLR   | 318   | 349   |
| >PTCH1-Y95EYMPETRLR    | 172   | >PTCH1-Y95EHMPETRLR   | 287   | 115   |
| >PTCH1-Y95EYMPETRLRI   | 240   | >PTCH1-Y95EHMPETRLRI  | 4310  | 4070  |
| >PTCH1-Y95EYMPETRLR    | 124   | >PTCH1-Y95EHMPETRLR   | 45    | 79    |
| >PTCH1-Y95EYMPETRLRI   | 470   | >PTCH1-Y95EDHMPETRLRI | 21499 | 21029 |
| >PTCH1-Y95EYMPETRL     | 207   | >PTCH1-Y95EDHMPETRL   | 19620 | 19413 |
| >PTCH1-Y95EYMPETRLRI   | 110   | >PTCH1-Y95EDHMPETRLRI | 18161 | 18051 |
| >PTCH1-Y95EYMPETRLR    | 26    | >PTCH1-Y95EDHMPETRLR  | 2355  | 2329  |
| >PTCH1-Y95EYMPETRLR    | 301   | >PTCH1-Y95EDHMPETRLR  | 1370  | 1069  |
| >PTCH1-Y95EYMPETRL     | 11077 | >PTCH1-Y95EDHMPETRL   | 489   | 10588 |
| >PTCH1-Y95EYMPETRLR    | 51    | >PTCH1-Y95EDHMPETRLR  | 1673  | 1622  |
| >PTCH1-Y95EYMPETRLR    | 97    | >PTCH1-Y95EYMPETRLR   | 1694  | 1597  |
| >PTCH1-Y95EYMPETRLR    | 99    | >PTCH1-Y95EYMPETRLR   | 338   | 239   |
| >PTCH1-Y95EYMPETRLR    | 101   | >PTCH1-Y95EYMPETRLR   | 237   | 136   |
| >PTCH1-Y95EKADYMPETR   | 411   | >PTCH1-Y95EKADHMPETR  | 665   | 254   |
| >PTCH1-Y95EKADYMPETR   | 426   | >PTCH1-Y95EKADHMPETR  | 626   | 200   |
| >PTCH1-Y95EKADYMPETR   | 273   | >PTCH1-Y95EKADHMPETR  | 124   | 149   |

|                       |       |                        |       |       |
|-----------------------|-------|------------------------|-------|-------|
| >PTCH1-Y95E WVHDKADY  | 460   | >PTCH1-Y95E WVHDKADH   | 9970  | 9510  |
| >PTCH1-Y95E WVHDKADY  | 70    | >PTCH1-Y95E WVHDKADH   | 9296  | 9226  |
| >PTCH1-Y95E WVHDKADY  | 455   | >PTCH1-Y95E WVHDKADH   | 7073  | 6618  |
| >PTCH1-Y95E WVHDKADYM | 417   | >PTCH1-Y95E WVHDKADHI  | 1735  | 1318  |
| >PTEN-A121IAIHCKAGK   | 243   | >PTEN-A121IEIHCKAGK    | 3545  | 3302  |
| >PTEN-A121IAIHCKAGK   | 221   | >PTEN-A121IEIHCKAGK    | 4141  | 3920  |
| >PTEN-A121IAIHCKAGK   | 29    | >PTEN-A121IEIHCKAGK    | 5908  | 5879  |
| >PTEN-A121IAIHCKAGKGR | 407   | >PTEN-A121IEIHCKAGKGR  | 2243  | 1836  |
| >PTEN-A121IAIHCKAGK   | 2651  | >PTEN-A121IEIHCKAGK    | 52    | 2599  |
| >PTEN-A121IAIHCKAGKGR | 1530  | >PTEN-A121IEIHCKAGKGR  | 363   | 1167  |
| >PTEN-A121IAAIHCKAGK  | 252   | >PTEN-A121IAEIHCKAGK   | 15820 | 15568 |
| >PTEN-A121IAAIHCKAGKC | 447   | >PTEN-A121IAEIHCKAGKG  | 8189  | 7742  |
| >PTEN-A121IAAIHCKAGKC | 33413 | >PTEN-A121IAEIHCKAGKG  | 389   | 33024 |
| >PTEN-A121IAAIHCKAGKC | 20997 | >PTEN-A121IAEIHCKAGKG  | 223   | 20774 |
| >PTEN-A121IWLSEDDNHV  | 480   | >PTEN-A121IWLSEDDNHV   | 19762 | 19282 |
| >PTEN-A121IWLSEDDNHV  | 30    | >PTEN-A121IWLSEDDNHV   | 3959  | 3929  |
| >PTEN-A121IWLSEDDNHV  | 39    | >PTEN-A121IWLSEDDNHV   | 14913 | 14874 |
| >PTEN-A121IWLSEDDNHV  | 56    | >PTEN-A121IWLSEDDNHV   | 12817 | 12761 |
| >PTEN-A121IWLSEDDNHV  | 34    | >PTEN-A121IWLSEDDNHV   | 7324  | 7290  |
| >PTEN-A121IWLSEDDNHV  | 26    | >PTEN-A121IWLSEDDNHV   | 8125  | 8099  |
| >PTEN-A121IWLSEDDNHV  | 85    | >PTEN-A121IWLSEDDNHV   | 13697 | 13612 |
| >PTEN-A121IWLSEDDNHV  | 108   | >PTEN-A121IWLSEDDNHV   | 19849 | 19741 |
| >PTEN-A121IWLSEDDNHV  | 9     | >PTEN-A121IWLSEDDNHV   | 2846  | 2837  |
| >PTEN-A121IVAAIHCKAGK | 459   | >PTEN-A121IVAEIHCKAGK  | 6043  | 5584  |
| >PTEN-A121IHVAAIHCKA  | 289   | >PTEN-A121IHVAEIHCKA   | 336   | 47    |
| >PTEN-A121IHVAAIHCKA  | 1779  | >PTEN-A121IHVAEIHCKA   | 482   | 1297  |
| >PTEN-A121IHVAAIHCK   | 130   | >PTEN-A121IHVAEIHCK    | 246   | 116   |
| >PTEN-A121IHVAAIHCKAC | 90    | >PTEN-A121IHVAEIHCKAC  | 132   | 42    |
| >PTEN-A121IHVAAIHCK   | 50    | >PTEN-A121IHVAEIHCK    | 74    | 24    |
| >PTEN-A121IHVAAIHCKAC | 114   | >PTEN-A121IHVAEIHCKAC  | 180   | 66    |
| >PTEN-A121IHVAAIHCK   | 74    | >PTEN-A121IHVAEIHCK    | 238   | 164   |
| >PTEN-A121IHVAAIHCKA  | 304   | >PTEN-A121IHVAEIHCKA   | 989   | 685   |
| >PTEN-A121IHVAAIHCKAC | 64    | >PTEN-A121IHVAEIHCKAC  | 146   | 82    |
| >PTEN-A121IHVAAIHCK   | 223   | >PTEN-A121IHVAEIHCK    | 550   | 327   |
| >PTEN-A121IHVAAIHCKAC | 185   | >PTEN-A121IHVAEIHCKAC  | 409   | 224   |
| >PTEN-A121IHVAAIHCK   | 5     | >PTEN-A121IHVAEIHCK    | 5     | 0     |
| >PTEN-A121IHVAAIHCKAC | 7     | >PTEN-A121IHVAEIHCKAC  | 7     | 0     |
| >PTEN-A121IHVAAIHCKA  | 12    | >PTEN-A121IHVAEIHCKA   | 14    | 2     |
| >PTEN-A121IHVAAIHCKA  | 480   | >PTEN-A121IHVAEIHCKA   | 100   | 380   |
| >PTEN-A121IDDNHVAAI   | 343   | >PTEN-A121IDDNHVAEI    | 301   | 42    |
| >PTEN-A121IEDDNHVAEI  | 195   | >PTEN-A121IEDDNHVAEI   | 171   | 24    |
| >PTEN-A121ISEDNDHVAAI | 347   | >PTEN-A121ISEDNDHVVAEI | 145   | 202   |
| >PTEN-A121ISEDNDHVAAI | 435   | >PTEN-A121ISEDNDHVVAEI | 542   | 107   |

|                       |     |                       |       |       |
|-----------------------|-----|-----------------------|-------|-------|
| >PTEN-A121ISEDDNHVAA  | 117 | >PTEN-A121ISEDDNHVAEI | 107   | 10    |
| >PTEN-A121ISEDDNHVAA  | 24  | >PTEN-A121ISEDDNHVAE  | 3190  | 3166  |
| >PTEN-A121ISEDDNHVAA  | 315 | >PTEN-A121ISEDDNHVAEI | 509   | 194   |
| >PTEN-A121ISEDDNHVAA  | 65  | >PTEN-A121ISEDDNHVAEI | 136   | 71    |
| >PTEN-A121ILSEDDNHVAI | 514 | >PTEN-A121ILSEDDNHVAI | 415   | 99    |
| >PTEN-A121ILSEDDNHVAI | 70  | >PTEN-A121ILSEDDNHVAI | 108   | 38    |
| >PTEN-A121IAIHCKAGK   | 243 | >PTEN-A121PIHCKAGK    | 5110  | 4867  |
| >PTEN-A121IAIHCKAGK   | 221 | >PTEN-A121PIHCKAGK    | 6939  | 6718  |
| >PTEN-A121IAIHCKAGK   | 29  | >PTEN-A121PIHCKAGK    | 905   | 876   |
| >PTEN-A121IAIHCKAGKGF | 407 | >PTEN-A121PIHCKAGKGR  | 4451  | 4044  |
| >PTEN-A121IAAIHCKAGK  | 252 | >PTEN-A121APIHCKAGK   | 13822 | 13570 |
| >PTEN-A121IAAIHCKAGKC | 447 | >PTEN-A121APIHCKAGKC  | 8054  | 7607  |
| >PTEN-A121IWLEDDNHV   | 480 | >PTEN-A121IWLEDDNHV   | 19347 | 18867 |
| >PTEN-A121IWLEDDNHV   | 30  | >PTEN-A121IWLEDDNHV   | 1372  | 1342  |
| >PTEN-A121IWLEDDNHV   | 39  | >PTEN-A121IWLEDDNHV   | 9100  | 9061  |
| >PTEN-A121IWLEDDNHV   | 56  | >PTEN-A121IWLEDDNHV   | 6875  | 6819  |
| >PTEN-A121IWLEDDNHV   | 34  | >PTEN-A121IWLEDDNHV   | 4501  | 4467  |
| >PTEN-A121IWLEDDNHV   | 26  | >PTEN-A121IWLEDDNHV   | 6222  | 6196  |
| >PTEN-A121IWLEDDNHV   | 85  | >PTEN-A121IWLEDDNHV   | 10079 | 9994  |
| >PTEN-A121IWLEDDNHV   | 108 | >PTEN-A121IWLEDDNHV   | 18980 | 18872 |
| >PTEN-A121IWLEDDNHV   | 9   | >PTEN-A121IWLEDDNHV   | 3400  | 3391  |
| >PTEN-A121IVAAIHCKAGK | 459 | >PTEN-A121IVAPIHCKAGK | 1260  | 801   |
| >PTEN-A121IHVAAIHCKA  | 289 | >PTEN-A121HVAPIHCKA   | 515   | 226   |
| >PTEN-A121IHVAAIHCK   | 130 | >PTEN-A121HVAPIHCK    | 158   | 28    |
| >PTEN-A121IHVAAIHCKAC | 90  | >PTEN-A121HVAPIHCKAC  | 115   | 25    |
| >PTEN-A121IHVAAIHCK   | 50  | >PTEN-A121HVAPIHCK    | 36    | 14    |
| >PTEN-A121IHVAAIHCKAC | 114 | >PTEN-A121HVAPIHCKAC  | 114   | 0     |
| >PTEN-A121IHVAAIHCK   | 74  | >PTEN-A121HVAPIHCK    | 94    | 20    |
| >PTEN-A121IHVAAIHCKA  | 304 | >PTEN-A121HVAPIHCKA   | 308   | 4     |
| >PTEN-A121IHVAAIHCKAC | 64  | >PTEN-A121HVAPIHCKAC  | 65    | 1     |
| >PTEN-A121IHVAAIHCK   | 223 | >PTEN-A121HVAPIHCK    | 193   | 30    |
| >PTEN-A121IHVAAIHCKAC | 185 | >PTEN-A121HVAPIHCKAC  | 175   | 10    |
| >PTEN-A121IHVAAIHCK   | 5   | >PTEN-A121HVAPIHCK    | 6     | 1     |
| >PTEN-A121IHVAAIHCKAC | 7   | >PTEN-A121HVAPIHCKAC  | 9     | 2     |
| >PTEN-A121IHVAAIHCKA  | 12  | >PTEN-A121HVAPIHCKA   | 12    | 0     |
| >PTEN-A121IHVAAIHCKA  | 480 | >PTEN-A121HVAPIHCKA   | 665   | 185   |
| >PTEN-A121IDDNHVAAI   | 343 | >PTEN-A121IDDNHVAPI   | 460   | 117   |
| >PTEN-A121IEDDNHVAAI  | 195 | >PTEN-A121IEDDNHVAPI  | 213   | 18    |
| >PTEN-A121ISEDDNHVAA  | 347 | >PTEN-A121ISEDDNHVAPI | 180   | 167   |
| >PTEN-A121ISEDDNHVAA  | 435 | >PTEN-A121ISEDDNHVAPI | 340   | 95    |
| >PTEN-A121ISEDDNHVAA  | 117 | >PTEN-A121ISEDDNHVAPI | 173   | 56    |
| >PTEN-A121ISEDDNHVAA  | 24  | >PTEN-A121ISEDDNHVAP  | 4053  | 4029  |
| >PTEN-A121ISEDDNHVAA  | 315 | >PTEN-A121ISEDDNHVAPI | 447   | 132   |

|                        |       |                        |       |       |
|------------------------|-------|------------------------|-------|-------|
| >PTEN-A121I SEDDNHVAA  | 65    | >PTEN-A121I SEDDNHVAPI | 118   | 53    |
| >PTEN-A121I LSEDDNHVAI | 514   | >PTEN-A121I LSEDDNHVAI | 240   | 274   |
| >PTEN-A121I LSEDDNHVAI | 70    | >PTEN-A121I LSEDDNHVAI | 66    | 4     |
| >PTEN-A126I KAGKGRTGVI | 135   | >PTEN-A126I KDGKGRTGVI | 2953  | 2818  |
| >PTEN-A126I HCKAGKGR   | 345   | >PTEN-A126I HCKDGKGR   | 374   | 29    |
| >PTEN-A126I AIHCKAGK   | 243   | >PTEN-A126I AIHCKDGK   | 2432  | 2189  |
| >PTEN-A126I AIHCKAGK   | 221   | >PTEN-A126I AIHCKDGK   | 497   | 276   |
| >PTEN-A126I AIHCKAGK   | 29    | >PTEN-A126I AIHCKDGK   | 277   | 248   |
| >PTEN-A126I AIHCKAGKGF | 407   | >PTEN-A126I AIHCKDGKGF | 1143  | 736   |
| >PTEN-A126I AAIHCKAGK  | 252   | >PTEN-A126I AAIHCKDGK  | 493   | 241   |
| >PTEN-A126I AAIHCKAGKC | 447   | >PTEN-A126I AAIHCKDGKC | 1342  | 895   |
| >PTEN-A126I VAAIHCKAGK | 459   | >PTEN-A126I VAAIHCKDGK | 1521  | 1062  |
| >PTEN-A126I HVAAIHCKA  | 289   | >PTEN-A126I HVAAIHCKD  | 17781 | 17492 |
| >PTEN-A126I HVAAIHCKAC | 90    | >PTEN-A126I HVAAIHCKDC | 351   | 261   |
| >PTEN-A126I HVAAIHCKAC | 114   | >PTEN-A126I HVAAIHCKDC | 190   | 76    |
| >PTEN-A126I HVAAIHCKA  | 304   | >PTEN-A126I HVAAIHCKD  | 7485  | 7181  |
| >PTEN-A126I HVAAIHCKAC | 64    | >PTEN-A126I HVAAIHCKDC | 442   | 378   |
| >PTEN-A126I HVAAIHCKAC | 185   | >PTEN-A126I HVAAIHCKDC | 1178  | 993   |
| >PTEN-A126I HVAAIHCKAC | 7     | >PTEN-A126I HVAAIHCKDC | 10    | 3     |
| >PTEN-A126I HVAAIHCKA  | 12    | >PTEN-A126I HVAAIHCKD  | 3609  | 3597  |
| >PTEN-A126I HVAAIHCKA  | 480   | >PTEN-A126I HVAAIHCKD  | 16633 | 16153 |
| >PTEN-A126I KAGKGRTGV  | 8547  | >PTEN-A126I KPGKGRTGV  | 26    | 8521  |
| >PTEN-A126I KAGKGRTGVI | 25097 | >PTEN-A126I KPGKGRTGVI | 205   | 24892 |
| >PTEN-A126I KAGKGRTGVI | 9197  | >PTEN-A126I KPGKGRTGVI | 45    | 9152  |
| >PTEN-A126I KAGKGRTGVI | 135   | >PTEN-A126I KPGKGRTGVI | 1976  | 1841  |
| >PTEN-A126I HCKAGKGR   | 345   | >PTEN-A126I HCKPGKGR   | 417   | 72    |
| >PTEN-A126I AIHCKAGK   | 243   | >PTEN-A126I AIHCKPGK   | 275   | 32    |
| >PTEN-A126I AIHCKAGK   | 221   | >PTEN-A126I AIHCKPGK   | 194   | 27    |
| >PTEN-A126I AIHCKAGK   | 29    | >PTEN-A126I AIHCKPGK   | 17    | 12    |
| >PTEN-A126I AIHCKAGKGF | 407   | >PTEN-A126I AIHCKPGKGR | 1037  | 630   |
| >PTEN-A126I AAIHCKAGK  | 252   | >PTEN-A126I AAIHCKPGK  | 228   | 24    |
| >PTEN-A126I AAIHCKAGKC | 447   | >PTEN-A126I AAIHCKPGKC | 619   | 172   |
| >PTEN-A126I AAIHCKAGK  | 1045  | >PTEN-A126I AAIHCKPGK  | 360   | 685   |
| >PTEN-A126I VAAIHCKAGK | 459   | >PTEN-A126I VAAIHCKPGK | 1676  | 1217  |
| >PTEN-A126I HVAAIHCKA  | 289   | >PTEN-A126I HVAAIHCKP  | 9702  | 9413  |
| >PTEN-A126I HVAAIHCKAC | 90    | >PTEN-A126I HVAAIHCKPC | 100   | 10    |
| >PTEN-A126I HVAAIHCKAC | 114   | >PTEN-A126I HVAAIHCKPC | 111   | 3     |
| >PTEN-A126I HVAAIHCKA  | 304   | >PTEN-A126I HVAAIHCKP  | 6611  | 6307  |
| >PTEN-A126I HVAAIHCKAC | 64    | >PTEN-A126I HVAAIHCKPC | 41    | 23    |
| >PTEN-A126I HVAAIHCKAC | 185   | >PTEN-A126I HVAAIHCKPC | 464   | 279   |
| >PTEN-A126I HVAAIHCKAC | 7     | >PTEN-A126I HVAAIHCKPC | 11    | 4     |
| >PTEN-A126I HVAAIHCKA  | 12    | >PTEN-A126I HVAAIHCKP  | 3722  | 3710  |
| >PTEN-A126I HVAAIHCKA  | 480   | >PTEN-A126I HVAAIHCKP  | 11731 | 11251 |



|                                    |      |                                    |      |      |
|------------------------------------|------|------------------------------------|------|------|
| >PTEN-A126 <sup>!</sup> KAGKGRTGVI | 2924 | >PTEN-A126 <sup>!</sup> KSGKGRTGVI | 412  | 2512 |
| >PTEN-A126 <sup>!</sup> KAGKGRTGVI | 1139 | >PTEN-A126 <sup>!</sup> KSGKGRTGVI | 124  | 1015 |
| >PTEN-A126 <sup>!</sup> KAGKGRTGVI | 2282 | >PTEN-A126 <sup>!</sup> KSGKGRTGVI | 118  | 2164 |
| >PTEN-A126 <sup>!</sup> KAGKGRTGVI | 135  | >PTEN-A126 <sup>!</sup> KSGKGRTGVI | 40   | 95   |
| >PTEN-A126 <sup>!</sup> HCKAGKGR   | 345  | >PTEN-A126 <sup>!</sup> HCKSGKGR   | 504  | 159  |
| >PTEN-A126 <sup>!</sup> AIHCKAGK   | 243  | >PTEN-A126 <sup>!</sup> AIHCKSGK   | 164  | 79   |
| >PTEN-A126 <sup>!</sup> AIHCKAGK   | 221  | >PTEN-A126 <sup>!</sup> AIHCKSGK   | 177  | 44   |
| >PTEN-A126 <sup>!</sup> AIHCKAGK   | 29   | >PTEN-A126 <sup>!</sup> AIHCKSGK   | 29   | 0    |
| >PTEN-A126 <sup>!</sup> AIHCKAGKGF | 407  | >PTEN-A126 <sup>!</sup> AIHCKSGKGR | 187  | 220  |
| >PTEN-A126 <sup>!</sup> AAIHCKAGK  | 252  | >PTEN-A126 <sup>!</sup> AAIHCKSGK  | 215  | 37   |
| >PTEN-A126 <sup>!</sup> AAIHCKAGKC | 447  | >PTEN-A126 <sup>!</sup> AAIHCKSGKG | 490  | 43   |
| >PTEN-A126 <sup>!</sup> VAAIHCKAGK | 459  | >PTEN-A126 <sup>!</sup> VAAIHCKSGK | 614  | 155  |
| >PTEN-A126 <sup>!</sup> HVAAIHCKA  | 289  | >PTEN-A126 <sup>!</sup> HVAAIHCKS  | 6709 | 6420 |
| >PTEN-A126 <sup>!</sup> HVAAIHCKAC | 90   | >PTEN-A126 <sup>!</sup> HVAAIHCKSG | 74   | 16   |
| >PTEN-A126 <sup>!</sup> HVAAIHCKAC | 114  | >PTEN-A126 <sup>!</sup> HVAAIHCKSG | 102  | 12   |
| >PTEN-A126 <sup>!</sup> HVAAIHCKA  | 304  | >PTEN-A126 <sup>!</sup> HVAAIHCKS  | 3516 | 3212 |
| >PTEN-A126 <sup>!</sup> HVAAIHCKAC | 64   | >PTEN-A126 <sup>!</sup> HVAAIHCKSG | 109  | 45   |
| >PTEN-A126 <sup>!</sup> HVAAIHCKAC | 185  | >PTEN-A126 <sup>!</sup> HVAAIHCKSG | 348  | 163  |
| >PTEN-A126 <sup>!</sup> HVAAIHCKAC | 7    | >PTEN-A126 <sup>!</sup> HVAAIHCKSG | 8    | 1    |
| >PTEN-A126 <sup>!</sup> HVAAIHCKA  | 12   | >PTEN-A126 <sup>!</sup> HVAAIHCKS  | 101  | 89   |
| >PTEN-A126 <sup>!</sup> HVAAIHCKA  | 480  | >PTEN-A126 <sup>!</sup> HVAAIHCKS  | 8738 | 8258 |
| >PTEN-A126 <sup>-</sup> KAGKGRTGVI | 2924 | >PTEN-A126 <sup>-</sup> KTGKGRTGVI | 113  | 2811 |
| >PTEN-A126 <sup>-</sup> KAGKGRTGVI | 1139 | >PTEN-A126 <sup>-</sup> KTGKGRTGVI | 81   | 1058 |
| >PTEN-A126 <sup>-</sup> KAGKGRTGVI | 3622 | >PTEN-A126 <sup>-</sup> KTGKGRTGVI | 315  | 3307 |
| >PTEN-A126 <sup>-</sup> KAGKGRTGVI | 2282 | >PTEN-A126 <sup>-</sup> KTGKGRTGVI | 51   | 2231 |
| >PTEN-A126 <sup>-</sup> KAGKGRTGVI | 4631 | >PTEN-A126 <sup>-</sup> KTGKGRTGVI | 305  | 4326 |
| >PTEN-A126 <sup>-</sup> KAGKGRTGVI | 135  | >PTEN-A126 <sup>-</sup> KTGKGRTGVI | 29   | 106  |
| >PTEN-A126 <sup>-</sup> HCKAGKGR   | 345  | >PTEN-A126 <sup>-</sup> HCKTGKGR   | 323  | 22   |
| >PTEN-A126 <sup>-</sup> AIHCKAGK   | 243  | >PTEN-A126 <sup>-</sup> AIHCKTGK   | 189  | 54   |
| >PTEN-A126 <sup>-</sup> AIHCKAGK   | 221  | >PTEN-A126 <sup>-</sup> AIHCKTGK   | 184  | 37   |
| >PTEN-A126 <sup>-</sup> AIHCKAGK   | 29   | >PTEN-A126 <sup>-</sup> AIHCKTGK   | 61   | 32   |
| >PTEN-A126 <sup>-</sup> AIHCKAGKGF | 407  | >PTEN-A126 <sup>-</sup> AIHCKTGKGR | 241  | 166  |
| >PTEN-A126 <sup>-</sup> AAIHCKAGK  | 252  | >PTEN-A126 <sup>-</sup> AAIHCKTGK  | 332  | 80   |
| >PTEN-A126 <sup>-</sup> AAIHCKAGKC | 447  | >PTEN-A126 <sup>-</sup> AAIHCKTGKG | 419  | 28   |
| >PTEN-A126 <sup>-</sup> VAAIHCKAGK | 459  | >PTEN-A126 <sup>-</sup> VAAIHCKTGK | 710  | 251  |
| >PTEN-A126 <sup>-</sup> HVAAIHCKA  | 289  | >PTEN-A126 <sup>-</sup> HVAAIHCKT  | 2636 | 2347 |
| >PTEN-A126 <sup>-</sup> HVAAIHCKAC | 90   | >PTEN-A126 <sup>-</sup> HVAAIHCKTC | 85   | 5    |
| >PTEN-A126 <sup>-</sup> HVAAIHCKAC | 114  | >PTEN-A126 <sup>-</sup> HVAAIHCKTC | 125  | 11   |
| >PTEN-A126 <sup>-</sup> HVAAIHCKA  | 304  | >PTEN-A126 <sup>-</sup> HVAAIHCKT  | 5730 | 5426 |
| >PTEN-A126 <sup>-</sup> HVAAIHCKAC | 64   | >PTEN-A126 <sup>-</sup> HVAAIHCKTC | 227  | 163  |
| >PTEN-A126 <sup>-</sup> HVAAIHCKAC | 185  | >PTEN-A126 <sup>-</sup> HVAAIHCKTC | 265  | 80   |
| >PTEN-A126 <sup>-</sup> HVAAIHCKAC | 7    | >PTEN-A126 <sup>-</sup> HVAAIHCKTC | 9    | 2    |
| >PTEN-A126 <sup>-</sup> HVAAIHCKA  | 12   | >PTEN-A126 <sup>-</sup> HVAAIHCKT  | 88   | 76   |

|                                     |       |                                     |      |       |
|-------------------------------------|-------|-------------------------------------|------|-------|
| >PTEN-A126 <sup>-</sup> HVAAIHCKA   | 480   | >PTEN-A126 <sup>-</sup> HVAAIHCKT   | 2792 | 2312  |
| >PTEN-A126 <sup>\</sup> KAGKGRTGV   | 1071  | >PTEN-A126 <sup>\</sup> KVGKGRTGV   | 62   | 1009  |
| >PTEN-A126 <sup>\</sup> KAGKGRTGVI  | 2924  | >PTEN-A126 <sup>\</sup> KVGKGRTGVI  | 247  | 2677  |
| >PTEN-A126 <sup>\</sup> KAGKGRTGVI  | 135   | >PTEN-A126 <sup>\</sup> KVGKGRTGVI  | 574  | 439   |
| >PTEN-A126 <sup>\</sup> HCKAGKGR    | 345   | >PTEN-A126 <sup>\</sup> HCKVGKGR    | 963  | 618   |
| >PTEN-A126 <sup>\</sup> AIHCKAGK    | 243   | >PTEN-A126 <sup>\</sup> AIHCKVGK    | 241  | 2     |
| >PTEN-A126 <sup>\</sup> AIHCKAGK    | 221   | >PTEN-A126 <sup>\</sup> AIHCKVGK    | 141  | 80    |
| >PTEN-A126 <sup>\</sup> AIHCKAGK    | 29    | >PTEN-A126 <sup>\</sup> AIHCKVGK    | 34   | 5     |
| >PTEN-A126 <sup>\</sup> AIHCKAGKGF  | 407   | >PTEN-A126 <sup>\</sup> AIHCKVGKGF  | 169  | 238   |
| >PTEN-A126 <sup>\</sup> AAIHCKAGK   | 252   | >PTEN-A126 <sup>\</sup> AAIHCKVGK   | 168  | 84    |
| >PTEN-A126 <sup>\</sup> AAIHCKAGKC  | 447   | >PTEN-A126 <sup>\</sup> AAIHCKVGKC  | 359  | 88    |
| >PTEN-A126 <sup>\</sup> AAIHCKAGK   | 1045  | >PTEN-A126 <sup>\</sup> AAIHCKVGK   | 354  | 691   |
| >PTEN-A126 <sup>\</sup> VAAIHCKA    | 13494 | >PTEN-A126 <sup>\</sup> VAAIHCKV    | 220  | 13274 |
| >PTEN-A126 <sup>\</sup> VAAIHCKAGK  | 459   | >PTEN-A126 <sup>\</sup> VAAIHCKVGK  | 430  | 29    |
| >PTEN-A126 <sup>\</sup> HVAAIHCKA   | 289   | >PTEN-A126 <sup>\</sup> HVAAIHCKV   | 37   | 252   |
| >PTEN-A126 <sup>\</sup> HVAAIHCKA   | 1656  | >PTEN-A126 <sup>\</sup> HVAAIHCKV   | 178  | 1478  |
| >PTEN-A126 <sup>\</sup> HVAAIHCKA   | 6496  | >PTEN-A126 <sup>\</sup> HVAAIHCKV   | 167  | 6329  |
| >PTEN-A126 <sup>\</sup> HVAAIHCKA   | 7213  | >PTEN-A126 <sup>\</sup> HVAAIHCKV   | 102  | 7111  |
| >PTEN-A126 <sup>\</sup> HVAAIHCKA   | 1779  | >PTEN-A126 <sup>\</sup> HVAAIHCKV   | 10   | 1769  |
| >PTEN-A126 <sup>\</sup> HVAAIHCKAC  | 90    | >PTEN-A126 <sup>\</sup> HVAAIHCKVC  | 95   | 5     |
| >PTEN-A126 <sup>\</sup> HVAAIHCKAC  | 114   | >PTEN-A126 <sup>\</sup> HVAAIHCKVC  | 89   | 25    |
| >PTEN-A126 <sup>\</sup> HVAAIHCKA   | 304   | >PTEN-A126 <sup>\</sup> HVAAIHCKV   | 609  | 305   |
| >PTEN-A126 <sup>\</sup> HVAAIHCKAC  | 64    | >PTEN-A126 <sup>\</sup> HVAAIHCKVC  | 92   | 28    |
| >PTEN-A126 <sup>\</sup> HVAAIHCKAC  | 185   | >PTEN-A126 <sup>\</sup> HVAAIHCKVC  | 238  | 53    |
| >PTEN-A126 <sup>\</sup> HVAAIHCKAC  | 7     | >PTEN-A126 <sup>\</sup> HVAAIHCKVC  | 9    | 2     |
| >PTEN-A126 <sup>\</sup> HVAAIHCKA   | 12    | >PTEN-A126 <sup>\</sup> HVAAIHCKV   | 5    | 7     |
| >PTEN-A126 <sup>\</sup> HVAAIHCKA   | 480   | >PTEN-A126 <sup>\</sup> HVAAIHCKV   | 14   | 466   |
| >PTEN-A126 <sup>\</sup> HVAAIHCKAC  | 806   | >PTEN-A126 <sup>\</sup> HVAAIHCKVC  | 416  | 390   |
| >PTEN-A137 <sup>\</sup> AYLLHRGKF   | 1272  | >PTEN-A137 <sup>\</sup> VYLLHRGKF   | 467  | 805   |
| >PTEN-A137 <sup>\</sup> AYLLHRGKFLI | 230   | >PTEN-A137 <sup>\</sup> VYLLHRGKFLI | 354  | 124   |
| >PTEN-A137 <sup>\</sup> AYLLHRGKF   | 418   | >PTEN-A137 <sup>\</sup> VYLLHRGKF   | 157  | 261   |
| >PTEN-A137 <sup>\</sup> AYLLHRGKFL  | 368   | >PTEN-A137 <sup>\</sup> VYLLHRGKFL  | 222  | 146   |
| >PTEN-A137 <sup>\</sup> AYLLHRGKF   | 8     | >PTEN-A137 <sup>\</sup> VYLLHRGKF   | 14   | 6     |
| >PTEN-A137 <sup>\</sup> AYLLHRGKFL  | 16    | >PTEN-A137 <sup>\</sup> VYLLHRGKFL  | 26   | 10    |
| >PTEN-A137 <sup>\</sup> AYLLHRGK    | 40    | >PTEN-A137 <sup>\</sup> VYLLHRGK    | 506  | 466   |
| >PTEN-A137 <sup>\</sup> AYLLHRGKFLI | 25    | >PTEN-A137 <sup>\</sup> VYLLHRGKFLI | 268  | 243   |
| >PTEN-A137 <sup>\</sup> AYLLHRGKFLI | 76    | >PTEN-A137 <sup>\</sup> VYLLHRGKFLI | 129  | 53    |
| >PTEN-A137 <sup>\</sup> AYLLHRGKFLI | 1595  | >PTEN-A137 <sup>\</sup> VYLLHRGKFLI | 469  | 1126  |
| >PTEN-A137 <sup>\</sup> AYLLHRGKFLI | 305   | >PTEN-A137 <sup>\</sup> VYLLHRGKFLI | 2273 | 1968  |
| >PTEN-A137 <sup>\</sup> AYLLHRGKFLI | 1086  | >PTEN-A137 <sup>\</sup> VYLLHRGKFLI | 488  | 598   |
| >PTEN-A137 <sup>\</sup> CAYLLHRGKF  | 119   | >PTEN-A137 <sup>\</sup> CVYLLHRGKF  | 125  | 6     |
| >PTEN-A137 <sup>\</sup> CAYLLHRGK   | 1373  | >PTEN-A137 <sup>\</sup> CVYLLHRGK   | 208  | 1165  |
| >PTEN-A137 <sup>\</sup> CAYLLHRGK   | 523   | >PTEN-A137 <sup>\</sup> CVYLLHRGK   | 129  | 394   |

|                        |      |                        |      |      |
|------------------------|------|------------------------|------|------|
| >PTEN-A137\CAYLLHRGK   | 1536 | >PTEN-A137\CVYLLHRGK   | 446  | 1090 |
| >PTEN-A137\CAYLLHRGK   | 471  | >PTEN-A137\CVYLLHRGK   | 356  | 115  |
| >PTEN-A137\CAYLLHRGKF  | 67   | >PTEN-A137\CVYLLHRGKF  | 671  | 604  |
| >PTEN-A137\CAYLLHRGKF  | 350  | >PTEN-A137\CVYLLHRGKF  | 3024 | 2674 |
| >PTEN-A137\CAYLLHRGKF  | 350  | >PTEN-A137\CVYLLHRGKF  | 217  | 133  |
| >PTEN-A137\CAYLLHRGKF  | 185  | >PTEN-A137\CVYLLHRGKF  | 736  | 551  |
| >PTEN-A137\ICAYLLHRGKI | 187  | >PTEN-A137\ICVYLLHRGKI | 206  | 19   |
| >PTEN-A137\ICAYLLHR    | 107  | >PTEN-A137\ICVYLLHR    | 78   | 29   |
| >PTEN-A137\MICAYLLHR   | 315  | >PTEN-A137\MICVYLLHR   | 986  | 671  |
| >PTEN-A137\MICAYLLHRG  | 162  | >PTEN-A137\MICVYLLHRG  | 330  | 168  |
| >PTEN-A137\MICAYLLH    | 299  | >PTEN-A137\MICVYLLH    | 573  | 274  |
| >PTEN-A137\MICAYLLHR   | 89   | >PTEN-A137\MICVYLLHR   | 218  | 129  |
| >PTEN-A137\MICAYLLHRG  | 49   | >PTEN-A137\MICVYLLHRG  | 87   | 38   |
| >PTEN-A137\MICAYLLHRG  | 77   | >PTEN-A137\MICVYLLHRG  | 113  | 36   |
| >PTEN-A137\MICAYLLHR   | 11   | >PTEN-A137\MICVYLLHR   | 12   | 1    |
| >PTEN-A137\MICAYLLHRG  | 473  | >PTEN-A137\MICVYLLHRG  | 475  | 2    |
| >PTEN-A137\MICAYLLHR   | 45   | >PTEN-A137\MICVYLLHR   | 35   | 10   |
| >PTEN-A137\MICAYLLHR   | 28   | >PTEN-A137\MICVYLLHR   | 39   | 11   |
| >PTEN-A137\MICAYLLHRG  | 124  | >PTEN-A137\MICVYLLHRG  | 155  | 31   |
| >PTEN-A137\MICAYLLHR   | 28   | >PTEN-A137\MICVYLLHR   | 82   | 54   |
| >PTEN-A137\VMICAYLL    | 248  | >PTEN-A137\VMICVYLL    | 156  | 92   |
| >PTEN-A137\VMICAYLL    | 15   | >PTEN-A137\VMICVYLL    | 13   | 2    |
| >PTEN-A137\VMICAYLL    | 9    | >PTEN-A137\VMICVYLL    | 10   | 1    |
| >PTEN-A137\VMICAYLL    | 27   | >PTEN-A137\VMICVYLL    | 18   | 9    |
| >PTEN-A137\VMICAYLL    | 39   | >PTEN-A137\VMICVYLL    | 50   | 11   |
| >PTEN-A137\VMICAYLL    | 10   | >PTEN-A137\VMICVYLL    | 4    | 6    |
| >PTEN-A137\VMICAYLLHR  | 1244 | >PTEN-A137\VMICVYLLHR  | 437  | 807  |
| >PTEN-A137\VMICAYLL    | 6    | >PTEN-A137\VMICVYLL    | 6    | 0    |
| >PTEN-A137\VMICAYLL    | 58   | >PTEN-A137\VMICVYLL    | 29   | 29   |
| >PTEN-A137\VMICAYLL    | 136  | >PTEN-A137\VMICVYLL    | 93   | 43   |
| >PTEN-A137\VMICAYLL    | 16   | >PTEN-A137\VMICVYLL    | 15   | 1    |
| >PTEN-A137\VMICAYLLH   | 1044 | >PTEN-A137\VMICVYLLH   | 453  | 591  |
| >PTEN-A137\VMICAYLLHR  | 166  | >PTEN-A137\VMICVYLLHR  | 218  | 52   |
| >PTEN-A137\VMICAYLLH   | 1118 | >PTEN-A137\VMICVYLLH   | 458  | 660  |
| >PTEN-A137\VMICAYLLHR  | 52   | >PTEN-A137\VMICVYLLHR  | 80   | 28   |
| >PTEN-A137\VMICAYLL    | 100  | >PTEN-A137\VMICVYLL    | 89   | 11   |
| >PTEN-A137\VMICAYLLH   | 46   | >PTEN-A137\VMICVYLLH   | 44   | 2    |
| >PTEN-A137\VMICAYLLHR  | 44   | >PTEN-A137\VMICVYLLHR  | 38   | 6    |
| >PTEN-A137\VMICAYLLHR  | 237  | >PTEN-A137\VMICVYLLHR  | 125  | 112  |
| >PTEN-A137\VMICAYLLHR  | 119  | >PTEN-A137\VMICVYLLHR  | 79   | 40   |
| >PTEN-A137\VMICAYLL    | 126  | >PTEN-A137\VMICVYLL    | 151  | 25   |
| >PTEN-A137\VMICAYLLHR  | 434  | >PTEN-A137\VMICVYLLHR  | 666  | 232  |
| >PTEN-A137\VMICAYLLHR  | 70   | >PTEN-A137\VMICVYLLHR  | 74   | 4    |

|                       |       |                       |      |       |
|-----------------------|-------|-----------------------|------|-------|
| >PTEN-A137\VMICAYLLHR | 58    | >PTEN-A137\VMICVYLLHR | 105  | 47    |
| >PTEN-A137\GVMICAYL   | 66    | >PTEN-A137\GVMICVYL   | 42   | 24    |
| >PTEN-A137\GVMICAYLL  | 57    | >PTEN-A137\GVMICVYLL  | 22   | 35    |
| >PTEN-A137\GVMICAYL   | 20    | >PTEN-A137\GVMICVYL   | 22   | 2     |
| >PTEN-A137\GVMICAYLL  | 18    | >PTEN-A137\GVMICVYLL  | 11   | 7     |
| >PTEN-A137\GVMICAYL   | 260   | >PTEN-A137\GVMICVYL   | 365  | 105   |
| >PTEN-A137\GVMICAYLL  | 1051  | >PTEN-A137\GVMICVYLL  | 241  | 810   |
| >PTEN-A137\GVMICAYL   | 51    | >PTEN-A137\GVMICVYL   | 53   | 2     |
| >PTEN-A137\GVMICAYLL  | 112   | >PTEN-A137\GVMICVYLL  | 92   | 20    |
| >PTEN-A137\GVMICAYL   | 844   | >PTEN-A137\GVMICVYL   | 493  | 351   |
| >PTEN-A137\GVMICAYL   | 346   | >PTEN-A137\GVMICVYL   | 340  | 6     |
| >PTEN-A137\GVMICAYLL  | 327   | >PTEN-A137\GVMICVYLL  | 117  | 210   |
| >PTEN-A137\GVMICAYL   | 403   | >PTEN-A137\GVMICVYL   | 369  | 34    |
| >PTEN-A137\GVMICAYLL  | 2518  | >PTEN-A137\GVMICVYLL  | 461  | 2057  |
| >PTEN-A137\GVMICAYL   | 574   | >PTEN-A137\GVMICVYL   | 457  | 117   |
| >PTEN-A137\GVMICAYLLH | 52    | >PTEN-A137\GVMICVYLLH | 48   | 4     |
| >PTEN-A137\GVMICAYLLH | 38    | >PTEN-A137\GVMICVYLLH | 29   | 9     |
| >PTEN-A137\GVMICAYLLH | 177   | >PTEN-A137\GVMICVYLLH | 197  | 20    |
| >PTEN-A137\GVMICAYL   | 485   | >PTEN-A137\GVMICVYL   | 385  | 100   |
| >PTEN-A137\GVMICAYLL  | 582   | >PTEN-A137\GVMICVYLL  | 222  | 360   |
| >PTEN-A137\GVMICAYLL  | 222   | >PTEN-A137\GVMICVYLL  | 578  | 356   |
| >PTEN-A137\GVMICAYLLH | 198   | >PTEN-A137\GVMICVYLLH | 140  | 58    |
| >PTEN-A137\GVMICAYLLH | 132   | >PTEN-A137\GVMICVYLLH | 168  | 36    |
| >PTEN-A137\TGVMICAYL  | 267   | >PTEN-A137\TGVMICVYL  | 338  | 71    |
| >PTEN-A137\TGVMICAY   | 166   | >PTEN-A137\TGVMICVY   | 697  | 531   |
| >PTEN-A137\RTGVMICA   | 10946 | >PTEN-A137\RTGVMICV   | 399  | 10547 |
| >PTEN-A137\RTGVMICAY  | 243   | >PTEN-A137\RTGVMICVY  | 263  | 20    |
| >PTEN-A137\RTGVMICAYL | 398   | >PTEN-A137\RTGVMICVYL | 1635 | 1237  |
| >PTEN-A137\RTGVMICAY  | 169   | >PTEN-A137\RTGVMICVY  | 720  | 551   |
| >PTEN-A137\RTGVMICAYL | 632   | >PTEN-A137\RTGVMICVYL | 255  | 377   |
| >PTEN-A137\RTGVMICAYL | 114   | >PTEN-A137\RTGVMICVYL | 128  | 14    |
| >PTEN-A137\RTGVMICAYL | 74    | >PTEN-A137\RTGVMICVYL | 117  | 43    |
| >PTEN-A137\RTGVMICAY  | 228   | >PTEN-A137\RTGVMICVY  | 206  | 22    |
| >PTEN-A137\RTGVMICAY  | 70    | >PTEN-A137\RTGVMICVY  | 68   | 2     |
| >PTEN-A137\RTGVMICAY  | 13    | >PTEN-A137\RTGVMICVY  | 7    | 6     |
| >PTEN-A137\RTGVMICAYL | 12    | >PTEN-A137\RTGVMICVYL | 22   | 10    |
| >PTEN-A137\RTGVMICAYL | 14    | >PTEN-A137\RTGVMICVYL | 16   | 2     |
| >PTEN-A137\RTGVMICAY  | 205   | >PTEN-A137\RTGVMICVY  | 43   | 162   |
| >PTEN-A137\RTGVMICAYL | 438   | >PTEN-A137\RTGVMICVYL | 633  | 195   |
| >PTEN-A137\RTGVMICAYL | 428   | >PTEN-A137\RTGVMICVYL | 188  | 240   |
| >PTEN-A137\RTGVMICAYL | 90    | >PTEN-A137\RTGVMICVYL | 182  | 92    |
| >PTEN-A137\RTGVMICAYL | 56    | >PTEN-A137\RTGVMICVYL | 50   | 6     |
| >PTEN-A137\RTGVMICA   | 2134  | >PTEN-A137\RTGVMICV   | 235  | 1899  |

|                         |       |                         |       |       |
|-------------------------|-------|-------------------------|-------|-------|
| >PTEN-A137\RTGVMICAY    | 378   | >PTEN-A137\RTGVMICVY    | 104   | 274   |
| >PTEN-A137\RTGVMICAYL   | 72    | >PTEN-A137\RTGVMICVYL   | 62    | 10    |
| >PTEN-A137\RTGVMICAYL   | 235   | >PTEN-A137\RTGVMICVYL   | 311   | 76    |
| >PTEN-A137\RTGVMICAYL   | 394   | >PTEN-A137\RTGVMICVYL   | 466   | 72    |
| >PTEN-A137\GRTGVMICA    | 756   | >PTEN-A137\GRTGVMICV    | 269   | 487   |
| >PTEN-A137\GRTGVMICA'   | 113   | >PTEN-A137\GRTGVMICV'   | 107   | 6     |
| >PTEN-A137\GRTGVMICA'   | 258   | >PTEN-A137\GRTGVMICV'   | 203   | 55    |
| >PTEN-A137\GRTGVMICA'   | 334   | >PTEN-A137\GRTGVMICV'   | 226   | 108   |
| >PTEN-A137\GRTGVMICA'   | 78    | >PTEN-A137\GRTGVMICV'   | 62    | 16    |
| >PTEN-A137\KGRTGVMIC\   | 21    | >PTEN-A137\KGRTGVMIC\   | 37    | 16    |
| >PTEN-A137\KGRTGVMIC\   | 38    | >PTEN-A137\KGRTGVMIC\   | 55    | 17    |
| >PTEN-A137\KGRTGVMIC\   | 314   | >PTEN-A137\KGRTGVMIC\   | 351   | 37    |
| >PTEN-A137\KGRTGVMIC\   | 165   | >PTEN-A137\KGRTGVMIC\   | 165   | 0     |
| >PTEN-A137\KGRTGVMIC\   | 174   | >PTEN-A137\KGRTGVMIC\   | 268   | 94    |
| >PTEN-A137\KGRTGVMIC\   | 135   | >PTEN-A137\KGRTGVMIC\   | 124   | 11    |
| >PTEN-A137\KGRTGVMIC\   | 666   | >PTEN-A137\KGRTGVMIC\   | 251   | 415   |
| >PTEN-A148\IAQEALDFYGE  | 422   | >PTEN-A148\IEQEALDFYGE  | 4526  | 4104  |
| >PTEN-A148\IAQEALDFYGE  | 39    | >PTEN-A148\IEQEALDFYGE  | 739   | 700   |
| >PTEN-A148\IAQEALDFY    | 178   | >PTEN-A148\IEQEALDFY    | 1099  | 921   |
| >PTEN-A148\IAQEALDFY    | 421   | >PTEN-A148\IEQEALDFY    | 2365  | 1944  |
| >PTEN-A148\IKAQEALDF    | 34992 | >PTEN-A148\IKEQEALDF    | 424   | 34568 |
| >PTEN-A148\IKAQEALDFY   | 27499 | >PTEN-A148\IKEQEALDFY   | 171   | 27328 |
| >PTEN-A148\IKAQEALDFY   | 271   | >PTEN-A148\IKEQEALDFY   | 4455  | 4184  |
| >PTEN-A148\IKAQEALDFY   | 46    | >PTEN-A148\IKEQEALDFY   | 355   | 309   |
| >PTEN-A148\IKAQEALDF    | 309   | >PTEN-A148\IKEQEALDF    | 445   | 136   |
| >PTEN-A148\IKAQEALDF    | 30    | >PTEN-A148\IKEQEALDF    | 13724 | 13694 |
| >PTEN-A148\IKAQEALDFY   | 139   | >PTEN-A148\IKEQEALDFY   | 19969 | 19830 |
| >PTEN-A148\IKAQEALDF    | 21912 | >PTEN-A148\IKEQEALDF    | 400   | 21512 |
| >PTEN-A148\IKAQEALDFY   | 17308 | >PTEN-A148\IKEQEALDFY   | 179   | 17129 |
| >PTEN-A148\IKAQEALDF    | 34275 | >PTEN-A148\IKEQEALDF    | 242   | 34033 |
| >PTEN-A148\IKAQEALDFYCG | 34203 | >PTEN-A148\IKEQEALDFYCG | 386   | 33817 |
| >PTEN-A148\IKAQEALDF    | 18381 | >PTEN-A148\IKEQEALDF    | 354   | 18027 |
| >PTEN-A148\IKAQEALDFY   | 19465 | >PTEN-A148\IKEQEALDFY   | 427   | 19038 |
| >PTEN-A148\IKAQEALDFYCG | 25753 | >PTEN-A148\IKEQEALDFYCG | 483   | 25270 |
| >PTEN-A148\IKAQEALDF    | 27184 | >PTEN-A148\IKEQEALDF    | 100   | 27084 |
| >PTEN-A148\IKAQEALDFY   | 25514 | >PTEN-A148\IKEQEALDFY   | 75    | 25439 |
| >PTEN-A148\IKAQEALDFYCG | 23746 | >PTEN-A148\IKEQEALDFYCG | 292   | 23454 |
| >PTEN-A148\IKAQEALDFY   | 481   | >PTEN-A148\IKEQEALDFY   | 21090 | 20609 |
| >PTEN-A148\IKAQEALDF    | 133   | >PTEN-A148\IKEQEALDF    | 16314 | 16181 |
| >PTEN-A148\IKAQEALDFY   | 195   | >PTEN-A148\IKEQEALDFY   | 17483 | 17288 |
| >PTEN-A148\IKAQEALDFY   | 33839 | >PTEN-A148\IKEQEALDFY   | 398   | 33441 |
| >PTEN-A148\IYLLHRGKFLK\ | 86    | >PTEN-A148\IYLLHRGKFLKI | 16640 | 16554 |
| >PTEN-A148\IYLLHRGKFLK\ | 446   | >PTEN-A148\IYLLHRGKFLKI | 14356 | 13910 |

|                        |      |                        |       |       |
|------------------------|------|------------------------|-------|-------|
| >PTEN-A148IYLLHRGKFLK/ | 44   | >PTEN-A148IYLLHRGKFLKI | 13759 | 13715 |
| >PTEN-A148IYLLHRGKFLK/ | 66   | >PTEN-A148IYLLHRGKFLKI | 8308  | 8242  |
| >PTEN-A148IYLLHRGKFLK/ | 12   | >PTEN-A148IYLLHRGKFLKI | 4809  | 4797  |
| >PTEN-A148IYLLHRGKFLK/ | 39   | >PTEN-A148IYLLHRGKFLKI | 11832 | 11793 |
| >PTEN-A148IYLLHRGKFLK/ | 17   | >PTEN-A148IYLLHRGKFLKI | 10070 | 10053 |
| >PTEN-A148IYLLHRGKFLK/ | 317  | >PTEN-A148IYLLHRGKFLKI | 22634 | 22317 |
| >PTEN-A148IYLLHRGKFLK/ | 8    | >PTEN-A148IYLLHRGKFLKI | 3481  | 3473  |
| >PTEN-A148IYLLHRGKFLK/ | 154  | >PTEN-A148IYLLHRGKFLKI | 2044  | 1890  |
| >PTEN-A148ILKAQEALDF   | 6    | >PTEN-A148ILKEQEALDF   | 111   | 105   |
| >PTEN-A148ILKAQEALDFY  | 85   | >PTEN-A148ILKEQEALDFY  | 1217  | 1132  |
| >PTEN-A148IFLKAQEAL    | 179  | >PTEN-A148IFLKEQEAL    | 97    | 82    |
| >PTEN-A148IFLKAQEAL    | 4    | >PTEN-A148IFLKEQEAL    | 4     | 0     |
| >PTEN-A148IFLKAQEALDF  | 370  | >PTEN-A148IFLKEQEALDF  | 332   | 38    |
| >PTEN-A148IFLKAQEAL    | 8    | >PTEN-A148IFLKEQEAL    | 7     | 1     |
| >PTEN-A148IFLKAQEAL    | 280  | >PTEN-A148IFLKEQEAL    | 126   | 154   |
| >PTEN-A148IFLKAQEAL    | 58   | >PTEN-A148IFLKEQEAL    | 17    | 41    |
| >PTEN-A148IFLKAQEAL    | 47   | >PTEN-A148IFLKEQEAL    | 15    | 32    |
| >PTEN-A148IFLKAQEAL    | 875  | >PTEN-A148IFLKEQEAL    | 264   | 611   |
| >PTEN-A148IFLKAQEAL    | 1321 | >PTEN-A148IFLKEQEAL    | 435   | 886   |
| >PTEN-A148IFLKAQEAL    | 4    | >PTEN-A148IFLKEQEAL    | 3     | 1     |
| >PTEN-A148IFLKAQEALDF  | 1457 | >PTEN-A148IFLKEQEALDF  | 478   | 979   |
| >PTEN-A148IFLKAQEALDF  | 548  | >PTEN-A148IFLKEQEALDF  | 353   | 195   |
| >PTEN-A148IFLKAQEALDF  | 98   | >PTEN-A148IFLKEQEALDF  | 142   | 44    |
| >PTEN-A148IFLKAQEALDF  | 209  | >PTEN-A148IFLKEQEALDF  | 275   | 66    |
| >PTEN-A148IFLKAQEALDF  | 122  | >PTEN-A148IFLKEQEALDF  | 277   | 155   |
| >PTEN-A148IFLKAQEAL    | 68   | >PTEN-A148IFLKEQEAL    | 91    | 23    |
| >PTEN-A148IFLKAQEAL    | 343  | >PTEN-A148IFLKEQEAL    | 818   | 475   |
| >PTEN-A148IFLKAQEALDF  | 105  | >PTEN-A148IFLKEQEALDF  | 171   | 66    |
| >PTEN-A148IFLKAQEALDF  | 105  | >PTEN-A148IFLKEQEALDF  | 145   | 40    |
| >PTEN-A148IFLKAQEALDF  | 108  | >PTEN-A148IFLKEQEALDF  | 155   | 47    |
| >PTEN-A148IFLKAQEALDF  | 78   | >PTEN-A148IFLKEQEALDF  | 106   | 28    |
| >PTEN-A148IFLKAQEALDF  | 37   | >PTEN-A148IFLKEQEALDF  | 59    | 22    |
| >PTEN-A148IKFLKAQEAL   | 154  | >PTEN-A148IKFLKEQEAL   | 3323  | 3169  |
| >PTEN-A148IKFLKAQEALD  | 77   | >PTEN-A148IKFLKEQEALD  | 86    | 9     |
| >PTEN-A148IKFLKAQEALD  | 345  | >PTEN-A148IKFLKEQEALD  | 382   | 37    |
| >PTEN-A148IKFLKAQEAL   | 37   | >PTEN-A148IKFLKEQEAL   | 51    | 14    |
| >PTEN-A148IKFLKAQEALD  | 9    | >PTEN-A148IKFLKEQEALD  | 10    | 1     |
| >PTEN-A148IKFLKAQEAL   | 464  | >PTEN-A148IKFLKEQEAL   | 2567  | 2103  |
| >PTEN-A148IKFLKAQEALD  | 364  | >PTEN-A148IKFLKEQEALD  | 459   | 95    |
| >PTEN-A148IKFLKAQEAL   | 257  | >PTEN-A148IKFLKEQEAL   | 521   | 264   |
| >PTEN-A148IGKFLKAQEAL  | 109  | >PTEN-A148IGKFLKEQEAL  | 154   | 45    |
| >PTEN-A148IRGKFLKAQEAL | 193  | >PTEN-A148IRGKFLKEQEAL | 964   | 771   |
| >PTEN-A148ILLHRGKFLKA  | 194  | >PTEN-A148ILLHRGKFLKE  | 15291 | 15097 |

|                                     |      |                                                 |       |       |
|-------------------------------------|------|-------------------------------------------------|-------|-------|
| >PTEN-A148ILLHRGKFLKA               | 132  | >PTEN-A148ILLHRGKFLKE                           | 15462 | 15330 |
| >PTEN-A148ILLHRGKFLKA               | 8    | >PTEN-A148ILLHRGKFLKE                           | 3708  | 3700  |
| >PTEN-A148ILLHRGKFLKA               | 230  | >PTEN-A148ILLHRGKFLKE                           | 86    | 144   |
| >PTEN-A148 <sup>+</sup> AQEALDFYGE  | 422  | >PTEN-A148 <sup>+</sup> TQEALDFYGE              | 984   | 562   |
| >PTEN-A148 <sup>+</sup> AQEALDFYGE  | 39   | >PTEN-A148 <sup>+</sup> TQEALDFYGE              | 95    | 56    |
| >PTEN-A148 <sup>+</sup> AQEALDFY    | 178  | >PTEN-A148 <sup>+</sup> TQEALDFY                | 283   | 105   |
| >PTEN-A148 <sup>+</sup> AQEALDFY    | 421  | >PTEN-A148 <sup>+</sup> TQEALDFY                | 1045  | 624   |
| >PTEN-A148 <sup>+</sup> KAQEALDFY   | 7529 | >PTEN-A148 <sup>+</sup> KTQEALDFY               | 190   | 7339  |
| >PTEN-A148 <sup>+</sup> KAQEALDFY   | 1686 | >PTEN-A148 <sup>+</sup> KTQEALDFY               | 146   | 1540  |
| >PTEN-A148 <sup>+</sup> KAQEALDFY   | 271  | >PTEN-A148 <sup>+</sup> KTQEALDFY               | 8     | 263   |
| >PTEN-A148 <sup>+</sup> KAQEALDFY   | 46   | >PTEN-A148 <sup>+</sup> KTQEALDFY               | 18    | 28    |
| >PTEN-A148 <sup>+</sup> KAQEALDF    | 1355 | >PTEN-A148 <sup>+</sup> KTQEALDF                | 30    | 1325  |
| >PTEN-A148 <sup>+</sup> KAQEALDFY   | 708  | >PTEN-A148 <sup>+</sup> KTQEALDFY               | 87    | 621   |
| >PTEN-A148 <sup>+</sup> KAQEALDF    | 309  | >PTEN-A148 <sup>+</sup> KTQEALDF                | 512   | 203   |
| >PTEN-A148 <sup>+</sup> KAQEALDF    | 30   | >PTEN-A148 <sup>+</sup> KTQEALDF                | 7     | 23    |
| >PTEN-A148 <sup>+</sup> KAQEALDFY   | 139  | >PTEN-A148 <sup>+</sup> KTQEALDFY               | 23    | 116   |
| >PTEN-A148 <sup>+</sup> KAQEALDF    | 767  | >PTEN-A148 <sup>+</sup> KTQEALDF                | 389   | 378   |
| >PTEN-A148 <sup>+</sup> KAQEALDFY   | 481  | >PTEN-A148 <sup>+</sup> KTQEALDFY               | 293   | 188   |
| >PTEN-A148 <sup>+</sup> KAQEALDF    | 133  | >PTEN-A148 <sup>+</sup> KTQEALDF                | 103   | 30    |
| >PTEN-A148 <sup>+</sup> KAQEALDFY   | 195  | >PTEN-A148 <sup>+</sup> KTQEALDFY               | 144   | 51    |
| >PTEN-A148 <sup>+</sup> KAQEALDFY   | 1326 | >PTEN-A148 <sup>+</sup> KTQEALDFY               | 62    | 1264  |
| >PTEN-A148 <sup>+</sup> YLLHRGKFLK/ | 86   | >PTEN-A148 <sup>+</sup> YLLHRGKFLK <sup>+</sup> | 462   | 376   |
| >PTEN-A148 <sup>+</sup> YLLHRGKFLK/ | 446  | >PTEN-A148 <sup>+</sup> YLLHRGKFLK <sup>+</sup> | 2692  | 2246  |
| >PTEN-A148 <sup>+</sup> YLLHRGKFLK/ | 44   | >PTEN-A148 <sup>+</sup> YLLHRGKFLK <sup>+</sup> | 523   | 479   |
| >PTEN-A148 <sup>+</sup> YLLHRGKFLK/ | 66   | >PTEN-A148 <sup>+</sup> YLLHRGKFLK <sup>+</sup> | 351   | 285   |
| >PTEN-A148 <sup>+</sup> YLLHRGKFLK/ | 12   | >PTEN-A148 <sup>+</sup> YLLHRGKFLK <sup>+</sup> | 66    | 54    |
| >PTEN-A148 <sup>+</sup> YLLHRGKFLK/ | 39   | >PTEN-A148 <sup>+</sup> YLLHRGKFLK <sup>+</sup> | 604   | 565   |
| >PTEN-A148 <sup>+</sup> YLLHRGKFLK/ | 17   | >PTEN-A148 <sup>+</sup> YLLHRGKFLK <sup>+</sup> | 150   | 133   |
| >PTEN-A148 <sup>+</sup> YLLHRGKFLK/ | 317  | >PTEN-A148 <sup>+</sup> YLLHRGKFLK <sup>+</sup> | 2083  | 1766  |
| >PTEN-A148 <sup>+</sup> YLLHRGKFLK/ | 8    | >PTEN-A148 <sup>+</sup> YLLHRGKFLK <sup>+</sup> | 41    | 33    |
| >PTEN-A148 <sup>+</sup> YLLHRGKFLK/ | 154  | >PTEN-A148 <sup>+</sup> YLLHRGKFLK <sup>+</sup> | 1480  | 1326  |
| >PTEN-A148 <sup>+</sup> LKAQEALDF   | 6    | >PTEN-A148 <sup>+</sup> LKTQEALDF               | 13    | 7     |
| >PTEN-A148 <sup>+</sup> LKAQEALDFY  | 85   | >PTEN-A148 <sup>+</sup> LKTQEALDFY              | 182   | 97    |
| >PTEN-A148 <sup>+</sup> FLKAQEAL    | 179  | >PTEN-A148 <sup>+</sup> FLKTQEAL                | 366   | 187   |
| >PTEN-A148 <sup>+</sup> FLKAQEAL    | 4    | >PTEN-A148 <sup>+</sup> FLKTQEAL                | 6     | 2     |
| >PTEN-A148 <sup>+</sup> FLKAQEALDF  | 370  | >PTEN-A148 <sup>+</sup> FLKTQEALDF <sup>+</sup> | 897   | 527   |
| >PTEN-A148 <sup>+</sup> FLKAQEAL    | 8    | >PTEN-A148 <sup>+</sup> FLKTQEAL                | 12    | 4     |
| >PTEN-A148 <sup>+</sup> FLKAQEAL    | 280  | >PTEN-A148 <sup>+</sup> FLKTQEAL                | 693   | 413   |
| >PTEN-A148 <sup>+</sup> FLKAQEAL    | 58   | >PTEN-A148 <sup>+</sup> FLKTQEAL                | 121   | 63    |
| >PTEN-A148 <sup>+</sup> FLKAQEAL    | 47   | >PTEN-A148 <sup>+</sup> FLKTQEAL                | 49    | 2     |
| >PTEN-A148 <sup>+</sup> FLKAQEAL    | 4    | >PTEN-A148 <sup>+</sup> FLKTQEAL                | 6     | 2     |
| >PTEN-A148 <sup>+</sup> FLKAQEALDF  | 548  | >PTEN-A148 <sup>+</sup> FLKTQEALDF <sup>+</sup> | 351   | 197   |
| >PTEN-A148 <sup>+</sup> FLKAQEALDF  | 98   | >PTEN-A148 <sup>+</sup> FLKTQEALDF <sup>+</sup> | 110   | 12    |

|                        |      |                         |       |       |
|------------------------|------|-------------------------|-------|-------|
| >PTEN-A148` FLKAQEALDF | 209  | >PTEN-A148` FLKTQEALDF' | 175   | 34    |
| >PTEN-A148` FLKAQEALDF | 122  | >PTEN-A148` FLKTQEALDF' | 305   | 183   |
| >PTEN-A148` FLKAQEAL   | 68   | >PTEN-A148` FLKTQEAL    | 56    | 12    |
| >PTEN-A148` FLKAQEAL   | 343  | >PTEN-A148` FLKTQEAL    | 1068  | 725   |
| >PTEN-A148` FLKAQEALDF | 105  | >PTEN-A148` FLKTQEALDF  | 266   | 161   |
| >PTEN-A148` FLKAQEALDF | 105  | >PTEN-A148` FLKTQEALDF' | 232   | 127   |
| >PTEN-A148` FLKAQEALDF | 108  | >PTEN-A148` FLKTQEALDF  | 316   | 208   |
| >PTEN-A148` FLKAQEALDF | 78   | >PTEN-A148` FLKTQEALDF' | 199   | 121   |
| >PTEN-A148` FLKAQEAL   | 515  | >PTEN-A148` FLKTQEAL    | 393   | 122   |
| >PTEN-A148` FLKAQEALDF | 37   | >PTEN-A148` FLKTQEALDF  | 34    | 3     |
| >PTEN-A148` KFLKAQEAL  | 154  | >PTEN-A148` KFLKTQEAL   | 45    | 109   |
| >PTEN-A148` KFLKAQEALD | 77   | >PTEN-A148` KFLKTQEALD  | 71    | 6     |
| >PTEN-A148` KFLKAQEALD | 345  | >PTEN-A148` KFLKTQEALD  | 337   | 8     |
| >PTEN-A148` KFLKAQEAL  | 37   | >PTEN-A148` KFLKTQEAL   | 55    | 18    |
| >PTEN-A148` KFLKAQEALD | 9    | >PTEN-A148` KFLKTQEALD  | 10    | 1     |
| >PTEN-A148` KFLKAQEA   | 464  | >PTEN-A148` KFLKTQEA    | 308   | 156   |
| >PTEN-A148` KFLKAQEALD | 745  | >PTEN-A148` KFLKTQEALD  | 482   | 263   |
| >PTEN-A148` KFLKAQEALD | 364  | >PTEN-A148` KFLKTQEALD  | 259   | 105   |
| >PTEN-A148` KFLKAQEA   | 626  | >PTEN-A148` KFLKTQEA    | 348   | 278   |
| >PTEN-A148` KFLKAQEAL  | 257  | >PTEN-A148` KFLKTQEAL   | 67    | 190   |
| >PTEN-A148` GKFLKAQEAL | 109  | >PTEN-A148` GKFLKTQEAL  | 76    | 33    |
| >PTEN-A148` RGKFLKAQEA | 193  | >PTEN-A148` RGKFLKTQEA  | 221   | 28    |
| >PTEN-A148` LLHRGKFLKA | 194  | >PTEN-A148` LLHRGKFLKT  | 488   | 294   |
| >PTEN-A148` LLHRGKFLKA | 132  | >PTEN-A148` LLHRGKFLKT  | 1054  | 922   |
| >PTEN-A148` LLHRGKFLKA | 8    | >PTEN-A148` LLHRGKFLKT  | 38    | 30    |
| >PTEN-A148` LLHRGKFLKA | 230  | >PTEN-A148` LLHRGKFLKT  | 87    | 143   |
| >PTEN-A151I ALDFYGEV   | 41   | >PTEN-A151I DLDFYGEV    | 6083  | 6042  |
| >PTEN-A151I ALDFYGEV   | 17   | >PTEN-A151I DLDFYGEV    | 1734  | 1717  |
| >PTEN-A151I ALDFYGEV   | 34   | >PTEN-A151I DLDFYGEV    | 3405  | 3371  |
| >PTEN-A151I ALDFYGEV   | 128  | >PTEN-A151I DLDFYGEV    | 4522  | 4394  |
| >PTEN-A151I ALDFYGEV   | 3    | >PTEN-A151I DLDFYGEV    | 22    | 19    |
| >PTEN-A151I ALDFYGEVRT | 308  | >PTEN-A151I DLDFYGEVRT  | 7435  | 7127  |
| >PTEN-A151I ALDFYGEV   | 12   | >PTEN-A151I DLDFYGEV    | 567   | 555   |
| >PTEN-A151I ALDFYGEV   | 9    | >PTEN-A151I DLDFYGEV    | 72    | 63    |
| >PTEN-A151I ALDFYGEV   | 29   | >PTEN-A151I DLDFYGEV    | 125   | 96    |
| >PTEN-A151I ALDFYGEV   | 3    | >PTEN-A151I DLDFYGEV    | 61    | 58    |
| >PTEN-A151I ALDFYGEVRT | 416  | >PTEN-A151I DLDFYGEVRT  | 10878 | 10462 |
| >PTEN-A151I ALDFYGEV   | 1767 | >PTEN-A151I DLDFYGEV    | 107   | 1660  |
| >PTEN-A151I EALDFYGEV  | 224  | >PTEN-A151I EDLDFYGEV   | 6665  | 6441  |
| >PTEN-A151I EALDFYGEV  | 188  | >PTEN-A151I EDLDFYGEV   | 7323  | 7135  |
| >PTEN-A151I EALDFYGEVR | 299  | >PTEN-A151I EDLDFYGEVR  | 3117  | 2818  |
| >PTEN-A151I EALDFYGEVR | 28   | >PTEN-A151I EDLDFYGEVR  | 10039 | 10011 |
| >PTEN-A151I EALDFYGEV  | 11   | >PTEN-A151I EDLDFYGEV   | 679   | 668   |



|                       |       |                       |      |       |
|-----------------------|-------|-----------------------|------|-------|
| >PTEN-A151IEALDFYGEV  | 4     | >PTEN-A151IEDLDFYGEV  | 52   | 48    |
| >PTEN-A151IEALDFYGEV  | 26231 | >PTEN-A151IEDLDFYGEV  | 57   | 26174 |
| >PTEN-A151IQEALDFYGEV | 22    | >PTEN-A151IQEDLDFYGEV | 106  | 84    |
| >PTEN-A151IQEALDFYGEV | 112   | >PTEN-A151IQEDLDFYGEV | 144  | 32    |
| >PTEN-A151IQEALDFYGEV | 426   | >PTEN-A151IQEDLDFYGEV | 375  | 51    |
| >PTEN-A151IQEALDFYGEV | 361   | >PTEN-A151IQEDLDFYGEV | 1184 | 823   |
| >PTEN-A151IQEALDFYGEV | 116   | >PTEN-A151IQEDLDFYGEV | 154  | 38    |
| >PTEN-A151IAQEALDFYGE | 422   | >PTEN-A151IAQEDLDFYGE | 364  | 58    |
| >PTEN-A151IAQEALDFYGE | 39    | >PTEN-A151IAQEDLDFYGE | 25   | 14    |
| >PTEN-A151IAQEALDFYGE | 942   | >PTEN-A151IAQEDLDFYGE | 380  | 562   |
| >PTEN-A151IAQEALDFYGE | 2427  | >PTEN-A151IAQEDLDFYGE | 408  | 2019  |
| >PTEN-A151IAQEALDFY   | 178   | >PTEN-A151IAQEDLDFY   | 163  | 15    |
| >PTEN-A151IAQEALDFY   | 421   | >PTEN-A151IAQEDLDFY   | 641  | 220   |
| >PTEN-A151IKAQEALDFY  | 271   | >PTEN-A151IKAQEDLDFY  | 138  | 133   |
| >PTEN-A151IKAQEALDFY  | 46    | >PTEN-A151IKAQEDLDFY  | 35   | 11    |
| >PTEN-A151IKAQEALDF   | 309   | >PTEN-A151IKAQEDLDF   | 704  | 395   |
| >PTEN-A151IKAQEALDF   | 30    | >PTEN-A151IKAQEDLDF   | 102  | 72    |
| >PTEN-A151IKAQEALDFY  | 139   | >PTEN-A151IKAQEDLDFY  | 670  | 531   |
| >PTEN-A151IKAQEALDFY  | 481   | >PTEN-A151IKAQEDLDFY  | 1222 | 741   |
| >PTEN-A151IKAQEALDF   | 133   | >PTEN-A151IKAQEDLDF   | 200  | 67    |
| >PTEN-A151IKAQEALDFY  | 195   | >PTEN-A151IKAQEDLDFY  | 524  | 329   |
| >PTEN-A151ILKAQEALDF  | 6     | >PTEN-A151ILKAQEDLDF  | 20   | 14    |
| >PTEN-A151ILKAQEALDFY | 85    | >PTEN-A151ILKAQEDLDFY | 191  | 106   |
| >PTEN-A151IFLKAQEAL   | 179   | >PTEN-A151IFLKAQEDL   | 1308 | 1129  |
| >PTEN-A151IFLKAQEAL   | 4     | >PTEN-A151IFLKAQEDL   | 13   | 9     |
| >PTEN-A151IFLKAQEALDF | 370   | >PTEN-A151IFLKAQEDLDF | 520  | 150   |
| >PTEN-A151IFLKAQEAL   | 8     | >PTEN-A151IFLKAQEDL   | 31   | 23    |
| >PTEN-A151IFLKAQEAL   | 280   | >PTEN-A151IFLKAQEDL   | 2540 | 2260  |
| >PTEN-A151IFLKAQEAL   | 58    | >PTEN-A151IFLKAQEDL   | 630  | 572   |
| >PTEN-A151IFLKAQEAL   | 47    | >PTEN-A151IFLKAQEDL   | 534  | 487   |
| >PTEN-A151IFLKAQEAL   | 4     | >PTEN-A151IFLKAQEDL   | 7    | 3     |
| >PTEN-A151IFLKAQEALDF | 548   | >PTEN-A151IFLKAQEDLDF | 471  | 77    |
| >PTEN-A151IFLKAQEALDF | 98    | >PTEN-A151IFLKAQEDLDF | 161  | 63    |
| >PTEN-A151IFLKAQEALDF | 209   | >PTEN-A151IFLKAQEDLDF | 295  | 86    |
| >PTEN-A151IFLKAQEALDF | 122   | >PTEN-A151IFLKAQEDLDF | 129  | 7     |
| >PTEN-A151IFLKAQEAL   | 68    | >PTEN-A151IFLKAQEDL   | 489  | 421   |
| >PTEN-A151IFLKAQEAL   | 343   | >PTEN-A151IFLKAQEDL   | 3427 | 3084  |
| >PTEN-A151IFLKAQEALDF | 105   | >PTEN-A151IFLKAQEDLDF | 167  | 62    |
| >PTEN-A151IFLKAQEALDF | 105   | >PTEN-A151IFLKAQEDLDF | 194  | 89    |
| >PTEN-A151IFLKAQEALDF | 108   | >PTEN-A151IFLKAQEDLDF | 104  | 4     |
| >PTEN-A151IFLKAQEALDF | 78    | >PTEN-A151IFLKAQEDLDF | 107  | 29    |
| >PTEN-A151IFLKAQEALDF | 37    | >PTEN-A151IFLKAQEDLDF | 144  | 107   |
| >PTEN-A151IKFLKAQEAL  | 154   | >PTEN-A151IKFLKAQEDL  | 905  | 751   |

|                       |      |                       |      |      |
|-----------------------|------|-----------------------|------|------|
| >PTEN-A151IKFLKAQEALD | 77   | >PTEN-A151IKFLKAQEDLD | 60   | 17   |
| >PTEN-A151IKFLKAQEALD | 345  | >PTEN-A151IKFLKAQEDLD | 522  | 177  |
| >PTEN-A151IKFLKAQEAL  | 37   | >PTEN-A151IKFLKAQEDL  | 92   | 55   |
| >PTEN-A151IKFLKAQEALD | 9    | >PTEN-A151IKFLKAQEDLD | 10   | 1    |
| >PTEN-A151IKFLKAQEA   | 464  | >PTEN-A151IKFLKAQED   | 6577 | 6113 |
| >PTEN-A151IKFLKAQEALD | 364  | >PTEN-A151IKFLKAQEDLD | 635  | 271  |
| >PTEN-A151IKFLKAQEAL  | 257  | >PTEN-A151IKFLKAQEDL  | 724  | 467  |
| >PTEN-A151IGKFLKAQEAL | 109  | >PTEN-A151IGKFLKAQEDL | 444  | 335  |
| >PTEN-A151IRGKFLKAQEA | 193  | >PTEN-A151IRGKFLKAQEC | 4800 | 4607 |
| >PTEN-A151ALDFYGEV    | 41   | >PTEN-A151TLDFYGEV    | 72   | 31   |
| >PTEN-A151ALDFYGEV    | 17   | >PTEN-A151TLDFYGEV    | 33   | 16   |
| >PTEN-A151ALDFYGEV    | 34   | >PTEN-A151TLDFYGEV    | 69   | 35   |
| >PTEN-A151ALDFYGEV    | 128  | >PTEN-A151TLDFYGEV    | 269  | 141  |
| >PTEN-A151ALDFYGEV    | 3    | >PTEN-A151TLDFYGEV    | 4    | 1    |
| >PTEN-A151ALDFYGEVRT  | 308  | >PTEN-A151TLDFYGEVRT  | 1371 | 1063 |
| >PTEN-A151ALDFYGEV    | 12   | >PTEN-A151TLDFYGEV    | 28   | 16   |
| >PTEN-A151ALDFYGEV    | 9    | >PTEN-A151TLDFYGEV    | 17   | 8    |
| >PTEN-A151ALDFYGEV    | 29   | >PTEN-A151TLDFYGEV    | 50   | 21   |
| >PTEN-A151ALDFYGEV    | 3    | >PTEN-A151TLDFYGEV    | 6    | 3    |
| >PTEN-A151ALDFYGEVRT  | 416  | >PTEN-A151TLDFYGEVRT  | 2404 | 1988 |
| >PTEN-A151ALDFYGEV    | 1767 | >PTEN-A151TLDFYGEV    | 130  | 1637 |
| >PTEN-A151EALDFYGEV   | 224  | >PTEN-A151ETLDFYGEV   | 510  | 286  |
| >PTEN-A151EALDFYGEV   | 188  | >PTEN-A151ETLDFYGEV   | 44   | 144  |
| >PTEN-A151EALDFYGEV   | 2235 | >PTEN-A151ETLDFYGEV   | 89   | 2146 |
| >PTEN-A151EALDFYGEVR  | 1029 | >PTEN-A151ETLDFYGEVR  | 475  | 554  |
| >PTEN-A151EALDFYGEVR  | 299  | >PTEN-A151ETLDFYGEVR  | 125  | 174  |
| >PTEN-A151EALDFYGEVR  | 28   | >PTEN-A151ETLDFYGEVR  | 10   | 18   |
| >PTEN-A151EALDFYGEV   | 11   | >PTEN-A151ETLDFYGEV   | 6    | 5    |
| >PTEN-A151EALDFYGE    | 2016 | >PTEN-A151ETLDFYGE    | 345  | 1671 |
| >PTEN-A151EALDFYGEV   | 4    | >PTEN-A151ETLDFYGEV   | 3    | 1    |
| >PTEN-A151EALDFYGEVR  | 519  | >PTEN-A151ETLDFYGEVR  | 123  | 396  |
| >PTEN-A151EALDFYGEVR  | 510  | >PTEN-A151ETLDFYGEVR  | 371  | 139  |
| >PTEN-A151QEALDFYGEV  | 22   | >PTEN-A151QETLDFYGEV  | 38   | 16   |
| >PTEN-A151QEALDFYGEV  | 112  | >PTEN-A151QETLDFYGEV  | 136  | 24   |
| >PTEN-A151QEALDFYGEV  | 426  | >PTEN-A151QETLDFYGEV  | 719  | 293  |
| >PTEN-A151QEALDFYGEV  | 361  | >PTEN-A151QETLDFYGEV  | 761  | 400  |
| >PTEN-A151QEALDFYGEV  | 116  | >PTEN-A151QETLDFYGEV  | 219  | 103  |
| >PTEN-A151AQEALDFYGE  | 422  | >PTEN-A151AQETLDFYGE  | 1118 | 696  |
| >PTEN-A151AQEALDFYGE  | 39   | >PTEN-A151AQETLDFYGE  | 76   | 37   |
| >PTEN-A151AQEALDFY    | 178  | >PTEN-A151AQETLDFY    | 146  | 32   |
| >PTEN-A151AQEALDFY    | 421  | >PTEN-A151AQETLDFY    | 1142 | 721  |
| >PTEN-A151KAQEALDFY   | 271  | >PTEN-A151KAQETLDFY   | 426  | 155  |
| >PTEN-A151KAQEALDFY   | 46   | >PTEN-A151KAQETLDFY   | 40   | 6    |

|                       |      |                        |      |      |
|-----------------------|------|------------------------|------|------|
| >PTEN-A151`KAQEALDFY  | 708  | >PTEN-A151`KAQETLDFY   | 307  | 401  |
| >PTEN-A151`KAQEALDF   | 309  | >PTEN-A151`KAQETLDF    | 161  | 148  |
| >PTEN-A151`KAQEALDF   | 30   | >PTEN-A151`KAQETLDF    | 28   | 2    |
| >PTEN-A151`KAQEALDFY  | 139  | >PTEN-A151`KAQETLDFY   | 79   | 60   |
| >PTEN-A151`KAQEALDFY  | 481  | >PTEN-A151`KAQETLDFY   | 986  | 505  |
| >PTEN-A151`KAQEALDF   | 133  | >PTEN-A151`KAQETLDF    | 78   | 55   |
| >PTEN-A151`KAQEALDFY  | 195  | >PTEN-A151`KAQETLDFY   | 93   | 102  |
| >PTEN-A151`LKAQEALDF  | 6    | >PTEN-A151`LKAQETLDF   | 6    | 0    |
| >PTEN-A151`LKAQEALDFY | 85   | >PTEN-A151`LKAQETLDFY  | 57   | 28   |
| >PTEN-A151`FLKAQEAL   | 179  | >PTEN-A151`FLKAQETL    | 199  | 20   |
| >PTEN-A151`FLKAQEAL   | 4    | >PTEN-A151`FLKAQETL    | 7    | 3    |
| >PTEN-A151`FLKAQEALDF | 370  | >PTEN-A151`FLKAQETLDF` | 508  | 138  |
| >PTEN-A151`FLKAQEAL   | 8    | >PTEN-A151`FLKAQETL    | 10   | 2    |
| >PTEN-A151`FLKAQEAL   | 280  | >PTEN-A151`FLKAQETL    | 620  | 340  |
| >PTEN-A151`FLKAQEAL   | 58   | >PTEN-A151`FLKAQETL    | 54   | 4    |
| >PTEN-A151`FLKAQEAL   | 47   | >PTEN-A151`FLKAQETL    | 44   | 3    |
| >PTEN-A151`FLKAQEAL   | 875  | >PTEN-A151`FLKAQETL    | 267  | 608  |
| >PTEN-A151`FLKAQEAL   | 4    | >PTEN-A151`FLKAQETL    | 3    | 1    |
| >PTEN-A151`FLKAQEALDF | 98   | >PTEN-A151`FLKAQETLDF` | 114  | 16   |
| >PTEN-A151`FLKAQEALDF | 209  | >PTEN-A151`FLKAQETLDF` | 355  | 146  |
| >PTEN-A151`FLKAQEALDF | 122  | >PTEN-A151`FLKAQETLDF` | 88   | 34   |
| >PTEN-A151`FLKAQEAL   | 68   | >PTEN-A151`FLKAQETL    | 100  | 32   |
| >PTEN-A151`FLKAQEAL   | 343  | >PTEN-A151`FLKAQETL    | 657  | 314  |
| >PTEN-A151`FLKAQEALDF | 105  | >PTEN-A151`FLKAQETLDF  | 92   | 13   |
| >PTEN-A151`FLKAQEALDF | 105  | >PTEN-A151`FLKAQETLDF` | 118  | 13   |
| >PTEN-A151`FLKAQEALDF | 108  | >PTEN-A151`FLKAQETLDF  | 92   | 16   |
| >PTEN-A151`FLKAQEALDF | 78   | >PTEN-A151`FLKAQETLDF` | 81   | 3    |
| >PTEN-A151`FLKAQEALDF | 37   | >PTEN-A151`FLKAQETLDF  | 26   | 11   |
| >PTEN-A151`FLKAQEALDF | 716  | >PTEN-A151`FLKAQETLDF` | 426  | 290  |
| >PTEN-A151`KFLKAQEAL  | 154  | >PTEN-A151`KFLKAQETL   | 31   | 123  |
| >PTEN-A151`KFLKAQEAL  | 1266 | >PTEN-A151`KFLKAQETL   | 235  | 1031 |
| >PTEN-A151`KFLKAQEALD | 77   | >PTEN-A151`KFLKAQETLD  | 40   | 37   |
| >PTEN-A151`KFLKAQEAL  | 3709 | >PTEN-A151`KFLKAQETL   | 471  | 3238 |
| >PTEN-A151`KFLKAQEALD | 345  | >PTEN-A151`KFLKAQETLD  | 204  | 141  |
| >PTEN-A151`KFLKAQEAL  | 37   | >PTEN-A151`KFLKAQETL   | 19   | 18   |
| >PTEN-A151`KFLKAQEALD | 9    | >PTEN-A151`KFLKAQETLD  | 7    | 2    |
| >PTEN-A151`KFLKAQEA   | 464  | >PTEN-A151`KFLKAQET    | 5905 | 5441 |
| >PTEN-A151`KFLKAQEAL  | 1092 | >PTEN-A151`KFLKAQETL   | 452  | 640  |
| >PTEN-A151`KFLKAQEALD | 745  | >PTEN-A151`KFLKAQETLD  | 338  | 407  |
| >PTEN-A151`KFLKAQEALD | 364  | >PTEN-A151`KFLKAQETLD  | 322  | 42   |
| >PTEN-A151`KFLKAQEAL  | 257  | >PTEN-A151`KFLKAQETL   | 280  | 23   |
| >PTEN-A151`GKFLKAQEAL | 109  | >PTEN-A151`GKFLKAQETL  | 172  | 63   |
| >PTEN-A151`RGKFLKAQEA | 193  | >PTEN-A151`RGKFLKAQET  | 3853 | 3660 |

|                        |      |                        |      |      |
|------------------------|------|------------------------|------|------|
| >PTEN-A39T-AERLEGVY    | 166  | >PTEN-A39T-TERLEGVY    | 52   | 114  |
| >PTEN-A39T-AERLEGVY    | 1288 | >PTEN-A39T-TERLEGVY    | 139  | 1149 |
| >PTEN-A39T-AERLEGVYR   | 1352 | >PTEN-A39T-TERLEGVYR   | 317  | 1035 |
| >PTEN-A39T-PAERLEGVY   | 2803 | >PTEN-A39T-PTERLEGVY   | 41   | 2762 |
| >PTEN-A39T-PAERLEGVY   | 1298 | >PTEN-A39T-PTERLEGVY   | 409  | 889  |
| >PTEN-A39T-YPNIIAMGFP  | 91   | >PTEN-A39T-YPNIIAMGFP  | 244  | 153  |
| >PTEN-A39T-YPNIIAMGFP  | 37   | >PTEN-A39T-YPNIIAMGFP  | 35   | 2    |
| >PTEN-A39T-YPNIIAMGFP  | 6    | >PTEN-A39T-YPNIIAMGFP  | 22   | 16   |
| >PTEN-A39T-FPAERLEGV   | 65   | >PTEN-A39T-FPTERLEGV   | 124  | 59   |
| >PTEN-A39T-FPAERLEGVY  | 125  | >PTEN-A39T-FPTERLEGVYI | 255  | 130  |
| >PTEN-A39T-FPAERLEGV   | 277  | >PTEN-A39T-FPTERLEGV   | 1880 | 1603 |
| >PTEN-A39T-FPAERLEGV   | 67   | >PTEN-A39T-FPTERLEGV   | 297  | 230  |
| >PTEN-A39T-FPAERLEGV   | 226  | >PTEN-A39T-FPTERLEGV   | 1310 | 1084 |
| >PTEN-A39T-FPAERLEGVY  | 481  | >PTEN-A39T-FPTERLEGVY  | 811  | 330  |
| >PTEN-A39T-FPAERLEGVY  | 17   | >PTEN-A39T-FPTERLEGVY  | 18   | 1    |
| >PTEN-A39T-FPAERLEGV   | 250  | >PTEN-A39T-FPTERLEGV   | 404  | 154  |
| >PTEN-A39T-FPAERLEGVY  | 170  | >PTEN-A39T-FPTERLEGVY  | 166  | 4    |
| >PTEN-A39T-FPAERLEG    | 462  | >PTEN-A39T-FPTERLEG    | 511  | 49   |
| >PTEN-A39T-FPAERLEGV   | 85   | >PTEN-A39T-FPTERLEGV   | 106  | 21   |
| >PTEN-A39T-FPAERLEGVY  | 29   | >PTEN-A39T-FPTERLEGVY  | 92   | 63   |
| >PTEN-A39T-FPAERLEGVY  | 82   | >PTEN-A39T-FPTERLEGVY  | 108  | 26   |
| >PTEN-A39T-FPAERLEGVY  | 459  | >PTEN-A39T-FPTERLEGVYI | 583  | 124  |
| >PTEN-A39T-GFPAERLEGV  | 291  | >PTEN-A39T-GFPTERLEGV  | 337  | 46   |
| >PTEN-A39T-MGFPAERLEGV | 257  | >PTEN-A39T-MGFPTERLEGV | 370  | 113  |
| >PTEN-A39T-MGFPAERLEGV | 186  | >PTEN-A39T-MGFPTERLEGV | 218  | 32   |
| >PTEN-A39T-MGFPAERLEGV | 355  | >PTEN-A39T-MGFPTERLEGV | 230  | 125  |
| >PTEN-A39T-MGFPAERL    | 378  | >PTEN-A39T-MGFPTERL    | 447  | 69   |
| >PTEN-A39T-MGFPAERLEGV | 46   | >PTEN-A39T-MGFPTERLEGV | 99   | 53   |
| >PTEN-A39T-MGFPAERL    | 258  | >PTEN-A39T-MGFPTERL    | 348  | 90   |
| >PTEN-A39T-AMGFPAERL   | 365  | >PTEN-A39T-AMGFPTERL   | 88   | 277  |
| >PTEN-A39T-AMGFPAERL   | 15   | >PTEN-A39T-AMGFPTERL   | 11   | 4    |
| >PTEN-A39T-AMGFPAERL   | 454  | >PTEN-A39T-AMGFPTERL   | 173  | 281  |
| >PTEN-A39T-AMGFPAERL   | 403  | >PTEN-A39T-AMGFPTERL   | 247  | 156  |
| >PTEN-A39T-AMGFPAERL   | 195  | >PTEN-A39T-AMGFPTERL   | 35   | 160  |
| >PTEN-A39T-AMGFPAERL   | 29   | >PTEN-A39T-AMGFPTERL   | 16   | 13   |
| >PTEN-A39T-AMGFPAER    | 75   | >PTEN-A39T-AMGFPTER    | 55   | 20   |
| >PTEN-A39T-AMGFPAERL   | 1075 | >PTEN-A39T-AMGFPTERL   | 371  | 704  |
| >PTEN-A39T-IAMGFPAERL  | 982  | >PTEN-A39T-IAMGFPTERL  | 414  | 568  |
| >PTEN-A39T-IAMGFPAERL  | 65   | >PTEN-A39T-IAMGFPTERL  | 41   | 24   |
| >PTEN-A39T-IAMGFPAERL  | 643  | >PTEN-A39T-IAMGFPTERL  | 198  | 445  |
| >PTEN-A39T-IAMGFPAERL  | 1215 | >PTEN-A39T-IAMGFPTERL  | 480  | 735  |
| >PTEN-A39T-IAMGFPAERL  | 445  | >PTEN-A39T-IAMGFPTERL  | 491  | 46   |
| >PTEN-A39T-IAMGFPAER   | 222  | >PTEN-A39T-IAMGFPTER   | 269  | 47   |

|                              |      |                            |      |      |
|------------------------------|------|----------------------------|------|------|
| >PTEN-A39T- IAMGFPAER        | 32   | >PTEN-A39T- IAMGFPTER      | 50   | 18   |
| >PTEN-A39T- IAMGFPAER        | 58   | >PTEN-A39T- IAMGFPTER      | 94   | 36   |
| >PTEN-A39T- IAMGFPAER        | 8    | >PTEN-A39T- IAMGFPTER      | 11   | 3    |
| >PTEN-A39T- IAMGFPAERL       | 19   | >PTEN-A39T- IAMGFPTERL     | 40   | 21   |
| >PTEN-A39T- IAMGFPAERL       | 332  | >PTEN-A39T- IAMGFPTERL     | 487  | 155  |
| >PTEN-A39T- IAMGFPAERL       | 476  | >PTEN-A39T- IAMGFPTERL     | 437  | 39   |
| >PTEN-A39T- IAMGFPAER        | 268  | >PTEN-A39T- IAMGFPTER      | 327  | 59   |
| >PTEN-A39T- IIAMGFPA         | 369  | >PTEN-A39T- IIAMGFPT       | 2886 | 2517 |
| >PTEN-A39T- IIAMGFPA         | 311  | >PTEN-A39T- IIAMGFPT       | 2345 | 2034 |
| >PTEN-A39T- IIAMGFPAER       | 200  | >PTEN-A39T- IIAMGFPTERI    | 119  | 81   |
| >PTEN-A39T- IIAMGFPA         | 65   | >PTEN-A39T- IIAMGFPT       | 1134 | 1069 |
| >PTEN-A39T- IIAMGFPAER       | 654  | >PTEN-A39T- IIAMGFPTERI    | 405  | 249  |
| >PTEN-A39T- IIAMGFPA         | 35   | >PTEN-A39T- IIAMGFPT       | 204  | 169  |
| >PTEN-A39T- IIAMGFPAER       | 213  | >PTEN-A39T- IIAMGFPTERI    | 197  | 16   |
| >PTEN-A39T- IIAMGFPAER       | 471  | >PTEN-A39T- IIAMGFPTERI    | 359  | 112  |
| >PTEN-A39T- IIAMGFPA         | 206  | >PTEN-A39T- IIAMGFPT       | 2803 | 2597 |
| >PTEN-A39T- IIAMGFPAER       | 73   | >PTEN-A39T- IIAMGFPTERI    | 46   | 27   |
| >PTEN-A39T- IIAMGFPAER       | 535  | >PTEN-A39T- IIAMGFPTER     | 281  | 254  |
| >PTEN-A39T- IIAMGFPAER       | 83   | >PTEN-A39T- IIAMGFPTER     | 223  | 140  |
| >PTEN-A39T- IIAMGFPAER       | 468  | >PTEN-A39T- IIAMGFPTER     | 987  | 519  |
| >PTEN-A39T- IIAMGFPAER       | 12   | >PTEN-A39T- IIAMGFPTER     | 19   | 7    |
| >PTEN-A39T- IIAMGFPAER       | 273  | >PTEN-A39T- IIAMGFPTER     | 283  | 10   |
| >PTEN-A39T- NIIAMGFPA        | 391  | >PTEN-A39T- NIIAMGFPT      | 2591 | 2200 |
| >PTEN-A39T- NIIAMGFPA        | 162  | >PTEN-A39T- NIIAMGFPT      | 2153 | 1991 |
| >PTEN-A39T- NIIAMGFPA        | 32   | >PTEN-A39T- NIIAMGFPT      | 241  | 209  |
| >PTEN-A39T- NIIAMGFPAE       | 150  | >PTEN-A39T- NIIAMGFPT      | 211  | 61   |
| >PTEN-A39T- NIIAMGFPAE       | 115  | >PTEN-A39T- NIIAMGFPT      | 163  | 48   |
| >PTEN-A39T- NIIAMGFPAE       | 8    | >PTEN-A39T- NIIAMGFPT      | 11   | 3    |
| >PTEN-A39T- NIIAMGFPA        | 28   | >PTEN-A39T- NIIAMGFPT      | 447  | 419  |
| >PTEN-A39T- NIIAMGFPA        | 154  | >PTEN-A39T- NIIAMGFPT      | 1103 | 949  |
| >PTEN-A39T- NIIAMGFPAE       | 235  | >PTEN-A39T- NIIAMGFPT      | 257  | 22   |
| >PTEN-A3S- $\nu$ AIIKEIVSRNK | 271  | >PTEN-A3S- $n$ SIIKEIVSRNK | 343  | 72   |
| >PTEN-A3S- $\nu$ AIIKEIVSR   | 531  | >PTEN-A3S- $n$ SIIKEIVSR   | 390  | 141  |
| >PTEN-A3S- $\nu$ AIIKEIVSRNK | 59   | >PTEN-A3S- $n$ SIIKEIVSRNK | 33   | 26   |
| >PTEN-A3S- $\nu$ AIIKEIVSRNK | 360  | >PTEN-A3S- $n$ SIIKEIVSRNK | 644  | 284  |
| >PTEN-A3S- $\nu$ AIIKEIVSR   | 388  | >PTEN-A3S- $n$ SIIKEIVSR   | 359  | 29   |
| >PTEN-A3S- $\nu$ AIIKEIVSR   | 131  | >PTEN-A3S- $n$ SIIKEIVSR   | 36   | 95   |
| >PTEN-A3S- $\nu$ AIIKEIVSRNK | 1321 | >PTEN-A3S- $n$ SIIKEIVSRNK | 255  | 1066 |
| >PTEN-A3S- $\nu$ AIIKEIVSR   | 326  | >PTEN-A3S- $n$ SIIKEIVSR   | 73   | 253  |
| >PTEN-A3S- $\nu$ TAIKEIVSR   | 962  | >PTEN-A3S- $n$ TSIKEIVSR   | 296  | 666  |
| >PTEN-A3S- $\nu$ TAIKEIVSR   | 406  | >PTEN-A3S- $n$ TSIKEIVSR   | 146  | 260  |
| >PTEN-A3S- $\nu$ TAIKEIVSR   | 24   | >PTEN-A3S- $n$ TSIKEIVSR   | 25   | 1    |
| >PTEN-A3S- $\nu$ TAIKEIV     | 224  | >PTEN-A3S- $n$ TSIKEIV     | 289  | 65   |

|                         |      |                         |      |      |
|-------------------------|------|-------------------------|------|------|
| >PTEN-A3S-v MTAIIKEI    | 121  | >PTEN-A3S-n MTSIIKEI    | 218  | 97   |
| >PTEN-A3S-v MTAIIKEIV   | 86   | >PTEN-A3S-n MTSIIKEIV   | 156  | 70   |
| >PTEN-A3S-v MTAIIKEIVSR | 373  | >PTEN-A3S-n MTSIIKEIVSR | 246  | 127  |
| >PTEN-A3S-v MTAIIKEIVSR | 22   | >PTEN-A3S-n MTSIIKEIVSR | 19   | 3    |
| >PTEN-A3S-v MTAIIKEIVSR | 145  | >PTEN-A3S-n MTSIIKEIVSR | 102  | 43   |
| >PTEN-A3S-v MTAIIKEIVSR | 2    | >PTEN-A3S-n MTSIIKEIVSR | 3    | 1    |
| >PTEN-A3S-v MTAIIKEI    | 6    | >PTEN-A3S-n MTSIIKEI    | 10   | 4    |
| >PTEN-A3S-v MTAIIKEIV   | 5    | >PTEN-A3S-n MTSIIKEIV   | 6    | 1    |
| >PTEN-A3S-v MTAIIKEI    | 286  | >PTEN-A3S-n MTSIIKEI    | 1369 | 1083 |
| >PTEN-A3S-v MTAIIKEIV   | 129  | >PTEN-A3S-n MTSIIKEIV   | 765  | 636  |
| >PTEN-A3S-v MTAIIKEI    | 94   | >PTEN-A3S-n MTSIIKEI    | 122  | 28   |
| >PTEN-A3S-v MTAIIKEIV   | 155  | >PTEN-A3S-n MTSIIKEIV   | 148  | 7    |
| >PTEN-A3S-v MTAIIKEIVSR | 379  | >PTEN-A3S-n MTSIIKEIVSR | 444  | 65   |
| >PTEN-A3S-v MTAIIKEI    | 29   | >PTEN-A3S-n MTSIIKEI    | 48   | 19   |
| >PTEN-A79T-AKFNCRVAQ\   | 381  | >PTEN-A79T-TKFNCRVAQ\   | 429  | 48   |
| >PTEN-A79T-AKFNCRVAQ\   | 197  | >PTEN-A79T-TKFNCRVAQ\   | 237  | 40   |
| >PTEN-A79T-AKFNCRVA     | 52   | >PTEN-A79T-TKFNCRVA     | 279  | 227  |
| >PTEN-A79T-AKFNCRVAQ    | 43   | >PTEN-A79T-TKFNCRVAQ    | 157  | 114  |
| >PTEN-A79T-AKFNCRVAQ\   | 3    | >PTEN-A79T-TKFNCRVAQ\   | 7    | 4    |
| >PTEN-A79T-AKFNCRVAQ\   | 114  | >PTEN-A79T-TKFNCRVAQ\   | 619  | 505  |
| >PTEN-A79T-TAKFNCRVAC   | 7492 | >PTEN-A79T-TTKFNCRVAC   | 386  | 7106 |
| >PTEN-A79T-TAKFNCRVAC   | 2765 | >PTEN-A79T-TTKFNCRVAC   | 75   | 2690 |
| >PTEN-A79T-TAKFNCRVAC   | 1131 | >PTEN-A79T-TTKFNCRVAC   | 213  | 918  |
| >PTEN-A79T-TAKFNCRV     | 1751 | >PTEN-A79T-TTKFNCRV     | 325  | 1426 |
| >PTEN-A79T-TAKFNCRVA    | 2277 | >PTEN-A79T-TTKFNCRVA    | 480  | 1797 |
| >PTEN-A79T-TAKFNCRVAC   | 573  | >PTEN-A79T-TTKFNCRVAC   | 175  | 398  |
| >PTEN-A79T-TAKFNCRVAC   | 1164 | >PTEN-A79T-TTKFNCRVAC   | 277  | 887  |
| >PTEN-A79T-TAKFNCRV     | 662  | >PTEN-A79T-TTKFNCRV     | 68   | 594  |
| >PTEN-A79T-TAKFNCRVAC   | 362  | >PTEN-A79T-TTKFNCRVAC   | 266  | 96   |
| >PTEN-A79T-TAKFNCRVAC   | 97   | >PTEN-A79T-TTKFNCRVAC   | 15   | 82   |
| >PTEN-A79T-TAKFNCRVAC   | 869  | >PTEN-A79T-TTKFNCRVAC   | 43   | 826  |
| >PTEN-A79T-NLCAERHYDT   | 387  | >PTEN-A79T-NLCAERHYDT   | 2772 | 2385 |
| >PTEN-A79T-DTAKFNCR     | 20   | >PTEN-A79T-DTTKFNCR     | 13   | 7    |
| >PTEN-A79T-DTAKFNCR     | 3    | >PTEN-A79T-DTTKFNCR     | 4    | 1    |
| >PTEN-A79T-DTAKFNCRVA/  | 171  | >PTEN-A79T-DTTKFNCRVA/  | 480  | 309  |
| >PTEN-A79T-DTAKFNCRV    | 12   | >PTEN-A79T-DTTKFNCRV    | 30   | 18   |
| >PTEN-A79T-DTAKFNCRVA/  | 460  | >PTEN-A79T-DTTKFNCRVA/  | 1129 | 669  |
| >PTEN-A79T-DTAKFNCRV    | 7    | >PTEN-A79T-DTTKFNCRV    | 29   | 22   |
| >PTEN-A79T-YDTAKFNCRV   | 183  | >PTEN-A79T-YDTTKFNCRV   | 231  | 48   |
| >PTEN-A79T-HYDTAKFNCF   | 204  | >PTEN-A79T-HYDTTKFNCF   | 250  | 46   |
| >PTEN-A79T-HYDTAKFNCF   | 29   | >PTEN-A79T-HYDTTKFNCF   | 28   | 1    |
| >PTEN-A79T-RHYDTAKF     | 418  | >PTEN-A79T-RHYDTTKF     | 343  | 75   |
| >PTEN-A79T-RHYDTAKFNC   | 374  | >PTEN-A79T-RHYDTTKFNC   | 207  | 167  |

|                       |      |                       |       |       |
|-----------------------|------|-----------------------|-------|-------|
| >PTEN-A79T-RHYDTAKF   | 742  | >PTEN-A79T-RHYDTTKF   | 332   | 410   |
| >PTEN-A79T-RHYDTAKF   | 7    | >PTEN-A79T-RHYDTTKF   | 5     | 2     |
| >PTEN-A79T-RHYDTAKFNC | 573  | >PTEN-A79T-RHYDTTKFNC | 495   | 78    |
| >PTEN-A79T-RHYDTAKF   | 384  | >PTEN-A79T-RHYDTTKF   | 1072  | 688   |
| >PTEN-A79T-RHYDTAKF   | 71   | >PTEN-A79T-RHYDTTKF   | 122   | 51    |
| >PTEN-A79T-RHYDTAKFNC | 71   | >PTEN-A79T-RHYDTTKFNC | 57    | 14    |
| >PTEN-A79T-ERHYDTAKF  | 202  | >PTEN-A79T-ERHYDTTKF  | 83    | 119   |
| >PTEN-A79T-AERHYDTAKF | 33   | >PTEN-A79T-AERHYDTTKF | 22    | 11    |
| >PTEN-A79T-AERHYDTA   | 84   | >PTEN-A79T-AERHYDTT   | 106   | 22    |
| >PTEN-A79T-AERHYDTAKF | 83   | >PTEN-A79T-AERHYDTTKF | 113   | 30    |
| >PTEN-A79T-AERHYDTAKF | 256  | >PTEN-A79T-AERHYDTTKF | 252   | 4     |
| >PTEN-A79T-AERHYDTA   | 12   | >PTEN-A79T-AERHYDTT   | 58    | 46    |
| >PTEN-A79T-AERHYDTAKF | 258  | >PTEN-A79T-AERHYDTTKF | 117   | 141   |
| >PTEN-A86P-AQYPFEDH   | 105  | >PTEN-A86P-PQYPFEDH   | 1375  | 1270  |
| >PTEN-A86P-AQYPFEDHNI | 263  | >PTEN-A86P-PQYPFEDHNI | 2654  | 2391  |
| >PTEN-A86P-CRVAQYPF   | 32   | >PTEN-A86P-CRVPQYPF   | 28    | 4     |
| >PTEN-A86P-CRVAQYPF   | 283  | >PTEN-A86P-CRVPQYPF   | 682   | 399   |
| >PTEN-A86P-CRVAQYPF   | 214  | >PTEN-A86P-CRVPQYPF   | 154   | 60    |
| >PTEN-A86P-FNCRVAQY   | 418  | >PTEN-A86P-FNCRVPQY   | 356   | 62    |
| >PTEN-A86P-FNCRVAQYPI | 119  | >PTEN-A86P-FNCRVPQYPI | 98    | 21    |
| >PTEN-A86P-KFNCRVAQYI | 235  | >PTEN-A86P-KFNCRVPQYI | 492   | 257   |
| >PTEN-A86P-KFNCRVAQYI | 412  | >PTEN-A86P-KFNCRVPQYI | 561   | 149   |
| >PTEN-A86P-KFNCRVAQYI | 140  | >PTEN-A86P-KFNCRVPQYI | 183   | 43    |
| >PTEN-A86P-KFNCRVAQY  | 167  | >PTEN-A86P-KFNCRVPQY  | 137   | 30    |
| >PTEN-A86P-KFNCRVAQ   | 653  | >PTEN-A86P-KFNCRVPQ   | 464   | 189   |
| >PTEN-A86P-KFNCRVAQY  | 377  | >PTEN-A86P-KFNCRVPQY  | 1222  | 845   |
| >PTEN-A86P-KFNCRVAQYI | 170  | >PTEN-A86P-KFNCRVPQYI | 225   | 55    |
| >PTEN-A86P-KFNCRVAQYI | 101  | >PTEN-A86P-KFNCRVPQYI | 116   | 15    |
| >PTEN-A86P-KFNCRVAQYI | 431  | >PTEN-A86P-KFNCRVPQYI | 764   | 333   |
| >PTEN-A86P-KFNCRVAQYI | 331  | >PTEN-A86P-KFNCRVPQYI | 314   | 17    |
| >PTEN-A86P-KFNCRVAQY  | 131  | >PTEN-A86P-KFNCRVPQY  | 199   | 68    |
| >PTEN-A86P-KFNCRVAQ   | 1354 | >PTEN-A86P-KFNCRVPQ   | 474   | 880   |
| >PTEN-A86P-AKFNCRVAQ` | 381  | >PTEN-A86P-AKFNCRVPQ` | 502   | 121   |
| >PTEN-A86P-AKFNCRVAQ` | 197  | >PTEN-A86P-AKFNCRVPQ` | 444   | 247   |
| >PTEN-A86P-AKFNCRVA   | 52   | >PTEN-A86P-AKFNCRVP   | 205   | 153   |
| >PTEN-A86P-AKFNCRVAQ  | 43   | >PTEN-A86P-AKFNCRVPQ  | 43    | 0     |
| >PTEN-A86P-AKFNCRVAQ` | 3    | >PTEN-A86P-AKFNCRVPQ` | 3     | 0     |
| >PTEN-A86P-AKFNCRVAQ` | 114  | >PTEN-A86P-AKFNCRVPQ` | 95    | 19    |
| >PTEN-A86P-TAKFNCRVAC | 573  | >PTEN-A86P-TAKFNCRVPC | 475   | 98    |
| >PTEN-A86P-TAKFNCRVAC | 362  | >PTEN-A86P-TAKFNCRVPC | 505   | 143   |
| >PTEN-A86P-TAKFNCRVAC | 97   | >PTEN-A86P-TAKFNCRVPC | 158   | 61    |
| >PTEN-A86P-DTAKFNCRV/ | 171  | >PTEN-A86P-DTAKFNCRVF | 174   | 3     |
| >PTEN-A86P-DTAKFNCRV/ | 460  | >PTEN-A86P-DTAKFNCRVF | 24266 | 23806 |

|                        |       |                        |     |       |
|------------------------|-------|------------------------|-----|-------|
| >PTEN-C105F CEDLDQWL   | 157   | >PTEN-C105F FEDLDQWL   | 24  | 133   |
| >PTEN-C105F CEDLDQWL   | 128   | >PTEN-C105F FEDLDQWL   | 29  | 99    |
| >PTEN-C105F FCEDLDQWL  | 905   | >PTEN-C105F FFEDLDQWL  | 276 | 629   |
| >PTEN-C105F FCEDLDQW   | 19837 | >PTEN-C105F FFEDLDQW   | 365 | 19472 |
| >PTEN-C105F FCEDLDQW   | 43    | >PTEN-C105F FFEDLDQW   | 173 | 130   |
| >PTEN-C105F PPQLELIKPF | 31970 | >PTEN-C105F PPQLELIKPF | 348 | 31622 |
| >PTEN-C105F KPFCEDLDQV | 13    | >PTEN-C105F KPFFEDLDQV | 16  | 3     |
| >PTEN-C105F KPFCEDLDQV | 102   | >PTEN-C105F KPFFEDLDQV | 104 | 2     |
| >PTEN-C105F IKPFCE     | 910   | >PTEN-C105F IKPFCE     | 430 | 480   |
| >PTEN-C105F LIKPFCE    | 541   | >PTEN-C105F LIKPFCE    | 255 | 286   |
| >PTEN-C105F ELIKPFCE   | 156   | >PTEN-C105F ELIKPFCE   | 122 | 34    |
| >PTEN-C105F ELIKPFCE   | 775   | >PTEN-C105F ELIKPFCE   | 237 | 538   |
| >PTEN-C105F ELIKPFCE   | 1055  | >PTEN-C105F ELIKPFCE   | 275 | 780   |
| >PTEN-C105F ELIKPFCE   | 726   | >PTEN-C105F ELIKPFCE   | 176 | 550   |
| >PTEN-C105F LELIKPFCE  | 166   | >PTEN-C105F LELIKPFCE  | 150 | 16    |
| >PTEN-C105F LELIKPF    | 6745  | >PTEN-C105F LELIKPF    | 45  | 6700  |
| >PTEN-C105F LELIKPFCE  | 248   | >PTEN-C105F LELIKPFCE  | 105 | 143   |
| >PTEN-C105F LELIKPF    | 2151  | >PTEN-C105F LELIKPF    | 328 | 1823  |
| >PTEN-C105F LELIKPFCE  | 275   | >PTEN-C105F LELIKPFCE  | 179 | 96    |
| >PTEN-C105F LELIKPF    | 8089  | >PTEN-C105F LELIKPF    | 416 | 7673  |
| >PTEN-C105F LELIKPF    | 6299  | >PTEN-C105F LELIKPF    | 120 | 6179  |
| >PTEN-C105F LELIKPFCE  | 78    | >PTEN-C105F LELIKPFCE  | 53  | 25    |
| >PTEN-C105F PQLELIKPF  | 18025 | >PTEN-C105F PQLELIKPF  | 120 | 17905 |
| >PTEN-C105( CEDLDQWL   | 157   | >PTEN-C105( GEDLDQWL   | 196 | 39    |
| >PTEN-C105( CEDLDQWL   | 128   | >PTEN-C105( GEDLDQWL   | 25  | 103   |
| >PTEN-C105( FCEDLDQW   | 43    | >PTEN-C105( FGEDLDQW   | 86  | 43    |
| >PTEN-C105( KPFCEDLDQV | 588   | >PTEN-C105( KPFGEDLDQV | 283 | 305   |
| >PTEN-C105( KPFCEDLDQV | 1266  | >PTEN-C105( KPFGEDLDQV | 272 | 994   |
| >PTEN-C105( KPFCEDLDQV | 892   | >PTEN-C105( KPFGEDLDQV | 362 | 530   |
| >PTEN-C105( KPFCEDLDQV | 13    | >PTEN-C105( KPFGEDLDQV | 14  | 1     |
| >PTEN-C105( KPFCEDLDQV | 102   | >PTEN-C105( KPFGEDLDQV | 240 | 138   |
| >PTEN-C105( ELIKPFCE   | 156   | >PTEN-C105( ELIKPFCE   | 393 | 237   |
| >PTEN-C105( ELIKPFCE   | 775   | >PTEN-C105( ELIKPFCE   | 327 | 448   |
| >PTEN-C105( ELIKPFCE   | 1055  | >PTEN-C105( ELIKPFCE   | 497 | 558   |
| >PTEN-C105( LELIKPFCE  | 166   | >PTEN-C105( LELIKPFCE  | 538 | 372   |
| >PTEN-C105( LELIKPFCE  | 248   | >PTEN-C105( LELIKPFCE  | 128 | 120   |
| >PTEN-C105( LELIKPFCE  | 275   | >PTEN-C105( LELIKPFCE  | 319 | 44    |
| >PTEN-C105( LELIKPFCE  | 78    | >PTEN-C105( LELIKPFCE  | 112 | 34    |
| >PTEN-C105F CEDLDQWL   | 157   | >PTEN-C105F REDLDQWL   | 231 | 74    |
| >PTEN-C105F CEDLDQWL   | 128   | >PTEN-C105F REDLDQWL   | 13  | 115   |
| >PTEN-C105F CEDLDQWLS  | 2235  | >PTEN-C105F REDLDQWLS  | 418 | 1817  |
| >PTEN-C105F FCEDLDQW   | 43    | >PTEN-C105F FREDLDQW   | 121 | 78    |
| >PTEN-C105F FCEDLDQWL  | 40387 | >PTEN-C105F FREDLDQWL  | 481 | 39906 |



|                         |       |                         |     |       |
|-------------------------|-------|-------------------------|-----|-------|
| >PTEN-C105F FCEDLDQW    | 7023  | >PTEN-C105F FREDLDQW    | 56  | 6967  |
| >PTEN-C105F KPFCEDLDQV  | 588   | >PTEN-C105F KPFREDLDQV  | 411 | 177   |
| >PTEN-C105F KPFCEDLDQV  | 1266  | >PTEN-C105F KPFREDLDQV  | 269 | 997   |
| >PTEN-C105F KPFCEDLDQV  | 892   | >PTEN-C105F KPFREDLDQV  | 193 | 699   |
| >PTEN-C105F KPFCEDLDQV  | 13    | >PTEN-C105F KPFREDLDQV  | 12  | 1     |
| >PTEN-C105F KPFCEDLDQV  | 102   | >PTEN-C105F KPFREDLDQV  | 360 | 258   |
| >PTEN-C105F ELIKPFCEDL  | 156   | >PTEN-C105F ELIKPFREDL  | 395 | 239   |
| >PTEN-C105F ELIKPFCEDL  | 775   | >PTEN-C105F ELIKPFREDL  | 453 | 322   |
| >PTEN-C105F LELIKPFCEDL | 166   | >PTEN-C105F LELIKPFREDL | 282 | 116   |
| >PTEN-C105F LELIKPFCEDL | 248   | >PTEN-C105F LELIKPFREDL | 253 | 5     |
| >PTEN-C105F LELIKPFCEDL | 275   | >PTEN-C105F LELIKPFREDL | 291 | 16    |
| >PTEN-C105F LELIKPFCEDL | 78    | >PTEN-C105F LELIKPFREDL | 86  | 8     |
| >PTEN-C105F LELIKPFC    | 36788 | >PTEN-C105F LELIKPFR    | 406 | 36382 |
| >PTEN-C105F QLELIKPFC   | 20919 | >PTEN-C105F QLELIKPFR   | 134 | 20785 |
| >PTEN-C105F QLELIKPFC   | 37894 | >PTEN-C105F QLELIKPFR   | 382 | 37512 |
| >PTEN-C105F QLELIKPFC   | 39893 | >PTEN-C105F QLELIKPFR   | 93  | 39800 |
| >PTEN-C105F QLELIKPFC   | 35633 | >PTEN-C105F QLELIKPFR   | 101 | 35532 |
| >PTEN-C105F PQLELIKPFC  | 34400 | >PTEN-C105F PQLELIKPFR  | 138 | 34262 |
| >PTEN-C105S CEDLDQWL    | 157   | >PTEN-C105S SEDLDQWL    | 30  | 127   |
| >PTEN-C105S CEDLDQWL    | 128   | >PTEN-C105S SEDLDQWL    | 72  | 56    |
| >PTEN-C105S FCEDLDQW    | 3032  | >PTEN-C105S FSEDLDQW    | 19  | 3013  |
| >PTEN-C105S FCEDLDQWL   | 13425 | >PTEN-C105S FSEDLDQWL   | 123 | 13302 |
| >PTEN-C105S FCEDLDQW    | 1692  | >PTEN-C105S FSEDLDQW    | 496 | 1196  |
| >PTEN-C105S FCEDLDQW    | 10328 | >PTEN-C105S FSEDLDQW    | 67  | 10261 |
| >PTEN-C105S FCEDLDQWL   | 1865  | >PTEN-C105S FSEDLDQWL   | 492 | 1373  |
| >PTEN-C105S FCEDLDQW    | 43    | >PTEN-C105S FSEDLDQW    | 37  | 6     |
| >PTEN-C105S KPFCEDLDQV  | 588   | >PTEN-C105S KPFSEDLDQV  | 109 | 479   |
| >PTEN-C105S KPFCEDLDQV  | 892   | >PTEN-C105S KPFSEDLDQV  | 391 | 501   |
| >PTEN-C105S KPFCEDLDQV  | 13    | >PTEN-C105S KPFSEDLDQV  | 11  | 2     |
| >PTEN-C105S KPFCEDLDQV  | 102   | >PTEN-C105S KPFSEDLDQV  | 120 | 18    |
| >PTEN-C105S IKPFCEDL    | 910   | >PTEN-C105S IKPFSEDL    | 471 | 439   |
| >PTEN-C105S LIKPFCEDL   | 541   | >PTEN-C105S LIKPFSEDL   | 329 | 212   |
| >PTEN-C105S ELIKPFCEDL  | 156   | >PTEN-C105S ELIKPFSEDL  | 178 | 22    |
| >PTEN-C105S ELIKPFCEDL  | 775   | >PTEN-C105S ELIKPFSEDL  | 304 | 471   |
| >PTEN-C105S ELIKPFCEDL  | 726   | >PTEN-C105S ELIKPFSEDL  | 474 | 252   |
| >PTEN-C105S LELIKPFCEDL | 166   | >PTEN-C105S LELIKPFSEDL | 199 | 33    |
| >PTEN-C105S LELIKPFCEDL | 248   | >PTEN-C105S LELIKPFSEDL | 164 | 84    |
| >PTEN-C105S LELIKPFCEDL | 275   | >PTEN-C105S LELIKPFSEDL | 246 | 29    |
| >PTEN-C105S LELIKPFCEDL | 78    | >PTEN-C105S LELIKPFSEDL | 70  | 8     |
| >PTEN-C105\ CEDLDQWL    | 157   | >PTEN-C105\ YEDLDQWL    | 17  | 140   |
| >PTEN-C105\ CEDLDQWL    | 128   | >PTEN-C105\ YEDLDQWL    | 19  | 109   |
| >PTEN-C105\ FCEDLDQW    | 25894 | >PTEN-C105\ FYEDLDQW    | 288 | 25606 |
| >PTEN-C105\ FCEDLDQW    | 19837 | >PTEN-C105\ FYEDLDQW    | 24  | 19813 |

|                        |       |                        |     |       |
|------------------------|-------|------------------------|-----|-------|
| >PTEN-C105\FCEDLDQWL   | 22211 | >PTEN-C105\FYEDLDQWL   | 35  | 22176 |
| >PTEN-C105\FCEDLDQW    | 43    | >PTEN-C105\FYEDLDQW    | 96  | 53    |
| >PTEN-C105\KPFCELDQV   | 892   | >PTEN-C105\KPFYEDLDQV  | 481 | 411   |
| >PTEN-C105\KPFCELDQV   | 13    | >PTEN-C105\KPFYEDLDQV  | 12  | 1     |
| >PTEN-C105\KPFCELDQV   | 102   | >PTEN-C105\KPFYEDLDQV  | 183 | 81    |
| >PTEN-C105\IKPFCELDQ'  | 840   | >PTEN-C105\IKPFYEDLDQ\ | 419 | 421   |
| >PTEN-C105\LIKPFCEDL   | 541   | >PTEN-C105\LIKPFYEDL   | 273 | 268   |
| >PTEN-C105\ELIKPFCEDL  | 156   | >PTEN-C105\ELIKPFYEDL  | 175 | 19    |
| >PTEN-C105\ELIKPFCEDL  | 775   | >PTEN-C105\ELIKPFYEDL  | 236 | 539   |
| >PTEN-C105\ELIKPFCEDL  | 726   | >PTEN-C105\ELIKPFYEDL  | 305 | 421   |
| >PTEN-C105\LELIKPFCEDL | 166   | >PTEN-C105\LELIKPFYEDL | 194 | 28    |
| >PTEN-C105\LELIKPF     | 6745  | >PTEN-C105\LELIKPFY    | 45  | 6700  |
| >PTEN-C105\LELIKPFCEDL | 248   | >PTEN-C105\LELIKPFYEDL | 113 | 135   |
| >PTEN-C105\LELIKPFCEDL | 275   | >PTEN-C105\LELIKPFYEDL | 240 | 35    |
| >PTEN-C105\LELIKPF     | 8089  | >PTEN-C105\LELIKPFY    | 447 | 7642  |
| >PTEN-C105\LELIKPF     | 6299  | >PTEN-C105\LELIKPFY    | 131 | 6168  |
| >PTEN-C105\LELIKPFCEDL | 78    | >PTEN-C105\LELIKPFYEDL | 90  | 12    |
| >PTEN-C105\QLELIKPF    | 24684 | >PTEN-C105\QLELIKPFY   | 259 | 24425 |
| >PTEN-C105\QLELIKPF    | 23947 | >PTEN-C105\QLELIKPFY   | 101 | 23846 |
| >PTEN-C105\PQLELIKPF   | 18025 | >PTEN-C105\PQLELIKPFY  | 423 | 17602 |
| >PTEN-C124fCKAGKGRG'   | 13366 | >PTEN-C124fFKAGKGRG\   | 363 | 13003 |
| >PTEN-C124fCKAGKGRG'   | 2391  | >PTEN-C124fFKAGKGRG\   | 424 | 1967  |
| >PTEN-C124fCKAGKGRG'   | 7276  | >PTEN-C124fFKAGKGRG\   | 439 | 6837  |
| >PTEN-C124fHCKAGKGRG'  | 1478  | >PTEN-C124fHFKAGKGRG'  | 429 | 1049  |
| >PTEN-C124fHCKAGKGR    | 1003  | >PTEN-C124fHFKAGKGR    | 33  | 970   |
| >PTEN-C124fHCKAGKGR    | 2312  | >PTEN-C124fHFKAGKGR    | 105 | 2207  |
| >PTEN-C124fHCKAGKGR    | 345   | >PTEN-C124fHFKAGKGR    | 65  | 280   |
| >PTEN-C124fIHCKAGKGR   | 954   | >PTEN-C124fIHFKAGKGR   | 326 | 628   |
| >PTEN-C124fAIHCKAGK    | 243   | >PTEN-C124fAIHFKAGK    | 140 | 103   |
| >PTEN-C124fAIHCKAGK    | 221   | >PTEN-C124fAIHFKAGK    | 88  | 133   |
| >PTEN-C124fAIHCKAGK    | 29    | >PTEN-C124fAIHFKAGK    | 18  | 11    |
| >PTEN-C124fAIHCKAGKGF  | 407   | >PTEN-C124fAIHFKAGKGR  | 171 | 236   |
| >PTEN-C124fAAIHCKAGK   | 252   | >PTEN-C124fAAIHFKAGK   | 61  | 191   |
| >PTEN-C124fAAIHCKAGK   | 1736  | >PTEN-C124fAAIHFKAGK   | 329 | 1407  |
| >PTEN-C124fAAIHCKAGKC  | 447   | >PTEN-C124fAAIHFKAGKC  | 337 | 110   |
| >PTEN-C124fAAIHCKAGK   | 909   | >PTEN-C124fAAIHFKAGK   | 186 | 723   |
| >PTEN-C124fAAIHCKAGKC  | 719   | >PTEN-C124fAAIHFKAGKC  | 268 | 451   |
| >PTEN-C124fAAIHCKAGK   | 1045  | >PTEN-C124fAAIHFKAGK   | 354 | 691   |
| >PTEN-C124fVAAIHCKAGK  | 459   | >PTEN-C124fVAAIHFKAGK  | 119 | 340   |
| >PTEN-C124fHVAAIHCKA   | 289   | >PTEN-C124fHVAAIHFKA   | 42  | 247   |
| >PTEN-C124fHVAAIHCKA   | 4591  | >PTEN-C124fHVAAIHFKA   | 473 | 4118  |
| >PTEN-C124fHVAAIHCK    | 130   | >PTEN-C124fHVAAIHFK    | 44  | 86    |
| >PTEN-C124fHVAAIHCKAC  | 90    | >PTEN-C124fHVAAIHFKAC  | 71  | 19    |

|                       |       |                       |      |       |
|-----------------------|-------|-----------------------|------|-------|
| >PTEN-C124FHVAAIHCK   | 50    | >PTEN-C124FHVAAIHFK   | 14   | 36    |
| >PTEN-C124FHVAAIHCKAC | 114   | >PTEN-C124FHVAAIHFKAC | 44   | 70    |
| >PTEN-C124FHVAAIHCK   | 74    | >PTEN-C124FHVAAIHFK   | 11   | 63    |
| >PTEN-C124FHVAAIHCKA  | 304   | >PTEN-C124FHVAAIHFKA  | 469  | 165   |
| >PTEN-C124FHVAAIHCKAC | 64    | >PTEN-C124FHVAAIHFKAC | 40   | 24    |
| >PTEN-C124FHVAAIHCK   | 223   | >PTEN-C124FHVAAIHFK   | 30   | 193   |
| >PTEN-C124FHVAAIHCKAC | 185   | >PTEN-C124FHVAAIHFKAC | 88   | 97    |
| >PTEN-C124FHVAAIHCK   | 1707  | >PTEN-C124FHVAAIHFK   | 321  | 1386  |
| >PTEN-C124FHVAAIHCK   | 5     | >PTEN-C124FHVAAIHFK   | 2    | 3     |
| >PTEN-C124FHVAAIHCKAC | 7     | >PTEN-C124FHVAAIHFKAC | 5    | 2     |
| >PTEN-C124FHVAAIHCKA  | 12    | >PTEN-C124FHVAAIHFKA  | 6    | 6     |
| >PTEN-C124FHVAAIHCKA  | 480   | >PTEN-C124FHVAAIHFKA  | 72   | 408   |
| >PTEN-C124FHVAAIHCK   | 1426  | >PTEN-C124FHVAAIHFK   | 229  | 1197  |
| >PTEN-C124FNHVAAIHCK  | 1175  | >PTEN-C124FNHVAAIHFK  | 211  | 964   |
| >PTEN-C124FNHVAAIHC   | 19743 | >PTEN-C124FNHVAAIHF   | 281  | 19462 |
| >PTEN-C124FDDNHVAAIH  | 1447  | >PTEN-C124FDDNHVAAIH  | 354  | 1093  |
| >PTEN-C124SHCKAGKGR   | 3136  | >PTEN-C124SHSKAGKGR   | 335  | 2801  |
| >PTEN-C124SHCKAGKGR   | 3727  | >PTEN-C124SHSKAGKGR   | 424  | 3303  |
| >PTEN-C124SHCKAGKGR   | 1478  | >PTEN-C124SHSKAGKGR   | 114  | 1364  |
| >PTEN-C124SHCKAGKGR   | 1003  | >PTEN-C124SHSKAGKGR   | 75   | 928   |
| >PTEN-C124SHCKAGKGR   | 10600 | >PTEN-C124SHSKAGKGR   | 489  | 10111 |
| >PTEN-C124SHCKAGKGR   | 345   | >PTEN-C124SHSKAGKGR   | 1293 | 948   |
| >PTEN-C124SAIHCKAGK   | 243   | >PTEN-C124SAIHSKAGK   | 150  | 93    |
| >PTEN-C124SAIHCKAGK   | 221   | >PTEN-C124SAIHSKAGK   | 147  | 74    |
| >PTEN-C124SAIHCKAGK   | 29    | >PTEN-C124SAIHSKAGK   | 22   | 7     |
| >PTEN-C124SAIHCKAGKGF | 407   | >PTEN-C124SAIHSKAGKGR | 391  | 16    |
| >PTEN-C124SAAIHCKAGK  | 252   | >PTEN-C124SAAIHSKAGK  | 141  | 111   |
| >PTEN-C124SAAIHCKAGK  | 1736  | >PTEN-C124SAAIHSKAGK  | 263  | 1473  |
| >PTEN-C124SAAIHCKAGKC | 447   | >PTEN-C124SAAIHSKAGKC | 656  | 209   |
| >PTEN-C124SAAIHCKAGK  | 909   | >PTEN-C124SAAIHSKAGK  | 411  | 498   |
| >PTEN-C124SAAIHCKAGKC | 719   | >PTEN-C124SAAIHSKAGKC | 430  | 289   |
| >PTEN-C124SVAAIHCKAGK | 459   | >PTEN-C124SVAAIHSKAGK | 124  | 335   |
| >PTEN-C124SHVAAIHCKA  | 289   | >PTEN-C124SHVAAIHSKA  | 176  | 113   |
| >PTEN-C124SHVAAIHCKA  | 1656  | >PTEN-C124SHVAAIHSKA  | 374  | 1282  |
| >PTEN-C124SHVAAIHCK   | 130   | >PTEN-C124SHVAAIHSK   | 63   | 67    |
| >PTEN-C124SHVAAIHCKAC | 90    | >PTEN-C124SHVAAIHSKAC | 68   | 22    |
| >PTEN-C124SHVAAIHCK   | 50    | >PTEN-C124SHVAAIHSK   | 30   | 20    |
| >PTEN-C124SHVAAIHCKAC | 114   | >PTEN-C124SHVAAIHSKAC | 81   | 33    |
| >PTEN-C124SHVAAIHCK   | 74    | >PTEN-C124SHVAAIHSK   | 22   | 52    |
| >PTEN-C124SHVAAIHCKA  | 304   | >PTEN-C124SHVAAIHSKA  | 725  | 421   |
| >PTEN-C124SHVAAIHCKAC | 64    | >PTEN-C124SHVAAIHSKAC | 41   | 23    |
| >PTEN-C124SHVAAIHCK   | 223   | >PTEN-C124SHVAAIHSK   | 209  | 14    |
| >PTEN-C124SHVAAIHCKAC | 185   | >PTEN-C124SHVAAIHSKAC | 241  | 56    |

|                        |       |                        |     |       |
|------------------------|-------|------------------------|-----|-------|
| >PTEN-C124S HVAAIHCK   | 5     | >PTEN-C124S HVAAIHCK   | 5   | 0     |
| >PTEN-C124S HVAAIHCKAC | 7     | >PTEN-C124S HVAAIHCKAC | 6   | 1     |
| >PTEN-C124S HVAAIHCKA  | 12    | >PTEN-C124S HVAAIHCKA  | 10  | 2     |
| >PTEN-C124S HVAAIHCKA  | 480   | >PTEN-C124S HVAAIHCKA  | 934 | 454   |
| >PTEN-C124\CKAGKGRTG\  | 13366 | >PTEN-C124\YKAGKGRTG\  | 297 | 13069 |
| >PTEN-C124\CKAGKGRTG\  | 2391  | >PTEN-C124\YKAGKGRTG\  | 340 | 2051  |
| >PTEN-C124\CKAGKGRTG\  | 7276  | >PTEN-C124\YKAGKGRTG\  | 409 | 6867  |
| >PTEN-C124\HCKAGKGRTG\ | 19239 | >PTEN-C124\HYKAGKGRTG\ | 23  | 19216 |
| >PTEN-C124\HCKAGKGR    | 3136  | >PTEN-C124\HYKAGKGR    | 346 | 2790  |
| >PTEN-C124\HCKAGKGRTG\ | 3727  | >PTEN-C124\HYKAGKGRTG\ | 437 | 3290  |
| >PTEN-C124\HCKAGKGRTG\ | 1478  | >PTEN-C124\HYKAGKGRTG\ | 117 | 1361  |
| >PTEN-C124\HCKAGKGR    | 1003  | >PTEN-C124\HYKAGKGR    | 43  | 960   |
| >PTEN-C124\HCKAGKGR    | 2312  | >PTEN-C124\HYKAGKGR    | 99  | 2213  |
| >PTEN-C124\HCKAGKGR    | 345   | >PTEN-C124\HYKAGKGR    | 32  | 313   |
| >PTEN-C124\IHCKAGKGR   | 954   | >PTEN-C124\IHYKAGKGR   | 429 | 525   |
| >PTEN-C124\AIHCKAGK    | 243   | >PTEN-C124\AIHYKAGK    | 222 | 21    |
| >PTEN-C124\AIHCKAGK    | 221   | >PTEN-C124\AIHYKAGK    | 172 | 49    |
| >PTEN-C124\AIHCKAGK    | 29    | >PTEN-C124\AIHYKAGK    | 21  | 8     |
| >PTEN-C124\AIHCKAGKGF  | 407   | >PTEN-C124\AIHYKAGKGR  | 341 | 66    |
| >PTEN-C124\AAIHCKAGK   | 252   | >PTEN-C124\AAIHYKAGK   | 116 | 136   |
| >PTEN-C124\AAIHCKAGKC  | 447   | >PTEN-C124\AAIHYKAGKC  | 311 | 136   |
| >PTEN-C124\AAIHCKAGK   | 909   | >PTEN-C124\AAIHYKAGK   | 394 | 515   |
| >PTEN-C124\AAIHCKAGKC  | 719   | >PTEN-C124\AAIHYKAGKC  | 407 | 312   |
| >PTEN-C124\VAAIHCKAGK  | 459   | >PTEN-C124\VAAIHYKAGK  | 123 | 336   |
| >PTEN-C124\HVAAIHCKA   | 289   | >PTEN-C124\HVAAIHYKA   | 30  | 259   |
| >PTEN-C124\HVAAIHCK    | 130   | >PTEN-C124\HVAAIHYK    | 49  | 81    |
| >PTEN-C124\HVAAIHCKAC  | 90    | >PTEN-C124\HVAAIHYKAC  | 89  | 1     |
| >PTEN-C124\HVAAIHCK    | 50    | >PTEN-C124\HVAAIHYK    | 15  | 35    |
| >PTEN-C124\HVAAIHCKAC  | 114   | >PTEN-C124\HVAAIHYKAC  | 65  | 49    |
| >PTEN-C124\HVAAIHCK    | 74    | >PTEN-C124\HVAAIHYK    | 15  | 59    |
| >PTEN-C124\HVAAIHCKA   | 304   | >PTEN-C124\HVAAIHYKA   | 810 | 506   |
| >PTEN-C124\HVAAIHCKAC  | 64    | >PTEN-C124\HVAAIHYKAC  | 51  | 13    |
| >PTEN-C124\HVAAIHCK    | 223   | >PTEN-C124\HVAAIHYK    | 25  | 198   |
| >PTEN-C124\HVAAIHCKAC  | 185   | >PTEN-C124\HVAAIHYKAC  | 90  | 95    |
| >PTEN-C124\HVAAIHCK    | 5     | >PTEN-C124\HVAAIHYK    | 3   | 2     |
| >PTEN-C124\HVAAIHCKAC  | 7     | >PTEN-C124\HVAAIHYKAC  | 6   | 1     |
| >PTEN-C124\HVAAIHCKA   | 12    | >PTEN-C124\HVAAIHYKA   | 6   | 6     |
| >PTEN-C124\HVAAIHCKA   | 480   | >PTEN-C124\HVAAIHYKA   | 233 | 247   |
| >PTEN-C124\HVAAIHCK    | 1426  | >PTEN-C124\HVAAIHYK    | 72  | 1354  |
| >PTEN-C124\NHVAAIHCK   | 1175  | >PTEN-C124\NHVAAIHYK   | 271 | 904   |
| >PTEN-C124\NHVAAIHCK   | 4911  | >PTEN-C124\NHVAAIHYK   | 499 | 4412  |
| >PTEN-C124\DDNHVAAIH\  | 1447  | >PTEN-C124\DDNHVAAIH\  | 433 | 1014  |
| >PTEN-C136F CAYLLHRGKF | 119   | >PTEN-C136F FAYLLHRGKF | 135 | 16    |

|                         |       |                         |     |       |
|-------------------------|-------|-------------------------|-----|-------|
| >PTEN-C136F CAYLLHRGKF  | 8684  | >PTEN-C136F FAYLLHRGKF  | 459 | 8225  |
| >PTEN-C136F CAYLLHRGK   | 471   | >PTEN-C136F FAYLLHRGK   | 101 | 370   |
| >PTEN-C136F CAYLLHRGKF  | 1066  | >PTEN-C136F FAYLLHRGKF  | 142 | 924   |
| >PTEN-C136F CAYLLHRGKF  | 67    | >PTEN-C136F FAYLLHRGKF  | 12  | 55    |
| >PTEN-C136F CAYLLHRGKF  | 350   | >PTEN-C136F FAYLLHRGKF  | 33  | 317   |
| >PTEN-C136F CAYLLHRGKF  | 1797  | >PTEN-C136F FAYLLHRGKF  | 486 | 1311  |
| >PTEN-C136F CAYLLHRGKF  | 350   | >PTEN-C136F FAYLLHRGKF  | 91  | 259   |
| >PTEN-C136F CAYLLHRGKF  | 185   | >PTEN-C136F FAYLLHRGKF  | 626 | 441   |
| >PTEN-C136F ICAYLLHRGK  | 913   | >PTEN-C136F IFAYLLHRGK  | 170 | 743   |
| >PTEN-C136F ICAYLLHRGKF | 4414  | >PTEN-C136F IFAYLLHRGKF | 114 | 4300  |
| >PTEN-C136F ICAYLLHRGKF | 6442  | >PTEN-C136F IFAYLLHRGKF | 383 | 6059  |
| >PTEN-C136F ICAYLLHRGKF | 11784 | >PTEN-C136F IFAYLLHRGKF | 94  | 11690 |
| >PTEN-C136F ICAYLLHRGKF | 6843  | >PTEN-C136F IFAYLLHRGKF | 207 | 6636  |
| >PTEN-C136F ICAYLLHR    | 569   | >PTEN-C136F IFAYLLHR    | 15  | 554   |
| >PTEN-C136F ICAYLLHRGK  | 3557  | >PTEN-C136F IFAYLLHRGK  | 439 | 3118  |
| >PTEN-C136F ICAYLLHR    | 1217  | >PTEN-C136F IFAYLLHR    | 49  | 1168  |
| >PTEN-C136F ICAYLLHR    | 969   | >PTEN-C136F IFAYLLHR    | 160 | 809   |
| >PTEN-C136F ICAYLLHRGKF | 187   | >PTEN-C136F IFAYLLHRGKF | 860 | 673   |
| >PTEN-C136F ICAYLLHR    | 107   | >PTEN-C136F IFAYLLHR    | 40  | 67    |
| >PTEN-C136F MICAYLLH    | 784   | >PTEN-C136F MIFAYLLH    | 97  | 687   |
| >PTEN-C136F MICAYLLHR   | 315   | >PTEN-C136F MIFAYLLHR   | 50  | 265   |
| >PTEN-C136F MICAYLLHRG  | 162   | >PTEN-C136F MIFAYLLHRG  | 43  | 119   |
| >PTEN-C136F MICAYLLH    | 299   | >PTEN-C136F MIFAYLLH    | 77  | 222   |
| >PTEN-C136F MICAYLLHR   | 89    | >PTEN-C136F MIFAYLLHR   | 24  | 65    |
| >PTEN-C136F MICAYLLHRG  | 49    | >PTEN-C136F MIFAYLLHRG  | 19  | 30    |
| >PTEN-C136F MICAYLLH    | 561   | >PTEN-C136F MIFAYLLH    | 77  | 484   |
| >PTEN-C136F MICAYLLHR   | 2180  | >PTEN-C136F MIFAYLLHR   | 352 | 1828  |
| >PTEN-C136F MICAYLLHRG  | 77    | >PTEN-C136F MIFAYLLHRG  | 16  | 61    |
| >PTEN-C136F MICAYLLHR   | 11    | >PTEN-C136F MIFAYLLHR   | 8   | 3     |
| >PTEN-C136F MICAYLLHRG  | 473   | >PTEN-C136F MIFAYLLHRG  | 118 | 355   |
| >PTEN-C136F MICAYLLHR   | 45    | >PTEN-C136F MIFAYLLHR   | 24  | 21    |
| >PTEN-C136F MICAYLLH    | 4099  | >PTEN-C136F MIFAYLLH    | 315 | 3784  |
| >PTEN-C136F MICAYLLHR   | 28    | >PTEN-C136F MIFAYLLHR   | 5   | 23    |
| >PTEN-C136F MICAYLLHRG  | 124   | >PTEN-C136F MIFAYLLHRG  | 12  | 112   |
| >PTEN-C136F MICAYLLHR   | 28    | >PTEN-C136F MIFAYLLHR   | 17  | 11    |
| >PTEN-C136F MICAYLLHRG  | 1168  | >PTEN-C136F MIFAYLLHRG  | 304 | 864   |
| >PTEN-C136F VMICAYLL    | 248   | >PTEN-C136F VMIFAYLL    | 150 | 98    |
| >PTEN-C136F VMICAYLL    | 15    | >PTEN-C136F VMIFAYLL    | 22  | 7     |
| >PTEN-C136F VMICAYLL    | 9     | >PTEN-C136F VMIFAYLL    | 11  | 2     |
| >PTEN-C136F VMICAYLL    | 27    | >PTEN-C136F VMIFAYLL    | 34  | 7     |
| >PTEN-C136F VMICAYLL    | 39    | >PTEN-C136F VMIFAYLL    | 84  | 45    |
| >PTEN-C136F VMICAYLL    | 10    | >PTEN-C136F VMIFAYLL    | 12  | 2     |
| >PTEN-C136F VMICAYLL    | 6     | >PTEN-C136F VMIFAYLL    | 17  | 11    |

|                       |      |                       |      |      |
|-----------------------|------|-----------------------|------|------|
| >PTEN-C136FVMICAYLL   | 58   | >PTEN-C136FVMIFAYLL   | 48   | 10   |
| >PTEN-C136FVMICAYLL   | 136  | >PTEN-C136FVMIFAYLL   | 90   | 46   |
| >PTEN-C136FVMICAYLL   | 16   | >PTEN-C136FVMIFAYLL   | 11   | 5    |
| >PTEN-C136FVMICAYLLHR | 166  | >PTEN-C136FVMIFAYLLHR | 91   | 75   |
| >PTEN-C136FVMICAYLLHR | 52   | >PTEN-C136FVMIFAYLLHR | 32   | 20   |
| >PTEN-C136FVMICAYLL   | 100  | >PTEN-C136FVMIFAYLL   | 219  | 119  |
| >PTEN-C136FVMICAYLLH  | 46   | >PTEN-C136FVMIFAYLLH  | 31   | 15   |
| >PTEN-C136FVMICAYLLHR | 44   | >PTEN-C136FVMIFAYLLHR | 24   | 20   |
| >PTEN-C136FVMICAYLLHR | 237  | >PTEN-C136FVMIFAYLLHR | 181  | 56   |
| >PTEN-C136FVMICAYLLHR | 119  | >PTEN-C136FVMIFAYLLHR | 51   | 68   |
| >PTEN-C136FVMICAYLL   | 126  | >PTEN-C136FVMIFAYLL   | 294  | 168  |
| >PTEN-C136FVMICAYLLHR | 434  | >PTEN-C136FVMIFAYLLHR | 1238 | 804  |
| >PTEN-C136FVMICAYLL   | 1022 | >PTEN-C136FVMIFAYLL   | 316  | 706  |
| >PTEN-C136FVMICAYLLHR | 70   | >PTEN-C136FVMIFAYLLHR | 199  | 129  |
| >PTEN-C136FVMICAYLLHR | 58   | >PTEN-C136FVMIFAYLLHR | 112  | 54   |
| >PTEN-C136FGVMICAYL   | 2779 | >PTEN-C136FGVMIFAYL   | 30   | 2749 |
| >PTEN-C136FGVMICAYL   | 66   | >PTEN-C136FGVMIFAYL   | 73   | 7    |
| >PTEN-C136FGVMICAYLL  | 57   | >PTEN-C136FGVMIFAYLL  | 67   | 10   |
| >PTEN-C136FGVMICAYL   | 20   | >PTEN-C136FGVMIFAYL   | 18   | 2    |
| >PTEN-C136FGVMICAYLL  | 18   | >PTEN-C136FGVMIFAYLL  | 16   | 2    |
| >PTEN-C136FGVMICAYL   | 260  | >PTEN-C136FGVMIFAYL   | 188  | 72   |
| >PTEN-C136FGVMICAYL   | 51   | >PTEN-C136FGVMIFAYL   | 34   | 17   |
| >PTEN-C136FGVMICAYLL  | 112  | >PTEN-C136FGVMIFAYLL  | 143  | 31   |
| >PTEN-C136FGVMICAYL   | 844  | >PTEN-C136FGVMIFAYL   | 112  | 732  |
| >PTEN-C136FGVMICAYL   | 346  | >PTEN-C136FGVMIFAYL   | 193  | 153  |
| >PTEN-C136FGVMICAYLL  | 327  | >PTEN-C136FGVMIFAYLL  | 482  | 155  |
| >PTEN-C136FGVMICAYL   | 403  | >PTEN-C136FGVMIFAYL   | 378  | 25   |
| >PTEN-C136FGVMICAYL   | 574  | >PTEN-C136FGVMIFAYL   | 344  | 230  |
| >PTEN-C136FGVMICAYLLH | 52   | >PTEN-C136FGVMIFAYLLH | 25   | 27   |
| >PTEN-C136FGVMICAYLLH | 38   | >PTEN-C136FGVMIFAYLLH | 29   | 9    |
| >PTEN-C136FGVMICAYLL  | 2144 | >PTEN-C136FGVMIFAYLL  | 194  | 1950 |
| >PTEN-C136FGVMICAYLLH | 177  | >PTEN-C136FGVMIFAYLLH | 89   | 88   |
| >PTEN-C136FGVMICAYL   | 485  | >PTEN-C136FGVMIFAYL   | 216  | 269  |
| >PTEN-C136FGVMICAYLL  | 582  | >PTEN-C136FGVMIFAYLL  | 397  | 185  |
| >PTEN-C136FGVMICAYLL  | 222  | >PTEN-C136FGVMIFAYLL  | 249  | 27   |
| >PTEN-C136FGVMICAYLLH | 198  | >PTEN-C136FGVMIFAYLLH | 131  | 67   |
| >PTEN-C136FGVMICAYLLH | 132  | >PTEN-C136FGVMIFAYLLH | 129  | 3    |
| >PTEN-C136FTGVMICAYL  | 1775 | >PTEN-C136FTGVMIFAYL  | 348  | 1427 |
| >PTEN-C136FTGVMICAYL  | 3369 | >PTEN-C136FTGVMIFAYL  | 385  | 2984 |
| >PTEN-C136FTGVMICAY   | 2263 | >PTEN-C136FTGVMIFAY   | 216  | 2047 |
| >PTEN-C136FTGVMICAY   | 567  | >PTEN-C136FTGVMIFAY   | 152  | 415  |
| >PTEN-C136FTGVMICAYL  | 267  | >PTEN-C136FTGVMIFAYL  | 54   | 213  |
| >PTEN-C136FTGVMICAY   | 166  | >PTEN-C136FTGVMIFAY   | 89   | 77   |

|                       |       |                       |     |       |
|-----------------------|-------|-----------------------|-----|-------|
| >PTEN-C136FTGVMICAYL  | 1397  | >PTEN-C136FTGVMIFAYL  | 220 | 1177  |
| >PTEN-C136FTGVMICAYLL | 791   | >PTEN-C136FTGVMIFAYLL | 191 | 600   |
| >PTEN-C136FRTGVMICAY  | 976   | >PTEN-C136FRTGVMIFAY  | 209 | 767   |
| >PTEN-C136FRTGVMICAYL | 583   | >PTEN-C136FRTGVMIFAYL | 277 | 306   |
| >PTEN-C136FRTGVMICAYL | 532   | >PTEN-C136FRTGVMIFAYL | 391 | 141   |
| >PTEN-C136FRTGVMICAYL | 1151  | >PTEN-C136FRTGVMIFAYL | 435 | 716   |
| >PTEN-C136FRTGVMICAYL | 1073  | >PTEN-C136FRTGVMIFAYL | 460 | 613   |
| >PTEN-C136FRTGVMICAY  | 913   | >PTEN-C136FRTGVMIFAY  | 62  | 851   |
| >PTEN-C136FRTGVMICAY  | 828   | >PTEN-C136FRTGVMIFAY  | 481 | 347   |
| >PTEN-C136FRTGVMICAY  | 1808  | >PTEN-C136FRTGVMIFAY  | 46  | 1762  |
| >PTEN-C136FRTGVMICA   | 980   | >PTEN-C136FRTGVMIFA   | 81  | 899   |
| >PTEN-C136FRTGVMICAYL | 550   | >PTEN-C136FRTGVMIFAYL | 298 | 252   |
| >PTEN-C136FRTGVMICAY  | 243   | >PTEN-C136FRTGVMIFAY  | 31  | 212   |
| >PTEN-C136FRTGVMICAYL | 398   | >PTEN-C136FRTGVMIFAYL | 434 | 36    |
| >PTEN-C136FRTGVMICAY  | 2502  | >PTEN-C136FRTGVMIFAY  | 254 | 2248  |
| >PTEN-C136FRTGVMICAY  | 169   | >PTEN-C136FRTGVMIFAY  | 50  | 119   |
| >PTEN-C136FRTGVMICAYL | 632   | >PTEN-C136FRTGVMIFAYL | 347 | 285   |
| >PTEN-C136FRTGVMICAYL | 114   | >PTEN-C136FRTGVMIFAYL | 38  | 76    |
| >PTEN-C136FRTGVMICAYL | 74    | >PTEN-C136FRTGVMIFAYL | 63  | 11    |
| >PTEN-C136FRTGVMICAY  | 228   | >PTEN-C136FRTGVMIFAY  | 16  | 212   |
| >PTEN-C136FRTGVMICAY  | 70    | >PTEN-C136FRTGVMIFAY  | 146 | 76    |
| >PTEN-C136FRTGVMICAY  | 13    | >PTEN-C136FRTGVMIFAY  | 7   | 6     |
| >PTEN-C136FRTGVMICAYL | 12    | >PTEN-C136FRTGVMIFAYL | 13  | 1     |
| >PTEN-C136FRTGVMICAYL | 14    | >PTEN-C136FRTGVMIFAYL | 12  | 2     |
| >PTEN-C136FRTGVMICAY  | 205   | >PTEN-C136FRTGVMIFAY  | 65  | 140   |
| >PTEN-C136FRTGVMICAYL | 438   | >PTEN-C136FRTGVMIFAYL | 176 | 262   |
| >PTEN-C136FRTGVMICAYL | 428   | >PTEN-C136FRTGVMIFAYL | 224 | 204   |
| >PTEN-C136FRTGVMICAYL | 90    | >PTEN-C136FRTGVMIFAYL | 20  | 70    |
| >PTEN-C136FRTGVMICAYL | 56    | >PTEN-C136FRTGVMIFAYL | 19  | 37    |
| >PTEN-C136FRTGVMICAY  | 378   | >PTEN-C136FRTGVMIFAY  | 140 | 238   |
| >PTEN-C136FRTGVMICAYL | 72    | >PTEN-C136FRTGVMIFAYL | 45  | 27    |
| >PTEN-C136FRTGVMICAYL | 235   | >PTEN-C136FRTGVMIFAYL | 172 | 63    |
| >PTEN-C136FRTGVMICAY  | 3713  | >PTEN-C136FRTGVMIFAY  | 447 | 3266  |
| >PTEN-C136FRTGVMICAY  | 2089  | >PTEN-C136FRTGVMIFAY  | 138 | 1951  |
| >PTEN-C136FRTGVMICAYL | 394   | >PTEN-C136FRTGVMIFAYL | 206 | 188   |
| >PTEN-C136FGRTGVMICA' | 620   | >PTEN-C136FGRTGVMIFA\ | 184 | 436   |
| >PTEN-C136FGRTGVMIC   | 13073 | >PTEN-C136FGRTGVMIF   | 408 | 12665 |
| >PTEN-C136FGRTGVMIC   | 6103  | >PTEN-C136FGRTGVMIF   | 280 | 5823  |
| >PTEN-C136FGRTGVMICA' | 113   | >PTEN-C136FGRTGVMIFA\ | 65  | 48    |
| >PTEN-C136FGRTGVMICA' | 258   | >PTEN-C136FGRTGVMIFA\ | 86  | 172   |
| >PTEN-C136FGRTGVMICA' | 334   | >PTEN-C136FGRTGVMIFA\ | 179 | 155   |
| >PTEN-C136FGRTGVMICA' | 78    | >PTEN-C136FGRTGVMIFA\ | 28  | 50    |
| >PTEN-C136FKGRTGVMIC  | 365   | >PTEN-C136FKGRTGVMIF  | 230 | 135   |

|                         |       |                         |      |       |
|-------------------------|-------|-------------------------|------|-------|
| >PTEN-C136F KGRTGVMIC/  | 21    | >PTEN-C136F KGRTGVMIF/  | 5    | 16    |
| >PTEN-C136F KGRTGVMIC/  | 38    | >PTEN-C136F KGRTGVMIF/  | 47   | 9     |
| >PTEN-C136F KGRTGVMIC/  | 314   | >PTEN-C136F KGRTGVMIF/  | 73   | 241   |
| >PTEN-C136F KGRTGVMIC/  | 165   | >PTEN-C136F KGRTGVMIF/  | 312  | 147   |
| >PTEN-C136F KGRTGVMIC   | 13944 | >PTEN-C136F KGRTGVMIF   | 24   | 13920 |
| >PTEN-C136F KGRTGVMIC/  | 174   | >PTEN-C136F KGRTGVMIF/  | 302  | 128   |
| >PTEN-C136F KGRTGVMIC   | 21458 | >PTEN-C136F KGRTGVMIF   | 149  | 21309 |
| >PTEN-C136F KGRTGVMIC/  | 135   | >PTEN-C136F KGRTGVMIF/  | 110  | 25    |
| >PTEN-C136F KGRTGVMIC   | 13397 | >PTEN-C136F KGRTGVMIF   | 115  | 13282 |
| >PTEN-C136F KGRTGVMIC/  | 666   | >PTEN-C136F KGRTGVMIF/  | 347  | 319   |
| >PTEN-C136F GKGRGVMII   | 6679  | >PTEN-C136F GKGRGVMII   | 9    | 6670  |
| >PTEN-C136F CAYLLHRGKF  | 119   | >PTEN-C136F RAYLLHRGKF  | 312  | 193   |
| >PTEN-C136F CAYLLHRGK   | 1373  | >PTEN-C136F RAYLLHRGK   | 116  | 1257  |
| >PTEN-C136F CAYLLHRGK   | 523   | >PTEN-C136F RAYLLHRGK   | 77   | 446   |
| >PTEN-C136F CAYLLHRGK   | 1536  | >PTEN-C136F RAYLLHRGK   | 20   | 1516  |
| >PTEN-C136F CAYLLHRGKF  | 8486  | >PTEN-C136F RAYLLHRGKF  | 347  | 8139  |
| >PTEN-C136F CAYLLHRGK   | 2302  | >PTEN-C136F RAYLLHRGK   | 141  | 2161  |
| >PTEN-C136F CAYLLHRGK   | 471   | >PTEN-C136F RAYLLHRGK   | 2468 | 1997  |
| >PTEN-C136F CAYLLHRGKF  | 1066  | >PTEN-C136F RAYLLHRGKF  | 131  | 935   |
| >PTEN-C136F CAYLLHRGKF  | 67    | >PTEN-C136F RAYLLHRGKF  | 4    | 63    |
| >PTEN-C136F CAYLLHRGKF  | 350   | >PTEN-C136F RAYLLHRGKF  | 6    | 344   |
| >PTEN-C136F CAYLLHRGKF  | 4198  | >PTEN-C136F RAYLLHRGKF  | 275  | 3923  |
| >PTEN-C136F CAYLLHRGKF  | 4416  | >PTEN-C136F RAYLLHRGKF  | 191  | 4225  |
| >PTEN-C136F CAYLLHRGKF  | 350   | >PTEN-C136F RAYLLHRGKF  | 40   | 310   |
| >PTEN-C136F CAYLLHRGKF  | 185   | >PTEN-C136F RAYLLHRGKF  | 209  | 24    |
| >PTEN-C136F ICAYLLHRGKI | 2218  | >PTEN-C136F IRAYLLHRGKI | 155  | 2063  |
| >PTEN-C136F ICAYLLHR    | 25017 | >PTEN-C136F IRAYLLHR    | 115  | 24902 |
| >PTEN-C136F ICAYLLHRGK  | 29796 | >PTEN-C136F IRAYLLHRGK  | 127  | 29669 |
| >PTEN-C136F ICAYLLHRGKI | 23347 | >PTEN-C136F IRAYLLHRGKI | 169  | 23178 |
| >PTEN-C136F ICAYLLHRGKI | 187   | >PTEN-C136F IRAYLLHRGKI | 1717 | 1530  |
| >PTEN-C136F ICAYLLHRGK  | 34447 | >PTEN-C136F IRAYLLHRGK  | 428  | 34019 |
| >PTEN-C136F ICAYLLHRGKI | 35435 | >PTEN-C136F IRAYLLHRGKI | 79   | 35356 |
| >PTEN-C136F ICAYLLHR    | 107   | >PTEN-C136F IRAYLLHR    | 337  | 230   |
| >PTEN-C136F MICAYLLH    | 784   | >PTEN-C136F MIRAYLLH    | 295  | 489   |
| >PTEN-C136F MICAYLLHR   | 315   | >PTEN-C136F MIRAYLLHR   | 120  | 195   |
| >PTEN-C136F MICAYLLHRG  | 162   | >PTEN-C136F MIRAYLLHRG  | 78   | 84    |
| >PTEN-C136F MICAYLLH    | 299   | >PTEN-C136F MIRAYLLH    | 4761 | 4462  |
| >PTEN-C136F MICAYLLHR   | 89    | >PTEN-C136F MIRAYLLHR   | 1877 | 1788  |
| >PTEN-C136F MICAYLLHRG  | 49    | >PTEN-C136F MIRAYLLHRG  | 578  | 529   |
| >PTEN-C136F MICAYLLH    | 7479  | >PTEN-C136F MIRAYLLH    | 64   | 7415  |
| >PTEN-C136F MICAYLLHR   | 2180  | >PTEN-C136F MIRAYLLHR   | 10   | 2170  |
| >PTEN-C136F MICAYLLHRG  | 8786  | >PTEN-C136F MIRAYLLHRG  | 93   | 8693  |
| >PTEN-C136F MICAYLLHRG  | 77    | >PTEN-C136F MIRAYLLHRG  | 4    | 73    |



|                        |      |                        |      |      |
|------------------------|------|------------------------|------|------|
| >PTEN-C136F MICAYLLHR  | 11   | >PTEN-C136F MIRAYLLHR  | 8    | 3    |
| >PTEN-C136F MICAYLLHRG | 473  | >PTEN-C136F MIRAYLLHRG | 199  | 274  |
| >PTEN-C136F MICAYLLHR  | 45   | >PTEN-C136F MIRAYLLHR  | 31   | 14   |
| >PTEN-C136F MICAYLLHR  | 28   | >PTEN-C136F MIRAYLLHR  | 118  | 90   |
| >PTEN-C136F MICAYLLHRG | 124  | >PTEN-C136F MIRAYLLHRG | 693  | 569  |
| >PTEN-C136F MICAYLLHR  | 28   | >PTEN-C136F MIRAYLLHR  | 70   | 42   |
| >PTEN-C136F VMICAYLL   | 248  | >PTEN-C136F VMIRAYLL   | 67   | 181  |
| >PTEN-C136F VMICAYLL   | 15   | >PTEN-C136F VMIRAYLL   | 33   | 18   |
| >PTEN-C136F VMICAYLL   | 9    | >PTEN-C136F VMIRAYLL   | 17   | 8    |
| >PTEN-C136F VMICAYLL   | 27   | >PTEN-C136F VMIRAYLL   | 49   | 22   |
| >PTEN-C136F VMICAYLL   | 39   | >PTEN-C136F VMIRAYLL   | 71   | 32   |
| >PTEN-C136F VMICAYLL   | 10   | >PTEN-C136F VMIRAYLL   | 14   | 4    |
| >PTEN-C136F VMICAYLL   | 6    | >PTEN-C136F VMIRAYLL   | 15   | 9    |
| >PTEN-C136F VMICAYLL   | 58   | >PTEN-C136F VMIRAYLL   | 56   | 2    |
| >PTEN-C136F VMICAYLL   | 136  | >PTEN-C136F VMIRAYLL   | 333  | 197  |
| >PTEN-C136F VMICAYLL   | 16   | >PTEN-C136F VMIRAYLL   | 8    | 8    |
| >PTEN-C136F VMICAYLLH  | 1044 | >PTEN-C136F VMIRAYLLH  | 450  | 594  |
| >PTEN-C136F VMICAYLLHR | 166  | >PTEN-C136F VMIRAYLLHR | 232  | 66   |
| >PTEN-C136F VMICAYLLHR | 52   | >PTEN-C136F VMIRAYLLHR | 97   | 45   |
| >PTEN-C136F VMICAYLL   | 100  | >PTEN-C136F VMIRAYLL   | 214  | 114  |
| >PTEN-C136F VMICAYLLH  | 46   | >PTEN-C136F VMIRAYLLH  | 127  | 81   |
| >PTEN-C136F VMICAYLLHR | 44   | >PTEN-C136F VMIRAYLLHR | 53   | 9    |
| >PTEN-C136F VMICAYLLHR | 237  | >PTEN-C136F VMIRAYLLHR | 240  | 3    |
| >PTEN-C136F VMICAYLLHR | 119  | >PTEN-C136F VMIRAYLLHR | 454  | 335  |
| >PTEN-C136F VMICAYLL   | 126  | >PTEN-C136F VMIRAYLL   | 210  | 84   |
| >PTEN-C136F VMICAYLLHR | 434  | >PTEN-C136F VMIRAYLLHR | 605  | 171  |
| >PTEN-C136F VMICAYLLHR | 70   | >PTEN-C136F VMIRAYLLHR | 136  | 66   |
| >PTEN-C136F VMICAYLLHR | 58   | >PTEN-C136F VMIRAYLLHR | 158  | 100  |
| >PTEN-C136F GVMICAYL   | 66   | >PTEN-C136F GVMIRAYL   | 445  | 379  |
| >PTEN-C136F GVMICAYLL  | 57   | >PTEN-C136F GVMIRAYLL  | 357  | 300  |
| >PTEN-C136F GVMICAYL   | 20   | >PTEN-C136F GVMIRAYL   | 55   | 35   |
| >PTEN-C136F GVMICAYLL  | 18   | >PTEN-C136F GVMIRAYLL  | 53   | 35   |
| >PTEN-C136F GVMICAYL   | 260  | >PTEN-C136F GVMIRAYL   | 437  | 177  |
| >PTEN-C136F GVMICAYL   | 51   | >PTEN-C136F GVMIRAYL   | 150  | 99   |
| >PTEN-C136F GVMICAYLL  | 112  | >PTEN-C136F GVMIRAYLL  | 255  | 143  |
| >PTEN-C136F GVMICAYL   | 346  | >PTEN-C136F GVMIRAYL   | 1091 | 745  |
| >PTEN-C136F GVMICAYLL  | 327  | >PTEN-C136F GVMIRAYLL  | 1057 | 730  |
| >PTEN-C136F GVMICAYL   | 403  | >PTEN-C136F GVMIRAYL   | 3152 | 2749 |
| >PTEN-C136F GVMICAYLLH | 52   | >PTEN-C136F GVMIRAYLLH | 48   | 4    |
| >PTEN-C136F GVMICAYLLH | 38   | >PTEN-C136F GVMIRAYLLH | 28   | 10   |
| >PTEN-C136F GVMICAYLLH | 177  | >PTEN-C136F GVMIRAYLLH | 190  | 13   |
| >PTEN-C136F GVMICAYL   | 485  | >PTEN-C136F GVMIRAYL   | 891  | 406  |
| >PTEN-C136F GVMICAYLL  | 222  | >PTEN-C136F GVMIRAYLL  | 961  | 739  |

|                       |       |                       |      |       |
|-----------------------|-------|-----------------------|------|-------|
| >PTEN-C136FGVMICAYLLH | 198   | >PTEN-C136FGVMIRAYLLH | 188  | 10    |
| >PTEN-C136FGVMICAYLLH | 132   | >PTEN-C136FGVMIRAYLLH | 407  | 275   |
| >PTEN-C136FTGVMICAY   | 567   | >PTEN-C136FTGVMIRAY   | 427  | 140   |
| >PTEN-C136FTGVMICAYL  | 267   | >PTEN-C136FTGVMIRAYL  | 91   | 176   |
| >PTEN-C136FTGVMICAY   | 166   | >PTEN-C136FTGVMIRAY   | 286  | 120   |
| >PTEN-C136FRTGVMICAY  | 828   | >PTEN-C136FRTGVMIRAY  | 430  | 398   |
| >PTEN-C136FRTGVMICAYL | 550   | >PTEN-C136FRTGVMIRAYL | 218  | 332   |
| >PTEN-C136FRTGVMICAY  | 243   | >PTEN-C136FRTGVMIRAY  | 173  | 70    |
| >PTEN-C136FRTGVMICAYL | 398   | >PTEN-C136FRTGVMIRAYL | 937  | 539   |
| >PTEN-C136FRTGVMICAY  | 169   | >PTEN-C136FRTGVMIRAY  | 257  | 88    |
| >PTEN-C136FRTGVMICAYL | 114   | >PTEN-C136FRTGVMIRAYL | 95   | 19    |
| >PTEN-C136FRTGVMICAYL | 74    | >PTEN-C136FRTGVMIRAYL | 97   | 23    |
| >PTEN-C136FRTGVMICAY  | 228   | >PTEN-C136FRTGVMIRAY  | 199  | 29    |
| >PTEN-C136FRTGVMICAY  | 70    | >PTEN-C136FRTGVMIRAY  | 179  | 109   |
| >PTEN-C136FRTGVMICAY  | 13    | >PTEN-C136FRTGVMIRAY  | 15   | 2     |
| >PTEN-C136FRTGVMICAYL | 12    | >PTEN-C136FRTGVMIRAYL | 18   | 6     |
| >PTEN-C136FRTGVMICAYL | 14    | >PTEN-C136FRTGVMIRAYL | 15   | 1     |
| >PTEN-C136FRTGVMICAY  | 205   | >PTEN-C136FRTGVMIRAY  | 6599 | 6394  |
| >PTEN-C136FRTGVMICAYL | 438   | >PTEN-C136FRTGVMIRAYL | 961  | 523   |
| >PTEN-C136FRTGVMICAYL | 428   | >PTEN-C136FRTGVMIRAYL | 1745 | 1317  |
| >PTEN-C136FRTGVMICAYL | 90    | >PTEN-C136FRTGVMIRAYL | 98   | 8     |
| >PTEN-C136FRTGVMICAYL | 56    | >PTEN-C136FRTGVMIRAYL | 67   | 11    |
| >PTEN-C136FRTGVMICAY  | 378   | >PTEN-C136FRTGVMIRAY  | 167  | 211   |
| >PTEN-C136FRTGVMICAYL | 72    | >PTEN-C136FRTGVMIRAYL | 40   | 32    |
| >PTEN-C136FRTGVMICAYL | 235   | >PTEN-C136FRTGVMIRAYL | 306  | 71    |
| >PTEN-C136FRTGVMICAYL | 394   | >PTEN-C136FRTGVMIRAYL | 302  | 92    |
| >PTEN-C136FGRTGVMIC   | 6103  | >PTEN-C136FGRTGVMIR   | 345  | 5758  |
| >PTEN-C136FGRTGVMICA' | 113   | >PTEN-C136FGRTGVMIRA' | 66   | 47    |
| >PTEN-C136FGRTGVMICA' | 258   | >PTEN-C136FGRTGVMIRA' | 88   | 170   |
| >PTEN-C136FGRTGVMICA' | 334   | >PTEN-C136FGRTGVMIRA' | 185  | 149   |
| >PTEN-C136FGRTGVMICA' | 78    | >PTEN-C136FGRTGVMIRA' | 42   | 36    |
| >PTEN-C136FKGRTGVMIC  | 365   | >PTEN-C136FKGRTGVMIR  | 26   | 339   |
| >PTEN-C136FKGRTGVMIC/ | 21    | >PTEN-C136FKGRTGVMIR/ | 15   | 6     |
| >PTEN-C136FKGRTGVMIC/ | 38    | >PTEN-C136FKGRTGVMIR/ | 60   | 22    |
| >PTEN-C136FKGRTGVMIC/ | 314   | >PTEN-C136FKGRTGVMIR/ | 250  | 64    |
| >PTEN-C136FKGRTGVMIC  | 21988 | >PTEN-C136FKGRTGVMIR  | 302  | 21686 |
| >PTEN-C136FKGRTGVMIC/ | 165   | >PTEN-C136FKGRTGVMIR/ | 379  | 214   |
| >PTEN-C136FKGRTGVMIC/ | 174   | >PTEN-C136FKGRTGVMIR/ | 325  | 151   |
| >PTEN-C136FKGRTGVMIC/ | 135   | >PTEN-C136FKGRTGVMIR/ | 223  | 88    |
| >PTEN-C136FKGRTGVMIC/ | 666   | >PTEN-C136FKGRTGVMIR/ | 439  | 227   |
| >PTEN-C136FKGRTGVMIC  | 34573 | >PTEN-C136FKGRTGVMIR  | 185  | 34388 |
| >PTEN-C136\CAYLLHRGKF | 119   | >PTEN-C136\WAYLLHRGK  | 386  | 267   |
| >PTEN-C136\CAYLLHRGK  | 471   | >PTEN-C136\WAYLLHRGK  | 711  | 240   |

|                        |       |                       |      |       |
|------------------------|-------|-----------------------|------|-------|
| >PTEN-C136\CAYLLHRGKF  | 1066  | >PTEN-C136\WAYLLHRGKI | 265  | 801   |
| >PTEN-C136\CAYLLHRGKF  | 67    | >PTEN-C136\WAYLLHRGKI | 13   | 54    |
| >PTEN-C136\CAYLLHRGKF  | 350   | >PTEN-C136\WAYLLHRGKI | 44   | 306   |
| >PTEN-C136\CAYLLHRGKF  | 350   | >PTEN-C136\WAYLLHRGKI | 33   | 317   |
| >PTEN-C136\CAYLLHRGKF  | 185   | >PTEN-C136\WAYLLHRGKI | 1512 | 1327  |
| >PTEN-C136\ICAYLLHRGKI | 4414  | >PTEN-C136\IWAYLLHRGK | 129  | 4285  |
| >PTEN-C136\ICAYLLHRGKI | 6442  | >PTEN-C136\IWAYLLHRGK | 206  | 6236  |
| >PTEN-C136\ICAYLLHRGKI | 11784 | >PTEN-C136\IWAYLLHRGK | 95   | 11689 |
| >PTEN-C136\ICAYLLHR    | 569   | >PTEN-C136\IWAYLLHR   | 112  | 457   |
| >PTEN-C136\ICAYLLHRGKI | 187   | >PTEN-C136\IWAYLLHRGK | 1748 | 1561  |
| >PTEN-C136\ICAYLLHR    | 107   | >PTEN-C136\IWAYLLHR   | 15   | 92    |
| >PTEN-C136\ICAYLLHRGK  | 6412  | >PTEN-C136\IWAYLLHRGK | 193  | 6219  |
| >PTEN-C136\ICAYLLHRG   | 37219 | >PTEN-C136\IWAYLLHRG  | 385  | 36834 |
| >PTEN-C136\ICAYLLHRGKI | 37415 | >PTEN-C136\IWAYLLHRGK | 320  | 37095 |
| >PTEN-C136\MICAYLLH    | 784   | >PTEN-C136\MIWAYLLH   | 281  | 503   |
| >PTEN-C136\MICAYLLHR   | 315   | >PTEN-C136\MIWAYLLHR  | 122  | 193   |
| >PTEN-C136\MICAYLLHRG  | 162   | >PTEN-C136\MIWAYLLHRG | 83   | 79    |
| >PTEN-C136\MICAYLLH    | 299   | >PTEN-C136\MIWAYLLH   | 474  | 175   |
| >PTEN-C136\MICAYLLHR   | 89    | >PTEN-C136\MIWAYLLHR  | 86   | 3     |
| >PTEN-C136\MICAYLLHRG  | 49    | >PTEN-C136\MIWAYLLHRG | 45   | 4     |
| >PTEN-C136\MICAYLLH    | 561   | >PTEN-C136\MIWAYLLH   | 56   | 505   |
| >PTEN-C136\MICAYLLHRG  | 77    | >PTEN-C136\MIWAYLLHRG | 114  | 37    |
| >PTEN-C136\MICAYLLHR   | 11    | >PTEN-C136\MIWAYLLHR  | 8    | 3     |
| >PTEN-C136\MICAYLLHRG  | 473   | >PTEN-C136\MIWAYLLHRG | 74   | 399   |
| >PTEN-C136\MICAYLLHR   | 45    | >PTEN-C136\MIWAYLLHR  | 27   | 18    |
| >PTEN-C136\MICAYLLHR   | 28    | >PTEN-C136\MIWAYLLHR  | 50   | 22    |
| >PTEN-C136\MICAYLLHRG  | 124   | >PTEN-C136\MIWAYLLHRG | 263  | 139   |
| >PTEN-C136\MICAYLLHR   | 28    | >PTEN-C136\MIWAYLLHR  | 14   | 14    |
| >PTEN-C136\MICAYLLHRG  | 1168  | >PTEN-C136\MIWAYLLHRG | 265  | 903   |
| >PTEN-C136\VMICAYLL    | 248   | >PTEN-C136\VMIWAYLL   | 190  | 58    |
| >PTEN-C136\VMICAYLL    | 15    | >PTEN-C136\VMIWAYLL   | 14   | 1     |
| >PTEN-C136\VMICAYLL    | 9     | >PTEN-C136\VMIWAYLL   | 12   | 3     |
| >PTEN-C136\VMICAYLL    | 27    | >PTEN-C136\VMIWAYLL   | 31   | 4     |
| >PTEN-C136\VMICAYLL    | 39    | >PTEN-C136\VMIWAYLL   | 37   | 2     |
| >PTEN-C136\VMICAYLL    | 10    | >PTEN-C136\VMIWAYLL   | 4    | 6     |
| >PTEN-C136\VMICAYLLHR  | 1244  | >PTEN-C136\VMIWAYLLHI | 402  | 842   |
| >PTEN-C136\VMICAYLL    | 6     | >PTEN-C136\VMIWAYLL   | 16   | 10    |
| >PTEN-C136\VMICAYLL    | 58    | >PTEN-C136\VMIWAYLL   | 15   | 43    |
| >PTEN-C136\VMICAYLL    | 136   | >PTEN-C136\VMIWAYLL   | 31   | 105   |
| >PTEN-C136\VMICAYLL    | 16    | >PTEN-C136\VMIWAYLL   | 4    | 12    |
| >PTEN-C136\VMICAYLLH   | 1044  | >PTEN-C136\VMIWAYLLH  | 386  | 658   |
| >PTEN-C136\VMICAYLLHR  | 166   | >PTEN-C136\VMIWAYLLHI | 140  | 26    |
| >PTEN-C136\VMICAYLLH   | 1118  | >PTEN-C136\VMIWAYLLH  | 447  | 671   |

|                       |      |                       |      |      |
|-----------------------|------|-----------------------|------|------|
| >PTEN-C136\VMICAYLLHR | 52   | >PTEN-C136\VMIWAYLLHI | 61   | 9    |
| >PTEN-C136\VMICAYLL   | 100  | >PTEN-C136\VMIWAYLL   | 304  | 204  |
| >PTEN-C136\VMICAYLL   | 955  | >PTEN-C136\VMIWAYLL   | 448  | 507  |
| >PTEN-C136\VMICAYLLH  | 46   | >PTEN-C136\VMIWAYLLH  | 52   | 6    |
| >PTEN-C136\VMICAYLLHR | 44   | >PTEN-C136\VMIWAYLLHI | 32   | 12   |
| >PTEN-C136\VMICAYLLHR | 237  | >PTEN-C136\VMIWAYLLHI | 177  | 60   |
| >PTEN-C136\VMICAYLLHR | 119  | >PTEN-C136\VMIWAYLLHI | 143  | 24   |
| >PTEN-C136\VMICAYLL   | 126  | >PTEN-C136\VMIWAYLL   | 646  | 520  |
| >PTEN-C136\VMICAYLLHR | 434  | >PTEN-C136\VMIWAYLLHI | 2071 | 1637 |
| >PTEN-C136\VMICAYLL   | 1077 | >PTEN-C136\VMIWAYLL   | 278  | 799  |
| >PTEN-C136\VMICAYLLHR | 70   | >PTEN-C136\VMIWAYLLHI | 102  | 32   |
| >PTEN-C136\VMICAYLLHR | 58   | >PTEN-C136\VMIWAYLLHI | 55   | 3    |
| >PTEN-C136\GVMICAYL   | 66   | >PTEN-C136\GVMIWAYL   | 43   | 23   |
| >PTEN-C136\GVMICAYLL  | 57   | >PTEN-C136\GVMIWAYLL  | 32   | 25   |
| >PTEN-C136\GVMICAYL   | 20   | >PTEN-C136\GVMIWAYL   | 33   | 13   |
| >PTEN-C136\GVMICAYLL  | 18   | >PTEN-C136\GVMIWAYLL  | 34   | 16   |
| >PTEN-C136\GVMICAYL   | 260  | >PTEN-C136\GVMIWAYL   | 240  | 20   |
| >PTEN-C136\GVMICAYL   | 51   | >PTEN-C136\GVMIWAYL   | 30   | 21   |
| >PTEN-C136\GVMICAYLL  | 112  | >PTEN-C136\GVMIWAYLL  | 80   | 32   |
| >PTEN-C136\GVMICAYL   | 844  | >PTEN-C136\GVMIWAYL   | 42   | 802  |
| >PTEN-C136\GVMICAYLL  | 3817 | >PTEN-C136\GVMIWAYLL  | 97   | 3720 |
| >PTEN-C136\GVMICAYL   | 346  | >PTEN-C136\GVMIWAYL   | 119  | 227  |
| >PTEN-C136\GVMICAYLL  | 327  | >PTEN-C136\GVMIWAYLL  | 78   | 249  |
| >PTEN-C136\GVMICAYL   | 2141 | >PTEN-C136\GVMIWAYL   | 205  | 1936 |
| >PTEN-C136\GVMICAYLL  | 4362 | >PTEN-C136\GVMIWAYLL  | 340  | 4022 |
| >PTEN-C136\GVMICAYL   | 403  | >PTEN-C136\GVMIWAYL   | 133  | 270  |
| >PTEN-C136\GVMICAYLL  | 2518 | >PTEN-C136\GVMIWAYLL  | 380  | 2138 |
| >PTEN-C136\GVMICAYL   | 574  | >PTEN-C136\GVMIWAYL   | 126  | 448  |
| >PTEN-C136\GVMICAYLL  | 1979 | >PTEN-C136\GVMIWAYLL  | 181  | 1798 |
| >PTEN-C136\GVMICAYLLH | 52   | >PTEN-C136\GVMIWAYLLI | 31   | 21   |
| >PTEN-C136\GVMICAYLLH | 38   | >PTEN-C136\GVMIWAYLLI | 27   | 11   |
| >PTEN-C136\GVMICAYLL  | 2144 | >PTEN-C136\GVMIWAYLL  | 394  | 1750 |
| >PTEN-C136\GVMICAYLLH | 1046 | >PTEN-C136\GVMIWAYLLI | 445  | 601  |
| >PTEN-C136\GVMICAYLLH | 177  | >PTEN-C136\GVMIWAYLLI | 177  | 0    |
| >PTEN-C136\GVMICAYL   | 485  | >PTEN-C136\GVMIWAYL   | 351  | 134  |
| >PTEN-C136\GVMICAYLL  | 7932 | >PTEN-C136\GVMIWAYLL  | 480  | 7452 |
| >PTEN-C136\GVMICAYLL  | 222  | >PTEN-C136\GVMIWAYLL  | 260  | 38   |
| >PTEN-C136\GVMICAYLLH | 198  | >PTEN-C136\GVMIWAYLLI | 155  | 43   |
| >PTEN-C136\GVMICAYLLH | 132  | >PTEN-C136\GVMIWAYLLI | 246  | 114  |
| >PTEN-C136\TGVMICAYL  | 1775 | >PTEN-C136\TGVMIWAYL  | 386  | 1389 |
| >PTEN-C136\TGVMICAY   | 2263 | >PTEN-C136\TGVMIWAY   | 247  | 2016 |
| >PTEN-C136\TGVMICAY   | 567  | >PTEN-C136\TGVMIWAY   | 132  | 435  |
| >PTEN-C136\TGVMICAYL  | 267  | >PTEN-C136\TGVMIWAYL  | 112  | 155  |

|                       |       |                        |     |       |
|-----------------------|-------|------------------------|-----|-------|
| >PTEN-C136\TGVMICAY   | 166   | >PTEN-C136\TGVMIIWAY   | 88  | 78    |
| >PTEN-C136\RTGVMICAY  | 976   | >PTEN-C136\RTGVMIIWAY  | 104 | 872   |
| >PTEN-C136\RTGVMICAYL | 583   | >PTEN-C136\RTGVMIIWAY  | 469 | 114   |
| >PTEN-C136\RTGVMICAYL | 1073  | >PTEN-C136\RTGVMIIWAY  | 256 | 817   |
| >PTEN-C136\RTGVMICAY  | 913   | >PTEN-C136\RTGVMIIWAY  | 213 | 700   |
| >PTEN-C136\RTGVMICAY  | 828   | >PTEN-C136\RTGVMIIWAY  | 277 | 551   |
| >PTEN-C136\RTGVMICAY  | 1808  | >PTEN-C136\RTGVMIIWAY  | 61  | 1747  |
| >PTEN-C136\RTGVMICAYL | 550   | >PTEN-C136\RTGVMIIWAY  | 220 | 330   |
| >PTEN-C136\RTGVMICAY  | 243   | >PTEN-C136\RTGVMIIWAY  | 18  | 225   |
| >PTEN-C136\RTGVMICAYL | 398   | >PTEN-C136\RTGVMIIWAY  | 269 | 129   |
| >PTEN-C136\RTGVMICAY  | 169   | >PTEN-C136\RTGVMIIWAY  | 83  | 86    |
| >PTEN-C136\RTGVMICAYL | 114   | >PTEN-C136\RTGVMIIWAY  | 54  | 60    |
| >PTEN-C136\RTGVMICAYL | 74    | >PTEN-C136\RTGVMIIWAY  | 176 | 102   |
| >PTEN-C136\RTGVMICAY  | 228   | >PTEN-C136\RTGVMIIWAY  | 7   | 221   |
| >PTEN-C136\RTGVMICAY  | 70    | >PTEN-C136\RTGVMIIWAY  | 305 | 235   |
| >PTEN-C136\RTGVMICAY  | 13    | >PTEN-C136\RTGVMIIWAY  | 13  | 0     |
| >PTEN-C136\RTGVMICAYL | 12    | >PTEN-C136\RTGVMIIWAY  | 10  | 2     |
| >PTEN-C136\RTGVMICAYL | 14    | >PTEN-C136\RTGVMIIWAY  | 15  | 1     |
| >PTEN-C136\RTGVMICAY  | 205   | >PTEN-C136\RTGVMIIWAY  | 66  | 139   |
| >PTEN-C136\RTGVMICAYL | 438   | >PTEN-C136\RTGVMIIWAY  | 186 | 252   |
| >PTEN-C136\RTGVMICAYL | 428   | >PTEN-C136\RTGVMIIWAY  | 216 | 212   |
| >PTEN-C136\RTGVMICAYL | 90    | >PTEN-C136\RTGVMIIWAY  | 61  | 29    |
| >PTEN-C136\RTGVMICAYL | 56    | >PTEN-C136\RTGVMIIWAY  | 24  | 32    |
| >PTEN-C136\RTGVMICAY  | 378   | >PTEN-C136\RTGVMIIWAY  | 636 | 258   |
| >PTEN-C136\RTGVMICAYL | 72    | >PTEN-C136\RTGVMIIWAY  | 36  | 36    |
| >PTEN-C136\RTGVMICAYL | 235   | >PTEN-C136\RTGVMIIWAY  | 288 | 53    |
| >PTEN-C136\RTGVMICAY  | 2089  | >PTEN-C136\RTGVMIIWAY  | 134 | 1955  |
| >PTEN-C136\RTGVMICAYL | 394   | >PTEN-C136\RTGVMIIWAY  | 320 | 74    |
| >PTEN-C136\GRTGVMICA' | 620   | >PTEN-C136\GRTGVMIIWA' | 198 | 422   |
| >PTEN-C136\GRTGVMICA' | 113   | >PTEN-C136\GRTGVMIIWA' | 37  | 76    |
| >PTEN-C136\GRTGVMICA' | 258   | >PTEN-C136\GRTGVMIIWA' | 95  | 163   |
| >PTEN-C136\GRTGVMICA' | 334   | >PTEN-C136\GRTGVMIIWA' | 149 | 185   |
| >PTEN-C136\GRTGVMICA' | 78    | >PTEN-C136\GRTGVMIIWA' | 46  | 32    |
| >PTEN-C136\GRTGVMIC   | 32212 | >PTEN-C136\GRTGVMIIW   | 45  | 32167 |
| >PTEN-C136\KGRTGVMIC  | 365   | >PTEN-C136\KGRTGVMIIW  | 983 | 618   |
| >PTEN-C136\KGRTGVMIC/ | 21    | >PTEN-C136\KGRTGVMIIW  | 15  | 6     |
| >PTEN-C136\KGRTGVMIC/ | 38    | >PTEN-C136\KGRTGVMIIW  | 89  | 51    |
| >PTEN-C136\KGRTGVMIC/ | 314   | >PTEN-C136\KGRTGVMIIW  | 50  | 264   |
| >PTEN-C136\KGRTGVMIC/ | 165   | >PTEN-C136\KGRTGVMIIW  | 559 | 394   |
| >PTEN-C136\KGRTGVMIC/ | 174   | >PTEN-C136\KGRTGVMIIW  | 273 | 99    |
| >PTEN-C136\KGRTGVMIC  | 21458 | >PTEN-C136\KGRTGVMIIW  | 119 | 21339 |
| >PTEN-C136\KGRTGVMIC/ | 135   | >PTEN-C136\KGRTGVMIIW  | 222 | 87    |
| >PTEN-C136\KGRTGVMIC  | 23526 | >PTEN-C136\KGRTGVMIIW  | 85  | 23441 |

|                        |       |                        |      |       |
|------------------------|-------|------------------------|------|-------|
| >PTEN-C136\KGRTGVMIC   | 20625 | >PTEN-C136\KGRTGVMIW   | 36   | 20589 |
| >PTEN-C136\CAYLLHRGKF  | 119   | >PTEN-C136\YAYLLHRGKF  | 154  | 35    |
| >PTEN-C136\CAYLLHRGK   | 523   | >PTEN-C136\YAYLLHRGK   | 410  | 113   |
| >PTEN-C136\CAYLLHRGK   | 471   | >PTEN-C136\YAYLLHRGK   | 71   | 400   |
| >PTEN-C136\CAYLLHRGKF  | 1066  | >PTEN-C136\YAYLLHRGKF  | 112  | 954   |
| >PTEN-C136\CAYLLHRGKF  | 67    | >PTEN-C136\YAYLLHRGKF  | 6    | 61    |
| >PTEN-C136\CAYLLHRGKF  | 350   | >PTEN-C136\YAYLLHRGKF  | 12   | 338   |
| >PTEN-C136\CAYLLHRGKF  | 1797  | >PTEN-C136\YAYLLHRGKF  | 270  | 1527  |
| >PTEN-C136\CAYLLHRGKF  | 350   | >PTEN-C136\YAYLLHRGKF  | 49   | 301   |
| >PTEN-C136\CAYLLHRGKF  | 185   | >PTEN-C136\YAYLLHRGKF  | 895  | 710   |
| >PTEN-C136\ICAYLLHRGKI | 4414  | >PTEN-C136\IYAYLLHRGKI | 70   | 4344  |
| >PTEN-C136\ICAYLLHRGKI | 6442  | >PTEN-C136\IYAYLLHRGKI | 95   | 6347  |
| >PTEN-C136\ICAYLLHRGKI | 11784 | >PTEN-C136\IYAYLLHRGKI | 18   | 11766 |
| >PTEN-C136\ICAYLLHR    | 569   | >PTEN-C136\IYAYLLHR    | 22   | 547   |
| >PTEN-C136\ICAYLLHR    | 1217  | >PTEN-C136\IYAYLLHR    | 48   | 1169  |
| >PTEN-C136\ICAYLLHR    | 969   | >PTEN-C136\IYAYLLHR    | 219  | 750   |
| >PTEN-C136\ICAYLLHRGKI | 187   | >PTEN-C136\IYAYLLHRGKI | 1283 | 1096  |
| >PTEN-C136\ICAYLLHR    | 107   | >PTEN-C136\IYAYLLHR    | 22   | 85    |
| >PTEN-C136\AGKGRTGVM   | 32043 | >PTEN-C136\AGKGRTGVM   | 458  | 31585 |
| >PTEN-C136\AGKGRTGVM   | 20367 | >PTEN-C136\AGKGRTGVM   | 480  | 19887 |
| >PTEN-C136\MICAYLLH    | 784   | >PTEN-C136\MIYAYLLH    | 55   | 729   |
| >PTEN-C136\MICAYLLHR   | 315   | >PTEN-C136\MIYAYLLHR   | 36   | 279   |
| >PTEN-C136\MICAYLLHRG  | 162   | >PTEN-C136\MIYAYLLHRG  | 33   | 129   |
| >PTEN-C136\MICAYLLH    | 299   | >PTEN-C136\MIYAYLLH    | 76   | 223   |
| >PTEN-C136\MICAYLLHR   | 89    | >PTEN-C136\MIYAYLLHR   | 29   | 60    |
| >PTEN-C136\MICAYLLHRG  | 49    | >PTEN-C136\MIYAYLLHRG  | 21   | 28    |
| >PTEN-C136\MICAYLLH    | 561   | >PTEN-C136\MIYAYLLH    | 96   | 465   |
| >PTEN-C136\MICAYLLHRG  | 77    | >PTEN-C136\MIYAYLLHRG  | 31   | 46    |
| >PTEN-C136\MICAYLLHR   | 11    | >PTEN-C136\MIYAYLLHR   | 9    | 2     |
| >PTEN-C136\MICAYLLHRG  | 473   | >PTEN-C136\MIYAYLLHRG  | 155  | 318   |
| >PTEN-C136\MICAYLLHR   | 45    | >PTEN-C136\MIYAYLLHR   | 35   | 10    |
| >PTEN-C136\MICAYLLHR   | 28    | >PTEN-C136\MIYAYLLHR   | 9    | 19    |
| >PTEN-C136\MICAYLLHRG  | 124   | >PTEN-C136\MIYAYLLHRG  | 24   | 100   |
| >PTEN-C136\MICAYLLHR   | 28    | >PTEN-C136\MIYAYLLHR   | 18   | 10    |
| >PTEN-C136\MICAYLLHRG  | 1168  | >PTEN-C136\MIYAYLLHRG  | 417  | 751   |
| >PTEN-C136\VMICAYLL    | 248   | >PTEN-C136\VMIYAYLL    | 140  | 108   |
| >PTEN-C136\VMICAYLL    | 15    | >PTEN-C136\VMIYAYLL    | 17   | 2     |
| >PTEN-C136\VMICAYLL    | 9     | >PTEN-C136\VMIYAYLL    | 9    | 0     |
| >PTEN-C136\VMICAYLL    | 27    | >PTEN-C136\VMIYAYLL    | 43   | 16    |
| >PTEN-C136\VMICAYLL    | 39    | >PTEN-C136\VMIYAYLL    | 64   | 25    |
| >PTEN-C136\VMICAYLL    | 10    | >PTEN-C136\VMIYAYLL    | 26   | 16    |
| >PTEN-C136\VMICAYLL    | 6     | >PTEN-C136\VMIYAYLL    | 16   | 10    |
| >PTEN-C136\VMICAYLL    | 58    | >PTEN-C136\VMIYAYLL    | 77   | 19    |

|                       |      |                        |     |      |
|-----------------------|------|------------------------|-----|------|
| >PTEN-C136\VMICAYLL   | 136  | >PTEN-C136\VMIIYAYLL   | 299 | 163  |
| >PTEN-C136\VMICAYLL   | 16   | >PTEN-C136\VMIIYAYLL   | 20  | 4    |
| >PTEN-C136\VMICAYLLHR | 166  | >PTEN-C136\VMIIYAYLLHR | 74  | 92   |
| >PTEN-C136\VMICAYLLHR | 52   | >PTEN-C136\VMIIYAYLLHR | 36  | 16   |
| >PTEN-C136\VMICAYLL   | 100  | >PTEN-C136\VMIIYAYLL   | 217 | 117  |
| >PTEN-C136\VMICAYLLH  | 46   | >PTEN-C136\VMIIYAYLLH  | 30  | 16   |
| >PTEN-C136\VMICAYLLHR | 44   | >PTEN-C136\VMIIYAYLLHR | 40  | 4    |
| >PTEN-C136\VMICAYLLHR | 237  | >PTEN-C136\VMIIYAYLLHR | 183 | 54   |
| >PTEN-C136\VMICAYLLHR | 119  | >PTEN-C136\VMIIYAYLLHR | 89  | 30   |
| >PTEN-C136\VMICAYLL   | 126  | >PTEN-C136\VMIIYAYLL   | 105 | 21   |
| >PTEN-C136\VMICAYLLHR | 434  | >PTEN-C136\VMIIYAYLLHR | 450 | 16   |
| >PTEN-C136\VMICAYLL   | 1022 | >PTEN-C136\VMIIYAYLL   | 299 | 723  |
| >PTEN-C136\VMICAYLLHR | 70   | >PTEN-C136\VMIIYAYLLHR | 87  | 17   |
| >PTEN-C136\VMICAYLLHR | 58   | >PTEN-C136\VMIIYAYLLHR | 146 | 88   |
| >PTEN-C136\GVMICAYL   | 2779 | >PTEN-C136\GVMIYAYL    | 32  | 2747 |
| >PTEN-C136\GVMICAYL   | 66   | >PTEN-C136\GVMIYAYL    | 53  | 13   |
| >PTEN-C136\GVMICAYLL  | 57   | >PTEN-C136\GVMIYAYLL   | 35  | 22   |
| >PTEN-C136\GVMICAYL   | 20   | >PTEN-C136\GVMIYAYL    | 14  | 6    |
| >PTEN-C136\GVMICAYLL  | 18   | >PTEN-C136\GVMIYAYLL   | 11  | 7    |
| >PTEN-C136\GVMICAYL   | 260  | >PTEN-C136\GVMIYAYL    | 139 | 121  |
| >PTEN-C136\GVMICAYL   | 51   | >PTEN-C136\GVMIYAYL    | 41  | 10   |
| >PTEN-C136\GVMICAYLL  | 112  | >PTEN-C136\GVMIYAYLL   | 66  | 46   |
| >PTEN-C136\GVMICAYL   | 844  | >PTEN-C136\GVMIYAYL    | 107 | 737  |
| >PTEN-C136\GVMICAYL   | 346  | >PTEN-C136\GVMIYAYL    | 185 | 161  |
| >PTEN-C136\GVMICAYLL  | 327  | >PTEN-C136\GVMIYAYLL   | 297 | 30   |
| >PTEN-C136\GVMICAYL   | 403  | >PTEN-C136\GVMIYAYL    | 382 | 21   |
| >PTEN-C136\GVMICAYL   | 574  | >PTEN-C136\GVMIYAYL    | 311 | 263  |
| >PTEN-C136\GVMICAYLLH | 52   | >PTEN-C136\GVMIYAYLLH  | 37  | 15   |
| >PTEN-C136\GVMICAYLLH | 38   | >PTEN-C136\GVMIYAYLLH  | 28  | 10   |
| >PTEN-C136\GVMICAYLLH | 177  | >PTEN-C136\GVMIYAYLLH  | 107 | 70   |
| >PTEN-C136\GVMICAYL   | 485  | >PTEN-C136\GVMIYAYL    | 448 | 37   |
| >PTEN-C136\GVMICAYLL  | 222  | >PTEN-C136\GVMIYAYLL   | 453 | 231  |
| >PTEN-C136\GVMICAYLLH | 198  | >PTEN-C136\GVMIYAYLLH  | 157 | 41   |
| >PTEN-C136\GVMICAYLLH | 132  | >PTEN-C136\GVMIYAYLLH  | 318 | 186  |
| >PTEN-C136\TGVMICAYL  | 1775 | >PTEN-C136\TGVMIIYAYL  | 182 | 1593 |
| >PTEN-C136\TGVMICAY   | 2263 | >PTEN-C136\TGVMIIYAY   | 219 | 2044 |
| >PTEN-C136\TGVMICAY   | 567  | >PTEN-C136\TGVMIIYAY   | 144 | 423  |
| >PTEN-C136\TGVMICAYL  | 267  | >PTEN-C136\TGVMIIYAYL  | 88  | 179  |
| >PTEN-C136\TGVMICAY   | 166  | >PTEN-C136\TGVMIIYAY   | 75  | 91   |
| >PTEN-C136\TGVMICAYLL | 791  | >PTEN-C136\TGVMIIYAYLL | 428 | 363  |
| >PTEN-C136\TGVMICAY   | 1635 | >PTEN-C136\TGVMIIYAY   | 352 | 1283 |
| >PTEN-C136\RTGVMICAY  | 976  | >PTEN-C136\RTGVMIIYAY  | 327 | 649  |
| >PTEN-C136\RTGVMICAYL | 583  | >PTEN-C136\RTGVMIIYAYL | 296 | 287  |

|                       |       |                        |     |       |
|-----------------------|-------|------------------------|-----|-------|
| >PTEN-C136\RTGVMICAYL | 1073  | >PTEN-C136\RTGVMIIYAYL | 475 | 598   |
| >PTEN-C136\RTGVMICAY  | 913   | >PTEN-C136\RTGVMIIYAY  | 148 | 765   |
| >PTEN-C136\RTGVMICAY  | 828   | >PTEN-C136\RTGVMIIYAY  | 173 | 655   |
| >PTEN-C136\RTGVMICAY  | 1808  | >PTEN-C136\RTGVMIIYAY  | 36  | 1772  |
| >PTEN-C136\RTGVMICA   | 980   | >PTEN-C136\RTGVMIIYA   | 130 | 850   |
| >PTEN-C136\RTGVMICAYL | 550   | >PTEN-C136\RTGVMIIYAYL | 241 | 309   |
| >PTEN-C136\RTGVMICAY  | 243   | >PTEN-C136\RTGVMIIYAY  | 19  | 224   |
| >PTEN-C136\RTGVMICAYL | 398   | >PTEN-C136\RTGVMIIYAYL | 339 | 59    |
| >PTEN-C136\RTGVMICAY  | 2502  | >PTEN-C136\RTGVMIIYAY  | 361 | 2141  |
| >PTEN-C136\RTGVMICAY  | 169   | >PTEN-C136\RTGVMIIYAY  | 22  | 147   |
| >PTEN-C136\RTGVMICAYL | 632   | >PTEN-C136\RTGVMIIYAYL | 391 | 241   |
| >PTEN-C136\RTGVMICAYL | 114   | >PTEN-C136\RTGVMIIYAYL | 45  | 69    |
| >PTEN-C136\RTGVMICAYL | 74    | >PTEN-C136\RTGVMIIYAYL | 116 | 42    |
| >PTEN-C136\RTGVMICAY  | 228   | >PTEN-C136\RTGVMIIYAY  | 24  | 204   |
| >PTEN-C136\RTGVMICAY  | 70    | >PTEN-C136\RTGVMIIYAY  | 122 | 52    |
| >PTEN-C136\RTGVMICAY  | 13    | >PTEN-C136\RTGVMIIYAY  | 12  | 1     |
| >PTEN-C136\RTGVMICAYL | 12    | >PTEN-C136\RTGVMIIYAYL | 13  | 1     |
| >PTEN-C136\RTGVMICAYL | 14    | >PTEN-C136\RTGVMIIYAYL | 13  | 1     |
| >PTEN-C136\RTGVMICAY  | 205   | >PTEN-C136\RTGVMIIYAY  | 224 | 19    |
| >PTEN-C136\RTGVMICAYL | 438   | >PTEN-C136\RTGVMIIYAYL | 187 | 251   |
| >PTEN-C136\RTGVMICAYL | 428   | >PTEN-C136\RTGVMIIYAYL | 377 | 51    |
| >PTEN-C136\RTGVMICAYL | 90    | >PTEN-C136\RTGVMIIYAYL | 34  | 56    |
| >PTEN-C136\RTGVMICAYL | 56    | >PTEN-C136\RTGVMIIYAYL | 22  | 34    |
| >PTEN-C136\RTGVMICAY  | 378   | >PTEN-C136\RTGVMIIYAY  | 178 | 200   |
| >PTEN-C136\RTGVMICAYL | 72    | >PTEN-C136\RTGVMIIYAYL | 39  | 33    |
| >PTEN-C136\RTGVMICAYL | 235   | >PTEN-C136\RTGVMIIYAYL | 232 | 3     |
| >PTEN-C136\RTGVMICAY  | 3713  | >PTEN-C136\RTGVMIIYAY  | 195 | 3518  |
| >PTEN-C136\RTGVMICAY  | 2089  | >PTEN-C136\RTGVMIIYAY  | 149 | 1940  |
| >PTEN-C136\RTGVMICAYL | 394   | >PTEN-C136\RTGVMIIYAYL | 351 | 43    |
| >PTEN-C136\GRTGVMICA' | 620   | >PTEN-C136\GRTGVMIIYA' | 181 | 439   |
| >PTEN-C136\GRTGVMIC   | 6103  | >PTEN-C136\GRTGVMIIY   | 483 | 5620  |
| >PTEN-C136\GRTGVMICA' | 113   | >PTEN-C136\GRTGVMIIYA' | 46  | 67    |
| >PTEN-C136\GRTGVMICA' | 258   | >PTEN-C136\GRTGVMIIYA' | 114 | 144   |
| >PTEN-C136\GRTGVMICA' | 334   | >PTEN-C136\GRTGVMIIYA' | 221 | 113   |
| >PTEN-C136\GRTGVMICA' | 78    | >PTEN-C136\GRTGVMIIYA' | 50  | 28    |
| >PTEN-C136\KGRTGVMIC  | 365   | >PTEN-C136\KGRTGVMIIY  | 29  | 336   |
| >PTEN-C136\KGRTGVMIC/ | 21    | >PTEN-C136\KGRTGVMIIY/ | 6   | 15    |
| >PTEN-C136\KGRTGVMIC/ | 38    | >PTEN-C136\KGRTGVMIIY/ | 64  | 26    |
| >PTEN-C136\KGRTGVMIC  | 26672 | >PTEN-C136\KGRTGVMIIY  | 228 | 26444 |
| >PTEN-C136\KGRTGVMIC/ | 314   | >PTEN-C136\KGRTGVMIIY/ | 51  | 263   |
| >PTEN-C136\KGRTGVMIC/ | 165   | >PTEN-C136\KGRTGVMIIY/ | 268 | 103   |
| >PTEN-C136\KGRTGVMIC  | 13944 | >PTEN-C136\KGRTGVMIIY  | 126 | 13818 |
| >PTEN-C136\KGRTGVMIC/ | 174   | >PTEN-C136\KGRTGVMIIY/ | 226 | 52    |



|                       |       |                        |      |       |
|-----------------------|-------|------------------------|------|-------|
| >PTEN-C136\KGRTGVMIC  | 21458 | >PTEN-C136\KGRTGVMIIY  | 205  | 21253 |
| >PTEN-C136\KGRTGVMIC/ | 135   | >PTEN-C136\KGRTGVMIIY/ | 205  | 70    |
| >PTEN-C136\KGRTGVMIC  | 13397 | >PTEN-C136\KGRTGVMIIY  | 76   | 13321 |
| >PTEN-C136\KGRTGVMIC/ | 666   | >PTEN-C136\KGRTGVMIIY/ | 425  | 241   |
| >PTEN-C136\GKGRTGVMII | 6679  | >PTEN-C136\GKGRTGVMII' | 25   | 6654  |
| >PTEN-C211\CNPQFVVCQ  | 625   | >PTEN-C211\YNPQFVVCQ   | 71   | 554   |
| >PTEN-C211\TCNPQFVVC  | 23797 | >PTEN-C211\TYNPQFVVC   | 57   | 23740 |
| >PTEN-C211\TCNPQFVVC  | 22713 | >PTEN-C211\TYNPQFVVC   | 476  | 22237 |
| >PTEN-C211\TCNPQFVV   | 23634 | >PTEN-C211\TYNPQFVV    | 194  | 23440 |
| >PTEN-C211\TCNPQFVVC  | 14270 | >PTEN-C211\TYNPQFVVC   | 10   | 14260 |
| >PTEN-C211\TCNPQFVV   | 293   | >PTEN-C211\TYNPQFVV    | 1115 | 822   |
| >PTEN-C211\ETIPMFSGGT | 2454  | >PTEN-C211\ETIPMFSGGT  | 28   | 2426  |
| >PTEN-C211\ETIPMFSGGT | 774   | >PTEN-C211\ETIPMFSGGT  | 5    | 769   |
| >PTEN-C211\ETIPMFSGGT | 875   | >PTEN-C211\ETIPMFSGGT  | 3    | 872   |
| >PTEN-C211\ETIPMFSGGT | 3920  | >PTEN-C211\ETIPMFSGGT  | 4    | 3916  |
| >PTEN-C211\ETIPMFSGGT | 21991 | >PTEN-C211\ETIPMFSGGT  | 45   | 21946 |
| >PTEN-C211\ETIPMFSGGT | 23469 | >PTEN-C211\ETIPMFSGGT  | 92   | 23377 |
| >PTEN-C211\ETIPMFSGGT | 6232  | >PTEN-C211\ETIPMFSGGT  | 24   | 6208  |
| >PTEN-C211\ETIPMFSGGT | 17026 | >PTEN-C211\ETIPMFSGGT  | 158  | 16868 |
| >PTEN-C211\ETIPMFSGGT | 5281  | >PTEN-C211\ETIPMFSGGT  | 5    | 5276  |
| >PTEN-C211\ETIPMFSGGT | 18587 | >PTEN-C211\ETIPMFSGGT  | 306  | 18281 |
| >PTEN-C211\ETIPMFSGGT | 5365  | >PTEN-C211\ETIPMFSGGT  | 17   | 5348  |
| >PTEN-C211\GTCNPQFV   | 5083  | >PTEN-C211\GTYNPQFV    | 443  | 4640  |
| >PTEN-C211\GTCNPQFVV  | 4624  | >PTEN-C211\GTYNPQFVV   | 444  | 4180  |
| >PTEN-C211\GTCNPQFV   | 2085  | >PTEN-C211\GTYNPQFV    | 118  | 1967  |
| >PTEN-C211\GTCNPQFV   | 1371  | >PTEN-C211\GTYNPQFV    | 127  | 1244  |
| >PTEN-C211\GTCNPQFVV  | 1472  | >PTEN-C211\GTYNPQFVV   | 146  | 1326  |
| >PTEN-C211\GTCNPQFV   | 37    | >PTEN-C211\GTYNPQFV    | 5    | 32    |
| >PTEN-C211\GTCNPQFVV  | 52    | >PTEN-C211\GTYNPQFVV   | 6    | 46    |
| >PTEN-C211\GTCNPQFV   | 1552  | >PTEN-C211\GTYNPQFV    | 41   | 1511  |
| >PTEN-C211\GTCNPQFVV  | 1208  | >PTEN-C211\GTYNPQFVV   | 37   | 1171  |
| >PTEN-C211\GTCNPQFV   | 465   | >PTEN-C211\GTYNPQFV    | 11   | 454   |
| >PTEN-C211\GTCNPQFVV  | 750   | >PTEN-C211\GTYNPQFVV   | 14   | 736   |
| >PTEN-C211\GTCNPQFV   | 402   | >PTEN-C211\GTYNPQFV    | 48   | 354   |
| >PTEN-C211\GTCNPQFVV  | 412   | >PTEN-C211\GTYNPQFVV   | 54   | 358   |
| >PTEN-C211\GTCNPQFV   | 1339  | >PTEN-C211\GTYNPQFV    | 204  | 1135  |
| >PTEN-C211\GTCNPQFVV  | 1004  | >PTEN-C211\GTYNPQFVV   | 145  | 859   |
| >PTEN-C211\GTCNPQFV   | 4270  | >PTEN-C211\GTYNPQFV    | 154  | 4116  |
| >PTEN-C211\GTCNPQFVV  | 4997  | >PTEN-C211\GTYNPQFVV   | 158  | 4839  |
| >PTEN-C211\GTCNPQFVV  | 2500  | >PTEN-C211\GTYNPQFVV   | 304  | 2196  |
| >PTEN-C211\GTCNPQFVV  | 130   | >PTEN-C211\GTYNPQFVV   | 27   | 103   |
| >PTEN-C211\FSGGTCNPQF | 143   | >PTEN-C211\FSGGTYNPQF  | 117  | 26    |
| >PTEN-C211\FSGGTCNPQF | 311   | >PTEN-C211\FSGGTYNPQF  | 285  | 26    |

|                        |       |                        |      |       |
|------------------------|-------|------------------------|------|-------|
| >PTEN-C211\FSGGTCNPQI  | 156   | >PTEN-C211\FSGGTYNPQI  | 99   | 57    |
| >PTEN-C211\FSGGTCNPQI  | 643   | >PTEN-C211\FSGGTYNPQI  | 455  | 188   |
| >PTEN-C211\FSGGTCNPQI  | 608   | >PTEN-C211\FSGGTYNPQI  | 459  | 149   |
| >PTEN-C211\FSGGTCNPQI  | 382   | >PTEN-C211\FSGGTYNPQI  | 204  | 178   |
| >PTEN-C211\FSGGTCNPQI  | 621   | >PTEN-C211\FSGGTYNPQI  | 379  | 242   |
| >PTEN-C211\FSGGTCNPQI  | 285   | >PTEN-C211\FSGGTYNPQI  | 277  | 8     |
| >PTEN-C211\FSGGTCNPQI  | 204   | >PTEN-C211\FSGGTYNPQI  | 126  | 78    |
| >PTEN-C211\FSGGTCNPQI  | 22    | >PTEN-C211\FSGGTYNPQI  | 17   | 5     |
| >PTEN-C211\FSGGTCNPQI  | 219   | >PTEN-C211\FSGGTYNPQI  | 99   | 120   |
| >PTEN-C211\FSGGTCNPQI  | 180   | >PTEN-C211\FSGGTYNPQI  | 327  | 147   |
| >PTEN-C211\MFSGGTCNP   | 107   | >PTEN-C211\MFSGGTYNP   | 58   | 49    |
| >PTEN-C211\MFSGGTCNP   | 11    | >PTEN-C211\MFSGGTYNP   | 8    | 3     |
| >PTEN-C211\MFSGGTCNP   | 107   | >PTEN-C211\MFSGGTYNP   | 36   | 71    |
| >PTEN-C211\MFSGGTCNP   | 130   | >PTEN-C211\MFSGGTYNP   | 87   | 43    |
| >PTEN-C211\PMFSGGTC    | 355   | >PTEN-C211\PMFSGGTY    | 7894 | 7539  |
| >PTEN-C211\PMFSGGTC    | 15995 | >PTEN-C211\PMFSGGTY    | 15   | 15980 |
| >PTEN-C211\PMFSGGTC    | 19000 | >PTEN-C211\PMFSGGTY    | 24   | 18976 |
| >PTEN-C211\PMFSGGTC    | 15569 | >PTEN-C211\PMFSGGTY    | 134  | 15435 |
| >PTEN-C211\PMFSGGTC    | 8645  | >PTEN-C211\PMFSGGTY    | 28   | 8617  |
| >PTEN-C211\PMFSGGTC    | 5284  | >PTEN-C211\PMFSGGTY    | 24   | 5260  |
| >PTEN-C211\IPMFSGGTC   | 31405 | >PTEN-C211\IPMFSGGTY   | 179  | 31226 |
| >PTEN-C211\IPMFSGGTC   | 404   | >PTEN-C211\IPMFSGGTY   | 489  | 85    |
| >PTEN-C211\IPMFSGGTC   | 20856 | >PTEN-C211\IPMFSGGTY   | 118  | 20738 |
| >PTEN-C211\IPMFSGGTC   | 3542  | >PTEN-C211\IPMFSGGTY   | 19   | 3523  |
| >PTEN-C211\IPMFSGGTC   | 13519 | >PTEN-C211\IPMFSGGTY   | 100  | 13419 |
| >PTEN-C211\IPMFSGGTC   | 10891 | >PTEN-C211\IPMFSGGTY   | 53   | 10838 |
| >PTEN-C211\IPMFSGGTC   | 22151 | >PTEN-C211\IPMFSGGTY   | 21   | 22130 |
| >PTEN-C211\TIPMFSGGTC  | 30458 | >PTEN-C211\TIPMFSGGTY  | 149  | 30309 |
| >PTEN-C211\TIPMFSGGTC  | 30367 | >PTEN-C211\TIPMFSGGTY  | 347  | 30020 |
| >PTEN-C211\TIPMFSGGTC  | 25378 | >PTEN-C211\TIPMFSGGTY  | 188  | 25190 |
| >PTEN-C304(CSIERADNDK  | 600   | >PTEN-C304(GSIERADNDK  | 335  | 265   |
| >PTEN-C304(SLCDQEIDSIC | 76    | >PTEN-C304(SLCDQEIDSIC | 5677 | 5601  |
| >PTEN-C304(DSICSIER    | 79    | >PTEN-C304(DSIGSIER    | 65   | 14    |
| >PTEN-C304(DSICSIER    | 9     | >PTEN-C304(DSIGSIER    | 9    | 0     |
| >PTEN-C304(DSICSIERA   | 79    | >PTEN-C304(DSIGSIERA   | 150  | 71    |
| >PTEN-C304(EIDSICSIER  | 479   | >PTEN-C304(EIDSIGSIER  | 836  | 357   |
| >PTEN-C304(EIDSICSIER  | 38    | >PTEN-C304(EIDSIGSIER  | 32   | 6     |
| >PTEN-C304(EIDSICSI    | 38    | >PTEN-C304(EIDSIGSI    | 56   | 18    |
| >PTEN-C304(QEIDSICSI   | 13    | >PTEN-C304(QEIDSIGSI   | 17   | 4     |
| >PTEN-C304(QEIDSICSI   | 90    | >PTEN-C304(QEIDSIGSI   | 78   | 12    |
| >PTEN-C304(QEIDSICSI   | 90    | >PTEN-C304(QEIDSIGSI   | 552  | 462   |
| >PTEN-C304(QEIDSICSI   | 339   | >PTEN-C304(QEIDSIGSI   | 1034 | 695   |
| >PTEN-C304(QEIDSICSI   | 458   | >PTEN-C304(QEIDSIGSI   | 600  | 142   |

|                         |       |                         |      |       |
|-------------------------|-------|-------------------------|------|-------|
| >PTEN-C304(QEIDSICS     | 228   | >PTEN-C304(QEIDSIGS     | 549  | 321   |
| >PTEN-C304(QEIDSICSI    | 4     | >PTEN-C304(QEIDSIGSI    | 6    | 2     |
| >PTEN-C304(QEIDSICSIER  | 281   | >PTEN-C304(QEIDSIGSIER  | 1323 | 1042  |
| >PTEN-C304(CDQEIDSICSI  | 493   | >PTEN-C304(CDQEIDSIGSI  | 200  | 293   |
| >PTEN-C304(CDQEIDSICSI  | 52    | >PTEN-C304(CDQEIDSIGSI  | 44   | 8     |
| >PTEN-C304(SIERADNDK    | 600   | >PTEN-C304(SSIERADNDK   | 92   | 508   |
| >PTEN-C304(SIERADNDK    | 1021  | >PTEN-C304(SSIERADNDK   | 345  | 676   |
| >PTEN-C304(SLCDQEIDSIC  | 76    | >PTEN-C304(SLCDQEIDSIS  | 1787 | 1711  |
| >PTEN-C304(SICSIERA     | 1890  | >PTEN-C304(SISSIERA     | 222  | 1668  |
| >PTEN-C304(SDICSIER     | 79    | >PTEN-C304(SDISSIER     | 72   | 7     |
| >PTEN-C304(SDICSIER     | 9     | >PTEN-C304(SDISSIER     | 6    | 3     |
| >PTEN-C304(SDICSIERA    | 79    | >PTEN-C304(SDISSIERA    | 196  | 117   |
| >PTEN-C304(SEIDSICSIER  | 479   | >PTEN-C304(SEIDSISSIER  | 389  | 90    |
| >PTEN-C304(SEIDSICSIER  | 38    | >PTEN-C304(SEIDSISSIER  | 14   | 24    |
| >PTEN-C304(SEIDSICSI    | 541   | >PTEN-C304(SEIDSISSI    | 242  | 299   |
| >PTEN-C304(SEIDSICSIERA | 597   | >PTEN-C304(SEIDSISSIERA | 463  | 134   |
| >PTEN-C304(SEIDSICSI    | 38    | >PTEN-C304(SEIDSISSI    | 30   | 8     |
| >PTEN-C304(SEIDSICSIERA | 830   | >PTEN-C304(SEIDSISSIERA | 457  | 373   |
| >PTEN-C304(SQEIDSICSI   | 13    | >PTEN-C304(SQEIDSISSI   | 18   | 5     |
| >PTEN-C304(SQEIDSICSI   | 797   | >PTEN-C304(SQEIDSISSI   | 490  | 307   |
| >PTEN-C304(SQEIDSICSI   | 90    | >PTEN-C304(SQEIDSISSI   | 88   | 2     |
| >PTEN-C304(SQEIDSICSI   | 90    | >PTEN-C304(SQEIDSISSI   | 177  | 87    |
| >PTEN-C304(SQEIDSICSI   | 339   | >PTEN-C304(SQEIDSISSI   | 352  | 13    |
| >PTEN-C304(SQEIDSICSI   | 458   | >PTEN-C304(SQEIDSISSI   | 293  | 165   |
| >PTEN-C304(SQEIDSICS    | 228   | >PTEN-C304(SQEIDSISS    | 388  | 160   |
| >PTEN-C304(SQEIDSICSI   | 1170  | >PTEN-C304(SQEIDSISSI   | 461  | 709   |
| >PTEN-C304(SQEIDSICSI   | 4     | >PTEN-C304(SQEIDSISSI   | 4    | 0     |
| >PTEN-C304(SQEIDSICSIER | 281   | >PTEN-C304(SQEIDSISSIER | 1104 | 823   |
| >PTEN-C304(SCDQEIDSICSI | 493   | >PTEN-C304(SCDQEIDSISSI | 166  | 327   |
| >PTEN-C304(SCDQEIDSICSI | 52    | >PTEN-C304(SCDQEIDSISSI | 71   | 19    |
| >PTEN-C71W CAERHYDTA    | 2797  | >PTEN-C71W WAERHYDTA    | 439  | 2358  |
| >PTEN-C71W CAERHYDTA    | 668   | >PTEN-C71W WAERHYDTA    | 98   | 570   |
| >PTEN-C71W CAERHYDTA    | 1056  | >PTEN-C71W WAERHYDTA    | 342  | 714   |
| >PTEN-C71W LCAERHYDTA   | 11627 | >PTEN-C71W LWAEERHYDT,  | 269  | 11358 |
| >PTEN-C71W LCAERHYD     | 34039 | >PTEN-C71W LWAEERHYD    | 284  | 33755 |
| >PTEN-C71W LCAERHYDTA   | 38497 | >PTEN-C71W LWAEERHYDT,  | 368  | 38129 |
| >PTEN-C71W HKNHYKIYNL   | 2879  | >PTEN-C71W HKNHYKIYNL   | 405  | 2474  |
| >PTEN-C71W HKNHYKIYNL   | 31065 | >PTEN-C71W HKNHYKIYNL   | 430  | 30635 |
| >PTEN-C71W HKNHYKIYNL   | 36550 | >PTEN-C71W HKNHYKIYNL   | 380  | 36170 |
| >PTEN-C71W NLCAERHYDT   | 7601  | >PTEN-C71W NLWAERHYD    | 322  | 7279  |
| >PTEN-C71W NLCAERHYDT   | 562   | >PTEN-C71W NLWAERHYD    | 342  | 220   |
| >PTEN-C71W NLCAERHYDT   | 944   | >PTEN-C71W NLWAERHYD    | 61   | 883   |
| >PTEN-C71W NLCAERHYDT   | 3765  | >PTEN-C71W NLWAERHYD    | 169  | 3596  |

|                         |       |                         |      |       |
|-------------------------|-------|-------------------------|------|-------|
| >PTEN-C71W NLCAERHYDT   | 7888  | >PTEN-C71W NLWAERHYD    | 158  | 7730  |
| >PTEN-C71W NLCAERHYDT   | 387   | >PTEN-C71W NLWAERHYD    | 70   | 317   |
| >PTEN-C71W NLCAERHY     | 884   | >PTEN-C71W NLWAERHY     | 101  | 783   |
| >PTEN-C71W NLCAERHY     | 551   | >PTEN-C71W NLWAERHY     | 235  | 316   |
| >PTEN-C71W NLCAERHY     | 310   | >PTEN-C71W NLWAERHY     | 258  | 52    |
| >PTEN-C71W NLCAERHY     | 346   | >PTEN-C71W NLWAERHY     | 660  | 314   |
| >PTEN-C71W NLCAERHY     | 781   | >PTEN-C71W NLWAERHY     | 208  | 573   |
| >PTEN-C71W YNLCAERHY    | 880   | >PTEN-C71W YNLWAERHY    | 470  | 410   |
| >PTEN-C71W YNLCAERHY    | 254   | >PTEN-C71W YNLWAERHY    | 1444 | 1190  |
| >PTEN-C71W IYNLCAERHY   | 43    | >PTEN-C71W IYNLWAERHY   | 112  | 69    |
| >PTEN-C71W IYNLCAERHY   | 212   | >PTEN-C71W IYNLWAERHY   | 98   | 114   |
| >PTEN-C71W IYNLCAER     | 36    | >PTEN-C71W IYNLWAER     | 20   | 16    |
| >PTEN-C71W IYNLCAER     | 62    | >PTEN-C71W IYNLWAER     | 27   | 35    |
| >PTEN-C71W IYNLCAER     | 55    | >PTEN-C71W IYNLWAER     | 50   | 5     |
| >PTEN-C71W KIYNLCAER    | 78    | >PTEN-C71W KIYNLWAER    | 78   | 0     |
| >PTEN-C71W KIYNLCAERH'  | 107   | >PTEN-C71W KIYNLWAERH'  | 96   | 11    |
| >PTEN-C71W KIYNLCAER    | 157   | >PTEN-C71W KIYNLWAER    | 102  | 55    |
| >PTEN-C71W KIYNLCAERH'  | 233   | >PTEN-C71W KIYNLWAERH'  | 172  | 61    |
| >PTEN-C71W KIYNLCAER    | 4052  | >PTEN-C71W KIYNLWAER    | 346  | 3706  |
| >PTEN-C71W KIYNLCAERH'  | 59    | >PTEN-C71W KIYNLWAERH'  | 57   | 2     |
| >PTEN-C71W KIYNLCAER    | 10    | >PTEN-C71W KIYNLWAER    | 6    | 4     |
| >PTEN-C71W KIYNLCAER    | 119   | >PTEN-C71W KIYNLWAER    | 146  | 27    |
| >PTEN-C71W KIYNLCAERH'  | 233   | >PTEN-C71W KIYNLWAERH'  | 292  | 59    |
| >PTEN-C71W KIYNLCAERH'  | 76    | >PTEN-C71W KIYNLWAERH'  | 99   | 23    |
| >PTEN-C71W KIYNLCAERH'  | 226   | >PTEN-C71W KIYNLWAERH'  | 358  | 132   |
| >PTEN-C71W KIYNLCAERH'  | 132   | >PTEN-C71W KIYNLWAERH'  | 82   | 50    |
| >PTEN-C71W KIYNLCAERH'  | 453   | >PTEN-C71W KIYNLWAERH'  | 674  | 221   |
| >PTEN-C71W KIYNLCAER    | 40    | >PTEN-C71W KIYNLWAER    | 17   | 23    |
| >PTEN-C71W YKIYNLCA     | 112   | >PTEN-C71W YKIYNLWA     | 363  | 251   |
| >PTEN-C71W YKIYNLCAE    | 469   | >PTEN-C71W YKIYNLWAE    | 862  | 393   |
| >PTEN-C71W YKIYNLCAER   | 117   | >PTEN-C71W YKIYNLWAER   | 131  | 14    |
| >PTEN-C71W YKIYNLCAERH' | 301   | >PTEN-C71W YKIYNLWAERH' | 449  | 148   |
| >PTEN-C71W HYKIYNLC     | 18279 | >PTEN-C71W HYKIYNLW     | 172  | 18107 |
| >PTEN-C71W HYKIYNLC     | 6387  | >PTEN-C71W HYKIYNLW     | 128  | 6259  |
| >PTEN-C71W HYKIYNLC     | 3862  | >PTEN-C71W HYKIYNLW     | 36   | 3826  |
| >PTEN-C71W HYKIYNLCA    | 22    | >PTEN-C71W HYKIYNLWA    | 14   | 8     |
| >PTEN-C71W HYKIYNLCAEI  | 120   | >PTEN-C71W HYKIYNLWAE   | 29   | 91    |
| >PTEN-C71W HYKIYNLCAEI  | 9     | >PTEN-C71W HYKIYNLWAE   | 8    | 1     |
| >PTEN-C71W HYKIYNLCAEI  | 13    | >PTEN-C71W HYKIYNLWAE   | 12   | 1     |
| >PTEN-C71W HYKIYNLCAEI  | 272   | >PTEN-C71W HYKIYNLWAE   | 356  | 84    |
| >PTEN-C71W HYKIYNLCAEI  | 26    | >PTEN-C71W HYKIYNLWAE   | 16   | 10    |
| >PTEN-C71W NHYKIYNLC    | 568   | >PTEN-C71W NHYKIYNLW    | 227  | 341   |
| >PTEN-C71W NHYKIYNLC    | 29825 | >PTEN-C71W NHYKIYNLW    | 203  | 29622 |

|                         |       |                         |     |       |
|-------------------------|-------|-------------------------|-----|-------|
| >PTEN-C71W NHYKIYNLC    | 26438 | >PTEN-C71W NHYKIYNLW    | 36  | 26402 |
| >PTEN-C71W KNHYKIYNLC   | 497   | >PTEN-C71W KNHYKIYNLW   | 314 | 183   |
| >PTEN-C71W KNHYKIYNLC   | 29614 | >PTEN-C71W KNHYKIYNLW   | 225 | 29389 |
| >PTEN-C71Y- CAERHYDTAK  | 2797  | >PTEN-C71Y- YAERHYDTAK  | 140 | 2657  |
| >PTEN-C71Y- CAERHYDTAK  | 668   | >PTEN-C71Y- YAERHYDTAK  | 87  | 581   |
| >PTEN-C71Y- CAERHYDTAK  | 1056  | >PTEN-C71Y- YAERHYDTAK  | 384 | 672   |
| >PTEN-C71Y- HKNHYKIYNL  | 30896 | >PTEN-C71Y- HKNHYKIYNL  | 445 | 30451 |
| >PTEN-C71Y- HKNHYKIYNL  | 2879  | >PTEN-C71Y- HKNHYKIYNL  | 16  | 2863  |
| >PTEN-C71Y- HKNHYKIYNL  | 38352 | >PTEN-C71Y- HKNHYKIYNL  | 413 | 37939 |
| >PTEN-C71Y- NLCAERHYDT  | 562   | >PTEN-C71Y- NLYAERHYDT  | 92  | 470   |
| >PTEN-C71Y- NLCAERHYDT  | 647   | >PTEN-C71Y- NLYAERHYDT  | 35  | 612   |
| >PTEN-C71Y- NLCAERHYDT  | 944   | >PTEN-C71Y- NLYAERHYDT  | 68  | 876   |
| >PTEN-C71Y- NLCAERHYDT  | 3765  | >PTEN-C71Y- NLYAERHYDT  | 196 | 3569  |
| >PTEN-C71Y- NLCAERHYDT  | 7888  | >PTEN-C71Y- NLYAERHYDT  | 293 | 7595  |
| >PTEN-C71Y- NLCAERHYDT  | 3600  | >PTEN-C71Y- NLYAERHYDT  | 492 | 3108  |
| >PTEN-C71Y- NLCAERHYDT  | 387   | >PTEN-C71Y- NLYAERHYDT  | 62  | 325   |
| >PTEN-C71Y- NLCAERHY    | 884   | >PTEN-C71Y- NLYAERHY    | 193 | 691   |
| >PTEN-C71Y- NLCAERHY    | 551   | >PTEN-C71Y- NLYAERHY    | 389 | 162   |
| >PTEN-C71Y- NLCAERHY    | 310   | >PTEN-C71Y- NLYAERHY    | 259 | 51    |
| >PTEN-C71Y- NLCAERHY    | 346   | >PTEN-C71Y- NLYAERHY    | 145 | 201   |
| >PTEN-C71Y- NLCAERHY    | 781   | >PTEN-C71Y- NLYAERHY    | 83  | 698   |
| >PTEN-C71Y- YNLCAERHY   | 880   | >PTEN-C71Y- YNLYAERHY   | 458 | 422   |
| >PTEN-C71Y- YNLCAERHY   | 254   | >PTEN-C71Y- YNLYAERHY   | 185 | 69    |
| >PTEN-C71Y- IYNLCAERHY  | 43    | >PTEN-C71Y- IYNLYAERHY  | 28  | 15    |
| >PTEN-C71Y- IYNLCAERHY  | 212   | >PTEN-C71Y- IYNLYAERHY  | 93  | 119   |
| >PTEN-C71Y- IYNLCAER    | 36    | >PTEN-C71Y- IYNLYAER    | 20  | 16    |
| >PTEN-C71Y- IYNLCAER    | 62    | >PTEN-C71Y- IYNLYAER    | 49  | 13    |
| >PTEN-C71Y- IYNLCAER    | 55    | >PTEN-C71Y- IYNLYAER    | 62  | 7     |
| >PTEN-C71Y- KIYNLCAER   | 78    | >PTEN-C71Y- KIYNLYAER   | 63  | 15    |
| >PTEN-C71Y- KIYNLCAERH' | 107   | >PTEN-C71Y- KIYNLYAERH' | 98  | 9     |
| >PTEN-C71Y- KIYNLCAER   | 157   | >PTEN-C71Y- KIYNLYAER   | 47  | 110   |
| >PTEN-C71Y- KIYNLCAERH' | 233   | >PTEN-C71Y- KIYNLYAERH' | 200 | 33    |
| >PTEN-C71Y- KIYNLCAERH' | 59    | >PTEN-C71Y- KIYNLYAERH' | 58  | 1     |
| >PTEN-C71Y- KIYNLCAER   | 10    | >PTEN-C71Y- KIYNLYAER   | 6   | 4     |
| >PTEN-C71Y- KIYNLCAE    | 858   | >PTEN-C71Y- KIYNLYAE    | 266 | 592   |
| >PTEN-C71Y- KIYNLCAER   | 119   | >PTEN-C71Y- KIYNLYAER   | 114 | 5     |
| >PTEN-C71Y- KIYNLCAERH' | 233   | >PTEN-C71Y- KIYNLYAERH' | 170 | 63    |
| >PTEN-C71Y- KIYNLCAERH' | 76    | >PTEN-C71Y- KIYNLYAERH' | 81  | 5     |
| >PTEN-C71Y- KIYNLCAERH' | 226   | >PTEN-C71Y- KIYNLYAERH' | 137 | 89    |
| >PTEN-C71Y- KIYNLCAERH' | 132   | >PTEN-C71Y- KIYNLYAERH' | 114 | 18    |
| >PTEN-C71Y- KIYNLCAERH' | 453   | >PTEN-C71Y- KIYNLYAERH' | 651 | 198   |
| >PTEN-C71Y- KIYNLCAER   | 40    | >PTEN-C71Y- KIYNLYAER   | 23  | 17    |
| >PTEN-C71Y- YKIYNLCA    | 112   | >PTEN-C71Y- YKIYNLYA    | 97  | 15    |

|                         |       |                         |     |       |
|-------------------------|-------|-------------------------|-----|-------|
| >PTEN-C71Y-YKIYNLCAE    | 469   | >PTEN-C71Y-YKIYNLYAE    | 636 | 167   |
| >PTEN-C71Y-YKIYNLCAER   | 117   | >PTEN-C71Y-YKIYNLYAER   | 72  | 45    |
| >PTEN-C71Y-YKIYNLCAERI  | 301   | >PTEN-C71Y-YKIYNLYAERI  | 273 | 28    |
| >PTEN-C71Y-HYKIYNLC     | 20588 | >PTEN-C71Y-HYKIYNLY     | 79  | 20509 |
| >PTEN-C71Y-HYKIYNLC     | 616   | >PTEN-C71Y-HYKIYNLY     | 37  | 579   |
| >PTEN-C71Y-HYKIYNLCA    | 22    | >PTEN-C71Y-HYKIYNLYA    | 5   | 17    |
| >PTEN-C71Y-HYKIYNLCAEI  | 120   | >PTEN-C71Y-HYKIYNLYAEI  | 27  | 93    |
| >PTEN-C71Y-HYKIYNLC     | 18050 | >PTEN-C71Y-HYKIYNLY     | 170 | 17880 |
| >PTEN-C71Y-HYKIYNLCAEI  | 9     | >PTEN-C71Y-HYKIYNLYAEI  | 7   | 2     |
| >PTEN-C71Y-HYKIYNLCAEI  | 13    | >PTEN-C71Y-HYKIYNLYAEI  | 11  | 2     |
| >PTEN-C71Y-HYKIYNLCAEI  | 272   | >PTEN-C71Y-HYKIYNLYAEI  | 263 | 9     |
| >PTEN-C71Y-HYKIYNLC     | 27967 | >PTEN-C71Y-HYKIYNLY     | 179 | 27788 |
| >PTEN-C71Y-HYKIYNLC     | 33204 | >PTEN-C71Y-HYKIYNLY     | 85  | 33119 |
| >PTEN-C71Y-HYKIYNLCA    | 7073  | >PTEN-C71Y-HYKIYNLYA    | 418 | 6655  |
| >PTEN-C71Y-HYKIYNLCAEI  | 26    | >PTEN-C71Y-HYKIYNLYAEI  | 17  | 9     |
| >PTEN-C71Y-NHYKIYNLC    | 24169 | >PTEN-C71Y-NHYKIYNLY    | 121 | 24048 |
| >PTEN-C71Y-NHYKIYNLC    | 25946 | >PTEN-C71Y-NHYKIYNLY    | 261 | 25685 |
| >PTEN-C71Y-NHYKIYNLC    | 10978 | >PTEN-C71Y-NHYKIYNLY    | 263 | 10715 |
| >PTEN-C71Y-NHYKIYNLCA   | 1127  | >PTEN-C71Y-NHYKIYNLYA   | 399 | 728   |
| >PTEN-C71Y-KNHYKIYNLC   | 497   | >PTEN-C71Y-KNHYKIYNLY   | 55  | 442   |
| >PTEN-C71Y-KNHYKIYNLC   | 31541 | >PTEN-C71Y-KNHYKIYNLY   | 180 | 31361 |
| >PTEN-C71Y-KNHYKIYNLC   | 27157 | >PTEN-C71Y-KNHYKIYNLY   | 438 | 26719 |
| >PTEN-D107, QLELIKPFCEA | 25896 | >PTEN-D107, QLELIKPFCEA | 236 | 25660 |
| >PTEN-D107, CEDLDQWL    | 157   | >PTEN-D107, CEALDQWL    | 192 | 35    |
| >PTEN-D107, CEDLDQWL    | 128   | >PTEN-D107, CEALDQWL    | 141 | 13    |
| >PTEN-D107, CEDLDQWL    | 1037  | >PTEN-D107, CEALDQWL    | 437 | 600   |
| >PTEN-D107, FCEALDQW    | 43    | >PTEN-D107, FCEALDQW    | 66  | 23    |
| >PTEN-D107, KPFCEDLDQV  | 588   | >PTEN-D107, KPFCEDLDQV  | 333 | 255   |
| >PTEN-D107, KPFCEDLDQV  | 13    | >PTEN-D107, KPFCEDLDQV  | 15  | 2     |
| >PTEN-D107, KPFCEDLDQV  | 102   | >PTEN-D107, KPFCEDLDQV  | 102 | 0     |
| >PTEN-D107, IKPFCEAL    | 910   | >PTEN-D107, IKPFCEAL    | 225 | 685   |
| >PTEN-D107, LIKPFCEAL   | 1522  | >PTEN-D107, LIKPFCEAL   | 167 | 1355  |
| >PTEN-D107, LIKPFCEA    | 21477 | >PTEN-D107, LIKPFCEA    | 302 | 21175 |
| >PTEN-D107, LIKPFCEAL   | 1904  | >PTEN-D107, LIKPFCEAL   | 458 | 1446  |
| >PTEN-D107, LIKPFCEA    | 25248 | >PTEN-D107, LIKPFCEA    | 185 | 25063 |
| >PTEN-D107, LIKPFCEAL   | 541   | >PTEN-D107, LIKPFCEAL   | 322 | 219   |
| >PTEN-D107, LIKPFCEA    | 8590  | >PTEN-D107, LIKPFCEA    | 496 | 8094  |
| >PTEN-D107, LIKPFCEAL   | 4774  | >PTEN-D107, LIKPFCEAL   | 417 | 4357  |
| >PTEN-D107, ELIKPFCEAL  | 1225  | >PTEN-D107, ELIKPFCEAL  | 400 | 825   |
| >PTEN-D107, ELIKPFCEA   | 18219 | >PTEN-D107, ELIKPFCEA   | 227 | 17992 |
| >PTEN-D107, ELIKPFCEAL  | 1130  | >PTEN-D107, ELIKPFCEAL  | 153 | 977   |
| >PTEN-D107, ELIKPFCEA   | 18907 | >PTEN-D107, ELIKPFCEA   | 80  | 18827 |
| >PTEN-D107, ELIKPFCEAL  | 156   | >PTEN-D107, ELIKPFCEAL  | 105 | 51    |

|                         |       |                         |     |       |
|-------------------------|-------|-------------------------|-----|-------|
| >PTEN-D107, ELIKPFCEDL  | 775   | >PTEN-D107, ELIKPFCEAL  | 175 | 600   |
| >PTEN-D107, ELIKPFCEAL  | 1055  | >PTEN-D107, ELIKPFCEAL  | 483 | 572   |
| >PTEN-D107, ELIKPFCEAL  | 9836  | >PTEN-D107, ELIKPFCEA   | 125 | 9711  |
| >PTEN-D107, ELIKPFCEA   | 14640 | >PTEN-D107, ELIKPFCEA   | 125 | 14515 |
| >PTEN-D107, ELIKPFCEAL  | 726   | >PTEN-D107, ELIKPFCEAL  | 94  | 632   |
| >PTEN-D107, LELIKPFCEAL | 166   | >PTEN-D107, LELIKPFCEAL | 162 | 4     |
| >PTEN-D107, LELIKPFCEAL | 1796  | >PTEN-D107, LELIKPFCEAL | 217 | 1579  |
| >PTEN-D107, LELIKPFCEAL | 248   | >PTEN-D107, LELIKPFCEAL | 60  | 188   |
| >PTEN-D107, LELIKPFCEAL | 275   | >PTEN-D107, LELIKPFCEAL | 73  | 202   |
| >PTEN-D107, LELIKPFCEAL | 78    | >PTEN-D107, LELIKPFCEAL | 70  | 8     |
| >PTEN-D107, ICENLDQWL   | 157   | >PTEN-D107, ICENLDQWL   | 157 | 0     |
| >PTEN-D107, ICENLDQWL   | 128   | >PTEN-D107, ICENLDQWL   | 252 | 124   |
| >PTEN-D107, ICENLDQWL   | 1037  | >PTEN-D107, ICENLDQWL   | 235 | 802   |
| >PTEN-D107, FCENLDQW    | 43    | >PTEN-D107, FCENLDQW    | 60  | 17    |
| >PTEN-D107, KPFCENLDQV  | 588   | >PTEN-D107, KPFCENLDQV  | 465 | 123   |
| >PTEN-D107, KPFCENLDQV  | 698   | >PTEN-D107, KPFCENLDQV  | 403 | 295   |
| >PTEN-D107, KPFCENLDQV  | 13    | >PTEN-D107, KPFCENLDQV  | 16  | 3     |
| >PTEN-D107, KPFCENLDQV  | 102   | >PTEN-D107, KPFCENLDQV  | 92  | 10    |
| >PTEN-D107, IKPFCEAL    | 910   | >PTEN-D107, IKPFCEAL    | 459 | 451   |
| >PTEN-D107, LIKPFCEAL   | 1522  | >PTEN-D107, LIKPFCEAL   | 175 | 1347  |
| >PTEN-D107, LIKPFCEAL   | 541   | >PTEN-D107, LIKPFCEAL   | 284 | 257   |
| >PTEN-D107, ELIKPFCEAL  | 1225  | >PTEN-D107, ELIKPFCEAL  | 476 | 749   |
| >PTEN-D107, ELIKPFCEAL  | 1130  | >PTEN-D107, ELIKPFCEAL  | 322 | 808   |
| >PTEN-D107, ELIKPFCEAL  | 156   | >PTEN-D107, ELIKPFCEAL  | 89  | 67    |
| >PTEN-D107, ELIKPFCEAL  | 775   | >PTEN-D107, ELIKPFCEAL  | 284 | 491   |
| >PTEN-D107, ELIKPFCEAL  | 1055  | >PTEN-D107, ELIKPFCEAL  | 399 | 656   |
| >PTEN-D107, ELIKPFCEAL  | 726   | >PTEN-D107, ELIKPFCEAL  | 93  | 633   |
| >PTEN-D107, LELIKPFCEAL | 166   | >PTEN-D107, LELIKPFCEAL | 163 | 3     |
| >PTEN-D107, LELIKPFCEAL | 248   | >PTEN-D107, LELIKPFCEAL | 174 | 74    |
| >PTEN-D107, LELIKPFCEAL | 275   | >PTEN-D107, LELIKPFCEAL | 149 | 126   |
| >PTEN-D107, LELIKPFCEAL | 78    | >PTEN-D107, LELIKPFCEAL | 76  | 2     |
| >PTEN-D107, DLDQWLSE    | 16679 | >PTEN-D107, YLDQWLSE    | 283 | 16396 |
| >PTEN-D107, DLDQWLSED   | 11044 | >PTEN-D107, YLDQWLSED   | 43  | 11001 |
| >PTEN-D107, DLDQWLSE    | 17544 | >PTEN-D107, YLDQWLSE    | 266 | 17278 |
| >PTEN-D107, DLDQWLSED   | 16641 | >PTEN-D107, YLDQWLSED   | 80  | 16561 |
| >PTEN-D107, CEDLDQWL    | 157   | >PTEN-D107, CEYLDQWL    | 63  | 94    |
| >PTEN-D107, CEDLDQWL    | 4469  | >PTEN-D107, CEYLDQWL    | 470 | 3999  |
| >PTEN-D107, CEDLDQWL    | 128   | >PTEN-D107, CEYLDQWL    | 73  | 55    |
| >PTEN-D107, CEDLDQWL    | 3634  | >PTEN-D107, CEYLDQWL    | 340 | 3294  |
| >PTEN-D107, CEDLDQWL    | 1037  | >PTEN-D107, CEYLDQWL    | 310 | 727   |
| >PTEN-D107, FCEDLDQW    | 43    | >PTEN-D107, FCEYLDQW    | 44  | 1     |
| >PTEN-D107, KPFCENLDQV  | 588   | >PTEN-D107, KPFCENLDQV  | 326 | 262   |
| >PTEN-D107, KPFCENLDQV  | 698   | >PTEN-D107, KPFCENLDQV  | 478 | 220   |

|                        |       |                        |       |       |
|------------------------|-------|------------------------|-------|-------|
| >PTEN-D107'KPFCELDQV   | 13    | >PTEN-D107'KPFCEYLDQV  | 10    | 3     |
| >PTEN-D107'KPFCELDQV   | 102   | >PTEN-D107'KPFCEYLDQV  | 73    | 29    |
| >PTEN-D107'LIKPFCEDL   | 1522  | >PTEN-D107'LIKPFCEYL   | 40    | 1482  |
| >PTEN-D107'LIKPFCEDL   | 1904  | >PTEN-D107'LIKPFCEYL   | 354   | 1550  |
| >PTEN-D107'LIKPFCEDL   | 5495  | >PTEN-D107'LIKPFCEYL   | 341   | 5154  |
| >PTEN-D107'LIKPFCEDL   | 541   | >PTEN-D107'LIKPFCEYL   | 92    | 449   |
| >PTEN-D107'LIKPFCE     | 26553 | >PTEN-D107'LIKPFCEY    | 338   | 26215 |
| >PTEN-D107'LIKPFCE     | 35265 | >PTEN-D107'LIKPFCEY    | 308   | 34957 |
| >PTEN-D107'LIKPFCE     | 16043 | >PTEN-D107'LIKPFCEY    | 46    | 15997 |
| >PTEN-D107'LIKPFCE     | 17274 | >PTEN-D107'LIKPFCEY    | 229   | 17045 |
| >PTEN-D107'ELIKPFCEDL  | 1522  | >PTEN-D107'ELIKPFCEYL  | 145   | 1377  |
| >PTEN-D107'ELIKPFCEDL  | 1225  | >PTEN-D107'ELIKPFCEYL  | 198   | 1027  |
| >PTEN-D107'ELIKPFCEDL  | 1130  | >PTEN-D107'ELIKPFCEYL  | 41    | 1089  |
| >PTEN-D107'ELIKPFCEDL  | 4595  | >PTEN-D107'ELIKPFCEYL  | 491   | 4104  |
| >PTEN-D107'ELIKPFCEDL  | 2842  | >PTEN-D107'ELIKPFCEYL  | 458   | 2384  |
| >PTEN-D107'ELIKPFCEDL  | 6485  | >PTEN-D107'ELIKPFCEYL  | 360   | 6125  |
| >PTEN-D107'ELIKPFCEDL  | 156   | >PTEN-D107'ELIKPFCEYL  | 42    | 114   |
| >PTEN-D107'ELIKPFCE    | 21345 | >PTEN-D107'ELIKPFCEY   | 424   | 20921 |
| >PTEN-D107'ELIKPFCE    | 17449 | >PTEN-D107'ELIKPFCEY   | 21    | 17428 |
| >PTEN-D107'ELIKPFCE    | 24546 | >PTEN-D107'ELIKPFCEY   | 11    | 24535 |
| >PTEN-D107'ELIKPFCEDL  | 775   | >PTEN-D107'ELIKPFCEYL  | 177   | 598   |
| >PTEN-D107'ELIKPFCE    | 22904 | >PTEN-D107'ELIKPFCEY   | 22    | 22882 |
| >PTEN-D107'ELIKPFCEDL  | 2042  | >PTEN-D107'ELIKPFCEYL  | 173   | 1869  |
| >PTEN-D107'ELIKPFCEDL  | 726   | >PTEN-D107'ELIKPFCEYL  | 40    | 686   |
| >PTEN-D107'ELIKPFCE    | 16922 | >PTEN-D107'ELIKPFCEY   | 76    | 16846 |
| >PTEN-D107'ELIKPFCE    | 32489 | >PTEN-D107'ELIKPFCEY   | 327   | 32162 |
| >PTEN-D107'ELIKPFCE    | 17569 | >PTEN-D107'ELIKPFCEY   | 199   | 17370 |
| >PTEN-D107'LELIKPFCEDL | 166   | >PTEN-D107'LELIKPFCEYL | 76    | 90    |
| >PTEN-D107'LELIKPFCE   | 24582 | >PTEN-D107'LELIKPFCEY  | 366   | 24216 |
| >PTEN-D107'LELIKPFCEDL | 248   | >PTEN-D107'LELIKPFCEYL | 122   | 126   |
| >PTEN-D107'LELIKPFCEDL | 275   | >PTEN-D107'LELIKPFCEYL | 175   | 100   |
| >PTEN-D107'LELIKPFCEDL | 78    | >PTEN-D107'LELIKPFCEYL | 87    | 9     |
| >PTEN-D116'DDNHVAAI    | 343   | >PTEN-D116'DGNHVAAI    | 19089 | 18746 |
| >PTEN-D116'EDDNHVAAI   | 195   | >PTEN-D116'EDGNHVAAI   | 471   | 276   |
| >PTEN-D116'SEDDNHVA    | 161   | >PTEN-D116'SEDGNHVA    | 207   | 46    |
| >PTEN-D116'SEDDNHVAA   | 347   | >PTEN-D116'SEDGNHVAA   | 516   | 169   |
| >PTEN-D116'SEDDNHVAA   | 1148  | >PTEN-D116'SEDGNHVAA   | 494   | 654   |
| >PTEN-D116'SEDDNHVAA   | 435   | >PTEN-D116'SEDGNHVAA   | 358   | 77    |
| >PTEN-D116'SEDDNHVAA   | 117   | >PTEN-D116'SEDGNHVAA   | 132   | 15    |
| >PTEN-D116'SEDDNHVA    | 53    | >PTEN-D116'SEDGNHVA    | 23    | 30    |
| >PTEN-D116'SEDDNHVAA   | 24    | >PTEN-D116'SEDGNHVAA   | 12    | 12    |
| >PTEN-D116'SEDDNHVAA   | 315   | >PTEN-D116'SEDGNHVAA   | 445   | 130   |
| >PTEN-D116'SEDDNHVAA   | 65    | >PTEN-D116'SEDGNHVAA   | 29    | 36    |



|                       |     |                        |     |     |
|-----------------------|-----|------------------------|-----|-----|
| >PTEN-D116(LSEDDNHVA/ | 514 | >PTEN-D116(LSEDDGNHVA/ | 126 | 388 |
| >PTEN-D116(LSEDDNHVA/ | 70  | >PTEN-D116(LSEDDGNHVA/ | 47  | 23  |
| >PTEN-D116(WLSEDDNHV  | 105 | >PTEN-D116(WLSEDDGNHV  | 153 | 48  |
| >PTEN-D116(WLSEDDNHV  | 480 | >PTEN-D116(WLSEDDGNHV  | 766 | 286 |
| >PTEN-D116(WLSEDDNHV  | 10  | >PTEN-D116(WLSEDDGNHV  | 9   | 1   |
| >PTEN-D116(WLSEDDNHV  | 99  | >PTEN-D116(WLSEDDGNHV  | 108 | 9   |
| >PTEN-D116(WLSEDDNHV  | 30  | >PTEN-D116(WLSEDDGNHV  | 30  | 0   |
| >PTEN-D116(WLSEDDNHV  | 12  | >PTEN-D116(WLSEDDGNHV  | 6   | 6   |
| >PTEN-D116(WLSEDDNHV  | 532 | >PTEN-D116(WLSEDDGNHV  | 254 | 278 |
| >PTEN-D116(WLSEDDNHV  | 39  | >PTEN-D116(WLSEDDGNHV  | 27  | 12  |
| >PTEN-D116(WLSEDDNHV  | 30  | >PTEN-D116(WLSEDDGNHV  | 26  | 4   |
| >PTEN-D116(WLSEDDNHV  | 56  | >PTEN-D116(WLSEDDGNHV  | 71  | 15  |
| >PTEN-D116(WLSEDDNHV  | 8   | >PTEN-D116(WLSEDDGNHV  | 4   | 4   |
| >PTEN-D116(WLSEDDNHV  | 65  | >PTEN-D116(WLSEDDGNHV  | 28  | 37  |
| >PTEN-D116(WLSEDDNHV  | 34  | >PTEN-D116(WLSEDDGNHV  | 19  | 15  |
| >PTEN-D116(WLSEDDNHV  | 4   | >PTEN-D116(WLSEDDGNHV  | 4   | 0   |
| >PTEN-D116(WLSEDDNHV  | 22  | >PTEN-D116(WLSEDDGNHV  | 24  | 2   |
| >PTEN-D116(WLSEDDNHV  | 26  | >PTEN-D116(WLSEDDGNHV  | 36  | 10  |
| >PTEN-D116(WLSEDDNHV  | 6   | >PTEN-D116(WLSEDDGNHV  | 6   | 0   |
| >PTEN-D116(WLSEDDNHV  | 46  | >PTEN-D116(WLSEDDGNHV  | 38  | 8   |
| >PTEN-D116(WLSEDDNHV  | 85  | >PTEN-D116(WLSEDDGNHV  | 94  | 9   |
| >PTEN-D116(WLSEDDNHV  | 6   | >PTEN-D116(WLSEDDGNHV  | 4   | 2   |
| >PTEN-D116(WLSEDDNHV  | 40  | >PTEN-D116(WLSEDDGNHV  | 32  | 8   |
| >PTEN-D116(WLSEDDNHV  | 108 | >PTEN-D116(WLSEDDGNHV  | 105 | 3   |
| >PTEN-D116(WLSEDDNHV  | 2   | >PTEN-D116(WLSEDDGNHV  | 2   | 0   |
| >PTEN-D116(WLSEDDNHV  | 7   | >PTEN-D116(WLSEDDGNHV  | 6   | 1   |
| >PTEN-D116(WLSEDDNHV  | 9   | >PTEN-D116(WLSEDDGNHV  | 8   | 1   |
| >PTEN-D116(WLSEDDNHV  | 243 | >PTEN-D116(WLSEDDGNHV  | 842 | 599 |
| >PTEN-D116(QWLSEDDNF  | 40  | >PTEN-D116(QWLSEDDGNF  | 41  | 1   |
| >PTEN-D116(QWLSEDDNF  | 162 | >PTEN-D116(QWLSEDDGNF  | 135 | 27  |
| >PTEN-D153IDFYGEVRTR  | 31  | >PTEN-D153IDFYGEVRTR   | 148 | 117 |
| >PTEN-D153IDFYGEVRTR  | 408 | >PTEN-D153IDFYGEVRTR   | 535 | 127 |
| >PTEN-D153IDFYGEVRTR  | 291 | >PTEN-D153IDFYGEVRTR   | 76  | 215 |
| >PTEN-D153ILDIFYGEVR  | 975 | >PTEN-D153ILDIFYGEVR   | 188 | 787 |
| >PTEN-D153IALDFYGEV   | 41  | >PTEN-D153IALNFYGEV    | 73  | 32  |
| >PTEN-D153IALDFYGEV   | 17  | >PTEN-D153IALNFYGEV    | 7   | 10  |
| >PTEN-D153IALDFYGEV   | 34  | >PTEN-D153IALNFYGEV    | 4   | 30  |
| >PTEN-D153IALDFYGEV   | 128 | >PTEN-D153IALNFYGEV    | 330 | 202 |
| >PTEN-D153IALDFYGEV   | 3   | >PTEN-D153IALNFYGEV    | 3   | 0   |
| >PTEN-D153IALDFYGEVRT | 308 | >PTEN-D153IALNFYGEVRT  | 609 | 301 |
| >PTEN-D153IALDFYGEV   | 12  | >PTEN-D153IALNFYGEV    | 23  | 11  |
| >PTEN-D153IALDFYGEV   | 9   | >PTEN-D153IALNFYGEV    | 15  | 6   |
| >PTEN-D153IALDFYGEV   | 29  | >PTEN-D153IALNFYGEV    | 41  | 12  |

|                        |      |                        |     |      |
|------------------------|------|------------------------|-----|------|
| >PTEN-D153IALDFYGEV    | 3    | >PTEN-D153IALNFYGEV    | 3   | 0    |
| >PTEN-D153IALDFYGEVRT  | 416  | >PTEN-D153IALNFYGEVRT  | 232 | 184  |
| >PTEN-D153IALDFYGEVR   | 2478 | >PTEN-D153IALNFYGEVR   | 56  | 2422 |
| >PTEN-D153IALDFYGEVRT  | 2863 | >PTEN-D153IALNFYGEVRT  | 112 | 2751 |
| >PTEN-D153I EALDFYGEV  | 224  | >PTEN-D153I EALNFYGEV  | 205 | 19   |
| >PTEN-D153I EALDFYGEV  | 188  | >PTEN-D153I EALNFYGEV  | 539 | 351  |
| >PTEN-D153I EALDFYGEVR | 299  | >PTEN-D153I EALNFYGEVR | 490 | 191  |
| >PTEN-D153I EALDFYGEVR | 28   | >PTEN-D153I EALNFYGEVR | 36  | 8    |
| >PTEN-D153I EALDFYGEV  | 11   | >PTEN-D153I EALNFYGEV  | 21  | 10   |
| >PTEN-D153I EALDFYGEV  | 4    | >PTEN-D153I EALNFYGEV  | 5   | 1    |
| >PTEN-D153IQEALDFYG    | 1008 | >PTEN-D153IQEALNFYG    | 259 | 749  |
| >PTEN-D153IQEALDFYGEV  | 22   | >PTEN-D153IQEALNFYGEV  | 15  | 7    |
| >PTEN-D153IQEALDFYGEV  | 112  | >PTEN-D153IQEALNFYGEV  | 95  | 17   |
| >PTEN-D153IQEALDFYGEV  | 426  | >PTEN-D153IQEALNFYGEV  | 196 | 230  |
| >PTEN-D153IQEALDFYGEV  | 361  | >PTEN-D153IQEALNFYGEV  | 272 | 89   |
| >PTEN-D153IQEALDFYG    | 796  | >PTEN-D153IQEALNFYG    | 488 | 308  |
| >PTEN-D153IQEALDFYGEV  | 116  | >PTEN-D153IQEALNFYGEV  | 89  | 27   |
| >PTEN-D153IAQEALDFYGE  | 422  | >PTEN-D153IAQEALNFYGE  | 343 | 79   |
| >PTEN-D153IAQEALDFYGE  | 39   | >PTEN-D153IAQEALNFYGE  | 39  | 0    |
| >PTEN-D153IAQEALDFY    | 178  | >PTEN-D153IAQEALNFY    | 86  | 92   |
| >PTEN-D153IAQEALDFY    | 421  | >PTEN-D153IAQEALNFY    | 269 | 152  |
| >PTEN-D153IKAQEALDFY   | 271  | >PTEN-D153IKAQEALNFY   | 299 | 28   |
| >PTEN-D153IKAQEALDFY   | 4376 | >PTEN-D153IKAQEALNFY   | 475 | 3901 |
| >PTEN-D153IKAQEALDFY   | 46   | >PTEN-D153IKAQEALNFY   | 19  | 27   |
| >PTEN-D153IKAQEALDFY   | 708  | >PTEN-D153IKAQEALNFY   | 393 | 315  |
| >PTEN-D153IKAQEALDF    | 309  | >PTEN-D153IKAQEALNF    | 125 | 184  |
| >PTEN-D153IKAQEALDF    | 30   | >PTEN-D153IKAQEALNF    | 11  | 19   |
| >PTEN-D153IKAQEALDFY   | 139  | >PTEN-D153IKAQEALNFY   | 92  | 47   |
| >PTEN-D153IKAQEALDFY   | 481  | >PTEN-D153IKAQEALNFY   | 355 | 126  |
| >PTEN-D153IKAQEALDF    | 133  | >PTEN-D153IKAQEALNF    | 49  | 84   |
| >PTEN-D153IKAQEALDFY   | 195  | >PTEN-D153IKAQEALNFY   | 333 | 138  |
| >PTEN-D153IKAQEALDFY   | 1085 | >PTEN-D153IKAQEALNFY   | 391 | 694  |
| >PTEN-D153ILKAQEALDF   | 6    | >PTEN-D153ILKAQEALNF   | 5   | 1    |
| >PTEN-D153ILKAQEALDFY  | 85   | >PTEN-D153ILKAQEALNFY  | 25  | 60   |
| >PTEN-D153IFLKAQEALDF  | 370  | >PTEN-D153IFLKAQEALNF  | 280 | 90   |
| >PTEN-D153IFLKAQEALDF  | 98   | >PTEN-D153IFLKAQEALNF  | 62  | 36   |
| >PTEN-D153IFLKAQEALDF  | 209  | >PTEN-D153IFLKAQEALNF  | 101 | 108  |
| >PTEN-D153IFLKAQEALDF  | 122  | >PTEN-D153IFLKAQEALNF  | 81  | 41   |
| >PTEN-D153IFLKAQEALDF  | 105  | >PTEN-D153IFLKAQEALNF  | 86  | 19   |
| >PTEN-D153IFLKAQEALDF  | 105  | >PTEN-D153IFLKAQEALNF  | 83  | 22   |
| >PTEN-D153IFLKAQEALDF  | 108  | >PTEN-D153IFLKAQEALNF  | 99  | 9    |
| >PTEN-D153IFLKAQEALDF  | 78   | >PTEN-D153IFLKAQEALNF  | 64  | 14   |
| >PTEN-D153IFLKAQEALDF  | 37   | >PTEN-D153IFLKAQEALNF  | 24  | 13   |

|                       |       |                       |      |       |
|-----------------------|-------|-----------------------|------|-------|
| >PTEN-D153IFLKAQEALDF | 716   | >PTEN-D153IFLKAQEALNF | 250  | 466   |
| >PTEN-D153IKFLKAQEALD | 77    | >PTEN-D153IKFLKAQEALN | 39   | 38    |
| >PTEN-D153IKFLKAQEALD | 345   | >PTEN-D153IKFLKAQEALN | 262  | 83    |
| >PTEN-D153IKFLKAQEALD | 9     | >PTEN-D153IKFLKAQEALN | 6    | 3     |
| >PTEN-D153IKFLKAQEALD | 364   | >PTEN-D153IKFLKAQEALN | 269  | 95    |
| >PTEN-D153'DFYGEVRTR  | 31    | >PTEN-D153'YFYGEVRTR  | 196  | 165   |
| >PTEN-D153'DFYGEVRTR  | 408   | >PTEN-D153'YFYGEVRTR  | 224  | 184   |
| >PTEN-D153'DFYGEVRTR  | 291   | >PTEN-D153'YFYGEVRTR  | 72   | 219   |
| >PTEN-D153'LDFYGEVR   | 8547  | >PTEN-D153'LYFYGEVR   | 52   | 8495  |
| >PTEN-D153'LDFYGEVRTR | 4341  | >PTEN-D153'LYFYGEVRTR | 227  | 4114  |
| >PTEN-D153'LDFYGEVR   | 13962 | >PTEN-D153'LYFYGEVR   | 82   | 13880 |
| >PTEN-D153'LDFYGEVR   | 975   | >PTEN-D153'LYFYGEVR   | 228  | 747   |
| >PTEN-D153'LDFYGEVR   | 3752  | >PTEN-D153'LYFYGEVR   | 120  | 3632  |
| >PTEN-D153'LDFYGEVRTR | 3634  | >PTEN-D153'LYFYGEVRTR | 114  | 3520  |
| >PTEN-D153'GKFLKAQEAL | 21678 | >PTEN-D153'GKFLKAQEAL | 102  | 21576 |
| >PTEN-D153'ALDFYGEV   | 11661 | >PTEN-D153'ALYFYGEV   | 203  | 11458 |
| >PTEN-D153'ALDFYGEV   | 41    | >PTEN-D153'ALYFYGEV   | 18   | 23    |
| >PTEN-D153'ALDFYGEV   | 17    | >PTEN-D153'ALYFYGEV   | 7    | 10    |
| >PTEN-D153'ALDFYGEVRT | 4340  | >PTEN-D153'ALYFYGEVRT | 467  | 3873  |
| >PTEN-D153'ALDFYGEV   | 34    | >PTEN-D153'ALYFYGEV   | 4    | 30    |
| >PTEN-D153'ALDFYGEV   | 128   | >PTEN-D153'ALYFYGEV   | 81   | 47    |
| >PTEN-D153'ALDFYGEV   | 3     | >PTEN-D153'ALYFYGEV   | 2    | 1     |
| >PTEN-D153'ALDFYGEVRT | 308   | >PTEN-D153'ALYFYGEVRT | 52   | 256   |
| >PTEN-D153'ALDFYGEV   | 12    | >PTEN-D153'ALYFYGEV   | 9    | 3     |
| >PTEN-D153'ALDFYGEV   | 9     | >PTEN-D153'ALYFYGEV   | 6    | 3     |
| >PTEN-D153'ALDFYGEV   | 29    | >PTEN-D153'ALYFYGEV   | 40   | 11    |
| >PTEN-D153'ALDFYGEV   | 3     | >PTEN-D153'ALYFYGEV   | 2    | 1     |
| >PTEN-D153'ALDFYGEVRT | 416   | >PTEN-D153'ALYFYGEVRT | 42   | 374   |
| >PTEN-D153'ALDFYGEVRT | 11461 | >PTEN-D153'ALYFYGEVRT | 369  | 11092 |
| >PTEN-D153'ALDFYGEVR  | 2478  | >PTEN-D153'ALYFYGEVR  | 53   | 2425  |
| >PTEN-D153'ALDFYGEVRT | 2863  | >PTEN-D153'ALYFYGEVRT | 110  | 2753  |
| >PTEN-D153'EALDFYGEV  | 224   | >PTEN-D153'EALYFYGEV  | 199  | 25    |
| >PTEN-D153'EALDFYGEV  | 188   | >PTEN-D153'EALYFYGEV  | 3315 | 3127  |
| >PTEN-D153'EALDFYGEVR | 299   | >PTEN-D153'EALYFYGEVR | 217  | 82    |
| >PTEN-D153'EALDFYGEVR | 28    | >PTEN-D153'EALYFYGEVR | 18   | 10    |
| >PTEN-D153'EALDFYGEV  | 11    | >PTEN-D153'EALYFYGEV  | 13   | 2     |
| >PTEN-D153'EALDFYGEV  | 4     | >PTEN-D153'EALYFYGEV  | 7    | 3     |
| >PTEN-D153'QEALDFYGEV | 22    | >PTEN-D153'QEALYFYGEV | 10   | 12    |
| >PTEN-D153'QEALDFYGEV | 112   | >PTEN-D153'QEALYFYGEV | 159  | 47    |
| >PTEN-D153'QEALDFYGEV | 426   | >PTEN-D153'QEALYFYGEV | 251  | 175   |
| >PTEN-D153'QEALDFYGEV | 361   | >PTEN-D153'QEALYFYGEV | 154  | 207   |
| >PTEN-D153'QEALDFYGEV | 796   | >PTEN-D153'QEALYFYGEV | 117  | 679   |
| >PTEN-D153'QEALDFYGEV | 551   | >PTEN-D153'QEALYFYGEV | 144  | 407   |

|                       |       |                       |     |       |
|-----------------------|-------|-----------------------|-----|-------|
| >PTEN-D153'QEALDFYGEV | 116   | >PTEN-D153'QEALFYGEV  | 88  | 28    |
| >PTEN-D153'AQEALDFYGE | 422   | >PTEN-D153'AQEALFYGE  | 270 | 152   |
| >PTEN-D153'AQEALDFYGE | 39    | >PTEN-D153'AQEALFYGE  | 33  | 6     |
| >PTEN-D153'AQEALDFY   | 178   | >PTEN-D153'AQEALFY    | 77  | 101   |
| >PTEN-D153'AQEALDFY   | 912   | >PTEN-D153'AQEALFY    | 321 | 591   |
| >PTEN-D153'AQEALDFY   | 421   | >PTEN-D153'AQEALFY    | 244 | 177   |
| >PTEN-D153'AQEALDFY   | 1554  | >PTEN-D153'AQEALFY    | 368 | 1186  |
| >PTEN-D153'AQEALDFY   | 1469  | >PTEN-D153'AQEALFY    | 418 | 1051  |
| >PTEN-D153'KAQEALDFY  | 1686  | >PTEN-D153'KAQEALFY   | 153 | 1533  |
| >PTEN-D153'KAQEALDFY  | 271   | >PTEN-D153'KAQEALFY   | 342 | 71    |
| >PTEN-D153'KAQEALDFY  | 5273  | >PTEN-D153'KAQEALFY   | 174 | 5099  |
| >PTEN-D153'KAQEALDFY  | 46    | >PTEN-D153'KAQEALFY   | 11  | 35    |
| >PTEN-D153'KAQEALDFY  | 708   | >PTEN-D153'KAQEALFY   | 72  | 636   |
| >PTEN-D153'KAQEALDF   | 309   | >PTEN-D153'KAQEALFY   | 163 | 146   |
| >PTEN-D153'KAQEALDF   | 30    | >PTEN-D153'KAQEALFY   | 9   | 21    |
| >PTEN-D153'KAQEALDFY  | 139   | >PTEN-D153'KAQEALFY   | 36  | 103   |
| >PTEN-D153'KAQEALDF   | 767   | >PTEN-D153'KAQEALFY   | 122 | 645   |
| >PTEN-D153'KAQEALDFY  | 481   | >PTEN-D153'KAQEALFY   | 102 | 379   |
| >PTEN-D153'KAQEALDF   | 133   | >PTEN-D153'KAQEALFY   | 20  | 113   |
| >PTEN-D153'KAQEALDFY  | 195   | >PTEN-D153'KAQEALFY   | 65  | 130   |
| >PTEN-D153'KAQEALDFY  | 1085  | >PTEN-D153'KAQEALFY   | 139 | 946   |
| >PTEN-D153'LKAQEALDFY | 1840  | >PTEN-D153'LKAQEALFY  | 152 | 1688  |
| >PTEN-D153'LKAQEALDFY | 1284  | >PTEN-D153'LKAQEALFY  | 285 | 999   |
| >PTEN-D153'LKAQEALDFY | 1260  | >PTEN-D153'LKAQEALFY  | 393 | 867   |
| >PTEN-D153'LKAQEALD   | 18971 | >PTEN-D153'LKAQEALFY  | 39  | 18932 |
| >PTEN-D153'LKAQEALDF  | 6     | >PTEN-D153'LKAQEALFY  | 5   | 1     |
| >PTEN-D153'LKAQEALDFY | 85    | >PTEN-D153'LKAQEALFY  | 25  | 60    |
| >PTEN-D153'FLKAQEALDF | 370   | >PTEN-D153'FLKAQEALFY | 153 | 217   |
| >PTEN-D153'FLKAQEALD  | 23613 | >PTEN-D153'FLKAQEALFY | 40  | 23573 |
| >PTEN-D153'FLKAQEALDF | 98    | >PTEN-D153'FLKAQEALFY | 19  | 79    |
| >PTEN-D153'FLKAQEALD  | 31494 | >PTEN-D153'FLKAQEALFY | 258 | 31236 |
| >PTEN-D153'FLKAQEALDF | 209   | >PTEN-D153'FLKAQEALFY | 61  | 148   |
| >PTEN-D153'FLKAQEALD  | 25592 | >PTEN-D153'FLKAQEALFY | 173 | 25419 |
| >PTEN-D153'FLKAQEALDF | 122   | >PTEN-D153'FLKAQEALFY | 32  | 90    |
| >PTEN-D153'FLKAQEALD  | 20534 | >PTEN-D153'FLKAQEALFY | 105 | 20429 |
| >PTEN-D153'FLKAQEALDF | 105   | >PTEN-D153'FLKAQEALFY | 59  | 46    |
| >PTEN-D153'FLKAQEALDF | 105   | >PTEN-D153'FLKAQEALFY | 77  | 28    |
| >PTEN-D153'FLKAQEALD  | 23841 | >PTEN-D153'FLKAQEALFY | 46  | 23795 |
| >PTEN-D153'FLKAQEALDF | 108   | >PTEN-D153'FLKAQEALFY | 114 | 6     |
| >PTEN-D153'FLKAQEALDF | 78    | >PTEN-D153'FLKAQEALFY | 76  | 2     |
| >PTEN-D153'FLKAQEALD  | 27517 | >PTEN-D153'FLKAQEALFY | 464 | 27053 |
| >PTEN-D153'FLKAQEALDF | 37    | >PTEN-D153'FLKAQEALFY | 28  | 9     |
| >PTEN-D153'FLKAQEALDF | 716   | >PTEN-D153'FLKAQEALFY | 224 | 492   |

|                         |       |                         |       |       |
|-------------------------|-------|-------------------------|-------|-------|
| >PTEN-D153'FLKAQEALD    | 35893 | >PTEN-D153'FLKAQEALY    | 187   | 35706 |
| >PTEN-D153'FLKAQEALDF   | 736   | >PTEN-D153'FLKAQEALYF   | 147   | 589   |
| >PTEN-D153'KFLKAQEALD   | 77    | >PTEN-D153'KFLKAQEALY   | 61    | 16    |
| >PTEN-D153'KFLKAQEALD   | 345   | >PTEN-D153'KFLKAQEALY   | 234   | 111   |
| >PTEN-D153'KFLKAQEALD   | 9     | >PTEN-D153'KFLKAQEALY   | 5     | 4     |
| >PTEN-D153'KFLKAQEALD   | 30716 | >PTEN-D153'KFLKAQEALY   | 148   | 30568 |
| >PTEN-D153'KFLKAQEALD   | 1363  | >PTEN-D153'KFLKAQEALY   | 441   | 922   |
| >PTEN-D153'KFLKAQEALD   | 23855 | >PTEN-D153'KFLKAQEALY   | 60    | 23795 |
| >PTEN-D153'KFLKAQEALD   | 25881 | >PTEN-D153'KFLKAQEALY   | 74    | 25807 |
| >PTEN-D153'KFLKAQEALD   | 364   | >PTEN-D153'KFLKAQEALY   | 309   | 55    |
| >PTEN-D153'KFLKAQEALD   | 3095  | >PTEN-D153'KFLKAQEALY   | 246   | 2849  |
| >PTEN-D162'DKKGGVTIPSQ  | 497   | >PTEN-D162'GKGGVTIPSQ   | 14421 | 13924 |
| >PTEN-D162'RDKGGVTI     | 3942  | >PTEN-D162'RGKGGVTI     | 149   | 3793  |
| >PTEN-D162'RDKGGVTIPS   | 5081  | >PTEN-D162'RGKGGVTIPS   | 269   | 4812  |
| >PTEN-D162'RDKGGVTIPS   | 5053  | >PTEN-D162'RGKGGVTIPS   | 318   | 4735  |
| >PTEN-D162'RDKGGVTI     | 179   | >PTEN-D162'RGKGGVTI     | 5609  | 5430  |
| >PTEN-D162'RDKGGVTI     | 1854  | >PTEN-D162'RGKGGVTI     | 497   | 1357  |
| >PTEN-D162'RTRDKKGV     | 14    | >PTEN-D162'RTRGKGGV     | 12    | 2     |
| >PTEN-D162'RTRDKKGGVT   | 71    | >PTEN-D162'RTRGKGGVT    | 87    | 16    |
| >PTEN-D162'RTRDKKGGVTI  | 5     | >PTEN-D162'RTRGKGGVTI   | 5     | 0     |
| >PTEN-D162'RTRDKKGGVTI  | 103   | >PTEN-D162'RTRGKGGVTI   | 120   | 17    |
| >PTEN-D162'RTRDKKGGVTI  | 120   | >PTEN-D162'RTRGKGGVTI   | 62    | 58    |
| >PTEN-D162'RTRDKKGGV    | 26    | >PTEN-D162'RTRGKGGV     | 20    | 6     |
| >PTEN-D162'RTRDKKGGVTI  | 5     | >PTEN-D162'RTRGKGGVTI   | 5     | 0     |
| >PTEN-D162'RTRDKKGGVTI  | 100   | >PTEN-D162'RTRGKGGVTI   | 123   | 23    |
| >PTEN-D162'EVRTRDKK     | 652   | >PTEN-D162'EVRTRGKK     | 120   | 532   |
| >PTEN-D162'EVRTRDKK     | 81    | >PTEN-D162'EVRTRGKK     | 191   | 110   |
| >PTEN-D162'GEVTRDKKC    | 178   | >PTEN-D162'GEVTRGKKC    | 151   | 27    |
| >PTEN-D162'GEVTRDKKC    | 381   | >PTEN-D162'GEVTRGKKC    | 351   | 30    |
| >PTEN-D162'GEVTRDKKC    | 89    | >PTEN-D162'GEVTRGKKC    | 67    | 22    |
| >PTEN-D162'IDKGGVTIPSQ  | 497   | >PTEN-D162'IDHGGVTIPSQ  | 1483  | 986   |
| >PTEN-D162'IRDKGGVTI    | 4249  | >PTEN-D162'IRHGGVTI     | 163   | 4086  |
| >PTEN-D162'IRDKGGVTI    | 179   | >PTEN-D162'IRHGGVTI     | 2435  | 2256  |
| >PTEN-D162'IRTRDKKGV    | 14    | >PTEN-D162'IRTRHKKGV    | 8     | 6     |
| >PTEN-D162'IRTRDKKGGVT  | 71    | >PTEN-D162'IRTRHKKGGVT  | 39    | 32    |
| >PTEN-D162'IRTRDKKGGVTI | 5     | >PTEN-D162'IRTRHKKGGVTI | 5     | 0     |
| >PTEN-D162'IRTRDKKGGVTI | 103   | >PTEN-D162'IRTRHKKGGVTI | 58    | 45    |
| >PTEN-D162'IRTRDKKGGVTI | 120   | >PTEN-D162'IRTRHKKGGVTI | 90    | 30    |
| >PTEN-D162'IRTRDKKGGV   | 26    | >PTEN-D162'IRTRHKKGGV   | 22    | 4     |
| >PTEN-D162'IRTRDKKGGVTI | 5     | >PTEN-D162'IRTRHKKGGVTI | 5     | 0     |
| >PTEN-D162'IRTRDKKGGVTI | 100   | >PTEN-D162'IRTRHKKGGVTI | 180   | 80    |
| >PTEN-D162'IVRTRDKKGGV  | 595   | >PTEN-D162'IVRTRHKKGGV  | 440   | 155   |
| >PTEN-D162'IVRTRDKK     | 652   | >PTEN-D162'IVRTRHKK     | 40    | 612   |

|                          |       |                         |      |       |
|--------------------------|-------|-------------------------|------|-------|
| >PTEN-D162IEVRTRDKK      | 81    | >PTEN-D162IEVRTRHKK     | 48   | 33    |
| >PTEN-D162IGEVRTRDKKC    | 178   | >PTEN-D162IGEVRTRHKKC   | 130  | 48    |
| >PTEN-D162IGEVRTRDKKC    | 381   | >PTEN-D162IGEVRTRHKKC   | 353  | 28    |
| >PTEN-D162IGEVRTRDKKC    | 89    | >PTEN-D162IGEVRTRHKKC   | 48   | 41    |
| >PTEN-D162IFYGEVRTRDK    | 1470  | >PTEN-D162IFYGEVRTRHK   | 422  | 1048  |
| >PTEN-D162IDFYGEVRTRC    | 764   | >PTEN-D162IDFYGEVRTRH   | 210  | 554   |
| >PTEN-D162' DKKKGV TIPSQ | 497   | >PTEN-D162' VKKGV TIPSQ | 7006 | 6509  |
| >PTEN-D162' RDKKGV TI    | 15692 | >PTEN-D162' RVKKGVTI    | 489  | 15203 |
| >PTEN-D162' RDKKGV TI    | 3942  | >PTEN-D162' RVKKGVTI    | 10   | 3932  |
| >PTEN-D162' RDKKGV TIPS  | 5081  | >PTEN-D162' RVKKGVTIPS  | 17   | 5064  |
| >PTEN-D162' RDKKGV TIPS  | 5053  | >PTEN-D162' RVKKGVTIPS  | 21   | 5032  |
| >PTEN-D162' RDKKGV TI    | 6434  | >PTEN-D162' RVKKGVTI    | 58   | 6376  |
| >PTEN-D162' RDKKGV TI    | 179   | >PTEN-D162' RVKKGVTI    | 5768 | 5589  |
| >PTEN-D162' RDKKGV TI    | 1854  | >PTEN-D162' RVKKGVTI    | 448  | 1406  |
| >PTEN-D162' RTRDKKGV     | 14    | >PTEN-D162' RTRVKKGV    | 10   | 4     |
| >PTEN-D162' RTRDKKGV T   | 71    | >PTEN-D162' RTRVKKGV T  | 50   | 21    |
| >PTEN-D162' RTRDKKGV TI  | 5     | >PTEN-D162' RTRVKKGV TI | 5    | 0     |
| >PTEN-D162' RTRDKKGV TI  | 103   | >PTEN-D162' RTRVKKGV TI | 74   | 29    |
| >PTEN-D162' RTRDKKGV TI  | 120   | >PTEN-D162' RTRVKKGV TI | 171  | 51    |
| >PTEN-D162' RTRDKKGV     | 26    | >PTEN-D162' RTRVKKGV    | 35   | 9     |
| >PTEN-D162' RTRDKKGV TI  | 5     | >PTEN-D162' RTRVKKGV TI | 5    | 0     |
| >PTEN-D162' RTRDKKGV TI  | 100   | >PTEN-D162' RTRVKKGV TI | 86   | 14    |
| >PTEN-D162' VRTRDKKGV T  | 595   | >PTEN-D162' VRTRVKKGV T | 363  | 232   |
| >PTEN-D162' EVRTRDKK     | 652   | >PTEN-D162' EVRTRVKK    | 73   | 579   |
| >PTEN-D162' EVRTRDKK     | 81    | >PTEN-D162' EVRTRVKK    | 64   | 17    |
| >PTEN-D162' GEVRTRDKKC   | 178   | >PTEN-D162' GEVRTRVKKC  | 136  | 42    |
| >PTEN-D162' GEVRTRDKKC   | 381   | >PTEN-D162' GEVRTRVKKC  | 280  | 101   |
| >PTEN-D162' GEVRTRDKKC   | 89    | >PTEN-D162' GEVRTRVKKC  | 48   | 41    |
| >PTEN-D162' FYGEVRTRD    | 10311 | >PTEN-D162' FYGEVRTRV   | 32   | 10279 |
| >PTEN-D162' FYGEVRTRD    | 28428 | >PTEN-D162' FYGEVRTRV   | 247  | 28181 |
| >PTEN-D162' FYGEVRTRD    | 34455 | >PTEN-D162' FYGEVRTRV   | 24   | 34431 |
| >PTEN-D162' FYGEVRTRD    | 3895  | >PTEN-D162' FYGEVRTRV   | 395  | 3500  |
| >PTEN-D19N DGFDLDLTY     | 122   | >PTEN-D19N NGFDLDLTY    | 59   | 63    |
| >PTEN-D19N DGFDLDLTY\    | 160   | >PTEN-D19N NGFDLDLTY\   | 74   | 86    |
| >PTEN-D19N DGFDLDLTY\    | 458   | >PTEN-D19N NGFDLDLTY\   | 321  | 137   |
| >PTEN-D19N DGFDLDLTY     | 4834  | >PTEN-D19N NGFDLDLTY    | 447  | 4387  |
| >PTEN-D19N DGFDLDLTY     | 300   | >PTEN-D19N NGFDLDLTY    | 957  | 657   |
| >PTEN-D19N DGFDLDLTY\    | 299   | >PTEN-D19N NGFDLDLTY\   | 925  | 626   |
| >PTEN-D19N DGFDLDLTY     | 37    | >PTEN-D19N NGFDLDLTY    | 30   | 7     |
| >PTEN-D19N DGFDLDLTY\    | 76    | >PTEN-D19N NGFDLDLTY\   | 62   | 14    |
| >PTEN-D19N DGFDLDLTY\    | 3729  | >PTEN-D19N NGFDLDLTY\   | 436  | 3293  |
| >PTEN-D19N QEDGFDLDT     | 845   | >PTEN-D19N QENGFDLDT    | 245  | 600   |
| >PTEN-D19N QEDGFDLDT     | 44    | >PTEN-D19N QENGFDLDT    | 19   | 25    |

|                       |      |                       |     |      |
|-----------------------|------|-----------------------|-----|------|
| >PTEN-D19N QEDGFDLDLT | 1053 | >PTEN-D19N QENGFDLDLT | 477 | 576  |
| >PTEN-D19N QEDGFDLDL  | 15   | >PTEN-D19N QENGFDLDL  | 27  | 12   |
| >PTEN-D19N QEDGFDLDL  | 803  | >PTEN-D19N QENGFDLDL  | 107 | 696  |
| >PTEN-D19N QEDGFDLDL  | 588  | >PTEN-D19N QENGFDLDL  | 128 | 460  |
| >PTEN-D19N QEDGFDLDLT | 114  | >PTEN-D19N QENGFDLDLT | 34  | 80   |
| >PTEN-D19N YQEDGFDLDI | 209  | >PTEN-D19N YQENGFDLDI | 252 | 43   |
| >PTEN-D19N YQEDGFDL   | 26   | >PTEN-D19N YQENGFDL   | 40  | 14   |
| >PTEN-D19N YQEDGFDLDI | 297  | >PTEN-D19N YQENGFDLDI | 458 | 161  |
| >PTEN-D19N YQEDGFDLDI | 27   | >PTEN-D19N YQENGFDLDI | 50  | 23   |
| >PTEN-D19N YQEDGFDL   | 68   | >PTEN-D19N YQENGFDL   | 90  | 22   |
| >PTEN-D19N YQEDGFDLDI | 137  | >PTEN-D19N YQENGFDLDI | 201 | 64   |
| >PTEN-D19N YQEDGFDL   | 269  | >PTEN-D19N YQENGFDL   | 286 | 17   |
| >PTEN-D19N RYQEDGFDL  | 467  | >PTEN-D19N RYQENGFDL  | 85  | 382  |
| >PTEN-D19N RYQEDGFDLI | 586  | >PTEN-D19N RYQENGFDLI | 185 | 401  |
| >PTEN-D19N RYQEDGFDL  | 320  | >PTEN-D19N RYQENGFDL  | 137 | 183  |
| >PTEN-D19N RYQEDGFDLI | 569  | >PTEN-D19N RYQENGFDLI | 317 | 252  |
| >PTEN-D19N RYQEDGFDL  | 6    | >PTEN-D19N RYQENGFDL  | 5   | 1    |
| >PTEN-D19N RYQEDGFDLI | 607  | >PTEN-D19N RYQENGFDLI | 392 | 215  |
| >PTEN-D19N RYQEDGFDLI | 7    | >PTEN-D19N RYQENGFDLI | 6   | 1    |
| >PTEN-D19N RRYQEDGF   | 41   | >PTEN-D19N RRYQENGF   | 11  | 30   |
| >PTEN-D19N RRYQEDGFDI | 223  | >PTEN-D19N RRYQENGFDI | 127 | 96   |
| >PTEN-D19N RRYQEDGF   | 61   | >PTEN-D19N RRYQENGF   | 49  | 12   |
| >PTEN-D19N RRYQEDGFDI | 11   | >PTEN-D19N RRYQENGFDI | 8   | 3    |
| >PTEN-D19N RRYQEDGF   | 189  | >PTEN-D19N RRYQENGF   | 81  | 108  |
| >PTEN-D19N RRYQEDGFD  | 951  | >PTEN-D19N RRYQENGF   | 433 | 518  |
| >PTEN-D19N RRYQEDGFDI | 18   | >PTEN-D19N RRYQENGFDI | 13  | 5    |
| >PTEN-D19N RRYQEDGFDI | 300  | >PTEN-D19N RRYQENGFDI | 191 | 109  |
| >PTEN-D19N RRYQEDGF   | 452  | >PTEN-D19N RRYQENGF   | 133 | 319  |
| >PTEN-D19N RRYQEDGFDI | 21   | >PTEN-D19N RRYQENGFDI | 14  | 7    |
| >PTEN-D19N RRYQEDGFDI | 559  | >PTEN-D19N RRYQENGFDI | 350 | 209  |
| >PTEN-D19N RRYQEDGF   | 229  | >PTEN-D19N RRYQENGF   | 814 | 585  |
| >PTEN-D19N KRRYQEDGF  | 93   | >PTEN-D19N KRRYQENGF  | 16  | 77   |
| >PTEN-D19N KRRYQEDGFI | 327  | >PTEN-D19N KRRYQENGF  | 181 | 146  |
| >PTEN-D19N KRRYQEDG   | 266  | >PTEN-D19N KRRYQENG   | 290 | 24   |
| >PTEN-D19N KRRYQEDGF  | 233  | >PTEN-D19N KRRYQENGF  | 156 | 77   |
| >PTEN-D19N KRRYQEDGFI | 203  | >PTEN-D19N KRRYQENGF  | 303 | 100  |
| >PTEN-D19N KRRYQEDGFI | 45   | >PTEN-D19N KRRYQENGF  | 38  | 7    |
| >PTEN-D19N KRRYQEDGF  | 1081 | >PTEN-D19N KRRYQENGF  | 405 | 676  |
| >PTEN-D19N KRRYQEDGFI | 515  | >PTEN-D19N KRRYQENGF  | 306 | 209  |
| >PTEN-D19N NKRRYQEDG  | 55   | >PTEN-D19N NKRRYQENG  | 19  | 36   |
| >PTEN-D19N RNKRRYQEDG | 317  | >PTEN-D19N RNKRRYQEN  | 104 | 213  |
| >PTEN-D24E- DLTYIYPNI | 2932 | >PTEN-D24E- ELTYIYPNI | 486 | 2446 |
| >PTEN-D24E- DLTYIYPNI | 1022 | >PTEN-D24E- ELTYIYPNI | 421 | 601  |

|                        |       |                        |       |       |
|------------------------|-------|------------------------|-------|-------|
| >PTEN-D24E-DLTYIYPNI   | 1506  | >PTEN-D24E-ELTYIYPNI   | 472   | 1034  |
| >PTEN-D24E-DLTYIYPNI   | 966   | >PTEN-D24E-ELTYIYPNI   | 169   | 797   |
| >PTEN-D24E-DLTYIYPNIIA | 2127  | >PTEN-D24E-ELTYIYPNIIA | 437   | 1690  |
| >PTEN-D24E-DLTYIYPNI   | 384   | >PTEN-D24E-ELTYIYPNI   | 61    | 323   |
| >PTEN-D24E-LDLTYIYPNI  | 87    | >PTEN-D24E-LELTYIYPNI  | 7     | 80    |
| >PTEN-D24E-LDLTYIYPNII | 90    | >PTEN-D24E-LELTYIYPNII | 8     | 82    |
| >PTEN-D24E-LDLTYIYPN   | 7691  | >PTEN-D24E-LELTYIYPN   | 42    | 7649  |
| >PTEN-D24E-LDLTYIYPNII | 20213 | >PTEN-D24E-LELTYIYPNII | 210   | 20003 |
| >PTEN-D24E-LDLTYIYPNII | 2340  | >PTEN-D24E-LELTYIYPNII | 144   | 2196  |
| >PTEN-D24E-LDLTYIYPN   | 9427  | >PTEN-D24E-LELTYIYPN   | 336   | 9091  |
| >PTEN-D24E-LDLTYIYPNI  | 482   | >PTEN-D24E-LELTYIYPNI  | 12    | 470   |
| >PTEN-D24E-LDLTYIYPNII | 52    | >PTEN-D24E-LELTYIYPNII | 5     | 47    |
| >PTEN-D24E-LDLTYIYPNI  | 72    | >PTEN-D24E-LELTYIYPNI  | 2219  | 2147  |
| >PTEN-D24E-LDLTYIYPNII | 27    | >PTEN-D24E-LELTYIYPNII | 586   | 559   |
| >PTEN-D24E-RRYQEDGFDI  | 300   | >PTEN-D24E-RRYQEDGFDI  | 268   | 32    |
| >PTEN-D24E-DLDLTYIY    | 101   | >PTEN-D24E-DLELTYIY    | 1758  | 1657  |
| >PTEN-D24E-DLDLTYIYPNI | 294   | >PTEN-D24E-DLELTYIYPNI | 7112  | 6818  |
| >PTEN-D24E-DLDLTYIYPNI | 480   | >PTEN-D24E-DLELTYIYPNI | 10276 | 9796  |
| >PTEN-D24E-DLDLTYIYPNI | 168   | >PTEN-D24E-DLELTYIYPNI | 1691  | 1523  |
| >PTEN-D24E-DLDLTYIY    | 217   | >PTEN-D24E-DLELTYIY    | 282   | 65    |
| >PTEN-D24E-FDLDLTYI    | 142   | >PTEN-D24E-FDLELTYI    | 126   | 16    |
| >PTEN-D24E-FDLDLTYIY   | 21    | >PTEN-D24E-FDLELTYIY   | 41    | 20    |
| >PTEN-D24E-FDLDLTYIY   | 725   | >PTEN-D24E-FDLELTYIY   | 460   | 265   |
| >PTEN-D24E-FDLDLTYIY   | 147   | >PTEN-D24E-FDLELTYIY   | 61    | 86    |
| >PTEN-D24E-FDLDLTYIY   | 123   | >PTEN-D24E-FDLELTYIY   | 93    | 30    |
| >PTEN-D24E-FDLDLTYI    | 510   | >PTEN-D24E-FDLELTYI    | 273   | 237   |
| >PTEN-D24E-FDLDLTYI    | 22    | >PTEN-D24E-FDLELTYI    | 13    | 9     |
| >PTEN-D24E-FDLDLTYI    | 53    | >PTEN-D24E-FDLELTYI    | 47    | 6     |
| >PTEN-D24E-GFDLTLTY    | 62    | >PTEN-D24E-GFDLELTY    | 107   | 45    |
| >PTEN-D24E-GFDLTLTYIY  | 64    | >PTEN-D24E-GFDLELTYIY  | 52    | 12    |
| >PTEN-D24E-GFDLTLTYIY  | 369   | >PTEN-D24E-GFDLELTYIY  | 457   | 88    |
| >PTEN-D24E-GFDLTLTY    | 126   | >PTEN-D24E-GFDLELTY    | 92    | 34    |
| >PTEN-D24E-DGFDLTLTY   | 122   | >PTEN-D24E-DGFDLELTY   | 403   | 281   |
| >PTEN-D24E-DGFDLTLTYIY | 160   | >PTEN-D24E-DGFDLELTYIY | 315   | 155   |
| >PTEN-D24E-DGFDLTLTYIY | 458   | >PTEN-D24E-DGFDLELTYIY | 531   | 73    |
| >PTEN-D24E-DGFDLTLTY   | 300   | >PTEN-D24E-DGFDLELTY   | 720   | 420   |
| >PTEN-D24E-DGFDLTLTYIY | 299   | >PTEN-D24E-DGFDLELTYIY | 399   | 100   |
| >PTEN-D24E-DGFDLTLTY   | 37    | >PTEN-D24E-DGFDLELTY   | 81    | 44    |
| >PTEN-D24E-DGFDLTLTYIY | 76    | >PTEN-D24E-DGFDLELTYIY | 112   | 36    |
| >PTEN-D24E-QEDGFDLTL   | 44    | >PTEN-D24E-QEDGFDELT   | 50    | 6     |
| >PTEN-D24E-QEDGFDLTL   | 15    | >PTEN-D24E-QEDGFDELEL  | 10    | 5     |
| >PTEN-D24E-QEDGFDLTL   | 803   | >PTEN-D24E-QEDGFDELEL  | 243   | 560   |
| >PTEN-D24E-QEDGFDLTL   | 114   | >PTEN-D24E-QEDGFDELELT | 181   | 67    |



|                        |       |                        |       |       |
|------------------------|-------|------------------------|-------|-------|
| >PTEN-D24E-YQEDGFDLDI  | 750   | >PTEN-D24E-YQEDGFDLEL  | 202   | 548   |
| >PTEN-D24E-YQEDGFDLDI  | 209   | >PTEN-D24E-YQEDGFDLEL  | 70    | 139   |
| >PTEN-D24E-YQEDGFDLD   | 731   | >PTEN-D24E-YQEDGFDLE   | 278   | 453   |
| >PTEN-D24E-YQEDGFDLDI  | 297   | >PTEN-D24E-YQEDGFDLEL  | 103   | 194   |
| >PTEN-D24E-YQEDGFDLDI  | 27    | >PTEN-D24E-YQEDGFDLEL  | 26    | 1     |
| >PTEN-D24E-YQEDGFDLDI  | 1773  | >PTEN-D24E-YQEDGFDLEL  | 496   | 1277  |
| >PTEN-D24E-YQEDGFDLDI  | 137   | >PTEN-D24E-YQEDGFDLEL  | 50    | 87    |
| >PTEN-D24E-RYQEDGFDLI  | 586   | >PTEN-D24E-RYQEDGFDLE  | 343   | 243   |
| >PTEN-D24E-RYQEDGFDLI  | 569   | >PTEN-D24E-RYQEDGFDLE  | 467   | 102   |
| >PTEN-D24E-RYQEDGFDLI  | 7     | >PTEN-D24E-RYQEDGFDLE  | 5     | 2     |
| >PTEN-D24G DLTYIYPNI   | 12869 | >PTEN-D24G GLTYIYPNI   | 115   | 12754 |
| >PTEN-D24G DLTYIYPNI   | 2932  | >PTEN-D24G GLTYIYPNI   | 30    | 2902  |
| >PTEN-D24G DLTYIYPNII  | 1420  | >PTEN-D24G GLTYIYPNII  | 192   | 1228  |
| >PTEN-D24G DLTYIYPNIIA | 9801  | >PTEN-D24G GLTYIYPNIIA | 484   | 9317  |
| >PTEN-D24G DLTYIYPNI   | 4331  | >PTEN-D24G GLTYIYPNI   | 71    | 4260  |
| >PTEN-D24G DLTYIYPNII  | 1083  | >PTEN-D24G GLTYIYPNII  | 225   | 858   |
| >PTEN-D24G DLTYIYPNI   | 5228  | >PTEN-D24G GLTYIYPNI   | 335   | 4893  |
| >PTEN-D24G DLTYIYPNI   | 6943  | >PTEN-D24G GLTYIYPNI   | 194   | 6749  |
| >PTEN-D24G DLTYIYPNII  | 7988  | >PTEN-D24G GLTYIYPNII  | 181   | 7807  |
| >PTEN-D24G DLTYIYPNI   | 1022  | >PTEN-D24G GLTYIYPNI   | 34    | 988   |
| >PTEN-D24G DLTYIYPNII  | 5030  | >PTEN-D24G GLTYIYPNII  | 304   | 4726  |
| >PTEN-D24G DLTYIYPNIIA | 6534  | >PTEN-D24G GLTYIYPNIIA | 483   | 6051  |
| >PTEN-D24G DLTYIYPNI   | 1506  | >PTEN-D24G GLTYIYPNI   | 60    | 1446  |
| >PTEN-D24G DLTYIYPNII  | 4394  | >PTEN-D24G GLTYIYPNII  | 314   | 4080  |
| >PTEN-D24G DLTYIYPNIIA | 4488  | >PTEN-D24G GLTYIYPNIIA | 287   | 4201  |
| >PTEN-D24G DLTYIYPNI   | 384   | >PTEN-D24G GLTYIYPNI   | 10239 | 9855  |
| >PTEN-D24G LDLTYPNI    | 87    | >PTEN-D24G LGLTYIYPNI  | 1963  | 1876  |
| >PTEN-D24G LDLTYPNII   | 90    | >PTEN-D24G LGLTYIYPNII | 1422  | 1332  |
| >PTEN-D24G LDLTYPNI    | 482   | >PTEN-D24G LGLTYIYPNI  | 16893 | 16411 |
| >PTEN-D24G LDLTYPNII   | 52    | >PTEN-D24G LGLTYIYPNII | 8408  | 8356  |
| >PTEN-D24G LDLTYPNI    | 72    | >PTEN-D24G LGLTYIYPNI  | 6264  | 6192  |
| >PTEN-D24G LDLTYPNII   | 27    | >PTEN-D24G LGLTYIYPNII | 2223  | 2196  |
| >PTEN-D24G RRYQEDGFDI  | 300   | >PTEN-D24G RRYQEDGFDI  | 259   | 41    |
| >PTEN-D24G RRYQEDGFDI  | 559   | >PTEN-D24G RRYQEDGFDI  | 271   | 288   |
| >PTEN-D24G DLDLTYIY    | 101   | >PTEN-D24G DLGLTYIY    | 9772  | 9671  |
| >PTEN-D24G DLDLTYIYPNI | 294   | >PTEN-D24G DLGLTYIYPNI | 872   | 578   |
| >PTEN-D24G DLDLTYIYPNI | 480   | >PTEN-D24G DLGLTYIYPNI | 783   | 303   |
| >PTEN-D24G DLDLTYIY    | 727   | >PTEN-D24G DLGLTYIY    | 221   | 506   |
| >PTEN-D24G DLDLTYIYPNI | 168   | >PTEN-D24G DLGLTYIYPNI | 649   | 481   |
| >PTEN-D24G DLDLTYIY    | 217   | >PTEN-D24G DLGLTYIY    | 835   | 618   |
| >PTEN-D24G FDLDLTYI    | 142   | >PTEN-D24G FDLGLTYI    | 256   | 114   |
| >PTEN-D24G FDLDLTYIY   | 21    | >PTEN-D24G FDLGLTYIY   | 21    | 0     |
| >PTEN-D24G FDLDLTYIY   | 147   | >PTEN-D24G FDLGLTYIY   | 128   | 19    |

|                        |       |                        |      |       |
|------------------------|-------|------------------------|------|-------|
| >PTEN-D24G FDLDLTYIY   | 123   | >PTEN-D24G FDLGLTYIY   | 165  | 42    |
| >PTEN-D24G FDLDLTYI    | 510   | >PTEN-D24G FDLGLTYI    | 397  | 113   |
| >PTEN-D24G FDLDLTYI    | 22    | >PTEN-D24G FDLGLTYI    | 27   | 5     |
| >PTEN-D24G FDLDLTYI    | 53    | >PTEN-D24G FDLGLTYI    | 100  | 47    |
| >PTEN-D24G GFDLDLTY    | 62    | >PTEN-D24G GFDLGLTY    | 38   | 24    |
| >PTEN-D24G GFDLDLTYIY  | 64    | >PTEN-D24G GFDLGLTYIY  | 74   | 10    |
| >PTEN-D24G GFDLDLTYIY  | 369   | >PTEN-D24G GFDLGLTYIY  | 211  | 158   |
| >PTEN-D24G GFDLDLTY    | 126   | >PTEN-D24G GFDLGLTY    | 138  | 12    |
| >PTEN-D24G DGFDLDLTY   | 122   | >PTEN-D24G DGFDLGLTY   | 79   | 43    |
| >PTEN-D24G DGFDLDLTYI\ | 160   | >PTEN-D24G DGFDLGLTYI\ | 128  | 32    |
| >PTEN-D24G DGFDLDLTYI\ | 458   | >PTEN-D24G DGFDLGLTYI\ | 504  | 46    |
| >PTEN-D24G DGFDLDLTY   | 300   | >PTEN-D24G DGFDLGLTY   | 155  | 145   |
| >PTEN-D24G DGFDLDLTYI\ | 299   | >PTEN-D24G DGFDLGLTYI\ | 217  | 82    |
| >PTEN-D24G DGFDLDLTY   | 37    | >PTEN-D24G DGFDLGLTY   | 100  | 63    |
| >PTEN-D24G DGFDLDLTYI\ | 76    | >PTEN-D24G DGFDLGLTYI\ | 139  | 63    |
| >PTEN-D24G DGFDLDLTY   | 1832  | >PTEN-D24G DGFDLGLTY   | 406  | 1426  |
| >PTEN-D24G QEDGFDLDT   | 44    | >PTEN-D24G QEDGFDLGLT  | 30   | 14    |
| >PTEN-D24G QEDGFDLDL   | 15    | >PTEN-D24G QEDGFDLGL   | 8    | 7     |
| >PTEN-D24G QEDGFDLDT   | 114   | >PTEN-D24G QEDGFDLGLT  | 111  | 3     |
| >PTEN-D24G QEDGFDLDT   | 825   | >PTEN-D24G QEDGFDLGLT  | 427  | 398   |
| >PTEN-D24G YQEDGFDLDI  | 750   | >PTEN-D24G YQEDGFDLGI  | 219  | 531   |
| >PTEN-D24G YQEDGFDLDI  | 209   | >PTEN-D24G YQEDGFDLGI  | 70   | 139   |
| >PTEN-D24G YQEDGFDL    | 731   | >PTEN-D24G YQEDGFDLG   | 88   | 643   |
| >PTEN-D24G YQEDGFDLDI  | 297   | >PTEN-D24G YQEDGFDLGI  | 89   | 208   |
| >PTEN-D24G YQEDGFDLDI  | 27    | >PTEN-D24G YQEDGFDLGI  | 50   | 23    |
| >PTEN-D24G YQEDGFDLDI  | 137   | >PTEN-D24G YQEDGFDLGI  | 79   | 58    |
| >PTEN-D24G RYQEDGFDLI  | 7     | >PTEN-D24G RYQEDGFDLG  | 7    | 0     |
| >PTEN-D24N DLTYIYPNI   | 12869 | >PTEN-D24N NLTYIYPNI   | 349  | 12520 |
| >PTEN-D24N DLTYIYPNI   | 2932  | >PTEN-D24N NLTYIYPNI   | 50   | 2882  |
| >PTEN-D24N DLTYIYPNII  | 1420  | >PTEN-D24N NLTYIYPNII  | 341  | 1079  |
| >PTEN-D24N DLTYIYPNI   | 4331  | >PTEN-D24N NLTYIYPNI   | 130  | 4201  |
| >PTEN-D24N DLTYIYPNII  | 1083  | >PTEN-D24N NLTYIYPNII  | 218  | 865   |
| >PTEN-D24N DLTYIYPNI   | 1022  | >PTEN-D24N NLTYIYPNI   | 335  | 687   |
| >PTEN-D24N DLTYIYPNI   | 1506  | >PTEN-D24N NLTYIYPNI   | 379  | 1127  |
| >PTEN-D24N DLTYIYPNI   | 384   | >PTEN-D24N NLTYIYPNI   | 356  | 28    |
| >PTEN-D24N LDLYIYPNI   | 87    | >PTEN-D24N LNLYIYPNI   | 466  | 379   |
| >PTEN-D24N LDLYIYPNII  | 90    | >PTEN-D24N LNLYIYPNII  | 343  | 253   |
| >PTEN-D24N LDLYIYPNI   | 482   | >PTEN-D24N LNLYIYPNI   | 8934 | 8452  |
| >PTEN-D24N LDLYIYPNII  | 52    | >PTEN-D24N LNLYIYPNII  | 1313 | 1261  |
| >PTEN-D24N LDLYIYPNI   | 72    | >PTEN-D24N LNLYIYPNI   | 2515 | 2443  |
| >PTEN-D24N LDLYIYPNII  | 27    | >PTEN-D24N LNLYIYPNII  | 721  | 694   |
| >PTEN-D24N RRYQEDGFDI  | 1099  | >PTEN-D24N RRYQEDGFDI  | 449  | 650   |
| >PTEN-D24N RRYQEDGFDI  | 300   | >PTEN-D24N RRYQEDGFDI  | 117  | 183   |

|                        |       |                        |      |       |
|------------------------|-------|------------------------|------|-------|
| >PTEN-D24N RRYQEDGFDI  | 559   | >PTEN-D24N RRYQEDGFDI  | 194  | 365   |
| >PTEN-D24N DLDLTYIY    | 101   | >PTEN-D24N DLNLTYIY    | 6118 | 6017  |
| >PTEN-D24N DLDLTYIYPNI | 294   | >PTEN-D24N DLNLTYIYPNI | 812  | 518   |
| >PTEN-D24N DLDLTYIYPNI | 480   | >PTEN-D24N DLNLTYIYPNI | 601  | 121   |
| >PTEN-D24N DLDLTYIY    | 727   | >PTEN-D24N DLNLTYIY    | 223  | 504   |
| >PTEN-D24N DLDLTYIY    | 1597  | >PTEN-D24N DLNLTYIY    | 428  | 1169  |
| >PTEN-D24N DLDLTYIYPNI | 168   | >PTEN-D24N DLNLTYIYPNI | 350  | 182   |
| >PTEN-D24N DLDLTYIY    | 217   | >PTEN-D24N DLNLTYIY    | 394  | 177   |
| >PTEN-D24N FDLDLTYI    | 142   | >PTEN-D24N FDLNLTYI    | 363  | 221   |
| >PTEN-D24N FDLDLTYIY   | 21    | >PTEN-D24N FDLNLTYIY   | 31   | 10    |
| >PTEN-D24N FDLDLTYIY   | 725   | >PTEN-D24N FDLNLTYIY   | 434  | 291   |
| >PTEN-D24N FDLDLTYIY   | 147   | >PTEN-D24N FDLNLTYIY   | 268  | 121   |
| >PTEN-D24N FDLDLTYIY   | 123   | >PTEN-D24N FDLNLTYIY   | 187  | 64    |
| >PTEN-D24N FDLDLTYI    | 510   | >PTEN-D24N FDLNLTYI    | 198  | 312   |
| >PTEN-D24N FDLDLTYI    | 22    | >PTEN-D24N FDLNLTYI    | 13   | 9     |
| >PTEN-D24N FDLDLTYI    | 53    | >PTEN-D24N FDLNLTYI    | 66   | 13    |
| >PTEN-D24N GFDLTYIY    | 565   | >PTEN-D24N GFDLNLTYIY  | 444  | 121   |
| >PTEN-D24N GFDLTY      | 62    | >PTEN-D24N GFDLNLTY    | 53   | 9     |
| >PTEN-D24N GFDLTYIY    | 64    | >PTEN-D24N GFDLNLTYIY  | 38   | 26    |
| >PTEN-D24N GFDLTYIY    | 369   | >PTEN-D24N GFDLNLTYIY  | 315  | 54    |
| >PTEN-D24N GFDLTY      | 126   | >PTEN-D24N GFDLNLTY    | 104  | 22    |
| >PTEN-D24N DGFDLTY     | 122   | >PTEN-D24N DGFDLNLTY   | 177  | 55    |
| >PTEN-D24N DGFDLTYIY   | 160   | >PTEN-D24N DGFDLNLTYIY | 204  | 44    |
| >PTEN-D24N DGFDLTYIY   | 458   | >PTEN-D24N DGFDLNLTYIY | 356  | 102   |
| >PTEN-D24N DGFDLTY     | 300   | >PTEN-D24N DGFDLNLTY   | 285  | 15    |
| >PTEN-D24N DGFDLTYIY   | 299   | >PTEN-D24N DGFDLNLTYIY | 326  | 27    |
| >PTEN-D24N DGFDLTY     | 37    | >PTEN-D24N DGFDLNLTY   | 79   | 42    |
| >PTEN-D24N DGFDLTYIY   | 76    | >PTEN-D24N DGFDLNLTYIY | 123  | 47    |
| >PTEN-D24N QEDGFDLTL   | 44    | >PTEN-D24N QEDGFDLNL   | 39   | 5     |
| >PTEN-D24N QEDGFDLTL   | 15    | >PTEN-D24N QEDGFDLNL   | 12   | 3     |
| >PTEN-D24N QEDGFDLTL   | 803   | >PTEN-D24N QEDGFDLNL   | 403  | 400   |
| >PTEN-D24N QEDGFDLTL   | 114   | >PTEN-D24N QEDGFDLNL   | 117  | 3     |
| >PTEN-D24N YQEDGFDLNI  | 750   | >PTEN-D24N YQEDGFDLNI  | 301  | 449   |
| >PTEN-D24N YQEDGFDLNI  | 209   | >PTEN-D24N YQEDGFDLNI  | 71   | 138   |
| >PTEN-D24N YQEDGFDLNI  | 731   | >PTEN-D24N YQEDGFDLNI  | 332  | 399   |
| >PTEN-D24N YQEDGFDLNI  | 297   | >PTEN-D24N YQEDGFDLNI  | 106  | 191   |
| >PTEN-D24N YQEDGFDLNI  | 27    | >PTEN-D24N YQEDGFDLNI  | 27   | 0     |
| >PTEN-D24N YQEDGFDLNI  | 137   | >PTEN-D24N YQEDGFDLNI  | 111  | 26    |
| >PTEN-D24N RYQEDGFDLI  | 586   | >PTEN-D24N RYQEDGFDLI  | 274  | 312   |
| >PTEN-D24N RYQEDGFDLI  | 569   | >PTEN-D24N RYQEDGFDLI  | 475  | 94    |
| >PTEN-D24N RYQEDGFDLI  | 607   | >PTEN-D24N RYQEDGFDLI  | 450  | 157   |
| >PTEN-D24N RYQEDGFDLI  | 7     | >PTEN-D24N RYQEDGFDLI  | 6    | 1     |
| >PTEN-D24Y-DLTYIYPNI   | 12869 | >PTEN-D24Y-YLTYIYPNI   | 12   | 12857 |

|                         |       |                         |       |       |
|-------------------------|-------|-------------------------|-------|-------|
| >PTEN-D24Y-DLTYIYPNII   | 8793  | >PTEN-D24Y-YLTYIYPNII   | 157   | 8636  |
| >PTEN-D24Y-DLTYIYPNIIIA | 17968 | >PTEN-D24Y-YLTYIYPNIIIA | 57    | 17911 |
| >PTEN-D24Y-DLTYIYPN     | 18309 | >PTEN-D24Y-YLTYIYPN     | 347   | 17962 |
| >PTEN-D24Y-DLTYIYPNI    | 2932  | >PTEN-D24Y-YLTYIYPNI    | 5     | 2927  |
| >PTEN-D24Y-DLTYIYPNII   | 1420  | >PTEN-D24Y-YLTYIYPNII   | 42    | 1378  |
| >PTEN-D24Y-DLTYIYPNIIIA | 9801  | >PTEN-D24Y-YLTYIYPNIIIA | 45    | 9756  |
| >PTEN-D24Y-DLTYIYPNI    | 4331  | >PTEN-D24Y-YLTYIYPNI    | 10    | 4321  |
| >PTEN-D24Y-DLTYIYPNII   | 1083  | >PTEN-D24Y-YLTYIYPNII   | 34    | 1049  |
| >PTEN-D24Y-DLTYIYPNIIIA | 8433  | >PTEN-D24Y-YLTYIYPNIIIA | 61    | 8372  |
| >PTEN-D24Y-DLTYIYPNI    | 10582 | >PTEN-D24Y-YLTYIYPNI    | 52    | 10530 |
| >PTEN-D24Y-DLTYIYPNII   | 12435 | >PTEN-D24Y-YLTYIYPNII   | 386   | 12049 |
| >PTEN-D24Y-DLTYIYPNIIIA | 18864 | >PTEN-D24Y-YLTYIYPNIIIA | 299   | 18565 |
| >PTEN-D24Y-DLTYIYPNI    | 5228  | >PTEN-D24Y-YLTYIYPNI    | 15    | 5213  |
| >PTEN-D24Y-DLTYIYPNII   | 8362  | >PTEN-D24Y-YLTYIYPNII   | 50    | 8312  |
| >PTEN-D24Y-DLTYIYPNIIIA | 14712 | >PTEN-D24Y-YLTYIYPNIIIA | 235   | 14477 |
| >PTEN-D24Y-DLTYIYPNI    | 6943  | >PTEN-D24Y-YLTYIYPNI    | 21    | 6922  |
| >PTEN-D24Y-DLTYIYPNII   | 7988  | >PTEN-D24Y-YLTYIYPNII   | 18    | 7970  |
| >PTEN-D24Y-DLTYIYPNIIIA | 12237 | >PTEN-D24Y-YLTYIYPNIIIA | 134   | 12103 |
| >PTEN-D24Y-DLTYIYPNI    | 1022  | >PTEN-D24Y-YLTYIYPNI    | 8     | 1014  |
| >PTEN-D24Y-DLTYIYPNII   | 5030  | >PTEN-D24Y-YLTYIYPNII   | 39    | 4991  |
| >PTEN-D24Y-DLTYIYPNIIIA | 6534  | >PTEN-D24Y-YLTYIYPNIIIA | 73    | 6461  |
| >PTEN-D24Y-DLTYIYPNI    | 2350  | >PTEN-D24Y-YLTYIYPNI    | 28    | 2322  |
| >PTEN-D24Y-DLTYIYPNII   | 7935  | >PTEN-D24Y-YLTYIYPNII   | 199   | 7736  |
| >PTEN-D24Y-DLTYIYPNI    | 1506  | >PTEN-D24Y-YLTYIYPNI    | 4     | 1502  |
| >PTEN-D24Y-DLTYIYPNII   | 4394  | >PTEN-D24Y-YLTYIYPNII   | 14    | 4380  |
| >PTEN-D24Y-DLTYIYPNIIIA | 4488  | >PTEN-D24Y-YLTYIYPNIIIA | 14    | 4474  |
| >PTEN-D24Y-DLTYIYPNI    | 384   | >PTEN-D24Y-YLTYIYPNI    | 231   | 153   |
| >PTEN-D24Y-DLTYIYPNII   | 6785  | >PTEN-D24Y-YLTYIYPNII   | 468   | 6317  |
| >PTEN-D24Y-LDLTYIYPNI   | 87    | >PTEN-D24Y-LYLTYPNI     | 691   | 604   |
| >PTEN-D24Y-LDLTYIYPNII  | 90    | >PTEN-D24Y-LYLTYPNII    | 622   | 532   |
| >PTEN-D24Y-LDLTYIYPNI   | 24044 | >PTEN-D24Y-LYLTYPNI     | 56    | 23988 |
| >PTEN-D24Y-LDLTYIYPNII  | 18274 | >PTEN-D24Y-LYLTYPNII    | 58    | 18216 |
| >PTEN-D24Y-LDLTYIYPNI   | 33069 | >PTEN-D24Y-LYLTYPNI     | 471   | 32598 |
| >PTEN-D24Y-LDLTYIYPNII  | 16614 | >PTEN-D24Y-LYLTYPNII    | 80    | 16534 |
| >PTEN-D24Y-LDLTYIYPNI   | 20266 | >PTEN-D24Y-LYLTYPNI     | 6     | 20260 |
| >PTEN-D24Y-LDLTYIYPNII  | 23034 | >PTEN-D24Y-LYLTYPNII    | 14    | 23020 |
| >PTEN-D24Y-LDLTYIYPNI   | 482   | >PTEN-D24Y-LYLTYPNI     | 13115 | 12633 |
| >PTEN-D24Y-LDLTYIYPNII  | 52    | >PTEN-D24Y-LYLTYPNII    | 6884  | 6832  |
| >PTEN-D24Y-LDLTYIYPN    | 18016 | >PTEN-D24Y-LYLTYPN      | 404   | 17612 |
| >PTEN-D24Y-LDLTYIYPNI   | 26348 | >PTEN-D24Y-LYLTYPNI     | 224   | 26124 |
| >PTEN-D24Y-LDLTYIYPNII  | 33128 | >PTEN-D24Y-LYLTYPNII    | 471   | 32657 |
| >PTEN-D24Y-LDLTYIYPNI   | 72    | >PTEN-D24Y-LYLTYPNI     | 12558 | 12486 |
| >PTEN-D24Y-LDLTYIYPNII  | 27    | >PTEN-D24Y-LYLTYPNII    | 6795  | 6768  |

|                         |       |                         |       |       |
|-------------------------|-------|-------------------------|-------|-------|
| >PTEN-D24Y- RRYQEDGFDI  | 28722 | >PTEN-D24Y- RRYQEDGFDI  | 260   | 28462 |
| >PTEN-D24Y- RRYQEDGFDI  | 25491 | >PTEN-D24Y- RRYQEDGFDI  | 348   | 25143 |
| >PTEN-D24Y- RRYQEDGFDI  | 12845 | >PTEN-D24Y- RRYQEDGFDI  | 154   | 12691 |
| >PTEN-D24Y- RRYQEDGFDI  | 1099  | >PTEN-D24Y- RRYQEDGFDI  | 59    | 1040  |
| >PTEN-D24Y- RRYQEDGFDI  | 300   | >PTEN-D24Y- RRYQEDGFDI  | 96    | 204   |
| >PTEN-D24Y- RRYQEDGFDI  | 559   | >PTEN-D24Y- RRYQEDGFDI  | 131   | 428   |
| >PTEN-D24Y- RRYQEDGFDI  | 10459 | >PTEN-D24Y- RRYQEDGFDI  | 147   | 10312 |
| >PTEN-D24Y- DLDLTYIY    | 101   | >PTEN-D24Y- DLYLTYIY    | 12736 | 12635 |
| >PTEN-D24Y- DLDLTYIYPNI | 932   | >PTEN-D24Y- DLYLTYIYPNI | 157   | 775   |
| >PTEN-D24Y- DLDLTYIYPNI | 294   | >PTEN-D24Y- DLYLTYIYPNI | 93    | 201   |
| >PTEN-D24Y- DLDLTYIYPNI | 480   | >PTEN-D24Y- DLYLTYIYPNI | 732   | 252   |
| >PTEN-D24Y- DLDLTYIYPNI | 2398  | >PTEN-D24Y- DLYLTYIYPNI | 359   | 2039  |
| >PTEN-D24Y- DLDLTYIY    | 727   | >PTEN-D24Y- DLYLTYIY    | 53    | 674   |
| >PTEN-D24Y- DLDLTYIYPNI | 168   | >PTEN-D24Y- DLYLTYIYPNI | 59    | 109   |
| >PTEN-D24Y- DLDLTYIY    | 4775  | >PTEN-D24Y- DLYLTYIY    | 242   | 4533  |
| >PTEN-D24Y- DLDLTYIY    | 217   | >PTEN-D24Y- DLYLTYIY    | 833   | 616   |
| >PTEN-D24Y- FDLDLTYI    | 142   | >PTEN-D24Y- FDLTYI      | 428   | 286   |
| >PTEN-D24Y- FDLDLTYIY   | 21    | >PTEN-D24Y- FDLTYIY     | 20    | 1     |
| >PTEN-D24Y- FDLDLTYIY   | 725   | >PTEN-D24Y- FDLTYIY     | 357   | 368   |
| >PTEN-D24Y- FDLDLTYIY   | 1471  | >PTEN-D24Y- FDLTYIY     | 353   | 1118  |
| >PTEN-D24Y- FDLDLTYIY   | 147   | >PTEN-D24Y- FDLTYIY     | 305   | 158   |
| >PTEN-D24Y- FDLDLTYIY   | 123   | >PTEN-D24Y- FDLTYIY     | 173   | 50    |
| >PTEN-D24Y- FDLDLTYI    | 510   | >PTEN-D24Y- FDLTYI      | 346   | 164   |
| >PTEN-D24Y- FDLDLTYI    | 22    | >PTEN-D24Y- FDLTYI      | 9     | 13    |
| >PTEN-D24Y- FDLDLTYI    | 53    | >PTEN-D24Y- FDLTYI      | 91    | 38    |
| >PTEN-D24Y- GFDLTY      | 62    | >PTEN-D24Y- GFDLYTY     | 42    | 20    |
| >PTEN-D24Y- GFDLTYIY    | 64    | >PTEN-D24Y- GFDLYTYIY   | 18    | 46    |
| >PTEN-D24Y- GFDLTYIY    | 369   | >PTEN-D24Y- GFDLYTYIY   | 157   | 212   |
| >PTEN-D24Y- GFDLTY      | 126   | >PTEN-D24Y- GFDLYTY     | 98    | 28    |
| >PTEN-D24Y- DGFDLTY     | 122   | >PTEN-D24Y- DGFDLYTY    | 69    | 53    |
| >PTEN-D24Y- DGFDLTYIY   | 160   | >PTEN-D24Y- DGFDLYTYIY  | 120   | 40    |
| >PTEN-D24Y- DGFDLTYIY   | 458   | >PTEN-D24Y- DGFDLYTYIY  | 481   | 23    |
| >PTEN-D24Y- DGFDLTY     | 300   | >PTEN-D24Y- DGFDLYTY    | 113   | 187   |
| >PTEN-D24Y- DGFDLTYIY   | 299   | >PTEN-D24Y- DGFDLYTYIY  | 211   | 88    |
| >PTEN-D24Y- DGFDLTY     | 37    | >PTEN-D24Y- DGFDLYTY    | 87    | 50    |
| >PTEN-D24Y- DGFDLTYIY   | 76    | >PTEN-D24Y- DGFDLYTYIY  | 130   | 54    |
| >PTEN-D24Y- QEDGFDL     | 12753 | >PTEN-D24Y- QEDGFDL     | 305   | 12448 |
| >PTEN-D24Y- QEDGFDL     | 44    | >PTEN-D24Y- QEDGFDL     | 28    | 16    |
| >PTEN-D24Y- QEDGFDL     | 15    | >PTEN-D24Y- QEDGFDL     | 8     | 7     |
| >PTEN-D24Y- QEDGFDL     | 5129  | >PTEN-D24Y- QEDGFDL     | 196   | 4933  |
| >PTEN-D24Y- QEDGFDL     | 588   | >PTEN-D24Y- QEDGFDL     | 315   | 273   |
| >PTEN-D24Y- QEDGFDL     | 114   | >PTEN-D24Y- QEDGFDL     | 96    | 18    |
| >PTEN-D24Y- QEDGFDL     | 825   | >PTEN-D24Y- QEDGFDL     | 305   | 520   |

|                        |       |                        |      |       |
|------------------------|-------|------------------------|------|-------|
| >PTEN-D24Y-YQEDGFDLD   | 21254 | >PTEN-D24Y-YQEDGFDLY   | 110  | 21144 |
| >PTEN-D24Y-YQEDGFDLDI  | 750   | >PTEN-D24Y-YQEDGFDLYL  | 38   | 712   |
| >PTEN-D24Y-YQEDGFDLDI  | 209   | >PTEN-D24Y-YQEDGFDLYL  | 20   | 189   |
| >PTEN-D24Y-YQEDGFDLDI  | 3644  | >PTEN-D24Y-YQEDGFDLYL  | 494  | 3150  |
| >PTEN-D24Y-YQEDGFDLD   | 731   | >PTEN-D24Y-YQEDGFDLY   | 52   | 679   |
| >PTEN-D24Y-YQEDGFDLDI  | 297   | >PTEN-D24Y-YQEDGFDLYL  | 56   | 241   |
| >PTEN-D24Y-YQEDGFDLDI  | 27    | >PTEN-D24Y-YQEDGFDLYL  | 21   | 6     |
| >PTEN-D24Y-YQEDGFDLDI  | 4364  | >PTEN-D24Y-YQEDGFDLYL  | 226  | 4138  |
| >PTEN-D24Y-YQEDGFDLDI  | 2222  | >PTEN-D24Y-YQEDGFDLYL  | 257  | 1965  |
| >PTEN-D24Y-YQEDGFDLDI  | 1773  | >PTEN-D24Y-YQEDGFDLYL  | 461  | 1312  |
| >PTEN-D24Y-YQEDGFDLD   | 20171 | >PTEN-D24Y-YQEDGFDLY   | 139  | 20032 |
| >PTEN-D24Y-YQEDGFDLD   | 20363 | >PTEN-D24Y-YQEDGFDLY   | 119  | 20244 |
| >PTEN-D24Y-YQEDGFDLD   | 25923 | >PTEN-D24Y-YQEDGFDLY   | 121  | 25802 |
| >PTEN-D24Y-YQEDGFDLDI  | 137   | >PTEN-D24Y-YQEDGFDLYL  | 117  | 20    |
| >PTEN-D24Y-RYQEDGFDLI  | 31542 | >PTEN-D24Y-RYQEDGFDLY  | 200  | 31342 |
| >PTEN-D24Y-RYQEDGFDLI  | 569   | >PTEN-D24Y-RYQEDGFDLY  | 367  | 202   |
| >PTEN-D24Y-RYQEDGFDLI  | 607   | >PTEN-D24Y-RYQEDGFDLY  | 50   | 557   |
| >PTEN-D24Y-RYQEDGFDLI  | 7     | >PTEN-D24Y-RYQEDGFDLY  | 5    | 2     |
| >PTEN-D24Y-RYQEDGFDLI  | 29999 | >PTEN-D24Y-RYQEDGFDLY  | 252  | 29747 |
| >PTEN-D24Y-RYQEDGFDLI  | 18179 | >PTEN-D24Y-RYQEDGFDLY  | 23   | 18156 |
| >PTEN-D24Y-RYQEDGFDLI  | 26330 | >PTEN-D24Y-RYQEDGFDLY  | 61   | 26269 |
| >PTEN-D24Y-RYQEDGFDLI  | 1505  | >PTEN-D24Y-RYQEDGFDLY  | 382  | 1123  |
| >PTEN-D252'GDIKVEFFHK  | 927   | >PTEN-D252'GGIKVEFFHK  | 308  | 619   |
| >PTEN-D252'PVCGDIKV    | 466   | >PTEN-D252'PVCGGIKV    | 252  | 214   |
| >PTEN-D252'PVCGDIKVEF  | 395   | >PTEN-D252'PVCGGIKVEF  | 476  | 81    |
| >PTEN-D252'PVCGDIKVEF  | 21    | >PTEN-D252'PVCGGIKVEF  | 28   | 7     |
| >PTEN-D252'LPVCGDIKVEI | 35    | >PTEN-D252'LPVCGGIKVEI | 37   | 2     |
| >PTEN-D252'LPVCGDIKVEI | 484   | >PTEN-D252'LPVCGGIKVEI | 120  | 364   |
| >PTEN-D252'LPVCGDIKVEI | 630   | >PTEN-D252'LPVCGGIKVEI | 284  | 346   |
| >PTEN-D252'LPVCGDIKVEI | 9     | >PTEN-D252'LPVCGGIKVEI | 10   | 1     |
| >PTEN-D252'LPVCGDIKVEI | 26    | >PTEN-D252'LPVCGGIKVEI | 40   | 14    |
| >PTEN-D252'LPVCGDIK    | 306   | >PTEN-D252'LPVCGGIK    | 315  | 9     |
| >PTEN-D252'LPVCGDIKVEI | 499   | >PTEN-D252'LPVCGGIKVEI | 389  | 110   |
| >PTEN-D252'LPVCGDIKVEI | 18    | >PTEN-D252'LPVCGGIKVEI | 31   | 13    |
| >PTEN-D252'PLPVCGDIKV  | 176   | >PTEN-D252'PLPVCGGIKV  | 243  | 67    |
| >PTEN-D252'PLPVCGDIKV  | 46    | >PTEN-D252'PLPVCGGIKV  | 48   | 2     |
| >PTEN-D252'QPLPVCGDIK  | 1162  | >PTEN-D252'QPLPVCGGIK  | 385  | 777   |
| >PTEN-D252'FPQPLPVCGC  | 95    | >PTEN-D252'FPQPLPVCGC  | 2100 | 2005  |
| >PTEN-D252'FPQPLPVCGC  | 360   | >PTEN-D252'FPQPLPVCGC  | 473  | 113   |
| >PTEN-D252'FPQPLPVCGC  | 419   | >PTEN-D252'FPQPLPVCGC  | 562  | 143   |
| >PTEN-D252'FPQPLPVCGC  | 832   | >PTEN-D252'FPQPLPVCGC  | 414  | 418   |
| >PTEN-D252'GDIKVEFF    | 9696  | >PTEN-D252'GYIKVEFF    | 22   | 9674  |
| >PTEN-D252'GDIKVEFF    | 17345 | >PTEN-D252'GYIKVEFF    | 81   | 17264 |

|                        |       |                        |     |       |
|------------------------|-------|------------------------|-----|-------|
| >PTEN-D252'GDIKVEFF    | 16664 | >PTEN-D252'GYIKVEFF    | 5   | 16659 |
| >PTEN-D252'GDIKVEFFHK  | 26053 | >PTEN-D252'GYIKVEFFHK  | 247 | 25806 |
| >PTEN-D252'GDIKVEFFHK  | 927   | >PTEN-D252'GYIKVEFFHK  | 267 | 660   |
| >PTEN-D252'EFQPLPVCG   | 22164 | >PTEN-D252'EFQPLPVCG   | 46  | 22118 |
| >PTEN-D252'EFQPLPVCG   | 22446 | >PTEN-D252'EFQPLPVCG   | 39  | 22407 |
| >PTEN-D252'PVCGDIKV    | 466   | >PTEN-D252'PVCGYIKV    | 242 | 224   |
| >PTEN-D252'PVCGDIKVEF  | 395   | >PTEN-D252'PVCGYIKVEF  | 569 | 174   |
| >PTEN-D252'PVCGDIKVEF  | 21    | >PTEN-D252'PVCGYIKVEFI | 28  | 7     |
| >PTEN-D252'LPVCGDIKVEI | 35    | >PTEN-D252'LPVCGYIKVEF | 27  | 8     |
| >PTEN-D252'LPVCGDIKVEI | 484   | >PTEN-D252'LPVCGYIKVEF | 351 | 133   |
| >PTEN-D252'LPVCGDIKVEI | 630   | >PTEN-D252'LPVCGYIKVEF | 176 | 454   |
| >PTEN-D252'LPVCGDIKVEI | 9     | >PTEN-D252'LPVCGYIKVEF | 11  | 2     |
| >PTEN-D252'LPVCGDIKVEI | 26    | >PTEN-D252'LPVCGYIKVEF | 38  | 12    |
| >PTEN-D252'LPVCGDIK    | 306   | >PTEN-D252'LPVCGYIK    | 102 | 204   |
| >PTEN-D252'LPVCGDIKVEI | 499   | >PTEN-D252'LPVCGYIKVEF | 372 | 127   |
| >PTEN-D252'LPVCGDIKVEI | 18    | >PTEN-D252'LPVCGYIKVEF | 14  | 4     |
| >PTEN-D252'PLPVCGDIKV  | 934   | >PTEN-D252'PLPVCGYIKV  | 281 | 653   |
| >PTEN-D252'PLPVCGDIKV  | 176   | >PTEN-D252'PLPVCGYIKV  | 104 | 72    |
| >PTEN-D252'PLPVCGDIKV  | 1835  | >PTEN-D252'PLPVCGYIKV  | 479 | 1356  |
| >PTEN-D252'PLPVCGDIKV  | 46    | >PTEN-D252'PLPVCGYIKV  | 22  | 24    |
| >PTEN-D252'QPLPVCGDIK  | 1162  | >PTEN-D252'QPLPVCGYIK' | 230 | 932   |
| >PTEN-D252'QPLPVCGD    | 12394 | >PTEN-D252'QPLPVCGY    | 59  | 12335 |
| >PTEN-D252'FPQPLPVCGL  | 95    | >PTEN-D252'FPQPLPVCGY  | 50  | 45    |
| >PTEN-D252'FPQPLPVCGL  | 360   | >PTEN-D252'FPQPLPVCGY  | 213 | 147   |
| >PTEN-D252'FPQPLPVCGL  | 419   | >PTEN-D252'FPQPLPVCGY  | 205 | 214   |
| >PTEN-D252'FPQPLPVCGL  | 832   | >PTEN-D252'FPQPLPVCGY  | 267 | 565   |
| >PTEN-D326(LDKANKDKAI  | 3618  | >PTEN-D326(LGKANKDKAI  | 235 | 3383  |
| >PTEN-D326(LTKNDLDK    | 81    | >PTEN-D326(LTKNDLGK    | 28  | 53    |
| >PTEN-D326(LTKNDLDKAN  | 55    | >PTEN-D326(LTKNDLGKAN  | 19  | 36    |
| >PTEN-D326(LTKNDLDKAN  | 446   | >PTEN-D326(LTKNDLGKAN  | 255 | 191   |
| >PTEN-D326(LTKNDLDK    | 853   | >PTEN-D326(LTKNDLGK    | 452 | 401   |
| >PTEN-D326(LTKNDLDKAN  | 335   | >PTEN-D326(LTKNDLGKAN  | 417 | 82    |
| >PTEN-D326(TLTKNDLDKA  | 789   | >PTEN-D326(TLTKNDLGKA  | 271 | 518   |
| >PTEN-D326(TLTKNDLDKA  | 242   | >PTEN-D326(TLTKNDLGKA  | 274 | 32    |
| >PTEN-D326(TLTKNDLDK   | 906   | >PTEN-D326(TLTKNDLGK   | 427 | 479   |
| >PTEN-D326(LTLTKNDLDK  | 313   | >PTEN-D326(LTLTKNDLGK  | 107 | 206   |
| >PTEN-D326(LTLTKNDLDK  | 62    | >PTEN-D326(LTLTKNDLGK  | 52  | 10    |
| >PTEN-D326(LTLTKNDLDK  | 592   | >PTEN-D326(LTLTKNDLGK  | 282 | 310   |
| >PTEN-D331(KDKANRYFSPN | 39    | >PTEN-D331(KGKANRYFSPN | 7   | 32    |
| >PTEN-D331(KDKANRYFS   | 1840  | >PTEN-D331(KGKANRYFS   | 40  | 1800  |
| >PTEN-D331(KDKANRYFSP  | 4461  | >PTEN-D331(KGKANRYFSP  | 314 | 4147  |
| >PTEN-D331(KDKANRYFSP  | 5095  | >PTEN-D331(KGKANRYFSP  | 429 | 4666  |
| >PTEN-D331(KDKANRYF    | 670   | >PTEN-D331(KGKANRYF    | 333 | 337   |

|                         |      |                          |       |       |
|-------------------------|------|--------------------------|-------|-------|
| >PTEN-D331(NKDKANRYF    | 698  | >PTEN-D331(NKGGKANRYF    | 120   | 578   |
| >PTEN-D331(ANKDKANR     | 309  | >PTEN-D331(ANKGGKANR     | 338   | 29    |
| >PTEN-D331(KANKDKANR    | 583  | >PTEN-D331(KANKGGKANR    | 337   | 246   |
| >PTEN-D331(KANKDKANR    | 10   | >PTEN-D331(KANKGGKANR    | 9     | 1     |
| >PTEN-D331(KANKDKANR    | 101  | >PTEN-D331(KANKGGKANR    | 103   | 2     |
| >PTEN-D331(KANKDKANR    | 112  | >PTEN-D331(KANKGGKANR    | 29    | 83    |
| >PTEN-D331(KANKDKANR    | 103  | >PTEN-D331(KANKGGKANR    | 31    | 72    |
| >PTEN-D331(KANKDKANR    | 493  | >PTEN-D331(KANKGGKANR    | 658   | 165   |
| >PTEN-D331(KANKDKANR    | 99   | >PTEN-D331(KANKGGKANR    | 142   | 43    |
| >PTEN-D331(KANKDKANR    | 498  | >PTEN-D331(KANKGGKANR    | 271   | 227   |
| >PTEN-D331(KANKDKANR    | 80   | >PTEN-D331(KANKGGKANR    | 56    | 24    |
| >PTEN-D331(KANKDKANR    | 496  | >PTEN-D331(KANKGGKANR    | 497   | 1     |
| >PTEN-D375IDHYRYSDDT    | 567  | >PTEN-D375INHYRYSDDT     | 339   | 228   |
| >PTEN-D375I EPDHYRYSDDT | 550  | >PTEN-D375I EPNHRYRYSDDT | 191   | 359   |
| >PTEN-D375INEPDHYRY     | 78   | >PTEN-D375INEPNHYRY      | 110   | 32    |
| >PTEN-D375IDNEPDHYR     | 469  | >PTEN-D375IDNEPNHYR      | 240   | 229   |
| >PTEN-D375IDNEPDHYRY    | 378  | >PTEN-D375IDNEPNHYRY     | 256   | 122   |
| >PTEN-D375IVSDNEPDHY    | 13   | >PTEN-D375IVSDNEPNHY     | 12    | 1     |
| >PTEN-D375IVSDNEPDHYI   | 12   | >PTEN-D375IVSDNEPNHYI    | 10    | 2     |
| >PTEN-D375IVSDNEPDHY    | 535  | >PTEN-D375IVSDNEPNHY     | 220   | 315   |
| >PTEN-D375IVSDNEPDHYI   | 120  | >PTEN-D375IVSDNEPNHYI    | 88    | 32    |
| >PTEN-D375IVSDNEPDHYI   | 501  | >PTEN-D375IVSDNEPNHYI    | 483   | 18    |
| >PTEN-D375IVSDNEPDHY    | 458  | >PTEN-D375IVSDNEPNHY     | 304   | 154   |
| >PTEN-D375IVSDNEPDHYI   | 57   | >PTEN-D375IVSDNEPNHYI    | 33    | 24    |
| >PTEN-D375IVSDNEPDHYI   | 415  | >PTEN-D375IVSDNEPNHYI    | 371   | 44    |
| >PTEN-D375IVSDNEPDHYI   | 276  | >PTEN-D375IVSDNEPNHYI    | 201   | 75    |
| >PTEN-D375IDVSDNEPDH    | 75   | >PTEN-D375IDVSDNEPNH     | 79    | 4     |
| >PTEN-D375IDVSDNEPDH    | 38   | >PTEN-D375IDVSDNEPNH     | 35    | 3     |
| >PTEN-D375IDVSDNEPDH    | 69   | >PTEN-D375IDVSDNEPNH     | 50    | 19    |
| >PTEN-D375IDVSDNEPDH    | 6    | >PTEN-D375IDVSDNEPNH     | 5     | 1     |
| >PTEN-D375IDVSDNEPDH    | 447  | >PTEN-D375IDVSDNEPNH     | 320   | 127   |
| >PTEN-D52G DVVRFLDSK    | 1598 | >PTEN-D52G GVVRFLLDSK    | 28    | 1570  |
| >PTEN-D52G DVVRFLDSKH   | 5765 | >PTEN-D52G GVVRFLLDSKH   | 182   | 5583  |
| >PTEN-D52G DVVRFLDSK    | 493  | >PTEN-D52G GVVRFLLDSK    | 10876 | 10383 |
| >PTEN-D52G DVVRFLDSKH   | 129  | >PTEN-D52G GVVRFLLDSKH   | 4125  | 3996  |
| >PTEN-D52G DVVRFLDSK    | 18   | >PTEN-D52G GVVRFLLDSK    | 337   | 319   |
| >PTEN-D52G DVVRFLDSKH   | 102  | >PTEN-D52G GVVRFLLDSKH   | 1538  | 1436  |
| >PTEN-D52G NIDDVVRFL    | 171  | >PTEN-D52G NIDGVVRFL     | 373   | 202   |
| >PTEN-D52G NIDDVVRFL    | 272  | >PTEN-D52G NIDGVVRFL     | 1535  | 1263  |
| >PTEN-D52G NIDDVVRFL    | 30   | >PTEN-D52G NIDGVVRFL     | 66    | 36    |
| >PTEN-D52G NIDDVVRFL    | 320  | >PTEN-D52G NIDGVVRFL     | 709   | 389   |
| >PTEN-D52G NIDDVVRFL    | 464  | >PTEN-D52G NIDGVVRFL     | 1105  | 641   |
| >PTEN-D52G NIDDVVRFL    | 324  | >PTEN-D52G NIDGVVRFL     | 1272  | 948   |



|                       |      |                       |      |      |
|-----------------------|------|-----------------------|------|------|
| >PTEN-D52G NNIDDVVR   | 192  | >PTEN-D52G NNIDGVVR   | 197  | 5    |
| >PTEN-D52G RNNIDDVVR  | 450  | >PTEN-D52G RNNIDGVVR  | 216  | 234  |
| >PTEN-D52G RNNIDDVVR  | 474  | >PTEN-D52G RNNIDGVVR  | 1165 | 691  |
| >PTEN-D52G YRNNIDDVVF | 48   | >PTEN-D52G YRNNIDGVVF | 55   | 7    |
| >PTEN-D52G YRNNIDDV   | 1455 | >PTEN-D52G YRNNIDGV   | 264  | 1191 |
| >PTEN-D52G YRNNIDDV   | 1277 | >PTEN-D52G YRNNIDGV   | 404  | 873  |
| >PTEN-D52G YRNNIDDVVF | 119  | >PTEN-D52G YRNNIDGVVF | 77   | 42   |
| >PTEN-D52G VYRNNIDDV\ | 219  | >PTEN-D52G VYRNNIDGV\ | 144  | 75   |
| >PTEN-D52G VYRNNIDDV\ | 173  | >PTEN-D52G VYRNNIDGV\ | 227  | 54   |
| >PTEN-D52G GYRNNIDD\  | 225  | >PTEN-D52G GYRNNIDG\  | 63   | 162  |
| >PTEN-D52G GYRNNIDD\  | 938  | >PTEN-D52G GYRNNIDG\  | 466  | 472  |
| >PTEN-D52G GYRNNIDD\  | 2297 | >PTEN-D52G GYRNNIDG\  | 488  | 1809 |
| >PTEN-D52G GYRNNIDD\  | 86   | >PTEN-D52G GYRNNIDG\  | 14   | 72   |
| >PTEN-D52G GYRNNIDD\  | 103  | >PTEN-D52G GYRNNIDG\  | 143  | 40   |
| >PTEN-D52G GYRNNIDD\  | 106  | >PTEN-D52G GYRNNIDG\  | 19   | 87   |
| >PTEN-D52G GYRNNIDD\  | 113  | >PTEN-D52G GYRNNIDG\  | 354  | 241  |
| >PTEN-D52G GYRNNIDD\  | 97   | >PTEN-D52G GYRNNIDG\  | 33   | 64   |
| >PTEN-D52G GYRNNIDD\  | 100  | >PTEN-D52G GYRNNIDG\  | 245  | 145  |
| >PTEN-D52G GYRNNIDD\  | 36   | >PTEN-D52G GYRNNIDG\  | 18   | 18   |
| >PTEN-D52G GYRNNIDD\  | 78   | >PTEN-D52G GYRNNIDG\  | 104  | 26   |
| >PTEN-D52G EGVYRNNIDC | 884  | >PTEN-D52G EGVYRNNIDC | 103  | 781  |
| >PTEN-D52N DVVRFLDSK  | 1598 | >PTEN-D52N NVVRFLDSK  | 167  | 1431 |
| >PTEN-D52N DVVRFLDSK  | 493  | >PTEN-D52N NVVRFLDSK  | 2999 | 2506 |
| >PTEN-D52N DVVRFLDSK  | 129  | >PTEN-D52N NVVRFLDSK  | 756  | 627  |
| >PTEN-D52N DVVRFLDSK  | 18   | >PTEN-D52N NVVRFLDSK  | 26   | 8    |
| >PTEN-D52N DVVRFLDSK  | 102  | >PTEN-D52N NVVRFLDSK  | 141  | 39   |
| >PTEN-D52N NIDDVVRFL  | 171  | >PTEN-D52N NIDNVVRFL  | 753  | 582  |
| >PTEN-D52N NIDDVVRFL  | 272  | >PTEN-D52N NIDNVVRFL  | 1362 | 1090 |
| >PTEN-D52N NIDDVVRFL  | 30   | >PTEN-D52N NIDNVVRFL  | 91   | 61   |
| >PTEN-D52N NIDDVVRFL  | 320  | >PTEN-D52N NIDNVVRFL  | 676  | 356  |
| >PTEN-D52N NIDDVVRFL  | 464  | >PTEN-D52N NIDNVVRFL  | 2123 | 1659 |
| >PTEN-D52N NIDDVVRFL  | 324  | >PTEN-D52N NIDNVVRFL  | 1169 | 845  |
| >PTEN-D52N NNIDDVVR   | 192  | >PTEN-D52N NNIDNVVR   | 98   | 94   |
| >PTEN-D52N NNIDDVVR   | 1048 | >PTEN-D52N NNIDNVVR   | 480  | 568  |
| >PTEN-D52N RNNIDDVVR  | 837  | >PTEN-D52N RNNIDNVVR  | 376  | 461  |
| >PTEN-D52N RNNIDDVVR  | 450  | >PTEN-D52N RNNIDNVVR  | 218  | 232  |
| >PTEN-D52N RNNIDDVVR  | 474  | >PTEN-D52N RNNIDNVVR  | 321  | 153  |
| >PTEN-D52N YRNNIDDVVF | 48   | >PTEN-D52N YRNNIDNVVF | 30   | 18   |
| >PTEN-D52N YRNNIDDV   | 1455 | >PTEN-D52N YRNNIDNV   | 401  | 1054 |
| >PTEN-D52N YRNNIDDVVF | 119  | >PTEN-D52N YRNNIDNVVF | 103  | 16   |
| >PTEN-D52N VYRNNIDDV\ | 219  | >PTEN-D52N VYRNNIDNV\ | 100  | 119  |
| >PTEN-D52N VYRNNIDDV\ | 712  | >PTEN-D52N VYRNNIDNV\ | 417  | 295  |
| >PTEN-D52N VYRNNIDDV\ | 173  | >PTEN-D52N VYRNNIDNV\ | 132  | 41   |

|                       |       |                       |       |       |
|-----------------------|-------|-----------------------|-------|-------|
| >PTEN-D52N GVYRNNIDDA | 225   | >PTEN-D52N GVYRNNIDN  | 84    | 141   |
| >PTEN-D52N GVYRNNIDDA | 86    | >PTEN-D52N GVYRNNIDN  | 27    | 59    |
| >PTEN-D52N GVYRNNIDDA | 103   | >PTEN-D52N GVYRNNIDN  | 139   | 36    |
| >PTEN-D52N GVYRNNIDDA | 106   | >PTEN-D52N GVYRNNIDN  | 39    | 67    |
| >PTEN-D52N GVYRNNIDDA | 113   | >PTEN-D52N GVYRNNIDN  | 104   | 9     |
| >PTEN-D52N GVYRNNIDDA | 97    | >PTEN-D52N GVYRNNIDN  | 46    | 51    |
| >PTEN-D52N GVYRNNIDDA | 100   | >PTEN-D52N GVYRNNIDN  | 140   | 40    |
| >PTEN-D52N GVYRNNIDDA | 36    | >PTEN-D52N GVYRNNIDN  | 25    | 11    |
| >PTEN-D52N GVYRNNIDDA | 78    | >PTEN-D52N GVYRNNIDN  | 54    | 24    |
| >PTEN-D52N GVYRNNIDDA | 1754  | >PTEN-D52N GVYRNNIDN  | 473   | 1281  |
| >PTEN-D52N EGVYRNNIDC | 884   | >PTEN-D52N EGVYRNNIDN | 146   | 738   |
| >PTEN-D58Y-DSKHKNHYK  | 2594  | >PTEN-D58Y-YSKHKNHYK  | 141   | 2453  |
| >PTEN-D58Y-DSKHKNHY   | 383   | >PTEN-D58Y-YSKHKNHY   | 398   | 15    |
| >PTEN-D58Y-DSKHKNHYK  | 121   | >PTEN-D58Y-YSKHKNHYK  | 7     | 114   |
| >PTEN-D58Y-DSKHKNHYKI | 5053  | >PTEN-D58Y-YSKHKNHYKI | 254   | 4799  |
| >PTEN-D58Y-DSKHKNHY   | 289   | >PTEN-D58Y-YSKHKNHY   | 115   | 174   |
| >PTEN-D58Y-DSKHKNHYKI | 698   | >PTEN-D58Y-YSKHKNHYKI | 330   | 368   |
| >PTEN-D58Y-DSKHKNHYK  | 342   | >PTEN-D58Y-YSKHKNHYK  | 40    | 302   |
| >PTEN-D58Y-DSKHKNHYK  | 155   | >PTEN-D58Y-YSKHKNHYK  | 942   | 787   |
| >PTEN-D58Y-DSKHKNHYK  | 77    | >PTEN-D58Y-YSKHKNHYK  | 59    | 18    |
| >PTEN-D58Y-DSKHKNHY   | 4062  | >PTEN-D58Y-YSKHKNHY   | 56    | 4006  |
| >PTEN-D58Y-DSKHKNHYKI | 8659  | >PTEN-D58Y-YSKHKNHYKI | 146   | 8513  |
| >PTEN-D58Y-DSKHKNHY   | 5192  | >PTEN-D58Y-YSKHKNHY   | 91    | 5101  |
| >PTEN-D58Y-DSKHKNHYKI | 1729  | >PTEN-D58Y-YSKHKNHYKI | 32    | 1697  |
| >PTEN-D58Y-DSKHKNHY   | 1802  | >PTEN-D58Y-YSKHKNHY   | 14    | 1788  |
| >PTEN-D58Y-DSKHKNHYKI | 8287  | >PTEN-D58Y-YSKHKNHYKI | 51    | 8236  |
| >PTEN-D58Y-DSKHKNHYKI | 1306  | >PTEN-D58Y-YSKHKNHYKI | 8     | 1298  |
| >PTEN-D58Y-DSKHKNHY   | 3193  | >PTEN-D58Y-YSKHKNHY   | 62    | 3131  |
| >PTEN-D58Y-DSKHKNHYKI | 3074  | >PTEN-D58Y-YSKHKNHYKI | 37    | 3037  |
| >PTEN-D58Y-LDSKHKNHYK | 16420 | >PTEN-D58Y-LYSKHKNHYK | 188   | 16232 |
| >PTEN-D58Y-LDSKHKNHYK | 19107 | >PTEN-D58Y-LYSKHKNHYK | 104   | 19003 |
| >PTEN-D58Y-LDSKHKNHYK | 23546 | >PTEN-D58Y-LYSKHKNHYK | 10    | 23536 |
| >PTEN-D58Y-LDSKHKNHY  | 6278  | >PTEN-D58Y-LYSKHKNHY  | 499   | 5779  |
| >PTEN-D58Y-LDSKHKNHYK | 8806  | >PTEN-D58Y-LYSKHKNHYK | 84    | 8722  |
| >PTEN-D58Y-LDSKHKNHY  | 4011  | >PTEN-D58Y-LYSKHKNHY  | 193   | 3818  |
| >PTEN-D58Y-LDSKHKNHYK | 2556  | >PTEN-D58Y-LYSKHKNHYK | 112   | 2444  |
| >PTEN-D58Y-LDSKHKNHY  | 5393  | >PTEN-D58Y-LYSKHKNHY  | 235   | 5158  |
| >PTEN-D58Y-LDSKHKNHYK | 5805  | >PTEN-D58Y-LYSKHKNHYK | 65    | 5740  |
| >PTEN-D58Y-LDSKHKNHYK | 229   | >PTEN-D58Y-LYSKHKNHYK | 23854 | 23625 |
| >PTEN-D58Y-NNIDDVVRF  | 23859 | >PTEN-D58Y-NNIDDVVRF  | 88    | 23771 |
| >PTEN-D58Y-FLDSKHKNHY | 86    | >PTEN-D58Y-FLYSKHKNHY | 396   | 310   |
| >PTEN-D58Y-FLDSKHKNHY | 1452  | >PTEN-D58Y-FLYSKHKNHY | 235   | 1217  |
| >PTEN-D58Y-FLDSKHKN   | 1378  | >PTEN-D58Y-FLYSKHKN   | 217   | 1161  |

|                       |       |                       |     |       |
|-----------------------|-------|-----------------------|-----|-------|
| >PTEN-D58Y-FLDSKHKNHY | 273   | >PTEN-D58Y-FLYSKHKNHY | 52  | 221   |
| >PTEN-D58Y-FLDSKHKN   | 1928  | >PTEN-D58Y-FLYSKHKN   | 219 | 1709  |
| >PTEN-D58Y-FLDSKHKNHY | 3735  | >PTEN-D58Y-FLYSKHKNHY | 480 | 3255  |
| >PTEN-D58Y-FLDSKHKNHY | 226   | >PTEN-D58Y-FLYSKHKNHY | 35  | 191   |
| >PTEN-D58Y-FLDSKHKNHY | 724   | >PTEN-D58Y-FLYSKHKNHY | 35  | 689   |
| >PTEN-D58Y-FLDSKHKNHY | 512   | >PTEN-D58Y-FLYSKHKNHY | 92  | 420   |
| >PTEN-D58Y-FLDSKHKNHY | 1135  | >PTEN-D58Y-FLYSKHKNHY | 290 | 845   |
| >PTEN-D58Y-FLDSKHKNHY | 4532  | >PTEN-D58Y-FLYSKHKNHY | 181 | 4351  |
| >PTEN-D58Y-FLDSKHKNHY | 688   | >PTEN-D58Y-FLYSKHKNHY | 30  | 658   |
| >PTEN-D58Y-FLDSKHKNHY | 676   | >PTEN-D58Y-FLYSKHKNHY | 257 | 419   |
| >PTEN-D58Y-FLDSKHKNHY | 1010  | >PTEN-D58Y-FLYSKHKNHY | 45  | 965   |
| >PTEN-D58Y-FLDSKHKNHY | 510   | >PTEN-D58Y-FLYSKHKNHY | 31  | 479   |
| >PTEN-D58Y-FLDSKHKNHY | 2947  | >PTEN-D58Y-FLYSKHKNHY | 19  | 2928  |
| >PTEN-D58Y-FLDSKHKNHY | 5001  | >PTEN-D58Y-FLYSKHKNHY | 217 | 4784  |
| >PTEN-D58Y-RFLDSKHKNH | 91    | >PTEN-D58Y-RFLYSKHKNH | 78  | 13    |
| >PTEN-D58Y-RFLDSKHK   | 19    | >PTEN-D58Y-RFLYSKHK   | 11  | 8     |
| >PTEN-D58Y-RFLDSKHKNH | 227   | >PTEN-D58Y-RFLYSKHKNH | 114 | 113   |
| >PTEN-D58Y-RFLDSKHK   | 73    | >PTEN-D58Y-RFLYSKHK   | 33  | 40    |
| >PTEN-D58Y-RFLDSKHKNH | 697   | >PTEN-D58Y-RFLYSKHKNH | 349 | 348   |
| >PTEN-D58Y-RFLDSKHK   | 66    | >PTEN-D58Y-RFLYSKHK   | 93  | 27    |
| >PTEN-D58Y-VRFLDSKH   | 482   | >PTEN-D58Y-VRFLYSKH   | 185 | 297   |
| >PTEN-D58Y-VRFLDSKHK  | 137   | >PTEN-D58Y-VRFLYSKHK  | 67  | 70    |
| >PTEN-D58Y-VRFLDSKHKN | 834   | >PTEN-D58Y-VRFLYSKHKN | 425 | 409   |
| >PTEN-D58Y-VVRFLDSK   | 644   | >PTEN-D58Y-VVRFLYSK   | 101 | 543   |
| >PTEN-D58Y-VVRFLDSKHK | 408   | >PTEN-D58Y-VVRFLYSKHK | 97  | 311   |
| >PTEN-D58Y-VVRFLDSK   | 455   | >PTEN-D58Y-VVRFLYSK   | 69  | 386   |
| >PTEN-D58Y-VVRFLDSKHK | 560   | >PTEN-D58Y-VVRFLYSKHK | 211 | 349   |
| >PTEN-D58Y-VVRFLDSK   | 17    | >PTEN-D58Y-VVRFLYSK   | 6   | 11    |
| >PTEN-D58Y-VVRFLDSKHK | 13    | >PTEN-D58Y-VVRFLYSKHK | 5   | 8     |
| >PTEN-D58Y-VVRFLDSK   | 3017  | >PTEN-D58Y-VVRFLYSK   | 103 | 2914  |
| >PTEN-D58Y-VVRFLDSKH  | 57    | >PTEN-D58Y-VVRFLYSKH  | 23  | 34    |
| >PTEN-D58Y-DVVRFLDSK  | 1598  | >PTEN-D58Y-DVVRFLYSK  | 196 | 1402  |
| >PTEN-D58Y-DVVRFLDSK  | 493   | >PTEN-D58Y-DVVRFLYSK  | 582 | 89    |
| >PTEN-D58Y-DVVRFLDSKH | 129   | >PTEN-D58Y-DVVRFLYSKH | 121 | 8     |
| >PTEN-D58Y-DVVRFLDSK  | 1890  | >PTEN-D58Y-DVVRFLYSK  | 111 | 1779  |
| >PTEN-D58Y-DVVRFLDSK  | 18    | >PTEN-D58Y-DVVRFLYSK  | 11  | 7     |
| >PTEN-D58Y-DVVRFLDSKH | 102   | >PTEN-D58Y-DVVRFLYSKH | 60  | 42    |
| >PTEN-D58Y-IDDVVRFLD  | 38236 | >PTEN-D58Y-IDDVVRFLY  | 398 | 37838 |
| >PTEN-D58Y-NIDDVVRFLD | 31077 | >PTEN-D58Y-NIDDVVRFLY | 161 | 30916 |
| >PTEN-D58Y-NIDDVVRFLD | 31798 | >PTEN-D58Y-NIDDVVRFLY | 439 | 31359 |
| >PTEN-D58Y-NIDDVVRFLD | 22640 | >PTEN-D58Y-NIDDVVRFLY | 358 | 22282 |
| >PTEN-D58Y-NIDDVVRFLD | 25153 | >PTEN-D58Y-NIDDVVRFLY | 242 | 24911 |
| >PTEN-D92A-DHNPPQLEL  | 5650  | >PTEN-D92A-AHNPPQLEL  | 471 | 5179  |

|                       |       |                       |       |       |
|-----------------------|-------|-----------------------|-------|-------|
| >PTEN-D92A·DHNPPQLEL  | 248   | >PTEN-D92A·AHNPPQLEL  | 401   | 153   |
| >PTEN-D92A·EDHNPPQLEI | 5968  | >PTEN-D92A·EAHNPPQLEL | 52    | 5916  |
| >PTEN-D92A·EDHNPPQL   | 13635 | >PTEN-D92A·EAHNPPQL   | 329   | 13306 |
| >PTEN-D92A·EDHNPPQLEI | 235   | >PTEN-D92A·EAHNPPQLEL | 29621 | 29386 |
| >PTEN-D92A·FEDHNPPQL  | 1032  | >PTEN-D92A·FEAHNPPQL  | 231   | 801   |
| >PTEN-D92A·FEDHNPPQLE | 1486  | >PTEN-D92A·FEAHNPPQLE | 356   | 1130  |
| >PTEN-D92A·FEDHNPPQLE | 7964  | >PTEN-D92A·FEAHNPPQLE | 486   | 7478  |
| >PTEN-D92A·FEDHNPPQL  | 169   | >PTEN-D92A·FEAHNPPQL  | 155   | 14    |
| >PTEN-D92A·FEDHNPPQLE | 275   | >PTEN-D92A·FEAHNPPQLE | 270   | 5     |
| >PTEN-D92A·FEDHNPPQL  | 116   | >PTEN-D92A·FEAHNPPQL  | 132   | 16    |
| >PTEN-D92A·FEDHNPPQLE | 47    | >PTEN-D92A·FEAHNPPQLE | 57    | 10    |
| >PTEN-D92A·FEDHNPPQL  | 314   | >PTEN-D92A·FEAHNPPQL  | 165   | 149   |
| >PTEN-D92A·FEDHNPPQLE | 186   | >PTEN-D92A·FEAHNPPQLE | 98    | 88    |
| >PTEN-D92A·FEDHNPPQL  | 128   | >PTEN-D92A·FEAHNPPQL  | 25    | 103   |
| >PTEN-D92A·FEDHNPPQLE | 802   | >PTEN-D92A·FEAHNPPQLE | 147   | 655   |
| >PTEN-D92A·YPFEDHNPPC | 43    | >PTEN-D92A·YPFEAHNPPC | 4     | 39    |
| >PTEN-D92A·YPFEDHNPPC | 145   | >PTEN-D92A·YPFEAHNPPC | 87    | 58    |
| >PTEN-D92A·YPFEDHNPPC | 145   | >PTEN-D92A·YPFEAHNPPC | 72    | 73    |
| >PTEN-D92A·YPFEDHNPP  | 145   | >PTEN-D92A·YPFEAHNPP  | 85    | 60    |
| >PTEN-D92A·YPFEDHNPPC | 43    | >PTEN-D92A·YPFEAHNPPC | 37    | 6     |
| >PTEN-D92A·YPFEDHNPPC | 22    | >PTEN-D92A·YPFEAHNPPC | 18    | 4     |
| >PTEN-D92A·YPFEDHNPPC | 711   | >PTEN-D92A·YPFEAHNPPC | 411   | 300   |
| >PTEN-D92A·YPFEDHNPP  | 291   | >PTEN-D92A·YPFEAHNPP  | 62    | 229   |
| >PTEN-D92A·AQYPFEDH   | 2087  | >PTEN-D92A·AQYPFEAH   | 260   | 1827  |
| >PTEN-D92A·AQYPFEDH   | 105   | >PTEN-D92A·AQYPFEAH   | 22    | 83    |
| >PTEN-D92A·AQYPFEDHNI | 263   | >PTEN-D92A·AQYPFEAHNI | 151   | 112   |
| >PTEN-D92A·RVAQYPFED  | 19715 | >PTEN-D92A·RVAQYPFEA  | 69    | 19646 |
| >PTEN-D92A·RVAQYPFED  | 14210 | >PTEN-D92A·RVAQYPFEA  | 154   | 14056 |
| >PTEN-D92A·RVAQYPFED  | 21011 | >PTEN-D92A·RVAQYPFEA  | 253   | 20758 |
| >PTEN-D92A·RVAQYPFED  | 18575 | >PTEN-D92A·RVAQYPFEA  | 73    | 18502 |
| >PTEN-D92A·RVAQYPFED  | 16831 | >PTEN-D92A·RVAQYPFEA  | 159   | 16672 |
| >PTEN-D92A·CRVAQYPFEA | 3049  | >PTEN-D92A·CRVAQYPFEA | 276   | 2773  |
| >PTEN-D92E·DHNPPQLEL  | 248   | >PTEN-D92E·EHNPPQLEL  | 231   | 17    |
| >PTEN-D92E·EDHNPPQLEI | 1216  | >PTEN-D92E·EEHNPPQLEL | 78    | 1138  |
| >PTEN-D92E·EDHNPPQL   | 4690  | >PTEN-D92E·EEHNPPQL   | 215   | 4475  |
| >PTEN-D92E·EDHNPPQLEI | 23091 | >PTEN-D92E·EEHNPPQLEL | 431   | 22660 |
| >PTEN-D92E·EDHNPPQLEI | 25143 | >PTEN-D92E·EEHNPPQLEL | 340   | 24803 |
| >PTEN-D92E·EDHNPPQLEI | 2168  | >PTEN-D92E·EEHNPPQLEL | 25    | 2143  |
| >PTEN-D92E·EDHNPPQLEI | 235   | >PTEN-D92E·EEHNPPQLEL | 8144  | 7909  |
| >PTEN-D92E·FEDHNPPQL  | 1032  | >PTEN-D92E·FEEHNPPQL  | 433   | 599   |
| >PTEN-D92E·FEDHNPPQL  | 169   | >PTEN-D92E·FEEHNPPQL  | 353   | 184   |
| >PTEN-D92E·FEDHNPPQLE | 275   | >PTEN-D92E·FEEHNPPQLE | 577   | 302   |
| >PTEN-D92E·FEDHNPPQL  | 116   | >PTEN-D92E·FEEHNPPQL  | 92    | 24    |

|                       |       |                       |       |       |
|-----------------------|-------|-----------------------|-------|-------|
| >PTEN-D92E-FEDHNPPQLE | 47    | >PTEN-D92E-FEEHNPPQLE | 42    | 5     |
| >PTEN-D92E-FEDHNPPQL  | 314   | >PTEN-D92E-FEEHNPPQL  | 357   | 43    |
| >PTEN-D92E-FEDHNPPQLE | 186   | >PTEN-D92E-FEEHNPPQLE | 205   | 19    |
| >PTEN-D92E-FEDHNPPQL  | 128   | >PTEN-D92E-FEEHNPPQL  | 61    | 67    |
| >PTEN-D92E-FEDHNPPQLE | 802   | >PTEN-D92E-FEEHNPPQLE | 436   | 366   |
| >PTEN-D92E-YPFEDHNPPC | 43    | >PTEN-D92E-YPFEEHNPPC | 34    | 9     |
| >PTEN-D92E-YPFEDHNPPC | 145   | >PTEN-D92E-YPFEEHNPPC | 181   | 36    |
| >PTEN-D92E-YPFEDHNPPC | 145   | >PTEN-D92E-YPFEEHNPPC | 286   | 141   |
| >PTEN-D92E-YPFEDHNPP  | 145   | >PTEN-D92E-YPFEEHNPP  | 156   | 11    |
| >PTEN-D92E-YPFEDHNPPC | 43    | >PTEN-D92E-YPFEEHNPPC | 45    | 2     |
| >PTEN-D92E-YPFEDHNPPC | 22    | >PTEN-D92E-YPFEEHNPPC | 22    | 0     |
| >PTEN-D92E-YPFEDHNPP  | 291   | >PTEN-D92E-YPFEEHNPP  | 433   | 142   |
| >PTEN-D92E-AQYPFEDH   | 105   | >PTEN-D92E-AQYPFEEH   | 50    | 55    |
| >PTEN-D92E-AQYPFEDHNI | 263   | >PTEN-D92E-AQYPFEEHNI | 196   | 67    |
| >PTEN-D92G-DHNPPQLEL  | 248   | >PTEN-D92G-GHNPPQLEL  | 741   | 493   |
| >PTEN-D92G-EDHNPPQLEI | 235   | >PTEN-D92G-EGHNPPQLEI | 16144 | 15909 |
| >PTEN-D92G-FEDHNPPQL  | 169   | >PTEN-D92G-FEGHNPPQL  | 3680  | 3511  |
| >PTEN-D92G-FEDHNPPQLE | 275   | >PTEN-D92G-FEGHNPPQLE | 4481  | 4206  |
| >PTEN-D92G-FEDHNPPQL  | 116   | >PTEN-D92G-FEGHNPPQL  | 649   | 533   |
| >PTEN-D92G-FEDHNPPQLE | 47    | >PTEN-D92G-FEGHNPPQLE | 281   | 234   |
| >PTEN-D92G-FEDHNPPQL  | 314   | >PTEN-D92G-FEGHNPPQL  | 173   | 141   |
| >PTEN-D92G-FEDHNPPQLE | 186   | >PTEN-D92G-FEGHNPPQLE | 97    | 89    |
| >PTEN-D92G-FEDHNPPQL  | 128   | >PTEN-D92G-FEGHNPPQL  | 85    | 43    |
| >PTEN-D92G-YPFEDHNPPC | 43    | >PTEN-D92G-YPFEGHNPPC | 11    | 32    |
| >PTEN-D92G-YPFEDHNPPC | 145   | >PTEN-D92G-YPFEGHNPPC | 108   | 37    |
| >PTEN-D92G-YPFEDHNPPC | 145   | >PTEN-D92G-YPFEGHNPPC | 70    | 75    |
| >PTEN-D92G-YPFEDHNPP  | 145   | >PTEN-D92G-YPFEGHNPP  | 123   | 22    |
| >PTEN-D92G-YPFEDHNPPC | 43    | >PTEN-D92G-YPFEGHNPPC | 45    | 2     |
| >PTEN-D92G-YPFEDHNPPC | 22    | >PTEN-D92G-YPFEGHNPPC | 15    | 7     |
| >PTEN-D92G-YPFEDHNPP  | 291   | >PTEN-D92G-YPFEGHNPP  | 113   | 178   |
| >PTEN-D92G-AQYPFEDH   | 105   | >PTEN-D92G-AQYPFEGH   | 162   | 57    |
| >PTEN-D92G-AQYPFEDHNI | 263   | >PTEN-D92G-AQYPFEGHNI | 290   | 27    |
| >PTEN-D92H-DHNPPQLEL  | 248   | >PTEN-D92H-HHNPPQLEL  | 86    | 162   |
| >PTEN-D92H-DHNPPQLELI | 1469  | >PTEN-D92H-HHNPPQLELI | 480   | 989   |
| >PTEN-D92H-DHNPPQLEL  | 3366  | >PTEN-D92H-HHNPPQLEL  | 85    | 3281  |
| >PTEN-D92H-EDHNPPQL   | 11044 | >PTEN-D92H-EHHNPPQL   | 116   | 10928 |
| >PTEN-D92H-EDHNPPQLEI | 11929 | >PTEN-D92H-EHHNPPQLEI | 145   | 11784 |
| >PTEN-D92H-EDHNPPQL   | 11411 | >PTEN-D92H-EHHNPPQL   | 227   | 11184 |
| >PTEN-D92H-EDHNPPQLEI | 12564 | >PTEN-D92H-EHHNPPQLEI | 316   | 12248 |
| >PTEN-D92H-EDHNPPQLEI | 235   | >PTEN-D92H-EHHNPPQLEI | 19254 | 19019 |
| >PTEN-D92H-FEDHNPPQLE | 7964  | >PTEN-D92H-FEHHNPPQLE | 291   | 7673  |
| >PTEN-D92H-FEDHNPPQL  | 169   | >PTEN-D92H-FEHHNPPQL  | 269   | 100   |
| >PTEN-D92H-FEDHNPPQLE | 275   | >PTEN-D92H-FEHHNPPQLE | 440   | 165   |

|                       |       |                       |       |       |
|-----------------------|-------|-----------------------|-------|-------|
| >PTEN-D92H FEDHNPPQL  | 116   | >PTEN-D92H FEHHNPPQL  | 135   | 19    |
| >PTEN-D92H FEDHNPPQLE | 47    | >PTEN-D92H FEHHNPPQLE | 53    | 6     |
| >PTEN-D92H FEDHNPPQ   | 3087  | >PTEN-D92H FEHHNPPQ   | 308   | 2779  |
| >PTEN-D92H FEDHNPPQL  | 314   | >PTEN-D92H FEHHNPPQL  | 29    | 285   |
| >PTEN-D92H FEDHNPPQLE | 186   | >PTEN-D92H FEHHNPPQLE | 21    | 165   |
| >PTEN-D92H FEDHNPPQL  | 128   | >PTEN-D92H FEHHNPPQL  | 14    | 114   |
| >PTEN-D92H FEDHNPPQLE | 802   | >PTEN-D92H FEHHNPPQLE | 91    | 711   |
| >PTEN-D92H YPFEDHNPPC | 43    | >PTEN-D92H YPFEHHNPPC | 28    | 15    |
| >PTEN-D92H YPFEDHNPPC | 145   | >PTEN-D92H YPFEHHNPPC | 97    | 48    |
| >PTEN-D92H YPFEDHNPPC | 145   | >PTEN-D92H YPFEHHNPPC | 56    | 89    |
| >PTEN-D92H YPFEDHNPPC | 3085  | >PTEN-D92H YPFEHHNPPC | 305   | 2780  |
| >PTEN-D92H YPFEDHNPP  | 145   | >PTEN-D92H YPFEHHNPP  | 96    | 49    |
| >PTEN-D92H YPFEDHNPPC | 43    | >PTEN-D92H YPFEHHNPPC | 36    | 7     |
| >PTEN-D92H YPFEDHNPPC | 22    | >PTEN-D92H YPFEHHNPPC | 18    | 4     |
| >PTEN-D92H YPFEDHNPP  | 291   | >PTEN-D92H YPFEHHNPP  | 112   | 179   |
| >PTEN-D92H YPFEDHNPPC | 638   | >PTEN-D92H YPFEHHNPPC | 453   | 185   |
| >PTEN-D92H AQYPFEDH   | 2087  | >PTEN-D92H AQYPFEDH   | 293   | 1794  |
| >PTEN-D92H AQYPFEDH   | 105   | >PTEN-D92H AQYPFEDH   | 56    | 49    |
| >PTEN-D92H AQYPFEDHNI | 1505  | >PTEN-D92H AQYPFEDHNI | 488   | 1017  |
| >PTEN-D92H AQYPFEDHNI | 263   | >PTEN-D92H AQYPFEDHNI | 155   | 108   |
| >PTEN-D92H RVAQYPFED  | 15526 | >PTEN-D92H RVAQYPFED  | 367   | 15159 |
| >PTEN-D92H CRVAQYPFED | 3049  | >PTEN-D92H CRVAQYPFED | 358   | 2691  |
| >PTEN-D92V·DHNPPQLEL  | 248   | >PTEN-D92V·VHNPPQLEL  | 425   | 177   |
| >PTEN-D92V·EDHNPPQL   | 22596 | >PTEN-D92V·EVHNPPQL   | 129   | 22467 |
| >PTEN-D92V·EDHNPPQLEL | 27623 | >PTEN-D92V·EVHNPPQLEL | 383   | 27240 |
| >PTEN-D92V·EDHNPPQLEL | 5740  | >PTEN-D92V·EVHNPPQLEL | 422   | 5318  |
| >PTEN-D92V·EDHNPPQL   | 18592 | >PTEN-D92V·EVHNPPQL   | 270   | 18322 |
| >PTEN-D92V·EDHNPPQLEL | 5968  | >PTEN-D92V·EVHNPPQLEL | 15    | 5953  |
| >PTEN-D92V·EDHNPPQL   | 13635 | >PTEN-D92V·EVHNPPQL   | 109   | 13526 |
| >PTEN-D92V·EDHNPPQLEL | 16265 | >PTEN-D92V·EVHNPPQLEL | 309   | 15956 |
| >PTEN-D92V·EDHNPPQLEL | 16183 | >PTEN-D92V·EVHNPPQLEL | 299   | 15884 |
| >PTEN-D92V·EDHNPPQLEL | 235   | >PTEN-D92V·EVHNPPQLEL | 22791 | 22556 |
| >PTEN-D92V·FEDHNPPQLE | 7964  | >PTEN-D92V·FEVHNPPQLE | 344   | 7620  |
| >PTEN-D92V·FEDHNPPQL  | 169   | >PTEN-D92V·FEVHNPPQL  | 156   | 13    |
| >PTEN-D92V·FEDHNPPQLE | 275   | >PTEN-D92V·FEVHNPPQLE | 274   | 1     |
| >PTEN-D92V·FEDHNPPQL  | 116   | >PTEN-D92V·FEVHNPPQL  | 80    | 36    |
| >PTEN-D92V·FEDHNPPQLE | 47    | >PTEN-D92V·FEVHNPPQLE | 37    | 10    |
| >PTEN-D92V·FEDHNPPQL  | 314   | >PTEN-D92V·FEVHNPPQL  | 80    | 234   |
| >PTEN-D92V·FEDHNPPQLE | 186   | >PTEN-D92V·FEVHNPPQLE | 44    | 142   |
| >PTEN-D92V·FEDHNPPQL  | 128   | >PTEN-D92V·FEVHNPPQL  | 16    | 112   |
| >PTEN-D92V·FEDHNPPQLE | 802   | >PTEN-D92V·FEVHNPPQLE | 110   | 692   |
| >PTEN-D92V·YPFEDHNPPC | 43    | >PTEN-D92V·YPFEVHNPPC | 12    | 31    |
| >PTEN-D92V·YPFEDHNPPC | 929   | >PTEN-D92V·YPFEVHNPPC | 323   | 606   |

|                        |       |                        |       |       |
|------------------------|-------|------------------------|-------|-------|
| >PTEN-D92V·YPFEDHNPPC  | 145   | >PTEN-D92V·YPFEVHNPPC  | 112   | 33    |
| >PTEN-D92V·YPFEDHNPPC  | 145   | >PTEN-D92V·YPFEVHNPPC  | 123   | 22    |
| >PTEN-D92V·YPFEDHNPP   | 145   | >PTEN-D92V·YPFEVHNPP   | 133   | 12    |
| >PTEN-D92V·YPFEDHNPPC  | 43    | >PTEN-D92V·YPFEVHNPPC  | 41    | 2     |
| >PTEN-D92V·YPFEDHNPPC  | 22    | >PTEN-D92V·YPFEVHNPPC  | 17    | 5     |
| >PTEN-D92V·YPFEDHNPPC  | 711   | >PTEN-D92V·YPFEVHNPPC  | 439   | 272   |
| >PTEN-D92V·YPFEDHNPP   | 291   | >PTEN-D92V·YPFEVHNPP   | 56    | 235   |
| >PTEN-D92V·AQYPFEDH    | 2087  | >PTEN-D92V·AQYPFEVH    | 273   | 1814  |
| >PTEN-D92V·AQYPFEDH    | 105   | >PTEN-D92V·AQYPFEVH    | 27    | 78    |
| >PTEN-D92V·AQYPFEDHN   | 2519  | >PTEN-D92V·AQYPFEVHN   | 364   | 2155  |
| >PTEN-D92V·AQYPFEDHNI  | 1505  | >PTEN-D92V·AQYPFEVHNI  | 310   | 1195  |
| >PTEN-D92V·AQYPFEDHNI  | 263   | >PTEN-D92V·AQYPFEVHNI  | 134   | 129   |
| >PTEN-D92V·VAQYPFED    | 29147 | >PTEN-D92V·VAQYPFEV    | 275   | 28872 |
| >PTEN-D92V·VAQYPFED    | 29633 | >PTEN-D92V·VAQYPFEV    | 397   | 29236 |
| >PTEN-D92V·VAQYPFED    | 21368 | >PTEN-D92V·VAQYPFEV    | 455   | 20913 |
| >PTEN-D92V·RVAQYPFED   | 19715 | >PTEN-D92V·RVAQYPFEV   | 11    | 19704 |
| >PTEN-D92V·RVAQYPFED   | 14210 | >PTEN-D92V·RVAQYPFEV   | 18    | 14192 |
| >PTEN-D92V·RVAQYPFED   | 21011 | >PTEN-D92V·RVAQYPFEV   | 20    | 20991 |
| >PTEN-D92V·RVAQYPFED   | 18575 | >PTEN-D92V·RVAQYPFEV   | 9     | 18566 |
| >PTEN-D92V·RVAQYPFED   | 16831 | >PTEN-D92V·RVAQYPFEV   | 5     | 16826 |
| >PTEN-D92V·RVAQYPFED   | 24031 | >PTEN-D92V·RVAQYPFEV   | 200   | 23831 |
| >PTEN-D92V·RVAQYPFED   | 23126 | >PTEN-D92V·RVAQYPFEV   | 18    | 23108 |
| >PTEN-D92V·RVAQYPFED   | 24931 | >PTEN-D92V·RVAQYPFEV   | 29    | 24902 |
| >PTEN-D92V·RVAQYPFED   | 30913 | >PTEN-D92V·RVAQYPFEV   | 8     | 30905 |
| >PTEN-D92V·RVAQYPFED   | 20856 | >PTEN-D92V·RVAQYPFEV   | 54    | 20802 |
| >PTEN-D92V·RVAQYPFED   | 18970 | >PTEN-D92V·RVAQYPFEV   | 35    | 18935 |
| >PTEN-D92V·CRVAQYPFEC  | 3049  | >PTEN-D92V·CRVAQYPFEV  | 213   | 2836  |
| >PTEN-D92V·CRVAQYPFEC  | 4212  | >PTEN-D92V·CRVAQYPFEV  | 469   | 3743  |
| >PTEN-E150[ EALDFYGEV  | 224   | >PTEN-E150[ DALDFYGEV  | 388   | 164   |
| >PTEN-E150[ EALDFYGEV  | 188   | >PTEN-E150[ DALDFYGEV  | 795   | 607   |
| >PTEN-E150[ EALDFYGEVR | 299   | >PTEN-E150[ DALDFYGEVF | 108   | 191   |
| >PTEN-E150[ EALDFYGEVR | 28    | >PTEN-E150[ DALDFYGEVF | 45    | 17    |
| >PTEN-E150[ EALDFYGEV  | 11    | >PTEN-E150[ DALDFYGEV  | 48    | 37    |
| >PTEN-E150[ EALDFYGEV  | 4     | >PTEN-E150[ DALDFYGEV  | 7     | 3     |
| >PTEN-E150[ QEALDFYGEV | 22    | >PTEN-E150[ QDALDFYGEV | 1134  | 1112  |
| >PTEN-E150[ QEALDFYGEV | 112   | >PTEN-E150[ QDALDFYGEV | 15238 | 15126 |
| >PTEN-E150[ QEALDFYGEV | 426   | >PTEN-E150[ QDALDFYGEV | 11540 | 11114 |
| >PTEN-E150[ QEALDFYGEV | 361   | >PTEN-E150[ QDALDFYGEV | 15233 | 14872 |
| >PTEN-E150[ QEALDFYGEV | 116   | >PTEN-E150[ QDALDFYGEV | 2802  | 2686  |
| >PTEN-E150[ QEALDFYGEV | 3559  | >PTEN-E150[ QDALDFYGEV | 57    | 3502  |
| >PTEN-E150[ AQEALDFY   | 3313  | >PTEN-E150[ AQDALDFY   | 203   | 3110  |
| >PTEN-E150[ AQEALDFYGE | 1377  | >PTEN-E150[ AQDALDFYGI | 131   | 1246  |
| >PTEN-E150[ AQEALDFYGE | 422   | >PTEN-E150[ AQDALDFYGI | 165   | 257   |

|                        |      |                        |      |      |
|------------------------|------|------------------------|------|------|
| >PTEN-E150[ AQEALDFYG  | 2516 | >PTEN-E150[ AQDALDFYG  | 410  | 2106 |
| >PTEN-E150[ AQEALDFYGE | 39   | >PTEN-E150[ AQDALDFYGI | 11   | 28   |
| >PTEN-E150[ AQEALDFYGE | 942  | >PTEN-E150[ AQDALDFYGI | 52   | 890  |
| >PTEN-E150[ AQEALDFYGE | 2939 | >PTEN-E150[ AQDALDFYGI | 434  | 2505 |
| >PTEN-E150[ AQEALDFYGE | 2325 | >PTEN-E150[ AQDALDFYGI | 87   | 2238 |
| >PTEN-E150[ AQEALDFY   | 178  | >PTEN-E150[ AQDALDFY   | 244  | 66   |
| >PTEN-E150[ AQEALDFY   | 912  | >PTEN-E150[ AQDALDFY   | 374  | 538  |
| >PTEN-E150[ AQEALDFY   | 421  | >PTEN-E150[ AQDALDFY   | 659  | 238  |
| >PTEN-E150[ KAQEALDFY  | 271  | >PTEN-E150[ KAQDALDFY  | 362  | 91   |
| >PTEN-E150[ KAQEALDFY  | 46   | >PTEN-E150[ KAQDALDFY  | 32   | 14   |
| >PTEN-E150[ KAQEALDF   | 309  | >PTEN-E150[ KAQDALDF   | 397  | 88   |
| >PTEN-E150[ KAQEALDF   | 30   | >PTEN-E150[ KAQDALDF   | 42   | 12   |
| >PTEN-E150[ KAQEALDFY  | 139  | >PTEN-E150[ KAQDALDFY  | 123  | 16   |
| >PTEN-E150[ KAQEALDFY  | 481  | >PTEN-E150[ KAQDALDFY  | 1062 | 581  |
| >PTEN-E150[ KAQEALDF   | 133  | >PTEN-E150[ KAQDALDF   | 180  | 47   |
| >PTEN-E150[ KAQEALDFY  | 195  | >PTEN-E150[ KAQDALDFY  | 283  | 88   |
| >PTEN-E150[ LKAQEALDF  | 6    | >PTEN-E150[ LKAQDALDF  | 7    | 1    |
| >PTEN-E150[ LKAQEALDFY | 85   | >PTEN-E150[ LKAQDALDFY | 92   | 7    |
| >PTEN-E150[ FLKAQEAL   | 179  | >PTEN-E150[ FLKAQDAL   | 254  | 75   |
| >PTEN-E150[ FLKAQEAL   | 4    | >PTEN-E150[ FLKAQDAL   | 4    | 0    |
| >PTEN-E150[ FLKAQEALDF | 370  | >PTEN-E150[ FLKAQDALDF | 365  | 5    |
| >PTEN-E150[ FLKAQEAL   | 8    | >PTEN-E150[ FLKAQDAL   | 8    | 0    |
| >PTEN-E150[ FLKAQEAL   | 280  | >PTEN-E150[ FLKAQDAL   | 258  | 22   |
| >PTEN-E150[ FLKAQEAL   | 58   | >PTEN-E150[ FLKAQDAL   | 113  | 55   |
| >PTEN-E150[ FLKAQEAL   | 47   | >PTEN-E150[ FLKAQDAL   | 32   | 15   |
| >PTEN-E150[ FLKAQEAL   | 4    | >PTEN-E150[ FLKAQDAL   | 7    | 3    |
| >PTEN-E150[ FLKAQEALDF | 98   | >PTEN-E150[ FLKAQDALDF | 54   | 44   |
| >PTEN-E150[ FLKAQEALDF | 209  | >PTEN-E150[ FLKAQDALDF | 170  | 39   |
| >PTEN-E150[ FLKAQEALDF | 122  | >PTEN-E150[ FLKAQDALDF | 141  | 19   |
| >PTEN-E150[ FLKAQEAL   | 68   | >PTEN-E150[ FLKAQDAL   | 90   | 22   |
| >PTEN-E150[ FLKAQEAL   | 343  | >PTEN-E150[ FLKAQDAL   | 381  | 38   |
| >PTEN-E150[ FLKAQEALDF | 105  | >PTEN-E150[ FLKAQDALDF | 71   | 34   |
| >PTEN-E150[ FLKAQEALDF | 105  | >PTEN-E150[ FLKAQDALDF | 72   | 33   |
| >PTEN-E150[ FLKAQEAL   | 579  | >PTEN-E150[ FLKAQDAL   | 337  | 242  |
| >PTEN-E150[ FLKAQEALDF | 108  | >PTEN-E150[ FLKAQDALDF | 48   | 60   |
| >PTEN-E150[ FLKAQEALDF | 78   | >PTEN-E150[ FLKAQDALDF | 52   | 26   |
| >PTEN-E150[ FLKAQEALDF | 37   | >PTEN-E150[ FLKAQDALDF | 54   | 17   |
| >PTEN-E150[ KFLKAQEAL  | 154  | >PTEN-E150[ KFLKAQDAL  | 143  | 11   |
| >PTEN-E150[ KFLKAQEALD | 77   | >PTEN-E150[ KFLKAQDALC | 128  | 51   |
| >PTEN-E150[ KFLKAQEALD | 345  | >PTEN-E150[ KFLKAQDALC | 561  | 216  |
| >PTEN-E150[ KFLKAQEAL  | 37   | >PTEN-E150[ KFLKAQDAL  | 38   | 1    |
| >PTEN-E150[ KFLKAQEALD | 9    | >PTEN-E150[ KFLKAQDALC | 10   | 1    |
| >PTEN-E150[ KFLKAQEA   | 464  | >PTEN-E150[ KFLKAQDA   | 1455 | 991  |



|                        |      |                         |       |       |
|------------------------|------|-------------------------|-------|-------|
| >PTEN-E150I KFLKAQEALD | 364  | >PTEN-E150I KFLKAQDALD  | 444   | 80    |
| >PTEN-E150I KFLKAQEAL  | 257  | >PTEN-E150I KFLKAQDAL   | 131   | 126   |
| >PTEN-E150I GKFLKAQEAL | 109  | >PTEN-E150I GKFLKAQDAL  | 268   | 159   |
| >PTEN-E150I RGKFLKAQEA | 193  | >PTEN-E150I RGKFLKAQD/  | 674   | 481   |
| >PTEN-E150C EALDFYGEV  | 224  | >PTEN-E150C GALDFYGEV   | 242   | 18    |
| >PTEN-E150C EALDFYGEV  | 1339 | >PTEN-E150C GALDFYGEV   | 136   | 1203  |
| >PTEN-E150C EALDFYGEV  | 188  | >PTEN-E150C GALDFYGEV   | 30    | 158   |
| >PTEN-E150C EALDFYGEV  | 3175 | >PTEN-E150C GALDFYGEV   | 230   | 2945  |
| >PTEN-E150C EALDFYGEV  | 810  | >PTEN-E150C GALDFYGEV   | 80    | 730   |
| >PTEN-E150C EALDFYGEVR | 299  | >PTEN-E150C GALDFYGEV F | 2388  | 2089  |
| >PTEN-E150C EALDFYGEVR | 28   | >PTEN-E150C GALDFYGEV F | 274   | 246   |
| >PTEN-E150C EALDFYGEV  | 11   | >PTEN-E150C GALDFYGEV   | 2778  | 2767  |
| >PTEN-E150C EALDFYGEV  | 4    | >PTEN-E150C GALDFYGEV   | 126   | 122   |
| >PTEN-E150C QEALDFYGEV | 22   | >PTEN-E150C QGALDFYGEV  | 12305 | 12283 |
| >PTEN-E150C QEALDFYGEV | 112  | >PTEN-E150C QGALDFYGEV  | 32181 | 32069 |
| >PTEN-E150C QEALDFYGEV | 426  | >PTEN-E150C QGALDFYGEV  | 28291 | 27865 |
| >PTEN-E150C QEALDFYGEV | 361  | >PTEN-E150C QGALDFYGEV  | 30706 | 30345 |
| >PTEN-E150C QEALDFYGEV | 116  | >PTEN-E150C QGALDFYGEV  | 20027 | 19911 |
| >PTEN-E150C AQEALDFYGE | 1377 | >PTEN-E150C AQGALDFYGI  | 447   | 930   |
| >PTEN-E150C AQEALDFYGE | 422  | >PTEN-E150C AQGALDFYGI  | 185   | 237   |
| >PTEN-E150C AQEALDFYGE | 1416 | >PTEN-E150C AQGALDFYGI  | 407   | 1009  |
| >PTEN-E150C AQEALDFYGE | 39   | >PTEN-E150C AQGALDFYGI  | 37    | 2     |
| >PTEN-E150C AQEALDFYGE | 942  | >PTEN-E150C AQGALDFYGI  | 130   | 812   |
| >PTEN-E150C AQEALDFYGE | 2325 | >PTEN-E150C AQGALDFYGI  | 203   | 2122  |
| >PTEN-E150C AQEALDFY   | 178  | >PTEN-E150C AQGALDFY    | 108   | 70    |
| >PTEN-E150C AQEALDFY   | 912  | >PTEN-E150C AQGALDFY    | 90    | 822   |
| >PTEN-E150C AQEALDFY   | 421  | >PTEN-E150C AQGALDFY    | 80    | 341   |
| >PTEN-E150C KAQEALDFY  | 271  | >PTEN-E150C KAQGALDFY   | 184   | 87    |
| >PTEN-E150C KAQEALDFY  | 46   | >PTEN-E150C KAQGALDFY   | 44    | 2     |
| >PTEN-E150C KAQEALDF   | 309  | >PTEN-E150C KAQGALDF    | 701   | 392   |
| >PTEN-E150C KAQEALDF   | 30   | >PTEN-E150C KAQGALDF    | 45    | 15    |
| >PTEN-E150C KAQEALDFY  | 139  | >PTEN-E150C KAQGALDFY   | 218   | 79    |
| >PTEN-E150C KAQEALDFY  | 481  | >PTEN-E150C KAQGALDFY   | 292   | 189   |
| >PTEN-E150C KAQEALDF   | 133  | >PTEN-E150C KAQGALDF    | 114   | 19    |
| >PTEN-E150C KAQEALDFY  | 195  | >PTEN-E150C KAQGALDFY   | 191   | 4     |
| >PTEN-E150C KAQEALDFY  | 1326 | >PTEN-E150C KAQGALDFY   | 405   | 921   |
| >PTEN-E150C LKAQEALDF  | 6    | >PTEN-E150C LKAQGALDF   | 7     | 1     |
| >PTEN-E150C LKAQEALDFY | 85   | >PTEN-E150C LKAQGALDFY  | 103   | 18    |
| >PTEN-E150C FLKAQEAL   | 179  | >PTEN-E150C FLKAQGAL    | 624   | 445   |
| >PTEN-E150C FLKAQEAL   | 4    | >PTEN-E150C FLKAQGAL    | 8     | 4     |
| >PTEN-E150C FLKAQEALDF | 370  | >PTEN-E150C FLKAQGALDF  | 388   | 18    |
| >PTEN-E150C FLKAQEAL   | 8    | >PTEN-E150C FLKAQGAL    | 5     | 3     |
| >PTEN-E150C FLKAQEAL   | 280  | >PTEN-E150C FLKAQGAL    | 721   | 441   |

|                       |       |                       |       |       |
|-----------------------|-------|-----------------------|-------|-------|
| >PTEN-E150(FLKAQEAL   | 58    | >PTEN-E150(FLKAQGAL   | 98    | 40    |
| >PTEN-E150(FLKAQEAL   | 47    | >PTEN-E150(FLKAQGAL   | 93    | 46    |
| >PTEN-E150(FLKAQEAL   | 4     | >PTEN-E150(FLKAQGAL   | 6     | 2     |
| >PTEN-E150(FLKAQEALDF | 98    | >PTEN-E150(FLKAQGALDF | 47    | 51    |
| >PTEN-E150(FLKAQEALDF | 209   | >PTEN-E150(FLKAQGALDF | 209   | 0     |
| >PTEN-E150(FLKAQEALDF | 122   | >PTEN-E150(FLKAQGALDF | 86    | 36    |
| >PTEN-E150(FLKAQEAL   | 68    | >PTEN-E150(FLKAQGAL   | 68    | 0     |
| >PTEN-E150(FLKAQEAL   | 343   | >PTEN-E150(FLKAQGAL   | 193   | 150   |
| >PTEN-E150(FLKAQEALDF | 105   | >PTEN-E150(FLKAQGALDF | 54    | 51    |
| >PTEN-E150(FLKAQEALDF | 105   | >PTEN-E150(FLKAQGALDF | 69    | 36    |
| >PTEN-E150(FLKAQEAL   | 579   | >PTEN-E150(FLKAQGAL   | 132   | 447   |
| >PTEN-E150(FLKAQEALDF | 108   | >PTEN-E150(FLKAQGALDF | 25    | 83    |
| >PTEN-E150(FLKAQEALDF | 78    | >PTEN-E150(FLKAQGALDF | 38    | 40    |
| >PTEN-E150(FLKAQEALDF | 37    | >PTEN-E150(FLKAQGALDF | 24    | 13    |
| >PTEN-E150(FLKAQEALDF | 716   | >PTEN-E150(FLKAQGALDF | 489   | 227   |
| >PTEN-E150(KFLKAQEAL  | 154   | >PTEN-E150(KFLKAQGAL  | 69    | 85    |
| >PTEN-E150(KFLKAQEALD | 77    | >PTEN-E150(KFLKAQGALD | 131   | 54    |
| >PTEN-E150(KFLKAQEALD | 345   | >PTEN-E150(KFLKAQGALD | 505   | 160   |
| >PTEN-E150(KFLKAQEAL  | 37    | >PTEN-E150(KFLKAQGAL  | 44    | 7     |
| >PTEN-E150(KFLKAQEALD | 9     | >PTEN-E150(KFLKAQGALD | 9     | 0     |
| >PTEN-E150(KFLKAQEA   | 464   | >PTEN-E150(KFLKAQGA   | 474   | 10    |
| >PTEN-E150(KFLKAQEAL  | 2878  | >PTEN-E150(KFLKAQGAL  | 395   | 2483  |
| >PTEN-E150(KFLKAQEALD | 364   | >PTEN-E150(KFLKAQGALD | 527   | 163   |
| >PTEN-E150(KFLKAQEA   | 626   | >PTEN-E150(KFLKAQGA   | 472   | 154   |
| >PTEN-E150(KFLKAQEAL  | 257   | >PTEN-E150(KFLKAQGAL  | 231   | 26    |
| >PTEN-E150(GKFLKAQEAL | 109   | >PTEN-E150(GKFLKAQGA  | 420   | 311   |
| >PTEN-E150(RGKFLKAQEA | 193   | >PTEN-E150(RGKFLKAQGA | 319   | 126   |
| >PTEN-E150(RGKFLKAQEA | 1102  | >PTEN-E150(RGKFLKAQGA | 301   | 801   |
| >PTEN-E150(EALDFYGEV  | 224   | >PTEN-E150(QALDFYGEV  | 54    | 170   |
| >PTEN-E150(EALDFYGEV  | 1339  | >PTEN-E150(QALDFYGEV  | 172   | 1167  |
| >PTEN-E150(EALDFYGEV  | 188   | >PTEN-E150(QALDFYGEV  | 115   | 73    |
| >PTEN-E150(EALDFYGEV  | 810   | >PTEN-E150(QALDFYGEV  | 409   | 401   |
| >PTEN-E150(EALDFYGEVR | 1029  | >PTEN-E150(QALDFYGEVF | 286   | 743   |
| >PTEN-E150(EALDFYGEVR | 299   | >PTEN-E150(QALDFYGEVF | 518   | 219   |
| >PTEN-E150(EALDFYGEVR | 28    | >PTEN-E150(QALDFYGEVF | 78    | 50    |
| >PTEN-E150(EALDFYGEV  | 11    | >PTEN-E150(QALDFYGEV  | 44    | 33    |
| >PTEN-E150(EALDFYGEV  | 4     | >PTEN-E150(QALDFYGEV  | 10    | 6     |
| >PTEN-E150(EALDFYGEVR | 510   | >PTEN-E150(QALDFYGEVF | 381   | 129   |
| >PTEN-E150(QEALDFYGEV | 22    | >PTEN-E150(QQALDFYGEV | 1655  | 1633  |
| >PTEN-E150(QEALDFYGEV | 11038 | >PTEN-E150(QQALDFYGEV | 348   | 10690 |
| >PTEN-E150(QEALDFYGEV | 7274  | >PTEN-E150(QQALDFYGEV | 194   | 7080  |
| >PTEN-E150(QEALDFYGEV | 112   | >PTEN-E150(QQALDFYGEV | 18530 | 18418 |
| >PTEN-E150(QEALDFYGEV | 426   | >PTEN-E150(QQALDFYGEV | 16027 | 15601 |

|                       |      |                       |       |       |
|-----------------------|------|-----------------------|-------|-------|
| >PTEN-E150CQEALDFYGEV | 361  | >PTEN-E150CQQALDFYGEV | 18032 | 17671 |
| >PTEN-E150CQEALDFYGEV | 116  | >PTEN-E150CQQALDFYGEV | 6847  | 6731  |
| >PTEN-E150CQEALDFYGEV | 931  | >PTEN-E150CQQALDFYGEV | 430   | 501   |
| >PTEN-E150CAQEALDFYGE | 1377 | >PTEN-E150CAQQALDFYGE | 250   | 1127  |
| >PTEN-E150CAQEALDFYGE | 422  | >PTEN-E150CAQQALDFYGE | 291   | 131   |
| >PTEN-E150CAQEALDFYGE | 1416 | >PTEN-E150CAQQALDFYGE | 274   | 1142  |
| >PTEN-E150CAQEALDFYGE | 39   | >PTEN-E150CAQQALDFYGE | 24    | 15    |
| >PTEN-E150CAQEALDFYGE | 942  | >PTEN-E150CAQQALDFYGE | 203   | 739   |
| >PTEN-E150CAQEALDFY   | 178  | >PTEN-E150CAQQALDFY   | 61    | 117   |
| >PTEN-E150CAQEALDFY   | 421  | >PTEN-E150CAQQALDFY   | 67    | 354   |
| >PTEN-E150CAQEALDFY   | 1554 | >PTEN-E150CAQQALDFY   | 288   | 1266  |
| >PTEN-E150CKAQEALDFY  | 271  | >PTEN-E150CKAQQALDFY  | 310   | 39    |
| >PTEN-E150CKAQEALDFY  | 46   | >PTEN-E150CKAQQALDFY  | 31    | 15    |
| >PTEN-E150CKAQEALDF   | 309  | >PTEN-E150CKAQQALDF   | 295   | 14    |
| >PTEN-E150CKAQEALDF   | 30   | >PTEN-E150CKAQQALDF   | 32    | 2     |
| >PTEN-E150CKAQEALDFY  | 139  | >PTEN-E150CKAQQALDFY  | 130   | 9     |
| >PTEN-E150CKAQEALDFY  | 481  | >PTEN-E150CKAQQALDFY  | 398   | 83    |
| >PTEN-E150CKAQEALDF   | 133  | >PTEN-E150CKAQQALDF   | 100   | 33    |
| >PTEN-E150CKAQEALDFY  | 195  | >PTEN-E150CKAQQALDFY  | 129   | 66    |
| >PTEN-E150CKAQEALDFY  | 1326 | >PTEN-E150CKAQQALDFY  | 397   | 929   |
| >PTEN-E150CLKAQEALDF  | 6    | >PTEN-E150CLKAQQALDF  | 6     | 0     |
| >PTEN-E150CLKAQEALDFY | 85   | >PTEN-E150CLKAQQALDFY | 83    | 2     |
| >PTEN-E150FLKAQEAL    | 179  | >PTEN-E150FLKAQQAL    | 157   | 22    |
| >PTEN-E150FLKAQEAL    | 4    | >PTEN-E150FLKAQQAL    | 4     | 0     |
| >PTEN-E150FLKAQEALDF  | 370  | >PTEN-E150FLKAQQALDF  | 320   | 50    |
| >PTEN-E150FLKAQEAL    | 8    | >PTEN-E150FLKAQQAL    | 5     | 3     |
| >PTEN-E150FLKAQEAL    | 280  | >PTEN-E150FLKAQQAL    | 339   | 59    |
| >PTEN-E150FLKAQEAL    | 58   | >PTEN-E150FLKAQQAL    | 53    | 5     |
| >PTEN-E150FLKAQEAL    | 47   | >PTEN-E150FLKAQQAL    | 30    | 17    |
| >PTEN-E150FLKAQEAL    | 4    | >PTEN-E150FLKAQQAL    | 3     | 1     |
| >PTEN-E150FLKAQEALDF  | 548  | >PTEN-E150FLKAQQALDF  | 407   | 141   |
| >PTEN-E150FLKAQEALDF  | 98   | >PTEN-E150FLKAQQALDF  | 57    | 41    |
| >PTEN-E150FLKAQEALDF  | 209  | >PTEN-E150FLKAQQALDF  | 130   | 79    |
| >PTEN-E150FLKAQEALDF  | 122  | >PTEN-E150FLKAQQALDF  | 77    | 45    |
| >PTEN-E150FLKAQEAL    | 68   | >PTEN-E150FLKAQQAL    | 26    | 42    |
| >PTEN-E150FLKAQEAL    | 343  | >PTEN-E150FLKAQQAL    | 217   | 126   |
| >PTEN-E150FLKAQEALDF  | 105  | >PTEN-E150FLKAQQALDF  | 76    | 29    |
| >PTEN-E150FLKAQEALDF  | 105  | >PTEN-E150FLKAQQALDF  | 81    | 24    |
| >PTEN-E150FLKAQEAL    | 579  | >PTEN-E150FLKAQQAL    | 251   | 328   |
| >PTEN-E150FLKAQEALDF  | 108  | >PTEN-E150FLKAQQALDF  | 62    | 46    |
| >PTEN-E150FLKAQEALDF  | 78   | >PTEN-E150FLKAQQALDF  | 66    | 12    |
| >PTEN-E150FLKAQEAL    | 515  | >PTEN-E150FLKAQQAL    | 213   | 302   |
| >PTEN-E150FLKAQEALDF  | 37   | >PTEN-E150FLKAQQALDF  | 29    | 8     |

|                        |       |                        |      |       |
|------------------------|-------|------------------------|------|-------|
| >PTEN-E150C KFLKAQEAL  | 154   | >PTEN-E150C KFLKAQQAL  | 93   | 61    |
| >PTEN-E150C KFLKAQEALD | 77    | >PTEN-E150C KFLKAQQALC | 114  | 37    |
| >PTEN-E150C KFLKAQEALD | 345   | >PTEN-E150C KFLKAQQALC | 344  | 1     |
| >PTEN-E150C KFLKAQEAL  | 37    | >PTEN-E150C KFLKAQQAL  | 28   | 9     |
| >PTEN-E150C KFLKAQEALD | 9     | >PTEN-E150C KFLKAQQALC | 8    | 1     |
| >PTEN-E150C KFLKAQEA   | 464   | >PTEN-E150C KFLKAQQA   | 265  | 199   |
| >PTEN-E150C KFLKAQEAL  | 2878  | >PTEN-E150C KFLKAQQAL  | 187  | 2691  |
| >PTEN-E150C KFLKAQEALD | 364   | >PTEN-E150C KFLKAQQALC | 277  | 87    |
| >PTEN-E150C KFLKAQEAL  | 257   | >PTEN-E150C KFLKAQQAL  | 400  | 143   |
| >PTEN-E150C GKFLKAQEAL | 109   | >PTEN-E150C GKFLKAQQAI | 59   | 50    |
| >PTEN-E150C RGKFLKAQEA | 193   | >PTEN-E150C RGKFLKAQQ/ | 193  | 0     |
| >PTEN-E150C RGKFLKAQEA | 1102  | >PTEN-E150C RGKFLKAQQ/ | 194  | 908   |
| >PTEN-E242K EFPQPLPV   | 296   | >PTEN-E242K KFPQPLPV   | 508  | 212   |
| >PTEN-E242K EFPQPLPV   | 3549  | >PTEN-E242K KFPQPLPV   | 369  | 3180  |
| >PTEN-E242K FEFQPLP    | 8700  | >PTEN-E242K FKFPQPLP   | 358  | 8342  |
| >PTEN-E242K FEFQPLPVC  | 3842  | >PTEN-E242K FKFPQPLPVC | 126  | 3716  |
| >PTEN-E242K FEFQPLPVC  | 7566  | >PTEN-E242K FKFPQPLPVC | 370  | 7196  |
| >PTEN-E242K TRREDKFMYP | 14430 | >PTEN-E242K TRREDKFMYP | 442  | 13988 |
| >PTEN-E242K YFEFPQPLPV | 11136 | >PTEN-E242K YFKFPQPLPV | 265  | 10871 |
| >PTEN-E242K MYFEFPQPLF | 484   | >PTEN-E242K MYFKFPQPLF | 539  | 55    |
| >PTEN-E242K MYFEFPQPLF | 130   | >PTEN-E242K MYFKFPQPLF | 776  | 646   |
| >PTEN-E242K MYFEFPQPLF | 48    | >PTEN-E242K MYFKFPQPLF | 120  | 72    |
| >PTEN-E242K MYFEFPQPLF | 105   | >PTEN-E242K MYFKFPQPLF | 661  | 556   |
| >PTEN-E242K MYFEFPQPLF | 9     | >PTEN-E242K MYFKFPQPLF | 49   | 40    |
| >PTEN-E242K MYFEFPQPLF | 103   | >PTEN-E242K MYFKFPQPLF | 571  | 468   |
| >PTEN-E242K MYFEFPQPLF | 37    | >PTEN-E242K MYFKFPQPLF | 260  | 223   |
| >PTEN-E242K MYFEFPQPLF | 278   | >PTEN-E242K MYFKFPQPLF | 168  | 110   |
| >PTEN-E242K MYFEFPQPLF | 51    | >PTEN-E242K MYFKFPQPLF | 28   | 23    |
| >PTEN-E242K MYFEFPQPLF | 436   | >PTEN-E242K MYFKFPQPLF | 560  | 124   |
| >PTEN-E242K MYFEFPQPLF | 45    | >PTEN-E242K MYFKFPQPLF | 119  | 74    |
| >PTEN-E242K MYFEFPQPLF | 141   | >PTEN-E242K MYFKFPQPLF | 1021 | 880   |
| >PTEN-E242K MYFEFPQPLF | 261   | >PTEN-E242K MYFKFPQPLF | 152  | 109   |
| >PTEN-E242K MYFEFPQPLF | 82    | >PTEN-E242K MYFKFPQPLF | 92   | 10    |
| >PTEN-E242K FMYFEFPQPL | 945   | >PTEN-E242K FMYFKFPQPL | 273  | 672   |
| >PTEN-E242K FMYFEFPQ   | 132   | >PTEN-E242K FMYFKFPQ   | 226  | 94    |
| >PTEN-E242K FMYFEFPQ   | 28    | >PTEN-E242K FMYFKFPQ   | 57   | 29    |
| >PTEN-E242K FMYFEFPQPL | 379   | >PTEN-E242K FMYFKFPQPL | 670  | 291   |
| >PTEN-E242K FMYFEFPQ   | 195   | >PTEN-E242K FMYFKFPQ   | 147  | 48    |
| >PTEN-E242K FMYFEFPQPL | 587   | >PTEN-E242K FMYFKFPQPL | 447  | 140   |
| >PTEN-E242K FMYFEFPQ   | 139   | >PTEN-E242K FMYFKFPQ   | 228  | 89    |
| >PTEN-E242K FMYFEFPQ   | 19    | >PTEN-E242K FMYFKFPQ   | 18   | 1     |
| >PTEN-E242K FMYFEFPQPL | 2     | >PTEN-E242K FMYFKFPQPL | 2    | 0     |
| >PTEN-E242K FMYFEFPQPL | 175   | >PTEN-E242K FMYFKFPQPL | 166  | 9     |

|                        |       |                        |      |       |
|------------------------|-------|------------------------|------|-------|
| >PTEN-E242K FMYFEFPQ   | 168   | >PTEN-E242K FMYFKFPQ   | 247  | 79    |
| >PTEN-E242K FMYFEFPQPL | 3     | >PTEN-E242K FMYFKFPQPL | 4    | 1     |
| >PTEN-E242K FMYFEFPQ   | 58    | >PTEN-E242K FMYFKFPQ   | 89   | 31    |
| >PTEN-E242K FMYFEFPQPL | 5     | >PTEN-E242K FMYFKFPQPL | 5    | 0     |
| >PTEN-E242K FMYFEFPQPL | 7     | >PTEN-E242K FMYFKFPQPL | 10   | 3     |
| >PTEN-E242K FMYFEFPQ   | 14    | >PTEN-E242K FMYFKFPQ   | 15   | 1     |
| >PTEN-E242K FMYFEFPQPL | 3     | >PTEN-E242K FMYFKFPQPL | 3    | 0     |
| >PTEN-E242K FMYFEFPQ   | 310   | >PTEN-E242K FMYFKFPQ   | 312  | 2     |
| >PTEN-E242K FMYFEFPQPL | 43    | >PTEN-E242K FMYFKFPQPL | 85   | 42    |
| >PTEN-E242K FMYFEFPQPL | 83    | >PTEN-E242K FMYFKFPQPL | 89   | 6     |
| >PTEN-E242K FMYFEFPQPL | 250   | >PTEN-E242K FMYFKFPQPL | 248  | 2     |
| >PTEN-E242K FMYFEFPQ   | 357   | >PTEN-E242K FMYFKFPQ   | 694  | 337   |
| >PTEN-E242K FMYFEFPQPL | 6     | >PTEN-E242K FMYFKFPQPL | 10   | 4     |
| >PTEN-E242K FMYFEFPQPL | 56    | >PTEN-E242K FMYFKFPQPL | 130  | 74    |
| >PTEN-E242K FMYFEFPQPL | 120   | >PTEN-E242K FMYFKFPQPL | 136  | 16    |
| >PTEN-E242K KFMYPEFPQF | 235   | >PTEN-E242K KFMYPEFPQF | 283  | 48    |
| >PTEN-E242K KFMYPEFPQF | 74    | >PTEN-E242K KFMYPEFPQF | 132  | 58    |
| >PTEN-E242K KFMYPEFPQF | 433   | >PTEN-E242K KFMYPEFPQF | 402  | 31    |
| >PTEN-E242K KFMYPEFPQF | 348   | >PTEN-E242K KFMYPEFPQF | 430  | 82    |
| >PTEN-E242K KFMYPEFPQF | 343   | >PTEN-E242K KFMYPEFPQF | 193  | 150   |
| >PTEN-E242K KFMYPEFPQF | 548   | >PTEN-E242K KFMYPEFPQF | 276  | 272   |
| >PTEN-E242K KFMYPEFPQF | 31    | >PTEN-E242K KFMYPEFPQF | 41   | 10    |
| >PTEN-E242K KFMYPEFPQF | 492   | >PTEN-E242K KFMYPEFPQF | 489  | 3     |
| >PTEN-E242K KFMYPEFP   | 152   | >PTEN-E242K KFMYPEFP   | 127  | 25    |
| >PTEN-E242K KFMYPEFPQF | 96    | >PTEN-E242K KFMYPEFPQF | 72   | 24    |
| >PTEN-E242K DKFMYFEF   | 10    | >PTEN-E242K DKFMYFKF   | 14   | 4     |
| >PTEN-E242K DKFMYFEF   | 149   | >PTEN-E242K DKFMYFKF   | 238  | 89    |
| >PTEN-E242K EDKMYFE    | 16581 | >PTEN-E242K EDKMYFK    | 150  | 16431 |
| >PTEN-E242K REDKMYFEF  | 366   | >PTEN-E242K REDKMYFKF  | 1726 | 1360  |
| >PTEN-E242K RREDKMYFE  | 195   | >PTEN-E242K RREDKMYFK  | 363  | 168   |
| >PTEN-E242K RREDKMYFE  | 714   | >PTEN-E242K RREDKMYFK  | 309  | 405   |
| >PTEN-E242K RREDKMYFE  | 87    | >PTEN-E242K RREDKMYFK  | 135  | 48    |
| >PTEN-E242K RREDKMYFE  | 23    | >PTEN-E242K RREDKMYFK  | 33   | 10    |
| >PTEN-E242K RREDKMYFE  | 9477  | >PTEN-E242K RREDKMYFK  | 118  | 9359  |
| >PTEN-E256K EFFHKQNK   | 8722  | >PTEN-E256K KFFHKQNK   | 176  | 8546  |
| >PTEN-E256K EFFHKQNK   | 2973  | >PTEN-E256K KFFHKQNK   | 68   | 2905  |
| >PTEN-E256K EFFHKQNK   | 3677  | >PTEN-E256K KFFHKQNK   | 179  | 3498  |
| >PTEN-E256K EFFHKQNK   | 1867  | >PTEN-E256K KFFHKQNK   | 165  | 1702  |
| >PTEN-E256K EFFHKQNK   | 8004  | >PTEN-E256K KFFHKQNK   | 11   | 7993  |
| >PTEN-E256K EFFHKQNK   | 5044  | >PTEN-E256K KFFHKQNK   | 8    | 5036  |
| >PTEN-E256K EFFHKQNK   | 1891  | >PTEN-E256K KFFHKQNK   | 23   | 1868  |
| >PTEN-E256K EFFHKQNK   | 2128  | >PTEN-E256K KFFHKQNK   | 23   | 2105  |
| >PTEN-E256K EFFHKQNK   | 240   | >PTEN-E256K KFFHKQNK   | 8575 | 8335  |

|                         |       |                         |       |       |
|-------------------------|-------|-------------------------|-------|-------|
| >PTEN-E256K EFFHKQNKM   | 159   | >PTEN-E256K KFFHKQNKM   | 5399  | 5240  |
| >PTEN-E256K EFFHKQNK    | 120   | >PTEN-E256K KFFHKQNK    | 8589  | 8469  |
| >PTEN-E256K EFFHKQNKM   | 31    | >PTEN-E256K KFFHKQNKM   | 2650  | 2619  |
| >PTEN-E256K EFFHKQNK    | 501   | >PTEN-E256K KFFHKQNK    | 45    | 456   |
| >PTEN-E256K EFFHKQNKM   | 204   | >PTEN-E256K KFFHKQNKM   | 29    | 175   |
| >PTEN-E256K VEFFHKQNKI  | 136   | >PTEN-E256K VKFFHKQNKI  | 7817  | 7681  |
| >PTEN-E256K VEFFHKQNKI  | 1271  | >PTEN-E256K VKFFHKQNKI  | 25    | 1246  |
| >PTEN-E256K VEFFHKQNKI  | 1072  | >PTEN-E256K VKFFHKQNKI  | 20    | 1052  |
| >PTEN-E256K VEFFHKQNKI  | 417   | >PTEN-E256K VKFFHKQNKI  | 22028 | 21611 |
| >PTEN-E256K VEFFHKQNKI  | 42    | >PTEN-E256K VKFFHKQNKI  | 16690 | 16648 |
| >PTEN-E256K VEFFHKQNKI  | 116   | >PTEN-E256K VKFFHKQNKI  | 21600 | 21484 |
| >PTEN-E256K VEFFHKQNKI  | 451   | >PTEN-E256K VKFFHKQNKI  | 26907 | 26456 |
| >PTEN-E256K VEFFHKQNKI  | 82    | >PTEN-E256K VKFFHKQNKI  | 18161 | 18079 |
| >PTEN-E256K KVEFFHKQ    | 5209  | >PTEN-E256K KVKFFHKQ    | 31    | 5178  |
| >PTEN-E256K KVEFFHKQNK  | 22    | >PTEN-E256K KVKFFHKQNK  | 3     | 19    |
| >PTEN-E256K KVEFFHKQNK  | 2228  | >PTEN-E256K KVKFFHKQNK  | 10    | 2218  |
| >PTEN-E256K KVEFFHKQNK  | 184   | >PTEN-E256K KVKFFHKQNK  | 118   | 66    |
| >PTEN-E256K IKVEFFHK    | 330   | >PTEN-E256K IKVFFHK     | 286   | 44    |
| >PTEN-E256K IKVEFFHKQN  | 265   | >PTEN-E256K IKVFFHKQN   | 202   | 63    |
| >PTEN-E256K IKVEFFHK    | 531   | >PTEN-E256K IKVFFHK     | 472   | 59    |
| >PTEN-E256K PVCGDIKVEF  | 395   | >PTEN-E256K PVCGDIKVKF  | 463   | 68    |
| >PTEN-E256K PVCGDIKVEF  | 21    | >PTEN-E256K PVCGDIKVKF  | 35    | 14    |
| >PTEN-E256K LPVCGDIKVEI | 35    | >PTEN-E256K LPVCGDIKVKI | 82    | 47    |
| >PTEN-E256K LPVCGDIKVEI | 484   | >PTEN-E256K LPVCGDIKVKI | 1623  | 1139  |
| >PTEN-E256K LPVCGDIKVEI | 9     | >PTEN-E256K LPVCGDIKVKI | 16    | 7     |
| >PTEN-E256K LPVCGDIKVEI | 26    | >PTEN-E256K LPVCGDIKVKI | 31    | 5     |
| >PTEN-E256K LPVCGDIKVEI | 499   | >PTEN-E256K LPVCGDIKVKI | 1741  | 1242  |
| >PTEN-E256K LPVCGDIKVEI | 18    | >PTEN-E256K LPVCGDIKVKI | 27    | 9     |
| >PTEN-E284K WVNTFFIPGF  | 20137 | >PTEN-E284K WVNTFFIPGF  | 374   | 19763 |
| >PTEN-E284K WVNTFFIPGF  | 21432 | >PTEN-E284K WVNTFFIPGF  | 52    | 21380 |
| >PTEN-E284K WVNTFFIPGF  | 15538 | >PTEN-E284K WVNTFFIPGF  | 177   | 15361 |
| >PTEN-E284K FIPGPEETSEK | 271   | >PTEN-E284K FIPGPKETSEK | 329   | 58    |
| >PTEN-E284K TFFIPGPE    | 27396 | >PTEN-E284K TFFIPGPK    | 166   | 27230 |
| >PTEN-E284K TFFIPGPE    | 16603 | >PTEN-E284K TFFIPGPK    | 451   | 16152 |
| >PTEN-E284K TFFIPGPE    | 14239 | >PTEN-E284K TFFIPGPK    | 345   | 13894 |
| >PTEN-E284K TFFIPGPE    | 17453 | >PTEN-E284K TFFIPGPK    | 482   | 16971 |
| >PTEN-E284K NTFFIPGPE   | 19902 | >PTEN-E284K NTFFIPGPK   | 150   | 19752 |
| >PTEN-E284K NTFFIPGPE   | 22087 | >PTEN-E284K NTFFIPGPK   | 21    | 22066 |
| >PTEN-E284K NTFFIPGPE   | 14354 | >PTEN-E284K NTFFIPGPK   | 190   | 14164 |
| >PTEN-E284K NTFFIPGPE   | 8331  | >PTEN-E284K NTFFIPGPK   | 225   | 8106  |
| >PTEN-E284K NTFFIPGPE   | 323   | >PTEN-E284K NTFFIPGPK   | 4     | 319   |
| >PTEN-E284K NTFFIPGPE   | 412   | >PTEN-E284K NTFFIPGPK   | 402   | 10    |
| >PTEN-E284K NTFFIPGPEET | 17    | >PTEN-E284K NTFFIPGPKET | 114   | 97    |

|                        |       |                       |       |       |
|------------------------|-------|-----------------------|-------|-------|
| >PTEN-E284KNTFFIPGPE   | 10135 | >PTEN-E284KNTFFIPGPK  | 268   | 9867  |
| >PTEN-E288KEKVENGSL    | 556   | >PTEN-E288KKKVENGSL   | 51    | 505   |
| >PTEN-E288KSEKVENGSL   | 9538  | >PTEN-E288SKKVENGSL   | 484   | 9054  |
| >PTEN-E288KSEKVENGSL   | 372   | >PTEN-E288SKKVENGSL   | 33904 | 33532 |
| >PTEN-E288KSEKVENGSL   | 376   | >PTEN-E288SKKVENGSL   | 24307 | 23931 |
| >PTEN-E288KETSEKVENGS  | 198   | >PTEN-E288ETSKKVENGS  | 393   | 195   |
| >PTEN-E288KETSEKVENGS  | 103   | >PTEN-E288ETSKKVENGS  | 218   | 115   |
| >PTEN-E288KETSEKVENGS  | 222   | >PTEN-E288ETSKKVENGS  | 619   | 397   |
| >PTEN-E288KETSEKVENGS  | 22    | >PTEN-E288ETSKKVENGS  | 48    | 26    |
| >PTEN-E288KETSEKVENGS  | 94    | >PTEN-E288ETSKKVENGS  | 718   | 624   |
| >PTEN-E288KETSEKVENGS  | 388   | >PTEN-E288ETSKKVENGS  | 939   | 551   |
| >PTEN-E288KFIPGPEETSE  | 23564 | >PTEN-E288FIPGPEETSK  | 53    | 23511 |
| >PTEN-E288KFIPGPEETSEK | 271   | >PTEN-E288FIPGPEETSCK | 376   | 105   |
| >PTEN-E291KVENGLCDQI   | 73    | >PTEN-E291VKNGSLCDQI  | 4012  | 3939  |
| >PTEN-E291KVENGLCDQI   | 5653  | >PTEN-E291VKNGSLCDQI  | 457   | 5196  |
| >PTEN-E291KVENGLCDQI   | 295   | >PTEN-E291VKNGSLCDQI  | 22913 | 22618 |
| >PTEN-E291KVENGLCDQI   | 243   | >PTEN-E291VKNGSLCDQI  | 26851 | 26608 |
| >PTEN-E291KVENGLCDQI   | 106   | >PTEN-E291VKNGSLCDQI  | 17400 | 17294 |
| >PTEN-E291KVENGSLC     | 10108 | >PTEN-E291KVKNGSLC    | 201   | 9907  |
| >PTEN-E291KVENGSLCD    | 9660  | >PTEN-E291KVKNGSLCD   | 337   | 9323  |
| >PTEN-E291KVENGSLCDC   | 7769  | >PTEN-E291KVKNGSLCDC  | 75    | 7694  |
| >PTEN-E291KEKVENGSL    | 556   | >PTEN-E291EKVKNGSL    | 450   | 106   |
| >PTEN-E291KSEKVENGSL   | 372   | >PTEN-E291SEKVKNGSL   | 348   | 24    |
| >PTEN-E291KSEKVENGSL   | 376   | >PTEN-E291SEKVKNGSL   | 905   | 529   |
| >PTEN-E291KETSEKVENGS  | 198   | >PTEN-E291ETSEKVKNGS  | 204   | 6     |
| >PTEN-E291KETSEKVENGS  | 103   | >PTEN-E291ETSEKVKNGS  | 205   | 102   |
| >PTEN-E291KETSEKVENGS  | 222   | >PTEN-E291ETSEKVKNGS  | 131   | 91    |
| >PTEN-E291KETSEKVENGS  | 22    | >PTEN-E291ETSEKVKNGS  | 40    | 18    |
| >PTEN-E291KETSEKVENGS  | 94    | >PTEN-E291ETSEKVKNGS  | 235   | 141   |
| >PTEN-E291KETSEKVENGS  | 388   | >PTEN-E291ETSEKVKNGS  | 186   | 202   |
| >PTEN-E307KERADNDKEYI  | 385   | >PTEN-E307KRADNDKEYI  | 15140 | 14755 |
| >PTEN-E307KERADNDKEY   | 1449  | >PTEN-E307KRADNDKEY   | 260   | 1189  |
| >PTEN-E307KERADNDKEYI  | 1982  | >PTEN-E307KRADNDKEYI  | 303   | 1679  |
| >PTEN-E307KERADNDKEYI  | 6794  | >PTEN-E307KRADNDKEYI  | 444   | 6350  |
| >PTEN-E307KIERADNDKEY  | 360   | >PTEN-E307IKRADNDKEY  | 9     | 351   |
| >PTEN-E307KIERADNDKEY  | 2681  | >PTEN-E307IKRADNDKEY  | 64    | 2617  |
| >PTEN-E307KIERADNDKEY  | 182   | >PTEN-E307IKRADNDKEY  | 19656 | 19474 |
| >PTEN-E307KIERADNDKEY  | 216   | >PTEN-E307IKRADNDKEY  | 22003 | 21787 |
| >PTEN-E307KSIERADNDK   | 4570  | >PTEN-E307SIKRADNDK   | 21    | 4549  |
| >PTEN-E307KSIERADNDKE  | 861   | >PTEN-E307SIKRADNDKE  | 498   | 363   |
| >PTEN-E307KSIERADNDKE  | 6450  | >PTEN-E307SIKRADNDKE  | 304   | 6146  |
| >PTEN-E307KSIERADNDKE  | 933   | >PTEN-E307SIKRADNDKE  | 385   | 548   |
| >PTEN-E307KDSICSIER    | 79    | >PTEN-E307DSICSIKR    | 131   | 52    |

|                        |       |                        |       |       |
|------------------------|-------|------------------------|-------|-------|
| >PTEN-E307†DSICSIER    | 9     | >PTEN-E307†DSICSIKR    | 15    | 6     |
| >PTEN-E307†DSICSIERA   | 79    | >PTEN-E307†DSICSIKRA   | 2061  | 1982  |
| >PTEN-E307†EIDSICSIER  | 479   | >PTEN-E307†EIDSICSIKR  | 407   | 72    |
| >PTEN-E307†EIDSICSIE   | 5137  | >PTEN-E307†EIDSICSIK   | 20    | 5117  |
| >PTEN-E307†EIDSICSIER  | 38    | >PTEN-E307†EIDSICSIKR  | 40    | 2     |
| >PTEN-E307†QEIDSICSIER | 281   | >PTEN-E307†QEIDSICSIKR | 148   | 133   |
| >PTEN-E314†EYLVLTTLK   | 4113  | >PTEN-E314†KYLVLTLTK   | 274   | 3839  |
| >PTEN-E314†EYLVLTTLK   | 1155  | >PTEN-E314†KYLVLTLTK   | 163   | 992   |
| >PTEN-E314†EYLVLTTLK   | 1580  | >PTEN-E314†KYLVLTLTK   | 285   | 1295  |
| >PTEN-E314†EYLVLTTLK   | 2838  | >PTEN-E314†KYLVLTLTK   | 5     | 2833  |
| >PTEN-E314†EYLVLTTLK   | 5855  | >PTEN-E314†KYLVLTLTK   | 184   | 5671  |
| >PTEN-E314†EYLVLTTLK   | 427   | >PTEN-E314†KYLVLTLTK   | 12335 | 11908 |
| >PTEN-E314†EYLVLTTLK   | 85    | >PTEN-E314†KYLVLTLTK   | 19    | 66    |
| >PTEN-E314†KEYLVLTTL   | 101   | >PTEN-E314†KKYLVLTTL   | 7442  | 7341  |
| >PTEN-E314†KEYLVLTTLK  | 523   | >PTEN-E314†KKYLVLTTLK  | 272   | 251   |
| >PTEN-E314†KEYLVLTTL   | 154   | >PTEN-E314†KKYLVLTTL   | 308   | 154   |
| >PTEN-E314†KEYLVLTTL   | 674   | >PTEN-E314†KKYLVLTTL   | 18    | 656   |
| >PTEN-E314†KEYLVLTTLK  | 6944  | >PTEN-E314†KKYLVLTTLK  | 209   | 6735  |
| >PTEN-E314†KEYLVLTTL   | 191   | >PTEN-E314†KKYLVLTTL   | 16300 | 16109 |
| >PTEN-E314†KEYLVLTTL   | 13    | >PTEN-E314†KKYLVLTTL   | 11208 | 11195 |
| >PTEN-E314†KEYLVLTTL   | 16    | >PTEN-E314†KKYLVLTTL   | 6942  | 6926  |
| >PTEN-E314†KEYLVLTTL   | 69    | >PTEN-E314†KKYLVLTTL   | 20862 | 20793 |
| >PTEN-E314†KEYLVLTTLK  | 249   | >PTEN-E314†KKYLVLTTLK  | 28536 | 28287 |
| >PTEN-E314†KEYLVLTTL   | 420   | >PTEN-E314†KKYLVLTTL   | 26302 | 25882 |
| >PTEN-E314†KEYLVLTTL   | 421   | >PTEN-E314†KKYLVLTTL   | 30816 | 30395 |
| >PTEN-E314†KEYLVLTTLK  | 454   | >PTEN-E314†KKYLVLTTLK  | 19537 | 19083 |
| >PTEN-E314†KEYLVLTTL   | 890   | >PTEN-E314†KKYLVLTTL   | 432   | 458   |
| >PTEN-E314†KEYLVLTTL   | 10    | >PTEN-E314†KKYLVLTTL   | 6090  | 6080  |
| >PTEN-E314†KEYLVLTTLTK | 125   | >PTEN-E314†KKYLVLTTLTK | 20374 | 20249 |
| >PTEN-E314†CSIERADNDK  | 27620 | >PTEN-E314†CSIERADNDK  | 266   | 27354 |
| >PTEN-E314†CSIERADNDK  | 15469 | >PTEN-E314†CSIERADNDK  | 132   | 15337 |
| >PTEN-E314†ADNDKEYLV   | 32    | >PTEN-E314†ADNDKKYLV   | 42    | 10    |
| >PTEN-E314†ADNDKEYLVL  | 255   | >PTEN-E314†ADNDKKYLVL  | 398   | 143   |
| >PTEN-E314†RADNDKEYL   | 211   | >PTEN-E314†RADNDKKYL   | 372   | 161   |
| >PTEN-E314†RADNDKEY    | 195   | >PTEN-E314†RADNDKKY    | 137   | 58    |
| >PTEN-E314†ERADNDKEYL  | 385   | >PTEN-E314†ERADNDKKYL  | 311   | 74    |
| >PTEN-E314†IERADNDKEY  | 360   | >PTEN-E314†IERADNDKKY  | 724   | 364   |
| >PTEN-E314†IERADNDKEY  | 182   | >PTEN-E314†IERADNDKKY  | 735   | 553   |
| >PTEN-E314†IERADNDKEY  | 216   | >PTEN-E314†IERADNDKKY  | 427   | 211   |
| >PTEN-E73V-ERHYDTAKF   | 202   | >PTEN-E73V-VRHYDTAKF   | 30    | 172   |
| >PTEN-E73V-AERHYDTAK   | 16484 | >PTEN-E73V-AVRHYDTAK   | 343   | 16141 |
| >PTEN-E73V-AERHYDTAKF  | 22614 | >PTEN-E73V-AVRHYDTAKF  | 298   | 22316 |
| >PTEN-E73V-AERHYDTA    | 7314  | >PTEN-E73V-AVRHYDTA    | 26    | 7288  |



|                       |       |                       |       |       |
|-----------------------|-------|-----------------------|-------|-------|
| >PTEN-E73V-AERHYDTAK  | 1510  | >PTEN-E73V-AVRHYDTAK  | 6     | 1504  |
| >PTEN-E73V-AERHYDTAKF | 11091 | >PTEN-E73V-AVRHYDTAKF | 180   | 10911 |
| >PTEN-E73V-AERHYDTAK  | 11488 | >PTEN-E73V-AVRHYDTAK  | 311   | 11177 |
| >PTEN-E73V-AERHYDTAKF | 610   | >PTEN-E73V-AVRHYDTAKF | 185   | 425   |
| >PTEN-E73V-AERHYDTAKF | 33    | >PTEN-E73V-AVRHYDTAKF | 86    | 53    |
| >PTEN-E73V-AERHYDTAKF | 6005  | >PTEN-E73V-AVRHYDTAKF | 14    | 5991  |
| >PTEN-E73V-AERHYDTA   | 84    | >PTEN-E73V-AVRHYDTA   | 36395 | 36311 |
| >PTEN-E73V-AERHYDTAKF | 83    | >PTEN-E73V-AVRHYDTAKF | 17139 | 17056 |
| >PTEN-E73V-AERHYDTAKF | 256   | >PTEN-E73V-AVRHYDTAKF | 28927 | 28671 |
| >PTEN-E73V-AERHYDTA   | 12    | >PTEN-E73V-AVRHYDTA   | 18904 | 18892 |
| >PTEN-E73V-AERHYDTAKF | 258   | >PTEN-E73V-AVRHYDTAKF | 34953 | 34695 |
| >PTEN-E73V-NHYKIYNLCA | 22521 | >PTEN-E73V-NHYKIYNLCA | 293   | 22228 |
| >PTEN-E73V-NHYKIYNLCA | 678   | >PTEN-E73V-NHYKIYNLCA | 176   | 502   |
| >PTEN-E73V-NHYKIYNLCA | 13763 | >PTEN-E73V-NHYKIYNLCA | 205   | 13558 |
| >PTEN-E73V-CAERHYDTAK | 17480 | >PTEN-E73V-CAVRHYDTAK | 272   | 17208 |
| >PTEN-E73V-CAERHYDTAK | 4844  | >PTEN-E73V-CAVRHYDTAK | 476   | 4368  |
| >PTEN-E73V-CAERHYDTAK | 4092  | >PTEN-E73V-CAVRHYDTAK | 309   | 3783  |
| >PTEN-E73V-CAERHYDTAK | 2797  | >PTEN-E73V-CAVRHYDTAK | 320   | 2477  |
| >PTEN-E73V-CAERHYDTAK | 668   | >PTEN-E73V-CAVRHYDTAK | 198   | 470   |
| >PTEN-E73V-CAERHYDTAK | 9093  | >PTEN-E73V-CAVRHYDTAK | 178   | 8915  |
| >PTEN-E73V-NLCAERHYDT | 562   | >PTEN-E73V-NLCAVRHYDT | 361   | 201   |
| >PTEN-E73V-NLCAERHYDT | 647   | >PTEN-E73V-NLCAVRHYDT | 351   | 296   |
| >PTEN-E73V-NLCAERHYDT | 944   | >PTEN-E73V-NLCAVRHYDT | 266   | 678   |
| >PTEN-E73V-NLCAERHYDT | 387   | >PTEN-E73V-NLCAVRHYDT | 411   | 24    |
| >PTEN-E73V-NLCAERHY   | 310   | >PTEN-E73V-NLCAVRHY   | 143   | 167   |
| >PTEN-E73V-NLCAERHY   | 346   | >PTEN-E73V-NLCAVRHY   | 146   | 200   |
| >PTEN-E73V-NLCAERHY   | 781   | >PTEN-E73V-NLCAVRHY   | 440   | 341   |
| >PTEN-E73V-YNLCAERHY  | 880   | >PTEN-E73V-YNLCAVRHY  | 390   | 490   |
| >PTEN-E73V-YNLCAERHY  | 1648  | >PTEN-E73V-YNLCAVRHY  | 219   | 1429  |
| >PTEN-E73V-YNLCAERHY  | 254   | >PTEN-E73V-YNLCAVRHY  | 92    | 162   |
| >PTEN-E73V-IYNLCAERHY | 43    | >PTEN-E73V-IYNLCAVRHY | 44    | 1     |
| >PTEN-E73V-IYNLCAERHY | 212   | >PTEN-E73V-IYNLCAVRHY | 128   | 84    |
| >PTEN-E73V-IYNLCAER   | 36    | >PTEN-E73V-IYNLCAVR   | 34    | 2     |
| >PTEN-E73V-IYNLCAER   | 62    | >PTEN-E73V-IYNLCAVR   | 77    | 15    |
| >PTEN-E73V-IYNLCAER   | 55    | >PTEN-E73V-IYNLCAVR   | 29    | 26    |
| >PTEN-E73V-KIYNLCAE   | 6597  | >PTEN-E73V-KIYNLCAV   | 266   | 6331  |
| >PTEN-E73V-KIYNLCAE   | 21240 | >PTEN-E73V-KIYNLCAV   | 20    | 21220 |
| >PTEN-E73V-KIYNLCAE   | 14850 | >PTEN-E73V-KIYNLCAV   | 39    | 14811 |
| >PTEN-E73V-KIYNLCAE   | 12944 | >PTEN-E73V-KIYNLCAV   | 7     | 12937 |
| >PTEN-E73V-KIYNLCAE   | 5745  | >PTEN-E73V-KIYNLCAV   | 7     | 5738  |
| >PTEN-E73V-KIYNLCAE   | 9516  | >PTEN-E73V-KIYNLCAV   | 3     | 9513  |
| >PTEN-E73V-KIYNLCAE   | 15786 | >PTEN-E73V-KIYNLCAV   | 15    | 15771 |
| >PTEN-E73V-KIYNLCAE   | 20075 | >PTEN-E73V-KIYNLCAV   | 9     | 20066 |

|                         |       |                         |     |       |
|-------------------------|-------|-------------------------|-----|-------|
| >PTEN-E73V-KIYNLCAE     | 26222 | >PTEN-E73V-KIYNLCAV     | 109 | 26113 |
| >PTEN-E73V-KIYNLCAE     | 24455 | >PTEN-E73V-KIYNLCAV     | 5   | 24450 |
| >PTEN-E73V-KIYNLCAER    | 78    | >PTEN-E73V-KIYNLCAVR    | 76  | 2     |
| >PTEN-E73V-KIYNLCAERH'  | 107   | >PTEN-E73V-KIYNLCAVRH'  | 60  | 47    |
| >PTEN-E73V-KIYNLCAER    | 157   | >PTEN-E73V-KIYNLCAVR    | 256 | 99    |
| >PTEN-E73V-KIYNLCAERH'  | 233   | >PTEN-E73V-KIYNLCAVRH'  | 181 | 52    |
| >PTEN-E73V-KIYNLCAERH'  | 59    | >PTEN-E73V-KIYNLCAVRH'  | 71  | 12    |
| >PTEN-E73V-KIYNLCAER    | 10    | >PTEN-E73V-KIYNLCAVR    | 11  | 1     |
| >PTEN-E73V-KIYNLCAERH   | 1566  | >PTEN-E73V-KIYNLCAVRH   | 496 | 1070  |
| >PTEN-E73V-KIYNLCAE     | 858   | >PTEN-E73V-KIYNLCAV     | 82  | 776   |
| >PTEN-E73V-KIYNLCAERH'  | 517   | >PTEN-E73V-KIYNLCAVRH'  | 203 | 314   |
| >PTEN-E73V-KIYNLCAER    | 119   | >PTEN-E73V-KIYNLCAVR    | 221 | 102   |
| >PTEN-E73V-KIYNLCAE     | 22564 | >PTEN-E73V-KIYNLCAV     | 477 | 22087 |
| >PTEN-E73V-KIYNLCAERH'  | 233   | >PTEN-E73V-KIYNLCAVRH'  | 164 | 69    |
| >PTEN-E73V-KIYNLCAERH'  | 76    | >PTEN-E73V-KIYNLCAVRH'  | 42  | 34    |
| >PTEN-E73V-KIYNLCAERH'  | 226   | >PTEN-E73V-KIYNLCAVRH'  | 120 | 106   |
| >PTEN-E73V-KIYNLCAERH'  | 132   | >PTEN-E73V-KIYNLCAVRH'  | 79  | 53    |
| >PTEN-E73V-KIYNLCAERH'  | 453   | >PTEN-E73V-KIYNLCAVRH'  | 306 | 147   |
| >PTEN-E73V-KIYNLCAERH'  | 1064  | >PTEN-E73V-KIYNLCAVRH'  | 411 | 653   |
| >PTEN-E73V-KIYNLCAER    | 40    | >PTEN-E73V-KIYNLCAVR    | 25  | 15    |
| >PTEN-E73V-YKIYNLCAE    | 18439 | >PTEN-E73V-YKIYNLCAV    | 58  | 18381 |
| >PTEN-E73V-YKIYNLCAE    | 28336 | >PTEN-E73V-YKIYNLCAV    | 312 | 28024 |
| >PTEN-E73V-YKIYNLCAE    | 17882 | >PTEN-E73V-YKIYNLCAV    | 63  | 17819 |
| >PTEN-E73V-YKIYNLCAE    | 469   | >PTEN-E73V-YKIYNLCAV    | 12  | 457   |
| >PTEN-E73V-YKIYNLCAER   | 117   | >PTEN-E73V-YKIYNLCAVR   | 83  | 34    |
| >PTEN-E73V-YKIYNLCAERH' | 301   | >PTEN-E73V-YKIYNLCAVRH' | 125 | 176   |
| >PTEN-E73V-HYKIYNLCAE   | 1095  | >PTEN-E73V-HYKIYNLCAV   | 17  | 1078  |
| >PTEN-E73V-HYKIYNLCAEI  | 120   | >PTEN-E73V-HYKIYNLCAVI  | 125 | 5     |
| >PTEN-E73V-HYKIYNLCAEI  | 9     | >PTEN-E73V-HYKIYNLCAVI  | 10  | 1     |
| >PTEN-E73V-HYKIYNLCAEI  | 13    | >PTEN-E73V-HYKIYNLCAVI  | 16  | 3     |
| >PTEN-E73V-HYKIYNLCAEI  | 272   | >PTEN-E73V-HYKIYNLCAVI  | 361 | 89    |
| >PTEN-E73V-HYKIYNLCAEI  | 26    | >PTEN-E73V-HYKIYNLCAVI  | 18  | 8     |
| >PTEN-E73V-HYKIYNLCAE   | 13214 | >PTEN-E73V-HYKIYNLCAV   | 331 | 12883 |
| >PTEN-E91A-EDHNPPQLEI   | 2168  | >PTEN-E91A-ADHNPPQLEI   | 82  | 2086  |
| >PTEN-E91A-EDHNPPQLEI   | 235   | >PTEN-E91A-ADHNPPQLEI   | 86  | 149   |
| >PTEN-E91A-FEDHNPPQLE   | 4239  | >PTEN-E91A-FADHNPPQLI   | 462 | 3777  |
| >PTEN-E91A-FEDHNPPQL    | 2367  | >PTEN-E91A-FADHNPPQL    | 114 | 2253  |
| >PTEN-E91A-FEDHNPPQLE   | 3627  | >PTEN-E91A-FADHNPPQLI   | 236 | 3391  |
| >PTEN-E91A-FEDHNPPQL    | 12581 | >PTEN-E91A-FADHNPPQL    | 216 | 12365 |
| >PTEN-E91A-FEDHNPPQL    | 22875 | >PTEN-E91A-FADHNPPQL    | 210 | 22665 |
| >PTEN-E91A-FEDHNPPQLE   | 23163 | >PTEN-E91A-FADHNPPQLI   | 240 | 22923 |
| >PTEN-E91A-FEDHNPPQL    | 169   | >PTEN-E91A-FADHNPPQL    | 590 | 421   |
| >PTEN-E91A-FEDHNPPQLE   | 275   | >PTEN-E91A-FADHNPPQLI   | 918 | 643   |

|                       |       |                       |       |       |
|-----------------------|-------|-----------------------|-------|-------|
| >PTEN-E91A-FEDHNPPQL  | 116   | >PTEN-E91A-FADHNPPQL  | 18401 | 18285 |
| >PTEN-E91A-FEDHNPPQLE | 47    | >PTEN-E91A-FADHNPPQLI | 15909 | 15862 |
| >PTEN-E91A-FEDHNPPQL  | 314   | >PTEN-E91A-FADHNPPQL  | 37028 | 36714 |
| >PTEN-E91A-FEDHNPPQLE | 186   | >PTEN-E91A-FADHNPPQLI | 33665 | 33479 |
| >PTEN-E91A-FEDHNPPQL  | 128   | >PTEN-E91A-FADHNPPQL  | 25131 | 25003 |
| >PTEN-E91A-YPFEDHNPPC | 43    | >PTEN-E91A-YPFADHNPPC | 12    | 31    |
| >PTEN-E91A-YPFEDHNPPC | 145   | >PTEN-E91A-YPFADHNPPC | 383   | 238   |
| >PTEN-E91A-YPFEDHNPPC | 145   | >PTEN-E91A-YPFADHNPPC | 111   | 34    |
| >PTEN-E91A-YPFEDHNPP  | 145   | >PTEN-E91A-YPFADHNPP  | 207   | 62    |
| >PTEN-E91A-YPFEDHNPPC | 43    | >PTEN-E91A-YPFADHNPPC | 51    | 8     |
| >PTEN-E91A-YPFEDHNPPC | 22    | >PTEN-E91A-YPFADHNPPC | 18    | 4     |
| >PTEN-E91A-YPFEDHNPP  | 291   | >PTEN-E91A-YPFADHNPP  | 129   | 162   |
| >PTEN-E91A-AQYPFEDH   | 105   | >PTEN-E91A-AQYPFADH   | 60    | 45    |
| >PTEN-E91A-AQYPFEDHNI | 263   | >PTEN-E91A-AQYPFADHN  | 192   | 71    |
| >PTEN-E91A-RVAQYPFE   | 19729 | >PTEN-E91A-RVAQYPFA   | 439   | 19290 |
| >PTEN-E91A-RVAQYPFE   | 20731 | >PTEN-E91A-RVAQYPFA   | 275   | 20456 |
| >PTEN-E91A-RVAQYPFE   | 13269 | >PTEN-E91A-RVAQYPFA   | 57    | 13212 |
| >PTEN-E91A-RVAQYPFE   | 3521  | >PTEN-E91A-RVAQYPFA   | 80    | 3441  |
| >PTEN-E91A-NCRVAQYPFI | 3367  | >PTEN-E91A-NCRVAQYPFA | 96    | 3271  |
| >PTEN-E91Q-EDHNPPQLEI | 2168  | >PTEN-E91Q-QDHNPPQLE  | 399   | 1769  |
| >PTEN-E91Q-EDHNPPQLEI | 235   | >PTEN-E91Q-QDHNPPQLE  | 205   | 30    |
| >PTEN-E91Q-FEDHNPPQL  | 16636 | >PTEN-E91Q-FQDHNPPQL  | 80    | 16556 |
| >PTEN-E91Q-FEDHNPPQLE | 15557 | >PTEN-E91Q-FQDHNPPQLI | 56    | 15501 |
| >PTEN-E91Q-FEDHNPPQLE | 10323 | >PTEN-E91Q-FQDHNPPQLI | 355   | 9968  |
| >PTEN-E91Q-FEDHNPPQ   | 13969 | >PTEN-E91Q-FQDHNPPQ   | 356   | 13613 |
| >PTEN-E91Q-FEDHNPPQL  | 6151  | >PTEN-E91Q-FQDHNPPQL  | 35    | 6116  |
| >PTEN-E91Q-FEDHNPPQLE | 4239  | >PTEN-E91Q-FQDHNPPQLI | 18    | 4221  |
| >PTEN-E91Q-FEDHNPPQL  | 2367  | >PTEN-E91Q-FQDHNPPQL  | 40    | 2327  |
| >PTEN-E91Q-FEDHNPPQLE | 3627  | >PTEN-E91Q-FQDHNPPQLI | 79    | 3548  |
| >PTEN-E91Q-FEDHNPPQL  | 10791 | >PTEN-E91Q-FQDHNPPQL  | 98    | 10693 |
| >PTEN-E91Q-FEDHNPPQLE | 10554 | >PTEN-E91Q-FQDHNPPQLI | 140   | 10414 |
| >PTEN-E91Q-FEDHNPPQL  | 7263  | >PTEN-E91Q-FQDHNPPQL  | 322   | 6941  |
| >PTEN-E91Q-FEDHNPPQLE | 7964  | >PTEN-E91Q-FQDHNPPQLI | 383   | 7581  |
| >PTEN-E91Q-FEDHNPPQL  | 169   | >PTEN-E91Q-FQDHNPPQL  | 22    | 147   |
| >PTEN-E91Q-FEDHNPPQLE | 275   | >PTEN-E91Q-FQDHNPPQLI | 30    | 245   |
| >PTEN-E91Q-FEDHNPPQL  | 116   | >PTEN-E91Q-FQDHNPPQL  | 6108  | 5992  |
| >PTEN-E91Q-FEDHNPPQLE | 47    | >PTEN-E91Q-FQDHNPPQLI | 3102  | 3055  |
| >PTEN-E91Q-FEDHNPPQL  | 314   | >PTEN-E91Q-FQDHNPPQL  | 16527 | 16213 |
| >PTEN-E91Q-FEDHNPPQLE | 186   | >PTEN-E91Q-FQDHNPPQLI | 12268 | 12082 |
| >PTEN-E91Q-FEDHNPPQL  | 128   | >PTEN-E91Q-FQDHNPPQL  | 10915 | 10787 |
| >PTEN-E91Q-YPFEDHNPPC | 43    | >PTEN-E91Q-YPFQDHNPPC | 30    | 13    |
| >PTEN-E91Q-YPFEDHNPPC | 145   | >PTEN-E91Q-YPFQDHNPPC | 550   | 405   |
| >PTEN-E91Q-YPFEDHNPPC | 145   | >PTEN-E91Q-YPFQDHNPPC | 90    | 55    |

|                          |       |                          |       |       |
|--------------------------|-------|--------------------------|-------|-------|
| >PTEN-E91Q: YPFEDHNPP    | 145   | >PTEN-E91Q: YPFQDHNPP    | 128   | 17    |
| >PTEN-E91Q: YPFEDHNPPC   | 43    | >PTEN-E91Q: YPFQDHNPPC   | 42    | 1     |
| >PTEN-E91Q: YPFEDHNPPC   | 22    | >PTEN-E91Q: YPFQDHNPPC   | 29    | 7     |
| >PTEN-E91Q: YPFEDHNPP    | 291   | >PTEN-E91Q: YPFQDHNPP    | 358   | 67    |
| >PTEN-E91Q: AQYPFEDH     | 105   | >PTEN-E91Q: AQYPFQDH     | 47    | 58    |
| >PTEN-E91Q: AQYPFEDHNI   | 263   | >PTEN-E91Q: AQYPFQDHN    | 232   | 31    |
| >PTEN-F145I: FLKAQEAL    | 179   | >PTEN-F145I: ILKAQEAL    | 2888  | 2709  |
| >PTEN-F145I: FLKAQEAL    | 4     | >PTEN-F145I: ILKAQEAL    | 29    | 25    |
| >PTEN-F145I: FLKAQEALDF  | 370   | >PTEN-F145I: ILKAQEALDF  | 4804  | 4434  |
| >PTEN-F145I: FLKAQEAL    | 8     | >PTEN-F145I: ILKAQEAL    | 109   | 101   |
| >PTEN-F145I: FLKAQEAL    | 280   | >PTEN-F145I: ILKAQEAL    | 4333  | 4053  |
| >PTEN-F145I: FLKAQEAL    | 58    | >PTEN-F145I: ILKAQEAL    | 567   | 509   |
| >PTEN-F145I: FLKAQEAL    | 47    | >PTEN-F145I: ILKAQEAL    | 1066  | 1019  |
| >PTEN-F145I: FLKAQEAL    | 4     | >PTEN-F145I: ILKAQEAL    | 24    | 20    |
| >PTEN-F145I: FLKAQEALDF  | 98    | >PTEN-F145I: ILKAQEALDF  | 412   | 314   |
| >PTEN-F145I: FLKAQEALDF  | 209   | >PTEN-F145I: ILKAQEALDF  | 47    | 162   |
| >PTEN-F145I: FLKAQEALDF  | 122   | >PTEN-F145I: ILKAQEALDF  | 93    | 29    |
| >PTEN-F145I: FLKAQEAL    | 68    | >PTEN-F145I: ILKAQEAL    | 555   | 487   |
| >PTEN-F145I: FLKAQEAL    | 343   | >PTEN-F145I: ILKAQEAL    | 637   | 294   |
| >PTEN-F145I: FLKAQEALDF  | 105   | >PTEN-F145I: ILKAQEALDF  | 182   | 77    |
| >PTEN-F145I: FLKAQEALDF  | 105   | >PTEN-F145I: ILKAQEALDF  | 189   | 84    |
| >PTEN-F145I: FLKAQEALDF  | 108   | >PTEN-F145I: ILKAQEALDF  | 733   | 625   |
| >PTEN-F145I: FLKAQEALDF  | 78    | >PTEN-F145I: ILKAQEALDF  | 433   | 355   |
| >PTEN-F145I: FLKAQEALDF  | 37    | >PTEN-F145I: ILKAQEALDF  | 66    | 29    |
| >PTEN-F145I: KFLKAQEAL   | 154   | >PTEN-F145I: KILKAQEAL   | 4792  | 4638  |
| >PTEN-F145I: KFLKAQEAL   | 2598  | >PTEN-F145I: KILKAQEAL   | 246   | 2352  |
| >PTEN-F145I: KFLKAQEA    | 12344 | >PTEN-F145I: KILKAQEA    | 308   | 12036 |
| >PTEN-F145I: KFLKAQEAL   | 6636  | >PTEN-F145I: KILKAQEAL   | 115   | 6521  |
| >PTEN-F145I: KFLKAQEAL   | 8773  | >PTEN-F145I: KILKAQEAL   | 275   | 8498  |
| >PTEN-F145I: KFLKAQEAL   | 10397 | >PTEN-F145I: KILKAQEAL   | 473   | 9924  |
| >PTEN-F145I: KFLKAQEALD  | 77    | >PTEN-F145I: KILKAQEALDI | 3763  | 3686  |
| >PTEN-F145I: KFLKAQEALD  | 345   | >PTEN-F145I: KILKAQEALDI | 5098  | 4753  |
| >PTEN-F145I: KFLKAQEAL   | 37    | >PTEN-F145I: KILKAQEAL   | 11069 | 11032 |
| >PTEN-F145I: KFLKAQEALD  | 9     | >PTEN-F145I: KILKAQEALDI | 2058  | 2049  |
| >PTEN-F145I: KFLKAQEA    | 464   | >PTEN-F145I: KILKAQEA    | 348   | 116   |
| >PTEN-F145I: KFLKAQEAL   | 1092  | >PTEN-F145I: KILKAQEAL   | 57    | 1035  |
| >PTEN-F145I: KFLKAQEALD  | 745   | >PTEN-F145I: KILKAQEALDI | 41    | 704   |
| >PTEN-F145I: KFLKAQEALD  | 364   | >PTEN-F145I: KILKAQEALDI | 110   | 254   |
| >PTEN-F145I: KFLKAQEALD  | 14527 | >PTEN-F145I: KILKAQEALDI | 364   | 14163 |
| >PTEN-F145I: KFLKAQEALD  | 3095  | >PTEN-F145I: KILKAQEALDI | 344   | 2751  |
| >PTEN-F145I: KFLKAQEAL   | 257   | >PTEN-F145I: KILKAQEAL   | 14761 | 14504 |
| >PTEN-F145I: ICAYLLHRGKI | 187   | >PTEN-F145I: ICAYLLHRGKI | 1721  | 1534  |
| >PTEN-F145I: GKFLKAQEAL  | 109   | >PTEN-F145I: GKILKAQEAL  | 554   | 445   |

|                        |       |                         |      |       |
|------------------------|-------|-------------------------|------|-------|
| >PTEN-F145I·RGKFLKAQEA | 193   | >PTEN-F145I·RGKILKAQEA  | 348  | 155   |
| >PTEN-F145I·LHRGKFLK   | 386   | >PTEN-F145I·LHRGKILK    | 258  | 128   |
| >PTEN-F145I·LLHRGKFL   | 274   | >PTEN-F145I·LLHRGKIL    | 1705 | 1431  |
| >PTEN-F145I·LLHRGKFL   | 288   | >PTEN-F145I·LLHRGKIL    | 760  | 472   |
| >PTEN-F145I·LLHRGKFLKA | 194   | >PTEN-F145I·LLHRGKILKA  | 167  | 27    |
| >PTEN-F145I·LLHRGKFL   | 28    | >PTEN-F145I·LLHRGKIL    | 304  | 276   |
| >PTEN-F145I·LLHRGKFLKA | 132   | >PTEN-F145I·LLHRGKILKA  | 89   | 43    |
| >PTEN-F145I·LLHRGKFL   | 353   | >PTEN-F145I·LLHRGKIL    | 1439 | 1086  |
| >PTEN-F145I·LLHRGKFL   | 204   | >PTEN-F145I·LLHRGKIL    | 2078 | 1874  |
| >PTEN-F145I·LLHRGKFL   | 8     | >PTEN-F145I·LLHRGKIL    | 16   | 8     |
| >PTEN-F145I·LLHRGKFLK  | 328   | >PTEN-F145I·LLHRGKILK   | 1048 | 720   |
| >PTEN-F145I·LLHRGKFLKA | 8     | >PTEN-F145I·LLHRGKILKA  | 7    | 1     |
| >PTEN-F145I·LLHRGKFLKA | 230   | >PTEN-F145I·LLHRGKILKA  | 353  | 123   |
| >PTEN-F145I·LLHRGKFLK  | 41    | >PTEN-F145I·LLHRGKILK   | 41   | 0     |
| >PTEN-F145I·LLHRGKFLK  | 63    | >PTEN-F145I·LLHRGKILK   | 183  | 120   |
| >PTEN-F145I·LLHRGKFLK  | 37    | >PTEN-F145I·LLHRGKILK   | 18   | 19    |
| >PTEN-F145I·LLHRGKFLK  | 69    | >PTEN-F145I·LLHRGKILK   | 878  | 809   |
| >PTEN-F145I·LLHRGKFLK  | 427   | >PTEN-F145I·LLHRGKILK   | 1352 | 925   |
| >PTEN-F145I·YLLHRGKF   | 12707 | >PTEN-F145I·YLLHRGKI    | 216  | 12491 |
| >PTEN-F145I·YLLHRGKFL  | 93    | >PTEN-F145I·YLLHRGKIL   | 934  | 841   |
| >PTEN-F145I·YLLHRGKFLK | 86    | >PTEN-F145I·YLLHRGKILKA | 103  | 17    |
| >PTEN-F145I·YLLHRGKFL  | 91    | >PTEN-F145I·YLLHRGKIL   | 741  | 650   |
| >PTEN-F145I·YLLHRGKFLK | 446   | >PTEN-F145I·YLLHRGKILKA | 550  | 104   |
| >PTEN-F145I·YLLHRGKF   | 5383  | >PTEN-F145I·YLLHRGKI    | 44   | 5339  |
| >PTEN-F145I·YLLHRGKFL  | 70    | >PTEN-F145I·YLLHRGKIL   | 181  | 111   |
| >PTEN-F145I·YLLHRGKFLK | 44    | >PTEN-F145I·YLLHRGKILKA | 42   | 2     |
| >PTEN-F145I·YLLHRGKF   | 2078  | >PTEN-F145I·YLLHRGKI    | 355  | 1723  |
| >PTEN-F145I·YLLHRGKFL  | 105   | >PTEN-F145I·YLLHRGKIL   | 1484 | 1379  |
| >PTEN-F145I·YLLHRGKFLK | 66    | >PTEN-F145I·YLLHRGKILKA | 157  | 91    |
| >PTEN-F145I·YLLHRGKF   | 1186  | >PTEN-F145I·YLLHRGKI    | 10   | 1176  |
| >PTEN-F145I·YLLHRGKFL  | 6     | >PTEN-F145I·YLLHRGKIL   | 41   | 35    |
| >PTEN-F145I·YLLHRGKFLK | 12    | >PTEN-F145I·YLLHRGKILKA | 12   | 0     |
| >PTEN-F145I·YLLHRGKF   | 6022  | >PTEN-F145I·YLLHRGKI    | 40   | 5982  |
| >PTEN-F145I·YLLHRGKFL  | 10    | >PTEN-F145I·YLLHRGKIL   | 23   | 13    |
| >PTEN-F145I·YLLHRGKFLK | 39    | >PTEN-F145I·YLLHRGKILKA | 39   | 0     |
| >PTEN-F145I·YLLHRGKF   | 8079  | >PTEN-F145I·YLLHRGKI    | 40   | 8039  |
| >PTEN-F145I·YLLHRGKFL  | 12    | >PTEN-F145I·YLLHRGKIL   | 56   | 44    |
| >PTEN-F145I·YLLHRGKFLK | 17    | >PTEN-F145I·YLLHRGKILKA | 21   | 4     |
| >PTEN-F145I·YLLHRGKFL  | 58    | >PTEN-F145I·YLLHRGKIL   | 983  | 925   |
| >PTEN-F145I·YLLHRGKFLK | 317   | >PTEN-F145I·YLLHRGKILKA | 242  | 75    |
| >PTEN-F145I·YLLHRGKF   | 3024  | >PTEN-F145I·YLLHRGKI    | 12   | 3012  |
| >PTEN-F145I·YLLHRGKFL  | 6     | >PTEN-F145I·YLLHRGKIL   | 14   | 8     |
| >PTEN-F145I·YLLHRGKFLK | 296   | >PTEN-F145I·YLLHRGKILK  | 741  | 445   |

|                         |       |                         |       |       |
|-------------------------|-------|-------------------------|-------|-------|
| >PTEN-F145I·YLLHRGKFLK/ | 8     | >PTEN-F145I·YLLHRGKILKA | 8     | 0     |
| >PTEN-F145I·YLLHRGKFLK  | 28    | >PTEN-F145I·YLLHRGKILK  | 23    | 5     |
| >PTEN-F145I·YLLHRGKFLK  | 113   | >PTEN-F145I·YLLHRGKILK  | 206   | 93    |
| >PTEN-F145I·YLLHRGKFLK  | 316   | >PTEN-F145I·YLLHRGKILK  | 1056  | 740   |
| >PTEN-F145I·YLLHRGKF    | 412   | >PTEN-F145I·YLLHRGKI    | 272   | 140   |
| >PTEN-F145I·YLLHRGKFL   | 54    | >PTEN-F145I·YLLHRGKIL   | 32    | 22    |
| >PTEN-F145I·YLLHRGKFLK/ | 154   | >PTEN-F145I·YLLHRGKILKA | 364   | 210   |
| >PTEN-F145I·YLLHRGKF    | 473   | >PTEN-F145I·YLLHRGKI    | 10726 | 10253 |
| >PTEN-F145I·YLLHRGKF    | 43    | >PTEN-F145I·YLLHRGKI    | 1231  | 1188  |
| >PTEN-F145I·YLLHRGKFL   | 478   | >PTEN-F145I·YLLHRGKIL   | 212   | 266   |
| >PTEN-F145I·YLLHRGKF    | 45    | >PTEN-F145I·YLLHRGKI    | 1564  | 1519  |
| >PTEN-F145I·YLLHRGKFL   | 278   | >PTEN-F145I·YLLHRGKIL   | 136   | 142   |
| >PTEN-F145I·YLLHRGKF    | 259   | >PTEN-F145I·YLLHRGKI    | 7457  | 7198  |
| >PTEN-F145I·YLLHRGKFLK  | 111   | >PTEN-F145I·YLLHRGKILK  | 308   | 197   |
| >PTEN-F145I·AYLLHRGKF   | 12179 | >PTEN-F145I·AYLLHRGKI   | 228   | 11951 |
| >PTEN-F145I·AYLLHRGKFLI | 230   | >PTEN-F145I·AYLLHRGKILK | 448   | 218   |
| >PTEN-F145I·AYLLHRGKF   | 418   | >PTEN-F145I·AYLLHRGKI   | 2243  | 1825  |
| >PTEN-F145I·AYLLHRGKFL  | 368   | >PTEN-F145I·AYLLHRGKIL  | 602   | 234   |
| >PTEN-F145I·AYLLHRGKF   | 8     | >PTEN-F145I·AYLLHRGKI   | 15    | 7     |
| >PTEN-F145I·AYLLHRGKFL  | 16    | >PTEN-F145I·AYLLHRGKIL  | 36    | 20    |
| >PTEN-F145I·AYLLHRGKFLI | 25    | >PTEN-F145I·AYLLHRGKILK | 16    | 9     |
| >PTEN-F145I·AYLLHRGKFLI | 76    | >PTEN-F145I·AYLLHRGKILK | 323   | 247   |
| >PTEN-F145I·AYLLHRGKFLI | 305   | >PTEN-F145I·AYLLHRGKILK | 565   | 260   |
| >PTEN-F145I·CAYLLHRGKF  | 119   | >PTEN-F145I·CAYLLHRGKIL | 82    | 37    |
| >PTEN-F145I·CAYLLHRGKF  | 67    | >PTEN-F145I·CAYLLHRGKI  | 4346  | 4279  |
| >PTEN-F145I·CAYLLHRGKF  | 350   | >PTEN-F145I·CAYLLHRGKIL | 803   | 453   |
| >PTEN-F145I·CAYLLHRGKF  | 350   | >PTEN-F145I·CAYLLHRGKI  | 7916  | 7566  |
| >PTEN-F145I·CAYLLHRGKF  | 25831 | >PTEN-F145I·CAYLLHRGKI  | 120   | 25711 |
| >PTEN-F145I·CAYLLHRGKF  | 185   | >PTEN-F145I·CAYLLHRGKIL | 269   | 84    |
| >PTEN-F154L·FYGEVRTR    | 1479  | >PTEN-F154L·LYGEVRTR    | 366   | 1113  |
| >PTEN-F154L·FYGEVRTR    | 163   | >PTEN-F154L·LYGEVRTR    | 257   | 94    |
| >PTEN-F154L·FYGEVRTR    | 107   | >PTEN-F154L·LYGEVRTR    | 145   | 38    |
| >PTEN-F154L·DFYGEVRTR   | 31    | >PTEN-F154L·DLYGEVRTR   | 134   | 103   |
| >PTEN-F154L·DFYGEVRTR   | 408   | >PTEN-F154L·DLYGEVRTR   | 186   | 222   |
| >PTEN-F154L·DFYGEVRTR   | 291   | >PTEN-F154L·DLYGEVRTR   | 1433  | 1142  |
| >PTEN-F154L·KFLKAQEALD  | 77    | >PTEN-F154L·KFLKAQEALD  | 1109  | 1032  |
| >PTEN-F154L·KFLKAQEALD  | 345   | >PTEN-F154L·KFLKAQEALD  | 2321  | 1976  |
| >PTEN-F154L·KFLKAQEALD  | 9     | >PTEN-F154L·KFLKAQEALD  | 58    | 49    |
| >PTEN-F154L·KFLKAQEALD  | 364   | >PTEN-F154L·KFLKAQEALD  | 5170  | 4806  |
| >PTEN-F154L·KFLKAQEALD  | 1473  | >PTEN-F154L·KFLKAQEALD  | 484   | 989   |
| >PTEN-F154L·ALDFYGEV    | 41    | >PTEN-F154L·ALDLYGEV    | 78    | 37    |
| >PTEN-F154L·ALDFYGEV    | 17    | >PTEN-F154L·ALDLYGEV    | 38    | 21    |
| >PTEN-F154L·ALDFYGEV    | 34    | >PTEN-F154L·ALDLYGEV    | 104   | 70    |

|                        |      |                        |      |      |
|------------------------|------|------------------------|------|------|
| >PTEN-F154L ALDFYGEV   | 128  | >PTEN-F154L ALDLYGEV   | 192  | 64   |
| >PTEN-F154L ALDFYGEV   | 3    | >PTEN-F154L ALDLYGEV   | 4    | 1    |
| >PTEN-F154L ALDFYGEVRT | 308  | >PTEN-F154L ALDLYGEVRT | 794  | 486  |
| >PTEN-F154L ALDFYGEV   | 12   | >PTEN-F154L ALDLYGEV   | 18   | 6    |
| >PTEN-F154L ALDFYGEV   | 9    | >PTEN-F154L ALDLYGEV   | 9    | 0    |
| >PTEN-F154L ALDFYGEV   | 29   | >PTEN-F154L ALDLYGEV   | 55   | 26   |
| >PTEN-F154L ALDFYGEV   | 3    | >PTEN-F154L ALDLYGEV   | 4    | 1    |
| >PTEN-F154L ALDFYGEVRT | 416  | >PTEN-F154L ALDLYGEVRT | 505  | 89   |
| >PTEN-F154L EALDFYGEV  | 224  | >PTEN-F154L EALDLYGEV  | 2003 | 1779 |
| >PTEN-F154L EALDFYGEV  | 188  | >PTEN-F154L EALDLYGEV  | 620  | 432  |
| >PTEN-F154L EALDFYGEVR | 299  | >PTEN-F154L EALDLYGEVR | 817  | 518  |
| >PTEN-F154L EALDFYGEVR | 28   | >PTEN-F154L EALDLYGEVR | 33   | 5    |
| >PTEN-F154L EALDFYGEV  | 11   | >PTEN-F154L EALDLYGEV  | 14   | 3    |
| >PTEN-F154L EALDFYGEV  | 4    | >PTEN-F154L EALDLYGEV  | 5    | 1    |
| >PTEN-F154L QEALDFYGEV | 22   | >PTEN-F154L QEALDLYGEV | 21   | 1    |
| >PTEN-F154L QEALDFYGEV | 112  | >PTEN-F154L QEALDLYGEV | 118  | 6    |
| >PTEN-F154L QEALDFYGEV | 426  | >PTEN-F154L QEALDLYGEV | 576  | 150  |
| >PTEN-F154L QEALDFYGEV | 361  | >PTEN-F154L QEALDLYGEV | 407  | 46   |
| >PTEN-F154L QEALDFYGEV | 116  | >PTEN-F154L QEALDLYGEV | 111  | 5    |
| >PTEN-F154L AQEALDFYGE | 422  | >PTEN-F154L AQEALDLYGE | 1095 | 673  |
| >PTEN-F154L AQEALDFYGE | 39   | >PTEN-F154L AQEALDLYGE | 70   | 31   |
| >PTEN-F154L AQEALDFY   | 178  | >PTEN-F154L AQEALDLY   | 571  | 393  |
| >PTEN-F154L AQEALDFY   | 421  | >PTEN-F154L AQEALDLY   | 542  | 121  |
| >PTEN-F154L KAQEALDFY  | 271  | >PTEN-F154L KAQEALDLY  | 3897 | 3626 |
| >PTEN-F154L KAQEALDFY  | 46   | >PTEN-F154L KAQEALDLY  | 139  | 93   |
| >PTEN-F154L KAQEALDF   | 309  | >PTEN-F154L KAQEALDL   | 6205 | 5896 |
| >PTEN-F154L KAQEALDF   | 30   | >PTEN-F154L KAQEALDL   | 166  | 136  |
| >PTEN-F154L KAQEALDFY  | 139  | >PTEN-F154L KAQEALDLY  | 159  | 20   |
| >PTEN-F154L KAQEALDFY  | 481  | >PTEN-F154L KAQEALDLY  | 675  | 194  |
| >PTEN-F154L KAQEALDF   | 133  | >PTEN-F154L KAQEALDL   | 2970 | 2837 |
| >PTEN-F154L KAQEALDFY  | 195  | >PTEN-F154L KAQEALDLY  | 165  | 30   |
| >PTEN-F154L LKAQEALDF  | 6    | >PTEN-F154L LKAQEALDL  | 156  | 150  |
| >PTEN-F154L LKAQEALDFY | 85   | >PTEN-F154L LKAQEALDLY | 112  | 27   |
| >PTEN-F154L FLKAQEALDF | 8599 | >PTEN-F154L FLKAQEALDL | 53   | 8546 |
| >PTEN-F154L FLKAQEALDF | 370  | >PTEN-F154L FLKAQEALDL | 798  | 428  |
| >PTEN-F154L FLKAQEALDF | 8577 | >PTEN-F154L FLKAQEALDL | 82   | 8495 |
| >PTEN-F154L FLKAQEALDF | 3025 | >PTEN-F154L FLKAQEALDL | 6    | 3019 |
| >PTEN-F154L FLKAQEALDF | 98   | >PTEN-F154L FLKAQEALDL | 66   | 32   |
| >PTEN-F154L FLKAQEALDF | 209  | >PTEN-F154L FLKAQEALDL | 526  | 317  |
| >PTEN-F154L FLKAQEALDF | 122  | >PTEN-F154L FLKAQEALDL | 186  | 64   |
| >PTEN-F154L FLKAQEALDF | 105  | >PTEN-F154L FLKAQEALDL | 2623 | 2518 |
| >PTEN-F154L FLKAQEALDF | 105  | >PTEN-F154L FLKAQEALDL | 140  | 35   |
| >PTEN-F154L FLKAQEALDF | 108  | >PTEN-F154L FLKAQEALDL | 2169 | 2061 |

|                        |      |                        |       |       |
|------------------------|------|------------------------|-------|-------|
| >PTEN-F154L FLKAQEALDF | 78   | >PTEN-F154L FLKAQEALDL | 61    | 17    |
| >PTEN-F154L FLKAQEALDF | 37   | >PTEN-F154L FLKAQEALDL | 1688  | 1651  |
| >PTEN-F154L FLKAQEALDF | 736  | >PTEN-F154L FLKAQEALDL | 316   | 420   |
| >PTEN-F154S FYGEVRTR   | 1479 | >PTEN-F154S SYGEVRTR   | 275   | 1204  |
| >PTEN-F154S FYGEVRTR   | 163  | >PTEN-F154S SYGEVRTR   | 363   | 200   |
| >PTEN-F154S FYGEVRTR   | 107  | >PTEN-F154S SYGEVRTR   | 74    | 33    |
| >PTEN-F154S DFYGEVRTR  | 31   | >PTEN-F154S DSYGEVRTR  | 156   | 125   |
| >PTEN-F154S DFYGEVRTR  | 408  | >PTEN-F154S DSYGEVRTR  | 42    | 366   |
| >PTEN-F154S DFYGEVRTRC | 2261 | >PTEN-F154S DSYGEVRTRC | 270   | 1991  |
| >PTEN-F154S DFYGEVRTR  | 291  | >PTEN-F154S DSYGEVRTR  | 4244  | 3953  |
| >PTEN-F154S KFLKAQEALD | 77   | >PTEN-F154S KFLKAQEALD | 22250 | 22173 |
| >PTEN-F154S KFLKAQEALD | 345  | >PTEN-F154S KFLKAQEALD | 22521 | 22176 |
| >PTEN-F154S KFLKAQEALD | 9    | >PTEN-F154S KFLKAQEALD | 7509  | 7500  |
| >PTEN-F154S KFLKAQEALD | 364  | >PTEN-F154S KFLKAQEALD | 22994 | 22630 |
| >PTEN-F154S ALDFYGEV   | 41   | >PTEN-F154S ALDSYGEV   | 40    | 1     |
| >PTEN-F154S ALDFYGEV   | 17   | >PTEN-F154S ALDSYGEV   | 17    | 0     |
| >PTEN-F154S ALDFYGEV   | 34   | >PTEN-F154S ALDSYGEV   | 29    | 5     |
| >PTEN-F154S ALDFYGEV   | 128  | >PTEN-F154S ALDSYGEV   | 96    | 32    |
| >PTEN-F154S ALDFYGEV   | 3    | >PTEN-F154S ALDSYGEV   | 2     | 1     |
| >PTEN-F154S ALDFYGEVRT | 308  | >PTEN-F154S ALDSYGEVRT | 165   | 143   |
| >PTEN-F154S ALDFYGEV   | 12   | >PTEN-F154S ALDSYGEV   | 10    | 2     |
| >PTEN-F154S ALDFYGEV   | 9    | >PTEN-F154S ALDSYGEV   | 7     | 2     |
| >PTEN-F154S ALDFYGEV   | 29   | >PTEN-F154S ALDSYGEV   | 23    | 6     |
| >PTEN-F154S ALDFYGEV   | 3    | >PTEN-F154S ALDSYGEV   | 2     | 1     |
| >PTEN-F154S ALDFYGEVRT | 416  | >PTEN-F154S ALDSYGEVRT | 155   | 261   |
| >PTEN-F154S EALDFYGEV  | 224  | >PTEN-F154S EALDSYGEV  | 4880  | 4656  |
| >PTEN-F154S EALDFYGEV  | 188  | >PTEN-F154S EALDSYGEV  | 912   | 724   |
| >PTEN-F154S EALDFYGEVR | 299  | >PTEN-F154S EALDSYGEVR | 1717  | 1418  |
| >PTEN-F154S EALDFYGEVR | 28   | >PTEN-F154S EALDSYGEVR | 49    | 21    |
| >PTEN-F154S EALDFYGEV  | 11   | >PTEN-F154S EALDSYGEV  | 20    | 9     |
| >PTEN-F154S EALDFYGEV  | 4    | >PTEN-F154S EALDSYGEV  | 6     | 2     |
| >PTEN-F154S QEALDFYGEV | 22   | >PTEN-F154S QEALDSYGEV | 30    | 8     |
| >PTEN-F154S QEALDFYGEV | 112  | >PTEN-F154S QEALDSYGEV | 112   | 0     |
| >PTEN-F154S QEALDFYGEV | 426  | >PTEN-F154S QEALDSYGEV | 634   | 208   |
| >PTEN-F154S QEALDFYGEV | 361  | >PTEN-F154S QEALDSYGEV | 718   | 357   |
| >PTEN-F154S QEALDFYGEV | 116  | >PTEN-F154S QEALDSYGEV | 204   | 88    |
| >PTEN-F154S AQEALDFYGE | 422  | >PTEN-F154S AQEALDSYGE | 1153  | 731   |
| >PTEN-F154S AQEALDFYGE | 39   | >PTEN-F154S AQEALDSYGE | 100   | 61    |
| >PTEN-F154S AQEALDFY   | 178  | >PTEN-F154S AQEALDSY   | 275   | 97    |
| >PTEN-F154S AQEALDFY   | 421  | >PTEN-F154S AQEALDSY   | 143   | 278   |
| >PTEN-F154S KAQEALDFY  | 271  | >PTEN-F154S KAQEALDSY  | 1366  | 1095  |
| >PTEN-F154S KAQEALDFY  | 46   | >PTEN-F154S KAQEALDSY  | 90    | 44    |
| >PTEN-F154S KAQEALDFY  | 1537 | >PTEN-F154S KAQEALDSY  | 287   | 1250  |



|                        |      |                        |       |       |
|------------------------|------|------------------------|-------|-------|
| >PTEN-F154S KAQEALDF   | 309  | >PTEN-F154S KAQEALDS   | 24332 | 24023 |
| >PTEN-F154S KAQEALDF   | 30   | >PTEN-F154S KAQEALDS   | 16044 | 16014 |
| >PTEN-F154S KAQEALDFY  | 139  | >PTEN-F154S KAQEALDSY  | 82    | 57    |
| >PTEN-F154S KAQEALDFY  | 2684 | >PTEN-F154S KAQEALDSY  | 482   | 2202  |
| >PTEN-F154S KAQEALDFY  | 481  | >PTEN-F154S KAQEALDSY  | 709   | 228   |
| >PTEN-F154S KAQEALDF   | 133  | >PTEN-F154S KAQEALDS   | 18048 | 17915 |
| >PTEN-F154S KAQEALDFY  | 195  | >PTEN-F154S KAQEALDSY  | 234   | 39    |
| >PTEN-F154S KAQEALDFY  | 1085 | >PTEN-F154S KAQEALDSY  | 330   | 755   |
| >PTEN-F154S LKAQEALDF  | 6    | >PTEN-F154S LKAQEALDS  | 6959  | 6953  |
| >PTEN-F154S LKAQEALDFY | 85   | >PTEN-F154S LKAQEALDSY | 24    | 61    |
| >PTEN-F154S FLKAQEALDF | 370  | >PTEN-F154S FLKAQEALDS | 992   | 622   |
| >PTEN-F154S FLKAQEALDF | 98   | >PTEN-F154S FLKAQEALDS | 316   | 218   |
| >PTEN-F154S FLKAQEALDF | 209  | >PTEN-F154S FLKAQEALDS | 336   | 127   |
| >PTEN-F154S FLKAQEALDF | 122  | >PTEN-F154S FLKAQEALDS | 903   | 781   |
| >PTEN-F154S FLKAQEALDF | 105  | >PTEN-F154S FLKAQEALDS | 15419 | 15314 |
| >PTEN-F154S FLKAQEALDF | 105  | >PTEN-F154S FLKAQEALDS | 60    | 45    |
| >PTEN-F154S FLKAQEALDF | 108  | >PTEN-F154S FLKAQEALDS | 15048 | 14940 |
| >PTEN-F154S FLKAQEALDF | 78   | >PTEN-F154S FLKAQEALDS | 35    | 43    |
| >PTEN-F154S FLKAQEALDF | 37   | >PTEN-F154S FLKAQEALDS | 16834 | 16797 |
| >PTEN-F154S FLKAQEALDF | 716  | >PTEN-F154S FLKAQEALDS | 241   | 475   |
| >PTEN-F238L FMYFEFPQ   | 132  | >PTEN-F238L LMYFEFPQ   | 1970  | 1838  |
| >PTEN-F238L FMYFEFPQ   | 28   | >PTEN-F238L LMYFEFPQ   | 374   | 346   |
| >PTEN-F238L FMYFEFPQP  | 265  | >PTEN-F238L LMYFEFPQP  | 3283  | 3018  |
| >PTEN-F238L FMYFEFPQPL | 379  | >PTEN-F238L LMYFEFPQPL | 3683  | 3304  |
| >PTEN-F238L FMYFEFPQ   | 195  | >PTEN-F238L LMYFEFPQ   | 1554  | 1359  |
| >PTEN-F238L FMYFEFPQ   | 139  | >PTEN-F238L LMYFEFPQ   | 699   | 560   |
| >PTEN-F238L FMYFEFPQ   | 19   | >PTEN-F238L LMYFEFPQ   | 128   | 109   |
| >PTEN-F238L FMYFEFPQPL | 2    | >PTEN-F238L LMYFEFPQPL | 3     | 1     |
| >PTEN-F238L FMYFEFPQPL | 175  | >PTEN-F238L LMYFEFPQPL | 1335  | 1160  |
| >PTEN-F238L FMYFEFPQ   | 168  | >PTEN-F238L LMYFEFPQ   | 1398  | 1230  |
| >PTEN-F238L FMYFEFPQPL | 3    | >PTEN-F238L LMYFEFPQPL | 8     | 5     |
| >PTEN-F238L FMYFEFPQ   | 58   | >PTEN-F238L LMYFEFPQ   | 510   | 452   |
| >PTEN-F238L FMYFEFPQPL | 5    | >PTEN-F238L LMYFEFPQPL | 10    | 5     |
| >PTEN-F238L FMYFEFPQPL | 7    | >PTEN-F238L LMYFEFPQPL | 23    | 16    |
| >PTEN-F238L FMYFEFPQ   | 14   | >PTEN-F238L LMYFEFPQ   | 66    | 52    |
| >PTEN-F238L FMYFEFPQPL | 3    | >PTEN-F238L LMYFEFPQPL | 5     | 2     |
| >PTEN-F238L FMYFEFPQ   | 310  | >PTEN-F238L LMYFEFPQ   | 1217  | 907   |
| >PTEN-F238L FMYFEFPQPL | 574  | >PTEN-F238L LMYFEFPQPL | 322   | 252   |
| >PTEN-F238L FMYFEFPQPL | 43   | >PTEN-F238L LMYFEFPQPL | 416   | 373   |
| >PTEN-F238L FMYFEFPQPL | 83   | >PTEN-F238L LMYFEFPQPL | 69    | 14    |
| >PTEN-F238L FMYFEFPQPL | 250  | >PTEN-F238L LMYFEFPQPL | 1352  | 1102  |
| >PTEN-F238L FMYFEFPQ   | 357  | >PTEN-F238L LMYFEFPQ   | 625   | 268   |
| >PTEN-F238L FMYFEFPQPL | 6    | >PTEN-F238L LMYFEFPQPL | 9     | 3     |

|                         |       |                         |       |       |
|-------------------------|-------|-------------------------|-------|-------|
| >PTEN-F238L FMYFEFPQPL  | 56    | >PTEN-F238L LMYFEFPQPL  | 1017  | 961   |
| >PTEN-F238L FMYFEFPQPL  | 120   | >PTEN-F238L LMYFEFPQPL  | 162   | 42    |
| >PTEN-F238L KFMYFEFPQF  | 235   | >PTEN-F238L KLMYFEFPQF  | 248   | 13    |
| >PTEN-F238L KFMYFEFPQ   | 17409 | >PTEN-F238L KLMYFEFPQ   | 88    | 17321 |
| >PTEN-F238L KFMYFEFPQF  | 799   | >PTEN-F238L KLMYFEFPQF  | 7     | 792   |
| >PTEN-F238L KFMYFEFP    | 6341  | >PTEN-F238L KLMYFEFP    | 87    | 6254  |
| >PTEN-F238L KFMYFEFPQ   | 4517  | >PTEN-F238L KLMYFEFPQ   | 58    | 4459  |
| >PTEN-F238L KFMYFEFPQF  | 74    | >PTEN-F238L KLMYFEFPQF  | 4     | 70    |
| >PTEN-F238L KFMYFEFPQF  | 7198  | >PTEN-F238L KLMYFEFPQF  | 15    | 7183  |
| >PTEN-F238L KFMYFEFPQF  | 2282  | >PTEN-F238L KLMYFEFPQF  | 23    | 2259  |
| >PTEN-F238L KFMYFEFPQF  | 3940  | >PTEN-F238L KLMYFEFPQF  | 7     | 3933  |
| >PTEN-F238L KFMYFEFPQF  | 3386  | >PTEN-F238L KLMYFEFPQF  | 5     | 3381  |
| >PTEN-F238L KFMYFEFPQF  | 9308  | >PTEN-F238L KLMYFEFPQF  | 36    | 9272  |
| >PTEN-F238L KFMYFEFPQF  | 10428 | >PTEN-F238L KLMYFEFPQF  | 19    | 10409 |
| >PTEN-F238L KFMYFEFPQF  | 18096 | >PTEN-F238L KLMYFEFPQF  | 13    | 18083 |
| >PTEN-F238L KFMYFEFPQF  | 433   | >PTEN-F238L KLMYFEFPQF  | 5424  | 4991  |
| >PTEN-F238L KFMYFEFPQF  | 348   | >PTEN-F238L KLMYFEFPQF  | 13189 | 12841 |
| >PTEN-F238L KFMYFEFPQF  | 343   | >PTEN-F238L KLMYFEFPQF  | 727   | 384   |
| >PTEN-F238L KFMYFEFPQF  | 31    | >PTEN-F238L KLMYFEFPQF  | 6     | 25    |
| >PTEN-F238L KFMYFEFPQF  | 745   | >PTEN-F238L KLMYFEFPQF  | 34    | 711   |
| >PTEN-F238L KFMYFEFPQF  | 492   | >PTEN-F238L KLMYFEFPQF  | 2804  | 2312  |
| >PTEN-F238L KFMYFEFP    | 152   | >PTEN-F238L KLMYFEFP    | 6970  | 6818  |
| >PTEN-F238L KFMYFEFPQF  | 96    | >PTEN-F238L KLMYFEFPQF  | 7063  | 6967  |
| >PTEN-F238L DKFMYFEF    | 10    | >PTEN-F238L DKLMYFEF    | 31    | 21    |
| >PTEN-F238L DKFMYFEF    | 149   | >PTEN-F238L DKLMYFEF    | 426   | 277   |
| >PTEN-F238L REDKFMYF    | 435   | >PTEN-F238L REDKLMYF    | 1321  | 886   |
| >PTEN-F238L REDKFMYF    | 373   | >PTEN-F238L REDKLMYF    | 522   | 149   |
| >PTEN-F238L REDKFMYF    | 26    | >PTEN-F238L REDKLMYF    | 53    | 27    |
| >PTEN-F238L REDKFMYFEF  | 366   | >PTEN-F238L REDKLMYFEF  | 526   | 160   |
| >PTEN-F238L REDKFMYF    | 250   | >PTEN-F238L REDKLMYF    | 319   | 69    |
| >PTEN-F238L REDKFMYF    | 214   | >PTEN-F238L REDKLMYF    | 293   | 79    |
| >PTEN-F238L RREDKFMYFE  | 195   | >PTEN-F238L RREDKLMYFE  | 361   | 166   |
| >PTEN-F238L RREDKFMYFE  | 87    | >PTEN-F238L RREDKLMYFE  | 112   | 25    |
| >PTEN-F238L RREDKFMYFE  | 23    | >PTEN-F238L RREDKLMYFE  | 39    | 16    |
| >PTEN-F238L TRREDKFMYF  | 74    | >PTEN-F238L TRREDKLMYF  | 102   | 28    |
| >PTEN-F238L PTRREDKFM\  | 892   | >PTEN-F238L PTRREDKLM\  | 468   | 424   |
| >PTEN-F238L PTRREDKFM\  | 460   | >PTEN-F238L PTRREDKLM\  | 280   | 180   |
| >PTEN-F238L GPTRREDKFM  | 420   | >PTEN-F238L GPTRREDKLM  | 658   | 238   |
| >PTEN-F238L SGPTRREDKFM | 70    | >PTEN-F238L SGPTRREDKLM | 134   | 64    |
| >PTEN-F238L SGPTRREDKFM | 159   | >PTEN-F238L SGPTRREDKLM | 189   | 30    |
| >PTEN-F241L FEFQPLPV    | 79    | >PTEN-F241L LEFPQPLPV   | 101   | 22    |
| >PTEN-F241L YFEFPQPL    | 17320 | >PTEN-F241L YLEFPQPL    | 117   | 17203 |
| >PTEN-F241L YFEFPQPL    | 4205  | >PTEN-F241L YLEFPQPL    | 28    | 4177  |

|                         |       |                         |      |       |
|-------------------------|-------|-------------------------|------|-------|
| >PTEN-F241L YFEFPQPL    | 17016 | >PTEN-F241L YLEFPQPL    | 132  | 16884 |
| >PTEN-F241L YFEFPQPL    | 8704  | >PTEN-F241L YLEFPQPL    | 10   | 8694  |
| >PTEN-F241L YFEFPQPLPV  | 1983  | >PTEN-F241L YLEFPQPLPV  | 3    | 1980  |
| >PTEN-F241L YFEFPQPLPVI | 19194 | >PTEN-F241L YLEFPQPLPVI | 137  | 19057 |
| >PTEN-F241L YFEFPQPL    | 12670 | >PTEN-F241L YLEFPQPL    | 19   | 12651 |
| >PTEN-F241L YFEFPQPLPV  | 5534  | >PTEN-F241L YLEFPQPLPV  | 7    | 5527  |
| >PTEN-F241L YFEFPQPL    | 16945 | >PTEN-F241L YLEFPQPL    | 115  | 16830 |
| >PTEN-F241L YFEFPQPLPV  | 5671  | >PTEN-F241L YLEFPQPLPV  | 12   | 5659  |
| >PTEN-F241L YFEFPQPL    | 20596 | >PTEN-F241L YLEFPQPL    | 258  | 20338 |
| >PTEN-F241L YFEFPQPLPV  | 14999 | >PTEN-F241L YLEFPQPLPV  | 19   | 14980 |
| >PTEN-F241L YFEFPQPL    | 8304  | >PTEN-F241L YLEFPQPL    | 4    | 8300  |
| >PTEN-F241L YFEFPQPLPV  | 883   | >PTEN-F241L YLEFPQPLPV  | 2    | 881   |
| >PTEN-F241L YFEFPQPLPVI | 20953 | >PTEN-F241L YLEFPQPLPVI | 28   | 20925 |
| >PTEN-F241L YFEFPQPLPV  | 3869  | >PTEN-F241L YLEFPQPLPV  | 191  | 3678  |
| >PTEN-F241L PTRREDKFM\  | 714   | >PTEN-F241L PTRREDKFM\  | 83   | 631   |
| >PTEN-F241L PTRREDKFM\  | 460   | >PTEN-F241L PTRREDKFM\  | 3821 | 3361  |
| >PTEN-F241L MYFEFPQPL   | 37    | >PTEN-F241L MYLEFPQPL   | 112  | 75    |
| >PTEN-F241L MYFEFPQPLF  | 484   | >PTEN-F241L MYLEFPQPLP  | 1370 | 886   |
| >PTEN-F241L MYFEFPQPLF  | 130   | >PTEN-F241L MYLEFPQPLP  | 301  | 171   |
| >PTEN-F241L MYFEFPQPL   | 36    | >PTEN-F241L MYLEFPQPL   | 337  | 301   |
| >PTEN-F241L MYFEFPQPLF  | 48    | >PTEN-F241L MYLEFPQPLP  | 429  | 381   |
| >PTEN-F241L MYFEFPQPLF  | 105   | >PTEN-F241L MYLEFPQPLP  | 154  | 49    |
| >PTEN-F241L MYFEFPQPLF  | 9     | >PTEN-F241L MYLEFPQPLP  | 12   | 3     |
| >PTEN-F241L MYFEFPQPLF  | 643   | >PTEN-F241L MYLEFPQPLP  | 361  | 282   |
| >PTEN-F241L MYFEFPQPLF  | 103   | >PTEN-F241L MYLEFPQPLP  | 119  | 16    |
| >PTEN-F241L MYFEFPQPLF  | 37    | >PTEN-F241L MYLEFPQPLP  | 77   | 40    |
| >PTEN-F241L MYFEFPQP    | 745   | >PTEN-F241L MYLEFPQP    | 416  | 329   |
| >PTEN-F241L MYFEFPQPLF  | 278   | >PTEN-F241L MYLEFPQPLP  | 180  | 98    |
| >PTEN-F241L MYFEFPQPLF  | 51    | >PTEN-F241L MYLEFPQPLP  | 96   | 45    |
| >PTEN-F241L MYFEFPQPLF  | 436   | >PTEN-F241L MYLEFPQPLP  | 1774 | 1338  |
| >PTEN-F241L MYFEFPQPLF  | 45    | >PTEN-F241L MYLEFPQPLP  | 1220 | 1175  |
| >PTEN-F241L MYFEFPQPLF  | 141   | >PTEN-F241L MYLEFPQPLP  | 73   | 68    |
| >PTEN-F241L MYFEFPQPLF  | 261   | >PTEN-F241L MYLEFPQPLP  | 1102 | 841   |
| >PTEN-F241L MYFEFPQPLF  | 82    | >PTEN-F241L MYLEFPQPLP  | 102  | 20    |
| >PTEN-F241L FMYFEFPQ    | 132   | >PTEN-F241L FMYLEFPQ    | 282  | 150   |
| >PTEN-F241L FMYFEFPQ    | 28    | >PTEN-F241L FMYLEFPQ    | 55   | 27    |
| >PTEN-F241L FMYFEFPQP   | 265   | >PTEN-F241L FMYLEFPQP   | 479  | 214   |
| >PTEN-F241L FMYFEFPQPL  | 379   | >PTEN-F241L FMYLEFPQPL  | 613  | 234   |
| >PTEN-F241L FMYFEFPQ    | 195   | >PTEN-F241L FMYLEFPQ    | 494  | 299   |
| >PTEN-F241L FMYFEFPQ    | 139   | >PTEN-F241L FMYLEFPQ    | 225  | 86    |
| >PTEN-F241L FMYFEFPQ    | 19    | >PTEN-F241L FMYLEFPQ    | 47   | 28    |
| >PTEN-F241L FMYFEFPQPL  | 2     | >PTEN-F241L FMYLEFPQPL  | 2    | 0     |
| >PTEN-F241L FMYFEFPQPL  | 175   | >PTEN-F241L FMYLEFPQPL  | 387  | 212   |

|                        |       |                        |       |       |
|------------------------|-------|------------------------|-------|-------|
| >PTEN-F241L FMYFEFPQ   | 168   | >PTEN-F241L FMYLEFPQ   | 313   | 145   |
| >PTEN-F241L FMYFEFPQPL | 3     | >PTEN-F241L FMYLEFPQPL | 5     | 2     |
| >PTEN-F241L FMYFEFPQ   | 58    | >PTEN-F241L FMYLEFPQ   | 69    | 11    |
| >PTEN-F241L FMYFEFPQPL | 5     | >PTEN-F241L FMYLEFPQPL | 5     | 0     |
| >PTEN-F241L FMYFEFPQPL | 7     | >PTEN-F241L FMYLEFPQPL | 11    | 4     |
| >PTEN-F241L FMYFEFPQ   | 14    | >PTEN-F241L FMYLEFPQ   | 22    | 8     |
| >PTEN-F241L FMYFEFPQPL | 3     | >PTEN-F241L FMYLEFPQPL | 3     | 0     |
| >PTEN-F241L FMYFEFPQ   | 310   | >PTEN-F241L FMYLEFPQ   | 646   | 336   |
| >PTEN-F241L FMYFEFPQPL | 43    | >PTEN-F241L FMYLEFPQPL | 90    | 47    |
| >PTEN-F241L FMYFEFPQPL | 83    | >PTEN-F241L FMYLEFPQPL | 145   | 62    |
| >PTEN-F241L FMYFEFPQPL | 250   | >PTEN-F241L FMYLEFPQPL | 342   | 92    |
| >PTEN-F241L FMYFEFPQ   | 357   | >PTEN-F241L FMYLEFPQ   | 751   | 394   |
| >PTEN-F241L FMYFEFPQPL | 6     | >PTEN-F241L FMYLEFPQPL | 8     | 2     |
| >PTEN-F241L FMYFEFPQPL | 56    | >PTEN-F241L FMYLEFPQPL | 42    | 14    |
| >PTEN-F241L FMYFEFPQPL | 120   | >PTEN-F241L FMYLEFPQPL | 176   | 56    |
| >PTEN-F241L KFMYLEFPQF | 235   | >PTEN-F241L KFMYLEFPQF | 714   | 479   |
| >PTEN-F241L KFMYLEFPQF | 74    | >PTEN-F241L KFMYLEFPQF | 116   | 42    |
| >PTEN-F241L KFMYLEFPQF | 433   | >PTEN-F241L KFMYLEFPQF | 443   | 10    |
| >PTEN-F241L KFMYLEFPQF | 348   | >PTEN-F241L KFMYLEFPQF | 323   | 25    |
| >PTEN-F241L KFMYLEFPQF | 343   | >PTEN-F241L KFMYLEFPQF | 632   | 289   |
| >PTEN-F241L KFMYLEFPQF | 31    | >PTEN-F241L KFMYLEFPQF | 36    | 5     |
| >PTEN-F241L KFMYLEFPQF | 492   | >PTEN-F241L KFMYLEFPQF | 743   | 251   |
| >PTEN-F241L KFMYLEFP   | 152   | >PTEN-F241L KFMYLEFP   | 222   | 70    |
| >PTEN-F241L KFMYLEFPQF | 96    | >PTEN-F241L KFMYLEFPQF | 108   | 12    |
| >PTEN-F241L DKFMYLEF   | 10    | >PTEN-F241L DKFMYLEF   | 10    | 0     |
| >PTEN-F241L DKFMYLEF   | 149   | >PTEN-F241L DKFMYLEF   | 202   | 53    |
| >PTEN-F241L REDKFMYL   | 435   | >PTEN-F241L REDKFMYL   | 4718  | 4283  |
| >PTEN-F241L REDKFMYL   | 373   | >PTEN-F241L REDKFMYL   | 3481  | 3108  |
| >PTEN-F241L REDKFMYL   | 26    | >PTEN-F241L REDKFMYL   | 7     | 19    |
| >PTEN-F241L REDKFMYLEF | 366   | >PTEN-F241L REDKFMYLEF | 591   | 225   |
| >PTEN-F241L REDKFMYL   | 250   | >PTEN-F241L REDKFMYL   | 76    | 174   |
| >PTEN-F241L REDKFMYL   | 214   | >PTEN-F241L REDKFMYL   | 1254  | 1040  |
| >PTEN-F241L RREDKFMYLE | 195   | >PTEN-F241L RREDKFMYLE | 132   | 63    |
| >PTEN-F241L RREDKFMYLE | 87    | >PTEN-F241L RREDKFMYLE | 61    | 26    |
| >PTEN-F241L RREDKFMYLE | 23    | >PTEN-F241L RREDKFMYLE | 12    | 11    |
| >PTEN-F241L TRREDKFMYL | 74    | >PTEN-F241L TRREDKFMYL | 874   | 800   |
| >PTEN-F241S YFEFPQPLPV | 3869  | >PTEN-F241S YSEFPQPLPV | 271   | 3598  |
| >PTEN-F241S YFEFPQPL   | 23767 | >PTEN-F241S YSEFPQPL   | 30    | 23737 |
| >PTEN-F241S YFEFPQPLPV | 26662 | >PTEN-F241S YSEFPQPLPV | 483   | 26179 |
| >PTEN-F241S PTRREDKFM\ | 714   | >PTEN-F241S PTRREDKFM\ | 287   | 427   |
| >PTEN-F241S PTRREDKFM\ | 460   | >PTEN-F241S PTRREDKFM\ | 23060 | 22600 |
| >PTEN-F241S MYFEFPQPLF | 484   | >PTEN-F241S MYSEFPQPLF | 5448  | 4964  |
| >PTEN-F241S MYFEFPQPLF | 130   | >PTEN-F241S MYSEFPQPLF | 1166  | 1036  |

|                         |      |                         |      |      |
|-------------------------|------|-------------------------|------|------|
| >PTEN-F241S MYFEFPQPLF  | 48   | >PTEN-F241S MYSEFPQPLF  | 105  | 57   |
| >PTEN-F241S MYFEFPQPLF  | 105  | >PTEN-F241S MYSEFPQPLF  | 706  | 601  |
| >PTEN-F241S MYFEFPQPLF  | 9    | >PTEN-F241S MYSEFPQPLF  | 83   | 74   |
| >PTEN-F241S MYFEFPQPLF  | 103  | >PTEN-F241S MYSEFPQPLF  | 1073 | 970  |
| >PTEN-F241S MYFEFPQPLF  | 37   | >PTEN-F241S MYSEFPQPLF  | 113  | 76   |
| >PTEN-F241S MYFEFPQPLF  | 278  | >PTEN-F241S MYSEFPQPLF  | 940  | 662  |
| >PTEN-F241S MYFEFPQPLF  | 51   | >PTEN-F241S MYSEFPQPLF  | 267  | 216  |
| >PTEN-F241S MYFEFPQPLF  | 436  | >PTEN-F241S MYSEFPQPLF  | 4408 | 3972 |
| >PTEN-F241S MYFEFPQPLF  | 45   | >PTEN-F241S MYSEFPQPLF  | 204  | 159  |
| >PTEN-F241S MYFEFPQPLF  | 141  | >PTEN-F241S MYSEFPQPLF  | 746  | 605  |
| >PTEN-F241S MYFEFPQPLF  | 261  | >PTEN-F241S MYSEFPQPLF  | 1758 | 1497 |
| >PTEN-F241S MYFEFPQPLF  | 82   | >PTEN-F241S MYSEFPQPLF  | 97   | 15   |
| >PTEN-F241S FMYFEFPQ    | 132  | >PTEN-F241S FMYSEFPQ    | 92   | 40   |
| >PTEN-F241S FMYFEFPQ    | 28   | >PTEN-F241S FMYSEFPQ    | 22   | 6    |
| >PTEN-F241S FMYFEFPQPL  | 379  | >PTEN-F241S FMYSEFPQPL  | 282  | 97   |
| >PTEN-F241S FMYFEFPQ    | 195  | >PTEN-F241S FMYSEFPQ    | 158  | 37   |
| >PTEN-F241S FMYFEFPQ    | 139  | >PTEN-F241S FMYSEFPQ    | 53   | 86   |
| >PTEN-F241S FMYFEFPQ    | 19   | >PTEN-F241S FMYSEFPQ    | 15   | 4    |
| >PTEN-F241S FMYFEFPQPL  | 2    | >PTEN-F241S FMYSEFPQPL  | 1    | 1    |
| >PTEN-F241S FMYFEFPQPL  | 175  | >PTEN-F241S FMYSEFPQPL  | 105  | 70   |
| >PTEN-F241S FMYFEFPQ    | 168  | >PTEN-F241S FMYSEFPQ    | 132  | 36   |
| >PTEN-F241S FMYFEFPQPL  | 3    | >PTEN-F241S FMYSEFPQPL  | 3    | 0    |
| >PTEN-F241S FMYFEFPQ    | 58   | >PTEN-F241S FMYSEFPQ    | 27   | 31   |
| >PTEN-F241S FMYFEFPQPL  | 5    | >PTEN-F241S FMYSEFPQPL  | 4    | 1    |
| >PTEN-F241S FMYFEFPQPL  | 7    | >PTEN-F241S FMYSEFPQPL  | 6    | 1    |
| >PTEN-F241S FMYFEFPQ    | 14   | >PTEN-F241S FMYSEFPQ    | 7    | 7    |
| >PTEN-F241S FMYFEFPQPL  | 3    | >PTEN-F241S FMYSEFPQPL  | 2    | 1    |
| >PTEN-F241S FMYFEFPQPL  | 710  | >PTEN-F241S FMYSEFPQPL  | 236  | 474  |
| >PTEN-F241S FMYFEFPQ    | 310  | >PTEN-F241S FMYSEFPQ    | 446  | 136  |
| >PTEN-F241S FMYFEFPQPL  | 43   | >PTEN-F241S FMYSEFPQPL  | 32   | 11   |
| >PTEN-F241S FMYFEFPQPL  | 83   | >PTEN-F241S FMYSEFPQPL  | 70   | 13   |
| >PTEN-F241S FMYFEFPQPL  | 250  | >PTEN-F241S FMYSEFPQPL  | 145  | 105  |
| >PTEN-F241S FMYFEFPQ    | 357  | >PTEN-F241S FMYSEFPQ    | 123  | 234  |
| >PTEN-F241S FMYFEFPQPL  | 6    | >PTEN-F241S FMYSEFPQPL  | 3    | 3    |
| >PTEN-F241S FMYFEFPQPL  | 1674 | >PTEN-F241S FMYSEFPQPL  | 468  | 1206 |
| >PTEN-F241S FMYFEFPQPL  | 56   | >PTEN-F241S FMYSEFPQPL  | 20   | 36   |
| >PTEN-F241S FMYFEFPQPL  | 120  | >PTEN-F241S FMYSEFPQPL  | 141  | 21   |
| >PTEN-F241S KFM YFEFPQF | 235  | >PTEN-F241S KFM YSEFPQF | 1107 | 872  |
| >PTEN-F241S KFM YFEFPQF | 74   | >PTEN-F241S KFM YSEFPQF | 190  | 116  |
| >PTEN-F241S KFM YFEFPQF | 433  | >PTEN-F241S KFM YSEFPQF | 488  | 55   |
| >PTEN-F241S KFM YFEFPQF | 348  | >PTEN-F241S KFM YSEFPQF | 439  | 91   |
| >PTEN-F241S KFM YFEFPQF | 343  | >PTEN-F241S KFM YSEFPQF | 301  | 42   |
| >PTEN-F241S KFM YFEFPQF | 31   | >PTEN-F241S KFM YSEFPQF | 107  | 76   |

|                         |      |                         |       |       |
|-------------------------|------|-------------------------|-------|-------|
| >PTEN-F241S KFM YFEFPQF | 492  | >PTEN-F241S KFM YSEFPQF | 845   | 353   |
| >PTEN-F241S KFM YFEFP   | 152  | >PTEN-F241S KFM YSEFP   | 231   | 79    |
| >PTEN-F241S KFM YFEFPQF | 96   | >PTEN-F241S KFM YSEFPQF | 101   | 5     |
| >PTEN-F241S DKFM YFEF   | 10   | >PTEN-F241S DKFM YSEF   | 7     | 3     |
| >PTEN-F241S DKFM YFEF   | 149  | >PTEN-F241S DKFM YSEF   | 448   | 299   |
| >PTEN-F241S REDKFM YF   | 435  | >PTEN-F241S REDKFM YS   | 22519 | 22084 |
| >PTEN-F241S REDKFM YFEF | 747  | >PTEN-F241S REDKFM YSEF | 248   | 499   |
| >PTEN-F241S REDKFM YF   | 373  | >PTEN-F241S REDKFM YS   | 14609 | 14236 |
| >PTEN-F241S REDKFM YF   | 26   | >PTEN-F241S REDKFM YS   | 4409  | 4383  |
| >PTEN-F241S REDKFM YFEF | 366  | >PTEN-F241S REDKFM YSEF | 615   | 249   |
| >PTEN-F241S REDKFM YF   | 250  | >PTEN-F241S REDKFM YS   | 1189  | 939   |
| >PTEN-F241S REDKFM YF   | 214  | >PTEN-F241S REDKFM YS   | 6188  | 5974  |
| >PTEN-F241S RREDKFM YFE | 195  | >PTEN-F241S RREDKFM YSE | 84    | 111   |
| >PTEN-F241S RREDKFM YFE | 87   | >PTEN-F241S RREDKFM YSE | 83    | 4     |
| >PTEN-F241S RREDKFM YFE | 23   | >PTEN-F241S RREDKFM YSE | 16    | 7     |
| >PTEN-F241S TRREDKFM YF | 74   | >PTEN-F241S TRREDKFM YS | 9462  | 9388  |
| >PTEN-F243S FPQPLPVCGE  | 95   | >PTEN-F243S SPQPLPVCGE  | 84    | 11    |
| >PTEN-F243S FPQPLPVCGE  | 360  | >PTEN-F243S SPQPLPVCGE  | 4874  | 4514  |
| >PTEN-F243S FPQPLPVCGE  | 419  | >PTEN-F243S SPQPLPVCGE  | 5521  | 5102  |
| >PTEN-F243S FPQPLPVC    | 387  | >PTEN-F243S SPQPLPVC    | 10004 | 9617  |
| >PTEN-F243S EFPQPLPV    | 2340 | >PTEN-F243S ESPQPLPV    | 43    | 2297  |
| >PTEN-F243S EFPQPLPV    | 1891 | >PTEN-F243S ESPQPLPV    | 77    | 1814  |
| >PTEN-F243S EFPQPLPV    | 296  | >PTEN-F243S ESPQPLPV    | 7311  | 7015  |
| >PTEN-F243S RREDKFM YFE | 195  | >PTEN-F243S RREDKFM YSE | 14738 | 14543 |
| >PTEN-F243S RREDKFM YFE | 87   | >PTEN-F243S RREDKFM YSE | 428   | 341   |
| >PTEN-F243S RREDKFM YFE | 23   | >PTEN-F243S RREDKFM YSE | 822   | 799   |
| >PTEN-F243S YFEFPQPLPV  | 883  | >PTEN-F243S YFESPQPLPV  | 331   | 552   |
| >PTEN-F243S MYFEFPQPLF  | 484  | >PTEN-F243S MYFESPQPLF  | 2959  | 2475  |
| >PTEN-F243S MYFEFPQPLF  | 130  | >PTEN-F243S MYFESPQPLF  | 343   | 213   |
| >PTEN-F243S MYFEFPQPLF  | 48   | >PTEN-F243S MYFESPQPLF  | 107   | 59    |
| >PTEN-F243S MYFEFPQPLF  | 105  | >PTEN-F243S MYFESPQPLF  | 181   | 76    |
| >PTEN-F243S MYFEFPQPLF  | 9    | >PTEN-F243S MYFESPQPLF  | 15    | 6     |
| >PTEN-F243S MYFEFPQPLF  | 103  | >PTEN-F243S MYFESPQPLF  | 125   | 22    |
| >PTEN-F243S MYFEFPQPLF  | 37   | >PTEN-F243S MYFESPQPLF  | 44    | 7     |
| >PTEN-F243S MYFEFPQPLF  | 278  | >PTEN-F243S MYFESPQPLF  | 535   | 257   |
| >PTEN-F243S MYFEFPQPLF  | 51   | >PTEN-F243S MYFESPQPLF  | 45    | 6     |
| >PTEN-F243S MYFEFPQPLF  | 436  | >PTEN-F243S MYFESPQPLF  | 1325  | 889   |
| >PTEN-F243S MYFEFPQPLF  | 45   | >PTEN-F243S MYFESPQPLF  | 81    | 36    |
| >PTEN-F243S MYFEFPQPLF  | 141  | >PTEN-F243S MYFESPQPLF  | 425   | 284   |
| >PTEN-F243S MYFEFPQPLF  | 261  | >PTEN-F243S MYFESPQPLF  | 247   | 14    |
| >PTEN-F243S MYFEFPQPLF  | 82   | >PTEN-F243S MYFESPQPLF  | 92    | 10    |
| >PTEN-F243S FMYFEFPQ    | 132  | >PTEN-F243S FMYFESPQ    | 1119  | 987   |
| >PTEN-F243S FMYFEFPQ    | 28   | >PTEN-F243S FMYFESPQ    | 57    | 29    |

|                        |       |                        |       |       |
|------------------------|-------|------------------------|-------|-------|
| >PTEN-F243S FMYFEFPQPL | 379   | >PTEN-F243S FMYFESPQPL | 512   | 133   |
| >PTEN-F243S FMYFEFPQ   | 195   | >PTEN-F243S FMYFESPQ   | 106   | 89    |
| >PTEN-F243S FMYFEFPQ   | 139   | >PTEN-F243S FMYFESPQ   | 794   | 655   |
| >PTEN-F243S FMYFEFPQ   | 19    | >PTEN-F243S FMYFESPQ   | 42    | 23    |
| >PTEN-F243S FMYFEFPQPL | 2     | >PTEN-F243S FMYFESPQPL | 2     | 0     |
| >PTEN-F243S FMYFEFPQPL | 175   | >PTEN-F243S FMYFESPQPL | 158   | 17    |
| >PTEN-F243S FMYFEFPQ   | 168   | >PTEN-F243S FMYFESPQ   | 394   | 226   |
| >PTEN-F243S FMYFEFPQPL | 3     | >PTEN-F243S FMYFESPQPL | 3     | 0     |
| >PTEN-F243S FMYFEFPQ   | 58    | >PTEN-F243S FMYFESPQ   | 149   | 91    |
| >PTEN-F243S FMYFEFPQPL | 5     | >PTEN-F243S FMYFESPQPL | 5     | 0     |
| >PTEN-F243S FMYFEFPQPL | 7     | >PTEN-F243S FMYFESPQPL | 7     | 0     |
| >PTEN-F243S FMYFEFPQ   | 14    | >PTEN-F243S FMYFESPQ   | 28    | 14    |
| >PTEN-F243S FMYFEFPQPL | 3     | >PTEN-F243S FMYFESPQPL | 3     | 0     |
| >PTEN-F243S FMYFEFPQ   | 310   | >PTEN-F243S FMYFESPQ   | 1195  | 885   |
| >PTEN-F243S FMYFEFPQPL | 43    | >PTEN-F243S FMYFESPQPL | 78    | 35    |
| >PTEN-F243S FMYFEFPQ   | 855   | >PTEN-F243S FMYFESPQ   | 392   | 463   |
| >PTEN-F243S FMYFEFPQPL | 83    | >PTEN-F243S FMYFESPQPL | 63    | 20    |
| >PTEN-F243S FMYFEFPQPL | 250   | >PTEN-F243S FMYFESPQPL | 132   | 118   |
| >PTEN-F243S FMYFEFPQ   | 357   | >PTEN-F243S FMYFESPQ   | 182   | 175   |
| >PTEN-F243S FMYFEFPQPL | 6     | >PTEN-F243S FMYFESPQPL | 7     | 1     |
| >PTEN-F243S FMYFEFPQPL | 892   | >PTEN-F243S FMYFESPQPL | 165   | 727   |
| >PTEN-F243S FMYFEFPQPL | 56    | >PTEN-F243S FMYFESPQPL | 38    | 18    |
| >PTEN-F243S FMYFEFPQPL | 120   | >PTEN-F243S FMYFESPQPL | 120   | 0     |
| >PTEN-F243S KFMYFEFPQF | 235   | >PTEN-F243S KFMYFESPQF | 453   | 218   |
| >PTEN-F243S KFMYFEFPQF | 74    | >PTEN-F243S KFMYFESPQF | 181   | 107   |
| >PTEN-F243S KFMYFEFPQF | 433   | >PTEN-F243S KFMYFESPQF | 725   | 292   |
| >PTEN-F243S KFMYFEFPQF | 348   | >PTEN-F243S KFMYFESPQF | 689   | 341   |
| >PTEN-F243S KFMYFEFPQF | 343   | >PTEN-F243S KFMYFESPQF | 365   | 22    |
| >PTEN-F243S KFMYFEFPQF | 31    | >PTEN-F243S KFMYFESPQF | 110   | 79    |
| >PTEN-F243S KFMYFEFPQF | 745   | >PTEN-F243S KFMYFESPQF | 428   | 317   |
| >PTEN-F243S KFMYFEFPQF | 492   | >PTEN-F243S KFMYFESPQF | 981   | 489   |
| >PTEN-F243S KFMYFEFP   | 152   | >PTEN-F243S KFMYFESP   | 288   | 136   |
| >PTEN-F243S KFMYFEFPQF | 96    | >PTEN-F243S KFMYFESPQF | 101   | 5     |
| >PTEN-F243S DKFMYFEF   | 10    | >PTEN-F243S DKFMYFES   | 4162  | 4152  |
| >PTEN-F243S DKFMYFEF   | 149   | >PTEN-F243S DKFMYFES   | 10259 | 10110 |
| >PTEN-F243S REDKFMYFEF | 366   | >PTEN-F243S REDKFMYFES | 330   | 36    |
| >PTEN-F257L FFHKQNKML  | 289   | >PTEN-F257L LFHKQNKML  | 18    | 271   |
| >PTEN-F257L FFHKQNKML  | 754   | >PTEN-F257L LFHKQNKML  | 31    | 723   |
| >PTEN-F257L EFFHKQNKML | 29358 | >PTEN-F257L ELFHKQNKML | 246   | 29112 |
| >PTEN-F257L EFFHKQNK   | 8722  | >PTEN-F257L ELFHKQNK   | 159   | 8563  |
| >PTEN-F257L EFFHKQNKML | 2973  | >PTEN-F257L ELFHKQNKML | 63    | 2910  |
| >PTEN-F257L EFFHKQNKML | 3677  | >PTEN-F257L ELFHKQNKML | 416   | 3261  |
| >PTEN-F257L EFFHKQNK   | 240   | >PTEN-F257L ELFHKQNK   | 1152  | 912   |

|                         |      |                         |      |      |
|-------------------------|------|-------------------------|------|------|
| >PTEN-F257L EFFHKQNKM   | 159  | >PTEN-F257L ELFHKQNKM   | 656  | 497  |
| >PTEN-F257L EFFHKQNK    | 120  | >PTEN-F257L ELFHKQNK    | 59   | 61   |
| >PTEN-F257L EFFHKQNKM   | 31   | >PTEN-F257L ELFHKQNKM   | 17   | 14   |
| >PTEN-F257L EFFHKQNKM   | 204  | >PTEN-F257L ELFHKQNKM   | 1282 | 1078 |
| >PTEN-F257L LPVCGDIKVEI | 35   | >PTEN-F257L LPVCGDIKVEI | 42   | 7    |
| >PTEN-F257L LPVCGDIKVEI | 484  | >PTEN-F257L LPVCGDIKVEI | 136  | 348  |
| >PTEN-F257L LPVCGDIKVEI | 9    | >PTEN-F257L LPVCGDIKVEI | 27   | 18   |
| >PTEN-F257L LPVCGDIKVEI | 26   | >PTEN-F257L LPVCGDIKVEI | 93   | 67   |
| >PTEN-F257L LPVCGDIKVEI | 499  | >PTEN-F257L LPVCGDIKVEI | 3338 | 2839 |
| >PTEN-F257L LPVCGDIKVEI | 18   | >PTEN-F257L LPVCGDIKVEI | 153  | 135  |
| >PTEN-F257L VEFFHKQNKI  | 136  | >PTEN-F257L VELFHKQNKI  | 219  | 83   |
| >PTEN-F257L VEFFHKQNKI  | 417  | >PTEN-F257L VELFHKQNKI  | 1075 | 658  |
| >PTEN-F257L VEFFHKQNKI  | 42   | >PTEN-F257L VELFHKQNKI  | 243  | 201  |
| >PTEN-F257L VEFFHKQNKI  | 116  | >PTEN-F257L VELFHKQNKI  | 277  | 161  |
| >PTEN-F257L VEFFHKQNKI  | 451  | >PTEN-F257L VELFHKQNKI  | 1208 | 757  |
| >PTEN-F257L VEFFHKQNKI  | 82   | >PTEN-F257L VELFHKQNKI  | 260  | 178  |
| >PTEN-F257L KVEFFHKQNKI | 22   | >PTEN-F257L KVELFHKQNKI | 37   | 15   |
| >PTEN-F257L KVEFFHKQNKI | 184  | >PTEN-F257L KVELFHKQNKI | 446  | 262  |
| >PTEN-F257L IKVEFFHK    | 330  | >PTEN-F257L IKVELFHK    | 1150 | 820  |
| >PTEN-F257L IKVEFFHKQN  | 265  | >PTEN-F257L IKVELFHKQN  | 608  | 343  |
| >PTEN-F257L PVCGDIKVEL  | 395  | >PTEN-F257L PVCGDIKVEL  | 2061 | 1666 |
| >PTEN-F257L PVCGDIKVELI | 21   | >PTEN-F257L PVCGDIKVELI | 144  | 123  |
| >PTEN-F271S FHFVWNTFFI  | 25   | >PTEN-F271S SHFWVNTFFI  | 28   | 3    |
| >PTEN-F271S FHFVWNTFFI  | 126  | >PTEN-F271S SHFWVNTFFI  | 709  | 583  |
| >PTEN-F271S FHFVWNTFFI  | 378  | >PTEN-F271S SHFWVNTFFI  | 925  | 547  |
| >PTEN-F271S FHFVWNTF    | 456  | >PTEN-F271S SHFWVNTF    | 1159 | 703  |
| >PTEN-F271S FHFVWNTF    | 93   | >PTEN-F271S SHFWVNTF    | 432  | 339  |
| >PTEN-F271S FHFVWNTF    | 750  | >PTEN-F271S SHFWVNTF    | 96   | 654  |
| >PTEN-F271S FHFVWNTF    | 7    | >PTEN-F271S SHFWVNTF    | 18   | 11   |
| >PTEN-F271S FHFVWNTF    | 483  | >PTEN-F271S SHFWVNTF    | 919  | 436  |
| >PTEN-F271S FHFVWNTF    | 229  | >PTEN-F271S SHFWVNTF    | 2396 | 2167 |
| >PTEN-F271S FHFVWNTF    | 32   | >PTEN-F271S SHFWVNTF    | 161  | 129  |
| >PTEN-F271S FHFVWNTFFI  | 50   | >PTEN-F271S SHFWVNTFFI  | 287  | 237  |
| >PTEN-F271S FHFVWNTF    | 29   | >PTEN-F271S SHFWVNTF    | 523  | 494  |
| >PTEN-F271S MFHFVWNTF   | 973  | >PTEN-F271S MSHFWVNTF   | 352  | 621  |
| >PTEN-F271S MFHFVWNTF   | 112  | >PTEN-F271S MSHFWVNTF   | 203  | 91   |
| >PTEN-F271S MFHFVWNTF   | 2289 | >PTEN-F271S MSHFWVNTF   | 466  | 1823 |
| >PTEN-F271S MFHFVWNTF   | 462  | >PTEN-F271S MSHFWVNTF   | 603  | 141  |
| >PTEN-F271S MFHFVWNTF   | 42   | >PTEN-F271S MSHFWVNTF   | 1872 | 1830 |
| >PTEN-F271S MFHFVWNTF   | 106  | >PTEN-F271S MSHFWVNTF   | 1298 | 1192 |
| >PTEN-F271S MFHFVWNTF   | 13   | >PTEN-F271S MSHFWVNTF   | 1438 | 1425 |
| >PTEN-F271S MFHFVWNTF   | 15   | >PTEN-F271S MSHFWVNTF   | 3753 | 3738 |
| >PTEN-F271S MFHFVWNTF   | 24   | >PTEN-F271S MSHFWVNTF   | 12   | 12   |



|                       |       |                       |       |       |
|-----------------------|-------|-----------------------|-------|-------|
| >PTEN-F271S MFHFWVNTF | 2274  | >PTEN-F271S MSHFWVNTF | 244   | 2030  |
| >PTEN-F271S MFHFWVNTF | 2585  | >PTEN-F271S MSHFWVNTF | 299   | 2286  |
| >PTEN-F271S MFHFWVNT  | 8338  | >PTEN-F271S MSHFWVNT  | 473   | 7865  |
| >PTEN-F271S MFHFWVNTF | 256   | >PTEN-F271S MSHFWVNTF | 8     | 248   |
| >PTEN-F271S MFHFWVNTF | 4171  | >PTEN-F271S MSHFWVNTF | 223   | 3948  |
| >PTEN-F271S MFHFWVNTF | 1243  | >PTEN-F271S MSHFWVNTF | 132   | 1111  |
| >PTEN-F271S MFHFWVNTF | 690   | >PTEN-F271S MSHFWVNTF | 27    | 663   |
| >PTEN-F271S MFHFWVNTF | 18247 | >PTEN-F271S MSHFWVNTF | 5     | 18242 |
| >PTEN-F271S MFHFWVNTF | 25023 | >PTEN-F271S MSHFWVNTF | 69    | 24954 |
| >PTEN-F271S MFHFWVNTF | 8747  | >PTEN-F271S MSHFWVNTF | 56    | 8691  |
| >PTEN-F271S MFHFWVNTF | 11726 | >PTEN-F271S MSHFWVNTF | 159   | 11567 |
| >PTEN-F271S MFHFWVNT  | 492   | >PTEN-F271S MSHFWVNT  | 28162 | 27670 |
| >PTEN-F271S MFHFWVNTF | 56    | >PTEN-F271S MSHFWVNTF | 11190 | 11134 |
| >PTEN-F271S MFHFWVNTF | 3083  | >PTEN-F271S MSHFWVNTF | 19    | 3064  |
| >PTEN-F271S KMFHFWVN  | 159   | >PTEN-F271S KMSHFWVN  | 1432  | 1273  |
| >PTEN-F271S KMFHFWVN  | 219   | >PTEN-F271S KMSHFWVN  | 2186  | 1967  |
| >PTEN-F271S KMFHFWVN  | 72    | >PTEN-F271S KMSHFWVN  | 69    | 3     |
| >PTEN-F271S KMFHFWVN  | 110   | >PTEN-F271S KMSHFWVN  | 298   | 188   |
| >PTEN-F271S KMFHFWVN  | 163   | >PTEN-F271S KMSHFWVN  | 2530  | 2367  |
| >PTEN-F271S KMFHFWVN  | 29    | >PTEN-F271S KMSHFWVN  | 437   | 408   |
| >PTEN-F271S KMFHFWVN  | 45    | >PTEN-F271S KMSHFWVN  | 785   | 740   |
| >PTEN-F271S KMFHFWVN  | 357   | >PTEN-F271S KMSHFWVN  | 1743  | 1386  |
| >PTEN-F271S KMFHFWVN  | 379   | >PTEN-F271S KMSHFWVN  | 2133  | 1754  |
| >PTEN-F271S KMFHFWVN  | 456   | >PTEN-F271S KMSHFWVN  | 415   | 41    |
| >PTEN-F271S KMFHFWVN  | 133   | >PTEN-F271S KMSHFWVN  | 355   | 222   |
| >PTEN-F271S KMFHFWVN  | 175   | >PTEN-F271S KMSHFWVN  | 643   | 468   |
| >PTEN-F271S KMFHFWVN  | 444   | >PTEN-F271S KMSHFWVN  | 469   | 25    |
| >PTEN-F271S KMFHFWVN  | 89    | >PTEN-F271S KMSHFWVN  | 359   | 270   |
| >PTEN-F271S KMFHFWVN  | 429   | >PTEN-F271S KMSHFWVN  | 5616  | 5187  |
| >PTEN-F271S KMFHFWVN  | 3     | >PTEN-F271S KMSHFWVN  | 9     | 6     |
| >PTEN-F271S KMFHFWVN  | 7     | >PTEN-F271S KMSHFWVN  | 44    | 37    |
| >PTEN-F271S KMFHFWVN  | 34    | >PTEN-F271S KMSHFWVN  | 46    | 12    |
| >PTEN-F271S KMFHFWVN  | 43    | >PTEN-F271S KMSHFWVN  | 68    | 25    |
| >PTEN-F271S KMFHFWVN  | 165   | >PTEN-F271S KMSHFWVN  | 829   | 664   |
| >PTEN-F271S KMFHFWVN  | 248   | >PTEN-F271S KMSHFWVN  | 1239  | 991   |
| >PTEN-F271S KMFHFWVN  | 314   | >PTEN-F271S KMSHFWVN  | 1649  | 1335  |
| >PTEN-F271S KMFHFWVN  | 2     | >PTEN-F271S KMSHFWVN  | 4     | 2     |
| >PTEN-F271S KMFHFWVN  | 3     | >PTEN-F271S KMSHFWVN  | 6     | 3     |
| >PTEN-F271S KMFHFWVN  | 32    | >PTEN-F271S KMSHFWVN  | 136   | 104   |
| >PTEN-F271S KMFHFWVN  | 67    | >PTEN-F271S KMSHFWVN  | 273   | 206   |
| >PTEN-F271S KMFHFWVN  | 121   | >PTEN-F271S KMSHFWVN  | 565   | 444   |
| >PTEN-F271S KMFHFWVN  | 232   | >PTEN-F271S KMSHFWVN  | 924   | 692   |
| >PTEN-F271S KMFHFWVN  | 38    | >PTEN-F271S KMSHFWVN  | 42    | 4     |

|                        |      |                         |       |       |
|------------------------|------|-------------------------|-------|-------|
| >PTEN-F271S KMFHFVVN   | 28   | >PTEN-F271S KMSHFVVN    | 33    | 5     |
| >PTEN-F271S KMFHFVVN   | 100  | >PTEN-F271S KMSHFVVN    | 464   | 364   |
| >PTEN-F271S KMFHFVVN   | 161  | >PTEN-F271S KMSHFVVN    | 1367  | 1206  |
| >PTEN-F271S DKMFHFVVI  | 19   | >PTEN-F271S DKMSHFVVI   | 9     | 10    |
| >PTEN-F271S DKMFHFVVI  | 190  | >PTEN-F271S DKMSHFVVI   | 260   | 70    |
| >PTEN-F271S KDKMFHFVA  | 395  | >PTEN-F271S KDKMSHFVA   | 750   | 355   |
| >PTEN-F271S KKDKMFHF   | 117  | >PTEN-F271S KKDKMSHF    | 53    | 64    |
| >PTEN-F271S LKKDKMFHVA | 474  | >PTEN-F271S LKKDKMSHVA  | 1260  | 786   |
| >PTEN-F271S MLKKDKMF   | 181  | >PTEN-F271S MLKKDKMS    | 3592  | 3411  |
| >PTEN-F271S MLKKDKMF   | 192  | >PTEN-F271S MLKKDKMS    | 16190 | 15998 |
| >PTEN-F271S MLKKDKMFH  | 63   | >PTEN-F271S MLKKDKMSH   | 36    | 27    |
| >PTEN-F271S MLKKDKMF   | 383  | >PTEN-F271S MLKKDKMS    | 22262 | 21879 |
| >PTEN-F271S MLKKDKMF   | 54   | >PTEN-F271S MLKKDKMS    | 16457 | 16403 |
| >PTEN-F271S MLKKDKMFH  | 71   | >PTEN-F271S MLKKDKMSH   | 24    | 47    |
| >PTEN-F271S MLKKDKMFH  | 137  | >PTEN-F271S MLKKDKMSH   | 144   | 7     |
| >PTEN-F271S KMLKKDKMF  | 505  | >PTEN-F271S KMLKKDKMS   | 424   | 81    |
| >PTEN-F271S KMLKKDKMF  | 262  | >PTEN-F271S KMLKKDKMS   | 1186  | 924   |
| >PTEN-F271S KMLKKDKMF  | 188  | >PTEN-F271S KMLKKDKMS   | 600   | 412   |
| >PTEN-F271S KMLKKDKMF  | 162  | >PTEN-F271S KMLKKDKMS   | 466   | 304   |
| >PTEN-F271S KMLKKDKMF  | 359  | >PTEN-F271S KMLKKDKMS   | 1469  | 1110  |
| >PTEN-F271S KMLKKDKMF  | 111  | >PTEN-F271S KMLKKDKMS   | 387   | 276   |
| >PTEN-F271S KMLKKDKMF  | 167  | >PTEN-F271S KMLKKDKMS   | 96    | 71    |
| >PTEN-F271S KMLKKDKMF  | 15   | >PTEN-F271S KMLKKDKMS   | 8     | 7     |
| >PTEN-F271S KMLKKDKMF  | 38   | >PTEN-F271S KMLKKDKMS   | 30    | 8     |
| >PTEN-F271S KMLKKDKMF  | 118  | >PTEN-F271S KMLKKDKMS   | 445   | 327   |
| >PTEN-F271S NKMLKKDKV  | 243  | >PTEN-F271S NKMLKKDKV   | 21416 | 21173 |
| >PTEN-F341C FKVKLYFTK\ | 224  | >PTEN-F341C CKVKLYFTK\  | 4880  | 4656  |
| >PTEN-F341C FKVKLYFTK  | 199  | >PTEN-F341C CKVKLYFTK   | 1466  | 1267  |
| >PTEN-F341C FKVKLYFTK\ | 25   | >PTEN-F341C CKVKLYFTK\  | 152   | 127   |
| >PTEN-F341C NFKVKLYF   | 240  | >PTEN-F341C NCKVKLYF    | 13688 | 13448 |
| >PTEN-F341C NFKVKLYF   | 96   | >PTEN-F341C NCKVKLYF    | 14450 | 14354 |
| >PTEN-F341C NFKVKLYFTK | 142  | >PTEN-F341C NCKVKLYFTK  | 622   | 480   |
| >PTEN-F341C NFKVKLYFTK | 284  | >PTEN-F341C NCKVKLYFTK  | 2138  | 1854  |
| >PTEN-F341C DKANRYFSPN | 39   | >PTEN-F341C DKANRYFSPN  | 10696 | 10657 |
| >PTEN-F341C SPNFVKLYF  | 136  | >PTEN-F341C SPNCKVKLYF  | 72    | 64    |
| >PTEN-F341C SPNFVKVL   | 224  | >PTEN-F341C SPNCKVKL    | 158   | 66    |
| >PTEN-F341C SPNFVKLYF  | 97   | >PTEN-F341C SPNCKVKLYF  | 72    | 25    |
| >PTEN-F341C SPNFVKLY   | 1114 | >PTEN-F341C SPNCKVKLY   | 371   | 743   |
| >PTEN-F341C SPNFVKLYF  | 2116 | >PTEN-F341C SPNCKVKLYF  | 350   | 1766  |
| >PTEN-F341C SPNFVKLY   | 167  | >PTEN-F341C SPNCKVKLY   | 503   | 336   |
| >PTEN-F341C FSPNFVKL   | 5371 | >PTEN-F341C FSPNCKVKL   | 357   | 5014  |
| >PTEN-F341C FSPNFVKLYI | 928  | >PTEN-F341C FSPNCKVKLYI | 181   | 747   |
| >PTEN-F341C FSPNFVKL   | 122  | >PTEN-F341C FSPNCKVKL   | 2054  | 1932  |

|                        |     |                        |      |      |
|------------------------|-----|------------------------|------|------|
| >PTEN-F341CFSPNFKVKLY  | 238 | >PTEN-F341CFSPNCKVKLY  | 235  | 3    |
| >PTEN-F341CFSPNFKVKLYI | 186 | >PTEN-F341CFSPNCKVKLYI | 300  | 114  |
| >PTEN-F341CFSPNFKVKLY  | 138 | >PTEN-F341CFSPNCKVKLY  | 531  | 393  |
| >PTEN-F341CFSPNFKVKLYI | 122 | >PTEN-F341CFSPNCKVKLYI | 192  | 70   |
| >PTEN-F341CFSPNFKVKLY  | 493 | >PTEN-F341CFSPNCKVKLY  | 559  | 66   |
| >PTEN-F341CFSPNFKVKL   | 7   | >PTEN-F341CFSPNCKVKL   | 30   | 23   |
| >PTEN-F341CFSPNFKVKLY  | 84  | >PTEN-F341CFSPNCKVKLY  | 299  | 215  |
| >PTEN-F341CFSPNFKVKLYI | 5   | >PTEN-F341CFSPNCKVKLYI | 10   | 5    |
| >PTEN-F341CFSPNFKVKLY  | 191 | >PTEN-F341CFSPNCKVKLY  | 675  | 484  |
| >PTEN-F341CFSPNFKVKLYI | 536 | >PTEN-F341CFSPNCKVKLYI | 465  | 71   |
| >PTEN-F341CYFSPNFKV    | 149 | >PTEN-F341CYFSPNCKV    | 562  | 413  |
| >PTEN-F341CYFSPNFKV    | 274 | >PTEN-F341CYFSPNCKV    | 623  | 349  |
| >PTEN-F341CYFSPNFKV    | 347 | >PTEN-F341CYFSPNCKV    | 664  | 317  |
| >PTEN-F341CYFSPNFKV    | 18  | >PTEN-F341CYFSPNCKV    | 24   | 6    |
| >PTEN-F341CYFSPNFKV    | 183 | >PTEN-F341CYFSPNCKV    | 1414 | 1231 |
| >PTEN-F341CYFSPNFKVK   | 422 | >PTEN-F341CYFSPNCKVK   | 2835 | 2413 |
| >PTEN-F341CYFSPNFKVKL  | 14  | >PTEN-F341CYFSPNCKVKL  | 25   | 11   |
| >PTEN-F341CYFSPNFKVKL' | 13  | >PTEN-F341CYFSPNCKVKL' | 15   | 2    |
| >PTEN-F341CYFSPNFKVKL' | 449 | >PTEN-F341CYFSPNCKVKL' | 483  | 34   |
| >PTEN-F341CYFSPNFKVKL' | 207 | >PTEN-F341CYFSPNCKVKL' | 137  | 70   |
| >PTEN-F341CYFSPNFKVK   | 356 | >PTEN-F341CYFSPNCKVK   | 3626 | 3270 |
| >PTEN-F341CRYFSPNFKV   | 92  | >PTEN-F341CRYFSPNCKV   | 166  | 74   |
| >PTEN-F341CRYFSPNFKV   | 634 | >PTEN-F341CRYFSPNCKV   | 440  | 194  |
| >PTEN-F341CRYFSPNFK    | 143 | >PTEN-F341CRYFSPNCK    | 979  | 836  |
| >PTEN-F341CRYFSPNFK    | 41  | >PTEN-F341CRYFSPNCK    | 149  | 108  |
| >PTEN-F341CRYFSPNFKVK  | 196 | >PTEN-F341CRYFSPNCKVK  | 314  | 118  |
| >PTEN-F341CRYFSPNFKVK  | 412 | >PTEN-F341CRYFSPNCKVK  | 702  | 290  |
| >PTEN-F341CRYFSPNFK    | 208 | >PTEN-F341CRYFSPNCK    | 2261 | 2053 |
| >PTEN-F341CRYFSPNFKV   | 20  | >PTEN-F341CRYFSPNCKV   | 121  | 101  |
| >PTEN-F341CRYFSPNFKVK  | 104 | >PTEN-F341CRYFSPNCKVK  | 456  | 352  |
| >PTEN-F341CRYFSPNFKVK  | 5   | >PTEN-F341CRYFSPNCKVK  | 7    | 2    |
| >PTEN-F341CRYFSPNFK    | 5   | >PTEN-F341CRYFSPNCK    | 11   | 6    |
| >PTEN-F341CRYFSPNFKV   | 209 | >PTEN-F341CRYFSPNCKV   | 128  | 81   |
| >PTEN-F341CRYFSPNFKVK  | 9   | >PTEN-F341CRYFSPNCKVK  | 13   | 4    |
| >PTEN-F341CRYFSPNFKVK  | 448 | >PTEN-F341CRYFSPNCKVK  | 660  | 212  |
| >PTEN-F341CRYFSPNFK    | 15  | >PTEN-F341CRYFSPNCK    | 61   | 46   |
| >PTEN-F341CRYFSPNFKV   | 206 | >PTEN-F341CRYFSPNCKV   | 1938 | 1732 |
| >PTEN-F341CRYFSPNFKVK  | 342 | >PTEN-F341CRYFSPNCKVK  | 855  | 513  |
| >PTEN-F341CRYFSPNFKV   | 238 | >PTEN-F341CRYFSPNCKV   | 891  | 653  |
| >PTEN-F341CRYFSPNFKVK  | 48  | >PTEN-F341CRYFSPNCKVK  | 127  | 79   |
| >PTEN-F341CRYFSPNFKVK  | 514 | >PTEN-F341CRYFSPNCKVK  | 457  | 57   |
| >PTEN-F341CRYFSPNFK    | 23  | >PTEN-F341CRYFSPNCK    | 63   | 40   |
| >PTEN-F341CRYFSPNFKVK  | 24  | >PTEN-F341CRYFSPNCKVK  | 41   | 17   |

|                        |      |                        |       |       |
|------------------------|------|------------------------|-------|-------|
| >PTEN-F341C RYFSPNFKV  | 223  | >PTEN-F341C RYFSPNCKV  | 959   | 736   |
| >PTEN-F341C RYFSPNFKVK | 319  | >PTEN-F341C RYFSPNCKVK | 600   | 281   |
| >PTEN-F341C RYFSPNFK   | 157  | >PTEN-F341C RYFSPNCK   | 871   | 714   |
| >PTEN-F341C RYFSPNFKV  | 242  | >PTEN-F341C RYFSPNCKV  | 427   | 185   |
| >PTEN-F341C RYFSPNFKVK | 185  | >PTEN-F341C RYFSPNCKVK | 341   | 156   |
| >PTEN-F341C NRYFSPNFK  | 331  | >PTEN-F341C NRYFSPNCK  | 1735  | 1404  |
| >PTEN-F341C NRYFSPNF   | 18   | >PTEN-F341C NRYFSPNC   | 5351  | 5333  |
| >PTEN-F341C NRYFSPNF   | 1982 | >PTEN-F341C NRYFSPNC   | 171   | 1811  |
| >PTEN-F341C NRYFSPNFKV | 221  | >PTEN-F341C NRYFSPNCKV | 689   | 468   |
| >PTEN-F341C NRYFSPNFK  | 120  | >PTEN-F341C NRYFSPNCK  | 284   | 164   |
| >PTEN-F341C NRYFSPNFKV | 151  | >PTEN-F341C NRYFSPNCKV | 507   | 356   |
| >PTEN-F341C ANRYFSPNF  | 389  | >PTEN-F341C ANRYFSPNC  | 4906  | 4517  |
| >PTEN-F341C ANRYFSPNF  | 450  | >PTEN-F341C ANRYFSPNC  | 728   | 278   |
| >PTEN-F341C ANRYFSPNFK | 4    | >PTEN-F341C ANRYFSPNCK | 10    | 6     |
| >PTEN-F341C ANRYFSPNFK | 174  | >PTEN-F341C ANRYFSPNCK | 130   | 44    |
| >PTEN-F341C ANRYFSPNF  | 13   | >PTEN-F341C ANRYFSPNC  | 6575  | 6562  |
| >PTEN-F341C KANRYFSPNF | 46   | >PTEN-F341C KANRYFSPNC | 138   | 92    |
| >PTEN-F341C KANRYFSPNF | 12   | >PTEN-F341C KANRYFSPNC | 30    | 18    |
| >PTEN-F341C KANRYFSPNF | 4    | >PTEN-F341C KANRYFSPNC | 14    | 10    |
| >PTEN-F341C KANRYFSPNF | 17   | >PTEN-F341C KANRYFSPNC | 74    | 57    |
| >PTEN-F341C KANRYFSPNF | 416  | >PTEN-F341C KANRYFSPNC | 13258 | 12842 |
| >PTEN-F341C KANRYFSPNF | 469  | >PTEN-F341C KANRYFSPNC | 2109  | 1640  |
| >PTEN-F341C KANRYFSPNF | 279  | >PTEN-F341C KANRYFSPNC | 17711 | 17432 |
| >PTEN-F341C KANRYFSPNF | 11   | >PTEN-F341C KANRYFSPNC | 4603  | 4592  |
| >PTEN-F341C KANRYFSPNF | 29   | >PTEN-F341C KANRYFSPNC | 14703 | 14674 |
| >PTEN-F341C KANRYFSPNF | 373  | >PTEN-F341C KANRYFSPNC | 19626 | 19253 |
| >PTEN-F341C KANRYFSPNF | 21   | >PTEN-F341C KANRYFSPNC | 2565  | 2544  |
| >PTEN-F341\ FKVKLYFTK\ | 224  | >PTEN-F341\ VKVKLYFTK\ | 2315  | 2091  |
| >PTEN-F341\ FKVKLYFTK  | 199  | >PTEN-F341\ VKVKLYFTK  | 752   | 553   |
| >PTEN-F341\ FKVKLYFTK\ | 25   | >PTEN-F341\ VKVKLYFTK\ | 76    | 51    |
| >PTEN-F341\ NFKVKLYFTK | 1063 | >PTEN-F341\ NVKVKLYFTK | 125   | 938   |
| >PTEN-F341\ NFKVKLYF   | 240  | >PTEN-F341\ NVKVKLYF   | 6477  | 6237  |
| >PTEN-F341\ NFKVKLYF   | 96   | >PTEN-F341\ NVKVKLYF   | 7275  | 7179  |
| >PTEN-F341\ NFKVKLYFTK | 142  | >PTEN-F341\ NVKVKLYFTK | 34    | 108   |
| >PTEN-F341\ NFKVKLYFTK | 284  | >PTEN-F341\ NVKVKLYFTK | 586   | 302   |
| >PTEN-F341\ NFKVKLYFTK | 570  | >PTEN-F341\ NVKVKLYFTK | 131   | 439   |
| >PTEN-F341\ DKANRYFSPN | 39   | >PTEN-F341\ DKANRYFSPN | 1524  | 1485  |
| >PTEN-F341\ SPNFKVKLYF | 136  | >PTEN-F341\ SPNVKVKLYF | 169   | 33    |
| >PTEN-F341\ SPNFKVKL   | 224  | >PTEN-F341\ SPNVKVKL   | 217   | 7     |
| >PTEN-F341\ SPNFKVKLYF | 97   | >PTEN-F341\ SPNVKVKLYF | 113   | 16    |
| >PTEN-F341\ SPNFKVKLY  | 167  | >PTEN-F341\ SPNVKVKLY  | 122   | 45    |
| >PTEN-F341\ SPNFKVKLY  | 1222 | >PTEN-F341\ SPNVKVKLY  | 476   | 746   |
| >PTEN-F341\ SPNFKVKLYF | 880  | >PTEN-F341\ SPNVKVKLYF | 416   | 464   |

|                        |     |                        |      |      |
|------------------------|-----|------------------------|------|------|
| >PTEN-F341\FSPNFKVKL   | 122 | >PTEN-F341\FSPNVKVKL   | 4154 | 4032 |
| >PTEN-F341\FSPNFKVKLY  | 238 | >PTEN-F341\FSPNVKVKLY  | 138  | 100  |
| >PTEN-F341\FSPNFKVKLYI | 186 | >PTEN-F341\FSPNVKVKLY  | 147  | 39   |
| >PTEN-F341\FSPNFKVKLY  | 138 | >PTEN-F341\FSPNVKVKLY  | 150  | 12   |
| >PTEN-F341\FSPNFKVKL   | 544 | >PTEN-F341\FSPNVKVKL   | 267  | 277  |
| >PTEN-F341\FSPNFKVKLYI | 122 | >PTEN-F341\FSPNVKVKLY  | 291  | 169  |
| >PTEN-F341\FSPNFKVKLY  | 493 | >PTEN-F341\FSPNVKVKLY  | 878  | 385  |
| >PTEN-F341\FSPNFKVKL   | 7   | >PTEN-F341\FSPNVKVKL   | 18   | 11   |
| >PTEN-F341\FSPNFKVKLY  | 84  | >PTEN-F341\FSPNVKVKLY  | 190  | 106  |
| >PTEN-F341\FSPNFKVKLYI | 5   | >PTEN-F341\FSPNVKVKLY  | 8    | 3    |
| >PTEN-F341\FSPNFKVKLY  | 191 | >PTEN-F341\FSPNVKVKLY  | 525  | 334  |
| >PTEN-F341\YFSPNFKV    | 149 | >PTEN-F341\YFSPNVKV    | 297  | 148  |
| >PTEN-F341\YFSPNFKV    | 274 | >PTEN-F341\YFSPNVKV    | 376  | 102  |
| >PTEN-F341\YFSPNFKV    | 347 | >PTEN-F341\YFSPNVKV    | 686  | 339  |
| >PTEN-F341\YFSPNFKV    | 18  | >PTEN-F341\YFSPNVKV    | 25   | 7    |
| >PTEN-F341\YFSPNFKV    | 183 | >PTEN-F341\YFSPNVKV    | 475  | 292  |
| >PTEN-F341\YFSPNFKVK   | 422 | >PTEN-F341\YFSPNVKVK   | 1221 | 799  |
| >PTEN-F341\YFSPNFKVKL  | 14  | >PTEN-F341\YFSPNVKVKL  | 14   | 0    |
| >PTEN-F341\YFSPNFKVKL' | 13  | >PTEN-F341\YFSPNVKVKL' | 20   | 7    |
| >PTEN-F341\YFSPNFKVKL' | 449 | >PTEN-F341\YFSPNVKVKL' | 413  | 36   |
| >PTEN-F341\YFSPNFKVKL' | 207 | >PTEN-F341\YFSPNVKVKL' | 142  | 65   |
| >PTEN-F341\YFSPNFKVK   | 356 | >PTEN-F341\YFSPNVKVK   | 1948 | 1592 |
| >PTEN-F341\RYFSPNFKV   | 92  | >PTEN-F341\RYFSPNVKV   | 370  | 278  |
| >PTEN-F341\RYFSPNFK    | 143 | >PTEN-F341\RYFSPNVK    | 666  | 523  |
| >PTEN-F341\RYFSPNFK    | 41  | >PTEN-F341\RYFSPNVK    | 196  | 155  |
| >PTEN-F341\RYFSPNFKVK  | 196 | >PTEN-F341\RYFSPNVKVK  | 200  | 4    |
| >PTEN-F341\RYFSPNFKVK  | 412 | >PTEN-F341\RYFSPNVKVK  | 563  | 151  |
| >PTEN-F341\RYFSPNFK    | 208 | >PTEN-F341\RYFSPNVK    | 345  | 137  |
| >PTEN-F341\RYFSPNFKV   | 20  | >PTEN-F341\RYFSPNVKV   | 30   | 10   |
| >PTEN-F341\RYFSPNFKVK  | 104 | >PTEN-F341\RYFSPNVKVK  | 204  | 100  |
| >PTEN-F341\RYFSPNFKVK  | 5   | >PTEN-F341\RYFSPNVKVK  | 5    | 0    |
| >PTEN-F341\RYFSPNFK    | 5   | >PTEN-F341\RYFSPNVK    | 7    | 2    |
| >PTEN-F341\RYFSPNFKV   | 209 | >PTEN-F341\RYFSPNVKV   | 246  | 37   |
| >PTEN-F341\RYFSPNFKVK  | 9   | >PTEN-F341\RYFSPNVKVK  | 10   | 1    |
| >PTEN-F341\RYFSPNFKVK  | 448 | >PTEN-F341\RYFSPNVKVK  | 654  | 206  |
| >PTEN-F341\RYFSPNFK    | 15  | >PTEN-F341\RYFSPNVK    | 58   | 43   |
| >PTEN-F341\RYFSPNFKV   | 206 | >PTEN-F341\RYFSPNVKV   | 1203 | 997  |
| >PTEN-F341\RYFSPNFKVK  | 342 | >PTEN-F341\RYFSPNVKVK  | 709  | 367  |
| >PTEN-F341\RYFSPNFKV   | 238 | >PTEN-F341\RYFSPNVKV   | 151  | 87   |
| >PTEN-F341\RYFSPNFKVK  | 48  | >PTEN-F341\RYFSPNVKVK  | 46   | 2    |
| >PTEN-F341\RYFSPNFKVK  | 514 | >PTEN-F341\RYFSPNVKVK  | 438  | 76   |
| >PTEN-F341\RYFSPNFK    | 23  | >PTEN-F341\RYFSPNVK    | 43   | 20   |
| >PTEN-F341\RYFSPNFKVK  | 24  | >PTEN-F341\RYFSPNVKVK  | 36   | 12   |

|                        |       |                        |       |       |
|------------------------|-------|------------------------|-------|-------|
| >PTEN-F341\RYFSPNFKV   | 223   | >PTEN-F341\RYFSPNVKV   | 666   | 443   |
| >PTEN-F341\RYFSPNFKVK  | 319   | >PTEN-F341\RYFSPNVKVK  | 507   | 188   |
| >PTEN-F341\RYFSPNFK    | 157   | >PTEN-F341\RYFSPNVK    | 781   | 624   |
| >PTEN-F341\RYFSPNFKV   | 242   | >PTEN-F341\RYFSPNVKV   | 314   | 72    |
| >PTEN-F341\RYFSPNFKVK  | 185   | >PTEN-F341\RYFSPNVKVK  | 239   | 54    |
| >PTEN-F341\NRYFSPNFK   | 331   | >PTEN-F341\NRYFSPNVK   | 2566  | 2235  |
| >PTEN-F341\NRYFSPNF    | 18    | >PTEN-F341\NRYFSPNV    | 619   | 601   |
| >PTEN-F341\NRYFSPNF    | 1982  | >PTEN-F341\NRYFSPNV    | 253   | 1729  |
| >PTEN-F341\NRYFSPNFKV  | 221   | >PTEN-F341\NRYFSPNVKV  | 193   | 28    |
| >PTEN-F341\NRYFSPNFK   | 120   | >PTEN-F341\NRYFSPNVK   | 205   | 85    |
| >PTEN-F341\NRYFSPNFKV  | 151   | >PTEN-F341\NRYFSPNVKV  | 302   | 151   |
| >PTEN-F341\ANRYFSPNF   | 389   | >PTEN-F341\ANRYFSPNV   | 753   | 364   |
| >PTEN-F341\ANRYFSPNF   | 450   | >PTEN-F341\ANRYFSPNV   | 20    | 430   |
| >PTEN-F341\ANRYFSPNFK  | 4     | >PTEN-F341\ANRYFSPNVk  | 6     | 2     |
| >PTEN-F341\ANRYFSPNFK  | 174   | >PTEN-F341\ANRYFSPNVk  | 193   | 19    |
| >PTEN-F341\ANRYFSPNF   | 13    | >PTEN-F341\ANRYFSPNV   | 574   | 561   |
| >PTEN-F341\KANRYFSPNF  | 22252 | >PTEN-F341\KANRYFSPNV  | 435   | 21817 |
| >PTEN-F341\KANRYFSPNF  | 23588 | >PTEN-F341\KANRYFSPNV  | 268   | 23320 |
| >PTEN-F341\KANRYFSPNF  | 46    | >PTEN-F341\KANRYFSPNV  | 101   | 55    |
| >PTEN-F341\KANRYFSPNF  | 12    | >PTEN-F341\KANRYFSPNV  | 37    | 25    |
| >PTEN-F341\KANRYFSPNF  | 819   | >PTEN-F341\KANRYFSPNV  | 36    | 783   |
| >PTEN-F341\KANRYFSPNF  | 4     | >PTEN-F341\KANRYFSPNV  | 8     | 4     |
| >PTEN-F341\KANRYFSPNF  | 17    | >PTEN-F341\KANRYFSPNV  | 78    | 61    |
| >PTEN-F341\KANRYFSPNF  | 416   | >PTEN-F341\KANRYFSPNV  | 4849  | 4433  |
| >PTEN-F341\KANRYFSPNF  | 469   | >PTEN-F341\KANRYFSPNV  | 2530  | 2061  |
| >PTEN-F341\KANRYFSPNF  | 19402 | >PTEN-F341\KANRYFSPNV  | 353   | 19049 |
| >PTEN-F341\KANRYFSPNF  | 279   | >PTEN-F341\KANRYFSPNV  | 8878  | 8599  |
| >PTEN-F341\KANRYFSPNF  | 11    | >PTEN-F341\KANRYFSPNV  | 330   | 319   |
| >PTEN-F341\KANRYFSPNF  | 29    | >PTEN-F341\KANRYFSPNV  | 4132  | 4103  |
| >PTEN-F341\KANRYFSPNF  | 373   | >PTEN-F341\KANRYFSPNV  | 14608 | 14235 |
| >PTEN-F341\KANRYFSPNF  | 21    | >PTEN-F341\KANRYFSPNV  | 2240  | 2219  |
| >PTEN-F37S- FPAERLEGV  | 65    | >PTEN-F37S- SPAERLEGV  | 528   | 463   |
| >PTEN-F37S- FPAERLEGVY | 125   | >PTEN-F37S- SPAERLEGVY | 453   | 328   |
| >PTEN-F37S- FPAERLEGV  | 277   | >PTEN-F37S- SPAERLEGV  | 1162  | 885   |
| >PTEN-F37S- FPAERLEGV  | 67    | >PTEN-F37S- SPAERLEGV  | 175   | 108   |
| >PTEN-F37S- FPAERLEGV  | 226   | >PTEN-F37S- SPAERLEGV  | 244   | 18    |
| >PTEN-F37S- FPAERLEGVY | 481   | >PTEN-F37S- SPAERLEGVY | 1577  | 1096  |
| >PTEN-F37S- FPAERLEGVY | 17    | >PTEN-F37S- SPAERLEGVY | 143   | 126   |
| >PTEN-F37S- FPAERLEGV  | 250   | >PTEN-F37S- SPAERLEGV  | 4669  | 4419  |
| >PTEN-F37S- FPAERLEGVY | 170   | >PTEN-F37S- SPAERLEGVY | 2193  | 2023  |
| >PTEN-F37S- FPAERLEG   | 462   | >PTEN-F37S- SPAERLEG   | 10665 | 10203 |
| >PTEN-F37S- FPAERLEGV  | 85    | >PTEN-F37S- SPAERLEGV  | 7925  | 7840  |
| >PTEN-F37S- FPAERLEGVY | 29    | >PTEN-F37S- SPAERLEGVY | 35    | 6     |

|                         |       |                         |       |       |
|-------------------------|-------|-------------------------|-------|-------|
| >PTEN-F37S- FPAERLEGVY  | 82    | >PTEN-F37S- SPAERLEGVY  | 2853  | 2771  |
| >PTEN-F37S- FPAERLEGVY  | 459   | >PTEN-F37S- SPAERLEGVY  | 369   | 90    |
| >PTEN-F37S- GFPAERLEGV  | 291   | >PTEN-F37S- GSPAERLEGV  | 2869  | 2578  |
| >PTEN-F37S- GFPAERLEGV  | 821   | >PTEN-F37S- GSPAERLEGV  | 246   | 575   |
| >PTEN-F37S- GFPAERLEGV  | 19892 | >PTEN-F37S- GSPAERLEGV  | 367   | 19525 |
| >PTEN-F37S- YIYPNIIAMGF | 464   | >PTEN-F37S- YIYPNIIAMGS | 200   | 264   |
| >PTEN-F37S- YIYPNIIAMGF | 31    | >PTEN-F37S- YIYPNIIAMGS | 100   | 69    |
| >PTEN-F37S- YIYPNIIAMGF | 73    | >PTEN-F37S- YIYPNIIAMGS | 87    | 14    |
| >PTEN-F37S- YIYPNIIAMGF | 338   | >PTEN-F37S- YIYPNIIAMGS | 156   | 182   |
| >PTEN-F37S- YIYPNIIAMGF | 133   | >PTEN-F37S- YIYPNIIAMGS | 19761 | 19628 |
| >PTEN-F37S- YIYPNIIAMGF | 214   | >PTEN-F37S- YIYPNIIAMGS | 15307 | 15093 |
| >PTEN-F37S- YIYPNIIAMGF | 417   | >PTEN-F37S- YIYPNIIAMGS | 22102 | 21685 |
| >PTEN-F37S- YIYPNIIAMGF | 92    | >PTEN-F37S- YIYPNIIAMGS | 6368  | 6276  |
| >PTEN-F37S- YIYPNIIAMGF | 311   | >PTEN-F37S- YIYPNIIAMGS | 19664 | 19353 |
| >PTEN-F37S- YIYPNIIAMGF | 63    | >PTEN-F37S- YIYPNIIAMGS | 10836 | 10773 |
| >PTEN-F37S- YIYPNIIAMGF | 93    | >PTEN-F37S- YIYPNIIAMGS | 10382 | 10289 |
| >PTEN-F37S- YIYPNIIAMGF | 16    | >PTEN-F37S- YIYPNIIAMGS | 8758  | 8742  |
| >PTEN-F37S- YIYPNIIAMGF | 8     | >PTEN-F37S- YIYPNIIAMGS | 9929  | 9921  |
| >PTEN-F37S- YIYPNIIAMGF | 173   | >PTEN-F37S- YIYPNIIAMGS | 8557  | 8384  |
| >PTEN-F37S- MGFPFAERLE  | 257   | >PTEN-F37S- MGSPAERLE   | 526   | 269   |
| >PTEN-F37S- MGFPFAERLE  | 186   | >PTEN-F37S- MGSPAERLE   | 543   | 357   |
| >PTEN-F37S- MGFPFAERLE  | 355   | >PTEN-F37S- MGSPAERLE   | 3596  | 3241  |
| >PTEN-F37S- MGFPFAERL   | 378   | >PTEN-F37S- MGSPAERL    | 1729  | 1351  |
| >PTEN-F37S- MGFPFAERLE  | 46    | >PTEN-F37S- MGSPAERLE   | 196   | 150   |
| >PTEN-F37S- MGFPFAERL   | 258   | >PTEN-F37S- MGSPAERL    | 1922  | 1664  |
| >PTEN-F37S- AMGFPAERL   | 365   | >PTEN-F37S- AMGSPAERL   | 265   | 100   |
| >PTEN-F37S- AMGFPAERL   | 15    | >PTEN-F37S- AMGSPAERL   | 10    | 5     |
| >PTEN-F37S- AMGFPAERL   | 454   | >PTEN-F37S- AMGSPAERL   | 323   | 131   |
| >PTEN-F37S- AMGFPAERL   | 403   | >PTEN-F37S- AMGSPAERL   | 190   | 213   |
| >PTEN-F37S- AMGFPAERL   | 195   | >PTEN-F37S- AMGSPAERL   | 127   | 68    |
| >PTEN-F37S- AMGFPAERL   | 29    | >PTEN-F37S- AMGSPAERL   | 12    | 17    |
| >PTEN-F37S- AMGFPAER    | 75    | >PTEN-F37S- AMGSPAER    | 75    | 0     |
| >PTEN-F37S- IAMGFPAERL  | 65    | >PTEN-F37S- IAMGSPAERL  | 191   | 126   |
| >PTEN-F37S- IAMGFPAERL  | 445   | >PTEN-F37S- IAMGSPAERL  | 1022  | 577   |
| >PTEN-F37S- IAMGFPAER   | 222   | >PTEN-F37S- IAMGSPAER   | 685   | 463   |
| >PTEN-F37S- IAMGFPAER   | 32    | >PTEN-F37S- IAMGSPAER   | 86    | 54    |
| >PTEN-F37S- IAMGFPAER   | 58    | >PTEN-F37S- IAMGSPAER   | 189   | 131   |
| >PTEN-F37S- IAMGFPAER   | 8     | >PTEN-F37S- IAMGSPAER   | 11    | 3     |
| >PTEN-F37S- IAMGFPAERL  | 19    | >PTEN-F37S- IAMGSPAERL  | 9     | 10    |
| >PTEN-F37S- IAMGFPAERL  | 332   | >PTEN-F37S- IAMGSPAERL  | 470   | 138   |
| >PTEN-F37S- IAMGFPAERL  | 476   | >PTEN-F37S- IAMGSPAERL  | 340   | 136   |
| >PTEN-F37S- IAMGFPAER   | 268   | >PTEN-F37S- IAMGSPAER   | 2062  | 1794  |
| >PTEN-F37S- IIAMGFPA    | 369   | >PTEN-F37S- IIAMGSPA    | 2917  | 2548  |

|                       |     |                       |       |       |
|-----------------------|-----|-----------------------|-------|-------|
| >PTEN-F37S-IIAMGFPA   | 311 | >PTEN-F37S-IIAMGSPA   | 812   | 501   |
| >PTEN-F37S-IIAMGFPAER | 200 | >PTEN-F37S-IIAMGSPAER | 202   | 2     |
| >PTEN-F37S-IIAMGFPA   | 65  | >PTEN-F37S-IIAMGSPA   | 35    | 30    |
| >PTEN-F37S-IIAMGFPA   | 35  | >PTEN-F37S-IIAMGSPA   | 240   | 205   |
| >PTEN-F37S-IIAMGFPAER | 213 | >PTEN-F37S-IIAMGSPAER | 444   | 231   |
| >PTEN-F37S-IIAMGFPAER | 471 | >PTEN-F37S-IIAMGSPAER | 425   | 46    |
| >PTEN-F37S-IIAMGFPA   | 206 | >PTEN-F37S-IIAMGSPA   | 494   | 288   |
| >PTEN-F37S-IIAMGFPAER | 73  | >PTEN-F37S-IIAMGSPAER | 78    | 5     |
| >PTEN-F37S-IIAMGFPAER | 83  | >PTEN-F37S-IIAMGSPAER | 151   | 68    |
| >PTEN-F37S-IIAMGFPAER | 468 | >PTEN-F37S-IIAMGSPAER | 1066  | 598   |
| >PTEN-F37S-IIAMGFPAER | 12  | >PTEN-F37S-IIAMGSPAER | 12    | 0     |
| >PTEN-F37S-IIAMGFPAER | 273 | >PTEN-F37S-IIAMGSPAER | 1083  | 810   |
| >PTEN-F37S-NIIAMGFPA  | 391 | >PTEN-F37S-NIIAMGSPA  | 1539  | 1148  |
| >PTEN-F37S-NIIAMGFPA  | 162 | >PTEN-F37S-NIIAMGSPA  | 43    | 119   |
| >PTEN-F37S-NIIAMGFPA  | 32  | >PTEN-F37S-NIIAMGSPA  | 522   | 490   |
| >PTEN-F37S-NIIAMGFPAE | 150 | >PTEN-F37S-NIIAMGSPA  | 452   | 302   |
| >PTEN-F37S-NIIAMGFPAE | 115 | >PTEN-F37S-NIIAMGSPA  | 281   | 166   |
| >PTEN-F37S-NIIAMGFPAE | 8   | >PTEN-F37S-NIIAMGSPA  | 12    | 4     |
| >PTEN-F37S-NIIAMGFPA  | 28  | >PTEN-F37S-NIIAMGSPA  | 100   | 72    |
| >PTEN-F37S-NIIAMGFPA  | 154 | >PTEN-F37S-NIIAMGSPA  | 1691  | 1537  |
| >PTEN-F37S-NIIAMGFPAE | 235 | >PTEN-F37S-NIIAMGSPA  | 838   | 603   |
| >PTEN-F37S-YPNIIAMGF  | 281 | >PTEN-F37S-YPNIIAMGS  | 18461 | 18180 |
| >PTEN-F37S-YPNIIAMGFP | 91  | >PTEN-F37S-YPNIIAMGSP | 51    | 40    |
| >PTEN-F37S-YPNIIAMGF  | 11  | >PTEN-F37S-YPNIIAMGS  | 538   | 527   |
| >PTEN-F37S-YPNIIAMGFP | 37  | >PTEN-F37S-YPNIIAMGSP | 45    | 8     |
| >PTEN-F37S-YPNIIAMGF  | 82  | >PTEN-F37S-YPNIIAMGS  | 13345 | 13263 |
| >PTEN-F37S-YPNIIAMGFP | 6   | >PTEN-F37S-YPNIIAMGSP | 7     | 1     |
| >PTEN-F37S-YPNIIAMGF  | 102 | >PTEN-F37S-YPNIIAMGS  | 19405 | 19303 |
| >PTEN-F37S-IYPNIIAMGF | 80  | >PTEN-F37S-IYPNIIAMGS | 31154 | 31074 |
| >PTEN-F37S-IYPNIIAMGF | 49  | >PTEN-F37S-IYPNIIAMGS | 19865 | 19816 |
| >PTEN-F37S-IYPNIIAMGF | 4   | >PTEN-F37S-IYPNIIAMGS | 723   | 719   |
| >PTEN-F37S-IYPNIIAMGF | 56  | >PTEN-F37S-IYPNIIAMGS | 11320 | 11264 |
| >PTEN-F37S-IYPNIIAMGF | 408 | >PTEN-F37S-IYPNIIAMGS | 14586 | 14178 |
| >PTEN-F56C-FLDSKHKNHY | 86  | >PTEN-F56C-CLDSKHKNHY | 175   | 89    |
| >PTEN-F56C-FLDSKHKNHY | 273 | >PTEN-F56C-CLDSKHKNHY | 7545  | 7272  |
| >PTEN-F56C-FLDSKHKNHY | 226 | >PTEN-F56C-CLDSKHKNHY | 8718  | 8492  |
| >PTEN-F56C-FLDSKHKNHY | 724 | >PTEN-F56C-CLDSKHKNHY | 405   | 319   |
| >PTEN-F56C-FLDSKHKNHY | 512 | >PTEN-F56C-CLDSKHKNHY | 313   | 199   |
| >PTEN-F56C-RFLDSKHKNF | 91  | >PTEN-F56C-RCLDSKHKNF | 3047  | 2956  |
| >PTEN-F56C-RFLDSKHK   | 19  | >PTEN-F56C-RCLDSKHK   | 63    | 44    |
| >PTEN-F56C-RFLDSKHKNF | 227 | >PTEN-F56C-RCLDSKHKNF | 698   | 471   |
| >PTEN-F56C-RFLDSKHK   | 73  | >PTEN-F56C-RCLDSKHK   | 2331  | 2258  |
| >PTEN-F56C-RFLDSKHK   | 66  | >PTEN-F56C-RCLDSKHK   | 342   | 276   |



|                         |       |                         |       |       |
|-------------------------|-------|-------------------------|-------|-------|
| >PTEN-F56C- YRNNIDDVVF  | 48    | >PTEN-F56C- YRNNIDDVVF  | 6124  | 6076  |
| >PTEN-F56C- YRNNIDDVVF  | 119   | >PTEN-F56C- YRNNIDDVVF  | 4064  | 3945  |
| >PTEN-F56C- VRFLDSKH    | 482   | >PTEN-F56C- VRCLDSKH    | 8151  | 7669  |
| >PTEN-F56C- VRFLDSKHK   | 137   | >PTEN-F56C- VRCLDSKHK   | 3351  | 3214  |
| >PTEN-F56C- VVRFLDSKHK  | 408   | >PTEN-F56C- VVRCLDSKHK  | 1145  | 737   |
| >PTEN-F56C- VVRFLDSK    | 455   | >PTEN-F56C- VVRCLDSK    | 906   | 451   |
| >PTEN-F56C- VVRFLDSK    | 17    | >PTEN-F56C- VVRCLDSK    | 26    | 9     |
| >PTEN-F56C- VVRFLDSKHK  | 13    | >PTEN-F56C- VVRCLDSKHK  | 15    | 2     |
| >PTEN-F56C- VVRFLDSKH   | 57    | >PTEN-F56C- VVRCLDSKH   | 58    | 1     |
| >PTEN-F56C- DVVRFLDSK   | 493   | >PTEN-F56C- DVVRCLDSK   | 569   | 76    |
| >PTEN-F56C- DVVRFLDSKH  | 129   | >PTEN-F56C- DVVRCLDSKH  | 153   | 24    |
| >PTEN-F56C- DVVRFLDSK   | 18    | >PTEN-F56C- DVVRCLDSK   | 60    | 42    |
| >PTEN-F56C- DVVRFLDSKH  | 102   | >PTEN-F56C- DVVRCLDSKH  | 234   | 132   |
| >PTEN-F56C- NIDDVVRFL   | 171   | >PTEN-F56C- NIDDVVRCL   | 895   | 724   |
| >PTEN-F56C- NIDDVVRFL   | 272   | >PTEN-F56C- NIDDVVRCL   | 4676  | 4404  |
| >PTEN-F56C- NIDDVVRFL   | 30    | >PTEN-F56C- NIDDVVRCL   | 279   | 249   |
| >PTEN-F56C- NIDDVVRFL   | 320   | >PTEN-F56C- NIDDVVRCL   | 1263  | 943   |
| >PTEN-F56C- NIDDVVRFL   | 464   | >PTEN-F56C- NIDDVVRCL   | 1260  | 796   |
| >PTEN-F56C- NIDDVVRFL   | 324   | >PTEN-F56C- NIDDVVRCL   | 4714  | 4390  |
| >PTEN-F56C- RNNIDDVVRFL | 450   | >PTEN-F56C- RNNIDDVVRCL | 22807 | 22357 |
| >PTEN-F56V- FLDSKHKNHY  | 86    | >PTEN-F56V- VLDSKHKNHY  | 113   | 27    |
| >PTEN-F56V- FLDSKHKNHY  | 273   | >PTEN-F56V- VLDSKHKNHY  | 1509  | 1236  |
| >PTEN-F56V- FLDSKHKNHY  | 226   | >PTEN-F56V- VLDSKHKNHY  | 1812  | 1586  |
| >PTEN-F56V- FLDSKHKNHY  | 724   | >PTEN-F56V- VLDSKHKNHY  | 169   | 555   |
| >PTEN-F56V- FLDSKHKNHY  | 512   | >PTEN-F56V- VLDSKHKNHY  | 149   | 363   |
| >PTEN-F56V- FLDSKHKNHY  | 676   | >PTEN-F56V- VLDSKHKNHY  | 270   | 406   |
| >PTEN-F56V- RFLDSKHK    | 3455  | >PTEN-F56V- RVLDSKHK    | 162   | 3293  |
| >PTEN-F56V- RFLDSKHK    | 2652  | >PTEN-F56V- RVLDSKHK    | 52    | 2600  |
| >PTEN-F56V- RFLDSKHKNF  | 10879 | >PTEN-F56V- RVLDSKHKNF  | 312   | 10567 |
| >PTEN-F56V- RFLDSKHKNF  | 91    | >PTEN-F56V- RVLDSKHKNF  | 221   | 130   |
| >PTEN-F56V- RFLDSKHK    | 19    | >PTEN-F56V- RVLDSKHK    | 8     | 11    |
| >PTEN-F56V- RFLDSKHKNF  | 1438  | >PTEN-F56V- RVLDSKHKNF  | 305   | 1133  |
| >PTEN-F56V- RFLDSKHKNF  | 227   | >PTEN-F56V- RVLDSKHKNF  | 91    | 136   |
| >PTEN-F56V- RFLDSKHK    | 73    | >PTEN-F56V- RVLDSKHK    | 127   | 54    |
| >PTEN-F56V- RFLDSKHKNF  | 697   | >PTEN-F56V- RVLDSKHKNF  | 121   | 576   |
| >PTEN-F56V- RFLDSKHKNF  | 1674  | >PTEN-F56V- RVLDSKHKNF  | 229   | 1445  |
| >PTEN-F56V- RFLDSKHKNF  | 10914 | >PTEN-F56V- RVLDSKHKNF  | 53    | 10861 |
| >PTEN-F56V- RFLDSKHKNF  | 3185  | >PTEN-F56V- RVLDSKHKNF  | 399   | 2786  |
| >PTEN-F56V- RFLDSKHK    | 66    | >PTEN-F56V- RVLDSKHK    | 584   | 518   |
| >PTEN-F56V- YRNNIDDVVF  | 48    | >PTEN-F56V- YRNNIDDVVF  | 957   | 909   |
| >PTEN-F56V- YRNNIDDVVF  | 119   | >PTEN-F56V- YRNNIDDVVF  | 286   | 167   |
| >PTEN-F56V- VRFLDSKH    | 482   | >PTEN-F56V- VRVLDSKH    | 2870  | 2388  |
| >PTEN-F56V- VRFLDSKHK   | 137   | >PTEN-F56V- VRVLDSKHK   | 677   | 540   |

|                        |       |                        |       |       |
|------------------------|-------|------------------------|-------|-------|
| >PTEN-F56V- VVRFLDSKHK | 408   | >PTEN-F56V- VVRVLDSKHK | 2310  | 1902  |
| >PTEN-F56V- VVRFLDSK   | 455   | >PTEN-F56V- VVRVLDSK   | 1052  | 597   |
| >PTEN-F56V- VVRFLDSK   | 17    | >PTEN-F56V- VVRVLDSK   | 21    | 4     |
| >PTEN-F56V- VVRFLDSKHK | 13    | >PTEN-F56V- VVRVLDSKHK | 14    | 1     |
| >PTEN-F56V- VVRFLDSKH  | 57    | >PTEN-F56V- VVRVLDSKH  | 119   | 62    |
| >PTEN-F56V- DVVRFLDSK  | 493   | >PTEN-F56V- DVVRVLDSK  | 619   | 126   |
| >PTEN-F56V- DVVRFLDSKH | 129   | >PTEN-F56V- DVVRVLDSKH | 222   | 93    |
| >PTEN-F56V- DVVRFLDSK  | 18    | >PTEN-F56V- DVVRVLDSK  | 16    | 2     |
| >PTEN-F56V- DVVRFLDSKH | 102   | >PTEN-F56V- DVVRVLDSKH | 89    | 13    |
| >PTEN-F56V- NIDDVVRV   | 18625 | >PTEN-F56V- NIDDVVRV   | 176   | 18449 |
| >PTEN-F56V- NIDDVVRV   | 8771  | >PTEN-F56V- NIDDVVRV   | 276   | 8495  |
| >PTEN-F56V- NIDDVVRFL  | 171   | >PTEN-F56V- NIDDVVRVL  | 1256  | 1085  |
| >PTEN-F56V- NIDDVVRV   | 18385 | >PTEN-F56V- NIDDVVRV   | 364   | 18021 |
| >PTEN-F56V- NIDDVVRV   | 4266  | >PTEN-F56V- NIDDVVRV   | 79    | 4187  |
| >PTEN-F56V- NIDDVVRFL  | 272   | >PTEN-F56V- NIDDVVRVL  | 4153  | 3881  |
| >PTEN-F56V- NIDDVVRV   | 5288  | >PTEN-F56V- NIDDVVRV   | 9     | 5279  |
| >PTEN-F56V- NIDDVVRFL  | 30    | >PTEN-F56V- NIDDVVRVL  | 111   | 81    |
| >PTEN-F56V- NIDDVVRV   | 19439 | >PTEN-F56V- NIDDVVRV   | 190   | 19249 |
| >PTEN-F56V- NIDDVVRV   | 20331 | >PTEN-F56V- NIDDVVRV   | 39    | 20292 |
| >PTEN-F56V- NIDDVVRFL  | 320   | >PTEN-F56V- NIDDVVRVL  | 2850  | 2530  |
| >PTEN-F56V- NIDDVVRV   | 16672 | >PTEN-F56V- NIDDVVRV   | 31    | 16641 |
| >PTEN-F56V- NIDDVVRFL  | 464   | >PTEN-F56V- NIDDVVRVL  | 2370  | 1906  |
| >PTEN-F56V- NIDDVVRV   | 21224 | >PTEN-F56V- NIDDVVRV   | 26    | 21198 |
| >PTEN-F56V- NIDDVVRV   | 20486 | >PTEN-F56V- NIDDVVRV   | 233   | 20253 |
| >PTEN-F56V- NIDDVVRV   | 12735 | >PTEN-F56V- NIDDVVRV   | 38    | 12697 |
| >PTEN-F56V- NIDDVVRFL  | 324   | >PTEN-F56V- NIDDVVRVL  | 2635  | 2311  |
| >PTEN-F56V- NNIDDVVRV  | 18994 | >PTEN-F56V- NNIDDVVRV  | 128   | 18866 |
| >PTEN-F56V- RNNIDDVVRV | 450   | >PTEN-F56V- RNNIDDVVRV | 9245  | 8795  |
| >PTEN-F81C- FNCRVAQY   | 418   | >PTEN-F81C- CNCRVAQY   | 2948  | 2530  |
| >PTEN-F81C- FNCRVAQYPI | 119   | >PTEN-F81C- CNCRVAQYPI | 978   | 859   |
| >PTEN-F81C- KFNCRVAQYI | 235   | >PTEN-F81C- KCNCRVAQYI | 11111 | 10876 |
| >PTEN-F81C- KFNCRVAQYI | 412   | >PTEN-F81C- KCNCRVAQYI | 8232  | 7820  |
| >PTEN-F81C- KFNCRVAQYI | 140   | >PTEN-F81C- KCNCRVAQYI | 15165 | 15025 |
| >PTEN-F81C- KFNCRVAQY  | 167   | >PTEN-F81C- KCNCRVAQY  | 5064  | 4897  |
| >PTEN-F81C- KFNCRVAQY  | 377   | >PTEN-F81C- KCNCRVAQY  | 5382  | 5005  |
| >PTEN-F81C- KFNCRVAQYI | 170   | >PTEN-F81C- KCNCRVAQYI | 3457  | 3287  |
| >PTEN-F81C- KFNCRVAQYI | 101   | >PTEN-F81C- KCNCRVAQYI | 46    | 55    |
| >PTEN-F81C- KFNCRVAQYI | 431   | >PTEN-F81C- KCNCRVAQYI | 4079  | 3648  |
| >PTEN-F81C- KFNCRVAQYI | 331   | >PTEN-F81C- KCNCRVAQYI | 115   | 216   |
| >PTEN-F81C- KFNCRVAQY  | 6027  | >PTEN-F81C- KCNCRVAQY  | 453   | 5574  |
| >PTEN-F81C- KFNCRVAQY  | 2209  | >PTEN-F81C- KCNCRVAQY  | 413   | 1796  |
| >PTEN-F81C- KFNCRVAQY  | 131   | >PTEN-F81C- KCNCRVAQY  | 623   | 492   |
| >PTEN-F81C- AKFNCRVAQ' | 381   | >PTEN-F81C- AKCNCRVAQ' | 3109  | 2728  |

|                       |       |                        |       |       |
|-----------------------|-------|------------------------|-------|-------|
| >PTEN-F81C-AKFNCRVAQ' | 197   | >PTEN-F81C-AKCNCRVAQ'  | 1588  | 1391  |
| >PTEN-F81C-AKFNCRVA   | 52    | >PTEN-F81C-AKCNCRVA    | 840   | 788   |
| >PTEN-F81C-AKFNCRVAQ  | 43    | >PTEN-F81C-AKCNCRVAQ   | 410   | 367   |
| >PTEN-F81C-AKFNCRVAQ' | 3     | >PTEN-F81C-AKCNCRVAQ'  | 21    | 18    |
| >PTEN-F81C-AKFNCRVAQ' | 114   | >PTEN-F81C-AKCNCRVAQ'  | 1820  | 1706  |
| >PTEN-F81C-TAKFNCRVAC | 362   | >PTEN-F81C-TAKCNCRVAC  | 255   | 107   |
| >PTEN-F81C-TAKFNCRVAC | 97    | >PTEN-F81C-TAKCNCRVAC  | 132   | 35    |
| >PTEN-F81C-DTAKFNCR   | 20    | >PTEN-F81C-DTAKCNCR    | 32    | 12    |
| >PTEN-F81C-DTAKFNCR   | 3     | >PTEN-F81C-DTAKCNCR    | 4     | 1     |
| >PTEN-F81C-DTAKFNCRV/ | 171   | >PTEN-F81C-DTAKCNCRV/  | 456   | 285   |
| >PTEN-F81C-DTAKFNCRV  | 12    | >PTEN-F81C-DTAKCNCRV   | 12    | 0     |
| >PTEN-F81C-DTAKFNCRV/ | 460   | >PTEN-F81C-DTAKCNCRV/  | 2200  | 1740  |
| >PTEN-F81C-DTAKFNCRV  | 7     | >PTEN-F81C-DTAKCNCRV   | 78    | 71    |
| >PTEN-F81C-YDTAKFNCRV | 183   | >PTEN-F81C-YDTAKCNCRV  | 348   | 165   |
| >PTEN-F81C-HYDTAKFNCF | 204   | >PTEN-F81C-HYDTAKCNCI  | 708   | 504   |
| >PTEN-F81C-HYDTAKFNCF | 29    | >PTEN-F81C-HYDTAKCNCI  | 58    | 29    |
| >PTEN-F81C-RHYDTAKF   | 418   | >PTEN-F81C-RHYDTAKC    | 30408 | 29990 |
| >PTEN-F81C-RHYDTAKFNC | 374   | >PTEN-F81C-RHYDTAKCNC  | 1353  | 979   |
| >PTEN-F81C-RHYDTAKF   | 7     | >PTEN-F81C-RHYDTAKC    | 4927  | 4920  |
| >PTEN-F81C-RHYDTAKF   | 384   | >PTEN-F81C-RHYDTAKC    | 21704 | 21320 |
| >PTEN-F81C-RHYDTAKF   | 71    | >PTEN-F81C-RHYDTAKC    | 10217 | 10146 |
| >PTEN-F81C-RHYDTAKFNC | 71    | >PTEN-F81C-RHYDTAKCNC  | 139   | 68    |
| >PTEN-F81C-ERHYDTAKF  | 202   | >PTEN-F81C-ERHYDTAKC   | 14611 | 14409 |
| >PTEN-F81C-AERHYDTAKF | 33    | >PTEN-F81C-AERHYDTAKC  | 7042  | 7009  |
| >PTEN-F81C-AERHYDTAKF | 83    | >PTEN-F81C-AERHYDTAKC  | 11957 | 11874 |
| >PTEN-F81C-AERHYDTAKF | 256   | >PTEN-F81C-AERHYDTAKC  | 17086 | 16830 |
| >PTEN-F81C-AERHYDTAKF | 258   | >PTEN-F81C-AERHYDTAKC  | 10282 | 10024 |
| >PTEN-F81L-FNCRVAQY   | 418   | >PTEN-F81L- LNCRVAQY   | 1789  | 1371  |
| >PTEN-F81L-FNCRVAQYPF | 544   | >PTEN-F81L- LNCRVAQYPF | 432   | 112   |
| >PTEN-F81L-FNCRVAQYPF | 119   | >PTEN-F81L- LNCRVAQYPF | 276   | 157   |
| >PTEN-F81L-KFNCRVAQYF | 10402 | >PTEN-F81L- KLNCRVAQYF | 343   | 10059 |
| >PTEN-F81L-KFNCRVAQY  | 2798  | >PTEN-F81L- KLNCRVAQY  | 57    | 2741  |
| >PTEN-F81L-KFNCRVAQYF | 235   | >PTEN-F81L- KLNCRVAQYF | 4067  | 3832  |
| >PTEN-F81L-KFNCRVAQYF | 412   | >PTEN-F81L- KLNCRVAQYF | 4643  | 4231  |
| >PTEN-F81L-KFNCRVAQYF | 140   | >PTEN-F81L- KLNCRVAQYF | 9877  | 9737  |
| >PTEN-F81L-KFNCRVAQY  | 167   | >PTEN-F81L- KLNCRVAQY  | 618   | 451   |
| >PTEN-F81L-KFNCRVAQY  | 853   | >PTEN-F81L- KLNCRVAQY  | 361   | 492   |
| >PTEN-F81L-KFNCRVAQY  | 377   | >PTEN-F81L- KLNCRVAQY  | 937   | 560   |
| >PTEN-F81L-KFNCRVAQYF | 170   | >PTEN-F81L- KLNCRVAQYF | 400   | 230   |
| >PTEN-F81L-KFNCRVAQY  | 4007  | >PTEN-F81L- KLNCRVAQY  | 354   | 3653  |
| >PTEN-F81L-KFNCRVAQYF | 101   | >PTEN-F81L- KLNCRVAQYF | 11    | 90    |
| >PTEN-F81L-KFNCRVAQY  | 759   | >PTEN-F81L- KLNCRVAQY  | 132   | 627   |
| >PTEN-F81L-KFNCRVAQY  | 611   | >PTEN-F81L- KLNCRVAQY  | 57    | 554   |

|                                      |      |                                      |       |       |
|--------------------------------------|------|--------------------------------------|-------|-------|
| >PTEN-F81L- <sup>-</sup> KFNCRVAQYF  | 431  | >PTEN-F81L- <sub>-</sub> KLNCRVAQYF  | 41    | 390   |
| >PTEN-F81L- <sup>-</sup> KFNCRVAQY   | 2714 | >PTEN-F81L- <sub>-</sub> KLNCRVAQY   | 187   | 2527  |
| >PTEN-F81L- <sup>-</sup> KFNCRVAQYF  | 331  | >PTEN-F81L- <sub>-</sub> KLNCRVAQYF  | 15    | 316   |
| >PTEN-F81L- <sup>-</sup> KFNCRVAQY   | 6027 | >PTEN-F81L- <sub>-</sub> KLNCRVAQY   | 124   | 5903  |
| >PTEN-F81L- <sup>-</sup> KFNCRVAQY   | 131  | >PTEN-F81L- <sub>-</sub> KLNCRVAQY   | 178   | 47    |
| >PTEN-F81L- <sup>-</sup> CAERHYDTAK  | 9086 | >PTEN-F81L- <sub>-</sub> CAERHYDTAK  | 481   | 8605  |
| >PTEN-F81L- <sup>-</sup> AKFNCRVAQ`  | 381  | >PTEN-F81L- <sub>-</sub> AKLNCRVAQ`  | 1636  | 1255  |
| >PTEN-F81L- <sup>-</sup> AKFNCRVAQ`  | 197  | >PTEN-F81L- <sub>-</sub> AKLNCRVAQ`  | 532   | 335   |
| >PTEN-F81L- <sup>-</sup> AKFNCRVA    | 52   | >PTEN-F81L- <sub>-</sub> AKLNCRVA    | 212   | 160   |
| >PTEN-F81L- <sup>-</sup> AKFNCRVAQ   | 43   | >PTEN-F81L- <sub>-</sub> AKLNCRVAQ   | 115   | 72    |
| >PTEN-F81L- <sup>-</sup> AKFNCRVAQ`  | 3    | >PTEN-F81L- <sub>-</sub> AKLNCRVAQ`  | 6     | 3     |
| >PTEN-F81L- <sup>-</sup> AKFNCRVAQ`  | 114  | >PTEN-F81L- <sub>-</sub> AKLNCRVAQ`  | 443   | 329   |
| >PTEN-F81L- <sup>-</sup> TAKFNCRVAC  | 362  | >PTEN-F81L- <sub>-</sub> TAKLNCRVAC  | 748   | 386   |
| >PTEN-F81L- <sup>-</sup> TAKFNCRVAC  | 97   | >PTEN-F81L- <sub>-</sub> TAKLNCRVAC  | 89    | 8     |
| >PTEN-F81L- <sup>-</sup> DTAKFNCR    | 20   | >PTEN-F81L- <sub>-</sub> DTAKLNCR    | 33    | 13    |
| >PTEN-F81L- <sup>-</sup> DTAKFNCR    | 3    | >PTEN-F81L- <sub>-</sub> DTAKLNCR    | 4     | 1     |
| >PTEN-F81L- <sup>-</sup> DTAKFNCRV/  | 171  | >PTEN-F81L- <sub>-</sub> DTAKLNCRV/  | 341   | 170   |
| >PTEN-F81L- <sup>-</sup> DTAKFNCRV   | 12   | >PTEN-F81L- <sub>-</sub> DTAKLNCRV   | 12    | 0     |
| >PTEN-F81L- <sup>-</sup> DTAKFNCRV/  | 460  | >PTEN-F81L- <sub>-</sub> DTAKLNCRV/  | 1351  | 891   |
| >PTEN-F81L- <sup>-</sup> DTAKFNCRV   | 7    | >PTEN-F81L- <sub>-</sub> DTAKLNCRV   | 17    | 10    |
| >PTEN-F81L- <sup>-</sup> YDTAKFNCRV  | 183  | >PTEN-F81L- <sub>-</sub> YDTAKLNCRV  | 278   | 95    |
| >PTEN-F81L- <sup>-</sup> HYDTAKFNCF  | 204  | >PTEN-F81L- <sub>-</sub> HYDTAKLNCF  | 441   | 237   |
| >PTEN-F81L- <sup>-</sup> HYDTAKFNCF  | 29   | >PTEN-F81L- <sub>-</sub> HYDTAKLNCF  | 58    | 29    |
| >PTEN-F81L- <sup>-</sup> RHYDTAKF    | 418  | >PTEN-F81L- <sub>-</sub> RHYDTAKL    | 7806  | 7388  |
| >PTEN-F81L- <sup>-</sup> RHYDTAKFNC  | 374  | >PTEN-F81L- <sub>-</sub> RHYDTAKLNC  | 875   | 501   |
| >PTEN-F81L- <sup>-</sup> RHYDTAKF    | 7    | >PTEN-F81L- <sub>-</sub> RHYDTAKL    | 139   | 132   |
| >PTEN-F81L- <sup>-</sup> RHYDTAKF    | 2311 | >PTEN-F81L- <sub>-</sub> RHYDTAKL    | 300   | 2011  |
| >PTEN-F81L- <sup>-</sup> RHYDTAKF    | 384  | >PTEN-F81L- <sub>-</sub> RHYDTAKL    | 4484  | 4100  |
| >PTEN-F81L- <sup>-</sup> RHYDTAKF    | 3319 | >PTEN-F81L- <sub>-</sub> RHYDTAKL    | 142   | 3177  |
| >PTEN-F81L- <sup>-</sup> RHYDTAKF    | 71   | >PTEN-F81L- <sub>-</sub> RHYDTAKL    | 498   | 427   |
| >PTEN-F81L- <sup>-</sup> RHYDTAKFNCF | 71   | >PTEN-F81L- <sub>-</sub> RHYDTAKLNCF | 143   | 72    |
| >PTEN-F81L- <sup>-</sup> ERHYDTAKF   | 202  | >PTEN-F81L- <sub>-</sub> ERHYDTAKL   | 2315  | 2113  |
| >PTEN-F81L- <sup>-</sup> AERHYDTAKF  | 33   | >PTEN-F81L- <sub>-</sub> AERHYDTAKL  | 651   | 618   |
| >PTEN-F81L- <sup>-</sup> AERHYDTAKF  | 83   | >PTEN-F81L- <sub>-</sub> AERHYDTAKL  | 522   | 439   |
| >PTEN-F81L- <sup>-</sup> AERHYDTAKF  | 256  | >PTEN-F81L- <sub>-</sub> AERHYDTAKL  | 1807  | 1551  |
| >PTEN-F81L- <sup>-</sup> AERHYDTAKF  | 258  | >PTEN-F81L- <sub>-</sub> AERHYDTAKL  | 103   | 155   |
| >PTEN-F81S- <sup>-</sup> FNCRVAQY    | 418  | >PTEN-F81S- <sub>-</sub> SNCRVAQY    | 2329  | 1911  |
| >PTEN-F81S- <sup>-</sup> FNCRVAQYPI  | 119  | >PTEN-F81S- <sub>-</sub> SNCRVAQYPI  | 574   | 455   |
| >PTEN-F81S- <sup>-</sup> KFNCRVAQY   | 2798 | >PTEN-F81S- <sub>-</sub> KSNCRVAQY   | 246   | 2552  |
| >PTEN-F81S- <sup>-</sup> KFNCRVAQYF  | 235  | >PTEN-F81S- <sub>-</sub> KSNCRVAQYF  | 7369  | 7134  |
| >PTEN-F81S- <sup>-</sup> KFNCRVAQYF  | 412  | >PTEN-F81S- <sub>-</sub> KSNCRVAQYF  | 4765  | 4353  |
| >PTEN-F81S- <sup>-</sup> KFNCRVAQYF  | 140  | >PTEN-F81S- <sub>-</sub> KSNCRVAQYF  | 11527 | 11387 |
| >PTEN-F81S- <sup>-</sup> KFNCRVAQY   | 167  | >PTEN-F81S- <sub>-</sub> KSNCRVAQY   | 2533  | 2366  |

|                         |       |                         |       |       |
|-------------------------|-------|-------------------------|-------|-------|
| >PTEN-F81S- KFNCRVAQY   | 1372  | >PTEN-F81S- KSNCRVAQY   | 359   | 1013  |
| >PTEN-F81S- KFNCRVAQY   | 853   | >PTEN-F81S- KSNCRVAQY   | 219   | 634   |
| >PTEN-F81S- KFNCRVAQY   | 377   | >PTEN-F81S- KSNCRVAQY   | 568   | 191   |
| >PTEN-F81S- KFNCRVAQYF  | 170   | >PTEN-F81S- KSNCRVAQYF  | 306   | 136   |
| >PTEN-F81S- KFNCRVAQYF  | 101   | >PTEN-F81S- KSNCRVAQYF  | 15    | 86    |
| >PTEN-F81S- KFNCRVAQY   | 611   | >PTEN-F81S- KSNCRVAQY   | 90    | 521   |
| >PTEN-F81S- KFNCRVAQYF  | 431   | >PTEN-F81S- KSNCRVAQYF  | 68    | 363   |
| >PTEN-F81S- KFNCRVAQY   | 2714  | >PTEN-F81S- KSNCRVAQY   | 124   | 2590  |
| >PTEN-F81S- KFNCRVAQYF  | 331   | >PTEN-F81S- KSNCRVAQYF  | 12    | 319   |
| >PTEN-F81S- KFNCRVAQY   | 6027  | >PTEN-F81S- KSNCRVAQY   | 3     | 6024  |
| >PTEN-F81S- KFNCRVAQYF  | 14747 | >PTEN-F81S- KSNCRVAQYF  | 5     | 14742 |
| >PTEN-F81S- KFNCRVAQY   | 22992 | >PTEN-F81S- KSNCRVAQY   | 408   | 22584 |
| >PTEN-F81S- KFNCRVAQYF  | 21566 | >PTEN-F81S- KSNCRVAQYF  | 194   | 21372 |
| >PTEN-F81S- KFNCRVAQY   | 3699  | >PTEN-F81S- KSNCRVAQY   | 28    | 3671  |
| >PTEN-F81S- KFNCRVAQYF  | 1474  | >PTEN-F81S- KSNCRVAQYF  | 21    | 1453  |
| >PTEN-F81S- KFNCRVAQY   | 2209  | >PTEN-F81S- KSNCRVAQY   | 72    | 2137  |
| >PTEN-F81S- KFNCRVAQY   | 131   | >PTEN-F81S- KSNCRVAQY   | 355   | 224   |
| >PTEN-F81S- AKFNCRVAQ'  | 381   | >PTEN-F81S- AKSNCRVAQ'  | 888   | 507   |
| >PTEN-F81S- AKFNCRVAQ'  | 197   | >PTEN-F81S- AKSNCRVAQ'  | 365   | 168   |
| >PTEN-F81S- AKFNCRVA    | 52    | >PTEN-F81S- AKSNCRVA    | 358   | 306   |
| >PTEN-F81S- AKFNCRVAQ   | 43    | >PTEN-F81S- AKSNCRVAQ   | 197   | 154   |
| >PTEN-F81S- AKFNCRVAQ'  | 3     | >PTEN-F81S- AKSNCRVAQ'  | 9     | 6     |
| >PTEN-F81S- AKFNCRVAQ'  | 114   | >PTEN-F81S- AKSNCRVAQ'  | 846   | 732   |
| >PTEN-F81S- TAKFNCRVAC  | 573   | >PTEN-F81S- TAKSNCRVAC  | 426   | 147   |
| >PTEN-F81S- TAKFNCRVAC  | 362   | >PTEN-F81S- TAKSNCRVAC  | 262   | 100   |
| >PTEN-F81S- TAKFNCRVAC  | 97    | >PTEN-F81S- TAKSNCRVAC  | 93    | 4     |
| >PTEN-F81S- DTAKFNCR    | 20    | >PTEN-F81S- DTAKSNCR    | 56    | 36    |
| >PTEN-F81S- DTAKFNCR    | 3     | >PTEN-F81S- DTAKSNCR    | 4     | 1     |
| >PTEN-F81S- DTAKFNCRV/  | 171   | >PTEN-F81S- DTAKSNCRV/  | 234   | 63    |
| >PTEN-F81S- DTAKFNCRV   | 12    | >PTEN-F81S- DTAKSNCRV   | 16    | 4     |
| >PTEN-F81S- DTAKFNCRV/  | 460   | >PTEN-F81S- DTAKSNCRV/  | 1557  | 1097  |
| >PTEN-F81S- DTAKFNCRV   | 7     | >PTEN-F81S- DTAKSNCRV   | 22    | 15    |
| >PTEN-F81S- YDTAKFNCRV  | 183   | >PTEN-F81S- YDTAKSNCRV  | 196   | 13    |
| >PTEN-F81S- HYDTAKFNCF  | 204   | >PTEN-F81S- HYDTAKSNCF  | 880   | 676   |
| >PTEN-F81S- HYDTAKFNCF  | 29    | >PTEN-F81S- HYDTAKSNCF  | 63    | 34    |
| >PTEN-F81S- RHYDTAKF    | 418   | >PTEN-F81S- RHYDTAKS    | 30655 | 30237 |
| >PTEN-F81S- RHYDTAKFNCF | 374   | >PTEN-F81S- RHYDTAKSNCF | 1402  | 1028  |
| >PTEN-F81S- RHYDTAKF    | 7     | >PTEN-F81S- RHYDTAKS    | 6025  | 6018  |
| >PTEN-F81S- RHYDTAKF    | 384   | >PTEN-F81S- RHYDTAKS    | 21096 | 20712 |
| >PTEN-F81S- RHYDTAKF    | 71    | >PTEN-F81S- RHYDTAKS    | 6163  | 6092  |
| >PTEN-F81S- RHYDTAKFNCF | 71    | >PTEN-F81S- RHYDTAKSNCF | 122   | 51    |
| >PTEN-F81S- ERHYDTAKF   | 202   | >PTEN-F81S- ERHYDTAKS   | 14633 | 14431 |
| >PTEN-F81S- AERHYDTAKF  | 33    | >PTEN-F81S- AERHYDTAKS  | 10021 | 9988  |

|                        |       |                        |       |       |
|------------------------|-------|------------------------|-------|-------|
| >PTEN-F81S- AERHYDTAKF | 83    | >PTEN-F81S- AERHYDTAKS | 7053  | 6970  |
| >PTEN-F81S- AERHYDTAKF | 256   | >PTEN-F81S- AERHYDTAKS | 11547 | 11291 |
| >PTEN-F81S- AERHYDTAKF | 258   | >PTEN-F81S- AERHYDTAKS | 10995 | 10737 |
| >PTEN-F90L- FEDHNPPQL  | 169   | >PTEN-F90L- LEDHNPPQL  | 3776  | 3607  |
| >PTEN-F90L- FEDHNPPQLE | 275   | >PTEN-F90L- LEDHNPPQLE | 4631  | 4356  |
| >PTEN-F90L- FEDHNPPQL  | 116   | >PTEN-F90L- LEDHNPPQL  | 173   | 57    |
| >PTEN-F90L- FEDHNPPQLE | 47    | >PTEN-F90L- LEDHNPPQLE | 66    | 19    |
| >PTEN-F90L- FEDHNPPQL  | 314   | >PTEN-F90L- LEDHNPPQL  | 853   | 539   |
| >PTEN-F90L- FEDHNPPQLE | 186   | >PTEN-F90L- LEDHNPPQLE | 461   | 275   |
| >PTEN-F90L- FEDHNPPQL  | 128   | >PTEN-F90L- LEDHNPPQL  | 277   | 149   |
| >PTEN-F90L- PFEDHNPPQI | 15806 | >PTEN-F90L- PLEDHNPPQI | 27    | 15779 |
| >PTEN-F90L- KFNCRVAQYF | 10402 | >PTEN-F90L- KFNCRVAQYF | 391   | 10011 |
| >PTEN-F90L- KFNCRVAQYF | 235   | >PTEN-F90L- KFNCRVAQYF | 3402  | 3167  |
| >PTEN-F90L- KFNCRVAQYF | 412   | >PTEN-F90L- KFNCRVAQYF | 2570  | 2158  |
| >PTEN-F90L- KFNCRVAQYF | 140   | >PTEN-F90L- KFNCRVAQYF | 2130  | 1990  |
| >PTEN-F90L- KFNCRVAQYF | 2797  | >PTEN-F90L- KFNCRVAQYF | 261   | 2536  |
| >PTEN-F90L- KFNCRVAQYF | 170   | >PTEN-F90L- KFNCRVAQYF | 124   | 46    |
| >PTEN-F90L- KFNCRVAQYF | 101   | >PTEN-F90L- KFNCRVAQYF | 346   | 245   |
| >PTEN-F90L- KFNCRVAQYF | 431   | >PTEN-F90L- KFNCRVAQYF | 7820  | 7389  |
| >PTEN-F90L- KFNCRVAQYF | 331   | >PTEN-F90L- KFNCRVAQYF | 4707  | 4376  |
| >PTEN-F90L- YPFEDHNPPC | 43    | >PTEN-F90L- YPLEDHNPPC | 169   | 126   |
| >PTEN-F90L- YPFEDHNPPC | 145   | >PTEN-F90L- YPLEDHNPPC | 81    | 64    |
| >PTEN-F90L- YPFEDHNPPC | 145   | >PTEN-F90L- YPLEDHNPPC | 111   | 34    |
| >PTEN-F90L- YPFEDHNPP  | 145   | >PTEN-F90L- YPLEDHNPP  | 279   | 134   |
| >PTEN-F90L- YPFEDHNPPC | 43    | >PTEN-F90L- YPLEDHNPPC | 70    | 27    |
| >PTEN-F90L- YPFEDHNPPC | 22    | >PTEN-F90L- YPLEDHNPPC | 30    | 8     |
| >PTEN-F90L- YPFEDHNPPC | 530   | >PTEN-F90L- YPLEDHNPPC | 337   | 193   |
| >PTEN-F90L- YPFEDHNPP  | 291   | >PTEN-F90L- YPLEDHNPP  | 413   | 122   |
| >PTEN-F90L- AQYPFEDH   | 105   | >PTEN-F90L- AQYPLEDH   | 442   | 337   |
| >PTEN-F90L- AQYPFEDHNI | 263   | >PTEN-F90L- AQYPLEDHNI | 547   | 284   |
| >PTEN-F90L- CRVAQYPF   | 32    | >PTEN-F90L- CRVAQYPL   | 515   | 483   |
| >PTEN-F90L- CRVAQYPF   | 283   | >PTEN-F90L- CRVAQYPL   | 220   | 63    |
| >PTEN-F90L- CRVAQYPF   | 1716  | >PTEN-F90L- CRVAQYPL   | 94    | 1622  |
| >PTEN-F90L- CRVAQYPF   | 2120  | >PTEN-F90L- CRVAQYPL   | 398   | 1722  |
| >PTEN-F90L- CRVAQYPF   | 214   | >PTEN-F90L- CRVAQYPL   | 83    | 131   |
| >PTEN-F90L- FNCRVAQYPI | 119   | >PTEN-F90L- FNCRVAQYPI | 2561  | 2442  |
| >PTEN-F90L- FNCRVAQYPI | 6728  | >PTEN-F90L- FNCRVAQYPI | 314   | 6414  |
| >PTEN-F90S- FEDHNPPQL  | 169   | >PTEN-F90S- SEDHNPPQL  | 1141  | 972   |
| >PTEN-F90S- FEDHNPPQLE | 275   | >PTEN-F90S- SEDHNPPQLE | 1562  | 1287  |
| >PTEN-F90S- FEDHNPPQL  | 116   | >PTEN-F90S- SEDHNPPQL  | 339   | 223   |
| >PTEN-F90S- FEDHNPPQLE | 47    | >PTEN-F90S- SEDHNPPQLE | 128   | 81    |
| >PTEN-F90S- FEDHNPPQL  | 314   | >PTEN-F90S- SEDHNPPQL  | 624   | 310   |
| >PTEN-F90S- FEDHNPPQLE | 186   | >PTEN-F90S- SEDHNPPQLE | 346   | 160   |

|                        |       |                        |       |       |
|------------------------|-------|------------------------|-------|-------|
| >PTEN-F90S- FEDHNPPQL  | 128   | >PTEN-F90S- SEDHNPPQL  | 394   | 266   |
| >PTEN-F90S- KFNCRVAQYF | 235   | >PTEN-F90S- KFNCRVAQYF | 24730 | 24495 |
| >PTEN-F90S- KFNCRVAQYF | 412   | >PTEN-F90S- KFNCRVAQYF | 22793 | 22381 |
| >PTEN-F90S- KFNCRVAQYF | 140   | >PTEN-F90S- KFNCRVAQYF | 21374 | 21234 |
| >PTEN-F90S- KFNCRVAQYF | 170   | >PTEN-F90S- KFNCRVAQYF | 572   | 402   |
| >PTEN-F90S- KFNCRVAQYF | 101   | >PTEN-F90S- KFNCRVAQYF | 9528  | 9427  |
| >PTEN-F90S- KFNCRVAQYF | 431   | >PTEN-F90S- KFNCRVAQYF | 19331 | 18900 |
| >PTEN-F90S- KFNCRVAQYF | 331   | >PTEN-F90S- KFNCRVAQYF | 18821 | 18490 |
| >PTEN-F90S- YPFEDHNPPC | 43    | >PTEN-F90S- YPSEDHNPPC | 837   | 794   |
| >PTEN-F90S- YPFEDHNPPC | 145   | >PTEN-F90S- YPSEDHNPPC | 626   | 481   |
| >PTEN-F90S- YPFEDHNPPC | 145   | >PTEN-F90S- YPSEDHNPPC | 76    | 69    |
| >PTEN-F90S- YPFEDHNPP  | 145   | >PTEN-F90S- YPSEDHNPP  | 162   | 17    |
| >PTEN-F90S- YPFEDHNPPC | 43    | >PTEN-F90S- YPSEDHNPPC | 40    | 3     |
| >PTEN-F90S- YPFEDHNPPC | 22    | >PTEN-F90S- YPSEDHNPPC | 38    | 16    |
| >PTEN-F90S- YPFEDHNPPC | 530   | >PTEN-F90S- YPSEDHNPPC | 261   | 269   |
| >PTEN-F90S- YPFEDHNPP  | 291   | >PTEN-F90S- YPSEDHNPP  | 1353  | 1062  |
| >PTEN-F90S- AQYPFEDH   | 105   | >PTEN-F90S- AQYPSEDH   | 96    | 9     |
| >PTEN-F90S- AQYPFEDHNI | 263   | >PTEN-F90S- AQYPSEDHNI | 169   | 94    |
| >PTEN-F90S- CRVAQYPF   | 32    | >PTEN-F90S- CRVAQYPS   | 8251  | 8219  |
| >PTEN-F90S- CRVAQYPF   | 283   | >PTEN-F90S- CRVAQYPS   | 2632  | 2349  |
| >PTEN-F90S- CRVAQYPF   | 214   | >PTEN-F90S- CRVAQYPS   | 3821  | 3607  |
| >PTEN-F90S- FNCRVAQYPI | 119   | >PTEN-F90S- FNCRVAQYPS | 20192 | 20073 |
| >PTEN-G127IAGKRTGVM    | 308   | >PTEN-G127IAEKRTGVM    | 500   | 192   |
| >PTEN-G127IAGKRTGVM    | 16244 | >PTEN-G127IAEKRTGVM    | 116   | 16128 |
| >PTEN-G127IAGKRTGV     | 39637 | >PTEN-G127IAEKRTGV     | 365   | 39272 |
| >PTEN-G127IAGKRTGVM    | 28566 | >PTEN-G127IAEKRTGVM    | 417   | 28149 |
| >PTEN-G127IAGKRTGV     | 33935 | >PTEN-G127IAEKRTGV     | 50    | 33885 |
| >PTEN-G127IAGKRTGVM    | 35990 | >PTEN-G127IAEKRTGVM    | 249   | 35741 |
| >PTEN-G127IAGKRTGVM    | 34715 | >PTEN-G127IAEKRTGVM    | 144   | 34571 |
| >PTEN-G127IAGKRTGVM    | 20065 | >PTEN-G127IAEKRTGVM    | 15    | 20050 |
| >PTEN-G127IAGKRTGVM    | 34659 | >PTEN-G127IAEKRTGVM    | 138   | 34521 |
| >PTEN-G127IKAGKRTGVI   | 135   | >PTEN-G127IKAEKRTGVI   | 136   | 1     |
| >PTEN-G127IHCKAGKGR    | 345   | >PTEN-G127IHCKAEKGR    | 164   | 181   |
| >PTEN-G127IAIHCKAGK    | 243   | >PTEN-G127IAIHCKAEK    | 433   | 190   |
| >PTEN-G127IAIHCKAGK    | 221   | >PTEN-G127IAIHCKAEK    | 140   | 81    |
| >PTEN-G127IAIHCKAGK    | 29    | >PTEN-G127IAIHCKAEK    | 30    | 1     |
| >PTEN-G127IAIHCKAGKGF  | 407   | >PTEN-G127IAIHCKAEKGR  | 743   | 336   |
| >PTEN-G127IAAIHCKAGK   | 252   | >PTEN-G127IAAIHCKAEK   | 153   | 99    |
| >PTEN-G127IAAIHCKAGK   | 1130  | >PTEN-G127IAAIHCKAEK   | 466   | 664   |
| >PTEN-G127IAAIHCKAGKE  | 447   | >PTEN-G127IAAIHCKAEKG  | 509   | 62    |
| >PTEN-G127IVAAIHCKAGK  | 459   | >PTEN-G127IVAAIHCKAEK  | 311   | 148   |
| >PTEN-G127HVAAIHCKAC   | 90    | >PTEN-G127HVAAIHCKAE   | 96    | 6     |
| >PTEN-G127HVAAIHCKAC   | 114   | >PTEN-G127HVAAIHCKAE   | 78    | 36    |

|                       |       |                       |     |       |
|-----------------------|-------|-----------------------|-----|-------|
| >PTEN-G127IHVAAIHCKAC | 64    | >PTEN-G127IHVAAIHCKAE | 43  | 21    |
| >PTEN-G127IHVAAIHCKAC | 185   | >PTEN-G127IHVAAIHCKAE | 87  | 98    |
| >PTEN-G127IHVAAIHCKAC | 7     | >PTEN-G127IHVAAIHCKAE | 7   | 0     |
| >PTEN-G127'GKGRTGVM   | 964   | >PTEN-G127'VKGRTGVM   | 298 | 666   |
| >PTEN-G127'GKGRTGVM   | 308   | >PTEN-G127'VKGRTGVM   | 76  | 232   |
| >PTEN-G127'AGKGRTGV   | 6933  | >PTEN-G127'AVKGRTGV   | 40  | 6893  |
| >PTEN-G127'AGKGRTGV   | 6148  | >PTEN-G127'AVKGRTGV   | 16  | 6132  |
| >PTEN-G127'AGKGRTGVM  | 27343 | >PTEN-G127'AVKGRTGVM  | 296 | 27047 |
| >PTEN-G127'AGKGRTGV   | 3445  | >PTEN-G127'AVKGRTGV   | 190 | 3255  |
| >PTEN-G127'AGKGRTGVM  | 2906  | >PTEN-G127'AVKGRTGVM  | 106 | 2800  |
| >PTEN-G127'AGKGRTGVM  | 861   | >PTEN-G127'AVKGRTGVM  | 34  | 827   |
| >PTEN-G127'AGKGRTGVM  | 3911  | >PTEN-G127'AVKGRTGVM  | 71  | 3840  |
| >PTEN-G127'AGKGRTGVM  | 1551  | >PTEN-G127'AVKGRTGVM  | 290 | 1261  |
| >PTEN-G127'AGKGRTGVM  | 1481  | >PTEN-G127'AVKGRTGVM  | 470 | 1011  |
| >PTEN-G127'NHVAAIHCKA | 6390  | >PTEN-G127'NHVAAIHCKA | 162 | 6228  |
| >PTEN-G127'KAGKGRTGV  | 2898  | >PTEN-G127'KAVKGRTGV  | 248 | 2650  |
| >PTEN-G127'KAGKGRTGVI | 1139  | >PTEN-G127'KAVKGRTGVI | 39  | 1100  |
| >PTEN-G127'KAGKGRTGVI | 3622  | >PTEN-G127'KAVKGRTGVI | 129 | 3493  |
| >PTEN-G127'KAGKGRTGVI | 1930  | >PTEN-G127'KAVKGRTGVI | 337 | 1593  |
| >PTEN-G127'KAGKGRTGVI | 135   | >PTEN-G127'KAVKGRTGVI | 165 | 30    |
| >PTEN-G127'HCKAGKGR   | 1003  | >PTEN-G127'HCKAVKGR   | 483 | 520   |
| >PTEN-G127'HCKAGKGR   | 345   | >PTEN-G127'HCKAVKGR   | 169 | 176   |
| >PTEN-G127'IHCKAGKGR  | 954   | >PTEN-G127'IHCKAVKGR  | 349 | 605   |
| >PTEN-G127'AIHCKAGK   | 243   | >PTEN-G127'AIHCKAVK   | 250 | 7     |
| >PTEN-G127'AIHCKAGK   | 221   | >PTEN-G127'AIHCKAVK   | 160 | 61    |
| >PTEN-G127'AIHCKAGK   | 29    | >PTEN-G127'AIHCKAVK   | 20  | 9     |
| >PTEN-G127'AIHCKAGKGF | 407   | >PTEN-G127'AIHCKAVKGR | 296 | 111   |
| >PTEN-G127'AIHCKAGKGF | 1530  | >PTEN-G127'AIHCKAVKGR | 470 | 1060  |
| >PTEN-G127'AAIHCKAG   | 24912 | >PTEN-G127'AAIHCKAV   | 345 | 24567 |
| >PTEN-G127'AAIHCKAGK  | 252   | >PTEN-G127'AAIHCKAVK  | 291 | 39    |
| >PTEN-G127'AAIHCKAGKC | 447   | >PTEN-G127'AAIHCKAVKC | 360 | 87    |
| >PTEN-G127'AAIHCKAGKC | 719   | >PTEN-G127'AAIHCKAVKC | 385 | 334   |
| >PTEN-G127'VAAIHCKAGK | 459   | >PTEN-G127'VAAIHCKAVK | 632 | 173   |
| >PTEN-G127'HVAAIHCKAC | 34348 | >PTEN-G127'HVAAIHCKAV | 151 | 34197 |
| >PTEN-G127'HVAAIHCKAC | 90    | >PTEN-G127'HVAAIHCKAV | 90  | 0     |
| >PTEN-G127'HVAAIHCKAC | 114   | >PTEN-G127'HVAAIHCKAV | 119 | 5     |
| >PTEN-G127'HVAAIHCKAC | 64    | >PTEN-G127'HVAAIHCKAV | 42  | 22    |
| >PTEN-G127'HVAAIHCKAC | 185   | >PTEN-G127'HVAAIHCKAV | 120 | 65    |
| >PTEN-G127'HVAAIHCKAC | 7     | >PTEN-G127'HVAAIHCKAV | 10  | 3     |
| >PTEN-G127'HVAAIHCKAC | 26315 | >PTEN-G127'HVAAIHCKAV | 101 | 26214 |
| >PTEN-G127'HVAAIHCKAC | 12816 | >PTEN-G127'HVAAIHCKAV | 70  | 12746 |
| >PTEN-G129IGRTGVMICA' | 14659 | >PTEN-G129IGRTGVMICAY | 360 | 14299 |
| >PTEN-G129IGRTGVMICA' | 113   | >PTEN-G129IGRTGVMICAY | 654 | 541   |



|                       |       |                       |      |       |
|-----------------------|-------|-----------------------|------|-------|
| >PTEN-G129IGRTGVMICA\ | 258   | >PTEN-G129IERTGVMICAY | 1853 | 1595  |
| >PTEN-G129IGRTGVMICA\ | 334   | >PTEN-G129IERTGVMICAY | 1213 | 879   |
| >PTEN-G129IGRTGVMICA\ | 78    | >PTEN-G129IERTGVMICAY | 2302 | 2224  |
| >PTEN-G129IKGRTGVMI   | 26291 | >PTEN-G129IKERTGVMI   | 8    | 26283 |
| >PTEN-G129IKGRTGVMI   | 29    | >PTEN-G129IKERTGVMI   | 933  | 904   |
| >PTEN-G129IKGRTGVMIC  | 365   | >PTEN-G129IKERTGVMIC  | 6423 | 6058  |
| >PTEN-G129IKGRTGVMIC/ | 21    | >PTEN-G129IKERTGVMIC/ | 902  | 881   |
| >PTEN-G129IKGRTGVMIC/ | 38    | >PTEN-G129IKERTGVMIC/ | 1410 | 1372  |
| >PTEN-G129IKGRTGVMIC/ | 314   | >PTEN-G129IKERTGVMIC/ | 1921 | 1607  |
| >PTEN-G129IKGRTGVMIC/ | 165   | >PTEN-G129IKERTGVMIC/ | 143  | 22    |
| >PTEN-G129IKGRTGVMI   | 2875  | >PTEN-G129IKERTGVMI   | 449  | 2426  |
| >PTEN-G129IKGRTGVMIC/ | 174   | >PTEN-G129IKERTGVMIC/ | 29   | 145   |
| >PTEN-G129IKGRTGVMIC/ | 135   | >PTEN-G129IKERTGVMIC/ | 6518 | 6383  |
| >PTEN-G129IKGRTGVMIC/ | 10566 | >PTEN-G129IKERTGVMIC/ | 104  | 10462 |
| >PTEN-G129IKGRTGVMI   | 24050 | >PTEN-G129IKERTGVMI   | 307  | 23743 |
| >PTEN-G129IKGRTGVMI   | 35387 | >PTEN-G129IKERTGVMI   | 237  | 35150 |
| >PTEN-G129IKGRTGVMI   | 8228  | >PTEN-G129IKERTGVMI   | 30   | 8198  |
| >PTEN-G129IKGRTGVMIC  | 28876 | >PTEN-G129IKERTGVMIC  | 20   | 28856 |
| >PTEN-G129IKGRTGVMIC/ | 38064 | >PTEN-G129IKERTGVMIC/ | 478  | 37586 |
| >PTEN-G129IKGRTGVMIC/ | 35409 | >PTEN-G129IKERTGVMIC/ | 140  | 35269 |
| >PTEN-G129IGKRTGVMI   | 308   | >PTEN-G129IGKERTGVMI  | 1115 | 807   |
| >PTEN-G129IKAGKRTGVI  | 135   | >PTEN-G129IKAGKERTGVI | 164  | 29    |
| >PTEN-G129IHCKAGKGR   | 1003  | >PTEN-G129IHCKAGKER   | 498  | 505   |
| >PTEN-G129IHCKAGKGR   | 345   | >PTEN-G129IHCKAGKER   | 643  | 298   |
| >PTEN-G129IAHCKAGKGF  | 407   | >PTEN-G129IAHCKAGKER  | 471  | 64    |
| >PTEN-G129AAIHCKAGKE  | 447   | >PTEN-G129AAIHCKAGKE  | 222  | 225   |
| >PTEN-G129IGRTGVMICA\ | 2501  | >PTEN-G129IRRTGVMICA\ | 321  | 2180  |
| >PTEN-G129IGRTGVMICA\ | 1375  | >PTEN-G129IRRTGVMICA\ | 222  | 1153  |
| >PTEN-G129IGRTGVMICA  | 756   | >PTEN-G129IRRTGVMICA  | 106  | 650   |
| >PTEN-G129IGRTGVMICA\ | 113   | >PTEN-G129IRRTGVMICA\ | 20   | 93    |
| >PTEN-G129IGRTGVMICA\ | 258   | >PTEN-G129IRRTGVMICA\ | 53   | 205   |
| >PTEN-G129IGRTGVMIC   | 19316 | >PTEN-G129IRRTGVMIC   | 453  | 18863 |
| >PTEN-G129IGRTGVMICA  | 5040  | >PTEN-G129IRRTGVMICA  | 273  | 4767  |
| >PTEN-G129IGRTGVMICA\ | 334   | >PTEN-G129IRRTGVMICA\ | 38   | 296   |
| >PTEN-G129IGRTGVMICA\ | 78    | >PTEN-G129IRRTGVMICA\ | 34   | 44    |
| >PTEN-G129IKGRTGVMI   | 29    | >PTEN-G129IKRRTGVMI   | 159  | 130   |
| >PTEN-G129IKGRTGVMIC  | 365   | >PTEN-G129IKRRTGVMIC  | 2343 | 1978  |
| >PTEN-G129IKGRTGVMIC/ | 21    | >PTEN-G129IKRRTGVMIC/ | 128  | 107   |
| >PTEN-G129IKGRTGVMIC/ | 38    | >PTEN-G129IKRRTGVMIC/ | 228  | 190   |
| >PTEN-G129IKGRTGVMIC/ | 314   | >PTEN-G129IKRRTGVMIC/ | 1003 | 689   |
| >PTEN-G129IKGRTGVMIC/ | 165   | >PTEN-G129IKRRTGVMIC/ | 2837 | 2672  |
| >PTEN-G129IKGRTGVMI   | 2875  | >PTEN-G129IKRRTGVMI   | 60   | 2815  |
| >PTEN-G129IKGRTGVMIC/ | 174   | >PTEN-G129IKRRTGVMIC/ | 9    | 165   |

|                       |       |                       |       |       |
|-----------------------|-------|-----------------------|-------|-------|
| >PTEN-G129 KGRTGVMIC/ | 135   | >PTEN-G129 KRRTGVMIC/ | 11145 | 11010 |
| >PTEN-G129 KGRTGVM    | 19915 | >PTEN-G129 KRRTGVM    | 254   | 19661 |
| >PTEN-G129 KGRTGVMIC/ | 29297 | >PTEN-G129 KRRTGVMIC/ | 388   | 28909 |
| >PTEN-G129 KGRTGVM    | 11034 | >PTEN-G129 KRRTGVM    | 40    | 10994 |
| >PTEN-G129 KGRTGVMIC  | 15612 | >PTEN-G129 KRRTGVMIC  | 77    | 15535 |
| >PTEN-G129 KGRTGVMIC/ | 20654 | >PTEN-G129 KRRTGVMIC/ | 157   | 20497 |
| >PTEN-G129 KGRTGVMIC/ | 9259  | >PTEN-G129 KRRTGVMIC/ | 80    | 9179  |
| >PTEN-G129 KGRTGVMIC/ | 26096 | >PTEN-G129 KRRTGVMIC/ | 232   | 25864 |
| >PTEN-G129 KGRTGVMIC/ | 26776 | >PTEN-G129 KRRTGVMIC/ | 250   | 26526 |
| >PTEN-G129 VAAIHCKAGK | 38595 | >PTEN-G129 VAAIHCKAGK | 340   | 38255 |
| >PTEN-G129 GKGRTGVM   | 964   | >PTEN-G129 GKRRTGVM   | 82    | 882   |
| >PTEN-G129 GKGRTGVM   | 308   | >PTEN-G129 GKRRTGVM   | 23    | 285   |
| >PTEN-G129 AGKRTGVM   | 861   | >PTEN-G129 AGKRRTGVM  | 261   | 600   |
| >PTEN-G129 AGKRTGVM   | 3140  | >PTEN-G129 AGKRRTGVM  | 342   | 2798  |
| >PTEN-G129 KAGKRTGVI  | 135   | >PTEN-G129 KAGKRRTGVI | 165   | 30    |
| >PTEN-G129 HCKAGKGR   | 345   | >PTEN-G129 HCKAGKRR   | 399   | 54    |
| >PTEN-G129 AIHCKAGKGF | 407   | >PTEN-G129 AIHCKAGKRR | 393   | 14    |
| >PTEN-G129 AAIHCKAGKC | 26518 | >PTEN-G129 AAIHCKAGKR | 126   | 26392 |
| >PTEN-G129 AAIHCKAGKC | 447   | >PTEN-G129 AAIHCKAGKR | 249   | 198   |
| >PTEN-G129 GRTGVMICA\ | 113   | >PTEN-G129 VRTGVMICA\ | 583   | 470   |
| >PTEN-G129 GRTGVMICA\ | 258   | >PTEN-G129 VRTGVMICA\ | 617   | 359   |
| >PTEN-G129 GRTGVMICA\ | 334   | >PTEN-G129 VRTGVMICA\ | 1450  | 1116  |
| >PTEN-G129 GRTGVMICA\ | 78    | >PTEN-G129 VRTGVMICA\ | 409   | 331   |
| >PTEN-G129 KGRTGVMIC/ | 7063  | >PTEN-G129 KVRTGVMIC/ | 190   | 6873  |
| >PTEN-G129 KGRTGVMIC/ | 22171 | >PTEN-G129 KVRTGVMIC/ | 195   | 21976 |
| >PTEN-G129 KGRTGVM    | 29    | >PTEN-G129 KVRTGVM    | 5     | 24    |
| >PTEN-G129 KGRTGVMIC  | 365   | >PTEN-G129 KVRTGVMIC  | 17    | 348   |
| >PTEN-G129 KGRTGVMIC/ | 21    | >PTEN-G129 KVRTGVMIC/ | 4     | 17    |
| >PTEN-G129 KGRTGVMIC/ | 38    | >PTEN-G129 KVRTGVMIC/ | 5     | 33    |
| >PTEN-G129 KGRTGVMIC/ | 314   | >PTEN-G129 KVRTGVMIC/ | 138   | 176   |
| >PTEN-G129 KGRTGVM    | 13844 | >PTEN-G129 KVRTGVM    | 332   | 13512 |
| >PTEN-G129 KGRTGVMIC/ | 7012  | >PTEN-G129 KVRTGVMIC/ | 340   | 6672  |
| >PTEN-G129 KGRTGVMIC/ | 165   | >PTEN-G129 KVRTGVMIC/ | 71    | 94    |
| >PTEN-G129 KGRTGVMIC/ | 174   | >PTEN-G129 KVRTGVMIC/ | 99    | 75    |
| >PTEN-G129 KGRTGVM    | 2687  | >PTEN-G129 KVRTGVM    | 454   | 2233  |
| >PTEN-G129 KGRTGVMIC/ | 135   | >PTEN-G129 KVRTGVMIC/ | 35    | 100   |
| >PTEN-G129 KGRTGVMIC/ | 666   | >PTEN-G129 KVRTGVMIC/ | 219   | 447   |
| >PTEN-G129 GKGRTGVM   | 964   | >PTEN-G129 GKVRTGVM   | 177   | 787   |
| >PTEN-G129 GKGRTGVM   | 308   | >PTEN-G129 GKVRTGVM   | 54    | 254   |
| >PTEN-G129 KAGKRTGVI  | 135   | >PTEN-G129 KAGKVRTGVI | 138   | 3     |
| >PTEN-G129 HCKAGKGR   | 345   | >PTEN-G129 HCKAGKVR   | 260   | 85    |
| >PTEN-G129 AIHCKAGKG  | 17386 | >PTEN-G129 AIHCKAGKV  | 55    | 17331 |
| >PTEN-G129 AIHCKAGKG  | 27357 | >PTEN-G129 AIHCKAGKV  | 251   | 27106 |

|                        |       |                        |       |       |
|------------------------|-------|------------------------|-------|-------|
| >PTEN-G129' AIHCKAGKGF | 407   | >PTEN-G129' AIHCKAGKVR | 960   | 553   |
| >PTEN-G129' AAIHCKAGKC | 447   | >PTEN-G129' AAIHCKAGKV | 310   | 137   |
| >PTEN-G132IGVMICAYL    | 66    | >PTEN-G132IDVMICAYL    | 7531  | 7465  |
| >PTEN-G132IGVMICAYLL   | 57    | >PTEN-G132IDVMICAYLL   | 7037  | 6980  |
| >PTEN-G132IGVMICAYL    | 20    | >PTEN-G132IDVMICAYL    | 871   | 851   |
| >PTEN-G132IGVMICAYLL   | 18    | >PTEN-G132IDVMICAYLL   | 933   | 915   |
| >PTEN-G132IGVMICAYL    | 260   | >PTEN-G132IDVMICAYL    | 5432  | 5172  |
| >PTEN-G132IGVMICAYL    | 51    | >PTEN-G132IDVMICAYL    | 2848  | 2797  |
| >PTEN-G132IGVMICAYLL   | 112   | >PTEN-G132IDVMICAYLL   | 5903  | 5791  |
| >PTEN-G132IGVMICAYL    | 346   | >PTEN-G132IDVMICAYL    | 10034 | 9688  |
| >PTEN-G132IGVMICAYLL   | 327   | >PTEN-G132IDVMICAYLL   | 10387 | 10060 |
| >PTEN-G132IGVMICAYL    | 403   | >PTEN-G132IDVMICAYL    | 572   | 169   |
| >PTEN-G132IGVMICAYLLH  | 52    | >PTEN-G132IDVMICAYLLH  | 2731  | 2679  |
| >PTEN-G132IGVMICAYLLH  | 38    | >PTEN-G132IDVMICAYLLH  | 324   | 286   |
| >PTEN-G132IGVMICAYLLH  | 3232  | >PTEN-G132IDVMICAYLLH  | 219   | 3013  |
| >PTEN-G132IGVMICAYLLH  | 1046  | >PTEN-G132IDVMICAYLLH  | 16    | 1030  |
| >PTEN-G132IGVMICAYLLH  | 177   | >PTEN-G132IDVMICAYLLH  | 19    | 158   |
| >PTEN-G132IGVMICAYL    | 485   | >PTEN-G132IDVMICAYL    | 15    | 470   |
| >PTEN-G132IGVMICAYLL   | 582   | >PTEN-G132IDVMICAYLL   | 14    | 568   |
| >PTEN-G132IGVMICAYL    | 4563  | >PTEN-G132IDVMICAYL    | 69    | 4494  |
| >PTEN-G132IGVMICAYLL   | 7932  | >PTEN-G132IDVMICAYLL   | 206   | 7726  |
| >PTEN-G132IGVMICAYLL   | 222   | >PTEN-G132IDVMICAYLL   | 6406  | 6184  |
| >PTEN-G132IGVMICAYLLH  | 198   | >PTEN-G132IDVMICAYLLH  | 940   | 742   |
| >PTEN-G132IGVMICAYLLH  | 132   | >PTEN-G132IDVMICAYLLH  | 101   | 31    |
| >PTEN-G132ITGVMICAYL   | 13572 | >PTEN-G132ITDVMICAYL   | 455   | 13117 |
| >PTEN-G132ITGVMICAYL   | 267   | >PTEN-G132ITDVMICAYL   | 1350  | 1083  |
| >PTEN-G132ITGVMICAY    | 166   | >PTEN-G132ITDVMICAY    | 1173  | 1007  |
| >PTEN-G132ITGVMICAYLL  | 13380 | >PTEN-G132ITDVMICAYLL  | 160   | 13220 |
| >PTEN-G132IRTGVMICAY   | 976   | >PTEN-G132IRTDVMICAY   | 12    | 964   |
| >PTEN-G132IRTGVMICAYL  | 1073  | >PTEN-G132IRTDVMICAYL  | 385   | 688   |
| >PTEN-G132IRTGVMICAY   | 243   | >PTEN-G132IRTDVMICAY   | 469   | 226   |
| >PTEN-G132IRTGVMICAYL  | 398   | >PTEN-G132IRTDVMICAYL  | 418   | 20    |
| >PTEN-G132IRTGVMICAY   | 169   | >PTEN-G132IRTDVMICAY   | 456   | 287   |
| >PTEN-G132IRTGVMICAYL  | 114   | >PTEN-G132IRTDVMICAYL  | 207   | 93    |
| >PTEN-G132IRTGVMICAYL  | 74    | >PTEN-G132IRTDVMICAYL  | 60    | 14    |
| >PTEN-G132IRTGVMICAY   | 228   | >PTEN-G132IRTDVMICAY   | 651   | 423   |
| >PTEN-G132IRTGVMICAY   | 70    | >PTEN-G132IRTDVMICAY   | 448   | 378   |
| >PTEN-G132IRTGVMICAY   | 13    | >PTEN-G132IRTDVMICAY   | 10    | 3     |
| >PTEN-G132IRTGVMICAYL  | 12    | >PTEN-G132IRTDVMICAYL  | 8     | 4     |
| >PTEN-G132IRTGVMICAYL  | 14    | >PTEN-G132IRTDVMICAYL  | 9     | 5     |
| >PTEN-G132IRTGVMICAY   | 205   | >PTEN-G132IRTDVMICAY   | 144   | 61    |
| >PTEN-G132IRTGVMICAYL  | 438   | >PTEN-G132IRTDVMICAYL  | 311   | 127   |
| >PTEN-G132IRTGVMICAYL  | 428   | >PTEN-G132IRTDVMICAYL  | 287   | 141   |

|                       |      |                       |      |      |
|-----------------------|------|-----------------------|------|------|
| >PTEN-G132 RTGVMICAYL | 90   | >PTEN-G132 RTDVMICAYL | 115  | 25   |
| >PTEN-G132 RTGVMICAYL | 56   | >PTEN-G132 RTDVMICAYL | 63   | 7    |
| >PTEN-G132 RTGVMICAY  | 378  | >PTEN-G132 RTDVMICAY  | 308  | 70   |
| >PTEN-G132 RTGVMICAYL | 72   | >PTEN-G132 RTDVMICAYL | 96   | 24   |
| >PTEN-G132 RTGVMICAYL | 235  | >PTEN-G132 RTDVMICAYL | 189  | 46   |
| >PTEN-G132 RTGVMICAYL | 394  | >PTEN-G132 RTDVMICAYL | 543  | 149  |
| >PTEN-G132 GRTGVMICA` | 113  | >PTEN-G132 GRTDVMICA` | 125  | 12   |
| >PTEN-G132 GRTGVMICA` | 258  | >PTEN-G132 GRTDVMICA` | 598  | 340  |
| >PTEN-G132 GRTGVMICA` | 334  | >PTEN-G132 GRTDVMICA` | 408  | 74   |
| >PTEN-G132 GRTGVMICA` | 78   | >PTEN-G132 GRTDVMICA` | 46   | 32   |
| >PTEN-G132 KGRTGVM    | 29   | >PTEN-G132 KGRTDVM    | 105  | 76   |
| >PTEN-G132 KGRTGVMIC  | 365  | >PTEN-G132 KGRTDVMIC  | 2169 | 1804 |
| >PTEN-G132 KGRTGVMIC/ | 21   | >PTEN-G132 KGRTDVMIC/ | 58   | 37   |
| >PTEN-G132 KGRTGVMIC/ | 38   | >PTEN-G132 KGRTDVMIC/ | 116  | 78   |
| >PTEN-G132 KGRTGVMIC/ | 314  | >PTEN-G132 KGRTDVMIC/ | 406  | 92   |
| >PTEN-G132 KGRTGVMIC/ | 165  | >PTEN-G132 KGRTDVMIC/ | 275  | 110  |
| >PTEN-G132 KGRTGVMIC/ | 174  | >PTEN-G132 KGRTDVMIC/ | 185  | 11   |
| >PTEN-G132 KGRTGVMIC/ | 135  | >PTEN-G132 KGRTDVMIC/ | 477  | 342  |
| >PTEN-G132 GKGRTGVM   | 308  | >PTEN-G132 GKGRTDVM   | 2143 | 1835 |
| >PTEN-G132 KAGKRTGVI  | 135  | >PTEN-G132 KAGKRTDVI  | 142  | 7    |
| >PTEN-G132 GVMICAYL   | 2779 | >PTEN-G132 RVMICAYL   | 470  | 2309 |
| >PTEN-G132 GVMICAYL   | 66   | >PTEN-G132 RVMICAYL   | 45   | 21   |
| >PTEN-G132 GVMICAYLL  | 57   | >PTEN-G132 RVMICAYLL  | 38   | 19   |
| >PTEN-G132 GVMICAYL   | 20   | >PTEN-G132 RVMICAYL   | 25   | 5    |
| >PTEN-G132 GVMICAYLL  | 18   | >PTEN-G132 RVMICAYLL  | 22   | 4    |
| >PTEN-G132 GVMICAYL   | 260  | >PTEN-G132 RVMICAYL   | 167  | 93   |
| >PTEN-G132 GVMICAYL   | 51   | >PTEN-G132 RVMICAYL   | 18   | 33   |
| >PTEN-G132 GVMICAYLL  | 112  | >PTEN-G132 RVMICAYLL  | 29   | 83   |
| >PTEN-G132 GVMICAYL   | 844  | >PTEN-G132 RVMICAYL   | 435  | 409  |
| >PTEN-G132 GVMICAYL   | 346  | >PTEN-G132 RVMICAYL   | 769  | 423  |
| >PTEN-G132 GVMICAYLL  | 327  | >PTEN-G132 RVMICAYLL  | 715  | 388  |
| >PTEN-G132 GVMICAYL   | 403  | >PTEN-G132 RVMICAYL   | 167  | 236  |
| >PTEN-G132 GVMICAYLLH | 1009 | >PTEN-G132 RVMICAYLLH | 436  | 573  |
| >PTEN-G132 GVMICAYLLH | 881  | >PTEN-G132 RVMICAYLLH | 133  | 748  |
| >PTEN-G132 GVMICAYLLH | 52   | >PTEN-G132 RVMICAYLLH | 37   | 15   |
| >PTEN-G132 GVMICAYL   | 7566 | >PTEN-G132 RVMICAYL   | 344  | 7222 |
| >PTEN-G132 GVMICAYLLH | 7431 | >PTEN-G132 RVMICAYLLH | 425  | 7006 |
| >PTEN-G132 GVMICAYL   | 3336 | >PTEN-G132 RVMICAYL   | 215  | 3121 |
| >PTEN-G132 GVMICAYLL  | 5098 | >PTEN-G132 RVMICAYLL  | 326  | 4772 |
| >PTEN-G132 GVMICAYLLH | 3093 | >PTEN-G132 RVMICAYLLH | 257  | 2836 |
| >PTEN-G132 GVMICAYLLH | 38   | >PTEN-G132 RVMICAYLLH | 10   | 28   |
| >PTEN-G132 GVMICAYL   | 6744 | >PTEN-G132 RVMICAYL   | 318  | 6426 |
| >PTEN-G132 GVMICAYLL  | 2144 | >PTEN-G132 RVMICAYLL  | 55   | 2089 |

|                       |       |                       |      |       |
|-----------------------|-------|-----------------------|------|-------|
| >PTEN-G132IGVMICAYLLH | 177   | >PTEN-G132IRVMICAYLLH | 191  | 14    |
| >PTEN-G132IGVMICAYL   | 485   | >PTEN-G132IRVMICAYL   | 178  | 307   |
| >PTEN-G132IGVMICAYLL  | 582   | >PTEN-G132IRVMICAYLL  | 186  | 396   |
| >PTEN-G132IGVMICAYL   | 1630  | >PTEN-G132IRVMICAYL   | 48   | 1582  |
| >PTEN-G132IGVMICAYLL  | 2055  | >PTEN-G132IRVMICAYLL  | 80   | 1975  |
| >PTEN-G132IGVMICAYLL  | 222   | >PTEN-G132IRVMICAYLL  | 148  | 74    |
| >PTEN-G132IGVMICAYLLH | 198   | >PTEN-G132IRVMICAYLLH | 554  | 356   |
| >PTEN-G132IGVMICAYLLH | 132   | >PTEN-G132IRVMICAYLLH | 17   | 115   |
| >PTEN-G132ITGVMICAYL  | 267   | >PTEN-G132ITRVMICAYL  | 2428 | 2161  |
| >PTEN-G132ITGVMICAY   | 4049  | >PTEN-G132ITRVMICAY   | 202  | 3847  |
| >PTEN-G132ITGVMICAYLL | 26518 | >PTEN-G132ITRVMICAYLL | 165  | 26353 |
| >PTEN-G132ITGVMICAY   | 166   | >PTEN-G132ITRVMICAY   | 4766 | 4600  |
| >PTEN-G132ITGVMICAYLL | 6247  | >PTEN-G132ITRVMICAYLL | 115  | 6132  |
| >PTEN-G132IRTGVMICAY  | 828   | >PTEN-G132IRTRVMICAY  | 489  | 339   |
| >PTEN-G132IRTGVMICA   | 980   | >PTEN-G132IRTRVMICA   | 4    | 976   |
| >PTEN-G132IRTGVMICAY  | 1333  | >PTEN-G132IRTRVMICAY  | 5    | 1328  |
| >PTEN-G132IRTGVMICAYL | 550   | >PTEN-G132IRTRVMICAYL | 4    | 546   |
| >PTEN-G132IRTGVMICAYL | 1899  | >PTEN-G132IRTRVMICAYL | 6    | 1893  |
| >PTEN-G132IRTGVMICAY  | 243   | >PTEN-G132IRTRVMICAY  | 289  | 46    |
| >PTEN-G132IRTGVMICAYL | 398   | >PTEN-G132IRTRVMICAYL | 649  | 251   |
| >PTEN-G132IRTGVMICAYL | 1242  | >PTEN-G132IRTRVMICAYL | 309  | 933   |
| >PTEN-G132IRTGVMICAY  | 169   | >PTEN-G132IRTRVMICAY  | 567  | 398   |
| >PTEN-G132IRTGVMICAYL | 114   | >PTEN-G132IRTRVMICAYL | 303  | 189   |
| >PTEN-G132IRTGVMICAYL | 74    | >PTEN-G132IRTRVMICAYL | 100  | 26    |
| >PTEN-G132IRTGVMICAY  | 228   | >PTEN-G132IRTRVMICAY  | 1458 | 1230  |
| >PTEN-G132IRTGVMICAY  | 70    | >PTEN-G132IRTRVMICAY  | 48   | 22    |
| >PTEN-G132IRTGVMICAY  | 767   | >PTEN-G132IRTRVMICAY  | 74   | 693   |
| >PTEN-G132IRTGVMICAY  | 13    | >PTEN-G132IRTRVMICAY  | 5    | 8     |
| >PTEN-G132IRTGVMICAYL | 12    | >PTEN-G132IRTRVMICAYL | 3    | 9     |
| >PTEN-G132IRTGVMICAYL | 14    | >PTEN-G132IRTRVMICAYL | 3    | 11    |
| >PTEN-G132IRTGVMICAY  | 205   | >PTEN-G132IRTRVMICAY  | 1636 | 1431  |
| >PTEN-G132IRTGVMICAYL | 438   | >PTEN-G132IRTRVMICAYL | 2639 | 2201  |
| >PTEN-G132IRTGVMICAYL | 428   | >PTEN-G132IRTRVMICAYL | 2843 | 2415  |
| >PTEN-G132IRTGVMICAYL | 90    | >PTEN-G132IRTRVMICAYL | 241  | 151   |
| >PTEN-G132IRTGVMICAYL | 56    | >PTEN-G132IRTRVMICAYL | 130  | 74    |
| >PTEN-G132IRTGVMICAY  | 378   | >PTEN-G132IRTRVMICAY  | 42   | 336   |
| >PTEN-G132IRTGVMICAYL | 72    | >PTEN-G132IRTRVMICAYL | 36   | 36    |
| >PTEN-G132IRTGVMICAYL | 235   | >PTEN-G132IRTRVMICAYL | 21   | 214   |
| >PTEN-G132IRTGVMICAYL | 1163  | >PTEN-G132IRTRVMICAYL | 213  | 950   |
| >PTEN-G132IRTGVMICAYL | 1191  | >PTEN-G132IRTRVMICAYL | 220  | 971   |
| >PTEN-G132IRTGVMICAYL | 394   | >PTEN-G132IRTRVMICAYL | 410  | 16    |
| >PTEN-G132IGRTGVMICA\ | 113   | >PTEN-G132IGRTRVMICA\ | 104  | 9     |
| >PTEN-G132IGRTGVMICA\ | 258   | >PTEN-G132IGRTRVMICA\ | 306  | 48    |

|                       |       |                       |     |       |
|-----------------------|-------|-----------------------|-----|-------|
| >PTEN-G132 GRTGVMICA\ | 334   | >PTEN-G132 GRTRVMICA\ | 142 | 192   |
| >PTEN-G132 GRTGVMICA\ | 78    | >PTEN-G132 GRTRVMICA\ | 36  | 42    |
| >PTEN-G132 KGRTGVM    | 29    | >PTEN-G132 KGRTRVMI   | 15  | 14    |
| >PTEN-G132 KGRTGVMIC  | 365   | >PTEN-G132 KGRTRVMIC  | 185 | 180   |
| >PTEN-G132 KGRTGVMIC/ | 21    | >PTEN-G132 KGRTRVMIC/ | 14  | 7     |
| >PTEN-G132 KGRTGVMIC/ | 38    | >PTEN-G132 KGRTRVMIC/ | 27  | 11    |
| >PTEN-G132 KGRTGVMIC/ | 314   | >PTEN-G132 KGRTRVMIC/ | 826 | 512   |
| >PTEN-G132 KGRTGVMIC/ | 165   | >PTEN-G132 KGRTRVMIC/ | 253 | 88    |
| >PTEN-G132 KGRTGVMIC/ | 174   | >PTEN-G132 KGRTRVMIC/ | 215 | 41    |
| >PTEN-G132 KGRTGVMIC/ | 135   | >PTEN-G132 KGRTRVMIC/ | 163 | 28    |
| >PTEN-G132 GKGRTRVMI  | 308   | >PTEN-G132 GKGRTRVMI  | 584 | 276   |
| >PTEN-G132 AGKGRTRVM  | 861   | >PTEN-G132 AGKGRTRVM  | 358 | 503   |
| >PTEN-G132 KAGKGRTRG  | 20718 | >PTEN-G132 KAGKGRTR   | 80  | 20638 |
| >PTEN-G132 KAGKGRTRVI | 135   | >PTEN-G132 KAGKGRTRVI | 153 | 18    |
| >PTEN-G132!GVMICAYL   | 2779  | >PTEN-G132!SVMICAYL   | 143 | 2636  |
| >PTEN-G132!GVMICAYL   | 66    | >PTEN-G132!SVMICAYL   | 36  | 30    |
| >PTEN-G132!GVMICAYLL  | 57    | >PTEN-G132!SVMICAYLL  | 29  | 28    |
| >PTEN-G132!GVMICAYL   | 20    | >PTEN-G132!SVMICAYL   | 16  | 4     |
| >PTEN-G132!GVMICAYLL  | 18    | >PTEN-G132!SVMICAYLL  | 14  | 4     |
| >PTEN-G132!GVMICAYL   | 260   | >PTEN-G132!SVMICAYL   | 180 | 80    |
| >PTEN-G132!GVMICAYL   | 51    | >PTEN-G132!SVMICAYL   | 28  | 23    |
| >PTEN-G132!GVMICAYLL  | 112   | >PTEN-G132!SVMICAYLL  | 45  | 67    |
| >PTEN-G132!GVMICAYL   | 844   | >PTEN-G132!SVMICAYL   | 368 | 476   |
| >PTEN-G132!GVMICAYL   | 346   | >PTEN-G132!SVMICAYL   | 703 | 357   |
| >PTEN-G132!GVMICAYLL  | 327   | >PTEN-G132!SVMICAYLL  | 665 | 338   |
| >PTEN-G132!GVMICAYL   | 403   | >PTEN-G132!SVMICAYL   | 214 | 189   |
| >PTEN-G132!GVMICAYL   | 574   | >PTEN-G132!SVMICAYL   | 238 | 336   |
| >PTEN-G132!GVMICAYLLH | 1450  | >PTEN-G132!SVMICAYLLH | 468 | 982   |
| >PTEN-G132!GVMICAYLLH | 52    | >PTEN-G132!SVMICAYLLH | 25  | 27    |
| >PTEN-G132!GVMICAYLLH | 38    | >PTEN-G132!SVMICAYLLH | 22  | 16    |
| >PTEN-G132!GVMICAYLLH | 1046  | >PTEN-G132!SVMICAYLLH | 289 | 757   |
| >PTEN-G132!GVMICAYLLH | 177   | >PTEN-G132!SVMICAYLLH | 40  | 137   |
| >PTEN-G132!GVMICAYL   | 485   | >PTEN-G132!SVMICAYL   | 16  | 469   |
| >PTEN-G132!GVMICAYLL  | 582   | >PTEN-G132!SVMICAYLL  | 14  | 568   |
| >PTEN-G132!GVMICAYL   | 4563  | >PTEN-G132!SVMICAYL   | 154 | 4409  |
| >PTEN-G132!GVMICAYLL  | 7932  | >PTEN-G132!SVMICAYLL  | 467 | 7465  |
| >PTEN-G132!GVMICAYLL  | 2770  | >PTEN-G132!SVMICAYLL  | 477 | 2293  |
| >PTEN-G132!GVMICAYLL  | 222   | >PTEN-G132!SVMICAYLL  | 219 | 3     |
| >PTEN-G132!GVMICAYLLH | 198   | >PTEN-G132!SVMICAYLLH | 158 | 40    |
| >PTEN-G132!GVMICAYLLH | 132   | >PTEN-G132!SVMICAYLLH | 35  | 97    |
| >PTEN-G132!TGVMICAYL  | 1775  | >PTEN-G132!TSVMICAYL  | 415 | 1360  |
| >PTEN-G132!TGVMICAYL  | 1039  | >PTEN-G132!TSVMICAYL  | 473 | 566   |
| >PTEN-G132!TGVMICAY   | 11431 | >PTEN-G132!TSVMICAY   | 55  | 11376 |

|                       |       |                        |     |       |
|-----------------------|-------|------------------------|-----|-------|
| >PTEN-G132!TGVMICAY   | 2263  | >PTEN-G132!TSVMICAY    | 401 | 1862  |
| >PTEN-G132!TGVMICAY   | 567   | >PTEN-G132!TSVMICAY    | 161 | 406   |
| >PTEN-G132!TGVMICAY   | 6199  | >PTEN-G132!TSVMICAY    | 369 | 5830  |
| >PTEN-G132!TGVMICAYL  | 267   | >PTEN-G132!TSVMICAYL   | 16  | 251   |
| >PTEN-G132!TGVMICAYLL | 6101  | >PTEN-G132!TSVMICAYLL  | 127 | 5974  |
| >PTEN-G132!TGVMICAY   | 714   | >PTEN-G132!TSVMICAY    | 170 | 544   |
| >PTEN-G132!TGVMICAY   | 4049  | >PTEN-G132!TSVMICAY    | 412 | 3637  |
| >PTEN-G132!TGVMICAY   | 2810  | >PTEN-G132!TSVMICAY    | 14  | 2796  |
| >PTEN-G132!TGVMICAYL  | 10495 | >PTEN-G132!TSVMICAYL   | 64  | 10431 |
| >PTEN-G132!TGVMICAYLL | 9886  | >PTEN-G132!TSVMICAYLL  | 80  | 9806  |
| >PTEN-G132!TGVMICAY   | 166   | >PTEN-G132!TSVMICAY    | 145 | 21    |
| >PTEN-G132!TGVMICAYL  | 1397  | >PTEN-G132!TSVMICAYL   | 38  | 1359  |
| >PTEN-G132!TGVMICAYLL | 791   | >PTEN-G132!TSVMICAYLL  | 22  | 769   |
| >PTEN-G132!TGVMICAY   | 3532  | >PTEN-G132!TSVMICAY    | 89  | 3443  |
| >PTEN-G132!TGVMICAYL  | 1647  | >PTEN-G132!TSVMICAYL   | 126 | 1521  |
| >PTEN-G132!TGVMICAYLL | 4572  | >PTEN-G132!TSVMICAYLLI | 415 | 4157  |
| >PTEN-G132!RTGVMICAY  | 976   | >PTEN-G132!RTSVMICAY   | 144 | 832   |
| >PTEN-G132!RTGVMICAYL | 583   | >PTEN-G132!RTSVMICAYL  | 224 | 359   |
| >PTEN-G132!RTGVMICAYL | 1352  | >PTEN-G132!RTSVMICAYL  | 156 | 1196  |
| >PTEN-G132!RTGVMICAYL | 532   | >PTEN-G132!RTSVMICAYL  | 238 | 294   |
| >PTEN-G132!RTGVMICAY  | 913   | >PTEN-G132!RTSVMICAY   | 157 | 756   |
| >PTEN-G132!RTGVMICA   | 980   | >PTEN-G132!RTSVMICA    | 178 | 802   |
| >PTEN-G132!RTGVMICAY  | 1333  | >PTEN-G132!RTSVMICAY   | 226 | 1107  |
| >PTEN-G132!RTGVMICAYL | 550   | >PTEN-G132!RTSVMICAYL  | 97  | 453   |
| >PTEN-G132!RTGVMICAYL | 1899  | >PTEN-G132!RTSVMICAYL  | 431 | 1468  |
| >PTEN-G132!RTGVMICAY  | 243   | >PTEN-G132!RTSVMICAY   | 82  | 161   |
| >PTEN-G132!RTGVMICAYL | 398   | >PTEN-G132!RTSVMICAYL  | 275 | 123   |
| >PTEN-G132!RTGVMICAY  | 169   | >PTEN-G132!RTSVMICAY   | 166 | 3     |
| >PTEN-G132!RTGVMICAYL | 114   | >PTEN-G132!RTSVMICAYL  | 91  | 23    |
| >PTEN-G132!RTGVMICAYL | 74    | >PTEN-G132!RTSVMICAYL  | 21  | 53    |
| >PTEN-G132!RTGVMICAY  | 228   | >PTEN-G132!RTSVMICAY   | 638 | 410   |
| >PTEN-G132!RTGVMICAY  | 70    | >PTEN-G132!RTSVMICAY   | 58  | 12    |
| >PTEN-G132!RTGVMICAY  | 767   | >PTEN-G132!RTSVMICAY   | 194 | 573   |
| >PTEN-G132!RTGVMICAY  | 13    | >PTEN-G132!RTSVMICAY   | 4   | 9     |
| >PTEN-G132!RTGVMICAYL | 12    | >PTEN-G132!RTSVMICAYL  | 5   | 7     |
| >PTEN-G132!RTGVMICAYL | 14    | >PTEN-G132!RTSVMICAYL  | 6   | 8     |
| >PTEN-G132!RTGVMICAY  | 205   | >PTEN-G132!RTSVMICAY   | 51  | 154   |
| >PTEN-G132!RTGVMICAYL | 438   | >PTEN-G132!RTSVMICAYL  | 85  | 353   |
| >PTEN-G132!RTGVMICAYL | 428   | >PTEN-G132!RTSVMICAYL  | 82  | 346   |
| >PTEN-G132!RTGVMICAYL | 90    | >PTEN-G132!RTSVMICAYL  | 44  | 46    |
| >PTEN-G132!RTGVMICAYL | 56    | >PTEN-G132!RTSVMICAYL  | 26  | 30    |
| >PTEN-G132!RTGVMICAY  | 378   | >PTEN-G132!RTSVMICAY   | 100 | 278   |
| >PTEN-G132!RTGVMICAYL | 72    | >PTEN-G132!RTSVMICAYL  | 26  | 46    |

|                         |      |                         |     |      |
|-------------------------|------|-------------------------|-----|------|
| >PTEN-G132!RTGVMICAYL   | 235  | >PTEN-G132!RTSVMICAYL   | 50  | 185  |
| >PTEN-G132!RTGVMICAY    | 3713 | >PTEN-G132!RTSVMICAY    | 180 | 3533 |
| >PTEN-G132!RTGVMICAYL   | 1191 | >PTEN-G132!RTSVMICAYL   | 424 | 767  |
| >PTEN-G132!RTGVMICAYL   | 394  | >PTEN-G132!RTSVMICAYL   | 227 | 167  |
| >PTEN-G132!GRTGVMICA'   | 1375 | >PTEN-G132!GRTSVMICAY   | 418 | 957  |
| >PTEN-G132!GRTGVMICA'   | 113  | >PTEN-G132!GRTSVMICAY   | 117 | 4    |
| >PTEN-G132!GRTGVMICA'   | 258  | >PTEN-G132!GRTSVMICAY   | 348 | 90   |
| >PTEN-G132!GRTGVMICA'   | 334  | >PTEN-G132!GRTSVMICAY   | 211 | 123  |
| >PTEN-G132!GRTGVMICA'   | 78   | >PTEN-G132!GRTSVMICAY   | 53  | 25   |
| >PTEN-G132!KGRTGVMIC    | 29   | >PTEN-G132!KGRTSVMIC    | 14  | 15   |
| >PTEN-G132!KGRTGVMIC    | 365  | >PTEN-G132!KGRTSVMIC    | 145 | 220  |
| >PTEN-G132!KGRTGVMIC/   | 21   | >PTEN-G132!KGRTSVMIC/   | 15  | 6    |
| >PTEN-G132!KGRTGVMIC/   | 38   | >PTEN-G132!KGRTSVMIC/   | 25  | 13   |
| >PTEN-G132!KGRTGVMIC/   | 314  | >PTEN-G132!KGRTSVMIC/   | 543 | 229  |
| >PTEN-G132!KGRTGVMIC/   | 165  | >PTEN-G132!KGRTSVMIC/   | 153 | 12   |
| >PTEN-G132!KGRTGVMIC/   | 174  | >PTEN-G132!KGRTSVMIC/   | 66  | 108  |
| >PTEN-G132!KGRTGVMIC/   | 135  | >PTEN-G132!KGRTSVMIC/   | 67  | 68   |
| >PTEN-G132!GKGRTGVM     | 964  | >PTEN-G132!GKGRTSVM     | 170 | 794  |
| >PTEN-G132!GKGRTGVM     | 308  | >PTEN-G132!GKGRTSVM     | 316 | 8    |
| >PTEN-G132!AGKGRTGVM    | 861  | >PTEN-G132!AGKGRTSVM    | 385 | 476  |
| >PTEN-G132!AGKGRTGVM    | 1481 | >PTEN-G132!AGKGRTSVM    | 93  | 1388 |
| >PTEN-G132!KAGKGRTGVM   | 1139 | >PTEN-G132!KAGKGRTSVM   | 434 | 705  |
| >PTEN-G132!KAGKGRTGVM   | 135  | >PTEN-G132!KAGKGRTSVM   | 93  | 42   |
| >PTEN-G132!CKAGKGRTGVM  | 2391 | >PTEN-G132!CKAGKGRTSVM  | 415 | 1976 |
| >PTEN-G132!HCKAGKGRTGVM | 1478 | >PTEN-G132!HCKAGKGRTSVM | 469 | 1009 |
| >PTEN-G132!GVMICAYL     | 2779 | >PTEN-G132!VVMICAYL     | 51  | 2728 |
| >PTEN-G132!GVMICAYLL    | 3813 | >PTEN-G132!VVMICAYLL    | 353 | 3460 |
| >PTEN-G132!GVMICAYL     | 66   | >PTEN-G132!VVMICAYL     | 56  | 10   |
| >PTEN-G132!GVMICAYLL    | 57   | >PTEN-G132!VVMICAYLL    | 48  | 9    |
| >PTEN-G132!GVMICAYL     | 20   | >PTEN-G132!VVMICAYL     | 31  | 11   |
| >PTEN-G132!GVMICAYLL    | 18   | >PTEN-G132!VVMICAYLL    | 28  | 10   |
| >PTEN-G132!GVMICAYL     | 260  | >PTEN-G132!VVMICAYL     | 259 | 1    |
| >PTEN-G132!GVMICAYL     | 51   | >PTEN-G132!VVMICAYL     | 28  | 23   |
| >PTEN-G132!GVMICAYLL    | 112  | >PTEN-G132!VVMICAYLL    | 48  | 64   |
| >PTEN-G132!GVMICAYL     | 844  | >PTEN-G132!VVMICAYL     | 346 | 498  |
| >PTEN-G132!GVMICAYL     | 346  | >PTEN-G132!VVMICAYL     | 838 | 492  |
| >PTEN-G132!GVMICAYLL    | 327  | >PTEN-G132!VVMICAYLL    | 809 | 482  |
| >PTEN-G132!GVMICAYL     | 403  | >PTEN-G132!VVMICAYL     | 44  | 359  |
| >PTEN-G132!GVMICAYLL    | 2518 | >PTEN-G132!VVMICAYLL    | 206 | 2312 |
| >PTEN-G132!GVMICAYL     | 574  | >PTEN-G132!VVMICAYL     | 169 | 405  |
| >PTEN-G132!GVMICAYLLH   | 52   | >PTEN-G132!VVMICAYLLH   | 54  | 2    |
| >PTEN-G132!GVMICAYLLH   | 38   | >PTEN-G132!VVMICAYLLH   | 30  | 8    |
| >PTEN-G132!GVMICAYLLH   | 1046 | >PTEN-G132!VVMICAYLLH   | 230 | 816  |



|                       |       |                       |     |       |
|-----------------------|-------|-----------------------|-----|-------|
| >PTEN-G132'GVMICAYLLH | 177   | >PTEN-G132'VVMICAYLLH | 116 | 61    |
| >PTEN-G132'GVMICAYL   | 485   | >PTEN-G132'VVMICAYL   | 84  | 401   |
| >PTEN-G132'GVMICAYLL  | 582   | >PTEN-G132'VVMICAYLL  | 85  | 497   |
| >PTEN-G132'GVMICAYL   | 1630  | >PTEN-G132'VVMICAYL   | 446 | 1184  |
| >PTEN-G132'GVMICAYLL  | 222   | >PTEN-G132'VVMICAYLL  | 369 | 147   |
| >PTEN-G132'GVMICAYLLH | 198   | >PTEN-G132'VVMICAYLLH | 739 | 541   |
| >PTEN-G132'GVMICAYLLH | 132   | >PTEN-G132'VVMICAYLLH | 78  | 54    |
| >PTEN-G132'TGVMICAYL  | 1775  | >PTEN-G132'TVVMICAYL  | 477 | 1298  |
| >PTEN-G132'TGVMICAYL  | 1039  | >PTEN-G132'TVVMICAYL  | 91  | 948   |
| >PTEN-G132'TGVMICAYLL | 8148  | >PTEN-G132'TVVMICAYLL | 349 | 7799  |
| >PTEN-G132'TGVMICAYL  | 10990 | >PTEN-G132'TVVMICAYL  | 376 | 10614 |
| >PTEN-G132'TGVMICAYL  | 3369  | >PTEN-G132'TVVMICAYL  | 106 | 3263  |
| >PTEN-G132'TGVMICAYLL | 6418  | >PTEN-G132'TVVMICAYLL | 198 | 6220  |
| >PTEN-G132'TGVMICAY   | 15284 | >PTEN-G132'TVVMICAY   | 386 | 14898 |
| >PTEN-G132'TGVMICAY   | 11758 | >PTEN-G132'TVVMICAY   | 57  | 11701 |
| >PTEN-G132'TGVMICAY   | 11431 | >PTEN-G132'TVVMICAY   | 15  | 11416 |
| >PTEN-G132'TGVMICAYL  | 30525 | >PTEN-G132'TVVMICAYL  | 292 | 30233 |
| >PTEN-G132'TGVMICAY   | 2263  | >PTEN-G132'TVVMICAY   | 100 | 2163  |
| >PTEN-G132'TGVMICAY   | 567   | >PTEN-G132'TVVMICAY   | 265 | 302   |
| >PTEN-G132'TGVMICAY   | 6199  | >PTEN-G132'TVVMICAY   | 146 | 6053  |
| >PTEN-G132'TGVMICAYL  | 267   | >PTEN-G132'TVVMICAYL  | 8   | 259   |
| >PTEN-G132'TGVMICAYLL | 6101  | >PTEN-G132'TVVMICAYLL | 104 | 5997  |
| >PTEN-G132'TGVMICAYL  | 12764 | >PTEN-G132'TVVMICAYL  | 270 | 12494 |
| >PTEN-G132'TGVMICAY   | 714   | >PTEN-G132'TVVMICAY   | 200 | 514   |
| >PTEN-G132'TGVMICAY   | 166   | >PTEN-G132'TVVMICAY   | 71  | 95    |
| >PTEN-G132'TGVMICAY   | 1635  | >PTEN-G132'TVVMICAY   | 345 | 1290  |
| >PTEN-G132'RTGVMICAYL | 583   | >PTEN-G132'RTVVMICAYL | 473 | 110   |
| >PTEN-G132'RTGVMICAYL | 532   | >PTEN-G132'RTVVMICAYL | 356 | 176   |
| >PTEN-G132'RTGVMICAYL | 1151  | >PTEN-G132'RTVVMICAYL | 256 | 895   |
| >PTEN-G132'RTGVMICAYL | 4570  | >PTEN-G132'RTVVMICAYL | 320 | 4250  |
| >PTEN-G132'RTGVMICAY  | 828   | >PTEN-G132'RTVVMICAY  | 23  | 805   |
| >PTEN-G132'RTGVMICA   | 980   | >PTEN-G132'RTVVMICA   | 390 | 590   |
| >PTEN-G132'RTGVMICAYL | 550   | >PTEN-G132'RTVVMICAYL | 214 | 336   |
| >PTEN-G132'RTGVMICAY  | 243   | >PTEN-G132'RTVVMICAY  | 266 | 23    |
| >PTEN-G132'RTGVMICAYL | 398   | >PTEN-G132'RTVVMICAYL | 379 | 19    |
| >PTEN-G132'RTGVMICAY  | 169   | >PTEN-G132'RTVVMICAY  | 144 | 25    |
| >PTEN-G132'RTGVMICAYL | 632   | >PTEN-G132'RTVVMICAYL | 483 | 149   |
| >PTEN-G132'RTGVMICAYL | 114   | >PTEN-G132'RTVVMICAYL | 92  | 22    |
| >PTEN-G132'RTGVMICAYL | 74    | >PTEN-G132'RTVVMICAYL | 20  | 54    |
| >PTEN-G132'RTGVMICAY  | 228   | >PTEN-G132'RTVVMICAY  | 567 | 339   |
| >PTEN-G132'RTGVMICAY  | 70    | >PTEN-G132'RTVVMICAY  | 58  | 12    |
| >PTEN-G132'RTGVMICAY  | 767   | >PTEN-G132'RTVVMICAY  | 189 | 578   |
| >PTEN-G132'RTGVMICAY  | 13    | >PTEN-G132'RTVVMICAY  | 3   | 10    |

|                        |       |                        |     |       |
|------------------------|-------|------------------------|-----|-------|
| >PTEN-G132' RTGVMICAYL | 12    | >PTEN-G132' RTVVMICAYL | 3   | 9     |
| >PTEN-G132' RTGVMICAYL | 14    | >PTEN-G132' RTVVMICAYL | 4   | 10    |
| >PTEN-G132' RTGVMICAY  | 205   | >PTEN-G132' RTVVMICAY  | 49  | 156   |
| >PTEN-G132' RTGVMICAYL | 438   | >PTEN-G132' RTVVMICAYL | 91  | 347   |
| >PTEN-G132' RTGVMICAYL | 428   | >PTEN-G132' RTVVMICAYL | 85  | 343   |
| >PTEN-G132' RTGVMICAYL | 90    | >PTEN-G132' RTVVMICAYL | 63  | 27    |
| >PTEN-G132' RTGVMICAYL | 56    | >PTEN-G132' RTVVMICAYL | 35  | 21    |
| >PTEN-G132' RTGVMICAY  | 378   | >PTEN-G132' RTVVMICAY  | 124 | 254   |
| >PTEN-G132' RTGVMICAYL | 72    | >PTEN-G132' RTVVMICAYL | 58  | 14    |
| >PTEN-G132' RTGVMICAYL | 235   | >PTEN-G132' RTVVMICAYL | 61  | 174   |
| >PTEN-G132' RTGVMICAY  | 3713  | >PTEN-G132' RTVVMICAY  | 209 | 3504  |
| >PTEN-G132' RTGVMICAYL | 394   | >PTEN-G132' RTVVMICAYL | 481 | 87    |
| >PTEN-G132' GRTGVMICA' | 113   | >PTEN-G132' GRTVVMICA' | 143 | 30    |
| >PTEN-G132' GRTGVMICA' | 258   | >PTEN-G132' GRTVVMICA' | 347 | 89    |
| >PTEN-G132' GRTGVMICA' | 334   | >PTEN-G132' GRTVVMICA' | 149 | 185   |
| >PTEN-G132' GRTGVMICA' | 78    | >PTEN-G132' GRTVVMICA' | 28  | 50    |
| >PTEN-G132' KGRTGVM    | 29    | >PTEN-G132' KGRTVVM    | 29  | 0     |
| >PTEN-G132' KGRTGVMIC  | 365   | >PTEN-G132' KGRTVVMIC  | 465 | 100   |
| >PTEN-G132' KGRTGVMIC/ | 21    | >PTEN-G132' KGRTVVMIC/ | 22  | 1     |
| >PTEN-G132' KGRTGVMIC/ | 38    | >PTEN-G132' KGRTVVMIC/ | 42  | 4     |
| >PTEN-G132' KGRTGVMIC/ | 314   | >PTEN-G132' KGRTVVMIC/ | 444 | 130   |
| >PTEN-G132' KGRTGVMIC/ | 165   | >PTEN-G132' KGRTVVMIC/ | 225 | 60    |
| >PTEN-G132' KGRTGVMIC/ | 174   | >PTEN-G132' KGRTVVMIC/ | 218 | 44    |
| >PTEN-G132' KGRTGVMIC/ | 135   | >PTEN-G132' KGRTVVMIC/ | 462 | 327   |
| >PTEN-G132' GKGRGVM    | 964   | >PTEN-G132' GKGRVVM    | 187 | 777   |
| >PTEN-G132' GKGRGVM    | 308   | >PTEN-G132' GKGRVVM    | 346 | 38    |
| >PTEN-G132' KAGKGRGVM  | 135   | >PTEN-G132' KAGKRVVM   | 127 | 8     |
| >PTEN-G132' CKAGKGRGVM | 2391  | >PTEN-G132' CKAGKRVVM  | 461 | 1930  |
| >PTEN-G156I GEVTRDKKC  | 178   | >PTEN-G156I REVTRDKKC  | 195 | 17    |
| >PTEN-G156I GEVTRDKKC  | 381   | >PTEN-G156I REVTRDKKC  | 142 | 239   |
| >PTEN-G156I GEVTRDKKC  | 89    | >PTEN-G156I REVTRDKKC  | 78  | 11    |
| >PTEN-G156I LKAQEALDFY | 38723 | >PTEN-G156I LKAQEALDFY | 348 | 38375 |
| >PTEN-G156I LKAQEALDFY | 34329 | >PTEN-G156I LKAQEALDFY | 120 | 34209 |
| >PTEN-G156I FYGEVTRDK  | 12224 | >PTEN-G156I FYREVTRDK  | 162 | 12062 |
| >PTEN-G156I FYGEVTRDK  | 13205 | >PTEN-G156I FYREVTRDK  | 181 | 13024 |
| >PTEN-G156I FYGEVTR    | 1479  | >PTEN-G156I FYREVTR    | 328 | 1151  |
| >PTEN-G156I FYGEVTR    | 163   | >PTEN-G156I FYREVTR    | 29  | 134   |
| >PTEN-G156I FYGEVTRDK  | 3395  | >PTEN-G156I FYREVTRDK  | 497 | 2898  |
| >PTEN-G156I FYGEVTR    | 107   | >PTEN-G156I FYREVTR    | 289 | 182   |
| >PTEN-G156I DFYGEVTR   | 31    | >PTEN-G156I DFYREVTR   | 38  | 7     |
| >PTEN-G156I DFYGEVTR   | 408   | >PTEN-G156I DFYREVTR   | 589 | 181   |
| >PTEN-G156I DFYGEVTR   | 291   | >PTEN-G156I DFYREVTR   | 555 | 264   |
| >PTEN-G156I ALDFYGEV   | 41    | >PTEN-G156I ALDFYREV   | 54  | 13    |

|                       |       |                       |      |       |
|-----------------------|-------|-----------------------|------|-------|
| >PTEN-G156IALDFYGEV   | 17    | >PTEN-G156IALDFYREV   | 30   | 13    |
| >PTEN-G156IALDFYGEV   | 34    | >PTEN-G156IALDFYREV   | 92   | 58    |
| >PTEN-G156IALDFYGEV   | 128   | >PTEN-G156IALDFYREV   | 242  | 114   |
| >PTEN-G156IALDFYGEV   | 3     | >PTEN-G156IALDFYREV   | 4    | 1     |
| >PTEN-G156IALDFYGEVRT | 308   | >PTEN-G156IALDFYREVRT | 1310 | 1002  |
| >PTEN-G156IALDFYGEV   | 12    | >PTEN-G156IALDFYREV   | 32   | 20    |
| >PTEN-G156IALDFYGEV   | 9     | >PTEN-G156IALDFYREV   | 14   | 5     |
| >PTEN-G156IALDFYGEV   | 29    | >PTEN-G156IALDFYREV   | 57   | 28    |
| >PTEN-G156IALDFYGEV   | 3     | >PTEN-G156IALDFYREV   | 3    | 0     |
| >PTEN-G156IALDFYGEVRT | 416   | >PTEN-G156IALDFYREVRT | 496  | 80    |
| >PTEN-G156IALDFYGEVR  | 2478  | >PTEN-G156IALDFYREVR  | 431  | 2047  |
| >PTEN-G156IEALDFYGEV  | 224   | >PTEN-G156IEALDFYREV  | 225  | 1     |
| >PTEN-G156IEALDFYGEV  | 188   | >PTEN-G156IEALDFYREV  | 214  | 26    |
| >PTEN-G156IEALDFYGEVR | 1029  | >PTEN-G156IEALDFYREVR | 216  | 813   |
| >PTEN-G156IEALDFYGEVR | 299   | >PTEN-G156IEALDFYREVR | 165  | 134   |
| >PTEN-G156IEALDFYGEVR | 28    | >PTEN-G156IEALDFYREVR | 38   | 10    |
| >PTEN-G156IEALDFYGEV  | 11    | >PTEN-G156IEALDFYREV  | 31   | 20    |
| >PTEN-G156IEALDFYGEV  | 4     | >PTEN-G156IEALDFYREV  | 6    | 2     |
| >PTEN-G156IEALDFYGEVR | 510   | >PTEN-G156IEALDFYREVR | 377  | 133   |
| >PTEN-G156IQEALDFYGEV | 22    | >PTEN-G156IQEALDFYREV | 27   | 5     |
| >PTEN-G156IQEALDFYG   | 40448 | >PTEN-G156IQEALDFYR   | 473  | 39975 |
| >PTEN-G156IQEALDFYGEV | 112   | >PTEN-G156IQEALDFYREV | 104  | 8     |
| >PTEN-G156IQEALDFYGEV | 426   | >PTEN-G156IQEALDFYREV | 223  | 203   |
| >PTEN-G156IQEALDFYGEV | 361   | >PTEN-G156IQEALDFYREV | 350  | 11    |
| >PTEN-G156IQEALDFYGEV | 116   | >PTEN-G156IQEALDFYREV | 124  | 8     |
| >PTEN-G156IQEALDFYG   | 31777 | >PTEN-G156IQEALDFYR   | 55   | 31722 |
| >PTEN-G156IAQEALDFYGE | 422   | >PTEN-G156IAQEALDFYRE | 599  | 177   |
| >PTEN-G156IAQEALDFYGE | 39    | >PTEN-G156IAQEALDFYRE | 61   | 22    |
| >PTEN-G156IAQEALDFYG  | 15334 | >PTEN-G156IAQEALDFYR  | 14   | 15320 |
| >PTEN-G156IAQEALDFYG  | 33208 | >PTEN-G156IAQEALDFYR  | 77   | 33131 |
| >PTEN-G156IKAQEALDFYC | 33021 | >PTEN-G156IKAQEALDFYR | 479  | 32542 |
| >PTEN-G156IKAQEALDFYC | 20024 | >PTEN-G156IKAQEALDFYR | 25   | 19999 |
| >PTEN-G156IKAQEALDFYC | 37241 | >PTEN-G156IKAQEALDFYR | 324  | 36917 |
| >PTEN-G156IKAQEALDFYC | 26757 | >PTEN-G156IKAQEALDFYR | 73   | 26684 |
| >PTEN-G165IGVTIPSQRRY | 123   | >PTEN-G165IEVTIPSQRRY | 978  | 855   |
| >PTEN-G165IGVTIPSQRRY | 5811  | >PTEN-G165IEVTIPSQRRY | 24   | 5787  |
| >PTEN-G165IGVTIPSQR   | 457   | >PTEN-G165IEVTIPSQR   | 3532 | 3075  |
| >PTEN-G165IGVTIPSQR   | 5749  | >PTEN-G165IEVTIPSQR   | 144  | 5605  |
| >PTEN-G165IGVTIPSQR   | 210   | >PTEN-G165IEVTIPSQR   | 6    | 204   |
| >PTEN-G165IGVTIPSQRR  | 1034  | >PTEN-G165IEVTIPSQRR  | 23   | 1011  |
| >PTEN-G165IGVTIPSQRRY | 1919  | >PTEN-G165IEVTIPSQRRY | 13   | 1906  |
| >PTEN-G165IGVTIPSQRRY | 6769  | >PTEN-G165IEVTIPSQRRY | 37   | 6732  |
| >PTEN-G165IGVTIPSQRRY | 172   | >PTEN-G165IEVTIPSQRRY | 495  | 323   |

|                        |       |                        |       |       |
|------------------------|-------|------------------------|-------|-------|
| >PTEN-G165IKGVTIPSQRR  | 155   | >PTEN-G165IKEVTIPSQRR` | 1108  | 953   |
| >PTEN-G165IKGVTIPSQR   | 208   | >PTEN-G165IKEVTIPSQR   | 2020  | 1812  |
| >PTEN-G165IKGVTIPSQRR  | 202   | >PTEN-G165IKEVTIPSQRR` | 6477  | 6275  |
| >PTEN-G165IKGVTIPSQRR  | 34396 | >PTEN-G165IKEVTIPSQRR` | 141   | 34255 |
| >PTEN-G165IKGVTIPSQRR  | 227   | >PTEN-G165IKEVTIPSQRR` | 1286  | 1059  |
| >PTEN-G165IKGVTIPSQR   | 35166 | >PTEN-G165IKEVTIPSQR   | 257   | 34909 |
| >PTEN-G165IKGVTIPSQR   | 147   | >PTEN-G165IKEVTIPSQR   | 179   | 32    |
| >PTEN-G165IKGVTIPSQRR  | 120   | >PTEN-G165IKEVTIPSQRR  | 147   | 27    |
| >PTEN-G165IDKKGVTIPSQ  | 497   | >PTEN-G165IDKKEVTIPSQI | 339   | 158   |
| >PTEN-G165IDKKGVTIPSQ  | 635   | >PTEN-G165IDKKEVTIPSQI | 432   | 203   |
| >PTEN-G165IRDKKGVTI    | 179   | >PTEN-G165IRDKKEVTI    | 424   | 245   |
| >PTEN-G165IRDKKGVTI    | 852   | >PTEN-G165IRDKKEVTI    | 272   | 580   |
| >PTEN-G165IRTRDKKGV    | 14    | >PTEN-G165IRTRDKKEV    | 15    | 1     |
| >PTEN-G165IRTRDKKGV    | 71    | >PTEN-G165IRTRDKKEVT   | 655   | 584   |
| >PTEN-G165IRTRDKKGV    | 5     | >PTEN-G165IRTRDKKEVTI  | 9     | 4     |
| >PTEN-G165IRTRDKKGV    | 103   | >PTEN-G165IRTRDKKEVTII | 315   | 212   |
| >PTEN-G165IRTRDKKGV    | 120   | >PTEN-G165IRTRDKKEVTI  | 59    | 61    |
| >PTEN-G165IRTRDKKGV    | 26    | >PTEN-G165IRTRDKKEV    | 35    | 9     |
| >PTEN-G165IRTRDKKGV    | 5     | >PTEN-G165IRTRDKKEVTI  | 7     | 2     |
| >PTEN-G165IRTRDKKGV    | 100   | >PTEN-G165IRTRDKKEVTI  | 159   | 59    |
| >PTEN-G165IGEVTRDKKC   | 178   | >PTEN-G165IGEVTRDKKE   | 94    | 84    |
| >PTEN-G165IGEVTRDKKC   | 381   | >PTEN-G165IGEVTRDKKE   | 629   | 248   |
| >PTEN-G165IGEVTRDKKC   | 89    | >PTEN-G165IGEVTRDKKE   | 102   | 13    |
| >PTEN-G165IGVTIPSQRRY` | 623   | >PTEN-G165IRVTIPSQRRY` | 333   | 290   |
| >PTEN-G165IGVTIPSQRRY` | 123   | >PTEN-G165IRVTIPSQRRY` | 163   | 40    |
| >PTEN-G165IGVTIPSQRRY` | 5834  | >PTEN-G165IRVTIPSQRRY` | 142   | 5692  |
| >PTEN-G165IGVTIPSQRRY` | 765   | >PTEN-G165IRVTIPSQRRY` | 150   | 615   |
| >PTEN-G165IGVTIPSQR    | 457   | >PTEN-G165IRVTIPSQR    | 26    | 431   |
| >PTEN-G165IGVTIPSQR    | 953   | >PTEN-G165IRVTIPSQR    | 47    | 906   |
| >PTEN-G165IGVTIPSQR    | 210   | >PTEN-G165IRVTIPSQR    | 181   | 29    |
| >PTEN-G165IGVTIPSQRRY  | 5519  | >PTEN-G165IRVTIPSQRRY  | 271   | 5248  |
| >PTEN-G165IGVTIPSQRRY  | 172   | >PTEN-G165IRVTIPSQRRY  | 10    | 162   |
| >PTEN-G165IGVTIPSQRRY  | 553   | >PTEN-G165IRVTIPSQRRY  | 94    | 459   |
| >PTEN-G165IKGVTIPSQRR  | 155   | >PTEN-G165IKRVTIPSQRR` | 520   | 365   |
| >PTEN-G165IKGVTIPSQR   | 208   | >PTEN-G165IKRVTIPSQR   | 5074  | 4866  |
| >PTEN-G165IKGVTIPSQRR  | 3396  | >PTEN-G165IKRVTIPSQRR` | 104   | 3292  |
| >PTEN-G165IKGVTIPSQRR  | 202   | >PTEN-G165IKRVTIPSQRR` | 10388 | 10186 |
| >PTEN-G165IKGVTIPSQR   | 23025 | >PTEN-G165IKRVTIPSQR   | 134   | 22891 |
| >PTEN-G165IKGVTIPSQRR  | 24105 | >PTEN-G165IKRVTIPSQRR  | 62    | 24043 |
| >PTEN-G165IKGVTIPSQRR  | 22746 | >PTEN-G165IKRVTIPSQRR` | 220   | 22526 |
| >PTEN-G165IKGVTIPSQRR  | 227   | >PTEN-G165IKRVTIPSQRR` | 1054  | 827   |
| >PTEN-G165IKGVTIPSQ    | 19934 | >PTEN-G165IKRVTIPSQ    | 68    | 19866 |
| >PTEN-G165IKGVTIPSQRR  | 22505 | >PTEN-G165IKRVTIPSQRR` | 282   | 22223 |

|                        |       |                        |      |       |
|------------------------|-------|------------------------|------|-------|
| >PTEN-G165IKGVTIPSQRR  | 30004 | >PTEN-G165IKRVTIPSQRR  | 413  | 29591 |
| >PTEN-G165IKGVTIPSQR   | 147   | >PTEN-G165IKRVTIPSQR   | 183  | 36    |
| >PTEN-G165IKGVTIPSQRR  | 120   | >PTEN-G165IKRVTIPSQRR  | 147  | 27    |
| >PTEN-G165IKKGVTTIPS   | 12861 | >PTEN-G165IKKRVTTIPS   | 96   | 12765 |
| >PTEN-G165IKKGVTTIPSQ  | 11870 | >PTEN-G165IKKRVTTIPSQ  | 63   | 11807 |
| >PTEN-G165IKKGVTTIPSQR | 14130 | >PTEN-G165IKKRVTTIPSQR | 210  | 13920 |
| >PTEN-G165IKKGVTTIPSQR | 14004 | >PTEN-G165IKKRVTTIPSQR | 181  | 13823 |
| >PTEN-G165IKKGVTTIPSQR | 1120  | >PTEN-G165IKKRVTTIPSQR | 395  | 725   |
| >PTEN-G165IKKGVTTIPS   | 3518  | >PTEN-G165IKKRVTTIPS   | 282  | 3236  |
| >PTEN-G165IKKGVTTIPSQ  | 1228  | >PTEN-G165IKKRVTTIPSQ  | 153  | 1075  |
| >PTEN-G165IKKGVTTIPSQR | 982   | >PTEN-G165IKKRVTTIPSQR | 83   | 899   |
| >PTEN-G165IKKGVTTIPSQR | 1636  | >PTEN-G165IKKRVTTIPSQR | 140  | 1496  |
| >PTEN-G165IDKKGVTIPSQ  | 497   | >PTEN-G165IDKRVTTIPSQ  | 633  | 136   |
| >PTEN-G165IRDKKGVTI    | 179   | >PTEN-G165IRDKRVTI     | 321  | 142   |
| >PTEN-G165IRTRDKKGV    | 14    | >PTEN-G165IRTRDKKRV    | 12   | 2     |
| >PTEN-G165IRTRDKKGVTT  | 71    | >PTEN-G165IRTRDKKRVTT  | 49   | 22    |
| >PTEN-G165IRTRDKKGVTTI | 5     | >PTEN-G165IRTRDKKRVTTI | 4    | 1     |
| >PTEN-G165IRTRDKKGVTTI | 103   | >PTEN-G165IRTRDKKRVTTI | 74   | 29    |
| >PTEN-G165IRTRDKKGVTTI | 120   | >PTEN-G165IRTRDKKRVTTI | 73   | 47    |
| >PTEN-G165IRTRDKKGV    | 26    | >PTEN-G165IRTRDKKRV    | 23   | 3     |
| >PTEN-G165IRTRDKKGVTTI | 5     | >PTEN-G165IRTRDKKRVTTI | 6    | 1     |
| >PTEN-G165IRTRDKKGVTTI | 100   | >PTEN-G165IRTRDKKRVTTI | 128  | 28    |
| >PTEN-G165IVRTRDKKGV   | 595   | >PTEN-G165IVRTRDKKRV   | 459  | 136   |
| >PTEN-G165IEVRTRDKKG   | 33110 | >PTEN-G165IEVRTRDKKR   | 196  | 32914 |
| >PTEN-G165IEVRTRDKKG   | 38420 | >PTEN-G165IEVRTRDKKR   | 123  | 38297 |
| >PTEN-G165IEVRTRDKK    | 178   | >PTEN-G165IEVRTRDKKF   | 276  | 98    |
| >PTEN-G165IEVRTRDKK    | 381   | >PTEN-G165IEVRTRDKKF   | 1267 | 886   |
| >PTEN-G165IEVRTRDKK    | 89    | >PTEN-G165IEVRTRDKKF   | 88   | 1     |
| >PTEN-G20E-GFDLDTYIY   | 565   | >PTEN-G20E-EFDLDTYIY   | 278  | 287   |
| >PTEN-G20E-GFDLDTYIY   | 5337  | >PTEN-G20E-EFDLDTYIY   | 403  | 4934  |
| >PTEN-G20E-GFDLDTY     | 62    | >PTEN-G20E-EFDLDTY     | 322  | 260   |
| >PTEN-G20E-GFDLDTYIY   | 64    | >PTEN-G20E-EFDLDTYIY   | 93   | 29    |
| >PTEN-G20E-GFDLDTYIY   | 369   | >PTEN-G20E-EFDLDTYIY   | 549  | 180   |
| >PTEN-G20E-GFDLDTY     | 126   | >PTEN-G20E-EFDLDTY     | 237  | 111   |
| >PTEN-G20E-DGFDLDTYI   | 6632  | >PTEN-G20E-DEFDLDTYI   | 17   | 6615  |
| >PTEN-G20E-DGFDLDTY    | 122   | >PTEN-G20E-DEFDLDTY    | 208  | 86    |
| >PTEN-G20E-DGFDLDTYI   | 160   | >PTEN-G20E-DEFDLDTYIY  | 254  | 94    |
| >PTEN-G20E-DGFDLDTYI   | 458   | >PTEN-G20E-DEFDLDTYIY  | 2550 | 2092  |
| >PTEN-G20E-DGFDLDT     | 23066 | >PTEN-G20E-DEFDLDT     | 246  | 22820 |
| >PTEN-G20E-DGFDLDTY    | 300   | >PTEN-G20E-DEFDLDTY    | 3    | 297   |
| >PTEN-G20E-DGFDLDTYI   | 34921 | >PTEN-G20E-DEFDLDTYI   | 436  | 34485 |
| >PTEN-G20E-DGFDLDTYI   | 299   | >PTEN-G20E-DEFDLDTYIY  | 3    | 296   |
| >PTEN-G20E-DGFDLDTY    | 37    | >PTEN-G20E-DEFDLDTY    | 190  | 153   |

|                       |       |                        |      |       |
|-----------------------|-------|------------------------|------|-------|
| >PTEN-G20E-DGFDLDLTYI | 76    | >PTEN-G20E-DEFDLDLTYIY | 506  | 430   |
| >PTEN-G20E-DGFDLDLTYI | 35156 | >PTEN-G20E-DEFDLDLTYI  | 442  | 34714 |
| >PTEN-G20E-DGFDLDLTY  | 19424 | >PTEN-G20E-DEFDLDLTY   | 466  | 18958 |
| >PTEN-G20E-DGFDLDLTYI | 19647 | >PTEN-G20E-DEFDLDLTYIY | 334  | 19313 |
| >PTEN-G20E-DGFDLDLTY  | 21445 | >PTEN-G20E-DEFDLDLTY   | 23   | 21422 |
| >PTEN-G20E-DGFDLDLTYI | 28379 | >PTEN-G20E-DEFDLDLTYI  | 221  | 28158 |
| >PTEN-G20E-DGFDLDLTYI | 21673 | >PTEN-G20E-DEFDLDLTYIY | 22   | 21651 |
| >PTEN-G20E-DGFDLDLTYI | 34258 | >PTEN-G20E-DEFDLDLTYI  | 430  | 33828 |
| >PTEN-G20E-QEDGFDLDT  | 44    | >PTEN-G20E-QEDEFDLDT   | 27   | 17    |
| >PTEN-G20E-QEDGFDDL   | 15    | >PTEN-G20E-QEDEFDDL    | 30   | 15    |
| >PTEN-G20E-QEDGFDLDT  | 114   | >PTEN-G20E-QEDEFDLDT   | 104  | 10    |
| >PTEN-G20E-YQEDGFDLDI | 209   | >PTEN-G20E-YQEDEFDLDL  | 334  | 125   |
| >PTEN-G20E-YQEDGFDL   | 26    | >PTEN-G20E-YQEDEFDL    | 51   | 25    |
| >PTEN-G20E-YQEDGFDLDI | 297   | >PTEN-G20E-YQEDEFDLDL  | 223  | 74    |
| >PTEN-G20E-YQEDGFDLDI | 27    | >PTEN-G20E-YQEDEFDLDL  | 49   | 22    |
| >PTEN-G20E-YQEDGFDL   | 68    | >PTEN-G20E-YQEDEFDL    | 157  | 89    |
| >PTEN-G20E-YQEDGFDLDI | 137   | >PTEN-G20E-YQEDEFDLDL  | 287  | 150   |
| >PTEN-G20E-YQEDGFDL   | 269   | >PTEN-G20E-YQEDEFDL    | 1352 | 1083  |
| >PTEN-G20E-RYQEDGFDL  | 467   | >PTEN-G20E-RYQEDEFDL   | 361  | 106   |
| >PTEN-G20E-RYQEDGFDL  | 320   | >PTEN-G20E-RYQEDEFDL   | 467  | 147   |
| >PTEN-G20E-RYQEDGFDL  | 6     | >PTEN-G20E-RYQEDEFDL   | 6    | 0     |
| >PTEN-G20E-RYQEDGFDLI | 7     | >PTEN-G20E-RYQEDEFDLI  | 7    | 0     |
| >PTEN-G20E-RRYQEDGF   | 41    | >PTEN-G20E-RRYQEDEF    | 14   | 27    |
| >PTEN-G20E-RRYQEDGFDI | 223   | >PTEN-G20E-RRYQEDEFDL  | 281  | 58    |
| >PTEN-G20E-RRYQEDGF   | 61    | >PTEN-G20E-RRYQEDEF    | 83   | 22    |
| >PTEN-G20E-RRYQEDGFDI | 11    | >PTEN-G20E-RRYQEDEFDL  | 14   | 3     |
| >PTEN-G20E-RRYQEDGF   | 189   | >PTEN-G20E-RRYQEDEF    | 91   | 98    |
| >PTEN-G20E-RRYQEDGFDI | 18    | >PTEN-G20E-RRYQEDEFDL  | 19   | 1     |
| >PTEN-G20E-RRYQEDGFDI | 300   | >PTEN-G20E-RRYQEDEFDL  | 441  | 141   |
| >PTEN-G20E-RRYQEDGF   | 452   | >PTEN-G20E-RRYQEDEF    | 439  | 13    |
| >PTEN-G20E-RRYQEDGFDI | 21    | >PTEN-G20E-RRYQEDEFDL  | 25   | 4     |
| >PTEN-G20E-RRYQEDGF   | 229   | >PTEN-G20E-RRYQEDEF    | 348  | 119   |
| >PTEN-G20E-KRRYQEDGF  | 93    | >PTEN-G20E-KRRYQEDEF   | 26   | 67    |
| >PTEN-G20E-KRRYQEDGFI | 327   | >PTEN-G20E-KRRYQEDEFI  | 562  | 235   |
| >PTEN-G20E-KRRYQEDG   | 266   | >PTEN-G20E-KRRYQEDEF   | 804  | 538   |
| >PTEN-G20E-KRRYQEDGF  | 233   | >PTEN-G20E-KRRYQEDEF   | 130  | 103   |
| >PTEN-G20E-KRRYQEDGFI | 203   | >PTEN-G20E-KRRYQEDEFI  | 284  | 81    |
| >PTEN-G20E-KRRYQEDGFI | 45    | >PTEN-G20E-KRRYQEDEFI  | 46   | 1     |
| >PTEN-G20E-NKRRYQEDG  | 55    | >PTEN-G20E-NKRRYQEDEF  | 24   | 31    |
| >PTEN-G20E-RNKRRYQEDI | 317   | >PTEN-G20E-RNKRRYQEDI  | 145  | 172   |
| >PTEN-G230IGPTRREDKFM | 921   | >PTEN-G230IEPTRREDKFM  | 72   | 849   |
| >PTEN-G230IGPTRREDKFM | 420   | >PTEN-G230IEPTRREDKFM  | 123  | 297   |
| >PTEN-G230ISGPTREDKFM | 70    | >PTEN-G230ISEPTRREDKFM | 3011 | 2941  |

|                       |       |                       |      |       |
|-----------------------|-------|-----------------------|------|-------|
| >PTEN-G230ISGPTRREDKF | 159   | >PTEN-G230ISEPTRREDKF | 5176 | 5017  |
| >PTEN-G230ISGPTRREDKF | 6663  | >PTEN-G230ISEPTRREDKF | 34   | 6629  |
| >PTEN-G230INSGPTRREDK | 882   | >PTEN-G230INSEPTRREDK | 484  | 398   |
| >PTEN-G230ISSNSGPTR   | 477   | >PTEN-G230ISSNSEPTR   | 671  | 194   |
| >PTEN-G230ISSNSGPTR   | 47    | >PTEN-G230ISSNSEPTR   | 110  | 63    |
| >PTEN-G230ISSNSGPTR   | 129   | >PTEN-G230ISSNSEPTR   | 100  | 29    |
| >PTEN-G230IYSSNSGPTRF | 137   | >PTEN-G230IYSSNSEPTRR | 227  | 90    |
| >PTEN-G230IYSSNSGPTRF | 467   | >PTEN-G230IYSSNSEPTRR | 737  | 270   |
| >PTEN-G230IYSSNSGPTRF | 615   | >PTEN-G230IYSSNSEPTRR | 476  | 139   |
| >PTEN-G230IYSSNSGPTR  | 95    | >PTEN-G230IYSSNSEPTR  | 80   | 15    |
| >PTEN-G230IYSSNSGPTRF | 80    | >PTEN-G230IYSSNSEPTRR | 56   | 24    |
| >PTEN-G230IKYSSNSGPTF | 50    | >PTEN-G230IKYSSNSEPTR | 67   | 17    |
| >PTEN-G230IKYSSNSGPTF | 121   | >PTEN-G230IKYSSNSEPTR | 153  | 32    |
| >PTEN-G230IKYSSNSGPTF | 316   | >PTEN-G230IKYSSNSEPTR | 526  | 210   |
| >PTEN-G230IKYSSNSGPTF | 12    | >PTEN-G230IKYSSNSEPTR | 14   | 2     |
| >PTEN-G230IKYSSNSGPTF | 189   | >PTEN-G230IKYSSNSEPTR | 141  | 48    |
| >PTEN-G230IKYSSNSGPTF | 466   | >PTEN-G230IKYSSNSEPTR | 741  | 275   |
| >PTEN-G230IKYSSNSGPTF | 41    | >PTEN-G230IKYSSNSEPTR | 40   | 1     |
| >PTEN-G230VKIYSSNSGP  | 308   | >PTEN-G230VKIYSSNSEP  | 146  | 162   |
| >PTEN-G230VKIYSSNSGP  | 660   | >PTEN-G230VKIYSSNSEPT | 202  | 458   |
| >PTEN-G230KVKIYSSNSG  | 14    | >PTEN-G230KVKIYSSNSE  | 99   | 85    |
| >PTEN-G230KVKIYSSNSGF | 192   | >PTEN-G230KVKIYSSNSEF | 119  | 73    |
| >PTEN-G230GPTRREDKFM  | 1163  | >PTEN-G230RPTRREDKFM  | 289  | 874   |
| >PTEN-G230GPTRREDKFM  | 921   | >PTEN-G230RPTRREDKFM  | 414  | 507   |
| >PTEN-G230GPTRREDKFM  | 420   | >PTEN-G230RPTRREDKFM  | 728  | 308   |
| >PTEN-G230GPTRREDKFM  | 526   | >PTEN-G230RPTRREDKFM  | 138  | 388   |
| >PTEN-G230ISGPTRREDKF | 70    | >PTEN-G230SRPTRREDKF  | 5864 | 5794  |
| >PTEN-G230ISGPTRREDKF | 159   | >PTEN-G230SRPTRREDKF  | 9028 | 8869  |
| >PTEN-G230LKVKIYSSNSC | 938   | >PTEN-G230LKVKIYSSNSR | 63   | 875   |
| >PTEN-G230INSGPTRREDK | 9640  | >PTEN-G230INSRPTRREDK | 60   | 9580  |
| >PTEN-G230INSGPTRREDK | 3306  | >PTEN-G230INSRPTRREDK | 469  | 2837  |
| >PTEN-G230INSGPTRREDK | 882   | >PTEN-G230INSRPTRREDK | 36   | 846   |
| >PTEN-G230INSGPTRREDK | 3626  | >PTEN-G230INSRPTRREDK | 276  | 3350  |
| >PTEN-G230ISSNSGPTR   | 477   | >PTEN-G230ISSNSRPTR   | 311  | 166   |
| >PTEN-G230ISSNSGPTR   | 47    | >PTEN-G230ISSNSRPTR   | 17   | 30    |
| >PTEN-G230ISSNSGPTR   | 129   | >PTEN-G230ISSNSRPTR   | 76   | 53    |
| >PTEN-G230IYSSNSGPTRF | 137   | >PTEN-G230IYSSNSRPTRF | 89   | 48    |
| >PTEN-G230IYSSNSGPTRF | 467   | >PTEN-G230IYSSNSRPTRF | 351  | 116   |
| >PTEN-G230IYSSNSGPTR  | 95    | >PTEN-G230IYSSNSRPTR  | 64   | 31    |
| >PTEN-G230IYSSNSGPTRF | 80    | >PTEN-G230IYSSNSRPTRF | 56   | 24    |
| >PTEN-G230IKYSSNSG    | 11482 | >PTEN-G230IKYSSNSR    | 49   | 11433 |
| >PTEN-G230IKYSSNSGPTF | 50    | >PTEN-G230IKYSSNSRPTR | 45   | 5     |
| >PTEN-G230IKYSSNSG    | 20427 | >PTEN-G230IKYSSNSR    | 87   | 20340 |

|                        |       |                        |      |       |
|------------------------|-------|------------------------|------|-------|
| >PTEN-G230IKIYSSNSGPTF | 121   | >PTEN-G230IKIYSSNSRPTR | 105  | 16    |
| >PTEN-G230IKIYSSNSG    | 1134  | >PTEN-G230IKIYSSNSR    | 374  | 760   |
| >PTEN-G230IKIYSSNSGPTF | 316   | >PTEN-G230IKIYSSNSRPTR | 140  | 176   |
| >PTEN-G230IKIYSSNSG    | 15949 | >PTEN-G230IKIYSSNSR    | 12   | 15937 |
| >PTEN-G230IKIYSSNSGPTF | 12    | >PTEN-G230IKIYSSNSRPTR | 8    | 4     |
| >PTEN-G230IKIYSSNSG    | 32863 | >PTEN-G230IKIYSSNSR    | 120  | 32743 |
| >PTEN-G230IKIYSSNSGPTF | 189   | >PTEN-G230IKIYSSNSRPTR | 118  | 71    |
| >PTEN-G230IKIYSSNSGPTF | 466   | >PTEN-G230IKIYSSNSRPTR | 649  | 183   |
| >PTEN-G230IKIYSSNSG    | 26963 | >PTEN-G230IKIYSSNSR    | 27   | 26936 |
| >PTEN-G230IKIYSSNSGPTF | 41    | >PTEN-G230IKIYSSNSRPTR | 31   | 10    |
| >PTEN-G230IKIYSSNSGP   | 308   | >PTEN-G230IKIYSSNSRP   | 416  | 108   |
| >PTEN-G230IKIYSSNSGPT  | 660   | >PTEN-G230IKIYSSNSRPT  | 205  | 455   |
| >PTEN-G230IKVKIYSSNSG  | 14    | >PTEN-G230IKVKIYSSNSR  | 8    | 6     |
| >PTEN-G230IKVKIYSSNSGF | 192   | >PTEN-G230IKVKIYSSNSRF | 164  | 28    |
| >PTEN-G230IKVKIYSSNSG  | 33857 | >PTEN-G230IKVKIYSSNSR  | 198  | 33659 |
| >PTEN-G251IFEFPQPLPVC  | 2326  | >PTEN-G251IFEFPQPLPVC  | 305  | 2021  |
| >PTEN-G251IFEFPQPLPVC  | 2369  | >PTEN-G251IFEFPQPLPVC  | 299  | 2070  |
| >PTEN-G251IPVCGDIKV    | 466   | >PTEN-G251IPVCCDIKV    | 4070 | 3604  |
| >PTEN-G251IPVCGDIKVEF  | 395   | >PTEN-G251IPVCCDIKVEF  | 1117 | 722   |
| >PTEN-G251IPVCGDIKVEF  | 21    | >PTEN-G251IPVCCDIKVEF  | 45   | 24    |
| >PTEN-G251LPVCGDIKVEI  | 35    | >PTEN-G251LPVCCDIKVEI  | 31   | 4     |
| >PTEN-G251LPVCGDIKVEI  | 484   | >PTEN-G251LPVCCDIKVEI  | 454  | 30    |
| >PTEN-G251LPVCGDIKVEI  | 630   | >PTEN-G251LPVCCDIKVEI  | 354  | 276   |
| >PTEN-G251LPVCGDIKVEI  | 9     | >PTEN-G251LPVCCDIKVEI  | 9    | 0     |
| >PTEN-G251LPVCGDIKVEI  | 26    | >PTEN-G251LPVCCDIKVEI  | 17   | 9     |
| >PTEN-G251LPVCGDIK     | 306   | >PTEN-G251LPVCCDIK     | 132  | 174   |
| >PTEN-G251LPVCGDIKVEI  | 1989  | >PTEN-G251LPVCCDIKVEI  | 459  | 1530  |
| >PTEN-G251LPVCGDIKVEI  | 499   | >PTEN-G251LPVCCDIKVEI  | 523  | 24    |
| >PTEN-G251LPVCGDIKVEI  | 18    | >PTEN-G251LPVCCDIKVEI  | 15   | 3     |
| >PTEN-G251PLPVCGDIKV   | 176   | >PTEN-G251PLPVCCDIKV   | 342  | 166   |
| >PTEN-G251PLPVCGDIKV   | 46    | >PTEN-G251PLPVCCDIKV   | 52   | 6     |
| >PTEN-G251FPQPLPVCGE   | 95    | >PTEN-G251FPQPLPVCCD   | 204  | 109   |
| >PTEN-G251FPQPLPVCGE   | 360   | >PTEN-G251FPQPLPVCCD   | 254  | 106   |
| >PTEN-G251FPQPLPVCGE   | 419   | >PTEN-G251FPQPLPVCCD   | 119  | 300   |
| >PTEN-G251PVCGDIKV     | 466   | >PTEN-G251PVCDDIKV     | 251  | 215   |
| >PTEN-G251PVCGDIKVEF   | 395   | >PTEN-G251PVCDDIKVEF   | 742  | 347   |
| >PTEN-G251PVCGDIKVEF   | 21    | >PTEN-G251PVCDDIKVEF   | 32   | 11    |
| >PTEN-G251LPVCGDIKVEI  | 35    | >PTEN-G251LPVCCDIKVEI  | 276  | 241   |
| >PTEN-G251LPVCGDIKVEI  | 484   | >PTEN-G251LPVCCDIKVEI  | 1187 | 703   |
| >PTEN-G251LPVCGDIK     | 621   | >PTEN-G251LPVCCDIK     | 344  | 277   |
| >PTEN-G251LPVCGDIKVEI  | 9     | >PTEN-G251LPVCCDIKVEI  | 9    | 0     |
| >PTEN-G251LPVCGDIKVEI  | 26    | >PTEN-G251LPVCCDIKVEI  | 23   | 3     |
| >PTEN-G251LPVCGDIK     | 306   | >PTEN-G251LPVCCDIK     | 751  | 445   |



|                        |       |                        |       |       |
|------------------------|-------|------------------------|-------|-------|
| >PTEN-G251'LPVCGDIKVEI | 499   | >PTEN-G251'LPVCDDIKVEI | 347   | 152   |
| >PTEN-G251'LPVCGDIKVEI | 18    | >PTEN-G251'LPVCDDIKVEI | 15    | 3     |
| >PTEN-G251'PLPVCGDIKV  | 176   | >PTEN-G251'PLPVCDDIKV  | 227   | 51    |
| >PTEN-G251'PLPVCGDIKV  | 46    | >PTEN-G251'PLPVCDDIKV  | 61    | 15    |
| >PTEN-G251'FPQPLPVCGE  | 95    | >PTEN-G251'FPQPLPVCDE  | 83    | 12    |
| >PTEN-G251'FPQPLPVCGE  | 360   | >PTEN-G251'FPQPLPVCDE  | 228   | 132   |
| >PTEN-G251'FPQPLPVCGE  | 419   | >PTEN-G251'FPQPLPVCDE  | 263   | 156   |
| >PTEN-G251'CGDIKVEFFH  | 3063  | >PTEN-G251'CVDIKVEFFHI | 94    | 2969  |
| >PTEN-G251'FEFPQPLPVC  | 8054  | >PTEN-G251'FEFPQPLPVC' | 59    | 7995  |
| >PTEN-G251'FEFPQPLPVC  | 19714 | >PTEN-G251'FEFPQPLPVC' | 396   | 19318 |
| >PTEN-G251'FEFPQPLPVC  | 20686 | >PTEN-G251'FEFPQPLPVC' | 237   | 20449 |
| >PTEN-G251'FEFPQPLPVC  | 17714 | >PTEN-G251'FEFPQPLPVC' | 205   | 17509 |
| >PTEN-G251'FEFPQPLPVC  | 35465 | >PTEN-G251'FEFPQPLPVC' | 443   | 35022 |
| >PTEN-G251'FEFPQPLPVC  | 7566  | >PTEN-G251'FEFPQPLPVC' | 140   | 7426  |
| >PTEN-G251'FEFPQPLPVC  | 13441 | >PTEN-G251'FEFPQPLPVC' | 302   | 13139 |
| >PTEN-G251'FEFPQPLPVC  | 14524 | >PTEN-G251'FEFPQPLPVC' | 443   | 14081 |
| >PTEN-G251'FEFPQPLPVC  | 2326  | >PTEN-G251'FEFPQPLPVC' | 51    | 2275  |
| >PTEN-G251'FEFPQPLPVC  | 2369  | >PTEN-G251'FEFPQPLPVC' | 15    | 2354  |
| >PTEN-G251'PVCGDIKV    | 466   | >PTEN-G251'PVCVDIKV    | 2772  | 2306  |
| >PTEN-G251'PVCGDIKVEF  | 395   | >PTEN-G251'PVCVDIKVEF  | 2100  | 1705  |
| >PTEN-G251'PVCGDIKVEF  | 21    | >PTEN-G251'PVCVDIKVEFI | 98    | 77    |
| >PTEN-G251'LPVCGDIKVEI | 35    | >PTEN-G251'LPVCVDIKVEI | 47    | 12    |
| >PTEN-G251'LPVCGDIKVEI | 484   | >PTEN-G251'LPVCVDIKVEI | 1076  | 592   |
| >PTEN-G251'LPVCGDIKVEI | 9     | >PTEN-G251'LPVCVDIKVEI | 9     | 0     |
| >PTEN-G251'LPVCGDIKVEI | 26    | >PTEN-G251'LPVCVDIKVEI | 29    | 3     |
| >PTEN-G251'LPVCGDIK    | 306   | >PTEN-G251'LPVCVDIK    | 296   | 10    |
| >PTEN-G251'LPVCGDIKVEI | 499   | >PTEN-G251'LPVCVDIKVEI | 103   | 396   |
| >PTEN-G251'LPVCGDIKVEI | 18    | >PTEN-G251'LPVCVDIKVEI | 15    | 3     |
| >PTEN-G251'PLPVCGDIKV  | 934   | >PTEN-G251'PLPVCVDIKV  | 322   | 612   |
| >PTEN-G251'PLPVCGDIKV  | 176   | >PTEN-G251'PLPVCVDIKV  | 85    | 91    |
| >PTEN-G251'PLPVCGDIKV  | 1835  | >PTEN-G251'PLPVCVDIKV  | 479   | 1356  |
| >PTEN-G251'PLPVCGDIKV  | 46    | >PTEN-G251'PLPVCVDIKV  | 39    | 7     |
| >PTEN-G251'FPQPLPVCGE  | 95    | >PTEN-G251'FPQPLPVCVC  | 48    | 47    |
| >PTEN-G251'FPQPLPVCGE  | 360   | >PTEN-G251'FPQPLPVCVC  | 198   | 162   |
| >PTEN-G251'FPQPLPVCGE  | 419   | >PTEN-G251'FPQPLPVCVC  | 144   | 275   |
| >PTEN-G36E-GFPAERLEGV  | 291   | >PTEN-G36E-EFPAERLEGV  | 1692  | 1401  |
| >PTEN-G36E-MGFPAERLEC  | 10612 | >PTEN-G36E-MEFPAERLEC  | 26    | 10586 |
| >PTEN-G36E-MGFPAERLEC  | 257   | >PTEN-G36E-MEFPAERLEC  | 841   | 584   |
| >PTEN-G36E-MGFPAERLEC  | 186   | >PTEN-G36E-MEFPAERLEC  | 172   | 14    |
| >PTEN-G36E-MGFPAERLEC  | 355   | >PTEN-G36E-MEFPAERLEC  | 496   | 141   |
| >PTEN-G36E-MGFPAERL    | 378   | >PTEN-G36E-MEFPAERL    | 3217  | 2839  |
| >PTEN-G36E-MGFPAERLEC  | 46    | >PTEN-G36E-MEFPAERLEC  | 417   | 371   |
| >PTEN-G36E-MGFPAERL    | 258   | >PTEN-G36E-MEFPAERL    | 10777 | 10519 |

|                       |       |                        |      |       |
|-----------------------|-------|------------------------|------|-------|
| >PTEN-G36E-MGFPAERL   | 23738 | >PTEN-G36E-MEFPAERL    | 294  | 23444 |
| >PTEN-G36E-MGFPAERLEC | 24061 | >PTEN-G36E-MEFPAERLEC  | 365  | 23696 |
| >PTEN-G36E-MGFPAERL   | 21118 | >PTEN-G36E-MEFPAERL    | 16   | 21102 |
| >PTEN-G36E-MGFPAERLEC | 22962 | >PTEN-G36E-MEFPAERLEC  | 66   | 22896 |
| >PTEN-G36E-MGFPAERL   | 36422 | >PTEN-G36E-MEFPAERL    | 282  | 36140 |
| >PTEN-G36E-MGFPAERLEC | 38753 | >PTEN-G36E-MEFPAERLEC  | 457  | 38296 |
| >PTEN-G36E-MGFPAERL   | 35671 | >PTEN-G36E-MEFPAERL    | 167  | 35504 |
| >PTEN-G36E-MGFPAERLEC | 39096 | >PTEN-G36E-MEFPAERLEC  | 426  | 38670 |
| >PTEN-G36E-MGFPAERLEC | 27863 | >PTEN-G36E-MEFPAERLEC  | 474  | 27389 |
| >PTEN-G36E-MGFPAERLEC | 40372 | >PTEN-G36E-MEFPAERLEC  | 310  | 40062 |
| >PTEN-G36E-MGFPAERL   | 31635 | >PTEN-G36E-MEFPAERL    | 445  | 31190 |
| >PTEN-G36E-MGFPAERLEC | 19856 | >PTEN-G36E-MEFPAERLEC  | 15   | 19841 |
| >PTEN-G36E-AMGFPAERL  | 365   | >PTEN-G36E-AMEFPAERL   | 628  | 263   |
| >PTEN-G36E-AMGFPAERL  | 15    | >PTEN-G36E-AMEFPAERL   | 129  | 114   |
| >PTEN-G36E-AMGFPAERL  | 454   | >PTEN-G36E-AMEFPAERL   | 2057 | 1603  |
| >PTEN-G36E-AMGFPAERL  | 403   | >PTEN-G36E-AMEFPAERL   | 5325 | 4922  |
| >PTEN-G36E-AMGFPAERL  | 195   | >PTEN-G36E-AMEFPAERL   | 5959 | 5764  |
| >PTEN-G36E-AMGFPAERL  | 29    | >PTEN-G36E-AMEFPAERL   | 62   | 33    |
| >PTEN-G36E-AMGFPAER   | 75    | >PTEN-G36E-AMEFPAER    | 106  | 31    |
| >PTEN-G36E-IAMGFPAERL | 65    | >PTEN-G36E-IAMEFPAERL  | 65   | 0     |
| >PTEN-G36E-IAMGFPAERL | 445   | >PTEN-G36E-IAMEFPAERL  | 160  | 285   |
| >PTEN-G36E-IAMGFPAER  | 222   | >PTEN-G36E-IAMEFPAER   | 227  | 5     |
| >PTEN-G36E-IAMGFPAER  | 32    | >PTEN-G36E-IAMEFPAER   | 28   | 4     |
| >PTEN-G36E-IAMGFPAER  | 58    | >PTEN-G36E-IAMEFPAER   | 43   | 15    |
| >PTEN-G36E-IAMGFPAER  | 8     | >PTEN-G36E-IAMEFPAER   | 8    | 0     |
| >PTEN-G36E-IAMGFPAERL | 676   | >PTEN-G36E-IAMEFPAERL  | 383  | 293   |
| >PTEN-G36E-IAMGFPAERL | 2200  | >PTEN-G36E-IAMEFPAERL  | 342  | 1858  |
| >PTEN-G36E-IAMGFPAERL | 19    | >PTEN-G36E-IAMEFPAERL  | 17   | 2     |
| >PTEN-G36E-IAMGFPAERL | 332   | >PTEN-G36E-IAMEFPAERL  | 473  | 141   |
| >PTEN-G36E-IAMGFPAERL | 476   | >PTEN-G36E-IAMEFPAERL  | 493  | 17    |
| >PTEN-G36E-IAMGFPAER  | 268   | >PTEN-G36E-IAMEFPAER   | 401  | 133   |
| >PTEN-G36E-IIAMGFPA   | 369   | >PTEN-G36E-IIAMEFPA    | 415  | 46    |
| >PTEN-G36E-IIAMGFPA   | 311   | >PTEN-G36E-IIAMEFPA    | 188  | 123   |
| >PTEN-G36E-IIAMGFPAER | 200   | >PTEN-G36E-IIAMEFPAERI | 117  | 83    |
| >PTEN-G36E-IIAMGFPA   | 65    | >PTEN-G36E-IIAMEFPA    | 216  | 151   |
| >PTEN-G36E-IIAMGFPA   | 35    | >PTEN-G36E-IIAMEFPA    | 51   | 16    |
| >PTEN-G36E-IIAMGFPAER | 213   | >PTEN-G36E-IIAMEFPAERI | 325  | 112   |
| >PTEN-G36E-IIAMGFPAER | 471   | >PTEN-G36E-IIAMEFPAERI | 807  | 336   |
| >PTEN-G36E-IIAMGFPA   | 206   | >PTEN-G36E-IIAMEFPA    | 458  | 252   |
| >PTEN-G36E-IIAMGFPAER | 73    | >PTEN-G36E-IIAMEFPAERI | 162  | 89    |
| >PTEN-G36E-IIAMGFPAER | 83    | >PTEN-G36E-IIAMEFPAER  | 168  | 85    |
| >PTEN-G36E-IIAMGFPAER | 468   | >PTEN-G36E-IIAMEFPAER  | 616  | 148   |
| >PTEN-G36E-IIAMGFPAER | 12    | >PTEN-G36E-IIAMEFPAER  | 19   | 7     |

|                        |      |                        |      |      |
|------------------------|------|------------------------|------|------|
| >PTEN-G36E-IIAMGFPAER  | 273  | >PTEN-G36E-IIAMEFPAER  | 145  | 128  |
| >PTEN-G36E-NIIAMGFPA   | 550  | >PTEN-G36E-NIIAMEFPA   | 347  | 203  |
| >PTEN-G36E-NIIAMGFPA   | 391  | >PTEN-G36E-NIIAMEFPA   | 460  | 69   |
| >PTEN-G36E-NIIAMGFPA   | 162  | >PTEN-G36E-NIIAMEFPA   | 857  | 695  |
| >PTEN-G36E-NIIAMGFPA   | 32   | >PTEN-G36E-NIIAMEFPA   | 65   | 33   |
| >PTEN-G36E-NIIAMGFPAE  | 150  | >PTEN-G36E-NIIAMEFPAE  | 216  | 66   |
| >PTEN-G36E-NIIAMGFPAE  | 115  | >PTEN-G36E-NIIAMEFPAE  | 80   | 35   |
| >PTEN-G36E-NIIAMGFPAE  | 8    | >PTEN-G36E-NIIAMEFPAE  | 6    | 2    |
| >PTEN-G36E-NIIAMGFPA   | 28   | >PTEN-G36E-NIIAMEFPA   | 30   | 2    |
| >PTEN-G36E-NIIAMGFPA   | 154  | >PTEN-G36E-NIIAMEFPA   | 645  | 491  |
| >PTEN-G36E-NIIAMGFPAE  | 235  | >PTEN-G36E-NIIAMEFPAE  | 222  | 13   |
| >PTEN-G36E-YPNIIAMGF   | 281  | >PTEN-G36E-YPNIIAMEF   | 150  | 131  |
| >PTEN-G36E-YPNIIAMGFP  | 91   | >PTEN-G36E-YPNIIAMEFP  | 327  | 236  |
| >PTEN-G36E-YPNIIAMGF   | 640  | >PTEN-G36E-YPNIIAMEF   | 220  | 420  |
| >PTEN-G36E-YPNIIAMGF   | 11   | >PTEN-G36E-YPNIIAMEF   | 9    | 2    |
| >PTEN-G36E-YPNIIAMGFP  | 37   | >PTEN-G36E-YPNIIAMEFP  | 25   | 12   |
| >PTEN-G36E-YPNIIAMGF   | 82   | >PTEN-G36E-YPNIIAMEF   | 37   | 45   |
| >PTEN-G36E-YPNIIAMG    | 328  | >PTEN-G36E-YPNIIAME    | 1281 | 953  |
| >PTEN-G36E-YPNIIAMGFP  | 6    | >PTEN-G36E-YPNIIAMEFP  | 7    | 1    |
| >PTEN-G36E-YPNIIAMGF   | 1601 | >PTEN-G36E-YPNIIAMEF   | 22   | 1579 |
| >PTEN-G36E-YPNIIAMGF   | 102  | >PTEN-G36E-YPNIIAMEF   | 18   | 84   |
| >PTEN-G36E-IYPNIIAMGF  | 80   | >PTEN-G36E-IYPNIIAMEF  | 49   | 31   |
| >PTEN-G36E-IYPNIIAMGF  | 49   | >PTEN-G36E-IYPNIIAMEF  | 38   | 11   |
| >PTEN-G36E-IYPNIIAMGF  | 4    | >PTEN-G36E-IYPNIIAMEF  | 4    | 0    |
| >PTEN-G36E-IYPNIIAMGF  | 56   | >PTEN-G36E-IYPNIIAMEF  | 69   | 13   |
| >PTEN-G36E-IYPNIIAMGF  | 408  | >PTEN-G36E-IYPNIIAMEF  | 494  | 86   |
| >PTEN-G36E-YIYPNIIAMGF | 464  | >PTEN-G36E-YIYPNIIAMEF | 582  | 118  |
| >PTEN-G36E-YIYPNIIAMGF | 31   | >PTEN-G36E-YIYPNIIAMEF | 50   | 19   |
| >PTEN-G36E-YIYPNIIAMG  | 49   | >PTEN-G36E-YIYPNIIAME  | 354  | 305  |
| >PTEN-G36E-YIYPNIIAMGF | 73   | >PTEN-G36E-YIYPNIIAMEF | 74   | 1    |
| >PTEN-G36E-YIYPNIIAMGF | 338  | >PTEN-G36E-YIYPNIIAMEF | 246  | 92   |
| >PTEN-G36E-YIYPNIIAMGF | 770  | >PTEN-G36E-YIYPNIIAMEF | 131  | 639  |
| >PTEN-G36E-YIYPNIIAMGF | 133  | >PTEN-G36E-YIYPNIIAMEF | 35   | 98   |
| >PTEN-G36E-YIYPNIIAMGF | 214  | >PTEN-G36E-YIYPNIIAMEF | 906  | 692  |
| >PTEN-G36E-YIYPNIIAMGF | 417  | >PTEN-G36E-YIYPNIIAMEF | 504  | 87   |
| >PTEN-G36E-YIYPNIIAMGF | 92   | >PTEN-G36E-YIYPNIIAMEF | 60   | 32   |
| >PTEN-G36E-YIYPNIIAMGF | 311  | >PTEN-G36E-YIYPNIIAMEF | 270  | 41   |
| >PTEN-G36E-YIYPNIIAMGF | 63   | >PTEN-G36E-YIYPNIIAMEF | 57   | 6    |
| >PTEN-G36E-YIYPNIIAMGF | 93   | >PTEN-G36E-YIYPNIIAMEF | 136  | 43   |
| >PTEN-G36E-YIYPNIIAMGF | 16   | >PTEN-G36E-YIYPNIIAMEF | 9    | 7    |
| >PTEN-G36E-YIYPNIIAMGF | 8    | >PTEN-G36E-YIYPNIIAMEF | 8    | 0    |
| >PTEN-G36E-YIYPNIIAMGF | 173  | >PTEN-G36E-YIYPNIIAMEF | 58   | 115  |
| >PTEN-G36E-YIYPNIIAMGF | 2646 | >PTEN-G36E-YIYPNIIAMEF | 257  | 2389 |

|                        |       |                        |       |       |
|------------------------|-------|------------------------|-------|-------|
| >PTEN-G36E-YIYPNIIAMGF | 719   | >PTEN-G36E-YIYPNIIAMEF | 342   | 377   |
| >PTEN-G36E-YIYPNIIAMGF | 701   | >PTEN-G36E-YIYPNIIAMEF | 395   | 306   |
| >PTEN-G36E-YIYPNIIAMGF | 3519  | >PTEN-G36E-YIYPNIIAMEF | 147   | 3372  |
| >PTEN-G36R-GFPAERLEGV  | 3145  | >PTEN-G36R-RFPAERLEGV  | 406   | 2739  |
| >PTEN-G36R-GFPAERLEGV  | 291   | >PTEN-G36R-RFPAERLEGV  | 775   | 484   |
| >PTEN-G36R-GFPAERLEGV  | 821   | >PTEN-G36R-RFPAERLEGV  | 378   | 443   |
| >PTEN-G36R-MGFPAERLEC  | 257   | >PTEN-G36R-MRFPAERLEC  | 1681  | 1424  |
| >PTEN-G36R-MGFPAERLEC  | 186   | >PTEN-G36R-MRFPAERLEC  | 863   | 677   |
| >PTEN-G36R-MGFPAERLEC  | 355   | >PTEN-G36R-MRFPAERLEC  | 1136  | 781   |
| >PTEN-G36R-MGFPAERL    | 378   | >PTEN-G36R-MRFPAERL    | 2698  | 2320  |
| >PTEN-G36R-MGFPAERLEC  | 46    | >PTEN-G36R-MRFPAERLEC  | 341   | 295   |
| >PTEN-G36R-MGFPAERL    | 3443  | >PTEN-G36R-MRFPAERL    | 180   | 3263  |
| >PTEN-G36R-MGFPAERLEC  | 6207  | >PTEN-G36R-MRFPAERLEC  | 420   | 5787  |
| >PTEN-G36R-MGFPAERL    | 258   | >PTEN-G36R-MRFPAERL    | 15444 | 15186 |
| >PTEN-G36R-MGFPAERL    | 24430 | >PTEN-G36R-MRFPAERL    | 146   | 24284 |
| >PTEN-G36R-MGFPAERLEC  | 25012 | >PTEN-G36R-MRFPAERLEC  | 195   | 24817 |
| >PTEN-G36R-MGFPAERL    | 10527 | >PTEN-G36R-MRFPAERL    | 199   | 10328 |
| >PTEN-G36R-MGFPAERL    | 2656  | >PTEN-G36R-MRFPAERL    | 211   | 2445  |
| >PTEN-G36R-TYIYPNIIAMC | 17252 | >PTEN-G36R-TYIYPNIIAMR | 37    | 17215 |
| >PTEN-G36R-TYIYPNIIAMC | 17572 | >PTEN-G36R-TYIYPNIIAMR | 24    | 17548 |
| >PTEN-G36R-TYIYPNIIAMC | 22605 | >PTEN-G36R-TYIYPNIIAMR | 21    | 22584 |
| >PTEN-G36R-TYIYPNIIAMC | 31931 | >PTEN-G36R-TYIYPNIIAMR | 65    | 31866 |
| >PTEN-G36R-AMGFPAERL   | 365   | >PTEN-G36R-AMRFPAERL   | 1556  | 1191  |
| >PTEN-G36R-AMGFPAERL   | 15    | >PTEN-G36R-AMRFPAERL   | 122   | 107   |
| >PTEN-G36R-AMGFPAERL   | 454   | >PTEN-G36R-AMRFPAERL   | 4971  | 4517  |
| >PTEN-G36R-AMGFPAERL   | 403   | >PTEN-G36R-AMRFPAERL   | 5707  | 5304  |
| >PTEN-G36R-AMGFPAERL   | 195   | >PTEN-G36R-AMRFPAERL   | 6418  | 6223  |
| >PTEN-G36R-AMGFPAERL   | 29    | >PTEN-G36R-AMRFPAERL   | 49    | 20    |
| >PTEN-G36R-AMGFPAER    | 14197 | >PTEN-G36R-AMRFPAER    | 192   | 14005 |
| >PTEN-G36R-AMGFPAER    | 75    | >PTEN-G36R-AMRFPAER    | 20    | 55    |
| >PTEN-G36R-AMGFPAERL   | 6271  | >PTEN-G36R-AMRFPAERL   | 392   | 5879  |
| >PTEN-G36R-AMGFPAERL   | 6563  | >PTEN-G36R-AMRFPAERL   | 326   | 6237  |
| >PTEN-G36R-IAMGFPAERL  | 65    | >PTEN-G36R-IAMRFPAERL  | 201   | 136   |
| >PTEN-G36R-IAMGFPAERL  | 445   | >PTEN-G36R-IAMRFPAERL  | 1233  | 788   |
| >PTEN-G36R-IAMGFPAER   | 222   | >PTEN-G36R-IAMRFPAER   | 157   | 65    |
| >PTEN-G36R-IAMGFPAER   | 32    | >PTEN-G36R-IAMRFPAER   | 17    | 15    |
| >PTEN-G36R-IAMGFPAER   | 58    | >PTEN-G36R-IAMRFPAER   | 78    | 20    |
| >PTEN-G36R-IAMGFPAER   | 8     | >PTEN-G36R-IAMRFPAER   | 11    | 3     |
| >PTEN-G36R-IAMGFPAERL  | 19    | >PTEN-G36R-IAMRFPAERL  | 56    | 37    |
| >PTEN-G36R-IAMGFPAERL  | 332   | >PTEN-G36R-IAMRFPAERL  | 304   | 28    |
| >PTEN-G36R-IAMGFPAERL  | 476   | >PTEN-G36R-IAMRFPAERL  | 211   | 265   |
| >PTEN-G36R-IAMGFPAER   | 268   | >PTEN-G36R-IAMRFPAER   | 518   | 250   |
| >PTEN-G36R-IIAMGFPAER  | 1246  | >PTEN-G36R-IIAMRFPAERI | 250   | 996   |

|                       |       |                        |      |       |
|-----------------------|-------|------------------------|------|-------|
| >PTEN-G36R·IIAMGFPA   | 369   | >PTEN-G36R·IIAMRFPA    | 637  | 268   |
| >PTEN-G36R·IIAMGFPA   | 311   | >PTEN-G36R·IIAMRFPA    | 418  | 107   |
| >PTEN-G36R·IIAMGFPAER | 200   | >PTEN-G36R·IIAMRFPAERI | 199  | 1     |
| >PTEN-G36R·IIAMGFPA   | 65    | >PTEN-G36R·IIAMRFPA    | 126  | 61    |
| >PTEN-G36R·IIAMGFPA   | 35    | >PTEN-G36R·IIAMRFPA    | 54   | 19    |
| >PTEN-G36R·IIAMGFPAER | 213   | >PTEN-G36R·IIAMRFPAERI | 297  | 84    |
| >PTEN-G36R·IIAMGFPAER | 471   | >PTEN-G36R·IIAMRFPAERI | 918  | 447   |
| >PTEN-G36R·IIAMGFPA   | 206   | >PTEN-G36R·IIAMRFPA    | 394  | 188   |
| >PTEN-G36R·IIAMGFPAER | 73    | >PTEN-G36R·IIAMRFPAERI | 148  | 75    |
| >PTEN-G36R·IIAMGFPAER | 83    | >PTEN-G36R·IIAMRFPAER  | 30   | 53    |
| >PTEN-G36R·IIAMGFPAER | 468   | >PTEN-G36R·IIAMRFPAER  | 107  | 361   |
| >PTEN-G36R·IIAMGFPAER | 12    | >PTEN-G36R·IIAMRFPAER  | 18   | 6     |
| >PTEN-G36R·IIAMGFPA   | 731   | >PTEN-G36R·IIAMRFPA    | 479  | 252   |
| >PTEN-G36R·IIAMGFPAER | 6463  | >PTEN-G36R·IIAMRFPAERI | 463  | 6000  |
| >PTEN-G36R·IIAMGFPAER | 273   | >PTEN-G36R·IIAMRFPAER  | 163  | 110   |
| >PTEN-G36R·NIIAMGFPA  | 391   | >PTEN-G36R·NIIAMRFPA   | 814  | 423   |
| >PTEN-G36R·NIIAMGFPA  | 162   | >PTEN-G36R·NIIAMRFPA   | 614  | 452   |
| >PTEN-G36R·NIIAMGFPA  | 32    | >PTEN-G36R·NIIAMRFPA   | 75   | 43    |
| >PTEN-G36R·NIIAMGFPAE | 150   | >PTEN-G36R·NIIAMRFPAE  | 64   | 86    |
| >PTEN-G36R·NIIAMGFPAE | 115   | >PTEN-G36R·NIIAMRFPAE  | 45   | 70    |
| >PTEN-G36R·NIIAMGFPAE | 8     | >PTEN-G36R·NIIAMRFPAE  | 6    | 2     |
| >PTEN-G36R·NIIAMGFPA  | 28    | >PTEN-G36R·NIIAMRFPA   | 10   | 18    |
| >PTEN-G36R·NIIAMGFPA  | 154   | >PTEN-G36R·NIIAMRFPA   | 180  | 26    |
| >PTEN-G36R·NIIAMGFPAE | 235   | >PTEN-G36R·NIIAMRFPAE  | 156  | 79    |
| >PTEN-G36R·YPNIIAMG   | 33696 | >PTEN-G36R·YPNIIAMR    | 69   | 33627 |
| >PTEN-G36R·YPNIIAMGF  | 281   | >PTEN-G36R·YPNIIAMRF   | 334  | 53    |
| >PTEN-G36R·YPNIIAMGFP | 91    | >PTEN-G36R·YPNIIAMRFP, | 80   | 11    |
| >PTEN-G36R·YPNIIAMGF  | 11    | >PTEN-G36R·YPNIIAMRF   | 14   | 3     |
| >PTEN-G36R·YPNIIAMGFP | 37    | >PTEN-G36R·YPNIIAMRFP, | 49   | 12    |
| >PTEN-G36R·YPNIIAMGF  | 82    | >PTEN-G36R·YPNIIAMRF   | 40   | 42    |
| >PTEN-G36R·YPNIIAMG   | 328   | >PTEN-G36R·YPNIIAMR    | 2002 | 1674  |
| >PTEN-G36R·YPNIIAMGFP | 6     | >PTEN-G36R·YPNIIAMRFP, | 7    | 1     |
| >PTEN-G36R·YPNIIAMGF  | 1262  | >PTEN-G36R·YPNIIAMRF   | 316  | 946   |
| >PTEN-G36R·YPNIIAMGF  | 1601  | >PTEN-G36R·YPNIIAMRF   | 137  | 1464  |
| >PTEN-G36R·YPNIIAMGF  | 102   | >PTEN-G36R·YPNIIAMRF   | 36   | 66    |
| >PTEN-G36R·IYPNIIAMGF | 80    | >PTEN-G36R·IYPNIIAMRF  | 69   | 11    |
| >PTEN-G36R·IYPNIIAMGF | 49    | >PTEN-G36R·IYPNIIAMRF  | 46   | 3     |
| >PTEN-G36R·IYPNIIAMG  | 583   | >PTEN-G36R·IYPNIIAMR   | 319  | 264   |
| >PTEN-G36R·IYPNIIAMGF | 4     | >PTEN-G36R·IYPNIIAMRF  | 5    | 1     |
| >PTEN-G36R·IYPNIIAMGF | 56    | >PTEN-G36R·IYPNIIAMRF  | 69   | 13    |
| >PTEN-G36R·IYPNIIAMG  | 18202 | >PTEN-G36R·IYPNIIAMR   | 48   | 18154 |
| >PTEN-G36R·IYPNIIAMG  | 23927 | >PTEN-G36R·IYPNIIAMR   | 66   | 23861 |
| >PTEN-G36R·IYPNIIAMG  | 35540 | >PTEN-G36R·IYPNIIAMR   | 181  | 35359 |

|                        |       |                        |     |       |
|------------------------|-------|------------------------|-----|-------|
| >PTEN-G36R·IYPNIIAMGF  | 408   | >PTEN-G36R·IYPNIIAMRF  | 282 | 126   |
| >PTEN-G36R·IYPNIIAMG   | 25968 | >PTEN-G36R·IYPNIIAMR   | 37  | 25931 |
| >PTEN-G36R·YIYPNIIAMGF | 561   | >PTEN-G36R·YIYPNIIAMRF | 361 | 200   |
| >PTEN-G36R·YIYPNIIAMGF | 464   | >PTEN-G36R·YIYPNIIAMRF | 994 | 530   |
| >PTEN-G36R·YIYPNIIAMGF | 31    | >PTEN-G36R·YIYPNIIAMRF | 120 | 89    |
| >PTEN-G36R·YIYPNIIAMG  | 49    | >PTEN-G36R·YIYPNIIAMR  | 327 | 278   |
| >PTEN-G36R·YIYPNIIAMGF | 73    | >PTEN-G36R·YIYPNIIAMRF | 105 | 32    |
| >PTEN-G36R·YIYPNIIAMGF | 338   | >PTEN-G36R·YIYPNIIAMRF | 309 | 29    |
| >PTEN-G36R·YIYPNIIAMG  | 15013 | >PTEN-G36R·YIYPNIIAMR  | 194 | 14819 |
| >PTEN-G36R·YIYPNIIAMGF | 770   | >PTEN-G36R·YIYPNIIAMRF | 142 | 628   |
| >PTEN-G36R·YIYPNIIAMGF | 133   | >PTEN-G36R·YIYPNIIAMRF | 110 | 23    |
| >PTEN-G36R·YIYPNIIAMGF | 214   | >PTEN-G36R·YIYPNIIAMRF | 863 | 649   |
| >PTEN-G36R·YIYPNIIAMGF | 417   | >PTEN-G36R·YIYPNIIAMRF | 420 | 3     |
| >PTEN-G36R·YIYPNIIAMGF | 92    | >PTEN-G36R·YIYPNIIAMRF | 66  | 26    |
| >PTEN-G36R·YIYPNIIAMG  | 17989 | >PTEN-G36R·YIYPNIIAMR  | 23  | 17966 |
| >PTEN-G36R·YIYPNIIAMGF | 311   | >PTEN-G36R·YIYPNIIAMRF | 392 | 81    |
| >PTEN-G36R·YIYPNIIAMG  | 17189 | >PTEN-G36R·YIYPNIIAMR  | 59  | 17130 |
| >PTEN-G36R·YIYPNIIAMG  | 15655 | >PTEN-G36R·YIYPNIIAMR  | 3   | 15652 |
| >PTEN-G36R·YIYPNIIAMGF | 63    | >PTEN-G36R·YIYPNIIAMRF | 78  | 15    |
| >PTEN-G36R·YIYPNIIAMGF | 93    | >PTEN-G36R·YIYPNIIAMRF | 187 | 94    |
| >PTEN-G36R·YIYPNIIAMGF | 16    | >PTEN-G36R·YIYPNIIAMRF | 21  | 5     |
| >PTEN-G36R·YIYPNIIAMGF | 8     | >PTEN-G36R·YIYPNIIAMRF | 7   | 1     |
| >PTEN-G36R·YIYPNIIAMGF | 173   | >PTEN-G36R·YIYPNIIAMRF | 211 | 38    |
| >PTEN-G36R·YIYPNIIAMGF | 719   | >PTEN-G36R·YIYPNIIAMRF | 337 | 382   |
| >PTEN-G36R·YIYPNIIAMGF | 701   | >PTEN-G36R·YIYPNIIAMRF | 205 | 496   |
| >PTEN-G36R·YIYPNIIAMG  | 29307 | >PTEN-G36R·YIYPNIIAMR  | 70  | 29237 |
| >PTEN-G36V·GFPAERLEGV  | 291   | >PTEN-G36V·VFPAERLEGV  | 355 | 64    |
| >PTEN-G36V·GFPAERLEGV  | 821   | >PTEN-G36V·VFPAERLEGV  | 325 | 496   |
| >PTEN-G36V·MGFPAERL    | 16547 | >PTEN-G36V·MVFPAERL    | 480 | 16067 |
| >PTEN-G36V·MGFPAERLE(C | 3599  | >PTEN-G36V·MVFPAERLEC  | 62  | 3537  |
| >PTEN-G36V·MGFPAERL    | 848   | >PTEN-G36V·MVFPAERL    | 46  | 802   |
| >PTEN-G36V·MGFPAERLE(C | 257   | >PTEN-G36V·MVFPAERLEC  | 15  | 242   |
| >PTEN-G36V·MGFPAERLE(C | 2982  | >PTEN-G36V·MVFPAERLEC  | 23  | 2959  |
| >PTEN-G36V·MGFPAERL    | 5214  | >PTEN-G36V·MVFPAERL    | 111 | 5103  |
| >PTEN-G36V·MGFPAERLE(C | 186   | >PTEN-G36V·MVFPAERLEC  | 11  | 175   |
| >PTEN-G36V·MGFPAERL    | 5481  | >PTEN-G36V·MVFPAERL    | 122 | 5359  |
| >PTEN-G36V·MGFPAERLE(C | 355   | >PTEN-G36V·MVFPAERLEC  | 9   | 346   |
| >PTEN-G36V·MGFPAERLE(C | 10384 | >PTEN-G36V·MVFPAERLEC  | 164 | 10220 |
| >PTEN-G36V·MGFPAERLE(C | 1323  | >PTEN-G36V·MVFPAERLEC  | 40  | 1283  |
| >PTEN-G36V·MGFPAERLE(C | 14623 | >PTEN-G36V·MVFPAERLEC  | 173 | 14450 |
| >PTEN-G36V·MGFPAERL    | 9663  | >PTEN-G36V·MVFPAERL    | 48  | 9615  |
| >PTEN-G36V·MGFPAERLE(C | 591   | >PTEN-G36V·MVFPAERLEC  | 5   | 586   |
| >PTEN-G36V·MGFPAERL    | 378   | >PTEN-G36V·MVFPAERL    | 10  | 368   |

|                        |       |                        |      |       |
|------------------------|-------|------------------------|------|-------|
| >PTEN-G36V·MGFPAERLEC  | 46    | >PTEN-G36V·MVFPAERLEC  | 5    | 41    |
| >PTEN-G36V·MGFPAERLEC  | 3225  | >PTEN-G36V·MVFPAERLEC  | 40   | 3185  |
| >PTEN-G36V·MGFPAERL    | 258   | >PTEN-G36V·MVFPAERL    | 48   | 210   |
| >PTEN-G36V·TYIYPNIIAMC | 5920  | >PTEN-G36V·TYIYPNIIAMV | 387  | 5533  |
| >PTEN-G36V·TYIYPNIIAMC | 13943 | >PTEN-G36V·TYIYPNIIAMV | 61   | 13882 |
| >PTEN-G36V·AMGFPAERL   | 365   | >PTEN-G36V·AMVFPAERL   | 105  | 260   |
| >PTEN-G36V·AMGFPAERL   | 2589  | >PTEN-G36V·AMVFPAERL   | 453  | 2136  |
| >PTEN-G36V·AMGFPAERL   | 15    | >PTEN-G36V·AMVFPAERL   | 16   | 1     |
| >PTEN-G36V·AMGFPAERL   | 454   | >PTEN-G36V·AMVFPAERL   | 663  | 209   |
| >PTEN-G36V·AMGFPAERL   | 403   | >PTEN-G36V·AMVFPAERL   | 774  | 371   |
| >PTEN-G36V·AMGFPAERL   | 195   | >PTEN-G36V·AMVFPAERL   | 892  | 697   |
| >PTEN-G36V·AMGFPAERL   | 29    | >PTEN-G36V·AMVFPAERL   | 27   | 2     |
| >PTEN-G36V·AMGFPAER    | 75    | >PTEN-G36V·AMVFPAER    | 49   | 26    |
| >PTEN-G36V·AMGFPAER    | 1953  | >PTEN-G36V·AMVFPAER    | 369  | 1584  |
| >PTEN-G36V·IAMGFPAERL  | 65    | >PTEN-G36V·IAMVFPAERL  | 162  | 97    |
| >PTEN-G36V·IAMGFPAERL  | 445   | >PTEN-G36V·IAMVFPAERL  | 2319 | 1874  |
| >PTEN-G36V·IAMGFPAER   | 222   | >PTEN-G36V·IAMVFPAER   | 244  | 22    |
| >PTEN-G36V·IAMGFPAER   | 32    | >PTEN-G36V·IAMVFPAER   | 18   | 14    |
| >PTEN-G36V·IAMGFPAER   | 58    | >PTEN-G36V·IAMVFPAER   | 61   | 3     |
| >PTEN-G36V·IAMGFPAER   | 8     | >PTEN-G36V·IAMVFPAER   | 11   | 3     |
| >PTEN-G36V·IAMGFPAERL  | 19    | >PTEN-G36V·IAMVFPAERL  | 24   | 5     |
| >PTEN-G36V·IAMGFPAERL  | 332   | >PTEN-G36V·IAMVFPAERL  | 525  | 193   |
| >PTEN-G36V·IAMGFPAERL  | 476   | >PTEN-G36V·IAMVFPAERL  | 354  | 122   |
| >PTEN-G36V·IAMGFPAER   | 268   | >PTEN-G36V·IAMVFPAER   | 676  | 408   |
| >PTEN-G36V·IIAMGFPA    | 369   | >PTEN-G36V·IIAMVFPA    | 121  | 248   |
| >PTEN-G36V·IIAMGFPA    | 311   | >PTEN-G36V·IIAMVFPA    | 92   | 219   |
| >PTEN-G36V·IIAMGFPAER  | 200   | >PTEN-G36V·IIAMVFPAERI | 127  | 73    |
| >PTEN-G36V·IIAMGFPA    | 65    | >PTEN-G36V·IIAMVFPA    | 36   | 29    |
| >PTEN-G36V·IIAMGFPA    | 35    | >PTEN-G36V·IIAMVFPA    | 36   | 1     |
| >PTEN-G36V·IIAMGFPAER  | 213   | >PTEN-G36V·IIAMVFPAERI | 246  | 33    |
| >PTEN-G36V·IIAMGFPA    | 974   | >PTEN-G36V·IIAMVFPA    | 252  | 722   |
| >PTEN-G36V·IIAMGFPAER  | 471   | >PTEN-G36V·IIAMVFPAERI | 218  | 253   |
| >PTEN-G36V·IIAMGFPA    | 892   | >PTEN-G36V·IIAMVFPA    | 330  | 562   |
| >PTEN-G36V·IIAMGFPA    | 206   | >PTEN-G36V·IIAMVFPA    | 280  | 74    |
| >PTEN-G36V·IIAMGFPAER  | 73    | >PTEN-G36V·IIAMVFPAERI | 156  | 83    |
| >PTEN-G36V·IIAMGFPAER  | 83    | >PTEN-G36V·IIAMVFPAER  | 44   | 39    |
| >PTEN-G36V·IIAMGFPAER  | 468   | >PTEN-G36V·IIAMVFPAER  | 194  | 274   |
| >PTEN-G36V·IIAMGFPAER  | 12    | >PTEN-G36V·IIAMVFPAER  | 7    | 5     |
| >PTEN-G36V·IIAMGFPA    | 731   | >PTEN-G36V·IIAMVFPA    | 129  | 602   |
| >PTEN-G36V·IIAMGFPAER  | 1235  | >PTEN-G36V·IIAMVFPAERI | 437  | 798   |
| >PTEN-G36V·IIAMGFPAER  | 273   | >PTEN-G36V·IIAMVFPAER  | 238  | 35    |
| >PTEN-G36V·NIIAMGFPA   | 550   | >PTEN-G36V·NIIAMVFPA   | 40   | 510   |
| >PTEN-G36V·NIIAMGFPA   | 391   | >PTEN-G36V·NIIAMVFPA   | 81   | 310   |

|                        |       |                        |      |       |
|------------------------|-------|------------------------|------|-------|
| >PTEN-G36V·NIIAMGFPA   | 162   | >PTEN-G36V·NIIAMVFPA   | 23   | 139   |
| >PTEN-G36V·NIIAMGFPA   | 32    | >PTEN-G36V·NIIAMVFPA   | 15   | 17    |
| >PTEN-G36V·NIIAMGFPAE  | 150   | >PTEN-G36V·NIIAMVFPAE  | 109  | 41    |
| >PTEN-G36V·NIIAMGFPAE  | 115   | >PTEN-G36V·NIIAMVFPAE  | 75   | 40    |
| >PTEN-G36V·NIIAMGFPAE  | 8     | >PTEN-G36V·NIIAMVFPAE  | 6    | 2     |
| >PTEN-G36V·NIIAMGFPA   | 28    | >PTEN-G36V·NIIAMVFPA   | 10   | 18    |
| >PTEN-G36V·NIIAMGFPA   | 154   | >PTEN-G36V·NIIAMVFPA   | 54   | 100   |
| >PTEN-G36V·NIIAMGFPAE  | 235   | >PTEN-G36V·NIIAMVFPAE  | 185  | 50    |
| >PTEN-G36V·YPNIIAMG    | 15812 | >PTEN-G36V·YPNIIAMV    | 139  | 15673 |
| >PTEN-G36V·YPNIIAMG    | 21522 | >PTEN-G36V·YPNIIAMV    | 365  | 21157 |
| >PTEN-G36V·YPNIIAMGF   | 281   | >PTEN-G36V·YPNIIAMVF   | 67   | 214   |
| >PTEN-G36V·YPNIIAMGFP  | 91    | >PTEN-G36V·YPNIIAMVFP  | 133  | 42    |
| >PTEN-G36V·YPNIIAMGF   | 640   | >PTEN-G36V·YPNIIAMVF   | 156  | 484   |
| >PTEN-G36V·YPNIIAMGF   | 11    | >PTEN-G36V·YPNIIAMVF   | 9    | 2     |
| >PTEN-G36V·YPNIIAMGFP  | 37    | >PTEN-G36V·YPNIIAMVFP  | 29   | 8     |
| >PTEN-G36V·YPNIIAMG    | 6260  | >PTEN-G36V·YPNIIAMV    | 316  | 5944  |
| >PTEN-G36V·YPNIIAMGF   | 82    | >PTEN-G36V·YPNIIAMVF   | 61   | 21    |
| >PTEN-G36V·YPNIIAMG    | 328   | >PTEN-G36V·YPNIIAMV    | 35   | 293   |
| >PTEN-G36V·YPNIIAMGFP  | 6     | >PTEN-G36V·YPNIIAMVFP  | 6    | 0     |
| >PTEN-G36V·YPNIIAMGF   | 1262  | >PTEN-G36V·YPNIIAMVF   | 278  | 984   |
| >PTEN-G36V·YPNIIAMGF   | 1601  | >PTEN-G36V·YPNIIAMVF   | 27   | 1574  |
| >PTEN-G36V·YPNIIAMGFP  | 748   | >PTEN-G36V·YPNIIAMVFP  | 421  | 327   |
| >PTEN-G36V·YPNIIAMGF   | 102   | >PTEN-G36V·YPNIIAMVF   | 22   | 80    |
| >PTEN-G36V·IYPNIIAMG   | 23911 | >PTEN-G36V·IYPNIIAMV   | 166  | 23745 |
| >PTEN-G36V·IYPNIIAMG   | 34233 | >PTEN-G36V·IYPNIIAMV   | 162  | 34071 |
| >PTEN-G36V·IYPNIIAMGF  | 80    | >PTEN-G36V·IYPNIIAMVF  | 21   | 59    |
| >PTEN-G36V·IYPNIIAMG   | 2285  | >PTEN-G36V·IYPNIIAMV   | 167  | 2118  |
| >PTEN-G36V·IYPNIIAMGF  | 49    | >PTEN-G36V·IYPNIIAMVF  | 28   | 21    |
| >PTEN-G36V·IYPNIIAMG   | 583   | >PTEN-G36V·IYPNIIAMV   | 27   | 556   |
| >PTEN-G36V·IYPNIIAMGF  | 4     | >PTEN-G36V·IYPNIIAMVF  | 4    | 0     |
| >PTEN-G36V·IYPNIIAMGF  | 56    | >PTEN-G36V·IYPNIIAMVF  | 67   | 11    |
| >PTEN-G36V·IYPNIIAMG   | 3792  | >PTEN-G36V·IYPNIIAMV   | 79   | 3713  |
| >PTEN-G36V·IYPNIIAMGF  | 408   | >PTEN-G36V·IYPNIIAMVF  | 127  | 281   |
| >PTEN-G36V·YIYPNIIAMG  | 1775  | >PTEN-G36V·YIYPNIIAMV  | 14   | 1761  |
| >PTEN-G36V·YIYPNIIAMG  | 2483  | >PTEN-G36V·YIYPNIIAMV  | 27   | 2456  |
| >PTEN-G36V·YIYPNIIAMG  | 1878  | >PTEN-G36V·YIYPNIIAMV  | 8    | 1870  |
| >PTEN-G36V·YIYPNIIAMGF | 464   | >PTEN-G36V·YIYPNIIAMVF | 1195 | 731   |
| >PTEN-G36V·YIYPNIIAMG  | 2274  | >PTEN-G36V·YIYPNIIAMV  | 26   | 2248  |
| >PTEN-G36V·YIYPNIIAMGF | 31    | >PTEN-G36V·YIYPNIIAMVF | 90   | 59    |
| >PTEN-G36V·YIYPNIIAMG  | 49    | >PTEN-G36V·YIYPNIIAMV  | 1    | 48    |
| >PTEN-G36V·YIYPNIIAMGF | 73    | >PTEN-G36V·YIYPNIIAMVF | 168  | 95    |
| >PTEN-G36V·YIYPNIIAMG  | 4196  | >PTEN-G36V·YIYPNIIAMV  | 3    | 4193  |
| >PTEN-G36V·YIYPNIIAMG  | 3526  | >PTEN-G36V·YIYPNIIAMV  | 4    | 3522  |



|                        |       |                        |      |       |
|------------------------|-------|------------------------|------|-------|
| >PTEN-G36V·YIYPNIIAMG  | 16371 | >PTEN-G36V·YIYPNIIAMV  | 4    | 16367 |
| >PTEN-G36V·YIYPNIIAMG  | 737   | >PTEN-G36V·YIYPNIIAMV  | 1    | 736   |
| >PTEN-G36V·YIYPNIIAMGF | 338   | >PTEN-G36V·YIYPNIIAMVF | 695  | 357   |
| >PTEN-G36V·YIYPNIIAMGF | 770   | >PTEN-G36V·YIYPNIIAMVF | 242  | 528   |
| >PTEN-G36V·YIYPNIIAMGF | 133   | >PTEN-G36V·YIYPNIIAMVF | 67   | 66    |
| >PTEN-G36V·YIYPNIIAMGF | 214   | >PTEN-G36V·YIYPNIIAMVF | 1227 | 1013  |
| >PTEN-G36V·YIYPNIIAMGF | 417   | >PTEN-G36V·YIYPNIIAMVF | 449  | 32    |
| >PTEN-G36V·YIYPNIIAMGF | 92    | >PTEN-G36V·YIYPNIIAMVF | 120  | 28    |
| >PTEN-G36V·YIYPNIIAMGF | 311   | >PTEN-G36V·YIYPNIIAMVF | 213  | 98    |
| >PTEN-G36V·YIYPNIIAMG  | 19475 | >PTEN-G36V·YIYPNIIAMV  | 68   | 19407 |
| >PTEN-G36V·YIYPNIIAMG  | 6249  | >PTEN-G36V·YIYPNIIAMV  | 5    | 6244  |
| >PTEN-G36V·YIYPNIIAMGF | 63    | >PTEN-G36V·YIYPNIIAMVF | 36   | 27    |
| >PTEN-G36V·YIYPNIIAMGF | 93    | >PTEN-G36V·YIYPNIIAMVF | 97   | 4     |
| >PTEN-G36V·YIYPNIIAMG  | 11731 | >PTEN-G36V·YIYPNIIAMV  | 491  | 11240 |
| >PTEN-G36V·YIYPNIIAMGF | 16    | >PTEN-G36V·YIYPNIIAMVF | 8    | 8     |
| >PTEN-G36V·YIYPNIIAMGF | 8     | >PTEN-G36V·YIYPNIIAMVF | 11   | 3     |
| >PTEN-G36V·YIYPNIIAMGF | 173   | >PTEN-G36V·YIYPNIIAMVF | 71   | 102   |
| >PTEN-G36V·YIYPNIIAMGF | 2646  | >PTEN-G36V·YIYPNIIAMVF | 240  | 2406  |
| >PTEN-G36V·YIYPNIIAMGF | 719   | >PTEN-G36V·YIYPNIIAMVF | 170  | 549   |
| >PTEN-G36V·YIYPNIIAMGF | 701   | >PTEN-G36V·YIYPNIIAMVF | 189  | 512   |
| >PTEN-G36V·YIYPNIIAMGF | 3519  | >PTEN-G36V·YIYPNIIAMVF | 181  | 3338  |
| >PTEN-G44D GVYRNNIDD\  | 225   | >PTEN-G44D DVYRNNIDD\  | 1069 | 844   |
| >PTEN-G44D GVYRNNIDD\  | 86    | >PTEN-G44D DVYRNNIDD\  | 1679 | 1593  |
| >PTEN-G44D GVYRNNIDD\  | 103   | >PTEN-G44D DVYRNNIDD\  | 2030 | 1927  |
| >PTEN-G44D GVYRNNIDD\  | 106   | >PTEN-G44D DVYRNNIDD\  | 5867 | 5761  |
| >PTEN-G44D GVYRNNIDD\  | 113   | >PTEN-G44D DVYRNNIDD\  | 6214 | 6101  |
| >PTEN-G44D GVYRNNIDD\  | 97    | >PTEN-G44D DVYRNNIDD\  | 2528 | 2431  |
| >PTEN-G44D GVYRNNIDD\  | 100   | >PTEN-G44D DVYRNNIDD\  | 2805 | 2705  |
| >PTEN-G44D GVYRNNIDD\  | 36    | >PTEN-G44D DVYRNNIDD\  | 814  | 778   |
| >PTEN-G44D GVYRNNIDD\  | 78    | >PTEN-G44D DVYRNNIDD\  | 1564 | 1486  |
| >PTEN-G44D GVYRNNIDD\  | 1754  | >PTEN-G44D DVYRNNIDD\  | 417  | 1337  |
| >PTEN-G44D GVYRNNIDD\  | 2466  | >PTEN-G44D DVYRNNIDD\  | 55   | 2411  |
| >PTEN-G44D GVYRNNIDD\  | 5899  | >PTEN-G44D DVYRNNIDD\  | 156  | 5743  |
| >PTEN-G44D GVYRNNIDD\  | 6986  | >PTEN-G44D DVYRNNIDD\  | 333  | 6653  |
| >PTEN-G44D LEGVYRNNI   | 15    | >PTEN-G44D LEDVYRNNI   | 19   | 4     |
| >PTEN-G44D LEGVYRNNI   | 457   | >PTEN-G44D LEDVYRNNI   | 871  | 414   |
| >PTEN-G44D LEGVYRNNI   | 40    | >PTEN-G44D LEDVYRNNI   | 44   | 4     |
| >PTEN-G44D RLEGVYRNNI  | 476   | >PTEN-G44D RLEDVYRNNI  | 303  | 173   |
| >PTEN-G44D RLEGVYRNNI  | 466   | >PTEN-G44D RLEDVYRNNI  | 251  | 215   |
| >PTEN-G44D RLEGVYRNNI  | 258   | >PTEN-G44D RLEDVYRNNI  | 113  | 145   |
| >PTEN-G44D RLEGVYRNNI  | 307   | >PTEN-G44D RLEDVYRNNI  | 962  | 655   |
| >PTEN-G44D ERLEGVYR    | 115   | >PTEN-G44D ERLEDVYR    | 74   | 41    |
| >PTEN-G44D AERLEGVY    | 166   | >PTEN-G44D AERLEDVY    | 3319 | 3153  |

|                        |       |                       |      |       |
|------------------------|-------|-----------------------|------|-------|
| >PTEN-G44D FPAERLEGV   | 65    | >PTEN-G44D FPAERLEDV  | 523  | 458   |
| >PTEN-G44D FPAERLEGVY  | 125   | >PTEN-G44D FPAERLEDVY | 92   | 33    |
| >PTEN-G44D FPAERLEGV   | 277   | >PTEN-G44D FPAERLEDV  | 3223 | 2946  |
| >PTEN-G44D FPAERLEGV   | 67    | >PTEN-G44D FPAERLEDV  | 817  | 750   |
| >PTEN-G44D FPAERLEGV   | 226   | >PTEN-G44D FPAERLEDV  | 326  | 100   |
| >PTEN-G44D FPAERLEGVY  | 481   | >PTEN-G44D FPAERLEDVY | 986  | 505   |
| >PTEN-G44D FPAERLEGVY  | 17    | >PTEN-G44D FPAERLEDVY | 20   | 3     |
| >PTEN-G44D FPAERLEGV   | 250   | >PTEN-G44D FPAERLEDV  | 170  | 80    |
| >PTEN-G44D FPAERLEGVY  | 170   | >PTEN-G44D FPAERLEDVY | 210  | 40    |
| >PTEN-G44D FPAERLEG    | 462   | >PTEN-G44D FPAERLED   | 942  | 480   |
| >PTEN-G44D FPAERLEGV   | 85    | >PTEN-G44D FPAERLEDV  | 171  | 86    |
| >PTEN-G44D FPAERLEGVY  | 29    | >PTEN-G44D FPAERLEDVY | 23   | 6     |
| >PTEN-G44D FPAERLEGVY  | 82    | >PTEN-G44D FPAERLEDVY | 38   | 44    |
| >PTEN-G44D FPAERLEGVY  | 459   | >PTEN-G44D FPAERLEDVY | 372  | 87    |
| >PTEN-G44D GFPAERLEGV  | 291   | >PTEN-G44D GFPAERLEDV | 628  | 337   |
| >PTEN-G44D MGFPAERLECV | 257   | >PTEN-G44D MGFPAERLEI | 1246 | 989   |
| >PTEN-G44D MGFPAERLECV | 186   | >PTEN-G44D MGFPAERLEI | 948  | 762   |
| >PTEN-G44D MGFPAERLECV | 355   | >PTEN-G44D MGFPAERLEI | 2639 | 2284  |
| >PTEN-G44D MGFPAERLECV | 46    | >PTEN-G44D MGFPAERLEI | 372  | 326   |
| >PTEN-H118IHVAAIHCKA   | 289   | >PTEN-H118ILVAAIHCKA  | 131  | 158   |
| >PTEN-H118IHVAAIHCKA   | 1779  | >PTEN-H118ILVAAIHCKA  | 185  | 1594  |
| >PTEN-H118IHVAAIHCK    | 130   | >PTEN-H118ILVAAIHCK   | 266  | 136   |
| >PTEN-H118IHVAAIHCKAC  | 90    | >PTEN-H118ILVAAIHCKAG | 162  | 72    |
| >PTEN-H118IHVAAIHCK    | 50    | >PTEN-H118ILVAAIHCK   | 42   | 8     |
| >PTEN-H118IHVAAIHCKAC  | 114   | >PTEN-H118ILVAAIHCKAG | 100  | 14    |
| >PTEN-H118IHVAAIHCK    | 74    | >PTEN-H118ILVAAIHCK   | 553  | 479   |
| >PTEN-H118IHVAAIHCKA   | 304   | >PTEN-H118ILVAAIHCKA  | 2729 | 2425  |
| >PTEN-H118IHVAAIHCKAC  | 64    | >PTEN-H118ILVAAIHCKAG | 542  | 478   |
| >PTEN-H118IHVAAIHCK    | 223   | >PTEN-H118ILVAAIHCK   | 507  | 284   |
| >PTEN-H118IHVAAIHCKAC  | 185   | >PTEN-H118ILVAAIHCKAG | 541  | 356   |
| >PTEN-H118IHVAAIHCK    | 5     | >PTEN-H118ILVAAIHCK   | 11   | 6     |
| >PTEN-H118IHVAAIHCKAC  | 7     | >PTEN-H118ILVAAIHCKAG | 17   | 10    |
| >PTEN-H118IHVAAIHCKA   | 12    | >PTEN-H118ILVAAIHCKA  | 44   | 32    |
| >PTEN-H118IHVAAIHCKA   | 480   | >PTEN-H118ILVAAIHCKA  | 2632 | 2152  |
| >PTEN-H118INHVAAIHCKA/ | 26716 | >PTEN-H118INLVAAIHCKA | 492  | 26224 |
| >PTEN-H118INHVAAIHCKA/ | 23721 | >PTEN-H118INLVAAIHCKA | 254  | 23467 |
| >PTEN-H118INHVAAIHCKA/ | 26754 | >PTEN-H118INLVAAIHCKA | 176  | 26578 |
| >PTEN-H118INHVAAIHCKA/ | 25000 | >PTEN-H118INLVAAIHCKA | 441  | 24559 |
| >PTEN-H118INHVAAIHCKA/ | 33402 | >PTEN-H118INLVAAIHCKA | 35   | 33367 |
| >PTEN-H118INHVAAIHCK   | 1175  | >PTEN-H118INLVAAIHCK  | 91   | 1084  |
| >PTEN-H118INHVAAIHCKA/ | 7240  | >PTEN-H118INLVAAIHCKA | 157  | 7083  |
| >PTEN-H118IDDNHVAAI    | 2150  | >PTEN-H118IDDNLVAAI   | 288  | 1862  |
| >PTEN-H118IDDNHVAAI    | 2910  | >PTEN-H118IDDNLVAAI   | 400  | 2510  |

|                       |       |                       |     |       |
|-----------------------|-------|-----------------------|-----|-------|
| >PTEN-H118 DDNHVAAI   | 343   | >PTEN-H118 DDNLVAAI   | 259 | 84    |
| >PTEN-H118 EDDNHVAAI  | 195   | >PTEN-H118 EDDNLVAAI  | 226 | 31    |
| >PTEN-H118 SEDDNHVA   | 161   | >PTEN-H118 SEDDNLVA   | 213 | 52    |
| >PTEN-H118 SEDDNHVAA  | 347   | >PTEN-H118 SEDDNLVAAI | 76  | 271   |
| >PTEN-H118 SEDDNHVAA  | 435   | >PTEN-H118 SEDDNLVAAI | 316 | 119   |
| >PTEN-H118 SEDDNHVAA  | 117   | >PTEN-H118 SEDDNLVAAI | 88  | 29    |
| >PTEN-H118 SEDDNHVA   | 53    | >PTEN-H118 SEDDNLVA   | 143 | 90    |
| >PTEN-H118 SEDDNHVAA  | 24    | >PTEN-H118 SEDDNLVAA  | 56  | 32    |
| >PTEN-H118 SEDDNHVAA  | 315   | >PTEN-H118 SEDDNLVAAI | 182 | 133   |
| >PTEN-H118 SEDDNHVAA  | 65    | >PTEN-H118 SEDDNLVAAI | 41  | 24    |
| >PTEN-H118 LSEDDNHVA/ | 514   | >PTEN-H118 LSEDDNLVAA | 411 | 103   |
| >PTEN-H118 LSEDDNHVA/ | 70    | >PTEN-H118 LSEDDNLVAA | 62  | 8     |
| >PTEN-H118 WLSEDDNH   | 21759 | >PTEN-H118 WLSEDDNL   | 347 | 21412 |
| >PTEN-H118 WLSEDDNHV  | 105   | >PTEN-H118 WLSEDDNLV  | 45  | 60    |
| >PTEN-H118 WLSEDDNHV  | 1721  | >PTEN-H118 WLSEDDNLV, | 326 | 1395  |
| >PTEN-H118 WLSEDDNHV  | 480   | >PTEN-H118 WLSEDDNLV, | 109 | 371   |
| >PTEN-H118 WLSEDDNH   | 6974  | >PTEN-H118 WLSEDDNL   | 7   | 6967  |
| >PTEN-H118 WLSEDDNHV  | 10    | >PTEN-H118 WLSEDDNLV  | 4   | 6     |
| >PTEN-H118 WLSEDDNHV  | 99    | >PTEN-H118 WLSEDDNLV, | 64  | 35    |
| >PTEN-H118 WLSEDDNHV  | 30    | >PTEN-H118 WLSEDDNLV, | 12  | 18    |
| >PTEN-H118 WLSEDDNH   | 19667 | >PTEN-H118 WLSEDDNL   | 112 | 19555 |
| >PTEN-H118 WLSEDDNHV  | 12    | >PTEN-H118 WLSEDDNLV  | 8   | 4     |
| >PTEN-H118 WLSEDDNHV  | 532   | >PTEN-H118 WLSEDDNLV, | 265 | 267   |
| >PTEN-H118 WLSEDDNHV  | 39    | >PTEN-H118 WLSEDDNLV, | 16  | 23    |
| >PTEN-H118 WLSEDDNH   | 26270 | >PTEN-H118 WLSEDDNL   | 260 | 26010 |
| >PTEN-H118 WLSEDDNHV  | 30    | >PTEN-H118 WLSEDDNLV  | 37  | 7     |
| >PTEN-H118 WLSEDDNHV  | 56    | >PTEN-H118 WLSEDDNLV, | 29  | 27    |
| >PTEN-H118 WLSEDDNH   | 19762 | >PTEN-H118 WLSEDDNL   | 58  | 19704 |
| >PTEN-H118 WLSEDDNHV  | 8     | >PTEN-H118 WLSEDDNLV  | 8   | 0     |
| >PTEN-H118 WLSEDDNHV  | 65    | >PTEN-H118 WLSEDDNLV, | 163 | 98    |
| >PTEN-H118 WLSEDDNHV  | 34    | >PTEN-H118 WLSEDDNLV, | 28  | 6     |
| >PTEN-H118 WLSEDDNH   | 19493 | >PTEN-H118 WLSEDDNL   | 28  | 19465 |
| >PTEN-H118 WLSEDDNHV  | 4     | >PTEN-H118 WLSEDDNLV  | 6   | 2     |
| >PTEN-H118 WLSEDDNHV  | 22    | >PTEN-H118 WLSEDDNLV, | 103 | 81    |
| >PTEN-H118 WLSEDDNHV  | 26    | >PTEN-H118 WLSEDDNLV, | 15  | 11    |
| >PTEN-H118 WLSEDDNH   | 18597 | >PTEN-H118 WLSEDDNL   | 29  | 18568 |
| >PTEN-H118 WLSEDDNHV  | 6     | >PTEN-H118 WLSEDDNLV  | 7   | 1     |
| >PTEN-H118 WLSEDDNHV  | 46    | >PTEN-H118 WLSEDDNLV, | 112 | 66    |
| >PTEN-H118 WLSEDDNHV  | 85    | >PTEN-H118 WLSEDDNLV, | 64  | 21    |
| >PTEN-H118 WLSEDDNH   | 20823 | >PTEN-H118 WLSEDDNL   | 29  | 20794 |
| >PTEN-H118 WLSEDDNHV  | 6     | >PTEN-H118 WLSEDDNLV  | 4   | 2     |
| >PTEN-H118 WLSEDDNHV  | 40    | >PTEN-H118 WLSEDDNLV, | 176 | 136   |
| >PTEN-H118 WLSEDDNHV  | 108   | >PTEN-H118 WLSEDDNLV, | 45  | 63    |

|                       |       |                        |      |       |
|-----------------------|-------|------------------------|------|-------|
| >PTEN-H118IWLSEDDNH   | 15980 | >PTEN-H118IWLSEDDNL    | 9    | 15971 |
| >PTEN-H118IWLSEDDNHV  | 2     | >PTEN-H118IWLSEDDNLV   | 2    | 0     |
| >PTEN-H118IWLSEDDNHV  | 7     | >PTEN-H118IWLSEDDNLV   | 13   | 6     |
| >PTEN-H118IWLSEDDNHV  | 9     | >PTEN-H118IWLSEDDNLV   | 7    | 2     |
| >PTEN-H118IWLSEDDNHV  | 243   | >PTEN-H118IWLSEDDNLV   | 246  | 3     |
| >PTEN-H118IQWLSEDDNF  | 8695  | >PTEN-H118IQWLSEDDNL   | 115  | 8580  |
| >PTEN-H118IQWLSEDDNF  | 705   | >PTEN-H118IQWLSEDDNL   | 149  | 556   |
| >PTEN-H118IQWLSEDDNF  | 40    | >PTEN-H118IQWLSEDDNL   | 74   | 34    |
| >PTEN-H118IQWLSEDDNF  | 162   | >PTEN-H118IQWLSEDDNL   | 251  | 89    |
| >PTEN-H118IHVAAIHCKA  | 289   | >PTEN-H118IRVAAIHCKA   | 573  | 284   |
| >PTEN-H118IHVAAIHCK   | 130   | >PTEN-H118IRVAAIHCK    | 69   | 61    |
| >PTEN-H118IHVAAIHCKAC | 90    | >PTEN-H118IRVAAIHCKAC  | 55   | 35    |
| >PTEN-H118IHVAAIHCK   | 50    | >PTEN-H118IRVAAIHCK    | 19   | 31    |
| >PTEN-H118IHVAAIHCKAC | 114   | >PTEN-H118IRVAAIHCKAC  | 31   | 83    |
| >PTEN-H118IHVAAIHCK   | 74    | >PTEN-H118IRVAAIHCK    | 28   | 46    |
| >PTEN-H118IHVAAIHCKA  | 304   | >PTEN-H118IRVAAIHCKA   | 74   | 230   |
| >PTEN-H118IHVAAIHCKAC | 64    | >PTEN-H118IRVAAIHCKAC  | 23   | 41    |
| >PTEN-H118IHVAAIHCK   | 223   | >PTEN-H118IRVAAIHCK    | 61   | 162   |
| >PTEN-H118IHVAAIHCKAC | 185   | >PTEN-H118IRVAAIHCKAC  | 46   | 139   |
| >PTEN-H118IHVAAIHCK   | 5     | >PTEN-H118IRVAAIHCK    | 41   | 36    |
| >PTEN-H118IHVAAIHCKAC | 7     | >PTEN-H118IRVAAIHCKAC  | 72   | 65    |
| >PTEN-H118IHVAAIHCKA  | 12    | >PTEN-H118IRVAAIHCKA   | 327  | 315   |
| >PTEN-H118IHVAAIHCKA  | 480   | >PTEN-H118IRVAAIHCKA   | 6900 | 6420  |
| >PTEN-H118INHVAAIHCK  | 18336 | >PTEN-H118INRVAAIHCK   | 113  | 18223 |
| >PTEN-H118IDDNHVAAI   | 343   | >PTEN-H118IDDNRVAAI    | 546  | 203   |
| >PTEN-H118IEDDNHVAAI  | 195   | >PTEN-H118IEDDNRVAAI   | 241  | 46    |
| >PTEN-H118ISEDNDHVAA  | 161   | >PTEN-H118ISEDNDNRVA   | 117  | 44    |
| >PTEN-H118ISEDNDHVAA  | 347   | >PTEN-H118ISEDNDNRVAAI | 99   | 248   |
| >PTEN-H118ISEDNDHVAA  | 435   | >PTEN-H118ISEDNDNRVAAI | 265  | 170   |
| >PTEN-H118ISEDNDHVAA  | 117   | >PTEN-H118ISEDNDNRVAAI | 164  | 47    |
| >PTEN-H118ISEDNDHVAA  | 53    | >PTEN-H118ISEDNDNRVA   | 203  | 150   |
| >PTEN-H118ISEDNDHVAA  | 24    | >PTEN-H118ISEDNDNRVAA  | 88   | 64    |
| >PTEN-H118ISEDNDHVAA  | 315   | >PTEN-H118ISEDNDNRVAAI | 254  | 61    |
| >PTEN-H118ISEDNDHVAA  | 65    | >PTEN-H118ISEDNDNRVAAI | 131  | 66    |
| >PTEN-H118ILSEDDNHVA/ | 70    | >PTEN-H118ILSEDDNRVA/  | 66   | 4     |
| >PTEN-H118IWLSEDDNHV  | 105   | >PTEN-H118IWLSEDDNRV   | 102  | 3     |
| >PTEN-H118IWLSEDDNHV  | 480   | >PTEN-H118IWLSEDDNRV   | 670  | 190   |
| >PTEN-H118IWLSEDDNHV  | 10    | >PTEN-H118IWLSEDDNRV   | 9    | 1     |
| >PTEN-H118IWLSEDDNHV  | 99    | >PTEN-H118IWLSEDDNRV   | 342  | 243   |
| >PTEN-H118IWLSEDDNHV  | 30    | >PTEN-H118IWLSEDDNRV   | 51   | 21    |
| >PTEN-H118IWLSEDDNHV  | 12    | >PTEN-H118IWLSEDDNRV   | 14   | 2     |
| >PTEN-H118IWLSEDDNHV  | 39    | >PTEN-H118IWLSEDDNRV   | 64   | 25    |
| >PTEN-H118IWLSEDDNHV  | 30    | >PTEN-H118IWLSEDDNRV   | 78   | 48    |

|                        |       |                        |      |       |
|------------------------|-------|------------------------|------|-------|
| >PTEN-H118I WLESDDNHV  | 56    | >PTEN-H118I WLESDDNRV  | 105  | 49    |
| >PTEN-H118I WLESDDNHV  | 8     | >PTEN-H118I WLESDDNRV  | 6    | 2     |
| >PTEN-H118I WLESDDNHV  | 65    | >PTEN-H118I WLESDDNRV  | 277  | 212   |
| >PTEN-H118I WLESDDNHV  | 34    | >PTEN-H118I WLESDDNRV  | 94   | 60    |
| >PTEN-H118I WLESDDNHV  | 4     | >PTEN-H118I WLESDDNRV  | 7    | 3     |
| >PTEN-H118I WLESDDNHV  | 22    | >PTEN-H118I WLESDDNRV  | 306  | 284   |
| >PTEN-H118I WLESDDNHV  | 26    | >PTEN-H118I WLESDDNRV  | 70   | 44    |
| >PTEN-H118I WLESDDNHV  | 6     | >PTEN-H118I WLESDDNRV  | 8    | 2     |
| >PTEN-H118I WLESDDNHV  | 46    | >PTEN-H118I WLESDDNRV  | 631  | 585   |
| >PTEN-H118I WLESDDNHV  | 85    | >PTEN-H118I WLESDDNRV  | 206  | 121   |
| >PTEN-H118I WLESDDNHV  | 6     | >PTEN-H118I WLESDDNRV  | 4    | 2     |
| >PTEN-H118I WLESDDNHV  | 40    | >PTEN-H118I WLESDDNRV  | 517  | 477   |
| >PTEN-H118I WLESDDNHV  | 108   | >PTEN-H118I WLESDDNRV  | 306  | 198   |
| >PTEN-H118I WLESDDNHV  | 2     | >PTEN-H118I WLESDDNRV  | 2    | 0     |
| >PTEN-H118I WLESDDNHV  | 7     | >PTEN-H118I WLESDDNRV  | 41   | 34    |
| >PTEN-H118I WLESDDNHV  | 9     | >PTEN-H118I WLESDDNRV  | 9    | 0     |
| >PTEN-H118I WLESDDNH   | 28276 | >PTEN-H118I WLESDDNR   | 482  | 27794 |
| >PTEN-H118I WLESDDNHV  | 243   | >PTEN-H118I WLESDDNRV  | 311  | 68    |
| >PTEN-H118I QWLESDDNH  | 7126  | >PTEN-H118I QWLESDDNR  | 17   | 7109  |
| >PTEN-H118I QWLESDDNH  | 40    | >PTEN-H118I QWLESDDNR  | 286  | 246   |
| >PTEN-H118I QWLESDDNH  | 162   | >PTEN-H118I QWLESDDNR  | 276  | 114   |
| >PTEN-H123' HCKAGKGR   | 7797  | >PTEN-H123' YCKAGKGR   | 367  | 7430  |
| >PTEN-H123' HCKAGKGR   | 345   | >PTEN-H123' YCKAGKGR   | 1020 | 675   |
| >PTEN-H123' IHCKAGKGR  | 954   | >PTEN-H123' IYCKAGKGR  | 52   | 902   |
| >PTEN-H123' SEDDNHVAA  | 5170  | >PTEN-H123' SEDDNHVAA  | 117  | 5053  |
| >PTEN-H123' SEDDNHVAA  | 4613  | >PTEN-H123' SEDDNHVAA  | 270  | 4343  |
| >PTEN-H123' AIHCKAGK   | 243   | >PTEN-H123' AIYCKAGK   | 44   | 199   |
| >PTEN-H123' AIHCKAGKGF | 1621  | >PTEN-H123' AIYCKAGKGR | 199  | 1422  |
| >PTEN-H123' AIHCKAGK   | 221   | >PTEN-H123' AIYCKAGK   | 39   | 182   |
| >PTEN-H123' AIHCKAGK   | 29    | >PTEN-H123' AIYCKAGK   | 379  | 350   |
| >PTEN-H123' AIHCKAGKGF | 407   | >PTEN-H123' AIYCKAGKGR | 73   | 334   |
| >PTEN-H123' AAIHCKAGK  | 252   | >PTEN-H123' AAIYCKAGK  | 186  | 66    |
| >PTEN-H123' AAIHCKAGKC | 447   | >PTEN-H123' AAIYCKAGKG | 343  | 104   |
| >PTEN-H123' AAIHCKAGK  | 909   | >PTEN-H123' AAIYCKAGK  | 277  | 632   |
| >PTEN-H123' AAIHCKAGKC | 719   | >PTEN-H123' AAIYCKAGKG | 289  | 430   |
| >PTEN-H123' VAAIHCKAGK | 459   | >PTEN-H123' VAAIYCKAGK | 407  | 52    |
| >PTEN-H123' HVAAIHCKA  | 289   | >PTEN-H123' HVAAIYCKA  | 107  | 182   |
| >PTEN-H123' HVAAIHCKA  | 1656  | >PTEN-H123' HVAAIYCKA  | 414  | 1242  |
| >PTEN-H123' HVAAIHCK   | 130   | >PTEN-H123' HVAAIYCK   | 133  | 3     |
| >PTEN-H123' HVAAIHCKAC | 90    | >PTEN-H123' HVAAIYCKAG | 95   | 5     |
| >PTEN-H123' HVAAIHCK   | 50    | >PTEN-H123' HVAAIYCK   | 33   | 17    |
| >PTEN-H123' HVAAIHCKAC | 114   | >PTEN-H123' HVAAIYCKAG | 84   | 30    |
| >PTEN-H123' HVAAIHCK   | 74    | >PTEN-H123' HVAAIYCK   | 96   | 22    |

|                        |       |                        |     |       |
|------------------------|-------|------------------------|-----|-------|
| >PTEN-H123' HVAAIHCKA  | 304   | >PTEN-H123' HVAAIYCKA  | 524 | 220   |
| >PTEN-H123' HVAAIHCKAC | 64    | >PTEN-H123' HVAAIYCKAG | 76  | 12    |
| >PTEN-H123' HVAAIHCK   | 223   | >PTEN-H123' HVAAIYCK   | 130 | 93    |
| >PTEN-H123' HVAAIHCKAC | 185   | >PTEN-H123' HVAAIYCKAG | 180 | 5     |
| >PTEN-H123' HVAAIHCK   | 5     | >PTEN-H123' HVAAIYCK   | 5   | 0     |
| >PTEN-H123' HVAAIHCKAC | 7     | >PTEN-H123' HVAAIYCKAG | 7   | 0     |
| >PTEN-H123' HVAAIHCKA  | 12    | >PTEN-H123' HVAAIYCKA  | 8   | 4     |
| >PTEN-H123' HVAAIHCKA  | 480   | >PTEN-H123' HVAAIYCKA  | 287 | 193   |
| >PTEN-H141' LHRGKFLK   | 386   | >PTEN-H141' LYRGKFLK   | 5   | 381   |
| >PTEN-H141' LHRGKFLKA  | 5588  | >PTEN-H141' LYRGKFLKA  | 30  | 5558  |
| >PTEN-H141' LHRGKFLKAC | 11860 | >PTEN-H141' LYRGKFLKAQ | 487 | 11373 |
| >PTEN-H141' LHRGKFLK   | 6052  | >PTEN-H141' LYRGKFLK   | 77  | 5975  |
| >PTEN-H141' LHRGKFLK   | 14075 | >PTEN-H141' LYRGKFLK   | 214 | 13861 |
| >PTEN-H141' LHRGKFLK   | 10450 | >PTEN-H141' LYRGKFLK   | 483 | 9967  |
| >PTEN-H141' TGVMICAYLL | 6892  | >PTEN-H141' TGVMICAYLL | 42  | 6850  |
| >PTEN-H141' TGVMICAYLL | 21171 | >PTEN-H141' TGVMICAYLL | 488 | 20683 |
| >PTEN-H141' TGVMICAYLL | 4572  | >PTEN-H141' TGVMICAYLL | 259 | 4313  |
| >PTEN-H141' LLHRGKFL   | 2717  | >PTEN-H141' LLYRGKFL   | 292 | 2425  |
| >PTEN-H141' LLHRGKFLKA | 2762  | >PTEN-H141' LLYRGKFLKA | 361 | 2401  |
| >PTEN-H141' LLHRGKFL   | 274   | >PTEN-H141' LLYRGKFL   | 81  | 193   |
| >PTEN-H141' LLHRGKFLKA | 546   | >PTEN-H141' LLYRGKFLKA | 100 | 446   |
| >PTEN-H141' LLHRGKFL   | 288   | >PTEN-H141' LLYRGKFL   | 50  | 238   |
| >PTEN-H141' LLHRGKFLKA | 194   | >PTEN-H141' LLYRGKFLKA | 44  | 150   |
| >PTEN-H141' LLHRGKFL   | 2648  | >PTEN-H141' LLYRGKFL   | 389 | 2259  |
| >PTEN-H141' LLHRGKFLKA | 3181  | >PTEN-H141' LLYRGKFLKA | 404 | 2777  |
| >PTEN-H141' LLHRGKFL   | 28    | >PTEN-H141' LLYRGKFL   | 5   | 23    |
| >PTEN-H141' LLHRGKFLKA | 132   | >PTEN-H141' LLYRGKFLKA | 14  | 118   |
| >PTEN-H141' LLHRGKFLKA | 3669  | >PTEN-H141' LLYRGKFLKA | 459 | 3210  |
| >PTEN-H141' LLHRGKFL   | 353   | >PTEN-H141' LLYRGKFL   | 41  | 312   |
| >PTEN-H141' LLHRGKFLKA | 2677  | >PTEN-H141' LLYRGKFLKA | 367 | 2310  |
| >PTEN-H141' LLHRGKFL   | 204   | >PTEN-H141' LLYRGKFL   | 15  | 189   |
| >PTEN-H141' LLHRGKFLKA | 700   | >PTEN-H141' LLYRGKFLKA | 31  | 669   |
| >PTEN-H141' LLHRGKFL   | 3033  | >PTEN-H141' LLYRGKFL   | 419 | 2614  |
| >PTEN-H141' LLHRGKFL   | 8     | >PTEN-H141' LLYRGKFL   | 5   | 3     |
| >PTEN-H141' LLHRGKFLK  | 328   | >PTEN-H141' LLYRGKFLK  | 59  | 269   |
| >PTEN-H141' LLHRGKFLKA | 8     | >PTEN-H141' LLYRGKFLKA | 4   | 4     |
| >PTEN-H141' LLHRGKFLKA | 230   | >PTEN-H141' LLYRGKFLKA | 52  | 178   |
| >PTEN-H141' LLHRGKFLK  | 41    | >PTEN-H141' LLYRGKFLK  | 24  | 17    |
| >PTEN-H141' LLHRGKFLK  | 63    | >PTEN-H141' LLYRGKFLK  | 19  | 44    |
| >PTEN-H141' LLHRGKFLK  | 37    | >PTEN-H141' LLYRGKFLK  | 545 | 508   |
| >PTEN-H141' LLHRGKFLK  | 69    | >PTEN-H141' LLYRGKFLK  | 35  | 34    |
| >PTEN-H141' LLHRGKFLK  | 427   | >PTEN-H141' LLYRGKFLK  | 119 | 308   |
| >PTEN-H141' YLLHRGKFL  | 93    | >PTEN-H141' YLLYRGKFL  | 70  | 23    |

|                        |      |                        |     |     |
|------------------------|------|------------------------|-----|-----|
| >PTEN-H141'YLLHRGKFLK/ | 86   | >PTEN-H141'YLLYRGKFLK/ | 78  | 8   |
| >PTEN-H141'YLLHRGKFL   | 91   | >PTEN-H141'YLLYRGKFL   | 70  | 21  |
| >PTEN-H141'YLLHRGKFLK/ | 446  | >PTEN-H141'YLLYRGKFLK/ | 415 | 31  |
| >PTEN-H141'YLLHRGKFL   | 70   | >PTEN-H141'YLLYRGKFL   | 132 | 62  |
| >PTEN-H141'YLLHRGKFLK/ | 44   | >PTEN-H141'YLLYRGKFLK/ | 78  | 34  |
| >PTEN-H141'YLLHRGKFL   | 105  | >PTEN-H141'YLLYRGKFL   | 156 | 51  |
| >PTEN-H141'YLLHRGKFLK/ | 66   | >PTEN-H141'YLLYRGKFLK/ | 102 | 36  |
| >PTEN-H141'YLLHRGKFL   | 6    | >PTEN-H141'YLLYRGKFL   | 10  | 4   |
| >PTEN-H141'YLLHRGKFLK/ | 12   | >PTEN-H141'YLLYRGKFLK/ | 25  | 13  |
| >PTEN-H141'YLLHRGKFL   | 10   | >PTEN-H141'YLLYRGKFL   | 15  | 5   |
| >PTEN-H141'YLLHRGKFLK/ | 39   | >PTEN-H141'YLLYRGKFLK/ | 62  | 23  |
| >PTEN-H141'YLLHRGKFL   | 12   | >PTEN-H141'YLLYRGKFL   | 18  | 6   |
| >PTEN-H141'YLLHRGKFLK/ | 17   | >PTEN-H141'YLLYRGKFLK/ | 30  | 13  |
| >PTEN-H141'YLLHRGKFL   | 58   | >PTEN-H141'YLLYRGKFL   | 86  | 28  |
| >PTEN-H141'YLLHRGKFLK/ | 317  | >PTEN-H141'YLLYRGKFLK/ | 401 | 84  |
| >PTEN-H141'YLLHRGKFL   | 6    | >PTEN-H141'YLLYRGKFL   | 14  | 8   |
| >PTEN-H141'YLLHRGKFLK  | 296  | >PTEN-H141'YLLYRGKFLK  | 654 | 358 |
| >PTEN-H141'YLLHRGKFLK/ | 8    | >PTEN-H141'YLLYRGKFLK/ | 15  | 7   |
| >PTEN-H141'YLLHRGKFLK  | 28   | >PTEN-H141'YLLYRGKFLK  | 16  | 12  |
| >PTEN-H141'YLLHRGKFLK  | 113  | >PTEN-H141'YLLYRGKFLK  | 52  | 61  |
| >PTEN-H141'YLLHRGKF    | 606  | >PTEN-H141'YLLYRGKF    | 445 | 161 |
| >PTEN-H141'YLLHRGKFLK  | 316  | >PTEN-H141'YLLYRGKFLK  | 336 | 20  |
| >PTEN-H141'YLLHRGKFLK  | 1275 | >PTEN-H141'YLLYRGKFLK  | 328 | 947 |
| >PTEN-H141'YLLHRGKF    | 412  | >PTEN-H141'YLLYRGKF    | 319 | 93  |
| >PTEN-H141'YLLHRGKFL   | 54   | >PTEN-H141'YLLYRGKFL   | 36  | 18  |
| >PTEN-H141'YLLHRGKFLK/ | 154  | >PTEN-H141'YLLYRGKFLK/ | 97  | 57  |
| >PTEN-H141'YLLHRGKF    | 473  | >PTEN-H141'YLLYRGKF    | 495 | 22  |
| >PTEN-H141'YLLHRGKF    | 43   | >PTEN-H141'YLLYRGKF    | 49  | 6   |
| >PTEN-H141'YLLHRGKFL   | 478  | >PTEN-H141'YLLYRGKFL   | 519 | 41  |
| >PTEN-H141'YLLHRGKF    | 45   | >PTEN-H141'YLLYRGKF    | 49  | 4   |
| >PTEN-H141'YLLHRGKFL   | 278  | >PTEN-H141'YLLYRGKFL   | 253 | 25  |
| >PTEN-H141'YLLHRGKF    | 259  | >PTEN-H141'YLLYRGKF    | 428 | 169 |
| >PTEN-H141'YLLHRGKFLK  | 111  | >PTEN-H141'YLLYRGKFLK  | 60  | 51  |
| >PTEN-H141'AYLLHRGKFLI | 230  | >PTEN-H141'AYLLYRGKFLI | 180 | 50  |
| >PTEN-H141'AYLLHRGKF   | 418  | >PTEN-H141'AYLLYRGKF   | 261 | 157 |
| >PTEN-H141'AYLLHRGKFL  | 368  | >PTEN-H141'AYLLYRGKFL  | 74  | 294 |
| >PTEN-H141'AYLLHRGKF   | 8    | >PTEN-H141'AYLLYRGKF   | 8   | 0   |
| >PTEN-H141'AYLLHRGKFL  | 16   | >PTEN-H141'AYLLYRGKFL  | 16  | 0   |
| >PTEN-H141'AYLLHRGK    | 40   | >PTEN-H141'AYLLYRGK    | 50  | 10  |
| >PTEN-H141'AYLLHRGKFLI | 25   | >PTEN-H141'AYLLYRGKFLI | 26  | 1   |
| >PTEN-H141'AYLLHRGKFLI | 76   | >PTEN-H141'AYLLYRGKFLI | 62  | 14  |
| >PTEN-H141'AYLLHRGKFLI | 305  | >PTEN-H141'AYLLYRGKFLI | 397 | 92  |
| >PTEN-H141'AYLLHRGKFL  | 540  | >PTEN-H141'AYLLYRGKFL  | 296 | 244 |

|                         |       |                         |     |       |
|-------------------------|-------|-------------------------|-----|-------|
| >PTEN-H141' CAYLLHRGKF  | 119   | >PTEN-H141' CAYLLYRGKFI | 62  | 57    |
| >PTEN-H141' CAYLLHRGK   | 523   | >PTEN-H141' CAYLLYRGK   | 321 | 202   |
| >PTEN-H141' CAYLLHRGK   | 471   | >PTEN-H141' CAYLLYRGK   | 586 | 115   |
| >PTEN-H141' CAYLLHRGKF  | 67    | >PTEN-H141' CAYLLYRGKF  | 87  | 20    |
| >PTEN-H141' CAYLLHRGKF  | 350   | >PTEN-H141' CAYLLYRGKFI | 782 | 432   |
| >PTEN-H141' CAYLLHRGKF  | 350   | >PTEN-H141' CAYLLYRGKF  | 502 | 152   |
| >PTEN-H141' CAYLLHRGKF  | 185   | >PTEN-H141' CAYLLYRGKFI | 175 | 10    |
| >PTEN-H141' ICAYLLHR    | 569   | >PTEN-H141' ICAYLLYR    | 136 | 433   |
| >PTEN-H141' ICAYLLHR    | 969   | >PTEN-H141' ICAYLLYR    | 311 | 658   |
| >PTEN-H141' ICAYLLHRGKI | 187   | >PTEN-H141' ICAYLLYRGKF | 127 | 60    |
| >PTEN-H141' ICAYLLHR    | 107   | >PTEN-H141' ICAYLLYR    | 46  | 61    |
| >PTEN-H141' MICAYLLH    | 784   | >PTEN-H141' MICAYLLY    | 199 | 585   |
| >PTEN-H141' MICAYLLHR   | 315   | >PTEN-H141' MICAYLLYR   | 119 | 196   |
| >PTEN-H141' MICAYLLHRG  | 162   | >PTEN-H141' MICAYLLYRG  | 138 | 24    |
| >PTEN-H141' MICAYLLH    | 299   | >PTEN-H141' MICAYLLY    | 43  | 256   |
| >PTEN-H141' MICAYLLHR   | 89    | >PTEN-H141' MICAYLLYR   | 23  | 66    |
| >PTEN-H141' MICAYLLHRG  | 49    | >PTEN-H141' MICAYLLYRG  | 36  | 13    |
| >PTEN-H141' MICAYLLH    | 561   | >PTEN-H141' MICAYLLY    | 7   | 554   |
| >PTEN-H141' MICAYLLHRG  | 77    | >PTEN-H141' MICAYLLYRG  | 93  | 16    |
| >PTEN-H141' MICAYLLH    | 17667 | >PTEN-H141' MICAYLLY    | 275 | 17392 |
| >PTEN-H141' MICAYLLHR   | 11    | >PTEN-H141' MICAYLLYR   | 7   | 4     |
| >PTEN-H141' MICAYLLHRG  | 473   | >PTEN-H141' MICAYLLYRG  | 412 | 61    |
| >PTEN-H141' MICAYLLHR   | 45    | >PTEN-H141' MICAYLLYR   | 30  | 15    |
| >PTEN-H141' MICAYLLHR   | 28    | >PTEN-H141' MICAYLLYR   | 9   | 19    |
| >PTEN-H141' MICAYLLHRG  | 124   | >PTEN-H141' MICAYLLYRG  | 134 | 10    |
| >PTEN-H141' MICAYLLH    | 2448  | >PTEN-H141' MICAYLLY    | 7   | 2441  |
| >PTEN-H141' MICAYLLH    | 7611  | >PTEN-H141' MICAYLLY    | 134 | 7477  |
| >PTEN-H141' MICAYLLH    | 18278 | >PTEN-H141' MICAYLLY    | 479 | 17799 |
| >PTEN-H141' MICAYLLH    | 5962  | >PTEN-H141' MICAYLLY    | 355 | 5607  |
| >PTEN-H141' MICAYLLH    | 15271 | >PTEN-H141' MICAYLLY    | 255 | 15016 |
| >PTEN-H141' MICAYLLHR   | 28    | >PTEN-H141' MICAYLLYR   | 20  | 8     |
| >PTEN-H141' VMICAYLLHR  | 1610  | >PTEN-H141' VMICAYLLYR  | 402 | 1208  |
| >PTEN-H141' VMICAYLLH   | 1044  | >PTEN-H141' VMICAYLLY   | 229 | 815   |
| >PTEN-H141' VMICAYLLHR  | 166   | >PTEN-H141' VMICAYLLYR  | 73  | 93    |
| >PTEN-H141' VMICAYLLH   | 1118  | >PTEN-H141' VMICAYLLY   | 105 | 1013  |
| >PTEN-H141' VMICAYLLHR  | 52    | >PTEN-H141' VMICAYLLYR  | 29  | 23    |
| >PTEN-H141' VMICAYLLH   | 46    | >PTEN-H141' VMICAYLLY   | 4   | 42    |
| >PTEN-H141' VMICAYLLH   | 10921 | >PTEN-H141' VMICAYLLY   | 211 | 10710 |
| >PTEN-H141' VMICAYLLHR  | 44    | >PTEN-H141' VMICAYLLYR  | 17  | 27    |
| >PTEN-H141' VMICAYLLHR  | 237   | >PTEN-H141' VMICAYLLYR  | 43  | 194   |
| >PTEN-H141' VMICAYLLHR  | 119   | >PTEN-H141' VMICAYLLYR  | 21  | 98    |
| >PTEN-H141' VMICAYLLH   | 4088  | >PTEN-H141' VMICAYLLY   | 8   | 4080  |
| >PTEN-H141' VMICAYLLH   | 1281  | >PTEN-H141' VMICAYLLY   | 44  | 1237  |



|                       |       |                       |      |       |
|-----------------------|-------|-----------------------|------|-------|
| >PTEN-H141'VMICAYLLH  | 14351 | >PTEN-H141'VMICAYLLY  | 484  | 13867 |
| >PTEN-H141'VMICAYLLH  | 676   | >PTEN-H141'VMICAYLLY  | 12   | 664   |
| >PTEN-H141'VMICAYLLHR | 434   | >PTEN-H141'VMICAYLLYR | 455  | 21    |
| >PTEN-H141'VMICAYLLH  | 4605  | >PTEN-H141'VMICAYLLY  | 400  | 4205  |
| >PTEN-H141'VMICAYLLH  | 20598 | >PTEN-H141'VMICAYLLY  | 404  | 20194 |
| >PTEN-H141'VMICAYLLHR | 70    | >PTEN-H141'VMICAYLLYR | 48   | 22    |
| >PTEN-H141'VMICAYLLHR | 58    | >PTEN-H141'VMICAYLLYR | 27   | 31    |
| >PTEN-H141'GVMICAYLLH | 1009  | >PTEN-H141'GVMICAYLLY | 145  | 864   |
| >PTEN-H141'GVMICAYLLH | 881   | >PTEN-H141'GVMICAYLLY | 354  | 527   |
| >PTEN-H141'GVMICAYLLH | 1450  | >PTEN-H141'GVMICAYLLY | 59   | 1391  |
| >PTEN-H141'GVMICAYLLH | 52    | >PTEN-H141'GVMICAYLLY | 20   | 32    |
| >PTEN-H141'GVMICAYLLH | 10456 | >PTEN-H141'GVMICAYLLY | 46   | 10410 |
| >PTEN-H141'GVMICAYLLH | 17962 | >PTEN-H141'GVMICAYLLY | 155  | 17807 |
| >PTEN-H141'GVMICAYLLH | 38    | >PTEN-H141'GVMICAYLLY | 18   | 20    |
| >PTEN-H141'GVMICAYLLH | 177   | >PTEN-H141'GVMICAYLLY | 48   | 129   |
| >PTEN-H141'GVMICAYLLH | 14014 | >PTEN-H141'GVMICAYLLY | 49   | 13965 |
| >PTEN-H141'GVMICAYLLH | 14462 | >PTEN-H141'GVMICAYLLY | 369  | 14093 |
| >PTEN-H141'GVMICAYLLH | 21445 | >PTEN-H141'GVMICAYLLY | 301  | 21144 |
| >PTEN-H141'GVMICAYLLH | 198   | >PTEN-H141'GVMICAYLLY | 177  | 21    |
| >PTEN-H141'GVMICAYLLH | 132   | >PTEN-H141'GVMICAYLLY | 50   | 82    |
| >PTEN-H272 HFWVNTFF   | 32    | >PTEN-H272 RFWVNTFF   | 19   | 13    |
| >PTEN-H272 HFWVNTFF   | 511   | >PTEN-H272 RFWVNTFF   | 125  | 386   |
| >PTEN-H272 HFWVNTFF   | 17    | >PTEN-H272 RFWVNTFF   | 9    | 8     |
| >PTEN-H272 HFWVNTFF   | 107   | >PTEN-H272 RFWVNTFF   | 204  | 97    |
| >PTEN-H272 HFWVNTFF   | 708   | >PTEN-H272 RFWVNTFF   | 158  | 550   |
| >PTEN-H272 HFWVNTFF   | 2166  | >PTEN-H272 RFWVNTFF   | 197  | 1969  |
| >PTEN-H272 HFWVNTFF   | 473   | >PTEN-H272 RFWVNTFF   | 153  | 320   |
| >PTEN-H272 HFWVNTFF   | 271   | >PTEN-H272 RFWVNTFF   | 2529 | 2258  |
| >PTEN-H272 FHFVNTFFI  | 25    | >PTEN-H272 FRFWNTFFI  | 35   | 10    |
| >PTEN-H272 FHFVNTFFI  | 126   | >PTEN-H272 FRFWNTFFI  | 141  | 15    |
| >PTEN-H272 FHFVNTFFI  | 378   | >PTEN-H272 FRFWNTFFI  | 453  | 75    |
| >PTEN-H272 FHFVNTF    | 456   | >PTEN-H272 FRFWNTF    | 1597 | 1141  |
| >PTEN-H272 FHFVNTF    | 93    | >PTEN-H272 FRFWNTF    | 2647 | 2554  |
| >PTEN-H272 FHFVNTF    | 7     | >PTEN-H272 FRFWNTF    | 7    | 0     |
| >PTEN-H272 FHFVNTFFI  | 826   | >PTEN-H272 FRFWNTFFI  | 354  | 472   |
| >PTEN-H272 FHFVNTF    | 483   | >PTEN-H272 FRFWNTF    | 5581 | 5098  |
| >PTEN-H272 FHFVNTF    | 9522  | >PTEN-H272 FRFWNTF    | 38   | 9484  |
| >PTEN-H272 FHFVNTFFI  | 17510 | >PTEN-H272 FRFWNTFFI  | 256  | 17254 |
| >PTEN-H272 FHFVNTF    | 229   | >PTEN-H272 FRFWNTF    | 648  | 419   |
| >PTEN-H272 FHFVNTF    | 32    | >PTEN-H272 FRFWNTF    | 43   | 11    |
| >PTEN-H272 FHFVNTFFI  | 50    | >PTEN-H272 FRFWNTFFI  | 78   | 28    |
| >PTEN-H272 FHFVNTFFI  | 8190  | >PTEN-H272 FRFWNTFFI  | 307  | 7883  |
| >PTEN-H272 FHFVNTFFI  | 4123  | >PTEN-H272 FRFWNTFFI  | 140  | 3983  |

|                      |      |                      |      |      |
|----------------------|------|----------------------|------|------|
| >PTEN-H272IFHFVWNTF  | 29   | >PTEN-H272IFRFVWNTF  | 67   | 38   |
| >PTEN-H272IMFHFVWNTF | 112  | >PTEN-H272IMFRFVWNTF | 885  | 773  |
| >PTEN-H272IMFHFVWNTF | 462  | >PTEN-H272IMFRFVWNTF | 4205 | 3743 |
| >PTEN-H272IMFHFVWNTF | 42   | >PTEN-H272IMFRFVWNTF | 34   | 8    |
| >PTEN-H272IMFHFVWNTF | 106  | >PTEN-H272IMFRFVWNTF | 209  | 103  |
| >PTEN-H272IMFHFVWNTF | 13   | >PTEN-H272IMFRFVWNTF | 44   | 31   |
| >PTEN-H272IMFHFVWNTF | 15   | >PTEN-H272IMFRFVWNTF | 64   | 49   |
| >PTEN-H272IMFHFVWNT  | 1803 | >PTEN-H272IMFRFVWNT  | 206  | 1597 |
| >PTEN-H272IMFHFVWNTF | 2666 | >PTEN-H272IMFRFVWNTF | 313  | 2353 |
| >PTEN-H272IMFHFVWNTF | 24   | >PTEN-H272IMFRFVWNTF | 7    | 17   |
| >PTEN-H272IMFHFVWNTF | 256  | >PTEN-H272IMFRFVWNTF | 3552 | 3296 |
| >PTEN-H272IMFHFVWNTF | 690  | >PTEN-H272IMFRFVWNTF | 419  | 271  |
| >PTEN-H272IMFHFVWNT  | 492  | >PTEN-H272IMFRFVWNT  | 610  | 118  |
| >PTEN-H272IMFHFVWNTF | 56   | >PTEN-H272IMFRFVWNTF | 61   | 5    |
| >PTEN-H272IKMFHFVWNT | 159  | >PTEN-H272IKMFRFVWNT | 123  | 36   |
| >PTEN-H272IKMFHFVWNT | 219  | >PTEN-H272IKMFRFVWNT | 463  | 244  |
| >PTEN-H272IKMFHFVWNT | 72   | >PTEN-H272IKMFRFVWNT | 111  | 39   |
| >PTEN-H272IKMFHFVWNT | 110  | >PTEN-H272IKMFRFVWNT | 158  | 48   |
| >PTEN-H272IKMFHFVWNT | 163  | >PTEN-H272IKMFRFVWNT | 156  | 7    |
| >PTEN-H272IKMFHFVWNT | 29   | >PTEN-H272IKMFRFVWNT | 24   | 5    |
| >PTEN-H272IKMFHFVWNT | 45   | >PTEN-H272IKMFRFVWNT | 36   | 9    |
| >PTEN-H272IKMFHFVWNT | 357  | >PTEN-H272IKMFRFVWNT | 384  | 27   |
| >PTEN-H272IKMFHFVWNT | 379  | >PTEN-H272IKMFRFVWNT | 329  | 50   |
| >PTEN-H272IKMFHFVWNT | 456  | >PTEN-H272IKMFRFVWNT | 297  | 159  |
| >PTEN-H272IKMFHFVWNT | 133  | >PTEN-H272IKMFRFVWNT | 94   | 39   |
| >PTEN-H272IKMFHFVWNT | 543  | >PTEN-H272IKMFRFVWNT | 380  | 163  |
| >PTEN-H272IKMFHFVWNT | 175  | >PTEN-H272IKMFRFVWNT | 565  | 390  |
| >PTEN-H272IKMFHFVWNT | 807  | >PTEN-H272IKMFRFVWNT | 474  | 333  |
| >PTEN-H272IKMFHFVWNT | 444  | >PTEN-H272IKMFRFVWNT | 880  | 436  |
| >PTEN-H272IKMFHFVWNT | 89   | >PTEN-H272IKMFRFVWNT | 79   | 10   |
| >PTEN-H272IKMFHFVWNT | 429  | >PTEN-H272IKMFRFVWNT | 465  | 36   |
| >PTEN-H272IKMFHFVWNT | 3    | >PTEN-H272IKMFRFVWNT | 5    | 2    |
| >PTEN-H272IKMFHFVWNT | 7    | >PTEN-H272IKMFRFVWNT | 8    | 1    |
| >PTEN-H272IKMFHFVWNT | 34   | >PTEN-H272IKMFRFVWNT | 40   | 6    |
| >PTEN-H272IKMFHFVWNT | 43   | >PTEN-H272IKMFRFVWNT | 54   | 11   |
| >PTEN-H272IKMFHFVWNT | 165  | >PTEN-H272IKMFRFVWNT | 232  | 67   |
| >PTEN-H272IKMFHFVWNT | 248  | >PTEN-H272IKMFRFVWNT | 328  | 80   |
| >PTEN-H272IKMFHFVWNT | 314  | >PTEN-H272IKMFRFVWNT | 719  | 405  |
| >PTEN-H272IKMFHFVWNT | 2    | >PTEN-H272IKMFRFVWNT | 2    | 0    |
| >PTEN-H272IKMFHFVWNT | 3    | >PTEN-H272IKMFRFVWNT | 3    | 0    |
| >PTEN-H272IKMFHFVWNT | 32   | >PTEN-H272IKMFRFVWNT | 97   | 65   |
| >PTEN-H272IKMFHFVWNT | 67   | >PTEN-H272IKMFRFVWNT | 172  | 105  |
| >PTEN-H272IKMFHFVWNT | 121  | >PTEN-H272IKMFRFVWNT | 83   | 38   |

|                       |       |                       |     |       |
|-----------------------|-------|-----------------------|-----|-------|
| >PTEN-H272IKMFHFWVN†  | 232   | >PTEN-H272IKMFRFWVN†  | 148 | 84    |
| >PTEN-H272IKMFHFWVN†  | 38    | >PTEN-H272IKMFRFWVN†  | 33  | 5     |
| >PTEN-H272IKMFHFWVN†  | 28    | >PTEN-H272IKMFRFWVN†  | 24  | 4     |
| >PTEN-H272IKMFHFWVN†  | 100   | >PTEN-H272IKMFRFWVN†  | 100 | 0     |
| >PTEN-H272IKMFHFWVN†  | 688   | >PTEN-H272IKMFRFWVN†  | 280 | 408   |
| >PTEN-H272IKMFHFWVN   | 161   | >PTEN-H272IKMFRFWVN   | 275 | 114   |
| >PTEN-H272IDKMFHFWV†  | 19    | >PTEN-H272IDKMFRFWV†  | 30  | 11    |
| >PTEN-H272IDKMFHFWV†  | 190   | >PTEN-H272IDKMFRFWV†  | 474 | 284   |
| >PTEN-H272IKDKMFHFW\  | 395   | >PTEN-H272IKDKMFRFW\  | 500 | 105   |
| >PTEN-H272IKDKMFHF    | 117   | >PTEN-H272IKDKMFRF    | 277 | 160   |
| >PTEN-H272ILKKDKMFH\  | 474   | >PTEN-H272ILKKDKMFRV  | 838 | 364   |
| >PTEN-H272IMLKKDKMFH  | 63    | >PTEN-H272IMLKKDKMFR  | 205 | 142   |
| >PTEN-H272IMLKKDKMFH  | 71    | >PTEN-H272IMLKKDKMFR  | 208 | 137   |
| >PTEN-H272IMLKKDKMFH  | 137   | >PTEN-H272IMLKKDKMFR  | 184 | 47    |
| >PTEN-H272IKMLKKDKMF  | 262   | >PTEN-H272IKMLKKDKMF  | 750 | 488   |
| >PTEN-H272IKMLKKDKMF  | 188   | >PTEN-H272IKMLKKDKMF  | 279 | 91    |
| >PTEN-H272IKMLKKDKMF  | 162   | >PTEN-H272IKMLKKDKMF  | 285 | 123   |
| >PTEN-H272IKMLKKDKMF  | 359   | >PTEN-H272IKMLKKDKMF  | 700 | 341   |
| >PTEN-H272IKMLKKDKMF  | 111   | >PTEN-H272IKMLKKDKMF  | 63  | 48    |
| >PTEN-H272IKMLKKDKMF  | 167   | >PTEN-H272IKMLKKDKMF  | 758 | 591   |
| >PTEN-H272IKMLKKDKMF  | 15    | >PTEN-H272IKMLKKDKMF  | 34  | 19    |
| >PTEN-H272IKMLKKDKMF  | 38    | >PTEN-H272IKMLKKDKMF  | 19  | 19    |
| >PTEN-H272IKMLKKDKMF  | 118   | >PTEN-H272IKMLKKDKMF  | 226 | 108   |
| >PTEN-H272IKMLKKDKMF  | 2367  | >PTEN-H272IKMLKKDKMF  | 13  | 2354  |
| >PTEN-H272'HFVWNTFF   | 32    | >PTEN-H272'YFVWNTFF   | 15  | 17    |
| >PTEN-H272'HFVWNTFF   | 511   | >PTEN-H272'YFVWNTFF   | 119 | 392   |
| >PTEN-H272'HFVWNTFF   | 17    | >PTEN-H272'YFVWNTFF   | 9   | 8     |
| >PTEN-H272'HFVWNTFF   | 107   | >PTEN-H272'YFVWNTFF   | 22  | 85    |
| >PTEN-H272'HFVWNTFF   | 510   | >PTEN-H272'YFVWNTFF   | 215 | 295   |
| >PTEN-H272'HFVWNTFF   | 473   | >PTEN-H272'YFVWNTFF   | 151 | 322   |
| >PTEN-H272'HFVWNTFF   | 271   | >PTEN-H272'YFVWNTFF   | 127 | 144   |
| >PTEN-H272'FHFVWNTF   | 12400 | >PTEN-H272'FYFVWNTF   | 169 | 12231 |
| >PTEN-H272'FHFVWNTFFI | 1510  | >PTEN-H272'FYFVWNTFFI | 11  | 1499  |
| >PTEN-H272'FHFVWNTFFI | 25    | >PTEN-H272'FYFVWNTFFI | 45  | 20    |
| >PTEN-H272'FHFVWNTFFI | 126   | >PTEN-H272'FYFVWNTFFI | 19  | 107   |
| >PTEN-H272'FHFVWNTFFI | 378   | >PTEN-H272'FYFVWNTFFI | 50  | 328   |
| >PTEN-H272'FHFVWNTFFI | 7292  | >PTEN-H272'FYFVWNTFFI | 481 | 6811  |
| >PTEN-H272'FHFVWNTF   | 456   | >PTEN-H272'FYFVWNTF   | 34  | 422   |
| >PTEN-H272'FHFVWNTF   | 1098  | >PTEN-H272'FYFVWNTF   | 42  | 1056  |
| >PTEN-H272'FHFVWNTF   | 93    | >PTEN-H272'FYFVWNTF   | 5   | 88    |
| >PTEN-H272'FHFVWNTFFI | 1000  | >PTEN-H272'FYFVWNTFFI | 5   | 995   |
| >PTEN-H272'FHFVWNTF   | 2723  | >PTEN-H272'FYFVWNTF   | 292 | 2431  |
| >PTEN-H272'FHFVWNTF   | 750   | >PTEN-H272'FYFVWNTF   | 71  | 679   |

|                        |      |                        |      |      |
|------------------------|------|------------------------|------|------|
| >PTEN-H272' FHFVWNTF   | 7    | >PTEN-H272' FYFWVNTF   | 44   | 37   |
| >PTEN-H272' FHFVWNTF   | 483  | >PTEN-H272' FYFWVNTF   | 7777 | 7294 |
| >PTEN-H272' FHFVWNTF   | 229  | >PTEN-H272' FYFWVNTF   | 162  | 67   |
| >PTEN-H272' FHFVWNTF   | 32   | >PTEN-H272' FYFWVNTF   | 2127 | 2095 |
| >PTEN-H272' FHFVWNTFFI | 50   | >PTEN-H272' FYFWVNTFFI | 3376 | 3326 |
| >PTEN-H272' FHFVWNTF   | 29   | >PTEN-H272' FYFWVNTF   | 2798 | 2769 |
| >PTEN-H272' FHFVWNTF   | 4123 | >PTEN-H272' FYFWVNTF   | 136  | 3987 |
| >PTEN-H272' FHFVWNTFFI | 9683 | >PTEN-H272' FYFWVNTFFI | 279  | 9404 |
| >PTEN-H272' MFHFVWNTF  | 973  | >PTEN-H272' MFYFWVNTF  | 102  | 871  |
| >PTEN-H272' MFHFVWNTF  | 2097 | >PTEN-H272' MFYFWVNTF  | 275  | 1822 |
| >PTEN-H272' MFHFVWNTF  | 112  | >PTEN-H272' MFYFWVNTF  | 27   | 85   |
| >PTEN-H272' MFHFVWNTF  | 2289 | >PTEN-H272' MFYFWVNTF  | 306  | 1983 |
| >PTEN-H272' MFHFVWNTF  | 462  | >PTEN-H272' MFYFWVNTF  | 47   | 415  |
| >PTEN-H272' MFHFVWNTF  | 4738 | >PTEN-H272' MFYFWVNTF  | 364  | 4374 |
| >PTEN-H272' MFHFVWNTF  | 42   | >PTEN-H272' MFYFWVNTF  | 15   | 27   |
| >PTEN-H272' MFHFVWNTF  | 106  | >PTEN-H272' MFYFWVNTF  | 81   | 25   |
| >PTEN-H272' MFHFVWNTF  | 13   | >PTEN-H272' MFYFWVNTF  | 16   | 3    |
| >PTEN-H272' MFHFVWNTF  | 15   | >PTEN-H272' MFYFWVNTF  | 18   | 3    |
| >PTEN-H272' MFHFVWNTF  | 521  | >PTEN-H272' MFYFWVNTF  | 145  | 376  |
| >PTEN-H272' MFHFVWNTF  | 24   | >PTEN-H272' MFYFWVNTF  | 250  | 226  |
| >PTEN-H272' MFHFVWNTF  | 751  | >PTEN-H272' MFYFWVNTF  | 381  | 370  |
| >PTEN-H272' MFHFVWNTF  | 2274 | >PTEN-H272' MFYFWVNTF  | 482  | 1792 |
| >PTEN-H272' MFHFVWNTF  | 256  | >PTEN-H272' MFYFWVNTF  | 159  | 97   |
| >PTEN-H272' MFHFVWNTF  | 4171 | >PTEN-H272' MFYFWVNTF  | 205  | 3966 |
| >PTEN-H272' MFHFVWNTF  | 690  | >PTEN-H272' MFYFWVNTF  | 175  | 515  |
| >PTEN-H272' MFHFVWNT   | 492  | >PTEN-H272' MFYFWVNT   | 288  | 204  |
| >PTEN-H272' MFHFVWNTF  | 56   | >PTEN-H272' MFYFWVNTF  | 44   | 12   |
| >PTEN-H272' KMFHFVWNT  | 159  | >PTEN-H272' KMFYFWVNT  | 153  | 6    |
| >PTEN-H272' KMFHFVWNT  | 219  | >PTEN-H272' KMFYFWVNT  | 187  | 32   |
| >PTEN-H272' KMFHFVWNT  | 72   | >PTEN-H272' KMFYFWVNT  | 84   | 12   |
| >PTEN-H272' KMFHFVWNT  | 110  | >PTEN-H272' KMFYFWVNT  | 216  | 106  |
| >PTEN-H272' KMFHFVWNT  | 163  | >PTEN-H272' KMFYFWVNT  | 303  | 140  |
| >PTEN-H272' KMFHFVWNT  | 29   | >PTEN-H272' KMFYFWVNT  | 61   | 32   |
| >PTEN-H272' KMFHFVWNT  | 45   | >PTEN-H272' KMFYFWVNT  | 102  | 57   |
| >PTEN-H272' KMFHFVWNT  | 357  | >PTEN-H272' KMFYFWVNT  | 668  | 311  |
| >PTEN-H272' KMFHFVWNT  | 379  | >PTEN-H272' KMFYFWVNT  | 345  | 34   |
| >PTEN-H272' KMFHFVWNT  | 456  | >PTEN-H272' KMFYFWVNT  | 483  | 27   |
| >PTEN-H272' KMFHFVWNT  | 133  | >PTEN-H272' KMFYFWVNT  | 180  | 47   |
| >PTEN-H272' KMFHFVWNT  | 175  | >PTEN-H272' KMFYFWVNT  | 134  | 41   |
| >PTEN-H272' KMFHFVWNT  | 444  | >PTEN-H272' KMFYFWVNT  | 327  | 117  |
| >PTEN-H272' KMFHFVWNT  | 89   | >PTEN-H272' KMFYFWVNT  | 76   | 13   |
| >PTEN-H272' KMFHFVWNT  | 429  | >PTEN-H272' KMFYFWVNT  | 204  | 225  |
| >PTEN-H272' KMFHFVWNT  | 3    | >PTEN-H272' KMFYFWVNT  | 3    | 0    |

|                      |       |                      |     |       |
|----------------------|-------|----------------------|-----|-------|
| >PTEN-H272'KMFHFVVNT | 7     | >PTEN-H272'KMFYFVVNT | 5   | 2     |
| >PTEN-H272'KMFHFVVNT | 34    | >PTEN-H272'KMFYFVVNT | 33  | 1     |
| >PTEN-H272'KMFHFVVNT | 43    | >PTEN-H272'KMFYFVVNT | 42  | 1     |
| >PTEN-H272'KMFHFVVNT | 165   | >PTEN-H272'KMFYFVVNT | 171 | 6     |
| >PTEN-H272'KMFHFVVNT | 248   | >PTEN-H272'KMFYFVVNT | 261 | 13    |
| >PTEN-H272'KMFHFVVN  | 314   | >PTEN-H272'KMFYFVVN  | 315 | 1     |
| >PTEN-H272'KMFHFVVNT | 2     | >PTEN-H272'KMFYFVVNT | 2   | 0     |
| >PTEN-H272'KMFHFVVNT | 3     | >PTEN-H272'KMFYFVVNT | 2   | 1     |
| >PTEN-H272'KMFHFVVNT | 32    | >PTEN-H272'KMFYFVVNT | 68  | 36    |
| >PTEN-H272'KMFHFVVNT | 67    | >PTEN-H272'KMFYFVVNT | 124 | 57    |
| >PTEN-H272'KMFHFVVNT | 121   | >PTEN-H272'KMFYFVVNT | 142 | 21    |
| >PTEN-H272'KMFHFVVNT | 232   | >PTEN-H272'KMFYFVVNT | 276 | 44    |
| >PTEN-H272'KMFHFVVNT | 38    | >PTEN-H272'KMFYFVVNT | 54  | 16    |
| >PTEN-H272'KMFHFVVNT | 28    | >PTEN-H272'KMFYFVVNT | 42  | 14    |
| >PTEN-H272'KMFHFVVNT | 100   | >PTEN-H272'KMFYFVVNT | 68  | 32    |
| >PTEN-H272'KMFHFVVN  | 161   | >PTEN-H272'KMFYFVVN  | 242 | 81    |
| >PTEN-H272'DKMFHFVV  | 884   | >PTEN-H272'DKMFYFVV  | 367 | 517   |
| >PTEN-H272'DKMFHFVVI | 19    | >PTEN-H272'DKMFYFVVI | 14  | 5     |
| >PTEN-H272'DKMFHFVVI | 190   | >PTEN-H272'DKMFYFVVI | 164 | 26    |
| >PTEN-H272'KDKMFHFV  | 395   | >PTEN-H272'KDKMFYFV  | 431 | 36    |
| >PTEN-H272'KKDKMFHF  | 117   | >PTEN-H272'KKDKMFYF  | 97  | 20    |
| >PTEN-H272'LKKDKMFH  | 2456  | >PTEN-H272'LKKDKMFY  | 41  | 2415  |
| >PTEN-H272'LKKDKMFHF | 474   | >PTEN-H272'LKKDKMFYF | 745 | 271   |
| >PTEN-H272'MLKKDKMFH | 63    | >PTEN-H272'MLKKDKMFY | 140 | 77    |
| >PTEN-H272'MLKKDKMFH | 71    | >PTEN-H272'MLKKDKMFY | 69  | 2     |
| >PTEN-H272'MLKKDKMFH | 137   | >PTEN-H272'MLKKDKMFY | 155 | 18    |
| >PTEN-H272'MLKKDKMFH | 553   | >PTEN-H272'MLKKDKMFY | 219 | 334   |
| >PTEN-H272'KMLKKDKMF | 262   | >PTEN-H272'KMLKKDKMF | 185 | 77    |
| >PTEN-H272'KMLKKDKMF | 830   | >PTEN-H272'KMLKKDKMF | 130 | 700   |
| >PTEN-H272'KMLKKDKMF | 188   | >PTEN-H272'KMLKKDKMF | 388 | 200   |
| >PTEN-H272'KMLKKDKMF | 162   | >PTEN-H272'KMLKKDKMF | 99  | 63    |
| >PTEN-H272'KMLKKDKMF | 359   | >PTEN-H272'KMLKKDKMF | 210 | 149   |
| >PTEN-H272'KMLKKDKMF | 111   | >PTEN-H272'KMLKKDKMF | 143 | 32    |
| >PTEN-H272'KMLKKDKMF | 3243  | >PTEN-H272'KMLKKDKMF | 16  | 3227  |
| >PTEN-H272'KMLKKDKMF | 167   | >PTEN-H272'KMLKKDKMF | 478 | 311   |
| >PTEN-H272'KMLKKDKMF | 2075  | >PTEN-H272'KMLKKDKMF | 32  | 2043  |
| >PTEN-H272'KMLKKDKMF | 15    | >PTEN-H272'KMLKKDKMF | 14  | 1     |
| >PTEN-H272'KMLKKDKMF | 18858 | >PTEN-H272'KMLKKDKMF | 424 | 18434 |
| >PTEN-H272'KMLKKDKMF | 38    | >PTEN-H272'KMLKKDKMF | 30  | 8     |
| >PTEN-H272'KMLKKDKMF | 118   | >PTEN-H272'KMLKKDKMF | 98  | 20    |
| >PTEN-H397'QHTQITKV  | 12310 | >PTEN-H397'QYTQITKV  | 182 | 12128 |
| >PTEN-H397'QHTQITKV  | 21369 | >PTEN-H397'QYTQITKV  | 388 | 20981 |
| >PTEN-H397'QHTQITKV  | 5688  | >PTEN-H397'QYTQITKV  | 444 | 5244  |

|                        |       |                        |      |       |
|------------------------|-------|------------------------|------|-------|
| >PTEN-H397' EDQHTQITKV | 202   | >PTEN-H397' EDQYTQITKV | 509  | 307   |
| >PTEN-H397' DEDQHTQITK | 1308  | >PTEN-H397' DEDQYTQITK | 411  | 897   |
| >PTEN-H397' FDEDQHTQI  | 1874  | >PTEN-H397' FDEDQYTQI  | 370  | 1504  |
| >PTEN-H397' FDEDQHTQI  | 195   | >PTEN-H397' FDEDQYTQI  | 63   | 132   |
| >PTEN-H397' EPFDEDQHQ  | 76    | >PTEN-H397' EPFDEDQY   | 12   | 64    |
| >PTEN-H397' EPFDEDQHTC | 384   | >PTEN-H397' EPFDEDQYTC | 282  | 102   |
| >PTEN-H397' EPFDEDQHQ  | 13914 | >PTEN-H397' EPFDEDQY   | 98   | 13816 |
| >PTEN-H397' EPFDEDQHTC | 327   | >PTEN-H397' EPFDEDQYTC | 151  | 176   |
| >PTEN-H397' EPFDEDQHQ  | 24575 | >PTEN-H397' EPFDEDQY   | 347  | 24228 |
| >PTEN-H397' EPFDEDQHQ  | 9935  | >PTEN-H397' EPFDEDQY   | 186  | 9749  |
| >PTEN-H61L- HKNHYKIY   | 7     | >PTEN-H61L- LKNHYKIY   | 5    | 2     |
| >PTEN-H61L- HKNHYKIYNL | 68    | >PTEN-H61L- LKNHYKIYNL | 40   | 28    |
| >PTEN-H61L- KHKNHYKIYN | 23583 | >PTEN-H61L- KLKNHYKIYN | 313  | 23270 |
| >PTEN-H61L- KHKNHYKI   | 27486 | >PTEN-H61L- KLKNHYKI   | 293  | 27193 |
| >PTEN-H61L- KHKNHYKIYN | 16669 | >PTEN-H61L- KLKNHYKIYN | 38   | 16631 |
| >PTEN-H61L- KHKNHYKI   | 16871 | >PTEN-H61L- KLKNHYKI   | 33   | 16838 |
| >PTEN-H61L- KHKNHYKIYN | 15329 | >PTEN-H61L- KLKNHYKIYN | 14   | 15315 |
| >PTEN-H61L- KHKNHYKI   | 25940 | >PTEN-H61L- KLKNHYKI   | 168  | 25772 |
| >PTEN-H61L- KHKNHYKIYN | 26642 | >PTEN-H61L- KLKNHYKIYN | 246  | 26396 |
| >PTEN-H61L- KHKNHYKI   | 23446 | >PTEN-H61L- KLKNHYKI   | 172  | 23274 |
| >PTEN-H61L- KHKNHYKIYN | 22190 | >PTEN-H61L- KLKNHYKIYN | 83   | 22107 |
| >PTEN-H61L- KHKNHYKI   | 34798 | >PTEN-H61L- KLKNHYKI   | 160  | 34638 |
| >PTEN-H61L- KHKNHYKIYN | 31484 | >PTEN-H61L- KLKNHYKIYN | 51   | 31433 |
| >PTEN-H61L- KHKNHYKIY  | 20055 | >PTEN-H61L- KLKNHYKIY  | 462  | 19593 |
| >PTEN-H61L- KHKNHYKI   | 1305  | >PTEN-H61L- KLKNHYKI   | 33   | 1272  |
| >PTEN-H61L- KHKNHYKIY  | 3473  | >PTEN-H61L- KLKNHYKIY  | 125  | 3348  |
| >PTEN-H61L- KHKNHYKIYN | 4087  | >PTEN-H61L- KLKNHYKIYN | 276  | 3811  |
| >PTEN-H61L- KHKNHYKIYN | 2568  | >PTEN-H61L- KLKNHYKIYN | 75   | 2493  |
| >PTEN-H61L- KHKNHYKIYN | 7392  | >PTEN-H61L- KLKNHYKIYN | 316  | 7076  |
| >PTEN-H61L- KHKNHYKI   | 4713  | >PTEN-H61L- KLKNHYKI   | 97   | 4616  |
| >PTEN-H61L- KHKNHYKIYN | 10546 | >PTEN-H61L- KLKNHYKIYN | 364  | 10182 |
| >PTEN-H61L- KHKNHYKI   | 8042  | >PTEN-H61L- KLKNHYKI   | 289  | 7753  |
| >PTEN-H61L- KHKNHYKIYN | 2459  | >PTEN-H61L- KLKNHYKIYN | 44   | 2415  |
| >PTEN-H61L- KHKNHYKIY  | 12291 | >PTEN-H61L- KLKNHYKIY  | 129  | 12162 |
| >PTEN-H61L- KHKNHYKIY  | 8601  | >PTEN-H61L- KLKNHYKIY  | 457  | 8144  |
| >PTEN-H61L- KHKNHYKIY  | 10    | >PTEN-H61L- KLKNHYKIY  | 14   | 4     |
| >PTEN-H61L- KHKNHYKIYN | 206   | >PTEN-H61L- KLKNHYKIYN | 336  | 130   |
| >PTEN-H61L- SKHKNHYK   | 78    | >PTEN-H61L- SKLKNHYK   | 1050 | 972   |
| >PTEN-H61L- SKHKNHYKI  | 129   | >PTEN-H61L- SKLKNHYKI  | 103  | 26    |
| >PTEN-H61L- SKHKNHYKIY | 6     | >PTEN-H61L- SKLKNHYKIY | 5    | 1     |
| >PTEN-H61L- DSKHKNHY   | 383   | >PTEN-H61L- DSKLKNHY   | 864  | 481   |
| >PTEN-H61L- DSKHKNHYK  | 121   | >PTEN-H61L- DSKLKNHYK  | 243  | 122   |
| >PTEN-H61L- DSKHKNHY   | 289   | >PTEN-H61L- DSKLKNHY   | 648  | 359   |

|                        |       |                        |      |       |
|------------------------|-------|------------------------|------|-------|
| >PTEN-H61L- DSKHKNHYK  | 342   | >PTEN-H61L- DSKLKNHYK  | 511  | 169   |
| >PTEN-H61L- DSKHKNHYK  | 155   | >PTEN-H61L- DSKLKNHYK  | 123  | 32    |
| >PTEN-H61L- DSKHKNHYK  | 77    | >PTEN-H61L- DSKLKNHYK  | 108  | 31    |
| >PTEN-H61L- LDSKHKNHYK | 229   | >PTEN-H61L- LDSKLKNHYK | 255  | 26    |
| >PTEN-H61L- FLDSKHKNHY | 86    | >PTEN-H61L- FLDSKLKNHY | 114  | 28    |
| >PTEN-H61L- FLDSKHKNHY | 273   | >PTEN-H61L- FLDSKLKNHY | 244  | 29    |
| >PTEN-H61L- FLDSKHKNHY | 226   | >PTEN-H61L- FLDSKLKNHY | 182  | 44    |
| >PTEN-H61L- FLDSKHKNHY | 512   | >PTEN-H61L- FLDSKLKNHY | 460  | 52    |
| >PTEN-H61L- FLDSKHKNHY | 676   | >PTEN-H61L- FLDSKLKNHY | 339  | 337   |
| >PTEN-H61L- RFLDSKHKNH | 91    | >PTEN-H61L- RFLDSKLKNH | 75   | 16    |
| >PTEN-H61L- RFLDSKHK   | 19    | >PTEN-H61L- RFLDSKLN   | 19   | 0     |
| >PTEN-H61L- RFLDSKHKNH | 227   | >PTEN-H61L- RFLDSKLKNH | 410  | 183   |
| >PTEN-H61L- RFLDSKHK   | 73    | >PTEN-H61L- RFLDSKLN   | 128  | 55    |
| >PTEN-H61L- RFLDSKHKNH | 697   | >PTEN-H61L- RFLDSKLKNH | 172  | 525   |
| >PTEN-H61L- RFLDSKHK   | 66    | >PTEN-H61L- RFLDSKLN   | 87   | 21    |
| >PTEN-H61L- VRFLDSKH   | 1832  | >PTEN-H61L- VRFLDSL    | 364  | 1468  |
| >PTEN-H61L- VRFLDSKH   | 482   | >PTEN-H61L- VRFLDSL    | 162  | 320   |
| >PTEN-H61L- VRFLDSKHK  | 137   | >PTEN-H61L- VRFLDSL    | 107  | 30    |
| >PTEN-H61L- VVRFLDSKHK | 408   | >PTEN-H61L- VVRFLDSL   | 302  | 106   |
| >PTEN-H61L- VVRFLDSKHK | 560   | >PTEN-H61L- VVRFLDSL   | 408  | 152   |
| >PTEN-H61L- VVRFLDSKHK | 13    | >PTEN-H61L- VVRFLDSL   | 13   | 0     |
| >PTEN-H61L- VVRFLDSKH  | 6172  | >PTEN-H61L- VVRFLDSL   | 404  | 5768  |
| >PTEN-H61L- VVRFLDSKH  | 57    | >PTEN-H61L- VVRFLDSL   | 28   | 29    |
| >PTEN-H61L- DVVRFLDSKH | 129   | >PTEN-H61L- DVVRFLDSL  | 35   | 94    |
| >PTEN-H61L- DVVRFLDSKH | 102   | >PTEN-H61L- DVVRFLDSL  | 45   | 57    |
| >PTEN-H61P- HKNHYKIY   | 7     | >PTEN-H61P- PKNHYKIY   | 44   | 37    |
| >PTEN-H61P- HKNHYKIYNL | 68    | >PTEN-H61P- PKNHYKIYNL | 727  | 659   |
| >PTEN-H61P- KHKNHYKIYN | 23470 | >PTEN-H61P- KPKNHYKIYN | 166  | 23304 |
| >PTEN-H61P- KHKNHYKI   | 8042  | >PTEN-H61P- KPKNHYKI   | 297  | 7745  |
| >PTEN-H61P- KHKNHYKIYN | 2459  | >PTEN-H61P- KPKNHYKIYN | 47   | 2412  |
| >PTEN-H61P- KHKNHYKIY  | 10    | >PTEN-H61P- KPKNHYKIY  | 90   | 80    |
| >PTEN-H61P- KHKNHYKIYN | 206   | >PTEN-H61P- KPKNHYKIYN | 2067 | 1861  |
| >PTEN-H61P- KHKNHYKIY  | 19887 | >PTEN-H61P- KPKNHYKIY  | 214  | 19673 |
| >PTEN-H61P- SKHKNHYK   | 78    | >PTEN-H61P- SKPKNHYK   | 8415 | 8337  |
| >PTEN-H61P- SKHKNHYKI  | 129   | >PTEN-H61P- SKPKNHYKI  | 1691 | 1562  |
| >PTEN-H61P- SKHKNHYKIY | 6     | >PTEN-H61P- SKPKNHYKIY | 34   | 28    |
| >PTEN-H61P- DSKHKNHY   | 383   | >PTEN-H61P- DSKPKNHY   | 589  | 206   |
| >PTEN-H61P- DSKHKNHYK  | 121   | >PTEN-H61P- DSKPKNHYK  | 104  | 17    |
| >PTEN-H61P- DSKHKNHY   | 289   | >PTEN-H61P- DSKPKNHY   | 316  | 27    |
| >PTEN-H61P- DSKHKNHYK  | 342   | >PTEN-H61P- DSKPKNHYK  | 177  | 165   |
| >PTEN-H61P- DSKHKNHYK  | 155   | >PTEN-H61P- DSKPKNHYK  | 194  | 39    |
| >PTEN-H61P- DSKHKNHYK  | 77    | >PTEN-H61P- DSKPKNHYK  | 112  | 35    |
| >PTEN-H61P- DSKHKNHYKI | 1306  | >PTEN-H61P- DSKPKNHYKI | 333  | 973   |

|                       |       |                       |      |       |
|-----------------------|-------|-----------------------|------|-------|
| >PTEN-H61P·LDSKHKNHYK | 229   | >PTEN-H61P·LDSKPKNHYK | 442  | 213   |
| >PTEN-H61P·FLDSKHKNHY | 86    | >PTEN-H61P·FLDSKPKNHY | 132  | 46    |
| >PTEN-H61P·FLDSKHKNHY | 273   | >PTEN-H61P·FLDSKPKNHY | 176  | 97    |
| >PTEN-H61P·FLDSKHKNHY | 226   | >PTEN-H61P·FLDSKPKNHY | 186  | 40    |
| >PTEN-H61P·FLDSKHKNHY | 512   | >PTEN-H61P·FLDSKPKNHY | 496  | 16    |
| >PTEN-H61P·FLDSKHKNHY | 510   | >PTEN-H61P·FLDSKPKNHY | 447  | 63    |
| >PTEN-H61P·RFLDSKHKNH | 91    | >PTEN-H61P·RFLDSKPKNH | 142  | 51    |
| >PTEN-H61P·RFLDSKHK   | 19    | >PTEN-H61P·RFLDSKPK   | 11   | 8     |
| >PTEN-H61P·RFLDSKHKNH | 227   | >PTEN-H61P·RFLDSKPKNH | 283  | 56    |
| >PTEN-H61P·RFLDSKHK   | 73    | >PTEN-H61P·RFLDSKPK   | 79   | 6     |
| >PTEN-H61P·RFLDSKHK   | 66    | >PTEN-H61P·RFLDSKPK   | 68   | 2     |
| >PTEN-H61P·VRFLDSKH   | 482   | >PTEN-H61P·VRFLDSKP   | 3301 | 2819  |
| >PTEN-H61P·VRFLDSKHK  | 137   | >PTEN-H61P·VRFLDSKPK  | 81   | 56    |
| >PTEN-H61P·VRFLDSKHKN | 672   | >PTEN-H61P·VRFLDSKPKN | 306  | 366   |
| >PTEN-H61P·VVRFLDSKHK | 408   | >PTEN-H61P·VVRFLDSKPK | 295  | 113   |
| >PTEN-H61P·VVRFLDSKHK | 560   | >PTEN-H61P·VVRFLDSKPK | 489  | 71    |
| >PTEN-H61P·VVRFLDSKHK | 13    | >PTEN-H61P·VVRFLDSKPK | 9    | 4     |
| >PTEN-H61P·VVRFLDSKH  | 57    | >PTEN-H61P·VVRFLDSKP  | 2251 | 2194  |
| >PTEN-H61P·DVVRFLDSKH | 129   | >PTEN-H61P·DVVRFLDSKP | 5202 | 5073  |
| >PTEN-H61P·DVVRFLDSKH | 102   | >PTEN-H61P·DVVRFLDSKP | 102  | 0     |
| >PTEN-H61R·HKNHYKIY   | 7     | >PTEN-H61R·RKNHYKIY   | 3    | 4     |
| >PTEN-H61R·HKNHYKIYNL | 68    | >PTEN-H61R·RKNHYKIYNL | 18   | 50    |
| >PTEN-H61R·HKNHYKIYNL | 983   | >PTEN-H61R·RKNHYKIYNL | 346  | 637   |
| >PTEN-H61R·KHKNHYKIYN | 2459  | >PTEN-H61R·KRKNHYKIYN | 457  | 2002  |
| >PTEN-H61R·KHKNHYKI   | 742   | >PTEN-H61R·KRKNHYKI   | 384  | 358   |
| >PTEN-H61R·KHKNHYKIY  | 10    | >PTEN-H61R·KRKNHYKIY  | 13   | 3     |
| >PTEN-H61R·KHKNHYKIYN | 206   | >PTEN-H61R·KRKNHYKIYN | 150  | 56    |
| >PTEN-H61R·KHKNHYKI   | 17301 | >PTEN-H61R·KRKNHYKI   | 172  | 17129 |
| >PTEN-H61R·KHKNHYKIYN | 15327 | >PTEN-H61R·KRKNHYKIYN | 111  | 15216 |
| >PTEN-H61R·KHKNHYKIY  | 9557  | >PTEN-H61R·KRKNHYKIY  | 472  | 9085  |
| >PTEN-H61R·KHKNHYKIYN | 20389 | >PTEN-H61R·KRKNHYKIYN | 350  | 20039 |
| >PTEN-H61R·KHKNHYKIYN | 4139  | >PTEN-H61R·KRKNHYKIYN | 84   | 4055  |
| >PTEN-H61R·KHKNHYKIYN | 8499  | >PTEN-H61R·KRKNHYKIYN | 65   | 8434  |
| >PTEN-H61R·SKHKNHYK   | 78    | >PTEN-H61R·SKRKNHYK   | 12   | 66    |
| >PTEN-H61R·SKHKNHYKI  | 129   | >PTEN-H61R·SKRKNHYKI  | 78   | 51    |
| >PTEN-H61R·SKHKNHYKIY | 6     | >PTEN-H61R·SKRKNHYKIY | 4    | 2     |
| >PTEN-H61R·DSKHKNHY   | 383   | >PTEN-H61R·DSKRKNHY   | 377  | 6     |
| >PTEN-H61R·DSKHKNHYK  | 121   | >PTEN-H61R·DSKRKNHYK  | 70   | 51    |
| >PTEN-H61R·DSKHKNHY   | 289   | >PTEN-H61R·DSKRKNHY   | 591  | 302   |
| >PTEN-H61R·DSKHKNHYK  | 342   | >PTEN-H61R·DSKRKNHYK  | 216  | 126   |
| >PTEN-H61R·DSKHKNHYK  | 155   | >PTEN-H61R·DSKRKNHYK  | 199  | 44    |
| >PTEN-H61R·DSKHKNHYK  | 77    | >PTEN-H61R·DSKRKNHYK  | 87   | 10    |
| >PTEN-H61R·LDSKHKNHYK | 229   | >PTEN-H61R·LDSKRKNHYK | 264  | 35    |



|                        |       |                        |      |       |
|------------------------|-------|------------------------|------|-------|
| >PTEN-H61R·FLDSKHKNHY  | 86    | >PTEN-H61R·FLDSKRKNHY  | 99   | 13    |
| >PTEN-H61R·FLDSKHKNHY  | 273   | >PTEN-H61R·FLDSKRKNHY  | 657  | 384   |
| >PTEN-H61R·FLDSKHKNHY  | 226   | >PTEN-H61R·FLDSKRKNHY  | 216  | 10    |
| >PTEN-H61R·RFLDSKHKNH  | 91    | >PTEN-H61R·RFLDSKRKNH  | 267  | 176   |
| >PTEN-H61R·RFLDSKHK    | 19    | >PTEN-H61R·RFLDSKRK    | 44   | 25    |
| >PTEN-H61R·RFLDSKHKNH  | 227   | >PTEN-H61R·RFLDSKRKNH  | 548  | 321   |
| >PTEN-H61R·RFLDSKHK    | 73    | >PTEN-H61R·RFLDSKRK    | 205  | 132   |
| >PTEN-H61R·RFLDSKHKNH  | 893   | >PTEN-H61R·RFLDSKRKNH  | 435  | 458   |
| >PTEN-H61R·RFLDSKHK    | 66    | >PTEN-H61R·RFLDSKRK    | 203  | 137   |
| >PTEN-H61R·VRFLDSKH    | 482   | >PTEN-H61R·VRFLDSKR    | 168  | 314   |
| >PTEN-H61R·VRFLDSKHK   | 137   | >PTEN-H61R·VRFLDSKRK   | 166  | 29    |
| >PTEN-H61R·VVRFLDSKHK  | 408   | >PTEN-H61R·VVRFLDSKRK  | 656  | 248   |
| >PTEN-H61R·VVRFLDSKHK  | 13    | >PTEN-H61R·VVRFLDSKRK  | 25   | 12    |
| >PTEN-H61R·VVRFLDSKH   | 11157 | >PTEN-H61R·VVRFLDSKR   | 79   | 11078 |
| >PTEN-H61R·VVRFLDSKH   | 26325 | >PTEN-H61R·VVRFLDSKR   | 187  | 26138 |
| >PTEN-H61R·VVRFLDSKH   | 21456 | >PTEN-H61R·VVRFLDSKR   | 310  | 21146 |
| >PTEN-H61R·VVRFLDSKH   | 57    | >PTEN-H61R·VVRFLDSKR   | 818  | 761   |
| >PTEN-H61R·DVVRFLDSKH  | 129   | >PTEN-H61R·DVVRFLDSKR  | 1513 | 1384  |
| >PTEN-H61R·DVVRFLDSKH  | 5628  | >PTEN-H61R·DVVRFLDSKR  | 107  | 5521  |
| >PTEN-H61R·DVVRFLDSKH  | 6389  | >PTEN-H61R·DVVRFLDSKR  | 23   | 6366  |
| >PTEN-H61R·DVVRFLDSKH  | 102   | >PTEN-H61R·DVVRFLDSKR  | 99   | 3     |
| >PTEN-H75N·HYDTAKFNCF  | 204   | >PTEN-H75N·NYDTAKFNCF  | 370  | 166   |
| >PTEN-H75N·HYDTAKFNCF  | 793   | >PTEN-H75N·NYDTAKFNCF  | 363  | 430   |
| >PTEN-H75N·HYDTAKFNCF  | 29    | >PTEN-H75N·NYDTAKFNCF  | 112  | 83    |
| >PTEN-H75N·RHYDTAKF    | 418   | >PTEN-H75N·RNYDTAKF    | 2302 | 1884  |
| >PTEN-H75N·RHYDTAKFNC  | 374   | >PTEN-H75N·RNYDTAKFNC  | 126  | 248   |
| >PTEN-H75N·RHYDTAKF    | 742   | >PTEN-H75N·RNYDTAKF    | 453  | 289   |
| >PTEN-H75N·RHYDTAKF    | 7     | >PTEN-H75N·RNYDTAKF    | 27   | 20    |
| >PTEN-H75N·RHYDTAKF    | 384   | >PTEN-H75N·RNYDTAKF    | 35   | 349   |
| >PTEN-H75N·RHYDTAKF    | 71    | >PTEN-H75N·RNYDTAKF    | 7986 | 7915  |
| >PTEN-H75N·RHYDTAKFNCF | 71    | >PTEN-H75N·RNYDTAKFNCF | 75   | 4     |
| >PTEN-H75N·YKIYNLCAERH | 301   | >PTEN-H75N·YKIYNLCAERH | 3453 | 3152  |
| >PTEN-H75N·ERHYDTAKF   | 202   | >PTEN-H75N·ERNYDTAKF   | 294  | 92    |
| >PTEN-H75N·AERHYDTAKF  | 33    | >PTEN-H75N·AERNYDTAKF  | 37   | 4     |
| >PTEN-H75N·AERHYDTA    | 84    | >PTEN-H75N·AERNYDTA    | 61   | 23    |
| >PTEN-H75N·AERHYDTAK   | 542   | >PTEN-H75N·AERNYDTAK   | 355  | 187   |
| >PTEN-H75N·AERHYDTAKF  | 83    | >PTEN-H75N·AERNYDTAKF  | 92   | 9     |
| >PTEN-H75N·AERHYDTAKF  | 256   | >PTEN-H75N·AERNYDTAKF  | 395  | 139   |
| >PTEN-H75N·AERHYDTA    | 12    | >PTEN-H75N·AERNYDTA    | 9    | 3     |
| >PTEN-H75N·AERHYDTAKF  | 258   | >PTEN-H75N·AERNYDTAKF  | 161  | 97    |
| >PTEN-H75N·NLCAERHYDT  | 387   | >PTEN-H75N·NLCAERNYDT  | 719  | 332   |
| >PTEN-H75N·NLCAERHY    | 310   | >PTEN-H75N·NLCAERNY    | 609  | 299   |
| >PTEN-H75N·NLCAERHY    | 346   | >PTEN-H75N·NLCAERNY    | 1810 | 1464  |

|                        |       |                        |       |       |
|------------------------|-------|------------------------|-------|-------|
| >PTEN-H75N YNLCAERHY   | 254   | >PTEN-H75N YNLCAERNY   | 219   | 35    |
| >PTEN-H75N IYNLCAERHY  | 43    | >PTEN-H75N IYNLCAERNY  | 40    | 3     |
| >PTEN-H75N IYNLCAERHY  | 212   | >PTEN-H75N IYNLCAERNY  | 168   | 44    |
| >PTEN-H75N KIYNLCAERH' | 107   | >PTEN-H75N KIYNLCAERN' | 93    | 14    |
| >PTEN-H75N KIYNLCAERH' | 233   | >PTEN-H75N KIYNLCAERN' | 354   | 121   |
| >PTEN-H75N KIYNLCAERH' | 59    | >PTEN-H75N KIYNLCAERN' | 84    | 25    |
| >PTEN-H75N KIYNLCAERH' | 517   | >PTEN-H75N KIYNLCAERN' | 183   | 334   |
| >PTEN-H75N KIYNLCAERH' | 233   | >PTEN-H75N KIYNLCAERN' | 328   | 95    |
| >PTEN-H75N KIYNLCAERH' | 76    | >PTEN-H75N KIYNLCAERN' | 345   | 269   |
| >PTEN-H75N KIYNLCAERH' | 226   | >PTEN-H75N KIYNLCAERN' | 197   | 29    |
| >PTEN-H75N KIYNLCAERH' | 132   | >PTEN-H75N KIYNLCAERN' | 106   | 26    |
| >PTEN-H75N KIYNLCAERH' | 453   | >PTEN-H75N KIYNLCAERN' | 363   | 90    |
| >PTEN-H93D HNPPQLELI   | 217   | >PTEN-H93D DNPPQLELI   | 634   | 417   |
| >PTEN-H93D DHNPPQLEL   | 248   | >PTEN-H93D DDNPPQLEL   | 14966 | 14718 |
| >PTEN-H93D DHNPPQLELI  | 15625 | >PTEN-H93D DDNPPQLELI  | 127   | 15498 |
| >PTEN-H93D EDHNPPQLEI  | 235   | >PTEN-H93D EDDNPPQLEI  | 175   | 60    |
| >PTEN-H93D FEDHNPPQL   | 2367  | >PTEN-H93D FEDDNPPQL   | 339   | 2028  |
| >PTEN-H93D FEDHNPPQL   | 169   | >PTEN-H93D FEDDNPPQL   | 98    | 71    |
| >PTEN-H93D FEDHNPPQLE  | 275   | >PTEN-H93D FEDDNPPQLE  | 180   | 95    |
| >PTEN-H93D FEDHNPPQL   | 116   | >PTEN-H93D FEDDNPPQL   | 76    | 40    |
| >PTEN-H93D FEDHNPPQLE  | 47    | >PTEN-H93D FEDDNPPQLE  | 37    | 10    |
| >PTEN-H93D FEDHNPPQL   | 314   | >PTEN-H93D FEDDNPPQL   | 575   | 261   |
| >PTEN-H93D FEDHNPPQLE  | 186   | >PTEN-H93D FEDDNPPQLE  | 278   | 92    |
| >PTEN-H93D FEDHNPPQL   | 128   | >PTEN-H93D FEDDNPPQL   | 107   | 21    |
| >PTEN-H93D YPFEDHNPPC  | 43    | >PTEN-H93D YPFEDDNPPC  | 47    | 4     |
| >PTEN-H93D YPFEDHNPPC  | 145   | >PTEN-H93D YPFEDDNPPC  | 369   | 224   |
| >PTEN-H93D YPFEDHNPPC  | 145   | >PTEN-H93D YPFEDDNPPC  | 449   | 304   |
| >PTEN-H93D YPFEDHNPP   | 145   | >PTEN-H93D YPFEDDNPP   | 37    | 108   |
| >PTEN-H93D YPFEDHNPPC  | 43    | >PTEN-H93D YPFEDDNPPC  | 32    | 11    |
| >PTEN-H93D YPFEDHNPPC  | 22    | >PTEN-H93D YPFEDDNPPC  | 35    | 13    |
| >PTEN-H93D YPFEDHNPPC  | 530   | >PTEN-H93D YPFEDDNPPC  | 235   | 295   |
| >PTEN-H93D YPFEDHNPP   | 291   | >PTEN-H93D YPFEDDNPP   | 426   | 135   |
| >PTEN-H93D YPFEDHNPPC  | 638   | >PTEN-H93D YPFEDDNPPC  | 376   | 262   |
| >PTEN-H93D AQYPFEDH    | 105   | >PTEN-H93D AQYPFEDD    | 4425  | 4320  |
| >PTEN-H93D AQYPFEDHNI  | 263   | >PTEN-H93D AQYPFEDDNI  | 638   | 375   |
| >PTEN-H93Q HNPPQLELI   | 217   | >PTEN-H93Q QNPPQLELI   | 309   | 92    |
| >PTEN-H93Q DHNPPQLEL   | 248   | >PTEN-H93Q DQNPPQLEL   | 7061  | 6813  |
| >PTEN-H93Q EDHNPPQLEI  | 235   | >PTEN-H93Q EDQNPPQLEI  | 194   | 41    |
| >PTEN-H93Q FEDHNPPQL   | 169   | >PTEN-H93Q FEDQNPPQL   | 84    | 85    |
| >PTEN-H93Q FEDHNPPQLE  | 275   | >PTEN-H93Q FEDQNPPQLE  | 163   | 112   |
| >PTEN-H93Q FEDHNPPQL   | 116   | >PTEN-H93Q FEDQNPPQL   | 153   | 37    |
| >PTEN-H93Q FEDHNPPQLE  | 47    | >PTEN-H93Q FEDQNPPQLE  | 56    | 9     |
| >PTEN-H93Q FEDHNPPQL   | 314   | >PTEN-H93Q FEDQNPPQL   | 274   | 40    |

|                       |       |                       |      |       |
|-----------------------|-------|-----------------------|------|-------|
| >PTEN-H93Q FEDHNPPQLE | 186   | >PTEN-H93Q FEDQNPPQLE | 166  | 20    |
| >PTEN-H93Q FEDHNPPQL  | 128   | >PTEN-H93Q FEDQNPPQL  | 69   | 59    |
| >PTEN-H93Q FEDHNPPQLE | 802   | >PTEN-H93Q FEDQNPPQLE | 446  | 356   |
| >PTEN-H93Q YPFEDHNPPC | 43    | >PTEN-H93Q YPFEDQNPPC | 30   | 13    |
| >PTEN-H93Q YPFEDHNPPC | 145   | >PTEN-H93Q YPFEDQNPPC | 196  | 51    |
| >PTEN-H93Q YPFEDHNPPC | 145   | >PTEN-H93Q YPFEDQNPPC | 291  | 146   |
| >PTEN-H93Q YPFEDHNPP  | 145   | >PTEN-H93Q YPFEDQNPP  | 177  | 32    |
| >PTEN-H93Q YPFEDHNPPC | 670   | >PTEN-H93Q YPFEDQNPPC | 318  | 352   |
| >PTEN-H93Q YPFEDHNPPC | 43    | >PTEN-H93Q YPFEDQNPPC | 43   | 0     |
| >PTEN-H93Q YPFEDHNPPC | 22    | >PTEN-H93Q YPFEDQNPPC | 23   | 1     |
| >PTEN-H93Q YPFEDHNPPC | 530   | >PTEN-H93Q YPFEDQNPPC | 346  | 184   |
| >PTEN-H93Q YPFEDHNPP  | 291   | >PTEN-H93Q YPFEDQNPP  | 291  | 0     |
| >PTEN-H93Q AQYPFEDH   | 105   | >PTEN-H93Q AQYPFEDQ   | 600  | 495   |
| >PTEN-H93Q AQYPFEDHNI | 263   | >PTEN-H93Q AQYPFEDQNI | 371  | 108   |
| >PTEN-H93R·HNPPQLELI  | 217   | >PTEN-H93R·RNPPQLELI  | 1279 | 1062  |
| >PTEN-H93R·HNPPQLELI  | 2278  | >PTEN-H93R·RNPPQLELI  | 375  | 1903  |
| >PTEN-H93R·HNPPQLELI  | 680   | >PTEN-H93R·RNPPQLELI  | 87   | 593   |
| >PTEN-H93R·DHNPPQLEL  | 248   | >PTEN-H93R·DRNPPQLEL  | 5392 | 5144  |
| >PTEN-H93R·EDHNPPQLEL | 235   | >PTEN-H93R·EDRNPPQLEL | 241  | 6     |
| >PTEN-H93R·FEDHNPPQL  | 169   | >PTEN-H93R·FEDRNPPQL  | 364  | 195   |
| >PTEN-H93R·FEDHNPPQLE | 275   | >PTEN-H93R·FEDRNPPQLE | 512  | 237   |
| >PTEN-H93R·FEDHNPPQL  | 116   | >PTEN-H93R·FEDRNPPQL  | 176  | 60    |
| >PTEN-H93R·FEDHNPPQLE | 47    | >PTEN-H93R·FEDRNPPQLE | 73   | 26    |
| >PTEN-H93R·FEDHNPPQL  | 314   | >PTEN-H93R·FEDRNPPQL  | 548  | 234   |
| >PTEN-H93R·FEDHNPPQLE | 186   | >PTEN-H93R·FEDRNPPQLE | 285  | 99    |
| >PTEN-H93R·FEDHNPPQL  | 128   | >PTEN-H93R·FEDRNPPQL  | 144  | 16    |
| >PTEN-H93R·YPFEDHNPPC | 43    | >PTEN-H93R·YPFEDRNPPC | 29   | 14    |
| >PTEN-H93R·YPFEDHNPPC | 145   | >PTEN-H93R·YPFEDRNPPC | 242  | 97    |
| >PTEN-H93R·YPFEDHNPPC | 145   | >PTEN-H93R·YPFEDRNPPC | 100  | 45    |
| >PTEN-H93R·YPFEDHNPP  | 145   | >PTEN-H93R·YPFEDRNPP  | 287  | 142   |
| >PTEN-H93R·YPFEDHNPPC | 43    | >PTEN-H93R·YPFEDRNPPC | 59   | 16    |
| >PTEN-H93R·YPFEDHNPPC | 22    | >PTEN-H93R·YPFEDRNPPC | 25   | 3     |
| >PTEN-H93R·YPFEDHNPP  | 291   | >PTEN-H93R·YPFEDRNPP  | 226  | 65    |
| >PTEN-H93R·AQYPFEDH   | 12541 | >PTEN-H93R·AQYPFEDR   | 119  | 12422 |
| >PTEN-H93R·AQYPFEDH   | 105   | >PTEN-H93R·AQYPFEDR   | 145  | 40    |
| >PTEN-H93R·AQYPFEDHNI | 263   | >PTEN-H93R·AQYPFEDRNI | 368  | 105   |
| >PTEN-H93R·AQYPFEDH   | 3045  | >PTEN-H93R·AQYPFEDR   | 418  | 2627  |
| >PTEN-H93R·RVAQYPFEDF | 16115 | >PTEN-H93R·RVAQYPFEDF | 262  | 15853 |
| >PTEN-H93R·RVAQYPFEDF | 18445 | >PTEN-H93R·RVAQYPFEDF | 109  | 18336 |
| >PTEN-H93R·RVAQYPFEDF | 19523 | >PTEN-H93R·RVAQYPFEDF | 157  | 19366 |
| >PTEN-H93Y·HNPPQLELI  | 217   | >PTEN-H93Y·YNPPQLELI  | 153  | 64    |
| >PTEN-H93Y·HNPPQLELI  | 2278  | >PTEN-H93Y·YNPPQLELI  | 70   | 2208  |
| >PTEN-H93Y·DHNPPQLEL  | 23210 | >PTEN-H93Y·DYNPPQLEL  | 342  | 22868 |

|                         |       |                         |      |       |
|-------------------------|-------|-------------------------|------|-------|
| >PTEN-H93Y-DHNPPQLEL    | 248   | >PTEN-H93Y-DYNPPQLEL    | 7042 | 6794  |
| >PTEN-H93Y-CRVAQYPFEC   | 3712  | >PTEN-H93Y-CRVAQYPFEC   | 234  | 3478  |
| >PTEN-H93Y-EDHNPPQLEL   | 1216  | >PTEN-H93Y-EDYNPPQLEL   | 211  | 1005  |
| >PTEN-H93Y-EDHNPPQLEL   | 235   | >PTEN-H93Y-EDYNPPQLEL   | 105  | 130   |
| >PTEN-H93Y-FEDHNPPQL    | 169   | >PTEN-H93Y-FEDYNPPQL    | 229  | 60    |
| >PTEN-H93Y-FEDHNPPQLE   | 275   | >PTEN-H93Y-FEDYNPPQLE   | 354  | 79    |
| >PTEN-H93Y-FEDHNPPQL    | 116   | >PTEN-H93Y-FEDYNPPQL    | 57   | 59    |
| >PTEN-H93Y-FEDHNPPQLE   | 47    | >PTEN-H93Y-FEDYNPPQLE   | 29   | 18    |
| >PTEN-H93Y-FEDHNPPQL    | 314   | >PTEN-H93Y-FEDYNPPQL    | 496  | 182   |
| >PTEN-H93Y-FEDHNPPQLE   | 186   | >PTEN-H93Y-FEDYNPPQLE   | 280  | 94    |
| >PTEN-H93Y-FEDHNPPQL    | 128   | >PTEN-H93Y-FEDYNPPQL    | 80   | 48    |
| >PTEN-H93Y-YPFEDHNPPC   | 43    | >PTEN-H93Y-YPFEDYNPPC   | 35   | 8     |
| >PTEN-H93Y-YPFEDHNPPC   | 145   | >PTEN-H93Y-YPFEDYNPPC   | 123  | 22    |
| >PTEN-H93Y-YPFEDHNPPC   | 145   | >PTEN-H93Y-YPFEDYNPPC   | 325  | 180   |
| >PTEN-H93Y-YPFEDHNPP    | 145   | >PTEN-H93Y-YPFEDYNPP    | 149  | 4     |
| >PTEN-H93Y-YPFEDHNPPC   | 670   | >PTEN-H93Y-YPFEDYNPPC   | 395  | 275   |
| >PTEN-H93Y-YPFEDHNPPC   | 43    | >PTEN-H93Y-YPFEDYNPPC   | 44   | 1     |
| >PTEN-H93Y-YPFEDHNPPC   | 22    | >PTEN-H93Y-YPFEDYNPPC   | 23   | 1     |
| >PTEN-H93Y-YPFEDHNPPC   | 711   | >PTEN-H93Y-YPFEDYNPPC   | 436  | 275   |
| >PTEN-H93Y-YPFEDHNPPC   | 530   | >PTEN-H93Y-YPFEDYNPPC   | 280  | 250   |
| >PTEN-H93Y-YPFEDHNPP    | 291   | >PTEN-H93Y-YPFEDYNPP    | 77   | 214   |
| >PTEN-H93Y-YPFEDHNPPC   | 638   | >PTEN-H93Y-YPFEDYNPPC   | 230  | 408   |
| >PTEN-H93Y-AQYPFEDH     | 16219 | >PTEN-H93Y-AQYPFEDY     | 340  | 15879 |
| >PTEN-H93Y-AQYPFEDH     | 16683 | >PTEN-H93Y-AQYPFEDY     | 242  | 16441 |
| >PTEN-H93Y-AQYPFEDH     | 2087  | >PTEN-H93Y-AQYPFEDY     | 55   | 2032  |
| >PTEN-H93Y-AQYPFEDH     | 5001  | >PTEN-H93Y-AQYPFEDY     | 156  | 4845  |
| >PTEN-H93Y-AQYPFEDH     | 105   | >PTEN-H93Y-AQYPFEDY     | 4    | 101   |
| >PTEN-H93Y-AQYPFEDHNI   | 263   | >PTEN-H93Y-AQYPFEDYNF   | 208  | 55    |
| >PTEN-H93Y-VAQYPFEDH    | 17971 | >PTEN-H93Y-VAQYPFEDY    | 333  | 17638 |
| >PTEN-H93Y-VAQYPFEDH    | 9693  | >PTEN-H93Y-VAQYPFEDY    | 429  | 9264  |
| >PTEN-H93Y-RVAQYPFEDH   | 10662 | >PTEN-H93Y-RVAQYPFEDY   | 155  | 10507 |
| >PTEN-H93Y-RVAQYPFEDH   | 23483 | >PTEN-H93Y-RVAQYPFEDY   | 274  | 23209 |
| >PTEN-H93Y-RVAQYPFEDH   | 21566 | >PTEN-H93Y-RVAQYPFEDY   | 238  | 21328 |
| >PTEN-H93Y-RVAQYPFEDH   | 7450  | >PTEN-H93Y-RVAQYPFEDY   | 12   | 7438  |
| >PTEN-H93Y-RVAQYPFEDH   | 8848  | >PTEN-H93Y-RVAQYPFEDY   | 174  | 8674  |
| >PTEN-H93Y-RVAQYPFEDH   | 15135 | >PTEN-H93Y-RVAQYPFEDY   | 302  | 14833 |
| >PTEN-I101M IKPFCELDLQ' | 840   | >PTEN-I101M MKPFCELDLQ' | 45   | 795   |
| >PTEN-I101M LIKPFCEDL   | 1522  | >PTEN-I101M LMKPFCEDL   | 128  | 1394  |
| >PTEN-I101M LIKPFCEDL   | 1904  | >PTEN-I101M LMKPFCEDL   | 146  | 1758  |
| >PTEN-I101M LIKPFCEDL   | 541   | >PTEN-I101M LMKPFCEDL   | 18   | 523   |
| >PTEN-I101M LIKPFCEDL   | 4774  | >PTEN-I101M LMKPFCEDL   | 416  | 4358  |
| >PTEN-I101M LIKPFCEDL   | 2688  | >PTEN-I101M LMKPFCEDL   | 160  | 2528  |
| >PTEN-I101M EDHNPPQLEL  | 235   | >PTEN-I101M EDHNPPQLEL  | 5905 | 5670  |

|                         |       |                         |       |       |
|-------------------------|-------|-------------------------|-------|-------|
| >PTEN-I101M ELIKPFCEDL  | 1522  | >PTEN-I101M ELMKPFCE    | 398   | 1124  |
| >PTEN-I101M ELIKPFCEDL  | 1225  | >PTEN-I101M ELMKPFCE    | 397   | 828   |
| >PTEN-I101M ELIKPFCEDL  | 6485  | >PTEN-I101M ELMKPFCE    | 142   | 6343  |
| >PTEN-I101M ELIKPFCEDL  | 156   | >PTEN-I101M ELMKPFCE    | 99    | 57    |
| >PTEN-I101M ELIKPFCEDL  | 726   | >PTEN-I101M ELMKPFCE    | 224   | 502   |
| >PTEN-I101M LELIKPFCEDL | 166   | >PTEN-I101M LELMKPFCE   | 111   | 55    |
| >PTEN-I101M LELIKPFCEDL | 248   | >PTEN-I101M LELMKPFCE   | 131   | 117   |
| >PTEN-I101M LELIKPFCEDL | 275   | >PTEN-I101M LELMKPFCE   | 193   | 82    |
| >PTEN-I101M LELIKPFCEDL | 78    | >PTEN-I101M LELMKPFCE   | 103   | 25    |
| >PTEN-I101M PQLELIKPF   | 16    | >PTEN-I101M PQLELMKPF   | 20    | 4     |
| >PTEN-I101M NPPQLELIKPF | 483   | >PTEN-I101M NPPQLELMKI  | 705   | 222   |
| >PTEN-I101M NPPQLELIKPF | 69    | >PTEN-I101M NPPQLELMKI  | 76    | 7     |
| >PTEN-I101M HNPPQLELI   | 217   | >PTEN-I101M HNPPQLELM   | 9538  | 9321  |
| >PTEN-I101N EDHNPPQLEI  | 235   | >PTEN-I101N EDHNPPQLEI  | 25539 | 25304 |
| >PTEN-I101N ELIKPFCEDL  | 156   | >PTEN-I101N ELNKPFCE    | 168   | 12    |
| >PTEN-I101N LELIKPFCEDL | 166   | >PTEN-I101N LELNKPFCE   | 278   | 112   |
| >PTEN-I101N LELIKPFCEDL | 248   | >PTEN-I101N LELNKPFCE   | 153   | 95    |
| >PTEN-I101N LELIKPFCEDL | 275   | >PTEN-I101N LELNKPFCE   | 197   | 78    |
| >PTEN-I101N LELIKPFCEDL | 78    | >PTEN-I101N LELNKPFCE   | 70    | 8     |
| >PTEN-I101N PQLELIKPF   | 16    | >PTEN-I101N PQLELNKPF   | 16    | 0     |
| >PTEN-I101N NPPQLELIKPF | 483   | >PTEN-I101N NPPQLELNKPF | 410   | 73    |
| >PTEN-I101N NPPQLELIKPF | 69    | >PTEN-I101N NPPQLELNKPF | 74    | 5     |
| >PTEN-I101N HNPPQLELI   | 217   | >PTEN-I101N HNPPQLELN   | 35015 | 34798 |
| >PTEN-I101T LIKPFCE     | 17035 | >PTEN-I101T LTKPFCE     | 147   | 16888 |
| >PTEN-I101T LIKPFCE     | 15456 | >PTEN-I101T LTKPFCE     | 452   | 15004 |
| >PTEN-I101T LIKPFCE     | 5867  | >PTEN-I101T LTKPFCE     | 154   | 5713  |
| >PTEN-I101T LIKPFCE     | 15344 | >PTEN-I101T LTKPFCE     | 298   | 15046 |
| >PTEN-I101T EDHNPPQLEI  | 235   | >PTEN-I101T EDHNPPQLEI  | 12103 | 11868 |
| >PTEN-I101T ELIKPFCEDL  | 156   | >PTEN-I101T ELTKPFCE    | 108   | 48    |
| >PTEN-I101T LELIKPFCEDL | 166   | >PTEN-I101T LELTKPFCE   | 143   | 23    |
| >PTEN-I101T LELIKPFCEDL | 248   | >PTEN-I101T LELTKPFCE   | 162   | 86    |
| >PTEN-I101T LELIKPFCEDL | 275   | >PTEN-I101T LELTKPFCE   | 743   | 468   |
| >PTEN-I101T LELIKPFCEDL | 78    | >PTEN-I101T LELTKPFCE   | 39    | 39    |
| >PTEN-I101T PQLELIKPF   | 16    | >PTEN-I101T PQLELTKPF   | 13    | 3     |
| >PTEN-I101T NPPQLELIKPF | 483   | >PTEN-I101T NPPQLELTKP  | 451   | 32    |
| >PTEN-I101T NPPQLELIKPF | 69    | >PTEN-I101T NPPQLELTKP  | 31    | 38    |
| >PTEN-I101T HNPPQLELI   | 217   | >PTEN-I101T HNPPQLELT   | 26793 | 26576 |
| >PTEN-I122S AIHCKAGK    | 243   | >PTEN-I122S ASHCKAGK    | 676   | 433   |
| >PTEN-I122S AIHCKAGK    | 221   | >PTEN-I122S ASHCKAGK    | 163   | 58    |
| >PTEN-I122S AIHCKAGK    | 29    | >PTEN-I122S ASHCKAGK    | 14    | 15    |
| >PTEN-I122S AIHCKAGKGF  | 407   | >PTEN-I122S ASHCKAGKI   | 445   | 38    |
| >PTEN-I122S LSEDDNHVA/  | 70    | >PTEN-I122S LSEDDNHVA/  | 27687 | 27617 |
| >PTEN-I122S AAIHCKAGK   | 252   | >PTEN-I122S AASHCKAGK   | 323   | 71    |

|                         |       |                        |       |       |
|-------------------------|-------|------------------------|-------|-------|
| >PTEN-I122S AAIHCKAGKC  | 447   | >PTEN-I122S AASHCKAGKC | 665   | 218   |
| >PTEN-I122S VAAIHCKAGK  | 459   | >PTEN-I122S VAASHCKAGI | 399   | 60    |
| >PTEN-I122S HVAAIHCKA   | 289   | >PTEN-I122S HVAASHCKA  | 2684  | 2395  |
| >PTEN-I122S HVAAIHCK    | 130   | >PTEN-I122S HVAASHCK   | 100   | 30    |
| >PTEN-I122S HVAAIHCKAC  | 90    | >PTEN-I122S HVAASHCKAC | 72    | 18    |
| >PTEN-I122S HVAAIHCK    | 50    | >PTEN-I122S HVAASHCK   | 49    | 1     |
| >PTEN-I122S HVAAIHCKAC  | 114   | >PTEN-I122S HVAASHCKAC | 99    | 15    |
| >PTEN-I122S HVAAIHCK    | 74    | >PTEN-I122S HVAASHCK   | 35    | 39    |
| >PTEN-I122S HVAAIHCKA   | 304   | >PTEN-I122S HVAASHCKA  | 110   | 194   |
| >PTEN-I122S HVAAIHCKAC  | 64    | >PTEN-I122S HVAASHCKAC | 42    | 22    |
| >PTEN-I122S HVAAIHCK    | 223   | >PTEN-I122S HVAASHCK   | 514   | 291   |
| >PTEN-I122S HVAAIHCKAC  | 185   | >PTEN-I122S HVAASHCKAC | 349   | 164   |
| >PTEN-I122S HVAAIHCK    | 5     | >PTEN-I122S HVAASHCK   | 8     | 3     |
| >PTEN-I122S HVAAIHCKAC  | 7     | >PTEN-I122S HVAASHCKAC | 12    | 5     |
| >PTEN-I122S HVAAIHCKA   | 12    | >PTEN-I122S HVAASHCKA  | 62    | 50    |
| >PTEN-I122S HVAAIHCKA   | 480   | >PTEN-I122S HVAASHCKA  | 808   | 328   |
| >PTEN-I122S DDNHVAAI    | 343   | >PTEN-I122S DDNHVAAS   | 22844 | 22501 |
| >PTEN-I122S EDDNHVAAI   | 195   | >PTEN-I122S EDDNHVAAS  | 20502 | 20307 |
| >PTEN-I122S SEDDNHVAA   | 347   | >PTEN-I122S SEDDNHVAA  | 26676 | 26329 |
| >PTEN-I122S SEDDNHVAA   | 435   | >PTEN-I122S SEDDNHVAA  | 3426  | 2991  |
| >PTEN-I122S SEDDNHVAA   | 117   | >PTEN-I122S SEDDNHVAA  | 2839  | 2722  |
| >PTEN-I122S SEDDNHVAA   | 315   | >PTEN-I122S SEDDNHVAA  | 498   | 183   |
| >PTEN-I122S SEDDNHVAA   | 65    | >PTEN-I122S SEDDNHVAA  | 24999 | 24934 |
| >PTEN-I135K ICAYLLHRGK  | 913   | >PTEN-I135K KCAYLLHRGK | 446   | 467   |
| >PTEN-I135K ICAYLLHR    | 569   | >PTEN-I135K KCAYLLHR   | 74    | 495   |
| >PTEN-I135K ICAYLLHRGKI | 187   | >PTEN-I135K KCAYLLHRGK | 260   | 73    |
| >PTEN-I135K ICAYLLHR    | 107   | >PTEN-I135K KCAYLLHR   | 27    | 80    |
| >PTEN-I135K MICAYLLHR   | 315   | >PTEN-I135K MKCAYLLHR  | 18877 | 18562 |
| >PTEN-I135K MICAYLLHRG  | 162   | >PTEN-I135K MKCAYLLHRG | 14823 | 14661 |
| >PTEN-I135K MICAYLLH    | 299   | >PTEN-I135K MKCAYLLH   | 18634 | 18335 |
| >PTEN-I135K MICAYLLHR   | 89    | >PTEN-I135K MKCAYLLHR  | 14796 | 14707 |
| >PTEN-I135K MICAYLLHRG  | 49    | >PTEN-I135K MKCAYLLHRG | 7594  | 7545  |
| >PTEN-I135K MICAYLLHRG  | 77    | >PTEN-I135K MKCAYLLHRG | 2969  | 2892  |
| >PTEN-I135K MICAYLLHR   | 11    | >PTEN-I135K MKCAYLLHR  | 538   | 527   |
| >PTEN-I135K MICAYLLHRG  | 473   | >PTEN-I135K MKCAYLLHRG | 10674 | 10201 |
| >PTEN-I135K MICAYLLHR   | 45    | >PTEN-I135K MKCAYLLHR  | 2359  | 2314  |
| >PTEN-I135K MICAYLLHR   | 28    | >PTEN-I135K MKCAYLLHR  | 647   | 619   |
| >PTEN-I135K MICAYLLHRG  | 124   | >PTEN-I135K MKCAYLLHRG | 4367  | 4243  |
| >PTEN-I135K MICAYLLHR   | 28    | >PTEN-I135K MKCAYLLHR  | 124   | 96    |
| >PTEN-I135K KAGKGRTGVI  | 21601 | >PTEN-I135K KAGKGRTGVI | 368   | 21233 |
| >PTEN-I135K KAGKGRTGVI  | 25831 | >PTEN-I135K KAGKGRTGVI | 496   | 25335 |
| >PTEN-I135K KAGKGRTGVI  | 3035  | >PTEN-I135K KAGKGRTGVI | 159   | 2876  |
| >PTEN-I135K KAGKGRTGVI  | 135   | >PTEN-I135K KAGKGRTGVI | 39498 | 39363 |

|                        |      |                       |      |      |
|------------------------|------|-----------------------|------|------|
| >PTEN-I135K VMICAYLL   | 248  | >PTEN-I135K VMKAYLL   | 3930 | 3682 |
| >PTEN-I135K VMICAYLL   | 15   | >PTEN-I135K VMKAYLL   | 346  | 331  |
| >PTEN-I135K VMICAYLL   | 9    | >PTEN-I135K VMKAYLL   | 33   | 24   |
| >PTEN-I135K VMICAYLL   | 27   | >PTEN-I135K VMKAYLL   | 38   | 11   |
| >PTEN-I135K VMICAYLL   | 39   | >PTEN-I135K VMKAYLL   | 1440 | 1401 |
| >PTEN-I135K VMICAYLL   | 10   | >PTEN-I135K VMKAYLL   | 198  | 188  |
| >PTEN-I135K VMICAYLL   | 6    | >PTEN-I135K VMKAYLL   | 59   | 53   |
| >PTEN-I135K VMICAYLL   | 58   | >PTEN-I135K VMKAYLL   | 2291 | 2233 |
| >PTEN-I135K VMICAYLL   | 136  | >PTEN-I135K VMKAYLL   | 2154 | 2018 |
| >PTEN-I135K VMICAYLL   | 16   | >PTEN-I135K VMKAYLL   | 57   | 41   |
| >PTEN-I135K VMICAYLLHR | 166  | >PTEN-I135K VMKAYLLHF | 371  | 205  |
| >PTEN-I135K VMICAYLLHR | 52   | >PTEN-I135K VMKAYLLHF | 293  | 241  |
| >PTEN-I135K VMICAYLL   | 100  | >PTEN-I135K VMKAYLL   | 729  | 629  |
| >PTEN-I135K VMICAYLLH  | 46   | >PTEN-I135K VMKAYLLH  | 594  | 548  |
| >PTEN-I135K VMICAYLLHR | 44   | >PTEN-I135K VMKAYLLHF | 32   | 12   |
| >PTEN-I135K VMICAYLLHR | 237  | >PTEN-I135K VMKAYLLHF | 327  | 90   |
| >PTEN-I135K VMICAYLLHR | 119  | >PTEN-I135K VMKAYLLHF | 1191 | 1072 |
| >PTEN-I135K VMICAYLL   | 126  | >PTEN-I135K VMKAYLL   | 165  | 39   |
| >PTEN-I135K VMICAYLLHR | 434  | >PTEN-I135K VMKAYLLHF | 660  | 226  |
| >PTEN-I135K VMICAYLLHR | 70   | >PTEN-I135K VMKAYLLHF | 85   | 15   |
| >PTEN-I135K VMICAYLLHR | 58   | >PTEN-I135K VMKAYLLHF | 69   | 11   |
| >PTEN-I135K GVMICAYL   | 66   | >PTEN-I135K GVMKAYL   | 58   | 8    |
| >PTEN-I135K GVMICAYLL  | 57   | >PTEN-I135K GVMKAYLL  | 34   | 23   |
| >PTEN-I135K GVMICAYL   | 20   | >PTEN-I135K GVMKAYL   | 17   | 3    |
| >PTEN-I135K GVMICAYLL  | 18   | >PTEN-I135K GVMKAYLL  | 12   | 6    |
| >PTEN-I135K GVMICAYL   | 260  | >PTEN-I135K GVMKAYL   | 237  | 23   |
| >PTEN-I135K GVMICAYL   | 51   | >PTEN-I135K GVMKAYL   | 57   | 6    |
| >PTEN-I135K GVMICAYLL  | 112  | >PTEN-I135K GVMKAYLL  | 109  | 3    |
| >PTEN-I135K GVMICAYL   | 346  | >PTEN-I135K GVMKAYL   | 211  | 135  |
| >PTEN-I135K GVMICAYLL  | 327  | >PTEN-I135K GVMKAYLL  | 161  | 166  |
| >PTEN-I135K GVMICAYL   | 403  | >PTEN-I135K GVMKAYL   | 414  | 11   |
| >PTEN-I135K GVMICAYLLH | 881  | >PTEN-I135K GVMKAYLLH | 401  | 480  |
| >PTEN-I135K GVMICAYLLH | 52   | >PTEN-I135K GVMKAYLLH | 41   | 11   |
| >PTEN-I135K GVMICAYLLH | 38   | >PTEN-I135K GVMKAYLLH | 38   | 0    |
| >PTEN-I135K GVMICAYLLH | 177  | >PTEN-I135K GVMKAYLLH | 143  | 34   |
| >PTEN-I135K GVMICAYL   | 485  | >PTEN-I135K GVMKAYL   | 876  | 391  |
| >PTEN-I135K GVMICAYLL  | 222  | >PTEN-I135K GVMKAYLL  | 83   | 139  |
| >PTEN-I135K GVMICAYLLH | 198  | >PTEN-I135K GVMKAYLLH | 334  | 136  |
| >PTEN-I135K GVMICAYLLH | 132  | >PTEN-I135K GVMKAYLLH | 98   | 34   |
| >PTEN-I135K TGVMICAYL  | 1775 | >PTEN-I135K TGVMKAYL  | 379  | 1396 |
| >PTEN-I135K TGVMICAYL  | 267  | >PTEN-I135K TGVMKAYL  | 5010 | 4743 |
| >PTEN-I135K TGVMICAY   | 166  | >PTEN-I135K TGVMKAY   | 730  | 564  |
| >PTEN-I135K RTGVMICAY  | 243  | >PTEN-I135K RTGVMKAY  | 259  | 16   |

|                         |      |                        |      |      |
|-------------------------|------|------------------------|------|------|
| >PTEN-I135K RTGVMICAYL  | 398  | >PTEN-I135K RTGVMKCA   | 458  | 60   |
| >PTEN-I135K RTGVMICAY   | 169  | >PTEN-I135K RTGVMKCA   | 796  | 627  |
| >PTEN-I135K RTGVMICAYL  | 114  | >PTEN-I135K RTGVMKCA   | 209  | 95   |
| >PTEN-I135K RTGVMICAYL  | 74   | >PTEN-I135K RTGVMKCA   | 278  | 204  |
| >PTEN-I135K RTGVMICAY   | 228  | >PTEN-I135K RTGVMKCA   | 831  | 603  |
| >PTEN-I135K RTGVMICAY   | 70   | >PTEN-I135K RTGVMKCA   | 126  | 56   |
| >PTEN-I135K RTGVMICAY   | 13   | >PTEN-I135K RTGVMKCA   | 24   | 11   |
| >PTEN-I135K RTGVMICAYL  | 12   | >PTEN-I135K RTGVMKCA   | 14   | 2    |
| >PTEN-I135K RTGVMICAYL  | 14   | >PTEN-I135K RTGVMKCA   | 32   | 18   |
| >PTEN-I135K RTGVMICAY   | 205  | >PTEN-I135K RTGVMKCA   | 1059 | 854  |
| >PTEN-I135K RTGVMICAYL  | 438  | >PTEN-I135K RTGVMKCA   | 1513 | 1075 |
| >PTEN-I135K RTGVMICAYL  | 428  | >PTEN-I135K RTGVMKCA   | 876  | 448  |
| >PTEN-I135K RTGVMICAYL  | 90   | >PTEN-I135K RTGVMKCA   | 528  | 438  |
| >PTEN-I135K RTGVMICAYL  | 56   | >PTEN-I135K RTGVMKCA   | 211  | 155  |
| >PTEN-I135K RTGVMICAY   | 378  | >PTEN-I135K RTGVMKCA   | 307  | 71   |
| >PTEN-I135K RTGVMICAYL  | 72   | >PTEN-I135K RTGVMKCA   | 214  | 142  |
| >PTEN-I135K RTGVMICAYL  | 235  | >PTEN-I135K RTGVMKCA   | 188  | 47   |
| >PTEN-I135K RTGVMICAYL  | 394  | >PTEN-I135K RTGVMKCA   | 540  | 146  |
| >PTEN-I135K GRTGVMICA'  | 113  | >PTEN-I135K GRTGVMKCA  | 184  | 71   |
| >PTEN-I135K GRTGVMICA'  | 258  | >PTEN-I135K GRTGVMKCA  | 410  | 152  |
| >PTEN-I135K GRTGVMICA'  | 334  | >PTEN-I135K GRTGVMKCA  | 755  | 421  |
| >PTEN-I135K GRTGVMICA'  | 78   | >PTEN-I135K GRTGVMKCA  | 178  | 100  |
| >PTEN-I135K KGRTGVM     | 29   | >PTEN-I135K KGRTGVMK   | 5    | 24   |
| >PTEN-I135K KGRTGVMIC   | 365  | >PTEN-I135K KGRTGVMKC  | 659  | 294  |
| >PTEN-I135K KGRTGVMIC/  | 21   | >PTEN-I135K KGRTGVMKC  | 79   | 58   |
| >PTEN-I135K KGRTGVMIC/  | 38   | >PTEN-I135K KGRTGVMKC  | 58   | 20   |
| >PTEN-I135K KGRTGVMIC/  | 314  | >PTEN-I135K KGRTGVMKC  | 358  | 44   |
| >PTEN-I135K KGRTGVMIC/  | 165  | >PTEN-I135K KGRTGVMKC  | 325  | 160  |
| >PTEN-I135K KGRTGVMIC/  | 174  | >PTEN-I135K KGRTGVMKC  | 350  | 176  |
| >PTEN-I135K KGRTGVMIC/  | 135  | >PTEN-I135K KGRTGVMKC  | 251  | 116  |
| >PTEN-I135K GKGRTGVM    | 308  | >PTEN-I135K GKGRTGVMK  | 2583 | 2275 |
| >PTEN-I135K AGKGRTGVM   | 861  | >PTEN-I135K AGKGRTGVM  | 36   | 825  |
| >PTEN-I135M ICAYLLHR    | 569  | >PTEN-I135M MCAYLLHR   | 134  | 435  |
| >PTEN-I135M ICAYLLHR    | 969  | >PTEN-I135M MCAYLLHR   | 110  | 859  |
| >PTEN-I135M ICAYLLHRGKI | 187  | >PTEN-I135M MCAYLLHRGI | 250  | 63   |
| >PTEN-I135M ICAYLLHR    | 107  | >PTEN-I135M MCAYLLHR   | 95   | 12   |
| >PTEN-I135M MICAYLLHRG  | 6135 | >PTEN-I135M MMCA       | 276  | 5859 |
| >PTEN-I135M MICAYLLH    | 784  | >PTEN-I135M MMCA       | 229  | 555  |
| >PTEN-I135M MICAYLLHR   | 315  | >PTEN-I135M MMCA       | 97   | 218  |
| >PTEN-I135M MICAYLLHRG  | 162  | >PTEN-I135M MMCA       | 70   | 92   |
| >PTEN-I135M MICAYLLH    | 299  | >PTEN-I135M MMCA       | 325  | 26   |
| >PTEN-I135M MICAYLLHR   | 89   | >PTEN-I135M MMCA       | 61   | 28   |
| >PTEN-I135M MICAYLLHRG  | 49   | >PTEN-I135M MMCA       | 25   | 24   |



|                        |      |                        |      |      |
|------------------------|------|------------------------|------|------|
| >PTEN-I135N MICAYLLH   | 561  | >PTEN-I135N MMCAYLLH   | 84   | 477  |
| >PTEN-I135N MICAYLLHRG | 77   | >PTEN-I135N MMCAYLLHR  | 111  | 34   |
| >PTEN-I135N MICAYLLHR  | 11   | >PTEN-I135N MMCAYLLHR  | 7    | 4    |
| >PTEN-I135N MICAYLLHRG | 473  | >PTEN-I135N MMCAYLLHR  | 76   | 397  |
| >PTEN-I135N MICAYLLHR  | 45   | >PTEN-I135N MMCAYLLHR  | 28   | 17   |
| >PTEN-I135N MICAYLLHR  | 28   | >PTEN-I135N MMCAYLLHR  | 52   | 24   |
| >PTEN-I135N MICAYLLHRG | 124  | >PTEN-I135N MMCAYLLHR  | 334  | 210  |
| >PTEN-I135N MICAYLLHR  | 28   | >PTEN-I135N MMCAYLLHR  | 21   | 7    |
| >PTEN-I135N KAGKGRTGVI | 3622 | >PTEN-I135N KAGKGRTGVI | 490  | 3132 |
| >PTEN-I135N KAGKGRTGVI | 4631 | >PTEN-I135N KAGKGRTGVI | 460  | 4171 |
| >PTEN-I135N KAGKGRTGVI | 135  | >PTEN-I135N KAGKGRTGVI | 3726 | 3591 |
| >PTEN-I135N VMICAYLL   | 248  | >PTEN-I135N VMMCAYLL   | 359  | 111  |
| >PTEN-I135N VMICAYLL   | 15   | >PTEN-I135N VMMCAYLL   | 9    | 6    |
| >PTEN-I135N VMICAYLLHR | 1610 | >PTEN-I135N VMMCAYLLH  | 389  | 1221 |
| >PTEN-I135N VMICAYLL   | 9    | >PTEN-I135N VMMCAYLL   | 4    | 5    |
| >PTEN-I135N VMICAYLL   | 27   | >PTEN-I135N VMMCAYLL   | 15   | 12   |
| >PTEN-I135N VMICAYLL   | 39   | >PTEN-I135N VMMCAYLL   | 22   | 17   |
| >PTEN-I135N VMICAYLL   | 10   | >PTEN-I135N VMMCAYLL   | 6    | 4    |
| >PTEN-I135N VMICAYLL   | 6    | >PTEN-I135N VMMCAYLL   | 4    | 2    |
| >PTEN-I135N VMICAYLL   | 58   | >PTEN-I135N VMMCAYLL   | 34   | 24   |
| >PTEN-I135N VMICAYLL   | 136  | >PTEN-I135N VMMCAYLL   | 4    | 132  |
| >PTEN-I135N VMICAYLL   | 16   | >PTEN-I135N VMMCAYLL   | 9    | 7    |
| >PTEN-I135N VMICAYLLH  | 1044 | >PTEN-I135N VMMCAYLLH  | 140  | 904  |
| >PTEN-I135N VMICAYLLHR | 166  | >PTEN-I135N VMMCAYLLH  | 52   | 114  |
| >PTEN-I135N VMICAYLLH  | 1118 | >PTEN-I135N VMMCAYLLH  | 199  | 919  |
| >PTEN-I135N VMICAYLLHR | 52   | >PTEN-I135N VMMCAYLLH  | 25   | 27   |
| >PTEN-I135N VMICAYLL   | 100  | >PTEN-I135N VMMCAYLL   | 209  | 109  |
| >PTEN-I135N VMICAYLLH  | 46   | >PTEN-I135N VMMCAYLLH  | 104  | 58   |
| >PTEN-I135N VMICAYLLHR | 44   | >PTEN-I135N VMMCAYLLH  | 18   | 26   |
| >PTEN-I135N VMICAYLLHR | 237  | >PTEN-I135N VMMCAYLLH  | 151  | 86   |
| >PTEN-I135N VMICAYLLHR | 119  | >PTEN-I135N VMMCAYLLH  | 105  | 14   |
| >PTEN-I135N VMICAYLL   | 126  | >PTEN-I135N VMMCAYLL   | 72   | 54   |
| >PTEN-I135N VMICAYLLH  | 676  | >PTEN-I135N VMMCAYLLH  | 308  | 368  |
| >PTEN-I135N VMICAYLLHR | 434  | >PTEN-I135N VMMCAYLLH  | 219  | 215  |
| >PTEN-I135N VMICAYLL   | 1077 | >PTEN-I135N VMMCAYLL   | 381  | 696  |
| >PTEN-I135N VMICAYLLHR | 70   | >PTEN-I135N VMMCAYLLH  | 39   | 31   |
| >PTEN-I135N VMICAYLLHR | 58   | >PTEN-I135N VMMCAYLLH  | 46   | 12   |
| >PTEN-I135N GVMICAYL   | 66   | >PTEN-I135N GVMMCAYL   | 50   | 16   |
| >PTEN-I135N GVMICAYLL  | 57   | >PTEN-I135N GVMMCAYLL  | 36   | 21   |
| >PTEN-I135N GVMICAYL   | 20   | >PTEN-I135N GVMMCAYL   | 25   | 5    |
| >PTEN-I135N GVMICAYLL  | 18   | >PTEN-I135N GVMMCAYLL  | 17   | 1    |
| >PTEN-I135N GVMICAYL   | 260  | >PTEN-I135N GVMMCAYL   | 176  | 84   |
| >PTEN-I135N GVMICAYL   | 51   | >PTEN-I135N GVMMCAYL   | 41   | 10   |

|                        |      |                        |      |      |
|------------------------|------|------------------------|------|------|
| >PTEN-I135M GVMICAYLL  | 112  | >PTEN-I135M GVMMCAYLL  | 66   | 46   |
| >PTEN-I135M GVMICAYL   | 346  | >PTEN-I135M GVMMCAYL   | 272  | 74   |
| >PTEN-I135M GVMICAYLL  | 327  | >PTEN-I135M GVMMCAYLL  | 201  | 126  |
| >PTEN-I135M GVMICAYL   | 403  | >PTEN-I135M GVMMCAYL   | 276  | 127  |
| >PTEN-I135M GVMICAYL   | 574  | >PTEN-I135M GVMMCAYL   | 360  | 214  |
| >PTEN-I135M GVMICAYLLH | 52   | >PTEN-I135M GVMMCAYLL  | 33   | 19   |
| >PTEN-I135M GVMICAYLLH | 38   | >PTEN-I135M GVMMCAYLL  | 29   | 9    |
| >PTEN-I135M GVMICAYLLH | 1046 | >PTEN-I135M GVMMCAYLL  | 477  | 569  |
| >PTEN-I135M GVMICAYLLH | 177  | >PTEN-I135M GVMMCAYLL  | 116  | 61   |
| >PTEN-I135M GVMICAYL   | 485  | >PTEN-I135M GVMMCAYL   | 779  | 294  |
| >PTEN-I135M GVMICAYLL  | 222  | >PTEN-I135M GVMMCAYLL  | 105  | 117  |
| >PTEN-I135M GVMICAYLLH | 198  | >PTEN-I135M GVMMCAYLL  | 273  | 75   |
| >PTEN-I135M GVMICAYLLH | 132  | >PTEN-I135M GVMMCAYLL  | 135  | 3    |
| >PTEN-I135M TGVMICAYL  | 267  | >PTEN-I135M TGVMMMCAYL | 2367 | 2100 |
| >PTEN-I135M TGVMICAY   | 166  | >PTEN-I135M TGVMMMCAY  | 181  | 15   |
| >PTEN-I135M RTGVMICAY  | 976  | >PTEN-I135M RTGVMMCA`  | 276  | 700  |
| >PTEN-I135M RTGVMICAY  | 828  | >PTEN-I135M RTGVMMCA`  | 114  | 714  |
| >PTEN-I135M RTGVMICAY  | 243  | >PTEN-I135M RTGVMMCA`  | 140  | 103  |
| >PTEN-I135M RTGVMICAYL | 398  | >PTEN-I135M RTGVMMCA`  | 508  | 110  |
| >PTEN-I135M RTGVMICAY  | 169  | >PTEN-I135M RTGVMMCA`  | 243  | 74   |
| >PTEN-I135M RTGVMICAYL | 114  | >PTEN-I135M RTGVMMCA`  | 125  | 11   |
| >PTEN-I135M RTGVMICAYL | 74   | >PTEN-I135M RTGVMMCA`  | 302  | 228  |
| >PTEN-I135M RTGVMICAY  | 228  | >PTEN-I135M RTGVMMCA`  | 62   | 166  |
| >PTEN-I135M RTGVMICAY  | 70   | >PTEN-I135M RTGVMMCA`  | 80   | 10   |
| >PTEN-I135M RTGVMICAY  | 13   | >PTEN-I135M RTGVMMCA`  | 8    | 5    |
| >PTEN-I135M RTGVMICAYL | 12   | >PTEN-I135M RTGVMMCA`  | 7    | 5    |
| >PTEN-I135M RTGVMICAYL | 14   | >PTEN-I135M RTGVMMCA`  | 10   | 4    |
| >PTEN-I135M RTGVMICAY  | 205  | >PTEN-I135M RTGVMMCA`  | 411  | 206  |
| >PTEN-I135M RTGVMICAYL | 438  | >PTEN-I135M RTGVMMCA`  | 592  | 154  |
| >PTEN-I135M RTGVMICAYL | 428  | >PTEN-I135M RTGVMMCA`  | 566  | 138  |
| >PTEN-I135M RTGVMICAYL | 90   | >PTEN-I135M RTGVMMCA`  | 99   | 9    |
| >PTEN-I135M RTGVMICAYL | 56   | >PTEN-I135M RTGVMMCA`  | 58   | 2    |
| >PTEN-I135M RTGVMICAY  | 378  | >PTEN-I135M RTGVMMCA`  | 144  | 234  |
| >PTEN-I135M RTGVMICAYL | 72   | >PTEN-I135M RTGVMMCA`  | 56   | 16   |
| >PTEN-I135M RTGVMICAYL | 235  | >PTEN-I135M RTGVMMCA`  | 121  | 114  |
| >PTEN-I135M RTGVMICAYL | 394  | >PTEN-I135M RTGVMMCA`  | 453  | 59   |
| >PTEN-I135M GRTGVMICA` | 113  | >PTEN-I135M GRTGVMMC   | 222  | 109  |
| >PTEN-I135M GRTGVMICA` | 258  | >PTEN-I135M GRTGVMMC   | 357  | 99   |
| >PTEN-I135M GRTGVMICA` | 334  | >PTEN-I135M GRTGVMMC   | 337  | 3    |
| >PTEN-I135M GRTGVMICA` | 78   | >PTEN-I135M GRTGVMMC   | 75   | 3    |
| >PTEN-I135M KGRTGVMII  | 29   | >PTEN-I135M KGRTGVMMI  | 68   | 39   |
| >PTEN-I135M KGRTGVMIC  | 365  | >PTEN-I135M KGRTGVMMI  | 490  | 125  |
| >PTEN-I135M KGRTGVMIC/ | 21   | >PTEN-I135M KGRTGVMMI  | 18   | 3    |

|                         |      |                         |      |      |
|-------------------------|------|-------------------------|------|------|
| >PTEN-I135N KGRTGVMIC/  | 38   | >PTEN-I135N KGRTGVMMMI  | 38   | 0    |
| >PTEN-I135N KGRTGVMIC/  | 314  | >PTEN-I135N KGRTGVMMMI  | 246  | 68   |
| >PTEN-I135N KGRTGVMIC/  | 165  | >PTEN-I135N KGRTGVMMMI  | 175  | 10   |
| >PTEN-I135N KGRTGVMIC/  | 174  | >PTEN-I135N KGRTGVMMMI  | 225  | 51   |
| >PTEN-I135N KGRTGVMII   | 2687 | >PTEN-I135N KGRTGVMMM   | 333  | 2354 |
| >PTEN-I135N KGRTGVMIC/  | 135  | >PTEN-I135N KGRTGVMMMI  | 76   | 59   |
| >PTEN-I135N KGRTGVMIC/  | 666  | >PTEN-I135N KGRTGVMMMI  | 357  | 309  |
| >PTEN-I135N GKGRGTGVMII | 308  | >PTEN-I135N GKGRGTGVMII | 89   | 219  |
| >PTEN-I135N AGKGRGTGVM  | 9394 | >PTEN-I135N AGKGRGTGVM  | 323  | 9071 |
| >PTEN-I135V ICAYLLHRGKI | 187  | >PTEN-I135V VCAYLLHRGK  | 311  | 124  |
| >PTEN-I135V ICAYLLHR    | 107  | >PTEN-I135V VCAYLLHR    | 325  | 218  |
| >PTEN-I135V MICAYLLHR   | 315  | >PTEN-I135V MVCAYLLHR   | 355  | 40   |
| >PTEN-I135V MICAYLLHRG  | 162  | >PTEN-I135V MVCAYLLHRG  | 185  | 23   |
| >PTEN-I135V MICAYLLH    | 299  | >PTEN-I135V MVCAYLLH    | 176  | 123  |
| >PTEN-I135V MICAYLLHR   | 89   | >PTEN-I135V MVCAYLLHR   | 52   | 37   |
| >PTEN-I135V MICAYLLHRG  | 49   | >PTEN-I135V MVCAYLLHRG  | 43   | 6    |
| >PTEN-I135V MICAYLLH    | 561  | >PTEN-I135V MVCAYLLH    | 316  | 245  |
| >PTEN-I135V MICAYLLHRG  | 77   | >PTEN-I135V MVCAYLLHRG  | 28   | 49   |
| >PTEN-I135V MICAYLLHR   | 11   | >PTEN-I135V MVCAYLLHR   | 10   | 1    |
| >PTEN-I135V MICAYLLHRG  | 473  | >PTEN-I135V MVCAYLLHRG  | 228  | 245  |
| >PTEN-I135V MICAYLLHR   | 45   | >PTEN-I135V MVCAYLLHR   | 39   | 6    |
| >PTEN-I135V MICAYLLHR   | 28   | >PTEN-I135V MVCAYLLHR   | 16   | 12   |
| >PTEN-I135V MICAYLLHRG  | 124  | >PTEN-I135V MVCAYLLHRG  | 48   | 76   |
| >PTEN-I135V MICAYLLHR   | 28   | >PTEN-I135V MVCAYLLHR   | 65   | 37   |
| >PTEN-I135V KAGKGRGTGVI | 135  | >PTEN-I135V KAGKGRGTGVI | 5216 | 5081 |
| >PTEN-I135V VMICAYLL    | 248  | >PTEN-I135V VMVCAYLL    | 468  | 220  |
| >PTEN-I135V VMICAYLL    | 15   | >PTEN-I135V VMVCAYLL    | 35   | 20   |
| >PTEN-I135V VMICAYLL    | 9    | >PTEN-I135V VMVCAYLL    | 13   | 4    |
| >PTEN-I135V VMICAYLL    | 27   | >PTEN-I135V VMVCAYLL    | 53   | 26   |
| >PTEN-I135V VMICAYLL    | 39   | >PTEN-I135V VMVCAYLL    | 56   | 17   |
| >PTEN-I135V VMICAYLL    | 10   | >PTEN-I135V VMVCAYLL    | 13   | 3    |
| >PTEN-I135V VMICAYLL    | 6    | >PTEN-I135V VMVCAYLL    | 12   | 6    |
| >PTEN-I135V VMICAYLL    | 58   | >PTEN-I135V VMVCAYLL    | 73   | 15   |
| >PTEN-I135V VMICAYLL    | 136  | >PTEN-I135V VMVCAYLL    | 145  | 9    |
| >PTEN-I135V VMICAYLL    | 16   | >PTEN-I135V VMVCAYLL    | 18   | 2    |
| >PTEN-I135V VMICAYLLHR  | 166  | >PTEN-I135V VMVCAYLLHI  | 281  | 115  |
| >PTEN-I135V VMICAYLLHR  | 52   | >PTEN-I135V VMVCAYLLHI  | 120  | 68   |
| >PTEN-I135V VMICAYLL    | 100  | >PTEN-I135V VMVCAYLL    | 182  | 82   |
| >PTEN-I135V VMICAYLLH   | 46   | >PTEN-I135V VMVCAYLLH   | 88   | 42   |
| >PTEN-I135V VMICAYLLHR  | 44   | >PTEN-I135V VMVCAYLLHI  | 93   | 49   |
| >PTEN-I135V VMICAYLLHR  | 237  | >PTEN-I135V VMVCAYLLHI  | 439  | 202  |
| >PTEN-I135V VMICAYLLHR  | 119  | >PTEN-I135V VMVCAYLLHI  | 269  | 150  |
| >PTEN-I135V VMICAYLL    | 126  | >PTEN-I135V VMVCAYLL    | 172  | 46   |

|                        |     |                        |     |     |
|------------------------|-----|------------------------|-----|-----|
| >PTEN-I135V VMICAYLLHR | 434 | >PTEN-I135V VMVCAYLLHI | 616 | 182 |
| >PTEN-I135V VMICAYLLHR | 70  | >PTEN-I135V VMVCAYLLHI | 60  | 10  |
| >PTEN-I135V VMICAYLLHR | 58  | >PTEN-I135V VMVCAYLLHI | 45  | 13  |
| >PTEN-I135V GVMICAYL   | 66  | >PTEN-I135V GVMVCAYL   | 66  | 0   |
| >PTEN-I135V GVMICAYLL  | 57  | >PTEN-I135V GVMVCAYLL  | 49  | 8   |
| >PTEN-I135V GVMICAYL   | 20  | >PTEN-I135V GVMVCAYL   | 21  | 1   |
| >PTEN-I135V GVMICAYLL  | 18  | >PTEN-I135V GVMVCAYLL  | 16  | 2   |
| >PTEN-I135V GVMICAYL   | 260 | >PTEN-I135V GVMVCAYL   | 348 | 88  |
| >PTEN-I135V GVMICAYL   | 51  | >PTEN-I135V GVMVCAYL   | 42  | 9   |
| >PTEN-I135V GVMICAYLL  | 112 | >PTEN-I135V GVMVCAYLL  | 86  | 26  |
| >PTEN-I135V GVMICAYL   | 346 | >PTEN-I135V GVMVCAYL   | 237 | 109 |
| >PTEN-I135V GVMICAYLL  | 327 | >PTEN-I135V GVMVCAYLL  | 196 | 131 |
| >PTEN-I135V GVMICAYL   | 403 | >PTEN-I135V GVMVCAYL   | 256 | 147 |
| >PTEN-I135V GVMICAYLLH | 52  | >PTEN-I135V GVMVCAYLLI | 45  | 7   |
| >PTEN-I135V GVMICAYLLH | 38  | >PTEN-I135V GVMVCAYLLI | 32  | 6   |
| >PTEN-I135V GVMICAYLLH | 177 | >PTEN-I135V GVMVCAYLLI | 147 | 30  |
| >PTEN-I135V GVMICAYL   | 485 | >PTEN-I135V GVMVCAYL   | 513 | 28  |
| >PTEN-I135V GVMICAYLL  | 222 | >PTEN-I135V GVMVCAYLL  | 166 | 56  |
| >PTEN-I135V GVMICAYLLH | 198 | >PTEN-I135V GVMVCAYLLI | 240 | 42  |
| >PTEN-I135V GVMICAYLLH | 132 | >PTEN-I135V GVMVCAYLLI | 279 | 147 |
| >PTEN-I135V TGVMICAYL  | 267 | >PTEN-I135V TGVMVCAYL  | 563 | 296 |
| >PTEN-I135V TGVMICAY   | 714 | >PTEN-I135V TGVMVCAY   | 451 | 263 |
| >PTEN-I135V TGVMICAY   | 166 | >PTEN-I135V TGVMVCAY   | 186 | 20  |
| >PTEN-I135V RTGVMICAY  | 243 | >PTEN-I135V RTGVMVCAY  | 370 | 127 |
| >PTEN-I135V RTGVMICAYL | 398 | >PTEN-I135V RTGVMVCAY  | 372 | 26  |
| >PTEN-I135V RTGVMICAY  | 169 | >PTEN-I135V RTGVMVCAY  | 72  | 97  |
| >PTEN-I135V RTGVMICAYL | 114 | >PTEN-I135V RTGVMVCAY  | 79  | 35  |
| >PTEN-I135V RTGVMICAYL | 74  | >PTEN-I135V RTGVMVCAY  | 87  | 13  |
| >PTEN-I135V RTGVMICAY  | 228 | >PTEN-I135V RTGVMVCAY  | 163 | 65  |
| >PTEN-I135V RTGVMICAY  | 70  | >PTEN-I135V RTGVMVCAY  | 55  | 15  |
| >PTEN-I135V RTGVMICAY  | 13  | >PTEN-I135V RTGVMVCAY  | 9   | 4   |
| >PTEN-I135V RTGVMICAYL | 12  | >PTEN-I135V RTGVMVCAY  | 12  | 0   |
| >PTEN-I135V RTGVMICAYL | 14  | >PTEN-I135V RTGVMVCAY  | 13  | 1   |
| >PTEN-I135V RTGVMICAY  | 205 | >PTEN-I135V RTGVMVCAY  | 96  | 109 |
| >PTEN-I135V RTGVMICAYL | 438 | >PTEN-I135V RTGVMVCAY  | 185 | 253 |
| >PTEN-I135V RTGVMICAYL | 428 | >PTEN-I135V RTGVMVCAY  | 235 | 193 |
| >PTEN-I135V RTGVMICAYL | 90  | >PTEN-I135V RTGVMVCAY  | 114 | 24  |
| >PTEN-I135V RTGVMICAYL | 56  | >PTEN-I135V RTGVMVCAY  | 79  | 23  |
| >PTEN-I135V RTGVMICAY  | 378 | >PTEN-I135V RTGVMVCAY  | 340 | 38  |
| >PTEN-I135V RTGVMICAYL | 72  | >PTEN-I135V RTGVMVCAY  | 89  | 17  |
| >PTEN-I135V RTGVMICAYL | 235 | >PTEN-I135V RTGVMVCAY  | 217 | 18  |
| >PTEN-I135V RTGVMICAYL | 394 | >PTEN-I135V RTGVMVCAY  | 481 | 87  |
| >PTEN-I135V GRTGVMICA' | 113 | >PTEN-I135V GRTGVMVCA  | 119 | 6   |

|                        |      |                        |      |      |
|------------------------|------|------------------------|------|------|
| >PTEN-I135V GRTGVMICA' | 258  | >PTEN-I135V GRTGVMVCA  | 292  | 34   |
| >PTEN-I135V GRTGVMICA' | 334  | >PTEN-I135V GRTGVMVCA  | 362  | 28   |
| >PTEN-I135V GRTGVMICA' | 78   | >PTEN-I135V GRTGVMVCA  | 92   | 14   |
| >PTEN-I135V KGRTGVMII  | 29   | >PTEN-I135V KGRTGVMIV  | 45   | 16   |
| >PTEN-I135V KGRTGVMIC  | 365  | >PTEN-I135V KGRTGVMIVC | 433  | 68   |
| >PTEN-I135V KGRTGVMIC/ | 21   | >PTEN-I135V KGRTGVMIVC | 42   | 21   |
| >PTEN-I135V KGRTGVMIC/ | 38   | >PTEN-I135V KGRTGVMIVC | 40   | 2    |
| >PTEN-I135V KGRTGVMIC/ | 314  | >PTEN-I135V KGRTGVMIVC | 392  | 78   |
| >PTEN-I135V KGRTGVMIC/ | 165  | >PTEN-I135V KGRTGVMIVC | 109  | 56   |
| >PTEN-I135V KGRTGVMIC/ | 174  | >PTEN-I135V KGRTGVMIVC | 138  | 36   |
| >PTEN-I135V KGRTGVMIC/ | 135  | >PTEN-I135V KGRTGVMIVC | 106  | 29   |
| >PTEN-I135V GKRTGVMII  | 308  | >PTEN-I135V GKRTGVMIV  | 502  | 194  |
| >PTEN-I168F IPSQRRYVYY | 288  | >PTEN-I168F FPSQRRYVYY | 87   | 201  |
| >PTEN-I168F IPSQRRYVY  | 183  | >PTEN-I168F FPSQRRYVY  | 924  | 741  |
| >PTEN-I168F IPSQRRYVYY | 123  | >PTEN-I168F FPSQRRYVYY | 656  | 533  |
| >PTEN-I168F IPSQRRYV   | 22   | >PTEN-I168F FPSQRRYV   | 20   | 2    |
| >PTEN-I168F IPSQRRYVY  | 165  | >PTEN-I168F FPSQRRYVY  | 133  | 32   |
| >PTEN-I168F IPSQRRYV   | 1066 | >PTEN-I168F FPSQRRYV   | 196  | 870  |
| >PTEN-I168F IPSQRRYVY  | 1412 | >PTEN-I168F FPSQRRYVY  | 168  | 1244 |
| >PTEN-I168F IPSQRRYVY  | 16   | >PTEN-I168F FPSQRRYVY  | 8    | 8    |
| >PTEN-I168F IPSQRRYVYY | 1086 | >PTEN-I168F FPSQRRYVYY | 55   | 1031 |
| >PTEN-I168F IPSQRRYVYY | 27   | >PTEN-I168F FPSQRRYVYY | 10   | 17   |
| >PTEN-I168F IPSQRRYVY  | 74   | >PTEN-I168F FPSQRRYVY  | 23   | 51   |
| >PTEN-I168F IPSQRRYVYY | 985  | >PTEN-I168F FPSQRRYVYY | 126  | 859  |
| >PTEN-I168F IPSQRRYVYY | 31   | >PTEN-I168F FPSQRRYVYY | 13   | 18   |
| >PTEN-I168F IPSQRRYV   | 2798 | >PTEN-I168F FPSQRRYV   | 135  | 2663 |
| >PTEN-I168F IPSQRRYVY  | 5843 | >PTEN-I168F FPSQRRYVY  | 167  | 5676 |
| >PTEN-I168F IPSQRRYVY  | 7    | >PTEN-I168F FPSQRRYVY  | 8    | 1    |
| >PTEN-I168F IPSQRRYVYY | 33   | >PTEN-I168F FPSQRRYVYY | 26   | 7    |
| >PTEN-I168F IPSQRRYVYY | 12   | >PTEN-I168F FPSQRRYVYY | 11   | 1    |
| >PTEN-I168F IPSQRRYVY  | 1416 | >PTEN-I168F FPSQRRYVY  | 191  | 1225 |
| >PTEN-I168F IPSQRRYVYY | 262  | >PTEN-I168F FPSQRRYVYY | 51   | 211  |
| >PTEN-I168F IPSQRRYVYY | 518  | >PTEN-I168F FPSQRRYVYY | 87   | 431  |
| >PTEN-I168F TIPSQRRYV  | 225  | >PTEN-I168F TFPSQRRYV  | 9553 | 9328 |
| >PTEN-I168F TIPSQRRY   | 437  | >PTEN-I168F TFPSQRRY   | 7114 | 6677 |
| >PTEN-I168F TIPSQRRYVY | 290  | >PTEN-I168F TFPSQRRYVY | 6816 | 6526 |
| >PTEN-I168F TIPSQRRY   | 1590 | >PTEN-I168F TFPSQRRY   | 271  | 1319 |
| >PTEN-I168F TIPSQRRYVY | 746  | >PTEN-I168F TFPSQRRYVY | 83   | 663  |
| >PTEN-I168F TIPSQRRYVY | 238  | >PTEN-I168F TFPSQRRYVY | 61   | 177  |
| >PTEN-I168F TIPSQRRYV  | 67   | >PTEN-I168F TFPSQRRYV  | 5901 | 5834 |
| >PTEN-I168F VRTRDKKGV  | 873  | >PTEN-I168F VRTRDKKGV  | 68   | 805  |
| >PTEN-I168F VTIPSQRRYV | 563  | >PTEN-I168F VTFPSQRRYV | 309  | 254  |
| >PTEN-I168F VTIPSQRRYV | 249  | >PTEN-I168F VTFPSQRRYV | 32   | 217  |

|                         |      |                        |      |      |
|-------------------------|------|------------------------|------|------|
| >PTEN-I168F VTIPSQRRYV  | 286  | >PTEN-I168F VTFPSQRRYV | 78   | 208  |
| >PTEN-I168F VTIPSQRRY   | 4835 | >PTEN-I168F VTFPSQRRY  | 410  | 4425 |
| >PTEN-I168F VTIPSQRR    | 608  | >PTEN-I168F VTFPSQRR   | 125  | 483  |
| >PTEN-I168F VTIPSQRRY   | 1876 | >PTEN-I168F VTFPSQRRY  | 496  | 1380 |
| >PTEN-I168F VTIPSQRRYV' | 284  | >PTEN-I168F VTFPSQRRYV | 92   | 192  |
| >PTEN-I168F VTIPSQRRY   | 26   | >PTEN-I168F VTFPSQRRY  | 2818 | 2792 |
| >PTEN-I168F VTIPSQRRYV' | 38   | >PTEN-I168F VTFPSQRRYV | 2695 | 2657 |
| >PTEN-I168F VTIPSQRRY   | 59   | >PTEN-I168F VTFPSQRRY  | 73   | 14   |
| >PTEN-I168F VTIPSQRRYV' | 26   | >PTEN-I168F VTFPSQRRYV | 28   | 2    |
| >PTEN-I168F VTIPSQRRYV  | 1911 | >PTEN-I168F VTFPSQRRYV | 307  | 1604 |
| >PTEN-I168F VTIPSQRRY   | 41   | >PTEN-I168F VTFPSQRRY  | 28   | 13   |
| >PTEN-I168F VTIPSQRRYV' | 16   | >PTEN-I168F VTFPSQRRYV | 12   | 4    |
| >PTEN-I168F VTIPSQRR    | 135  | >PTEN-I168F VTFPSQRR   | 33   | 102  |
| >PTEN-I168F VTIPSQRR    | 1245 | >PTEN-I168F VTFPSQRR   | 428  | 817  |
| >PTEN-I168F VTIPSQRR    | 65   | >PTEN-I168F VTFPSQRR   | 25   | 40   |
| >PTEN-I168F VTIPSQRRYV' | 906  | >PTEN-I168F VTFPSQRRYV | 277  | 629  |
| >PTEN-I168F VTIPSQRRYV  | 225  | >PTEN-I168F VTFPSQRRYV | 135  | 90   |
| >PTEN-I168F VTIPSQRRYV' | 579  | >PTEN-I168F VTFPSQRRYV | 425  | 154  |
| >PTEN-I168F VTIPSQRRY   | 399  | >PTEN-I168F VTFPSQRRY  | 290  | 109  |
| >PTEN-I168F VTIPSQRRYV' | 109  | >PTEN-I168F VTFPSQRRYV | 93   | 16   |
| >PTEN-I168F VTIPSQRRY   | 706  | >PTEN-I168F VTFPSQRRY  | 113  | 593  |
| >PTEN-I168F VTIPSQRRYV' | 205  | >PTEN-I168F VTFPSQRRYV | 38   | 167  |
| >PTEN-I168F VTIPSQRR    | 677  | >PTEN-I168F VTFPSQRR   | 304  | 373  |
| >PTEN-I168F VTIPSQRRY   | 3    | >PTEN-I168F VTFPSQRRY  | 2    | 1    |
| >PTEN-I168F VTIPSQRRYV  | 124  | >PTEN-I168F VTFPSQRRYV | 91   | 33   |
| >PTEN-I168F VTIPSQRRYV' | 4    | >PTEN-I168F VTFPSQRRYV | 3    | 1    |
| >PTEN-I168F VTIPSQRRY   | 81   | >PTEN-I168F VTFPSQRRY  | 49   | 32   |
| >PTEN-I168F VTIPSQRRYV' | 111  | >PTEN-I168F VTFPSQRRYV | 61   | 50   |
| >PTEN-I168F VTIPSQRRY   | 122  | >PTEN-I168F VTFPSQRRY  | 189  | 67   |
| >PTEN-I168F VTIPSQRRYV' | 76   | >PTEN-I168F VTFPSQRRYV | 102  | 26   |
| >PTEN-I168F VTIPSQRRYV  | 616  | >PTEN-I168F VTFPSQRRYV | 361  | 255  |
| >PTEN-I168F VTIPSQRRY   | 37   | >PTEN-I168F VTFPSQRRY  | 7    | 30   |
| >PTEN-I168F VTIPSQRRYV' | 37   | >PTEN-I168F VTFPSQRRYV | 7    | 30   |
| >PTEN-I168F VTIPSQRRYV' | 256  | >PTEN-I168F VTFPSQRRYV | 282  | 26   |
| >PTEN-I168F VTIPSQRRY   | 2526 | >PTEN-I168F VTFPSQRRY  | 480  | 2046 |
| >PTEN-I168F VTIPSQRRYV' | 817  | >PTEN-I168F VTFPSQRRYV | 198  | 619  |
| >PTEN-I168F VTIPSQRR    | 925  | >PTEN-I168F VTFPSQRR   | 307  | 618  |
| >PTEN-I168F GVTIPSQRRY' | 123  | >PTEN-I168F GVTIPSQRRY | 209  | 86   |
| >PTEN-I168F GVTIPSQR    | 1062 | >PTEN-I168F GVTIPSQR   | 351  | 711  |
| >PTEN-I168F GVTIPSQR    | 457  | >PTEN-I168F GVTIPSQR   | 378  | 79   |
| >PTEN-I168F GVTIPSQR    | 210  | >PTEN-I168F GVTIPSQR   | 116  | 94   |
| >PTEN-I168F GVTIPSQRR   | 1034 | >PTEN-I168F GVTIPSQRR  | 442  | 592  |
| >PTEN-I168F GVTIPSQRRY  | 1919 | >PTEN-I168F GVTIPSQRRY | 498  | 1421 |

|                         |      |                         |       |       |
|-------------------------|------|-------------------------|-------|-------|
| >PTEN-I168F GVTIPSQRRY  | 172  | >PTEN-I168F GVTFPSQRRY  | 439   | 267   |
| >PTEN-I168F GVTIPSQRRY  | 553  | >PTEN-I168F GVTFPSQRRY  | 476   | 77    |
| >PTEN-I168F KGV TIPSQRR | 155  | >PTEN-I168F KGVTFPSQRF  | 215   | 60    |
| >PTEN-I168F KGV TIPSQR  | 208  | >PTEN-I168F KGVTFPSQR   | 180   | 28    |
| >PTEN-I168F KGV TIPSQRR | 202  | >PTEN-I168F KGVTFPSQRF  | 136   | 66    |
| >PTEN-I168F KGV TIPSQRR | 227  | >PTEN-I168F KGVTFPSQRF  | 244   | 17    |
| >PTEN-I168F KGV TIPSQR  | 147  | >PTEN-I168F KGVTFPSQR   | 47    | 100   |
| >PTEN-I168F KGV TIPSQRR | 120  | >PTEN-I168F KGVTFPSQRF  | 58    | 62    |
| >PTEN-I168F KKGVTIPSQR  | 982  | >PTEN-I168F KKGVTFPSQR  | 490   | 492   |
| >PTEN-I168F KKGVTIPSQR  | 609  | >PTEN-I168F KKGVTFPSQR  | 223   | 386   |
| >PTEN-I168F KKGVTIPSQR  | 511  | >PTEN-I168F KKGVTFPSQR  | 284   | 227   |
| >PTEN-I168F DKKGV TIPSQ | 497  | >PTEN-I168F DKKGVTFPSC  | 323   | 174   |
| >PTEN-I168F DKKGV TIPSQ | 635  | >PTEN-I168F DKKGVTFPSC  | 417   | 218   |
| >PTEN-I168F RD KKGVTI   | 4249 | >PTEN-I168F RD KKGVTF   | 113   | 4136  |
| >PTEN-I168F RD KKGVTI   | 179  | >PTEN-I168F RD KKGVTF   | 10376 | 10197 |
| >PTEN-I168F RTRD KKGVTI | 5    | >PTEN-I168F RTRD KKGVTF | 33    | 28    |
| >PTEN-I168F RTRD KKGVTI | 103  | >PTEN-I168F RTRD KKGVTF | 23    | 80    |
| >PTEN-I168F RTRD KKGVTI | 120  | >PTEN-I168F RTRD KKGVTF | 97    | 23    |
| >PTEN-I168F RTRD KKGVTI | 4691 | >PTEN-I168F RTRD KKGVTF | 114   | 4577  |
| >PTEN-I168F RTRD KKGVTI | 2150 | >PTEN-I168F RTRD KKGVTF | 88    | 2062  |
| >PTEN-I168F RTRD KKGVTI | 5    | >PTEN-I168F RTRD KKGVTF | 3     | 2     |
| >PTEN-I168F RTRD KKGVTI | 6081 | >PTEN-I168F RTRD KKGVTF | 283   | 5798  |
| >PTEN-I168F RTRD KKGVTI | 100  | >PTEN-I168F RTRD KKGVTF | 21    | 79    |
| >PTEN-I253N IKVEFFHK    | 1021 | >PTEN-I253N NKVEFFHK    | 458   | 563   |
| >PTEN-I253N IKVEFFHK    | 330  | >PTEN-I253N NKVEFFHK    | 2741  | 2411  |
| >PTEN-I253N IKVEFFHKQN  | 265  | >PTEN-I253N NKVEFFHKQN  | 2261  | 1996  |
| >PTEN-I253N FPQPLVCGE   | 95   | >PTEN-I253N FPQPLVCGE   | 22701 | 22606 |
| >PTEN-I253N FPQPLVCGE   | 360  | >PTEN-I253N FPQPLVCGE   | 15636 | 15276 |
| >PTEN-I253N FPQPLVCGE   | 419  | >PTEN-I253N FPQPLVCGE   | 17955 | 17536 |
| >PTEN-I253N PVC GDIKV   | 466  | >PTEN-I253N PVC GDNKV   | 1871  | 1405  |
| >PTEN-I253N PVC GDIKVEF | 395  | >PTEN-I253N PVC GDNKVEI | 1147  | 752   |
| >PTEN-I253N PVC GDIKVEF | 21   | >PTEN-I253N PVC GDNKVEI | 41    | 20    |
| >PTEN-I253N LPVCGDIKVEI | 35   | >PTEN-I253N LPVCGDNKVEI | 33    | 2     |
| >PTEN-I253N LPVCGDIKVEI | 484  | >PTEN-I253N LPVCGDNKVEI | 283   | 201   |
| >PTEN-I253N LPVCGDIKVEI | 630  | >PTEN-I253N LPVCGDNKVEI | 481   | 149   |
| >PTEN-I253N LPVCGDIKVEI | 9    | >PTEN-I253N LPVCGDNKVEI | 11    | 2     |
| >PTEN-I253N LPVCGDIKVEI | 26   | >PTEN-I253N LPVCGDNKVEI | 41    | 15    |
| >PTEN-I253N LPVCGDIK    | 306  | >PTEN-I253N LPVCGDNK    | 769   | 463   |
| >PTEN-I253N LPVCGDIKVEI | 499  | >PTEN-I253N LPVCGDNKVEI | 809   | 310   |
| >PTEN-I253N LPVCGDIKVEI | 18   | >PTEN-I253N LPVCGDNKVEI | 28    | 10    |
| >PTEN-I253N PLPVC GDIKV | 176  | >PTEN-I253N PLPVC GDNKV | 372   | 196   |
| >PTEN-I253N PLPVC GDIKV | 46   | >PTEN-I253N PLPVC GDNKV | 64    | 18    |
| >PTEN-I33S-r IAMGFPAERL | 65   | >PTEN-I33S-r SAMGFPAERL | 56    | 9     |

|                         |      |                         |       |       |
|-------------------------|------|-------------------------|-------|-------|
| >PTEN-I33S-v IAMGFPAERL | 643  | >PTEN-I33S-r SAMGFPAERL | 495   | 148   |
| >PTEN-I33S-v IAMGFPAERL | 445  | >PTEN-I33S-r SAMGFPAERL | 417   | 28    |
| >PTEN-I33S-v IAMGFPAER  | 222  | >PTEN-I33S-r SAMGFPAER  | 54    | 168   |
| >PTEN-I33S-v IAMGFPAER  | 32   | >PTEN-I33S-r SAMGFPAER  | 28    | 4     |
| >PTEN-I33S-v IAMGFPAER  | 58   | >PTEN-I33S-r SAMGFPAER  | 184   | 126   |
| >PTEN-I33S-v IAMGFPAER  | 8    | >PTEN-I33S-r SAMGFPAER  | 9     | 1     |
| >PTEN-I33S-v IAMGFPAERL | 676  | >PTEN-I33S-r SAMGFPAERL | 186   | 490   |
| >PTEN-I33S-v IAMGFPAERL | 2200 | >PTEN-I33S-r SAMGFPAERL | 256   | 1944  |
| >PTEN-I33S-v IAMGFPAERL | 19   | >PTEN-I33S-r SAMGFPAERL | 84    | 65    |
| >PTEN-I33S-v IAMGFPAERL | 332  | >PTEN-I33S-r SAMGFPAERL | 2497  | 2165  |
| >PTEN-I33S-v IAMGFPAERL | 476  | >PTEN-I33S-r SAMGFPAERL | 4644  | 4168  |
| >PTEN-I33S-v IAMGFPAER  | 1098 | >PTEN-I33S-r SAMGFPAER  | 251   | 847   |
| >PTEN-I33S-v IAMGFPAER  | 268  | >PTEN-I33S-r SAMGFPAER  | 316   | 48    |
| >PTEN-I33S-v IIAMGFPA   | 369  | >PTEN-I33S-r ISAMGFPA   | 8315  | 7946  |
| >PTEN-I33S-v IIAMGFPA   | 311  | >PTEN-I33S-r ISAMGFPA   | 3580  | 3269  |
| >PTEN-I33S-v IIAMGFPAER | 200  | >PTEN-I33S-r ISAMGFPAER | 3475  | 3275  |
| >PTEN-I33S-v IIAMGFPA   | 65   | >PTEN-I33S-r ISAMGFPA   | 4188  | 4123  |
| >PTEN-I33S-v IIAMGFPA   | 35   | >PTEN-I33S-r ISAMGFPA   | 528   | 493   |
| >PTEN-I33S-v IIAMGFPAER | 213  | >PTEN-I33S-r ISAMGFPAER | 2584  | 2371  |
| >PTEN-I33S-v IIAMGFPAER | 471  | >PTEN-I33S-r ISAMGFPAER | 13420 | 12949 |
| >PTEN-I33S-v IIAMGFPA   | 206  | >PTEN-I33S-r ISAMGFPA   | 26291 | 26085 |
| >PTEN-I33S-v IIAMGFPAER | 73   | >PTEN-I33S-r ISAMGFPAER | 20017 | 19944 |
| >PTEN-I33S-v IIAMGFPAER | 535  | >PTEN-I33S-r ISAMGFPAER | 408   | 127   |
| >PTEN-I33S-v IIAMGFPAER | 83   | >PTEN-I33S-r ISAMGFPAER | 55    | 28    |
| >PTEN-I33S-v IIAMGFPAER | 468  | >PTEN-I33S-r ISAMGFPAER | 1287  | 819   |
| >PTEN-I33S-v IIAMGFPAER | 12   | >PTEN-I33S-r ISAMGFPAER | 13    | 1     |
| >PTEN-I33S-v IIAMGFPAER | 2838 | >PTEN-I33S-r ISAMGFPAER | 9     | 2829  |
| >PTEN-I33S-v IIAMGFPAER | 6919 | >PTEN-I33S-r ISAMGFPAER | 157   | 6762  |
| >PTEN-I33S-v IIAMGFPAER | 1436 | >PTEN-I33S-r ISAMGFPAER | 75    | 1361  |
| >PTEN-I33S-v IIAMGFPAER | 2958 | >PTEN-I33S-r ISAMGFPAER | 286   | 2672  |
| >PTEN-I33S-v IIAMGFPAER | 273  | >PTEN-I33S-r ISAMGFPAER | 1664  | 1391  |
| >PTEN-I33S-v LDLYIYPNII | 90   | >PTEN-I33S-r LDLYIYPNIS | 18829 | 18739 |
| >PTEN-I33S-v LDLYIYPNII | 52   | >PTEN-I33S-r LDLYIYPNIS | 11632 | 11580 |
| >PTEN-I33S-v LDLYIYPNII | 27   | >PTEN-I33S-r LDLYIYPNIS | 4560  | 4533  |
| >PTEN-I33S-v NIIAMGFPA  | 391  | >PTEN-I33S-r NISAMGFPA  | 186   | 205   |
| >PTEN-I33S-v NIIAMGFPA  | 162  | >PTEN-I33S-r NISAMGFPA  | 220   | 58    |
| >PTEN-I33S-v NIIAMGFPA  | 32   | >PTEN-I33S-r NISAMGFPA  | 163   | 131   |
| >PTEN-I33S-v NIIAMGFPAE | 150  | >PTEN-I33S-r NISAMGFPAE | 209   | 59    |
| >PTEN-I33S-v NIIAMGFPAE | 115  | >PTEN-I33S-r NISAMGFPAE | 170   | 55    |
| >PTEN-I33S-v NIIAMGFPAE | 8    | >PTEN-I33S-r NISAMGFPAE | 14    | 6     |
| >PTEN-I33S-v NIIAMGFPA  | 28   | >PTEN-I33S-r NISAMGFPA  | 56    | 28    |
| >PTEN-I33S-v NIIAMGFPA  | 154  | >PTEN-I33S-r NISAMGFPA  | 525   | 371   |
| >PTEN-I33S-v NIIAMGFPAE | 235  | >PTEN-I33S-r NISAMGFPAE | 282   | 47    |



|                                   |      |                         |     |      |
|-----------------------------------|------|-------------------------|-----|------|
| >PTEN-I33S- $\lambda$ YPNIIAMGF   | 281  | >PTEN-I33S-r YPNISAMGF  | 94  | 187  |
| >PTEN-I33S- $\lambda$ YPNIIAMGFP  | 91   | >PTEN-I33S-r YPNISAMGFF | 53  | 38   |
| >PTEN-I33S- $\lambda$ YPNIIAMGF   | 640  | >PTEN-I33S-r YPNISAMGF  | 92  | 548  |
| >PTEN-I33S- $\lambda$ YPNIIAMGF   | 3692 | >PTEN-I33S-r YPNISAMGF  | 448 | 3244 |
| >PTEN-I33S- $\lambda$ YPNIIAMGF   | 11   | >PTEN-I33S-r YPNISAMGF  | 13  | 2    |
| >PTEN-I33S- $\lambda$ YPNIIAMGFP  | 37   | >PTEN-I33S-r YPNISAMGFF | 43  | 6    |
| >PTEN-I33S- $\lambda$ YPNIIAMGF   | 82   | >PTEN-I33S-r YPNISAMGF  | 88  | 6    |
| >PTEN-I33S- $\lambda$ YPNIIAMG    | 328  | >PTEN-I33S-r YPNISAMG   | 769 | 441  |
| >PTEN-I33S- $\lambda$ YPNIIAMGFP  | 6    | >PTEN-I33S-r YPNISAMGFF | 9   | 3    |
| >PTEN-I33S- $\lambda$ YPNIIAMGF   | 102  | >PTEN-I33S-r YPNISAMGF  | 236 | 134  |
| >PTEN-I33S- $\lambda$ IYPNIIAMGF  | 80   | >PTEN-I33S-r IYPNISAMGF | 52  | 28   |
| >PTEN-I33S- $\lambda$ IYPNIIAM    | 522  | >PTEN-I33S-r IYPNISAM   | 399 | 123  |
| >PTEN-I33S- $\lambda$ IYPNIIAMGF  | 49   | >PTEN-I33S-r IYPNISAMGF | 38  | 11   |
| >PTEN-I33S- $\lambda$ IYPNIIAM    | 32   | >PTEN-I33S-r IYPNISAM   | 46  | 14   |
| >PTEN-I33S- $\lambda$ IYPNIIAMGF  | 4    | >PTEN-I33S-r IYPNISAMGF | 5   | 1    |
| >PTEN-I33S- $\lambda$ IYPNIIAMGF  | 56   | >PTEN-I33S-r IYPNISAMGF | 93  | 37   |
| >PTEN-I33S- $\lambda$ IYPNIIAM    | 288  | >PTEN-I33S-r IYPNISAM   | 496 | 208  |
| >PTEN-I33S- $\lambda$ IYPNIIAMGF  | 408  | >PTEN-I33S-r IYPNISAMGF | 896 | 488  |
| >PTEN-I33S- $\lambda$ YIYPNIIAM   | 226  | >PTEN-I33S-r YIYPNISAM  | 329 | 103  |
| >PTEN-I33S- $\lambda$ YIYPNIIAM   | 163  | >PTEN-I33S-r YIYPNISAM  | 128 | 35   |
| >PTEN-I33S- $\lambda$ YIYPNIIAMGF | 561  | >PTEN-I33S-r YIYPNISAMG | 491 | 70   |
| >PTEN-I33S- $\lambda$ YIYPNIIA    | 75   | >PTEN-I33S-r YIYPNISA   | 37  | 38   |
| >PTEN-I33S- $\lambda$ YIYPNIIAM   | 35   | >PTEN-I33S-r YIYPNISAM  | 94  | 59   |
| >PTEN-I33S- $\lambda$ YIYPNIIA    | 345  | >PTEN-I33S-r YIYPNISA   | 108 | 237  |
| >PTEN-I33S- $\lambda$ YIYPNIIAM   | 172  | >PTEN-I33S-r YIYPNISAM  | 100 | 72   |
| >PTEN-I33S- $\lambda$ YIYPNIIA    | 25   | >PTEN-I33S-r YIYPNISA   | 10  | 15   |
| >PTEN-I33S- $\lambda$ YIYPNIIAM   | 29   | >PTEN-I33S-r YIYPNISAM  | 9   | 20   |
| >PTEN-I33S- $\lambda$ YIYPNIIAMGF | 464  | >PTEN-I33S-r YIYPNISAMG | 260 | 204  |
| >PTEN-I33S- $\lambda$ YIYPNIIA    | 21   | >PTEN-I33S-r YIYPNISA   | 10  | 11   |
| >PTEN-I33S- $\lambda$ YIYPNIIAM   | 8    | >PTEN-I33S-r YIYPNISAM  | 12  | 4    |
| >PTEN-I33S- $\lambda$ YIYPNIIAMGF | 31   | >PTEN-I33S-r YIYPNISAMG | 31  | 0    |
| >PTEN-I33S- $\lambda$ YIYPNIIA    | 17   | >PTEN-I33S-r YIYPNISA   | 5   | 12   |
| >PTEN-I33S- $\lambda$ YIYPNIIAM   | 4    | >PTEN-I33S-r YIYPNISAM  | 5   | 1    |
| >PTEN-I33S- $\lambda$ YIYPNIIAMG  | 49   | >PTEN-I33S-r YIYPNISAMG | 127 | 78   |
| >PTEN-I33S- $\lambda$ YIYPNIIAMGF | 73   | >PTEN-I33S-r YIYPNISAMG | 100 | 27   |
| >PTEN-I33S- $\lambda$ YIYPNIIA    | 129  | >PTEN-I33S-r YIYPNISA   | 68  | 61   |
| >PTEN-I33S- $\lambda$ YIYPNIIAM   | 21   | >PTEN-I33S-r YIYPNISAM  | 25  | 4    |
| >PTEN-I33S- $\lambda$ YIYPNIIA    | 53   | >PTEN-I33S-r YIYPNISA   | 33  | 20   |
| >PTEN-I33S- $\lambda$ YIYPNIIAM   | 72   | >PTEN-I33S-r YIYPNISAM  | 219 | 147  |
| >PTEN-I33S- $\lambda$ YIYPNIIA    | 1165 | >PTEN-I33S-r YIYPNISA   | 418 | 747  |
| >PTEN-I33S- $\lambda$ YIYPNIIAM   | 117  | >PTEN-I33S-r YIYPNISAM  | 127 | 10   |
| >PTEN-I33S- $\lambda$ YIYPNIIA    | 11   | >PTEN-I33S-r YIYPNISA   | 5   | 6    |
| >PTEN-I33S- $\lambda$ YIYPNIIAM   | 6    | >PTEN-I33S-r YIYPNISAM  | 6   | 0    |

|                                      |      |                          |       |       |
|--------------------------------------|------|--------------------------|-------|-------|
| >PTEN-I33S- $\backslash$ YIYPNIIAMGF | 338  | >PTEN-I33S-r YIYPNISAMG  | 342   | 4     |
| >PTEN-I33S- $\backslash$ YIYPNIIAMGF | 133  | >PTEN-I33S-r YIYPNISAMG  | 156   | 23    |
| >PTEN-I33S- $\backslash$ YIYPNIIAM   | 959  | >PTEN-I33S-r YIYPNISAM   | 252   | 707   |
| >PTEN-I33S- $\backslash$ YIYPNIIAM   | 108  | >PTEN-I33S-r YIYPNISAM   | 24    | 84    |
| >PTEN-I33S- $\backslash$ YIYPNIIAMGF | 214  | >PTEN-I33S-r YIYPNISAMG  | 172   | 42    |
| >PTEN-I33S- $\backslash$ YIYPNIIAM   | 26   | >PTEN-I33S-r YIYPNISAM   | 11    | 15    |
| >PTEN-I33S- $\backslash$ YIYPNIIAMGF | 417  | >PTEN-I33S-r YIYPNISAMG  | 260   | 157   |
| >PTEN-I33S- $\backslash$ YIYPNIIAMGF | 92   | >PTEN-I33S-r YIYPNISAMG  | 151   | 59    |
| >PTEN-I33S- $\backslash$ YIYPNIIAMGF | 311  | >PTEN-I33S-r YIYPNISAMG  | 1040  | 729   |
| >PTEN-I33S- $\backslash$ YIYPNIIA    | 921  | >PTEN-I33S-r YIYPNISA    | 344   | 577   |
| >PTEN-I33S- $\backslash$ YIYPNIIA    | 616  | >PTEN-I33S-r YIYPNISA    | 138   | 478   |
| >PTEN-I33S- $\backslash$ YIYPNIIAM   | 40   | >PTEN-I33S-r YIYPNISAM   | 89    | 49    |
| >PTEN-I33S- $\backslash$ YIYPNIIAM   | 1072 | >PTEN-I33S-r YIYPNISAM   | 259   | 813   |
| >PTEN-I33S- $\backslash$ YIYPNIIAM   | 69   | >PTEN-I33S-r YIYPNISAM   | 42    | 27    |
| >PTEN-I33S- $\backslash$ YIYPNIIAMGF | 63   | >PTEN-I33S-r YIYPNISAMG  | 43    | 20    |
| >PTEN-I33S- $\backslash$ YIYPNIIAM   | 187  | >PTEN-I33S-r YIYPNISAM   | 52    | 135   |
| >PTEN-I33S- $\backslash$ YIYPNIIAMGF | 93   | >PTEN-I33S-r YIYPNISAMG  | 44    | 49    |
| >PTEN-I33S- $\backslash$ YIYPNIIAM   | 35   | >PTEN-I33S-r YIYPNISAM   | 17    | 18    |
| >PTEN-I33S- $\backslash$ YIYPNIIAMGF | 16   | >PTEN-I33S-r YIYPNISAMG  | 8     | 8     |
| >PTEN-I33S- $\backslash$ YIYPNIIAM   | 51   | >PTEN-I33S-r YIYPNISAM   | 17    | 34    |
| >PTEN-I33S- $\backslash$ YIYPNIIAMGF | 8    | >PTEN-I33S-r YIYPNISAMG  | 5     | 3     |
| >PTEN-I33S- $\backslash$ YIYPNIIAM   | 22   | >PTEN-I33S-r YIYPNISAM   | 25    | 3     |
| >PTEN-I33S- $\backslash$ YIYPNIIAMGF | 173  | >PTEN-I33S-r YIYPNISAMG  | 188   | 15    |
| >PTEN-I33S- $\backslash$ YIYPNIIAM   | 197  | >PTEN-I33S-r YIYPNISAM   | 347   | 150   |
| >PTEN-I33S- $\backslash$ YIYPNIIAM   | 672  | >PTEN-I33S-r YIYPNISAM   | 128   | 544   |
| >PTEN-I33S- $\backslash$ YIYPNIIAM   | 2549 | >PTEN-I33S-r YIYPNISAM   | 68    | 2481  |
| >PTEN-I33S- $\backslash$ YIYPNIIAMGF | 701  | >PTEN-I33S-r YIYPNISAMG  | 273   | 428   |
| >PTEN-I33S- $\backslash$ TYIYPNII    | 422  | >PTEN-I33S-r TYIYPNIS    | 29793 | 29371 |
| >PTEN-I33S- $\backslash$ TYIYPNIIAM  | 2120 | >PTEN-I33S-r TYIYPNISAM  | 125   | 1995  |
| >PTEN-I33S- $\backslash$ TYIYPNII    | 64   | >PTEN-I33S-r TYIYPNIS    | 10426 | 10362 |
| >PTEN-I33S- $\backslash$ TYIYPNII    | 128  | >PTEN-I33S-r TYIYPNIS    | 10251 | 10123 |
| >PTEN-I33S- $\backslash$ TYIYPNII    | 64   | >PTEN-I33S-r TYIYPNIS    | 12654 | 12590 |
| >PTEN-I33S- $\backslash$ TYIYPNIIAM  | 317  | >PTEN-I33S-r TYIYPNISAM  | 285   | 32    |
| >PTEN-I33S- $\backslash$ TYIYPNIIAM  | 36   | >PTEN-I33S-r TYIYPNISAM  | 19    | 17    |
| >PTEN-I33S- $\backslash$ TYIYPNIIAM  | 641  | >PTEN-I33S-r TYIYPNISAM  | 392   | 249   |
| >PTEN-I33S- $\backslash$ LTYIYPNII   | 234  | >PTEN-I33S-r LTYIYPNIS   | 3696  | 3462  |
| >PTEN-I33S- $\backslash$ LTYIYPNIIAM | 69   | >PTEN-I33S-r LTYIYPNISAM | 57    | 12    |
| >PTEN-I33S- $\backslash$ LTYIYPNII   | 435  | >PTEN-I33S-r LTYIYPNIS   | 27935 | 27500 |
| >PTEN-I33S- $\backslash$ LTYIYPNIIA  | 669  | >PTEN-I33S-r LTYIYPNISA  | 198   | 471   |
| >PTEN-I33S- $\backslash$ LTYIYPNII   | 431  | >PTEN-I33S-r LTYIYPNIS   | 10290 | 9859  |
| >PTEN-I33S- $\backslash$ LTYIYPNIIA  | 819  | >PTEN-I33S-r LTYIYPNISA  | 221   | 598   |
| >PTEN-I33S- $\backslash$ LTYIYPNIIA  | 368  | >PTEN-I33S-r LTYIYPNISA  | 123   | 245   |
| >PTEN-I33S- $\backslash$ LTYIYPNIIAM | 239  | >PTEN-I33S-r LTYIYPNISAM | 342   | 103   |

|                          |     |                          |       |       |
|--------------------------|-----|--------------------------|-------|-------|
| >PTEN-I33S-v LTYIYPNIIAM | 320 | >PTEN-I33S-r LTYIYPNISAM | 172   | 148   |
| >PTEN-I33S-v LTYIYPNIIA  | 118 | >PTEN-I33S-r LTYIYPNISA  | 45    | 73    |
| >PTEN-I33S-v LTYIYPNIIAM | 326 | >PTEN-I33S-r LTYIYPNISAM | 568   | 242   |
| >PTEN-I33S-v LTYIYPNIIAM | 368 | >PTEN-I33S-r LTYIYPNISAM | 207   | 161   |
| >PTEN-I33S-v LTYIYPNIIAM | 98  | >PTEN-I33S-r LTYIYPNISAM | 54    | 44    |
| >PTEN-I33S-v LTYIYPNII   | 33  | >PTEN-I33S-r LTYIYPNIS   | 4872  | 4839  |
| >PTEN-I33S-v LTYIYPNIIAM | 5   | >PTEN-I33S-r LTYIYPNISAM | 4     | 1     |
| >PTEN-I33S-v LTYIYPNIIAM | 134 | >PTEN-I33S-r LTYIYPNISAM | 165   | 31    |
| >PTEN-I33S-v LTYIYPNII   | 167 | >PTEN-I33S-r LTYIYPNIS   | 3344  | 3177  |
| >PTEN-I33S-v LTYIYPNIIAM | 111 | >PTEN-I33S-r LTYIYPNISAM | 147   | 36    |
| >PTEN-I33S-v LTYIYPNII   | 126 | >PTEN-I33S-r LTYIYPNIS   | 2123  | 1997  |
| >PTEN-I33S-v LTYIYPNIIA  | 136 | >PTEN-I33S-r LTYIYPNISA  | 105   | 31    |
| >PTEN-I33S-v LTYIYPNIIAM | 74  | >PTEN-I33S-r LTYIYPNISAM | 9     | 65    |
| >PTEN-I33S-v LTYIYPNII   | 12  | >PTEN-I33S-r LTYIYPNIS   | 16562 | 16550 |
| >PTEN-I33S-v LTYIYPNIIAM | 147 | >PTEN-I33S-r LTYIYPNISAM | 89    | 58    |
| >PTEN-I5L-wi IIKEIVSRNK  | 201 | >PTEN-I5L-m ILKEIVSRNK   | 135   | 66    |
| >PTEN-I5L-wi IIKEIVSRNK  | 31  | >PTEN-I5L-m ILKEIVSRNK   | 80    | 49    |
| >PTEN-I5L-wi IIKEIVSR    | 30  | >PTEN-I5L-m ILKEIVSR     | 30    | 0     |
| >PTEN-I5L-wi IIKEIVSRNKR | 24  | >PTEN-I5L-m ILKEIVSRNKR  | 24    | 0     |
| >PTEN-I5L-wi IIKEIVSR    | 71  | >PTEN-I5L-m ILKEIVSR     | 69    | 2     |
| >PTEN-I5L-wi IIKEIVSRNKR | 117 | >PTEN-I5L-m ILKEIVSRNKR  | 119   | 2     |
| >PTEN-I5L-wi IIKEIVSR    | 66  | >PTEN-I5L-m ILKEIVSR     | 206   | 140   |
| >PTEN-I5L-wi IIKEIVSRNKR | 40  | >PTEN-I5L-m ILKEIVSRNKR  | 149   | 109   |
| >PTEN-I5L-wi IIKEIVSR    | 184 | >PTEN-I5L-m ILKEIVSR     | 272   | 88    |
| >PTEN-I5L-wi AIIKEIVSRNK | 271 | >PTEN-I5L-m AILKEIVSRNK  | 147   | 124   |
| >PTEN-I5L-wi AIIKEIVSRNK | 59  | >PTEN-I5L-m AILKEIVSRNK  | 73    | 14    |
| >PTEN-I5L-wi AIIKEIVSRNK | 360 | >PTEN-I5L-m AILKEIVSRNK  | 95    | 265   |
| >PTEN-I5L-wi AIIKEIVSR   | 388 | >PTEN-I5L-m AILKEIVSR    | 231   | 157   |
| >PTEN-I5L-wi AIIKEIVSR   | 131 | >PTEN-I5L-m AILKEIVSR    | 960   | 829   |
| >PTEN-I5L-wi AIIKEIVSR   | 326 | >PTEN-I5L-m AILKEIVSR    | 209   | 117   |
| >PTEN-I5L-wi TAIKEIVSR   | 406 | >PTEN-I5L-m TAILKEIVSR   | 375   | 31    |
| >PTEN-I5L-wi TAIKEIVSR   | 24  | >PTEN-I5L-m TAILKEIVSR   | 44    | 20    |
| >PTEN-I5L-wi TAIKEIV     | 224 | >PTEN-I5L-m TAILKEIV     | 276   | 52    |
| >PTEN-I5L-wi MTAIKEI     | 121 | >PTEN-I5L-m MTAILKEI     | 228   | 107   |
| >PTEN-I5L-wi MTAIKEIV    | 86  | >PTEN-I5L-m MTAILKEIV    | 249   | 163   |
| >PTEN-I5L-wi MTAIKEIVSR  | 373 | >PTEN-I5L-m MTAILKEIVSF  | 414   | 41    |
| >PTEN-I5L-wi MTAIKEIVSR  | 22  | >PTEN-I5L-m MTAILKEIVSF  | 23    | 1     |
| >PTEN-I5L-wi MTAIKEIVSR  | 145 | >PTEN-I5L-m MTAILKEIVSF  | 193   | 48    |
| >PTEN-I5L-wi MTAIKEIVSR  | 2   | >PTEN-I5L-m MTAILKEIVSF  | 3     | 1     |
| >PTEN-I5L-wi MTAIKEI     | 6   | >PTEN-I5L-m MTAILKEI     | 9     | 3     |
| >PTEN-I5L-wi MTAIKEIV    | 5   | >PTEN-I5L-m MTAILKEIV    | 7     | 2     |
| >PTEN-I5L-wi MTAIKEI     | 286 | >PTEN-I5L-m MTAILKEI     | 333   | 47    |
| >PTEN-I5L-wi MTAIKEIV    | 129 | >PTEN-I5L-m MTAILKEIV    | 177   | 48    |

|                          |       |                         |       |       |
|--------------------------|-------|-------------------------|-------|-------|
| >PTEN-I5L-wi MTAIIKEI    | 94    | >PTEN-I5L-m MTAILKEI    | 66    | 28    |
| >PTEN-I5L-wi MTAIIKEIV   | 155   | >PTEN-I5L-m MTAILKEIV   | 186   | 31    |
| >PTEN-I5L-wi MTAIIKEIVSR | 684   | >PTEN-I5L-m MTAILKEIVSF | 426   | 258   |
| >PTEN-I5L-wi MTAIIKEIVSR | 379   | >PTEN-I5L-m MTAILKEIVSF | 382   | 3     |
| >PTEN-I5L-wi MTAIIKEI    | 29    | >PTEN-I5L-m MTAILKEI    | 36    | 7     |
| >PTEN-I67K-i IYNLCAERHY  | 43    | >PTEN-I67K-r KYNLCAERHY | 101   | 58    |
| >PTEN-I67K-i IYNLCAERHY  | 212   | >PTEN-I67K-r KYNLCAERHY | 292   | 80    |
| >PTEN-I67K-i IYNLCAER    | 36    | >PTEN-I67K-r KYNLCAER   | 12    | 24    |
| >PTEN-I67K-i IYNLCAER    | 62    | >PTEN-I67K-r KYNLCAER   | 900   | 838   |
| >PTEN-I67K-i IYNLCAERHY  | 1448  | >PTEN-I67K-r KYNLCAERHY | 415   | 1033  |
| >PTEN-I67K-i IYNLCAER    | 55    | >PTEN-I67K-r KYNLCAER   | 17    | 38    |
| >PTEN-I67K-i KIYNLCAER   | 78    | >PTEN-I67K-r KKYNLCAER  | 16563 | 16485 |
| >PTEN-I67K-i KIYNLCAERH' | 107   | >PTEN-I67K-r KKYNLCAERH | 16826 | 16719 |
| >PTEN-I67K-i KIYNLCAER   | 157   | >PTEN-I67K-r KKYNLCAER  | 19075 | 18918 |
| >PTEN-I67K-i KIYNLCAERH' | 233   | >PTEN-I67K-r KKYNLCAERH | 3514  | 3281  |
| >PTEN-I67K-i KIYNLCAERH' | 59    | >PTEN-I67K-r KKYNLCAERH | 326   | 267   |
| >PTEN-I67K-i KIYNLCAER   | 10    | >PTEN-I67K-r KKYNLCAER  | 187   | 177   |
| >PTEN-I67K-i KIYNLCAER   | 119   | >PTEN-I67K-r KKYNLCAER  | 2894  | 2775  |
| >PTEN-I67K-i KIYNLCAERH' | 233   | >PTEN-I67K-r KKYNLCAERH | 3477  | 3244  |
| >PTEN-I67K-i KIYNLCAERH' | 76    | >PTEN-I67K-r KKYNLCAERH | 1969  | 1893  |
| >PTEN-I67K-i KIYNLCAER   | 4568  | >PTEN-I67K-r KKYNLCAER  | 100   | 4468  |
| >PTEN-I67K-i KIYNLCAERH  | 11176 | >PTEN-I67K-r KKYNLCAERH | 340   | 10836 |
| >PTEN-I67K-i KIYNLCAERH' | 226   | >PTEN-I67K-r KKYNLCAERH | 4     | 222   |
| >PTEN-I67K-i KIYNLCAERH' | 132   | >PTEN-I67K-r KKYNLCAERH | 7420  | 7288  |
| >PTEN-I67K-i KIYNLCAERH' | 453   | >PTEN-I67K-r KKYNLCAERH | 1634  | 1181  |
| >PTEN-I67K-i KIYNLCAER   | 40    | >PTEN-I67K-r KKYNLCAER  | 154   | 114   |
| >PTEN-I67K-i LDSKHKNHYK  | 229   | >PTEN-I67K-r LDSKHKNHYK | 22776 | 22547 |
| >PTEN-I67K-i YKIYNLCA    | 112   | >PTEN-I67K-r YKKYNLCA   | 169   | 57    |
| >PTEN-I67K-i YKIYNLCAE   | 469   | >PTEN-I67K-r YKKYNLCAE  | 625   | 156   |
| >PTEN-I67K-i YKIYNLCAER  | 117   | >PTEN-I67K-r YKKYNLCAER | 160   | 43    |
| >PTEN-I67K-i YKIYNLCAERf | 301   | >PTEN-I67K-r YKKYNLCAER | 433   | 132   |
| >PTEN-I67K-i HYKIYNLC    | 616   | >PTEN-I67K-r HYKKYNLC   | 406   | 210   |
| >PTEN-I67K-i HYKIYNLCA   | 22    | >PTEN-I67K-r HYKKYNLCA  | 16    | 6     |
| >PTEN-I67K-i HYKIYNLCAEI | 120   | >PTEN-I67K-r HYKKYNLCAE | 82    | 38    |
| >PTEN-I67K-i HYKIYNLCAEI | 9     | >PTEN-I67K-r HYKKYNLCAE | 9     | 0     |
| >PTEN-I67K-i HYKIYNLCAEI | 13    | >PTEN-I67K-r HYKKYNLCAE | 14    | 1     |
| >PTEN-I67K-i HYKIYNLCAEI | 272   | >PTEN-I67K-r HYKKYNLCAE | 321   | 49    |
| >PTEN-I67K-i HYKIYNLCAEI | 26    | >PTEN-I67K-r HYKKYNLCAE | 22    | 4     |
| >PTEN-I67K-i NHYKIYNL    | 145   | >PTEN-I67K-r NHYKKYNL   | 135   | 10    |
| >PTEN-I67K-i NHYKIYNL    | 67    | >PTEN-I67K-r NHYKKYNL   | 202   | 135   |
| >PTEN-I67K-i KNHYKIYNLC  | 497   | >PTEN-I67K-r KNHYKKYNLC | 628   | 131   |
| >PTEN-I67K-i HKNHYKIY    | 7     | >PTEN-I67K-r HKNHYKKY   | 12    | 5     |
| >PTEN-I67K-i HKNHYKIYNL  | 68    | >PTEN-I67K-r HKNHYKKYNI | 109   | 41    |

|                          |       |                         |       |       |
|--------------------------|-------|-------------------------|-------|-------|
| >PTEN-I67K-1 KHKNHYKI    | 1305  | >PTEN-I67K-1 KHKNHYKK   | 51    | 1254  |
| >PTEN-I67K-1 KHKNHYKI    | 15829 | >PTEN-I67K-1 KHKNHYKK   | 398   | 15431 |
| >PTEN-I67K-1 KHKNHYKIY   | 10    | >PTEN-I67K-1 KHKNHYKKY  | 28    | 18    |
| >PTEN-I67K-1 KHKNHYKIYN  | 206   | >PTEN-I67K-1 KHKNHYKKY  | 453   | 247   |
| >PTEN-I67K-1 SKHKNHYKI   | 4236  | >PTEN-I67K-1 SKHKNHYKK  | 217   | 4019  |
| >PTEN-I67K-1 SKHKNHYKI   | 129   | >PTEN-I67K-1 SKHKNHYKK  | 1254  | 1125  |
| >PTEN-I67K-1 SKHKNHYKIY  | 6     | >PTEN-I67K-1 SKHKNHYKKY | 11    | 5     |
| >PTEN-I67K-1 DSKHKNHYKI  | 5053  | >PTEN-I67K-1 DSKHKNHYKI | 371   | 4682  |
| >PTEN-I67R-1 IYNLCAERHY  | 43    | >PTEN-I67R-1 RYNLCAERHY | 70    | 27    |
| >PTEN-I67R-1 IYNLCAERHY  | 212   | >PTEN-I67R-1 RYNLCAERHY | 111   | 101   |
| >PTEN-I67R-1 IYNLCAER    | 36    | >PTEN-I67R-1 RYNLCAER   | 10    | 26    |
| >PTEN-I67R-1 IYNLCAER    | 62    | >PTEN-I67R-1 RYNLCAER   | 469   | 407   |
| >PTEN-I67R-1 IYNLCAERHY  | 1448  | >PTEN-I67R-1 RYNLCAERHY | 305   | 1143  |
| >PTEN-I67R-1 IYNLCAER    | 55    | >PTEN-I67R-1 RYNLCAER   | 20    | 35    |
| >PTEN-I67R-1 KIYNLCAER   | 78    | >PTEN-I67R-1 KRYNLCAER  | 17927 | 17849 |
| >PTEN-I67R-1 KIYNLCAERH' | 107   | >PTEN-I67R-1 KRYNLCAERH | 18448 | 18341 |
| >PTEN-I67R-1 KIYNLCAER   | 157   | >PTEN-I67R-1 KRYNLCAER  | 20297 | 20140 |
| >PTEN-I67R-1 KIYNLCAERH' | 233   | >PTEN-I67R-1 KRYNLCAERH | 3328  | 3095  |
| >PTEN-I67R-1 KIYNLCAERH' | 59    | >PTEN-I67R-1 KRYNLCAERH | 311   | 252   |
| >PTEN-I67R-1 KIYNLCAER   | 10    | >PTEN-I67R-1 KRYNLCAER  | 418   | 408   |
| >PTEN-I67R-1 KIYNLCAER   | 119   | >PTEN-I67R-1 KRYNLCAER  | 4504  | 4385  |
| >PTEN-I67R-1 KIYNLCAERH' | 233   | >PTEN-I67R-1 KRYNLCAERH | 2375  | 2142  |
| >PTEN-I67R-1 KIYNLCAERH' | 76    | >PTEN-I67R-1 KRYNLCAERH | 4938  | 4862  |
| >PTEN-I67R-1 KIYNLCAERH' | 226   | >PTEN-I67R-1 KRYNLCAERH | 21    | 205   |
| >PTEN-I67R-1 KIYNLCAERH' | 132   | >PTEN-I67R-1 KRYNLCAERH | 12553 | 12421 |
| >PTEN-I67R-1 KIYNLCAER   | 18547 | >PTEN-I67R-1 KRYNLCAER  | 138   | 18409 |
| >PTEN-I67R-1 KIYNLCAERH  | 29079 | >PTEN-I67R-1 KRYNLCAERH | 155   | 28924 |
| >PTEN-I67R-1 KIYNLCAERH' | 15575 | >PTEN-I67R-1 KRYNLCAERH | 99    | 15476 |
| >PTEN-I67R-1 KIYNLCAERH' | 453   | >PTEN-I67R-1 KRYNLCAERH | 1705  | 1252  |
| >PTEN-I67R-1 KIYNLCAER   | 21777 | >PTEN-I67R-1 KRYNLCAER  | 176   | 21601 |
| >PTEN-I67R-1 KIYNLCAERH' | 17120 | >PTEN-I67R-1 KRYNLCAERH | 197   | 16923 |
| >PTEN-I67R-1 KIYNLCAER   | 20781 | >PTEN-I67R-1 KRYNLCAER  | 270   | 20511 |
| >PTEN-I67R-1 KIYNLCAERH' | 19538 | >PTEN-I67R-1 KRYNLCAERH | 362   | 19176 |
| >PTEN-I67R-1 KIYNLCAER   | 40    | >PTEN-I67R-1 KRYNLCAER  | 112   | 72    |
| >PTEN-I67R-1 LDSKHKNHYK  | 229   | >PTEN-I67R-1 LDSKHKNHYK | 25726 | 25497 |
| >PTEN-I67R-1 YKIYNLCA    | 112   | >PTEN-I67R-1 YKRYNLCA   | 80    | 32    |
| >PTEN-I67R-1 YKIYNLCAE   | 469   | >PTEN-I67R-1 YKRYNLCAE  | 296   | 173   |
| >PTEN-I67R-1 YKIYNLCAER  | 117   | >PTEN-I67R-1 YKRYNLCAER | 81    | 36    |
| >PTEN-I67R-1 YKIYNLCAERH | 301   | >PTEN-I67R-1 YKRYNLCAER | 185   | 116   |
| >PTEN-I67R-1 HYKIYNLC    | 616   | >PTEN-I67R-1 HYKRYNLC   | 172   | 444   |
| >PTEN-I67R-1 HYKIYNLCA   | 22    | >PTEN-I67R-1 HYKRYNLCA  | 10    | 12    |
| >PTEN-I67R-1 HYKIYNLCAE  | 1095  | >PTEN-I67R-1 HYKRYNLCAE | 352   | 743   |
| >PTEN-I67R-1 HYKIYNLCAEI | 120   | >PTEN-I67R-1 HYKRYNLCAE | 46    | 74    |

|                          |       |                         |       |       |
|--------------------------|-------|-------------------------|-------|-------|
| >PTEN-I67R-I HYKIYNLCAEI | 9     | >PTEN-I67R-I HYKRYNLCAE | 8     | 1     |
| >PTEN-I67R-I HYKIYNLCAEI | 13    | >PTEN-I67R-I HYKRYNLCAE | 13    | 0     |
| >PTEN-I67R-I HYKIYNLCAEI | 272   | >PTEN-I67R-I HYKRYNLCAE | 358   | 86    |
| >PTEN-I67R-I HYKIYNLCAEI | 26    | >PTEN-I67R-I HYKRYNLCAE | 35    | 9     |
| >PTEN-I67R-I NHYKIYNL    | 145   | >PTEN-I67R-I NHYKRYNL   | 137   | 8     |
| >PTEN-I67R-I NHYKIYNL    | 67    | >PTEN-I67R-I NHYKRYNL   | 86    | 19    |
| >PTEN-I67R-I KNHYKIYNL   | 1185  | >PTEN-I67R-I KNHYKRYNL  | 396   | 789   |
| >PTEN-I67R-I KNHYKIYNLC  | 497   | >PTEN-I67R-I KNHYKRYNLC | 227   | 270   |
| >PTEN-I67R-I KNHYKIYNL   | 1052  | >PTEN-I67R-I KNHYKRYNL  | 301   | 751   |
| >PTEN-I67R-I HKNHYKIY    | 7     | >PTEN-I67R-I HKNHYKRY   | 17    | 10    |
| >PTEN-I67R-I HKNHYKIYNL  | 68    | >PTEN-I67R-I HKNHYKRYNI | 75    | 7     |
| >PTEN-I67R-I KHKNHYKI    | 15829 | >PTEN-I67R-I KHKNHYKR   | 21    | 15808 |
| >PTEN-I67R-I KHKNHYKIY   | 10    | >PTEN-I67R-I KHKNHYKRY  | 47    | 37    |
| >PTEN-I67R-I KHKNHYKIYN  | 206   | >PTEN-I67R-I KHKNHYKRYN | 312   | 106   |
| >PTEN-I67R-I KHKNHYKI    | 25878 | >PTEN-I67R-I KHKNHYKR   | 63    | 25815 |
| >PTEN-I67R-I SKHKNHYKI   | 129   | >PTEN-I67R-I SKHKNHYKR  | 1066  | 937   |
| >PTEN-I67R-I SKHKNHYKIY  | 6     | >PTEN-I67R-I SKHKNHYKRY | 14    | 8     |
| >PTEN-I67R-I SKHKNHYKI   | 24431 | >PTEN-I67R-I SKHKNHYKR  | 141   | 24290 |
| >PTEN-I67R-I DSKHKNHYKI  | 858   | >PTEN-I67R-I DSKHKNHYKR | 486   | 372   |
| >PTEN-I67R-I DSKHKNHYKI  | 16400 | >PTEN-I67R-I DSKHKNHYKR | 91    | 16309 |
| >PTEN-I67R-I DSKHKNHYKI  | 26148 | >PTEN-I67R-I DSKHKNHYKR | 323   | 25825 |
| >PTEN-I67R-I DSKHKNHYKI  | 1306  | >PTEN-I67R-I DSKHKNHYKR | 326   | 980   |
| >PTEN-K125E KAGKGRTGV    | 13737 | >PTEN-K125E EAGKGRTGV   | 183   | 13554 |
| >PTEN-K125E KAGKGRTGV    | 9479  | >PTEN-K125E EAGKGRTGV   | 98    | 9381  |
| >PTEN-K125E KAGKGRTGVI   | 135   | >PTEN-K125E EAGKGRTGVI  | 1916  | 1781  |
| >PTEN-K125E HCKAGKGR     | 345   | >PTEN-K125E HCEAGKGR    | 528   | 183   |
| >PTEN-K125E AIHCKAGK     | 243   | >PTEN-K125E AIHCEAGK    | 620   | 377   |
| >PTEN-K125E AIHCKAGK     | 221   | >PTEN-K125E AIHCEAGK    | 233   | 12    |
| >PTEN-K125E AIHCKAGK     | 29    | >PTEN-K125E AIHCEAGK    | 70    | 41    |
| >PTEN-K125E AIHCKAGKGF   | 407   | >PTEN-K125E AIHCEAGKGF  | 1442  | 1035  |
| >PTEN-K125E AAHCKAGK     | 252   | >PTEN-K125E AAHCEAGK    | 264   | 12    |
| >PTEN-K125E AAHCKAGKC    | 447   | >PTEN-K125E AAHCEAGKC   | 1262  | 815   |
| >PTEN-K125E VAAHCKAGK    | 459   | >PTEN-K125E VAAHCEAGK   | 429   | 30    |
| >PTEN-K125E HVAAIHCKA    | 289   | >PTEN-K125E HVAAIHCEA   | 77    | 212   |
| >PTEN-K125E HVAAIHCK     | 130   | >PTEN-K125E HVAAIHCE    | 17978 | 17848 |
| >PTEN-K125E HVAAIHCKAC   | 90    | >PTEN-K125E HVAAIHCEAC  | 128   | 38    |
| >PTEN-K125E HVAAIHCK     | 50    | >PTEN-K125E HVAAIHCE    | 20042 | 19992 |
| >PTEN-K125E HVAAIHCKAC   | 114   | >PTEN-K125E HVAAIHCEAC  | 126   | 12    |
| >PTEN-K125E HVAAIHCK     | 74    | >PTEN-K125E HVAAIHCE    | 12608 | 12534 |
| >PTEN-K125E HVAAIHCKA    | 304   | >PTEN-K125E HVAAIHCEA   | 196   | 108   |
| >PTEN-K125E HVAAIHCKAC   | 64    | >PTEN-K125E HVAAIHCEAC  | 97    | 33    |
| >PTEN-K125E HVAAIHCK     | 223   | >PTEN-K125E HVAAIHCE    | 11292 | 11069 |
| >PTEN-K125E HVAAIHCKAC   | 185   | >PTEN-K125E HVAAIHCEAC  | 491   | 306   |

|                        |      |                        |       |       |
|------------------------|------|------------------------|-------|-------|
| >PTEN-K125E HVAAIHCK   | 5    | >PTEN-K125E HVAAIHCE   | 1063  | 1058  |
| >PTEN-K125E HVAAIHCKAC | 7    | >PTEN-K125E HVAAIHCEAC | 6     | 1     |
| >PTEN-K125E HVAAIHCKA  | 12   | >PTEN-K125E HVAAIHCEA  | 7     | 5     |
| >PTEN-K125E HVAAIHCKA  | 480  | >PTEN-K125E HVAAIHCEA  | 291   | 189   |
| >PTEN-K125I KAGKGRTGVI | 135  | >PTEN-K125I NAGKGRTGV  | 1113  | 978   |
| >PTEN-K125I HCKAGKGR   | 345  | >PTEN-K125I HCNAGKGR   | 432   | 87    |
| >PTEN-K125I AIHCKAGK   | 243  | >PTEN-K125I AIHCNAGK   | 254   | 11    |
| >PTEN-K125I AIHCKAGK   | 221  | >PTEN-K125I AIHCNAGK   | 158   | 63    |
| >PTEN-K125I AIHCKAGK   | 29   | >PTEN-K125I AIHCNAGK   | 17    | 12    |
| >PTEN-K125I AIHCKAGKGF | 407  | >PTEN-K125I AIHCNAGKGF | 450   | 43    |
| >PTEN-K125I AAHCKAGK   | 252  | >PTEN-K125I AAHCNAGK   | 143   | 109   |
| >PTEN-K125I AAHCKAGKC  | 447  | >PTEN-K125I AAHCNAGKC  | 701   | 254   |
| >PTEN-K125I VAAIHCKAGK | 459  | >PTEN-K125I VAAIHCNAGI | 252   | 207   |
| >PTEN-K125I HVAAIHCKA  | 289  | >PTEN-K125I HVAAIHCNA  | 148   | 141   |
| >PTEN-K125I HVAAIHCK   | 130  | >PTEN-K125I HVAAIHCN   | 17783 | 17653 |
| >PTEN-K125I HVAAIHCKAC | 90   | >PTEN-K125I HVAAIHCNAC | 89    | 1     |
| >PTEN-K125I HVAAIHCK   | 50   | >PTEN-K125I HVAAIHCN   | 18985 | 18935 |
| >PTEN-K125I HVAAIHCKAC | 114  | >PTEN-K125I HVAAIHCNAC | 91    | 23    |
| >PTEN-K125I HVAAIHCK   | 74   | >PTEN-K125I HVAAIHCN   | 10642 | 10568 |
| >PTEN-K125I HVAAIHCKA  | 304  | >PTEN-K125I HVAAIHCNA  | 124   | 180   |
| >PTEN-K125I HVAAIHCKAC | 64   | >PTEN-K125I HVAAIHCNAC | 34    | 30    |
| >PTEN-K125I HVAAIHCK   | 223  | >PTEN-K125I HVAAIHCN   | 11921 | 11698 |
| >PTEN-K125I HVAAIHCKAC | 185  | >PTEN-K125I HVAAIHCNAC | 304   | 119   |
| >PTEN-K125I HVAAIHCK   | 5    | >PTEN-K125I HVAAIHCN   | 1466  | 1461  |
| >PTEN-K125I HVAAIHCKAC | 7    | >PTEN-K125I HVAAIHCNAC | 5     | 2     |
| >PTEN-K125I HVAAIHCKA  | 12   | >PTEN-K125I HVAAIHCNA  | 9     | 3     |
| >PTEN-K125I HVAAIHCKA  | 480  | >PTEN-K125I HVAAIHCNA  | 219   | 261   |
| >PTEN-K128I KGRTGVMI   | 29   | >PTEN-K128I NGRTGVMI   | 5585  | 5556  |
| >PTEN-K128I KGRTGVMIC  | 365  | >PTEN-K128I NGRTGVMIC  | 13442 | 13077 |
| >PTEN-K128I KGRTGVMIC/ | 21   | >PTEN-K128I NGRTGVMIC/ | 5907  | 5886  |
| >PTEN-K128I KGRTGVMIC/ | 38   | >PTEN-K128I NGRTGVMIC/ | 7308  | 7270  |
| >PTEN-K128I KGRTGVMIC/ | 314  | >PTEN-K128I NGRTGVMIC/ | 2692  | 2378  |
| >PTEN-K128I KGRTGVMIC/ | 165  | >PTEN-K128I NGRTGVMIC/ | 428   | 263   |
| >PTEN-K128I KGRTGVMIC/ | 174  | >PTEN-K128I NGRTGVMIC/ | 1689  | 1515  |
| >PTEN-K128I KGRTGVMIC/ | 135  | >PTEN-K128I NGRTGVMIC/ | 5446  | 5311  |
| >PTEN-K128I GKRTGVMI   | 308  | >PTEN-K128I GNGRTGVMI  | 11882 | 11574 |
| >PTEN-K128I HVAAIHCKAC | 90   | >PTEN-K128I HVAAIHCKAC | 16740 | 16650 |
| >PTEN-K128I HVAAIHCKAC | 114  | >PTEN-K128I HVAAIHCKAC | 24699 | 24585 |
| >PTEN-K128I HVAAIHCKAC | 64   | >PTEN-K128I HVAAIHCKAC | 10577 | 10513 |
| >PTEN-K128I HVAAIHCKAC | 185  | >PTEN-K128I HVAAIHCKAC | 13778 | 13593 |
| >PTEN-K128I HVAAIHCKAC | 7    | >PTEN-K128I HVAAIHCKAC | 2232  | 2225  |
| >PTEN-K128I KAGKGRTGV  | 1071 | >PTEN-K128I KAGNGRTGV  | 363   | 708   |
| >PTEN-K128I KAGKGRTGVI | 135  | >PTEN-K128I KAGNGRTGV  | 112   | 23    |

|                         |     |                         |       |       |
|-------------------------|-----|-------------------------|-------|-------|
| >PTEN-K128I HCKAGKGR    | 345 | >PTEN-K128I HCKAGNGR    | 353   | 8     |
| >PTEN-K128I AIHCKAGK    | 243 | >PTEN-K128I AIHCKAGN    | 20229 | 19986 |
| >PTEN-K128I AIHCKAGK    | 221 | >PTEN-K128I AIHCKAGN    | 24375 | 24154 |
| >PTEN-K128I AIHCKAGK    | 29  | >PTEN-K128I AIHCKAGN    | 9409  | 9380  |
| >PTEN-K128I AIHCKAGKGF  | 407 | >PTEN-K128I AIHCKAGNGF  | 253   | 154   |
| >PTEN-K128I AAIHCKAGK   | 252 | >PTEN-K128I AAIHCKAGN   | 26843 | 26591 |
| >PTEN-K128I AAIHCKAGKC  | 447 | >PTEN-K128I AAIHCKAGNC  | 303   | 144   |
| >PTEN-K128I AAIHCKAGKC  | 719 | >PTEN-K128I AAIHCKAGNC  | 285   | 434   |
| >PTEN-K128I VAAIHCKAGK  | 459 | >PTEN-K128I VAAIHCKAGN  | 31990 | 31531 |
| >PTEN-K13E- KRRYQEDGF   | 93  | >PTEN-K13E- ERRYQEDGF   | 639   | 546   |
| >PTEN-K13E- KRRYQEDGFI  | 327 | >PTEN-K13E- ERRYQEDGFI  | 2169  | 1842  |
| >PTEN-K13E- KRRYQEDG    | 266 | >PTEN-K13E- ERRYQEDG    | 9651  | 9385  |
| >PTEN-K13E- KRRYQEDGF   | 233 | >PTEN-K13E- ERRYQEDGF   | 3499  | 3266  |
| >PTEN-K13E- KRRYQEDGFI  | 203 | >PTEN-K13E- ERRYQEDGFI  | 3376  | 3173  |
| >PTEN-K13E- KRRYQEDGFI  | 45  | >PTEN-K13E- ERRYQEDGFI  | 842   | 797   |
| >PTEN-K13E- NKRRYQEDG   | 55  | >PTEN-K13E- NERRYQEDG   | 1398  | 1343  |
| >PTEN-K13E- AIIKEIVSRNK | 271 | >PTEN-K13E- AIIKEIVSRNE | 20918 | 20647 |
| >PTEN-K13E- AIIKEIVSRNK | 59  | >PTEN-K13E- AIIKEIVSRNE | 25757 | 25698 |
| >PTEN-K13E- AIIKEIVSRNK | 360 | >PTEN-K13E- AIIKEIVSRNE | 15910 | 15550 |
| >PTEN-K13E- RNKRRYQEDG  | 317 | >PTEN-K13E- RNERRYQEDG  | 3007  | 2690  |
| >PTEN-K13E- VSRNKRRYQ   | 113 | >PTEN-K13E- VSRNERRYQ   | 295   | 182   |
| >PTEN-K13E- VSRNKRRY    | 155 | >PTEN-K13E- VSRNERRY    | 122   | 33    |
| >PTEN-K13E- VSRNKRRY    | 7   | >PTEN-K13E- VSRNERRY    | 9     | 2     |
| >PTEN-K13E- VSRNKRRY    | 919 | >PTEN-K13E- VSRNERRY    | 437   | 482   |
| >PTEN-K13E- IVSRNKRRY   | 157 | >PTEN-K13E- IVSRNERRY   | 138   | 19    |
| >PTEN-K13E- IVSRNKRR    | 225 | >PTEN-K13E- IVSRNERR    | 420   | 195   |
| >PTEN-K13E- IVSRNKRR    | 128 | >PTEN-K13E- IVSRNERR    | 37    | 91    |
| >PTEN-K13E- EIVSRNKRRY  | 13  | >PTEN-K13E- EIVSRNERRY  | 8     | 5     |
| >PTEN-K13E- EIVSRNKRRY  | 313 | >PTEN-K13E- EIVSRNERRY  | 302   | 11    |
| >PTEN-K13E- EIVSRNKR    | 155 | >PTEN-K13E- EIVSRNER    | 83    | 72    |
| >PTEN-K13E- EIVSRNKRR   | 356 | >PTEN-K13E- EIVSRNERR   | 222   | 134   |
| >PTEN-K13E- EIVSRNKR    | 8   | >PTEN-K13E- EIVSRNER    | 5     | 3     |
| >PTEN-K13E- EIVSRNKRR   | 20  | >PTEN-K13E- EIVSRNERR   | 6     | 14    |
| >PTEN-K13E- EIVSRNKR    | 258 | >PTEN-K13E- EIVSRNER    | 571   | 313   |
| >PTEN-K13E- EIVSRNKRR   | 226 | >PTEN-K13E- EIVSRNERR   | 453   | 227   |
| >PTEN-K13E- KEIVSRNKR   | 538 | >PTEN-K13E- KEIVSRNER   | 438   | 100   |
| >PTEN-K13E- KEIVSRNKRR  | 632 | >PTEN-K13E- KEIVSRNERR  | 496   | 136   |
| >PTEN-K13E- KEIVSRNKRR  | 321 | >PTEN-K13E- KEIVSRNERR  | 346   | 25    |
| >PTEN-K13E- KEIVSRNKRR  | 358 | >PTEN-K13E- KEIVSRNERR  | 701   | 343   |
| >PTEN-K13E- IIKEIVSRNK  | 201 | >PTEN-K13E- IIKEIVSRNE  | 23789 | 23588 |
| >PTEN-K13E- IIKEIVSRNK  | 31  | >PTEN-K13E- IIKEIVSRNE  | 10715 | 10684 |
| >PTEN-K13E- IIKEIVSRNKR | 24  | >PTEN-K13E- IIKEIVSRNER | 22    | 2     |
| >PTEN-K13E- IIKEIVSRNKR | 117 | >PTEN-K13E- IIKEIVSRNER | 75    | 42    |



|                         |       |                         |       |       |
|-------------------------|-------|-------------------------|-------|-------|
| >PTEN-K13E- IIKEIVSRNKR | 40    | >PTEN-K13E- IIKEIVSRNER | 33    | 7     |
| >PTEN-K13Q: KRRYQEDGF   | 93    | >PTEN-K13Q: QRRYQEDGF   | 193   | 100   |
| >PTEN-K13Q: KRRYQEDGFI  | 327   | >PTEN-K13Q: QRRYQEDGFI  | 704   | 377   |
| >PTEN-K13Q: KRRYQEDG    | 266   | >PTEN-K13Q: QRRYQEDG    | 6501  | 6235  |
| >PTEN-K13Q: KRRYQEDGF   | 233   | >PTEN-K13Q: QRRYQEDGF   | 1532  | 1299  |
| >PTEN-K13Q: KRRYQEDGFI  | 203   | >PTEN-K13Q: QRRYQEDGFI  | 1470  | 1267  |
| >PTEN-K13Q: KRRYQEDGFI  | 45    | >PTEN-K13Q: QRRYQEDGFI  | 260   | 215   |
| >PTEN-K13Q: NKRRYQEDG   | 16551 | >PTEN-K13Q: NQRRYQEDG   | 297   | 16254 |
| >PTEN-K13Q: NKRRYQEDG   | 55    | >PTEN-K13Q: NQRRYQEDG   | 53    | 2     |
| >PTEN-K13Q: AIIKEIVSRNK | 271   | >PTEN-K13Q: AIIKEIVSRNQ | 19918 | 19647 |
| >PTEN-K13Q: AIIKEIVSRNK | 59    | >PTEN-K13Q: AIIKEIVSRNQ | 25021 | 24962 |
| >PTEN-K13Q: AIIKEIVSRNK | 360   | >PTEN-K13Q: AIIKEIVSRNQ | 11455 | 11095 |
| >PTEN-K13Q: RNKRRYQEDG  | 317   | >PTEN-K13Q: RNQRRYQED   | 659   | 342   |
| >PTEN-K13Q: VSRNKRRY    | 685   | >PTEN-K13Q: VSRNQRRY    | 359   | 326   |
| >PTEN-K13Q: VSRNKRRYQ   | 113   | >PTEN-K13Q: VSRNQRRYQ   | 60    | 53    |
| >PTEN-K13Q: VSRNKRRY    | 155   | >PTEN-K13Q: VSRNQRRY    | 94    | 61    |
| >PTEN-K13Q: VSRNKRRY    | 956   | >PTEN-K13Q: VSRNQRRY    | 422   | 534   |
| >PTEN-K13Q: VSRNKRRY    | 7     | >PTEN-K13Q: VSRNQRRY    | 6     | 1     |
| >PTEN-K13Q: VSRNKRRY    | 919   | >PTEN-K13Q: VSRNQRRY    | 449   | 470   |
| >PTEN-K13Q: IVSRNKRRY   | 1084  | >PTEN-K13Q: IVSRNQRRY   | 302   | 782   |
| >PTEN-K13Q: IVSRNKRRY   | 157   | >PTEN-K13Q: IVSRNQRRY   | 59    | 98    |
| >PTEN-K13Q: IVSRNKRR    | 225   | >PTEN-K13Q: IVSRNQRR    | 196   | 29    |
| >PTEN-K13Q: IVSRNKRR    | 128   | >PTEN-K13Q: IVSRNQRR    | 74    | 54    |
| >PTEN-K13Q: EIVSRNKRRY  | 13    | >PTEN-K13Q: EIVSRNQRRY  | 8     | 5     |
| >PTEN-K13Q: EIVSRNKRRY  | 313   | >PTEN-K13Q: EIVSRNQRRY  | 252   | 61    |
| >PTEN-K13Q: EIVSRNKR    | 155   | >PTEN-K13Q: EIVSRNQR    | 96    | 59    |
| >PTEN-K13Q: EIVSRNKRR   | 356   | >PTEN-K13Q: EIVSRNQRR   | 183   | 173   |
| >PTEN-K13Q: EIVSRNKR    | 8     | >PTEN-K13Q: EIVSRNQR    | 5     | 3     |
| >PTEN-K13Q: EIVSRNKRR   | 20    | >PTEN-K13Q: EIVSRNQRR   | 13    | 7     |
| >PTEN-K13Q: EIVSRNKR    | 258   | >PTEN-K13Q: EIVSRNQR    | 420   | 162   |
| >PTEN-K13Q: EIVSRNKRR   | 226   | >PTEN-K13Q: EIVSRNQRR   | 349   | 123   |
| >PTEN-K13Q: KEIVSRNKR   | 538   | >PTEN-K13Q: KEIVSRNQR   | 452   | 86    |
| >PTEN-K13Q: KEIVSRNKRR  | 632   | >PTEN-K13Q: KEIVSRNQRR  | 435   | 197   |
| >PTEN-K13Q: KEIVSRNKRR  | 321   | >PTEN-K13Q: KEIVSRNQRR  | 289   | 32    |
| >PTEN-K13Q: KEIVSRNKRR  | 358   | >PTEN-K13Q: KEIVSRNQRR  | 515   | 157   |
| >PTEN-K13Q: IIKEIVSRNK  | 201   | >PTEN-K13Q: IIKEIVSRNQ  | 23285 | 23084 |
| >PTEN-K13Q: IIKEIVSRNK  | 31    | >PTEN-K13Q: IIKEIVSRNQ  | 5086  | 5055  |
| >PTEN-K13Q: IIKEIVSRNKR | 24    | >PTEN-K13Q: IIKEIVSRNQR | 22    | 2     |
| >PTEN-K13Q: IIKEIVSRNKR | 117   | >PTEN-K13Q: IIKEIVSRNQR | 84    | 33    |
| >PTEN-K13Q: IIKEIVSRNKR | 40    | >PTEN-K13Q: IIKEIVSRNQR | 30    | 10    |
| >PTEN-K144I KFLKAQEAL   | 154   | >PTEN-K144I IFLKAQEAL   | 1317  | 1163  |
| >PTEN-K144I KFLKAQEALD  | 77    | >PTEN-K144I IFLKAQEALDf | 44    | 33    |
| >PTEN-K144I KFLKAQEALD  | 345   | >PTEN-K144I IFLKAQEALDf | 266   | 79    |

|                        |       |                         |       |       |
|------------------------|-------|-------------------------|-------|-------|
| >PTEN-K144I KFLKAQEAL  | 37    | >PTEN-K144I IFLKAQEAL   | 72    | 35    |
| >PTEN-K144I KFLKAQEALD | 9     | >PTEN-K144I IFLKAQEALDI | 13    | 4     |
| >PTEN-K144I KFLKAQEALD | 1363  | >PTEN-K144I IFLKAQEALDI | 398   | 965   |
| >PTEN-K144I KFLKAQEA   | 464   | >PTEN-K144I IFLKAQEA    | 6653  | 6189  |
| >PTEN-K144I KFLKAQEALD | 364   | >PTEN-K144I IFLKAQEALDI | 334   | 30    |
| >PTEN-K144I KFLKAQEAL  | 257   | >PTEN-K144I IFLKAQEAL   | 1908  | 1651  |
| >PTEN-K144I GKFLKAQEAL | 11107 | >PTEN-K144I GIFLKAQEAL  | 328   | 10779 |
| >PTEN-K144I GKFLKAQEAL | 109   | >PTEN-K144I GIFLKAQEAL  | 7333  | 7224  |
| >PTEN-K144I MICAYLLHRG | 16008 | >PTEN-K144I MICAYLLHRG  | 354   | 15654 |
| >PTEN-K144I MICAYLLHRG | 14290 | >PTEN-K144I MICAYLLHRG  | 159   | 14131 |
| >PTEN-K144I MICAYLLHRG | 14973 | >PTEN-K144I MICAYLLHRG  | 224   | 14749 |
| >PTEN-K144I MICAYLLHRG | 16896 | >PTEN-K144I MICAYLLHRG  | 124   | 16772 |
| >PTEN-K144I MICAYLLHRG | 162   | >PTEN-K144I MICAYLLHRG  | 18985 | 18823 |
| >PTEN-K144I MICAYLLHRG | 49    | >PTEN-K144I MICAYLLHRG  | 19454 | 19405 |
| >PTEN-K144I MICAYLLHRG | 77    | >PTEN-K144I MICAYLLHRG  | 2018  | 1941  |
| >PTEN-K144I MICAYLLHRG | 473   | >PTEN-K144I MICAYLLHRG  | 14815 | 14342 |
| >PTEN-K144I MICAYLLHRG | 124   | >PTEN-K144I MICAYLLHRG  | 25969 | 25845 |
| >PTEN-K144I RGKFLKAQEA | 193   | >PTEN-K144I RGIFLKAQEA  | 6744  | 6551  |
| >PTEN-K144I LHRGKFLK   | 386   | >PTEN-K144I LHRGIFLK    | 302   | 84    |
| >PTEN-K144I LLHRGKFL   | 2717  | >PTEN-K144I LLHRGIFL    | 97    | 2620  |
| >PTEN-K144I LLHRGKFL   | 274   | >PTEN-K144I LLHRGIFL    | 42    | 232   |
| >PTEN-K144I LLHRGKFLKA | 546   | >PTEN-K144I LLHRGIFLKA  | 156   | 390   |
| >PTEN-K144I LLHRGKFL   | 288   | >PTEN-K144I LLHRGIFL    | 64    | 224   |
| >PTEN-K144I LLHRGKFLKA | 194   | >PTEN-K144I LLHRGIFLKA  | 87    | 107   |
| >PTEN-K144I LLHRGKFL   | 2648  | >PTEN-K144I LLHRGIFL    | 294   | 2354  |
| >PTEN-K144I LLHRGKFL   | 28    | >PTEN-K144I LLHRGIFL    | 7     | 21    |
| >PTEN-K144I LLHRGKFLKA | 132   | >PTEN-K144I LLHRGIFLKA  | 30    | 102   |
| >PTEN-K144I LLHRGKFL   | 353   | >PTEN-K144I LLHRGIFL    | 26    | 327   |
| >PTEN-K144I LLHRGKFL   | 204   | >PTEN-K144I LLHRGIFL    | 23    | 181   |
| >PTEN-K144I LLHRGKFLKA | 700   | >PTEN-K144I LLHRGIFLKA  | 158   | 542   |
| >PTEN-K144I LLHRGKFL   | 3033  | >PTEN-K144I LLHRGIFL    | 375   | 2658  |
| >PTEN-K144I LLHRGKFL   | 8     | >PTEN-K144I LLHRGIFL    | 4     | 4     |
| >PTEN-K144I LLHRGKFLK  | 328   | >PTEN-K144I LLHRGIFLK   | 45    | 283   |
| >PTEN-K144I LLHRGKFLKA | 8     | >PTEN-K144I LLHRGIFLKA  | 4     | 4     |
| >PTEN-K144I LLHRGKFLKA | 230   | >PTEN-K144I LLHRGIFLKAC | 95    | 135   |
| >PTEN-K144I LLHRGKFLK  | 41    | >PTEN-K144I LLHRGIFLK   | 31    | 10    |
| >PTEN-K144I LLHRGKFLK  | 63    | >PTEN-K144I LLHRGIFLK   | 22    | 41    |
| >PTEN-K144I LLHRGKFL   | 1631  | >PTEN-K144I LLHRGIFL    | 416   | 1215  |
| >PTEN-K144I LLHRGKFLK  | 37    | >PTEN-K144I LLHRGIFLK   | 24    | 13    |
| >PTEN-K144I LLHRGKFLK  | 69    | >PTEN-K144I LLHRGIFLK   | 72    | 3     |
| >PTEN-K144I LLHRGKFLK  | 427   | >PTEN-K144I LLHRGIFLK   | 256   | 171   |
| >PTEN-K144I YLLHRGKFL  | 93    | >PTEN-K144I YLLHRGIFL   | 12    | 81    |
| >PTEN-K144I YLLHRGKFLK | 86    | >PTEN-K144I YLLHRGIFLKA | 25    | 61    |

|                         |       |                         |      |       |
|-------------------------|-------|-------------------------|------|-------|
| >PTEN-K144I YLLHRGKFL   | 91    | >PTEN-K144I YLLHRGIFL   | 22   | 69    |
| >PTEN-K144I YLLHRGKFLK/ | 446   | >PTEN-K144I YLLHRGIFLKA | 162  | 284   |
| >PTEN-K144I YLLHRGKFL   | 70    | >PTEN-K144I YLLHRGIFL   | 45   | 25    |
| >PTEN-K144I YLLHRGKFLK/ | 44    | >PTEN-K144I YLLHRGIFLKA | 38   | 6     |
| >PTEN-K144I YLLHRGKFL   | 105   | >PTEN-K144I YLLHRGIFL   | 10   | 95    |
| >PTEN-K144I YLLHRGKFLK/ | 66    | >PTEN-K144I YLLHRGIFLKA | 23   | 43    |
| >PTEN-K144I YLLHRGKFL   | 6     | >PTEN-K144I YLLHRGIFL   | 3    | 3     |
| >PTEN-K144I YLLHRGKFLK  | 1163  | >PTEN-K144I YLLHRGIFLK  | 188  | 975   |
| >PTEN-K144I YLLHRGKFLK/ | 12    | >PTEN-K144I YLLHRGIFLKA | 7    | 5     |
| >PTEN-K144I YLLHRGKFL   | 10    | >PTEN-K144I YLLHRGIFL   | 4    | 6     |
| >PTEN-K144I YLLHRGKFLK/ | 39    | >PTEN-K144I YLLHRGIFLKA | 22   | 17    |
| >PTEN-K144I YLLHRGKFL   | 12    | >PTEN-K144I YLLHRGIFL   | 5    | 7     |
| >PTEN-K144I YLLHRGKFLK/ | 17    | >PTEN-K144I YLLHRGIFLKA | 10   | 7     |
| >PTEN-K144I YLLHRGKFL   | 58    | >PTEN-K144I YLLHRGIFL   | 13   | 45    |
| >PTEN-K144I YLLHRGKFLK/ | 317   | >PTEN-K144I YLLHRGIFLKA | 109  | 208   |
| >PTEN-K144I YLLHRGKFL   | 6     | >PTEN-K144I YLLHRGIFL   | 3    | 3     |
| >PTEN-K144I YLLHRGKFLK  | 296   | >PTEN-K144I YLLHRGIFLK  | 77   | 219   |
| >PTEN-K144I YLLHRGKFLK/ | 8     | >PTEN-K144I YLLHRGIFLKA | 5    | 3     |
| >PTEN-K144I YLLHRGKFLK  | 28    | >PTEN-K144I YLLHRGIFLK  | 31   | 3     |
| >PTEN-K144I YLLHRGKFLK  | 113   | >PTEN-K144I YLLHRGIFLK  | 82   | 31    |
| >PTEN-K144I YLLHRGKFLK  | 1229  | >PTEN-K144I YLLHRGIFLK  | 473  | 756   |
| >PTEN-K144I YLLHRGKFLK  | 316   | >PTEN-K144I YLLHRGIFLK  | 619  | 303   |
| >PTEN-K144I YLLHRGKF    | 412   | >PTEN-K144I YLLHRGIF    | 333  | 79    |
| >PTEN-K144I YLLHRGKFL   | 54    | >PTEN-K144I YLLHRGIFL   | 184  | 130   |
| >PTEN-K144I YLLHRGKFLK/ | 154   | >PTEN-K144I YLLHRGIFLKA | 658  | 504   |
| >PTEN-K144I YLLHRGKF    | 473   | >PTEN-K144I YLLHRGIF    | 182  | 291   |
| >PTEN-K144I YLLHRGKF    | 43    | >PTEN-K144I YLLHRGIF    | 37   | 6     |
| >PTEN-K144I YLLHRGKFL   | 478   | >PTEN-K144I YLLHRGIFL   | 975  | 497   |
| >PTEN-K144I YLLHRGKF    | 45    | >PTEN-K144I YLLHRGIF    | 24   | 21    |
| >PTEN-K144I YLLHRGKFL   | 278   | >PTEN-K144I YLLHRGIFL   | 279  | 1     |
| >PTEN-K144I YLLHRGKF    | 259   | >PTEN-K144I YLLHRGIF    | 783  | 524   |
| >PTEN-K144I YLLHRGKFLK  | 111   | >PTEN-K144I YLLHRGIFLK  | 82   | 29    |
| >PTEN-K144I AYLLHRGK    | 32280 | >PTEN-K144I AYLLHRGI    | 368  | 31912 |
| >PTEN-K144I AYLLHRGKFLI | 230   | >PTEN-K144I AYLLHRGIFLK | 154  | 76    |
| >PTEN-K144I AYLLHRGKF   | 418   | >PTEN-K144I AYLLHRGIF   | 595  | 177   |
| >PTEN-K144I AYLLHRGKFL  | 368   | >PTEN-K144I AYLLHRGIFL  | 285  | 83    |
| >PTEN-K144I AYLLHRGK    | 4446  | >PTEN-K144I AYLLHRGI    | 25   | 4421  |
| >PTEN-K144I AYLLHRGKF   | 8     | >PTEN-K144I AYLLHRGIF   | 11   | 3     |
| >PTEN-K144I AYLLHRGKFL  | 16    | >PTEN-K144I AYLLHRGIFL  | 12   | 4     |
| >PTEN-K144I AYLLHRGK    | 40    | >PTEN-K144I AYLLHRGI    | 1226 | 1186  |
| >PTEN-K144I AYLLHRGKFL  | 782   | >PTEN-K144I AYLLHRGIFL  | 205  | 577   |
| >PTEN-K144I AYLLHRGKFLI | 25    | >PTEN-K144I AYLLHRGIFLK | 18   | 7     |
| >PTEN-K144I AYLLHRGKFLI | 76    | >PTEN-K144I AYLLHRGIFLK | 83   | 7     |

|                         |       |                         |       |       |
|-------------------------|-------|-------------------------|-------|-------|
| >PTEN-K144I AYLLHRGKFLI | 305   | >PTEN-K144I AYLLHRGIFLK | 244   | 61    |
| >PTEN-K144I AYLLHRGKFL  | 540   | >PTEN-K144I AYLLHRGIFL  | 148   | 392   |
| >PTEN-K144I CAYLLHRGK   | 9098  | >PTEN-K144I CAYLLHRGI   | 141   | 8957  |
| >PTEN-K144I CAYLLHRGKF  | 119   | >PTEN-K144I CAYLLHRGIFL | 71    | 48    |
| >PTEN-K144I CAYLLHRGK   | 471   | >PTEN-K144I CAYLLHRGI   | 31363 | 30892 |
| >PTEN-K144I CAYLLHRGKF  | 67    | >PTEN-K144I CAYLLHRGIF  | 194   | 127   |
| >PTEN-K144I CAYLLHRGKF  | 350   | >PTEN-K144I CAYLLHRGIFL | 431   | 81    |
| >PTEN-K144I CAYLLHRGKF  | 350   | >PTEN-K144I CAYLLHRGIF  | 440   | 90    |
| >PTEN-K144I CAYLLHRGK   | 36779 | >PTEN-K144I CAYLLHRGI   | 46    | 36733 |
| >PTEN-K144I CAYLLHRGKF  | 185   | >PTEN-K144I CAYLLHRGIFL | 185   | 0     |
| >PTEN-K144I ICAYLLHRGKI | 187   | >PTEN-K144I ICAYLLHRGIF | 117   | 70    |
| >PTEN-K147F KAQEALDFY   | 271   | >PTEN-K147F RAQEALDFY   | 194   | 77    |
| >PTEN-K147F KAQEALDFY   | 46    | >PTEN-K147F RAQEALDFY   | 82    | 36    |
| >PTEN-K147F KAQEALDFY   | 708   | >PTEN-K147F RAQEALDFY   | 497   | 211   |
| >PTEN-K147F KAQEALDFY   | 1537  | >PTEN-K147F RAQEALDFY   | 473   | 1064  |
| >PTEN-K147F KAQEALDF    | 309   | >PTEN-K147F RAQEALDF    | 204   | 105   |
| >PTEN-K147F KAQEALDF    | 30    | >PTEN-K147F RAQEALDF    | 13    | 17    |
| >PTEN-K147F KAQEALDFY   | 139   | >PTEN-K147F RAQEALDFY   | 55    | 84    |
| >PTEN-K147F KAQEALDFY   | 481   | >PTEN-K147F RAQEALDFY   | 528   | 47    |
| >PTEN-K147F KAQEALDF    | 133   | >PTEN-K147F RAQEALDF    | 159   | 26    |
| >PTEN-K147F KAQEALDFY   | 195   | >PTEN-K147F RAQEALDFY   | 253   | 58    |
| >PTEN-K147F LKAQEALDF   | 6     | >PTEN-K147F LRAQEALDF   | 63    | 57    |
| >PTEN-K147F LKAQEALDFY  | 85    | >PTEN-K147F LRAQEALDFY  | 540   | 455   |
| >PTEN-K147F LKAQEALDFY  | 16975 | >PTEN-K147F LRAQEALDFY  | 399   | 16576 |
| >PTEN-K147F AYLLHRGKFLI | 230   | >PTEN-K147F AYLLHRGKFLI | 3434  | 3204  |
| >PTEN-K147F AYLLHRGKFLI | 25    | >PTEN-K147F AYLLHRGKFLI | 2497  | 2472  |
| >PTEN-K147F AYLLHRGKFLI | 76    | >PTEN-K147F AYLLHRGKFLI | 10    | 66    |
| >PTEN-K147F AYLLHRGKFLI | 1595  | >PTEN-K147F AYLLHRGKFLI | 68    | 1527  |
| >PTEN-K147F AYLLHRGKFLI | 305   | >PTEN-K147F AYLLHRGKFLI | 505   | 200   |
| >PTEN-K147F AYLLHRGKFLI | 1086  | >PTEN-K147F AYLLHRGKFLI | 93    | 993   |
| >PTEN-K147F FLKAQEAL    | 179   | >PTEN-K147F FLRAQEAL    | 342   | 163   |
| >PTEN-K147F FLKAQEAL    | 4     | >PTEN-K147F FLRAQEAL    | 7     | 3     |
| >PTEN-K147F FLKAQEALDF  | 370   | >PTEN-K147F FLRAQEALDF  | 767   | 397   |
| >PTEN-K147F FLKAQEAL    | 8     | >PTEN-K147F FLRAQEAL    | 14    | 6     |
| >PTEN-K147F FLKAQEAL    | 280   | >PTEN-K147F FLRAQEAL    | 347   | 67    |
| >PTEN-K147F FLKAQEAL    | 58    | >PTEN-K147F FLRAQEAL    | 27    | 31    |
| >PTEN-K147F FLKAQEAL    | 47    | >PTEN-K147F FLRAQEAL    | 63    | 16    |
| >PTEN-K147F FLKAQEAL    | 875   | >PTEN-K147F FLRAQEAL    | 333   | 542   |
| >PTEN-K147F FLKAQEAL    | 4     | >PTEN-K147F FLRAQEAL    | 4     | 0     |
| >PTEN-K147F FLKAQEALDF  | 548   | >PTEN-K147F FLRAQEALDF  | 369   | 179   |
| >PTEN-K147F FLKAQEALDF  | 98    | >PTEN-K147F FLRAQEALDF  | 53    | 45    |
| >PTEN-K147F FLKAQEALDF  | 209   | >PTEN-K147F FLRAQEALDF  | 365   | 156   |
| >PTEN-K147F FLKAQEALDF  | 122   | >PTEN-K147F FLRAQEALDF  | 125   | 3     |

|                         |      |                         |       |      |
|-------------------------|------|-------------------------|-------|------|
| >PTEN-K147F FLKAEAL     | 68   | >PTEN-K147F FLRAQEAL    | 81    | 13   |
| >PTEN-K147F FLKAEAL     | 343  | >PTEN-K147F FLRAQEAL    | 309   | 34   |
| >PTEN-K147F FLKAEALDF   | 105  | >PTEN-K147F FLRAQEALDF  | 105   | 0    |
| >PTEN-K147F FLKAEALDF   | 105  | >PTEN-K147F FLRAQEALDF  | 103   | 2    |
| >PTEN-K147F FLKAEAL     | 579  | >PTEN-K147F FLRAQEAL    | 352   | 227  |
| >PTEN-K147F FLKAEALDF   | 108  | >PTEN-K147F FLRAQEALDF  | 68    | 40   |
| >PTEN-K147F FLKAEALDF   | 78   | >PTEN-K147F FLRAQEALDF  | 53    | 25   |
| >PTEN-K147F FLKAEAL     | 515  | >PTEN-K147F FLRAQEAL    | 234   | 281  |
| >PTEN-K147F FLKAEALDF   | 37   | >PTEN-K147F FLRAQEALDF  | 18    | 19   |
| >PTEN-K147F FLKAEALDF   | 716  | >PTEN-K147F FLRAQEALDF  | 335   | 381  |
| >PTEN-K147F FLKAEALDF   | 2201 | >PTEN-K147F FLRAQEALDF  | 307   | 1894 |
| >PTEN-K147F KFLKAEAL    | 154  | >PTEN-K147F KFLRAQEAL   | 221   | 67   |
| >PTEN-K147F KFLKAEALD   | 77   | >PTEN-K147F KFLRAQEALD  | 72    | 5    |
| >PTEN-K147F KFLKAEALD   | 345  | >PTEN-K147F KFLRAQEALD  | 271   | 74   |
| >PTEN-K147F KFLKAEAL    | 37   | >PTEN-K147F KFLRAQEAL   | 42    | 5    |
| >PTEN-K147F KFLKAEALD   | 9    | >PTEN-K147F KFLRAQEALD  | 9     | 0    |
| >PTEN-K147F KFLKAEAL    | 464  | >PTEN-K147F KFLRAQEAL   | 204   | 260  |
| >PTEN-K147F KFLKAEALD   | 745  | >PTEN-K147F KFLRAQEALD  | 484   | 261  |
| >PTEN-K147F KFLKAEALD   | 364  | >PTEN-K147F KFLRAQEALD  | 379   | 15   |
| >PTEN-K147F KFLKAEAL    | 626  | >PTEN-K147F KFLRAQEAL   | 466   | 160  |
| >PTEN-K147F KFLKAEAL    | 257  | >PTEN-K147F KFLRAQEAL   | 195   | 62   |
| >PTEN-K147F GKFLKAEAL   | 109  | >PTEN-K147F GKFLRAQEAL  | 73    | 36   |
| >PTEN-K147F RGKFLKAEAL  | 193  | >PTEN-K147F RGKFLRAQEAL | 65    | 128  |
| >PTEN-K147F RGKFLKAEAL  | 1102 | >PTEN-K147F RGKFLRAQEAL | 421   | 681  |
| >PTEN-K147F LHRGKFLK    | 386  | >PTEN-K147F LHRGKFLR    | 10220 | 9834 |
| >PTEN-K147F LHRGKFLK    | 6052 | >PTEN-K147F LHRGKFLR    | 469   | 5583 |
| >PTEN-K147F LLHRGKFLKA  | 194  | >PTEN-K147F LLHRGKFLRA  | 248   | 54   |
| >PTEN-K147F LLHRGKFLKA  | 132  | >PTEN-K147F LLHRGKFLRA  | 82    | 50   |
| >PTEN-K147F LLHRGKFLK   | 328  | >PTEN-K147F LLHRGKFLR   | 2059  | 1731 |
| >PTEN-K147F LLHRGKFLKA  | 8    | >PTEN-K147F LLHRGKFLRA  | 6     | 2    |
| >PTEN-K147F LLHRGKFLKA  | 230  | >PTEN-K147F LLHRGKFLRA  | 318   | 88   |
| >PTEN-K147F LLHRGKFLK   | 41   | >PTEN-K147F LLHRGKFLR   | 294   | 253  |
| >PTEN-K147F LLHRGKFLK   | 63   | >PTEN-K147F LLHRGKFLR   | 1831  | 1768 |
| >PTEN-K147F LLHRGKFLK   | 37   | >PTEN-K147F LLHRGKFLR   | 3276  | 3239 |
| >PTEN-K147F LLHRGKFLK   | 69   | >PTEN-K147F LLHRGKFLR   | 9     | 60   |
| >PTEN-K147F LLHRGKFLK   | 3461 | >PTEN-K147F LLHRGKFLR   | 147   | 3314 |
| >PTEN-K147F LLHRGKFLK   | 427  | >PTEN-K147F LLHRGKFLR   | 135   | 292  |
| >PTEN-K147F YLLHRGKFLK/ | 86   | >PTEN-K147F YLLHRGKFLR/ | 72    | 14   |
| >PTEN-K147F YLLHRGKFLK/ | 446  | >PTEN-K147F YLLHRGKFLR/ | 444   | 2    |
| >PTEN-K147F YLLHRGKFLK/ | 44   | >PTEN-K147F YLLHRGKFLR/ | 43    | 1    |
| >PTEN-K147F YLLHRGKFLK/ | 66   | >PTEN-K147F YLLHRGKFLR/ | 74    | 8    |
| >PTEN-K147F YLLHRGKFLK/ | 12   | >PTEN-K147F YLLHRGKFLR/ | 9     | 3    |
| >PTEN-K147F YLLHRGKFLK/ | 39   | >PTEN-K147F YLLHRGKFLR/ | 40    | 1    |

|                        |       |                        |      |       |
|------------------------|-------|------------------------|------|-------|
| >PTEN-K147FYLLHRGKFLK/ | 17    | >PTEN-K147FYLLHRGKFLR/ | 22   | 5     |
| >PTEN-K147FYLLHRGKFLK/ | 317   | >PTEN-K147FYLLHRGKFLR/ | 315  | 2     |
| >PTEN-K147FYLLHRGKFLK  | 296   | >PTEN-K147FYLLHRGKFLR  | 1444 | 1148  |
| >PTEN-K147FYLLHRGKFLK/ | 8     | >PTEN-K147FYLLHRGKFLR/ | 6    | 2     |
| >PTEN-K147FYLLHRGKFLK  | 28    | >PTEN-K147FYLLHRGKFLR  | 416  | 388   |
| >PTEN-K147FYLLHRGKFLK  | 113   | >PTEN-K147FYLLHRGKFLR  | 1532 | 1419  |
| >PTEN-K147FYLLHRGKFLK  | 316   | >PTEN-K147FYLLHRGKFLR  | 21   | 295   |
| >PTEN-K147FYLLHRGKFLK  | 1206  | >PTEN-K147FYLLHRGKFLR  | 51   | 1155  |
| >PTEN-K147FYLLHRGKFLK  | 1275  | >PTEN-K147FYLLHRGKFLR  | 424  | 851   |
| >PTEN-K147FYLLHRGKFLK/ | 154   | >PTEN-K147FYLLHRGKFLR/ | 130  | 24    |
| >PTEN-K147FYLLHRGKFLK  | 111   | >PTEN-K147FYLLHRGKFLR  | 65   | 46    |
| >PTEN-K147FYLLHRGKFLK  | 2668  | >PTEN-K147FYLLHRGKFLR  | 243  | 2425  |
| >PTEN-K164FKGVTIPSQRR  | 155   | >PTEN-K164FRGVTIPSQRR  | 296  | 141   |
| >PTEN-K164FKGVTIPSQR   | 208   | >PTEN-K164FRGVTIPSQR   | 181  | 27    |
| >PTEN-K164FKGVTIPSQRR  | 202   | >PTEN-K164FRGVTIPSQRR  | 69   | 133   |
| >PTEN-K164FKGVTIPSQRR  | 227   | >PTEN-K164FRGVTIPSQRR  | 142  | 85    |
| >PTEN-K164FKGVTIPSQR   | 147   | >PTEN-K164FRGVTIPSQR   | 189  | 42    |
| >PTEN-K164FKGVTIPSQRR  | 120   | >PTEN-K164FRGVTIPSQRR  | 163  | 43    |
| >PTEN-K164FKKGVVTIPSQR | 8641  | >PTEN-K164FKRGVTIPSQR  | 67   | 8574  |
| >PTEN-K164FKKGVVTIPS   | 8465  | >PTEN-K164FKRGVTIPS    | 186  | 8279  |
| >PTEN-K164FKKGVVTIPSQR | 609   | >PTEN-K164FKRGVTIPSQR  | 410  | 199   |
| >PTEN-K164FKKGVVTIPSQR | 511   | >PTEN-K164FKRGVTIPSQR  | 329  | 182   |
| >PTEN-K164FYGVEVTRDK   | 3395  | >PTEN-K164FYGVEVTRDK   | 171  | 3224  |
| >PTEN-K164FYGVEVTRDK   | 1184  | >PTEN-K164FYGVEVTRDK   | 399  | 785   |
| >PTEN-K164FYGVEVTRDK   | 3491  | >PTEN-K164FYGVEVTRDK   | 104  | 3387  |
| >PTEN-K164FDKKGVTIPSQ  | 497   | >PTEN-K164DKRGVTIPSQ   | 386  | 111   |
| >PTEN-K164FRDKKGVTI    | 179   | >PTEN-K164FRDKRGVTI    | 953  | 774   |
| >PTEN-K164FRTRDKKGV    | 14    | >PTEN-K164FRTRDKRGV    | 9    | 5     |
| >PTEN-K164FRTRDKKGVT   | 71    | >PTEN-K164FRTRDKRGVT   | 14   | 57    |
| >PTEN-K164FRTRDKKGVTI  | 5     | >PTEN-K164FRTRDKRGVTI  | 4    | 1     |
| >PTEN-K164FRTRDKKGVTI  | 103   | >PTEN-K164FRTRDKRGVTI  | 36   | 67    |
| >PTEN-K164FRTRDKKGVTI  | 120   | >PTEN-K164FRTRDKRGVTI  | 85   | 35    |
| >PTEN-K164FRTRDKKGV    | 26    | >PTEN-K164FRTRDKRGV    | 33   | 7     |
| >PTEN-K164FRTRDKKGVTI  | 5     | >PTEN-K164FRTRDKRGVTI  | 5    | 0     |
| >PTEN-K164FRTRDKKGVTI  | 100   | >PTEN-K164FRTRDKRGVTI  | 60   | 40    |
| >PTEN-K164FVRTRDKKGV   | 595   | >PTEN-K164FVRTRDKRGV   | 402  | 193   |
| >PTEN-K164FEVTRDKK     | 2612  | >PTEN-K164FEVTRDKR     | 94   | 2518  |
| >PTEN-K164FEVTRDKK     | 81    | >PTEN-K164FEVTRDKR     | 28   | 53    |
| >PTEN-K164FGEVTRDKKC   | 178   | >PTEN-K164FGEVTRDKRC   | 354  | 176   |
| >PTEN-K164FGEVTRDKKC   | 381   | >PTEN-K164FGEVTRDKRC   | 297  | 84    |
| >PTEN-K164FGEVTRDKKC   | 89    | >PTEN-K164FGEVTRDKRC   | 89   | 0     |
| >PTEN-K254FEVEFFHKQNF  | 22    | >PTEN-K254FEVEFFHKQNF  | 9850 | 9828  |
| >PTEN-K254FEVEFFHKQ    | 16311 | >PTEN-K254FEVEFFHKQ    | 483  | 15828 |

|                         |       |                         |       |       |
|-------------------------|-------|-------------------------|-------|-------|
| >PTEN-K254E KVEFFHKQNF  | 184   | >PTEN-K254E EVEFFHKQNF  | 2250  | 2066  |
| >PTEN-K254E IKVEFFHK    | 330   | >PTEN-K254E IEVEFFHK    | 5981  | 5651  |
| >PTEN-K254E IKVEFFHKQN  | 265   | >PTEN-K254E IEVEFFHKQN  | 5061  | 4796  |
| >PTEN-K254E IKVEFFHK    | 21376 | >PTEN-K254E IEVEFFHK    | 358   | 21018 |
| >PTEN-K254E IKVEFFHKQN  | 20714 | >PTEN-K254E IEVEFFHKQN  | 323   | 20391 |
| >PTEN-K254E PVCGDIKV    | 466   | >PTEN-K254E PVCGDIEV    | 178   | 288   |
| >PTEN-K254E PVCGDIKVEF  | 395   | >PTEN-K254E PVCGDIEVEF  | 213   | 182   |
| >PTEN-K254E PVCGDIKVEF  | 21    | >PTEN-K254E PVCGDIEVEF  | 14    | 7     |
| >PTEN-K254E LPVCGDIKVEI | 35    | >PTEN-K254E LPVCGDIEVEI | 32    | 3     |
| >PTEN-K254E LPVCGDIKVEI | 484   | >PTEN-K254E LPVCGDIEVEI | 908   | 424   |
| >PTEN-K254E LPVCGDIK    | 621   | >PTEN-K254E LPVCGDIE    | 339   | 282   |
| >PTEN-K254E LPVCGDIKVEI | 9     | >PTEN-K254E LPVCGDIEVEI | 7     | 2     |
| >PTEN-K254E LPVCGDIKVEI | 26    | >PTEN-K254E LPVCGDIEVEI | 25    | 1     |
| >PTEN-K254E LPVCGDIK    | 306   | >PTEN-K254E LPVCGDIE    | 304   | 2     |
| >PTEN-K254E LPVCGDIKVEI | 499   | >PTEN-K254E LPVCGDIEVEI | 549   | 50    |
| >PTEN-K254E LPVCGDIKVEI | 18    | >PTEN-K254E LPVCGDIEVEI | 12    | 6     |
| >PTEN-K254E PLPVCGDIKV  | 934   | >PTEN-K254E PLPVCGDIEV  | 478   | 456   |
| >PTEN-K254E PLPVCGDIKV  | 176   | >PTEN-K254E PLPVCGDIEV  | 105   | 71    |
| >PTEN-K254E PLPVCGDIKV  | 46    | >PTEN-K254E PLPVCGDIEV  | 33    | 13    |
| >PTEN-K254E QPLPVCGDIK  | 878   | >PTEN-K254E QPLPVCGDIE  | 323   | 555   |
| >PTEN-K342I KVKLYFTKTV  | 150   | >PTEN-K342I NVKLYFTKTV  | 259   | 109   |
| >PTEN-K342I KVKLYFTK    | 81    | >PTEN-K342I NVKLYFTK    | 2054  | 1973  |
| >PTEN-K342I KVKLYFTK    | 30    | >PTEN-K342I NVKLYFTK    | 165   | 135   |
| >PTEN-K342I KVKLYFTK    | 4     | >PTEN-K342I NVKLYFTK    | 79    | 75    |
| >PTEN-K342I KVKLYFTKTV  | 15    | >PTEN-K342I NVKLYFTKTV  | 3921  | 3906  |
| >PTEN-K342I KVKLYFTK    | 8     | >PTEN-K342I NVKLYFTK    | 94    | 86    |
| >PTEN-K342I KVKLYFTK    | 4696  | >PTEN-K342I NVKLYFTK    | 146   | 4550  |
| >PTEN-K342I KVKLYFTK    | 1422  | >PTEN-K342I NVKLYFTK    | 68    | 1354  |
| >PTEN-K342I KVKLYFTK    | 485   | >PTEN-K342I NVKLYFTK    | 6492  | 6007  |
| >PTEN-K342I FVKLYFTKT\  | 224   | >PTEN-K342I FNVKLYFTKT\ | 985   | 761   |
| >PTEN-K342I FVKLYFTK    | 513   | >PTEN-K342I FNVKLYFTK   | 120   | 393   |
| >PTEN-K342I FVKLYFTK    | 199   | >PTEN-K342I FNVKLYFTK   | 9453  | 9254  |
| >PTEN-K342I FVKLYFTKT\  | 25    | >PTEN-K342I FNVKLYFTKT\ | 1360  | 1335  |
| >PTEN-K342I KANRYFSPNF  | 46    | >PTEN-K342I KANRYFSPNF  | 16359 | 16313 |
| >PTEN-K342I KANRYFSPNF  | 12    | >PTEN-K342I KANRYFSPNF  | 13792 | 13780 |
| >PTEN-K342I KANRYFSPNF  | 4     | >PTEN-K342I KANRYFSPNF  | 788   | 784   |
| >PTEN-K342I KANRYFSPNF  | 17    | >PTEN-K342I KANRYFSPNF  | 3243  | 3226  |
| >PTEN-K342I KANRYFSPNF  | 469   | >PTEN-K342I KANRYFSPNF  | 24579 | 24110 |
| >PTEN-K342I NFKVKLYFTK  | 1063  | >PTEN-K342I NFNVKLYFTK  | 373   | 690   |
| >PTEN-K342I NFKVKLYF    | 240   | >PTEN-K342I NFNVKLYF    | 437   | 197   |
| >PTEN-K342I NFKVKLYF    | 96    | >PTEN-K342I NFNVKLYF    | 117   | 21    |
| >PTEN-K342I NFKVKLYFTK  | 142   | >PTEN-K342I NFNVKLYFTK  | 3109  | 2967  |
| >PTEN-K342I NFKVKLYFTK  | 284   | >PTEN-K342I NFNVKLYFTK  | 425   | 141   |

|                         |      |                         |     |      |
|-------------------------|------|-------------------------|-----|------|
| >PTEN-K342I NFKVKLYFTK  | 570  | >PTEN-K342I NFNVKLYFTK  | 492 | 78   |
| >PTEN-K342I SPNFKVKLYF  | 136  | >PTEN-K342I SPNFNVKLYF  | 37  | 99   |
| >PTEN-K342I SPNFKVKL    | 224  | >PTEN-K342I SPNFNVKL    | 311 | 87   |
| >PTEN-K342I SPNFKVKLYF  | 97   | >PTEN-K342I SPNFNVKLYF  | 171 | 74   |
| >PTEN-K342I SPNFKVKLY   | 1114 | >PTEN-K342I SPNFNVKLY   | 311 | 803  |
| >PTEN-K342I SPNFKVKLY   | 653  | >PTEN-K342I SPNFNVKLY   | 286 | 367  |
| >PTEN-K342I SPNFKVKLY   | 167  | >PTEN-K342I SPNFNVKLY   | 474 | 307  |
| >PTEN-K342I FSPNFKVKL   | 122  | >PTEN-K342I FSPNFNVKL   | 396 | 274  |
| >PTEN-K342I FSPNFKVKLY  | 238  | >PTEN-K342I FSPNFNVKLY  | 220 | 18   |
| >PTEN-K342I FSPNFKVKL   | 2943 | >PTEN-K342I FSPNFNVKL   | 472 | 2471 |
| >PTEN-K342I FSPNFKVKLYI | 186  | >PTEN-K342I FSPNFNVKLY  | 144 | 42   |
| >PTEN-K342I FSPNFKVKLY  | 701  | >PTEN-K342I FSPNFNVKLY  | 263 | 438  |
| >PTEN-K342I FSPNFKVKLY  | 138  | >PTEN-K342I FSPNFNVKLY  | 120 | 18   |
| >PTEN-K342I FSPNFKVK    | 695  | >PTEN-K342I FSPNFNVK    | 162 | 533  |
| >PTEN-K342I FSPNFKVKL   | 544  | >PTEN-K342I FSPNFNVKL   | 142 | 402  |
| >PTEN-K342I FSPNFKVKLY  | 548  | >PTEN-K342I FSPNFNVKLY  | 206 | 342  |
| >PTEN-K342I FSPNFKVKLYI | 122  | >PTEN-K342I FSPNFNVKLY  | 71  | 51   |
| >PTEN-K342I FSPNFKVKLY  | 493  | >PTEN-K342I FSPNFNVKLY  | 315 | 178  |
| >PTEN-K342I FSPNFKVKLYI | 571  | >PTEN-K342I FSPNFNVKLY  | 319 | 252  |
| >PTEN-K342I FSPNFKVKL   | 7    | >PTEN-K342I FSPNFNVKL   | 4   | 3    |
| >PTEN-K342I FSPNFKVKLY  | 84   | >PTEN-K342I FSPNFNVKLY  | 29  | 55   |
| >PTEN-K342I FSPNFKVKLYI | 5    | >PTEN-K342I FSPNFNVKLY  | 4   | 1    |
| >PTEN-K342I FSPNFKVKLY  | 191  | >PTEN-K342I FSPNFNVKLY  | 92  | 99   |
| >PTEN-K342I FSPNFKVKLYI | 536  | >PTEN-K342I FSPNFNVKLY  | 419 | 117  |
| >PTEN-K342I FSPNFKVKL   | 581  | >PTEN-K342I FSPNFNVKL   | 322 | 259  |
| >PTEN-K342I YFSPNFKV    | 149  | >PTEN-K342I YFSPNFNV    | 52  | 97   |
| >PTEN-K342I YFSPNFKV    | 826  | >PTEN-K342I YFSPNFNV    | 417 | 409  |
| >PTEN-K342I YFSPNFKV    | 274  | >PTEN-K342I YFSPNFNV    | 248 | 26   |
| >PTEN-K342I YFSPNFKV    | 347  | >PTEN-K342I YFSPNFNV    | 226 | 121  |
| >PTEN-K342I YFSPNFKV    | 721  | >PTEN-K342I YFSPNFNV    | 445 | 276  |
| >PTEN-K342I YFSPNFKV    | 18   | >PTEN-K342I YFSPNFNV    | 15  | 3    |
| >PTEN-K342I YFSPNFKVK   | 757  | >PTEN-K342I YFSPNFNVK   | 448 | 309  |
| >PTEN-K342I YFSPNFKV    | 183  | >PTEN-K342I YFSPNFNV    | 200 | 17   |
| >PTEN-K342I YFSPNFKVK   | 422  | >PTEN-K342I YFSPNFNVK   | 180 | 242  |
| >PTEN-K342I YFSPNFKVKL  | 14   | >PTEN-K342I YFSPNFNVKL  | 10  | 4    |
| >PTEN-K342I YFSPNFKVKL' | 13   | >PTEN-K342I YFSPNFNVKL' | 10  | 3    |
| >PTEN-K342I YFSPNFKVKL' | 1065 | >PTEN-K342I YFSPNFNVKL' | 439 | 626  |
| >PTEN-K342I YFSPNFKVKL' | 624  | >PTEN-K342I YFSPNFNVKL' | 480 | 144  |
| >PTEN-K342I YFSPNFKVKL' | 449  | >PTEN-K342I YFSPNFNVKL' | 303 | 146  |
| >PTEN-K342I YFSPNFKVKL' | 1180 | >PTEN-K342I YFSPNFNVKL' | 444 | 736  |
| >PTEN-K342I YFSPNFKVKL' | 207  | >PTEN-K342I YFSPNFNVKL' | 143 | 64   |
| >PTEN-K342I YFSPNFKVK   | 356  | >PTEN-K342I YFSPNFNVK   | 468 | 112  |
| >PTEN-K342I RYFSPNFKV   | 92   | >PTEN-K342I RYFSPNFNV   | 91  | 1    |



|                        |      |                        |       |       |
|------------------------|------|------------------------|-------|-------|
| >PTEN-K342I RYFSPNFK   | 143  | >PTEN-K342I RYFSPNFN   | 17796 | 17653 |
| >PTEN-K342I RYFSPNFK   | 41   | >PTEN-K342I RYFSPNFN   | 20176 | 20135 |
| >PTEN-K342I RYFSPNFKV  | 627  | >PTEN-K342I RYFSPNFNV  | 392   | 235   |
| >PTEN-K342I RYFSPNFKVK | 196  | >PTEN-K342I RYFSPNFNVK | 132   | 64    |
| >PTEN-K342I RYFSPNFKVK | 412  | >PTEN-K342I RYFSPNFNVK | 307   | 105   |
| >PTEN-K342I RYFSPNFK   | 208  | >PTEN-K342I RYFSPNFN   | 689   | 481   |
| >PTEN-K342I RYFSPNFKV  | 20   | >PTEN-K342I RYFSPNFNV  | 23    | 3     |
| >PTEN-K342I RYFSPNFKVK | 104  | >PTEN-K342I RYFSPNFNVK | 67    | 37    |
| >PTEN-K342I RYFSPNFKVK | 5    | >PTEN-K342I RYFSPNFNVK | 5     | 0     |
| >PTEN-K342I RYFSPNFK   | 5    | >PTEN-K342I RYFSPNFN   | 665   | 660   |
| >PTEN-K342I RYFSPNFKV  | 209  | >PTEN-K342I RYFSPNFNV  | 79    | 130   |
| >PTEN-K342I RYFSPNFKVK | 9    | >PTEN-K342I RYFSPNFNVK | 7     | 2     |
| >PTEN-K342I RYFSPNFKVK | 448  | >PTEN-K342I RYFSPNFNVK | 214   | 234   |
| >PTEN-K342I RYFSPNFK   | 15   | >PTEN-K342I RYFSPNFN   | 2021  | 2006  |
| >PTEN-K342I RYFSPNFKV  | 206  | >PTEN-K342I RYFSPNFNV  | 160   | 46    |
| >PTEN-K342I RYFSPNFKVK | 658  | >PTEN-K342I RYFSPNFNVK | 420   | 238   |
| >PTEN-K342I RYFSPNFKVK | 342  | >PTEN-K342I RYFSPNFNVK | 470   | 128   |
| >PTEN-K342I RYFSPNFKV  | 238  | >PTEN-K342I RYFSPNFNV  | 267   | 29    |
| >PTEN-K342I RYFSPNFKVK | 48   | >PTEN-K342I RYFSPNFNVK | 26    | 22    |
| >PTEN-K342I RYFSPNFKVK | 514  | >PTEN-K342I RYFSPNFNVK | 288   | 226   |
| >PTEN-K342I RYFSPNFK   | 23   | >PTEN-K342I RYFSPNFN   | 624   | 601   |
| >PTEN-K342I RYFSPNFKVK | 24   | >PTEN-K342I RYFSPNFNVK | 26    | 2     |
| >PTEN-K342I RYFSPNFKV  | 223  | >PTEN-K342I RYFSPNFNV  | 393   | 170   |
| >PTEN-K342I RYFSPNFKVK | 319  | >PTEN-K342I RYFSPNFNVK | 356   | 37    |
| >PTEN-K342I RYFSPNFK   | 157  | >PTEN-K342I RYFSPNFN   | 244   | 87    |
| >PTEN-K342I RYFSPNFKV  | 242  | >PTEN-K342I RYFSPNFNV  | 289   | 47    |
| >PTEN-K342I RYFSPNFKVK | 2535 | >PTEN-K342I RYFSPNFNVK | 411   | 2124  |
| >PTEN-K342I RYFSPNFKVK | 185  | >PTEN-K342I RYFSPNFNVK | 179   | 6     |
| >PTEN-K342I NRYFSPNFK  | 331  | >PTEN-K342I NRYFSPNFN  | 19506 | 19175 |
| >PTEN-K342I NRYFSPNFKV | 221  | >PTEN-K342I NRYFSPNFNV | 356   | 135   |
| >PTEN-K342I NRYFSPNFK  | 120  | >PTEN-K342I NRYFSPNFN  | 1312  | 1192  |
| >PTEN-K342I NRYFSPNFKV | 151  | >PTEN-K342I NRYFSPNFNV | 81    | 70    |
| >PTEN-K342I ANRYFSPNFK | 4    | >PTEN-K342I ANRYFSPNFN | 447   | 443   |
| >PTEN-K342I ANRYFSPNFK | 174  | >PTEN-K342I ANRYFSPNFN | 87    | 87    |
| >PTEN-K344F KLYFTKTV   | 37   | >PTEN-K344F RLYFTKTV   | 89    | 52    |
| >PTEN-K344F KLYFTKTV   | 73   | >PTEN-K344F RLYFTKTV   | 118   | 45    |
| >PTEN-K344F KLYFTKTV   | 7    | >PTEN-K344F RLYFTKTV   | 6     | 1     |
| >PTEN-K344F KLYFTKTV   | 212  | >PTEN-K344F RLYFTKTV   | 419   | 207   |
| >PTEN-K344F KLYFTKTV   | 2    | >PTEN-K344F RLYFTKTV   | 2     | 0     |
| >PTEN-K344F KLYFTKTV   | 6    | >PTEN-K344F RLYFTKTV   | 7     | 1     |
| >PTEN-K344F KLYFTKTV   | 7    | >PTEN-K344F RLYFTKTV   | 8     | 1     |
| >PTEN-K344F KLYFTKTV   | 15   | >PTEN-K344F RLYFTKTV   | 20    | 5     |
| >PTEN-K344F KLYFTKTV   | 3    | >PTEN-K344F RLYFTKTV   | 3     | 0     |

|                        |      |                         |     |      |
|------------------------|------|-------------------------|-----|------|
| >PTEN-K344F KLYFTKTV   | 41   | >PTEN-K344F RLYFTKTV    | 42  | 1    |
| >PTEN-K344F KLYFTKTV   | 283  | >PTEN-K344F RLYFTKTV    | 152 | 131  |
| >PTEN-K344F VKLYFTKTV  | 222  | >PTEN-K344F VRLYFTKTV   | 422 | 200  |
| >PTEN-K344F VKLYFTKTV  | 15   | >PTEN-K344F VRLYFTKTV   | 87  | 72   |
| >PTEN-K344F NRYFSPNFKV | 151  | >PTEN-K344F NRYFSPNFKV  | 634 | 483  |
| >PTEN-K344F NRYFSPNFKV | 4459 | >PTEN-K344F NRYFSPNFKV  | 279 | 4180 |
| >PTEN-K344F KVLYFTKTV  | 150  | >PTEN-K344F KVRLYFTKTV  | 263 | 113  |
| >PTEN-K344F KVLYFTK    | 81   | >PTEN-K344F KVRLYFTK    | 54  | 27   |
| >PTEN-K344F KVLYFTK    | 30   | >PTEN-K344F KVRLYFTK    | 70  | 40   |
| >PTEN-K344F KVLYFTK    | 4    | >PTEN-K344F KVRLYFTK    | 3   | 1    |
| >PTEN-K344F KVLYFTKT   | 813  | >PTEN-K344F KVRLYFTKT   | 120 | 693  |
| >PTEN-K344F KVLYFTKTV  | 15   | >PTEN-K344F KVRLYFTKTV  | 6   | 9    |
| >PTEN-K344F KVLYFTKTVI | 2074 | >PTEN-K344F KVRLYFTKTVI | 464 | 1610 |
| >PTEN-K344F KVLYFTK    | 8    | >PTEN-K344F KVRLYFTK    | 10  | 2    |
| >PTEN-K344F KVLYFTK    | 485  | >PTEN-K344F KVRLYFTK    | 741 | 256  |
| >PTEN-K344F FKVLYFTKT\ | 224  | >PTEN-K344F FKVLYFTKT\  | 238 | 14   |
| >PTEN-K344F FKVLYFTK   | 199  | >PTEN-K344F FKVLYFTK    | 223 | 24   |
| >PTEN-K344F FKVLYFTKT\ | 25   | >PTEN-K344F FKVLYFTKT\  | 27  | 2    |
| >PTEN-K344F NFKVLYF    | 240  | >PTEN-K344F NFKVLYF     | 201 | 39   |
| >PTEN-K344F NFKVLYF    | 96   | >PTEN-K344F NFKVLYF     | 69  | 27   |
| >PTEN-K344F NFKVLYFTK  | 142  | >PTEN-K344F NFKVLYFTK   | 82  | 60   |
| >PTEN-K344F NFKVLYFTK  | 284  | >PTEN-K344F NFKVLYFTK   | 177 | 107  |
| >PTEN-K344F NFKVLYFTK  | 604  | >PTEN-K344F NFKVLYFTK   | 283 | 321  |
| >PTEN-K344F NFKVLYFTK  | 570  | >PTEN-K344F NFKVLYFTK   | 403 | 167  |
| >PTEN-K344F PNFKVLYF   | 804  | >PTEN-K344F PNFKVLYF    | 318 | 486  |
| >PTEN-K344F PNFKVLYF   | 830  | >PTEN-K344F PNFKVLYF    | 266 | 564  |
| >PTEN-K344F SPNFKVLYF  | 136  | >PTEN-K344F SPNFKVLYF   | 143 | 7    |
| >PTEN-K344F SPNFKVLYF  | 224  | >PTEN-K344F SPNFKVLYF   | 108 | 116  |
| >PTEN-K344F SPNFKVLYF  | 97   | >PTEN-K344F SPNFKVLYF   | 71  | 26   |
| >PTEN-K344F SPNFKVLY   | 167  | >PTEN-K344F SPNFKVLY    | 61  | 106  |
| >PTEN-K344F SPNFKVLYF  | 833  | >PTEN-K344F SPNFKVLYF   | 390 | 443  |
| >PTEN-K344F FSPNFKVLY  | 122  | >PTEN-K344F FSPNFKVLY   | 39  | 83   |
| >PTEN-K344F FSPNFKVLY  | 238  | >PTEN-K344F FSPNFKVLY   | 172 | 66   |
| >PTEN-K344F FSPNFKVLYI | 186  | >PTEN-K344F FSPNFKVLYI  | 148 | 38   |
| >PTEN-K344F FSPNFKVLY  | 701  | >PTEN-K344F FSPNFKVLY   | 422 | 279  |
| >PTEN-K344F FSPNFKVLY  | 138  | >PTEN-K344F FSPNFKVLY   | 106 | 32   |
| >PTEN-K344F FSPNFKV    | 695  | >PTEN-K344F FSPNFKV     | 218 | 477  |
| >PTEN-K344F FSPNFKV    | 544  | >PTEN-K344F FSPNFKV     | 314 | 230  |
| >PTEN-K344F FSPNFKVLYI | 122  | >PTEN-K344F FSPNFKVLYI  | 82  | 40   |
| >PTEN-K344F FSPNFKVLY  | 493  | >PTEN-K344F FSPNFKVLY   | 694 | 201  |
| >PTEN-K344F FSPNFKVLY  | 7    | >PTEN-K344F FSPNFKVLY   | 8   | 1    |
| >PTEN-K344F FSPNFKVLY  | 84   | >PTEN-K344F FSPNFKVLY   | 65  | 19   |
| >PTEN-K344F FSPNFKVLYI | 5    | >PTEN-K344F FSPNFKVLYI  | 4   | 1    |

|                                     |      |                                    |       |       |
|-------------------------------------|------|------------------------------------|-------|-------|
| >PTEN-K344F FSPNFKVKLY              | 191  | >PTEN-K344F FSPNFKVRLY             | 204   | 13    |
| >PTEN-K344F FSPNFKVKLYI             | 536  | >PTEN-K344F FSPNFKVRLYI            | 479   | 57    |
| >PTEN-K344F YFSPNFKVK               | 422  | >PTEN-K344F YFSPNFKVR              | 667   | 245   |
| >PTEN-K344F YFSPNFKVKL              | 14   | >PTEN-K344F YFSPNFKVRL             | 18    | 4     |
| >PTEN-K344F YFSPNFKVKL'             | 13   | >PTEN-K344F YFSPNFKVRL'            | 11    | 2     |
| >PTEN-K344F YFSPNFKVK               | 2709 | >PTEN-K344F YFSPNFKVR              | 124   | 2585  |
| >PTEN-K344F YFSPNFKVKL'             | 624  | >PTEN-K344F YFSPNFKVRL'            | 439   | 185   |
| >PTEN-K344F YFSPNFKVKL'             | 449  | >PTEN-K344F YFSPNFKVRL'            | 451   | 2     |
| >PTEN-K344F YFSPNFKVKL'             | 207  | >PTEN-K344F YFSPNFKVRL'            | 309   | 102   |
| >PTEN-K344F YFSPNFKVK               | 356  | >PTEN-K344F YFSPNFKVR              | 32    | 324   |
| >PTEN-K344F RYFSPNFKVK              | 196  | >PTEN-K344F RYFSPNFKVR             | 154   | 42    |
| >PTEN-K344F RYFSPNFKVK              | 412  | >PTEN-K344F RYFSPNFKVR             | 358   | 54    |
| >PTEN-K344F RYFSPNFKVK              | 104  | >PTEN-K344F RYFSPNFKVR             | 162   | 58    |
| >PTEN-K344F RYFSPNFKVK              | 5    | >PTEN-K344F RYFSPNFKVR             | 6     | 1     |
| >PTEN-K344F RYFSPNFKVK              | 9    | >PTEN-K344F RYFSPNFKVR             | 533   | 524   |
| >PTEN-K344F RYFSPNFKVK              | 448  | >PTEN-K344F RYFSPNFKVR             | 427   | 21    |
| >PTEN-K344F RYFSPNFKVK              | 658  | >PTEN-K344F RYFSPNFKVR             | 29    | 629   |
| >PTEN-K344F RYFSPNFKVK              | 342  | >PTEN-K344F RYFSPNFKVR             | 319   | 23    |
| >PTEN-K344F RYFSPNFKVK              | 48   | >PTEN-K344F RYFSPNFKVR             | 63    | 15    |
| >PTEN-K344F RYFSPNFKVK              | 24   | >PTEN-K344F RYFSPNFKVR             | 12    | 12    |
| >PTEN-K344F RYFSPNFKVK              | 319  | >PTEN-K344F RYFSPNFKVR             | 556   | 237   |
| >PTEN-K344F RYFSPNFKVK              | 185  | >PTEN-K344F RYFSPNFKVR             | 208   | 23    |
| >PTEN-K62I- $\backslash$ KNHYKIYNL  | 1019 | >PTEN-K62I- $\uparrow$ INHYKIYNL   | 275   | 744   |
| >PTEN-K62I- $\backslash$ KNHYKIYNLC | 497  | >PTEN-K62I- $\uparrow$ INHYKIYNLC  | 6351  | 5854  |
| >PTEN-K62I- $\backslash$ HKNHYKIY   | 2068 | >PTEN-K62I- $\uparrow$ HINHYKIY    | 384   | 1684  |
| >PTEN-K62I- $\backslash$ HKNHYKIY   | 7    | >PTEN-K62I- $\uparrow$ HINHYKIY    | 387   | 380   |
| >PTEN-K62I- $\backslash$ HKNHYKIYNL | 68   | >PTEN-K62I- $\uparrow$ HINHYKIYNL  | 4194  | 4126  |
| >PTEN-K62I- $\backslash$ HKNHYKIY   | 3012 | >PTEN-K62I- $\uparrow$ HINHYKIY    | 212   | 2800  |
| >PTEN-K62I- $\backslash$ HKNHYKIY   | 1417 | >PTEN-K62I- $\uparrow$ HINHYKIY    | 217   | 1200  |
| >PTEN-K62I- $\backslash$ DVVRFLDSKH | 1708 | >PTEN-K62I- $\uparrow$ DVVRFLDSKH  | 137   | 1571  |
| >PTEN-K62I- $\backslash$ DVVRFLDSKH | 102  | >PTEN-K62I- $\uparrow$ DVVRFLDSKH  | 23570 | 23468 |
| >PTEN-K62I- $\backslash$ KHKNHYKI   | 2901 | >PTEN-K62I- $\uparrow$ KHINHYKI    | 284   | 2617  |
| >PTEN-K62I- $\backslash$ KHKNHYKIY  | 10   | >PTEN-K62I- $\uparrow$ KHINHYKIY   | 9     | 1     |
| >PTEN-K62I- $\backslash$ KHKNHYKIYN | 206  | >PTEN-K62I- $\uparrow$ KHINHYKIYNI | 165   | 41    |
| >PTEN-K62I- $\backslash$ SKHKNHYK   | 78   | >PTEN-K62I- $\uparrow$ SKHINHYK    | 118   | 40    |
| >PTEN-K62I- $\backslash$ SKHKNHYKI  | 129  | >PTEN-K62I- $\uparrow$ SKHINHYKI   | 392   | 263   |
| >PTEN-K62I- $\backslash$ SKHKNHYKIY | 6    | >PTEN-K62I- $\uparrow$ SKHINHYKIY  | 11    | 5     |
| >PTEN-K62I- $\backslash$ DSKHKNHY   | 383  | >PTEN-K62I- $\uparrow$ DSKHINHY    | 146   | 237   |
| >PTEN-K62I- $\backslash$ DSKHKNHYK  | 121  | >PTEN-K62I- $\uparrow$ DSKHINHYK   | 134   | 13    |
| >PTEN-K62I- $\backslash$ DSKHKNHY   | 289  | >PTEN-K62I- $\uparrow$ DSKHINHY    | 124   | 165   |
| >PTEN-K62I- $\backslash$ DSKHKNHYKI | 698  | >PTEN-K62I- $\uparrow$ DSKHINHYKI  | 335   | 363   |
| >PTEN-K62I- $\backslash$ DSKHKNHYK  | 342  | >PTEN-K62I- $\uparrow$ DSKHINHYK   | 281   | 61    |
| >PTEN-K62I- $\backslash$ DSKHKNHYK  | 155  | >PTEN-K62I- $\uparrow$ DSKHINHYK   | 80    | 75    |

|                         |       |                         |       |       |
|-------------------------|-------|-------------------------|-------|-------|
| >PTEN-K62I-1 DSKHKNHYK  | 77    | >PTEN-K62I-r DSKHINHYK  | 8     | 69    |
| >PTEN-K62I-1 DSKHKNHY   | 3193  | >PTEN-K62I-r DSKHINHY   | 436   | 2757  |
| >PTEN-K62I-1 LDSKHKNHYK | 1193  | >PTEN-K62I-r LDSKHINHYK | 391   | 802   |
| >PTEN-K62I-1 LDSKHKNHYK | 229   | >PTEN-K62I-r LDSKHINHYK | 142   | 87    |
| >PTEN-K62I-1 FLDSKHKNHY | 86    | >PTEN-K62I-r FLDSKHINHY | 41    | 45    |
| >PTEN-K62I-1 FLDSKHKNHY | 1452  | >PTEN-K62I-r FLDSKHINHY | 417   | 1035  |
| >PTEN-K62I-1 FLDSKHKNHY | 273   | >PTEN-K62I-r FLDSKHINHY | 116   | 157   |
| >PTEN-K62I-1 FLDSKHKNHY | 226   | >PTEN-K62I-r FLDSKHINHY | 99    | 127   |
| >PTEN-K62I-1 FLDSKHKNHY | 724   | >PTEN-K62I-r FLDSKHINHY | 306   | 418   |
| >PTEN-K62I-1 FLDSKHKNHY | 512   | >PTEN-K62I-r FLDSKHINHY | 155   | 357   |
| >PTEN-K62I-1 FLDSKHKNHY | 688   | >PTEN-K62I-r FLDSKHINHY | 197   | 491   |
| >PTEN-K62I-1 FLDSKHKNHY | 676   | >PTEN-K62I-r FLDSKHINHY | 158   | 518   |
| >PTEN-K62I-1 FLDSKHKNHY | 1010  | >PTEN-K62I-r FLDSKHINHY | 487   | 523   |
| >PTEN-K62I-1 RFLDSKHK   | 2399  | >PTEN-K62I-r RFLDSKHI   | 230   | 2169  |
| >PTEN-K62I-1 RFLDSKHK   | 6698  | >PTEN-K62I-r RFLDSKHI   | 80    | 6618  |
| >PTEN-K62I-1 RFLDSKHKNF | 91    | >PTEN-K62I-r RFLDSKHINH | 65    | 26    |
| >PTEN-K62I-1 RFLDSKHK   | 19    | >PTEN-K62I-r RFLDSKHI   | 478   | 459   |
| >PTEN-K62I-1 RFLDSKHKNF | 227   | >PTEN-K62I-r RFLDSKHINH | 191   | 36    |
| >PTEN-K62I-1 RFLDSKHK   | 73    | >PTEN-K62I-r RFLDSKHI   | 7628  | 7555  |
| >PTEN-K62I-1 RFLDSKHKNF | 893   | >PTEN-K62I-r RFLDSKHINH | 371   | 522   |
| >PTEN-K62I-1 RFLDSKHKNF | 697   | >PTEN-K62I-r RFLDSKHINH | 335   | 362   |
| >PTEN-K62I-1 RFLDSKHK   | 66    | >PTEN-K62I-r RFLDSKHI   | 15506 | 15440 |
| >PTEN-K62I-1 VRFLDSKHK  | 32742 | >PTEN-K62I-r VRFLDSKHI  | 473   | 32269 |
| >PTEN-K62I-1 VRFLDSKHK  | 2070  | >PTEN-K62I-r VRFLDSKHI  | 353   | 1717  |
| >PTEN-K62I-1 VRFLDSKHK  | 137   | >PTEN-K62I-r VRFLDSKHI  | 197   | 60    |
| >PTEN-K62I-1 VVRFLDSKHK | 408   | >PTEN-K62I-r VVRFLDSKHI | 24951 | 24543 |
| >PTEN-K62I-1 VVRFLDSKHK | 13    | >PTEN-K62I-r VVRFLDSKHI | 201   | 188   |
| >PTEN-K62R- KNHYKIYNLC  | 497   | >PTEN-K62R- RNHYKIYNLC  | 451   | 46    |
| >PTEN-K62R- KNHYKIYNL   | 1052  | >PTEN-K62R- RNHYKIYNL   | 372   | 680   |
| >PTEN-K62R- HKNHYKIY    | 7     | >PTEN-K62R- HRNHYKIY    | 55    | 48    |
| >PTEN-K62R- HKNHYKIYNL  | 68    | >PTEN-K62R- HRNHYKIYNL  | 435   | 367   |
| >PTEN-K62R- HKNHYKIY    | 11036 | >PTEN-K62R- HRNHYKIY    | 370   | 10666 |
| >PTEN-K62R- HKNHYKIYNL  | 983   | >PTEN-K62R- HRNHYKIYNL  | 17    | 966   |
| >PTEN-K62R- HKNHYKIYNL  | 566   | >PTEN-K62R- HRNHYKIYNL  | 235   | 331   |
| >PTEN-K62R- DVVRFLDSKH  | 2693  | >PTEN-K62R- DVVRFLDSKH  | 120   | 2573  |
| >PTEN-K62R- DVVRFLDSKH  | 102   | >PTEN-K62R- DVVRFLDSKH  | 36    | 66    |
| >PTEN-K62R- KHKNHYKI    | 1305  | >PTEN-K62R- KHRNHYKI    | 210   | 1095  |
| >PTEN-K62R- KHKNHYKI    | 742   | >PTEN-K62R- KHRNHYKI    | 415   | 327   |
| >PTEN-K62R- KHKNHYKIY   | 10    | >PTEN-K62R- KHRNHYKIY   | 6     | 4     |
| >PTEN-K62R- KHKNHYKIYN  | 206   | >PTEN-K62R- KHRNHYKIYN  | 109   | 97    |
| >PTEN-K62R- SKHKNHYK    | 78    | >PTEN-K62R- SKHRNHYK    | 38    | 40    |
| >PTEN-K62R- SKHKNHYKI   | 129   | >PTEN-K62R- SKHRNHYKI   | 113   | 16    |
| >PTEN-K62R- SKHKNHYKIY  | 6     | >PTEN-K62R- SKHRNHYKIY  | 6     | 0     |

|                         |       |                         |       |       |
|-------------------------|-------|-------------------------|-------|-------|
| >PTEN-K62R- DSKHKNHY    | 383   | >PTEN-K62R- DSKHRNHY    | 370   | 13    |
| >PTEN-K62R- DSKHKNHYK   | 121   | >PTEN-K62R- DSKHRNHYK   | 76    | 45    |
| >PTEN-K62R- DSKHKNHY    | 289   | >PTEN-K62R- DSKHRNHY    | 255   | 34    |
| >PTEN-K62R- DSKHKNHYK   | 342   | >PTEN-K62R- DSKHRNHYK   | 212   | 130   |
| >PTEN-K62R- DSKHKNHYK   | 155   | >PTEN-K62R- DSKHRNHYK   | 66    | 89    |
| >PTEN-K62R- DSKHKNHYK   | 77    | >PTEN-K62R- DSKHRNHYK   | 43    | 34    |
| >PTEN-K62R- LDSKHKNHYK  | 229   | >PTEN-K62R- LDSKHRNHYK  | 360   | 131   |
| >PTEN-K62R- FLDSKHKNHY  | 86    | >PTEN-K62R- FLDSKHRNHY  | 71    | 15    |
| >PTEN-K62R- FLDSKHKNHY  | 273   | >PTEN-K62R- FLDSKHRNHY  | 270   | 3     |
| >PTEN-K62R- FLDSKHKNHY  | 226   | >PTEN-K62R- FLDSKHRNHY  | 230   | 4     |
| >PTEN-K62R- FLDSKHKNHY  | 724   | >PTEN-K62R- FLDSKHRNHY  | 428   | 296   |
| >PTEN-K62R- FLDSKHKNHY  | 512   | >PTEN-K62R- FLDSKHRNHY  | 400   | 112   |
| >PTEN-K62R- RFLDSKHKNF  | 91    | >PTEN-K62R- RFLDSKHRNF  | 68    | 23    |
| >PTEN-K62R- RFLDSKHK    | 19    | >PTEN-K62R- RFLDSKHR    | 2081  | 2062  |
| >PTEN-K62R- RFLDSKHKNF  | 227   | >PTEN-K62R- RFLDSKHRNF  | 155   | 72    |
| >PTEN-K62R- RFLDSKHK    | 73    | >PTEN-K62R- RFLDSKHR    | 10    | 63    |
| >PTEN-K62R- RFLDSKHKNF  | 893   | >PTEN-K62R- RFLDSKHRNF  | 356   | 537   |
| >PTEN-K62R- RFLDSKHK    | 66    | >PTEN-K62R- RFLDSKHR    | 16    | 50    |
| >PTEN-K62R- VRFLDSKHK   | 137   | >PTEN-K62R- VRFLDSKHR   | 195   | 58    |
| >PTEN-K62R- VVRFLDSKHK  | 408   | >PTEN-K62R- VVRFLDSKHR  | 6263  | 5855  |
| >PTEN-K62R- VVRFLDSKHK  | 13    | >PTEN-K62R- VVRFLDSKHR  | 825   | 812   |
| >PTEN-K62R- VVRFLDSKHK  | 3442  | >PTEN-K62R- VVRFLDSKHR  | 214   | 3228  |
| >PTEN-K66E- KIYNLCAER   | 78    | >PTEN-K66E- EIYNLCAER   | 4912  | 4834  |
| >PTEN-K66E- KIYNLCAERH' | 107   | >PTEN-K66E- EIYNLCAERH' | 5561  | 5454  |
| >PTEN-K66E- KIYNLCAER   | 157   | >PTEN-K66E- EIYNLCAER   | 4224  | 4067  |
| >PTEN-K66E- KIYNLCAERH' | 15797 | >PTEN-K66E- EIYNLCAERH' | 141   | 15656 |
| >PTEN-K66E- KIYNLCAERH' | 3121  | >PTEN-K66E- EIYNLCAERH' | 28    | 3093  |
| >PTEN-K66E- KIYNLCAERH' | 10833 | >PTEN-K66E- EIYNLCAERH' | 451   | 10382 |
| >PTEN-K66E- KIYNLCAERH' | 233   | >PTEN-K66E- EIYNLCAERH' | 530   | 297   |
| >PTEN-K66E- KIYNLCAERH' | 59    | >PTEN-K66E- EIYNLCAERH' | 847   | 788   |
| >PTEN-K66E- KIYNLCAER   | 10    | >PTEN-K66E- EIYNLCAER   | 190   | 180   |
| >PTEN-K66E- KIYNLCAER   | 885   | >PTEN-K66E- EIYNLCAER   | 20    | 865   |
| >PTEN-K66E- KIYNLCAER   | 119   | >PTEN-K66E- EIYNLCAER   | 3     | 116   |
| >PTEN-K66E- KIYNLCAERH' | 9484  | >PTEN-K66E- EIYNLCAERH' | 241   | 9243  |
| >PTEN-K66E- KIYNLCAERH' | 233   | >PTEN-K66E- EIYNLCAERH' | 4326  | 4093  |
| >PTEN-K66E- KIYNLCAERH' | 76    | >PTEN-K66E- EIYNLCAERH' | 283   | 207   |
| >PTEN-K66E- KIYNLCAERH' | 226   | >PTEN-K66E- EIYNLCAERH' | 1692  | 1466  |
| >PTEN-K66E- KIYNLCAERH' | 132   | >PTEN-K66E- EIYNLCAERH' | 4649  | 4517  |
| >PTEN-K66E- KIYNLCAERH' | 453   | >PTEN-K66E- EIYNLCAERH' | 3668  | 3215  |
| >PTEN-K66E- KIYNLCAER   | 40    | >PTEN-K66E- EIYNLCAER   | 340   | 300   |
| >PTEN-K66E- YKIYNLCA    | 11810 | >PTEN-K66E- YEIYNLCA    | 21    | 11789 |
| >PTEN-K66E- YKIYNLCA    | 112   | >PTEN-K66E- YEIYNLCA    | 3260  | 3148  |
| >PTEN-K66E- YKIYNLCAE   | 469   | >PTEN-K66E- YEIYNLCAE   | 10312 | 9843  |

|                        |       |                        |       |       |
|------------------------|-------|------------------------|-------|-------|
| >PTEN-K66E-YKIYNLCAER  | 117   | >PTEN-K66E-YEIYNLCAER  | 2425  | 2308  |
| >PTEN-K66E-YKIYNLCAERH | 301   | >PTEN-K66E-YEIYNLCAERH | 6605  | 6304  |
| >PTEN-K66E-YKIYNLCA    | 23285 | >PTEN-K66E-YEIYNLCA    | 87    | 23198 |
| >PTEN-K66E-YKIYNLCAER  | 29224 | >PTEN-K66E-YEIYNLCAER  | 449   | 28775 |
| >PTEN-K66E-YKIYNLCA    | 26468 | >PTEN-K66E-YEIYNLCA    | 117   | 26351 |
| >PTEN-K66E-YKIYNLCAE   | 25884 | >PTEN-K66E-YEIYNLCAE   | 209   | 25675 |
| >PTEN-K66E-FLDSKHKNHY  | 273   | >PTEN-K66E-FLDSKHKNHY  | 723   | 450   |
| >PTEN-K66E-FLDSKHKNHY  | 226   | >PTEN-K66E-FLDSKHKNHY  | 1212  | 986   |
| >PTEN-K66E-HYKIYNLCA   | 22    | >PTEN-K66E-HYEIYNLCA   | 5042  | 5020  |
| >PTEN-K66E-HYKIYNLCAE  | 120   | >PTEN-K66E-HYEIYNLCAE  | 9876  | 9756  |
| >PTEN-K66E-HYKIYNLCAE  | 9     | >PTEN-K66E-HYEIYNLCAE  | 51    | 42    |
| >PTEN-K66E-HYKIYNLCAE  | 13    | >PTEN-K66E-HYEIYNLCAE  | 45    | 32    |
| >PTEN-K66E-HYKIYNLCAE  | 272   | >PTEN-K66E-HYEIYNLCAE  | 293   | 21    |
| >PTEN-K66E-HYKIYNLCAE  | 26    | >PTEN-K66E-HYEIYNLCAE  | 30    | 4     |
| >PTEN-K66E-NHYKIYNL    | 145   | >PTEN-K66E-NHYEIYNL    | 173   | 28    |
| >PTEN-K66E-NHYKIYNL    | 67    | >PTEN-K66E-NHYEIYNL    | 25    | 42    |
| >PTEN-K66E-KNHYKIYNLC  | 497   | >PTEN-K66E-KNHYEIYNLC  | 1013  | 516   |
| >PTEN-K66E-HKNHYKIY    | 7     | >PTEN-K66E-HKNHYEIY    | 8     | 1     |
| >PTEN-K66E-HKNHYKIYNL  | 68    | >PTEN-K66E-HKNHYEIYNL  | 38    | 30    |
| >PTEN-K66E-HKNHYKIYNL  | 566   | >PTEN-K66E-HKNHYEIYNL  | 470   | 96    |
| >PTEN-K66E-KHKNHYKI    | 742   | >PTEN-K66E-KHKNHYEI    | 369   | 373   |
| >PTEN-K66E-KHKNHYKIY   | 10    | >PTEN-K66E-KHKNHYEIY   | 17    | 7     |
| >PTEN-K66E-KHKNHYKIYN  | 206   | >PTEN-K66E-KHKNHYEIYN  | 190   | 16    |
| >PTEN-K66E-SKHKNHYKI   | 2147  | >PTEN-K66E-SKHKNHYEI   | 457   | 1690  |
| >PTEN-K66E-SKHKNHYK    | 78    | >PTEN-K66E-SKHKNHYE    | 14313 | 14235 |
| >PTEN-K66E-SKHKNHYKI   | 129   | >PTEN-K66E-SKHKNHYEI   | 61    | 68    |
| >PTEN-K66E-SKHKNHYKIY  | 6     | >PTEN-K66E-SKHKNHYEIY  | 7     | 1     |
| >PTEN-K66E-DSKHKNHYKI  | 858   | >PTEN-K66E-DSKHKNHYEI  | 489   | 369   |
| >PTEN-K66E-DSKHKNHYK   | 121   | >PTEN-K66E-DSKHKNHYE   | 14035 | 13914 |
| >PTEN-K66E-DSKHKNHYK   | 342   | >PTEN-K66E-DSKHKNHYE   | 12800 | 12458 |
| >PTEN-K66E-DSKHKNHYK   | 155   | >PTEN-K66E-DSKHKNHYE   | 5318  | 5163  |
| >PTEN-K66E-DSKHKNHYK   | 77    | >PTEN-K66E-DSKHKNHYE   | 12603 | 12526 |
| >PTEN-K66E-LDSKHKNHYK  | 229   | >PTEN-K66E-LDSKHKNHYE  | 196   | 33    |
| >PTEN-K66N-KIYNLCAER   | 78    | >PTEN-K66N-NIYNLCAER   | 2975  | 2897  |
| >PTEN-K66N-KIYNLCAERH  | 107   | >PTEN-K66N-NIYNLCAERH  | 3429  | 3322  |
| >PTEN-K66N-KIYNLCAER   | 157   | >PTEN-K66N-NIYNLCAER   | 2455  | 2298  |
| >PTEN-K66N-KIYNLCAERH  | 233   | >PTEN-K66N-NIYNLCAERH  | 236   | 3     |
| >PTEN-K66N-KIYNLCAERH  | 59    | >PTEN-K66N-NIYNLCAERH  | 573   | 514   |
| >PTEN-K66N-KIYNLCAER   | 10    | >PTEN-K66N-NIYNLCAER   | 81    | 71    |
| >PTEN-K66N-KIYNLCAER   | 885   | >PTEN-K66N-NIYNLCAER   | 32    | 853   |
| >PTEN-K66N-KIYNLCAER   | 119   | >PTEN-K66N-NIYNLCAER   | 9     | 110   |
| >PTEN-K66N-KIYNLCAERH  | 233   | >PTEN-K66N-NIYNLCAERH  | 1246  | 1013  |
| >PTEN-K66N-KIYNLCAERH  | 76    | >PTEN-K66N-NIYNLCAERH  | 184   | 108   |

|                        |      |                        |       |       |
|------------------------|------|------------------------|-------|-------|
| >PTEN-K66N·KIYNLCAERH' | 226  | >PTEN-K66N·NIYNLCAERH  | 1814  | 1588  |
| >PTEN-K66N·KIYNLCAERH' | 132  | >PTEN-K66N·NIYNLCAERH  | 7623  | 7491  |
| >PTEN-K66N·KIYNLCAERH' | 453  | >PTEN-K66N·NIYNLCAERH  | 2859  | 2406  |
| >PTEN-K66N·KIYNLCAER   | 40   | >PTEN-K66N·NIYNLCAER   | 311   | 271   |
| >PTEN-K66N·YKIYNLCAER  | 710  | >PTEN-K66N·YNIYNLCAER  | 253   | 457   |
| >PTEN-K66N·YKIYNLCA    | 112  | >PTEN-K66N·YNIYNLCA    | 5232  | 5120  |
| >PTEN-K66N·YKIYNLCAE   | 469  | >PTEN-K66N·YNIYNLCAE   | 14150 | 13681 |
| >PTEN-K66N·YKIYNLCAER  | 117  | >PTEN-K66N·YNIYNLCAER  | 3822  | 3705  |
| >PTEN-K66N·YKIYNLCAERI | 301  | >PTEN-K66N·YNIYNLCAERI | 9279  | 8978  |
| >PTEN-K66N·FLDSKHKNHY  | 273  | >PTEN-K66N·FLDSKHKNHY  | 202   | 71    |
| >PTEN-K66N·FLDSKHKNHY  | 226  | >PTEN-K66N·FLDSKHKNHY  | 1389  | 1163  |
| >PTEN-K66N·HYKIYNLCA   | 22   | >PTEN-K66N·HYNIYNLCA   | 620   | 598   |
| >PTEN-K66N·HYKIYNLCAEI | 120  | >PTEN-K66N·HYNIYNLCAE  | 2917  | 2797  |
| >PTEN-K66N·HYKIYNLCAEI | 9    | >PTEN-K66N·HYNIYNLCAE  | 12    | 3     |
| >PTEN-K66N·HYKIYNLCAEI | 13   | >PTEN-K66N·HYNIYNLCAE  | 20    | 7     |
| >PTEN-K66N·HYKIYNLCAEI | 272  | >PTEN-K66N·HYNIYNLCAE  | 150   | 122   |
| >PTEN-K66N·HYKIYNLCAEI | 26   | >PTEN-K66N·HYNIYNLCAE  | 28    | 2     |
| >PTEN-K66N·NHYKIYNL    | 145  | >PTEN-K66N·NHYNIYNL    | 130   | 15    |
| >PTEN-K66N·NHYKIYNL    | 67   | >PTEN-K66N·NHYNIYNL    | 46    | 21    |
| >PTEN-K66N·KNHYKIYNLC  | 497  | >PTEN-K66N·KNHYNIYNLC  | 392   | 105   |
| >PTEN-K66N·HKNHYKIY    | 2068 | >PTEN-K66N·HKNHYNIY    | 494   | 1574  |
| >PTEN-K66N·HKNHYKIY    | 7    | >PTEN-K66N·HKNHYNIY    | 6     | 1     |
| >PTEN-K66N·HKNHYKIYNL  | 68   | >PTEN-K66N·HKNHYNIYNL  | 28    | 40    |
| >PTEN-K66N·HKNHYKIYNL  | 566  | >PTEN-K66N·HKNHYNIYNL  | 236   | 330   |
| >PTEN-K66N·KHKNHYKIY   | 2608 | >PTEN-K66N·KHKNHYNIY   | 394   | 2214  |
| >PTEN-K66N·KHKNHYKI    | 742  | >PTEN-K66N·KHKNHYNI    | 341   | 401   |
| >PTEN-K66N·KHKNHYKIY   | 10   | >PTEN-K66N·KHKNHYNIY   | 12    | 2     |
| >PTEN-K66N·KHKNHYKIYN  | 206  | >PTEN-K66N·KHKNHYNIYN  | 136   | 70    |
| >PTEN-K66N·SKHKNHYK    | 78   | >PTEN-K66N·SKHKNHYN    | 13116 | 13038 |
| >PTEN-K66N·SKHKNHYKI   | 129  | >PTEN-K66N·SKHKNHYNI   | 54    | 75    |
| >PTEN-K66N·SKHKNHYKIY  | 6    | >PTEN-K66N·SKHKNHYNIY  | 6     | 0     |
| >PTEN-K66N·DSKHKNHYKI  | 858  | >PTEN-K66N·DSKHKNHYN   | 465   | 393   |
| >PTEN-K66N·DSKHKNHYK   | 121  | >PTEN-K66N·DSKHKNHYN   | 11221 | 11100 |
| >PTEN-K66N·DSKHKNHYKI  | 698  | >PTEN-K66N·DSKHKNHYN   | 201   | 497   |
| >PTEN-K66N·DSKHKNHYK   | 342  | >PTEN-K66N·DSKHKNHYN   | 13015 | 12673 |
| >PTEN-K66N·DSKHKNHYK   | 155  | >PTEN-K66N·DSKHKNHYN   | 6036  | 5881  |
| >PTEN-K66N·DSKHKNHYK   | 77   | >PTEN-K66N·DSKHKNHYN   | 15542 | 15465 |
| >PTEN-K66N·LDSKHKNHYK  | 229  | >PTEN-K66N·LDSKHKNHYN  | 222   | 7     |
| >PTEN-K66Q·KIYNLCAER   | 78   | >PTEN-K66Q·QIYNLCAER   | 898   | 820   |
| >PTEN-K66Q·KIYNLCAERH' | 107  | >PTEN-K66Q·QIYNLCAERH  | 1229  | 1122  |
| >PTEN-K66Q·KIYNLCAER   | 157  | >PTEN-K66Q·QIYNLCAER   | 826   | 669   |
| >PTEN-K66Q·KIYNLCAERH' | 233  | >PTEN-K66Q·QIYNLCAERH  | 120   | 113   |
| >PTEN-K66Q·KIYNLCAERH' | 59   | >PTEN-K66Q·QIYNLCAERH  | 316   | 257   |

|                         |       |                         |      |       |
|-------------------------|-------|-------------------------|------|-------|
| >PTEN-K66Q: KIYNLCAER   | 10    | >PTEN-K66Q: QIYNLCAER   | 44   | 34    |
| >PTEN-K66Q: KIYNLCAER   | 885   | >PTEN-K66Q: QIYNLCAER   | 107  | 778   |
| >PTEN-K66Q: KIYNLCAER   | 119   | >PTEN-K66Q: QIYNLCAER   | 15   | 104   |
| >PTEN-K66Q: KIYNLCAERH' | 233   | >PTEN-K66Q: QIYNLCAERH  | 964  | 731   |
| >PTEN-K66Q: KIYNLCAERH' | 76    | >PTEN-K66Q: QIYNLCAERH  | 111  | 35    |
| >PTEN-K66Q: KIYNLCAERH' | 226   | >PTEN-K66Q: QIYNLCAERH  | 540  | 314   |
| >PTEN-K66Q: KIYNLCAERH' | 132   | >PTEN-K66Q: QIYNLCAERH  | 1372 | 1240  |
| >PTEN-K66Q: KIYNLCAERH' | 453   | >PTEN-K66Q: QIYNLCAERH  | 1098 | 645   |
| >PTEN-K66Q: KIYNLCAER   | 40    | >PTEN-K66Q: QIYNLCAER   | 218  | 178   |
| >PTEN-K66Q: YKIYNLCA    | 17601 | >PTEN-K66Q: YQIYNLCA    | 104  | 17497 |
| >PTEN-K66Q: YKIYNLCA    | 8647  | >PTEN-K66Q: YQIYNLCA    | 400  | 8247  |
| >PTEN-K66Q: YKIYNLCA    | 3993  | >PTEN-K66Q: YQIYNLCA    | 14   | 3979  |
| >PTEN-K66Q: YKIYNLCAE   | 18439 | >PTEN-K66Q: YQIYNLCAE   | 270  | 18169 |
| >PTEN-K66Q: YKIYNLCA    | 10712 | >PTEN-K66Q: YQIYNLCA    | 393  | 10319 |
| >PTEN-K66Q: YKIYNLCAER  | 884   | >PTEN-K66Q: YQIYNLCAER  | 107  | 777   |
| >PTEN-K66Q: YKIYNLCAER  | 710   | >PTEN-K66Q: YQIYNLCAER  | 41   | 669   |
| >PTEN-K66Q: YKIYNLCA    | 16069 | >PTEN-K66Q: YQIYNLCA    | 195  | 15874 |
| >PTEN-K66Q: YKIYNLCAE   | 18164 | >PTEN-K66Q: YQIYNLCAE   | 248  | 17916 |
| >PTEN-K66Q: YKIYNLCAERH | 17466 | >PTEN-K66Q: YQIYNLCAERH | 393  | 17073 |
| >PTEN-K66Q: YKIYNLCA    | 112   | >PTEN-K66Q: YQIYNLCA    | 104  | 8     |
| >PTEN-K66Q: YKIYNLCAE   | 469   | >PTEN-K66Q: YQIYNLCAE   | 475  | 6     |
| >PTEN-K66Q: YKIYNLCAER  | 117   | >PTEN-K66Q: YQIYNLCAER  | 107  | 10    |
| >PTEN-K66Q: YKIYNLCAERH | 301   | >PTEN-K66Q: YQIYNLCAERH | 292  | 9     |
| >PTEN-K66Q: FLDSKHKNHY  | 1452  | >PTEN-K66Q: FLDSKHKNHY  | 181  | 1271  |
| >PTEN-K66Q: FLDSKHKNHY  | 273   | >PTEN-K66Q: FLDSKHKNHY  | 82   | 191   |
| >PTEN-K66Q: FLDSKHKNHY  | 2808  | >PTEN-K66Q: FLDSKHKNHY  | 311  | 2497  |
| >PTEN-K66Q: FLDSKHKNHY  | 226   | >PTEN-K66Q: FLDSKHKNHY  | 28   | 198   |
| >PTEN-K66Q: HYKIYNLCA   | 22    | >PTEN-K66Q: HYQIYNLCA   | 1770 | 1748  |
| >PTEN-K66Q: HYKIYNLCAEI | 120   | >PTEN-K66Q: HYQIYNLCAE  | 5358 | 5238  |
| >PTEN-K66Q: HYKIYNLCAEI | 9     | >PTEN-K66Q: HYQIYNLCAE  | 17   | 8     |
| >PTEN-K66Q: HYKIYNLCAEI | 13    | >PTEN-K66Q: HYQIYNLCAE  | 20   | 7     |
| >PTEN-K66Q: HYKIYNLCAEI | 272   | >PTEN-K66Q: HYQIYNLCAE  | 398  | 126   |
| >PTEN-K66Q: HYKIYNLCAEI | 26    | >PTEN-K66Q: HYQIYNLCAE  | 28   | 2     |
| >PTEN-K66Q: NHYKIYNL    | 145   | >PTEN-K66Q: NHYQIYNL    | 111  | 34    |
| >PTEN-K66Q: NHYKIYNLC   | 568   | >PTEN-K66Q: NHYQIYNLC   | 417  | 151   |
| >PTEN-K66Q: NHYKIYNL    | 67    | >PTEN-K66Q: NHYQIYNL    | 37   | 30    |
| >PTEN-K66Q: KNHYKIYNLC  | 497   | >PTEN-K66Q: KNHYQIYNLC  | 324  | 173   |
| >PTEN-K66Q: HKNHYKIY    | 7     | >PTEN-K66Q: HKNHYQIY    | 5    | 2     |
| >PTEN-K66Q: HKNHYKIYNL  | 68    | >PTEN-K66Q: HKNHYQIYNL  | 34   | 34    |
| >PTEN-K66Q: HKNHYKIYNL  | 566   | >PTEN-K66Q: HKNHYQIYNL  | 368  | 198   |
| >PTEN-K66Q: KHKNHYKIY   | 10    | >PTEN-K66Q: KHKNHYQIY   | 7    | 3     |
| >PTEN-K66Q: KHKNHYKIYN  | 206   | >PTEN-K66Q: KHKNHYQIYN  | 133  | 73    |
| >PTEN-K66Q: SKHKNHYK    | 78    | >PTEN-K66Q: SKHKNHYQ    | 8387 | 8309  |



|                         |       |                          |      |       |
|-------------------------|-------|--------------------------|------|-------|
| >PTEN-K66Q: SKHKNHYKI   | 129   | >PTEN-K66Q: SKHKNHYQI    | 101  | 28    |
| >PTEN-K66Q: SKHKNHYKIY  | 6     | >PTEN-K66Q: SKHKNHYQIY   | 5    | 1     |
| >PTEN-K66Q: DSKHKNHYK   | 121   | >PTEN-K66Q: DSKHKNHYQ    | 9880 | 9759  |
| >PTEN-K66Q: DSKHKNHYKI  | 698   | >PTEN-K66Q: DSKHKNHYQ    | 499  | 199   |
| >PTEN-K66Q: DSKHKNHYK   | 342   | >PTEN-K66Q: DSKHKNHYQ    | 9531 | 9189  |
| >PTEN-K66Q: DSKHKNHYK   | 155   | >PTEN-K66Q: DSKHKNHYQ    | 3180 | 3025  |
| >PTEN-K66Q: DSKHKNHYK   | 77    | >PTEN-K66Q: DSKHKNHYQ    | 4987 | 4910  |
| >PTEN-K66Q: LDSKHKNHYK  | 229   | >PTEN-K66Q: LDSKHKNHYC   | 221  | 8     |
| >PTEN-K6I-w KEIVSRNKRR' | 1780  | >PTEN-K6I-m IEIVSRNKRRY  | 135  | 1645  |
| >PTEN-K6I-w KEIVSRNKRR' | 321   | >PTEN-K6I-m IEIVSRNKRRY  | 534  | 213   |
| >PTEN-K6I-w KEIVSRNKRR  | 358   | >PTEN-K6I-m IEIVSRNKRR   | 2829 | 2471  |
| >PTEN-K6I-w IKEIVSRNKR  | 2093  | >PTEN-K6I-m IIEIVSRNKR   | 127  | 1966  |
| >PTEN-K6I-w IKEIVSRNKR  | 14453 | >PTEN-K6I-m IIEIVSRNKR   | 256  | 14197 |
| >PTEN-K6I-w IKEIVSRNKRR | 10904 | >PTEN-K6I-m IIEIVSRNKRR  | 498  | 10406 |
| >PTEN-K6I-w IIEIVSRNK   | 201   | >PTEN-K6I-m IIIIEIVSRNK  | 75   | 126   |
| >PTEN-K6I-w IIEIVSRNK   | 524   | >PTEN-K6I-m IIIIEIVSRNK  | 59   | 465   |
| >PTEN-K6I-w IIEIVSRNK   | 31    | >PTEN-K6I-m IIIIEIVSRNK  | 1937 | 1906  |
| >PTEN-K6I-w IIEIVSR     | 30    | >PTEN-K6I-m IIIIEIVSR    | 139  | 109   |
| >PTEN-K6I-w IIEIVSRNKR  | 24    | >PTEN-K6I-m IIIIEIVSRNKR | 120  | 96    |
| >PTEN-K6I-w IIEIVSR     | 71    | >PTEN-K6I-m IIIIEIVSR    | 115  | 44    |
| >PTEN-K6I-w IIEIVSRNKR  | 117   | >PTEN-K6I-m IIIIEIVSRNKR | 201  | 84    |
| >PTEN-K6I-w IIEIVSR     | 66    | >PTEN-K6I-m IIIIEIVSR    | 13   | 53    |
| >PTEN-K6I-w IIEIVSRNK   | 1962  | >PTEN-K6I-m IIIIEIVSRNK  | 188  | 1774  |
| >PTEN-K6I-w IIEIVSRNKR  | 40    | >PTEN-K6I-m IIIIEIVSRNKR | 11   | 29    |
| >PTEN-K6I-w IIEIVSR     | 184   | >PTEN-K6I-m IIIIEIVSR    | 120  | 64    |
| >PTEN-K6I-w IIEIVSRNKR  | 534   | >PTEN-K6I-m IIIIEIVSRNKR | 322  | 212   |
| >PTEN-K6I-w AIIKEIVSRNK | 271   | >PTEN-K6I-m AIIIIEIVSRNK | 610  | 339   |
| >PTEN-K6I-w AIIKEIVSRNK | 59    | >PTEN-K6I-m AIIIIEIVSRNK | 71   | 12    |
| >PTEN-K6I-w AIIKEIVSRNK | 360   | >PTEN-K6I-m AIIIIEIVSRNK | 545  | 185   |
| >PTEN-K6I-w AIIKEIVSR   | 388   | >PTEN-K6I-m AIIIIEIVSR   | 315  | 73    |
| >PTEN-K6I-w AIIKEIVSR   | 131   | >PTEN-K6I-m AIIIIEIVSR   | 167  | 36    |
| >PTEN-K6I-w AIIKEIVSR   | 326   | >PTEN-K6I-m AIIIIEIVSR   | 546  | 220   |
| >PTEN-K6I-w TAIKEIVSR   | 406   | >PTEN-K6I-m TAIIEIVSR    | 306  | 100   |
| >PTEN-K6I-w TAIKEIVSR   | 24    | >PTEN-K6I-m TAIIEIVSR    | 10   | 14    |
| >PTEN-K6I-w TAIKEIV     | 224   | >PTEN-K6I-m TAIIEIV      | 29   | 195   |
| >PTEN-K6I-w MTAIKEI     | 4161  | >PTEN-K6I-m MTAIIEI      | 191  | 3970  |
| >PTEN-K6I-w MTAIKEIV    | 5388  | >PTEN-K6I-m MTAIIEIV     | 263  | 5125  |
| >PTEN-K6I-w MTAIKEI     | 121   | >PTEN-K6I-m MTAIIEI      | 24   | 97    |
| >PTEN-K6I-w MTAIKEIV    | 86    | >PTEN-K6I-m MTAIIEIV     | 13   | 73    |
| >PTEN-K6I-w MTAIKEI     | 601   | >PTEN-K6I-m MTAIIEI      | 178  | 423   |
| >PTEN-K6I-w MTAIKEIV    | 1059  | >PTEN-K6I-m MTAIIEIV     | 62   | 997   |
| >PTEN-K6I-w MTAIKEI     | 1163  | >PTEN-K6I-m MTAIIEI      | 115  | 1048  |
| >PTEN-K6I-w MTAIKEIV    | 1244  | >PTEN-K6I-m MTAIIEIV     | 33   | 1211  |

|                         |      |                         |     |      |
|-------------------------|------|-------------------------|-----|------|
| >PTEN-K6I-w MTAIKEI     | 1149 | >PTEN-K6I-m MTAIIEI     | 146 | 1003 |
| >PTEN-K6I-w MTAIKEIV    | 836  | >PTEN-K6I-m MTAIIEIV    | 56  | 780  |
| >PTEN-K6I-w MTAIKEIV    | 1627 | >PTEN-K6I-m MTAIIEIV    | 167 | 1460 |
| >PTEN-K6I-w MTAIKEIV    | 566  | >PTEN-K6I-m MTAIIEIV    | 73  | 493  |
| >PTEN-K6I-w MTAIKEIVSR  | 373  | >PTEN-K6I-m MTAIIEIVSR  | 199 | 174  |
| >PTEN-K6I-w MTAIKEIVSR  | 22   | >PTEN-K6I-m MTAIIEIVSR  | 22  | 0    |
| >PTEN-K6I-w MTAIKEI     | 1068 | >PTEN-K6I-m MTAIIEI     | 331 | 737  |
| >PTEN-K6I-w MTAIKEIVSR  | 145  | >PTEN-K6I-m MTAIIEIVSR  | 106 | 39   |
| >PTEN-K6I-w MTAIKEIVSR  | 2    | >PTEN-K6I-m MTAIIEIVSR  | 2   | 0    |
| >PTEN-K6I-w MTAIKEI     | 6    | >PTEN-K6I-m MTAIIEI     | 4   | 2    |
| >PTEN-K6I-w MTAIKEIV    | 5    | >PTEN-K6I-m MTAIIEIV    | 4   | 1    |
| >PTEN-K6I-w MTAIKEI     | 286  | >PTEN-K6I-m MTAIIEI     | 41  | 245  |
| >PTEN-K6I-w MTAIKEIV    | 129  | >PTEN-K6I-m MTAIIEIV    | 39  | 90   |
| >PTEN-K6I-w MTAIKEI     | 94   | >PTEN-K6I-m MTAIIEI     | 62  | 32   |
| >PTEN-K6I-w MTAIKEI     | 1780 | >PTEN-K6I-m MTAIIEI     | 238 | 1542 |
| >PTEN-K6I-w MTAIKEIV    | 2080 | >PTEN-K6I-m MTAIIEIV    | 139 | 1941 |
| >PTEN-K6I-w MTAIKEIV    | 155  | >PTEN-K6I-m MTAIIEIV    | 213 | 58   |
| >PTEN-K6I-w MTAIKEIVSR  | 684  | >PTEN-K6I-m MTAIIEIVSR  | 383 | 301  |
| >PTEN-K6I-w MTAIKEIVSR  | 379  | >PTEN-K6I-m MTAIIEIVSR  | 316 | 63   |
| >PTEN-K6I-w MTAIKEI     | 29   | >PTEN-K6I-m MTAIIEI     | 24  | 5    |
| >PTEN-K6R-v KEIVSRNKRR' | 632  | >PTEN-K6R-n REIVSRNKRR' | 329 | 303  |
| >PTEN-K6R-v KEIVSRNKRR' | 321  | >PTEN-K6R-n REIVSRNKRR' | 315 | 6    |
| >PTEN-K6R-v KEIVSRNKRR  | 358  | >PTEN-K6R-n REIVSRNKRR  | 625 | 267  |
| >PTEN-K6R-v IIEIVSRNK   | 201  | >PTEN-K6R-n IIEIVSRNK   | 136 | 65   |
| >PTEN-K6R-v IIEIVSRNK   | 31   | >PTEN-K6R-n IIEIVSRNK   | 9   | 22   |
| >PTEN-K6R-v IIEIVSR     | 30   | >PTEN-K6R-n IIEIVSR     | 55  | 25   |
| >PTEN-K6R-v IIEIVSRNKR  | 24   | >PTEN-K6R-n IIEIVSRNKR  | 44  | 20   |
| >PTEN-K6R-v IIEIVSR     | 71   | >PTEN-K6R-n IIEIVSR     | 60  | 11   |
| >PTEN-K6R-v IIEIVSRNKR  | 117  | >PTEN-K6R-n IIEIVSRNKR  | 100 | 17   |
| >PTEN-K6R-v IIEIVSR     | 66   | >PTEN-K6R-n IIEIVSR     | 203 | 137  |
| >PTEN-K6R-v IIEIVSRNKR  | 40   | >PTEN-K6R-n IIEIVSRNKR  | 143 | 103  |
| >PTEN-K6R-v IIEIVSR     | 184  | >PTEN-K6R-n IIEIVSR     | 255 | 71   |
| >PTEN-K6R-v AIIKEIVSRNK | 271  | >PTEN-K6R-n AIIKEIVSRNK | 251 | 20   |
| >PTEN-K6R-v AIIKEIVSR   | 531  | >PTEN-K6R-n AIIKEIVSR   | 351 | 180  |
| >PTEN-K6R-v AIIKEIVSRNK | 59   | >PTEN-K6R-n AIIKEIVSRNK | 54  | 5    |
| >PTEN-K6R-v AIIKEIVSRNK | 360  | >PTEN-K6R-n AIIKEIVSRNK | 175 | 185  |
| >PTEN-K6R-v AIIKEIVSR   | 388  | >PTEN-K6R-n AIIKEIVSR   | 229 | 159  |
| >PTEN-K6R-v AIIKEIVSR   | 131  | >PTEN-K6R-n AIIKEIVSR   | 154 | 23   |
| >PTEN-K6R-v AIIKEIVSR   | 326  | >PTEN-K6R-n AIIKEIVSR   | 871 | 545  |
| >PTEN-K6R-v TAIKEIVSR   | 406  | >PTEN-K6R-n TAIKEIVSR   | 227 | 179  |
| >PTEN-K6R-v TAIKEIVSR   | 1237 | >PTEN-K6R-n TAIKEIVSR   | 461 | 776  |
| >PTEN-K6R-v TAIKEIVSR   | 24   | >PTEN-K6R-n TAIKEIVSR   | 18  | 6    |
| >PTEN-K6R-v TAIKEIV     | 224  | >PTEN-K6R-n TAIKEIV     | 174 | 50   |

|                         |       |                         |       |       |
|-------------------------|-------|-------------------------|-------|-------|
| >PTEN-K6R-v MTAIIKEI    | 121   | >PTEN-K6R-n MTAIIREI    | 97    | 24    |
| >PTEN-K6R-v MTAIIKEIV   | 86    | >PTEN-K6R-n MTAIIREIV   | 59    | 27    |
| >PTEN-K6R-v MTAIIKEI    | 601   | >PTEN-K6R-n MTAIIREI    | 463   | 138   |
| >PTEN-K6R-v MTAIIKEIV   | 566   | >PTEN-K6R-n MTAIIREIV   | 450   | 116   |
| >PTEN-K6R-v MTAIIKEIVSR | 373   | >PTEN-K6R-n MTAIIREIVSR | 241   | 132   |
| >PTEN-K6R-v MTAIIKEIVSR | 22    | >PTEN-K6R-n MTAIIREIVSR | 18    | 4     |
| >PTEN-K6R-v MTAIIKEIVSR | 145   | >PTEN-K6R-n MTAIIREIVSR | 86    | 59    |
| >PTEN-K6R-v MTAIIKEIVSR | 2     | >PTEN-K6R-n MTAIIREIVSR | 2     | 0     |
| >PTEN-K6R-v MTAIIKEI    | 6     | >PTEN-K6R-n MTAIIREI    | 5     | 1     |
| >PTEN-K6R-v MTAIIKEIV   | 5     | >PTEN-K6R-n MTAIIREIV   | 4     | 1     |
| >PTEN-K6R-v MTAIIKEI    | 286   | >PTEN-K6R-n MTAIIREI    | 250   | 36    |
| >PTEN-K6R-v MTAIIKEIV   | 129   | >PTEN-K6R-n MTAIIREIV   | 140   | 11    |
| >PTEN-K6R-v MTAIIKEI    | 94    | >PTEN-K6R-n MTAIIREI    | 145   | 51    |
| >PTEN-K6R-v MTAIIKEIV   | 155   | >PTEN-K6R-n MTAIIREIV   | 151   | 4     |
| >PTEN-K6R-v MTAIIKEIVSR | 379   | >PTEN-K6R-n MTAIIREIVSR | 414   | 35    |
| >PTEN-K6R-v MTAIIKEI    | 29    | >PTEN-K6R-n MTAIIREI    | 30    | 1     |
| >PTEN-K80E- KFNCRVAQYF  | 235   | >PTEN-K80E- EFNCRVAQYF  | 1134  | 899   |
| >PTEN-K80E- KFNCRVAQYF  | 412   | >PTEN-K80E- EFNCRVAQYF  | 1345  | 933   |
| >PTEN-K80E- KFNCRVAQYF  | 140   | >PTEN-K80E- EFNCRVAQYF  | 1265  | 1125  |
| >PTEN-K80E- KFNCRVAQY   | 13262 | >PTEN-K80E- EFNCRVAQY   | 352   | 12910 |
| >PTEN-K80E- KFNCRVAQY   | 167   | >PTEN-K80E- EFNCRVAQY   | 414   | 247   |
| >PTEN-K80E- KFNCRVAQY   | 377   | >PTEN-K80E- EFNCRVAQY   | 11400 | 11023 |
| >PTEN-K80E- KFNCRVAQYF  | 170   | >PTEN-K80E- EFNCRVAQYF  | 8511  | 8341  |
| >PTEN-K80E- KFNCRVAQYF  | 101   | >PTEN-K80E- EFNCRVAQYF  | 4334  | 4233  |
| >PTEN-K80E- KFNCRVAQYF  | 431   | >PTEN-K80E- EFNCRVAQYF  | 2381  | 1950  |
| >PTEN-K80E- KFNCRVAQYF  | 331   | >PTEN-K80E- EFNCRVAQYF  | 2183  | 1852  |
| >PTEN-K80E- KFNCRVAQYF  | 3200  | >PTEN-K80E- EFNCRVAQYF  | 362   | 2838  |
| >PTEN-K80E- KFNCRVAQY   | 131   | >PTEN-K80E- EFNCRVAQY   | 268   | 137   |
| >PTEN-K80E- AKFNCRVAQ`  | 381   | >PTEN-K80E- AEFNCRVAQ`  | 652   | 271   |
| >PTEN-K80E- AKFNCRVAQ`  | 197   | >PTEN-K80E- AEFNCRVAQ`  | 298   | 101   |
| >PTEN-K80E- AKFNCRVAQ`  | 1463  | >PTEN-K80E- AEFNCRVAQ`  | 173   | 1290  |
| >PTEN-K80E- AKFNCRVA    | 52    | >PTEN-K80E- AEFNCRVA    | 1739  | 1687  |
| >PTEN-K80E- AKFNCRVAQ   | 43    | >PTEN-K80E- AEFNCRVAQ   | 828   | 785   |
| >PTEN-K80E- AKFNCRVAQ`  | 3     | >PTEN-K80E- AEFNCRVAQ`  | 31    | 28    |
| >PTEN-K80E- AKFNCRVAQ`  | 114   | >PTEN-K80E- AEFNCRVAQ`  | 3457  | 3343  |
| >PTEN-K80E- AKFNCRVAQ`  | 22188 | >PTEN-K80E- AEFNCRVAQ`  | 373   | 21815 |
| >PTEN-K80E- AKFNCRVA    | 9601  | >PTEN-K80E- AEFNCRVA    | 18    | 9583  |
| >PTEN-K80E- AKFNCRVAQ   | 16937 | >PTEN-K80E- AEFNCRVAQ   | 42    | 16895 |
| >PTEN-K80E- AKFNCRVAQ`  | 28165 | >PTEN-K80E- AEFNCRVAQ`  | 344   | 27821 |
| >PTEN-K80E- AKFNCRVAQ`  | 27665 | >PTEN-K80E- AEFNCRVAQ`  | 314   | 27351 |
| >PTEN-K80E- AKFNCRVAQ`  | 2422  | >PTEN-K80E- AEFNCRVAQ`  | 24    | 2398  |
| >PTEN-K80E- AKFNCRVA    | 26205 | >PTEN-K80E- AEFNCRVA    | 472   | 25733 |
| >PTEN-K80E- AKFNCRVAQ   | 24126 | >PTEN-K80E- AEFNCRVAQ   | 367   | 23759 |

|                       |       |                       |      |       |
|-----------------------|-------|-----------------------|------|-------|
| >PTEN-K80E-AKFNCRVAQ` | 2470  | >PTEN-K80E-AEFNCRVAQ` | 27   | 2443  |
| >PTEN-K80E-AKFNCRVAQ` | 24955 | >PTEN-K80E-AEFNCRVAQ` | 420  | 24535 |
| >PTEN-K80E-AKFNCRVA   | 9391  | >PTEN-K80E-AEFNCRVA   | 12   | 9379  |
| >PTEN-K80E-AKFNCRVAQ` | 13232 | >PTEN-K80E-AEFNCRVAQ` | 331  | 12901 |
| >PTEN-K80E-TAKFNCRVAC | 362   | >PTEN-K80E-TAEFNCRVAC | 6538 | 6176  |
| >PTEN-K80E-TAKFNCRVAC | 97    | >PTEN-K80E-TAEFNCRVAC | 178  | 81    |
| >PTEN-K80E-DTAKFNCRV  | 3983  | >PTEN-K80E-DTAEFNCRV  | 268  | 3715  |
| >PTEN-K80E-DTAKFNCR   | 20    | >PTEN-K80E-DTAEFNCR   | 16   | 4     |
| >PTEN-K80E-DTAKFNCR   | 3     | >PTEN-K80E-DTAEFNCR   | 2    | 1     |
| >PTEN-K80E-DTAKFNCRV/ | 171   | >PTEN-K80E-DTAEFNCRV/ | 126  | 45    |
| >PTEN-K80E-DTAKFNCRV  | 12    | >PTEN-K80E-DTAEFNCRV  | 7    | 5     |
| >PTEN-K80E-DTAKFNCRV/ | 460   | >PTEN-K80E-DTAEFNCRV/ | 99   | 361   |
| >PTEN-K80E-DTAKFNCRV  | 7     | >PTEN-K80E-DTAEFNCRV  | 3    | 4     |
| >PTEN-K80E-DTAKFNCRV/ | 1729  | >PTEN-K80E-DTAEFNCRV/ | 361  | 1368  |
| >PTEN-K80E-YDTAKFNCRV | 183   | >PTEN-K80E-YDTAEFNCRV | 106  | 77    |
| >PTEN-K80E-HYDTAKFNCF | 204   | >PTEN-K80E-HYDTAEFNCF | 539  | 335   |
| >PTEN-K80E-HYDTAKFNCF | 29    | >PTEN-K80E-HYDTAEFNCF | 34   | 5     |
| >PTEN-K80E-RHYDTAKF   | 418   | >PTEN-K80E-RHYDTAEF   | 294  | 124   |
| >PTEN-K80E-RHYDTAKF   | 791   | >PTEN-K80E-RHYDTAEF   | 366  | 425   |
| >PTEN-K80E-RHYDTAKFNC | 374   | >PTEN-K80E-RHYDTAEFNC | 672  | 298   |
| >PTEN-K80E-RHYDTAKF   | 7     | >PTEN-K80E-RHYDTAEF   | 5    | 2     |
| >PTEN-K80E-RHYDTAKF   | 384   | >PTEN-K80E-RHYDTAEF   | 496  | 112   |
| >PTEN-K80E-RHYDTAKF   | 71    | >PTEN-K80E-RHYDTAEF   | 55   | 16    |
| >PTEN-K80E-RHYDTAKFNC | 71    | >PTEN-K80E-RHYDTAEFNC | 78   | 7     |
| >PTEN-K80E-ERHYDTAKF  | 202   | >PTEN-K80E-ERHYDTAEF  | 74   | 128   |
| >PTEN-K80E-AERHYDTAKF | 610   | >PTEN-K80E-AERHYDTAEF | 144  | 466   |
| >PTEN-K80E-AERHYDTAKF | 33    | >PTEN-K80E-AERHYDTAEF | 17   | 16    |
| >PTEN-K80E-AERHYDTAKF | 83    | >PTEN-K80E-AERHYDTAEF | 43   | 40    |
| >PTEN-K80E-AERHYDTAKF | 256   | >PTEN-K80E-AERHYDTAEF | 125  | 131   |
| >PTEN-K80E-AERHYDTAKF | 258   | >PTEN-K80E-AERHYDTAEF | 520  | 262   |
| >PTEN-K80E-CAERHYDTAK | 668   | >PTEN-K80E-CAERHYDTAE | 201  | 467   |
| >PTEN-K80N-KFNCRVAQY  | 235   | >PTEN-K80N-NFNCRVAQY  | 399  | 164   |
| >PTEN-K80N-KFNCRVAQY  | 412   | >PTEN-K80N-NFNCRVAQY  | 1397 | 985   |
| >PTEN-K80N-KFNCRVAQY  | 140   | >PTEN-K80N-NFNCRVAQY  | 348  | 208   |
| >PTEN-K80N-KFNCRVAQY  | 167   | >PTEN-K80N-NFNCRVAQY  | 128  | 39    |
| >PTEN-K80N-KFNCRVAQY  | 377   | >PTEN-K80N-NFNCRVAQY  | 8418 | 8041  |
| >PTEN-K80N-KFNCRVAQY  | 170   | >PTEN-K80N-NFNCRVAQY  | 5307 | 5137  |
| >PTEN-K80N-KFNCRVAQY  | 101   | >PTEN-K80N-NFNCRVAQY  | 7292 | 7191  |
| >PTEN-K80N-KFNCRVAQY  | 431   | >PTEN-K80N-NFNCRVAQY  | 1470 | 1039  |
| >PTEN-K80N-KFNCRVAQY  | 331   | >PTEN-K80N-NFNCRVAQY  | 2092 | 1761  |
| >PTEN-K80N-KFNCRVAQY  | 3200  | >PTEN-K80N-NFNCRVAQY  | 483  | 2717  |
| >PTEN-K80N-KFNCRVAQY  | 131   | >PTEN-K80N-NFNCRVAQY  | 345  | 214   |
| >PTEN-K80N-AKFNCRVAQ` | 381   | >PTEN-K80N-ANFNCRVAQ  | 355  | 26    |

|                         |      |                         |       |       |
|-------------------------|------|-------------------------|-------|-------|
| >PTEN-K80N·AKFNCRVAQ'   | 197  | >PTEN-K80N·ANFNCRVAQ    | 217   | 20    |
| >PTEN-K80N·AKFNCRVAQ'   | 1463 | >PTEN-K80N·ANFNCRVAQ    | 280   | 1183  |
| >PTEN-K80N·AKFNCRVA     | 52   | >PTEN-K80N·ANFNCRVA     | 3013  | 2961  |
| >PTEN-K80N·AKFNCRVAQ    | 43   | >PTEN-K80N·ANFNCRVAQ    | 1494  | 1451  |
| >PTEN-K80N·AKFNCRVAQ'   | 3    | >PTEN-K80N·ANFNCRVAQ    | 61    | 58    |
| >PTEN-K80N·AKFNCRVAQ'   | 114  | >PTEN-K80N·ANFNCRVAQ    | 5445  | 5331  |
| >PTEN-K80N·TAKFNCRVAC   | 1131 | >PTEN-K80N·TANFNCRVAC   | 432   | 699   |
| >PTEN-K80N·TAKFNCRVAC   | 573  | >PTEN-K80N·TANFNCRVAC   | 312   | 261   |
| >PTEN-K80N·TAKFNCRV     | 662  | >PTEN-K80N·TANFNCRV     | 54    | 608   |
| >PTEN-K80N·TAKFNCRV     | 3366 | >PTEN-K80N·TANFNCRV     | 456   | 2910  |
| >PTEN-K80N·TAKFNCRVAC   | 362  | >PTEN-K80N·TANFNCRVAC   | 574   | 212   |
| >PTEN-K80N·TAKFNCRVAC   | 97   | >PTEN-K80N·TANFNCRVAC   | 106   | 9     |
| >PTEN-K80N·TAKFNCRVAC   | 2715 | >PTEN-K80N·TANFNCRVAC   | 239   | 2476  |
| >PTEN-K80N·DTAKFNCR     | 20   | >PTEN-K80N·DTANFNCR     | 20    | 0     |
| >PTEN-K80N·DTAKFNCR     | 3    | >PTEN-K80N·DTANFNCR     | 2     | 1     |
| >PTEN-K80N·DTAKFNCRV/   | 171  | >PTEN-K80N·DTANFNCRV/   | 126   | 45    |
| >PTEN-K80N·DTAKFNCRV    | 12   | >PTEN-K80N·DTANFNCRV    | 8     | 4     |
| >PTEN-K80N·DTAKFNCRV/   | 460  | >PTEN-K80N·DTANFNCRV/   | 131   | 329   |
| >PTEN-K80N·DTAKFNCRV    | 7    | >PTEN-K80N·DTANFNCRV    | 6     | 1     |
| >PTEN-K80N·DTAKFNCR     | 780  | >PTEN-K80N·DTANFNCR     | 485   | 295   |
| >PTEN-K80N·YDTAKFNCRV   | 183  | >PTEN-K80N·YDTANFNCRV   | 133   | 50    |
| >PTEN-K80N·HYDTAKFNCF   | 204  | >PTEN-K80N·HYDTANFNCF   | 369   | 165   |
| >PTEN-K80N·HYDTAKFNCF   | 29   | >PTEN-K80N·HYDTANFNCF   | 24    | 5     |
| >PTEN-K80N·RHYDTAKF     | 418  | >PTEN-K80N·RHYDTANF     | 244   | 174   |
| >PTEN-K80N·RHYDTAKFNCF  | 374  | >PTEN-K80N·RHYDTANFNCF  | 379   | 5     |
| >PTEN-K80N·RHYDTAKF     | 7    | >PTEN-K80N·RHYDTANF     | 4     | 3     |
| >PTEN-K80N·RHYDTAKFNCF  | 573  | >PTEN-K80N·RHYDTANFNCF  | 394   | 179   |
| >PTEN-K80N·RHYDTAKF     | 384  | >PTEN-K80N·RHYDTANF     | 541   | 157   |
| >PTEN-K80N·RHYDTAKF     | 71   | >PTEN-K80N·RHYDTANF     | 66    | 5     |
| >PTEN-K80N·RHYDTAKFNCF  | 71   | >PTEN-K80N·RHYDTANFNCF  | 67    | 4     |
| >PTEN-K80N·ERHYDTAKF    | 202  | >PTEN-K80N·ERHYDTANF    | 84    | 118   |
| >PTEN-K80N·AERHYDTAKF   | 610  | >PTEN-K80N·AERHYDTANF   | 283   | 327   |
| >PTEN-K80N·AERHYDTAKF   | 33   | >PTEN-K80N·AERHYDTANI   | 18    | 15    |
| >PTEN-K80N·AERHYDTAKF   | 83   | >PTEN-K80N·AERHYDTANI   | 94    | 11    |
| >PTEN-K80N·AERHYDTAKF   | 256  | >PTEN-K80N·AERHYDTANI   | 347   | 91    |
| >PTEN-K80N·AERHYDTAK    | 707  | >PTEN-K80N·AERHYDTAN    | 498   | 209   |
| >PTEN-K80N·AERHYDTAKF   | 258  | >PTEN-K80N·AERHYDTANI   | 507   | 249   |
| >PTEN-L108F LELIKPFCEDL | 166  | >PTEN-L108F LELIKPFCEDP | 7317  | 7151  |
| >PTEN-L108F LELIKPFCEDL | 248  | >PTEN-L108F LELIKPFCEDP | 11564 | 11316 |
| >PTEN-L108F LELIKPFCEDL | 275  | >PTEN-L108F LELIKPFCEDP | 8807  | 8532  |
| >PTEN-L108F LELIKPFCEDL | 78   | >PTEN-L108F LELIKPFCEDP | 5238  | 5160  |
| >PTEN-L108F CEDLDQWL    | 157  | >PTEN-L108F CEDPDQWL    | 2911  | 2754  |
| >PTEN-L108F CEDLDQWL    | 128  | >PTEN-L108F CEDPDQWL    | 177   | 49    |

|                         |       |                         |       |       |
|-------------------------|-------|-------------------------|-------|-------|
| >PTEN-L108F FCEDLDQW    | 43    | >PTEN-L108F FCEDPDQW    | 111   | 68    |
| >PTEN-L108F KPFCEDLDQV  | 588   | >PTEN-L108F KPFCEDPDQ\  | 430   | 158   |
| >PTEN-L108F KPFCEDLDQV  | 13    | >PTEN-L108F KPFCEDPDQ\  | 28    | 15    |
| >PTEN-L108F KPFCEDLDQV  | 102   | >PTEN-L108F KPFCEDPDQ\  | 100   | 2     |
| >PTEN-L108F ELIKPFCEDL  | 156   | >PTEN-L108F ELIKPFCEDP  | 23983 | 23827 |
| >PTEN-L108F LELIKPFCEDL | 166   | >PTEN-L108F LELIKPFCEDR | 11061 | 10895 |
| >PTEN-L108F LELIKPFCEDL | 248   | >PTEN-L108F LELIKPFCEDR | 18627 | 18379 |
| >PTEN-L108F LELIKPFCEDL | 275   | >PTEN-L108F LELIKPFCEDR | 10479 | 10204 |
| >PTEN-L108F LELIKPFCEDL | 78    | >PTEN-L108F LELIKPFCEDR | 4990  | 4912  |
| >PTEN-L108F CEDLDQWL    | 157   | >PTEN-L108F CEDRDQWL    | 1138  | 981   |
| >PTEN-L108F CEDLDQWL    | 128   | >PTEN-L108F CEDRDQWL    | 192   | 64    |
| >PTEN-L108F FCEDLDQW    | 43    | >PTEN-L108F FCEDRDQW    | 73    | 30    |
| >PTEN-L108F KPFCEDLDQV  | 13    | >PTEN-L108F KPFCEDRDQ\  | 21    | 8     |
| >PTEN-L108F KPFCEDLDQV  | 102   | >PTEN-L108F KPFCEDRDQ\  | 156   | 54    |
| >PTEN-L108F LIKPFCEDL   | 19069 | >PTEN-L108F LIKPFCEDR   | 320   | 18749 |
| >PTEN-L108F LIKPFCEDL   | 31183 | >PTEN-L108F LIKPFCEDR   | 191   | 30992 |
| >PTEN-L108F ELIKPFCEDL  | 156   | >PTEN-L108F ELIKPFCEDR  | 22541 | 22385 |
| >PTEN-L108F ELIKPFCEDL  | 28558 | >PTEN-L108F ELIKPFCEDR  | 87    | 28471 |
| >PTEN-L108F ELIKPFCEDL  | 33795 | >PTEN-L108F ELIKPFCEDR  | 392   | 33403 |
| >PTEN-L112F LSEDDNHVA\  | 70    | >PTEN-L112F PSEDDNHVA\  | 2197  | 2127  |
| >PTEN-L112F WLSEDDNHV   | 105   | >PTEN-L112F WPEDDNHV    | 18265 | 18160 |
| >PTEN-L112F WLSEDDNHV   | 480   | >PTEN-L112F WPEDDNHV    | 23349 | 22869 |
| >PTEN-L112F WLSEDDNHV   | 10    | >PTEN-L112F WPEDDNHV    | 12198 | 12188 |
| >PTEN-L112F WLSEDDNHV   | 99    | >PTEN-L112F WPEDDNHV    | 21988 | 21889 |
| >PTEN-L112F WLSEDDNHV   | 30    | >PTEN-L112F WPEDDNHV    | 22278 | 22248 |
| >PTEN-L112F WLSEDDNHV   | 12    | >PTEN-L112F WPEDDNHV    | 18805 | 18793 |
| >PTEN-L112F WLSEDDNHV   | 39    | >PTEN-L112F WPEDDNHV    | 19777 | 19738 |
| >PTEN-L112F WLSEDDNHV   | 30    | >PTEN-L112F WPEDDNHV    | 2280  | 2250  |
| >PTEN-L112F WLSEDDNHV   | 56    | >PTEN-L112F WPEDDNHV    | 9797  | 9741  |
| >PTEN-L112F WLSEDDNHV   | 8     | >PTEN-L112F WPEDDNHV    | 17760 | 17752 |
| >PTEN-L112F WLSEDDNHV   | 65    | >PTEN-L112F WPEDDNHV    | 24287 | 24222 |
| >PTEN-L112F WLSEDDNHV   | 34    | >PTEN-L112F WPEDDNHV    | 20498 | 20464 |
| >PTEN-L112F WLSEDDNHV   | 4     | >PTEN-L112F WPEDDNHV    | 14537 | 14533 |
| >PTEN-L112F WLSEDDNHV   | 22    | >PTEN-L112F WPEDDNHV    | 20146 | 20124 |
| >PTEN-L112F WLSEDDNHV   | 26    | >PTEN-L112F WPEDDNHV    | 20556 | 20530 |
| >PTEN-L112F WLSEDDNHV   | 6     | >PTEN-L112F WPEDDNHV    | 12502 | 12496 |
| >PTEN-L112F WLSEDDNHV   | 46    | >PTEN-L112F WPEDDNHV    | 23530 | 23484 |
| >PTEN-L112F WLSEDDNHV   | 85    | >PTEN-L112F WPEDDNHV    | 23935 | 23850 |
| >PTEN-L112F WLSEDDNHV   | 6     | >PTEN-L112F WPEDDNHV    | 20771 | 20765 |
| >PTEN-L112F WLSEDDNHV   | 40    | >PTEN-L112F WPEDDNHV    | 19766 | 19726 |
| >PTEN-L112F WLSEDDNHV   | 108   | >PTEN-L112F WPEDDNHV    | 22149 | 22041 |
| >PTEN-L112F WLSEDDNHV   | 2     | >PTEN-L112F WPEDDNHV    | 16300 | 16298 |
| >PTEN-L112F WLSEDDNHV   | 7     | >PTEN-L112F WPEDDNHV    | 27987 | 27980 |

|                        |       |                        |       |       |
|------------------------|-------|------------------------|-------|-------|
| >PTEN-L112F WlseDDNHV  | 9     | >PTEN-L112F WpseDDNHV  | 28847 | 28838 |
| >PTEN-L112F WlseDDNHV  | 243   | >PTEN-L112F WpseDDNHV  | 3087  | 2844  |
| >PTEN-L112F WlseDDNH   | 1920  | >PTEN-L112F WpseDDNH   | 34    | 1886  |
| >PTEN-L112F WlseDDNHV  | 10367 | >PTEN-L112F WpseDDNHV  | 359   | 10008 |
| >PTEN-L112F WlseDDNHV  | 1901  | >PTEN-L112F WpseDDNHV  | 23    | 1878  |
| >PTEN-L112F WlseDDNHV  | 31373 | >PTEN-L112F WpseDDNHV  | 345   | 31028 |
| >PTEN-L112F WlseDDNHV  | 20023 | >PTEN-L112F WpseDDNHV  | 38    | 19985 |
| >PTEN-L112F QWlseDDNF  | 40    | >PTEN-L112F QWpseDDNF  | 47    | 7     |
| >PTEN-L112F QWlseDDNF  | 162   | >PTEN-L112F QWpseDDNF  | 435   | 273   |
| >PTEN-L112F CEDLDQWL   | 157   | >PTEN-L112F CEDLDQWP   | 3738  | 3581  |
| >PTEN-L112F CEDLDQWL   | 128   | >PTEN-L112F CEDLDQWP   | 9660  | 9532  |
| >PTEN-L112C LseDDNHVA/ | 70    | >PTEN-L112C QseDDNHVA  | 280   | 210   |
| >PTEN-L112C WlseDDNHV  | 105   | >PTEN-L112C WqseDDNHV  | 1098  | 993   |
| >PTEN-L112C WlseDDNHV  | 480   | >PTEN-L112C WqseDDNHV  | 5095  | 4615  |
| >PTEN-L112C WlseDDNHV  | 10    | >PTEN-L112C WqseDDNHV  | 198   | 188   |
| >PTEN-L112C WlseDDNHV  | 99    | >PTEN-L112C WqseDDNHV  | 1544  | 1445  |
| >PTEN-L112C WlseDDNHV  | 30    | >PTEN-L112C WqseDDNHV  | 908   | 878   |
| >PTEN-L112C WlseDDNHV  | 12    | >PTEN-L112C WqseDDNHV  | 272   | 260   |
| >PTEN-L112C WlseDDNHV  | 39    | >PTEN-L112C WqseDDNHV  | 802   | 763   |
| >PTEN-L112C WlseDDNHV  | 30    | >PTEN-L112C WqseDDNHV  | 34    | 4     |
| >PTEN-L112C WlseDDNHV  | 56    | >PTEN-L112C WqseDDNHV  | 47    | 9     |
| >PTEN-L112C WlseDDNHV  | 8     | >PTEN-L112C WqseDDNHV  | 889   | 881   |
| >PTEN-L112C WlseDDNHV  | 65    | >PTEN-L112C WqseDDNHV  | 5278  | 5213  |
| >PTEN-L112C WlseDDNHV  | 34    | >PTEN-L112C WqseDDNHV  | 2362  | 2328  |
| >PTEN-L112C WlseDDNHV  | 4     | >PTEN-L112C WqseDDNHV  | 55    | 51    |
| >PTEN-L112C WlseDDNHV  | 22    | >PTEN-L112C WqseDDNHV  | 1826  | 1804  |
| >PTEN-L112C WlseDDNHV  | 26    | >PTEN-L112C WqseDDNHV  | 2295  | 2269  |
| >PTEN-L112C WlseDDNHV  | 6     | >PTEN-L112C WqseDDNHV  | 123   | 117   |
| >PTEN-L112C WlseDDNHV  | 46    | >PTEN-L112C WqseDDNHV  | 6857  | 6811  |
| >PTEN-L112C WlseDDNHV  | 85    | >PTEN-L112C WqseDDNHV  | 7683  | 7598  |
| >PTEN-L112C WlseDDNHV  | 6     | >PTEN-L112C WqseDDNHV  | 3463  | 3457  |
| >PTEN-L112C WlseDDNHV  | 40    | >PTEN-L112C WqseDDNHV  | 5676  | 5636  |
| >PTEN-L112C WlseDDNHV  | 108   | >PTEN-L112C WqseDDNHV  | 11765 | 11657 |
| >PTEN-L112C WlseDDNHV  | 2     | >PTEN-L112C WqseDDNHV  | 782   | 780   |
| >PTEN-L112C WlseDDNHV  | 7     | >PTEN-L112C WqseDDNHV  | 8834  | 8827  |
| >PTEN-L112C WlseDDNHV  | 9     | >PTEN-L112C WqseDDNHV  | 10395 | 10386 |
| >PTEN-L112C WlseDDNHV  | 243   | >PTEN-L112C WqseDDNHV  | 3705  | 3462  |
| >PTEN-L112C WlseDDNHV  | 4386  | >PTEN-L112C WqseDDNHV  | 414   | 3972  |
| >PTEN-L112C QWlseDDNF  | 40    | >PTEN-L112C QWqseDDNI  | 73    | 33    |
| >PTEN-L112C QWlseDDNF  | 162   | >PTEN-L112C QWqseDDNI  | 287   | 125   |
| >PTEN-L112C CEDLDQWL   | 157   | >PTEN-L112C CEDLDQWQ   | 3153  | 2996  |
| >PTEN-L112C CEDLDQWL   | 128   | >PTEN-L112C CEDLDQWQ   | 14618 | 14490 |
| >PTEN-L112F LseDDNHVA/ | 6670  | >PTEN-L112F RseDDNHVA/ | 196   | 6474  |

|                        |       |                       |       |       |
|------------------------|-------|-----------------------|-------|-------|
| >PTEN-L112FLSEDDNHVA/  | 514   | >PTEN-L112FRSEDDNHVA/ | 49    | 465   |
| >PTEN-L112FLSEDDNHVA/  | 70    | >PTEN-L112FRSEDDNHVA/ | 35    | 35    |
| >PTEN-L112FWLSEDDNHV   | 105   | >PTEN-L112FWRSEDDNHV  | 17598 | 17493 |
| >PTEN-L112FWLSEDDNHV   | 480   | >PTEN-L112FWRSEDDNHV  | 23060 | 22580 |
| >PTEN-L112FWLSEDDNHV   | 10    | >PTEN-L112FWRSEDDNHV  | 7714  | 7704  |
| >PTEN-L112FWLSEDDNHV   | 99    | >PTEN-L112FWRSEDDNHV  | 17641 | 17542 |
| >PTEN-L112FWLSEDDNHV   | 30    | >PTEN-L112FWRSEDDNHV  | 15962 | 15932 |
| >PTEN-L112FWLSEDDNHV   | 12    | >PTEN-L112FWRSEDDNHV  | 16656 | 16644 |
| >PTEN-L112FWLSEDDNHV   | 39    | >PTEN-L112FWRSEDDNHV  | 17880 | 17841 |
| >PTEN-L112FWLSEDDNHV   | 30    | >PTEN-L112FWRSEDDNHV  | 1943  | 1913  |
| >PTEN-L112FWLSEDDNHV   | 56    | >PTEN-L112FWRSEDDNHV  | 8537  | 8481  |
| >PTEN-L112FWLSEDDNHV   | 8     | >PTEN-L112FWRSEDDNHV  | 14098 | 14090 |
| >PTEN-L112FWLSEDDNHV   | 65    | >PTEN-L112FWRSEDDNHV  | 22184 | 22119 |
| >PTEN-L112FWLSEDDNHV   | 34    | >PTEN-L112FWRSEDDNHV  | 18498 | 18464 |
| >PTEN-L112FWLSEDDNHV   | 4     | >PTEN-L112FWRSEDDNHV  | 10616 | 10612 |
| >PTEN-L112FWLSEDDNHV   | 22    | >PTEN-L112FWRSEDDNHV  | 18328 | 18306 |
| >PTEN-L112FWLSEDDNHV   | 26    | >PTEN-L112FWRSEDDNHV  | 18926 | 18900 |
| >PTEN-L112FWLSEDDNHV   | 6     | >PTEN-L112FWRSEDDNHV  | 8402  | 8396  |
| >PTEN-L112FWLSEDDNHV   | 46    | >PTEN-L112FWRSEDDNHV  | 21421 | 21375 |
| >PTEN-L112FWLSEDDNHV   | 85    | >PTEN-L112FWRSEDDNHV  | 21872 | 21787 |
| >PTEN-L112FWLSEDDNHV   | 6     | >PTEN-L112FWRSEDDNHV  | 18819 | 18813 |
| >PTEN-L112FWLSEDDNHV   | 40    | >PTEN-L112FWRSEDDNHV  | 18733 | 18693 |
| >PTEN-L112FWLSEDDNHV   | 108   | >PTEN-L112FWRSEDDNHV  | 21353 | 21245 |
| >PTEN-L112FWLSEDDNHV   | 2     | >PTEN-L112FWRSEDDNHV  | 8001  | 7999  |
| >PTEN-L112FWLSEDDNHV   | 7     | >PTEN-L112FWRSEDDNHV  | 22266 | 22259 |
| >PTEN-L112FWLSEDDNHV   | 9     | >PTEN-L112FWRSEDDNHV  | 22952 | 22943 |
| >PTEN-L112FWLSEDDNHV   | 243   | >PTEN-L112FWRSEDDNHV  | 7239  | 6996  |
| >PTEN-L112FKPFCEDLDQV  | 15098 | >PTEN-L112FKPFCEDLDQV | 21    | 15077 |
| >PTEN-L112FQWLSEDDNF   | 40    | >PTEN-L112FQWRSEDDNF  | 91    | 51    |
| >PTEN-L112FQWLSEDDNF   | 162   | >PTEN-L112FQWRSEDDNF  | 374   | 212   |
| >PTEN-L112FCEDLDQWL    | 157   | >PTEN-L112FCEDLDQWR   | 4066  | 3909  |
| >PTEN-L112FCEDLDQWL    | 128   | >PTEN-L112FCEDLDQWR   | 17133 | 17005 |
| >PTEN-L112V LSEDDNHVA/ | 514   | >PTEN-L112VSEDDNHVA/  | 433   | 81    |
| >PTEN-L112V LSEDDNHVA/ | 70    | >PTEN-L112VSEDDNHVA/  | 242   | 172   |
| >PTEN-L112VWLSEDDNHV   | 105   | >PTEN-L112VWVSEDDNHV  | 1748  | 1643  |
| >PTEN-L112VWLSEDDNHV   | 480   | >PTEN-L112VWVSEDDNHV  | 6063  | 5583  |
| >PTEN-L112VWLSEDDNHV   | 10    | >PTEN-L112VWVSEDDNHV  | 160   | 150   |
| >PTEN-L112VWLSEDDNHV   | 99    | >PTEN-L112VWVSEDDNHV  | 1942  | 1843  |
| >PTEN-L112VWLSEDDNHV   | 30    | >PTEN-L112VWVSEDDNHV  | 975   | 945   |
| >PTEN-L112VWLSEDDNHV   | 12    | >PTEN-L112VWVSEDDNHV  | 252   | 240   |
| >PTEN-L112VWLSEDDNHV   | 39    | >PTEN-L112VWVSEDDNHV  | 892   | 853   |
| >PTEN-L112VWLSEDDNHV   | 30    | >PTEN-L112VWVSEDDNHV  | 69    | 39    |
| >PTEN-L112VWLSEDDNHV   | 56    | >PTEN-L112VWVSEDDNHV  | 150   | 94    |



|                       |      |                       |      |      |
|-----------------------|------|-----------------------|------|------|
| >PTEN-L112\WLSEDDNHV  | 8    | >PTEN-L112\WVSEDDNH\  | 532  | 524  |
| >PTEN-L112\WLSEDDNHV  | 65   | >PTEN-L112\WVSEDDNH\  | 4237 | 4172 |
| >PTEN-L112\WLSEDDNHV  | 34   | >PTEN-L112\WVSEDDNH\  | 1930 | 1896 |
| >PTEN-L112\WLSEDDNHV  | 4    | >PTEN-L112\WVSEDDNH\  | 133  | 129  |
| >PTEN-L112\WLSEDDNHV  | 22   | >PTEN-L112\WVSEDDNH\  | 3177 | 3155 |
| >PTEN-L112\WLSEDDNHV  | 26   | >PTEN-L112\WVSEDDNH\  | 3462 | 3436 |
| >PTEN-L112\WLSEDDNHV  | 6    | >PTEN-L112\WVSEDDNH\  | 73   | 67   |
| >PTEN-L112\WLSEDDNHV  | 46   | >PTEN-L112\WVSEDDNH\  | 5124 | 5078 |
| >PTEN-L112\WLSEDDNHV  | 85   | >PTEN-L112\WVSEDDNH\  | 6000 | 5915 |
| >PTEN-L112\WLSEDDNHV  | 6    | >PTEN-L112\WVSEDDNH\  | 551  | 545  |
| >PTEN-L112\WLSEDDNHV  | 40   | >PTEN-L112\WVSEDDNH\  | 1815 | 1775 |
| >PTEN-L112\WLSEDDNHV  | 108  | >PTEN-L112\WVSEDDNH\  | 6125 | 6017 |
| >PTEN-L112\WLSEDDNHV  | 2    | >PTEN-L112\WVSEDDNH\  | 22   | 20   |
| >PTEN-L112\WLSEDDNHV  | 7    | >PTEN-L112\WVSEDDNH\  | 467  | 460  |
| >PTEN-L112\WLSEDDNHV  | 9    | >PTEN-L112\WVSEDDNH\  | 848  | 839  |
| >PTEN-L112\WLSEDDNHV  | 243  | >PTEN-L112\WVSEDDNH\  | 21   | 222  |
| >PTEN-L112\WLSEDDNHV  | 2298 | >PTEN-L112\WVSEDDNH\  | 102  | 2196 |
| >PTEN-L112\WLSEDDNHV  | 1901 | >PTEN-L112\WVSEDDNH\  | 488  | 1413 |
| >PTEN-L112\QWLSEDDNH  | 40   | >PTEN-L112\QWVSEDDNH  | 74   | 34   |
| >PTEN-L112\QWLSEDDNH  | 162  | >PTEN-L112\QWVSEDDNH  | 186  | 24   |
| >PTEN-L112\CEDLDQWL   | 157  | >PTEN-L112\CEDLDQWV   | 125  | 32   |
| >PTEN-L112\CEDLDQWL   | 128  | >PTEN-L112\CEDLDQWV   | 1467 | 1339 |
| >PTEN-L112\FCEDLDQWL  | 1161 | >PTEN-L112\FCEDLDQWV  | 29   | 1132 |
| >PTEN-L139FLLHRGKFL   | 2717 | >PTEN-L139FLLHRGKFL   | 166  | 2551 |
| >PTEN-L139FLLHRGKFLKA | 2762 | >PTEN-L139FLLHRGKFLKA | 276  | 2486 |
| >PTEN-L139FLLHRGKFL   | 274  | >PTEN-L139FLLHRGKFL   | 17   | 257  |
| >PTEN-L139FLLHRGKFLKA | 546  | >PTEN-L139FLLHRGKFLKA | 102  | 444  |
| >PTEN-L139FLLHRGKFL   | 288  | >PTEN-L139FLLHRGKFL   | 21   | 267  |
| >PTEN-L139FLLHRGKFLKA | 194  | >PTEN-L139FLLHRGKFLKA | 51   | 143  |
| >PTEN-L139FLLHRGKFL   | 2648 | >PTEN-L139FLLHRGKFL   | 281  | 2367 |
| >PTEN-L139FLLHRGKFLKA | 3181 | >PTEN-L139FLLHRGKFLKA | 422  | 2759 |
| >PTEN-L139FLLHRGKFL   | 28   | >PTEN-L139FLLHRGKFL   | 6    | 22   |
| >PTEN-L139FLLHRGKFLKA | 132  | >PTEN-L139FLLHRGKFLKA | 16   | 116  |
| >PTEN-L139FLLHRGKFL   | 353  | >PTEN-L139FLLHRGKFL   | 26   | 327  |
| >PTEN-L139FLLHRGKFLKA | 2677 | >PTEN-L139FLLHRGKFLKA | 306  | 2371 |
| >PTEN-L139FLLHRGKFL   | 204  | >PTEN-L139FLLHRGKFL   | 23   | 181  |
| >PTEN-L139FLLHRGKFLKA | 700  | >PTEN-L139FLLHRGKFLKA | 55   | 645  |
| >PTEN-L139FLLHRGKFL   | 8    | >PTEN-L139FLLHRGKFL   | 3    | 5    |
| >PTEN-L139FLLHRGKFLK  | 328  | >PTEN-L139FLLHRGKFLK  | 49   | 279  |
| >PTEN-L139FLLHRGKFLKA | 8    | >PTEN-L139FLLHRGKFLKA | 3    | 5    |
| >PTEN-L139FLLHRGKFLKA | 230  | >PTEN-L139FLLHRGKFLKA | 41   | 189  |
| >PTEN-L139FLLHRGKFLK  | 41   | >PTEN-L139FLLHRGKFLK  | 61   | 20   |
| >PTEN-L139FLLHRGKFLK  | 63   | >PTEN-L139FLLHRGKFLK  | 108  | 45   |

|                        |       |                        |       |       |
|------------------------|-------|------------------------|-------|-------|
| >PTEN-L139F LLHRGKFLK  | 37    | >PTEN-L139F FLHRGKFLK  | 981   | 944   |
| >PTEN-L139F LLHRGKFLK  | 69    | >PTEN-L139F FLHRGKFLK  | 495   | 426   |
| >PTEN-L139F LLHRGKFLK  | 427   | >PTEN-L139F FLHRGKFLK  | 90    | 337   |
| >PTEN-L139F LLHRGKFL   | 932   | >PTEN-L139F FLHRGKFL   | 373   | 559   |
| >PTEN-L139F YLLHRGKFL  | 93    | >PTEN-L139F YFLHRGKFL  | 16677 | 16584 |
| >PTEN-L139F YLLHRGKFLK | 86    | >PTEN-L139F YFLHRGKFLK | 14744 | 14658 |
| >PTEN-L139F YLLHRGKFL  | 91    | >PTEN-L139F YFLHRGKFL  | 4541  | 4450  |
| >PTEN-L139F YLLHRGKFLK | 446   | >PTEN-L139F YFLHRGKFLK | 13386 | 12940 |
| >PTEN-L139F YLLHRGKFL  | 70    | >PTEN-L139F YFLHRGKFL  | 13557 | 13487 |
| >PTEN-L139F YLLHRGKFLK | 44    | >PTEN-L139F YFLHRGKFLK | 11850 | 11806 |
| >PTEN-L139F YLLHRGKFL  | 105   | >PTEN-L139F YFLHRGKFL  | 6484  | 6379  |
| >PTEN-L139F YLLHRGKFLK | 66    | >PTEN-L139F YFLHRGKFLK | 5682  | 5616  |
| >PTEN-L139F YLLHRGKFL  | 6     | >PTEN-L139F YFLHRGKFL  | 5269  | 5263  |
| >PTEN-L139F YLLHRGKFLK | 12    | >PTEN-L139F YFLHRGKFLK | 8392  | 8380  |
| >PTEN-L139F YLLHRGKFL  | 10    | >PTEN-L139F YFLHRGKFL  | 9017  | 9007  |
| >PTEN-L139F YLLHRGKFLK | 39    | >PTEN-L139F YFLHRGKFLK | 16040 | 16001 |
| >PTEN-L139F YLLHRGKFL  | 12    | >PTEN-L139F YFLHRGKFL  | 6810  | 6798  |
| >PTEN-L139F YLLHRGKFLK | 17    | >PTEN-L139F YFLHRGKFLK | 8656  | 8639  |
| >PTEN-L139F YLLHRGKFL  | 58    | >PTEN-L139F YFLHRGKFL  | 17737 | 17679 |
| >PTEN-L139F YLLHRGKFLK | 317   | >PTEN-L139F YFLHRGKFLK | 16768 | 16451 |
| >PTEN-L139F YLLHRGKFL  | 6     | >PTEN-L139F YFLHRGKFL  | 11400 | 11394 |
| >PTEN-L139F YLLHRGKFLK | 296   | >PTEN-L139F YFLHRGKFLK | 29257 | 28961 |
| >PTEN-L139F YLLHRGKFLK | 8     | >PTEN-L139F YFLHRGKFLK | 13075 | 13067 |
| >PTEN-L139F YLLHRGKFLK | 28    | >PTEN-L139F YFLHRGKFLK | 198   | 170   |
| >PTEN-L139F YLLHRGKFLK | 113   | >PTEN-L139F YFLHRGKFLK | 469   | 356   |
| >PTEN-L139F YLLHRGKF   | 1516  | >PTEN-L139F YFLHRGKF   | 90    | 1426  |
| >PTEN-L139F YLLHRGKF   | 5320  | >PTEN-L139F YFLHRGKF   | 486   | 4834  |
| >PTEN-L139F YLLHRGKF   | 735   | >PTEN-L139F YFLHRGKF   | 7     | 728   |
| >PTEN-L139F YLLHRGKFL  | 10206 | >PTEN-L139F YFLHRGKFL  | 63    | 10143 |
| >PTEN-L139F YLLHRGKF   | 606   | >PTEN-L139F YFLHRGKF   | 138   | 468   |
| >PTEN-L139F YLLHRGKFLK | 316   | >PTEN-L139F YFLHRGKFLK | 126   | 190   |
| >PTEN-L139F YLLHRGKFLK | 1206  | >PTEN-L139F YFLHRGKFLK | 245   | 961   |
| >PTEN-L139F YLLHRGKF   | 412   | >PTEN-L139F YFLHRGKF   | 4614  | 4202  |
| >PTEN-L139F YLLHRGKFL  | 54    | >PTEN-L139F YFLHRGKFL  | 919   | 865   |
| >PTEN-L139F YLLHRGKFLK | 154   | >PTEN-L139F YFLHRGKFLK | 1663  | 1509  |
| >PTEN-L139F YLLHRGKF   | 473   | >PTEN-L139F YFLHRGKF   | 6991  | 6518  |
| >PTEN-L139F YLLHRGKF   | 43    | >PTEN-L139F YFLHRGKF   | 171   | 128   |
| >PTEN-L139F YLLHRGKFL  | 478   | >PTEN-L139F YFLHRGKFL  | 1899  | 1421  |
| >PTEN-L139F YLLHRGKF   | 45    | >PTEN-L139F YFLHRGKF   | 759   | 714   |
| >PTEN-L139F YLLHRGKFL  | 278   | >PTEN-L139F YFLHRGKFL  | 3766  | 3488  |
| >PTEN-L139F YLLHRGKF   | 259   | >PTEN-L139F YFLHRGKF   | 11700 | 11441 |
| >PTEN-L139F YLLHRGKFLK | 111   | >PTEN-L139F YFLHRGKFLK | 113   | 2     |
| >PTEN-L139F GRTGVMICA  | 258   | >PTEN-L139F GRTGVMICA  | 315   | 57    |

|                         |      |                         |      |      |
|-------------------------|------|-------------------------|------|------|
| >PTEN-L139F GRTGVMICA'  | 334  | >PTEN-L139F GRTGVMICA'  | 1307 | 973  |
| >PTEN-L139F GRTGVMICA'  | 78   | >PTEN-L139F GRTGVMICA'  | 267  | 189  |
| >PTEN-L139F AYLLHRGKF   | 1272 | >PTEN-L139F AYFLHRGKF   | 389  | 883  |
| >PTEN-L139F AYLLHRGKFL  | 2715 | >PTEN-L139F AYFLHRGKFL  | 481  | 2234 |
| >PTEN-L139F AYLLHRGKFL  | 230  | >PTEN-L139F AYFLHRGKFL  | 77   | 153  |
| >PTEN-L139F AYLLHRGKF   | 418  | >PTEN-L139F AYFLHRGKF   | 397  | 21   |
| >PTEN-L139F AYLLHRGKFL  | 368  | >PTEN-L139F AYFLHRGKFL  | 174  | 194  |
| >PTEN-L139F AYLLHRGKFL  | 1868 | >PTEN-L139F AYFLHRGKFL  | 324  | 1544 |
| >PTEN-L139F AYLLHRGKF   | 8    | >PTEN-L139F AYFLHRGKF   | 10   | 2    |
| >PTEN-L139F AYLLHRGKFL  | 16   | >PTEN-L139F AYFLHRGKFL  | 22   | 6    |
| >PTEN-L139F AYLLHRGK    | 40   | >PTEN-L139F AYFLHRGK    | 23   | 17   |
| >PTEN-L139F AYLLHRGKFL  | 782  | >PTEN-L139F AYFLHRGKFL  | 393  | 389  |
| >PTEN-L139F AYLLHRGKFL  | 25   | >PTEN-L139F AYFLHRGKFL  | 16   | 9    |
| >PTEN-L139F AYLLHRGK    | 1264 | >PTEN-L139F AYFLHRGK    | 445  | 819  |
| >PTEN-L139F AYLLHRGKFL  | 76   | >PTEN-L139F AYFLHRGKFL  | 37   | 39   |
| >PTEN-L139F AYLLHRGK    | 841  | >PTEN-L139F AYFLHRGK    | 327  | 514  |
| >PTEN-L139F AYLLHRGKFL  | 305  | >PTEN-L139F AYFLHRGKFL  | 166  | 139  |
| >PTEN-L139F AYLLHRGKFL  | 1086 | >PTEN-L139F AYFLHRGKFL  | 485  | 601  |
| >PTEN-L139F AYLLHRGKFL  | 540  | >PTEN-L139F AYFLHRGKFL  | 286  | 254  |
| >PTEN-L139F CAYLLHRGKF  | 119  | >PTEN-L139F CAYFLHRGKF  | 106  | 13   |
| >PTEN-L139F CAYLLHRGK   | 523  | >PTEN-L139F CAYFLHRGK   | 254  | 269  |
| >PTEN-L139F CAYLLHRGK   | 471  | >PTEN-L139F CAYFLHRGK   | 106  | 365  |
| >PTEN-L139F CAYLLHRGKF  | 67   | >PTEN-L139F CAYFLHRGKF  | 72   | 5    |
| >PTEN-L139F CAYLLHRGKF  | 350  | >PTEN-L139F CAYFLHRGKF  | 334  | 16   |
| >PTEN-L139F CAYLLHRGKF  | 350  | >PTEN-L139F CAYFLHRGKF  | 344  | 6    |
| >PTEN-L139F CAYLLHRGKF  | 185  | >PTEN-L139F CAYFLHRGKF  | 149  | 36   |
| >PTEN-L139F ICAYLLHRGK  | 913  | >PTEN-L139F ICAYFLHRGK  | 370  | 543  |
| >PTEN-L139F ICAYLLHR    | 569  | >PTEN-L139F ICAYFLHR    | 267  | 302  |
| >PTEN-L139F ICAYLLHR    | 969  | >PTEN-L139F ICAYFLHR    | 430  | 539  |
| >PTEN-L139F ICAYLLHRGKI | 187  | >PTEN-L139F ICAYFLHRGKI | 182  | 5    |
| >PTEN-L139F ICAYLLHR    | 107  | >PTEN-L139F ICAYFLHR    | 46   | 61   |
| >PTEN-L139F MICAYLLHR   | 315  | >PTEN-L139F MICAYFLHR   | 155  | 160  |
| >PTEN-L139F MICAYLLHRG  | 162  | >PTEN-L139F MICAYFLHRG  | 120  | 42   |
| >PTEN-L139F MICAYLLH    | 299  | >PTEN-L139F MICAYFLH    | 97   | 202  |
| >PTEN-L139F MICAYLLHR   | 89   | >PTEN-L139F MICAYFLHR   | 34   | 55   |
| >PTEN-L139F MICAYLLHRG  | 49   | >PTEN-L139F MICAYFLHRG  | 36   | 13   |
| >PTEN-L139F MICAYLLHRG  | 77   | >PTEN-L139F MICAYFLHRG  | 59   | 18   |
| >PTEN-L139F MICAYLLH    | 2741 | >PTEN-L139F MICAYFLH    | 372  | 2369 |
| >PTEN-L139F MICAYLLHR   | 11   | >PTEN-L139F MICAYFLHR   | 9    | 2    |
| >PTEN-L139F MICAYLLHRG  | 473  | >PTEN-L139F MICAYFLHRG  | 274  | 199  |
| >PTEN-L139F MICAYLLHR   | 45   | >PTEN-L139F MICAYFLHR   | 23   | 22   |
| >PTEN-L139F MICAYLLHR   | 28   | >PTEN-L139F MICAYFLHR   | 16   | 12   |
| >PTEN-L139F MICAYLLHRG  | 124  | >PTEN-L139F MICAYFLHRG  | 70   | 54   |

|                        |      |                        |       |       |
|------------------------|------|------------------------|-------|-------|
| >PTEN-L139F MICAYLLHR  | 28   | >PTEN-L139F MICAYFLHR  | 14    | 14    |
| >PTEN-L139F VMICAYLL   | 248  | >PTEN-L139F VMICAYFL   | 207   | 41    |
| >PTEN-L139F VMICAYLL   | 15   | >PTEN-L139F VMICAYFL   | 11    | 4     |
| >PTEN-L139F VMICAYLL   | 9    | >PTEN-L139F VMICAYFL   | 5     | 4     |
| >PTEN-L139F VMICAYLL   | 27   | >PTEN-L139F VMICAYFL   | 22    | 5     |
| >PTEN-L139F VMICAYLL   | 39   | >PTEN-L139F VMICAYFL   | 15    | 24    |
| >PTEN-L139F VMICAYLL   | 10   | >PTEN-L139F VMICAYFL   | 5     | 5     |
| >PTEN-L139F VMICAYLL   | 6    | >PTEN-L139F VMICAYFL   | 4     | 2     |
| >PTEN-L139F VMICAYLL   | 58   | >PTEN-L139F VMICAYFL   | 18    | 40    |
| >PTEN-L139F VMICAYLL   | 136  | >PTEN-L139F VMICAYFL   | 14    | 122   |
| >PTEN-L139F VMICAYLL   | 16   | >PTEN-L139F VMICAYFL   | 11    | 5     |
| >PTEN-L139F VMICAYLLHR | 166  | >PTEN-L139F VMICAYFLHR | 141   | 25    |
| >PTEN-L139F VMICAYLLH  | 1118 | >PTEN-L139F VMICAYFLH  | 444   | 674   |
| >PTEN-L139F VMICAYLLHR | 52   | >PTEN-L139F VMICAYFLHR | 54    | 2     |
| >PTEN-L139F VMICAYLL   | 100  | >PTEN-L139F VMICAYFL   | 136   | 36    |
| >PTEN-L139F VMICAYLLH  | 46   | >PTEN-L139F VMICAYFLH  | 70    | 24    |
| >PTEN-L139F VMICAYLLHR | 44   | >PTEN-L139F VMICAYFLHR | 24    | 20    |
| >PTEN-L139F VMICAYLLHR | 237  | >PTEN-L139F VMICAYFLHR | 139   | 98    |
| >PTEN-L139F VMICAYLLHR | 119  | >PTEN-L139F VMICAYFLHR | 124   | 5     |
| >PTEN-L139F VMICAYLL   | 126  | >PTEN-L139F VMICAYFL   | 88    | 38    |
| >PTEN-L139F VMICAYLLHR | 434  | >PTEN-L139F VMICAYFLHR | 283   | 151   |
| >PTEN-L139F VMICAYLLHR | 70   | >PTEN-L139F VMICAYFLHR | 71    | 1     |
| >PTEN-L139F VMICAYLLHR | 58   | >PTEN-L139F VMICAYFLHR | 39    | 19    |
| >PTEN-L139F GVMICAYL   | 66   | >PTEN-L139F GVMICAYF   | 9546  | 9480  |
| >PTEN-L139F GVMICAYLL  | 57   | >PTEN-L139F GVMICAYFL  | 33    | 24    |
| >PTEN-L139F GVMICAYL   | 20   | >PTEN-L139F GVMICAYF   | 1651  | 1631  |
| >PTEN-L139F GVMICAYLL  | 18   | >PTEN-L139F GVMICAYFL  | 10    | 8     |
| >PTEN-L139F GVMICAYL   | 260  | >PTEN-L139F GVMICAYF   | 9741  | 9481  |
| >PTEN-L139F GVMICAYL   | 51   | >PTEN-L139F GVMICAYF   | 1102  | 1051  |
| >PTEN-L139F GVMICAYLL  | 112  | >PTEN-L139F GVMICAYFL  | 33    | 79    |
| >PTEN-L139F GVMICAYL   | 346  | >PTEN-L139F GVMICAYF   | 15137 | 14791 |
| >PTEN-L139F GVMICAYLL  | 327  | >PTEN-L139F GVMICAYFL  | 65    | 262   |
| >PTEN-L139F GVMICAYL   | 403  | >PTEN-L139F GVMICAYF   | 16868 | 16465 |
| >PTEN-L139F GVMICAYLL  | 2518 | >PTEN-L139F GVMICAYFL  | 301   | 2217  |
| >PTEN-L139F GVMICAYLLH | 52   | >PTEN-L139F GVMICAYFLH | 36    | 16    |
| >PTEN-L139F GVMICAYL   | 8475 | >PTEN-L139F GVMICAYF   | 367   | 8108  |
| >PTEN-L139F GVMICAYLLH | 38   | >PTEN-L139F GVMICAYFLH | 28    | 10    |
| >PTEN-L139F GVMICAYLLH | 177  | >PTEN-L139F GVMICAYFLH | 107   | 70    |
| >PTEN-L139F GVMICAYL   | 485  | >PTEN-L139F GVMICAYF   | 16592 | 16107 |
| >PTEN-L139F GVMICAYLL  | 582  | >PTEN-L139F GVMICAYFL  | 198   | 384   |
| >PTEN-L139F GVMICAYL   | 6878 | >PTEN-L139F GVMICAYF   | 453   | 6425  |
| >PTEN-L139F GVMICAYL   | 1630 | >PTEN-L139F GVMICAYF   | 124   | 1506  |
| >PTEN-L139F GVMICAYLL  | 222  | >PTEN-L139F GVMICAYFL  | 496   | 274   |

|                        |      |                        |       |       |
|------------------------|------|------------------------|-------|-------|
| >PTEN-L139F GVMICAYLLH | 198  | >PTEN-L139F GVMICAYFLH | 110   | 88    |
| >PTEN-L139F GVMICAYLLH | 132  | >PTEN-L139F GVMICAYFLH | 52    | 80    |
| >PTEN-L139F TGVMICAYL  | 267  | >PTEN-L139F TGVMICAYF  | 13958 | 13691 |
| >PTEN-L139F TGVMICAYL  | 1647 | >PTEN-L139F TGVMICAYF  | 256   | 1391  |
| >PTEN-L139F RTGVMICAYL | 5200 | >PTEN-L139F RTGVMICAYF | 430   | 4770  |
| >PTEN-L139F RTGVMICAYL | 6240 | >PTEN-L139F RTGVMICAYF | 475   | 5765  |
| >PTEN-L139F RTGVMICAYL | 398  | >PTEN-L139F RTGVMICAYF | 84    | 314   |
| >PTEN-L139F RTGVMICAYL | 1242 | >PTEN-L139F RTGVMICAYF | 492   | 750   |
| >PTEN-L139F RTGVMICAYL | 632  | >PTEN-L139F RTGVMICAYF | 142   | 490   |
| >PTEN-L139F RTGVMICAYL | 114  | >PTEN-L139F RTGVMICAYF | 254   | 140   |
| >PTEN-L139F RTGVMICAYL | 74   | >PTEN-L139F RTGVMICAYF | 10962 | 10888 |
| >PTEN-L139F RTGVMICAYL | 3628 | >PTEN-L139F RTGVMICAYF | 147   | 3481  |
| >PTEN-L139F RTGVMICAYL | 12   | >PTEN-L139F RTGVMICAYF | 6     | 6     |
| >PTEN-L139F RTGVMICAYL | 14   | >PTEN-L139F RTGVMICAYF | 12    | 2     |
| >PTEN-L139F RTGVMICAYL | 438  | >PTEN-L139F RTGVMICAYF | 31    | 407   |
| >PTEN-L139F RTGVMICAYL | 428  | >PTEN-L139F RTGVMICAYF | 514   | 86    |
| >PTEN-L139F RTGVMICAYL | 90   | >PTEN-L139F RTGVMICAYF | 146   | 56    |
| >PTEN-L139F RTGVMICAYL | 56   | >PTEN-L139F RTGVMICAYF | 74    | 18    |
| >PTEN-L139F RTGVMICAYL | 72   | >PTEN-L139F RTGVMICAYF | 24    | 48    |
| >PTEN-L139F RTGVMICAYL | 235  | >PTEN-L139F RTGVMICAYF | 464   | 229   |
| >PTEN-L139F RTGVMICAYL | 394  | >PTEN-L139F RTGVMICAYF | 268   | 126   |
| >PTEN-L146\ LKAQEALDFY | 1260 | >PTEN-L146\ VKAQEALDFY | 393   | 867   |
| >PTEN-L146\ LKAQEALDF  | 6    | >PTEN-L146\ VKAQEALDF  | 9     | 3     |
| >PTEN-L146\ LKAQEALDFY | 85   | >PTEN-L146\ VKAQEALDFY | 139   | 54    |
| >PTEN-L146\ FLKAQEAL   | 179  | >PTEN-L146\ FVKAQEAL   | 5135  | 4956  |
| >PTEN-L146\ FLKAQEAL   | 4    | >PTEN-L146\ FVKAQEAL   | 76    | 72    |
| >PTEN-L146\ FLKAQEALDF | 370  | >PTEN-L146\ FVKAQEALDF | 7696  | 7326  |
| >PTEN-L146\ FLKAQEAL   | 8    | >PTEN-L146\ FVKAQEAL   | 187   | 179   |
| >PTEN-L146\ FLKAQEAL   | 280  | >PTEN-L146\ FVKAQEAL   | 371   | 91    |
| >PTEN-L146\ FLKAQEAL   | 58   | >PTEN-L146\ FVKAQEAL   | 4166  | 4108  |
| >PTEN-L146\ FLKAQEAL   | 47   | >PTEN-L146\ FVKAQEAL   | 7946  | 7899  |
| >PTEN-L146\ FLKAQEAL   | 4    | >PTEN-L146\ FVKAQEAL   | 349   | 345   |
| >PTEN-L146\ FLKAQEALDF | 1457 | >PTEN-L146\ FVKAQEALDF | 134   | 1323  |
| >PTEN-L146\ FLKAQEALDF | 548  | >PTEN-L146\ FVKAQEALDF | 25    | 523   |
| >PTEN-L146\ FLKAQEALDF | 98   | >PTEN-L146\ FVKAQEALDF | 71    | 27    |
| >PTEN-L146\ FLKAQEALDF | 209  | >PTEN-L146\ FVKAQEALDF | 209   | 0     |
| >PTEN-L146\ FLKAQEALDF | 122  | >PTEN-L146\ FVKAQEALDF | 123   | 1     |
| >PTEN-L146\ FLKAQEAL   | 68   | >PTEN-L146\ FVKAQEAL   | 512   | 444   |
| >PTEN-L146\ FLKAQEAL   | 343  | >PTEN-L146\ FVKAQEAL   | 1054  | 711   |
| >PTEN-L146\ FLKAQEALDF | 105  | >PTEN-L146\ FVKAQEALDF | 271   | 166   |
| >PTEN-L146\ FLKAQEALDF | 105  | >PTEN-L146\ FVKAQEALDF | 239   | 134   |
| >PTEN-L146\ FLKAQEALDF | 108  | >PTEN-L146\ FVKAQEALDF | 840   | 732   |
| >PTEN-L146\ FLKAQEALDF | 78   | >PTEN-L146\ FVKAQEALDF | 471   | 393   |

|                        |      |                         |      |      |
|------------------------|------|-------------------------|------|------|
| >PTEN-L146\ FLKAQEALDF | 37   | >PTEN-L146\ FVKAQEALDF  | 323  | 286  |
| >PTEN-L146\ FLKAQEALDF | 2201 | >PTEN-L146\ FVKAQEALDF  | 356  | 1845 |
| >PTEN-L146\ CAYLLHRGKF | 119  | >PTEN-L146\ CAYLLHRGKF  | 360  | 241  |
| >PTEN-L146\ CAYLLHRGKF | 350  | >PTEN-L146\ CAYLLHRGKF  | 7699 | 7349 |
| >PTEN-L146\ CAYLLHRGKF | 185  | >PTEN-L146\ CAYLLHRGKF  | 732  | 547  |
| >PTEN-L146\ KFLKAQEAL  | 154  | >PTEN-L146\ KFVKAQEAL   | 279  | 125  |
| >PTEN-L146\ KFLKAQEALD | 77   | >PTEN-L146\ KFVKAQEALD  | 71   | 6    |
| >PTEN-L146\ KFLKAQEALD | 345  | >PTEN-L146\ KFVKAQEALD  | 503  | 158  |
| >PTEN-L146\ KFLKAQEAL  | 37   | >PTEN-L146\ KFVKAQEAL   | 274  | 237  |
| >PTEN-L146\ KFLKAQEALD | 9    | >PTEN-L146\ KFVKAQEALD  | 27   | 18   |
| >PTEN-L146\ KFLKAQEA   | 464  | >PTEN-L146\ KFVKAQEA    | 2376 | 1912 |
| >PTEN-L146\ KFLKAQEALD | 364  | >PTEN-L146\ KFVKAQEALD  | 560  | 196  |
| >PTEN-L146\ KFLKAQEAL  | 257  | >PTEN-L146\ KFVKAQEAL   | 280  | 23   |
| >PTEN-L146\ GKFLKAQEAL | 109  | >PTEN-L146\ GK FVKAQEAL | 43   | 66   |
| >PTEN-L146\ RGKFLKAQEA | 193  | >PTEN-L146\ RGK FVKAQEA | 172  | 21   |
| >PTEN-L146\ LHRGKFLK   | 386  | >PTEN-L146\ LHRGK FVK   | 775  | 389  |
| >PTEN-L146\ LLHRGKFL   | 274  | >PTEN-L146\ LLHRGK FV   | 181  | 93   |
| >PTEN-L146\ LLHRGKFL   | 288  | >PTEN-L146\ LLHRGK FV   | 23   | 265  |
| >PTEN-L146\ LLHRGKFLKA | 194  | >PTEN-L146\ LLHRGK FVKA | 392  | 198  |
| >PTEN-L146\ LLHRGKFL   | 2648 | >PTEN-L146\ LLHRGK FV   | 452  | 2196 |
| >PTEN-L146\ LLHRGKFL   | 28   | >PTEN-L146\ LLHRGK FV   | 4    | 24   |
| >PTEN-L146\ LLHRGKFLKA | 132  | >PTEN-L146\ LLHRGK FVKA | 98   | 34   |
| >PTEN-L146\ LLHRGKFL   | 353  | >PTEN-L146\ LLHRGK FV   | 30   | 323  |
| >PTEN-L146\ LLHRGKFL   | 204  | >PTEN-L146\ LLHRGK FV   | 16   | 188  |
| >PTEN-L146\ LLHRGKFL   | 3033 | >PTEN-L146\ LLHRGK FV   | 262  | 2771 |
| >PTEN-L146\ LLHRGKFL   | 8    | >PTEN-L146\ LLHRGK FV   | 3    | 5    |
| >PTEN-L146\ LLHRGKFLK  | 328  | >PTEN-L146\ LLHRGK FVK  | 627  | 299  |
| >PTEN-L146\ LLHRGKFLKA | 8    | >PTEN-L146\ LLHRGK FVKA | 6    | 2    |
| >PTEN-L146\ LLHRGKFLKA | 230  | >PTEN-L146\ LLHRGK FVKA | 235  | 5    |
| >PTEN-L146\ LLHRGKFLK  | 41   | >PTEN-L146\ LLHRGK FVK  | 70   | 29   |
| >PTEN-L146\ LLHRGKFLK  | 63   | >PTEN-L146\ LLHRGK FVK  | 297  | 234  |
| >PTEN-L146\ LLHRGKFLK  | 37   | >PTEN-L146\ LLHRGK FVK  | 74   | 37   |
| >PTEN-L146\ LLHRGKFLK  | 69   | >PTEN-L146\ LLHRGK FVK  | 177  | 108  |
| >PTEN-L146\ LLHRGKFLK  | 427  | >PTEN-L146\ LLHRGK FVK  | 1366 | 939  |
| >PTEN-L146\ YLLHRGKFL  | 93   | >PTEN-L146\ YLLHRGK FV  | 31   | 62   |
| >PTEN-L146\ YLLHRGKFLK | 86   | >PTEN-L146\ YLLHRGK FVK | 86   | 0    |
| >PTEN-L146\ YLLHRGKFL  | 91   | >PTEN-L146\ YLLHRGK FV  | 55   | 36   |
| >PTEN-L146\ YLLHRGKFLK | 446  | >PTEN-L146\ YLLHRGK FVK | 219  | 227  |
| >PTEN-L146\ YLLHRGKFL  | 70   | >PTEN-L146\ YLLHRGK FV  | 10   | 60   |
| >PTEN-L146\ YLLHRGKFLK | 44   | >PTEN-L146\ YLLHRGK FVK | 42   | 2    |
| >PTEN-L146\ YLLHRGKFL  | 105  | >PTEN-L146\ YLLHRGK FV  | 17   | 88   |
| >PTEN-L146\ YLLHRGKFLK | 66   | >PTEN-L146\ YLLHRGK FVK | 57   | 9    |
| >PTEN-L146\ YLLHRGKFL  | 6    | >PTEN-L146\ YLLHRGK FV  | 2    | 4    |

|                        |      |                       |       |       |
|------------------------|------|-----------------------|-------|-------|
| >PTEN-L146\YLLHRGKFLK/ | 12   | >PTEN-L146\YLLHRGKFKV | 10    | 2     |
| >PTEN-L146\YLLHRGKFL   | 10   | >PTEN-L146\YLLHRGKFV  | 4     | 6     |
| >PTEN-L146\YLLHRGKFLK/ | 39   | >PTEN-L146\YLLHRGKFKV | 26    | 13    |
| >PTEN-L146\YLLHRGKFL   | 12   | >PTEN-L146\YLLHRGKFV  | 5     | 7     |
| >PTEN-L146\YLLHRGKFLK/ | 17   | >PTEN-L146\YLLHRGKFKV | 15    | 2     |
| >PTEN-L146\YLLHRGKFL   | 58   | >PTEN-L146\YLLHRGKFV  | 7     | 51    |
| >PTEN-L146\YLLHRGKFLK/ | 317  | >PTEN-L146\YLLHRGKFKV | 203   | 114   |
| >PTEN-L146\YLLHRGKFL   | 6    | >PTEN-L146\YLLHRGKFV  | 2     | 4     |
| >PTEN-L146\YLLHRGKFLK  | 296  | >PTEN-L146\YLLHRGKFKV | 489   | 193   |
| >PTEN-L146\YLLHRGKFLK/ | 8    | >PTEN-L146\YLLHRGKFKV | 6     | 2     |
| >PTEN-L146\YLLHRGKFLK  | 28   | >PTEN-L146\YLLHRGKFKV | 53    | 25    |
| >PTEN-L146\YLLHRGKFLK  | 113  | >PTEN-L146\YLLHRGKFKV | 229   | 116   |
| >PTEN-L146\YLLHRGKFLK  | 316  | >PTEN-L146\YLLHRGKFKV | 715   | 399   |
| >PTEN-L146\YLLHRGKFL   | 54   | >PTEN-L146\YLLHRGKFV  | 196   | 142   |
| >PTEN-L146\YLLHRGKFLK/ | 154  | >PTEN-L146\YLLHRGKFKV | 211   | 57    |
| >PTEN-L146\YLLHRGKFL   | 478  | >PTEN-L146\YLLHRGKFV  | 808   | 330   |
| >PTEN-L146\YLLHRGKFL   | 278  | >PTEN-L146\YLLHRGKFV  | 545   | 267   |
| >PTEN-L146\YLLHRGKFLK  | 111  | >PTEN-L146\YLLHRGKFKV | 306   | 195   |
| >PTEN-L146\AYLLHRGKFLI | 230  | >PTEN-L146\AYLLHRGKFV | 614   | 384   |
| >PTEN-L146\AYLLHRGKFL  | 368  | >PTEN-L146\AYLLHRGKFV | 3423  | 3055  |
| >PTEN-L146\AYLLHRGKFL  | 16   | >PTEN-L146\AYLLHRGKFV | 270   | 254   |
| >PTEN-L146\AYLLHRGKFL  | 782  | >PTEN-L146\AYLLHRGKFV | 470   | 312   |
| >PTEN-L146\AYLLHRGKFLI | 25   | >PTEN-L146\AYLLHRGKFV | 40    | 15    |
| >PTEN-L146\AYLLHRGKFLI | 76   | >PTEN-L146\AYLLHRGKFV | 147   | 71    |
| >PTEN-L146\AYLLHRGKFLI | 305  | >PTEN-L146\AYLLHRGKFV | 545   | 240   |
| >PTEN-L152\ALDFYGEV    | 41   | >PTEN-L152\AVDFYGEV   | 654   | 613   |
| >PTEN-L152\ALDFYGEV    | 17   | >PTEN-L152\AVDFYGEV   | 387   | 370   |
| >PTEN-L152\ALDFYGEV    | 34   | >PTEN-L152\AVDFYGEV   | 517   | 483   |
| >PTEN-L152\ALDFYGEV    | 128  | >PTEN-L152\AVDFYGEV   | 93    | 35    |
| >PTEN-L152\ALDFYGEV    | 3    | >PTEN-L152\AVDFYGEV   | 35    | 32    |
| >PTEN-L152\ALDFYGEVRT  | 308  | >PTEN-L152\AVDFYGEVRT | 9712  | 9404  |
| >PTEN-L152\ALDFYGEV    | 12   | >PTEN-L152\AVDFYGEV   | 1402  | 1390  |
| >PTEN-L152\ALDFYGEV    | 9    | >PTEN-L152\AVDFYGEV   | 319   | 310   |
| >PTEN-L152\ALDFYGEV    | 29   | >PTEN-L152\AVDFYGEV   | 3400  | 3371  |
| >PTEN-L152\ALDFYGEV    | 3    | >PTEN-L152\AVDFYGEV   | 104   | 101   |
| >PTEN-L152\ALDFYGEVRT  | 416  | >PTEN-L152\AVDFYGEVRT | 17543 | 17127 |
| >PTEN-L152\ALDFYGEV    | 1767 | >PTEN-L152\AVDFYGEV   | 354   | 1413  |
| >PTEN-L152\EALDFYGEV   | 224  | >PTEN-L152\EAVDFYGEV  | 260   | 36    |
| >PTEN-L152\EALDFYGEV   | 188  | >PTEN-L152\EAVDFYGEV  | 1270  | 1082  |
| >PTEN-L152\EALDFYGEV   | 2235 | >PTEN-L152\EAVDFYGEV  | 77    | 2158  |
| >PTEN-L152\EALDFYGEVR  | 299  | >PTEN-L152\EAVDFYGEVF | 566   | 267   |
| >PTEN-L152\EALDFYGEVR  | 28   | >PTEN-L152\EAVDFYGEVF | 13    | 15    |
| >PTEN-L152\EALDFYGEV   | 11   | >PTEN-L152\EAVDFYGEV  | 6     | 5     |

|                       |      |                       |      |      |
|-----------------------|------|-----------------------|------|------|
| >PTEN-L152\EALDFYGEV  | 4    | >PTEN-L152\EAVDFYGEV  | 6    | 2    |
| >PTEN-L152\QEALDFYGEV | 22   | >PTEN-L152\QEAVDFYGEV | 50   | 28   |
| >PTEN-L152\QEALDFYGEV | 112  | >PTEN-L152\QEAVDFYGEV | 140  | 28   |
| >PTEN-L152\QEALDFYGEV | 426  | >PTEN-L152\QEAVDFYGEV | 376  | 50   |
| >PTEN-L152\QEALDFYGEV | 361  | >PTEN-L152\QEAVDFYGEV | 283  | 78   |
| >PTEN-L152\QEALDFYGE  | 551  | >PTEN-L152\QEAVDFYGE  | 410  | 141  |
| >PTEN-L152\QEALDFYGEV | 116  | >PTEN-L152\QEAVDFYGEV | 113  | 3    |
| >PTEN-L152\AQEALDFYGE | 422  | >PTEN-L152\AQEAVDFYGI | 425  | 3    |
| >PTEN-L152\AQEALDFYGE | 39   | >PTEN-L152\AQEAVDFYGI | 31   | 8    |
| >PTEN-L152\AQEALDFYGE | 942  | >PTEN-L152\AQEAVDFYGI | 447  | 495  |
| >PTEN-L152\AQEALDFY   | 178  | >PTEN-L152\AQEAVDFY   | 214  | 36   |
| >PTEN-L152\AQEALDFY   | 421  | >PTEN-L152\AQEAVDFY   | 339  | 82   |
| >PTEN-L152\KAQEALDFY  | 271  | >PTEN-L152\KAQEAVDFY  | 505  | 234  |
| >PTEN-L152\KAQEALDFY  | 46   | >PTEN-L152\KAQEAVDFY  | 82   | 36   |
| >PTEN-L152\KAQEALDF   | 1355 | >PTEN-L152\KAQEAVDF   | 435  | 920  |
| >PTEN-L152\KAQEALDF   | 309  | >PTEN-L152\KAQEAVDF   | 132  | 177  |
| >PTEN-L152\KAQEALDF   | 30   | >PTEN-L152\KAQEAVDF   | 40   | 10   |
| >PTEN-L152\KAQEALDFY  | 139  | >PTEN-L152\KAQEAVDFY  | 96   | 43   |
| >PTEN-L152\KAQEALDFY  | 481  | >PTEN-L152\KAQEAVDFY  | 409  | 72   |
| >PTEN-L152\KAQEALDF   | 133  | >PTEN-L152\KAQEAVDF   | 284  | 151  |
| >PTEN-L152\KAQEALDFY  | 195  | >PTEN-L152\KAQEAVDFY  | 75   | 120  |
| >PTEN-L152\LKAQEALDF  | 6    | >PTEN-L152\LKAQEAVDF  | 5    | 1    |
| >PTEN-L152\LKAQEALDFY | 85   | >PTEN-L152\LKAQEAVDFY | 46   | 39   |
| >PTEN-L152\FLKAQEAL   | 179  | >PTEN-L152\FLKAQEAV   | 53   | 126  |
| >PTEN-L152\FLKAQEAL   | 4    | >PTEN-L152\FLKAQEAV   | 4    | 0    |
| >PTEN-L152\FLKAQEALDF | 370  | >PTEN-L152\FLKAQEAVDF | 506  | 136  |
| >PTEN-L152\FLKAQEAL   | 8    | >PTEN-L152\FLKAQEAV   | 3    | 5    |
| >PTEN-L152\FLKAQEAL   | 280  | >PTEN-L152\FLKAQEAV   | 36   | 244  |
| >PTEN-L152\FLKAQEAL   | 58   | >PTEN-L152\FLKAQEAV   | 6    | 52   |
| >PTEN-L152\FLKAQEAL   | 47   | >PTEN-L152\FLKAQEAV   | 8    | 39   |
| >PTEN-L152\FLKAQEAL   | 875  | >PTEN-L152\FLKAQEAV   | 35   | 840  |
| >PTEN-L152\FLKAQEAL   | 1321 | >PTEN-L152\FLKAQEAV   | 72   | 1249 |
| >PTEN-L152\FLKAQEAL   | 4    | >PTEN-L152\FLKAQEAV   | 2    | 2    |
| >PTEN-L152\FLKAQEALDF | 98   | >PTEN-L152\FLKAQEAVDF | 210  | 112  |
| >PTEN-L152\FLKAQEALDF | 209  | >PTEN-L152\FLKAQEAVDF | 295  | 86   |
| >PTEN-L152\FLKAQEALDF | 122  | >PTEN-L152\FLKAQEAVDF | 222  | 100  |
| >PTEN-L152\FLKAQEAL   | 68   | >PTEN-L152\FLKAQEAV   | 286  | 218  |
| >PTEN-L152\FLKAQEAL   | 343  | >PTEN-L152\FLKAQEAV   | 1074 | 731  |
| >PTEN-L152\FLKAQEALDF | 105  | >PTEN-L152\FLKAQEAVDF | 111  | 6    |
| >PTEN-L152\FLKAQEALDF | 105  | >PTEN-L152\FLKAQEAVDF | 76   | 29   |
| >PTEN-L152\FLKAQEALDF | 108  | >PTEN-L152\FLKAQEAVDF | 116  | 8    |
| >PTEN-L152\FLKAQEALDF | 78   | >PTEN-L152\FLKAQEAVDF | 62   | 16   |
| >PTEN-L152\FLKAQEALDF | 37   | >PTEN-L152\FLKAQEAVDF | 22   | 15   |



|                        |       |                        |       |       |
|------------------------|-------|------------------------|-------|-------|
| >PTEN-L152\ FLKAQEALDF | 716   | >PTEN-L152\ FLKAQEAVDF | 403   | 313   |
| >PTEN-L152\ KFLKAQEAL  | 154   | >PTEN-L152\ KFLKAQEAV  | 643   | 489   |
| >PTEN-L152\ KFLKAQEALD | 77    | >PTEN-L152\ KFLKAQEAVC | 68    | 9     |
| >PTEN-L152\ KFLKAQEALD | 345   | >PTEN-L152\ KFLKAQEAVC | 423   | 78    |
| >PTEN-L152\ KFLKAQEAL  | 37    | >PTEN-L152\ KFLKAQEAV  | 1527  | 1490  |
| >PTEN-L152\ KFLKAQEALD | 9     | >PTEN-L152\ KFLKAQEAVC | 8     | 1     |
| >PTEN-L152\ KFLKAQEALD | 745   | >PTEN-L152\ KFLKAQEAVC | 336   | 409   |
| >PTEN-L152\ KFLKAQEALD | 364   | >PTEN-L152\ KFLKAQEAVC | 251   | 113   |
| >PTEN-L152\ KFLKAQEAL  | 257   | >PTEN-L152\ KFLKAQEAV  | 387   | 130   |
| >PTEN-L152\ GKFLKAQEAL | 109   | >PTEN-L152\ GKFLKAQEAV | 274   | 165   |
| >PTEN-L181F LLKNHLDYRP | 79    | >PTEN-L181F PLKNHLDYRP | 1796  | 1717  |
| >PTEN-L181F LLKNHLDYRP | 4     | >PTEN-L181F PLKNHLDYRP | 82    | 78    |
| >PTEN-L181F LLKNHLDYRP | 278   | >PTEN-L181F PLKNHLDYRP | 8754  | 8476  |
| >PTEN-L181F LLKNHLDYRP | 27    | >PTEN-L181F PLKNHLDYRP | 540   | 513   |
| >PTEN-L181F LLKNHLDYRP | 36    | >PTEN-L181F PLKNHLDYRP | 1443  | 1407  |
| >PTEN-L181F LLKNHLDYRP | 5     | >PTEN-L181F PLKNHLDYRP | 93    | 88    |
| >PTEN-L181F LLKNHLDY   | 63    | >PTEN-L181F PLKNHLDY   | 160   | 97    |
| >PTEN-L181F LLKNHLDY   | 443   | >PTEN-L181F PLKNHLDY   | 1804  | 1361  |
| >PTEN-L181F LLKNHLDYR  | 10    | >PTEN-L181F PLKNHLDYR  | 161   | 151   |
| >PTEN-L181F LLKNHLDYR  | 347   | >PTEN-L181F PLKNHLDYR  | 1964  | 1617  |
| >PTEN-L181F LLKNHLDY   | 276   | >PTEN-L181F PLKNHLDY   | 1192  | 916   |
| >PTEN-L181F LLKNHLDYRP | 177   | >PTEN-L181F PLKNHLDYRP | 1618  | 1441  |
| >PTEN-L181F LLKNHLDY   | 57    | >PTEN-L181F PLKNHLDY   | 2043  | 1986  |
| >PTEN-L181F LLKNHLDY   | 248   | >PTEN-L181F PLKNHLDY   | 1465  | 1217  |
| >PTEN-L181F LLKNHLDY   | 179   | >PTEN-L181F PLKNHLDY   | 2666  | 2487  |
| >PTEN-L181F YLLKNHLDY  | 36041 | >PTEN-L181F YPLKNHLDY  | 286   | 35755 |
| >PTEN-L181F YLLKNHLDYR | 262   | >PTEN-L181F YPLKNHLDYR | 27940 | 27678 |
| >PTEN-L181F YLLKNHLDY  | 6     | >PTEN-L181F YPLKNHLDY  | 28    | 22    |
| >PTEN-L181F YLLKNHLDYR | 202   | >PTEN-L181F YPLKNHLDYR | 2038  | 1836  |
| >PTEN-L181F YLLKNHLDYR | 171   | >PTEN-L181F YPLKNHLDYR | 1860  | 1689  |
| >PTEN-L181F YLLKNHLDY  | 4     | >PTEN-L181F YPLKNHLDY  | 31    | 27    |
| >PTEN-L181F YLLKNHLDY  | 121   | >PTEN-L181F YPLKNHLDY  | 10168 | 10047 |
| >PTEN-L181F YLLKNHLDY  | 32    | >PTEN-L181F YPLKNHLDY  | 317   | 285   |
| >PTEN-L181F YLLKNHLDY  | 22    | >PTEN-L181F YPLKNHLDY  | 203   | 181   |
| >PTEN-L181F YLLKNHLDY  | 916   | >PTEN-L181F YPLKNHLDY  | 15    | 901   |
| >PTEN-L181F YLLKNHLDY  | 27975 | >PTEN-L181F YPLKNHLDY  | 103   | 27872 |
| >PTEN-L181F YLLKNHLDY  | 19876 | >PTEN-L181F YPLKNHLDY  | 158   | 19718 |
| >PTEN-L181F YLLKNHLDY  | 495   | >PTEN-L181F YPLKNHLDY  | 6652  | 6157  |
| >PTEN-L181F YLLKNHLDYR | 327   | >PTEN-L181F YPLKNHLDYR | 13746 | 13419 |
| >PTEN-L181F YLLKNHLDYR | 43    | >PTEN-L181F YPLKNHLDYR | 105   | 62    |
| >PTEN-L181F QRRYVYYYSY | 44    | >PTEN-L181F QRRYVYYYSY | 1448  | 1404  |
| >PTEN-L181F QRRYVYYYSY | 41    | >PTEN-L181F QRRYVYYYSY | 1674  | 1633  |
| >PTEN-L181F QRRYVYYYSY | 19    | >PTEN-L181F QRRYVYYYSY | 4969  | 4950  |

|                        |      |                        |     |      |
|------------------------|------|------------------------|-----|------|
| >PTEN-L181FSYLLKNHL    | 13   | >PTEN-L181FSYPLKNHL    | 558 | 545  |
| >PTEN-L181FSYLLKNHL    | 810  | >PTEN-L181FSYPLKNHL    | 484 | 326  |
| >PTEN-L181FSYLLKNHLDY  | 2676 | >PTEN-L181FSYPLKNHLDY  | 369 | 2307 |
| >PTEN-L181FSYLLKNHL    | 12   | >PTEN-L181FSYPLKNHL    | 11  | 1    |
| >PTEN-L181FSYLLKNHLDY  | 499  | >PTEN-L181FSYPLKNHLDY  | 362 | 137  |
| >PTEN-L181FSYLLKNHLDY  | 51   | >PTEN-L181FSYPLKNHLDY  | 59  | 8    |
| >PTEN-L181FSYLLKNHLDY  | 246  | >PTEN-L181FSYPLKNHLDY  | 386 | 140  |
| >PTEN-L181FSYLLKNHLDYI | 15   | >PTEN-L181FSYPLKNHLDY  | 104 | 89   |
| >PTEN-L181FSYLLKNHLDYI | 82   | >PTEN-L181FSYPLKNHLDY  | 712 | 630  |
| >PTEN-L181FSYLLKNHLDY  | 21   | >PTEN-L181FSYPLKNHLDY  | 185 | 164  |
| >PTEN-L181FSYLLKNHLDYI | 15   | >PTEN-L181FSYPLKNHLDY  | 19  | 4    |
| >PTEN-L181FSYLLKNHL    | 463  | >PTEN-L181FSYPLKNHL    | 468 | 5    |
| >PTEN-L181FYSYLLKNHL   | 16   | >PTEN-L181FYSYPLKNHL   | 32  | 16   |
| >PTEN-L181FYSYLLKNHLD' | 125  | >PTEN-L181FYSYPLKNHLD' | 176 | 51   |
| >PTEN-L181FYSYLLKNHLD' | 15   | >PTEN-L181FYSYPLKNHLD' | 10  | 5    |
| >PTEN-L181FYSYLLKNHLD' | 641  | >PTEN-L181FYSYPLKNHLD' | 220 | 421  |
| >PTEN-L181FYSYLLKNHL   | 1543 | >PTEN-L181FYSYPLKNHL   | 312 | 1231 |
| >PTEN-L181FYSYLLKNHLD' | 71   | >PTEN-L181FYSYPLKNHLD' | 43  | 28   |
| >PTEN-L181FYSYLLKNHLD' | 164  | >PTEN-L181FYSYPLKNHLD' | 69  | 95   |
| >PTEN-L181FYSYLLKNHL   | 852  | >PTEN-L181FYSYPLKNHL   | 278 | 574  |
| >PTEN-L181FYSYLLKNHLD' | 47   | >PTEN-L181FYSYPLKNHLD' | 17  | 30   |
| >PTEN-L181FYSYLLKNH    | 289  | >PTEN-L181FYSYPLKNH    | 81  | 208  |
| >PTEN-L181FYSYLLKNHL   | 52   | >PTEN-L181FYSYPLKNHL   | 26  | 26   |
| >PTEN-L181FYSYLLKNHLD' | 5    | >PTEN-L181FYSYPLKNHLD' | 4   | 1    |
| >PTEN-L181FYSYLLKNHLD' | 315  | >PTEN-L181FYSYPLKNHLD' | 164 | 151  |
| >PTEN-L181FYSYLLKNHLD' | 3047 | >PTEN-L181FYSYPLKNHLD' | 432 | 2615 |
| >PTEN-L181FYSYLLKNHL   | 2879 | >PTEN-L181FYSYPLKNHL   | 373 | 2506 |
| >PTEN-L181FYSYLLKNHLD' | 1013 | >PTEN-L181FYSYPLKNHLD' | 209 | 804  |
| >PTEN-L181FYSYLLKNHL   | 740  | >PTEN-L181FYSYPLKNHL   | 206 | 534  |
| >PTEN-L181FYSYLLKNHL   | 143  | >PTEN-L181FYSYPLKNHL   | 58  | 85   |
| >PTEN-L181FYSYLLKNHLD' | 58   | >PTEN-L181FYSYPLKNHLD' | 30  | 28   |
| >PTEN-L181FYSYLLKNHLD' | 815  | >PTEN-L181FYSYPLKNHLD' | 432 | 383  |
| >PTEN-L181FYSYLLKNHL   | 994  | >PTEN-L181FYSYPLKNHL   | 81  | 913  |
| >PTEN-L181FYYSYLLKNHL  | 49   | >PTEN-L181FYYSYPLKNHL  | 436 | 387  |
| >PTEN-L181FYYSYLLKNHL  | 115  | >PTEN-L181FYYSYPLKNHL  | 105 | 10   |
| >PTEN-L181FYYSYLLKNHL  | 108  | >PTEN-L181FYYSYPLKNHL  | 110 | 2    |
| >PTEN-L181FYYSYLLKNHL  | 8    | >PTEN-L181FYYSYPLKNHL  | 9   | 1    |
| >PTEN-L181FYYSYLLKNHL  | 117  | >PTEN-L181FYYSYPLKNHL  | 77  | 40   |
| >PTEN-L181FYYSYLLKNHI  | 31   | >PTEN-L181FYYSYPLKNHI  | 57  | 26   |
| >PTEN-L181FYYSYLLKNHI  | 250  | >PTEN-L181FYYSYPLKNHI  | 312 | 62   |
| >PTEN-L181FYYSYLLKNHI  | 109  | >PTEN-L181FYYSYPLKNHI  | 216 | 107  |
| >PTEN-L181FYYSYLLKNHI  | 536  | >PTEN-L181FYYSYPLKNHI  | 410 | 126  |
| >PTEN-L181FYYSYLLK     | 387  | >PTEN-L181FYYSYPLK     | 666 | 279  |

|                         |      |                         |       |       |
|-------------------------|------|-------------------------|-------|-------|
| >PTEN-L181F YYYSYLLK    | 85   | >PTEN-L181F YYYSYPLK    | 152   | 67    |
| >PTEN-L181F YYYSYLLK    | 59   | >PTEN-L181F YYYSYPLK    | 56    | 3     |
| >PTEN-L181F YYYSYLLKNHI | 29   | >PTEN-L181F YYYSYPLKNHI | 23    | 6     |
| >PTEN-L181F YYYSYLLK    | 399  | >PTEN-L181F YYYSYPLK    | 422   | 23    |
| >PTEN-L181F YYYSYLLKNHI | 147  | >PTEN-L181F YYYSYPLKNHI | 112   | 35    |
| >PTEN-L181F YYYSYLLK    | 127  | >PTEN-L181F YYYSYPLK    | 220   | 93    |
| >PTEN-L181F YYYSYLLKN   | 315  | >PTEN-L181F YYYSYPLKN   | 1157  | 842   |
| >PTEN-L181F YYYSYLLKNHI | 6    | >PTEN-L181F YYYSYPLKNHI | 6     | 0     |
| >PTEN-L181F YYYSYLLK    | 269  | >PTEN-L181F YYYSYPLK    | 552   | 283   |
| >PTEN-L181F YYYSYLLK    | 125  | >PTEN-L181F YYYSYPLK    | 89    | 36    |
| >PTEN-L181F YYYSYLLK    | 211  | >PTEN-L181F YYYSYPLK    | 262   | 51    |
| >PTEN-L181F YYYSYLLK    | 364  | >PTEN-L181F YYYSYPLK    | 611   | 247   |
| >PTEN-L181F YYYSYLLK    | 81   | >PTEN-L181F YYYSYPLK    | 79    | 2     |
| >PTEN-L181F YYYSYLLKNHI | 597  | >PTEN-L181F YYYSYPLKNHI | 384   | 213   |
| >PTEN-L181F YYYSYLLK    | 50   | >PTEN-L181F YYYSYPLK    | 66    | 16    |
| >PTEN-L181F YYYSYLLKNHI | 347  | >PTEN-L181F YYYSYPLKNHI | 590   | 243   |
| >PTEN-L181F YYYSYLLKNHI | 441  | >PTEN-L181F YYYSYPLKNHI | 334   | 107   |
| >PTEN-L181F VYYYSYLL    | 63   | >PTEN-L181F VYYYSYPL    | 27    | 36    |
| >PTEN-L181F VYYYSYLL    | 411  | >PTEN-L181F VYYYSYPL    | 532   | 121   |
| >PTEN-L181F VYYYSYLLK   | 105  | >PTEN-L181F VYYYSYPLK   | 252   | 147   |
| >PTEN-L181F VYYYSYLLK   | 39   | >PTEN-L181F VYYYSYPLK   | 84    | 45    |
| >PTEN-L181F VYYYSYLL    | 28   | >PTEN-L181F VYYYSYPL    | 30    | 2     |
| >PTEN-L181F VYYYSYLLK   | 68   | >PTEN-L181F VYYYSYPLK   | 62    | 6     |
| >PTEN-L181F VYYYSYLL    | 59   | >PTEN-L181F VYYYSYPL    | 128   | 69    |
| >PTEN-L181F VYYYSYLLK   | 411  | >PTEN-L181F VYYYSYPLK   | 623   | 212   |
| >PTEN-L181F VYYYSYLL    | 23   | >PTEN-L181F VYYYSYPL    | 37    | 14    |
| >PTEN-L181F VYYYSYLLK   | 23   | >PTEN-L181F VYYYSYPLK   | 14    | 9     |
| >PTEN-L181F VYYYSYLLK   | 302  | >PTEN-L181F VYYYSYPLK   | 202   | 100   |
| >PTEN-L181F VYYYSYLL    | 1091 | >PTEN-L181F VYYYSYPL    | 301   | 790   |
| >PTEN-L181F VYYYSYLL    | 234  | >PTEN-L181F VYYYSYPL    | 1217  | 983   |
| >PTEN-L181F VYYYSYLLK   | 155  | >PTEN-L181F VYYYSYPLK   | 476   | 321   |
| >PTEN-L181F VYYYSYLL    | 353  | >PTEN-L181F VYYYSYPL    | 615   | 262   |
| >PTEN-L181F VYYYSYLL    | 188  | >PTEN-L181F VYYYSYPL    | 205   | 17    |
| >PTEN-L181F VVYYYSYL    | 4    | >PTEN-L181F VVYYYSYPL   | 848   | 844   |
| >PTEN-L181F VVYYYSYLL   | 20   | >PTEN-L181F VVYYYSYPL   | 15    | 5     |
| >PTEN-L181F VVYYYSYL    | 10   | >PTEN-L181F VVYYYSYPL   | 10897 | 10887 |
| >PTEN-L181F VVYYYSYLL   | 7    | >PTEN-L181F VVYYYSYPL   | 6     | 1     |
| >PTEN-L181F VVYYYSYL    | 4    | >PTEN-L181F VVYYYSYPL   | 1021  | 1017  |
| >PTEN-L181F VVYYYSYLL   | 3    | >PTEN-L181F VVYYYSYPL   | 3     | 0     |
| >PTEN-L181F VVYYYSYL    | 9    | >PTEN-L181F VVYYYSYPL   | 1621  | 1612  |
| >PTEN-L181F VVYYYSYLL   | 18   | >PTEN-L181F VVYYYSYPL   | 10    | 8     |
| >PTEN-L181F VVYYYSYL    | 8    | >PTEN-L181F VVYYYSYPL   | 1231  | 1223  |
| >PTEN-L181F VVYYYSYLL   | 8    | >PTEN-L181F VVYYYSYPL   | 5     | 3     |

|                       |      |                       |       |       |
|-----------------------|------|-----------------------|-------|-------|
| >PTEN-L181FYVYYYSYL   | 5    | >PTEN-L181FYVYYYSYP   | 2308  | 2303  |
| >PTEN-L181FYVYYYSYLL  | 10   | >PTEN-L181FYVYYYSYPL  | 7     | 3     |
| >PTEN-L181FYVYYYSYL   | 21   | >PTEN-L181FYVYYYSYP   | 11536 | 11515 |
| >PTEN-L181FYVYYYSYLL  | 12   | >PTEN-L181FYVYYYSYPL  | 6     | 6     |
| >PTEN-L181FYVYYYSYL   | 42   | >PTEN-L181FYVYYYSYP   | 16014 | 15972 |
| >PTEN-L181FYVYYYSYLL  | 86   | >PTEN-L181FYVYYYSYPL  | 62    | 24    |
| >PTEN-L181FYVYYYSYL   | 99   | >PTEN-L181FYVYYYSYP   | 21756 | 21657 |
| >PTEN-L181FYVYYYSYLL  | 200  | >PTEN-L181FYVYYYSYPL  | 106   | 94    |
| >PTEN-L181FYVYYYSYL   | 12   | >PTEN-L181FYVYYYSYP   | 17427 | 17415 |
| >PTEN-L181FYVYYYSYLL  | 27   | >PTEN-L181FYVYYYSYPL  | 37    | 10    |
| >PTEN-L181FYVYYYSYLLK | 8    | >PTEN-L181FYVYYYSYPLK | 11    | 3     |
| >PTEN-L181FYVYYYSYLLK | 7    | >PTEN-L181FYVYYYSYPLK | 11    | 4     |
| >PTEN-L181FYVYYYSYL   | 193  | >PTEN-L181FYVYYYSYP   | 17859 | 17666 |
| >PTEN-L181FYVYYYSYLL  | 2715 | >PTEN-L181FYVYYYSYPL  | 405   | 2310  |
| >PTEN-L181FYVYYYSYLL  | 71   | >PTEN-L181FYVYYYSYPL  | 289   | 218   |
| >PTEN-L181FYVYYYSYLLK | 41   | >PTEN-L181FYVYYYSYPLK | 28    | 13    |
| >PTEN-L181FYVYYYSYLLK | 165  | >PTEN-L181FYVYYYSYPLK | 514   | 349   |
| >PTEN-L181FYVYYYSYLL  | 81   | >PTEN-L181FYVYYYSYPL  | 17    | 64    |
| >PTEN-L181FYVYYYSYLLK | 274  | >PTEN-L181FYVYYYSYPLK | 1036  | 762   |
| >PTEN-L181FYVYYYSYL   | 377  | >PTEN-L181FYVYYYSYP   | 1339  | 962   |
| >PTEN-L181FYVYYYSYLL  | 253  | >PTEN-L181FYVYYYSYPL  | 731   | 478   |
| >PTEN-L181FYVYYYSYLLK | 6    | >PTEN-L181FYVYYYSYPLK | 6     | 0     |
| >PTEN-L181FYVYYYSYL   | 21   | >PTEN-L181FYVYYYSYP   | 2869  | 2848  |
| >PTEN-L181FYVYYYSYLL  | 11   | >PTEN-L181FYVYYYSYPL  | 7     | 4     |
| >PTEN-L181FYVYYYSYL   | 17   | >PTEN-L181FYVYYYSYP   | 4645  | 4628  |
| >PTEN-L181FYVYYYSYLL  | 19   | >PTEN-L181FYVYYYSYPL  | 8     | 11    |
| >PTEN-L181FYVYYYSYLL  | 8096 | >PTEN-L181FYVYYYSYPL  | 454   | 7642  |
| >PTEN-L181FYVYYYSYLL  | 676  | >PTEN-L181FYVYYYSYPL  | 96    | 580   |
| >PTEN-L181FYVYYYSYL   | 279  | >PTEN-L181FYVYYYSYP   | 5527  | 5248  |
| >PTEN-L181FYVYYYSYLL  | 421  | >PTEN-L181FYVYYYSYPL  | 50    | 371   |
| >PTEN-L181FYVYYYSYL   | 85   | >PTEN-L181FYVYYYSYP   | 2883  | 2798  |
| >PTEN-L181FYVYYYSYLL  | 255  | >PTEN-L181FYVYYYSYPL  | 38    | 217   |
| >PTEN-L181FYVYYYSYL   | 52   | >PTEN-L181FYVYYYSYP   | 18004 | 17952 |
| >PTEN-L181FYVYYYSYLL  | 84   | >PTEN-L181FYVYYYSYPL  | 23    | 61    |
| >PTEN-L181FYVYYYSYLL  | 219  | >PTEN-L181FYVYYYSYPL  | 23    | 196   |
| >PTEN-L181FYVYYYSYLL  | 75   | >PTEN-L181FYVYYYSYPL  | 18    | 57    |
| >PTEN-L181FYVYYYSYLL  | 971  | >PTEN-L181FYVYYYSYPL  | 462   | 509   |
| >PTEN-L181FYVYYYSYLL  | 63   | >PTEN-L181FYVYYYSYPL  | 280   | 217   |
| >PTEN-L181FYVYYYSYLL  | 51   | >PTEN-L181FYVYYYSYPL  | 896   | 845   |
| >PTEN-L181FYVYYYSYLL  | 750  | >PTEN-L181FYVYYYSYPL  | 56    | 694   |
| >PTEN-L181FYVYYYSYLLK | 50   | >PTEN-L181FYVYYYSYPLK | 66    | 16    |
| >PTEN-L181FYVYYYSYLLK | 490  | >PTEN-L181FYVYYYSYPLK | 605   | 115   |
| >PTEN-L181F RYVYYYSYL | 51   | >PTEN-L181F RYVYYYSYP | 2353  | 2302  |

|                          |      |                          |       |       |
|--------------------------|------|--------------------------|-------|-------|
| >PTEN-L181F RYVYYYYSYL   | 340  | >PTEN-L181F RYVYYYYSYP   | 22576 | 22236 |
| >PTEN-L181F RYVYYYYSYLLK | 94   | >PTEN-L181F RYVYYYYSYPLK | 176   | 82    |
| >PTEN-L181F RYVYYYYSYL   | 42   | >PTEN-L181F RYVYYYYSYP   | 4631  | 4589  |
| >PTEN-L181F RYVYYYYSYLL  | 6    | >PTEN-L181F RYVYYYYSYPL  | 11    | 5     |
| >PTEN-L181F RYVYYYYSYLLK | 105  | >PTEN-L181F RYVYYYYSYPLK | 104   | 1     |
| >PTEN-L181F RYVYYYYSYL   | 56   | >PTEN-L181F RYVYYYYSYP   | 1518  | 1462  |
| >PTEN-L181F RYVYYYYSYLL  | 26   | >PTEN-L181F RYVYYYYSYPL  | 33    | 7     |
| >PTEN-L181F RYVYYYYSYLLK | 271  | >PTEN-L181F RYVYYYYSYPLK | 352   | 81    |
| >PTEN-L181F RYVYYYYSYL   | 6    | >PTEN-L181F RYVYYYYSYP   | 519   | 513   |
| >PTEN-L181F RYVYYYYSYLL  | 10   | >PTEN-L181F RYVYYYYSYPL  | 14    | 4     |
| >PTEN-L181F RYVYYYYSYLLK | 446  | >PTEN-L181F RYVYYYYSYPLK | 547   | 101   |
| >PTEN-L181F RYVYYYYSYLL  | 222  | >PTEN-L181F RYVYYYYSYPL  | 301   | 79    |
| >PTEN-L181F RYVYYYYSYL   | 121  | >PTEN-L181F RYVYYYYSYP   | 1819  | 1698  |
| >PTEN-L181F RYVYYYYSYLL  | 348  | >PTEN-L181F RYVYYYYSYPL  | 148   | 200   |
| >PTEN-L181F RYVYYYYSYLLK | 6    | >PTEN-L181F RYVYYYYSYPLK | 5     | 1     |
| >PTEN-L181F RYVYYYYSYLL  | 410  | >PTEN-L181F RYVYYYYSYPL  | 981   | 571   |
| >PTEN-L181F RYVYYYYSYL   | 105  | >PTEN-L181F RYVYYYYSYP   | 1836  | 1731  |
| >PTEN-L181F RYVYYYYSYLLK | 33   | >PTEN-L181F RYVYYYYSYPLK | 27    | 6     |
| >PTEN-L181F RYVYYYYSYLL  | 747  | >PTEN-L181F RYVYYYYSYPL  | 172   | 575   |
| >PTEN-L181F RYVYYYYSYL   | 223  | >PTEN-L181F RYVYYYYSYP   | 6399  | 6176  |
| >PTEN-L181F RYVYYYYSYLL  | 1103 | >PTEN-L181F RYVYYYYSYPL  | 239   | 864   |
| >PTEN-L181F RYVYYYYSYLL  | 420  | >PTEN-L181F RYVYYYYSYPL  | 246   | 174   |
| >PTEN-L181F RYVYYYYSYL   | 403  | >PTEN-L181F RYVYYYYSYP   | 15147 | 14744 |
| >PTEN-L181F RYVYYYYSYLLK | 42   | >PTEN-L181F RYVYYYYSYPLK | 69    | 27    |
| >PTEN-L181F RYVYYYYSYL   | 311  | >PTEN-L181F RYVYYYYSYP   | 10440 | 10129 |
| >PTEN-L181F RYVYYYYSYLL  | 195  | >PTEN-L181F RYVYYYYSYPL  | 430   | 235   |
| >PTEN-L181F RYVYYYYSYL   | 37   | >PTEN-L181F RYVYYYYSYP   | 137   | 100   |
| >PTEN-L181F RYVYYYYSYLL  | 32   | >PTEN-L181F RYVYYYYSYPL  | 29    | 3     |
| >PTEN-L181F RYVYYYYSYLLK | 325  | >PTEN-L181F RYVYYYYSYPLK | 386   | 61    |
| >PTEN-L181F RRYVYYYYSYLL | 136  | >PTEN-L181F RRYVYYYYSYPI | 87    | 49    |
| >PTEN-L181F RRYVYYYYSYL  | 429  | >PTEN-L181F RRYVYYYYSYP  | 23547 | 23118 |
| >PTEN-L181F RRYVYYYYSYLL | 2061 | >PTEN-L181F RRYVYYYYSYPI | 471   | 1590  |
| >PTEN-L181F RRYVYYYYSYL  | 8    | >PTEN-L181F RRYVYYYYSYP  | 104   | 96    |
| >PTEN-L181F RRYVYYYYSYLL | 19   | >PTEN-L181F RRYVYYYYSYPI | 6     | 13    |
| >PTEN-L181F RRYVYYYYSYL  | 7    | >PTEN-L181F RRYVYYYYSYP  | 71    | 64    |
| >PTEN-L181F RRYVYYYYSYLL | 8    | >PTEN-L181F RRYVYYYYSYPI | 8     | 0     |
| >PTEN-L181F RRYVYYYYSYL  | 325  | >PTEN-L181F RRYVYYYYSYP  | 18521 | 18196 |
| >PTEN-L181F RRYVYYYYSYLL | 50   | >PTEN-L181F RRYVYYYYSYPI | 20    | 30    |
| >PTEN-L181F RRYVYYYYSYL  | 263  | >PTEN-L181F RRYVYYYYSYP  | 16327 | 16064 |
| >PTEN-L181F RRYVYYYYSYLL | 106  | >PTEN-L181F RRYVYYYYSYPI | 80    | 26    |
| >PTEN-L181F RRYVYYYYSYL  | 14   | >PTEN-L181F RRYVYYYYSYP  | 174   | 160   |
| >PTEN-L181F RRYVYYYYSYLL | 11   | >PTEN-L181F RRYVYYYYSYPI | 14    | 3     |
| >PTEN-L181F RRYVYYYYSYL  | 12   | >PTEN-L181F RRYVYYYYSYP  | 168   | 156   |

|                         |      |                         |       |       |
|-------------------------|------|-------------------------|-------|-------|
| >PTEN-L181F RRYVYYYSYLL | 3    | >PTEN-L181F RRYVYYYSYPI | 6     | 3     |
| >PTEN-L182F LKNHLDYRPV  | 111  | >PTEN-L182F FKNHLDYRPV  | 64    | 47    |
| >PTEN-L182F LKNHLDYRPV  | 686  | >PTEN-L182F FKNHLDYRPV  | 390   | 296   |
| >PTEN-L182F LLKNHLDYRP  | 79   | >PTEN-L182F LFKNHLDYRP  | 3743  | 3664  |
| >PTEN-L182F LLKNHLDYRP  | 4    | >PTEN-L182F LFKNHLDYRP  | 1593  | 1589  |
| >PTEN-L182F LLKNHLDYRP  | 278  | >PTEN-L182F LFKNHLDYRP  | 7414  | 7136  |
| >PTEN-L182F LLKNHLDYRP  | 27   | >PTEN-L182F LFKNHLDYRP  | 10711 | 10684 |
| >PTEN-L182F LLKNHLDYRP  | 36   | >PTEN-L182F LFKNHLDYRP  | 14770 | 14734 |
| >PTEN-L182F LLKNHLDYRP  | 5    | >PTEN-L182F LFKNHLDYRP  | 7983  | 7978  |
| >PTEN-L182F LLKNHLDY    | 63   | >PTEN-L182F LFKNHLDY    | 28    | 35    |
| >PTEN-L182F LLKNHLDY    | 443  | >PTEN-L182F LFKNHLDY    | 1112  | 669   |
| >PTEN-L182F LLKNHLDYR   | 10   | >PTEN-L182F LFKNHLDYR   | 8     | 2     |
| >PTEN-L182F LLKNHLDYR   | 347  | >PTEN-L182F LFKNHLDYR   | 65    | 282   |
| >PTEN-L182F LLKNHLDY    | 276  | >PTEN-L182F LFKNHLDY    | 1180  | 904   |
| >PTEN-L182F LLKNHLDYRP  | 177  | >PTEN-L182F LFKNHLDYRP  | 2000  | 1823  |
| >PTEN-L182F LLKNHLDY    | 57   | >PTEN-L182F LFKNHLDY    | 606   | 549   |
| >PTEN-L182F LLKNHLDY    | 248  | >PTEN-L182F LFKNHLDY    | 950   | 702   |
| >PTEN-L182F LLKNHLDY    | 179  | >PTEN-L182F LFKNHLDY    | 2628  | 2449  |
| >PTEN-L182F LLKNHLDYR   | 678  | >PTEN-L182F LFKNHLDYR   | 182   | 496   |
| >PTEN-L182F RRYVYYYSYLL | 136  | >PTEN-L182F RRYVYYYSYLF | 263   | 127   |
| >PTEN-L182F RRYVYYYSYLL | 1708 | >PTEN-L182F RRYVYYYSYLF | 129   | 1579  |
| >PTEN-L182F RRYVYYYSYLL | 3174 | >PTEN-L182F RRYVYYYSYLF | 374   | 2800  |
| >PTEN-L182F RRYVYYYSYLL | 19   | >PTEN-L182F RRYVYYYSYLF | 3     | 16    |
| >PTEN-L182F RRYVYYYSYLL | 8    | >PTEN-L182F RRYVYYYSYLF | 9     | 1     |
| >PTEN-L182F RRYVYYYSYLL | 50   | >PTEN-L182F RRYVYYYSYLF | 1277  | 1227  |
| >PTEN-L182F RRYVYYYSYLL | 106  | >PTEN-L182F RRYVYYYSYLF | 1502  | 1396  |
| >PTEN-L182F RRYVYYYSYLL | 11   | >PTEN-L182F RRYVYYYSYLF | 18    | 7     |
| >PTEN-L182F RRYVYYYSYLL | 3    | >PTEN-L182F RRYVYYYSYLF | 6     | 3     |
| >PTEN-L182F RRYVYYYSYLL | 785  | >PTEN-L182F RRYVYYYSYLF | 83    | 702   |
| >PTEN-L182F YLLKNHLDYR  | 827  | >PTEN-L182F YLFKNHLDYR  | 298   | 529   |
| >PTEN-L182F YLLKNHLDYR  | 262  | >PTEN-L182F YLFKNHLDYR  | 159   | 103   |
| >PTEN-L182F YLLKNHLDYR  | 630  | >PTEN-L182F YLFKNHLDYR  | 368   | 262   |
| >PTEN-L182F YLLKNHLD    | 1057 | >PTEN-L182F YLFKNHLD    | 423   | 634   |
| >PTEN-L182F YLLKNHLDY   | 868  | >PTEN-L182F YLFKNHLDY   | 376   | 492   |
| >PTEN-L182F YLLKNHLDY   | 2343 | >PTEN-L182F YLFKNHLDY   | 348   | 1995  |
| >PTEN-L182F YLLKNHLDY   | 6    | >PTEN-L182F YLFKNHLDY   | 5     | 1     |
| >PTEN-L182F YLLKNHLDYR  | 202  | >PTEN-L182F YLFKNHLDYR  | 146   | 56    |
| >PTEN-L182F YLLKNHLDYR  | 558  | >PTEN-L182F YLFKNHLDYR  | 346   | 212   |
| >PTEN-L182F YLLKNHLDYR  | 171  | >PTEN-L182F YLFKNHLDYR  | 22    | 149   |
| >PTEN-L182F YLLKNHLDY   | 4    | >PTEN-L182F YLFKNHLDY   | 4     | 0     |
| >PTEN-L182F YLLKNHLDY   | 121  | >PTEN-L182F YLFKNHLDY   | 44    | 77    |
| >PTEN-L182F YLLKNHLDY   | 32   | >PTEN-L182F YLFKNHLDY   | 17    | 15    |
| >PTEN-L182F YLLKNHLDY   | 22   | >PTEN-L182F YLFKNHLDY   | 6     | 16    |

|                        |      |                        |     |     |
|------------------------|------|------------------------|-----|-----|
| >PTEN-L182FYLLKNHLDY   | 556  | >PTEN-L182FYLFKNHLDY   | 154 | 402 |
| >PTEN-L182FYLLKNHLDY   | 916  | >PTEN-L182FYLFKNHLDY   | 441 | 475 |
| >PTEN-L182FYLLKNHLDY   | 495  | >PTEN-L182FYLFKNHLDY   | 80  | 415 |
| >PTEN-L182FYLLKNHLDYR  | 327  | >PTEN-L182FYLFKNHLDYR  | 150 | 177 |
| >PTEN-L182FYLLKNHLDYR  | 43   | >PTEN-L182FYLFKNHLDYR  | 28  | 15  |
| >PTEN-L182FSYLLKNHL    | 13   | >PTEN-L182FSYLFKNHL    | 23  | 10  |
| >PTEN-L182FSYLLKNHL    | 959  | >PTEN-L182FSYLFKNHL    | 289 | 670 |
| >PTEN-L182FSYLLKNHL    | 12   | >PTEN-L182FSYLFKNHL    | 10  | 2   |
| >PTEN-L182FSYLLKNHLDY  | 499  | >PTEN-L182FSYLFKNHLDY  | 364 | 135 |
| >PTEN-L182FSYLLKNHLDY  | 51   | >PTEN-L182FSYLFKNHLDY  | 37  | 14  |
| >PTEN-L182FSYLLKNHLDY  | 246  | >PTEN-L182FSYLFKNHLDY  | 225 | 21  |
| >PTEN-L182FSYLLKNHLDYI | 15   | >PTEN-L182FSYLFKNHLDYI | 12  | 3   |
| >PTEN-L182FSYLLKNHLDYI | 82   | >PTEN-L182FSYLFKNHLDYI | 82  | 0   |
| >PTEN-L182FSYLLKNHLDYI | 1246 | >PTEN-L182FSYLFKNHLDYI | 450 | 796 |
| >PTEN-L182FSYLLKNHLDY  | 21   | >PTEN-L182FSYLFKNHLDY  | 10  | 11  |
| >PTEN-L182FSYLLKNHLDYI | 15   | >PTEN-L182FSYLFKNHLDYI | 17  | 2   |
| >PTEN-L182FSYLLKNHL    | 463  | >PTEN-L182FSYLFKNHL    | 230 | 233 |
| >PTEN-L182FSYLLKNHL    | 566  | >PTEN-L182FSYLFKNHL    | 306 | 260 |
| >PTEN-L182FYSYLLKNHL   | 16   | >PTEN-L182FYSYLFKNHL   | 7   | 9   |
| >PTEN-L182FYSYLLKNHLD' | 125  | >PTEN-L182FYSYLFKNHLD' | 104 | 21  |
| >PTEN-L182FYSYLLKNHLD' | 15   | >PTEN-L182FYSYLFKNHLD' | 14  | 1   |
| >PTEN-L182FYSYLLKNHLD' | 641  | >PTEN-L182FYSYLFKNHLD' | 473 | 168 |
| >PTEN-L182FYSYLLKNHLD' | 71   | >PTEN-L182FYSYLFKNHLD' | 77  | 6   |
| >PTEN-L182FYSYLLKNHLD' | 164  | >PTEN-L182FYSYLFKNHLD' | 183 | 19  |
| >PTEN-L182FYSYLLKNHLD' | 1079 | >PTEN-L182FYSYLFKNHLD' | 403 | 676 |
| >PTEN-L182FYSYLLKNHL   | 852  | >PTEN-L182FYSYLFKNHL   | 311 | 541 |
| >PTEN-L182FYSYLLKNHLD' | 47   | >PTEN-L182FYSYLFKNHLD' | 21  | 26  |
| >PTEN-L182FYSYLLKNH    | 289  | >PTEN-L182FYSYLFKNH    | 443 | 154 |
| >PTEN-L182FYSYLLKNHL   | 52   | >PTEN-L182FYSYLFKNHL   | 43  | 9   |
| >PTEN-L182FYSYLLKNHLD' | 5    | >PTEN-L182FYSYLFKNHLD' | 5   | 0   |
| >PTEN-L182FYSYLLKNHLD' | 315  | >PTEN-L182FYSYLFKNHLD' | 281 | 34  |
| >PTEN-L182FYSYLLKNHL   | 740  | >PTEN-L182FYSYLFKNHL   | 310 | 430 |
| >PTEN-L182FYSYLLKNHL   | 143  | >PTEN-L182FYSYLFKNHL   | 156 | 13  |
| >PTEN-L182FYSYLLKNHLD' | 58   | >PTEN-L182FYSYLFKNHLD' | 55  | 3   |
| >PTEN-L182FYSYLLKNHL   | 994  | >PTEN-L182FYSYLFKNHL   | 323 | 671 |
| >PTEN-L182FYYSYLLKNHL  | 49   | >PTEN-L182FYYSYLFKNHL  | 101 | 52  |
| >PTEN-L182FYYSYLLKNHL  | 115  | >PTEN-L182FYYSYLFKNHL  | 50  | 65  |
| >PTEN-L182FYYSYLLKNHL  | 108  | >PTEN-L182FYYSYLFKNHL  | 65  | 43  |
| >PTEN-L182FYYSYLLKN    | 985  | >PTEN-L182FYYSYLFKN    | 444 | 541 |
| >PTEN-L182FYYSYLLKNHL  | 8    | >PTEN-L182FYYSYLFKNHL  | 8   | 0   |
| >PTEN-L182FYYSYLLKNHL  | 117  | >PTEN-L182FYYSYLFKNHL  | 104 | 13  |
| >PTEN-L182FYYSYLLKNHI  | 31   | >PTEN-L182FYYSYLFKNHI  | 20  | 11  |
| >PTEN-L182FYYSYLLKNHI  | 250  | >PTEN-L182FYYSYLFKNHI  | 481 | 231 |

|                                   |      |                                   |      |      |
|-----------------------------------|------|-----------------------------------|------|------|
| >PTEN-L182F Y Y Y S Y L L K N H I | 109  | >PTEN-L182F Y Y Y S Y L F K N H I | 49   | 60   |
| >PTEN-L182F Y Y Y S Y L L K N H I | 615  | >PTEN-L182F Y Y Y S Y L F K N H I | 283  | 332  |
| >PTEN-L182F Y Y Y S Y L L K N H I | 536  | >PTEN-L182F Y Y Y S Y L F K N H I | 242  | 294  |
| >PTEN-L182F Y Y Y S Y L L K N H I | 563  | >PTEN-L182F Y Y Y S Y L F K N H I | 285  | 278  |
| >PTEN-L182F Y Y Y S Y L L K       | 387  | >PTEN-L182F Y Y Y S Y L F K       | 267  | 120  |
| >PTEN-L182F Y Y Y S Y L L K       | 85   | >PTEN-L182F Y Y Y S Y L F K       | 45   | 40   |
| >PTEN-L182F Y Y Y S Y L L K       | 59   | >PTEN-L182F Y Y Y S Y L F K       | 68   | 9    |
| >PTEN-L182F Y Y Y S Y L L K N H I | 29   | >PTEN-L182F Y Y Y S Y L F K N H I | 27   | 2    |
| >PTEN-L182F Y Y Y S Y L L K       | 399  | >PTEN-L182F Y Y Y S Y L F K       | 411  | 12   |
| >PTEN-L182F Y Y Y S Y L L K N H I | 147  | >PTEN-L182F Y Y Y S Y L F K N H I | 112  | 35   |
| >PTEN-L182F Y Y Y S Y L L K       | 127  | >PTEN-L182F Y Y Y S Y L F K       | 61   | 66   |
| >PTEN-L182F Y Y Y S Y L L K N     | 315  | >PTEN-L182F Y Y Y S Y L F K N     | 107  | 208  |
| >PTEN-L182F Y Y Y S Y L L K N H I | 6    | >PTEN-L182F Y Y Y S Y L F K N H I | 6    | 0    |
| >PTEN-L182F Y Y Y S Y L L K       | 269  | >PTEN-L182F Y Y Y S Y L F K       | 432  | 163  |
| >PTEN-L182F Y Y Y S Y L L K       | 125  | >PTEN-L182F Y Y Y S Y L F K       | 51   | 74   |
| >PTEN-L182F Y Y Y S Y L L K       | 211  | >PTEN-L182F Y Y Y S Y L F K       | 41   | 170  |
| >PTEN-L182F Y Y Y S Y L L K       | 364  | >PTEN-L182F Y Y Y S Y L F K       | 73   | 291  |
| >PTEN-L182F Y Y Y S Y L L K       | 81   | >PTEN-L182F Y Y Y S Y L F K       | 26   | 55   |
| >PTEN-L182F Y Y Y S Y L L K       | 50   | >PTEN-L182F Y Y Y S Y L F K       | 41   | 9    |
| >PTEN-L182F Y Y Y S Y L L K N H I | 347  | >PTEN-L182F Y Y Y S Y L F K N H I | 297  | 50   |
| >PTEN-L182F Y Y Y S Y L L K N H I | 441  | >PTEN-L182F Y Y Y S Y L F K N H I | 398  | 43   |
| >PTEN-L182F V Y Y Y S Y L L       | 63   | >PTEN-L182F V Y Y Y S Y L F       | 2252 | 2189 |
| >PTEN-L182F V Y Y Y S Y L L       | 411  | >PTEN-L182F V Y Y Y S Y L F       | 9557 | 9146 |
| >PTEN-L182F V Y Y Y S Y L L K     | 105  | >PTEN-L182F V Y Y Y S Y L F K     | 72   | 33   |
| >PTEN-L182F V Y Y Y S Y L L K     | 39   | >PTEN-L182F V Y Y Y S Y L F K     | 27   | 12   |
| >PTEN-L182F V Y Y Y S Y L L       | 28   | >PTEN-L182F V Y Y Y S Y L F       | 11   | 17   |
| >PTEN-L182F V Y Y Y S Y L L K     | 68   | >PTEN-L182F V Y Y Y S Y L F K     | 96   | 28   |
| >PTEN-L182F V Y Y Y S Y L L       | 59   | >PTEN-L182F V Y Y Y S Y L F       | 19   | 40   |
| >PTEN-L182F V Y Y Y S Y L L K     | 411  | >PTEN-L182F V Y Y Y S Y L F K     | 549  | 138  |
| >PTEN-L182F V Y Y Y S Y L L       | 23   | >PTEN-L182F V Y Y Y S Y L F       | 12   | 11   |
| >PTEN-L182F V Y Y Y S Y L L K     | 1138 | >PTEN-L182F V Y Y Y S Y L F K     | 494  | 644  |
| >PTEN-L182F V Y Y Y S Y L L       | 1590 | >PTEN-L182F V Y Y Y S Y L F       | 33   | 1557 |
| >PTEN-L182F V Y Y Y S Y L L K     | 23   | >PTEN-L182F V Y Y Y S Y L F K     | 9    | 14   |
| >PTEN-L182F V Y Y Y S Y L L K     | 302  | >PTEN-L182F V Y Y Y S Y L F K     | 71   | 231  |
| >PTEN-L182F V Y Y Y S Y L L K     | 1172 | >PTEN-L182F V Y Y Y S Y L F K     | 269  | 903  |
| >PTEN-L182F V Y Y Y S Y L L K     | 585  | >PTEN-L182F V Y Y Y S Y L F K     | 217  | 368  |
| >PTEN-L182F V Y Y Y S Y L L       | 1091 | >PTEN-L182F V Y Y Y S Y L F       | 43   | 1048 |
| >PTEN-L182F V Y Y Y S Y L L       | 234  | >PTEN-L182F V Y Y Y S Y L F       | 619  | 385  |
| >PTEN-L182F V Y Y Y S Y L L K     | 155  | >PTEN-L182F V Y Y Y S Y L F K     | 83   | 72   |
| >PTEN-L182F V Y Y Y S Y L L       | 353  | >PTEN-L182F V Y Y Y S Y L F       | 605  | 252  |
| >PTEN-L182F V Y Y Y S Y L L       | 188  | >PTEN-L182F V Y Y Y S Y L F       | 539  | 351  |
| >PTEN-L182F V Y Y Y S Y L L K     | 969  | >PTEN-L182F V Y Y Y S Y L F K     | 233  | 736  |
| >PTEN-L182F V Y Y Y S Y L L       | 20   | >PTEN-L182F V Y Y Y S Y L F       | 29   | 9    |



|                          |      |                          |       |       |
|--------------------------|------|--------------------------|-------|-------|
| >PTEN-L182F YVYYYYSYLL   | 7    | >PTEN-L182F YVYYYYSYLF   | 166   | 159   |
| >PTEN-L182F YVYYYYSYLL   | 3    | >PTEN-L182F YVYYYYSYLF   | 67    | 64    |
| >PTEN-L182F YVYYYYSYLL   | 18   | >PTEN-L182F YVYYYYSYLF   | 1707  | 1689  |
| >PTEN-L182F YVYYYYSYLL   | 8    | >PTEN-L182F YVYYYYSYLF   | 95    | 87    |
| >PTEN-L182F YVYYYYSYLL   | 10   | >PTEN-L182F YVYYYYSYLF   | 1261  | 1251  |
| >PTEN-L182F YVYYYYSYLL   | 12   | >PTEN-L182F YVYYYYSYLF   | 5194  | 5182  |
| >PTEN-L182F YVYYYYSYLL   | 86   | >PTEN-L182F YVYYYYSYLF   | 16165 | 16079 |
| >PTEN-L182F YVYYYYSYLL   | 200  | >PTEN-L182F YVYYYYSYLF   | 15842 | 15642 |
| >PTEN-L182F YVYYYYSYLL   | 27   | >PTEN-L182F YVYYYYSYLF   | 17433 | 17406 |
| >PTEN-L182F YVYYYYSYLLK  | 8    | >PTEN-L182F YVYYYYSYLFK  | 7     | 1     |
| >PTEN-L182F YVYYYYSYLLK  | 7    | >PTEN-L182F YVYYYYSYLFK  | 5     | 2     |
| >PTEN-L182F YVYYYYSYLL   | 514  | >PTEN-L182F YVYYYYSYLF   | 55    | 459   |
| >PTEN-L182F YVYYYYSYLL   | 1316 | >PTEN-L182F YVYYYYSYLF   | 141   | 1175  |
| >PTEN-L182F YVYYYYSYLL   | 3686 | >PTEN-L182F YVYYYYSYLF   | 373   | 3313  |
| >PTEN-L182F YVYYYYSYLL   | 2978 | >PTEN-L182F YVYYYYSYLF   | 285   | 2693  |
| >PTEN-L182F YVYYYYSYLL   | 2715 | >PTEN-L182F YVYYYYSYLF   | 233   | 2482  |
| >PTEN-L182F YVYYYYSYLL   | 71   | >PTEN-L182F YVYYYYSYLF   | 7     | 64    |
| >PTEN-L182F YVYYYYSYLLK  | 41   | >PTEN-L182F YVYYYYSYLFK  | 17    | 24    |
| >PTEN-L182F YVYYYYSYLLK  | 165  | >PTEN-L182F YVYYYYSYLFK  | 58    | 107   |
| >PTEN-L182F YVYYYYSYLL   | 81   | >PTEN-L182F YVYYYYSYLF   | 19    | 62    |
| >PTEN-L182F YVYYYYSYLLK  | 274  | >PTEN-L182F YVYYYYSYLFK  | 88    | 186   |
| >PTEN-L182F YVYYYYSYLL   | 253  | >PTEN-L182F YVYYYYSYLF   | 86    | 167   |
| >PTEN-L182F YVYYYYSYLLK  | 6    | >PTEN-L182F YVYYYYSYLFK  | 4     | 2     |
| >PTEN-L182F YVYYYYSYLLK  | 1318 | >PTEN-L182F YVYYYYSYLFK  | 316   | 1002  |
| >PTEN-L182F YVYYYYSYLL   | 11   | >PTEN-L182F YVYYYYSYLF   | 788   | 777   |
| >PTEN-L182F YVYYYYSYLL   | 19   | >PTEN-L182F YVYYYYSYLF   | 2245  | 2226  |
| >PTEN-L182F YVYYYYSYLL   | 421  | >PTEN-L182F YVYYYYSYLF   | 40    | 381   |
| >PTEN-L182F YVYYYYSYLL   | 2689 | >PTEN-L182F YVYYYYSYLF   | 170   | 2519  |
| >PTEN-L182F YVYYYYSYLL   | 255  | >PTEN-L182F YVYYYYSYLF   | 14    | 241   |
| >PTEN-L182F YVYYYYSYLL   | 84   | >PTEN-L182F YVYYYYSYLF   | 9     | 75    |
| >PTEN-L182F YVYYYYSYLL   | 219  | >PTEN-L182F YVYYYYSYLF   | 24    | 195   |
| >PTEN-L182F YVYYYYSYLL   | 75   | >PTEN-L182F YVYYYYSYLF   | 3251  | 3176  |
| >PTEN-L182F YVYYYYSYLL   | 4124 | >PTEN-L182F YVYYYYSYLF   | 145   | 3979  |
| >PTEN-L182F YVYYYYSYLL   | 63   | >PTEN-L182F YVYYYYSYLF   | 111   | 48    |
| >PTEN-L182F YVYYYYSYLL   | 51   | >PTEN-L182F YVYYYYSYLF   | 12    | 39    |
| >PTEN-L182F YVYYYYSYLL   | 750  | >PTEN-L182F YVYYYYSYLF   | 50    | 700   |
| >PTEN-L182F YVYYYYSYLLK  | 50   | >PTEN-L182F YVYYYYSYLFK  | 36    | 14    |
| >PTEN-L182F YVYYYYSYLLK  | 490  | >PTEN-L182F YVYYYYSYLFK  | 462   | 28    |
| >PTEN-L182F YVYYYYSYLLK  | 898  | >PTEN-L182F YVYYYYSYLFK  | 492   | 406   |
| >PTEN-L182F RYVYYYYSYLLK | 94   | >PTEN-L182F RYVYYYYSYLFK | 56    | 38    |
| >PTEN-L182F RYVYYYYSYLL  | 6    | >PTEN-L182F RYVYYYYSYLF  | 3     | 3     |
| >PTEN-L182F RYVYYYYSYLLK | 105  | >PTEN-L182F RYVYYYYSYLFK | 139   | 34    |
| >PTEN-L182F RYVYYYYSYLL  | 26   | >PTEN-L182F RYVYYYYSYLF  | 15    | 11    |

|                          |      |                          |       |       |
|--------------------------|------|--------------------------|-------|-------|
| >PTEN-L182F RYVYYYYSYLLK | 271  | >PTEN-L182F RYVYYYYSYLfk | 347   | 76    |
| >PTEN-L182F RYVYYYYSYLL  | 10   | >PTEN-L182F RYVYYYYSYLF  | 7     | 3     |
| >PTEN-L182F RYVYYYYSYLLK | 446  | >PTEN-L182F RYVYYYYSYLfk | 220   | 226   |
| >PTEN-L182F RYVYYYYSYLL  | 222  | >PTEN-L182F RYVYYYYSYLF  | 22    | 200   |
| >PTEN-L182F RYVYYYYSYLL  | 348  | >PTEN-L182F RYVYYYYSYLF  | 3707  | 3359  |
| >PTEN-L182F RYVYYYYSYLLK | 6    | >PTEN-L182F RYVYYYYSYLfk | 4     | 2     |
| >PTEN-L182F RYVYYYYSYLL  | 410  | >PTEN-L182F RYVYYYYSYLF  | 102   | 308   |
| >PTEN-L182F RYVYYYYSYLLK | 33   | >PTEN-L182F RYVYYYYSYLfk | 15    | 18    |
| >PTEN-L182F RYVYYYYSYLL  | 747  | >PTEN-L182F RYVYYYYSYLF  | 185   | 562   |
| >PTEN-L182F RYVYYYYSYLL  | 1103 | >PTEN-L182F RYVYYYYSYLF  | 42    | 1061  |
| >PTEN-L182F RYVYYYYSYLL  | 420  | >PTEN-L182F RYVYYYYSYLF  | 7203  | 6783  |
| >PTEN-L182F RYVYYYYSYLLK | 42   | >PTEN-L182F RYVYYYYSYLfk | 31    | 11    |
| >PTEN-L182F RYVYYYYSYLL  | 195  | >PTEN-L182F RYVYYYYSYLF  | 256   | 61    |
| >PTEN-L182F RYVYYYYSYLL  | 32   | >PTEN-L182F RYVYYYYSYLF  | 85    | 53    |
| >PTEN-L182F RYVYYYYSYLLK | 325  | >PTEN-L182F RYVYYYYSYLfk | 110   | 215   |
| >PTEN-L193F LLFHKMMFE'   | 234  | >PTEN-L193F PLFHKMMFE'   | 6954  | 6720  |
| >PTEN-L193F LLFHKMMFE'   | 35   | >PTEN-L193F PLFHKMMFE'   | 2325  | 2290  |
| >PTEN-L193F LLFHKMMFE'   | 239  | >PTEN-L193F PLFHKMMFE'   | 5651  | 5412  |
| >PTEN-L193F LLFHKMMFE'   | 45   | >PTEN-L193F PLFHKMMFE'   | 587   | 542   |
| >PTEN-L193F LLFHKMMFE'   | 252  | >PTEN-L193F PLFHKMMFE'   | 4068  | 3816  |
| >PTEN-L193F LLFHKMMFE'   | 14   | >PTEN-L193F PLFHKMMFE'   | 450   | 436   |
| >PTEN-L193F LLFHKMMFE'   | 82   | >PTEN-L193F PLFHKMMFE'   | 2465  | 2383  |
| >PTEN-L193F LLFHKMMFE'   | 57   | >PTEN-L193F PLFHKMMFE'   | 1596  | 1539  |
| >PTEN-L193F LLFHKMMFE'   | 5    | >PTEN-L193F PLFHKMMFE'   | 69    | 64    |
| >PTEN-L193F LLFHKMMFE'   | 15   | >PTEN-L193F PLFHKMMFE'   | 720   | 705   |
| >PTEN-L193F LLFHKMMFE'   | 206  | >PTEN-L193F PLFHKMMFE'   | 2662  | 2456  |
| >PTEN-L193F LLFHKMMFE'   | 29   | >PTEN-L193F PLFHKMMFE'   | 461   | 432   |
| >PTEN-L193F LLFHKMMFE'   | 20   | >PTEN-L193F PLFHKMMFE'   | 993   | 973   |
| >PTEN-L193F LLFHKMMFE'   | 8    | >PTEN-L193F PLFHKMMFE'   | 168   | 160   |
| >PTEN-L193F LLFHKMMFE'   | 71   | >PTEN-L193F PLFHKMMFE'   | 132   | 61    |
| >PTEN-L193F LLFHKMMFE'   | 384  | >PTEN-L193F PLFHKMMFE'   | 3192  | 2808  |
| >PTEN-L193F LLFHKMMF     | 57   | >PTEN-L193F PLFHKMMF     | 3422  | 3365  |
| >PTEN-L193F LLFHKMMFE'   | 493  | >PTEN-L193F PLFHKMMFE'   | 11427 | 10934 |
| >PTEN-L193F LLFHKMMF     | 412  | >PTEN-L193F PLFHKMMF     | 2830  | 2418  |
| >PTEN-L193F LLFHKMMF     | 8    | >PTEN-L193F PLFHKMMF     | 80    | 72    |
| >PTEN-L193F LLFHKMMFE'   | 162  | >PTEN-L193F PLFHKMMFE'   | 3195  | 3033  |
| >PTEN-L193F LLFHKMMF     | 200  | >PTEN-L193F PLFHKMMF     | 9852  | 9652  |
| >PTEN-L193F ALLFHKMMF    | 206  | >PTEN-L193F APLFHKMMF    | 23124 | 22918 |
| >PTEN-L193F ALLFHKMM     | 88   | >PTEN-L193F APLFHKMM     | 25781 | 25693 |
| >PTEN-L193F ALLFHKMMF    | 106  | >PTEN-L193F APLFHKMMF    | 25739 | 25633 |
| >PTEN-L193F ALLFHKMMF    | 392  | >PTEN-L193F APLFHKMMF    | 25356 | 24964 |
| >PTEN-L193F ALLFHKMM     | 431  | >PTEN-L193F APLFHKMM     | 37046 | 36615 |
| >PTEN-L193F ALLFHKMMF    | 54   | >PTEN-L193F APLFHKMMF    | 35418 | 35364 |

|                         |       |                         |       |       |
|-------------------------|-------|-------------------------|-------|-------|
| >PTEN-L193F ALLFHKMMF   | 379   | >PTEN-L193F APLFHKMMF   | 19666 | 19287 |
| >PTEN-L193F ALLFHKMM    | 19530 | >PTEN-L193F APLFHKMM    | 77    | 19453 |
| >PTEN-L193F ALLFHKMMF   | 22568 | >PTEN-L193F APLFHKMMF   | 113   | 22455 |
| >PTEN-L193F ALLFHKMMF   | 37    | >PTEN-L193F APLFHKMMF   | 398   | 361   |
| >PTEN-L193F ALLFHKMMF   | 17518 | >PTEN-L193F APLFHKMMF   | 137   | 17381 |
| >PTEN-L193F VALLFHKM    | 32    | >PTEN-L193F VAPLFHKM    | 77    | 45    |
| >PTEN-L193F VALLFHKMM   | 40    | >PTEN-L193F VAPLFHKMM   | 35    | 5     |
| >PTEN-L193F VALLFHKMM   | 63    | >PTEN-L193F VAPLFHKMM   | 806   | 743   |
| >PTEN-L193F VALLFHKM    | 114   | >PTEN-L193F VAPLFHKM    | 4534  | 4420  |
| >PTEN-L193F VALLFHKMM   | 56    | >PTEN-L193F VAPLFHKMM   | 3284  | 3228  |
| >PTEN-L193F VALLFHKMM   | 30    | >PTEN-L193F VAPLFHKMM   | 1678  | 1648  |
| >PTEN-L193F VALLFHKM    | 3815  | >PTEN-L193F VAPLFHKM    | 9     | 3806  |
| >PTEN-L193F VALLFHKMM   | 1922  | >PTEN-L193F VAPLFHKMM   | 4     | 1918  |
| >PTEN-L193F VALLFHKMM   | 4020  | >PTEN-L193F VAPLFHKMM   | 12    | 4008  |
| >PTEN-L193F VALLFHKMM   | 16400 | >PTEN-L193F VAPLFHKMM   | 300   | 16100 |
| >PTEN-L193F VALLFHKMM   | 108   | >PTEN-L193F VAPLFHKMM   | 2333  | 2225  |
| >PTEN-L193F VALLFHKMM   | 371   | >PTEN-L193F VAPLFHKMM   | 345   | 26    |
| >PTEN-L193F PVALLFHK    | 282   | >PTEN-L193F PVAPLFHK    | 152   | 130   |
| >PTEN-L193F RPVALLFHKM  | 17    | >PTEN-L193F RPVAPLFHKM  | 19    | 2     |
| >PTEN-L193F RPVALLFHKM  | 289   | >PTEN-L193F RPVAPLFHKM  | 463   | 174   |
| >PTEN-L193F RPVALLFHKM  | 88    | >PTEN-L193F RPVAPLFHKM  | 73    | 15    |
| >PTEN-L193F RPVALLFHKM  | 42    | >PTEN-L193F RPVAPLFHKM  | 24    | 18    |
| >PTEN-L193F RPVALLFHKM  | 252   | >PTEN-L193F RPVAPLFHKM  | 416   | 164   |
| >PTEN-L193F RPVALLFHKM  | 358   | >PTEN-L193F RPVAPLFHKM  | 367   | 9     |
| >PTEN-L193F RPVALLFHKM  | 295   | >PTEN-L193F RPVAPLFHKM  | 392   | 97    |
| >PTEN-L193F YRPVALLF    | 169   | >PTEN-L193F YRPVAPLF    | 152   | 17    |
| >PTEN-L193F YRPVALLF    | 219   | >PTEN-L193F YRPVAPLF    | 432   | 213   |
| >PTEN-L193F YRPVALLFHKM | 60    | >PTEN-L193F YRPVAPLFHKM | 79    | 19    |
| >PTEN-L193F YRPVALLF    | 251   | >PTEN-L193F YRPVAPLF    | 707   | 456   |
| >PTEN-L193F YRPVALLFHKM | 120   | >PTEN-L193F YRPVAPLFHKM | 290   | 170   |
| >PTEN-L193F YRPVALLFHKM | 338   | >PTEN-L193F YRPVAPLFHKM | 353   | 15    |
| >PTEN-L193F DYRPVALLF   | 159   | >PTEN-L193F DYRPVAPLF   | 195   | 36    |
| >PTEN-L193F DYRPVALLF   | 87    | >PTEN-L193F DYRPVAPLF   | 129   | 42    |
| >PTEN-L193F DYRPVALLF   | 52    | >PTEN-L193F DYRPVAPLF   | 83    | 31    |
| >PTEN-L193F DYRPVALLF   | 325   | >PTEN-L193F DYRPVAPLF   | 1561  | 1236  |
| >PTEN-L193F DYRPVALLFH  | 67    | >PTEN-L193F DYRPVAPLFH  | 63    | 4     |
| >PTEN-L193F DYRPVALLFH  | 247   | >PTEN-L193F DYRPVAPLFH  | 1014  | 767   |
| >PTEN-L193F DYRPVALLFH  | 22    | >PTEN-L193F DYRPVAPLFH  | 30    | 8     |
| >PTEN-L193F LDYRPVALLF  | 237   | >PTEN-L193F LDYRPVAPLF  | 192   | 45    |
| >PTEN-L193F HLDYRPVAL   | 252   | >PTEN-L193F HLDYRPVAP   | 23176 | 22924 |
| >PTEN-L193F HLDYRPVALL  | 671   | >PTEN-L193F HLDYRPVAPL  | 387   | 284   |
| >PTEN-L193F HLDYRPVAL   | 165   | >PTEN-L193F HLDYRPVAP   | 16338 | 16173 |
| >PTEN-L193F HLDYRPVALL  | 97    | >PTEN-L193F HLDYRPVAPL  | 77    | 20    |

|                         |      |                         |       |       |
|-------------------------|------|-------------------------|-------|-------|
| >PTEN-L193F HLDYRPVALL  | 488  | >PTEN-L193F HLDYRPVAPL  | 320   | 168   |
| >PTEN-L193F HLDYRPVAL   | 121  | >PTEN-L193F HLDYRPVAP   | 16378 | 16257 |
| >PTEN-L193F HLDYRPVALL  | 82   | >PTEN-L193F HLDYRPVAPL  | 41    | 41    |
| >PTEN-L193F HLDYRPVAL   | 34   | >PTEN-L193F HLDYRPVAP   | 12535 | 12501 |
| >PTEN-L193F HLDYRPVALL  | 42   | >PTEN-L193F HLDYRPVAPL  | 15    | 27    |
| >PTEN-L193F HLDYRPVALL  | 262  | >PTEN-L193F HLDYRPVAPL  | 168   | 94    |
| >PTEN-L193F HLDYRPVAL   | 187  | >PTEN-L193F HLDYRPVAP   | 26618 | 26431 |
| >PTEN-L193F HLDYRPVALL  | 60   | >PTEN-L193F HLDYRPVAPL  | 65    | 5     |
| >PTEN-L193F HLDYRPVAL   | 101  | >PTEN-L193F HLDYRPVAP   | 6741  | 6640  |
| >PTEN-L193F HLDYRPVALL  | 2289 | >PTEN-L193F HLDYRPVAPL  | 492   | 1797  |
| >PTEN-L193F HLDYRPVALL  | 365  | >PTEN-L193F HLDYRPVAPL  | 761   | 396   |
| >PTEN-L193F HLDYRPVAL   | 71   | >PTEN-L193F HLDYRPVAP   | 17298 | 17227 |
| >PTEN-L193F HLDYRPVALL  | 662  | >PTEN-L193F HLDYRPVAPL  | 149   | 513   |
| >PTEN-L193F N HLDYRPVAL | 321  | >PTEN-L193F N HLDYRPVAL | 4741  | 4420  |
| >PTEN-L193F N HLDYRPVAL | 7    | >PTEN-L193F N HLDYRPVAL | 2910  | 2903  |
| >PTEN-L193F N HLDYRPVAL | 17   | >PTEN-L193F N HLDYRPVAL | 9     | 8     |
| >PTEN-L23F- LDLTYYIPNI  | 87   | >PTEN-L23F- FDLTYYIPNI  | 49    | 38    |
| >PTEN-L23F- LDLTYYIPNII | 90   | >PTEN-L23F- FDLTYYIPNII | 57    | 33    |
| >PTEN-L23F- LDLTYYIPNI  | 482  | >PTEN-L23F- FDLTYYIPNI  | 75    | 407   |
| >PTEN-L23F- LDLTYYIPNII | 52   | >PTEN-L23F- FDLTYYIPNII | 27    | 25    |
| >PTEN-L23F- LDLTYYIPNI  | 72   | >PTEN-L23F- FDLTYYIPNI  | 57    | 15    |
| >PTEN-L23F- LDLTYYIPNII | 27   | >PTEN-L23F- FDLTYYIPNII | 23    | 4     |
| >PTEN-L23F- DLDLTYIY    | 101  | >PTEN-L23F- DFDLTYIY    | 6878  | 6777  |
| >PTEN-L23F- DLDLTYIYPNI | 294  | >PTEN-L23F- DFDLTYIYPNI | 17535 | 17241 |
| >PTEN-L23F- DLDLTYIYPNI | 480  | >PTEN-L23F- DFDLTYIYPNI | 19491 | 19011 |
| >PTEN-L23F- DLDLTYIY    | 727  | >PTEN-L23F- DFDLTYIY    | 260   | 467   |
| >PTEN-L23F- DLDLTYIYPNI | 168  | >PTEN-L23F- DFDLTYIYPNI | 5498  | 5330  |
| >PTEN-L23F- DLDLTYIY    | 217  | >PTEN-L23F- DFDLTYIY    | 166   | 51    |
| >PTEN-L23F- KRRYQEDGFI  | 327  | >PTEN-L23F- KRRYQEDGFI  | 21    | 306   |
| >PTEN-L23F- KRRYQEDGFI  | 45   | >PTEN-L23F- KRRYQEDGFI  | 137   | 92    |
| >PTEN-L23F- FDLDLTYI    | 679  | >PTEN-L23F- FDFDLTYI    | 85    | 594   |
| >PTEN-L23F- FDLDLTYI    | 142  | >PTEN-L23F- FDFDLTYI    | 92    | 50    |
| >PTEN-L23F- FDLDLTYIY   | 21   | >PTEN-L23F- FDFDLTYIY   | 16    | 5     |
| >PTEN-L23F- FDLDLTYI    | 5688 | >PTEN-L23F- FDFDLTYI    | 312   | 5376  |
| >PTEN-L23F- FDLDLTYIY   | 1471 | >PTEN-L23F- FDFDLTYIY   | 315   | 1156  |
| >PTEN-L23F- FDLDLTYIY   | 147  | >PTEN-L23F- FDFDLTYIY   | 65    | 82    |
| >PTEN-L23F- FDLDLTYIY   | 123  | >PTEN-L23F- FDFDLTYIY   | 75    | 48    |
| >PTEN-L23F- FDLDLTYI    | 510  | >PTEN-L23F- FDFDLTYI    | 116   | 394   |
| >PTEN-L23F- FDLDLTYIYPN | 2643 | >PTEN-L23F- FDFDLTYIYPN | 483   | 2160  |
| >PTEN-L23F- FDLDLTYIY   | 1110 | >PTEN-L23F- FDFDLTYIY   | 318   | 792   |
| >PTEN-L23F- FDLDLTYI    | 22   | >PTEN-L23F- FDFDLTYI    | 50    | 28    |
| >PTEN-L23F- FDLDLTYI    | 1606 | >PTEN-L23F- FDFDLTYI    | 242   | 1364  |
| >PTEN-L23F- FDLDLTYI    | 53   | >PTEN-L23F- FDFDLTYI    | 79    | 26    |

|                                      |      |                                      |      |      |
|--------------------------------------|------|--------------------------------------|------|------|
| >PTEN-L23F- <sup>-</sup> GFDLTLTY    | 62   | >PTEN-L23F- <sub>-</sub> GFDLTLTY    | 35   | 27   |
| >PTEN-L23F- <sup>-</sup> GFDLTLTYIY  | 64   | >PTEN-L23F- <sub>-</sub> GFDLTLTYIY  | 45   | 19   |
| >PTEN-L23F- <sup>-</sup> GFDLTLTYIY  | 369  | >PTEN-L23F- <sub>-</sub> GFDLTLTYIY  | 267  | 102  |
| >PTEN-L23F- <sup>-</sup> GFDLTLTY    | 126  | >PTEN-L23F- <sub>-</sub> GFDLTLTY    | 55   | 71   |
| >PTEN-L23F- <sup>-</sup> DGFDLTLTY   | 122  | >PTEN-L23F- <sub>-</sub> DGFDLTLTY   | 99   | 23   |
| >PTEN-L23F- <sup>-</sup> DGFDLTLTYI\ | 160  | >PTEN-L23F- <sub>-</sub> DGFDLTLTYI\ | 140  | 20   |
| >PTEN-L23F- <sup>-</sup> DGFDLTLTYI\ | 458  | >PTEN-L23F- <sub>-</sub> DGFDLTLTYI\ | 340  | 118  |
| >PTEN-L23F- <sup>-</sup> DGFDLTLTY   | 300  | >PTEN-L23F- <sub>-</sub> DGFDLTLTY   | 184  | 116  |
| >PTEN-L23F- <sup>-</sup> DGFDLTLTYI\ | 299  | >PTEN-L23F- <sub>-</sub> DGFDLTLTYI\ | 216  | 83   |
| >PTEN-L23F- <sup>-</sup> DGFDLTLTY   | 37   | >PTEN-L23F- <sub>-</sub> DGFDLTLTY   | 39   | 2    |
| >PTEN-L23F- <sup>-</sup> DGFDLTLTYI\ | 76   | >PTEN-L23F- <sub>-</sub> DGFDLTLTYI\ | 79   | 3    |
| >PTEN-L23F- <sup>-</sup> QEDGFDLTL   | 44   | >PTEN-L23F- <sub>-</sub> QEDGFDLTL   | 32   | 12   |
| >PTEN-L23F- <sup>-</sup> QEDGFDLTL   | 15   | >PTEN-L23F- <sub>-</sub> QEDGFDLTL   | 11   | 4    |
| >PTEN-L23F- <sup>-</sup> QEDGFDLTL   | 114  | >PTEN-L23F- <sub>-</sub> QEDGFDLTL   | 107  | 7    |
| >PTEN-L23F- <sup>-</sup> QEDGFDLTL   | 825  | >PTEN-L23F- <sub>-</sub> QEDGFDLTL   | 386  | 439  |
| >PTEN-L23F- <sup>-</sup> YQEDGFDLTL  | 750  | >PTEN-L23F- <sub>-</sub> YQEDGFDLTL  | 360  | 390  |
| >PTEN-L23F- <sup>-</sup> YQEDGFDLTL  | 209  | >PTEN-L23F- <sub>-</sub> YQEDGFDLTL  | 132  | 77   |
| >PTEN-L23F- <sup>-</sup> YQEDGFDL    | 26   | >PTEN-L23F- <sub>-</sub> YQEDGFDL    | 74   | 48   |
| >PTEN-L23F- <sup>-</sup> YQEDGFDL    | 731  | >PTEN-L23F- <sub>-</sub> YQEDGFDL    | 182  | 549  |
| >PTEN-L23F- <sup>-</sup> YQEDGFDLTL  | 297  | >PTEN-L23F- <sub>-</sub> YQEDGFDLTL  | 206  | 91   |
| >PTEN-L23F- <sup>-</sup> YQEDGFDLTL  | 27   | >PTEN-L23F- <sub>-</sub> YQEDGFDLTL  | 18   | 9    |
| >PTEN-L23F- <sup>-</sup> YQEDGFDLTL  | 2222 | >PTEN-L23F- <sub>-</sub> YQEDGFDLTL  | 466  | 1756 |
| >PTEN-L23F- <sup>-</sup> YQEDGFDL    | 3907 | >PTEN-L23F- <sub>-</sub> YQEDGFDL    | 180  | 3727 |
| >PTEN-L23F- <sup>-</sup> YQEDGFDL    | 2328 | >PTEN-L23F- <sub>-</sub> YQEDGFDL    | 162  | 2166 |
| >PTEN-L23F- <sup>-</sup> YQEDGFDL    | 1477 | >PTEN-L23F- <sub>-</sub> YQEDGFDL    | 85   | 1392 |
| >PTEN-L23F- <sup>-</sup> YQEDGFDL    | 68   | >PTEN-L23F- <sub>-</sub> YQEDGFDL    | 2951 | 2883 |
| >PTEN-L23F- <sup>-</sup> YQEDGFDLTL  | 137  | >PTEN-L23F- <sub>-</sub> YQEDGFDLTL  | 108  | 29   |
| >PTEN-L23F- <sup>-</sup> YQEDGFDL    | 269  | >PTEN-L23F- <sub>-</sub> YQEDGFDL    | 2245 | 1976 |
| >PTEN-L23F- <sup>-</sup> RYQEDGFDL   | 467  | >PTEN-L23F- <sub>-</sub> RYQEDGFDL   | 42   | 425  |
| >PTEN-L23F- <sup>-</sup> RYQEDGFDL   | 586  | >PTEN-L23F- <sub>-</sub> RYQEDGFDL   | 257  | 329  |
| >PTEN-L23F- <sup>-</sup> RYQEDGFDL   | 320  | >PTEN-L23F- <sub>-</sub> RYQEDGFDL   | 86   | 234  |
| >PTEN-L23F- <sup>-</sup> RYQEDGFDL   | 569  | >PTEN-L23F- <sub>-</sub> RYQEDGFDL   | 298  | 271  |
| >PTEN-L23F- <sup>-</sup> RYQEDGFDL   | 6    | >PTEN-L23F- <sub>-</sub> RYQEDGFDL   | 4    | 2    |
| >PTEN-L23F- <sup>-</sup> RYQEDGFDL   | 607  | >PTEN-L23F- <sub>-</sub> RYQEDGFDL   | 404  | 203  |
| >PTEN-L23F- <sup>-</sup> RYQEDGFDL   | 7    | >PTEN-L23F- <sub>-</sub> RYQEDGFDL   | 6    | 1    |
| >PTEN-L23F- <sup>-</sup> RRYQEDGFDI  | 223  | >PTEN-L23F- <sub>-</sub> RRYQEDGFDI  | 20   | 203  |
| >PTEN-L23F- <sup>-</sup> RRYQEDGFDI  | 11   | >PTEN-L23F- <sub>-</sub> RRYQEDGFDI  | 17   | 6    |
| >PTEN-L23F- <sup>-</sup> RRYQEDGFDI  | 18   | >PTEN-L23F- <sub>-</sub> RRYQEDGFDI  | 62   | 44   |
| >PTEN-L23F- <sup>-</sup> RRYQEDGFDI  | 300  | >PTEN-L23F- <sub>-</sub> RRYQEDGFDI  | 390  | 90   |
| >PTEN-L23F- <sup>-</sup> RRYQEDGFDI  | 21   | >PTEN-L23F- <sub>-</sub> RRYQEDGFDI  | 65   | 44   |
| >PTEN-L25F- <sup>-</sup> LTYIYPNI    | 4    | >PTEN-L25F- <sub>-</sub> FTYIYPNI    | 5    | 1    |
| >PTEN-L25F- <sup>-</sup> LTYIYPNII   | 234  | >PTEN-L25F- <sub>-</sub> FTYIYPNII   | 264  | 30   |
| >PTEN-L25F- <sup>-</sup> LTYIYPNIIAM | 69   | >PTEN-L25F- <sub>-</sub> FTYIYPNIIAM | 69   | 0    |

|                                      |      |                                      |     |      |
|--------------------------------------|------|--------------------------------------|-----|------|
| >PTEN-L25F- <sup>+</sup> LTYIYPNII   | 435  | >PTEN-L25F- <sup>-</sup> FTYIYPNII   | 215 | 220  |
| >PTEN-L25F- <sup>+</sup> LTYIYPNI    | 1067 | >PTEN-L25F- <sup>-</sup> FTYIYPNI    | 54  | 1013 |
| >PTEN-L25F- <sup>+</sup> LTYIYPNII   | 4719 | >PTEN-L25F- <sup>-</sup> FTYIYPNII   | 248 | 4471 |
| >PTEN-L25F- <sup>+</sup> LTYIYPNIIA  | 2179 | >PTEN-L25F- <sup>-</sup> FTYIYPNIIA  | 357 | 1822 |
| >PTEN-L25F- <sup>+</sup> LTYIYPNIIAM | 3070 | >PTEN-L25F- <sup>-</sup> FTYIYPNIIAM | 281 | 2789 |
| >PTEN-L25F- <sup>+</sup> LTYIYPNI    | 736  | >PTEN-L25F- <sup>-</sup> FTYIYPNI    | 61  | 675  |
| >PTEN-L25F- <sup>+</sup> LTYIYPNII   | 1344 | >PTEN-L25F- <sup>-</sup> FTYIYPNII   | 137 | 1207 |
| >PTEN-L25F- <sup>+</sup> LTYIYPNIIA  | 669  | >PTEN-L25F- <sup>-</sup> FTYIYPNIIA  | 186 | 483  |
| >PTEN-L25F- <sup>+</sup> LTYIYPNIIAM | 1976 | >PTEN-L25F- <sup>-</sup> FTYIYPNIIAM | 287 | 1689 |
| >PTEN-L25F- <sup>+</sup> LTYIYPNI    | 309  | >PTEN-L25F- <sup>-</sup> FTYIYPNI    | 31  | 278  |
| >PTEN-L25F- <sup>+</sup> LTYIYPNII   | 431  | >PTEN-L25F- <sup>-</sup> FTYIYPNII   | 38  | 393  |
| >PTEN-L25F- <sup>+</sup> LTYIYPNIIA  | 819  | >PTEN-L25F- <sup>-</sup> FTYIYPNIIA  | 204 | 615  |
| >PTEN-L25F- <sup>+</sup> LTYIYPNIIAM | 2719 | >PTEN-L25F- <sup>-</sup> FTYIYPNIIAM | 394 | 2325 |
| >PTEN-L25F- <sup>+</sup> LTYIYPNI    | 677  | >PTEN-L25F- <sup>-</sup> FTYIYPNI    | 58  | 619  |
| >PTEN-L25F- <sup>+</sup> LTYIYPNII   | 3447 | >PTEN-L25F- <sup>-</sup> FTYIYPNII   | 350 | 3097 |
| >PTEN-L25F- <sup>+</sup> LTYIYPNIIA  | 368  | >PTEN-L25F- <sup>-</sup> FTYIYPNIIA  | 87  | 281  |
| >PTEN-L25F- <sup>+</sup> LTYIYPNIIAM | 1066 | >PTEN-L25F- <sup>-</sup> FTYIYPNIIAM | 154 | 912  |
| >PTEN-L25F- <sup>+</sup> LTYIYPNI    | 86   | >PTEN-L25F- <sup>-</sup> FTYIYPNI    | 12  | 74   |
| >PTEN-L25F- <sup>+</sup> LTYIYPNII   | 535  | >PTEN-L25F- <sup>-</sup> FTYIYPNII   | 54  | 481  |
| >PTEN-L25F- <sup>+</sup> LTYIYPNIIA  | 2097 | >PTEN-L25F- <sup>-</sup> FTYIYPNIIA  | 269 | 1828 |
| >PTEN-L25F- <sup>+</sup> LTYIYPNIIAM | 239  | >PTEN-L25F- <sup>-</sup> FTYIYPNIIAM | 36  | 203  |
| >PTEN-L25F- <sup>+</sup> LTYIYPNI    | 1453 | >PTEN-L25F- <sup>-</sup> FTYIYPNI    | 127 | 1326 |
| >PTEN-L25F- <sup>+</sup> LTYIYPNIIAM | 4141 | >PTEN-L25F- <sup>-</sup> FTYIYPNIIAM | 215 | 3926 |
| >PTEN-L25F- <sup>+</sup> LTYIYPNIIAM | 320  | >PTEN-L25F- <sup>-</sup> FTYIYPNIIAM | 106 | 214  |
| >PTEN-L25F- <sup>+</sup> LTYIYPNIIAM | 613  | >PTEN-L25F- <sup>-</sup> FTYIYPNIIAM | 293 | 320  |
| >PTEN-L25F- <sup>+</sup> LTYIYPNI    | 821  | >PTEN-L25F- <sup>-</sup> FTYIYPNI    | 94  | 727  |
| >PTEN-L25F- <sup>+</sup> LTYIYPNII   | 1430 | >PTEN-L25F- <sup>-</sup> FTYIYPNII   | 176 | 1254 |
| >PTEN-L25F- <sup>+</sup> LTYIYPNIIA  | 118  | >PTEN-L25F- <sup>-</sup> FTYIYPNIIA  | 51  | 67   |
| >PTEN-L25F- <sup>+</sup> LTYIYPNIIAM | 2898 | >PTEN-L25F- <sup>-</sup> FTYIYPNIIAM | 490 | 2408 |
| >PTEN-L25F- <sup>+</sup> LTYIYPNI    | 65   | >PTEN-L25F- <sup>-</sup> FTYIYPNI    | 10  | 55   |
| >PTEN-L25F- <sup>+</sup> LTYIYPNII   | 1149 | >PTEN-L25F- <sup>-</sup> FTYIYPNII   | 127 | 1022 |
| >PTEN-L25F- <sup>+</sup> LTYIYPNIIA  | 2413 | >PTEN-L25F- <sup>-</sup> FTYIYPNIIA  | 295 | 2118 |
| >PTEN-L25F- <sup>+</sup> LTYIYPNIIAM | 326  | >PTEN-L25F- <sup>-</sup> FTYIYPNIIAM | 37  | 289  |
| >PTEN-L25F- <sup>+</sup> LTYIYPNIIAM | 368  | >PTEN-L25F- <sup>-</sup> FTYIYPNIIAM | 465 | 97   |
| >PTEN-L25F- <sup>+</sup> LTYIYPNI    | 639  | >PTEN-L25F- <sup>-</sup> FTYIYPNI    | 408 | 231  |
| >PTEN-L25F- <sup>+</sup> LTYIYPNII   | 529  | >PTEN-L25F- <sup>-</sup> FTYIYPNII   | 335 | 194  |
| >PTEN-L25F- <sup>+</sup> LTYIYPNIIAM | 98   | >PTEN-L25F- <sup>-</sup> FTYIYPNIIAM | 53  | 45   |
| >PTEN-L25F- <sup>+</sup> LTYIYPNI    | 13   | >PTEN-L25F- <sup>-</sup> FTYIYPNI    | 18  | 5    |
| >PTEN-L25F- <sup>+</sup> LTYIYPNII   | 33   | >PTEN-L25F- <sup>-</sup> FTYIYPNII   | 56  | 23   |
| >PTEN-L25F- <sup>+</sup> LTYIYPNIIAM | 5    | >PTEN-L25F- <sup>-</sup> FTYIYPNIIAM | 7   | 2    |
| >PTEN-L25F- <sup>+</sup> LTYIYPNIIAM | 134  | >PTEN-L25F- <sup>-</sup> FTYIYPNIIAM | 65  | 69   |
| >PTEN-L25F- <sup>+</sup> LTYIYPNI    | 469  | >PTEN-L25F- <sup>-</sup> FTYIYPNI    | 922 | 453  |
| >PTEN-L25F- <sup>+</sup> LTYIYPNII   | 167  | >PTEN-L25F- <sup>-</sup> FTYIYPNII   | 132 | 35   |

|                        |      |                        |      |      |
|------------------------|------|------------------------|------|------|
| >PTEN-L25F-LTYIYPNIIAM | 111  | >PTEN-L25F-FTYIYPNIIAM | 100  | 11   |
| >PTEN-L25F-LTYIYPNII   | 126  | >PTEN-L25F-FTYIYPNII   | 160  | 34   |
| >PTEN-L25F-LTYIYPNIIA  | 136  | >PTEN-L25F-FTYIYPNIIA  | 191  | 55   |
| >PTEN-L25F-LTYIYPNIIAM | 74   | >PTEN-L25F-FTYIYPNIIAM | 87   | 13   |
| >PTEN-L25F-LTYIYPNI    | 9    | >PTEN-L25F-FTYIYPNI    | 10   | 1    |
| >PTEN-L25F-LTYIYPNII   | 12   | >PTEN-L25F-FTYIYPNII   | 14   | 2    |
| >PTEN-L25F-LTYIYPNIIAM | 147  | >PTEN-L25F-FTYIYPNIIAM | 200  | 53   |
| >PTEN-L25F-DLTYIYPNI   | 384  | >PTEN-L25F-DFTYIYPNI   | 9523 | 9139 |
| >PTEN-L25F-RYQEDGFDLI  | 586  | >PTEN-L25F-RYQEDGFDLI  | 50   | 536  |
| >PTEN-L25F-RYQEDGFDLI  | 569  | >PTEN-L25F-RYQEDGFDLI  | 130  | 439  |
| >PTEN-L25F-RYQEDGFDLI  | 7    | >PTEN-L25F-RYQEDGFDLI  | 4    | 3    |
| >PTEN-L25F-LDLTYIYPNI  | 87   | >PTEN-L25F-LDFTYIYPNI  | 62   | 25   |
| >PTEN-L25F-LDLTYIYPNII | 90   | >PTEN-L25F-LDFTYIYPNII | 62   | 28   |
| >PTEN-L25F-LDLTYIYPNI  | 482  | >PTEN-L25F-LDFTYIYPNI  | 418  | 64   |
| >PTEN-L25F-LDLTYIYPNII | 52   | >PTEN-L25F-LDFTYIYPNII | 24   | 28   |
| >PTEN-L25F-LDLTYIYPNI  | 72   | >PTEN-L25F-LDFTYIYPNI  | 110  | 38   |
| >PTEN-L25F-LDLTYIYPNII | 27   | >PTEN-L25F-LDFTYIYPNII | 38   | 11   |
| >PTEN-L25F-DLDLTYIY    | 101  | >PTEN-L25F-DLDFTYIY    | 104  | 3    |
| >PTEN-L25F-DLDLTYIYPNI | 932  | >PTEN-L25F-DLDFTYIYPNI | 393  | 539  |
| >PTEN-L25F-DLDLTYIYPNI | 294  | >PTEN-L25F-DLDFTYIYPNI | 237  | 57   |
| >PTEN-L25F-DLDLTYIYPNI | 480  | >PTEN-L25F-DLDFTYIYPNI | 279  | 201  |
| >PTEN-L25F-DLDLTYIY    | 727  | >PTEN-L25F-DLDFTYIY    | 369  | 358  |
| >PTEN-L25F-DLDLTYIYPNI | 168  | >PTEN-L25F-DLDFTYIYPNI | 78   | 90   |
| >PTEN-L25F-DLDLTYIY    | 217  | >PTEN-L25F-DLDFTYIY    | 87   | 130  |
| >PTEN-L25F-FDLDLTYI    | 679  | >PTEN-L25F-FDLDFTYI    | 476  | 203  |
| >PTEN-L25F-FDLDLTYI    | 142  | >PTEN-L25F-FDLDFTYI    | 71   | 71   |
| >PTEN-L25F-FDLDLTYIY   | 21   | >PTEN-L25F-FDLDFTYIY   | 17   | 4    |
| >PTEN-L25F-FDLDLTYIY   | 1471 | >PTEN-L25F-FDLDFTYIY   | 383  | 1088 |
| >PTEN-L25F-FDLDLTYIY   | 147  | >PTEN-L25F-FDLDFTYIY   | 94   | 53   |
| >PTEN-L25F-FDLDLTYIY   | 123  | >PTEN-L25F-FDLDFTYIY   | 102  | 21   |
| >PTEN-L25F-FDLDLTYI    | 510  | >PTEN-L25F-FDLDFTYI    | 463  | 47   |
| >PTEN-L25F-FDLDLTYI    | 22   | >PTEN-L25F-FDLDFTYI    | 43   | 21   |
| >PTEN-L25F-FDLDLTYI    | 53   | >PTEN-L25F-FDLDFTYI    | 41   | 12   |
| >PTEN-L25F-GFDLDTYIY   | 565  | >PTEN-L25F-GFDLDFTYIY  | 365  | 200  |
| >PTEN-L25F-GFDLDTY     | 62   | >PTEN-L25F-GFDLDFTY    | 57   | 5    |
| >PTEN-L25F-GFDLDTYIY   | 64   | >PTEN-L25F-GFDLDFTYIY  | 22   | 42   |
| >PTEN-L25F-GFDLDTYIY   | 369  | >PTEN-L25F-GFDLDFTYIY  | 252  | 117  |
| >PTEN-L25F-GFDLDTY     | 126  | >PTEN-L25F-GFDLDFTY    | 127  | 1    |
| >PTEN-L25F-DGFDLDTY    | 122  | >PTEN-L25F-DGFDLDFTY   | 156  | 34   |
| >PTEN-L25F-DGFDLDTYI\  | 160  | >PTEN-L25F-DGFDLDFTYI\ | 163  | 3    |
| >PTEN-L25F-DGFDLDTY    | 1916 | >PTEN-L25F-DGFDLDFTY   | 416  | 1500 |
| >PTEN-L25F-DGFDLDTYI\  | 458  | >PTEN-L25F-DGFDLDFTYI\ | 237  | 221  |
| >PTEN-L25F-DGFDLDTY    | 300  | >PTEN-L25F-DGFDLDFTY   | 209  | 91   |

|                         |      |                         |       |       |
|-------------------------|------|-------------------------|-------|-------|
| >PTEN-L25F- DGFDLDLTYI\ | 299  | >PTEN-L25F- DGFDLDFTYI\ | 228   | 71    |
| >PTEN-L25F- DGFDLDLTY   | 37   | >PTEN-L25F- DGFDLDFTY   | 26    | 11    |
| >PTEN-L25F- DGFDLDLTYI\ | 76   | >PTEN-L25F- DGFDLDFTYI\ | 67    | 9     |
| >PTEN-L25F- QEDGFDLDL   | 2356 | >PTEN-L25F- QEDGFDLDF   | 213   | 2143  |
| >PTEN-L25F- QEDGFDLDT   | 44   | >PTEN-L25F- QEDGFDLDFI  | 32    | 12    |
| >PTEN-L25F- QEDGFDLDL   | 15   | >PTEN-L25F- QEDGFDLDF   | 152   | 137   |
| >PTEN-L25F- QEDGFDLDL   | 588  | >PTEN-L25F- QEDGFDLDF   | 94    | 494   |
| >PTEN-L25F- QEDGFDLDT   | 114  | >PTEN-L25F- QEDGFDLDFI  | 101   | 13    |
| >PTEN-L25F- QEDGFDLDT   | 990  | >PTEN-L25F- QEDGFDLDFI  | 444   | 546   |
| >PTEN-L25F- YQEDGFDLDI  | 209  | >PTEN-L25F- YQEDGFDLDF  | 12882 | 12673 |
| >PTEN-L25F- YQEDGFDLDI  | 297  | >PTEN-L25F- YQEDGFDLDF  | 13907 | 13610 |
| >PTEN-L25F- YQEDGFDLDI  | 27   | >PTEN-L25F- YQEDGFDLDF  | 13    | 14    |
| >PTEN-L25F- YQEDGFDLDI  | 3587 | >PTEN-L25F- YQEDGFDLDF  | 169   | 3418  |
| >PTEN-L25F- YQEDGFDLDI  | 1815 | >PTEN-L25F- YQEDGFDLDF  | 145   | 1670  |
| >PTEN-L25F- YQEDGFDLDI  | 1692 | >PTEN-L25F- YQEDGFDLDF  | 111   | 1581  |
| >PTEN-L25F- YQEDGFDLDI  | 137  | >PTEN-L25F- YQEDGFDLDF  | 4140  | 4003  |
| >PTEN-L318F LTLTKNDLKD  | 3309 | >PTEN-L318F FTLTKNDLKD  | 246   | 3063  |
| >PTEN-L318F LTLTKNDLKD  | 313  | >PTEN-L318F FTLTKNDLKD  | 412   | 99    |
| >PTEN-L318F LTLTKNDLKD  | 62   | >PTEN-L318F FTLTKNDLKD  | 72    | 10    |
| >PTEN-L318F LTLTKNDLKD  | 1239 | >PTEN-L318F FTLTKNDLKD  | 264   | 975   |
| >PTEN-L318F LTLTKNDL    | 261  | >PTEN-L318F FTLTKNDL    | 381   | 120   |
| >PTEN-L318F VLTLTKNDL   | 69   | >PTEN-L318F VFTLTKNDL   | 25944 | 25875 |
| >PTEN-L318F RADNDKEYL\  | 1265 | >PTEN-L318F RADNDKEYL\  | 200   | 1065  |
| >PTEN-L318F RADNDKEYL\  | 1580 | >PTEN-L318F RADNDKEYL\  | 70    | 1510  |
| >PTEN-L318F YLVLTLTKNDI | 703  | >PTEN-L318F YLVFTLTKNDI | 403   | 300   |
| >PTEN-L318F YLVLTLTKNDI | 87   | >PTEN-L318F YLVFTLTKNDI | 44    | 43    |
| >PTEN-L318F YLVLTLTKNDI | 88   | >PTEN-L318F YLVFTLTKNDI | 41    | 47    |
| >PTEN-L318F YLVLTLTKNDI | 288  | >PTEN-L318F YLVFTLTKNDI | 219   | 69    |
| >PTEN-L318F YLVLTLTKNDI | 147  | >PTEN-L318F YLVFTLTKNDI | 65    | 82    |
| >PTEN-L318F YLVLTLTKNDI | 56   | >PTEN-L318F YLVFTLTKNDI | 35    | 21    |
| >PTEN-L318F YLVLTLTKNDI | 91   | >PTEN-L318F YLVFTLTKNDI | 77    | 14    |
| >PTEN-L318F YLVLTLTKNDI | 525  | >PTEN-L318F YLVFTLTKNDI | 295   | 230   |
| >PTEN-L318F YLVLTLTK    | 297  | >PTEN-L318F YLVFTLTK    | 189   | 108   |
| >PTEN-L318F YLVLTLTKNDI | 8    | >PTEN-L318F YLVFTLTKNDI | 7     | 1     |
| >PTEN-L318F YLVLTLTK    | 398  | >PTEN-L318F YLVFTLTK    | 190   | 208   |
| >PTEN-L318F YLVLTLTK    | 432  | >PTEN-L318F YLVFTLTK    | 198   | 234   |
| >PTEN-L318F YLVLTLTK    | 270  | >PTEN-L318F YLVFTLTK    | 70    | 200   |
| >PTEN-L318F EYLVLTLTK   | 427  | >PTEN-L318F EYLVFTLTK   | 285   | 142   |
| >PTEN-L318F EYLVLTLTK   | 742  | >PTEN-L318F EYLVFTLTK   | 247   | 495   |
| >PTEN-L318F EYLVLTLTK   | 85   | >PTEN-L318F EYLVFTLTK   | 41    | 44    |
| >PTEN-L318F KEYLVLTLT   | 101  | >PTEN-L318F KEYLVFTLT   | 165   | 64    |
| >PTEN-L318F KEYLVLTLT   | 943  | >PTEN-L318F KEYLVFTL    | 242   | 701   |
| >PTEN-L318F KEYLVLTLT   | 154  | >PTEN-L318F KEYLVFTL    | 104   | 50    |



|                       |      |                        |      |      |
|-----------------------|------|------------------------|------|------|
| >PTEN-L318F KEYLVLT   | 191  | >PTEN-L318F KEYLVFTL   | 130  | 61   |
| >PTEN-L318F KEYLVLT   | 13   | >PTEN-L318F KEYLVFTL   | 8    | 5    |
| >PTEN-L318F KEYLVLT   | 16   | >PTEN-L318F KEYLVFTL   | 15   | 1    |
| >PTEN-L318F KEYLVLT   | 69   | >PTEN-L318F KEYLVFTL   | 48   | 21   |
| >PTEN-L318F KEYLVLT   | 249  | >PTEN-L318F KEYLVFTLTK | 241  | 8    |
| >PTEN-L318F KEYLVLT   | 420  | >PTEN-L318F KEYLVFTL   | 304  | 116  |
| >PTEN-L318F KEYLVLT   | 421  | >PTEN-L318F KEYLVFTL   | 102  | 319  |
| >PTEN-L318F KEYLVLT   | 454  | >PTEN-L318F KEYLVFTLTK | 520  | 66   |
| >PTEN-L318F KEYLVLT   | 10   | >PTEN-L318F KEYLVFTL   | 14   | 4    |
| >PTEN-L318F KEYLVLT   | 125  | >PTEN-L318F KEYLVFTLTK | 165  | 40   |
| >PTEN-L318F KEYLVLT   | 658  | >PTEN-L318F KEYLVFTLTK | 194  | 464  |
| >PTEN-L318F ADNDKEYLV | 255  | >PTEN-L318F ADNDKEYLV  | 5206 | 4951 |
| >PTEN-L325\ YLVLT     | 703  | >PTEN-L325\ YLVLT      | 238  | 465  |
| >PTEN-L325\ YLVLT     | 87   | >PTEN-L325\ YLVLT      | 72   | 15   |
| >PTEN-L325\ YLVLT     | 88   | >PTEN-L325\ YLVLT      | 14   | 74   |
| >PTEN-L325\ YLVLT     | 288  | >PTEN-L325\ YLVLT      | 54   | 234  |
| >PTEN-L325\ YLVLT     | 147  | >PTEN-L325\ YLVLT      | 13   | 134  |
| >PTEN-L325\ YLVLT     | 56   | >PTEN-L325\ YLVLT      | 9    | 47   |
| >PTEN-L325\ YLVLT     | 91   | >PTEN-L325\ YLVLT      | 12   | 79   |
| >PTEN-L325\ YLVLT     | 525  | >PTEN-L325\ YLVLT      | 33   | 492  |
| >PTEN-L325\ YLVLT     | 8    | >PTEN-L325\ YLVLT      | 2    | 6    |
| >PTEN-L325\ LTKND     | 81   | >PTEN-L325\ LTKND      | 126  | 45   |
| >PTEN-L325\ LTKND     | 55   | >PTEN-L325\ LTKND      | 53   | 2    |
| >PTEN-L325\ LTKND     | 446  | >PTEN-L325\ LTKND      | 484  | 38   |
| >PTEN-L325\ LTKND     | 853  | >PTEN-L325\ LTKND      | 339  | 514  |
| >PTEN-L325\ LTKND     | 335  | >PTEN-L325\ LTKND      | 246  | 89   |
| >PTEN-L325\ LTKND     | 242  | >PTEN-L325\ LTKND      | 196  | 46   |
| >PTEN-L325\ LTKND     | 906  | >PTEN-L325\ LTKND      | 296  | 610  |
| >PTEN-L325\ LTKND     | 313  | >PTEN-L325\ LTKND      | 723  | 410  |
| >PTEN-L325\ LTKND     | 62   | >PTEN-L325\ LTKND      | 129  | 67   |
| >PTEN-L325\ LTKND     | 261  | >PTEN-L325\ LTKND      | 6697 | 6436 |
| >PTEN-L325\ VLT       | 4175 | >PTEN-L325\ VLT        | 483  | 3692 |
| >PTEN-L325\ VLT       | 1669 | >PTEN-L325\ VLT        | 53   | 1616 |
| >PTEN-L325\ VLT       | 69   | >PTEN-L325\ VLT        | 6    | 63   |
| >PTEN-L325\ VLT       | 2569 | >PTEN-L325\ VLT        | 495  | 2074 |
| >PTEN-L325\ VLT       | 1410 | >PTEN-L325\ VLT        | 265  | 1145 |
| >PTEN-L325\ VLT       | 3414 | >PTEN-L325\ VLT        | 114  | 3300 |
| >PTEN-L345C KLYFT     | 37   | >PTEN-L345C KLYFT      | 411  | 374  |
| >PTEN-L345C KLYFT     | 73   | >PTEN-L345C KLYFT      | 817  | 744  |
| >PTEN-L345C KLYFT     | 7    | >PTEN-L345C KLYFT      | 31   | 24   |
| >PTEN-L345C KLYFT     | 212  | >PTEN-L345C KLYFT      | 16   | 196  |
| >PTEN-L345C KLYFT     | 2    | >PTEN-L345C KLYFT      | 30   | 28   |
| >PTEN-L345C KLYFT     | 6    | >PTEN-L345C KLYFT      | 109  | 103  |

|                         |      |                        |       |       |
|-------------------------|------|------------------------|-------|-------|
| >PTEN-L345C KLYFTKTV    | 7    | >PTEN-L345C KQYFTKTV   | 107   | 100   |
| >PTEN-L345C KLYFTKTV    | 15   | >PTEN-L345C KQYFTKTV   | 5940  | 5925  |
| >PTEN-L345C KLYFTKTV    | 3    | >PTEN-L345C KQYFTKTV   | 1824  | 1821  |
| >PTEN-L345C KLYFTKTV    | 41   | >PTEN-L345C KQYFTKTV   | 124   | 83    |
| >PTEN-L345C KLYFTKTV    | 283  | >PTEN-L345C KQYFTKTV   | 12    | 271   |
| >PTEN-L345C KLYFTKTVEEF | 4246 | >PTEN-L345C KQYFTKTVEE | 265   | 3981  |
| >PTEN-L345C RYFSPNFKVK  | 196  | >PTEN-L345C RYFSPNFKVK | 8264  | 8068  |
| >PTEN-L345C RYFSPNFKVK  | 412  | >PTEN-L345C RYFSPNFKVK | 7299  | 6887  |
| >PTEN-L345C RYFSPNFKVK  | 5    | >PTEN-L345C RYFSPNFKVK | 484   | 479   |
| >PTEN-L345C RYFSPNFKVK  | 448  | >PTEN-L345C RYFSPNFKVK | 1583  | 1135  |
| >PTEN-L345C RYFSPNFKVK  | 342  | >PTEN-L345C RYFSPNFKVK | 508   | 166   |
| >PTEN-L345C RYFSPNFKVK  | 48   | >PTEN-L345C RYFSPNFKVK | 1818  | 1770  |
| >PTEN-L345C RYFSPNFKVK  | 761  | >PTEN-L345C RYFSPNFKVK | 87    | 674   |
| >PTEN-L345C RYFSPNFKVK  | 319  | >PTEN-L345C RYFSPNFKVK | 8821  | 8502  |
| >PTEN-L345C RYFSPNFKVK  | 185  | >PTEN-L345C RYFSPNFKVK | 1154  | 969   |
| >PTEN-L345C VKLYFTKTV   | 222  | >PTEN-L345C VKQYFTKTV  | 1401  | 1179  |
| >PTEN-L345C VKLYFTKTV   | 15   | >PTEN-L345C VKQYFTKTV  | 43    | 28    |
| >PTEN-L345C KVKLYFTKTV  | 150  | >PTEN-L345C KVKQYFTKTV | 135   | 15    |
| >PTEN-L345C KVKLYFTKTV  | 969  | >PTEN-L345C KVKQYFTKTV | 186   | 783   |
| >PTEN-L345C KVKLYFTK    | 81   | >PTEN-L345C KVKQYFTK   | 84    | 3     |
| >PTEN-L345C KVKLYFTK    | 30   | >PTEN-L345C KVKQYFTK   | 42    | 12    |
| >PTEN-L345C KVKLYFTK    | 4    | >PTEN-L345C KVKQYFTK   | 4     | 0     |
| >PTEN-L345C KVKLYFTKTV  | 15   | >PTEN-L345C KVKQYFTKTV | 26    | 11    |
| >PTEN-L345C KVKLYFTK    | 8    | >PTEN-L345C KVKQYFTK   | 11    | 3     |
| >PTEN-L345C KVKLYFTKTV  | 626  | >PTEN-L345C KVKQYFTKTV | 441   | 185   |
| >PTEN-L345C KVKLYFTK    | 485  | >PTEN-L345C KVKQYFTK   | 317   | 168   |
| >PTEN-L345C FKVKLYFTKT  | 224  | >PTEN-L345C FKVKQYFTKT | 310   | 86    |
| >PTEN-L345C FKVKLYFTK   | 199  | >PTEN-L345C FKVKQYFTK  | 147   | 52    |
| >PTEN-L345C FKVKLYFTKT  | 25   | >PTEN-L345C FKVKQYFTKT | 18    | 7     |
| >PTEN-L345C NFKVKLYF    | 240  | >PTEN-L345C NFKVKQYF   | 444   | 204   |
| >PTEN-L345C NFKVKLYF    | 96   | >PTEN-L345C NFKVKQYF   | 133   | 37    |
| >PTEN-L345C NFKVKLYFTK  | 142  | >PTEN-L345C NFKVKQYFTK | 102   | 40    |
| >PTEN-L345C NFKVKLYFTK  | 284  | >PTEN-L345C NFKVKQYFTK | 463   | 179   |
| >PTEN-L345C SPNFKVKLYF  | 136  | >PTEN-L345C SPNFKVKQYF | 155   | 19    |
| >PTEN-L345C SPNFKVKL    | 224  | >PTEN-L345C SPNFKVKQ   | 18718 | 18494 |
| >PTEN-L345C SPNFKVKLYF  | 97   | >PTEN-L345C SPNFKVKQYF | 98    | 1     |
| >PTEN-L345C SPNFKVKLY   | 167  | >PTEN-L345C SPNFKVKQY  | 46    | 121   |
| >PTEN-L345C SPNFKVKLYF  | 833  | >PTEN-L345C SPNFKVKQYF | 432   | 401   |
| >PTEN-L345C FSPNFKVKL   | 122  | >PTEN-L345C FSPNFKVKQ  | 10872 | 10750 |
| >PTEN-L345C FSPNFKVKLY  | 238  | >PTEN-L345C FSPNFKVKQY | 272   | 34    |
| >PTEN-L345C FSPNFKVKLYI | 186  | >PTEN-L345C FSPNFKVKQY | 204   | 18    |
| >PTEN-L345C FSPNFKVKLY  | 138  | >PTEN-L345C FSPNFKVKQY | 294   | 156   |
| >PTEN-L345C FSPNFKVKLY  | 548  | >PTEN-L345C FSPNFKVKQY | 452   | 96    |

|                         |       |                        |       |       |
|-------------------------|-------|------------------------|-------|-------|
| >PTEN-L345C FSPNFKVKLYI | 122   | >PTEN-L345C FSPNFKVKQY | 99    | 23    |
| >PTEN-L345C FSPNFKVKLY  | 493   | >PTEN-L345C FSPNFKVKQY | 130   | 363   |
| >PTEN-L345C FSPNFKVKL   | 7     | >PTEN-L345C FSPNFKVKQ  | 1176  | 1169  |
| >PTEN-L345C FSPNFKVKLY  | 84    | >PTEN-L345C FSPNFKVKQY | 679   | 595   |
| >PTEN-L345C FSPNFKVKLYI | 5     | >PTEN-L345C FSPNFKVKQY | 6     | 1     |
| >PTEN-L345C FSPNFKVKLY  | 191   | >PTEN-L345C FSPNFKVKQY | 358   | 167   |
| >PTEN-L345C YFSPNFKVKL  | 14    | >PTEN-L345C YFSPNFKVKQ | 1849  | 1835  |
| >PTEN-L345C YFSPNFKVKL' | 993   | >PTEN-L345C YFSPNFKVKQ | 370   | 623   |
| >PTEN-L345C YFSPNFKVKL' | 13    | >PTEN-L345C YFSPNFKVKQ | 25    | 12    |
| >PTEN-L345C YFSPNFKVKL' | 449   | >PTEN-L345C YFSPNFKVKQ | 383   | 66    |
| >PTEN-L345C YFSPNFKVKL' | 207   | >PTEN-L345C YFSPNFKVKQ | 339   | 132   |
| >PTEN-L42P- LEGVYRNNI   | 15    | >PTEN-L42P- PEGVYRNNI  | 159   | 144   |
| >PTEN-L42P- LEGVYRNNI   | 457   | >PTEN-L42P- PEGVYRNNI  | 7386  | 6929  |
| >PTEN-L42P- LEGVYRNNI   | 40    | >PTEN-L42P- PEGVYRNNI  | 437   | 397   |
| >PTEN-L42P- RLEGVYRNNI  | 476   | >PTEN-L42P- RPEGVYRNNI | 28263 | 27787 |
| >PTEN-L42P- RLEGVYRNNI  | 466   | >PTEN-L42P- RPEGVYRNNI | 28365 | 27899 |
| >PTEN-L42P- RLEGVYRNNI  | 258   | >PTEN-L42P- RPEGVYRNNI | 36103 | 35845 |
| >PTEN-L42P- RLEGVYRNNI  | 307   | >PTEN-L42P- RPEGVYRNNI | 17434 | 17127 |
| >PTEN-L42P- RLEGVYRNNI  | 21246 | >PTEN-L42P- RPEGVYRNNI | 78    | 21168 |
| >PTEN-L42P- IIAMGFPAER  | 200   | >PTEN-L42P- IIAMGFPAER | 18840 | 18640 |
| >PTEN-L42P- IIAMGFPAER  | 213   | >PTEN-L42P- IIAMGFPAER | 8874  | 8661  |
| >PTEN-L42P- IIAMGFPAER  | 471   | >PTEN-L42P- IIAMGFPAER | 23679 | 23208 |
| >PTEN-L42P- IIAMGFPAER  | 73    | >PTEN-L42P- IIAMGFPAER | 27378 | 27305 |
| >PTEN-L42P- ERLEGVYR    | 115   | >PTEN-L42P- ERPEGVYR   | 233   | 118   |
| >PTEN-L42P- AERLEGVY    | 166   | >PTEN-L42P- AERPEGVY   | 4294  | 4128  |
| >PTEN-L42P- AERLEGVY    | 853   | >PTEN-L42P- AERPEGVY   | 298   | 555   |
| >PTEN-L42P- AERLEGVY    | 1265  | >PTEN-L42P- AERPEGVY   | 374   | 891   |
| >PTEN-L42P- FPAERLEGV   | 65    | >PTEN-L42P- FPAERPEGV  | 862   | 797   |
| >PTEN-L42P- FPAERLEGVY  | 125   | >PTEN-L42P- FPAERPEGVY | 148   | 23    |
| >PTEN-L42P- FPAERLEGV   | 277   | >PTEN-L42P- FPAERPEGV  | 390   | 113   |
| >PTEN-L42P- FPAERLEGV   | 67    | >PTEN-L42P- FPAERPEGV  | 118   | 51    |
| >PTEN-L42P- FPAERLEGV   | 226   | >PTEN-L42P- FPAERPEGV  | 451   | 225   |
| >PTEN-L42P- FPAERLEGVY  | 481   | >PTEN-L42P- FPAERPEGVY | 205   | 276   |
| >PTEN-L42P- FPAERLEGVY  | 17    | >PTEN-L42P- FPAERPEGVY | 20    | 3     |
| >PTEN-L42P- FPAERLEGV   | 250   | >PTEN-L42P- FPAERPEGV  | 326   | 76    |
| >PTEN-L42P- FPAERLEGVY  | 170   | >PTEN-L42P- FPAERPEGVY | 196   | 26    |
| >PTEN-L42P- FPAERLEG    | 462   | >PTEN-L42P- FPAERPEG   | 292   | 170   |
| >PTEN-L42P- FPAERLEGV   | 85    | >PTEN-L42P- FPAERPEGV  | 274   | 189   |
| >PTEN-L42P- FPAERLEGVY  | 29    | >PTEN-L42P- FPAERPEGVY | 134   | 105   |
| >PTEN-L42P- FPAERLEGVY  | 82    | >PTEN-L42P- FPAERPEGVY | 304   | 222   |
| >PTEN-L42P- FPAERLEGVY  | 459   | >PTEN-L42P- FPAERPEGVY | 343   | 116   |
| >PTEN-L42P- GFPAERLEGV  | 291   | >PTEN-L42P- GFPAERPEGV | 641   | 350   |
| >PTEN-L42P- MGFPAERLE   | 257   | >PTEN-L42P- MGFPAERPE  | 614   | 357   |

|                        |       |                        |       |       |
|------------------------|-------|------------------------|-------|-------|
| >PTEN-L42P- MGFPAERLEC | 186   | >PTEN-L42P- MGFPAERPEI | 699   | 513   |
| >PTEN-L42P- MGFPAERLEC | 355   | >PTEN-L42P- MGFPAERPEI | 318   | 37    |
| >PTEN-L42P- MGFPAERL   | 378   | >PTEN-L42P- MGFPAERP   | 17742 | 17364 |
| >PTEN-L42P- MGFPAERLEC | 46    | >PTEN-L42P- MGFPAERPEI | 40    | 6     |
| >PTEN-L42P- MGFPAERL   | 258   | >PTEN-L42P- MGFPAERP   | 24311 | 24053 |
| >PTEN-L42P- AMGFPAERL  | 365   | >PTEN-L42P- AMGFPAERP  | 22067 | 21702 |
| >PTEN-L42P- AMGFPAERL  | 15    | >PTEN-L42P- AMGFPAERP  | 9207  | 9192  |
| >PTEN-L42P- AMGFPAERL  | 454   | >PTEN-L42P- AMGFPAERP  | 23237 | 22783 |
| >PTEN-L42P- AMGFPAERL  | 403   | >PTEN-L42P- AMGFPAERP  | 21823 | 21420 |
| >PTEN-L42P- AMGFPAERL  | 195   | >PTEN-L42P- AMGFPAERP  | 24294 | 24099 |
| >PTEN-L42P- AMGFPAERL  | 29    | >PTEN-L42P- AMGFPAERP  | 23044 | 23015 |
| >PTEN-L42P- IAMGFPAERL | 65    | >PTEN-L42P- IAMGFPAERF | 14046 | 13981 |
| >PTEN-L42P- IAMGFPAERL | 445   | >PTEN-L42P- IAMGFPAERF | 21789 | 21344 |
| >PTEN-L42P- IAMGFPAERL | 19    | >PTEN-L42P- IAMGFPAERF | 13160 | 13141 |
| >PTEN-L42P- IAMGFPAERL | 332   | >PTEN-L42P- IAMGFPAERF | 10553 | 10221 |
| >PTEN-L42P- IAMGFPAERL | 476   | >PTEN-L42P- IAMGFPAERF | 17666 | 17190 |
| >PTEN-L42R- LEGVYRNNI  | 15    | >PTEN-L42R- REGVYRNNI  | 55    | 40    |
| >PTEN-L42R- LEGVYRNNI  | 457   | >PTEN-L42R- REGVYRNNI  | 119   | 338   |
| >PTEN-L42R- LEGVYRNNI  | 40    | >PTEN-L42R- REGVYRNNI  | 10    | 30    |
| >PTEN-L42R- RLEGVYRNNI | 476   | >PTEN-L42R- RREGVYRNNI | 25111 | 24635 |
| >PTEN-L42R- RLEGVYRNNI | 466   | >PTEN-L42R- RREGVYRNNI | 28084 | 27618 |
| >PTEN-L42R- RLEGVYRNNI | 258   | >PTEN-L42R- RREGVYRNNI | 34365 | 34107 |
| >PTEN-L42R- RLEGVYRNNI | 307   | >PTEN-L42R- RREGVYRNNI | 12647 | 12340 |
| >PTEN-L42R- RLEGVYRNNI | 23941 | >PTEN-L42R- RREGVYRNNI | 82    | 23859 |
| >PTEN-L42R- RLEGVYRNN  | 20693 | >PTEN-L42R- RREGVYRNN  | 265   | 20428 |
| >PTEN-L42R- RLEGVYRNNI | 25153 | >PTEN-L42R- RREGVYRNNI | 370   | 24783 |
| >PTEN-L42R- RLEGVYRNNI | 20063 | >PTEN-L42R- RREGVYRNNI | 175   | 19888 |
| >PTEN-L42R- IIAMGFPAER | 200   | >PTEN-L42R- IIAMGFPAER | 25831 | 25631 |
| >PTEN-L42R- IIAMGFPAER | 213   | >PTEN-L42R- IIAMGFPAER | 14707 | 14494 |
| >PTEN-L42R- IIAMGFPAER | 471   | >PTEN-L42R- IIAMGFPAER | 24548 | 24077 |
| >PTEN-L42R- IIAMGFPAER | 73    | >PTEN-L42R- IIAMGFPAER | 25716 | 25643 |
| >PTEN-L42R- IIAMGFPAER | 19244 | >PTEN-L42R- IIAMGFPAER | 478   | 18766 |
| >PTEN-L42R- IIAMGFPAER | 18865 | >PTEN-L42R- IIAMGFPAER | 57    | 18808 |
| >PTEN-L42R- ERLEGVYR   | 115   | >PTEN-L42R- ERREGVYR   | 521   | 406   |
| >PTEN-L42R- AERLEGVY   | 166   | >PTEN-L42R- AERREGVY   | 1546  | 1380  |
| >PTEN-L42R- AERLEGVY   | 853   | >PTEN-L42R- AERREGVY   | 470   | 383   |
| >PTEN-L42R- AERLEGVY   | 1265  | >PTEN-L42R- AERREGVY   | 453   | 812   |
| >PTEN-L42R- FPAERLEGV  | 65    | >PTEN-L42R- FPAERREGV  | 971   | 906   |
| >PTEN-L42R- FPAERLEGVY | 125   | >PTEN-L42R- FPAERREGVY | 92    | 33    |
| >PTEN-L42R- FPAERLEGV  | 277   | >PTEN-L42R- FPAERREGV  | 145   | 132   |
| >PTEN-L42R- FPAERLEGV  | 67    | >PTEN-L42R- FPAERREGV  | 252   | 185   |
| >PTEN-L42R- FPAERLEGV  | 226   | >PTEN-L42R- FPAERREGV  | 23    | 203   |
| >PTEN-L42R- FPAERLEGVY | 481   | >PTEN-L42R- FPAERREGVY | 400   | 81    |

|                        |       |                        |       |       |
|------------------------|-------|------------------------|-------|-------|
| >PTEN-L42R- FPAERLEGVY | 17    | >PTEN-L42R- FPAERREGVY | 28    | 11    |
| >PTEN-L42R- FPAERLEGV  | 250   | >PTEN-L42R- FPAERREGV  | 1117  | 867   |
| >PTEN-L42R- FPAERLEGVY | 170   | >PTEN-L42R- FPAERREGVY | 195   | 25    |
| >PTEN-L42R- FPAERLEG   | 462   | >PTEN-L42R- FPAERREG   | 543   | 81    |
| >PTEN-L42R- FPAERLEGV  | 85    | >PTEN-L42R- FPAERREGV  | 207   | 122   |
| >PTEN-L42R- FPAERLEGVY | 29    | >PTEN-L42R- FPAERREGVY | 38    | 9     |
| >PTEN-L42R- FPAERLEGVY | 82    | >PTEN-L42R- FPAERREGVY | 159   | 77    |
| >PTEN-L42R- FPAERLEGVY | 459   | >PTEN-L42R- FPAERREGVY | 360   | 99    |
| >PTEN-L42R- GFPAERLEGV | 291   | >PTEN-L42R- GFPAERREGV | 1336  | 1045  |
| >PTEN-L42R- MGFPFAERLE | 257   | >PTEN-L42R- MGFPFAERRE | 980   | 723   |
| >PTEN-L42R- MGFPFAERLE | 186   | >PTEN-L42R- MGFPFAERRE | 981   | 795   |
| >PTEN-L42R- MGFPFAERLE | 355   | >PTEN-L42R- MGFPFAERRE | 1559  | 1204  |
| >PTEN-L42R- MGFPFAERL  | 20420 | >PTEN-L42R- MGFPFAERR  | 325   | 20095 |
| >PTEN-L42R- MGFPFAERL  | 21810 | >PTEN-L42R- MGFPFAERR  | 60    | 21750 |
| >PTEN-L42R- MGFPFAERL  | 378   | >PTEN-L42R- MGFPFAERR  | 18902 | 18524 |
| >PTEN-L42R- MGFPFAERLE | 46    | >PTEN-L42R- MGFPFAERRE | 45    | 1     |
| >PTEN-L42R- MGFPFAERL  | 258   | >PTEN-L42R- MGFPFAERR  | 20696 | 20438 |
| >PTEN-L42R- MGFPFAERL  | 30685 | >PTEN-L42R- MGFPFAERR  | 291   | 30394 |
| >PTEN-L42R- AMGFPAERL  | 365   | >PTEN-L42R- AMGFPAERR  | 28051 | 27686 |
| >PTEN-L42R- AMGFPAERL  | 15    | >PTEN-L42R- AMGFPAERR  | 11667 | 11652 |
| >PTEN-L42R- AMGFPAERL  | 454   | >PTEN-L42R- AMGFPAERR  | 26173 | 25719 |
| >PTEN-L42R- AMGFPAERL  | 403   | >PTEN-L42R- AMGFPAERR  | 23497 | 23094 |
| >PTEN-L42R- AMGFPAERL  | 195   | >PTEN-L42R- AMGFPAERR  | 24867 | 24672 |
| >PTEN-L42R- AMGFPAERL  | 29    | >PTEN-L42R- AMGFPAERR  | 20442 | 20413 |
| >PTEN-L42R- IAMGFPAERL | 65    | >PTEN-L42R- IAMGFPAERF | 12157 | 12092 |
| >PTEN-L42R- IAMGFPAERL | 445   | >PTEN-L42R- IAMGFPAERF | 25719 | 25274 |
| >PTEN-L42R- IAMGFPAERL | 31590 | >PTEN-L42R- IAMGFPAERF | 499   | 31091 |
| >PTEN-L42R- IAMGFPAERL | 16530 | >PTEN-L42R- IAMGFPAERF | 80    | 16450 |
| >PTEN-L42R- IAMGFPAERL | 21496 | >PTEN-L42R- IAMGFPAERF | 16    | 21480 |
| >PTEN-L42R- IAMGFPAERL | 19    | >PTEN-L42R- IAMGFPAERF | 7338  | 7319  |
| >PTEN-L42R- IAMGFPAERL | 332   | >PTEN-L42R- IAMGFPAERF | 6427  | 6095  |
| >PTEN-L42R- IAMGFPAERL | 476   | >PTEN-L42R- IAMGFPAERF | 17875 | 17399 |
| >PTEN-L57S- FLDSKHKNHY | 229   | >PTEN-L57S- FSDSKHKNHY | 152   | 77    |
| >PTEN-L57S- FLDSKHKNHY | 86    | >PTEN-L57S- FSDSKHKNHY | 28    | 58    |
| >PTEN-L57S- FLDSKHKNHY | 273   | >PTEN-L57S- FSDSKHKNHY | 21451 | 21178 |
| >PTEN-L57S- FLDSKHKNHY | 226   | >PTEN-L57S- FSDSKHKNHY | 33198 | 32972 |
| >PTEN-L57S- FLDSKHKNHY | 512   | >PTEN-L57S- FSDSKHKNHY | 182   | 330   |
| >PTEN-L57S- FLDSKHKNHY | 688   | >PTEN-L57S- FSDSKHKNHY | 277   | 411   |
| >PTEN-L57S- FLDSKHKNHY | 10316 | >PTEN-L57S- FSDSKHKNHY | 131   | 10185 |
| >PTEN-L57S- FLDSKHKNHY | 6749  | >PTEN-L57S- FSDSKHKNHY | 484   | 6265  |
| >PTEN-L57S- RFLDSKHKNF | 91    | >PTEN-L57S- RFSDSKHKNF | 262   | 171   |
| >PTEN-L57S- RFLDSKHK   | 19    | >PTEN-L57S- RFSDSKHK   | 48    | 29    |
| >PTEN-L57S- RFLDSKHKNF | 227   | >PTEN-L57S- RFSDSKHKNF | 90    | 137   |

|                                      |       |                                     |       |       |
|--------------------------------------|-------|-------------------------------------|-------|-------|
| >PTEN-L57S- <sup>1</sup> RFLDSKHK    | 73    | >PTEN-L57S- <sup>1</sup> RFSDSKHK   | 158   | 85    |
| >PTEN-L57S- <sup>1</sup> RFLDSKHK    | 66    | >PTEN-L57S- <sup>1</sup> RFSDSKHK   | 190   | 124   |
| >PTEN-L57S- <sup>1</sup> VRFLDSKH    | 1832  | >PTEN-L57S- <sup>1</sup> VRFSDSKH   | 440   | 1392  |
| >PTEN-L57S- <sup>1</sup> VRFLDSKHK   | 2070  | >PTEN-L57S- <sup>1</sup> VRFSDSKHK  | 444   | 1626  |
| >PTEN-L57S- <sup>1</sup> VRFLDSKHKN  | 1240  | >PTEN-L57S- <sup>1</sup> VRFSDSKHKN | 340   | 900   |
| >PTEN-L57S- <sup>1</sup> VRFLDSKH    | 482   | >PTEN-L57S- <sup>1</sup> VRFSDSKH   | 598   | 116   |
| >PTEN-L57S- <sup>1</sup> VRFLDSKHK   | 137   | >PTEN-L57S- <sup>1</sup> VRFSDSKHK  | 149   | 12    |
| >PTEN-L57S- <sup>1</sup> VVRFLLDSK   | 644   | >PTEN-L57S- <sup>1</sup> VVRFSDSK   | 302   | 342   |
| >PTEN-L57S- <sup>1</sup> VVRFLLDSKHK | 408   | >PTEN-L57S- <sup>1</sup> VVRFSDSKHK | 562   | 154   |
| >PTEN-L57S- <sup>1</sup> VVRFLLDSK   | 455   | >PTEN-L57S- <sup>1</sup> VVRFSDSK   | 353   | 102   |
| >PTEN-L57S- <sup>1</sup> VVRFLLDSK   | 17    | >PTEN-L57S- <sup>1</sup> VVRFSDSK   | 9     | 8     |
| >PTEN-L57S- <sup>1</sup> VVRFLLDSKHK | 13    | >PTEN-L57S- <sup>1</sup> VVRFSDSKHK | 9     | 4     |
| >PTEN-L57S- <sup>1</sup> VVRFLLDSKH  | 57    | >PTEN-L57S- <sup>1</sup> VVRFSDSKH  | 116   | 59    |
| >PTEN-L57S- <sup>1</sup> DVVRFLLDSK  | 493   | >PTEN-L57S- <sup>1</sup> DVVRFSDSK  | 7328  | 6835  |
| >PTEN-L57S- <sup>1</sup> DVVRFLLDSKH | 129   | >PTEN-L57S- <sup>1</sup> DVVRFSDSKH | 631   | 502   |
| >PTEN-L57S- <sup>1</sup> DVVRFLLDSK  | 18    | >PTEN-L57S- <sup>1</sup> DVVRFSDSK  | 14    | 4     |
| >PTEN-L57S- <sup>1</sup> DVVRFLLDSKH | 102   | >PTEN-L57S- <sup>1</sup> DVVRFSDSKH | 77    | 25    |
| >PTEN-L57S- <sup>1</sup> NIDDVVRF    | 171   | >PTEN-L57S- <sup>1</sup> NIDDVRF    | 8943  | 8772  |
| >PTEN-L57S- <sup>1</sup> NIDDVVRF    | 272   | >PTEN-L57S- <sup>1</sup> NIDDVRF    | 8568  | 8296  |
| >PTEN-L57S- <sup>1</sup> NIDDVVRF    | 30    | >PTEN-L57S- <sup>1</sup> NIDDVRF    | 3549  | 3519  |
| >PTEN-L57S- <sup>1</sup> NIDDVVRF    | 320   | >PTEN-L57S- <sup>1</sup> NIDDVRF    | 18203 | 17883 |
| >PTEN-L57S- <sup>1</sup> NIDDVVRF    | 464   | >PTEN-L57S- <sup>1</sup> NIDDVRF    | 17975 | 17511 |
| >PTEN-L57S- <sup>1</sup> NIDDVVRF    | 324   | >PTEN-L57S- <sup>1</sup> NIDDVRF    | 10980 | 10656 |
| >PTEN-L57W LDSKHKNHY <sup>1</sup>    | 1193  | >PTEN-L57W WDSKHKNHY                | 206   | 987   |
| >PTEN-L57W LDSKHKNHY <sup>1</sup>    | 229   | >PTEN-L57W WDSKHKNHY                | 166   | 63    |
| >PTEN-L57W FLDSKHKNHY                | 86    | >PTEN-L57W FWDSKHKNH                | 123   | 37    |
| >PTEN-L57W FLDSKHKNHY                | 273   | >PTEN-L57W FWDSKHKNH                | 24437 | 24164 |
| >PTEN-L57W FLDSKHKNHY                | 226   | >PTEN-L57W FWDSKHKNH                | 33322 | 33096 |
| >PTEN-L57W FLDSKHKNHY                | 5001  | >PTEN-L57W FWDSKHKNH                | 111   | 4890  |
| >PTEN-L57W FLDSKHKNHY                | 33609 | >PTEN-L57W FWDSKHKNH                | 478   | 33131 |
| >PTEN-L57W RNNIDDVRF                 | 20704 | >PTEN-L57W RNNIDDVRF                | 306   | 20398 |
| >PTEN-L57W RNNIDDVRF                 | 17075 | >PTEN-L57W RNNIDDVRF                | 167   | 16908 |
| >PTEN-L57W RFLDSKHKN <sup>1</sup>    | 91    | >PTEN-L57W RFWDSKHKN                | 26    | 65    |
| >PTEN-L57W RFLDSKHK                  | 19    | >PTEN-L57W RFWDSKHK                 | 83    | 64    |
| >PTEN-L57W RFLDSKHKN <sup>1</sup>    | 227   | >PTEN-L57W RFWDSKHKN                | 73    | 154   |
| >PTEN-L57W RFLDSKHK                  | 73    | >PTEN-L57W RFWDSKHK                 | 26    | 47    |
| >PTEN-L57W RFLDSKHKN <sup>1</sup>    | 761   | >PTEN-L57W RFWDSKHKN                | 143   | 618   |
| >PTEN-L57W RFLDSKHK                  | 66    | >PTEN-L57W RFWDSKHK                 | 31    | 35    |
| >PTEN-L57W VRFLDSKH                  | 482   | >PTEN-L57W VRFWDSKH                 | 411   | 71    |
| >PTEN-L57W VRFLDSKHK                 | 137   | >PTEN-L57W VRFWDSKHK                | 128   | 9     |
| >PTEN-L57W VRFLDSKHKN                | 672   | >PTEN-L57W VRFWDSKHK                | 349   | 323   |
| >PTEN-L57W VVRFLLDSK                 | 644   | >PTEN-L57W VVRFWDSK                 | 475   | 169   |
| >PTEN-L57W VVRFLLDSKHK               | 408   | >PTEN-L57W VVRFWDSKH                | 141   | 267   |

|                         |       |                         |       |       |
|-------------------------|-------|-------------------------|-------|-------|
| >PTEN-L57W VVRFLDSK     | 455   | >PTEN-L57W VVRFWDSK     | 424   | 31    |
| >PTEN-L57W VVRFLDSKHK   | 560   | >PTEN-L57W VVRFWDSKH    | 480   | 80    |
| >PTEN-L57W VVRFLDSK     | 17    | >PTEN-L57W VVRFWDSK     | 13    | 4     |
| >PTEN-L57W VVRFLDSKHK   | 13    | >PTEN-L57W VVRFWDSKH    | 15    | 2     |
| >PTEN-L57W VVRFLDSKH    | 57    | >PTEN-L57W VVRFWDSKH    | 58    | 1     |
| >PTEN-L57W DVVRFLDSK    | 493   | >PTEN-L57W DVVRFWDSK    | 4303  | 3810  |
| >PTEN-L57W DVVRFLDSKH   | 129   | >PTEN-L57W DVVRFWDSK    | 295   | 166   |
| >PTEN-L57W DVVRFLDSK    | 18    | >PTEN-L57W DVVRFWDSK    | 20    | 2     |
| >PTEN-L57W DVVRFLDSKH   | 102   | >PTEN-L57W DVVRFWDSK    | 88    | 14    |
| >PTEN-L57W NIDDVVRFL    | 171   | >PTEN-L57W NIDDVVRFW    | 15644 | 15473 |
| >PTEN-L57W NIDDVVRFL    | 272   | >PTEN-L57W NIDDVVRFW    | 19762 | 19490 |
| >PTEN-L57W NIDDVVRFL    | 30    | >PTEN-L57W NIDDVVRFW    | 13584 | 13554 |
| >PTEN-L57W NIDDVVRFL    | 320   | >PTEN-L57W NIDDVVRFW    | 23107 | 22787 |
| >PTEN-L57W NIDDVVRFL    | 464   | >PTEN-L57W NIDDVVRFW    | 21525 | 21061 |
| >PTEN-L57W NIDDVVRFL    | 324   | >PTEN-L57W NIDDVVRFW    | 16900 | 16576 |
| >PTEN-L57W NNIDDVVRFL   | 22930 | >PTEN-L57W NNIDDVVRFW   | 380   | 22550 |
| >PTEN-L70F- NLCAERHYDT  | 387   | >PTEN-L70F- NFCAERHYDT  | 31483 | 31096 |
| >PTEN-L70F- NLCAERHY    | 884   | >PTEN-L70F- NFCAERHY    | 245   | 639   |
| >PTEN-L70F- NLCAERHY    | 310   | >PTEN-L70F- NFCAERHY    | 1401  | 1091  |
| >PTEN-L70F- NLCAERHY    | 346   | >PTEN-L70F- NFCAERHY    | 6037  | 5691  |
| >PTEN-L70F- KHKNHYKIYN  | 4423  | >PTEN-L70F- KHKNHYKIYN  | 265   | 4158  |
| >PTEN-L70F- KHKNHYKIYN  | 206   | >PTEN-L70F- KHKNHYKIYN  | 10    | 196   |
| >PTEN-L70F- YNLCAERHY   | 880   | >PTEN-L70F- YNFCAERHY   | 469   | 411   |
| >PTEN-L70F- YNLCAERHY   | 1648  | >PTEN-L70F- YNFCAERHY   | 199   | 1449  |
| >PTEN-L70F- YNLCAERHY   | 254   | >PTEN-L70F- YNFCAERHY   | 62    | 192   |
| >PTEN-L70F- IYNLCAERHY  | 43    | >PTEN-L70F- IYNFCAERHY  | 32    | 11    |
| >PTEN-L70F- IYNLCAERHY  | 212   | >PTEN-L70F- IYNFCAERHY  | 171   | 41    |
| >PTEN-L70F- IYNLCAER    | 36    | >PTEN-L70F- IYNFCAER    | 23    | 13    |
| >PTEN-L70F- IYNLCAER    | 62    | >PTEN-L70F- IYNFCAER    | 55    | 7     |
| >PTEN-L70F- IYNLCAER    | 718   | >PTEN-L70F- IYNFCAER    | 227   | 491   |
| >PTEN-L70F- IYNLCAER    | 55    | >PTEN-L70F- IYNFCAER    | 45    | 10    |
| >PTEN-L70F- KIYNLCAER   | 78    | >PTEN-L70F- KIYNFCAER   | 58    | 20    |
| >PTEN-L70F- KIYNLCAERH' | 107   | >PTEN-L70F- KIYNFCAERH' | 92    | 15    |
| >PTEN-L70F- KIYNLCAER   | 157   | >PTEN-L70F- KIYNFCAER   | 52    | 105   |
| >PTEN-L70F- KIYNLCAERH' | 233   | >PTEN-L70F- KIYNFCAERH' | 204   | 29    |
| >PTEN-L70F- KIYNLCAERH' | 59    | >PTEN-L70F- KIYNFCAERH' | 47    | 12    |
| >PTEN-L70F- KIYNLCAER   | 10    | >PTEN-L70F- KIYNFCAER   | 10    | 0     |
| >PTEN-L70F- KIYNLCAERH' | 517   | >PTEN-L70F- KIYNFCAERH' | 438   | 79    |
| >PTEN-L70F- KIYNLCAER   | 119   | >PTEN-L70F- KIYNFCAER   | 50    | 69    |
| >PTEN-L70F- KIYNLCAERH' | 233   | >PTEN-L70F- KIYNFCAERH' | 238   | 5     |
| >PTEN-L70F- KIYNLCAERH' | 76    | >PTEN-L70F- KIYNFCAERH' | 87    | 11    |
| >PTEN-L70F- KIYNLCAERH' | 226   | >PTEN-L70F- KIYNFCAERH' | 101   | 125   |
| >PTEN-L70F- KIYNLCAERH' | 132   | >PTEN-L70F- KIYNFCAERH' | 115   | 17    |

|                         |       |                         |       |       |
|-------------------------|-------|-------------------------|-------|-------|
| >PTEN-L70F-·KIYNLCAERH' | 453   | >PTEN-L70F- KIYNFCAERH' | 467   | 14    |
| >PTEN-L70F-·KIYNLCAER   | 40    | >PTEN-L70F- KIYNFCAER   | 21    | 19    |
| >PTEN-L70F-·YKIYNLCAER  | 884   | >PTEN-L70F- YKIYNFCAER  | 309   | 575   |
| >PTEN-L70F-·YKIYNLCAER  | 710   | >PTEN-L70F- YKIYNFCAER  | 368   | 342   |
| >PTEN-L70F-·YKIYNLCA    | 112   | >PTEN-L70F- YKIYNFCA    | 108   | 4     |
| >PTEN-L70F-·YKIYNLCAE   | 469   | >PTEN-L70F- YKIYNFCAE   | 158   | 311   |
| >PTEN-L70F-·YKIYNLCAER  | 117   | >PTEN-L70F- YKIYNFCAER  | 52    | 65    |
| >PTEN-L70F-·YKIYNLCAER  | 301   | >PTEN-L70F- YKIYNFCAER  | 159   | 142   |
| >PTEN-L70F-·HYKIYNLC    | 616   | >PTEN-L70F- HYKIYNFC    | 195   | 421   |
| >PTEN-L70F-·HYKIYNLCA   | 22    | >PTEN-L70F- HYKIYNFCA   | 39    | 17    |
| >PTEN-L70F-·HYKIYNLCAEI | 120   | >PTEN-L70F- HYKIYNFCAEI | 107   | 13    |
| >PTEN-L70F-·HYKIYNLCAEI | 9     | >PTEN-L70F- HYKIYNFCAEI | 6     | 3     |
| >PTEN-L70F-·HYKIYNLCAEI | 13    | >PTEN-L70F- HYKIYNFCAEI | 9     | 4     |
| >PTEN-L70F-·HYKIYNLCAEI | 272   | >PTEN-L70F- HYKIYNFCAEI | 103   | 169   |
| >PTEN-L70F-·HYKIYNLCAEI | 26    | >PTEN-L70F- HYKIYNFCAEI | 22    | 4     |
| >PTEN-L70F-·NHYKIYNL    | 1274  | >PTEN-L70F- NHYKIYNF    | 66    | 1208  |
| >PTEN-L70F-·NHYKIYNL    | 996   | >PTEN-L70F- NHYKIYNF    | 45    | 951   |
| >PTEN-L70F-·NHYKIYNL    | 145   | >PTEN-L70F- NHYKIYNF    | 1168  | 1023  |
| >PTEN-L70F-·NHYKIYNL    | 67    | >PTEN-L70F- NHYKIYNF    | 2567  | 2500  |
| >PTEN-L70F-·KNHYKIYNLC, | 497   | >PTEN-L70F- KNHYKIYNFC, | 746   | 249   |
| >PTEN-L70F-·KNHYKIYNL   | 1031  | >PTEN-L70F- KNHYKIYNF   | 210   | 821   |
| >PTEN-L70F-·KNHYKIYNL   | 2736  | >PTEN-L70F- KNHYKIYNF   | 119   | 2617  |
| >PTEN-L70F-·HKNHYKIYNL  | 68    | >PTEN-L70F- HKNHYKIYNF  | 6     | 62    |
| >PTEN-L70P-·NLCAERHYD   | 387   | >PTEN-L70P-·NPCAERHYD   | 37412 | 37025 |
| >PTEN-L70P-·NLCAERHY    | 310   | >PTEN-L70P-·NPCAERHY    | 8209  | 7899  |
| >PTEN-L70P-·NLCAERHY    | 346   | >PTEN-L70P-·NPCAERHY    | 14365 | 14019 |
| >PTEN-L70P-·NLCAERHY    | 10298 | >PTEN-L70P-·NPCAERHY    | 214   | 10084 |
| >PTEN-L70P-·NLCAERHYD   | 30953 | >PTEN-L70P-·NPCAERHYD   | 382   | 30571 |
| >PTEN-L70P-·KHKNHYKIYN  | 206   | >PTEN-L70P-·KHKNHYKIYN  | 6656  | 6450  |
| >PTEN-L70P-·YNLCAERHY   | 254   | >PTEN-L70P-·YNPCAERHY   | 2577  | 2323  |
| >PTEN-L70P-·IYNLCAERHY  | 43    | >PTEN-L70P-·IYNPCAERHY  | 68    | 25    |
| >PTEN-L70P-·IYNLCAERHY  | 212   | >PTEN-L70P-·IYNPCAERHY  | 471   | 259   |
| >PTEN-L70P-·IYNLCAER    | 36    | >PTEN-L70P-·IYNPCAER    | 26    | 10    |
| >PTEN-L70P-·IYNLCAER    | 62    | >PTEN-L70P-·IYNPCAER    | 95    | 33    |
| >PTEN-L70P-·IYNLCAER    | 55    | >PTEN-L70P-·IYNPCAER    | 56    | 1     |
| >PTEN-L70P-·KIYNLCAER   | 78    | >PTEN-L70P-·KIYNPCAER   | 57    | 21    |
| >PTEN-L70P-·KIYNLCAERH' | 107   | >PTEN-L70P-·KIYNPCAERH' | 90    | 17    |
| >PTEN-L70P-·KIYNLCAER   | 157   | >PTEN-L70P-·KIYNPCAER   | 141   | 16    |
| >PTEN-L70P-·KIYNLCAERH' | 233   | >PTEN-L70P-·KIYNPCAERH' | 337   | 104   |
| >PTEN-L70P-·KIYNLCAERH' | 59    | >PTEN-L70P-·KIYNPCAERH' | 82    | 23    |
| >PTEN-L70P-·KIYNLCAER   | 10    | >PTEN-L70P-·KIYNPCAER   | 14    | 4     |
| >PTEN-L70P-·KIYNLCAER   | 119   | >PTEN-L70P-·KIYNPCAER   | 393   | 274   |
| >PTEN-L70P-·KIYNLCAERH' | 233   | >PTEN-L70P-·KIYNPCAERH' | 670   | 437   |



|                         |     |                         |       |       |
|-------------------------|-----|-------------------------|-------|-------|
| >PTEN-L70P- KIYNLCAERH' | 76  | >PTEN-L70P- KIYNPCAERH' | 87    | 11    |
| >PTEN-L70P- KIYNLCAERH' | 226 | >PTEN-L70P- KIYNPCAERH' | 148   | 78    |
| >PTEN-L70P- KIYNLCAERH' | 132 | >PTEN-L70P- KIYNPCAERH' | 83    | 49    |
| >PTEN-L70P- KIYNLCAERH' | 453 | >PTEN-L70P- KIYNPCAERH' | 470   | 17    |
| >PTEN-L70P- KIYNLCAER   | 40  | >PTEN-L70P- KIYNPCAER   | 82    | 42    |
| >PTEN-L70P- YKIYNLCA    | 112 | >PTEN-L70P- YKIYNPCA    | 104   | 8     |
| >PTEN-L70P- YKIYNLCAE   | 469 | >PTEN-L70P- YKIYNPCA    | 274   | 195   |
| >PTEN-L70P- YKIYNLCAER  | 117 | >PTEN-L70P- YKIYNPCAER  | 83    | 34    |
| >PTEN-L70P- YKIYNLCAERI | 301 | >PTEN-L70P- YKIYNPCAERI | 183   | 118   |
| >PTEN-L70P- HYKIYNLC    | 616 | >PTEN-L70P- HYKIYNPC    | 258   | 358   |
| >PTEN-L70P- HYKIYNLCA   | 22  | >PTEN-L70P- HYKIYNPCA   | 15    | 7     |
| >PTEN-L70P- HYKIYNLCAEI | 120 | >PTEN-L70P- HYKIYNPCA   | 110   | 10    |
| >PTEN-L70P- HYKIYNLCAEI | 9   | >PTEN-L70P- HYKIYNPCA   | 10    | 1     |
| >PTEN-L70P- HYKIYNLCAEI | 13  | >PTEN-L70P- HYKIYNPCA   | 15    | 2     |
| >PTEN-L70P- HYKIYNLCAEI | 272 | >PTEN-L70P- HYKIYNPCA   | 282   | 10    |
| >PTEN-L70P- HYKIYNLCAEI | 26  | >PTEN-L70P- HYKIYNPCA   | 41    | 15    |
| >PTEN-L70P- NHYKIYNL    | 145 | >PTEN-L70P- NHYKIYNP    | 1759  | 1614  |
| >PTEN-L70P- NHYKIYNLC   | 568 | >PTEN-L70P- NHYKIYNPC   | 371   | 197   |
| >PTEN-L70P- NHYKIYNLCA  | 678 | >PTEN-L70P- NHYKIYNPCA  | 339   | 339   |
| >PTEN-L70P- NHYKIYNL    | 67  | >PTEN-L70P- NHYKIYNP    | 19934 | 19867 |
| >PTEN-L70P- KNHYKIYNLC  | 497 | >PTEN-L70P- KNHYKIYNPC  | 337   | 160   |
| >PTEN-L70P- HKNHYKIYNL  | 68  | >PTEN-L70P- HKNHYKIYNP  | 2358  | 2290  |
| >PTEN-M134 MICAYLLHR    | 315 | >PTEN-M134 LICAYLLHR    | 1392  | 1077  |
| >PTEN-M134 MICAYLLHRG   | 162 | >PTEN-M134 LICAYLLHRG   | 472   | 310   |
| >PTEN-M134 MICAYLLH     | 299 | >PTEN-M134 LICAYLLH     | 2396  | 2097  |
| >PTEN-M134 MICAYLLHR    | 89  | >PTEN-M134 LICAYLLHR    | 619   | 530   |
| >PTEN-M134 MICAYLLHRG   | 49  | >PTEN-M134 LICAYLLHRG   | 207   | 158   |
| >PTEN-M134 MICAYLLHRG   | 77  | >PTEN-M134 LICAYLLHRG   | 599   | 522   |
| >PTEN-M134 MICAYLLHR    | 11  | >PTEN-M134 LICAYLLHR    | 47    | 36    |
| >PTEN-M134 MICAYLLHRG   | 473 | >PTEN-M134 LICAYLLHRG   | 2346  | 1873  |
| >PTEN-M134 MICAYLLHR    | 45  | >PTEN-M134 LICAYLLHR    | 207   | 162   |
| >PTEN-M134 MICAYLLHR    | 28  | >PTEN-M134 LICAYLLHR    | 404   | 376   |
| >PTEN-M134 MICAYLLHRG   | 124 | >PTEN-M134 LICAYLLHRG   | 1818  | 1694  |
| >PTEN-M134 MICAYLLHR    | 28  | >PTEN-M134 LICAYLLHR    | 74    | 46    |
| >PTEN-M134 VMICAYLL     | 248 | >PTEN-M134 VLICAYLL     | 681   | 433   |
| >PTEN-M134 VMICAYLL     | 15  | >PTEN-M134 VLICAYLL     | 18    | 3     |
| >PTEN-M134 VMICAYLL     | 9   | >PTEN-M134 VLICAYLL     | 9     | 0     |
| >PTEN-M134 VMICAYLL     | 27  | >PTEN-M134 VLICAYLL     | 38    | 11    |
| >PTEN-M134 VMICAYLL     | 39  | >PTEN-M134 VLICAYLL     | 71    | 32    |
| >PTEN-M134 VMICAYLL     | 10  | >PTEN-M134 VLICAYLL     | 15    | 5     |
| >PTEN-M134 VMICAYLL     | 6   | >PTEN-M134 VLICAYLL     | 8     | 2     |
| >PTEN-M134 VMICAYLL     | 58  | >PTEN-M134 VLICAYLL     | 68    | 10    |
| >PTEN-M134 VMICAYLL     | 136 | >PTEN-M134 VLICAYLL     | 236   | 100   |

|                       |     |                        |      |      |
|-----------------------|-----|------------------------|------|------|
| >PTEN-M134 VMICAYLL   | 16  | >PTEN-M134 VLICAYLL    | 10   | 6    |
| >PTEN-M134 VMICAYLLHR | 166 | >PTEN-M134 VLICAYLLHR  | 207  | 41   |
| >PTEN-M134 VMICAYLLHR | 52  | >PTEN-M134 VLICAYLLHR  | 91   | 39   |
| >PTEN-M134 VMICAYLL   | 100 | >PTEN-M134 VLICAYLL    | 195  | 95   |
| >PTEN-M134 VMICAYLLH  | 46  | >PTEN-M134 VLICAYLLH   | 216  | 170  |
| >PTEN-M134 VMICAYLLHR | 44  | >PTEN-M134 VLICAYLLHR  | 104  | 60   |
| >PTEN-M134 VMICAYLLHR | 237 | >PTEN-M134 VLICAYLLHR  | 452  | 215  |
| >PTEN-M134 VMICAYLLHR | 119 | >PTEN-M134 VLICAYLLHR  | 313  | 194  |
| >PTEN-M134 VMICAYLL   | 126 | >PTEN-M134 VLICAYLL    | 1344 | 1218 |
| >PTEN-M134 VMICAYLLHR | 434 | >PTEN-M134 VLICAYLLHR  | 4441 | 4007 |
| >PTEN-M134 VMICAYLLHR | 70  | >PTEN-M134 VLICAYLLHR  | 89   | 19   |
| >PTEN-M134 VMICAYLLHR | 58  | >PTEN-M134 VLICAYLLHR  | 134  | 76   |
| >PTEN-M134 GVMICAYL   | 66  | >PTEN-M134 GVLICAYL    | 249  | 183  |
| >PTEN-M134 GVMICAYLL  | 57  | >PTEN-M134 GVLICAYLL   | 231  | 174  |
| >PTEN-M134 GVMICAYL   | 20  | >PTEN-M134 GVLICAYL    | 286  | 266  |
| >PTEN-M134 GVMICAYLL  | 18  | >PTEN-M134 GVLICAYLL   | 286  | 268  |
| >PTEN-M134 GVMICAYL   | 260 | >PTEN-M134 GVLICAYL    | 2040 | 1780 |
| >PTEN-M134 GVMICAYL   | 51  | >PTEN-M134 GVLICAYL    | 101  | 50   |
| >PTEN-M134 GVMICAYLL  | 112 | >PTEN-M134 GVLICAYLL   | 229  | 117  |
| >PTEN-M134 GVMICAYL   | 844 | >PTEN-M134 GVLICAYL    | 386  | 458  |
| >PTEN-M134 GVMICAYL   | 346 | >PTEN-M134 GVLICAYL    | 484  | 138  |
| >PTEN-M134 GVMICAYLL  | 327 | >PTEN-M134 GVLICAYLL   | 511  | 184  |
| >PTEN-M134 GVMICAYL   | 403 | >PTEN-M134 GVLICAYL    | 1230 | 827  |
| >PTEN-M134 GVMICAYLLH | 52  | >PTEN-M134 GVLICAYLLHF | 220  | 168  |
| >PTEN-M134 GVMICAYLLH | 38  | >PTEN-M134 GVLICAYLLHF | 54   | 16   |
| >PTEN-M134 GVMICAYLLH | 177 | >PTEN-M134 GVLICAYLLHF | 888  | 711  |
| >PTEN-M134 GVMICAYL   | 485 | >PTEN-M134 GVLICAYL    | 6188 | 5703 |
| >PTEN-M134 GVMICAYLL  | 222 | >PTEN-M134 GVLICAYLL   | 278  | 56   |
| >PTEN-M134 GVMICAYLLH | 198 | >PTEN-M134 GVLICAYLLHF | 242  | 44   |
| >PTEN-M134 GVMICAYLLH | 132 | >PTEN-M134 GVLICAYLLHF | 96   | 36   |
| >PTEN-M134 TGVMICAYL  | 267 | >PTEN-M134 TGVVICAYL   | 271  | 4    |
| >PTEN-M134 TGVMICAY   | 166 | >PTEN-M134 TGVVICAY    | 254  | 88   |
| >PTEN-M134 RTGVMICAYL | 583 | >PTEN-M134 RTGVVICAYL  | 400  | 183  |
| >PTEN-M134 RTGVMICAYL | 532 | >PTEN-M134 RTGVVICAYL  | 442  | 90   |
| >PTEN-M134 RTGVMICAY  | 243 | >PTEN-M134 RTGVVICAY   | 250  | 7    |
| >PTEN-M134 RTGVMICAYL | 398 | >PTEN-M134 RTGVVICAYL  | 795  | 397  |
| >PTEN-M134 RTGVMICAY  | 169 | >PTEN-M134 RTGVVICAY   | 141  | 28   |
| >PTEN-M134 RTGVMICAYL | 114 | >PTEN-M134 RTGVVICAYLL | 123  | 9    |
| >PTEN-M134 RTGVMICAYL | 74  | >PTEN-M134 RTGVVICAYL  | 111  | 37   |
| >PTEN-M134 RTGVMICAY  | 228 | >PTEN-M134 RTGVVICAY   | 144  | 84   |
| >PTEN-M134 RTGVMICAY  | 70  | >PTEN-M134 RTGVVICAY   | 67   | 3    |
| >PTEN-M134 RTGVMICAY  | 13  | >PTEN-M134 RTGVVICAY   | 14   | 1    |
| >PTEN-M134 RTGVMICAYL | 12  | >PTEN-M134 RTGVVICAYL  | 15   | 3    |

|                       |      |                        |       |       |
|-----------------------|------|------------------------|-------|-------|
| >PTEN-M134 RTGVMICAYL | 14   | >PTEN-M134 RTGVLICAYLL | 17    | 3     |
| >PTEN-M134 RTGVMICAY  | 205  | >PTEN-M134 RTGVLICAY   | 102   | 103   |
| >PTEN-M134 RTGVMICAYL | 438  | >PTEN-M134 RTGVLICAYL  | 321   | 117   |
| >PTEN-M134 RTGVMICAYL | 428  | >PTEN-M134 RTGVLICAYLL | 277   | 151   |
| >PTEN-M134 RTGVMICAYL | 90   | >PTEN-M134 RTGVLICAYL  | 101   | 11    |
| >PTEN-M134 RTGVMICAYL | 56   | >PTEN-M134 RTGVLICAYLL | 56    | 0     |
| >PTEN-M134 RTGVMICAY  | 378  | >PTEN-M134 RTGVLICAY   | 321   | 57    |
| >PTEN-M134 RTGVMICAYL | 72   | >PTEN-M134 RTGVLICAYL  | 92    | 20    |
| >PTEN-M134 RTGVMICAYL | 235  | >PTEN-M134 RTGVLICAYLL | 211   | 24    |
| >PTEN-M134 RTGVMICAYL | 394  | >PTEN-M134 RTGVLICAYLL | 462   | 68    |
| >PTEN-M134 GRTGVMICA' | 113  | >PTEN-M134 GRTGVLICAY  | 71    | 42    |
| >PTEN-M134 GRTGVMICA' | 258  | >PTEN-M134 GRTGVLICAYL | 224   | 34    |
| >PTEN-M134 GRTGVMICA' | 334  | >PTEN-M134 GRTGVLICAYL | 304   | 30    |
| >PTEN-M134 GRTGVMICA' | 78   | >PTEN-M134 GRTGVLICAYL | 47    | 31    |
| >PTEN-M134 KGRTGVM    | 29   | >PTEN-M134 KGRTGVLI    | 18    | 11    |
| >PTEN-M134 KGRTGVMIC  | 365  | >PTEN-M134 KGRTGVLIC   | 660   | 295   |
| >PTEN-M134 KGRTGVMIC/ | 21   | >PTEN-M134 KGRTGVLICA  | 25    | 4     |
| >PTEN-M134 KGRTGVMIC/ | 38   | >PTEN-M134 KGRTGVLICA' | 52    | 14    |
| >PTEN-M134 KGRTGVMIC/ | 314  | >PTEN-M134 KGRTGVLICA' | 312   | 2     |
| >PTEN-M134 KGRTGVMIC/ | 165  | >PTEN-M134 KGRTGVLICA' | 145   | 20    |
| >PTEN-M134 KGRTGVMIC/ | 174  | >PTEN-M134 KGRTGVLICA' | 227   | 53    |
| >PTEN-M134 KGRTGVMIC/ | 135  | >PTEN-M134 KGRTGVLICA' | 125   | 10    |
| >PTEN-M134 GKRTGVM    | 308  | >PTEN-M134 GKRTGVLI    | 787   | 479   |
| >PTEN-M134 AGKRTGVM   | 861  | >PTEN-M134 AGKRTGVLI   | 456   | 405   |
| >PTEN-M134 KAGKRTGVM  | 135  | >PTEN-M134 KAGKRTGVLI  | 134   | 1     |
| >PTEN-M134 MICAYLLH   | 784  | >PTEN-M134 RICAYLLH    | 431   | 353   |
| >PTEN-M134 MICAYLLHR  | 315  | >PTEN-M134 RICAYLLHR   | 171   | 144   |
| >PTEN-M134 MICAYLLHRG | 162  | >PTEN-M134 RICAYLLHRGI | 105   | 57    |
| >PTEN-M134 MICAYLLH   | 299  | >PTEN-M134 RICAYLLH    | 345   | 46    |
| >PTEN-M134 MICAYLLHR  | 89   | >PTEN-M134 RICAYLLHR   | 102   | 13    |
| >PTEN-M134 MICAYLLHRG | 49   | >PTEN-M134 RICAYLLHRGI | 46    | 3     |
| >PTEN-M134 MICAYLLHR  | 2180 | >PTEN-M134 RICAYLLHR   | 499   | 1681  |
| >PTEN-M134 MICAYLLHRG | 77   | >PTEN-M134 RICAYLLHRGI | 20    | 57    |
| >PTEN-M134 MICAYLLHR  | 11   | >PTEN-M134 RICAYLLHR   | 9     | 2     |
| >PTEN-M134 MICAYLLHRG | 473  | >PTEN-M134 RICAYLLHRGI | 211   | 262   |
| >PTEN-M134 MICAYLLHR  | 45   | >PTEN-M134 RICAYLLHR   | 1081  | 1036  |
| >PTEN-M134 MICAYLLHR  | 28   | >PTEN-M134 RICAYLLHR   | 853   | 825   |
| >PTEN-M134 MICAYLLHRG | 124  | >PTEN-M134 RICAYLLHRGI | 5153  | 5029  |
| >PTEN-M134 MICAYLLHR  | 28   | >PTEN-M134 RICAYLLHR   | 17    | 11    |
| >PTEN-M134 MICAYLLHRG | 1168 | >PTEN-M134 RICAYLLHRGI | 412   | 756   |
| >PTEN-M134 VMICAYLL   | 248  | >PTEN-M134 VRICAYLL    | 2210  | 1962  |
| >PTEN-M134 VMICAYLL   | 15   | >PTEN-M134 VRICAYLL    | 19517 | 19502 |
| >PTEN-M134 VMICAYLL   | 9    | >PTEN-M134 VRICAYLL    | 8419  | 8410  |

|                       |       |                        |       |       |
|-----------------------|-------|------------------------|-------|-------|
| >PTEN-M134 VMICAYLL   | 27    | >PTEN-M134 VRICAYLL    | 14996 | 14969 |
| >PTEN-M134 VMICAYLL   | 39    | >PTEN-M134 VRICAYLL    | 9953  | 9914  |
| >PTEN-M134 VMICAYLL   | 10    | >PTEN-M134 VRICAYLL    | 19532 | 19522 |
| >PTEN-M134 VMICAYLL   | 6     | >PTEN-M134 VRICAYLL    | 14892 | 14886 |
| >PTEN-M134 VMICAYLL   | 58    | >PTEN-M134 VRICAYLL    | 23169 | 23111 |
| >PTEN-M134 VMICAYLL   | 136   | >PTEN-M134 VRICAYLL    | 23142 | 23006 |
| >PTEN-M134 VMICAYLL   | 16    | >PTEN-M134 VRICAYLL    | 27622 | 27606 |
| >PTEN-M134 VMICAYLLHR | 166   | >PTEN-M134 VRICAYLLHR  | 5274  | 5108  |
| >PTEN-M134 VMICAYLLHR | 52    | >PTEN-M134 VRICAYLLHR  | 3842  | 3790  |
| >PTEN-M134 VMICAYLL   | 100   | >PTEN-M134 VRICAYLL    | 1154  | 1054  |
| >PTEN-M134 VMICAYLLH  | 46    | >PTEN-M134 VRICAYLLH   | 5420  | 5374  |
| >PTEN-M134 VMICAYLLHR | 44    | >PTEN-M134 VRICAYLLHR  | 532   | 488   |
| >PTEN-M134 VMICAYLLHR | 237   | >PTEN-M134 VRICAYLLHR  | 2766  | 2529  |
| >PTEN-M134 VMICAYLLHR | 119   | >PTEN-M134 VRICAYLLHR  | 3512  | 3393  |
| >PTEN-M134 VMICAYLL   | 126   | >PTEN-M134 VRICAYLL    | 359   | 233   |
| >PTEN-M134 VMICAYLLHR | 434   | >PTEN-M134 VRICAYLLHR  | 1191  | 757   |
| >PTEN-M134 VMICAYLL   | 11619 | >PTEN-M134 VRICAYLL    | 142   | 11477 |
| >PTEN-M134 VMICAYLLH  | 15476 | >PTEN-M134 VRICAYLLH   | 334   | 15142 |
| >PTEN-M134 VMICAYLLHR | 23711 | >PTEN-M134 VRICAYLLHR  | 142   | 23569 |
| >PTEN-M134 VMICAYLL   | 1077  | >PTEN-M134 VRICAYLL    | 354   | 723   |
| >PTEN-M134 VMICAYLL   | 15465 | >PTEN-M134 VRICAYLL    | 224   | 15241 |
| >PTEN-M134 VMICAYLLHR | 21699 | >PTEN-M134 VRICAYLLHR  | 310   | 21389 |
| >PTEN-M134 VMICAYLLHR | 18805 | >PTEN-M134 VRICAYLLHR  | 139   | 18666 |
| >PTEN-M134 VMICAYLLHR | 70    | >PTEN-M134 VRICAYLLHR  | 3286  | 3216  |
| >PTEN-M134 VMICAYLLHR | 58    | >PTEN-M134 VRICAYLLHR  | 342   | 284   |
| >PTEN-M134 GVMICAYL   | 66    | >PTEN-M134 GVRICAYL    | 9655  | 9589  |
| >PTEN-M134 GVMICAYLL  | 57    | >PTEN-M134 GVRICAYLL   | 8797  | 8740  |
| >PTEN-M134 GVMICAYL   | 20    | >PTEN-M134 GVRICAYL    | 1424  | 1404  |
| >PTEN-M134 GVMICAYLL  | 18    | >PTEN-M134 GVRICAYLL   | 1388  | 1370  |
| >PTEN-M134 GVMICAYL   | 260   | >PTEN-M134 GVRICAYL    | 1921  | 1661  |
| >PTEN-M134 GVMICAYL   | 51    | >PTEN-M134 GVRICAYL    | 5329  | 5278  |
| >PTEN-M134 GVMICAYLL  | 112   | >PTEN-M134 GVRICAYLL   | 9696  | 9584  |
| >PTEN-M134 GVMICAYL   | 346   | >PTEN-M134 GVRICAYL    | 11091 | 10745 |
| >PTEN-M134 GVMICAYLL  | 327   | >PTEN-M134 GVRICAYLL   | 11214 | 10887 |
| >PTEN-M134 GVMICAYL   | 403   | >PTEN-M134 GVRICAYL    | 18215 | 17812 |
| >PTEN-M134 GVMICAYLLH | 52    | >PTEN-M134 GVRICAYLLHI | 3709  | 3657  |
| >PTEN-M134 GVMICAYL   | 7566  | >PTEN-M134 GVRICAYL    | 182   | 7384  |
| >PTEN-M134 GVMICAYLLH | 7431  | >PTEN-M134 GVRICAYLLHI | 237   | 7194  |
| >PTEN-M134 GVMICAYLLH | 38    | >PTEN-M134 GVRICAYLLHI | 25    | 13    |
| >PTEN-M134 GVMICAYLLH | 177   | >PTEN-M134 GVRICAYLLHI | 1870  | 1693  |
| >PTEN-M134 GVMICAYL   | 485   | >PTEN-M134 GVRICAYL    | 13053 | 12568 |
| >PTEN-M134 GVMICAYLL  | 222   | >PTEN-M134 GVRICAYLL   | 106   | 116   |
| >PTEN-M134 GVMICAYLLH | 198   | >PTEN-M134 GVRICAYLLHI | 711   | 513   |

|                       |       |                        |      |       |
|-----------------------|-------|------------------------|------|-------|
| >PTEN-M134 GVMICAYLLH | 132   | >PTEN-M134 GVRICAYLLHI | 422  | 290   |
| >PTEN-M134 TGVMICAYL  | 267   | >PTEN-M134 TGVRICAYL   | 237  | 30    |
| >PTEN-M134 TGVMICAY   | 166   | >PTEN-M134 TGVRICAY    | 455  | 289   |
| >PTEN-M134 RTGVMICA   | 980   | >PTEN-M134 RTGVRICA    | 469  | 511   |
| >PTEN-M134 RTGVMICAYL | 550   | >PTEN-M134 RTGVRICAYL  | 346  | 204   |
| >PTEN-M134 RTGVMICAY  | 243   | >PTEN-M134 RTGVRICAY   | 475  | 232   |
| >PTEN-M134 RTGVMICAYL | 398   | >PTEN-M134 RTGVRICAYL  | 596  | 198   |
| >PTEN-M134 RTGVMICAY  | 169   | >PTEN-M134 RTGVRICAY   | 625  | 456   |
| >PTEN-M134 RTGVMICAYL | 114   | >PTEN-M134 RTGVRICAYLI | 238  | 124   |
| >PTEN-M134 RTGVMICAYL | 74    | >PTEN-M134 RTGVRICAYL  | 209  | 135   |
| >PTEN-M134 RTGVMICAY  | 228   | >PTEN-M134 RTGVRICAY   | 372  | 144   |
| >PTEN-M134 RTGVMICAY  | 70    | >PTEN-M134 RTGVRICAY   | 77   | 7     |
| >PTEN-M134 RTGVMICAY  | 13    | >PTEN-M134 RTGVRICAY   | 11   | 2     |
| >PTEN-M134 RTGVMICAYL | 12    | >PTEN-M134 RTGVRICAYL  | 15   | 3     |
| >PTEN-M134 RTGVMICAYL | 14    | >PTEN-M134 RTGVRICAYLI | 13   | 1     |
| >PTEN-M134 RTGVMICAY  | 205   | >PTEN-M134 RTGVRICAY   | 1097 | 892   |
| >PTEN-M134 RTGVMICAYL | 438   | >PTEN-M134 RTGVRICAYL  | 936  | 498   |
| >PTEN-M134 RTGVMICAYL | 428   | >PTEN-M134 RTGVRICAYLI | 1264 | 836   |
| >PTEN-M134 RTGVMICAYL | 90    | >PTEN-M134 RTGVRICAYL  | 255  | 165   |
| >PTEN-M134 RTGVMICAYL | 56    | >PTEN-M134 RTGVRICAYLI | 123  | 67    |
| >PTEN-M134 RTGVMICAY  | 378   | >PTEN-M134 RTGVRICAY   | 1056 | 678   |
| >PTEN-M134 RTGVMICAYL | 72    | >PTEN-M134 RTGVRICAYL  | 80   | 8     |
| >PTEN-M134 RTGVMICAYL | 235   | >PTEN-M134 RTGVRICAYLI | 478  | 243   |
| >PTEN-M134 RTGVMICAYL | 394   | >PTEN-M134 RTGVRICAYLI | 381  | 13    |
| >PTEN-M134 GRTGVMICA  | 756   | >PTEN-M134 GRTGVRICA   | 439  | 317   |
| >PTEN-M134 GRTGVMICA' | 113   | >PTEN-M134 GRTGVRICAY  | 97   | 16    |
| >PTEN-M134 GRTGVMICA' | 258   | >PTEN-M134 GRTGVRICAY  | 198  | 60    |
| >PTEN-M134 GRTGVMICA' | 334   | >PTEN-M134 GRTGVRICAY  | 220  | 114   |
| >PTEN-M134 GRTGVMICA' | 78    | >PTEN-M134 GRTGVRICAY  | 40   | 38    |
| >PTEN-M134 KGRTGVM    | 29    | >PTEN-M134 KGRTGVRI    | 42   | 13    |
| >PTEN-M134 KGRTGVMIC  | 365   | >PTEN-M134 KGRTGVRIC   | 1765 | 1400  |
| >PTEN-M134 KGRTGVMIC/ | 21    | >PTEN-M134 KGRTGVRICA  | 23   | 2     |
| >PTEN-M134 KGRTGVMIC/ | 38    | >PTEN-M134 KGRTGVRICA  | 56   | 18    |
| >PTEN-M134 KGRTGVMIC/ | 314   | >PTEN-M134 KGRTGVRICA  | 442  | 128   |
| >PTEN-M134 KGRTGVMIC/ | 165   | >PTEN-M134 KGRTGVRICA  | 224  | 59    |
| >PTEN-M134 KGRTGVMIC/ | 174   | >PTEN-M134 KGRTGVRICA  | 263  | 89    |
| >PTEN-M134 KGRTGVMIC/ | 135   | >PTEN-M134 KGRTGVRICA  | 171  | 36    |
| >PTEN-M134 GKGRTGVM   | 308   | >PTEN-M134 GKGRTGVRI   | 1153 | 845   |
| >PTEN-M134 KAGKGRTGV  | 29390 | >PTEN-M134 KAGKGRTGV   | 205  | 29185 |
| >PTEN-M134 KAGKGRTGV  | 135   | >PTEN-M134 KAGKGRTGV   | 213  | 78    |
| >PTEN-M198 MMFETIPM   | 270   | >PTEN-M198 KMFETIPM    | 626  | 356   |
| >PTEN-M198 MMFETIPMF  | 183   | >PTEN-M198 KMFETIPMF   | 285  | 102   |
| >PTEN-M198 MMFETIPM   | 8     | >PTEN-M198 KMFETIPM    | 10   | 2     |

|                      |      |                       |      |      |
|----------------------|------|-----------------------|------|------|
| >PTEN-M198 MMFETIPMF | 34   | >PTEN-M198 KMFETIPMF  | 58   | 24   |
| >PTEN-M198 MMFETIPMF | 57   | >PTEN-M198 KMFETIPMFS | 113  | 56   |
| >PTEN-M198 MMFETIPMF | 136  | >PTEN-M198 KMFETIPMFS | 265  | 129  |
| >PTEN-M198 MMFETIPM  | 8    | >PTEN-M198 KMFETIPM   | 22   | 14   |
| >PTEN-M198 MMFETIPMF | 148  | >PTEN-M198 KMFETIPMF  | 530  | 382  |
| >PTEN-M198 MMFETIPMF | 64   | >PTEN-M198 KMFETIPMFS | 117  | 53   |
| >PTEN-M198 MMFETIPMF | 99   | >PTEN-M198 KMFETIPMFS | 346  | 247  |
| >PTEN-M198 MMFETIPM  | 10   | >PTEN-M198 KMFETIPM   | 26   | 16   |
| >PTEN-M198 MMFETIPMF | 137  | >PTEN-M198 KMFETIPMF  | 425  | 288  |
| >PTEN-M198 MMFETIPMF | 142  | >PTEN-M198 KMFETIPMFS | 243  | 101  |
| >PTEN-M198 MMFETIPMF | 195  | >PTEN-M198 KMFETIPMFS | 653  | 458  |
| >PTEN-M198 MMFETIPM  | 12   | >PTEN-M198 KMFETIPM   | 13   | 1    |
| >PTEN-M198 MMFETIPMF | 21   | >PTEN-M198 KMFETIPMF  | 26   | 5    |
| >PTEN-M198 MMFETIPMF | 384  | >PTEN-M198 KMFETIPMFS | 671  | 287  |
| >PTEN-M198 MMFETIPMF | 155  | >PTEN-M198 KMFETIPMFS | 166  | 11   |
| >PTEN-M198 MMFETIPM  | 2    | >PTEN-M198 KMFETIPM   | 3    | 1    |
| >PTEN-M198 MMFETIPMF | 2    | >PTEN-M198 KMFETIPMF  | 3    | 1    |
| >PTEN-M198 MMFETIPMF | 4    | >PTEN-M198 KMFETIPMFS | 6    | 2    |
| >PTEN-M198 MMFETIPMF | 7    | >PTEN-M198 KMFETIPMFS | 10   | 3    |
| >PTEN-M198 MMFETIPM  | 7    | >PTEN-M198 KMFETIPM   | 7    | 0    |
| >PTEN-M198 MMFETIPMF | 334  | >PTEN-M198 KMFETIPMF  | 264  | 70   |
| >PTEN-M198 MMFETIPMF | 217  | >PTEN-M198 KMFETIPMFS | 165  | 52   |
| >PTEN-M198 MMFETIPMF | 300  | >PTEN-M198 KMFETIPMFS | 212  | 88   |
| >PTEN-M198 MMFETIPM  | 11   | >PTEN-M198 KMFETIPM   | 12   | 1    |
| >PTEN-M198 MMFETIPMF | 52   | >PTEN-M198 KMFETIPMF  | 47   | 5    |
| >PTEN-M198 MMFETIPMF | 44   | >PTEN-M198 KMFETIPMFS | 40   | 4    |
| >PTEN-M198 MMFETIPMF | 186  | >PTEN-M198 KMFETIPMFS | 164  | 22   |
| >PTEN-M198 MMFETIPM  | 16   | >PTEN-M198 KMFETIPM   | 55   | 39   |
| >PTEN-M198 MMFETIPM  | 5    | >PTEN-M198 KMFETIPM   | 25   | 20   |
| >PTEN-M198 MMFETIPMF | 24   | >PTEN-M198 KMFETIPMF  | 177  | 153  |
| >PTEN-M198 MMFETIPMF | 38   | >PTEN-M198 KMFETIPMFS | 255  | 217  |
| >PTEN-M198 MMFETIPMF | 100  | >PTEN-M198 KMFETIPMFS | 854  | 754  |
| >PTEN-M198 MMFETIPMF | 60   | >PTEN-M198 KMFETIPMF  | 139  | 79   |
| >PTEN-M198 MMFETIPMF | 50   | >PTEN-M198 KMFETIPMF  | 126  | 76   |
| >PTEN-M198 MMFETIPM  | 472  | >PTEN-M198 KMFETIPM   | 4221 | 3749 |
| >PTEN-M198 MMFETIPMF | 61   | >PTEN-M198 KMFETIPMF  | 712  | 651  |
| >PTEN-M198 MMFETIPM  | 391  | >PTEN-M198 KMFETIPM   | 78   | 313  |
| >PTEN-M198 MMFETIPMF | 468  | >PTEN-M198 KMFETIPMFS | 100  | 368  |
| >PTEN-M198 MMFETIPMF | 963  | >PTEN-M198 KMFETIPMF  | 393  | 570  |
| >PTEN-M198 MMFETIPM  | 88   | >PTEN-M198 KMFETIPM   | 14   | 74   |
| >PTEN-M198 MMFETIPMF | 76   | >PTEN-M198 KMFETIPMF  | 13   | 63   |
| >PTEN-M198 MMFETIPMF | 2240 | >PTEN-M198 KMFETIPMFS | 256  | 1984 |
| >PTEN-M198 MMFETIPM  | 27   | >PTEN-M198 KMFETIPM   | 1027 | 1000 |

|                       |      |                        |       |       |
|-----------------------|------|------------------------|-------|-------|
| >PTEN-M198 MMFETIPM   | 28   | >PTEN-M198 KMFETIPM    | 38    | 10    |
| >PTEN-M198 MMFETIPMF  | 29   | >PTEN-M198 KMFETIPMF   | 40    | 11    |
| >PTEN-M198 MMFETIPMF  | 380  | >PTEN-M198 KMFETIPMFS  | 744   | 364   |
| >PTEN-M198 MMFETIPM   | 111  | >PTEN-M198 KMFETIPM    | 604   | 493   |
| >PTEN-M198 MMFETIPMF  | 86   | >PTEN-M198 KMFETIPMF   | 446   | 360   |
| >PTEN-M198 MMFETIPM   | 4    | >PTEN-M198 KMFETIPM    | 5     | 1     |
| >PTEN-M198 MMFETIPMF  | 2    | >PTEN-M198 KMFETIPMF   | 2     | 0     |
| >PTEN-M198 MMFETIPMF  | 283  | >PTEN-M198 KMFETIPMFS  | 370   | 87    |
| >PTEN-M198 MMFETIPM   | 163  | >PTEN-M198 KMFETIPM    | 92    | 71    |
| >PTEN-M198 MMFETIPMF  | 21   | >PTEN-M198 KMFETIPMF   | 17    | 4     |
| >PTEN-M198 MMFETIPM   | 16   | >PTEN-M198 KMFETIPM    | 473   | 457   |
| >PTEN-M198 MMFETIPMF  | 79   | >PTEN-M198 KMFETIPMF   | 4628  | 4549  |
| >PTEN-M198 MMFETIPM   | 35   | >PTEN-M198 KMFETIPM    | 394   | 359   |
| >PTEN-M198 MMFETIPM   | 1120 | >PTEN-M198 KMFETIPM    | 277   | 843   |
| >PTEN-M198 MMFETIPMF  | 82   | >PTEN-M198 KMFETIPMF   | 40    | 42    |
| >PTEN-M198 MMFETIPMF  | 193  | >PTEN-M198 KMFETIPMF   | 12770 | 12577 |
| >PTEN-M198 KMMFETIPM  | 12   | >PTEN-M198 KKMFFETIPM  | 17125 | 17113 |
| >PTEN-M198 KMMFETIPM  | 271  | >PTEN-M198 KKMFFETIPMF | 24501 | 24230 |
| >PTEN-M198 KMMFETIPM  | 121  | >PTEN-M198 KKMFFETIPMF | 22436 | 22315 |
| >PTEN-M198 KMMFETIPM  | 12   | >PTEN-M198 KKMFFETIPM  | 8262  | 8250  |
| >PTEN-M198 KMMFETIPM  | 102  | >PTEN-M198 KKMFFETIPMF | 15617 | 15515 |
| >PTEN-M198 KMMFETIPM  | 31   | >PTEN-M198 KKMFFETIPM  | 14039 | 14008 |
| >PTEN-M198 KMMFETIPM  | 184  | >PTEN-M198 KKMFFETIPMF | 16051 | 15867 |
| >PTEN-M198 KMMFETIPM  | 31   | >PTEN-M198 KKMFFETIPM  | 6605  | 6574  |
| >PTEN-M198 KMMFETIPM  | 45   | >PTEN-M198 KKMFFETIPM  | 22348 | 22303 |
| >PTEN-M198 KMMFETIPM  | 153  | >PTEN-M198 KKMFFETIPMF | 21782 | 21629 |
| >PTEN-M198 KMMFETIPM  | 474  | >PTEN-M198 KKMFFETIPMF | 27475 | 27001 |
| >PTEN-M198 KMMFETIPM  | 11   | >PTEN-M198 KKMFFETIPM  | 13322 | 13311 |
| >PTEN-M198 KMMFETIPM  | 31   | >PTEN-M198 KKMFFETIPM  | 17091 | 17060 |
| >PTEN-M198 KMMFETIPM  | 69   | >PTEN-M198 KKMFFETIPMF | 3569  | 3500  |
| >PTEN-M198 KMMFETIPM  | 184  | >PTEN-M198 KKMFFETIPM  | 4176  | 3992  |
| >PTEN-M198 KMMFETIPM  | 350  | >PTEN-M198 KKMFFETIPMF | 5419  | 5069  |
| >PTEN-M198 KMMFETIPM  | 9    | >PTEN-M198 KKMFFETIPM  | 555   | 546   |
| >PTEN-M198 KMMFETIPM  | 11   | >PTEN-M198 KKMFFETIPMF | 524   | 513   |
| >PTEN-M198 KMMFETIPM  | 47   | >PTEN-M198 KKMFFETIPM  | 6780  | 6733  |
| >PTEN-M198 KMMFETIPM  | 50   | >PTEN-M198 KKMFFETIPMF | 5355  | 5305  |
| >PTEN-M198 KMMFETIPM  | 14   | >PTEN-M198 KKMFFETIPM  | 8     | 6     |
| >PTEN-M198 KMMFETIPM  | 4    | >PTEN-M198 KKMFFETIPMF | 3     | 1     |
| >PTEN-M198 KMMFETIPM  | 59   | >PTEN-M198 KKMFFETIPMF | 5398  | 5339  |
| >PTEN-M198 KMMFETIPM  | 347  | >PTEN-M198 KKMFFETIPM  | 6105  | 5758  |
| >PTEN-M198 KMMFETIPM  | 57   | >PTEN-M198 KKMFFETIPMF | 9536  | 9479  |
| >PTEN-M198 YRPVALLFHK | 60   | >PTEN-M198 YRPVALLFHK  | 64    | 4     |
| >PTEN-M198 YRPVALLFHK | 120  | >PTEN-M198 YRPVALLFHK  | 15638 | 15518 |

|                        |     |                        |      |      |
|------------------------|-----|------------------------|------|------|
| >PTEN-M198 YRPVALLFHK  | 338 | >PTEN-M198 YRPVALLFHK  | 457  | 119  |
| >PTEN-M198 HKMMMFETI   | 31  | >PTEN-M198 HKMMMFETI   | 77   | 46   |
| >PTEN-M198 HKMMMFETIP  | 379 | >PTEN-M198 HKMMMFETIP  | 852  | 473  |
| >PTEN-M198 HKMMMFETIPI | 7   | >PTEN-M198 HKMMMFETIPI | 14   | 7    |
| >PTEN-M198 HKMMMFETIPI | 3   | >PTEN-M198 HKMMMFETIPI | 4    | 1    |
| >PTEN-M198 HKMMMFETIPI | 41  | >PTEN-M198 HKMMMFETIPI | 5215 | 5174 |
| >PTEN-M198 FHKMMMFETI  | 93  | >PTEN-M198 FHKMMMFETI  | 78   | 15   |
| >PTEN-M198 FHKMMMFETI  | 346 | >PTEN-M198 FHKMMMFETI  | 756  | 410  |
| >PTEN-M198 FHKMMMFETI  | 428 | >PTEN-M198 FHKMMMFETI  | 587  | 159  |
| >PTEN-M198 FHKMMMFETI  | 428 | >PTEN-M198 FHKMMMFETI  | 436  | 8    |
| >PTEN-M198 FHKMMMFETIF | 87  | >PTEN-M198 FHKMMMFETIF | 94   | 7    |
| >PTEN-M198 LFHKMMMFET  | 58  | >PTEN-M198 LFHKMMMFET  | 514  | 456  |
| >PTEN-M198 LFHKMMMFET  | 18  | >PTEN-M198 LFHKMMMFET  | 20   | 2    |
| >PTEN-M198 LLFHKMMMFE' | 234 | >PTEN-M198 LLFHKMMMFE' | 846  | 612  |
| >PTEN-M198 LLFHKMMMFE' | 35  | >PTEN-M198 LLFHKMMMFE' | 104  | 69   |
| >PTEN-M198 LLFHKMMMFE' | 239 | >PTEN-M198 LLFHKMMMFE' | 785  | 546  |
| >PTEN-M198 LLFHKMMMFE' | 45  | >PTEN-M198 LLFHKMMMFE' | 91   | 46   |
| >PTEN-M198 LLFHKMMMFE' | 252 | >PTEN-M198 LLFHKMMMFE' | 490  | 238  |
| >PTEN-M198 LLFHKMMMFE' | 14  | >PTEN-M198 LLFHKMMMFE' | 33   | 19   |
| >PTEN-M198 LLFHKMMMFE' | 82  | >PTEN-M198 LLFHKMMMFE' | 232  | 150  |
| >PTEN-M198 LLFHKMMMFE' | 57  | >PTEN-M198 LLFHKMMMFE' | 79   | 22   |
| >PTEN-M198 LLFHKMMMFE' | 5   | >PTEN-M198 LLFHKMMMFE' | 7    | 2    |
| >PTEN-M198 LLFHKMMMFE' | 15  | >PTEN-M198 LLFHKMMMFE' | 21   | 6    |
| >PTEN-M198 LLFHKMMMFE' | 206 | >PTEN-M198 LLFHKMMMFE' | 355  | 149  |
| >PTEN-M198 LLFHKMMMFE' | 29  | >PTEN-M198 LLFHKMMMFE' | 39   | 10   |
| >PTEN-M198 LLFHKMMMFE' | 20  | >PTEN-M198 LLFHKMMMFE' | 28   | 8    |
| >PTEN-M198 LLFHKMMMFE' | 8   | >PTEN-M198 LLFHKMMMFE' | 10   | 2    |
| >PTEN-M198 LLFHKMMMFE' | 71  | >PTEN-M198 LLFHKMMMFE' | 105  | 34   |
| >PTEN-M198 LLFHKMMMFE' | 384 | >PTEN-M198 LLFHKMMMFE' | 263  | 121  |
| >PTEN-M198 LLFHKMMMF   | 57  | >PTEN-M198 LLFHKMMMF   | 110  | 53   |
| >PTEN-M198 LLFHKMMMFE' | 493 | >PTEN-M198 LLFHKMMMFE' | 827  | 334  |
| >PTEN-M198 LLFHKMMMF   | 412 | >PTEN-M198 LLFHKMMMF   | 434  | 22   |
| >PTEN-M198 LLFHKMMMF   | 8   | >PTEN-M198 LLFHKMMMF   | 12   | 4    |
| >PTEN-M198 LLFHKMMMFE' | 162 | >PTEN-M198 LLFHKMMMFE' | 207  | 45   |
| >PTEN-M198 LLFHKMMMF   | 200 | >PTEN-M198 LLFHKMMMF   | 522  | 322  |
| >PTEN-M198 ALLFHKKMMFE | 206 | >PTEN-M198 ALLFHKKMMFE | 410  | 204  |
| >PTEN-M198 ALLFHKKMM   | 88  | >PTEN-M198 ALLFHKKMM   | 260  | 172  |
| >PTEN-M198 ALLFHKKMMF  | 106 | >PTEN-M198 ALLFHKKMMF  | 152  | 46   |
| >PTEN-M198 ALLFHKKMMF  | 392 | >PTEN-M198 ALLFHKKMMF  | 740  | 348  |
| >PTEN-M198 ALLFHKKMM   | 431 | >PTEN-M198 ALLFHKKMM   | 679  | 248  |
| >PTEN-M198 ALLFHKKMMF  | 54  | >PTEN-M198 ALLFHKKMMF  | 166  | 112  |
| >PTEN-M198 ALLFHKKMMF  | 379 | >PTEN-M198 ALLFHKKMMF  | 1364 | 985  |
| >PTEN-M198 ALLFHKKMMF  | 37  | >PTEN-M198 ALLFHKKMMF  | 79   | 42   |



|                       |       |                       |       |       |
|-----------------------|-------|-----------------------|-------|-------|
| >PTEN-M198 VALLFHKM   | 32    | >PTEN-M198 VALLFHKK   | 5977  | 5945  |
| >PTEN-M198 VALLFHKMM  | 40    | >PTEN-M198 VALLFHKKM  | 44    | 4     |
| >PTEN-M198 VALLFHKM   | 21585 | >PTEN-M198 VALLFHKK   | 41    | 21544 |
| >PTEN-M198 VALLFHKMM  | 63    | >PTEN-M198 VALLFHKKMF | 122   | 59    |
| >PTEN-M198 VALLFHKM   | 114   | >PTEN-M198 VALLFHKK   | 18943 | 18829 |
| >PTEN-M198 VALLFHKMM  | 56    | >PTEN-M198 VALLFHKKM  | 46    | 10    |
| >PTEN-M198 VALLFHKMM  | 30    | >PTEN-M198 VALLFHKKMF | 24    | 6     |
| >PTEN-M198 VALLFHKMM  | 108   | >PTEN-M198 VALLFHKKM  | 472   | 364   |
| >PTEN-M198 VALLFHKMM  | 371   | >PTEN-M198 VALLFHKKMF | 1211  | 840   |
| >PTEN-M198 PVALLFHKM  | 26174 | >PTEN-M198 PVALLFHKK  | 164   | 26010 |
| >PTEN-M198 RPVALLFHKN | 17    | >PTEN-M198 RPVALLFHKK | 29259 | 29242 |
| >PTEN-M198 RPVALLFHKN | 289   | >PTEN-M198 RPVALLFHKK | 214   | 75    |
| >PTEN-M198 RPVALLFHKN | 88    | >PTEN-M198 RPVALLFHKK | 4134  | 4046  |
| >PTEN-M198 RPVALLFHKN | 42    | >PTEN-M198 RPVALLFHKK | 80    | 38    |
| >PTEN-M198 RPVALLFHKN | 252   | >PTEN-M198 RPVALLFHKK | 409   | 157   |
| >PTEN-M198 RPVALLFHKN | 358   | >PTEN-M198 RPVALLFHKK | 1204  | 846   |
| >PTEN-M198 RPVALLFHKN | 295   | >PTEN-M198 RPVALLFHKK | 11833 | 11538 |
| >PTEN-M198 RPVALLFHKN | 11909 | >PTEN-M198 RPVALLFHKK | 297   | 11612 |
| >PTEN-M1T-1MTAIKEI    | 121   | >PTEN-M1T-1TTAIKEI    | 1444  | 1323  |
| >PTEN-M1T-1MTAIKEIV   | 86    | >PTEN-M1T-1TTAIKEIV   | 891   | 805   |
| >PTEN-M1T-1MTAIKEIVSR | 373   | >PTEN-M1T-1TTAIKEIVSR | 498   | 125   |
| >PTEN-M1T-1MTAIKEIVSR | 22    | >PTEN-M1T-1TTAIKEIVSR | 77    | 55    |
| >PTEN-M1T-1MTAIKEIVSR | 145   | >PTEN-M1T-1TTAIKEIVSR | 369   | 224   |
| >PTEN-M1T-1MTAIKEIVSR | 2     | >PTEN-M1T-1TTAIKEIVSR | 4     | 2     |
| >PTEN-M1T-1MTAIKEI    | 6     | >PTEN-M1T-1TTAIKEI    | 9     | 3     |
| >PTEN-M1T-1MTAIKEIV   | 5     | >PTEN-M1T-1TTAIKEIV   | 7     | 2     |
| >PTEN-M1T-1MTAIKEI    | 286   | >PTEN-M1T-1TTAIKEI    | 512   | 226   |
| >PTEN-M1T-1MTAIKEIV   | 129   | >PTEN-M1T-1TTAIKEIV   | 225   | 96    |
| >PTEN-M1T-1MTAIKEI    | 94    | >PTEN-M1T-1TTAIKEI    | 931   | 837   |
| >PTEN-M1T-1MTAIKEIV   | 155   | >PTEN-M1T-1TTAIKEIV   | 510   | 355   |
| >PTEN-M1T-1MTAIKEIVSR | 684   | >PTEN-M1T-1TTAIKEIVSR | 404   | 280   |
| >PTEN-M1T-1MTAIKEIVSR | 379   | >PTEN-M1T-1TTAIKEIVSR | 857   | 478   |
| >PTEN-M1T-1MTAIKEI    | 29    | >PTEN-M1T-1TTAIKEI    | 63    | 34    |
| >PTEN-M205 MFSGGTCNP  | 107   | >PTEN-M205 IFSGGTCNPQ | 148   | 41    |
| >PTEN-M205 MFSGGTCNP  | 1215  | >PTEN-M205 IFSGGTCNPQ | 420   | 795   |
| >PTEN-M205 MFSGGTCNP  | 11    | >PTEN-M205 IFSGGTCNPQ | 34    | 23    |
| >PTEN-M205 MFSGGTCNP  | 107   | >PTEN-M205 IFSGGTCNPQ | 317   | 210   |
| >PTEN-M205 MFSGGTCNP  | 130   | >PTEN-M205 IFSGGTCNPQ | 1621  | 1491  |
| >PTEN-M205 PMFSGGTC   | 355   | >PTEN-M205 PIFSGGTC   | 8231  | 7876  |
| >PTEN-M205 FHKMMFETIF | 6283  | >PTEN-M205 FHKMMFETIF | 430   | 5853  |
| >PTEN-M205 FHKMMFETIF | 87    | >PTEN-M205 FHKMMFETIF | 295   | 208   |
| >PTEN-M205 IPMFSGGTC  | 404   | >PTEN-M205 IPIFSGGTC  | 1804  | 1400  |
| >PTEN-M205 ETIPMFSGGT | 269   | >PTEN-M205 ETIPIFSGGT | 328   | 59    |

|                       |     |                        |     |     |
|-----------------------|-----|------------------------|-----|-----|
| >PTEN-M205 ETIPMFSG   | 113 | >PTEN-M205 ETIPIFSG    | 43  | 70  |
| >PTEN-M205 ETIPMFSGG  | 129 | >PTEN-M205 ETIPIFSGG   | 25  | 104 |
| >PTEN-M205 ETIPMFSGGT | 70  | >PTEN-M205 ETIPIFSGGT  | 71  | 1   |
| >PTEN-M205 ETIPMFSGGT | 545 | >PTEN-M205 ETIPIFSGGTC | 166 | 379 |
| >PTEN-M205 ETIPMFSGGT | 173 | >PTEN-M205 ETIPIFSGGT  | 78  | 95  |
| >PTEN-M205 FETIPMFSGG | 483 | >PTEN-M205 FETIPIFSGGT | 401 | 82  |
| >PTEN-M205 MFETIPMF   | 43  | >PTEN-M205 MFETIPIF    | 68  | 25  |
| >PTEN-M205 MFETIPMF   | 23  | >PTEN-M205 MFETIPIF    | 100 | 77  |
| >PTEN-M205 MMFETIPM   | 270 | >PTEN-M205 MMFETIPI    | 696 | 426 |
| >PTEN-M205 MMFETIPMF  | 183 | >PTEN-M205 MMFETIPIF   | 288 | 105 |
| >PTEN-M205 MMFETIPM   | 8   | >PTEN-M205 MMFETIPI    | 7   | 1   |
| >PTEN-M205 MMFETIPMF  | 34  | >PTEN-M205 MMFETIPIF   | 66  | 32  |
| >PTEN-M205 MMFETIPMF  | 57  | >PTEN-M205 MMFETIPIFS  | 79  | 22  |
| >PTEN-M205 MMFETIPMF  | 136 | >PTEN-M205 MMFETIPIFS  | 128 | 8   |
| >PTEN-M205 MMFETIPM   | 8   | >PTEN-M205 MMFETIPI    | 4   | 4   |
| >PTEN-M205 MMFETIPMF  | 148 | >PTEN-M205 MMFETIPIF   | 219 | 71  |
| >PTEN-M205 MMFETIPMF  | 64  | >PTEN-M205 MMFETIPIFS  | 141 | 77  |
| >PTEN-M205 MMFETIPMF  | 99  | >PTEN-M205 MMFETIPIFS  | 95  | 4   |
| >PTEN-M205 MMFETIPM   | 10  | >PTEN-M205 MMFETIPI    | 3   | 7   |
| >PTEN-M205 MMFETIPMF  | 137 | >PTEN-M205 MMFETIPIF   | 174 | 37  |
| >PTEN-M205 MMFETIPMF  | 142 | >PTEN-M205 MMFETIPIFS  | 315 | 173 |
| >PTEN-M205 MMFETIPMF  | 195 | >PTEN-M205 MMFETIPIFS  | 191 | 4   |
| >PTEN-M205 MMFETIPM   | 12  | >PTEN-M205 MMFETIPI    | 5   | 7   |
| >PTEN-M205 MMFETIPMF  | 21  | >PTEN-M205 MMFETIPIF   | 25  | 4   |
| >PTEN-M205 MMFETIPMF  | 384 | >PTEN-M205 MMFETIPIFS  | 610 | 226 |
| >PTEN-M205 MMFETIPMF  | 155 | >PTEN-M205 MMFETIPIFS  | 183 | 28  |
| >PTEN-M205 MMFETIPM   | 2   | >PTEN-M205 MMFETIPI    | 1   | 1   |
| >PTEN-M205 MMFETIPMF  | 2   | >PTEN-M205 MMFETIPIF   | 5   | 3   |
| >PTEN-M205 MMFETIPMF  | 4   | >PTEN-M205 MMFETIPIFS  | 5   | 1   |
| >PTEN-M205 MMFETIPMF  | 7   | >PTEN-M205 MMFETIPIFS  | 5   | 2   |
| >PTEN-M205 MMFETIPM   | 7   | >PTEN-M205 MMFETIPI    | 3   | 4   |
| >PTEN-M205 MMFETIPMF  | 334 | >PTEN-M205 MMFETIPIF   | 260 | 74  |
| >PTEN-M205 MMFETIPMF  | 217 | >PTEN-M205 MMFETIPIFS  | 210 | 7   |
| >PTEN-M205 MMFETIPMF  | 300 | >PTEN-M205 MMFETIPIFS  | 216 | 84  |
| >PTEN-M205 MMFETIPM   | 11  | >PTEN-M205 MMFETIPI    | 5   | 6   |
| >PTEN-M205 MMFETIPMF  | 52  | >PTEN-M205 MMFETIPIF   | 140 | 88  |
| >PTEN-M205 MMFETIPMF  | 44  | >PTEN-M205 MMFETIPIFS  | 45  | 1   |
| >PTEN-M205 MMFETIPMF  | 186 | >PTEN-M205 MMFETIPIFS  | 120 | 66  |
| >PTEN-M205 MMFETIPM   | 16  | >PTEN-M205 MMFETIPI    | 6   | 10  |
| >PTEN-M205 MMFETIPM   | 5   | >PTEN-M205 MMFETIPI    | 3   | 2   |
| >PTEN-M205 MMFETIPMF  | 24  | >PTEN-M205 MMFETIPIF   | 52  | 28  |
| >PTEN-M205 MMFETIPMF  | 38  | >PTEN-M205 MMFETIPIFS  | 60  | 22  |
| >PTEN-M205 MMFETIPMF  | 100 | >PTEN-M205 MMFETIPIFS  | 46  | 54  |

|                      |      |                       |      |      |
|----------------------|------|-----------------------|------|------|
| >PTEN-M205 MMFETIPMF | 60   | >PTEN-M205 MMFETIPIF  | 94   | 34   |
| >PTEN-M205 MMFETIPMF | 50   | >PTEN-M205 MMFETIPIF  | 246  | 196  |
| >PTEN-M205 MMFETIPM  | 472  | >PTEN-M205 MMFETIPI   | 2530 | 2058 |
| >PTEN-M205 MMFETIPMF | 61   | >PTEN-M205 MMFETIPIF  | 205  | 144  |
| >PTEN-M205 MMFETIPM  | 391  | >PTEN-M205 MMFETIPI   | 129  | 262  |
| >PTEN-M205 MMFETIPMF | 468  | >PTEN-M205 MMFETIPIFS | 628  | 160  |
| >PTEN-M205 MMFETIPM  | 88   | >PTEN-M205 MMFETIPI   | 11   | 77   |
| >PTEN-M205 MMFETIPMF | 76   | >PTEN-M205 MMFETIPIF  | 69   | 7    |
| >PTEN-M205 MMFETIPM  | 816  | >PTEN-M205 MMFETIPI   | 71   | 745  |
| >PTEN-M205 MMFETIPM  | 27   | >PTEN-M205 MMFETIPI   | 14   | 13   |
| >PTEN-M205 MMFETIPM  | 28   | >PTEN-M205 MMFETIPI   | 109  | 81   |
| >PTEN-M205 MMFETIPMF | 29   | >PTEN-M205 MMFETIPIF  | 30   | 1    |
| >PTEN-M205 MMFETIPMF | 380  | >PTEN-M205 MMFETIPIFS | 339  | 41   |
| >PTEN-M205 MMFETIPM  | 111  | >PTEN-M205 MMFETIPI   | 977  | 866  |
| >PTEN-M205 MMFETIPMF | 86   | >PTEN-M205 MMFETIPIF  | 80   | 6    |
| >PTEN-M205 MMFETIPM  | 4    | >PTEN-M205 MMFETIPI   | 8    | 4    |
| >PTEN-M205 MMFETIPMF | 2    | >PTEN-M205 MMFETIPIF  | 2    | 0    |
| >PTEN-M205 MMFETIPMF | 283  | >PTEN-M205 MMFETIPIFS | 539  | 256  |
| >PTEN-M205 MMFETIPM  | 163  | >PTEN-M205 MMFETIPI   | 743  | 580  |
| >PTEN-M205 MMFETIPMF | 21   | >PTEN-M205 MMFETIPIF  | 54   | 33   |
| >PTEN-M205 MMFETIPM  | 16   | >PTEN-M205 MMFETIPI   | 423  | 407  |
| >PTEN-M205 MMFETIPMF | 79   | >PTEN-M205 MMFETIPIF  | 49   | 30   |
| >PTEN-M205 MMFETIPM  | 35   | >PTEN-M205 MMFETIPI   | 90   | 55   |
| >PTEN-M205 MMFETIPMF | 1206 | >PTEN-M205 MMFETIPIF  | 290  | 916  |
| >PTEN-M205 MMFETIPMF | 82   | >PTEN-M205 MMFETIPIF  | 41   | 41   |
| >PTEN-M205 MMFETIPM  | 1688 | >PTEN-M205 MMFETIPI   | 263  | 1425 |
| >PTEN-M205 MMFETIPMF | 193  | >PTEN-M205 MMFETIPIF  | 130  | 63   |
| >PTEN-M205 MMFETIPM  | 5599 | >PTEN-M205 MMFETIPI   | 114  | 5485 |
| >PTEN-M205 KMMFETIPM | 12   | >PTEN-M205 KMMFETIPI  | 8    | 4    |
| >PTEN-M205 KMMFETIPM | 271  | >PTEN-M205 KMMFETIPIF | 396  | 125  |
| >PTEN-M205 KMMFETIPM | 121  | >PTEN-M205 KMMFETIPIF | 112  | 9    |
| >PTEN-M205 KMMFETIPM | 12   | >PTEN-M205 KMMFETIPI  | 5    | 7    |
| >PTEN-M205 KMMFETIPM | 102  | >PTEN-M205 KMMFETIPIF | 124  | 22   |
| >PTEN-M205 KMMFETIPM | 31   | >PTEN-M205 KMMFETIPI  | 5    | 26   |
| >PTEN-M205 KMMFETIPM | 184  | >PTEN-M205 KMMFETIPIF | 469  | 285  |
| >PTEN-M205 KMMFETIPM | 31   | >PTEN-M205 KMMFETIPI  | 9    | 22   |
| >PTEN-M205 KMMFETIPM | 45   | >PTEN-M205 KMMFETIPI  | 7    | 38   |
| >PTEN-M205 KMMFETIPM | 153  | >PTEN-M205 KMMFETIPIF | 786  | 633  |
| >PTEN-M205 KMMFETIPM | 474  | >PTEN-M205 KMMFETIPIF | 344  | 130  |
| >PTEN-M205 KMMFETIPM | 11   | >PTEN-M205 KMMFETIPI  | 4    | 7    |
| >PTEN-M205 KMMFETIPM | 506  | >PTEN-M205 KMMFETIPI  | 46   | 460  |
| >PTEN-M205 KMMFETIPM | 31   | >PTEN-M205 KMMFETIPI  | 7    | 24   |
| >PTEN-M205 KMMFETIPM | 1166 | >PTEN-M205 KMMFETIPI  | 126  | 1040 |

|                        |       |                        |       |       |
|------------------------|-------|------------------------|-------|-------|
| >PTEN-M205 KMMFETIPM   | 69    | >PTEN-M205 KMMFETIPIF  | 246   | 177   |
| >PTEN-M205 KMMFETIPM   | 184   | >PTEN-M205 KMMFETIPI   | 69    | 115   |
| >PTEN-M205 KMMFETIPM   | 350   | >PTEN-M205 KMMFETIPIF  | 459   | 109   |
| >PTEN-M205 KMMFETIPM   | 9     | >PTEN-M205 KMMFETIPI   | 4     | 5     |
| >PTEN-M205 KMMFETIPM   | 11    | >PTEN-M205 KMMFETIPIF  | 10    | 1     |
| >PTEN-M205 KMMFETIPM   | 47    | >PTEN-M205 KMMFETIPI   | 271   | 224   |
| >PTEN-M205 KMMFETIPM   | 50    | >PTEN-M205 KMMFETIPIF  | 52    | 2     |
| >PTEN-M205 KMMFETIPM   | 14    | >PTEN-M205 KMMFETIPI   | 38    | 24    |
| >PTEN-M205 KMMFETIPM   | 4     | >PTEN-M205 KMMFETIPIF  | 4     | 0     |
| >PTEN-M205 KMMFETIPM   | 59    | >PTEN-M205 KMMFETIPIF  | 118   | 59    |
| >PTEN-M205 KMMFETIPM   | 347   | >PTEN-M205 KMMFETIPI   | 11552 | 11205 |
| >PTEN-M205 KMMFETIPM   | 57    | >PTEN-M205 KMMFETIPIF  | 34    | 23    |
| >PTEN-M205 HKMMFETIPI  | 6169  | >PTEN-M205 HKMMFETIPI  | 492   | 5677  |
| >PTEN-M205 HKMMFETIPI  | 7     | >PTEN-M205 HKMMFETIPI  | 16    | 9     |
| >PTEN-M205 HKMMFETIPI  | 3     | >PTEN-M205 HKMMFETIPI  | 3     | 0     |
| >PTEN-M205 HKMMFETIPI  | 41    | >PTEN-M205 HKMMFETIPI  | 115   | 74    |
| >PTEN-M205 HKMMFETIPI  | 1271  | >PTEN-M205 HKMMFETIPI  | 456   | 815   |
| >PTEN-M35R MGFP AERLE  | 257   | >PTEN-M35R RGFP AERLEG | 2136  | 1879  |
| >PTEN-M35R MGFP AERLE  | 186   | >PTEN-M35R RGFP AERLEG | 344   | 158   |
| >PTEN-M35R MGFP AERLE  | 355   | >PTEN-M35R RGFP AERLEG | 735   | 380   |
| >PTEN-M35R MGFP AERL   | 378   | >PTEN-M35R RGFP AERL   | 15518 | 15140 |
| >PTEN-M35R MGFP AERLE  | 46    | >PTEN-M35R RGFP AERLEG | 6032  | 5986  |
| >PTEN-M35R MGFP AERL   | 258   | >PTEN-M35R RGFP AERL   | 61    | 197   |
| >PTEN-M35R MGFP AERL   | 767   | >PTEN-M35R RGFP AERL   | 309   | 458   |
| >PTEN-M35R AMGFP AERL  | 365   | >PTEN-M35R ARGFP AERL  | 28035 | 27670 |
| >PTEN-M35R AMGFP AERL  | 15    | >PTEN-M35R ARGFP AERL  | 23419 | 23404 |
| >PTEN-M35R AMGFP AERL  | 454   | >PTEN-M35R ARGFP AERL  | 25510 | 25056 |
| >PTEN-M35R AMGFP AERL  | 403   | >PTEN-M35R ARGFP AERL  | 26065 | 25662 |
| >PTEN-M35R AMGFP AERL  | 195   | >PTEN-M35R ARGFP AERL  | 26630 | 26435 |
| >PTEN-M35R AMGFP AERL  | 29    | >PTEN-M35R ARGFP AERL  | 29492 | 29463 |
| >PTEN-M35R AMGFP AER   | 75    | >PTEN-M35R ARGFP AER   | 13929 | 13854 |
| >PTEN-M35R AMGFP AERL  | 24524 | >PTEN-M35R ARGFP AERL  | 457   | 24067 |
| >PTEN-M35R LTYIYPNIIAM | 69    | >PTEN-M35R LTYIYPNIIAR | 10597 | 10528 |
| >PTEN-M35R LTYIYPNIIAM | 239   | >PTEN-M35R LTYIYPNIIAR | 10815 | 10576 |
| >PTEN-M35R LTYIYPNIIAM | 14617 | >PTEN-M35R LTYIYPNIIAR | 473   | 14144 |
| >PTEN-M35R LTYIYPNIIAM | 12255 | >PTEN-M35R LTYIYPNIIAR | 120   | 12135 |
| >PTEN-M35R LTYIYPNIIAM | 320   | >PTEN-M35R LTYIYPNIIAR | 20331 | 20011 |
| >PTEN-M35R LTYIYPNIIAM | 8602  | >PTEN-M35R LTYIYPNIIAR | 15    | 8587  |
| >PTEN-M35R LTYIYPNIIAM | 18656 | >PTEN-M35R LTYIYPNIIAR | 171   | 18485 |
| >PTEN-M35R LTYIYPNIIAM | 9531  | >PTEN-M35R LTYIYPNIIAR | 14    | 9517  |
| >PTEN-M35R LTYIYPNIIAM | 326   | >PTEN-M35R LTYIYPNIIAR | 14683 | 14357 |
| >PTEN-M35R LTYIYPNIIAM | 368   | >PTEN-M35R LTYIYPNIIAR | 16104 | 15736 |
| >PTEN-M35R LTYIYPNIIAM | 98    | >PTEN-M35R LTYIYPNIIAR | 2183  | 2085  |

|                       |       |                       |       |       |
|-----------------------|-------|-----------------------|-------|-------|
| >PTEN-M35RLTYIYPNIIAM | 5     | >PTEN-M35RLTYIYPNIIAR | 1875  | 1870  |
| >PTEN-M35RLTYIYPNIIAM | 134   | >PTEN-M35RLTYIYPNIIAR | 15438 | 15304 |
| >PTEN-M35RLTYIYPNIIAM | 111   | >PTEN-M35RLTYIYPNIIAR | 7489  | 7378  |
| >PTEN-M35RLTYIYPNIIAM | 74    | >PTEN-M35RLTYIYPNIIAR | 10034 | 9960  |
| >PTEN-M35RLTYIYPNIIAM | 2615  | >PTEN-M35RLTYIYPNIIAR | 144   | 2471  |
| >PTEN-M35RLTYIYPNIIAM | 26865 | >PTEN-M35RLTYIYPNIIAR | 372   | 26493 |
| >PTEN-M35RLTYIYPNIIAM | 147   | >PTEN-M35RLTYIYPNIIAR | 29629 | 29482 |
| >PTEN-M35RIAMGFPAERL  | 65    | >PTEN-M35RIARGFPAERL  | 2484  | 2419  |
| >PTEN-M35RIAMGFPAERL  | 445   | >PTEN-M35RIARGFPAERL  | 6417  | 5972  |
| >PTEN-M35RIAMGFPAER   | 222   | >PTEN-M35RIARGFPAER   | 14268 | 14046 |
| >PTEN-M35RIAMGFPAER   | 8601  | >PTEN-M35RIARGFPAER   | 179   | 8422  |
| >PTEN-M35RIAMGFPAER   | 32    | >PTEN-M35RIARGFPAER   | 44    | 12    |
| >PTEN-M35RIAMGFPAER   | 58    | >PTEN-M35RIARGFPAER   | 58    | 0     |
| >PTEN-M35RIAMGFPAER   | 8     | >PTEN-M35RIARGFPAER   | 131   | 123   |
| >PTEN-M35RIAMGFPAERL  | 19    | >PTEN-M35RIARGFPAERL  | 11    | 8     |
| >PTEN-M35RIAMGFPAERL  | 332   | >PTEN-M35RIARGFPAERL  | 376   | 44    |
| >PTEN-M35RIAMGFPAERL  | 476   | >PTEN-M35RIARGFPAERL  | 11037 | 10561 |
| >PTEN-M35RIAMGFPAER   | 268   | >PTEN-M35RIARGFPAER   | 775   | 507   |
| >PTEN-M35RIIAMGFPA    | 369   | >PTEN-M35RIIARGFPA    | 732   | 363   |
| >PTEN-M35RIIAMGFPA    | 311   | >PTEN-M35RIIARGFPA    | 448   | 137   |
| >PTEN-M35RIIAMGFPAER  | 200   | >PTEN-M35RIIARGFPAERL | 265   | 65    |
| >PTEN-M35RIIAMGFPA    | 65    | >PTEN-M35RIIARGFPA    | 96    | 31    |
| >PTEN-M35RIIAMGFPA    | 35    | >PTEN-M35RIIARGFPA    | 26    | 9     |
| >PTEN-M35RIIAMGFPAER  | 213   | >PTEN-M35RIIARGFPAERL | 260   | 47    |
| >PTEN-M35RIIAMGFPAER  | 471   | >PTEN-M35RIIARGFPAERL | 491   | 20    |
| >PTEN-M35RIIAMGFPA    | 206   | >PTEN-M35RIIARGFPA    | 230   | 24    |
| >PTEN-M35RIIAMGFPAER  | 73    | >PTEN-M35RIIARGFPAERL | 66    | 7     |
| >PTEN-M35RIIAMGFPAER  | 83    | >PTEN-M35RIIARGFPAER  | 97    | 14    |
| >PTEN-M35RIIAMGFPAER  | 468   | >PTEN-M35RIIARGFPAER  | 852   | 384   |
| >PTEN-M35RIIAMGFPAER  | 12    | >PTEN-M35RIIARGFPAER  | 37    | 25    |
| >PTEN-M35RIIAMGFPAER  | 273   | >PTEN-M35RIIARGFPAER  | 410   | 137   |
| >PTEN-M35RNIIAMGFPA   | 391   | >PTEN-M35RNIIARGFPA   | 800   | 409   |
| >PTEN-M35RNIIAMGFPA   | 162   | >PTEN-M35RNIIARGFPA   | 201   | 39    |
| >PTEN-M35RNIIAMGFPA   | 32    | >PTEN-M35RNIIARGFPA   | 27    | 5     |
| >PTEN-M35RNIIAMGFPAE  | 150   | >PTEN-M35RNIIARGFPAEF | 118   | 32    |
| >PTEN-M35RNIIAMGFPAE  | 115   | >PTEN-M35RNIIARGFPAEF | 62    | 53    |
| >PTEN-M35RNIIAMGFPAE  | 8     | >PTEN-M35RNIIARGFPAEF | 15    | 7     |
| >PTEN-M35RNIIAMGFPA   | 28    | >PTEN-M35RNIIARGFPA   | 79    | 51    |
| >PTEN-M35RNIIAMGFPA   | 154   | >PTEN-M35RNIIARGFPA   | 485   | 331   |
| >PTEN-M35RNIIAMGFPAE  | 235   | >PTEN-M35RNIIARGFPAEF | 226   | 9     |
| >PTEN-M35RYPNIIAMGF   | 281   | >PTEN-M35RYPNIIARGF   | 116   | 165   |
| >PTEN-M35RYPNIIAMGF   | 91    | >PTEN-M35RYPNIIARGFPA | 62    | 29    |
| >PTEN-M35RYPNIIAMGF   | 11    | >PTEN-M35RYPNIIARGF   | 16    | 5     |

|                       |       |                       |       |       |
|-----------------------|-------|-----------------------|-------|-------|
| >PTEN-M35RYPNIIAMGFP  | 37    | >PTEN-M35RYPNIIARGFPA | 83    | 46    |
| >PTEN-M35RYPNIIAMGF   | 82    | >PTEN-M35RYPNIIARGF   | 441   | 359   |
| >PTEN-M35RYPNIIAMG    | 328   | >PTEN-M35RYPNIIARG    | 751   | 423   |
| >PTEN-M35RYPNIIAMGFP  | 6     | >PTEN-M35RYPNIIARGFPA | 8     | 2     |
| >PTEN-M35RYPNIIAMGF   | 102   | >PTEN-M35RYPNIIARGF   | 238   | 136   |
| >PTEN-M35RIYPNIIAMGF  | 80    | >PTEN-M35RIYPNIIARGF  | 75    | 5     |
| >PTEN-M35RIYPNIIAMGF  | 49    | >PTEN-M35RIYPNIIARGF  | 68    | 19    |
| >PTEN-M35RIYPNIIAM    | 32    | >PTEN-M35RIYPNIIAR    | 796   | 764   |
| >PTEN-M35RIYPNIIAMGF  | 4     | >PTEN-M35RIYPNIIARGF  | 7     | 3     |
| >PTEN-M35RIYPNIIAMGF  | 56    | >PTEN-M35RIYPNIIARGF  | 115   | 59    |
| >PTEN-M35RIYPNIIAM    | 16819 | >PTEN-M35RIYPNIIAR    | 97    | 16722 |
| >PTEN-M35RIYPNIIAM    | 22356 | >PTEN-M35RIYPNIIAR    | 137   | 22219 |
| >PTEN-M35RIYPNIIAM    | 288   | >PTEN-M35RIYPNIIAR    | 22688 | 22400 |
| >PTEN-M35RIYPNIIAMGF  | 408   | >PTEN-M35RIYPNIIARGF  | 728   | 320   |
| >PTEN-M35RIYPNIIAM    | 10777 | >PTEN-M35RIYPNIIAR    | 24    | 10753 |
| >PTEN-M35RYIYPNIIAM   | 226   | >PTEN-M35RYIYPNIIAR   | 23685 | 23459 |
| >PTEN-M35RYIYPNIIAM   | 163   | >PTEN-M35RYIYPNIIAR   | 17031 | 16868 |
| >PTEN-M35RYIYPNIIAM   | 35    | >PTEN-M35RYIYPNIIAR   | 11797 | 11762 |
| >PTEN-M35RYIYPNIIAM   | 172   | >PTEN-M35RYIYPNIIAR   | 5184  | 5012  |
| >PTEN-M35RYIYPNIIAM   | 29    | >PTEN-M35RYIYPNIIAR   | 6744  | 6715  |
| >PTEN-M35RYIYPNIIAMGF | 464   | >PTEN-M35RYIYPNIIARGF | 1270  | 806   |
| >PTEN-M35RYIYPNIIAM   | 8     | >PTEN-M35RYIYPNIIAR   | 1571  | 1563  |
| >PTEN-M35RYIYPNIIAMGF | 31    | >PTEN-M35RYIYPNIIARGF | 111   | 80    |
| >PTEN-M35RYIYPNIIAM   | 4     | >PTEN-M35RYIYPNIIAR   | 352   | 348   |
| >PTEN-M35RYIYPNIIAMG  | 49    | >PTEN-M35RYIYPNIIARG  | 68    | 19    |
| >PTEN-M35RYIYPNIIAMGF | 73    | >PTEN-M35RYIYPNIIARGF | 155   | 82    |
| >PTEN-M35RYIYPNIIAM   | 21    | >PTEN-M35RYIYPNIIAR   | 8572  | 8551  |
| >PTEN-M35RYIYPNIIAM   | 72    | >PTEN-M35RYIYPNIIAR   | 11645 | 11573 |
| >PTEN-M35RYIYPNIIAM   | 117   | >PTEN-M35RYIYPNIIAR   | 22125 | 22008 |
| >PTEN-M35RYIYPNIIAM   | 6     | >PTEN-M35RYIYPNIIAR   | 1350  | 1344  |
| >PTEN-M35RYIYPNIIAMG  | 737   | >PTEN-M35RYIYPNIIARG  | 359   | 378   |
| >PTEN-M35RYIYPNIIAMGF | 338   | >PTEN-M35RYIYPNIIARGF | 1845  | 1507  |
| >PTEN-M35RYIYPNIIAM   | 12999 | >PTEN-M35RYIYPNIIAR   | 208   | 12791 |
| >PTEN-M35RYIYPNIIAM   | 12491 | >PTEN-M35RYIYPNIIAR   | 131   | 12360 |
| >PTEN-M35RYIYPNIIAMGF | 133   | >PTEN-M35RYIYPNIIARGF | 650   | 517   |
| >PTEN-M35RYIYPNIIAM   | 108   | >PTEN-M35RYIYPNIIAR   | 13177 | 13069 |
| >PTEN-M35RYIYPNIIAMGF | 214   | >PTEN-M35RYIYPNIIARGF | 367   | 153   |
| >PTEN-M35RYIYPNIIAM   | 26    | >PTEN-M35RYIYPNIIAR   | 12207 | 12181 |
| >PTEN-M35RYIYPNIIAMGF | 417   | >PTEN-M35RYIYPNIIARGF | 337   | 80    |
| >PTEN-M35RYIYPNIIAMGF | 92    | >PTEN-M35RYIYPNIIARGF | 312   | 220   |
| >PTEN-M35RYIYPNIIAM   | 16917 | >PTEN-M35RYIYPNIIAR   | 34    | 16883 |
| >PTEN-M35RYIYPNIIAMGF | 311   | >PTEN-M35RYIYPNIIARGF | 512   | 201   |
| >PTEN-M35RYIYPNIIAM   | 21810 | >PTEN-M35RYIYPNIIAR   | 166   | 21644 |

|                        |       |                        |       |       |
|------------------------|-------|------------------------|-------|-------|
| >PTEN-M35RYIYPNIIAM    | 6709  | >PTEN-M35RYIYPNIIAR    | 8     | 6701  |
| >PTEN-M35RYIYPNIIAM    | 40    | >PTEN-M35RYIYPNIIAR    | 11731 | 11691 |
| >PTEN-M35RYIYPNIIAM    | 69    | >PTEN-M35RYIYPNIIAR    | 10796 | 10727 |
| >PTEN-M35RYIYPNIIAMGF  | 63    | >PTEN-M35RYIYPNIIARGF  | 92    | 29    |
| >PTEN-M35RYIYPNIIAM    | 187   | >PTEN-M35RYIYPNIIAR    | 7713  | 7526  |
| >PTEN-M35RYIYPNIIAMGF  | 93    | >PTEN-M35RYIYPNIIARGF  | 92    | 1     |
| >PTEN-M35RYIYPNIIAM    | 35    | >PTEN-M35RYIYPNIIAR    | 832   | 797   |
| >PTEN-M35RYIYPNIIAMGF  | 16    | >PTEN-M35RYIYPNIIARGF  | 34    | 18    |
| >PTEN-M35RYIYPNIIAM    | 51    | >PTEN-M35RYIYPNIIAR    | 14885 | 14834 |
| >PTEN-M35RYIYPNIIAMGF  | 8     | >PTEN-M35RYIYPNIIARGF  | 8     | 0     |
| >PTEN-M35RYIYPNIIAM    | 22    | >PTEN-M35RYIYPNIIAR    | 6729  | 6707  |
| >PTEN-M35RYIYPNIIAMGF  | 173   | >PTEN-M35RYIYPNIIARGF  | 293   | 120   |
| >PTEN-M35RYIYPNIIAM    | 197   | >PTEN-M35RYIYPNIIAR    | 13352 | 13155 |
| >PTEN-M35RYIYPNIIAM    | 12763 | >PTEN-M35RYIYPNIIAR    | 49    | 12714 |
| >PTEN-M35RTYIYPNIIAM   | 317   | >PTEN-M35RTYIYPNIIAR   | 4559  | 4242  |
| >PTEN-M35RTYIYPNIIAM   | 36    | >PTEN-M35RTYIYPNIIAR   | 8695  | 8659  |
| >PTEN-M35RTYIYPNIIAM   | 22994 | >PTEN-M35RTYIYPNIIAR   | 140   | 22854 |
| >PTEN-M35RTYIYPNIIAM   | 22226 | >PTEN-M35RTYIYPNIIAR   | 280   | 21946 |
| >PTEN-M35RTYIYPNIIAM   | 28023 | >PTEN-M35RTYIYPNIIAR   | 90    | 27933 |
| >PTEN-M35RTYIYPNIIAM   | 17039 | >PTEN-M35RTYIYPNIIAR   | 46    | 16993 |
| >PTEN-M35V MGFPAERLEC  | 257   | >PTEN-M35V VGFPAERLEG  | 1921  | 1664  |
| >PTEN-M35V MGFPAERLEC  | 186   | >PTEN-M35V VGFPAERLEG  | 556   | 370   |
| >PTEN-M35V MGFPAERLEC  | 355   | >PTEN-M35V VGFPAERLEG  | 642   | 287   |
| >PTEN-M35V MGFPAERL    | 378   | >PTEN-M35V VGFPAERL    | 11948 | 11570 |
| >PTEN-M35V MGFPAERLEC  | 46    | >PTEN-M35V VGFPAERLEG  | 3489  | 3443  |
| >PTEN-M35V MGFPAERL    | 258   | >PTEN-M35V VGFPAERL    | 537   | 279   |
| >PTEN-M35V AMGFPAERL   | 365   | >PTEN-M35V AVGFPAERL   | 6619  | 6254  |
| >PTEN-M35V AMGFPAERL   | 15    | >PTEN-M35V AVGFPAERL   | 2760  | 2745  |
| >PTEN-M35V AMGFPAERL   | 454   | >PTEN-M35V AVGFPAERL   | 11102 | 10648 |
| >PTEN-M35V AMGFPAERL   | 403   | >PTEN-M35V AVGFPAERL   | 12301 | 11898 |
| >PTEN-M35V AMGFPAERL   | 195   | >PTEN-M35V AVGFPAERL   | 12589 | 12394 |
| >PTEN-M35V AMGFPAERL   | 29    | >PTEN-M35V AVGFPAERL   | 3515  | 3486  |
| >PTEN-M35V AMGFPAER    | 1050  | >PTEN-M35V AVGFPAER    | 411   | 639   |
| >PTEN-M35V AMGFPAER    | 75    | >PTEN-M35V AVGFPAER    | 213   | 138   |
| >PTEN-M35V AMGFPAER    | 1953  | >PTEN-M35V AVGFPAER    | 387   | 1566  |
| >PTEN-M35V LTYIYPNIIAM | 69    | >PTEN-M35V LTYIYPNIIAV | 313   | 244   |
| >PTEN-M35V LTYIYPNIIAM | 3070  | >PTEN-M35V LTYIYPNIIAV | 133   | 2937  |
| >PTEN-M35V LTYIYPNIIAM | 1976  | >PTEN-M35V LTYIYPNIIAV | 262   | 1714  |
| >PTEN-M35V LTYIYPNIIAM | 2719  | >PTEN-M35V LTYIYPNIIAV | 41    | 2678  |
| >PTEN-M35V LTYIYPNIIAM | 1066  | >PTEN-M35V LTYIYPNIIAV | 66    | 1000  |
| >PTEN-M35V LTYIYPNIIAM | 239   | >PTEN-M35V LTYIYPNIIAV | 5     | 234   |
| >PTEN-M35V LTYIYPNIIAM | 6314  | >PTEN-M35V LTYIYPNIIAV | 152   | 6162  |
| >PTEN-M35V LTYIYPNIIAM | 10703 | >PTEN-M35V LTYIYPNIIAV | 124   | 10579 |

|                        |       |                        |       |       |
|------------------------|-------|------------------------|-------|-------|
| >PTEN-M35V LTYIYPNIIAM | 11627 | >PTEN-M35V LTYIYPNIIAV | 35    | 11592 |
| >PTEN-M35V LTYIYPNIIAM | 320   | >PTEN-M35V LTYIYPNIIAV | 12800 | 12480 |
| >PTEN-M35V LTYIYPNIIAM | 2898  | >PTEN-M35V LTYIYPNIIAV | 78    | 2820  |
| >PTEN-M35V LTYIYPNIIAM | 326   | >PTEN-M35V LTYIYPNIIAV | 23    | 303   |
| >PTEN-M35V LTYIYPNIIAM | 368   | >PTEN-M35V LTYIYPNIIAV | 4007  | 3639  |
| >PTEN-M35V LTYIYPNIIAM | 98    | >PTEN-M35V LTYIYPNIIAV | 376   | 278   |
| >PTEN-M35V LTYIYPNIIAM | 5     | >PTEN-M35V LTYIYPNIIAV | 63    | 58    |
| >PTEN-M35V LTYIYPNIIAM | 134   | >PTEN-M35V LTYIYPNIIAV | 9275  | 9141  |
| >PTEN-M35V LTYIYPNIIAM | 111   | >PTEN-M35V LTYIYPNIIAV | 359   | 248   |
| >PTEN-M35V LTYIYPNIIAM | 74    | >PTEN-M35V LTYIYPNIIAV | 1515  | 1441  |
| >PTEN-M35V LTYIYPNIIAM | 147   | >PTEN-M35V LTYIYPNIIAV | 380   | 233   |
| >PTEN-M35V IAMGFPAERL  | 65    | >PTEN-M35V IAVGFPAERL  | 621   | 556   |
| >PTEN-M35V IAMGFPAERL  | 445   | >PTEN-M35V IAVGFPAERL  | 1288  | 843   |
| >PTEN-M35V IAMGFPAER   | 222   | >PTEN-M35V IAVGFPAER   | 3941  | 3719  |
| >PTEN-M35V IAMGFPAER   | 32    | >PTEN-M35V IAVGFPAER   | 112   | 80    |
| >PTEN-M35V IAMGFPAER   | 58    | >PTEN-M35V IAVGFPAER   | 235   | 177   |
| >PTEN-M35V IAMGFPAER   | 8     | >PTEN-M35V IAVGFPAER   | 12    | 4     |
| >PTEN-M35V IAMGFPAERL  | 19    | >PTEN-M35V IAVGFPAERL  | 18    | 1     |
| >PTEN-M35V IAMGFPAERL  | 332   | >PTEN-M35V IAVGFPAERL  | 670   | 338   |
| >PTEN-M35V IAMGFPAERL  | 476   | >PTEN-M35V IAVGFPAERL  | 1224  | 748   |
| >PTEN-M35V IAMGFPAER   | 268   | >PTEN-M35V IAVGFPAER   | 320   | 52    |
| >PTEN-M35V IIAMGFPA    | 369   | >PTEN-M35V IIAVGFPA    | 566   | 197   |
| >PTEN-M35V IIAMGFPA    | 311   | >PTEN-M35V IIAVGFPA    | 303   | 8     |
| >PTEN-M35V IIAMGFPAER  | 200   | >PTEN-M35V IIAVGFPAERL | 204   | 4     |
| >PTEN-M35V IIAMGFPA    | 65    | >PTEN-M35V IIAVGFPA    | 158   | 93    |
| >PTEN-M35V IIAMGFPA    | 35    | >PTEN-M35V IIAVGFPA    | 32    | 3     |
| >PTEN-M35V IIAMGFPAER  | 213   | >PTEN-M35V IIAVGFPAERL | 223   | 10    |
| >PTEN-M35V IIAMGFPAER  | 471   | >PTEN-M35V IIAVGFPAERL | 1031  | 560   |
| >PTEN-M35V IIAMGFPA    | 206   | >PTEN-M35V IIAVGFPA    | 588   | 382   |
| >PTEN-M35V IIAMGFPAER  | 73    | >PTEN-M35V IIAVGFPAERL | 144   | 71    |
| >PTEN-M35V IIAMGFPAER  | 83    | >PTEN-M35V IIAVGFPAER  | 178   | 95    |
| >PTEN-M35V IIAMGFPAER  | 468   | >PTEN-M35V IIAVGFPAER  | 1442  | 974   |
| >PTEN-M35V IIAMGFPAER  | 12    | >PTEN-M35V IIAVGFPAER  | 13    | 1     |
| >PTEN-M35V IIAMGFPA    | 731   | >PTEN-M35V IIAVGFPA    | 494   | 237   |
| >PTEN-M35V IIAMGFPAER  | 273   | >PTEN-M35V IIAVGFPAER  | 528   | 255   |
| >PTEN-M35V NIIAMGFPA   | 550   | >PTEN-M35V NIIAVGFPA   | 311   | 239   |
| >PTEN-M35V NIIAMGFPA   | 391   | >PTEN-M35V NIIAVGFPA   | 238   | 153   |
| >PTEN-M35V NIIAMGFPA   | 162   | >PTEN-M35V NIIAVGFPA   | 144   | 18    |
| >PTEN-M35V NIIAMGFPA   | 32    | >PTEN-M35V NIIAVGFPA   | 19    | 13    |
| >PTEN-M35V NIIAMGFPAE  | 150   | >PTEN-M35V NIIAVGFPAEF | 152   | 2     |
| >PTEN-M35V NIIAMGFPAE  | 115   | >PTEN-M35V NIIAVGFPAEF | 58    | 57    |
| >PTEN-M35V NIIAMGFPAE  | 8     | >PTEN-M35V NIIAVGFPAEF | 7     | 1     |
| >PTEN-M35V NIIAMGFPA   | 28    | >PTEN-M35V NIIAVGFPA   | 12    | 16    |



|                        |       |                        |      |       |
|------------------------|-------|------------------------|------|-------|
| >PTEN-M35V NIIAMGFPA   | 154   | >PTEN-M35V NIIAVGFPA   | 65   | 89    |
| >PTEN-M35V NIIAMGFPAE  | 235   | >PTEN-M35V NIIAVGFPAEF | 359  | 124   |
| >PTEN-M35V YPNIIAMGF   | 281   | >PTEN-M35V YPNIIAVGF   | 258  | 23    |
| >PTEN-M35V YPNIIAMGFP  | 91    | >PTEN-M35V YPNIIAVGFPA | 105  | 14    |
| >PTEN-M35V YPNIIAMG    | 766   | >PTEN-M35V YPNIIAVG    | 263  | 503   |
| >PTEN-M35V YPNIIAMGF   | 11    | >PTEN-M35V YPNIIAVGF   | 9    | 2     |
| >PTEN-M35V YPNIIAMGFP  | 37    | >PTEN-M35V YPNIIAVGFPA | 33   | 4     |
| >PTEN-M35V YPNIIAMGF   | 82    | >PTEN-M35V YPNIIAVGF   | 78   | 4     |
| >PTEN-M35V YPNIIAMG    | 328   | >PTEN-M35V YPNIIAVG    | 167  | 161   |
| >PTEN-M35V YPNIIAMGFP  | 6     | >PTEN-M35V YPNIIAVGFPA | 6    | 0     |
| >PTEN-M35V YPNIIAMGF   | 102   | >PTEN-M35V YPNIIAVGF   | 57   | 45    |
| >PTEN-M35V IYPNIIAM    | 9987  | >PTEN-M35V IYPNIIAV    | 348  | 9639  |
| >PTEN-M35V IYPNIIAM    | 23858 | >PTEN-M35V IYPNIIAV    | 434  | 23424 |
| >PTEN-M35V IYPNIIAMGF  | 80    | >PTEN-M35V IYPNIIAVGF  | 72   | 8     |
| >PTEN-M35V IYPNIIAMGF  | 49    | >PTEN-M35V IYPNIIAVGF  | 50   | 1     |
| >PTEN-M35V IYPNIIAM    | 32    | >PTEN-M35V IYPNIIAV    | 72   | 40    |
| >PTEN-M35V IYPNIIAMGF  | 4     | >PTEN-M35V IYPNIIAVGF  | 5    | 1     |
| >PTEN-M35V IYPNIIAMGF  | 56    | >PTEN-M35V IYPNIIAVGF  | 74   | 18    |
| >PTEN-M35V IYPNIIAM    | 288   | >PTEN-M35V IYPNIIAV    | 2257 | 1969  |
| >PTEN-M35V IYPNIIAMGF  | 408   | >PTEN-M35V IYPNIIAVGF  | 415  | 7     |
| >PTEN-M35V YIYPNIIAM   | 226   | >PTEN-M35V YIYPNIIAV   | 871  | 645   |
| >PTEN-M35V YIYPNIIAM   | 163   | >PTEN-M35V YIYPNIIAV   | 855  | 692   |
| >PTEN-M35V YIYPNIIAM   | 35    | >PTEN-M35V YIYPNIIAV   | 8    | 27    |
| >PTEN-M35V YIYPNIIAM   | 172   | >PTEN-M35V YIYPNIIAV   | 12   | 160   |
| >PTEN-M35V YIYPNIIAM   | 29    | >PTEN-M35V YIYPNIIAV   | 3    | 26    |
| >PTEN-M35V YIYPNIIAMGF | 464   | >PTEN-M35V YIYPNIIAVGF | 857  | 393   |
| >PTEN-M35V YIYPNIIAM   | 8     | >PTEN-M35V YIYPNIIAV   | 3    | 5     |
| >PTEN-M35V YIYPNIIAMGF | 31    | >PTEN-M35V YIYPNIIAVGF | 28   | 3     |
| >PTEN-M35V YIYPNIIAM   | 4     | >PTEN-M35V YIYPNIIAV   | 1    | 3     |
| >PTEN-M35V YIYPNIIAMG  | 49    | >PTEN-M35V YIYPNIIAVG  | 104  | 55    |
| >PTEN-M35V YIYPNIIAMGF | 73    | >PTEN-M35V YIYPNIIAVGF | 60   | 13    |
| >PTEN-M35V YIYPNIIAM   | 21    | >PTEN-M35V YIYPNIIAV   | 2    | 19    |
| >PTEN-M35V YIYPNIIAM   | 72    | >PTEN-M35V YIYPNIIAV   | 4    | 68    |
| >PTEN-M35V YIYPNIIAM   | 117   | >PTEN-M35V YIYPNIIAV   | 5    | 112   |
| >PTEN-M35V YIYPNIIAM   | 6     | >PTEN-M35V YIYPNIIAV   | 1    | 5     |
| >PTEN-M35V YIYPNIIAMGF | 338   | >PTEN-M35V YIYPNIIAVGF | 404  | 66    |
| >PTEN-M35V YIYPNIIAMGF | 133   | >PTEN-M35V YIYPNIIAVGF | 212  | 79    |
| >PTEN-M35V YIYPNIIAM   | 108   | >PTEN-M35V YIYPNIIAV   | 4573 | 4465  |
| >PTEN-M35V YIYPNIIAMGF | 214   | >PTEN-M35V YIYPNIIAVGF | 511  | 297   |
| >PTEN-M35V YIYPNIIAM   | 26    | >PTEN-M35V YIYPNIIAV   | 3572 | 3546  |
| >PTEN-M35V YIYPNIIAMGF | 417   | >PTEN-M35V YIYPNIIAVGF | 354  | 63    |
| >PTEN-M35V YIYPNIIAMGF | 92    | >PTEN-M35V YIYPNIIAVGF | 155  | 63    |
| >PTEN-M35V YIYPNIIAMGF | 311   | >PTEN-M35V YIYPNIIAVGF | 140  | 171   |

|                        |       |                        |      |       |
|------------------------|-------|------------------------|------|-------|
| >PTEN-M35V YIYPNIIAM   | 1222  | >PTEN-M35V YIYPNIIAV   | 25   | 1197  |
| >PTEN-M35V YIYPNIIAM   | 40    | >PTEN-M35V YIYPNIIAV   | 6    | 34    |
| >PTEN-M35V YIYPNIIAM   | 69    | >PTEN-M35V YIYPNIIAV   | 701  | 632   |
| >PTEN-M35V YIYPNIIAMGF | 63    | >PTEN-M35V YIYPNIIAVGF | 70   | 7     |
| >PTEN-M35V YIYPNIIAM   | 187   | >PTEN-M35V YIYPNIIAV   | 1129 | 942   |
| >PTEN-M35V YIYPNIIAMGF | 93    | >PTEN-M35V YIYPNIIAVGF | 107  | 14    |
| >PTEN-M35V YIYPNIIAM   | 35    | >PTEN-M35V YIYPNIIAV   | 143  | 108   |
| >PTEN-M35V YIYPNIIAMGF | 16    | >PTEN-M35V YIYPNIIAVGF | 17   | 1     |
| >PTEN-M35V YIYPNIIAM   | 51    | >PTEN-M35V YIYPNIIAV   | 1399 | 1348  |
| >PTEN-M35V YIYPNIIAMGF | 8     | >PTEN-M35V YIYPNIIAVGF | 7    | 1     |
| >PTEN-M35V YIYPNIIAM   | 22    | >PTEN-M35V YIYPNIIAV   | 1756 | 1734  |
| >PTEN-M35V YIYPNIIAMGF | 173   | >PTEN-M35V YIYPNIIAVGF | 128  | 45    |
| >PTEN-M35V YIYPNIIAM   | 197   | >PTEN-M35V YIYPNIIAV   | 767  | 570   |
| >PTEN-M35V TYIYPNIIAM  | 317   | >PTEN-M35V TYIYPNIIAV  | 705  | 388   |
| >PTEN-M35V TYIYPNIIAM  | 36    | >PTEN-M35V TYIYPNIIAV  | 3539 | 3503  |
| >PTEN-M35V TYIYPNIIAM  | 641   | >PTEN-M35V TYIYPNIIAV  | 157  | 484   |
| >PTEN-N184 NHLDYRPV    | 6001  | >PTEN-N184 IHLDYRPV    | 109  | 5892  |
| >PTEN-N184 NHLDYRPVAL  | 2479  | >PTEN-N184 IHLDYRPVALI | 179  | 2300  |
| >PTEN-N184 NHLDYRPV    | 4477  | >PTEN-N184 IHLDYRPV    | 456  | 4021  |
| >PTEN-N184 NHLDYRPVAL  | 853   | >PTEN-N184 IHLDYRPVAL  | 82   | 771   |
| >PTEN-N184 NHLDYRPVAL  | 321   | >PTEN-N184 IHLDYRPVAL  | 1177 | 856   |
| >PTEN-N184 NHLDYRPV    | 235   | >PTEN-N184 IHLDYRPV    | 2730 | 2495  |
| >PTEN-N184 NHLDYRPVAL  | 7     | >PTEN-N184 IHLDYRPVAL  | 19   | 12    |
| >PTEN-N184 NHLDYRPVAL  | 17    | >PTEN-N184 IHLDYRPVALI | 108  | 91    |
| >PTEN-N184 KNHLDYRPV   | 11186 | >PTEN-N184 KIHLDYRPV   | 83   | 11103 |
| >PTEN-N184 KNHLDYRPV   | 19223 | >PTEN-N184 KIHLDYRPV   | 329  | 18894 |
| >PTEN-N184 KNHLDYRPV   | 898   | >PTEN-N184 KIHLDYRPV   | 46   | 852   |
| >PTEN-N184 KNHLDYRPV/  | 282   | >PTEN-N184 KIHLDYRPVA  | 25   | 257   |
| >PTEN-N184 KNHLDYRPV/  | 1646  | >PTEN-N184 KIHLDYRPVA  | 107  | 1539  |
| >PTEN-N184 KNHLDYRPV/  | 2688  | >PTEN-N184 KIHLDYRPVA  | 109  | 2579  |
| >PTEN-N184 YVYYYSYLLKN | 4714  | >PTEN-N184 YVYYYSYLLKI | 105  | 4609  |
| >PTEN-N184 YVYYYSYLLKN | 9367  | >PTEN-N184 YVYYYSYLLKI | 11   | 9356  |
| >PTEN-N184 YVYYYSYLLKN | 6313  | >PTEN-N184 YVYYYSYLLKI | 22   | 6291  |
| >PTEN-N184 YVYYYSYLLKN | 7120  | >PTEN-N184 YVYYYSYLLKI | 15   | 7105  |
| >PTEN-N184 YVYYYSYLLKN | 4828  | >PTEN-N184 YVYYYSYLLKI | 18   | 4810  |
| >PTEN-N184 YVYYYSYLLKN | 5268  | >PTEN-N184 YVYYYSYLLKI | 14   | 5254  |
| >PTEN-N184 YVYYYSYLLKN | 16918 | >PTEN-N184 YVYYYSYLLKI | 99   | 16819 |
| >PTEN-N184 YVYYYSYLLKN | 19054 | >PTEN-N184 YVYYYSYLLKI | 135  | 18919 |
| >PTEN-N184 YVYYYSYLLKN | 19655 | >PTEN-N184 YVYYYSYLLKI | 111  | 19544 |
| >PTEN-N184 YVYYYSYLLKN | 632   | >PTEN-N184 YVYYYSYLLKI | 155  | 477   |
| >PTEN-N184 YVYYYSYLLKN | 10512 | >PTEN-N184 YVYYYSYLLKI | 109  | 10403 |
| >PTEN-N184 YVYYYSYLLKN | 8693  | >PTEN-N184 YVYYYSYLLKI | 82   | 8611  |
| >PTEN-N184 YVYYYSYLLKN | 8644  | >PTEN-N184 YVYYYSYLLKI | 23   | 8621  |

|                         |       |                         |     |       |
|-------------------------|-------|-------------------------|-----|-------|
| >PTEN-N184 YVYYYYSYLLKN | 9602  | >PTEN-N184 YVYYYYSYLLKI | 436 | 9166  |
| >PTEN-N184 YVYYYYSYLLKN | 9081  | >PTEN-N184 YVYYYYSYLLKI | 97  | 8984  |
| >PTEN-N184 YVYYYYSYLLKN | 3273  | >PTEN-N184 YVYYYYSYLLKI | 228 | 3045  |
| >PTEN-N184 YVYYYYSYLLKN | 38048 | >PTEN-N184 YVYYYYSYLLKI | 120 | 37928 |
| >PTEN-N184 LKNHLDYRPV   | 111   | >PTEN-N184 LKIHLDYRPV   | 62  | 49    |
| >PTEN-N184 LKNHLDYRPV   | 686   | >PTEN-N184 LKIHLDYRPV/  | 397 | 289   |
| >PTEN-N184 LKNHLDYR     | 860   | >PTEN-N184 LKIHLDYR     | 461 | 399   |
| >PTEN-N184 LLKNHLDYRP   | 79    | >PTEN-N184 LLKIHLDYRPV  | 138 | 59    |
| >PTEN-N184 LLKNHLDYRP   | 4     | >PTEN-N184 LLKIHLDYRPV  | 6   | 2     |
| >PTEN-N184 LLKNHLDYRP   | 278   | >PTEN-N184 LLKIHLDYRPV  | 448 | 170   |
| >PTEN-N184 LLKNHLDYRP   | 27    | >PTEN-N184 LLKIHLDYRPV  | 46  | 19    |
| >PTEN-N184 LLKNHLDYRP   | 36    | >PTEN-N184 LLKIHLDYRPV  | 119 | 83    |
| >PTEN-N184 LLKNHLDYRP   | 5     | >PTEN-N184 LLKIHLDYRPV  | 6   | 1     |
| >PTEN-N184 LLKNHLDY     | 63    | >PTEN-N184 LLKIHLDY     | 57  | 6     |
| >PTEN-N184 LLKNHLDY     | 443   | >PTEN-N184 LLKIHLDY     | 442 | 1     |
| >PTEN-N184 LLKNHLDYR    | 10    | >PTEN-N184 LLKIHLDYR    | 11  | 1     |
| >PTEN-N184 LLKNHLDYR    | 347   | >PTEN-N184 LLKIHLDYR    | 369 | 22    |
| >PTEN-N184 LLKNHLDY     | 276   | >PTEN-N184 LLKIHLDY     | 248 | 28    |
| >PTEN-N184 LLKNHLDYRP   | 177   | >PTEN-N184 LLKIHLDYRPV  | 133 | 44    |
| >PTEN-N184 LLKNHLDY     | 57    | >PTEN-N184 LLKIHLDY     | 92  | 35    |
| >PTEN-N184 LLKNHLDY     | 248   | >PTEN-N184 LLKIHLDY     | 606 | 358   |
| >PTEN-N184 LLKNHLDY     | 179   | >PTEN-N184 LLKIHLDY     | 642 | 463   |
| >PTEN-N184 LLKNHLDYR    | 678   | >PTEN-N184 LLKIHLDYR    | 406 | 272   |
| >PTEN-N184 YLLKNHLD     | 1076  | >PTEN-N184 YLLKIHL      | 495 | 581   |
| >PTEN-N184 YLLKNHLDYR   | 262   | >PTEN-N184 YLLKIHLDYR   | 353 | 91    |
| >PTEN-N184 YLLKNHLDY    | 6     | >PTEN-N184 YLLKIHLDY    | 5   | 1     |
| >PTEN-N184 YLLKNHLDYR   | 202   | >PTEN-N184 YLLKIHLDYR   | 149 | 53    |
| >PTEN-N184 YLLKNHLDYR   | 558   | >PTEN-N184 YLLKIHLDYR   | 448 | 110   |
| >PTEN-N184 YLLKNHLDYR   | 171   | >PTEN-N184 YLLKIHLDYR   | 91  | 80    |
| >PTEN-N184 YLLKNHLDY    | 4     | >PTEN-N184 YLLKIHLDY    | 3   | 1     |
| >PTEN-N184 YLLKNHLDY    | 121   | >PTEN-N184 YLLKIHLDY    | 196 | 75    |
| >PTEN-N184 YLLKNHLDY    | 32    | >PTEN-N184 YLLKIHLDY    | 70  | 38    |
| >PTEN-N184 YLLKNHLDY    | 22    | >PTEN-N184 YLLKIHLDY    | 47  | 25    |
| >PTEN-N184 YLLKNHLDY    | 3389  | >PTEN-N184 YLLKIHLDY    | 434 | 2955  |
| >PTEN-N184 YLLKNHLDY    | 495   | >PTEN-N184 YLLKIHLDY    | 907 | 412   |
| >PTEN-N184 YLLKNHLDYR   | 327   | >PTEN-N184 YLLKIHLDYR   | 193 | 134   |
| >PTEN-N184 YLLKNHLDYR   | 43    | >PTEN-N184 YLLKIHLDYR   | 33  | 10    |
| >PTEN-N184 SYLLKNHL     | 13    | >PTEN-N184 SYLLKIHL     | 59  | 46    |
| >PTEN-N184 SYLLKNHL     | 12    | >PTEN-N184 SYLLKIHL     | 11  | 1     |
| >PTEN-N184 SYLLKNHLDY   | 499   | >PTEN-N184 SYLLKIHLDY   | 259 | 240   |
| >PTEN-N184 SYLLKNHLDYI  | 709   | >PTEN-N184 SYLLKIHLDYR  | 477 | 232   |
| >PTEN-N184 SYLLKNHLDY   | 51    | >PTEN-N184 SYLLKIHLDY   | 31  | 20    |
| >PTEN-N184 SYLLKNHLDY   | 246   | >PTEN-N184 SYLLKIHLDY   | 158 | 88    |

|                        |       |                        |      |       |
|------------------------|-------|------------------------|------|-------|
| >PTEN-N184 SYLLKNHLDYI | 15    | >PTEN-N184 SYLLKIHLDYR | 12   | 3     |
| >PTEN-N184 SYLLKNHLDYI | 82    | >PTEN-N184 SYLLKIHLDYR | 68   | 14    |
| >PTEN-N184 SYLLKNHLDY  | 21    | >PTEN-N184 SYLLKIHLDY  | 14   | 7     |
| >PTEN-N184 SYLLKNHLDYI | 15    | >PTEN-N184 SYLLKIHLDYR | 18   | 3     |
| >PTEN-N184 SYLLKNHL    | 463   | >PTEN-N184 SYLLKIHL    | 231  | 232   |
| >PTEN-N184 YSYLLKNHL   | 16    | >PTEN-N184 YSYLLKIHL   | 20   | 4     |
| >PTEN-N184 YSYLLKNHLD' | 125   | >PTEN-N184 YSYLLKIHLDY | 112  | 13    |
| >PTEN-N184 YSYLLKNHLD' | 15    | >PTEN-N184 YSYLLKIHLDY | 12   | 3     |
| >PTEN-N184 YSYLLKNHLD' | 71    | >PTEN-N184 YSYLLKIHLDY | 40   | 31    |
| >PTEN-N184 YSYLLKNHLD' | 164   | >PTEN-N184 YSYLLKIHLDY | 189  | 25    |
| >PTEN-N184 YSYLLKNHLD' | 47    | >PTEN-N184 YSYLLKIHLDY | 53   | 6     |
| >PTEN-N184 YSYLLKNH    | 289   | >PTEN-N184 YSYLLKIH    | 628  | 339   |
| >PTEN-N184 YSYLLKNHL   | 52    | >PTEN-N184 YSYLLKIHL   | 14   | 38    |
| >PTEN-N184 YSYLLKNHLD' | 5     | >PTEN-N184 YSYLLKIHLDY | 4    | 1     |
| >PTEN-N184 YSYLLKNHLD' | 315   | >PTEN-N184 YSYLLKIHLDY | 251  | 64    |
| >PTEN-N184 YSYLLKNHL   | 143   | >PTEN-N184 YSYLLKIHL   | 515  | 372   |
| >PTEN-N184 YSYLLKNHLD' | 58    | >PTEN-N184 YSYLLKIHLDY | 49   | 9     |
| >PTEN-N184 YYSYLLKNHL  | 49    | >PTEN-N184 YYSYLLKIHL  | 405  | 356   |
| >PTEN-N184 YYSYLLKN    | 17757 | >PTEN-N184 YYSYLLKI    | 131  | 17626 |
| >PTEN-N184 YYSYLLKNHL  | 115   | >PTEN-N184 YYSYLLKIHL  | 216  | 101   |
| >PTEN-N184 YYSYLLKN    | 7002  | >PTEN-N184 YYSYLLKI    | 72   | 6930  |
| >PTEN-N184 YYSYLLKNHL  | 108   | >PTEN-N184 YYSYLLKIHL  | 155  | 47    |
| >PTEN-N184 YYSYLLKN    | 985   | >PTEN-N184 YYSYLLKI    | 6    | 979   |
| >PTEN-N184 YYSYLLKNHL  | 8     | >PTEN-N184 YYSYLLKIHL  | 10   | 2     |
| >PTEN-N184 YYSYLLKN    | 6646  | >PTEN-N184 YYSYLLKI    | 266  | 6380  |
| >PTEN-N184 YYSYLLKNHL  | 117   | >PTEN-N184 YYSYLLKIHL  | 202  | 85    |
| >PTEN-N184 YYSYLLKN    | 8721  | >PTEN-N184 YYSYLLKI    | 294  | 8427  |
| >PTEN-N184 YYSYLLKNHI  | 31    | >PTEN-N184 YYSYLLKIHL  | 38   | 7     |
| >PTEN-N184 YYSYLLKNHI  | 250   | >PTEN-N184 YYSYLLKIHL  | 1651 | 1401  |
| >PTEN-N184 YYSYLLKN    | 30798 | >PTEN-N184 YYSYLLKI    | 442  | 30356 |
| >PTEN-N184 YYSYLLKN    | 21972 | >PTEN-N184 YYSYLLKI    | 347  | 21625 |
| >PTEN-N184 YYSYLLKN    | 17435 | >PTEN-N184 YYSYLLKI    | 150  | 17285 |
| >PTEN-N184 YYSYLLKNHI  | 109   | >PTEN-N184 YYSYLLKIHL  | 245  | 136   |
| >PTEN-N184 YYSYLLKN    | 17476 | >PTEN-N184 YYSYLLKI    | 246  | 17230 |
| >PTEN-N184 YYSYLLKNHI  | 615   | >PTEN-N184 YYSYLLKIHL  | 429  | 186   |
| >PTEN-N184 YYSYLLKN    | 11636 | >PTEN-N184 YYSYLLKI    | 90   | 11546 |
| >PTEN-N184 YYSYLLKNHI  | 536   | >PTEN-N184 YYSYLLKIHL  | 233  | 303   |
| >PTEN-N184 YYSYLLKNHI  | 563   | >PTEN-N184 YYSYLLKIHL  | 340  | 223   |
| >PTEN-N184 YYSYLLKN    | 2223  | >PTEN-N184 YYSYLLKI    | 13   | 2210  |
| >PTEN-N184 YYSYLLKNHI  | 29    | >PTEN-N184 YYSYLLKIHL  | 38   | 9     |
| >PTEN-N184 YYSYLLKN    | 3862  | >PTEN-N184 YYSYLLKI    | 30   | 3832  |
| >PTEN-N184 YYSYLLKNHI  | 147   | >PTEN-N184 YYSYLLKIHL  | 175  | 28    |
| >PTEN-N184 YYSYLLKN    | 315   | >PTEN-N184 YYSYLLKI    | 4    | 311   |

|                        |       |                        |      |       |
|------------------------|-------|------------------------|------|-------|
| >PTEN-N184 YYYSYLLKNHI | 6     | >PTEN-N184 YYYSYLLKIHL | 7    | 1     |
| >PTEN-N184 YYYSYLLKN   | 818   | >PTEN-N184 YYYSYLLKI   | 187  | 631   |
| >PTEN-N184 YYYSYLLKN   | 3054  | >PTEN-N184 YYYSYLLKI   | 113  | 2941  |
| >PTEN-N184 YYYSYLLKNHI | 347   | >PTEN-N184 YYYSYLLKIHL | 290  | 57    |
| >PTEN-N184 YYYSYLLKNHI | 441   | >PTEN-N184 YYYSYLLKIHL | 633  | 192   |
| >PTEN-N184 VYYYSYLLKN  | 2179  | >PTEN-N184 VYYYSYLLKI  | 461  | 1718  |
| >PTEN-N184 VYYYSYLLKN  | 19225 | >PTEN-N184 VYYYSYLLKI  | 233  | 18992 |
| >PTEN-N184 VYYYSYLLKN  | 7261  | >PTEN-N184 VYYYSYLLKI  | 134  | 7127  |
| >PTEN-N184 VYYYSYLLKN  | 3984  | >PTEN-N184 VYYYSYLLKI  | 17   | 3967  |
| >PTEN-N184 VYYYSYLLKN  | 7125  | >PTEN-N184 VYYYSYLLKI  | 262  | 6863  |
| >PTEN-N184 VYYYSYLLKN  | 12170 | >PTEN-N184 VYYYSYLLKI  | 423  | 11747 |
| >PTEN-N323 KEYLVLTLTKN | 21226 | >PTEN-N323 KEYLVLTLTCK | 470  | 20756 |
| >PTEN-N323 KEYLVLTLTKN | 125   | >PTEN-N323 KEYLVLTLTCK | 124  | 1     |
| >PTEN-N323 LTKNDLKD    | 81    | >PTEN-N323 LTKKDLKD    | 74   | 7     |
| >PTEN-N323 LTKNDLKDAN  | 55    | >PTEN-N323 LTKKDLKDAN  | 49   | 6     |
| >PTEN-N323 LTKNDLKDAN  | 446   | >PTEN-N323 LTKKDLKDAN  | 586  | 140   |
| >PTEN-N323 LTKNDLKDAN  | 335   | >PTEN-N323 LTKKDLKDAN  | 408  | 73    |
| >PTEN-N323 TLTKNDLDKA  | 242   | >PTEN-N323 TLTKKDLDKA  | 548  | 306   |
| >PTEN-N323 LTLTKNDLKD  | 313   | >PTEN-N323 LTLTKKDLKD  | 283  | 30    |
| >PTEN-N323 LTLTKNDLKD  | 62    | >PTEN-N323 LTLTKKDLKD  | 68   | 6     |
| >PTEN-N323 LTLTKNDL    | 261   | >PTEN-N323 LTLTKKDL    | 150  | 111   |
| >PTEN-N323 VLTLTKNDL   | 69    | >PTEN-N323 VLTLTKKDL   | 143  | 74    |
| >PTEN-N323 LVLTLTKN    | 19930 | >PTEN-N323 LVLTLTKK    | 184  | 19746 |
| >PTEN-N323 LVLTLTKN    | 24730 | >PTEN-N323 LVLTLTKK    | 53   | 24677 |
| >PTEN-N323 LVLTLTKN    | 15365 | >PTEN-N323 LVLTLTKK    | 427  | 14938 |
| >PTEN-N323 YLVLTLTKNDI | 87    | >PTEN-N323 YLVLTLTKKDL | 327  | 240   |
| >PTEN-N323 YLVLTLTKNDI | 88    | >PTEN-N323 YLVLTLTKKDL | 188  | 100   |
| >PTEN-N323 YLVLTLTKNDI | 288   | >PTEN-N323 YLVLTLTKKDL | 748  | 460   |
| >PTEN-N323 YLVLTLTKNDI | 147   | >PTEN-N323 YLVLTLTKKDL | 199  | 52    |
| >PTEN-N323 YLVLTLTKNDI | 56    | >PTEN-N323 YLVLTLTKKDL | 202  | 146   |
| >PTEN-N323 YLVLTLTKNDI | 91    | >PTEN-N323 YLVLTLTKKDL | 233  | 142   |
| >PTEN-N323 YLVLTLTKNDI | 8     | >PTEN-N323 YLVLTLTKKDL | 12   | 4     |
| >PTEN-N323 YLVLTLTKN   | 21090 | >PTEN-N323 YLVLTLTCK   | 461  | 20629 |
| >PTEN-N323 YLVLTLTKN   | 25480 | >PTEN-N323 YLVLTLTCK   | 345  | 25135 |
| >PTEN-N323 EYLVLTLTKN  | 13307 | >PTEN-N323 EYLVLTLTCK  | 341  | 12966 |
| >PTEN-N48D NNIDDVVR    | 972   | >PTEN-N48D DNIDDVVR    | 116  | 856   |
| >PTEN-N48D NNIDDVVRFL  | 3013  | >PTEN-N48D DNIDDVVRFL  | 460  | 2553  |
| >PTEN-N48D NNIDDVVR    | 192   | >PTEN-N48D DNIDDVVR    | 177  | 15    |
| >PTEN-N48D RNNIDDVVR   | 450   | >PTEN-N48D RDNIDDVVR   | 1371 | 921   |
| >PTEN-N48D RNNIDDVVR   | 474   | >PTEN-N48D RDNIDDVVR   | 1644 | 1170  |
| >PTEN-N48D RNNIDDVV    | 7040  | >PTEN-N48D RDNIDDVV    | 139  | 6901  |
| >PTEN-N48D YRNNIDDVVF  | 48    | >PTEN-N48D YRDNIDDVVF  | 507  | 459   |
| >PTEN-N48D YRNNIDDVVF  | 119   | >PTEN-N48D YRDNIDDVVF  | 695  | 576   |

|                         |       |                         |     |       |
|-------------------------|-------|-------------------------|-----|-------|
| >PTEN-N48D VYRNNIDDV    | 4009  | >PTEN-N48D VYRDNIDDV    | 340 | 3669  |
| >PTEN-N48D VYRNNIDDV\   | 219   | >PTEN-N48D VYRDNIDDV\   | 352 | 133   |
| >PTEN-N48D VYRNNIDDV\   | 173   | >PTEN-N48D VYRDNIDDV\   | 101 | 72    |
| >PTEN-N48D GVYRNNIDDV\  | 225   | >PTEN-N48D GVYRDNIDDV\  | 269 | 44    |
| >PTEN-N48D GVYRNNIDDV\  | 86    | >PTEN-N48D GVYRDNIDDV\  | 134 | 48    |
| >PTEN-N48D GVYRNNIDDV\  | 103   | >PTEN-N48D GVYRDNIDDV\  | 177 | 74    |
| >PTEN-N48D GVYRNNIDDV\  | 106   | >PTEN-N48D GVYRDNIDDV\  | 183 | 77    |
| >PTEN-N48D GVYRNNIDDV\  | 113   | >PTEN-N48D GVYRDNIDDV\  | 214 | 101   |
| >PTEN-N48D GVYRNNIDDV\  | 97    | >PTEN-N48D GVYRDNIDDV\  | 76  | 21    |
| >PTEN-N48D GVYRNNIDDV\  | 100   | >PTEN-N48D GVYRDNIDDV\  | 86  | 14    |
| >PTEN-N48D GVYRNNIDDV\  | 36    | >PTEN-N48D GVYRDNIDDV\  | 35  | 1     |
| >PTEN-N48D GVYRNNIDDV\  | 78    | >PTEN-N48D GVYRDNIDDV\  | 89  | 11    |
| >PTEN-N48D LEGVYRNNI    | 15    | >PTEN-N48D LEGVYRDNI    | 13  | 2     |
| >PTEN-N48D LEGVYRNNI    | 457   | >PTEN-N48D LEGVYRDNI    | 568 | 111   |
| >PTEN-N48D LEGVYRNNI    | 40    | >PTEN-N48D LEGVYRDNI    | 31  | 9     |
| >PTEN-N48D RLEGVYRNNI   | 476   | >PTEN-N48D RLEGVYRDNI   | 522 | 46    |
| >PTEN-N48D RLEGVYRNNI   | 466   | >PTEN-N48D RLEGVYRDNI   | 465 | 1     |
| >PTEN-N48D RLEGVYRNNI   | 258   | >PTEN-N48D RLEGVYRDNI   | 494 | 236   |
| >PTEN-N48D RLEGVYRNNI   | 307   | >PTEN-N48D RLEGVYRDNI   | 375 | 68    |
| >PTEN-N48I- NNIDDVVR    | 192   | >PTEN-N48I- INIDDVVR    | 402 | 210   |
| >PTEN-N48I- NNIDDVVRF   | 2229  | >PTEN-N48I- INIDDVVRF   | 252 | 1977  |
| >PTEN-N48I- RNNIDDVVRFI | 10831 | >PTEN-N48I- RINIDDVVRFI | 485 | 10346 |
| >PTEN-N48I- RNNIDDVV    | 16833 | >PTEN-N48I- RINIDDVV    | 235 | 16598 |
| >PTEN-N48I- RNNIDDVVRFI | 15227 | >PTEN-N48I- RINIDDVVRFI | 375 | 14852 |
| >PTEN-N48I- RNNIDDVV    | 18413 | >PTEN-N48I- RINIDDVV    | 302 | 18111 |
| >PTEN-N48I- RNNIDDVV    | 26720 | >PTEN-N48I- RINIDDVV    | 200 | 26520 |
| >PTEN-N48I- RNNIDDVVR   | 837   | >PTEN-N48I- RINIDDVVR   | 48  | 789   |
| >PTEN-N48I- RNNIDDVVRFI | 2826  | >PTEN-N48I- RINIDDVVRFI | 97  | 2729  |
| >PTEN-N48I- RNNIDDVVRFI | 2261  | >PTEN-N48I- RINIDDVVRFI | 271 | 1990  |
| >PTEN-N48I- RNNIDDVVRFI | 450   | >PTEN-N48I- RINIDDVVRFI | 435 | 15    |
| >PTEN-N48I- RNNIDDVVRFI | 4771  | >PTEN-N48I- RINIDDVVRFI | 211 | 4560  |
| >PTEN-N48I- RNNIDDVVRFI | 6606  | >PTEN-N48I- RINIDDVVRFI | 468 | 6138  |
| >PTEN-N48I- RNNIDDVVR   | 474   | >PTEN-N48I- RINIDDVVR   | 69  | 405   |
| >PTEN-N48I- YRNNIDDVVF  | 48    | >PTEN-N48I- YRINIDDVVRI | 35  | 13    |
| >PTEN-N48I- YRNNIDDVVF  | 1092  | >PTEN-N48I- YRINIDDVVR  | 242 | 850   |
| >PTEN-N48I- YRNNIDDVVF  | 119   | >PTEN-N48I- YRINIDDVVRI | 84  | 35    |
| >PTEN-N48I- VYRNNIDDV\  | 219   | >PTEN-N48I- VYRINIDDVVI | 268 | 49    |
| >PTEN-N48I- VYRNNIDDV\  | 173   | >PTEN-N48I- VYRINIDDVVI | 147 | 26    |
| >PTEN-N48I- GVYRNNIDDV\ | 225   | >PTEN-N48I- GVYRINIDDV  | 176 | 49    |
| >PTEN-N48I- GVYRNNIDDV\ | 938   | >PTEN-N48I- GVYRINIDDV  | 489 | 449   |
| >PTEN-N48I- GVYRNNIDDV\ | 939   | >PTEN-N48I- GVYRINIDDV  | 448 | 491   |
| >PTEN-N48I- GVYRNNIDDV\ | 86    | >PTEN-N48I- GVYRINIDDV  | 113 | 27    |
| >PTEN-N48I- GVYRNNIDDV\ | 103   | >PTEN-N48I- GVYRINIDDV  | 111 | 8     |

|                        |       |                        |     |       |
|------------------------|-------|------------------------|-----|-------|
| >PTEN-N48I-GVYRNNIDDA  | 106   | >PTEN-N48I-GVYRINIDDV  | 341 | 235   |
| >PTEN-N48I-GVYRNNIDDA  | 113   | >PTEN-N48I-GVYRINIDDV  | 294 | 181   |
| >PTEN-N48I-GVYRNNIDDA  | 97    | >PTEN-N48I-GVYRINIDDV  | 65  | 32    |
| >PTEN-N48I-GVYRNNIDDA  | 100   | >PTEN-N48I-GVYRINIDDV  | 66  | 34    |
| >PTEN-N48I-GVYRNNIDDA  | 36    | >PTEN-N48I-GVYRINIDDV  | 50  | 14    |
| >PTEN-N48I-GVYRNNIDDA  | 78    | >PTEN-N48I-GVYRINIDDV  | 96  | 18    |
| >PTEN-N48I-LEGVYRNNI   | 15    | >PTEN-N48I-LEGVYRINI   | 26  | 11    |
| >PTEN-N48I-LEGVYRNNI   | 457   | >PTEN-N48I-LEGVYRINI   | 268 | 189   |
| >PTEN-N48I-LEGVYRNNI   | 40    | >PTEN-N48I-LEGVYRINI   | 38  | 2     |
| >PTEN-N48I-RLEGVYRN    | 12097 | >PTEN-N48I-RLEGVYRI    | 130 | 11967 |
| >PTEN-N48I-RLEGVYRNNI  | 476   | >PTEN-N48I-RLEGVYRINI  | 332 | 144   |
| >PTEN-N48I-RLEGVYRN    | 5913  | >PTEN-N48I-RLEGVYRI    | 17  | 5896  |
| >PTEN-N48I-RLEGVYRNNI  | 466   | >PTEN-N48I-RLEGVYRINI  | 241 | 225   |
| >PTEN-N48I-RLEGVYRN    | 17523 | >PTEN-N48I-RLEGVYRI    | 202 | 17321 |
| >PTEN-N48I-RLEGVYRN    | 12583 | >PTEN-N48I-RLEGVYRI    | 30  | 12553 |
| >PTEN-N48I-RLEGVYRNNI  | 258   | >PTEN-N48I-RLEGVYRINI  | 170 | 88    |
| >PTEN-N48I-RLEGVYRN    | 7965  | >PTEN-N48I-RLEGVYRI    | 72  | 7893  |
| >PTEN-N48I-RLEGVYRNNI  | 307   | >PTEN-N48I-RLEGVYRINI  | 221 | 86    |
| >PTEN-N48I-ERLEGVYRN   | 5337  | >PTEN-N48I-ERLEGVYRI   | 459 | 4878  |
| >PTEN-N48I-ERLEGVYRNNI | 960   | >PTEN-N48I-ERLEGVYRINI | 415 | 545   |
| >PTEN-N48I-AERLEGVYRN  | 4677  | >PTEN-N48I-AERLEGVYRI  | 489 | 4188  |
| >PTEN-N48I-AERLEGVYRN  | 7367  | >PTEN-N48I-AERLEGVYRI  | 7   | 7360  |
| >PTEN-N49T-NIDDVVRFL   | 909   | >PTEN-N49T-TIDDVVRFL   | 416 | 493   |
| >PTEN-N49T-NIDDVVRFL   | 171   | >PTEN-N49T-TIDDVVRFL   | 162 | 9     |
| >PTEN-N49T-NIDDVVRFL   | 272   | >PTEN-N49T-TIDDVVRFL   | 214 | 58    |
| >PTEN-N49T-NIDDVVRFL   | 30    | >PTEN-N49T-TIDDVVRFL   | 20  | 10    |
| >PTEN-N49T-NIDDVVRFL   | 320   | >PTEN-N49T-TIDDVVRFL   | 111 | 209   |
| >PTEN-N49T-NIDDVVRFL   | 464   | >PTEN-N49T-TIDDVVRFL   | 772 | 308   |
| >PTEN-N49T-NIDDVVRFL   | 324   | >PTEN-N49T-TIDDVVRFL   | 413 | 89    |
| >PTEN-N49T-NNIDDVVRFL  | 2199  | >PTEN-N49T-NTIDDVVRFL  | 317 | 1882  |
| >PTEN-N49T-NNIDDVVRFL  | 10154 | >PTEN-N49T-NTIDDVVRFL  | 50  | 10104 |
| >PTEN-N49T-NNIDDVVRFL  | 972   | >PTEN-N49T-NTIDDVVRFL  | 4   | 968   |
| >PTEN-N49T-NNIDDVVRFL  | 3013  | >PTEN-N49T-NTIDDVVRFL  | 9   | 3004  |
| >PTEN-N49T-NNIDDVVR    | 7443  | >PTEN-N49T-NTIDDVVR    | 262 | 7181  |
| >PTEN-N49T-NNIDDVVR    | 192   | >PTEN-N49T-NTIDDVVR    | 6   | 186   |
| >PTEN-N49T-NNIDDVVRFL  | 5650  | >PTEN-N49T-NTIDDVVRFL  | 65  | 5585  |
| >PTEN-N49T-NNIDDVVRFL  | 9652  | >PTEN-N49T-NTIDDVVRFL  | 88  | 9564  |
| >PTEN-N49T-NNIDDVVRFL  | 18624 | >PTEN-N49T-NTIDDVVRFL  | 13  | 18611 |
| >PTEN-N49T-NNIDDVVR    | 4036  | >PTEN-N49T-NTIDDVVR    | 313 | 3723  |
| >PTEN-N49T-AERLEGVYRN  | 1329  | >PTEN-N49T-AERLEGVYRI  | 109 | 1220  |
| >PTEN-N49T-AERLEGVYRN  | 450   | >PTEN-N49T-RNTIDDVVR   | 921 | 471   |
| >PTEN-N49T-RNNIDDVVR   | 474   | >PTEN-N49T-RNTIDDVVR   | 366 | 108   |
| >PTEN-N49T-YRNNIDDVVR  | 48    | >PTEN-N49T-YRNTIDDVVR  | 53  | 5     |

|                        |       |                       |     |       |
|------------------------|-------|-----------------------|-----|-------|
| >PTEN-N49T·YRNNIDDVVF  | 119   | >PTEN-N49T·YRNTIDDVVR | 164 | 45    |
| >PTEN-N49T·VYRNNIDDV\  | 219   | >PTEN-N49T·VYRNTIDDVV | 162 | 57    |
| >PTEN-N49T·VYRNNIDDV\  | 712   | >PTEN-N49T·VYRNTIDDVV | 409 | 303   |
| >PTEN-N49T·VYRNNIDDV\  | 173   | >PTEN-N49T·VYRNTIDDVV | 196 | 23    |
| >PTEN-N49T·GVYRNNIDDV\ | 225   | >PTEN-N49T·GVYRNTIDDV | 123 | 102   |
| >PTEN-N49T·GVYRNNIDDV\ | 938   | >PTEN-N49T·GVYRNTIDDV | 421 | 517   |
| >PTEN-N49T·GVYRNNIDDV\ | 86    | >PTEN-N49T·GVYRNTIDDV | 62  | 24    |
| >PTEN-N49T·GVYRNNIDDV\ | 103   | >PTEN-N49T·GVYRNTIDDV | 92  | 11    |
| >PTEN-N49T·GVYRNNIDDV\ | 106   | >PTEN-N49T·GVYRNTIDDV | 70  | 36    |
| >PTEN-N49T·GVYRNNIDDV\ | 113   | >PTEN-N49T·GVYRNTIDDV | 71  | 42    |
| >PTEN-N49T·GVYRNNIDDV\ | 97    | >PTEN-N49T·GVYRNTIDDV | 46  | 51    |
| >PTEN-N49T·GVYRNNIDDV\ | 100   | >PTEN-N49T·GVYRNTIDDV | 68  | 32    |
| >PTEN-N49T·GVYRNNIDDV\ | 36    | >PTEN-N49T·GVYRNTIDDV | 26  | 10    |
| >PTEN-N49T·GVYRNNIDDV\ | 78    | >PTEN-N49T·GVYRNTIDDV | 61  | 17    |
| >PTEN-N49T·LEGVYRNNI   | 15    | >PTEN-N49T·LEGVYRNTI  | 12  | 3     |
| >PTEN-N49T·LEGVYRNNI   | 457   | >PTEN-N49T·LEGVYRNTI  | 483 | 26    |
| >PTEN-N49T·LEGVYRNNI   | 40    | >PTEN-N49T·LEGVYRNTI  | 44  | 4     |
| >PTEN-N49T·RLEGVYRNNI  | 476   | >PTEN-N49T·RLEGVYRNTI | 236 | 240   |
| >PTEN-N49T·RLEGVYRNNI  | 466   | >PTEN-N49T·RLEGVYRNTI | 182 | 284   |
| >PTEN-N49T·RLEGVYRNNI  | 258   | >PTEN-N49T·RLEGVYRNTI | 108 | 150   |
| >PTEN-N49T·RLEGVYRNNI  | 307   | >PTEN-N49T·RLEGVYRNTI | 53  | 254   |
| >PTEN-N49T·ERLEGVYRNN  | 1427  | >PTEN-N49T·ERLEGVYRNT | 192 | 1235  |
| >PTEN-N82T·NCRVAQYPF   | 697   | >PTEN-N82T·TCRVAQYPF  | 442 | 255   |
| >PTEN-N82T·FNCRVAQY    | 14915 | >PTEN-N82T·FTCRVAQY   | 195 | 14720 |
| >PTEN-N82T·FNCRVAQYPF  | 8228  | >PTEN-N82T·FTCRVAQYPF | 494 | 7734  |
| >PTEN-N82T·FNCRVAQY    | 13609 | >PTEN-N82T·FTCRVAQY   | 469 | 13140 |
| >PTEN-N82T·FNCRVAQY    | 12716 | >PTEN-N82T·FTCRVAQY   | 258 | 12458 |
| >PTEN-N82T·FNCRVAQY    | 4975  | >PTEN-N82T·FTCRVAQY   | 33  | 4942  |
| >PTEN-N82T·FNCRVAQYPF  | 15126 | >PTEN-N82T·FTCRVAQYPF | 99  | 15027 |
| >PTEN-N82T·FNCRVAQY    | 418   | >PTEN-N82T·FTCRVAQY   | 43  | 375   |
| >PTEN-N82T·FNCRVAQYPF  | 3439  | >PTEN-N82T·FTCRVAQYPF | 473 | 2966  |
| >PTEN-N82T·FNCRVAQYPF  | 11087 | >PTEN-N82T·FTCRVAQYPF | 250 | 10837 |
| >PTEN-N82T·FNCRVAQY    | 5355  | >PTEN-N82T·FTCRVAQY   | 153 | 5202  |
| >PTEN-N82T·FNCRVAQY    | 4940  | >PTEN-N82T·FTCRVAQY   | 276 | 4664  |
| >PTEN-N82T·FNCRVAQY    | 913   | >PTEN-N82T·FTCRVAQY   | 177 | 736   |
| >PTEN-N82T·FNCRVAQYPF  | 544   | >PTEN-N82T·FTCRVAQYPF | 114 | 430   |
| >PTEN-N82T·FNCRVAQYPF  | 119   | >PTEN-N82T·FTCRVAQYPF | 73  | 46    |
| >PTEN-N82T·FNCRVAQY    | 8672  | >PTEN-N82T·FTCRVAQY   | 9   | 8663  |
| >PTEN-N82T·FNCRVAQYPF  | 14868 | >PTEN-N82T·FTCRVAQYPF | 16  | 14852 |
| >PTEN-N82T·FNCRVAQY    | 14507 | >PTEN-N82T·FTCRVAQY   | 312 | 14195 |
| >PTEN-N82T·FNCRVAQYPF  | 8564  | >PTEN-N82T·FTCRVAQYPF | 95  | 8469  |
| >PTEN-N82T·FNCRVAQYPF  | 11494 | >PTEN-N82T·FTCRVAQYPF | 74  | 11420 |
| >PTEN-N82T·AERHYDTAKF  | 2064  | >PTEN-N82T·AERHYDTAKF | 185 | 1879  |



|                        |       |                        |      |       |
|------------------------|-------|------------------------|------|-------|
| >PTEN-N82T-AERHYDTAKF  | 864   | >PTEN-N82T-AERHYDTAKF  | 85   | 779   |
| >PTEN-N82T-KFNCRVAQYI  | 235   | >PTEN-N82T-KFTCRVAQYF  | 176  | 59    |
| >PTEN-N82T-KFNCRVAQYI  | 412   | >PTEN-N82T-KFTCRVAQYF  | 297  | 115   |
| >PTEN-N82T-KFNCRVAQYI  | 140   | >PTEN-N82T-KFTCRVAQYF  | 66   | 74    |
| >PTEN-N82T-KFNCRVAQY   | 167   | >PTEN-N82T-KFTCRVAQY   | 146  | 21    |
| >PTEN-N82T-KFNCRVAQY   | 377   | >PTEN-N82T-KFTCRVAQY   | 2236 | 1859  |
| >PTEN-N82T-KFNCRVAQYI  | 170   | >PTEN-N82T-KFTCRVAQYF  | 812  | 642   |
| >PTEN-N82T-KFNCRVAQYI  | 101   | >PTEN-N82T-KFTCRVAQYF  | 306  | 205   |
| >PTEN-N82T-KFNCRVAQYI  | 431   | >PTEN-N82T-KFTCRVAQYF  | 4238 | 3807  |
| >PTEN-N82T-KFNCRVAQYI  | 331   | >PTEN-N82T-KFTCRVAQYF  | 624  | 293   |
| >PTEN-N82T-KFNCRVAQY   | 131   | >PTEN-N82T-KFTCRVAQY   | 132  | 1     |
| >PTEN-N82T-AKFNCRVAQ'  | 381   | >PTEN-N82T-AKFTCRVAQY  | 235  | 146   |
| >PTEN-N82T-AKFNCRVAQ'  | 197   | >PTEN-N82T-AKFTCRVAQY  | 295  | 98    |
| >PTEN-N82T-AKFNCRVA    | 52    | >PTEN-N82T-AKFTCRVA    | 49   | 3     |
| >PTEN-N82T-AKFNCRVAQ   | 43    | >PTEN-N82T-AKFTCRVAQ   | 42   | 1     |
| >PTEN-N82T-AKFNCRVAQ'  | 3     | >PTEN-N82T-AKFTCRVAQY  | 3    | 0     |
| >PTEN-N82T-AKFNCRVAQ'  | 114   | >PTEN-N82T-AKFTCRVAQY  | 124  | 10    |
| >PTEN-N82T-TAKFNCRVAC  | 362   | >PTEN-N82T-TAKFTCRVAC  | 266  | 96    |
| >PTEN-N82T-TAKFNCRVAC  | 97    | >PTEN-N82T-TAKFTCRVAC  | 69   | 28    |
| >PTEN-N82T-TAKFNCRVAC  | 869   | >PTEN-N82T-TAKFTCRVAC  | 284  | 585   |
| >PTEN-N82T-DTAKFNCRV   | 1832  | >PTEN-N82T-DTAKFTCRV   | 376  | 1456  |
| >PTEN-N82T-DTAKFNCR    | 20    | >PTEN-N82T-DTAKFTCR    | 17   | 3     |
| >PTEN-N82T-DTAKFNCR    | 3     | >PTEN-N82T-DTAKFTCR    | 3    | 0     |
| >PTEN-N82T-DTAKFNCRV/  | 171   | >PTEN-N82T-DTAKFTCRVA  | 152  | 19    |
| >PTEN-N82T-DTAKFNCRV   | 12    | >PTEN-N82T-DTAKFTCRV   | 9    | 3     |
| >PTEN-N82T-DTAKFNCRV/  | 460   | >PTEN-N82T-DTAKFTCRVA  | 217  | 243   |
| >PTEN-N82T-DTAKFNCRV   | 7     | >PTEN-N82T-DTAKFTCRV   | 5    | 2     |
| >PTEN-N82T-DTAKFNCR    | 780   | >PTEN-N82T-DTAKFTCR    | 461  | 319   |
| >PTEN-N82T-YDTAKFNCRV  | 183   | >PTEN-N82T-YDTAKFTCRV  | 120  | 63    |
| >PTEN-N82T-HYDTAKFNCF  | 204   | >PTEN-N82T-HYDTAKFTCR  | 214  | 10    |
| >PTEN-N82T-HYDTAKFNCF  | 29    | >PTEN-N82T-HYDTAKFTCR  | 29   | 0     |
| >PTEN-N82T-RHYDTAKFNC  | 374   | >PTEN-N82T-RHYDTAKFTC  | 219  | 155   |
| >PTEN-N82T-RHYDTAKFNC  | 573   | >PTEN-N82T-RHYDTAKFTC  | 403  | 170   |
| >PTEN-N82T-RHYDTAKFNC  | 71    | >PTEN-N82T-RHYDTAKFTC  | 71   | 0     |
| >PTEN-N94I-NPPQLELIKPF | 483   | >PTEN-N94I-IPPQLELIKPF | 517  | 34    |
| >PTEN-N94I-NPPQLELIKPF | 69    | >PTEN-N94I-IPPQLELIKPF | 59   | 10    |
| >PTEN-N94I-NPPQLELI    | 1581  | >PTEN-N94I-IPPQLELI    | 287  | 1294  |
| >PTEN-N94I-NPPQLELI    | 628   | >PTEN-N94I-IPPQLELI    | 374  | 254   |
| >PTEN-N94I-HNPPQLELI   | 217   | >PTEN-N94I-HIPPQLELI   | 2229 | 2012  |
| >PTEN-N94I-HNPPQLELI   | 13094 | >PTEN-N94I-HIPPQLELI   | 229  | 12865 |
| >PTEN-N94I-HNPPQLELI   | 19937 | >PTEN-N94I-HIPPQLELI   | 498  | 19439 |
| >PTEN-N94I-HNPPQLELI   | 9950  | >PTEN-N94I-HIPPQLELI   | 225  | 9725  |
| >PTEN-N94I-HNPPQLEL    | 23929 | >PTEN-N94I-HIPPQLEL    | 156  | 23773 |

|                         |       |                         |     |       |
|-------------------------|-------|-------------------------|-----|-------|
| >PTEN-N94I- HNPPQLELIK  | 15371 | >PTEN-N94I- HIPPQLELIK  | 212 | 15159 |
| >PTEN-N94I- HNPPQLELIK  | 10162 | >PTEN-N94I- HIPPQLELIK  | 429 | 9733  |
| >PTEN-N94I- HNPPQLEL    | 6547  | >PTEN-N94I- HIPPQLEL    | 454 | 6093  |
| >PTEN-N94I- HNPPQLELI   | 1774  | >PTEN-N94I- HIPPQLELI   | 88  | 1686  |
| >PTEN-N94I- RVAQYPFEDH  | 20463 | >PTEN-N94I- RVAQYPFEDH  | 356 | 20107 |
| >PTEN-N94I- RVAQYPFEDH  | 20619 | >PTEN-N94I- RVAQYPFEDH  | 227 | 20392 |
| >PTEN-N94I- RVAQYPFEDH  | 18233 | >PTEN-N94I- RVAQYPFEDH  | 320 | 17913 |
| >PTEN-N94I- RVAQYPFEDH  | 11899 | >PTEN-N94I- RVAQYPFEDH  | 113 | 11786 |
| >PTEN-N94I- RVAQYPFEDH  | 35718 | >PTEN-N94I- RVAQYPFEDH  | 66  | 35652 |
| >PTEN-N94I- DHNPPQLEL   | 248   | >PTEN-N94I- DHIPPQLEL   | 348 | 100   |
| >PTEN-N94I- EDHNPPQLEI  | 235   | >PTEN-N94I- EDHIPPQLELI | 126 | 109   |
| >PTEN-N94I- FEDHNPPQL   | 1032  | >PTEN-N94I- FEDHIPPQL   | 369 | 663   |
| >PTEN-N94I- FEDHNPPQL   | 169   | >PTEN-N94I- FEDHIPPQL   | 179 | 10    |
| >PTEN-N94I- FEDHNPPQLE  | 275   | >PTEN-N94I- FEDHIPPQLEI | 284 | 9     |
| >PTEN-N94I- FEDHNPPQL   | 116   | >PTEN-N94I- FEDHIPPQL   | 51  | 65    |
| >PTEN-N94I- FEDHNPPQLE  | 47    | >PTEN-N94I- FEDHIPPQLEI | 31  | 16    |
| >PTEN-N94I- FEDHNPPQL   | 314   | >PTEN-N94I- FEDHIPPQL   | 222 | 92    |
| >PTEN-N94I- FEDHNPPQLE  | 186   | >PTEN-N94I- FEDHIPPQLEI | 149 | 37    |
| >PTEN-N94I- FEDHNPPQL   | 128   | >PTEN-N94I- FEDHIPPQL   | 70  | 58    |
| >PTEN-N94I- FEDHNPPQLE  | 802   | >PTEN-N94I- FEDHIPPQLEI | 490 | 312   |
| >PTEN-N94I- YPFEDHNPPC  | 43    | >PTEN-N94I- YPFEDHIPPQ  | 26  | 17    |
| >PTEN-N94I- YPFEDHNPPC  | 145   | >PTEN-N94I- YPFEDHIPPQ  | 107 | 38    |
| >PTEN-N94I- YPFEDHNPPC  | 145   | >PTEN-N94I- YPFEDHIPPQ  | 198 | 53    |
| >PTEN-N94I- YPFEDHNPP   | 1138  | >PTEN-N94I- YPFEDHIP    | 368 | 770   |
| >PTEN-N94I- YPFEDHNPP   | 145   | >PTEN-N94I- YPFEDHIPP   | 71  | 74    |
| >PTEN-N94I- YPFEDHNPPC  | 43    | >PTEN-N94I- YPFEDHIPPQ  | 33  | 10    |
| >PTEN-N94I- YPFEDHNPPC  | 22    | >PTEN-N94I- YPFEDHIPPQ  | 20  | 2     |
| >PTEN-N94I- YPFEDHNPPC  | 530   | >PTEN-N94I- YPFEDHIPPQ  | 250 | 280   |
| >PTEN-N94I- YPFEDHNPP   | 291   | >PTEN-N94I- YPFEDHIPP   | 669 | 378   |
| >PTEN-N94I- YPFEDHNPPC  | 638   | >PTEN-N94I- YPFEDHIPPQ  | 350 | 288   |
| >PTEN-N94I- QYPFEDHN    | 23828 | >PTEN-N94I- QYPFEDHI    | 484 | 23344 |
| >PTEN-N94I- QYPFEDHN    | 17988 | >PTEN-N94I- QYPFEDHI    | 416 | 17572 |
| >PTEN-N94I- QYPFEDHN    | 1093  | >PTEN-N94I- QYPFEDHI    | 9   | 1084  |
| >PTEN-N94I- AQYPFEDHN   | 13548 | >PTEN-N94I- AQYPFEDHI   | 287 | 13261 |
| >PTEN-N94I- AQYPFEDHN   | 35951 | >PTEN-N94I- AQYPFEDHI   | 466 | 35485 |
| >PTEN-N94I- AQYPFEDHN   | 20961 | >PTEN-N94I- AQYPFEDHI   | 263 | 20698 |
| >PTEN-N94I- AQYPFEDHN   | 7494  | >PTEN-N94I- AQYPFEDHI   | 20  | 7474  |
| >PTEN-N94I- AQYPFEDHN   | 19445 | >PTEN-N94I- AQYPFEDHI   | 314 | 19131 |
| >PTEN-N94I- AQYPFEDHN   | 2519  | >PTEN-N94I- AQYPFEDHI   | 73  | 2446  |
| >PTEN-N94I- AQYPFEDHNI  | 263   | >PTEN-N94I- AQYPFEDHIP  | 254 | 9     |
| >PTEN-N94I- AQYPFEDHN   | 31596 | >PTEN-N94I- AQYPFEDHI   | 143 | 31453 |
| >PTEN-N94Y- NPPQLELIKPF | 483   | >PTEN-N94Y- YPPQLELIKPF | 770 | 287   |
| >PTEN-N94Y- NPPQLELIKPF | 1789  | >PTEN-N94Y- YPPQLELIKPF | 380 | 1409  |

|                        |       |                         |     |       |
|------------------------|-------|-------------------------|-----|-------|
| >PTEN-N94Y-NPPQLELIKPF | 69    | >PTEN-N94Y-YPPQLELIKPF  | 14  | 55    |
| >PTEN-N94Y-NPPQLELI    | 1581  | >PTEN-N94Y-YPPQLELI     | 327 | 1254  |
| >PTEN-N94Y-NPPQLELI    | 628   | >PTEN-N94Y-YPPQLELI     | 316 | 312   |
| >PTEN-N94Y-NPPQLELIKPF | 8731  | >PTEN-N94Y-YPPQLELIKPF  | 205 | 8526  |
| >PTEN-N94Y-NPPQLELI    | 4394  | >PTEN-N94Y-YPPQLELI     | 208 | 4186  |
| >PTEN-N94Y-NPPQLELIKPF | 1018  | >PTEN-N94Y-YPPQLELIKPF  | 186 | 832   |
| >PTEN-N94Y-NPPQLELIKPF | 2370  | >PTEN-N94Y-YPPQLELIKPF  | 429 | 1941  |
| >PTEN-N94Y-HNPPQLELI   | 217   | >PTEN-N94Y-HYPPQLELI    | 831 | 614   |
| >PTEN-N94Y-HNPPQLELI   | 23921 | >PTEN-N94Y-HYPPQLELI    | 269 | 23652 |
| >PTEN-N94Y-HNPPQLELI   | 9748  | >PTEN-N94Y-HYPPQLELI    | 58  | 9690  |
| >PTEN-N94Y-HNPPQLEL    | 9578  | >PTEN-N94Y-HYPPQLEL     | 4   | 9574  |
| >PTEN-N94Y-HNPPQLELI   | 10636 | >PTEN-N94Y-HYPPQLELI    | 4   | 10632 |
| >PTEN-N94Y-HNPPQLELIK  | 20080 | >PTEN-N94Y-HYPPQLELIK   | 172 | 19908 |
| >PTEN-N94Y-HNPPQLELIKI | 20508 | >PTEN-N94Y-HYPPQLELIKFI | 330 | 20178 |
| >PTEN-N94Y-HNPPQLELIK  | 5781  | >PTEN-N94Y-HYPPQLELIK   | 79  | 5702  |
| >PTEN-N94Y-HNPPQLEL    | 5983  | >PTEN-N94Y-HYPPQLEL     | 334 | 5649  |
| >PTEN-N94Y-RVAQYPFED†  | 25211 | >PTEN-N94Y-RVAQYPFED†   | 81  | 25130 |
| >PTEN-N94Y-RVAQYPFED†  | 18386 | >PTEN-N94Y-RVAQYPFED†   | 116 | 18270 |
| >PTEN-N94Y-RVAQYPFED†  | 17642 | >PTEN-N94Y-RVAQYPFED†   | 47  | 17595 |
| >PTEN-N94Y-RVAQYPFED†  | 19430 | >PTEN-N94Y-RVAQYPFED†   | 13  | 19417 |
| >PTEN-N94Y-RVAQYPFED†  | 15760 | >PTEN-N94Y-RVAQYPFED†   | 153 | 15607 |
| >PTEN-N94Y-RVAQYPFED†  | 18342 | >PTEN-N94Y-RVAQYPFED†   | 126 | 18216 |
| >PTEN-N94Y-RVAQYPFED†  | 11899 | >PTEN-N94Y-RVAQYPFED†   | 50  | 11849 |
| >PTEN-N94Y-RVAQYPFED†  | 21830 | >PTEN-N94Y-RVAQYPFED†   | 466 | 21364 |
| >PTEN-N94Y-RVAQYPFED†  | 32384 | >PTEN-N94Y-RVAQYPFED†   | 407 | 31977 |
| >PTEN-N94Y-DHNPPQLELI  | 2293  | >PTEN-N94Y-DHYPPQLELI   | 493 | 1800  |
| >PTEN-N94Y-DHNPPQLEL   | 248   | >PTEN-N94Y-DHYPPQLEL    | 62  | 186   |
| >PTEN-N94Y-DHNPPQLELI  | 1469  | >PTEN-N94Y-DHYPPQLELI   | 416 | 1053  |
| >PTEN-N94Y-EDHNPPQLEL  | 235   | >PTEN-N94Y-EDHYPPQLEL   | 414 | 179   |
| >PTEN-N94Y-FEDHNPPQL   | 1032  | >PTEN-N94Y-FEDHYPPQL    | 316 | 716   |
| >PTEN-N94Y-FEDHNPPQL   | 169   | >PTEN-N94Y-FEDHYPPQL    | 86  | 83    |
| >PTEN-N94Y-FEDHNPPQLE  | 275   | >PTEN-N94Y-FEDHYPPQLE   | 168 | 107   |
| >PTEN-N94Y-FEDHNPPQL   | 116   | >PTEN-N94Y-FEDHYPPQL    | 113 | 3     |
| >PTEN-N94Y-FEDHNPPQLE  | 47    | >PTEN-N94Y-FEDHYPPQLE   | 46  | 1     |
| >PTEN-N94Y-FEDHNPPQL   | 314   | >PTEN-N94Y-FEDHYPPQL    | 175 | 139   |
| >PTEN-N94Y-FEDHNPPQLE  | 186   | >PTEN-N94Y-FEDHYPPQLE   | 130 | 56    |
| >PTEN-N94Y-FEDHNPPQL   | 128   | >PTEN-N94Y-FEDHYPPQL    | 68  | 60    |
| >PTEN-N94Y-YPFEDHNPPC  | 43    | >PTEN-N94Y-YPFEDHYPPC   | 37  | 6     |
| >PTEN-N94Y-YPFEDHNPPC  | 929   | >PTEN-N94Y-YPFEDHYPPC   | 388 | 541   |
| >PTEN-N94Y-YPFEDHNPPC  | 145   | >PTEN-N94Y-YPFEDHYPPC   | 91  | 54    |
| >PTEN-N94Y-YPFEDHNPPC  | 145   | >PTEN-N94Y-YPFEDHYPPC   | 174 | 29    |
| >PTEN-N94Y-YPFEDHNPP   | 145   | >PTEN-N94Y-YPFEDHYPP    | 55  | 90    |
| >PTEN-N94Y-YPFEDHNPPC  | 670   | >PTEN-N94Y-YPFEDHYPPC   | 445 | 225   |

|                         |       |                         |     |       |
|-------------------------|-------|-------------------------|-----|-------|
| >PTEN-N94Y·YPFEDHNPPC   | 43    | >PTEN-N94Y·YPFEDHYPPC   | 33  | 10    |
| >PTEN-N94Y·YPFEDHNPPC   | 22    | >PTEN-N94Y·YPFEDHYPPC   | 16  | 6     |
| >PTEN-N94Y·YPFEDHNPPC   | 530   | >PTEN-N94Y·YPFEDHYPPC   | 231 | 299   |
| >PTEN-N94Y·YPFEDHNPP    | 291   | >PTEN-N94Y·YPFEDHYPP    | 279 | 12    |
| >PTEN-N94Y·YPFEDHNPPC   | 638   | >PTEN-N94Y·YPFEDHYPPC   | 463 | 175   |
| >PTEN-N94Y·QYPFEDHN     | 1093  | >PTEN-N94Y·QYPFEDHY     | 192 | 901   |
| >PTEN-N94Y·QYPFEDHN     | 22829 | >PTEN-N94Y·QYPFEDHY     | 420 | 22409 |
| >PTEN-N94Y·AQYPFEDHN    | 25526 | >PTEN-N94Y·AQYPFEDHY    | 94  | 25432 |
| >PTEN-N94Y·AQYPFEDHN    | 9418  | >PTEN-N94Y·AQYPFEDHY    | 43  | 9375  |
| >PTEN-N94Y·AQYPFEDHN    | 25193 | >PTEN-N94Y·AQYPFEDHY    | 323 | 24870 |
| >PTEN-N94Y·AQYPFEDHN    | 2519  | >PTEN-N94Y·AQYPFEDHY    | 8   | 2511  |
| >PTEN-N94Y·AQYPFEDHNI   | 263   | >PTEN-N94Y·AQYPFEDHYF   | 232 | 31    |
| >PTEN-N94Y·VAQYPFEDHI   | 28329 | >PTEN-N94Y·VAQYPFEDHY   | 200 | 28129 |
| >PTEN-P103S PFCEDLDQW   | 1473  | >PTEN-P103S SFCEDLDQW   | 210 | 1263  |
| >PTEN-P103S PFCEDLDQW   | 2258  | >PTEN-P103S SFCEDLDQW   | 390 | 1868  |
| >PTEN-P103S PFCEDLDQW   | 3988  | >PTEN-P103S SFCEDLDQW   | 258 | 3730  |
| >PTEN-P103S PFCEDLDQW   | 4178  | >PTEN-P103S SFCEDLDQW   | 313 | 3865  |
| >PTEN-P103S KPFCEDLDQV  | 7481  | >PTEN-P103S KSFCELDQV   | 86  | 7395  |
| >PTEN-P103S KPFCEDLDQV  | 14444 | >PTEN-P103S KSFCELDQV   | 183 | 14261 |
| >PTEN-P103S KPFCEDLDQV  | 4131  | >PTEN-P103S KSFCELDQV   | 9   | 4122  |
| >PTEN-P103S KPFCEDLDQV  | 11109 | >PTEN-P103S KSFCELDQV   | 7   | 11102 |
| >PTEN-P103S KPFCEDLDQV  | 1266  | >PTEN-P103S KSFCELDQV   | 37  | 1229  |
| >PTEN-P103S KPFCEDLDQV  | 20775 | >PTEN-P103S KSFCELDQV   | 484 | 20291 |
| >PTEN-P103S KPFCEDLDQV  | 892   | >PTEN-P103S KSFCELDQV   | 10  | 882   |
| >PTEN-P103S KPFCEDLDQV  | 4340  | >PTEN-P103S KSFCELDQV   | 211 | 4129  |
| >PTEN-P103S KPFCEDLDQV  | 13    | >PTEN-P103S KSFCELDQV   | 819 | 806   |
| >PTEN-P103S KPFCEDLDQV  | 102   | >PTEN-P103S KSFCELDQV   | 100 | 2     |
| >PTEN-P103S KPFCEDLDQV  | 4477  | >PTEN-P103S KSFCELDQV   | 137 | 4340  |
| >PTEN-P103S IKPFCELD    | 910   | >PTEN-P103S IKSFCEDL    | 172 | 738   |
| >PTEN-P103S IKPFCELDQV  | 840   | >PTEN-P103S IKSFCEDLDQV | 88  | 752   |
| >PTEN-P103S ELIKPFCELD  | 156   | >PTEN-P103S ELIKSFCEDL  | 154 | 2     |
| >PTEN-P103S LELIKPFCELD | 166   | >PTEN-P103S LELIKSFCEDL | 72  | 94    |
| >PTEN-P103S LELIKPFCELD | 248   | >PTEN-P103S LELIKSFCEDL | 139 | 109   |
| >PTEN-P103S LELIKPFCELD | 275   | >PTEN-P103S LELIKSFCEDL | 219 | 56    |
| >PTEN-P103S LELIKPFCELD | 78    | >PTEN-P103S LELIKSFCEDL | 54  | 24    |
| >PTEN-P103S PQLELIKPF   | 16    | >PTEN-P103S PQLELIKSF   | 20  | 4     |
| >PTEN-P103S NPPQLELIKPF | 483   | >PTEN-P103S NPPQLELIKSF | 427 | 56    |
| >PTEN-P103S NPPQLELIKPF | 69    | >PTEN-P103S NPPQLELIKSF | 191 | 122   |
| >PTEN-P169F PSQRRYVY    | 1626  | >PTEN-P169F HSQRRYVY    | 488 | 1138  |
| >PTEN-P169F PSQRRYVYY   | 907   | >PTEN-P169F HSQRRYVYY   | 233 | 674   |
| >PTEN-P169F PSQRRYVYYY  | 186   | >PTEN-P169F HSQRRYVYYY  | 115 | 71    |
| >PTEN-P169F PSQRRYVYYY  | 5067  | >PTEN-P169F HSQRRYVYYY  | 315 | 4752  |
| >PTEN-P169F PSQRRYVYYY  | 1031  | >PTEN-P169F HSQRRYVYYY  | 226 | 805   |

|                         |      |                         |       |       |
|-------------------------|------|-------------------------|-------|-------|
| >PTEN-P169F PSQRRYVYYY  | 359  | >PTEN-P169F HSQRRYVYYY  | 120   | 239   |
| >PTEN-P169F PSQRRYVYY   | 5454 | >PTEN-P169F HSQRRYVYY   | 103   | 5351  |
| >PTEN-P169F PSQRRYVYYY  | 7291 | >PTEN-P169F HSQRRYVYYY  | 254   | 7037  |
| >PTEN-P169F PSQRRYVY    | 465  | >PTEN-P169F HSQRRYVY    | 129   | 336   |
| >PTEN-P169F PSQRRYVYYY  | 40   | >PTEN-P169F HSQRRYVYYY  | 21    | 19    |
| >PTEN-P169F PSQRRYVYY   | 8414 | >PTEN-P169F HSQRRYVYY   | 229   | 8185  |
| >PTEN-P169F PSQRRYVY    | 5724 | >PTEN-P169F HSQRRYVY    | 242   | 5482  |
| >PTEN-P169F PSQRRYVYYY  | 6867 | >PTEN-P169F HSQRRYVYYY  | 349   | 6518  |
| >PTEN-P169F PSQRRYVY    | 3270 | >PTEN-P169F HSQRRYVY    | 448   | 2822  |
| >PTEN-P169F PSQRRYVYY   | 2186 | >PTEN-P169F HSQRRYVYY   | 209   | 1977  |
| >PTEN-P169F PSQRRYVYYY  | 2492 | >PTEN-P169F HSQRRYVYYY  | 310   | 2182  |
| >PTEN-P169F PSQRRYVY    | 7360 | >PTEN-P169F HSQRRYVY    | 43    | 7317  |
| >PTEN-P169F PSQRRYVYY   | 6148 | >PTEN-P169F HSQRRYVYY   | 29    | 6119  |
| >PTEN-P169F PSQRRYVYYY  | 4356 | >PTEN-P169F HSQRRYVYYY  | 20    | 4336  |
| >PTEN-P169F PSQRRYVYYY  | 7107 | >PTEN-P169F HSQRRYVYYY  | 229   | 6878  |
| >PTEN-P169F PSQRRYVYYY  | 9035 | >PTEN-P169F HSQRRYVYYY  | 126   | 8909  |
| >PTEN-P169F PSQRRYVYYY  | 353  | >PTEN-P169F HSQRRYVYYY  | 112   | 241   |
| >PTEN-P169F PSQRRYVY    | 6884 | >PTEN-P169F HSQRRYVY    | 393   | 6491  |
| >PTEN-P169F PSQRRYVY    | 2184 | >PTEN-P169F HSQRRYVY    | 431   | 1753  |
| >PTEN-P169F IPSQRRYVYY  | 1219 | >PTEN-P169F IHSQRRYVYY  | 440   | 779   |
| >PTEN-P169F IPSQRRYVYYY | 288  | >PTEN-P169F IHSQRRYVYYY | 91    | 197   |
| >PTEN-P169F IPSQRRYVY   | 183  | >PTEN-P169F IHSQRRYVY   | 57    | 126   |
| >PTEN-P169F IPSQRRYVYYY | 123  | >PTEN-P169F IHSQRRYVYYY | 42    | 81    |
| >PTEN-P169F IPSQRRYV    | 22   | >PTEN-P169F IHSQRRYV    | 23307 | 23285 |
| >PTEN-P169F IPSQRRYVY   | 165  | >PTEN-P169F IHSQRRYVY   | 24632 | 24467 |
| >PTEN-P169F IPSQRRYVY   | 1987 | >PTEN-P169F IHSQRRYVY   | 222   | 1765  |
| >PTEN-P169F IPSQRRYVYY  | 1203 | >PTEN-P169F IHSQRRYVYY  | 103   | 1100  |
| >PTEN-P169F IPSQRRYVYYY | 1534 | >PTEN-P169F IHSQRRYVYYY | 149   | 1385  |
| >PTEN-P169F IPSQRRYVY   | 16   | >PTEN-P169F IHSQRRYVY   | 8218  | 8202  |
| >PTEN-P169F IPSQRRYVYYY | 27   | >PTEN-P169F IHSQRRYVYYY | 9995  | 9968  |
| >PTEN-P169F IPSQRRYVY   | 74   | >PTEN-P169F IHSQRRYVY   | 11486 | 11412 |
| >PTEN-P169F IPSQRRYVYYY | 31   | >PTEN-P169F IHSQRRYVYYY | 6332  | 6301  |
| >PTEN-P169F IPSQRRYVY   | 7    | >PTEN-P169F IHSQRRYVY   | 947   | 940   |
| >PTEN-P169F IPSQRRYVYY  | 33   | >PTEN-P169F IHSQRRYVYY  | 3977  | 3944  |
| >PTEN-P169F IPSQRRYVYYY | 12   | >PTEN-P169F IHSQRRYVYYY | 1461  | 1449  |
| >PTEN-P169F IPSQRRYVYY  | 262  | >PTEN-P169F IHSQRRYVYY  | 16783 | 16521 |
| >PTEN-P169F RTRDKKGVTI  | 103  | >PTEN-P169F RTRDKKGVTI  | 111   | 8     |
| >PTEN-P169F RTRDKKGVTI  | 4844 | >PTEN-P169F RTRDKKGVTI  | 54    | 4790  |
| >PTEN-P169F RTRDKKGVTI  | 1410 | >PTEN-P169F RTRDKKGVTI  | 28    | 1382  |
| >PTEN-P169F TIPSQRRYV   | 225  | >PTEN-P169F TIHSQRRYV   | 167   | 58    |
| >PTEN-P169F TIPSQRRYVYY | 2575 | >PTEN-P169F TIHSQRRYVYY | 336   | 2239  |
| >PTEN-P169F TIPSQRRYVYY | 1079 | >PTEN-P169F TIHSQRRYVYY | 168   | 911   |
| >PTEN-P169F TIPSQRRY    | 437  | >PTEN-P169F TIHSQRRY    | 277   | 160   |

|                         |       |                         |      |       |
|-------------------------|-------|-------------------------|------|-------|
| >PTEN-P169f TIPSQRRYVY  | 618   | >PTEN-P169f TIHSQRRYVY  | 366  | 252   |
| >PTEN-P169f TIPSQRRYVY' | 290   | >PTEN-P169f TIHSQRRYVY' | 197  | 93    |
| >PTEN-P169f TIPSQRRY    | 1590  | >PTEN-P169f TIHSQRRY    | 438  | 1152  |
| >PTEN-P169f TIPSQRRYVY' | 238   | >PTEN-P169f TIHSQRRYVY' | 79   | 159   |
| >PTEN-P169f TIPSQRRYV   | 11073 | >PTEN-P169f TIHSQRRYV   | 152  | 10921 |
| >PTEN-P169f TIPSQRRYVY' | 11987 | >PTEN-P169f TIHSQRRYVY' | 314  | 11673 |
| >PTEN-P169f TIPSQRRY    | 641   | >PTEN-P169f TIHSQRRY    | 208  | 433   |
| >PTEN-P169f TIPSQRRYVY' | 597   | >PTEN-P169f TIHSQRRYVY' | 205  | 392   |
| >PTEN-P169f TIPSQRRYV   | 67    | >PTEN-P169f TIHSQRRYV   | 93   | 26    |
| >PTEN-P169f TIPSQRRYVY  | 2267  | >PTEN-P169f TIHSQRRYVY  | 351  | 1916  |
| >PTEN-P169f VTIPSQRRYV  | 249   | >PTEN-P169f VTIHSQRRYV  | 587  | 338   |
| >PTEN-P169f VTIPSQRRYV  | 286   | >PTEN-P169f VTIHSQRRYV  | 2008 | 1722  |
| >PTEN-P169f VTIPSQRRYV' | 284   | >PTEN-P169f VTIHSQRRYV  | 518  | 234   |
| >PTEN-P169f VTIPSQRRY   | 26    | >PTEN-P169f VTIHSQRRY   | 18   | 8     |
| >PTEN-P169f VTIPSQRRYV' | 38    | >PTEN-P169f VTIHSQRRYV  | 28   | 10    |
| >PTEN-P169f VTIPSQRRYV' | 509   | >PTEN-P169f VTIHSQRRYV  | 368  | 141   |
| >PTEN-P169f VTIPSQRRY   | 59    | >PTEN-P169f VTIHSQRRY   | 103  | 44    |
| >PTEN-P169f VTIPSQRRYV' | 26    | >PTEN-P169f VTIHSQRRYV  | 37   | 11    |
| >PTEN-P169f VTIPSQRRY   | 41    | >PTEN-P169f VTIHSQRRY   | 40   | 1     |
| >PTEN-P169f VTIPSQRRYV' | 16    | >PTEN-P169f VTIHSQRRYV  | 16   | 0     |
| >PTEN-P169f VTIPSQRR    | 135   | >PTEN-P169f VTIHSQRR    | 156  | 21    |
| >PTEN-P169f VTIPSQRR    | 65    | >PTEN-P169f VTIHSQRR    | 67   | 2     |
| >PTEN-P169f VTIPSQRRYV  | 225   | >PTEN-P169f VTIHSQRRYV  | 98   | 127   |
| >PTEN-P169f VTIPSQRRY   | 1209  | >PTEN-P169f VTIHSQRRY   | 448  | 761   |
| >PTEN-P169f VTIPSQRRYV' | 579   | >PTEN-P169f VTIHSQRRYV  | 277  | 302   |
| >PTEN-P169f VTIPSQRRY   | 399   | >PTEN-P169f VTIHSQRRY   | 470  | 71    |
| >PTEN-P169f VTIPSQRRYV' | 109   | >PTEN-P169f VTIHSQRRYV  | 119  | 10    |
| >PTEN-P169f VTIPSQRRY   | 706   | >PTEN-P169f VTIHSQRRY   | 467  | 239   |
| >PTEN-P169f VTIPSQRRYV' | 205   | >PTEN-P169f VTIHSQRRYV  | 187  | 18    |
| >PTEN-P169f VTIPSQRRY   | 3     | >PTEN-P169f VTIHSQRRY   | 3    | 0     |
| >PTEN-P169f VTIPSQRRYV  | 124   | >PTEN-P169f VTIHSQRRYV  | 259  | 135   |
| >PTEN-P169f VTIPSQRRYV' | 4     | >PTEN-P169f VTIHSQRRYV  | 4    | 0     |
| >PTEN-P169f VTIPSQRRY   | 81    | >PTEN-P169f VTIHSQRRY   | 294  | 213   |
| >PTEN-P169f VTIPSQRRYV' | 111   | >PTEN-P169f VTIHSQRRYV  | 311  | 200   |
| >PTEN-P169f VTIPSQRRY   | 122   | >PTEN-P169f VTIHSQRRY   | 303  | 181   |
| >PTEN-P169f VTIPSQRRYV' | 76    | >PTEN-P169f VTIHSQRRYV  | 135  | 59    |
| >PTEN-P169f VTIPSQRRY   | 37    | >PTEN-P169f VTIHSQRRY   | 47   | 10    |
| >PTEN-P169f VTIPSQRRYV' | 37    | >PTEN-P169f VTIHSQRRYV  | 46   | 9     |
| >PTEN-P169f VTIPSQRRYV' | 256   | >PTEN-P169f VTIHSQRRYV  | 399  | 143   |
| >PTEN-P169f GVTIPSQRRY  | 123   | >PTEN-P169f GVTIHSQRRY  | 125  | 2     |
| >PTEN-P169f GVTIPSQR    | 457   | >PTEN-P169f GVTIHSQR    | 137  | 320   |
| >PTEN-P169f GVTIPSQRR   | 953   | >PTEN-P169f GVTIHSQRR   | 475  | 478   |
| >PTEN-P169f GVTIPSQR    | 210   | >PTEN-P169f GVTIHSQR    | 124  | 86    |

|                         |      |                         |       |       |
|-------------------------|------|-------------------------|-------|-------|
| >PTEN-P169F GVTIPSQRRY  | 172  | >PTEN-P169F GVTIHSQRRY  | 366   | 194   |
| >PTEN-P169F KGV TIPSQRR | 155  | >PTEN-P169F KGV TIHSQRR | 133   | 22    |
| >PTEN-P169F KGV TIPSQR  | 208  | >PTEN-P169F KGV TIHSQR  | 33    | 175   |
| >PTEN-P169F KGV TIPSQRR | 202  | >PTEN-P169F KGV TIHSQRR | 186   | 16    |
| >PTEN-P169F KGV TIPSQRR | 227  | >PTEN-P169F KGV TIHSQRR | 151   | 76    |
| >PTEN-P169F KGV TIPSQR  | 147  | >PTEN-P169F KGV TIHSQR  | 102   | 45    |
| >PTEN-P169F KGV TIPSQRR | 120  | >PTEN-P169F KGV TIHSQRR | 73    | 47    |
| >PTEN-P169F KKGVTIPSQR  | 609  | >PTEN-P169F KKGVTIHSQR  | 365   | 244   |
| >PTEN-P169F KKGVTIPSQR  | 511  | >PTEN-P169F KKGVTIHSQR  | 212   | 299   |
| >PTEN-P169F DKKGV TIPSQ | 497  | >PTEN-P169F DKKGV TIHSQ | 252   | 245   |
| >PTEN-P169F DKKGV TIPSQ | 635  | >PTEN-P169F DKKGV TIHSQ | 354   | 281   |
| >PTEN-P204S PMFSGGTC    | 355  | >PTEN-P204S SMFSGGTC    | 13    | 342   |
| >PTEN-P204S PMFSGGTC    | 9723 | >PTEN-P204S SMFSGGTC    | 415   | 9308  |
| >PTEN-P204S PMFSGGTC    | 6515 | >PTEN-P204S SMFSGGTC    | 257   | 6258  |
| >PTEN-P204S PMFSGGTC    | 2332 | >PTEN-P204S SMFSGGTC    | 61    | 2271  |
| >PTEN-P204S PMFSGGTCN   | 5245 | >PTEN-P204S SMFSGGTCN   | 199   | 5046  |
| >PTEN-P204S PMFSGGTCN   | 6009 | >PTEN-P204S SMFSGGTCN   | 259   | 5750  |
| >PTEN-P204S PMFSGGTCN   | 954  | >PTEN-P204S SMFSGGTCN   | 227   | 727   |
| >PTEN-P204S IPMFSGGTC   | 404  | >PTEN-P204S ISMFSGGTC   | 22699 | 22295 |
| >PTEN-P204S ETIPMFSG    | 791  | >PTEN-P204S ETISMFSG    | 455   | 336   |
| >PTEN-P204S ETIPMFSGG   | 1056 | >PTEN-P204S ETISMFSGG   | 430   | 626   |
| >PTEN-P204S ETIPMFSGGT  | 269  | >PTEN-P204S ETISMFSGGT  | 98    | 171   |
| >PTEN-P204S ETIPMFSGGT  | 875  | >PTEN-P204S ETISMFSGGT  | 332   | 543   |
| >PTEN-P204S ETIPMFSGGT  | 711  | >PTEN-P204S ETISMFSGGT  | 302   | 409   |
| >PTEN-P204S ETIPMFSG    | 113  | >PTEN-P204S ETISMFSG    | 198   | 85    |
| >PTEN-P204S ETIPMFSGG   | 129  | >PTEN-P204S ETISMFSGG   | 204   | 75    |
| >PTEN-P204S ETIPMFSGGT  | 70   | >PTEN-P204S ETISMFSGGT  | 29    | 41    |
| >PTEN-P204S ETIPMFSGGT  | 173  | >PTEN-P204S ETISMFSGGT  | 155   | 18    |
| >PTEN-P204S FETIPMFSGG  | 896  | >PTEN-P204S FETISMFSGG  | 449   | 447   |
| >PTEN-P204S FETIPMFSGG  | 483  | >PTEN-P204S FETISMFSGG  | 461   | 22    |
| >PTEN-P204S MFETIPMF    | 43   | >PTEN-P204S MFETISMF    | 61    | 18    |
| >PTEN-P204S MFETIPMF    | 23   | >PTEN-P204S MFETISMF    | 17    | 6     |
| >PTEN-P204S MMFETIPM    | 270  | >PTEN-P204S MMFETISM    | 759   | 489   |
| >PTEN-P204S MMFETIPMF   | 183  | >PTEN-P204S MMFETISMF   | 204   | 21    |
| >PTEN-P204S MMFETIPM    | 8    | >PTEN-P204S MMFETISM    | 12    | 4     |
| >PTEN-P204S MMFETIPMF   | 34   | >PTEN-P204S MMFETISMF   | 116   | 82    |
| >PTEN-P204S MMFETIPMF   | 57   | >PTEN-P204S MMFETISMF   | 71    | 14    |
| >PTEN-P204S MMFETIPMF   | 136  | >PTEN-P204S MMFETISMF   | 193   | 57    |
| >PTEN-P204S MMFETIPM    | 8    | >PTEN-P204S MMFETISM    | 12    | 4     |
| >PTEN-P204S MMFETIPMF   | 148  | >PTEN-P204S MMFETISMF   | 99    | 49    |
| >PTEN-P204S MMFETIPMF   | 64   | >PTEN-P204S MMFETISMF   | 66    | 2     |
| >PTEN-P204S MMFETIPMF   | 99   | >PTEN-P204S MMFETISMF   | 56    | 43    |
| >PTEN-P204S MMFETIPM    | 10   | >PTEN-P204S MMFETISM    | 11    | 1     |

|                           |     |                           |     |     |
|---------------------------|-----|---------------------------|-----|-----|
| >PTEN-P204 $\S$ MMFETIPMF | 137 | >PTEN-P204 $\S$ MMFETISMF | 34  | 103 |
| >PTEN-P204 $\S$ MMFETIPMF | 142 | >PTEN-P204 $\S$ MMFETISMF | 203 | 61  |
| >PTEN-P204 $\S$ MMFETIPMF | 195 | >PTEN-P204 $\S$ MMFETISMF | 81  | 114 |
| >PTEN-P204 $\S$ MMFETIPM  | 12  | >PTEN-P204 $\S$ MMFETISM  | 25  | 13  |
| >PTEN-P204 $\S$ MMFETIPMF | 21  | >PTEN-P204 $\S$ MMFETISMF | 57  | 36  |
| >PTEN-P204 $\S$ MMFETIPMF | 384 | >PTEN-P204 $\S$ MMFETISMF | 368 | 16  |
| >PTEN-P204 $\S$ MMFETIPMF | 155 | >PTEN-P204 $\S$ MMFETISMF | 176 | 21  |
| >PTEN-P204 $\S$ MMFETIPM  | 2   | >PTEN-P204 $\S$ MMFETISM  | 2   | 0   |
| >PTEN-P204 $\S$ MMFETIPMF | 2   | >PTEN-P204 $\S$ MMFETISMF | 3   | 1   |
| >PTEN-P204 $\S$ MMFETIPMF | 4   | >PTEN-P204 $\S$ MMFETISMF | 6   | 2   |
| >PTEN-P204 $\S$ MMFETIPMF | 7   | >PTEN-P204 $\S$ MMFETISMF | 9   | 2   |
| >PTEN-P204 $\S$ MMFETIPM  | 7   | >PTEN-P204 $\S$ MMFETISM  | 9   | 2   |
| >PTEN-P204 $\S$ MMFETIPMF | 334 | >PTEN-P204 $\S$ MMFETISMF | 356 | 22  |
| >PTEN-P204 $\S$ MMFETIPMF | 217 | >PTEN-P204 $\S$ MMFETISMF | 172 | 45  |
| >PTEN-P204 $\S$ MMFETIPMF | 300 | >PTEN-P204 $\S$ MMFETISMF | 274 | 26  |
| >PTEN-P204 $\S$ MMFETIPM  | 11  | >PTEN-P204 $\S$ MMFETISM  | 15  | 4   |
| >PTEN-P204 $\S$ MMFETIPMF | 52  | >PTEN-P204 $\S$ MMFETISMF | 317 | 265 |
| >PTEN-P204 $\S$ MMFETIPMF | 44  | >PTEN-P204 $\S$ MMFETISMF | 60  | 16  |
| >PTEN-P204 $\S$ MMFETIPMF | 186 | >PTEN-P204 $\S$ MMFETISMF | 291 | 105 |
| >PTEN-P204 $\S$ MMFETIPM  | 16  | >PTEN-P204 $\S$ MMFETISM  | 13  | 3   |
| >PTEN-P204 $\S$ MMFETIPM  | 5   | >PTEN-P204 $\S$ MMFETISM  | 4   | 1   |
| >PTEN-P204 $\S$ MMFETIPMF | 24  | >PTEN-P204 $\S$ MMFETISMF | 43  | 19  |
| >PTEN-P204 $\S$ MMFETIPMF | 38  | >PTEN-P204 $\S$ MMFETISMF | 27  | 11  |
| >PTEN-P204 $\S$ MMFETIPMF | 100 | >PTEN-P204 $\S$ MMFETISMF | 102 | 2   |
| >PTEN-P204 $\S$ MMFETIPMF | 60  | >PTEN-P204 $\S$ MMFETISMF | 63  | 3   |
| >PTEN-P204 $\S$ MMFETIPMF | 50  | >PTEN-P204 $\S$ MMFETISMF | 48  | 2   |
| >PTEN-P204 $\S$ MMFETIPM  | 472 | >PTEN-P204 $\S$ MMFETISM  | 695 | 223 |
| >PTEN-P204 $\S$ MMFETIPMF | 61  | >PTEN-P204 $\S$ MMFETISMF | 109 | 48  |
| >PTEN-P204 $\S$ MMFETIPM  | 391 | >PTEN-P204 $\S$ MMFETISM  | 951 | 560 |
| >PTEN-P204 $\S$ MMFETIPMF | 468 | >PTEN-P204 $\S$ MMFETISMF | 448 | 20  |
| >PTEN-P204 $\S$ MMFETIPM  | 88  | >PTEN-P204 $\S$ MMFETISM  | 103 | 15  |
| >PTEN-P204 $\S$ MMFETIPMF | 76  | >PTEN-P204 $\S$ MMFETISMF | 103 | 27  |
| >PTEN-P204 $\S$ MMFETIPM  | 27  | >PTEN-P204 $\S$ MMFETISM  | 89  | 62  |
| >PTEN-P204 $\S$ MMFETIPM  | 28  | >PTEN-P204 $\S$ MMFETISM  | 30  | 2   |
| >PTEN-P204 $\S$ MMFETIPMF | 29  | >PTEN-P204 $\S$ MMFETISMF | 22  | 7   |
| >PTEN-P204 $\S$ MMFETIPMF | 380 | >PTEN-P204 $\S$ MMFETISMF | 241 | 139 |
| >PTEN-P204 $\S$ MMFETIPM  | 111 | >PTEN-P204 $\S$ MMFETISM  | 130 | 19  |
| >PTEN-P204 $\S$ MMFETIPMF | 86  | >PTEN-P204 $\S$ MMFETISMF | 19  | 67  |
| >PTEN-P204 $\S$ MMFETIPM  | 4   | >PTEN-P204 $\S$ MMFETISM  | 4   | 0   |
| >PTEN-P204 $\S$ MMFETIPMF | 2   | >PTEN-P204 $\S$ MMFETISMF | 2   | 0   |
| >PTEN-P204 $\S$ MMFETIPMF | 283 | >PTEN-P204 $\S$ MMFETISMF | 164 | 119 |
| >PTEN-P204 $\S$ MMFETIPMF | 832 | >PTEN-P204 $\S$ MMFETISMF | 419 | 413 |
| >PTEN-P204 $\S$ MMFETIPM  | 163 | >PTEN-P204 $\S$ MMFETISM  | 164 | 1   |



|                             |      |                             |      |      |
|-----------------------------|------|-----------------------------|------|------|
| >PTEN-P204 $\S$ MMMFETIPMF  | 21   | >PTEN-P204 $\S$ MMMFETISMF  | 14   | 7    |
| >PTEN-P204 $\S$ MMMFETIPM   | 16   | >PTEN-P204 $\S$ MMMFETISM   | 28   | 12   |
| >PTEN-P204 $\S$ MMMFETIPMF  | 79   | >PTEN-P204 $\S$ MMMFETISMF  | 73   | 6    |
| >PTEN-P204 $\S$ MMMFETIPM   | 35   | >PTEN-P204 $\S$ MMMFETISM   | 46   | 11   |
| >PTEN-P204 $\S$ MMMFETIPM   | 1120 | >PTEN-P204 $\S$ MMMFETISM   | 494  | 626  |
| >PTEN-P204 $\S$ MMMFETIPMF  | 82   | >PTEN-P204 $\S$ MMMFETISMF  | 135  | 53   |
| >PTEN-P204 $\S$ MMMFETIPMF  | 610  | >PTEN-P204 $\S$ MMMFETISMF  | 20   | 590  |
| >PTEN-P204 $\S$ MMMFETIPMF  | 193  | >PTEN-P204 $\S$ MMMFETISMF  | 101  | 92   |
| >PTEN-P204 $\S$ KMMMFETIPM  | 12   | >PTEN-P204 $\S$ KMMMFETISM  | 19   | 7    |
| >PTEN-P204 $\S$ KMMMFETIPM  | 271  | >PTEN-P204 $\S$ KMMMFETISM  | 497  | 226  |
| >PTEN-P204 $\S$ KMMMFETIPM  | 121  | >PTEN-P204 $\S$ KMMMFETISM  | 135  | 14   |
| >PTEN-P204 $\S$ KMMMFETIPM  | 12   | >PTEN-P204 $\S$ KMMMFETISM  | 15   | 3    |
| >PTEN-P204 $\S$ KMMMFETIPM  | 102  | >PTEN-P204 $\S$ KMMMFETISM  | 61   | 41   |
| >PTEN-P204 $\S$ KMMMFETIPM  | 31   | >PTEN-P204 $\S$ KMMMFETISM  | 45   | 14   |
| >PTEN-P204 $\S$ KMMMFETIPM  | 184  | >PTEN-P204 $\S$ KMMMFETISM  | 192  | 8    |
| >PTEN-P204 $\S$ KMMMFETIPM  | 31   | >PTEN-P204 $\S$ KMMMFETISM  | 77   | 46   |
| >PTEN-P204 $\S$ KMMMFETIPM  | 840  | >PTEN-P204 $\S$ KMMMFETISM  | 399  | 441  |
| >PTEN-P204 $\S$ KMMMFETIPM  | 45   | >PTEN-P204 $\S$ KMMMFETISM  | 53   | 8    |
| >PTEN-P204 $\S$ KMMMFETIPM  | 153  | >PTEN-P204 $\S$ KMMMFETISM  | 255  | 102  |
| >PTEN-P204 $\S$ KMMMFETIPM  | 474  | >PTEN-P204 $\S$ KMMMFETISM  | 743  | 269  |
| >PTEN-P204 $\S$ KMMMFETIPM  | 11   | >PTEN-P204 $\S$ KMMMFETISM  | 17   | 6    |
| >PTEN-P204 $\S$ KMMMFETIPM  | 31   | >PTEN-P204 $\S$ KMMMFETISM  | 18   | 13   |
| >PTEN-P204 $\S$ KMMMFETIPM  | 69   | >PTEN-P204 $\S$ KMMMFETISM  | 53   | 16   |
| >PTEN-P204 $\S$ KMMMFETIPM  | 184  | >PTEN-P204 $\S$ KMMMFETISM  | 383  | 199  |
| >PTEN-P204 $\S$ KMMMFETIPM  | 350  | >PTEN-P204 $\S$ KMMMFETISM  | 253  | 97   |
| >PTEN-P204 $\S$ KMMMFETIPM  | 724  | >PTEN-P204 $\S$ KMMMFETISM  | 325  | 399  |
| >PTEN-P204 $\S$ KMMMFETIPM  | 9    | >PTEN-P204 $\S$ KMMMFETISM  | 9    | 0    |
| >PTEN-P204 $\S$ KMMMFETIPM  | 11   | >PTEN-P204 $\S$ KMMMFETISM  | 11   | 0    |
| >PTEN-P204 $\S$ KMMMFETIPM  | 47   | >PTEN-P204 $\S$ KMMMFETISM  | 58   | 11   |
| >PTEN-P204 $\S$ KMMMFETIPM  | 50   | >PTEN-P204 $\S$ KMMMFETISM  | 37   | 13   |
| >PTEN-P204 $\S$ KMMMFETIPM  | 14   | >PTEN-P204 $\S$ KMMMFETISM  | 14   | 0    |
| >PTEN-P204 $\S$ KMMMFETIPM  | 4    | >PTEN-P204 $\S$ KMMMFETISM  | 3    | 1    |
| >PTEN-P204 $\S$ KMMMFETIPM  | 544  | >PTEN-P204 $\S$ KMMMFETISM  | 497  | 47   |
| >PTEN-P204 $\S$ KMMMFETIPM  | 59   | >PTEN-P204 $\S$ KMMMFETISM  | 48   | 11   |
| >PTEN-P204 $\S$ KMMMFETIPM  | 347  | >PTEN-P204 $\S$ KMMMFETISM  | 1862 | 1515 |
| >PTEN-P204 $\S$ KMMMFETIPM  | 971  | >PTEN-P204 $\S$ KMMMFETISM  | 270  | 701  |
| >PTEN-P204 $\S$ KMMMFETIPM  | 57   | >PTEN-P204 $\S$ KMMMFETISM  | 68   | 11   |
| >PTEN-P204 $\S$ KMMMFETIPM  | 667  | >PTEN-P204 $\S$ KMMMFETISM  | 217  | 450  |
| >PTEN-P204 $\S$ HKMMMFETIP  | 379  | >PTEN-P204 $\S$ HKMMMFETIS  | 376  | 3    |
| >PTEN-P204 $\S$ HKMMMFETIPI | 7    | >PTEN-P204 $\S$ HKMMMFETISI | 7    | 0    |
| >PTEN-P204 $\S$ HKMMMFETIPI | 3    | >PTEN-P204 $\S$ HKMMMFETISI | 2    | 1    |
| >PTEN-P204 $\S$ HKMMMFETIPI | 41   | >PTEN-P204 $\S$ HKMMMFETISI | 69   | 28   |
| >PTEN-P204 $\S$ HKMMMFETIPI | 2790 | >PTEN-P204 $\S$ HKMMMFETISI | 275  | 2515 |

|                       |       |                       |       |       |
|-----------------------|-------|-----------------------|-------|-------|
| >PTEN-P2041FHKMMFETIF | 87    | >PTEN-P2041FHKMMFETIS | 98    | 11    |
| >PTEN-P2041PMFSGGTC   | 355   | >PTEN-P2041TMFSGGTC   | 63    | 292   |
| >PTEN-P2041PMFSGGTC   | 2332  | >PTEN-P2041TMFSGGTC   | 287   | 2045  |
| >PTEN-P2041PMFSGGTCN  | 954   | >PTEN-P2041TMFSGGTCN  | 467   | 487   |
| >PTEN-P2041IPMFSGGTC  | 404   | >PTEN-P2041ITMFSGGTC  | 21181 | 20777 |
| >PTEN-P2041IPMFSGGT   | 20777 | >PTEN-P2041ITMFSGGT   | 471   | 20306 |
| >PTEN-P2041IPMFSGGTC  | 17791 | >PTEN-P2041ITMFSGGTC  | 311   | 17480 |
| >PTEN-P2041IPMFSGGTC  | 10891 | >PTEN-P2041ITMFSGGTC  | 311   | 10580 |
| >PTEN-P2041ETIPMFSG   | 791   | >PTEN-P2041ETITMFSG   | 457   | 334   |
| >PTEN-P2041ETIPMFSGG  | 1056  | >PTEN-P2041ETITMFSGG  | 425   | 631   |
| >PTEN-P2041ETIPMFSGGT | 269   | >PTEN-P2041ETITMFSGGT | 118   | 151   |
| >PTEN-P2041ETIPMFSGGT | 875   | >PTEN-P2041ETITMFSGGT | 353   | 522   |
| >PTEN-P2041ETIPMFSGG  | 1860  | >PTEN-P2041ETITMFSGG  | 477   | 1383  |
| >PTEN-P2041ETIPMFSGGT | 711   | >PTEN-P2041ETITMFSGGT | 249   | 462   |
| >PTEN-P2041ETIPMFSG   | 113   | >PTEN-P2041ETITMFSG   | 217   | 104   |
| >PTEN-P2041ETIPMFSGG  | 129   | >PTEN-P2041ETITMFSGG  | 190   | 61    |
| >PTEN-P2041ETIPMFSGGT | 70    | >PTEN-P2041ETITMFSGGT | 43    | 27    |
| >PTEN-P2041ETIPMFSGGT | 173   | >PTEN-P2041ETITMFSGGT | 311   | 138   |
| >PTEN-P2041FETIPMFSGG | 483   | >PTEN-P2041FETITMFSGG | 543   | 60    |
| >PTEN-P2041MFETIPMF   | 43    | >PTEN-P2041MFETITMF   | 61    | 18    |
| >PTEN-P2041MFETIPMF   | 23    | >PTEN-P2041MFETITMF   | 20    | 3     |
| >PTEN-P2041MMFETIPM   | 270   | >PTEN-P2041MMFETITM   | 1017  | 747   |
| >PTEN-P2041MMFETIPMF  | 183   | >PTEN-P2041MMFETITMF  | 295   | 112   |
| >PTEN-P2041MMFETIPM   | 8     | >PTEN-P2041MMFETITM   | 13    | 5     |
| >PTEN-P2041MMFETIPMF  | 34    | >PTEN-P2041MMFETITMF  | 63    | 29    |
| >PTEN-P2041MMFETIPMF  | 57    | >PTEN-P2041MMFETITMF  | 61    | 4     |
| >PTEN-P2041MMFETIPMF  | 136   | >PTEN-P2041MMFETITMF  | 157   | 21    |
| >PTEN-P2041MMFETIPM   | 8     | >PTEN-P2041MMFETITM   | 21    | 13    |
| >PTEN-P2041MMFETIPMF  | 148   | >PTEN-P2041MMFETITMF  | 53    | 95    |
| >PTEN-P2041MMFETIPMF  | 64    | >PTEN-P2041MMFETITMF  | 51    | 13    |
| >PTEN-P2041MMFETIPMF  | 99    | >PTEN-P2041MMFETITMF  | 59    | 40    |
| >PTEN-P2041MMFETIPM   | 10    | >PTEN-P2041MMFETITM   | 16    | 6     |
| >PTEN-P2041MMFETIPMF  | 137   | >PTEN-P2041MMFETITMF  | 33    | 104   |
| >PTEN-P2041MMFETIPMF  | 142   | >PTEN-P2041MMFETITMF  | 147   | 5     |
| >PTEN-P2041MMFETIPMF  | 195   | >PTEN-P2041MMFETITMF  | 95    | 100   |
| >PTEN-P2041MMFETIPM   | 12    | >PTEN-P2041MMFETITM   | 37    | 25    |
| >PTEN-P2041MMFETIPMF  | 21    | >PTEN-P2041MMFETITMF  | 36    | 15    |
| >PTEN-P2041MMFETIPMF  | 384   | >PTEN-P2041MMFETITMF  | 365   | 19    |
| >PTEN-P2041MMFETIPMF  | 155   | >PTEN-P2041MMFETITMF  | 182   | 27    |
| >PTEN-P2041MMFETIPM   | 2     | >PTEN-P2041MMFETITM   | 2     | 0     |
| >PTEN-P2041MMFETIPMF  | 2     | >PTEN-P2041MMFETITMF  | 3     | 1     |
| >PTEN-P2041MMFETIPMF  | 4     | >PTEN-P2041MMFETITMF  | 6     | 2     |
| >PTEN-P2041MMFETIPMF  | 7     | >PTEN-P2041MMFETITMF  | 8     | 1     |

|                      |       |                      |      |       |
|----------------------|-------|----------------------|------|-------|
| >PTEN-P2041MMFETIPM  | 7     | >PTEN-P2041MMFETITM  | 7    | 0     |
| >PTEN-P2041MMFETIPMF | 334   | >PTEN-P2041MMFETITMF | 705  | 371   |
| >PTEN-P2041MMFETIPMF | 217   | >PTEN-P2041MMFETITMF | 218  | 1     |
| >PTEN-P2041MMFETIPMF | 300   | >PTEN-P2041MMFETITMF | 299  | 1     |
| >PTEN-P2041MMFETIPM  | 11    | >PTEN-P2041MMFETITM  | 12   | 1     |
| >PTEN-P2041MMFETIPMF | 52    | >PTEN-P2041MMFETITMF | 282  | 230   |
| >PTEN-P2041MMFETIPMF | 44    | >PTEN-P2041MMFETITMF | 57   | 13    |
| >PTEN-P2041MMFETIPMF | 186   | >PTEN-P2041MMFETITMF | 231  | 45    |
| >PTEN-P2041MMFETIPM  | 16    | >PTEN-P2041MMFETITM  | 13   | 3     |
| >PTEN-P2041MMFETIPM  | 5     | >PTEN-P2041MMFETITM  | 4    | 1     |
| >PTEN-P2041MMFETIPMF | 24    | >PTEN-P2041MMFETITMF | 38   | 14    |
| >PTEN-P2041MMFETIPMF | 38    | >PTEN-P2041MMFETITMF | 21   | 17    |
| >PTEN-P2041MMFETIPMF | 100   | >PTEN-P2041MMFETITMF | 103  | 3     |
| >PTEN-P2041MMFETIPMF | 60    | >PTEN-P2041MMFETITMF | 90   | 30    |
| >PTEN-P2041MMFETIPMF | 50    | >PTEN-P2041MMFETITMF | 105  | 55    |
| >PTEN-P2041MMFETIPM  | 472   | >PTEN-P2041MMFETITM  | 709  | 237   |
| >PTEN-P2041MMFETIPMF | 61    | >PTEN-P2041MMFETITMF | 127  | 66    |
| >PTEN-P2041MMFETIPM  | 391   | >PTEN-P2041MMFETITM  | 1461 | 1070  |
| >PTEN-P2041MMFETIPMF | 468   | >PTEN-P2041MMFETITMF | 692  | 224   |
| >PTEN-P2041MMFETIPM  | 88    | >PTEN-P2041MMFETITM  | 44   | 44    |
| >PTEN-P2041MMFETIPMF | 76    | >PTEN-P2041MMFETITMF | 27   | 49    |
| >PTEN-P2041MMFETIPM  | 27    | >PTEN-P2041MMFETITM  | 102  | 75    |
| >PTEN-P2041MMFETIPM  | 28    | >PTEN-P2041MMFETITM  | 38   | 10    |
| >PTEN-P2041MMFETIPMF | 29    | >PTEN-P2041MMFETITMF | 24   | 5     |
| >PTEN-P2041MMFETIPMF | 380   | >PTEN-P2041MMFETITMF | 293  | 87    |
| >PTEN-P2041MMFETIPM  | 111   | >PTEN-P2041MMFETITM  | 153  | 42    |
| >PTEN-P2041MMFETIPMF | 86    | >PTEN-P2041MMFETITMF | 40   | 46    |
| >PTEN-P2041MMFETIPM  | 4     | >PTEN-P2041MMFETITM  | 4    | 0     |
| >PTEN-P2041MMFETIPMF | 2     | >PTEN-P2041MMFETITMF | 2    | 0     |
| >PTEN-P2041MMFETIPMF | 283   | >PTEN-P2041MMFETITMF | 194  | 89    |
| >PTEN-P2041MMFETIPM  | 163   | >PTEN-P2041MMFETITM  | 102  | 61    |
| >PTEN-P2041MMFETIPMF | 21    | >PTEN-P2041MMFETITMF | 21   | 0     |
| >PTEN-P2041MMFETIPM  | 16    | >PTEN-P2041MMFETITM  | 19   | 3     |
| >PTEN-P2041MMFETIPMF | 79    | >PTEN-P2041MMFETITMF | 67   | 12    |
| >PTEN-P2041MMFETIPM  | 35    | >PTEN-P2041MMFETITM  | 51   | 16    |
| >PTEN-P2041MMFETIPM  | 1120  | >PTEN-P2041MMFETITM  | 325  | 795   |
| >PTEN-P2041MMFETIPMF | 82    | >PTEN-P2041MMFETITMF | 88   | 6     |
| >PTEN-P2041MMFETIPMF | 610   | >PTEN-P2041MMFETITMF | 111  | 499   |
| >PTEN-P2041MMFETIPMF | 193   | >PTEN-P2041MMFETITMF | 193  | 0     |
| >PTEN-P2041KMMFETIP  | 14751 | >PTEN-P2041KMMFETIT  | 260  | 14491 |
| >PTEN-P2041KMMFETIPM | 12    | >PTEN-P2041KMMFETITM | 25   | 13    |
| >PTEN-P2041KMMFETIPM | 271   | >PTEN-P2041KMMFETITM | 346  | 75    |
| >PTEN-P2041KMMFETIPM | 121   | >PTEN-P2041KMMFETITM | 118  | 3     |

|                       |      |                       |     |      |
|-----------------------|------|-----------------------|-----|------|
| >PTEN-P2041KMMFETIP   | 1760 | >PTEN-P2041KMMFETIT   | 193 | 1567 |
| >PTEN-P2041KMMFETIPM  | 12   | >PTEN-P2041KMMFETITM  | 33  | 21   |
| >PTEN-P2041KMMFETIPM  | 102  | >PTEN-P2041KMMFETITM  | 57  | 45   |
| >PTEN-P2041KMMFETIP   | 5104 | >PTEN-P2041KMMFETIT   | 122 | 4982 |
| >PTEN-P2041KMMFETIPM  | 31   | >PTEN-P2041KMMFETITM  | 73  | 42   |
| >PTEN-P2041KMMFETIPM  | 184  | >PTEN-P2041KMMFETITM  | 162 | 22   |
| >PTEN-P2041KMMFETIPM  | 31   | >PTEN-P2041KMMFETITM  | 170 | 139  |
| >PTEN-P2041KMMFETIPM  | 840  | >PTEN-P2041KMMFETITM  | 393 | 447  |
| >PTEN-P2041KMMFETIPM  | 45   | >PTEN-P2041KMMFETITM  | 32  | 13   |
| >PTEN-P2041KMMFETIPM  | 153  | >PTEN-P2041KMMFETITM  | 272 | 119  |
| >PTEN-P2041KMMFETIPM  | 474  | >PTEN-P2041KMMFETITM  | 643 | 169  |
| >PTEN-P2041KMMFETIPM  | 11   | >PTEN-P2041KMMFETITM  | 10  | 1    |
| >PTEN-P2041KMMFETIPM  | 717  | >PTEN-P2041KMMFETITM  | 477 | 240  |
| >PTEN-P2041KMMFETIPM  | 506  | >PTEN-P2041KMMFETITM  | 333 | 173  |
| >PTEN-P2041KMMFETIPM  | 31   | >PTEN-P2041KMMFETITM  | 17  | 14   |
| >PTEN-P2041KMMFETIPM  | 1166 | >PTEN-P2041KMMFETITM  | 424 | 742  |
| >PTEN-P2041KMMFETIPM  | 69   | >PTEN-P2041KMMFETITM  | 81  | 12   |
| >PTEN-P2041KMMFETIPM  | 184  | >PTEN-P2041KMMFETITM  | 562 | 378  |
| >PTEN-P2041KMMFETIPM  | 350  | >PTEN-P2041KMMFETITM  | 321 | 29   |
| >PTEN-P2041KMMFETIPM  | 9    | >PTEN-P2041KMMFETITM  | 6   | 3    |
| >PTEN-P2041KMMFETIPM  | 11   | >PTEN-P2041KMMFETITM  | 6   | 5    |
| >PTEN-P2041KMMFETIPM  | 832  | >PTEN-P2041KMMFETITM  | 445 | 387  |
| >PTEN-P2041KMMFETIPM  | 47   | >PTEN-P2041KMMFETITM  | 83  | 36   |
| >PTEN-P2041KMMFETIPM  | 50   | >PTEN-P2041KMMFETITM  | 44  | 6    |
| >PTEN-P2041KMMFETIPM  | 14   | >PTEN-P2041KMMFETITM  | 20  | 6    |
| >PTEN-P2041KMMFETIPM  | 4    | >PTEN-P2041KMMFETITM  | 4   | 0    |
| >PTEN-P2041KMMFETIPM  | 544  | >PTEN-P2041KMMFETITM  | 251 | 293  |
| >PTEN-P2041KMMFETIPM  | 59   | >PTEN-P2041KMMFETITM  | 50  | 9    |
| >PTEN-P2041KMMFETIPM  | 347  | >PTEN-P2041KMMFETITM  | 774 | 427  |
| >PTEN-P2041KMMFETIPM  | 971  | >PTEN-P2041KMMFETITM  | 181 | 790  |
| >PTEN-P2041KMMFETIPM  | 57   | >PTEN-P2041KMMFETITM  | 52  | 5    |
| >PTEN-P2041KMMFETIPM  | 667  | >PTEN-P2041KMMFETITM  | 267 | 400  |
| >PTEN-P2041HKMMFETIP  | 379  | >PTEN-P2041HKMMFETIT  | 415 | 36   |
| >PTEN-P2041HKMMFETIPI | 7    | >PTEN-P2041HKMMFETITI | 9   | 2    |
| >PTEN-P2041HKMMFETIPI | 3    | >PTEN-P2041HKMMFETITI | 2   | 1    |
| >PTEN-P2041HKMMFETIPI | 41   | >PTEN-P2041HKMMFETITI | 67  | 26   |
| >PTEN-P2041FHKMMFETIF | 87   | >PTEN-P2041FHKMMFETIF | 144 | 57   |
| >PTEN-P2131PQFVVCQL   | 2931 | >PTEN-P2131HQFVVCQL   | 277 | 2654 |
| >PTEN-P2131PQFVVCQL   | 2677 | >PTEN-P2131HQFVVCQL   | 82  | 2595 |
| >PTEN-P2131PQFVVCQLK\ | 2054 | >PTEN-P2131HQFVVCQLK\ | 377 | 1677 |
| >PTEN-P2131PQFVVCQLK  | 3419 | >PTEN-P2131HQFVVCQLK  | 117 | 3302 |
| >PTEN-P2131PQFVVCQLK\ | 7729 | >PTEN-P2131HQFVVCQLK\ | 437 | 7292 |
| >PTEN-P2131PQFVVCQLK  | 1770 | >PTEN-P2131HQFVVCQLK  | 113 | 1657 |

|                        |       |                        |      |       |
|------------------------|-------|------------------------|------|-------|
| >PTEN-P213F PQFVVCQLK  | 7109  | >PTEN-P213F HQFVVCQLK  | 253  | 6856  |
| >PTEN-P213F PQFVVCQLK\ | 7948  | >PTEN-P213F HQFVVCQLK\ | 331  | 7617  |
| >PTEN-P213F PQFVVCQLK  | 6497  | >PTEN-P213F HQFVVCQLK  | 147  | 6350  |
| >PTEN-P213F PQFVVCQLK\ | 8448  | >PTEN-P213F HQFVVCQLK\ | 450  | 7998  |
| >PTEN-P213F PQFVVCQLK  | 8179  | >PTEN-P213F HQFVVCQLK  | 163  | 8016  |
| >PTEN-P213F PQFVVCQL   | 4086  | >PTEN-P213F HQFVVCQL   | 196  | 3890  |
| >PTEN-P213F PQFVVCQL   | 328   | >PTEN-P213F HQFVVCQL   | 40   | 288   |
| >PTEN-P213F PQFVVCQLK  | 2788  | >PTEN-P213F HQFVVCQLK  | 448  | 2340  |
| >PTEN-P213F PQFVVCQLK\ | 689   | >PTEN-P213F HQFVVCQLK\ | 80   | 609   |
| >PTEN-P213F PQFVVCQLK\ | 1395  | >PTEN-P213F HQFVVCQLK\ | 208  | 1187  |
| >PTEN-P213F PQFVVCQL   | 8401  | >PTEN-P213F HQFVVCQL   | 48   | 8353  |
| >PTEN-P213F NPQFVVCQLI | 443   | >PTEN-P213F NHQFVVCQL  | 5928 | 5485  |
| >PTEN-P213F NPQFVVCQL  | 1858  | >PTEN-P213F NHQFVVCQL  | 270  | 1588  |
| >PTEN-P213F IPMFSGGTCN | 10288 | >PTEN-P213F IPMFSGGTCN | 462  | 9826  |
| >PTEN-P213F TCNPQFVV   | 293   | >PTEN-P213F TCNHQFVV   | 373  | 80    |
| >PTEN-P213F GTCNPQFV   | 37    | >PTEN-P213F GTCNHQFV   | 69   | 32    |
| >PTEN-P213F GTCNPQFVV  | 52    | >PTEN-P213F GTCNHQFVV  | 102  | 50    |
| >PTEN-P213F GTCNPQFV   | 465   | >PTEN-P213F GTCNHQFV   | 902  | 437   |
| >PTEN-P213F GTCNPQFV   | 402   | >PTEN-P213F GTCNHQFV   | 373  | 29    |
| >PTEN-P213F GTCNPQFVV  | 412   | >PTEN-P213F GTCNHQFVV  | 458  | 46    |
| >PTEN-P213F GTCNPQFVV  | 130   | >PTEN-P213F GTCNHQFVV  | 1248 | 1118  |
| >PTEN-P213F FSGGTCNPQI | 143   | >PTEN-P213F FSGGTCNHQI | 161  | 18    |
| >PTEN-P213F FSGGTCNPQI | 311   | >PTEN-P213F FSGGTCNHQI | 255  | 56    |
| >PTEN-P213F FSGGTCNPQI | 156   | >PTEN-P213F FSGGTCNHQI | 219  | 63    |
| >PTEN-P213F FSGGTCNPQI | 608   | >PTEN-P213F FSGGTCNHQI | 423  | 185   |
| >PTEN-P213F FSGGTCNPQI | 382   | >PTEN-P213F FSGGTCNHQI | 453  | 71    |
| >PTEN-P213F FSGGTCNPQI | 285   | >PTEN-P213F FSGGTCNHQI | 358  | 73    |
| >PTEN-P213F FSGGTCNPQI | 204   | >PTEN-P213F FSGGTCNHQI | 311  | 107   |
| >PTEN-P213F FSGGTCNPQI | 22    | >PTEN-P213F FSGGTCNHQI | 26   | 4     |
| >PTEN-P213F FSGGTCNPQI | 219   | >PTEN-P213F FSGGTCNHQI | 82   | 137   |
| >PTEN-P213F FSGGTCNPQI | 180   | >PTEN-P213F FSGGTCNHQI | 593  | 413   |
| >PTEN-P213F MFSGGTCNP  | 107   | >PTEN-P213F MFSGGTCNH  | 50   | 57    |
| >PTEN-P213F MFSGGTCNP  | 11    | >PTEN-P213F MFSGGTCNH  | 7    | 4     |
| >PTEN-P213F MFSGGTCNP  | 107   | >PTEN-P213F MFSGGTCNH  | 83   | 24    |
| >PTEN-P213F MFSGGTCNP  | 130   | >PTEN-P213F MFSGGTCNH  | 120  | 10    |
| >PTEN-P213S PQFVVCQL   | 9909  | >PTEN-P213S SQFVVCQL   | 199  | 9710  |
| >PTEN-P213S PQFVVCQL   | 12116 | >PTEN-P213S SQFVVCQL   | 416  | 11700 |
| >PTEN-P213S PQFVVCQL   | 2931  | >PTEN-P213S SQFVVCQL   | 173  | 2758  |
| >PTEN-P213S PQFVVCQLK\ | 5651  | >PTEN-P213S SQFVVCQLK\ | 352  | 5299  |
| >PTEN-P213S PQFVVCQLK\ | 4941  | >PTEN-P213S SQFVVCQLK\ | 313  | 4628  |
| >PTEN-P213S PQFVVCQL   | 2677  | >PTEN-P213S SQFVVCQL   | 42   | 2635  |
| >PTEN-P213S PQFVVCQLK\ | 7827  | >PTEN-P213S SQFVVCQLK\ | 171  | 7656  |
| >PTEN-P213S PQFVVCQL   | 2449  | >PTEN-P213S SQFVVCQL   | 143  | 2306  |

|                        |      |                        |       |       |
|------------------------|------|------------------------|-------|-------|
| >PTEN-P213S PQFVVCQLK\ | 3626 | >PTEN-P213S SQFVVCQLKV | 147   | 3479  |
| >PTEN-P213S PQFVVCQL   | 3941 | >PTEN-P213S SQFVVCQL   | 133   | 3808  |
| >PTEN-P213S PQFVVCQLK\ | 2054 | >PTEN-P213S SQFVVCQLKV | 38    | 2016  |
| >PTEN-P213S PQFVVCQLK\ | 6016 | >PTEN-P213S SQFVVCQLKV | 57    | 5959  |
| >PTEN-P213S PQFVVCQL   | 4086 | >PTEN-P213S SQFVVCQL   | 156   | 3930  |
| >PTEN-P213S PQFVVCQL   | 328  | >PTEN-P213S SQFVVCQL   | 42    | 286   |
| >PTEN-P213S PQFVVCQLK\ | 689  | >PTEN-P213S SQFVVCQLKV | 87    | 602   |
| >PTEN-P213S PQFVVCQLK\ | 1395 | >PTEN-P213S SQFVVCQLKV | 246   | 1149  |
| >PTEN-P213S PQFVVCQL   | 8401 | >PTEN-P213S SQFVVCQL   | 205   | 8196  |
| >PTEN-P213S NPQFVVCQLI | 6566 | >PTEN-P213S NSQFVVCQLI | 220   | 6346  |
| >PTEN-P213S NPQFVVCQLI | 5579 | >PTEN-P213S NSQFVVCQLI | 37    | 5542  |
| >PTEN-P213S NPQFVVCQLI | 443  | >PTEN-P213S NSQFVVCQLI | 16    | 427   |
| >PTEN-P213S NPQFVVCQLI | 5884 | >PTEN-P213S NSQFVVCQLI | 315   | 5569  |
| >PTEN-P213S TCNPQFVV   | 293  | >PTEN-P213S TCNSQFVV   | 540   | 247   |
| >PTEN-P213S GTCNPQFV   | 37   | >PTEN-P213S GTCNSQFV   | 88    | 51    |
| >PTEN-P213S GTCNPQFV   | 465  | >PTEN-P213S GTCNSQFV   | 277   | 188   |
| >PTEN-P213S GTCNPQFV   | 402  | >PTEN-P213S GTCNSQFV   | 291   | 111   |
| >PTEN-P213S FSGGTCNPQI | 143  | >PTEN-P213S FSGGTCNSQF | 76    | 67    |
| >PTEN-P213S FSGGTCNPQI | 311  | >PTEN-P213S FSGGTCNSQF | 127   | 184   |
| >PTEN-P213S FSGGTCNPQI | 156  | >PTEN-P213S FSGGTCNSQF | 236   | 80    |
| >PTEN-P213S FSGGTCNPQI | 608  | >PTEN-P213S FSGGTCNSQF | 378   | 230   |
| >PTEN-P213S FSGGTCNPQI | 382  | >PTEN-P213S FSGGTCNSQF | 331   | 51    |
| >PTEN-P213S FSGGTCNPQI | 285  | >PTEN-P213S FSGGTCNSQF | 189   | 96    |
| >PTEN-P213S FSGGTCNPQI | 204  | >PTEN-P213S FSGGTCNSQF | 105   | 99    |
| >PTEN-P213S FSGGTCNPQI | 22   | >PTEN-P213S FSGGTCNSQF | 19    | 3     |
| >PTEN-P213S FSGGTCNPQI | 219  | >PTEN-P213S FSGGTCNSQF | 317   | 98    |
| >PTEN-P213S FSGGTCNPQI | 180  | >PTEN-P213S FSGGTCNSQF | 72    | 108   |
| >PTEN-P213S MFSGGTCNP  | 107  | >PTEN-P213S MFSGGTCNSI | 103   | 4     |
| >PTEN-P213S MFSGGTCNP  | 11   | >PTEN-P213S MFSGGTCNSI | 11    | 0     |
| >PTEN-P213S MFSGGTCNP  | 107  | >PTEN-P213S MFSGGTCNSI | 162   | 55    |
| >PTEN-P213S MFSGGTCNP  | 1411 | >PTEN-P213S MFSGGTCNSI | 412   | 999   |
| >PTEN-P213S MFSGGTCNP  | 130  | >PTEN-P213S MFSGGTCNSI | 126   | 4     |
| >PTEN-P213S MFSGGTCNP  | 2122 | >PTEN-P213S MFSGGTCNSI | 200   | 1922  |
| >PTEN-P244S FPQPLPVCGE | 95   | >PTEN-P244S FSQPLPVCGE | 19901 | 19806 |
| >PTEN-P244S FPQPLPVCGE | 360  | >PTEN-P244S FSQPLPVCGE | 15309 | 14949 |
| >PTEN-P244S FPQPLPVCGE | 419  | >PTEN-P244S FSQPLPVCGE | 15750 | 15331 |
| >PTEN-P244S FPQPLPVC   | 387  | >PTEN-P244S FSQPLPVC   | 20171 | 19784 |
| >PTEN-P244S FPQPLPVCGE | 832  | >PTEN-P244S FSQPLPVCGE | 21    | 811   |
| >PTEN-P244S REDKFMFEF  | 366  | >PTEN-P244S REDKFMFEF  | 2543  | 2177  |
| >PTEN-P244S EFPQPLPV   | 296  | >PTEN-P244S EFSQPLPV   | 418   | 122   |
| >PTEN-P244S MYFEFPQPLF | 484  | >PTEN-P244S MYFEFSQPLP | 289   | 195   |
| >PTEN-P244S MYFEFPQPLF | 130  | >PTEN-P244S MYFEFSQPLP | 118   | 12    |
| >PTEN-P244S MYFEFPQPLF | 48   | >PTEN-P244S MYFEFSQPLP | 28    | 20    |

|                        |     |                        |     |     |
|------------------------|-----|------------------------|-----|-----|
| >PTEN-P244S MYFEFPQPLF | 105 | >PTEN-P244S MYFEFSQPLP | 55  | 50  |
| >PTEN-P244S MYFEFPQPLF | 9   | >PTEN-P244S MYFEFSQPLP | 11  | 2   |
| >PTEN-P244S MYFEFPQPLF | 103 | >PTEN-P244S MYFEFSQPLP | 92  | 11  |
| >PTEN-P244S MYFEFPQPLF | 37  | >PTEN-P244S MYFEFSQPLP | 37  | 0   |
| >PTEN-P244S MYFEFPQPLF | 278 | >PTEN-P244S MYFEFSQPLP | 186 | 92  |
| >PTEN-P244S MYFEFPQPLF | 51  | >PTEN-P244S MYFEFSQPLP | 37  | 14  |
| >PTEN-P244S MYFEFPQPLF | 436 | >PTEN-P244S MYFEFSQPLP | 358 | 78  |
| >PTEN-P244S MYFEFPQPLF | 45  | >PTEN-P244S MYFEFSQPLP | 40  | 5   |
| >PTEN-P244S MYFEFPQPLF | 141 | >PTEN-P244S MYFEFSQPLP | 96  | 45  |
| >PTEN-P244S MYFEFPQPLF | 261 | >PTEN-P244S MYFEFSQPLP | 215 | 46  |
| >PTEN-P244S MYFEFPQPLF | 82  | >PTEN-P244S MYFEFSQPLP | 105 | 23  |
| >PTEN-P244S FMYFEFPQ   | 132 | >PTEN-P244S FMYFEFSQ   | 329 | 197 |
| >PTEN-P244S FMYFEFPQ   | 28  | >PTEN-P244S FMYFEFSQ   | 32  | 4   |
| >PTEN-P244S FMYFEFPQPL | 379 | >PTEN-P244S FMYFEFSQPL | 174 | 205 |
| >PTEN-P244S FMYFEFPQ   | 195 | >PTEN-P244S FMYFEFSQ   | 196 | 1   |
| >PTEN-P244S FMYFEFPQPL | 587 | >PTEN-P244S FMYFEFSQPL | 269 | 318 |
| >PTEN-P244S FMYFEFPQ   | 139 | >PTEN-P244S FMYFEFSQ   | 378 | 239 |
| >PTEN-P244S FMYFEFPQ   | 19  | >PTEN-P244S FMYFEFSQ   | 24  | 5   |
| >PTEN-P244S FMYFEFPQPL | 2   | >PTEN-P244S FMYFEFSQPL | 2   | 0   |
| >PTEN-P244S FMYFEFPQPL | 175 | >PTEN-P244S FMYFEFSQPL | 307 | 132 |
| >PTEN-P244S FMYFEFPQ   | 168 | >PTEN-P244S FMYFEFSQ   | 331 | 163 |
| >PTEN-P244S FMYFEFPQPL | 3   | >PTEN-P244S FMYFEFSQPL | 3   | 0   |
| >PTEN-P244S FMYFEFPQ   | 58  | >PTEN-P244S FMYFEFSQ   | 103 | 45  |
| >PTEN-P244S FMYFEFPQPL | 5   | >PTEN-P244S FMYFEFSQPL | 5   | 0   |
| >PTEN-P244S FMYFEFPQPL | 7   | >PTEN-P244S FMYFEFSQPL | 8   | 1   |
| >PTEN-P244S FMYFEFPQ   | 14  | >PTEN-P244S FMYFEFSQ   | 10  | 4   |
| >PTEN-P244S FMYFEFPQPL | 3   | >PTEN-P244S FMYFEFSQPL | 2   | 1   |
| >PTEN-P244S FMYFEFPQ   | 310 | >PTEN-P244S FMYFEFSQ   | 453 | 143 |
| >PTEN-P244S FMYFEFPQPL | 43  | >PTEN-P244S FMYFEFSQPL | 59  | 16  |
| >PTEN-P244S FMYFEFPQPL | 83  | >PTEN-P244S FMYFEFSQPL | 41  | 42  |
| >PTEN-P244S FMYFEFPQPL | 250 | >PTEN-P244S FMYFEFSQPL | 87  | 163 |
| >PTEN-P244S FMYFEFPQ   | 357 | >PTEN-P244S FMYFEFSQ   | 325 | 32  |
| >PTEN-P244S FMYFEFPQPL | 6   | >PTEN-P244S FMYFEFSQPL | 5   | 1   |
| >PTEN-P244S FMYFEFPQPL | 892 | >PTEN-P244S FMYFEFSQPL | 468 | 424 |
| >PTEN-P244S FMYFEFPQPL | 56  | >PTEN-P244S FMYFEFSQPL | 47  | 9   |
| >PTEN-P244S FMYFEFPQPL | 120 | >PTEN-P244S FMYFEFSQPL | 136 | 16  |
| >PTEN-P244S KFMYFEFPQF | 235 | >PTEN-P244S KFMYFEFSQF | 183 | 52  |
| >PTEN-P244S KFMYFEFPQF | 74  | >PTEN-P244S KFMYFEFSQF | 40  | 34  |
| >PTEN-P244S KFMYFEFPQF | 433 | >PTEN-P244S KFMYFEFSQF | 516 | 83  |
| >PTEN-P244S KFMYFEFPQF | 348 | >PTEN-P244S KFMYFEFSQF | 182 | 166 |
| >PTEN-P244S KFMYFEFPQF | 343 | >PTEN-P244S KFMYFEFSQF | 247 | 96  |
| >PTEN-P244S KFMYFEFPQF | 31  | >PTEN-P244S KFMYFEFSQF | 26  | 5   |
| >PTEN-P244S KFMYFEFPQF | 492 | >PTEN-P244S KFMYFEFSQF | 599 | 107 |

|                         |       |                         |     |       |
|-------------------------|-------|-------------------------|-----|-------|
| >PTEN-P244S KFM YFEFP   | 152   | >PTEN-P244S KFM YFEFS   | 240 | 88    |
| >PTEN-P244S KFM YFEFPQF | 96    | >PTEN-P244S KFM YFEFSQF | 108 | 12    |
| >PTEN-P246L PLPVCGDI    | 9411  | >PTEN-P246L LLPVCGDI    | 497 | 8914  |
| >PTEN-P246L PLPVCGDIKV  | 934   | >PTEN-P246L LLPVCGDIKV  | 44  | 890   |
| >PTEN-P246L PLPVCGDIKV  | 2585  | >PTEN-P246L LLPVCGDIKV  | 56  | 2529  |
| >PTEN-P246L PLPVCGDIKV  | 176   | >PTEN-P246L LLPVCGDIKV  | 18  | 158   |
| >PTEN-P246L PLPVCGDIKV  | 1835  | >PTEN-P246L LLPVCGDIKV  | 127 | 1708  |
| >PTEN-P246L PLPVCGDI    | 6252  | >PTEN-P246L LLPVCGDI    | 304 | 5948  |
| >PTEN-P246L PLPVCGDIKV  | 46    | >PTEN-P246L LLPVCGDIKV  | 6   | 40    |
| >PTEN-P246L QPLPVCGDIK  | 20970 | >PTEN-P246L QLLPVCGDIK' | 148 | 20822 |
| >PTEN-P246L QPLPVCGDIK  | 28326 | >PTEN-P246L QLLPVCGDIK' | 286 | 28040 |
| >PTEN-P246L QPLPVCGDIK  | 22895 | >PTEN-P246L QLLPVCGDIK' | 348 | 22547 |
| >PTEN-P246L QPLPVCGDIK  | 10954 | >PTEN-P246L QLLPVCGDIK' | 67  | 10887 |
| >PTEN-P246L QPLPVCGDIK  | 16295 | >PTEN-P246L QLLPVCGDIK' | 9   | 16286 |
| >PTEN-P246L QPLPVCGDIK  | 22015 | >PTEN-P246L QLLPVCGDIK' | 50  | 21965 |
| >PTEN-P246L QPLPVCGDIK  | 15309 | >PTEN-P246L QLLPVCGDIK' | 11  | 15298 |
| >PTEN-P246L QPLPVCGDIK  | 22338 | >PTEN-P246L QLLPVCGDIK' | 29  | 22309 |
| >PTEN-P246L QPLPVCGDIK  | 23719 | >PTEN-P246L QLLPVCGDIK' | 5   | 23714 |
| >PTEN-P246L DKFM YFEFPC | 3426  | >PTEN-P246L DKFM YFEFPC | 183 | 3243  |
| >PTEN-P246L FPQPLPVCGE  | 95    | >PTEN-P246L FPQLLPVCGD  | 511 | 416   |
| >PTEN-P246L FPQPLPVCGE  | 360   | >PTEN-P246L FPQLLPVCGD  | 537 | 177   |
| >PTEN-P246L FPQPLPVCGE  | 419   | >PTEN-P246L FPQLLPVCGD  | 338 | 81    |
| >PTEN-P246L FPQPLPVC    | 387   | >PTEN-P246L FPQLLPVC    | 216 | 171   |
| >PTEN-P246L EFPQPLPV    | 296   | >PTEN-P246L EFPQLLPV    | 210 | 86    |
| >PTEN-P246L MYFEFPQPLF  | 484   | >PTEN-P246L MYFEFPQLLP  | 259 | 225   |
| >PTEN-P246L MYFEFPQPLF  | 130   | >PTEN-P246L MYFEFPQLLP  | 76  | 54    |
| >PTEN-P246L MYFEFPQP    | 9845  | >PTEN-P246L MYFEFPQL    | 75  | 9770  |
| >PTEN-P246L MYFEFPQPLF  | 48    | >PTEN-P246L MYFEFPQLLP  | 22  | 26    |
| >PTEN-P246L MYFEFPQPLF  | 565   | >PTEN-P246L MYFEFPQLLP  | 347 | 218   |
| >PTEN-P246L MYFEFPQP    | 17004 | >PTEN-P246L MYFEFPQL    | 389 | 16615 |
| >PTEN-P246L MYFEFPQPLF  | 105   | >PTEN-P246L MYFEFPQLLP  | 33  | 72    |
| >PTEN-P246L MYFEFPQP    | 12947 | >PTEN-P246L MYFEFPQL    | 85  | 12862 |
| >PTEN-P246L MYFEFPQPLF  | 9     | >PTEN-P246L MYFEFPQLLP  | 9   | 0     |
| >PTEN-P246L MYFEFPQPLF  | 643   | >PTEN-P246L MYFEFPQLLP  | 486 | 157   |
| >PTEN-P246L MYFEFPQPLF  | 103   | >PTEN-P246L MYFEFPQLLP  | 83  | 20    |
| >PTEN-P246L MYFEFPQP    | 29877 | >PTEN-P246L MYFEFPQL    | 231 | 29646 |
| >PTEN-P246L MYFEFPQPLF  | 37    | >PTEN-P246L MYFEFPQLLP  | 20  | 17    |
| >PTEN-P246L MYFEFPQP    | 5600  | >PTEN-P246L MYFEFPQL    | 36  | 5564  |
| >PTEN-P246L MYFEFPQP    | 9324  | >PTEN-P246L MYFEFPQL    | 358 | 8966  |
| >PTEN-P246L MYFEFPQP    | 745   | >PTEN-P246L MYFEFPQL    | 5   | 740   |
| >PTEN-P246L MYFEFPQPLF  | 278   | >PTEN-P246L MYFEFPQLLP  | 122 | 156   |
| >PTEN-P246L MYFEFPQPLF  | 51    | >PTEN-P246L MYFEFPQLLP  | 62  | 11    |
| >PTEN-P246L MYFEFPQPLF  | 436   | >PTEN-P246L MYFEFPQLLP  | 891 | 455   |



|                         |       |                         |       |       |
|-------------------------|-------|-------------------------|-------|-------|
| >PTEN-P246L MYFEFPQPLF  | 45    | >PTEN-P246L MYFEFPQLLP  | 48    | 3     |
| >PTEN-P246L MYFEFPQPLF  | 141   | >PTEN-P246L MYFEFPQLLP  | 136   | 5     |
| >PTEN-P246L MYFEFPQPLF  | 261   | >PTEN-P246L MYFEFPQLLP  | 478   | 217   |
| >PTEN-P246L MYFEFPQP    | 12982 | >PTEN-P246L MYFEFPQL    | 473   | 12509 |
| >PTEN-P246L MYFEFPQPLF  | 643   | >PTEN-P246L MYFEFPQLLP  | 308   | 335   |
| >PTEN-P246L MYFEFPQP    | 555   | >PTEN-P246L MYFEFPQL    | 108   | 447   |
| >PTEN-P246L MYFEFPQPLF  | 82    | >PTEN-P246L MYFEFPQLLP  | 88    | 6     |
| >PTEN-P246L FMYFEFPQPL  | 379   | >PTEN-P246L FMYFEFPQLL  | 285   | 94    |
| >PTEN-P246L FMYFEFPQPL  | 2     | >PTEN-P246L FMYFEFPQLL  | 2     | 0     |
| >PTEN-P246L FMYFEFPQPL  | 175   | >PTEN-P246L FMYFEFPQLL  | 324   | 149   |
| >PTEN-P246L FMYFEFPQPL  | 3     | >PTEN-P246L FMYFEFPQLL  | 5     | 2     |
| >PTEN-P246L FMYFEFPQPL  | 5     | >PTEN-P246L FMYFEFPQLL  | 5     | 0     |
| >PTEN-P246L FMYFEFPQPL  | 7     | >PTEN-P246L FMYFEFPQLL  | 9     | 2     |
| >PTEN-P246L FMYFEFPQPL  | 3     | >PTEN-P246L FMYFEFPQLL  | 3     | 0     |
| >PTEN-P246L FMYFEFPQPL  | 43    | >PTEN-P246L FMYFEFPQLL  | 164   | 121   |
| >PTEN-P246L FMYFEFPQPL  | 83    | >PTEN-P246L FMYFEFPQLL  | 595   | 512   |
| >PTEN-P246L FMYFEFPQPL  | 250   | >PTEN-P246L FMYFEFPQLL  | 925   | 675   |
| >PTEN-P246L FMYFEFPQPL  | 6     | >PTEN-P246L FMYFEFPQLL  | 17    | 11    |
| >PTEN-P246L FMYFEFPQPL  | 56    | >PTEN-P246L FMYFEFPQLL  | 196   | 140   |
| >PTEN-P246L FMYFEFPQPL  | 120   | >PTEN-P246L FMYFEFPQLL  | 207   | 87    |
| >PTEN-P246L KFM YFEFPQF | 235   | >PTEN-P246L KFM YFEFPQL | 398   | 163   |
| >PTEN-P246L KFM YFEFPQF | 74    | >PTEN-P246L KFM YFEFPQL | 63    | 11    |
| >PTEN-P246L KFM YFEFPQF | 1232  | >PTEN-P246L KFM YFEFPQL | 358   | 874   |
| >PTEN-P246L KFM YFEFPQF | 433   | >PTEN-P246L KFM YFEFPQL | 177   | 256   |
| >PTEN-P246L KFM YFEFPQF | 7582  | >PTEN-P246L KFM YFEFPQL | 32    | 7550  |
| >PTEN-P246L KFM YFEFPQF | 348   | >PTEN-P246L KFM YFEFPQL | 169   | 179   |
| >PTEN-P246L KFM YFEFPQF | 343   | >PTEN-P246L KFM YFEFPQL | 738   | 395   |
| >PTEN-P246L KFM YFEFPQF | 8579  | >PTEN-P246L KFM YFEFPQL | 208   | 8371  |
| >PTEN-P246L KFM YFEFPQF | 31    | >PTEN-P246L KFM YFEFPQL | 137   | 106   |
| >PTEN-P246L KFM YFEFPQF | 492   | >PTEN-P246L KFM YFEFPQL | 297   | 195   |
| >PTEN-P246L KFM YFEFPQF | 96    | >PTEN-P246L KFM YFEFPQL | 88    | 8     |
| >PTEN-P339L PNFKVKLYF   | 804   | >PTEN-P339L LNFKVKLYF   | 250   | 554   |
| >PTEN-P339L PNFKVKLYFTI | 4714  | >PTEN-P339L LNFKVKLYFTI | 271   | 4443  |
| >PTEN-P339L PNFKVKLY    | 1474  | >PTEN-P339L LNFKVKLY    | 472   | 1002  |
| >PTEN-P339L PNFKVKLYFTI | 3121  | >PTEN-P339L LNFKVKLYFTI | 98    | 3023  |
| >PTEN-P339L PNFKVKLY    | 3577  | >PTEN-P339L LNFKVKLY    | 410   | 3167  |
| >PTEN-P339L PNFKVKLYF   | 830   | >PTEN-P339L LNFKVKLYF   | 57    | 773   |
| >PTEN-P339L PNFKVKLYF   | 6876  | >PTEN-P339L LNFKVKLYF   | 102   | 6774  |
| >PTEN-P339L SPNFKVKLYF  | 136   | >PTEN-P339L SLNFKVKLYF  | 25648 | 25512 |
| >PTEN-P339L SPNFKVKL    | 28260 | >PTEN-P339L SLNFKVKL    | 34    | 28226 |
| >PTEN-P339L SPNFKVKLYF  | 27610 | >PTEN-P339L SLNFKVKLYF  | 95    | 27515 |
| >PTEN-P339L SPNFKVKL    | 22434 | >PTEN-P339L SLNFKVKL    | 66    | 22368 |
| >PTEN-P339L SPNFKVKLYF  | 20496 | >PTEN-P339L SLNFKVKLYF  | 64    | 20432 |

|                         |       |                         |       |       |
|-------------------------|-------|-------------------------|-------|-------|
| >PTEN-P339I SPNFKVKL    | 23400 | >PTEN-P339I SLNFKVKL    | 33    | 23367 |
| >PTEN-P339I SPNFKVKLYF  | 26889 | >PTEN-P339I SLNFKVKLYF  | 163   | 26726 |
| >PTEN-P339I SPNFKVKL    | 24806 | >PTEN-P339I SLNFKVKL    | 342   | 24464 |
| >PTEN-P339I SPNFKVKL    | 24286 | >PTEN-P339I SLNFKVKL    | 62    | 24224 |
| >PTEN-P339I SPNFKVKL    | 29965 | >PTEN-P339I SLNFKVKL    | 12    | 29953 |
| >PTEN-P339I SPNFKVKLY   | 4518  | >PTEN-P339I SLNFKVKLY   | 163   | 4355  |
| >PTEN-P339I SPNFKVKLY   | 4772  | >PTEN-P339I SLNFKVKLY   | 402   | 4370  |
| >PTEN-P339I SPNFKVKLY   | 2135  | >PTEN-P339I SLNFKVKLY   | 62    | 2073  |
| >PTEN-P339I SPNFKVKL    | 224   | >PTEN-P339I SLNFKVKL    | 24075 | 23851 |
| >PTEN-P339I SPNFKVKLYF  | 97    | >PTEN-P339I SLNFKVKLYF  | 25429 | 25332 |
| >PTEN-P339I SPNFKVKLYF  | 15028 | >PTEN-P339I SLNFKVKLYF  | 263   | 14765 |
| >PTEN-P339I SPNFKVKLYF  | 3308  | >PTEN-P339I SLNFKVKLYF  | 221   | 3087  |
| >PTEN-P339I SPNFKVKLY   | 167   | >PTEN-P339I SLNFKVKLY   | 9533  | 9366  |
| >PTEN-P339I SPNFKVKLY   | 2386  | >PTEN-P339I SLNFKVKLY   | 270   | 2116  |
| >PTEN-P339I NKDKANRYF   | 17888 | >PTEN-P339I NKDKANRYF   | 176   | 17712 |
| >PTEN-P339I FSPNFKVKL   | 122   | >PTEN-P339I FSLNFKVKL   | 81    | 41    |
| >PTEN-P339I FSPNFKVKLYI | 757   | >PTEN-P339I FSLNFKVKLYF | 370   | 387   |
| >PTEN-P339I FSPNFKVKLY  | 238   | >PTEN-P339I FSLNFKVKLY  | 353   | 115   |
| >PTEN-P339I FSPNFKVK    | 2038  | >PTEN-P339I FSLNFKVK    | 166   | 1872  |
| >PTEN-P339I FSPNFKVKLYI | 186   | >PTEN-P339I FSLNFKVKLYF | 309   | 123   |
| >PTEN-P339I FSPNFKVKLY  | 138   | >PTEN-P339I FSLNFKVKLY  | 68    | 70    |
| >PTEN-P339I FSPNFKVK    | 695   | >PTEN-P339I FSLNFKVK    | 466   | 229   |
| >PTEN-P339I FSPNFKVKL   | 2153  | >PTEN-P339I FSLNFKVKL   | 197   | 1956  |
| >PTEN-P339I FSPNFKVKLY  | 548   | >PTEN-P339I FSLNFKVKLY  | 42    | 506   |
| >PTEN-P339I FSPNFKVKLYI | 122   | >PTEN-P339I FSLNFKVKLYF | 13    | 109   |
| >PTEN-P339I FSPNFKVKL   | 4893  | >PTEN-P339I FSLNFKVKL   | 93    | 4800  |
| >PTEN-P339I FSPNFKVKLY  | 493   | >PTEN-P339I FSLNFKVKLY  | 11    | 482   |
| >PTEN-P339I FSPNFKVKLYI | 571   | >PTEN-P339I FSLNFKVKLYF | 16    | 555   |
| >PTEN-P339I FSPNFKVKLYI | 4211  | >PTEN-P339I FSLNFKVKLYF | 47    | 4164  |
| >PTEN-P339I FSPNFKVKL   | 7     | >PTEN-P339I FSLNFKVKL   | 4524  | 4517  |
| >PTEN-P339I FSPNFKVKLY  | 84    | >PTEN-P339I FSLNFKVKLY  | 16369 | 16285 |
| >PTEN-P339I FSPNFKVKLYI | 5     | >PTEN-P339I FSLNFKVKLYF | 2731  | 2726  |
| >PTEN-P339I FSPNFKVKL   | 3817  | >PTEN-P339I FSLNFKVKL   | 255   | 3562  |
| >PTEN-P339I FSPNFKVKLY  | 191   | >PTEN-P339I FSLNFKVKLY  | 206   | 15    |
| >PTEN-P339I FSPNFKVKLYI | 536   | >PTEN-P339I FSLNFKVKLYF | 33    | 503   |
| >PTEN-P339I FSPNFKVK    | 3177  | >PTEN-P339I FSLNFKVK    | 375   | 2802  |
| >PTEN-P339I FSPNFKVKL   | 581   | >PTEN-P339I FSLNFKVKL   | 376   | 205   |
| >PTEN-P339I YFSPNFKV    | 149   | >PTEN-P339I YFSLNFKV    | 231   | 82    |
| >PTEN-P339I YFSPNFKV    | 274   | >PTEN-P339I YFSLNFKV    | 1162  | 888   |
| >PTEN-P339I YFSPNFKV    | 347   | >PTEN-P339I YFSLNFKV    | 807   | 460   |
| >PTEN-P339I YFSPNFKV    | 18    | >PTEN-P339I YFSLNFKV    | 161   | 143   |
| >PTEN-P339I YFSPNFKV    | 183   | >PTEN-P339I YFSLNFKV    | 628   | 445   |
| >PTEN-P339I YFSPNFKVK   | 422   | >PTEN-P339I YFSLNFKVK   | 2562  | 2140  |

|                         |      |                         |     |      |
|-------------------------|------|-------------------------|-----|------|
| >PTEN-P339L YFSPNFKVKL  | 14   | >PTEN-P339L YFSLNFKVKL  | 35  | 21   |
| >PTEN-P339L YFSPNFKVKL  | 681  | >PTEN-P339L YFSLNFKVKL  | 385 | 296  |
| >PTEN-P339L YFSPNFKVKL' | 13   | >PTEN-P339L YFSLNFKVKLY | 16  | 3    |
| >PTEN-P339L YFSPNFKVKL' | 449  | >PTEN-P339L YFSLNFKVKLY | 943 | 494  |
| >PTEN-P339L YFSPNFKVKL' | 207  | >PTEN-P339L YFSLNFKVKLY | 395 | 188  |
| >PTEN-P339L YFSPNFKVK   | 356  | >PTEN-P339L YFSLNFKVK   | 433 | 77   |
| >PTEN-P339L RYFSPNFKV   | 9897 | >PTEN-P339L RYFSLNFKV   | 352 | 9545 |
| >PTEN-P339L RYFSPNFKVK  | 3156 | >PTEN-P339L RYFSLNFKVKI | 220 | 2936 |
| >PTEN-P339L RYFSPNFKV   | 1290 | >PTEN-P339L RYFSLNFKV   | 164 | 1126 |
| >PTEN-P339L RYFSPNFKV   | 92   | >PTEN-P339L RYFSLNFKV   | 201 | 109  |
| >PTEN-P339L RYFSPNFKV   | 622  | >PTEN-P339L RYFSLNFKV   | 213 | 409  |
| >PTEN-P339L RYFSPNFK    | 143  | >PTEN-P339L RYFSLNFK    | 204 | 61   |
| >PTEN-P339L RYFSPNFK    | 41   | >PTEN-P339L RYFSLNFK    | 30  | 11   |
| >PTEN-P339L RYFSPNFK    | 689  | >PTEN-P339L RYFSLNFK    | 379 | 310  |
| >PTEN-P339L RYFSPNFKV   | 627  | >PTEN-P339L RYFSLNFKV   | 177 | 450  |
| >PTEN-P339L RYFSPNFKVK  | 196  | >PTEN-P339L RYFSLNFKVKI | 106 | 90   |
| >PTEN-P339L RYFSPNFKV   | 725  | >PTEN-P339L RYFSLNFKV   | 290 | 435  |
| >PTEN-P339L RYFSPNFKVK  | 412  | >PTEN-P339L RYFSLNFKVKI | 236 | 176  |
| >PTEN-P339L RYFSPNFK    | 208  | >PTEN-P339L RYFSLNFK    | 88  | 120  |
| >PTEN-P339L RYFSPNFKV   | 20   | >PTEN-P339L RYFSLNFKV   | 11  | 9    |
| >PTEN-P339L RYFSPNFKVK  | 104  | >PTEN-P339L RYFSLNFKVK  | 93  | 11   |
| >PTEN-P339L RYFSPNFKVK  | 5    | >PTEN-P339L RYFSLNFKVKI | 5   | 0    |
| >PTEN-P339L RYFSPNFK    | 5    | >PTEN-P339L RYFSLNFK    | 4   | 1    |
| >PTEN-P339L RYFSPNFKV   | 209  | >PTEN-P339L RYFSLNFKV   | 161 | 48   |
| >PTEN-P339L RYFSPNFKVK  | 9    | >PTEN-P339L RYFSLNFKVK  | 9   | 0    |
| >PTEN-P339L RYFSPNFKVK  | 448  | >PTEN-P339L RYFSLNFKVKI | 380 | 68   |
| >PTEN-P339L RYFSPNFK    | 15   | >PTEN-P339L RYFSLNFK    | 10  | 5    |
| >PTEN-P339L RYFSPNFKV   | 206  | >PTEN-P339L RYFSLNFKV   | 86  | 120  |
| >PTEN-P339L RYFSPNFKVK  | 658  | >PTEN-P339L RYFSLNFKVK  | 463 | 195  |
| >PTEN-P339L RYFSPNFKVK  | 342  | >PTEN-P339L RYFSLNFKVKI | 191 | 151  |
| >PTEN-P339L RYFSPNFKV   | 238  | >PTEN-P339L RYFSLNFKV   | 89  | 149  |
| >PTEN-P339L RYFSPNFKVK  | 48   | >PTEN-P339L RYFSLNFKVKI | 28  | 20   |
| >PTEN-P339L RYFSPNFK    | 506  | >PTEN-P339L RYFSLNFK    | 256 | 250  |
| >PTEN-P339L RYFSPNFK    | 23   | >PTEN-P339L RYFSLNFK    | 19  | 4    |
| >PTEN-P339L RYFSPNFKVK  | 24   | >PTEN-P339L RYFSLNFKVK  | 17  | 7    |
| >PTEN-P339L RYFSPNFKVK  | 761  | >PTEN-P339L RYFSLNFKVKI | 419 | 342  |
| >PTEN-P339L RYFSPNFKV   | 223  | >PTEN-P339L RYFSLNFKV   | 250 | 27   |
| >PTEN-P339L RYFSPNFKVK  | 319  | >PTEN-P339L RYFSLNFKVKI | 340 | 21   |
| >PTEN-P339L RYFSPNFK    | 157  | >PTEN-P339L RYFSLNFK    | 154 | 3    |
| >PTEN-P339L RYFSPNFKV   | 242  | >PTEN-P339L RYFSLNFKV   | 166 | 76   |
| >PTEN-P339L RYFSPNFKVK  | 185  | >PTEN-P339L RYFSLNFKVKI | 146 | 39   |
| >PTEN-P339L NRYFSPNFK   | 331  | >PTEN-P339L NRYFSLNFK   | 218 | 113  |
| >PTEN-P339L NRYFSPNF    | 18   | >PTEN-P339L NRYFSLNF    | 22  | 4    |

|                         |       |                         |       |       |
|-------------------------|-------|-------------------------|-------|-------|
| >PTEN-P339I NRYFSPNFKV  | 584   | >PTEN-P339I NRYFSLNFKV  | 413   | 171   |
| >PTEN-P339I NRYFSPNFKV  | 221   | >PTEN-P339I NRYFSLNFKV  | 199   | 22    |
| >PTEN-P339I NRYFSPNFK   | 120   | >PTEN-P339I NRYFSLNFK   | 90    | 30    |
| >PTEN-P339I NRYFSPNFKV  | 151   | >PTEN-P339I NRYFSLNFKV  | 145   | 6     |
| >PTEN-P339I ANRYFSPNF   | 389   | >PTEN-P339I ANRYFSLNF   | 969   | 580   |
| >PTEN-P339I ANRYFSPNFK  | 685   | >PTEN-P339I ANRYFSLNFK  | 309   | 376   |
| >PTEN-P339I ANRYFSPNF   | 450   | >PTEN-P339I ANRYFSLNF   | 786   | 336   |
| >PTEN-P339I ANRYFSPNFK  | 4     | >PTEN-P339I ANRYFSLNFK  | 4     | 0     |
| >PTEN-P339I ANRYFSPNFK  | 174   | >PTEN-P339I ANRYFSLNFK  | 192   | 18    |
| >PTEN-P339I ANRYFSPNFK  | 847   | >PTEN-P339I ANRYFSLNFK  | 441   | 406   |
| >PTEN-P339I ANRYFSPNF   | 860   | >PTEN-P339I ANRYFSLNF   | 435   | 425   |
| >PTEN-P339I ANRYFSPNF   | 13    | >PTEN-P339I ANRYFSLNF   | 11    | 2     |
| >PTEN-P339I KANRYFSP    | 24058 | >PTEN-P339I KANRYFSL    | 471   | 23587 |
| >PTEN-P339I KANRYFSP    | 15726 | >PTEN-P339I KANRYFSL    | 144   | 15582 |
| >PTEN-P339I KANRYFSPNF  | 46    | >PTEN-P339I KANRYFSLNF  | 44    | 2     |
| >PTEN-P339I KANRYFSPNF  | 12    | >PTEN-P339I KANRYFSLNF  | 10    | 2     |
| >PTEN-P339I KANRYFSP    | 2014  | >PTEN-P339I KANRYFSL    | 179   | 1835  |
| >PTEN-P339I KANRYFSPNF  | 4     | >PTEN-P339I KANRYFSLNF  | 5     | 1     |
| >PTEN-P339I KANRYFSP    | 5333  | >PTEN-P339I KANRYFSL    | 485   | 4848  |
| >PTEN-P339I KANRYFSPNF  | 17    | >PTEN-P339I KANRYFSLNF  | 11    | 6     |
| >PTEN-P339I KANRYFSPNF  | 416   | >PTEN-P339I KANRYFSLNF  | 275   | 141   |
| >PTEN-P339I KANRYFSPNF  | 469   | >PTEN-P339I KANRYFSLNF  | 301   | 168   |
| >PTEN-P339I KANRYFSPNF  | 279   | >PTEN-P339I KANRYFSLNF  | 245   | 34    |
| >PTEN-P339I KANRYFSP    | 5923  | >PTEN-P339I KANRYFSL    | 263   | 5660  |
| >PTEN-P339I KANRYFSPNF  | 11    | >PTEN-P339I KANRYFSLNF  | 10    | 1     |
| >PTEN-P339I KANRYFSP    | 19908 | >PTEN-P339I KANRYFSL    | 260   | 19648 |
| >PTEN-P339I KANRYFSPNF  | 29    | >PTEN-P339I KANRYFSLNF  | 21    | 8     |
| >PTEN-P339I KANRYFSPNF  | 373   | >PTEN-P339I KANRYFSLNF  | 250   | 123   |
| >PTEN-P339I KANRYFSP    | 8030  | >PTEN-P339I KANRYFSL    | 51    | 7979  |
| >PTEN-P339I KANRYFSPNF  | 21    | >PTEN-P339I KANRYFSLNF  | 16    | 5     |
| >PTEN-P339I DKANRYFSPN  | 39    | >PTEN-P339I DKANRYFSLN  | 33    | 6     |
| >PTEN-P339I PNFKVKLYF   | 804   | >PTEN-P339I SNFKVKLYF   | 200   | 604   |
| >PTEN-P339I PNFKVKLYFTI | 4714  | >PTEN-P339I SNFKVKLYFTI | 35    | 4679  |
| >PTEN-P339I PNFKVKLYFTI | 5376  | >PTEN-P339I SNFKVKLYFTI | 484   | 4892  |
| >PTEN-P339I PNFKVKLYFTI | 5612  | >PTEN-P339I SNFKVKLYFTI | 460   | 5152  |
| >PTEN-P339I PNFKVKLYFTI | 3121  | >PTEN-P339I SNFKVKLYFTI | 89    | 3032  |
| >PTEN-P339I PNFKVKLYF   | 830   | >PTEN-P339I SNFKVKLYF   | 135   | 695   |
| >PTEN-P339I PNFKVKLYF   | 6876  | >PTEN-P339I SNFKVKLYF   | 67    | 6809  |
| >PTEN-P339I PNFKVKLYFTI | 3947  | >PTEN-P339I SNFKVKLYFTI | 301   | 3646  |
| >PTEN-P339I SPNFKVKLYF  | 136   | >PTEN-P339I SSNFKVKLYF  | 18659 | 18523 |
| >PTEN-P339I SPNFKVKLY   | 4772  | >PTEN-P339I SSNFKVKLY   | 235   | 4537  |
| >PTEN-P339I SPNFKVKLY   | 2135  | >PTEN-P339I SSNFKVKLY   | 471   | 1664  |
| >PTEN-P339I SPNFKVKL    | 224   | >PTEN-P339I SSNFKVKL    | 25930 | 25706 |

|                             |       |                             |       |       |
|-----------------------------|-------|-----------------------------|-------|-------|
| >PTEN-P339 $\S$ SPNFVKVLYF  | 97    | >PTEN-P339 $\S$ SSNFVKVLYF  | 17208 | 17111 |
| >PTEN-P339 $\S$ SPNFVKVKL   | 20945 | >PTEN-P339 $\S$ SSNFVKVKL   | 138   | 20807 |
| >PTEN-P339 $\S$ SPNFVKVLY   | 13321 | >PTEN-P339 $\S$ SSNFVKVLY   | 14    | 13307 |
| >PTEN-P339 $\S$ SPNFVKVLYF  | 15854 | >PTEN-P339 $\S$ SSNFVKVLYF  | 19    | 15835 |
| >PTEN-P339 $\S$ SPNFVKVLYF  | 19121 | >PTEN-P339 $\S$ SSNFVKVLYF  | 251   | 18870 |
| >PTEN-P339 $\S$ SPNFVKVLY   | 2197  | >PTEN-P339 $\S$ SSNFVKVLY   | 80    | 2117  |
| >PTEN-P339 $\S$ SPNFVKVLYF  | 3308  | >PTEN-P339 $\S$ SSNFVKVLYF  | 33    | 3275  |
| >PTEN-P339 $\S$ SPNFVKVLY   | 167   | >PTEN-P339 $\S$ SSNFVKVLY   | 13097 | 12930 |
| >PTEN-P339 $\S$ SPNFVKVLY   | 2386  | >PTEN-P339 $\S$ SSNFVKVLY   | 460   | 1926  |
| >PTEN-P339 $\S$ FSPNFVKVKL  | 122   | >PTEN-P339 $\S$ FSSNFVKVKL  | 653   | 531   |
| >PTEN-P339 $\S$ FSPNFVKVLY  | 238   | >PTEN-P339 $\S$ FSSNFVKVLY  | 74    | 164   |
| >PTEN-P339 $\S$ FSPNFVKVKL  | 2943  | >PTEN-P339 $\S$ FSSNFVKVKL  | 452   | 2491  |
| >PTEN-P339 $\S$ FSPNFVKV    | 2038  | >PTEN-P339 $\S$ FSSNFVKV    | 166   | 1872  |
| >PTEN-P339 $\S$ FSPNFVKVLYI | 186   | >PTEN-P339 $\S$ FSSNFVKVLYI | 1375  | 1189  |
| >PTEN-P339 $\S$ FSPNFVKVLY  | 701   | >PTEN-P339 $\S$ FSSNFVKVLY  | 293   | 408   |
| >PTEN-P339 $\S$ FSPNFVKVLY  | 138   | >PTEN-P339 $\S$ FSSNFVKVLY  | 49    | 89    |
| >PTEN-P339 $\S$ FSPNFVKV    | 695   | >PTEN-P339 $\S$ FSSNFVKV    | 123   | 572   |
| >PTEN-P339 $\S$ FSPNFVKVLYI | 2633  | >PTEN-P339 $\S$ FSSNFVKVLYI | 405   | 2228  |
| >PTEN-P339 $\S$ FSPNFVKVKL  | 2153  | >PTEN-P339 $\S$ FSSNFVKVKL  | 423   | 1730  |
| >PTEN-P339 $\S$ FSPNFVKVLY  | 548   | >PTEN-P339 $\S$ FSSNFVKVLY  | 91    | 457   |
| >PTEN-P339 $\S$ FSPNFVKVLYI | 122   | >PTEN-P339 $\S$ FSSNFVKVLYI | 27    | 95    |
| >PTEN-P339 $\S$ FSPNFVKVKL  | 4893  | >PTEN-P339 $\S$ FSSNFVKVKL  | 226   | 4667  |
| >PTEN-P339 $\S$ FSPNFVKVLY  | 493   | >PTEN-P339 $\S$ FSSNFVKVLY  | 17    | 476   |
| >PTEN-P339 $\S$ FSPNFVKVLYI | 571   | >PTEN-P339 $\S$ FSSNFVKVLYI | 24    | 547   |
| >PTEN-P339 $\S$ FSPNFVKVLYI | 4211  | >PTEN-P339 $\S$ FSSNFVKVLYI | 40    | 4171  |
| >PTEN-P339 $\S$ FSPNFVKVKL  | 7     | >PTEN-P339 $\S$ FSSNFVKVKL  | 1290  | 1283  |
| >PTEN-P339 $\S$ FSPNFVKVLY  | 84    | >PTEN-P339 $\S$ FSSNFVKVLY  | 10155 | 10071 |
| >PTEN-P339 $\S$ FSPNFVKVLYI | 5     | >PTEN-P339 $\S$ FSSNFVKVLYI | 679   | 674   |
| >PTEN-P339 $\S$ FSPNFVKVKL  | 3817  | >PTEN-P339 $\S$ FSSNFVKVKL  | 291   | 3526  |
| >PTEN-P339 $\S$ FSPNFVKVLY  | 191   | >PTEN-P339 $\S$ FSSNFVKVLY  | 47    | 144   |
| >PTEN-P339 $\S$ FSPNFVKVLYI | 536   | >PTEN-P339 $\S$ FSSNFVKVLYI | 32    | 504   |
| >PTEN-P339 $\S$ FSPNFVKVKL  | 581   | >PTEN-P339 $\S$ FSSNFVKVKL  | 408   | 173   |
| >PTEN-P339 $\S$ YFSPNFVKV   | 149   | >PTEN-P339 $\S$ YFSSNFVKV   | 109   | 40    |
| >PTEN-P339 $\S$ YFSPNFVKV   | 274   | >PTEN-P339 $\S$ YFSSNFVKV   | 388   | 114   |
| >PTEN-P339 $\S$ YFSPNFVKV   | 347   | >PTEN-P339 $\S$ YFSSNFVKV   | 421   | 74    |
| >PTEN-P339 $\S$ YFSPNFVKV   | 18    | >PTEN-P339 $\S$ YFSSNFVKV   | 37    | 19    |
| >PTEN-P339 $\S$ YFSPNFVKV   | 183   | >PTEN-P339 $\S$ YFSSNFVKV   | 352   | 169   |
| >PTEN-P339 $\S$ YFSPNFVKVK  | 422   | >PTEN-P339 $\S$ YFSSNFVKVK  | 908   | 486   |
| >PTEN-P339 $\S$ YFSPNFVKVKL | 14    | >PTEN-P339 $\S$ YFSSNFVKVKL | 19    | 5     |
| >PTEN-P339 $\S$ YFSPNFVKVKL | 681   | >PTEN-P339 $\S$ YFSSNFVKVKL | 449   | 232   |
| >PTEN-P339 $\S$ YFSPNFVKVKL | 13    | >PTEN-P339 $\S$ YFSSNFVKVKL | 14    | 1     |
| >PTEN-P339 $\S$ YFSPNFVKVKL | 624   | >PTEN-P339 $\S$ YFSSNFVKVKL | 447   | 177   |
| >PTEN-P339 $\S$ YFSPNFVKVKL | 449   | >PTEN-P339 $\S$ YFSSNFVKVKL | 409   | 40    |

|                      |      |                      |     |      |
|----------------------|------|----------------------|-----|------|
| >PTEN-P339YFSPNFKVKL | 705  | >PTEN-P339YFSSNFKVKL | 367 | 338  |
| >PTEN-P339YFSPNFKVKL | 207  | >PTEN-P339YFSSNFKVKL | 226 | 19   |
| >PTEN-P339YFSPNFKVK  | 356  | >PTEN-P339YFSSNFKVK  | 459 | 103  |
| >PTEN-P339RYFSPNFKV  | 9897 | >PTEN-P339RYFSSNFKV  | 343 | 9554 |
| >PTEN-P339RYFSPNFKVK | 3156 | >PTEN-P339RYFSSNFKVK | 173 | 2983 |
| >PTEN-P339RYFSPNFKV  | 1290 | >PTEN-P339RYFSSNFKV  | 398 | 892  |
| >PTEN-P339RYFSPNFKV  | 92   | >PTEN-P339RYFSSNFKV  | 305 | 213  |
| >PTEN-P339RYFSPNFKV  | 622  | >PTEN-P339RYFSSNFKV  | 437 | 185  |
| >PTEN-P339RYFSPNFKV  | 634  | >PTEN-P339RYFSSNFKV  | 422 | 212  |
| >PTEN-P339RYFSPNFK   | 143  | >PTEN-P339RYFSSNFK   | 111 | 32   |
| >PTEN-P339RYFSPNFK   | 41   | >PTEN-P339RYFSSNFK   | 31  | 10   |
| >PTEN-P339RYFSPNFK   | 689  | >PTEN-P339RYFSSNFK   | 424 | 265  |
| >PTEN-P339RYFSPNFKV  | 627  | >PTEN-P339RYFSSNFKV  | 114 | 513  |
| >PTEN-P339RYFSPNFKVK | 196  | >PTEN-P339RYFSSNFKVK | 81  | 115  |
| >PTEN-P339RYFSPNFKV  | 725  | >PTEN-P339RYFSSNFKV  | 422 | 303  |
| >PTEN-P339RYFSPNFKVK | 412  | >PTEN-P339RYFSSNFKVK | 298 | 114  |
| >PTEN-P339RYFSPNFK   | 208  | >PTEN-P339RYFSSNFK   | 131 | 77   |
| >PTEN-P339RYFSPNFKV  | 20   | >PTEN-P339RYFSSNFKV  | 19  | 1    |
| >PTEN-P339RYFSPNFKVK | 104  | >PTEN-P339RYFSSNFKVK | 100 | 4    |
| >PTEN-P339RYFSPNFKVK | 5    | >PTEN-P339RYFSSNFKVK | 5   | 0    |
| >PTEN-P339RYFSPNFK   | 5    | >PTEN-P339RYFSSNFK   | 4   | 1    |
| >PTEN-P339RYFSPNFKV  | 209  | >PTEN-P339RYFSSNFKV  | 52  | 157  |
| >PTEN-P339RYFSPNFKVK | 9    | >PTEN-P339RYFSSNFKVK | 7   | 2    |
| >PTEN-P339RYFSPNFKVK | 448  | >PTEN-P339RYFSSNFKVK | 172 | 276  |
| >PTEN-P339RYFSPNFK   | 15   | >PTEN-P339RYFSSNFK   | 12  | 3    |
| >PTEN-P339RYFSPNFKV  | 206  | >PTEN-P339RYFSSNFKV  | 161 | 45   |
| >PTEN-P339RYFSPNFKVK | 342  | >PTEN-P339RYFSSNFKVK | 292 | 50   |
| >PTEN-P339RYFSPNFKV  | 238  | >PTEN-P339RYFSSNFKV  | 311 | 73   |
| >PTEN-P339RYFSPNFKVK | 48   | >PTEN-P339RYFSSNFKVK | 62  | 14   |
| >PTEN-P339RYFSPNFK   | 506  | >PTEN-P339RYFSSNFK   | 189 | 317  |
| >PTEN-P339RYFSPNFKVK | 514  | >PTEN-P339RYFSSNFKVK | 238 | 276  |
| >PTEN-P339RYFSPNFK   | 23   | >PTEN-P339RYFSSNFK   | 22  | 1    |
| >PTEN-P339RYFSPNFKVK | 24   | >PTEN-P339RYFSSNFKVK | 23  | 1    |
| >PTEN-P339RYFSPNFKV  | 223  | >PTEN-P339RYFSSNFKV  | 319 | 96   |
| >PTEN-P339RYFSPNFKVK | 319  | >PTEN-P339RYFSSNFKVK | 391 | 72   |
| >PTEN-P339RYFSPNFK   | 157  | >PTEN-P339RYFSSNFK   | 164 | 7    |
| >PTEN-P339RYFSPNFKV  | 242  | >PTEN-P339RYFSSNFKV  | 164 | 78   |
| >PTEN-P339RYFSPNFKVK | 185  | >PTEN-P339RYFSSNFKVK | 149 | 36   |
| >PTEN-P339NRYFSPNFK  | 331  | >PTEN-P339NRYFSSNFK  | 181 | 150  |
| >PTEN-P339NRYFSPNF   | 18   | >PTEN-P339NRYFSSNF   | 10  | 8    |
| >PTEN-P339NRYFSPNFKV | 221  | >PTEN-P339NRYFSSNFKV | 148 | 73   |
| >PTEN-P339NRYFSPNFK  | 120  | >PTEN-P339NRYFSSNFK  | 311 | 191  |
| >PTEN-P339NRYFSPNFKV | 151  | >PTEN-P339NRYFSSNFKV | 316 | 165  |

|                        |       |                         |      |       |
|------------------------|-------|-------------------------|------|-------|
| >PTEN-P339ϵANRYFSPNF   | 389   | >PTEN-P339ϵANRYFSSNF    | 414  | 25    |
| >PTEN-P339ϵANRYFSPNFK  | 685   | >PTEN-P339ϵANRYFSSNFK   | 330  | 355   |
| >PTEN-P339ϵANRYFSPNF   | 450   | >PTEN-P339ϵANRYFSSNF    | 1931 | 1481  |
| >PTEN-P339ϵANRYFSPNFK  | 4     | >PTEN-P339ϵANRYFSSNFK   | 4    | 0     |
| >PTEN-P339ϵANRYFSPNFK  | 174   | >PTEN-P339ϵANRYFSSNFK   | 183  | 9     |
| >PTEN-P339ϵANRYFSPNF   | 860   | >PTEN-P339ϵANRYFSSNF    | 371  | 489   |
| >PTEN-P339ϵANRYFSPNF   | 13    | >PTEN-P339ϵANRYFSSNF    | 7    | 6     |
| >PTEN-P339ϵANRYFSPNF   | 685   | >PTEN-P339ϵANRYFSSNF    | 17   | 668   |
| >PTEN-P339ϵKANRYFSPNF  | 46    | >PTEN-P339ϵKANRYFSSNF   | 41   | 5     |
| >PTEN-P339ϵKANRYFSPNF  | 12    | >PTEN-P339ϵKANRYFSSNF   | 12   | 0     |
| >PTEN-P339ϵKANRYFSPNF  | 4     | >PTEN-P339ϵKANRYFSSNF   | 4    | 0     |
| >PTEN-P339ϵKANRYFSPNF  | 17    | >PTEN-P339ϵKANRYFSSNF   | 16   | 1     |
| >PTEN-P339ϵKANRYFSPNF  | 416   | >PTEN-P339ϵKANRYFSSNF   | 509  | 93    |
| >PTEN-P339ϵKANRYFSPNF  | 469   | >PTEN-P339ϵKANRYFSSNF   | 315  | 154   |
| >PTEN-P339ϵKANRYFSPNF  | 279   | >PTEN-P339ϵKANRYFSSNF   | 164  | 115   |
| >PTEN-P339ϵKANRYFSPNF  | 11    | >PTEN-P339ϵKANRYFSSNF   | 7    | 4     |
| >PTEN-P339ϵKANRYFSPNF  | 29    | >PTEN-P339ϵKANRYFSSNF   | 23   | 6     |
| >PTEN-P339ϵKANRYFSPNF  | 373   | >PTEN-P339ϵKANRYFSSNF   | 276  | 97    |
| >PTEN-P339ϵKANRYFSPNF  | 21    | >PTEN-P339ϵKANRYFSSNF   | 22   | 1     |
| >PTEN-P339ϵDKANRYFSPN  | 39    | >PTEN-P339ϵDKANRYFSSN   | 23   | 16    |
| >PTEN-P38L- PAERLEGVY  | 1298  | >PTEN-P38L- LAERLEGVY   | 308  | 990   |
| >PTEN-P38L- PAERLEGVYR | 3534  | >PTEN-P38L- LAERLEGVYR  | 141  | 3393  |
| >PTEN-P38L- PAERLEGVY  | 4209  | >PTEN-P38L- LAERLEGVY   | 113  | 4096  |
| >PTEN-P38L- PAERLEGVY  | 8581  | >PTEN-P38L- LAERLEGVY   | 194  | 8387  |
| >PTEN-P38L- FPAERLEGVY | 15850 | >PTEN-P38L- FLAERLEGVY  | 370  | 15480 |
| >PTEN-P38L- FPAERLEGV  | 5875  | >PTEN-P38L- FLAERLEGV   | 6    | 5869  |
| >PTEN-P38L- FPAERLEG   | 26791 | >PTEN-P38L- FLAERLEG    | 35   | 26756 |
| >PTEN-P38L- FPAERLEGV  | 933   | >PTEN-P38L- FLAERLEGV   | 1    | 932   |
| >PTEN-P38L- FPAERLEGVY | 26122 | >PTEN-P38L- FLAERLEGVYI | 40   | 26082 |
| >PTEN-P38L- FPAERLEG   | 22790 | >PTEN-P38L- FLAERLEG    | 194  | 22596 |
| >PTEN-P38L- FPAERLEGV  | 1421  | >PTEN-P38L- FLAERLEGV   | 2    | 1419  |
| >PTEN-P38L- FPAERLEG   | 21370 | >PTEN-P38L- FLAERLEG    | 467  | 20903 |
| >PTEN-P38L- FPAERLEGV  | 65    | >PTEN-P38L- FLAERLEGV   | 3    | 62    |
| >PTEN-P38L- FPAERLEG   | 27825 | >PTEN-P38L- FLAERLEG    | 356  | 27469 |
| >PTEN-P38L- FPAERLEGV  | 607   | >PTEN-P38L- FLAERLEGV   | 1    | 606   |
| >PTEN-P38L- FPAERLEGVY | 27454 | >PTEN-P38L- FLAERLEGVYI | 278  | 27176 |
| >PTEN-P38L- FPAERLEGV  | 7024  | >PTEN-P38L- FLAERLEGV   | 2    | 7022  |
| >PTEN-P38L- FPAERLEGV  | 3005  | >PTEN-P38L- FLAERLEGV   | 4    | 3001  |
| >PTEN-P38L- FPAERLEGV  | 11460 | >PTEN-P38L- FLAERLEGV   | 2    | 11458 |
| >PTEN-P38L- FPAERLEG   | 35982 | >PTEN-P38L- FLAERLEG    | 103  | 35879 |
| >PTEN-P38L- FPAERLEGV  | 1335  | >PTEN-P38L- FLAERLEGV   | 1    | 1334  |
| >PTEN-P38L- FPAERLEGVY | 36629 | >PTEN-P38L- FLAERLEGVY  | 394  | 36235 |
| >PTEN-P38L- FPAERLEGVY | 35636 | >PTEN-P38L- FLAERLEGVYI | 136  | 35500 |

|                         |      |                         |       |       |
|-------------------------|------|-------------------------|-------|-------|
| >PTEN-P38L- FPAERLEGVY  | 1850 | >PTEN-P38L- FLAERLEGVYI | 223   | 1627  |
| >PTEN-P38L- FPAERLEGVY  | 125  | >PTEN-P38L- FLAERLEGVYI | 23    | 102   |
| >PTEN-P38L- FPAERLEGV   | 277  | >PTEN-P38L- FLAERLEGV   | 47    | 230   |
| >PTEN-P38L- FPAERLEGV   | 67   | >PTEN-P38L- FLAERLEGV   | 22    | 45    |
| >PTEN-P38L- FPAERLEGVY  | 6228 | >PTEN-P38L- FLAERLEGVY  | 187   | 6041  |
| >PTEN-P38L- FPAERLEGV   | 226  | >PTEN-P38L- FLAERLEGV   | 25367 | 25141 |
| >PTEN-P38L- FPAERLEGVY  | 7025 | >PTEN-P38L- FLAERLEGVY  | 72    | 6953  |
| >PTEN-P38L- FPAERLEGVY  | 481  | >PTEN-P38L- FLAERLEGVY  | 37    | 444   |
| >PTEN-P38L- FPAERLEGVY  | 17   | >PTEN-P38L- FLAERLEGVY  | 18909 | 18892 |
| >PTEN-P38L- FPAERLEGV   | 250  | >PTEN-P38L- FLAERLEGV   | 23182 | 22932 |
| >PTEN-P38L- FPAERLEGVY  | 170  | >PTEN-P38L- FLAERLEGVY  | 15637 | 15467 |
| >PTEN-P38L- FPAERLEG    | 462  | >PTEN-P38L- FLAERLEG    | 27694 | 27232 |
| >PTEN-P38L- FPAERLEGV   | 85   | >PTEN-P38L- FLAERLEGV   | 24740 | 24655 |
| >PTEN-P38L- FPAERLEGVY  | 4307 | >PTEN-P38L- FLAERLEGVY  | 323   | 3984  |
| >PTEN-P38L- FPAERLEGVY  | 29   | >PTEN-P38L- FLAERLEGVY  | 1514  | 1485  |
| >PTEN-P38L- FPAERLEGVY  | 82   | >PTEN-P38L- FLAERLEGVY  | 18752 | 18670 |
| >PTEN-P38L- FPAERLEGVY  | 459  | >PTEN-P38L- FLAERLEGVYI | 227   | 232   |
| >PTEN-P38L- IYPNIIAMGFF | 3159 | >PTEN-P38L- IYPNIIAMGFL | 84    | 3075  |
| >PTEN-P38L- IYPNIIAMGFF | 1073 | >PTEN-P38L- IYPNIIAMGFL | 6     | 1067  |
| >PTEN-P38L- IYPNIIAMGFF | 8521 | >PTEN-P38L- IYPNIIAMGFL | 36    | 8485  |
| >PTEN-P38L- GFPAERLEGV  | 291  | >PTEN-P38L- GFLAERLEGV  | 48    | 243   |
| >PTEN-P38L- GFPAERLEGV  | 821  | >PTEN-P38L- GFLAERLEGV  | 370   | 451   |
| >PTEN-P38L- MGFPFAERLEC | 257  | >PTEN-P38L- MGFLAERLEC  | 608   | 351   |
| >PTEN-P38L- MGFPFAERLEC | 186  | >PTEN-P38L- MGFLAERLEC  | 448   | 262   |
| >PTEN-P38L- MGFPFAERLEC | 355  | >PTEN-P38L- MGFLAERLEC  | 1415  | 1060  |
| >PTEN-P38L- MGFPFAERL   | 378  | >PTEN-P38L- MGFLAERL    | 1178  | 800   |
| >PTEN-P38L- MGFPFAERLEC | 46   | >PTEN-P38L- MGFLAERLEC  | 139   | 93    |
| >PTEN-P38L- MGFPFAERL   | 258  | >PTEN-P38L- MGFLAERL    | 1503  | 1245  |
| >PTEN-P38L- AMGFPAERL   | 365  | >PTEN-P38L- AMGFLAERL   | 53    | 312   |
| >PTEN-P38L- AMGFPAERL   | 15   | >PTEN-P38L- AMGFLAERL   | 26    | 11    |
| >PTEN-P38L- AMGFPAERL   | 454  | >PTEN-P38L- AMGFLAERL   | 369   | 85    |
| >PTEN-P38L- AMGFPAERL   | 403  | >PTEN-P38L- AMGFLAERL   | 190   | 213   |
| >PTEN-P38L- AMGFPAERL   | 195  | >PTEN-P38L- AMGFLAERL   | 147   | 48    |
| >PTEN-P38L- AMGFPAERL   | 29   | >PTEN-P38L- AMGFLAERL   | 23    | 6     |
| >PTEN-P38L- AMGFPAER    | 75   | >PTEN-P38L- AMGFLAER    | 32    | 43    |
| >PTEN-P38L- AMGFPAERL   | 1075 | >PTEN-P38L- AMGFLAERL   | 461   | 614   |
| >PTEN-P38L- IAMGFPAERL  | 65   | >PTEN-P38L- IAMGFLAERL  | 68    | 3     |
| >PTEN-P38L- IAMGFPAERL  | 1215 | >PTEN-P38L- IAMGFLAERL  | 373   | 842   |
| >PTEN-P38L- IAMGFPAERL  | 445  | >PTEN-P38L- IAMGFLAERL  | 547   | 102   |
| >PTEN-P38L- IAMGFPAER   | 222  | >PTEN-P38L- IAMGFLAER   | 209   | 13    |
| >PTEN-P38L- IAMGFPAER   | 32   | >PTEN-P38L- IAMGFLAER   | 15    | 17    |
| >PTEN-P38L- IAMGFPAER   | 58   | >PTEN-P38L- IAMGFLAER   | 34    | 24    |
| >PTEN-P38L- IAMGFPAER   | 8    | >PTEN-P38L- IAMGFLAER   | 7     | 1     |



|                        |       |                         |      |       |
|------------------------|-------|-------------------------|------|-------|
| >PTEN-P38L- IAMGFPAERL | 19    | >PTEN-P38L- IAMGFLAERL  | 24   | 5     |
| >PTEN-P38L- IAMGFPAERL | 332   | >PTEN-P38L- IAMGFLAERL  | 357  | 25    |
| >PTEN-P38L- IAMGFPAERL | 476   | >PTEN-P38L- IAMGFLAERL  | 453  | 23    |
| >PTEN-P38L- IAMGFPAER  | 268   | >PTEN-P38L- IAMGFLAER   | 489  | 221   |
| >PTEN-P38L- IIAMGFPA   | 369   | >PTEN-P38L- IIAMGFLA    | 613  | 244   |
| >PTEN-P38L- IIAMGFPA   | 311   | >PTEN-P38L- IIAMGFLA    | 222  | 89    |
| >PTEN-P38L- IIAMGFPAER | 200   | >PTEN-P38L- IIAMGFLAERI | 118  | 82    |
| >PTEN-P38L- IIAMGFPA   | 65    | >PTEN-P38L- IIAMGFLA    | 135  | 70    |
| >PTEN-P38L- IIAMGFPAER | 654   | >PTEN-P38L- IIAMGFLAERI | 477  | 177   |
| >PTEN-P38L- IIAMGFPA   | 35    | >PTEN-P38L- IIAMGFLA    | 96   | 61    |
| >PTEN-P38L- IIAMGFPAER | 213   | >PTEN-P38L- IIAMGFLAERI | 275  | 62    |
| >PTEN-P38L- IIAMGFPAER | 471   | >PTEN-P38L- IIAMGFLAERI | 817  | 346   |
| >PTEN-P38L- IIAMGFPA   | 206   | >PTEN-P38L- IIAMGFLA    | 221  | 15    |
| >PTEN-P38L- IIAMGFPAER | 73    | >PTEN-P38L- IIAMGFLAERI | 103  | 30    |
| >PTEN-P38L- IIAMGFPAER | 535   | >PTEN-P38L- IIAMGFLAER  | 339  | 196   |
| >PTEN-P38L- IIAMGFPAER | 83    | >PTEN-P38L- IIAMGFLAER  | 54   | 29    |
| >PTEN-P38L- IIAMGFPAER | 468   | >PTEN-P38L- IIAMGFLAER  | 122  | 346   |
| >PTEN-P38L- IIAMGFPAER | 12    | >PTEN-P38L- IIAMGFLAER  | 9    | 3     |
| >PTEN-P38L- IIAMGFPAER | 273   | >PTEN-P38L- IIAMGFLAER  | 239  | 34    |
| >PTEN-P38L- NIIAMGFP   | 11267 | >PTEN-P38L- NIIAMGFL    | 119  | 11148 |
| >PTEN-P38L- NIIAMGFPA  | 391   | >PTEN-P38L- NIIAMGFLA   | 358  | 33    |
| >PTEN-P38L- NIIAMGFP   | 14042 | >PTEN-P38L- NIIAMGFL    | 191  | 13851 |
| >PTEN-P38L- NIIAMGFPA  | 162   | >PTEN-P38L- NIIAMGFLA   | 364  | 202   |
| >PTEN-P38L- NIIAMGFP   | 12677 | >PTEN-P38L- NIIAMGFL    | 137  | 12540 |
| >PTEN-P38L- NIIAMGFPA  | 32    | >PTEN-P38L- NIIAMGFLA   | 79   | 47    |
| >PTEN-P38L- NIIAMGFP   | 10178 | >PTEN-P38L- NIIAMGFL    | 153  | 10025 |
| >PTEN-P38L- NIIAMGFPAE | 150   | >PTEN-P38L- NIIAMGFLAE  | 100  | 50    |
| >PTEN-P38L- NIIAMGFPAE | 115   | >PTEN-P38L- NIIAMGFLAE  | 83   | 32    |
| >PTEN-P38L- NIIAMGFPAE | 8     | >PTEN-P38L- NIIAMGFLAE  | 7    | 1     |
| >PTEN-P38L- NIIAMGFP   | 9410  | >PTEN-P38L- NIIAMGFL    | 48   | 9362  |
| >PTEN-P38L- NIIAMGFPA  | 28    | >PTEN-P38L- NIIAMGFLA   | 86   | 58    |
| >PTEN-P38L- NIIAMGFP   | 14373 | >PTEN-P38L- NIIAMGFL    | 284  | 14089 |
| >PTEN-P38L- NIIAMGFPA  | 154   | >PTEN-P38L- NIIAMGFLA   | 946  | 792   |
| >PTEN-P38L- NIIAMGFPAE | 235   | >PTEN-P38L- NIIAMGFLAE  | 287  | 52    |
| >PTEN-P38L- YPNIIAMGFP | 36802 | >PTEN-P38L- YPNIIAMGFL  | 200  | 36602 |
| >PTEN-P38L- YPNIIAMGFP | 91    | >PTEN-P38L- YPNIIAMGFL  | 1580 | 1489  |
| >PTEN-P38L- YPNIIAMGFP | 37    | >PTEN-P38L- YPNIIAMGFL  | 318  | 281   |
| >PTEN-P38L- YPNIIAMGFP | 6     | >PTEN-P38L- YPNIIAMGFL  | 8    | 2     |
| >PTEN-P38S- PAERLEGVY  | 1298  | >PTEN-P38S- SAERLEGVY   | 185  | 1113  |
| >PTEN-P38S- PAERLEGVYR | 5444  | >PTEN-P38S- SAERLEGVYR  | 434  | 5010  |
| >PTEN-P38S- PAERLEGVYR | 5115  | >PTEN-P38S- SAERLEGVYR  | 448  | 4667  |
| >PTEN-P38S- PAERLEGVYR | 3534  | >PTEN-P38S- SAERLEGVYR  | 70   | 3464  |
| >PTEN-P38S- PAERLEGVY  | 8581  | >PTEN-P38S- SAERLEGVY   | 144  | 8437  |

|                        |       |                        |       |       |
|------------------------|-------|------------------------|-------|-------|
| >PTEN-P38S- FPAERLEGVY | 15850 | >PTEN-P38S- FSAERLEGVY | 99    | 15751 |
| >PTEN-P38S- FPAERLEGV  | 5875  | >PTEN-P38S- FSAERLEGV  | 54    | 5821  |
| >PTEN-P38S- FPAERLEGV  | 933   | >PTEN-P38S- FSAERLEGV  | 10    | 923   |
| >PTEN-P38S- FPAERLEGV  | 1421  | >PTEN-P38S- FSAERLEGV  | 17    | 1404  |
| >PTEN-P38S- FPAERLEGV  | 65    | >PTEN-P38S- FSAERLEGV  | 11    | 54    |
| >PTEN-P38S- FPAERLEGV  | 607   | >PTEN-P38S- FSAERLEGV  | 41    | 566   |
| >PTEN-P38S- FPAERLEGV  | 3005  | >PTEN-P38S- FSAERLEGV  | 281   | 2724  |
| >PTEN-P38S- FPAERLEGV  | 1335  | >PTEN-P38S- FSAERLEGV  | 95    | 1240  |
| >PTEN-P38S- FPAERLEGVY | 3652  | >PTEN-P38S- FSAERLEGVY | 262   | 3390  |
| >PTEN-P38S- FPAERLEGVY | 1609  | >PTEN-P38S- FSAERLEGVY | 79    | 1530  |
| >PTEN-P38S- FPAERLEGVY | 8255  | >PTEN-P38S- FSAERLEGVY | 212   | 8043  |
| >PTEN-P38S- FPAERLEGVY | 8877  | >PTEN-P38S- FSAERLEGVY | 314   | 8563  |
| >PTEN-P38S- FPAERLEGVY | 1850  | >PTEN-P38S- FSAERLEGVY | 394   | 1456  |
| >PTEN-P38S- FPAERLEGVY | 125   | >PTEN-P38S- FSAERLEGVY | 8     | 117   |
| >PTEN-P38S- FPAERLEGV  | 277   | >PTEN-P38S- FSAERLEGV  | 11    | 266   |
| >PTEN-P38S- FPAERLEGV  | 67    | >PTEN-P38S- FSAERLEGV  | 34    | 33    |
| >PTEN-P38S- FPAERLEGV  | 226   | >PTEN-P38S- FSAERLEGV  | 26590 | 26364 |
| >PTEN-P38S- FPAERLEGVY | 7025  | >PTEN-P38S- FSAERLEGVY | 130   | 6895  |
| >PTEN-P38S- FPAERLEGVY | 481   | >PTEN-P38S- FSAERLEGVY | 1132  | 651   |
| >PTEN-P38S- FPAERLEGVY | 18346 | >PTEN-P38S- FSAERLEGVY | 26    | 18320 |
| >PTEN-P38S- FPAERLEGVY | 17    | >PTEN-P38S- FSAERLEGVY | 8106  | 8089  |
| >PTEN-P38S- FPAERLEGV  | 250   | >PTEN-P38S- FSAERLEGV  | 18327 | 18077 |
| >PTEN-P38S- FPAERLEGVY | 170   | >PTEN-P38S- FSAERLEGVY | 12248 | 12078 |
| >PTEN-P38S- FPAERLEG   | 462   | >PTEN-P38S- FSAERLEG   | 21754 | 21292 |
| >PTEN-P38S- FPAERLEGV  | 85    | >PTEN-P38S- FSAERLEGV  | 18188 | 18103 |
| >PTEN-P38S- FPAERLEGVY | 20940 | >PTEN-P38S- FSAERLEGVY | 431   | 20509 |
| >PTEN-P38S- FPAERLEGVY | 4307  | >PTEN-P38S- FSAERLEGVY | 39    | 4268  |
| >PTEN-P38S- FPAERLEGVY | 29    | >PTEN-P38S- FSAERLEGVY | 3029  | 3000  |
| >PTEN-P38S- FPAERLEGVY | 82    | >PTEN-P38S- FSAERLEGVY | 13037 | 12955 |
| >PTEN-P38S- FPAERLEGVY | 459   | >PTEN-P38S- FSAERLEGVY | 723   | 264   |
| >PTEN-P38S- GFPAERLEGV | 291   | >PTEN-P38S- GFSAERLEGV | 69    | 222   |
| >PTEN-P38S- GFPAERLEGV | 821   | >PTEN-P38S- GFSAERLEGV | 144   | 677   |
| >PTEN-P38S- GFPAERLEGV | 1336  | >PTEN-P38S- GFSAERLEGV | 181   | 1155  |
| >PTEN-P38S- MGFPFAERLE | 257   | >PTEN-P38S- MGFSFAERLE | 253   | 4     |
| >PTEN-P38S- MGFPFAERLE | 186   | >PTEN-P38S- MGFSFAERLE | 381   | 195   |
| >PTEN-P38S- MGFPFAERLE | 355   | >PTEN-P38S- MGFSFAERLE | 449   | 94    |
| >PTEN-P38S- MGFPFAERL  | 378   | >PTEN-P38S- MGFSFAERL  | 786   | 408   |
| >PTEN-P38S- MGFPFAERLE | 46    | >PTEN-P38S- MGFSFAERLE | 73    | 27    |
| >PTEN-P38S- MGFPFAERL  | 258   | >PTEN-P38S- MGFSFAERL  | 1091  | 833   |
| >PTEN-P38S- AMGFPAERL  | 365   | >PTEN-P38S- AMGFSAERL  | 70    | 295   |
| >PTEN-P38S- AMGFPAERL  | 15    | >PTEN-P38S- AMGFSAERL  | 39    | 24    |
| >PTEN-P38S- AMGFPAERL  | 454   | >PTEN-P38S- AMGFSAERL  | 303   | 151   |
| >PTEN-P38S- AMGFPAERL  | 403   | >PTEN-P38S- AMGFSAERL  | 360   | 43    |

|                        |      |                         |     |      |
|------------------------|------|-------------------------|-----|------|
| >PTEN-P38S- AMGFPAERL  | 195  | >PTEN-P38S- AMGFAERL    | 93  | 102  |
| >PTEN-P38S- AMGFPAERL  | 29   | >PTEN-P38S- AMGFAERL    | 19  | 10   |
| >PTEN-P38S- AMGFPAER   | 75   | >PTEN-P38S- AMGFAER     | 53  | 22   |
| >PTEN-P38S- IAMGFPAERL | 65   | >PTEN-P38S- IAMGFAERL   | 89  | 24   |
| >PTEN-P38S- IAMGFPAERL | 445  | >PTEN-P38S- IAMGFAERL   | 831 | 386  |
| >PTEN-P38S- IAMGFPAER  | 222  | >PTEN-P38S- IAMGFAER    | 187 | 35   |
| >PTEN-P38S- IAMGFPAER  | 32   | >PTEN-P38S- IAMGFAER    | 26  | 6    |
| >PTEN-P38S- IAMGFPAER  | 58   | >PTEN-P38S- IAMGFAER    | 51  | 7    |
| >PTEN-P38S- IAMGFPAER  | 8    | >PTEN-P38S- IAMGFAER    | 6   | 2    |
| >PTEN-P38S- IAMGFPAERL | 19   | >PTEN-P38S- IAMGFAERL   | 11  | 8    |
| >PTEN-P38S- IAMGFPAERL | 332  | >PTEN-P38S- IAMGFAERL   | 310 | 22   |
| >PTEN-P38S- IAMGFPAERL | 476  | >PTEN-P38S- IAMGFAERL   | 374 | 102  |
| >PTEN-P38S- IAMGFPAER  | 268  | >PTEN-P38S- IAMGFAER    | 244 | 24   |
| >PTEN-P38S- IIAMGFPA   | 369  | >PTEN-P38S- IIAMGFSA    | 884 | 515  |
| >PTEN-P38S- IIAMGFPA   | 311  | >PTEN-P38S- IIAMGFSA    | 322 | 11   |
| >PTEN-P38S- IIAMGFPAER | 200  | >PTEN-P38S- IIAMGFSAERL | 95  | 105  |
| >PTEN-P38S- IIAMGFPA   | 65   | >PTEN-P38S- IIAMGFSA    | 59  | 6    |
| >PTEN-P38S- IIAMGFPAER | 654  | >PTEN-P38S- IIAMGFSAERL | 236 | 418  |
| >PTEN-P38S- IIAMGFPA   | 35   | >PTEN-P38S- IIAMGFSA    | 66  | 31   |
| >PTEN-P38S- IIAMGFPAER | 213  | >PTEN-P38S- IIAMGFSAERL | 290 | 77   |
| >PTEN-P38S- IIAMGFPAER | 471  | >PTEN-P38S- IIAMGFSAERL | 843 | 372  |
| >PTEN-P38S- IIAMGFPA   | 206  | >PTEN-P38S- IIAMGFSA    | 119 | 87   |
| >PTEN-P38S- IIAMGFPAER | 73   | >PTEN-P38S- IIAMGFSAERL | 77  | 4    |
| >PTEN-P38S- IIAMGFPAER | 535  | >PTEN-P38S- IIAMGFSAER  | 373 | 162  |
| >PTEN-P38S- IIAMGFPAER | 83   | >PTEN-P38S- IIAMGFSAER  | 76  | 7    |
| >PTEN-P38S- IIAMGFPAER | 468  | >PTEN-P38S- IIAMGFSAER  | 180 | 288  |
| >PTEN-P38S- IIAMGFPAER | 12   | >PTEN-P38S- IIAMGFSAER  | 8   | 4    |
| >PTEN-P38S- IIAMGFPAER | 273  | >PTEN-P38S- IIAMGFSAER  | 327 | 54   |
| >PTEN-P38S- NIIAMGFPA  | 391  | >PTEN-P38S- NIIAMGFSA   | 556 | 165  |
| >PTEN-P38S- NIIAMGFPA  | 162  | >PTEN-P38S- NIIAMGFSA   | 239 | 77   |
| >PTEN-P38S- NIIAMGFPA  | 32   | >PTEN-P38S- NIIAMGFSA   | 53  | 21   |
| >PTEN-P38S- NIIAMGFPAE | 150  | >PTEN-P38S- NIIAMGFSAE  | 179 | 29   |
| >PTEN-P38S- NIIAMGFPAE | 115  | >PTEN-P38S- NIIAMGFSAE  | 122 | 7    |
| >PTEN-P38S- NIIAMGFPAE | 8    | >PTEN-P38S- NIIAMGFSAE  | 7   | 1    |
| >PTEN-P38S- NIIAMGFPA  | 28   | >PTEN-P38S- NIIAMGFSA   | 123 | 95   |
| >PTEN-P38S- NIIAMGFPA  | 154  | >PTEN-P38S- NIIAMGFSA   | 568 | 414  |
| >PTEN-P38S- NIIAMGFPAE | 235  | >PTEN-P38S- NIIAMGFSAE  | 254 | 19   |
| >PTEN-P38S- YPNIIAMGFP | 91   | >PTEN-P38S- YPNIIAMGFS  | 165 | 74   |
| >PTEN-P38S- YPNIIAMGFP | 37   | >PTEN-P38S- YPNIIAMGFS  | 91  | 54   |
| >PTEN-P38S- YPNIIAMGFP | 1157 | >PTEN-P38S- YPNIIAMGFS  | 464 | 693  |
| >PTEN-P38S- YPNIIAMGFP | 6    | >PTEN-P38S- YPNIIAMGFS  | 8   | 2    |
| >PTEN-P95L- PPQLELIKPF | 9317 | >PTEN-P95L- LPQLELIKPF  | 171 | 9146 |
| >PTEN-P95L- PPQLELIKPF | 1219 | >PTEN-P95L- LPQLELIKPF  | 181 | 1038 |

|                         |       |                         |      |       |
|-------------------------|-------|-------------------------|------|-------|
| >PTEN-P95L- PPQLELIKPF  | 2859  | >PTEN-P95L- LPQLELIKPF  | 124  | 2735  |
| >PTEN-P95L- NPPQLELIKPF | 483   | >PTEN-P95L- NLPQLELIKPF | 7828 | 7345  |
| >PTEN-P95L- NPPQLELI    | 28904 | >PTEN-P95L- NLPQLELI    | 185  | 28719 |
| >PTEN-P95L- NPPQLELI    | 30090 | >PTEN-P95L- NLPQLELI    | 351  | 29739 |
| >PTEN-P95L- NPPQLELI    | 36774 | >PTEN-P95L- NLPQLELI    | 360  | 36414 |
| >PTEN-P95L- NPPQLELIKPF | 69    | >PTEN-P95L- NLPQLELIKPF | 3968 | 3899  |
| >PTEN-P95L- HNPPQLELI   | 217   | >PTEN-P95L- HNLPQLELI   | 76   | 141   |
| >PTEN-P95L- HNPPQLELI   | 680   | >PTEN-P95L- HNLPQLELI   | 415  | 265   |
| >PTEN-P95L- HNPPQLELI   | 3441  | >PTEN-P95L- HNLPQLELI   | 395  | 3046  |
| >PTEN-P95L- DHNPPQLEL   | 248   | >PTEN-P95L- DHNLPQLEL   | 309  | 61    |
| >PTEN-P95L- EDHNPQLEL   | 1216  | >PTEN-P95L- EDHNPQLEL   | 242  | 974   |
| >PTEN-P95L- EDHNPQQL    | 4690  | >PTEN-P95L- EDHNPQQL    | 465  | 4225  |
| >PTEN-P95L- EDHNPQLEL   | 235   | >PTEN-P95L- EDHNPQLEL   | 123  | 112   |
| >PTEN-P95L- FEDHNPQQL   | 1032  | >PTEN-P95L- FEDHNPQQL   | 169  | 863   |
| >PTEN-P95L- FEDHNPQLE   | 1486  | >PTEN-P95L- FEDHNPQLE   | 478  | 1008  |
| >PTEN-P95L- FEDHNPQQL   | 6151  | >PTEN-P95L- FEDHNPQQL   | 388  | 5763  |
| >PTEN-P95L- FEDHNPQQL   | 169   | >PTEN-P95L- FEDHNPQQL   | 871  | 702   |
| >PTEN-P95L- FEDHNPQLE   | 275   | >PTEN-P95L- FEDHNPQLE   | 680  | 405   |
| >PTEN-P95L- FEDHNPQQL   | 116   | >PTEN-P95L- FEDHNPQQL   | 49   | 67    |
| >PTEN-P95L- FEDHNPQLE   | 47    | >PTEN-P95L- FEDHNPQLE   | 32   | 15    |
| >PTEN-P95L- FEDHNPQQL   | 314   | >PTEN-P95L- FEDHNPQQL   | 104  | 210   |
| >PTEN-P95L- FEDHNPQLE   | 186   | >PTEN-P95L- FEDHNPQLE   | 103  | 83    |
| >PTEN-P95L- FEDHNPQQL   | 128   | >PTEN-P95L- FEDHNPQQL   | 27   | 101   |
| >PTEN-P95L- FEDHNPQLE   | 802   | >PTEN-P95L- FEDHNPQLE   | 265  | 537   |
| >PTEN-P95L- YPFEDHNP    | 31700 | >PTEN-P95L- YPFEDHNL    | 25   | 31675 |
| >PTEN-P95L- YPFEDHNPPC  | 43    | >PTEN-P95L- YPFEDHNLPC  | 40   | 3     |
| >PTEN-P95L- YPFEDHNP    | 13296 | >PTEN-P95L- YPFEDHNL    | 481  | 12815 |
| >PTEN-P95L- YPFEDHNPPC  | 145   | >PTEN-P95L- YPFEDHNLPC  | 138  | 7     |
| >PTEN-P95L- YPFEDHNP    | 23477 | >PTEN-P95L- YPFEDHNL    | 244  | 23233 |
| >PTEN-P95L- YPFEDHNPPC  | 145   | >PTEN-P95L- YPFEDHNLPC  | 167  | 22    |
| >PTEN-P95L- YPFEDHNP    | 1138  | >PTEN-P95L- YPFEDHNL    | 41   | 1097  |
| >PTEN-P95L- YPFEDHNPP   | 145   | >PTEN-P95L- YPFEDHNLP   | 2025 | 1880  |
| >PTEN-P95L- YPFEDHNPPC  | 670   | >PTEN-P95L- YPFEDHNLPC  | 340  | 330   |
| >PTEN-P95L- YPFEDHNPPC  | 43    | >PTEN-P95L- YPFEDHNLPC  | 58   | 15    |
| >PTEN-P95L- YPFEDHNP    | 17235 | >PTEN-P95L- YPFEDHNL    | 61   | 17174 |
| >PTEN-P95L- YPFEDHNPPC  | 22    | >PTEN-P95L- YPFEDHNLPC  | 46   | 24    |
| >PTEN-P95L- YPFEDHNP    | 6327  | >PTEN-P95L- YPFEDHNL    | 109  | 6218  |
| >PTEN-P95L- YPFEDHNPP   | 291   | >PTEN-P95L- YPFEDHNLP   | 517  | 226   |
| >PTEN-P95L- YPFEDHNP    | 17480 | >PTEN-P95L- YPFEDHNL    | 420  | 17060 |
| >PTEN-P95L- YPFEDHNP    | 13867 | >PTEN-P95L- YPFEDHNL    | 143  | 13724 |
| >PTEN-P95L- YPFEDHNPPC  | 638   | >PTEN-P95L- YPFEDHNLPC  | 241  | 397   |
| >PTEN-P95L- QYPFEDHNP   | 13402 | >PTEN-P95L- QYPFEDHNL   | 115  | 13287 |
| >PTEN-P95L- QYPFEDHNP   | 1257  | >PTEN-P95L- QYPFEDHNL   | 8    | 1249  |

|                         |       |                         |      |       |
|-------------------------|-------|-------------------------|------|-------|
| >PTEN-P95L- QYPFEDHNPI  | 1353  | >PTEN-P95L- QYPFEDHNLF  | 437  | 916   |
| >PTEN-P95L- QYPFEDHNP   | 13269 | >PTEN-P95L- QYPFEDHNL   | 423  | 12846 |
| >PTEN-P95L- AQYPFEDHNI  | 9852  | >PTEN-P95L- AQYPFEDHNI  | 39   | 9813  |
| >PTEN-P95L- AQYPFEDHNI  | 16880 | >PTEN-P95L- AQYPFEDHNI  | 428  | 16452 |
| >PTEN-P95L- AQYPFEDHNI  | 14907 | >PTEN-P95L- AQYPFEDHNI  | 309  | 14598 |
| >PTEN-P95L- AQYPFEDHNI  | 20699 | >PTEN-P95L- AQYPFEDHNI  | 385  | 20314 |
| >PTEN-P95L- AQYPFEDHNI  | 1505  | >PTEN-P95L- AQYPFEDHNI  | 40   | 1465  |
| >PTEN-P95L- AQYPFEDHNI  | 263   | >PTEN-P95L- AQYPFEDHNI  | 1147 | 884   |
| >PTEN-P95S- PPQLELIKPF  | 9616  | >PTEN-P95S- SPQLELIKPF  | 494  | 9122  |
| >PTEN-P95S- PPQLELIKPF  | 1219  | >PTEN-P95S- SPQLELIKPF  | 170  | 1049  |
| >PTEN-P95S- NPPQLELIKPF | 483   | >PTEN-P95S- NSPQLELIKPF | 1688 | 1205  |
| >PTEN-P95S- NPPQLELIKPF | 69    | >PTEN-P95S- NSPQLELIKPF | 2572 | 2503  |
| >PTEN-P95S- NPPQLELI    | 5325  | >PTEN-P95S- NSPQLELI    | 431  | 4894  |
| >PTEN-P95S- NPPQLELIKPF | 8731  | >PTEN-P95S- NSPQLELIKPF | 178  | 8553  |
| >PTEN-P95S- NPPQLELI    | 8646  | >PTEN-P95S- NSPQLELI    | 431  | 8215  |
| >PTEN-P95S- HNPPQLELI   | 217   | >PTEN-P95S- HNPPQLELI   | 244  | 27    |
| >PTEN-P95S- HNPPQLELI   | 680   | >PTEN-P95S- HNPPQLELI   | 372  | 308   |
| >PTEN-P95S- DHNPPQLEL   | 248   | >PTEN-P95S- DHNPPQLEL   | 244  | 4     |
| >PTEN-P95S- EDHNPQLEL   | 1216  | >PTEN-P95S- EDHNPQLEL   | 324  | 892   |
| >PTEN-P95S- EDHNPQLEL   | 235   | >PTEN-P95S- EDHNPQLEL   | 76   | 159   |
| >PTEN-P95S- FEDHNPPQL   | 1032  | >PTEN-P95S- FEDHNPPQL   | 187  | 845   |
| >PTEN-P95S- FEDHNPPQL   | 169   | >PTEN-P95S- FEDHNPPQL   | 131  | 38    |
| >PTEN-P95S- FEDHNPPQLE  | 275   | >PTEN-P95S- FEDHNPPQLE  | 216  | 59    |
| >PTEN-P95S- FEDHNPPQL   | 116   | >PTEN-P95S- FEDHNPPQL   | 57   | 59    |
| >PTEN-P95S- FEDHNPPQLE  | 47    | >PTEN-P95S- FEDHNPPQLE  | 30   | 17    |
| >PTEN-P95S- FEDHNPPQL   | 314   | >PTEN-P95S- FEDHNPPQL   | 171  | 143   |
| >PTEN-P95S- FEDHNPPQLE  | 186   | >PTEN-P95S- FEDHNPPQLE  | 137  | 49    |
| >PTEN-P95S- FEDHNPPQL   | 128   | >PTEN-P95S- FEDHNPPQL   | 107  | 21    |
| >PTEN-P95S- YPFEDHNPPC  | 43    | >PTEN-P95S- YPFEDHNPPC  | 33   | 10    |
| >PTEN-P95S- YPFEDHNPPC  | 145   | >PTEN-P95S- YPFEDHNPPC  | 124  | 21    |
| >PTEN-P95S- YPFEDHNPPC  | 145   | >PTEN-P95S- YPFEDHNPPC  | 81   | 64    |
| >PTEN-P95S- YPFEDHNP    | 1138  | >PTEN-P95S- YPFEDHNP    | 121  | 1017  |
| >PTEN-P95S- YPFEDHNPP   | 145   | >PTEN-P95S- YPFEDHNPP   | 547  | 402   |
| >PTEN-P95S- YPFEDHNPPC  | 670   | >PTEN-P95S- YPFEDHNPPC  | 392  | 278   |
| >PTEN-P95S- YPFEDHNPPC  | 43    | >PTEN-P95S- YPFEDHNPPC  | 34   | 9     |
| >PTEN-P95S- YPFEDHNPPC  | 22    | >PTEN-P95S- YPFEDHNPPC  | 22   | 0     |
| >PTEN-P95S- YPFEDHNPPC  | 530   | >PTEN-P95S- YPFEDHNPPC  | 453  | 77    |
| >PTEN-P95S- YPFEDHNPP   | 291   | >PTEN-P95S- YPFEDHNPP   | 984  | 693   |
| >PTEN-P95S- YPFEDHNPPC  | 1937  | >PTEN-P95S- YPFEDHNPPC  | 347  | 1590  |
| >PTEN-P95S- YPFEDHNPPC  | 638   | >PTEN-P95S- YPFEDHNPPC  | 206  | 432   |
| >PTEN-P95S- AQYPFEDHNI  | 263   | >PTEN-P95S- AQYPFEDHNI  | 295  | 32    |
| >PTEN-P96L- PQLELIKPF   | 1931  | >PTEN-P96L- LQLELIKPF   | 27   | 1904  |
| >PTEN-P96L- PQLELIKPF   | 5166  | >PTEN-P96L- LQLELIKPF   | 423  | 4743  |

|                         |       |                         |       |       |
|-------------------------|-------|-------------------------|-------|-------|
| >PTEN-P96L- PQLELIKPF   | 1158  | >PTEN-P96L- LQLELIKPF   | 45    | 1113  |
| >PTEN-P96L- PQLELIKPF   | 2357  | >PTEN-P96L- LQLELIKPF   | 446   | 1911  |
| >PTEN-P96L- PQLELIKPF   | 16    | >PTEN-P96L- LQLELIKPF   | 3     | 13    |
| >PTEN-P96L- PQLELIKPF   | 756   | >PTEN-P96L- LQLELIKPF   | 41    | 715   |
| >PTEN-P96L- AQYPFEDHNI  | 2943  | >PTEN-P96L- AQYPFEDHNI  | 94    | 2849  |
| >PTEN-P96L- AQYPFEDHNI  | 22415 | >PTEN-P96L- AQYPFEDHNI  | 495   | 21920 |
| >PTEN-P96L- AQYPFEDHNI  | 9807  | >PTEN-P96L- AQYPFEDHNI  | 47    | 9760  |
| >PTEN-P96L- AQYPFEDHNI  | 12213 | >PTEN-P96L- AQYPFEDHNI  | 306   | 11907 |
| >PTEN-P96L- AQYPFEDHNI  | 1241  | >PTEN-P96L- AQYPFEDHNI  | 13    | 1228  |
| >PTEN-P96L- AQYPFEDHNI  | 17789 | >PTEN-P96L- AQYPFEDHNI  | 219   | 17570 |
| >PTEN-P96L- AQYPFEDHNI  | 2162  | >PTEN-P96L- AQYPFEDHNI  | 125   | 2037  |
| >PTEN-P96L- AQYPFEDHNI  | 263   | >PTEN-P96L- AQYPFEDHNI  | 9     | 254   |
| >PTEN-P96L- AQYPFEDHNI  | 16995 | >PTEN-P96L- AQYPFEDHNI  | 72    | 16923 |
| >PTEN-P96L- AQYPFEDHNI  | 14497 | >PTEN-P96L- AQYPFEDHNI  | 484   | 14013 |
| >PTEN-P96L- AQYPFEDHNI  | 11266 | >PTEN-P96L- AQYPFEDHNI  | 172   | 11094 |
| >PTEN-P96L- NPPQLELIKPF | 483   | >PTEN-P96L- NPLQLELIKPF | 24729 | 24246 |
| >PTEN-P96L- NPPQLELIKPF | 4282  | >PTEN-P96L- NPLQLELIKPF | 418   | 3864  |
| >PTEN-P96L- NPPQLELIKPF | 69    | >PTEN-P96L- NPLQLELIKPF | 18    | 51    |
| >PTEN-P96L- NPPQLELI    | 628   | >PTEN-P96L- NPLQLELI    | 79    | 549   |
| >PTEN-P96L- NPPQLELIKPF | 1595  | >PTEN-P96L- NPLQLELIKPF | 265   | 1330  |
| >PTEN-P96L- NPPQLELI    | 4394  | >PTEN-P96L- NPLQLELI    | 256   | 4138  |
| >PTEN-P96L- NPPQLELIKPF | 1018  | >PTEN-P96L- NPLQLELIKPF | 148   | 870   |
| >PTEN-P96L- NPPQLELIKPF | 2370  | >PTEN-P96L- NPLQLELIKPF | 98    | 2272  |
| >PTEN-P96L- HNPPQLELI   | 217   | >PTEN-P96L- HNPLQLELI   | 152   | 65    |
| >PTEN-P96L- DHNPPQLELI  | 2293  | >PTEN-P96L- DHNPLQLELI  | 379   | 1914  |
| >PTEN-P96L- DHNPPQLEL   | 248   | >PTEN-P96L- DHNPLQLEL   | 432   | 184   |
| >PTEN-P96L- EDHNPPQLEL  | 235   | >PTEN-P96L- EDHNPLQLEL  | 228   | 7     |
| >PTEN-P96L- FEDHNPPQ    | 4510  | >PTEN-P96L- FEDHNPLQ    | 392   | 4118  |
| >PTEN-P96L- FEDHNPPQLE  | 1486  | >PTEN-P96L- FEDHNPLQLE  | 444   | 1042  |
| >PTEN-P96L- FEDHNPPQL   | 169   | >PTEN-P96L- FEDHNPLQL   | 117   | 52    |
| >PTEN-P96L- FEDHNPPQLE  | 275   | >PTEN-P96L- FEDHNPLQLE  | 173   | 102   |
| >PTEN-P96L- FEDHNPPQL   | 116   | >PTEN-P96L- FEDHNPLQL   | 95    | 21    |
| >PTEN-P96L- FEDHNPPQLE  | 47    | >PTEN-P96L- FEDHNPLQLE  | 39    | 8     |
| >PTEN-P96L- FEDHNPPQL   | 314   | >PTEN-P96L- FEDHNPLQL   | 389   | 75    |
| >PTEN-P96L- FEDHNPPQLE  | 186   | >PTEN-P96L- FEDHNPLQLE  | 94    | 92    |
| >PTEN-P96L- FEDHNPPQL   | 128   | >PTEN-P96L- FEDHNPLQL   | 297   | 169   |
| >PTEN-P96L- YPFEDHNPPC  | 43    | >PTEN-P96L- YPFEDHNPLC  | 86    | 43    |
| >PTEN-P96L- YPFEDHNPP   | 6691  | >PTEN-P96L- YPFEDHNPL   | 113   | 6578  |
| >PTEN-P96L- YPFEDHNPPC  | 145   | >PTEN-P96L- YPFEDHNPLC  | 293   | 148   |
| >PTEN-P96L- YPFEDHNPP   | 13455 | >PTEN-P96L- YPFEDHNPL   | 16    | 13439 |
| >PTEN-P96L- YPFEDHNPPC  | 145   | >PTEN-P96L- YPFEDHNPLC  | 56    | 89    |
| >PTEN-P96L- YPFEDHNPP   | 7436  | >PTEN-P96L- YPFEDHNPL   | 245   | 7191  |
| >PTEN-P96L- YPFEDHNPP   | 145   | >PTEN-P96L- YPFEDHNPL   | 13    | 132   |

|                         |       |                         |       |       |
|-------------------------|-------|-------------------------|-------|-------|
| >PTEN-P96L- YPFEDHNPPC  | 43    | >PTEN-P96L- YPFEDHNPLC  | 35    | 8     |
| >PTEN-P96L- YPFEDHNPP   | 4510  | >PTEN-P96L- YPFEDHNPL   | 13    | 4497  |
| >PTEN-P96L- YPFEDHNPPC  | 22    | >PTEN-P96L- YPFEDHNPLC  | 19    | 3     |
| >PTEN-P96L- YPFEDHNPPC  | 530   | >PTEN-P96L- YPFEDHNPLC  | 299   | 231   |
| >PTEN-P96L- YPFEDHNPP   | 291   | >PTEN-P96L- YPFEDHNPL   | 1058  | 767   |
| >PTEN-P96L- YPFEDHNPP   | 9760  | >PTEN-P96L- YPFEDHNPL   | 90    | 9670  |
| >PTEN-P96L- YPFEDHNPP   | 18653 | >PTEN-P96L- YPFEDHNPL   | 444   | 18209 |
| >PTEN-P96L- YPFEDHNPPC  | 638   | >PTEN-P96L- YPFEDHNPLC  | 348   | 290   |
| >PTEN-P96L- QYPFEDHNPI  | 22098 | >PTEN-P96L- QYPFEDHNPI  | 210   | 21888 |
| >PTEN-P96L- QYPFEDHNPI  | 2983  | >PTEN-P96L- QYPFEDHNPI  | 19    | 2964  |
| >PTEN-P96L- QYPFEDHNPI  | 13458 | >PTEN-P96L- QYPFEDHNPI  | 176   | 13282 |
| >PTEN-P96Q: PQLELIKPF   | 1931  | >PTEN-P96Q: QQLELIKPF   | 61    | 1870  |
| >PTEN-P96Q: PQLELIKPF   | 3548  | >PTEN-P96Q: QQLELIKPF   | 208   | 3340  |
| >PTEN-P96Q: PQLELIKPF   | 1158  | >PTEN-P96Q: QQLELIKPF   | 81    | 1077  |
| >PTEN-P96Q: PQLELIKPF   | 2357  | >PTEN-P96Q: QQLELIKPF   | 257   | 2100  |
| >PTEN-P96Q: PQLELIKPF   | 16    | >PTEN-P96Q: QQLELIKPF   | 4     | 12    |
| >PTEN-P96Q: PQLELIKPF   | 756   | >PTEN-P96Q: QQLELIKPF   | 128   | 628   |
| >PTEN-P96Q: PPQLELIKPF  | 8887  | >PTEN-P96Q: PQQLELIKPF  | 231   | 8656  |
| >PTEN-P96Q: AQYPFEDHNI  | 263   | >PTEN-P96Q: AQYPFEDHNI  | 209   | 54    |
| >PTEN-P96Q: NPPQLELIKPF | 483   | >PTEN-P96Q: NPQQLELIKPF | 18552 | 18069 |
| >PTEN-P96Q: NPPQLELIKPF | 1789  | >PTEN-P96Q: NPQQLELIKPF | 363   | 1426  |
| >PTEN-P96Q: NPPQLELIKPF | 69    | >PTEN-P96Q: NPQQLELIKPF | 23    | 46    |
| >PTEN-P96Q: NPPQLELI    | 628   | >PTEN-P96Q: NPQQLELI    | 193   | 435   |
| >PTEN-P96Q: NPPQLELIKPF | 1018  | >PTEN-P96Q: NPQQLELIKPF | 53    | 965   |
| >PTEN-P96Q: HNPPQLELI   | 217   | >PTEN-P96Q: HNPQQLELI   | 284   | 67    |
| >PTEN-P96Q: DHNPPQLEL   | 248   | >PTEN-P96Q: DHNPQQLEL   | 249   | 1     |
| >PTEN-P96Q: EDHNPQLEL   | 235   | >PTEN-P96Q: EDHNPQQLEL  | 165   | 70    |
| >PTEN-P96Q: FEDHNPPQL   | 169   | >PTEN-P96Q: FEDHNPQQL   | 233   | 64    |
| >PTEN-P96Q: FEDHNPPQLE  | 275   | >PTEN-P96Q: FEDHNPQQL   | 275   | 0     |
| >PTEN-P96Q: FEDHNPPQL   | 116   | >PTEN-P96Q: FEDHNPQQL   | 126   | 10    |
| >PTEN-P96Q: FEDHNPPQLE  | 47    | >PTEN-P96Q: FEDHNPQQL   | 59    | 12    |
| >PTEN-P96Q: FEDHNPPQL   | 314   | >PTEN-P96Q: FEDHNPQQL   | 696   | 382   |
| >PTEN-P96Q: FEDHNPPQLE  | 186   | >PTEN-P96Q: FEDHNPQQL   | 151   | 35    |
| >PTEN-P96Q: FEDHNPPQL   | 128   | >PTEN-P96Q: FEDHNPQQL   | 275   | 147   |
| >PTEN-P96Q: YPFEDHNPPC  | 43    | >PTEN-P96Q: YPFEDHNPPC  | 120   | 77    |
| >PTEN-P96Q: YPFEDHNPPC  | 145   | >PTEN-P96Q: YPFEDHNPPC  | 374   | 229   |
| >PTEN-P96Q: YPFEDHNPPC  | 145   | >PTEN-P96Q: YPFEDHNPPC  | 78    | 67    |
| >PTEN-P96Q: YPFEDHNPP   | 145   | >PTEN-P96Q: YPFEDHNPP   | 29    | 116   |
| >PTEN-P96Q: YPFEDHNPPC  | 43    | >PTEN-P96Q: YPFEDHNPPC  | 49    | 6     |
| >PTEN-P96Q: YPFEDHNPPC  | 22    | >PTEN-P96Q: YPFEDHNPPC  | 27    | 5     |
| >PTEN-P96Q: YPFEDHNPP   | 291   | >PTEN-P96Q: YPFEDHNPP   | 478   | 187   |
| >PTEN-P96S- PQLELIKPF   | 1931  | >PTEN-P96S- SQLELIKPF   | 25    | 1906  |
| >PTEN-P96S- PQLELIKPF   | 5166  | >PTEN-P96S- SQLELIKPF   | 375   | 4791  |

|                         |      |                         |       |       |
|-------------------------|------|-------------------------|-------|-------|
| >PTEN-P96S- PQLELIKPF   | 3548 | >PTEN-P96S- SQLELIKPF   | 229   | 3319  |
| >PTEN-P96S- PQLELIKPF   | 1158 | >PTEN-P96S- SQLELIKPF   | 50    | 1108  |
| >PTEN-P96S- PQLELIKPF   | 2357 | >PTEN-P96S- SQLELIKPF   | 184   | 2173  |
| >PTEN-P96S- PQLELIKPF   | 16   | >PTEN-P96S- SQLELIKPF   | 4     | 12    |
| >PTEN-P96S- PQLELIKPF   | 756  | >PTEN-P96S- SQLELIKPF   | 165   | 591   |
| >PTEN-P96S- AQYPFEDHNI  | 1241 | >PTEN-P96S- AQYPFEDHNI  | 310   | 931   |
| >PTEN-P96S- AQYPFEDHNI  | 263  | >PTEN-P96S- AQYPFEDHNI  | 264   | 1     |
| >PTEN-P96S- NPPQLELIKPF | 483  | >PTEN-P96S- NPSQLELIKPF | 18412 | 17929 |
| >PTEN-P96S- NPPQLELIKPF | 1789 | >PTEN-P96S- NPSQLELIKPF | 340   | 1449  |
| >PTEN-P96S- NPPQLELIKPF | 69   | >PTEN-P96S- NPSQLELIKPF | 16    | 53    |
| >PTEN-P96S- NPPQLELI    | 628  | >PTEN-P96S- NPSQLELI    | 67    | 561   |
| >PTEN-P96S- NPPQLELIKPF | 1595 | >PTEN-P96S- NPSQLELIKPF | 216   | 1379  |
| >PTEN-P96S- NPPQLELIKPF | 1018 | >PTEN-P96S- NPSQLELIKPF | 30    | 988   |
| >PTEN-P96S- NPPQLELIKPF | 2370 | >PTEN-P96S- NPSQLELIKPF | 301   | 2069  |
| >PTEN-P96S- HNPPQLELI   | 217  | >PTEN-P96S- HNPSQLELI   | 775   | 558   |
| >PTEN-P96S- DHNPPQLEL   | 248  | >PTEN-P96S- DHNPSQLEL   | 266   | 18    |
| >PTEN-P96S- EDHNPPQLEI  | 235  | >PTEN-P96S- EDHNPSQLEL  | 199   | 36    |
| >PTEN-P96S- FEDHNPPQLE  | 1486 | >PTEN-P96S- FEDHNPSQLE  | 442   | 1044  |
| >PTEN-P96S- FEDHNPPQL   | 169  | >PTEN-P96S- FEDHNPSQL   | 141   | 28    |
| >PTEN-P96S- FEDHNPPQLE  | 275  | >PTEN-P96S- FEDHNPSQLE  | 173   | 102   |
| >PTEN-P96S- FEDHNPPQL   | 116  | >PTEN-P96S- FEDHNPSQL   | 183   | 67    |
| >PTEN-P96S- FEDHNPPQLE  | 47   | >PTEN-P96S- FEDHNPSQLE  | 46    | 1     |
| >PTEN-P96S- FEDHNPPQL   | 314  | >PTEN-P96S- FEDHNPSQL   | 596   | 282   |
| >PTEN-P96S- FEDHNPPQLE  | 186  | >PTEN-P96S- FEDHNPSQLE  | 137   | 49    |
| >PTEN-P96S- FEDHNPPQL   | 128  | >PTEN-P96S- FEDHNPSQL   | 176   | 48    |
| >PTEN-P96S- YPFEDHNPPC  | 43   | >PTEN-P96S- YPFEDHNPSC  | 95    | 52    |
| >PTEN-P96S- YPFEDHNPPC  | 145  | >PTEN-P96S- YPFEDHNPSC  | 366   | 221   |
| >PTEN-P96S- YPFEDHNPPC  | 145  | >PTEN-P96S- YPFEDHNPSC  | 52    | 93    |
| >PTEN-P96S- YPFEDHNPPC  | 859  | >PTEN-P96S- YPFEDHNPSC  | 434   | 425   |
| >PTEN-P96S- YPFEDHNPP   | 145  | >PTEN-P96S- YPFEDHNPS   | 25    | 120   |
| >PTEN-P96S- YPFEDHNPPC  | 43   | >PTEN-P96S- YPFEDHNPSC  | 36    | 7     |
| >PTEN-P96S- YPFEDHNPPC  | 22   | >PTEN-P96S- YPFEDHNPSC  | 20    | 2     |
| >PTEN-P96S- YPFEDHNPP   | 291  | >PTEN-P96S- YPFEDHNPS   | 152   | 139   |
| >PTEN-P96S- YPFEDHNPPC  | 638  | >PTEN-P96S- YPFEDHNPSC  | 483   | 155   |
| >PTEN-Q149 QEALDFYGEV   | 22   | >PTEN-Q149 REALDFYGEV   | 64    | 42    |
| >PTEN-Q149 QEALDFYGEV   | 112  | >PTEN-Q149 REALDFYGEV   | 71    | 41    |
| >PTEN-Q149 QEALDFYGEV   | 426  | >PTEN-Q149 REALDFYGEV   | 830   | 404   |
| >PTEN-Q149 QEALDFYGEV   | 361  | >PTEN-Q149 REALDFYGEV   | 774   | 413   |
| >PTEN-Q149 QEALDFYGEV   | 116  | >PTEN-Q149 REALDFYGEV   | 165   | 49    |
| >PTEN-Q149 QEALDFYGEV   | 1133 | >PTEN-Q149 REALDFYGEV   | 100   | 1033  |
| >PTEN-Q149 QEALDFYGEV   | 931  | >PTEN-Q149 REALDFYGEV   | 307   | 624   |
| >PTEN-Q149 AQEALDFYGE   | 422  | >PTEN-Q149 AREALDFYGE   | 12468 | 12046 |
| >PTEN-Q149 AQEALDFYGE   | 39   | >PTEN-Q149 AREALDFYGE   | 11440 | 11401 |



|                       |       |                        |       |       |
|-----------------------|-------|------------------------|-------|-------|
| >PTEN-Q149 AQEALDFY   | 178   | >PTEN-Q149 AREALDFY    | 969   | 791   |
| >PTEN-Q149 AQEALDFY   | 421   | >PTEN-Q149 AREALDFY    | 19009 | 18588 |
| >PTEN-Q149 LLHRGKFLKA | 230   | >PTEN-Q149 LLHRGKFLKA  | 6505  | 6275  |
| >PTEN-Q149 LLHRGKFLKA | 11765 | >PTEN-Q149 LLHRGKFLKA  | 42    | 11723 |
| >PTEN-Q149 KAQEALDFY  | 271   | >PTEN-Q149 KAREALDFY   | 165   | 106   |
| >PTEN-Q149 KAQEALDFY  | 4376  | >PTEN-Q149 KAREALDFY   | 15    | 4361  |
| >PTEN-Q149 KAQEALDFYC | 5801  | >PTEN-Q149 KAREALDFYG  | 29    | 5772  |
| >PTEN-Q149 KAQEALDFY  | 46    | >PTEN-Q149 KAREALDFY   | 98    | 52    |
| >PTEN-Q149 KAQEALDF   | 309   | >PTEN-Q149 KAREALDF    | 48    | 261   |
| >PTEN-Q149 KAQEALDF   | 30    | >PTEN-Q149 KAREALDF    | 8     | 22    |
| >PTEN-Q149 KAQEALDFY  | 139   | >PTEN-Q149 KAREALDFY   | 24    | 115   |
| >PTEN-Q149 KAQEALDF   | 767   | >PTEN-Q149 KAREALDF    | 148   | 619   |
| >PTEN-Q149 KAQEALDFY  | 481   | >PTEN-Q149 KAREALDFY   | 115   | 366   |
| >PTEN-Q149 KAQEALDF   | 133   | >PTEN-Q149 KAREALDF    | 1336  | 1203  |
| >PTEN-Q149 KAQEALDFY  | 195   | >PTEN-Q149 KAREALDFY   | 2315  | 2120  |
| >PTEN-Q149 KAQEALDFY  | 1326  | >PTEN-Q149 KAREALDFY   | 355   | 971   |
| >PTEN-Q149 LKAQEALDF  | 6     | >PTEN-Q149 LKAREALDF   | 5     | 1     |
| >PTEN-Q149 LKAQEALDFY | 85    | >PTEN-Q149 LKAREALDFY  | 64    | 21    |
| >PTEN-Q149 FLKAQEAL   | 179   | >PTEN-Q149 FLKAREAL    | 355   | 176   |
| >PTEN-Q149 FLKAQEAL   | 4     | >PTEN-Q149 FLKAREAL    | 7     | 3     |
| >PTEN-Q149 FLKAQEALDF | 370   | >PTEN-Q149 FLKAREALDF` | 453   | 83    |
| >PTEN-Q149 FLKAQEAL   | 8     | >PTEN-Q149 FLKAREAL    | 10    | 2     |
| >PTEN-Q149 FLKAQEAL   | 280   | >PTEN-Q149 FLKAREAL    | 336   | 56    |
| >PTEN-Q149 FLKAQEAL   | 58    | >PTEN-Q149 FLKAREAL    | 159   | 101   |
| >PTEN-Q149 FLKAQEAL   | 47    | >PTEN-Q149 FLKAREAL    | 248   | 201   |
| >PTEN-Q149 FLKAQEAL   | 4     | >PTEN-Q149 FLKAREAL    | 5     | 1     |
| >PTEN-Q149 FLKAQEALDF | 98    | >PTEN-Q149 FLKAREALDF` | 149   | 51    |
| >PTEN-Q149 FLKAQEALDF | 209   | >PTEN-Q149 FLKAREALDF` | 298   | 89    |
| >PTEN-Q149 FLKAQEALDF | 122   | >PTEN-Q149 FLKAREALDF` | 151   | 29    |
| >PTEN-Q149 FLKAQEAL   | 68    | >PTEN-Q149 FLKAREAL    | 18    | 50    |
| >PTEN-Q149 FLKAQEAL   | 343   | >PTEN-Q149 FLKAREAL    | 367   | 24    |
| >PTEN-Q149 FLKAQEALDF | 105   | >PTEN-Q149 FLKAREALDF  | 120   | 15    |
| >PTEN-Q149 FLKAQEALDF | 105   | >PTEN-Q149 FLKAREALDF` | 109   | 4     |
| >PTEN-Q149 FLKAQEALDF | 108   | >PTEN-Q149 FLKAREALDF  | 116   | 8     |
| >PTEN-Q149 FLKAQEALDF | 78    | >PTEN-Q149 FLKAREALDF` | 75    | 3     |
| >PTEN-Q149 FLKAQEALDF | 37    | >PTEN-Q149 FLKAREALDF  | 42    | 5     |
| >PTEN-Q149 FLKAQEALDF | 736   | >PTEN-Q149 FLKAREALDF` | 475   | 261   |
| >PTEN-Q149 KFLKAQEAL  | 154   | >PTEN-Q149 KFLKAREAL   | 77    | 77    |
| >PTEN-Q149 KFLKAQEALD | 77    | >PTEN-Q149 KFLKAREALD  | 62    | 15    |
| >PTEN-Q149 KFLKAQEALD | 345   | >PTEN-Q149 KFLKAREALD  | 485   | 140   |
| >PTEN-Q149 KFLKAQEAL  | 37    | >PTEN-Q149 KFLKAREAL   | 40    | 3     |
| >PTEN-Q149 KFLKAQEALD | 9     | >PTEN-Q149 KFLKAREALD  | 9     | 0     |
| >PTEN-Q149 KFLKAQEAL  | 464   | >PTEN-Q149 KFLKAREA    | 366   | 98    |

|                       |       |                        |      |       |
|-----------------------|-------|------------------------|------|-------|
| >PTEN-Q149 KFLKAQEALD | 364   | >PTEN-Q149 KFLKAREALD  | 321  | 43    |
| >PTEN-Q149 KFLKAQEA   | 626   | >PTEN-Q149 KFLKAREA    | 277  | 349   |
| >PTEN-Q149 KFLKAQEAL  | 257   | >PTEN-Q149 KFLKAREAL   | 63   | 194   |
| >PTEN-Q149 GKFLKAQEAL | 109   | >PTEN-Q149 GKFLKAREAL  | 166  | 57    |
| >PTEN-Q149 RGKFLKAQEA | 193   | >PTEN-Q149 RGKFLKAREA  | 255  | 62    |
| >PTEN-Q149 RGKFLKAQ   | 10802 | >PTEN-Q149 RGKFLKAR    | 21   | 10781 |
| >PTEN-Q149 RGKFLKAQ   | 13204 | >PTEN-Q149 RGKFLKAR    | 214  | 12990 |
| >PTEN-Q149 HRGKFLKAQ  | 2942  | >PTEN-Q149 HRGKFLKAR   | 175  | 2767  |
| >PTEN-Q149 HRGKFLKAQ  | 9165  | >PTEN-Q149 HRGKFLKAR   | 61   | 9104  |
| >PTEN-Q149 LHRGKFLKAC | 21399 | >PTEN-Q149 LHRGKFLKAR  | 409  | 20990 |
| >PTEN-Q171 QRRYVYYY   | 292   | >PTEN-Q171 ERRYVYYY    | 1691 | 1399  |
| >PTEN-Q171 QRRYVYYY   | 388   | >PTEN-Q171 ERRYVYYY    | 1099 | 711   |
| >PTEN-Q171 QRRYVYYYSY | 405   | >PTEN-Q171 ERRYVYYYSY  | 664  | 259   |
| >PTEN-Q171 QRRYVYYY   | 33    | >PTEN-Q171 ERRYVYYY    | 177  | 144   |
| >PTEN-Q171 QRRYVYYYSY | 15    | >PTEN-Q171 ERRYVYYYSY  | 57   | 42    |
| >PTEN-Q171 QRRYVYYYSY | 44    | >PTEN-Q171 ERRYVYYYSYI | 213  | 169   |
| >PTEN-Q171 QRRYVYYYSY | 33    | >PTEN-Q171 ERRYVYYYSY  | 46   | 13    |
| >PTEN-Q171 QRRYVYYYSY | 41    | >PTEN-Q171 ERRYVYYYSYI | 101  | 60    |
| >PTEN-Q171 QRRYVYYYSY | 19    | >PTEN-Q171 ERRYVYYYSYI | 115  | 96    |
| >PTEN-Q171 SQRRYVYYY  | 11107 | >PTEN-Q171 SERRYVYYY   | 344  | 10763 |
| >PTEN-Q171 SQRRYVYYY  | 14575 | >PTEN-Q171 SERRYVYYY   | 496  | 14079 |
| >PTEN-Q171 SQRRYVYYY  | 308   | >PTEN-Q171 SERRYVYYY   | 1432 | 1124  |
| >PTEN-Q171 SQRRYVYYY  | 137   | >PTEN-Q171 SERRYVYYY   | 476  | 339   |
| >PTEN-Q171 SQRRYVYYY  | 355   | >PTEN-Q171 SERRYVYYY   | 1136 | 781   |
| >PTEN-Q171 SQRRYVYY   | 72    | >PTEN-Q171 SERRYVYY    | 3292 | 3220  |
| >PTEN-Q171 SQRRYVYYY  | 75    | >PTEN-Q171 SERRYVYYY   | 3449 | 3374  |
| >PTEN-Q171 SQRRYVYYY  | 152   | >PTEN-Q171 SERRYVYYY   | 5046 | 4894  |
| >PTEN-Q171 SQRRYVYYY  | 104   | >PTEN-Q171 SERRYVYYY   | 4100 | 3996  |
| >PTEN-Q171 SQRRYVYYY  | 83    | >PTEN-Q171 SERRYVYYY   | 961  | 878   |
| >PTEN-Q171 SQRRYVYYY  | 106   | >PTEN-Q171 SERRYVYYY   | 1130 | 1024  |
| >PTEN-Q171 SQRRYVYYY  | 219   | >PTEN-Q171 SERRYVYYY   | 8240 | 8021  |
| >PTEN-Q171 SQRRYVYYY  | 212   | >PTEN-Q171 SERRYVYYY   | 527  | 315   |
| >PTEN-Q171 SQRRYVYY   | 41    | >PTEN-Q171 SERRYVYY    | 433  | 392   |
| >PTEN-Q171 SQRRYVYYY  | 36    | >PTEN-Q171 SERRYVYYY   | 254  | 218   |
| >PTEN-Q171 SQRRYVYYY  | 34    | >PTEN-Q171 SERRYVYYY   | 153  | 119   |
| >PTEN-Q171 SQRRYVYY   | 383   | >PTEN-Q171 SERRYVYY    | 4213 | 3830  |
| >PTEN-Q171 SQRRYVYYY  | 322   | >PTEN-Q171 SERRYVYYY   | 4357 | 4035  |
| >PTEN-Q171 SQRRYVYY   | 4     | >PTEN-Q171 SERRYVYY    | 88   | 84    |
| >PTEN-Q171 SQRRYVYYY  | 4     | >PTEN-Q171 SERRYVYYY   | 100  | 96    |
| >PTEN-Q171 SQRRYVYYY  | 3     | >PTEN-Q171 SERRYVYYY   | 36   | 33    |
| >PTEN-Q171 SQRRYVYY   | 3838  | >PTEN-Q171 SERRYVYY    | 106  | 3732  |
| >PTEN-Q171 SQRRYVYYY  | 1083  | >PTEN-Q171 SERRYVYYY   | 28   | 1055  |
| >PTEN-Q171 SQRRYVYYY  | 492   | >PTEN-Q171 SERRYVYYY   | 14   | 478   |

|                         |       |                        |      |       |
|-------------------------|-------|------------------------|------|-------|
| >PTEN-Q171 SQRRYVYYYS   | 12601 | >PTEN-Q171 SERRYVYYYS\ | 300  | 12301 |
| >PTEN-Q171 SQRRYVYYYS   | 11406 | >PTEN-Q171 SERRYVYYYS\ | 306  | 11100 |
| >PTEN-Q171 SQRRYVYY     | 5435  | >PTEN-Q171 SERRYVYY    | 80   | 5355  |
| >PTEN-Q171 SQRRYVYYY    | 2452  | >PTEN-Q171 SERRYVYYY   | 37   | 2415  |
| >PTEN-Q171 SQRRYVYYYS   | 4976  | >PTEN-Q171 SERRYVYYYS\ | 62   | 4914  |
| >PTEN-Q171 SQRRYVYYY    | 15705 | >PTEN-Q171 SERRYVYYY   | 466  | 15239 |
| >PTEN-Q171 SQRRYVYYYS   | 13847 | >PTEN-Q171 SERRYVYYYS  | 389  | 13458 |
| >PTEN-Q171 SQRRYVYYYS   | 11492 | >PTEN-Q171 SERRYVYYYS\ | 288  | 11204 |
| >PTEN-Q171 SQRRYVYYY    | 453   | >PTEN-Q171 SERRYVYYY   | 838  | 385   |
| >PTEN-Q171 PSQRRYVY     | 1626  | >PTEN-Q171 PSERRYVY    | 144  | 1482  |
| >PTEN-Q171 PSQRRYVYY    | 907   | >PTEN-Q171 PSERRYVYY   | 68   | 839   |
| >PTEN-Q171 PSQRRYVYYY   | 186   | >PTEN-Q171 PSERRYVYYY  | 114  | 72    |
| >PTEN-Q171 PSQRRYVYYY   | 359   | >PTEN-Q171 PSERRYVYYY  | 304  | 55    |
| >PTEN-Q171 PSQRRYVY     | 465   | >PTEN-Q171 PSERRYVY    | 1005 | 540   |
| >PTEN-Q171 PSQRRYVYYY   | 40    | >PTEN-Q171 PSERRYVYYY  | 65   | 25    |
| >PTEN-Q171 PSQRRYVYYY   | 353   | >PTEN-Q171 PSERRYVYYY  | 1562 | 1209  |
| >PTEN-Q171 IPSQRRYVYY\  | 288   | >PTEN-Q171 IPSERRYVYYY | 322  | 34    |
| >PTEN-Q171 IPSQRRYVY    | 183   | >PTEN-Q171 IPSERRYVY   | 329  | 146   |
| >PTEN-Q171 IPSQRRYVYY\  | 123   | >PTEN-Q171 IPSERRYVYYY | 195  | 72    |
| >PTEN-Q171 IPSQRRYV     | 22    | >PTEN-Q171 IPSERRYV    | 51   | 29    |
| >PTEN-Q171 IPSQRRYVY    | 165   | >PTEN-Q171 IPSERRYVY   | 449  | 284   |
| >PTEN-Q171 IPSQRRYVY    | 16    | >PTEN-Q171 IPSERRYVY   | 14   | 2     |
| >PTEN-Q171 IPSQRRYVYYY\ | 27    | >PTEN-Q171 IPSERRYVYYY | 24   | 3     |
| >PTEN-Q171 IPSQRRYVY    | 74    | >PTEN-Q171 IPSERRYVY   | 51   | 23    |
| >PTEN-Q171 IPSQRRYVYYY\ | 31    | >PTEN-Q171 IPSERRYVYYY | 24   | 7     |
| >PTEN-Q171 IPSQRRYVY    | 7     | >PTEN-Q171 IPSERRYVY   | 6    | 1     |
| >PTEN-Q171 IPSQRRYVYY   | 33    | >PTEN-Q171 IPSERRYVYY  | 22   | 11    |
| >PTEN-Q171 IPSQRRYVYYY\ | 12    | >PTEN-Q171 IPSERRYVYYY | 9    | 3     |
| >PTEN-Q171 IPSQRRYVY    | 262   | >PTEN-Q171 IPSERRYVY   | 166  | 96    |
| >PTEN-Q171 IPSQRRYVYYY\ | 518   | >PTEN-Q171 IPSERRYVYYY | 324  | 194   |
| >PTEN-Q171 TIPSQRRYV    | 225   | >PTEN-Q171 TIPSERRYV   | 324  | 99    |
| >PTEN-Q171 TIPSQRRY     | 437   | >PTEN-Q171 TIPSERRY    | 607  | 170   |
| >PTEN-Q171 TIPSQRRYVY\  | 290   | >PTEN-Q171 TIPSERRYVYY | 308  | 18    |
| >PTEN-Q171 TIPSQRRYVY\  | 238   | >PTEN-Q171 TIPSERRYVYY | 361  | 123   |
| >PTEN-Q171 TIPSQRRYV    | 67    | >PTEN-Q171 TIPSERRYV   | 151  | 84    |
| >PTEN-Q171 VTIPSQRRYV   | 563   | >PTEN-Q171 VTIPSERRYV  | 422  | 141   |
| >PTEN-Q171 VTIPSQRRYV   | 916   | >PTEN-Q171 VTIPSERRYV  | 420  | 496   |
| >PTEN-Q171 VTIPSQRRYV   | 249   | >PTEN-Q171 VTIPSERRYV  | 318  | 69    |
| >PTEN-Q171 VTIPSQRRYV   | 286   | >PTEN-Q171 VTIPSERRYV  | 488  | 202   |
| >PTEN-Q171 VTIPSQRRYV\  | 284   | >PTEN-Q171 VTIPSERRYVY | 294  | 10    |
| >PTEN-Q171 VTIPSQRRY    | 26    | >PTEN-Q171 VTIPSERRY   | 47   | 21    |
| >PTEN-Q171 VTIPSQRRYV\  | 38    | >PTEN-Q171 VTIPSERRYVY | 52   | 14    |
| >PTEN-Q171 VTIPSQRRYV\  | 509   | >PTEN-Q171 VTIPSERRYVY | 455  | 54    |

|                        |      |                         |      |      |
|------------------------|------|-------------------------|------|------|
| >PTEN-Q171 VTIPSQRRY   | 59   | >PTEN-Q171 VTIPSERRY    | 256  | 197  |
| >PTEN-Q171 VTIPSQRRYV' | 26   | >PTEN-Q171 VTIPSERRYVY  | 49   | 23   |
| >PTEN-Q171 VTIPSQRRY   | 41   | >PTEN-Q171 VTIPSERRY    | 83   | 42   |
| >PTEN-Q171 VTIPSQRRYV' | 16   | >PTEN-Q171 VTIPSERRYVY  | 22   | 6    |
| >PTEN-Q171 VTIPSQRR    | 135  | >PTEN-Q171 VTIPSERR     | 288  | 153  |
| >PTEN-Q171 VTIPSQRR    | 65   | >PTEN-Q171 VTIPSERR     | 37   | 28   |
| >PTEN-Q171 VTIPSQRRYV  | 225  | >PTEN-Q171 VTIPSERRYV   | 213  | 12   |
| >PTEN-Q171 VTIPSQRRY   | 399  | >PTEN-Q171 VTIPSERRY    | 1042 | 643  |
| >PTEN-Q171 VTIPSQRRYV' | 109  | >PTEN-Q171 VTIPSERRYVY  | 162  | 53   |
| >PTEN-Q171 VTIPSQRRYV' | 205  | >PTEN-Q171 VTIPSERRYVY  | 288  | 83   |
| >PTEN-Q171 VTIPSQRRY   | 3    | >PTEN-Q171 VTIPSERRY    | 3    | 0    |
| >PTEN-Q171 VTIPSQRRYV  | 124  | >PTEN-Q171 VTIPSERRYV   | 160  | 36   |
| >PTEN-Q171 VTIPSQRRYV' | 4    | >PTEN-Q171 VTIPSERRYVY  | 4    | 0    |
| >PTEN-Q171 VTIPSQRRY   | 81   | >PTEN-Q171 VTIPSERRY    | 78   | 3    |
| >PTEN-Q171 VTIPSQRRYV' | 111  | >PTEN-Q171 VTIPSERRYVY  | 111  | 0    |
| >PTEN-Q171 VTIPSQRRY   | 122  | >PTEN-Q171 VTIPSERRY    | 911  | 789  |
| >PTEN-Q171 VTIPSQRRYV' | 76   | >PTEN-Q171 VTIPSERRYVY  | 169  | 93   |
| >PTEN-Q171 VTIPSQRRY   | 37   | >PTEN-Q171 VTIPSERRY    | 57   | 20   |
| >PTEN-Q171 VTIPSQRRYV' | 37   | >PTEN-Q171 VTIPSERRYVY  | 58   | 21   |
| >PTEN-Q171 VTIPSQRRYV' | 256  | >PTEN-Q171 VTIPSERRYVY  | 619  | 363  |
| >PTEN-Q171 GVTIPSQRRY  | 123  | >PTEN-Q171 GVTIPSERRY   | 184  | 61   |
| >PTEN-Q171 GVTIPSQR    | 457  | >PTEN-Q171 GVTIPSER     | 442  | 15   |
| >PTEN-Q171 GVTIPSQR    | 210  | >PTEN-Q171 GVTIPSER     | 168  | 42   |
| >PTEN-Q171 GVTIPSQRR   | 1034 | >PTEN-Q171 GVTIPSERR    | 380  | 654  |
| >PTEN-Q171 GVTIPSQRRY  | 172  | >PTEN-Q171 GVTIPSERRY   | 380  | 208  |
| >PTEN-Q171 KGV TIPSQRR | 155  | >PTEN-Q171 KGV TIPSERR\ | 211  | 56   |
| >PTEN-Q171 KGV TIPSQR  | 208  | >PTEN-Q171 KGV TIPSER   | 194  | 14   |
| >PTEN-Q171 KGV TIPSQRR | 202  | >PTEN-Q171 KGV TIPSERR\ | 262  | 60   |
| >PTEN-Q171 KGV TIPSQRR | 227  | >PTEN-Q171 KGV TIPSERR\ | 305  | 78   |
| >PTEN-Q171 KGV TIPSQR  | 147  | >PTEN-Q171 KGV TIPSER   | 185  | 38   |
| >PTEN-Q171 KGV TIPSQRR | 120  | >PTEN-Q171 KGV TIPSERR  | 151  | 31   |
| >PTEN-Q171 DKKGV TIPSQ | 497  | >PTEN-Q171 DKKGV TIPSER | 437  | 60   |
| >PTEN-Q171 QRRYVYYY    | 292  | >PTEN-Q171 HRRYVYYY     | 330  | 38   |
| >PTEN-Q171 QRRYVYYYSY  | 4477 | >PTEN-Q171 HRRYVYYYSY   | 491  | 3986 |
| >PTEN-Q171 QRRYVYYYSY  | 1981 | >PTEN-Q171 HRRYVYYYSY   | 124  | 1857 |
| >PTEN-Q171 QRRYVYYY    | 388  | >PTEN-Q171 HRRYVYYY     | 262  | 126  |
| >PTEN-Q171 QRRYVYYYSY  | 405  | >PTEN-Q171 HRRYVYYYSY   | 297  | 108  |
| >PTEN-Q171 QRRYVYYY    | 33   | >PTEN-Q171 HRRYVYYY     | 30   | 3    |
| >PTEN-Q171 QRRYVYYYSY  | 15   | >PTEN-Q171 HRRYVYYYSY   | 14   | 1    |
| >PTEN-Q171 QRRYVYYYSY  | 44   | >PTEN-Q171 HRRYVYYYSY   | 43   | 1    |
| >PTEN-Q171 QRRYVYYY    | 774  | >PTEN-Q171 HRRYVYYY     | 317  | 457  |
| >PTEN-Q171 QRRYVYYYSY  | 33   | >PTEN-Q171 HRRYVYYYSY   | 11   | 22   |
| >PTEN-Q171 QRRYVYYYSY  | 595  | >PTEN-Q171 HRRYVYYYSY   | 229  | 366  |

|                         |      |                         |      |      |
|-------------------------|------|-------------------------|------|------|
| >PTEN-Q171 QRRYVYYYS    | 747  | >PTEN-Q171 HRRYVYYYS    | 383  | 364  |
| >PTEN-Q171 QRRYVYYYSY   | 41   | >PTEN-Q171 HRRYVYYYSY   | 66   | 25   |
| >PTEN-Q171 QRRYVYYYSY   | 19   | >PTEN-Q171 HRRYVYYYSY   | 18   | 1    |
| >PTEN-Q171 QRRYVYYYY    | 869  | >PTEN-Q171 HRRYVYYYY    | 249  | 620  |
| >PTEN-Q171 SQRRYVYYYY   | 308  | >PTEN-Q171 SHRRYVYYYY   | 2891 | 2583 |
| >PTEN-Q171 SQRRYVYYYY   | 137  | >PTEN-Q171 SHRRYVYYYY   | 117  | 20   |
| >PTEN-Q171 SQRRYVYYYS   | 355  | >PTEN-Q171 SHRRYVYYYS'  | 302  | 53   |
| >PTEN-Q171 SQRRYVYYY    | 72   | >PTEN-Q171 SHRRYVYYY    | 1347 | 1275 |
| >PTEN-Q171 SQRRYVYYYY   | 75   | >PTEN-Q171 SHRRYVYYYY   | 1443 | 1368 |
| >PTEN-Q171 SQRRYVYYYS   | 152  | >PTEN-Q171 SHRRYVYYYS   | 2744 | 2592 |
| >PTEN-Q171 SQRRYVYYYS   | 104  | >PTEN-Q171 SHRRYVYYYS'  | 1834 | 1730 |
| >PTEN-Q171 SQRRYVYYYY   | 83   | >PTEN-Q171 SHRRYVYYYY   | 342  | 259  |
| >PTEN-Q171 SQRRYVYYYS   | 106  | >PTEN-Q171 SHRRYVYYYS'  | 417  | 311  |
| >PTEN-Q171 SQRRYVYYYY   | 219  | >PTEN-Q171 SHRRYVYYYY   | 7892 | 7673 |
| >PTEN-Q171 SQRRYVYYYY   | 212  | >PTEN-Q171 SHRRYVYYYY   | 381  | 169  |
| >PTEN-Q171 SQRRYVYYY    | 41   | >PTEN-Q171 SHRRYVYYY    | 7963 | 7922 |
| >PTEN-Q171 SQRRYVYYYY   | 36   | >PTEN-Q171 SHRRYVYYYY   | 5705 | 5669 |
| >PTEN-Q171 SQRRYVYYYS   | 34   | >PTEN-Q171 SHRRYVYYYS'  | 3651 | 3617 |
| >PTEN-Q171 SQRRYVYYY    | 383  | >PTEN-Q171 SHRRYVYYY    | 6388 | 6005 |
| >PTEN-Q171 SQRRYVYYYS   | 322  | >PTEN-Q171 SHRRYVYYYS'  | 6610 | 6288 |
| >PTEN-Q171 SQRRYVYYY    | 4    | >PTEN-Q171 SHRRYVYYY    | 28   | 24   |
| >PTEN-Q171 SQRRYVYYYY   | 4    | >PTEN-Q171 SHRRYVYYYY   | 29   | 25   |
| >PTEN-Q171 SQRRYVYYYS   | 3    | >PTEN-Q171 SHRRYVYYYS'  | 13   | 10   |
| >PTEN-Q171 SQRRYVYYYS   | 492  | >PTEN-Q171 SHRRYVYYYS'  | 3766 | 3274 |
| >PTEN-Q171 SQRRYVYYYY   | 453  | >PTEN-Q171 SHRRYVYYYY   | 444  | 9    |
| >PTEN-Q171 PSQRRYVYYYY  | 186  | >PTEN-Q171 PSHRRYVYYYY  | 745  | 559  |
| >PTEN-Q171 PSQRRYVYYYY  | 1031 | >PTEN-Q171 PSHRRYVYYYY  | 353  | 678  |
| >PTEN-Q171 PSQRRYVYYYY  | 359  | >PTEN-Q171 PSHRRYVYYYY  | 462  | 103  |
| >PTEN-Q171 PSQRRYVYYY   | 5454 | >PTEN-Q171 PSHRRYVYYY   | 179  | 5275 |
| >PTEN-Q171 PSQRRYVYYYY  | 7291 | >PTEN-Q171 PSHRRYVYYYY  | 388  | 6903 |
| >PTEN-Q171 PSQRRYVYY    | 465  | >PTEN-Q171 PSHRRYVYY    | 591  | 126  |
| >PTEN-Q171 PSQRRYVYYYY  | 40   | >PTEN-Q171 PSHRRYVYYYY  | 84   | 44   |
| >PTEN-Q171 PSQRRYVYYYY  | 353  | >PTEN-Q171 PSHRRYVYYYY  | 1077 | 724  |
| >PTEN-Q171 IPSQRRYVYYYY | 288  | >PTEN-Q171 IPSHRRYVYYYY | 232  | 56   |
| >PTEN-Q171 IPSQRRYVYY   | 183  | >PTEN-Q171 IPSHRRYVYY   | 166  | 17   |
| >PTEN-Q171 IPSQRRYVYYYY | 123  | >PTEN-Q171 IPSHRRYVYYYY | 112  | 11   |
| >PTEN-Q171 IPSQRRYV     | 22   | >PTEN-Q171 IPSHRRYV     | 21   | 1    |
| >PTEN-Q171 IPSQRRYVYY   | 165  | >PTEN-Q171 IPSHRRYVYY   | 203  | 38   |
| >PTEN-Q171 IPSQRRYVYYY  | 1203 | >PTEN-Q171 IPSHRRYVYYY  | 455  | 748  |
| >PTEN-Q171 IPSQRRYVYY   | 16   | >PTEN-Q171 IPSHRRYVYY   | 19   | 3    |
| >PTEN-Q171 IPSQRRYVYYYY | 27   | >PTEN-Q171 IPSHRRYVYYYY | 32   | 5    |
| >PTEN-Q171 IPSQRRYVYY   | 74   | >PTEN-Q171 IPSHRRYVYY   | 65   | 9    |
| >PTEN-Q171 IPSQRRYVYYYY | 31   | >PTEN-Q171 IPSHRRYVYYYY | 29   | 2    |

|                         |      |                         |     |      |
|-------------------------|------|-------------------------|-----|------|
| >PTEN-Q171 IPSQRRYVY    | 7    | >PTEN-Q171 IPSHRRYVY    | 11  | 4    |
| >PTEN-Q171 IPSQRRYVYY   | 33   | >PTEN-Q171 IPSHRRYVYY   | 54  | 21   |
| >PTEN-Q171 IPSQRRYVYYY  | 12   | >PTEN-Q171 IPSHRRYVYYY  | 19  | 7    |
| >PTEN-Q171 IPSQRRYVY    | 1416 | >PTEN-Q171 IPSHRRYVY    | 438 | 978  |
| >PTEN-Q171 IPSQRRYVYY   | 262  | >PTEN-Q171 IPSHRRYVYY   | 107 | 155  |
| >PTEN-Q171 IPSQRRYVYYY  | 518  | >PTEN-Q171 IPSHRRYVYYY  | 203 | 315  |
| >PTEN-Q171 TIPSQRRYV    | 1432 | >PTEN-Q171 TIPSHRRYV    | 263 | 1169 |
| >PTEN-Q171 TIPSQRRYV    | 225  | >PTEN-Q171 TIPSHRRYV    | 321 | 96   |
| >PTEN-Q171 TIPSQRRY     | 437  | >PTEN-Q171 TIPSHRRY     | 182 | 255  |
| >PTEN-Q171 TIPSQRRYVY   | 618  | >PTEN-Q171 TIPSHRRYVY   | 280 | 338  |
| >PTEN-Q171 TIPSQRRYVYY  | 290  | >PTEN-Q171 TIPSHRRYVYY  | 121 | 169  |
| >PTEN-Q171 TIPSQRRYVYYY | 238  | >PTEN-Q171 TIPSHRRYVYYY | 162 | 76   |
| >PTEN-Q171 TIPSQRRYV    | 67   | >PTEN-Q171 TIPSHRRYV    | 66  | 1    |
| >PTEN-Q171 TIPSQRRYV    | 2924 | >PTEN-Q171 TIPSHRRYV    | 317 | 2607 |
| >PTEN-Q171 VTIPSQRRYV   | 563  | >PTEN-Q171 VTIPSHRRYV   | 462 | 101  |
| >PTEN-Q171 VTIPSQRRYV   | 249  | >PTEN-Q171 VTIPSHRRYV   | 156 | 93   |
| >PTEN-Q171 VTIPSQRRYV   | 286  | >PTEN-Q171 VTIPSHRRYV   | 382 | 96   |
| >PTEN-Q171 VTIPSQRR     | 608  | >PTEN-Q171 VTIPSHRR     | 134 | 474  |
| >PTEN-Q171 VTIPSQRRYV   | 284  | >PTEN-Q171 VTIPSHRRYV   | 189 | 95   |
| >PTEN-Q171 VTIPSQRRY    | 26   | >PTEN-Q171 VTIPSHRRY    | 23  | 3    |
| >PTEN-Q171 VTIPSQRRYV   | 38   | >PTEN-Q171 VTIPSHRRYV   | 41  | 3    |
| >PTEN-Q171 VTIPSQRRY    | 1205 | >PTEN-Q171 VTIPSHRRY    | 384 | 821  |
| >PTEN-Q171 VTIPSQRRYV   | 509  | >PTEN-Q171 VTIPSHRRYV   | 421 | 88   |
| >PTEN-Q171 VTIPSQRRY    | 59   | >PTEN-Q171 VTIPSHRRY    | 28  | 31   |
| >PTEN-Q171 VTIPSQRRYV   | 26   | >PTEN-Q171 VTIPSHRRYV   | 18  | 8    |
| >PTEN-Q171 VTIPSQRRY    | 41   | >PTEN-Q171 VTIPSHRRY    | 92  | 51   |
| >PTEN-Q171 VTIPSQRRYV   | 16   | >PTEN-Q171 VTIPSHRRYV   | 22  | 6    |
| >PTEN-Q171 VTIPSQRR     | 135  | >PTEN-Q171 VTIPSHRR     | 36  | 99   |
| >PTEN-Q171 VTIPSQRR     | 1245 | >PTEN-Q171 VTIPSHRR     | 497 | 748  |
| >PTEN-Q171 VTIPSQRR     | 65   | >PTEN-Q171 VTIPSHRR     | 22  | 43   |
| >PTEN-Q171 VTIPSQRRYV   | 225  | >PTEN-Q171 VTIPSHRRYV   | 180 | 45   |
| >PTEN-Q171 VTIPSQRRYV   | 579  | >PTEN-Q171 VTIPSHRRYV   | 398 | 181  |
| >PTEN-Q171 VTIPSQRRY    | 399  | >PTEN-Q171 VTIPSHRRY    | 162 | 237  |
| >PTEN-Q171 VTIPSQRRYV   | 109  | >PTEN-Q171 VTIPSHRRYV   | 81  | 28   |
| >PTEN-Q171 VTIPSQRRY    | 706  | >PTEN-Q171 VTIPSHRRY    | 361 | 345  |
| >PTEN-Q171 VTIPSQRRYV   | 205  | >PTEN-Q171 VTIPSHRRYV   | 139 | 66   |
| >PTEN-Q171 VTIPSQRR     | 677  | >PTEN-Q171 VTIPSHRR     | 470 | 207  |
| >PTEN-Q171 VTIPSQRRY    | 3    | >PTEN-Q171 VTIPSHRRY    | 2   | 1    |
| >PTEN-Q171 VTIPSQRRYV   | 124  | >PTEN-Q171 VTIPSHRRYV   | 83  | 41   |
| >PTEN-Q171 VTIPSQRRYV   | 4    | >PTEN-Q171 VTIPSHRRYV   | 3   | 1    |
| >PTEN-Q171 VTIPSQRRY    | 81   | >PTEN-Q171 VTIPSHRRY    | 56  | 25   |
| >PTEN-Q171 VTIPSQRRYV   | 111  | >PTEN-Q171 VTIPSHRRYV   | 97  | 14   |
| >PTEN-Q171 VTIPSQRRY    | 122  | >PTEN-Q171 VTIPSHRRY    | 859 | 737  |

|                        |      |                         |       |       |
|------------------------|------|-------------------------|-------|-------|
| >PTEN-Q171 VTIPSQRRYV' | 76   | >PTEN-Q171 VTIPSHRRYV'  | 152   | 76    |
| >PTEN-Q171 VTIPSQRRYV  | 616  | >PTEN-Q171 VTIPSHRRYV   | 139   | 477   |
| >PTEN-Q171 VTIPSQRRY   | 37   | >PTEN-Q171 VTIPSHRRY    | 17    | 20    |
| >PTEN-Q171 VTIPSQRRYV' | 37   | >PTEN-Q171 VTIPSHRRYV'  | 27    | 10    |
| >PTEN-Q171 VTIPSQRRYV' | 256  | >PTEN-Q171 VTIPSHRRYV'  | 648   | 392   |
| >PTEN-Q171 VTIPSQRR    | 925  | >PTEN-Q171 VTIPSHRR     | 262   | 663   |
| >PTEN-Q171 GVTIPSQRRY' | 623  | >PTEN-Q171 GVTIPSHRRY'  | 390   | 233   |
| >PTEN-Q171 GVTIPSQRRY' | 123  | >PTEN-Q171 GVTIPSHRRY'  | 105   | 18    |
| >PTEN-Q171 GVTIPSQR    | 457  | >PTEN-Q171 GVTIPSHR     | 157   | 300   |
| >PTEN-Q171 GVTIPSQRR   | 953  | >PTEN-Q171 GVTIPSHRR    | 194   | 759   |
| >PTEN-Q171 GVTIPSQR    | 210  | >PTEN-Q171 GVTIPSHR     | 229   | 19    |
| >PTEN-Q171 GVTIPSQRR   | 1034 | >PTEN-Q171 GVTIPSHRR    | 285   | 749   |
| >PTEN-Q171 GVTIPSQRRY  | 172  | >PTEN-Q171 GVTIPSHRRY   | 124   | 48    |
| >PTEN-Q171 KGV TIPSQRR | 155  | >PTEN-Q171 KGV TIPSHRR' | 221   | 66    |
| >PTEN-Q171 KGV TIPSQR  | 208  | >PTEN-Q171 KGV TIPSHR   | 85    | 123   |
| >PTEN-Q171 KGV TIPSQRR | 202  | >PTEN-Q171 KGV TIPSHRR' | 172   | 30    |
| >PTEN-Q171 KGV TIPSQRR | 227  | >PTEN-Q171 KGV TIPSHRR' | 179   | 48    |
| >PTEN-Q171 KGV TIPSQR  | 147  | >PTEN-Q171 KGV TIPSHR   | 53    | 94    |
| >PTEN-Q171 KGV TIPSQRR | 120  | >PTEN-Q171 KGV TIPSHRR  | 43    | 77    |
| >PTEN-Q171 KKGVTIPSQ   | 1228 | >PTEN-Q171 KKGVTIPSH    | 416   | 812   |
| >PTEN-Q171 KKGVTIPSQR  | 609  | >PTEN-Q171 KKGVTIPSHR   | 193   | 416   |
| >PTEN-Q171 KKGVTIPSQR  | 511  | >PTEN-Q171 KKGVTIPSHR   | 155   | 356   |
| >PTEN-Q171 DKKGVTIPSQ  | 497  | >PTEN-Q171 DKKGVTIPSH   | 204   | 293   |
| >PTEN-Q171 QRRYVYYY    | 292  | >PTEN-Q171 PRRYVYYY     | 755   | 463   |
| >PTEN-Q171 QRRYVYYY    | 388  | >PTEN-Q171 PRRYVYYY     | 928   | 540   |
| >PTEN-Q171 QRRYVYYYSY  | 405  | >PTEN-Q171 PRRYVYYYSY   | 750   | 345   |
| >PTEN-Q171 QRRYVYYY    | 33   | >PTEN-Q171 PRRYVYYY     | 277   | 244   |
| >PTEN-Q171 QRRYVYYYSY  | 15   | >PTEN-Q171 PRRYVYYYSY   | 96    | 81    |
| >PTEN-Q171 QRRYVYYYSY  | 44   | >PTEN-Q171 PRRYVYYYSYI  | 371   | 327   |
| >PTEN-Q171 QRRYVYYYSY  | 33   | >PTEN-Q171 PRRYVYYYSY   | 473   | 440   |
| >PTEN-Q171 QRRYVYYYSY  | 41   | >PTEN-Q171 PRRYVYYYSYI  | 214   | 173   |
| >PTEN-Q171 QRRYVYYYSY  | 19   | >PTEN-Q171 PRRYVYYYSYI  | 69    | 50    |
| >PTEN-Q171 SQRRYVYYY   | 308  | >PTEN-Q171 SPRRYVYYY    | 383   | 75    |
| >PTEN-Q171 SQRRYVYYY   | 137  | >PTEN-Q171 SPRRYVYYY    | 419   | 282   |
| >PTEN-Q171 SQRRYVYYYS  | 355  | >PTEN-Q171 SPRRYVYYYS'  | 989   | 634   |
| >PTEN-Q171 SQRRYVYY    | 72   | >PTEN-Q171 SPRRYVYY     | 8225  | 8153  |
| >PTEN-Q171 SQRRYVYYY   | 75   | >PTEN-Q171 SPRRYVYYY    | 8624  | 8549  |
| >PTEN-Q171 SQRRYVYYYS  | 152  | >PTEN-Q171 SPRRYVYYYS   | 10683 | 10531 |
| >PTEN-Q171 SQRRYVYYYS  | 104  | >PTEN-Q171 SPRRYVYYYS'  | 9284  | 9180  |
| >PTEN-Q171 SQRRYVYYY   | 83   | >PTEN-Q171 SPRRYVYYY    | 1033  | 950   |
| >PTEN-Q171 SQRRYVYYYS  | 106  | >PTEN-Q171 SPRRYVYYYS'  | 1199  | 1093  |
| >PTEN-Q171 SQRRYVYYY   | 219  | >PTEN-Q171 SPRRYVYYY    | 9635  | 9416  |
| >PTEN-Q171 SQRRYVYYY   | 212  | >PTEN-Q171 SPRRYVYYY    | 1147  | 935   |

|                        |       |                        |      |       |
|------------------------|-------|------------------------|------|-------|
| >PTEN-Q171 SQRRYVYYYS  | 23149 | >PTEN-Q171 SPRRYVYYYS\ | 441  | 22708 |
| >PTEN-Q171 SQRRYVYYYS  | 4956  | >PTEN-Q171 SPRRYVYYYS\ | 422  | 4534  |
| >PTEN-Q171 SQRRYVYY    | 41    | >PTEN-Q171 SPRRYVYY    | 6837 | 6796  |
| >PTEN-Q171 SQRRYVYY    | 36    | >PTEN-Q171 SPRRYVYY    | 5065 | 5029  |
| >PTEN-Q171 SQRRYVYYYS  | 34    | >PTEN-Q171 SPRRYVYYYS\ | 3270 | 3236  |
| >PTEN-Q171 SQRRYVYY    | 383   | >PTEN-Q171 SPRRYVYY    | 3110 | 2727  |
| >PTEN-Q171 SQRRYVYYYS  | 322   | >PTEN-Q171 SPRRYVYYYS\ | 3160 | 2838  |
| >PTEN-Q171 SQRRYVYY    | 4     | >PTEN-Q171 SPRRYVYY    | 548  | 544   |
| >PTEN-Q171 SQRRYVYY    | 4     | >PTEN-Q171 SPRRYVYY    | 634  | 630   |
| >PTEN-Q171 SQRRYVYYYS  | 3     | >PTEN-Q171 SPRRYVYYYS\ | 190  | 187   |
| >PTEN-Q171 SQRRYVYYYS  | 492   | >PTEN-Q171 SPRRYVYYYS\ | 866  | 374   |
| >PTEN-Q171 SQRRYVYY    | 14910 | >PTEN-Q171 SPRRYVYY    | 484  | 14426 |
| >PTEN-Q171 SQRRYVYY    | 14486 | >PTEN-Q171 SPRRYVYY    | 222  | 14264 |
| >PTEN-Q171 SQRRYVYYYS  | 9232  | >PTEN-Q171 SPRRYVYYYS\ | 67   | 9165  |
| >PTEN-Q171 SQRRYVYYYS  | 29073 | >PTEN-Q171 SPRRYVYYYS  | 232  | 28841 |
| >PTEN-Q171 SQRRYVYY    | 14773 | >PTEN-Q171 SPRRYVYY    | 122  | 14651 |
| >PTEN-Q171 SQRRYVYY    | 6596  | >PTEN-Q171 SPRRYVYY    | 26   | 6570  |
| >PTEN-Q171 SQRRYVYYYS  | 4103  | >PTEN-Q171 SPRRYVYYYS\ | 14   | 4089  |
| >PTEN-Q171 SQRRYVYY    | 453   | >PTEN-Q171 SPRRYVYY    | 1294 | 841   |
| >PTEN-Q171 PSQRRYVY    | 20525 | >PTEN-Q171 PSPRRYVY    | 451  | 20074 |
| >PTEN-Q171 PSQRRYVY    | 14002 | >PTEN-Q171 PSPRRYVY    | 176  | 13826 |
| >PTEN-Q171 PSQRRYVYYY  | 186   | >PTEN-Q171 PSPRRYVYYY  | 386  | 200   |
| >PTEN-Q171 PSQRRYVYYY  | 359   | >PTEN-Q171 PSPRRYVYYY  | 281  | 78    |
| >PTEN-Q171 PSQRRYVY    | 465   | >PTEN-Q171 PSPRRYVY    | 1417 | 952   |
| >PTEN-Q171 PSQRRYVYYY  | 40    | >PTEN-Q171 PSPRRYVYYY  | 89   | 49    |
| >PTEN-Q171 PSQRRYVYYY  | 353   | >PTEN-Q171 PSPRRYVYYY  | 1128 | 775   |
| >PTEN-Q171 IPSQRRYV    | 597   | >PTEN-Q171 IPSPRRYV    | 469  | 128   |
| >PTEN-Q171 IPSQRRYVYY\ | 288   | >PTEN-Q171 IPSPRRYVYYY | 182  | 106   |
| >PTEN-Q171 IPSQRRYVY   | 183   | >PTEN-Q171 IPSPRRYVY   | 185  | 2     |
| >PTEN-Q171 IPSQRRYVYY\ | 123   | >PTEN-Q171 IPSPRRYVYYY | 122  | 1     |
| >PTEN-Q171 IPSQRRYV    | 22    | >PTEN-Q171 IPSPRRYV    | 25   | 3     |
| >PTEN-Q171 IPSQRRYVY   | 165   | >PTEN-Q171 IPSPRRYVY   | 292  | 127   |
| >PTEN-Q171 IPSQRRYVY   | 16    | >PTEN-Q171 IPSPRRYVY   | 20   | 4     |
| >PTEN-Q171 IPSQRRYVYY\ | 27    | >PTEN-Q171 IPSPRRYVYYY | 34   | 7     |
| >PTEN-Q171 IPSQRRYVY   | 74    | >PTEN-Q171 IPSPRRYVY   | 80   | 6     |
| >PTEN-Q171 IPSQRRYVYY\ | 31    | >PTEN-Q171 IPSPRRYVYYY | 34   | 3     |
| >PTEN-Q171 IPSQRRYVY   | 7     | >PTEN-Q171 IPSPRRYVY   | 8    | 1     |
| >PTEN-Q171 IPSQRRYVYY  | 33    | >PTEN-Q171 IPSPRRYVY   | 32   | 1     |
| >PTEN-Q171 IPSQRRYVYY\ | 12    | >PTEN-Q171 IPSPRRYVYYY | 12   | 0     |
| >PTEN-Q171 IPSQRRYVY   | 262   | >PTEN-Q171 IPSPRRYVY   | 228  | 34    |
| >PTEN-Q171 IPSQRRYVYY\ | 518   | >PTEN-Q171 IPSPRRYVYYY | 448  | 70    |
| >PTEN-Q171 TIPSQRRYV   | 1464  | >PTEN-Q171 TIPSPRRYV   | 438  | 1026  |
| >PTEN-Q171 TIPSQRRYV   | 225   | >PTEN-Q171 TIPSPRRYV   | 317  | 92    |



|                        |      |                        |      |      |
|------------------------|------|------------------------|------|------|
| >PTEN-Q171 TIPSQRRY    | 437  | >PTEN-Q171 TIPSPRRY    | 351  | 86   |
| >PTEN-Q171 TIPSQRRYVY  | 618  | >PTEN-Q171 TIPSPRRYVY  | 413  | 205  |
| >PTEN-Q171 TIPSQRRYVY\ | 290  | >PTEN-Q171 TIPSPRRYVY\ | 201  | 89   |
| >PTEN-Q171 TIPSQRRYVY\ | 238  | >PTEN-Q171 TIPSPRRYVY\ | 296  | 58   |
| >PTEN-Q171 TIPSQRRYVY  | 1051 | >PTEN-Q171 TIPSPRRYVY  | 431  | 620  |
| >PTEN-Q171 TIPSQRRYV   | 67   | >PTEN-Q171 TIPSPRRYV   | 22   | 45   |
| >PTEN-Q171 TIPSQRRYV   | 2924 | >PTEN-Q171 TIPSPRRYV   | 189  | 2735 |
| >PTEN-Q171 VTIPSQRRYV  | 563  | >PTEN-Q171 VTIPSPRRYV  | 283  | 280  |
| >PTEN-Q171 VTIPSQRRYV  | 249  | >PTEN-Q171 VTIPSPRRYV  | 87   | 162  |
| >PTEN-Q171 VTIPSQRRYV  | 286  | >PTEN-Q171 VTIPSPRRYV  | 482  | 196  |
| >PTEN-Q171 VTIPSQRR    | 608  | >PTEN-Q171 VTIPSPRR    | 220  | 388  |
| >PTEN-Q171 VTIPSQRRYV\ | 284  | >PTEN-Q171 VTIPSPRRYV\ | 168  | 116  |
| >PTEN-Q171 VTIPSQRRY   | 26   | >PTEN-Q171 VTIPSPRRY   | 54   | 28   |
| >PTEN-Q171 VTIPSQRRYV\ | 38   | >PTEN-Q171 VTIPSPRRYV\ | 67   | 29   |
| >PTEN-Q171 VTIPSQRRY   | 1205 | >PTEN-Q171 VTIPSPRRY   | 241  | 964  |
| >PTEN-Q171 VTIPSQRRYV\ | 509  | >PTEN-Q171 VTIPSPRRYV\ | 370  | 139  |
| >PTEN-Q171 VTIPSQRRY   | 59   | >PTEN-Q171 VTIPSPRRY   | 39   | 20   |
| >PTEN-Q171 VTIPSQRRYV\ | 26   | >PTEN-Q171 VTIPSPRRYV\ | 20   | 6    |
| >PTEN-Q171 VTIPSQRRY   | 41   | >PTEN-Q171 VTIPSPRRY   | 134  | 93   |
| >PTEN-Q171 VTIPSQRRYV\ | 16   | >PTEN-Q171 VTIPSPRRYV\ | 26   | 10   |
| >PTEN-Q171 VTIPSQRR    | 135  | >PTEN-Q171 VTIPSPRR    | 169  | 34   |
| >PTEN-Q171 VTIPSQRR    | 65   | >PTEN-Q171 VTIPSPRR    | 64   | 1    |
| >PTEN-Q171 VTIPSQRRYV  | 225  | >PTEN-Q171 VTIPSPRRYV  | 106  | 119  |
| >PTEN-Q171 VTIPSQRRYV\ | 579  | >PTEN-Q171 VTIPSPRRYV\ | 393  | 186  |
| >PTEN-Q171 VTIPSQRRY   | 399  | >PTEN-Q171 VTIPSPRRY   | 716  | 317  |
| >PTEN-Q171 VTIPSQRRYV\ | 109  | >PTEN-Q171 VTIPSPRRYV\ | 128  | 19   |
| >PTEN-Q171 VTIPSQRRYV\ | 205  | >PTEN-Q171 VTIPSPRRYV\ | 154  | 51   |
| >PTEN-Q171 VTIPSQRR    | 677  | >PTEN-Q171 VTIPSPRR    | 490  | 187  |
| >PTEN-Q171 VTIPSQRRY   | 3    | >PTEN-Q171 VTIPSPRRY   | 2    | 1    |
| >PTEN-Q171 VTIPSQRRYV  | 124  | >PTEN-Q171 VTIPSPRRYV  | 91   | 33   |
| >PTEN-Q171 VTIPSQRRYV\ | 4    | >PTEN-Q171 VTIPSPRRYV\ | 3    | 1    |
| >PTEN-Q171 VTIPSQRRY   | 81   | >PTEN-Q171 VTIPSPRRY   | 71   | 10   |
| >PTEN-Q171 VTIPSQRRYV\ | 111  | >PTEN-Q171 VTIPSPRRYV\ | 85   | 26   |
| >PTEN-Q171 VTIPSQRRY   | 122  | >PTEN-Q171 VTIPSPRRY   | 397  | 275  |
| >PTEN-Q171 VTIPSQRRYV\ | 76   | >PTEN-Q171 VTIPSPRRYV\ | 95   | 19   |
| >PTEN-Q171 VTIPSQRRYV  | 616  | >PTEN-Q171 VTIPSPRRYV  | 323  | 293  |
| >PTEN-Q171 VTIPSQRRY   | 37   | >PTEN-Q171 VTIPSPRRY   | 48   | 11   |
| >PTEN-Q171 VTIPSQRRYV\ | 37   | >PTEN-Q171 VTIPSPRRYV\ | 42   | 5    |
| >PTEN-Q171 VTIPSQRRYV\ | 256  | >PTEN-Q171 VTIPSPRRYV\ | 1677 | 1421 |
| >PTEN-Q171 VTIPSQRR    | 925  | >PTEN-Q171 VTIPSPRR    | 457  | 468  |
| >PTEN-Q171 GVTIPSQRRY  | 623  | >PTEN-Q171 GVTIPSPRRY\ | 388  | 235  |
| >PTEN-Q171 GVTIPSQRRY  | 123  | >PTEN-Q171 GVTIPSPRRY\ | 131  | 8    |
| >PTEN-Q171 GVTIPSQR    | 1062 | >PTEN-Q171 GVTIPSQR    | 392  | 670  |

|                         |       |                         |       |       |
|-------------------------|-------|-------------------------|-------|-------|
| >PTEN-Q171 GVTIPSQR     | 457   | >PTEN-Q171 GVTIPSPR     | 169   | 288   |
| >PTEN-Q171 GVTIPSQR     | 210   | >PTEN-Q171 GVTIPSPR     | 229   | 19    |
| >PTEN-Q171 GVTIPSQRRY   | 172   | >PTEN-Q171 GVTIPSPRRY   | 170   | 2     |
| >PTEN-Q171 GVTIPSQRRY   | 553   | >PTEN-Q171 GVTIPSPRRY   | 264   | 289   |
| >PTEN-Q171 KGV TIPSQR   | 155   | >PTEN-Q171 KGV TIPSRR\  | 285   | 130   |
| >PTEN-Q171 KGV TIPSQR   | 208   | >PTEN-Q171 KGV TIPSPR   | 72    | 136   |
| >PTEN-Q171 KGV TIPSQR   | 202   | >PTEN-Q171 KGV TIPSRR\  | 186   | 16    |
| >PTEN-Q171 KGV TIPSQR   | 227   | >PTEN-Q171 KGV TIPSRR\  | 344   | 117   |
| >PTEN-Q171 KGV TIPSQR   | 147   | >PTEN-Q171 KGV TIPSPR   | 46    | 101   |
| >PTEN-Q171 KGV TIPSQR   | 120   | >PTEN-Q171 KGV TIPSRR   | 101   | 19    |
| >PTEN-Q171 KKGVTIPSQR   | 982   | >PTEN-Q171 KKGVTIPSPR   | 321   | 661   |
| >PTEN-Q171 KKGVTIPSQR   | 609   | >PTEN-Q171 KKGVTIPSPR   | 155   | 454   |
| >PTEN-Q171 DKKGV TIPSQ  | 497   | >PTEN-Q171 DKKGV TIPSPI | 214   | 283   |
| >PTEN-Q17P·QEDGF DLDL T | 44    | >PTEN-Q17P·PEDGF DLDL T | 197   | 153   |
| >PTEN-Q17P·QEDGF DLDL   | 15    | >PTEN-Q17P·PEDGF DLDL   | 118   | 103   |
| >PTEN-Q17P·QEDGF DLDL T | 114   | >PTEN-Q17P·PEDGF DLDL T | 706   | 592   |
| >PTEN-Q17P·YQEDGF DL    | 25159 | >PTEN-Q17P·YPEDGF DL    | 136   | 25023 |
| >PTEN-Q17P·YQEDGF DLDI  | 30944 | >PTEN-Q17P·YPEDGF DLDL  | 233   | 30711 |
| >PTEN-Q17P·YQEDGF DLDI  | 209   | >PTEN-Q17P·YPEDGF DLDL  | 11917 | 11708 |
| >PTEN-Q17P·YQEDGF DL    | 26    | >PTEN-Q17P·YPEDGF DL    | 7417  | 7391  |
| >PTEN-Q17P·YQEDGF DLDI  | 297   | >PTEN-Q17P·YPEDGF DLDL  | 11476 | 11179 |
| >PTEN-Q17P·YQEDGF DLDI  | 27    | >PTEN-Q17P·YPEDGF DLDL  | 11750 | 11723 |
| >PTEN-Q17P·YQEDGF DL    | 21978 | >PTEN-Q17P·YPEDGF DL    | 133   | 21845 |
| >PTEN-Q17P·YQEDGF DL    | 11688 | >PTEN-Q17P·YPEDGF DL    | 98    | 11590 |
| >PTEN-Q17P·YQEDGF DLDI  | 35855 | >PTEN-Q17P·YPEDGF DLDL  | 246   | 35609 |
| >PTEN-Q17P·YQEDGF DL    | 68    | >PTEN-Q17P·YPEDGF DL    | 223   | 155   |
| >PTEN-Q17P·YQEDGF DLDI  | 137   | >PTEN-Q17P·YPEDGF DLDL  | 437   | 300   |
| >PTEN-Q17P·YQEDGF DL    | 269   | >PTEN-Q17P·YPEDGF DL    | 16560 | 16291 |
| >PTEN-Q17P·YQEDGF DL    | 24015 | >PTEN-Q17P·YPEDGF DL    | 184   | 23831 |
| >PTEN-Q17P·YQEDGF DLDI  | 23073 | >PTEN-Q17P·YPEDGF DLDL  | 327   | 22746 |
| >PTEN-Q17P·YQEDGF DLD   | 29827 | >PTEN-Q17P·YPEDGF DLD   | 420   | 29407 |
| >PTEN-Q17P·YQEDGF DLDI  | 27326 | >PTEN-Q17P·YPEDGF DLDL  | 317   | 27009 |
| >PTEN-Q17P·YQEDGF DL    | 18250 | >PTEN-Q17P·YPEDGF DL    | 189   | 18061 |
| >PTEN-Q17P·YQEDGF DLDI  | 14629 | >PTEN-Q17P·YPEDGF DLDL  | 86    | 14543 |
| >PTEN-Q17P·RYQEDGF DL   | 467   | >PTEN-Q17P·RYPEDGF DL   | 2130  | 1663  |
| >PTEN-Q17P·RYQEDGF DL   | 320   | >PTEN-Q17P·RYPEDGF DL   | 213   | 107   |
| >PTEN-Q17P·RYQEDGF DLI  | 569   | >PTEN-Q17P·RYPEDGF DLI  | 353   | 216   |
| >PTEN-Q17P·RYQEDGF DL   | 6     | >PTEN-Q17P·RYPEDGF DL   | 5     | 1     |
| >PTEN-Q17P·RYQEDGF DLI  | 607   | >PTEN-Q17P·RYPEDGF DLI  | 373   | 234   |
| >PTEN-Q17P·RYQEDGF DLI  | 7     | >PTEN-Q17P·RYPEDGF DLI  | 6     | 1     |
| >PTEN-Q17P·RRYQEDGF     | 41    | >PTEN-Q17P·RRYPEDGF     | 24    | 17    |
| >PTEN-Q17P·RRYQEDGF DI  | 223   | >PTEN-Q17P·RRYPEDGF DL  | 147   | 76    |
| >PTEN-Q17P·RRYQEDGF     | 61    | >PTEN-Q17P·RRYPEDGF     | 91    | 30    |

|                       |     |                       |       |       |
|-----------------------|-----|-----------------------|-------|-------|
| >PTEN-Q17P·RRYQEDGFDI | 11  | >PTEN-Q17P·RRYPEDGFDL | 18    | 7     |
| >PTEN-Q17P·RRYQEDGF   | 189 | >PTEN-Q17P·RRYPEDGF   | 405   | 216   |
| >PTEN-Q17P·RRYQEDGFDI | 18  | >PTEN-Q17P·RRYPEDGFDL | 35    | 17    |
| >PTEN-Q17P·RRYQEDGFDI | 300 | >PTEN-Q17P·RRYPEDGFDL | 355   | 55    |
| >PTEN-Q17P·RRYQEDGF   | 452 | >PTEN-Q17P·RRYPEDGF   | 222   | 230   |
| >PTEN-Q17P·RRYQEDGFDI | 21  | >PTEN-Q17P·RRYPEDGFDL | 32    | 11    |
| >PTEN-Q17P·RRYQEDGF   | 229 | >PTEN-Q17P·RRYPEDGF   | 101   | 128   |
| >PTEN-Q17P·KRRYQEDGF  | 93  | >PTEN-Q17P·KRRYPEDGF  | 41    | 52    |
| >PTEN-Q17P·KRRYQEDGFI | 327 | >PTEN-Q17P·KRRYPEDGFI | 216   | 111   |
| >PTEN-Q17P·KRRYQEDG   | 266 | >PTEN-Q17P·KRRYPEDG   | 586   | 320   |
| >PTEN-Q17P·KRRYQEDGF  | 233 | >PTEN-Q17P·KRRYPEDGF  | 198   | 35    |
| >PTEN-Q17P·KRRYQEDGFI | 203 | >PTEN-Q17P·KRRYPEDGFI | 198   | 5     |
| >PTEN-Q17P·KRRYQEDGFI | 45  | >PTEN-Q17P·KRRYPEDGFI | 42    | 3     |
| >PTEN-Q17P·KRRYQEDGFI | 515 | >PTEN-Q17P·KRRYPEDGFI | 494   | 21    |
| >PTEN-Q17P·NKRRYQEDG  | 55  | >PTEN-Q17P·NKRRYPEDGF | 31    | 24    |
| >PTEN-Q17P·RNKRRYQED  | 980 | >PTEN-Q17P·RNKRRYPED  | 465   | 515   |
| >PTEN-Q17P·RNKRRYQED  | 317 | >PTEN-Q17P·RNKRRYPED  | 328   | 11    |
| >PTEN-Q17P·VSRNKRRYQ  | 113 | >PTEN-Q17P·VSRNKRRYP  | 344   | 231   |
| >PTEN-R130(RTGVMICAY  | 243 | >PTEN-R130(GTGVMICAY  | 587   | 344   |
| >PTEN-R130(RTGVMICAYL | 398 | >PTEN-R130(GTGVMICAYI | 2172  | 1774  |
| >PTEN-R130(RTGVMICAY  | 169 | >PTEN-R130(GTGVMICAY  | 5877  | 5708  |
| >PTEN-R130(RTGVMICAYL | 114 | >PTEN-R130(GTGVMICAYI | 3615  | 3501  |
| >PTEN-R130(RTGVMICAYL | 74  | >PTEN-R130(GTGVMICAYI | 288   | 214   |
| >PTEN-R130(RTGVMICAY  | 228 | >PTEN-R130(GTGVMICAY  | 4952  | 4724  |
| >PTEN-R130(RTGVMICAY  | 70  | >PTEN-R130(GTGVMICAY  | 173   | 103   |
| >PTEN-R130(RTGVMICAY  | 13  | >PTEN-R130(GTGVMICAY  | 78    | 65    |
| >PTEN-R130(RTGVMICAYL | 12  | >PTEN-R130(GTGVMICAYI | 435   | 423   |
| >PTEN-R130(RTGVMICAYL | 14  | >PTEN-R130(GTGVMICAYI | 554   | 540   |
| >PTEN-R130(RTGVMICAY  | 205 | >PTEN-R130(GTGVMICAY  | 10404 | 10199 |
| >PTEN-R130(RTGVMICAYL | 438 | >PTEN-R130(GTGVMICAYI | 12869 | 12431 |
| >PTEN-R130(RTGVMICAYL | 428 | >PTEN-R130(GTGVMICAYI | 13231 | 12803 |
| >PTEN-R130(RTGVMICAYL | 90  | >PTEN-R130(GTGVMICAYI | 302   | 212   |
| >PTEN-R130(RTGVMICAYL | 56  | >PTEN-R130(GTGVMICAYI | 176   | 120   |
| >PTEN-R130(RTGVMICAY  | 378 | >PTEN-R130(GTGVMICAY  | 426   | 48    |
| >PTEN-R130(RTGVMICAYL | 72  | >PTEN-R130(GTGVMICAYI | 389   | 317   |
| >PTEN-R130(RTGVMICAYL | 235 | >PTEN-R130(GTGVMICAYI | 306   | 71    |
| >PTEN-R130(RTGVMICAYL | 394 | >PTEN-R130(GTGVMICAYI | 4674  | 4280  |
| >PTEN-R130(GRTGVMICA' | 620 | >PTEN-R130(GGTGVMICA' | 368   | 252   |
| >PTEN-R130(GRTGVMICA' | 113 | >PTEN-R130(GGTGVMICA' | 27627 | 27514 |
| >PTEN-R130(GRTGVMICA' | 258 | >PTEN-R130(GGTGVMICA' | 22192 | 21934 |
| >PTEN-R130(GRTGVMICA' | 334 | >PTEN-R130(GGTGVMICA' | 27195 | 26861 |
| >PTEN-R130(GRTGVMICA' | 78  | >PTEN-R130(GGTGVMICA' | 21406 | 21328 |
| >PTEN-R130(AAIHCKAGKC | 447 | >PTEN-R130(AAIHCKAGKC | 23120 | 22673 |

|                        |       |                        |       |       |
|------------------------|-------|------------------------|-------|-------|
| >PTEN-R130(KGRTGVM I   | 29    | >PTEN-R130(KGGTGVM I   | 8680  | 8651  |
| >PTEN-R130(KGRTGVMIC   | 365   | >PTEN-R130(KGGTGVMIC   | 15680 | 15315 |
| >PTEN-R130(KGRTGVMIC/  | 21    | >PTEN-R130(KGGTGVMIC/  | 9258  | 9237  |
| >PTEN-R130(KGRTGVMIC/  | 38    | >PTEN-R130(KGGTGVMIC/  | 10261 | 10223 |
| >PTEN-R130(KGRTGVMIC/  | 314   | >PTEN-R130(KGGTGVMIC/  | 252   | 62    |
| >PTEN-R130(KGRTGVMIC/  | 165   | >PTEN-R130(KGGTGVMIC/  | 412   | 247   |
| >PTEN-R130(KGRTGVMIC/  | 174   | >PTEN-R130(KGGTGVMIC/  | 1997  | 1823  |
| >PTEN-R130(KGRTGVMIC/  | 135   | >PTEN-R130(KGGTGVMIC/  | 3691  | 3556  |
| >PTEN-R130(KKGRTGVM I  | 308   | >PTEN-R130(KKGGTGVM I  | 1914  | 1606  |
| >PTEN-R130(KAGKGRTGV I | 1139  | >PTEN-R130(KAGKGGTG V  | 438   | 701   |
| >PTEN-R130(KAGKGRTGV I | 135   | >PTEN-R130(KAGKGGTG V  | 120   | 15    |
| >PTEN-R130(HCKAGKGR    | 345   | >PTEN-R130(HCKAGKGG    | 34880 | 34535 |
| >PTEN-R130(AIHCKAGKGF  | 407   | >PTEN-R130(AIHCKAGKGC  | 32053 | 31646 |
| >PTEN-R130f RTGVMICAY  | 243   | >PTEN-R130f PTGVMICAY  | 1912  | 1669  |
| >PTEN-R130f RTGVMICAYL | 398   | >PTEN-R130f PTGVMICAYL | 4717  | 4319  |
| >PTEN-R130f RTGVMICAY  | 169   | >PTEN-R130f PTGVMICAY  | 12371 | 12202 |
| >PTEN-R130f RTGVMICAYL | 114   | >PTEN-R130f PTGVMICAYL | 9187  | 9073  |
| >PTEN-R130f RTGVMICAYL | 74    | >PTEN-R130f PTGVMICAYL | 1523  | 1449  |
| >PTEN-R130f RTGVMICAY  | 228   | >PTEN-R130f PTGVMICAY  | 6590  | 6362  |
| >PTEN-R130f RTGVMICAY  | 70    | >PTEN-R130f PTGVMICAY  | 2621  | 2551  |
| >PTEN-R130f RTGVMICAY  | 13    | >PTEN-R130f PTGVMICAY  | 3254  | 3241  |
| >PTEN-R130f RTGVMICAYL | 12    | >PTEN-R130f PTGVMICAYL | 8877  | 8865  |
| >PTEN-R130f RTGVMICAYL | 14    | >PTEN-R130f PTGVMICAYL | 9304  | 9290  |
| >PTEN-R130f RTGVMICAY  | 205   | >PTEN-R130f PTGVMICAY  | 18901 | 18696 |
| >PTEN-R130f RTGVMICAYL | 438   | >PTEN-R130f PTGVMICAYL | 19752 | 19314 |
| >PTEN-R130f RTGVMICAYL | 428   | >PTEN-R130f PTGVMICAYL | 19831 | 19403 |
| >PTEN-R130f RTGVMICAYL | 90    | >PTEN-R130f PTGVMICAYL | 970   | 880   |
| >PTEN-R130f RTGVMICAYL | 56    | >PTEN-R130f PTGVMICAYL | 560   | 504   |
| >PTEN-R130f RTGVMICAY  | 378   | >PTEN-R130f PTGVMICAY  | 11837 | 11459 |
| >PTEN-R130f RTGVMICAYL | 72    | >PTEN-R130f PTGVMICAYL | 3066  | 2994  |
| >PTEN-R130f RTGVMICAYL | 235   | >PTEN-R130f PTGVMICAYL | 12354 | 12119 |
| >PTEN-R130f RTGVMICAYL | 394   | >PTEN-R130f PTGVMICAYL | 13662 | 13268 |
| >PTEN-R130f GRTGVMICA` | 22032 | >PTEN-R130f GPTGVMICA` | 311   | 21721 |
| >PTEN-R130f GRTGVMICA` | 113   | >PTEN-R130f GPTGVMICA` | 27530 | 27417 |
| >PTEN-R130f GRTGVMICA` | 258   | >PTEN-R130f GPTGVMICA` | 23437 | 23179 |
| >PTEN-R130f GRTGVMICA  | 30607 | >PTEN-R130f GPTGVMICA  | 267   | 30340 |
| >PTEN-R130f GRTGVMICA` | 13318 | >PTEN-R130f GPTGVMICA` | 54    | 13264 |
| >PTEN-R130f GRTGVMICA` | 334   | >PTEN-R130f GPTGVMICA` | 25816 | 25482 |
| >PTEN-R130f GRTGVMICA` | 78    | >PTEN-R130f GPTGVMICA` | 22089 | 22011 |
| >PTEN-R130f AAIHCKAGKC | 447   | >PTEN-R130f AAIHCKAGKC | 23778 | 23331 |
| >PTEN-R130f KGRTGVM I  | 29    | >PTEN-R130f KGPTGVM I  | 10985 | 10956 |
| >PTEN-R130f KGRTGVMIC  | 365   | >PTEN-R130f KGPTGVMIC  | 16629 | 16264 |
| >PTEN-R130f KGRTGVMIC/ | 21    | >PTEN-R130f KGPTGVMIC/ | 11191 | 11170 |

|                         |       |                           |       |       |
|-------------------------|-------|---------------------------|-------|-------|
| >PTEN-R130f KGRTGVMIC/  | 38    | >PTEN-R130f KGPTGVMIC/    | 11926 | 11888 |
| >PTEN-R130f KGRTGVMIC/  | 314   | >PTEN-R130f KGPTGVMIC/    | 629   | 315   |
| >PTEN-R130f KGRTGVMIC/  | 165   | >PTEN-R130f KGPTGVMIC/    | 1507  | 1342  |
| >PTEN-R130f KGRTGVMIC/  | 174   | >PTEN-R130f KGPTGVMIC/    | 2246  | 2072  |
| >PTEN-R130f KGRTGVMIC/  | 135   | >PTEN-R130f KGPTGVMIC/    | 7331  | 7196  |
| >PTEN-R130f KGRTGVMIC   | 21668 | >PTEN-R130f KGPTGVMIC     | 116   | 21552 |
| >PTEN-R130f GKGRGTVMI   | 308   | >PTEN-R130f GKGPRTGVMIC   | 377   | 69    |
| >PTEN-R130f AGKGRGTVMI  | 1481  | >PTEN-R130f AGKGPRTGVMIC  | 409   | 1072  |
| >PTEN-R130f KAGKGRGTVMI | 135   | >PTEN-R130f KAGKGPRTGVMIC | 100   | 35    |
| >PTEN-R130f HCKAGKGR    | 345   | >PTEN-R130f HCKAGKGP      | 34615 | 34270 |
| >PTEN-R130f AIHCKAGKGF  | 407   | >PTEN-R130f AIHCKAGKGF    | 32969 | 32562 |
| >PTEN-R130f RTGVMICAY   | 1764  | >PTEN-R130f QTGVMICAY     | 466   | 1298  |
| >PTEN-R130f RTGVMICAY   | 828   | >PTEN-R130f QTGVMICAY     | 125   | 703   |
| >PTEN-R130f RTGVMICAY   | 243   | >PTEN-R130f QTGVMICAY     | 749   | 506   |
| >PTEN-R130f RTGVMICAYL  | 398   | >PTEN-R130f QTGVMICAYI    | 2147  | 1749  |
| >PTEN-R130f RTGVMICAY   | 169   | >PTEN-R130f QTGVMICAY     | 2206  | 2037  |
| >PTEN-R130f RTGVMICAYL  | 114   | >PTEN-R130f QTGVMICAYI    | 1157  | 1043  |
| >PTEN-R130f RTGVMICAYL  | 74    | >PTEN-R130f QTGVMICAYI    | 86    | 12    |
| >PTEN-R130f RTGVMICAYL  | 5024  | >PTEN-R130f QTGVMICAYI    | 388   | 4636  |
| >PTEN-R130f RTGVMICAY   | 228   | >PTEN-R130f QTGVMICAY     | 1254  | 1026  |
| >PTEN-R130f RTGVMICAY   | 70    | >PTEN-R130f QTGVMICAY     | 188   | 118   |
| >PTEN-R130f RTGVMICAY   | 13    | >PTEN-R130f QTGVMICAY     | 65    | 52    |
| >PTEN-R130f RTGVMICAYL  | 12    | >PTEN-R130f QTGVMICAYI    | 239   | 227   |
| >PTEN-R130f RTGVMICAYL  | 14    | >PTEN-R130f QTGVMICAYI    | 314   | 300   |
| >PTEN-R130f RTGVMICAY   | 205   | >PTEN-R130f QTGVMICAY     | 6590  | 6385  |
| >PTEN-R130f RTGVMICAYL  | 438   | >PTEN-R130f QTGVMICAYI    | 9238  | 8800  |
| >PTEN-R130f RTGVMICAYL  | 428   | >PTEN-R130f QTGVMICAYI    | 9382  | 8954  |
| >PTEN-R130f RTGVMICAYL  | 90    | >PTEN-R130f QTGVMICAYI    | 238   | 148   |
| >PTEN-R130f RTGVMICAYL  | 56    | >PTEN-R130f QTGVMICAYI    | 138   | 82    |
| >PTEN-R130f RTGVMICAY   | 378   | >PTEN-R130f QTGVMICAY     | 1610  | 1232  |
| >PTEN-R130f RTGVMICAYL  | 72    | >PTEN-R130f QTGVMICAYI    | 354   | 282   |
| >PTEN-R130f RTGVMICAYL  | 235   | >PTEN-R130f QTGVMICAYI    | 1058  | 823   |
| >PTEN-R130f RTGVMICAYL  | 394   | >PTEN-R130f QTGVMICAYI    | 3386  | 2992  |
| >PTEN-R130f GRTGVMICA'  | 6271  | >PTEN-R130f GQTGVMICA     | 78    | 6193  |
| >PTEN-R130f GRTGVMICA   | 23887 | >PTEN-R130f GQTGVMICA     | 322   | 23565 |
| >PTEN-R130f GRTGVMICA'  | 14054 | >PTEN-R130f GQTGVMICA     | 29    | 14025 |
| >PTEN-R130f GRTGVMICA'  | 620   | >PTEN-R130f GQTGVMICA     | 248   | 372   |
| >PTEN-R130f GRTGVMICA'  | 2501  | >PTEN-R130f GQTGVMICA     | 466   | 2035  |
| >PTEN-R130f GRTGVMICA'  | 13211 | >PTEN-R130f GQTGVMICA     | 154   | 13057 |
| >PTEN-R130f GRTGVMICA'  | 1375  | >PTEN-R130f GQTGVMICA     | 401   | 974   |
| >PTEN-R130f GRTGVMICA'  | 113   | >PTEN-R130f GQTGVMICA     | 10375 | 10262 |
| >PTEN-R130f GRTGVMICA'  | 258   | >PTEN-R130f GQTGVMICA     | 3726  | 3468  |
| >PTEN-R130f GRTGVMICA'  | 14320 | >PTEN-R130f GQTGVMICA     | 180   | 14140 |

|                        |      |                       |       |       |
|------------------------|------|-----------------------|-------|-------|
| >PTEN-R130(GRTGVMICA'  | 334  | >PTEN-R130(GQTGVMICA  | 7313  | 6979  |
| >PTEN-R130(GRTGVMICA'  | 78   | >PTEN-R130(GQTGVMICA  | 1850  | 1772  |
| >PTEN-R130(AAIHCKAGKC  | 447  | >PTEN-R130(AAIHCKAGKC | 19687 | 19240 |
| >PTEN-R130(KGRTGVM     | 29   | >PTEN-R130(KGQTGVM    | 5116  | 5087  |
| >PTEN-R130(KGRTGVMIC   | 365  | >PTEN-R130(KGQTGVMIC  | 13439 | 13074 |
| >PTEN-R130(KGRTGVMIC/  | 21   | >PTEN-R130(KGQTGVMIC, | 5588  | 5567  |
| >PTEN-R130(KGRTGVMIC/  | 38   | >PTEN-R130(KGQTGVMIC, | 6863  | 6825  |
| >PTEN-R130(KGRTGVMIC/  | 314  | >PTEN-R130(KGQTGVMIC, | 142   | 172   |
| >PTEN-R130(KGRTGVMIC/  | 165  | >PTEN-R130(KGQTGVMIC, | 270   | 105   |
| >PTEN-R130(KGRTGVMIC/  | 174  | >PTEN-R130(KGQTGVMIC, | 887   | 713   |
| >PTEN-R130(KGRTGVMIC/  | 135  | >PTEN-R130(KGQTGVMIC, | 1304  | 1169  |
| >PTEN-R130(KGRTGVM     | 1059 | >PTEN-R130(KGQTGVM    | 361   | 698   |
| >PTEN-R130(GKGRTGVM    | 308  | >PTEN-R130(GKGQTGVM   | 640   | 332   |
| >PTEN-R130(KAGKGRTGV   | 1930 | >PTEN-R130(KAGKGQTV   | 426   | 1504  |
| >PTEN-R130(KAGKGRTGV   | 135  | >PTEN-R130(KAGKGQTV   | 106   | 29    |
| >PTEN-R130(HCKAGKGR    | 345  | >PTEN-R130(HCKAGKGQ   | 21319 | 20974 |
| >PTEN-R130(AIHCKAGKGF  | 407  | >PTEN-R130(AIHCKAGKGC | 25896 | 25489 |
| >PTEN-R142(RGKFLKAQEA  | 193  | >PTEN-R142(QGKFLKAQE/ | 6019  | 5826  |
| >PTEN-R142(GVMICAYLLH  | 52   | >PTEN-R142(GVMICAYLLH | 9307  | 9255  |
| >PTEN-R142(GVMICAYLLH  | 38   | >PTEN-R142(GVMICAYLLH | 9430  | 9392  |
| >PTEN-R142(GVMICAYLLH  | 177  | >PTEN-R142(GVMICAYLLH | 12288 | 12111 |
| >PTEN-R142(GVMICAYLLH  | 198  | >PTEN-R142(GVMICAYLLH | 1864  | 1666  |
| >PTEN-R142(GVMICAYLLH  | 132  | >PTEN-R142(GVMICAYLLH | 17100 | 16968 |
| >PTEN-R142(LHRGKFLK    | 386  | >PTEN-R142(LHQGKFLK   | 13158 | 12772 |
| >PTEN-R142(LLHRGKFL    | 274  | >PTEN-R142(LLHQGKFL   | 183   | 91    |
| >PTEN-R142(LLHRGKFLKA  | 546  | >PTEN-R142(LLHQGKFLKA | 287   | 259   |
| >PTEN-R142(LLHRGKFL    | 288  | >PTEN-R142(LLHQGKFL   | 290   | 2     |
| >PTEN-R142(LLHRGKFLKA  | 194  | >PTEN-R142(LLHQGKFLKA | 186   | 8     |
| >PTEN-R142(LLHRGKFL    | 28   | >PTEN-R142(LLHQGKFL   | 21    | 7     |
| >PTEN-R142(LLHRGKFLKA  | 132  | >PTEN-R142(LLHQGKFLKA | 89    | 43    |
| >PTEN-R142(LLHRGKFL    | 353  | >PTEN-R142(LLHQGKFL   | 409   | 56    |
| >PTEN-R142(LLHRGKFL    | 204  | >PTEN-R142(LLHQGKFL   | 102   | 102   |
| >PTEN-R142(LLHRGKFLKA  | 700  | >PTEN-R142(LLHQGKFLKA | 365   | 335   |
| >PTEN-R142(LLHRGKFL    | 8    | >PTEN-R142(LLHQGKFL   | 6     | 2     |
| >PTEN-R142(LLHRGKFLK   | 328  | >PTEN-R142(LLHQGKFLK  | 258   | 70    |
| >PTEN-R142(LLHRGKFLKA  | 8    | >PTEN-R142(LLHQGKFLKA | 6     | 2     |
| >PTEN-R142(LLHRGKFLKA/ | 230  | >PTEN-R142(LLHQGKFLKA | 176   | 54    |
| >PTEN-R142(LLHRGKFLK   | 41   | >PTEN-R142(LLHQGKFLK  | 62    | 21    |
| >PTEN-R142(LLHRGKFLK   | 63   | >PTEN-R142(LLHQGKFLK  | 149   | 86    |
| >PTEN-R142(LLHRGKFLK   | 37   | >PTEN-R142(LLHQGKFLK  | 360   | 323   |
| >PTEN-R142(LLHRGKFLK   | 69   | >PTEN-R142(LLHQGKFLK  | 343   | 274   |
| >PTEN-R142(LLHRGKFLK   | 427  | >PTEN-R142(LLHQGKFLK  | 384   | 43    |
| >PTEN-R142(YLLHRGKFL   | 93   | >PTEN-R142(YLLHQGKFL  | 116   | 23    |

|                        |      |                       |      |      |
|------------------------|------|-----------------------|------|------|
| >PTEN-R142(YLLHRGKFLK/ | 86   | >PTEN-R142(YLLHQGKFLK | 94   | 8    |
| >PTEN-R142(YLLHRGKFL   | 91   | >PTEN-R142(YLLHQGKFL  | 57   | 34   |
| >PTEN-R142(YLLHRGKFLK/ | 446  | >PTEN-R142(YLLHQGKFLK | 338  | 108  |
| >PTEN-R142(YLLHRGKFL   | 70   | >PTEN-R142(YLLHQGKFL  | 89   | 19   |
| >PTEN-R142(YLLHRGKFLK/ | 44   | >PTEN-R142(YLLHQGKFLK | 53   | 9    |
| >PTEN-R142(YLLHRGKFL   | 105  | >PTEN-R142(YLLHQGKFL  | 120  | 15   |
| >PTEN-R142(YLLHRGKFLK/ | 66   | >PTEN-R142(YLLHQGKFLK | 75   | 9    |
| >PTEN-R142(YLLHRGKF    | 1186 | >PTEN-R142(YLLHQGKF   | 448  | 738  |
| >PTEN-R142(YLLHRGKFL   | 6    | >PTEN-R142(YLLHQGKFL  | 5    | 1    |
| >PTEN-R142(YLLHRGKFLK/ | 12   | >PTEN-R142(YLLHQGKFLK | 11   | 1    |
| >PTEN-R142(YLLHRGKFL   | 10   | >PTEN-R142(YLLHQGKFL  | 6    | 4    |
| >PTEN-R142(YLLHRGKFLK/ | 39   | >PTEN-R142(YLLHQGKFLK | 28   | 11   |
| >PTEN-R142(YLLHRGKFL   | 12   | >PTEN-R142(YLLHQGKFL  | 9    | 3    |
| >PTEN-R142(YLLHRGKFLK/ | 17   | >PTEN-R142(YLLHQGKFLK | 13   | 4    |
| >PTEN-R142(YLLHRGKFL   | 58   | >PTEN-R142(YLLHQGKFL  | 47   | 11   |
| >PTEN-R142(YLLHRGKFLK/ | 317  | >PTEN-R142(YLLHQGKFLK | 205  | 112  |
| >PTEN-R142(YLLHRGKFL   | 6    | >PTEN-R142(YLLHQGKFL  | 6    | 0    |
| >PTEN-R142(YLLHRGKFLK  | 296  | >PTEN-R142(YLLHQGKFLK | 243  | 53   |
| >PTEN-R142(YLLHRGKFLK/ | 8    | >PTEN-R142(YLLHQGKFLK | 7    | 1    |
| >PTEN-R142(YLLHRGKFLK  | 28   | >PTEN-R142(YLLHQGKFLK | 46   | 18   |
| >PTEN-R142(YLLHRGKFLK  | 113  | >PTEN-R142(YLLHQGKFLK | 150  | 37   |
| >PTEN-R142(YLLHRGKF    | 735  | >PTEN-R142(YLLHQGKF   | 366  | 369  |
| >PTEN-R142(YLLHRGKF    | 606  | >PTEN-R142(YLLHQGKF   | 285  | 321  |
| >PTEN-R142(YLLHRGKFLK  | 316  | >PTEN-R142(YLLHQGKFLK | 804  | 488  |
| >PTEN-R142(YLLHRGKF    | 412  | >PTEN-R142(YLLHQGKF   | 4254 | 3842 |
| >PTEN-R142(YLLHRGKFL   | 54   | >PTEN-R142(YLLHQGKFL  | 1394 | 1340 |
| >PTEN-R142(YLLHRGKFLK/ | 154  | >PTEN-R142(YLLHQGKFLK | 999  | 845  |
| >PTEN-R142(YLLHRGKF    | 473  | >PTEN-R142(YLLHQGKF   | 449  | 24   |
| >PTEN-R142(YLLHRGKF    | 43   | >PTEN-R142(YLLHQGKF   | 40   | 3    |
| >PTEN-R142(YLLHRGKFL   | 478  | >PTEN-R142(YLLHQGKFL  | 483  | 5    |
| >PTEN-R142(YLLHRGKF    | 45   | >PTEN-R142(YLLHQGKF   | 42   | 3    |
| >PTEN-R142(YLLHRGKFL   | 278  | >PTEN-R142(YLLHQGKFL  | 218  | 60   |
| >PTEN-R142(YLLHRGKF    | 259  | >PTEN-R142(YLLHQGKF   | 203  | 56   |
| >PTEN-R142(YLLHRGKFLK  | 111  | >PTEN-R142(YLLHQGKFLK | 171  | 60   |
| >PTEN-R142(AYLLHRGKFLI | 230  | >PTEN-R142(AYLLHQGKFL | 316  | 86   |
| >PTEN-R142(AYLLHRGKF   | 418  | >PTEN-R142(AYLLHQGKF  | 706  | 288  |
| >PTEN-R142(AYLLHRGKFL  | 368  | >PTEN-R142(AYLLHQGKFL | 347  | 21   |
| >PTEN-R142(AYLLHRGKF   | 8    | >PTEN-R142(AYLLHQGKF  | 8    | 0    |
| >PTEN-R142(AYLLHRGKFL  | 16   | >PTEN-R142(AYLLHQGKFL | 12   | 4    |
| >PTEN-R142(AYLLHRGK    | 40   | >PTEN-R142(AYLLHQGK   | 50   | 10   |
| >PTEN-R142(AYLLHRGKFLI | 25   | >PTEN-R142(AYLLHQGKFL | 54   | 29   |
| >PTEN-R142(AYLLHRGKFLI | 76   | >PTEN-R142(AYLLHQGKFL | 161  | 85   |
| >PTEN-R142(AYLLHRGKFLI | 305  | >PTEN-R142(AYLLHQGKFL | 170  | 135  |

|                         |       |                        |       |       |
|-------------------------|-------|------------------------|-------|-------|
| >PTEN-R142(CAYLLHRGKFL  | 540   | >PTEN-R142(CAYLLHQGKFL | 456   | 84    |
| >PTEN-R142(CAYLLHRGKFK  | 119   | >PTEN-R142(CAYLLHQGKFK | 178   | 59    |
| >PTEN-R142(CAYLLHRGK    | 523   | >PTEN-R142(CAYLLHQGK   | 312   | 211   |
| >PTEN-R142(CAYLLHRGK    | 471   | >PTEN-R142(CAYLLHQGK   | 228   | 243   |
| >PTEN-R142(CAYLLHRGKFK  | 67    | >PTEN-R142(CAYLLHQGKFK | 36    | 31    |
| >PTEN-R142(CAYLLHRGKFK  | 350   | >PTEN-R142(CAYLLHQGKFK | 281   | 69    |
| >PTEN-R142(CAYLLHRGKFK  | 350   | >PTEN-R142(CAYLLHQGKFK | 163   | 187   |
| >PTEN-R142(CAYLLHRGKFK  | 185   | >PTEN-R142(CAYLLHQGKFK | 216   | 31    |
| >PTEN-R142(ICAYLLHRGKFI | 187   | >PTEN-R142(ICAYLLHQGKI | 206   | 19    |
| >PTEN-R142(ICAYLLHR     | 107   | >PTEN-R142(ICAYLLHQ    | 16339 | 16232 |
| >PTEN-R142(MICAYLLHR    | 315   | >PTEN-R142(MICAYLLHQ   | 12632 | 12317 |
| >PTEN-R142(MICAYLLHRG   | 162   | >PTEN-R142(MICAYLLHQG  | 181   | 19    |
| >PTEN-R142(MICAYLLHR    | 89    | >PTEN-R142(MICAYLLHQ   | 10860 | 10771 |
| >PTEN-R142(MICAYLLHRG   | 49    | >PTEN-R142(MICAYLLHQG  | 38    | 11    |
| >PTEN-R142(MICAYLLHRG   | 77    | >PTEN-R142(MICAYLLHQG  | 63    | 14    |
| >PTEN-R142(MICAYLLHR    | 11    | >PTEN-R142(MICAYLLHQ   | 6390  | 6379  |
| >PTEN-R142(MICAYLLHRG   | 473   | >PTEN-R142(MICAYLLHQG  | 358   | 115   |
| >PTEN-R142(MICAYLLHR    | 45    | >PTEN-R142(MICAYLLHQ   | 16158 | 16113 |
| >PTEN-R142(MICAYLLHR    | 28    | >PTEN-R142(MICAYLLHQ   | 5274  | 5246  |
| >PTEN-R142(MICAYLLHRG   | 124   | >PTEN-R142(MICAYLLHQG  | 82    | 42    |
| >PTEN-R142(MICAYLLHR    | 28    | >PTEN-R142(MICAYLLHQ   | 2575  | 2547  |
| >PTEN-R142(VMICAYLLHR   | 166   | >PTEN-R142(VMICAYLLHC  | 4389  | 4223  |
| >PTEN-R142(VMICAYLLHR   | 52    | >PTEN-R142(VMICAYLLHC  | 15153 | 15101 |
| >PTEN-R142(VMICAYLLHR   | 44    | >PTEN-R142(VMICAYLLHC  | 7975  | 7931  |
| >PTEN-R142(VMICAYLLHR   | 237   | >PTEN-R142(VMICAYLLHC  | 15566 | 15329 |
| >PTEN-R142(VMICAYLLHR   | 119   | >PTEN-R142(VMICAYLLHC  | 23157 | 23038 |
| >PTEN-R142(VMICAYLLHR   | 4242  | >PTEN-R142(VMICAYLLHC  | 477   | 3765  |
| >PTEN-R142(VMICAYLLHR   | 434   | >PTEN-R142(VMICAYLLHC  | 1924  | 1490  |
| >PTEN-R142(VMICAYLLHR   | 70    | >PTEN-R142(VMICAYLLHC  | 4791  | 4721  |
| >PTEN-R142(VMICAYLLHR   | 58    | >PTEN-R142(VMICAYLLHC  | 6539  | 6481  |
| >PTEN-R142\RGKFLKAQEAF  | 193   | >PTEN-R142\HWGKFLKAQE  | 13760 | 13567 |
| >PTEN-R142\HRGKFLKA     | 15219 | >PTEN-R142\HWGKFLKA    | 264   | 14955 |
| >PTEN-R142\HRGKFLKAQ    | 9165  | >PTEN-R142\HWGKFLKAQ   | 69    | 9096  |
| >PTEN-R142\HRGKFLKAQ    | 37561 | >PTEN-R142\HWGKFLKAQ   | 450   | 37111 |
| >PTEN-R142\GVMICAYLLH   | 52    | >PTEN-R142\GVMICAYLLH  | 18459 | 18407 |
| >PTEN-R142\GVMICAYLLH   | 38    | >PTEN-R142\GVMICAYLLH  | 13899 | 13861 |
| >PTEN-R142\GVMICAYLLH   | 177   | >PTEN-R142\GVMICAYLLH  | 28845 | 28668 |
| >PTEN-R142\GVMICAYLLH   | 17458 | >PTEN-R142\GVMICAYLLH  | 57    | 17401 |
| >PTEN-R142\GVMICAYLLH   | 23056 | >PTEN-R142\GVMICAYLLH  | 285   | 22771 |
| >PTEN-R142\GVMICAYLLH   | 21585 | >PTEN-R142\GVMICAYLLH  | 27    | 21558 |
| >PTEN-R142\GVMICAYLLH   | 198   | >PTEN-R142\GVMICAYLLH  | 4402  | 4204  |
| >PTEN-R142\GVMICAYLLH   | 132   | >PTEN-R142\GVMICAYLLH  | 29735 | 29603 |
| >PTEN-R142\LHRGKFLK     | 386   | >PTEN-R142\LHWGKFLK    | 12744 | 12358 |



|                        |      |                       |     |      |
|------------------------|------|-----------------------|-----|------|
| >PTEN-R142\LLHRGKFL    | 2717 | >PTEN-R142\LLHWGKFL   | 457 | 2260 |
| >PTEN-R142\LLHRGKFL    | 274  | >PTEN-R142\LLHWGKFL   | 160 | 114  |
| >PTEN-R142\LLHRGKFLKA  | 546  | >PTEN-R142\LLHWGKFLK/ | 319 | 227  |
| >PTEN-R142\LLHRGKFL    | 288  | >PTEN-R142\LLHWGKFL   | 139 | 149  |
| >PTEN-R142\LLHRGKFLKA  | 194  | >PTEN-R142\LLHWGKFLK/ | 207 | 13   |
| >PTEN-R142\LLHRGKFL    | 28   | >PTEN-R142\LLHWGKFL   | 6   | 22   |
| >PTEN-R142\LLHRGKFLKA  | 132  | >PTEN-R142\LLHWGKFLK/ | 22  | 110  |
| >PTEN-R142\LLHRGKFL    | 353  | >PTEN-R142\LLHWGKFL   | 223 | 130  |
| >PTEN-R142\LLHRGKFL    | 204  | >PTEN-R142\LLHWGKFL   | 33  | 171  |
| >PTEN-R142\LLHRGKFLKA  | 700  | >PTEN-R142\LLHWGKFLK/ | 123 | 577  |
| >PTEN-R142\LLHRGKFL    | 8    | >PTEN-R142\LLHWGKFL   | 3   | 5    |
| >PTEN-R142\LLHRGKFLK   | 328  | >PTEN-R142\LLHWGKFLK  | 56  | 272  |
| >PTEN-R142\LLHRGKFLKA  | 8    | >PTEN-R142\LLHWGKFLK/ | 5   | 3    |
| >PTEN-R142\LLHRGKFLKA/ | 230  | >PTEN-R142\LLHWGKFLK/ | 71  | 159  |
| >PTEN-R142\LLHRGKFLK   | 41   | >PTEN-R142\LLHWGKFLK  | 36  | 5    |
| >PTEN-R142\LLHRGKFLK   | 63   | >PTEN-R142\LLHWGKFLK  | 31  | 32   |
| >PTEN-R142\LLHRGKFLK   | 37   | >PTEN-R142\LLHWGKFLK  | 283 | 246  |
| >PTEN-R142\LLHRGKFLK   | 69   | >PTEN-R142\LLHWGKFLK  | 55  | 14   |
| >PTEN-R142\LLHRGKFLK   | 427  | >PTEN-R142\LLHWGKFLK  | 132 | 295  |
| >PTEN-R142\YLLHRGKFL   | 93   | >PTEN-R142\YLLHWGKFL  | 17  | 76   |
| >PTEN-R142\YLLHRGKFLK  | 4680 | >PTEN-R142\YLLHWGKFLK | 499 | 4181 |
| >PTEN-R142\YLLHRGKFLK/ | 86   | >PTEN-R142\YLLHWGKFLK | 26  | 60   |
| >PTEN-R142\YLLHRGKFL   | 91   | >PTEN-R142\YLLHWGKFL  | 75  | 16   |
| >PTEN-R142\YLLHRGKFLK/ | 446  | >PTEN-R142\YLLHWGKFLK | 317 | 129  |
| >PTEN-R142\YLLHRGKFL   | 70   | >PTEN-R142\YLLHWGKFL  | 42  | 28   |
| >PTEN-R142\YLLHRGKFLK/ | 44   | >PTEN-R142\YLLHWGKFLK | 31  | 13   |
| >PTEN-R142\YLLHRGKF    | 2078 | >PTEN-R142\YLLHWGKF   | 392 | 1686 |
| >PTEN-R142\YLLHRGKFL   | 105  | >PTEN-R142\YLLHWGKFL  | 30  | 75   |
| >PTEN-R142\YLLHRGKFLK/ | 66   | >PTEN-R142\YLLHWGKFLK | 36  | 30   |
| >PTEN-R142\YLLHRGKF    | 1186 | >PTEN-R142\YLLHWGKF   | 48  | 1138 |
| >PTEN-R142\YLLHRGKFL   | 6    | >PTEN-R142\YLLHWGKFL  | 2   | 4    |
| >PTEN-R142\YLLHRGKFLK  | 1163 | >PTEN-R142\YLLHWGKFLK | 95  | 1068 |
| >PTEN-R142\YLLHRGKFLK/ | 12   | >PTEN-R142\YLLHWGKFLK | 4   | 8    |
| >PTEN-R142\YLLHRGKFL   | 10   | >PTEN-R142\YLLHWGKFL  | 3   | 7    |
| >PTEN-R142\YLLHRGKFLK/ | 39   | >PTEN-R142\YLLHWGKFLK | 13  | 26   |
| >PTEN-R142\YLLHRGKFL   | 12   | >PTEN-R142\YLLHWGKFL  | 6   | 6    |
| >PTEN-R142\YLLHRGKFLK/ | 17   | >PTEN-R142\YLLHWGKFLK | 8   | 9    |
| >PTEN-R142\YLLHRGKFL   | 58   | >PTEN-R142\YLLHWGKFL  | 6   | 52   |
| >PTEN-R142\YLLHRGKFLK/ | 317  | >PTEN-R142\YLLHWGKFLK | 31  | 286  |
| >PTEN-R142\YLLHRGKFL   | 6    | >PTEN-R142\YLLHWGKFL  | 3   | 3    |
| >PTEN-R142\YLLHRGKFLK  | 296  | >PTEN-R142\YLLHWGKFLK | 51  | 245  |
| >PTEN-R142\YLLHRGKFLK/ | 8    | >PTEN-R142\YLLHWGKFLK | 4   | 4    |
| >PTEN-R142\YLLHRGKFLK  | 28   | >PTEN-R142\YLLHWGKFLK | 20  | 8    |

|                        |       |                       |      |       |
|------------------------|-------|-----------------------|------|-------|
| >PTEN-R142\YLLHRGKFLK  | 113   | >PTEN-R142\YLLHWGKFLK | 89   | 24    |
| >PTEN-R142\YLLHRGKF    | 1516  | >PTEN-R142\YLLHWGKF   | 210  | 1306  |
| >PTEN-R142\YLLHRGKF    | 735   | >PTEN-R142\YLLHWGKF   | 308  | 427   |
| >PTEN-R142\YLLHRGKF    | 606   | >PTEN-R142\YLLHWGKF   | 68   | 538   |
| >PTEN-R142\YLLHRGKFLK  | 316   | >PTEN-R142\YLLHWGKFLK | 228  | 88    |
| >PTEN-R142\YLLHRGKFL   | 9678  | >PTEN-R142\YLLHWGKFL  | 457  | 9221  |
| >PTEN-R142\YLLHRGKF    | 412   | >PTEN-R142\YLLHWGKF   | 5850 | 5438  |
| >PTEN-R142\YLLHRGKFL   | 54    | >PTEN-R142\YLLHWGKFL  | 3338 | 3284  |
| >PTEN-R142\YLLHRGKFLK/ | 154   | >PTEN-R142\YLLHWGKFLK | 1439 | 1285  |
| >PTEN-R142\YLLHRGKF    | 473   | >PTEN-R142\YLLHWGKF   | 251  | 222   |
| >PTEN-R142\YLLHRGKF    | 43    | >PTEN-R142\YLLHWGKF   | 33   | 10    |
| >PTEN-R142\YLLHRGKFL   | 478   | >PTEN-R142\YLLHWGKFL  | 831  | 353   |
| >PTEN-R142\YLLHRGKF    | 45    | >PTEN-R142\YLLHWGKF   | 44   | 1     |
| >PTEN-R142\YLLHRGKFL   | 278   | >PTEN-R142\YLLHWGKFL  | 175  | 103   |
| >PTEN-R142\YLLHRGKF    | 259   | >PTEN-R142\YLLHWGKF   | 189  | 70    |
| >PTEN-R142\YLLHRGKFLK  | 111   | >PTEN-R142\YLLHWGKFLK | 68   | 43    |
| >PTEN-R142\AYLLHRGKF   | 1272  | >PTEN-R142\AYLLHWGKF  | 280  | 992   |
| >PTEN-R142\AYLLHRGKFLI | 230   | >PTEN-R142\AYLLHWGKFI | 219  | 11    |
| >PTEN-R142\AYLLHRGKF   | 418   | >PTEN-R142\AYLLHWGKF  | 180  | 238   |
| >PTEN-R142\AYLLHRGKFL  | 368   | >PTEN-R142\AYLLHWGKFI | 469  | 101   |
| >PTEN-R142\AYLLHRGKF   | 1055  | >PTEN-R142\AYLLHWGKF  | 115  | 940   |
| >PTEN-R142\AYLLHRGKF   | 8     | >PTEN-R142\AYLLHWGKF  | 10   | 2     |
| >PTEN-R142\AYLLHRGKFL  | 16    | >PTEN-R142\AYLLHWGKFI | 16   | 0     |
| >PTEN-R142\AYLLHRGK    | 40    | >PTEN-R142\AYLLHWGK   | 51   | 11    |
| >PTEN-R142\AYLLHRGKFLI | 25    | >PTEN-R142\AYLLHWGKFI | 30   | 5     |
| >PTEN-R142\AYLLHRGK    | 1264  | >PTEN-R142\AYLLHWGK   | 406  | 858   |
| >PTEN-R142\AYLLHRGKFLI | 76    | >PTEN-R142\AYLLHWGKFI | 85   | 9     |
| >PTEN-R142\AYLLHRGK    | 841   | >PTEN-R142\AYLLHWGK   | 211  | 630   |
| >PTEN-R142\AYLLHRGKFLI | 305   | >PTEN-R142\AYLLHWGKFI | 126  | 179   |
| >PTEN-R142\AYLLHRGK    | 1682  | >PTEN-R142\AYLLHWGK   | 280  | 1402  |
| >PTEN-R142\AYLLHRGKFL  | 2514  | >PTEN-R142\AYLLHWGKFI | 405  | 2109  |
| >PTEN-R142\AYLLHRGKFL  | 540   | >PTEN-R142\AYLLHWGKFI | 177  | 363   |
| >PTEN-R142\CAYLLHRGKF  | 119   | >PTEN-R142\CAYLLHWGKI | 216  | 97    |
| >PTEN-R142\CAYLLHRGK   | 523   | >PTEN-R142\CAYLLHWGK  | 50   | 473   |
| >PTEN-R142\CAYLLHRGK   | 2302  | >PTEN-R142\CAYLLHWGK  | 425  | 1877  |
| >PTEN-R142\CAYLLHRGK   | 471   | >PTEN-R142\CAYLLHWGK  | 76   | 395   |
| >PTEN-R142\CAYLLHRGKF  | 67    | >PTEN-R142\CAYLLHWGKI | 33   | 34    |
| >PTEN-R142\CAYLLHRGKF  | 350   | >PTEN-R142\CAYLLHWGKI | 380  | 30    |
| >PTEN-R142\CAYLLHRGKF  | 350   | >PTEN-R142\CAYLLHWGKI | 314  | 36    |
| >PTEN-R142\CAYLLHRGK   | 6990  | >PTEN-R142\CAYLLHWGK  | 490  | 6500  |
| >PTEN-R142\CAYLLHRGKF  | 185   | >PTEN-R142\CAYLLHWGKI | 198  | 13    |
| >PTEN-R142\ICAYLLHR    | 22088 | >PTEN-R142\ICAYLLHW   | 81   | 22007 |
| >PTEN-R142\ICAYLLHRGKI | 187   | >PTEN-R142\ICAYLLHWGK | 165  | 22    |

|                       |       |                       |       |       |
|-----------------------|-------|-----------------------|-------|-------|
| >PTEN-R142\ICAYLLHR   | 32537 | >PTEN-R142\ICAYLLHW   | 408   | 32129 |
| >PTEN-R142\ICAYLLHR   | 107   | >PTEN-R142\ICAYLLHW   | 29987 | 29880 |
| >PTEN-R142\MICAYLLHR  | 315   | >PTEN-R142\MICAYLLHW  | 17479 | 17164 |
| >PTEN-R142\MICAYLLHRG | 162   | >PTEN-R142\MICAYLLHW  | 147   | 15    |
| >PTEN-R142\MICAYLLHR  | 89    | >PTEN-R142\MICAYLLHW  | 19700 | 19611 |
| >PTEN-R142\MICAYLLHRG | 49    | >PTEN-R142\MICAYLLHW  | 17    | 32    |
| >PTEN-R142\MICAYLLHRG | 77    | >PTEN-R142\MICAYLLHW  | 120   | 43    |
| >PTEN-R142\MICAYLLHR  | 11    | >PTEN-R142\MICAYLLHW  | 11946 | 11935 |
| >PTEN-R142\MICAYLLHRG | 473   | >PTEN-R142\MICAYLLHW  | 126   | 347   |
| >PTEN-R142\MICAYLLHR  | 45    | >PTEN-R142\MICAYLLHW  | 24215 | 24170 |
| >PTEN-R142\MICAYLLHR  | 28    | >PTEN-R142\MICAYLLHW  | 17677 | 17649 |
| >PTEN-R142\MICAYLLHRG | 124   | >PTEN-R142\MICAYLLHW  | 46    | 78    |
| >PTEN-R142\MICAYLLHR  | 21093 | >PTEN-R142\MICAYLLHW  | 56    | 21037 |
| >PTEN-R142\MICAYLLHR  | 21285 | >PTEN-R142\MICAYLLHW  | 18    | 21267 |
| >PTEN-R142\MICAYLLHR  | 31011 | >PTEN-R142\MICAYLLHW  | 154   | 30857 |
| >PTEN-R142\MICAYLLHR  | 28    | >PTEN-R142\MICAYLLHW  | 10504 | 10476 |
| >PTEN-R142\MICAYLLHRG | 1168  | >PTEN-R142\MICAYLLHW  | 224   | 944   |
| >PTEN-R142\VMICAYLLHR | 166   | >PTEN-R142\VMICAYLLHV | 6511  | 6345  |
| >PTEN-R142\VMICAYLLHR | 52    | >PTEN-R142\VMICAYLLHV | 19582 | 19530 |
| >PTEN-R142\VMICAYLLHR | 44    | >PTEN-R142\VMICAYLLHV | 12316 | 12272 |
| >PTEN-R142\VMICAYLLHR | 237   | >PTEN-R142\VMICAYLLHV | 21818 | 21581 |
| >PTEN-R142\VMICAYLLHR | 119   | >PTEN-R142\VMICAYLLHV | 29697 | 29578 |
| >PTEN-R142\VMICAYLLHR | 4242  | >PTEN-R142\VMICAYLLHV | 103   | 4139  |
| >PTEN-R142\VMICAYLLHR | 434   | >PTEN-R142\VMICAYLLHV | 188   | 246   |
| >PTEN-R142\VMICAYLLHR | 18960 | >PTEN-R142\VMICAYLLHV | 65    | 18895 |
| >PTEN-R142\VMICAYLLHR | 23789 | >PTEN-R142\VMICAYLLHV | 380   | 23409 |
| >PTEN-R142\VMICAYLLHR | 20509 | >PTEN-R142\VMICAYLLHV | 14    | 20495 |
| >PTEN-R142\VMICAYLLHR | 27619 | >PTEN-R142\VMICAYLLHV | 341   | 27278 |
| >PTEN-R142\VMICAYLLHR | 70    | >PTEN-R142\VMICAYLLHV | 25600 | 25530 |
| >PTEN-R142\VMICAYLLHR | 58    | >PTEN-R142\VMICAYLLHV | 17581 | 17523 |
| >PTEN-R14G·RRYQEDGF   | 41    | >PTEN-R14G·GRYQEDGF   | 406   | 365   |
| >PTEN-R14G·RRYQEDGFDI | 223   | >PTEN-R14G·GRYQEDGFDI | 1570  | 1347  |
| >PTEN-R14G·RRYQEDGF   | 61    | >PTEN-R14G·GRYQEDGF   | 413   | 352   |
| >PTEN-R14G·RRYQEDGFDI | 11    | >PTEN-R14G·GRYQEDGFDI | 39    | 28    |
| >PTEN-R14G·RRYQEDGF   | 189   | >PTEN-R14G·GRYQEDGF   | 12938 | 12749 |
| >PTEN-R14G·RRYQEDGFDI | 18    | >PTEN-R14G·GRYQEDGFDI | 284   | 266   |
| >PTEN-R14G·RRYQEDGFDI | 300   | >PTEN-R14G·GRYQEDGFDI | 4331  | 4031  |
| >PTEN-R14G·RRYQEDGF   | 452   | >PTEN-R14G·GRYQEDGF   | 11082 | 10630 |
| >PTEN-R14G·RRYQEDGFDI | 21    | >PTEN-R14G·GRYQEDGFDI | 217   | 196   |
| >PTEN-R14G·RRYQEDGF   | 229   | >PTEN-R14G·GRYQEDGF   | 4066  | 3837  |
| >PTEN-R14G·KRRYQEDGF  | 93    | >PTEN-R14G·KGRYQEDGF  | 1838  | 1745  |
| >PTEN-R14G·KRRYQEDGFI | 327   | >PTEN-R14G·KGRYQEDGFI | 7153  | 6826  |
| >PTEN-R14G·KRRYQEDG   | 266   | >PTEN-R14G·KGRYQEDG   | 26567 | 26301 |

|                        |      |                        |       |       |
|------------------------|------|------------------------|-------|-------|
| >PTEN-R14G·KRRYQEDGF   | 233  | >PTEN-R14G·KGRYQEDGF   | 20319 | 20086 |
| >PTEN-R14G·KRRYQEDGFI  | 203  | >PTEN-R14G·KGRYQEDGFI  | 23924 | 23721 |
| >PTEN-R14G·KRRYQEDGFI  | 45   | >PTEN-R14G·KGRYQEDGFI  | 11406 | 11361 |
| >PTEN-R14G·IIKEIVSRNKR | 24   | >PTEN-R14G·IIKEIVSRNKG | 19664 | 19640 |
| >PTEN-R14G·IIKEIVSRNKR | 117  | >PTEN-R14G·IIKEIVSRNKG | 29966 | 29849 |
| >PTEN-R14G·IIKEIVSRNKR | 40   | >PTEN-R14G·IIKEIVSRNKG | 31367 | 31327 |
| >PTEN-R14G·NKRRYQEDG   | 55   | >PTEN-R14G·NKGRYQEDG   | 549   | 494   |
| >PTEN-R14G·RNKRRYQEDG  | 317  | >PTEN-R14G·RNKGRYQEDG  | 1031  | 714   |
| >PTEN-R14G·VSRNKRRYQ   | 113  | >PTEN-R14G·VSRNKGRYQ   | 437   | 324   |
| >PTEN-R14G·VSRNKRRY    | 155  | >PTEN-R14G·VSRNKGRY    | 63    | 92    |
| >PTEN-R14G·VSRNKRRY    | 7    | >PTEN-R14G·VSRNKGRY    | 5     | 2     |
| >PTEN-R14G·IVSRNKRRY   | 1084 | >PTEN-R14G·IVSRNKGRY   | 316   | 768   |
| >PTEN-R14G·IVSRNKRRY   | 157  | >PTEN-R14G·IVSRNKGRY   | 22    | 135   |
| >PTEN-R14G·IVSRNKRR    | 225  | >PTEN-R14G·IVSRNKGR    | 456   | 231   |
| >PTEN-R14G·IVSRNKRR    | 128  | >PTEN-R14G·IVSRNKGR    | 95    | 33    |
| >PTEN-R14G·IVSRNKRRY   | 542  | >PTEN-R14G·IVSRNKGRY   | 198   | 344   |
| >PTEN-R14G·EIVSRNKRRY  | 13   | >PTEN-R14G·EIVSRNKGRY  | 9     | 4     |
| >PTEN-R14G·EIVSRNKRRY  | 313  | >PTEN-R14G·EIVSRNKGRY  | 215   | 98    |
| >PTEN-R14G·EIVSRNKR    | 155  | >PTEN-R14G·EIVSRNKG    | 32515 | 32360 |
| >PTEN-R14G·EIVSRNKRR   | 356  | >PTEN-R14G·EIVSRNKGR   | 416   | 60    |
| >PTEN-R14G·EIVSRNKR    | 8    | >PTEN-R14G·EIVSRNKG    | 18928 | 18920 |
| >PTEN-R14G·EIVSRNKRR   | 20   | >PTEN-R14G·EIVSRNKGR   | 19    | 1     |
| >PTEN-R14G·EIVSRNKR    | 258  | >PTEN-R14G·EIVSRNKG    | 34347 | 34089 |
| >PTEN-R14G·EIVSRNKRR   | 226  | >PTEN-R14G·EIVSRNKGR   | 222   | 4     |
| >PTEN-R14G·KEIVSRNKRR  | 954  | >PTEN-R14G·KEIVSRNKGR  | 255   | 699   |
| >PTEN-R14G·KEIVSRNKRR  | 321  | >PTEN-R14G·KEIVSRNKGR  | 573   | 252   |
| >PTEN-R14G·KEIVSRNKRR  | 358  | >PTEN-R14G·KEIVSRNKGR  | 259   | 99    |
| >PTEN-R159I·RTRDKKGV   | 14   | >PTEN-R159I·KTRDKKGV   | 16    | 2     |
| >PTEN-R159I·RTRDKKGV   | 71   | >PTEN-R159I·KTRDKKGV   | 82    | 11    |
| >PTEN-R159I·RTRDKKGV   | 5    | >PTEN-R159I·KTRDKKGV   | 5     | 0     |
| >PTEN-R159I·RTRDKKGV   | 103  | >PTEN-R159I·KTRDKKGV   | 120   | 17    |
| >PTEN-R159I·RTRDKKGV   | 120  | >PTEN-R159I·KTRDKKGV   | 126   | 6     |
| >PTEN-R159I·RTRDKKGV   | 26   | >PTEN-R159I·KTRDKKGV   | 47    | 21    |
| >PTEN-R159I·RTRDKKGV   | 5    | >PTEN-R159I·KTRDKKGV   | 7     | 2     |
| >PTEN-R159I·RTRDKKGV   | 100  | >PTEN-R159I·KTRDKKGV   | 441   | 341   |
| >PTEN-R159I·VRTRDKKGV  | 873  | >PTEN-R159I·VKTRDKKGV  | 282   | 591   |
| >PTEN-R159I·EVRTRDKK   | 81   | >PTEN-R159I·EVKTRDKK   | 33    | 48    |
| >PTEN-R159I·GEVTRDKK   | 178  | >PTEN-R159I·GEVKTRDKK  | 316   | 138   |
| >PTEN-R159I·GEVTRDKK   | 381  | >PTEN-R159I·GEVKTRDKK  | 365   | 16    |
| >PTEN-R159I·GEVTRDKK   | 89   | >PTEN-R159I·GEVKTRDKK  | 53    | 36    |
| >PTEN-R159I·FYGEVTR    | 163  | >PTEN-R159I·FYGEVKTR   | 295   | 132   |
| >PTEN-R159I·FYGEVTR    | 107  | >PTEN-R159I·FYGEVKTR   | 68    | 39    |
| >PTEN-R159I·DFYGEVTR   | 31   | >PTEN-R159I·DFYGEVKTR  | 42    | 11    |

|                         |       |                         |       |       |
|-------------------------|-------|-------------------------|-------|-------|
| >PTEN-R159I DFYGEVRTR   | 408   | >PTEN-R159I DFYGEVKTR   | 365   | 43    |
| >PTEN-R159I DFYGEVRTR   | 291   | >PTEN-R159I DFYGEVKTR   | 128   | 163   |
| >PTEN-R159I ALDFYGEVRT  | 308   | >PTEN-R159I ALDFYGEVKT  | 477   | 169   |
| >PTEN-R159I ALDFYGEVRT  | 416   | >PTEN-R159I ALDFYGEVKT  | 820   | 404   |
| >PTEN-R159I ALDFYGEVR   | 5928  | >PTEN-R159I ALDFYGEVK   | 250   | 5678  |
| >PTEN-R159I EALDFYGEVR  | 5833  | >PTEN-R159I EALDFYGEVK  | 487   | 5346  |
| >PTEN-R159I EALDFYGEVR  | 299   | >PTEN-R159I EALDFYGEVK  | 6947  | 6648  |
| >PTEN-R159I EALDFYGEVR  | 28    | >PTEN-R159I EALDFYGEVK  | 77    | 49    |
| >PTEN-R159I EALDFYGEVR  | 519   | >PTEN-R159I EALDFYGEVK  | 456   | 63    |
| >PTEN-R159I RTRDKKGV    | 14    | >PTEN-R159I STRDKKGV    | 144   | 130   |
| >PTEN-R159I RTRDKKGV    | 71    | >PTEN-R159I STRDKKGV    | 1179  | 1108  |
| >PTEN-R159I RTRDKKGV    | 5     | >PTEN-R159I STRDKKGV    | 17    | 12    |
| >PTEN-R159I RTRDKKGV    | 103   | >PTEN-R159I STRDKKGV    | 1511  | 1408  |
| >PTEN-R159I RTRDKKGV    | 120   | >PTEN-R159I STRDKKGV    | 931   | 811   |
| >PTEN-R159I RTRDKKGV    | 26    | >PTEN-R159I STRDKKGV    | 438   | 412   |
| >PTEN-R159I RTRDKKGV    | 5     | >PTEN-R159I STRDKKGV    | 24    | 19    |
| >PTEN-R159I RTRDKKGV    | 100   | >PTEN-R159I STRDKKGV    | 162   | 62    |
| >PTEN-R159I VRTRDKKGV   | 9171  | >PTEN-R159I VSTRDKKGV   | 164   | 9007  |
| >PTEN-R159I QEALDFYGEV  | 1385  | >PTEN-R159I QEALDFYGEV  | 167   | 1218  |
| >PTEN-R159I EVRTRDKK    | 81    | >PTEN-R159I EVSTRDKK    | 12    | 69    |
| >PTEN-R159I GEVTRDKKC   | 178   | >PTEN-R159I GEVSTRDKKC  | 466   | 288   |
| >PTEN-R159I GEVTRDKKC   | 381   | >PTEN-R159I GEVSTRDKKC  | 197   | 184   |
| >PTEN-R159I GEVTRDKKC   | 89    | >PTEN-R159I GEVSTRDKKC  | 53    | 36    |
| >PTEN-R159I FYGEVRTR    | 705   | >PTEN-R159I FYGEVSTR    | 391   | 314   |
| >PTEN-R159I FYGEVRTR    | 163   | >PTEN-R159I FYGEVSTR    | 134   | 29    |
| >PTEN-R159I FYGEVRTR    | 883   | >PTEN-R159I FYGEVSTR    | 383   | 500   |
| >PTEN-R159I FYGEVRTR    | 107   | >PTEN-R159I FYGEVSTR    | 109   | 2     |
| >PTEN-R159I DFYGEVRTR   | 31    | >PTEN-R159I DFYGEVSTR   | 15    | 16    |
| >PTEN-R159I DFYGEVRTR   | 408   | >PTEN-R159I DFYGEVSTR   | 63    | 345   |
| >PTEN-R159I DFYGEVRTR   | 291   | >PTEN-R159I DFYGEVSTR   | 296   | 5     |
| >PTEN-R159I ALDFYGEVRT  | 308   | >PTEN-R159I ALDFYGEVST  | 267   | 41    |
| >PTEN-R159I ALDFYGEVRT  | 416   | >PTEN-R159I ALDFYGEVST  | 372   | 44    |
| >PTEN-R159I EALDFYGEVR  | 299   | >PTEN-R159I EALDFYGEVS  | 26219 | 25920 |
| >PTEN-R159I EALDFYGEVR  | 28    | >PTEN-R159I EALDFYGEVS  | 21286 | 21258 |
| >PTEN-R159I EALDFYGEVR  | 519   | >PTEN-R159I EALDFYGEVS  | 284   | 235   |
| >PTEN-R15I-I RYQEDGFDL  | 467   | >PTEN-R15I-I YQEDGFDL   | 302   | 165   |
| >PTEN-R15I-I RYQEDGFDL  | 586   | >PTEN-R15I-I YQEDGFDL   | 397   | 189   |
| >PTEN-R15I-I RYQEDGFDL  | 320   | >PTEN-R15I-I YQEDGFDL   | 325   | 5     |
| >PTEN-R15I-I RYQEDGFDL  | 6     | >PTEN-R15I-I YQEDGFDL   | 19    | 13    |
| >PTEN-R15I-I RYQEDGFDL  | 7     | >PTEN-R15I-I YQEDGFDL   | 24    | 17    |
| >PTEN-R15I-I RRYQEDGFDI | 12867 | >PTEN-R15I-I RIYQEDGFDL | 380   | 12487 |
| >PTEN-R15I-I RRYQEDGFDI | 17105 | >PTEN-R15I-I RIYQEDGFDL | 288   | 16817 |
| >PTEN-R15I-I RRYQEDGFDI | 16822 | >PTEN-R15I-I RIYQEDGFDL | 286   | 16536 |

|                          |       |                          |       |       |
|--------------------------|-------|--------------------------|-------|-------|
| >PTEN-R15I-1 RRYQEDGFDI  | 25138 | >PTEN-R15I-1 RIYQEDGFDL  | 328   | 24810 |
| >PTEN-R15I-1 RRYQEDGF    | 6457  | >PTEN-R15I-1 RIYQEDGF    | 85    | 6372  |
| >PTEN-R15I-1 RRYQEDGF    | 11726 | >PTEN-R15I-1 RIYQEDGF    | 199   | 11527 |
| >PTEN-R15I-1 RRYQEDGF    | 41    | >PTEN-R15I-1 RIYQEDGF    | 383   | 342   |
| >PTEN-R15I-1 RRYQEDGFDI  | 223   | >PTEN-R15I-1 RIYQEDGFDL  | 2345  | 2122  |
| >PTEN-R15I-1 RRYQEDGF    | 6333  | >PTEN-R15I-1 RIYQEDGF    | 24    | 6309  |
| >PTEN-R15I-1 RRYQEDGFDI  | 15600 | >PTEN-R15I-1 RIYQEDGFDL  | 248   | 15352 |
| >PTEN-R15I-1 RRYQEDGF    | 61    | >PTEN-R15I-1 RIYQEDGF    | 13853 | 13792 |
| >PTEN-R15I-1 RRYQEDGFDI  | 11    | >PTEN-R15I-1 RIYQEDGFDL  | 11928 | 11917 |
| >PTEN-R15I-1 RRYQEDGF    | 189   | >PTEN-R15I-1 RIYQEDGF    | 20644 | 20455 |
| >PTEN-R15I-1 RRYQEDGFDI  | 18    | >PTEN-R15I-1 RIYQEDGFDL  | 3854  | 3836  |
| >PTEN-R15I-1 RRYQEDGFDI  | 300   | >PTEN-R15I-1 RIYQEDGFDL  | 20467 | 20167 |
| >PTEN-R15I-1 RRYQEDGF    | 452   | >PTEN-R15I-1 RIYQEDGF    | 21108 | 20656 |
| >PTEN-R15I-1 RRYQEDGFDI  | 21    | >PTEN-R15I-1 RIYQEDGFDL  | 11496 | 11475 |
| >PTEN-R15I-1 RRYQEDGF    | 229   | >PTEN-R15I-1 RIYQEDGF    | 7828  | 7599  |
| >PTEN-R15I-1 IKEIVSRNKRR | 33584 | >PTEN-R15I-1 IKEIVSRNKRI | 471   | 33113 |
| >PTEN-R15I-1 KRRYQEDGF   | 93    | >PTEN-R15I-1 KRIYQEDGF   | 154   | 61    |
| >PTEN-R15I-1 KRRYQEDGFL  | 327   | >PTEN-R15I-1 KRIYQEDGFD  | 499   | 172   |
| >PTEN-R15I-1 KRRYQEDGFL  | 1396  | >PTEN-R15I-1 KRIYQEDGFD  | 452   | 944   |
| >PTEN-R15I-1 KRRYQEDG    | 266   | >PTEN-R15I-1 KRIYQEDG    | 218   | 48    |
| >PTEN-R15I-1 KRRYQEDGF   | 233   | >PTEN-R15I-1 KRIYQEDGF   | 530   | 297   |
| >PTEN-R15I-1 KRRYQEDGFL  | 203   | >PTEN-R15I-1 KRIYQEDGFD  | 419   | 216   |
| >PTEN-R15I-1 KRRYQEDGFL  | 45    | >PTEN-R15I-1 KRIYQEDGFD  | 92    | 47    |
| >PTEN-R15I-1 NKRRYQEDG   | 55    | >PTEN-R15I-1 NKRIYQEDGF  | 111   | 56    |
| >PTEN-R15I-1 RNKRRYQEDG  | 317   | >PTEN-R15I-1 RNKRIYQEDG  | 338   | 21    |
| >PTEN-R15I-1 VSRNKRRY    | 685   | >PTEN-R15I-1 VSRNKRIY    | 375   | 310   |
| >PTEN-R15I-1 VSRNKRRYQ   | 113   | >PTEN-R15I-1 VSRNKRIYQ   | 41    | 72    |
| >PTEN-R15I-1 VSRNKRRY    | 155   | >PTEN-R15I-1 VSRNKRIY    | 145   | 10    |
| >PTEN-R15I-1 VSRNKRRY    | 956   | >PTEN-R15I-1 VSRNKRIY    | 209   | 747   |
| >PTEN-R15I-1 VSRNKRRY    | 7     | >PTEN-R15I-1 VSRNKRIY    | 13    | 6     |
| >PTEN-R15I-1 IVSRNKRRY   | 157   | >PTEN-R15I-1 IVSRNKRIY   | 146   | 11    |
| >PTEN-R15I-1 IVSRNKRR    | 225   | >PTEN-R15I-1 IVSRNKRI    | 22262 | 22037 |
| >PTEN-R15I-1 IVSRNKRR    | 128   | >PTEN-R15I-1 IVSRNKRI    | 33642 | 33514 |
| >PTEN-R15I-1 IVSRNKRRY   | 542   | >PTEN-R15I-1 IVSRNKRIY   | 450   | 92    |
| >PTEN-R15I-1 EIVSRNKRRY  | 13    | >PTEN-R15I-1 EIVSRNKRIY  | 20    | 7     |
| >PTEN-R15I-1 EIVSRNKRRY  | 313   | >PTEN-R15I-1 EIVSRNKRIY  | 383   | 70    |
| >PTEN-R15I-1 EIVSRNKRR   | 356   | >PTEN-R15I-1 EIVSRNKRI   | 32537 | 32181 |
| >PTEN-R15I-1 EIVSRNKRR   | 20    | >PTEN-R15I-1 EIVSRNKRI   | 22877 | 22857 |
| >PTEN-R15I-1 EIVSRNKRR   | 226   | >PTEN-R15I-1 EIVSRNKRI   | 33474 | 33248 |
| >PTEN-R15I-1 KEIVSRNKRR  | 28239 | >PTEN-R15I-1 KEIVSRNKRI  | 125   | 28114 |
| >PTEN-R15I-1 KEIVSRNKRR' | 632   | >PTEN-R15I-1 KEIVSRNKRIY | 150   | 482   |
| >PTEN-R15I-1 KEIVSRNKRR' | 1780  | >PTEN-R15I-1 KEIVSRNKRIY | 450   | 1330  |
| >PTEN-R15I-1 KEIVSRNKRR' | 321   | >PTEN-R15I-1 KEIVSRNKRIY | 245   | 76    |

|                                 |       |                                 |       |       |
|---------------------------------|-------|---------------------------------|-------|-------|
| >PTEN-R15I- <b>l</b> KEIVSRNKRR | 22280 | >PTEN-R15I- <b>i</b> KEIVSRNKRI | 16    | 22264 |
| >PTEN-R15I- <b>l</b> KEIVSRNKRR | 358   | >PTEN-R15I- <b>i</b> KEIVSRNKRI | 33232 | 32874 |
| >PTEN-R15K- RYQEDGFDL           | 467   | >PTEN-R15K- KYQEDGFDL           | 436   | 31    |
| >PTEN-R15K- RYQEDGFDL           | 320   | >PTEN-R15K- KYQEDGFDL           | 443   | 123   |
| >PTEN-R15K- RYQEDGFDL           | 6     | >PTEN-R15K- KYQEDGFDL           | 13    | 7     |
| >PTEN-R15K- RYQEDGFDL <b>l</b>  | 7     | >PTEN-R15K- KYQEDGFDL <b>l</b>  | 16    | 9     |
| >PTEN-R15K- RRYQEDGF            | 41    | >PTEN-R15K- RKYQEDGF            | 6     | 35    |
| >PTEN-R15K- RRYQEDGF <b>l</b>   | 223   | >PTEN-R15K- RKYQEDGF <b>l</b>   | 39    | 184   |
| >PTEN-R15K- RRYQEDGF            | 61    | >PTEN-R15K- RKYQEDGF            | 3025  | 2964  |
| >PTEN-R15K- RRYQEDGF <b>l</b>   | 11    | >PTEN-R15K- RKYQEDGF <b>l</b>   | 428   | 417   |
| >PTEN-R15K- RRYQEDGF            | 189   | >PTEN-R15K- RKYQEDGF            | 6170  | 5981  |
| >PTEN-R15K- RRYQEDGF <b>l</b>   | 18    | >PTEN-R15K- RKYQEDGF <b>l</b>   | 224   | 206   |
| >PTEN-R15K- RRYQEDGF <b>l</b>   | 300   | >PTEN-R15K- RKYQEDGF <b>l</b>   | 4907  | 4607  |
| >PTEN-R15K- RRYQEDGF            | 452   | >PTEN-R15K- RKYQEDGF            | 7383  | 6931  |
| >PTEN-R15K- RRYQEDGF <b>l</b>   | 21    | >PTEN-R15K- RKYQEDGF <b>l</b>   | 480   | 459   |
| >PTEN-R15K- RRYQEDGF            | 229   | >PTEN-R15K- RKYQEDGF            | 1873  | 1644  |
| >PTEN-R15K- KRRYQEDGF           | 93    | >PTEN-R15K- KRKYQEDGF           | 204   | 111   |
| >PTEN-R15K- KRRYQEDGF <b>l</b>  | 327   | >PTEN-R15K- KRKYQEDGF <b>l</b>  | 700   | 373   |
| >PTEN-R15K- KRRYQEDG            | 266   | >PTEN-R15K- KRKYQEDG            | 1453  | 1187  |
| >PTEN-R15K- KRRYQEDGF           | 233   | >PTEN-R15K- KRKYQEDGF           | 583   | 350   |
| >PTEN-R15K- KRRYQEDGF <b>l</b>  | 203   | >PTEN-R15K- KRKYQEDGF <b>l</b>  | 569   | 366   |
| >PTEN-R15K- KRRYQEDGF <b>l</b>  | 45    | >PTEN-R15K- KRKYQEDGF <b>l</b>  | 97    | 52    |
| >PTEN-R15K- NKRRYQEDG           | 55    | >PTEN-R15K- NKRYQEDG <b>l</b>   | 51    | 4     |
| >PTEN-R15K- RNKRRYQEDG          | 317   | >PTEN-R15K- RNKRYQEDG           | 477   | 160   |
| >PTEN-R15K- VSRNKRRYQ           | 113   | >PTEN-R15K- VSRNKRYQ            | 190   | 77    |
| >PTEN-R15K- VSRNKRRY            | 155   | >PTEN-R15K- VSRNKRY             | 180   | 25    |
| >PTEN-R15K- VSRNKRRY            | 7     | >PTEN-R15K- VSRNKRY             | 7     | 0     |
| >PTEN-R15K- IVSRNKRR            | 4670  | >PTEN-R15K- IVSRNKRK            | 212   | 4458  |
| >PTEN-R15K- IVSRNKRR            | 3756  | >PTEN-R15K- IVSRNKRK            | 195   | 3561  |
| >PTEN-R15K- IVSRNKRR            | 9240  | >PTEN-R15K- IVSRNKRK            | 408   | 8832  |
| >PTEN-R15K- IVSRNKRRY           | 157   | >PTEN-R15K- IVSRNKRY            | 152   | 5     |
| >PTEN-R15K- IVSRNKRR            | 225   | >PTEN-R15K- IVSRNKRK            | 4226  | 4001  |
| >PTEN-R15K- IVSRNKRR            | 128   | >PTEN-R15K- IVSRNKRK            | 490   | 362   |
| >PTEN-R15K- EIVSRNKRRY          | 1743  | >PTEN-R15K- EIVSRNKRY           | 469   | 1274  |
| >PTEN-R15K- EIVSRNKRRY          | 13    | >PTEN-R15K- EIVSRNKRY           | 20    | 7     |
| >PTEN-R15K- EIVSRNKRRY          | 313   | >PTEN-R15K- EIVSRNKRY           | 427   | 114   |
| >PTEN-R15K- EIVSRNKRR           | 356   | >PTEN-R15K- EIVSRNKRK           | 7435  | 7079  |
| >PTEN-R15K- EIVSRNKRR           | 20    | >PTEN-R15K- EIVSRNKRK           | 64    | 44    |
| >PTEN-R15K- EIVSRNKRR           | 226   | >PTEN-R15K- EIVSRNKRK           | 6294  | 6068  |
| >PTEN-R15K- KEIVSRNKRR'         | 632   | >PTEN-R15K- KEIVSRNKRK'         | 408   | 224   |
| >PTEN-R15K- KEIVSRNKRR'         | 321   | >PTEN-R15K- KEIVSRNKRK'         | 344   | 23    |
| >PTEN-R15K- KEIVSRNKRR          | 358   | >PTEN-R15K- KEIVSRNKRK          | 7026  | 6668  |
| >PTEN-R15S- RYQEDGFDL           | 467   | >PTEN-R15S- SYQEDGFDL           | 2059  | 1592  |

|                        |       |                        |       |       |
|------------------------|-------|------------------------|-------|-------|
| >PTEN-R15S- RYQEDGFDL  | 320   | >PTEN-R15S- SYQEDGFDL  | 954   | 634   |
| >PTEN-R15S- RYQEDGFDL  | 6     | >PTEN-R15S- SYQEDGFDL  | 14    | 8     |
| >PTEN-R15S- RYQEDGFDLL | 7     | >PTEN-R15S- SYQEDGFDLL | 18    | 11    |
| >PTEN-R15S- RRYQEDGF   | 6457  | >PTEN-R15S- RSYQEDGF   | 120   | 6337  |
| >PTEN-R15S- RRYQEDGF   | 11726 | >PTEN-R15S- RSYQEDGF   | 222   | 11504 |
| >PTEN-R15S- RRYQEDGF   | 41    | >PTEN-R15S- RSYQEDGF   | 61    | 20    |
| >PTEN-R15S- RRYQEDGFDI | 223   | >PTEN-R15S- RSYQEDGFDI | 569   | 346   |
| >PTEN-R15S- RRYQEDGF   | 6333  | >PTEN-R15S- RSYQEDGF   | 4     | 6329  |
| >PTEN-R15S- RRYQEDGFDI | 15600 | >PTEN-R15S- RSYQEDGFDI | 7     | 15593 |
| >PTEN-R15S- RRYQEDGF   | 61    | >PTEN-R15S- RSYQEDGF   | 12112 | 12051 |
| >PTEN-R15S- RRYQEDGFDI | 11    | >PTEN-R15S- RSYQEDGFDI | 5749  | 5738  |
| >PTEN-R15S- RRYQEDGF   | 21302 | >PTEN-R15S- RSYQEDGF   | 128   | 21174 |
| >PTEN-R15S- RRYQEDGF   | 18647 | >PTEN-R15S- RSYQEDGF   | 25    | 18622 |
| >PTEN-R15S- RRYQEDGFDI | 21103 | >PTEN-R15S- RSYQEDGFDI | 322   | 20781 |
| >PTEN-R15S- RRYQEDGF   | 189   | >PTEN-R15S- RSYQEDGF   | 16146 | 15957 |
| >PTEN-R15S- RRYQEDGFDI | 18    | >PTEN-R15S- RSYQEDGFDI | 2344  | 2326  |
| >PTEN-R15S- RRYQEDGFDI | 300   | >PTEN-R15S- RSYQEDGFDI | 12410 | 12110 |
| >PTEN-R15S- RRYQEDGF   | 452   | >PTEN-R15S- RSYQEDGF   | 17386 | 16934 |
| >PTEN-R15S- RRYQEDGFDI | 21    | >PTEN-R15S- RSYQEDGFDI | 4292  | 4271  |
| >PTEN-R15S- RRYQEDGF   | 229   | >PTEN-R15S- RSYQEDGF   | 1469  | 1240  |
| >PTEN-R15S- KRRYQEDGF  | 93    | >PTEN-R15S- KRSYQEDGF  | 227   | 134   |
| >PTEN-R15S- KRRYQEDGFL | 327   | >PTEN-R15S- KRSYQEDGFL | 718   | 391   |
| >PTEN-R15S- KRRYQEDG   | 266   | >PTEN-R15S- KRSYQEDG   | 1290  | 1024  |
| >PTEN-R15S- KRRYQEDGF  | 233   | >PTEN-R15S- KRSYQEDGF  | 859   | 626   |
| >PTEN-R15S- KRRYQEDGFL | 203   | >PTEN-R15S- KRSYQEDGFL | 1285  | 1082  |
| >PTEN-R15S- KRRYQEDGFL | 45    | >PTEN-R15S- KRSYQEDGFL | 146   | 101   |
| >PTEN-R15S- NKRRYQEDG  | 55    | >PTEN-R15S- NKRSYQEDGI | 34    | 21    |
| >PTEN-R15S- RNKRRYQEDG | 317   | >PTEN-R15S- RNKRSYQEDG | 117   | 200   |
| >PTEN-R15S- VSRNKRRY   | 685   | >PTEN-R15S- VSRNKRSY   | 269   | 416   |
| >PTEN-R15S- VSRNKRRYQ  | 113   | >PTEN-R15S- VSRNKRSYQ  | 113   | 0     |
| >PTEN-R15S- VSRNKRRY   | 155   | >PTEN-R15S- VSRNKRSY   | 73    | 82    |
| >PTEN-R15S- VSRNKRRY   | 1116  | >PTEN-R15S- VSRNKRSY   | 196   | 920   |
| >PTEN-R15S- VSRNKRRY   | 956   | >PTEN-R15S- VSRNKRSY   | 93    | 863   |
| >PTEN-R15S- VSRNKRRY   | 7     | >PTEN-R15S- VSRNKRSY   | 7     | 0     |
| >PTEN-R15S- VSRNKRRYQ  | 4780  | >PTEN-R15S- VSRNKRSYQ  | 154   | 4626  |
| >PTEN-R15S- IVSRNKRRY  | 157   | >PTEN-R15S- IVSRNKRSY  | 87    | 70    |
| >PTEN-R15S- IVSRNKRR   | 225   | >PTEN-R15S- IVSRNKRS   | 22195 | 21970 |
| >PTEN-R15S- IVSRNKRR   | 128   | >PTEN-R15S- IVSRNKRS   | 28621 | 28493 |
| >PTEN-R15S- IVSRNKRRY  | 2097  | >PTEN-R15S- IVSRNKRSY  | 347   | 1750  |
| >PTEN-R15S- EIVSRNKRRY | 1743  | >PTEN-R15S- EIVSRNKRSY | 231   | 1512  |
| >PTEN-R15S- EIVSRNKRRY | 13    | >PTEN-R15S- EIVSRNKRSY | 14    | 1     |
| >PTEN-R15S- EIVSRNKRRY | 313   | >PTEN-R15S- EIVSRNKRSY | 75    | 238   |
| >PTEN-R15S- EIVSRNKRR  | 356   | >PTEN-R15S- EIVSRNKRS  | 31817 | 31461 |



|                         |       |                         |       |       |
|-------------------------|-------|-------------------------|-------|-------|
| >PTEN-R15S- EIVSRNKRR   | 20    | >PTEN-R15S- EIVSRNKRS   | 16162 | 16142 |
| >PTEN-R15S- EIVSRNKRRY( | 1650  | >PTEN-R15S- EIVSRNKRSY( | 415   | 1235  |
| >PTEN-R15S- EIVSRNKRR   | 226   | >PTEN-R15S- EIVSRNKRS   | 31299 | 31073 |
| >PTEN-R15S- KEIVSRNKRR' | 632   | >PTEN-R15S- KEIVSRNKRS\ | 92    | 540   |
| >PTEN-R15S- KEIVSRNKRR' | 1780  | >PTEN-R15S- KEIVSRNKRS\ | 202   | 1578  |
| >PTEN-R15S- KEIVSRNKRR' | 321   | >PTEN-R15S- KEIVSRNKRS\ | 264   | 57    |
| >PTEN-R15S- KEIVSRNKRR  | 358   | >PTEN-R15S- KEIVSRNKRS  | 31269 | 30911 |
| >PTEN-R161(RDKKGVTI     | 179   | >PTEN-R161(GDKKGVTI     | 87    | 92    |
| >PTEN-R161(RTRDKKGV     | 2423  | >PTEN-R161(RTGDKKGV     | 365   | 2058  |
| >PTEN-R161(RTRDKKGV     | 14    | >PTEN-R161(RTGDKKGV     | 6776  | 6762  |
| >PTEN-R161(RTRDKKGV     | 71    | >PTEN-R161(RTGDKKGV     | 12950 | 12879 |
| >PTEN-R161(RTRDKKGV     | 5     | >PTEN-R161(RTGDKKGV     | 1745  | 1740  |
| >PTEN-R161(RTRDKKGV     | 103   | >PTEN-R161(RTGDKKGV     | 13236 | 13133 |
| >PTEN-R161(RTRDKKGV     | 120   | >PTEN-R161(RTGDKKGV     | 66    | 54    |
| >PTEN-R161(RTRDKKGV     | 26    | >PTEN-R161(RTGDKKGV     | 764   | 738   |
| >PTEN-R161(RTRDKKGV     | 5     | >PTEN-R161(RTGDKKGV     | 34    | 29    |
| >PTEN-R161(RTRDKKGV     | 100   | >PTEN-R161(RTGDKKGV     | 319   | 219   |
| >PTEN-R161(EVRTRDKK     | 81    | >PTEN-R161(EVRTGDKK     | 147   | 66    |
| >PTEN-R161(GEVTRDKK(    | 178   | >PTEN-R161(GEVRTGDKK(   | 444   | 266   |
| >PTEN-R161(GEVTRDKK(    | 381   | >PTEN-R161(GEVRTGDKK(   | 198   | 183   |
| >PTEN-R161(GEVTRDKK(    | 89    | >PTEN-R161(GEVRTGDKK(   | 167   | 78    |
| >PTEN-R161(FYGEVRTR     | 163   | >PTEN-R161(FYGEVRTG     | 26844 | 26681 |
| >PTEN-R161(FYGEVRTR     | 107   | >PTEN-R161(FYGEVRTG     | 34540 | 34433 |
| >PTEN-R161(DFYGEVRTR    | 31    | >PTEN-R161(DFYGEVRTG    | 21668 | 21637 |
| >PTEN-R161(DFYGEVRTR    | 408   | >PTEN-R161(DFYGEVRTG    | 37303 | 36895 |
| >PTEN-R161(DFYGEVRTR    | 291   | >PTEN-R161(DFYGEVRTG    | 35168 | 34877 |
| >PTEN-R161(RDKKGVTI     | 179   | >PTEN-R161(RDKKGVTI     | 338   | 159   |
| >PTEN-R161(ALDFYGEVRT   | 23003 | >PTEN-R161(ALDFYGEVRT   | 415   | 22588 |
| >PTEN-R161(ALDFYGEVRT   | 16711 | >PTEN-R161(ALDFYGEVRT   | 390   | 16321 |
| >PTEN-R161(ALDFYGEVRT   | 21598 | >PTEN-R161(ALDFYGEVRT   | 405   | 21193 |
| >PTEN-R161(ALDFYGEVRT   | 6380  | >PTEN-R161(ALDFYGEVRT   | 7     | 6373  |
| >PTEN-R161(ALDFYGEVRT   | 20014 | >PTEN-R161(ALDFYGEVRT   | 41    | 19973 |
| >PTEN-R161(ALDFYGEVRT   | 20508 | >PTEN-R161(ALDFYGEVRT   | 110   | 20398 |
| >PTEN-R161(ALDFYGEVRT   | 25314 | >PTEN-R161(ALDFYGEVRT   | 368   | 24946 |
| >PTEN-R161(ALDFYGEVRT   | 15045 | >PTEN-R161(ALDFYGEVRT   | 78    | 14967 |
| >PTEN-R161(ALDFYGEVRT   | 16712 | >PTEN-R161(ALDFYGEVRT   | 257   | 16455 |
| >PTEN-R161(RTRDKKGV     | 2423  | >PTEN-R161(RTRDKKGV     | 271   | 2152  |
| >PTEN-R161(RTRDKKGV     | 14    | >PTEN-R161(RTRDKKGV     | 3556  | 3542  |
| >PTEN-R161(RTRDKKGV     | 71    | >PTEN-R161(RTRDKKGV     | 9560  | 9489  |
| >PTEN-R161(RTRDKKGV     | 5     | >PTEN-R161(RTRDKKGV     | 474   | 469   |
| >PTEN-R161(RTRDKKGV     | 103   | >PTEN-R161(RTRDKKGV     | 10322 | 10219 |
| >PTEN-R161(RTRDKKGV     | 120   | >PTEN-R161(RTRDKKGV     | 37    | 83    |
| >PTEN-R161(RTRDKKGV     | 4233  | >PTEN-R161(RTRDKKGV     | 270   | 3963  |

|                        |       |                         |       |       |
|------------------------|-------|-------------------------|-------|-------|
| >PTEN-R161I RTRDKKGV   | 26    | >PTEN-R161I RTIDKKGV    | 49    | 23    |
| >PTEN-R161I RTRDKKGVTI | 5     | >PTEN-R161I RTIDKKGVTI  | 6     | 1     |
| >PTEN-R161I RTRDKKGVTI | 100   | >PTEN-R161I RTIDKKGVTI  | 138   | 38    |
| >PTEN-R161I EVRTRDKK   | 81    | >PTEN-R161I EVRTIDKK    | 31    | 50    |
| >PTEN-R161I GEVRTRDKKC | 178   | >PTEN-R161I GEVRTIDKKG  | 178   | 0     |
| >PTEN-R161I GEVRTRDKKC | 381   | >PTEN-R161I GEVRTIDKKG  | 350   | 31    |
| >PTEN-R161I GEVRTRDKKC | 89    | >PTEN-R161I GEVRTIDKKG  | 50    | 39    |
| >PTEN-R161I FYGEVRTR   | 21124 | >PTEN-R161I FYGEVRTI    | 26    | 21098 |
| >PTEN-R161I FYGEVRTR   | 8453  | >PTEN-R161I FYGEVRTI    | 180   | 8273  |
| >PTEN-R161I FYGEVRTR   | 8238  | >PTEN-R161I FYGEVRTI    | 295   | 7943  |
| >PTEN-R161I FYGEVRTR   | 705   | >PTEN-R161I FYGEVRTI    | 8     | 697   |
| >PTEN-R161I FYGEVRTRDK | 839   | >PTEN-R161I FYGEVRTIDKI | 418   | 421   |
| >PTEN-R161I FYGEVRTR   | 163   | >PTEN-R161I FYGEVRTI    | 21342 | 21179 |
| >PTEN-R161I FYGEVRTR   | 107   | >PTEN-R161I FYGEVRTI    | 33851 | 33744 |
| >PTEN-R161I DFYGEVRTR  | 31    | >PTEN-R161I DFYGEVRTI   | 14010 | 13979 |
| >PTEN-R161I DFYGEVRTRC | 764   | >PTEN-R161I DFYGEVRTID  | 418   | 346   |
| >PTEN-R161I DFYGEVRTR  | 408   | >PTEN-R161I DFYGEVRTI   | 34310 | 33902 |
| >PTEN-R161I DFYGEVRTR  | 291   | >PTEN-R161I DFYGEVRTI   | 34529 | 34238 |
| >PTEN-R161I RDKKGVTI   | 2542  | >PTEN-R161I KDKKGVTI    | 440   | 2102  |
| >PTEN-R161I RDKKGVTI   | 179   | >PTEN-R161I KDKKGVTI    | 267   | 88    |
| >PTEN-R161I RTRDKKGV   | 14    | >PTEN-R161I RTKDKKGV    | 61    | 47    |
| >PTEN-R161I RTRDKKGV   | 71    | >PTEN-R161I RTKDKKGV    | 533   | 462   |
| >PTEN-R161I RTRDKKGVTI | 5     | >PTEN-R161I RTKDKKGVTI  | 10    | 5     |
| >PTEN-R161I RTRDKKGVTI | 103   | >PTEN-R161I RTKDKKGVTI  | 726   | 623   |
| >PTEN-R161I RTRDKKGVTI | 120   | >PTEN-R161I RTKDKKGVTI  | 126   | 6     |
| >PTEN-R161I RTRDKKGV   | 26    | >PTEN-R161I RTKDKKGV    | 154   | 128   |
| >PTEN-R161I RTRDKKGVTI | 5     | >PTEN-R161I RTKDKKGVTI  | 11    | 6     |
| >PTEN-R161I RTRDKKGVTI | 100   | >PTEN-R161I RTKDKKGVTI  | 231   | 131   |
| >PTEN-R161I EVRTRDKK   | 81    | >PTEN-R161I EVRTKDKK    | 159   | 78    |
| >PTEN-R161I GEVRTRDKKC | 178   | >PTEN-R161I GEVRTKDKKC  | 170   | 8     |
| >PTEN-R161I GEVRTRDKKC | 381   | >PTEN-R161I GEVRTKDKKC  | 383   | 2     |
| >PTEN-R161I GEVRTRDKKC | 89    | >PTEN-R161I GEVRTKDKKC  | 164   | 75    |
| >PTEN-R161I FYGEVRTR   | 163   | >PTEN-R161I FYGEVRTK    | 2518  | 2355  |
| >PTEN-R161I FYGEVRTR   | 107   | >PTEN-R161I FYGEVRTK    | 2819  | 2712  |
| >PTEN-R161I DFYGEVRTR  | 31    | >PTEN-R161I DFYGEVRTK   | 654   | 623   |
| >PTEN-R161I DFYGEVRTR  | 408   | >PTEN-R161I DFYGEVRTK   | 1253  | 845   |
| >PTEN-R161I DFYGEVRTR  | 291   | >PTEN-R161I DFYGEVRTK   | 5629  | 5338  |
| >PTEN-R172\RRYVYYYSYL  | 136   | >PTEN-R172\WRYVYYYSYL   | 214   | 78    |
| >PTEN-R172\RRYVYYYSYL  | 3115  | >PTEN-R172\WRYVYYYSYL   | 459   | 2656  |
| >PTEN-R172\RRYVYYYSYL  | 2252  | >PTEN-R172\WRYVYYYSYL   | 385   | 1867  |
| >PTEN-R172\RRYVYYYSYL  | 429   | >PTEN-R172\WRYVYYYSYL   | 378   | 51    |
| >PTEN-R172\RRYVYYYSY   | 139   | >PTEN-R172\WRYVYYYSY    | 35    | 104   |
| >PTEN-R172\RRYVYYYSY   | 106   | >PTEN-R172\WRYVYYYSY    | 422   | 316   |

|                        |       |                        |       |       |
|------------------------|-------|------------------------|-------|-------|
| >PTEN-R172\RRYVYYYSY   | 3     | >PTEN-R172\WRYVYYYSY   | 7     | 4     |
| >PTEN-R172\RRYVYYYSYL  | 8     | >PTEN-R172\WRYVYYYSYL  | 14    | 6     |
| >PTEN-R172\RRYVYYYSYLL | 19    | >PTEN-R172\WRYVYYYSYL  | 52    | 33    |
| >PTEN-R172\RRYVYYYSY   | 4587  | >PTEN-R172\WRYVYYYSY   | 238   | 4349  |
| >PTEN-R172\RRYVYYYS    | 69    | >PTEN-R172\WRYVYYYS    | 264   | 195   |
| >PTEN-R172\RRYVYYYSY   | 11    | >PTEN-R172\WRYVYYYSY   | 18    | 7     |
| >PTEN-R172\RRYVYYYSYL  | 7     | >PTEN-R172\WRYVYYYSYL  | 11    | 4     |
| >PTEN-R172\RRYVYYYSYLL | 8     | >PTEN-R172\WRYVYYYSYL  | 18    | 10    |
| >PTEN-R172\RRYVYYYSYL  | 325   | >PTEN-R172\WRYVYYYSYL  | 27    | 298   |
| >PTEN-R172\RRYVYYYSYLL | 50    | >PTEN-R172\WRYVYYYSYL  | 9     | 41    |
| >PTEN-R172\RRYVYYYSYL  | 263   | >PTEN-R172\WRYVYYYSYL  | 819   | 556   |
| >PTEN-R172\RRYVYYYSYLL | 106   | >PTEN-R172\WRYVYYYSYL  | 261   | 155   |
| >PTEN-R172\RRYVYYYS    | 710   | >PTEN-R172\WRYVYYYS    | 420   | 290   |
| >PTEN-R172\RRYVYYYS    | 221   | >PTEN-R172\WRYVYYYS    | 3440  | 3219  |
| >PTEN-R172\RRYVYYYSY   | 47    | >PTEN-R172\WRYVYYYSY   | 791   | 744   |
| >PTEN-R172\RRYVYYYSYL  | 14    | >PTEN-R172\WRYVYYYSYL  | 34    | 20    |
| >PTEN-R172\RRYVYYYSYLL | 11    | >PTEN-R172\WRYVYYYSYL  | 70    | 59    |
| >PTEN-R172\RRYVYYYS    | 450   | >PTEN-R172\WRYVYYYS    | 6226  | 5776  |
| >PTEN-R172\RRYVYYYSY   | 33    | >PTEN-R172\WRYVYYYSY   | 87    | 54    |
| >PTEN-R172\RRYVYYYSYL  | 12    | >PTEN-R172\WRYVYYYSYL  | 19    | 7     |
| >PTEN-R172\RRYVYYYSYLL | 3     | >PTEN-R172\WRYVYYYSYL  | 5     | 2     |
| >PTEN-R172\RRYVYYYSY   | 231   | >PTEN-R172\WRYVYYYSY   | 868   | 637   |
| >PTEN-R172\RRYVYYYSY   | 747   | >PTEN-R172\WRYVYYYSY   | 274   | 473   |
| >PTEN-R172\QRRYVYYYSY  | 2267  | >PTEN-R172\QWRYVYYYS'  | 204   | 2063  |
| >PTEN-R172\QRRYVYYYSY  | 21292 | >PTEN-R172\QWRYVYYYS'  | 138   | 21154 |
| >PTEN-R172\QRRYVYYYSY  | 19463 | >PTEN-R172\QWRYVYYYS'  | 165   | 19298 |
| >PTEN-R172\QRRYVYYY    | 292   | >PTEN-R172\QWRYVYYY    | 17    | 275   |
| >PTEN-R172\QRRYVYYYSY  | 971   | >PTEN-R172\QWRYVYYYS'  | 69    | 902   |
| >PTEN-R172\QRRYVYYYSY  | 1981  | >PTEN-R172\QWRYVYYYS'  | 199   | 1782  |
| >PTEN-R172\QRRYVYYY    | 388   | >PTEN-R172\QWRYVYYY    | 85    | 303   |
| >PTEN-R172\QRRYVYYYSY  | 405   | >PTEN-R172\QWRYVYYYS'  | 61    | 344   |
| >PTEN-R172\QRRYVYYY    | 33    | >PTEN-R172\QWRYVYYY    | 1241  | 1208  |
| >PTEN-R172\QRRYVYYYSY  | 15    | >PTEN-R172\QWRYVYYYS'  | 424   | 409   |
| >PTEN-R172\QRRYVYYYSY  | 44    | >PTEN-R172\QWRYVYYYS'  | 2420  | 2376  |
| >PTEN-R172\QRRYVYYYSY  | 33    | >PTEN-R172\QWRYVYYYS'  | 3905  | 3872  |
| >PTEN-R172\QRRYVYYYSY  | 41    | >PTEN-R172\QWRYVYYYS'  | 5078  | 5037  |
| >PTEN-R172\QRRYVYYYSY  | 19    | >PTEN-R172\QWRYVYYYS'  | 7343  | 7324  |
| >PTEN-R172\QRRYVYYY    | 29799 | >PTEN-R172\QWRYVYYY    | 96    | 29703 |
| >PTEN-R172\QRRYVYYYS   | 27973 | >PTEN-R172\QWRYVYYYS   | 163   | 27810 |
| >PTEN-R172\QRRYVYYYSY  | 19543 | >PTEN-R172\QWRYVYYYS'  | 35    | 19508 |
| >PTEN-R172\DKKGV TIPSQ | 497   | >PTEN-R172\DKKGV TIPSQ | 33063 | 32566 |
| >PTEN-R172\SQRRYVYYY   | 12829 | >PTEN-R172\SQWRYVYYY   | 378   | 12451 |
| >PTEN-R172\SQRRYVYYYS  | 10033 | >PTEN-R172\SQWRYVYYY!  | 232   | 9801  |

|                       |      |                       |       |       |
|-----------------------|------|-----------------------|-------|-------|
| >PTEN-R172\SQRRYVYY   | 2860 | >PTEN-R172\SQWRYVYY   | 183   | 2677  |
| >PTEN-R172\SQRRYVYYY  | 654  | >PTEN-R172\SQWRYVYYY  | 47    | 607   |
| >PTEN-R172\SQRRYVYYY  | 2362 | >PTEN-R172\SQWRYVYYY! | 161   | 2201  |
| >PTEN-R172\SQRRYVYYY  | 308  | >PTEN-R172\SQWRYVYYY  | 491   | 183   |
| >PTEN-R172\SQRRYVYY   | 960  | >PTEN-R172\SQWRYVYY   | 48    | 912   |
| >PTEN-R172\SQRRYVYYY  | 137  | >PTEN-R172\SQWRYVYYY  | 14    | 123   |
| >PTEN-R172\SQRRYVYYY  | 355  | >PTEN-R172\SQWRYVYYY! | 23    | 332   |
| >PTEN-R172\SQRRYVYY   | 72   | >PTEN-R172\SQWRYVYY   | 7921  | 7849  |
| >PTEN-R172\SQRRYVYYY  | 75   | >PTEN-R172\SQWRYVYYY  | 8343  | 8268  |
| >PTEN-R172\SQRRYVYYY  | 152  | >PTEN-R172\SQWRYVYYY! | 11691 | 11539 |
| >PTEN-R172\SQRRYVYYY  | 104  | >PTEN-R172\SQWRYVYYY! | 8939  | 8835  |
| >PTEN-R172\SQRRYVYY   | 535  | >PTEN-R172\SQWRYVYY   | 124   | 411   |
| >PTEN-R172\SQRRYVYYY  | 83   | >PTEN-R172\SQWRYVYYY  | 24    | 59    |
| >PTEN-R172\SQRRYVYYY  | 106  | >PTEN-R172\SQWRYVYYY! | 29    | 77    |
| >PTEN-R172\SQRRYVYY   | 1014 | >PTEN-R172\SQWRYVYY   | 227   | 787   |
| >PTEN-R172\SQRRYVYYY  | 219  | >PTEN-R172\SQWRYVYYY  | 59    | 160   |
| >PTEN-R172\SQRRYVYYY  | 943  | >PTEN-R172\SQWRYVYYY! | 254   | 689   |
| >PTEN-R172\SQRRYVYYY  | 9053 | >PTEN-R172\SQWRYVYYY! | 341   | 8712  |
| >PTEN-R172\SQRRYVYY   | 1467 | >PTEN-R172\SQWRYVYY   | 409   | 1058  |
| >PTEN-R172\SQRRYVYYY  | 212  | >PTEN-R172\SQWRYVYYY  | 46    | 166   |
| >PTEN-R172\SQRRYVYYY  | 924  | >PTEN-R172\SQWRYVYYY! | 233   | 691   |
| >PTEN-R172\SQRRYVYY   | 41   | >PTEN-R172\SQWRYVYY   | 65    | 24    |
| >PTEN-R172\SQRRYVYYY  | 36   | >PTEN-R172\SQWRYVYYY  | 53    | 17    |
| >PTEN-R172\SQRRYVYYY  | 34   | >PTEN-R172\SQWRYVYYY! | 47    | 13    |
| >PTEN-R172\SQRRYVYY   | 383  | >PTEN-R172\SQWRYVYY   | 449   | 66    |
| >PTEN-R172\SQRRYVYYY  | 322  | >PTEN-R172\SQWRYVYYY! | 434   | 112   |
| >PTEN-R172\SQRRYVYY   | 4    | >PTEN-R172\SQWRYVYY   | 3     | 1     |
| >PTEN-R172\SQRRYVYYY  | 4    | >PTEN-R172\SQWRYVYYY  | 3     | 1     |
| >PTEN-R172\SQRRYVYYY  | 3    | >PTEN-R172\SQWRYVYYY! | 2     | 1     |
| >PTEN-R172\SQRRYVYYY  | 1083 | >PTEN-R172\SQWRYVYYY  | 332   | 751   |
| >PTEN-R172\SQRRYVYYY  | 492  | >PTEN-R172\SQWRYVYYY! | 146   | 346   |
| >PTEN-R172\SQRRYVYYY  | 4194 | >PTEN-R172\SQWRYVYYY  | 335   | 3859  |
| >PTEN-R172\SQRRYVYYY  | 3634 | >PTEN-R172\SQWRYVYYY! | 266   | 3368  |
| >PTEN-R172\SQRRYVYYY  | 9232 | >PTEN-R172\SQWRYVYYY! | 416   | 8816  |
| >PTEN-R172\SQRRYVYYY  | 453  | >PTEN-R172\SQWRYVYYY  | 819   | 366   |
| >PTEN-R172\PSQRRYVYYY | 186  | >PTEN-R172\PSQWRYVYY' | 189   | 3     |
| >PTEN-R172\PSQRRYVYY  | 1915 | >PTEN-R172\PSQWRYVYY  | 482   | 1433  |
| >PTEN-R172\PSQRRYVYYY | 359  | >PTEN-R172\PSQWRYVYY' | 212   | 147   |
| >PTEN-R172\PSQRRYVYY  | 465  | >PTEN-R172\PSQWRYVYY  | 104   | 361   |
| >PTEN-R172\PSQRRYVYY  | 1811 | >PTEN-R172\PSQWRYVYY  | 391   | 1420  |
| >PTEN-R172\PSQRRYVYYY | 40   | >PTEN-R172\PSQWRYVYY' | 37    | 3     |
| >PTEN-R172\PSQRRYVYYY | 353  | >PTEN-R172\PSQWRYVYY' | 252   | 101   |
| >PTEN-R172\IPSQRRYVYY | 1972 | >PTEN-R172\IPSQWRYVYY | 208   | 1764  |

|                        |      |                       |      |      |
|------------------------|------|-----------------------|------|------|
| >PTEN-R172\IPSQRRYVYY\ | 288  | >PTEN-R172\IPSQWRYVYY | 71   | 217  |
| >PTEN-R172\IPSQRRYVY   | 183  | >PTEN-R172\IPSQWRYVY  | 29   | 154  |
| >PTEN-R172\IPSQRRYVYY\ | 123  | >PTEN-R172\IPSQWRYVYY | 39   | 84   |
| >PTEN-R172\IPSQRRYV    | 22   | >PTEN-R172\IPSQWRYV   | 108  | 86   |
| >PTEN-R172\IPSQRRYVY   | 165  | >PTEN-R172\IPSQWRYVY  | 1363 | 1198 |
| >PTEN-R172\IPSQRRYVY   | 1556 | >PTEN-R172\IPSQWRYVY  | 494  | 1062 |
| >PTEN-R172\IPSQRRYVY   | 16   | >PTEN-R172\IPSQWRYVY  | 8    | 8    |
| >PTEN-R172\IPSQRRYVYY  | 1086 | >PTEN-R172\IPSQWRYVYY | 393  | 693  |
| >PTEN-R172\IPSQRRYVYY\ | 27   | >PTEN-R172\IPSQWRYVYY | 13   | 14   |
| >PTEN-R172\IPSQRRYVY   | 74   | >PTEN-R172\IPSQWRYVY  | 20   | 54   |
| >PTEN-R172\IPSQRRYVY   | 985  | >PTEN-R172\IPSQWRYVY  | 190  | 795  |
| >PTEN-R172\IPSQRRYVYY\ | 31   | >PTEN-R172\IPSQWRYVYY | 14   | 17   |
| >PTEN-R172\IPSQRRYVY   | 1200 | >PTEN-R172\IPSQWRYVY  | 388  | 812  |
| >PTEN-R172\IPSQRRYVY   | 7    | >PTEN-R172\IPSQWRYVY  | 7    | 0    |
| >PTEN-R172\IPSQRRYVY   | 33   | >PTEN-R172\IPSQWRYVY  | 41   | 8    |
| >PTEN-R172\IPSQRRYVYY\ | 12   | >PTEN-R172\IPSQWRYVYY | 11   | 1    |
| >PTEN-R172\IPSQRRYVY   | 1416 | >PTEN-R172\IPSQWRYVY  | 254  | 1162 |
| >PTEN-R172\IPSQRRYVYY  | 262  | >PTEN-R172\IPSQWRYVYY | 103  | 159  |
| >PTEN-R172\IPSQRRYVYY\ | 518  | >PTEN-R172\IPSQWRYVYY | 175  | 343  |
| >PTEN-R172\TIPSQRRYV   | 1432 | >PTEN-R172\TIPSQWRYV  | 371  | 1061 |
| >PTEN-R172\TIPSQRRYV   | 7722 | >PTEN-R172\TIPSQWRYV  | 452  | 7270 |
| >PTEN-R172\TIPSQRRYV   | 1464 | >PTEN-R172\TIPSQWRYV  | 93   | 1371 |
| >PTEN-R172\TIPSQRRYV   | 225  | >PTEN-R172\TIPSQWRYV  | 265  | 40   |
| >PTEN-R172\TIPSQRRY    | 437  | >PTEN-R172\TIPSQWRY   | 234  | 203  |
| >PTEN-R172\TIPSQRRYVY  | 618  | >PTEN-R172\TIPSQWRYVY | 204  | 414  |
| >PTEN-R172\TIPSQRRYVY\ | 290  | >PTEN-R172\TIPSQWRYVY | 234  | 56   |
| >PTEN-R172\TIPSQRRY    | 1590 | >PTEN-R172\TIPSQWRY   | 136  | 1454 |
| >PTEN-R172\TIPSQRRYVY  | 746  | >PTEN-R172\TIPSQWRYVY | 231  | 515  |
| >PTEN-R172\TIPSQRRYVY\ | 238  | >PTEN-R172\TIPSQWRYVY | 90   | 148  |
| >PTEN-R172\TIPSQRRY    | 641  | >PTEN-R172\TIPSQWRY   | 218  | 423  |
| >PTEN-R172\TIPSQRRYV   | 67   | >PTEN-R172\TIPSQWRYV  | 69   | 2    |
| >PTEN-R172\TIPSQRRY    | 8273 | >PTEN-R172\TIPSQWRY   | 474  | 7799 |
| >PTEN-R172\VTIPSQRRY   | 4918 | >PTEN-R172\VTIPSQWRY  | 156  | 4762 |
| >PTEN-R172\VTIPSQRRYV  | 563  | >PTEN-R172\VTIPSQWRY\ | 338  | 225  |
| >PTEN-R172\VTIPSQRRYV  | 916  | >PTEN-R172\VTIPSQWRY\ | 494  | 422  |
| >PTEN-R172\VTIPSQRRYV  | 249  | >PTEN-R172\VTIPSQWRY\ | 21   | 228  |
| >PTEN-R172\VTIPSQRRYV  | 3708 | >PTEN-R172\VTIPSQWRY\ | 277  | 3431 |
| >PTEN-R172\VTIPSQRRYV  | 286  | >PTEN-R172\VTIPSQWRY\ | 91   | 195  |
| >PTEN-R172\VTIPSQRR    | 608  | >PTEN-R172\VTIPSQWR   | 302  | 306  |
| >PTEN-R172\VTIPSQRRY   | 1876 | >PTEN-R172\VTIPSQWRY  | 116  | 1760 |
| >PTEN-R172\VTIPSQRRYV\ | 284  | >PTEN-R172\VTIPSQWRY\ | 90   | 194  |
| >PTEN-R172\VTIPSQRRY   | 26   | >PTEN-R172\VTIPSQWRY  | 21   | 5    |
| >PTEN-R172\VTIPSQRRYV\ | 38   | >PTEN-R172\VTIPSQWRY\ | 19   | 19   |

|                        |       |                       |       |       |
|------------------------|-------|-----------------------|-------|-------|
| >PTEN-R172\VTIPSQRRY   | 59    | >PTEN-R172\VTIPSQWRV  | 10    | 49    |
| >PTEN-R172\VTIPSQRRYV' | 26    | >PTEN-R172\VTIPSQWRV\ | 9     | 17    |
| >PTEN-R172\VTIPSQRRY   | 41    | >PTEN-R172\VTIPSQWRV  | 10    | 31    |
| >PTEN-R172\VTIPSQRRYV' | 16    | >PTEN-R172\VTIPSQWRV\ | 7     | 9     |
| >PTEN-R172\VTIPSQRR    | 135   | >PTEN-R172\VTIPSQWR   | 71    | 64    |
| >PTEN-R172\VTIPSQRR    | 1245  | >PTEN-R172\VTIPSQWR   | 457   | 788   |
| >PTEN-R172\VTIPSQRR    | 65    | >PTEN-R172\VTIPSQWR   | 27    | 38    |
| >PTEN-R172\VTIPSQRRYV  | 225   | >PTEN-R172\VTIPSQWRV\ | 459   | 234   |
| >PTEN-R172\VTIPSQRRYV  | 1840  | >PTEN-R172\VTIPSQWRV\ | 336   | 1504  |
| >PTEN-R172\VTIPSQRRY   | 1209  | >PTEN-R172\VTIPSQWRV  | 10    | 1199  |
| >PTEN-R172\VTIPSQRRYV' | 579   | >PTEN-R172\VTIPSQWRV\ | 94    | 485   |
| >PTEN-R172\VTIPSQRRY   | 399   | >PTEN-R172\VTIPSQWRV  | 703   | 304   |
| >PTEN-R172\VTIPSQRRYV' | 109   | >PTEN-R172\VTIPSQWRV\ | 113   | 4     |
| >PTEN-R172\VTIPSQRRYV' | 205   | >PTEN-R172\VTIPSQWRV\ | 181   | 24    |
| >PTEN-R172\VTIPSQRRY   | 3     | >PTEN-R172\VTIPSQWRV  | 2     | 1     |
| >PTEN-R172\VTIPSQRRYV  | 124   | >PTEN-R172\VTIPSQWRV\ | 82    | 42    |
| >PTEN-R172\VTIPSQRRYV' | 4     | >PTEN-R172\VTIPSQWRV\ | 3     | 1     |
| >PTEN-R172\VTIPSQRRY   | 81    | >PTEN-R172\VTIPSQWRV  | 44    | 37    |
| >PTEN-R172\VTIPSQRRYV' | 111   | >PTEN-R172\VTIPSQWRV\ | 69    | 42    |
| >PTEN-R172\VTIPSQRRY   | 122   | >PTEN-R172\VTIPSQWRV  | 11    | 111   |
| >PTEN-R172\VTIPSQRRYV' | 76    | >PTEN-R172\VTIPSQWRV\ | 21    | 55    |
| >PTEN-R172\VTIPSQRRYV  | 616   | >PTEN-R172\VTIPSQWRV\ | 442   | 174   |
| >PTEN-R172\VTIPSQRRY   | 37    | >PTEN-R172\VTIPSQWRV  | 156   | 119   |
| >PTEN-R172\VTIPSQRRYV' | 37    | >PTEN-R172\VTIPSQWRV\ | 43    | 6     |
| >PTEN-R172\VTIPSQRRYV' | 256   | >PTEN-R172\VTIPSQWRV\ | 286   | 30    |
| >PTEN-R172\VTIPSQRRY   | 2526  | >PTEN-R172\VTIPSQWRV  | 122   | 2404  |
| >PTEN-R172\VTIPSQRRYV' | 817   | >PTEN-R172\VTIPSQWRV\ | 260   | 557   |
| >PTEN-R172\VTIPSQRR    | 925   | >PTEN-R172\VTIPSQWR   | 469   | 456   |
| >PTEN-R172\GVTIPSQRRY  | 623   | >PTEN-R172\GVTIPSQWR\ | 164   | 459   |
| >PTEN-R172\GVTIPSQRRY' | 1023  | >PTEN-R172\GVTIPSQWR\ | 196   | 827   |
| >PTEN-R172\GVTIPSQRRY  | 123   | >PTEN-R172\GVTIPSQWR\ | 123   | 0     |
| >PTEN-R172\GVTIPSQRRY  | 765   | >PTEN-R172\GVTIPSQWR\ | 218   | 547   |
| >PTEN-R172\GVTIPSQR    | 457   | >PTEN-R172\GVTIPSQW   | 21006 | 20549 |
| >PTEN-R172\GVTIPSQR    | 210   | >PTEN-R172\GVTIPSQW   | 31295 | 31085 |
| >PTEN-R172\GVTIPSQRR   | 1034  | >PTEN-R172\GVTIPSQWR  | 399   | 635   |
| >PTEN-R172\GVTIPSQRRY  | 5519  | >PTEN-R172\GVTIPSQWR\ | 452   | 5067  |
| >PTEN-R172\GVTIPSQR    | 21354 | >PTEN-R172\GVTIPSQW   | 148   | 21206 |
| >PTEN-R172\GVTIPSQRRY  | 172   | >PTEN-R172\GVTIPSQWR\ | 182   | 10    |
| >PTEN-R172\GVTIPSQR    | 22303 | >PTEN-R172\GVTIPSQW   | 244   | 22059 |
| >PTEN-R172\GVTIPSQRRY  | 553   | >PTEN-R172\GVTIPSQWR\ | 303   | 250   |
| >PTEN-R172\KGVIPSQRR   | 155   | >PTEN-R172\KGVIPSQWF  | 39    | 116   |
| >PTEN-R172\KGVIPSQR    | 208   | >PTEN-R172\KGVIPSQW   | 19832 | 19624 |
| >PTEN-R172\KGVIPSQRR   | 2691  | >PTEN-R172\KGVIPSQWF  | 170   | 2521  |

|                              |       |                             |       |       |
|------------------------------|-------|-----------------------------|-------|-------|
| >PTEN-R172\KGV TIPSQR        | 21620 | >PTEN-R172\KGV TIPSQW       | 185   | 21435 |
| >PTEN-R172\KGV TIPSQRR       | 202   | >PTEN-R172\KGV TIPSQWF      | 178   | 24    |
| >PTEN-R172\KGV TIPSQR        | 22430 | >PTEN-R172\KGV TIPSQW       | 93    | 22337 |
| >PTEN-R172\KGV TIPSQRR       | 1307  | >PTEN-R172\KGV TIPSQWF      | 465   | 842   |
| >PTEN-R172\KGV TIPSQR        | 20585 | >PTEN-R172\KGV TIPSQW       | 13    | 20572 |
| >PTEN-R172\KGV TIPSQRR       | 1795  | >PTEN-R172\KGV TIPSQWF      | 100   | 1695  |
| >PTEN-R172\KGV TIPSQR        | 5261  | >PTEN-R172\KGV TIPSQW       | 296   | 4965  |
| >PTEN-R172\KGV TIPSQRR       | 227   | >PTEN-R172\KGV TIPSQWF      | 504   | 277   |
| >PTEN-R172\KGV TIPSQR        | 147   | >PTEN-R172\KGV TIPSQW       | 27489 | 27342 |
| >PTEN-R172\KGV TIPSQRR       | 120   | >PTEN-R172\KGV TIPSQWF      | 59    | 61    |
| >PTEN-R172\KKG V TIPSQR      | 982   | >PTEN-R172\KKG V TIPSQW     | 408   | 574   |
| >PTEN-R172\KKG V TIPSQR      | 22335 | >PTEN-R172\KKG V TIPSQW     | 499   | 21836 |
| >PTEN-R172\KKG V TIPSQR      | 511   | >PTEN-R172\KKG V TIPSQW     | 272   | 239   |
| >PTEN-R173(CRY V V V V SYL   | 51    | >PTEN-R173(CY V V V V SYL   | 29    | 22    |
| >PTEN-R173(CRY V V V V SYL   | 794   | >PTEN-R173(CY V V V V SYL   | 465   | 329   |
| >PTEN-R173(CRY V V V V SYL   | 340   | >PTEN-R173(CY V V V V SYL   | 625   | 285   |
| >PTEN-R173(CRY V V V V SYLLK | 94    | >PTEN-R173(CY V V V V SYLLK | 367   | 273   |
| >PTEN-R173(CRY V V V V SY    | 213   | >PTEN-R173(CY V V V V SY    | 278   | 65    |
| >PTEN-R173(CRY V V V V SYL   | 42    | >PTEN-R173(CY V V V V SYL   | 46    | 4     |
| >PTEN-R173(CRY V V V V SYLL  | 6     | >PTEN-R173(CY V V V V SYLL  | 10    | 4     |
| >PTEN-R173(CRY V V V V SYLLK | 105   | >PTEN-R173(CY V V V V SYLLK | 115   | 10    |
| >PTEN-R173(CRY V V V V SY    | 244   | >PTEN-R173(CY V V V V SY    | 679   | 435   |
| >PTEN-R173(CRY V V V V SYL   | 56    | >PTEN-R173(CY V V V V SYL   | 135   | 79    |
| >PTEN-R173(CRY V V V V SYLL  | 26    | >PTEN-R173(CY V V V V SYLL  | 37    | 11    |
| >PTEN-R173(CRY V V V V SYLLK | 271   | >PTEN-R173(CY V V V V SYLLK | 861   | 590   |
| >PTEN-R173(CRY V V V V SY    | 86    | >PTEN-R173(CY V V V V SY    | 136   | 50    |
| >PTEN-R173(CRY V V V V SYL   | 6     | >PTEN-R173(CY V V V V SYL   | 7     | 1     |
| >PTEN-R173(CRY V V V V SYLL  | 10    | >PTEN-R173(CY V V V V SYLL  | 14    | 4     |
| >PTEN-R173(CRY V V V V SYLLK | 446   | >PTEN-R173(CY V V V V SYLLK | 743   | 297   |
| >PTEN-R173(CRY V V V V SY    | 664   | >PTEN-R173(CY V V V V SY    | 342   | 322   |
| >PTEN-R173(CRY V V V V SY    | 18    | >PTEN-R173(CY V V V V SY    | 16    | 2     |
| >PTEN-R173(CRY V V V V SYLL  | 222   | >PTEN-R173(CY V V V V SYLL  | 259   | 37    |
| >PTEN-R173(CRY V V V V SYL   | 121   | >PTEN-R173(CY V V V V SYL   | 6340  | 6219  |
| >PTEN-R173(CRY V V V V SYLL  | 348   | >PTEN-R173(CY V V V V SYLL  | 8785  | 8437  |
| >PTEN-R173(CRY V V V V SYLLK | 6     | >PTEN-R173(CY V V V V SYLLK | 152   | 146   |
| >PTEN-R173(CRY V V V V SY    | 39    | >PTEN-R173(CY V V V V SY    | 67    | 28    |
| >PTEN-R173(CRY V V V V SYLL  | 410   | >PTEN-R173(CY V V V V SYLL  | 2554  | 2144  |
| >PTEN-R173(CRY V V V V SY    | 484   | >PTEN-R173(CY V V V V SY    | 6792  | 6308  |
| >PTEN-R173(CRY V V V V SYL   | 105   | >PTEN-R173(CY V V V V SYL   | 2586  | 2481  |
| >PTEN-R173(CRY V V V V SYLLK | 33    | >PTEN-R173(CY V V V V SYLLK | 540   | 507   |
| >PTEN-R173(CRY V V V V SYLLK | 1453  | >PTEN-R173(CY V V V V SYLLK | 327   | 1126  |
| >PTEN-R173(CRY V V V V SY    | 88    | >PTEN-R173(CY V V V V SY    | 920   | 832   |
| >PTEN-R173(CRY V V V V SY    | 77    | >PTEN-R173(CY V V V V SY    | 529   | 452   |

|                         |      |                         |       |       |
|-------------------------|------|-------------------------|-------|-------|
| >PTEN-R173(RYVYYYYSYL   | 223  | >PTEN-R173(CYVYYYYSYL   | 1972  | 1749  |
| >PTEN-R173(RYVYYYYSYLL  | 420  | >PTEN-R173(CYVYYYYSYLL  | 13220 | 12800 |
| >PTEN-R173(RYVYYYYSYL   | 403  | >PTEN-R173(CYVYYYYSYL   | 6402  | 5999  |
| >PTEN-R173(RYVYYYYSY    | 127  | >PTEN-R173(CYVYYYYSY    | 47    | 80    |
| >PTEN-R173(RYVYYYYSYLLK | 42   | >PTEN-R173(CYVYYYYSYLLK | 109   | 67    |
| >PTEN-R173(RYVYYYYSYL   | 311  | >PTEN-R173(CYVYYYYSYL   | 419   | 108   |
| >PTEN-R173(RYVYYYYSYLL  | 195  | >PTEN-R173(CYVYYYYSYLL  | 216   | 21    |
| >PTEN-R173(RYVYYYYSY    | 356  | >PTEN-R173(CYVYYYYSY    | 1162  | 806   |
| >PTEN-R173(RYVYYYYSYL   | 37   | >PTEN-R173(CYVYYYYSYL   | 125   | 88    |
| >PTEN-R173(RYVYYYYSYLL  | 32   | >PTEN-R173(CYVYYYYSYLL  | 128   | 96    |
| >PTEN-R173(RYVYYYYSYLLK | 325  | >PTEN-R173(CYVYYYYSYLLK | 1080  | 755   |
| >PTEN-R173(RRYVYYYYSYLL | 136  | >PTEN-R173(RCYVYYYYSYLL | 173   | 37    |
| >PTEN-R173(RRYVYYYYSYL  | 429  | >PTEN-R173(RCYVYYYYSYL  | 123   | 306   |
| >PTEN-R173(RRYVYYYYSYLL | 2314 | >PTEN-R173(RCYVYYYYSYLL | 190   | 2124  |
| >PTEN-R173(RRYVYYYYSYL  | 3713 | >PTEN-R173(RCYVYYYYSYL  | 341   | 3372  |
| >PTEN-R173(RRYVYYYYSY   | 139  | >PTEN-R173(RCYVYYYYSY   | 68    | 71    |
| >PTEN-R173(RRYVYYYYSYL  | 3632 | >PTEN-R173(RCYVYYYYSYL  | 446   | 3186  |
| >PTEN-R173(RRYVYYYYSY   | 106  | >PTEN-R173(RCYVYYYYSY   | 108   | 2     |
| >PTEN-R173(RRYVYYYYSYL  | 3116 | >PTEN-R173(RCYVYYYYSYL  | 282   | 2834  |
| >PTEN-R173(RRYVYYYYSYLL | 2061 | >PTEN-R173(RCYVYYYYSYLL | 198   | 1863  |
| >PTEN-R173(RRYVYYYYSY   | 797  | >PTEN-R173(RCYVYYYYSY   | 122   | 675   |
| >PTEN-R173(RRYVYYYYSY   | 3    | >PTEN-R173(RCYVYYYYSY   | 17    | 14    |
| >PTEN-R173(RRYVYYYYSYL  | 8    | >PTEN-R173(RCYVYYYYSYL  | 103   | 95    |
| >PTEN-R173(RRYVYYYYSYLL | 19   | >PTEN-R173(RCYVYYYYSYLL | 509   | 490   |
| >PTEN-R173(RRYVYYYYSY   | 5878 | >PTEN-R173(RCYVYYYYSY   | 164   | 5714  |
| >PTEN-R173(RRYVYYYYS    | 69   | >PTEN-R173(RCYVYYYYS    | 21652 | 21583 |
| >PTEN-R173(RRYVYYYYSY   | 11   | >PTEN-R173(RCYVYYYYSY   | 13251 | 13240 |
| >PTEN-R173(RRYVYYYYSYL  | 7    | >PTEN-R173(RCYVYYYYSYL  | 2755  | 2748  |
| >PTEN-R173(RRYVYYYYSYLL | 8    | >PTEN-R173(RCYVYYYYSYLL | 11062 | 11054 |
| >PTEN-R173(RRYVYYYYSYL  | 325  | >PTEN-R173(RCYVYYYYSYL  | 9541  | 9216  |
| >PTEN-R173(RRYVYYYYSYLL | 50   | >PTEN-R173(RCYVYYYYSYLL | 4187  | 4137  |
| >PTEN-R173(RRYVYYYYSYL  | 263  | >PTEN-R173(RCYVYYYYSYL  | 1657  | 1394  |
| >PTEN-R173(RRYVYYYYSYLL | 106  | >PTEN-R173(RCYVYYYYSYLL | 517   | 411   |
| >PTEN-R173(RRYVYYYYSY   | 1676 | >PTEN-R173(RCYVYYYYSY   | 187   | 1489  |
| >PTEN-R173(RRYVYYYYSYLL | 4609 | >PTEN-R173(RCYVYYYYSYLL | 404   | 4205  |
| >PTEN-R173(RRYVYYYYSY   | 676  | >PTEN-R173(RCYVYYYYSY   | 143   | 533   |
| >PTEN-R173(RRYVYYYYS    | 221  | >PTEN-R173(RCYVYYYYS    | 21329 | 21108 |
| >PTEN-R173(RRYVYYYYSY   | 47   | >PTEN-R173(RCYVYYYYSY   | 7784  | 7737  |
| >PTEN-R173(RRYVYYYYSYL  | 14   | >PTEN-R173(RCYVYYYYSYL  | 2282  | 2268  |
| >PTEN-R173(RRYVYYYYSYLL | 11   | >PTEN-R173(RCYVYYYYSYLL | 877   | 866   |
| >PTEN-R173(RRYVYYYYS    | 450  | >PTEN-R173(RCYVYYYYS    | 17183 | 16733 |
| >PTEN-R173(RRYVYYYYSY   | 33   | >PTEN-R173(RCYVYYYYSY   | 13722 | 13689 |
| >PTEN-R173(RRYVYYYYSYL  | 12   | >PTEN-R173(RCYVYYYYSYL  | 2151  | 2139  |



|                        |      |                        |       |       |
|------------------------|------|------------------------|-------|-------|
| >PTEN-R173(RRYVYYYSYLL | 3    | >PTEN-R173(RCYVYYYSYLL | 1073  | 1070  |
| >PTEN-R173(RRYVYYYSY   | 231  | >PTEN-R173(RCYVYYYSY   | 13200 | 12969 |
| >PTEN-R173(RRYVYYYSY   | 747  | >PTEN-R173(RCYVYYYSY   | 355   | 392   |
| >PTEN-R173(QRRYVYYY    | 292  | >PTEN-R173(QRCYVYYY    | 130   | 162   |
| >PTEN-R173(QRRYVYYY    | 388  | >PTEN-R173(QRCYVYYY    | 234   | 154   |
| >PTEN-R173(QRRYVYYYSY  | 405  | >PTEN-R173(QRCYVYYYSY  | 943   | 538   |
| >PTEN-R173(QRRYVYYY    | 33   | >PTEN-R173(QRCYVYYY    | 147   | 114   |
| >PTEN-R173(QRRYVYYYSY  | 15   | >PTEN-R173(QRCYVYYYSY  | 54    | 39    |
| >PTEN-R173(QRRYVYYYSY  | 44   | >PTEN-R173(QRCYVYYYSY  | 220   | 176   |
| >PTEN-R173(QRRYVYYYSY  | 33   | >PTEN-R173(QRCYVYYYSY  | 71    | 38    |
| >PTEN-R173(QRRYVYYYSY  | 41   | >PTEN-R173(QRCYVYYYSY  | 191   | 150   |
| >PTEN-R173(QRRYVYYYSY  | 19   | >PTEN-R173(QRCYVYYYSY  | 24    | 5     |
| >PTEN-R173(SQRRYVYYY   | 308  | >PTEN-R173(SQRCYVYYY   | 628   | 320   |
| >PTEN-R173(SQRRYVYY    | 960  | >PTEN-R173(SQRCYVYY    | 357   | 603   |
| >PTEN-R173(SQRRYVYYY   | 137  | >PTEN-R173(SQRCYVYYY   | 50    | 87    |
| >PTEN-R173(SQRRYVYYYS  | 355  | >PTEN-R173(SQRCYVYYYS  | 145   | 210   |
| >PTEN-R173(SQRRYVYY    | 72   | >PTEN-R173(SQRCYVYY    | 236   | 164   |
| >PTEN-R173(SQRRYVYYY   | 75   | >PTEN-R173(SQRCYVYYY   | 222   | 147   |
| >PTEN-R173(SQRRYVYYYS  | 152  | >PTEN-R173(SQRCYVYYYS  | 419   | 267   |
| >PTEN-R173(SQRRYVYYYS  | 104  | >PTEN-R173(SQRCYVYYYS  | 262   | 158   |
| >PTEN-R173(SQRRYVYYY   | 83   | >PTEN-R173(SQRCYVYYY   | 176   | 93    |
| >PTEN-R173(SQRRYVYYYS  | 106  | >PTEN-R173(SQRCYVYYYS  | 195   | 89    |
| >PTEN-R173(SQRRYVYYY   | 219  | >PTEN-R173(SQRCYVYYY   | 279   | 60    |
| >PTEN-R173(SQRRYVYYY   | 212  | >PTEN-R173(SQRCYVYYY   | 412   | 200   |
| >PTEN-R173(SQRRYVYY    | 41   | >PTEN-R173(SQRCYVYY    | 36    | 5     |
| >PTEN-R173(SQRRYVYYY   | 36   | >PTEN-R173(SQRCYVYYY   | 31    | 5     |
| >PTEN-R173(SQRRYVYYYS  | 34   | >PTEN-R173(SQRCYVYYYS  | 30    | 4     |
| >PTEN-R173(SQRRYVYY    | 383  | >PTEN-R173(SQRCYVYY    | 478   | 95    |
| >PTEN-R173(SQRRYVYYYS  | 322  | >PTEN-R173(SQRCYVYYYS  | 329   | 7     |
| >PTEN-R173(SQRRYVYY    | 4    | >PTEN-R173(SQRCYVYY    | 4     | 0     |
| >PTEN-R173(SQRRYVYYY   | 4    | >PTEN-R173(SQRCYVYYY   | 4     | 0     |
| >PTEN-R173(SQRRYVYYYS  | 3    | >PTEN-R173(SQRCYVYYYS  | 3     | 0     |
| >PTEN-R173(SQRRYVYYYS  | 492  | >PTEN-R173(SQRCYVYYYS  | 323   | 169   |
| >PTEN-R173(SQRRYVYYY   | 453  | >PTEN-R173(SQRCYVYYY   | 207   | 246   |
| >PTEN-R173(PSQRRYVYYY  | 186  | >PTEN-R173(PSQRCYVYYY  | 260   | 74    |
| >PTEN-R173(PSQRRYVYYY  | 359  | >PTEN-R173(PSQRCYVYYY  | 85    | 274   |
| >PTEN-R173(PSQRRYVY    | 465  | >PTEN-R173(PSQRCYVY    | 176   | 289   |
| >PTEN-R173(PSQRRYVYY   | 1811 | >PTEN-R173(PSQRCYVYY   | 276   | 1535  |
| >PTEN-R173(PSQRRYVYYY  | 40   | >PTEN-R173(PSQRCYVYYY  | 48    | 8     |
| >PTEN-R173(PSQRRYVYYY  | 353  | >PTEN-R173(PSQRCYVYYY  | 948   | 595   |
| >PTEN-R173(IPSQRRYV    | 597  | >PTEN-R173(IPSQRCYV    | 357   | 240   |
| >PTEN-R173(IPSQRRYVYYY | 288  | >PTEN-R173(IPSQRCYVYYY | 156   | 132   |
| >PTEN-R173(IPSQRRYVY   | 183  | >PTEN-R173(IPSQRCYVY   | 233   | 50    |

|                        |      |                        |       |       |
|------------------------|------|------------------------|-------|-------|
| >PTEN-R173(IPSQRRYVYY) | 123  | >PTEN-R173(IPSQRCYVYY) | 160   | 37    |
| >PTEN-R173(IPSQRRYV    | 22   | >PTEN-R173(IPSQRCYV    | 155   | 133   |
| >PTEN-R173(IPSQRRYVY   | 165  | >PTEN-R173(IPSQRCYVY   | 3631  | 3466  |
| >PTEN-R173(IPSQRRYVY   | 16   | >PTEN-R173(IPSQRCYVY   | 13    | 3     |
| >PTEN-R173(IPSQRRYVYY) | 27   | >PTEN-R173(IPSQRCYVYY) | 20    | 7     |
| >PTEN-R173(IPSQRRYVY   | 74   | >PTEN-R173(IPSQRCYVY   | 151   | 77    |
| >PTEN-R173(IPSQRRYVYY) | 31   | >PTEN-R173(IPSQRCYVYY) | 43    | 12    |
| >PTEN-R173(IPSQRRYVY   | 7    | >PTEN-R173(IPSQRCYVY   | 7     | 0     |
| >PTEN-R173(IPSQRRYVYY  | 33   | >PTEN-R173(IPSQRCYVYY  | 43    | 10    |
| >PTEN-R173(IPSQRRYVYY) | 12   | >PTEN-R173(IPSQRCYVYY) | 16    | 4     |
| >PTEN-R173(IPSQRRYVYY  | 262  | >PTEN-R173(IPSQRCYVYY  | 165   | 97    |
| >PTEN-R173(IPSQRRYVYY) | 518  | >PTEN-R173(IPSQRCYVYY) | 435   | 83    |
| >PTEN-R173(TIPSQRRYV   | 1464 | >PTEN-R173(TIPSQRCYV   | 222   | 1242  |
| >PTEN-R173(TIPSQRRYV   | 7150 | >PTEN-R173(TIPSQRCYV   | 247   | 6903  |
| >PTEN-R173(TIPSQRRYV   | 225  | >PTEN-R173(TIPSQRCYV   | 15    | 210   |
| >PTEN-R173(TIPSQRRY    | 437  | >PTEN-R173(TIPSQRCY    | 589   | 152   |
| >PTEN-R173(TIPSQRRYVY) | 290  | >PTEN-R173(TIPSQRCYVY) | 347   | 57    |
| >PTEN-R173(TIPSQRRYVY) | 238  | >PTEN-R173(TIPSQRCYVY) | 228   | 10    |
| >PTEN-R173(TIPSQRRYVY  | 1051 | >PTEN-R173(TIPSQRCYVY  | 497   | 554   |
| >PTEN-R173(TIPSQRRYVY) | 597  | >PTEN-R173(TIPSQRCYVY) | 412   | 185   |
| >PTEN-R173(TIPSQRRYV   | 67   | >PTEN-R173(TIPSQRCYV   | 24    | 43    |
| >PTEN-R173(VTIPSQRRYV  | 563  | >PTEN-R173(VTIPSQRCYV  | 287   | 276   |
| >PTEN-R173(VTIPSQRRYV  | 916  | >PTEN-R173(VTIPSQRCYV  | 293   | 623   |
| >PTEN-R173(VTIPSQRRYV  | 249  | >PTEN-R173(VTIPSQRCYV  | 84    | 165   |
| >PTEN-R173(VTIPSQRRYV  | 3708 | >PTEN-R173(VTIPSQRCYV  | 401   | 3307  |
| >PTEN-R173(VTIPSQRRYV  | 286  | >PTEN-R173(VTIPSQRCYV  | 50    | 236   |
| >PTEN-R173(VTIPSQRRYV' | 284  | >PTEN-R173(VTIPSQRCYV' | 356   | 72    |
| >PTEN-R173(VTIPSQRRY   | 26   | >PTEN-R173(VTIPSQRCY   | 21    | 5     |
| >PTEN-R173(VTIPSQRRYV' | 38   | >PTEN-R173(VTIPSQRCYV' | 42    | 4     |
| >PTEN-R173(VTIPSQRRY   | 1205 | >PTEN-R173(VTIPSQRCY   | 441   | 764   |
| >PTEN-R173(VTIPSQRRY   | 59   | >PTEN-R173(VTIPSQRCY   | 98    | 39    |
| >PTEN-R173(VTIPSQRRYV' | 26   | >PTEN-R173(VTIPSQRCYV' | 24    | 2     |
| >PTEN-R173(VTIPSQRRY   | 41   | >PTEN-R173(VTIPSQRCY   | 88    | 47    |
| >PTEN-R173(VTIPSQRRYV' | 16   | >PTEN-R173(VTIPSQRCYV' | 20    | 4     |
| >PTEN-R173(VTIPSQRR    | 135  | >PTEN-R173(VTIPSQRC    | 21663 | 21528 |
| >PTEN-R173(VTIPSQRR    | 65   | >PTEN-R173(VTIPSQRC    | 32717 | 32652 |
| >PTEN-R173(VTIPSQRRYV  | 225  | >PTEN-R173(VTIPSQRCYV  | 54    | 171   |
| >PTEN-R173(VTIPSQRRYV' | 579  | >PTEN-R173(VTIPSQRCYV' | 483   | 96    |
| >PTEN-R173(VTIPSQRRY   | 399  | >PTEN-R173(VTIPSQRCY   | 350   | 49    |
| >PTEN-R173(VTIPSQRRYV' | 109  | >PTEN-R173(VTIPSQRCYV' | 91    | 18    |
| >PTEN-R173(VTIPSQRRY   | 706  | >PTEN-R173(VTIPSQRCY   | 160   | 546   |
| >PTEN-R173(VTIPSQRRYV' | 205  | >PTEN-R173(VTIPSQRCYV' | 174   | 31    |
| >PTEN-R173(VTIPSQRR    | 677  | >PTEN-R173(VTIPSQRC    | 293   | 384   |

|                         |      |                         |       |       |
|-------------------------|------|-------------------------|-------|-------|
| >PTEN-R173(VTIPSQRRY    | 3    | >PTEN-R173(VTIPSQRCY    | 4     | 1     |
| >PTEN-R173(VTIPSQRRYV   | 124  | >PTEN-R173(VTIPSQRCYV   | 108   | 16    |
| >PTEN-R173(VTIPSQRRYV'  | 4    | >PTEN-R173(VTIPSQRCYV'  | 4     | 0     |
| >PTEN-R173(VTIPSQRRY    | 81   | >PTEN-R173(VTIPSQRCY    | 308   | 227   |
| >PTEN-R173(VTIPSQRRYV'  | 111  | >PTEN-R173(VTIPSQRCYV'  | 246   | 135   |
| >PTEN-R173(VTIPSQRRY    | 122  | >PTEN-R173(VTIPSQRCY    | 731   | 609   |
| >PTEN-R173(VTIPSQRRYV'  | 76   | >PTEN-R173(VTIPSQRCYV'  | 129   | 53    |
| >PTEN-R173(VTIPSQRRY    | 37   | >PTEN-R173(VTIPSQRCY    | 218   | 181   |
| >PTEN-R173(VTIPSQRRYV'  | 37   | >PTEN-R173(VTIPSQRCYV'  | 33    | 4     |
| >PTEN-R173(VTIPSQRRYV'  | 256  | >PTEN-R173(VTIPSQRCYV'  | 298   | 42    |
| >PTEN-R173(GVTIPSQRRY   | 623  | >PTEN-R173(GVTIPSQRCY'  | 187   | 436   |
| >PTEN-R173(GVTIPSQRRY'  | 1023 | >PTEN-R173(GVTIPSQRCY'  | 90    | 933   |
| >PTEN-R173(GVTIPSQRRY   | 123  | >PTEN-R173(GVTIPSQRCY'  | 21    | 102   |
| >PTEN-R173(GVTIPSQRRY   | 172  | >PTEN-R173(GVTIPSQRCY   | 1934  | 1762  |
| >PTEN-R173(KGVTIPSQRR   | 155  | >PTEN-R173(KGVTIPSQRC   | 312   | 157   |
| >PTEN-R173(KGVTIPSQRR   | 202  | >PTEN-R173(KGVTIPSQRC   | 1623  | 1421  |
| >PTEN-R173(KGVTIPSQRR   | 227  | >PTEN-R173(KGVTIPSQRC   | 820   | 593   |
| >PTEN-R173(KGVTIPSQRR   | 120  | >PTEN-R173(KGVTIPSQRC   | 31041 | 30921 |
| >PTEN-R173(RYVYYYYSYL   | 51   | >PTEN-R173(HYVYYYYSYL   | 67    | 16    |
| >PTEN-R173(RYVYYYYSYL   | 340  | >PTEN-R173(HYVYYYYSYL   | 206   | 134   |
| >PTEN-R173(RYVYYYYSYLLK | 94   | >PTEN-R173(HYVYYYYSYLLK | 532   | 438   |
| >PTEN-R173(RYVYYYYSY    | 213  | >PTEN-R173(HYVYYYYSY    | 419   | 206   |
| >PTEN-R173(RYVYYYYSYL   | 42   | >PTEN-R173(HYVYYYYSYL   | 70    | 28    |
| >PTEN-R173(RYVYYYYSYLL  | 6    | >PTEN-R173(HYVYYYYSYLL  | 12    | 6     |
| >PTEN-R173(RYVYYYYSYLLK | 105  | >PTEN-R173(HYVYYYYSYLLK | 170   | 65    |
| >PTEN-R173(RYVYYYYSY    | 244  | >PTEN-R173(HYVYYYYSY    | 851   | 607   |
| >PTEN-R173(RYVYYYYSYL   | 56   | >PTEN-R173(HYVYYYYSYL   | 184   | 128   |
| >PTEN-R173(RYVYYYYSYLL  | 26   | >PTEN-R173(HYVYYYYSYLL  | 54    | 28    |
| >PTEN-R173(RYVYYYYSYLLK | 271  | >PTEN-R173(HYVYYYYSYLLK | 1072  | 801   |
| >PTEN-R173(RYVYYYYSY    | 86   | >PTEN-R173(HYVYYYYSY    | 271   | 185   |
| >PTEN-R173(RYVYYYYSYL   | 6    | >PTEN-R173(HYVYYYYSYL   | 9     | 3     |
| >PTEN-R173(RYVYYYYSYLL  | 10   | >PTEN-R173(HYVYYYYSYLL  | 20    | 10    |
| >PTEN-R173(RYVYYYYSYLLK | 446  | >PTEN-R173(HYVYYYYSYLLK | 1090  | 644   |
| >PTEN-R173(RYVYYYYSY    | 1620 | >PTEN-R173(HYVYYYYSY    | 65    | 1555  |
| >PTEN-R173(RYVYYYYSY    | 664  | >PTEN-R173(HYVYYYYSY    | 116   | 548   |
| >PTEN-R173(RYVYYYYSY    | 18   | >PTEN-R173(HYVYYYYSY    | 13    | 5     |
| >PTEN-R173(RYVYYYYSYLL  | 222  | >PTEN-R173(HYVYYYYSYLL  | 137   | 85    |
| >PTEN-R173(RYVYYYYSYL   | 121  | >PTEN-R173(HYVYYYYSYL   | 526   | 405   |
| >PTEN-R173(RYVYYYYSYLL  | 348  | >PTEN-R173(HYVYYYYSYLL  | 1332  | 984   |
| >PTEN-R173(RYVYYYYSYLLK | 6    | >PTEN-R173(HYVYYYYSYLLK | 10    | 4     |
| >PTEN-R173(RYVYYYYSY    | 39   | >PTEN-R173(HYVYYYYSY    | 73    | 34    |
| >PTEN-R173(RYVYYYYSYLL  | 410  | >PTEN-R173(HYVYYYYSYLL  | 1926  | 1516  |
| >PTEN-R173(RYVYYYYSY    | 484  | >PTEN-R173(HYVYYYYSY    | 2137  | 1653  |

|                          |      |                          |       |       |
|--------------------------|------|--------------------------|-------|-------|
| >PTEN-R173I RYVYYYYSYL   | 105  | >PTEN-R173I HYVYYYYSYL   | 485   | 380   |
| >PTEN-R173I RYVYYYYSYLLK | 33   | >PTEN-R173I HYVYYYYSYLLK | 104   | 71    |
| >PTEN-R173I RYVYYYYSYLLK | 3462 | >PTEN-R173I HYVYYYYSYLLK | 156   | 3306  |
| >PTEN-R173I RYVYYYYSYLLK | 1453 | >PTEN-R173I HYVYYYYSYLLK | 105   | 1348  |
| >PTEN-R173I RYVYYYYSY    | 88   | >PTEN-R173I HYVYYYYSY    | 276   | 188   |
| >PTEN-R173I RYVYYYYSY    | 77   | >PTEN-R173I HYVYYYYSY    | 263   | 186   |
| >PTEN-R173I RYVYYYYSYL   | 223  | >PTEN-R173I HYVYYYYSYL   | 1044  | 821   |
| >PTEN-R173I RYVYYYYSY    | 4822 | >PTEN-R173I HYVYYYYSY    | 454   | 4368  |
| >PTEN-R173I RYVYYYYSYLL  | 2871 | >PTEN-R173I HYVYYYYSYLL  | 286   | 2585  |
| >PTEN-R173I RYVYYYYSYLL  | 420  | >PTEN-R173I HYVYYYYSYLL  | 4987  | 4567  |
| >PTEN-R173I RYVYYYYSYL   | 403  | >PTEN-R173I HYVYYYYSYL   | 2073  | 1670  |
| >PTEN-R173I RYVYYYYSY    | 510  | >PTEN-R173I HYVYYYYSY    | 154   | 356   |
| >PTEN-R173I RYVYYYYSY    | 127  | >PTEN-R173I HYVYYYYSY    | 65    | 62    |
| >PTEN-R173I RYVYYYYSYLLK | 42   | >PTEN-R173I HYVYYYYSYLLK | 42    | 0     |
| >PTEN-R173I RYVYYYYSYL   | 311  | >PTEN-R173I HYVYYYYSYL   | 307   | 4     |
| >PTEN-R173I RYVYYYYSYLL  | 195  | >PTEN-R173I HYVYYYYSYLL  | 294   | 99    |
| >PTEN-R173I RYVYYYYSY    | 356  | >PTEN-R173I HYVYYYYSY    | 952   | 596   |
| >PTEN-R173I RYVYYYYSYL   | 37   | >PTEN-R173I HYVYYYYSYL   | 77    | 40    |
| >PTEN-R173I RYVYYYYSYLL  | 32   | >PTEN-R173I HYVYYYYSYLL  | 100   | 68    |
| >PTEN-R173I RYVYYYYSYLLK | 325  | >PTEN-R173I HYVYYYYSYLLK | 871   | 546   |
| >PTEN-R173I RRYVYYYYSYLI | 136  | >PTEN-R173I RHYVYYYYSYLI | 54    | 82    |
| >PTEN-R173I RRYVYYYYSYL  | 429  | >PTEN-R173I RHYVYYYYSYL  | 577   | 148   |
| >PTEN-R173I RRYVYYYYSYLI | 1708 | >PTEN-R173I RHYVYYYYSYLI | 344   | 1364  |
| >PTEN-R173I RRYVYYYYSYLI | 3174 | >PTEN-R173I RHYVYYYYSYLI | 476   | 2698  |
| >PTEN-R173I RRYVYYYYSY   | 139  | >PTEN-R173I RHYVYYYYSY   | 43    | 96    |
| >PTEN-R173I RRYVYYYYSY   | 106  | >PTEN-R173I RHYVYYYYSY   | 85    | 21    |
| >PTEN-R173I RRYVYYYYSY   | 3    | >PTEN-R173I RHYVYYYYSY   | 3     | 0     |
| >PTEN-R173I RRYVYYYYSYL  | 8    | >PTEN-R173I RHYVYYYYSYL  | 11    | 3     |
| >PTEN-R173I RRYVYYYYSYLI | 19   | >PTEN-R173I RHYVYYYYSYLI | 37    | 18    |
| >PTEN-R173I RRYVYYYYSYL  | 3795 | >PTEN-R173I RHYVYYYYSYL  | 240   | 3555  |
| >PTEN-R173I RRYVYYYYSYLI | 6334 | >PTEN-R173I RHYVYYYYSYLI | 453   | 5881  |
| >PTEN-R173I RRYVYYYYS    | 69   | >PTEN-R173I RHYVYYYYS    | 9241  | 9172  |
| >PTEN-R173I RRYVYYYYSY   | 11   | >PTEN-R173I RHYVYYYYSY   | 1676  | 1665  |
| >PTEN-R173I RRYVYYYYSYL  | 7    | >PTEN-R173I RHYVYYYYSYL  | 46    | 39    |
| >PTEN-R173I RRYVYYYYSYLI | 8    | >PTEN-R173I RHYVYYYYSYLI | 1030  | 1022  |
| >PTEN-R173I RRYVYYYYSYL  | 325  | >PTEN-R173I RHYVYYYYSYL  | 128   | 197   |
| >PTEN-R173I RRYVYYYYSYLI | 50   | >PTEN-R173I RHYVYYYYSYLI | 22    | 28    |
| >PTEN-R173I RRYVYYYYSYL  | 263  | >PTEN-R173I RHYVYYYYSYL  | 385   | 122   |
| >PTEN-R173I RRYVYYYYSYLI | 106  | >PTEN-R173I RHYVYYYYSYLI | 124   | 18    |
| >PTEN-R173I RRYVYYYYSY   | 676  | >PTEN-R173I RHYVYYYYSY   | 371   | 305   |
| >PTEN-R173I RRYVYYYYS    | 221  | >PTEN-R173I RHYVYYYYS    | 12097 | 11876 |
| >PTEN-R173I RRYVYYYYSY   | 47   | >PTEN-R173I RHYVYYYYSY   | 1239  | 1192  |
| >PTEN-R173I RRYVYYYYSYL  | 14   | >PTEN-R173I RHYVYYYYSYL  | 441   | 427   |

|                        |     |                        |       |       |
|------------------------|-----|------------------------|-------|-------|
| >PTEN-R173I RRYVYYYSYL | 11  | >PTEN-R173I RHYVYYYSYL | 79    | 68    |
| >PTEN-R173I RRYVYYYS   | 450 | >PTEN-R173I RHYVYYYS   | 11680 | 11230 |
| >PTEN-R173I RRYVYYYSY  | 33  | >PTEN-R173I RHYVYYYSY  | 3176  | 3143  |
| >PTEN-R173I RRYVYYYSYL | 12  | >PTEN-R173I RHYVYYYSYL | 388   | 376   |
| >PTEN-R173I RRYVYYYSYL | 3   | >PTEN-R173I RHYVYYYSYL | 66    | 63    |
| >PTEN-R173I RRYVYYYSY  | 231 | >PTEN-R173I RHYVYYYSY  | 70    | 161   |
| >PTEN-R173I RRYVYYYSYL | 541 | >PTEN-R173I RHYVYYYSYL | 442   | 99    |
| >PTEN-R173I RRYVYYYSYL | 785 | >PTEN-R173I RHYVYYYSYL | 218   | 567   |
| >PTEN-R173I RRYVYYYSY  | 747 | >PTEN-R173I RHYVYYYSY  | 476   | 271   |
| >PTEN-R173I QRRYVYYY   | 292 | >PTEN-R173I QRHYVYYY   | 136   | 156   |
| >PTEN-R173I QRRYVYYY   | 388 | >PTEN-R173I QRHYVYYY   | 228   | 160   |
| >PTEN-R173I QRRYVYYYSY | 405 | >PTEN-R173I QRHYVYYYSY | 376   | 29    |
| >PTEN-R173I QRRYVYYY   | 33  | >PTEN-R173I QRHYVYYY   | 51    | 18    |
| >PTEN-R173I QRRYVYYYSY | 15  | >PTEN-R173I QRHYVYYYSY | 19    | 4     |
| >PTEN-R173I QRRYVYYYSY | 44  | >PTEN-R173I QRHYVYYYSY | 68    | 24    |
| >PTEN-R173I QRRYVYYY   | 774 | >PTEN-R173I QRHYVYYY   | 320   | 454   |
| >PTEN-R173I QRRYVYYYSY | 33  | >PTEN-R173I QRHYVYYYSY | 43    | 10    |
| >PTEN-R173I QRRYVYYYSY | 595 | >PTEN-R173I QRHYVYYYSY | 255   | 340   |
| >PTEN-R173I QRRYVYYYSY | 41  | >PTEN-R173I QRHYVYYYSY | 114   | 73    |
| >PTEN-R173I QRRYVYYYSY | 19  | >PTEN-R173I QRHYVYYYSY | 33    | 14    |
| >PTEN-R173I SQRRYVYYY  | 308 | >PTEN-R173I SQRHYVYYY  | 519   | 211   |
| >PTEN-R173I SQRRYVYY   | 960 | >PTEN-R173I SQRHYVYY   | 261   | 699   |
| >PTEN-R173I SQRRYVYYY  | 137 | >PTEN-R173I SQRHYVYYY  | 43    | 94    |
| >PTEN-R173I SQRRYVYYYS | 355 | >PTEN-R173I SQRHYVYYYS | 114   | 241   |
| >PTEN-R173I SQRRYVYY   | 72  | >PTEN-R173I SQRHYVYY   | 118   | 46    |
| >PTEN-R173I SQRRYVYYY  | 75  | >PTEN-R173I SQRHYVYYY  | 130   | 55    |
| >PTEN-R173I SQRRYVYYYS | 152 | >PTEN-R173I SQRHYVYYYS | 278   | 126   |
| >PTEN-R173I SQRRYVYYYS | 104 | >PTEN-R173I SQRHYVYYYS | 166   | 62    |
| >PTEN-R173I SQRRYVYY   | 535 | >PTEN-R173I SQRHYVYY   | 183   | 352   |
| >PTEN-R173I SQRRYVYYY  | 83  | >PTEN-R173I SQRHYVYYY  | 25    | 58    |
| >PTEN-R173I SQRRYVYYYS | 106 | >PTEN-R173I SQRHYVYYYS | 36    | 70    |
| >PTEN-R173I SQRRYVYYY  | 219 | >PTEN-R173I SQRHYVYYY  | 293   | 74    |
| >PTEN-R173I SQRRYVYYY  | 212 | >PTEN-R173I SQRHYVYYY  | 181   | 31    |
| >PTEN-R173I SQRRYVYY   | 41  | >PTEN-R173I SQRHYVYY   | 33    | 8     |
| >PTEN-R173I SQRRYVYYY  | 36  | >PTEN-R173I SQRHYVYYY  | 30    | 6     |
| >PTEN-R173I SQRRYVYYYS | 34  | >PTEN-R173I SQRHYVYYYS | 29    | 5     |
| >PTEN-R173I SQRRYVYY   | 383 | >PTEN-R173I SQRHYVYY   | 279   | 104   |
| >PTEN-R173I SQRRYVYYY  | 581 | >PTEN-R173I SQRHYVYYY  | 391   | 190   |
| >PTEN-R173I SQRRYVYYYS | 322 | >PTEN-R173I SQRHYVYYYS | 235   | 87    |
| >PTEN-R173I SQRRYVYY   | 4   | >PTEN-R173I SQRHYVYY   | 4     | 0     |
| >PTEN-R173I SQRRYVYYY  | 4   | >PTEN-R173I SQRHYVYYY  | 4     | 0     |
| >PTEN-R173I SQRRYVYYYS | 947 | >PTEN-R173I SQRHYVYYYS | 450   | 497   |
| >PTEN-R173I SQRRYVYYYS | 3   | >PTEN-R173I SQRHYVYYYS | 3     | 0     |

|                         |      |                        |      |      |
|-------------------------|------|------------------------|------|------|
| >PTEN-R173I SQRRYVYYY   | 492  | >PTEN-R173I SQRHYVYYY  | 784  | 292  |
| >PTEN-R173I SQRRYVYYY   | 453  | >PTEN-R173I SQRHYVYYY  | 266  | 187  |
| >PTEN-R173I PSQRRYVYYY  | 186  | >PTEN-R173I PSQRHYVYYY | 189  | 3    |
| >PTEN-R173I PSQRRYVYYY  | 1031 | >PTEN-R173I PSQRHYVYYY | 213  | 818  |
| >PTEN-R173I PSQRRYVYYY  | 359  | >PTEN-R173I PSQRHYVYYY | 325  | 34   |
| >PTEN-R173I PSQRRYVY    | 465  | >PTEN-R173I PSQRHYVY   | 642  | 177  |
| >PTEN-R173I PSQRRYVYYY  | 40   | >PTEN-R173I PSQRHYVYYY | 46   | 6    |
| >PTEN-R173I PSQRRYVYYY  | 353  | >PTEN-R173I PSQRHYVYYY | 639  | 286  |
| >PTEN-R173I IPSQRRYV    | 597  | >PTEN-R173I IPSQRHYV   | 81   | 516  |
| >PTEN-R173I IPSQRRYVYYY | 288  | >PTEN-R173I IPSQRHYVY  | 129  | 159  |
| >PTEN-R173I IPSQRRYVY   | 183  | >PTEN-R173I IPSQRHYVY  | 367  | 184  |
| >PTEN-R173I IPSQRRYVYYY | 123  | >PTEN-R173I IPSQRHYVY  | 148  | 25   |
| >PTEN-R173I IPSQRRYV    | 22   | >PTEN-R173I IPSQRHYV   | 48   | 26   |
| >PTEN-R173I IPSQRRYVY   | 165  | >PTEN-R173I IPSQRHYVY  | 1241 | 1076 |
| >PTEN-R173I IPSQRRYVY   | 16   | >PTEN-R173I IPSQRHYVY  | 12   | 4    |
| >PTEN-R173I IPSQRRYVYYY | 27   | >PTEN-R173I IPSQRHYVY  | 20   | 7    |
| >PTEN-R173I IPSQRRYVY   | 74   | >PTEN-R173I IPSQRHYVY  | 117  | 43   |
| >PTEN-R173I IPSQRRYVYYY | 31   | >PTEN-R173I IPSQRHYVY  | 37   | 6    |
| >PTEN-R173I IPSQRRYVY   | 7    | >PTEN-R173I IPSQRHYVY  | 12   | 5    |
| >PTEN-R173I IPSQRRYVYYY | 33   | >PTEN-R173I IPSQRHYVY  | 38   | 5    |
| >PTEN-R173I IPSQRRYVYYY | 12   | >PTEN-R173I IPSQRHYVY  | 21   | 9    |
| >PTEN-R173I IPSQRRYVY   | 262  | >PTEN-R173I IPSQRHYVY  | 170  | 92   |
| >PTEN-R173I IPSQRRYVYYY | 518  | >PTEN-R173I IPSQRHYVY  | 369  | 149  |
| >PTEN-R173I TIPSQRRYV   | 4246 | >PTEN-R173I TIPSQRHYV  | 309  | 3937 |
| >PTEN-R173I TIPSQRRYV   | 1432 | >PTEN-R173I TIPSQRHYV  | 328  | 1104 |
| >PTEN-R173I TIPSQRRYV   | 1464 | >PTEN-R173I TIPSQRHYV  | 190  | 1274 |
| >PTEN-R173I TIPSQRRYV   | 7150 | >PTEN-R173I TIPSQRHYV  | 346  | 6804 |
| >PTEN-R173I TIPSQRRYV   | 225  | >PTEN-R173I TIPSQRHYV  | 10   | 215  |
| >PTEN-R173I TIPSQRRYVY  | 1079 | >PTEN-R173I TIPSQRHYVY | 469  | 610  |
| >PTEN-R173I TIPSQRRY    | 437  | >PTEN-R173I TIPSQRHY   | 155  | 282  |
| >PTEN-R173I TIPSQRRYVY  | 618  | >PTEN-R173I TIPSQRHYVY | 221  | 397  |
| >PTEN-R173I TIPSQRRYVY  | 290  | >PTEN-R173I TIPSQRHYVY | 85   | 205  |
| >PTEN-R173I TIPSQRRYVY  | 238  | >PTEN-R173I TIPSQRHYVY | 77   | 161  |
| >PTEN-R173I TIPSQRRY    | 641  | >PTEN-R173I TIPSQRHY   | 344  | 297  |
| >PTEN-R173I TIPSQRRYVY  | 597  | >PTEN-R173I TIPSQRHYVY | 273  | 324  |
| >PTEN-R173I TIPSQRRYV   | 67   | >PTEN-R173I TIPSQRHYV  | 10   | 57   |
| >PTEN-R173I TIPSQRRYV   | 4724 | >PTEN-R173I TIPSQRHYV  | 133  | 4591 |
| >PTEN-R173I VTIPSQRRYV  | 563  | >PTEN-R173I VTIPSQRHYV | 411  | 152  |
| >PTEN-R173I VTIPSQRRYV  | 916  | >PTEN-R173I VTIPSQRHYV | 376  | 540  |
| >PTEN-R173I VTIPSQRRYV  | 249  | >PTEN-R173I VTIPSQRHYV | 61   | 188  |
| >PTEN-R173I VTIPSQRRYV  | 3708 | >PTEN-R173I VTIPSQRHYV | 447  | 3261 |
| >PTEN-R173I VTIPSQRRYV  | 286  | >PTEN-R173I VTIPSQRHYV | 30   | 256  |
| >PTEN-R173I VTIPSQRRYV  | 284  | >PTEN-R173I VTIPSQRHYV | 297  | 13   |

|                          |      |                          |       |       |
|--------------------------|------|--------------------------|-------|-------|
| >PTEN-R173I VTIPSQRRY    | 26   | >PTEN-R173I VTIPSQRHY    | 14    | 12    |
| >PTEN-R173I VTIPSQRRYV'  | 38   | >PTEN-R173I VTIPSQRHYV'  | 22    | 16    |
| >PTEN-R173I VTIPSQRRYV'  | 509  | >PTEN-R173I VTIPSQRHYV'  | 408   | 101   |
| >PTEN-R173I VTIPSQRRY    | 59   | >PTEN-R173I VTIPSQRHY    | 40    | 19    |
| >PTEN-R173I VTIPSQRRYV'  | 26   | >PTEN-R173I VTIPSQRHYV'  | 17    | 9     |
| >PTEN-R173I VTIPSQRRY    | 41   | >PTEN-R173I VTIPSQRHY    | 39    | 2     |
| >PTEN-R173I VTIPSQRRYV'  | 16   | >PTEN-R173I VTIPSQRHYV'  | 20    | 4     |
| >PTEN-R173I VTIPSQRR     | 135  | >PTEN-R173I VTIPSQRH     | 11257 | 11122 |
| >PTEN-R173I VTIPSQRR     | 65   | >PTEN-R173I VTIPSQRH     | 9411  | 9346  |
| >PTEN-R173I VTIPSQRRYV'  | 225  | >PTEN-R173I VTIPSQRHYV'  | 38    | 187   |
| >PTEN-R173I VTIPSQRRYV'  | 1840 | >PTEN-R173I VTIPSQRHYV'  | 142   | 1698  |
| >PTEN-R173I VTIPSQRRY    | 1209 | >PTEN-R173I VTIPSQRHY    | 381   | 828   |
| >PTEN-R173I VTIPSQRRYV'  | 579  | >PTEN-R173I VTIPSQRHYV'  | 163   | 416   |
| >PTEN-R173I VTIPSQRRY    | 399  | >PTEN-R173I VTIPSQRHY    | 85    | 314   |
| >PTEN-R173I VTIPSQRRYV'  | 109  | >PTEN-R173I VTIPSQRHYV'  | 68    | 41    |
| >PTEN-R173I VTIPSQRRY    | 706  | >PTEN-R173I VTIPSQRHY    | 180   | 526   |
| >PTEN-R173I VTIPSQRRYV'  | 205  | >PTEN-R173I VTIPSQRHYV'  | 135   | 70    |
| >PTEN-R173I VTIPSQRR     | 677  | >PTEN-R173I VTIPSQRH     | 31    | 646   |
| >PTEN-R173I VTIPSQRRY    | 3    | >PTEN-R173I VTIPSQRHY    | 3     | 0     |
| >PTEN-R173I VTIPSQRRYV'  | 124  | >PTEN-R173I VTIPSQRHYV'  | 113   | 11    |
| >PTEN-R173I VTIPSQRRYV'  | 4    | >PTEN-R173I VTIPSQRHYV'  | 3     | 1     |
| >PTEN-R173I VTIPSQRRY    | 81   | >PTEN-R173I VTIPSQRHY    | 78    | 3     |
| >PTEN-R173I VTIPSQRRYV'  | 111  | >PTEN-R173I VTIPSQRHYV'  | 91    | 20    |
| >PTEN-R173I VTIPSQRRY    | 122  | >PTEN-R173I VTIPSQRHY    | 46    | 76    |
| >PTEN-R173I VTIPSQRRYV'  | 76   | >PTEN-R173I VTIPSQRHYV'  | 45    | 31    |
| >PTEN-R173I VTIPSQRRYV'  | 616  | >PTEN-R173I VTIPSQRHYV'  | 201   | 415   |
| >PTEN-R173I VTIPSQRRY    | 37   | >PTEN-R173I VTIPSQRHY    | 180   | 143   |
| >PTEN-R173I VTIPSQRRYV'  | 37   | >PTEN-R173I VTIPSQRHYV'  | 36    | 1     |
| >PTEN-R173I VTIPSQRRYV'  | 256  | >PTEN-R173I VTIPSQRHYV'  | 556   | 300   |
| >PTEN-R173I GVTIPSQRRY'  | 623  | >PTEN-R173I GVTIPSQRHY'  | 170   | 453   |
| >PTEN-R173I GVTIPSQRRY   | 1023 | >PTEN-R173I GVTIPSQRHY   | 113   | 910   |
| >PTEN-R173I GVTIPSQRRY'  | 123  | >PTEN-R173I GVTIPSQRHY'  | 16    | 107   |
| >PTEN-R173I GVTIPSQRRY   | 1919 | >PTEN-R173I GVTIPSQRHY   | 283   | 1636  |
| >PTEN-R173I GVTIPSQRRY   | 172  | >PTEN-R173I GVTIPSQRHY   | 396   | 224   |
| >PTEN-R173I KGV TIPSQRR  | 155  | >PTEN-R173I KGV TIPSQRH  | 141   | 14    |
| >PTEN-R173I KGV TIPSQRR  | 202  | >PTEN-R173I KGV TIPSQRH  | 388   | 186   |
| >PTEN-R173I KGV TIPSQRR  | 227  | >PTEN-R173I KGV TIPSQRH  | 755   | 528   |
| >PTEN-R173I KGV TIPSQRR  | 120  | >PTEN-R173I KGV TIPSQRH  | 21918 | 21798 |
| >PTEN-R173I RYVYYYYSYL   | 51   | >PTEN-R173I PYVYYYYSYL   | 105   | 54    |
| >PTEN-R173I RYVYYYYSYL   | 340  | >PTEN-R173I PYVYYYYSYL   | 3809  | 3469  |
| >PTEN-R173I RYVYYYYSYLLK | 94   | >PTEN-R173I PYVYYYYSYLLK | 5316  | 5222  |
| >PTEN-R173I RYVYYYYSY    | 213  | >PTEN-R173I PYVYYYYSY    | 521   | 308   |
| >PTEN-R173I RYVYYYYSYL   | 42   | >PTEN-R173I PYVYYYYSYL   | 83    | 41    |

|                          |       |                          |       |       |
|--------------------------|-------|--------------------------|-------|-------|
| >PTEN-R173F RYVYYYYSYLL  | 6     | >PTEN-R173F PYVYYYYSYLL  | 9     | 3     |
| >PTEN-R173F RYVYYYYSYLLK | 105   | >PTEN-R173F PYVYYYYSYLLK | 200   | 95    |
| >PTEN-R173F RYVYYYYSY    | 244   | >PTEN-R173F PYVYYYYSY    | 1181  | 937   |
| >PTEN-R173F RYVYYYYSYL   | 56    | >PTEN-R173F PYVYYYYSYL   | 245   | 189   |
| >PTEN-R173F RYVYYYYSYLL  | 26    | >PTEN-R173F PYVYYYYSYLL  | 39    | 13    |
| >PTEN-R173F RYVYYYYSYLLK | 271   | >PTEN-R173F PYVYYYYSYLLK | 1651  | 1380  |
| >PTEN-R173F RYVYYYYSY    | 86    | >PTEN-R173F PYVYYYYSY    | 2665  | 2579  |
| >PTEN-R173F RYVYYYYSYL   | 6     | >PTEN-R173F PYVYYYYSYL   | 47    | 41    |
| >PTEN-R173F RYVYYYYSYLL  | 10    | >PTEN-R173F PYVYYYYSYLL  | 178   | 168   |
| >PTEN-R173F RYVYYYYSYLLK | 446   | >PTEN-R173F PYVYYYYSYLLK | 6267  | 5821  |
| >PTEN-R173F RYVYYYYSY    | 18    | >PTEN-R173F PYVYYYYSY    | 19    | 1     |
| >PTEN-R173F RYVYYYYSYLL  | 222   | >PTEN-R173F PYVYYYYSYLL  | 411   | 189   |
| >PTEN-R173F RYVYYYYSYL   | 121   | >PTEN-R173F PYVYYYYSYL   | 10287 | 10166 |
| >PTEN-R173F RYVYYYYSYLL  | 348   | >PTEN-R173F PYVYYYYSYLL  | 12333 | 11985 |
| >PTEN-R173F RYVYYYYSYLLK | 6     | >PTEN-R173F PYVYYYYSYLLK | 538   | 532   |
| >PTEN-R173F RYVYYYYSY    | 39    | >PTEN-R173F PYVYYYYSY    | 267   | 228   |
| >PTEN-R173F RYVYYYYSYLL  | 410   | >PTEN-R173F PYVYYYYSYLL  | 4743  | 4333  |
| >PTEN-R173F RYVYYYYSY    | 484   | >PTEN-R173F PYVYYYYSY    | 15676 | 15192 |
| >PTEN-R173F RYVYYYYSYL   | 105   | >PTEN-R173F PYVYYYYSYL   | 10337 | 10232 |
| >PTEN-R173F RYVYYYYSYLLK | 33    | >PTEN-R173F PYVYYYYSYLLK | 3461  | 3428  |
| >PTEN-R173F RYVYYYYSY    | 88    | >PTEN-R173F PYVYYYYSY    | 4844  | 4756  |
| >PTEN-R173F RYVYYYYSY    | 77    | >PTEN-R173F PYVYYYYSY    | 1656  | 1579  |
| >PTEN-R173F RYVYYYYSYL   | 223   | >PTEN-R173F PYVYYYYSYL   | 5439  | 5216  |
| >PTEN-R173F RYVYYYYSYLL  | 420   | >PTEN-R173F PYVYYYYSYLL  | 14282 | 13862 |
| >PTEN-R173F RYVYYYYSYL   | 403   | >PTEN-R173F PYVYYYYSYL   | 18062 | 17659 |
| >PTEN-R173F RYVYYYYSY    | 127   | >PTEN-R173F PYVYYYYSY    | 437   | 310   |
| >PTEN-R173F RYVYYYYSYLLK | 42    | >PTEN-R173F PYVYYYYSYLLK | 386   | 344   |
| >PTEN-R173F RYVYYYYSYL   | 311   | >PTEN-R173F PYVYYYYSYL   | 1132  | 821   |
| >PTEN-R173F RYVYYYYSYLL  | 195   | >PTEN-R173F PYVYYYYSYLL  | 1093  | 898   |
| >PTEN-R173F RYVYYYYSY    | 356   | >PTEN-R173F PYVYYYYSY    | 3774  | 3418  |
| >PTEN-R173F RYVYYYYSYL   | 37    | >PTEN-R173F PYVYYYYSYL   | 452   | 415   |
| >PTEN-R173F RYVYYYYSYLL  | 32    | >PTEN-R173F PYVYYYYSYLL  | 209   | 177   |
| >PTEN-R173F RYVYYYYSYLLK | 325   | >PTEN-R173F PYVYYYYSYLLK | 2991  | 2666  |
| >PTEN-R173F RRYVYYYYSYLL | 136   | >PTEN-R173F RPYVYYYYSYLL | 253   | 117   |
| >PTEN-R173F RRYVYYYYSYL  | 16776 | >PTEN-R173F RPYVYYYYSYL  | 32    | 16744 |
| >PTEN-R173F RRYVYYYYSY   | 429   | >PTEN-R173F RPYVYYYYSY   | 835   | 406   |
| >PTEN-R173F RRYVYYYYSY   | 139   | >PTEN-R173F RPYVYYYYSY   | 135   | 4     |
| >PTEN-R173F RRYVYYYYSY   | 106   | >PTEN-R173F RPYVYYYYSY   | 238   | 132   |
| >PTEN-R173F RRYVYYYYSYL  | 23220 | >PTEN-R173F RPYVYYYYSYL  | 76    | 23144 |
| >PTEN-R173F RRYVYYYYSYLL | 23418 | >PTEN-R173F RPYVYYYYSYLL | 52    | 23366 |
| >PTEN-R173F RRYVYYYYSYLL | 2872  | >PTEN-R173F RPYVYYYYSYLL | 352   | 2520  |
| >PTEN-R173F RRYVYYYYSY   | 3     | >PTEN-R173F RPYVYYYYSY   | 14    | 11    |
| >PTEN-R173F RRYVYYYYSYL  | 8     | >PTEN-R173F RPYVYYYYSYL  | 90    | 82    |



|                          |       |                          |       |       |
|--------------------------|-------|--------------------------|-------|-------|
| >PTEN-R173F RRYVYYYYSYLL | 19    | >PTEN-R173F RPYVYYYYSYLL | 470   | 451   |
| >PTEN-R173F RRYVYYYYSY   | 4587  | >PTEN-R173F RPYVYYYYSY   | 465   | 4122  |
| >PTEN-R173F RRYVYYYYS    | 69    | >PTEN-R173F RPYVYYYYS    | 20517 | 20448 |
| >PTEN-R173F RRYVYYYYSY   | 11    | >PTEN-R173F RPYVYYYYSY   | 10781 | 10770 |
| >PTEN-R173F RRYVYYYYSYL  | 7     | >PTEN-R173F RPYVYYYYSYL  | 1933  | 1926  |
| >PTEN-R173F RRYVYYYYSYLL | 8     | >PTEN-R173F RPYVYYYYSYLL | 8650  | 8642  |
| >PTEN-R173F RRYVYYYYSY   | 8472  | >PTEN-R173F RPYVYYYYSY   | 17    | 8455  |
| >PTEN-R173F RRYVYYYYSYL  | 325   | >PTEN-R173F RPYVYYYYSYL  | 603   | 278   |
| >PTEN-R173F RRYVYYYYSYLL | 50    | >PTEN-R173F RPYVYYYYSYLL | 76    | 26    |
| >PTEN-R173F RRYVYYYYSYL  | 263   | >PTEN-R173F RPYVYYYYSYL  | 1406  | 1143  |
| >PTEN-R173F RRYVYYYYSYLL | 106   | >PTEN-R173F RPYVYYYYSYLL | 394   | 288   |
| >PTEN-R173F RRYVYYYYSY   | 22251 | >PTEN-R173F RPYVYYYYSY   | 69    | 22182 |
| >PTEN-R173F RRYVYYYYS    | 28630 | >PTEN-R173F RPYVYYYYS    | 493   | 28137 |
| >PTEN-R173F RRYVYYYYSY   | 676   | >PTEN-R173F RPYVYYYYSY   | 6     | 670   |
| >PTEN-R173F RRYVYYYYSYLL | 18623 | >PTEN-R173F RPYVYYYYSYLL | 150   | 18473 |
| >PTEN-R173F RRYVYYYYSY   | 15405 | >PTEN-R173F RPYVYYYYSY   | 54    | 15351 |
| >PTEN-R173F RRYVYYYYSYL  | 20687 | >PTEN-R173F RPYVYYYYSYL  | 226   | 20461 |
| >PTEN-R173F RRYVYYYYSYLL | 24248 | >PTEN-R173F RPYVYYYYSYLL | 376   | 23872 |
| >PTEN-R173F RRYVYYYYS    | 221   | >PTEN-R173F RPYVYYYYS    | 16967 | 16746 |
| >PTEN-R173F RRYVYYYYSY   | 47    | >PTEN-R173F RPYVYYYYSY   | 4909  | 4862  |
| >PTEN-R173F RRYVYYYYSYL  | 14    | >PTEN-R173F RPYVYYYYSYL  | 1455  | 1441  |
| >PTEN-R173F RRYVYYYYSYLL | 11    | >PTEN-R173F RPYVYYYYSYLL | 438   | 427   |
| >PTEN-R173F RRYVYYYYS    | 450   | >PTEN-R173F RPYVYYYYS    | 17541 | 17091 |
| >PTEN-R173F RRYVYYYYSY   | 33    | >PTEN-R173F RPYVYYYYSY   | 8497  | 8464  |
| >PTEN-R173F RRYVYYYYSYL  | 12    | >PTEN-R173F RPYVYYYYSYL  | 1293  | 1281  |
| >PTEN-R173F RRYVYYYYSYLL | 3     | >PTEN-R173F RPYVYYYYSYLL | 354   | 351   |
| >PTEN-R173F RRYVYYYYSY   | 231   | >PTEN-R173F RPYVYYYYSY   | 1637  | 1406  |
| >PTEN-R173F QRRYVYYYY    | 292   | >PTEN-R173F QRPVYYYY     | 481   | 189   |
| >PTEN-R173F QRRYVYYYYSY  | 971   | >PTEN-R173F QRPVYYYYSY   | 384   | 587   |
| >PTEN-R173F QRRYVYYYY    | 388   | >PTEN-R173F QRPVYYYY     | 755   | 367   |
| >PTEN-R173F QRRYVYYYYSY  | 405   | >PTEN-R173F QRPVYYYYSY   | 369   | 36    |
| >PTEN-R173F QRRYVYYYY    | 33    | >PTEN-R173F QRPVYYYY     | 478   | 445   |
| >PTEN-R173F QRRYVYYYYSY  | 15    | >PTEN-R173F QRPVYYYYSY   | 181   | 166   |
| >PTEN-R173F QRRYVYYYYSY  | 44    | >PTEN-R173F QRPVYYYYSY   | 625   | 581   |
| >PTEN-R173F QRRYVYYYYSY  | 33    | >PTEN-R173F QRPVYYYYSY   | 227   | 194   |
| >PTEN-R173F QRRYVYYYYSY  | 41    | >PTEN-R173F QRPVYYYYSY   | 178   | 137   |
| >PTEN-R173F QRRYVYYYYSY  | 19    | >PTEN-R173F QRPVYYYYSY   | 32    | 13    |
| >PTEN-R173F SQRRYVYYYY   | 308   | >PTEN-R173F SQRPYVYYYY   | 830   | 522   |
| >PTEN-R173F SQRRYVYYY    | 960   | >PTEN-R173F SQRPYVYYY    | 205   | 755   |
| >PTEN-R173F SQRRYVYYYY   | 137   | >PTEN-R173F SQRPYVYYYY   | 32    | 105   |
| >PTEN-R173F SQRRYVYYYYS  | 355   | >PTEN-R173F SQRPYVYYYYS  | 79    | 276   |
| >PTEN-R173F SQRRYVYYY    | 72    | >PTEN-R173F SQRPYVYYY    | 118   | 46    |
| >PTEN-R173F SQRRYVYYYY   | 75    | >PTEN-R173F SQRPYVYYYY   | 109   | 34    |

|                        |      |                        |      |      |
|------------------------|------|------------------------|------|------|
| >PTEN-R173FSQRRYVYYYS  | 152  | >PTEN-R173FSQRPYVYYYS  | 250  | 98   |
| >PTEN-R173FSQRRYVYYYS  | 104  | >PTEN-R173FSQRPYVYYYS  | 143  | 39   |
| >PTEN-R173FSQRRYVYY    | 535  | >PTEN-R173FSQRPYVYY    | 182  | 353  |
| >PTEN-R173FSQRRYVYYY   | 83   | >PTEN-R173FSQRPYVYYY   | 26   | 57   |
| >PTEN-R173FSQRRYVYYYS  | 106  | >PTEN-R173FSQRPYVYYYS  | 37   | 69   |
| >PTEN-R173FSQRRYVYYY   | 219  | >PTEN-R173FSQRPYVYYY   | 179  | 40   |
| >PTEN-R173FSQRRYVYYY   | 212  | >PTEN-R173FSQRPYVYYY   | 327  | 115  |
| >PTEN-R173FSQRRYVYY    | 41   | >PTEN-R173FSQRPYVYY    | 32   | 9    |
| >PTEN-R173FSQRRYVYYY   | 36   | >PTEN-R173FSQRPYVYYY   | 28   | 8    |
| >PTEN-R173FSQRRYVYYYS  | 34   | >PTEN-R173FSQRPYVYYYS  | 29   | 5    |
| >PTEN-R173FSQRRYVYY    | 383  | >PTEN-R173FSQRPYVYY    | 189  | 194  |
| >PTEN-R173FSQRRYVYYY   | 581  | >PTEN-R173FSQRPYVYYY   | 325  | 256  |
| >PTEN-R173FSQRRYVYYYS  | 322  | >PTEN-R173FSQRPYVYYYS  | 192  | 130  |
| >PTEN-R173FSQRRYVYY    | 4    | >PTEN-R173FSQRPYVYY    | 4    | 0    |
| >PTEN-R173FSQRRYVYYY   | 4    | >PTEN-R173FSQRPYVYYY   | 4    | 0    |
| >PTEN-R173FSQRRYVYYYS  | 3    | >PTEN-R173FSQRPYVYYYS  | 3    | 0    |
| >PTEN-R173FSQRRYVYYY   | 7064 | >PTEN-R173FSQRPYVYYY   | 426  | 6638 |
| >PTEN-R173FSQRRYVYYYS  | 492  | >PTEN-R173FSQRPYVYYYS  | 335  | 157  |
| >PTEN-R173FSQRRYVYYY   | 453  | >PTEN-R173FSQRPYVYYY   | 239  | 214  |
| >PTEN-R173FPSQRRYVYYY  | 186  | >PTEN-R173FPSQRPYVYYY  | 197  | 11   |
| >PTEN-R173FPSQRRYVYYY  | 1031 | >PTEN-R173FPSQRPYVYYY  | 327  | 704  |
| >PTEN-R173FPSQRRYVYYY  | 359  | >PTEN-R173FPSQRPYVYYY  | 222  | 137  |
| >PTEN-R173FPSQRRYVY    | 465  | >PTEN-R173FPSQRPYVY    | 688  | 223  |
| >PTEN-R173FPSQRRYVYYY  | 40   | >PTEN-R173FPSQRPYVYYY  | 22   | 18   |
| >PTEN-R173FPSQRRYVYYY  | 353  | >PTEN-R173FPSQRPYVYYY  | 705  | 352  |
| >PTEN-R173FIPSQRRYV    | 597  | >PTEN-R173FIPSQRPYV    | 80   | 517  |
| >PTEN-R173FIPSQRRYVYY  | 288  | >PTEN-R173FIPSQRPYVYY  | 146  | 142  |
| >PTEN-R173FIPSQRRYVY   | 183  | >PTEN-R173FIPSQRPYVY   | 498  | 315  |
| >PTEN-R173FIPSQRRYVYY  | 123  | >PTEN-R173FIPSQRPYVYY  | 176  | 53   |
| >PTEN-R173FIPSQRRYV    | 22   | >PTEN-R173FIPSQRPYV    | 232  | 210  |
| >PTEN-R173FIPSQRRYVY   | 165  | >PTEN-R173FIPSQRPYVY   | 4373 | 4208 |
| >PTEN-R173FIPSQRRYVY   | 16   | >PTEN-R173FIPSQRPYVY   | 13   | 3    |
| >PTEN-R173FIPSQRRYVYY  | 27   | >PTEN-R173FIPSQRPYVYY  | 21   | 6    |
| >PTEN-R173FIPSQRRYV    | 1455 | >PTEN-R173FIPSQRPYV    | 499  | 956  |
| >PTEN-R173FIPSQRRYVY   | 74   | >PTEN-R173FIPSQRPYVY   | 37   | 37   |
| >PTEN-R173FIPSQRRYVYY  | 31   | >PTEN-R173FIPSQRPYVYY  | 21   | 10   |
| >PTEN-R173FIPSQRRYVY   | 7    | >PTEN-R173FIPSQRPYVY   | 92   | 85   |
| >PTEN-R173FIPSQRRYVYYY | 33   | >PTEN-R173FIPSQRPYVYYY | 125  | 92   |
| >PTEN-R173FIPSQRRYVYY  | 12   | >PTEN-R173FIPSQRPYVYY  | 62   | 50   |
| >PTEN-R173FIPSQRRYVYYY | 262  | >PTEN-R173FIPSQRPYVYYY | 433  | 171  |
| >PTEN-R173FIPSQRRYV    | 7722 | >PTEN-R173FIPSQRPYV    | 404  | 7318 |
| >PTEN-R173FTIPSQRRYV   | 1464 | >PTEN-R173FTIPSQRPYV   | 301  | 1163 |
| >PTEN-R173FTIPSQRRYV   | 7150 | >PTEN-R173FTIPSQRPYV   | 174  | 6976 |

|                        |      |                        |       |       |
|------------------------|------|------------------------|-------|-------|
| >PTEN-R173FTIPSQRRYV   | 225  | >PTEN-R173FTIPSQRPYV   | 16    | 209   |
| >PTEN-R173FTIPSQRRY    | 437  | >PTEN-R173FTIPSQRPY    | 232   | 205   |
| >PTEN-R173FTIPSQRRYVY  | 618  | >PTEN-R173FTIPSQRPYVY  | 310   | 308   |
| >PTEN-R173FTIPSQRRYVY\ | 290  | >PTEN-R173FTIPSQRPYVY\ | 117   | 173   |
| >PTEN-R173FTIPSQRRYVY  | 746  | >PTEN-R173FTIPSQRPYVY  | 410   | 336   |
| >PTEN-R173FTIPSQRRYVY\ | 238  | >PTEN-R173FTIPSQRPYVY\ | 125   | 113   |
| >PTEN-R173FTIPSQRRYVY\ | 597  | >PTEN-R173FTIPSQRPYVY\ | 314   | 283   |
| >PTEN-R173FTIPSQRRYV   | 67   | >PTEN-R173FTIPSQRPYV   | 97    | 30    |
| >PTEN-R173FTIPSQRRYV   | 4724 | >PTEN-R173FTIPSQRPYV   | 184   | 4540  |
| >PTEN-R173FVTIPSQRRYV  | 3001 | >PTEN-R173FVTIPSQRPYV  | 479   | 2522  |
| >PTEN-R173FVTIPSQRRYV  | 916  | >PTEN-R173FVTIPSQRPYV  | 173   | 743   |
| >PTEN-R173FVTIPSQRRYV  | 249  | >PTEN-R173FVTIPSQRPYV  | 76    | 173   |
| >PTEN-R173FVTIPSQRRYV  | 3708 | >PTEN-R173FVTIPSQRPYV  | 306   | 3402  |
| >PTEN-R173FVTIPSQRRYV  | 286  | >PTEN-R173FVTIPSQRPYV  | 50    | 236   |
| >PTEN-R173FVTIPSQRRYV\ | 284  | >PTEN-R173FVTIPSQRPYV\ | 215   | 69    |
| >PTEN-R173FVTIPSQRRY   | 26   | >PTEN-R173FVTIPSQRPY   | 16    | 10    |
| >PTEN-R173FVTIPSQRRYV\ | 38   | >PTEN-R173FVTIPSQRPYV\ | 34    | 4     |
| >PTEN-R173FVTIPSQRRY   | 1205 | >PTEN-R173FVTIPSQRPY   | 240   | 965   |
| >PTEN-R173FVTIPSQRRYV\ | 509  | >PTEN-R173FVTIPSQRPYV\ | 281   | 228   |
| >PTEN-R173FVTIPSQRRY   | 59   | >PTEN-R173FVTIPSQRPY   | 44    | 15    |
| >PTEN-R173FVTIPSQRRYV\ | 26   | >PTEN-R173FVTIPSQRPYV\ | 19    | 7     |
| >PTEN-R173FVTIPSQRRY   | 41   | >PTEN-R173FVTIPSQRPY   | 63    | 22    |
| >PTEN-R173FVTIPSQRRYV\ | 16   | >PTEN-R173FVTIPSQRPYV\ | 25    | 9     |
| >PTEN-R173FVTIPSQRR    | 135  | >PTEN-R173FVTIPSQRP    | 21398 | 21263 |
| >PTEN-R173FVTIPSQRR    | 65   | >PTEN-R173FVTIPSQRP    | 27941 | 27876 |
| >PTEN-R173FVTIPSQRRYV  | 225  | >PTEN-R173FVTIPSQRPYV  | 122   | 103   |
| >PTEN-R173FVTIPSQRRYV  | 1840 | >PTEN-R173FVTIPSQRPYV  | 133   | 1707  |
| >PTEN-R173FVTIPSQRRYV\ | 579  | >PTEN-R173FVTIPSQRPYV\ | 176   | 403   |
| >PTEN-R173FVTIPSQRRY   | 399  | >PTEN-R173FVTIPSQRPY   | 65    | 334   |
| >PTEN-R173FVTIPSQRRYV\ | 109  | >PTEN-R173FVTIPSQRPYV\ | 98    | 11    |
| >PTEN-R173FVTIPSQRRY   | 706  | >PTEN-R173FVTIPSQRPY   | 60    | 646   |
| >PTEN-R173FVTIPSQRRYV\ | 205  | >PTEN-R173FVTIPSQRPYV\ | 122   | 83    |
| >PTEN-R173FVTIPSQRRY   | 3    | >PTEN-R173FVTIPSQRPY   | 3     | 0     |
| >PTEN-R173FVTIPSQRRYV  | 124  | >PTEN-R173FVTIPSQRPYV  | 90    | 34    |
| >PTEN-R173FVTIPSQRRYV\ | 4    | >PTEN-R173FVTIPSQRPYV\ | 3     | 1     |
| >PTEN-R173FVTIPSQRRY   | 81   | >PTEN-R173FVTIPSQRPY   | 103   | 22    |
| >PTEN-R173FVTIPSQRRYV\ | 111  | >PTEN-R173FVTIPSQRPYV\ | 106   | 5     |
| >PTEN-R173FVTIPSQRRY   | 122  | >PTEN-R173FVTIPSQRPY   | 302   | 180   |
| >PTEN-R173FVTIPSQRRYV\ | 76   | >PTEN-R173FVTIPSQRPYV\ | 48    | 28    |
| >PTEN-R173FVTIPSQRRYV  | 616  | >PTEN-R173FVTIPSQRPYV  | 296   | 320   |
| >PTEN-R173FVTIPSQRRY   | 37   | >PTEN-R173FVTIPSQRPY   | 287   | 250   |
| >PTEN-R173FVTIPSQRRYV\ | 37   | >PTEN-R173FVTIPSQRPYV\ | 64    | 27    |
| >PTEN-R173FVTIPSQRRY   | 1441 | >PTEN-R173FVTIPSQRPY   | 124   | 1317  |

|                        |       |                         |       |       |
|------------------------|-------|-------------------------|-------|-------|
| >PTEN-R173FVTIPSQRRYV' | 256   | >PTEN-R173FVTIPSQRPYV'  | 951   | 695   |
| >PTEN-R173FGVTIPSQRRY' | 3004  | >PTEN-R173FGVTIPSQRPY'  | 484   | 2520  |
| >PTEN-R173FGVTIPSQRRY  | 623   | >PTEN-R173FGVTIPSQRPY'  | 230   | 393   |
| >PTEN-R173FGVTIPSQRRY' | 1023  | >PTEN-R173FGVTIPSQRPY'  | 79    | 944   |
| >PTEN-R173FGVTIPSQRRY  | 123   | >PTEN-R173FGVTIPSQRPY'  | 23    | 100   |
| >PTEN-R173FGVTIPSQRRY  | 1811  | >PTEN-R173FGVTIPSQRPY   | 488   | 1323  |
| >PTEN-R173FGVTIPSQRRY  | 172   | >PTEN-R173FGVTIPSQRPY   | 189   | 17    |
| >PTEN-R173FKGVTIPSQRR  | 155   | >PTEN-R173FKGVTIPSQRP'  | 251   | 96    |
| >PTEN-R173FKGVTIPSQRR  | 202   | >PTEN-R173FKGVTIPSQRP'  | 231   | 29    |
| >PTEN-R173FKGVTIPSQRR  | 227   | >PTEN-R173FKGVTIPSQRP'  | 940   | 713   |
| >PTEN-R173FKGVTIPSQRR  | 120   | >PTEN-R173FKGVTIPSQRP   | 28641 | 28521 |
| >PTEN-R234(REDKFMFYF   | 435   | >PTEN-R234(QEDKFMFYF    | 1463  | 1028  |
| >PTEN-R234(REDKFMFYF   | 373   | >PTEN-R234(QEDKFMFYF    | 128   | 245   |
| >PTEN-R234(REDKFMFYF   | 26    | >PTEN-R234(QEDKFMFYF    | 258   | 232   |
| >PTEN-R234(REDKFMFYFEI | 366   | >PTEN-R234(QEDKFMFYFEI  | 4081  | 3715  |
| >PTEN-R234(REDKFMFYF   | 250   | >PTEN-R234(QEDKFMFYF    | 1533  | 1283  |
| >PTEN-R234(REDKFMFYF   | 214   | >PTEN-R234(QEDKFMFYF    | 204   | 10    |
| >PTEN-R234(RREDKFMFYFE | 19026 | >PTEN-R234(RQEDKFMFYFI  | 88    | 18938 |
| >PTEN-R234(RREDKFMFYFE | 920   | >PTEN-R234(RQEDKFMFYFI  | 192   | 728   |
| >PTEN-R234(RREDKFMFYFE | 4868  | >PTEN-R234(RQEDKFMFYFI  | 403   | 4465  |
| >PTEN-R234(RREDKFMFY   | 1169  | >PTEN-R234(RQEDKFMFY    | 229   | 940   |
| >PTEN-R234(RREDKFMFY   | 19155 | >PTEN-R234(RQEDKFMFY    | 276   | 18879 |
| >PTEN-R234(RREDKFMFYFE | 19631 | >PTEN-R234(RQEDKFMFYFI  | 179   | 19452 |
| >PTEN-R234(RREDKFMFY   | 1254  | >PTEN-R234(RQEDKFMFY    | 378   | 876   |
| >PTEN-R234(RREDKFMFYFE | 195   | >PTEN-R234(RQEDKFMFYFI  | 27    | 168   |
| >PTEN-R234(RREDKFMFYFE | 87    | >PTEN-R234(RQEDKFMFYFI  | 1283  | 1196  |
| >PTEN-R234(RREDKFMFYFE | 23    | >PTEN-R234(RQEDKFMFYFI  | 477   | 454   |
| >PTEN-R234(IYSSNSGPTRF | 137   | >PTEN-R234(IYSSNSGPTRC  | 18659 | 18522 |
| >PTEN-R234(IYSSNSGPTRF | 467   | >PTEN-R234(IYSSNSGPTRC  | 26011 | 25544 |
| >PTEN-R234(IYSSNSGPTRF | 80    | >PTEN-R234(IYSSNSGPTRC  | 7837  | 7757  |
| >PTEN-R234(TRREDKFMFYF | 74    | >PTEN-R234(TRQEDKFMFYFI | 327   | 253   |
| >PTEN-R234(PTRREDKF    | 1127  | >PTEN-R234(PTRQEDKF     | 384   | 743   |
| >PTEN-R234(PTRREDKFM'  | 1300  | >PTEN-R234(PTRQEDKFM'   | 407   | 893   |
| >PTEN-R234(PTRREDKFM'  | 460   | >PTEN-R234(PTRQEDKFM'   | 124   | 336   |
| >PTEN-R234(GPTRREDKFM  | 921   | >PTEN-R234(GPTRQEDKFM   | 349   | 572   |
| >PTEN-R234(GPTRREDKFM  | 420   | >PTEN-R234(GPTRQEDKFM   | 185   | 235   |
| >PTEN-R234(GPTRREDKFM  | 526   | >PTEN-R234(GPTRQEDKFM   | 222   | 304   |
| >PTEN-R234(SGPTRREDKF  | 70    | >PTEN-R234(SGPTRQEDKF   | 109   | 39    |
| >PTEN-R234(SGPTRREDKF  | 159   | >PTEN-R234(SGPTRQEDKF   | 155   | 4     |
| >PTEN-R234\REDKFMFYFEI | 2446  | >PTEN-R234\WEDKFMFYFE   | 219   | 2227  |
| >PTEN-R234\REDKFMFYF   | 435   | >PTEN-R234\WEDKFMFYF    | 1010  | 575   |
| >PTEN-R234\REDKFMFYF   | 373   | >PTEN-R234\WEDKFMFYF    | 14    | 359   |
| >PTEN-R234\REDKFMFYF   | 26    | >PTEN-R234\WEDKFMFYF    | 34    | 8     |

|                        |       |                        |       |       |
|------------------------|-------|------------------------|-------|-------|
| >PTEN-R234\REDKFMFYFE  | 366   | >PTEN-R234\WEDKFMFYF   | 722   | 356   |
| >PTEN-R234\REDKFMFYF   | 250   | >PTEN-R234\WEDKFMFYF   | 410   | 160   |
| >PTEN-R234\REDKFMFYF   | 214   | >PTEN-R234\WEDKFMFYF   | 494   | 280   |
| >PTEN-R234\RREDKFMFYFE | 920   | >PTEN-R234\RWEDKFMFYF  | 18    | 902   |
| >PTEN-R234\RREDKFMFYFE | 4100  | >PTEN-R234\RWEDKFMFYF  | 68    | 4032  |
| >PTEN-R234\RREDKFMFYFE | 4868  | >PTEN-R234\RWEDKFMFYF  | 6     | 4862  |
| >PTEN-R234\RREDKFMFY   | 4018  | >PTEN-R234\RWEDKFMFY   | 448   | 3570  |
| >PTEN-R234\RREDKFMFY   | 1169  | >PTEN-R234\RWEDKFMFY   | 188   | 981   |
| >PTEN-R234\RREDKFMFYFE | 195   | >PTEN-R234\RWEDKFMFYF  | 4790  | 4595  |
| >PTEN-R234\RREDKFMFYFE | 87    | >PTEN-R234\RWEDKFMFYF  | 5376  | 5289  |
| >PTEN-R234\RREDKFMFYFE | 23    | >PTEN-R234\RWEDKFMFYF  | 6489  | 6466  |
| >PTEN-R234\RREDKFMFYFE | 9477  | >PTEN-R234\RWEDKFMFYF  | 108   | 9369  |
| >PTEN-R234\RREDKFMFY   | 36884 | >PTEN-R234\RWEDKFMFY   | 346   | 36538 |
| >PTEN-R234\RREDKFMFYFE | 33288 | >PTEN-R234\RWEDKFMFYF  | 142   | 33146 |
| >PTEN-R234\IYSSNSGPTRF | 7543  | >PTEN-R234\IYSSNSGPTR\ | 146   | 7397  |
| >PTEN-R234\IYSSNSGPTRF | 4172  | >PTEN-R234\IYSSNSGPTR\ | 152   | 4020  |
| >PTEN-R234\IYSSNSGPTRF | 6883  | >PTEN-R234\IYSSNSGPTR\ | 143   | 6740  |
| >PTEN-R234\IYSSNSGPTRF | 137   | >PTEN-R234\IYSSNSGPTR\ | 22037 | 21900 |
| >PTEN-R234\IYSSNSGPTRF | 467   | >PTEN-R234\IYSSNSGPTR\ | 31395 | 30928 |
| >PTEN-R234\IYSSNSGPTRF | 80    | >PTEN-R234\IYSSNSGPTR\ | 25072 | 24992 |
| >PTEN-R234\TRREDKFMFY  | 74    | >PTEN-R234\TRWEDKFMFY  | 62    | 12    |
| >PTEN-R234\TRREDKFM    | 2065  | >PTEN-R234\TRWEDKFM    | 82    | 1983  |
| >PTEN-R234\TRREDKFMFY  | 5288  | >PTEN-R234\TRWEDKFMFY  | 349   | 4939  |
| >PTEN-R234\PTRREDKFM\  | 460   | >PTEN-R234\PTRWEDKFM   | 177   | 283   |
| >PTEN-R234\GPTRREDKFM  | 921   | >PTEN-R234\GPTRWEDKF   | 250   | 671   |
| >PTEN-R234\GPTRREDKFM  | 420   | >PTEN-R234\GPTRWEDKF   | 149   | 271   |
| >PTEN-R234\GPTRREDKFM  | 526   | >PTEN-R234\GPTRWEDKF   | 369   | 157   |
| >PTEN-R234\SGPTRREDKF  | 70    | >PTEN-R234\SGPTRWEDK   | 58    | 12    |
| >PTEN-R234\SGPTRREDKF  | 159   | >PTEN-R234\SGPTRWEDK   | 175   | 16    |
| >PTEN-R234\YSSNSGPTRR  | 1290  | >PTEN-R234\YSSNSGPTRV  | 447   | 843   |
| >PTEN-R234\YSSNSGPTRR  | 3003  | >PTEN-R234\YSSNSGPTRV  | 3     | 3000  |
| >PTEN-R234\YSSNSGPTRR  | 24397 | >PTEN-R234\YSSNSGPTRV  | 72    | 24325 |
| >PTEN-R234\YSSNSGPTRR  | 19661 | >PTEN-R234\YSSNSGPTRV  | 11    | 19650 |
| >PTEN-R308\RADNDKEY    | 3410  | >PTEN-R308\CADNDKEY    | 299   | 3111  |
| >PTEN-R308\RADNDKEYL\  | 211   | >PTEN-R308\CADNDKEYL\  | 1991  | 1780  |
| >PTEN-R308\RADNDKEY    | 195   | >PTEN-R308\CADNDKEY    | 4898  | 4703  |
| >PTEN-R308\RADNDKEY    | 1023  | >PTEN-R308\CADNDKEY    | 259   | 764   |
| >PTEN-R308\ERADNDKEY   | 4772  | >PTEN-R308\ECADNDKEY   | 166   | 4606  |
| >PTEN-R308\ERADNDKEYL  | 385   | >PTEN-R308\ECADNDKEYL  | 37    | 348   |
| >PTEN-R308\ERADNDKEY   | 2739  | >PTEN-R308\ECADNDKEY   | 325   | 2414  |
| >PTEN-R308\QEIDSICSIER | 1270  | >PTEN-R308\QEIDSICSIEC | 178   | 1092  |
| >PTEN-R308\QEIDSICSIER | 281   | >PTEN-R308\QEIDSICSIEC | 35841 | 35560 |
| >PTEN-R308\IERADNDKEY  | 360   | >PTEN-R308\IECADNDKEY  | 1928  | 1568  |

|                       |      |                       |       |       |
|-----------------------|------|-----------------------|-------|-------|
| >PTEN-R308(IERADNDKEY | 182  | >PTEN-R308(IECADNDKEY | 21    | 161   |
| >PTEN-R308(IERADNDKEY | 216  | >PTEN-R308(IECADNDKEY | 792   | 576   |
| >PTEN-R308(CSIERADNDK | 1021 | >PTEN-R308(CSIECADNDK | 275   | 746   |
| >PTEN-R308(DSICSIER   | 79   | >PTEN-R308(DSICSIEC   | 30014 | 29935 |
| >PTEN-R308(DSICSIER   | 9    | >PTEN-R308(DSICSIEC   | 23330 | 23321 |
| >PTEN-R308(DSICSIERA  | 79   | >PTEN-R308(DSICSIECA  | 194   | 115   |
| >PTEN-R308(EIDSICSIER | 479  | >PTEN-R308(EIDSICSIEC | 29236 | 28757 |
| >PTEN-R308(EIDSICSIER | 38   | >PTEN-R308(EIDSICSIEC | 30791 | 30753 |
| >PTEN-R47G·RNNIDDVVF  | 450  | >PTEN-R47G·GNNIDDVVRI | 4374  | 3924  |
| >PTEN-R47G·RNNIDDVVR  | 474  | >PTEN-R47G·GNNIDDVVR  | 7155  | 6681  |
| >PTEN-R47G·YRNNIDDVVF | 48   | >PTEN-R47G·YGNNIDDVVI | 837   | 789   |
| >PTEN-R47G·YRNNIDDVVF | 119  | >PTEN-R47G·YGNNIDDVVI | 19741 | 19622 |
| >PTEN-R47G·YRNNIDDVVF | 5166 | >PTEN-R47G·YGNNIDDVVI | 260   | 4906  |
| >PTEN-R47G·YRNNIDDVVF | 2165 | >PTEN-R47G·YGNNIDDVVI | 480   | 1685  |
| >PTEN-R47G·FPAERLEGVY | 125  | >PTEN-R47G·FPAERLEGVY | 35068 | 34943 |
| >PTEN-R47G·FPAERLEGVY | 799  | >PTEN-R47G·FPAERLEGVY | 244   | 555   |
| >PTEN-R47G·FPAERLEGVY | 459  | >PTEN-R47G·FPAERLEGVY | 36057 | 35598 |
| >PTEN-R47G·VYRNNIDDV  | 897  | >PTEN-R47G·VYGNNIDDV  | 170   | 727   |
| >PTEN-R47G·VYRNNIDDV\ | 1198 | >PTEN-R47G·VYGNNIDDV\ | 231   | 967   |
| >PTEN-R47G·VYRNNIDDV\ | 219  | >PTEN-R47G·VYGNNIDDV\ | 1359  | 1140  |
| >PTEN-R47G·VYRNNIDDV\ | 173  | >PTEN-R47G·VYGNNIDDV\ | 62    | 111   |
| >PTEN-R47G·GVYRNNIDD\ | 1347 | >PTEN-R47G·GVYGNIDD\  | 467   | 880   |
| >PTEN-R47G·GVYRNNIDD\ | 225  | >PTEN-R47G·GVYGNIDD\  | 151   | 74    |
| >PTEN-R47G·GVYRNNIDD\ | 939  | >PTEN-R47G·GVYGNIDD\  | 451   | 488   |
| >PTEN-R47G·GVYRNNIDD\ | 86   | >PTEN-R47G·GVYGNIDD\  | 33    | 53    |
| >PTEN-R47G·GVYRNNIDD\ | 103  | >PTEN-R47G·GVYGNIDD\  | 41    | 62    |
| >PTEN-R47G·GVYRNNIDD\ | 106  | >PTEN-R47G·GVYGNIDD\  | 109   | 3     |
| >PTEN-R47G·GVYRNNIDD\ | 113  | >PTEN-R47G·GVYGNIDD\  | 114   | 1     |
| >PTEN-R47G·GVYRNNIDD\ | 97   | >PTEN-R47G·GVYGNIDD\  | 39    | 58    |
| >PTEN-R47G·GVYRNNIDD\ | 100  | >PTEN-R47G·GVYGNIDD\  | 38    | 62    |
| >PTEN-R47G·GVYRNNIDD\ | 36   | >PTEN-R47G·GVYGNIDD\  | 13    | 23    |
| >PTEN-R47G·GVYRNNIDD\ | 78   | >PTEN-R47G·GVYGNIDD\  | 36    | 42    |
| >PTEN-R47G·LEGVYRNNI  | 15   | >PTEN-R47G·LEGVYGNNI  | 41    | 26    |
| >PTEN-R47G·LEGVYRNNI  | 457  | >PTEN-R47G·LEGVYGNNI  | 627   | 170   |
| >PTEN-R47G·LEGVYRNNI  | 40   | >PTEN-R47G·LEGVYGNNI  | 69    | 29    |
| >PTEN-R47G·RLEGVYRNNI | 476  | >PTEN-R47G·RLEGVYGNNI | 485   | 9     |
| >PTEN-R47G·RLEGVYRNNI | 466  | >PTEN-R47G·RLEGVYGNNI | 161   | 305   |
| >PTEN-R47G·RLEGVYRNNI | 258  | >PTEN-R47G·RLEGVYGNNI | 241   | 17    |
| >PTEN-R47G·RLEGVYRNNI | 307  | >PTEN-R47G·RLEGVYGNNI | 759   | 452   |
| >PTEN-R47G·ERLEGVYR   | 115  | >PTEN-R47G·ERLEGVYG   | 33680 | 33565 |
| >PTEN-R55G·RFLDSKHKNF | 91   | >PTEN-R55G·GFLDSKHKNF | 32    | 59    |
| >PTEN-R55G·RFLDSKHK   | 19   | >PTEN-R55G·GFLDSKHK   | 1550  | 1531  |
| >PTEN-R55G·RFLDSKHKNF | 227  | >PTEN-R55G·GFLDSKHKNF | 495   | 268   |

|                       |       |                       |       |       |
|-----------------------|-------|-----------------------|-------|-------|
| >PTEN-R55G·RFLDSKHK   | 73    | >PTEN-R55G·GFLDSKHK   | 1280  | 1207  |
| >PTEN-R55G·RFLDSKHK   | 66    | >PTEN-R55G·GFLDSKHK   | 3335  | 3269  |
| >PTEN-R55G·VRFLDSKH   | 482   | >PTEN-R55G·VGFLDSKH   | 26611 | 26129 |
| >PTEN-R55G·VRFLDSKHK  | 137   | >PTEN-R55G·VGFLDSKHK  | 24095 | 23958 |
| >PTEN-R55G·VYRNNIDDV\ | 219   | >PTEN-R55G·VYRNNIDDV\ | 21208 | 20989 |
| >PTEN-R55G·VYRNNIDDV\ | 173   | >PTEN-R55G·VYRNNIDDV\ | 33236 | 33063 |
| >PTEN-R55G·VVRFLDSKHK | 408   | >PTEN-R55G·VVGFLDSKHK | 701   | 293   |
| >PTEN-R55G·VVRFLDSK   | 455   | >PTEN-R55G·VVGFLDSK   | 80    | 375   |
| >PTEN-R55G·VVRFLDSKHK | 560   | >PTEN-R55G·VVGFLDSKHK | 388   | 172   |
| >PTEN-R55G·VVRFLDSK   | 17    | >PTEN-R55G·VVGFLDSK   | 7218  | 7201  |
| >PTEN-R55G·VVRFLDSKHK | 13    | >PTEN-R55G·VVGFLDSKHK | 5472  | 5459  |
| >PTEN-R55G·VVRFLDSKH  | 57    | >PTEN-R55G·VVGFLDSKH  | 851   | 794   |
| >PTEN-R55G·DVVRFLDSK  | 493   | >PTEN-R55G·DVVGFLDSK  | 289   | 204   |
| >PTEN-R55G·DVVRFLDSKH | 129   | >PTEN-R55G·DVVGFLDSKH | 85    | 44    |
| >PTEN-R55G·DVVRFLDSK  | 18    | >PTEN-R55G·DVVGFLDSK  | 15    | 3     |
| >PTEN-R55G·DVVRFLDSKH | 102   | >PTEN-R55G·DVVGFLDSKH | 86    | 16    |
| >PTEN-R55G·NIDDVVRFL  | 171   | >PTEN-R55G·NIDDVVGFL  | 90    | 81    |
| >PTEN-R55G·NIDDVVRFL  | 1161  | >PTEN-R55G·NIDDVVGFL  | 400   | 761   |
| >PTEN-R55G·NIDDVVRFL  | 272   | >PTEN-R55G·NIDDVVGFL  | 108   | 164   |
| >PTEN-R55G·NIDDVVRFL  | 30    | >PTEN-R55G·NIDDVVGFL  | 27    | 3     |
| >PTEN-R55G·NIDDVVRFL  | 320   | >PTEN-R55G·NIDDVVGFL  | 144   | 176   |
| >PTEN-R55G·NIDDVVRFL  | 464   | >PTEN-R55G·NIDDVVGFL  | 383   | 81    |
| >PTEN-R55G·NIDDVVRFL  | 1548  | >PTEN-R55G·NIDDVVGFL  | 296   | 1252  |
| >PTEN-R55G·NIDDVVRFL  | 324   | >PTEN-R55G·NIDDVVGFL  | 76    | 248   |
| >PTEN-R55G·NNIDDVVR   | 192   | >PTEN-R55G·NNIDDVVG   | 34476 | 34284 |
| >PTEN-R55G·RNNIDDVVR\ | 450   | >PTEN-R55G·RNNIDDVVG\ | 306   | 144   |
| >PTEN-R55G·RNNIDDVVR  | 474   | >PTEN-R55G·RNNIDDVVG  | 34986 | 34512 |
| >PTEN-R55G·YRNNIDDVVF | 48    | >PTEN-R55G·YRNNIDDVVC | 38    | 10    |
| >PTEN-R55G·YRNNIDDVVF | 119   | >PTEN-R55G·YRNNIDDVVC | 93    | 26    |
| >PTEN-R55S·RFLDSKHKNH | 91    | >PTEN-R55S·SFLDSKHKNH | 36    | 55    |
| >PTEN-R55S·RFLDSKHK   | 19    | >PTEN-R55S·SFLDSKHK   | 241   | 222   |
| >PTEN-R55S·RFLDSKHKNH | 227   | >PTEN-R55S·SFLDSKHKNH | 250   | 23    |
| >PTEN-R55S·RFLDSKHK   | 73    | >PTEN-R55S·SFLDSKHK   | 574   | 501   |
| >PTEN-R55S·RFLDSKHK   | 66    | >PTEN-R55S·SFLDSKHK   | 432   | 366   |
| >PTEN-R55S·VRFLDSKHK  | 21945 | >PTEN-R55S·VSFLDSKHK  | 169   | 21776 |
| >PTEN-R55S·VRFLDSKH   | 27473 | >PTEN-R55S·VSFLDSKH   | 401   | 27072 |
| >PTEN-R55S·VRFLDSKHKN | 27252 | >PTEN-R55S·VSFLDSKHKN | 385   | 26867 |
| >PTEN-R55S·VRFLDSKH   | 482   | >PTEN-R55S·VSFLDSKH   | 24096 | 23614 |
| >PTEN-R55S·VRFLDSKHK  | 137   | >PTEN-R55S·VSFLDSKHK  | 20395 | 20258 |
| >PTEN-R55S·VRFLDSKHK  | 12904 | >PTEN-R55S·VSFLDSKHK  | 434   | 12470 |
| >PTEN-R55S·VYRNNIDDV\ | 219   | >PTEN-R55S·VYRNNIDDV\ | 19084 | 18865 |
| >PTEN-R55S·VYRNNIDDV\ | 173   | >PTEN-R55S·VYRNNIDDV\ | 28358 | 28185 |
| >PTEN-R55S·VVRFLDSKHK | 408   | >PTEN-R55S·VVSFLDSKHK | 226   | 182   |

|                       |      |                       |       |       |
|-----------------------|------|-----------------------|-------|-------|
| >PTEN-R55S-VVRFLDSK   | 455  | >PTEN-R55S-VVSFLDSK   | 27    | 428   |
| >PTEN-R55S-VVRFLDSKHK | 560  | >PTEN-R55S-VVSFLDSKHK | 44    | 516   |
| >PTEN-R55S-VVRFLDSK   | 17   | >PTEN-R55S-VVSFLDSK   | 3359  | 3342  |
| >PTEN-R55S-VVRFLDSKHK | 13   | >PTEN-R55S-VVSFLDSKHK | 2066  | 2053  |
| >PTEN-R55S-VVRFLDSK   | 1300 | >PTEN-R55S-VVSFLDSK   | 125   | 1175  |
| >PTEN-R55S-VVRFLDSKHK | 1972 | >PTEN-R55S-VVSFLDSKHK | 198   | 1774  |
| >PTEN-R55S-VVRFLDSKH  | 57   | >PTEN-R55S-VVSFLDSKH  | 151   | 94    |
| >PTEN-R55S-DVVRFLDSK  | 493  | >PTEN-R55S-DVVSFLDSK  | 394   | 99    |
| >PTEN-R55S-DVVRFLDSKH | 129  | >PTEN-R55S-DVVSFLDSKH | 106   | 23    |
| >PTEN-R55S-DVVRFLDSK  | 18   | >PTEN-R55S-DVVSFLDSK  | 10    | 8     |
| >PTEN-R55S-DVVRFLDSKH | 102  | >PTEN-R55S-DVVSFLDSKH | 52    | 50    |
| >PTEN-R55S-NIDDVVRFL  | 909  | >PTEN-R55S-NIDDVVSFL  | 122   | 787   |
| >PTEN-R55S-NIDDVVRFL  | 171  | >PTEN-R55S-NIDDVVSFL  | 25    | 146   |
| >PTEN-R55S-NIDDVVRFL  | 1161 | >PTEN-R55S-NIDDVVSFL  | 154   | 1007  |
| >PTEN-R55S-NIDDVVRFL  | 272  | >PTEN-R55S-NIDDVVSFL  | 35    | 237   |
| >PTEN-R55S-NIDDVVRFL  | 30   | >PTEN-R55S-NIDDVVSFL  | 14    | 16    |
| >PTEN-R55S-NIDDVVRFL  | 1529 | >PTEN-R55S-NIDDVVSFL  | 199   | 1330  |
| >PTEN-R55S-NIDDVVRFL  | 320  | >PTEN-R55S-NIDDVVSFL  | 42    | 278   |
| >PTEN-R55S-NIDDVVRFL  | 464  | >PTEN-R55S-NIDDVVSFL  | 36    | 428   |
| >PTEN-R55S-NIDDVVRFL  | 2416 | >PTEN-R55S-NIDDVVSFL  | 288   | 2128  |
| >PTEN-R55S-NIDDVVRFL  | 1548 | >PTEN-R55S-NIDDVVSFL  | 194   | 1354  |
| >PTEN-R55S-NIDDVVRFL  | 324  | >PTEN-R55S-NIDDVVSFL  | 60    | 264   |
| >PTEN-R55S-NNIDDVVR   | 192  | >PTEN-R55S-NNIDDVVS   | 26246 | 26054 |
| >PTEN-R55S-NNIDDVVR   | 2229 | >PTEN-R55S-NNIDDVVS   | 322   | 1907  |
| >PTEN-R55S-RNNIDDVVR  | 2261 | >PTEN-R55S-RNNIDDVVS  | 466   | 1795  |
| >PTEN-R55S-RNNIDDVVR  | 450  | >PTEN-R55S-RNNIDDVVS  | 76    | 374   |
| >PTEN-R55S-RNNIDDVVR  | 474  | >PTEN-R55S-RNNIDDVVS  | 32015 | 31541 |
| >PTEN-R55S-YRNNIDDVVR | 48   | >PTEN-R55S-YRNNIDDVVS | 15    | 33    |
| >PTEN-R55S-YRNNIDDVVR | 119  | >PTEN-R55S-YRNNIDDVVS | 98    | 21    |
| >PTEN-R84G-CRVAQYPF   | 32   | >PTEN-R84G-CGVAQYPF   | 785   | 753   |
| >PTEN-R84G-CRVAQYPF   | 283  | >PTEN-R84G-CGVAQYPF   | 21941 | 21658 |
| >PTEN-R84G-CRVAQYPF   | 5407 | >PTEN-R84G-CGVAQYPF   | 216   | 5191  |
| >PTEN-R84G-CRVAQYPF   | 214  | >PTEN-R84G-CGVAQYPF   | 13155 | 12941 |
| >PTEN-R84G-RHYDTAKFNC | 374  | >PTEN-R84G-RHYDTAKFNC | 21735 | 21361 |
| >PTEN-R84G-RHYDTAKFNC | 71   | >PTEN-R84G-RHYDTAKFNC | 28170 | 28099 |
| >PTEN-R84G-FNCRVAQY   | 418  | >PTEN-R84G-FNCGVAQY   | 96    | 322   |
| >PTEN-R84G-FNCRVAQYPI | 119  | >PTEN-R84G-FNCGVAQYPI | 444   | 325   |
| >PTEN-R84G-KFNCRVAQYI | 235  | >PTEN-R84G-KFNCGVAQYI | 177   | 58    |
| >PTEN-R84G-KFNCRVAQYI | 412  | >PTEN-R84G-KFNCGVAQYI | 655   | 243   |
| >PTEN-R84G-KFNCRVAQYI | 140  | >PTEN-R84G-KFNCGVAQYI | 86    | 54    |
| >PTEN-R84G-KFNCRVAQY  | 167  | >PTEN-R84G-KFNCGVAQY  | 53    | 114   |
| >PTEN-R84G-KFNCRVAQY  | 853  | >PTEN-R84G-KFNCGVAQY  | 248   | 605   |
| >PTEN-R84G-KFNCRVAQY  | 377  | >PTEN-R84G-KFNCGVAQY  | 1376  | 999   |



|                        |      |                       |       |       |
|------------------------|------|-----------------------|-------|-------|
| >PTEN-R84G·KFNCRVAQYI  | 170  | >PTEN-R84G·KFNCGVAQYI | 354   | 184   |
| >PTEN-R84G·KFNCRVAQYI  | 101  | >PTEN-R84G·KFNCGVAQYI | 117   | 16    |
| >PTEN-R84G·KFNCRVAQY   | 611  | >PTEN-R84G·KFNCGVAQY  | 279   | 332   |
| >PTEN-R84G·KFNCRVAQYI  | 431  | >PTEN-R84G·KFNCGVAQYI | 268   | 163   |
| >PTEN-R84G·KFNCRVAQYI  | 331  | >PTEN-R84G·KFNCGVAQYI | 306   | 25    |
| >PTEN-R84G·KFNCRVAQY   | 131  | >PTEN-R84G·KFNCGVAQY  | 196   | 65    |
| >PTEN-R84G·AKFNCRVAQ'  | 381  | >PTEN-R84G·AKFNCGVAQ' | 161   | 220   |
| >PTEN-R84G·AKFNCRVAQ'  | 197  | >PTEN-R84G·AKFNCGVAQ' | 156   | 41    |
| >PTEN-R84G·AKFNCRVA    | 52   | >PTEN-R84G·AKFNCGVA   | 95    | 43    |
| >PTEN-R84G·AKFNCRVAQ   | 43   | >PTEN-R84G·AKFNCGVAQ  | 23    | 20    |
| >PTEN-R84G·AKFNCRVAQ'  | 3    | >PTEN-R84G·AKFNCGVAQ' | 3     | 0     |
| >PTEN-R84G·AKFNCRVAQ'  | 114  | >PTEN-R84G·AKFNCGVAQ' | 104   | 10    |
| >PTEN-R84G·TAKFNCRVAC  | 573  | >PTEN-R84G·TAKFNCGVAQ | 189   | 384   |
| >PTEN-R84G·TAKFNCRV    | 662  | >PTEN-R84G·TAKFNCGV   | 286   | 376   |
| >PTEN-R84G·TAKFNCRVAC  | 362  | >PTEN-R84G·TAKFNCGVAQ | 262   | 100   |
| >PTEN-R84G·TAKFNCRVAC  | 97   | >PTEN-R84G·TAKFNCGVAQ | 96    | 1     |
| >PTEN-R84G·TAKFNCRVAC  | 869  | >PTEN-R84G·TAKFNCGVAQ | 474   | 395   |
| >PTEN-R84G·DTAKFNCRV   | 1832 | >PTEN-R84G·DTAKFNCGV  | 357   | 1475  |
| >PTEN-R84G·DTAKFNCR    | 20   | >PTEN-R84G·DTAKFNCG   | 20519 | 20499 |
| >PTEN-R84G·DTAKFNCR    | 3    | >PTEN-R84G·DTAKFNCG   | 8856  | 8853  |
| >PTEN-R84G·DTAKFNCRV/  | 171  | >PTEN-R84G·DTAKFNCGV/ | 313   | 142   |
| >PTEN-R84G·DTAKFNCRV   | 12   | >PTEN-R84G·DTAKFNCGV  | 10    | 2     |
| >PTEN-R84G·DTAKFNCRV/  | 460  | >PTEN-R84G·DTAKFNCGV/ | 87    | 373   |
| >PTEN-R84G·DTAKFNCRV   | 7    | >PTEN-R84G·DTAKFNCGV  | 4     | 3     |
| >PTEN-R84G·YDTAKFNCRV  | 183  | >PTEN-R84G·YDTAKFNCGV | 173   | 10    |
| >PTEN-R84G·HYDTAKFNCF  | 204  | >PTEN-R84G·HYDTAKFNCC | 31530 | 31326 |
| >PTEN-R84G·HYDTAKFNCF  | 29   | >PTEN-R84G·HYDTAKFNCC | 27443 | 27414 |
| >PTEN-S10N·VSRNKRRYQ   | 113  | >PTEN-S10N·VNRNKRRYQ  | 2721  | 2608  |
| >PTEN-S10N·VSRNKRRY    | 155  | >PTEN-S10N·VNRNKRRY   | 1994  | 1839  |
| >PTEN-S10N·VSRNKRRY    | 7    | >PTEN-S10N·VNRNKRRY   | 10952 | 10945 |
| >PTEN-S10N·IVSRNKRRY   | 157  | >PTEN-S10N·IVNRNKRRY  | 160   | 3     |
| >PTEN-S10N·IVSRNKRR    | 225  | >PTEN-S10N·IVNRNKRR   | 49    | 176   |
| >PTEN-S10N·IVSRNKRR    | 128  | >PTEN-S10N·IVNRNKRR   | 232   | 104   |
| >PTEN-S10N·EIVSRNKRRY  | 13   | >PTEN-S10N·EIVNRNKRRY | 26    | 13    |
| >PTEN-S10N·EIVSRNKRRY  | 313  | >PTEN-S10N·EIVNRNKRRY | 278   | 35    |
| >PTEN-S10N·EIVSRNKRR   | 155  | >PTEN-S10N·EIVNRNKRR  | 177   | 22    |
| >PTEN-S10N·EIVSRNKRR   | 356  | >PTEN-S10N·EIVNRNKRR  | 349   | 7     |
| >PTEN-S10N·EIVSRNKRR   | 8    | >PTEN-S10N·EIVNRNKRR  | 10    | 2     |
| >PTEN-S10N·EIVSRNKRR   | 20   | >PTEN-S10N·EIVNRNKRR  | 28    | 8     |
| >PTEN-S10N·EIVSRNKRR   | 258  | >PTEN-S10N·EIVNRNKRR  | 291   | 33    |
| >PTEN-S10N·EIVSRNKRR   | 226  | >PTEN-S10N·EIVNRNKRR  | 299   | 73    |
| >PTEN-S10N·KEIVSRNKRR' | 321  | >PTEN-S10N·KEIVNRNKRR | 428   | 107   |
| >PTEN-S10N·KEIVSRNKRR  | 621  | >PTEN-S10N·KEIVNRNKRR | 336   | 285   |

|                        |       |                        |      |       |
|------------------------|-------|------------------------|------|-------|
| >PTEN-S10N-KEIVSRNKRR  | 358   | >PTEN-S10N-KEIVNRNKRR  | 248  | 110   |
| >PTEN-S10N-IIKEIVSRNK  | 201   | >PTEN-S10N-IIKEIVNRNK  | 410  | 209   |
| >PTEN-S10N-IIKEIVSRNK  | 31    | >PTEN-S10N-IIKEIVNRNK  | 35   | 4     |
| >PTEN-S10N-IIKEIVSR    | 30    | >PTEN-S10N-IIKEIVNR    | 23   | 7     |
| >PTEN-S10N-IIKEIVSRNKR | 24    | >PTEN-S10N-IIKEIVNRNKR | 30   | 6     |
| >PTEN-S10N-IIKEIVSR    | 71    | >PTEN-S10N-IIKEIVNR    | 82   | 11    |
| >PTEN-S10N-IIKEIVSRNKR | 117   | >PTEN-S10N-IIKEIVNRNKR | 175  | 58    |
| >PTEN-S10N-IIKEIVSR    | 66    | >PTEN-S10N-IIKEIVNR    | 63   | 3     |
| >PTEN-S10N-IIKEIVSRNKR | 40    | >PTEN-S10N-IIKEIVNRNKR | 49   | 9     |
| >PTEN-S10N-IIKEIVSR    | 184   | >PTEN-S10N-IIKEIVNR    | 123  | 61    |
| >PTEN-S10N-IIKEIVSRNKR | 534   | >PTEN-S10N-IIKEIVNRNKR | 387  | 147   |
| >PTEN-S10N-AIIEIVSRNK  | 271   | >PTEN-S10N-AIIEIVNRNK  | 444  | 173   |
| >PTEN-S10N-AIIEIVSR    | 531   | >PTEN-S10N-AIIEIVNR    | 427  | 104   |
| >PTEN-S10N-AIIEIVSRNK  | 59    | >PTEN-S10N-AIIEIVNRNK  | 74   | 15    |
| >PTEN-S10N-AIIEIVSRNK  | 360   | >PTEN-S10N-AIIEIVNRNK  | 537  | 177   |
| >PTEN-S10N-AIIEIVSR    | 388   | >PTEN-S10N-AIIEIVNR    | 164  | 224   |
| >PTEN-S10N-AIIEIVSR    | 131   | >PTEN-S10N-AIIEIVNR    | 126  | 5     |
| >PTEN-S10N-AIIEIVSR    | 326   | >PTEN-S10N-AIIEIVNR    | 173  | 153   |
| >PTEN-S10N-TAIIEIVSR   | 406   | >PTEN-S10N-TAIIEIVNR   | 263  | 143   |
| >PTEN-S10N-TAIIEIVSR   | 24    | >PTEN-S10N-TAIIEIVNR   | 18   | 6     |
| >PTEN-S10N-MTAIIEIVSR  | 373   | >PTEN-S10N-MTAIIEIVNF  | 297  | 76    |
| >PTEN-S10N-MTAIIEIVSR  | 22    | >PTEN-S10N-MTAIIEIVNF  | 20   | 2     |
| >PTEN-S10N-MTAIIEIVSR  | 145   | >PTEN-S10N-MTAIIEIVNF  | 160  | 15    |
| >PTEN-S10N-MTAIIEIVSR  | 2     | >PTEN-S10N-MTAIIEIVNF  | 2    | 0     |
| >PTEN-S10N-MTAIIEIVSR  | 684   | >PTEN-S10N-MTAIIEIVNF  | 469  | 215   |
| >PTEN-S10N-MTAIIEIVSR  | 379   | >PTEN-S10N-MTAIIEIVNF  | 216  | 163   |
| >PTEN-S113FSEDDNHVA    | 161   | >PTEN-S113FREDDNHVA    | 2607 | 2446  |
| >PTEN-S113FSEDDNHVAA   | 347   | >PTEN-S113FREDDNHVAA   | 1390 | 1043  |
| >PTEN-S113FSEDDNHVAA   | 1148  | >PTEN-S113FREDDNHVAA   | 192  | 956   |
| >PTEN-S113FSEDDNHVAA   | 768   | >PTEN-S113FREDDNHVAA   | 204  | 564   |
| >PTEN-S113FSEDDNHVAA   | 435   | >PTEN-S113FREDDNHVAA   | 179  | 256   |
| >PTEN-S113FSEDDNHVAA   | 117   | >PTEN-S113FREDDNHVAA   | 308  | 191   |
| >PTEN-S113FSEDDNHVA    | 53    | >PTEN-S113FREDDNHVA    | 90   | 37    |
| >PTEN-S113FSEDDNHVAA   | 24    | >PTEN-S113FREDDNHVAA   | 41   | 17    |
| >PTEN-S113FSEDDNHVAA   | 315   | >PTEN-S113FREDDNHVAA   | 663  | 348   |
| >PTEN-S113FSEDDNHVAA   | 65    | >PTEN-S113FREDDNHVAA   | 17   | 48    |
| >PTEN-S113FLSEDDNHVA/  | 70    | >PTEN-S113FLREDDNHVA/  | 6047 | 5977  |
| >PTEN-S113FPFCEDLDQW   | 28826 | >PTEN-S113FPFCEDLDQW   | 232  | 28594 |
| >PTEN-S113FPFCEDLDQW   | 29506 | >PTEN-S113FPFCEDLDQW   | 280  | 29226 |
| >PTEN-S113FWLSEDDNHV   | 105   | >PTEN-S113FWLREDDNHV   | 2145 | 2040  |
| >PTEN-S113FWLSEDDNHV   | 480   | >PTEN-S113FWLREDDNHV   | 6250 | 5770  |
| >PTEN-S113FWLSEDDNHV   | 10    | >PTEN-S113FWLREDDNHV   | 152  | 142   |
| >PTEN-S113FWLSEDDNHV   | 99    | >PTEN-S113FWLREDDNHV   | 902  | 803   |

|                       |       |                       |      |       |
|-----------------------|-------|-----------------------|------|-------|
| >PTEN-S113FWLSEDDNHV  | 30    | >PTEN-S113FWLREDDNHV  | 1033 | 1003  |
| >PTEN-S113FWLSEDDNHV  | 12    | >PTEN-S113FWLREDDNHV  | 25   | 13    |
| >PTEN-S113FWLSEDDNHV  | 39    | >PTEN-S113FWLREDDNHV  | 112  | 73    |
| >PTEN-S113FWLSEDDNHV  | 30    | >PTEN-S113FWLREDDNHV  | 188  | 158   |
| >PTEN-S113FWLSEDDNHV  | 56    | >PTEN-S113FWLREDDNHV  | 748  | 692   |
| >PTEN-S113FWLSEDDNHV  | 8     | >PTEN-S113FWLREDDNHV  | 30   | 22    |
| >PTEN-S113FWLSEDDNHV  | 65    | >PTEN-S113FWLREDDNHV  | 348  | 283   |
| >PTEN-S113FWLSEDDNHV  | 34    | >PTEN-S113FWLREDDNHV  | 147  | 113   |
| >PTEN-S113FWLSEDDNHV  | 4     | >PTEN-S113FWLREDDNHV  | 13   | 9     |
| >PTEN-S113FWLSEDDNHV  | 22    | >PTEN-S113FWLREDDNHV  | 196  | 174   |
| >PTEN-S113FWLSEDDNHV  | 26    | >PTEN-S113FWLREDDNHV  | 223  | 197   |
| >PTEN-S113FWLSEDDNHV  | 6     | >PTEN-S113FWLREDDNHV  | 17   | 11    |
| >PTEN-S113FWLSEDDNHV  | 46    | >PTEN-S113FWLREDDNHV  | 997  | 951   |
| >PTEN-S113FWLSEDDNHV  | 85    | >PTEN-S113FWLREDDNHV  | 1299 | 1214  |
| >PTEN-S113FWLSEDDNHV  | 6     | >PTEN-S113FWLREDDNHV  | 249  | 243   |
| >PTEN-S113FWLSEDDNHV  | 40    | >PTEN-S113FWLREDDNHV  | 1403 | 1363  |
| >PTEN-S113FWLSEDDNHV  | 108   | >PTEN-S113FWLREDDNHV  | 5021 | 4913  |
| >PTEN-S113FWLSEDDNHV  | 2     | >PTEN-S113FWLREDDNHV  | 3    | 1     |
| >PTEN-S113FWLSEDDNHV  | 7     | >PTEN-S113FWLREDDNHV  | 15   | 8     |
| >PTEN-S113FWLSEDDNHV  | 9     | >PTEN-S113FWLREDDNHV  | 20   | 11    |
| >PTEN-S113FWLSEDDNHV  | 243   | >PTEN-S113FWLREDDNHV  | 5341 | 5098  |
| >PTEN-S113FQWLSEDDNF  | 40    | >PTEN-S113FQWLREDDNF  | 46   | 6     |
| >PTEN-S113FQWLSEDDNF  | 162   | >PTEN-S113FQWLREDDNF  | 264  | 102   |
| >PTEN-S113FEDLDQWLS   | 28355 | >PTEN-S113FEDLDQWLR   | 389  | 27966 |
| >PTEN-S113FCEDLDQWL   | 29671 | >PTEN-S113FCEDLDQWL   | 301  | 29370 |
| >PTEN-S170CSQRRYVYYY  | 308   | >PTEN-S170CGQRRYVYYY  | 4154 | 3846  |
| >PTEN-S170CSQRRYVYYY  | 137   | >PTEN-S170CGQRRYVYYY  | 129  | 8     |
| >PTEN-S170CSQRRYVYYYS | 355   | >PTEN-S170CGQRRYVYYYS | 330  | 25    |
| >PTEN-S170CSQRRYVYYY  | 72    | >PTEN-S170CGQRRYVYYY  | 412  | 340   |
| >PTEN-S170CSQRRYVYYY  | 75    | >PTEN-S170CGQRRYVYYY  | 444  | 369   |
| >PTEN-S170CSQRRYVYYYS | 152   | >PTEN-S170CGQRRYVYYYS | 939  | 787   |
| >PTEN-S170CSQRRYVYYYS | 104   | >PTEN-S170CGQRRYVYYYS | 623  | 519   |
| >PTEN-S170CSQRRYVYYY  | 83    | >PTEN-S170CGQRRYVYYY  | 154  | 71    |
| >PTEN-S170CSQRRYVYYYS | 106   | >PTEN-S170CGQRRYVYYYS | 202  | 96    |
| >PTEN-S170CSQRRYVYYY  | 219   | >PTEN-S170CGQRRYVYYY  | 437  | 218   |
| >PTEN-S170CSQRRYVYYY  | 212   | >PTEN-S170CGQRRYVYYY  | 3627 | 3415  |
| >PTEN-S170CSQRRYVYYY  | 41    | >PTEN-S170CGQRRYVYYY  | 54   | 13    |
| >PTEN-S170CSQRRYVYYY  | 36    | >PTEN-S170CGQRRYVYYY  | 46   | 10    |
| >PTEN-S170CSQRRYVYYYS | 34    | >PTEN-S170CGQRRYVYYYS | 41   | 7     |
| >PTEN-S170CSQRRYVYYY  | 383   | >PTEN-S170CGQRRYVYYY  | 1164 | 781   |
| >PTEN-S170CSQRRYVYYYS | 322   | >PTEN-S170CGQRRYVYYYS | 1010 | 688   |
| >PTEN-S170CSQRRYVYYY  | 4     | >PTEN-S170CGQRRYVYYY  | 7    | 3     |
| >PTEN-S170CSQRRYVYYY  | 4     | >PTEN-S170CGQRRYVYYY  | 7    | 3     |

|                       |      |                      |      |      |
|-----------------------|------|----------------------|------|------|
| >PTEN-S170CSQRRYVYYY  | 3    | >PTEN-S170GQRRYVYYY  | 5    | 2    |
| >PTEN-S170CSQRRYVYYY  | 492  | >PTEN-S170GQRRYVYYY  | 2551 | 2059 |
| >PTEN-S170CSQRRYVYY   | 453  | >PTEN-S170GQRRYVYY   | 361  | 92   |
| >PTEN-S170CPSQRRYVYY  | 186  | >PTEN-S170PGQRRYVYY  | 4886 | 4700 |
| >PTEN-S170CPSQRRYVYY  | 359  | >PTEN-S170PGQRRYVYY  | 1158 | 799  |
| >PTEN-S170CPSQRRYVY   | 465  | >PTEN-S170PGQRRYVY   | 1398 | 933  |
| >PTEN-S170CPSQRRYVYY  | 40   | >PTEN-S170PGQRRYVYY  | 314  | 274  |
| >PTEN-S170CPSQRRYVYY  | 353  | >PTEN-S170PGQRRYVYY  | 4533 | 4180 |
| >PTEN-S170CIPSQRRYVYY | 288  | >PTEN-S170IPGQRRYVY  | 309  | 21   |
| >PTEN-S170CIPSQRRYVY  | 183  | >PTEN-S170IPGQRRYVY  | 465  | 282  |
| >PTEN-S170CIPSQRRYVYY | 123  | >PTEN-S170IPGQRRYVYY | 349  | 226  |
| >PTEN-S170CIPSQRRYV   | 22   | >PTEN-S170IPGQRRYV   | 46   | 24   |
| >PTEN-S170CIPSQRRYVY  | 165  | >PTEN-S170IPGQRRYVY  | 409  | 244  |
| >PTEN-S170CIPSQRRYVY  | 16   | >PTEN-S170IPGQRRYVY  | 38   | 22   |
| >PTEN-S170CIPSQRRYVYY | 27   | >PTEN-S170IPGQRRYVYY | 73   | 46   |
| >PTEN-S170CIPSQRRYVY  | 74   | >PTEN-S170IPGQRRYVY  | 244  | 170  |
| >PTEN-S170CIPSQRRYVYY | 31   | >PTEN-S170IPGQRRYVYY | 80   | 49   |
| >PTEN-S170CIPSQRRYVY  | 7    | >PTEN-S170IPGQRRYVY  | 44   | 37   |
| >PTEN-S170CIPSQRRYVY  | 33   | >PTEN-S170IPGQRRYVY  | 370  | 337  |
| >PTEN-S170CIPSQRRYVYY | 12   | >PTEN-S170IPGQRRYVYY | 92   | 80   |
| >PTEN-S170CIPSQRRYVY  | 262  | >PTEN-S170IPGQRRYVY  | 1433 | 1171 |
| >PTEN-S170CTIPSQRRYV  | 225  | >PTEN-S170TIPGQRRYV  | 57   | 168  |
| >PTEN-S170CTIPSQRRY   | 437  | >PTEN-S170TIPGQRRY   | 289  | 148  |
| >PTEN-S170CTIPSQRRYVY | 618  | >PTEN-S170TIPGQRRYVY | 419  | 199  |
| >PTEN-S170CTIPSQRRYVY | 290  | >PTEN-S170TIPGQRRYVY | 218  | 72   |
| >PTEN-S170CTIPSQRRYVY | 238  | >PTEN-S170TIPGQRRYVY | 198  | 40   |
| >PTEN-S170CTIPSQRRYV  | 67   | >PTEN-S170TIPGQRRYV  | 51   | 16   |
| >PTEN-S170CVTIPSQRRYV | 249  | >PTEN-S170VTIPGQRRYV | 153  | 96   |
| >PTEN-S170CVTIPSQRRYV | 286  | >PTEN-S170VTIPGQRRYV | 135  | 151  |
| >PTEN-S170CVTIPSQRRYV | 284  | >PTEN-S170VTIPGQRRYV | 502  | 218  |
| >PTEN-S170CVTIPSQRRY  | 26   | >PTEN-S170VTIPGQRRY  | 20   | 6    |
| >PTEN-S170CVTIPSQRRYV | 38   | >PTEN-S170VTIPGQRRYV | 30   | 8    |
| >PTEN-S170CVTIPSQRRY  | 59   | >PTEN-S170VTIPGQRRY  | 20   | 39   |
| >PTEN-S170CVTIPSQRRYV | 26   | >PTEN-S170VTIPGQRRYV | 15   | 11   |
| >PTEN-S170CVTIPSQRRY  | 41   | >PTEN-S170VTIPGQRRY  | 22   | 19   |
| >PTEN-S170CVTIPSQRRYV | 16   | >PTEN-S170VTIPGQRRYV | 12   | 4    |
| >PTEN-S170CVTIPSQRR   | 135  | >PTEN-S170VTIPGQRR   | 166  | 31   |
| >PTEN-S170CVTIPSQRR   | 65   | >PTEN-S170VTIPGQRR   | 172  | 107  |
| >PTEN-S170CVTIPSQRRYV | 225  | >PTEN-S170VTIPGQRRYV | 254  | 29   |
| >PTEN-S170CVTIPSQRRY  | 1209 | >PTEN-S170VTIPGQRRY  | 427  | 782  |
| >PTEN-S170CVTIPSQRRYV | 579  | >PTEN-S170VTIPGQRRYV | 304  | 275  |
| >PTEN-S170CVTIPSQRRY  | 399  | >PTEN-S170VTIPGQRRY  | 478  | 79   |
| >PTEN-S170CVTIPSQRRYV | 109  | >PTEN-S170VTIPGQRRYV | 126  | 17   |

|                         |     |                         |      |      |
|-------------------------|-----|-------------------------|------|------|
| >PTEN-S170C VTIPSQRRYV' | 205 | >PTEN-S170C VTIPGQRRYV  | 636  | 431  |
| >PTEN-S170C VTIPSQRRY   | 3   | >PTEN-S170C VTIPGQRRY   | 3    | 0    |
| >PTEN-S170C VTIPSQRRYV  | 124 | >PTEN-S170C VTIPGQRRYV  | 188  | 64   |
| >PTEN-S170C VTIPSQRRYV' | 4   | >PTEN-S170C VTIPGQRRYV  | 4    | 0    |
| >PTEN-S170C VTIPSQRRY   | 81  | >PTEN-S170C VTIPGQRRY   | 298  | 217  |
| >PTEN-S170C VTIPSQRRYV' | 111 | >PTEN-S170C VTIPGQRRYV  | 241  | 130  |
| >PTEN-S170C VTIPSQRRY   | 122 | >PTEN-S170C VTIPGQRRY   | 273  | 151  |
| >PTEN-S170C VTIPSQRRYV' | 76  | >PTEN-S170C VTIPGQRRYV  | 108  | 32   |
| >PTEN-S170C VTIPSQRRY   | 37  | >PTEN-S170C VTIPGQRRY   | 26   | 11   |
| >PTEN-S170C VTIPSQRRYV' | 37  | >PTEN-S170C VTIPGQRRYV  | 29   | 8    |
| >PTEN-S170C VTIPSQRRYV' | 256 | >PTEN-S170C VTIPGQRRYV  | 1154 | 898  |
| >PTEN-S170C GVTIPSQRRY' | 123 | >PTEN-S170C GVTIPGQRRY  | 123  | 0    |
| >PTEN-S170C GVTIPSQR    | 457 | >PTEN-S170C GVTIPGQR    | 929  | 472  |
| >PTEN-S170C GVTIPSQR    | 210 | >PTEN-S170C GVTIPGQR    | 543  | 333  |
| >PTEN-S170C GVTIPSQRRY  | 172 | >PTEN-S170C GVTIPGQRRY  | 424  | 252  |
| >PTEN-S170C KGVTIPSQRR  | 155 | >PTEN-S170C KGVTIPGQRR  | 97   | 58   |
| >PTEN-S170C KGVTIPSQR   | 208 | >PTEN-S170C KGVTIPGQR   | 610  | 402  |
| >PTEN-S170C KGVTIPSQRR  | 202 | >PTEN-S170C KGVTIPGQRR  | 479  | 277  |
| >PTEN-S170C KGVTIPSQRR  | 227 | >PTEN-S170C KGVTIPGQRR  | 475  | 248  |
| >PTEN-S170C KGVTIPSQR   | 147 | >PTEN-S170C KGVTIPGQR   | 149  | 2    |
| >PTEN-S170C KGVTIPSQRR  | 120 | >PTEN-S170C KGVTIPGQRR  | 192  | 72   |
| >PTEN-S170C DKKGVTIPSQ  | 497 | >PTEN-S170C DKKGVTIPGC  | 918  | 421  |
| >PTEN-S170I SQRRYVYYY   | 308 | >PTEN-S170I IQRRYVYYY   | 1844 | 1536 |
| >PTEN-S170I SQRRYVYYY   | 137 | >PTEN-S170I IQRRYVYYY   | 109  | 28   |
| >PTEN-S170I SQRRYVYYYS  | 355 | >PTEN-S170I IQRRYVYYYS\ | 282  | 73   |
| >PTEN-S170I SQRRYVYY    | 72  | >PTEN-S170I IQRRYVYY    | 194  | 122  |
| >PTEN-S170I SQRRYVYYY   | 75  | >PTEN-S170I IQRRYVYYY   | 193  | 118  |
| >PTEN-S170I SQRRYVYYYS  | 152 | >PTEN-S170I IQRRYVYYYS  | 404  | 252  |
| >PTEN-S170I SQRRYVYYYS  | 104 | >PTEN-S170I IQRRYVYYYS\ | 273  | 169  |
| >PTEN-S170I SQRRYVYY    | 535 | >PTEN-S170I IQRRYVYY    | 386  | 149  |
| >PTEN-S170I SQRRYVYYY   | 83  | >PTEN-S170I IQRRYVYYY   | 58   | 25   |
| >PTEN-S170I SQRRYVYYYS  | 106 | >PTEN-S170I IQRRYVYYYS\ | 78   | 28   |
| >PTEN-S170I SQRRYVYYY   | 219 | >PTEN-S170I IQRRYVYYY   | 247  | 28   |
| >PTEN-S170I SQRRYVYYY   | 212 | >PTEN-S170I IQRRYVYYY   | 414  | 202  |
| >PTEN-S170I SQRRYVYY    | 41  | >PTEN-S170I IQRRYVYY    | 51   | 10   |
| >PTEN-S170I SQRRYVYYY   | 36  | >PTEN-S170I IQRRYVYYY   | 45   | 9    |
| >PTEN-S170I SQRRYVYYYS  | 34  | >PTEN-S170I IQRRYVYYYS\ | 43   | 9    |
| >PTEN-S170I SQRRYVYY    | 383 | >PTEN-S170I IQRRYVYY    | 802  | 419  |
| >PTEN-S170I SQRRYVYYYS  | 322 | >PTEN-S170I IQRRYVYYYS\ | 702  | 380  |
| >PTEN-S170I SQRRYVYY    | 4   | >PTEN-S170I IQRRYVYY    | 3    | 1    |
| >PTEN-S170I SQRRYVYYY   | 4   | >PTEN-S170I IQRRYVYYY   | 3    | 1    |
| >PTEN-S170I SQRRYVYYYS  | 947 | >PTEN-S170I IQRRYVYYYS  | 288  | 659  |
| >PTEN-S170I SQRRYVYYYS  | 3   | >PTEN-S170I IQRRYVYYYS\ | 2    | 1    |

|                          |      |                          |      |      |
|--------------------------|------|--------------------------|------|------|
| >PTEN-S170I·SQRRYVYYY    | 1083 | >PTEN-S170I·IQRRYVYYY    | 426  | 657  |
| >PTEN-S170I·SQRRYVYYYS   | 492  | >PTEN-S170I·IQRRYVYYYS\  | 182  | 310  |
| >PTEN-S170I·SQRRYVYYY    | 453  | >PTEN-S170I·IQRRYVYYY    | 863  | 410  |
| >PTEN-S170I·PSQRRYVYYY   | 186  | >PTEN-S170I·PIQRRYVYYY   | 1181 | 995  |
| >PTEN-S170I·PSQRRYVYYY   | 359  | >PTEN-S170I·PIQRRYVYYY   | 691  | 332  |
| >PTEN-S170I·PSQRRYVY     | 465  | >PTEN-S170I·PIQRRYVY     | 832  | 367  |
| >PTEN-S170I·PSQRRYVYYY   | 40   | >PTEN-S170I·PIQRRYVYYY   | 165  | 125  |
| >PTEN-S170I·PSQRRYVYYY   | 353  | >PTEN-S170I·PIQRRYVYYY   | 5363 | 5010 |
| >PTEN-S170I·TRDKKGV TIP\ | 9938 | >PTEN-S170I·TRDKKGV TIP\ | 294  | 9644 |
| >PTEN-S170I·IPSQRRYV     | 597  | >PTEN-S170I·IPIQRRYV     | 44   | 553  |
| >PTEN-S170I·IPSQRRYVY    | 2308 | >PTEN-S170I·IPIQRRYVY    | 249  | 2059 |
| >PTEN-S170I·IPSQRRYVYYY\ | 4585 | >PTEN-S170I·IPIQRRYVYYY  | 373  | 4212 |
| >PTEN-S170I·IPSQRRYVYYY\ | 288  | >PTEN-S170I·IPIQRRYVYYY  | 82   | 206  |
| >PTEN-S170I·IPSQRRYVY    | 183  | >PTEN-S170I·IPIQRRYVY    | 300  | 117  |
| >PTEN-S170I·IPSQRRYVYYY\ | 123  | >PTEN-S170I·IPIQRRYVYYY  | 224  | 101  |
| >PTEN-S170I·IPSQRRYV     | 22   | >PTEN-S170I·IPIQRRYV     | 26   | 4    |
| >PTEN-S170I·IPSQRRYVY    | 165  | >PTEN-S170I·IPIQRRYVY    | 215  | 50   |
| >PTEN-S170I·IPSQRRYVY    | 16   | >PTEN-S170I·IPIQRRYVY    | 14   | 2    |
| >PTEN-S170I·IPSQRRYVY    | 1086 | >PTEN-S170I·IPIQRRYVY    | 314  | 772  |
| >PTEN-S170I·IPSQRRYVYYY\ | 27   | >PTEN-S170I·IPIQRRYVYYY  | 20   | 7    |
| >PTEN-S170I·IPSQRRYVY    | 74   | >PTEN-S170I·IPIQRRYVY    | 43   | 31   |
| >PTEN-S170I·IPSQRRYVY    | 985  | >PTEN-S170I·IPIQRRYVY    | 271  | 714  |
| >PTEN-S170I·IPSQRRYVYYY\ | 31   | >PTEN-S170I·IPIQRRYVYYY  | 20   | 11   |
| >PTEN-S170I·IPSQRRYV     | 2798 | >PTEN-S170I·IPIQRRYV     | 343  | 2455 |
| >PTEN-S170I·IPSQRRYVY    | 7    | >PTEN-S170I·IPIQRRYVY    | 7    | 0    |
| >PTEN-S170I·IPSQRRYVYYY  | 33   | >PTEN-S170I·IPIQRRYVYYY  | 29   | 4    |
| >PTEN-S170I·IPSQRRYVYYY\ | 12   | >PTEN-S170I·IPIQRRYVYYY  | 11   | 1    |
| >PTEN-S170I·IPSQRRYVYYY  | 262  | >PTEN-S170I·IPIQRRYVYYY  | 104  | 158  |
| >PTEN-S170I·IPSQRRYVYYY\ | 518  | >PTEN-S170I·IPIQRRYVYYY  | 202  | 316  |
| >PTEN-S170I·TIPSQRRYV    | 225  | >PTEN-S170I·TIPIQRRYV    | 356  | 131  |
| >PTEN-S170I·TIPSQRRY     | 437  | >PTEN-S170I·TIPIQRRY     | 2932 | 2495 |
| >PTEN-S170I·TIPSQRRYVY\  | 290  | >PTEN-S170I·TIPIQRRYVY   | 1823 | 1533 |
| >PTEN-S170I·TIPSQRRYVY\  | 238  | >PTEN-S170I·TIPIQRRYVY   | 349  | 111  |
| >PTEN-S170I·TIPSQRRYV    | 67   | >PTEN-S170I·TIPIQRRYV    | 167  | 100  |
| >PTEN-S170I·VTIPSQRRYV   | 563  | >PTEN-S170I·VTIPIQRRYV   | 479  | 84   |
| >PTEN-S170I·VTIPSQRRYV   | 249  | >PTEN-S170I·VTIPIQRRYV   | 182  | 67   |
| >PTEN-S170I·VTIPSQRRYV   | 286  | >PTEN-S170I·VTIPIQRRYV   | 329  | 43   |
| >PTEN-S170I·VTIPSQRRYV\  | 284  | >PTEN-S170I·VTIPIQRRYVY  | 327  | 43   |
| >PTEN-S170I·VTIPSQRRY    | 26   | >PTEN-S170I·VTIPIQRRY    | 44   | 18   |
| >PTEN-S170I·VTIPSQRRYV\  | 38   | >PTEN-S170I·VTIPIQRRYVY  | 52   | 14   |
| >PTEN-S170I·VTIPSQRRY    | 59   | >PTEN-S170I·VTIPIQRRY    | 19   | 40   |
| >PTEN-S170I·VTIPSQRRYV\  | 26   | >PTEN-S170I·VTIPIQRRYVY  | 15   | 11   |
| >PTEN-S170I·VTIPSQRRY    | 41   | >PTEN-S170I·VTIPIQRRY    | 20   | 21   |

|                                     |      |                                     |      |      |
|-------------------------------------|------|-------------------------------------|------|------|
| >PTEN-S170I·VTIPSQRRYV'             | 16   | >PTEN-S170I·VTIPIQRRYVY             | 11   | 5    |
| >PTEN-S170I·VTIPSQRR                | 135  | >PTEN-S170I·VTIPIQRR                | 57   | 78   |
| >PTEN-S170I·VTIPSQRR                | 1245 | >PTEN-S170I·VTIPIQRR                | 429  | 816  |
| >PTEN-S170I·VTIPSQRR                | 65   | >PTEN-S170I·VTIPIQRR                | 34   | 31   |
| >PTEN-S170I·VTIPSQRRYV              | 225  | >PTEN-S170I·VTIPIQRRYV              | 157  | 68   |
| >PTEN-S170I·VTIPSQRRY               | 1209 | >PTEN-S170I·VTIPIQRRY               | 94   | 1115 |
| >PTEN-S170I·VTIPSQRRYV'             | 579  | >PTEN-S170I·VTIPIQRRYVY             | 114  | 465  |
| >PTEN-S170I·VTIPSQRRY               | 399  | >PTEN-S170I·VTIPIQRRY               | 1537 | 1138 |
| >PTEN-S170I·VTIPSQRRYV'             | 109  | >PTEN-S170I·VTIPIQRRYVY             | 216  | 107  |
| >PTEN-S170I·VTIPSQRRYV'             | 205  | >PTEN-S170I·VTIPIQRRYVY             | 742  | 537  |
| >PTEN-S170I·VTIPSQRRY               | 3    | >PTEN-S170I·VTIPIQRRY               | 4    | 1    |
| >PTEN-S170I·VTIPSQRRYV              | 124  | >PTEN-S170I·VTIPIQRRYV              | 405  | 281  |
| >PTEN-S170I·VTIPSQRRYV'             | 4    | >PTEN-S170I·VTIPIQRRYVY             | 5    | 1    |
| >PTEN-S170I·VTIPSQRRY               | 81   | >PTEN-S170I·VTIPIQRRY               | 97   | 16   |
| >PTEN-S170I·VTIPSQRRYV'             | 111  | >PTEN-S170I·VTIPIQRRYVY             | 121  | 10   |
| >PTEN-S170I·VTIPSQRRY               | 122  | >PTEN-S170I·VTIPIQRRY               | 242  | 120  |
| >PTEN-S170I·VTIPSQRRYV'             | 76   | >PTEN-S170I·VTIPIQRRYVY             | 103  | 27   |
| >PTEN-S170I·VTIPSQRRY               | 37   | >PTEN-S170I·VTIPIQRRY               | 22   | 15   |
| >PTEN-S170I·VTIPSQRRYV'             | 37   | >PTEN-S170I·VTIPIQRRYVY             | 26   | 11   |
| >PTEN-S170I·VTIPSQRRYV'             | 256  | >PTEN-S170I·VTIPIQRRYVY             | 217  | 39   |
| >PTEN-S170I·GVTIPSQRRY              | 623  | >PTEN-S170I·GVTIPIQRRY              | 282  | 341  |
| >PTEN-S170I·GVTIPSQRRY              | 123  | >PTEN-S170I·GVTIPIQRRY              | 81   | 42   |
| >PTEN-S170I·GVTIPSQR                | 457  | >PTEN-S170I·GVTIPIQR                | 327  | 130  |
| >PTEN-S170I·GVTIPSQR                | 953  | >PTEN-S170I·GVTIPIQR                | 334  | 619  |
| >PTEN-S170I·GVTIPSQR                | 210  | >PTEN-S170I·GVTIPIQR                | 224  | 14   |
| >PTEN-S170I·GVTIPSQRRY              | 172  | >PTEN-S170I·GVTIPIQRRY              | 631  | 459  |
| >PTEN-S170I·KGV TIPSQR              | 155  | >PTEN-S170I·KGV T IPIQRR\           | 203  | 48   |
| >PTEN-S170I·KGV TIPSQR              | 208  | >PTEN-S170I·KGV T IPIQR             | 227  | 19   |
| >PTEN-S170I·KGV TIPSQR              | 202  | >PTEN-S170I·KGV T IPIQRR\           | 572  | 370  |
| >PTEN-S170I·KGV TIPSQR              | 227  | >PTEN-S170I·KGV T IPIQRR\           | 661  | 434  |
| >PTEN-S170I·KGV TIPSQR              | 147  | >PTEN-S170I·KGV T IPIQR             | 27   | 120  |
| >PTEN-S170I·KGV TIPSQR              | 120  | >PTEN-S170I·KGV T IPIQR             | 56   | 64   |
| >PTEN-S170I·KKGVTIPS                | 3518 | >PTEN-S170I·KKGVTIPI                | 123  | 3395 |
| >PTEN-S170I·KKGVTIPSQR              | 609  | >PTEN-S170I·KKGVTIPIQR              | 157  | 452  |
| >PTEN-S170I·KKGVTIPSQR              | 511  | >PTEN-S170I·KKGVTIPIQR\             | 308  | 203  |
| >PTEN-S170I·DKKGVTIPSQ              | 497  | >PTEN-S170I·DKKGVTIPIQI             | 638  | 141  |
| >PTEN-S170I <sup>†</sup> SQRRYVYYY  | 308  | >PTEN-S170I <sup>†</sup> NQRRYVYYY  | 604  | 296  |
| >PTEN-S170I <sup>†</sup> SQRRYVYYY  | 137  | >PTEN-S170I <sup>†</sup> NQRRYVYYY  | 371  | 234  |
| >PTEN-S170I <sup>†</sup> SQRRYVYYYS | 355  | >PTEN-S170I <sup>†</sup> NQRRYVYYYS | 899  | 544  |
| >PTEN-S170I <sup>†</sup> SQRRYVYY   | 72   | >PTEN-S170I <sup>†</sup> NQRRYVYY   | 2415 | 2343 |
| >PTEN-S170I <sup>†</sup> SQRRYVYYY  | 75   | >PTEN-S170I <sup>†</sup> NQRRYVYYY  | 2594 | 2519 |
| >PTEN-S170I <sup>†</sup> SQRRYVYYYS | 152  | >PTEN-S170I <sup>†</sup> NQRRYVYYYS | 4286 | 4134 |
| >PTEN-S170I <sup>†</sup> SQRRYVYYYS | 104  | >PTEN-S170I <sup>†</sup> NQRRYVYYYS | 3133 | 3029 |

|                         |      |                         |       |       |
|-------------------------|------|-------------------------|-------|-------|
| >PTEN-S170M SQRRYVYYY   | 83   | >PTEN-S170M NQRRYVYYY   | 403   | 320   |
| >PTEN-S170M SQRRYVYYYS  | 106  | >PTEN-S170M NQRRYVYYYS  | 513   | 407   |
| >PTEN-S170M SQRRYVYYY   | 219  | >PTEN-S170M NQRRYVYYY   | 1306  | 1087  |
| >PTEN-S170M SQRRYVYYY   | 212  | >PTEN-S170M NQRRYVYYY   | 1030  | 818   |
| >PTEN-S170M SQRRYVYY    | 41   | >PTEN-S170M NQRRYVYY    | 72    | 31    |
| >PTEN-S170M SQRRYVYYY   | 36   | >PTEN-S170M NQRRYVYYY   | 59    | 23    |
| >PTEN-S170M SQRRYVYYYS  | 34   | >PTEN-S170M NQRRYVYYYS  | 51    | 17    |
| >PTEN-S170M SQRRYVYY    | 383  | >PTEN-S170M NQRRYVYY    | 432   | 49    |
| >PTEN-S170M SQRRYVYYYS  | 322  | >PTEN-S170M NQRRYVYYYS  | 354   | 32    |
| >PTEN-S170M SQRRYVYY    | 4    | >PTEN-S170M NQRRYVYY    | 8     | 4     |
| >PTEN-S170M SQRRYVYYY   | 4    | >PTEN-S170M NQRRYVYYY   | 8     | 4     |
| >PTEN-S170M SQRRYVYYYS  | 3    | >PTEN-S170M NQRRYVYYYS  | 5     | 2     |
| >PTEN-S170M SQRRYVYYY   | 1083 | >PTEN-S170M NQRRYVYYY   | 156   | 927   |
| >PTEN-S170M SQRRYVYYYS  | 492  | >PTEN-S170M NQRRYVYYYS  | 72    | 420   |
| >PTEN-S170M SQRRYVYYY   | 453  | >PTEN-S170M NQRRYVYYY   | 706   | 253   |
| >PTEN-S170M PSQRRYVYYY  | 186  | >PTEN-S170M PNQRRYVYYY  | 4948  | 4762  |
| >PTEN-S170M PSQRRYVYYY  | 359  | >PTEN-S170M PNQRRYVYYY  | 1332  | 973   |
| >PTEN-S170M PSQRRYVY    | 465  | >PTEN-S170M PNQRRYVY    | 3332  | 2867  |
| >PTEN-S170M PSQRRYVYYY  | 40   | >PTEN-S170M PNQRRYVYYY  | 336   | 296   |
| >PTEN-S170M PSQRRYVYYY  | 353  | >PTEN-S170M PNQRRYVYYY  | 12433 | 12080 |
| >PTEN-S170M IPSQRRYV    | 597  | >PTEN-S170M IPNQRRYV    | 318   | 279   |
| >PTEN-S170M IPSQRRYVYYY | 288  | >PTEN-S170M IPNQRRYVYY  | 455   | 167   |
| >PTEN-S170M IPSQRRYVY   | 183  | >PTEN-S170M IPNQRRYVY   | 174   | 9     |
| >PTEN-S170M IPSQRRYVYYY | 123  | >PTEN-S170M IPNQRRYVYYY | 121   | 2     |
| >PTEN-S170M IPSQRRYV    | 22   | >PTEN-S170M IPNQRRYV    | 27    | 5     |
| >PTEN-S170M IPSQRRYVY   | 165  | >PTEN-S170M IPNQRRYVY   | 238   | 73    |
| >PTEN-S170M IPSQRRYVY   | 16   | >PTEN-S170M IPNQRRYVY   | 16    | 0     |
| >PTEN-S170M IPSQRRYVYYY | 27   | >PTEN-S170M IPNQRRYVYYY | 27    | 0     |
| >PTEN-S170M IPSQRRYVY   | 74   | >PTEN-S170M IPNQRRYVY   | 63    | 11    |
| >PTEN-S170M IPSQRRYVYYY | 31   | >PTEN-S170M IPNQRRYVYYY | 27    | 4     |
| >PTEN-S170M IPSQRRYVY   | 7    | >PTEN-S170M IPNQRRYVY   | 8     | 1     |
| >PTEN-S170M IPSQRRYVYY  | 33   | >PTEN-S170M IPNQRRYVYY  | 35    | 2     |
| >PTEN-S170M IPSQRRYVYYY | 12   | >PTEN-S170M IPNQRRYVYYY | 13    | 1     |
| >PTEN-S170M IPSQRRYVYY  | 262  | >PTEN-S170M IPNQRRYVYY  | 202   | 60    |
| >PTEN-S170M IPSQRRYVYYY | 518  | >PTEN-S170M IPNQRRYVYYY | 403   | 115   |
| >PTEN-S170M TIPSQRRYV   | 225  | >PTEN-S170M TIPNQRRYV   | 231   | 6     |
| >PTEN-S170M TIPSQRRY    | 437  | >PTEN-S170M TIPNQRRY    | 1083  | 646   |
| >PTEN-S170M TIPSQRRYVYY | 290  | >PTEN-S170M TIPNQRRYVY  | 803   | 513   |
| >PTEN-S170M TIPSQRRYVY  | 238  | >PTEN-S170M TIPNQRRYVY  | 359   | 121   |
| >PTEN-S170M TIPSQRRYV   | 67   | >PTEN-S170M TIPNQRRYV   | 93    | 26    |
| >PTEN-S170M VTIPSQRRYV  | 249  | >PTEN-S170M VTIPNQRRYV  | 137   | 112   |
| >PTEN-S170M VTIPSQRRYV  | 286  | >PTEN-S170M VTIPNQRRYV  | 225   | 61    |
| >PTEN-S170M VTIPSQRRYV  | 284  | >PTEN-S170M VTIPNQRRYV  | 468   | 184   |



|                         |     |                         |      |     |
|-------------------------|-----|-------------------------|------|-----|
| >PTEN-S170MVTIPSQRRY    | 26  | >PTEN-S170MVTIPNQRRY    | 20   | 6   |
| >PTEN-S170MVTIPSQRRYV'  | 38  | >PTEN-S170MVTIPNQRRYV   | 31   | 7   |
| >PTEN-S170MVTIPSQRRY    | 59  | >PTEN-S170MVTIPNQRRY    | 30   | 29  |
| >PTEN-S170MVTIPSQRRYV'  | 26  | >PTEN-S170MVTIPNQRRYV   | 19   | 7   |
| >PTEN-S170MVTIPSQRRY    | 41  | >PTEN-S170MVTIPNQRRY    | 33   | 8   |
| >PTEN-S170MVTIPSQRRYV'  | 16  | >PTEN-S170MVTIPNQRRYV   | 14   | 2   |
| >PTEN-S170MVTIPSQRR     | 135 | >PTEN-S170MVTIPNQRR     | 167  | 32  |
| >PTEN-S170MVTIPSQRR     | 65  | >PTEN-S170MVTIPNQRR     | 60   | 5   |
| >PTEN-S170MVTIPSQRRYV   | 225 | >PTEN-S170MVTIPNQRRYV   | 363  | 138 |
| >PTEN-S170MVTIPSQRRY    | 399 | >PTEN-S170MVTIPNQRRY    | 951  | 552 |
| >PTEN-S170MVTIPSQRRYV'  | 109 | >PTEN-S170MVTIPNQRRYV   | 166  | 57  |
| >PTEN-S170MVTIPSQRRYV'  | 205 | >PTEN-S170MVTIPNQRRYV   | 451  | 246 |
| >PTEN-S170MVTIPSQRRY    | 3   | >PTEN-S170MVTIPNQRRY    | 3    | 0   |
| >PTEN-S170MVTIPSQRRYV   | 124 | >PTEN-S170MVTIPNQRRYV   | 306  | 182 |
| >PTEN-S170MVTIPSQRRYV'  | 4   | >PTEN-S170MVTIPNQRRYV   | 4    | 0   |
| >PTEN-S170MVTIPSQRRY    | 81  | >PTEN-S170MVTIPNQRRY    | 144  | 63  |
| >PTEN-S170MVTIPSQRRYV'  | 111 | >PTEN-S170MVTIPNQRRYV   | 155  | 44  |
| >PTEN-S170MVTIPSQRRY    | 122 | >PTEN-S170MVTIPNQRRY    | 350  | 228 |
| >PTEN-S170MVTIPSQRRYV'  | 76  | >PTEN-S170MVTIPNQRRYV   | 121  | 45  |
| >PTEN-S170MVTIPSQRRY    | 37  | >PTEN-S170MVTIPNQRRY    | 152  | 115 |
| >PTEN-S170MVTIPSQRRYV'  | 37  | >PTEN-S170MVTIPNQRRYV   | 91   | 54  |
| >PTEN-S170MVTIPSQRRYV'  | 256 | >PTEN-S170MVTIPNQRRYV   | 759  | 503 |
| >PTEN-S170MGVTIPSQRRY   | 123 | >PTEN-S170MGVTIPNQRRY   | 152  | 29  |
| >PTEN-S170MGVTIPSQR     | 457 | >PTEN-S170MGVTIPNQR     | 573  | 116 |
| >PTEN-S170MGVTIPSQR     | 210 | >PTEN-S170MGVTIPNQR     | 197  | 13  |
| >PTEN-S170MGVTIPSQRRY   | 172 | >PTEN-S170MGVTIPNQRRY   | 683  | 511 |
| >PTEN-S170MKGVTIPSQRR   | 155 | >PTEN-S170MKGVTIPNQRR   | 142  | 13  |
| >PTEN-S170MKGVTIPSQR    | 208 | >PTEN-S170MKGVTIPNQR    | 339  | 131 |
| >PTEN-S170MKGVTIPSQRR   | 202 | >PTEN-S170MKGVTIPNQRR   | 638  | 436 |
| >PTEN-S170MKGVTIPSQRR   | 227 | >PTEN-S170MKGVTIPNQRR   | 786  | 559 |
| >PTEN-S170MKGVTIPSQR    | 147 | >PTEN-S170MKGVTIPNQR    | 114  | 33  |
| >PTEN-S170MKGVTIPSQRR   | 120 | >PTEN-S170MKGVTIPNQRR   | 96   | 24  |
| >PTEN-S170MKGVTIPSQR    | 609 | >PTEN-S170MKGVTIPNQR    | 377  | 232 |
| >PTEN-S170MKGVTIPSQR    | 511 | >PTEN-S170MKGVTIPNQR    | 382  | 129 |
| >PTEN-S170MDKKGVTIPSQ   | 497 | >PTEN-S170MDKKGVTIPNC   | 676  | 179 |
| >PTEN-S179I-SYLLKNHL    | 13  | >PTEN-S179I-IYLLKNHL    | 87   | 74  |
| >PTEN-S179I-SYLLKNHL    | 959 | >PTEN-S179I-IYLLKNHL    | 155  | 804 |
| >PTEN-S179I-SYLLKNHL    | 810 | >PTEN-S179I-IYLLKNHL    | 272  | 538 |
| >PTEN-S179I-SYLLKNHL    | 12  | >PTEN-S179I-IYLLKNHL    | 26   | 14  |
| >PTEN-S179I-SYLLKNHLDY  | 499 | >PTEN-S179I-IYLLKNHLDY  | 1144 | 645 |
| >PTEN-S179I-SYLLKNHLDY  | 51  | >PTEN-S179I-IYLLKNHLDY  | 37   | 14  |
| >PTEN-S179I-SYLLKNHLDY  | 246 | >PTEN-S179I-IYLLKNHLDY  | 190  | 56  |
| >PTEN-S179I-SYLLKNHLDYI | 15  | >PTEN-S179I-IYLLKNHLDYF | 16   | 1   |

|                         |       |                         |       |       |
|-------------------------|-------|-------------------------|-------|-------|
| >PTEN-S179I·SYLLKNHLDYI | 82    | >PTEN-S179I·IYLLKNHLDYF | 27    | 55    |
| >PTEN-S179I·SYLLKNHLDY  | 21    | >PTEN-S179I·IYLLKNHLDY  | 36    | 15    |
| >PTEN-S179I·SYLLKNHLDYI | 15    | >PTEN-S179I·IYLLKNHLDYF | 15    | 0     |
| >PTEN-S179I·SYLLKNHL    | 463   | >PTEN-S179I·IYLLKNHL    | 1858  | 1395  |
| >PTEN-S179I·YSYLLKNHL   | 16    | >PTEN-S179I·YIYLLKNHL   | 21    | 5     |
| >PTEN-S179I·YSYLLKNHLD' | 125   | >PTEN-S179I·YIYLLKNHLDY | 2631  | 2506  |
| >PTEN-S179I·YSYLLKNHL   | 1273  | >PTEN-S179I·YIYLLKNHL   | 88    | 1185  |
| >PTEN-S179I·YSYLLKNHL   | 8702  | >PTEN-S179I·YIYLLKNHL   | 300   | 8402  |
| >PTEN-S179I·YSYLLKNHL   | 3806  | >PTEN-S179I·YIYLLKNHL   | 196   | 3610  |
| >PTEN-S179I·YSYLLKNHL   | 7910  | >PTEN-S179I·YIYLLKNHL   | 209   | 7701  |
| >PTEN-S179I·YSYLLKNHL   | 11642 | >PTEN-S179I·YIYLLKNHL   | 112   | 11530 |
| >PTEN-S179I·YSYLLKNHL   | 19875 | >PTEN-S179I·YIYLLKNHL   | 88    | 19787 |
| >PTEN-S179I·YSYLLKNHLD' | 15    | >PTEN-S179I·YIYLLKNHLDY | 10    | 5     |
| >PTEN-S179I·YSYLLKNHLD' | 71    | >PTEN-S179I·YIYLLKNHLDY | 27    | 44    |
| >PTEN-S179I·YSYLLKNHLD' | 164   | >PTEN-S179I·YIYLLKNHLDY | 177   | 13    |
| >PTEN-S179I·YSYLLKNHLD' | 1079  | >PTEN-S179I·YIYLLKNHLDY | 195   | 884   |
| >PTEN-S179I·YSYLLKNHLD' | 47    | >PTEN-S179I·YIYLLKNHLDY | 274   | 227   |
| >PTEN-S179I·YSYLLKNH    | 289   | >PTEN-S179I·YIYLLKNH    | 15204 | 14915 |
| >PTEN-S179I·YSYLLKNHL   | 52    | >PTEN-S179I·YIYLLKNHL   | 9866  | 9814  |
| >PTEN-S179I·YSYLLKNHLD' | 5     | >PTEN-S179I·YIYLLKNHLDY | 230   | 225   |
| >PTEN-S179I·YSYLLKNHLD' | 315   | >PTEN-S179I·YIYLLKNHLDY | 583   | 268   |
| >PTEN-S179I·YSYLLKNHL   | 143   | >PTEN-S179I·YIYLLKNHL   | 2185  | 2042  |
| >PTEN-S179I·YSYLLKNHLD' | 58    | >PTEN-S179I·YIYLLKNHLDY | 884   | 826   |
| >PTEN-S179I·YSYLLKNHLD' | 815   | >PTEN-S179I·YIYLLKNHLDY | 470   | 345   |
| >PTEN-S179I·YYSYLLKNHL  | 49    | >PTEN-S179I·YYIYLLKNHL  | 15    | 34    |
| >PTEN-S179I·YYSYLLKNHL  | 115   | >PTEN-S179I·YYIYLLKNHL  | 87    | 28    |
| >PTEN-S179I·YYSYLLKNHL  | 108   | >PTEN-S179I·YYIYLLKNHL  | 216   | 108   |
| >PTEN-S179I·YYSYLLKNHL  | 8     | >PTEN-S179I·YYIYLLKNHL  | 7     | 1     |
| >PTEN-S179I·YYSYLLKNHL  | 10952 | >PTEN-S179I·YYIYLLKNHL  | 497   | 10455 |
| >PTEN-S179I·YYSYLLKNHL  | 117   | >PTEN-S179I·YYIYLLKNHL  | 91    | 26    |
| >PTEN-S179I·YYYSYLLKNHI | 31    | >PTEN-S179I·YYYIYLLKNHL | 44    | 13    |
| >PTEN-S179I·YYYSYLLKNHI | 250   | >PTEN-S179I·YYYIYLLKNHL | 475   | 225   |
| >PTEN-S179I·YYYSYLLKNHI | 109   | >PTEN-S179I·YYYIYLLKNHL | 316   | 207   |
| >PTEN-S179I·YYYSYLLK    | 387   | >PTEN-S179I·YYYIYLLK    | 865   | 478   |
| >PTEN-S179I·YYYSYLLK    | 85    | >PTEN-S179I·YYYIYLLK    | 183   | 98    |
| >PTEN-S179I·YYYSYLLK    | 59    | >PTEN-S179I·YYYIYLLK    | 73    | 14    |
| >PTEN-S179I·YYYSYLLKNHI | 29    | >PTEN-S179I·YYYIYLLKNHL | 41    | 12    |
| >PTEN-S179I·YYYSYLLK    | 399   | >PTEN-S179I·YYYIYLLK    | 420   | 21    |
| >PTEN-S179I·YYYSYLLKNHI | 147   | >PTEN-S179I·YYYIYLLKNHL | 177   | 30    |
| >PTEN-S179I·YYYSYLLK    | 127   | >PTEN-S179I·YYYIYLLK    | 262   | 135   |
| >PTEN-S179I·YYYSYLLKN   | 315   | >PTEN-S179I·YYYIYLLKN   | 725   | 410   |
| >PTEN-S179I·YYYSYLLKNHI | 6     | >PTEN-S179I·YYYIYLLKNHL | 7     | 1     |
| >PTEN-S179I·YYYSYLLK    | 269   | >PTEN-S179I·YYYIYLLK    | 327   | 58    |

|                         |      |                         |     |     |
|-------------------------|------|-------------------------|-----|-----|
| >PTEN-S179I·YYYSYLLK    | 125  | >PTEN-S179I·YYYYYLLK    | 180 | 55  |
| >PTEN-S179I·YYYSYLLK    | 211  | >PTEN-S179I·YYYYYLLK    | 316 | 105 |
| >PTEN-S179I·YYYSYLLK    | 364  | >PTEN-S179I·YYYYYLLK    | 366 | 2   |
| >PTEN-S179I·YYYSYLLK    | 81   | >PTEN-S179I·YYYYYLLK    | 158 | 77  |
| >PTEN-S179I·YYYSYLLK    | 50   | >PTEN-S179I·YYYYYLLK    | 45  | 5   |
| >PTEN-S179I·YYYSYLLKNHI | 347  | >PTEN-S179I·YYYYYLLKNHL | 580 | 233 |
| >PTEN-S179I·YYYSYLLKNHI | 441  | >PTEN-S179I·YYYYYLLKNHL | 758 | 317 |
| >PTEN-S179I·VYYYYSYLL   | 63   | >PTEN-S179I·VYYYYYLL    | 55  | 8   |
| >PTEN-S179I·VYYYYSYLL   | 411  | >PTEN-S179I·VYYYYYLL    | 171 | 240 |
| >PTEN-S179I·VYYYYSYLLK  | 105  | >PTEN-S179I·VYYYYYLLK   | 160 | 55  |
| >PTEN-S179I·VYYYYSYLLK  | 39   | >PTEN-S179I·VYYYYYLLK   | 40  | 1   |
| >PTEN-S179I·VYYYYSYLL   | 28   | >PTEN-S179I·VYYYYYLL    | 17  | 11  |
| >PTEN-S179I·VYYYYSYLLK  | 68   | >PTEN-S179I·VYYYYYLLK   | 41  | 27  |
| >PTEN-S179I·VYYYYSYLL   | 59   | >PTEN-S179I·VYYYYYLL    | 43  | 16  |
| >PTEN-S179I·VYYYYSYLLK  | 411  | >PTEN-S179I·VYYYYYLLK   | 193 | 218 |
| >PTEN-S179I·VYYYYSYLL   | 23   | >PTEN-S179I·VYYYYYLL    | 20  | 3   |
| >PTEN-S179I·VYYYYSYLLK  | 898  | >PTEN-S179I·VYYYYYLLK   | 281 | 617 |
| >PTEN-S179I·VYYYYSYLLK  | 23   | >PTEN-S179I·VYYYYYLLK   | 52  | 29  |
| >PTEN-S179I·VYYYYSYLLK  | 302  | >PTEN-S179I·VYYYYYLLK   | 118 | 184 |
| >PTEN-S179I·VYYYYSYLLK  | 1172 | >PTEN-S179I·VYYYYYLLK   | 319 | 853 |
| >PTEN-S179I·VYYYYSYLLK  | 585  | >PTEN-S179I·VYYYYYLLK   | 240 | 345 |
| >PTEN-S179I·VYYYYSYLL   | 234  | >PTEN-S179I·VYYYYYLL    | 371 | 137 |
| >PTEN-S179I·VYYYYSYLLK  | 155  | >PTEN-S179I·VYYYYYLLK   | 64  | 91  |
| >PTEN-S179I·VYYYYSYLL   | 353  | >PTEN-S179I·VYYYYYLL    | 170 | 183 |
| >PTEN-S179I·VYYYYSYLL   | 188  | >PTEN-S179I·VYYYYYLL    | 154 | 34  |
| >PTEN-S179I·YVYYYYSYL   | 4    | >PTEN-S179I·YVYYYYIYL   | 10  | 6   |
| >PTEN-S179I·YVYYYYSYLL  | 20   | >PTEN-S179I·YVYYYYIYLL  | 22  | 2   |
| >PTEN-S179I·YVYYYYSYL   | 10   | >PTEN-S179I·YVYYYYIYL   | 8   | 2   |
| >PTEN-S179I·YVYYYYSYLL  | 7    | >PTEN-S179I·YVYYYYIYLL  | 7   | 0   |
| >PTEN-S179I·YVYYYYSYL   | 4    | >PTEN-S179I·YVYYYYIYL   | 6   | 2   |
| >PTEN-S179I·YVYYYYSYLL  | 3    | >PTEN-S179I·YVYYYYIYLL  | 3   | 0   |
| >PTEN-S179I·YVYYYYSYL   | 9    | >PTEN-S179I·YVYYYYIYL   | 15  | 6   |
| >PTEN-S179I·YVYYYYSYLL  | 18   | >PTEN-S179I·YVYYYYIYLL  | 12  | 6   |
| >PTEN-S179I·YVYYYYSYL   | 8    | >PTEN-S179I·YVYYYYIYL   | 8   | 0   |
| >PTEN-S179I·YVYYYYSYLL  | 8    | >PTEN-S179I·YVYYYYIYLL  | 8   | 0   |
| >PTEN-S179I·YVYYYYSYL   | 5    | >PTEN-S179I·YVYYYYIYL   | 4   | 1   |
| >PTEN-S179I·YVYYYYSYLL  | 10   | >PTEN-S179I·YVYYYYIYLL  | 4   | 6   |
| >PTEN-S179I·YVYYYYSYL   | 21   | >PTEN-S179I·YVYYYYIYL   | 21  | 0   |
| >PTEN-S179I·YVYYYYSYLL  | 12   | >PTEN-S179I·YVYYYYIYLL  | 12  | 0   |
| >PTEN-S179I·YVYYYYSYL   | 42   | >PTEN-S179I·YVYYYYIYL   | 25  | 17  |
| >PTEN-S179I·YVYYYYSYLL  | 86   | >PTEN-S179I·YVYYYYIYLL  | 46  | 40  |
| >PTEN-S179I·YVYYYYSYL   | 99   | >PTEN-S179I·YVYYYYIYL   | 81  | 18  |
| >PTEN-S179I·YVYYYYSYLL  | 200  | >PTEN-S179I·YVYYYYIYLL  | 98  | 102 |

|                          |      |                          |      |      |
|--------------------------|------|--------------------------|------|------|
| >PTEN-S179I·YVYYYYSYL    | 12   | >PTEN-S179I·YVYYYYIYL    | 9    | 3    |
| >PTEN-S179I·YVYYYYSYLL   | 27   | >PTEN-S179I·YVYYYYIYLL   | 10   | 17   |
| >PTEN-S179I·YVYYYYSYLLK  | 8    | >PTEN-S179I·YVYYYYIYLLK  | 9    | 1    |
| >PTEN-S179I·YVYYYYSYLLK  | 7    | >PTEN-S179I·YVYYYYIYLLK  | 8    | 1    |
| >PTEN-S179I·YVYYYYSYLL   | 514  | >PTEN-S179I·YVYYYYIYLL   | 307  | 207  |
| >PTEN-S179I·YVYYYYSYL    | 193  | >PTEN-S179I·YVYYYYIYL    | 123  | 70   |
| >PTEN-S179I·YVYYYYSYLL   | 2715 | >PTEN-S179I·YVYYYYIYLL   | 164  | 2551 |
| >PTEN-S179I·YVYYYYSYLL   | 71   | >PTEN-S179I·YVYYYYIYLL   | 145  | 74   |
| >PTEN-S179I·YVYYYYSYLLK  | 41   | >PTEN-S179I·YVYYYYIYLLK  | 81   | 40   |
| >PTEN-S179I·YVYYYYSYLLK  | 165  | >PTEN-S179I·YVYYYYIYLLK  | 162  | 3    |
| >PTEN-S179I·YVYYYYSYLL   | 81   | >PTEN-S179I·YVYYYYIYLL   | 238  | 157  |
| >PTEN-S179I·YVYYYYSYLLK  | 274  | >PTEN-S179I·YVYYYYIYLLK  | 298  | 24   |
| >PTEN-S179I·YVYYYYSYL    | 377  | >PTEN-S179I·YVYYYYIYL    | 556  | 179  |
| >PTEN-S179I·YVYYYYSYLL   | 253  | >PTEN-S179I·YVYYYYIYLL   | 225  | 28   |
| >PTEN-S179I·YVYYYYSYLLK  | 6    | >PTEN-S179I·YVYYYYIYLLK  | 5    | 1    |
| >PTEN-S179I·YVYYYYSYL    | 21   | >PTEN-S179I·YVYYYYIYL    | 19   | 2    |
| >PTEN-S179I·YVYYYYSYLL   | 11   | >PTEN-S179I·YVYYYYIYLL   | 8    | 3    |
| >PTEN-S179I·YVYYYYSYL    | 17   | >PTEN-S179I·YVYYYYIYL    | 15   | 2    |
| >PTEN-S179I·YVYYYYSYLL   | 19   | >PTEN-S179I·YVYYYYIYLL   | 31   | 12   |
| >PTEN-S179I·YVYYYYSYL    | 279  | >PTEN-S179I·YVYYYYIYL    | 790  | 511  |
| >PTEN-S179I·YVYYYYSYLL   | 421  | >PTEN-S179I·YVYYYYIYLL   | 1126 | 705  |
| >PTEN-S179I·YVYYYYSYL    | 85   | >PTEN-S179I·YVYYYYIYL    | 175  | 90   |
| >PTEN-S179I·YVYYYYSYLL   | 255  | >PTEN-S179I·YVYYYYIYLL   | 372  | 117  |
| >PTEN-S179I·YVYYYYSYL    | 52   | >PTEN-S179I·YVYYYYIYL    | 128  | 76   |
| >PTEN-S179I·YVYYYYSYLL   | 84   | >PTEN-S179I·YVYYYYIYLL   | 158  | 74   |
| >PTEN-S179I·YVYYYYSYLL   | 219  | >PTEN-S179I·YVYYYYIYLL   | 977  | 758  |
| >PTEN-S179I·YVYYYYSYLL   | 75   | >PTEN-S179I·YVYYYYIYLL   | 203  | 128  |
| >PTEN-S179I·YVYYYYSYLL   | 63   | >PTEN-S179I·YVYYYYIYLL   | 78   | 15   |
| >PTEN-S179I·YVYYYYSYLL   | 51   | >PTEN-S179I·YVYYYYIYLL   | 121  | 70   |
| >PTEN-S179I·YVYYYYSYLLK  | 50   | >PTEN-S179I·YVYYYYIYLLK  | 113  | 63   |
| >PTEN-S179I·YVYYYYSYLLK  | 490  | >PTEN-S179I·YVYYYYIYLLK  | 463  | 27   |
| >PTEN-S179I·RYVYYYYSYL   | 51   | >PTEN-S179I·RYVYYYYIYL   | 68   | 17   |
| >PTEN-S179I·RYVYYYYSYL   | 340  | >PTEN-S179I·RYVYYYYIYL   | 716  | 376  |
| >PTEN-S179I·RYVYYYYSYLLK | 94   | >PTEN-S179I·RYVYYYYIYLLK | 79   | 15   |
| >PTEN-S179I·RYVYYYYSY    | 213  | >PTEN-S179I·RYVYYYYIY    | 191  | 22   |
| >PTEN-S179I·RYVYYYYSYL   | 42   | >PTEN-S179I·RYVYYYYIYL   | 63   | 21   |
| >PTEN-S179I·RYVYYYYSYLL  | 6    | >PTEN-S179I·RYVYYYYIYLL  | 6    | 0    |
| >PTEN-S179I·RYVYYYYSYLLK | 105  | >PTEN-S179I·RYVYYYYIYLLK | 97   | 8    |
| >PTEN-S179I·RYVYYYYSY    | 244  | >PTEN-S179I·RYVYYYYIY    | 238  | 6    |
| >PTEN-S179I·RYVYYYYSYL   | 56   | >PTEN-S179I·RYVYYYYIYL   | 74   | 18   |
| >PTEN-S179I·RYVYYYYSYLL  | 26   | >PTEN-S179I·RYVYYYYIYLL  | 32   | 6    |
| >PTEN-S179I·RYVYYYYSYLLK | 271  | >PTEN-S179I·RYVYYYYIYLLK | 236  | 35   |
| >PTEN-S179I·RYVYYYYSY    | 86   | >PTEN-S179I·RYVYYYYIY    | 179  | 93   |

|                          |      |                          |      |      |
|--------------------------|------|--------------------------|------|------|
| >PTEN-S179I RYVYYYYSYL   | 6    | >PTEN-S179I RYVYYYYIYL   | 7    | 1    |
| >PTEN-S179I RYVYYYYSYLL  | 10   | >PTEN-S179I RYVYYYYIYLL  | 11   | 1    |
| >PTEN-S179I RYVYYYYSYLLK | 446  | >PTEN-S179I RYVYYYYIYLLK | 418  | 28   |
| >PTEN-S179I RYVYYYYSY    | 18   | >PTEN-S179I RYVYYYYIY    | 25   | 7    |
| >PTEN-S179I RYVYYYYSYLL  | 222  | >PTEN-S179I RYVYYYYIYLL  | 419  | 197  |
| >PTEN-S179I RYVYYYYSYL   | 121  | >PTEN-S179I RYVYYYYIYL   | 33   | 88   |
| >PTEN-S179I RYVYYYYSYLL  | 348  | >PTEN-S179I RYVYYYYIYLL  | 363  | 15   |
| >PTEN-S179I RYVYYYYSYLLK | 6    | >PTEN-S179I RYVYYYYIYLLK | 6    | 0    |
| >PTEN-S179I RYVYYYYSY    | 39   | >PTEN-S179I RYVYYYYIY    | 78   | 39   |
| >PTEN-S179I RYVYYYYSYLL  | 410  | >PTEN-S179I RYVYYYYIYLL  | 319  | 91   |
| >PTEN-S179I RYVYYYYSY    | 484  | >PTEN-S179I RYVYYYYIY    | 522  | 38   |
| >PTEN-S179I RYVYYYYSYL   | 105  | >PTEN-S179I RYVYYYYIYL   | 104  | 1    |
| >PTEN-S179I RYVYYYYSYLLK | 33   | >PTEN-S179I RYVYYYYIYLLK | 27   | 6    |
| >PTEN-S179I RYVYYYYSY    | 88   | >PTEN-S179I RYVYYYYIY    | 60   | 28   |
| >PTEN-S179I RYVYYYYSY    | 77   | >PTEN-S179I RYVYYYYIY    | 132  | 55   |
| >PTEN-S179I RYVYYYYSYL   | 223  | >PTEN-S179I RYVYYYYIYL   | 658  | 435  |
| >PTEN-S179I RYVYYYYSYLL  | 420  | >PTEN-S179I RYVYYYYIYLL  | 452  | 32   |
| >PTEN-S179I RYVYYYYSYL   | 403  | >PTEN-S179I RYVYYYYIYL   | 8973 | 8570 |
| >PTEN-S179I RYVYYYYSY    | 127  | >PTEN-S179I RYVYYYYIY    | 128  | 1    |
| >PTEN-S179I RYVYYYYSYL   | 1563 | >PTEN-S179I RYVYYYYIYL   | 408  | 1155 |
| >PTEN-S179I RYVYYYYSYLLK | 42   | >PTEN-S179I RYVYYYYIYLLK | 27   | 15   |
| >PTEN-S179I RYVYYYYSYL   | 311  | >PTEN-S179I RYVYYYYIYL   | 229  | 82   |
| >PTEN-S179I RYVYYYYSYLL  | 195  | >PTEN-S179I RYVYYYYIYLL  | 70   | 125  |
| >PTEN-S179I RYVYYYYSY    | 356  | >PTEN-S179I RYVYYYYIY    | 712  | 356  |
| >PTEN-S179I RYVYYYYSYL   | 37   | >PTEN-S179I RYVYYYYIYL   | 38   | 1    |
| >PTEN-S179I RYVYYYYSYLL  | 32   | >PTEN-S179I RYVYYYYIYLL  | 29   | 3    |
| >PTEN-S179I RYVYYYYSYLLK | 325  | >PTEN-S179I RYVYYYYIYLLK | 341  | 16   |
| >PTEN-S179I RRYVYYYYS    | 2202 | >PTEN-S179I RRYVYYYYI    | 159  | 2043 |
| >PTEN-S179I RRYVYYYYSYLL | 136  | >PTEN-S179I RRYVYYYYIYLL | 159  | 23   |
| >PTEN-S179I RRYVYYYYSYL  | 429  | >PTEN-S179I RRYVYYYYIYL  | 532  | 103  |
| >PTEN-S179I RRYVYYYYSY   | 139  | >PTEN-S179I RRYVYYYYIY   | 281  | 142  |
| >PTEN-S179I RRYVYYYYSY   | 106  | >PTEN-S179I RRYVYYYYIY   | 176  | 70   |
| >PTEN-S179I RRYVYYYYSY   | 797  | >PTEN-S179I RRYVYYYYIY   | 446  | 351  |
| >PTEN-S179I RRYVYYYYS    | 704  | >PTEN-S179I RRYVYYYYI    | 30   | 674  |
| >PTEN-S179I RRYVYYYYSY   | 3    | >PTEN-S179I RRYVYYYYIY   | 3    | 0    |
| >PTEN-S179I RRYVYYYYSYL  | 8    | >PTEN-S179I RRYVYYYYIYL  | 13   | 5    |
| >PTEN-S179I RRYVYYYYSYLL | 19   | >PTEN-S179I RRYVYYYYIYLL | 23   | 4    |
| >PTEN-S179I RRYVYYYYS    | 69   | >PTEN-S179I RRYVYYYYI    | 16   | 53   |
| >PTEN-S179I RRYVYYYYSY   | 11   | >PTEN-S179I RRYVYYYYIY   | 15   | 4    |
| >PTEN-S179I RRYVYYYYSYL  | 7    | >PTEN-S179I RRYVYYYYIYL  | 7    | 0    |
| >PTEN-S179I RRYVYYYYSYLL | 8    | >PTEN-S179I RRYVYYYYIYLL | 8    | 0    |
| >PTEN-S179I RRYVYYYYSYL  | 325  | >PTEN-S179I RRYVYYYYIYL  | 210  | 115  |
| >PTEN-S179I RRYVYYYYSYLL | 50   | >PTEN-S179I RRYVYYYYIYLL | 68   | 18   |

|                         |       |                         |      |       |
|-------------------------|-------|-------------------------|------|-------|
| >PTEN-S179I RRYVYYYSYL  | 263   | >PTEN-S179I RRYVYYYIYL  | 280  | 17    |
| >PTEN-S179I RRYVYYYSYLL | 106   | >PTEN-S179I RRYVYYYIYLL | 114  | 8     |
| >PTEN-S179I RRYVYYYS    | 221   | >PTEN-S179I RRYVYYYI    | 15   | 206   |
| >PTEN-S179I RRYVYYYSY   | 47    | >PTEN-S179I RRYVYYYIY   | 27   | 20    |
| >PTEN-S179I RRYVYYYSYL  | 14    | >PTEN-S179I RRYVYYYIYL  | 10   | 4     |
| >PTEN-S179I RRYVYYYSYLL | 11    | >PTEN-S179I RRYVYYYIYLL | 9    | 2     |
| >PTEN-S179I RRYVYYYS    | 450   | >PTEN-S179I RRYVYYYI    | 47   | 403   |
| >PTEN-S179I RRYVYYYSY   | 33    | >PTEN-S179I RRYVYYYIY   | 19   | 14    |
| >PTEN-S179I RRYVYYYSYL  | 12    | >PTEN-S179I RRYVYYYIYL  | 9    | 3     |
| >PTEN-S179I RRYVYYYSYLL | 3     | >PTEN-S179I RRYVYYYIYLL | 2    | 1     |
| >PTEN-S179I RRYVYYYSY   | 231   | >PTEN-S179I RRYVYYYIY   | 189  | 42    |
| >PTEN-S179I RRYVYYYS    | 34611 | >PTEN-S179I RRYVYYYI    | 219  | 34392 |
| >PTEN-S179I QRRVYYYSY   | 405   | >PTEN-S179I QRRVYYYIY   | 598  | 193   |
| >PTEN-S179I QRRVYYYS    | 3809  | >PTEN-S179I QRRVYYYI    | 203  | 3606  |
| >PTEN-S179I QRRVYYYSY   | 15    | >PTEN-S179I QRRVYYYIY   | 22   | 7     |
| >PTEN-S179I QRRVYYYSY   | 44    | >PTEN-S179I QRRVYYYIYI  | 90   | 46    |
| >PTEN-S179I QRRVYYYS    | 3152  | >PTEN-S179I QRRVYYYI    | 434  | 2718  |
| >PTEN-S179I QRRVYYYSY   | 33    | >PTEN-S179I QRRVYYYIY   | 25   | 8     |
| >PTEN-S179I QRRVYYYSY   | 595   | >PTEN-S179I QRRVYYYIYI  | 454  | 141   |
| >PTEN-S179I QRRVYYYS    | 1391  | >PTEN-S179I QRRVYYYI    | 175  | 1216  |
| >PTEN-S179I QRRVYYYSY   | 41    | >PTEN-S179I QRRVYYYIYI  | 35   | 6     |
| >PTEN-S179I QRRVYYYS    | 5039  | >PTEN-S179I QRRVYYYI    | 225  | 4814  |
| >PTEN-S179I QRRVYYYSY   | 19    | >PTEN-S179I QRRVYYYIYI  | 21   | 2     |
| >PTEN-S179I SQRRVYYYS   | 25810 | >PTEN-S179I SQRRVYYYI   | 137  | 25673 |
| >PTEN-S179I SQRRVYYYS   | 9667  | >PTEN-S179I SQRRVYYYI   | 229  | 9438  |
| >PTEN-S179I SQRRVYYYS   | 11367 | >PTEN-S179I SQRRVYYYI   | 412  | 10955 |
| >PTEN-S179I SQRRVYYYS   | 10033 | >PTEN-S179I SQRRVYYYI   | 238  | 9795  |
| >PTEN-S179I SQRRVYYYS   | 355   | >PTEN-S179I SQRRVYYYI\  | 559  | 204   |
| >PTEN-S179I SQRRVYYYS   | 152   | >PTEN-S179I SQRRVYYYI   | 16   | 136   |
| >PTEN-S179I SQRRVYYYS   | 104   | >PTEN-S179I SQRRVYYYI\  | 197  | 93    |
| >PTEN-S179I SQRRVYYYS   | 106   | >PTEN-S179I SQRRVYYYI\  | 163  | 57    |
| >PTEN-S179I SQRRVYYYS   | 34    | >PTEN-S179I SQRRVYYYI\  | 44   | 10    |
| >PTEN-S179I SQRRVYYYS   | 322   | >PTEN-S179I SQRRVYYYI\  | 381  | 59    |
| >PTEN-S179I SQRRVYYYS   | 947   | >PTEN-S179I SQRRVYYYI   | 31   | 916   |
| >PTEN-S179I SQRRVYYYS   | 3     | >PTEN-S179I SQRRVYYYI\  | 4    | 1     |
| >PTEN-S179I SQRRVYYYS   | 492   | >PTEN-S179I SQRRVYYYI\  | 870  | 378   |
| >PTEN-S227F SNSGPTRR    | 1564  | >PTEN-S227F FNSGPTRR    | 381  | 1183  |
| >PTEN-S227F SSNSGPTR    | 477   | >PTEN-S227F SFNSGPTR    | 9483 | 9006  |
| >PTEN-S227F SSNSGPTR    | 47    | >PTEN-S227F SFNSGPTR    | 21   | 26    |
| >PTEN-S227F SSNSGPTR    | 129   | >PTEN-S227F SFNSGPTR    | 887  | 758   |
| >PTEN-S227F YSSNSGPTRR  | 1290  | >PTEN-S227F YSFNSGPTRR  | 134  | 1156  |
| >PTEN-S227F YSSNSGPT    | 2079  | >PTEN-S227F YSFNSGPT    | 303  | 1776  |
| >PTEN-S227F YSSNSGPTRR  | 842   | >PTEN-S227F YSFNSGPTRR  | 228  | 614   |

|                        |       |                        |      |       |
|------------------------|-------|------------------------|------|-------|
| >PTEN-S227FIYSSNSGPTRF | 137   | >PTEN-S227FIYFNSGPTRF  | 192  | 55    |
| >PTEN-S227FIYSSNSGPTRF | 467   | >PTEN-S227FIYFNSGPTRF  | 256  | 211   |
| >PTEN-S227FIYSSNSGPTRF | 615   | >PTEN-S227FIYFNSGPTRF  | 472  | 143   |
| >PTEN-S227FIYSSNSGPTR  | 95    | >PTEN-S227FIYFNSGPTR   | 99   | 4     |
| >PTEN-S227FIYSSNSGPTRF | 80    | >PTEN-S227FIYFNSGPTRF  | 81   | 1     |
| >PTEN-S227FIYSSNSGPTF  | 50    | >PTEN-S227FIYFNSGPTF   | 54   | 4     |
| >PTEN-S227FIYSSNSGPTF  | 121   | >PTEN-S227FIYFNSGPTF   | 73   | 48    |
| >PTEN-S227FIYSSNSGPTF  | 316   | >PTEN-S227FIYFNSGPTF   | 359  | 43    |
| >PTEN-S227FIYSSNSGPTF  | 12    | >PTEN-S227FIYFNSGPTF   | 10   | 2     |
| >PTEN-S227FIYSSNSGPTF  | 189   | >PTEN-S227FIYFNSGPTF   | 135  | 54    |
| >PTEN-S227FIYSSNSGPTF  | 466   | >PTEN-S227FIYFNSGPTF   | 662  | 196   |
| >PTEN-S227FIYSSNSGPTF  | 41    | >PTEN-S227FIYFNSGPTF   | 23   | 18    |
| >PTEN-S227FVKIYSSNS    | 338   | >PTEN-S227FVKIYFNS     | 728  | 390   |
| >PTEN-S227FVKIYSSNSGP  | 308   | >PTEN-S227FVKIYFNSGP   | 289  | 19    |
| >PTEN-S227FVKIYSSNS    | 115   | >PTEN-S227FVKIYFNS     | 42   | 73    |
| >PTEN-S227FVKIYSSNSG   | 14    | >PTEN-S227FVKIYFNSG    | 15   | 1     |
| >PTEN-S227FVKIYSSNSGI  | 192   | >PTEN-S227FVKIYFNSGI   | 177  | 15    |
| >PTEN-S227FLKVKIYSS    | 1482  | >PTEN-S227FLKVKIYSF    | 3    | 1479  |
| >PTEN-S227FLKVKIYSSNS  | 496   | >PTEN-S227FLKVKIYSFNS  | 1449 | 953   |
| >PTEN-S227FCQLKVKIYSS  | 19114 | >PTEN-S227FCQLKVKIYSF  | 170  | 18944 |
| >PTEN-S227FCQLKVKIYSS  | 6769  | >PTEN-S227FCQLKVKIYSF  | 9    | 6760  |
| >PTEN-S3381SPNFKVKLYF  | 136   | >PTEN-S3381TPNFKVKLYF  | 201  | 65    |
| >PTEN-S3381SPNFKVKL    | 224   | >PTEN-S3381TPNFKVKL    | 1469 | 1245  |
| >PTEN-S3381SPNFKVKLYF  | 97    | >PTEN-S3381TPNFKVKLYF  | 137  | 40    |
| >PTEN-S3381SPNFKVKLY   | 653   | >PTEN-S3381TPNFKVKLY   | 271  | 382   |
| >PTEN-S3381SPNFKVKLY   | 167   | >PTEN-S3381TPNFKVKLY   | 446  | 279   |
| >PTEN-S3381SPNFKVKLYF  | 880   | >PTEN-S3381TPNFKVKLYF  | 403  | 477   |
| >PTEN-S3381FSPNFKVKL   | 122   | >PTEN-S3381FTPnFKVKL   | 341  | 219   |
| >PTEN-S3381FSPNFKVKLY  | 238   | >PTEN-S3381FTPnFKVKLY  | 137  | 101   |
| >PTEN-S3381FSPNFKVKL   | 6207  | >PTEN-S3381FTPnFKVKL   | 404  | 5803  |
| >PTEN-S3381FSPNFKVKLYI | 186   | >PTEN-S3381FTPnFKVKLYI | 43   | 143   |
| >PTEN-S3381FSPNFKVKLY  | 3172  | >PTEN-S3381FTPnFKVKLY  | 455  | 2717  |
| >PTEN-S3381FSPNFKVKLYI | 6847  | >PTEN-S3381FTPnFKVKLYI | 423  | 6424  |
| >PTEN-S3381FSPNFKVKLY  | 701   | >PTEN-S3381FTPnFKVKLY  | 458  | 243   |
| >PTEN-S3381FSPNFKVKLY  | 138   | >PTEN-S3381FTPnFKVKLY  | 131  | 7     |
| >PTEN-S3381FSPNFKVK    | 695   | >PTEN-S3381FTPnFKVK    | 167  | 528   |
| >PTEN-S3381FSPNFKVKL   | 544   | >PTEN-S3381FTPnFKVKL   | 44   | 500   |
| >PTEN-S3381FSPNFKVKLYI | 122   | >PTEN-S3381FTPnFKVKLYI | 363  | 241   |
| >PTEN-S3381FSPNFKVKLY  | 493   | >PTEN-S3381FTPnFKVKLY  | 310  | 183   |
| >PTEN-S3381FSPNFKVKLYI | 571   | >PTEN-S3381FTPnFKVKLYI | 376  | 195   |
| >PTEN-S3381FSPNFKVKL   | 7     | >PTEN-S3381FTPnFKVKL   | 4    | 3     |
| >PTEN-S3381FSPNFKVKLY  | 84    | >PTEN-S3381FTPnFKVKLY  | 30   | 54    |
| >PTEN-S3381FSPNFKVKLYI | 5     | >PTEN-S3381FTPnFKVKLYI | 3    | 2     |

|                        |     |                        |     |     |
|------------------------|-----|------------------------|-----|-----|
| >PTEN-S338TFSPNFKVKLY  | 191 | >PTEN-S338TFTPNFKVKLY  | 80  | 111 |
| >PTEN-S338TFSPNFKVKLYI | 536 | >PTEN-S338TFTPNFKVKLYI | 191 | 345 |
| >PTEN-S338TFSPNFKVKL   | 581 | >PTEN-S338TFTPNFKVKL   | 485 | 96  |
| >PTEN-S338TYFSPNFKV    | 149 | >PTEN-S338TYFTPNFKV    | 674 | 525 |
| >PTEN-S338TYFSPNFKV    | 274 | >PTEN-S338TYFTPNFKV    | 397 | 123 |
| >PTEN-S338TYFSPNFKV    | 347 | >PTEN-S338TYFTPNFKV    | 280 | 67  |
| >PTEN-S338TYFSPNFKV    | 18  | >PTEN-S338TYFTPNFKV    | 14  | 4   |
| >PTEN-S338TYFSPNFKV    | 183 | >PTEN-S338TYFTPNFKV    | 237 | 54  |
| >PTEN-S338TYFSPNFKVK   | 422 | >PTEN-S338TYFTPNFKVK   | 563 | 141 |
| >PTEN-S338TYFSPNFKVKL  | 14  | >PTEN-S338TYFTPNFKVKL  | 14  | 0   |
| >PTEN-S338TYFSPNFKVKL' | 13  | >PTEN-S338TYFTPNFKVKL' | 12  | 1   |
| >PTEN-S338TYFSPNFKVKL' | 624 | >PTEN-S338TYFTPNFKVKL' | 433 | 191 |
| >PTEN-S338TYFSPNFKVKL' | 449 | >PTEN-S338TYFTPNFKVKL' | 347 | 102 |
| >PTEN-S338TYFSPNFKVKL' | 207 | >PTEN-S338TYFTPNFKVKL' | 259 | 52  |
| >PTEN-S338TYFSPNFKVK   | 356 | >PTEN-S338TYFTPNFKVK   | 346 | 10  |
| >PTEN-S338TRYFSPNFKV   | 92  | >PTEN-S338TRYFTPNFKV   | 243 | 151 |
| >PTEN-S338TRYFSPNFK    | 143 | >PTEN-S338TRYFTPNFK    | 174 | 31  |
| >PTEN-S338TRYFSPNFK    | 41  | >PTEN-S338TRYFTPNFK    | 47  | 6   |
| >PTEN-S338TRYFSPNFKVK  | 196 | >PTEN-S338TRYFTPNFKVK  | 512 | 316 |
| >PTEN-S338TRYFSPNFKVK  | 412 | >PTEN-S338TRYFTPNFKVK  | 476 | 64  |
| >PTEN-S338TRYFSPNFK    | 208 | >PTEN-S338TRYFTPNFK    | 426 | 218 |
| >PTEN-S338TRYFSPNFKV   | 20  | >PTEN-S338TRYFTPNFKV   | 39  | 19  |
| >PTEN-S338TRYFSPNFKVK  | 104 | >PTEN-S338TRYFTPNFKVK  | 214 | 110 |
| >PTEN-S338TRYFSPNFKVK  | 5   | >PTEN-S338TRYFTPNFKVK  | 6   | 1   |
| >PTEN-S338TRYFSPNFK    | 5   | >PTEN-S338TRYFTPNFK    | 4   | 1   |
| >PTEN-S338TRYFSPNFKV   | 209 | >PTEN-S338TRYFTPNFKV   | 167 | 42  |
| >PTEN-S338TRYFSPNFKVK  | 9   | >PTEN-S338TRYFTPNFKVK  | 9   | 0   |
| >PTEN-S338TRYFSPNFKVK  | 448 | >PTEN-S338TRYFTPNFKVK  | 374 | 74  |
| >PTEN-S338TRYFSPNFK    | 15  | >PTEN-S338TRYFTPNFK    | 18  | 3   |
| >PTEN-S338TRYFSPNFKV   | 206 | >PTEN-S338TRYFTPNFKV   | 414 | 208 |
| >PTEN-S338TRYFSPNFKVK  | 342 | >PTEN-S338TRYFTPNFKVK  | 643 | 301 |
| >PTEN-S338TRYFSPNFKV   | 238 | >PTEN-S338TRYFTPNFKV   | 265 | 27  |
| >PTEN-S338TRYFSPNFKVK  | 48  | >PTEN-S338TRYFTPNFKVK  | 55  | 7   |
| >PTEN-S338TRYFSPNFK    | 23  | >PTEN-S338TRYFTPNFK    | 17  | 6   |
| >PTEN-S338TRYFSPNFKVK  | 24  | >PTEN-S338TRYFTPNFKVK  | 18  | 6   |
| >PTEN-S338TRYFSPNFKV   | 223 | >PTEN-S338TRYFTPNFKV   | 397 | 174 |
| >PTEN-S338TRYFSPNFKVK  | 319 | >PTEN-S338TRYFTPNFKVK  | 495 | 176 |
| >PTEN-S338TRYFSPNFK    | 157 | >PTEN-S338TRYFTPNFK    | 204 | 47  |
| >PTEN-S338TRYFSPNFKV   | 242 | >PTEN-S338TRYFTPNFKV   | 389 | 147 |
| >PTEN-S338TRYFSPNFKVK  | 185 | >PTEN-S338TRYFTPNFKVK  | 272 | 87  |
| >PTEN-S338NRYFSPNFK    | 331 | >PTEN-S338NRYFTPNFK    | 421 | 90  |
| >PTEN-S338NRYFSPNF     | 18  | >PTEN-S338NRYFTPNF     | 29  | 11  |
| >PTEN-S338NRYFSPNFKV   | 584 | >PTEN-S338NRYFTPNFKV   | 437 | 147 |



|                        |      |                        |       |       |
|------------------------|------|------------------------|-------|-------|
| >PTEN-S3381NRYFSPNFKV  | 221  | >PTEN-S3381NRYFTP NFKV | 273   | 52    |
| >PTEN-S3381NRYFSPNFK   | 120  | >PTEN-S3381NRYFTP NFK  | 74    | 46    |
| >PTEN-S3381NRYFSPNFKV  | 151  | >PTEN-S3381NRYFTP NFKV | 106   | 45    |
| >PTEN-S3381ANRYFSPNF   | 389  | >PTEN-S3381ANRYFTP NF  | 451   | 62    |
| >PTEN-S3381ANRYFSPNF   | 450  | >PTEN-S3381ANRYFTP NF  | 718   | 268   |
| >PTEN-S3381ANRYFSPNFK  | 4    | >PTEN-S3381ANRYFTP NFK | 4     | 0     |
| >PTEN-S3381ANRYFSPNFK  | 174  | >PTEN-S3381ANRYFTP NFK | 206   | 32    |
| >PTEN-S3381ANRYFSPNF   | 13   | >PTEN-S3381ANRYFTP NF  | 13    | 0     |
| >PTEN-S3381KANRYFSPNF  | 46   | >PTEN-S3381KANRYFTP NF | 53    | 7     |
| >PTEN-S3381KANRYFSPNF  | 12   | >PTEN-S3381KANRYFTP NF | 15    | 3     |
| >PTEN-S3381KANRYFSPNF  | 4    | >PTEN-S3381KANRYFTP NF | 5     | 1     |
| >PTEN-S3381KANRYFSPNF  | 17   | >PTEN-S3381KANRYFTP NF | 16    | 1     |
| >PTEN-S3381KANRYFSPNF  | 416  | >PTEN-S3381KANRYFTP NF | 170   | 246   |
| >PTEN-S3381KANRYFSPNF  | 469  | >PTEN-S3381KANRYFTP NF | 597   | 128   |
| >PTEN-S3381KANRYFSPNF  | 279  | >PTEN-S3381KANRYFTP NF | 452   | 173   |
| >PTEN-S3381KANRYFSPNF  | 11   | >PTEN-S3381KANRYFTP NF | 12    | 1     |
| >PTEN-S3381KANRYFSPNF  | 29   | >PTEN-S3381KANRYFTP NF | 47    | 18    |
| >PTEN-S3381KANRYFSPNF  | 373  | >PTEN-S3381KANRYFTP NF | 361   | 12    |
| >PTEN-S3381KANRYFSPNF  | 21   | >PTEN-S3381KANRYFTP NF | 20    | 1     |
| >PTEN-S3381DKANRYFSPN  | 39   | >PTEN-S3381DKANRYFTP N | 41    | 2     |
| >PTEN-S364CSTSVTPDV    | 172  | >PTEN-S364CSTCVTPDV    | 912   | 740   |
| >PTEN-S364CSTSVTPDV    | 364  | >PTEN-S364CSTCVTPDV    | 1544  | 1180  |
| >PTEN-S364CSTSVTPDV    | 260  | >PTEN-S364CSTCVTPDV    | 974   | 714   |
| >PTEN-S364CSSTSVTPDV   | 1098 | >PTEN-S364CSSTCVTPDV   | 439   | 659   |
| >PTEN-S364CSSSTSVTPDV  | 325  | >PTEN-S364CSSSTCVTPDV  | 445   | 120   |
| >PTEN-S364CSSSTSVTPDV  | 389  | >PTEN-S364CSSSTCVTPDV  | 834   | 445   |
| >PTEN-S364CASSSTSVTPD' | 438  | >PTEN-S364CASSSTCVTPD' | 599   | 161   |
| >PTEN-S364CEASSSTSV    | 12   | >PTEN-S364CEASSSTCV    | 22    | 10    |
| >PTEN-S364CEASSSTSV    | 27   | >PTEN-S364CEASSSTCV    | 137   | 110   |
| >PTEN-S364CEASSSTSV    | 491  | >PTEN-S364CEASSSTCV    | 854   | 363   |
| >PTEN-S364CNPEASSSTSV  | 130  | >PTEN-S364CNPEASSSTCV  | 434   | 304   |
| >PTEN-S364CNPEASSSTS   | 381  | >PTEN-S364CNPEASSSTC   | 866   | 485   |
| >PTEN-S364CNPEASSSTSV' | 394  | >PTEN-S364CNPEASSSTCV  | 595   | 201   |
| >PTEN-S364CNPEASSSTSV  | 370  | >PTEN-S364CNPEASSSTCV  | 486   | 116   |
| >PTEN-S59P-SKHKNHYK    | 78   | >PTEN-S59P-PKHKNHYK    | 1567  | 1489  |
| >PTEN-S59P-SKHKNHYKI   | 129  | >PTEN-S59P-PKHKNHYKI   | 1301  | 1172  |
| >PTEN-S59P-SKHKNHYKIY  | 6    | >PTEN-S59P-PKHKNHYKIY  | 36    | 30    |
| >PTEN-S59P-DSKHKNHY    | 383  | >PTEN-S59P-DPKHKNHY    | 4200  | 3817  |
| >PTEN-S59P-DSKHKNHYK   | 121  | >PTEN-S59P-DPKHKNHYK   | 14456 | 14335 |
| >PTEN-S59P-DSKHKNHY    | 289  | >PTEN-S59P-DPKHKNHY    | 4668  | 4379  |
| >PTEN-S59P-DSKHKNHYK   | 342  | >PTEN-S59P-DPKHKNHYK   | 10841 | 10499 |
| >PTEN-S59P-DSKHKNHYK   | 155  | >PTEN-S59P-DPKHKNHYK   | 1030  | 875   |
| >PTEN-S59P-DSKHKNHYK   | 77   | >PTEN-S59P-DPKHKNHYK   | 2338  | 2261  |

|                        |      |                        |      |      |
|------------------------|------|------------------------|------|------|
| >PTEN-S59P- LDSKHKNHYK | 229  | >PTEN-S59P- LDPKHKNHYK | 1048 | 819  |
| >PTEN-S59P- FLDSKHKNHY | 86   | >PTEN-S59P- FLDPKHKNHY | 186  | 100  |
| >PTEN-S59P- FLDSKHKNHY | 273  | >PTEN-S59P- FLDPKHKNHY | 230  | 43   |
| >PTEN-S59P- FLDSKHKNHY | 226  | >PTEN-S59P- FLDPKHKNHY | 95   | 131  |
| >PTEN-S59P- RFLDSKHKNF | 91   | >PTEN-S59P- RFLDPKHKNF | 67   | 24   |
| >PTEN-S59P- RFLDSKHK   | 19   | >PTEN-S59P- RFLDPKHK   | 46   | 27   |
| >PTEN-S59P- RFLDSKHKNF | 227  | >PTEN-S59P- RFLDPKHKNF | 305  | 78   |
| >PTEN-S59P- RFLDSKHK   | 73   | >PTEN-S59P- RFLDPKHK   | 101  | 28   |
| >PTEN-S59P- RFLDSKHK   | 66   | >PTEN-S59P- RFLDPKHK   | 81   | 15   |
| >PTEN-S59P- VRFLDSKH   | 482  | >PTEN-S59P- VRFLDPKH   | 496  | 14   |
| >PTEN-S59P- VRFLDSKHK  | 137  | >PTEN-S59P- VRFLDPKHK  | 121  | 16   |
| >PTEN-S59P- VVRFLDSKHK | 408  | >PTEN-S59P- VVRFLDPKHK | 843  | 435  |
| >PTEN-S59P- VVRFLDSK   | 455  | >PTEN-S59P- VVRFLDPK   | 257  | 198  |
| >PTEN-S59P- VVRFLDSK   | 17   | >PTEN-S59P- VVRFLDPK   | 10   | 7    |
| >PTEN-S59P- VVRFLDSKHK | 13   | >PTEN-S59P- VVRFLDPKHK | 12   | 1    |
| >PTEN-S59P- VVRFLDSKH  | 57   | >PTEN-S59P- VVRFLDPKH  | 1874 | 1817 |
| >PTEN-S59P- DVVRFLDSK  | 493  | >PTEN-S59P- DVVRFLDPK  | 254  | 239  |
| >PTEN-S59P- DVVRFLDSKH | 129  | >PTEN-S59P- DVVRFLDPKH | 133  | 4    |
| >PTEN-S59P- DVVRFLDSK  | 18   | >PTEN-S59P- DVVRFLDPK  | 23   | 5    |
| >PTEN-S59P- DVVRFLDSKH | 102  | >PTEN-S59P- DVVRFLDPKH | 138  | 36   |
| >PTEN-T131/ TGVMICAYL  | 1039 | >PTEN-T131/ AGVMICAYL  | 491  | 548  |
| >PTEN-T131/ TGVMICAY   | 567  | >PTEN-T131/ AGVMICAY   | 343  | 224  |
| >PTEN-T131/ TGVMICAYL  | 267  | >PTEN-T131/ AGVMICAYL  | 5932 | 5665 |
| >PTEN-T131/ TGVMICAY   | 714  | >PTEN-T131/ AGVMICAY   | 306  | 408  |
| >PTEN-T131/ TGVMICAY   | 166  | >PTEN-T131/ AGVMICAY   | 647  | 481  |
| >PTEN-T131/ TGVMICAY   | 1635 | >PTEN-T131/ AGVMICAY   | 415  | 1220 |
| >PTEN-T131/ RTGVMICAY  | 243  | >PTEN-T131/ RAGVMICAY  | 779  | 536  |
| >PTEN-T131/ RTGVMICAYL | 398  | >PTEN-T131/ RAGVMICAYL | 1956 | 1558 |
| >PTEN-T131/ RTGVMICAY  | 169  | >PTEN-T131/ RAGVMICAY  | 6518 | 6349 |
| >PTEN-T131/ RTGVMICAYL | 114  | >PTEN-T131/ RAGVMICAYL | 3678 | 3564 |
| >PTEN-T131/ RTGVMICAYL | 74   | >PTEN-T131/ RAGVMICAYL | 618  | 544  |
| >PTEN-T131/ RTGVMICAY  | 228  | >PTEN-T131/ RAGVMICAY  | 1827 | 1599 |
| >PTEN-T131/ RTGVMICAY  | 70   | >PTEN-T131/ RAGVMICAY  | 87   | 17   |
| >PTEN-T131/ RTGVMICAY  | 767  | >PTEN-T131/ RAGVMICAY  | 390  | 377  |
| >PTEN-T131/ RTGVMICAY  | 13   | >PTEN-T131/ RAGVMICAY  | 46   | 33   |
| >PTEN-T131/ RTGVMICAYL | 12   | >PTEN-T131/ RAGVMICAYL | 120  | 108  |
| >PTEN-T131/ RTGVMICAYL | 14   | >PTEN-T131/ RAGVMICAYL | 191  | 177  |
| >PTEN-T131/ RTGVMICAY  | 5831 | >PTEN-T131/ RAGVMICAY  | 339  | 5492 |
| >PTEN-T131/ RTGVMICAY  | 205  | >PTEN-T131/ RAGVMICAY  | 279  | 74   |
| >PTEN-T131/ RTGVMICAYL | 438  | >PTEN-T131/ RAGVMICAYL | 592  | 154  |
| >PTEN-T131/ RTGVMICAYL | 428  | >PTEN-T131/ RAGVMICAYL | 597  | 169  |
| >PTEN-T131/ RTGVMICAYL | 90   | >PTEN-T131/ RAGVMICAYL | 1069 | 979  |
| >PTEN-T131/ RTGVMICAYL | 56   | >PTEN-T131/ RAGVMICAYL | 675  | 619  |

|                        |      |                        |      |      |
|------------------------|------|------------------------|------|------|
| >PTEN-T131/RTGVMICAY   | 378  | >PTEN-T131/RAGVMICAY   | 4655 | 4277 |
| >PTEN-T131/RTGVMICAYL  | 72   | >PTEN-T131/RAGVMICAYL  | 4450 | 4378 |
| >PTEN-T131/RTGVMICAYL  | 235  | >PTEN-T131/RAGVMICAYL  | 3755 | 3520 |
| >PTEN-T131/RTGVMICAYL  | 394  | >PTEN-T131/RAGVMICAYL  | 3455 | 3061 |
| >PTEN-T131/GRTGVMICA'  | 620  | >PTEN-T131/GRAGVMICA'  | 312  | 308  |
| >PTEN-T131/GRTGVMICA'  | 113  | >PTEN-T131/GRAGVMICA'  | 143  | 30   |
| >PTEN-T131/GRTGVMICA'  | 258  | >PTEN-T131/GRAGVMICA'  | 238  | 20   |
| >PTEN-T131/GRTGVMICA'  | 334  | >PTEN-T131/GRAGVMICA'  | 337  | 3    |
| >PTEN-T131/GRTGVMICA'  | 78   | >PTEN-T131/GRAGVMICA'  | 52   | 26   |
| >PTEN-T131/KGRTGVMIC   | 29   | >PTEN-T131/KGRAGVMIC   | 21   | 8    |
| >PTEN-T131/KGRTGVMIC   | 365  | >PTEN-T131/KGRAGVMIC   | 223  | 142  |
| >PTEN-T131/KGRTGVMIC/  | 21   | >PTEN-T131/KGRAGVMIC/  | 16   | 5    |
| >PTEN-T131/KGRTGVMIC/  | 38   | >PTEN-T131/KGRAGVMIC/  | 26   | 12   |
| >PTEN-T131/KGRTGVMIC/  | 314  | >PTEN-T131/KGRAGVMIC/  | 378  | 64   |
| >PTEN-T131/KGRTGVMIC/  | 165  | >PTEN-T131/KGRAGVMIC/  | 94   | 71   |
| >PTEN-T131/KGRTGVMIC/  | 174  | >PTEN-T131/KGRAGVMIC/  | 185  | 11   |
| >PTEN-T131/KGRTGVMIC/  | 135  | >PTEN-T131/KGRAGVMIC/  | 74   | 61   |
| >PTEN-T131/GKGRAGVMI   | 308  | >PTEN-T131/GKGRAGVMI   | 884  | 576  |
| >PTEN-T131/KAGKGRTGV   | 1139 | >PTEN-T131/KAGKGRTGV   | 483  | 656  |
| >PTEN-T131/KAGKGRTGV   | 135  | >PTEN-T131/KAGKGRTGV   | 120  | 15   |
| >PTEN-T131/HCKAGKGRAG  | 1478 | >PTEN-T131/HCKAGKGRAG  | 428  | 1050 |
| >PTEN-T131I TGVMICAY   | 567  | >PTEN-T131I IGVMICAY   | 229  | 338  |
| >PTEN-T131I TGVMICAYL  | 267  | >PTEN-T131I IGVMICAYL  | 3803 | 3536 |
| >PTEN-T131I TGVMICAY   | 714  | >PTEN-T131I IGVMICAY   | 375  | 339  |
| >PTEN-T131I TGVMICAY   | 166  | >PTEN-T131I IGVMICAY   | 148  | 18   |
| >PTEN-T131I TGVMICAYL  | 1647 | >PTEN-T131I IGVMICAYL  | 463  | 1184 |
| >PTEN-T131I RTGVMICAYL | 886  | >PTEN-T131I RIGVMICAYL | 363  | 523  |
| >PTEN-T131I RTGVMICAYL | 583  | >PTEN-T131I RIGVMICAYL | 294  | 289  |
| >PTEN-T131I RTGVMICAYL | 1352 | >PTEN-T131I RIGVMICAYL | 398  | 954  |
| >PTEN-T131I RTGVMICAYL | 532  | >PTEN-T131I RIGVMICAYL | 247  | 285  |
| >PTEN-T131I RTGVMICAYL | 1073 | >PTEN-T131I RIGVMICAYL | 254  | 819  |
| >PTEN-T131I RTGVMICAYL | 4855 | >PTEN-T131I RIGVMICAYL | 192  | 4663 |
| >PTEN-T131I RTGVMICAY  | 243  | >PTEN-T131I RIGVMICAY  | 507  | 264  |
| >PTEN-T131I RTGVMICAYL | 398  | >PTEN-T131I RIGVMICAYL | 2352 | 1954 |
| >PTEN-T131I RTGVMICAY  | 169  | >PTEN-T131I RIGVMICAY  | 536  | 367  |
| >PTEN-T131I RTGVMICAYL | 114  | >PTEN-T131I RIGVMICAYL | 356  | 242  |
| >PTEN-T131I RTGVMICAYL | 74   | >PTEN-T131I RIGVMICAYL | 485  | 411  |
| >PTEN-T131I RTGVMICAY  | 228  | >PTEN-T131I RIGVMICAY  | 391  | 163  |
| >PTEN-T131I RTGVMICAY  | 70   | >PTEN-T131I RIGVMICAY  | 67   | 3    |
| >PTEN-T131I RTGVMICAY  | 13   | >PTEN-T131I RIGVMICAY  | 861  | 848  |
| >PTEN-T131I RTGVMICAYL | 12   | >PTEN-T131I RIGVMICAYL | 4537 | 4525 |
| >PTEN-T131I RTGVMICAYL | 14   | >PTEN-T131I RIGVMICAYL | 6139 | 6125 |
| >PTEN-T131I RTGVMICAY  | 205  | >PTEN-T131I RIGVMICAY  | 4421 | 4216 |

|                        |      |                         |       |       |
|------------------------|------|-------------------------|-------|-------|
| >PTEN-T131I RTGVMICAYL | 438  | >PTEN-T131I RIGVMICAYL  | 6019  | 5581  |
| >PTEN-T131I RTGVMICAYL | 428  | >PTEN-T131I RIGVMICAYL  | 6624  | 6196  |
| >PTEN-T131I RTGVMICAYL | 90   | >PTEN-T131I RIGVMICAYL  | 7612  | 7522  |
| >PTEN-T131I RTGVMICAYL | 56   | >PTEN-T131I RIGVMICAYL  | 6139  | 6083  |
| >PTEN-T131I RTGVMICAY  | 378  | >PTEN-T131I RIGVMICAY   | 6657  | 6279  |
| >PTEN-T131I RTGVMICAYL | 72   | >PTEN-T131I RIGVMICAYL  | 3729  | 3657  |
| >PTEN-T131I RTGVMICAYL | 235  | >PTEN-T131I RIGVMICAYL  | 6109  | 5874  |
| >PTEN-T131I RTGVMICAYL | 394  | >PTEN-T131I RIGVMICAYL  | 15001 | 14607 |
| >PTEN-T131I GRTGVMICA' | 620  | >PTEN-T131I GRIGVMICAY  | 353   | 267   |
| >PTEN-T131I GRTGVMICA' | 113  | >PTEN-T131I GRIGVMICAY  | 41    | 72    |
| >PTEN-T131I GRTGVMICA' | 258  | >PTEN-T131I GRIGVMICAY  | 201   | 57    |
| >PTEN-T131I GRTGVMICA' | 334  | >PTEN-T131I GRIGVMICAY  | 285   | 49    |
| >PTEN-T131I GRTGVMICA' | 78   | >PTEN-T131I GRIGVMICAY  | 50    | 28    |
| >PTEN-T131I KGRTGVM    | 29   | >PTEN-T131I KGRIGVM     | 44    | 15    |
| >PTEN-T131I KGRTGVMIC  | 365  | >PTEN-T131I KGRIGVMIC   | 551   | 186   |
| >PTEN-T131I KGRTGVMIC/ | 21   | >PTEN-T131I KGRIGVMICA  | 27    | 6     |
| >PTEN-T131I KGRTGVMIC/ | 38   | >PTEN-T131I KGRIGVMICA  | 46    | 8     |
| >PTEN-T131I KGRTGVMIC/ | 314  | >PTEN-T131I KGRIGVMICA  | 294   | 20    |
| >PTEN-T131I KGRTGVMIC/ | 165  | >PTEN-T131I KGRIGVMICA  | 171   | 6     |
| >PTEN-T131I KGRTGVMIC/ | 174  | >PTEN-T131I KGRIGVMICA  | 443   | 269   |
| >PTEN-T131I KGRTGVMIC/ | 135  | >PTEN-T131I KGRIGVMICA  | 54    | 81    |
| >PTEN-T131I GKRTGVM    | 308  | >PTEN-T131I GKGRIGVM    | 1473  | 1165  |
| >PTEN-T131I KAGKGRIGV  | 135  | >PTEN-T131I KAGKGRIGV   | 154   | 19    |
| >PTEN-T131I HCKAGKGRIC | 1478 | >PTEN-T131I HCKAGKGRIC  | 312   | 1166  |
| >PTEN-T131I RTGVMICAYL | 267  | >PTEN-T131I RINGVMICAYL | 372   | 105   |
| >PTEN-T131I RTGVMICAY  | 166  | >PTEN-T131I RINGVMICAY  | 144   | 22    |
| >PTEN-T131I RTGVMICAY  | 243  | >PTEN-T131I RINGVMICAY  | 2331  | 2088  |
| >PTEN-T131I RTGVMICAYL | 398  | >PTEN-T131I RINGVMICAYL | 4505  | 4107  |
| >PTEN-T131I RTGVMICAY  | 169  | >PTEN-T131I RINGVMICAY  | 14028 | 13859 |
| >PTEN-T131I RTGVMICAYL | 114  | >PTEN-T131I RINGVMICAYL | 9558  | 9444  |
| >PTEN-T131I RTGVMICAYL | 74   | >PTEN-T131I RINGVMICAYL | 5208  | 5134  |
| >PTEN-T131I RTGVMICAY  | 228  | >PTEN-T131I RINGVMICAY  | 4254  | 4026  |
| >PTEN-T131I RTGVMICAY  | 70   | >PTEN-T131I RINGVMICAY  | 212   | 142   |
| >PTEN-T131I RTGVMICAY  | 13   | >PTEN-T131I RINGVMICAY  | 9610  | 9597  |
| >PTEN-T131I RTGVMICAYL | 12   | >PTEN-T131I RINGVMICAYL | 16841 | 16829 |
| >PTEN-T131I RTGVMICAYL | 14   | >PTEN-T131I RINGVMICAYL | 17698 | 17684 |
| >PTEN-T131I RTGVMICAY  | 205  | >PTEN-T131I RINGVMICAY  | 15548 | 15343 |
| >PTEN-T131I RTGVMICAYL | 438  | >PTEN-T131I RINGVMICAYL | 16452 | 16014 |
| >PTEN-T131I RTGVMICAYL | 428  | >PTEN-T131I RINGVMICAYL | 17018 | 16590 |
| >PTEN-T131I RTGVMICAYL | 90   | >PTEN-T131I RINGVMICAYL | 11908 | 11818 |
| >PTEN-T131I RTGVMICAYL | 56   | >PTEN-T131I RINGVMICAYL | 9641  | 9585  |
| >PTEN-T131I RTGVMICAY  | 378  | >PTEN-T131I RINGVMICAY  | 7669  | 7291  |
| >PTEN-T131I RTGVMICAYL | 72   | >PTEN-T131I RINGVMICAYL | 10867 | 10795 |

|                                    |       |                                    |       |       |
|------------------------------------|-------|------------------------------------|-------|-------|
| >PTEN-T131 <sup>†</sup> RTGVMICAYL | 235   | >PTEN-T131 <sup>†</sup> RNGVMICAYI | 7142  | 6907  |
| >PTEN-T131 <sup>†</sup> RTGVMICAYL | 394   | >PTEN-T131 <sup>†</sup> RNGVMICAYI | 8549  | 8155  |
| >PTEN-T131 <sup>†</sup> GRTGVMICA' | 113   | >PTEN-T131 <sup>†</sup> GRNGVMICA  | 130   | 17    |
| >PTEN-T131 <sup>†</sup> GRTGVMICA' | 258   | >PTEN-T131 <sup>†</sup> GRNGVMICA  | 354   | 96    |
| >PTEN-T131 <sup>†</sup> GRTGVMICA' | 334   | >PTEN-T131 <sup>†</sup> GRNGVMICA  | 650   | 316   |
| >PTEN-T131 <sup>†</sup> GRTGVMICA' | 78    | >PTEN-T131 <sup>†</sup> GRNGVMICA  | 133   | 55    |
| >PTEN-T131 <sup>†</sup> KGRTGVMII  | 29    | >PTEN-T131 <sup>†</sup> KGRNGVMI   | 33    | 4     |
| >PTEN-T131 <sup>†</sup> KGRTGVMIC  | 365   | >PTEN-T131 <sup>†</sup> KGRNGVMIC  | 374   | 9     |
| >PTEN-T131 <sup>†</sup> KGRTGVMIC/ | 21    | >PTEN-T131 <sup>†</sup> KGRNGVMIC. | 22    | 1     |
| >PTEN-T131 <sup>†</sup> KGRTGVMIC/ | 38    | >PTEN-T131 <sup>†</sup> KGRNGVMIC. | 38    | 0     |
| >PTEN-T131 <sup>†</sup> KGRTGVMIC/ | 314   | >PTEN-T131 <sup>†</sup> KGRNGVMIC. | 278   | 36    |
| >PTEN-T131 <sup>†</sup> KGRTGVMIC/ | 165   | >PTEN-T131 <sup>†</sup> KGRNGVMIC. | 104   | 61    |
| >PTEN-T131 <sup>†</sup> KGRTGVMIC/ | 174   | >PTEN-T131 <sup>†</sup> KGRNGVMIC. | 153   | 21    |
| >PTEN-T131 <sup>†</sup> KGRTGVMIC/ | 135   | >PTEN-T131 <sup>†</sup> KGRNGVMIC. | 134   | 1     |
| >PTEN-T131 <sup>†</sup> KGRTGVMIC/ | 666   | >PTEN-T131 <sup>†</sup> KGRNGVMIC. | 356   | 310   |
| >PTEN-T131 <sup>†</sup> GKGRNGVMI  | 308   | >PTEN-T131 <sup>†</sup> GKGRNGVMI  | 712   | 404   |
| >PTEN-T131 <sup>†</sup> KAGKGRNGV  | 135   | >PTEN-T131 <sup>†</sup> KAGKGRNGV  | 232   | 97    |
| >PTEN-T131 <sup>f</sup> TGVMICAYL  | 267   | >PTEN-T131 <sup>f</sup> PGVMICAYL  | 14882 | 14615 |
| >PTEN-T131 <sup>f</sup> TGVMICAY   | 166   | >PTEN-T131 <sup>f</sup> PGVMICAY   | 2317  | 2151  |
| >PTEN-T131 <sup>f</sup> RTGVMICAYL | 36324 | >PTEN-T131 <sup>f</sup> RPGVMICAYL | 381   | 35943 |
| >PTEN-T131 <sup>f</sup> RTGVMICAY  | 243   | >PTEN-T131 <sup>f</sup> RPGVMICAY  | 4497  | 4254  |
| >PTEN-T131 <sup>f</sup> RTGVMICAYL | 398   | >PTEN-T131 <sup>f</sup> RPGVMICAYL | 12141 | 11743 |
| >PTEN-T131 <sup>f</sup> RTGVMICAY  | 169   | >PTEN-T131 <sup>f</sup> RPGVMICAY  | 22923 | 22754 |
| >PTEN-T131 <sup>f</sup> RTGVMICAYL | 114   | >PTEN-T131 <sup>f</sup> RPGVMICAYL | 18269 | 18155 |
| >PTEN-T131 <sup>f</sup> RTGVMICAYL | 74    | >PTEN-T131 <sup>f</sup> RPGVMICAYL | 16177 | 16103 |
| >PTEN-T131 <sup>f</sup> RTGVMICAY  | 228   | >PTEN-T131 <sup>f</sup> RPGVMICAY  | 6151  | 5923  |
| >PTEN-T131 <sup>f</sup> RTGVMICAYL | 21570 | >PTEN-T131 <sup>f</sup> RPGVMICAYL | 86    | 21484 |
| >PTEN-T131 <sup>f</sup> RTGVMICAYL | 18778 | >PTEN-T131 <sup>f</sup> RPGVMICAYL | 105   | 18673 |
| >PTEN-T131 <sup>f</sup> RTGVMICAY  | 70    | >PTEN-T131 <sup>f</sup> RPGVMICAY  | 2351  | 2281  |
| >PTEN-T131 <sup>f</sup> RTGVMICAY  | 13    | >PTEN-T131 <sup>f</sup> RPGVMICAY  | 10339 | 10326 |
| >PTEN-T131 <sup>f</sup> RTGVMICAYL | 12    | >PTEN-T131 <sup>f</sup> RPGVMICAYL | 16820 | 16808 |
| >PTEN-T131 <sup>f</sup> RTGVMICAYL | 14    | >PTEN-T131 <sup>f</sup> RPGVMICAYL | 16589 | 16575 |
| >PTEN-T131 <sup>f</sup> RTGVMICAY  | 5831  | >PTEN-T131 <sup>f</sup> RPGVMICAY  | 38    | 5793  |
| >PTEN-T131 <sup>f</sup> RTGVMICAY  | 23762 | >PTEN-T131 <sup>f</sup> RPGVMICAY  | 367   | 23395 |
| >PTEN-T131 <sup>f</sup> RTGVMICAY  | 205   | >PTEN-T131 <sup>f</sup> RPGVMICAY  | 19872 | 19667 |
| >PTEN-T131 <sup>f</sup> RTGVMICAYL | 438   | >PTEN-T131 <sup>f</sup> RPGVMICAYL | 20450 | 20012 |
| >PTEN-T131 <sup>f</sup> RTGVMICAYL | 428   | >PTEN-T131 <sup>f</sup> RPGVMICAYL | 20600 | 20172 |
| >PTEN-T131 <sup>f</sup> RTGVMICAYL | 90    | >PTEN-T131 <sup>f</sup> RPGVMICAYL | 7370  | 7280  |
| >PTEN-T131 <sup>f</sup> RTGVMICAYL | 56    | >PTEN-T131 <sup>f</sup> RPGVMICAYL | 5352  | 5296  |
| >PTEN-T131 <sup>f</sup> RTGVMICAY  | 378   | >PTEN-T131 <sup>f</sup> RPGVMICAY  | 8803  | 8425  |
| >PTEN-T131 <sup>f</sup> RTGVMICAYL | 72    | >PTEN-T131 <sup>f</sup> RPGVMICAYL | 16206 | 16134 |
| >PTEN-T131 <sup>f</sup> RTGVMICAYL | 235   | >PTEN-T131 <sup>f</sup> RPGVMICAYL | 9029  | 8794  |
| >PTEN-T131 <sup>f</sup> RTGVMICAY  | 3713  | >PTEN-T131 <sup>f</sup> RPGVMICAY  | 44    | 3669  |

|                         |      |                         |       |       |
|-------------------------|------|-------------------------|-------|-------|
| >PTEN-T131FRTGVMICAYL   | 394  | >PTEN-T131FRPGVMICAYL   | 12738 | 12344 |
| >PTEN-T131FGRTGVMICA'   | 113  | >PTEN-T131FGRPVMICA'    | 795   | 682   |
| >PTEN-T131FGRTGVMICA'   | 258  | >PTEN-T131FGRPVMICA'    | 1837  | 1579  |
| >PTEN-T131FGRTGVMICA'   | 334  | >PTEN-T131FGRPVMICA'    | 852   | 518   |
| >PTEN-T131FGRTGVMICA'   | 78   | >PTEN-T131FGRPVMICA'    | 85    | 7     |
| >PTEN-T131FKGRTGVMIC    | 29   | >PTEN-T131FKGRPVMIC     | 28    | 1     |
| >PTEN-T131FKGRTGVMIC    | 365  | >PTEN-T131FKGRPVMIC     | 229   | 136   |
| >PTEN-T131FKGRTGVMIC/   | 21   | >PTEN-T131FKGRPVMIC/    | 16    | 5     |
| >PTEN-T131FKGRTGVMIC/   | 38   | >PTEN-T131FKGRPVMIC/    | 26    | 12    |
| >PTEN-T131FKGRTGVMIC/   | 314  | >PTEN-T131FKGRPVMIC/    | 244   | 70    |
| >PTEN-T131FKGRTGVMIC/   | 165  | >PTEN-T131FKGRPVMIC/    | 98    | 67    |
| >PTEN-T131FKGRTGVMIC/   | 174  | >PTEN-T131FKGRPVMIC/    | 218   | 44    |
| >PTEN-T131FKGRTGVMIC    | 2687 | >PTEN-T131FKGRPVMIC     | 403   | 2284  |
| >PTEN-T131FKGRTGVMIC/   | 135  | >PTEN-T131FKGRPVMIC/    | 27    | 108   |
| >PTEN-T131FKGRTGVMIC/   | 666  | >PTEN-T131FKGRPVMIC/    | 491   | 175   |
| >PTEN-T131FKGRTGVMIC    | 1059 | >PTEN-T131FKGRPVMIC     | 246   | 813   |
| >PTEN-T131FGKGRTPGVMIC  | 308  | >PTEN-T131FGKGRTPGVMIC  | 623   | 315   |
| >PTEN-T131FKAGKGRTPGV   | 1071 | >PTEN-T131FKAGKGRTPGV   | 425   | 646   |
| >PTEN-T131FKAGKGRTPGV   | 135  | >PTEN-T131FKAGKGRTPGV   | 120   | 15    |
| >PTEN-T131FHCKAGKGRTPGV | 1478 | >PTEN-T131FHCKAGKGRTPGV | 256   | 1222  |
| >PTEN-T160I RTRDCKGV    | 2097 | >PTEN-T160I RTRDCKGV    | 350   | 1747  |
| >PTEN-T160I RTRDCKGV    | 1918 | >PTEN-T160I RTRDCKGV    | 51    | 1867  |
| >PTEN-T160I RTRDCKGV    | 14   | >PTEN-T160I RTRDCKGV    | 55    | 41    |
| >PTEN-T160I RTRDCKGVT   | 71   | >PTEN-T160I RTRDCKGVT   | 424   | 353   |
| >PTEN-T160I RTRDCKGVTI  | 5    | >PTEN-T160I RTRDCKGVTI  | 11    | 6     |
| >PTEN-T160I RTRDCKGVTI  | 103  | >PTEN-T160I RTRDCKGVTIF | 628   | 525   |
| >PTEN-T160I RTRDCKGVTI  | 120  | >PTEN-T160I RTRDCKGVTI  | 308   | 188   |
| >PTEN-T160I RTRDCKGV    | 26   | >PTEN-T160I RTRDCKGV    | 5403  | 5377  |
| >PTEN-T160I RTRDCKGVTI  | 5    | >PTEN-T160I RTRDCKGVTI  | 349   | 344   |
| >PTEN-T160I RTRDCKGVTI  | 100  | >PTEN-T160I RTRDCKGVTI  | 5013  | 4913  |
| >PTEN-T160I EALDFYGEVR  | 4121 | >PTEN-T160I EALDFYGEVR  | 130   | 3991  |
| >PTEN-T160I EALDFYGEVR  | 519  | >PTEN-T160I EALDFYGEVR  | 34    | 485   |
| >PTEN-T160I VRTRDCKGVT  | 873  | >PTEN-T160I VRTRDCKGVT  | 398   | 475   |
| >PTEN-T160I VRTRDCKGVT  | 595  | >PTEN-T160I VRTRDCKGVT  | 481   | 114   |
| >PTEN-T160I EVRTRDCK    | 81   | >PTEN-T160I EVRTRDCK    | 96    | 15    |
| >PTEN-T160I GEVTRDCKK   | 178  | >PTEN-T160I GEVTRDCKK   | 135   | 43    |
| >PTEN-T160I GEVTRDCKK   | 381  | >PTEN-T160I GEVTRDCKK   | 317   | 64    |
| >PTEN-T160I GEVTRDCKK   | 89   | >PTEN-T160I GEVTRDCKK   | 47    | 42    |
| >PTEN-T160I FYGEVRTR    | 163  | >PTEN-T160I FYGEVRIR    | 377   | 214   |
| >PTEN-T160I FYGEVRTR    | 107  | >PTEN-T160I FYGEVRIR    | 117   | 10    |
| >PTEN-T160I DFYGEVRTR   | 31   | >PTEN-T160I DFYGEVRIR   | 84    | 53    |
| >PTEN-T160I DFYGEVRTR   | 408  | >PTEN-T160I DFYGEVRIR   | 676   | 268   |
| >PTEN-T160I DFYGEVRTR   | 291  | >PTEN-T160I DFYGEVRIR   | 246   | 45    |

|                        |       |                        |      |       |
|------------------------|-------|------------------------|------|-------|
| >PTEN-T160I LDFYGEVRT  | 10760 | >PTEN-T160I LDFYGEVRI  | 207  | 10553 |
| >PTEN-T160I ALDFYGEVRT | 308   | >PTEN-T160I ALDFYGEVRI | 16   | 292   |
| >PTEN-T160I ALDFYGEVRT | 6007  | >PTEN-T160I ALDFYGEVRI | 99   | 5908  |
| >PTEN-T160I ALDFYGEVRT | 2402  | >PTEN-T160I ALDFYGEVRI | 79   | 2323  |
| >PTEN-T160I ALDFYGEVRT | 416   | >PTEN-T160I ALDFYGEVRI | 42   | 374   |
| >PTEN-T160S RTRDKKGV   | 14    | >PTEN-T160S RSRDKKGV   | 25   | 11    |
| >PTEN-T160S RTRDKKGV   | 71    | >PTEN-T160S RSRDKKGV   | 162  | 91    |
| >PTEN-T160S RTRDKKGV   | 5     | >PTEN-T160S RSRDKKGV   | 6    | 1     |
| >PTEN-T160S RTRDKKGV   | 103   | >PTEN-T160S RSRDKKGV   | 230  | 127   |
| >PTEN-T160S RTRDKKGV   | 120   | >PTEN-T160S RSRDKKGV   | 390  | 270   |
| >PTEN-T160S RTRDKKGV   | 26    | >PTEN-T160S RSRDKKGV   | 40   | 14    |
| >PTEN-T160S RTRDKKGV   | 5     | >PTEN-T160S RSRDKKGV   | 6    | 1     |
| >PTEN-T160S RTRDKKGV   | 100   | >PTEN-T160S RSRDKKGV   | 280  | 180   |
| >PTEN-T160S EVRTRDKK   | 81    | >PTEN-T160S EVRSRDKK   | 54   | 27    |
| >PTEN-T160S GEVTRDKK   | 178   | >PTEN-T160S GEVRSRDKK  | 212  | 34    |
| >PTEN-T160S GEVTRDKK   | 381   | >PTEN-T160S GEVRSRDKK  | 370  | 11    |
| >PTEN-T160S GEVTRDKK   | 89    | >PTEN-T160S GEVRSRDKK  | 79   | 10    |
| >PTEN-T160S FYGEVRTR   | 163   | >PTEN-T160S FYGEVRSR   | 143  | 20    |
| >PTEN-T160S FYGEVRTR   | 107   | >PTEN-T160S FYGEVRSR   | 149  | 42    |
| >PTEN-T160S DFYGEVRTR  | 31    | >PTEN-T160S DFYGEVRSR  | 30   | 1     |
| >PTEN-T160S DFYGEVRTR  | 408   | >PTEN-T160S DFYGEVRSR  | 453  | 45    |
| >PTEN-T160S DFYGEVRTR  | 291   | >PTEN-T160S DFYGEVRSR  | 513  | 222   |
| >PTEN-T160S ALDFYGEVRT | 308   | >PTEN-T160S ALDFYGEVRS | 1563 | 1255  |
| >PTEN-T160S ALDFYGEVRT | 416   | >PTEN-T160S ALDFYGEVRS | 4655 | 4239  |
| >PTEN-T167/ TIPSQRRYV  | 1464  | >PTEN-T167/ AIPSQRRYV  | 322  | 1142  |
| >PTEN-T167/ TIPSQRRYV  | 225   | >PTEN-T167/ AIPSQRRYV  | 40   | 185   |
| >PTEN-T167/ TIPSQRRY   | 437   | >PTEN-T167/ AIPSQRRY   | 536  | 99    |
| >PTEN-T167/ TIPSQRRYVY | 290   | >PTEN-T167/ AIPSQRRYVY | 355  | 65    |
| >PTEN-T167/ TIPSQRRYVY | 238   | >PTEN-T167/ AIPSQRRYVY | 464  | 226   |
| >PTEN-T167/ TIPSQRRY   | 641   | >PTEN-T167/ AIPSQRRY   | 405  | 236   |
| >PTEN-T167/ TIPSQRRYVY | 597   | >PTEN-T167/ AIPSQRRYVY | 381  | 216   |
| >PTEN-T167/ TIPSQRRYV  | 67    | >PTEN-T167/ AIPSQRRYV  | 2049 | 1982  |
| >PTEN-T167/ VTIPSQRRYV | 249   | >PTEN-T167/ VAIPSQRRYV | 980  | 731   |
| >PTEN-T167/ VTIPSQRRYV | 286   | >PTEN-T167/ VAIPSQRRYV | 391  | 105   |
| >PTEN-T167/ VTIPSQRRYV | 284   | >PTEN-T167/ VAIPSQRRYV | 3117 | 2833  |
| >PTEN-T167/ VTIPSQRRY  | 26    | >PTEN-T167/ VAIPSQRRY  | 1477 | 1451  |
| >PTEN-T167/ VTIPSQRRYV | 38    | >PTEN-T167/ VAIPSQRRYV | 1620 | 1582  |
| >PTEN-T167/ VTIPSQRRY  | 59    | >PTEN-T167/ VAIPSQRRY  | 549  | 490   |
| >PTEN-T167/ VTIPSQRRYV | 26    | >PTEN-T167/ VAIPSQRRYV | 162  | 136   |
| >PTEN-T167/ VTIPSQRRY  | 41    | >PTEN-T167/ VAIPSQRRY  | 134  | 93    |
| >PTEN-T167/ VTIPSQRRYV | 16    | >PTEN-T167/ VAIPSQRRYV | 40   | 24    |
| >PTEN-T167/ VTIPSQRR   | 135   | >PTEN-T167/ VAIPSQRR   | 383  | 248   |
| >PTEN-T167/ VTIPSQRR   | 65    | >PTEN-T167/ VAIPSQRR   | 194  | 129   |

|                         |      |                         |      |      |
|-------------------------|------|-------------------------|------|------|
| >PTEN-T167/VTIPSQRRYV   | 225  | >PTEN-T167/VAIPSQRRYV   | 1785 | 1560 |
| >PTEN-T167/VTIPSQRRY    | 399  | >PTEN-T167/VAIPSQRRY    | 542  | 143  |
| >PTEN-T167/VTIPSQRRYV'  | 109  | >PTEN-T167/VAIPSQRRYV   | 143  | 34   |
| >PTEN-T167/VTIPSQRRY    | 706  | >PTEN-T167/VAIPSQRRY    | 337  | 369  |
| >PTEN-T167/VTIPSQRRYV'  | 205  | >PTEN-T167/VAIPSQRRYV   | 113  | 92   |
| >PTEN-T167/VTIPSQRRY    | 3    | >PTEN-T167/VAIPSQRRY    | 4    | 1    |
| >PTEN-T167/VTIPSQRRYV   | 124  | >PTEN-T167/VAIPSQRRYV   | 696  | 572  |
| >PTEN-T167/VTIPSQRRYV'  | 4    | >PTEN-T167/VAIPSQRRYV   | 7    | 3    |
| >PTEN-T167/VTIPSQRRYV'  | 2122 | >PTEN-T167/VAIPSQRRYV   | 120  | 2002 |
| >PTEN-T167/VTIPSQRRY    | 81   | >PTEN-T167/VAIPSQRRY    | 106  | 25   |
| >PTEN-T167/VTIPSQRRYV'  | 111  | >PTEN-T167/VAIPSQRRYV   | 148  | 37   |
| >PTEN-T167/VTIPSQRRY    | 122  | >PTEN-T167/VAIPSQRRY    | 172  | 50   |
| >PTEN-T167/VTIPSQRRYV'  | 76   | >PTEN-T167/VAIPSQRRYV   | 95   | 19   |
| >PTEN-T167/VTIPSQRRY    | 37   | >PTEN-T167/VAIPSQRRY    | 914  | 877  |
| >PTEN-T167/VTIPSQRRYV'  | 37   | >PTEN-T167/VAIPSQRRYV   | 809  | 772  |
| >PTEN-T167/VTIPSQRRYV'  | 256  | >PTEN-T167/VAIPSQRRYV   | 189  | 67   |
| >PTEN-T167/GVTIPSQRRY   | 623  | >PTEN-T167/GVAIPSQRRY   | 255  | 368  |
| >PTEN-T167/GVTIPSQRRY   | 1023 | >PTEN-T167/GVAIPSQRRY   | 483  | 540  |
| >PTEN-T167/GVTIPSQRRY   | 123  | >PTEN-T167/GVAIPSQRRY   | 112  | 11   |
| >PTEN-T167/GVTIPSQRRY   | 765  | >PTEN-T167/GVAIPSQRRY   | 299  | 466  |
| >PTEN-T167/GVTIPSQR     | 457  | >PTEN-T167/GVAIPSQR     | 434  | 23   |
| >PTEN-T167/GVTIPSQR     | 210  | >PTEN-T167/GVAIPSQR     | 155  | 55   |
| >PTEN-T167/GVTIPSQRRY   | 1919 | >PTEN-T167/GVAIPSQRRY   | 384  | 1535 |
| >PTEN-T167/GVTIPSQRRY   | 172  | >PTEN-T167/GVAIPSQRRY   | 103  | 69   |
| >PTEN-T167/KGVTIPSQRR   | 155  | >PTEN-T167/KGVAIPSQRR   | 185  | 30   |
| >PTEN-T167/KGVTIPSQR    | 208  | >PTEN-T167/KGVAIPSQR    | 133  | 75   |
| >PTEN-T167/KGVTIPSQRR   | 202  | >PTEN-T167/KGVAIPSQRR   | 98   | 104  |
| >PTEN-T167/KGVTIPSQRR   | 227  | >PTEN-T167/KGVAIPSQRR   | 297  | 70   |
| >PTEN-T167/KGVTIPSQR    | 147  | >PTEN-T167/KGVAIPSQR    | 137  | 10   |
| >PTEN-T167/KGVTIPSQRR   | 120  | >PTEN-T167/KGVAIPSQRR   | 115  | 5    |
| >PTEN-T167/DKKGVTIPSQ   | 497  | >PTEN-T167/DKKGVAIPSQ   | 749  | 252  |
| >PTEN-T167/RDKKGVTI     | 179  | >PTEN-T167/RDKKGVAI     | 88   | 91   |
| >PTEN-T167/RTRDKKGVTI   | 71   | >PTEN-T167/RTRDKKGVAI   | 7    | 64   |
| >PTEN-T167/RTRDKKGVTI   | 5    | >PTEN-T167/RTRDKKGVAI   | 5    | 0    |
| >PTEN-T167/RTRDKKGVTI   | 103  | >PTEN-T167/RTRDKKGVAI   | 32   | 71   |
| >PTEN-T167/RTRDKKGVTI   | 120  | >PTEN-T167/RTRDKKGVAI   | 221  | 101  |
| >PTEN-T167/RTRDKKGVTI   | 5    | >PTEN-T167/RTRDKKGVAI   | 7    | 2    |
| >PTEN-T167/RTRDKKGVTI   | 100  | >PTEN-T167/RTRDKKGVAI   | 275  | 175  |
| >PTEN-T167I TIPSQRRYV   | 1464 | >PTEN-T167I IIPSQRRYV   | 301  | 1163 |
| >PTEN-T167I TIPSQRRYV   | 225  | >PTEN-T167I IIPSQRRYV   | 58   | 167  |
| >PTEN-T167I TIPSQRRY    | 437  | >PTEN-T167I IIPSQRRY    | 2748 | 2311 |
| >PTEN-T167I TIPSQRRYVYY | 290  | >PTEN-T167I IIPSQRRYVYY | 2031 | 1741 |
| >PTEN-T167I TIPSQRRYVYY | 238  | >PTEN-T167I IIPSQRRYVYY | 174  | 64   |



|                         |      |                         |      |      |
|-------------------------|------|-------------------------|------|------|
| >PTEN-T167I TIPSQRRY    | 641  | >PTEN-T167I IIPSQRRY    | 252  | 389  |
| >PTEN-T167I TIPSQRRYVY  | 597  | >PTEN-T167I IIPSQRRYVY  | 244  | 353  |
| >PTEN-T167I TIPSQRRYV   | 67   | >PTEN-T167I IIPSQRRYV   | 1094 | 1027 |
| >PTEN-T167I VTIPSQRRYV  | 563  | >PTEN-T167I VIIPSQRRYV  | 217  | 346  |
| >PTEN-T167I VTIPSQRRYV  | 249  | >PTEN-T167I VIIPSQRRYV  | 53   | 196  |
| >PTEN-T167I VTIPSQRRYV  | 286  | >PTEN-T167I VIIPSQRRYV  | 11   | 275  |
| >PTEN-T167I VTIPSQRRYV' | 284  | >PTEN-T167I VIIPSQRRYVY | 1071 | 787  |
| >PTEN-T167I VTIPSQRRY   | 26   | >PTEN-T167I VIIPSQRRY   | 145  | 119  |
| >PTEN-T167I VTIPSQRRYV' | 38   | >PTEN-T167I VIIPSQRRYVY | 209  | 171  |
| >PTEN-T167I VTIPSQRRY   | 59   | >PTEN-T167I VIIPSQRRY   | 127  | 68   |
| >PTEN-T167I VTIPSQRRYV' | 26   | >PTEN-T167I VIIPSQRRYVY | 46   | 20   |
| >PTEN-T167I VTIPSQRRY   | 41   | >PTEN-T167I VIIPSQRRY   | 80   | 39   |
| >PTEN-T167I VTIPSQRRYV' | 16   | >PTEN-T167I VIIPSQRRYVY | 27   | 11   |
| >PTEN-T167I VTIPSQRR    | 135  | >PTEN-T167I VIIPSQRR    | 463  | 328  |
| >PTEN-T167I VTIPSQRR    | 65   | >PTEN-T167I VIIPSQRR    | 342  | 277  |
| >PTEN-T167I VTIPSQRRYV  | 225  | >PTEN-T167I VIIPSQRRYV  | 1770 | 1545 |
| >PTEN-T167I VTIPSQRRY   | 399  | >PTEN-T167I VIIPSQRRY   | 307  | 92   |
| >PTEN-T167I VTIPSQRRYV' | 109  | >PTEN-T167I VIIPSQRRYVY | 101  | 8    |
| >PTEN-T167I VTIPSQRRYV' | 205  | >PTEN-T167I VIIPSQRRYVY | 450  | 245  |
| >PTEN-T167I VTIPSQRRY   | 3    | >PTEN-T167I VIIPSQRRY   | 21   | 18   |
| >PTEN-T167I VTIPSQRRYV  | 124  | >PTEN-T167I VIIPSQRRYV  | 6621 | 6497 |
| >PTEN-T167I VTIPSQRRYV' | 4    | >PTEN-T167I VIIPSQRRYVY | 100  | 96   |
| >PTEN-T167I VTIPSQRRY   | 81   | >PTEN-T167I VIIPSQRRY   | 1989 | 1908 |
| >PTEN-T167I VTIPSQRRYV' | 111  | >PTEN-T167I VIIPSQRRYVY | 2748 | 2637 |
| >PTEN-T167I VTIPSQRRY   | 122  | >PTEN-T167I VIIPSQRRY   | 3671 | 3549 |
| >PTEN-T167I VTIPSQRRYV' | 76   | >PTEN-T167I VIIPSQRRYVY | 1204 | 1128 |
| >PTEN-T167I VTIPSQRRY   | 37   | >PTEN-T167I VIIPSQRRY   | 1738 | 1701 |
| >PTEN-T167I VTIPSQRRYV' | 37   | >PTEN-T167I VIIPSQRRYVY | 1480 | 1443 |
| >PTEN-T167I VTIPSQRRY   | 1441 | >PTEN-T167I VIIPSQRRY   | 436  | 1005 |
| >PTEN-T167I VTIPSQRRYV' | 256  | >PTEN-T167I VIIPSQRRYVY | 94   | 162  |
| >PTEN-T167I GVTIPSQRRY  | 623  | >PTEN-T167I GVIIPSQRRY  | 224  | 399  |
| >PTEN-T167I GVTIPSQRRY  | 123  | >PTEN-T167I GVIIPSQRRY  | 172  | 49   |
| >PTEN-T167I GVTIPSQR    | 1062 | >PTEN-T167I GVIIPSQR    | 339  | 723  |
| >PTEN-T167I GVTIPSQRRY  | 5811 | >PTEN-T167I GVIIPSQRRY  | 323  | 5488 |
| >PTEN-T167I GVTIPSQRRY  | 765  | >PTEN-T167I GVIIPSQRRY  | 208  | 557  |
| >PTEN-T167I GVTIPSQR    | 457  | >PTEN-T167I GVIIPSQR    | 274  | 183  |
| >PTEN-T167I GVTIPSQR    | 210  | >PTEN-T167I GVIIPSQR    | 214  | 4    |
| >PTEN-T167I GVTIPSQRRY  | 172  | >PTEN-T167I GVIIPSQRRY  | 37   | 135  |
| >PTEN-T167I KGVTIPSQRR  | 155  | >PTEN-T167I KGVIIPSQRRY | 154  | 1    |
| >PTEN-T167I KGVTIPSQR   | 208  | >PTEN-T167I KGVIIPSQR   | 183  | 25   |
| >PTEN-T167I KGVTIPSQRR  | 202  | >PTEN-T167I KGVIIPSQRRY | 64   | 138  |
| >PTEN-T167I KGVTIPSQRR  | 227  | >PTEN-T167I KGVIIPSQRRY | 374  | 147  |
| >PTEN-T167I KGVTIPSQR   | 147  | >PTEN-T167I KGVIIPSQR   | 221  | 74   |

|                         |       |                          |       |       |
|-------------------------|-------|--------------------------|-------|-------|
| >PTEN-T167I KGV TIPSQRR | 120   | >PTEN-T167I KGV IIPSQRR  | 181   | 61    |
| >PTEN-T167I KKGVTIPSQR  | 609   | >PTEN-T167I KKGVIIPSQR   | 445   | 164   |
| >PTEN-T167I KKGVTIPSQR  | 511   | >PTEN-T167I KKGVIIPSQRf  | 353   | 158   |
| >PTEN-T167I DKKGV TIPSQ | 497   | >PTEN-T167I DKKGV IIPSQf | 339   | 158   |
| >PTEN-T167I RD KKGVTI   | 179   | >PTEN-T167I RD KKGVII    | 102   | 77    |
| >PTEN-T167I RTRD KKGVT  | 71    | >PTEN-T167I RTRD KKGVI   | 7     | 64    |
| >PTEN-T167I RTRD KKGVTI | 5     | >PTEN-T167I RTRD KKGVII  | 5     | 0     |
| >PTEN-T167I RTRD KKGVTI | 103   | >PTEN-T167I RTRD KKGVIIF | 28    | 75    |
| >PTEN-T167I RTRD KKGVTI | 120   | >PTEN-T167I RTRD KKGVII  | 853   | 733   |
| >PTEN-T167I RTRD KKGVT  | 4137  | >PTEN-T167I RTRD KKGVI   | 483   | 3654  |
| >PTEN-T167I RTRD KKGVT  | 896   | >PTEN-T167I RTRD KKGVI   | 10    | 886   |
| >PTEN-T167I RTRD KKGVTI | 5     | >PTEN-T167I RTRD KKGVII  | 9     | 4     |
| >PTEN-T167I RTRD KKGVT  | 620   | >PTEN-T167I RTRD KKGVI   | 57    | 563   |
| >PTEN-T167I RTRD KKGVTI | 100   | >PTEN-T167I RTRD KKGVII  | 85    | 15    |
| >PTEN-T167I RTRD KKGVT  | 25935 | >PTEN-T167I RTRD KKGVI   | 66    | 25869 |
| >PTEN-T167F TIPSQRRYV   | 225   | >PTEN-T167F PIPSQRRYV    | 1378  | 1153  |
| >PTEN-T167F TIPSQRRY    | 437   | >PTEN-T167F PIPSQRRY     | 2445  | 2008  |
| >PTEN-T167F TIPSQRRYVY  | 290   | >PTEN-T167F PIPSQRRYVY   | 1911  | 1621  |
| >PTEN-T167F TIPSQRRYVY  | 238   | >PTEN-T167F PIPSQRRYVY   | 750   | 512   |
| >PTEN-T167F TIPSQRRYV   | 67    | >PTEN-T167F PIPSQRRYV    | 8622  | 8555  |
| >PTEN-T167F VTIPSQRRYV  | 19858 | >PTEN-T167F VPIPSQRRYV   | 37    | 19821 |
| >PTEN-T167F VTIPSQRRYV  | 249   | >PTEN-T167F VPIPSQRRYV   | 13600 | 13351 |
| >PTEN-T167F VTIPSQRRYV  | 286   | >PTEN-T167F VPIPSQRRYV   | 16140 | 15854 |
| >PTEN-T167F VTIPSQRRYV  | 284   | >PTEN-T167F VPIPSQRRYV   | 20184 | 19900 |
| >PTEN-T167F VTIPSQRRY   | 26    | >PTEN-T167F VPIPSQRRY    | 3697  | 3671  |
| >PTEN-T167F VTIPSQRRYV  | 38    | >PTEN-T167F VPIPSQRRYV   | 3774  | 3736  |
| >PTEN-T167F VTIPSQRRY   | 59    | >PTEN-T167F VPIPSQRRY    | 2785  | 2726  |
| >PTEN-T167F VTIPSQRRYV  | 26    | >PTEN-T167F VPIPSQRRYV   | 981   | 955   |
| >PTEN-T167F VTIPSQRRY   | 41    | >PTEN-T167F VPIPSQRRY    | 1296  | 1255  |
| >PTEN-T167F VTIPSQRRYV  | 16    | >PTEN-T167F VPIPSQRRYV   | 306   | 290   |
| >PTEN-T167F VTIPSQRR    | 135   | >PTEN-T167F VPIPSQRR     | 8494  | 8359  |
| >PTEN-T167F VTIPSQRR    | 65    | >PTEN-T167F VPIPSQRR     | 4214  | 4149  |
| >PTEN-T167F VTIPSQRRYV  | 225   | >PTEN-T167F VPIPSQRRYV   | 20091 | 19866 |
| >PTEN-T167F VTIPSQRRY   | 399   | >PTEN-T167F VPIPSQRRY    | 10814 | 10415 |
| >PTEN-T167F VTIPSQRRYV  | 109   | >PTEN-T167F VPIPSQRRYV   | 4997  | 4888  |
| >PTEN-T167F VTIPSQRRYV  | 205   | >PTEN-T167F VPIPSQRRYV   | 785   | 580   |
| >PTEN-T167F VTIPSQRRY   | 3     | >PTEN-T167F VPIPSQRRY    | 722   | 719   |
| >PTEN-T167F VTIPSQRRYV  | 124   | >PTEN-T167F VPIPSQRRYV   | 21674 | 21550 |
| >PTEN-T167F VTIPSQRRYV  | 4     | >PTEN-T167F VPIPSQRRYV   | 3581  | 3577  |
| >PTEN-T167F VTIPSQRRY   | 7262  | >PTEN-T167F VPIPSQRRY    | 93    | 7169  |
| >PTEN-T167F VTIPSQRRYV  | 2122  | >PTEN-T167F VPIPSQRRYV   | 25    | 2097  |
| >PTEN-T167F VTIPSQRRYV  | 17641 | >PTEN-T167F VPIPSQRRYV   | 120   | 17521 |
| >PTEN-T167F VTIPSQRRYV  | 19953 | >PTEN-T167F VPIPSQRRYV   | 180   | 19773 |

|                        |      |                        |       |       |
|------------------------|------|------------------------|-------|-------|
| >PTEN-T167FVTIPSQRRY   | 81   | >PTEN-T167FVPIPSQRRY   | 14442 | 14361 |
| >PTEN-T167FVTIPSQRRYV' | 111  | >PTEN-T167FVPIPSQRRYV' | 15983 | 15872 |
| >PTEN-T167FVTIPSQRRY   | 122  | >PTEN-T167FVPIPSQRRY   | 19030 | 18908 |
| >PTEN-T167FVTIPSQRRYV' | 76   | >PTEN-T167FVPIPSQRRYV' | 15377 | 15301 |
| >PTEN-T167FVTIPSQRRY   | 37   | >PTEN-T167FVPIPSQRRY   | 3081  | 3044  |
| >PTEN-T167FVTIPSQRRYV' | 37   | >PTEN-T167FVPIPSQRRYV' | 2721  | 2684  |
| >PTEN-T167FVTIPSQRRY   | 1441 | >PTEN-T167FVPIPSQRRY   | 25    | 1416  |
| >PTEN-T167FVTIPSQRRYV' | 256  | >PTEN-T167FVPIPSQRRYV' | 10    | 246   |
| >PTEN-T167FGVTIPSQRRY  | 623  | >PTEN-T167FGVPIPSQRRY  | 381   | 242   |
| >PTEN-T167FGVTIPSQRRY  | 123  | >PTEN-T167FGVPIPSQRRY  | 232   | 109   |
| >PTEN-T167FGVTIPSQR    | 457  | >PTEN-T167FGVPIPSQR    | 2171  | 1714  |
| >PTEN-T167FGVTIPSQR    | 210  | >PTEN-T167FGVPIPSQR    | 1305  | 1095  |
| >PTEN-T167FGVTIPSQRRY  | 172  | >PTEN-T167FGVPIPSQRRY  | 2605  | 2433  |
| >PTEN-T167FKGVTIPSQRR  | 155  | >PTEN-T167FKGVPIPSQRR  | 139   | 16    |
| >PTEN-T167FKGVTIPSQR   | 208  | >PTEN-T167FKGVPIPSQR   | 140   | 68    |
| >PTEN-T167FKGVTIPSQRR  | 202  | >PTEN-T167FKGVPIPSQRR  | 21    | 181   |
| >PTEN-T167FKGVTIPSQRR  | 1307 | >PTEN-T167FKGVPIPSQRR  | 340   | 967   |
| >PTEN-T167FKGVTIPSQRR  | 227  | >PTEN-T167FKGVPIPSQRR  | 184   | 43    |
| >PTEN-T167FKGVTIPSQR   | 147  | >PTEN-T167FKGVPIPSQR   | 150   | 3     |
| >PTEN-T167FKGVTIPSQRR  | 120  | >PTEN-T167FKGVPIPSQRR  | 131   | 11    |
| >PTEN-T167FDKKGVTIPSQ  | 497  | >PTEN-T167FDKKGVPIPSQ  | 558   | 61    |
| >PTEN-T167FRDKKGVTI    | 179  | >PTEN-T167FRDKKGVPI    | 31    | 148   |
| >PTEN-T167FRTRDKKGVT   | 71   | >PTEN-T167FRTRDKKGVP   | 108   | 37    |
| >PTEN-T167FRTRDKKGVTI  | 5    | >PTEN-T167FRTRDKKGVPI  | 4     | 1     |
| >PTEN-T167FRTRDKKGVTI  | 103  | >PTEN-T167FRTRDKKGVPI  | 25    | 78    |
| >PTEN-T167FRTRDKKGVTI  | 120  | >PTEN-T167FRTRDKKGVPI  | 254   | 134   |
| >PTEN-T167FRTRDKKGVTI  | 5    | >PTEN-T167FRTRDKKGVPI  | 5     | 0     |
| >PTEN-T167FRTRDKKGVTI  | 100  | >PTEN-T167FRTRDKKGVPI  | 267   | 167   |
| >PTEN-T167FVRTRDKKGVF  | 595  | >PTEN-T167FVRTRDKKGVF  | 379   | 216   |
| >PTEN-T167SIPSQRRYV    | 1464 | >PTEN-T167SIPSQRRYV    | 243   | 1221  |
| >PTEN-T167SIPSQRRYV    | 225  | >PTEN-T167SIPSQRRYV    | 56    | 169   |
| >PTEN-T167SIPSQRRY     | 437  | >PTEN-T167SIPSQRRY     | 474   | 37    |
| >PTEN-T167SIPSQRRYVY\  | 290  | >PTEN-T167SIPSQRRYVY\  | 318   | 28    |
| >PTEN-T167SIPSQRRYVY\  | 238  | >PTEN-T167SIPSQRRYVY\  | 242   | 4     |
| >PTEN-T167SIPSQRRY     | 641  | >PTEN-T167SIPSQRRY     | 352   | 289   |
| >PTEN-T167SIPSQRRYVY\  | 597  | >PTEN-T167SIPSQRRYVY\  | 331   | 266   |
| >PTEN-T167SIPSQRRYV    | 67   | >PTEN-T167SIPSQRRYV    | 261   | 194   |
| >PTEN-T167SVTIPSQRRYV  | 249  | >PTEN-T167SVSIPSQRRYV  | 4305  | 4056  |
| >PTEN-T167SVTIPSQRRYV  | 286  | >PTEN-T167SVSIPSQRRYV  | 7699  | 7413  |
| >PTEN-T167SVTIPSQRRYV' | 284  | >PTEN-T167SVSIPSQRRYV' | 943   | 659   |
| >PTEN-T167SVTIPSQRRY   | 26   | >PTEN-T167SVSIPSQRRY   | 218   | 192   |
| >PTEN-T167SVTIPSQRRYV' | 38   | >PTEN-T167SVSIPSQRRYV' | 281   | 243   |
| >PTEN-T167SVTIPSQRRY   | 59   | >PTEN-T167SVSIPSQRRY   | 312   | 253   |

|                         |      |                         |      |     |
|-------------------------|------|-------------------------|------|-----|
| >PTEN-T167S VTIPSQRRYV' | 26   | >PTEN-T167S VSIPSQRRYV' | 96   | 70  |
| >PTEN-T167S VTIPSQRRY   | 41   | >PTEN-T167S VSIPSQRRY   | 44   | 3   |
| >PTEN-T167S VTIPSQRRYV' | 16   | >PTEN-T167S VSIPSQRRYV' | 17   | 1   |
| >PTEN-T167S VTIPSQRR    | 135  | >PTEN-T167S VSIPSQRR    | 221  | 86  |
| >PTEN-T167S VTIPSQRR    | 65   | >PTEN-T167S VSIPSQRR    | 244  | 179 |
| >PTEN-T167S VTIPSQRRYV  | 225  | >PTEN-T167S VSIPSQRRYV  | 1067 | 842 |
| >PTEN-T167S VTIPSQRRY   | 399  | >PTEN-T167S VSIPSQRRY   | 325  | 74  |
| >PTEN-T167S VTIPSQRRYV' | 109  | >PTEN-T167S VSIPSQRRYV' | 99   | 10  |
| >PTEN-T167S VTIPSQRRY   | 706  | >PTEN-T167S VSIPSQRRY   | 186  | 520 |
| >PTEN-T167S VTIPSQRRYV' | 205  | >PTEN-T167S VSIPSQRRYV' | 61   | 144 |
| >PTEN-T167S VTIPSQRRY   | 3    | >PTEN-T167S VSIPSQRRY   | 3    | 0   |
| >PTEN-T167S VTIPSQRRYV  | 124  | >PTEN-T167S VSIPSQRRYV  | 171  | 47  |
| >PTEN-T167S VTIPSQRRYV' | 4    | >PTEN-T167S VSIPSQRRYV' | 4    | 0   |
| >PTEN-T167S VTIPSQRRY   | 81   | >PTEN-T167S VSIPSQRRY   | 77   | 4   |
| >PTEN-T167S VTIPSQRRYV' | 111  | >PTEN-T167S VSIPSQRRYV' | 103  | 8   |
| >PTEN-T167S VTIPSQRRY   | 122  | >PTEN-T167S VSIPSQRRY   | 53   | 69  |
| >PTEN-T167S VTIPSQRRYV' | 76   | >PTEN-T167S VSIPSQRRYV' | 40   | 36  |
| >PTEN-T167S VTIPSQRRY   | 37   | >PTEN-T167S VSIPSQRRY   | 107  | 70  |
| >PTEN-T167S VTIPSQRRYV' | 37   | >PTEN-T167S VSIPSQRRYV' | 107  | 70  |
| >PTEN-T167S VTIPSQRRYV' | 256  | >PTEN-T167S VSIPSQRRYV' | 590  | 334 |
| >PTEN-T167S GVTIPSQRRY  | 623  | >PTEN-T167S GVSIPSQRRY' | 451  | 172 |
| >PTEN-T167S GVTIPSQRRY  | 123  | >PTEN-T167S GVSIPSQRRY' | 172  | 49  |
| >PTEN-T167S GVTIPSQR    | 1062 | >PTEN-T167S GVSIPSQR    | 320  | 742 |
| >PTEN-T167S GVTIPSQRRY  | 765  | >PTEN-T167S GVSIPSQRRY  | 222  | 543 |
| >PTEN-T167S GVTIPSQR    | 457  | >PTEN-T167S GVSIPSQR    | 397  | 60  |
| >PTEN-T167S GVTIPSQR    | 210  | >PTEN-T167S GVSIPSQR    | 242  | 32  |
| >PTEN-T167S GVTIPSQRRY  | 172  | >PTEN-T167S GVSIPSQRRY  | 100  | 72  |
| >PTEN-T167S GVTIPSQRRY  | 553  | >PTEN-T167S GVSIPSQRRY  | 383  | 170 |
| >PTEN-T167S KGV TIPSQRR | 155  | >PTEN-T167S KGVSIPSQRR' | 85   | 70  |
| >PTEN-T167S KGV TIPSQR  | 208  | >PTEN-T167S KGVSIPSQR   | 101  | 107 |
| >PTEN-T167S KGV TIPSQRR | 202  | >PTEN-T167S KGVSIPSQRR' | 137  | 65  |
| >PTEN-T167S KGV TIPSQRR | 227  | >PTEN-T167S KGVSIPSQRR' | 98   | 129 |
| >PTEN-T167S KGV TIPSQR  | 147  | >PTEN-T167S KGVSIPSQR   | 194  | 47  |
| >PTEN-T167S KGV TIPSQRR | 120  | >PTEN-T167S KGVSIPSQRR  | 160  | 40  |
| >PTEN-T167S DKKGVTIPSQ  | 497  | >PTEN-T167S DKKGVSIPSQ  | 536  | 39  |
| >PTEN-T167S RDKKGVTI    | 179  | >PTEN-T167S RDKKGVSI    | 227  | 48  |
| >PTEN-T167S RTRD KKGVT  | 71   | >PTEN-T167S RTRD KKGVS  | 34   | 37  |
| >PTEN-T167S RTRD KKGVTI | 5    | >PTEN-T167S RTRD KKGVSI | 5    | 0   |
| >PTEN-T167S RTRD KKGVTI | 103  | >PTEN-T167S RTRD KKGVSI | 50   | 53  |
| >PTEN-T167S RTRD KKGVTI | 120  | >PTEN-T167S RTRD KKGVSI | 222  | 102 |
| >PTEN-T167S RTRD KKGVTI | 5    | >PTEN-T167S RTRD KKGVSI | 6    | 1   |
| >PTEN-T167S RTRD KKGVTI | 100  | >PTEN-T167S RTRD KKGVSI | 91   | 9   |
| >PTEN-T167S RTRD KKGVTI | 1410 | >PTEN-T167S RTRD KKGVSI | 457  | 953 |

|                         |       |                         |       |       |
|-------------------------|-------|-------------------------|-------|-------|
| >PTEN-T26P- TYIYPNII    | 422   | >PTEN-T26P- PYIYPNII    | 5875  | 5453  |
| >PTEN-T26P- TYIYPNII    | 64    | >PTEN-T26P- PYIYPNII    | 162   | 98    |
| >PTEN-T26P- TYIYPNII    | 128   | >PTEN-T26P- PYIYPNII    | 392   | 264   |
| >PTEN-T26P- TYIYPNII    | 64    | >PTEN-T26P- PYIYPNII    | 483   | 419   |
| >PTEN-T26P- TYIYPNIIAM  | 317   | >PTEN-T26P- PYIYPNIIAM  | 1806  | 1489  |
| >PTEN-T26P- TYIYPNIIAM  | 36    | >PTEN-T26P- PYIYPNIIAM  | 168   | 132   |
| >PTEN-T26P- LTYIYPNI    | 4     | >PTEN-T26P- LPYIYPNI    | 62    | 58    |
| >PTEN-T26P- LTYIYPNII   | 234   | >PTEN-T26P- LPYIYPNII   | 2861  | 2627  |
| >PTEN-T26P- LTYIYPNIIAM | 69    | >PTEN-T26P- LPYIYPNIIAM | 1029  | 960   |
| >PTEN-T26P- LTYIYPNII   | 435   | >PTEN-T26P- LPYIYPNII   | 775   | 340   |
| >PTEN-T26P- LTYIYPNI    | 18501 | >PTEN-T26P- LPYIYPNI    | 87    | 18414 |
| >PTEN-T26P- LTYIYPNIIAM | 25935 | >PTEN-T26P- LPYIYPNIIAM | 139   | 25796 |
| >PTEN-T26P- LTYIYPNI    | 309   | >PTEN-T26P- LPYIYPNI    | 15770 | 15461 |
| >PTEN-T26P- LTYIYPNII   | 431   | >PTEN-T26P- LPYIYPNII   | 15894 | 15463 |
| >PTEN-T26P- LTYIYPNIIA  | 368   | >PTEN-T26P- LPYIYPNIIA  | 9864  | 9496  |
| >PTEN-T26P- LTYIYPNI    | 86    | >PTEN-T26P- LPYIYPNI    | 10417 | 10331 |
| >PTEN-T26P- LTYIYPNIIAM | 239   | >PTEN-T26P- LPYIYPNIIAM | 10276 | 10037 |
| >PTEN-T26P- LTYIYPNIIAM | 320   | >PTEN-T26P- LPYIYPNIIAM | 15979 | 15659 |
| >PTEN-T26P- LTYIYPNIIA  | 118   | >PTEN-T26P- LPYIYPNIIA  | 19341 | 19223 |
| >PTEN-T26P- LTYIYPNI    | 65    | >PTEN-T26P- LPYIYPNI    | 1129  | 1064  |
| >PTEN-T26P- LTYIYPNIIAM | 326   | >PTEN-T26P- LPYIYPNIIAM | 2566  | 2240  |
| >PTEN-T26P- LTYIYPNIIAM | 10059 | >PTEN-T26P- LPYIYPNIIAM | 22    | 10037 |
| >PTEN-T26P- LTYIYPNIIAM | 368   | >PTEN-T26P- LPYIYPNIIAM | 9895  | 9527  |
| >PTEN-T26P- LTYIYPNIIAM | 98    | >PTEN-T26P- LPYIYPNIIAM | 411   | 313   |
| >PTEN-T26P- LTYIYPNI    | 13    | >PTEN-T26P- LPYIYPNI    | 14972 | 14959 |
| >PTEN-T26P- LTYIYPNII   | 33    | >PTEN-T26P- LPYIYPNII   | 19345 | 19312 |
| >PTEN-T26P- LTYIYPNIIAM | 5     | >PTEN-T26P- LPYIYPNIIAM | 7454  | 7449  |
| >PTEN-T26P- LTYIYPNIIAM | 134   | >PTEN-T26P- LPYIYPNIIAM | 8     | 126   |
| >PTEN-T26P- LTYIYPNIIAM | 7640  | >PTEN-T26P- LPYIYPNIIAM | 417   | 7223  |
| >PTEN-T26P- LTYIYPNI    | 4317  | >PTEN-T26P- LPYIYPNI    | 21    | 4296  |
| >PTEN-T26P- LTYIYPNII   | 4167  | >PTEN-T26P- LPYIYPNII   | 21    | 4146  |
| >PTEN-T26P- LTYIYPNIIAM | 15115 | >PTEN-T26P- LPYIYPNIIAM | 117   | 14998 |
| >PTEN-T26P- LTYIYPNI    | 7125  | >PTEN-T26P- LPYIYPNI    | 41    | 7084  |
| >PTEN-T26P- LTYIYPNII   | 11696 | >PTEN-T26P- LPYIYPNII   | 49    | 11647 |
| >PTEN-T26P- LTYIYPNIIAM | 13092 | >PTEN-T26P- LPYIYPNIIAM | 102   | 12990 |
| >PTEN-T26P- LTYIYPNI    | 15475 | >PTEN-T26P- LPYIYPNI    | 24    | 15451 |
| >PTEN-T26P- LTYIYPNII   | 9384  | >PTEN-T26P- LPYIYPNII   | 13    | 9371  |
| >PTEN-T26P- LTYIYPNIIA  | 2553  | >PTEN-T26P- LPYIYPNIIA  | 11    | 2542  |
| >PTEN-T26P- LTYIYPNIIAM | 21610 | >PTEN-T26P- LPYIYPNIIAM | 46    | 21564 |
| >PTEN-T26P- LTYIYPNI    | 469   | >PTEN-T26P- LPYIYPNI    | 20770 | 20301 |
| >PTEN-T26P- LTYIYPNII   | 167   | >PTEN-T26P- LPYIYPNII   | 9957  | 9790  |
| >PTEN-T26P- LTYIYPNIIAM | 111   | >PTEN-T26P- LPYIYPNIIAM | 7480  | 7369  |
| >PTEN-T26P- LTYIYPNII   | 126   | >PTEN-T26P- LPYIYPNII   | 8258  | 8132  |

|                         |       |                         |       |       |
|-------------------------|-------|-------------------------|-------|-------|
| >PTEN-T26P- LTYIYPNIIA  | 136   | >PTEN-T26P- LPYIYPNIIA  | 18335 | 18199 |
| >PTEN-T26P- LTYIYPNIIAM | 74    | >PTEN-T26P- LPYIYPNIIAM | 4629  | 4555  |
| >PTEN-T26P- LTYIYPNIIAM | 14088 | >PTEN-T26P- LPYIYPNIIAM | 337   | 13751 |
| >PTEN-T26P- LTYIYPNI    | 9     | >PTEN-T26P- LPYIYPNI    | 253   | 244   |
| >PTEN-T26P- LTYIYPNII   | 12    | >PTEN-T26P- LPYIYPNII   | 465   | 453   |
| >PTEN-T26P- LTYIYPNIIAM | 147   | >PTEN-T26P- LPYIYPNIIAM | 8328  | 8181  |
| >PTEN-T26P- YQEDGFDLDI  | 27    | >PTEN-T26P- YQEDGFDLDI  | 279   | 252   |
| >PTEN-T26P- DLTYIYPNI   | 384   | >PTEN-T26P- DLPYIYPNI   | 1340  | 956   |
| >PTEN-T26P- LDLYIYPNI   | 87    | >PTEN-T26P- LDLPYIYPNI  | 126   | 39    |
| >PTEN-T26P- LDLYIYPNII  | 90    | >PTEN-T26P- LDLPYIYPNII | 127   | 37    |
| >PTEN-T26P- LDLYIYPNI   | 482   | >PTEN-T26P- LDLPYIYPNI  | 894   | 412   |
| >PTEN-T26P- LDLYIYPNII  | 52    | >PTEN-T26P- LDLPYIYPNII | 195   | 143   |
| >PTEN-T26P- LDLYIYPNI   | 72    | >PTEN-T26P- LDLPYIYPNI  | 55    | 17    |
| >PTEN-T26P- LDLYIYPNII  | 27    | >PTEN-T26P- LDLPYIYPNII | 21    | 6     |
| >PTEN-T26P- DLDLYIY     | 101   | >PTEN-T26P- DLDLPYIY    | 382   | 281   |
| >PTEN-T26P- DLDLYIYPNI  | 294   | >PTEN-T26P- DLDLPYIYPNI | 620   | 326   |
| >PTEN-T26P- DLDLYIYPNI  | 480   | >PTEN-T26P- DLDLPYIYPNI | 819   | 339   |
| >PTEN-T26P- DLDLYIYPNI  | 168   | >PTEN-T26P- DLDLPYIYPNI | 102   | 66    |
| >PTEN-T26P- DLDLYIY     | 217   | >PTEN-T26P- DLDLPYIY    | 181   | 36    |
| >PTEN-T26P- FDLDLTYI    | 142   | >PTEN-T26P- FDLDLPYI    | 244   | 102   |
| >PTEN-T26P- FDLDLTYI    | 815   | >PTEN-T26P- FDLDLPYI    | 358   | 457   |
| >PTEN-T26P- FDLDLTYIY   | 21    | >PTEN-T26P- FDLDLPYIY   | 21    | 0     |
| >PTEN-T26P- FDLDLTYIY   | 147   | >PTEN-T26P- FDLDLPYIY   | 377   | 230   |
| >PTEN-T26P- FDLDLTYIY   | 123   | >PTEN-T26P- FDLDLPYIY   | 370   | 247   |
| >PTEN-T26P- FDLDLTYI    | 22    | >PTEN-T26P- FDLDLPYI    | 32    | 10    |
| >PTEN-T26P- FDLDLTYI    | 53    | >PTEN-T26P- FDLDLPYI    | 89    | 36    |
| >PTEN-T26P- GFDLDLTY    | 62    | >PTEN-T26P- GFDLDLPY    | 46    | 16    |
| >PTEN-T26P- GFDLDLTYIY  | 64    | >PTEN-T26P- GFDLDLPYIY  | 73    | 9     |
| >PTEN-T26P- GFDLDLTYIY  | 369   | >PTEN-T26P- GFDLDLPYIY  | 354   | 15    |
| >PTEN-T26P- GFDLDLTY    | 126   | >PTEN-T26P- GFDLDLPY    | 329   | 203   |
| >PTEN-T26P- DGFDLDLTY   | 122   | >PTEN-T26P- DGFDLDLPY   | 90    | 32    |
| >PTEN-T26P- DGFDLDLTYI\ | 160   | >PTEN-T26P- DGFDLDLPYI\ | 152   | 8     |
| >PTEN-T26P- DGFDLDLTYI\ | 458   | >PTEN-T26P- DGFDLDLPYI\ | 743   | 285   |
| >PTEN-T26P- DGFDLDLTY   | 300   | >PTEN-T26P- DGFDLDLPY   | 304   | 4     |
| >PTEN-T26P- DGFDLDLTYI\ | 299   | >PTEN-T26P- DGFDLDLPYI\ | 473   | 174   |
| >PTEN-T26P- DGFDLDLTY   | 37    | >PTEN-T26P- DGFDLDLPY   | 26    | 11    |
| >PTEN-T26P- DGFDLDLTYI\ | 76    | >PTEN-T26P- DGFDLDLPYI\ | 120   | 44    |
| >PTEN-T26P- QEDGFDLDLT  | 44    | >PTEN-T26P- QEDGFDLDLF  | 30    | 14    |
| >PTEN-T26P- QEDGFDLDLT  | 114   | >PTEN-T26P- QEDGFDLDLF  | 157   | 43    |
| >PTEN-T277I NTFIPGPE    | 323   | >PTEN-T277I NIFFIPGPE   | 2158  | 1835  |
| >PTEN-T277I NTFIPGPE    | 412   | >PTEN-T277I NIFFIPGPE   | 3836  | 3424  |
| >PTEN-T277I NTFIPGPEET  | 17    | >PTEN-T277I NIFFIPGPEET | 110   | 93    |
| >PTEN-T277I KDKMFHFW\   | 5124  | >PTEN-T277I KDKMFHFW\   | 449   | 4675  |

|                        |      |                        |     |      |
|------------------------|------|------------------------|-----|------|
| >PTEN-T277I KDKMFHFW\  | 395  | >PTEN-T277I KDKMFHFW\  | 207 | 188  |
| >PTEN-T277I KDKMFHFW\  | 5221 | >PTEN-T277I KDKMFHFW\  | 156 | 5065 |
| >PTEN-T277I FWVNTFFI   | 63   | >PTEN-T277I FWVNIFFI   | 21  | 42   |
| >PTEN-T277I FWVNTFFI   | 12   | >PTEN-T277I FWVNIFFI   | 10  | 2    |
| >PTEN-T277I FWVNTFFI   | 35   | >PTEN-T277I FWVNIFFI   | 36  | 1    |
| >PTEN-T277I FWVNTFFI   | 126  | >PTEN-T277I FWVNIFFI   | 115 | 11   |
| >PTEN-T277I FWVNTFFI   | 17   | >PTEN-T277I FWVNIFFI   | 18  | 1    |
| >PTEN-T277I FWVNTFFI   | 39   | >PTEN-T277I FWVNIFFI   | 30  | 9    |
| >PTEN-T277I FWVNTFFIP  | 203  | >PTEN-T277I FWVNIFFIP  | 259 | 56   |
| >PTEN-T277I FWVNTFFIPG | 239  | >PTEN-T277I FWVNIFFIPG | 288 | 49   |
| >PTEN-T277I HFWVNTFFI  | 139  | >PTEN-T277I HFWVNIFFI  | 387 | 248  |
| >PTEN-T277I HFWVNTFF   | 32   | >PTEN-T277I HFWVNIFF   | 31  | 1    |
| >PTEN-T277I HFWVNTFFI  | 40   | >PTEN-T277I HFWVNIFFI  | 54  | 14   |
| >PTEN-T277I HFWVNTFFI  | 202  | >PTEN-T277I HFWVNIFFI  | 267 | 65   |
| >PTEN-T277I HFWVNTFF   | 17   | >PTEN-T277I HFWVNIFF   | 12  | 5    |
| >PTEN-T277I HFWVNTFFI  | 13   | >PTEN-T277I HFWVNIFFI  | 22  | 9    |
| >PTEN-T277I HFWVNTFF   | 107  | >PTEN-T277I HFWVNIFF   | 112 | 5    |
| >PTEN-T277I HFWVNTFFI  | 281  | >PTEN-T277I HFWVNIFFI  | 714 | 433  |
| >PTEN-T277I HFWVNTFFI  | 289  | >PTEN-T277I HFWVNIFFI  | 452 | 163  |
| >PTEN-T277I HFWVNTFFI  | 358  | >PTEN-T277I HFWVNIFFI  | 211 | 147  |
| >PTEN-T277I HFWVNTFFI  | 920  | >PTEN-T277I HFWVNIFFI  | 492 | 428  |
| >PTEN-T277I HFWVNTFF   | 473  | >PTEN-T277I HFWVNIFF   | 715 | 242  |
| >PTEN-T277I HFWVNTFF   | 271  | >PTEN-T277I HFWVNIFF   | 277 | 6    |
| >PTEN-T277I HFWVNTFFI  | 520  | >PTEN-T277I HFWVNIFFI  | 245 | 275  |
| >PTEN-T277I FHFVWNTFFI | 25   | >PTEN-T277I FHFVWNIFFI | 35  | 10   |
| >PTEN-T277I FHFVWNTFFI | 545  | >PTEN-T277I FHFVWNIFFI | 429 | 116  |
| >PTEN-T277I FHFVWNTFFI | 126  | >PTEN-T277I FHFVWNIFFI | 51  | 75   |
| >PTEN-T277I FHFVWNTFFI | 378  | >PTEN-T277I FHFVWNIFFI | 243 | 135  |
| >PTEN-T277I FHFVWNTF   | 456  | >PTEN-T277I FHFVWNIFF  | 927 | 471  |
| >PTEN-T277I FHFVWNTF   | 93   | >PTEN-T277I FHFVWNIFF  | 259 | 166  |
| >PTEN-T277I FHFVWNTFF  | 326  | >PTEN-T277I FHFVWNIFF  | 135 | 191  |
| >PTEN-T277I FHFVWNTF   | 7    | >PTEN-T277I FHFVWNIFF  | 8   | 1    |
| >PTEN-T277I FHFVWNTFF  | 10   | >PTEN-T277I FHFVWNIFF  | 16  | 6    |
| >PTEN-T277I FHFVWNTF   | 483  | >PTEN-T277I FHFVWNIFF  | 701 | 218  |
| >PTEN-T277I FHFVWNTF   | 229  | >PTEN-T277I FHFVWNIFF  | 562 | 333  |
| >PTEN-T277I FHFVWNTF   | 32   | >PTEN-T277I FHFVWNIFF  | 31  | 1    |
| >PTEN-T277I FHFVWNTFF  | 214  | >PTEN-T277I FHFVWNIFF  | 72  | 142  |
| >PTEN-T277I FHFVWNTFFI | 50   | >PTEN-T277I FHFVWNIFFI | 47  | 3    |
| >PTEN-T277I FHFVWNTFF  | 128  | >PTEN-T277I FHFVWNIFF  | 900 | 772  |
| >PTEN-T277I FHFVWNTFFI | 351  | >PTEN-T277I FHFVWNIFFI | 245 | 106  |
| >PTEN-T277I FHFVWNTF   | 29   | >PTEN-T277I FHFVWNIFF  | 30  | 1    |
| >PTEN-T277I FHFVWNTFF  | 21   | >PTEN-T277I FHFVWNIFF  | 26  | 5    |
| >PTEN-T277I MFHFVWNTF  | 112  | >PTEN-T277I MFHFVWNIFF | 135 | 23   |

|                       |       |                       |      |       |
|-----------------------|-------|-----------------------|------|-------|
| >PTEN-T277I MFHFWVNTF | 462   | >PTEN-T277I MFHFWVNIF | 310  | 152   |
| >PTEN-T277I MFHFWVNT  | 9217  | >PTEN-T277I MFHFWVNI  | 57   | 9160  |
| >PTEN-T277I MFHFWVNTF | 17    | >PTEN-T277I MFHFWVNIF | 34   | 17    |
| >PTEN-T277I MFHFWVNTF | 391   | >PTEN-T277I MFHFWVNIF | 781  | 390   |
| >PTEN-T277I MFHFWVNTF | 42    | >PTEN-T277I MFHFWVNIF | 53   | 11    |
| >PTEN-T277I MFHFWVNT  | 17541 | >PTEN-T277I MFHFWVNI  | 472  | 17069 |
| >PTEN-T277I MFHFWVNTF | 48    | >PTEN-T277I MFHFWVNIF | 156  | 108   |
| >PTEN-T277I MFHFWVNTF | 369   | >PTEN-T277I MFHFWVNIF | 692  | 323   |
| >PTEN-T277I MFHFWVNTF | 106   | >PTEN-T277I MFHFWVNIF | 156  | 50    |
| >PTEN-T277I MFHFWVNT  | 6887  | >PTEN-T277I MFHFWVNI  | 78   | 6809  |
| >PTEN-T277I MFHFWVNTF | 8     | >PTEN-T277I MFHFWVNIF | 14   | 6     |
| >PTEN-T277I MFHFWVNTF | 13    | >PTEN-T277I MFHFWVNIF | 10   | 3     |
| >PTEN-T277I MFHFWVNTF | 15    | >PTEN-T277I MFHFWVNIF | 21   | 6     |
| >PTEN-T277I MFHFWVNTF | 152   | >PTEN-T277I MFHFWVNIF | 257  | 105   |
| >PTEN-T277I MFHFWVNTF | 163   | >PTEN-T277I MFHFWVNIF | 187  | 24    |
| >PTEN-T277I MFHFWVNT  | 1803  | >PTEN-T277I MFHFWVNI  | 82   | 1721  |
| >PTEN-T277I MFHFWVNTF | 24    | >PTEN-T277I MFHFWVNIF | 32   | 8     |
| >PTEN-T277I MFHFWVNTF | 198   | >PTEN-T277I MFHFWVNIF | 1960 | 1762  |
| >PTEN-T277I MFHFWVNTF | 256   | >PTEN-T277I MFHFWVNIF | 277  | 21    |
| >PTEN-T277I MFHFWVNTF | 363   | >PTEN-T277I MFHFWVNIF | 1263 | 900   |
| >PTEN-T277I MFHFWVNTF | 303   | >PTEN-T277I MFHFWVNIF | 361  | 58    |
| >PTEN-T277I MFHFWVNTF | 148   | >PTEN-T277I MFHFWVNIF | 505  | 357   |
| >PTEN-T277I MFHFWVNTF | 480   | >PTEN-T277I MFHFWVNIF | 756  | 276   |
| >PTEN-T277I MFHFWVNTF | 210   | >PTEN-T277I MFHFWVNIF | 362  | 152   |
| >PTEN-T277I MFHFWVNTF | 494   | >PTEN-T277I MFHFWVNIF | 955  | 461   |
| >PTEN-T277I MFHFWVNT  | 492   | >PTEN-T277I MFHFWVNI  | 164  | 328   |
| >PTEN-T277I MFHFWVNTF | 80    | >PTEN-T277I MFHFWVNIF | 123  | 43    |
| >PTEN-T277I MFHFWVNTF | 56    | >PTEN-T277I MFHFWVNIF | 44   | 12    |
| >PTEN-T277I KMFHFWVNT | 56    | >PTEN-T277I KMFHFWVNI | 13   | 43    |
| >PTEN-T277I KMFHFWVNT | 159   | >PTEN-T277I KMFHFWVNI | 152  | 7     |
| >PTEN-T277I KMFHFWVNT | 35    | >PTEN-T277I KMFHFWVNI | 10   | 25    |
| >PTEN-T277I KMFHFWVNT | 219   | >PTEN-T277I KMFHFWVNI | 142  | 77    |
| >PTEN-T277I KMFHFWVNT | 65    | >PTEN-T277I KMFHFWVNI | 10   | 55    |
| >PTEN-T277I KMFHFWVNT | 72    | >PTEN-T277I KMFHFWVNI | 149  | 77    |
| >PTEN-T277I KMFHFWVNT | 183   | >PTEN-T277I KMFHFWVNI | 17   | 166   |
| >PTEN-T277I KMFHFWVNT | 107   | >PTEN-T277I KMFHFWVNI | 22   | 85    |
| >PTEN-T277I KMFHFWVNT | 110   | >PTEN-T277I KMFHFWVNI | 124  | 14    |
| >PTEN-T277I KMFHFWVNT | 22    | >PTEN-T277I KMFHFWVNI | 3    | 19    |
| >PTEN-T277I KMFHFWVNT | 29    | >PTEN-T277I KMFHFWVNI | 196  | 167   |
| >PTEN-T277I KMFHFWVNT | 45    | >PTEN-T277I KMFHFWVNI | 29   | 16    |
| >PTEN-T277I KMFHFWVNT | 996   | >PTEN-T277I KMFHFWVNI | 23   | 973   |
| >PTEN-T277I KMFHFWVNT | 130   | >PTEN-T277I KMFHFWVNI | 11   | 119   |
| >PTEN-T277I KMFHFWVNT | 652   | >PTEN-T277I KMFHFWVNI | 61   | 591   |



|                        |       |                        |      |       |
|------------------------|-------|------------------------|------|-------|
| >PTEN-T277I KMFHFVVNI  | 357   | >PTEN-T277I KMFHFVVNI  | 269  | 88    |
| >PTEN-T277I KMFHFVVNI  | 379   | >PTEN-T277I KMFHFVVNI  | 392  | 13    |
| >PTEN-T277I KMFHFVVNI  | 456   | >PTEN-T277I KMFHFVVNI  | 391  | 65    |
| >PTEN-T277I KMFHFVVNI  | 133   | >PTEN-T277I KMFHFVVNI  | 476  | 343   |
| >PTEN-T277I KMFHFVVNI  | 543   | >PTEN-T277I KMFHFVVNI  | 311  | 232   |
| >PTEN-T277I KMFHFVVNI  | 175   | >PTEN-T277I KMFHFVVNI  | 117  | 58    |
| >PTEN-T277I KMFHFVVNI  | 397   | >PTEN-T277I KMFHFVVNI  | 16   | 381   |
| >PTEN-T277I KMFHFVVNI  | 807   | >PTEN-T277I KMFHFVVNI  | 181  | 626   |
| >PTEN-T277I KMFHFVVNI  | 444   | >PTEN-T277I KMFHFVVNI  | 512  | 68    |
| >PTEN-T277I KMFHFVVNI  | 433   | >PTEN-T277I KMFHFVVNI  | 281  | 152   |
| >PTEN-T277I KMFHFVVNI  | 89    | >PTEN-T277I KMFHFVVNI  | 95   | 6     |
| >PTEN-T277I KMFHFVVNI  | 202   | >PTEN-T277I KMFHFVVNI  | 6    | 196   |
| >PTEN-T277I KMFHFVVNI  | 3     | >PTEN-T277I KMFHFVVNI  | 6    | 3     |
| >PTEN-T277I KMFHFVVNI  | 7     | >PTEN-T277I KMFHFVVNI  | 6    | 1     |
| >PTEN-T277I KMFHFVVNI  | 34    | >PTEN-T277I KMFHFVVNI  | 41   | 7     |
| >PTEN-T277I KMFHFVVNI  | 43    | >PTEN-T277I KMFHFVVNI  | 55   | 12    |
| >PTEN-T277I KMFHFVVNI  | 165   | >PTEN-T277I KMFHFVVNI  | 191  | 26    |
| >PTEN-T277I KMFHFVVNI  | 248   | >PTEN-T277I KMFHFVVNI  | 350  | 102   |
| >PTEN-T277I KMFHFVVNI  | 103   | >PTEN-T277I KMFHFVVNI  | 8    | 95    |
| >PTEN-T277I KMFHFVVNI  | 2     | >PTEN-T277I KMFHFVVNI  | 2    | 0     |
| >PTEN-T277I KMFHFVVNI  | 3     | >PTEN-T277I KMFHFVVNI  | 3    | 0     |
| >PTEN-T277I KMFHFVVNI  | 32    | >PTEN-T277I KMFHFVVNI  | 146  | 114   |
| >PTEN-T277I KMFHFVVNI  | 67    | >PTEN-T277I KMFHFVVNI  | 89   | 22    |
| >PTEN-T277I KMFHFVVNI  | 121   | >PTEN-T277I KMFHFVVNI  | 264  | 143   |
| >PTEN-T277I KMFHFVVNI  | 232   | >PTEN-T277I KMFHFVVNI  | 241  | 9     |
| >PTEN-T277I KMFHFVVNI  | 38    | >PTEN-T277I KMFHFVVNI  | 41   | 3     |
| >PTEN-T277I KMFHFVVNI  | 28    | >PTEN-T277I KMFHFVVNI  | 33   | 5     |
| >PTEN-T277I KMFHFVVNI  | 100   | >PTEN-T277I KMFHFVVNI  | 358  | 258   |
| >PTEN-T277I KMFHFVVNI  | 5795  | >PTEN-T277I KMFHFVVNI  | 253  | 5542  |
| >PTEN-T277I KMFHFVVNI  | 214   | >PTEN-T277I KMFHFVVNI  | 516  | 302   |
| >PTEN-T277I KMFHFVVNI  | 30793 | >PTEN-T277I KMFHFVVNI  | 63   | 30730 |
| >PTEN-T277I DKMFHFVVNI | 6654  | >PTEN-T277I DKMFHFVVNI | 457  | 6197  |
| >PTEN-T277I DKMFHFVVNI | 19    | >PTEN-T277I DKMFHFVVNI | 34   | 15    |
| >PTEN-T277I DKMFHFVVNI | 190   | >PTEN-T277I DKMFHFVVNI | 509  | 319   |
| >PTEN-T2I-w TAIKEIVSR  | 406   | >PTEN-T2I-m IAIKEIVSR  | 358  | 48    |
| >PTEN-T2I-w TAIKEIVSR  | 24    | >PTEN-T2I-m IAIKEIVSR  | 82   | 58    |
| >PTEN-T2I-w TAIKEIV    | 224   | >PTEN-T2I-m IAIKEIV    | 2310 | 2086  |
| >PTEN-T2I-w MTAIKEI    | 121   | >PTEN-T2I-m MIAIKEI    | 37   | 84    |
| >PTEN-T2I-w MTAIKEIV   | 86    | >PTEN-T2I-m MIAIKEIV   | 25   | 61    |
| >PTEN-T2I-w MTAIKEI    | 601   | >PTEN-T2I-m MIAIKEI    | 86   | 515   |
| >PTEN-T2I-w MTAIKEIV   | 1059  | >PTEN-T2I-m MIAIKEIV   | 152  | 907   |
| >PTEN-T2I-w MTAIKEI    | 1163  | >PTEN-T2I-m MIAIKEI    | 474  | 689   |
| >PTEN-T2I-w MTAIKEIV   | 1244  | >PTEN-T2I-m MIAIKEIV   | 293  | 951   |

|                         |       |                         |       |       |
|-------------------------|-------|-------------------------|-------|-------|
| >PTEN-T2I-w MTAIIKEI    | 1149  | >PTEN-T2I-m MIAIIKEI    | 292   | 857   |
| >PTEN-T2I-w MTAIIKEIV   | 836   | >PTEN-T2I-m MIAIIKEIV   | 210   | 626   |
| >PTEN-T2I-w MTAIIKEIV   | 1627  | >PTEN-T2I-m MIAIIKEIV   | 237   | 1390  |
| >PTEN-T2I-w MTAIIKEI    | 8460  | >PTEN-T2I-m MIAIIKEI    | 324   | 8136  |
| >PTEN-T2I-w MTAIIKEIV   | 566   | >PTEN-T2I-m MIAIIKEIV   | 17    | 549   |
| >PTEN-T2I-w MTAIIKEIVSR | 373   | >PTEN-T2I-m MIAIIKEIVSR | 1334  | 961   |
| >PTEN-T2I-w MTAIIKEIVSR | 22    | >PTEN-T2I-m MIAIIKEIVSR | 47    | 25    |
| >PTEN-T2I-w MTAIIKEIVSR | 145   | >PTEN-T2I-m MIAIIKEIVSR | 354   | 209   |
| >PTEN-T2I-w MTAIIKEIVSR | 2     | >PTEN-T2I-m MIAIIKEIVSR | 6     | 4     |
| >PTEN-T2I-w MTAIIKEI    | 6     | >PTEN-T2I-m MIAIIKEI    | 15    | 9     |
| >PTEN-T2I-w MTAIIKEIV   | 5     | >PTEN-T2I-m MIAIIKEIV   | 11    | 6     |
| >PTEN-T2I-w MTAIIKEI    | 286   | >PTEN-T2I-m MIAIIKEI    | 1319  | 1033  |
| >PTEN-T2I-w MTAIIKEIV   | 129   | >PTEN-T2I-m MIAIIKEIV   | 643   | 514   |
| >PTEN-T2I-w MTAIIKEI    | 94    | >PTEN-T2I-m MIAIIKEI    | 11713 | 11619 |
| >PTEN-T2I-w MTAIIKEIV   | 155   | >PTEN-T2I-m MIAIIKEIV   | 5078  | 4923  |
| >PTEN-T2I-w MTAIIKEIVSR | 379   | >PTEN-T2I-m MIAIIKEIVSR | 100   | 279   |
| >PTEN-T2I-w MTAIIKEI    | 29    | >PTEN-T2I-m MIAIIKEI    | 1501  | 1472  |
| >PTEN-T348I SPNFKVKLYF  | 24989 | >PTEN-T348I SPNFKVKLYFI | 439   | 24550 |
| >PTEN-T348I KLYFTKTV    | 37    | >PTEN-T348I KLYFIKTV    | 20    | 17    |
| >PTEN-T348I KLYFTKTV    | 73    | >PTEN-T348I KLYFIKTV    | 32    | 41    |
| >PTEN-T348I KLYFTKTV    | 7     | >PTEN-T348I KLYFIKTV    | 6     | 1     |
| >PTEN-T348I KLYFTKTV    | 212   | >PTEN-T348I KLYFIKTV    | 115   | 97    |
| >PTEN-T348I KLYFTKTV    | 2     | >PTEN-T348I KLYFIKTV    | 2     | 0     |
| >PTEN-T348I KLYFTKTV    | 6     | >PTEN-T348I KLYFIKTV    | 6     | 0     |
| >PTEN-T348I KLYFTKTV    | 7     | >PTEN-T348I KLYFIKTV    | 7     | 0     |
| >PTEN-T348I KLYFTKTV    | 15    | >PTEN-T348I KLYFIKTV    | 12    | 3     |
| >PTEN-T348I KLYFTKTV    | 3     | >PTEN-T348I KLYFIKTV    | 3     | 0     |
| >PTEN-T348I KLYFTKTV    | 41    | >PTEN-T348I KLYFIKTV    | 35    | 6     |
| >PTEN-T348I KLYFTKTVEE  | 631   | >PTEN-T348I KLYFIKTVEE  | 338   | 293   |
| >PTEN-T348I KLYFTKTV    | 283   | >PTEN-T348I KLYFIKTV    | 746   | 463   |
| >PTEN-T348I VKLYFTKTV   | 222   | >PTEN-T348I VKLYFIKTV   | 883   | 661   |
| >PTEN-T348I VKLYFTKTV   | 15    | >PTEN-T348I VKLYFIKTV   | 16    | 1     |
| >PTEN-T348I KVKLYFTKTV  | 150   | >PTEN-T348I KVKLYFIKTV  | 124   | 26    |
| >PTEN-T348I KVKLYFTK    | 81    | >PTEN-T348I KVKLYFIK    | 94    | 13    |
| >PTEN-T348I KVKLYFTK    | 30    | >PTEN-T348I KVKLYFIK    | 29    | 1     |
| >PTEN-T348I KVKLYFTK    | 4     | >PTEN-T348I KVKLYFIK    | 3     | 1     |
| >PTEN-T348I KVKLYFTKT   | 813   | >PTEN-T348I KVKLYFIKT   | 68    | 745   |
| >PTEN-T348I KVKLYFTKTV  | 15    | >PTEN-T348I KVKLYFIKTV  | 11    | 4     |
| >PTEN-T348I KVKLYFTK    | 8     | >PTEN-T348I KVKLYFIK    | 10    | 2     |
| >PTEN-T348I KVKLYFTK    | 485   | >PTEN-T348I KVKLYFIK    | 454   | 31    |
| >PTEN-T348I FKVKLYFT    | 2330  | >PTEN-T348I FKVKLYFI    | 152   | 2178  |
| >PTEN-T348I FKVKLYFT    | 1701  | >PTEN-T348I FKVKLYFI    | 107   | 1594  |
| >PTEN-T348I FKVKLYFTKT  | 224   | >PTEN-T348I FKVKLYFIKTV | 168   | 56    |

|                        |       |                         |       |       |
|------------------------|-------|-------------------------|-------|-------|
| >PTEN-T348I FKVKLYFT   | 3224  | >PTEN-T348I FKVKLYFI    | 102   | 3122  |
| >PTEN-T348I FKVKLYFTK  | 199   | >PTEN-T348I FKVKLYFIK   | 268   | 69    |
| >PTEN-T348I FKVKLYFTKT | 25    | >PTEN-T348I FKVKLYFIKTV | 27    | 2     |
| >PTEN-T348I FKVKLYFT   | 10589 | >PTEN-T348I FKVKLYFI    | 31    | 10558 |
| >PTEN-T348I NFKVKLYFT  | 23111 | >PTEN-T348I NFKVKLYFI   | 452   | 22659 |
| >PTEN-T348I NFKVKLYFTK | 142   | >PTEN-T348I NFKVKLYFIK  | 199   | 57    |
| >PTEN-T348I NFKVKLYFTK | 284   | >PTEN-T348I NFKVKLYFIK  | 518   | 234   |
| >PTEN-T348I NFKVKLYFT  | 5427  | >PTEN-T348I NFKVKLYFI   | 466   | 4961  |
| >PTEN-T348I PNFKVKLYFT | 20193 | >PTEN-T348I PNFKVKLYFI  | 291   | 19902 |
| >PTEN-T382S TTDSDPENEP | 165   | >PTEN-T382S STDSDPENEP  | 171   | 6     |
| >PTEN-T382S TTDSDPENEP | 757   | >PTEN-T382S STDSDPENEP  | 291   | 466   |
| >PTEN-T382S TTDSDPENEP | 219   | >PTEN-T382S STDSDPENEP  | 132   | 87    |
| >PTEN-T382S TTDSDPENEP | 901   | >PTEN-T382S STDSDPENEP  | 291   | 610   |
| >PTEN-T382S YRYSDTTDS  | 637   | >PTEN-T382S YRYSDSTDS   | 468   | 169   |
| >PTEN-T382S HYRYSDTT   | 326   | >PTEN-T382S HYRYSDST    | 187   | 139   |
| >PTEN-T383I TTDSDPENEP | 165   | >PTEN-T383I TIDSDPENEP  | 8189  | 8024  |
| >PTEN-T383I TTDSDPENEP | 219   | >PTEN-T383I TIDSDPENEP  | 15232 | 15013 |
| >PTEN-T383I EPDHYRYSDT | 6001  | >PTEN-T383I EPDHYRYSDT  | 433   | 5568  |
| >PTEN-T383I EPDHYRYSDT | 5158  | >PTEN-T383I EPDHYRYSDT  | 198   | 4960  |
| >PTEN-T383I HYRYSDTT   | 11460 | >PTEN-T383I HYRYSDTI    | 58    | 11402 |
| >PTEN-T383I HYRYSDTT   | 22002 | >PTEN-T383I HYRYSDTI    | 340   | 21662 |
| >PTEN-T383I HYRYSDTT   | 7427  | >PTEN-T383I HYRYSDTI    | 62    | 7365  |
| >PTEN-T383I HYRYSDTT   | 326   | >PTEN-T383I HYRYSDTI    | 14    | 312   |
| >PTEN-T383I HYRYSDTTDS | 846   | >PTEN-T383I HYRYSDTIDS  | 200   | 646   |
| >PTEN-T383I DHYRYSDTT  | 7344  | >PTEN-T383I DHYRYSDTI   | 103   | 7241  |
| >PTEN-T383I DHYRYSDTT  | 567   | >PTEN-T383I DHYRYSDTI   | 277   | 290   |
| >PTEN-T383I PDHYRYSDTT | 9016  | >PTEN-T383I PDHYRYSDTI  | 141   | 8875  |
| >PTEN-T398S EDQHTQITKV | 202   | >PTEN-T398S EDQHSQITKV  | 214   | 12    |
| >PTEN-T398S FDEDQHTQI  | 195   | >PTEN-T398S FDEDQHSQI   | 197   | 2     |
| >PTEN-T398S EPFDEDQHTC | 384   | >PTEN-T398S EPFDEDQHSC  | 397   | 13    |
| >PTEN-T398S EPFDEDQHTC | 327   | >PTEN-T398S EPFDEDQHSC  | 407   | 80    |
| >PTEN-T401I EDQHTQIT   | 7016  | >PTEN-T401I EDQHTQII    | 92    | 6924  |
| >PTEN-T401I EDQHTQITKV | 202   | >PTEN-T401I EDQHTQIIKV  | 231   | 29    |
| >PTEN-T401I DEDQHTQIT  | 11492 | >PTEN-T401I DEDQHTQII   | 98    | 11394 |
| >PTEN-T401I DEDQHTQIT  | 9303  | >PTEN-T401I DEDQHTQII   | 240   | 9063  |
| >PTEN-T401I FDEDQHTQIT | 14573 | >PTEN-T401I FDEDQHTQII  | 151   | 14422 |
| >PTEN-T401I FDEDQHTQIT | 6305  | >PTEN-T401I FDEDQHTQII  | 87    | 6218  |
| >PTEN-T78A-TAKFNCRV    | 1751  | >PTEN-T78A-AAKFNCRV     | 231   | 1520  |
| >PTEN-T78A-TAKFNCRVA   | 2277  | >PTEN-T78A-AAKFNCRVA    | 343   | 1934  |
| >PTEN-T78A-TAKFNCRVAC  | 573   | >PTEN-T78A-AAKFNCRVAC   | 361   | 212   |
| >PTEN-T78A-TAKFNCRVAC  | 362   | >PTEN-T78A-AAKFNCRVAC   | 165   | 197   |
| >PTEN-T78A-TAKFNCRVAC  | 97    | >PTEN-T78A-AAKFNCRVAC   | 23    | 74    |
| >PTEN-T78A-DTAKFNCR    | 20    | >PTEN-T78A-DAAKFNCR     | 47    | 27    |

|                        |      |                        |       |       |
|------------------------|------|------------------------|-------|-------|
| >PTEN-T78A-DTAKFNCR    | 3    | >PTEN-T78A-DAAKFNCR    | 6     | 3     |
| >PTEN-T78A-DTAKFNCRV/  | 171  | >PTEN-T78A-DAAKFNCRV/  | 1123  | 952   |
| >PTEN-T78A-DTAKFNCRV   | 12   | >PTEN-T78A-DAAKFNCRV   | 43    | 31    |
| >PTEN-T78A-DTAKFNCRV/  | 460  | >PTEN-T78A-DAAKFNCRV/  | 3796  | 3336  |
| >PTEN-T78A-DTAKFNCRV   | 7    | >PTEN-T78A-DAAKFNCRV   | 23    | 16    |
| >PTEN-T78A-YDTAKFNCRV  | 183  | >PTEN-T78A-YDAAKFNCRV  | 262   | 79    |
| >PTEN-T78A-HYDTAKFNCF  | 204  | >PTEN-T78A-HYDAAKFNCF  | 240   | 36    |
| >PTEN-T78A-HYDTAKFNCF  | 29   | >PTEN-T78A-HYDAAKFNCF  | 29    | 0     |
| >PTEN-T78A-RHYDTAKF    | 418  | >PTEN-T78A-RHYDAAKF    | 719   | 301   |
| >PTEN-T78A-RHYDTAKFNC  | 374  | >PTEN-T78A-RHYDAAKFNC  | 552   | 178   |
| >PTEN-T78A-RHYDTAKF    | 7    | >PTEN-T78A-RHYDAAKF    | 10    | 3     |
| >PTEN-T78A-RHYDTAKF    | 384  | >PTEN-T78A-RHYDAAKF    | 297   | 87    |
| >PTEN-T78A-RHYDTAKF    | 71   | >PTEN-T78A-RHYDAAKF    | 93    | 22    |
| >PTEN-T78A-RHYDTAKFNC  | 71   | >PTEN-T78A-RHYDAAKFNC  | 79    | 8     |
| >PTEN-T78A-ERHYDTAKF   | 202  | >PTEN-T78A-ERHYDAAKF   | 254   | 52    |
| >PTEN-T78A-AERHYDTAK   | 1510 | >PTEN-T78A-AERHYDAAK   | 259   | 1251  |
| >PTEN-T78A-AERHYDTAKF  | 33   | >PTEN-T78A-AERHYDAAKF  | 46    | 13    |
| >PTEN-T78A-AERHYDTA    | 84   | >PTEN-T78A-AERHYDAA    | 48    | 36    |
| >PTEN-T78A-AERHYDTAKF  | 83   | >PTEN-T78A-AERHYDAAKF  | 44    | 39    |
| >PTEN-T78A-AERHYDTAKF  | 256  | >PTEN-T78A-AERHYDAAKF  | 191   | 65    |
| >PTEN-T78A-AERHYDTA    | 12   | >PTEN-T78A-AERHYDAA    | 7     | 5     |
| >PTEN-T78A-AERHYDTAKF  | 258  | >PTEN-T78A-AERHYDAAKF  | 329   | 71    |
| >PTEN-T78A-NLCAERHYDT  | 562  | >PTEN-T78A-NLCAERHYD/  | 314   | 248   |
| >PTEN-T78A-NLCAERHYDT  | 3600 | >PTEN-T78A-NLCAERHYD/  | 489   | 3111  |
| >PTEN-T78A-NLCAERHYDT  | 387  | >PTEN-T78A-NLCAERHYD/  | 945   | 558   |
| >PTEN-V119I VAAIHCKAGK | 459  | >PTEN-V119I DAAIHCKAGK | 80    | 379   |
| >PTEN-V119I HVAAIHCKA  | 289  | >PTEN-V119I HDAAIHCKA  | 11933 | 11644 |
| >PTEN-V119I HVAAIHCK   | 130  | >PTEN-V119I HDAAIHCK   | 14390 | 14260 |
| >PTEN-V119I HVAAIHCKAC | 90   | >PTEN-V119I HDAAIHCKAC | 12793 | 12703 |
| >PTEN-V119I HVAAIHCK   | 50   | >PTEN-V119I HDAAIHCK   | 11655 | 11605 |
| >PTEN-V119I HVAAIHCKAC | 114  | >PTEN-V119I HDAAIHCKAC | 18783 | 18669 |
| >PTEN-V119I HVAAIHCK   | 74   | >PTEN-V119I HDAAIHCK   | 8742  | 8668  |
| >PTEN-V119I HVAAIHCKA  | 304  | >PTEN-V119I HDAAIHCKA  | 14890 | 14586 |
| >PTEN-V119I HVAAIHCKAC | 64   | >PTEN-V119I HDAAIHCKAC | 9284  | 9220  |
| >PTEN-V119I HVAAIHCK   | 223  | >PTEN-V119I HDAAIHCK   | 13516 | 13293 |
| >PTEN-V119I HVAAIHCKAC | 185  | >PTEN-V119I HDAAIHCKAC | 13646 | 13461 |
| >PTEN-V119I HVAAIHCK   | 5    | >PTEN-V119I HDAAIHCK   | 480   | 475   |
| >PTEN-V119I HVAAIHCKAC | 7    | >PTEN-V119I HDAAIHCKAC | 1000  | 993   |
| >PTEN-V119I HVAAIHCKA  | 12   | >PTEN-V119I HDAAIHCKA  | 3495  | 3483  |
| >PTEN-V119I HVAAIHCKA  | 480  | >PTEN-V119I HDAAIHCKA  | 14551 | 14071 |
| >PTEN-V119I DDNHVAAI   | 343  | >PTEN-V119I DDNHDAAI   | 328   | 15    |
| >PTEN-V119I EDDNHVAAI  | 195  | >PTEN-V119I EDDNHDAAI  | 320   | 125   |
| >PTEN-V119I SEDDNHVA   | 161  | >PTEN-V119I SEDDNHDA   | 787   | 626   |

|                        |       |                        |       |       |
|------------------------|-------|------------------------|-------|-------|
| >PTEN-V119I SEDDNHVAA  | 347   | >PTEN-V119I SEDDNHDAA  | 689   | 342   |
| >PTEN-V119I SEDDNHVAA  | 435   | >PTEN-V119I SEDDNHDAA  | 676   | 241   |
| >PTEN-V119I SEDDNHVAA  | 117   | >PTEN-V119I SEDDNHDAA  | 175   | 58    |
| >PTEN-V119I SEDDNHVA   | 53    | >PTEN-V119I SEDDNHDA   | 150   | 97    |
| >PTEN-V119I SEDDNHVAA  | 24    | >PTEN-V119I SEDDNHDAA  | 41    | 17    |
| >PTEN-V119I SEDDNHVAA  | 315   | >PTEN-V119I SEDDNHDAA  | 336   | 21    |
| >PTEN-V119I SEDDNHVAA  | 65    | >PTEN-V119I SEDDNHDAA  | 110   | 45    |
| >PTEN-V119I LSEDDNHVA/ | 70    | >PTEN-V119I LSEDDNHDA/ | 90    | 20    |
| >PTEN-V119I WLSEDDNHV  | 105   | >PTEN-V119I WLSEDDNHD  | 21834 | 21729 |
| >PTEN-V119I WLSEDDNHV  | 480   | >PTEN-V119I WLSEDDNHD  | 1334  | 854   |
| >PTEN-V119I WLSEDDNHV  | 10    | >PTEN-V119I WLSEDDNHD  | 4714  | 4704  |
| >PTEN-V119I WLSEDDNHV  | 99    | >PTEN-V119I WLSEDDNHD  | 230   | 131   |
| >PTEN-V119I WLSEDDNHV  | 30    | >PTEN-V119I WLSEDDNHD  | 36    | 6     |
| >PTEN-V119I WLSEDDNHV  | 12    | >PTEN-V119I WLSEDDNHD  | 17089 | 17077 |
| >PTEN-V119I WLSEDDNHV  | 39    | >PTEN-V119I WLSEDDNHD  | 55    | 16    |
| >PTEN-V119I WLSEDDNHV  | 30    | >PTEN-V119I WLSEDDNHD  | 19823 | 19793 |
| >PTEN-V119I WLSEDDNHV  | 56    | >PTEN-V119I WLSEDDNHD  | 125   | 69    |
| >PTEN-V119I WLSEDDNHV  | 8     | >PTEN-V119I WLSEDDNHD  | 16981 | 16973 |
| >PTEN-V119I WLSEDDNHV  | 65    | >PTEN-V119I WLSEDDNHD  | 269   | 204   |
| >PTEN-V119I WLSEDDNHV  | 34    | >PTEN-V119I WLSEDDNHD  | 48    | 14    |
| >PTEN-V119I WLSEDDNHV  | 4     | >PTEN-V119I WLSEDDNHD  | 12657 | 12653 |
| >PTEN-V119I WLSEDDNHV  | 22    | >PTEN-V119I WLSEDDNHD  | 67    | 45    |
| >PTEN-V119I WLSEDDNHV  | 26    | >PTEN-V119I WLSEDDNHD  | 37    | 11    |
| >PTEN-V119I WLSEDDNHV  | 6     | >PTEN-V119I WLSEDDNHD  | 13081 | 13075 |
| >PTEN-V119I WLSEDDNHV  | 46    | >PTEN-V119I WLSEDDNHD  | 62    | 16    |
| >PTEN-V119I WLSEDDNHV  | 85    | >PTEN-V119I WLSEDDNHD  | 136   | 51    |
| >PTEN-V119I WLSEDDNHV  | 6     | >PTEN-V119I WLSEDDNHD  | 22949 | 22943 |
| >PTEN-V119I WLSEDDNHV  | 40    | >PTEN-V119I WLSEDDNHD  | 144   | 104   |
| >PTEN-V119I WLSEDDNHV  | 108   | >PTEN-V119I WLSEDDNHD  | 160   | 52    |
| >PTEN-V119I WLSEDDNHV  | 2     | >PTEN-V119I WLSEDDNHD  | 12947 | 12945 |
| >PTEN-V119I WLSEDDNHV  | 7     | >PTEN-V119I WLSEDDNHD  | 9     | 2     |
| >PTEN-V119I WLSEDDNHV  | 9     | >PTEN-V119I WLSEDDNHD  | 19    | 10    |
| >PTEN-V119I WLSEDDNHV  | 243   | >PTEN-V119I WLSEDDNHD  | 23569 | 23326 |
| >PTEN-V119I QWLSEDDNF  | 40    | >PTEN-V119I QWLSEDDNF  | 2050  | 2010  |
| >PTEN-V119I QWLSEDDNF  | 162   | >PTEN-V119I QWLSEDDNF  | 204   | 42    |
| >PTEN-V119I VAAIHCKAGK | 459   | >PTEN-V119I FAAIHCKAGK | 40    | 419   |
| >PTEN-V119I VAAIHCKA   | 11378 | >PTEN-V119I FAAIHCKA   | 221   | 11157 |
| >PTEN-V119I HVAAIHCKA  | 289   | >PTEN-V119I HFAAIHCKA  | 1548  | 1259  |
| >PTEN-V119I HVAAIHCK   | 130   | >PTEN-V119I HFAAIHCK   | 2880  | 2750  |
| >PTEN-V119I HVAAIHCKAC | 90    | >PTEN-V119I HFAAIHCKAG | 1684  | 1594  |
| >PTEN-V119I HVAAIHCK   | 50    | >PTEN-V119I HFAAIHCK   | 1552  | 1502  |
| >PTEN-V119I HVAAIHCKAC | 114   | >PTEN-V119I HFAAIHCKAG | 4881  | 4767  |
| >PTEN-V119I HVAAIHCK   | 74    | >PTEN-V119I HFAAIHCK   | 265   | 191   |

|                       |       |                        |       |       |
|-----------------------|-------|------------------------|-------|-------|
| >PTEN-V119IHVAAIHCKA  | 304   | >PTEN-V119IHFAAIIHCKA  | 1322  | 1018  |
| >PTEN-V119IHVAAIHCKAC | 64    | >PTEN-V119IHFAAIIHCKAG | 255   | 191   |
| >PTEN-V119IHVAAIHCK   | 223   | >PTEN-V119IHFAAIIHCK   | 114   | 109   |
| >PTEN-V119IHVAAIHCKAC | 185   | >PTEN-V119IHFAAIIHCKAG | 95    | 90    |
| >PTEN-V119IHVAAIHCK   | 5     | >PTEN-V119IHFAAIIHCK   | 40    | 35    |
| >PTEN-V119IHVAAIHCKAC | 7     | >PTEN-V119IHFAAIIHCKAG | 95    | 88    |
| >PTEN-V119IHVAAIHCKA  | 12    | >PTEN-V119IHFAAIIHCKA  | 3711  | 3699  |
| >PTEN-V119IHVAAIHCKA  | 480   | >PTEN-V119IHFAAIIHCKA  | 14146 | 13666 |
| >PTEN-V119IHVAAIHCK   | 1426  | >PTEN-V119IHFAAIIHCK   | 114   | 1312  |
| >PTEN-V119IHVAAIHCKAC | 806   | >PTEN-V119IHFAAIIHCKAG | 74    | 732   |
| >PTEN-V119IDQWLSEDDN  | 2435  | >PTEN-V119IDQWLSEDDN   | 135   | 2300  |
| >PTEN-V119INHVAAIHCK  | 1175  | >PTEN-V119INHFAAIIHCK  | 256   | 919   |
| >PTEN-V119IDDNHVAAI   | 343   | >PTEN-V119IDDNHFAAI    | 224   | 119   |
| >PTEN-V119IEDDNHVAAI  | 195   | >PTEN-V119IEDDNHFAAI   | 150   | 45    |
| >PTEN-V119ISEDNDHVAA  | 161   | >PTEN-V119ISEDNDHFAA   | 123   | 38    |
| >PTEN-V119ISEDNDHVAA  | 347   | >PTEN-V119ISEDNDHFAAI  | 262   | 85    |
| >PTEN-V119ISEDNDHVAA  | 768   | >PTEN-V119ISEDNDHFAA   | 284   | 484   |
| >PTEN-V119ISEDNDHVAA  | 435   | >PTEN-V119ISEDNDHFAAI  | 229   | 206   |
| >PTEN-V119ISEDNDHVAA  | 117   | >PTEN-V119ISEDNDHFAAI  | 45    | 72    |
| >PTEN-V119ISEDNDHVAA  | 1064  | >PTEN-V119ISEDNDHFAAI  | 343   | 721   |
| >PTEN-V119ISEDNDHVAA  | 53    | >PTEN-V119ISEDNDHFAA   | 57    | 4     |
| >PTEN-V119ISEDNDHVAA  | 24    | >PTEN-V119ISEDNDHFAA   | 11    | 13    |
| >PTEN-V119ISEDNDHVAA  | 315   | >PTEN-V119ISEDNDHFAAI  | 186   | 129   |
| >PTEN-V119ISEDNDHVAA  | 65    | >PTEN-V119ISEDNDHFAAI  | 102   | 37    |
| >PTEN-V119LSEDDNHV    | 12235 | >PTEN-V119LSEDDNHF     | 70    | 12165 |
| >PTEN-V119LSEDDNDHVAA | 70    | >PTEN-V119LSEDDNDHFAA  | 56    | 14    |
| >PTEN-V119WLSEDDNHV   | 105   | >PTEN-V119WLSEDDNHF    | 12659 | 12554 |
| >PTEN-V119WLSEDDNHV   | 1721  | >PTEN-V119WLSEDDNHF    | 361   | 1360  |
| >PTEN-V119WLSEDDNHV   | 480   | >PTEN-V119WLSEDDNHF    | 126   | 354   |
| >PTEN-V119WLSEDDNHV   | 10    | >PTEN-V119WLSEDDNHF    | 784   | 774   |
| >PTEN-V119WLSEDDNHV   | 99    | >PTEN-V119WLSEDDNHF    | 30    | 69    |
| >PTEN-V119WLSEDDNHV   | 30    | >PTEN-V119WLSEDDNHF    | 16    | 14    |
| >PTEN-V119WLSEDDNHV   | 12    | >PTEN-V119WLSEDDNHF    | 5941  | 5929  |
| >PTEN-V119WLSEDDNHV   | 532   | >PTEN-V119WLSEDDNHF    | 221   | 311   |
| >PTEN-V119WLSEDDNHV   | 39    | >PTEN-V119WLSEDDNHF    | 30    | 9     |
| >PTEN-V119WLSEDDNHV   | 30    | >PTEN-V119WLSEDDNHF    | 446   | 416   |
| >PTEN-V119WLSEDDNHV   | 56    | >PTEN-V119WLSEDDNHF    | 26    | 30    |
| >PTEN-V119WLSEDDNHV   | 8     | >PTEN-V119WLSEDDNHF    | 6175  | 6167  |
| >PTEN-V119WLSEDDNHV   | 65    | >PTEN-V119WLSEDDNHF    | 24    | 41    |
| >PTEN-V119WLSEDDNHV   | 34    | >PTEN-V119WLSEDDNHF    | 20    | 14    |
| >PTEN-V119WLSEDDNHV   | 4     | >PTEN-V119WLSEDDNHF    | 2911  | 2907  |
| >PTEN-V119WLSEDDNHV   | 22    | >PTEN-V119WLSEDDNHF    | 12    | 10    |
| >PTEN-V119WLSEDDNHV   | 26    | >PTEN-V119WLSEDDNHF    | 13    | 13    |

|                       |       |                       |       |       |
|-----------------------|-------|-----------------------|-------|-------|
| >PTEN-V119FWLSEDDNHV  | 6     | >PTEN-V119FWLSEDDNHF  | 6471  | 6465  |
| >PTEN-V119FWLSEDDNHV  | 46    | >PTEN-V119FWLSEDDNHF  | 15    | 31    |
| >PTEN-V119FWLSEDDNHV  | 85    | >PTEN-V119FWLSEDDNHF  | 39    | 46    |
| >PTEN-V119FWLSEDDNHV  | 6     | >PTEN-V119FWLSEDDNHF  | 9729  | 9723  |
| >PTEN-V119FWLSEDDNHV  | 40    | >PTEN-V119FWLSEDDNHF  | 14    | 26    |
| >PTEN-V119FWLSEDDNHV  | 108   | >PTEN-V119FWLSEDDNHF  | 32    | 76    |
| >PTEN-V119FWLSEDDNHV  | 2     | >PTEN-V119FWLSEDDNHF  | 3491  | 3489  |
| >PTEN-V119FWLSEDDNHV  | 7     | >PTEN-V119FWLSEDDNHF  | 5     | 2     |
| >PTEN-V119FWLSEDDNHV  | 9     | >PTEN-V119FWLSEDDNHF  | 7     | 2     |
| >PTEN-V119FWLSEDDNHV  | 243   | >PTEN-V119FWLSEDDNHF  | 22439 | 22196 |
| >PTEN-V119FWLSEDDNHV  | 5503  | >PTEN-V119FWLSEDDNHF  | 86    | 5417  |
| >PTEN-V119FWLSEDDNHV  | 7640  | >PTEN-V119FWLSEDDNHF  | 335   | 7305  |
| >PTEN-V119FWLSEDDNHV  | 8007  | >PTEN-V119FWLSEDDNHF  | 364   | 7643  |
| >PTEN-V119FWLSEDDNHV  | 10367 | >PTEN-V119FWLSEDDNHF  | 207   | 10160 |
| >PTEN-V119FQWLSEDDNF  | 4082  | >PTEN-V119FQWLSEDDNF  | 34    | 4048  |
| >PTEN-V119FQWLSEDDNF  | 8957  | >PTEN-V119FQWLSEDDNF  | 87    | 8870  |
| >PTEN-V119FQWLSEDDNF  | 2922  | >PTEN-V119FQWLSEDDNF  | 13    | 2909  |
| >PTEN-V119FQWLSEDDNF  | 40    | >PTEN-V119FQWLSEDDNF  | 90    | 50    |
| >PTEN-V119FQWLSEDDNF  | 162   | >PTEN-V119FQWLSEDDNF  | 37    | 125   |
| >PTEN-V133IVMICAYLL   | 248   | >PTEN-V133IVMICAYLL   | 210   | 38    |
| >PTEN-V133IVMICAYLL   | 15    | >PTEN-V133IVMICAYLL   | 13    | 2     |
| >PTEN-V133IVMICAYLL   | 9     | >PTEN-V133IVMICAYLL   | 6     | 3     |
| >PTEN-V133IVMICAYLL   | 27    | >PTEN-V133IVMICAYLL   | 21    | 6     |
| >PTEN-V133IVMICAYLL   | 39    | >PTEN-V133IVMICAYLL   | 27    | 12    |
| >PTEN-V133IVMICAYLL   | 10    | >PTEN-V133IVMICAYLL   | 11    | 1     |
| >PTEN-V133IVMICAYLL   | 6     | >PTEN-V133IVMICAYLL   | 7     | 1     |
| >PTEN-V133IVMICAYLL   | 58    | >PTEN-V133IVMICAYLL   | 104   | 46    |
| >PTEN-V133IVMICAYLL   | 136   | >PTEN-V133IVMICAYLL   | 134   | 2     |
| >PTEN-V133IVMICAYLL   | 16    | >PTEN-V133IVMICAYLL   | 21    | 5     |
| >PTEN-V133IVMICAYLLHR | 166   | >PTEN-V133IVMICAYLLHR | 88    | 78    |
| >PTEN-V133IVMICAYLLHR | 52    | >PTEN-V133IVMICAYLLHR | 52    | 0     |
| >PTEN-V133IVMICAYLL   | 100   | >PTEN-V133IVMICAYLL   | 107   | 7     |
| >PTEN-V133IVMICAYLLH  | 46    | >PTEN-V133IVMICAYLLH  | 35    | 11    |
| >PTEN-V133IVMICAYLLHR | 44    | >PTEN-V133IVMICAYLLHR | 31    | 13    |
| >PTEN-V133IVMICAYLLHR | 237   | >PTEN-V133IVMICAYLLHR | 142   | 95    |
| >PTEN-V133IVMICAYLLHR | 119   | >PTEN-V133IVMICAYLLHR | 50    | 69    |
| >PTEN-V133IVMICAYLL   | 126   | >PTEN-V133IVMICAYLL   | 49    | 77    |
| >PTEN-V133IVMICAYLLH  | 676   | >PTEN-V133IVMICAYLLH  | 247   | 429   |
| >PTEN-V133IVMICAYLLHR | 434   | >PTEN-V133IVMICAYLLHR | 178   | 256   |
| >PTEN-V133IVMICAYLLHR | 70    | >PTEN-V133IVMICAYLLHR | 45    | 25    |
| >PTEN-V133IVMICAYLLHR | 58    | >PTEN-V133IVMICAYLLHR | 23    | 35    |
| >PTEN-V133IGVMICAYL   | 66    | >PTEN-V133IGVMICAYL   | 38    | 28    |
| >PTEN-V133IGVMICAYLL  | 57    | >PTEN-V133IGVMICAYLL  | 33    | 24    |

|                        |      |                         |      |      |
|------------------------|------|-------------------------|------|------|
| >PTEN-V133I GVMICAYL   | 20   | >PTEN-V133I GIMICAYL    | 11   | 9    |
| >PTEN-V133I GVMICAYLL  | 18   | >PTEN-V133I GIMICAYLL   | 10   | 8    |
| >PTEN-V133I GVMICAYL   | 260  | >PTEN-V133I GIMICAYL    | 117  | 143  |
| >PTEN-V133I GVMICAYL   | 51   | >PTEN-V133I GIMICAYL    | 63   | 12   |
| >PTEN-V133I GVMICAYLL  | 112  | >PTEN-V133I GIMICAYLL   | 135  | 23   |
| >PTEN-V133I GVMICAYL   | 844  | >PTEN-V133I GIMICAYL    | 255  | 589  |
| >PTEN-V133I GVMICAYL   | 346  | >PTEN-V133I GIMICAYL    | 168  | 178  |
| >PTEN-V133I GVMICAYLL  | 327  | >PTEN-V133I GIMICAYLL   | 158  | 169  |
| >PTEN-V133I GVMICAYL   | 403  | >PTEN-V133I GIMICAYL    | 171  | 232  |
| >PTEN-V133I GVMICAYL   | 574  | >PTEN-V133I GIMICAYL    | 152  | 422  |
| >PTEN-V133I GVMICAYLLH | 52   | >PTEN-V133I GIMICAYLLHI | 104  | 52   |
| >PTEN-V133I GVMICAYLLH | 38   | >PTEN-V133I GIMICAYLLHI | 53   | 15   |
| >PTEN-V133I GVMICAYLLH | 177  | >PTEN-V133I GIMICAYLLHI | 372  | 195  |
| >PTEN-V133I GVMICAYL   | 485  | >PTEN-V133I GIMICAYL    | 1873 | 1388 |
| >PTEN-V133I GVMICAYLL  | 222  | >PTEN-V133I GIMICAYLL   | 951  | 729  |
| >PTEN-V133I GVMICAYLLH | 198  | >PTEN-V133I GIMICAYLLHI | 529  | 331  |
| >PTEN-V133I GVMICAYLLH | 132  | >PTEN-V133I GIMICAYLLHI | 54   | 78   |
| >PTEN-V133I TGVMICAY   | 567  | >PTEN-V133I TGIMICAY    | 354  | 213  |
| >PTEN-V133I TGVMICAYL  | 267  | >PTEN-V133I TGIMICAYL   | 129  | 138  |
| >PTEN-V133I TGVMICAY   | 714  | >PTEN-V133I TGIMICAY    | 363  | 351  |
| >PTEN-V133I TGVMICAY   | 166  | >PTEN-V133I TGIMICAY    | 192  | 26   |
| >PTEN-V133I RTGVMICAYL | 583  | >PTEN-V133I RTGIMICAYL  | 398  | 185  |
| >PTEN-V133I RTGVMICAYL | 532  | >PTEN-V133I RTGIMICAYL  | 433  | 99   |
| >PTEN-V133I RTGVMICAYL | 1073 | >PTEN-V133I RTGIMICAYL  | 494  | 579  |
| >PTEN-V133I RTGVMICAY  | 243  | >PTEN-V133I RTGIMICAY   | 186  | 57   |
| >PTEN-V133I RTGVMICAYL | 398  | >PTEN-V133I RTGIMICAYL  | 367  | 31   |
| >PTEN-V133I RTGVMICAY  | 169  | >PTEN-V133I RTGIMICAY   | 183  | 14   |
| >PTEN-V133I RTGVMICAYL | 114  | >PTEN-V133I RTGIMICAYLI | 134  | 20   |
| >PTEN-V133I RTGVMICAYL | 74   | >PTEN-V133I RTGIMICAYL  | 45   | 29   |
| >PTEN-V133I RTGVMICAY  | 228  | >PTEN-V133I RTGIMICAY   | 219  | 9    |
| >PTEN-V133I RTGVMICAY  | 70   | >PTEN-V133I RTGIMICAY   | 76   | 6    |
| >PTEN-V133I RTGVMICAY  | 13   | >PTEN-V133I RTGIMICAY   | 10   | 3    |
| >PTEN-V133I RTGVMICAYL | 12   | >PTEN-V133I RTGIMICAYL  | 8    | 4    |
| >PTEN-V133I RTGVMICAYL | 14   | >PTEN-V133I RTGIMICAYLI | 9    | 5    |
| >PTEN-V133I RTGVMICAY  | 205  | >PTEN-V133I RTGIMICAY   | 570  | 365  |
| >PTEN-V133I RTGVMICAYL | 438  | >PTEN-V133I RTGIMICAYL  | 959  | 521  |
| >PTEN-V133I RTGVMICAYL | 428  | >PTEN-V133I RTGIMICAYLI | 993  | 565  |
| >PTEN-V133I RTGVMICAYL | 90   | >PTEN-V133I RTGIMICAYL  | 52   | 38   |
| >PTEN-V133I RTGVMICAYL | 56   | >PTEN-V133I RTGIMICAYLI | 34   | 22   |
| >PTEN-V133I RTGVMICAY  | 378  | >PTEN-V133I RTGIMICAY   | 473  | 95   |
| >PTEN-V133I RTGVMICAYL | 72   | >PTEN-V133I RTGIMICAYL  | 54   | 18   |
| >PTEN-V133I RTGVMICAYL | 235  | >PTEN-V133I RTGIMICAYLI | 287  | 52   |
| >PTEN-V133I RTGVMICAYL | 394  | >PTEN-V133I RTGIMICAYLI | 404  | 10   |



|                          |      |                         |     |      |
|--------------------------|------|-------------------------|-----|------|
| >PTEN-V133I GRTGVMICA'   | 113  | >PTEN-V133I GRTGIMICAY  | 134 | 21   |
| >PTEN-V133I GRTGVMICA'   | 258  | >PTEN-V133I GRTGIMICAY  | 197 | 61   |
| >PTEN-V133I GRTGVMICA'   | 334  | >PTEN-V133I GRTGIMICAY  | 358 | 24   |
| >PTEN-V133I GRTGVMICA'   | 78   | >PTEN-V133I GRTGIMICAY  | 65  | 13   |
| >PTEN-V133I KGRTGVM I    | 29   | >PTEN-V133I KGRTGIMI    | 18  | 11   |
| >PTEN-V133I KGRTGVMIC    | 365  | >PTEN-V133I KGRTGIMIC   | 334 | 31   |
| >PTEN-V133I KGRTGVMIC/   | 21   | >PTEN-V133I KGRTGIMICA  | 21  | 0    |
| >PTEN-V133I KGRTGVMIC/   | 38   | >PTEN-V133I KGRTGIMICA  | 39  | 1    |
| >PTEN-V133I KGRTGVMIC/   | 314  | >PTEN-V133I KGRTGIMICA  | 244 | 70   |
| >PTEN-V133I KGRTGVMIC/   | 165  | >PTEN-V133I KGRTGIMICA  | 204 | 39   |
| >PTEN-V133I KGRTGVMIC/   | 174  | >PTEN-V133I KGRTGIMICA  | 258 | 84   |
| >PTEN-V133I KGRTGVMIC/   | 135  | >PTEN-V133I KGRTGIMICA  | 140 | 5    |
| >PTEN-V133I GKGR TGVM I  | 308  | >PTEN-V133I GKGR TGIMI  | 858 | 550  |
| >PTEN-V133I AGKGR TGVM I | 861  | >PTEN-V133I AGKGR TGIMI | 476 | 385  |
| >PTEN-V133I KAGKGR TG V  | 9353 | >PTEN-V133I KAGKGR TGI  | 317 | 9036 |
| >PTEN-V133I KAGKGR TGVI  | 135  | >PTEN-V133I KAGKGR TGI  | 154 | 19   |
| >PTEN-V166I VTIPSQRRYV   | 563  | >PTEN-V166I ITIPSQRRYV  | 216 | 347  |
| >PTEN-V166I VTIPSQRRYV   | 916  | >PTEN-V166I ITIPSQRRYV  | 396 | 520  |
| >PTEN-V166I VTIPSQRRYV   | 249  | >PTEN-V166I ITIPSQRRYV  | 298 | 49   |
| >PTEN-V166I VTIPSQRRYV   | 286  | >PTEN-V166I ITIPSQRRYV  | 404 | 118  |
| >PTEN-V166I VTIPSQRRYV'  | 284  | >PTEN-V166I ITIPSQRRYVY | 347 | 63   |
| >PTEN-V166I VTIPSQRRY    | 26   | >PTEN-V166I ITIPSQRRY   | 40  | 14   |
| >PTEN-V166I VTIPSQRRYV'  | 38   | >PTEN-V166I ITIPSQRRYVY | 57  | 19   |
| >PTEN-V166I VTIPSQRRYV'  | 509  | >PTEN-V166I ITIPSQRRYVY | 425 | 84   |
| >PTEN-V166I VTIPSQRRY    | 59   | >PTEN-V166I ITIPSQRRY   | 41  | 18   |
| >PTEN-V166I VTIPSQRRYV'  | 26   | >PTEN-V166I ITIPSQRRYVY | 20  | 6    |
| >PTEN-V166I VTIPSQRRY    | 41   | >PTEN-V166I ITIPSQRRY   | 45  | 4    |
| >PTEN-V166I VTIPSQRRYV'  | 16   | >PTEN-V166I ITIPSQRRYVY | 17  | 1    |
| >PTEN-V166I VTIPSQRR     | 135  | >PTEN-V166I ITIPSQRR    | 79  | 56   |
| >PTEN-V166I VTIPSQRR     | 65   | >PTEN-V166I ITIPSQRR    | 18  | 47   |
| >PTEN-V166I VTIPSQRRYV'  | 906  | >PTEN-V166I ITIPSQRRYVY | 209 | 697  |
| >PTEN-V166I VTIPSQRRYV   | 225  | >PTEN-V166I ITIPSQRRYV  | 151 | 74   |
| >PTEN-V166I VTIPSQRRY    | 399  | >PTEN-V166I ITIPSQRRY   | 305 | 94   |
| >PTEN-V166I VTIPSQRRYV'  | 109  | >PTEN-V166I ITIPSQRRYVY | 95  | 14   |
| >PTEN-V166I VTIPSQRRY    | 706  | >PTEN-V166I ITIPSQRRY   | 331 | 375  |
| >PTEN-V166I VTIPSQRRYV'  | 205  | >PTEN-V166I ITIPSQRRYVY | 99  | 106  |
| >PTEN-V166I VTIPSQRR     | 677  | >PTEN-V166I ITIPSQRR    | 327 | 350  |
| >PTEN-V166I VTIPSQRRY    | 3    | >PTEN-V166I ITIPSQRRY   | 2   | 1    |
| >PTEN-V166I VTIPSQRRYV   | 124  | >PTEN-V166I ITIPSQRRYV  | 69  | 55   |
| >PTEN-V166I VTIPSQRRYV'  | 4    | >PTEN-V166I ITIPSQRRYVY | 3   | 1    |
| >PTEN-V166I VTIPSQRRY    | 81   | >PTEN-V166I ITIPSQRRY   | 44  | 37   |
| >PTEN-V166I VTIPSQRRYV'  | 111  | >PTEN-V166I ITIPSQRRYVY | 55  | 56   |
| >PTEN-V166I VTIPSQRRY    | 122  | >PTEN-V166I ITIPSQRRY   | 61  | 61   |

|                         |      |                         |     |      |
|-------------------------|------|-------------------------|-----|------|
| >PTEN-V166I VTIPSQRRYV' | 76   | >PTEN-V166I ITIPSQRRYVY | 44  | 32   |
| >PTEN-V166I VTIPSQRRY   | 37   | >PTEN-V166I ITIPSQRRY   | 21  | 16   |
| >PTEN-V166I VTIPSQRRYV' | 37   | >PTEN-V166I ITIPSQRRYVY | 22  | 15   |
| >PTEN-V166I VTIPSQRRYV' | 256  | >PTEN-V166I ITIPSQRRYVY | 117 | 139  |
| >PTEN-V166I GVTIPSQRRY  | 623  | >PTEN-V166I GITIPSQRRYV | 209 | 414  |
| >PTEN-V166I GVTIPSQRRY' | 1023 | >PTEN-V166I GITIPSQRRYV | 390 | 633  |
| >PTEN-V166I GVTIPSQRRY  | 123  | >PTEN-V166I GITIPSQRRYV | 45  | 78   |
| >PTEN-V166I GVTIPSQR    | 457  | >PTEN-V166I GITIPSQR    | 800 | 343  |
| >PTEN-V166I GVTIPSQR    | 210  | >PTEN-V166I GITIPSQR    | 421 | 211  |
| >PTEN-V166I GVTIPSQRRY  | 172  | >PTEN-V166I GITIPSQRRY  | 803 | 631  |
| >PTEN-V166I GEVTRDKKC   | 178  | >PTEN-V166I GEVTRDKKC   | 27  | 151  |
| >PTEN-V166I GEVTRDKKC   | 381  | >PTEN-V166I GEVTRDKKC   | 168 | 213  |
| >PTEN-V166I GEVTRDKKC   | 89   | >PTEN-V166I GEVTRDKKC   | 25  | 64   |
| >PTEN-V166I KGVTIPSQRR  | 155  | >PTEN-V166I KGITIPSQRRY | 94  | 61   |
| >PTEN-V166I KGVTIPSQR   | 208  | >PTEN-V166I KGITIPSQR   | 126 | 82   |
| >PTEN-V166I KGVTIPSQRR  | 202  | >PTEN-V166I KGITIPSQRRY | 249 | 47   |
| >PTEN-V166I KGVTIPSQRR  | 227  | >PTEN-V166I KGITIPSQRRY | 341 | 114  |
| >PTEN-V166I KGVTIPSQR   | 147  | >PTEN-V166I KGITIPSQR   | 154 | 7    |
| >PTEN-V166I KGVTIPSQRR  | 120  | >PTEN-V166I KGITIPSQRR  | 126 | 6    |
| >PTEN-V166I KKGVTIPSQR  | 609  | >PTEN-V166I KKGITIPSQR  | 314 | 295  |
| >PTEN-V166I KKGVTIPSQR  | 511  | >PTEN-V166I KKGITIPSQRF | 258 | 253  |
| >PTEN-V166I DKKGVTIPSQ  | 497  | >PTEN-V166I DKKGITIPSQF | 595 | 98   |
| >PTEN-V166I RDKKGVTI    | 179  | >PTEN-V166I RDKKGITI    | 435 | 256  |
| >PTEN-V166I RTRDKKGV    | 14   | >PTEN-V166I RTRDKKGI    | 11  | 3    |
| >PTEN-V166I RTRDKKGV    | 71   | >PTEN-V166I RTRDKKGIT   | 61  | 10   |
| >PTEN-V166I RTRDKKGV    | 5    | >PTEN-V166I RTRDKKGITI  | 4   | 1    |
| >PTEN-V166I RTRDKKGV    | 103  | >PTEN-V166I RTRDKKGITIP | 96  | 7    |
| >PTEN-V166I RTRDKKGV    | 120  | >PTEN-V166I RTRDKKGITI  | 303 | 183  |
| >PTEN-V166I RTRDKKGV    | 26   | >PTEN-V166I RTRDKKGI    | 8   | 18   |
| >PTEN-V166I RTRDKKGV    | 5    | >PTEN-V166I RTRDKKGITI  | 6   | 1    |
| >PTEN-V166I RTRDKKGV    | 100  | >PTEN-V166I RTRDKKGITI  | 73  | 27   |
| >PTEN-V166I RTRDKKGV    | 5655 | >PTEN-V166I RTRDKKGI    | 130 | 5525 |
| >PTEN-V166I VTIPSQRRYV  | 563  | >PTEN-V166I LTIPSQRRYV  | 209 | 354  |
| >PTEN-V166I VTIPSQRRYV  | 916  | >PTEN-V166I LTIPSQRRYV  | 287 | 629  |
| >PTEN-V166I VTIPSQRRYV  | 249  | >PTEN-V166I LTIPSQRRYV  | 312 | 63   |
| >PTEN-V166I VTIPSQRRYV  | 286  | >PTEN-V166I LTIPSQRRYV  | 173 | 113  |
| >PTEN-V166I VTIPSQRRYV' | 284  | >PTEN-V166I LTIPSQRRYV\ | 783 | 499  |
| >PTEN-V166I VTIPSQRRY   | 26   | >PTEN-V166I LTIPSQRRY   | 33  | 7    |
| >PTEN-V166I VTIPSQRRYV' | 38   | >PTEN-V166I LTIPSQRRYV\ | 46  | 8    |
| >PTEN-V166I VTIPSQRRYV' | 509  | >PTEN-V166I LTIPSQRRYV\ | 362 | 147  |
| >PTEN-V166I VTIPSQRRY   | 59   | >PTEN-V166I LTIPSQRRY   | 44  | 15   |
| >PTEN-V166I VTIPSQRRYV' | 26   | >PTEN-V166I LTIPSQRRYV\ | 21  | 5    |
| >PTEN-V166I VTIPSQRRY   | 41   | >PTEN-V166I LTIPSQRRY   | 90  | 49   |

|                         |      |                         |      |      |
|-------------------------|------|-------------------------|------|------|
| >PTEN-V166I VTIPSQRRYV' | 16   | >PTEN-V166I LTIPSQRRYV\ | 29   | 13   |
| >PTEN-V166I VTIPSQRR    | 135  | >PTEN-V166I LTIPSQRR    | 104  | 31   |
| >PTEN-V166I VTIPSQRR    | 65   | >PTEN-V166I LTIPSQRR    | 26   | 39   |
| >PTEN-V166I VTIPSQRRYV' | 906  | >PTEN-V166I LTIPSQRRYV\ | 313  | 593  |
| >PTEN-V166I VTIPSQRRYV  | 225  | >PTEN-V166I LTIPSQRRYV  | 88   | 137  |
| >PTEN-V166I VTIPSQRRY   | 399  | >PTEN-V166I LTIPSQRRY   | 144  | 255  |
| >PTEN-V166I VTIPSQRRYV' | 109  | >PTEN-V166I LTIPSQRRYV\ | 58   | 51   |
| >PTEN-V166I VTIPSQRRY   | 706  | >PTEN-V166I LTIPSQRRY   | 425  | 281  |
| >PTEN-V166I VTIPSQRRYV' | 205  | >PTEN-V166I LTIPSQRRYV\ | 125  | 80   |
| >PTEN-V166I VTIPSQRRY   | 3    | >PTEN-V166I LTIPSQRRY   | 3    | 0    |
| >PTEN-V166I VTIPSQRRYV  | 124  | >PTEN-V166I LTIPSQRRYV  | 146  | 22   |
| >PTEN-V166I VTIPSQRRYV' | 4    | >PTEN-V166I LTIPSQRRYV\ | 4    | 0    |
| >PTEN-V166I VTIPSQRRY   | 81   | >PTEN-V166I LTIPSQRRY   | 66   | 15   |
| >PTEN-V166I VTIPSQRRYV' | 111  | >PTEN-V166I LTIPSQRRYV\ | 88   | 23   |
| >PTEN-V166I VTIPSQRRY   | 122  | >PTEN-V166I LTIPSQRRY   | 70   | 52   |
| >PTEN-V166I VTIPSQRRYV' | 76   | >PTEN-V166I LTIPSQRRYV\ | 51   | 25   |
| >PTEN-V166I VTIPSQRRY   | 37   | >PTEN-V166I LTIPSQRRY   | 35   | 2    |
| >PTEN-V166I VTIPSQRRYV  | 1085 | >PTEN-V166I LTIPSQRRYV  | 340  | 745  |
| >PTEN-V166I VTIPSQRRYV' | 37   | >PTEN-V166I LTIPSQRRYV\ | 35   | 2    |
| >PTEN-V166I VTIPSQRRYV' | 256  | >PTEN-V166I LTIPSQRRYV\ | 141  | 115  |
| >PTEN-V166I GVTIPSQRRY  | 6356 | >PTEN-V166I GLTIPSQRRY  | 292  | 6064 |
| >PTEN-V166I GVTIPSQRRY  | 3326 | >PTEN-V166I GLTIPSQRRY  | 215  | 3111 |
| >PTEN-V166I GVTIPSQRRY  | 623  | >PTEN-V166I GLTIPSQRRY  | 13   | 610  |
| >PTEN-V166I GVTIPSQRRY  | 3637 | >PTEN-V166I GLTIPSQRRY  | 94   | 3543 |
| >PTEN-V166I GVTIPSQRRY  | 1023 | >PTEN-V166I GLTIPSQRRY  | 20   | 1003 |
| >PTEN-V166I GVTIPSQRRY  | 123  | >PTEN-V166I GLTIPSQRRY  | 6    | 117  |
| >PTEN-V166I GVTIPSQR    | 457  | >PTEN-V166I GLTIPSQR    | 753  | 296  |
| >PTEN-V166I GVTIPSQR    | 210  | >PTEN-V166I GLTIPSQR    | 1208 | 998  |
| >PTEN-V166I GVTIPSQRRY  | 1811 | >PTEN-V166I GLTIPSQRRY  | 286  | 1525 |
| >PTEN-V166I GVTIPSQRRY  | 172  | >PTEN-V166I GLTIPSQRRY  | 1060 | 888  |
| >PTEN-V166I GEVTRDKKC   | 178  | >PTEN-V166I GEVTRDKKC   | 433  | 255  |
| >PTEN-V166I GEVTRDKKC   | 381  | >PTEN-V166I GEVTRDKKC   | 43   | 338  |
| >PTEN-V166I GEVTRDKKC   | 89   | >PTEN-V166I GEVTRDKKC   | 154  | 65   |
| >PTEN-V166I KGVTIPSQRR  | 155  | >PTEN-V166I KGLTIPSQRR\ | 132  | 23   |
| >PTEN-V166I KGVTIPSQR   | 208  | >PTEN-V166I KGLTIPSQR   | 87   | 121  |
| >PTEN-V166I KGVTIPSQRR  | 202  | >PTEN-V166I KGLTIPSQRR\ | 257  | 55   |
| >PTEN-V166I KGVTIPSQRR  | 227  | >PTEN-V166I KGLTIPSQRR\ | 167  | 60   |
| >PTEN-V166I KGVTIPSQR   | 147  | >PTEN-V166I KGLTIPSQR   | 85   | 62   |
| >PTEN-V166I KGVTIPSQRR  | 120  | >PTEN-V166I KGLTIPSQRR  | 66   | 54   |
| >PTEN-V166I KKGVTIPSQR  | 609  | >PTEN-V166I KKGLTIPSQR  | 305  | 304  |
| >PTEN-V166I KKGVTIPSQR  | 511  | >PTEN-V166I KKGLTIPSQR  | 237  | 274  |
| >PTEN-V166I DKKGVTIPSQ  | 497  | >PTEN-V166I DKKGLTIPSQ  | 756  | 259  |
| >PTEN-V166I RDKKGVTI    | 179  | >PTEN-V166I RDKKGVTI    | 301  | 122  |

|                         |      |                         |     |      |
|-------------------------|------|-------------------------|-----|------|
| >PTEN-V166I RTRDKKGV    | 14   | >PTEN-V166I RTRDKKGL    | 19  | 5    |
| >PTEN-V166I RTRDKKGV    | 71   | >PTEN-V166I RTRDKKGLT   | 37  | 34   |
| >PTEN-V166I RTRDKKGVTI  | 5    | >PTEN-V166I RTRDKKGLTI  | 4   | 1    |
| >PTEN-V166I RTRDKKGVTI  | 103  | >PTEN-V166I RTRDKKGLTII | 88  | 15   |
| >PTEN-V166I RTRDKKGVTI  | 120  | >PTEN-V166I RTRDKKGLTI  | 286 | 166  |
| >PTEN-V166I RTRDKKGV    | 26   | >PTEN-V166I RTRDKKGL    | 4   | 22   |
| >PTEN-V166I RTRDKKGVTI  | 5    | >PTEN-V166I RTRDKKGLTI  | 4   | 1    |
| >PTEN-V166I RTRDKKGV    | 620  | >PTEN-V166I RTRDKKGLT   | 386 | 234  |
| >PTEN-V166I RTRDKKGVTI  | 100  | >PTEN-V166I RTRDKKGLTI  | 107 | 7    |
| >PTEN-V166I VRTRDKKGV   | 4734 | >PTEN-V166I VRTRDKKGL   | 396 | 4338 |
| >PTEN-V175I VYYYYSYLL   | 63   | >PTEN-V175I LYYYYSYLL   | 307 | 244  |
| >PTEN-V175I VYYYYSYLL   | 411  | >PTEN-V175I LYYYYSYLL   | 158 | 253  |
| >PTEN-V175I VYYYYSYLLK  | 105  | >PTEN-V175I LYYYYSYLLK  | 149 | 44   |
| >PTEN-V175I VYYYYSYLLK  | 39   | >PTEN-V175I LYYYYSYLLK  | 69  | 30   |
| >PTEN-V175I VYYYYSYLL   | 28   | >PTEN-V175I LYYYYSYLL   | 37  | 9    |
| >PTEN-V175I VYYYYSYLLK  | 68   | >PTEN-V175I LYYYYSYLLK  | 89  | 21   |
| >PTEN-V175I VYYYYSYLL   | 59   | >PTEN-V175I LYYYYSYLL   | 65  | 6    |
| >PTEN-V175I VYYYYSYLLK  | 411  | >PTEN-V175I LYYYYSYLLK  | 558 | 147  |
| >PTEN-V175I VYYYYSYLL   | 23   | >PTEN-V175I LYYYYSYLL   | 15  | 8    |
| >PTEN-V175I VYYYYSYLLK  | 23   | >PTEN-V175I LYYYYSYLLK  | 11  | 12   |
| >PTEN-V175I VYYYYSYLLK  | 302  | >PTEN-V175I LYYYYSYLLK  | 239 | 63   |
| >PTEN-V175I VYYYYSYLLK  | 585  | >PTEN-V175I LYYYYSYLLK  | 230 | 355  |
| >PTEN-V175I VYYYYSYLL   | 234  | >PTEN-V175I LYYYYSYLL   | 600 | 366  |
| >PTEN-V175I VYYYYSYLLK  | 155  | >PTEN-V175I LYYYYSYLLK  | 149 | 6    |
| >PTEN-V175I VYYYYSYLL   | 353  | >PTEN-V175I LYYYYSYLL   | 520 | 167  |
| >PTEN-V175I VYYYYSYLL   | 188  | >PTEN-V175I LYYYYSYLL   | 146 | 42   |
| >PTEN-V175I VYYYYSYL    | 4    | >PTEN-V175I YLYYYSYL    | 11  | 7    |
| >PTEN-V175I VYYYYSYLL   | 20   | >PTEN-V175I YLYYYSYLL   | 126 | 106  |
| >PTEN-V175I VYYYYSYL    | 10   | >PTEN-V175I YLYYYSYL    | 6   | 4    |
| >PTEN-V175I VYYYYSYLL   | 7    | >PTEN-V175I YLYYYSYLL   | 6   | 1    |
| >PTEN-V175I VYYYYSYLLK  | 3557 | >PTEN-V175I YLYYYSYLLK  | 283 | 3274 |
| >PTEN-V175I VYYYYSYL    | 4    | >PTEN-V175I YLYYYSYL    | 2   | 2    |
| >PTEN-V175I VYYYYSYLL   | 3    | >PTEN-V175I YLYYYSYLL   | 2   | 1    |
| >PTEN-V175I VYYYYSYLLK  | 2371 | >PTEN-V175I YLYYYSYLLK  | 214 | 2157 |
| >PTEN-V175I VYYYYSYLLKN | 6313 | >PTEN-V175I YLYYYSYLLKN | 311 | 6002 |
| >PTEN-V175I VYYYYSYL    | 9    | >PTEN-V175I YLYYYSYL    | 3   | 6    |
| >PTEN-V175I VYYYYSYLL   | 18   | >PTEN-V175I YLYYYSYLL   | 5   | 13   |
| >PTEN-V175I VYYYYSYL    | 8    | >PTEN-V175I YLYYYSYL    | 14  | 6    |
| >PTEN-V175I VYYYYSYLL   | 8    | >PTEN-V175I YLYYYSYLL   | 14  | 6    |
| >PTEN-V175I VYYYYSYL    | 5    | >PTEN-V175I YLYYYSYL    | 1   | 4    |
| >PTEN-V175I VYYYYSYLL   | 10   | >PTEN-V175I YLYYYSYLL   | 2   | 8    |
| >PTEN-V175I VYYYYSYLLK  | 9016 | >PTEN-V175I YLYYYSYLLK  | 309 | 8707 |
| >PTEN-V175I VYYYYSYLLKN | 5268 | >PTEN-V175I YLYYYSYLLKN | 101 | 5167 |

|                       |       |                       |      |       |
|-----------------------|-------|-----------------------|------|-------|
| >PTEN-V175IYVYYYSYL   | 21    | >PTEN-V175IYLYYYSYL   | 3    | 18    |
| >PTEN-V175IYVYYYSYLL  | 12    | >PTEN-V175IYLYYYSYLL  | 2    | 10    |
| >PTEN-V175IYVYYYSYL   | 42    | >PTEN-V175IYLYYYSYL   | 5    | 37    |
| >PTEN-V175IYVYYYSYLL  | 86    | >PTEN-V175IYLYYYSYLL  | 6    | 80    |
| >PTEN-V175IYVYYYSYL   | 99    | >PTEN-V175IYLYYYSYL   | 4    | 95    |
| >PTEN-V175IYVYYYSYLL  | 200   | >PTEN-V175IYLYYYSYLL  | 5    | 195   |
| >PTEN-V175IYVYYYSYL   | 12    | >PTEN-V175IYLYYYSYL   | 2    | 10    |
| >PTEN-V175IYVYYYSYLL  | 27    | >PTEN-V175IYLYYYSYLL  | 2    | 25    |
| >PTEN-V175IYVYYYSYLLK | 16749 | >PTEN-V175IYLYYYSYLLK | 172  | 16577 |
| >PTEN-V175IYVYYYSYLLK | 8     | >PTEN-V175IYLYYYSYLLK | 7    | 1     |
| >PTEN-V175IYVYYYSYLLK | 7     | >PTEN-V175IYLYYYSYLLK | 10   | 3     |
| >PTEN-V175IYVYYYSYL   | 193   | >PTEN-V175IYLYYYSYL   | 3300 | 3107  |
| >PTEN-V175IYVYYYSYLL  | 71    | >PTEN-V175IYLYYYSYLL  | 88   | 17    |
| >PTEN-V175IYVYYYSYLLK | 41    | >PTEN-V175IYLYYYSYLLK | 312  | 271   |
| >PTEN-V175IYVYYYSYLLK | 165   | >PTEN-V175IYLYYYSYLLK | 244  | 79    |
| >PTEN-V175IYVYYYSYL   | 81    | >PTEN-V175IYLYYYSYL   | 95   | 14    |
| >PTEN-V175IYVYYYSYLLK | 274   | >PTEN-V175IYLYYYSYLLK | 305  | 31    |
| >PTEN-V175IYVYYYSYL   | 377   | >PTEN-V175IYLYYYSYL   | 2969 | 2592  |
| >PTEN-V175IYVYYYSYLL  | 253   | >PTEN-V175IYLYYYSYLL  | 2120 | 1867  |
| >PTEN-V175IYVYYYSYLLK | 6     | >PTEN-V175IYLYYYSYLLK | 19   | 13    |
| >PTEN-V175IYVYYYSYL   | 21    | >PTEN-V175IYLYYYSYL   | 375  | 354   |
| >PTEN-V175IYVYYYSYLL  | 11    | >PTEN-V175IYLYYYSYLL  | 184  | 173   |
| >PTEN-V175IYVYYYSYL   | 17    | >PTEN-V175IYLYYYSYL   | 63   | 46    |
| >PTEN-V175IYVYYYSYLL  | 19    | >PTEN-V175IYLYYYSYLL  | 70   | 51    |
| >PTEN-V175IYVYYYSYL   | 597   | >PTEN-V175IYLYYYSYL   | 86   | 511   |
| >PTEN-V175IYVYYYSYLL  | 676   | >PTEN-V175IYLYYYSYLL  | 87   | 589   |
| >PTEN-V175IYVYYYSYL   | 279   | >PTEN-V175IYLYYYSYL   | 111  | 168   |
| >PTEN-V175IYVYYYSYLL  | 421   | >PTEN-V175IYLYYYSYLL  | 147  | 274   |
| >PTEN-V175IYVYYYSYL   | 1552  | >PTEN-V175IYLYYYSYL   | 213  | 1339  |
| >PTEN-V175IYVYYYSYLL  | 2689  | >PTEN-V175IYLYYYSYLL  | 430  | 2259  |
| >PTEN-V175IYVYYYSYL   | 85    | >PTEN-V175IYLYYYSYL   | 15   | 70    |
| >PTEN-V175IYVYYYSYLL  | 255   | >PTEN-V175IYLYYYSYLL  | 43   | 212   |
| >PTEN-V175IYVYYYSYLLK | 1314  | >PTEN-V175IYLYYYSYLLK | 250  | 1064  |
| >PTEN-V175IYVYYYSYL   | 52    | >PTEN-V175IYLYYYSYL   | 378  | 326   |
| >PTEN-V175IYVYYYSYLL  | 84    | >PTEN-V175IYLYYYSYLL  | 657  | 573   |
| >PTEN-V175IYVYYYSYLL  | 219   | >PTEN-V175IYLYYYSYLL  | 1512 | 1293  |
| >PTEN-V175IYVYYYSYLL  | 75    | >PTEN-V175IYLYYYSYLL  | 47   | 28    |
| >PTEN-V175IYVYYYSYLL  | 63    | >PTEN-V175IYLYYYSYLL  | 83   | 20    |
| >PTEN-V175IYVYYYSYLL  | 51    | >PTEN-V175IYLYYYSYLL  | 346  | 295   |
| >PTEN-V175IYVYYYSYLLK | 50    | >PTEN-V175IYLYYYSYLLK | 22   | 28    |
| >PTEN-V175IYVYYYSYLLK | 490   | >PTEN-V175IYLYYYSYLLK | 1646 | 1156  |
| >PTEN-V175IGVTIPSQRRY | 123   | >PTEN-V175IGVTIPSQRRY | 2867 | 2744  |
| >PTEN-V175IRVYYYSYL   | 51    | >PTEN-V175IRVYYYSYL   | 42   | 9     |

|                          |      |                          |     |     |
|--------------------------|------|--------------------------|-----|-----|
| >PTEN-V175I RYVYYYYSYL   | 340  | >PTEN-V175I RYLYYYYSYL   | 736 | 396 |
| >PTEN-V175I RYVYYYYSYLLK | 1034 | >PTEN-V175I RYLYYYYSYLLK | 439 | 595 |
| >PTEN-V175I RYVYYYYSYLLK | 94   | >PTEN-V175I RYLYYYYSYLLK | 47  | 47  |
| >PTEN-V175I RYVYYYYSY    | 213  | >PTEN-V175I RYLYYYYSY    | 209 | 4   |
| >PTEN-V175I RYVYYYYSYL   | 42   | >PTEN-V175I RYLYYYYSYL   | 46  | 4   |
| >PTEN-V175I RYVYYYYSYLL  | 6    | >PTEN-V175I RYLYYYYSYLL  | 5   | 1   |
| >PTEN-V175I RYVYYYYSYLLK | 105  | >PTEN-V175I RYLYYYYSYLLK | 117 | 12  |
| >PTEN-V175I RYVYYYYSY    | 244  | >PTEN-V175I RYLYYYYSY    | 174 | 70  |
| >PTEN-V175I RYVYYYYSYL   | 56   | >PTEN-V175I RYLYYYYSYL   | 40  | 16  |
| >PTEN-V175I RYVYYYYSYLL  | 26   | >PTEN-V175I RYLYYYYSYLL  | 25  | 1   |
| >PTEN-V175I RYVYYYYSYLLK | 271  | >PTEN-V175I RYLYYYYSYLLK | 196 | 75  |
| >PTEN-V175I RYVYYYYSY    | 86   | >PTEN-V175I RYLYYYYSY    | 20  | 66  |
| >PTEN-V175I RYVYYYYSYL   | 6    | >PTEN-V175I RYLYYYYSYL   | 4   | 2   |
| >PTEN-V175I RYVYYYYSYLL  | 10   | >PTEN-V175I RYLYYYYSYLL  | 5   | 5   |
| >PTEN-V175I RYVYYYYSYLLK | 446  | >PTEN-V175I RYLYYYYSYLLK | 91  | 355 |
| >PTEN-V175I RYVYYYYSY    | 18   | >PTEN-V175I RYLYYYYSY    | 15  | 3   |
| >PTEN-V175I RYVYYYYSYLL  | 222  | >PTEN-V175I RYLYYYYSYLL  | 175 | 47  |
| >PTEN-V175I RYVYYYYSY    | 842  | >PTEN-V175I RYLYYYYSY    | 128 | 714 |
| >PTEN-V175I RYVYYYYSYL   | 121  | >PTEN-V175I RYLYYYYSYL   | 21  | 100 |
| >PTEN-V175I RYVYYYYSYLL  | 348  | >PTEN-V175I RYLYYYYSYLL  | 50  | 298 |
| >PTEN-V175I RYVYYYYSYLLK | 6    | >PTEN-V175I RYLYYYYSYLLK | 4   | 2   |
| >PTEN-V175I RYVYYYYSY    | 39   | >PTEN-V175I RYLYYYYSY    | 32  | 7   |
| >PTEN-V175I RYVYYYYSYLL  | 410  | >PTEN-V175I RYLYYYYSYLL  | 441 | 31  |
| >PTEN-V175I RYVYYYYSY    | 484  | >PTEN-V175I RYLYYYYSY    | 210 | 274 |
| >PTEN-V175I RYVYYYYSYL   | 105  | >PTEN-V175I RYLYYYYSYL   | 56  | 49  |
| >PTEN-V175I RYVYYYYSYLLK | 33   | >PTEN-V175I RYLYYYYSYLLK | 20  | 13  |
| >PTEN-V175I RYVYYYYSY    | 794  | >PTEN-V175I RYLYYYYSY    | 255 | 539 |
| >PTEN-V175I RYVYYYYSYLL  | 747  | >PTEN-V175I RYLYYYYSYLL  | 246 | 501 |
| >PTEN-V175I RYVYYYYSY    | 88   | >PTEN-V175I RYLYYYYSY    | 43  | 45  |
| >PTEN-V175I RYVYYYYSY    | 77   | >PTEN-V175I RYLYYYYSY    | 51  | 26  |
| >PTEN-V175I RYVYYYYSYL   | 223  | >PTEN-V175I RYLYYYYSYL   | 146 | 77  |
| >PTEN-V175I RYVYYYYSYLL  | 420  | >PTEN-V175I RYLYYYYSYLL  | 350 | 70  |
| >PTEN-V175I RYVYYYYSYL   | 403  | >PTEN-V175I RYLYYYYSYL   | 291 | 112 |
| >PTEN-V175I RYVYYYYSYL   | 623  | >PTEN-V175I RYLYYYYSYL   | 374 | 249 |
| >PTEN-V175I RYVYYYYSY    | 127  | >PTEN-V175I RYLYYYYSY    | 183 | 56  |
| >PTEN-V175I RYVYYYYSYLLK | 42   | >PTEN-V175I RYLYYYYSYLLK | 36  | 6   |
| >PTEN-V175I RYVYYYYSYL   | 311  | >PTEN-V175I RYLYYYYSYL   | 293 | 18  |
| >PTEN-V175I RYVYYYYSYLL  | 195  | >PTEN-V175I RYLYYYYSYLL  | 161 | 34  |
| >PTEN-V175I RYVYYYYSY    | 356  | >PTEN-V175I RYLYYYYSY    | 339 | 17  |
| >PTEN-V175I RYVYYYYSYL   | 37   | >PTEN-V175I RYLYYYYSYL   | 34  | 3   |
| >PTEN-V175I RYVYYYYSYLL  | 32   | >PTEN-V175I RYLYYYYSYLL  | 23  | 9   |
| >PTEN-V175I RYVYYYYSYLLK | 325  | >PTEN-V175I RYLYYYYSYLLK | 315 | 10  |
| >PTEN-V175I RRYVYYYYSYLL | 136  | >PTEN-V175I RRYLYYYYSYLL | 151 | 15  |

|                         |     |                         |     |     |
|-------------------------|-----|-------------------------|-----|-----|
| >PTEN-V175I RRYVYYYSYL  | 429 | >PTEN-V175I RRYLYYYSYL  | 276 | 153 |
| >PTEN-V175I RRYVYYYSY   | 139 | >PTEN-V175I RRYLYYYSY   | 121 | 18  |
| >PTEN-V175I RRYVYYYSY   | 106 | >PTEN-V175I RRYLYYYSY   | 265 | 159 |
| >PTEN-V175I RRYVYYYSY   | 3   | >PTEN-V175I RRYLYYYSY   | 4   | 1   |
| >PTEN-V175I RRYVYYYSYL  | 8   | >PTEN-V175I RRYLYYYSYL  | 13  | 5   |
| >PTEN-V175I RRYVYYYSYLL | 19  | >PTEN-V175I RRYLYYYSYLL | 43  | 24  |
| >PTEN-V175I RRYVYYYS    | 69  | >PTEN-V175I RRYLYYYS    | 66  | 3   |
| >PTEN-V175I RRYVYYYSY   | 11  | >PTEN-V175I RRYLYYYSY   | 13  | 2   |
| >PTEN-V175I RRYVYYYSYL  | 7   | >PTEN-V175I RRYLYYYSYL  | 6   | 1   |
| >PTEN-V175I RRYVYYYSYLL | 8   | >PTEN-V175I RRYLYYYSYLL | 9   | 1   |
| >PTEN-V175I RRYVYYYSYL  | 325 | >PTEN-V175I RRYLYYYSYL  | 429 | 104 |
| >PTEN-V175I RRYVYYYSYLL | 50  | >PTEN-V175I RRYLYYYSYLL | 64  | 14  |
| >PTEN-V175I RRYVYYYSYL  | 263 | >PTEN-V175I RRYLYYYSYL  | 226 | 37  |
| >PTEN-V175I RRYVYYYSYLL | 106 | >PTEN-V175I RRYLYYYSYLL | 97  | 9   |
| >PTEN-V175I RRYVYYYS    | 221 | >PTEN-V175I RRYLYYYS    | 389 | 168 |
| >PTEN-V175I RRYVYYYSY   | 47  | >PTEN-V175I RRYLYYYSY   | 70  | 23  |
| >PTEN-V175I RRYVYYYSYL  | 14  | >PTEN-V175I RRYLYYYSYL  | 13  | 1   |
| >PTEN-V175I RRYVYYYSYLL | 11  | >PTEN-V175I RRYLYYYSYLL | 12  | 1   |
| >PTEN-V175I RRYVYYYS    | 450 | >PTEN-V175I RRYLYYYS    | 546 | 96  |
| >PTEN-V175I RRYVYYYSY   | 33  | >PTEN-V175I RRYLYYYSY   | 41  | 8   |
| >PTEN-V175I RRYVYYYSYL  | 12  | >PTEN-V175I RRYLYYYSYL  | 10  | 2   |
| >PTEN-V175I RRYVYYYSYLL | 3   | >PTEN-V175I RRYLYYYSYLL | 4   | 1   |
| >PTEN-V175I RRYVYYYSY   | 231 | >PTEN-V175I RRYLYYYSY   | 521 | 290 |
| >PTEN-V175I RRYVYYYSYL  | 541 | >PTEN-V175I RRYLYYYSYL  | 442 | 99  |
| >PTEN-V175I QRRYVYYY    | 292 | >PTEN-V175I QRRYLYYY    | 155 | 137 |
| >PTEN-V175I QRRYVYYY    | 388 | >PTEN-V175I QRRYLYYY    | 344 | 44  |
| >PTEN-V175I QRRYVYYYSY  | 405 | >PTEN-V175I QRRYLYYYSY  | 737 | 332 |
| >PTEN-V175I QRRYVYYY    | 33  | >PTEN-V175I QRRYLYYY    | 53  | 20  |
| >PTEN-V175I QRRYVYYYSY  | 15  | >PTEN-V175I QRRYLYYYSY  | 18  | 3   |
| >PTEN-V175I QRRYVYYYSY  | 44  | >PTEN-V175I QRRYLYYYSYI | 44  | 0   |
| >PTEN-V175I QRRYVYYYSY  | 33  | >PTEN-V175I QRRYLYYYSY  | 24  | 9   |
| >PTEN-V175I QRRYVYYYSY  | 595 | >PTEN-V175I QRRYLYYYSYI | 390 | 205 |
| >PTEN-V175I QRRYVYYYSY  | 41  | >PTEN-V175I QRRYLYYYSYI | 38  | 3   |
| >PTEN-V175I QRRYVYYYSY  | 19  | >PTEN-V175I QRRYLYYYSYI | 14  | 5   |
| >PTEN-V175I SQRRYVYYY   | 308 | >PTEN-V175I SQRRYLYYY   | 147 | 161 |
| >PTEN-V175I SQRRYVYYY   | 960 | >PTEN-V175I SQRRYLYY    | 151 | 809 |
| >PTEN-V175I SQRRYVYYY   | 137 | >PTEN-V175I SQRRYLYYY   | 74  | 63  |
| >PTEN-V175I SQRRYVYYYS  | 355 | >PTEN-V175I SQRRYLYYYS' | 246 | 109 |
| >PTEN-V175I SQRRYVYYY   | 72  | >PTEN-V175I SQRRYLYY    | 49  | 23  |
| >PTEN-V175I SQRRYVYYY   | 75  | >PTEN-V175I SQRRYLYYY   | 69  | 6   |
| >PTEN-V175I SQRRYVYYYS  | 152 | >PTEN-V175I SQRRYLYYYS  | 148 | 4   |
| >PTEN-V175I SQRRYVYYYS  | 104 | >PTEN-V175I SQRRYLYYYS' | 109 | 5   |
| >PTEN-V175I SQRRYVYYY   | 535 | >PTEN-V175I SQRRYLYY    | 354 | 181 |

|                       |      |                        |      |      |
|-----------------------|------|------------------------|------|------|
| >PTEN-V175ISQRRYVYYY  | 83   | >PTEN-V175ISQRRYLYYY   | 42   | 41   |
| >PTEN-V175ISQRRYVYYYS | 106  | >PTEN-V175ISQRRYLYYYS' | 88   | 18   |
| >PTEN-V175ISQRRYVYYY  | 219  | >PTEN-V175ISQRRYLYYY   | 149  | 70   |
| >PTEN-V175ISQRRYVYY   | 1467 | >PTEN-V175ISQRRYLYY    | 130  | 1337 |
| >PTEN-V175ISQRRYVYYY  | 212  | >PTEN-V175ISQRRYLYYY   | 150  | 62   |
| >PTEN-V175ISQRRYVYY   | 41   | >PTEN-V175ISQRRYLYY    | 40   | 1    |
| >PTEN-V175ISQRRYVYYY  | 36   | >PTEN-V175ISQRRYLYYY   | 45   | 9    |
| >PTEN-V175ISQRRYVYYYS | 34   | >PTEN-V175ISQRRYLYYYS' | 37   | 3    |
| >PTEN-V175ISQRRYVYY   | 383  | >PTEN-V175ISQRRYLYY    | 358  | 25   |
| >PTEN-V175ISQRRYVYYYS | 322  | >PTEN-V175ISQRRYLYYYS' | 414  | 92   |
| >PTEN-V175ISQRRYVYY   | 4    | >PTEN-V175ISQRRYLYY    | 6    | 2    |
| >PTEN-V175ISQRRYVYYY  | 4    | >PTEN-V175ISQRRYLYYY   | 6    | 2    |
| >PTEN-V175ISQRRYVYYYS | 3    | >PTEN-V175ISQRRYLYYYS' | 4    | 1    |
| >PTEN-V175ISQRRYVYYYS | 492  | >PTEN-V175ISQRRYLYYYS' | 499  | 7    |
| >PTEN-V175ISQRRYVYYY  | 453  | >PTEN-V175ISQRRYLYYY   | 385  | 68   |
| >PTEN-V175IPSQRRYVY   | 1626 | >PTEN-V175IPSQRRYLY    | 239  | 1387 |
| >PTEN-V175IPSQRRYVYY  | 907  | >PTEN-V175IPSQRRYLYY   | 77   | 830  |
| >PTEN-V175IPSQRRYVYYY | 186  | >PTEN-V175IPSQRRYLYYY  | 117  | 69   |
| >PTEN-V175IPSQRRYVY   | 3238 | >PTEN-V175IPSQRRYLY    | 456  | 2782 |
| >PTEN-V175IPSQRRYVYY  | 1915 | >PTEN-V175IPSQRRYLYY   | 211  | 1704 |
| >PTEN-V175IPSQRRYVYYY | 359  | >PTEN-V175IPSQRRYLYYY  | 360  | 1    |
| >PTEN-V175IPSQRRYVY   | 465  | >PTEN-V175IPSQRRYLY    | 503  | 38   |
| >PTEN-V175IPSQRRYVYYY | 40   | >PTEN-V175IPSQRRYLYYY  | 35   | 5    |
| >PTEN-V175IPSQRRYVYYY | 353  | >PTEN-V175IPSQRRYLYYY  | 183  | 170  |
| >PTEN-V175IPSQRRYV    | 597  | >PTEN-V175IPSQRRYL     | 109  | 488  |
| >PTEN-V175IPSQRRYVY   | 1972 | >PTEN-V175IPSQRRYLY    | 213  | 1759 |
| >PTEN-V175IPSQRRYVYYY | 288  | >PTEN-V175IPSQRRYLYYY  | 145  | 143  |
| >PTEN-V175IPSQRRYVY   | 183  | >PTEN-V175IPSQRRYLY    | 187  | 4    |
| >PTEN-V175IPSQRRYVYYY | 123  | >PTEN-V175IPSQRRYLYYY  | 88   | 35   |
| >PTEN-V175IPSQRRYV    | 22   | >PTEN-V175IPSQRRYL     | 10   | 12   |
| >PTEN-V175IPSQRRYVY   | 165  | >PTEN-V175IPSQRRYLY    | 1680 | 1515 |
| >PTEN-V175IPSQRRYV    | 1066 | >PTEN-V175IPSQRRYL     | 319  | 747  |
| >PTEN-V175IPSQRRYVY   | 16   | >PTEN-V175IPSQRRYLY    | 45   | 29   |
| >PTEN-V175IPSQRRYVYYY | 27   | >PTEN-V175IPSQRRYLYYY  | 36   | 9    |
| >PTEN-V175IPSQRRYVY   | 74   | >PTEN-V175IPSQRRYLY    | 42   | 32   |
| >PTEN-V175IPSQRRYVYYY | 31   | >PTEN-V175IPSQRRYLYYY  | 38   | 7    |
| >PTEN-V175IPSQRRYVY   | 7    | >PTEN-V175IPSQRRYLY    | 26   | 19   |
| >PTEN-V175IPSQRRYVYYY | 33   | >PTEN-V175IPSQRRYLYYY  | 78   | 45   |
| >PTEN-V175IPSQRRYVYYY | 12   | >PTEN-V175IPSQRRYLYYY  | 19   | 7    |
| >PTEN-V175IPSQRRYVY   | 262  | >PTEN-V175IPSQRRYLY    | 479  | 217  |
| >PTEN-V175TIPSQRRYV   | 225  | >PTEN-V175TIPSQRRYL    | 4380 | 4155 |
| >PTEN-V175TIPSQRRYVYY | 290  | >PTEN-V175TIPSQRRYLY   | 378  | 88   |
| >PTEN-V175TIPSQRRYVY  | 746  | >PTEN-V175TIPSQRRYLY   | 410  | 336  |



|                        |      |                        |      |      |
|------------------------|------|------------------------|------|------|
| >PTEN-V175I TIPSQRRYVY | 238  | >PTEN-V175I TIPSQRRYLY | 63   | 175  |
| >PTEN-V175I TIPSQRRYVY | 1051 | >PTEN-V175I TIPSQRRYLY | 303  | 748  |
| >PTEN-V175I TIPSQRRYVY | 2181 | >PTEN-V175I TIPSQRRYLY | 486  | 1695 |
| >PTEN-V175I TIPSQRRYV  | 67   | >PTEN-V175I TIPSQRRYL  | 780  | 713  |
| >PTEN-V175I TIPSQRRYVY | 6378 | >PTEN-V175I TIPSQRRYLY | 362  | 6016 |
| >PTEN-V175I TIPSQRRYV  | 2924 | >PTEN-V175I TIPSQRRYL  | 303  | 2621 |
| >PTEN-V175I VTIPSQRRYV | 249  | >PTEN-V175I VTIPSQRRYL | 3352 | 3103 |
| >PTEN-V175I VTIPSQRRYV | 286  | >PTEN-V175I VTIPSQRRYL | 5655 | 5369 |
| >PTEN-V175I VTIPSQRRYV | 284  | >PTEN-V175I VTIPSQRRYL | 87   | 197  |
| >PTEN-V175I VTIPSQRRYV | 4252 | >PTEN-V175I VTIPSQRRYL | 336  | 3916 |
| >PTEN-V175I VTIPSQRRYV | 38   | >PTEN-V175I VTIPSQRRYL | 97   | 59   |
| >PTEN-V175I VTIPSQRRYV | 509  | >PTEN-V175I VTIPSQRRYL | 460  | 49   |
| >PTEN-V175I VTIPSQRRYV | 26   | >PTEN-V175I VTIPSQRRYL | 11   | 15   |
| >PTEN-V175I VTIPSQRRYV | 16   | >PTEN-V175I VTIPSQRRYL | 17   | 1    |
| >PTEN-V175I VTIPSQRRYV | 906  | >PTEN-V175I VTIPSQRRYL | 314  | 592  |
| >PTEN-V175I VTIPSQRRYV | 225  | >PTEN-V175I VTIPSQRRYL | 1321 | 1096 |
| >PTEN-V175I VTIPSQRRYV | 579  | >PTEN-V175I VTIPSQRRYL | 77   | 502  |
| >PTEN-V175I VTIPSQRRYV | 109  | >PTEN-V175I VTIPSQRRYL | 529  | 420  |
| >PTEN-V175I VTIPSQRRYV | 205  | >PTEN-V175I VTIPSQRRYL | 624  | 419  |
| >PTEN-V175I VTIPSQRRYV | 124  | >PTEN-V175I VTIPSQRRYL | 13   | 111  |
| >PTEN-V175I VTIPSQRRYV | 4    | >PTEN-V175I VTIPSQRRYL | 4    | 0    |
| >PTEN-V175I VTIPSQRRYV | 2601 | >PTEN-V175I VTIPSQRRYL | 367  | 2234 |
| >PTEN-V175I VTIPSQRRYV | 111  | >PTEN-V175I VTIPSQRRYL | 99   | 12   |
| >PTEN-V175I VTIPSQRRYV | 76   | >PTEN-V175I VTIPSQRRYL | 85   | 9    |
| >PTEN-V175I VTIPSQRRYV | 616  | >PTEN-V175I VTIPSQRRYL | 107  | 509  |
| >PTEN-V175I VTIPSQRRYV | 37   | >PTEN-V175I VTIPSQRRYL | 24   | 13   |
| >PTEN-V175I VTIPSQRRYV | 256  | >PTEN-V175I VTIPSQRRYL | 1812 | 1556 |
| >PTEN-V175I VTIPSQRRYV | 817  | >PTEN-V175I VTIPSQRRYL | 432  | 385  |
| >PTEN-V216I VVCQLKVK   | 204  | >PTEN-V216I MVCQLKVK   | 113  | 91   |
| >PTEN-V216I VVCQLKVKIY | 635  | >PTEN-V216I MVCQLKVKIY | 389  | 246  |
| >PTEN-V216I VVCQLKVK   | 4151 | >PTEN-V216I MVCQLKVK   | 478  | 3673 |
| >PTEN-V216I VVCQLKVK   | 4066 | >PTEN-V216I MVCQLKVK   | 116  | 3950 |
| >PTEN-V216I VVCQLKVKIY | 1031 | >PTEN-V216I MVCQLKVKIY | 471  | 560  |
| >PTEN-V216I FVVCQLKV   | 81   | >PTEN-V216I FMVCQLKV   | 11   | 70   |
| >PTEN-V216I FVVCQLKVKI | 5889 | >PTEN-V216I FMVCQLKVKI | 313  | 5576 |
| >PTEN-V216I FVVCQLKV   | 60   | >PTEN-V216I FMVCQLKV   | 5    | 55   |
| >PTEN-V216I FVVCQLKVKI | 1905 | >PTEN-V216I FMVCQLKVKI | 166  | 1739 |
| >PTEN-V216I FVVCQLKV   | 19   | >PTEN-V216I FMVCQLKV   | 4    | 15   |
| >PTEN-V216I FVVCQLKVKI | 1321 | >PTEN-V216I FMVCQLKVKI | 148  | 1173 |
| >PTEN-V216I FVVCQLKV   | 8    | >PTEN-V216I FMVCQLKV   | 6    | 2    |
| >PTEN-V216I FVVCQLKVKI | 279  | >PTEN-V216I FMVCQLKVKI | 147  | 132  |
| >PTEN-V216I FVVCQLKV   | 43   | >PTEN-V216I FMVCQLKV   | 2    | 41   |
| >PTEN-V216I FVVCQLKVKI | 820  | >PTEN-V216I FMVCQLKVKI | 7    | 813  |

|                         |       |                         |       |       |
|-------------------------|-------|-------------------------|-------|-------|
| >PTEN-V216I FVVCQLKV    | 67    | >PTEN-V216I FMVCQLKV    | 3     | 64    |
| >PTEN-V216I FVVCQLKVKI  | 1498  | >PTEN-V216I FMVCQLKVKI  | 13    | 1485  |
| >PTEN-V216I FVVCQLKV    | 203   | >PTEN-V216I FMVCQLKV    | 7     | 196   |
| >PTEN-V216I FVVCQLKVKI  | 6170  | >PTEN-V216I FMVCQLKVKI  | 76    | 6094  |
| >PTEN-V216I FVVCQLKV    | 907   | >PTEN-V216I FMVCQLKV    | 9     | 898   |
| >PTEN-V216I FVVCQLKVKI  | 13464 | >PTEN-V216I FMVCQLKVKI  | 490   | 12974 |
| >PTEN-V216I FVVCQLKV    | 13    | >PTEN-V216I FMVCQLKV    | 2     | 11    |
| >PTEN-V216I FVVCQLKVKI  | 2498  | >PTEN-V216I FMVCQLKVKI  | 23    | 2475  |
| >PTEN-V216I FVVCQLKVKI' | 160   | >PTEN-V216I FMVCQLKVKI' | 3663  | 3503  |
| >PTEN-V216I FVVCQLKVKI' | 9     | >PTEN-V216I FMVCQLKVKI' | 190   | 181   |
| >PTEN-V216I FVVCQLKVKI' | 137   | >PTEN-V216I FMVCQLKVKI' | 41    | 96    |
| >PTEN-V216I FVVCQLKV    | 33    | >PTEN-V216I FMVCQLKV    | 1036  | 1003  |
| >PTEN-V216I FVVCQLKV    | 78    | >PTEN-V216I FMVCQLKV    | 321   | 243   |
| >PTEN-V216I FVVCQLKVKI' | 573   | >PTEN-V216I FMVCQLKVKI' | 88    | 485   |
| >PTEN-V216I FVVCQLKVKI' | 849   | >PTEN-V216I FMVCQLKVKI' | 96    | 753   |
| >PTEN-V216I FVVCQLKV    | 6299  | >PTEN-V216I FMVCQLKV    | 183   | 6116  |
| >PTEN-V216I FVVCQLKVKI  | 5411  | >PTEN-V216I FMVCQLKVKI  | 159   | 5252  |
| >PTEN-V216I FVVCQLKVKI' | 388   | >PTEN-V216I FMVCQLKVKI' | 12    | 376   |
| >PTEN-V216I FVVCQLKVKI' | 231   | >PTEN-V216I FMVCQLKVKI' | 418   | 187   |
| >PTEN-V216I FSGGTCNPQI  | 143   | >PTEN-V216I FSGGTCNPQI  | 1950  | 1807  |
| >PTEN-V216I FSGGTCNPQI  | 311   | >PTEN-V216I FSGGTCNPQI  | 6508  | 6197  |
| >PTEN-V216I FSGGTCNPQI  | 156   | >PTEN-V216I FSGGTCNPQI  | 7126  | 6970  |
| >PTEN-V216I FSGGTCNPQI  | 382   | >PTEN-V216I FSGGTCNPQI  | 10885 | 10503 |
| >PTEN-V216I FSGGTCNPQI  | 8966  | >PTEN-V216I FSGGTCNPQI  | 409   | 8557  |
| >PTEN-V216I FSGGTCNPQI  | 2647  | >PTEN-V216I FSGGTCNPQI  | 259   | 2388  |
| >PTEN-V216I QFVVCQLKVI  | 538   | >PTEN-V216I QFMVCQLKV   | 495   | 43    |
| >PTEN-V216I QFVVCQLKVI  | 1654  | >PTEN-V216I QFMVCQLKV   | 198   | 1456  |
| >PTEN-V216I PQFVVCQL    | 328   | >PTEN-V216I PQFMVCQL    | 253   | 75    |
| >PTEN-V216I NPQFVVCQLI  | 443   | >PTEN-V216I NPQFMVCQL   | 709   | 266   |
| >PTEN-V216I TCNPQFVV    | 293   | >PTEN-V216I TCNPQFMV    | 169   | 124   |
| >PTEN-V216I TCNPQFVV    | 1514  | >PTEN-V216I TCNPQFMV    | 248   | 1266  |
| >PTEN-V216I GTCNPQFV    | 37    | >PTEN-V216I GTCNPQFM    | 4722  | 4685  |
| >PTEN-V216I GTCNPQFV    | 465   | >PTEN-V216I GTCNPQFM    | 14467 | 14002 |
| >PTEN-V216I GTCNPQFV    | 402   | >PTEN-V216I GTCNPQFM    | 23187 | 22785 |
| >PTEN-V216I GTCNPQFV    | 16349 | >PTEN-V216I GTCNPQFM    | 452   | 15897 |
| >PTEN-V216I GTCNPQFV    | 3760  | >PTEN-V216I GTCNPQFM    | 138   | 3622  |
| >PTEN-V216I SGGTCNPQFI  | 7426  | >PTEN-V216I SGGTCNPQFI  | 301   | 7125  |
| >PTEN-V217I VVCQLKVK    | 204   | >PTEN-V217I VACQLKVK    | 1329  | 1125  |
| >PTEN-V217I VVCQLKVKIY  | 1031  | >PTEN-V217I VACQLKVKIY  | 108   | 923   |
| >PTEN-V217I FVVCQLKV    | 81    | >PTEN-V217I FVACQLKV    | 29    | 52    |
| >PTEN-V217I FVVCQLKV    | 60    | >PTEN-V217I FVACQLKV    | 13    | 47    |
| >PTEN-V217I FVVCQLKV    | 19    | >PTEN-V217I FVACQLKV    | 8     | 11    |
| >PTEN-V217I FVVCQLKV    | 8     | >PTEN-V217I FVACQLKV    | 10    | 2     |

|                         |       |                         |      |       |
|-------------------------|-------|-------------------------|------|-------|
| >PTEN-V217/FVVCQLKVKI   | 279   | >PTEN-V217/FVACQLKVKI   | 558  | 279   |
| >PTEN-V217/FVVCQLKV     | 43    | >PTEN-V217/FVACQLKV     | 35   | 8     |
| >PTEN-V217/FVVCQLKV     | 67    | >PTEN-V217/FVACQLKV     | 65   | 2     |
| >PTEN-V217/FVVCQLKV     | 203   | >PTEN-V217/FVACQLKV     | 53   | 150   |
| >PTEN-V217/FVVCQLKV     | 907   | >PTEN-V217/FVACQLKV     | 75   | 832   |
| >PTEN-V217/FVVCQLKV     | 13    | >PTEN-V217/FVACQLKV     | 7    | 6     |
| >PTEN-V217/FVVCQLKVKI'  | 160   | >PTEN-V217/FVACQLKVKI'  | 212  | 52    |
| >PTEN-V217/FVVCQLKVKI'  | 9     | >PTEN-V217/FVACQLKVKI'  | 28   | 19    |
| >PTEN-V217/FVVCQLKVKI'  | 137   | >PTEN-V217/FVACQLKVKI'  | 92   | 45    |
| >PTEN-V217/FVVCQLKV     | 33    | >PTEN-V217/FVACQLKV     | 13   | 20    |
| >PTEN-V217/FVVCQLKV     | 78    | >PTEN-V217/FVACQLKV     | 50   | 28    |
| >PTEN-V217/FVVCQLKVKI   | 571   | >PTEN-V217/FVACQLKVKI   | 384  | 187   |
| >PTEN-V217/FVVCQLKVKI'  | 573   | >PTEN-V217/FVACQLKVKI'  | 431  | 142   |
| >PTEN-V217/FVVCQLKVKI'  | 849   | >PTEN-V217/FVACQLKVKI'  | 469  | 380   |
| >PTEN-V217/FVVCQLKVKI'  | 388   | >PTEN-V217/FVACQLKVKI'  | 450  | 62    |
| >PTEN-V217/FVVCQLKVKI'  | 231   | >PTEN-V217/FVACQLKVKI'  | 196  | 35    |
| >PTEN-V217/FVVCQLKVKI'  | 529   | >PTEN-V217/FVACQLKVKI'  | 485  | 44    |
| >PTEN-V217/QFVVCQLK     | 1046  | >PTEN-V217/QFVACQLK     | 315  | 731   |
| >PTEN-V217/QFVVCQLKVF   | 767   | >PTEN-V217/QFVACQLKVF   | 219  | 548   |
| >PTEN-V217/PQFVVCQL     | 328   | >PTEN-V217/PQFVACQL     | 298  | 30    |
| >PTEN-V217/NPQFVVCQLI   | 443   | >PTEN-V217/NPQFVACQLI   | 718  | 275   |
| >PTEN-V217/TCNPQFVV     | 293   | >PTEN-V217/TCNPQFVA     | 2647 | 2354  |
| >PTEN-V217I VVCQLKVK    | 204   | >PTEN-V217I VICQLKVK    | 448  | 244   |
| >PTEN-V217I SGGTCNPQFV  | 12479 | >PTEN-V217I SGGTCNPQFV  | 382  | 12097 |
| >PTEN-V217I FVVCQLKV    | 81    | >PTEN-V217I FVICQLKV    | 26   | 55    |
| >PTEN-V217I FVVCQLKV    | 60    | >PTEN-V217I FVICQLKV    | 41   | 19    |
| >PTEN-V217I FVVCQLKV    | 19    | >PTEN-V217I FVICQLKV    | 11   | 8     |
| >PTEN-V217I FVVCQLKV    | 8     | >PTEN-V217I FVICQLKV    | 6    | 2     |
| >PTEN-V217I FVVCQLKV    | 43    | >PTEN-V217I FVICQLKV    | 29   | 14    |
| >PTEN-V217I FVVCQLKV    | 67    | >PTEN-V217I FVICQLKV    | 22   | 45    |
| >PTEN-V217I FVVCQLKV    | 203   | >PTEN-V217I FVICQLKV    | 152  | 51    |
| >PTEN-V217I FVVCQLKV    | 13    | >PTEN-V217I FVICQLKV    | 10   | 3     |
| >PTEN-V217I FVVCQLKVKI' | 160   | >PTEN-V217I FVICQLKVKIY | 83   | 77    |
| >PTEN-V217I FVVCQLKVKI' | 9     | >PTEN-V217I FVICQLKVKIY | 6    | 3     |
| >PTEN-V217I FVVCQLKVKI' | 137   | >PTEN-V217I FVICQLKVKIY | 59   | 78    |
| >PTEN-V217I FVVCQLKV    | 33    | >PTEN-V217I FVICQLKV    | 19   | 14    |
| >PTEN-V217I FVVCQLKV    | 78    | >PTEN-V217I FVICQLKV    | 61   | 17    |
| >PTEN-V217I FVVCQLKVKI  | 571   | >PTEN-V217I FVICQLKVKI  | 448  | 123   |
| >PTEN-V217I FVVCQLKVKI' | 573   | >PTEN-V217I FVICQLKVKIY | 313  | 260   |
| >PTEN-V217I FVVCQLKVKI' | 388   | >PTEN-V217I FVICQLKVKIY | 310  | 78    |
| >PTEN-V217I FVVCQLKVKI' | 231   | >PTEN-V217I FVICQLKVKIY | 258  | 27    |
| >PTEN-V217I QFVVCQLK    | 1046  | >PTEN-V217I QFVICQLK    | 438  | 608   |
| >PTEN-V217I QFVVCQLKVF  | 767   | >PTEN-V217I QFVICQLKVK  | 359  | 408   |

|                          |      |                          |      |      |
|--------------------------|------|--------------------------|------|------|
| >PTEN-V217I PQFVVCQL     | 328  | >PTEN-V217I PQFVICQL     | 361  | 33   |
| >PTEN-V217I CNPQFVVCQ    | 625  | >PTEN-V217I CNPQFVICQL   | 354  | 271  |
| >PTEN-V217I TCNPQFVV     | 293  | >PTEN-V217I TCNPQFVI     | 1301 | 1008 |
| >PTEN-V222/ VKIYSSNS     | 338  | >PTEN-V222/ AKIYSSNS     | 190  | 148  |
| >PTEN-V222/ VKIYSSNSGP   | 308  | >PTEN-V222/ AKIYSSNSGP   | 186  | 122  |
| >PTEN-V222/ VKIYSSNSGP1  | 660  | >PTEN-V222/ AKIYSSNSGP1  | 350  | 310  |
| >PTEN-V222/ KVKIYSSN     | 115  | >PTEN-V222/ KAKIYSSN     | 402  | 287  |
| >PTEN-V222/ KVKIYSSNSG   | 14   | >PTEN-V222/ KAKIYSSNSG   | 36   | 22   |
| >PTEN-V222/ KVKIYSSNSGF  | 192  | >PTEN-V222/ KAKIYSSNSGF  | 673  | 481  |
| >PTEN-V222/ LKVKIYSSNS   | 496  | >PTEN-V222/ LKAKIYSSNS   | 634  | 138  |
| >PTEN-V222/ CQLKVKIY     | 27   | >PTEN-V222/ CQLKAKIY     | 26   | 1    |
| >PTEN-V222/ VVCQLKVK     | 204  | >PTEN-V222/ VVCQLKAK     | 192  | 12   |
| >PTEN-V222/ FVVCQLKV     | 81   | >PTEN-V222/ FVVCQLKA     | 1347 | 1266 |
| >PTEN-V222/ FVVCQLKV     | 60   | >PTEN-V222/ FVVCQLKA     | 620  | 560  |
| >PTEN-V222/ FVVCQLKV     | 19   | >PTEN-V222/ FVVCQLKA     | 122  | 103  |
| >PTEN-V222/ FVVCQLKV     | 8    | >PTEN-V222/ FVVCQLKA     | 61   | 53   |
| >PTEN-V222/ FVVCQLKV     | 43   | >PTEN-V222/ FVVCQLKA     | 2527 | 2484 |
| >PTEN-V222/ FVVCQLKV     | 67   | >PTEN-V222/ FVVCQLKA     | 3922 | 3855 |
| >PTEN-V222/ FVVCQLKV     | 203  | >PTEN-V222/ FVVCQLKA     | 7378 | 7175 |
| >PTEN-V222/ FVVCQLKV     | 13   | >PTEN-V222/ FVVCQLKA     | 2284 | 2271 |
| >PTEN-V222/ FVVCQLKVKI'  | 160  | >PTEN-V222/ FVVCQLKAKI'  | 200  | 40   |
| >PTEN-V222/ FVVCQLKVKI'  | 9    | >PTEN-V222/ FVVCQLKAKI'  | 23   | 14   |
| >PTEN-V222/ FVVCQLKVKI'  | 137  | >PTEN-V222/ FVVCQLKAKI'  | 74   | 63   |
| >PTEN-V222/ FVVCQLKV     | 33   | >PTEN-V222/ FVVCQLKA     | 306  | 273  |
| >PTEN-V222/ FVVCQLKV     | 78   | >PTEN-V222/ FVVCQLKA     | 2041 | 1963 |
| >PTEN-V222/ FVVCQLKVKI   | 571  | >PTEN-V222/ FVVCQLKAKI   | 308  | 263  |
| >PTEN-V222/ FVVCQLKVKI'  | 388  | >PTEN-V222/ FVVCQLKAKI'  | 425  | 37   |
| >PTEN-V222/ FVVCQLKVKI'  | 565  | >PTEN-V222/ FVVCQLKAKI'  | 352  | 213  |
| >PTEN-V222/ FVVCQLKVKI'  | 231  | >PTEN-V222/ FVVCQLKAKI'  | 163  | 68   |
| >PTEN-V222/ FVVCQLKVKI'  | 529  | >PTEN-V222/ FVVCQLKAKI'  | 420  | 109  |
| >PTEN-V255/ VEFFHKQNKI'  | 136  | >PTEN-V255/ AEFFHKQNKI'  | 287  | 151  |
| >PTEN-V255/ VEFFHKQNKI'  | 417  | >PTEN-V255/ AEFFHKQNKI'  | 4045 | 3628 |
| >PTEN-V255/ VEFFHKQNKI'  | 42   | >PTEN-V255/ AEFFHKQNKI'  | 16   | 26   |
| >PTEN-V255/ VEFFHKQNKI'  | 116  | >PTEN-V255/ AEFFHKQNKI'  | 30   | 86   |
| >PTEN-V255/ VEFFHKQNKI'  | 451  | >PTEN-V255/ AEFFHKQNKI'  | 83   | 368  |
| >PTEN-V255/ VEFFHKQNKI'  | 82   | >PTEN-V255/ AEFFHKQNKI'  | 23   | 59   |
| >PTEN-V255/ KVEFFHKQNKI' | 22   | >PTEN-V255/ KAEFFHKQNKI' | 67   | 45   |
| >PTEN-V255/ KVEFFHKQNKI' | 2774 | >PTEN-V255/ KAEFFHKQNKI' | 410  | 2364 |
| >PTEN-V255/ KVEFFHKQNKI' | 184  | >PTEN-V255/ KAEFFHKQNKI' | 370  | 186  |
| >PTEN-V255/ IKVEFFHK     | 1021 | >PTEN-V255/ IKAEFFHK     | 485  | 536  |
| >PTEN-V255/ IKVEFFHK     | 330  | >PTEN-V255/ IKAEFFHK     | 402  | 72   |
| >PTEN-V255/ IKVEFFHKQN   | 265  | >PTEN-V255/ IKAEFFHKQN   | 317  | 52   |
| >PTEN-V255/ IKVEFFHK     | 531  | >PTEN-V255/ IKAEFFHK     | 288  | 243  |

|                        |       |                        |       |       |
|------------------------|-------|------------------------|-------|-------|
| >PTEN-V255/PVCGDIKV    | 466   | >PTEN-V255/PVCGDIKA    | 15992 | 15526 |
| >PTEN-V255/PVCGDIKVEF  | 395   | >PTEN-V255/PVCGDIKAEF  | 150   | 245   |
| >PTEN-V255/PVCGDIKVEF  | 21    | >PTEN-V255/PVCGDIKAEF  | 52    | 31    |
| >PTEN-V255/LPVCGDIKVEI | 35    | >PTEN-V255/LPVCGDIKAEI | 82    | 47    |
| >PTEN-V255/LPVCGDIKVEI | 484   | >PTEN-V255/LPVCGDIKAEI | 413   | 71    |
| >PTEN-V255/LPVCGDIKVEI | 9     | >PTEN-V255/LPVCGDIKAEI | 10    | 1     |
| >PTEN-V255/LPVCGDIKVEI | 26    | >PTEN-V255/LPVCGDIKAEI | 32    | 6     |
| >PTEN-V255/LPVCGDIKVEI | 499   | >PTEN-V255/LPVCGDIKAEI | 579   | 80    |
| >PTEN-V255/LPVCGDIKVEI | 18    | >PTEN-V255/LPVCGDIKAEI | 27    | 9     |
| >PTEN-V255/PLPVCGDIKV  | 176   | >PTEN-V255/PLPVCGDIKA  | 6140  | 5964  |
| >PTEN-V255/PLPVCGDIKV  | 46    | >PTEN-V255/PLPVCGDIKA  | 3844  | 3798  |
| >PTEN-V275/FWVNTFFI    | 63    | >PTEN-V275/FWANTFFI    | 16    | 47    |
| >PTEN-V275/FWVNTFFI    | 12    | >PTEN-V275/FWANTFFI    | 15    | 3     |
| >PTEN-V275/FWVNTFFI    | 35    | >PTEN-V275/FWANTFFI    | 76    | 41    |
| >PTEN-V275/FWVNTFFI    | 126   | >PTEN-V275/FWANTFFI    | 67    | 59    |
| >PTEN-V275/FWVNTFFI    | 17    | >PTEN-V275/FWANTFFI    | 12    | 5     |
| >PTEN-V275/FWVNTFFI    | 39    | >PTEN-V275/FWANTFFI    | 67    | 28    |
| >PTEN-V275/FWVNTFFIP   | 203   | >PTEN-V275/FWANTFFIP   | 524   | 321   |
| >PTEN-V275/FWVNTFFIPG  | 239   | >PTEN-V275/FWANTFFIPG  | 492   | 253   |
| >PTEN-V275/HFWVNTFFI   | 139   | >PTEN-V275/HFWANTFFI   | 216   | 77    |
| >PTEN-V275/HFWVNTFFI   | 980   | >PTEN-V275/HFWANTFFI   | 222   | 758   |
| >PTEN-V275/HFWVNTFF    | 32    | >PTEN-V275/HFWANTFF    | 39    | 7     |
| >PTEN-V275/HFWVNTFFI   | 40    | >PTEN-V275/HFWANTFFI   | 45    | 5     |
| >PTEN-V275/HFWVNTFFI   | 202   | >PTEN-V275/HFWANTFFI   | 242   | 40    |
| >PTEN-V275/HFWVNTFF    | 17    | >PTEN-V275/HFWANTFF    | 12    | 5     |
| >PTEN-V275/HFWVNTFFI   | 13    | >PTEN-V275/HFWANTFFI   | 11    | 2     |
| >PTEN-V275/HFWVNTFF    | 107   | >PTEN-V275/HFWANTFF    | 72    | 35    |
| >PTEN-V275/HFWVNTFFI   | 281   | >PTEN-V275/HFWANTFFI   | 161   | 120   |
| >PTEN-V275/HFWVNTFFI   | 289   | >PTEN-V275/HFWANTFFI   | 183   | 106   |
| >PTEN-V275/HFWVNTFFI   | 358   | >PTEN-V275/HFWANTFFI   | 337   | 21    |
| >PTEN-V275/HFWVNTFFI   | 619   | >PTEN-V275/HFWANTFFI   | 195   | 424   |
| >PTEN-V275/HFWVNTFF    | 510   | >PTEN-V275/HFWANTFF    | 224   | 286   |
| >PTEN-V275/HFWVNTFF    | 473   | >PTEN-V275/HFWANTFF    | 346   | 127   |
| >PTEN-V275/HFWVNTFF    | 271   | >PTEN-V275/HFWANTFF    | 124   | 147   |
| >PTEN-V275/HFWVNTFFI   | 520   | >PTEN-V275/HFWANTFFI   | 306   | 214   |
| >PTEN-V275/FHFWVNTFFI  | 25    | >PTEN-V275/FHFWANTFFI  | 34    | 9     |
| >PTEN-V275/FHFWVNTFF   | 13414 | >PTEN-V275/FHFWANTFF   | 461   | 12953 |
| >PTEN-V275/FHFWVNTFFI  | 545   | >PTEN-V275/FHFWANTFFI  | 462   | 83    |
| >PTEN-V275/FHFWVNTFFI  | 126   | >PTEN-V275/FHFWANTFFI  | 286   | 160   |
| >PTEN-V275/FHFWVNTFFI  | 378   | >PTEN-V275/FHFWANTFFI  | 528   | 150   |
| >PTEN-V275/FHFWVNTF    | 456   | >PTEN-V275/FHFWANTF    | 510   | 54    |
| >PTEN-V275/FHFWVNTF    | 93    | >PTEN-V275/FHFWANTF    | 126   | 33    |
| >PTEN-V275/FHFWVNTFF   | 326   | >PTEN-V275/FHFWANTFF   | 379   | 53    |

|                       |     |                       |     |     |
|-----------------------|-----|-----------------------|-----|-----|
| >PTEN-V275/FHFWVNTF   | 7   | >PTEN-V275/FHFWANTF   | 6   | 1   |
| >PTEN-V275/FHFWVNTFF  | 10  | >PTEN-V275/FHFWANTFF  | 8   | 2   |
| >PTEN-V275/FHFWVNTF   | 483 | >PTEN-V275/FHFWANTF   | 631 | 148 |
| >PTEN-V275/FHFWVNTF   | 229 | >PTEN-V275/FHFWANTF   | 139 | 90  |
| >PTEN-V275/FHFWVNTF   | 32  | >PTEN-V275/FHFWANTF   | 30  | 2   |
| >PTEN-V275/FHFWVNTFF  | 214 | >PTEN-V275/FHFWANTFF  | 241 | 27  |
| >PTEN-V275/FHFWVNTFFI | 50  | >PTEN-V275/FHFWANTFFI | 45  | 5   |
| >PTEN-V275/FHFWVNTFF  | 128 | >PTEN-V275/FHFWANTFF  | 307 | 179 |
| >PTEN-V275/FHFWVNTFFI | 351 | >PTEN-V275/FHFWANTFFI | 550 | 199 |
| >PTEN-V275/FHFWVNTF   | 29  | >PTEN-V275/FHFWANTF   | 24  | 5   |
| >PTEN-V275/FHFWVNTFF  | 21  | >PTEN-V275/FHFWANTFF  | 18  | 3   |
| >PTEN-V275/MFHFWVNTF  | 112 | >PTEN-V275/MFHFWANTF  | 163 | 51  |
| >PTEN-V275/MFHFWVNTF  | 462 | >PTEN-V275/MFHFWANTF  | 795 | 333 |
| >PTEN-V275/MFHFWVNTF  | 17  | >PTEN-V275/MFHFWANTF  | 23  | 6   |
| >PTEN-V275/MFHFWVNTF  | 391 | >PTEN-V275/MFHFWANTF  | 180 | 211 |
| >PTEN-V275/MFHFWVNTF  | 42  | >PTEN-V275/MFHFWANTF  | 53  | 11  |
| >PTEN-V275/MFHFWVNTF  | 48  | >PTEN-V275/MFHFWANTF  | 77  | 29  |
| >PTEN-V275/MFHFWVNTF  | 369 | >PTEN-V275/MFHFWANTF  | 306 | 63  |
| >PTEN-V275/MFHFWVNTF  | 106 | >PTEN-V275/MFHFWANTF  | 138 | 32  |
| >PTEN-V275/MFHFWVNTF  | 8   | >PTEN-V275/MFHFWANTF  | 9   | 1   |
| >PTEN-V275/MFHFWVNTF  | 13  | >PTEN-V275/MFHFWANTF  | 14  | 1   |
| >PTEN-V275/MFHFWVNTF  | 15  | >PTEN-V275/MFHFWANTF  | 19  | 4   |
| >PTEN-V275/MFHFWVNTF  | 152 | >PTEN-V275/MFHFWANTF  | 67  | 85  |
| >PTEN-V275/MFHFWVNTF  | 163 | >PTEN-V275/MFHFWANTF  | 193 | 30  |
| >PTEN-V275/MFHFWVNTF  | 521 | >PTEN-V275/MFHFWANTF  | 330 | 191 |
| >PTEN-V275/MFHFWVNTF  | 24  | >PTEN-V275/MFHFWANTF  | 26  | 2   |
| >PTEN-V275/MFHFWVNTF  | 198 | >PTEN-V275/MFHFWANTF  | 247 | 49  |
| >PTEN-V275/MFHFWVNTF  | 256 | >PTEN-V275/MFHFWANTF  | 262 | 6   |
| >PTEN-V275/MFHFWVNTF  | 363 | >PTEN-V275/MFHFWANTF  | 951 | 588 |
| >PTEN-V275/MFHFWVNTF  | 303 | >PTEN-V275/MFHFWANTF  | 498 | 195 |
| >PTEN-V275/MFHFWVNTF  | 148 | >PTEN-V275/MFHFWANTF  | 102 | 46  |
| >PTEN-V275/MFHFWVNTF  | 480 | >PTEN-V275/MFHFWANTF  | 207 | 273 |
| >PTEN-V275/MFHFWVNTF  | 210 | >PTEN-V275/MFHFWANTF  | 239 | 29  |
| >PTEN-V275/MFHFWVNTF  | 494 | >PTEN-V275/MFHFWANTF  | 843 | 349 |
| >PTEN-V275/MFHFWVNT   | 492 | >PTEN-V275/MFHFWANT   | 558 | 66  |
| >PTEN-V275/MFHFWVNTF  | 80  | >PTEN-V275/MFHFWANTF  | 85  | 5   |
| >PTEN-V275/MFHFWVNTF  | 56  | >PTEN-V275/MFHFWANTF  | 53  | 3   |
| >PTEN-V275/KMFHFWVN   | 56  | >PTEN-V275/KMFHFWAN   | 40  | 16  |
| >PTEN-V275/KMFHFWVN   | 159 | >PTEN-V275/KMFHFWAN   | 117 | 42  |
| >PTEN-V275/KMFHFWVN   | 35  | >PTEN-V275/KMFHFWAN   | 36  | 1   |
| >PTEN-V275/KMFHFWVN   | 219 | >PTEN-V275/KMFHFWAN   | 266 | 47  |
| >PTEN-V275/KMFHFWVN   | 65  | >PTEN-V275/KMFHFWAN   | 52  | 13  |
| >PTEN-V275/KMFHFWVN   | 72  | >PTEN-V275/KMFHFWAN   | 64  | 8   |

|                      |      |                      |      |     |
|----------------------|------|----------------------|------|-----|
| >PTEN-V275/KMFHFWVN  | 183  | >PTEN-V275/KMFHFWAN  | 42   | 141 |
| >PTEN-V275/KMFHFWVN  | 1138 | >PTEN-V275/KMFHFWAN  | 421  | 717 |
| >PTEN-V275/KMFHFWVN  | 107  | >PTEN-V275/KMFHFWAN  | 102  | 5   |
| >PTEN-V275/KMFHFWVN  | 110  | >PTEN-V275/KMFHFWAN  | 91   | 19  |
| >PTEN-V275/KMFHFWVN  | 163  | >PTEN-V275/KMFHFWAN  | 77   | 86  |
| >PTEN-V275/KMFHFWVN  | 22   | >PTEN-V275/KMFHFWAN  | 18   | 4   |
| >PTEN-V275/KMFHFWVN  | 29   | >PTEN-V275/KMFHFWAN  | 51   | 22  |
| >PTEN-V275/KMFHFWVN  | 45   | >PTEN-V275/KMFHFWAN  | 71   | 26  |
| >PTEN-V275/KMFHFWVN  | 130  | >PTEN-V275/KMFHFWAN  | 233  | 103 |
| >PTEN-V275/KMFHFWVN  | 357  | >PTEN-V275/KMFHFWAN  | 459  | 102 |
| >PTEN-V275/KMFHFWVN  | 379  | >PTEN-V275/KMFHFWAN  | 419  | 40  |
| >PTEN-V275/KMFHFWVN  | 456  | >PTEN-V275/KMFHFWAN  | 509  | 53  |
| >PTEN-V275/KMFHFWVN  | 133  | >PTEN-V275/KMFHFWAN  | 235  | 102 |
| >PTEN-V275/KMFHFWVN  | 644  | >PTEN-V275/KMFHFWAN  | 352  | 292 |
| >PTEN-V275/KMFHFWVN  | 175  | >PTEN-V275/KMFHFWAN  | 162  | 13  |
| >PTEN-V275/KMFHFWVN  | 397  | >PTEN-V275/KMFHFWAN  | 207  | 190 |
| >PTEN-V275/KMFHFWVN  | 807  | >PTEN-V275/KMFHFWAN  | 466  | 341 |
| >PTEN-V275/KMFHFWVN  | 444  | >PTEN-V275/KMFHFWAN  | 287  | 157 |
| >PTEN-V275/KMFHFWVN  | 433  | >PTEN-V275/KMFHFWAN  | 338  | 95  |
| >PTEN-V275/KMFHFWVN  | 89   | >PTEN-V275/KMFHFWAN  | 114  | 25  |
| >PTEN-V275/KMFHFWVN  | 429  | >PTEN-V275/KMFHFWAN  | 245  | 184 |
| >PTEN-V275/KMFHFWVN  | 202  | >PTEN-V275/KMFHFWAN  | 1189 | 987 |
| >PTEN-V275/KMFHFWVN  | 3    | >PTEN-V275/KMFHFWAN  | 4    | 1   |
| >PTEN-V275/KMFHFWVN  | 7    | >PTEN-V275/KMFHFWAN  | 10   | 3   |
| >PTEN-V275/KMFHFWVN  | 34   | >PTEN-V275/KMFHFWAN  | 37   | 3   |
| >PTEN-V275/KMFHFWVN  | 43   | >PTEN-V275/KMFHFWAN  | 37   | 6   |
| >PTEN-V275/KMFHFWVN  | 165  | >PTEN-V275/KMFHFWAN  | 115  | 50  |
| >PTEN-V275/KMFHFWVN  | 248  | >PTEN-V275/KMFHFWAN  | 169  | 79  |
| >PTEN-V275/KMFHFWVN  | 314  | >PTEN-V275/KMFHFWAN  | 264  | 50  |
| >PTEN-V275/KMFHFWVN  | 103  | >PTEN-V275/KMFHFWAN  | 243  | 140 |
| >PTEN-V275/KMFHFWVN  | 2    | >PTEN-V275/KMFHFWAN  | 2    | 0   |
| >PTEN-V275/KMFHFWVN  | 3    | >PTEN-V275/KMFHFWAN  | 3    | 0   |
| >PTEN-V275/KMFHFWVN  | 32   | >PTEN-V275/KMFHFWAN  | 19   | 13  |
| >PTEN-V275/KMFHFWVN  | 67   | >PTEN-V275/KMFHFWAN  | 34   | 33  |
| >PTEN-V275/KMFHFWVN  | 121  | >PTEN-V275/KMFHFWAN  | 101  | 20  |
| >PTEN-V275/KMFHFWVN  | 232  | >PTEN-V275/KMFHFWAN  | 193  | 39  |
| >PTEN-V275/KMFHFWVN  | 38   | >PTEN-V275/KMFHFWAN  | 36   | 2   |
| >PTEN-V275/KMFHFWVN  | 28   | >PTEN-V275/KMFHFWAN  | 28   | 0   |
| >PTEN-V275/KMFHFWVN  | 100  | >PTEN-V275/KMFHFWAN  | 92   | 8   |
| >PTEN-V275/KMFHFWVN  | 161  | >PTEN-V275/KMFHFWAN  | 213  | 52  |
| >PTEN-V275/KMFHFWVN  | 214  | >PTEN-V275/KMFHFWAN  | 428  | 214 |
| >PTEN-V275/DKMFHFWVF | 19   | >PTEN-V275/DKMFHFWVF | 20   | 1   |
| >PTEN-V275/DKMFHFWVF | 190  | >PTEN-V275/DKMFHFWVF | 216  | 26  |

|                         |       |                         |       |       |
|-------------------------|-------|-------------------------|-------|-------|
| >PTEN-V275/KDKMFHFW\    | 395   | >PTEN-V275/KDKMFHFW/    | 608   | 213   |
| >PTEN-V275/KDKMFHFW\    | 1359  | >PTEN-V275/KDKMFHFW/    | 288   | 1071  |
| >PTEN-V365I VTPDVSDNE   | 553   | >PTEN-V365I ITPDVSDNE   | 498   | 55    |
| >PTEN-V365I SNPEASSSTSI | 7492  | >PTEN-V365I SNPEASSSTSI | 159   | 7333  |
| >PTEN-V365I STSVTPDV    | 172   | >PTEN-V365I STSITPDV    | 136   | 36    |
| >PTEN-V365I STSVTPDV    | 364   | >PTEN-V365I STSITPDV    | 388   | 24    |
| >PTEN-V365I STSVTPDV    | 260   | >PTEN-V365I STSITPDV    | 232   | 28    |
| >PTEN-V365I SSTSVPDV    | 513   | >PTEN-V365I SSTSITPDV   | 479   | 34    |
| >PTEN-V365I SSSTSVTPDV  | 325   | >PTEN-V365I SSSTSITPDV  | 232   | 93    |
| >PTEN-V365I SSSTSVTPDV  | 389   | >PTEN-V365I SSSTSITPDV  | 308   | 81    |
| >PTEN-V365I ASSSTSVTPD' | 438   | >PTEN-V365I ASSSTSITPDV | 590   | 152   |
| >PTEN-V365I EASSSTSV    | 12    | >PTEN-V365I EASSSTSI    | 33    | 21    |
| >PTEN-V365I EASSSTSV    | 27    | >PTEN-V365I EASSSTSI    | 168   | 141   |
| >PTEN-V365I EASSSTSV    | 14452 | >PTEN-V365I EASSSTSI    | 291   | 14161 |
| >PTEN-V365I PEASSSTSV   | 590   | >PTEN-V365I PEASSSTSI   | 75    | 515   |
| >PTEN-V365I PEASSSTSV   | 491   | >PTEN-V365I PEASSSTSI   | 110   | 381   |
| >PTEN-V365I NPEASSSTSV  | 1772  | >PTEN-V365I NPEASSSTSI  | 235   | 1537  |
| >PTEN-V365I NPEASSSTSV  | 130   | >PTEN-V365I NPEASSSTSI  | 160   | 30    |
| >PTEN-V365I NPEASSSTSV' | 394   | >PTEN-V365I NPEASSSTSIT | 691   | 297   |
| >PTEN-V365I NPEASSSTSV  | 370   | >PTEN-V365I NPEASSSTSI  | 265   | 105   |
| >PTEN-V369(VSDNEPDHY    | 13    | >PTEN-V369(GSDNEPDHY    | 21    | 8     |
| >PTEN-V369(VSDNEPDHYI   | 12    | >PTEN-V369(GSDNEPDHYI   | 21    | 9     |
| >PTEN-V369(VSDNEPDHYI   | 734   | >PTEN-V369(GSDNEPDHYI   | 489   | 245   |
| >PTEN-V369(VSDNEPDHYI   | 120   | >PTEN-V369(GSDNEPDHYI   | 227   | 107   |
| >PTEN-V369(VSDNEPDHY    | 458   | >PTEN-V369(GSDNEPDHY    | 2074  | 1616  |
| >PTEN-V369(VSDNEPDHYI   | 57    | >PTEN-V369(GSDNEPDHYI   | 246   | 189   |
| >PTEN-V369(VSDNEPDHYI   | 415   | >PTEN-V369(GSDNEPDHYI   | 257   | 158   |
| >PTEN-V369(VSDNEPDHYI   | 276   | >PTEN-V369(GSDNEPDHYI   | 133   | 143   |
| >PTEN-V369(DVSDNEPDH'   | 75    | >PTEN-V369(DGSDNEPDH    | 453   | 378   |
| >PTEN-V369(DVSDNEPDH'   | 38    | >PTEN-V369(DGSDNEPDH    | 17969 | 17931 |
| >PTEN-V369(DVSDNEPDH'   | 69    | >PTEN-V369(DGSDNEPDH    | 2724  | 2655  |
| >PTEN-V369(DVSDNEPDH'   | 6     | >PTEN-V369(DGSDNEPDH    | 138   | 132   |
| >PTEN-V369(DVSDNEPDH'   | 447   | >PTEN-V369(DGSDNEPDH    | 644   | 197   |
| >PTEN-V369( ASSSTSVTPD' | 438   | >PTEN-V369( ASSSTSVTPD( | 7638  | 7200  |
| >PTEN-V369( STSVTPDV    | 172   | >PTEN-V369( STSVTPDG    | 23907 | 23735 |
| >PTEN-V369( STSVTPDV    | 364   | >PTEN-V369( STSVTPDG    | 17830 | 17466 |
| >PTEN-V369( STSVTPDV    | 260   | >PTEN-V369( STSVTPDG    | 19317 | 19057 |
| >PTEN-V369( SSSTSVTPDV  | 325   | >PTEN-V369( SSSTSVTPDG  | 30733 | 30408 |
| >PTEN-V369( SSSTSVTPDV  | 389   | >PTEN-V369( SSSTSVTPDG  | 13322 | 12933 |
| >PTEN-V53A- VVRFLDSKHK  | 408   | >PTEN-V53A- AVRFLDSKHK  | 139   | 269   |
| >PTEN-V53A- VVRFLDSK    | 455   | >PTEN-V53A- AVRFLDSK    | 261   | 194   |
| >PTEN-V53A- VVRFLDSKHK  | 560   | >PTEN-V53A- AVRFLDSKHK  | 163   | 397   |
| >PTEN-V53A- VVRFLDSK    | 17    | >PTEN-V53A- AVRFLDSK    | 5     | 12    |



|                       |     |                        |       |       |
|-----------------------|-----|------------------------|-------|-------|
| >PTEN-V53A·VVRFLDSKHK | 13  | >PTEN-V53A·AVRFLDSKHK  | 5     | 8     |
| >PTEN-V53A·VVRFLDSKH  | 57  | >PTEN-V53A·AVRFLDSKH   | 84    | 27    |
| >PTEN-V53A·DVVRFLDSK  | 493 | >PTEN-V53A·DAVRFLDSK   | 9438  | 8945  |
| >PTEN-V53A·DVVRFLDSKH | 129 | >PTEN-V53A·DAVRFLDSKH  | 3099  | 2970  |
| >PTEN-V53A·DVVRFLDSK  | 18  | >PTEN-V53A·DAVRFLDSK   | 24    | 6     |
| >PTEN-V53A·DVVRFLDSKH | 102 | >PTEN-V53A·DAVRFLDSKH  | 132   | 30    |
| >PTEN-V53A·NIDDVVRFL  | 171 | >PTEN-V53A·NIDDAVRFL   | 160   | 11    |
| >PTEN-V53A·NIDDVVRFL  | 272 | >PTEN-V53A·NIDDAVRFL   | 297   | 25    |
| >PTEN-V53A·NIDDVVRFL  | 30  | >PTEN-V53A·NIDDAVRFL   | 182   | 152   |
| >PTEN-V53A·NIDDVVRFL  | 320 | >PTEN-V53A·NIDDAVRFL   | 785   | 465   |
| >PTEN-V53A·NIDDVVRFL  | 464 | >PTEN-V53A·NIDDAVRFL   | 302   | 162   |
| >PTEN-V53A·NIDDVVRFL  | 324 | >PTEN-V53A·NIDDAVRFL   | 231   | 93    |
| >PTEN-V53A·NNIDDVVR   | 192 | >PTEN-V53A·NNIDDAVR    | 181   | 11    |
| >PTEN-V53A·RNNIDDVVR  | 450 | >PTEN-V53A·RNNIDDAVR   | 774   | 324   |
| >PTEN-V53A·RNNIDDVVR  | 474 | >PTEN-V53A·RNNIDDAVR   | 1208  | 734   |
| >PTEN-V53A·YRNNIDDVVF | 48  | >PTEN-V53A·YRNNIDDAVF  | 56    | 8     |
| >PTEN-V53A·YRNNIDDVVF | 119 | >PTEN-V53A·YRNNIDDAVF  | 127   | 8     |
| >PTEN-V53A·VYRNNIDDV\ | 219 | >PTEN-V53A·VYRNNIDDA\  | 183   | 36    |
| >PTEN-V53A·VYRNNIDDV\ | 173 | >PTEN-V53A·VYRNNIDDA\  | 285   | 112   |
| >PTEN-V53A·GVYRNNIDD\ | 225 | >PTEN-V53A·GVYRNNIDDA\ | 1681  | 1456  |
| >PTEN-V53A·GVYRNNIDD\ | 938 | >PTEN-V53A·GVYRNNIDDA\ | 357   | 581   |
| >PTEN-V53A·GVYRNNIDD\ | 939 | >PTEN-V53A·GVYRNNIDDA\ | 216   | 723   |
| >PTEN-V53A·GVYRNNIDD\ | 86  | >PTEN-V53A·GVYRNNIDDA\ | 3807  | 3721  |
| >PTEN-V53A·GVYRNNIDD\ | 103 | >PTEN-V53A·GVYRNNIDDA\ | 50    | 53    |
| >PTEN-V53A·GVYRNNIDD\ | 106 | >PTEN-V53A·GVYRNNIDDA\ | 4433  | 4327  |
| >PTEN-V53A·GVYRNNIDD\ | 113 | >PTEN-V53A·GVYRNNIDDA\ | 56    | 57    |
| >PTEN-V53A·GVYRNNIDD\ | 97  | >PTEN-V53A·GVYRNNIDDA\ | 5671  | 5574  |
| >PTEN-V53A·GVYRNNIDD\ | 100 | >PTEN-V53A·GVYRNNIDDA\ | 106   | 6     |
| >PTEN-V53A·GVYRNNIDD\ | 36  | >PTEN-V53A·GVYRNNIDDA\ | 4123  | 4087  |
| >PTEN-V53A·GVYRNNIDD\ | 78  | >PTEN-V53A·GVYRNNIDDA\ | 71    | 7     |
| >PTEN-V53G·VVRFLDSKHK | 408 | >PTEN-V53G·GVRFLDSKHK  | 415   | 7     |
| >PTEN-V53G·VVRFLDSK   | 455 | >PTEN-V53G·GVRFLDSK    | 401   | 54    |
| >PTEN-V53G·VVRFLDSK   | 17  | >PTEN-V53G·GVRFLDSK    | 14    | 3     |
| >PTEN-V53G·VVRFLDSKHK | 13  | >PTEN-V53G·GVRFLDSKHK  | 10    | 3     |
| >PTEN-V53G·VVRFLDSKH  | 57  | >PTEN-V53G·GVRFLDSKH   | 38    | 19    |
| >PTEN-V53G·DVVRFLDSK  | 493 | >PTEN-V53G·DGVVRFLDSK  | 30140 | 29647 |
| >PTEN-V53G·DVVRFLDSKH | 129 | >PTEN-V53G·DGVVRFLDSKH | 21176 | 21047 |
| >PTEN-V53G·DVVRFLDSK  | 18  | >PTEN-V53G·DGVVRFLDSK  | 894   | 876   |
| >PTEN-V53G·DVVRFLDSKH | 102 | >PTEN-V53G·DGVVRFLDSKH | 2982  | 2880  |
| >PTEN-V53G·NIDDVVRFL  | 171 | >PTEN-V53G·NIDDGVRFL   | 392   | 221   |
| >PTEN-V53G·NIDDVVRFL  | 272 | >PTEN-V53G·NIDDGVRFL   | 259   | 13    |
| >PTEN-V53G·NIDDVVRFL  | 30  | >PTEN-V53G·NIDDGVRFL   | 96    | 66    |
| >PTEN-V53G·NIDDVVRFL  | 320 | >PTEN-V53G·NIDDGVRFL   | 662   | 342   |

|                       |     |                        |       |       |
|-----------------------|-----|------------------------|-------|-------|
| >PTEN-V53G·NIDDVVRFL  | 464 | >PTEN-V53G·NIDDGVRFL   | 334   | 130   |
| >PTEN-V53G·NIDDVVRFL  | 324 | >PTEN-V53G·NIDDGVRFL   | 329   | 5     |
| >PTEN-V53G·NNIDDVVR   | 192 | >PTEN-V53G·NNIDDGVR    | 636   | 444   |
| >PTEN-V53G·RNNIDDVVR  | 450 | >PTEN-V53G·RNNIDDGVR   | 836   | 386   |
| >PTEN-V53G·RNNIDDVVR  | 474 | >PTEN-V53G·RNNIDDGVR   | 3197  | 2723  |
| >PTEN-V53G·YRNNIDDVVF | 48  | >PTEN-V53G·YRNNIDDGVF  | 54    | 6     |
| >PTEN-V53G·YRNNIDDVVF | 119 | >PTEN-V53G·YRNNIDDGVF  | 136   | 17    |
| >PTEN-V53G·VYRNNIDDV\ | 219 | >PTEN-V53G·VYRNNIDDG\  | 616   | 397   |
| >PTEN-V53G·VYRNNIDDV\ | 173 | >PTEN-V53G·VYRNNIDDG\  | 485   | 312   |
| >PTEN-V53G·GVYRNNIDD\ | 225 | >PTEN-V53G·GVYRNNIDD\  | 22764 | 22539 |
| >PTEN-V53G·GVYRNNIDD\ | 938 | >PTEN-V53G·GVYRNNIDD\  | 353   | 585   |
| >PTEN-V53G·GVYRNNIDD\ | 939 | >PTEN-V53G·GVYRNNIDD\  | 257   | 682   |
| >PTEN-V53G·GVYRNNIDD\ | 86  | >PTEN-V53G·GVYRNNIDD\  | 22734 | 22648 |
| >PTEN-V53G·GVYRNNIDD\ | 103 | >PTEN-V53G·GVYRNNIDD\  | 45    | 58    |
| >PTEN-V53G·GVYRNNIDD\ | 106 | >PTEN-V53G·GVYRNNIDD\  | 19226 | 19120 |
| >PTEN-V53G·GVYRNNIDD\ | 113 | >PTEN-V53G·GVYRNNIDD\  | 54    | 59    |
| >PTEN-V53G·GVYRNNIDD\ | 97  | >PTEN-V53G·GVYRNNIDD\  | 23225 | 23128 |
| >PTEN-V53G·GVYRNNIDD\ | 100 | >PTEN-V53G·GVYRNNIDD\  | 43    | 57    |
| >PTEN-V53G·GVYRNNIDD\ | 36  | >PTEN-V53G·GVYRNNIDD\  | 32176 | 32140 |
| >PTEN-V53G·GVYRNNIDD\ | 78  | >PTEN-V53G·GVYRNNIDD\  | 48    | 30    |
| >PTEN-V54L·VRFLDSKH   | 482 | >PTEN-V54L·LRFLDSKH    | 240   | 242   |
| >PTEN-V54L·VRFLDSKHK  | 137 | >PTEN-V54L·LRFLDSKHK   | 84    | 53    |
| >PTEN-V54L·VRFLDSKHKN | 834 | >PTEN-V54L·LRFLDSKHKN  | 412   | 422   |
| >PTEN-V54L·VVRFLDSK   | 644 | >PTEN-V54L·VLRFLDSK    | 210   | 434   |
| >PTEN-V54L·VVRFLDSKHK | 408 | >PTEN-V54L·VLRFLDSKHK  | 182   | 226   |
| >PTEN-V54L·VVRFLDSK   | 455 | >PTEN-V54L·VLRFLDSK    | 2573  | 2118  |
| >PTEN-V54L·VVRFLDSK   | 17  | >PTEN-V54L·VLRFLDSK    | 114   | 97    |
| >PTEN-V54L·VVRFLDSKHK | 13  | >PTEN-V54L·VLRFLDSKHK  | 69    | 56    |
| >PTEN-V54L·VVRFLDSKH  | 57  | >PTEN-V54L·VLRFLDSKH   | 301   | 244   |
| >PTEN-V54L·GVYRNNIDD\ | 103 | >PTEN-V54L·GVYRNNIDD\  | 1467  | 1364  |
| >PTEN-V54L·GVYRNNIDD\ | 113 | >PTEN-V54L·GVYRNNIDD\  | 1441  | 1328  |
| >PTEN-V54L·GVYRNNIDD\ | 100 | >PTEN-V54L·GVYRNNIDD\  | 2539  | 2439  |
| >PTEN-V54L·GVYRNNIDD\ | 78  | >PTEN-V54L·GVYRNNIDD\  | 1710  | 1632  |
| >PTEN-V54L·DVVRFLDSK  | 493 | >PTEN-V54L·DVLRFLLDSK  | 3984  | 3491  |
| >PTEN-V54L·DVVRFLDSKH | 129 | >PTEN-V54L·DVLRFLLDSKH | 1136  | 1007  |
| >PTEN-V54L·DVVRFLDSK  | 18  | >PTEN-V54L·DVLRFLLDSK  | 85    | 67    |
| >PTEN-V54L·DVVRFLDSKH | 102 | >PTEN-V54L·DVLRFLLDSKH | 462   | 360   |
| >PTEN-V54L·NIDDVVRFL  | 171 | >PTEN-V54L·NIDDVLRFL   | 146   | 25    |
| >PTEN-V54L·NIDDVVRFL  | 272 | >PTEN-V54L·NIDDVLRFL   | 65    | 207   |
| >PTEN-V54L·NIDDVVRFL  | 30  | >PTEN-V54L·NIDDVLRFL   | 55    | 25    |
| >PTEN-V54L·NIDDVVRFL  | 320 | >PTEN-V54L·NIDDVLRFL   | 584   | 264   |
| >PTEN-V54L·NIDDVVRFL  | 464 | >PTEN-V54L·NIDDVLRFL   | 870   | 406   |
| >PTEN-V54L·NIDDVVRFL  | 324 | >PTEN-V54L·NIDDVLRFL   | 280   | 44    |

|                        |      |                        |     |      |
|------------------------|------|------------------------|-----|------|
| >PTEN-V54L- NNIDDVVR   | 192  | >PTEN-V54L- NNIDDVLR   | 92  | 100  |
| >PTEN-V54L- RNNIDDVVR  | 837  | >PTEN-V54L- RNNIDDVLR  | 297 | 540  |
| >PTEN-V54L- RNNIDDVVR  | 450  | >PTEN-V54L- RNNIDDVLR  | 828 | 378  |
| >PTEN-V54L- RNNIDDVVR  | 474  | >PTEN-V54L- RNNIDDVLR  | 330 | 144  |
| >PTEN-V54L- YRNNIDDVVF | 48   | >PTEN-V54L- YRNNIDDVLR | 61  | 13   |
| >PTEN-V54L- YRNNIDDVV  | 1277 | >PTEN-V54L- YRNNIDDVL  | 443 | 834  |
| >PTEN-V54L- YRNNIDDVVF | 119  | >PTEN-V54L- YRNNIDDVLR | 104 | 15   |
| >PTEN-V54L- YRNNIDDVV  | 2092 | >PTEN-V54L- YRNNIDDVL  | 134 | 1958 |
| >PTEN-V54L- VYRNNIDDV\ | 1198 | >PTEN-V54L- VYRNNIDDVL | 42  | 1156 |
| >PTEN-V54L- VYRNNIDDV\ | 219  | >PTEN-V54L- VYRNNIDDVL | 102 | 117  |
| >PTEN-V54L- VYRNNIDDV\ | 712  | >PTEN-V54L- VYRNNIDDVL | 252 | 460  |
| >PTEN-V54L- VYRNNIDDV\ | 173  | >PTEN-V54L- VYRNNIDDVL | 125 | 48   |
| >PTEN-V85A- CRVAQYPF   | 32   | >PTEN-V85A- CRAAQYPF   | 36  | 4    |
| >PTEN-V85A- CRVAQYPF   | 283  | >PTEN-V85A- CRAAQYPF   | 227 | 56   |
| >PTEN-V85A- CRVAQYPF   | 214  | >PTEN-V85A- CRAAQYPF   | 154 | 60   |
| >PTEN-V85A- CRVAQYPF   | 618  | >PTEN-V85A- CRAAQYPF   | 385 | 233  |
| >PTEN-V85A- NCRVAQYPF  | 697  | >PTEN-V85A- NCRAAQYPF  | 457 | 240  |
| >PTEN-V85A- FNCRVAQY   | 418  | >PTEN-V85A- FNCRAAQY   | 321 | 97   |
| >PTEN-V85A- FNCRVAQYF  | 544  | >PTEN-V85A- FNCRAAQYF  | 315 | 229  |
| >PTEN-V85A- FNCRVAQYF  | 119  | >PTEN-V85A- FNCRAAQYF  | 73  | 46   |
| >PTEN-V85A- KFNCRVAQYF | 235  | >PTEN-V85A- KFNCRAAQYF | 331 | 96   |
| >PTEN-V85A- KFNCRVAQYF | 412  | >PTEN-V85A- KFNCRAAQYF | 556 | 144  |
| >PTEN-V85A- KFNCRVAQYF | 140  | >PTEN-V85A- KFNCRAAQYF | 177 | 37   |
| >PTEN-V85A- KFNCRVAQY  | 167  | >PTEN-V85A- KFNCRAAQY  | 76  | 91   |
| >PTEN-V85A- KFNCRVAQY  | 377  | >PTEN-V85A- KFNCRAAQY  | 992 | 615  |
| >PTEN-V85A- KFNCRVAQYF | 170  | >PTEN-V85A- KFNCRAAQYF | 267 | 97   |
| >PTEN-V85A- KFNCRVAQYF | 101  | >PTEN-V85A- KFNCRAAQYF | 102 | 1    |
| >PTEN-V85A- KFNCRVAQY  | 759  | >PTEN-V85A- KFNCRAAQY  | 450 | 309  |
| >PTEN-V85A- KFNCRVAQYF | 431  | >PTEN-V85A- KFNCRAAQYF | 584 | 153  |
| >PTEN-V85A- KFNCRVAQYF | 331  | >PTEN-V85A- KFNCRAAQYF | 422 | 91   |
| >PTEN-V85A- KFNCRVAQY  | 131  | >PTEN-V85A- KFNCRAAQY  | 76  | 55   |
| >PTEN-V85A- AKFNCRVAQ' | 381  | >PTEN-V85A- AKFNCRAAQ' | 214 | 167  |
| >PTEN-V85A- AKFNCRVAQ' | 197  | >PTEN-V85A- AKFNCRAAQ' | 154 | 43   |
| >PTEN-V85A- AKFNCRVA   | 52   | >PTEN-V85A- AKFNCRAA   | 47  | 5    |
| >PTEN-V85A- AKFNCRVAQ  | 43   | >PTEN-V85A- AKFNCRAAQ  | 80  | 37   |
| >PTEN-V85A- AKFNCRVAQ' | 3    | >PTEN-V85A- AKFNCRAAQ' | 4   | 1    |
| >PTEN-V85A- AKFNCRVAQ' | 114  | >PTEN-V85A- AKFNCRAAQ' | 128 | 14   |
| >PTEN-V85A- TAKFNCRVAC | 573  | >PTEN-V85A- TAKFNCRAAC | 499 | 74   |
| >PTEN-V85A- TAKFNCRVAC | 362  | >PTEN-V85A- TAKFNCRAAC | 578 | 216  |
| >PTEN-V85A- TAKFNCRVAC | 97   | >PTEN-V85A- TAKFNCRAAC | 89  | 8    |
| >PTEN-V85A- DTAKFNCRV/ | 171  | >PTEN-V85A- DTAKFNCRA/ | 141 | 30   |
| >PTEN-V85A- DTAKFNCRV  | 12   | >PTEN-V85A- DTAKFNCRA  | 52  | 40   |
| >PTEN-V85A- DTAKFNCRV/ | 460  | >PTEN-V85A- DTAKFNCRA/ | 217 | 243  |

|                       |      |                       |       |       |
|-----------------------|------|-----------------------|-------|-------|
| >PTEN-V85A·DTAKFNCRV  | 7    | >PTEN-V85A·DTAKFNCRV  | 178   | 171   |
| >PTEN-V85A·YDTAKFNCRV | 183  | >PTEN-V85A·YDTAKFNCRV | 5112  | 4929  |
| >PTEN-V85G·CRVAQYPF   | 32   | >PTEN-V85G·CRVAQYPF   | 201   | 169   |
| >PTEN-V85G·CRVAQYPF   | 283  | >PTEN-V85G·CRVAQYPF   | 882   | 599   |
| >PTEN-V85G·CRVAQYPF   | 214  | >PTEN-V85G·CRVAQYPF   | 163   | 51    |
| >PTEN-V85G·FNCRVAQY   | 418  | >PTEN-V85G·FNCRVAQY   | 172   | 246   |
| >PTEN-V85G·FNCRVAQYPI | 544  | >PTEN-V85G·FNCRVAQYPI | 370   | 174   |
| >PTEN-V85G·FNCRVAQY   | 2564 | >PTEN-V85G·FNCRVAQY   | 480   | 2084  |
| >PTEN-V85G·FNCRVAQYPI | 119  | >PTEN-V85G·FNCRVAQYPI | 130   | 11    |
| >PTEN-V85G·KFNCRVAQYI | 235  | >PTEN-V85G·KFNCRVAQYI | 331   | 96    |
| >PTEN-V85G·KFNCRVAQYI | 412  | >PTEN-V85G·KFNCRVAQYI | 599   | 187   |
| >PTEN-V85G·KFNCRVAQYI | 140  | >PTEN-V85G·KFNCRVAQYI | 207   | 67    |
| >PTEN-V85G·KFNCRVAQY  | 167  | >PTEN-V85G·KFNCRVAQY  | 86    | 81    |
| >PTEN-V85G·KFNCRVAQY  | 377  | >PTEN-V85G·KFNCRVAQY  | 538   | 161   |
| >PTEN-V85G·KFNCRVAQYI | 170  | >PTEN-V85G·KFNCRVAQYI | 241   | 71    |
| >PTEN-V85G·KFNCRVAQYI | 101  | >PTEN-V85G·KFNCRVAQYI | 180   | 79    |
| >PTEN-V85G·KFNCRVAQYI | 431  | >PTEN-V85G·KFNCRVAQYI | 427   | 4     |
| >PTEN-V85G·KFNCRVAQYI | 331  | >PTEN-V85G·KFNCRVAQYI | 378   | 47    |
| >PTEN-V85G·KFNCRVAQY  | 131  | >PTEN-V85G·KFNCRVAQY  | 140   | 9     |
| >PTEN-V85G·AKFNCRVAQ' | 381  | >PTEN-V85G·AKFNCRVAQ' | 272   | 109   |
| >PTEN-V85G·AKFNCRVAQ' | 197  | >PTEN-V85G·AKFNCRVAQ' | 139   | 58    |
| >PTEN-V85G·AKFNCRVA   | 52   | >PTEN-V85G·AKFNCRVA   | 262   | 210   |
| >PTEN-V85G·AKFNCRVAQ  | 43   | >PTEN-V85G·AKFNCRVAQ  | 386   | 343   |
| >PTEN-V85G·AKFNCRVAQ' | 3    | >PTEN-V85G·AKFNCRVAQ' | 5     | 2     |
| >PTEN-V85G·AKFNCRVAQ' | 114  | >PTEN-V85G·AKFNCRVAQ' | 229   | 115   |
| >PTEN-V85G·TAKFNCRVAC | 362  | >PTEN-V85G·TAKFNCRVAC | 491   | 129   |
| >PTEN-V85G·TAKFNCRVAC | 97   | >PTEN-V85G·TAKFNCRVAC | 99    | 2     |
| >PTEN-V85G·DTAKFNCRV/ | 171  | >PTEN-V85G·DTAKFNCRV/ | 299   | 128   |
| >PTEN-V85G·DTAKFNCRV  | 12   | >PTEN-V85G·DTAKFNCRV  | 3574  | 3562  |
| >PTEN-V85G·DTAKFNCRV/ | 460  | >PTEN-V85G·DTAKFNCRV/ | 239   | 221   |
| >PTEN-V85G·DTAKFNCRV  | 7    | >PTEN-V85G·DTAKFNCRV  | 9237  | 9230  |
| >PTEN-V85G·DTAKFNCRV/ | 1729 | >PTEN-V85G·DTAKFNCRV/ | 396   | 1333  |
| >PTEN-V85G·YDTAKFNCRV | 183  | >PTEN-V85G·YDTAKFNCRV | 23495 | 23312 |
| >PTEN-W111·WLSEDDNHV  | 105  | >PTEN-W111·WLSEDDNHV  | 119   | 14    |
| >PTEN-W111·WLSEDDNHV  | 480  | >PTEN-W111·WLSEDDNHV/ | 584   | 104   |
| >PTEN-W111·WLSEDDNHV  | 10   | >PTEN-W111·WLSEDDNHV  | 13    | 3     |
| >PTEN-W111·WLSEDDNHV  | 99   | >PTEN-W111·WLSEDDNHV/ | 141   | 42    |
| >PTEN-W111·WLSEDDNHV  | 30   | >PTEN-W111·WLSEDDNHV/ | 62    | 32    |
| >PTEN-W111·WLSEDDNHV  | 12   | >PTEN-W111·WLSEDDNHV  | 12    | 0     |
| >PTEN-W111·WLSEDDNHV  | 39   | >PTEN-W111·WLSEDDNHV/ | 45    | 6     |
| >PTEN-W111·WLSEDDNHV  | 30   | >PTEN-W111·WLSEDDNHV  | 52    | 22    |
| >PTEN-W111·WLSEDDNHV  | 56   | >PTEN-W111·WLSEDDNHV/ | 137   | 81    |
| >PTEN-W111·WLSEDDNHV  | 8    | >PTEN-W111·WLSEDDNHV  | 8     | 0     |

|                      |       |                      |       |       |
|----------------------|-------|----------------------|-------|-------|
| >PTEN-W111WLSEDDNHV  | 65    | >PTEN-W111RLSEDDNHV/ | 84    | 19    |
| >PTEN-W111WLSEDDNHV  | 34    | >PTEN-W111RLSEDDNHV/ | 46    | 12    |
| >PTEN-W111WLSEDDNHV  | 4     | >PTEN-W111RLSEDDNHV  | 4     | 0     |
| >PTEN-W111WLSEDDNHV  | 22    | >PTEN-W111RLSEDDNHV/ | 29    | 7     |
| >PTEN-W111WLSEDDNHV  | 26    | >PTEN-W111RLSEDDNHV/ | 35    | 9     |
| >PTEN-W111WLSEDDNHV  | 6     | >PTEN-W111RLSEDDNHV  | 7     | 1     |
| >PTEN-W111WLSEDDNHV  | 46    | >PTEN-W111RLSEDDNHV/ | 84    | 38    |
| >PTEN-W111WLSEDDNHV  | 85    | >PTEN-W111RLSEDDNHV/ | 165   | 80    |
| >PTEN-W111WLSEDDNHV  | 6     | >PTEN-W111RLSEDDNHV  | 34    | 28    |
| >PTEN-W111WLSEDDNHV  | 40    | >PTEN-W111RLSEDDNHV/ | 295   | 255   |
| >PTEN-W111WLSEDDNHV  | 108   | >PTEN-W111RLSEDDNHV/ | 1302  | 1194  |
| >PTEN-W111WLSEDDNHV  | 2     | >PTEN-W111RLSEDDNHV  | 4     | 2     |
| >PTEN-W111WLSEDDNHV  | 7     | >PTEN-W111RLSEDDNHV/ | 18    | 11    |
| >PTEN-W111WLSEDDNHV  | 9     | >PTEN-W111RLSEDDNHV/ | 21    | 12    |
| >PTEN-W111WLSEDDNHV  | 243   | >PTEN-W111RLSEDDNHV  | 5417  | 5174  |
| >PTEN-W111QWLSEDDNH  | 40    | >PTEN-W111QRLSEDDNH' | 10644 | 10604 |
| >PTEN-W111QWLSEDDNH  | 162   | >PTEN-W111QRLSEDDNH' | 29472 | 29310 |
| >PTEN-W111CEDLDQWL   | 157   | >PTEN-W111CEDLDQRL   | 386   | 229   |
| >PTEN-W111CEDLDQWL   | 128   | >PTEN-W111CEDLDQRL   | 578   | 450   |
| >PTEN-W111FCEDLDQW   | 43    | >PTEN-W111FCEDLDQR   | 29258 | 29215 |
| >PTEN-W111KPFCELDQV  | 13    | >PTEN-W111KPFCELDQF  | 18186 | 18173 |
| >PTEN-W111KPFCELDQV  | 102   | >PTEN-W111KPFCELDQF  | 21053 | 20951 |
| >PTEN-W111KPFCELDQV  | 23436 | >PTEN-W111KPFCELDQF  | 93    | 23343 |
| >PTEN-W274FWVNTFFI   | 63    | >PTEN-W274FGVNTFFI   | 150   | 87    |
| >PTEN-W274FWVNTFFI   | 12    | >PTEN-W274FGVNTFFI   | 13    | 1     |
| >PTEN-W274FWVNTFFI   | 35    | >PTEN-W274FGVNTFFI   | 1791  | 1756  |
| >PTEN-W274FWVNTFFI   | 126   | >PTEN-W274FGVNTFFI   | 8863  | 8737  |
| >PTEN-W274FWVNTFFI   | 17    | >PTEN-W274FGVNTFFI   | 14867 | 14850 |
| >PTEN-W274FWVNTFFI   | 2421  | >PTEN-W274FGVNTFFI   | 354   | 2067  |
| >PTEN-W274FWVNTFFI   | 39    | >PTEN-W274FGVNTFFI   | 20657 | 20618 |
| >PTEN-W274FWVNTFFIP  | 203   | >PTEN-W274FGVNTFFIP  | 32752 | 32549 |
| >PTEN-W274FWVNTFFIPG | 239   | >PTEN-W274FGVNTFFIPG | 32229 | 31990 |
| >PTEN-W274FWVNTFFI   | 8016  | >PTEN-W274FGVNTFFI   | 373   | 7643  |
| >PTEN-W274MLKKDKMFH  | 137   | >PTEN-W274MLKKDKMFH  | 24390 | 24253 |
| >PTEN-W274HFWVNTFFI  | 139   | >PTEN-W274HFGVNTFFI  | 1004  | 865   |
| >PTEN-W274HFWVNTFF   | 32    | >PTEN-W274HFGVNTFF   | 104   | 72    |
| >PTEN-W274HFWVNTFFI  | 40    | >PTEN-W274HFGVNTFFI  | 149   | 109   |
| >PTEN-W274HFWVNTFFI  | 202   | >PTEN-W274HFGVNTFFI  | 212   | 10    |
| >PTEN-W274HFWVNTFF   | 17    | >PTEN-W274HFGVNTFF   | 13    | 4     |
| >PTEN-W274HFWVNTFFI  | 13    | >PTEN-W274HFGVNTFFI  | 12    | 1     |
| >PTEN-W274HFWVNTFF   | 107   | >PTEN-W274HFGVNTFF   | 1031  | 924   |
| >PTEN-W274HFWVNTFFI  | 281   | >PTEN-W274HFGVNTFFI  | 3149  | 2868  |
| >PTEN-W274HFWVNTFFI  | 289   | >PTEN-W274HFGVNTFFI  | 967   | 678   |

|                      |      |                      |      |      |
|----------------------|------|----------------------|------|------|
| >PTEN-W274HFWVNTFFI  | 358  | >PTEN-W274HFGVNTFFI  | 4241 | 3883 |
| >PTEN-W274HFWVNTFF   | 473  | >PTEN-W274HFGVNTFF   | 5482 | 5009 |
| >PTEN-W274HFWVNTFF   | 271  | >PTEN-W274HFGVNTFF   | 5376 | 5105 |
| >PTEN-W274FHFVWNTFFI | 25   | >PTEN-W274FHFVWNTFFI | 38   | 13   |
| >PTEN-W274FHFVWNTFFI | 545  | >PTEN-W274FHFVWNTFFI | 296  | 249  |
| >PTEN-W274FHFVWNTFFI | 126  | >PTEN-W274FHFVWNTFFI | 264  | 138  |
| >PTEN-W274FHFVWNTFFI | 378  | >PTEN-W274FHFVWNTFFI | 623  | 245  |
| >PTEN-W274FHFVWNTF   | 456  | >PTEN-W274FHFVWNTF   | 512  | 56   |
| >PTEN-W274FHFVWNTF   | 93   | >PTEN-W274FHFVWNTF   | 99   | 6    |
| >PTEN-W274FHFVWNTFF  | 326  | >PTEN-W274FHFVWNTFF  | 343  | 17   |
| >PTEN-W274FHFVWNTF   | 2049 | >PTEN-W274FHFVWNTF   | 343  | 1706 |
| >PTEN-W274FHFVWNTF   | 7    | >PTEN-W274FHFVWNTF   | 7    | 0    |
| >PTEN-W274FHFVWNTFF  | 10   | >PTEN-W274FHFVWNTFF  | 10   | 0    |
| >PTEN-W274FHFVWNTF   | 483  | >PTEN-W274FHFVWNTF   | 348  | 135  |
| >PTEN-W274FHFVWNTF   | 229  | >PTEN-W274FHFVWNTF   | 584  | 355  |
| >PTEN-W274FHFVWNTF   | 32   | >PTEN-W274FHFVWNTF   | 34   | 2    |
| >PTEN-W274FHFVWNTFF  | 214  | >PTEN-W274FHFVWNTFF  | 188  | 26   |
| >PTEN-W274FHFVWNTFFI | 50   | >PTEN-W274FHFVWNTFFI | 47   | 3    |
| >PTEN-W274FHFVWNTFF  | 128  | >PTEN-W274FHFVWNTFF  | 104  | 24   |
| >PTEN-W274FHFVWNTFFI | 351  | >PTEN-W274FHFVWNTFFI | 293  | 58   |
| >PTEN-W274FHFVWNTF   | 29   | >PTEN-W274FHFVWNTF   | 29   | 0    |
| >PTEN-W274FHFVWNTFF  | 21   | >PTEN-W274FHFVWNTFF  | 18   | 3    |
| >PTEN-W274MFHFVWNTF  | 112  | >PTEN-W274MFHFVWNTF  | 151  | 39   |
| >PTEN-W274MFHFVWNTF  | 462  | >PTEN-W274MFHFVWNTF  | 2112 | 1650 |
| >PTEN-W274MFHFVWNTF  | 17   | >PTEN-W274MFHFVWNTF  | 53   | 36   |
| >PTEN-W274MFHFVWNTF  | 391  | >PTEN-W274MFHFVWNTF  | 670  | 279  |
| >PTEN-W274MFHFVWNTF  | 42   | >PTEN-W274MFHFVWNTF  | 138  | 96   |
| >PTEN-W274MFHFVWNTF  | 48   | >PTEN-W274MFHFVWNTF  | 221  | 173  |
| >PTEN-W274MFHFVWNTF  | 369  | >PTEN-W274MFHFVWNTF  | 406  | 37   |
| >PTEN-W274MFHFVWNTF  | 106  | >PTEN-W274MFHFVWNTF  | 329  | 223  |
| >PTEN-W274MFHFVWNTF  | 8    | >PTEN-W274MFHFVWNTF  | 6    | 2    |
| >PTEN-W274MFHFVWNTF  | 13   | >PTEN-W274MFHFVWNTF  | 10   | 3    |
| >PTEN-W274MFHFVWNTF  | 15   | >PTEN-W274MFHFVWNTF  | 13   | 2    |
| >PTEN-W274MFHFVWNTF  | 152  | >PTEN-W274MFHFVWNTF  | 383  | 231  |
| >PTEN-W274MFHFVWNTF  | 163  | >PTEN-W274MFHFVWNTF  | 264  | 101  |
| >PTEN-W274MFHFVWNTF  | 24   | >PTEN-W274MFHFVWNTF  | 18   | 6    |
| >PTEN-W274MFHFVWNTF  | 198  | >PTEN-W274MFHFVWNTF  | 563  | 365  |
| >PTEN-W274MFHFVWNTF  | 256  | >PTEN-W274MFHFVWNTF  | 449  | 193  |
| >PTEN-W274MFHFVWNTF  | 363  | >PTEN-W274MFHFVWNTF  | 403  | 40   |
| >PTEN-W274MFHFVWNTF  | 2429 | >PTEN-W274MFHFVWNTF  | 414  | 2015 |
| >PTEN-W274MFHFVWNTF  | 303  | >PTEN-W274MFHFVWNTF  | 284  | 19   |
| >PTEN-W274MFHFVWNTF  | 148  | >PTEN-W274MFHFVWNTF  | 181  | 33   |
| >PTEN-W274MFHFVWNTF  | 480  | >PTEN-W274MFHFVWNTF  | 731  | 251  |

|                     |     |                     |      |      |
|---------------------|-----|---------------------|------|------|
| >PTEN-W274MFHFWVNTF | 210 | >PTEN-W274MFHFGVNTF | 450  | 240  |
| >PTEN-W274MFHFWVNTF | 494 | >PTEN-W274MFHFGVNTF | 5539 | 5045 |
| >PTEN-W274MFHFWVNT  | 492 | >PTEN-W274MFHFGVNT  | 1527 | 1035 |
| >PTEN-W274MFHFWVNTF | 80  | >PTEN-W274MFHFGVNTF | 231  | 151  |
| >PTEN-W274MFHFWVNTF | 56  | >PTEN-W274MFHFGVNTF | 99   | 43   |
| >PTEN-W274KMFHFWVNT | 56  | >PTEN-W274KMFHFGVNT | 731  | 675  |
| >PTEN-W274KMFHFWVNT | 159 | >PTEN-W274KMFHFGVNT | 475  | 316  |
| >PTEN-W274KMFHFWVNT | 35  | >PTEN-W274KMFHFGVNT | 161  | 126  |
| >PTEN-W274KMFHFWVNT | 219 | >PTEN-W274KMFHFGVNT | 589  | 370  |
| >PTEN-W274KMFHFWVNT | 65  | >PTEN-W274KMFHFGVNT | 121  | 56   |
| >PTEN-W274KMFHFWVNT | 72  | >PTEN-W274KMFHFGVNT | 83   | 11   |
| >PTEN-W274KMFHFWVNT | 183 | >PTEN-W274KMFHFGVNT | 199  | 16   |
| >PTEN-W274KMFHFWVNT | 107 | >PTEN-W274KMFHFGVNT | 647  | 540  |
| >PTEN-W274KMFHFWVNT | 110 | >PTEN-W274KMFHFGVNT | 227  | 117  |
| >PTEN-W274KMFHFWVN  | 163 | >PTEN-W274KMFHFGVN  | 1792 | 1629 |
| >PTEN-W274KMFHFWVNT | 22  | >PTEN-W274KMFHFGVNT | 33   | 11   |
| >PTEN-W274KMFHFWVNT | 29  | >PTEN-W274KMFHFGVNT | 65   | 36   |
| >PTEN-W274KMFHFWVNT | 45  | >PTEN-W274KMFHFGVNT | 61   | 16   |
| >PTEN-W274KMFHFWVNT | 996 | >PTEN-W274KMFHFGVNT | 401  | 595  |
| >PTEN-W274KMFHFWVNT | 130 | >PTEN-W274KMFHFGVNT | 334  | 204  |
| >PTEN-W274KMFHFWVNT | 357 | >PTEN-W274KMFHFGVNT | 472  | 115  |
| >PTEN-W274KMFHFWVNT | 536 | >PTEN-W274KMFHFGVNT | 377  | 159  |
| >PTEN-W274KMFHFWVNT | 379 | >PTEN-W274KMFHFGVNT | 710  | 331  |
| >PTEN-W274KMFHFWVNT | 456 | >PTEN-W274KMFHFGVNT | 1255 | 799  |
| >PTEN-W274KMFHFWVNT | 133 | >PTEN-W274KMFHFGVNT | 142  | 9    |
| >PTEN-W274KMFHFWVNT | 175 | >PTEN-W274KMFHFGVNT | 223  | 48   |
| >PTEN-W274KMFHFWVNT | 397 | >PTEN-W274KMFHFGVNT | 2527 | 2130 |
| >PTEN-W274KMFHFWVNT | 444 | >PTEN-W274KMFHFGVNT | 555  | 111  |
| >PTEN-W274KMFHFWVNT | 433 | >PTEN-W274KMFHFGVNT | 1521 | 1088 |
| >PTEN-W274KMFHFWVNT | 89  | >PTEN-W274KMFHFGVNT | 152  | 63   |
| >PTEN-W274KMFHFWVN  | 429 | >PTEN-W274KMFHFGVN  | 1226 | 797  |
| >PTEN-W274KMFHFWVNT | 202 | >PTEN-W274KMFHFGVNT | 68   | 134  |
| >PTEN-W274KMFHFWVNT | 3   | >PTEN-W274KMFHFGVNT | 3    | 0    |
| >PTEN-W274KMFHFWVNT | 7   | >PTEN-W274KMFHFGVNT | 5    | 2    |
| >PTEN-W274KMFHFWVNT | 34  | >PTEN-W274KMFHFGVNT | 33   | 1    |
| >PTEN-W274KMFHFWVNT | 43  | >PTEN-W274KMFHFGVNT | 38   | 5    |
| >PTEN-W274KMFHFWVNT | 165 | >PTEN-W274KMFHFGVNT | 91   | 74   |
| >PTEN-W274KMFHFWVNT | 248 | >PTEN-W274KMFHFGVNT | 179  | 69   |
| >PTEN-W274KMFHFWVN  | 314 | >PTEN-W274KMFHFGVN  | 567  | 253  |
| >PTEN-W274KMFHFWVNT | 103 | >PTEN-W274KMFHFGVNT | 49   | 54   |
| >PTEN-W274KMFHFWVNT | 2   | >PTEN-W274KMFHFGVNT | 2    | 0    |
| >PTEN-W274KMFHFWVNT | 3   | >PTEN-W274KMFHFGVNT | 2    | 1    |
| >PTEN-W274KMFHFWVNT | 32  | >PTEN-W274KMFHFGVNT | 25   | 7    |

|                      |       |                      |       |       |
|----------------------|-------|----------------------|-------|-------|
| >PTEN-W274KMFHFWVNT  | 67    | >PTEN-W274KMFHFGVNT  | 61    | 6     |
| >PTEN-W274KMFHFWVNT  | 121   | >PTEN-W274KMFHFGVNT  | 326   | 205   |
| >PTEN-W274KMFHFWVNT  | 232   | >PTEN-W274KMFHFGVNT  | 268   | 36    |
| >PTEN-W274KMFHFWVNT  | 38    | >PTEN-W274KMFHFGVNT  | 55    | 17    |
| >PTEN-W274KMFHFWVNT  | 28    | >PTEN-W274KMFHFGVNT  | 40    | 12    |
| >PTEN-W274KMFHFWVNT  | 100   | >PTEN-W274KMFHFGVNT  | 75    | 25    |
| >PTEN-W274KMFHFWVN   | 161   | >PTEN-W274KMFHFGVN   | 1385  | 1224  |
| >PTEN-W274KMFHFWVNT  | 214   | >PTEN-W274KMFHFGVNT  | 922   | 708   |
| >PTEN-W274DKMFHFVW   | 884   | >PTEN-W274DKMFHFGV   | 463   | 421   |
| >PTEN-W274DKMFHFVVI  | 19    | >PTEN-W274DKMFHFGVN  | 35    | 16    |
| >PTEN-W274DKMFHFVVI  | 190   | >PTEN-W274DKMFHFGVN  | 533   | 343   |
| >PTEN-W274KDKMFHFW\  | 626   | >PTEN-W274KDKMFHFGV  | 257   | 369   |
| >PTEN-W274KDKMFHFW\  | 395   | >PTEN-W274KDKMFHFGV  | 756   | 361   |
| >PTEN-W274KKDKMFHF\  | 462   | >PTEN-W274KKDKMFHFG  | 33669 | 33207 |
| >PTEN-W274LKKDKMFHF\ | 474   | >PTEN-W274LKKDKMFHF\ | 32847 | 32373 |
| >PTEN-W274LKKDKMFHF\ | 164   | >PTEN-W274LKKDKMFHF\ | 22708 | 22544 |
| >PTEN-W274WVNTFFIPG  | 11167 | >PTEN-W274RVNTFFIPG  | 41    | 11126 |
| >PTEN-W274FWVNTFFI   | 63    | >PTEN-W274FRVNTFFI   | 962   | 899   |
| >PTEN-W274FWVNTFFI   | 12    | >PTEN-W274FRVNTFFI   | 76    | 64    |
| >PTEN-W274FWVNTFFI   | 35    | >PTEN-W274FRVNTFFI   | 2019  | 1984  |
| >PTEN-W274FWVNTFFI   | 126   | >PTEN-W274FRVNTFFI   | 8401  | 8275  |
| >PTEN-W274FWVNTFFI   | 17    | >PTEN-W274FRVNTFFI   | 15097 | 15080 |
| >PTEN-W274FWVNTFFI   | 4114  | >PTEN-W274FRVNTFFI   | 216   | 3898  |
| >PTEN-W274FWVNTFFI   | 11066 | >PTEN-W274FRVNTFFI   | 56    | 11010 |
| >PTEN-W274FWVNTFFI   | 13403 | >PTEN-W274FRVNTFFI   | 179   | 13224 |
| >PTEN-W274FWVNTFFI   | 39    | >PTEN-W274FRVNTFFI   | 19047 | 19008 |
| >PTEN-W274FWVNTFFIP  | 203   | >PTEN-W274FRVNTFFIP  | 32078 | 31875 |
| >PTEN-W274FWVNTFFIPG | 239   | >PTEN-W274FRVNTFFIPG | 31325 | 31086 |
| >PTEN-W274MLKKDKMFH  | 16683 | >PTEN-W274MLKKDKMFH  | 221   | 16462 |
| >PTEN-W274MLKKDKMFH  | 5505  | >PTEN-W274MLKKDKMFH  | 258   | 5247  |
| >PTEN-W274MLKKDKMFH  | 3342  | >PTEN-W274MLKKDKMFH  | 8     | 3334  |
| >PTEN-W274MLKKDKMFH  | 13305 | >PTEN-W274MLKKDKMFH  | 20    | 13285 |
| >PTEN-W274MLKKDKMFH  | 14232 | >PTEN-W274MLKKDKMFH  | 15    | 14217 |
| >PTEN-W274MLKKDKMFH  | 137   | >PTEN-W274MLKKDKMFH  | 24341 | 24204 |
| >PTEN-W274MLKKDKMFH  | 15211 | >PTEN-W274MLKKDKMFH  | 50    | 15161 |
| >PTEN-W274HFWVNTFFI  | 139   | >PTEN-W274HFRVNTFFI  | 1404  | 1265  |
| >PTEN-W274HFWVNTFF   | 32    | >PTEN-W274HFRVNTFF   | 145   | 113   |
| >PTEN-W274HFWVNTFFI  | 40    | >PTEN-W274HFRVNTFFI  | 196   | 156   |
| >PTEN-W274HFWVNTFFI  | 202   | >PTEN-W274HFRVNTFFI  | 487   | 285   |
| >PTEN-W274HFWVNTFF   | 17    | >PTEN-W274HFRVNTFF   | 36    | 19    |
| >PTEN-W274HFWVNTFFI  | 13    | >PTEN-W274HFRVNTFFI  | 38    | 25    |
| >PTEN-W274HFWVNTFF   | 107   | >PTEN-W274HFRVNTFF   | 2096  | 1989  |
| >PTEN-W274HFWVNTFFI  | 281   | >PTEN-W274HFRVNTFFI  | 5614  | 5333  |



|                      |       |                      |      |       |
|----------------------|-------|----------------------|------|-------|
| >PTEN-W274HFWVNTFF   | 10439 | >PTEN-W274HFRVNTFF   | 117  | 10322 |
| >PTEN-W274HFWVNTFFI  | 289   | >PTEN-W274HFRVNTFFI  | 4    | 285   |
| >PTEN-W274HFWVNTFFIP | 9342  | >PTEN-W274HFRVNTFFIP | 90   | 9252  |
| >PTEN-W274HFWVNTFFIP | 2780  | >PTEN-W274HFRVNTFFIP | 10   | 2770  |
| >PTEN-W274HFWVNTFFI  | 358   | >PTEN-W274HFRVNTFFI  | 1161 | 803   |
| >PTEN-W274HFWVNTFF   | 510   | >PTEN-W274HFRVNTFF   | 477  | 33    |
| >PTEN-W274HFWVNTFF   | 473   | >PTEN-W274HFRVNTFF   | 852  | 379   |
| >PTEN-W274HFWVNTFF   | 271   | >PTEN-W274HFRVNTFF   | 4550 | 4279  |
| >PTEN-W274FHFVNTFFI  | 25    | >PTEN-W274FHFVNTFFI  | 14   | 11    |
| >PTEN-W274FHFVNTFFI  | 126   | >PTEN-W274FHFVNTFFI  | 716  | 590   |
| >PTEN-W274FHFVNTFFI  | 378   | >PTEN-W274FHFVNTFFI  | 1546 | 1168  |
| >PTEN-W274FHFVNTF    | 456   | >PTEN-W274FHFVNTF    | 457  | 1     |
| >PTEN-W274FHFVNTF    | 93    | >PTEN-W274FHFVNTF    | 123  | 30    |
| >PTEN-W274FHFVNTFF   | 326   | >PTEN-W274FHFVNTFF   | 365  | 39    |
| >PTEN-W274FHFVNTF    | 7     | >PTEN-W274FHFVNTF    | 3    | 4     |
| >PTEN-W274FHFVNTFF   | 10    | >PTEN-W274FHFVNTFF   | 4    | 6     |
| >PTEN-W274FHFVNTFFI  | 826   | >PTEN-W274FHFVNTFFI  | 197  | 629   |
| >PTEN-W274FHFVNTF    | 483   | >PTEN-W274FHFVNTF    | 465  | 18    |
| >PTEN-W274FHFVNTF    | 229   | >PTEN-W274FHFVNTF    | 1957 | 1728  |
| >PTEN-W274FHFVNTF    | 32    | >PTEN-W274FHFVNTF    | 116  | 84    |
| >PTEN-W274FHFVNTFF   | 214   | >PTEN-W274FHFVNTFF   | 977  | 763   |
| >PTEN-W274FHFVNTFFI  | 50    | >PTEN-W274FHFVNTFFI  | 153  | 103   |
| >PTEN-W274FHFVNTFF   | 128   | >PTEN-W274FHFVNTFF   | 134  | 6     |
| >PTEN-W274FHFVNTFFI  | 351   | >PTEN-W274FHFVNTFFI  | 249  | 102   |
| >PTEN-W274FHFVNTF    | 29    | >PTEN-W274FHFVNTF    | 80   | 51    |
| >PTEN-W274FHFVNTFF   | 21    | >PTEN-W274FHFVNTFF   | 31   | 10    |
| >PTEN-W274MFHFVNTF   | 112   | >PTEN-W274MFHFVNTF   | 164  | 52    |
| >PTEN-W274MFHFVNTF   | 462   | >PTEN-W274MFHFVNTF   | 3646 | 3184  |
| >PTEN-W274MFHFVNTF   | 17    | >PTEN-W274MFHFVNTF   | 86   | 69    |
| >PTEN-W274MFHFVNTF   | 391   | >PTEN-W274MFHFVNTF   | 627  | 236   |
| >PTEN-W274MFHFVNTF   | 42    | >PTEN-W274MFHFVNTF   | 197  | 155   |
| >PTEN-W274MFHFVNTF   | 48    | >PTEN-W274MFHFVNTF   | 101  | 53    |
| >PTEN-W274MFHFVNTF   | 369   | >PTEN-W274MFHFVNTF   | 251  | 118   |
| >PTEN-W274MFHFVNTF   | 106   | >PTEN-W274MFHFVNTF   | 198  | 92    |
| >PTEN-W274MFHFVNTF   | 8     | >PTEN-W274MFHFVNTF   | 9    | 1     |
| >PTEN-W274MFHFVNTF   | 13    | >PTEN-W274MFHFVNTF   | 13   | 0     |
| >PTEN-W274MFHFVNTF   | 15    | >PTEN-W274MFHFVNTF   | 20   | 5     |
| >PTEN-W274MFHFVNTF   | 152   | >PTEN-W274MFHFVNTF   | 1536 | 1384  |
| >PTEN-W274MFHFVNTF   | 163   | >PTEN-W274MFHFVNTF   | 245  | 82    |
| >PTEN-W274MFHFVNTF   | 24    | >PTEN-W274MFHFVNTF   | 14   | 10    |
| >PTEN-W274MFHFVNTF   | 198   | >PTEN-W274MFHFVNTF   | 499  | 301   |
| >PTEN-W274MFHFVNTF   | 256   | >PTEN-W274MFHFVNTF   | 740  | 484   |
| >PTEN-W274MFHFVNTF   | 5795  | >PTEN-W274MFHFVNTF   | 104  | 5691  |

|                     |     |                     |      |      |
|---------------------|-----|---------------------|------|------|
| >PTEN-W274MFHFWVNTF | 363 | >PTEN-W274MFHFRVNTF | 980  | 617  |
| >PTEN-W274MFHFWVNTF | 303 | >PTEN-W274MFHFRVNTF | 376  | 73   |
| >PTEN-W274MFHFWVNTF | 148 | >PTEN-W274MFHFRVNTF | 1042 | 894  |
| >PTEN-W274MFHFWVNTF | 480 | >PTEN-W274MFHFRVNTF | 1464 | 984  |
| >PTEN-W274MFHFWVNTF | 210 | >PTEN-W274MFHFRVNTF | 362  | 152  |
| >PTEN-W274MFHFWVNTF | 494 | >PTEN-W274MFHFRVNTF | 3090 | 2596 |
| >PTEN-W274MFHFWVNT  | 492 | >PTEN-W274MFHFRVNT  | 1382 | 890  |
| >PTEN-W274MFHFWVNTF | 80  | >PTEN-W274MFHFRVNTF | 452  | 372  |
| >PTEN-W274MFHFWVNTF | 56  | >PTEN-W274MFHFRVNTF | 133  | 77   |
| >PTEN-W274KMFHFWVNT | 56  | >PTEN-W274KMFHFRVNT | 249  | 193  |
| >PTEN-W274KMFHFWVNT | 159 | >PTEN-W274KMFHFRVNT | 289  | 130  |
| >PTEN-W274KMFHFWVNT | 35  | >PTEN-W274KMFHFRVNT | 317  | 282  |
| >PTEN-W274KMFHFWVNT | 219 | >PTEN-W274KMFHFRVNT | 1013 | 794  |
| >PTEN-W274KMFHFWVNT | 65  | >PTEN-W274KMFHFRVNT | 207  | 142  |
| >PTEN-W274KMFHFWVNT | 72  | >PTEN-W274KMFHFRVNT | 127  | 55   |
| >PTEN-W274KMFHFWVNT | 183 | >PTEN-W274KMFHFRVNT | 557  | 374  |
| >PTEN-W274KMFHFWVNT | 107 | >PTEN-W274KMFHFRVNT | 1313 | 1206 |
| >PTEN-W274KMFHFWVNT | 110 | >PTEN-W274KMFHFRVNT | 309  | 199  |
| >PTEN-W274KMFHFWVN  | 163 | >PTEN-W274KMFHFRVN  | 3992 | 3829 |
| >PTEN-W274KMFHFWVNT | 22  | >PTEN-W274KMFHFRVNT | 269  | 247  |
| >PTEN-W274KMFHFWVNT | 29  | >PTEN-W274KMFHFRVNT | 308  | 279  |
| >PTEN-W274KMFHFWVNT | 45  | >PTEN-W274KMFHFRVNT | 225  | 180  |
| >PTEN-W274KMFHFWVNT | 130 | >PTEN-W274KMFHFRVNT | 1921 | 1791 |
| >PTEN-W274KMFHFWVNT | 357 | >PTEN-W274KMFHFRVNT | 340  | 17   |
| >PTEN-W274KMFHFWVNT | 536 | >PTEN-W274KMFHFRVNT | 340  | 196  |
| >PTEN-W274KMFHFWVNT | 379 | >PTEN-W274KMFHFRVNT | 583  | 204  |
| >PTEN-W274KMFHFWVNT | 456 | >PTEN-W274KMFHFRVNT | 1536 | 1080 |
| >PTEN-W274KMFHFWVNT | 133 | >PTEN-W274KMFHFRVNT | 186  | 53   |
| >PTEN-W274KMFHFWVNT | 175 | >PTEN-W274KMFHFRVNT | 498  | 323  |
| >PTEN-W274KMFHFWVNT | 397 | >PTEN-W274KMFHFRVNT | 571  | 174  |
| >PTEN-W274KMFHFWVNT | 444 | >PTEN-W274KMFHFRVNT | 396  | 48   |
| >PTEN-W274KMFHFWVNT | 433 | >PTEN-W274KMFHFRVNT | 359  | 74   |
| >PTEN-W274KMFHFWVNT | 89  | >PTEN-W274KMFHFRVNT | 83   | 6    |
| >PTEN-W274KMFHFWVN  | 429 | >PTEN-W274KMFHFRVN  | 381  | 48   |
| >PTEN-W274KMFHFWVNT | 202 | >PTEN-W274KMFHFRVNT | 38   | 164  |
| >PTEN-W274KMFHFWVNT | 3   | >PTEN-W274KMFHFRVNT | 3    | 0    |
| >PTEN-W274KMFHFWVNT | 7   | >PTEN-W274KMFHFRVNT | 5    | 2    |
| >PTEN-W274KMFHFWVNT | 34  | >PTEN-W274KMFHFRVNT | 40   | 6    |
| >PTEN-W274KMFHFWVNT | 43  | >PTEN-W274KMFHFRVNT | 46   | 3    |
| >PTEN-W274KMFHFWVNT | 165 | >PTEN-W274KMFHFRVNT | 299  | 134  |
| >PTEN-W274KMFHFWVNT | 248 | >PTEN-W274KMFHFRVNT | 530  | 282  |
| >PTEN-W274KMFHFWVN  | 314 | >PTEN-W274KMFHFRVN  | 312  | 2    |
| >PTEN-W274KMFHFWVNT | 103 | >PTEN-W274KMFHFRVNT | 75   | 28   |

|                        |       |                        |       |       |
|------------------------|-------|------------------------|-------|-------|
| >PTEN-W274KMFHFVNT     | 2     | >PTEN-W274KMFHFRVNT    | 2     | 0     |
| >PTEN-W274KMFHFVNT     | 3     | >PTEN-W274KMFHFRVNT    | 2     | 1     |
| >PTEN-W274KMFHFVNT     | 32    | >PTEN-W274KMFHFRVNT    | 43    | 11    |
| >PTEN-W274KMFHFVNT     | 67    | >PTEN-W274KMFHFRVNT    | 111   | 44    |
| >PTEN-W274KMFHFVNT     | 121   | >PTEN-W274KMFHFRVNT    | 238   | 117   |
| >PTEN-W274KMFHFVNT     | 232   | >PTEN-W274KMFHFRVNT    | 231   | 1     |
| >PTEN-W274KMFHFVNT     | 38    | >PTEN-W274KMFHFRVNT    | 67    | 29    |
| >PTEN-W274KMFHFVNT     | 28    | >PTEN-W274KMFHFRVNT    | 36    | 8     |
| >PTEN-W274KMFHFVNT     | 100   | >PTEN-W274KMFHFRVNT    | 112   | 12    |
| >PTEN-W274KMFHFVN      | 161   | >PTEN-W274KMFHFRVN     | 1106  | 945   |
| >PTEN-W274KMFHFVNT     | 214   | >PTEN-W274KMFHFRVNT    | 444   | 230   |
| >PTEN-W274DKMFHFVNT    | 19    | >PTEN-W274DKMFHFRVN    | 24    | 5     |
| >PTEN-W274DKMFHFVNT    | 190   | >PTEN-W274DKMFHFRVN    | 608   | 418   |
| >PTEN-W274KDKMFHFV     | 15210 | >PTEN-W274KDKMFHFR     | 17    | 15193 |
| >PTEN-W274KDKMFHFV     | 626   | >PTEN-W274KDKMFHFRV    | 342   | 284   |
| >PTEN-W274KDKMFHFV     | 395   | >PTEN-W274KDKMFHFRV    | 611   | 216   |
| >PTEN-W274KDKMFHFV     | 15916 | >PTEN-W274KDKMFHFR     | 40    | 15876 |
| >PTEN-W274KKDKMFHFV    | 22281 | >PTEN-W274KKDKMFHFR    | 258   | 22023 |
| >PTEN-W274KKDKMFHFV    | 462   | >PTEN-W274KKDKMFHFR    | 33727 | 33265 |
| >PTEN-W274KKDKMFHFV    | 16163 | >PTEN-W274KKDKMFHFR    | 28    | 16135 |
| >PTEN-W274LKKDKMFHFV   | 16176 | >PTEN-W274LKKDKMFHFR   | 34    | 16142 |
| >PTEN-W274LKKDKMFHFV   | 22946 | >PTEN-W274LKKDKMFHFR   | 292   | 22654 |
| >PTEN-W274LKKDKMFHFV   | 474   | >PTEN-W274LKKDKMFHFR   | 33063 | 32589 |
| >PTEN-W274LKKDKMFHFV   | 164   | >PTEN-W274LKKDKMFHFR   | 22548 | 22384 |
| >PTEN-W274LKKDKMFHFV   | 29479 | >PTEN-W274LKKDKMFHFR   | 278   | 29201 |
| >PTEN-Y138C YLLHRGKFL  | 93    | >PTEN-Y138C CLLHRGKFL  | 5285  | 5192  |
| >PTEN-Y138C YLLHRGKFLK | 86    | >PTEN-Y138C CLLHRGKFLK | 2829  | 2743  |
| >PTEN-Y138C YLLHRGKFL  | 91    | >PTEN-Y138C CLLHRGKFL  | 1708  | 1617  |
| >PTEN-Y138C YLLHRGKFLK | 446   | >PTEN-Y138C CLLHRGKFLK | 4173  | 3727  |
| >PTEN-Y138C YLLHRGKFL  | 70    | >PTEN-Y138C CLLHRGKFL  | 1794  | 1724  |
| >PTEN-Y138C YLLHRGKFLK | 44    | >PTEN-Y138C CLLHRGKFLK | 1101  | 1057  |
| >PTEN-Y138C YLLHRGKFL  | 105   | >PTEN-Y138C CLLHRGKFL  | 6911  | 6806  |
| >PTEN-Y138C YLLHRGKFLK | 66    | >PTEN-Y138C CLLHRGKFLK | 2063  | 1997  |
| >PTEN-Y138C YLLHRGKFL  | 6     | >PTEN-Y138C CLLHRGKFL  | 315   | 309   |
| >PTEN-Y138C YLLHRGKFLK | 12    | >PTEN-Y138C CLLHRGKFLK | 1075  | 1063  |
| >PTEN-Y138C YLLHRGKFL  | 10    | >PTEN-Y138C CLLHRGKFL  | 426   | 416   |
| >PTEN-Y138C YLLHRGKFLK | 39    | >PTEN-Y138C CLLHRGKFLK | 2275  | 2236  |
| >PTEN-Y138C YLLHRGKFL  | 12    | >PTEN-Y138C CLLHRGKFL  | 1223  | 1211  |
| >PTEN-Y138C YLLHRGKFLK | 17    | >PTEN-Y138C CLLHRGKFLK | 2625  | 2608  |
| >PTEN-Y138C YLLHRGKFL  | 58    | >PTEN-Y138C CLLHRGKFL  | 3158  | 3100  |
| >PTEN-Y138C YLLHRGKFLK | 317   | >PTEN-Y138C CLLHRGKFLK | 4586  | 4269  |
| >PTEN-Y138C YLLHRGKFL  | 6     | >PTEN-Y138C CLLHRGKFL  | 420   | 414   |
| >PTEN-Y138C YLLHRGKFLK | 296   | >PTEN-Y138C CLLHRGKFLK | 11900 | 11604 |

|                        |     |                        |       |       |
|------------------------|-----|------------------------|-------|-------|
| >PTEN-Y138(YLLHRGKFLK/ | 8   | >PTEN-Y138(CLLHRGKFLK/ | 736   | 728   |
| >PTEN-Y138(YLLHRGKFLK  | 28  | >PTEN-Y138(CLLHRGKFLK  | 29    | 1     |
| >PTEN-Y138(YLLHRGKFLK  | 113 | >PTEN-Y138(CLLHRGKFLK  | 136   | 23    |
| >PTEN-Y138(YLLHRGKFLK  | 316 | >PTEN-Y138(CLLHRGKFLK  | 248   | 68    |
| >PTEN-Y138(YLLHRGKFL   | 412 | >PTEN-Y138(CLLHRGKFL   | 2629  | 2217  |
| >PTEN-Y138(YLLHRGKFL   | 54  | >PTEN-Y138(CLLHRGKFL   | 370   | 316   |
| >PTEN-Y138(YLLHRGKFLK/ | 154 | >PTEN-Y138(CLLHRGKFLK/ | 1108  | 954   |
| >PTEN-Y138(YLLHRGKFL   | 473 | >PTEN-Y138(CLLHRGKFL   | 5527  | 5054  |
| >PTEN-Y138(YLLHRGKFL   | 43  | >PTEN-Y138(CLLHRGKFL   | 1103  | 1060  |
| >PTEN-Y138(YLLHRGKFL   | 478 | >PTEN-Y138(CLLHRGKFL   | 9380  | 8902  |
| >PTEN-Y138(YLLHRGKFL   | 45  | >PTEN-Y138(CLLHRGKFL   | 347   | 302   |
| >PTEN-Y138(YLLHRGKFL   | 278 | >PTEN-Y138(CLLHRGKFL   | 2131  | 1853  |
| >PTEN-Y138(YLLHRGKFL   | 259 | >PTEN-Y138(CLLHRGKFL   | 3796  | 3537  |
| >PTEN-Y138(YLLHRGKFLK  | 111 | >PTEN-Y138(CLLHRGKFLK  | 195   | 84    |
| >PTEN-Y138(AYLLHRGKFLI | 230 | >PTEN-Y138(ACLLHRGKFLI | 2369  | 2139  |
| >PTEN-Y138(AYLLHRGKFL  | 418 | >PTEN-Y138(ACLLHRGKFL  | 22046 | 21628 |
| >PTEN-Y138(AYLLHRGKFL  | 368 | >PTEN-Y138(ACLLHRGKFL  | 23444 | 23076 |
| >PTEN-Y138(AYLLHRGKFL  | 8   | >PTEN-Y138(ACLLHRGKFL  | 6794  | 6786  |
| >PTEN-Y138(AYLLHRGKFL  | 16  | >PTEN-Y138(ACLLHRGKFL  | 19722 | 19706 |
| >PTEN-Y138(AYLLHRGK    | 40  | >PTEN-Y138(ACLLHRGK    | 583   | 543   |
| >PTEN-Y138(AYLLHRGKFLI | 25  | >PTEN-Y138(ACLLHRGKFLI | 310   | 285   |
| >PTEN-Y138(AYLLHRGKFLI | 76  | >PTEN-Y138(ACLLHRGKFLI | 1409  | 1333  |
| >PTEN-Y138(AYLLHRGKFLI | 305 | >PTEN-Y138(ACLLHRGKFLI | 875   | 570   |
| >PTEN-Y138(KGRTGVMIC/  | 38  | >PTEN-Y138(KGRTGVMIC/  | 440   | 402   |
| >PTEN-Y138(KGRTGVMIC/  | 314 | >PTEN-Y138(KGRTGVMIC/  | 29412 | 29098 |
| >PTEN-Y138(KGRTGVMIC/  | 165 | >PTEN-Y138(KGRTGVMIC/  | 16623 | 16458 |
| >PTEN-Y138(KGRTGVMIC/  | 174 | >PTEN-Y138(KGRTGVMIC/  | 10318 | 10144 |
| >PTEN-Y138(KGRTGVMIC/  | 135 | >PTEN-Y138(KGRTGVMIC/  | 20070 | 19935 |
| >PTEN-Y138(CAYLLHRGKFL | 119 | >PTEN-Y138(CACLLHRGKFL | 8629  | 8510  |
| >PTEN-Y138(CAYLLHRGKFL | 471 | >PTEN-Y138(CACLLHRGKFL | 2262  | 1791  |
| >PTEN-Y138(CAYLLHRGKFL | 67  | >PTEN-Y138(CACLLHRGKFL | 1005  | 938   |
| >PTEN-Y138(CAYLLHRGKFL | 350 | >PTEN-Y138(CACLLHRGKFL | 4003  | 3653  |
| >PTEN-Y138(CAYLLHRGKFL | 350 | >PTEN-Y138(CACLLHRGKFL | 1513  | 1163  |
| >PTEN-Y138(CAYLLHRGKFL | 185 | >PTEN-Y138(CACLLHRGKFL | 782   | 597   |
| >PTEN-Y138(ICAYLLHRGKI | 187 | >PTEN-Y138(ICACLLHRGKI | 224   | 37    |
| >PTEN-Y138(ICAYLLHR    | 107 | >PTEN-Y138(ICACLLHR    | 48    | 59    |
| >PTEN-Y138(MICAYLLHR   | 315 | >PTEN-Y138(MICACLLHR   | 322   | 7     |
| >PTEN-Y138(MICAYLLHRG  | 162 | >PTEN-Y138(MICACLLHRG  | 162   | 0     |
| >PTEN-Y138(MICAYLLH    | 299 | >PTEN-Y138(MICACLLH    | 557   | 258   |
| >PTEN-Y138(MICAYLLHR   | 89  | >PTEN-Y138(MICACLLHR   | 148   | 59    |
| >PTEN-Y138(MICAYLLHRG  | 49  | >PTEN-Y138(MICACLLHRG  | 63    | 14    |
| >PTEN-Y138(MICAYLLHRG  | 77  | >PTEN-Y138(MICACLLHRG  | 177   | 100   |
| >PTEN-Y138(MICAYLLHR   | 11  | >PTEN-Y138(MICACLLHR   | 18    | 7     |

|                        |      |                        |      |      |
|------------------------|------|------------------------|------|------|
| >PTEN-Y138C MICAYLLHRG | 473  | >PTEN-Y138C MICACLLHRG | 646  | 173  |
| >PTEN-Y138C MICAYLLHR  | 45   | >PTEN-Y138C MICACLLHR  | 62   | 17   |
| >PTEN-Y138C MICAYLLHR  | 28   | >PTEN-Y138C MICACLLHR  | 52   | 24   |
| >PTEN-Y138C MICAYLLHRG | 124  | >PTEN-Y138C MICACLLHRG | 184  | 60   |
| >PTEN-Y138C MICAYLLHR  | 28   | >PTEN-Y138C MICACLLHR  | 13   | 15   |
| >PTEN-Y138C VMICAYLL   | 248  | >PTEN-Y138C VMICACLL   | 345  | 97   |
| >PTEN-Y138C VMICAYLL   | 15   | >PTEN-Y138C VMICACLL   | 27   | 12   |
| >PTEN-Y138C VMICAYLL   | 9    | >PTEN-Y138C VMICACLL   | 22   | 13   |
| >PTEN-Y138C VMICAYLL   | 27   | >PTEN-Y138C VMICACLL   | 37   | 10   |
| >PTEN-Y138C VMICAYLL   | 39   | >PTEN-Y138C VMICACLL   | 42   | 3    |
| >PTEN-Y138C VMICAYLL   | 10   | >PTEN-Y138C VMICACLL   | 20   | 10   |
| >PTEN-Y138C VMICAYLL   | 6    | >PTEN-Y138C VMICACLL   | 15   | 9    |
| >PTEN-Y138C VMICAYLL   | 58   | >PTEN-Y138C VMICACLL   | 65   | 7    |
| >PTEN-Y138C VMICAYLL   | 136  | >PTEN-Y138C VMICACLL   | 228  | 92   |
| >PTEN-Y138C VMICAYLL   | 16   | >PTEN-Y138C VMICACLL   | 15   | 1    |
| >PTEN-Y138C VMICAYLLHR | 166  | >PTEN-Y138C VMICACLLHR | 101  | 65   |
| >PTEN-Y138C VMICAYLLHR | 52   | >PTEN-Y138C VMICACLLHR | 61   | 9    |
| >PTEN-Y138C VMICAYLL   | 100  | >PTEN-Y138C VMICACLL   | 810  | 710  |
| >PTEN-Y138C VMICAYLLH  | 46   | >PTEN-Y138C VMICACLLH  | 57   | 11   |
| >PTEN-Y138C VMICAYLLHR | 44   | >PTEN-Y138C VMICACLLHR | 30   | 14   |
| >PTEN-Y138C VMICAYLLHR | 237  | >PTEN-Y138C VMICACLLHR | 300  | 63   |
| >PTEN-Y138C VMICAYLLHR | 119  | >PTEN-Y138C VMICACLLHR | 308  | 189  |
| >PTEN-Y138C VMICAYLL   | 727  | >PTEN-Y138C VMICACLL   | 373  | 354  |
| >PTEN-Y138C VMICAYLL   | 126  | >PTEN-Y138C VMICACLL   | 209  | 83   |
| >PTEN-Y138C VMICAYLLHR | 434  | >PTEN-Y138C VMICACLLHR | 880  | 446  |
| >PTEN-Y138C VMICAYLLHR | 70   | >PTEN-Y138C VMICACLLHR | 36   | 34   |
| >PTEN-Y138C VMICAYLLHR | 58   | >PTEN-Y138C VMICACLLHR | 48   | 10   |
| >PTEN-Y138C GVMICAYL   | 66   | >PTEN-Y138C GVMICACL   | 579  | 513  |
| >PTEN-Y138C GVMICAYLL  | 57   | >PTEN-Y138C GVMICACLL  | 553  | 496  |
| >PTEN-Y138C GVMICAYL   | 20   | >PTEN-Y138C GVMICACL   | 157  | 137  |
| >PTEN-Y138C GVMICAYLL  | 18   | >PTEN-Y138C GVMICACLL  | 131  | 113  |
| >PTEN-Y138C GVMICAYL   | 260  | >PTEN-Y138C GVMICACL   | 1555 | 1295 |
| >PTEN-Y138C GVMICAYL   | 51   | >PTEN-Y138C GVMICACL   | 544  | 493  |
| >PTEN-Y138C GVMICAYLL  | 112  | >PTEN-Y138C GVMICACLL  | 189  | 77   |
| >PTEN-Y138C GVMICAYL   | 346  | >PTEN-Y138C GVMICACL   | 2055 | 1709 |
| >PTEN-Y138C GVMICAYLL  | 327  | >PTEN-Y138C GVMICACLL  | 1933 | 1606 |
| >PTEN-Y138C GVMICAYL   | 403  | >PTEN-Y138C GVMICACL   | 2046 | 1643 |
| >PTEN-Y138C GVMICAYLL  | 1979 | >PTEN-Y138C GVMICACLL  | 447  | 1532 |
| >PTEN-Y138C GVMICAYLLH | 52   | >PTEN-Y138C GVMICACLLH | 91   | 39   |
| >PTEN-Y138C GVMICAYLLH | 38   | >PTEN-Y138C GVMICACLLH | 66   | 28   |
| >PTEN-Y138C GVMICAYLLH | 177  | >PTEN-Y138C GVMICACLLH | 296  | 119  |
| >PTEN-Y138C GVMICAYL   | 485  | >PTEN-Y138C GVMICACL   | 4258 | 3773 |
| >PTEN-Y138C GVMICAYLL  | 222  | >PTEN-Y138C GVMICACLL  | 443  | 221  |

|                       |      |                       |       |       |
|-----------------------|------|-----------------------|-------|-------|
| >PTEN-Y138(GVMICAYLLH | 198  | >PTEN-Y138(GVMICACLLH | 324   | 126   |
| >PTEN-Y138(GVMICAYLLH | 132  | >PTEN-Y138(GVMICACLLH | 102   | 30    |
| >PTEN-Y138(TGVMICAYL  | 267  | >PTEN-Y138(TGVMICACL  | 3505  | 3238  |
| >PTEN-Y138(TGVMICAY   | 166  | >PTEN-Y138(TGVMICAC   | 19055 | 18889 |
| >PTEN-Y138(RTGVMICAY  | 243  | >PTEN-Y138(RTGVMICAC  | 27049 | 26806 |
| >PTEN-Y138(RTGVMICAYL | 398  | >PTEN-Y138(RTGVMICACL | 956   | 558   |
| >PTEN-Y138(RTGVMICAY  | 169  | >PTEN-Y138(RTGVMICAC  | 2076  | 1907  |
| >PTEN-Y138(RTGVMICAYL | 114  | >PTEN-Y138(RTGVMICACL | 525   | 411   |
| >PTEN-Y138(RTGVMICAYL | 74   | >PTEN-Y138(RTGVMICACL | 269   | 195   |
| >PTEN-Y138(RTGVMICAY  | 228  | >PTEN-Y138(RTGVMICAC  | 26077 | 25849 |
| >PTEN-Y138(RTGVMICAY  | 70   | >PTEN-Y138(RTGVMICAC  | 12928 | 12858 |
| >PTEN-Y138(RTGVMICAY  | 13   | >PTEN-Y138(RTGVMICAC  | 3833  | 3820  |
| >PTEN-Y138(RTGVMICAYL | 12   | >PTEN-Y138(RTGVMICACL | 73    | 61    |
| >PTEN-Y138(RTGVMICAYL | 14   | >PTEN-Y138(RTGVMICACL | 10    | 4     |
| >PTEN-Y138(RTGVMICAY  | 205  | >PTEN-Y138(RTGVMICAC  | 12969 | 12764 |
| >PTEN-Y138(RTGVMICAYL | 438  | >PTEN-Y138(RTGVMICACL | 4485  | 4047  |
| >PTEN-Y138(RTGVMICAYL | 428  | >PTEN-Y138(RTGVMICACL | 390   | 38    |
| >PTEN-Y138(RTGVMICAYL | 90   | >PTEN-Y138(RTGVMICACL | 753   | 663   |
| >PTEN-Y138(RTGVMICAYL | 56   | >PTEN-Y138(RTGVMICACL | 261   | 205   |
| >PTEN-Y138(RTGVMICAY  | 378  | >PTEN-Y138(RTGVMICAC  | 21669 | 21291 |
| >PTEN-Y138(RTGVMICAYL | 72   | >PTEN-Y138(RTGVMICACL | 423   | 351   |
| >PTEN-Y138(RTGVMICAYL | 235  | >PTEN-Y138(RTGVMICACL | 413   | 178   |
| >PTEN-Y138(RTGVMICAYL | 394  | >PTEN-Y138(RTGVMICACL | 560   | 166   |
| >PTEN-Y138(GRTGVMICA' | 113  | >PTEN-Y138(GRTGVMICA' | 5196  | 5083  |
| >PTEN-Y138(GRTGVMICA' | 258  | >PTEN-Y138(GRTGVMICA' | 238   | 20    |
| >PTEN-Y138(GRTGVMICA' | 334  | >PTEN-Y138(GRTGVMICA' | 394   | 60    |
| >PTEN-Y138(GRTGVMICA' | 78   | >PTEN-Y138(GRTGVMICA' | 88    | 10    |
| >PTEN-Y155(FYGEVRTR   | 163  | >PTEN-Y155(FCGEVRTR   | 2330  | 2167  |
| >PTEN-Y155(FYGEVRTR   | 107  | >PTEN-Y155(FCGEVRTR   | 1672  | 1565  |
| >PTEN-Y155(FLKAQEALDF | 370  | >PTEN-Y155(FLKAQEALDF | 115   | 255   |
| >PTEN-Y155(FLKAQEALDF | 1885 | >PTEN-Y155(FLKAQEALDF | 224   | 1661  |
| >PTEN-Y155(FLKAQEALDF | 7342 | >PTEN-Y155(FLKAQEALDF | 377   | 6965  |
| >PTEN-Y155(FLKAQEALDF | 1630 | >PTEN-Y155(FLKAQEALDF | 34    | 1596  |
| >PTEN-Y155(FLKAQEALDF | 98   | >PTEN-Y155(FLKAQEALDF | 24286 | 24188 |
| >PTEN-Y155(FLKAQEALDF | 209  | >PTEN-Y155(FLKAQEALDF | 29153 | 28944 |
| >PTEN-Y155(FLKAQEALDF | 122  | >PTEN-Y155(FLKAQEALDF | 24510 | 24388 |
| >PTEN-Y155(FLKAQEALDF | 105  | >PTEN-Y155(FLKAQEALDF | 16343 | 16238 |
| >PTEN-Y155(FLKAQEALDF | 78   | >PTEN-Y155(FLKAQEALDF | 18374 | 18296 |
| >PTEN-Y155(DFYGEVRTR  | 31   | >PTEN-Y155(DFCGEVRTR  | 33    | 2     |
| >PTEN-Y155(DFYGEVRTR  | 408  | >PTEN-Y155(DFCGEVRTR  | 1368  | 960   |
| >PTEN-Y155(DFYGEVRTR  | 291  | >PTEN-Y155(DFCGEVRTR  | 809   | 518   |
| >PTEN-Y155(ALDFYGEV   | 41   | >PTEN-Y155(ALDFCGEV   | 54    | 13    |
| >PTEN-Y155(ALDFYGEV   | 17   | >PTEN-Y155(ALDFCGEV   | 25    | 8     |

|                       |      |                       |       |       |
|-----------------------|------|-----------------------|-------|-------|
| >PTEN-Y155(ALDFYGEV   | 34   | >PTEN-Y155(ALDFCGEV   | 63    | 29    |
| >PTEN-Y155(ALDFYGEV   | 128  | >PTEN-Y155(ALDFCGEV   | 169   | 41    |
| >PTEN-Y155(ALDFYGEV   | 3    | >PTEN-Y155(ALDFCGEV   | 6     | 3     |
| >PTEN-Y155(ALDFYGEVRT | 308  | >PTEN-Y155(ALDFCGEVRT | 943   | 635   |
| >PTEN-Y155(ALDFYGEV   | 12   | >PTEN-Y155(ALDFCGEV   | 21    | 9     |
| >PTEN-Y155(ALDFYGEV   | 9    | >PTEN-Y155(ALDFCGEV   | 12    | 3     |
| >PTEN-Y155(ALDFYGEV   | 29   | >PTEN-Y155(ALDFCGEV   | 31    | 2     |
| >PTEN-Y155(ALDFYGEV   | 3    | >PTEN-Y155(ALDFCGEV   | 4     | 1     |
| >PTEN-Y155(ALDFYGEVRT | 416  | >PTEN-Y155(ALDFCGEVRT | 548   | 132   |
| >PTEN-Y155(EALDFYGEV  | 224  | >PTEN-Y155(EALDFCGEV  | 2467  | 2243  |
| >PTEN-Y155(EALDFYGEV  | 188  | >PTEN-Y155(EALDFCGEV  | 971   | 783   |
| >PTEN-Y155(EALDFYGEVR | 299  | >PTEN-Y155(EALDFCGEVR | 473   | 174   |
| >PTEN-Y155(EALDFYGEVR | 28   | >PTEN-Y155(EALDFCGEVR | 70    | 42    |
| >PTEN-Y155(EALDFYGEV  | 11   | >PTEN-Y155(EALDFCGEV  | 21    | 10    |
| >PTEN-Y155(EALDFYGEV  | 4    | >PTEN-Y155(EALDFCGEV  | 5     | 1     |
| >PTEN-Y155(EALDFYGEVR | 510  | >PTEN-Y155(EALDFCGEVR | 493   | 17    |
| >PTEN-Y155(QEALDFYG   | 1008 | >PTEN-Y155(QEALDFCG   | 485   | 523   |
| >PTEN-Y155(QEALDFYGEV | 22   | >PTEN-Y155(QEALDFCGEV | 17    | 5     |
| >PTEN-Y155(QEALDFYGEV | 112  | >PTEN-Y155(QEALDFCGEV | 297   | 185   |
| >PTEN-Y155(QEALDFYGEV | 426  | >PTEN-Y155(QEALDFCGEV | 1176  | 750   |
| >PTEN-Y155(QEALDFYGEV | 361  | >PTEN-Y155(QEALDFCGEV | 994   | 633   |
| >PTEN-Y155(QEALDFYGEV | 116  | >PTEN-Y155(QEALDFCGEV | 449   | 333   |
| >PTEN-Y155(QEALDFYGEV | 1133 | >PTEN-Y155(QEALDFCGEV | 475   | 658   |
| >PTEN-Y155(AQEALDFYGE | 422  | >PTEN-Y155(AQEALDFCGE | 782   | 360   |
| >PTEN-Y155(AQEALDFYGE | 39   | >PTEN-Y155(AQEALDFCGE | 66    | 27    |
| >PTEN-Y155(AQEALDFY   | 178  | >PTEN-Y155(AQEALDFC   | 29420 | 29242 |
| >PTEN-Y155(AQEALDFY   | 421  | >PTEN-Y155(AQEALDFC   | 18250 | 17829 |
| >PTEN-Y155(KAQEALDFY  | 271  | >PTEN-Y155(KAQEALDFC  | 33453 | 33182 |
| >PTEN-Y155(KAQEALDFY  | 46   | >PTEN-Y155(KAQEALDFC  | 22516 | 22470 |
| >PTEN-Y155(KAQEALDFY  | 139  | >PTEN-Y155(KAQEALDFC  | 22458 | 22319 |
| >PTEN-Y155(KAQEALDFY  | 481  | >PTEN-Y155(KAQEALDFC  | 18135 | 17654 |
| >PTEN-Y155(KAQEALDFY  | 195  | >PTEN-Y155(KAQEALDFC  | 10725 | 10530 |
| >PTEN-Y155(LKAQEALDFY | 85   | >PTEN-Y155(LKAQEALDFC | 10073 | 9988  |
| >PTEN-Y155FYGEVRTR    | 163  | >PTEN-Y155FHGEVRTR    | 7525  | 7362  |
| >PTEN-Y155FYGEVRTR    | 107  | >PTEN-Y155FHGEVRTR    | 3302  | 3195  |
| >PTEN-Y155FLKAQEALDF  | 370  | >PTEN-Y155FLKAQEALDF  | 866   | 496   |
| >PTEN-Y155FLKAQEALDF  | 98   | >PTEN-Y155FLKAQEALDF  | 11247 | 11149 |
| >PTEN-Y155FLKAQEALDF  | 209  | >PTEN-Y155FLKAQEALDF  | 15655 | 15446 |
| >PTEN-Y155FLKAQEALDF  | 122  | >PTEN-Y155FLKAQEALDF  | 14187 | 14065 |
| >PTEN-Y155FLKAQEALDF  | 105  | >PTEN-Y155FLKAQEALDF  | 6598  | 6493  |
| >PTEN-Y155FLKAQEALDF  | 78   | >PTEN-Y155FLKAQEALDF  | 4186  | 4108  |
| >PTEN-Y155DFYGEVRTR   | 31   | >PTEN-Y155DFHGEVRTR   | 83    | 52    |
| >PTEN-Y155DFYGEVRTR   | 408  | >PTEN-Y155DFHGEVRTR   | 1099  | 691   |

|                        |     |                        |       |       |
|------------------------|-----|------------------------|-------|-------|
| >PTEN-Y155F DFYGEVRTR  | 291 | >PTEN-Y155F DFHGEVRTR  | 868   | 577   |
| >PTEN-Y155F ALDFYGEV   | 41  | >PTEN-Y155F ALDFHGEV   | 128   | 87    |
| >PTEN-Y155F ALDFYGEV   | 17  | >PTEN-Y155F ALDFHGEV   | 32    | 15    |
| >PTEN-Y155F ALDFYGEV   | 34  | >PTEN-Y155F ALDFHGEV   | 37    | 3     |
| >PTEN-Y155F ALDFYGEV   | 128 | >PTEN-Y155F ALDFHGEV   | 234   | 106   |
| >PTEN-Y155F ALDFYGEV   | 3   | >PTEN-Y155F ALDFHGEV   | 3     | 0     |
| >PTEN-Y155F ALDFYGEVRT | 308 | >PTEN-Y155F ALDFHGEVRT | 574   | 266   |
| >PTEN-Y155F ALDFYGEV   | 12  | >PTEN-Y155F ALDFHGEV   | 23    | 11    |
| >PTEN-Y155F ALDFYGEV   | 9   | >PTEN-Y155F ALDFHGEV   | 12    | 3     |
| >PTEN-Y155F ALDFYGEV   | 29  | >PTEN-Y155F ALDFHGEV   | 96    | 67    |
| >PTEN-Y155F ALDFYGEV   | 3   | >PTEN-Y155F ALDFHGEV   | 4     | 1     |
| >PTEN-Y155F ALDFYGEVRT | 416 | >PTEN-Y155F ALDFHGEVRT | 539   | 123   |
| >PTEN-Y155F EALDFYGEV  | 224 | >PTEN-Y155F EALDFHGEV  | 1510  | 1286  |
| >PTEN-Y155F EALDFYGEV  | 188 | >PTEN-Y155F EALDFHGEV  | 182   | 6     |
| >PTEN-Y155F EALDFYGEVR | 299 | >PTEN-Y155F EALDFHGEVF | 709   | 410   |
| >PTEN-Y155F EALDFYGEVR | 28  | >PTEN-Y155F EALDFHGEVF | 42    | 14    |
| >PTEN-Y155F EALDFYGEV  | 11  | >PTEN-Y155F EALDFHGEV  | 18    | 7     |
| >PTEN-Y155F EALDFYGEV  | 4   | >PTEN-Y155F EALDFHGEV  | 4     | 0     |
| >PTEN-Y155F QEALDFYGEV | 22  | >PTEN-Y155F QEALDFHGEV | 37    | 15    |
| >PTEN-Y155F QEALDFYGEV | 112 | >PTEN-Y155F QEALDFHGEV | 220   | 108   |
| >PTEN-Y155F QEALDFYGEV | 426 | >PTEN-Y155F QEALDFHGEV | 882   | 456   |
| >PTEN-Y155F QEALDFYGEV | 361 | >PTEN-Y155F QEALDFHGEV | 769   | 408   |
| >PTEN-Y155F QEALDFYGEV | 116 | >PTEN-Y155F QEALDFHGEV | 242   | 126   |
| >PTEN-Y155F AQEALDFYGE | 422 | >PTEN-Y155F AQEALDFHGI | 910   | 488   |
| >PTEN-Y155F AQEALDFYGE | 39  | >PTEN-Y155F AQEALDFHGI | 82    | 43    |
| >PTEN-Y155F AQEALDFY   | 178 | >PTEN-Y155F AQEALDFH   | 15689 | 15511 |
| >PTEN-Y155F AQEALDFY   | 421 | >PTEN-Y155F AQEALDFH   | 11611 | 11190 |
| >PTEN-Y155F KAQEALDFY  | 271 | >PTEN-Y155F KAQEALDFH  | 17866 | 17595 |
| >PTEN-Y155F KAQEALDFY  | 46  | >PTEN-Y155F KAQEALDFH  | 8264  | 8218  |
| >PTEN-Y155F KAQEALDFY  | 139 | >PTEN-Y155F KAQEALDFH  | 14202 | 14063 |
| >PTEN-Y155F KAQEALDFY  | 481 | >PTEN-Y155F KAQEALDFH  | 13566 | 13085 |
| >PTEN-Y155F KAQEALDFY  | 195 | >PTEN-Y155F KAQEALDFH  | 9651  | 9456  |
| >PTEN-Y155F LKAQEALDFY | 85  | >PTEN-Y155F LKAQEALDFH | 3007  | 2922  |
| >PTEN-Y155F FYGEVRTR   | 163 | >PTEN-Y155F FNGEVRTR   | 7142  | 6979  |
| >PTEN-Y155F FYGEVRTR   | 107 | >PTEN-Y155F FNGEVRTR   | 4859  | 4752  |
| >PTEN-Y155F FLKAQEALDF | 370 | >PTEN-Y155F FLKAQEALDF | 417   | 47    |
| >PTEN-Y155F FLKAQEALDF | 98  | >PTEN-Y155F FLKAQEALDF | 22324 | 22226 |
| >PTEN-Y155F FLKAQEALDF | 209 | >PTEN-Y155F FLKAQEALDF | 26263 | 26054 |
| >PTEN-Y155F FLKAQEALDF | 122 | >PTEN-Y155F FLKAQEALDF | 23455 | 23333 |
| >PTEN-Y155F FLKAQEALDF | 105 | >PTEN-Y155F FLKAQEALDF | 16853 | 16748 |
| >PTEN-Y155F FLKAQEALDF | 78  | >PTEN-Y155F FLKAQEALDF | 18088 | 18010 |
| >PTEN-Y155F DFYGEVRTR  | 31  | >PTEN-Y155F DFNGEVRTR  | 61    | 30    |
| >PTEN-Y155F DFYGEVRTR  | 408 | >PTEN-Y155F DFNGEVRTR  | 1211  | 803   |



|                       |     |                       |       |       |
|-----------------------|-----|-----------------------|-------|-------|
| >PTEN-Y155MDFYGEVRTR  | 291 | >PTEN-Y155MDFNGEVRTR  | 2006  | 1715  |
| >PTEN-Y155MALDFYGEV   | 41  | >PTEN-Y155MALDFNGEV   | 140   | 99    |
| >PTEN-Y155MALDFYGEV   | 17  | >PTEN-Y155MALDFNGEV   | 46    | 29    |
| >PTEN-Y155MALDFYGEV   | 34  | >PTEN-Y155MALDFNGEV   | 82    | 48    |
| >PTEN-Y155MALDFYGEV   | 128 | >PTEN-Y155MALDFNGEV   | 285   | 157   |
| >PTEN-Y155MALDFYGEV   | 3   | >PTEN-Y155MALDFNGEV   | 3     | 0     |
| >PTEN-Y155MALDFYGEVRT | 308 | >PTEN-Y155MALDFNGEVRT | 345   | 37    |
| >PTEN-Y155MALDFYGEV   | 12  | >PTEN-Y155MALDFNGEV   | 11    | 1     |
| >PTEN-Y155MALDFYGEV   | 9   | >PTEN-Y155MALDFNGEV   | 10    | 1     |
| >PTEN-Y155MALDFYGEV   | 29  | >PTEN-Y155MALDFNGEV   | 26    | 3     |
| >PTEN-Y155MALDFYGEV   | 3   | >PTEN-Y155MALDFNGEV   | 4     | 1     |
| >PTEN-Y155MALDFYGEVRT | 416 | >PTEN-Y155MALDFNGEVRT | 315   | 101   |
| >PTEN-Y155MEALDFYGEV  | 224 | >PTEN-Y155MEALDFNGEV  | 5394  | 5170  |
| >PTEN-Y155MEALDFYGEV  | 188 | >PTEN-Y155MEALDFNGEV  | 449   | 261   |
| >PTEN-Y155MEALDFYGEVR | 299 | >PTEN-Y155MEALDFNGEVF | 1121  | 822   |
| >PTEN-Y155MEALDFYGEVR | 28  | >PTEN-Y155MEALDFNGEVF | 29    | 1     |
| >PTEN-Y155MEALDFYGEV  | 11  | >PTEN-Y155MEALDFNGEV  | 13    | 2     |
| >PTEN-Y155MEALDFYGEV  | 4   | >PTEN-Y155MEALDFNGEV  | 4     | 0     |
| >PTEN-Y155MQEALDFYGEV | 22  | >PTEN-Y155MQEALDFNGE\ | 37    | 15    |
| >PTEN-Y155MQEALDFYGEV | 112 | >PTEN-Y155MQEALDFNGE\ | 260   | 148   |
| >PTEN-Y155MQEALDFYGEV | 426 | >PTEN-Y155MQEALDFNGE\ | 446   | 20    |
| >PTEN-Y155MQEALDFYGEV | 361 | >PTEN-Y155MQEALDFNGE\ | 453   | 92    |
| >PTEN-Y155MQEALDFYGEV | 116 | >PTEN-Y155MQEALDFNGE\ | 335   | 219   |
| >PTEN-Y155MQEALDFYGE  | 422 | >PTEN-Y155MQEALDFNGI  | 608   | 186   |
| >PTEN-Y155MQEALDFYGE  | 39  | >PTEN-Y155MQEALDFNGI  | 79    | 40    |
| >PTEN-Y155MQEALDFY    | 178 | >PTEN-Y155MQEALDFN    | 26657 | 26479 |
| >PTEN-Y155MQEALDFY    | 421 | >PTEN-Y155MQEALDFN    | 18760 | 18339 |
| >PTEN-Y155MKAQEALDFY  | 271 | >PTEN-Y155MKAQEALDFN  | 32918 | 32647 |
| >PTEN-Y155MKAQEALDFY  | 46  | >PTEN-Y155MKAQEALDFN  | 18917 | 18871 |
| >PTEN-Y155MKAQEALDFY  | 139 | >PTEN-Y155MKAQEALDFN  | 22428 | 22289 |
| >PTEN-Y155MKAQEALDFY  | 481 | >PTEN-Y155MKAQEALDFN  | 18443 | 17962 |
| >PTEN-Y155MKAQEALDFY  | 195 | >PTEN-Y155MKAQEALDFN  | 16963 | 16768 |
| >PTEN-Y155MLKAQEALDFY | 85  | >PTEN-Y155MLKAQEALDFN | 12812 | 12727 |
| >PTEN-Y16C-YQEDGFDLDI | 209 | >PTEN-Y16C-CQEDGFDLDI | 2465  | 2256  |
| >PTEN-Y16C-YQEDGFDL   | 26  | >PTEN-Y16C-CQEDGFDL   | 540   | 514   |
| >PTEN-Y16C-YQEDGFDLDI | 297 | >PTEN-Y16C-CQEDGFDLDI | 5798  | 5501  |
| >PTEN-Y16C-YQEDGFDLDI | 27  | >PTEN-Y16C-CQEDGFDLDI | 884   | 857   |
| >PTEN-Y16C-YQEDGFDL   | 68  | >PTEN-Y16C-CQEDGFDL   | 2144  | 2076  |
| >PTEN-Y16C-YQEDGFDLDI | 137 | >PTEN-Y16C-CQEDGFDLDI | 3074  | 2937  |
| >PTEN-Y16C-YQEDGFDL   | 269 | >PTEN-Y16C-CQEDGFDL   | 2126  | 1857  |
| >PTEN-Y16C-RYQEDGFDL  | 467 | >PTEN-Y16C-RCQEDGFDL  | 21237 | 20770 |
| >PTEN-Y16C-RYQEDGFDL  | 320 | >PTEN-Y16C-RCQEDGFDL  | 17551 | 17231 |
| >PTEN-Y16C-RYQEDGFDL  | 6   | >PTEN-Y16C-RCQEDGFDL  | 13160 | 13154 |

|                         |     |                         |       |       |
|-------------------------|-----|-------------------------|-------|-------|
| >PTEN-Y16C- RYQEDGFDLI  | 7   | >PTEN-Y16C- RCQEDGFDLI  | 14270 | 14263 |
| >PTEN-Y16C- KEIVSRNKRR' | 321 | >PTEN-Y16C- KEIVSRNKRR' | 9319  | 8998  |
| >PTEN-Y16C- RRYQEDGF    | 41  | >PTEN-Y16C- RRCQEDGF    | 344   | 303   |
| >PTEN-Y16C- RRYQEDGFDI  | 223 | >PTEN-Y16C- RRCQEDGFDI  | 1209  | 986   |
| >PTEN-Y16C- RRYQEDGF    | 61  | >PTEN-Y16C- RRCQEDGF    | 1145  | 1084  |
| >PTEN-Y16C- RRYQEDGFDI  | 11  | >PTEN-Y16C- RRCQEDGFDI  | 30    | 19    |
| >PTEN-Y16C- RRYQEDGF    | 189 | >PTEN-Y16C- RRCQEDGF    | 382   | 193   |
| >PTEN-Y16C- RRYQEDGFDI  | 18  | >PTEN-Y16C- RRCQEDGFDI  | 44    | 26    |
| >PTEN-Y16C- RRYQEDGFDI  | 300 | >PTEN-Y16C- RRCQEDGFDI  | 1863  | 1563  |
| >PTEN-Y16C- RRYQEDGF    | 452 | >PTEN-Y16C- RRCQEDGF    | 400   | 52    |
| >PTEN-Y16C- RRYQEDGFDI  | 21  | >PTEN-Y16C- RRCQEDGFDI  | 44    | 23    |
| >PTEN-Y16C- RRYQEDGF    | 229 | >PTEN-Y16C- RRCQEDGF    | 1050  | 821   |
| >PTEN-Y16C- KRRYQEDGF   | 93  | >PTEN-Y16C- KRRQEDGF    | 81    | 12    |
| >PTEN-Y16C- KRRYQEDGFI  | 327 | >PTEN-Y16C- KRRQEDGFI   | 294   | 33    |
| >PTEN-Y16C- KRRYQEDG    | 266 | >PTEN-Y16C- KRRQEDG     | 194   | 72    |
| >PTEN-Y16C- KRRYQEDGF   | 233 | >PTEN-Y16C- KRRQEDGF    | 281   | 48    |
| >PTEN-Y16C- KRRYQEDGFI  | 203 | >PTEN-Y16C- KRRQEDGFI   | 151   | 52    |
| >PTEN-Y16C- KRRYQEDGFI  | 45  | >PTEN-Y16C- KRRQEDGFI   | 53    | 8     |
| >PTEN-Y16C- NKRRYQEDG   | 55  | >PTEN-Y16C- NKRRQEDG    | 86    | 31    |
| >PTEN-Y16C- RNKRRYQEDG  | 317 | >PTEN-Y16C- RNKRRQEDG   | 531   | 214   |
| >PTEN-Y16C- VSRNKRRYQ   | 113 | >PTEN-Y16C- VSRNKRRQ    | 1201  | 1088  |
| >PTEN-Y16C- VSRNKRRY    | 155 | >PTEN-Y16C- VSRNKRRC    | 26683 | 26528 |
| >PTEN-Y16C- VSRNKRRY    | 7   | >PTEN-Y16C- VSRNKRRC    | 8481  | 8474  |
| >PTEN-Y16C- IVSRNKRRY   | 157 | >PTEN-Y16C- IVSRNKRRC   | 31613 | 31456 |
| >PTEN-Y16C- EIVSRNKRRY  | 13  | >PTEN-Y16C- EIVSRNKRRC  | 13923 | 13910 |
| >PTEN-Y16C- EIVSRNKRRY  | 313 | >PTEN-Y16C- EIVSRNKRRC  | 33787 | 33474 |
| >PTEN-Y174[ YVYYYSYL    | 4   | >PTEN-Y174[ DVYYYSYL    | 15    | 11    |
| >PTEN-Y174[ YVYYYSYLL   | 20  | >PTEN-Y174[ DVYYYSYLL   | 74    | 54    |
| >PTEN-Y174[ YVYYYSYL    | 10  | >PTEN-Y174[ DVYYYSYL    | 8604  | 8594  |
| >PTEN-Y174[ YVYYYSYLL   | 7   | >PTEN-Y174[ DVYYYSYLL   | 2974  | 2967  |
| >PTEN-Y174[ YVYYYSYL    | 4   | >PTEN-Y174[ DVYYYSYL    | 1079  | 1075  |
| >PTEN-Y174[ YVYYYSYLL   | 3   | >PTEN-Y174[ DVYYYSYLL   | 363   | 360   |
| >PTEN-Y174[ YVYYYSYL    | 9   | >PTEN-Y174[ DVYYYSYL    | 2550  | 2541  |
| >PTEN-Y174[ YVYYYSYLL   | 18  | >PTEN-Y174[ DVYYYSYLL   | 4123  | 4105  |
| >PTEN-Y174[ YVYYYSYL    | 8   | >PTEN-Y174[ DVYYYSYL    | 2586  | 2578  |
| >PTEN-Y174[ YVYYYSYLL   | 8   | >PTEN-Y174[ DVYYYSYLL   | 3170  | 3162  |
| >PTEN-Y174[ YVYYYSYL    | 5   | >PTEN-Y174[ DVYYYSYL    | 1561  | 1556  |
| >PTEN-Y174[ YVYYYSYLL   | 10  | >PTEN-Y174[ DVYYYSYLL   | 4437  | 4427  |
| >PTEN-Y174[ YVYYYSYL    | 21  | >PTEN-Y174[ DVYYYSYL    | 5246  | 5225  |
| >PTEN-Y174[ YVYYYSYLL   | 12  | >PTEN-Y174[ DVYYYSYLL   | 4614  | 4602  |
| >PTEN-Y174[ YVYYYSYL    | 42  | >PTEN-Y174[ DVYYYSYL    | 6287  | 6245  |
| >PTEN-Y174[ YVYYYSYLL   | 86  | >PTEN-Y174[ DVYYYSYLL   | 9985  | 9899  |
| >PTEN-Y174[ YVYYYSYL    | 99  | >PTEN-Y174[ DVYYYSYL    | 6610  | 6511  |

|                          |      |                          |       |       |
|--------------------------|------|--------------------------|-------|-------|
| >PTEN-Y174[ YVYYYYSYLL   | 200  | >PTEN-Y174[ DVYYYYSYLL   | 6816  | 6616  |
| >PTEN-Y174[ YVYYYYSYL    | 12   | >PTEN-Y174[ DVYYYYSYL    | 6505  | 6493  |
| >PTEN-Y174[ YVYYYYSYLL   | 27   | >PTEN-Y174[ DVYYYYSYLL   | 12703 | 12676 |
| >PTEN-Y174[ YVYYYYSYLLK  | 8    | >PTEN-Y174[ DVYYYYSYLLK  | 15    | 7     |
| >PTEN-Y174[ YVYYYYSYLLK  | 7    | >PTEN-Y174[ DVYYYYSYLLK  | 13    | 6     |
| >PTEN-Y174[ YVYYYYSYL    | 702  | >PTEN-Y174[ DVYYYYSYL    | 479   | 223   |
| >PTEN-Y174[ YVYYYYSYL    | 193  | >PTEN-Y174[ DVYYYYSYL    | 133   | 60    |
| >PTEN-Y174[ YVYYYYSYLL   | 71   | >PTEN-Y174[ DVYYYYSYLL   | 1734  | 1663  |
| >PTEN-Y174[ YVYYYYSYLLK  | 41   | >PTEN-Y174[ DVYYYYSYLLK  | 1150  | 1109  |
| >PTEN-Y174[ YVYYYYSYLLK  | 165  | >PTEN-Y174[ DVYYYYSYLLK  | 497   | 332   |
| >PTEN-Y174[ YVYYYYSYLL   | 81   | >PTEN-Y174[ DVYYYYSYLL   | 363   | 282   |
| >PTEN-Y174[ YVYYYYSYL    | 2622 | >PTEN-Y174[ DVYYYYSYL    | 489   | 2133  |
| >PTEN-Y174[ YVYYYYSYLL   | 2006 | >PTEN-Y174[ DVYYYYSYLL   | 330   | 1676  |
| >PTEN-Y174[ YVYYYYSYLLK  | 274  | >PTEN-Y174[ DVYYYYSYLLK  | 84    | 190   |
| >PTEN-Y174[ YVYYYYSYL    | 377  | >PTEN-Y174[ DVYYYYSYL    | 623   | 246   |
| >PTEN-Y174[ YVYYYYSYLL   | 253  | >PTEN-Y174[ DVYYYYSYLL   | 430   | 177   |
| >PTEN-Y174[ YVYYYYSYLLK  | 6    | >PTEN-Y174[ DVYYYYSYLLK  | 9     | 3     |
| >PTEN-Y174[ YVYYYYSYL    | 21   | >PTEN-Y174[ DVYYYYSYL    | 22    | 1     |
| >PTEN-Y174[ YVYYYYSYLL   | 11   | >PTEN-Y174[ DVYYYYSYLL   | 12    | 1     |
| >PTEN-Y174[ YVYYYYSYL    | 17   | >PTEN-Y174[ DVYYYYSYL    | 20    | 3     |
| >PTEN-Y174[ YVYYYYSYLL   | 19   | >PTEN-Y174[ DVYYYYSYLL   | 23    | 4     |
| >PTEN-Y174[ YVYYYYSYL    | 279  | >PTEN-Y174[ DVYYYYSYL    | 11951 | 11672 |
| >PTEN-Y174[ YVYYYYSYLL   | 421  | >PTEN-Y174[ DVYYYYSYLL   | 14221 | 13800 |
| >PTEN-Y174[ YVYYYYSYL    | 85   | >PTEN-Y174[ DVYYYYSYL    | 4128  | 4043  |
| >PTEN-Y174[ YVYYYYSYLL   | 255  | >PTEN-Y174[ DVYYYYSYLL   | 6972  | 6717  |
| >PTEN-Y174[ YVYYYYSYL    | 52   | >PTEN-Y174[ DVYYYYSYL    | 5664  | 5612  |
| >PTEN-Y174[ YVYYYYSYLL   | 84   | >PTEN-Y174[ DVYYYYSYLL   | 7131  | 7047  |
| >PTEN-Y174[ YVYYYYSYLL   | 219  | >PTEN-Y174[ DVYYYYSYLL   | 2078  | 1859  |
| >PTEN-Y174[ YVYYYYSYLL   | 75   | >PTEN-Y174[ DVYYYYSYLL   | 3620  | 3545  |
| >PTEN-Y174[ YVYYYYSYLL   | 63   | >PTEN-Y174[ DVYYYYSYLL   | 5698  | 5635  |
| >PTEN-Y174[ YVYYYYSYLL   | 51   | >PTEN-Y174[ DVYYYYSYLL   | 4858  | 4807  |
| >PTEN-Y174[ YVYYYYSYLLK  | 50   | >PTEN-Y174[ DVYYYYSYLLK  | 211   | 161   |
| >PTEN-Y174[ YVYYYYSYLLK  | 490  | >PTEN-Y174[ DVYYYYSYLLK  | 701   | 211   |
| >PTEN-Y174[ RYVYYYYSYL   | 51   | >PTEN-Y174[ RDVYYYYSYL   | 713   | 662   |
| >PTEN-Y174[ RYVYYYYSYL   | 340  | >PTEN-Y174[ RDVYYYYSYL   | 4000  | 3660  |
| >PTEN-Y174[ RYVYYYYSYLLK | 94   | >PTEN-Y174[ RDVYYYYSYLLK | 1256  | 1162  |
| >PTEN-Y174[ RYVYYYYSY    | 213  | >PTEN-Y174[ RDVYYYYSY    | 21603 | 21390 |
| >PTEN-Y174[ RYVYYYYSYL   | 42   | >PTEN-Y174[ RDVYYYYSYL   | 12729 | 12687 |
| >PTEN-Y174[ RYVYYYYSYLL  | 6    | >PTEN-Y174[ RDVYYYYSYLL  | 3139  | 3133  |
| >PTEN-Y174[ RYVYYYYSYLLK | 105  | >PTEN-Y174[ RDVYYYYSYLLK | 15058 | 14953 |
| >PTEN-Y174[ RYVYYYYSY    | 244  | >PTEN-Y174[ RDVYYYYSY    | 24578 | 24334 |
| >PTEN-Y174[ RYVYYYYSYL   | 56   | >PTEN-Y174[ RDVYYYYSYL   | 13600 | 13544 |
| >PTEN-Y174[ RYVYYYYSYLL  | 26   | >PTEN-Y174[ RDVYYYYSYLL  | 13513 | 13487 |

|                          |       |                          |       |       |
|--------------------------|-------|--------------------------|-------|-------|
| >PTEN-Y174[ RYVYYYYSYLLK | 271   | >PTEN-Y174[ RDVYYYYSYLLK | 22201 | 21930 |
| >PTEN-Y174[ RYVYYYYSY    | 86    | >PTEN-Y174[ RDVYYYYSY    | 24145 | 24059 |
| >PTEN-Y174[ RYVYYYYSYL   | 6     | >PTEN-Y174[ RDVYYYYSYL   | 18556 | 18550 |
| >PTEN-Y174[ RYVYYYYSYLL  | 10    | >PTEN-Y174[ RDVYYYYSYLL  | 21599 | 21589 |
| >PTEN-Y174[ RYVYYYYSYLLK | 446   | >PTEN-Y174[ RDVYYYYSYLLK | 25959 | 25513 |
| >PTEN-Y174[ RYVYYYYSY    | 18    | >PTEN-Y174[ RDVYYYYSY    | 470   | 452   |
| >PTEN-Y174[ RYVYYYYSYLL  | 222   | >PTEN-Y174[ RDVYYYYSYLL  | 12531 | 12309 |
| >PTEN-Y174[ RYVYYYYSYL   | 121   | >PTEN-Y174[ RDVYYYYSYL   | 12154 | 12033 |
| >PTEN-Y174[ RYVYYYYSYLL  | 348   | >PTEN-Y174[ RDVYYYYSYLL  | 13946 | 13598 |
| >PTEN-Y174[ RYVYYYYSYLLK | 6     | >PTEN-Y174[ RDVYYYYSYLLK | 1275  | 1269  |
| >PTEN-Y174[ RYVYYYYSY    | 39    | >PTEN-Y174[ RDVYYYYSY    | 992   | 953   |
| >PTEN-Y174[ RYVYYYYSYLL  | 410   | >PTEN-Y174[ RDVYYYYSYLL  | 10860 | 10450 |
| >PTEN-Y174[ RYVYYYYSY    | 484   | >PTEN-Y174[ RDVYYYYSY    | 16516 | 16032 |
| >PTEN-Y174[ RYVYYYYSYL   | 105   | >PTEN-Y174[ RDVYYYYSYL   | 12506 | 12401 |
| >PTEN-Y174[ RYVYYYYSYLLK | 33    | >PTEN-Y174[ RDVYYYYSYLLK | 4296  | 4263  |
| >PTEN-Y174[ RYVYYYYSY    | 88    | >PTEN-Y174[ RDVYYYYSY    | 4404  | 4316  |
| >PTEN-Y174[ RYVYYYYSY    | 77    | >PTEN-Y174[ RDVYYYYSY    | 152   | 75    |
| >PTEN-Y174[ RYVYYYYSYL   | 223   | >PTEN-Y174[ RDVYYYYSYL   | 514   | 291   |
| >PTEN-Y174[ RYVYYYYSYL   | 22633 | >PTEN-Y174[ RDVYYYYSYL   | 204   | 22429 |
| >PTEN-Y174[ RYVYYYYSYLL  | 420   | >PTEN-Y174[ RDVYYYYSYLL  | 886   | 466   |
| >PTEN-Y174[ RYVYYYYSYL   | 403   | >PTEN-Y174[ RDVYYYYSYL   | 266   | 137   |
| >PTEN-Y174[ RYVYYYYSYLL  | 14714 | >PTEN-Y174[ RDVYYYYSYLL  | 470   | 14244 |
| >PTEN-Y174[ RYVYYYYSY    | 127   | >PTEN-Y174[ RDVYYYYSY    | 5059  | 4932  |
| >PTEN-Y174[ RYVYYYYSYLLK | 42    | >PTEN-Y174[ RDVYYYYSYLLK | 4276  | 4234  |
| >PTEN-Y174[ RYVYYYYSYL   | 311   | >PTEN-Y174[ RDVYYYYSYL   | 15350 | 15039 |
| >PTEN-Y174[ RYVYYYYSYLL  | 195   | >PTEN-Y174[ RDVYYYYSYLL  | 20790 | 20595 |
| >PTEN-Y174[ RYVYYYYSY    | 356   | >PTEN-Y174[ RDVYYYYSY    | 29016 | 28660 |
| >PTEN-Y174[ RYVYYYYSYL   | 37    | >PTEN-Y174[ RDVYYYYSYL   | 18903 | 18866 |
| >PTEN-Y174[ RYVYYYYSYLL  | 32    | >PTEN-Y174[ RDVYYYYSYLL  | 13397 | 13365 |
| >PTEN-Y174[ RYVYYYYSYLLK | 325   | >PTEN-Y174[ RDVYYYYSYLLK | 28451 | 28126 |
| >PTEN-Y174[ RYVYYYYSYLL  | 25563 | >PTEN-Y174[ RDVYYYYSYLL  | 207   | 25356 |
| >PTEN-Y174[ KGV TIPSQRR  | 155   | >PTEN-Y174[ KGV TIPSQRR  | 29447 | 29292 |
| >PTEN-Y174[ KGV TIPSQRR  | 202   | >PTEN-Y174[ KGV TIPSQRR  | 22810 | 22608 |
| >PTEN-Y174[ KGV TIPSQRR  | 227   | >PTEN-Y174[ KGV TIPSQRR  | 21167 | 20940 |
| >PTEN-Y174[ RRYVYYYYSYL  | 136   | >PTEN-Y174[ RRDVYYYYSYL  | 4938  | 4802  |
| >PTEN-Y174[ RRYVYYYYSYL  | 429   | >PTEN-Y174[ RRDVYYYYSYL  | 3717  | 3288  |
| >PTEN-Y174[ RRYVYYYYSY   | 139   | >PTEN-Y174[ RRDVYYYYSY   | 2047  | 1908  |
| >PTEN-Y174[ RRYVYYYYSY   | 106   | >PTEN-Y174[ RRDVYYYYSY   | 432   | 326   |
| >PTEN-Y174[ RRYVYYYYSY   | 3     | >PTEN-Y174[ RRDVYYYYSY   | 120   | 117   |
| >PTEN-Y174[ RRYVYYYYSYL  | 8     | >PTEN-Y174[ RRDVYYYYSYL  | 402   | 394   |
| >PTEN-Y174[ RRYVYYYYSYL  | 19    | >PTEN-Y174[ RRDVYYYYSYL  | 1232  | 1213  |
| >PTEN-Y174[ RRYVYYYYS    | 69    | >PTEN-Y174[ RRDVYYYYS    | 1565  | 1496  |
| >PTEN-Y174[ RRYVYYYYSY   | 11    | >PTEN-Y174[ RRDVYYYYSY   | 76    | 65    |

|                         |     |                         |      |      |
|-------------------------|-----|-------------------------|------|------|
| >PTEN-Y174[ RRYVYYYSYL  | 7   | >PTEN-Y174[ RRDVYYYSYL  | 13   | 6    |
| >PTEN-Y174[ RRYVYYYSYLI | 8   | >PTEN-Y174[ RRDVYYYSYLI | 58   | 50   |
| >PTEN-Y174[ RRYVYYYSYL  | 325 | >PTEN-Y174[ RRDVYYYSYL  | 429  | 104  |
| >PTEN-Y174[ RRYVYYYSYLI | 50  | >PTEN-Y174[ RRDVYYYSYLI | 74   | 24   |
| >PTEN-Y174[ RRYVYYYSYL  | 263 | >PTEN-Y174[ RRDVYYYSYL  | 6440 | 6177 |
| >PTEN-Y174[ RRYVYYYSYLI | 106 | >PTEN-Y174[ RRDVYYYSYLI | 2380 | 2274 |
| >PTEN-Y174[ RRYVYYYS    | 221 | >PTEN-Y174[ RRDVYYYS    | 1691 | 1470 |
| >PTEN-Y174[ RRYVYYYSY   | 47  | >PTEN-Y174[ RRDVYYYSY   | 284  | 237  |
| >PTEN-Y174[ RRYVYYYSYL  | 14  | >PTEN-Y174[ RRDVYYYSYL  | 25   | 11   |
| >PTEN-Y174[ RRYVYYYSYLI | 11  | >PTEN-Y174[ RRDVYYYSYLI | 27   | 16   |
| >PTEN-Y174[ RRYVYYYS    | 450 | >PTEN-Y174[ RRDVYYYS    | 2766 | 2316 |
| >PTEN-Y174[ RRYVYYYSY   | 33  | >PTEN-Y174[ RRDVYYYSY   | 183  | 150  |
| >PTEN-Y174[ RRYVYYYSYL  | 12  | >PTEN-Y174[ RRDVYYYSYL  | 18   | 6    |
| >PTEN-Y174[ RRYVYYYSYLI | 3   | >PTEN-Y174[ RRDVYYYSYLI | 11   | 8    |
| >PTEN-Y174[ RRYVYYYSY   | 231 | >PTEN-Y174[ RRDVYYYSY   | 4766 | 4535 |
| >PTEN-Y174[ RRYVYYYSY   | 747 | >PTEN-Y174[ RRDVYYYSY   | 243  | 504  |
| >PTEN-Y174[ QRRYVYYY    | 292 | >PTEN-Y174[ QRRDVYYY    | 408  | 116  |
| >PTEN-Y174[ QRRYVYYY    | 388 | >PTEN-Y174[ QRRDVYYY    | 738  | 350  |
| >PTEN-Y174[ QRRYVYYYSY  | 405 | >PTEN-Y174[ QRRDVYYYSY  | 650  | 245  |
| >PTEN-Y174[ QRRYVYYY    | 33  | >PTEN-Y174[ QRRDVYYY    | 113  | 80   |
| >PTEN-Y174[ QRRYVYYYSY  | 15  | >PTEN-Y174[ QRRDVYYYSY  | 35   | 20   |
| >PTEN-Y174[ QRRYVYYYSY  | 44  | >PTEN-Y174[ QRRDVYYYSY  | 130  | 86   |
| >PTEN-Y174[ QRRYVYYYSY  | 33  | >PTEN-Y174[ QRRDVYYYSY  | 49   | 16   |
| >PTEN-Y174[ QRRYVYYYSY  | 41  | >PTEN-Y174[ QRRDVYYYSY  | 101  | 60   |
| >PTEN-Y174[ QRRYVYYYSY  | 19  | >PTEN-Y174[ QRRDVYYYSY  | 26   | 7    |
| >PTEN-Y174[ SQRRYVYYY   | 308 | >PTEN-Y174[ SQRRDVYYY   | 167  | 141  |
| >PTEN-Y174[ SQRRYVYYY   | 137 | >PTEN-Y174[ SQRRDVYYY   | 313  | 176  |
| >PTEN-Y174[ SQRRYVYYYS  | 355 | >PTEN-Y174[ SQRRDVYYYS  | 594  | 239  |
| >PTEN-Y174[ SQRRYVYY    | 72  | >PTEN-Y174[ SQRRDVYY    | 703  | 631  |
| >PTEN-Y174[ SQRRYVYYY   | 75  | >PTEN-Y174[ SQRRDVYYY   | 639  | 564  |
| >PTEN-Y174[ SQRRYVYYYS  | 152 | >PTEN-Y174[ SQRRDVYYYS  | 745  | 593  |
| >PTEN-Y174[ SQRRYVYYYS  | 104 | >PTEN-Y174[ SQRRDVYYYS  | 425  | 321  |
| >PTEN-Y174[ SQRRYVYY    | 535 | >PTEN-Y174[ SQRRDVYY    | 294  | 241  |
| >PTEN-Y174[ SQRRYVYYY   | 83  | >PTEN-Y174[ SQRRDVYYY   | 50   | 33   |
| >PTEN-Y174[ SQRRYVYYYS  | 106 | >PTEN-Y174[ SQRRDVYYYS  | 75   | 31   |
| >PTEN-Y174[ SQRRYVYYY   | 219 | >PTEN-Y174[ SQRRDVYYY   | 2229 | 2010 |
| >PTEN-Y174[ SQRRYVYYY   | 212 | >PTEN-Y174[ SQRRDVYYY   | 654  | 442  |
| >PTEN-Y174[ SQRRYVYY    | 41  | >PTEN-Y174[ SQRRDVYY    | 48   | 7    |
| >PTEN-Y174[ SQRRYVYYY   | 36  | >PTEN-Y174[ SQRRDVYYY   | 44   | 8    |
| >PTEN-Y174[ SQRRYVYYYS  | 34  | >PTEN-Y174[ SQRRDVYYYS  | 37   | 3    |
| >PTEN-Y174[ SQRRYVYY    | 383 | >PTEN-Y174[ SQRRDVYY    | 265  | 118  |
| >PTEN-Y174[ SQRRYVYYYS  | 322 | >PTEN-Y174[ SQRRDVYYYS  | 312  | 10   |
| >PTEN-Y174[ SQRRYVYY    | 4   | >PTEN-Y174[ SQRRDVYY    | 8    | 4    |

|                         |      |                         |       |       |
|-------------------------|------|-------------------------|-------|-------|
| >PTEN-Y174[ SQRRYVYYY   | 4    | >PTEN-Y174[ SQRRDVYYY   | 7     | 3     |
| >PTEN-Y174[ SQRRYVYYYS  | 3    | >PTEN-Y174[ SQRRDVYYYS  | 4     | 1     |
| >PTEN-Y174[ SQRRYVYYYS  | 492  | >PTEN-Y174[ SQRRDVYYYS  | 1165  | 673   |
| >PTEN-Y174[ SQRRYVYYY   | 453  | >PTEN-Y174[ SQRRDVYYY   | 657   | 204   |
| >PTEN-Y174[ PSQRRYVYYY  | 186  | >PTEN-Y174[ PSQRRDVYYY  | 173   | 13    |
| >PTEN-Y174[ PSQRRYVYYY  | 359  | >PTEN-Y174[ PSQRRDVYYY  | 591   | 232   |
| >PTEN-Y174[ PSQRRYVY    | 465  | >PTEN-Y174[ PSQRRDVY    | 1135  | 670   |
| >PTEN-Y174[ PSQRRYVYYY  | 40   | >PTEN-Y174[ PSQRRDVYYY  | 45    | 5     |
| >PTEN-Y174[ PSQRRYVYYY  | 353  | >PTEN-Y174[ PSQRRDVYYY  | 517   | 164   |
| >PTEN-Y174[ IPSQRRYVYYY | 288  | >PTEN-Y174[ IPSQRRDVYY' | 784   | 496   |
| >PTEN-Y174[ IPSQRRYVY   | 183  | >PTEN-Y174[ IPSQRRDVY   | 1333  | 1150  |
| >PTEN-Y174[ IPSQRRYVYYY | 123  | >PTEN-Y174[ IPSQRRDVYY' | 223   | 100   |
| >PTEN-Y174[ IPSQRRYV    | 22   | >PTEN-Y174[ IPSQRRDV    | 28    | 6     |
| >PTEN-Y174[ IPSQRRYVY   | 165  | >PTEN-Y174[ IPSQRRDVY   | 223   | 58    |
| >PTEN-Y174[ IPSQRRYVY   | 16   | >PTEN-Y174[ IPSQRRDVY   | 26    | 10    |
| >PTEN-Y174[ IPSQRRYVYYY | 1086 | >PTEN-Y174[ IPSQRRDVYY  | 460   | 626   |
| >PTEN-Y174[ IPSQRRYVYYY | 27   | >PTEN-Y174[ IPSQRRDVYY' | 32    | 5     |
| >PTEN-Y174[ IPSQRRYVY   | 74   | >PTEN-Y174[ IPSQRRDVY   | 400   | 326   |
| >PTEN-Y174[ IPSQRRYVYYY | 31   | >PTEN-Y174[ IPSQRRDVYY' | 54    | 23    |
| >PTEN-Y174[ IPSQRRYVY   | 7    | >PTEN-Y174[ IPSQRRDVY   | 29    | 22    |
| >PTEN-Y174[ IPSQRRYVYYY | 33   | >PTEN-Y174[ IPSQRRDVYY  | 80    | 47    |
| >PTEN-Y174[ IPSQRRYVYYY | 12   | >PTEN-Y174[ IPSQRRDVYY' | 30    | 18    |
| >PTEN-Y174[ IPSQRRYVYYY | 262  | >PTEN-Y174[ IPSQRRDVYY  | 410   | 148   |
| >PTEN-Y174[ TIPSQRRYV   | 225  | >PTEN-Y174[ TIPSQRRDV   | 1462  | 1237  |
| >PTEN-Y174[ TIPSQRRY    | 437  | >PTEN-Y174[ TIPSQRRD    | 36396 | 35959 |
| >PTEN-Y174[ TIPSQRRYVY  | 290  | >PTEN-Y174[ TIPSQRRDVY' | 571   | 281   |
| >PTEN-Y174[ TIPSQRRYVY  | 238  | >PTEN-Y174[ TIPSQRRDVY' | 390   | 152   |
| >PTEN-Y174[ TIPSQRRYV   | 67   | >PTEN-Y174[ TIPSQRRDV   | 2200  | 2133  |
| >PTEN-Y174[ VTIPSQRRYV  | 249  | >PTEN-Y174[ VTIPSQRRDV  | 4537  | 4288  |
| >PTEN-Y174[ VTIPSQRRYV  | 286  | >PTEN-Y174[ VTIPSQRRDV  | 1280  | 994   |
| >PTEN-Y174[ VTIPSQRRYV' | 284  | >PTEN-Y174[ VTIPSQRRDV  | 1321  | 1037  |
| >PTEN-Y174[ VTIPSQRRY   | 26   | >PTEN-Y174[ VTIPSQRRD   | 24092 | 24066 |
| >PTEN-Y174[ VTIPSQRRYV' | 38   | >PTEN-Y174[ VTIPSQRRDV  | 30    | 8     |
| >PTEN-Y174[ VTIPSQRRY   | 59   | >PTEN-Y174[ VTIPSQRRD   | 25621 | 25562 |
| >PTEN-Y174[ VTIPSQRRYV' | 26   | >PTEN-Y174[ VTIPSQRRDV  | 209   | 183   |
| >PTEN-Y174[ VTIPSQRRY   | 41   | >PTEN-Y174[ VTIPSQRRD   | 23148 | 23107 |
| >PTEN-Y174[ VTIPSQRRYV' | 16   | >PTEN-Y174[ VTIPSQRRDV  | 39    | 23    |
| >PTEN-Y174[ VTIPSQRRYV  | 225  | >PTEN-Y174[ VTIPSQRRDV  | 3562  | 3337  |
| >PTEN-Y174[ VTIPSQRRY   | 399  | >PTEN-Y174[ VTIPSQRRD   | 21403 | 21004 |
| >PTEN-Y174[ VTIPSQRRYV' | 109  | >PTEN-Y174[ VTIPSQRRDV  | 164   | 55    |
| >PTEN-Y174[ VTIPSQRRYV' | 205  | >PTEN-Y174[ VTIPSQRRDV  | 597   | 392   |
| >PTEN-Y174[ VTIPSQRRY   | 3    | >PTEN-Y174[ VTIPSQRRD   | 1614  | 1611  |
| >PTEN-Y174[ VTIPSQRRYV  | 124  | >PTEN-Y174[ VTIPSQRRDV  | 255   | 131   |

|                        |     |                        |       |       |
|------------------------|-----|------------------------|-------|-------|
| >PTEN-Y174[VTIPSQRRYV' | 4   | >PTEN-Y174[VTIPSQRRDV  | 5     | 1     |
| >PTEN-Y174[VTIPSQRRY   | 81  | >PTEN-Y174[VTIPSQRRD   | 14247 | 14166 |
| >PTEN-Y174[VTIPSQRRYV' | 111 | >PTEN-Y174[VTIPSQRRDV  | 319   | 208   |
| >PTEN-Y174[VTIPSQRRY   | 122 | >PTEN-Y174[VTIPSQRRD   | 17233 | 17111 |
| >PTEN-Y174[VTIPSQRRYV' | 76  | >PTEN-Y174[VTIPSQRRDV  | 165   | 89    |
| >PTEN-Y174[VTIPSQRRY   | 37  | >PTEN-Y174[VTIPSQRRD   | 14924 | 14887 |
| >PTEN-Y174[VTIPSQRRYV' | 37  | >PTEN-Y174[VTIPSQRRDV  | 31    | 6     |
| >PTEN-Y174[VTIPSQRRYV' | 256 | >PTEN-Y174[VTIPSQRRDV  | 1619  | 1363  |
| >PTEN-Y174[GVTIPSQRRY  | 123 | >PTEN-Y174[GVTIPSQRRD  | 566   | 443   |
| >PTEN-Y174[GVTIPSQRRY  | 172 | >PTEN-Y174[GVTIPSQRRD  | 22472 | 22300 |
| >PTEN-Y174†VYVYYSYL    | 4   | >PTEN-Y174†NVYVYYSYL   | 10    | 6     |
| >PTEN-Y174†VYVYYSYLL   | 20  | >PTEN-Y174†NVYVYYSYLL  | 51    | 31    |
| >PTEN-Y174†VYVYYSYL    | 10  | >PTEN-Y174†NVYVYYSYL   | 146   | 136   |
| >PTEN-Y174†VYVYYSYLL   | 7   | >PTEN-Y174†NVYVYYSYLL  | 25    | 18    |
| >PTEN-Y174†VYVYYSYL    | 4   | >PTEN-Y174†NVYVYYSYL   | 26    | 22    |
| >PTEN-Y174†VYVYYSYLL   | 3   | >PTEN-Y174†NVYVYYSYLL  | 9     | 6     |
| >PTEN-Y174†VYVYYSYL    | 9   | >PTEN-Y174†NVYVYYSYL   | 73    | 64    |
| >PTEN-Y174†VYVYYSYLL   | 18  | >PTEN-Y174†NVYVYYSYLL  | 212   | 194   |
| >PTEN-Y174†VYVYYSYL    | 8   | >PTEN-Y174†NVYVYYSYL   | 85    | 77    |
| >PTEN-Y174†VYVYYSYLL   | 8   | >PTEN-Y174†NVYVYYSYLL  | 78    | 70    |
| >PTEN-Y174†VYVYYSYL    | 5   | >PTEN-Y174†NVYVYYSYL   | 226   | 221   |
| >PTEN-Y174†VYVYYSYLL   | 10  | >PTEN-Y174†NVYVYYSYLL  | 893   | 883   |
| >PTEN-Y174†VYVYYSYL    | 21  | >PTEN-Y174†NVYVYYSYL   | 721   | 700   |
| >PTEN-Y174†VYVYYSYLL   | 12  | >PTEN-Y174†NVYVYYSYLL  | 436   | 424   |
| >PTEN-Y174†VYVYYSYL    | 42  | >PTEN-Y174†NVYVYYSYL   | 3117  | 3075  |
| >PTEN-Y174†VYVYYSYLL   | 86  | >PTEN-Y174†NVYVYYSYLL  | 5984  | 5898  |
| >PTEN-Y174†VYVYYSYL    | 99  | >PTEN-Y174†NVYVYYSYL   | 3295  | 3196  |
| >PTEN-Y174†VYVYYSYLL   | 200 | >PTEN-Y174†NVYVYYSYLL  | 4265  | 4065  |
| >PTEN-Y174†VYVYYSYL    | 12  | >PTEN-Y174†NVYVYYSYL   | 2496  | 2484  |
| >PTEN-Y174†VYVYYSYLL   | 27  | >PTEN-Y174†NVYVYYSYLL  | 6543  | 6516  |
| >PTEN-Y174†VYVYYSYLLK  | 8   | >PTEN-Y174†NVYVYYSYLLK | 9     | 1     |
| >PTEN-Y174†VYVYYSYLLK  | 7   | >PTEN-Y174†NVYVYYSYLLK | 8     | 1     |
| >PTEN-Y174†VYVYYSYL    | 193 | >PTEN-Y174†NVYVYYSYL   | 694   | 501   |
| >PTEN-Y174†VYVYYSYLL   | 71  | >PTEN-Y174†NVYVYYSYLL  | 1062  | 991   |
| >PTEN-Y174†VYVYYSYLLK  | 41  | >PTEN-Y174†NVYVYYSYLLK | 215   | 174   |
| >PTEN-Y174†VYVYYSYLLK  | 165 | >PTEN-Y174†NVYVYYSYLLK | 236   | 71    |
| >PTEN-Y174†VYVYYSYLL   | 81  | >PTEN-Y174†NVYVYYSYLL  | 287   | 206   |
| >PTEN-Y174†VYVYYSYLLK  | 274 | >PTEN-Y174†NVYVYYSYLLK | 189   | 85    |
| >PTEN-Y174†VYVYYSYL    | 377 | >PTEN-Y174†NVYVYYSYL   | 815   | 438   |
| >PTEN-Y174†VYVYYSYLL   | 253 | >PTEN-Y174†NVYVYYSYLL  | 575   | 322   |
| >PTEN-Y174†VYVYYSYLLK  | 6   | >PTEN-Y174†NVYVYYSYLLK | 6     | 0     |
| >PTEN-Y174†VYVYYSYL    | 21  | >PTEN-Y174†NVYVYYSYL   | 14    | 7     |
| >PTEN-Y174†VYVYYSYLL   | 11  | >PTEN-Y174†NVYVYYSYLL  | 9     | 2     |

|                        |      |                        |       |       |
|------------------------|------|------------------------|-------|-------|
| >PTEN-Y174FVYYYYSYL    | 17   | >PTEN-Y174FNVYYYYSYL   | 20    | 3     |
| >PTEN-Y174FVYYYYSYLL   | 19   | >PTEN-Y174FNVYYYYSYLL  | 22    | 3     |
| >PTEN-Y174FVYYYYSYL    | 279  | >PTEN-Y174FNVYYYYSYL   | 3595  | 3316  |
| >PTEN-Y174FVYYYYSYLL   | 421  | >PTEN-Y174FNVYYYYSYLL  | 5135  | 4714  |
| >PTEN-Y174FVYYYYSYL    | 85   | >PTEN-Y174FNVYYYYSYL   | 1530  | 1445  |
| >PTEN-Y174FVYYYYSYLL   | 255  | >PTEN-Y174FNVYYYYSYLL  | 3101  | 2846  |
| >PTEN-Y174FVYYYYSYL    | 52   | >PTEN-Y174FNVYYYYSYL   | 3749  | 3697  |
| >PTEN-Y174FVYYYYSYLL   | 84   | >PTEN-Y174FNVYYYYSYLL  | 5428  | 5344  |
| >PTEN-Y174FVYYYYSYLL   | 219  | >PTEN-Y174FNVYYYYSYLL  | 1517  | 1298  |
| >PTEN-Y174FVYYYYSYLL   | 75   | >PTEN-Y174FNVYYYYSYLL  | 266   | 191   |
| >PTEN-Y174FVYYYYSYLL   | 63   | >PTEN-Y174FNVYYYYSYLL  | 2270  | 2207  |
| >PTEN-Y174FVYYYYSYLL   | 51   | >PTEN-Y174FNVYYYYSYLL  | 1600  | 1549  |
| >PTEN-Y174FVYYYYSYLLK  | 50   | >PTEN-Y174FNVYYYYSYLLK | 231   | 181   |
| >PTEN-Y174FVYYYYSYLLK  | 490  | >PTEN-Y174FNVYYYYSYLLK | 822   | 332   |
| >PTEN-Y174FRVYYYYSYL   | 51   | >PTEN-Y174FRVYYYYSYL   | 22    | 29    |
| >PTEN-Y174FRVYYYYSYL   | 340  | >PTEN-Y174FRVYYYYSYL   | 1992  | 1652  |
| >PTEN-Y174FRVYYYYSYLLK | 94   | >PTEN-Y174FRVYYYYSYLLK | 171   | 77    |
| >PTEN-Y174FRVYYYYSY    | 213  | >PTEN-Y174FRVYYYYSY    | 17775 | 17562 |
| >PTEN-Y174FRVYYYYSYL   | 42   | >PTEN-Y174FRVYYYYSYL   | 8081  | 8039  |
| >PTEN-Y174FRVYYYYSYLL  | 6    | >PTEN-Y174FRVYYYYSYLL  | 1422  | 1416  |
| >PTEN-Y174FRVYYYYSYLLK | 105  | >PTEN-Y174FRVYYYYSYLLK | 10441 | 10336 |
| >PTEN-Y174FRVYYYYSY    | 244  | >PTEN-Y174FRVYYYYSY    | 18337 | 18093 |
| >PTEN-Y174FRVYYYYSYL   | 56   | >PTEN-Y174FRVYYYYSYL   | 7570  | 7514  |
| >PTEN-Y174FRVYYYYSYLL  | 26   | >PTEN-Y174FRVYYYYSYLL  | 8240  | 8214  |
| >PTEN-Y174FRVYYYYSYLLK | 271  | >PTEN-Y174FRVYYYYSYLLK | 16663 | 16392 |
| >PTEN-Y174FRVYYYYSY    | 86   | >PTEN-Y174FRVYYYYSY    | 22485 | 22399 |
| >PTEN-Y174FRVYYYYSYL   | 6    | >PTEN-Y174FRVYYYYSYL   | 13200 | 13194 |
| >PTEN-Y174FRVYYYYSYLL  | 10   | >PTEN-Y174FRVYYYYSYLL  | 17771 | 17761 |
| >PTEN-Y174FRVYYYYSYLLK | 446  | >PTEN-Y174FRVYYYYSYLLK | 24880 | 24434 |
| >PTEN-Y174FRVYYYYSY    | 18   | >PTEN-Y174FRVYYYYSY    | 139   | 121   |
| >PTEN-Y174FRVYYYYSYLL  | 222  | >PTEN-Y174FRVYYYYSYLL  | 7958  | 7736  |
| >PTEN-Y174FRVYYYYSYL   | 121  | >PTEN-Y174FRVYYYYSYL   | 4022  | 3901  |
| >PTEN-Y174FRVYYYYSYLL  | 348  | >PTEN-Y174FRVYYYYSYLL  | 6742  | 6394  |
| >PTEN-Y174FRVYYYYSYLLK | 6    | >PTEN-Y174FRVYYYYSYLLK | 64    | 58    |
| >PTEN-Y174FRVYYYYSY    | 39   | >PTEN-Y174FRVYYYYSY    | 211   | 172   |
| >PTEN-Y174FRVYYYYSYLL  | 410  | >PTEN-Y174FRVYYYYSYLL  | 5159  | 4749  |
| >PTEN-Y174FRVYYYYSY    | 484  | >PTEN-Y174FRVYYYYSY    | 8187  | 7703  |
| >PTEN-Y174FRVYYYYSYL   | 105  | >PTEN-Y174FRVYYYYSYL   | 3572  | 3467  |
| >PTEN-Y174FRVYYYYSYLLK | 33   | >PTEN-Y174FRVYYYYSYLLK | 643   | 610   |
| >PTEN-Y174FRVYYYYSY    | 88   | >PTEN-Y174FRVYYYYSY    | 1863  | 1775  |
| >PTEN-Y174FRVYYYYSY    | 1452 | >PTEN-Y174FRVYYYYSY    | 217   | 1235  |
| >PTEN-Y174FRVYYYYSY    | 77   | >PTEN-Y174FRVYYYYSY    | 27    | 50    |
| >PTEN-Y174FRVYYYYSYL   | 223  | >PTEN-Y174FRVYYYYSYL   | 79    | 144   |



|                          |      |                          |       |       |
|--------------------------|------|--------------------------|-------|-------|
| >PTEN-Y174F RYVYYYYSYLL  | 1103 | >PTEN-Y174F RNVYYYYSYLL  | 476   | 627   |
| >PTEN-Y174F RYVYYYYSYLL  | 420  | >PTEN-Y174F RNVYYYYSYLL  | 177   | 243   |
| >PTEN-Y174F RYVYYYYSYL   | 403  | >PTEN-Y174F RNVYYYYSYL   | 135   | 268   |
| >PTEN-Y174F RYVYYYYSY    | 127  | >PTEN-Y174F RNVYYYYSY    | 2196  | 2069  |
| >PTEN-Y174F RYVYYYYSYLLK | 42   | >PTEN-Y174F RNVYYYYSYLLK | 1474  | 1432  |
| >PTEN-Y174F RYVYYYYSYL   | 311  | >PTEN-Y174F RNVYYYYSYL   | 10292 | 9981  |
| >PTEN-Y174F RYVYYYYSYLL  | 195  | >PTEN-Y174F RNVYYYYSYLL  | 16233 | 16038 |
| >PTEN-Y174F RYVYYYYSY    | 356  | >PTEN-Y174F RNVYYYYSY    | 26391 | 26035 |
| >PTEN-Y174F RYVYYYYSYL   | 37   | >PTEN-Y174F RNVYYYYSYL   | 14853 | 14816 |
| >PTEN-Y174F RYVYYYYSYLL  | 32   | >PTEN-Y174F RNVYYYYSYLL  | 9248  | 9216  |
| >PTEN-Y174F RYVYYYYSYLLK | 325  | >PTEN-Y174F RNVYYYYSYLLK | 25104 | 24779 |
| >PTEN-Y174F KGV TIPSQRR  | 155  | >PTEN-Y174F KGV TIPSQRR  | 23501 | 23346 |
| >PTEN-Y174F KGV TIPSQRR  | 202  | >PTEN-Y174F KGV TIPSQRR  | 20719 | 20517 |
| >PTEN-Y174F KGV TIPSQRR  | 227  | >PTEN-Y174F KGV TIPSQRR  | 12606 | 12379 |
| >PTEN-Y174F RRYVYYYYSYLL | 136  | >PTEN-Y174F RRNVYYYYSYL  | 2642  | 2506  |
| >PTEN-Y174F RRYVYYYYSYL  | 429  | >PTEN-Y174F RRNVYYYYSYL  | 3560  | 3131  |
| >PTEN-Y174F RRYVYYYYSY   | 139  | >PTEN-Y174F RRNVYYYYSY   | 1005  | 866   |
| >PTEN-Y174F RRYVYYYYSY   | 106  | >PTEN-Y174F RRNVYYYYSY   | 80    | 26    |
| >PTEN-Y174F RRYVYYYYSY   | 3    | >PTEN-Y174F RRNVYYYYSY   | 7     | 4     |
| >PTEN-Y174F RRYVYYYYSYL  | 8    | >PTEN-Y174F RRNVYYYYSYL  | 27    | 19    |
| >PTEN-Y174F RRYVYYYYSYLL | 19   | >PTEN-Y174F RRNVYYYYSYL  | 100   | 81    |
| >PTEN-Y174F RRYVYYYYS    | 69   | >PTEN-Y174F RRNVYYYYS    | 236   | 167   |
| >PTEN-Y174F RRYVYYYYSY   | 11   | >PTEN-Y174F RRNVYYYYSY   | 20    | 9     |
| >PTEN-Y174F RRYVYYYYSYL  | 7    | >PTEN-Y174F RRNVYYYYSYL  | 10    | 3     |
| >PTEN-Y174F RRYVYYYYSYLL | 8    | >PTEN-Y174F RRNVYYYYSYL  | 15    | 7     |
| >PTEN-Y174F RRYVYYYYSYL  | 325  | >PTEN-Y174F RRNVYYYYSYL  | 1051  | 726   |
| >PTEN-Y174F RRYVYYYYSYLL | 50   | >PTEN-Y174F RRNVYYYYSYL  | 162   | 112   |
| >PTEN-Y174F RRYVYYYYSYL  | 263  | >PTEN-Y174F RRNVYYYYSYL  | 1415  | 1152  |
| >PTEN-Y174F RRYVYYYYSYLL | 106  | >PTEN-Y174F RRNVYYYYSYL  | 412   | 306   |
| >PTEN-Y174F RRYVYYYYS    | 221  | >PTEN-Y174F RRNVYYYYS    | 359   | 138   |
| >PTEN-Y174F RRYVYYYYSY   | 47   | >PTEN-Y174F RRNVYYYYSY   | 193   | 146   |
| >PTEN-Y174F RRYVYYYYSYL  | 14   | >PTEN-Y174F RRNVYYYYSYL  | 23    | 9     |
| >PTEN-Y174F RRYVYYYYSYLL | 11   | >PTEN-Y174F RRNVYYYYSYL  | 21    | 10    |
| >PTEN-Y174F RRYVYYYYS    | 450  | >PTEN-Y174F RRNVYYYYS    | 737   | 287   |
| >PTEN-Y174F RRYVYYYYSY   | 33   | >PTEN-Y174F RRNVYYYYSY   | 139   | 106   |
| >PTEN-Y174F RRYVYYYYSYL  | 12   | >PTEN-Y174F RRNVYYYYSYL  | 16    | 4     |
| >PTEN-Y174F RRYVYYYYSYLL | 3    | >PTEN-Y174F RRNVYYYYSYL  | 8     | 5     |
| >PTEN-Y174F RRYVYYYYSY   | 231  | >PTEN-Y174F RRNVYYYYSY   | 1002  | 771   |
| >PTEN-Y174F RRYVYYYYSY   | 747  | >PTEN-Y174F RRNVYYYYSY   | 415   | 332   |
| >PTEN-Y174F QRRYVYYYY    | 292  | >PTEN-Y174F QRRNVYYYY    | 608   | 316   |
| >PTEN-Y174F QRRYVYYYY    | 388  | >PTEN-Y174F QRRNVYYYY    | 573   | 185   |
| >PTEN-Y174F QRRYVYYYYSY  | 405  | >PTEN-Y174F QRRNVYYYYSY  | 578   | 173   |
| >PTEN-Y174F QRRYVYYYY    | 33   | >PTEN-Y174F QRRNVYYYY    | 46    | 13    |

|                         |     |                        |     |     |
|-------------------------|-----|------------------------|-----|-----|
| >PTEN-Y174F QRRYVYYYSY  | 15  | >PTEN-Y174F QRRNVYYYSY | 19  | 4   |
| >PTEN-Y174F QRRYVYYYSY  | 44  | >PTEN-Y174F QRRNVYYYSY | 69  | 25  |
| >PTEN-Y174F QRRYVYYYSY  | 33  | >PTEN-Y174F QRRNVYYYSY | 45  | 12  |
| >PTEN-Y174F QRRYVYYYSY  | 595 | >PTEN-Y174F QRRNVYYYSY | 382 | 213 |
| >PTEN-Y174F QRRYVYYYSY  | 41  | >PTEN-Y174F QRRNVYYYSY | 64  | 23  |
| >PTEN-Y174F QRRYVYYYSY  | 19  | >PTEN-Y174F QRRNVYYYSY | 20  | 1   |
| >PTEN-Y174F SQRRYVYYY   | 308 | >PTEN-Y174F SQRRNVYYY  | 308 | 0   |
| >PTEN-Y174F SQRRYVYYY   | 137 | >PTEN-Y174F SQRRNVYYY  | 177 | 40  |
| >PTEN-Y174F SQRRYVYYYS  | 355 | >PTEN-Y174F SQRRNVYYYS | 416 | 61  |
| >PTEN-Y174F SQRRYVYYY   | 72  | >PTEN-Y174F SQRRNVYY   | 88  | 16  |
| >PTEN-Y174F SQRRYVYYY   | 75  | >PTEN-Y174F SQRRNVYYY  | 71  | 4   |
| >PTEN-Y174F SQRRYVYYYS  | 152 | >PTEN-Y174F SQRRNVYYYS | 154 | 2   |
| >PTEN-Y174F SQRRYVYYYS  | 104 | >PTEN-Y174F SQRRNVYYYS | 100 | 4   |
| >PTEN-Y174F SQRRYVYYY   | 535 | >PTEN-Y174F SQRRNVYY   | 267 | 268 |
| >PTEN-Y174F SQRRYVYYY   | 83  | >PTEN-Y174F SQRRNVYYY  | 48  | 35  |
| >PTEN-Y174F SQRRYVYYYS  | 106 | >PTEN-Y174F SQRRNVYYYS | 75  | 31  |
| >PTEN-Y174F SQRRYVYYY   | 219 | >PTEN-Y174F SQRRNVYYY  | 915 | 696 |
| >PTEN-Y174F SQRRYVYYY   | 212 | >PTEN-Y174F SQRRNVYYY  | 636 | 424 |
| >PTEN-Y174F SQRRYVYYY   | 41  | >PTEN-Y174F SQRRNVYY   | 47  | 6   |
| >PTEN-Y174F SQRRYVYYY   | 36  | >PTEN-Y174F SQRRNVYYY  | 44  | 8   |
| >PTEN-Y174F SQRRYVYYYS  | 34  | >PTEN-Y174F SQRRNVYYYS | 38  | 4   |
| >PTEN-Y174F SQRRYVYYY   | 383 | >PTEN-Y174F SQRRNVYY   | 163 | 220 |
| >PTEN-Y174F SQRRYVYYY   | 581 | >PTEN-Y174F SQRRNVYYY  | 258 | 323 |
| >PTEN-Y174F SQRRYVYYYS  | 322 | >PTEN-Y174F SQRRNVYYYS | 203 | 119 |
| >PTEN-Y174F SQRRYVYYY   | 4   | >PTEN-Y174F SQRRNVYY   | 5   | 1   |
| >PTEN-Y174F SQRRYVYYY   | 4   | >PTEN-Y174F SQRRNVYYY  | 5   | 1   |
| >PTEN-Y174F SQRRYVYYYS  | 3   | >PTEN-Y174F SQRRNVYYYS | 3   | 0   |
| >PTEN-Y174F SQRRYVYYYS  | 492 | >PTEN-Y174F SQRRNVYYYS | 671 | 179 |
| >PTEN-Y174F SQRRYVYYY   | 453 | >PTEN-Y174F SQRRNVYYY  | 433 | 20  |
| >PTEN-Y174F PSQRRYVYY   | 907 | >PTEN-Y174F PSQRRNVYY  | 310 | 597 |
| >PTEN-Y174F PSQRRYVYYY  | 186 | >PTEN-Y174F PSQRRNVYYY | 200 | 14  |
| >PTEN-Y174F PSQRRYVYYY  | 359 | >PTEN-Y174F PSQRRNVYYY | 342 | 17  |
| >PTEN-Y174F PSQRRYVY    | 465 | >PTEN-Y174F PSQRRNVY   | 572 | 107 |
| >PTEN-Y174F PSQRRYVYYY  | 40  | >PTEN-Y174F PSQRRNVYYY | 35  | 5   |
| >PTEN-Y174F PSQRRYVYYY  | 353 | >PTEN-Y174F PSQRRNVYYY | 350 | 3   |
| >PTEN-Y174F IPSQRRYVYYY | 288 | >PTEN-Y174F IPSQRRNVYY | 587 | 299 |
| >PTEN-Y174F IPSQRRYVY   | 183 | >PTEN-Y174F IPSQRRNVY  | 434 | 251 |
| >PTEN-Y174F IPSQRRYVYYY | 123 | >PTEN-Y174F IPSQRRNVYY | 148 | 25  |
| >PTEN-Y174F IPSQRRYV    | 22  | >PTEN-Y174F IPSQRRNV   | 20  | 2   |
| >PTEN-Y174F IPSQRRYVY   | 165 | >PTEN-Y174F IPSQRRNVY  | 87  | 78  |
| >PTEN-Y174F IPSQRRYVY   | 16  | >PTEN-Y174F IPSQRRNVY  | 35  | 19  |
| >PTEN-Y174F IPSQRRYVYYY | 27  | >PTEN-Y174F IPSQRRNVYY | 41  | 14  |
| >PTEN-Y174F IPSQRRYVY   | 74  | >PTEN-Y174F IPSQRRNVY  | 479 | 405 |

|                       |      |                       |       |       |
|-----------------------|------|-----------------------|-------|-------|
| >PTEN-Y174MIPSQRRYVYY | 31   | >PTEN-Y174MIPSQRRNVYY | 66    | 35    |
| >PTEN-Y174MIPSQRRYVY  | 1200 | >PTEN-Y174MIPSQRRNVY  | 493   | 707   |
| >PTEN-Y174MIPSQRRYVY  | 7    | >PTEN-Y174MIPSQRRNVY  | 11    | 4     |
| >PTEN-Y174MIPSQRRYVYY | 33   | >PTEN-Y174MIPSQRRNVYY | 46    | 13    |
| >PTEN-Y174MIPSQRRYVYY | 12   | >PTEN-Y174MIPSQRRNVYY | 20    | 8     |
| >PTEN-Y174MIPSQRRYVYY | 262  | >PTEN-Y174MIPSQRRNVYY | 666   | 404   |
| >PTEN-Y174MTIPSQRRYV  | 225  | >PTEN-Y174MTIPSQRRNV  | 802   | 577   |
| >PTEN-Y174MTIPSQRRY   | 437  | >PTEN-Y174MTIPSQRRN   | 33344 | 32907 |
| >PTEN-Y174MTIPSQRRYVY | 290  | >PTEN-Y174MTIPSQRRNVY | 437   | 147   |
| >PTEN-Y174MTIPSQRRYVY | 238  | >PTEN-Y174MTIPSQRRNVY | 494   | 256   |
| >PTEN-Y174MTIPSQRRYV  | 67   | >PTEN-Y174MTIPSQRRNV  | 256   | 189   |
| >PTEN-Y174MTIPSQRRYV  | 249  | >PTEN-Y174MTIPSQRRNV  | 1968  | 1719  |
| >PTEN-Y174MTIPSQRRYV  | 286  | >PTEN-Y174MTIPSQRRNV  | 795   | 509   |
| >PTEN-Y174MTIPSQRRYV  | 284  | >PTEN-Y174MTIPSQRRNV  | 1006  | 722   |
| >PTEN-Y174MTIPSQRRY   | 26   | >PTEN-Y174MTIPSQRRN   | 17309 | 17283 |
| >PTEN-Y174MTIPSQRRYV  | 38   | >PTEN-Y174MTIPSQRRNV  | 34    | 4     |
| >PTEN-Y174MTIPSQRRYV  | 509  | >PTEN-Y174MTIPSQRRNV  | 203   | 306   |
| >PTEN-Y174MTIPSQRRY   | 59   | >PTEN-Y174MTIPSQRRN   | 22558 | 22499 |
| >PTEN-Y174MTIPSQRRYV  | 26   | >PTEN-Y174MTIPSQRRNV  | 114   | 88    |
| >PTEN-Y174MTIPSQRRY   | 41   | >PTEN-Y174MTIPSQRRN   | 16835 | 16794 |
| >PTEN-Y174MTIPSQRRYV  | 16   | >PTEN-Y174MTIPSQRRNV  | 22    | 6     |
| >PTEN-Y174MTIPSQRRYV  | 225  | >PTEN-Y174MTIPSQRRNV  | 926   | 701   |
| >PTEN-Y174MTIPSQRRY   | 399  | >PTEN-Y174MTIPSQRRN   | 19815 | 19416 |
| >PTEN-Y174MTIPSQRRYV  | 109  | >PTEN-Y174MTIPSQRRNV  | 113   | 4     |
| >PTEN-Y174MTIPSQRRYV  | 205  | >PTEN-Y174MTIPSQRRNV  | 217   | 12    |
| >PTEN-Y174MTIPSQRRY   | 3    | >PTEN-Y174MTIPSQRRN   | 488   | 485   |
| >PTEN-Y174MTIPSQRRYV  | 124  | >PTEN-Y174MTIPSQRRNV  | 90    | 34    |
| >PTEN-Y174MTIPSQRRYV  | 4    | >PTEN-Y174MTIPSQRRNV  | 4     | 0     |
| >PTEN-Y174MTIPSQRRY   | 81   | >PTEN-Y174MTIPSQRRN   | 10318 | 10237 |
| >PTEN-Y174MTIPSQRRYV  | 111  | >PTEN-Y174MTIPSQRRNV  | 255   | 144   |
| >PTEN-Y174MTIPSQRRY   | 122  | >PTEN-Y174MTIPSQRRN   | 16224 | 16102 |
| >PTEN-Y174MTIPSQRRYV  | 76   | >PTEN-Y174MTIPSQRRNV  | 211   | 135   |
| >PTEN-Y174MTIPSQRRY   | 37   | >PTEN-Y174MTIPSQRRN   | 6870  | 6833  |
| >PTEN-Y174MTIPSQRRYV  | 37   | >PTEN-Y174MTIPSQRRNV  | 19    | 18    |
| >PTEN-Y174MTIPSQRRYV  | 256  | >PTEN-Y174MTIPSQRRNV  | 560   | 304   |
| >PTEN-Y174MGVTIPSQRRY | 123  | >PTEN-Y174MGVTIPSQRRN | 331   | 208   |
| >PTEN-Y174MGVTIPSQRRY | 172  | >PTEN-Y174MGVTIPSQRRN | 20755 | 20583 |
| >PTEN-Y177CYYSYLLKNHL | 49   | >PTEN-Y177CYYSYLLKNHL | 66    | 17    |
| >PTEN-Y177CYYSYLLKNHL | 115  | >PTEN-Y177CYYSYLLKNHL | 587   | 472   |
| >PTEN-Y177CYYSYLLKNHL | 108  | >PTEN-Y177CYYSYLLKNHL | 202   | 94    |
| >PTEN-Y177CYYSYLLKNHL | 8    | >PTEN-Y177CYYSYLLKNHL | 11    | 3     |
| >PTEN-Y177CYYSYLLKNHL | 117  | >PTEN-Y177CYYSYLLKNHL | 141   | 24    |
| >PTEN-Y177CYYSYLLKNHI | 31   | >PTEN-Y177CYYSYLLKNHI | 113   | 82    |

|                        |      |                        |       |       |
|------------------------|------|------------------------|-------|-------|
| >PTEN-Y177(YYYSYLLKNHI | 250  | >PTEN-Y177(YCYSYLLKNHI | 20260 | 20010 |
| >PTEN-Y177(YYYSYLLKNHI | 109  | >PTEN-Y177(YCYSYLLKNHI | 198   | 89    |
| >PTEN-Y177(YYYSYLLKNHI | 536  | >PTEN-Y177(YCYSYLLKNHI | 409   | 127   |
| >PTEN-Y177(YYYSYLLK    | 387  | >PTEN-Y177(YCYSYLLK    | 300   | 87    |
| >PTEN-Y177(YYYSYLLK    | 85   | >PTEN-Y177(YCYSYLLK    | 956   | 871   |
| >PTEN-Y177(YYYSYLLK    | 59   | >PTEN-Y177(YCYSYLLK    | 7644  | 7585  |
| >PTEN-Y177(YYYSYLLKNHI | 29   | >PTEN-Y177(YCYSYLLKNHI | 6225  | 6196  |
| >PTEN-Y177(YYYSYLLK    | 399  | >PTEN-Y177(YCYSYLLK    | 16796 | 16397 |
| >PTEN-Y177(YYYSYLLKNHI | 147  | >PTEN-Y177(YCYSYLLKNHI | 16436 | 16289 |
| >PTEN-Y177(YYYSYLLK    | 127  | >PTEN-Y177(YCYSYLLK    | 21758 | 21631 |
| >PTEN-Y177(YYYSYLLKN   | 315  | >PTEN-Y177(YCYSYLLKN   | 24061 | 23746 |
| >PTEN-Y177(YYYSYLLKNHI | 6    | >PTEN-Y177(YCYSYLLKNHI | 9241  | 9235  |
| >PTEN-Y177(YYYSYLLK    | 269  | >PTEN-Y177(YCYSYLLK    | 4908  | 4639  |
| >PTEN-Y177(YYYSYLLK    | 125  | >PTEN-Y177(YCYSYLLK    | 1248  | 1123  |
| >PTEN-Y177(YYYSYLLK    | 211  | >PTEN-Y177(YCYSYLLK    | 4315  | 4104  |
| >PTEN-Y177(YYYSYLLK    | 364  | >PTEN-Y177(YCYSYLLK    | 5693  | 5329  |
| >PTEN-Y177(YYYSYLLK    | 81   | >PTEN-Y177(YCYSYLLK    | 468   | 387   |
| >PTEN-Y177(YYYSYLLKNHI | 2898 | >PTEN-Y177(YCYSYLLKNHI | 272   | 2626  |
| >PTEN-Y177(YYYSYLLK    | 50   | >PTEN-Y177(YCYSYLLK    | 607   | 557   |
| >PTEN-Y177(YYYSYLLKNHI | 347  | >PTEN-Y177(YCYSYLLKNHI | 5773  | 5426  |
| >PTEN-Y177(YYYSYLLKNHI | 441  | >PTEN-Y177(YCYSYLLKNHI | 28762 | 28321 |
| >PTEN-Y177(TIPSQRRYVY  | 290  | >PTEN-Y177(TIPSQRRYVY  | 32189 | 31899 |
| >PTEN-Y177(TIPSQRRYVY  | 238  | >PTEN-Y177(TIPSQRRYVY  | 24796 | 24558 |
| >PTEN-Y177(VYYYSYLL    | 63   | >PTEN-Y177(VYCYSYLL    | 1873  | 1810  |
| >PTEN-Y177(VYYYSYLL    | 411  | >PTEN-Y177(VYCYSYLL    | 2086  | 1675  |
| >PTEN-Y177(VYYYSYLLK   | 105  | >PTEN-Y177(VYCYSYLLK   | 2053  | 1948  |
| >PTEN-Y177(VYYYSYLLK   | 39   | >PTEN-Y177(VYCYSYLLK   | 61    | 22    |
| >PTEN-Y177(VYYYSYLL    | 28   | >PTEN-Y177(VYCYSYLL    | 126   | 98    |
| >PTEN-Y177(VYYYSYLLK   | 68   | >PTEN-Y177(VYCYSYLLK   | 293   | 225   |
| >PTEN-Y177(VYYYSYLL    | 59   | >PTEN-Y177(VYCYSYLL    | 101   | 42    |
| >PTEN-Y177(VYYYSYLLK   | 411  | >PTEN-Y177(VYCYSYLLK   | 765   | 354   |
| >PTEN-Y177(VYYYSYLL    | 23   | >PTEN-Y177(VYCYSYLL    | 32    | 9     |
| >PTEN-Y177(VYYYSYLLK   | 23   | >PTEN-Y177(VYCYSYLLK   | 60    | 37    |
| >PTEN-Y177(VYYYSYLLK   | 302  | >PTEN-Y177(VYCYSYLLK   | 753   | 451   |
| >PTEN-Y177(VYYYSYLL    | 234  | >PTEN-Y177(VYCYSYLL    | 3995  | 3761  |
| >PTEN-Y177(VYYYSYLLK   | 155  | >PTEN-Y177(VYCYSYLLK   | 405   | 250   |
| >PTEN-Y177(VYYYSYLL    | 353  | >PTEN-Y177(VYCYSYLL    | 196   | 157   |
| >PTEN-Y177(VYYYSYLL    | 188  | >PTEN-Y177(VYCYSYLL    | 655   | 467   |
| >PTEN-Y177(VVYYYSYL    | 4    | >PTEN-Y177(VVYCYSYL    | 3     | 1     |
| >PTEN-Y177(VVYYYSYLL   | 20   | >PTEN-Y177(VVYCYSYLL   | 44    | 24    |
| >PTEN-Y177(VVYYYSYL    | 10   | >PTEN-Y177(VVYCYSYL    | 10    | 0     |
| >PTEN-Y177(VVYYYSYLL   | 7    | >PTEN-Y177(VVYCYSYLL   | 7     | 0     |
| >PTEN-Y177(VVYYYSYL    | 4    | >PTEN-Y177(VVYCYSYL    | 5     | 1     |

|                       |     |                       |     |     |
|-----------------------|-----|-----------------------|-----|-----|
| >PTEN-Y177(YVYYYSYLL  | 3   | >PTEN-Y177(YVYCYSYLL  | 3   | 0   |
| >PTEN-Y177(YVYYYSYL   | 9   | >PTEN-Y177(YVYCYSYL   | 6   | 3   |
| >PTEN-Y177(YVYYYSYLL  | 18  | >PTEN-Y177(YVYCYSYLL  | 9   | 9   |
| >PTEN-Y177(YVYYYSYL   | 8   | >PTEN-Y177(YVYCYSYL   | 6   | 2   |
| >PTEN-Y177(YVYYYSYLL  | 8   | >PTEN-Y177(YVYCYSYLL  | 6   | 2   |
| >PTEN-Y177(YVYYYSYL   | 5   | >PTEN-Y177(YVYCYSYL   | 3   | 2   |
| >PTEN-Y177(YVYYYSYLL  | 10  | >PTEN-Y177(YVYCYSYLL  | 4   | 6   |
| >PTEN-Y177(YVYYYSYL   | 21  | >PTEN-Y177(YVYCYSYL   | 8   | 13  |
| >PTEN-Y177(YVYYYSYLL  | 12  | >PTEN-Y177(YVYCYSYLL  | 5   | 7   |
| >PTEN-Y177(YVYYYSYL   | 42  | >PTEN-Y177(YVYCYSYL   | 33  | 9   |
| >PTEN-Y177(YVYYYSYLL  | 86  | >PTEN-Y177(YVYCYSYLL  | 53  | 33  |
| >PTEN-Y177(YVYYYSYL   | 99  | >PTEN-Y177(YVYCYSYL   | 39  | 60  |
| >PTEN-Y177(YVYYYSYLL  | 200 | >PTEN-Y177(YVYCYSYLL  | 65  | 135 |
| >PTEN-Y177(YVYYYSYL   | 12  | >PTEN-Y177(YVYCYSYL   | 11  | 1   |
| >PTEN-Y177(YVYYYSYLL  | 27  | >PTEN-Y177(YVYCYSYLL  | 21  | 6   |
| >PTEN-Y177(YVYYYSYLLK | 8   | >PTEN-Y177(YVYCYSYLLK | 11  | 3   |
| >PTEN-Y177(YVYYYSYLLK | 7   | >PTEN-Y177(YVYCYSYLLK | 8   | 1   |
| >PTEN-Y177(YVYYYSYLL  | 514 | >PTEN-Y177(YVYCYSYLL  | 214 | 300 |
| >PTEN-Y177(YVYYYSYL   | 193 | >PTEN-Y177(YVYCYSYL   | 416 | 223 |
| >PTEN-Y177(YVYYYSYLL  | 71  | >PTEN-Y177(YVYCYSYLL  | 130 | 59  |
| >PTEN-Y177(YVYYYSYLLK | 41  | >PTEN-Y177(YVYCYSYLLK | 45  | 4   |
| >PTEN-Y177(YVYYYSYLLK | 165 | >PTEN-Y177(YVYCYSYLLK | 170 | 5   |
| >PTEN-Y177(YVYYYSYLL  | 81  | >PTEN-Y177(YVYCYSYLL  | 256 | 175 |
| >PTEN-Y177(YVYYYSYLLK | 274 | >PTEN-Y177(YVYCYSYLLK | 402 | 128 |
| >PTEN-Y177(YVYYYSYL   | 377 | >PTEN-Y177(YVYCYSYL   | 847 | 470 |
| >PTEN-Y177(YVYYYSYLL  | 253 | >PTEN-Y177(YVYCYSYLL  | 600 | 347 |
| >PTEN-Y177(YVYYYSYLLK | 6   | >PTEN-Y177(YVYCYSYLLK | 6   | 0   |
| >PTEN-Y177(YVYYYSYL   | 21  | >PTEN-Y177(YVYCYSYL   | 16  | 5   |
| >PTEN-Y177(YVYYYSYLL  | 11  | >PTEN-Y177(YVYCYSYLL  | 9   | 2   |
| >PTEN-Y177(YVYYYSYL   | 17  | >PTEN-Y177(YVYCYSYL   | 13  | 4   |
| >PTEN-Y177(YVYYYSYLL  | 19  | >PTEN-Y177(YVYCYSYLL  | 10  | 9   |
| >PTEN-Y177(YVYYYSYL   | 279 | >PTEN-Y177(YVYCYSYL   | 309 | 30  |
| >PTEN-Y177(YVYYYSYLL  | 421 | >PTEN-Y177(YVYCYSYLL  | 443 | 22  |
| >PTEN-Y177(YVYYYSYL   | 85  | >PTEN-Y177(YVYCYSYL   | 89  | 4   |
| >PTEN-Y177(YVYYYSYLL  | 255 | >PTEN-Y177(YVYCYSYLL  | 282 | 27  |
| >PTEN-Y177(YVYYYSYL   | 52  | >PTEN-Y177(YVYCYSYL   | 82  | 30  |
| >PTEN-Y177(YVYYYSYLL  | 84  | >PTEN-Y177(YVYCYSYLL  | 136 | 52  |
| >PTEN-Y177(YVYYYSYL   | 748 | >PTEN-Y177(YVYCYSYL   | 407 | 341 |
| >PTEN-Y177(YVYYYSYLL  | 219 | >PTEN-Y177(YVYCYSYLL  | 117 | 102 |
| >PTEN-Y177(YVYYYSYLL  | 75  | >PTEN-Y177(YVYCYSYLL  | 107 | 32  |
| >PTEN-Y177(YVYYYSYLL  | 63  | >PTEN-Y177(YVYCYSYLL  | 123 | 60  |
| >PTEN-Y177(YVYYYSYLL  | 51  | >PTEN-Y177(YVYCYSYLL  | 67  | 16  |
| >PTEN-Y177(YVYYYSYLLK | 50  | >PTEN-Y177(YVYCYSYLLK | 39  | 11  |

|                          |      |                         |      |      |
|--------------------------|------|-------------------------|------|------|
| >PTEN-Y177C(YVYYYYSYLLK  | 490  | >PTEN-Y177C(YVYCYSYLLK  | 434  | 56   |
| >PTEN-Y177C(YVYYYYSYLLK  | 898  | >PTEN-Y177C(YVYCYSYLLK  | 362  | 536  |
| >PTEN-Y177C(RYVYYYYSYL   | 51   | >PTEN-Y177C(RYVYCYSYL   | 183  | 132  |
| >PTEN-Y177C(RYVYYYYSYL   | 794  | >PTEN-Y177C(RYVYCYSYL   | 177  | 617  |
| >PTEN-Y177C(RYVYYYYSYL   | 340  | >PTEN-Y177C(RYVYCYSYL   | 633  | 293  |
| >PTEN-Y177C(RYVYYYYSYLLK | 94   | >PTEN-Y177C(RYVYCYSYLLK | 135  | 41   |
| >PTEN-Y177C(RYVYYYYSY    | 213  | >PTEN-Y177C(RYVYCYSY    | 143  | 70   |
| >PTEN-Y177C(RYVYYYYSYL   | 42   | >PTEN-Y177C(RYVYCYSYL   | 24   | 18   |
| >PTEN-Y177C(RYVYYYYSYLL  | 6    | >PTEN-Y177C(RYVYCYSYLL  | 13   | 7    |
| >PTEN-Y177C(RYVYYYYSYLLK | 105  | >PTEN-Y177C(RYVYCYSYLLK | 62   | 43   |
| >PTEN-Y177C(RYVYYYYSY    | 244  | >PTEN-Y177C(RYVYCYSY    | 338  | 94   |
| >PTEN-Y177C(RYVYYYYSYL   | 56   | >PTEN-Y177C(RYVYCYSYL   | 50   | 6    |
| >PTEN-Y177C(RYVYYYYSYLL  | 26   | >PTEN-Y177C(RYVYCYSYLL  | 46   | 20   |
| >PTEN-Y177C(RYVYYYYSYLLK | 271  | >PTEN-Y177C(RYVYCYSYLLK | 246  | 25   |
| >PTEN-Y177C(RYVYYYYSY    | 86   | >PTEN-Y177C(RYVYCYSY    | 185  | 99   |
| >PTEN-Y177C(RYVYYYYSYL   | 6    | >PTEN-Y177C(RYVYCYSYL   | 6    | 0    |
| >PTEN-Y177C(RYVYYYYSYLL  | 10   | >PTEN-Y177C(RYVYCYSYLL  | 10   | 0    |
| >PTEN-Y177C(RYVYYYYSYLLK | 446  | >PTEN-Y177C(RYVYCYSYLLK | 436  | 10   |
| >PTEN-Y177C(RYVYYYYSY    | 18   | >PTEN-Y177C(RYVYCYSY    | 22   | 4    |
| >PTEN-Y177C(RYVYYYYSYLL  | 222  | >PTEN-Y177C(RYVYCYSYLL  | 370  | 148  |
| >PTEN-Y177C(RYVYYYYSYL   | 121  | >PTEN-Y177C(RYVYCYSYL   | 484  | 363  |
| >PTEN-Y177C(RYVYYYYSYLL  | 348  | >PTEN-Y177C(RYVYCYSYLL  | 872  | 524  |
| >PTEN-Y177C(RYVYYYYSYLLK | 6    | >PTEN-Y177C(RYVYCYSYLLK | 9    | 3    |
| >PTEN-Y177C(RYVYYYYSY    | 39   | >PTEN-Y177C(RYVYCYSY    | 17   | 22   |
| >PTEN-Y177C(RYVYYYYSYLL  | 410  | >PTEN-Y177C(RYVYCYSYLL  | 1130 | 720  |
| >PTEN-Y177C(RYVYYYYSY    | 484  | >PTEN-Y177C(RYVYCYSY    | 1182 | 698  |
| >PTEN-Y177C(RYVYYYYSYL   | 105  | >PTEN-Y177C(RYVYCYSYL   | 189  | 84   |
| >PTEN-Y177C(RYVYYYYSYLLK | 33   | >PTEN-Y177C(RYVYCYSYLLK | 48   | 15   |
| >PTEN-Y177C(RYVYYYYSY    | 88   | >PTEN-Y177C(RYVYCYSY    | 177  | 89   |
| >PTEN-Y177C(RYVYYYYSY    | 77   | >PTEN-Y177C(RYVYCYSY    | 150  | 73   |
| >PTEN-Y177C(RYVYYYYSYL   | 223  | >PTEN-Y177C(RYVYCYSYL   | 325  | 102  |
| >PTEN-Y177C(RYVYYYYSYLL  | 420  | >PTEN-Y177C(RYVYCYSYLL  | 526  | 106  |
| >PTEN-Y177C(RYVYYYYSYL   | 403  | >PTEN-Y177C(RYVYCYSYL   | 182  | 221  |
| >PTEN-Y177C(RYVYYYYSY    | 127  | >PTEN-Y177C(RYVYCYSY    | 84   | 43   |
| >PTEN-Y177C(RYVYYYYSYL   | 1563 | >PTEN-Y177C(RYVYCYSYL   | 373  | 1190 |
| >PTEN-Y177C(RYVYYYYSYLLK | 42   | >PTEN-Y177C(RYVYCYSYLLK | 25   | 17   |
| >PTEN-Y177C(RYVYYYYSYL   | 311  | >PTEN-Y177C(RYVYCYSYL   | 396  | 85   |
| >PTEN-Y177C(RYVYYYYSYLL  | 195  | >PTEN-Y177C(RYVYCYSYLL  | 349  | 154  |
| >PTEN-Y177C(RYVYYYYSY    | 356  | >PTEN-Y177C(RYVYCYSY    | 479  | 123  |
| >PTEN-Y177C(RYVYYYYSYL   | 37   | >PTEN-Y177C(RYVYCYSYL   | 66   | 29   |
| >PTEN-Y177C(RYVYYYYSYLL  | 32   | >PTEN-Y177C(RYVYCYSYLL  | 59   | 27   |
| >PTEN-Y177C(RYVYYYYSYLLK | 325  | >PTEN-Y177C(RYVYCYSYLLK | 534  | 209  |
| >PTEN-Y177C(RRYVYYYYSYLI | 136  | >PTEN-Y177C(RRYVYCYSYLI | 383  | 247  |

|                         |     |                         |      |      |
|-------------------------|-----|-------------------------|------|------|
| >PTEN-Y177C RRYVYYYSYL  | 429 | >PTEN-Y177C RRYVVCYSYL  | 785  | 356  |
| >PTEN-Y177C RRYVYYYSY   | 139 | >PTEN-Y177C RRYVVCYSY   | 150  | 11   |
| >PTEN-Y177C RRYVYYYSY   | 106 | >PTEN-Y177C RRYVVCYSY   | 46   | 60   |
| >PTEN-Y177C RRYVYYYSY   | 3   | >PTEN-Y177C RRYVVCYSY   | 4    | 1    |
| >PTEN-Y177C RRYVYYYSYL  | 8   | >PTEN-Y177C RRYVVCYSYL  | 10   | 2    |
| >PTEN-Y177C RRYVYYYSYLI | 19  | >PTEN-Y177C RRYVVCYSYLI | 23   | 4    |
| >PTEN-Y177C RRYVYYYS    | 69  | >PTEN-Y177C RRYVVCYS    | 182  | 113  |
| >PTEN-Y177C RRYVYYYSY   | 11  | >PTEN-Y177C RRYVVCYSY   | 23   | 12   |
| >PTEN-Y177C RRYVYYYSYL  | 7   | >PTEN-Y177C RRYVVCYSYL  | 8    | 1    |
| >PTEN-Y177C RRYVYYYSYLI | 8   | >PTEN-Y177C RRYVVCYSYLI | 11   | 3    |
| >PTEN-Y177C RRYVYYYSYL  | 325 | >PTEN-Y177C RRYVVCYSYL  | 762  | 437  |
| >PTEN-Y177C RRYVYYYSYLI | 50  | >PTEN-Y177C RRYVVCYSYLI | 97   | 47   |
| >PTEN-Y177C RRYVYYYSYL  | 263 | >PTEN-Y177C RRYVVCYSYL  | 581  | 318  |
| >PTEN-Y177C RRYVYYYSYLI | 106 | >PTEN-Y177C RRYVVCYSYLI | 212  | 106  |
| >PTEN-Y177C RRYVYYYS    | 221 | >PTEN-Y177C RRYVVCYS    | 179  | 42   |
| >PTEN-Y177C RRYVYYYSY   | 47  | >PTEN-Y177C RRYVVCYSY   | 70   | 23   |
| >PTEN-Y177C RRYVYYYSYL  | 14  | >PTEN-Y177C RRYVVCYSYL  | 15   | 1    |
| >PTEN-Y177C RRYVYYYSYLI | 11  | >PTEN-Y177C RRYVVCYSYLI | 12   | 1    |
| >PTEN-Y177C RRYVYYYS    | 450 | >PTEN-Y177C RRYVVCYS    | 790  | 340  |
| >PTEN-Y177C RRYVYYYSY   | 33  | >PTEN-Y177C RRYVVCYSY   | 91   | 58   |
| >PTEN-Y177C RRYVYYYSYL  | 12  | >PTEN-Y177C RRYVVCYSYL  | 17   | 5    |
| >PTEN-Y177C RRYVYYYSYLI | 3   | >PTEN-Y177C RRYVVCYSYLI | 4    | 1    |
| >PTEN-Y177C RRYVYYYSY   | 231 | >PTEN-Y177C RRYVVCYSY   | 324  | 93   |
| >PTEN-Y177C QRRYVYYY    | 292 | >PTEN-Y177C QRRYVVCY    | 3402 | 3110 |
| >PTEN-Y177C QRRYVYYY    | 388 | >PTEN-Y177C QRRYVVCY    | 2528 | 2140 |
| >PTEN-Y177C QRRYVYYYYSY | 405 | >PTEN-Y177C QRRYVVCYSY  | 506  | 101  |
| >PTEN-Y177C QRRYVYYY    | 33  | >PTEN-Y177C QRRYVVCY    | 40   | 7    |
| >PTEN-Y177C QRRYVYYYYSY | 15  | >PTEN-Y177C QRRYVVCYSY  | 21   | 6    |
| >PTEN-Y177C QRRYVYYYYSY | 44  | >PTEN-Y177C QRRYVVCYSY  | 59   | 15   |
| >PTEN-Y177C QRRYVYYYYSY | 33  | >PTEN-Y177C QRRYVVCYSY  | 68   | 35   |
| >PTEN-Y177C QRRYVYYYYSY | 41  | >PTEN-Y177C QRRYVVCYSY  | 45   | 4    |
| >PTEN-Y177C QRRYVYYYYSY | 19  | >PTEN-Y177C QRRYVVCYSY  | 23   | 4    |
| >PTEN-Y177C SQRRYVYYY   | 308 | >PTEN-Y177C SQRRYVVCY   | 726  | 418  |
| >PTEN-Y177C SQRRYVYYY   | 137 | >PTEN-Y177C SQRRYVVCY   | 1659 | 1522 |
| >PTEN-Y177C SQRRYVYYYYS | 355 | >PTEN-Y177C SQRRYVVCYS  | 583  | 228  |
| >PTEN-Y177C SQRRYVYYY   | 72  | >PTEN-Y177C SQRRYVVC    | 951  | 879  |
| >PTEN-Y177C SQRRYVYYY   | 75  | >PTEN-Y177C SQRRYVVCY   | 1190 | 1115 |
| >PTEN-Y177C SQRRYVYYYYS | 152 | >PTEN-Y177C SQRRYVVCYS  | 122  | 30   |
| >PTEN-Y177C SQRRYVYYYYS | 104 | >PTEN-Y177C SQRRYVVCYS  | 499  | 395  |
| >PTEN-Y177C SQRRYVYYY   | 83  | >PTEN-Y177C SQRRYVVCY   | 661  | 578  |
| >PTEN-Y177C SQRRYVYYYYS | 106 | >PTEN-Y177C SQRRYVVCYS  | 100  | 6    |
| >PTEN-Y177C SQRRYVYYY   | 219 | >PTEN-Y177C SQRRYVVCY   | 2518 | 2299 |
| >PTEN-Y177C SQRRYVYYY   | 212 | >PTEN-Y177C SQRRYVVCY   | 407  | 195  |

|                         |       |                         |       |       |
|-------------------------|-------|-------------------------|-------|-------|
| >PTEN-Y177C(SQRRYVYY    | 41    | >PTEN-Y177C(SQRRYVYC    | 7160  | 7119  |
| >PTEN-Y177C(SQRRYVYYY   | 36    | >PTEN-Y177C(SQRRYVYCY   | 40    | 4     |
| >PTEN-Y177C(SQRRYVYYYS  | 34    | >PTEN-Y177C(SQRRYVYCYS  | 34    | 0     |
| >PTEN-Y177C(SQRRYVYY    | 383   | >PTEN-Y177C(SQRRYVYC    | 25877 | 25494 |
| >PTEN-Y177C(SQRRYVYYYS  | 322   | >PTEN-Y177C(SQRRYVYCYS  | 379   | 57    |
| >PTEN-Y177C(SQRRYVYY    | 4     | >PTEN-Y177C(SQRRYVYC    | 746   | 742   |
| >PTEN-Y177C(SQRRYVYYY   | 4     | >PTEN-Y177C(SQRRYVYCY   | 5     | 1     |
| >PTEN-Y177C(SQRRYVYYYS  | 3     | >PTEN-Y177C(SQRRYVYCYS  | 4     | 1     |
| >PTEN-Y177C(SQRRYVYYYS  | 492   | >PTEN-Y177C(SQRRYVYCYS  | 773   | 281   |
| >PTEN-Y177C(SQRRYVYYY   | 453   | >PTEN-Y177C(SQRRYVYCY   | 1874  | 1421  |
| >PTEN-Y177C(PSQRRYVYYY  | 186   | >PTEN-Y177C(PSQRRYVYCY  | 198   | 12    |
| >PTEN-Y177C(PSQRRYVYYY  | 359   | >PTEN-Y177C(PSQRRYVYCY  | 923   | 564   |
| >PTEN-Y177C(PSQRRYVYYY  | 40    | >PTEN-Y177C(PSQRRYVYCY  | 81    | 41    |
| >PTEN-Y177C(PSQRRYVYYY  | 353   | >PTEN-Y177C(PSQRRYVYCY  | 1556  | 1203  |
| >PTEN-Y177C(IPSQRRYVYYY | 288   | >PTEN-Y177C(IPSQRRYVYC  | 1411  | 1123  |
| >PTEN-Y177C(IPSQRRYVYYY | 123   | >PTEN-Y177C(IPSQRRYVYC  | 755   | 632   |
| >PTEN-Y177C(IPSQRRYVYYY | 27    | >PTEN-Y177C(IPSQRRYVYC  | 17    | 10    |
| >PTEN-Y177C(IPSQRRYVYYY | 31    | >PTEN-Y177C(IPSQRRYVYC  | 42    | 11    |
| >PTEN-Y177C(IPSQRRYVYY  | 33    | >PTEN-Y177C(IPSQRRYVYC  | 22838 | 22805 |
| >PTEN-Y177C(IPSQRRYVYYY | 12    | >PTEN-Y177C(IPSQRRYVYC  | 18    | 6     |
| >PTEN-Y177C(IPSQRRYVYY  | 262   | >PTEN-Y177C(IPSQRRYVYC  | 6447  | 6185  |
| >PTEN-Y177C(IPSQRRYVYYY | 518   | >PTEN-Y177C(IPSQRRYVYC  | 394   | 124   |
| >PTEN-Y188S YRPVALLFHK  | 2228  | >PTEN-Y188S SRPVALLFHK  | 425   | 1803  |
| >PTEN-Y188S YRPVALLF    | 169   | >PTEN-Y188S SRPVALLF    | 605   | 436   |
| >PTEN-Y188S YRPVALLF    | 219   | >PTEN-Y188S SRPVALLF    | 1060  | 841   |
| >PTEN-Y188S YRPVALLFHK  | 60    | >PTEN-Y188S SRPVALLFHK  | 216   | 156   |
| >PTEN-Y188S YRPVALLF    | 251   | >PTEN-Y188S SRPVALLF    | 1239  | 988   |
| >PTEN-Y188S YRPVALLFHK  | 120   | >PTEN-Y188S SRPVALLFHK  | 518   | 398   |
| >PTEN-Y188S YRPVALLFHK  | 338   | >PTEN-Y188S SRPVALLFHK  | 108   | 230   |
| >PTEN-Y188S DYRPVALLF   | 159   | >PTEN-Y188S DSRPVALLF   | 16470 | 16311 |
| >PTEN-Y188S DYRPVALLF   | 87    | >PTEN-Y188S DSRPVALLF   | 6077  | 5990  |
| >PTEN-Y188S DYRPVALLF   | 52    | >PTEN-Y188S DSRPVALLF   | 18165 | 18113 |
| >PTEN-Y188S DYRPVALLF   | 325   | >PTEN-Y188S DSRPVALLF   | 2042  | 1717  |
| >PTEN-Y188S DYRPVALLFH  | 67    | >PTEN-Y188S DSRPVALLFH  | 66    | 1     |
| >PTEN-Y188S DYRPVALLFH  | 247   | >PTEN-Y188S DSRPVALLFH  | 1327  | 1080  |
| >PTEN-Y188S DYRPVALLFH  | 22    | >PTEN-Y188S DSRPVALLFH  | 121   | 99    |
| >PTEN-Y188S DYRPVALLFH  | 1548  | >PTEN-Y188S DSRPVALLFH  | 192   | 1356  |
| >PTEN-Y188S DYRPVALL    | 23557 | >PTEN-Y188S DSRPVALL    | 163   | 23394 |
| >PTEN-Y188S DYRPVALLF   | 17020 | >PTEN-Y188S DSRPVALLF   | 9     | 17011 |
| >PTEN-Y188S DYRPVALLF   | 1340  | >PTEN-Y188S DSRPVALLF   | 59    | 1281  |
| >PTEN-Y188S YSYLLKNHLD' | 125   | >PTEN-Y188S YSYLLKNHLD' | 18655 | 18530 |
| >PTEN-Y188S YSYLLKNHLD' | 15    | >PTEN-Y188S YSYLLKNHLD' | 8881  | 8866  |
| >PTEN-Y188S YSYLLKNHLD' | 71    | >PTEN-Y188S YSYLLKNHLD' | 20739 | 20668 |



|                         |      |                         |       |       |
|-------------------------|------|-------------------------|-------|-------|
| >PTEN-Y188S YSYLLKNHLD' | 164  | >PTEN-Y188S YSYLLKNHLD' | 16689 | 16525 |
| >PTEN-Y188S YSYLLKNHLD' | 47   | >PTEN-Y188S YSYLLKNHLD' | 8213  | 8166  |
| >PTEN-Y188S YSYLLKNHLD' | 5    | >PTEN-Y188S YSYLLKNHLD' | 5103  | 5098  |
| >PTEN-Y188S YSYLLKNHLD' | 315  | >PTEN-Y188S YSYLLKNHLD' | 16516 | 16201 |
| >PTEN-Y188S YSYLLKNHLD' | 58   | >PTEN-Y188S YSYLLKNHLD' | 8089  | 8031  |
| >PTEN-Y188S LDYRPVALLF  | 237  | >PTEN-Y188S LDYRPVALLF  | 1373  | 1136  |
| >PTEN-Y188S HLDYRPVALL  | 544  | >PTEN-Y188S HLDYRPVALL  | 479   | 65    |
| >PTEN-Y188S HLDYRPVAL   | 252  | >PTEN-Y188S HLDYRPVAL   | 156   | 96    |
| >PTEN-Y188S HLDYRPVAL   | 165  | >PTEN-Y188S HLDYRPVAL   | 84    | 81    |
| >PTEN-Y188S HLDYRPVALL  | 97   | >PTEN-Y188S HLDYRPVALL  | 39    | 58    |
| >PTEN-Y188S HLDYRPVALL  | 488  | >PTEN-Y188S HLDYRPVALL  | 296   | 192   |
| >PTEN-Y188S HLDYRPVA    | 1289 | >PTEN-Y188S HLDYRPVA    | 397   | 892   |
| >PTEN-Y188S HLDYRPVAL   | 121  | >PTEN-Y188S HLDYRPVAL   | 19    | 102   |
| >PTEN-Y188S HLDYRPVALL  | 82   | >PTEN-Y188S HLDYRPVALL  | 18    | 64    |
| >PTEN-Y188S HLDYRPVAL   | 34   | >PTEN-Y188S HLDYRPVAL   | 23    | 11    |
| >PTEN-Y188S HLDYRPVALL  | 42   | >PTEN-Y188S HLDYRPVALL  | 31    | 11    |
| >PTEN-Y188S HLDYRPVA    | 1155 | >PTEN-Y188S HLDYRPVA    | 314   | 841   |
| >PTEN-Y188S HLDYRPVAL   | 538  | >PTEN-Y188S HLDYRPVAL   | 115   | 423   |
| >PTEN-Y188S HLDYRPVALL  | 262  | >PTEN-Y188S HLDYRPVALL  | 70    | 192   |
| >PTEN-Y188S HLDYRPVALL  | 1143 | >PTEN-Y188S HLDYRPVALL  | 258   | 885   |
| >PTEN-Y188S HLDYRPVA    | 296  | >PTEN-Y188S HLDYRPVA    | 83    | 213   |
| >PTEN-Y188S HLDYRPVAL   | 187  | >PTEN-Y188S HLDYRPVAL   | 39    | 148   |
| >PTEN-Y188S HLDYRPVALL  | 60   | >PTEN-Y188S HLDYRPVALL  | 19    | 41    |
| >PTEN-Y188S HLDYRPVAL   | 101  | >PTEN-Y188S HLDYRPVAL   | 453   | 352   |
| >PTEN-Y188S HLDYRPVALL  | 365  | >PTEN-Y188S HLDYRPVALL  | 1107  | 742   |
| >PTEN-Y188S HLDYRPVAL   | 71   | >PTEN-Y188S HLDYRPVAL   | 25    | 46    |
| >PTEN-Y188S HLDYRPVALL  | 662  | >PTEN-Y188S HLDYRPVALL  | 244   | 418   |
| >PTEN-Y188S NHLDYRPVAL  | 321  | >PTEN-Y188S NHLDYRPVAL  | 265   | 56    |
| >PTEN-Y188S NHLDYRPV    | 235  | >PTEN-Y188S NHLDYRPV    | 246   | 11    |
| >PTEN-Y188S NHLDYRPVAL  | 7    | >PTEN-Y188S NHLDYRPVAL  | 7     | 0     |
| >PTEN-Y188S NHLDYRPVAL  | 17   | >PTEN-Y188S NHLDYRPVAL  | 21    | 4     |
| >PTEN-Y188S KNHLDYRPV/  | 282  | >PTEN-Y188S KNHLDYRPV/  | 250   | 32    |
| >PTEN-Y188S LKNHLDYRPV  | 111  | >PTEN-Y188S LKNHLDYRPV  | 93    | 18    |
| >PTEN-Y188S LKNHLDYRPV  | 686  | >PTEN-Y188S LKNHLDYRPV  | 413   | 273   |
| >PTEN-Y188S LLKNHLDYRP  | 79   | >PTEN-Y188S LLKNHLDYRP  | 83    | 4     |
| >PTEN-Y188S LLKNHLDYRP  | 4    | >PTEN-Y188S LLKNHLDYRP  | 4     | 0     |
| >PTEN-Y188S LLKNHLDYRP  | 278  | >PTEN-Y188S LLKNHLDYRP  | 339   | 61    |
| >PTEN-Y188S LLKNHLDYRP  | 27   | >PTEN-Y188S LLKNHLDYRP  | 34    | 7     |
| >PTEN-Y188S LLKNHLDYRP  | 36   | >PTEN-Y188S LLKNHLDYRP  | 28    | 8     |
| >PTEN-Y188S LLKNHLDYRP  | 5    | >PTEN-Y188S LLKNHLDYRP  | 5     | 0     |
| >PTEN-Y188S LLKNHLDY    | 63   | >PTEN-Y188S LLKNHLDY    | 19889 | 19826 |
| >PTEN-Y188S LLKNHLDY    | 443  | >PTEN-Y188S LLKNHLDY    | 30130 | 29687 |
| >PTEN-Y188S LLKNHLDYR   | 10   | >PTEN-Y188S LLKNHLDYR   | 67    | 57    |

|                         |     |                         |       |       |
|-------------------------|-----|-------------------------|-------|-------|
| >PTEN-Y188S LLKNHLDYR   | 347 | >PTEN-Y188S LLKNHLDSR   | 1430  | 1083  |
| >PTEN-Y188S LLKNHLDY    | 276 | >PTEN-Y188S LLKNHLDS    | 24581 | 24305 |
| >PTEN-Y188S LLKNHLDYRP  | 177 | >PTEN-Y188S LLKNHLDSRP  | 151   | 26    |
| >PTEN-Y188S LLKNHLDY    | 57  | >PTEN-Y188S LLKNHLDS    | 10807 | 10750 |
| >PTEN-Y188S LLKNHLDYRP  | 775 | >PTEN-Y188S LLKNHLDSRP  | 328   | 447   |
| >PTEN-Y188S LLKNHLDY    | 248 | >PTEN-Y188S LLKNHLDS    | 25638 | 25390 |
| >PTEN-Y188S LLKNHLDY    | 179 | >PTEN-Y188S LLKNHLDS    | 15178 | 14999 |
| >PTEN-Y188S YLLKNHLDYR  | 262 | >PTEN-Y188S YLLKNHLDSR  | 1231  | 969   |
| >PTEN-Y188S YLLKNHLDY   | 868 | >PTEN-Y188S YLLKNHLDS   | 446   | 422   |
| >PTEN-Y188S YLLKNHLDY   | 6   | >PTEN-Y188S YLLKNHLDS   | 3809  | 3803  |
| >PTEN-Y188S YLLKNHLDYR  | 202 | >PTEN-Y188S YLLKNHLDSR  | 1009  | 807   |
| >PTEN-Y188S YLLKNHLDYR  | 171 | >PTEN-Y188S YLLKNHLDSR  | 2158  | 1987  |
| >PTEN-Y188S YLLKNHLDY   | 4   | >PTEN-Y188S YLLKNHLDS   | 10378 | 10374 |
| >PTEN-Y188S YLLKNHLDY   | 121 | >PTEN-Y188S YLLKNHLDS   | 16078 | 15957 |
| >PTEN-Y188S YLLKNHLDY   | 32  | >PTEN-Y188S YLLKNHLDS   | 9195  | 9163  |
| >PTEN-Y188S YLLKNHLDY   | 22  | >PTEN-Y188S YLLKNHLDS   | 8291  | 8269  |
| >PTEN-Y188S YLLKNHLDY   | 495 | >PTEN-Y188S YLLKNHLDS   | 36000 | 35505 |
| >PTEN-Y188S YLLKNHLDYR  | 327 | >PTEN-Y188S YLLKNHLDSR  | 1927  | 1600  |
| >PTEN-Y188S YLLKNHLDYR  | 43  | >PTEN-Y188S YLLKNHLDSR  | 225   | 182   |
| >PTEN-Y188S SYLLKNHLDY  | 499 | >PTEN-Y188S SYLLKNHLDS  | 2327  | 1828  |
| >PTEN-Y188S SYLLKNHLDY  | 51  | >PTEN-Y188S SYLLKNHLDS  | 22213 | 22162 |
| >PTEN-Y188S SYLLKNHLDY  | 246 | >PTEN-Y188S SYLLKNHLDS  | 20728 | 20482 |
| >PTEN-Y188S SYLLKNHLDYI | 15  | >PTEN-Y188S SYLLKNHLDSI | 84    | 69    |
| >PTEN-Y188S SYLLKNHLDYI | 82  | >PTEN-Y188S SYLLKNHLDSI | 168   | 86    |
| >PTEN-Y188S SYLLKNHLDY  | 21  | >PTEN-Y188S SYLLKNHLDS  | 20449 | 20428 |
| >PTEN-Y188S SYLLKNHLDYI | 15  | >PTEN-Y188S SYLLKNHLDSI | 61    | 46    |
| >PTEN-Y225C IYSSNSGPTRF | 137 | >PTEN-Y225C ICSSNSGPTRF | 3665  | 3528  |
| >PTEN-Y225C IYSSNSGPTRF | 467 | >PTEN-Y225C ICSSNSGPTRF | 6863  | 6396  |
| >PTEN-Y225C IYSSNSGPTR  | 95  | >PTEN-Y225C ICSSNSGPTR  | 1456  | 1361  |
| >PTEN-Y225C IYSSNSGPTRF | 80  | >PTEN-Y225C ICSSNSGPTRF | 940   | 860   |
| >PTEN-Y225C FVVCQLKVKI  | 160 | >PTEN-Y225C FVVCQLKVKII | 16673 | 16513 |
| >PTEN-Y225C FVVCQLKVKI  | 9   | >PTEN-Y225C FVVCQLKVKII | 12138 | 12129 |
| >PTEN-Y225C FVVCQLKVKI  | 137 | >PTEN-Y225C FVVCQLKVKII | 24484 | 24347 |
| >PTEN-Y225C FVVCQLKVKI  | 388 | >PTEN-Y225C FVVCQLKVKII | 17117 | 16729 |
| >PTEN-Y225C FVVCQLKVKI  | 231 | >PTEN-Y225C FVVCQLKVKII | 16869 | 16638 |
| >PTEN-Y225C KIYSSNSGPTF | 50  | >PTEN-Y225C KICSSNSGPTF | 940   | 890   |
| >PTEN-Y225C KIYSSNSGPTF | 121 | >PTEN-Y225C KICSSNSGPTF | 558   | 437   |
| >PTEN-Y225C KIYSSNSGPTF | 316 | >PTEN-Y225C KICSSNSGPTF | 886   | 570   |
| >PTEN-Y225C KIYSSNSGPTF | 12  | >PTEN-Y225C KICSSNSGPTF | 27    | 15    |
| >PTEN-Y225C KIYSSNSGPTF | 189 | >PTEN-Y225C KICSSNSGPTF | 492   | 303   |
| >PTEN-Y225C KIYSSNSGPTF | 466 | >PTEN-Y225C KICSSNSGPTF | 3999  | 3533  |
| >PTEN-Y225C KIYSSNSGPTF | 41  | >PTEN-Y225C KICSSNSGPTF | 99    | 58    |
| >PTEN-Y225C VKIYSSNS    | 338 | >PTEN-Y225C VKICSSNS    | 354   | 16    |

|                        |     |                        |       |       |
|------------------------|-----|------------------------|-------|-------|
| >PTEN-Y225(VKIYSSNSGP  | 308 | >PTEN-Y225(VKICSSNSGP  | 285   | 23    |
| >PTEN-Y225(KVKIYSSN    | 115 | >PTEN-Y225(KVKICSSN    | 560   | 445   |
| >PTEN-Y225(KVKIYSSNSG  | 14  | >PTEN-Y225(KVKICSSNSG  | 30    | 16    |
| >PTEN-Y225(KVKIYSSNSGI | 192 | >PTEN-Y225(KVKICSSNSGI | 445   | 253   |
| >PTEN-Y225(LKVKIYSSNS  | 496 | >PTEN-Y225(LKVKICSSNS  | 840   | 344   |
| >PTEN-Y225(CQLKVKIY    | 27  | >PTEN-Y225(CQLKVKIC    | 6275  | 6248  |
| >PTEN-Y27C-YIYPNIIAM   | 226 | >PTEN-Y27C-CIYPNIIAM   | 1419  | 1193  |
| >PTEN-Y27C-YIYPNIIAM   | 163 | >PTEN-Y27C-CIYPNIIAM   | 111   | 52    |
| >PTEN-Y27C-YIYPNIIAMGF | 561 | >PTEN-Y27C-CIYPNIIAMGF | 436   | 125   |
| >PTEN-Y27C-YIYPNIIA    | 75  | >PTEN-Y27C-CIYPNIIA    | 3326  | 3251  |
| >PTEN-Y27C-YIYPNIIAM   | 35  | >PTEN-Y27C-CIYPNIIAM   | 1551  | 1516  |
| >PTEN-Y27C-YIYPNIIA    | 345 | >PTEN-Y27C-CIYPNIIA    | 3500  | 3155  |
| >PTEN-Y27C-YIYPNIIAM   | 172 | >PTEN-Y27C-CIYPNIIAM   | 2094  | 1922  |
| >PTEN-Y27C-YIYPNIIA    | 25  | >PTEN-Y27C-CIYPNIIA    | 507   | 482   |
| >PTEN-Y27C-YIYPNIIAM   | 29  | >PTEN-Y27C-CIYPNIIAM   | 1014  | 985   |
| >PTEN-Y27C-YIYPNIIAMGF | 464 | >PTEN-Y27C-CIYPNIIAMGF | 6954  | 6490  |
| >PTEN-Y27C-YIYPNIIA    | 21  | >PTEN-Y27C-CIYPNIIA    | 1174  | 1153  |
| >PTEN-Y27C-YIYPNIIAM   | 8   | >PTEN-Y27C-CIYPNIIAM   | 242   | 234   |
| >PTEN-Y27C-YIYPNIIAMGF | 31  | >PTEN-Y27C-CIYPNIIAMGF | 1017  | 986   |
| >PTEN-Y27C-YIYPNIIA    | 17  | >PTEN-Y27C-CIYPNIIA    | 1210  | 1193  |
| >PTEN-Y27C-YIYPNIIAM   | 4   | >PTEN-Y27C-CIYPNIIAM   | 126   | 122   |
| >PTEN-Y27C-YIYPNIIAMG  | 49  | >PTEN-Y27C-CIYPNIIAMG  | 4217  | 4168  |
| >PTEN-Y27C-YIYPNIIAMGF | 73  | >PTEN-Y27C-CIYPNIIAMGF | 4076  | 4003  |
| >PTEN-Y27C-YIYPNIIA    | 129 | >PTEN-Y27C-CIYPNIIA    | 5084  | 4955  |
| >PTEN-Y27C-YIYPNIIAM   | 21  | >PTEN-Y27C-CIYPNIIAM   | 1728  | 1707  |
| >PTEN-Y27C-YIYPNIIA    | 53  | >PTEN-Y27C-CIYPNIIA    | 6661  | 6608  |
| >PTEN-Y27C-YIYPNIIAM   | 72  | >PTEN-Y27C-CIYPNIIAM   | 7387  | 7315  |
| >PTEN-Y27C-YIYPNIIAM   | 117 | >PTEN-Y27C-CIYPNIIAM   | 3677  | 3560  |
| >PTEN-Y27C-YIYPNIIA    | 11  | >PTEN-Y27C-CIYPNIIA    | 936   | 925   |
| >PTEN-Y27C-YIYPNIIAM   | 6   | >PTEN-Y27C-CIYPNIIAM   | 1562  | 1556  |
| >PTEN-Y27C-YIYPNIIAMGF | 338 | >PTEN-Y27C-CIYPNIIAMGF | 13061 | 12723 |
| >PTEN-Y27C-YIYPNIIAMGF | 133 | >PTEN-Y27C-CIYPNIIAMGF | 222   | 89    |
| >PTEN-Y27C-YIYPNIIAM   | 108 | >PTEN-Y27C-CIYPNIIAM   | 2183  | 2075  |
| >PTEN-Y27C-YIYPNIIAMGF | 214 | >PTEN-Y27C-CIYPNIIAMGF | 3018  | 2804  |
| >PTEN-Y27C-YIYPNIIAM   | 26  | >PTEN-Y27C-CIYPNIIAM   | 202   | 176   |
| >PTEN-Y27C-YIYPNIIAMGF | 417 | >PTEN-Y27C-CIYPNIIAMGF | 2232  | 1815  |
| >PTEN-Y27C-YIYPNIIAMGF | 92  | >PTEN-Y27C-CIYPNIIAMGF | 990   | 898   |
| >PTEN-Y27C-YIYPNIIAMGF | 311 | >PTEN-Y27C-CIYPNIIAMGF | 1334  | 1023  |
| >PTEN-Y27C-YIYPNIIAM   | 40  | >PTEN-Y27C-CIYPNIIAM   | 2083  | 2043  |
| >PTEN-Y27C-YIYPNIIAM   | 69  | >PTEN-Y27C-CIYPNIIAM   | 1148  | 1079  |
| >PTEN-Y27C-YIYPNIIAMGF | 63  | >PTEN-Y27C-CIYPNIIAMGF | 818   | 755   |
| >PTEN-Y27C-YIYPNIIAM   | 187 | >PTEN-Y27C-CIYPNIIAM   | 4573  | 4386  |
| >PTEN-Y27C-YIYPNIIAMGF | 93  | >PTEN-Y27C-CIYPNIIAMGF | 1987  | 1894  |

|                        |     |                        |       |       |
|------------------------|-----|------------------------|-------|-------|
| >PTEN-Y27C-YIYPNIIAM   | 35  | >PTEN-Y27C-CIYPNIIAM   | 380   | 345   |
| >PTEN-Y27C-YIYPNIIAMGF | 16  | >PTEN-Y27C-CIYPNIIAMGF | 105   | 89    |
| >PTEN-Y27C-YIYPNIIAM   | 51  | >PTEN-Y27C-CIYPNIIAM   | 1169  | 1118  |
| >PTEN-Y27C-YIYPNIIAMGF | 8   | >PTEN-Y27C-CIYPNIIAMGF | 55    | 47    |
| >PTEN-Y27C-YIYPNIIAM   | 22  | >PTEN-Y27C-CIYPNIIAM   | 122   | 100   |
| >PTEN-Y27C-YIYPNIIAMGF | 173 | >PTEN-Y27C-CIYPNIIAMGF | 1399  | 1226  |
| >PTEN-Y27C-YIYPNIIAM   | 197 | >PTEN-Y27C-CIYPNIIAM   | 4156  | 3959  |
| >PTEN-Y27C-TYIYPNII    | 422 | >PTEN-Y27C-TCIYPNII    | 30891 | 30469 |
| >PTEN-Y27C-TYIYPNII    | 64  | >PTEN-Y27C-TCIYPNII    | 14102 | 14038 |
| >PTEN-Y27C-TYIYPNII    | 128 | >PTEN-Y27C-TCIYPNII    | 13355 | 13227 |
| >PTEN-Y27C-TYIYPNII    | 64  | >PTEN-Y27C-TCIYPNII    | 24738 | 24674 |
| >PTEN-Y27C-TYIYPNIIAM  | 317 | >PTEN-Y27C-TCIYPNIIAM  | 25672 | 25355 |
| >PTEN-Y27C-TYIYPNIIAM  | 36  | >PTEN-Y27C-TCIYPNIIAM  | 34    | 2     |
| >PTEN-Y27C-QEDGFDLDLT  | 44  | >PTEN-Y27C-QEDGFDLDLT  | 5676  | 5632  |
| >PTEN-Y27C-QEDGFDLDLT  | 114 | >PTEN-Y27C-QEDGFDLDLT  | 4657  | 4543  |
| >PTEN-Y27C-LTYIYPNI    | 4   | >PTEN-Y27C-LTCIYPNI    | 419   | 415   |
| >PTEN-Y27C-LTYIYPNII   | 234 | >PTEN-Y27C-LTCIYPNII   | 10495 | 10261 |
| >PTEN-Y27C-LTYIYPNIIAM | 69  | >PTEN-Y27C-LTCIYPNIIAM | 5145  | 5076  |
| >PTEN-Y27C-LTYIYPNII   | 435 | >PTEN-Y27C-LTCIYPNII   | 2869  | 2434  |
| >PTEN-Y27C-LTYIYPNI    | 309 | >PTEN-Y27C-LTCIYPNI    | 3910  | 3601  |
| >PTEN-Y27C-LTYIYPNII   | 431 | >PTEN-Y27C-LTCIYPNII   | 4235  | 3804  |
| >PTEN-Y27C-LTYIYPNIIA  | 368 | >PTEN-Y27C-LTCIYPNIIA  | 1052  | 684   |
| >PTEN-Y27C-LTYIYPNI    | 86  | >PTEN-Y27C-LTCIYPNI    | 1484  | 1398  |
| >PTEN-Y27C-LTYIYPNIIAM | 239 | >PTEN-Y27C-LTCIYPNIIAM | 2531  | 2292  |
| >PTEN-Y27C-LTYIYPNIIAM | 320 | >PTEN-Y27C-LTCIYPNIIAM | 373   | 53    |
| >PTEN-Y27C-LTYIYPNIIA  | 118 | >PTEN-Y27C-LTCIYPNIIA  | 587   | 469   |
| >PTEN-Y27C-LTYIYPNI    | 65  | >PTEN-Y27C-LTCIYPNI    | 2515  | 2450  |
| >PTEN-Y27C-LTYIYPNIIAM | 326 | >PTEN-Y27C-LTCIYPNIIAM | 6054  | 5728  |
| >PTEN-Y27C-LTYIYPNIIAM | 368 | >PTEN-Y27C-LTCIYPNIIAM | 979   | 611   |
| >PTEN-Y27C-LTYIYPNIIAM | 98  | >PTEN-Y27C-LTCIYPNIIAM | 1355  | 1257  |
| >PTEN-Y27C-LTYIYPNI    | 13  | >PTEN-Y27C-LTCIYPNI    | 106   | 93    |
| >PTEN-Y27C-LTYIYPNII   | 33  | >PTEN-Y27C-LTCIYPNII   | 632   | 599   |
| >PTEN-Y27C-LTYIYPNIIAM | 5   | >PTEN-Y27C-LTCIYPNIIAM | 22    | 17    |
| >PTEN-Y27C-LTYIYPNIIAM | 134 | >PTEN-Y27C-LTCIYPNIIAM | 576   | 442   |
| >PTEN-Y27C-LTYIYPNI    | 469 | >PTEN-Y27C-LTCIYPNI    | 6927  | 6458  |
| >PTEN-Y27C-LTYIYPNII   | 167 | >PTEN-Y27C-LTCIYPNII   | 557   | 390   |
| >PTEN-Y27C-LTYIYPNIIAM | 111 | >PTEN-Y27C-LTCIYPNIIAM | 341   | 230   |
| >PTEN-Y27C-LTYIYPNII   | 126 | >PTEN-Y27C-LTCIYPNII   | 616   | 490   |
| >PTEN-Y27C-LTYIYPNIIA  | 136 | >PTEN-Y27C-LTCIYPNIIA  | 419   | 283   |
| >PTEN-Y27C-LTYIYPNIIAM | 74  | >PTEN-Y27C-LTCIYPNIIAM | 334   | 260   |
| >PTEN-Y27C-LTYIYPNI    | 9   | >PTEN-Y27C-LTCIYPNI    | 22    | 13    |
| >PTEN-Y27C-LTYIYPNII   | 12  | >PTEN-Y27C-LTCIYPNII   | 32    | 20    |
| >PTEN-Y27C-LTYIYPNIIAM | 147 | >PTEN-Y27C-LTCIYPNIIAM | 600   | 453   |

|                          |     |                          |       |       |
|--------------------------|-----|--------------------------|-------|-------|
| >PTEN-Y27C- DLTYIYPNI    | 384 | >PTEN-Y27C- DLTCIYPNI    | 107   | 277   |
| >PTEN-Y27C- LDLTYYIYPNI  | 87  | >PTEN-Y27C- LDLTTCIYPNI  | 308   | 221   |
| >PTEN-Y27C- LDLTYYIYPNII | 90  | >PTEN-Y27C- LDLTTCIYPNII | 215   | 125   |
| >PTEN-Y27C- LDLTYYIYPNI  | 482 | >PTEN-Y27C- LDLTTCIYPNI  | 662   | 180   |
| >PTEN-Y27C- LDLTYYIYPNII | 52  | >PTEN-Y27C- LDLTTCIYPNII | 78    | 26    |
| >PTEN-Y27C- LDLTYYIYPNI  | 72  | >PTEN-Y27C- LDLTTCIYPNI  | 171   | 99    |
| >PTEN-Y27C- LDLTYYIYPNII | 27  | >PTEN-Y27C- LDLTTCIYPNII | 64    | 37    |
| >PTEN-Y27C- DLDLTYIY     | 101 | >PTEN-Y27C- DLDLTCIY     | 410   | 309   |
| >PTEN-Y27C- DLDLTYIYPNI  | 294 | >PTEN-Y27C- DLDLTCIYPNI  | 471   | 177   |
| >PTEN-Y27C- DLDLTYIYPNI  | 480 | >PTEN-Y27C- DLDLTCIYPNI  | 460   | 20    |
| >PTEN-Y27C- DLDLTYIYPNI  | 168 | >PTEN-Y27C- DLDLTCIYPNI  | 254   | 86    |
| >PTEN-Y27C- DLDLTYIY     | 217 | >PTEN-Y27C- DLDLTCIY     | 1063  | 846   |
| >PTEN-Y27C- FDLDLTYI     | 142 | >PTEN-Y27C- FDLDLTCI     | 1466  | 1324  |
| >PTEN-Y27C- FDLDLTYIY    | 21  | >PTEN-Y27C- FDLDLTCIY    | 785   | 764   |
| >PTEN-Y27C- FDLDLTYIY    | 147 | >PTEN-Y27C- FDLDLTCIY    | 1993  | 1846  |
| >PTEN-Y27C- FDLDLTYIY    | 123 | >PTEN-Y27C- FDLDLTCIY    | 520   | 397   |
| >PTEN-Y27C- FDLDLTYI     | 22  | >PTEN-Y27C- FDLDLTCI     | 22    | 0     |
| >PTEN-Y27C- FDLDLTYI     | 53  | >PTEN-Y27C- FDLDLTCI     | 83    | 30    |
| >PTEN-Y27C- GFDDLTY      | 62  | >PTEN-Y27C- GFDDLTC      | 18794 | 18732 |
| >PTEN-Y27C- GFDDLTYIY    | 64  | >PTEN-Y27C- GFDDLTCIY    | 203   | 139   |
| >PTEN-Y27C- GFDDLTYIY    | 369 | >PTEN-Y27C- GFDDLTCIY    | 976   | 607   |
| >PTEN-Y27C- GFDDLTY      | 126 | >PTEN-Y27C- GFDDLTC      | 36086 | 35960 |
| >PTEN-Y27C- DGFDLTY      | 122 | >PTEN-Y27C- DGFDLTC      | 21254 | 21132 |
| >PTEN-Y27C- DGFDLTYIY    | 160 | >PTEN-Y27C- DGFDLTCIY    | 1385  | 1225  |
| >PTEN-Y27C- DGFDLTYIY    | 458 | >PTEN-Y27C- DGFDLTCIY    | 2749  | 2291  |
| >PTEN-Y27C- DGFDLTY      | 300 | >PTEN-Y27C- DGFDLTC      | 13529 | 13229 |
| >PTEN-Y27C- DGFDLTYIY    | 299 | >PTEN-Y27C- DGFDLTCIY    | 1402  | 1103  |
| >PTEN-Y27C- DGFDLTY      | 37  | >PTEN-Y27C- DGFDLTC      | 7738  | 7701  |
| >PTEN-Y27C- DGFDLTYIY    | 76  | >PTEN-Y27C- DGFDLTCIY    | 174   | 98    |
| >PTEN-Y27N- YIYPNIIAM    | 226 | >PTEN-Y27N- NIYPNIIAM    | 2965  | 2739  |
| >PTEN-Y27N- YIYPNIIAM    | 163 | >PTEN-Y27N- NIYPNIIAM    | 804   | 641   |
| >PTEN-Y27N- YIYPNIIA     | 75  | >PTEN-Y27N- NIYPNIIA     | 3926  | 3851  |
| >PTEN-Y27N- YIYPNIIAM    | 35  | >PTEN-Y27N- NIYPNIIAM    | 1831  | 1796  |
| >PTEN-Y27N- YIYPNIIA     | 345 | >PTEN-Y27N- NIYPNIIA     | 2794  | 2449  |
| >PTEN-Y27N- YIYPNIIAM    | 172 | >PTEN-Y27N- NIYPNIIAM    | 1244  | 1072  |
| >PTEN-Y27N- YIYPNIIA     | 25  | >PTEN-Y27N- NIYPNIIA     | 363   | 338   |
| >PTEN-Y27N- YIYPNIIAM    | 29  | >PTEN-Y27N- NIYPNIIAM    | 652   | 623   |
| >PTEN-Y27N- YIYPNIIAMGF  | 464 | >PTEN-Y27N- NIYPNIIAMGF  | 5168  | 4704  |
| >PTEN-Y27N- YIYPNIIA     | 21  | >PTEN-Y27N- NIYPNIIA     | 547   | 526   |
| >PTEN-Y27N- YIYPNIIAM    | 8   | >PTEN-Y27N- NIYPNIIAM    | 99    | 91    |
| >PTEN-Y27N- YIYPNIIAMGF  | 31  | >PTEN-Y27N- NIYPNIIAMGF  | 461   | 430   |
| >PTEN-Y27N- YIYPNIIA     | 17  | >PTEN-Y27N- NIYPNIIA     | 985   | 968   |
| >PTEN-Y27N- YIYPNIIAM    | 4   | >PTEN-Y27N- NIYPNIIAM    | 105   | 101   |

|                        |     |                        |       |       |
|------------------------|-----|------------------------|-------|-------|
| >PTEN-Y27N·YIYPNIIAMG  | 49  | >PTEN-Y27N·NIYPNIIAMG  | 3122  | 3073  |
| >PTEN-Y27N·YIYPNIIAMGF | 73  | >PTEN-Y27N·NIYPNIIAMG  | 3248  | 3175  |
| >PTEN-Y27N·YIYPNIIA    | 129 | >PTEN-Y27N·NIYPNIIA    | 3452  | 3323  |
| >PTEN-Y27N·YIYPNIIAM   | 21  | >PTEN-Y27N·NIYPNIIAM   | 867   | 846   |
| >PTEN-Y27N·YIYPNIIA    | 53  | >PTEN-Y27N·NIYPNIIA    | 4899  | 4846  |
| >PTEN-Y27N·YIYPNIIAM   | 72  | >PTEN-Y27N·NIYPNIIAM   | 6348  | 6276  |
| >PTEN-Y27N·YIYPNIIAM   | 117 | >PTEN-Y27N·NIYPNIIAM   | 2496  | 2379  |
| >PTEN-Y27N·YIYPNIIA    | 11  | >PTEN-Y27N·NIYPNIIA    | 1176  | 1165  |
| >PTEN-Y27N·YIYPNIIAM   | 6   | >PTEN-Y27N·NIYPNIIAM   | 1723  | 1717  |
| >PTEN-Y27N·YIYPNIIAMGF | 338 | >PTEN-Y27N·NIYPNIIAMG  | 13009 | 12671 |
| >PTEN-Y27N·YIYPNIIAMGF | 133 | >PTEN-Y27N·NIYPNIIAMG  | 1603  | 1470  |
| >PTEN-Y27N·YIYPNIIAM   | 108 | >PTEN-Y27N·NIYPNIIAM   | 546   | 438   |
| >PTEN-Y27N·YIYPNIIAMGF | 214 | >PTEN-Y27N·NIYPNIIAMG  | 912   | 698   |
| >PTEN-Y27N·YIYPNIIAM   | 26  | >PTEN-Y27N·NIYPNIIAM   | 135   | 109   |
| >PTEN-Y27N·YIYPNIIAMGF | 417 | >PTEN-Y27N·NIYPNIIAMG  | 1615  | 1198  |
| >PTEN-Y27N·YIYPNIIAMGF | 92  | >PTEN-Y27N·NIYPNIIAMG  | 1452  | 1360  |
| >PTEN-Y27N·YIYPNIIAMGF | 311 | >PTEN-Y27N·NIYPNIIAMG  | 894   | 583   |
| >PTEN-Y27N·YIYPNIIAM   | 40  | >PTEN-Y27N·NIYPNIIAM   | 60    | 20    |
| >PTEN-Y27N·YIYPNIIAM   | 69  | >PTEN-Y27N·NIYPNIIAM   | 656   | 587   |
| >PTEN-Y27N·YIYPNIIAMGF | 63  | >PTEN-Y27N·NIYPNIIAMG  | 501   | 438   |
| >PTEN-Y27N·YIYPNIIAM   | 187 | >PTEN-Y27N·NIYPNIIAM   | 778   | 591   |
| >PTEN-Y27N·YIYPNIIAMGF | 93  | >PTEN-Y27N·NIYPNIIAMG  | 334   | 241   |
| >PTEN-Y27N·YIYPNIIAM   | 35  | >PTEN-Y27N·NIYPNIIAM   | 1038  | 1003  |
| >PTEN-Y27N·YIYPNIIAMGF | 16  | >PTEN-Y27N·NIYPNIIAMG  | 257   | 241   |
| >PTEN-Y27N·YIYPNIIAM   | 51  | >PTEN-Y27N·NIYPNIIAM   | 2885  | 2834  |
| >PTEN-Y27N·YIYPNIIAMGF | 8   | >PTEN-Y27N·NIYPNIIAMG  | 164   | 156   |
| >PTEN-Y27N·YIYPNIIAM   | 22  | >PTEN-Y27N·NIYPNIIAM   | 76    | 54    |
| >PTEN-Y27N·YIYPNIIAMGF | 173 | >PTEN-Y27N·NIYPNIIAMG  | 819   | 646   |
| >PTEN-Y27N·YIYPNIIAM   | 197 | >PTEN-Y27N·NIYPNIIAM   | 589   | 392   |
| >PTEN-Y27N·TYIYPNII    | 422 | >PTEN-Y27N·TNIYPNII    | 29557 | 29135 |
| >PTEN-Y27N·TYIYPNII    | 64  | >PTEN-Y27N·TNIYPNII    | 14362 | 14298 |
| >PTEN-Y27N·TYIYPNII    | 128 | >PTEN-Y27N·TNIYPNII    | 15102 | 14974 |
| >PTEN-Y27N·TYIYPNII    | 64  | >PTEN-Y27N·TNIYPNII    | 25530 | 25466 |
| >PTEN-Y27N·TYIYPNIIAM  | 317 | >PTEN-Y27N·TNIYPNIIAM  | 25991 | 25674 |
| >PTEN-Y27N·TYIYPNIIAM  | 36  | >PTEN-Y27N·TNIYPNIIAM  | 363   | 327   |
| >PTEN-Y27N·QEDGFDLDT   | 44  | >PTEN-Y27N·QEDGFDLDT   | 5067  | 5023  |
| >PTEN-Y27N·QEDGFDLDT   | 114 | >PTEN-Y27N·QEDGFDLDT   | 4194  | 4080  |
| >PTEN-Y27N·LTYIYPNI    | 4   | >PTEN-Y27N·LTNIYPNI    | 1044  | 1040  |
| >PTEN-Y27N·LTYIYPNII   | 234 | >PTEN-Y27N·LTNIYPNII   | 6423  | 6189  |
| >PTEN-Y27N·LTYIYPNIIAM | 69  | >PTEN-Y27N·LTNIYPNIIAM | 2313  | 2244  |
| >PTEN-Y27N·LTYIYPNII   | 435 | >PTEN-Y27N·LTNIYPNII   | 2317  | 1882  |
| >PTEN-Y27N·LTYIYPNI    | 309 | >PTEN-Y27N·LTNIYPNI    | 1065  | 756   |
| >PTEN-Y27N·LTYIYPNII   | 431 | >PTEN-Y27N·LTNIYPNII   | 1180  | 749   |

|                        |      |                        |      |      |
|------------------------|------|------------------------|------|------|
| >PTEN-Y27N-LTYIYPNIIA  | 368  | >PTEN-Y27N-LTNIYPNIIA  | 2696 | 2328 |
| >PTEN-Y27N-LTYIYPNI    | 86   | >PTEN-Y27N-LTNIYPNI    | 1151 | 1065 |
| >PTEN-Y27N-LTYIYPNIIAM | 239  | >PTEN-Y27N-LTNIYPNIIAM | 1770 | 1531 |
| >PTEN-Y27N-LTYIYPNIIAM | 320  | >PTEN-Y27N-LTNIYPNIIAM | 1728 | 1408 |
| >PTEN-Y27N-LTYIYPNIIA  | 118  | >PTEN-Y27N-LTNIYPNIIA  | 721  | 603  |
| >PTEN-Y27N-LTYIYPNI    | 65   | >PTEN-Y27N-LTNIYPNI    | 415  | 350  |
| >PTEN-Y27N-LTYIYPNIIAM | 326  | >PTEN-Y27N-LTNIYPNIIAM | 1916 | 1590 |
| >PTEN-Y27N-LTYIYPNIIAM | 368  | >PTEN-Y27N-LTNIYPNIIAM | 835  | 467  |
| >PTEN-Y27N-LTYIYPNIIAM | 98   | >PTEN-Y27N-LTNIYPNIIAM | 765  | 667  |
| >PTEN-Y27N-LTYIYPNI    | 13   | >PTEN-Y27N-LTNIYPNI    | 116  | 103  |
| >PTEN-Y27N-LTYIYPNII   | 33   | >PTEN-Y27N-LTNIYPNII   | 974  | 941  |
| >PTEN-Y27N-LTYIYPNIIAM | 5    | >PTEN-Y27N-LTNIYPNIIAM | 19   | 14   |
| >PTEN-Y27N-LTYIYPNIIAM | 134  | >PTEN-Y27N-LTNIYPNIIAM | 317  | 183  |
| >PTEN-Y27N-LTYIYPNI    | 469  | >PTEN-Y27N-LTNIYPNI    | 695  | 226  |
| >PTEN-Y27N-LTYIYPNII   | 167  | >PTEN-Y27N-LTNIYPNII   | 381  | 214  |
| >PTEN-Y27N-LTYIYPNIIAM | 111  | >PTEN-Y27N-LTNIYPNIIAM | 239  | 128  |
| >PTEN-Y27N-LTYIYPNII   | 126  | >PTEN-Y27N-LTNIYPNII   | 538  | 412  |
| >PTEN-Y27N-LTYIYPNIIA  | 136  | >PTEN-Y27N-LTNIYPNIIA  | 445  | 309  |
| >PTEN-Y27N-LTYIYPNIIAM | 74   | >PTEN-Y27N-LTNIYPNIIAM | 270  | 196  |
| >PTEN-Y27N-LTYIYPNI    | 9    | >PTEN-Y27N-LTNIYPNI    | 34   | 25   |
| >PTEN-Y27N-LTYIYPNII   | 12   | >PTEN-Y27N-LTNIYPNII   | 48   | 36   |
| >PTEN-Y27N-LTYIYPNIIAM | 147  | >PTEN-Y27N-LTNIYPNIIAM | 1732 | 1585 |
| >PTEN-Y27N-DLTYIYPNI   | 1022 | >PTEN-Y27N-DLTNIYPNI   | 134  | 888  |
| >PTEN-Y27N-DLTYIYPNI   | 1506 | >PTEN-Y27N-DLTNIYPNI   | 255  | 1251 |
| >PTEN-Y27N-DLTYIYPNI   | 384  | >PTEN-Y27N-DLTNIYPNI   | 244  | 140  |
| >PTEN-Y27N-LDLTYIYPNI  | 87   | >PTEN-Y27N-LDLTNIYPNI  | 285  | 198  |
| >PTEN-Y27N-LDLTYIYPNII | 90   | >PTEN-Y27N-LDLTNIYPNII | 202  | 112  |
| >PTEN-Y27N-LDLTYIYPNI  | 482  | >PTEN-Y27N-LDLTNIYPNI  | 521  | 39   |
| >PTEN-Y27N-LDLTYIYPNII | 52   | >PTEN-Y27N-LDLTNIYPNII | 100  | 48   |
| >PTEN-Y27N-LDLTYIYPNI  | 72   | >PTEN-Y27N-LDLTNIYPNI  | 89   | 17   |
| >PTEN-Y27N-LDLTYIYPNII | 27   | >PTEN-Y27N-LDLTNIYPNII | 35   | 8    |
| >PTEN-Y27N-DLDLTYIY    | 101  | >PTEN-Y27N-DLDLTNIY    | 79   | 22   |
| >PTEN-Y27N-DLDLTYIYPNI | 294  | >PTEN-Y27N-DLDLTNIYPNI | 327  | 33   |
| >PTEN-Y27N-DLDLTYIYPNI | 480  | >PTEN-Y27N-DLDLTNIYPNI | 342  | 138  |
| >PTEN-Y27N-DLDLTYIYPNI | 168  | >PTEN-Y27N-DLDLTNIYPNI | 193  | 25   |
| >PTEN-Y27N-DLDLTYIY    | 217  | >PTEN-Y27N-DLDLTNIY    | 748  | 531  |
| >PTEN-Y27N-FDLDLTYI    | 142  | >PTEN-Y27N-FDLDLTNI    | 1113 | 971  |
| >PTEN-Y27N-FDLDLTYIY   | 21   | >PTEN-Y27N-FDLDLTNIY   | 234  | 213  |
| >PTEN-Y27N-FDLDLTYIY   | 147  | >PTEN-Y27N-FDLDLTNIY   | 1879 | 1732 |
| >PTEN-Y27N-FDLDLTYIY   | 123  | >PTEN-Y27N-FDLDLTNIY   | 285  | 162  |
| >PTEN-Y27N-FDLDLTYIY   | 1110 | >PTEN-Y27N-FDLDLTNIY   | 378  | 732  |
| >PTEN-Y27N-FDLDLTYI    | 22   | >PTEN-Y27N-FDLDLTNI    | 28   | 6    |
| >PTEN-Y27N-FDLDLTYI    | 53   | >PTEN-Y27N-FDLDLTNI    | 58   | 5    |

|                        |     |                        |       |       |
|------------------------|-----|------------------------|-------|-------|
| >PTEN-Y27N-GFDLDTY     | 62  | >PTEN-Y27N-GFDLDTN     | 16398 | 16336 |
| >PTEN-Y27N-GFDLDTYIY   | 64  | >PTEN-Y27N-GFDLDTNIY   | 406   | 342   |
| >PTEN-Y27N-GFDLDTYIY   | 369 | >PTEN-Y27N-GFDLDTNIY   | 1254  | 885   |
| >PTEN-Y27N-GFDLDTY     | 126 | >PTEN-Y27N-GFDLDTN     | 30803 | 30677 |
| >PTEN-Y27N-DGFDLDTY    | 122 | >PTEN-Y27N-DGFDLDTN    | 19279 | 19157 |
| >PTEN-Y27N-DGFDLDTYIY  | 160 | >PTEN-Y27N-DGFDLDTNIY  | 888   | 728   |
| >PTEN-Y27N-DGFDLDTYIY  | 458 | >PTEN-Y27N-DGFDLDTNIY  | 780   | 322   |
| >PTEN-Y27N-DGFDLDTY    | 300 | >PTEN-Y27N-DGFDLDTN    | 13273 | 12973 |
| >PTEN-Y27N-DGFDLDTYIY  | 299 | >PTEN-Y27N-DGFDLDTNIY  | 1426  | 1127  |
| >PTEN-Y27N-DGFDLDTY    | 37  | >PTEN-Y27N-DGFDLDTN    | 10046 | 10009 |
| >PTEN-Y27N-DGFDLDTYIY  | 76  | >PTEN-Y27N-DGFDLDTNIY  | 129   | 53    |
| >PTEN-Y27S-YIYPNIIAM   | 226 | >PTEN-Y27S-SIYPNIIAM   | 918   | 692   |
| >PTEN-Y27S-YIYPNIIAM   | 163 | >PTEN-Y27S-SIYPNIIAM   | 68    | 95    |
| >PTEN-Y27S-YIYPNIIAMGF | 561 | >PTEN-Y27S-SIYPNIIAMGF | 238   | 323   |
| >PTEN-Y27S-YIYPNIIA    | 75  | >PTEN-Y27S-SIYPNIIA    | 858   | 783   |
| >PTEN-Y27S-YIYPNIIAM   | 35  | >PTEN-Y27S-SIYPNIIAM   | 344   | 309   |
| >PTEN-Y27S-YIYPNIIA    | 345 | >PTEN-Y27S-SIYPNIIA    | 1725  | 1380  |
| >PTEN-Y27S-YIYPNIIAM   | 172 | >PTEN-Y27S-SIYPNIIAM   | 773   | 601   |
| >PTEN-Y27S-YIYPNIIA    | 25  | >PTEN-Y27S-SIYPNIIA    | 162   | 137   |
| >PTEN-Y27S-YIYPNIIAM   | 29  | >PTEN-Y27S-SIYPNIIAM   | 298   | 269   |
| >PTEN-Y27S-YIYPNIIAMGF | 464 | >PTEN-Y27S-SIYPNIIAMGF | 3217  | 2753  |
| >PTEN-Y27S-YIYPNIIA    | 21  | >PTEN-Y27S-SIYPNIIA    | 180   | 159   |
| >PTEN-Y27S-YIYPNIIAM   | 8   | >PTEN-Y27S-SIYPNIIAM   | 51    | 43    |
| >PTEN-Y27S-YIYPNIIAMGF | 31  | >PTEN-Y27S-SIYPNIIAMGF | 251   | 220   |
| >PTEN-Y27S-YIYPNIIA    | 17  | >PTEN-Y27S-SIYPNIIA    | 120   | 103   |
| >PTEN-Y27S-YIYPNIIAM   | 4   | >PTEN-Y27S-SIYPNIIAM   | 15    | 11    |
| >PTEN-Y27S-YIYPNIIAMG  | 49  | >PTEN-Y27S-SIYPNIIAMG  | 436   | 387   |
| >PTEN-Y27S-YIYPNIIAMGF | 73  | >PTEN-Y27S-SIYPNIIAMGF | 618   | 545   |
| >PTEN-Y27S-YIYPNIIA    | 129 | >PTEN-Y27S-SIYPNIIA    | 1728  | 1599  |
| >PTEN-Y27S-YIYPNIIAM   | 21  | >PTEN-Y27S-SIYPNIIAM   | 272   | 251   |
| >PTEN-Y27S-YIYPNIIA    | 53  | >PTEN-Y27S-SIYPNIIA    | 206   | 153   |
| >PTEN-Y27S-YIYPNIIAM   | 72  | >PTEN-Y27S-SIYPNIIAM   | 416   | 344   |
| >PTEN-Y27S-YIYPNIIAM   | 117 | >PTEN-Y27S-SIYPNIIAM   | 6620  | 6503  |
| >PTEN-Y27S-YIYPNIIA    | 11  | >PTEN-Y27S-SIYPNIIA    | 84    | 73    |
| >PTEN-Y27S-YIYPNIIAM   | 6   | >PTEN-Y27S-SIYPNIIAM   | 71    | 65    |
| >PTEN-Y27S-YIYPNIIAMGF | 338 | >PTEN-Y27S-SIYPNIIAMGF | 2663  | 2325  |
| >PTEN-Y27S-YIYPNIIAMGF | 133 | >PTEN-Y27S-SIYPNIIAMGF | 833   | 700   |
| >PTEN-Y27S-YIYPNIIAM   | 108 | >PTEN-Y27S-SIYPNIIAM   | 609   | 501   |
| >PTEN-Y27S-YIYPNIIAMGF | 214 | >PTEN-Y27S-SIYPNIIAMGF | 1016  | 802   |
| >PTEN-Y27S-YIYPNIIAM   | 26  | >PTEN-Y27S-SIYPNIIAM   | 52    | 26    |
| >PTEN-Y27S-YIYPNIIAMGF | 417 | >PTEN-Y27S-SIYPNIIAMGF | 798   | 381   |
| >PTEN-Y27S-YIYPNIIAMGF | 92  | >PTEN-Y27S-SIYPNIIAMGF | 600   | 508   |
| >PTEN-Y27S-YIYPNIIAMGF | 311 | >PTEN-Y27S-SIYPNIIAMGF | 86    | 225   |



|                         |       |                         |       |       |
|-------------------------|-------|-------------------------|-------|-------|
| >PTEN-Y27S- YIYPNIIAM   | 40    | >PTEN-Y27S- SIYPNIIAM   | 162   | 122   |
| >PTEN-Y27S- YIYPNIIAM   | 69    | >PTEN-Y27S- SIYPNIIAM   | 183   | 114   |
| >PTEN-Y27S- YIYPNIIAMGF | 63    | >PTEN-Y27S- SIYPNIIAMGF | 143   | 80    |
| >PTEN-Y27S- YIYPNIIAM   | 187   | >PTEN-Y27S- SIYPNIIAM   | 721   | 534   |
| >PTEN-Y27S- YIYPNIIAMGF | 93    | >PTEN-Y27S- SIYPNIIAMGF | 304   | 211   |
| >PTEN-Y27S- YIYPNIIAM   | 35    | >PTEN-Y27S- SIYPNIIAM   | 323   | 288   |
| >PTEN-Y27S- YIYPNIIAMGF | 16    | >PTEN-Y27S- SIYPNIIAMGF | 88    | 72    |
| >PTEN-Y27S- YIYPNIIAM   | 51    | >PTEN-Y27S- SIYPNIIAM   | 164   | 113   |
| >PTEN-Y27S- YIYPNIIAMGF | 8     | >PTEN-Y27S- SIYPNIIAMGF | 14    | 6     |
| >PTEN-Y27S- YIYPNIIAM   | 22    | >PTEN-Y27S- SIYPNIIAM   | 151   | 129   |
| >PTEN-Y27S- YIYPNIIAMGF | 173   | >PTEN-Y27S- SIYPNIIAMGF | 1722  | 1549  |
| >PTEN-Y27S- YIYPNIIAM   | 197   | >PTEN-Y27S- SIYPNIIAM   | 1257  | 1060  |
| >PTEN-Y27S- TYIYPNII    | 422   | >PTEN-Y27S- TSIYPNII    | 30380 | 29958 |
| >PTEN-Y27S- TYIYPNII    | 64    | >PTEN-Y27S- TSIYPNII    | 10485 | 10421 |
| >PTEN-Y27S- TYIYPNII    | 128   | >PTEN-Y27S- TSIYPNII    | 8696  | 8568  |
| >PTEN-Y27S- TYIYPNII    | 64    | >PTEN-Y27S- TSIYPNII    | 23142 | 23078 |
| >PTEN-Y27S- TYIYPNIIAM  | 317   | >PTEN-Y27S- TSIYPNIIAM  | 24047 | 23730 |
| >PTEN-Y27S- TYIYPNIIAM  | 36    | >PTEN-Y27S- TSIYPNIIAM  | 9     | 27    |
| >PTEN-Y27S- TYIYPNIIAM  | 1228  | >PTEN-Y27S- TSIYPNIIAM  | 379   | 849   |
| >PTEN-Y27S- TYIYPNII    | 2902  | >PTEN-Y27S- TSIYPNII    | 68    | 2834  |
| >PTEN-Y27S- TYIYPNIIA   | 5014  | >PTEN-Y27S- TSIYPNIIA   | 128   | 4886  |
| >PTEN-Y27S- TYIYPNIIAM  | 3502  | >PTEN-Y27S- TSIYPNIIAM  | 282   | 3220  |
| >PTEN-Y27S- TYIYPNIIAM  | 23940 | >PTEN-Y27S- TSIYPNIIAM  | 36    | 23904 |
| >PTEN-Y27S- TYIYPNII    | 16080 | >PTEN-Y27S- TSIYPNII    | 124   | 15956 |
| >PTEN-Y27S- TYIYPNIIAM  | 6670  | >PTEN-Y27S- TSIYPNIIAM  | 49    | 6621  |
| >PTEN-Y27S- TYIYPNII    | 9281  | >PTEN-Y27S- TSIYPNII    | 72    | 9209  |
| >PTEN-Y27S- QEDGFDLDLT  | 44    | >PTEN-Y27S- QEDGFDLDLT  | 4147  | 4103  |
| >PTEN-Y27S- QEDGFDLDLT  | 114   | >PTEN-Y27S- QEDGFDLDLT  | 3601  | 3487  |
| >PTEN-Y27S- LTYIYPNI    | 4     | >PTEN-Y27S- LTSIYPNI    | 457   | 453   |
| >PTEN-Y27S- LTYIYPNII   | 234   | >PTEN-Y27S- LTSIYPNII   | 8328  | 8094  |
| >PTEN-Y27S- LTYIYPNIIAM | 69    | >PTEN-Y27S- LTSIYPNIIAM | 3500  | 3431  |
| >PTEN-Y27S- LTYIYPNII   | 435   | >PTEN-Y27S- LTSIYPNII   | 3314  | 2879  |
| >PTEN-Y27S- LTYIYPNI    | 309   | >PTEN-Y27S- LTSIYPNI    | 1316  | 1007  |
| >PTEN-Y27S- LTYIYPNII   | 431   | >PTEN-Y27S- LTSIYPNII   | 1473  | 1042  |
| >PTEN-Y27S- LTYIYPNIIA  | 368   | >PTEN-Y27S- LTSIYPNIIA  | 1126  | 758   |
| >PTEN-Y27S- LTYIYPNI    | 86    | >PTEN-Y27S- LTSIYPNI    | 2541  | 2455  |
| >PTEN-Y27S- LTYIYPNIIAM | 239   | >PTEN-Y27S- LTSIYPNIIAM | 3187  | 2948  |
| >PTEN-Y27S- LTYIYPNIIAM | 320   | >PTEN-Y27S- LTSIYPNIIAM | 2017  | 1697  |
| >PTEN-Y27S- LTYIYPNIIA  | 118   | >PTEN-Y27S- LTSIYPNIIA  | 254   | 136   |
| >PTEN-Y27S- LTYIYPNI    | 65    | >PTEN-Y27S- LTSIYPNI    | 737   | 672   |
| >PTEN-Y27S- LTYIYPNIIAM | 326   | >PTEN-Y27S- LTSIYPNIIAM | 2525  | 2199  |
| >PTEN-Y27S- LTYIYPNIIAM | 368   | >PTEN-Y27S- LTSIYPNIIAM | 942   | 574   |
| >PTEN-Y27S- LTYIYPNIIAM | 98    | >PTEN-Y27S- LTSIYPNIIAM | 738   | 640   |

|                         |      |                         |       |       |
|-------------------------|------|-------------------------|-------|-------|
| >PTEN-Y27S- LTYIYPNI    | 13   | >PTEN-Y27S- LTSIYPNI    | 78    | 65    |
| >PTEN-Y27S- LTYIYPNII   | 33   | >PTEN-Y27S- LTSIYPNII   | 609   | 576   |
| >PTEN-Y27S- LTYIYPNIIAM | 5    | >PTEN-Y27S- LTSIYPNIIAM | 14    | 9     |
| >PTEN-Y27S- LTYIYPNIIAM | 134  | >PTEN-Y27S- LTSIYPNIIAM | 213   | 79    |
| >PTEN-Y27S- LTYIYPNI    | 469  | >PTEN-Y27S- LTSIYPNI    | 1016  | 547   |
| >PTEN-Y27S- LTYIYPNII   | 167  | >PTEN-Y27S- LTSIYPNII   | 156   | 11    |
| >PTEN-Y27S- LTYIYPNIIAM | 111  | >PTEN-Y27S- LTSIYPNIIAM | 94    | 17    |
| >PTEN-Y27S- LTYIYPNII   | 126  | >PTEN-Y27S- LTSIYPNII   | 246   | 120   |
| >PTEN-Y27S- LTYIYPNIIA  | 136  | >PTEN-Y27S- LTSIYPNIIA  | 85    | 51    |
| >PTEN-Y27S- LTYIYPNIIAM | 74   | >PTEN-Y27S- LTSIYPNIIAM | 137   | 63    |
| >PTEN-Y27S- LTYIYPNI    | 9    | >PTEN-Y27S- LTSIYPNI    | 23    | 14    |
| >PTEN-Y27S- LTYIYPNII   | 12   | >PTEN-Y27S- LTSIYPNII   | 34    | 22    |
| >PTEN-Y27S- LTYIYPNIIAM | 147  | >PTEN-Y27S- LTSIYPNIIAM | 1013  | 866   |
| >PTEN-Y27S- DLTYIYPNI   | 1022 | >PTEN-Y27S- DLTSIYPNI   | 218   | 804   |
| >PTEN-Y27S- DLTYIYPNI   | 1506 | >PTEN-Y27S- DLTSIYPNI   | 258   | 1248  |
| >PTEN-Y27S- DLTYIYPNI   | 384  | >PTEN-Y27S- DLTSIYPNI   | 153   | 231   |
| >PTEN-Y27S- LDLYIYPNI   | 87   | >PTEN-Y27S- LDLSIYPNI   | 216   | 129   |
| >PTEN-Y27S- LDLYIYPNII  | 90   | >PTEN-Y27S- LDLSIYPNII  | 152   | 62    |
| >PTEN-Y27S- LDLYIYPNI   | 482  | >PTEN-Y27S- LDLSIYPNI   | 416   | 66    |
| >PTEN-Y27S- LDLYIYPNII  | 52   | >PTEN-Y27S- LDLSIYPNII  | 96    | 44    |
| >PTEN-Y27S- LDLYIYPNI   | 72   | >PTEN-Y27S- LDLSIYPNI   | 69    | 3     |
| >PTEN-Y27S- LDLYIYPNII  | 27   | >PTEN-Y27S- LDLSIYPNII  | 30    | 3     |
| >PTEN-Y27S- DLDLYIY     | 101  | >PTEN-Y27S- DLDLSIY     | 139   | 38    |
| >PTEN-Y27S- DLDLYIYPNI  | 294  | >PTEN-Y27S- DLDLSIYPNI  | 209   | 85    |
| >PTEN-Y27S- DLDLYIYPNI  | 480  | >PTEN-Y27S- DLDLSIYPNI  | 220   | 260   |
| >PTEN-Y27S- DLDLYIYPNI  | 168  | >PTEN-Y27S- DLDLSIYPNI  | 152   | 16    |
| >PTEN-Y27S- DLDLYIY     | 217  | >PTEN-Y27S- DLDLSIY     | 640   | 423   |
| >PTEN-Y27S- FDLDLTYI    | 142  | >PTEN-Y27S- FDLDLTSI    | 315   | 173   |
| >PTEN-Y27S- FDLDLTYIY   | 21   | >PTEN-Y27S- FDLDLTSIY   | 179   | 158   |
| >PTEN-Y27S- FDLDLTYIY   | 147  | >PTEN-Y27S- FDLDLTSIY   | 1238  | 1091  |
| >PTEN-Y27S- FDLDLTYIY   | 123  | >PTEN-Y27S- FDLDLTSIY   | 199   | 76    |
| >PTEN-Y27S- FDLDLTYI    | 510  | >PTEN-Y27S- FDLDLTSI    | 234   | 276   |
| >PTEN-Y27S- FDLDLTYIY   | 1110 | >PTEN-Y27S- FDLDLTSIY   | 32    | 1078  |
| >PTEN-Y27S- FDLDLTYI    | 22   | >PTEN-Y27S- FDLDLTSI    | 27    | 5     |
| >PTEN-Y27S- FDLDLTYI    | 53   | >PTEN-Y27S- FDLDLTSI    | 62    | 9     |
| >PTEN-Y27S- GFDDLTYIY   | 565  | >PTEN-Y27S- GFDDLTSIY   | 472   | 93    |
| >PTEN-Y27S- GFDDLTY     | 62   | >PTEN-Y27S- GFDDLTS     | 15898 | 15836 |
| >PTEN-Y27S- GFDDLTYIY   | 64   | >PTEN-Y27S- GFDDLTSIY   | 234   | 170   |
| >PTEN-Y27S- GFDDLTYIY   | 369  | >PTEN-Y27S- GFDDLTSIY   | 622   | 253   |
| >PTEN-Y27S- GFDDLTY     | 126  | >PTEN-Y27S- GFDDLTS     | 31967 | 31841 |
| >PTEN-Y27S- DGFDDLTY    | 122  | >PTEN-Y27S- DGFDDLTS    | 19275 | 19153 |
| >PTEN-Y27S- DGFDDLTYI\  | 160  | >PTEN-Y27S- DGFDDLTSI\  | 736   | 576   |
| >PTEN-Y27S- DGFDDLTYI\  | 458  | >PTEN-Y27S- DGFDDLTSI\  | 762   | 304   |

|                         |      |                         |       |       |
|-------------------------|------|-------------------------|-------|-------|
| >PTEN-Y27S- DGFDLDLTY   | 300  | >PTEN-Y27S- DGFDLDLTS   | 12782 | 12482 |
| >PTEN-Y27S- DGFDLDLTY\  | 299  | >PTEN-Y27S- DGFDLDLTS\  | 1112  | 813   |
| >PTEN-Y27S- DGFDLDLTY   | 37   | >PTEN-Y27S- DGFDLDLTS   | 4918  | 4881  |
| >PTEN-Y27S- DGFDLDLTY\  | 76   | >PTEN-Y27S- DGFDLDLTS\  | 104   | 28    |
| >PTEN-Y27S- DGFDLDLTY\  | 2353 | >PTEN-Y27S- DGFDLDLTS\  | 213   | 2140  |
| >PTEN-Y336F YFSPNFKV    | 149  | >PTEN-Y336F FFSPNFKV    | 42    | 107   |
| >PTEN-Y336F YFSPNFKV    | 826  | >PTEN-Y336F FFSPNFKV    | 405   | 421   |
| >PTEN-Y336F YFSPNFKV    | 274  | >PTEN-Y336F FFSPNFKV    | 349   | 75    |
| >PTEN-Y336F YFSPNFKV    | 347  | >PTEN-Y336F FFSPNFKV    | 463   | 116   |
| >PTEN-Y336F YFSPNFKV    | 18   | >PTEN-Y336F FFSPNFKV    | 22    | 4     |
| >PTEN-Y336F YFSPNFKV    | 183  | >PTEN-Y336F FFSPNFKV    | 310   | 127   |
| >PTEN-Y336F YFSPNFKVK   | 422  | >PTEN-Y336F FFSPNFKVK   | 742   | 320   |
| >PTEN-Y336F YFSPNFKVKL  | 14   | >PTEN-Y336F FFSPNFKVKL  | 22    | 8     |
| >PTEN-Y336F YFSPNFKVKL\ | 13   | >PTEN-Y336F FFSPNFKVKL\ | 13    | 0     |
| >PTEN-Y336F YFSPNFKVKL\ | 449  | >PTEN-Y336F FFSPNFKVKL\ | 509   | 60    |
| >PTEN-Y336F YFSPNFKVKL\ | 207  | >PTEN-Y336F FFSPNFKVKL\ | 242   | 35    |
| >PTEN-Y336F YFSPNFKVK   | 356  | >PTEN-Y336F FFSPNFKVK   | 708   | 352   |
| >PTEN-Y336F RYFSPNFKV   | 92   | >PTEN-Y336F RFFSPNFKV   | 98    | 6     |
| >PTEN-Y336F RYFSPNFK    | 143  | >PTEN-Y336F RFFSPNFK    | 67    | 76    |
| >PTEN-Y336F RYFSPNFKVK  | 1350 | >PTEN-Y336F RFFSPNFKVK  | 155   | 1195  |
| >PTEN-Y336F RYFSPNFK    | 41   | >PTEN-Y336F RFFSPNFK    | 29    | 12    |
| >PTEN-Y336F RYFSPNFKVK  | 5519 | >PTEN-Y336F RFFSPNFKVK  | 478   | 5041  |
| >PTEN-Y336F RYFSPNFKVK  | 196  | >PTEN-Y336F RFFSPNFKVK  | 346   | 150   |
| >PTEN-Y336F RYFSPNFKVK  | 412  | >PTEN-Y336F RFFSPNFKVK  | 2330  | 1918  |
| >PTEN-Y336F RYFSPNFK    | 208  | >PTEN-Y336F RFFSPNFK    | 3367  | 3159  |
| >PTEN-Y336F RYFSPNFKV   | 20   | >PTEN-Y336F RFFSPNFKV   | 386   | 366   |
| >PTEN-Y336F RYFSPNFKVK  | 104  | >PTEN-Y336F RFFSPNFKVK  | 1336  | 1232  |
| >PTEN-Y336F RYFSPNFKVK  | 5    | >PTEN-Y336F RFFSPNFKVK  | 22    | 17    |
| >PTEN-Y336F RYFSPNFK    | 5    | >PTEN-Y336F RFFSPNFK    | 7     | 2     |
| >PTEN-Y336F RYFSPNFKV   | 209  | >PTEN-Y336F RFFSPNFKV   | 728   | 519   |
| >PTEN-Y336F RYFSPNFKVK  | 9    | >PTEN-Y336F RFFSPNFKVK  | 18    | 9     |
| >PTEN-Y336F RYFSPNFKVK  | 448  | >PTEN-Y336F RFFSPNFKVK  | 1435  | 987   |
| >PTEN-Y336F RYFSPNFK    | 15   | >PTEN-Y336F RFFSPNFK    | 14    | 1     |
| >PTEN-Y336F RYFSPNFKV   | 206  | >PTEN-Y336F RFFSPNFKV   | 188   | 18    |
| >PTEN-Y336F RYFSPNFKVK  | 658  | >PTEN-Y336F RFFSPNFKVK  | 246   | 412   |
| >PTEN-Y336F RYFSPNFKVK  | 342  | >PTEN-Y336F RFFSPNFKVK  | 282   | 60    |
| >PTEN-Y336F RYFSPNFKV   | 238  | >PTEN-Y336F RFFSPNFKV   | 679   | 441   |
| >PTEN-Y336F RYFSPNFKVK  | 48   | >PTEN-Y336F RFFSPNFKVK  | 143   | 95    |
| >PTEN-Y336F RYFSPNFK    | 506  | >PTEN-Y336F RFFSPNFK    | 463   | 43    |
| >PTEN-Y336F RYFSPNFK    | 23   | >PTEN-Y336F RFFSPNFK    | 48    | 25    |
| >PTEN-Y336F RYFSPNFKVK  | 24   | >PTEN-Y336F RFFSPNFKVK  | 47    | 23    |
| >PTEN-Y336F RYFSPNFKV   | 223  | >PTEN-Y336F RFFSPNFKV   | 418   | 195   |
| >PTEN-Y336F RYFSPNFKVK  | 319  | >PTEN-Y336F RFFSPNFKVK  | 524   | 205   |

|                         |      |                         |      |      |
|-------------------------|------|-------------------------|------|------|
| >PTEN-Y336F RYFSPNFK    | 157  | >PTEN-Y336F RFFSPNFK    | 191  | 34   |
| >PTEN-Y336F RYFSPNFKV   | 242  | >PTEN-Y336F RFFSPNFKV   | 279  | 37   |
| >PTEN-Y336F RYFSPNFKVK  | 185  | >PTEN-Y336F RFFSPNFKVK  | 221  | 36   |
| >PTEN-Y336F NRYFSPNFK   | 331  | >PTEN-Y336F NRFFSPNFK   | 153  | 178  |
| >PTEN-Y336F NRYFSPNF    | 18   | >PTEN-Y336F NRFFSPNF    | 15   | 3    |
| >PTEN-Y336F NRYFSPNFKV  | 584  | >PTEN-Y336F NRFFSPNFKV  | 377  | 207  |
| >PTEN-Y336F NRYFSPNFKV  | 221  | >PTEN-Y336F NRFFSPNFKV  | 211  | 10   |
| >PTEN-Y336F NRYFSPNFK   | 120  | >PTEN-Y336F NRFFSPNFK   | 232  | 112  |
| >PTEN-Y336F NRYFSPNFKV  | 151  | >PTEN-Y336F NRFFSPNFKV  | 303  | 152  |
| >PTEN-Y336F ANRYFSPNF   | 389  | >PTEN-Y336F ANRFFSPNF   | 653  | 264  |
| >PTEN-Y336F ANRYFSPNF   | 450  | >PTEN-Y336F ANRFFSPNF   | 371  | 79   |
| >PTEN-Y336F ANRYFSPNFK  | 4    | >PTEN-Y336F ANRFFSPNFK  | 4    | 0    |
| >PTEN-Y336F ANRYFSPNFK  | 174  | >PTEN-Y336F ANRFFSPNFK  | 149  | 25   |
| >PTEN-Y336F ANRYFSPNFK  | 847  | >PTEN-Y336F ANRFFSPNFK  | 399  | 448  |
| >PTEN-Y336F ANRYFSPNF   | 13   | >PTEN-Y336F ANRFFSPNF   | 31   | 18   |
| >PTEN-Y336F KANRYFSPNF  | 46   | >PTEN-Y336F KANRFFSPNF  | 44   | 2    |
| >PTEN-Y336F KANRYFSPNF  | 12   | >PTEN-Y336F KANRFFSPNF  | 10   | 2    |
| >PTEN-Y336F KANRYFSPNF  | 4    | >PTEN-Y336F KANRFFSPNF  | 4    | 0    |
| >PTEN-Y336F KANRYFSPNF  | 17   | >PTEN-Y336F KANRFFSPNF  | 17   | 0    |
| >PTEN-Y336F KANRYFSPNF  | 416  | >PTEN-Y336F KANRFFSPNF  | 142  | 274  |
| >PTEN-Y336F KANRYFSPNF  | 469  | >PTEN-Y336F KANRFFSPNF  | 250  | 219  |
| >PTEN-Y336F KANRYFSPNF  | 279  | >PTEN-Y336F KANRFFSPNF  | 452  | 173  |
| >PTEN-Y336F KANRYFSPNF  | 11   | >PTEN-Y336F KANRFFSPNF  | 13   | 2    |
| >PTEN-Y336F KANRYFSPNF  | 29   | >PTEN-Y336F KANRFFSPNF  | 35   | 6    |
| >PTEN-Y336F KANRYFSPNF  | 373  | >PTEN-Y336F KANRFFSPNF  | 150  | 223  |
| >PTEN-Y336F KANRYFSPNF  | 21   | >PTEN-Y336F KANRFFSPNF  | 19   | 2    |
| >PTEN-Y336F DKANRYFSPN  | 39   | >PTEN-Y336F DKANRFFSPN  | 49   | 10   |
| >PTEN-Y336F KANKDKANR'  | 1769 | >PTEN-Y336F KANKDKANR   | 345  | 1424 |
| >PTEN-Y336F KANKDKANR'  | 101  | >PTEN-Y336F KANKDKANR   | 151  | 50   |
| >PTEN-Y336F KANKDKANR'  | 112  | >PTEN-Y336F KANKDKANR   | 78   | 34   |
| >PTEN-Y336F KANKDKANR'  | 103  | >PTEN-Y336F KANKDKANR   | 190  | 87   |
| >PTEN-Y336F KANKDKANR'  | 493  | >PTEN-Y336F KANKDKANR   | 314  | 179  |
| >PTEN-Y336F KANKDKANR'  | 99   | >PTEN-Y336F KANKDKANR   | 124  | 25   |
| >PTEN-Y336F KANKDKANR'  | 498  | >PTEN-Y336F KANKDKANR   | 100  | 398  |
| >PTEN-Y336F KANKDKANR'  | 80   | >PTEN-Y336F KANKDKANR   | 183  | 103  |
| >PTEN-Y65C- YKIYNLCA    | 112  | >PTEN-Y65C- CKIYNLCA    | 885  | 773  |
| >PTEN-Y65C- YKIYNLCAE   | 469  | >PTEN-Y65C- CKIYNLCAE   | 2924 | 2455 |
| >PTEN-Y65C- YKIYNLCAER  | 117  | >PTEN-Y65C- CKIYNLCAER  | 684  | 567  |
| >PTEN-Y65C- YKIYNLCAERI | 301  | >PTEN-Y65C- CKIYNLCAERI | 2480 | 2179 |
| >PTEN-Y65C- HYKIYNLCA   | 22   | >PTEN-Y65C- HCKIYNLCA   | 286  | 264  |
| >PTEN-Y65C- HYKIYNLCAEI | 120  | >PTEN-Y65C- HCKIYNLCAEI | 1574 | 1454 |
| >PTEN-Y65C- HYKIYNLCAEI | 9    | >PTEN-Y65C- HCKIYNLCAEI | 69   | 60   |
| >PTEN-Y65C- HYKIYNLCAEI | 13   | >PTEN-Y65C- HCKIYNLCAEI | 128  | 115  |

|                         |       |                         |       |       |
|-------------------------|-------|-------------------------|-------|-------|
| >PTEN-Y65C- HYKIYNLCAEI | 272   | >PTEN-Y65C- HCKIYNLCAEI | 1912  | 1640  |
| >PTEN-Y65C- HYKIYNLCAEI | 26    | >PTEN-Y65C- HCKIYNLCAEI | 146   | 120   |
| >PTEN-Y65C- RFLDSKHKNF  | 91    | >PTEN-Y65C- RFLDSKHKNF  | 21526 | 21435 |
| >PTEN-Y65C- RFLDSKHKNF  | 227   | >PTEN-Y65C- RFLDSKHKNF  | 25276 | 25049 |
| >PTEN-Y65C- NHYKIYNL    | 145   | >PTEN-Y65C- NHCKIYNL    | 1422  | 1277  |
| >PTEN-Y65C- NHYKIYNL    | 67    | >PTEN-Y65C- NHCKIYNL    | 172   | 105   |
| >PTEN-Y65C- KNHYKIYNLC  | 497   | >PTEN-Y65C- KNHCKIYNLC  | 591   | 94    |
| >PTEN-Y65C- HKNHYKIY    | 7     | >PTEN-Y65C- HKNHCKIY    | 12    | 5     |
| >PTEN-Y65C- HKNHYKIYNL  | 68    | >PTEN-Y65C- HKNHCKIYNL  | 101   | 33    |
| >PTEN-Y65C- KHKNHYKIY   | 10    | >PTEN-Y65C- KHKNHCKIY   | 28    | 18    |
| >PTEN-Y65C- KHKNHYKIYN  | 206   | >PTEN-Y65C- KHKNHCKIYN  | 314   | 108   |
| >PTEN-Y65C- SKHKNHYK    | 78    | >PTEN-Y65C- SKHKNHCK    | 583   | 505   |
| >PTEN-Y65C- SKHKNHYKI   | 129   | >PTEN-Y65C- SKHKNHCKI   | 174   | 45    |
| >PTEN-Y65C- SKHKNHYKIY  | 6     | >PTEN-Y65C- SKHKNHCKIY  | 10    | 4     |
| >PTEN-Y65C- DSKHKNHY    | 383   | >PTEN-Y65C- DSKHKNHC    | 32928 | 32545 |
| >PTEN-Y65C- DSKHKNHYK   | 121   | >PTEN-Y65C- DSKHKNHCK   | 1083  | 962   |
| >PTEN-Y65C- DSKHKNHY    | 289   | >PTEN-Y65C- DSKHKNHC    | 27972 | 27683 |
| >PTEN-Y65C- DSKHKNHYK   | 342   | >PTEN-Y65C- DSKHKNHCK   | 3584  | 3242  |
| >PTEN-Y65C- DSKHKNHYK   | 155   | >PTEN-Y65C- DSKHKNHCK   | 525   | 370   |
| >PTEN-Y65C- DSKHKNHYK   | 77    | >PTEN-Y65C- DSKHKNHCK   | 443   | 366   |
| >PTEN-Y65C- LDSKHKNHYK  | 229   | >PTEN-Y65C- LDSKHKNHCK  | 349   | 120   |
| >PTEN-Y65C- FLDSKHKNHY  | 86    | >PTEN-Y65C- FLDSKHKNHC  | 27504 | 27418 |
| >PTEN-Y65C- FLDSKHKNHY  | 3801  | >PTEN-Y65C- FLDSKHKNHC  | 109   | 3692  |
| >PTEN-Y65C- FLDSKHKNHY  | 273   | >PTEN-Y65C- FLDSKHKNHC  | 3764  | 3491  |
| >PTEN-Y65C- FLDSKHKNHY  | 3735  | >PTEN-Y65C- FLDSKHKNHC  | 88    | 3647  |
| >PTEN-Y65C- FLDSKHKNHY  | 226   | >PTEN-Y65C- FLDSKHKNHC  | 1155  | 929   |
| >PTEN-Y65D- YKIYNLCA    | 112   | >PTEN-Y65D- DKIYNLCA    | 4856  | 4744  |
| >PTEN-Y65D- YKIYNLCAE   | 469   | >PTEN-Y65D- DKIYNLCAE   | 11512 | 11043 |
| >PTEN-Y65D- YKIYNLCAER  | 117   | >PTEN-Y65D- DKIYNLCAER  | 3472  | 3355  |
| >PTEN-Y65D- YKIYNLCAERI | 301   | >PTEN-Y65D- DKIYNLCAERI | 7670  | 7369  |
| >PTEN-Y65D- HYKIYNLCA   | 22    | >PTEN-Y65D- HDKIYNLCA   | 7158  | 7136  |
| >PTEN-Y65D- HYKIYNLCAEI | 120   | >PTEN-Y65D- HDKIYNLCAE  | 11646 | 11526 |
| >PTEN-Y65D- HYKIYNLCAEI | 9     | >PTEN-Y65D- HDKIYNLCAE  | 1035  | 1026  |
| >PTEN-Y65D- HYKIYNLCAEI | 13    | >PTEN-Y65D- HDKIYNLCAE  | 3647  | 3634  |
| >PTEN-Y65D- HYKIYNLCAEI | 272   | >PTEN-Y65D- HDKIYNLCAE  | 2170  | 1898  |
| >PTEN-Y65D- HYKIYNLCA   | 29021 | >PTEN-Y65D- HDKIYNLCA   | 481   | 28540 |
| >PTEN-Y65D- HYKIYNLCAEI | 26    | >PTEN-Y65D- HDKIYNLCAE  | 1583  | 1557  |
| >PTEN-Y65D- RFLDSKHKNF  | 91    | >PTEN-Y65D- RFLDSKHKNF  | 22870 | 22779 |
| >PTEN-Y65D- RFLDSKHKNF  | 227   | >PTEN-Y65D- RFLDSKHKNF  | 27866 | 27639 |
| >PTEN-Y65D- NHYKIYNL    | 145   | >PTEN-Y65D- NHDKIYNL    | 719   | 574   |
| >PTEN-Y65D- NHYKIYNL    | 67    | >PTEN-Y65D- NHDKIYNL    | 78    | 11    |
| >PTEN-Y65D- KNHYKIYNLC  | 497   | >PTEN-Y65D- KNHDKIYNLC  | 736   | 239   |
| >PTEN-Y65D- HKNHYKIY    | 7     | >PTEN-Y65D- HKNHDKIY    | 20    | 13    |

|                         |     |                         |       |       |
|-------------------------|-----|-------------------------|-------|-------|
| >PTEN-Y65D- HKNHYKIYNL  | 68  | >PTEN-Y65D- HKNHDKIYNL  | 141   | 73    |
| >PTEN-Y65D- KHKNHYKIY   | 10  | >PTEN-Y65D- KHKNHDKIY   | 92    | 82    |
| >PTEN-Y65D- KHKNHYKIYN  | 206 | >PTEN-Y65D- KHKNHDKIYN  | 737   | 531   |
| >PTEN-Y65D- SKHKNHYK    | 78  | >PTEN-Y65D- SKHKNHDK    | 1752  | 1674  |
| >PTEN-Y65D- SKHKNHYKI   | 129 | >PTEN-Y65D- SKHKNHDKI   | 686   | 557   |
| >PTEN-Y65D- SKHKNHYKIY  | 6   | >PTEN-Y65D- SKHKNHDKIY  | 16    | 10    |
| >PTEN-Y65D- DSKHKNHY    | 383 | >PTEN-Y65D- DSKHKNHD    | 37717 | 37334 |
| >PTEN-Y65D- DSKHKNHYK   | 121 | >PTEN-Y65D- DSKHKNHDK   | 1715  | 1594  |
| >PTEN-Y65D- DSKHKNHY    | 289 | >PTEN-Y65D- DSKHKNHD    | 29514 | 29225 |
| >PTEN-Y65D- DSKHKNHYK   | 342 | >PTEN-Y65D- DSKHKNHDK   | 9679  | 9337  |
| >PTEN-Y65D- DSKHKNHYK   | 155 | >PTEN-Y65D- DSKHKNHDK   | 1423  | 1268  |
| >PTEN-Y65D- DSKHKNHYK   | 77  | >PTEN-Y65D- DSKHKNHDK   | 1129  | 1052  |
| >PTEN-Y65D- LDSKHKNHYK  | 229 | >PTEN-Y65D- LDSKHKNHDI  | 342   | 113   |
| >PTEN-Y65D- FLDSKHKNHY  | 86  | >PTEN-Y65D- FLDSKHKNHL  | 27385 | 27299 |
| >PTEN-Y65D- FLDSKHKNHY  | 273 | >PTEN-Y65D- FLDSKHKNHL  | 6141  | 5868  |
| >PTEN-Y65D- FLDSKHKNHY  | 226 | >PTEN-Y65D- FLDSKHKNHL  | 1070  | 844   |
| >PTEN-Y65N- YKIYNLCA    | 112 | >PTEN-Y65N- NKIYNLCA    | 1910  | 1798  |
| >PTEN-Y65N- YKIYNLCAE   | 469 | >PTEN-Y65N- NKIYNLCAE   | 4928  | 4459  |
| >PTEN-Y65N- YKIYNLCAER  | 117 | >PTEN-Y65N- NKIYNLCAER  | 1232  | 1115  |
| >PTEN-Y65N- YKIYNLCAERI | 301 | >PTEN-Y65N- NKIYNLCAERI | 4155  | 3854  |
| >PTEN-Y65N- HYKIYNLCA   | 22  | >PTEN-Y65N- HNKIYNLCA   | 928   | 906   |
| >PTEN-Y65N- HYKIYNLCAEI | 120 | >PTEN-Y65N- HNKIYNLCAE  | 3538  | 3418  |
| >PTEN-Y65N- HYKIYNLCAEI | 9   | >PTEN-Y65N- HNKIYNLCAE  | 87    | 78    |
| >PTEN-Y65N- HYKIYNLCAEI | 13  | >PTEN-Y65N- HNKIYNLCAE  | 998   | 985   |
| >PTEN-Y65N- HYKIYNLCAEI | 272 | >PTEN-Y65N- HNKIYNLCAE  | 501   | 229   |
| >PTEN-Y65N- HYKIYNLCAEI | 26  | >PTEN-Y65N- HNKIYNLCAE  | 472   | 446   |
| >PTEN-Y65N- RFLDSKHKNH  | 91  | >PTEN-Y65N- RFLDSKHKNH  | 19073 | 18982 |
| >PTEN-Y65N- RFLDSKHKNH  | 227 | >PTEN-Y65N- RFLDSKHKNH  | 22206 | 21979 |
| >PTEN-Y65N- NHYKIYNL    | 145 | >PTEN-Y65N- NHNKIYNL    | 666   | 521   |
| >PTEN-Y65N- NHYKIYNL    | 67  | >PTEN-Y65N- NHNKIYNL    | 247   | 180   |
| >PTEN-Y65N- KNHYKIYNLC  | 497 | >PTEN-Y65N- KNHNKIYNLC  | 557   | 60    |
| >PTEN-Y65N- HKNHYKIY    | 7   | >PTEN-Y65N- HKNHNKIY    | 10    | 3     |
| >PTEN-Y65N- HKNHYKIYNL  | 68  | >PTEN-Y65N- HKNHNKIYNL  | 89    | 21    |
| >PTEN-Y65N- KHKNHYKIY   | 10  | >PTEN-Y65N- KHKNHNKIY   | 20    | 10    |
| >PTEN-Y65N- KHKNHYKIYN  | 206 | >PTEN-Y65N- KHKNHNKIYN  | 302   | 96    |
| >PTEN-Y65N- SKHKNHYK    | 78  | >PTEN-Y65N- SKHKNHNK    | 210   | 132   |
| >PTEN-Y65N- SKHKNHYKI   | 129 | >PTEN-Y65N- SKHKNHNKI   | 136   | 7     |
| >PTEN-Y65N- SKHKNHYKIY  | 6   | >PTEN-Y65N- SKHKNHNKIY  | 8     | 2     |
| >PTEN-Y65N- DSKHKNHY    | 383 | >PTEN-Y65N- DSKHKNHN    | 33451 | 33068 |
| >PTEN-Y65N- DSKHKNHYK   | 121 | >PTEN-Y65N- DSKHKNHNK   | 350   | 229   |
| >PTEN-Y65N- DSKHKNHY    | 289 | >PTEN-Y65N- DSKHKNHN    | 24589 | 24300 |
| >PTEN-Y65N- DSKHKNHYK   | 342 | >PTEN-Y65N- DSKHKNHNK   | 2311  | 1969  |
| >PTEN-Y65N- DSKHKNHYK   | 155 | >PTEN-Y65N- DSKHKNHNK   | 480   | 325   |

|                         |      |                         |       |       |
|-------------------------|------|-------------------------|-------|-------|
| >PTEN-Y65N·DSKHKNHYK    | 77   | >PTEN-Y65N·DSKHKNHMK    | 423   | 346   |
| >PTEN-Y65N·LDSKHKNHYK   | 229  | >PTEN-Y65N·LDSKHKNHNI   | 524   | 295   |
| >PTEN-Y65N·FLDSKHKNHY   | 86   | >PTEN-Y65N·FLDSKHKNHM   | 24176 | 24090 |
| >PTEN-Y65N·FLDSKHKNHY   | 273  | >PTEN-Y65N·FLDSKHKNHM   | 2346  | 2073  |
| >PTEN-Y65N·FLDSKHKNHY   | 226  | >PTEN-Y65N·FLDSKHKNHM   | 577   | 351   |
| >PTEN-Y68C·YNLCAERHY    | 254  | >PTEN-Y68C·CNLCAERHY    | 2209  | 1955  |
| >PTEN-Y68C·IYNLCAERHY   | 43   | >PTEN-Y68C·ICNLCAERHY   | 694   | 651   |
| >PTEN-Y68C·IYNLCAERHY   | 212  | >PTEN-Y68C·ICNLCAERHY   | 728   | 516   |
| >PTEN-Y68C·IYNLCAER     | 36   | >PTEN-Y68C·ICNLCAER     | 584   | 548   |
| >PTEN-Y68C·IYNLCAER     | 62   | >PTEN-Y68C·ICNLCAER     | 1113  | 1051  |
| >PTEN-Y68C·IYNLCAER     | 55   | >PTEN-Y68C·ICNLCAER     | 504   | 449   |
| >PTEN-Y68C·KIYNLCAER    | 78   | >PTEN-Y68C·KICNLCAER    | 2064  | 1986  |
| >PTEN-Y68C·KIYNLCAERH'  | 107  | >PTEN-Y68C·KICNLCAERH'  | 2449  | 2342  |
| >PTEN-Y68C·KIYNLCAER    | 157  | >PTEN-Y68C·KICNLCAER    | 668   | 511   |
| >PTEN-Y68C·KIYNLCAERH'  | 233  | >PTEN-Y68C·KICNLCAERH'  | 958   | 725   |
| >PTEN-Y68C·KIYNLCAERH'  | 59   | >PTEN-Y68C·KICNLCAERH'  | 94    | 35    |
| >PTEN-Y68C·KIYNLCAER    | 10   | >PTEN-Y68C·KICNLCAER    | 15    | 5     |
| >PTEN-Y68C·KIYNLCAER    | 119  | >PTEN-Y68C·KICNLCAER    | 437   | 318   |
| >PTEN-Y68C·KIYNLCAERH'  | 233  | >PTEN-Y68C·KICNLCAERH'  | 288   | 55    |
| >PTEN-Y68C·KIYNLCAERH'  | 76   | >PTEN-Y68C·KICNLCAERH'  | 161   | 85    |
| >PTEN-Y68C·KIYNLCAERH'  | 226  | >PTEN-Y68C·KICNLCAERH'  | 2385  | 2159  |
| >PTEN-Y68C·KIYNLCAERH'  | 132  | >PTEN-Y68C·KICNLCAERH'  | 2133  | 2001  |
| >PTEN-Y68C·KIYNLCAERH'  | 453  | >PTEN-Y68C·KICNLCAERH'  | 1581  | 1128  |
| >PTEN-Y68C·KIYNLCAER    | 40   | >PTEN-Y68C·KICNLCAER    | 84    | 44    |
| >PTEN-Y68C·YKIYNLCA     | 112  | >PTEN-Y68C·YKICNLCA     | 123   | 11    |
| >PTEN-Y68C·YKIYNLCAE    | 469  | >PTEN-Y68C·YKICNLCAE    | 483   | 14    |
| >PTEN-Y68C·YKIYNLCAER   | 117  | >PTEN-Y68C·YKICNLCAER   | 112   | 5     |
| >PTEN-Y68C·YKIYNLCAERH' | 301  | >PTEN-Y68C·YKICNLCAERH' | 298   | 3     |
| >PTEN-Y68C·HYKIYNLCA    | 22   | >PTEN-Y68C·HYKICNLCA    | 74    | 52    |
| >PTEN-Y68C·HYKIYNLCAEI  | 120  | >PTEN-Y68C·HYKICNLCAEI  | 292   | 172   |
| >PTEN-Y68C·HYKIYNLCAEI  | 9    | >PTEN-Y68C·HYKICNLCAEI  | 11    | 2     |
| >PTEN-Y68C·HYKIYNLCAEI  | 13   | >PTEN-Y68C·HYKICNLCAEI  | 15    | 2     |
| >PTEN-Y68C·HYKIYNLCAEI  | 272  | >PTEN-Y68C·HYKICNLCAEI  | 396   | 124   |
| >PTEN-Y68C·HYKIYNLCAEI  | 26   | >PTEN-Y68C·HYKICNLCAEI  | 20    | 6     |
| >PTEN-Y68C·NHYKIYNL     | 145  | >PTEN-Y68C·NHYKICNL     | 178   | 33    |
| >PTEN-Y68C·NHYKIYNL     | 67   | >PTEN-Y68C·NHYKICNL     | 299   | 232   |
| >PTEN-Y68C·KNHYKIYNL    | 1185 | >PTEN-Y68C·KNHYKICNL    | 483   | 702   |
| >PTEN-Y68C·KNHYKIYNLC   | 497  | >PTEN-Y68C·KNHYKICNLC   | 568   | 71    |
| >PTEN-Y68C·HKNHYKIY     | 7    | >PTEN-Y68C·HKNHYKIC     | 1481  | 1474  |
| >PTEN-Y68C·HKNHYKIYNL   | 68   | >PTEN-Y68C·HKNHYKICNL   | 77    | 9     |
| >PTEN-Y68C·KHKNHYKIY    | 10   | >PTEN-Y68C·KHKNHYKIC    | 4075  | 4065  |
| >PTEN-Y68C·KHKNHYKIYN   | 206  | >PTEN-Y68C·KHKNHYKICN   | 242   | 36    |
| >PTEN-Y68C·SKHKNHYKIY   | 6    | >PTEN-Y68C·SKHKNHYKIC   | 1259  | 1253  |

|                         |      |                         |      |      |
|-------------------------|------|-------------------------|------|------|
| >PTEN-Y68H-YNLCAERHY    | 254  | >PTEN-Y68H-HNLCAERHY    | 1415 | 1161 |
| >PTEN-Y68H-IYNLCAERHY   | 43   | >PTEN-Y68H-IHNLCAERHY   | 1407 | 1364 |
| >PTEN-Y68H-IYNLCAERHY   | 212  | >PTEN-Y68H-IHNLCAERHY   | 2797 | 2585 |
| >PTEN-Y68H-IYNLCAER     | 36   | >PTEN-Y68H-IHNLCAER     | 2095 | 2059 |
| >PTEN-Y68H-IYNLCAER     | 62   | >PTEN-Y68H-IHNLCAER     | 6490 | 6428 |
| >PTEN-Y68H-IYNLCAER     | 55   | >PTEN-Y68H-IHNLCAER     | 1041 | 986  |
| >PTEN-Y68H-KIYNLCAER    | 78   | >PTEN-Y68H-KIHNLCAER    | 774  | 696  |
| >PTEN-Y68H-KIYNLCAERH'  | 107  | >PTEN-Y68H-KIHNLCAERH'  | 1032 | 925  |
| >PTEN-Y68H-KIYNLCAER    | 157  | >PTEN-Y68H-KIHNLCAER    | 1384 | 1227 |
| >PTEN-Y68H-KIYNLCAERH'  | 233  | >PTEN-Y68H-KIHNLCAERH'  | 956  | 723  |
| >PTEN-Y68H-KIYNLCAER    | 4052 | >PTEN-Y68H-KIHNLCAER    | 353  | 3699 |
| >PTEN-Y68H-KIYNLCAERH'  | 2807 | >PTEN-Y68H-KIHNLCAERH'  | 226  | 2581 |
| >PTEN-Y68H-KIYNLCAERH'  | 59   | >PTEN-Y68H-KIHNLCAERH'  | 90   | 31   |
| >PTEN-Y68H-KIYNLCAER    | 10   | >PTEN-Y68H-KIHNLCAER    | 13   | 3    |
| >PTEN-Y68H-KIYNLCAER    | 119  | >PTEN-Y68H-KIHNLCAER    | 395  | 276  |
| >PTEN-Y68H-KIYNLCAERH'  | 233  | >PTEN-Y68H-KIHNLCAERH'  | 319  | 86   |
| >PTEN-Y68H-KIYNLCAERH'  | 76   | >PTEN-Y68H-KIHNLCAERH'  | 138  | 62   |
| >PTEN-Y68H-KIYNLCAERH'  | 226  | >PTEN-Y68H-KIHNLCAERH'  | 923  | 697  |
| >PTEN-Y68H-KIYNLCAERH'  | 132  | >PTEN-Y68H-KIHNLCAERH'  | 1714 | 1582 |
| >PTEN-Y68H-KIYNLCAERH'  | 453  | >PTEN-Y68H-KIHNLCAERH'  | 1684 | 1231 |
| >PTEN-Y68H-KIYNLCAER    | 40   | >PTEN-Y68H-KIHNLCAER    | 73   | 33   |
| >PTEN-Y68H-YKIYNLCA     | 112  | >PTEN-Y68H-YKIHNLCA     | 115  | 3    |
| >PTEN-Y68H-YKIYNLCAE    | 469  | >PTEN-Y68H-YKIHNLCAE    | 486  | 17   |
| >PTEN-Y68H-YKIYNLCAER   | 117  | >PTEN-Y68H-YKIHNLCAER   | 106  | 11   |
| >PTEN-Y68H-YKIYNLCAERH' | 301  | >PTEN-Y68H-YKIHNLCAERH' | 254  | 47   |
| >PTEN-Y68H-HYKIYNLC     | 616  | >PTEN-Y68H-HYKIHNL      | 460  | 156  |
| >PTEN-Y68H-HYKIYNLCA    | 22   | >PTEN-Y68H-HYKIHNLCA    | 21   | 1    |
| >PTEN-Y68H-HYKIYNLCAEI  | 120  | >PTEN-Y68H-HYKIHNLCAEI  | 111  | 9    |
| >PTEN-Y68H-HYKIYNLCAEI  | 9    | >PTEN-Y68H-HYKIHNLCAEI  | 9    | 0    |
| >PTEN-Y68H-HYKIYNLCAEI  | 13   | >PTEN-Y68H-HYKIHNLCAEI  | 17   | 4    |
| >PTEN-Y68H-HYKIYNLCAEI  | 272  | >PTEN-Y68H-HYKIHNLCAEI  | 469  | 197  |
| >PTEN-Y68H-HYKIYNLCAEI  | 26   | >PTEN-Y68H-HYKIHNLCAEI  | 28   | 2    |
| >PTEN-Y68H-NHYKIYNL     | 145  | >PTEN-Y68H-NHYKIHN      | 89   | 56   |
| >PTEN-Y68H-NHYKIYNLC    | 568  | >PTEN-Y68H-NHYKIHNLC    | 353  | 215  |
| >PTEN-Y68H-NHYKIYNL     | 67   | >PTEN-Y68H-NHYKIHN      | 52   | 15   |
| >PTEN-Y68H-KNHYKIYNLC   | 497  | >PTEN-Y68H-KNHYKIHNLC   | 443  | 54   |
| >PTEN-Y68H-HKNHYKIY     | 7    | >PTEN-Y68H-HKNHYKIH     | 315  | 308  |
| >PTEN-Y68H-HKNHYKIYNL   | 68   | >PTEN-Y68H-HKNHYKIHN    | 80   | 12   |
| >PTEN-Y68H-HKNHYKIYNL   | 566  | >PTEN-Y68H-HKNHYKIHN    | 496  | 70   |
| >PTEN-Y68H-KHKNHYKIY    | 10   | >PTEN-Y68H-KHKNHYKIH    | 896  | 886  |
| >PTEN-Y68H-KHKNHYKIYN   | 206  | >PTEN-Y68H-KHKNHYKIHN   | 282  | 76   |
| >PTEN-Y68H-SKHKNHYKIY   | 6    | >PTEN-Y68H-SKHKNHYKIH   | 243  | 237  |
| >PTEN-Y88C-YPFEDHNPPC   | 43   | >PTEN-Y88C-CPFEDHNPPC   | 228  | 185  |



|                        |     |                        |       |       |
|------------------------|-----|------------------------|-------|-------|
| >PTEN-Y88C- YPFEDHNPPC | 145 | >PTEN-Y88C- CPFEDHNPPC | 3814  | 3669  |
| >PTEN-Y88C- YPFEDHNPPC | 145 | >PTEN-Y88C- CPFEDHNPPC | 2131  | 1986  |
| >PTEN-Y88C- YPFEDHNPP  | 145 | >PTEN-Y88C- CPFEDHNPP  | 1412  | 1267  |
| >PTEN-Y88C- YPFEDHNPPC | 43  | >PTEN-Y88C- CPFEDHNPPC | 263   | 220   |
| >PTEN-Y88C- YPFEDHNPPC | 22  | >PTEN-Y88C- CPFEDHNPPC | 463   | 441   |
| >PTEN-Y88C- YPFEDHNPP  | 291 | >PTEN-Y88C- CPFEDHNPP  | 376   | 85    |
| >PTEN-Y88C- TAKFNCRVAC | 362 | >PTEN-Y88C- TAKFNCRVAC | 20792 | 20430 |
| >PTEN-Y88C- TAKFNCRVAC | 97  | >PTEN-Y88C- TAKFNCRVAC | 15166 | 15069 |
| >PTEN-Y88C- AQYPFEDH   | 105 | >PTEN-Y88C- AQCPFEDH   | 1485  | 1380  |
| >PTEN-Y88C- AQYPFEDHNI | 263 | >PTEN-Y88C- AQCPFEDHNI | 2347  | 2084  |
| >PTEN-Y88C- CRVAQYPF   | 32  | >PTEN-Y88C- CRVAQCPF   | 50    | 18    |
| >PTEN-Y88C- CRVAQYPF   | 283 | >PTEN-Y88C- CRVAQCPF   | 1365  | 1082  |
| >PTEN-Y88C- CRVAQYPF   | 214 | >PTEN-Y88C- CRVAQCPF   | 422   | 208   |
| >PTEN-Y88C- FNCRVAQY   | 418 | >PTEN-Y88C- FNCRVAQC   | 25326 | 24908 |
| >PTEN-Y88C- FNCRVAQYPI | 544 | >PTEN-Y88C- FNCRVAQCPI | 304   | 240   |
| >PTEN-Y88C- FNCRVAQYPI | 119 | >PTEN-Y88C- FNCRVAQCPI | 141   | 22    |
| >PTEN-Y88C- KFNCRVAQYI | 235 | >PTEN-Y88C- KFNCRVAQCI | 1673  | 1438  |
| >PTEN-Y88C- KFNCRVAQYI | 412 | >PTEN-Y88C- KFNCRVAQCI | 1115  | 703   |
| >PTEN-Y88C- KFNCRVAQYI | 140 | >PTEN-Y88C- KFNCRVAQCI | 294   | 154   |
| >PTEN-Y88C- KFNCRVAQY  | 167 | >PTEN-Y88C- KFNCRVAQC  | 22734 | 22567 |
| >PTEN-Y88C- KFNCRVAQY  | 377 | >PTEN-Y88C- KFNCRVAQC  | 5204  | 4827  |
| >PTEN-Y88C- KFNCRVAQYI | 170 | >PTEN-Y88C- KFNCRVAQCI | 575   | 405   |
| >PTEN-Y88C- KFNCRVAQYI | 101 | >PTEN-Y88C- KFNCRVAQCI | 403   | 302   |
| >PTEN-Y88C- KFNCRVAQYI | 431 | >PTEN-Y88C- KFNCRVAQCI | 222   | 209   |
| >PTEN-Y88C- KFNCRVAQYI | 331 | >PTEN-Y88C- KFNCRVAQCI | 271   | 60    |
| >PTEN-Y88C- KFNCRVAQY  | 131 | >PTEN-Y88C- KFNCRVAQC  | 36160 | 36029 |
| >PTEN-Y88C- AKFNCRVAQ' | 381 | >PTEN-Y88C- AKFNCRVAQ' | 32364 | 31983 |
| >PTEN-Y88C- AKFNCRVAQ' | 197 | >PTEN-Y88C- AKFNCRVAQ' | 27483 | 27286 |
| >PTEN-Y88C- AKFNCRVAQ' | 3   | >PTEN-Y88C- AKFNCRVAQ' | 287   | 284   |
| >PTEN-Y88C- AKFNCRVAQ' | 114 | >PTEN-Y88C- AKFNCRVAQ' | 139   | 25    |
| >PTEN-Y88H- YPFEDHNPPC | 43  | >PTEN-Y88H- HPFEDHNPPC | 89    | 46    |
| >PTEN-Y88H- YPFEDHNPPC | 145 | >PTEN-Y88H- HPFEDHNPPC | 272   | 127   |
| >PTEN-Y88H- YPFEDHNPPC | 145 | >PTEN-Y88H- HPFEDHNPPC | 171   | 26    |
| >PTEN-Y88H- YPFEDHNPP  | 145 | >PTEN-Y88H- HPFEDHNPP  | 289   | 144   |
| >PTEN-Y88H- YPFEDHNPPC | 43  | >PTEN-Y88H- HPFEDHNPPC | 95    | 52    |
| >PTEN-Y88H- YPFEDHNPPC | 22  | >PTEN-Y88H- HPFEDHNPPC | 25    | 3     |
| >PTEN-Y88H- YPFEDHNPP  | 291 | >PTEN-Y88H- HPFEDHNPP  | 626   | 335   |
| >PTEN-Y88H- TAKFNCRVAC | 362 | >PTEN-Y88H- TAKFNCRVAC | 13979 | 13617 |
| >PTEN-Y88H- TAKFNCRVAC | 97  | >PTEN-Y88H- TAKFNCRVAC | 6803  | 6706  |
| >PTEN-Y88H- AQYPFEDH   | 105 | >PTEN-Y88H- AQHPFEDH   | 410   | 305   |
| >PTEN-Y88H- AQYPFEDHNI | 263 | >PTEN-Y88H- AQHPFEDHN  | 953   | 690   |
| >PTEN-Y88H- CRVAQYPF   | 32  | >PTEN-Y88H- CRVAQHPF   | 47    | 15    |
| >PTEN-Y88H- CRVAQYPF   | 283 | >PTEN-Y88H- CRVAQHPF   | 445   | 162   |

|                       |     |                       |       |       |
|-----------------------|-----|-----------------------|-------|-------|
| >PTEN-Y88H-CRVAQYPF   | 214 | >PTEN-Y88H-CRVAQHPF   | 132   | 82    |
| >PTEN-Y88H-FNCRVAQY   | 418 | >PTEN-Y88H-FNCRVAQH   | 16064 | 15646 |
| >PTEN-Y88H-FNCRVAQYPI | 119 | >PTEN-Y88H-FNCRVAQHP  | 153   | 34    |
| >PTEN-Y88H-KFNCRVAQYI | 235 | >PTEN-Y88H-KFNCRVAQH  | 231   | 4     |
| >PTEN-Y88H-KFNCRVAQYI | 412 | >PTEN-Y88H-KFNCRVAQH  | 489   | 77    |
| >PTEN-Y88H-KFNCRVAQYI | 140 | >PTEN-Y88H-KFNCRVAQH  | 131   | 9     |
| >PTEN-Y88H-KFNCRVAQY  | 167 | >PTEN-Y88H-KFNCRVAQH  | 11446 | 11279 |
| >PTEN-Y88H-KFNCRVAQY  | 377 | >PTEN-Y88H-KFNCRVAQH  | 139   | 238   |
| >PTEN-Y88H-KFNCRVAQYI | 170 | >PTEN-Y88H-KFNCRVAQH  | 329   | 159   |
| >PTEN-Y88H-KFNCRVAQYI | 101 | >PTEN-Y88H-KFNCRVAQH  | 310   | 209   |
| >PTEN-Y88H-KFNCRVAQYI | 431 | >PTEN-Y88H-KFNCRVAQH  | 499   | 68    |
| >PTEN-Y88H-KFNCRVAQYI | 331 | >PTEN-Y88H-KFNCRVAQH  | 367   | 36    |
| >PTEN-Y88H-KFNCRVAQY  | 131 | >PTEN-Y88H-KFNCRVAQH  | 12770 | 12639 |
| >PTEN-Y88H-AKFNCRVAQI | 381 | >PTEN-Y88H-AKFNCRVAQI | 25063 | 24682 |
| >PTEN-Y88H-AKFNCRVAQI | 197 | >PTEN-Y88H-AKFNCRVAQI | 16460 | 16263 |
| >PTEN-Y88H-AKFNCRVAQI | 3   | >PTEN-Y88H-AKFNCRVAQI | 44    | 41    |
| >PTEN-Y88H-AKFNCRVAQI | 114 | >PTEN-Y88H-AKFNCRVAQI | 134   | 20    |
| >PTEN-Y88N-YPFEDHNPPC | 43  | >PTEN-Y88N-NPFEDHNPPC | 180   | 137   |
| >PTEN-Y88N-YPFEDHNPPC | 145 | >PTEN-Y88N-NPFEDHNPPC | 239   | 94    |
| >PTEN-Y88N-YPFEDHNPPC | 145 | >PTEN-Y88N-NPFEDHNPPC | 799   | 654   |
| >PTEN-Y88N-YPFEDHNPP  | 145 | >PTEN-Y88N-NPFEDHNPP  | 1102  | 957   |
| >PTEN-Y88N-YPFEDHNPPC | 43  | >PTEN-Y88N-NPFEDHNPPC | 282   | 239   |
| >PTEN-Y88N-YPFEDHNPPC | 22  | >PTEN-Y88N-NPFEDHNPPC | 50    | 28    |
| >PTEN-Y88N-YPFEDHNPP  | 291 | >PTEN-Y88N-NPFEDHNPP  | 1562  | 1271  |
| >PTEN-Y88N-TAKFNCRVAC | 362 | >PTEN-Y88N-TAKFNCRVAC | 21325 | 20963 |
| >PTEN-Y88N-TAKFNCRVAC | 97  | >PTEN-Y88N-TAKFNCRVAC | 15449 | 15352 |
| >PTEN-Y88N-AQYPFEDH   | 105 | >PTEN-Y88N-AQNPFEDH   | 737   | 632   |
| >PTEN-Y88N-AQYPFEDHNI | 263 | >PTEN-Y88N-AQNPFEDHN  | 1465  | 1202  |
| >PTEN-Y88N-CRVAQYPF   | 32  | >PTEN-Y88N-CRVAQNPF   | 42    | 10    |
| >PTEN-Y88N-CRVAQYPF   | 283 | >PTEN-Y88N-CRVAQNPF   | 1004  | 721   |
| >PTEN-Y88N-CRVAQYPF   | 214 | >PTEN-Y88N-CRVAQNPF   | 223   | 9     |
| >PTEN-Y88N-FNCRVAQY   | 418 | >PTEN-Y88N-FNCRVAQN   | 23950 | 23532 |
| >PTEN-Y88N-FNCRVAQYPI | 119 | >PTEN-Y88N-FNCRVAQNP  | 119   | 0     |
| >PTEN-Y88N-KFNCRVAQYI | 235 | >PTEN-Y88N-KFNCRVAQN  | 924   | 689   |
| >PTEN-Y88N-KFNCRVAQYI | 412 | >PTEN-Y88N-KFNCRVAQN  | 760   | 348   |
| >PTEN-Y88N-KFNCRVAQYI | 140 | >PTEN-Y88N-KFNCRVAQN  | 203   | 63    |
| >PTEN-Y88N-KFNCRVAQY  | 167 | >PTEN-Y88N-KFNCRVAQN  | 20979 | 20812 |
| >PTEN-Y88N-KFNCRVAQY  | 377 | >PTEN-Y88N-KFNCRVAQN  | 2426  | 2049  |
| >PTEN-Y88N-KFNCRVAQYI | 170 | >PTEN-Y88N-KFNCRVAQN  | 862   | 692   |
| >PTEN-Y88N-KFNCRVAQYI | 101 | >PTEN-Y88N-KFNCRVAQN  | 388   | 287   |
| >PTEN-Y88N-KFNCRVAQYI | 431 | >PTEN-Y88N-KFNCRVAQN  | 509   | 78    |
| >PTEN-Y88N-KFNCRVAQYI | 331 | >PTEN-Y88N-KFNCRVAQN  | 273   | 58    |
| >PTEN-Y88N-KFNCRVAQY  | 131 | >PTEN-Y88N-KFNCRVAQN  | 30942 | 30811 |

|                       |     |                       |       |       |
|-----------------------|-----|-----------------------|-------|-------|
| >PTEN-Y88N-AKFNCRVAQ' | 381 | >PTEN-Y88N-AKFNCRVAQ' | 32994 | 32613 |
| >PTEN-Y88N-AKFNCRVAQ' | 197 | >PTEN-Y88N-AKFNCRVAQ' | 23950 | 23753 |
| >PTEN-Y88N-AKFNCRVAQ' | 3   | >PTEN-Y88N-AKFNCRVAQ' | 562   | 559   |
| >PTEN-Y88N-AKFNCRVAQ' | 114 | >PTEN-Y88N-AKFNCRVAQ' | 121   | 7     |
| >PTEN-Y88S-YPFEDHNPPC | 43  | >PTEN-Y88S-YPFEDHNPPC | 34    | 9     |
| >PTEN-Y88S-YPFEDHNPPC | 145 | >PTEN-Y88S-YPFEDHNPPC | 435   | 290   |
| >PTEN-Y88S-YPFEDHNPPC | 145 | >PTEN-Y88S-YPFEDHNPPC | 345   | 200   |
| >PTEN-Y88S-YPFEDHNPP  | 145 | >PTEN-Y88S-YPFEDHNPP  | 2333  | 2188  |
| >PTEN-Y88S-YPFEDHNPPC | 43  | >PTEN-Y88S-YPFEDHNPPC | 502   | 459   |
| >PTEN-Y88S-YPFEDHNPPC | 22  | >PTEN-Y88S-YPFEDHNPPC | 96    | 74    |
| >PTEN-Y88S-YPFEDHNPP  | 291 | >PTEN-Y88S-YPFEDHNPP  | 2039  | 1748  |
| >PTEN-Y88S-TAKFNCRVAC | 362 | >PTEN-Y88S-TAKFNCRVAC | 20121 | 19759 |
| >PTEN-Y88S-TAKFNCRVAC | 97  | >PTEN-Y88S-TAKFNCRVAC | 14133 | 14036 |
| >PTEN-Y88S-AQYPFEDH   | 105 | >PTEN-Y88S-AQYPFEDH   | 710   | 605   |
| >PTEN-Y88S-AQYPFEDHNI | 263 | >PTEN-Y88S-AQYPFEDHNI | 1397  | 1134  |
| >PTEN-Y88S-CRVAQYPF   | 32  | >PTEN-Y88S-CRVAQYPF   | 23    | 9     |
| >PTEN-Y88S-CRVAQYPF   | 283 | >PTEN-Y88S-CRVAQYPF   | 586   | 303   |
| >PTEN-Y88S-CRVAQYPF   | 214 | >PTEN-Y88S-CRVAQYPF   | 173   | 41    |
| >PTEN-Y88S-NCRVAQYPF  | 697 | >PTEN-Y88S-NCRVAQYPF  | 238   | 459   |
| >PTEN-Y88S-FNCRVAQY   | 418 | >PTEN-Y88S-FNCRVAQY   | 24099 | 23681 |
| >PTEN-Y88S-FNCRVAQYPF | 544 | >PTEN-Y88S-FNCRVAQYPF | 264   | 280   |
| >PTEN-Y88S-FNCRVAQYPF | 119 | >PTEN-Y88S-FNCRVAQYPF | 57    | 62    |
| >PTEN-Y88S-KFNCRVAQYF | 235 | >PTEN-Y88S-KFNCRVAQYF | 851   | 616   |
| >PTEN-Y88S-KFNCRVAQYF | 412 | >PTEN-Y88S-KFNCRVAQYF | 726   | 314   |
| >PTEN-Y88S-KFNCRVAQYF | 140 | >PTEN-Y88S-KFNCRVAQYF | 272   | 132   |
| >PTEN-Y88S-KFNCRVAQY  | 167 | >PTEN-Y88S-KFNCRVAQY  | 20774 | 20607 |
| >PTEN-Y88S-KFNCRVAQY  | 377 | >PTEN-Y88S-KFNCRVAQY  | 1875  | 1498  |
| >PTEN-Y88S-KFNCRVAQYF | 170 | >PTEN-Y88S-KFNCRVAQYF | 604   | 434   |
| >PTEN-Y88S-KFNCRVAQYF | 101 | >PTEN-Y88S-KFNCRVAQYF | 686   | 585   |
| >PTEN-Y88S-KFNCRVAQYF | 431 | >PTEN-Y88S-KFNCRVAQYF | 261   | 170   |
| >PTEN-Y88S-KFNCRVAQYF | 331 | >PTEN-Y88S-KFNCRVAQYF | 206   | 125   |
| >PTEN-Y88S-KFNCRVAQY  | 131 | >PTEN-Y88S-KFNCRVAQY  | 32277 | 32146 |
| >PTEN-Y88S-AKFNCRVAQ' | 381 | >PTEN-Y88S-AKFNCRVAQ' | 31883 | 31502 |
| >PTEN-Y88S-AKFNCRVAQ' | 197 | >PTEN-Y88S-AKFNCRVAQ' | 22412 | 22215 |
| >PTEN-Y88S-AKFNCRVAQ' | 3   | >PTEN-Y88S-AKFNCRVAQ' | 257   | 254   |
| >PTEN-Y88S-AKFNCRVAQ' | 114 | >PTEN-Y88S-AKFNCRVAQ' | 64    | 50    |
| >PTPN11-A7:ATLAELVQYY | 167 | >PTPN11-A7:ATLAELVQYY | 248   | 81    |
| >PTPN11-A7:ATLAELVQYY | 442 | >PTPN11-A7:ATLAELVQYY | 16103 | 15661 |
| >PTPN11-A7:ATLAELVQYY | 285 | >PTPN11-A7:ATLAELVQYY | 11290 | 11005 |
| >PTPN11-A7:ATLAELVQYY | 247 | >PTPN11-A7:ATLAELVQYY | 7148  | 6901  |
| >PTPN11-A7:ATLAELVQYY | 371 | >PTPN11-A7:ATLAELVQYY | 5849  | 5478  |
| >PTPN11-A7:ATLAELVQY  | 112 | >PTPN11-A7:ATLAELVQY  | 12106 | 11994 |
| >PTPN11-A7:ATLAELVQYY | 73  | >PTPN11-A7:ATLAELVQYY | 1576  | 1503  |

|                       |       |                       |       |       |
|-----------------------|-------|-----------------------|-------|-------|
| >PTPN11-A7:ATLAELVQY  | 2821  | >PTPN11-A7:DTLAELVQY  | 251   | 2570  |
| >PTPN11-A7:ATLAELVQYY | 2985  | >PTPN11-A7:DTLAELVQYY | 325   | 2660  |
| >PTPN11-A7:ATLAELVQY  | 8380  | >PTPN11-A7:DTLAELVQY  | 285   | 8095  |
| >PTPN11-A7:ATLAELVQYY | 152   | >PTPN11-A7:DTLAELVQYY | 51    | 101   |
| >PTPN11-A7:ATLAELVQY  | 8     | >PTPN11-A7:DTLAELVQY  | 5     | 3     |
| >PTPN11-A7:ATLAELVQYY | 8     | >PTPN11-A7:DTLAELVQYY | 5     | 3     |
| >PTPN11-A7:ATLAELVQYY | 28    | >PTPN11-A7:DTLAELVQYY | 13    | 15    |
| >PTPN11-A7:ATLAELVQY  | 2379  | >PTPN11-A7:DTLAELVQY  | 166   | 2213  |
| >PTPN11-A7:ATLAELVQYY | 778   | >PTPN11-A7:DTLAELVQYY | 56    | 722   |
| >PTPN11-A7:ATLAELVQYY | 3644  | >PTPN11-A7:DTLAELVQYY | 351   | 3293  |
| >PTPN11-A7:ATLAELVQY  | 70    | >PTPN11-A7:DTLAELVQY  | 246   | 176   |
| >PTPN11-A7:ATLAELVQYY | 196   | >PTPN11-A7:DTLAELVQYY | 358   | 162   |
| >PTPN11-A7:ATLAELVQYY | 72    | >PTPN11-A7:DTLAELVQYY | 232   | 160   |
| >PTPN11-A7:ATLAELVQY  | 342   | >PTPN11-A7:DTLAELVQY  | 6031  | 5689  |
| >PTPN11-A7:ATLAELVQYY | 1544  | >PTPN11-A7:DTLAELVQYY | 460   | 1084  |
| >PTPN11-A7:ATLAELVQYY | 363   | >PTPN11-A7:DTLAELVQYY | 22    | 341   |
| >PTPN11-A7:ATLAELVQY  | 256   | >PTPN11-A7:DTLAELVQY  | 3606  | 3350  |
| >PTPN11-A7:ATLAELVQYY | 70    | >PTPN11-A7:DTLAELVQYY | 1366  | 1296  |
| >PTPN11-A7:ATLAELVQYY | 290   | >PTPN11-A7:DTLAELVQYY | 4274  | 3984  |
| >PTPN11-A7:ATLAELVQY  | 5     | >PTPN11-A7:DTLAELVQY  | 71    | 66    |
| >PTPN11-A7:ATLAELVQYY | 5     | >PTPN11-A7:DTLAELVQYY | 91    | 86    |
| >PTPN11-A7:ATLAELVQYY | 23    | >PTPN11-A7:DTLAELVQYY | 1510  | 1487  |
| >PTPN11-A7:ATLAELVQYY | 460   | >PTPN11-A7:DTLAELVQYY | 6574  | 6114  |
| >PTPN11-A7:ATLAELVQYY | 302   | >PTPN11-A7:DTLAELVQYY | 5299  | 4997  |
| >PTPN11-A7:ATLAELVQYY | 379   | >PTPN11-A7:DTLAELVQYY | 6239  | 5860  |
| >PTPN11-A7:ATLAELVQY  | 166   | >PTPN11-A7:DTLAELVQY  | 2743  | 2577  |
| >PTPN11-A7:ATLAELVQYY | 136   | >PTPN11-A7:DTLAELVQYY | 817   | 681   |
| >PTPN11-A7:ATLAELVQYY | 137   | >PTPN11-A7:DTLAELVQYY | 2210  | 2073  |
| >PTPN11-A7:FATLAELV   | 4821  | >PTPN11-A7:FDTLAELV   | 52    | 4769  |
| >PTPN11-A7:FATLAELVQY | 360   | >PTPN11-A7:FDTLAELVQY | 6526  | 6166  |
| >PTPN11-A7:FATLAELV   | 189   | >PTPN11-A7:FDTLAELV   | 3737  | 3548  |
| >PTPN11-A7:FATLAELV   | 38    | >PTPN11-A7:FDTLAELV   | 4155  | 4117  |
| >PTPN11-A7:FATLAELV   | 97    | >PTPN11-A7:FDTLAELV   | 14195 | 14098 |
| >PTPN11-A7:FATLAELVQY | 99    | >PTPN11-A7:FDTLAELVQY | 583   | 484   |
| >PTPN11-A7:FATLAELV   | 99    | >PTPN11-A7:FDTLAELV   | 4740  | 4641  |
| >PTPN11-A7:FATLAELVQY | 41    | >PTPN11-A7:FDTLAELVQY | 17849 | 17808 |
| >PTPN11-A7:FATLAELVQY | 41    | >PTPN11-A7:FDTLAELVQY | 19931 | 19890 |
| >PTPN11-A7:FATLAELVQY | 27    | >PTPN11-A7:FDTLAELVQY | 1682  | 1655  |
| >PTPN11-A7:FATLAELVQY | 310   | >PTPN11-A7:FDTLAELVQY | 9476  | 9166  |
| >PTPN11-A7:FATLAELVQY | 221   | >PTPN11-A7:FDTLAELVQY | 19619 | 19398 |
| >PTPN11-A7:FATLAELVQY | 104   | >PTPN11-A7:FDTLAELVQY | 778   | 674   |
| >PTPN11-A7:FATLAELV   | 3765  | >PTPN11-A7:FDTLAELV   | 86    | 3679  |
| >PTPN11-A7:FATLAELV   | 17503 | >PTPN11-A7:FDTLAELV   | 29    | 17474 |

|                        |     |                        |       |       |
|------------------------|-----|------------------------|-------|-------|
| >PTPN11-A7:KFATLAEL    | 82  | >PTPN11-A7:KFDTLAEL    | 1134  | 1052  |
| >PTPN11-A7:KFATLAELV   | 64  | >PTPN11-A7:KFDTLAELV   | 918   | 854   |
| >PTPN11-A7:KFATLAEL    | 221 | >PTPN11-A7:KFDTLAEL    | 1560  | 1339  |
| >PTPN11-A7:KFATLAELVQ  | 27  | >PTPN11-A7:KFDTLAELVQ  | 190   | 163   |
| >PTPN11-A7:KFATLAELVQ  | 319 | >PTPN11-A7:KFDTLAELVQ  | 1088  | 769   |
| >PTPN11-A7:KFATLAELVQ  | 117 | >PTPN11-A7:KFDTLAELVQ  | 276   | 159   |
| >PTPN11-A7:KFATLAELVQ  | 144 | >PTPN11-A7:KFDTLAELVQ  | 111   | 33    |
| >PTPN11-A7:KFATLAEL    | 210 | >PTPN11-A7:KFDTLAEL    | 507   | 297   |
| >PTPN11-A7:KFATLAELV   | 149 | >PTPN11-A7:KFDTLAELV   | 392   | 243   |
| >PTPN11-A7:EKFATLAEL   | 36  | >PTPN11-A7:EKFDTLAEL   | 76    | 40    |
| >PTPN11-A7:EKFATLAELV  | 324 | >PTPN11-A7:EKFDTLAELV  | 645   | 321   |
| >PTPN11-A7:EKFATLAEL   | 89  | >PTPN11-A7:EKFDTLAEL   | 244   | 155   |
| >PTPN11-A7:GEKFATLA    | 283 | >PTPN11-A7:GEKFDTLA    | 3480  | 3197  |
| >PTPN11-A7:GEKFATLAEL' | 114 | >PTPN11-A7:GEKFDTLAEL' | 332   | 218   |
| >PTPN11-A7:GEKFATLAEL' | 110 | >PTPN11-A7:GEKFDTLAEL' | 174   | 64    |
| >PTPN11-A7:GEKFATLA    | 277 | >PTPN11-A7:GEKFDTLA    | 513   | 236   |
| >PTPN11-A7:GEKFATLAEL  | 173 | >PTPN11-A7:GEKFDTLAEL  | 162   | 11    |
| >PTPN11-A7:GEKFATLAEL' | 367 | >PTPN11-A7:GEKFDTLAEL' | 776   | 409   |
| >PTPN11-A7:GEKFATLA    | 55  | >PTPN11-A7:GEKFDTLA    | 120   | 65    |
| >PTPN11-A7:GEKFATLAEL' | 309 | >PTPN11-A7:GEKFDTLAEL' | 438   | 129   |
| >PTPN11-A7:GEKFATLAEL  | 478 | >PTPN11-A7:GEKFDTLAEL  | 703   | 225   |
| >PTPN11-A7:GEKFATLAEL' | 9   | >PTPN11-A7:GEKFDTLAEL' | 12    | 3     |
| >PTPN11-A7:YGGEKFATL   | 410 | >PTPN11-A7:YGGEKFDTL   | 806   | 396   |
| >PTPN11-A7:YGGEKFATL   | 121 | >PTPN11-A7:YGGEKFDTL   | 987   | 866   |
| >PTPN11-A7:LYGGEKFATL  | 7   | >PTPN11-A7:LYGGEKFDTL  | 7     | 0     |
| >PTPN11-A7:DLYGGEKFA   | 494 | >PTPN11-A7:DLYGGEKFD   | 19704 | 19210 |
| >PTPN11-A7:DLYGGEKFAT  | 31  | >PTPN11-A7:DLYGGEKFDT  | 51    | 20    |
| >PTPN11-A7:DLYGGEKFAT  | 396 | >PTPN11-A7:DLYGGEKFDT  | 803   | 407   |
| >PTPN11-A7:DLYGGEKFA   | 293 | >PTPN11-A7:DLYGGEKFD   | 19649 | 19356 |
| >PTPN11-A7:DLYGGEKFAT  | 66  | >PTPN11-A7:DLYGGEKFDT  | 80    | 14    |
| >PTPN11-A7:DLYGGEKFAT  | 205 | >PTPN11-A7:DLYGGEKFDT  | 584   | 379   |
| >PTPN11-A7:DLYGGEKFA   | 143 | >PTPN11-A7:DLYGGEKFD   | 23525 | 23382 |
| >PTPN11-A7:DLYGGEKFAT  | 11  | >PTPN11-A7:DLYGGEKFDT  | 27    | 16    |
| >PTPN11-A7:ATLAELVQYY  | 167 | >PTPN11-A7:TTLAELVQYY  | 126   | 41    |
| >PTPN11-A7:ATLAELVQYY  | 442 | >PTPN11-A7:TTLAELVQYY  | 946   | 504   |
| >PTPN11-A7:ATLAELVQYY  | 285 | >PTPN11-A7:TTLAELVQYY  | 673   | 388   |
| >PTPN11-A7:ATLAELVQYY  | 247 | >PTPN11-A7:TTLAELVQYY  | 1139  | 892   |
| >PTPN11-A7:ATLAELVQYY  | 371 | >PTPN11-A7:TTLAELVQYY  | 1039  | 668   |
| >PTPN11-A7:ATLAELVQY   | 112 | >PTPN11-A7:TTLAELVQY   | 134   | 22    |
| >PTPN11-A7:ATLAELVQYY  | 73  | >PTPN11-A7:TTLAELVQYY  | 121   | 48    |
| >PTPN11-A7:ATLAELVQYY  | 152 | >PTPN11-A7:TTLAELVQYY  | 93    | 59    |
| >PTPN11-A7:ATLAELVQY   | 8   | >PTPN11-A7:TTLAELVQY   | 8     | 0     |
| >PTPN11-A7:ATLAELVQYY  | 8   | >PTPN11-A7:TTLAELVQYY  | 7     | 1     |

|                        |      |                        |      |      |
|------------------------|------|------------------------|------|------|
| >PTPN11-A7:ATLAELVQYY  | 28   | >PTPN11-A7:TTLAELVQYYI | 25   | 3    |
| >PTPN11-A7:ATLAELVQYY  | 778  | >PTPN11-A7:TTLAELVQYY  | 184  | 594  |
| >PTPN11-A7:ATLAELVQY   | 70   | >PTPN11-A7:TTLAELVQY   | 46   | 24   |
| >PTPN11-A7:ATLAELVQYY  | 196  | >PTPN11-A7:TTLAELVQYY  | 217  | 21   |
| >PTPN11-A7:ATLAELVQYY  | 72   | >PTPN11-A7:TTLAELVQYY  | 80   | 8    |
| >PTPN11-A7:ATLAELVQY   | 342  | >PTPN11-A7:TTLAELVQY   | 1242 | 900  |
| >PTPN11-A7:ATLAELVQYY  | 1544 | >PTPN11-A7:TTLAELVQYY  | 328  | 1216 |
| >PTPN11-A7:ATLAELVQYY  | 3436 | >PTPN11-A7:TTLAELVQYYI | 179  | 3257 |
| >PTPN11-A7:ATLAELVQYY  | 363  | >PTPN11-A7:TTLAELVQYYI | 26   | 337  |
| >PTPN11-A7:ATLAELVQY   | 256  | >PTPN11-A7:TTLAELVQY   | 204  | 52   |
| >PTPN11-A7:ATLAELVQYY  | 70   | >PTPN11-A7:TTLAELVQYY  | 56   | 14   |
| >PTPN11-A7:ATLAELVQYY  | 290  | >PTPN11-A7:TTLAELVQYY  | 1235 | 945  |
| >PTPN11-A7:ATLAELVQY   | 5    | >PTPN11-A7:TTLAELVQY   | 7    | 2    |
| >PTPN11-A7:ATLAELVQYY  | 5    | >PTPN11-A7:TTLAELVQYY  | 7    | 2    |
| >PTPN11-A7:ATLAELVQYY  | 23   | >PTPN11-A7:TTLAELVQYYI | 72   | 49   |
| >PTPN11-A7:ATLAELVQYY  | 932  | >PTPN11-A7:TTLAELVQYY  | 260  | 672  |
| >PTPN11-A7:ATLAELVQYY  | 1812 | >PTPN11-A7:TTLAELVQYYI | 471  | 1341 |
| >PTPN11-A7:ATLAELVQYY  | 460  | >PTPN11-A7:TTLAELVQYY  | 369  | 91   |
| >PTPN11-A7:ATLAELVQYY  | 302  | >PTPN11-A7:TTLAELVQYYI | 255  | 47   |
| >PTPN11-A7:ATLAELVQYY  | 379  | >PTPN11-A7:TTLAELVQYYI | 309  | 70   |
| >PTPN11-A7:ATLAELVQY   | 166  | >PTPN11-A7:TTLAELVQY   | 216  | 50   |
| >PTPN11-A7:ATLAELVQYY  | 136  | >PTPN11-A7:TTLAELVQYY  | 207  | 71   |
| >PTPN11-A7:ATLAELVQYY  | 137  | >PTPN11-A7:TTLAELVQYYI | 178  | 41   |
| >PTPN11-A7:FATLAELVQY  | 360  | >PTPN11-A7:FTTLAELVQY  | 24   | 336  |
| >PTPN11-A7:FATLAELVQY  | 1890 | >PTPN11-A7:FTTLAELVQY` | 42   | 1848 |
| >PTPN11-A7:FATLAELV    | 189  | >PTPN11-A7:FTTLAELV    | 71   | 118  |
| >PTPN11-A7:FATLAELV    | 1117 | >PTPN11-A7:FTTLAELV    | 423  | 694  |
| >PTPN11-A7:FATLAELV    | 38   | >PTPN11-A7:FTTLAELV    | 26   | 12   |
| >PTPN11-A7:FATLAELV    | 1497 | >PTPN11-A7:FTTLAELV    | 446  | 1051 |
| >PTPN11-A7:FATLAELV    | 829  | >PTPN11-A7:FTTLAELV    | 162  | 667  |
| >PTPN11-A7:FATLAELV    | 97   | >PTPN11-A7:FTTLAELV    | 72   | 25   |
| >PTPN11-A7:FATLAELVQY  | 2570 | >PTPN11-A7:FTTLAELVQY  | 415  | 2155 |
| >PTPN11-A7:FATLAELVQY  | 6869 | >PTPN11-A7:FTTLAELVQY  | 294  | 6575 |
| >PTPN11-A7:FATLAELVQY` | 7899 | >PTPN11-A7:FTTLAELVQY` | 417  | 7482 |
| >PTPN11-A7:FATLAELVQY  | 4417 | >PTPN11-A7:FTTLAELVQY` | 363  | 4054 |
| >PTPN11-A7:FATLAELVQY  | 3450 | >PTPN11-A7:FTTLAELVQY  | 111  | 3339 |
| >PTPN11-A7:FATLAELVQY  | 1972 | >PTPN11-A7:FTTLAELVQY` | 62   | 1910 |
| >PTPN11-A7:FATLAELVQY  | 717  | >PTPN11-A7:FTTLAELVQY  | 207  | 510  |
| >PTPN11-A7:FATLAELVQY  | 99   | >PTPN11-A7:FTTLAELVQY` | 22   | 77   |
| >PTPN11-A7:FATLAELVQY  | 1566 | >PTPN11-A7:FTTLAELVQY  | 262  | 1304 |
| >PTPN11-A7:FATLAELVQY  | 693  | >PTPN11-A7:FTTLAELVQY  | 231  | 462  |
| >PTPN11-A7:FATLAELVQY` | 778  | >PTPN11-A7:FTTLAELVQY` | 205  | 573  |
| >PTPN11-A7:FATLAELV    | 99   | >PTPN11-A7:FTTLAELV    | 19   | 80   |

|                       |      |                        |      |      |
|-----------------------|------|------------------------|------|------|
| >PTPN11-A7:FATLAELV   | 1002 | >PTPN11-A7:FTTLAELV    | 204  | 798  |
| >PTPN11-A7:FATLAELVQY | 3011 | >PTPN11-A7:FTTLAELVQY  | 351  | 2660 |
| >PTPN11-A7:FATLAELVQY | 41   | >PTPN11-A7:FTTLAELVQY  | 12   | 29   |
| >PTPN11-A7:FATLAELVQY | 41   | >PTPN11-A7:FTTLAELVQY  | 9    | 32   |
| >PTPN11-A7:FATLAELVQY | 27   | >PTPN11-A7:FTTLAELVQY  | 499  | 472  |
| >PTPN11-A7:FATLAELVQY | 310  | >PTPN11-A7:FTTLAELVQY  | 5914 | 5604 |
| >PTPN11-A7:FATLAELVQY | 221  | >PTPN11-A7:FTTLAELVQY  | 160  | 61   |
| >PTPN11-A7:FATLAELV   | 2801 | >PTPN11-A7:FTTLAELV    | 78   | 2723 |
| >PTPN11-A7:FATLAELV   | 3623 | >PTPN11-A7:FTTLAELV    | 299  | 3324 |
| >PTPN11-A7:FATLAELVQY | 104  | >PTPN11-A7:FTTLAELVQY  | 16   | 88   |
| >PTPN11-A7:FATLAELVQY | 850  | >PTPN11-A7:FTTLAELVQY  | 57   | 793  |
| >PTPN11-A7:FATLAELVQY | 912  | >PTPN11-A7:FTTLAELVQY  | 218  | 694  |
| >PTPN11-A7:KFATLAEL   | 82   | >PTPN11-A7:KFTTLAEL    | 988  | 906  |
| >PTPN11-A7:KFATLAELV  | 64   | >PTPN11-A7:KFTTLAELV   | 911  | 847  |
| >PTPN11-A7:KFATLAEL   | 221  | >PTPN11-A7:KFTTLAEL    | 278  | 57   |
| >PTPN11-A7:KFATLAELVQ | 27   | >PTPN11-A7:KFTTLAELVQ  | 48   | 21   |
| >PTPN11-A7:KFATLAELVQ | 319  | >PTPN11-A7:KFTTLAELVQ  | 756  | 437  |
| >PTPN11-A7:KFATLAELVQ | 117  | >PTPN11-A7:KFTTLAELVQ  | 169  | 52   |
| >PTPN11-A7:KFATLAELVQ | 144  | >PTPN11-A7:KFTTLAELVQ  | 220  | 76   |
| >PTPN11-A7:KFATLAEL   | 210  | >PTPN11-A7:KFTTLAEL    | 167  | 43   |
| >PTPN11-A7:KFATLAELV  | 149  | >PTPN11-A7:KFTTLAELV   | 118  | 31   |
| >PTPN11-A7:EKFATLAELV | 917  | >PTPN11-A7:EKFTTLAELV  | 368  | 549  |
| >PTPN11-A7:EKFATLAEL  | 36   | >PTPN11-A7:EKFTTLAEL   | 29   | 7    |
| >PTPN11-A7:EKFATLAELV | 324  | >PTPN11-A7:EKFTTLAELV  | 285  | 39   |
| >PTPN11-A7:EKFATLAEL  | 89   | >PTPN11-A7:EKFTTLAEL   | 181  | 92   |
| >PTPN11-A7:GEKFATLA   | 283  | >PTPN11-A7:GEKFTTLA    | 1349 | 1066 |
| >PTPN11-A7:GEKFATLAEL | 114  | >PTPN11-A7:GEKFTTLAEL  | 108  | 6    |
| >PTPN11-A7:GEKFATLAEL | 110  | >PTPN11-A7:GEKFTTLAEL  | 142  | 32   |
| >PTPN11-A7:GEKFATLA   | 277  | >PTPN11-A7:GEKFTTLA    | 247  | 30   |
| >PTPN11-A7:GEKFATLAEL | 173  | >PTPN11-A7:GEKFTTLAEL  | 181  | 8    |
| >PTPN11-A7:GEKFATLAEL | 367  | >PTPN11-A7:GEKFTTLAEL  | 428  | 61   |
| >PTPN11-A7:GEKFATLA   | 55   | >PTPN11-A7:GEKFTTLA    | 53   | 2    |
| >PTPN11-A7:GEKFATLAEL | 309  | >PTPN11-A7:GEKFTTLAEL  | 270  | 39   |
| >PTPN11-A7:GEKFATLAEL | 478  | >PTPN11-A7:GEKFTTLAEL  | 270  | 208  |
| >PTPN11-A7:GEKFATLAEL | 9    | >PTPN11-A7:GEKFTTLAEL  | 11   | 2    |
| >PTPN11-A7:YGGEKFATL  | 410  | >PTPN11-A7:YGGEKF TTL  | 556  | 146  |
| >PTPN11-A7:YGGEKFATL  | 121  | >PTPN11-A7:YGGEKF TTL  | 144  | 23   |
| >PTPN11-A7:LYGGEKFATL | 4237 | >PTPN11-A7:LYGGEKF TTL | 474  | 3763 |
| >PTPN11-A7:LYGGEKFAT  | 1107 | >PTPN11-A7:LYGGEKF TT  | 476  | 631  |
| >PTPN11-A7:LYGGEKFATL | 7    | >PTPN11-A7:LYGGEKF TTL | 8    | 1    |
| >PTPN11-A7:DLYGGEKFA  | 494  | >PTPN11-A7:DLYGGEK FT  | 2964 | 2470 |
| >PTPN11-A7:DLYGGEKFAT | 31   | >PTPN11-A7:DLYGGEK FT  | 51   | 20   |
| >PTPN11-A7:DLYGGEKFAT | 396  | >PTPN11-A7:DLYGGEK FT  | 1057 | 661  |

|                       |      |                       |      |      |
|-----------------------|------|-----------------------|------|------|
| >PTPN11-A7:DLYGGEKFA  | 293  | >PTPN11-A7:DLYGGEKFT  | 3501 | 3208 |
| >PTPN11-A7:DLYGGEKFAT | 66   | >PTPN11-A7:DLYGGEKFTT | 68   | 2    |
| >PTPN11-A7:DLYGGEKFA  | 205  | >PTPN11-A7:DLYGGEKFTT | 693  | 488  |
| >PTPN11-A7:DLYGGEKFA  | 143  | >PTPN11-A7:DLYGGEKFT  | 1669 | 1526 |
| >PTPN11-A7:DLYGGEKFAT | 653  | >PTPN11-A7:DLYGGEKFTT | 233  | 420  |
| >PTPN11-A7:DLYGGEKFAT | 11   | >PTPN11-A7:DLYGGEKFTT | 12   | 1    |
| >PTPN11-A7:ATLAELVQYY | 167  | >PTPN11-A7:VTLAELVQYY | 127  | 40   |
| >PTPN11-A7:ATLAELVQYY | 442  | >PTPN11-A7:VTLAELVQYY | 610  | 168  |
| >PTPN11-A7:ATLAELVQYY | 285  | >PTPN11-A7:VTLAELVQYY | 415  | 130  |
| >PTPN11-A7:ATLAELVQYY | 247  | >PTPN11-A7:VTLAELVQYY | 183  | 64   |
| >PTPN11-A7:ATLAELVQYY | 371  | >PTPN11-A7:VTLAELVQYY | 1111 | 740  |
| >PTPN11-A7:ATLAELVQY  | 112  | >PTPN11-A7:VTLAELVQY  | 282  | 170  |
| >PTPN11-A7:ATLAELVQYY | 73   | >PTPN11-A7:VTLAELVQYY | 224  | 151  |
| >PTPN11-A7:ATLAELVQYY | 152  | >PTPN11-A7:VTLAELVQYY | 218  | 66   |
| >PTPN11-A7:ATLAELVQY  | 8    | >PTPN11-A7:VTLAELVQY  | 26   | 18   |
| >PTPN11-A7:ATLAELVQYY | 8    | >PTPN11-A7:VTLAELVQYY | 21   | 13   |
| >PTPN11-A7:ATLAELVQYY | 28   | >PTPN11-A7:VTLAELVQYY | 116  | 88   |
| >PTPN11-A7:ATLAELVQY  | 70   | >PTPN11-A7:VTLAELVQY  | 41   | 29   |
| >PTPN11-A7:ATLAELVQYY | 196  | >PTPN11-A7:VTLAELVQYY | 247  | 51   |
| >PTPN11-A7:ATLAELVQY  | 579  | >PTPN11-A7:VTLAELVQY  | 350  | 229  |
| >PTPN11-A7:ATLAELVQYY | 72   | >PTPN11-A7:VTLAELVQYY | 69   | 3    |
| >PTPN11-A7:ATLAELVQY  | 342  | >PTPN11-A7:VTLAELVQY  | 1498 | 1156 |
| >PTPN11-A7:ATLAELVQYY | 363  | >PTPN11-A7:VTLAELVQYY | 425  | 62   |
| >PTPN11-A7:ATLAELVQY  | 256  | >PTPN11-A7:VTLAELVQY  | 89   | 167  |
| >PTPN11-A7:ATLAELVQYY | 70   | >PTPN11-A7:VTLAELVQYY | 27   | 43   |
| >PTPN11-A7:ATLAELVQYY | 290  | >PTPN11-A7:VTLAELVQYY | 412  | 122  |
| >PTPN11-A7:ATLAELVQY  | 5    | >PTPN11-A7:VTLAELVQY  | 5    | 0    |
| >PTPN11-A7:ATLAELVQYY | 5    | >PTPN11-A7:VTLAELVQYY | 5    | 0    |
| >PTPN11-A7:ATLAELVQYY | 23   | >PTPN11-A7:VTLAELVQYY | 23   | 0    |
| >PTPN11-A7:ATLAELVQYY | 932  | >PTPN11-A7:VTLAELVQYY | 233  | 699  |
| >PTPN11-A7:ATLAELVQYY | 1812 | >PTPN11-A7:VTLAELVQYY | 461  | 1351 |
| >PTPN11-A7:ATLAELVQY  | 1820 | >PTPN11-A7:VTLAELVQY  | 303  | 1517 |
| >PTPN11-A7:ATLAELVQYY | 460  | >PTPN11-A7:VTLAELVQYY | 94   | 366  |
| >PTPN11-A7:ATLAELVQYY | 302  | >PTPN11-A7:VTLAELVQYY | 75   | 227  |
| >PTPN11-A7:ATLAELVQYY | 379  | >PTPN11-A7:VTLAELVQYY | 228  | 151  |
| >PTPN11-A7:ATLAELVQY  | 166  | >PTPN11-A7:VTLAELVQY  | 105  | 61   |
| >PTPN11-A7:ATLAELVQYY | 136  | >PTPN11-A7:VTLAELVQYY | 139  | 3    |
| >PTPN11-A7:ATLAELVQYY | 137  | >PTPN11-A7:VTLAELVQYY | 84   | 53   |
| >PTPN11-A7:FATLAELVQY | 360  | >PTPN11-A7:FVTLAELVQY | 206  | 154  |
| >PTPN11-A7:FATLAELV   | 2281 | >PTPN11-A7:FVTLAELV   | 290  | 1991 |
| >PTPN11-A7:FATLAELV   | 189  | >PTPN11-A7:FVTLAELV   | 40   | 149  |
| >PTPN11-A7:FATLAELV   | 1117 | >PTPN11-A7:FVTLAELV   | 138  | 979  |
| >PTPN11-A7:FATLAELV   | 38   | >PTPN11-A7:FVTLAELV   | 12   | 26   |



|                       |      |                       |      |      |
|-----------------------|------|-----------------------|------|------|
| >PTPN11-A7:FATLAELV   | 1497 | >PTPN11-A7:FVTLAELV   | 319  | 1178 |
| >PTPN11-A7:FATLAELV   | 829  | >PTPN11-A7:FVTLAELV   | 77   | 752  |
| >PTPN11-A7:FATLAELV   | 97   | >PTPN11-A7:FVTLAELV   | 12   | 85   |
| >PTPN11-A7:FATLAELVQY | 3450 | >PTPN11-A7:FVTLAELVQY | 164  | 3286 |
| >PTPN11-A7:FATLAELVQY | 1972 | >PTPN11-A7:FVTLAELVQY | 91   | 1881 |
| >PTPN11-A7:FATLAELVQY | 717  | >PTPN11-A7:FVTLAELVQY | 458  | 259  |
| >PTPN11-A7:FATLAELVQY | 99   | >PTPN11-A7:FVTLAELVQY | 20   | 79   |
| >PTPN11-A7:FATLAELVQY | 693  | >PTPN11-A7:FVTLAELVQY | 399  | 294  |
| >PTPN11-A7:FATLAELVQY | 778  | >PTPN11-A7:FVTLAELVQY | 472  | 306  |
| >PTPN11-A7:FATLAELV   | 99   | >PTPN11-A7:FVTLAELV   | 30   | 69   |
| >PTPN11-A7:FATLAELV   | 1002 | >PTPN11-A7:FVTLAELV   | 397  | 605  |
| >PTPN11-A7:FATLAELVQY | 3011 | >PTPN11-A7:FVTLAELVQY | 230  | 2781 |
| >PTPN11-A7:FATLAELVQY | 41   | >PTPN11-A7:FVTLAELVQY | 381  | 340  |
| >PTPN11-A7:FATLAELVQY | 41   | >PTPN11-A7:FVTLAELVQY | 577  | 536  |
| >PTPN11-A7:FATLAELVQY | 27   | >PTPN11-A7:FVTLAELVQY | 105  | 78   |
| >PTPN11-A7:FATLAELVQY | 310  | >PTPN11-A7:FVTLAELVQY | 2928 | 2618 |
| >PTPN11-A7:FATLAELVQY | 221  | >PTPN11-A7:FVTLAELVQY | 1729 | 1508 |
| >PTPN11-A7:FATLAELVQY | 104  | >PTPN11-A7:FVTLAELVQY | 76   | 28   |
| >PTPN11-A7:FATLAELVQY | 912  | >PTPN11-A7:FVTLAELVQY | 361  | 551  |
| >PTPN11-A7:YYDLYGGEKF | 8186 | >PTPN11-A7:YYDLYGGEKF | 422  | 7764 |
| >PTPN11-A7:KFATLAEL   | 82   | >PTPN11-A7:KFVTLAEL   | 462  | 380  |
| >PTPN11-A7:KFATLAELV  | 64   | >PTPN11-A7:KFVTLAELV  | 409  | 345  |
| >PTPN11-A7:KFATLAEL   | 221  | >PTPN11-A7:KFVTLAEL   | 347  | 126  |
| >PTPN11-A7:KFATLAELVQ | 27   | >PTPN11-A7:KFVTLAELVQ | 35   | 8    |
| >PTPN11-A7:KFATLAELVQ | 319  | >PTPN11-A7:KFVTLAELVQ | 1188 | 869  |
| >PTPN11-A7:KFATLAELVQ | 117  | >PTPN11-A7:KFVTLAELVQ | 219  | 102  |
| >PTPN11-A7:KFATLAELVQ | 144  | >PTPN11-A7:KFVTLAELVQ | 700  | 556  |
| >PTPN11-A7:KFATLAEL   | 210  | >PTPN11-A7:KFVTLAEL   | 110  | 100  |
| >PTPN11-A7:KFATLAELV  | 149  | >PTPN11-A7:KFVTLAELV  | 99   | 50   |
| >PTPN11-A7:EKFATLAEL  | 36   | >PTPN11-A7:EKFVTLAEL  | 51   | 15   |
| >PTPN11-A7:EKFATLAELV | 324  | >PTPN11-A7:EKFVTLAELV | 439  | 115  |
| >PTPN11-A7:EKFATLAEL  | 89   | >PTPN11-A7:EKFVTLAEL  | 413  | 324  |
| >PTPN11-A7:GEKFATLA   | 283  | >PTPN11-A7:GEKFVTLA   | 669  | 386  |
| >PTPN11-A7:GEKFATLAEL | 114  | >PTPN11-A7:GEKFVTLAEL | 84   | 30   |
| >PTPN11-A7:GEKFATLAEL | 110  | >PTPN11-A7:GEKFVTLAEL | 117  | 7    |
| >PTPN11-A7:GEKFATLA   | 277  | >PTPN11-A7:GEKFVTLA   | 206  | 71   |
| >PTPN11-A7:GEKFATLAEL | 173  | >PTPN11-A7:GEKFVTLAEL | 178  | 5    |
| >PTPN11-A7:GEKFATLAEL | 367  | >PTPN11-A7:GEKFVTLAEL | 395  | 28   |
| >PTPN11-A7:GEKFATLA   | 55   | >PTPN11-A7:GEKFVTLA   | 57   | 2    |
| >PTPN11-A7:GEKFATLAEL | 309  | >PTPN11-A7:GEKFVTLAEL | 298  | 11   |
| >PTPN11-A7:GEKFATLAEL | 478  | >PTPN11-A7:GEKFVTLAEL | 358  | 120  |
| >PTPN11-A7:GEKFATLAEL | 9    | >PTPN11-A7:GEKFVTLAEL | 7    | 2    |
| >PTPN11-A7:YGGEKFATL  | 410  | >PTPN11-A7:YGGEKFVTL  | 627  | 217  |

|                       |      |                       |       |       |
|-----------------------|------|-----------------------|-------|-------|
| >PTPN11-A7:YGGEKFATL  | 121  | >PTPN11-A7:YGGEKFVTL  | 187   | 66    |
| >PTPN11-A7:LYGGEKFA   | 1652 | >PTPN11-A7:LYGGEKFV   | 198   | 1454  |
| >PTPN11-A7:LYGGEKFATL | 7    | >PTPN11-A7:LYGGEKFVTL | 6     | 1     |
| >PTPN11-A7:DLYGGEKFA  | 494  | >PTPN11-A7:DLYGGEKFV  | 10    | 484   |
| >PTPN11-A7:DLYGGEKFAT | 31   | >PTPN11-A7:DLYGGEKFVT | 34    | 3     |
| >PTPN11-A7:DLYGGEKFAT | 396  | >PTPN11-A7:DLYGGEKFVT | 547   | 151   |
| >PTPN11-A7:DLYGGEKFA  | 293  | >PTPN11-A7:DLYGGEKFV  | 11    | 282   |
| >PTPN11-A7:DLYGGEKFAT | 66   | >PTPN11-A7:DLYGGEKFVT | 52    | 14    |
| >PTPN11-A7:DLYGGEKFA  | 3193 | >PTPN11-A7:DLYGGEKFV  | 53    | 3140  |
| >PTPN11-A7:DLYGGEKFAT | 205  | >PTPN11-A7:DLYGGEKFVT | 452   | 247   |
| >PTPN11-A7:DLYGGEKFA  | 143  | >PTPN11-A7:DLYGGEKFV  | 8     | 135   |
| >PTPN11-A7:DLYGGEKFAT | 11   | >PTPN11-A7:DLYGGEKFVT | 12    | 1     |
| >PTPN11-A7:YDLYGGEKFA | 5687 | >PTPN11-A7:YDLYGGEKFV | 470   | 5217  |
| >PTPN11-D6:DYYDLYGGEK | 108  | >PTPN11-D6:GYDLYGGEK  | 39    | 69    |
| >PTPN11-D6:DYYDLYGGEK | 44   | >PTPN11-D6:GYDLYGGEK  | 8     | 36    |
| >PTPN11-D6:DYYDLYGGEK | 1039 | >PTPN11-D6:GYDLYGGEK  | 197   | 842   |
| >PTPN11-D6:TGDYYDLY   | 200  | >PTPN11-D6:TGGYYDLY   | 11307 | 11107 |
| >PTPN11-D6:TGDYYDLY   | 1135 | >PTPN11-D6:TGGYYDLY   | 252   | 883   |
| >PTPN11-D6:NTGDYYDLY  | 33   | >PTPN11-D6:NTGGYYDLY  | 84    | 51    |
| >PTPN11-D6:NTGDYYDLY  | 429  | >PTPN11-D6:NTGGYYDLY  | 222   | 207   |
| >PTPN11-D6:NTGDYYDLY  | 40   | >PTPN11-D6:NTGGYYDLY  | 46    | 6     |
| >PTPN11-D6:NTGDYYDLY  | 213  | >PTPN11-D6:NTGGYYDLY  | 448   | 235   |
| >PTPN11-D6:NTGDYYDL   | 482  | >PTPN11-D6:NTGGYYDL   | 646   | 164   |
| >PTPN11-D6:NTGDYYDL   | 425  | >PTPN11-D6:NTGGYYDL   | 1118  | 693   |
| >PTPN11-D6:NTGDYYDLY  | 255  | >PTPN11-D6:NTGGYYDLY  | 311   | 56    |
| >PTPN11-D6:NTGDYYDLY  | 249  | >PTPN11-D6:NTGGYYDLY  | 199   | 50    |
| >PTPN11-D6:IQNTGDYY   | 329  | >PTPN11-D6:IQNTGGYY   | 113   | 216   |
| >PTPN11-D6:IQNTGDYYDL | 132  | >PTPN11-D6:IQNTGGYYDL | 114   | 18    |
| >PTPN11-D6:IQNTGDYY   | 23   | >PTPN11-D6:IQNTGGYY   | 12    | 11    |
| >PTPN11-D6:IQNTGDYYDL | 42   | >PTPN11-D6:IQNTGGYYDL | 50    | 8     |
| >PTPN11-D6:IQNTGDYY   | 73   | >PTPN11-D6:IQNTGGYY   | 56    | 17    |
| >PTPN11-D6:IQNTGDYYDL | 124  | >PTPN11-D6:IQNTGGYYDL | 113   | 11    |
| >PTPN11-D6:IQNTGDYY   | 245  | >PTPN11-D6:IQNTGGYY   | 104   | 141   |
| >PTPN11-D6:IQNTGDYYDL | 719  | >PTPN11-D6:IQNTGGYYDL | 428   | 291   |
| >PTPN11-D6:IQNTGDYY   | 27   | >PTPN11-D6:IQNTGGYY   | 17    | 10    |
| >PTPN11-D6:IQNTGDYYDL | 132  | >PTPN11-D6:IQNTGGYYDL | 50    | 82    |
| >PTPN11-D6:IQNTGDYYDL | 50   | >PTPN11-D6:IQNTGGYYDL | 28    | 22    |
| >PTPN11-D6:KIQNTGDYYC | 452  | >PTPN11-D6:KIQNTGGYYC | 759   | 307   |
| >PTPN11-D6:KIQNTGDYY  | 212  | >PTPN11-D6:KIQNTGGYY  | 304   | 92    |
| >PTPN11-D6:KIQNTGDYY  | 816  | >PTPN11-D6:KIQNTGGYY  | 180   | 636   |
| >PTPN11-D6:KIQNTGDY   | 30   | >PTPN11-D6:KIQNTGGY   | 16    | 14    |
| >PTPN11-D6:KIQNTGDYY  | 32   | >PTPN11-D6:KIQNTGGYY  | 9     | 23    |
| >PTPN11-D6:KIQNTGDYYC | 219  | >PTPN11-D6:KIQNTGGYYC | 314   | 95    |

|                        |      |                        |       |       |
|------------------------|------|------------------------|-------|-------|
| >PTPN11-D6: KIQNTGDY   | 113  | >PTPN11-D6: KIQNTGGY   | 129   | 16    |
| >PTPN11-D6: KIQNTGDYY  | 332  | >PTPN11-D6: KIQNTGGYY  | 66    | 266   |
| >PTPN11-D6: KIQNTGDY   | 453  | >PTPN11-D6: KIQNTGGY   | 178   | 275   |
| >PTPN11-D6: KIQNTGDYY  | 229  | >PTPN11-D6: KIQNTGGYY  | 120   | 109   |
| >PTPN11-D6: KIQNTGDY   | 648  | >PTPN11-D6: KIQNTGGY   | 337   | 311   |
| >PTPN11-D6: KIQNTGDYY  | 549  | >PTPN11-D6: KIQNTGGYY  | 241   | 308   |
| >PTPN11-D6: KIQNTGDY   | 135  | >PTPN11-D6: KIQNTGGY   | 74    | 61    |
| >PTPN11-D6: KIQNTGDYY  | 478  | >PTPN11-D6: KIQNTGGYY  | 377   | 101   |
| >PTPN11-D6: IKIQNTGDY  | 1166 | >PTPN11-D6: IKIQNTGGY  | 214   | 952   |
| >PTPN11-D6: IKIQNTGDY  | 416  | >PTPN11-D6: IKIQNTGGY  | 764   | 348   |
| >PTPN11-D6: IKIQNTGDYY | 627  | >PTPN11-D6: IKIQNTGGYY | 263   | 364   |
| >PTPN11-D6: IKIQNTGDY  | 165  | >PTPN11-D6: IKIQNTGGY  | 117   | 48    |
| >PTPN11-D6: IKIQNTGDYY | 248  | >PTPN11-D6: IKIQNTGGYY | 35    | 213   |
| >PTPN11-D6: IKIQNTGDY  | 37   | >PTPN11-D6: IKIQNTGGY  | 56    | 19    |
| >PTPN11-D6: IKIQNTGDYY | 13   | >PTPN11-D6: IKIQNTGGYY | 18    | 5     |
| >PTPN11-D6: HIKIQNTGDY | 714  | >PTPN11-D6: HIKIQNTGGY | 471   | 243   |
| >PTPN11-D6: HIKIQNTGDY | 1418 | >PTPN11-D6: HIKIQNTGGY | 177   | 1241  |
| >PTPN11-D6: HIKIQNTGDY | 889  | >PTPN11-D6: HIKIQNTGGY | 347   | 542   |
| >PTPN11-D6: HIKIQNTGDY | 472  | >PTPN11-D6: HIKIQNTGGY | 109   | 363   |
| >PTPN11-D6: HIKIQNTGDY | 257  | >PTPN11-D6: HIKIQNTGGY | 378   | 121   |
| >PTPN11-D6: HIKIQNTGDY | 197  | >PTPN11-D6: HIKIQNTGGY | 65    | 132   |
| >PTPN11-D6: HIKIQNTGDY | 440  | >PTPN11-D6: HIKIQNTGGY | 740   | 300   |
| >PTPN11-D6: HIKIQNTGDY | 654  | >PTPN11-D6: HIKIQNTGGY | 292   | 362   |
| >PTPN11-D6: HIKIQNTGDY | 402  | >PTPN11-D6: HIKIQNTGGY | 261   | 141   |
| >PTPN11-D6: HIKIQNTGDY | 273  | >PTPN11-D6: HIKIQNTGGY | 168   | 105   |
| >PTPN11-D6: HIKIQNTGDY | 297  | >PTPN11-D6: HIKIQNTGGY | 183   | 114   |
| >PTPN11-D6: HIKIQNTGDY | 564  | >PTPN11-D6: HIKIQNTGGY | 439   | 125   |
| >PTPN11-D6: THIKIQNTGD | 281  | >PTPN11-D6: THIKIQNTGG | 449   | 168   |
| >PTPN11-D6: THIKIQNTGD | 247  | >PTPN11-D6: THIKIQNTGG | 173   | 74    |
| >PTPN11-D6: THIKIQNTGD | 301  | >PTPN11-D6: THIKIQNTGG | 484   | 183   |
| >PTPN11-D6: DYYDLYGGEK | 108  | >PTPN11-D6: HYYDLYGGEK | 38    | 70    |
| >PTPN11-D6: DYYDLYGGEK | 616  | >PTPN11-D6: HYYDLYGGEK | 350   | 266   |
| >PTPN11-D6: DYYDLYGGEK | 44   | >PTPN11-D6: HYYDLYGGEK | 6     | 38    |
| >PTPN11-D6: DYYDLYGGEK | 1039 | >PTPN11-D6: HYYDLYGGEK | 322   | 717   |
| >PTPN11-D6: DYYDLYGGEK | 9423 | >PTPN11-D6: HYYDLYGGEK | 51    | 9372  |
| >PTPN11-D6: DYYDLYGGEK | 2062 | >PTPN11-D6: HYYDLYGGEK | 107   | 1955  |
| >PTPN11-D6: VTHIKIQNTG | 7775 | >PTPN11-D6: VTHIKIQNTG | 199   | 7576  |
| >PTPN11-D6: TGDYYDLY   | 200  | >PTPN11-D6: TGHYYDLY   | 14550 | 14350 |
| >PTPN11-D6: TGDYYDLY   | 1135 | >PTPN11-D6: TGHYYDLY   | 266   | 869   |
| >PTPN11-D6: TGDYYDLY   | 968  | >PTPN11-D6: TGHYYDLY   | 468   | 500   |
| >PTPN11-D6: NTGDYYDLY  | 33   | >PTPN11-D6: NTGHYYDLY  | 55    | 22    |
| >PTPN11-D6: NTGDYYDLY  | 429  | >PTPN11-D6: NTGHYYDLY  | 601   | 172   |
| >PTPN11-D6: NTGDYYDLY  | 40   | >PTPN11-D6: NTGHYYDLY  | 60    | 20    |

|                        |      |                        |      |      |
|------------------------|------|------------------------|------|------|
| >PTPN11-D6: NTGDYYDLY  | 213  | >PTPN11-D6: NTGHYYDLY  | 785  | 572  |
| >PTPN11-D6: NTGDYYDL   | 482  | >PTPN11-D6: NTGHYYDL   | 539  | 57   |
| >PTPN11-D6: NTGDYYDL   | 425  | >PTPN11-D6: NTGHYYDL   | 1482 | 1057 |
| >PTPN11-D6: NTGDYYDLY  | 255  | >PTPN11-D6: NTGHYYDLY  | 67   | 188  |
| >PTPN11-D6: NTGDYYDLY  | 249  | >PTPN11-D6: NTGHYYDLY  | 236  | 13   |
| >PTPN11-D6: IQNTGDYY   | 329  | >PTPN11-D6: IQNTGHYY   | 53   | 276  |
| >PTPN11-D6: IQNTGDYYDL | 132  | >PTPN11-D6: IQNTGHYYDL | 103  | 29   |
| >PTPN11-D6: IQNTGDYY   | 23   | >PTPN11-D6: IQNTGHYY   | 10   | 13   |
| >PTPN11-D6: IQNTGDYYDL | 42   | >PTPN11-D6: IQNTGHYYDL | 44   | 2    |
| >PTPN11-D6: IQNTGDYY   | 2304 | >PTPN11-D6: IQNTGHYY   | 317  | 1987 |
| >PTPN11-D6: IQNTGDYYDL | 1138 | >PTPN11-D6: IQNTGHYYDL | 461  | 677  |
| >PTPN11-D6: IQNTGDYY   | 73   | >PTPN11-D6: IQNTGHYY   | 59   | 14   |
| >PTPN11-D6: IQNTGDYYDL | 124  | >PTPN11-D6: IQNTGHYYDL | 112  | 12   |
| >PTPN11-D6: IQNTGDYY   | 245  | >PTPN11-D6: IQNTGHYY   | 167  | 78   |
| >PTPN11-D6: IQNTGDYY   | 27   | >PTPN11-D6: IQNTGHYY   | 7    | 20   |
| >PTPN11-D6: IQNTGDYYDL | 132  | >PTPN11-D6: IQNTGHYYDL | 50   | 82   |
| >PTPN11-D6: IQNTGDYYDL | 50   | >PTPN11-D6: IQNTGHYYDL | 21   | 29   |
| >PTPN11-D6: IQNTGDYYDL | 890  | >PTPN11-D6: IQNTGHYYDL | 473  | 417  |
| >PTPN11-D6: KIQNTGDYYC | 452  | >PTPN11-D6: KIQNTGHYYC | 302  | 150  |
| >PTPN11-D6: KIQNTGDYY  | 212  | >PTPN11-D6: KIQNTGHYY  | 51   | 161  |
| >PTPN11-D6: KIQNTGDY   | 797  | >PTPN11-D6: KIQNTGHY   | 410  | 387  |
| >PTPN11-D6: KIQNTGDYY  | 816  | >PTPN11-D6: KIQNTGHYY  | 56   | 760  |
| >PTPN11-D6: KIQNTGDY   | 30   | >PTPN11-D6: KIQNTGHY   | 15   | 15   |
| >PTPN11-D6: KIQNTGDYY  | 32   | >PTPN11-D6: KIQNTGHYY  | 7    | 25   |
| >PTPN11-D6: KIQNTGDYYC | 219  | >PTPN11-D6: KIQNTGHYYC | 127  | 92   |
| >PTPN11-D6: KIQNTGDY   | 113  | >PTPN11-D6: KIQNTGHY   | 37   | 76   |
| >PTPN11-D6: KIQNTGDYY  | 332  | >PTPN11-D6: KIQNTGHYY  | 31   | 301  |
| >PTPN11-D6: KIQNTGDY   | 453  | >PTPN11-D6: KIQNTGHY   | 79   | 374  |
| >PTPN11-D6: KIQNTGDYY  | 229  | >PTPN11-D6: KIQNTGHYY  | 131  | 98   |
| >PTPN11-D6: KIQNTGDYY  | 549  | >PTPN11-D6: KIQNTGHYY  | 231  | 318  |
| >PTPN11-D6: KIQNTGDYY  | 1230 | >PTPN11-D6: KIQNTGHYY  | 495  | 735  |
| >PTPN11-D6: KIQNTGDYY  | 3387 | >PTPN11-D6: KIQNTGHYY  | 331  | 3056 |
| >PTPN11-D6: KIQNTGDYY  | 2193 | >PTPN11-D6: KIQNTGHYY  | 243  | 1950 |
| >PTPN11-D6: KIQNTGDYY  | 135  | >PTPN11-D6: KIQNTGHYY  | 161  | 26   |
| >PTPN11-D6: KIQNTGDYY  | 478  | >PTPN11-D6: KIQNTGHYY  | 192  | 286  |
| >PTPN11-D6: IKIQNTGDY  | 2894 | >PTPN11-D6: IKIQNTGHY  | 487  | 2407 |
| >PTPN11-D6: IKIQNTGDY  | 416  | >PTPN11-D6: IKIQNTGHY  | 322  | 94   |
| >PTPN11-D6: IKIQNTGDYY | 627  | >PTPN11-D6: IKIQNTGHYY | 277  | 350  |
| >PTPN11-D6: IKIQNTGDY  | 165  | >PTPN11-D6: IKIQNTGHY  | 102  | 63   |
| >PTPN11-D6: IKIQNTGDYY | 248  | >PTPN11-D6: IKIQNTGHYY | 75   | 173  |
| >PTPN11-D6: IKIQNTGDY  | 37   | >PTPN11-D6: IKIQNTGHY  | 24   | 13   |
| >PTPN11-D6: IKIQNTGDYY | 13   | >PTPN11-D6: IKIQNTGHYY | 8    | 5    |
| >PTPN11-D6: HIKIQNTGDY | 889  | >PTPN11-D6: HIKIQNTGHY | 186  | 703  |

|                        |      |                        |      |      |
|------------------------|------|------------------------|------|------|
| >PTPN11-D6: HIKIQNTGDY | 1625 | >PTPN11-D6: HIKIQNTGHY | 223  | 1402 |
| >PTPN11-D6: HIKIQNTGDY | 472  | >PTPN11-D6: HIKIQNTGHY | 81   | 391  |
| >PTPN11-D6: HIKIQNTGDY | 257  | >PTPN11-D6: HIKIQNTGHY | 237  | 20   |
| >PTPN11-D6: HIKIQNTGDY | 197  | >PTPN11-D6: HIKIQNTGHY | 49   | 148  |
| >PTPN11-D6: HIKIQNTGDY | 440  | >PTPN11-D6: HIKIQNTGHY | 193  | 247  |
| >PTPN11-D6: HIKIQNTGDY | 1468 | >PTPN11-D6: HIKIQNTGHY | 306  | 1162 |
| >PTPN11-D6: HIKIQNTGDY | 654  | >PTPN11-D6: HIKIQNTGHY | 113  | 541  |
| >PTPN11-D6: HIKIQNTGDY | 402  | >PTPN11-D6: HIKIQNTGHY | 290  | 112  |
| >PTPN11-D6: HIKIQNTGDY | 273  | >PTPN11-D6: HIKIQNTGHY | 367  | 94   |
| >PTPN11-D6: HIKIQNTGDY | 297  | >PTPN11-D6: HIKIQNTGHY | 189  | 108  |
| >PTPN11-D6: HIKIQNTGDY | 1910 | >PTPN11-D6: HIKIQNTGHY | 489  | 1421 |
| >PTPN11-D6: HIKIQNTGDY | 564  | >PTPN11-D6: HIKIQNTGHY | 257  | 307  |
| >PTPN11-D6: THIKIQNTGD | 281  | >PTPN11-D6: THIKIQNTGH | 209  | 72   |
| >PTPN11-D6: THIKIQNTGD | 247  | >PTPN11-D6: THIKIQNTGH | 164  | 83   |
| >PTPN11-D6: THIKIQNTGD | 301  | >PTPN11-D6: THIKIQNTGH | 131  | 170  |
| >PTPN11-D6: DYYDLYGGEK | 108  | >PTPN11-D6: NYDLYGGEK  | 35   | 73   |
| >PTPN11-D6: DYYDLYGGEK | 616  | >PTPN11-D6: NYDLYGGEK  | 456  | 160  |
| >PTPN11-D6: DYYDLYGGEK | 44   | >PTPN11-D6: NYDLYGGEK  | 8    | 36   |
| >PTPN11-D6: TGDYYDLY   | 200  | >PTPN11-D6: TGNYYDLY   | 7687 | 7487 |
| >PTPN11-D6: TGDYYDLY   | 1135 | >PTPN11-D6: TGNYYDLY   | 358  | 777  |
| >PTPN11-D6: TGDYYDLY   | 968  | >PTPN11-D6: TGNYYDLY   | 211  | 757  |
| >PTPN11-D6: NTGDYYDLY  | 33   | >PTPN11-D6: NTGNYDLY   | 60   | 27   |
| >PTPN11-D6: NTGDYYDLY  | 429  | >PTPN11-D6: NTGNYDLY   | 713  | 284  |
| >PTPN11-D6: NTGDYYDLY  | 40   | >PTPN11-D6: NTGNYDLY   | 89   | 49   |
| >PTPN11-D6: NTGDYYDLY  | 213  | >PTPN11-D6: NTGNYDLY   | 395  | 182  |
| >PTPN11-D6: NTGDYYDL   | 482  | >PTPN11-D6: NTGNYDL    | 936  | 454  |
| >PTPN11-D6: NTGDYYDL   | 425  | >PTPN11-D6: NTGNYDL    | 1092 | 667  |
| >PTPN11-D6: NTGDYYDLY  | 255  | >PTPN11-D6: NTGNYDLY   | 134  | 121  |
| >PTPN11-D6: NTGDYYDLY  | 249  | >PTPN11-D6: NTGNYDLY   | 111  | 138  |
| >PTPN11-D6: IQNTGDYY   | 329  | >PTPN11-D6: IQNTGNYY   | 236  | 93   |
| >PTPN11-D6: IQNTGDYYDL | 132  | >PTPN11-D6: IQNTGNYYDL | 158  | 26   |
| >PTPN11-D6: IQNTGDYY   | 23   | >PTPN11-D6: IQNTGNYY   | 14   | 9    |
| >PTPN11-D6: IQNTGDYYDL | 42   | >PTPN11-D6: IQNTGNYYDL | 38   | 4    |
| >PTPN11-D6: IQNTGDYY   | 73   | >PTPN11-D6: IQNTGNYY   | 60   | 13   |
| >PTPN11-D6: IQNTGDYYDL | 124  | >PTPN11-D6: IQNTGNYYDL | 120  | 4    |
| >PTPN11-D6: IQNTGDYY   | 245  | >PTPN11-D6: IQNTGNYY   | 162  | 83   |
| >PTPN11-D6: IQNTGDYY   | 27   | >PTPN11-D6: IQNTGNYY   | 7    | 20   |
| >PTPN11-D6: IQNTGDYYDL | 132  | >PTPN11-D6: IQNTGNYYDL | 57   | 75   |
| >PTPN11-D6: IQNTGDYYDL | 50   | >PTPN11-D6: IQNTGNYYDL | 24   | 26   |
| >PTPN11-D6: KIQTGDYYE  | 452  | >PTPN11-D6: KIQTGNYYE  | 315  | 137  |
| >PTPN11-D6: KIQTGDYY   | 212  | >PTPN11-D6: KIQTGNYY   | 159  | 53   |
| >PTPN11-D6: KIQTGDYY   | 816  | >PTPN11-D6: KIQTGNYY   | 359  | 457  |
| >PTPN11-D6: KIQTGDY    | 30   | >PTPN11-D6: KIQTGNYY   | 24   | 6    |

|                         |       |                         |       |       |
|-------------------------|-------|-------------------------|-------|-------|
| >PTPN11-D6: KIQNTGDYY   | 32    | >PTPN11-D6: KIQNTGNYY   | 15    | 17    |
| >PTPN11-D6: KIQNTGDYYE  | 219   | >PTPN11-D6: KIQNTGNYYE  | 155   | 64    |
| >PTPN11-D6: KIQNTGDY    | 113   | >PTPN11-D6: KIQNTGNY    | 71    | 42    |
| >PTPN11-D6: KIQNTGDYY   | 332   | >PTPN11-D6: KIQNTGNYY   | 187   | 145   |
| >PTPN11-D6: KIQNTGDY    | 453   | >PTPN11-D6: KIQNTGNY    | 325   | 128   |
| >PTPN11-D6: KIQNTGDYY   | 229   | >PTPN11-D6: KIQNTGNYY   | 136   | 93    |
| >PTPN11-D6: KIQNTGDYY   | 549   | >PTPN11-D6: KIQNTGNYY   | 388   | 161   |
| >PTPN11-D6: KIQNTGDYY   | 1230  | >PTPN11-D6: KIQNTGNYY   | 283   | 947   |
| >PTPN11-D6: KIQNTGDYY   | 135   | >PTPN11-D6: KIQNTGNYY   | 68    | 67    |
| >PTPN11-D6: KIQNTGDYY   | 478   | >PTPN11-D6: KIQNTGNYY   | 341   | 137   |
| >PTPN11-D6: IKIQNTGDY   | 1166  | >PTPN11-D6: IKIQNTGNY   | 366   | 800   |
| >PTPN11-D6: IKIQNTGDY   | 416   | >PTPN11-D6: IKIQNTGNY   | 547   | 131   |
| >PTPN11-D6: IKIQNTGDYY  | 627   | >PTPN11-D6: IKIQNTGNYY  | 369   | 258   |
| >PTPN11-D6: IKIQNTGDY   | 165   | >PTPN11-D6: IKIQNTGNY   | 160   | 5     |
| >PTPN11-D6: IKIQNTGDYY  | 248   | >PTPN11-D6: IKIQNTGNYY  | 105   | 143   |
| >PTPN11-D6: IKIQNTGDY   | 37    | >PTPN11-D6: IKIQNTGNY   | 20    | 17    |
| >PTPN11-D6: IKIQNTGDYY  | 13    | >PTPN11-D6: IKIQNTGNYY  | 7     | 6     |
| >PTPN11-D6: HIKIQNTGDY  | 1625  | >PTPN11-D6: HIKIQNTGNY  | 332   | 1293  |
| >PTPN11-D6: HIKIQNTGDY  | 472   | >PTPN11-D6: HIKIQNTGNY  | 75    | 397   |
| >PTPN11-D6: HIKIQNTGDY  | 257   | >PTPN11-D6: HIKIQNTGNY  | 180   | 77    |
| >PTPN11-D6: HIKIQNTGDY  | 197   | >PTPN11-D6: HIKIQNTGNY  | 107   | 90    |
| >PTPN11-D6: HIKIQNTGDY  | 440   | >PTPN11-D6: HIKIQNTGNY  | 297   | 143   |
| >PTPN11-D6: HIKIQNTGDY  | 402   | >PTPN11-D6: HIKIQNTGNY  | 284   | 118   |
| >PTPN11-D6: HIKIQNTGDY  | 273   | >PTPN11-D6: HIKIQNTGNY  | 258   | 15    |
| >PTPN11-D6: HIKIQNTGDY  | 297   | >PTPN11-D6: HIKIQNTGNY  | 256   | 41    |
| >PTPN11-D6: HIKIQNTGDY  | 564   | >PTPN11-D6: HIKIQNTGNY  | 409   | 155   |
| >PTPN11-D6: THIKIQNTGD  | 281   | >PTPN11-D6: THIKIQNTGN  | 364   | 83    |
| >PTPN11-D6: THIKIQNTGD  | 247   | >PTPN11-D6: THIKIQNTGN  | 234   | 13    |
| >PTPN11-D6: THIKIQNTGD  | 301   | >PTPN11-D6: THIKIQNTGN  | 200   | 101   |
| >PTPN11-D6: DYYDLYGGEK  | 3977  | >PTPN11-D6: VYYDLYGGEK  | 275   | 3702  |
| >PTPN11-D6: DYYDLYGGEK  | 108   | >PTPN11-D6: VYYDLYGGEK  | 24    | 84    |
| >PTPN11-D6: DYYDLYGGEK  | 616   | >PTPN11-D6: VYYDLYGGEK  | 173   | 443   |
| >PTPN11-D6: DYYDLYGGEK  | 44    | >PTPN11-D6: VYYDLYGGEK  | 8     | 36    |
| >PTPN11-D6: DYYDLYGGEK  | 1039  | >PTPN11-D6: VYYDLYGGEK  | 256   | 783   |
| >PTPN11-D6: GDYYDLYGGE  | 16270 | >PTPN11-D6: GVYYDLYGGE  | 126   | 16144 |
| >PTPN11-D6: GDYYDLYGGE  | 8292  | >PTPN11-D6: GVYYDLYGGE  | 31    | 8261  |
| >PTPN11-D6: GDYYDLYGGE  | 11899 | >PTPN11-D6: GVYYDLYGGE  | 214   | 11685 |
| >PTPN11-D6: VTHIKIQNTG' | 25007 | >PTPN11-D6: VTHIKIQNTG' | 295   | 24712 |
| >PTPN11-D6: VTHIKIQNTG' | 28600 | >PTPN11-D6: VTHIKIQNTG' | 137   | 28463 |
| >PTPN11-D6: VTHIKIQNTG' | 36750 | >PTPN11-D6: VTHIKIQNTG' | 170   | 36580 |
| >PTPN11-D6: VTHIKIQNTG' | 20618 | >PTPN11-D6: VTHIKIQNTG' | 446   | 20172 |
| >PTPN11-D6: VTHIKIQNTG' | 7775  | >PTPN11-D6: VTHIKIQNTG' | 95    | 7680  |
| >PTPN11-D6: TGDYYDLY    | 200   | >PTPN11-D6: TGVYYDLY    | 15793 | 15593 |

|                       |       |                       |      |       |
|-----------------------|-------|-----------------------|------|-------|
| >PTPN11-D6:TGDYYDLY   | 1135  | >PTPN11-D6:TGVYYDLY   | 143  | 992   |
| >PTPN11-D6:NTGDYYDLY  | 33    | >PTPN11-D6:NTGVYYDLY  | 49   | 16    |
| >PTPN11-D6:NTGDYYDLY  | 429   | >PTPN11-D6:NTGVYYDLY  | 1288 | 859   |
| >PTPN11-D6:NTGDYYDLY  | 40    | >PTPN11-D6:NTGVYYDLY  | 135  | 95    |
| >PTPN11-D6:NTGDYYDLY  | 213   | >PTPN11-D6:NTGVYYDLY  | 804  | 591   |
| >PTPN11-D6:NTGDYYDL   | 482   | >PTPN11-D6:NTGVYYDL   | 811  | 329   |
| >PTPN11-D6:NTGDYYDL   | 425   | >PTPN11-D6:NTGVYYDL   | 1398 | 973   |
| >PTPN11-D6:NTGDYYDLY  | 255   | >PTPN11-D6:NTGVYYDLY  | 239  | 16    |
| >PTPN11-D6:NTGDYYDLY  | 249   | >PTPN11-D6:NTGVYYDLY  | 347  | 98    |
| >PTPN11-D6:IQNTGDYYDL | 568   | >PTPN11-D6:IQNTGVYYDL | 363  | 205   |
| >PTPN11-D6:IQNTGDYY   | 329   | >PTPN11-D6:IQNTGVYY   | 178  | 151   |
| >PTPN11-D6:IQNTGDYYDL | 132   | >PTPN11-D6:IQNTGVYYDL | 188  | 56    |
| >PTPN11-D6:IQNTGDYY   | 23    | >PTPN11-D6:IQNTGVYY   | 33   | 10    |
| >PTPN11-D6:IQNTGDYYDL | 42    | >PTPN11-D6:IQNTGVYYDL | 55   | 13    |
| >PTPN11-D6:IQNTGDYY   | 73    | >PTPN11-D6:IQNTGVYY   | 54   | 19    |
| >PTPN11-D6:IQNTGDYYDL | 124   | >PTPN11-D6:IQNTGVYYDL | 116  | 8     |
| >PTPN11-D6:IQNTGDYY   | 245   | >PTPN11-D6:IQNTGVYY   | 358  | 113   |
| >PTPN11-D6:IQNTGDYY   | 27    | >PTPN11-D6:IQNTGVYY   | 5    | 22    |
| >PTPN11-D6:IQNTGDYYDL | 132   | >PTPN11-D6:IQNTGVYYDL | 57   | 75    |
| >PTPN11-D6:IQNTGDYYDL | 50    | >PTPN11-D6:IQNTGVYYDL | 23   | 27    |
| >PTPN11-D6:KIQNTGDYYC | 452   | >PTPN11-D6:KIQNTGVYYC | 414  | 38    |
| >PTPN11-D6:KIQNTGDYY  | 212   | >PTPN11-D6:KIQNTGVYY  | 70   | 142   |
| >PTPN11-D6:KIQNTGDYY  | 816   | >PTPN11-D6:KIQNTGVYY  | 220  | 596   |
| >PTPN11-D6:KIQNTGDY   | 30    | >PTPN11-D6:KIQNTGVY   | 23   | 7     |
| >PTPN11-D6:KIQNTGDYY  | 32    | >PTPN11-D6:KIQNTGVYY  | 42   | 10    |
| >PTPN11-D6:KIQNTGDYYC | 219   | >PTPN11-D6:KIQNTGVYYC | 58   | 161   |
| >PTPN11-D6:KIQNTGDY   | 113   | >PTPN11-D6:KIQNTGVY   | 179  | 66    |
| >PTPN11-D6:KIQNTGDYY  | 332   | >PTPN11-D6:KIQNTGVYY  | 219  | 113   |
| >PTPN11-D6:KIQNTGDY   | 453   | >PTPN11-D6:KIQNTGVY   | 83   | 370   |
| >PTPN11-D6:KIQNTGDYY  | 229   | >PTPN11-D6:KIQNTGVYY  | 111  | 118   |
| >PTPN11-D6:KIQNTGDY   | 648   | >PTPN11-D6:KIQNTGVY   | 439  | 209   |
| >PTPN11-D6:KIQNTGDYY  | 1230  | >PTPN11-D6:KIQNTGVYY  | 146  | 1084  |
| >PTPN11-D6:KIQNTGDYY  | 135   | >PTPN11-D6:KIQNTGVYY  | 238  | 103   |
| >PTPN11-D6:KIQNTGDY   | 6021  | >PTPN11-D6:KIQNTGVY   | 488  | 5533  |
| >PTPN11-D6:KIQNTGDYY  | 478   | >PTPN11-D6:KIQNTGVYY  | 743  | 265   |
| >PTPN11-D6:IKIQNTGDY  | 416   | >PTPN11-D6:IKIQNTGVY  | 1030 | 614   |
| >PTPN11-D6:IKIQNTGDYY | 627   | >PTPN11-D6:IKIQNTGVYY | 135  | 492   |
| >PTPN11-D6:IKIQNTGDY  | 165   | >PTPN11-D6:IKIQNTGVY  | 94   | 71    |
| >PTPN11-D6:IKIQNTGDYY | 248   | >PTPN11-D6:IKIQNTGVYY | 199  | 49    |
| >PTPN11-D6:IKIQNTGD   | 11412 | >PTPN11-D6:IKIQNTGV   | 153  | 11259 |
| >PTPN11-D6:IKIQNTGDY  | 37    | >PTPN11-D6:IKIQNTGVY  | 14   | 23    |
| >PTPN11-D6:IKIQNTGDYY | 13    | >PTPN11-D6:IKIQNTGVYY | 5    | 8     |
| >PTPN11-D6:HIQIQTGD   | 24469 | >PTPN11-D6:HIQIQTGV   | 115  | 24354 |

|                        |       |                        |       |       |
|------------------------|-------|------------------------|-------|-------|
| >PTPN11-D6: HIKIQNTGD  | 36489 | >PTPN11-D6: HIKIQNTGV  | 143   | 36346 |
| >PTPN11-D6: HIKIQNTGDY | 889   | >PTPN11-D6: HIKIQNTGVY | 392   | 497   |
| >PTPN11-D6: HIKIQNTGD  | 6894  | >PTPN11-D6: HIKIQNTGV  | 430   | 6464  |
| >PTPN11-D6: HIKIQNTGDY | 472   | >PTPN11-D6: HIKIQNTGVY | 77    | 395   |
| >PTPN11-D6: HIKIQNTGDY | 257   | >PTPN11-D6: HIKIQNTGVY | 302   | 45    |
| >PTPN11-D6: HIKIQNTGDY | 197   | >PTPN11-D6: HIKIQNTGVY | 267   | 70    |
| >PTPN11-D6: HIKIQNTGDY | 440   | >PTPN11-D6: HIKIQNTGVY | 849   | 409   |
| >PTPN11-D6: HIKIQNTGDY | 654   | >PTPN11-D6: HIKIQNTGVY | 122   | 532   |
| >PTPN11-D6: HIKIQNTGDY | 402   | >PTPN11-D6: HIKIQNTGVY | 247   | 155   |
| >PTPN11-D6: HIKIQNTGDY | 273   | >PTPN11-D6: HIKIQNTGVY | 182   | 91    |
| >PTPN11-D6: HIKIQNTGDY | 297   | >PTPN11-D6: HIKIQNTGVY | 308   | 11    |
| >PTPN11-D6: THIKIQNTGD | 281   | >PTPN11-D6: THIKIQNTGV | 651   | 370   |
| >PTPN11-D6: THIKIQNTGD | 247   | >PTPN11-D6: THIKIQNTGV | 159   | 88    |
| >PTPN11-D6: THIKIQNTGD | 301   | >PTPN11-D6: THIKIQNTGV | 559   | 258   |
| >PTPN11-D6: DYYDLYGGEK | 108   | >PTPN11-D6: YYYDLYGGEK | 19    | 89    |
| >PTPN11-D6: DYYDLYGGEK | 616   | >PTPN11-D6: YYYDLYGGEK | 85    | 531   |
| >PTPN11-D6: DYYDLYGGEK | 7232  | >PTPN11-D6: YYYDLYGGEK | 158   | 7074  |
| >PTPN11-D6: DYYDLYGGEK | 44    | >PTPN11-D6: YYYDLYGGEK | 4     | 40    |
| >PTPN11-D6: DYYDLYGGEK | 1039  | >PTPN11-D6: YYYDLYGGEK | 43    | 996   |
| >PTPN11-D6: DYYDLYGGEK | 3577  | >PTPN11-D6: YYYDLYGGEK | 317   | 3260  |
| >PTPN11-D6: DYYDLYGGEK | 4229  | >PTPN11-D6: YYYDLYGGEK | 151   | 4078  |
| >PTPN11-D6: DYYDLYGGEK | 8580  | >PTPN11-D6: YYYDLYGGEK | 263   | 8317  |
| >PTPN11-D6: DYYDLYGGEK | 2062  | >PTPN11-D6: YYYDLYGGEK | 329   | 1733  |
| >PTPN11-D6: VTHIKIQNTG | 33997 | >PTPN11-D6: VTHIKIQNTG | 279   | 33718 |
| >PTPN11-D6: VTHIKIQNTG | 26916 | >PTPN11-D6: VTHIKIQNTG | 168   | 26748 |
| >PTPN11-D6: VTHIKIQNTG | 7775  | >PTPN11-D6: VTHIKIQNTG | 3     | 7772  |
| >PTPN11-D6: VTHIKIQNTG | 26601 | >PTPN11-D6: VTHIKIQNTG | 338   | 26263 |
| >PTPN11-D6: TGDYYDLY   | 200   | >PTPN11-D6: TGYYYDLY   | 13515 | 13315 |
| >PTPN11-D6: TGDYYDLY   | 1135  | >PTPN11-D6: TGYYYDLY   | 53    | 1082  |
| >PTPN11-D6: TGDYYDLY   | 968   | >PTPN11-D6: TGYYYDLY   | 300   | 668   |
| >PTPN11-D6: TGDYYDLY   | 1412  | >PTPN11-D6: TGYYYDLY   | 313   | 1099  |
| >PTPN11-D6: NTGDYYDLY  | 33    | >PTPN11-D6: NTGYYDLY   | 47    | 14    |
| >PTPN11-D6: NTGDYYDLY  | 429   | >PTPN11-D6: NTGYYDLY   | 369   | 60    |
| >PTPN11-D6: NTGDYYDLY  | 40    | >PTPN11-D6: NTGYYDLY   | 38    | 2     |
| >PTPN11-D6: NTGDYYDLY  | 213   | >PTPN11-D6: NTGYYDLY   | 201   | 12    |
| >PTPN11-D6: NTGDYYDL   | 482   | >PTPN11-D6: NTGYYDL    | 327   | 155   |
| >PTPN11-D6: NTGDYYDL   | 425   | >PTPN11-D6: NTGYYDL    | 1136  | 711   |
| >PTPN11-D6: NTGDYYDLY  | 255   | >PTPN11-D6: NTGYYDLY   | 108   | 147   |
| >PTPN11-D6: NTGDYYDLY  | 249   | >PTPN11-D6: NTGYYDLY   | 132   | 117   |
| >PTPN11-D6: IQNTGDYYDL | 568   | >PTPN11-D6: IQNTGYYDL  | 222   | 346   |
| >PTPN11-D6: IQNTGDYY   | 329   | >PTPN11-D6: IQNTGYYY   | 35    | 294   |
| >PTPN11-D6: IQNTGDYYDL | 132   | >PTPN11-D6: IQNTGYYDL  | 110   | 22    |
| >PTPN11-D6: IQNTGDYY   | 23    | >PTPN11-D6: IQNTGYYY   | 12    | 11    |



|                        |       |                        |     |       |
|------------------------|-------|------------------------|-----|-------|
| >PTPN11-D6: IQNTGDYYDL | 42    | >PTPN11-D6: IQNTGYYYDL | 45  | 3     |
| >PTPN11-D6: IQNTGDYY   | 73    | >PTPN11-D6: IQNTGYYY   | 59  | 14    |
| >PTPN11-D6: IQNTGDYYDL | 124   | >PTPN11-D6: IQNTGYYYDL | 124 | 0     |
| >PTPN11-D6: IQNTGDYY   | 245   | >PTPN11-D6: IQNTGYYY   | 356 | 111   |
| >PTPN11-D6: IQNTGDYY   | 27    | >PTPN11-D6: IQNTGYYY   | 6   | 21    |
| >PTPN11-D6: IQNTGDYYDL | 132   | >PTPN11-D6: IQNTGYYYDL | 37  | 95    |
| >PTPN11-D6: IQNTGDYYDL | 50    | >PTPN11-D6: IQNTGYYYDL | 17  | 33    |
| >PTPN11-D6: IQNTGDYYDL | 890   | >PTPN11-D6: IQNTGYYYDL | 390 | 500   |
| >PTPN11-D6: KIQNTGDYYC | 452   | >PTPN11-D6: KIQNTGYYD  | 190 | 262   |
| >PTPN11-D6: KIQNTGDY   | 3931  | >PTPN11-D6: KIQNTGYY   | 171 | 3760  |
| >PTPN11-D6: KIQNTGDYY  | 212   | >PTPN11-D6: KIQNTGYYY  | 29  | 183   |
| >PTPN11-D6: KIQNTGDY   | 797   | >PTPN11-D6: KIQNTGYY   | 124 | 673   |
| >PTPN11-D6: KIQNTGDYY  | 816   | >PTPN11-D6: KIQNTGYYY  | 22  | 794   |
| >PTPN11-D6: KIQNTGDY   | 30    | >PTPN11-D6: KIQNTGYY   | 11  | 19    |
| >PTPN11-D6: KIQNTGDYY  | 32    | >PTPN11-D6: KIQNTGYYY  | 8   | 24    |
| >PTPN11-D6: KIQNTGDYY  | 7724  | >PTPN11-D6: KIQNTGYYY  | 302 | 7422  |
| >PTPN11-D6: KIQNTGDYYC | 219   | >PTPN11-D6: KIQNTGYYD  | 71  | 148   |
| >PTPN11-D6: KIQNTGDY   | 113   | >PTPN11-D6: KIQNTGYY   | 43  | 70    |
| >PTPN11-D6: KIQNTGDYY  | 332   | >PTPN11-D6: KIQNTGYYY  | 38  | 294   |
| >PTPN11-D6: KIQNTGDY   | 453   | >PTPN11-D6: KIQNTGYY   | 169 | 284   |
| >PTPN11-D6: KIQNTGDYY  | 229   | >PTPN11-D6: KIQNTGYYY  | 113 | 116   |
| >PTPN11-D6: KIQNTGDYY  | 1230  | >PTPN11-D6: KIQNTGYYY  | 376 | 854   |
| >PTPN11-D6: KIQNTGDYY  | 2193  | >PTPN11-D6: KIQNTGYYY  | 481 | 1712  |
| >PTPN11-D6: KIQNTGDYY  | 135   | >PTPN11-D6: KIQNTGYYY  | 170 | 35    |
| >PTPN11-D6: KIQNTGDYY  | 4341  | >PTPN11-D6: KIQNTGYYY  | 366 | 3975  |
| >PTPN11-D6: KIQNTGDY   | 813   | >PTPN11-D6: KIQNTGYY   | 316 | 497   |
| >PTPN11-D6: KIQNTGDYY  | 478   | >PTPN11-D6: KIQNTGYYY  | 85  | 393   |
| >PTPN11-D6: IKIQNTGDY  | 416   | >PTPN11-D6: IKIQNTGYY  | 99  | 317   |
| >PTPN11-D6: IKIQNTGDYY | 627   | >PTPN11-D6: IKIQNTGYYY | 54  | 573   |
| >PTPN11-D6: IKIQNTGDY  | 165   | >PTPN11-D6: IKIQNTGYY  | 46  | 119   |
| >PTPN11-D6: IKIQNTGDYY | 248   | >PTPN11-D6: IKIQNTGYYY | 41  | 207   |
| >PTPN11-D6: IKIQNTGD   | 11412 | >PTPN11-D6: IKIQNTGY   | 10  | 11402 |
| >PTPN11-D6: IKIQNTGDY  | 37    | >PTPN11-D6: IKIQNTGYY  | 23  | 14    |
| >PTPN11-D6: IKIQNTGDYY | 13    | >PTPN11-D6: IKIQNTGYYY | 7   | 6     |
| >PTPN11-D6: HIKIQNTGDY | 714   | >PTPN11-D6: HIKIQNTGYY | 489 | 225   |
| >PTPN11-D6: HIKIQNTGD  | 21263 | >PTPN11-D6: HIKIQNTGY  | 299 | 20964 |
| >PTPN11-D6: HIKIQNTGDY | 2077  | >PTPN11-D6: HIKIQNTGYY | 378 | 1699  |
| >PTPN11-D6: HIKIQNTGDY | 889   | >PTPN11-D6: HIKIQNTGYY | 96  | 793   |
| >PTPN11-D6: HIKIQNTGDY | 1625  | >PTPN11-D6: HIKIQNTGYY | 103 | 1522  |
| >PTPN11-D6: HIKIQNTGDY | 472   | >PTPN11-D6: HIKIQNTGYY | 93  | 379   |
| >PTPN11-D6: HIKIQNTGD  | 31937 | >PTPN11-D6: HIKIQNTGY  | 488 | 31449 |
| >PTPN11-D6: HIKIQNTGDY | 257   | >PTPN11-D6: HIKIQNTGYY | 110 | 147   |
| >PTPN11-D6: HIKIQNTGDY | 197   | >PTPN11-D6: HIKIQNTGYY | 64  | 133   |

|                       |       |                       |       |       |
|-----------------------|-------|-----------------------|-------|-------|
| >PTPN11-D6:HIKIQTGDY  | 440   | >PTPN11-D6:HIKIQTGY   | 275   | 165   |
| >PTPN11-D6:HIKIQTGDY  | 1468  | >PTPN11-D6:HIKIQTGY   | 340   | 1128  |
| >PTPN11-D6:HIKIQTGD   | 22001 | >PTPN11-D6:HIKIQTGY   | 347   | 21654 |
| >PTPN11-D6:HIKIQTGDY  | 654   | >PTPN11-D6:HIKIQTGY   | 295   | 359   |
| >PTPN11-D6:HIKIQTGDY  | 402   | >PTPN11-D6:HIKIQTGY   | 229   | 173   |
| >PTPN11-D6:HIKIQTGD   | 30734 | >PTPN11-D6:HIKIQTGY   | 282   | 30452 |
| >PTPN11-D6:HIKIQTGDY  | 273   | >PTPN11-D6:HIKIQTGY   | 256   | 17    |
| >PTPN11-D6:HIKIQTGDY  | 297   | >PTPN11-D6:HIKIQTGY   | 304   | 7     |
| >PTPN11-D6:HIKIQTGD   | 25664 | >PTPN11-D6:HIKIQTGY   | 347   | 25317 |
| >PTPN11-D6:HIKIQTGDY  | 1468  | >PTPN11-D6:HIKIQTGY   | 327   | 1141  |
| >PTPN11-D6:HIKIQTGDY  | 564   | >PTPN11-D6:HIKIQTGY   | 127   | 437   |
| >PTPN11-D6:THIKIQTGD  | 281   | >PTPN11-D6:THIKIQTGY  | 87    | 194   |
| >PTPN11-D6:THIKIQTGD  | 247   | >PTPN11-D6:THIKIQTGY  | 85    | 162   |
| >PTPN11-D6:THIKIQTGD  | 301   | >PTPN11-D6:THIKIQTGY  | 177   | 124   |
| >PTPN11-E1:ESQSHPGDF  | 65    | >PTPN11-E1:DSQSHPGDF  | 420   | 355   |
| >PTPN11-E1:ESQSHPGDF\ | 423   | >PTPN11-E1:DSQSHPGDF\ | 2108  | 1685  |
| >PTPN11-E1:ESQSHPGDF\ | 486   | >PTPN11-E1:DSQSHPGDF\ | 2550  | 2064  |
| >PTPN11-E1:RESQSHPGDI | 302   | >PTPN11-E1:RDSQSHPGDI | 6314  | 6012  |
| >PTPN11-E1:RESQSHPGDI | 84    | >PTPN11-E1:RDSQSHPGDI | 688   | 604   |
| >PTPN11-E1:RESQSHPGDI | 18    | >PTPN11-E1:RDSQSHPGDI | 13334 | 13316 |
| >PTPN11-E1:RESQSHPGDI | 398   | >PTPN11-E1:RDSQSHPGDI | 21210 | 20812 |
| >PTPN11-E1:RESQSHPGDI | 162   | >PTPN11-E1:RDSQSHPGDI | 2199  | 2037  |
| >PTPN11-E1:RESQSHPGDI | 375   | >PTPN11-E1:RDSQSHPGDI | 13111 | 12736 |
| >PTPN11-E1:RESQSHPG   | 271   | >PTPN11-E1:RDSQSHPG   | 24475 | 24204 |
| >PTPN11-E1:RESQSHPGD  | 477   | >PTPN11-E1:RDSQSHPGD  | 28043 | 27566 |
| >PTPN11-E1:RESQSHPGDI | 53    | >PTPN11-E1:RDSQSHPGDI | 11334 | 11281 |
| >PTPN11-E1:RESQSHPGDI | 247   | >PTPN11-E1:RDSQSHPGDI | 349   | 102   |
| >PTPN11-E1:RESQSHPGDI | 129   | >PTPN11-E1:RDSQSHPGDI | 7630  | 7501  |
| >PTPN11-E1:RESQSHPGDI | 49    | >PTPN11-E1:RDSQSHPGDI | 3178  | 3129  |
| >PTPN11-E1:RESQSHPGDI | 13171 | >PTPN11-E1:RDSQSHPGDI | 420   | 12751 |
| >PTPN11-E1:LVRESQSHP  | 487   | >PTPN11-E1:LVRDSQSHP  | 380   | 107   |
| >PTPN11-E1:LVRESQSHPG | 46    | >PTPN11-E1:LVRDSQSHPG | 40    | 6     |
| >PTPN11-E1:FLVRESQS   | 418   | >PTPN11-E1:FLVRDSQS   | 574   | 156   |
| >PTPN11-E1:FLVRESQSHP | 124   | >PTPN11-E1:FLVRDSQSHP | 168   | 44    |
| >PTPN11-E1:FLVRESQS   | 138   | >PTPN11-E1:FLVRDSQS   | 133   | 5     |
| >PTPN11-E1:FLVRESQSHP | 443   | >PTPN11-E1:FLVRDSQSHP | 326   | 117   |
| >PTPN11-E1:GSFLVRESQS | 187   | >PTPN11-E1:GSFLVRDSQS | 187   | 0     |
| >PTPN11-E6:GKFATLAEL  | 36    | >PTPN11-E6:GKFATLAEL  | 22    | 14    |
| >PTPN11-E6:GKFATLAELV | 324   | >PTPN11-E6:GKFATLAELV | 204   | 120   |
| >PTPN11-E6:GKFATLAEL  | 89    | >PTPN11-E6:GKFATLAEL  | 480   | 391   |
| >PTPN11-E6:GKGFATLA   | 283   | >PTPN11-E6:GKGFATLA   | 39837 | 39554 |
| >PTPN11-E6:GKGFATLAEL | 114   | >PTPN11-E6:GKGFATLAEL | 21430 | 21316 |
| >PTPN11-E6:GKGFATLAEL | 110   | >PTPN11-E6:GKGFATLAEL | 23265 | 23155 |

|                                     |      |                                     |       |       |
|-------------------------------------|------|-------------------------------------|-------|-------|
| >PTPN11-E6 <sup>9</sup> GEKFATLA    | 277  | >PTPN11-E6 <sup>9</sup> GGKFATLA    | 38664 | 38387 |
| >PTPN11-E6 <sup>9</sup> GEKFATLAEL  | 173  | >PTPN11-E6 <sup>9</sup> GGKFATLAEL  | 34651 | 34478 |
| >PTPN11-E6 <sup>9</sup> GEKFATLAEL' | 367  | >PTPN11-E6 <sup>9</sup> GGKFATLAEL  | 37772 | 37405 |
| >PTPN11-E6 <sup>9</sup> GEKFATLA    | 55   | >PTPN11-E6 <sup>9</sup> GGKFATLA    | 36378 | 36323 |
| >PTPN11-E6 <sup>9</sup> GEKFATLAEL' | 309  | >PTPN11-E6 <sup>9</sup> GGKFATLAEL  | 40844 | 40535 |
| >PTPN11-E6 <sup>9</sup> GEKFATLAEL  | 478  | >PTPN11-E6 <sup>9</sup> GGKFATLAEL  | 37002 | 36524 |
| >PTPN11-E6 <sup>9</sup> GEKFATLAEL' | 9    | >PTPN11-E6 <sup>9</sup> GGKFATLAEL  | 20513 | 20504 |
| >PTPN11-E6 <sup>9</sup> YGGEKFATL   | 410  | >PTPN11-E6 <sup>9</sup> YGGGKFATL   | 1463  | 1053  |
| >PTPN11-E6 <sup>9</sup> YGGEKFATL   | 121  | >PTPN11-E6 <sup>9</sup> YGGGKFATL   | 232   | 111   |
| >PTPN11-E6 <sup>9</sup> LYGGEKFATL  | 4237 | >PTPN11-E6 <sup>9</sup> LYGGGKFATL  | 470   | 3767  |
| >PTPN11-E6 <sup>9</sup> LYGGEKFATL  | 7    | >PTPN11-E6 <sup>9</sup> LYGGGKFATL  | 7     | 0     |
| >PTPN11-E6 <sup>9</sup> DLYGGEKFA   | 494  | >PTPN11-E6 <sup>9</sup> DLYGGGKFA   | 208   | 286   |
| >PTPN11-E6 <sup>9</sup> DLYGGEKFAT  | 31   | >PTPN11-E6 <sup>9</sup> DLYGGGKFA   | 25    | 6     |
| >PTPN11-E6 <sup>9</sup> DLYGGEKFAT  | 396  | >PTPN11-E6 <sup>9</sup> DLYGGGKFA   | 443   | 47    |
| >PTPN11-E6 <sup>9</sup> DLYGGEKFA   | 293  | >PTPN11-E6 <sup>9</sup> DLYGGGKFA   | 289   | 4     |
| >PTPN11-E6 <sup>9</sup> DLYGGEKFAT  | 66   | >PTPN11-E6 <sup>9</sup> DLYGGGKFA   | 90    | 24    |
| >PTPN11-E6 <sup>9</sup> DLYGGEKFAT  | 205  | >PTPN11-E6 <sup>9</sup> DLYGGGKFA   | 225   | 20    |
| >PTPN11-E6 <sup>9</sup> DLYGGEKFA   | 143  | >PTPN11-E6 <sup>9</sup> DLYGGGKFA   | 159   | 16    |
| >PTPN11-E6 <sup>9</sup> DLYGGEKFAT  | 653  | >PTPN11-E6 <sup>9</sup> DLYGGGKFA   | 447   | 206   |
| >PTPN11-E6 <sup>9</sup> DLYGGEKFAT  | 11   | >PTPN11-E6 <sup>9</sup> DLYGGGKFA   | 12    | 1     |
| >PTPN11-E6 <sup>9</sup> DLYGGEKF    | 82   | >PTPN11-E6 <sup>9</sup> DLYGGGKF    | 29    | 53    |
| >PTPN11-E6 <sup>9</sup> YDLYGGEKF   | 803  | >PTPN11-E6 <sup>9</sup> YDLYGGGKF   | 314   | 489   |
| >PTPN11-E6 <sup>9</sup> YDLYGGEKF   | 303  | >PTPN11-E6 <sup>9</sup> YDLYGGGKF   | 1189  | 886   |
| >PTPN11-E6 <sup>9</sup> YDLYGGEKF   | 183  | >PTPN11-E6 <sup>9</sup> YDLYGGGKF   | 136   | 47    |
| >PTPN11-E6 <sup>9</sup> YYDLYGGEKF  | 31   | >PTPN11-E6 <sup>9</sup> YYDLYGGGKF  | 31    | 0     |
| >PTPN11-E6 <sup>9</sup> YYDLYGGEKF  | 76   | >PTPN11-E6 <sup>9</sup> YYDLYGGGKF  | 75    | 1     |
| >PTPN11-E6 <sup>9</sup> YYDLYGGEKF  | 7    | >PTPN11-E6 <sup>9</sup> YYDLYGGGKF  | 10    | 3     |
| >PTPN11-E6 <sup>9</sup> YYDLYGGEKF  | 47   | >PTPN11-E6 <sup>9</sup> YYDLYGGGKF  | 38    | 9     |
| >PTPN11-E6 <sup>9</sup> DYYDLYGGEK  | 108  | >PTPN11-E6 <sup>9</sup> DYYDLYGGG   | 280   | 172   |
| >PTPN11-E6 <sup>9</sup> DYYDLYGGEK  | 44   | >PTPN11-E6 <sup>9</sup> DYYDLYGGG   | 52    | 8     |
| >PTPN11-E6 <sup>9</sup> EKFATLAEL   | 3247 | >PTPN11-E6 <sup>9</sup> KKFATLAEL   | 300   | 2947  |
| >PTPN11-E6 <sup>9</sup> EKFATLAEL   | 6533 | >PTPN11-E6 <sup>9</sup> KKFATLAEL   | 303   | 6230  |
| >PTPN11-E6 <sup>9</sup> EKFATLAE    | 2737 | >PTPN11-E6 <sup>9</sup> KKFATLAE    | 216   | 2521  |
| >PTPN11-E6 <sup>9</sup> EKFATLAEL   | 36   | >PTPN11-E6 <sup>9</sup> KKFATLAEL   | 5     | 31    |
| >PTPN11-E6 <sup>9</sup> EKFATLAELV  | 324  | >PTPN11-E6 <sup>9</sup> KKFATLAELV  | 29    | 295   |
| >PTPN11-E6 <sup>9</sup> EKFATLAELV( | 1494 | >PTPN11-E6 <sup>9</sup> KKFATLAELV( | 147   | 1347  |
| >PTPN11-E6 <sup>9</sup> EKFATLAEL   | 89   | >PTPN11-E6 <sup>9</sup> KKFATLAEL   | 414   | 325   |
| >PTPN11-E6 <sup>9</sup> EKFATLAEL   | 8171 | >PTPN11-E6 <sup>9</sup> KKFATLAEL   | 419   | 7752  |
| >PTPN11-E6 <sup>9</sup> GEKFATLA    | 283  | >PTPN11-E6 <sup>9</sup> GKKFATLA    | 30681 | 30398 |
| >PTPN11-E6 <sup>9</sup> GEKFATLAEL' | 114  | >PTPN11-E6 <sup>9</sup> GKKFATLAEL' | 9623  | 9509  |
| >PTPN11-E6 <sup>9</sup> GEKFATLAEL  | 8155 | >PTPN11-E6 <sup>9</sup> GKKFATLAEL  | 241   | 7914  |
| >PTPN11-E6 <sup>9</sup> GEKFATLAEL' | 110  | >PTPN11-E6 <sup>9</sup> GKKFATLAEL' | 19803 | 19693 |
| >PTPN11-E6 <sup>9</sup> GEKFATLA    | 277  | >PTPN11-E6 <sup>9</sup> GKKFATLA    | 32811 | 32534 |

|                                     |       |                                     |       |       |
|-------------------------------------|-------|-------------------------------------|-------|-------|
| >PTPN11-E6 <sup>9</sup> GEKFATLAEL  | 173   | >PTPN11-E6 <sup>9</sup> GKKFATLAEL  | 26244 | 26071 |
| >PTPN11-E6 <sup>9</sup> GEKFATLAEL' | 367   | >PTPN11-E6 <sup>9</sup> GKKFATLAEL' | 31469 | 31102 |
| >PTPN11-E6 <sup>9</sup> GEKFATLA    | 55    | >PTPN11-E6 <sup>9</sup> GKKFATLA    | 22855 | 22800 |
| >PTPN11-E6 <sup>9</sup> GEKFATLAEL' | 309   | >PTPN11-E6 <sup>9</sup> GKKFATLAEL' | 32639 | 32330 |
| >PTPN11-E6 <sup>9</sup> GEKFATLAEL  | 478   | >PTPN11-E6 <sup>9</sup> GKKFATLAEL  | 27920 | 27442 |
| >PTPN11-E6 <sup>9</sup> GEKFATLAEL' | 9     | >PTPN11-E6 <sup>9</sup> GKKFATLAEL' | 6482  | 6473  |
| >PTPN11-E6 <sup>9</sup> YGGEKFATL   | 410   | >PTPN11-E6 <sup>9</sup> YGGKKFATL   | 3638  | 3228  |
| >PTPN11-E6 <sup>9</sup> YGGEKFATL   | 121   | >PTPN11-E6 <sup>9</sup> YGGKKFATL   | 47    | 74    |
| >PTPN11-E6 <sup>9</sup> LYGGEKFATL  | 7     | >PTPN11-E6 <sup>9</sup> LYGGKKFATL  | 9     | 2     |
| >PTPN11-E6 <sup>9</sup> DLYGGEKFA   | 494   | >PTPN11-E6 <sup>9</sup> DLYGGKKFA   | 595   | 101   |
| >PTPN11-E6 <sup>9</sup> DLYGGEKFAT  | 31    | >PTPN11-E6 <sup>9</sup> DLYGGKKFAT  | 50    | 19    |
| >PTPN11-E6 <sup>9</sup> DLYGGEKFAT  | 396   | >PTPN11-E6 <sup>9</sup> DLYGGKKFAT  | 728   | 332   |
| >PTPN11-E6 <sup>9</sup> DLYGGEKFA   | 293   | >PTPN11-E6 <sup>9</sup> DLYGGKKFA   | 726   | 433   |
| >PTPN11-E6 <sup>9</sup> DLYGGEKFAT  | 66    | >PTPN11-E6 <sup>9</sup> DLYGGKKFAT  | 146   | 80    |
| >PTPN11-E6 <sup>9</sup> DLYGGEKFAT  | 205   | >PTPN11-E6 <sup>9</sup> DLYGGKKFAT  | 431   | 226   |
| >PTPN11-E6 <sup>9</sup> DLYGGEKFA   | 143   | >PTPN11-E6 <sup>9</sup> DLYGGKKFA   | 158   | 15    |
| >PTPN11-E6 <sup>9</sup> DLYGGEKFAT  | 11    | >PTPN11-E6 <sup>9</sup> DLYGGKKFAT  | 14    | 3     |
| >PTPN11-E6 <sup>9</sup> DLYGGEKF    | 82    | >PTPN11-E6 <sup>9</sup> DLYGGKKF    | 57    | 25    |
| >PTPN11-E6 <sup>9</sup> YDLYGGEKF   | 303   | >PTPN11-E6 <sup>9</sup> YDLYGGKKF   | 137   | 166   |
| >PTPN11-E6 <sup>9</sup> YDLYGGEKF   | 183   | >PTPN11-E6 <sup>9</sup> YDLYGGKKF   | 307   | 124   |
| >PTPN11-E6 <sup>9</sup> YYDLYGGEKF  | 31    | >PTPN11-E6 <sup>9</sup> YYDLYGGKKF  | 35    | 4     |
| >PTPN11-E6 <sup>9</sup> YYDLYGGEKF  | 76    | >PTPN11-E6 <sup>9</sup> YYDLYGGKKF  | 106   | 30    |
| >PTPN11-E6 <sup>9</sup> YYDLYGGEKF  | 7     | >PTPN11-E6 <sup>9</sup> YYDLYGGKKF  | 11    | 4     |
| >PTPN11-E6 <sup>9</sup> YYDLYGGEKF  | 47    | >PTPN11-E6 <sup>9</sup> YYDLYGGKKF  | 52    | 5     |
| >PTPN11-E6 <sup>9</sup> DYYDLYGGEK  | 108   | >PTPN11-E6 <sup>9</sup> DYYDLYGGKK  | 188   | 80    |
| >PTPN11-E6 <sup>9</sup> DYYDLYGGEK  | 44    | >PTPN11-E6 <sup>9</sup> DYYDLYGGKK  | 66    | 22    |
| >PTPN11-E6 <sup>9</sup> DYYDLYGGE   | 3067  | >PTPN11-E6 <sup>9</sup> DYYDLYGGK   | 80    | 2987  |
| >PTPN11-E6 <sup>9</sup> DYYDLYGGE   | 18466 | >PTPN11-E6 <sup>9</sup> DYYDLYGGK   | 393   | 18073 |
| >PTPN11-E6 <sup>9</sup> DYYDLYGGE   | 16977 | >PTPN11-E6 <sup>9</sup> DYYDLYGGK   | 311   | 16666 |
| >PTPN11-E6 <sup>9</sup> EKFATLAELV  | 5173  | >PTPN11-E6 <sup>9</sup> VKFATLAELV  | 469   | 4704  |
| >PTPN11-E6 <sup>9</sup> EKFATLAEL   | 36    | >PTPN11-E6 <sup>9</sup> VKFATLAEL   | 11    | 25    |
| >PTPN11-E6 <sup>9</sup> EKFATLAELV  | 324   | >PTPN11-E6 <sup>9</sup> VKFATLAELV  | 65    | 259   |
| >PTPN11-E6 <sup>9</sup> EKFATLAELV' | 1494  | >PTPN11-E6 <sup>9</sup> VKFATLAELV' | 342   | 1152  |
| >PTPN11-E6 <sup>9</sup> EKFATLAEL   | 89    | >PTPN11-E6 <sup>9</sup> VKFATLAEL   | 294   | 205   |
| >PTPN11-E6 <sup>9</sup> GEKFATLA    | 283   | >PTPN11-E6 <sup>9</sup> GVKFATLA    | 40756 | 40473 |
| >PTPN11-E6 <sup>9</sup> GEKFATLAEL' | 114   | >PTPN11-E6 <sup>9</sup> GVKFATLAEL' | 21396 | 21282 |
| >PTPN11-E6 <sup>9</sup> GEKFATLA    | 11711 | >PTPN11-E6 <sup>9</sup> GVKFATLA    | 446   | 11265 |
| >PTPN11-E6 <sup>9</sup> GEKFATLAEL' | 7699  | >PTPN11-E6 <sup>9</sup> GVKFATLAEL' | 151   | 7548  |
| >PTPN11-E6 <sup>9</sup> GEKFATLA    | 11921 | >PTPN11-E6 <sup>9</sup> GVKFATLA    | 165   | 11756 |
| >PTPN11-E6 <sup>9</sup> GEKFATLAEL  | 12031 | >PTPN11-E6 <sup>9</sup> GVKFATLAEL  | 95    | 11936 |
| >PTPN11-E6 <sup>9</sup> GEKFATLAEL' | 110   | >PTPN11-E6 <sup>9</sup> GVKFATLAEL' | 22735 | 22625 |
| >PTPN11-E6 <sup>9</sup> GEKFATLA    | 277   | >PTPN11-E6 <sup>9</sup> GVKFATLA    | 38894 | 38617 |
| >PTPN11-E6 <sup>9</sup> GEKFATLAEL  | 173   | >PTPN11-E6 <sup>9</sup> GVKFATLAEL  | 34091 | 33918 |

|                        |       |                        |       |       |
|------------------------|-------|------------------------|-------|-------|
| >PTPN11-E6ϑGEKFATLAEL' | 367   | >PTPN11-E6ϑGVKFATLAEL' | 38000 | 37633 |
| >PTPN11-E6ϑGEKFATLA    | 55    | >PTPN11-E6ϑGVKFATLA    | 35078 | 35023 |
| >PTPN11-E6ϑGEKFATLAEL' | 309   | >PTPN11-E6ϑGVKFATLAEL' | 39527 | 39218 |
| >PTPN11-E6ϑGEKFATLAEL  | 478   | >PTPN11-E6ϑGVKFATLAEL  | 35785 | 35307 |
| >PTPN11-E6ϑGEKFATLAEL' | 9     | >PTPN11-E6ϑGVKFATLAEL' | 17244 | 17235 |
| >PTPN11-E6ϑGGEKFATL    | 2795  | >PTPN11-E6ϑGGVKFATL    | 123   | 2672  |
| >PTPN11-E6ϑYGGEKFATL   | 653   | >PTPN11-E6ϑYGGVKFATL   | 318   | 335   |
| >PTPN11-E6ϑYGGEKFATL   | 410   | >PTPN11-E6ϑYGGVKFATL   | 3013  | 2603  |
| >PTPN11-E6ϑYGGEKFATL   | 121   | >PTPN11-E6ϑYGGVKFATL   | 79    | 42    |
| >PTPN11-E6ϑLYGGEKFATL  | 4237  | >PTPN11-E6ϑLYGGVKFATL  | 343   | 3894  |
| >PTPN11-E6ϑLYGGEKFATL  | 2750  | >PTPN11-E6ϑLYGGVKFATL  | 481   | 2269  |
| >PTPN11-E6ϑLYGGEKFATL  | 7     | >PTPN11-E6ϑLYGGVKFATL  | 7     | 0     |
| >PTPN11-E6ϑDLYGGEKFA   | 6925  | >PTPN11-E6ϑDLYGGVKFA   | 381   | 6544  |
| >PTPN11-E6ϑDLYGGEKFAT  | 1178  | >PTPN11-E6ϑDLYGGVKFAT  | 468   | 710   |
| >PTPN11-E6ϑDLYGGEKFA   | 494   | >PTPN11-E6ϑDLYGGVKFA   | 38    | 456   |
| >PTPN11-E6ϑDLYGGEKFAT  | 1024  | >PTPN11-E6ϑDLYGGVKFAT  | 163   | 861   |
| >PTPN11-E6ϑDLYGGEKFAT  | 31    | >PTPN11-E6ϑDLYGGVKFAT  | 18    | 13    |
| >PTPN11-E6ϑDLYGGEKFAT  | 396   | >PTPN11-E6ϑDLYGGVKFAT  | 290   | 106   |
| >PTPN11-E6ϑDLYGGEKFA   | 293   | >PTPN11-E6ϑDLYGGVKFA   | 88    | 205   |
| >PTPN11-E6ϑDLYGGEKFAT  | 66    | >PTPN11-E6ϑDLYGGVKFAT  | 64    | 2     |
| >PTPN11-E6ϑDLYGGEKFA   | 3193  | >PTPN11-E6ϑDLYGGVKFA   | 442   | 2751  |
| >PTPN11-E6ϑDLYGGEKFAT  | 205   | >PTPN11-E6ϑDLYGGVKFAT  | 76    | 129   |
| >PTPN11-E6ϑDLYGGEKFA   | 143   | >PTPN11-E6ϑDLYGGVKFA   | 47    | 96    |
| >PTPN11-E6ϑDLYGGEKFAT  | 653   | >PTPN11-E6ϑDLYGGVKFAT  | 397   | 256   |
| >PTPN11-E6ϑDLYGGEKFAT  | 11    | >PTPN11-E6ϑDLYGGVKFAT  | 9     | 2     |
| >PTPN11-E6ϑDLYGGEKF    | 82    | >PTPN11-E6ϑDLYGGVKF    | 67    | 15    |
| >PTPN11-E6ϑYDLYGGEK    | 2313  | >PTPN11-E6ϑYDLYGGVK    | 268   | 2045  |
| >PTPN11-E6ϑYDLYGGEKF   | 303   | >PTPN11-E6ϑYDLYGGVKF   | 83    | 220   |
| >PTPN11-E6ϑYDLYGGEKF   | 183   | >PTPN11-E6ϑYDLYGGVKF   | 420   | 237   |
| >PTPN11-E6ϑYYDLYGGE    | 28933 | >PTPN11-E6ϑYYDLYGGV    | 297   | 28636 |
| >PTPN11-E6ϑYYDLYGGEKF  | 31    | >PTPN11-E6ϑYYDLYGGVKF  | 20    | 11    |
| >PTPN11-E6ϑYYDLYGGEKF  | 76    | >PTPN11-E6ϑYYDLYGGVKF  | 47    | 29    |
| >PTPN11-E6ϑYYDLYGGEKF  | 7     | >PTPN11-E6ϑYYDLYGGVKF  | 7     | 0     |
| >PTPN11-E6ϑYYDLYGGEKF  | 47    | >PTPN11-E6ϑYYDLYGGVKF  | 26    | 21    |
| >PTPN11-E6ϑDYYDLYGGEK  | 108   | >PTPN11-E6ϑDYYDLYGGVK  | 96    | 12    |
| >PTPN11-E6ϑDYYDLYGGEK  | 44    | >PTPN11-E6ϑDYYDLYGGVK  | 35    | 9     |
| >PTPN11-E6ϑDYYDLYGGE   | 19878 | >PTPN11-E6ϑDYYDLYGGV   | 342   | 19536 |
| >PTPN11-E6ϑGDYYDLYGGE  | 27744 | >PTPN11-E6ϑGDYYDLYGGV  | 265   | 27479 |
| >PTPN11-E7ϕELVQYYMEHI  | 139   | >PTPN11-E7ϕALVQYYMEH   | 1357  | 1218  |
| >PTPN11-E7ϕAELVQYYM    | 3395  | >PTPN11-E7ϕAALVQYYM    | 35    | 3360  |
| >PTPN11-E7ϕAELVQYYM    | 23557 | >PTPN11-E7ϕAALVQYYM    | 252   | 23305 |
| >PTPN11-E7ϕAELVQYYM    | 206   | >PTPN11-E7ϕAALVQYYM    | 21710 | 21504 |
| >PTPN11-E7ϕAELVQYYM    | 34    | >PTPN11-E7ϕAALVQYYM    | 29343 | 29309 |

|                       |      |                       |       |       |
|-----------------------|------|-----------------------|-------|-------|
| >PTPN11-E7(AELVQYYM   | 278  | >PTPN11-E7(AALVQYYM   | 18651 | 18373 |
| >PTPN11-E7(AELVQYYM   | 121  | >PTPN11-E7(AALVQYYM   | 27888 | 27767 |
| >PTPN11-E7(AELVQYYMEI | 424  | >PTPN11-E7(AALVQYYMEI | 22445 | 22021 |
| >PTPN11-E7(AELVQYYM   | 148  | >PTPN11-E7(AALVQYYM   | 28528 | 28380 |
| >PTPN11-E7(AELVQYYME  | 269  | >PTPN11-E7(AALVQYYME  | 30015 | 29746 |
| >PTPN11-E7(AELVQYYM   | 78   | >PTPN11-E7(AALVQYYM   | 11035 | 10957 |
| >PTPN11-E7(LAELVQYY   | 266  | >PTPN11-E7(LAALVQYY   | 1496  | 1230  |
| >PTPN11-E7(LAELVQYYM  | 2529 | >PTPN11-E7(LAALVQYYM  | 239   | 2290  |
| >PTPN11-E7(LAELVQYY   | 1220 | >PTPN11-E7(LAALVQYY   | 97    | 1123  |
| >PTPN11-E7(LAELVQYY   | 845  | >PTPN11-E7(LAALVQYY   | 170   | 675   |
| >PTPN11-E7(LAELVQYY   | 4341 | >PTPN11-E7(LAALVQYY   | 430   | 3911  |
| >PTPN11-E7(LAELVQYYM  | 5669 | >PTPN11-E7(LAALVQYYM  | 133   | 5536  |
| >PTPN11-E7(LAELVQYY   | 5090 | >PTPN11-E7(LAALVQYY   | 446   | 4644  |
| >PTPN11-E7(LAELVQYY   | 293  | >PTPN11-E7(LAALVQYY   | 86    | 207   |
| >PTPN11-E7(LAELVQYY   | 240  | >PTPN11-E7(LAALVQYY   | 68    | 172   |
| >PTPN11-E7(LAELVQYYM  | 711  | >PTPN11-E7(LAALVQYYM  | 161   | 550   |
| >PTPN11-E7(LAELVQYY   | 3201 | >PTPN11-E7(LAALVQYY   | 33    | 3168  |
| >PTPN11-E7(LAELVQYYM  | 984  | >PTPN11-E7(LAALVQYYM  | 18    | 966   |
| >PTPN11-E7(LAELVQYYM  | 420  | >PTPN11-E7(LAALVQYYM  | 124   | 296   |
| >PTPN11-E7(TLAELVQYYM | 36   | >PTPN11-E7(TLAALVQYYM | 54    | 18    |
| >PTPN11-E7(TLAELVQYY  | 296  | >PTPN11-E7(TLAALVQYY  | 461   | 165   |
| >PTPN11-E7(TLAELVQYYM | 13   | >PTPN11-E7(TLAALVQYYM | 14    | 1     |
| >PTPN11-E7(TLAELVQYYM | 448  | >PTPN11-E7(TLAALVQYYM | 383   | 65    |
| >PTPN11-E7(TLAELVQYY  | 179  | >PTPN11-E7(TLAALVQYY  | 1116  | 937   |
| >PTPN11-E7(TLAELVQYYM | 7    | >PTPN11-E7(TLAALVQYYM | 18    | 11    |
| >PTPN11-E7(TLAELVQYYM | 25   | >PTPN11-E7(TLAALVQYYM | 135   | 110   |
| >PTPN11-E7(TLAELVQYYM | 21   | >PTPN11-E7(TLAALVQYYM | 53    | 32    |
| >PTPN11-E7(TLAELVQYYM | 7    | >PTPN11-E7(TLAALVQYYM | 17    | 10    |
| >PTPN11-E7(TLAELVQYY  | 389  | >PTPN11-E7(TLAALVQYY  | 1086  | 697   |
| >PTPN11-E7(TLAELVQYYM | 26   | >PTPN11-E7(TLAALVQYYM | 56    | 30    |
| >PTPN11-E7(TLAELVQY   | 1185 | >PTPN11-E7(TLAALVQY   | 482   | 703   |
| >PTPN11-E7(TLAELVQYY  | 504  | >PTPN11-E7(TLAALVQYY  | 224   | 280   |
| >PTPN11-E7(TLAELVQYY  | 248  | >PTPN11-E7(TLAALVQYY  | 1517  | 1269  |
| >PTPN11-E7(TLAELVQY   | 243  | >PTPN11-E7(TLAALVQY   | 398   | 155   |
| >PTPN11-E7(TLAELVQYY  | 80   | >PTPN11-E7(TLAALVQYY  | 158   | 78    |
| >PTPN11-E7(TLAELVQY   | 64   | >PTPN11-E7(TLAALVQY   | 44    | 20    |
| >PTPN11-E7(TLAELVQYY  | 40   | >PTPN11-E7(TLAALVQYY  | 26    | 14    |
| >PTPN11-E7(TLAELVQY   | 681  | >PTPN11-E7(TLAALVQY   | 484   | 197   |
| >PTPN11-E7(TLAELVQYY  | 262  | >PTPN11-E7(TLAALVQYY  | 186   | 76    |
| >PTPN11-E7(TLAELVQYYM | 497  | >PTPN11-E7(TLAALVQYYM | 239   | 258   |
| >PTPN11-E7(TLAELVQYYM | 91   | >PTPN11-E7(TLAALVQYYM | 373   | 282   |
| >PTPN11-E7(TLAELVQY   | 182  | >PTPN11-E7(TLAALVQY   | 77    | 105   |
| >PTPN11-E7(TLAELVQYY  | 32   | >PTPN11-E7(TLAALVQYY  | 15    | 17    |

|                       |      |                       |     |      |
|-----------------------|------|-----------------------|-----|------|
| >PTPN11-E7€TLAELVQY   | 204  | >PTPN11-E7€TLAALVQY   | 127 | 77   |
| >PTPN11-E7€TLAELVQYY  | 102  | >PTPN11-E7€TLAALVQYY  | 72  | 30   |
| >PTPN11-E7€TLAELVQY   | 332  | >PTPN11-E7€TLAALVQY   | 180 | 152  |
| >PTPN11-E7€TLAELVQYY  | 207  | >PTPN11-E7€TLAALVQYY  | 130 | 77   |
| >PTPN11-E7€TLAELVQYYM | 291  | >PTPN11-E7€TLAALVQYYM | 250 | 41   |
| >PTPN11-E7€TLAELVQY   | 482  | >PTPN11-E7€TLAALVQY   | 562 | 80   |
| >PTPN11-E7€TLAELVQYY  | 700  | >PTPN11-E7€TLAALVQYY  | 262 | 438  |
| >PTPN11-E7€ATLAELVQYY | 4378 | >PTPN11-E7€ATLAALVQYY | 121 | 4257 |
| >PTPN11-E7€ATLAELVQYY | 167  | >PTPN11-E7€ATLAALVQYY | 100 | 67   |
| >PTPN11-E7€ATLAELVQYY | 442  | >PTPN11-E7€ATLAALVQYY | 320 | 122  |
| >PTPN11-E7€ATLAELVQYY | 285  | >PTPN11-E7€ATLAALVQYY | 184 | 101  |
| >PTPN11-E7€ATLAELVQYY | 247  | >PTPN11-E7€ATLAALVQYY | 210 | 37   |
| >PTPN11-E7€ATLAELVQYY | 371  | >PTPN11-E7€ATLAALVQYY | 102 | 269  |
| >PTPN11-E7€ATLAELVQY  | 112  | >PTPN11-E7€ATLAALVQY  | 64  | 48   |
| >PTPN11-E7€ATLAELVQYY | 73   | >PTPN11-E7€ATLAALVQYY | 30  | 43   |
| >PTPN11-E7€ATLAELVQYY | 152  | >PTPN11-E7€ATLAALVQYY | 149 | 3    |
| >PTPN11-E7€ATLAELVQY  | 8    | >PTPN11-E7€ATLAALVQY  | 9   | 1    |
| >PTPN11-E7€ATLAELVQYY | 8    | >PTPN11-E7€ATLAALVQYY | 8   | 0    |
| >PTPN11-E7€ATLAELVQYY | 28   | >PTPN11-E7€ATLAALVQYY | 27  | 1    |
| >PTPN11-E7€ATLAELVQY  | 70   | >PTPN11-E7€ATLAALVQY  | 62  | 8    |
| >PTPN11-E7€ATLAELVQYY | 196  | >PTPN11-E7€ATLAALVQYY | 110 | 86   |
| >PTPN11-E7€ATLAELVQY  | 3407 | >PTPN11-E7€ATLAALVQY  | 472 | 2935 |
| >PTPN11-E7€ATLAELVQYY | 930  | >PTPN11-E7€ATLAALVQYY | 166 | 764  |
| >PTPN11-E7€ATLAELVQYY | 781  | >PTPN11-E7€ATLAALVQYY | 153 | 628  |
| >PTPN11-E7€ATLAELVQYY | 72   | >PTPN11-E7€ATLAALVQYY | 36  | 36   |
| >PTPN11-E7€ATLAELVQY  | 342  | >PTPN11-E7€ATLAALVQY  | 302 | 40   |
| >PTPN11-E7€ATLAELVQYY | 363  | >PTPN11-E7€ATLAALVQYY | 126 | 237  |
| >PTPN11-E7€ATLAELVQY  | 256  | >PTPN11-E7€ATLAALVQY  | 369 | 113  |
| >PTPN11-E7€ATLAELVQYY | 70   | >PTPN11-E7€ATLAALVQYY | 79  | 9    |
| >PTPN11-E7€ATLAELVQY  | 939  | >PTPN11-E7€ATLAALVQY  | 346 | 593  |
| >PTPN11-E7€ATLAELVQYY | 556  | >PTPN11-E7€ATLAALVQYY | 247 | 309  |
| >PTPN11-E7€ATLAELVQY  | 546  | >PTPN11-E7€ATLAALVQY  | 318 | 228  |
| >PTPN11-E7€ATLAELVQYY | 290  | >PTPN11-E7€ATLAALVQYY | 186 | 104  |
| >PTPN11-E7€ATLAELVQY  | 5    | >PTPN11-E7€ATLAALVQY  | 3   | 2    |
| >PTPN11-E7€ATLAELVQYY | 5    | >PTPN11-E7€ATLAALVQYY | 4   | 1    |
| >PTPN11-E7€ATLAELVQYY | 23   | >PTPN11-E7€ATLAALVQYY | 16  | 7    |
| >PTPN11-E7€ATLAELVQYY | 460  | >PTPN11-E7€ATLAALVQYY | 231 | 229  |
| >PTPN11-E7€ATLAELVQYY | 302  | >PTPN11-E7€ATLAALVQYY | 175 | 127  |
| >PTPN11-E7€ATLAELVQYY | 379  | >PTPN11-E7€ATLAALVQYY | 169 | 210  |
| >PTPN11-E7€ATLAELVQY  | 166  | >PTPN11-E7€ATLAALVQY  | 68  | 98   |
| >PTPN11-E7€ATLAELVQYY | 136  | >PTPN11-E7€ATLAALVQYY | 79  | 57   |
| >PTPN11-E7€ATLAELVQYY | 137  | >PTPN11-E7€ATLAALVQYY | 72  | 65   |
| >PTPN11-E7€FATLAELVQY | 360  | >PTPN11-E7€FATLAALVQY | 362 | 2    |

|                        |      |                        |      |      |
|------------------------|------|------------------------|------|------|
| >PTPN11-E7€FATLAELV    | 189  | >PTPN11-E7€FATLAALV    | 140  | 49   |
| >PTPN11-E7€FATLAELV    | 1117 | >PTPN11-E7€FATLAALV    | 224  | 893  |
| >PTPN11-E7€FATLAELV    | 38   | >PTPN11-E7€FATLAALV    | 19   | 19   |
| >PTPN11-E7€FATLAELV    | 97   | >PTPN11-E7€FATLAALV    | 46   | 51   |
| >PTPN11-E7€FATLAELVQY  | 717  | >PTPN11-E7€FATLAALVQY  | 457  | 260  |
| >PTPN11-E7€FATLAELVQY  | 99   | >PTPN11-E7€FATLAALVQY  | 47   | 52   |
| >PTPN11-E7€FATLAELV    | 99   | >PTPN11-E7€FATLAALV    | 59   | 40   |
| >PTPN11-E7€FATLAELV    | 1002 | >PTPN11-E7€FATLAALV    | 182  | 820  |
| >PTPN11-E7€FATLAELVQY  | 41   | >PTPN11-E7€FATLAALVQY  | 20   | 21   |
| >PTPN11-E7€FATLAELVQY  | 41   | >PTPN11-E7€FATLAALVQY  | 21   | 20   |
| >PTPN11-E7€FATLAELVQY  | 27   | >PTPN11-E7€FATLAALVQY  | 27   | 0    |
| >PTPN11-E7€FATLAELVQY  | 310  | >PTPN11-E7€FATLAALVQY  | 326  | 16   |
| >PTPN11-E7€FATLAELV    | 1144 | >PTPN11-E7€FATLAALV    | 313  | 831  |
| >PTPN11-E7€FATLAELVQY  | 221  | >PTPN11-E7€FATLAALVQY  | 168  | 53   |
| >PTPN11-E7€FATLAELVQY  | 104  | >PTPN11-E7€FATLAALVQY  | 75   | 29   |
| >PTPN11-E7€FATLAELVQY  | 850  | >PTPN11-E7€FATLAALVQY  | 421  | 429  |
| >PTPN11-E7€KFATLAEL    | 625  | >PTPN11-E7€KFATLAAL    | 341  | 284  |
| >PTPN11-E7€KFATLAEL    | 82   | >PTPN11-E7€KFATLAAL    | 100  | 18   |
| >PTPN11-E7€KFATLAELV   | 64   | >PTPN11-E7€KFATLAALV   | 46   | 18   |
| >PTPN11-E7€KFATLAEL    | 221  | >PTPN11-E7€KFATLAAL    | 551  | 330  |
| >PTPN11-E7€KFATLAELVQ  | 27   | >PTPN11-E7€KFATLAALVQ  | 23   | 4    |
| >PTPN11-E7€KFATLAELVQ  | 319  | >PTPN11-E7€KFATLAALVQ  | 171  | 148  |
| >PTPN11-E7€KFATLAELVQ  | 117  | >PTPN11-E7€KFATLAALVQ  | 159  | 42   |
| >PTPN11-E7€KFATLAELVQ  | 144  | >PTPN11-E7€KFATLAALVQ  | 116  | 28   |
| >PTPN11-E7€KFATLAEL    | 210  | >PTPN11-E7€KFATLAAL    | 105  | 105  |
| >PTPN11-E7€KFATLAELV   | 149  | >PTPN11-E7€KFATLAALV   | 220  | 71   |
| >PTPN11-E7€EKFATLAELV  | 809  | >PTPN11-E7€EKFATLAALV  | 338  | 471  |
| >PTPN11-E7€EKFATLAE    | 2737 | >PTPN11-E7€EKFATLAA    | 182  | 2555 |
| >PTPN11-E7€EKFATLAEL   | 36   | >PTPN11-E7€EKFATLAAL   | 18   | 18   |
| >PTPN11-E7€EKFATLAELV  | 324  | >PTPN11-E7€EKFATLAALV  | 207  | 117  |
| >PTPN11-E7€EKFATLAEL   | 89   | >PTPN11-E7€EKFATLAAL   | 14   | 75   |
| >PTPN11-E7€EKFATLAELV  | 2304 | >PTPN11-E7€EKFATLAALV  | 477  | 1827 |
| >PTPN11-E7€GEKFATLAEL' | 114  | >PTPN11-E7€GEKFATLAAL' | 111  | 3    |
| >PTPN11-E7€GEKFATLAEL' | 110  | >PTPN11-E7€GEKFATLAAL' | 169  | 59   |
| >PTPN11-E7€GEKFATLAE   | 1529 | >PTPN11-E7€GEKFATLAA   | 62   | 1467 |
| >PTPN11-E7€GEKFATLAEL  | 173  | >PTPN11-E7€GEKFATLAAL  | 136  | 37   |
| >PTPN11-E7€GEKFATLAEL' | 367  | >PTPN11-E7€GEKFATLAAL' | 552  | 185  |
| >PTPN11-E7€GEKFATLAE   | 2675 | >PTPN11-E7€GEKFATLAA   | 17   | 2658 |
| >PTPN11-E7€GEKFATLAEL' | 309  | >PTPN11-E7€GEKFATLAAL' | 215  | 94   |
| >PTPN11-E7€GEKFATLAE   | 2524 | >PTPN11-E7€GEKFATLAA   | 237  | 2287 |
| >PTPN11-E7€GEKFATLAEL  | 478  | >PTPN11-E7€GEKFATLAAL  | 253  | 225  |
| >PTPN11-E7€GEKFATLAEL' | 9    | >PTPN11-E7€GEKFATLAAL' | 9    | 0    |
| >PTPN11-E7€ELVQYYMEHI  | 139  | >PTPN11-E7€GLVQYYMEH   | 8841 | 8702 |



|                       |      |                       |       |       |
|-----------------------|------|-----------------------|-------|-------|
| >PTPN11-E7(AELVQYYM   | 3395 | >PTPN11-E7(AGLVQYYM   | 406   | 2989  |
| >PTPN11-E7(AELVQYYM   | 206  | >PTPN11-E7(AGLVQYYM   | 23480 | 23274 |
| >PTPN11-E7(AELVQYYM   | 34   | >PTPN11-E7(AGLVQYYM   | 32189 | 32155 |
| >PTPN11-E7(AELVQYYM   | 278  | >PTPN11-E7(AGLVQYYM   | 21414 | 21136 |
| >PTPN11-E7(AELVQYYM   | 121  | >PTPN11-E7(AGLVQYYM   | 34840 | 34719 |
| >PTPN11-E7(AELVQYYMEI | 424  | >PTPN11-E7(AGLVQYYME  | 26255 | 25831 |
| >PTPN11-E7(AELVQYYM   | 148  | >PTPN11-E7(AGLVQYYM   | 36210 | 36062 |
| >PTPN11-E7(AELVQYYME  | 269  | >PTPN11-E7(AGLVQYYME  | 36858 | 36589 |
| >PTPN11-E7(AELVQYYM   | 78   | >PTPN11-E7(AGLVQYYM   | 23028 | 22950 |
| >PTPN11-E7(LAELVQYY   | 266  | >PTPN11-E7(LAGLVQYY   | 4137  | 3871  |
| >PTPN11-E7(LAELVQYY   | 1220 | >PTPN11-E7(LAGLVQYY   | 231   | 989   |
| >PTPN11-E7(LAELVQYY   | 293  | >PTPN11-E7(LAGLVQYY   | 570   | 277   |
| >PTPN11-E7(LAELVQYY   | 240  | >PTPN11-E7(LAGLVQYY   | 626   | 386   |
| >PTPN11-E7(LAELVQYY   | 3201 | >PTPN11-E7(LAGLVQYY   | 210   | 2991  |
| >PTPN11-E7(LAELVQYYM  | 984  | >PTPN11-E7(LAGLVQYYM  | 56    | 928   |
| >PTPN11-E7(LAELVQYYM  | 420  | >PTPN11-E7(LAGLVQYYM  | 1136  | 716   |
| >PTPN11-E7(TLAELVQYYM | 36   | >PTPN11-E7(TLAGLVQYYM | 45    | 9     |
| >PTPN11-E7(TLAELVQYY  | 296  | >PTPN11-E7(TLAGLVQYY  | 445   | 149   |
| >PTPN11-E7(TLAELVQYYM | 13   | >PTPN11-E7(TLAGLVQYYM | 15    | 2     |
| >PTPN11-E7(TLAELVQYYM | 448  | >PTPN11-E7(TLAGLVQYYM | 401   | 47    |
| >PTPN11-E7(TLAELVQYY  | 179  | >PTPN11-E7(TLAGLVQYY  | 669   | 490   |
| >PTPN11-E7(TLAELVQYYM | 7    | >PTPN11-E7(TLAGLVQYYM | 14    | 7     |
| >PTPN11-E7(TLAELVQYYM | 25   | >PTPN11-E7(TLAGLVQYYM | 175   | 150   |
| >PTPN11-E7(TLAELVQYYM | 21   | >PTPN11-E7(TLAGLVQYYM | 38    | 17    |
| >PTPN11-E7(TLAELVQYYM | 7    | >PTPN11-E7(TLAGLVQYYM | 12    | 5     |
| >PTPN11-E7(TLAELVQYY  | 389  | >PTPN11-E7(TLAGLVQYY  | 340   | 49    |
| >PTPN11-E7(TLAELVQYYM | 26   | >PTPN11-E7(TLAGLVQYYM | 25    | 1     |
| >PTPN11-E7(TLAELVQYY  | 504  | >PTPN11-E7(TLAGLVQYY  | 427   | 77    |
| >PTPN11-E7(TLAELVQYY  | 248  | >PTPN11-E7(TLAGLVQYY  | 485   | 237   |
| >PTPN11-E7(TLAELVQY   | 243  | >PTPN11-E7(TLAGLVQY   | 162   | 81    |
| >PTPN11-E7(TLAELVQYY  | 80   | >PTPN11-E7(TLAGLVQYY  | 66    | 14    |
| >PTPN11-E7(TLAELVQYYM | 597  | >PTPN11-E7(TLAGLVQYYM | 424   | 173   |
| >PTPN11-E7(TLAELVQY   | 64   | >PTPN11-E7(TLAGLVQY   | 28    | 36    |
| >PTPN11-E7(TLAELVQYY  | 40   | >PTPN11-E7(TLAGLVQYY  | 19    | 21    |
| >PTPN11-E7(TLAELVQY   | 681  | >PTPN11-E7(TLAGLVQY   | 462   | 219   |
| >PTPN11-E7(TLAELVQYY  | 262  | >PTPN11-E7(TLAGLVQYY  | 216   | 46    |
| >PTPN11-E7(TLAELVQYYM | 497  | >PTPN11-E7(TLAGLVQYYM | 808   | 311   |
| >PTPN11-E7(TLAELVQYYM | 91   | >PTPN11-E7(TLAGLVQYYM | 625   | 534   |
| >PTPN11-E7(TLAELVQY   | 182  | >PTPN11-E7(TLAGLVQY   | 264   | 82    |
| >PTPN11-E7(TLAELVQYY  | 32   | >PTPN11-E7(TLAGLVQYY  | 57    | 25    |
| >PTPN11-E7(TLAELVQY   | 204  | >PTPN11-E7(TLAGLVQY   | 174   | 30    |
| >PTPN11-E7(TLAELVQYY  | 102  | >PTPN11-E7(TLAGLVQYY  | 103   | 1     |
| >PTPN11-E7(TLAELVQY   | 332  | >PTPN11-E7(TLAGLVQY   | 176   | 156   |

|                       |      |                       |      |      |
|-----------------------|------|-----------------------|------|------|
| >PTPN11-E7(TLAELVQYY  | 207  | >PTPN11-E7(TLAGLVQYY  | 177  | 30   |
| >PTPN11-E7(TLAELVQYYN | 291  | >PTPN11-E7(TLAGLVQYYN | 274  | 17   |
| >PTPN11-E7(TLAELVQY   | 482  | >PTPN11-E7(TLAGLVQY   | 3152 | 2670 |
| >PTPN11-E7(TLAELVQY   | 1581 | >PTPN11-E7(TLAGLVQY   | 438  | 1143 |
| >PTPN11-E7(TLAELVQYY  | 700  | >PTPN11-E7(TLAGLVQYY  | 172  | 528  |
| >PTPN11-E7(ATLAELVQYY | 167  | >PTPN11-E7(ATLAGLVQYY | 214  | 47   |
| >PTPN11-E7(ATLAELVQYY | 442  | >PTPN11-E7(ATLAGLVQYY | 307  | 135  |
| >PTPN11-E7(ATLAELVQYY | 285  | >PTPN11-E7(ATLAGLVQYY | 187  | 98   |
| >PTPN11-E7(ATLAELVQYY | 247  | >PTPN11-E7(ATLAGLVQYY | 144  | 103  |
| >PTPN11-E7(ATLAELVQYY | 371  | >PTPN11-E7(ATLAGLVQYY | 122  | 249  |
| >PTPN11-E7(ATLAELVQY  | 112  | >PTPN11-E7(ATLAGLVQY  | 99   | 13   |
| >PTPN11-E7(ATLAELVQYY | 73   | >PTPN11-E7(ATLAGLVQYY | 40   | 33   |
| >PTPN11-E7(ATLAELVQYY | 152  | >PTPN11-E7(ATLAGLVQYY | 271  | 119  |
| >PTPN11-E7(ATLAELVQY  | 8    | >PTPN11-E7(ATLAGLVQY  | 8    | 0    |
| >PTPN11-E7(ATLAELVQYY | 8    | >PTPN11-E7(ATLAGLVQYY | 8    | 0    |
| >PTPN11-E7(ATLAELVQYY | 28   | >PTPN11-E7(ATLAGLVQYY | 26   | 2    |
| >PTPN11-E7(ATLAELVQYY | 778  | >PTPN11-E7(ATLAGLVQYY | 350  | 428  |
| >PTPN11-E7(ATLAELVQY  | 70   | >PTPN11-E7(ATLAGLVQY  | 25   | 45   |
| >PTPN11-E7(ATLAELVQYY | 196  | >PTPN11-E7(ATLAGLVQYY | 286  | 90   |
| >PTPN11-E7(ATLAELVQYY | 930  | >PTPN11-E7(ATLAGLVQYY | 451  | 479  |
| >PTPN11-E7(ATLAELVQYY | 781  | >PTPN11-E7(ATLAGLVQYY | 348  | 433  |
| >PTPN11-E7(ATLAELVQY  | 579  | >PTPN11-E7(ATLAGLVQY  | 214  | 365  |
| >PTPN11-E7(ATLAELVQYY | 72   | >PTPN11-E7(ATLAGLVQYY | 44   | 28   |
| >PTPN11-E7(ATLAELVQY  | 342  | >PTPN11-E7(ATLAGLVQY  | 264  | 78   |
| >PTPN11-E7(ATLAELVQYY | 363  | >PTPN11-E7(ATLAGLVQYY | 152  | 211  |
| >PTPN11-E7(ATLAELVQY  | 256  | >PTPN11-E7(ATLAGLVQY  | 161  | 95   |
| >PTPN11-E7(ATLAELVQYY | 70   | >PTPN11-E7(ATLAGLVQYY | 61   | 9    |
| >PTPN11-E7(ATLAELVQY  | 939  | >PTPN11-E7(ATLAGLVQY  | 359  | 580  |
| >PTPN11-E7(ATLAELVQYY | 556  | >PTPN11-E7(ATLAGLVQYY | 295  | 261  |
| >PTPN11-E7(ATLAELVQYY | 290  | >PTPN11-E7(ATLAGLVQYY | 351  | 61   |
| >PTPN11-E7(ATLAELVQY  | 5    | >PTPN11-E7(ATLAGLVQY  | 3    | 2    |
| >PTPN11-E7(ATLAELVQYY | 5    | >PTPN11-E7(ATLAGLVQYY | 4    | 1    |
| >PTPN11-E7(ATLAELVQYY | 23   | >PTPN11-E7(ATLAGLVQYY | 14   | 9    |
| >PTPN11-E7(ATLAELVQYY | 460  | >PTPN11-E7(ATLAGLVQYY | 298  | 162  |
| >PTPN11-E7(ATLAELVQYY | 302  | >PTPN11-E7(ATLAGLVQYY | 199  | 103  |
| >PTPN11-E7(ATLAELVQYY | 379  | >PTPN11-E7(ATLAGLVQYY | 531  | 152  |
| >PTPN11-E7(ATLAELVQY  | 166  | >PTPN11-E7(ATLAGLVQY  | 31   | 135  |
| >PTPN11-E7(ATLAELVQYY | 136  | >PTPN11-E7(ATLAGLVQYY | 111  | 25   |
| >PTPN11-E7(ATLAELVQYY | 137  | >PTPN11-E7(ATLAGLVQYY | 48   | 89   |
| >PTPN11-E7(ATLAELVQY  | 505  | >PTPN11-E7(ATLAGLVQY  | 448  | 57   |
| >PTPN11-E7(FATLAELVQY | 360  | >PTPN11-E7(FATLAGLVQY | 448  | 88   |
| >PTPN11-E7(FATLAELV   | 189  | >PTPN11-E7(FATLAGLV   | 597  | 408  |
| >PTPN11-E7(FATLAELV   | 1117 | >PTPN11-E7(FATLAGLV   | 462  | 655  |

|                        |      |                       |       |       |
|------------------------|------|-----------------------|-------|-------|
| >PTPN11-E7€FATLAELV    | 38   | >PTPN11-E7€FATLAGLV   | 73    | 35    |
| >PTPN11-E7€FATLAELV    | 97   | >PTPN11-E7€FATLAGLV   | 283   | 186   |
| >PTPN11-E7€FATLAELVQY  | 717  | >PTPN11-E7€FATLAGLVQY | 281   | 436   |
| >PTPN11-E7€FATLAELVQY  | 99   | >PTPN11-E7€FATLAGLVQY | 46    | 53    |
| >PTPN11-E7€FATLAELV    | 99   | >PTPN11-E7€FATLAGLV   | 157   | 58    |
| >PTPN11-E7€FATLAELVQY  | 41   | >PTPN11-E7€FATLAGLVQY | 22    | 19    |
| >PTPN11-E7€FATLAELVQY  | 41   | >PTPN11-E7€FATLAGLVQY | 25    | 16    |
| >PTPN11-E7€FATLAELVQY  | 27   | >PTPN11-E7€FATLAGLVQY | 32    | 5     |
| >PTPN11-E7€FATLAELVQY  | 310  | >PTPN11-E7€FATLAGLVQY | 393   | 83    |
| >PTPN11-E7€FATLAELV    | 1144 | >PTPN11-E7€FATLAGLV   | 305   | 839   |
| >PTPN11-E7€FATLAELVQY  | 221  | >PTPN11-E7€FATLAGLVQY | 382   | 161   |
| >PTPN11-E7€FATLAELVQY  | 104  | >PTPN11-E7€FATLAGLVQY | 82    | 22    |
| >PTPN11-E7€FATLAELVQY  | 850  | >PTPN11-E7€FATLAGLVQY | 358   | 492   |
| >PTPN11-E7€KFATLAEL    | 82   | >PTPN11-E7€KFATLAGL   | 228   | 146   |
| >PTPN11-E7€KFATLAELV   | 64   | >PTPN11-E7€KFATLAGLV  | 455   | 391   |
| >PTPN11-E7€KFATLAEL    | 221  | >PTPN11-E7€KFATLAGL   | 905   | 684   |
| >PTPN11-E7€KFATLAELVQ  | 27   | >PTPN11-E7€KFATLAGLVQ | 18    | 9     |
| >PTPN11-E7€KFATLAELVQ  | 319  | >PTPN11-E7€KFATLAGLVQ | 122   | 197   |
| >PTPN11-E7€KFATLAELVQ  | 117  | >PTPN11-E7€KFATLAGLVQ | 88    | 29    |
| >PTPN11-E7€KFATLAELVQ  | 144  | >PTPN11-E7€KFATLAGLVQ | 149   | 5     |
| >PTPN11-E7€KFATLAEL    | 210  | >PTPN11-E7€KFATLAGL   | 158   | 52    |
| >PTPN11-E7€KFATLAELV   | 149  | >PTPN11-E7€KFATLAGLV  | 142   | 7     |
| >PTPN11-E7€EKFATLAELV  | 809  | >PTPN11-E7€EKFATLAGLV | 440   | 369   |
| >PTPN11-E7€EKFATLAEL   | 36   | >PTPN11-E7€EKFATLAGL  | 116   | 80    |
| >PTPN11-E7€EKFATLAELV  | 324  | >PTPN11-E7€EKFATLAGLV | 1096  | 772   |
| >PTPN11-E7€EKFATLAEL   | 89   | >PTPN11-E7€EKFATLAGL  | 150   | 61    |
| >PTPN11-E7€GEKFATLAEL' | 114  | >PTPN11-E7€GEKFATLAGL | 81    | 33    |
| >PTPN11-E7€GEKFATLAEL' | 110  | >PTPN11-E7€GEKFATLAGL | 187   | 77    |
| >PTPN11-E7€GEKFATLAEL  | 173  | >PTPN11-E7€GEKFATLAGL | 283   | 110   |
| >PTPN11-E7€GEKFATLAEL' | 367  | >PTPN11-E7€GEKFATLAGL | 561   | 194   |
| >PTPN11-E7€GEKFATLAEL' | 309  | >PTPN11-E7€GEKFATLAGL | 451   | 142   |
| >PTPN11-E7€GEKFATLAEL  | 478  | >PTPN11-E7€GEKFATLAGL | 191   | 287   |
| >PTPN11-E7€GEKFATLAEL' | 9    | >PTPN11-E7€GEKFATLAGL | 11    | 2     |
| >PTPN11-E7€ELVQYYMEHI  | 139  | >PTPN11-E7€KLVQYYMEHI | 4176  | 4037  |
| >PTPN11-E7€AELVQYYM    | 1489 | >PTPN11-E7€AKLVQYYM   | 31    | 1458  |
| >PTPN11-E7€AELVQYYMEI  | 2627 | >PTPN11-E7€AKLVQYYMEI | 94    | 2533  |
| >PTPN11-E7€AELVQYYMEI  | 7695 | >PTPN11-E7€AKLVQYYMEI | 344   | 7351  |
| >PTPN11-E7€AELVQYYM    | 206  | >PTPN11-E7€AKLVQYYM   | 20912 | 20706 |
| >PTPN11-E7€AELVQYYM    | 34   | >PTPN11-E7€AKLVQYYM   | 19701 | 19667 |
| >PTPN11-E7€AELVQYYM    | 278  | >PTPN11-E7€AKLVQYYM   | 15972 | 15694 |
| >PTPN11-E7€AELVQYYM    | 121  | >PTPN11-E7€AKLVQYYM   | 18069 | 17948 |
| >PTPN11-E7€AELVQYYMEI  | 424  | >PTPN11-E7€AKLVQYYMEI | 16486 | 16062 |
| >PTPN11-E7€AELVQYYM    | 148  | >PTPN11-E7€AKLVQYYM   | 23576 | 23428 |

|                       |      |                       |       |       |
|-----------------------|------|-----------------------|-------|-------|
| >PTPN11-E7(AELVQYYME  | 269  | >PTPN11-E7(AKLVQYYME  | 24316 | 24047 |
| >PTPN11-E7(AELVQYYM   | 78   | >PTPN11-E7(AKLVQYYM   | 7182  | 7104  |
| >PTPN11-E7(LAELVQYY   | 266  | >PTPN11-E7(LAKLVQYY   | 10313 | 10047 |
| >PTPN11-E7(LAELVQYY   | 845  | >PTPN11-E7(LAKLVQYY   | 359   | 486   |
| >PTPN11-E7(LAELVQYY   | 5090 | >PTPN11-E7(LAKLVQYY   | 284   | 4806  |
| >PTPN11-E7(LAELVQYY   | 293  | >PTPN11-E7(LAKLVQYY   | 116   | 177   |
| >PTPN11-E7(LAELVQYY   | 240  | >PTPN11-E7(LAKLVQYY   | 1273  | 1033  |
| >PTPN11-E7(LAELVQYY   | 5705 | >PTPN11-E7(LAKLVQYY   | 457   | 5248  |
| >PTPN11-E7(LAELVQYYM  | 5816 | >PTPN11-E7(LAKLVQYYM  | 496   | 5320  |
| >PTPN11-E7(LAELVQYYM  | 984  | >PTPN11-E7(LAKLVQYYM  | 264   | 720   |
| >PTPN11-E7(LAELVQYYM  | 420  | >PTPN11-E7(LAKLVQYYM  | 921   | 501   |
| >PTPN11-E7(TLAELVQYYM | 36   | >PTPN11-E7(TLAKLVQYYM | 152   | 116   |
| >PTPN11-E7(TLAELVQYY  | 296  | >PTPN11-E7(TLAKLVQYY  | 1596  | 1300  |
| >PTPN11-E7(TLAELVQYYM | 13   | >PTPN11-E7(TLAKLVQYYM | 31    | 18    |
| >PTPN11-E7(TLAELVQYYM | 448  | >PTPN11-E7(TLAKLVQYYM | 744   | 296   |
| >PTPN11-E7(TLAELVQYY  | 179  | >PTPN11-E7(TLAKLVQYY  | 2298  | 2119  |
| >PTPN11-E7(TLAELVQYYM | 7    | >PTPN11-E7(TLAKLVQYYM | 40    | 33    |
| >PTPN11-E7(TLAELVQYYM | 25   | >PTPN11-E7(TLAKLVQYYM | 209   | 184   |
| >PTPN11-E7(TLAELVQYYM | 21   | >PTPN11-E7(TLAKLVQYYM | 71    | 50    |
| >PTPN11-E7(TLAELVQYYM | 7    | >PTPN11-E7(TLAKLVQYYM | 42    | 35    |
| >PTPN11-E7(TLAELVQYY  | 389  | >PTPN11-E7(TLAKLVQYY  | 2874  | 2485  |
| >PTPN11-E7(TLAELVQYYM | 26   | >PTPN11-E7(TLAKLVQYYM | 150   | 124   |
| >PTPN11-E7(TLAELVQYY  | 504  | >PTPN11-E7(TLAKLVQYY  | 322   | 182   |
| >PTPN11-E7(TLAELVQYY  | 248  | >PTPN11-E7(TLAKLVQYY  | 713   | 465   |
| >PTPN11-E7(TLAELVQY   | 243  | >PTPN11-E7(TLAKLVQY   | 557   | 314   |
| >PTPN11-E7(TLAELVQYY  | 80   | >PTPN11-E7(TLAKLVQYY  | 188   | 108   |
| >PTPN11-E7(TLAELVQY   | 64   | >PTPN11-E7(TLAKLVQY   | 103   | 39    |
| >PTPN11-E7(TLAELVQYY  | 40   | >PTPN11-E7(TLAKLVQYY  | 67    | 27    |
| >PTPN11-E7(TLAELVQYY  | 262  | >PTPN11-E7(TLAKLVQYY  | 256   | 6     |
| >PTPN11-E7(TLAELVQYYM | 497  | >PTPN11-E7(TLAKLVQYYM | 2189  | 1692  |
| >PTPN11-E7(TLAELVQYYM | 91   | >PTPN11-E7(TLAKLVQYYM | 761   | 670   |
| >PTPN11-E7(TLAELVQY   | 182  | >PTPN11-E7(TLAKLVQY   | 71    | 111   |
| >PTPN11-E7(TLAELVQYY  | 32   | >PTPN11-E7(TLAKLVQYY  | 15    | 17    |
| >PTPN11-E7(TLAELVQY   | 204  | >PTPN11-E7(TLAKLVQY   | 201   | 3     |
| >PTPN11-E7(TLAELVQYY  | 102  | >PTPN11-E7(TLAKLVQYY  | 93    | 9     |
| >PTPN11-E7(TLAELVQY   | 332  | >PTPN11-E7(TLAKLVQY   | 460   | 128   |
| >PTPN11-E7(TLAELVQYY  | 207  | >PTPN11-E7(TLAKLVQYY  | 316   | 109   |
| >PTPN11-E7(TLAELVQYYM | 291  | >PTPN11-E7(TLAKLVQYYM | 506   | 215   |
| >PTPN11-E7(TLAELVQY   | 482  | >PTPN11-E7(TLAKLVQY   | 413   | 69    |
| >PTPN11-E7(TLAELVQYY  | 700  | >PTPN11-E7(TLAKLVQYY  | 316   | 384   |
| >PTPN11-E7(ATLAELVQYY | 167  | >PTPN11-E7(ATLAKLVQYY | 202   | 35    |
| >PTPN11-E7(ATLAELVQYY | 442  | >PTPN11-E7(ATLAKLVQYY | 495   | 53    |
| >PTPN11-E7(ATLAELVQYY | 285  | >PTPN11-E7(ATLAKLVQYY | 478   | 193   |

|                       |      |                       |      |      |
|-----------------------|------|-----------------------|------|------|
| >PTPN11-E7(ATLAELVQYY | 247  | >PTPN11-E7(ATLAKLVQYY | 238  | 9    |
| >PTPN11-E7(ATLAELVQYY | 371  | >PTPN11-E7(ATLAKLVQYY | 133  | 238  |
| >PTPN11-E7(ATLAELVQY  | 112  | >PTPN11-E7(ATLAKLVQY  | 110  | 2    |
| >PTPN11-E7(ATLAELVQYY | 73   | >PTPN11-E7(ATLAKLVQYY | 69   | 4    |
| >PTPN11-E7(ATLAELVQYY | 152  | >PTPN11-E7(ATLAKLVQYY | 282  | 130  |
| >PTPN11-E7(ATLAELVQY  | 8    | >PTPN11-E7(ATLAKLVQY  | 14   | 6    |
| >PTPN11-E7(ATLAELVQYY | 8    | >PTPN11-E7(ATLAKLVQYY | 12   | 4    |
| >PTPN11-E7(ATLAELVQYY | 28   | >PTPN11-E7(ATLAKLVQYY | 43   | 15   |
| >PTPN11-E7(ATLAELVQYY | 778  | >PTPN11-E7(ATLAKLVQYY | 342  | 436  |
| >PTPN11-E7(ATLAELVQY  | 70   | >PTPN11-E7(ATLAKLVQY  | 85   | 15   |
| >PTPN11-E7(ATLAELVQYY | 196  | >PTPN11-E7(ATLAKLVQYY | 263  | 67   |
| >PTPN11-E7(ATLAELVQYY | 930  | >PTPN11-E7(ATLAKLVQYY | 398  | 532  |
| >PTPN11-E7(ATLAELVQYY | 781  | >PTPN11-E7(ATLAKLVQYY | 352  | 429  |
| >PTPN11-E7(ATLAELVQYY | 72   | >PTPN11-E7(ATLAKLVQYY | 53   | 19   |
| >PTPN11-E7(ATLAELVQY  | 342  | >PTPN11-E7(ATLAKLVQY  | 298  | 44   |
| >PTPN11-E7(ATLAELVQYY | 363  | >PTPN11-E7(ATLAKLVQYY | 591  | 228  |
| >PTPN11-E7(ATLAELVQY  | 256  | >PTPN11-E7(ATLAKLVQY  | 215  | 41   |
| >PTPN11-E7(ATLAELVQYY | 70   | >PTPN11-E7(ATLAKLVQYY | 55   | 15   |
| >PTPN11-E7(ATLAELVQYY | 290  | >PTPN11-E7(ATLAKLVQYY | 459  | 169  |
| >PTPN11-E7(ATLAELVQY  | 5    | >PTPN11-E7(ATLAKLVQY  | 3    | 2    |
| >PTPN11-E7(ATLAELVQYY | 5    | >PTPN11-E7(ATLAKLVQYY | 4    | 1    |
| >PTPN11-E7(ATLAELVQYY | 23   | >PTPN11-E7(ATLAKLVQYY | 15   | 8    |
| >PTPN11-E7(ATLAELVQYY | 460  | >PTPN11-E7(ATLAKLVQYY | 764  | 304  |
| >PTPN11-E7(ATLAELVQYY | 302  | >PTPN11-E7(ATLAKLVQYY | 452  | 150  |
| >PTPN11-E7(ATLAELVQYY | 379  | >PTPN11-E7(ATLAKLVQYY | 637  | 258  |
| >PTPN11-E7(ATLAELVQY  | 166  | >PTPN11-E7(ATLAKLVQY  | 154  | 12   |
| >PTPN11-E7(ATLAELVQYY | 136  | >PTPN11-E7(ATLAKLVQYY | 103  | 33   |
| >PTPN11-E7(ATLAELVQYY | 137  | >PTPN11-E7(ATLAKLVQYY | 128  | 9    |
| >PTPN11-E7(FATLAELV   | 4821 | >PTPN11-E7(FATLAKLV   | 389  | 4432 |
| >PTPN11-E7(FATLAELVQY | 360  | >PTPN11-E7(FATLAKLVQY | 387  | 27   |
| >PTPN11-E7(FATLAELV   | 189  | >PTPN11-E7(FATLAKLV   | 1367 | 1178 |
| >PTPN11-E7(FATLAELV   | 38   | >PTPN11-E7(FATLAKLV   | 208  | 170  |
| >PTPN11-E7(FATLAELV   | 97   | >PTPN11-E7(FATLAKLV   | 224  | 127  |
| >PTPN11-E7(FATLAELVQY | 99   | >PTPN11-E7(FATLAKLVQY | 108  | 9    |
| >PTPN11-E7(FATLAELV   | 99   | >PTPN11-E7(FATLAKLV   | 468  | 369  |
| >PTPN11-E7(FATLAELVQY | 41   | >PTPN11-E7(FATLAKLVQY | 41   | 0    |
| >PTPN11-E7(FATLAELVQY | 41   | >PTPN11-E7(FATLAKLVQY | 61   | 20   |
| >PTPN11-E7(FATLAELVQY | 27   | >PTPN11-E7(FATLAKLVQY | 53   | 26   |
| >PTPN11-E7(FATLAELVQY | 310  | >PTPN11-E7(FATLAKLVQY | 337  | 27   |
| >PTPN11-E7(FATLAELV   | 1144 | >PTPN11-E7(FATLAKLV   | 444  | 700  |
| >PTPN11-E7(FATLAELVQY | 221  | >PTPN11-E7(FATLAKLVQY | 423  | 202  |
| >PTPN11-E7(FATLAELVQY | 104  | >PTPN11-E7(FATLAKLVQY | 192  | 88   |
| >PTPN11-E7(KFATLAEL   | 82   | >PTPN11-E7(KFATLAKL   | 428  | 346  |

|                        |       |                        |       |       |
|------------------------|-------|------------------------|-------|-------|
| >PTPN11-E7€KFATLAELV   | 64    | >PTPN11-E7€KFATLAKLV   | 1122  | 1058  |
| >PTPN11-E7€KFATLAEL    | 221   | >PTPN11-E7€KFATLAKL    | 522   | 301   |
| >PTPN11-E7€KFATLAELVQ  | 27    | >PTPN11-E7€KFATLAKLVQ  | 34    | 7     |
| >PTPN11-E7€KFATLAELVQ  | 319   | >PTPN11-E7€KFATLAKLVQ  | 420   | 101   |
| >PTPN11-E7€KFATLAELVQ  | 117   | >PTPN11-E7€KFATLAKLVQ  | 180   | 63    |
| >PTPN11-E7€KFATLAELVQ  | 144   | >PTPN11-E7€KFATLAKLVQ  | 155   | 11    |
| >PTPN11-E7€KFATLAEL    | 210   | >PTPN11-E7€KFATLAKL    | 274   | 64    |
| >PTPN11-E7€KFATLAELV   | 149   | >PTPN11-E7€KFATLAKLV   | 196   | 47    |
| >PTPN11-E7€EKFATLAELV  | 917   | >PTPN11-E7€EKFATLAKLV  | 342   | 575   |
| >PTPN11-E7€EKFATLAE    | 18094 | >PTPN11-E7€EKFATLAK    | 204   | 17890 |
| >PTPN11-E7€EKFATLAE    | 2737  | >PTPN11-E7€EKFATLAK    | 227   | 2510  |
| >PTPN11-E7€EKFATLAEL   | 36    | >PTPN11-E7€EKFATLAKL   | 93    | 57    |
| >PTPN11-E7€EKFATLAELV  | 324   | >PTPN11-E7€EKFATLAKLV  | 252   | 72    |
| >PTPN11-E7€EKFATLAEL   | 89    | >PTPN11-E7€EKFATLAKL   | 329   | 240   |
| >PTPN11-E7€GEKFATLAEL' | 114   | >PTPN11-E7€GEKFATLAKL' | 45    | 69    |
| >PTPN11-E7€GEKFATLAEL' | 110   | >PTPN11-E7€GEKFATLAKL' | 366   | 256   |
| >PTPN11-E7€GEKFATLAEL  | 173   | >PTPN11-E7€GEKFATLAKL  | 280   | 107   |
| >PTPN11-E7€GEKFATLAEL' | 367   | >PTPN11-E7€GEKFATLAKL' | 453   | 86    |
| >PTPN11-E7€GEKFATLAEL' | 309   | >PTPN11-E7€GEKFATLAKL' | 414   | 105   |
| >PTPN11-E7€GEKFATLAEL  | 478   | >PTPN11-E7€GEKFATLAKL  | 260   | 218   |
| >PTPN11-E7€GEKFATLAEL' | 9     | >PTPN11-E7€GEKFATLAKL' | 14    | 5     |
| >PTPN11-E7€ELVQYYMEHI  | 12287 | >PTPN11-E7€MLVQYYMEH   | 421   | 11866 |
| >PTPN11-E7€ELVQYYMEHI  | 139   | >PTPN11-E7€MLVQYYMEH   | 2602  | 2463  |
| >PTPN11-E7€AELVQYYM    | 3395  | >PTPN11-E7€AMLVQYYM    | 55    | 3340  |
| >PTPN11-E7€AELVQYYM    | 20407 | >PTPN11-E7€AMLVQYYM    | 41    | 20366 |
| >PTPN11-E7€AELVQYYM    | 15079 | >PTPN11-E7€AMLVQYYM    | 115   | 14964 |
| >PTPN11-E7€AELVQYYM    | 10019 | >PTPN11-E7€AMLVQYYM    | 324   | 9695  |
| >PTPN11-E7€AELVQYYM    | 12697 | >PTPN11-E7€AMLVQYYM    | 8     | 12689 |
| >PTPN11-E7€AELVQYYM    | 15975 | >PTPN11-E7€AMLVQYYM    | 20    | 15955 |
| >PTPN11-E7€AELVQYYM    | 17272 | >PTPN11-E7€AMLVQYYM    | 35    | 17237 |
| >PTPN11-E7€AELVQYYM    | 17571 | >PTPN11-E7€AMLVQYYM    | 29    | 17542 |
| >PTPN11-E7€AELVQYYM    | 33791 | >PTPN11-E7€AMLVQYYM    | 64    | 33727 |
| >PTPN11-E7€AELVQYYM    | 1489  | >PTPN11-E7€AMLVQYYM    | 57    | 1432  |
| >PTPN11-E7€AELVQYYMEI  | 2627  | >PTPN11-E7€AMLVQYYME   | 169   | 2458  |
| >PTPN11-E7€AELVQYYM    | 206   | >PTPN11-E7€AMLVQYYM    | 21008 | 20802 |
| >PTPN11-E7€AELVQYYM    | 34    | >PTPN11-E7€AMLVQYYM    | 26812 | 26778 |
| >PTPN11-E7€AELVQYYM    | 278   | >PTPN11-E7€AMLVQYYM    | 20935 | 20657 |
| >PTPN11-E7€AELVQYYM    | 121   | >PTPN11-E7€AMLVQYYM    | 31282 | 31161 |
| >PTPN11-E7€AELVQYYMEI  | 424   | >PTPN11-E7€AMLVQYYME   | 21066 | 20642 |
| >PTPN11-E7€AELVQYYM    | 148   | >PTPN11-E7€AMLVQYYM    | 28432 | 28284 |
| >PTPN11-E7€AELVQYYME   | 269   | >PTPN11-E7€AMLVQYYME   | 31433 | 31164 |
| >PTPN11-E7€AELVQYYM    | 78    | >PTPN11-E7€AMLVQYYM    | 10366 | 10288 |
| >PTPN11-E7€YGGEKFATLA  | 13838 | >PTPN11-E7€YGGEKFATLA  | 207   | 13631 |

|                       |      |                       |      |      |
|-----------------------|------|-----------------------|------|------|
| >PTPN11-E7(LAELVQYY   | 266  | >PTPN11-E7(LAMLVQYY   | 3799 | 3533 |
| >PTPN11-E7(LAELVQYYM  | 2529 | >PTPN11-E7(LAMLVQYYM  | 283  | 2246 |
| >PTPN11-E7(LAELVQYY   | 1220 | >PTPN11-E7(LAMLVQYY   | 147  | 1073 |
| >PTPN11-E7(LAELVQYY   | 845  | >PTPN11-E7(LAMLVQYY   | 249  | 596  |
| >PTPN11-E7(LAELVQYYM  | 5669 | >PTPN11-E7(LAMLVQYYM  | 146  | 5523 |
| >PTPN11-E7(LAELVQYY   | 5090 | >PTPN11-E7(LAMLVQYY   | 224  | 4866 |
| >PTPN11-E7(LAELVQYY   | 6790 | >PTPN11-E7(LAMLVQYY   | 315  | 6475 |
| >PTPN11-E7(LAELVQYY   | 293  | >PTPN11-E7(LAMLVQYY   | 32   | 261  |
| >PTPN11-E7(LAELVQYY   | 240  | >PTPN11-E7(LAMLVQYY   | 67   | 173  |
| >PTPN11-E7(LAELVQYYM  | 711  | >PTPN11-E7(LAMLVQYYM  | 162  | 549  |
| >PTPN11-E7(LAELVQYY   | 915  | >PTPN11-E7(LAMLVQYY   | 263  | 652  |
| >PTPN11-E7(LAELVQYYM  | 887  | >PTPN11-E7(LAMLVQYYM  | 231  | 656  |
| >PTPN11-E7(LAELVQYY   | 5705 | >PTPN11-E7(LAMLVQYY   | 233  | 5472 |
| >PTPN11-E7(LAELVQYYM  | 5816 | >PTPN11-E7(LAMLVQYYM  | 256  | 5560 |
| >PTPN11-E7(LAELVQYY   | 3201 | >PTPN11-E7(LAMLVQYY   | 26   | 3175 |
| >PTPN11-E7(LAELVQYYM  | 984  | >PTPN11-E7(LAMLVQYYM  | 15   | 969  |
| >PTPN11-E7(LAELVQYYM  | 420  | >PTPN11-E7(LAMLVQYYM  | 732  | 312  |
| >PTPN11-E7(TLAELVQYYM | 36   | >PTPN11-E7(TLAMLVQYYM | 58   | 22   |
| >PTPN11-E7(TLAELVQYY  | 296  | >PTPN11-E7(TLAMLVQYY  | 2155 | 1859 |
| >PTPN11-E7(TLAELVQYYM | 13   | >PTPN11-E7(TLAMLVQYYM | 20   | 7    |
| >PTPN11-E7(TLAELVQYYM | 448  | >PTPN11-E7(TLAMLVQYYM | 618  | 170  |
| >PTPN11-E7(TLAELVQYY  | 179  | >PTPN11-E7(TLAMLVQYY  | 1815 | 1636 |
| >PTPN11-E7(TLAELVQYYM | 7    | >PTPN11-E7(TLAMLVQYYM | 30   | 23   |
| >PTPN11-E7(TLAELVQYYM | 25   | >PTPN11-E7(TLAMLVQYYM | 267  | 242  |
| >PTPN11-E7(TLAELVQYYM | 21   | >PTPN11-E7(TLAMLVQYYM | 79   | 58   |
| >PTPN11-E7(TLAELVQYYM | 7    | >PTPN11-E7(TLAMLVQYYM | 38   | 31   |
| >PTPN11-E7(TLAELVQYY  | 389  | >PTPN11-E7(TLAMLVQYY  | 1611 | 1222 |
| >PTPN11-E7(TLAELVQYYM | 26   | >PTPN11-E7(TLAMLVQYYM | 76   | 50   |
| >PTPN11-E7(TLAELVQYY  | 504  | >PTPN11-E7(TLAMLVQYY  | 484  | 20   |
| >PTPN11-E7(TLAELVQYY  | 248  | >PTPN11-E7(TLAMLVQYY  | 2694 | 2446 |
| >PTPN11-E7(TLAELVQY   | 243  | >PTPN11-E7(TLAMLVQY   | 649  | 406  |
| >PTPN11-E7(TLAELVQYY  | 80   | >PTPN11-E7(TLAMLVQYY  | 227  | 147  |
| >PTPN11-E7(TLAELVQY   | 64   | >PTPN11-E7(TLAMLVQY   | 53   | 11   |
| >PTPN11-E7(TLAELVQYY  | 40   | >PTPN11-E7(TLAMLVQYY  | 39   | 1    |
| >PTPN11-E7(TLAELVQY   | 681  | >PTPN11-E7(TLAMLVQY   | 440  | 241  |
| >PTPN11-E7(TLAELVQYY  | 262  | >PTPN11-E7(TLAMLVQYY  | 168  | 94   |
| >PTPN11-E7(TLAELVQYYM | 497  | >PTPN11-E7(TLAMLVQYYM | 1081 | 584  |
| >PTPN11-E7(TLAELVQYYM | 91   | >PTPN11-E7(TLAMLVQYYM | 1255 | 1164 |
| >PTPN11-E7(TLAELVQY   | 182  | >PTPN11-E7(TLAMLVQY   | 169  | 13   |
| >PTPN11-E7(TLAELVQYY  | 32   | >PTPN11-E7(TLAMLVQYY  | 35   | 3    |
| >PTPN11-E7(TLAELVQY   | 204  | >PTPN11-E7(TLAMLVQY   | 162  | 42   |
| >PTPN11-E7(TLAELVQYY  | 102  | >PTPN11-E7(TLAMLVQYY  | 86   | 16   |
| >PTPN11-E7(TLAELVQY   | 332  | >PTPN11-E7(TLAMLVQY   | 593  | 261  |

|                       |      |                       |      |      |
|-----------------------|------|-----------------------|------|------|
| >PTPN11-E7€TLAELVQYY  | 207  | >PTPN11-E7€TLAMLVQYY  | 441  | 234  |
| >PTPN11-E7€TLAELVQYYN | 291  | >PTPN11-E7€TLAMLVQYYN | 325  | 34   |
| >PTPN11-E7€TLAELVQY   | 482  | >PTPN11-E7€TLAMLVQY   | 1790 | 1308 |
| >PTPN11-E7€TLAELVQYY  | 700  | >PTPN11-E7€TLAMLVQYY  | 310  | 390  |
| >PTPN11-E7€ATLAELVQYY | 1965 | >PTPN11-E7€ATLAMLVQY` | 322  | 1643 |
| >PTPN11-E7€ATLAELVQYY | 167  | >PTPN11-E7€ATLAMLVQY` | 144  | 23   |
| >PTPN11-E7€ATLAELVQYY | 442  | >PTPN11-E7€ATLAMLVQY` | 290  | 152  |
| >PTPN11-E7€ATLAELVQYY | 285  | >PTPN11-E7€ATLAMLVQY` | 315  | 30   |
| >PTPN11-E7€ATLAELVQYY | 247  | >PTPN11-E7€ATLAMLVQY` | 264  | 17   |
| >PTPN11-E7€ATLAELVQYY | 371  | >PTPN11-E7€ATLAMLVQY` | 133  | 238  |
| >PTPN11-E7€ATLAELVQY  | 112  | >PTPN11-E7€ATLAMLVQY  | 33   | 79   |
| >PTPN11-E7€ATLAELVQYY | 73   | >PTPN11-E7€ATLAMLVQY` | 33   | 40   |
| >PTPN11-E7€ATLAELVQYY | 152  | >PTPN11-E7€ATLAMLVQY` | 126  | 26   |
| >PTPN11-E7€ATLAELVQY  | 8    | >PTPN11-E7€ATLAMLVQY  | 12   | 4    |
| >PTPN11-E7€ATLAELVQYY | 8    | >PTPN11-E7€ATLAMLVQY` | 10   | 2    |
| >PTPN11-E7€ATLAELVQYY | 28   | >PTPN11-E7€ATLAMLVQY` | 35   | 7    |
| >PTPN11-E7€ATLAELVQY  | 70   | >PTPN11-E7€ATLAMLVQY  | 29   | 41   |
| >PTPN11-E7€ATLAELVQYY | 196  | >PTPN11-E7€ATLAMLVQY` | 96   | 100  |
| >PTPN11-E7€ATLAELVQYY | 930  | >PTPN11-E7€ATLAMLVQY` | 357  | 573  |
| >PTPN11-E7€ATLAELVQYY | 781  | >PTPN11-E7€ATLAMLVQY` | 311  | 470  |
| >PTPN11-E7€ATLAELVQYY | 72   | >PTPN11-E7€ATLAMLVQY` | 32   | 40   |
| >PTPN11-E7€ATLAELVQY  | 342  | >PTPN11-E7€ATLAMLVQY  | 93   | 249  |
| >PTPN11-E7€ATLAELVQYY | 1288 | >PTPN11-E7€ATLAMLVQY` | 468  | 820  |
| >PTPN11-E7€ATLAELVQYY | 363  | >PTPN11-E7€ATLAMLVQY` | 273  | 90   |
| >PTPN11-E7€ATLAELVQY  | 256  | >PTPN11-E7€ATLAMLVQY  | 111  | 145  |
| >PTPN11-E7€ATLAELVQYY | 70   | >PTPN11-E7€ATLAMLVQY` | 46   | 24   |
| >PTPN11-E7€ATLAELVQYY | 556  | >PTPN11-E7€ATLAMLVQY` | 371  | 185  |
| >PTPN11-E7€ATLAELVQYY | 290  | >PTPN11-E7€ATLAMLVQY` | 305  | 15   |
| >PTPN11-E7€ATLAELVQY  | 5    | >PTPN11-E7€ATLAMLVQY  | 3    | 2    |
| >PTPN11-E7€ATLAELVQYY | 5    | >PTPN11-E7€ATLAMLVQY` | 4    | 1    |
| >PTPN11-E7€ATLAELVQYY | 23   | >PTPN11-E7€ATLAMLVQY` | 15   | 8    |
| >PTPN11-E7€ATLAELVQYY | 460  | >PTPN11-E7€ATLAMLVQY` | 286  | 174  |
| >PTPN11-E7€ATLAELVQYY | 302  | >PTPN11-E7€ATLAMLVQY` | 181  | 121  |
| >PTPN11-E7€ATLAELVQYY | 379  | >PTPN11-E7€ATLAMLVQY` | 265  | 114  |
| >PTPN11-E7€ATLAELVQY  | 166  | >PTPN11-E7€ATLAMLVQY  | 35   | 131  |
| >PTPN11-E7€ATLAELVQYY | 136  | >PTPN11-E7€ATLAMLVQY` | 59   | 77   |
| >PTPN11-E7€ATLAELVQYY | 137  | >PTPN11-E7€ATLAMLVQY` | 42   | 95   |
| >PTPN11-E7€ATLAELVQY  | 505  | >PTPN11-E7€ATLAMLVQY  | 325  | 180  |
| >PTPN11-E7€ATLAELVQYY | 612  | >PTPN11-E7€ATLAMLVQY` | 492  | 120  |
| >PTPN11-E7€FATLAELVQY | 360  | >PTPN11-E7€FATLAMLVQ` | 269  | 91   |
| >PTPN11-E7€FATLAELV   | 189  | >PTPN11-E7€FATLAMLV   | 168  | 21   |
| >PTPN11-E7€FATLAELV   | 1117 | >PTPN11-E7€FATLAMLV   | 211  | 906  |
| >PTPN11-E7€FATLAELV   | 38   | >PTPN11-E7€FATLAMLV   | 21   | 17   |



|                        |       |                       |     |       |
|------------------------|-------|-----------------------|-----|-------|
| >PTPN11-E7(FATLAELV    | 97    | >PTPN11-E7(FATLAMLV   | 48  | 49    |
| >PTPN11-E7(FATLAELVQY  | 1972  | >PTPN11-E7(FATLAMLVQ) | 456 | 1516  |
| >PTPN11-E7(FATLAELVQY  | 717   | >PTPN11-E7(FATLAMLVQ) | 179 | 538   |
| >PTPN11-E7(FATLAELVQY  | 99    | >PTPN11-E7(FATLAMLVQ) | 52  | 47    |
| >PTPN11-E7(FATLAELVQY  | 693   | >PTPN11-E7(FATLAMLVQ) | 318 | 375   |
| >PTPN11-E7(FATLAELV    | 99    | >PTPN11-E7(FATLAMLV   | 33  | 66    |
| >PTPN11-E7(FATLAELV    | 1002  | >PTPN11-E7(FATLAMLV   | 155 | 847   |
| >PTPN11-E7(FATLAELVQY  | 41    | >PTPN11-E7(FATLAMLVQ) | 17  | 24    |
| >PTPN11-E7(FATLAELVQY  | 41    | >PTPN11-E7(FATLAMLVQ) | 18  | 23    |
| >PTPN11-E7(FATLAELVQY  | 27    | >PTPN11-E7(FATLAMLVQ) | 37  | 10    |
| >PTPN11-E7(FATLAELVQY  | 310   | >PTPN11-E7(FATLAMLVQ) | 384 | 74    |
| >PTPN11-E7(FATLAELV    | 1144  | >PTPN11-E7(FATLAMLV   | 288 | 856   |
| >PTPN11-E7(FATLAELVQY  | 221   | >PTPN11-E7(FATLAMLVQ) | 282 | 61    |
| >PTPN11-E7(FATLAELVQY  | 104   | >PTPN11-E7(FATLAMLVQ) | 55  | 49    |
| >PTPN11-E7(FATLAELVQY  | 850   | >PTPN11-E7(FATLAMLVQ) | 416 | 434   |
| >PTPN11-E7(KFATLAEL    | 82    | >PTPN11-E7(KFATLAML   | 190 | 108   |
| >PTPN11-E7(KFATLAELV   | 64    | >PTPN11-E7(KFATLAMLV  | 141 | 77    |
| >PTPN11-E7(KFATLAEL    | 221   | >PTPN11-E7(KFATLAML   | 159 | 62    |
| >PTPN11-E7(KFATLAELVQ  | 27    | >PTPN11-E7(KFATLAMLVC | 16  | 11    |
| >PTPN11-E7(KFATLAELVQ  | 319   | >PTPN11-E7(KFATLAMLVC | 265 | 54    |
| >PTPN11-E7(KFATLAELVQ  | 117   | >PTPN11-E7(KFATLAMLVC | 62  | 55    |
| >PTPN11-E7(KFATLAELVQ  | 144   | >PTPN11-E7(KFATLAMLVC | 111 | 33    |
| >PTPN11-E7(KFATLAEL    | 210   | >PTPN11-E7(KFATLAML   | 189 | 21    |
| >PTPN11-E7(KFATLAELV   | 149   | >PTPN11-E7(KFATLAMLV  | 144 | 5     |
| >PTPN11-E7(EKFATLAE    | 19674 | >PTPN11-E7(EKFATLAM   | 379 | 19295 |
| >PTPN11-E7(EKFATLAELV  | 809   | >PTPN11-E7(EKFATLAMLV | 285 | 524   |
| >PTPN11-E7(EKFATLAE    | 2737  | >PTPN11-E7(EKFATLAM   | 10  | 2727  |
| >PTPN11-E7(EKFATLAEL   | 36    | >PTPN11-E7(EKFATLAML  | 44  | 8     |
| >PTPN11-E7(EKFATLAELV  | 324   | >PTPN11-E7(EKFATLAMLV | 123 | 201   |
| >PTPN11-E7(EKFATLAE    | 12113 | >PTPN11-E7(EKFATLAM   | 66  | 12047 |
| >PTPN11-E7(EKFATLAEL   | 89    | >PTPN11-E7(EKFATLAML  | 88  | 1     |
| >PTPN11-E7(GEKFATLAEL) | 114   | >PTPN11-E7(GEKFATLAMI | 155 | 41    |
| >PTPN11-E7(GEKFATLAE   | 16256 | >PTPN11-E7(GEKFATLAM  | 392 | 15864 |
| >PTPN11-E7(GEKFATLAE   | 3584  | >PTPN11-E7(GEKFATLAM  | 63  | 3521  |
| >PTPN11-E7(GEKFATLAEL) | 110   | >PTPN11-E7(GEKFATLAMI | 102 | 8     |
| >PTPN11-E7(GEKFATLAE   | 1529  | >PTPN11-E7(GEKFATLAM  | 43  | 1486  |
| >PTPN11-E7(GEKFATLAEL  | 173   | >PTPN11-E7(GEKFATLAMI | 307 | 134   |
| >PTPN11-E7(GEKFATLAEL) | 367   | >PTPN11-E7(GEKFATLAMI | 217 | 150   |
| >PTPN11-E7(GEKFATLAEL) | 309   | >PTPN11-E7(GEKFATLAMI | 236 | 73    |
| >PTPN11-E7(GEKFATLAE   | 2524  | >PTPN11-E7(GEKFATLAM  | 33  | 2491  |
| >PTPN11-E7(GEKFATLAEL  | 478   | >PTPN11-E7(GEKFATLAMI | 289 | 189   |
| >PTPN11-E7(GEKFATLAEL) | 9     | >PTPN11-E7(GEKFATLAMI | 8   | 1     |
| >PTPN11-E7(GGEKFATLAE  | 1366  | >PTPN11-E7(GGEKFATLAN | 329 | 1037  |

|                       |       |                       |       |       |
|-----------------------|-------|-----------------------|-------|-------|
| >PTPN11-E7(ELVQYYMEHI | 139   | >PTPN11-E7(QLVQYYMEH  | 1221  | 1082  |
| >PTPN11-E7(AELVQYYM   | 3395  | >PTPN11-E7(AQLVQYYM   | 134   | 3261  |
| >PTPN11-E7(AELVQYYM   | 10019 | >PTPN11-E7(AQLVQYYM   | 58    | 9961  |
| >PTPN11-E7(AELVQYYM   | 1489  | >PTPN11-E7(AQLVQYYM   | 31    | 1458  |
| >PTPN11-E7(AELVQYYMEI | 2627  | >PTPN11-E7(AQLVQYYME  | 88    | 2539  |
| >PTPN11-E7(AELVQYYMEI | 7695  | >PTPN11-E7(AQLVQYYME  | 382   | 7313  |
| >PTPN11-E7(AELVQYYM   | 206   | >PTPN11-E7(AQLVQYYM   | 8278  | 8072  |
| >PTPN11-E7(AELVQYYM   | 34    | >PTPN11-E7(AQLVQYYM   | 4780  | 4746  |
| >PTPN11-E7(AELVQYYM   | 278   | >PTPN11-E7(AQLVQYYM   | 12095 | 11817 |
| >PTPN11-E7(AELVQYYM   | 121   | >PTPN11-E7(AQLVQYYM   | 7599  | 7478  |
| >PTPN11-E7(AELVQYYMEI | 424   | >PTPN11-E7(AQLVQYYME  | 14427 | 14003 |
| >PTPN11-E7(AELVQYYM   | 148   | >PTPN11-E7(AQLVQYYM   | 10686 | 10538 |
| >PTPN11-E7(AELVQYYME  | 269   | >PTPN11-E7(AQLVQYYME  | 12838 | 12569 |
| >PTPN11-E7(AELVQYYM   | 78    | >PTPN11-E7(AQLVQYYM   | 1643  | 1565  |
| >PTPN11-E7(LAELVQYY   | 266   | >PTPN11-E7(LAQLVQYY   | 2918  | 2652  |
| >PTPN11-E7(LAELVQYY   | 1220  | >PTPN11-E7(LAQLVQYY   | 487   | 733   |
| >PTPN11-E7(LAELVQYY   | 845   | >PTPN11-E7(LAQLVQYY   | 291   | 554   |
| >PTPN11-E7(LAELVQYY   | 5090  | >PTPN11-E7(LAQLVQYY   | 485   | 4605  |
| >PTPN11-E7(LAELVQYY   | 293   | >PTPN11-E7(LAQLVQYY   | 157   | 136   |
| >PTPN11-E7(LAELVQYY   | 240   | >PTPN11-E7(LAQLVQYY   | 369   | 129   |
| >PTPN11-E7(LAELVQYY   | 3201  | >PTPN11-E7(LAQLVQYY   | 131   | 3070  |
| >PTPN11-E7(LAELVQYYM  | 984   | >PTPN11-E7(LAQLVQYYM  | 46    | 938   |
| >PTPN11-E7(LAELVQYYM  | 420   | >PTPN11-E7(LAQLVQYYM  | 681   | 261   |
| >PTPN11-E7(TLAELVQYYM | 36    | >PTPN11-E7(TLAQLVQYYM | 71    | 35    |
| >PTPN11-E7(TLAELVQYY  | 296   | >PTPN11-E7(TLAQLVQYY  | 1265  | 969   |
| >PTPN11-E7(TLAELVQYYM | 13    | >PTPN11-E7(TLAQLVQYYM | 21    | 8     |
| >PTPN11-E7(TLAELVQYYM | 448   | >PTPN11-E7(TLAQLVQYYM | 592   | 144   |
| >PTPN11-E7(TLAELVQYY  | 179   | >PTPN11-E7(TLAQLVQYY  | 1312  | 1133  |
| >PTPN11-E7(TLAELVQYYM | 7     | >PTPN11-E7(TLAQLVQYYM | 21    | 14    |
| >PTPN11-E7(TLAELVQYYM | 25    | >PTPN11-E7(TLAQLVQYYM | 227   | 202   |
| >PTPN11-E7(TLAELVQYYM | 21    | >PTPN11-E7(TLAQLVQYYM | 59    | 38    |
| >PTPN11-E7(TLAELVQYYM | 7     | >PTPN11-E7(TLAQLVQYYM | 25    | 18    |
| >PTPN11-E7(TLAELVQYY  | 389   | >PTPN11-E7(TLAQLVQYY  | 986   | 597   |
| >PTPN11-E7(TLAELVQYYM | 26    | >PTPN11-E7(TLAQLVQYYM | 59    | 33    |
| >PTPN11-E7(TLAELVQYY  | 248   | >PTPN11-E7(TLAQLVQYY  | 1579  | 1331  |
| >PTPN11-E7(TLAELVQY   | 243   | >PTPN11-E7(TLAQLVQY   | 268   | 25    |
| >PTPN11-E7(TLAELVQYY  | 80    | >PTPN11-E7(TLAQLVQYY  | 96    | 16    |
| >PTPN11-E7(TLAELVQY   | 64    | >PTPN11-E7(TLAQLVQY   | 53    | 11    |
| >PTPN11-E7(TLAELVQYY  | 40    | >PTPN11-E7(TLAQLVQYY  | 36    | 4     |
| >PTPN11-E7(TLAELVQY   | 681   | >PTPN11-E7(TLAQLVQY   | 448   | 233   |
| >PTPN11-E7(TLAELVQYY  | 262   | >PTPN11-E7(TLAQLVQYY  | 160   | 102   |
| >PTPN11-E7(TLAELVQYYM | 497   | >PTPN11-E7(TLAQLVQYYM | 1611  | 1114  |
| >PTPN11-E7(TLAELVQYYM | 91    | >PTPN11-E7(TLAQLVQYYM | 545   | 454   |

|                       |     |                       |     |     |
|-----------------------|-----|-----------------------|-----|-----|
| >PTPN11-E7(TLAELVQY   | 182 | >PTPN11-E7(TLAQLVQY   | 166 | 16  |
| >PTPN11-E7(TLAELVQYY  | 32  | >PTPN11-E7(TLAQLVQYY  | 34  | 2   |
| >PTPN11-E7(TLAELVQY   | 204 | >PTPN11-E7(TLAQLVQY   | 141 | 63  |
| >PTPN11-E7(TLAELVQYY  | 102 | >PTPN11-E7(TLAQLVQYY  | 71  | 31  |
| >PTPN11-E7(TLAELVQY   | 332 | >PTPN11-E7(TLAQLVQY   | 294 | 38  |
| >PTPN11-E7(TLAELVQYY  | 207 | >PTPN11-E7(TLAQLVQYY  | 225 | 18  |
| >PTPN11-E7(TLAELVQYYM | 291 | >PTPN11-E7(TLAQLVQYYM | 539 | 248 |
| >PTPN11-E7(TLAELVQY   | 482 | >PTPN11-E7(TLAQLVQY   | 715 | 233 |
| >PTPN11-E7(TLAELVQYY  | 700 | >PTPN11-E7(TLAQLVQYY  | 486 | 214 |
| >PTPN11-E7(ATLAELVQYY | 167 | >PTPN11-E7(ATLAQLVQYY | 161 | 6   |
| >PTPN11-E7(ATLAELVQYY | 442 | >PTPN11-E7(ATLAQLVQYY | 486 | 44  |
| >PTPN11-E7(ATLAELVQYY | 285 | >PTPN11-E7(ATLAQLVQYY | 342 | 57  |
| >PTPN11-E7(ATLAELVQYY | 247 | >PTPN11-E7(ATLAQLVQYY | 234 | 13  |
| >PTPN11-E7(ATLAELVQYY | 371 | >PTPN11-E7(ATLAQLVQYY | 219 | 152 |
| >PTPN11-E7(ATLAELVQY  | 112 | >PTPN11-E7(ATLAQLVQY  | 68  | 44  |
| >PTPN11-E7(ATLAELVQYY | 73  | >PTPN11-E7(ATLAQLVQYY | 63  | 10  |
| >PTPN11-E7(ATLAELVQYY | 152 | >PTPN11-E7(ATLAQLVQYY | 214 | 62  |
| >PTPN11-E7(ATLAELVQY  | 8   | >PTPN11-E7(ATLAQLVQY  | 9   | 1   |
| >PTPN11-E7(ATLAELVQYY | 8   | >PTPN11-E7(ATLAQLVQYY | 8   | 0   |
| >PTPN11-E7(ATLAELVQYY | 28  | >PTPN11-E7(ATLAQLVQYY | 27  | 1   |
| >PTPN11-E7(ATLAELVQYY | 778 | >PTPN11-E7(ATLAQLVQYY | 495 | 283 |
| >PTPN11-E7(ATLAELVQY  | 70  | >PTPN11-E7(ATLAQLVQY  | 47  | 23  |
| >PTPN11-E7(ATLAELVQYY | 196 | >PTPN11-E7(ATLAQLVQYY | 224 | 28  |
| >PTPN11-E7(ATLAELVQYY | 930 | >PTPN11-E7(ATLAQLVQYY | 316 | 614 |
| >PTPN11-E7(ATLAELVQYY | 781 | >PTPN11-E7(ATLAQLVQYY | 217 | 564 |
| >PTPN11-E7(ATLAELVQYY | 72  | >PTPN11-E7(ATLAQLVQYY | 60  | 12  |
| >PTPN11-E7(ATLAELVQY  | 342 | >PTPN11-E7(ATLAQLVQY  | 239 | 103 |
| >PTPN11-E7(ATLAELVQYY | 363 | >PTPN11-E7(ATLAQLVQYY | 288 | 75  |
| >PTPN11-E7(ATLAELVQY  | 256 | >PTPN11-E7(ATLAQLVQY  | 111 | 145 |
| >PTPN11-E7(ATLAELVQYY | 70  | >PTPN11-E7(ATLAQLVQYY | 44  | 26  |
| >PTPN11-E7(ATLAELVQYY | 556 | >PTPN11-E7(ATLAQLVQYY | 398 | 158 |
| >PTPN11-E7(ATLAELVQYY | 290 | >PTPN11-E7(ATLAQLVQYY | 277 | 13  |
| >PTPN11-E7(ATLAELVQY  | 5   | >PTPN11-E7(ATLAQLVQY  | 4   | 1   |
| >PTPN11-E7(ATLAELVQYY | 5   | >PTPN11-E7(ATLAQLVQYY | 4   | 1   |
| >PTPN11-E7(ATLAELVQYY | 23  | >PTPN11-E7(ATLAQLVQYY | 19  | 4   |
| >PTPN11-E7(ATLAELVQYY | 460 | >PTPN11-E7(ATLAQLVQYY | 442 | 18  |
| >PTPN11-E7(ATLAELVQYY | 302 | >PTPN11-E7(ATLAQLVQYY | 306 | 4   |
| >PTPN11-E7(ATLAELVQYY | 379 | >PTPN11-E7(ATLAQLVQYY | 636 | 257 |
| >PTPN11-E7(ATLAELVQY  | 166 | >PTPN11-E7(ATLAQLVQY  | 159 | 7   |
| >PTPN11-E7(ATLAELVQYY | 136 | >PTPN11-E7(ATLAQLVQYY | 77  | 59  |
| >PTPN11-E7(ATLAELVQYY | 137 | >PTPN11-E7(ATLAQLVQYY | 130 | 7   |
| >PTPN11-E7(ATLAELVQY  | 505 | >PTPN11-E7(ATLAQLVQY  | 436 | 69  |
| >PTPN11-E7(FATLAELVQY | 360 | >PTPN11-E7(FATLAQLVQY | 238 | 122 |

|                       |       |                       |       |       |
|-----------------------|-------|-----------------------|-------|-------|
| >PTPN11-E7(FATLAELV   | 189   | >PTPN11-E7(FATLAQLV   | 226   | 37    |
| >PTPN11-E7(FATLAELV   | 38    | >PTPN11-E7(FATLAQLV   | 42    | 4     |
| >PTPN11-E7(FATLAELV   | 97    | >PTPN11-E7(FATLAQLV   | 38    | 59    |
| >PTPN11-E7(FATLAELVQY | 99    | >PTPN11-E7(FATLAQLVQY | 56    | 43    |
| >PTPN11-E7(FATLAELV   | 99    | >PTPN11-E7(FATLAQLV   | 131   | 32    |
| >PTPN11-E7(FATLAELVQY | 41    | >PTPN11-E7(FATLAQLVQY | 31    | 10    |
| >PTPN11-E7(FATLAELVQY | 41    | >PTPN11-E7(FATLAQLVQY | 36    | 5     |
| >PTPN11-E7(FATLAELVQY | 27    | >PTPN11-E7(FATLAQLVQY | 32    | 5     |
| >PTPN11-E7(FATLAELVQY | 310   | >PTPN11-E7(FATLAQLVQY | 316   | 6     |
| >PTPN11-E7(FATLAELVQY | 866   | >PTPN11-E7(FATLAQLVQY | 350   | 516   |
| >PTPN11-E7(FATLAELVQY | 221   | >PTPN11-E7(FATLAQLVQY | 90    | 131   |
| >PTPN11-E7(FATLAELVQY | 104   | >PTPN11-E7(FATLAQLVQY | 110   | 6     |
| >PTPN11-E7(KFATLAEL   | 625   | >PTPN11-E7(KFATLAQL   | 461   | 164   |
| >PTPN11-E7(KFATLAEL   | 82    | >PTPN11-E7(KFATLAQL   | 177   | 95    |
| >PTPN11-E7(KFATLAELV  | 64    | >PTPN11-E7(KFATLAQLV  | 166   | 102   |
| >PTPN11-E7(KFATLAEL   | 221   | >PTPN11-E7(KFATLAQL   | 282   | 61    |
| >PTPN11-E7(KFATLAELVQ | 27    | >PTPN11-E7(KFATLAQLVC | 24    | 3     |
| >PTPN11-E7(KFATLAELVQ | 319   | >PTPN11-E7(KFATLAQLVC | 311   | 8     |
| >PTPN11-E7(KFATLAELVQ | 117   | >PTPN11-E7(KFATLAQLVC | 96    | 21    |
| >PTPN11-E7(KFATLAELVQ | 144   | >PTPN11-E7(KFATLAQLVC | 158   | 14    |
| >PTPN11-E7(KFATLAEL   | 210   | >PTPN11-E7(KFATLAQL   | 271   | 61    |
| >PTPN11-E7(KFATLAELV  | 149   | >PTPN11-E7(KFATLAQLV  | 243   | 94    |
| >PTPN11-E7(EKFATLAEL  | 36    | >PTPN11-E7(EKFATLAQL  | 84    | 48    |
| >PTPN11-E7(EKFATLAELV | 324   | >PTPN11-E7(EKFATLAQLV | 166   | 158   |
| >PTPN11-E7(EKFATLAEL  | 89    | >PTPN11-E7(EKFATLAQL  | 81    | 8     |
| >PTPN11-E7(GEKFATLAEL | 114   | >PTPN11-E7(GEKFATLAQL | 135   | 21    |
| >PTPN11-E7(GEKFATLAEL | 110   | >PTPN11-E7(GEKFATLAQL | 176   | 66    |
| >PTPN11-E7(GEKFATLAEL | 173   | >PTPN11-E7(GEKFATLAQL | 143   | 30    |
| >PTPN11-E7(GEKFATLAEL | 367   | >PTPN11-E7(GEKFATLAQL | 232   | 135   |
| >PTPN11-E7(GEKFATLAEL | 309   | >PTPN11-E7(GEKFATLAQL | 208   | 101   |
| >PTPN11-E7(GEKFATLAEL | 478   | >PTPN11-E7(GEKFATLAQL | 528   | 50    |
| >PTPN11-E7(GEKFATLAEL | 9     | >PTPN11-E7(GEKFATLAQL | 10    | 1     |
| >PTPN11-E7(ELVQYYMEHI | 139   | >PTPN11-E7(VLVQYYMEH  | 3778  | 3639  |
| >PTPN11-E7(AELVQYYM   | 3395  | >PTPN11-E7(AVLVQYYM   | 238   | 3157  |
| >PTPN11-E7(AELVQYYM   | 21486 | >PTPN11-E7(AVLVQYYM   | 261   | 21225 |
| >PTPN11-E7(AELVQYYM   | 15098 | >PTPN11-E7(AVLVQYYM   | 446   | 14652 |
| >PTPN11-E7(AELVQYYM   | 206   | >PTPN11-E7(AVLVQYYM   | 22934 | 22728 |
| >PTPN11-E7(AELVQYYM   | 34    | >PTPN11-E7(AVLVQYYM   | 33146 | 33112 |
| >PTPN11-E7(AELVQYYM   | 278   | >PTPN11-E7(AVLVQYYM   | 22136 | 21858 |
| >PTPN11-E7(AELVQYYM   | 121   | >PTPN11-E7(AVLVQYYM   | 34999 | 34878 |
| >PTPN11-E7(AELVQYYMEI | 424   | >PTPN11-E7(AVLVQYYMEI | 24157 | 23733 |
| >PTPN11-E7(AELVQYYM   | 148   | >PTPN11-E7(AVLVQYYM   | 33578 | 33430 |
| >PTPN11-E7(AELVQYYME  | 269   | >PTPN11-E7(AVLVQYYME  | 35942 | 35673 |

|                       |       |                       |       |       |
|-----------------------|-------|-----------------------|-------|-------|
| >PTPN11-E7(AELVQYYM   | 78    | >PTPN11-E7(AVLVQYYM   | 19308 | 19230 |
| >PTPN11-E7(AELVQYYMEI | 4258  | >PTPN11-E7(AVLVQYYMEI | 442   | 3816  |
| >PTPN11-E7(AELVQYYMEI | 4162  | >PTPN11-E7(AVLVQYYMEI | 460   | 3702  |
| >PTPN11-E7(YGGEKFATLA | 24299 | >PTPN11-E7(YGGEKFATLA | 180   | 24119 |
| >PTPN11-E7(YGGEKFATLA | 26288 | >PTPN11-E7(YGGEKFATLA | 209   | 26079 |
| >PTPN11-E7(LAELVQYY   | 266   | >PTPN11-E7(LAVLVQYY   | 9596  | 9330  |
| >PTPN11-E7(LAELVQYY   | 1220  | >PTPN11-E7(LAVLVQYY   | 132   | 1088  |
| >PTPN11-E7(LAELVQYYM  | 5669  | >PTPN11-E7(LAVLVQYYM  | 468   | 5201  |
| >PTPN11-E7(LAELVQYY   | 293   | >PTPN11-E7(LAVLVQYY   | 34    | 259   |
| >PTPN11-E7(LAELVQYY   | 240   | >PTPN11-E7(LAVLVQYY   | 75    | 165   |
| >PTPN11-E7(LAELVQYYM  | 711   | >PTPN11-E7(LAVLVQYYM  | 198   | 513   |
| >PTPN11-E7(LAELVQYY   | 915   | >PTPN11-E7(LAVLVQYY   | 383   | 532   |
| >PTPN11-E7(LAELVQYYM  | 887   | >PTPN11-E7(LAVLVQYYM  | 411   | 476   |
| >PTPN11-E7(LAELVQYY   | 3201  | >PTPN11-E7(LAVLVQYY   | 47    | 3154  |
| >PTPN11-E7(LAELVQYYM  | 984   | >PTPN11-E7(LAVLVQYYM  | 21    | 963   |
| >PTPN11-E7(LAELVQYYM  | 420   | >PTPN11-E7(LAVLVQYYM  | 326   | 94    |
| >PTPN11-E7(TLAELVQYYM | 36    | >PTPN11-E7(TLAVLVQYYM | 113   | 77    |
| >PTPN11-E7(TLAELVQYY  | 296   | >PTPN11-E7(TLAVLVQYY  | 2456  | 2160  |
| >PTPN11-E7(TLAELVQYYM | 13    | >PTPN11-E7(TLAVLVQYYM | 30    | 17    |
| >PTPN11-E7(TLAELVQYYM | 448   | >PTPN11-E7(TLAVLVQYYM | 843   | 395   |
| >PTPN11-E7(TLAELVQYY  | 179   | >PTPN11-E7(TLAVLVQYY  | 3342  | 3163  |
| >PTPN11-E7(TLAELVQYYM | 7     | >PTPN11-E7(TLAVLVQYYM | 62    | 55    |
| >PTPN11-E7(TLAELVQYYM | 25    | >PTPN11-E7(TLAVLVQYYM | 277   | 252   |
| >PTPN11-E7(TLAELVQYYM | 21    | >PTPN11-E7(TLAVLVQYYM | 101   | 80    |
| >PTPN11-E7(TLAELVQYYM | 7     | >PTPN11-E7(TLAVLVQYYM | 29    | 22    |
| >PTPN11-E7(TLAELVQYY  | 389   | >PTPN11-E7(TLAVLVQYY  | 3231  | 2842  |
| >PTPN11-E7(TLAELVQYYM | 26    | >PTPN11-E7(TLAVLVQYYM | 160   | 134   |
| >PTPN11-E7(TLAELVQYY  | 248   | >PTPN11-E7(TLAVLVQYY  | 3377  | 3129  |
| >PTPN11-E7(TLAELVQY   | 243   | >PTPN11-E7(TLAVLVQY   | 1073  | 830   |
| >PTPN11-E7(TLAELVQYY  | 80    | >PTPN11-E7(TLAVLVQYY  | 377   | 297   |
| >PTPN11-E7(TLAELVQY   | 64    | >PTPN11-E7(TLAVLVQY   | 57    | 7     |
| >PTPN11-E7(TLAELVQYY  | 40    | >PTPN11-E7(TLAVLVQYY  | 38    | 2     |
| >PTPN11-E7(TLAELVQY   | 681   | >PTPN11-E7(TLAVLVQY   | 457   | 224   |
| >PTPN11-E7(TLAELVQYY  | 262   | >PTPN11-E7(TLAVLVQYY  | 183   | 79    |
| >PTPN11-E7(TLAELVQYYM | 497   | >PTPN11-E7(TLAVLVQYYM | 1748  | 1251  |
| >PTPN11-E7(TLAELVQYYM | 91    | >PTPN11-E7(TLAVLVQYYM | 887   | 796   |
| >PTPN11-E7(TLAELVQY   | 182   | >PTPN11-E7(TLAVLVQY   | 187   | 5     |
| >PTPN11-E7(TLAELVQYY  | 32    | >PTPN11-E7(TLAVLVQYY  | 40    | 8     |
| >PTPN11-E7(TLAELVQY   | 204   | >PTPN11-E7(TLAVLVQY   | 250   | 46    |
| >PTPN11-E7(TLAELVQYY  | 102   | >PTPN11-E7(TLAVLVQYY  | 143   | 41    |
| >PTPN11-E7(TLAELVQY   | 332   | >PTPN11-E7(TLAVLVQY   | 422   | 90    |
| >PTPN11-E7(TLAELVQYY  | 207   | >PTPN11-E7(TLAVLVQYY  | 316   | 109   |
| >PTPN11-E7(TLAELVQYYM | 291   | >PTPN11-E7(TLAVLVQYYM | 187   | 104   |

|                       |      |                       |      |      |
|-----------------------|------|-----------------------|------|------|
| >PTPN11-E7€TLAELVQY   | 482  | >PTPN11-E7€TLAVLVQY   | 1421 | 939  |
| >PTPN11-E7€TLAELVQYY  | 700  | >PTPN11-E7€TLAVLVQYY  | 270  | 430  |
| >PTPN11-E7€ATLAELVQYY | 167  | >PTPN11-E7€ATLAVLVQYY | 154  | 13   |
| >PTPN11-E7€ATLAELVQYY | 442  | >PTPN11-E7€ATLAVLVQYY | 252  | 190  |
| >PTPN11-E7€ATLAELVQYY | 558  | >PTPN11-E7€ATLAVLVQYY | 490  | 68   |
| >PTPN11-E7€ATLAELVQYY | 285  | >PTPN11-E7€ATLAVLVQYY | 207  | 78   |
| >PTPN11-E7€ATLAELVQYY | 247  | >PTPN11-E7€ATLAVLVQYY | 66   | 181  |
| >PTPN11-E7€ATLAELVQYY | 371  | >PTPN11-E7€ATLAVLVQYY | 131  | 240  |
| >PTPN11-E7€ATLAELVQY  | 112  | >PTPN11-E7€ATLAVLVQY  | 37   | 75   |
| >PTPN11-E7€ATLAELVQYY | 73   | >PTPN11-E7€ATLAVLVQYY | 46   | 27   |
| >PTPN11-E7€ATLAELVQYY | 152  | >PTPN11-E7€ATLAVLVQYY | 218  | 66   |
| >PTPN11-E7€ATLAELVQY  | 8    | >PTPN11-E7€ATLAVLVQY  | 17   | 9    |
| >PTPN11-E7€ATLAELVQYY | 8    | >PTPN11-E7€ATLAVLVQYY | 13   | 5    |
| >PTPN11-E7€ATLAELVQYY | 28   | >PTPN11-E7€ATLAVLVQYY | 40   | 12   |
| >PTPN11-E7€ATLAELVQY  | 70   | >PTPN11-E7€ATLAVLVQY  | 53   | 17   |
| >PTPN11-E7€ATLAELVQYY | 196  | >PTPN11-E7€ATLAVLVQYY | 60   | 136  |
| >PTPN11-E7€ATLAELVQYY | 930  | >PTPN11-E7€ATLAVLVQYY | 474  | 456  |
| >PTPN11-E7€ATLAELVQYY | 781  | >PTPN11-E7€ATLAVLVQYY | 405  | 376  |
| >PTPN11-E7€ATLAELVQY  | 579  | >PTPN11-E7€ATLAVLVQY  | 375  | 204  |
| >PTPN11-E7€ATLAELVQYY | 72   | >PTPN11-E7€ATLAVLVQYY | 33   | 39   |
| >PTPN11-E7€ATLAELVQY  | 342  | >PTPN11-E7€ATLAVLVQY  | 77   | 265  |
| >PTPN11-E7€ATLAELVQYY | 1288 | >PTPN11-E7€ATLAVLVQYY | 454  | 834  |
| >PTPN11-E7€ATLAELVQYY | 363  | >PTPN11-E7€ATLAVLVQYY | 148  | 215  |
| >PTPN11-E7€ATLAELVQY  | 256  | >PTPN11-E7€ATLAVLVQY  | 114  | 142  |
| >PTPN11-E7€ATLAELVQYY | 70   | >PTPN11-E7€ATLAVLVQYY | 47   | 23   |
| >PTPN11-E7€ATLAELVQYY | 556  | >PTPN11-E7€ATLAVLVQYY | 428  | 128  |
| >PTPN11-E7€ATLAELVQYY | 290  | >PTPN11-E7€ATLAVLVQYY | 294  | 4    |
| >PTPN11-E7€ATLAELVQY  | 5    | >PTPN11-E7€ATLAVLVQY  | 5    | 0    |
| >PTPN11-E7€ATLAELVQYY | 5    | >PTPN11-E7€ATLAVLVQYY | 5    | 0    |
| >PTPN11-E7€ATLAELVQYY | 23   | >PTPN11-E7€ATLAVLVQYY | 33   | 10   |
| >PTPN11-E7€ATLAELVQY  | 1820 | >PTPN11-E7€ATLAVLVQY  | 172  | 1648 |
| >PTPN11-E7€ATLAELVQYY | 460  | >PTPN11-E7€ATLAVLVQYY | 105  | 355  |
| >PTPN11-E7€ATLAELVQYY | 302  | >PTPN11-E7€ATLAVLVQYY | 79   | 223  |
| >PTPN11-E7€ATLAELVQYY | 379  | >PTPN11-E7€ATLAVLVQYY | 258  | 121  |
| >PTPN11-E7€ATLAELVQY  | 166  | >PTPN11-E7€ATLAVLVQY  | 30   | 136  |
| >PTPN11-E7€ATLAELVQYY | 136  | >PTPN11-E7€ATLAVLVQYY | 127  | 9    |
| >PTPN11-E7€ATLAELVQYY | 137  | >PTPN11-E7€ATLAVLVQYY | 37   | 100  |
| >PTPN11-E7€FATLAELVQY | 360  | >PTPN11-E7€FATLAVLVQY | 453  | 93   |
| >PTPN11-E7€FATLAELV   | 189  | >PTPN11-E7€FATLAVLV   | 150  | 39   |
| >PTPN11-E7€FATLAELV   | 1117 | >PTPN11-E7€FATLAVLV   | 321  | 796  |
| >PTPN11-E7€FATLAELV   | 38   | >PTPN11-E7€FATLAVLV   | 24   | 14   |
| >PTPN11-E7€FATLAELV   | 829  | >PTPN11-E7€FATLAVLV   | 286  | 543  |
| >PTPN11-E7€FATLAELV   | 97   | >PTPN11-E7€FATLAVLV   | 37   | 60   |

|                        |       |                        |      |       |
|------------------------|-------|------------------------|------|-------|
| >PTPN11-E7€FATLAELVQY  | 717   | >PTPN11-E7€FATLAVLVQY  | 372  | 345   |
| >PTPN11-E7€FATLAELVQY  | 99    | >PTPN11-E7€FATLAVLVQY  | 73   | 26    |
| >PTPN11-E7€FATLAELVQY  | 693   | >PTPN11-E7€FATLAVLVQY  | 413  | 280   |
| >PTPN11-E7€FATLAELV    | 99    | >PTPN11-E7€FATLAVLV    | 55   | 44    |
| >PTPN11-E7€FATLAELV    | 1002  | >PTPN11-E7€FATLAVLV    | 315  | 687   |
| >PTPN11-E7€FATLAELVQY  | 764   | >PTPN11-E7€FATLAVLVQY  | 427  | 337   |
| >PTPN11-E7€FATLAELVQY  | 41    | >PTPN11-E7€FATLAVLVQY  | 31   | 10    |
| >PTPN11-E7€FATLAELVQY  | 41    | >PTPN11-E7€FATLAVLVQY  | 25   | 16    |
| >PTPN11-E7€FATLAELVQY  | 27    | >PTPN11-E7€FATLAVLVQY  | 33   | 6     |
| >PTPN11-E7€FATLAELVQY  | 310   | >PTPN11-E7€FATLAVLVQY  | 234  | 76    |
| >PTPN11-E7€FATLAELV    | 1144  | >PTPN11-E7€FATLAVLV    | 219  | 925   |
| >PTPN11-E7€FATLAELVQY  | 866   | >PTPN11-E7€FATLAVLVQY  | 211  | 655   |
| >PTPN11-E7€FATLAELVQY  | 221   | >PTPN11-E7€FATLAVLVQY  | 115  | 106   |
| >PTPN11-E7€FATLAELVQY  | 104   | >PTPN11-E7€FATLAVLVQY  | 97   | 7     |
| >PTPN11-E7€KFATLAEL    | 82    | >PTPN11-E7€KFATLAVL    | 400  | 318   |
| >PTPN11-E7€KFATLAELV   | 64    | >PTPN11-E7€KFATLAVLV   | 106  | 42    |
| >PTPN11-E7€KFATLAEL    | 221   | >PTPN11-E7€KFATLAVL    | 339  | 118   |
| >PTPN11-E7€KFATLAELVQ  | 27    | >PTPN11-E7€KFATLAVLVQ  | 22   | 5     |
| >PTPN11-E7€KFATLAELVQ  | 319   | >PTPN11-E7€KFATLAVLVQ  | 259  | 60    |
| >PTPN11-E7€KFATLAELVQ  | 117   | >PTPN11-E7€KFATLAVLVQ  | 100  | 17    |
| >PTPN11-E7€KFATLAELVQ  | 144   | >PTPN11-E7€KFATLAVLVQ  | 126  | 18    |
| >PTPN11-E7€KFATLAELVQ  | 1428  | >PTPN11-E7€KFATLAVLVQ  | 436  | 992   |
| >PTPN11-E7€KFATLAEL    | 210   | >PTPN11-E7€KFATLAVL    | 209  | 1     |
| >PTPN11-E7€KFATLAELV   | 149   | >PTPN11-E7€KFATLAVLV   | 193  | 44    |
| >PTPN11-E7€EKFATLAE    | 23963 | >PTPN11-E7€EKFATLAV    | 384  | 23579 |
| >PTPN11-E7€EKFATLAE    | 2737  | >PTPN11-E7€EKFATLAV    | 32   | 2705  |
| >PTPN11-E7€EKFATLAEL   | 36    | >PTPN11-E7€EKFATLAVL   | 29   | 7     |
| >PTPN11-E7€EKFATLAELV  | 324   | >PTPN11-E7€EKFATLAVLV  | 120  | 204   |
| >PTPN11-E7€EKFATLAE    | 12113 | >PTPN11-E7€EKFATLAV    | 222  | 11891 |
| >PTPN11-E7€EKFATLAEL   | 89    | >PTPN11-E7€EKFATLAVL   | 17   | 72    |
| >PTPN11-E7€EKFATLAELV  | 2304  | >PTPN11-E7€EKFATLAVLV  | 416  | 1888  |
| >PTPN11-E7€GEKFATLAEL' | 114   | >PTPN11-E7€GEKFATLAVL' | 162  | 48    |
| >PTPN11-E7€GEKFATLAE   | 3584  | >PTPN11-E7€GEKFATLAV   | 70   | 3514  |
| >PTPN11-E7€GEKFATLAEL' | 110   | >PTPN11-E7€GEKFATLAVL' | 99   | 11    |
| >PTPN11-E7€GEKFATLAE   | 1529  | >PTPN11-E7€GEKFATLAV   | 54   | 1475  |
| >PTPN11-E7€GEKFATLAEL  | 173   | >PTPN11-E7€GEKFATLAVL  | 250  | 77    |
| >PTPN11-E7€GEKFATLAEL' | 367   | >PTPN11-E7€GEKFATLAVL' | 247  | 120   |
| >PTPN11-E7€GEKFATLAE   | 2675  | >PTPN11-E7€GEKFATLAV   | 66   | 2609  |
| >PTPN11-E7€GEKFATLAEL' | 309   | >PTPN11-E7€GEKFATLAVL' | 170  | 139   |
| >PTPN11-E7€GEKFATLAE   | 2524  | >PTPN11-E7€GEKFATLAV   | 12   | 2512  |
| >PTPN11-E7€GEKFATLAEL  | 478   | >PTPN11-E7€GEKFATLAVL  | 397  | 81    |
| >PTPN11-E7€GEKFATLAEL' | 9     | >PTPN11-E7€GEKFATLAVL' | 8    | 1     |
| >PTPN11-F7J\FATLAELVQY | 360   | >PTPN11-F7J\KATLAELVQY | 3618 | 3258  |

|                        |       |                        |       |       |
|------------------------|-------|------------------------|-------|-------|
| >PTPN11-F71FATLAELV    | 189   | >PTPN11-F71KATLAELV    | 2522  | 2333  |
| >PTPN11-F71FATLAELV    | 38    | >PTPN11-F71KATLAELV    | 551   | 513   |
| >PTPN11-F71FATLAELV    | 97    | >PTPN11-F71KATLAELV    | 2800  | 2703  |
| >PTPN11-F71FATLAELVQY  | 99    | >PTPN11-F71KATLAELVQY  | 1422  | 1323  |
| >PTPN11-F71FATLAELVQY  | 2617  | >PTPN11-F71KATLAELVQY  | 329   | 2288  |
| >PTPN11-F71FATLAELV    | 99    | >PTPN11-F71KATLAELV    | 4738  | 4639  |
| >PTPN11-F71FATLAELVQY  | 41    | >PTPN11-F71KATLAELVQY  | 23    | 18    |
| >PTPN11-F71FATLAELVQY  | 41    | >PTPN11-F71KATLAELVQY  | 16    | 25    |
| >PTPN11-F71FATLAELVQY  | 27    | >PTPN11-F71KATLAELVQY  | 1145  | 1118  |
| >PTPN11-F71FATLAELVQY  | 310   | >PTPN11-F71KATLAELVQY  | 6245  | 5935  |
| >PTPN11-F71FATLAELVQY  | 9900  | >PTPN11-F71KATLAELVQY  | 455   | 9445  |
| >PTPN11-F71FATLAELVQY  | 4007  | >PTPN11-F71KATLAELVQY  | 177   | 3830  |
| >PTPN11-F71FATLAELVQY  | 866   | >PTPN11-F71KATLAELVQY  | 54    | 812   |
| >PTPN11-F71FATLAELVQY  | 221   | >PTPN11-F71KATLAELVQY  | 29    | 192   |
| >PTPN11-F71FATLAELVQY  | 104   | >PTPN11-F71KATLAELVQY  | 159   | 55    |
| >PTPN11-F71KFATLAEL    | 82    | >PTPN11-F71KKATLAEL    | 1196  | 1114  |
| >PTPN11-F71KFATLAELV   | 64    | >PTPN11-F71KKATLAELV   | 1039  | 975   |
| >PTPN11-F71KFATLAEL    | 221   | >PTPN11-F71KKATLAEL    | 21233 | 21012 |
| >PTPN11-F71KFATLAELVQ  | 27    | >PTPN11-F71KKATLAELVQ  | 2330  | 2303  |
| >PTPN11-F71KFATLAELVQ  | 319   | >PTPN11-F71KKATLAELVQ  | 849   | 530   |
| >PTPN11-F71KFATLAELVQ  | 117   | >PTPN11-F71KKATLAELVQ  | 1419  | 1302  |
| >PTPN11-F71KFATLAEL    | 8324  | >PTPN11-F71KKATLAEL    | 56    | 8268  |
| >PTPN11-F71KFATLAELVQ  | 3922  | >PTPN11-F71KKATLAELVQ  | 11    | 3911  |
| >PTPN11-F71KFATLAEL    | 1473  | >PTPN11-F71KKATLAEL    | 165   | 1308  |
| >PTPN11-F71KFATLAELVQ  | 144   | >PTPN11-F71KKATLAELVQ  | 1411  | 1267  |
| >PTPN11-F71KFATLAEL    | 210   | >PTPN11-F71KKATLAEL    | 23913 | 23703 |
| >PTPN11-F71KFATLAELV   | 149   | >PTPN11-F71KKATLAELV   | 24208 | 24059 |
| >PTPN11-F71DYYDLYGGEK  | 108   | >PTPN11-F71DYYDLYGGEK  | 5154  | 5046  |
| >PTPN11-F71DYYDLYGGEK  | 44    | >PTPN11-F71DYYDLYGGEK  | 8720  | 8676  |
| >PTPN11-F71DYYDLYGGEK  | 6321  | >PTPN11-F71DYYDLYGGEK  | 222   | 6099  |
| >PTPN11-F71DYYDLYGGEK  | 15154 | >PTPN11-F71DYYDLYGGEK  | 441   | 14713 |
| >PTPN11-F71EKFATLAEL   | 36    | >PTPN11-F71EKKATLAEL   | 276   | 240   |
| >PTPN11-F71EKFATLAELV  | 324   | >PTPN11-F71EKKATLAELV  | 2059  | 1735  |
| >PTPN11-F71EKFATLAEL   | 89    | >PTPN11-F71EKKATLAEL   | 6976  | 6887  |
| >PTPN11-F71GEKFATLA    | 283   | >PTPN11-F71GEKKATLA    | 354   | 71    |
| >PTPN11-F71GEKFATLAEL' | 114   | >PTPN11-F71GEKKATLAEL' | 68    | 46    |
| >PTPN11-F71GEKFATLAEL' | 110   | >PTPN11-F71GEKKATLAEL' | 202   | 92    |
| >PTPN11-F71GEKFATLA    | 277   | >PTPN11-F71GEKKATLA    | 431   | 154   |
| >PTPN11-F71GEKFATLAEL  | 173   | >PTPN11-F71GEKKATLAEL  | 283   | 110   |
| >PTPN11-F71GEKFATLAEL' | 367   | >PTPN11-F71GEKKATLAEL' | 352   | 15    |
| >PTPN11-F71GEKFATLA    | 55    | >PTPN11-F71GEKKATLA    | 134   | 79    |
| >PTPN11-F71GEKFATLAEL' | 309   | >PTPN11-F71GEKKATLAEL' | 554   | 245   |
| >PTPN11-F71GEKFATLAEL  | 478   | >PTPN11-F71GEKKATLAEL  | 1351  | 873   |



|                        |       |                        |       |       |
|------------------------|-------|------------------------|-------|-------|
| >PTPN11-F71GEKFATLAEL' | 9     | >PTPN11-F71GEKKATLAEL' | 7     | 2     |
| >PTPN11-F71YGGEKFATL   | 410   | >PTPN11-F71YGGEKKATL   | 10720 | 10310 |
| >PTPN11-F71YGGEKFATL   | 121   | >PTPN11-F71YGGEKKATL   | 876   | 755   |
| >PTPN11-F71LYGGEKFATL  | 7     | >PTPN11-F71LYGGEKKATL  | 19    | 12    |
| >PTPN11-F71DLYGGEKFA   | 494   | >PTPN11-F71DLYGGEKKA   | 1934  | 1440  |
| >PTPN11-F71DLYGGEKFAT  | 31    | >PTPN11-F71DLYGGEKKAT  | 68    | 37    |
| >PTPN11-F71DLYGGEKFAT  | 396   | >PTPN11-F71DLYGGEKKAT  | 1130  | 734   |
| >PTPN11-F71DLYGGEKFA   | 293   | >PTPN11-F71DLYGGEKKA   | 1841  | 1548  |
| >PTPN11-F71DLYGGEKFAT  | 66    | >PTPN11-F71DLYGGEKKAT  | 149   | 83    |
| >PTPN11-F71DLYGGEKFAT  | 205   | >PTPN11-F71DLYGGEKKAT  | 706   | 501   |
| >PTPN11-F71DLYGGEKFA   | 143   | >PTPN11-F71DLYGGEKKA   | 252   | 109   |
| >PTPN11-F71DLYGGEKFAT  | 11    | >PTPN11-F71DLYGGEKKAT  | 15    | 4     |
| >PTPN11-F71DLYGGEKF    | 17020 | >PTPN11-F71DLYGGEKK    | 486   | 16534 |
| >PTPN11-F71DLYGGEKF    | 82    | >PTPN11-F71DLYGGEKK    | 12196 | 12114 |
| >PTPN11-F71YDLYGGEKF   | 303   | >PTPN11-F71YDLYGGEKK   | 14600 | 14297 |
| >PTPN11-F71YDLYGGEKF   | 183   | >PTPN11-F71YDLYGGEKK   | 17998 | 17815 |
| >PTPN11-F71YYDLYGGEKF  | 31    | >PTPN11-F71YYDLYGGEKK  | 24944 | 24913 |
| >PTPN11-F71YYDLYGGEKF  | 76    | >PTPN11-F71YYDLYGGEKK  | 26295 | 26219 |
| >PTPN11-F71YYDLYGGEKF  | 7     | >PTPN11-F71YYDLYGGEKK  | 5417  | 5410  |
| >PTPN11-F71YYDLYGGEKF  | 47    | >PTPN11-F71YYDLYGGEKK  | 5778  | 5731  |
| >PTPN11-F71FATLAELVQY  | 360   | >PTPN11-F71LATLAELVQY  | 751   | 391   |
| >PTPN11-F71FATLAELV    | 189   | >PTPN11-F71LATLAELV    | 1472  | 1283  |
| >PTPN11-F71FATLAELV    | 38    | >PTPN11-F71LATLAELV    | 773   | 735   |
| >PTPN11-F71FATLAELV    | 97    | >PTPN11-F71LATLAELV    | 613   | 516   |
| >PTPN11-F71FATLAELVQY  | 99    | >PTPN11-F71LATLAELVQY' | 451   | 352   |
| >PTPN11-F71FATLAELV    | 99    | >PTPN11-F71LATLAELV    | 759   | 660   |
| >PTPN11-F71FATLAELVQY  | 41    | >PTPN11-F71LATLAELVQY  | 41    | 0     |
| >PTPN11-F71FATLAELVQY  | 41    | >PTPN11-F71LATLAELVQY' | 37    | 4     |
| >PTPN11-F71FATLAELVQY  | 27    | >PTPN11-F71LATLAELVQY' | 65    | 38    |
| >PTPN11-F71FATLAELVQY  | 310   | >PTPN11-F71LATLAELVQY' | 704   | 394   |
| >PTPN11-F71FATLAELVQY  | 866   | >PTPN11-F71LATLAELVQY  | 424   | 442   |
| >PTPN11-F71FATLAELVQY  | 221   | >PTPN11-F71LATLAELVQY' | 116   | 105   |
| >PTPN11-F71FATLAELVQY  | 104   | >PTPN11-F71LATLAELVQY  | 69    | 35    |
| >PTPN11-F71KFATLAEL    | 7905  | >PTPN11-F71KLATLAEL    | 23    | 7882  |
| >PTPN11-F71KFATLAELV   | 7949  | >PTPN11-F71KLATLAELV   | 18    | 7931  |
| >PTPN11-F71KFATLAEL    | 82    | >PTPN11-F71KLATLAEL    | 4     | 78    |
| >PTPN11-F71KFATLAELV   | 64    | >PTPN11-F71KLATLAELV   | 3     | 61    |
| >PTPN11-F71KFATLAEL    | 8002  | >PTPN11-F71KLATLAEL    | 14    | 7988  |
| >PTPN11-F71KFATLAELV   | 6716  | >PTPN11-F71KLATLAELV   | 8     | 6708  |
| >PTPN11-F71KFATLAEL    | 4669  | >PTPN11-F71KLATLAEL    | 49    | 4620  |
| >PTPN11-F71KFATLAELV   | 2337  | >PTPN11-F71KLATLAELV   | 15    | 2322  |
| >PTPN11-F71KFATLAEL    | 10091 | >PTPN11-F71KLATLAEL    | 16    | 10075 |
| >PTPN11-F71KFATLAELV   | 5872  | >PTPN11-F71KLATLAELV   | 7     | 5865  |

|                        |       |                        |       |       |
|------------------------|-------|------------------------|-------|-------|
| >PTPN11-F71KFATLAEL    | 13842 | >PTPN11-F71KLATLAEL    | 23    | 13819 |
| >PTPN11-F71KFATLAELV   | 14178 | >PTPN11-F71KLATLAELV   | 19    | 14159 |
| >PTPN11-F71KFATLAEL    | 8580  | >PTPN11-F71KLATLAEL    | 18    | 8562  |
| >PTPN11-F71KFATLAELV   | 3122  | >PTPN11-F71KLATLAELV   | 9     | 3113  |
| >PTPN11-F71KFATLAEL    | 17044 | >PTPN11-F71KLATLAEL    | 30    | 17014 |
| >PTPN11-F71KFATLAELV   | 14441 | >PTPN11-F71KLATLAELV   | 8     | 14433 |
| >PTPN11-F71KFATLAEL    | 12559 | >PTPN11-F71KLATLAEL    | 6     | 12553 |
| >PTPN11-F71KFATLAELV   | 7020  | >PTPN11-F71KLATLAELV   | 5     | 7015  |
| >PTPN11-F71KFATLAELVQ  | 8819  | >PTPN11-F71KLATLAELVQ  | 172   | 8647  |
| >PTPN11-F71KFATLAEL    | 221   | >PTPN11-F71KLATLAEL    | 13120 | 12899 |
| >PTPN11-F71KFATLAELVQ  | 27    | >PTPN11-F71KLATLAELVQ  | 68    | 41    |
| >PTPN11-F71KFATLAELVQ  | 319   | >PTPN11-F71KLATLAELVQ  | 110   | 209   |
| >PTPN11-F71KFATLAEL    | 4423  | >PTPN11-F71KLATLAEL    | 220   | 4203  |
| >PTPN11-F71KFATLAELVQ  | 3683  | >PTPN11-F71KLATLAELVQ  | 243   | 3440  |
| >PTPN11-F71KFATLAELVQ  | 117   | >PTPN11-F71KLATLAELVQ  | 25    | 92    |
| >PTPN11-F71KFATLAELVQ  | 4562  | >PTPN11-F71KLATLAELVQ  | 269   | 4293  |
| >PTPN11-F71KFATLAELVQ  | 3922  | >PTPN11-F71KLATLAELVQ  | 348   | 3574  |
| >PTPN11-F71KFATLAEL    | 1473  | >PTPN11-F71KLATLAEL    | 403   | 1070  |
| >PTPN11-F71KFATLAELVQ  | 144   | >PTPN11-F71KLATLAELVQ  | 194   | 50    |
| >PTPN11-F71KFATLAEL    | 210   | >PTPN11-F71KLATLAEL    | 14040 | 13830 |
| >PTPN11-F71KFATLAELV   | 149   | >PTPN11-F71KLATLAELV   | 13870 | 13721 |
| >PTPN11-F71DYYDLYGGEK  | 108   | >PTPN11-F71DYYDLYGGEK  | 1837  | 1729  |
| >PTPN11-F71DYYDLYGGEK  | 44    | >PTPN11-F71DYYDLYGGEK  | 264   | 220   |
| >PTPN11-F71EKFATLAEL   | 36    | >PTPN11-F71EKLATLAEL   | 187   | 151   |
| >PTPN11-F71EKFATLAELV  | 324   | >PTPN11-F71EKLATLAELV  | 1615  | 1291  |
| >PTPN11-F71EKFATLAEL   | 89    | >PTPN11-F71EKLATLAEL   | 195   | 106   |
| >PTPN11-F71GEKFATLA    | 283   | >PTPN11-F71GEKLATLA    | 91    | 192   |
| >PTPN11-F71GEKFATLAEL  | 881   | >PTPN11-F71GEKLATLAEL  | 214   | 667   |
| >PTPN11-F71GEKFATLAEL\ | 114   | >PTPN11-F71GEKLATLAEL\ | 34    | 80    |
| >PTPN11-F71GEKFATLAEL\ | 110   | >PTPN11-F71GEKLATLAEL\ | 226   | 116   |
| >PTPN11-F71GEKFATLA    | 277   | >PTPN11-F71GEKLATLA    | 215   | 62    |
| >PTPN11-F71GEKFATLAEL  | 173   | >PTPN11-F71GEKLATLAEL  | 222   | 49    |
| >PTPN11-F71GEKFATLAEL\ | 367   | >PTPN11-F71GEKLATLAEL\ | 281   | 86    |
| >PTPN11-F71GEKFATLA    | 55    | >PTPN11-F71GEKLATLA    | 84    | 29    |
| >PTPN11-F71GEKFATLAEL\ | 309   | >PTPN11-F71GEKLATLAEL\ | 414   | 105   |
| >PTPN11-F71GEKFATLAEL  | 478   | >PTPN11-F71GEKLATLAEL  | 690   | 212   |
| >PTPN11-F71GEKFATLAEL\ | 9     | >PTPN11-F71GEKLATLAEL\ | 6     | 3     |
| >PTPN11-F71YGGEKFATL   | 410   | >PTPN11-F71YGGEKLATL   | 895   | 485   |
| >PTPN11-F71YGGEKFATL   | 121   | >PTPN11-F71YGGEKLATL   | 1224  | 1103  |
| >PTPN11-F71LYGGEKFATL  | 7     | >PTPN11-F71LYGGEKLATL  | 9     | 2     |
| >PTPN11-F71DLYGGEKF    | 5592  | >PTPN11-F71DLYGGEKL    | 93    | 5499  |
| >PTPN11-F71DLYGGEKFA   | 494   | >PTPN11-F71DLYGGEKLA   | 1851  | 1357  |
| >PTPN11-F71DLYGGEKFAT  | 31    | >PTPN11-F71DLYGGEKLAT  | 32    | 1     |

|                       |       |                       |      |       |
|-----------------------|-------|-----------------------|------|-------|
| >PTPN11-F71DLYGGEKFAT | 396   | >PTPN11-F71DLYGGEKLAT | 290  | 106   |
| >PTPN11-F71DLYGGEKF   | 14681 | >PTPN11-F71DLYGGEKL   | 143  | 14538 |
| >PTPN11-F71DLYGGEKFA  | 293   | >PTPN11-F71DLYGGEKLA  | 1740 | 1447  |
| >PTPN11-F71DLYGGEKFAT | 66    | >PTPN11-F71DLYGGEKLAT | 73   | 7     |
| >PTPN11-F71DLYGGEKFAT | 205   | >PTPN11-F71DLYGGEKLAT | 154  | 51    |
| >PTPN11-F71DLYGGEKF   | 10742 | >PTPN11-F71DLYGGEKL   | 29   | 10713 |
| >PTPN11-F71DLYGGEKFA  | 143   | >PTPN11-F71DLYGGEKLA  | 176  | 33    |
| >PTPN11-F71DLYGGEKFAT | 11    | >PTPN11-F71DLYGGEKLAT | 10   | 1     |
| >PTPN11-F71DLYGGEKF   | 82    | >PTPN11-F71DLYGGEKL   | 1249 | 1167  |
| >PTPN11-F71YDLYGGEKF  | 303   | >PTPN11-F71YDLYGGEKL  | 5940 | 5637  |
| >PTPN11-F71YDLYGGEKF  | 183   | >PTPN11-F71YDLYGGEKL  | 1257 | 1074  |
| >PTPN11-F71YYDLYGGEKF | 31    | >PTPN11-F71YYDLYGGEKL | 373  | 342   |
| >PTPN11-F71YYDLYGGEKF | 76    | >PTPN11-F71YYDLYGGEKL | 1098 | 1022  |
| >PTPN11-F71YYDLYGGEKF | 7     | >PTPN11-F71YYDLYGGEKL | 25   | 18    |
| >PTPN11-F71YYDLYGGEKF | 47    | >PTPN11-F71YYDLYGGEKL | 492  | 445   |
| >PTPN11-G5(GMVQTEAQ)  | 834   | >PTPN11-G5(AMVQTEAQY  | 231  | 603   |
| >PTPN11-G5(GMVQTEAQ)  | 277   | >PTPN11-G5(AMVQTEAQY  | 368  | 91    |
| >PTPN11-G5(GMVQTEAQ)  | 3763  | >PTPN11-G5(AMVQTEAQY  | 173  | 3590  |
| >PTPN11-G5(GMVQTEAQ)  | 37    | >PTPN11-G5(AMVQTEAQY  | 66   | 29    |
| >PTPN11-G5(GMVQTEAQ)  | 357   | >PTPN11-G5(AMVQTEAQY  | 717  | 360   |
| >PTPN11-G5(GMVQTEAQ)  | 95    | >PTPN11-G5(AMVQTEAQY  | 51   | 44    |
| >PTPN11-G5(GMVQTEAQ)  | 756   | >PTPN11-G5(AMVQTEAQY  | 150  | 606   |
| >PTPN11-G5(GMVQTEAQ)  | 1518  | >PTPN11-G5(AMVQTEAQY  | 362  | 1156  |
| >PTPN11-G5(GMVQTEAQ)  | 260   | >PTPN11-G5(AMVQTEAQY  | 104  | 156   |
| >PTPN11-G5(GMVQTEAQ)  | 86    | >PTPN11-G5(AMVQTEAQY  | 59   | 27    |
| >PTPN11-G5(GMVQTEAQ)  | 135   | >PTPN11-G5(AMVQTEAQY  | 80   | 55    |
| >PTPN11-G5(GMVQTEAQ)  | 312   | >PTPN11-G5(AMVQTEAQY  | 270  | 42    |
| >PTPN11-G5(GMVQTEAQ)  | 249   | >PTPN11-G5(AMVQTEAQY  | 42   | 207   |
| >PTPN11-G5(GMVQTEAQ)  | 128   | >PTPN11-G5(AMVQTEAQY  | 22   | 106   |
| >PTPN11-G5(GMVQTEAQ)  | 59    | >PTPN11-G5(AMVQTEAQY  | 15   | 44    |
| >PTPN11-G5(GMVQTEAQ)  | 162   | >PTPN11-G5(AMVQTEAQY  | 38   | 124   |
| >PTPN11-G5(GMVQTEAQ)  | 804   | >PTPN11-G5(AMVQTEAQY  | 370  | 434   |
| >PTPN11-G5(GMVQTEAQ)  | 387   | >PTPN11-G5(AMVQTEAQY  | 302  | 85    |
| >PTPN11-G5(GMVQTEAQ)  | 120   | >PTPN11-G5(AMVQTEAQY  | 93   | 27    |
| >PTPN11-G5(SGMVQTEAC  | 2523  | >PTPN11-G5(SAMVQTEAC  | 160  | 2363  |
| >PTPN11-G5(SGMVQTEAC  | 100   | >PTPN11-G5(SAMVQTEAC  | 56   | 44    |
| >PTPN11-G5(SGMVQTEAC  | 297   | >PTPN11-G5(SAMVQTEAC  | 44   | 253   |
| >PTPN11-G5(SGMVQTEAC  | 836   | >PTPN11-G5(SAMVQTEAC  | 26   | 810   |
| >PTPN11-G5(SGMVQTEA   | 5286  | >PTPN11-G5(SAMVQTEA   | 378  | 4908  |
| >PTPN11-G5(SGMVQTEAC  | 514   | >PTPN11-G5(SAMVQTEAC  | 218  | 296   |
| >PTPN11-G5(SGMVQTEAC  | 436   | >PTPN11-G5(SAMVQTEAC  | 16   | 420   |
| >PTPN11-G5(SGMVQTEAC  | 7414  | >PTPN11-G5(SAMVQTEAC  | 405  | 7009  |
| >PTPN11-G5(SGMVQTEAC  | 224   | >PTPN11-G5(SAMVQTEAC  | 307  | 83    |

|                      |       |                      |     |       |
|----------------------|-------|----------------------|-----|-------|
| >PTPN11-G5ISGMVQTEAC | 179   | >PTPN11-G5ISAMVQTEAC | 283 | 104   |
| >PTPN11-G5IRSGMVQTEA | 1496  | >PTPN11-G5IRSAMVQTEA | 353 | 1143  |
| >PTPN11-G5IRSGMVQTEA | 84    | >PTPN11-G5IRSAMVQTEA | 33  | 51    |
| >PTPN11-G5IRSGMVQTEA | 203   | >PTPN11-G5IRSAMVQTEA | 136 | 67    |
| >PTPN11-G5IRSGMVQTEA | 836   | >PTPN11-G5IRSAMVQTEA | 134 | 702   |
| >PTPN11-G5IRSGMVQTEA | 9     | >PTPN11-G5IRSAMVQTEA | 4   | 5     |
| >PTPN11-G5IRSGMVQTEA | 428   | >PTPN11-G5IRSAMVQTEA | 128 | 300   |
| >PTPN11-G5IRSGMVQTEA | 20    | >PTPN11-G5IRSAMVQTEA | 12  | 8     |
| >PTPN11-G5IRSGMVQTEA | 46    | >PTPN11-G5IRSAMVQTEA | 14  | 32    |
| >PTPN11-G5IRSGMVQTEA | 603   | >PTPN11-G5IRSAMVQTEA | 233 | 370   |
| >PTPN11-G5ISQRSGMVQT | 574   | >PTPN11-G5ISQRSAMVQT | 248 | 326   |
| >PTPN11-G5ISQRSGMVQ  | 352   | >PTPN11-G5ISQRSAMVQ  | 469 | 117   |
| >PTPN11-G5ISQRSGMVQT | 512   | >PTPN11-G5ISQRSAMVQT | 473 | 39    |
| >PTPN11-G5ISQRSGMVQ  | 392   | >PTPN11-G5ISQRSAMVQ  | 416 | 24    |
| >PTPN11-G5ISQRSGMVQT | 258   | >PTPN11-G5ISQRSAMVQT | 192 | 66    |
| >PTPN11-G5IRSQRSGMV  | 251   | >PTPN11-G5IRSQRSAMV  | 110 | 141   |
| >PTPN11-G5IRSQRSGMVC | 380   | >PTPN11-G5IRSQRSAMVC | 368 | 12    |
| >PTPN11-G5IRSQRSGMV  | 224   | >PTPN11-G5IRSQRSAMV  | 47  | 177   |
| >PTPN11-G5IRSQRSGMVC | 477   | >PTPN11-G5IRSQRSAMVC | 354 | 123   |
| >PTPN11-G5IRSQRSGMV  | 246   | >PTPN11-G5IRSQRSAMV  | 334 | 88    |
| >PTPN11-G5IRSQRSGMVC | 490   | >PTPN11-G5IRSQRSAMVC | 393 | 97    |
| >PTPN11-G5IVRSQRSGM  | 1031  | >PTPN11-G5IVRSQRSAM  | 198 | 833   |
| >PTPN11-G5IVRSQRSGM  | 310   | >PTPN11-G5IVRSQRSAM  | 424 | 114   |
| >PTPN11-G5IMVRSQRSGM | 485   | >PTPN11-G5IMVRSQRSAN | 307 | 178   |
| >PTPN11-G5IMVRSQRSGM | 108   | >PTPN11-G5IMVRSQRSAN | 21  | 87    |
| >PTPN11-G5IMVRSQRSGM | 574   | >PTPN11-G5IMVRSQRSAN | 281 | 293   |
| >PTPN11-G5IMVRSQRSG  | 16    | >PTPN11-G5IMVRSQRSA  | 5   | 11    |
| >PTPN11-G5IMVRSQRSGM | 9     | >PTPN11-G5IMVRSQRSAN | 6   | 3     |
| >PTPN11-G5IMVRSQRSGM | 9     | >PTPN11-G5IMVRSQRSAN | 6   | 3     |
| >PTPN11-G5IMVRSQRSGM | 14    | >PTPN11-G5IMVRSQRSAN | 12  | 2     |
| >PTPN11-G5IMVRSQRSG  | 12273 | >PTPN11-G5IMVRSQRSA  | 215 | 12058 |
| >PTPN11-G5IMVRSQRSGM | 59    | >PTPN11-G5IMVRSQRSAN | 9   | 50    |
| >PTPN11-G5IMVRSQRSGM | 438   | >PTPN11-G5IMVRSQRSAN | 40  | 398   |
| >PTPN11-G5IMVRSQRSGM | 470   | >PTPN11-G5IMVRSQRSAN | 118 | 352   |
| >PTPN11-G5IMVRSQRSGM | 563   | >PTPN11-G5IMVRSQRSAN | 64  | 499   |
| >PTPN11-G5IMVRSQRSGM | 115   | >PTPN11-G5IMVRSQRSAN | 303 | 188   |
| >PTPN11-G5IMVRSQRSGM | 929   | >PTPN11-G5IMVRSQRSAN | 65  | 864   |
| >PTPN11-G5IMVRSQRSGM | 16    | >PTPN11-G5IMVRSQRSAN | 9   | 7     |
| >PTPN11-G5IQMVRSQRSC | 827   | >PTPN11-G5IQMVRSQRSA | 168 | 659   |
| >PTPN11-G5IQMVRSQRSC | 64    | >PTPN11-G5IQMVRSQRSA | 37  | 27    |
| >PTPN11-G5IQMVRSQRSC | 1998  | >PTPN11-G5IQMVRSQRSA | 404 | 1594  |
| >PTPN11-G5IQMVRSQRSC | 40    | >PTPN11-G5IQMVRSQRSA | 18  | 22    |
| >PTPN11-G5IQMVRSQRSC | 535   | >PTPN11-G5IQMVRSQRSA | 84  | 451   |

|                      |       |                      |      |       |
|----------------------|-------|----------------------|------|-------|
| >PTPN11-G5IQMVRQRSC  | 450   | >PTPN11-G5IQMVRQRSA  | 165  | 285   |
| >PTPN11-G5IQMVRQRSC  | 2128  | >PTPN11-G5IQMVRQRSA  | 257  | 1871  |
| >PTPN11-G5IQMVRQRSC  | 18    | >PTPN11-G5IQMVRQRSA  | 8    | 10    |
| >PTPN11-G5IQMVRQRSC  | 503   | >PTPN11-G5IQMVRQRSA  | 269  | 234   |
| >PTPN11-G5IQMVRQRSC  | 338   | >PTPN11-G5IQMVRQRSA  | 115  | 223   |
| >PTPN11-G5IQMVRQRSC  | 587   | >PTPN11-G5IQMVRQRSA  | 317  | 270   |
| >PTPN11-G5IQMVRQRSC  | 4171  | >PTPN11-G5IQMVRQRSA  | 456  | 3715  |
| >PTPN11-G5IQMVRQRSC  | 47    | >PTPN11-G5IQMVRQRSA  | 13   | 34    |
| >PTPN11-G5IQMVRQRSC  | 772   | >PTPN11-G5IQMVRQRSA  | 209  | 563   |
| >PTPN11-G5IQMVRQRS(  | 158   | >PTPN11-G5IQMVRQRS/  | 151  | 7     |
| >PTPN11-G5IQMVRQRS(  | 303   | >PTPN11-G5IQMVRQRS/  | 238  | 65    |
| >PTPN11-G5IQMVRQRS(  | 1892  | >PTPN11-G5IQMVRQRS/  | 281  | 1611  |
| >PTPN11-G5IQMVRQRS(  | 642   | >PTPN11-G5IQMVRQRS/  | 399  | 243   |
| >PTPN11-G5IQMVRQRS(  | 83    | >PTPN11-G5IQMVRQRS/  | 49   | 34    |
| >PTPN11-G5IQMVRQRS(  | 461   | >PTPN11-G5IQMVRQRS/  | 258  | 203   |
| >PTPN11-G5IQMVRQRS(  | 1592  | >PTPN11-G5IQMVRQRS/  | 84   | 1508  |
| >PTPN11-G5IQMVRQRS(  | 13    | >PTPN11-G5IQMVRQRS/  | 5    | 8     |
| >PTPN11-G5IQMVRQRS(  | 2975  | >PTPN11-G5IQMVRQRS/  | 192  | 2783  |
| >PTPN11-G5IGMVQTEAQ\ | 277   | >PTPN11-G5IGMVQTEAQY | 594  | 317   |
| >PTPN11-G5IGMVQTEAQ\ | 12862 | >PTPN11-G5IGMVQTEAQY | 336  | 12526 |
| >PTPN11-G5IGMVQTEAQ\ | 3763  | >PTPN11-G5IGMVQTEAQY | 12   | 3751  |
| >PTPN11-G5IGMVQTEAQ\ | 7553  | >PTPN11-G5IGMVQTEAQY | 26   | 7527  |
| >PTPN11-G5IGMVQTEAQ\ | 37    | >PTPN11-G5IGMVQTEAQY | 251  | 214   |
| >PTPN11-G5IGMVQTEAQ\ | 357   | >PTPN11-G5IGMVQTEAQY | 2426 | 2069  |
| >PTPN11-G5IGMVQTEAQ\ | 95    | >PTPN11-G5IGMVQTEAQY | 398  | 303   |
| >PTPN11-G5IGMVQTEAQ\ | 3791  | >PTPN11-G5IGMVQTEAQY | 497  | 3294  |
| >PTPN11-G5IGMVQTEAQ\ | 260   | >PTPN11-G5IGMVQTEAQY | 20   | 240   |
| >PTPN11-G5IGMVQTEAQ\ | 86    | >PTPN11-G5IGMVQTEAQY | 173  | 87    |
| >PTPN11-G5IGMVQTEAQ\ | 135   | >PTPN11-G5IGMVQTEAQY | 349  | 214   |
| >PTPN11-G5IGMVQTEAQ\ | 312   | >PTPN11-G5IGMVQTEAQY | 362  | 50    |
| >PTPN11-G5IGMVQTEAQ\ | 249   | >PTPN11-G5IGMVQTEAQY | 304  | 55    |
| >PTPN11-G5IGMVQTEAQ\ | 128   | >PTPN11-G5IGMVQTEAQY | 141  | 13    |
| >PTPN11-G5IGMVQTEAQ\ | 59    | >PTPN11-G5IGMVQTEAQY | 190  | 131   |
| >PTPN11-G5IGMVQTEAQ\ | 162   | >PTPN11-G5IGMVQTEAQY | 504  | 342   |
| >PTPN11-G5IGMVQTEAQ\ | 3311  | >PTPN11-G5IGMVQTEAQY | 211  | 3100  |
| >PTPN11-G5IGMVQTEAQ\ | 5705  | >PTPN11-G5IGMVQTEAQY | 476  | 5229  |
| >PTPN11-G5IGMVQTEAQ\ | 387   | >PTPN11-G5IGMVQTEAQY | 903  | 516   |
| >PTPN11-G5IGMVQTEAQ\ | 120   | >PTPN11-G5IGMVQTEAQY | 30   | 90    |
| >PTPN11-G5ISGMVQTEAC | 100   | >PTPN11-G5ISEMVQTEAQ | 145  | 45    |
| >PTPN11-G5ISGMVQTEAC | 297   | >PTPN11-G5ISEMVQTEAQ | 1912 | 1615  |
| >PTPN11-G5ISGMVQTEAC | 514   | >PTPN11-G5ISEMVQTEAQ | 412  | 102   |
| >PTPN11-G5ISGMVQTEAC | 436   | >PTPN11-G5ISEMVQTEAQ | 8831 | 8395  |
| >PTPN11-G5ISGMVQTEA  | 35842 | >PTPN11-G5ISEMVQTEA  | 133  | 35709 |

|                      |       |                      |      |       |
|----------------------|-------|----------------------|------|-------|
| >PTPN11-G5ISGMVQTEAC | 24443 | >PTPN11-G5ISEMVQTEAQ | 477  | 23966 |
| >PTPN11-G5ISGMVQTEAC | 16745 | >PTPN11-G5ISEMVQTEAQ | 62   | 16683 |
| >PTPN11-G5ISGMVQTEAC | 12969 | >PTPN11-G5ISEMVQTEAQ | 31   | 12938 |
| >PTPN11-G5ISGMVQTEA  | 26630 | >PTPN11-G5ISEMVQTEA  | 11   | 26619 |
| >PTPN11-G5ISGMVQTEAC | 41367 | >PTPN11-G5ISEMVQTEAQ | 456  | 40911 |
| >PTPN11-G5ISGMVQTEAC | 224   | >PTPN11-G5ISEMVQTEAQ | 1753 | 1529  |
| >PTPN11-G5ISGMVQTEAC | 179   | >PTPN11-G5ISEMVQTEAQ | 249  | 70    |
| >PTPN11-G5IRSGMVQTEA | 1496  | >PTPN11-G5IRSEMVQTEA | 86   | 1410  |
| >PTPN11-G5IRSGMVQTEA | 84    | >PTPN11-G5IRSEMVQTEA | 135  | 51    |
| >PTPN11-G5IRSGMVQTEA | 203   | >PTPN11-G5IRSEMVQTEA | 1650 | 1447  |
| >PTPN11-G5IRSGMVQTEA | 9     | >PTPN11-G5IRSEMVQTEA | 6    | 3     |
| >PTPN11-G5IRSGMVQTEA | 428   | >PTPN11-G5IRSEMVQTEA | 1250 | 822   |
| >PTPN11-G5IRSGMVQTEA | 20    | >PTPN11-G5IRSEMVQTEA | 132  | 112   |
| >PTPN11-G5IRSGMVQTEA | 46    | >PTPN11-G5IRSEMVQTEA | 18   | 28    |
| >PTPN11-G5IRSGMVQTEA | 603   | >PTPN11-G5IRSEMVQTEA | 223  | 380   |
| >PTPN11-G5ISQRSGMVQ  | 352   | >PTPN11-G5ISQRSEMVQ  | 1527 | 1175  |
| >PTPN11-G5ISQRSGMVQ  | 392   | >PTPN11-G5ISQRSEMVQ  | 621  | 229   |
| >PTPN11-G5ISQRSGMVQT | 258   | >PTPN11-G5ISQRSEMVQT | 231  | 27    |
| >PTPN11-G5IRSQRSGMV  | 251   | >PTPN11-G5IRSQRSEMV  | 1252 | 1001  |
| >PTPN11-G5IRSQRSGMVC | 380   | >PTPN11-G5IRSQRSEMVQ | 1091 | 711   |
| >PTPN11-G5IRSQRSGMV  | 224   | >PTPN11-G5IRSQRSEMV  | 514  | 290   |
| >PTPN11-G5IRSQRSGMVC | 477   | >PTPN11-G5IRSQRSEMVQ | 1144 | 667   |
| >PTPN11-G5IRSQRSGMV  | 246   | >PTPN11-G5IRSQRSEMV  | 814  | 568   |
| >PTPN11-G5IRSQRSGMVC | 490   | >PTPN11-G5IRSQRSEMVQ | 650  | 160   |
| >PTPN11-G5IVRSQRSGM  | 1031  | >PTPN11-G5IVRSQRSEM  | 452  | 579   |
| >PTPN11-G5IVRSQRSGM  | 310   | >PTPN11-G5IVRSQRSEM  | 589  | 279   |
| >PTPN11-G5IMVRSQRSGM | 485   | >PTPN11-G5IMVRSQRSEM | 887  | 402   |
| >PTPN11-G5IMVRSQRSGM | 108   | >PTPN11-G5IMVRSQRSEM | 36   | 72    |
| >PTPN11-G5IMVRSQRSG  | 16    | >PTPN11-G5IMVRSQRSE  | 131  | 115   |
| >PTPN11-G5IMVRSQRSGM | 9     | >PTPN11-G5IMVRSQRSEM | 7    | 2     |
| >PTPN11-G5IMVRSQRSGM | 9     | >PTPN11-G5IMVRSQRSEM | 22   | 13    |
| >PTPN11-G5IMVRSQRSGM | 14    | >PTPN11-G5IMVRSQRSEM | 18   | 4     |
| >PTPN11-G5IMVRSQRSGM | 59    | >PTPN11-G5IMVRSQRSEM | 30   | 29    |
| >PTPN11-G5IMVRSQRSGM | 438   | >PTPN11-G5IMVRSQRSEM | 227  | 211   |
| >PTPN11-G5IMVRSQRSGM | 470   | >PTPN11-G5IMVRSQRSEM | 392  | 78    |
| >PTPN11-G5IMVRSQRSGM | 563   | >PTPN11-G5IMVRSQRSEM | 189  | 374   |
| >PTPN11-G5IMVRSQRSGM | 115   | >PTPN11-G5IMVRSQRSEM | 197  | 82    |
| >PTPN11-G5IMVRSQRSGM | 929   | >PTPN11-G5IMVRSQRSEM | 237  | 692   |
| >PTPN11-G5IMVRSQRSGM | 16    | >PTPN11-G5IMVRSQRSEM | 8    | 8     |
| >PTPN11-G5IQMVRSQRSC | 827   | >PTPN11-G5IQMVRSQRSE | 193  | 634   |
| >PTPN11-G5IQMVRSQRSC | 64    | >PTPN11-G5IQMVRSQRSE | 103  | 39    |
| >PTPN11-G5IQMVRSQRSC | 40    | >PTPN11-G5IQMVRSQRSE | 19   | 21    |
| >PTPN11-G5IQMVRSQRSC | 535   | >PTPN11-G5IQMVRSQRSE | 208  | 327   |

|                      |       |                      |     |       |
|----------------------|-------|----------------------|-----|-------|
| >PTPN11-G5IQMVRQRSC  | 450   | >PTPN11-G5IQMVRQRSE  | 212 | 238   |
| >PTPN11-G5IQMVRQRSC  | 2128  | >PTPN11-G5IQMVRQRSE  | 438 | 1690  |
| >PTPN11-G5IQMVRQRSC  | 18    | >PTPN11-G5IQMVRQRSE  | 12  | 6     |
| >PTPN11-G5IQMVRQRSC  | 338   | >PTPN11-G5IQMVRQRSE  | 298 | 40    |
| >PTPN11-G5IQMVRQRSC  | 47    | >PTPN11-G5IQMVRQRSE  | 20  | 27    |
| >PTPN11-G5IQMVRQRSC  | 772   | >PTPN11-G5IQMVRQRSE  | 261 | 511   |
| >PTPN11-G5IQMVRQRSC  | 158   | >PTPN11-G5IQMVRQRSE  | 249 | 91    |
| >PTPN11-G5IQMVRQRSC  | 303   | >PTPN11-G5IQMVRQRSE  | 371 | 68    |
| >PTPN11-G5IQMVRQRSC  | 83    | >PTPN11-G5IQMVRQRSE  | 79  | 4     |
| >PTPN11-G5IQMVRQRSC  | 461   | >PTPN11-G5IQMVRQRSE  | 788 | 327   |
| >PTPN11-G5IQMVRQRSC  | 13    | >PTPN11-G5IQMVRQRSE  | 8   | 5     |
| >PTPN11-G5IGMVQTEAQ  | 2005  | >PTPN11-G5ILMVQTEAQ  | 428 | 1577  |
| >PTPN11-G5IGMVQTEAQ  | 277   | >PTPN11-G5ILMVQTEAQY | 168 | 109   |
| >PTPN11-G5IGMVQTEAQ  | 37    | >PTPN11-G5ILMVQTEAQY | 28  | 9     |
| >PTPN11-G5IGMVQTEAQ  | 357   | >PTPN11-G5ILMVQTEAQY | 325 | 32    |
| >PTPN11-G5IGMVQTEAQ  | 95    | >PTPN11-G5ILMVQTEAQY | 64  | 31    |
| >PTPN11-G5IGMVQTEAQ  | 756   | >PTPN11-G5ILMVQTEAQY | 177 | 579   |
| >PTPN11-G5IGMVQTEAQ  | 260   | >PTPN11-G5ILMVQTEAQY | 54  | 206   |
| >PTPN11-G5IGMVQTEAQ  | 86    | >PTPN11-G5ILMVQTEAQY | 50  | 36    |
| >PTPN11-G5IGMVQTEAQ  | 135   | >PTPN11-G5ILMVQTEAQY | 61  | 74    |
| >PTPN11-G5IGMVQTEAQ  | 312   | >PTPN11-G5ILMVQTEAQY | 229 | 83    |
| >PTPN11-G5IGMVQTEAQ  | 249   | >PTPN11-G5ILMVQTEAQY | 35  | 214   |
| >PTPN11-G5IGMVQTEAQ  | 128   | >PTPN11-G5ILMVQTEAQY | 18  | 110   |
| >PTPN11-G5IGMVQTEAQ  | 59    | >PTPN11-G5ILMVQTEAQY | 20  | 39    |
| >PTPN11-G5IGMVQTEAQ  | 162   | >PTPN11-G5ILMVQTEAQY | 57  | 105   |
| >PTPN11-G5IGMVQTEAQ  | 3311  | >PTPN11-G5ILMVQTEAQY | 164 | 3147  |
| >PTPN11-G5IGMVQTEAQ  | 5705  | >PTPN11-G5ILMVQTEAQY | 350 | 5355  |
| >PTPN11-G5IGMVQTEAQ  | 3173  | >PTPN11-G5ILMVQTEAQY | 124 | 3049  |
| >PTPN11-G5IGMVQTEAQ  | 804   | >PTPN11-G5ILMVQTEAQY | 45  | 759   |
| >PTPN11-G5IGMVQTEAQ  | 387   | >PTPN11-G5ILMVQTEAQY | 465 | 78    |
| >PTPN11-G5IGMVQTEAQ  | 120   | >PTPN11-G5ILMVQTEAQY | 47  | 73    |
| >PTPN11-G5ISGMVQTEA  | 18021 | >PTPN11-G5ISLMVQTEA  | 48  | 17973 |
| >PTPN11-G5ISGMVQTEA  | 5583  | >PTPN11-G5ISLMVQTEA  | 12  | 5571  |
| >PTPN11-G5ISGMVQTEAC | 21493 | >PTPN11-G5ISLMVQTEAQ | 253 | 21240 |
| >PTPN11-G5ISGMVQTEA  | 13906 | >PTPN11-G5ISLMVQTEA  | 16  | 13890 |
| >PTPN11-G5ISGMVQTEA  | 7944  | >PTPN11-G5ISLMVQTEA  | 431 | 7513  |
| >PTPN11-G5ISGMVQTEA  | 20260 | >PTPN11-G5ISLMVQTEA  | 73  | 20187 |
| >PTPN11-G5ISGMVQTEA  | 23445 | >PTPN11-G5ISLMVQTEA  | 111 | 23334 |
| >PTPN11-G5ISGMVQTEA  | 18566 | >PTPN11-G5ISLMVQTEA  | 46  | 18520 |
| >PTPN11-G5ISGMVQTEA  | 21462 | >PTPN11-G5ISLMVQTEA  | 395 | 21067 |
| >PTPN11-G5ISGMVQTEA  | 27518 | >PTPN11-G5ISLMVQTEA  | 11  | 27507 |
| >PTPN11-G5ISGMVQTEAC | 2523  | >PTPN11-G5ISLMVQTEAQ | 181 | 2342  |
| >PTPN11-G5ISGMVQTEAC | 996   | >PTPN11-G5ISLMVQTEAQ | 408 | 588   |

|                      |       |                      |      |       |
|----------------------|-------|----------------------|------|-------|
| >PTPN11-G5ISGMVQTEAC | 100   | >PTPN11-G5ISLMVQTEAQ | 39   | 61    |
| >PTPN11-G5ISGMVQTEAC | 297   | >PTPN11-G5ISLMVQTEAQ | 52   | 245   |
| >PTPN11-G5ISGMVQTEAC | 836   | >PTPN11-G5ISLMVQTEAQ | 128  | 708   |
| >PTPN11-G5ISGMVQTEAC | 4579  | >PTPN11-G5ISLMVQTEAQ | 163  | 4416  |
| >PTPN11-G5ISGMVQTEAC | 514   | >PTPN11-G5ISLMVQTEAQ | 84   | 430   |
| >PTPN11-G5ISGMVQTEAC | 1022  | >PTPN11-G5ISLMVQTEAQ | 58   | 964   |
| >PTPN11-G5ISGMVQTEAC | 3400  | >PTPN11-G5ISLMVQTEAQ | 408  | 2992  |
| >PTPN11-G5ISGMVQTEAC | 436   | >PTPN11-G5ISLMVQTEAQ | 357  | 79    |
| >PTPN11-G5ISGMVQTEAC | 224   | >PTPN11-G5ISLMVQTEAQ | 207  | 17    |
| >PTPN11-G5ISGMVQTEAC | 179   | >PTPN11-G5ISLMVQTEAQ | 75   | 104   |
| >PTPN11-G5IRSGMVQTEA | 84    | >PTPN11-G5IRSLMVQTEA | 75   | 9     |
| >PTPN11-G5IRSGMVQTEA | 203   | >PTPN11-G5IRSLMVQTEA | 332  | 129   |
| >PTPN11-G5IRSGMVQTEA | 836   | >PTPN11-G5IRSLMVQTEA | 75   | 761   |
| >PTPN11-G5IRSGMVQTEA | 9     | >PTPN11-G5IRSLMVQTEA | 3    | 6     |
| >PTPN11-G5IRSGMVQTEA | 428   | >PTPN11-G5IRSLMVQTEA | 98   | 330   |
| >PTPN11-G5IRSGMVQTEA | 20    | >PTPN11-G5IRSLMVQTEA | 15   | 5     |
| >PTPN11-G5IRSGMVQTEA | 46    | >PTPN11-G5IRSLMVQTEA | 12   | 34    |
| >PTPN11-G5ISQRSGMVQ  | 352   | >PTPN11-G5ISQRSLMVQ  | 596  | 244   |
| >PTPN11-G5ISQRSGMVQ  | 392   | >PTPN11-G5ISQRSLMVQ  | 680  | 288   |
| >PTPN11-G5ISQRSGMVQT | 258   | >PTPN11-G5ISQRSLMVQT | 309  | 51    |
| >PTPN11-G5IRSQRSGMV  | 251   | >PTPN11-G5IRSQRSLMV  | 82   | 169   |
| >PTPN11-G5IRSQRSGMVC | 380   | >PTPN11-G5IRSQRSLMVQ | 233  | 147   |
| >PTPN11-G5IRSQRSGMV  | 224   | >PTPN11-G5IRSQRSLMV  | 83   | 141   |
| >PTPN11-G5IRSQRSGMVC | 477   | >PTPN11-G5IRSQRSLMVQ | 763  | 286   |
| >PTPN11-G5IRSQRSGMV  | 246   | >PTPN11-G5IRSQRSLMV  | 190  | 56    |
| >PTPN11-G5IRSQRSGMVC | 490   | >PTPN11-G5IRSQRSLMVQ | 655  | 165   |
| >PTPN11-G5IVRSQRSGM  | 310   | >PTPN11-G5IVRSQRSLM  | 248  | 62    |
| >PTPN11-G5IVRSQRSGMV | 1067  | >PTPN11-G5IVRSQRSLMV | 306  | 761   |
| >PTPN11-G5IMVRSQRSGM | 485   | >PTPN11-G5IMVRSQRSLM | 315  | 170   |
| >PTPN11-G5IMVRSQRSGM | 108   | >PTPN11-G5IMVRSQRSLM | 32   | 76    |
| >PTPN11-G5IMVRSQRSG  | 16    | >PTPN11-G5IMVRSQRSL  | 8    | 8     |
| >PTPN11-G5IMVRSQRSGM | 9     | >PTPN11-G5IMVRSQRSLM | 6    | 3     |
| >PTPN11-G5IMVRSQRSGM | 9     | >PTPN11-G5IMVRSQRSLM | 6    | 3     |
| >PTPN11-G5IMVRSQRSGM | 14    | >PTPN11-G5IMVRSQRSLM | 11   | 3     |
| >PTPN11-G5IMVRSQRSG  | 12273 | >PTPN11-G5IMVRSQRSL  | 13   | 12260 |
| >PTPN11-G5IMVRSQRSGM | 59    | >PTPN11-G5IMVRSQRSLM | 87   | 28    |
| >PTPN11-G5IMVRSQRSG  | 2738  | >PTPN11-G5IMVRSQRSL  | 76   | 2662  |
| >PTPN11-G5IMVRSQRSGM | 438   | >PTPN11-G5IMVRSQRSLM | 426  | 12    |
| >PTPN11-G5IMVRSQRSGM | 470   | >PTPN11-G5IMVRSQRSLM | 1063 | 593   |
| >PTPN11-G5IMVRSQRSG  | 19195 | >PTPN11-G5IMVRSQRSL  | 427  | 18768 |
| >PTPN11-G5IMVRSQRSGM | 115   | >PTPN11-G5IMVRSQRSLM | 666  | 551   |
| >PTPN11-G5IMVRSQRSGM | 16    | >PTPN11-G5IMVRSQRSLM | 4    | 12    |
| >PTPN11-G5IQMVRQRSG  | 827   | >PTPN11-G5IQMVRQRSL  | 450  | 377   |



|                      |       |                      |      |       |
|----------------------|-------|----------------------|------|-------|
| >PTPN11-G5IQMVRQRSC  | 64    | >PTPN11-G5IQMVRQRSL  | 72   | 8     |
| >PTPN11-G5IQMVRQRSC  | 1998  | >PTPN11-G5IQMVRQRSL  | 312  | 1686  |
| >PTPN11-G5IQMVRQRSC  | 40    | >PTPN11-G5IQMVRQRSL  | 24   | 16    |
| >PTPN11-G5IQMVRQRSC  | 535   | >PTPN11-G5IQMVRQRSL  | 215  | 320   |
| >PTPN11-G5IQMVRQRSC  | 450   | >PTPN11-G5IQMVRQRSL  | 164  | 286   |
| >PTPN11-G5IQMVRQRSC  | 27882 | >PTPN11-G5IQMVRQRSL  | 254  | 27628 |
| >PTPN11-G5IQMVRQRSC  | 18    | >PTPN11-G5IQMVRQRSL  | 10   | 8     |
| >PTPN11-G5IQMVRQRSC  | 338   | >PTPN11-G5IQMVRQRSL  | 654  | 316   |
| >PTPN11-G5IQMVRQRSC  | 4171  | >PTPN11-G5IQMVRQRSL  | 34   | 4137  |
| >PTPN11-G5IQMVRQRSC  | 47    | >PTPN11-G5IQMVRQRSL  | 49   | 2     |
| >PTPN11-G5IQMVRQRSC  | 772   | >PTPN11-G5IQMVRQRSL  | 174  | 598   |
| >PTPN11-G5IQMVRQRSC  | 158   | >PTPN11-G5IQMVRQRSL  | 124  | 34    |
| >PTPN11-G5IQMVRQRSC  | 303   | >PTPN11-G5IQMVRQRSL  | 366  | 63    |
| >PTPN11-G5IQMVRQRSC  | 642   | >PTPN11-G5IQMVRQRSL  | 167  | 475   |
| >PTPN11-G5IQMVRQRSC  | 83    | >PTPN11-G5IQMVRQRSL  | 113  | 30    |
| >PTPN11-G5IQMVRQRSC  | 461   | >PTPN11-G5IQMVRQRSL  | 934  | 473   |
| >PTPN11-G5IQMVRQRSC  | 1592  | >PTPN11-G5IQMVRQRSL  | 10   | 1582  |
| >PTPN11-G5IQMVRQRSC  | 13    | >PTPN11-G5IQMVRQRSL  | 13   | 0     |
| >PTPN11-G5IQMVRQRSC  | 24445 | >PTPN11-G5IQMVRQRSL  | 491  | 23954 |
| >PTPN11-G5IQMVRQRSC  | 2701  | >PTPN11-G5IQMVRQRSL  | 476  | 2225  |
| >PTPN11-G5IGMVQTEAQY | 834   | >PTPN11-G5IRMVQTEAQY | 470  | 364   |
| >PTPN11-G5IGMVQTEAQY | 277   | >PTPN11-G5IRMVQTEAQY | 92   | 185   |
| >PTPN11-G5IGMVQTEAQY | 2746  | >PTPN11-G5IRMVQTEAQY | 265  | 2481  |
| >PTPN11-G5IGMVQTEAQY | 37    | >PTPN11-G5IRMVQTEAQY | 98   | 61    |
| >PTPN11-G5IGMVQTEAQY | 357   | >PTPN11-G5IRMVQTEAQY | 1091 | 734   |
| >PTPN11-G5IGMVQTEAQY | 95    | >PTPN11-G5IRMVQTEAQY | 44   | 51    |
| >PTPN11-G5IGMVQTEAQY | 756   | >PTPN11-G5IRMVQTEAQY | 39   | 717   |
| >PTPN11-G5IGMVQTEAQY | 1518  | >PTPN11-G5IRMVQTEAQY | 54   | 1464  |
| >PTPN11-G5IGMVQTEAQY | 260   | >PTPN11-G5IRMVQTEAQY | 148  | 112   |
| >PTPN11-G5IGMVQTEAQY | 86    | >PTPN11-G5IRMVQTEAQY | 48   | 38    |
| >PTPN11-G5IGMVQTEAQY | 135   | >PTPN11-G5IRMVQTEAQY | 59   | 76    |
| >PTPN11-G5IGMVQTEAQY | 312   | >PTPN11-G5IRMVQTEAQY | 557  | 245   |
| >PTPN11-G5IGMVQTEAQY | 249   | >PTPN11-G5IRMVQTEAQY | 25   | 224   |
| >PTPN11-G5IGMVQTEAQY | 128   | >PTPN11-G5IRMVQTEAQY | 12   | 116   |
| >PTPN11-G5IGMVQTEAQY | 59    | >PTPN11-G5IRMVQTEAQY | 6    | 53    |
| >PTPN11-G5IGMVQTEAQY | 162   | >PTPN11-G5IRMVQTEAQY | 12   | 150   |
| >PTPN11-G5IGMVQTEAQY | 7110  | >PTPN11-G5IRMVQTEAQY | 338  | 6772  |
| >PTPN11-G5IGMVQTEAQY | 3173  | >PTPN11-G5IRMVQTEAQY | 33   | 3140  |
| >PTPN11-G5IGMVQTEAQY | 804   | >PTPN11-G5IRMVQTEAQY | 19   | 785   |
| >PTPN11-G5IGMVQTEAQY | 387   | >PTPN11-G5IRMVQTEAQY | 56   | 331   |
| >PTPN11-G5IGMVQTEAQY | 120   | >PTPN11-G5IRMVQTEAQY | 14   | 106   |
| >PTPN11-G5ISGMVQTEAC | 100   | >PTPN11-G5ISRMVQTEAC | 163  | 63    |
| >PTPN11-G5ISGMVQTEAC | 297   | >PTPN11-G5ISRMVQTEAC | 5156 | 4859  |

|                       |       |                       |       |       |
|-----------------------|-------|-----------------------|-------|-------|
| >PTPN11-G5ISGMVQTEAC  | 3400  | >PTPN11-G5ISRMVQTEAQ  | 128   | 3272  |
| >PTPN11-G5ISGMVQTEAC  | 436   | >PTPN11-G5ISRMVQTEAQ  | 11668 | 11232 |
| >PTPN11-G5ISGMVQTEAC  | 24994 | >PTPN11-G5ISRMVQTEAQ  | 51    | 24943 |
| >PTPN11-G5ISGMVQTEAC  | 25295 | >PTPN11-G5ISRMVQTEAQ  | 175   | 25120 |
| >PTPN11-G5ISGMVQTEAC  | 224   | >PTPN11-G5ISRMVQTEAQ  | 2272  | 2048  |
| >PTPN11-G5ISGMVQTEAC  | 179   | >PTPN11-G5ISRMVQTEAQ  | 241   | 62    |
| >PTPN11-G5ITIQMVRSQR! | 21370 | >PTPN11-G5ITIQMVRSQR! | 120   | 21250 |
| >PTPN11-G5ITIQMVRSQR! | 30510 | >PTPN11-G5ITIQMVRSQR! | 167   | 30343 |
| >PTPN11-G5ITIQMVRSQR! | 32730 | >PTPN11-G5ITIQMVRSQR! | 73    | 32657 |
| >PTPN11-G5IRSGMVQTE   | 12141 | >PTPN11-G5IRSRMVQTE   | 114   | 12027 |
| >PTPN11-G5IRSGMVQTEA  | 4498  | >PTPN11-G5IRSRMVQTEA  | 8     | 4490  |
| >PTPN11-G5IRSGMVQTEA  | 9326  | >PTPN11-G5IRSRMVQTEA  | 54    | 9272  |
| >PTPN11-G5IRSGMVQTEA  | 6267  | >PTPN11-G5IRSRMVQTEA  | 13    | 6254  |
| >PTPN11-G5IRSGMVQTEA  | 84    | >PTPN11-G5IRSRMVQTEA  | 96    | 12    |
| >PTPN11-G5IRSGMVQTEA  | 203   | >PTPN11-G5IRSRMVQTEA  | 105   | 98    |
| >PTPN11-G5IRSGMVQTEA  | 836   | >PTPN11-G5IRSRMVQTEA  | 53    | 783   |
| >PTPN11-G5IRSGMVQTEA  | 9     | >PTPN11-G5IRSRMVQTEA  | 3     | 6     |
| >PTPN11-G5IRSGMVQTEA  | 428   | >PTPN11-G5IRSRMVQTEA  | 76    | 352   |
| >PTPN11-G5IRSGMVQTEA  | 20    | >PTPN11-G5IRSRMVQTEA  | 58    | 38    |
| >PTPN11-G5IRSGMVQTEA  | 46    | >PTPN11-G5IRSRMVQTEA  | 7     | 39    |
| >PTPN11-G5ISQRSRGMVQT | 574   | >PTPN11-G5ISQRSRGMVQT | 367   | 207   |
| >PTPN11-G5ISQRSRGMVQ  | 352   | >PTPN11-G5ISQRSRGMVQ  | 900   | 548   |
| >PTPN11-G5ISQRSRGMVQ  | 392   | >PTPN11-G5ISQRSRGMVQ  | 519   | 127   |
| >PTPN11-G5ISQRSRGMVQT | 258   | >PTPN11-G5ISQRSRGMVQT | 282   | 24    |
| >PTPN11-G5IRSQRSGMV   | 251   | >PTPN11-G5IRSQRSGMV   | 107   | 144   |
| >PTPN11-G5IRSQRSGMVC  | 380   | >PTPN11-G5IRSQRSGMVC  | 77    | 303   |
| >PTPN11-G5IRSQRSGMV   | 224   | >PTPN11-G5IRSQRSGMV   | 402   | 178   |
| >PTPN11-G5IRSQRSGMVC  | 477   | >PTPN11-G5IRSQRSGMVC  | 1078  | 601   |
| >PTPN11-G5IRSQRSGMV   | 246   | >PTPN11-G5IRSQRSGMV   | 187   | 59    |
| >PTPN11-G5IRSQRSGMVC  | 490   | >PTPN11-G5IRSQRSGMVC  | 678   | 188   |
| >PTPN11-G5IVRSQRSGM   | 310   | >PTPN11-G5IVRSQRSGM   | 372   | 62    |
| >PTPN11-G5IMVRSQRSGM  | 485   | >PTPN11-G5IMVRSQRSGM  | 904   | 419   |
| >PTPN11-G5IMVRSQRSGM  | 108   | >PTPN11-G5IMVRSQRSGM  | 149   | 41    |
| >PTPN11-G5IMVRSQRSG   | 16    | >PTPN11-G5IMVRSQRSG   | 9     | 7     |
| >PTPN11-G5IMVRSQRSGM  | 9     | >PTPN11-G5IMVRSQRSGM  | 9     | 0     |
| >PTPN11-G5IMVRSQRSGM  | 9     | >PTPN11-G5IMVRSQRSGM  | 7     | 2     |
| >PTPN11-G5IMVRSQRSGM  | 14    | >PTPN11-G5IMVRSQRSGM  | 10    | 4     |
| >PTPN11-G5IMVRSQRSG   | 15288 | >PTPN11-G5IMVRSQRSG   | 18    | 15270 |
| >PTPN11-G5IMVRSQRSG   | 27561 | >PTPN11-G5IMVRSQRSG   | 69    | 27492 |
| >PTPN11-G5IMVRSQRSG   | 30924 | >PTPN11-G5IMVRSQRSG   | 50    | 30874 |
| >PTPN11-G5IMVRSQRSGM  | 59    | >PTPN11-G5IMVRSQRSGM  | 37    | 22    |
| >PTPN11-G5IMVRSQRSGM  | 438   | >PTPN11-G5IMVRSQRSGM  | 189   | 249   |
| >PTPN11-G5IMVRSQRSGM  | 470   | >PTPN11-G5IMVRSQRSGM  | 713   | 243   |

|                      |       |                      |      |       |
|----------------------|-------|----------------------|------|-------|
| >PTPN11-G5IMVRSQRSGM | 115   | >PTPN11-G5IMVRSQRSRM | 101  | 14    |
| >PTPN11-G5IMVRSQRSGM | 16    | >PTPN11-G5IMVRSQRSRM | 5    | 11    |
| >PTPN11-G5IQMVRSQRSC | 64    | >PTPN11-G5IQMVRSQRSR | 119  | 55    |
| >PTPN11-G5IQMVRSQRSC | 40    | >PTPN11-G5IQMVRSQRSR | 41   | 1     |
| >PTPN11-G5IQMVRSQRSC | 450   | >PTPN11-G5IQMVRSQRSR | 786  | 336   |
| >PTPN11-G5IQMVRSQRSC | 18    | >PTPN11-G5IQMVRSQRSR | 24   | 6     |
| >PTPN11-G5IQMVRSQRSC | 22771 | >PTPN11-G5IQMVRSQRSR | 272  | 22499 |
| >PTPN11-G5IQMVRSQRSC | 338   | >PTPN11-G5IQMVRSQRSR | 486  | 148   |
| >PTPN11-G5IQMVRSQRSC | 4171  | >PTPN11-G5IQMVRSQRSR | 341  | 3830  |
| >PTPN11-G5IQMVRSQRSC | 47    | >PTPN11-G5IQMVRSQRSR | 73   | 26    |
| >PTPN11-G5IQMVRSQRSC | 772   | >PTPN11-G5IQMVRSQRSR | 284  | 488   |
| >PTPN11-G5IQMVRSQRSI | 158   | >PTPN11-G5IQMVRSQRSI | 106  | 52    |
| >PTPN11-G5IQMVRSQRSI | 303   | >PTPN11-G5IQMVRSQRSI | 1142 | 839   |
| >PTPN11-G5IQMVRSQRSI | 21585 | >PTPN11-G5IQMVRSQRSI | 42   | 21543 |
| >PTPN11-G5IQMVRSQRSI | 83    | >PTPN11-G5IQMVRSQRSI | 102  | 19    |
| >PTPN11-G5IQMVRSQRSI | 461   | >PTPN11-G5IQMVRSQRSI | 1071 | 610   |
| >PTPN11-G5IQMVRSQRSI | 1592  | >PTPN11-G5IQMVRSQRSI | 88   | 1504  |
| >PTPN11-G5IQMVRSQRSI | 13    | >PTPN11-G5IQMVRSQRSI | 17   | 4     |
| >PTPN11-G5IGMVQTEAQY | 3223  | >PTPN11-G5IGMVQTEAQY | 153  | 3070  |
| >PTPN11-G5IGMVQTEAQY | 277   | >PTPN11-G5IGMVQTEAQY | 74   | 203   |
| >PTPN11-G5IGMVQTEAQY | 37    | >PTPN11-G5IGMVQTEAQY | 40   | 3     |
| >PTPN11-G5IGMVQTEAQY | 357   | >PTPN11-G5IGMVQTEAQY | 429  | 72    |
| >PTPN11-G5IGMVQTEAQY | 95    | >PTPN11-G5IGMVQTEAQY | 30   | 65    |
| >PTPN11-G5IGMVQTEAQY | 756   | >PTPN11-G5IGMVQTEAQY | 281  | 475   |
| >PTPN11-G5IGMVQTEAQY | 260   | >PTPN11-G5IGMVQTEAQY | 151  | 109   |
| >PTPN11-G5IGMVQTEAQY | 86    | >PTPN11-G5IGMVQTEAQY | 71   | 15    |
| >PTPN11-G5IGMVQTEAQY | 135   | >PTPN11-G5IGMVQTEAQY | 105  | 30    |
| >PTPN11-G5IGMVQTEAQY | 312   | >PTPN11-G5IGMVQTEAQY | 205  | 107   |
| >PTPN11-G5IGMVQTEAQY | 249   | >PTPN11-G5IGMVQTEAQY | 68   | 181   |
| >PTPN11-G5IGMVQTEAQY | 128   | >PTPN11-G5IGMVQTEAQY | 31   | 97    |
| >PTPN11-G5IGMVQTEAQY | 59    | >PTPN11-G5IGMVQTEAQY | 20   | 39    |
| >PTPN11-G5IGMVQTEAQY | 162   | >PTPN11-G5IGMVQTEAQY | 59   | 103   |
| >PTPN11-G5IGMVQTEAQY | 3311  | >PTPN11-G5IGMVQTEAQY | 456  | 2855  |
| >PTPN11-G5IGMVQTEAQY | 3173  | >PTPN11-G5IGMVQTEAQY | 248  | 2925  |
| >PTPN11-G5IGMVQTEAQY | 804   | >PTPN11-G5IGMVQTEAQY | 66   | 738   |
| >PTPN11-G5IGMVQTEAQY | 387   | >PTPN11-G5IGMVQTEAQY | 548  | 161   |
| >PTPN11-G5IGMVQTEAQY | 120   | >PTPN11-G5IGMVQTEAQY | 49   | 71    |
| >PTPN11-G5ISGMVQTEA  | 5583  | >PTPN11-G5ISGMVQTEA  | 338  | 5245  |
| >PTPN11-G5ISGMVQTEA  | 13906 | >PTPN11-G5ISGMVQTEA  | 345  | 13561 |
| >PTPN11-G5ISGMVQTEA  | 7944  | >PTPN11-G5ISGMVQTEA  | 251  | 7693  |
| >PTPN11-G5ISGMVQTEAC | 25918 | >PTPN11-G5ISGMVQTEAC | 397  | 25521 |
| >PTPN11-G5ISGMVQTEAC | 2523  | >PTPN11-G5ISGMVQTEAC | 31   | 2492  |
| >PTPN11-G5ISGMVQTEAC | 15888 | >PTPN11-G5ISGMVQTEAC | 21   | 15867 |

|                        |       |                       |     |       |
|------------------------|-------|-----------------------|-----|-------|
| >PTPN11-G5ISGMVQTEAC   | 996   | >PTPN11-G5ISVMVQTEAC  | 476 | 520   |
| >PTPN11-G5ISGMVQTEAC   | 100   | >PTPN11-G5ISVMVQTEAC  | 47  | 53    |
| >PTPN11-G5ISGMVQTEAC   | 297   | >PTPN11-G5ISVMVQTEAC  | 38  | 259   |
| >PTPN11-G5ISGMVQTEAC   | 836   | >PTPN11-G5ISVMVQTEAC  | 17  | 819   |
| >PTPN11-G5ISGMVQTEA    | 5286  | >PTPN11-G5ISVMVQTEA   | 71  | 5215  |
| >PTPN11-G5ISGMVQTEAC   | 4579  | >PTPN11-G5ISVMVQTEAC  | 158 | 4421  |
| >PTPN11-G5ISGMVQTEAC   | 514   | >PTPN11-G5ISVMVQTEAC  | 150 | 364   |
| >PTPN11-G5ISGMVQTEAC   | 1022  | >PTPN11-G5ISVMVQTEAC  | 359 | 663   |
| >PTPN11-G5ISGMVQTEAC   | 436   | >PTPN11-G5ISVMVQTEAC  | 74  | 362   |
| >PTPN11-G5ISGMVQTEAC   | 224   | >PTPN11-G5ISVMVQTEAC  | 164 | 60    |
| >PTPN11-G5ISGMVQTEAC   | 179   | >PTPN11-G5ISVMVQTEAC  | 114 | 65    |
| >PTPN11-G5ITIQMVRSQR'  | 34571 | >PTPN11-G5ITIQMVRSQR' | 138 | 34433 |
| >PTPN11-G5IRSGMVQTEA   | 84    | >PTPN11-G5IRSVMVQTEA  | 89  | 5     |
| >PTPN11-G5IRSGMVQTEA   | 203   | >PTPN11-G5IRSVMVQTEA  | 164 | 39    |
| >PTPN11-G5IRSGMVQTEA   | 836   | >PTPN11-G5IRSVMVQTEA  | 118 | 718   |
| >PTPN11-G5IRSGMVQTEA   | 9     | >PTPN11-G5IRSVMVQTEA  | 3   | 6     |
| >PTPN11-G5IRSGMVQTEA   | 428   | >PTPN11-G5IRSVMVQTEA  | 120 | 308   |
| >PTPN11-G5IRSGMVQTEA   | 20    | >PTPN11-G5IRSVMVQTEA  | 13  | 7     |
| >PTPN11-G5IRSGMVQTEA   | 46    | >PTPN11-G5IRSVMVQTEA  | 15  | 31    |
| >PTPN11-G5ISQRSGMVQ    | 352   | >PTPN11-G5ISQRSVMVQ   | 504 | 152   |
| >PTPN11-G5ISQRSGMVQ    | 392   | >PTPN11-G5ISQRSVMVQ   | 468 | 76    |
| >PTPN11-G5ISQRSGMVQT   | 258   | >PTPN11-G5ISQRSVMVQT  | 330 | 72    |
| >PTPN11-G5IRSQRSGMV    | 251   | >PTPN11-G5IRSQR SVMV  | 137 | 114   |
| >PTPN11-G5IRSQRSGMVC   | 380   | >PTPN11-G5IRSQR SVMVQ | 249 | 131   |
| >PTPN11-G5IRSQRSGMV    | 1525  | >PTPN11-G5IRSQR SVMV  | 377 | 1148  |
| >PTPN11-G5IRSQRSGMV    | 224   | >PTPN11-G5IRSQR SVMV  | 135 | 89    |
| >PTPN11-G5IRSQRSGMVC   | 477   | >PTPN11-G5IRSQR SVMVQ | 822 | 345   |
| >PTPN11-G5IRSQRSGMV    | 246   | >PTPN11-G5IRSQR SVMV  | 220 | 26    |
| >PTPN11-G5IRSQRSGMVC   | 490   | >PTPN11-G5IRSQR SVMVQ | 557 | 67    |
| >PTPN11-G5IVRSQRSGM    | 1031  | >PTPN11-G5IVRSQR SVM  | 278 | 753   |
| >PTPN11-G5IVRSQRSGM    | 310   | >PTPN11-G5IVRSQR SVM  | 439 | 129   |
| >PTPN11-G5IMVRSQRSRSG  | 19715 | >PTPN11-G5IMVRSQRSV   | 124 | 19591 |
| >PTPN11-G5IMVRSQRSRSGM | 485   | >PTPN11-G5IMVRSQRSVM  | 672 | 187   |
| >PTPN11-G5IMVRSQRSRSG  | 32855 | >PTPN11-G5IMVRSQRSV   | 44  | 32811 |
| >PTPN11-G5IMVRSQRSRSGM | 108   | >PTPN11-G5IMVRSQRSVM  | 26  | 82    |
| >PTPN11-G5IMVRSQRSRSG  | 16    | >PTPN11-G5IMVRSQRSV   | 6   | 10    |
| >PTPN11-G5IMVRSQRSRSGM | 9     | >PTPN11-G5IMVRSQRSVM  | 8   | 1     |
| >PTPN11-G5IMVRSQRSRSGM | 9     | >PTPN11-G5IMVRSQRSVM  | 7   | 2     |
| >PTPN11-G5IMVRSQRSRSGM | 14    | >PTPN11-G5IMVRSQRSVM  | 12  | 2     |
| >PTPN11-G5IMVRSQRSRSG  | 21972 | >PTPN11-G5IMVRSQRSV   | 398 | 21574 |
| >PTPN11-G5IMVRSQRSRSG  | 12273 | >PTPN11-G5IMVRSQRSV   | 69  | 12204 |
| >PTPN11-G5IMVRSQRSRSGM | 59    | >PTPN11-G5IMVRSQRSVM  | 18  | 41    |
| >PTPN11-G5IMVRSQRSRSG  | 2738  | >PTPN11-G5IMVRSQRSV   | 302 | 2436  |

|                      |       |                      |     |       |
|----------------------|-------|----------------------|-----|-------|
| >PTPN11-G5IMVRSQRSGM | 438   | >PTPN11-G5IMVRSQRSVM | 78  | 360   |
| >PTPN11-G5IMVRSQRSGM | 470   | >PTPN11-G5IMVRSQRSVM | 115 | 355   |
| >PTPN11-G5IMVRSQRSGM | 563   | >PTPN11-G5IMVRSQRSVM | 145 | 418   |
| >PTPN11-G5IMVRSQRSGM | 115   | >PTPN11-G5IMVRSQRSVM | 439 | 324   |
| >PTPN11-G5IMVRSQRSGM | 929   | >PTPN11-G5IMVRSQRSVM | 255 | 674   |
| >PTPN11-G5IMVRSQRSGM | 16    | >PTPN11-G5IMVRSQRSVM | 4   | 12    |
| >PTPN11-G5IQMVRSQRSC | 827   | >PTPN11-G5IQMVRSQRSV | 231 | 596   |
| >PTPN11-G5IQMVRSQRSC | 18619 | >PTPN11-G5IQMVRSQRSV | 87  | 18532 |
| >PTPN11-G5IQMVRSQRSC | 64    | >PTPN11-G5IQMVRSQRSV | 81  | 17    |
| >PTPN11-G5IQMVRSQRSC | 1998  | >PTPN11-G5IQMVRSQRSV | 297 | 1701  |
| >PTPN11-G5IQMVRSQRSC | 20609 | >PTPN11-G5IQMVRSQRSV | 55  | 20554 |
| >PTPN11-G5IQMVRSQRSC | 40    | >PTPN11-G5IQMVRSQRSV | 19  | 21    |
| >PTPN11-G5IQMVRSQRSC | 20402 | >PTPN11-G5IQMVRSQRSV | 318 | 20084 |
| >PTPN11-G5IQMVRSQRSC | 535   | >PTPN11-G5IQMVRSQRSV | 111 | 424   |
| >PTPN11-G5IQMVRSQRSC | 450   | >PTPN11-G5IQMVRSQRSV | 131 | 319   |
| >PTPN11-G5IQMVRSQRSC | 2128  | >PTPN11-G5IQMVRSQRSV | 459 | 1669  |
| >PTPN11-G5IQMVRSQRSC | 27882 | >PTPN11-G5IQMVRSQRSV | 12  | 27870 |
| >PTPN11-G5IQMVRSQRSC | 18    | >PTPN11-G5IQMVRSQRSV | 10  | 8     |
| >PTPN11-G5IQMVRSQRSC | 338   | >PTPN11-G5IQMVRSQRSV | 113 | 225   |
| >PTPN11-G5IQMVRSQRSC | 4171  | >PTPN11-G5IQMVRSQRSV | 82  | 4089  |
| >PTPN11-G5IQMVRSQRSC | 47    | >PTPN11-G5IQMVRSQRSV | 18  | 29    |
| >PTPN11-G5IQMVRSQRSC | 772   | >PTPN11-G5IQMVRSQRSV | 124 | 648   |
| >PTPN11-G5IQMVRSQRS\ | 158   | >PTPN11-G5IQMVRSQRS\ | 364 | 206   |
| >PTPN11-G5IQMVRSQRS\ | 20123 | >PTPN11-G5IQMVRSQRS\ | 165 | 19958 |
| >PTPN11-G5IQMVRSQRS\ | 303   | >PTPN11-G5IQMVRSQRS\ | 941 | 638   |
| >PTPN11-G5IQMVRSQRS\ | 1892  | >PTPN11-G5IQMVRSQRS\ | 493 | 1399  |
| >PTPN11-G5IQMVRSQRS\ | 642   | >PTPN11-G5IQMVRSQRS\ | 416 | 226   |
| >PTPN11-G5IQMVRSQRS\ | 83    | >PTPN11-G5IQMVRSQRS\ | 47  | 36    |
| >PTPN11-G5IQMVRSQRS\ | 461   | >PTPN11-G5IQMVRSQRS\ | 475 | 14    |
| >PTPN11-G5IQMVRSQRS\ | 1592  | >PTPN11-G5IQMVRSQRS\ | 18  | 1574  |
| >PTPN11-G5IQMVRSQRS\ | 13    | >PTPN11-G5IQMVRSQRS\ | 6   | 7     |
| >PTPN11-G5IQMVRSQRS\ | 2975  | >PTPN11-G5IQMVRSQRS\ | 249 | 2726  |
| >PTPN11-G6ITGDYYDLY  | 200   | >PTPN11-G6ITADYYDLY  | 20  | 180   |
| >PTPN11-G6ITGDYYDLY  | 1135  | >PTPN11-G6ITADYYDLY  | 386 | 749   |
| >PTPN11-G6ITGDYYDLY  | 1412  | >PTPN11-G6ITADYYDLY  | 164 | 1248  |
| >PTPN11-G6INTGDYYDLY | 33    | >PTPN11-G6INTADYYDLY | 14  | 19    |
| >PTPN11-G6INTGDYYDL  | 1388  | >PTPN11-G6INTADYYDL  | 121 | 1267  |
| >PTPN11-G6INTGDYYDLY | 896   | >PTPN11-G6INTADYYDLY | 202 | 694   |
| >PTPN11-G6INTGDYYDLY | 1027  | >PTPN11-G6INTADYYDLY | 13  | 1014  |
| >PTPN11-G6INTGDYYDLY | 429   | >PTPN11-G6INTADYYDLY | 99  | 330   |
| >PTPN11-G6INTGDYYDLY | 40    | >PTPN11-G6INTADYYDLY | 21  | 19    |
| >PTPN11-G6INTGDYYDLY | 1354  | >PTPN11-G6INTADYYDLY | 412 | 942   |
| >PTPN11-G6INTGDYYDLY | 213   | >PTPN11-G6INTADYYDLY | 13  | 200   |

|                       |      |                       |      |      |
|-----------------------|------|-----------------------|------|------|
| >PTPN11-G6 NTGDYYDL   | 482  | >PTPN11-G6 NTADYYDL   | 21   | 461  |
| >PTPN11-G6 NTGDYYDLYC | 4047 | >PTPN11-G6 NTADYYDLYC | 247  | 3800 |
| >PTPN11-G6 NTGDYYDL   | 425  | >PTPN11-G6 NTADYYDL   | 70   | 355  |
| >PTPN11-G6 NTGDYYDLY  | 255  | >PTPN11-G6 NTADYYDLY  | 465  | 210  |
| >PTPN11-G6 NTGDYYDLY  | 249  | >PTPN11-G6 NTADYYDLY  | 44   | 205  |
| >PTPN11-G6 IQNTGDYY   | 329  | >PTPN11-G6 IQNTADYY   | 558  | 229  |
| >PTPN11-G6 IQNTGDYYDL | 132  | >PTPN11-G6 IQNTADYYDL | 237  | 105  |
| >PTPN11-G6 IQNTGDYY   | 23   | >PTPN11-G6 IQNTADYY   | 30   | 7    |
| >PTPN11-G6 IQNTGDYYDL | 42   | >PTPN11-G6 IQNTADYYDL | 58   | 16   |
| >PTPN11-G6 IQNTGDYY   | 73   | >PTPN11-G6 IQNTADYY   | 89   | 16   |
| >PTPN11-G6 IQNTGDYYDL | 124  | >PTPN11-G6 IQNTADYYDL | 125  | 1    |
| >PTPN11-G6 IQNTGDYY   | 245  | >PTPN11-G6 IQNTADYY   | 895  | 650  |
| >PTPN11-G6 IQNTGDYY   | 27   | >PTPN11-G6 IQNTADYY   | 24   | 3    |
| >PTPN11-G6 IQNTGDYYDL | 132  | >PTPN11-G6 IQNTADYYDL | 76   | 56   |
| >PTPN11-G6 IQNTGDYYDL | 50   | >PTPN11-G6 IQNTADYYDL | 37   | 13   |
| >PTPN11-G6 KIQNTGDYYC | 452  | >PTPN11-G6 KIQNTADYYD | 364  | 88   |
| >PTPN11-G6 KIQNTGDYY  | 212  | >PTPN11-G6 KIQNTADYY  | 166  | 46   |
| >PTPN11-G6 KIQNTGDY   | 30   | >PTPN11-G6 KIQNTADY   | 33   | 3    |
| >PTPN11-G6 KIQNTGDYY  | 32   | >PTPN11-G6 KIQNTADYY  | 28   | 4    |
| >PTPN11-G6 KIQNTGDY   | 2468 | >PTPN11-G6 KIQNTADY   | 339  | 2129 |
| >PTPN11-G6 KIQNTGDYYC | 219  | >PTPN11-G6 KIQNTADYYD | 112  | 107  |
| >PTPN11-G6 KIQNTGDY   | 113  | >PTPN11-G6 KIQNTADY   | 171  | 58   |
| >PTPN11-G6 KIQNTGDYY  | 332  | >PTPN11-G6 KIQNTADYY  | 168  | 164  |
| >PTPN11-G6 KIQNTGDY   | 453  | >PTPN11-G6 KIQNTADY   | 364  | 89   |
| >PTPN11-G6 KIQNTGDYY  | 229  | >PTPN11-G6 KIQNTADYY  | 552  | 323  |
| >PTPN11-G6 KIQNTGDYY  | 135  | >PTPN11-G6 KIQNTADYY  | 145  | 10   |
| >PTPN11-G6 KIQNTGDYY  | 478  | >PTPN11-G6 KIQNTADYY  | 278  | 200  |
| >PTPN11-G6 IKIQNTGDY  | 416  | >PTPN11-G6 IKIQNTADY  | 358  | 58   |
| >PTPN11-G6 IKIQNTGDY  | 165  | >PTPN11-G6 IKIQNTADY  | 251  | 86   |
| >PTPN11-G6 IKIQNTGDYY | 248  | >PTPN11-G6 IKIQNTADYY | 288  | 40   |
| >PTPN11-G6 IKIQNTGDY  | 37   | >PTPN11-G6 IKIQNTADY  | 7    | 30   |
| >PTPN11-G6 IKIQNTGDYY | 13   | >PTPN11-G6 IKIQNTADYY | 9    | 4    |
| >PTPN11-G6 HIKIQNTGDY | 714  | >PTPN11-G6 HIKIQNTADY | 387  | 327  |
| >PTPN11-G6 HIKIQNTG   | 617  | >PTPN11-G6 HIKIQNTA   | 39   | 578  |
| >PTPN11-G6 HIKIQNTGDY | 472  | >PTPN11-G6 HIKIQNTADY | 377  | 95   |
| >PTPN11-G6 HIKIQNTGDY | 257  | >PTPN11-G6 HIKIQNTADY | 386  | 129  |
| >PTPN11-G6 HIKIQNTGDY | 197  | >PTPN11-G6 HIKIQNTADY | 175  | 22   |
| >PTPN11-G6 HIKIQNTGDY | 440  | >PTPN11-G6 HIKIQNTADY | 1079 | 639  |
| >PTPN11-G6 HIKIQNTGDY | 654  | >PTPN11-G6 HIKIQNTADY | 301  | 353  |
| >PTPN11-G6 HIKIQNTGDY | 402  | >PTPN11-G6 HIKIQNTADY | 528  | 126  |
| >PTPN11-G6 HIKIQNTGDY | 273  | >PTPN11-G6 HIKIQNTADY | 291  | 18   |
| >PTPN11-G6 HIKIQNTGDY | 297  | >PTPN11-G6 HIKIQNTADY | 476  | 179  |
| >PTPN11-G6 HIKIQNTGDY | 564  | >PTPN11-G6 HIKIQNTADY | 345  | 219  |

|                       |       |                        |      |       |
|-----------------------|-------|------------------------|------|-------|
| >PTPN11-G6ITHIKIQTGD' | 281   | >PTPN11-G6ITHIKIQTAD'  | 257  | 24    |
| >PTPN11-G6ITHIKIQTGD  | 247   | >PTPN11-G6ITHIKIQTAD'  | 316  | 69    |
| >PTPN11-G6ITHIKIQTGD' | 301   | >PTPN11-G6ITHIKIQTAD'  | 627  | 326   |
| >PTPN11-G6ITHIKIQTG   | 939   | >PTPN11-G6ITHIKIQNTA   | 450  | 489   |
| >PTPN11-G6IVTHIKIQTG  | 3415  | >PTPN11-G6IVTHIKIQNTA  | 340  | 3075  |
| >PTPN11-G6ITGDYYDLY   | 200   | >PTPN11-G6ITRDYYDLY    | 1265 | 1065  |
| >PTPN11-G6IAVTHIKIQTG | 20030 | >PTPN11-G6IAVTHIKIQNTI | 52   | 19978 |
| >PTPN11-G6IAVTHIKIQTG | 31986 | >PTPN11-G6IAVTHIKIQNTI | 34   | 31952 |
| >PTPN11-G6INTGDYYDLY  | 33    | >PTPN11-G6INTRDYYDLY   | 450  | 417   |
| >PTPN11-G6INTGDYYDLY  | 1027  | >PTPN11-G6INTRDYYDLY   | 78   | 949   |
| >PTPN11-G6INTGDYYDLY  | 429   | >PTPN11-G6INTRDYYDLY   | 254  | 175   |
| >PTPN11-G6INTGDYYDLY  | 40    | >PTPN11-G6INTRDYYDLY   | 69   | 29    |
| >PTPN11-G6INTGDYYDLY  | 213   | >PTPN11-G6INTRDYYDLY   | 377  | 164   |
| >PTPN11-G6INTGDYYDL   | 482   | >PTPN11-G6INTRDYYDL    | 1659 | 1177  |
| >PTPN11-G6INTGDYYDL   | 425   | >PTPN11-G6INTRDYYDL    | 2724 | 2299  |
| >PTPN11-G6INTGDYYDLY  | 255   | >PTPN11-G6INTRDYYDLY   | 1984 | 1729  |
| >PTPN11-G6INTGDYYDLY  | 5232  | >PTPN11-G6INTRDYYDLY   | 227  | 5005  |
| >PTPN11-G6INTGDYYDLY  | 249   | >PTPN11-G6INTRDYYDLY   | 16   | 233   |
| >PTPN11-G6IQNTGDYY    | 329   | >PTPN11-G6IQNTRDYY     | 952  | 623   |
| >PTPN11-G6IQNTGDYYDL  | 132   | >PTPN11-G6IQNTRDYYDL   | 286  | 154   |
| >PTPN11-G6IQNTGDYY    | 23    | >PTPN11-G6IQNTRDYY     | 34   | 11    |
| >PTPN11-G6IQNTGDYYDL  | 42    | >PTPN11-G6IQNTRDYYDL   | 87   | 45    |
| >PTPN11-G6IQNTGDYY    | 73    | >PTPN11-G6IQNTRDYY     | 116  | 43    |
| >PTPN11-G6IQNTGDYYDL  | 124   | >PTPN11-G6IQNTRDYYDL   | 186  | 62    |
| >PTPN11-G6IQNTGDYY    | 245   | >PTPN11-G6IQNTRDYY     | 1309 | 1064  |
| >PTPN11-G6IQNTGDYY    | 27    | >PTPN11-G6IQNTRDYY     | 34   | 7     |
| >PTPN11-G6IQNTGDYYDL  | 132   | >PTPN11-G6IQNTRDYYDL   | 117  | 15    |
| >PTPN11-G6IQNTGDYYDL  | 50    | >PTPN11-G6IQNTRDYYDL   | 54   | 4     |
| >PTPN11-G6KIQNTGDYYC  | 452   | >PTPN11-G6KIQNTRDYYD   | 1088 | 636   |
| >PTPN11-G6KIQNTGDYY   | 212   | >PTPN11-G6KIQNTRDYY    | 142  | 70    |
| >PTPN11-G6KIQNTGDY    | 30    | >PTPN11-G6KIQNTRDY     | 71   | 41    |
| >PTPN11-G6KIQNTGDYY   | 32    | >PTPN11-G6KIQNTRDYY    | 16   | 16    |
| >PTPN11-G6KIQNTGDYYC  | 219   | >PTPN11-G6KIQNTRDYYD   | 192  | 27    |
| >PTPN11-G6KIQNTGDY    | 113   | >PTPN11-G6KIQNTRDY     | 667  | 554   |
| >PTPN11-G6KIQNTGDYY   | 332   | >PTPN11-G6KIQNTRDYY    | 1782 | 1450  |
| >PTPN11-G6KIQNTGDY    | 453   | >PTPN11-G6KIQNTRDY     | 884  | 431   |
| >PTPN11-G6KIQNTGDYY   | 229   | >PTPN11-G6KIQNTRDYY    | 631  | 402   |
| >PTPN11-G6KIQNTGDYY   | 135   | >PTPN11-G6KIQNTRDYY    | 384  | 249   |
| >PTPN11-G6KIQNTGDYY   | 478   | >PTPN11-G6KIQNTRDYY    | 384  | 94    |
| >PTPN11-G6IKIQNTGDY   | 416   | >PTPN11-G6IKIQNTRDY    | 1606 | 1190  |
| >PTPN11-G6IKIQNTGDY   | 165   | >PTPN11-G6IKIQNTRDY    | 1345 | 1180  |
| >PTPN11-G6IKIQNTGDYY  | 248   | >PTPN11-G6IKIQNTRDYY   | 453  | 205   |
| >PTPN11-G6IKIQNTGDY   | 37    | >PTPN11-G6IKIQNTRDY    | 8    | 29    |

|                       |       |                      |      |       |
|-----------------------|-------|----------------------|------|-------|
| >PTPN11-G6IKIQNTGDYY  | 13    | >PTPN11-G6IKIQNTRDYY | 11   | 2     |
| >PTPN11-G6HIKIQNTG    | 617   | >PTPN11-G6HIKIQNTR   | 196  | 421   |
| >PTPN11-G6HIKIQNTGDY  | 472   | >PTPN11-G6HIKIQNTRDY | 191  | 281   |
| >PTPN11-G6HIKIQNTGDY  | 257   | >PTPN11-G6HIKIQNTRDY | 1073 | 816   |
| >PTPN11-G6HIKIQNTGDY  | 197   | >PTPN11-G6HIKIQNTRDY | 137  | 60    |
| >PTPN11-G6HIKIQNTG    | 19103 | >PTPN11-G6HIKIQNTR   | 19   | 19084 |
| >PTPN11-G6HIKIQNTG    | 29428 | >PTPN11-G6HIKIQNTR   | 73   | 29355 |
| >PTPN11-G6HIKIQNTG    | 33873 | >PTPN11-G6HIKIQNTR   | 62   | 33811 |
| >PTPN11-G6HIKIQNTGDY  | 440   | >PTPN11-G6HIKIQNTRDY | 1503 | 1063  |
| >PTPN11-G6HIKIQNTGDY  | 402   | >PTPN11-G6HIKIQNTRDY | 701  | 299   |
| >PTPN11-G6HIKIQNTGDY  | 273   | >PTPN11-G6HIKIQNTRDY | 416  | 143   |
| >PTPN11-G6HIKIQNTGDY  | 297   | >PTPN11-G6HIKIQNTRDY | 819  | 522   |
| >PTPN11-G6HIKIQNTGDY  | 564   | >PTPN11-G6HIKIQNTRDY | 407  | 157   |
| >PTPN11-G6HIKIQNTG    | 31889 | >PTPN11-G6HIKIQNTR   | 101  | 31788 |
| >PTPN11-G6THIKIQNTGD  | 281   | >PTPN11-G6THIKIQNTRD | 687  | 406   |
| >PTPN11-G6THIKIQNTGD  | 247   | >PTPN11-G6THIKIQNTRD | 863  | 616   |
| >PTPN11-G6THIKIQNTG   | 35130 | >PTPN11-G6THIKIQNTR  | 137  | 34993 |
| >PTPN11-G6THIKIQNTGD  | 301   | >PTPN11-G6THIKIQNTRD | 933  | 632   |
| >PTPN11-G6VTHIKIQNTG  | 28710 | >PTPN11-G6VTHIKIQNTR | 160  | 28550 |
| >PTPN11-G6VTHIKIQNTG  | 35021 | >PTPN11-G6VTHIKIQNTR | 108  | 34913 |
| >PTPN11-G6TGDYYDLY    | 200   | >PTPN11-G6TVDYYDLY   | 17   | 183   |
| >PTPN11-G6TGDYYDLY    | 1135  | >PTPN11-G6TVDYYDLY   | 73   | 1062  |
| >PTPN11-G6TGDYYDLY    | 3078  | >PTPN11-G6TVDYYDLY   | 96   | 2982  |
| >PTPN11-G6TGDYYDLY    | 1760  | >PTPN11-G6TVDYYDLY   | 386  | 1374  |
| >PTPN11-G6AVTHIKIQNTG | 20143 | >PTPN11-G6AVTHIKIQNT | 312  | 19831 |
| >PTPN11-G6AVTHIKIQNTG | 21538 | >PTPN11-G6AVTHIKIQNT | 414  | 21124 |
| >PTPN11-G6AVTHIKIQNTG | 23755 | >PTPN11-G6AVTHIKIQNT | 226  | 23529 |
| >PTPN11-G6AVTHIKIQNTG | 26736 | >PTPN11-G6AVTHIKIQNT | 312  | 26424 |
| >PTPN11-G6AVTHIKIQNTG | 31882 | >PTPN11-G6AVTHIKIQNT | 20   | 31862 |
| >PTPN11-G6AVTHIKIQNTG | 10778 | >PTPN11-G6AVTHIKIQNT | 52   | 10726 |
| >PTPN11-G6NTGDYYDLY   | 33    | >PTPN11-G6NTVDYYDLY  | 180  | 147   |
| >PTPN11-G6NTGDYYDLY   | 896   | >PTPN11-G6NTVDYYDLY  | 310  | 586   |
| >PTPN11-G6NTGDYYDLY   | 1027  | >PTPN11-G6NTVDYYDLY  | 11   | 1016  |
| >PTPN11-G6NTGDYYDL    | 6994  | >PTPN11-G6NTVDYYDL   | 342  | 6652  |
| >PTPN11-G6NTGDYYDLY   | 429   | >PTPN11-G6NTVDYYDLY  | 38   | 391   |
| >PTPN11-G6NTGDYYDLY   | 40    | >PTPN11-G6NTVDYYDLY  | 24   | 16    |
| >PTPN11-G6NTGDYYDLY   | 213   | >PTPN11-G6NTVDYYDLY  | 30   | 183   |
| >PTPN11-G6NTGDYYDL    | 482   | >PTPN11-G6NTVDYYDL   | 42   | 440   |
| >PTPN11-G6NTGDYYDL    | 425   | >PTPN11-G6NTVDYYDL   | 137  | 288   |
| >PTPN11-G6NTGDYYDLY   | 255   | >PTPN11-G6NTVDYYDLY  | 1078 | 823   |
| >PTPN11-G6NTGDYYDLY   | 5232  | >PTPN11-G6NTVDYYDLY  | 306  | 4926  |
| >PTPN11-G6NTGDYYDLY   | 249   | >PTPN11-G6NTVDYYDLY  | 56   | 193   |
| >PTPN11-G6IQNTGDYY    | 329   | >PTPN11-G6IQNTVDYY   | 761  | 432   |



|                      |       |                       |      |       |
|----------------------|-------|-----------------------|------|-------|
| >PTPN11-G6IQNTGDYYDL | 132   | >PTPN11-G6IQNTVDYYDL  | 223  | 91    |
| >PTPN11-G6IQNTGDYY   | 23    | >PTPN11-G6IQNTVDYY    | 31   | 8     |
| >PTPN11-G6IQNTGDYYDL | 42    | >PTPN11-G6IQNTVDYYDL  | 52   | 10    |
| >PTPN11-G6IQNTGDYY   | 73    | >PTPN11-G6IQNTVDYY    | 86   | 13    |
| >PTPN11-G6IQNTGDYYDL | 124   | >PTPN11-G6IQNTVDYYDL  | 167  | 43    |
| >PTPN11-G6IQNTGDYY   | 245   | >PTPN11-G6IQNTVDYY    | 1369 | 1124  |
| >PTPN11-G6IQNTGDYY   | 27    | >PTPN11-G6IQNTVDYY    | 28   | 1     |
| >PTPN11-G6IQNTGDYYDL | 132   | >PTPN11-G6IQNTVDYYDL  | 112  | 20    |
| >PTPN11-G6IQNTGDYYDL | 50    | >PTPN11-G6IQNTVDYYDL  | 52   | 2     |
| >PTPN11-G6IKIQTGDYYC | 452   | >PTPN11-G6IKIQTVDYYD  | 241  | 211   |
| >PTPN11-G6IKIQTGDYY  | 212   | >PTPN11-G6IKIQTVDYY   | 116  | 96    |
| >PTPN11-G6IKIQTGDYY  | 4971  | >PTPN11-G6IKIQTVDYY   | 418  | 4553  |
| >PTPN11-G6IKIQTGDY   | 30    | >PTPN11-G6IKIQTVDY    | 91   | 61    |
| >PTPN11-G6IKIQTGDYY  | 32    | >PTPN11-G6IKIQTVDYY   | 33   | 1     |
| >PTPN11-G6IKIQTGDY   | 2468  | >PTPN11-G6IKIQTVDY    | 98   | 2370  |
| >PTPN11-G6IKIQTGDYYC | 219   | >PTPN11-G6IKIQTVDYYD  | 122  | 97    |
| >PTPN11-G6IKIQTGDY   | 113   | >PTPN11-G6IKIQTVDY    | 211  | 98    |
| >PTPN11-G6IKIQTGDYY  | 332   | >PTPN11-G6IKIQTVDYY   | 304  | 28    |
| >PTPN11-G6IKIQTGDY   | 453   | >PTPN11-G6IKIQTVDY    | 350  | 103   |
| >PTPN11-G6IKIQTGDYY  | 229   | >PTPN11-G6IKIQTVDYY   | 211  | 18    |
| >PTPN11-G6IKIQTGDYY  | 2193  | >PTPN11-G6IKIQTVDYY   | 298  | 1895  |
| >PTPN11-G6IKIQTGDYY  | 135   | >PTPN11-G6IKIQTVDYY   | 403  | 268   |
| >PTPN11-G6IKIQTGDYY  | 478   | >PTPN11-G6IKIQTVDYY   | 399  | 79    |
| >PTPN11-G6IKIQTGDY   | 416   | >PTPN11-G6IKIQTVDY    | 523  | 107   |
| >PTPN11-G6IKIQTGDY   | 165   | >PTPN11-G6IKIQTVDY    | 1211 | 1046  |
| >PTPN11-G6IKIQTGDYY  | 248   | >PTPN11-G6IKIQTVDYY   | 382  | 134   |
| >PTPN11-G6IKIQTGDY   | 37    | >PTPN11-G6IKIQTVDY    | 4    | 33    |
| >PTPN11-G6IKIQTGDYY  | 13    | >PTPN11-G6IKIQTVDYY   | 7    | 6     |
| >PTPN11-G6HIKIQTG    | 21343 | >PTPN11-G6HIKIQNTV    | 234  | 21109 |
| >PTPN11-G6HIKIQTG    | 34463 | >PTPN11-G6HIKIQNTV    | 112  | 34351 |
| >PTPN11-G6HIKIQTG    | 617   | >PTPN11-G6HIKIQNTV    | 69   | 548   |
| >PTPN11-G6HIKIQTGDY  | 472   | >PTPN11-G6HIKIQNTVDY' | 342  | 130   |
| >PTPN11-G6HIKIQTGDY  | 257   | >PTPN11-G6HIKIQNTVDY  | 1094 | 837   |
| >PTPN11-G6HIKIQTGDY  | 197   | >PTPN11-G6HIKIQNTVDY' | 201  | 4     |
| >PTPN11-G6HIKIQTGDY  | 440   | >PTPN11-G6HIKIQNTVDY  | 1084 | 644   |
| >PTPN11-G6HIKIQTGDY  | 654   | >PTPN11-G6HIKIQNTVDY  | 456  | 198   |
| >PTPN11-G6HIKIQTGDY  | 402   | >PTPN11-G6HIKIQNTVDY' | 328  | 74    |
| >PTPN11-G6HIKIQTGDY  | 273   | >PTPN11-G6HIKIQNTVDY  | 448  | 175   |
| >PTPN11-G6HIKIQTGDY  | 297   | >PTPN11-G6HIKIQNTVDY' | 636  | 339   |
| >PTPN11-G6THIKIQTG   | 21810 | >PTPN11-G6THIKIQNTV   | 249  | 21561 |
| >PTPN11-G6THIKIQTGD  | 281   | >PTPN11-G6THIKIQNTVD' | 327  | 46    |
| >PTPN11-G6THIKIQTGD  | 247   | >PTPN11-G6THIKIQNTVD' | 773  | 526   |
| >PTPN11-G6THIKIQTGD  | 301   | >PTPN11-G6THIKIQNTVD' | 621  | 320   |

|                       |       |                       |      |       |
|-----------------------|-------|-----------------------|------|-------|
| >PTPN11-G6ITHIKIQTGD' | 1591  | >PTPN11-G6ITHIKIQTVD' | 357  | 1234  |
| >PTPN11-G6ITHIKIQTG   | 939   | >PTPN11-G6ITHIKIQNTV  | 186  | 753   |
| >PTPN11-G6ITHIKIQTG   | 9151  | >PTPN11-G6ITHIKIQNTV  | 169  | 8982  |
| >PTPN11-G6IVTHIKIQTG  | 23736 | >PTPN11-G6IVTHIKIQNTV | 109  | 23627 |
| >PTPN11-G6IVTHIKIQTG  | 35347 | >PTPN11-G6IVTHIKIQNTV | 163  | 35184 |
| >PTPN11-G6IVTHIKIQTG  | 6959  | >PTPN11-G6IVTHIKIQNTV | 414  | 6545  |
| >PTPN11-G6IVTHIKIQTG  | 9637  | >PTPN11-G6IVTHIKIQNTV | 159  | 9478  |
| >PTPN11-H5:HIKIQTGDY  | 472   | >PTPN11-H5:QIKIQTGDY  | 4454 | 3982  |
| >PTPN11-H5:HIKIQTGDY  | 257   | >PTPN11-H5:QIKIQTGDY  | 373  | 116   |
| >PTPN11-H5:HIKIQTGDY  | 197   | >PTPN11-H5:QIKIQTGDY  | 294  | 97    |
| >PTPN11-H5:HIKIQTGDY  | 440   | >PTPN11-H5:QIKIQTGDY  | 1023 | 583   |
| >PTPN11-H5:HIKIQTGDY  | 402   | >PTPN11-H5:QIKIQTGDY  | 666  | 264   |
| >PTPN11-H5:HIKIQTGDY  | 273   | >PTPN11-H5:QIKIQTGDY  | 455  | 182   |
| >PTPN11-H5:HIKIQTGDY  | 297   | >PTPN11-H5:QIKIQTGDY  | 521  | 224   |
| >PTPN11-H5:THIKIQTGD' | 281   | >PTPN11-H5:TQIKIQTGD  | 330  | 49    |
| >PTPN11-H5:THIKIQTGD  | 247   | >PTPN11-H5:TQIKIQTGD  | 72   | 175   |
| >PTPN11-H5:THIKIQTGD' | 301   | >PTPN11-H5:TQIKIQTGD  | 180  | 121   |
| >PTPN11-H5:THIKIQTGD  | 16747 | >PTPN11-H5:TQIKIQTGD  | 140  | 16607 |
| >PTPN11-H5:THIKIQTGD' | 5266  | >PTPN11-H5:TQIKIQTGD  | 330  | 4936  |
| >PTPN11-H5:THIKIQTGD  | 1591  | >PTPN11-H5:TQIKIQTGD  | 160  | 1431  |
| >PTPN11-H5:RNGAVTHI   | 270   | >PTPN11-H5:RNGAVTQI   | 210  | 60    |
| >PTPN11-H5:RRNGAVTHI  | 407   | >PTPN11-H5:RRNGAVTQI  | 645  | 238   |
| >PTPN11-H5:RRNGAVTH   | 75    | >PTPN11-H5:RRNGAVTQ   | 345  | 270   |
| >PTPN11-H5:RRNGAVTHI  | 28    | >PTPN11-H5:RRNGAVTQI  | 29   | 1     |
| >PTPN11-H5:RRNGAVTHIK | 19    | >PTPN11-H5:RRNGAVTQIk | 18   | 1     |
| >PTPN11-H5:RRNGAVTHIK | 31    | >PTPN11-H5:RRNGAVTQIk | 23   | 8     |
| >PTPN11-H5:RRNGAVTH   | 558   | >PTPN11-H5:RRNGAVTQ   | 283  | 275   |
| >PTPN11-H5:RRNGAVTHI  | 238   | >PTPN11-H5:RRNGAVTQI  | 195  | 43    |
| >PTPN11-H5:RRNGAVTHIK | 134   | >PTPN11-H5:RRNGAVTQIk | 128  | 6     |
| >PTPN11-H5:RRNGAVTHIK | 158   | >PTPN11-H5:RRNGAVTQIk | 155  | 3     |
| >PTPN11-H5:RRNGAVTHI  | 164   | >PTPN11-H5:RRNGAVTQI  | 309  | 145   |
| >PTPN11-H5:RRNGAVTHIK | 89    | >PTPN11-H5:RRNGAVTQIk | 70   | 19    |
| >PTPN11-H5:RRNGAVTHIK | 146   | >PTPN11-H5:RRNGAVTQIk | 185  | 39    |
| >PTPN11-H5:VRRNGAVTH  | 471   | >PTPN11-H5:VRRNGAVTQ  | 435  | 36    |
| >PTPN11-H5:VRRNGAVTH  | 185   | >PTPN11-H5:VRRNGAVTQ  | 263  | 78    |
| >PTPN11-H5:VRRNGAVTH  | 418   | >PTPN11-H5:VRRNGAVTQ  | 808  | 390   |
| >PTPN11-H5:VRRNGAVTH  | 229   | >PTPN11-H5:VRRNGAVTQ  | 429  | 200   |
| >PTPN11-H5:SVRRNGAVTI | 150   | >PTPN11-H5:SVRRNGAVT( | 45   | 105   |
| >PTPN11-H5:SVRRNGAVTI | 8     | >PTPN11-H5:SVRRNGAVT( | 12   | 4     |
| >PTPN11-H5:SVRRNGAVTI | 903   | >PTPN11-H5:SVRRNGAVT( | 437  | 466   |
| >PTPN11-I28ILPFDHTRV  | 659   | >PTPN11-I28MLPFDHTRV  | 166  | 493   |
| >PTPN11-I28ILPFDHTRV  | 53    | >PTPN11-I28MLPFDHTRV  | 12   | 41    |
| >PTPN11-I28ILPFDHTRVV | 364   | >PTPN11-I28MLPFDHTRV' | 186  | 178   |

|                         |      |                        |     |      |
|-------------------------|------|------------------------|-----|------|
| >PTPN11-I28 ILPFDHTRVVI | 236  | >PTPN11-I28 MLPFDHTRV' | 56  | 180  |
| >PTPN11-I28 ILPFDHTRV   | 13   | >PTPN11-I28 MLPFDHTRV  | 7   | 6    |
| >PTPN11-I28 ILPFDHTRVV  | 183  | >PTPN11-I28 MLPFDHTRV' | 109 | 74   |
| >PTPN11-I28 ILPFDHTRVVI | 615  | >PTPN11-I28 MLPFDHTRV' | 160 | 455  |
| >PTPN11-I28 ILPFDHTRV   | 597  | >PTPN11-I28 MLPFDHTRV  | 189 | 408  |
| >PTPN11-I28 ILPFDHTRV   | 10   | >PTPN11-I28 MLPFDHTRV  | 6   | 4    |
| >PTPN11-I28 ILPFDHTRVV  | 13   | >PTPN11-I28 MLPFDHTRV' | 7   | 6    |
| >PTPN11-I28 ILPFDHTRVVI | 305  | >PTPN11-I28 MLPFDHTRV' | 135 | 170  |
| >PTPN11-I28 ILPFDHTRV   | 561  | >PTPN11-I28 MLPFDHTRV  | 277 | 284  |
| >PTPN11-I28 ILPFDHTRVV  | 195  | >PTPN11-I28 MLPFDHTRV' | 87  | 108  |
| >PTPN11-I28 ILPFDHTRV   | 79   | >PTPN11-I28 MLPFDHTRV  | 46  | 33   |
| >PTPN11-I28 ILPFDHTRVV  | 170  | >PTPN11-I28 MLPFDHTRV' | 91  | 79   |
| >PTPN11-I28 ILPFDHTRV   | 81   | >PTPN11-I28 MLPFDHTRV  | 63  | 18   |
| >PTPN11-I28 ILPFDHTRVV  | 91   | >PTPN11-I28 MLPFDHTRV' | 57  | 34   |
| >PTPN11-I28 ILPFDHTRV   | 3    | >PTPN11-I28 MLPFDHTRV  | 2   | 1    |
| >PTPN11-I28 ILPFDHTRVV  | 7    | >PTPN11-I28 MLPFDHTRV' | 4   | 3    |
| >PTPN11-I28 ILPFDHTRVVI | 21   | >PTPN11-I28 MLPFDHTRV' | 9   | 12   |
| >PTPN11-I28 ILPFDHTR    | 925  | >PTPN11-I28 MLPFDHTR   | 160 | 765  |
| >PTPN11-I28 ILPFDHTR    | 989  | >PTPN11-I28 MLPFDHTR   | 406 | 583  |
| >PTPN11-I28 ILPFDHTR    | 299  | >PTPN11-I28 MLPFDHTR   | 35  | 264  |
| >PTPN11-I28 ILPFDHTRV   | 2413 | >PTPN11-I28 MLPFDHTRV  | 79  | 2334 |
| >PTPN11-I28 ILPFDHTRVVI | 256  | >PTPN11-I28 MLPFDHTRV' | 382 | 126  |
| >PTPN11-I28 ILPFDHTR    | 197  | >PTPN11-I28 MLPFDHTR   | 145 | 52   |
| >PTPN11-I28 NILPFDHTRV  | 303  | >PTPN11-I28 NMLPFDHTR' | 38  | 265  |
| >PTPN11-I28 NILPFDHTRV' | 1241 | >PTPN11-I28 NMLPFDHTR' | 145 | 1096 |
| >PTPN11-I28 NILPFDHTRV  | 584  | >PTPN11-I28 NMLPFDHTR' | 82  | 502  |
| >PTPN11-I28 NILPFDHTRV' | 1029 | >PTPN11-I28 NMLPFDHTR' | 165 | 864  |
| >PTPN11-I28 NILPFDHTRV  | 205  | >PTPN11-I28 NMLPFDHTR' | 55  | 150  |
| >PTPN11-I28 NILPFDHTRV' | 521  | >PTPN11-I28 NMLPFDHTR' | 53  | 468  |
| >PTPN11-I28 NILPFDHT    | 989  | >PTPN11-I28 NMLPFDHT   | 251 | 738  |
| >PTPN11-I28 NILPFDHTRV  | 213  | >PTPN11-I28 NMLPFDHTR' | 123 | 90   |
| >PTPN11-I28 NILPFDHTRV' | 201  | >PTPN11-I28 NMLPFDHTR' | 92  | 109  |
| >PTPN11-I28 NILPFDHT    | 8862 | >PTPN11-I28 NMLPFDHT   | 331 | 8531 |
| >PTPN11-I28 NILPFDHTRV  | 41   | >PTPN11-I28 NMLPFDHTR' | 4   | 37   |
| >PTPN11-I28 NILPFDHTRV' | 51   | >PTPN11-I28 NMLPFDHTR' | 4   | 47   |
| >PTPN11-I28 NILPFDHTRV  | 516  | >PTPN11-I28 NMLPFDHTR' | 12  | 504  |
| >PTPN11-I28 NILPFDHTRV' | 210  | >PTPN11-I28 NMLPFDHTR' | 5   | 205  |
| >PTPN11-I28 NILPFDHTRV  | 177  | >PTPN11-I28 NMLPFDHTR' | 11  | 166  |
| >PTPN11-I28 NILPFDHTRV' | 395  | >PTPN11-I28 NMLPFDHTR' | 20  | 375  |
| >PTPN11-I28 NILPFDHTRV  | 183  | >PTPN11-I28 NMLPFDHTR' | 7   | 176  |
| >PTPN11-I28 NILPFDHTRV' | 185  | >PTPN11-I28 NMLPFDHTR' | 8   | 177  |
| >PTPN11-I28 NILPFDHTRV  | 15   | >PTPN11-I28 NMLPFDHTR' | 3   | 12   |
| >PTPN11-I28 NILPFDHTRV' | 82   | >PTPN11-I28 NMLPFDHTR' | 7   | 75   |

|                         |     |                        |      |      |
|-------------------------|-----|------------------------|------|------|
| >PTPN11-I28 NILPFDHTR   | 153 | >PTPN11-I28 NMLPFDHTR  | 26   | 127  |
| >PTPN11-I28 NILPFDHTR   | 83  | >PTPN11-I28 NMLPFDHTR  | 37   | 46   |
| >PTPN11-I28 NILPFDHTR   | 27  | >PTPN11-I28 NMLPFDHTR  | 58   | 31   |
| >PTPN11-I28 NILPFDHTRV' | 413 | >PTPN11-I28 NMLPFDHTR' | 1967 | 1554 |
| >PTPN11-I28 NILPFDHTRV  | 30  | >PTPN11-I28 NMLPFDHTR' | 70   | 40   |
| >PTPN11-I28 NILPFDHTRV' | 59  | >PTPN11-I28 NMLPFDHTR' | 140  | 81   |
| >PTPN11-I28 NILPFDHTR   | 24  | >PTPN11-I28 NMLPFDHTR  | 19   | 5    |
| >PTPN11-I28 KNILPFDHTR  | 129 | >PTPN11-I28 KNMLPFDHT  | 53   | 76   |
| >PTPN11-I28 KNILPFDHTR  | 48  | >PTPN11-I28 KNMLPFDHT  | 39   | 9    |
| >PTPN11-I28 YKNILPFDHTI | 545 | >PTPN11-I28 YKNMLPFDH' | 390  | 155  |
| >PTPN11-I28 YKNILPFDHTI | 953 | >PTPN11-I28 YKNMLPFDH' | 385  | 568  |
| >PTPN11-I28 YKNILPFDHTI | 390 | >PTPN11-I28 YKNMLPFDH' | 376  | 14   |
| >PTPN11-I28 RYKNILPF    | 33  | >PTPN11-I28 RYKNMLPF   | 46   | 13   |
| >PTPN11-I28 RYKNILPF    | 53  | >PTPN11-I28 RYKNMLPF   | 65   | 12   |
| >PTPN11-I28 RYKNILPF    | 5   | >PTPN11-I28 RYKNMLPF   | 6    | 1    |
| >PTPN11-I28 RYKNILPFDH' | 397 | >PTPN11-I28 RYKNMLPFDI | 530  | 133  |
| >PTPN11-I28 RYKNILPF    | 40  | >PTPN11-I28 RYKNMLPF   | 33   | 7    |
| >PTPN11-I28 RYKNILPFD   | 75  | >PTPN11-I28 RYKNMLPFD  | 58   | 17   |
| >PTPN11-I28 RYKNILPFDH  | 498 | >PTPN11-I28 RYKNMLPFDI | 397  | 101  |
| >PTPN11-I28 RYKNILPFDH' | 290 | >PTPN11-I28 RYKNMLPFDI | 258  | 32   |
| >PTPN11-I28 RYKNILPF    | 157 | >PTPN11-I28 RYKNMLPF   | 277  | 120  |
| >PTPN11-I28 RYKNILPF    | 106 | >PTPN11-I28 RYKNMLPF   | 119  | 13   |
| >PTPN11-I28 RYKNILPF    | 479 | >PTPN11-I28 RYKNMLPF   | 439  | 40   |
| >PTPN11-I28 NRYKNILPF   | 9   | >PTPN11-I28 NRYKNMLPF  | 13   | 4    |
| >PTPN11-I28 NRYKNILPF   | 38  | >PTPN11-I28 NRYKNMLPF  | 86   | 48   |
| >PTPN11-I28 NRYKNILPF   | 352 | >PTPN11-I28 NRYKNMLPF  | 270  | 82   |
| >PTPN11-I28 NRYKNILP    | 374 | >PTPN11-I28 NRYKNMLP   | 307  | 67   |
| >PTPN11-I28 NRYKNILPFD  | 289 | >PTPN11-I28 NRYKNMLPFI | 321  | 32   |
| >PTPN11-I28 NRYKNILPF   | 136 | >PTPN11-I28 NRYKNMLPF  | 251  | 115  |
| >PTPN11-I28 NRYKNILPF   | 31  | >PTPN11-I28 NRYKNMLPF  | 87   | 56   |
| >PTPN11-I28 KNRYKNIL    | 105 | >PTPN11-I28 KNRYKNML   | 126  | 21   |
| >PTPN11-I28 KNRYKNILP   | 224 | >PTPN11-I28 KNRYKNMLP  | 147  | 77   |
| >PTPN11-I28 KNRYKNILPF  | 112 | >PTPN11-I28 KNRYKNMLP  | 95   | 17   |
| >PTPN11-I28 KNRYKNILPFI | 231 | >PTPN11-I28 KNRYKNMLP  | 205  | 26   |
| >PTPN11-I28 KNRYKNILPF  | 300 | >PTPN11-I28 KNRYKNMLP  | 287  | 13   |
| >PTPN11-I28 KNRYKNILPF  | 27  | >PTPN11-I28 KNRYKNMLP  | 25   | 2    |
| >PTPN11-I28 KNRYKNILPF  | 861 | >PTPN11-I28 KNRYKNMLP  | 487  | 374  |
| >PTPN11-I28 NKNRYKNI    | 654 | >PTPN11-I28 NKNRYKNM   | 212  | 442  |
| >PTPN11-I28 NKNRYKNILP  | 9   | >PTPN11-I28 NKNRYKNML  | 11   | 2    |
| >PTPN11-I28 NKNRYKNIL   | 300 | >PTPN11-I28 NKNRYKNML  | 1095 | 795  |
| >PTPN11-I28 KNKNRYKNI   | 87  | >PTPN11-I28 KNKNRYKNM  | 267  | 180  |
| >PTPN11-I28 KNKNRYKNIL  | 442 | >PTPN11-I28 KNKNRYKNM  | 549  | 107  |
| >PTPN11-I28 KNKNRYKNI   | 470 | >PTPN11-I28 KNKNRYKNM  | 422  | 48   |

|                        |      |                        |      |      |
|------------------------|------|------------------------|------|------|
| >PTPN11-I28 NKNKNRYKN  | 515  | >PTPN11-I28 NKNKNRYKN  | 163  | 352  |
| >PTPN11-I28 NKNKNRYKN  | 488  | >PTPN11-I28 NKNKNRYKN  | 640  | 152  |
| >PTPN11-I28 NKNKNRYKN  | 307  | >PTPN11-I28 NKNKNRYKN  | 994  | 687  |
| >PTPN11-L74 LAELVQYY   | 266  | >PTPN11-L74 MAELVQYY   | 234  | 32   |
| >PTPN11-L74 LAELVQYY   | 1220 | >PTPN11-L74 MAELVQYY   | 344  | 876  |
| >PTPN11-L74 LAELVQYY   | 4341 | >PTPN11-L74 MAELVQYY   | 452  | 3889 |
| >PTPN11-L74 LAELVQYYM  | 5669 | >PTPN11-L74 MAELVQYYM  | 341  | 5328 |
| >PTPN11-L74 LAELVQYY   | 293  | >PTPN11-L74 MAELVQYY   | 121  | 172  |
| >PTPN11-L74 LAELVQYY   | 240  | >PTPN11-L74 MAELVQYY   | 42   | 198  |
| >PTPN11-L74 LAELVQYYM  | 711  | >PTPN11-L74 MAELVQYYM  | 84   | 627  |
| >PTPN11-L74 LAELVQYYME | 1990 | >PTPN11-L74 MAELVQYYM  | 456  | 1534 |
| >PTPN11-L74 LAELVQYY   | 915  | >PTPN11-L74 MAELVQYY   | 434  | 481  |
| >PTPN11-L74 LAELVQYYM  | 887  | >PTPN11-L74 MAELVQYYM  | 341  | 546  |
| >PTPN11-L74 LAELVQYYM  | 984  | >PTPN11-L74 MAELVQYYM  | 341  | 643  |
| >PTPN11-L74 LAELVQYYM  | 420  | >PTPN11-L74 MAELVQYYM  | 572  | 152  |
| >PTPN11-L74 TLAELVQYYM | 36   | >PTPN11-L74 TMAELVQYYI | 33   | 3    |
| >PTPN11-L74 TLAELVQYY  | 296  | >PTPN11-L74 TMAELVQYY  | 426  | 130  |
| >PTPN11-L74 TLAELVQYYM | 13   | >PTPN11-L74 TMAELVQYYI | 15   | 2    |
| >PTPN11-L74 TLAELVQYYM | 448  | >PTPN11-L74 TMAELVQYYI | 461  | 13   |
| >PTPN11-L74 TLAELVQYYM | 556  | >PTPN11-L74 TMAELVQYYI | 374  | 182  |
| >PTPN11-L74 TLAELVQYY  | 179  | >PTPN11-L74 TMAELVQYY  | 104  | 75   |
| >PTPN11-L74 TLAELVQYYM | 7    | >PTPN11-L74 TMAELVQYYI | 5    | 2    |
| >PTPN11-L74 TLAELVQYYM | 25   | >PTPN11-L74 TMAELVQYYI | 18   | 7    |
| >PTPN11-L74 TLAELVQYYM | 21   | >PTPN11-L74 TMAELVQYYI | 21   | 0    |
| >PTPN11-L74 TLAELVQYYM | 7    | >PTPN11-L74 TMAELVQYYI | 6    | 1    |
| >PTPN11-L74 TLAELVQYY  | 389  | >PTPN11-L74 TMAELVQYY  | 723  | 334  |
| >PTPN11-L74 TLAELVQYYM | 26   | >PTPN11-L74 TMAELVQYYI | 49   | 23   |
| >PTPN11-L74 TLAELVQYY  | 504  | >PTPN11-L74 TMAELVQYY  | 390  | 114  |
| >PTPN11-L74 TLAELVQYY  | 1323 | >PTPN11-L74 TMAELVQYY  | 401  | 922  |
| >PTPN11-L74 TLAELVQYY  | 248  | >PTPN11-L74 TMAELVQYY  | 1639 | 1391 |
| >PTPN11-L74 TLAELVQY   | 243  | >PTPN11-L74 TMAELVQY   | 205  | 38   |
| >PTPN11-L74 TLAELVQYY  | 80   | >PTPN11-L74 TMAELVQYY  | 65   | 15   |
| >PTPN11-L74 TLAELVQYYM | 597  | >PTPN11-L74 TMAELVQYYI | 491  | 106  |
| >PTPN11-L74 TLAELVQY   | 64   | >PTPN11-L74 TMAELVQY   | 23   | 41   |
| >PTPN11-L74 TLAELVQYY  | 40   | >PTPN11-L74 TMAELVQYY  | 16   | 24   |
| >PTPN11-L74 TLAELVQY   | 681  | >PTPN11-L74 TMAELVQY   | 161  | 520  |
| >PTPN11-L74 TLAELVQYY  | 262  | >PTPN11-L74 TMAELVQYY  | 64   | 198  |
| >PTPN11-L74 TLAELVQYY  | 571  | >PTPN11-L74 TMAELVQYY  | 403  | 168  |
| >PTPN11-L74 TLAELVQYYM | 497  | >PTPN11-L74 TMAELVQYYI | 200  | 297  |
| >PTPN11-L74 TLAELVQYYM | 91   | >PTPN11-L74 TMAELVQYYI | 68   | 23   |
| >PTPN11-L74 TLAELVQY   | 182  | >PTPN11-L74 TMAELVQY   | 201  | 19   |
| >PTPN11-L74 TLAELVQYY  | 32   | >PTPN11-L74 TMAELVQYY  | 42   | 10   |
| >PTPN11-L74 TLAELVQY   | 204  | >PTPN11-L74 TMAELVQY   | 77   | 127  |

|                       |      |                       |      |      |
|-----------------------|------|-----------------------|------|------|
| >PTPN11-L74TLAELVQYY  | 102  | >PTPN11-L74TMAELVQYY  | 46   | 56   |
| >PTPN11-L74TLAELVQYYM | 1615 | >PTPN11-L74TMAELVQYYI | 356  | 1259 |
| >PTPN11-L74TLAELVQY   | 332  | >PTPN11-L74TMAELVQY   | 221  | 111  |
| >PTPN11-L74TLAELVQYY  | 207  | >PTPN11-L74TMAELVQYY  | 131  | 76   |
| >PTPN11-L74TLAELVQY   | 1923 | >PTPN11-L74TMAELVQY   | 193  | 1730 |
| >PTPN11-L74TLAELVQYY  | 1108 | >PTPN11-L74TMAELVQYY  | 87   | 1021 |
| >PTPN11-L74TLAELVQY   | 1447 | >PTPN11-L74TMAELVQY   | 451  | 996  |
| >PTPN11-L74TLAELVQYYM | 3363 | >PTPN11-L74TMAELVQYYI | 280  | 3083 |
| >PTPN11-L74TLAELVQYYM | 291  | >PTPN11-L74TMAELVQYYI | 390  | 99   |
| >PTPN11-L74TLAELVQY   | 482  | >PTPN11-L74TMAELVQY   | 918  | 436  |
| >PTPN11-L74DLYGGEKFAT | 31   | >PTPN11-L74DLYGGEKFAT | 207  | 176  |
| >PTPN11-L74DLYGGEKFAT | 396  | >PTPN11-L74DLYGGEKFAT | 2208 | 1812 |
| >PTPN11-L74DLYGGEKFAT | 66   | >PTPN11-L74DLYGGEKFAT | 1144 | 1078 |
| >PTPN11-L74DLYGGEKFAT | 205  | >PTPN11-L74DLYGGEKFAT | 995  | 790  |
| >PTPN11-L74DLYGGEKFAT | 11   | >PTPN11-L74DLYGGEKFAT | 147  | 136  |
| >PTPN11-L74DLYGGEKFAT | 2915 | >PTPN11-L74DLYGGEKFAT | 449  | 2466 |
| >PTPN11-L74DLYGGEKFAT | 1074 | >PTPN11-L74DLYGGEKFAT | 167  | 907  |
| >PTPN11-L74DLYGGEKFAT | 1548 | >PTPN11-L74DLYGGEKFAT | 460  | 1088 |
| >PTPN11-L74ATLAELVQYY | 167  | >PTPN11-L74ATMAELVQY' | 82   | 85   |
| >PTPN11-L74ATLAELVQYY | 442  | >PTPN11-L74ATMAELVQY' | 118  | 324  |
| >PTPN11-L74ATLAELVQYY | 558  | >PTPN11-L74ATMAELVQY' | 36   | 522  |
| >PTPN11-L74ATLAELVQYY | 285  | >PTPN11-L74ATMAELVQY' | 127  | 158  |
| >PTPN11-L74ATLAELVQYY | 247  | >PTPN11-L74ATMAELVQY' | 593  | 346  |
| >PTPN11-L74ATLAELVQYY | 371  | >PTPN11-L74ATMAELVQY' | 128  | 243  |
| >PTPN11-L74ATLAELVQY  | 112  | >PTPN11-L74ATMAELVQY  | 26   | 86   |
| >PTPN11-L74ATLAELVQYY | 73   | >PTPN11-L74ATMAELVQY' | 22   | 51   |
| >PTPN11-L74ATLAELVQYY | 2599 | >PTPN11-L74ATMAELVQY' | 416  | 2183 |
| >PTPN11-L74ATLAELVQYY | 152  | >PTPN11-L74ATMAELVQY' | 96   | 56   |
| >PTPN11-L74ATLAELVQY  | 8    | >PTPN11-L74ATMAELVQY  | 5    | 3    |
| >PTPN11-L74ATLAELVQYY | 8    | >PTPN11-L74ATMAELVQY' | 4    | 4    |
| >PTPN11-L74ATLAELVQYY | 28   | >PTPN11-L74ATMAELVQY' | 11   | 17   |
| >PTPN11-L74ATLAELVQY  | 70   | >PTPN11-L74ATMAELVQY  | 111  | 41   |
| >PTPN11-L74ATLAELVQYY | 196  | >PTPN11-L74ATMAELVQY' | 112  | 84   |
| >PTPN11-L74ATLAELVQY  | 579  | >PTPN11-L74ATMAELVQY  | 309  | 270  |
| >PTPN11-L74ATLAELVQYY | 72   | >PTPN11-L74ATMAELVQY' | 27   | 45   |
| >PTPN11-L74ATLAELVQY  | 342  | >PTPN11-L74ATMAELVQY  | 149  | 193  |
| >PTPN11-L74ATLAELVQYY | 1544 | >PTPN11-L74ATMAELVQY' | 283  | 1261 |
| >PTPN11-L74ATLAELVQYY | 3436 | >PTPN11-L74ATMAELVQY' | 211  | 3225 |
| >PTPN11-L74ATLAELVQYY | 363  | >PTPN11-L74ATMAELVQY' | 371  | 8    |
| >PTPN11-L74ATLAELVQY  | 256  | >PTPN11-L74ATMAELVQY  | 289  | 33   |
| >PTPN11-L74ATLAELVQYY | 70   | >PTPN11-L74ATMAELVQY' | 81   | 11   |
| >PTPN11-L74ATLAELVQY  | 939  | >PTPN11-L74ATMAELVQY  | 170  | 769  |
| >PTPN11-L74ATLAELVQYY | 556  | >PTPN11-L74ATMAELVQY' | 107  | 449  |

|                        |      |                       |     |     |
|------------------------|------|-----------------------|-----|-----|
| >PTPN11-L74ATLAELVQY   | 546  | >PTPN11-L74ATMAELVQY  | 258 | 288 |
| >PTPN11-L74ATLAELVQYY  | 290  | >PTPN11-L74ATMAELVQY' | 162 | 128 |
| >PTPN11-L74ATLAELVQY   | 5    | >PTPN11-L74ATMAELVQY  | 4   | 1   |
| >PTPN11-L74ATLAELVQYY  | 5    | >PTPN11-L74ATMAELVQY' | 5   | 0   |
| >PTPN11-L74ATLAELVQYY  | 23   | >PTPN11-L74ATMAELVQY' | 18  | 5   |
| >PTPN11-L74ATLAELVQYY  | 460  | >PTPN11-L74ATMAELVQY' | 159 | 301 |
| >PTPN11-L74ATLAELVQYY  | 302  | >PTPN11-L74ATMAELVQY' | 118 | 184 |
| >PTPN11-L74ATLAELVQYY  | 379  | >PTPN11-L74ATMAELVQY' | 139 | 240 |
| >PTPN11-L74ATLAELVQY   | 166  | >PTPN11-L74ATMAELVQY  | 133 | 33  |
| >PTPN11-L74ATLAELVQYY  | 136  | >PTPN11-L74ATMAELVQY' | 63  | 73  |
| >PTPN11-L74ATLAELVQYY  | 137  | >PTPN11-L74ATMAELVQY' | 106 | 31  |
| >PTPN11-L74ATLAELVQY   | 505  | >PTPN11-L74ATMAELVQY  | 388 | 117 |
| >PTPN11-L74ATLAELVQYY  | 612  | >PTPN11-L74ATMAELVQY' | 471 | 141 |
| >PTPN11-L74FATLAELVQY  | 360  | >PTPN11-L74FATMAELVQ' | 282 | 78  |
| >PTPN11-L74FATLAELV    | 189  | >PTPN11-L74FATMAELV   | 221 | 32  |
| >PTPN11-L74FATLAELV    | 38   | >PTPN11-L74FATMAELV   | 33  | 5   |
| >PTPN11-L74FATLAELV    | 829  | >PTPN11-L74FATMAELV   | 482 | 347 |
| >PTPN11-L74FATLAELV    | 97   | >PTPN11-L74FATMAELV   | 34  | 63  |
| >PTPN11-L74FATLAELVQY  | 99   | >PTPN11-L74FATMAELVQ' | 113 | 14  |
| >PTPN11-L74FATLAELVQY  | 693  | >PTPN11-L74FATMAELVQ' | 323 | 370 |
| >PTPN11-L74FATLAELVQY  | 778  | >PTPN11-L74FATMAELVQ' | 419 | 359 |
| >PTPN11-L74FATLAELV    | 99   | >PTPN11-L74FATMAELV   | 101 | 2   |
| >PTPN11-L74FATLAELVQY  | 1330 | >PTPN11-L74FATMAELVQ' | 484 | 846 |
| >PTPN11-L74FATLAELVQY' | 764  | >PTPN11-L74FATMAELVQ' | 262 | 502 |
| >PTPN11-L74FATLAELVQY  | 41   | >PTPN11-L74FATMAELVQ' | 30  | 11  |
| >PTPN11-L74FATLAELVQY' | 41   | >PTPN11-L74FATMAELVQ' | 28  | 13  |
| >PTPN11-L74FATLAELVQY  | 27   | >PTPN11-L74FATMAELVQ' | 23  | 4   |
| >PTPN11-L74FATLAELVQY' | 310  | >PTPN11-L74FATMAELVQ' | 260 | 50  |
| >PTPN11-L74FATLAELVQY  | 221  | >PTPN11-L74FATMAELVQ' | 150 | 71  |
| >PTPN11-L74FATLAELVQY  | 104  | >PTPN11-L74FATMAELVQ' | 278 | 174 |
| >PTPN11-L74KFATLAEL    | 625  | >PTPN11-L74KFATMAEL   | 229 | 396 |
| >PTPN11-L74KFATLAEL    | 82   | >PTPN11-L74KFATMAEL   | 146 | 64  |
| >PTPN11-L74KFATLAELV   | 64   | >PTPN11-L74KFATMAELV  | 147 | 83  |
| >PTPN11-L74KFATLAEL    | 221  | >PTPN11-L74KFATMAEL   | 338 | 117 |
| >PTPN11-L74KFATLAELVQ  | 27   | >PTPN11-L74KFATMAELVQ | 25  | 2   |
| >PTPN11-L74KFATLAELVQ  | 319  | >PTPN11-L74KFATMAELVQ | 284 | 35  |
| >PTPN11-L74KFATLAELVQ  | 117  | >PTPN11-L74KFATMAELVQ | 156 | 39  |
| >PTPN11-L74KFATLAELVQ  | 144  | >PTPN11-L74KFATMAELVQ | 148 | 4   |
| >PTPN11-L74KFATLAEL    | 210  | >PTPN11-L74KFATMAEL   | 263 | 53  |
| >PTPN11-L74KFATLAELV   | 149  | >PTPN11-L74KFATMAELV  | 195 | 46  |
| >PTPN11-L74EKFATLAEL   | 1348 | >PTPN11-L74EKFATMAEL  | 353 | 995 |
| >PTPN11-L74EKFATLAEL   | 36   | >PTPN11-L74EKFATMAEL  | 34  | 2   |
| >PTPN11-L74EKFATLAELV  | 324  | >PTPN11-L74EKFATMAELV | 316 | 8   |

|                        |      |                       |      |      |
|------------------------|------|-----------------------|------|------|
| >PTPN11-L74EKFATLAEL   | 89   | >PTPN11-L74EKFATMAEL  | 35   | 54   |
| >PTPN11-L74GEKFATLA    | 283  | >PTPN11-L74GEKFATMA   | 999  | 716  |
| >PTPN11-L74GEKFATLAEL' | 114  | >PTPN11-L74GEKFATMAEI | 116  | 2    |
| >PTPN11-L74GEKFATLAEL' | 110  | >PTPN11-L74GEKFATMAEI | 109  | 1    |
| >PTPN11-L74GEKFATLA    | 277  | >PTPN11-L74GEKFATMA   | 191  | 86   |
| >PTPN11-L74GEKFATLAEL  | 173  | >PTPN11-L74GEKFATMAEI | 173  | 0    |
| >PTPN11-L74GEKFATLAEL' | 367  | >PTPN11-L74GEKFATMAEI | 405  | 38   |
| >PTPN11-L74GEKFATLA    | 55   | >PTPN11-L74GEKFATMA   | 40   | 15   |
| >PTPN11-L74GEKFATLAEL' | 309  | >PTPN11-L74GEKFATMAEI | 329  | 20   |
| >PTPN11-L74GEKFATLAEL  | 478  | >PTPN11-L74GEKFATMAEI | 179  | 299  |
| >PTPN11-L74GEKFATLAEL' | 9    | >PTPN11-L74GEKFATMAEI | 7    | 2    |
| >PTPN11-L74YGGEKFATL   | 653  | >PTPN11-L74YGGEKFATM  | 499  | 154  |
| >PTPN11-L74YGGEKFATL   | 410  | >PTPN11-L74YGGEKFATM  | 2365 | 1955 |
| >PTPN11-L74YGGEKFATL   | 121  | >PTPN11-L74YGGEKFATM  | 243  | 122  |
| >PTPN11-L74LYGGEKFATL  | 7    | >PTPN11-L74LYGGEKFATM | 29   | 22   |
| >PTPN11-L77ELVQYYMEH   | 2320 | >PTPN11-L77EVVQYYMEH  | 137  | 2183 |
| >PTPN11-L77ELVQYYMEH   | 4289 | >PTPN11-L77EVVQYYMEH  | 116  | 4173 |
| >PTPN11-L77ELVQYYMEHI  | 139  | >PTPN11-L77EVVQYYMEH  | 10   | 129  |
| >PTPN11-L77ELVQYYMEH   | 3295 | >PTPN11-L77EVVQYYMEH  | 426  | 2869 |
| >PTPN11-L77AELVQYYM    | 206  | >PTPN11-L77AEVVQYYM   | 126  | 80   |
| >PTPN11-L77AELVQYYM    | 34   | >PTPN11-L77AEVVQYYM   | 65   | 31   |
| >PTPN11-L77AELVQYYM    | 278  | >PTPN11-L77AEVVQYYM   | 386  | 108  |
| >PTPN11-L77AELVQYYM    | 121  | >PTPN11-L77AEVVQYYM   | 117  | 4    |
| >PTPN11-L77AELVQYYMEI  | 424  | >PTPN11-L77AEVVQYYME  | 347  | 77   |
| >PTPN11-L77AELVQYYM    | 148  | >PTPN11-L77AEVVQYYM   | 208  | 60   |
| >PTPN11-L77AELVQYYME   | 269  | >PTPN11-L77AEVVQYYME  | 364  | 95   |
| >PTPN11-L77AELVQYYMEI  | 510  | >PTPN11-L77AEVVQYYME  | 405  | 105  |
| >PTPN11-L77AELVQYYM    | 78   | >PTPN11-L77AEVVQYYM   | 341  | 263  |
| >PTPN11-L77LAELVQYY    | 266  | >PTPN11-L77LAEVVQYY   | 271  | 5    |
| >PTPN11-L77LAELVQYY    | 845  | >PTPN11-L77LAEVVQYY   | 451  | 394  |
| >PTPN11-L77LAELVQYY    | 293  | >PTPN11-L77LAEVVQYY   | 322  | 29   |
| >PTPN11-L77LAELVQYY    | 240  | >PTPN11-L77LAEVVQYY   | 229  | 11   |
| >PTPN11-L77LAELVQYYM   | 984  | >PTPN11-L77LAEVVQYYM  | 232  | 752  |
| >PTPN11-L77LAELVQYYM   | 420  | >PTPN11-L77LAEVVQYYM  | 529  | 109  |
| >PTPN11-L77LAELVQYY    | 776  | >PTPN11-L77LAEVVQYY   | 435  | 341  |
| >PTPN11-L77TLAELVQYYM  | 36   | >PTPN11-L77TLAEVVQYYM | 60   | 24   |
| >PTPN11-L77TLAELVQYY   | 296  | >PTPN11-L77TLAEVVQYY  | 270  | 26   |
| >PTPN11-L77TLAELVQYYM  | 13   | >PTPN11-L77TLAEVVQYYM | 16   | 3    |
| >PTPN11-L77TLAELVQYYM  | 448  | >PTPN11-L77TLAEVVQYYM | 628  | 180  |
| >PTPN11-L77TLAELVQYY   | 179  | >PTPN11-L77TLAEVVQYY  | 43   | 136  |
| >PTPN11-L77TLAELVQYYM  | 7    | >PTPN11-L77TLAEVVQYYM | 5    | 2    |
| >PTPN11-L77TLAELVQYYM  | 25   | >PTPN11-L77TLAEVVQYYM | 20   | 5    |
| >PTPN11-L77TLAELVQYY   | 1123 | >PTPN11-L77TLAEVVQYY  | 448  | 675  |



|                       |     |                       |     |     |
|-----------------------|-----|-----------------------|-----|-----|
| >PTPN11-L77TLAELVQYYM | 21  | >PTPN11-L77TLAEVVQYYM | 17  | 4   |
| >PTPN11-L77TLAELVQYYM | 7   | >PTPN11-L77TLAEVVQYYM | 6   | 1   |
| >PTPN11-L77TLAELVQYY  | 389 | >PTPN11-L77TLAEVVQYY  | 371 | 18  |
| >PTPN11-L77TLAELVQYYM | 26  | >PTPN11-L77TLAEVVQYYM | 23  | 3   |
| >PTPN11-L77TLAELVQYY  | 504 | >PTPN11-L77TLAEVVQYY  | 226 | 278 |
| >PTPN11-L77TLAELVQYY  | 248 | >PTPN11-L77TLAEVVQYY  | 71  | 177 |
| >PTPN11-L77TLAELVQY   | 243 | >PTPN11-L77TLAEVVQY   | 367 | 124 |
| >PTPN11-L77TLAELVQYY  | 80  | >PTPN11-L77TLAEVVQYY  | 106 | 26  |
| >PTPN11-L77TLAELVQY   | 64  | >PTPN11-L77TLAEVVQY   | 109 | 45  |
| >PTPN11-L77TLAELVQYY  | 40  | >PTPN11-L77TLAEVVQYY  | 65  | 25  |
| >PTPN11-L77TLAELVQYY  | 262 | >PTPN11-L77TLAEVVQYY  | 198 | 64  |
| >PTPN11-L77TLAELVQYY  | 571 | >PTPN11-L77TLAEVVQYY  | 158 | 413 |
| >PTPN11-L77TLAELVQYYM | 497 | >PTPN11-L77TLAEVVQYYM | 487 | 10  |
| >PTPN11-L77TLAELVQYYM | 91  | >PTPN11-L77TLAEVVQYYM | 88  | 3   |
| >PTPN11-L77TLAELVQY   | 182 | >PTPN11-L77TLAEVVQY   | 276 | 94  |
| >PTPN11-L77TLAELVQYY  | 32  | >PTPN11-L77TLAEVVQYY  | 56  | 24  |
| >PTPN11-L77TLAELVQY   | 204 | >PTPN11-L77TLAEVVQY   | 162 | 42  |
| >PTPN11-L77TLAELVQYY  | 102 | >PTPN11-L77TLAEVVQYY  | 114 | 12  |
| >PTPN11-L77TLAELVQY   | 332 | >PTPN11-L77TLAEVVQY   | 253 | 79  |
| >PTPN11-L77TLAELVQYY  | 207 | >PTPN11-L77TLAEVVQYY  | 150 | 57  |
| >PTPN11-L77TLAELVQYYM | 291 | >PTPN11-L77TLAEVVQYYM | 527 | 236 |
| >PTPN11-L77TLAELVQY   | 482 | >PTPN11-L77TLAEVVQY   | 219 | 263 |
| >PTPN11-L77TLAELVQYY  | 545 | >PTPN11-L77TLAEVVQYY  | 343 | 202 |
| >PTPN11-L77ATLAELVQYY | 167 | >PTPN11-L77ATLAEVVQYY | 122 | 45  |
| >PTPN11-L77ATLAELVQYY | 442 | >PTPN11-L77ATLAEVVQYY | 488 | 46  |
| >PTPN11-L77ATLAELVQYY | 285 | >PTPN11-L77ATLAEVVQYY | 522 | 237 |
| >PTPN11-L77ATLAELVQYY | 247 | >PTPN11-L77ATLAEVVQYY | 175 | 72  |
| >PTPN11-L77ATLAELVQYY | 371 | >PTPN11-L77ATLAEVVQYY | 279 | 92  |
| >PTPN11-L77ATLAELVQY  | 112 | >PTPN11-L77ATLAEVVQY  | 98  | 14  |
| >PTPN11-L77ATLAELVQYY | 73  | >PTPN11-L77ATLAEVVQYY | 56  | 17  |
| >PTPN11-L77ATLAELVQYY | 152 | >PTPN11-L77ATLAEVVQYY | 168 | 16  |
| >PTPN11-L77ATLAELVQY  | 8   | >PTPN11-L77ATLAEVVQY  | 15  | 7   |
| >PTPN11-L77ATLAELVQYY | 8   | >PTPN11-L77ATLAEVVQYY | 11  | 3   |
| >PTPN11-L77ATLAELVQYY | 28  | >PTPN11-L77ATLAEVVQYY | 38  | 10  |
| >PTPN11-L77ATLAELVQY  | 70  | >PTPN11-L77ATLAEVVQY  | 152 | 82  |
| >PTPN11-L77ATLAELVQYY | 196 | >PTPN11-L77ATLAEVVQYY | 118 | 78  |
| >PTPN11-L77ATLAELVQYY | 72  | >PTPN11-L77ATLAEVVQYY | 43  | 29  |
| >PTPN11-L77ATLAELVQY  | 342 | >PTPN11-L77ATLAEVVQY  | 130 | 212 |
| >PTPN11-L77ATLAELVQYY | 363 | >PTPN11-L77ATLAEVVQYY | 372 | 9   |
| >PTPN11-L77ATLAELVQY  | 256 | >PTPN11-L77ATLAEVVQY  | 411 | 155 |
| >PTPN11-L77ATLAELVQYY | 70  | >PTPN11-L77ATLAEVVQYY | 103 | 33  |
| >PTPN11-L77ATLAELVQY  | 939 | >PTPN11-L77ATLAEVVQY  | 433 | 506 |
| >PTPN11-L77ATLAELVQYY | 556 | >PTPN11-L77ATLAEVVQYY | 387 | 169 |

|                        |      |                        |      |      |
|------------------------|------|------------------------|------|------|
| >PTPN11-L77ATLAELVQY   | 546  | >PTPN11-L77ATLAEEVVQY  | 186  | 360  |
| >PTPN11-L77ATLAELVQYY  | 290  | >PTPN11-L77ATLAEEVVQYY | 175  | 115  |
| >PTPN11-L77ATLAELVQY   | 5    | >PTPN11-L77ATLAEEVVQY  | 4    | 1    |
| >PTPN11-L77ATLAELVQYY  | 5    | >PTPN11-L77ATLAEEVVQYY | 5    | 0    |
| >PTPN11-L77ATLAELVQYY  | 23   | >PTPN11-L77ATLAEEVVQYY | 18   | 5    |
| >PTPN11-L77ATLAELVQYY  | 460  | >PTPN11-L77ATLAEEVVQYY | 218  | 242  |
| >PTPN11-L77ATLAELVQYY  | 302  | >PTPN11-L77ATLAEEVVQYY | 167  | 135  |
| >PTPN11-L77ATLAELVQYY  | 379  | >PTPN11-L77ATLAEEVVQYY | 337  | 42   |
| >PTPN11-L77ATLAELVQY   | 166  | >PTPN11-L77ATLAEEVVQY  | 278  | 112  |
| >PTPN11-L77ATLAELVQYY  | 136  | >PTPN11-L77ATLAEEVVQYY | 125  | 11   |
| >PTPN11-L77ATLAELVQYY  | 137  | >PTPN11-L77ATLAEEVVQYY | 179  | 42   |
| >PTPN11-L77ATLAELVQY   | 505  | >PTPN11-L77ATLAEEVVQY  | 364  | 141  |
| >PTPN11-L77ATLAELVQYY  | 612  | >PTPN11-L77ATLAEEVVQYY | 493  | 119  |
| >PTPN11-L77FATLAELVQY  | 360  | >PTPN11-L77FATLAEEVVQY | 572  | 212  |
| >PTPN11-L77FATLAELV    | 189  | >PTPN11-L77FATLAEEVV   | 756  | 567  |
| >PTPN11-L77FATLAELV    | 38   | >PTPN11-L77FATLAEEVV   | 103  | 65   |
| >PTPN11-L77FATLAELV    | 97   | >PTPN11-L77FATLAEEVV   | 139  | 42   |
| >PTPN11-L77FATLAELVQY  | 99   | >PTPN11-L77FATLAEEVVQY | 252  | 153  |
| >PTPN11-L77FATLAELVQY  | 778  | >PTPN11-L77FATLAEEVVQY | 359  | 419  |
| >PTPN11-L77FATLAELV    | 99   | >PTPN11-L77FATLAEEVV   | 164  | 65   |
| >PTPN11-L77FATLAELVQY  | 41   | >PTPN11-L77FATLAEEVVQY | 42   | 1    |
| >PTPN11-L77FATLAELVQY  | 41   | >PTPN11-L77FATLAEEVVQY | 84   | 43   |
| >PTPN11-L77FATLAELVQY  | 27   | >PTPN11-L77FATLAEEVVQY | 25   | 2    |
| >PTPN11-L77FATLAELVQY  | 310  | >PTPN11-L77FATLAEEVVQY | 357  | 47   |
| >PTPN11-L77FATLAELVQY  | 221  | >PTPN11-L77FATLAEEVVQY | 356  | 135  |
| >PTPN11-L77FATLAELVQY  | 104  | >PTPN11-L77FATLAEEVVQY | 209  | 105  |
| >PTPN11-L77KFATLAEL    | 82   | >PTPN11-L77KFATLAEEV   | 65   | 17   |
| >PTPN11-L77KFATLAELV   | 64   | >PTPN11-L77KFATLAEEVV  | 515  | 451  |
| >PTPN11-L77KFATLAEL    | 221  | >PTPN11-L77KFATLAEEV   | 4825 | 4604 |
| >PTPN11-L77KFATLAELVQ  | 27   | >PTPN11-L77KFATLAEEVVQ | 44   | 17   |
| >PTPN11-L77KFATLAELVQ  | 319  | >PTPN11-L77KFATLAEEVVQ | 440  | 121  |
| >PTPN11-L77KFATLAELVQ  | 117  | >PTPN11-L77KFATLAEEVVQ | 185  | 68   |
| >PTPN11-L77KFATLAELVQ  | 144  | >PTPN11-L77KFATLAEEVVQ | 178  | 34   |
| >PTPN11-L77KFATLAEL    | 210  | >PTPN11-L77KFATLAEEV   | 287  | 77   |
| >PTPN11-L77KFATLAELV   | 149  | >PTPN11-L77KFATLAEEVV  | 276  | 127  |
| >PTPN11-L77EKFATLAEL   | 1348 | >PTPN11-L77EKFATLAEEV  | 82   | 1266 |
| >PTPN11-L77EKFATLAEL   | 3821 | >PTPN11-L77EKFATLAEEV  | 423  | 3398 |
| >PTPN11-L77EKFATLAEL   | 36   | >PTPN11-L77EKFATLAEEV  | 82   | 46   |
| >PTPN11-L77EKFATLAELV  | 324  | >PTPN11-L77EKFATLAEEVV | 100  | 224  |
| >PTPN11-L77EKFATLAEL   | 89   | >PTPN11-L77EKFATLAEEV  | 1795 | 1706 |
| >PTPN11-L77GEKFATLAEL  | 881  | >PTPN11-L77GEKFATLAEEV | 322  | 559  |
| >PTPN11-L77GEKFATLAEL' | 114  | >PTPN11-L77GEKFATLAEEV | 517  | 403  |
| >PTPN11-L77GEKFATLAEL' | 110  | >PTPN11-L77GEKFATLAEEV | 86   | 24   |

|                        |      |                        |      |      |
|------------------------|------|------------------------|------|------|
| >PTPN11-L77GEKFATLAEL  | 173  | >PTPN11-L77GEKFATLAEV  | 400  | 227  |
| >PTPN11-L77GEKFATLAEL' | 367  | >PTPN11-L77GEKFATLAEV  | 202  | 165  |
| >PTPN11-L77GEKFATLAEL' | 309  | >PTPN11-L77GEKFATLAEV  | 119  | 190  |
| >PTPN11-L77GEKFATLAEL  | 478  | >PTPN11-L77GEKFATLAEV  | 612  | 134  |
| >PTPN11-L77GEKFATLAEL' | 9    | >PTPN11-L77GEKFATLAEV  | 13   | 4    |
| >PTPN11-N3INIIMPEFETK  | 300  | >PTPN11-N3IDIIMPEFETK  | 1108 | 808  |
| >PTPN11-N3INIIMPEFETK  | 31   | >PTPN11-N3IDIIMPEFETK  | 88   | 57   |
| >PTPN11-N3INIIMPEFETK  | 8    | >PTPN11-N3IDIIMPEFETK  | 13   | 5    |
| >PTPN11-N3IANIIMPEF    | 9434 | >PTPN11-N3ADIIMPEF     | 214  | 9220 |
| >PTPN11-N3IANIIMPEFETI | 465  | >PTPN11-N3ADIIMPEFETI  | 958  | 493  |
| >PTPN11-N3INANIIMPEF   | 269  | >PTPN11-N3INADIIMPEF   | 721  | 452  |
| >PTPN11-N3INANIIMPEF   | 175  | >PTPN11-N3INADIIMPEF   | 380  | 205  |
| >PTPN11-N3INANIIMPEF   | 126  | >PTPN11-N3INADIIMPEF   | 263  | 137  |
| >PTPN11-N3IYINANIIM    | 420  | >PTPN11-N3IYNADIIM     | 532  | 112  |
| >PTPN11-N3IYINANIIMPEF | 315  | >PTPN11-N3IYNADIIMPEF  | 213  | 102  |
| >PTPN11-N3IYINANIIM    | 373  | >PTPN11-N3IYNADIIM     | 744  | 371  |
| >PTPN11-N3IYINANIIMPEF | 137  | >PTPN11-N3IYNADIIMPEF  | 98   | 39   |
| >PTPN11-N3IYINANIIM    | 495  | >PTPN11-N3IYNADIIM     | 700  | 205  |
| >PTPN11-N3IYINANIIMPEF | 97   | >PTPN11-N3IYNADIIMPEF  | 109  | 12   |
| >PTPN11-N3IYINANIIMPEF | 102  | >PTPN11-N3IYNADIIMPEF  | 146  | 44   |
| >PTPN11-N3IYINANIIMPEF | 161  | >PTPN11-N3IYNADIIMPEF  | 419  | 258  |
| >PTPN11-N3IYINANIIM    | 241  | >PTPN11-N3IYNADIIM     | 177  | 64   |
| >PTPN11-N3IYINANIIMPEF | 209  | >PTPN11-N3IYNADIIMPEF  | 236  | 27   |
| >PTPN11-N3IYINANIIMPEF | 293  | >PTPN11-N3IYNADIIMPEF  | 293  | 0    |
| >PTPN11-N3IDYINANII    | 178  | >PTPN11-N3IDYNADII     | 717  | 539  |
| >PTPN11-N3IDYINANII    | 316  | >PTPN11-N3IDYNADII     | 513  | 197  |
| >PTPN11-N3IDYINANII    | 444  | >PTPN11-N3IDYNADII     | 1039 | 595  |
| >PTPN11-N3IDYINANII    | 497  | >PTPN11-N3IDYNADII     | 527  | 30   |
| >PTPN11-N3IDYINANIIM   | 333  | >PTPN11-N3IDYNADIIM    | 375  | 42   |
| >PTPN11-N3ISDYINANI    | 333  | >PTPN11-N3ISDYINADI    | 340  | 7    |
| >PTPN11-N3ISDYINANII   | 17   | >PTPN11-N3ISDYINADII   | 16   | 1    |
| >PTPN11-N3ISDYINANIIM  | 162  | >PTPN11-N3ISDYINADIIM  | 420  | 258  |
| >PTPN11-N3ISDYINANI    | 476  | >PTPN11-N3ISDYINADI    | 360  | 116  |
| >PTPN11-N3ISDYINANII   | 307  | >PTPN11-N3ISDYINADII   | 202  | 105  |
| >PTPN11-N3ISDYINANI    | 203  | >PTPN11-N3ISDYINADI    | 165  | 38   |
| >PTPN11-N3ISDYINANII   | 50   | >PTPN11-N3ISDYINADII   | 33   | 17   |
| >PTPN11-N3ISDYINANII   | 511  | >PTPN11-N3ISDYINADII   | 370  | 141  |
| >PTPN11-N3ISDYINANI    | 49   | >PTPN11-N3ISDYINADI    | 49   | 0    |
| >PTPN11-N3ISDYINANII   | 19   | >PTPN11-N3ISDYINADII   | 13   | 6    |
| >PTPN11-N3IVSDYINANI   | 478  | >PTPN11-N3IVSDYINADI   | 2094 | 1616 |
| >PTPN11-N3IVSDYINANIIM | 287  | >PTPN11-N3IVSDYINADIIM | 347  | 60   |
| >PTPN11-N3IVSDYINANIIM | 473  | >PTPN11-N3IVSDYINADIIM | 1195 | 722  |
| >PTPN11-N3IVSDYINANIIM | 62   | >PTPN11-N3IVSDYINADIIM | 141  | 79   |

|                       |       |                       |      |       |
|-----------------------|-------|-----------------------|------|-------|
| >PTPN11-N3:VSDYINANI  | 148   | >PTPN11-N3:VSDYINADI  | 398  | 250   |
| >PTPN11-N3:EPVSDYINAN | 192   | >PTPN11-N3:EPVSDYINAD | 1174 | 982   |
| >PTPN11-N3:EPVSDYINAN | 409   | >PTPN11-N3:EPVSDYINAD | 1027 | 618   |
| >PTPN11-N3:EPVSDYINAN | 40    | >PTPN11-N3:EPVSDYINAD | 103  | 63    |
| >PTPN11-N3:NDFWRMV    | 233   | >PTPN11-N3:SDFWRMV    | 1560 | 1327  |
| >PTPN11-N3:NDFWRMV    | 1381  | >PTPN11-N3:SDFWRMV    | 479  | 902   |
| >PTPN11-N3:VNDFWRMV   | 13666 | >PTPN11-N3:VSDFWRMV   | 148  | 13518 |
| >PTPN11-N3:VNDFWRMV   | 22312 | >PTPN11-N3:VSDFWRMV   | 42   | 22270 |
| >PTPN11-N3:VNDFWRMV   | 15192 | >PTPN11-N3:VSDFWRMV   | 109  | 15083 |
| >PTPN11-N3:VNDFWRMV   | 855   | >PTPN11-N3:VSDFWRMV   | 50   | 805   |
| >PTPN11-N3:TVNDFWRM\  | 323   | >PTPN11-N3:TVSDFWRM\  | 524  | 201   |
| >PTPN11-N3:TVNDFWRM\  | 895   | >PTPN11-N3:TVSDFWRM\  | 490  | 405   |
| >PTPN11-N3:TVNDFWRM\  | 106   | >PTPN11-N3:TVSDFWRM\  | 167  | 61    |
| >PTPN11-N3:TVNDFWRM   | 369   | >PTPN11-N3:TVSDFWRM   | 240  | 129   |
| >PTPN11-N3:TVNDFWRM\  | 175   | >PTPN11-N3:TVSDFWRM\  | 123  | 52    |
| >PTPN11-N3:TVNDFWRM\  | 50    | >PTPN11-N3:TVSDFWRM\  | 103  | 53    |
| >PTPN11-N3:TVNDFWRM\  | 156   | >PTPN11-N3:TVSDFWRM\  | 120  | 36    |
| >PTPN11-N3:TVNDFWRM\  | 319   | >PTPN11-N3:TVSDFWRM\  | 207  | 112   |
| >PTPN11-N3:TVNDFWRM   | 156   | >PTPN11-N3:TVSDFWRM   | 109  | 47    |
| >PTPN11-N3:TVNDFWRM\  | 14    | >PTPN11-N3:TVSDFWRM\  | 12   | 2     |
| >PTPN11-N3:TVNDFWRM   | 125   | >PTPN11-N3:TVSDFWRM   | 203  | 78    |
| >PTPN11-N3:TVNDFWRM\  | 27    | >PTPN11-N3:TVSDFWRM\  | 43   | 16    |
| >PTPN11-N3:TVNDFWRM\  | 319   | >PTPN11-N3:TVSDFWRM\  | 373  | 54    |
| >PTPN11-N3:TVNDFWRM\  | 2308  | >PTPN11-N3:TVSDFWRM\  | 253  | 2055  |
| >PTPN11-N3:NTVNDFWRM  | 121   | >PTPN11-N3:NTVSDFWRM  | 172  | 51    |
| >PTPN11-N3:NTVNDFWRM  | 384   | >PTPN11-N3:NTVSDFWRM  | 500  | 116   |
| >PTPN11-N3:NTVNDFWRM  | 330   | >PTPN11-N3:NTVSDFWRM  | 437  | 107   |
| >PTPN11-N3:NTVNDFWRM  | 239   | >PTPN11-N3:NTVSDFWRM  | 223  | 16    |
| >PTPN11-N3:NTVNDFWRM  | 513   | >PTPN11-N3:NTVSDFWRM  | 461  | 52    |
| >PTPN11-N3:NTVNDFWRM  | 29    | >PTPN11-N3:NTVSDFWRM  | 85   | 56    |
| >PTPN11-N3:NTVNDFWRM  | 132   | >PTPN11-N3:NTVSDFWRM  | 384  | 252   |
| >PTPN11-N3:NTVNDFWRM  | 12    | >PTPN11-N3:NTVSDFWRM  | 7    | 5     |
| >PTPN11-N3:NTVNDFWRM  | 45    | >PTPN11-N3:NTVSDFWRM  | 20   | 25    |
| >PTPN11-N3:NTVNDFWRM  | 94    | >PTPN11-N3:NTVSDFWRM  | 106  | 12    |
| >PTPN11-N3:NTVNDFWR   | 108   | >PTPN11-N3:NTVSDFWR   | 78   | 30    |
| >PTPN11-N3:NTVNDFWR   | 80    | >PTPN11-N3:NTVSDFWR   | 67   | 13    |
| >PTPN11-N3:NTVNDFWR   | 4     | >PTPN11-N3:NTVSDFWR   | 3    | 1     |
| >PTPN11-N3:NTVNDFWRM  | 153   | >PTPN11-N3:NTVSDFWRM  | 112  | 41    |
| >PTPN11-N3:NTVNDFWRM  | 125   | >PTPN11-N3:NTVSDFWRM  | 121  | 4     |
| >PTPN11-N3:NTVNDFWRM  | 40    | >PTPN11-N3:NTVSDFWRM  | 26   | 14    |
| >PTPN11-N3:NTVNDFWRM  | 19    | >PTPN11-N3:NTVSDFWRM  | 15   | 4     |
| >PTPN11-N3:NTVNDFWRM  | 281   | >PTPN11-N3:NTVSDFWRM  | 223  | 58    |
| >PTPN11-N3:NTVNDFWRM  | 362   | >PTPN11-N3:NTVSDFWRM  | 278  | 84    |

|                       |       |                        |      |       |
|-----------------------|-------|------------------------|------|-------|
| >PTPN11-N3:NTVNDFWRN  | 489   | >PTPN11-N3:NTVSDFWRN   | 345  | 144   |
| >PTPN11-N3:NTVNDFWRN  | 114   | >PTPN11-N3:NTVSDFWRN   | 85   | 29    |
| >PTPN11-N3:NTVNDFWR   | 194   | >PTPN11-N3:NTVSDFWR    | 208  | 14    |
| >PTPN11-N3:NTVNDFWR   | 323   | >PTPN11-N3:NTVSDFWR    | 280  | 43    |
| >PTPN11-N3:QNTVNDFWF  | 107   | >PTPN11-N3:QNTVSDFWR   | 70   | 37    |
| >PTPN11-N3:LQNTVNDFW  | 1195  | >PTPN11-N3:LQNTVSDFW   | 383  | 812   |
| >PTPN11-N3:LQNTVNDFW  | 97    | >PTPN11-N3:LQNTVSDFW   | 73   | 24    |
| >PTPN11-N3:LQNTVNDFW  | 66    | >PTPN11-N3:LQNTVSDFW   | 35   | 31    |
| >PTPN11-N3:LQNTVNDFW  | 794   | >PTPN11-N3:LQNTVSDFW   | 283  | 511   |
| >PTPN11-N3:LQNTVNDFW  | 207   | >PTPN11-N3:LQNTVSDFW   | 126  | 81    |
| >PTPN11-N3:LQNTVNDF   | 78    | >PTPN11-N3:LQNTVSDF    | 47   | 31    |
| >PTPN11-N3:LQNTVNDFW  | 335   | >PTPN11-N3:LQNTVSDFW   | 207  | 128   |
| >PTPN11-N3:LQNTVNDF   | 9     | >PTPN11-N3:LQNTVSDF    | 6    | 3     |
| >PTPN11-N3:LQNTVNDFW  | 218   | >PTPN11-N3:LQNTVSDFW   | 160  | 58    |
| >PTPN11-N3:LQNTVNDFW  | 136   | >PTPN11-N3:LQNTVSDFW   | 85   | 51    |
| >PTPN11-N3:LQNTVNDFW  | 420   | >PTPN11-N3:LQNTVSDFW   | 357  | 63    |
| >PTPN11-N3:LQNTVNDFW  | 16    | >PTPN11-N3:LQNTVSDFW   | 20   | 4     |
| >PTPN11-N3:CLQNTVNDF  | 440   | >PTPN11-N3:CLQNTVSDF   | 650  | 210   |
| >PTPN11-N3:CLQNTVNDF\ | 114   | >PTPN11-N3:CLQNTVSDFV  | 83   | 31    |
| >PTPN11-N3:CLQNTVNDF\ | 533   | >PTPN11-N3:CLQNTVSDFV  | 334  | 199   |
| >PTPN11-N3:CLQNTVNDF\ | 233   | >PTPN11-N3:CLQNTVSDFV  | 190  | 43    |
| >PTPN11-N3:CLQNTVNDF  | 879   | >PTPN11-N3:CLQNTVSDF   | 292  | 587   |
| >PTPN11-N3:CLQNTVNDF  | 1172  | >PTPN11-N3:CLQNTVSDF   | 390  | 782   |
| >PTPN11-N3:CLQNTVNDF  | 125   | >PTPN11-N3:CLQNTVSDF   | 51   | 74    |
| >PTPN11-N3:CLQNTVNDF\ | 83    | >PTPN11-N3:CLQNTVSDFV  | 120  | 37    |
| >PTPN11-N3:GCLQNTVND  | 905   | >PTPN11-N3:GCLQNTVSDI  | 420  | 485   |
| >PTPN11-N5:NTGDYYDLY  | 33    | >PTPN11-N5:STGDYYDLY   | 29   | 4     |
| >PTPN11-N5:NTGDYYDLY  | 2329  | >PTPN11-N5:STGDYYDLY   | 77   | 2252  |
| >PTPN11-N5:NTGDYYDLY  | 429   | >PTPN11-N5:STGDYYDLY   | 189  | 240   |
| >PTPN11-N5:NTGDYYDLY  | 40    | >PTPN11-N5:STGDYYDLY   | 19   | 21    |
| >PTPN11-N5:NTGDYYDLY  | 1354  | >PTPN11-N5:STGDYYDLY   | 252  | 1102  |
| >PTPN11-N5:NTGDYYDLY  | 213   | >PTPN11-N5:STGDYYDLY   | 433  | 220   |
| >PTPN11-N5:NTGDYYDL   | 482   | >PTPN11-N5:STGDYYDL    | 1188 | 706   |
| >PTPN11-N5:NTGDYYDL   | 425   | >PTPN11-N5:STGDYYDL    | 926  | 501   |
| >PTPN11-N5:NTGDYYDLY  | 255   | >PTPN11-N5:STGDYYDLY   | 56   | 199   |
| >PTPN11-N5:NTGDYYDLY  | 249   | >PTPN11-N5:STGDYYDLY   | 21   | 228   |
| >PTPN11-N5:QNTGDYYDL' | 4631  | >PTPN11-N5:QSTGDYYDLY  | 71   | 4560  |
| >PTPN11-N5:QNTGDYYDL' | 8328  | >PTPN11-N5:QSTGDYYDLY  | 213  | 8115  |
| >PTPN11-N5:QNTGDYYDL' | 2171  | >PTPN11-N5:QSTGDYYDLY  | 159  | 2012  |
| >PTPN11-N5:QNTGDYYDL' | 11018 | >PTPN11-N5:QSTGDYYDLY  | 397  | 10621 |
| >PTPN11-N5:IQNTGDYYDL | 568   | >PTPN11-N5:IQSTGDYYDL  | 134  | 434   |
| >PTPN11-N5:IQNTGDYY   | 329   | >PTPN11-N5:IQSTGDYY    | 208  | 121   |
| >PTPN11-N5:IQNTGDYYDL | 132   | >PTPN11-N5:IQSTGDYYDL' | 93   | 39    |

|                       |      |                        |     |      |
|-----------------------|------|------------------------|-----|------|
| >PTPN11-N5:IQNTGDYY   | 23   | >PTPN11-N5:IQSTGDYY    | 25  | 2    |
| >PTPN11-N5:IQNTGDYYDL | 42   | >PTPN11-N5:IQSTGDYYDL  | 43  | 1    |
| >PTPN11-N5:IQNTGDYY   | 73   | >PTPN11-N5:IQSTGDYY    | 84  | 11   |
| >PTPN11-N5:IQNTGDYYDL | 124  | >PTPN11-N5:IQSTGDYYDL  | 141 | 17   |
| >PTPN11-N5:IQNTGDYY   | 245  | >PTPN11-N5:IQSTGDYY    | 271 | 26   |
| >PTPN11-N5:IQNTGDYY   | 27   | >PTPN11-N5:IQSTGDYY    | 27  | 0    |
| >PTPN11-N5:IQNTGDYYDL | 132  | >PTPN11-N5:IQSTGDYYDL  | 123 | 9    |
| >PTPN11-N5:IQNTGDYYDL | 50   | >PTPN11-N5:IQSTGDYYDL  | 50  | 0    |
| >PTPN11-N5:KIQNTGDYYC | 452  | >PTPN11-N5:KIQSTGDYYD  | 921 | 469  |
| >PTPN11-N5:KIQNTGDYY  | 212  | >PTPN11-N5:KIQSTGDYY   | 211 | 1    |
| >PTPN11-N5:KIQNTGDYY  | 816  | >PTPN11-N5:KIQSTGDYY   | 443 | 373  |
| >PTPN11-N5:KIQNTGDY   | 30   | >PTPN11-N5:KIQSTGDY    | 22  | 8    |
| >PTPN11-N5:KIQNTGDYY  | 32   | >PTPN11-N5:KIQSTGDYY   | 20  | 12   |
| >PTPN11-N5:KIQNTGDYYC | 219  | >PTPN11-N5:KIQSTGDYYD  | 494 | 275  |
| >PTPN11-N5:KIQNTGDY   | 113  | >PTPN11-N5:KIQSTGDY    | 100 | 13   |
| >PTPN11-N5:KIQNTGDYY  | 332  | >PTPN11-N5:KIQSTGDYY   | 262 | 70   |
| >PTPN11-N5:KIQNTGDY   | 453  | >PTPN11-N5:KIQSTGDY    | 367 | 86   |
| >PTPN11-N5:KIQNTGDYY  | 229  | >PTPN11-N5:KIQSTGDYY   | 225 | 4    |
| >PTPN11-N5:KIQNTGDYY  | 135  | >PTPN11-N5:KIQSTGDYY   | 99  | 36   |
| >PTPN11-N5:KIQNTGDYY  | 478  | >PTPN11-N5:KIQSTGDYY   | 384 | 94   |
| >PTPN11-N5:IKIQNTGDY  | 416  | >PTPN11-N5:IKIQSTGDY   | 984 | 568  |
| >PTPN11-N5:IKIQNTGDYY | 627  | >PTPN11-N5:IKIQSTGDYY  | 492 | 135  |
| >PTPN11-N5:IKIQNTGDY  | 165  | >PTPN11-N5:IKIQSTGDY   | 231 | 66   |
| >PTPN11-N5:IKIQNTGDYY | 248  | >PTPN11-N5:IKIQSTGDYY  | 195 | 53   |
| >PTPN11-N5:IKIQNTGDY  | 37   | >PTPN11-N5:IKIQSTGDY   | 13  | 24   |
| >PTPN11-N5:IKIQNTGDYY | 13   | >PTPN11-N5:IKIQSTGDYY  | 7   | 6    |
| >PTPN11-N5:HIKIQNTGDY | 472  | >PTPN11-N5:HIKIQSTGDY\ | 347 | 125  |
| >PTPN11-N5:HIKIQNTGDY | 257  | >PTPN11-N5:HIKIQSTGDY  | 297 | 40   |
| >PTPN11-N5:HIKIQNTGDY | 197  | >PTPN11-N5:HIKIQSTGDY\ | 199 | 2    |
| >PTPN11-N5:HIKIQNTGDY | 440  | >PTPN11-N5:HIKIQSTGDY  | 254 | 186  |
| >PTPN11-N5:HIKIQNTGDY | 654  | >PTPN11-N5:HIKIQSTGDY  | 299 | 355  |
| >PTPN11-N5:HIKIQNTGDY | 402  | >PTPN11-N5:HIKIQSTGDY\ | 247 | 155  |
| >PTPN11-N5:HIKIQNTGDY | 273  | >PTPN11-N5:HIKIQSTGDY  | 227 | 46   |
| >PTPN11-N5:HIKIQNTGDY | 297  | >PTPN11-N5:HIKIQSTGDY\ | 285 | 12   |
| >PTPN11-N5:HIKIQNTGDY | 564  | >PTPN11-N5:HIKIQSTGDY\ | 478 | 86   |
| >PTPN11-N5:THIKIQNTGD | 281  | >PTPN11-N5:THIKIQSTGD\ | 346 | 65   |
| >PTPN11-N5:THIKIQNTGD | 247  | >PTPN11-N5:THIKIQSTGD\ | 259 | 12   |
| >PTPN11-N5:THIKIQNTGD | 301  | >PTPN11-N5:THIKIQSTGD\ | 266 | 35   |
| >PTPN11-N5:NTGDYYDLY  | 33   | >PTPN11-N5:YTGDDYYDLY  | 12  | 21   |
| >PTPN11-N5:NTGDYYDL   | 6547 | >PTPN11-N5:YTGDDYYDL   | 360 | 6187 |
| >PTPN11-N5:NTGDYYDL   | 1388 | >PTPN11-N5:YTGDDYYDL   | 137 | 1251 |
| >PTPN11-N5:NTGDYYDL   | 5368 | >PTPN11-N5:YTGDDYYDL   | 125 | 5243 |
| >PTPN11-N5:NTGDYYDL   | 5019 | >PTPN11-N5:YTGDDYYDL   | 302 | 4717 |

|                       |       |                         |     |       |
|-----------------------|-------|-------------------------|-----|-------|
| >PTPN11-N5:NTGDYYDL   | 9377  | >PTPN11-N5:YTGDDYYDL    | 159 | 9218  |
| >PTPN11-N5:NTGDYYDLY  | 896   | >PTPN11-N5:YTGDDYYDLY   | 59  | 837   |
| >PTPN11-N5:NTGDYYDLY  | 1027  | >PTPN11-N5:YTGDDYYDLY   | 176 | 851   |
| >PTPN11-N5:NTGDYYDLY  | 429   | >PTPN11-N5:YTGDDYYDLY   | 88  | 341   |
| >PTPN11-N5:NTGDYYDLY  | 40    | >PTPN11-N5:YTGDDYYDLY   | 8   | 32    |
| >PTPN11-N5:NTGDYYDLY  | 213   | >PTPN11-N5:YTGDDYYDLY   | 151 | 62    |
| >PTPN11-N5:NTGDYYDL   | 482   | >PTPN11-N5:YTGDDYYDL    | 609 | 127   |
| >PTPN11-N5:NTGDYYDL   | 425   | >PTPN11-N5:YTGDDYYDL    | 277 | 148   |
| >PTPN11-N5:NTGDYYDLY  | 255   | >PTPN11-N5:YTGDDYYDLY   | 33  | 222   |
| >PTPN11-N5:NTGDYYDL   | 11598 | >PTPN11-N5:YTGDDYYDL    | 348 | 11250 |
| >PTPN11-N5:NTGDYYDLY  | 5232  | >PTPN11-N5:YTGDDYYDLY   | 74  | 5158  |
| >PTPN11-N5:NTGDYYDLY  | 249   | >PTPN11-N5:YTGDDYYDLY   | 12  | 237   |
| >PTPN11-N5:QNTGDYYDL' | 4631  | >PTPN11-N5:QYTGDDYYDLY  | 300 | 4331  |
| >PTPN11-N5:QNTGDYYDL  | 19578 | >PTPN11-N5:QYTGDDYYDL   | 356 | 19222 |
| >PTPN11-N5:QNTGDYYDL  | 20623 | >PTPN11-N5:QYTGDDYYDL   | 10  | 20613 |
| >PTPN11-N5:QNTGDYYDL' | 22327 | >PTPN11-N5:QYTGDDYYDLY  | 284 | 22043 |
| >PTPN11-N5:QNTGDYYDL' | 5360  | >PTPN11-N5:QYTGDDYYDLY  | 207 | 5153  |
| >PTPN11-N5:QNTGDYYDL' | 2171  | >PTPN11-N5:QYTGDDYYDLY  | 170 | 2001  |
| >PTPN11-N5:QNTGDYYDL  | 6365  | >PTPN11-N5:QYTGDDYYDL   | 222 | 6143  |
| >PTPN11-N5:IQNTGDYYDL | 568   | >PTPN11-N5:IQYTGDDYYDL  | 59  | 509   |
| >PTPN11-N5:IQNTGDYYDL | 3260  | >PTPN11-N5:IQYTGDDYYDL  | 356 | 2904  |
| >PTPN11-N5:IQNTGDYY   | 329   | >PTPN11-N5:IQYTGDDYY    | 46  | 283   |
| >PTPN11-N5:IQNTGDYYDL | 132   | >PTPN11-N5:IQYTGDDYYDL' | 26  | 106   |
| >PTPN11-N5:IQNTGDYY   | 23    | >PTPN11-N5:IQYTGDDYY    | 26  | 3     |
| >PTPN11-N5:IQNTGDYYDL | 42    | >PTPN11-N5:IQYTGDDYYDL' | 50  | 8     |
| >PTPN11-N5:IQNTGDYY   | 73    | >PTPN11-N5:IQYTGDDYY    | 51  | 22    |
| >PTPN11-N5:IQNTGDYYDL | 124   | >PTPN11-N5:IQYTGDDYYDL' | 73  | 51    |
| >PTPN11-N5:IQNTGDYY   | 245   | >PTPN11-N5:IQYTGDDYY    | 48  | 197   |
| >PTPN11-N5:IQNTGDYYDL | 719   | >PTPN11-N5:IQYTGDDYYDL' | 129 | 590   |
| >PTPN11-N5:IQNTGDYY   | 27    | >PTPN11-N5:IQYTGDDYY    | 7   | 20    |
| >PTPN11-N5:IQNTGDYYDL | 132   | >PTPN11-N5:IQYTGDDYYDL  | 23  | 109   |
| >PTPN11-N5:IQNTGDYYDL | 50    | >PTPN11-N5:IQYTGDDYYDL' | 11  | 39    |
| >PTPN11-N5:IQNTGDYYDL | 890   | >PTPN11-N5:IQYTGDDYYDL  | 173 | 717   |
| >PTPN11-N5:KIQNTGDYYC | 452   | >PTPN11-N5:KIQYTGDDYYD  | 857 | 405   |
| >PTPN11-N5:KIQNTGDYY  | 212   | >PTPN11-N5:KIQYTGDDYY   | 315 | 103   |
| >PTPN11-N5:KIQNTGDY   | 797   | >PTPN11-N5:KIQYTGDDY    | 377 | 420   |
| >PTPN11-N5:KIQNTGDYY  | 816   | >PTPN11-N5:KIQYTGDDYY   | 334 | 482   |
| >PTPN11-N5:KIQNTGDY   | 30    | >PTPN11-N5:KIQYTGDDY    | 20  | 10    |
| >PTPN11-N5:KIQNTGDYY  | 32    | >PTPN11-N5:KIQYTGDDYY   | 19  | 13    |
| >PTPN11-N5:KIQNTGDYYC | 219   | >PTPN11-N5:KIQYTGDDYYD  | 158 | 61    |
| >PTPN11-N5:KIQNTGDY   | 113   | >PTPN11-N5:KIQYTGDDY    | 83  | 30    |
| >PTPN11-N5:KIQNTGDYY  | 332   | >PTPN11-N5:KIQYTGDDYY   | 280 | 52    |
| >PTPN11-N5:KIQNTGDY   | 453   | >PTPN11-N5:KIQYTGDDY    | 369 | 84    |

|                       |       |                        |     |       |
|-----------------------|-------|------------------------|-----|-------|
| >PTPN11-N5:KIQNTGDYY  | 229   | >PTPN11-N5:KIQYTGDIY   | 206 | 23    |
| >PTPN11-N5:KIQNTGDYY  | 135   | >PTPN11-N5:KIQYTGDIY   | 198 | 63    |
| >PTPN11-N5:KIQNTGDYY  | 478   | >PTPN11-N5:KIQYTGDIY   | 421 | 57    |
| >PTPN11-N5:IKIQNTGDY  | 416   | >PTPN11-N5:IKIQYTGDIY  | 291 | 125   |
| >PTPN11-N5:IKIQNTGDYY | 627   | >PTPN11-N5:IKIQYTGDIY  | 190 | 437   |
| >PTPN11-N5:IKIQNTGDY  | 165   | >PTPN11-N5:IKIQYTGDIY  | 220 | 55    |
| >PTPN11-N5:IKIQNTGDYY | 248   | >PTPN11-N5:IKIQYTGDIY  | 132 | 116   |
| >PTPN11-N5:IKIQNTGDY  | 37    | >PTPN11-N5:IKIQYTGDIY  | 26  | 11    |
| >PTPN11-N5:IKIQNTGDYY | 13    | >PTPN11-N5:IKIQYTGDIY  | 11  | 2     |
| >PTPN11-N5:HIKIQTGDY  | 714   | >PTPN11-N5:HIKIYTGDIY  | 310 | 404   |
| >PTPN11-N5:HIKIQTGDY  | 472   | >PTPN11-N5:HIKIYTGDIY  | 324 | 148   |
| >PTPN11-N5:HIKIQTGDY  | 257   | >PTPN11-N5:HIKIYTGDIY  | 358 | 101   |
| >PTPN11-N5:HIKIQTGDY  | 197   | >PTPN11-N5:HIKIYTGDIY  | 254 | 57    |
| >PTPN11-N5:HIKIQTGDY  | 440   | >PTPN11-N5:HIKIYTGDIY  | 346 | 94    |
| >PTPN11-N5:HIKIQTGDY  | 402   | >PTPN11-N5:HIKIYTGDIY  | 433 | 31    |
| >PTPN11-N5:HIKIQTGDY  | 273   | >PTPN11-N5:HIKIYTGDIY  | 513 | 240   |
| >PTPN11-N5:HIKIQTGDY  | 297   | >PTPN11-N5:HIKIYTGDIY  | 491 | 194   |
| >PTPN11-N5:HIKIQTGDY  | 564   | >PTPN11-N5:HIKIYTGDIY  | 472 | 92    |
| >PTPN11-N5:THIKIQTGD  | 281   | >PTPN11-N5:THIKIYTGDIY | 101 | 180   |
| >PTPN11-N5:THIKIQTGD  | 247   | >PTPN11-N5:THIKIYTGDIY | 211 | 36    |
| >PTPN11-N5:THIKIQTGD  | 301   | >PTPN11-N5:THIKIYTGDIY | 107 | 194   |
| >PTPN11-N5:VTHIKIQN   | 24240 | >PTPN11-N5:VTHIKIQY    | 189 | 24051 |
| >PTPN11-N5:VTHIKIQN   | 24511 | >PTPN11-N5:VTHIKIQY    | 279 | 24232 |
| >PTPN11-N5:VTHIKIQN   | 5642  | >PTPN11-N5:VTHIKIQY    | 5   | 5637  |
| >PTPN11-N5:AVTHIKIQN  | 19857 | >PTPN11-N5:AVTHIKIQY   | 136 | 19721 |
| >PTPN11-N5:AVTHIKIQN  | 30339 | >PTPN11-N5:AVTHIKIQY   | 370 | 29969 |
| >PTPN11-N5:AVTHIKIQN  | 26804 | >PTPN11-N5:AVTHIKIQY   | 206 | 26598 |
| >PTPN11-N5:AVTHIKIQN  | 16995 | >PTPN11-N5:AVTHIKIQY   | 302 | 16693 |
| >PTPN11-N5:GAVTHIKIQN | 21467 | >PTPN11-N5:GAVTHIKIQY  | 79  | 21388 |
| >PTPN11-P4:VPKTIQMV   | 23792 | >PTPN11-P4:VLKTIQMV    | 475 | 23317 |
| >PTPN11-P4:VPKTIQMV   | 29882 | >PTPN11-P4:VLKTIQMV    | 62  | 29820 |
| >PTPN11-P4:VPKTIQMV   | 14400 | >PTPN11-P4:VLKTIQMV    | 9   | 14391 |
| >PTPN11-P4:VPKTIQMV   | 18741 | >PTPN11-P4:VLKTIQMV    | 15  | 18726 |
| >PTPN11-P4:VPKTIQMV   | 23820 | >PTPN11-P4:VLKTIQMV    | 69  | 23751 |
| >PTPN11-P4:VPKTIQMV   | 23096 | >PTPN11-P4:VLKTIQMV    | 51  | 23045 |
| >PTPN11-P4:VPKTIQMV   | 22406 | >PTPN11-P4:VLKTIQMV    | 88  | 22318 |
| >PTPN11-P4:VPKTIQMV   | 17662 | >PTPN11-P4:VLKTIQMV    | 2   | 17660 |
| >PTPN11-P4:VPKTIQMVR  | 19797 | >PTPN11-P4:VLKTIQMVR   | 485 | 19312 |
| >PTPN11-P4:VPKTIQMVR  | 3191  | >PTPN11-P4:VLKTIQMVR   | 43  | 3148  |
| >PTPN11-P4:VPKTIQMVR  | 3933  | >PTPN11-P4:VLKTIQMVR   | 379 | 3554  |
| >PTPN11-P4:VPKTIQMVR  | 2770  | >PTPN11-P4:VLKTIQMVR   | 432 | 2338  |
| >PTPN11-P4:VPKTIQMVR  | 1166  | >PTPN11-P4:VLKTIQMVR   | 357 | 809   |
| >PTPN11-P4:DVPKTIQMV  | 1419  | >PTPN11-P4:DVLKTIQMV   | 183 | 1236  |



|                                |       |                                |      |       |
|--------------------------------|-------|--------------------------------|------|-------|
| >PTPN11-P4 $\zeta$ DVPKTIQMV   | 1262  | >PTPN11-P4 $\zeta$ DVLKTIQMV   | 168  | 1094  |
| >PTPN11-P4 $\zeta$ DVPKTIQMV   | 7452  | >PTPN11-P4 $\zeta$ DVLKTIQMV   | 299  | 7153  |
| >PTPN11-P4 $\zeta$ DVPKTIQMV   | 736   | >PTPN11-P4 $\zeta$ DVLKTIQMV   | 345  | 391   |
| >PTPN11-P4 $\zeta$ DVPKTIQM    | 99    | >PTPN11-P4 $\zeta$ DVLKTIQM    | 72   | 27    |
| >PTPN11-P4 $\zeta$ DVPKTIQM    | 319   | >PTPN11-P4 $\zeta$ DVLKTIQM    | 312  | 7     |
| >PTPN11-P4 $\zeta$ DVPKTIQMVI  | 1035  | >PTPN11-P4 $\zeta$ DVLKTIQMVF  | 237  | 798   |
| >PTPN11-P4 $\zeta$ DVPKTIQMVI  | 762   | >PTPN11-P4 $\zeta$ DVLKTIQMVF  | 331  | 431   |
| >PTPN11-P4 $\zeta$ DVPKTIQMVI  | 31    | >PTPN11-P4 $\zeta$ DVLKTIQMVF  | 59   | 28    |
| >PTPN11-P4 $\zeta$ DVPKTIQMV   | 114   | >PTPN11-P4 $\zeta$ DVLKTIQMV   | 676  | 562   |
| >PTPN11-P4 $\zeta$ DVPKTIQM    | 3269  | >PTPN11-P4 $\zeta$ DVLKTIQM    | 68   | 3201  |
| >PTPN11-P4 $\zeta$ DVPKTIQMV   | 195   | >PTPN11-P4 $\zeta$ DVLKTIQMV   | 8    | 187   |
| >PTPN11-P4 $\zeta$ IDVPKTIQMV  | 136   | >PTPN11-P4 $\zeta$ IDVLKTIQMV  | 125  | 11    |
| >PTPN11-P4 $\zeta$ DIDVPKTIQM  | 47    | >PTPN11-P4 $\zeta$ DIDVLKTIQM  | 92   | 45    |
| >PTPN11-P4 $\zeta$ CDIDVPKTI   | 469   | >PTPN11-P4 $\zeta$ CDIDVLKTI   | 84   | 385   |
| >PTPN11-P4 $\zeta$ CDIDVPKTI   | 499   | >PTPN11-P4 $\zeta$ CDIDVLKTI   | 567  | 68    |
| >PTPN11-P4 $\zeta$ CDIDVPKTI   | 56    | >PTPN11-P4 $\zeta$ CDIDVLKTI   | 46   | 10    |
| >PTPN11-P4 $\zeta$ VDCDIDVPKT  | 318   | >PTPN11-P4 $\zeta$ VDCDIDVLKT  | 253  | 65    |
| >PTPN11-P4 $\zeta$ GVDCDIDVP   | 15526 | >PTPN11-P4 $\zeta$ GVDCDIDVL   | 118  | 15408 |
| >PTPN11-P4 $\zeta$ GVDCDIDVPk  | 131   | >PTPN11-P4 $\zeta$ GVDCDIDVLK  | 102  | 29    |
| >PTPN11-P4 $\zeta$ GVDCDIDVPk  | 618   | >PTPN11-P4 $\zeta$ GVDCDIDVLK  | 361  | 257   |
| >PTPN11-P4 $\zeta$ KGVDCCDIDVF | 127   | >PTPN11-P4 $\zeta$ KGVDCCDIDVL | 174  | 47    |
| >PTPN11-P4 $\zeta$ VPKTIQMVR   | 3191  | >PTPN11-P4 $\zeta$ VSKTIQMVR   | 29   | 3162  |
| >PTPN11-P4 $\zeta$ VPKTIQMVR   | 2770  | >PTPN11-P4 $\zeta$ VSKTIQMVR   | 171  | 2599  |
| >PTPN11-P4 $\zeta$ DVPKTIQM    | 99    | >PTPN11-P4 $\zeta$ DVSKTIQM    | 262  | 163   |
| >PTPN11-P4 $\zeta$ DVPKTIQM    | 319   | >PTPN11-P4 $\zeta$ DVSKTIQM    | 2234 | 1915  |
| >PTPN11-P4 $\zeta$ DVPKTIQMVI  | 1035  | >PTPN11-P4 $\zeta$ DVSKTIQMVF  | 224  | 811   |
| >PTPN11-P4 $\zeta$ DVPKTIQMVI  | 762   | >PTPN11-P4 $\zeta$ DVSKTIQMVF  | 475  | 287   |
| >PTPN11-P4 $\zeta$ DVPKTIQMVI  | 31    | >PTPN11-P4 $\zeta$ DVSKTIQMVF  | 21   | 10    |
| >PTPN11-P4 $\zeta$ DVPKTIQMV   | 114   | >PTPN11-P4 $\zeta$ DVSKTIQMV   | 103  | 11    |
| >PTPN11-P4 $\zeta$ DVPKTIQMV   | 195   | >PTPN11-P4 $\zeta$ DVSKTIQMV   | 42   | 153   |
| >PTPN11-P4 $\zeta$ IDVPKTIQMV  | 136   | >PTPN11-P4 $\zeta$ IDVSKTIQMV  | 150  | 14    |
| >PTPN11-P4 $\zeta$ DIDVPKTIQM  | 47    | >PTPN11-P4 $\zeta$ DIDVSKTIQM  | 109  | 62    |
| >PTPN11-P4 $\zeta$ CDIDVPKTI   | 469   | >PTPN11-P4 $\zeta$ CDIDVSKTI   | 330  | 139   |
| >PTPN11-P4 $\zeta$ CDIDVPKTI   | 499   | >PTPN11-P4 $\zeta$ CDIDVSKTI   | 481  | 18    |
| >PTPN11-P4 $\zeta$ CDIDVPKTI   | 56    | >PTPN11-P4 $\zeta$ CDIDVSKTI   | 42   | 14    |
| >PTPN11-P4 $\zeta$ VDCDIDVPKT  | 318   | >PTPN11-P4 $\zeta$ VDCDIDVSKT  | 269  | 49    |
| >PTPN11-P4 $\zeta$ GVDCDIDVPk  | 131   | >PTPN11-P4 $\zeta$ GVDCDIDVSK  | 139  | 8     |
| >PTPN11-P4 $\zeta$ KGVDCCDIDVF | 127   | >PTPN11-P4 $\zeta$ KGVDCCDIDVS | 329  | 202   |
| >PTPN11-Q5 QYRFIYMAV           | 134   | >PTPN11-Q5 HYRFIYMAV           | 58   | 76    |
| >PTPN11-Q5 QYRFIYMA            | 36    | >PTPN11-Q5 HYRFIYMA            | 7    | 29    |
| >PTPN11-Q5 QYRFIYMAV           | 8     | >PTPN11-Q5 HYRFIYMAV           | 4    | 4     |
| >PTPN11-Q5 QYRFIYMAVC          | 144   | >PTPN11-Q5 HYRFIYMAVC          | 16   | 128   |
| >PTPN11-Q5 QYRFIYMAVC          | 888   | >PTPN11-Q5 HYRFIYMAVC          | 66   | 822   |

|                       |      |                       |       |       |
|-----------------------|------|-----------------------|-------|-------|
| >PTPN11-Q5 QYRFIYMAV  | 195  | >PTPN11-Q5 HYRFIYMAV  | 398   | 203   |
| >PTPN11-Q5 QYRFIYMAV  | 338  | >PTPN11-Q5 HYRFIYMAV  | 441   | 103   |
| >PTPN11-Q5 AQYRFIYM   | 347  | >PTPN11-Q5 AHYRFIYM   | 4264  | 3917  |
| >PTPN11-Q5 AQYRFIYM   | 25   | >PTPN11-Q5 AHYRFIYM   | 46    | 21    |
| >PTPN11-Q5 AQYRFIYM   | 215  | >PTPN11-Q5 AHYRFIYM   | 18749 | 18534 |
| >PTPN11-Q5 AQYRFIYMA  | 57   | >PTPN11-Q5 AHYRFIYMA  | 15908 | 15851 |
| >PTPN11-Q5 AQYRFIYMA\ | 86   | >PTPN11-Q5 AHYRFIYMA\ | 1745  | 1659  |
| >PTPN11-Q5 AQYRFIYM   | 487  | >PTPN11-Q5 AHYRFIYM   | 6940  | 6453  |
| >PTPN11-Q5 AQYRFIYMA  | 85   | >PTPN11-Q5 AHYRFIYMA  | 3433  | 3348  |
| >PTPN11-Q5 AQYRFIYMA\ | 39   | >PTPN11-Q5 AHYRFIYMA\ | 972   | 933   |
| >PTPN11-Q5 AQYRFIYMA  | 76   | >PTPN11-Q5 AHYRFIYMA  | 12769 | 12693 |
| >PTPN11-Q5 AQYRFIYMA\ | 14   | >PTPN11-Q5 AHYRFIYMA\ | 570   | 556   |
| >PTPN11-Q5 AQYRFIYM   | 20   | >PTPN11-Q5 AHYRFIYM   | 8483  | 8463  |
| >PTPN11-Q5 AQYRFIYMA  | 15   | >PTPN11-Q5 AHYRFIYMA  | 11448 | 11433 |
| >PTPN11-Q5 AQYRFIYMA\ | 55   | >PTPN11-Q5 AHYRFIYMA\ | 2007  | 1952  |
| >PTPN11-Q5 AQYRFIYM   | 101  | >PTPN11-Q5 AHYRFIYM   | 5464  | 5363  |
| >PTPN11-Q5 AQYRFIYMA  | 26   | >PTPN11-Q5 AHYRFIYMA  | 2019  | 1993  |
| >PTPN11-Q5 AQYRFIYMA\ | 7    | >PTPN11-Q5 AHYRFIYMA\ | 311   | 304   |
| >PTPN11-Q5 AQYRFIYMA\ | 32   | >PTPN11-Q5 AHYRFIYMA\ | 8883  | 8851  |
| >PTPN11-Q5 AQYRFIYMA\ | 43   | >PTPN11-Q5 AHYRFIYMA\ | 3515  | 3472  |
| >PTPN11-Q5 AQYRFIYMA\ | 46   | >PTPN11-Q5 AHYRFIYMA\ | 2173  | 2127  |
| >PTPN11-Q5 AQYRFIYMA\ | 184  | >PTPN11-Q5 AHYRFIYMA\ | 1836  | 1652  |
| >PTPN11-Q5 AQYRFIYM   | 68   | >PTPN11-Q5 AHYRFIYM   | 15611 | 15543 |
| >PTPN11-Q5 AQYRFIYMA\ | 281  | >PTPN11-Q5 AHYRFIYMA\ | 21061 | 20780 |
| >PTPN11-Q5 AQYRFIYMA\ | 418  | >PTPN11-Q5 AHYRFIYMA\ | 21810 | 21392 |
| >PTPN11-Q5 AQYRFIYM   | 5    | >PTPN11-Q5 AHYRFIYM   | 43    | 38    |
| >PTPN11-Q5 AQYRFIYMA  | 32   | >PTPN11-Q5 AHYRFIYMA  | 740   | 708   |
| >PTPN11-Q5 AQYRFIYMA\ | 5    | >PTPN11-Q5 AHYRFIYMA\ | 35    | 30    |
| >PTPN11-Q5 AQYRFIYMA\ | 163  | >PTPN11-Q5 AHYRFIYMA\ | 2372  | 2209  |
| >PTPN11-Q5 AQYRFIYM   | 236  | >PTPN11-Q5 AHYRFIYM   | 5956  | 5720  |
| >PTPN11-Q5 AQYRFIYMA\ | 550  | >PTPN11-Q5 AHYRFIYMA\ | 284   | 266   |
| >PTPN11-Q5 AQYRFIYMA  | 36   | >PTPN11-Q5 AHYRFIYMA  | 484   | 448   |
| >PTPN11-Q5 AQYRFIYMA\ | 179  | >PTPN11-Q5 AHYRFIYMA\ | 553   | 374   |
| >PTPN11-Q5 AQYRFIYMA\ | 497  | >PTPN11-Q5 AHYRFIYMA\ | 3404  | 2907  |
| >PTPN11-Q5 EAQYRFIYM  | 359  | >PTPN11-Q5 EAHYRFIYM  | 86    | 273   |
| >PTPN11-Q5 EAQYRFIYM  | 740  | >PTPN11-Q5 EAHYRFIYM  | 277   | 463   |
| >PTPN11-Q5 EAQYRFIYM  | 981  | >PTPN11-Q5 EAHYRFIYM  | 262   | 719   |
| >PTPN11-Q5 EAQYRFIYM  | 1231 | >PTPN11-Q5 EAHYRFIYM  | 90    | 1141  |
| >PTPN11-Q5 EAQYRFIY   | 334  | >PTPN11-Q5 EAHYRFIY   | 111   | 223   |
| >PTPN11-Q5 EAQYRFIYM  | 1272 | >PTPN11-Q5 EAHYRFIYM  | 226   | 1046  |
| >PTPN11-Q5 EAQYRFIYMA | 18   | >PTPN11-Q5 EAHYRFIYMA | 8     | 10    |
| >PTPN11-Q5 EAQYRFIYMA | 61   | >PTPN11-Q5 EAHYRFIYMA | 71    | 10    |
| >PTPN11-Q5 EAQYRFIYM  | 170  | >PTPN11-Q5 EAHYRFIYM  | 64    | 106   |

|                       |      |                       |     |     |
|-----------------------|------|-----------------------|-----|-----|
| >PTPN11-Q5 EAQYRFIYMA | 237  | >PTPN11-Q5 EAHYRFIYMA | 104 | 133 |
| >PTPN11-Q5 EAQYRFIY   | 261  | >PTPN11-Q5 EAHYRFIY   | 176 | 85  |
| >PTPN11-Q5 TEAQYRFI   | 9    | >PTPN11-Q5 TEAHYRFI   | 9   | 0   |
| >PTPN11-Q5 TEAQYRFIY  | 245  | >PTPN11-Q5 TEAHYRFIY  | 215 | 30  |
| >PTPN11-Q5 TEAQYRFIYM | 42   | >PTPN11-Q5 TEAHYRFIYM | 37  | 5   |
| >PTPN11-Q5 TEAQYRFIYM | 444  | >PTPN11-Q5 TEAHYRFIYM | 391 | 53  |
| >PTPN11-Q5 TEAQYRFIY  | 625  | >PTPN11-Q5 TEAHYRFIY  | 429 | 196 |
| >PTPN11-Q5 TEAQYRFIY  | 336  | >PTPN11-Q5 TEAHYRFIY  | 267 | 69  |
| >PTPN11-Q5 TEAQYRFIY  | 11   | >PTPN11-Q5 TEAHYRFIY  | 24  | 13  |
| >PTPN11-Q5 TEAQYRFI   | 443  | >PTPN11-Q5 TEAHYRFI   | 320 | 123 |
| >PTPN11-Q5 TEAQYRFI   | 320  | >PTPN11-Q5 TEAHYRFI   | 418 | 98  |
| >PTPN11-Q5 TEAQYRFIYM | 172  | >PTPN11-Q5 TEAHYRFIYM | 182 | 10  |
| >PTPN11-Q5 TEAQYRFIYM | 100  | >PTPN11-Q5 TEAHYRFIYM | 116 | 16  |
| >PTPN11-Q5 TEAQYRFIYM | 217  | >PTPN11-Q5 TEAHYRFIYM | 170 | 47  |
| >PTPN11-Q5 TEAQYRFIY  | 78   | >PTPN11-Q5 TEAHYRFIY  | 89  | 11  |
| >PTPN11-Q5 TEAQYRFIYM | 264  | >PTPN11-Q5 TEAHYRFIYM | 277 | 13  |
| >PTPN11-Q5 TEAQYRFI   | 158  | >PTPN11-Q5 TEAHYRFI   | 290 | 132 |
| >PTPN11-Q5 TEAQYRFIY  | 256  | >PTPN11-Q5 TEAHYRFIY  | 743 | 487 |
| >PTPN11-Q5 TEAQYRFIYM | 6    | >PTPN11-Q5 TEAHYRFIYM | 8   | 2   |
| >PTPN11-Q5 TEAQYRFI   | 208  | >PTPN11-Q5 TEAHYRFI   | 730 | 522 |
| >PTPN11-Q5 TEAQYRFIYM | 375  | >PTPN11-Q5 TEAHYRFIYM | 622 | 247 |
| >PTPN11-Q5 QTEAQYRFI  | 303  | >PTPN11-Q5 QTEAHYRFI  | 686 | 383 |
| >PTPN11-Q5 QTEAQYRFIY | 121  | >PTPN11-Q5 QTEAHYRFIY | 129 | 8   |
| >PTPN11-Q5 QTEAQYRFIY | 279  | >PTPN11-Q5 QTEAHYRFIY | 337 | 58  |
| >PTPN11-Q5 QTEAQYRFIY | 454  | >PTPN11-Q5 QTEAHYRFIY | 653 | 199 |
| >PTPN11-Q5 QTEAQYRF   | 19   | >PTPN11-Q5 QTEAHYRF   | 17  | 2   |
| >PTPN11-Q5 QTEAQYRFIY | 63   | >PTPN11-Q5 QTEAHYRFIY | 78  | 15  |
| >PTPN11-Q5 QTEAQYRFIY | 380  | >PTPN11-Q5 QTEAHYRFIY | 390 | 10  |
| >PTPN11-Q5 QTEAQYRFI  | 1026 | >PTPN11-Q5 QTEAHYRFI  | 174 | 852 |
| >PTPN11-Q5 QTEAQYRFIY | 198  | >PTPN11-Q5 QTEAHYRFIY | 71  | 127 |
| >PTPN11-Q5 QTEAQYRFIY | 50   | >PTPN11-Q5 QTEAHYRFIY | 76  | 26  |
| >PTPN11-Q5 QTEAQYRFIY | 316  | >PTPN11-Q5 QTEAHYRFIY | 410 | 94  |
| >PTPN11-Q5 QTEAQYRFI  | 209  | >PTPN11-Q5 QTEAHYRFI  | 130 | 79  |
| >PTPN11-Q5 VQTEAQYRFI | 116  | >PTPN11-Q5 VQTEAHYRFI | 217 | 101 |
| >PTPN11-Q5 VQTEAQYRF  | 568  | >PTPN11-Q5 VQTEAHYRF  | 237 | 331 |
| >PTPN11-Q5 VQTEAQYRFI | 661  | >PTPN11-Q5 VQTEAHYRFI | 405 | 256 |
| >PTPN11-Q5 VQTEAQYRFI | 33   | >PTPN11-Q5 VQTEAHYRFI | 46  | 13  |
| >PTPN11-Q5 VQTEAQYR   | 215  | >PTPN11-Q5 VQTEAHYR   | 46  | 169 |
| >PTPN11-Q5 VQTEAQYRF  | 642  | >PTPN11-Q5 VQTEAHYRF  | 286 | 356 |
| >PTPN11-Q5 VQTEAQYRFI | 529  | >PTPN11-Q5 VQTEAHYRFI | 370 | 159 |
| >PTPN11-Q5 VQTEAQYRF  | 51   | >PTPN11-Q5 VQTEAHYRF  | 33  | 18  |
| >PTPN11-Q5 VQTEAQYRFI | 67   | >PTPN11-Q5 VQTEAHYRFI | 44  | 23  |
| >PTPN11-Q5 VQTEAQYRFI | 719  | >PTPN11-Q5 VQTEAHYRFI | 450 | 269 |

|                      |      |                      |      |      |
|----------------------|------|----------------------|------|------|
| >PTPN11-Q5 VQTEAQYR  | 323  | >PTPN11-Q5 VQTEAHYR  | 99   | 224  |
| >PTPN11-Q5 MVQTEAQYR | 265  | >PTPN11-Q5 MVQTEAHYR | 58   | 207  |
| >PTPN11-Q5 MVQTEAQYR | 567  | >PTPN11-Q5 MVQTEAHYR | 391  | 176  |
| >PTPN11-Q5 MVQTEAQY  | 328  | >PTPN11-Q5 MVQTEAHY  | 103  | 225  |
| >PTPN11-Q5 MVQTEAQY  | 60   | >PTPN11-Q5 MVQTEAHY  | 45   | 15   |
| >PTPN11-Q5 MVQTEAQYR | 322  | >PTPN11-Q5 MVQTEAHYR | 365  | 43   |
| >PTPN11-Q5 MVQTEAQY  | 143  | >PTPN11-Q5 MVQTEAHY  | 40   | 103  |
| >PTPN11-Q5 MVQTEAQYR | 74   | >PTPN11-Q5 MVQTEAHYR | 26   | 48   |
| >PTPN11-Q5 MVQTEAQYR | 767  | >PTPN11-Q5 MVQTEAHYR | 485  | 282  |
| >PTPN11-Q5 MVQTEAQYR | 662  | >PTPN11-Q5 MVQTEAHYR | 243  | 419  |
| >PTPN11-Q5 MVQTEAQYR | 14   | >PTPN11-Q5 MVQTEAHYR | 5    | 9    |
| >PTPN11-Q5 MVQTEAQYR | 290  | >PTPN11-Q5 MVQTEAHYR | 142  | 148  |
| >PTPN11-Q5 MVQTEAQY  | 1142 | >PTPN11-Q5 MVQTEAHY  | 192  | 950  |
| >PTPN11-Q5 MVQTEAQY  | 481  | >PTPN11-Q5 MVQTEAHY  | 194  | 287  |
| >PTPN11-Q5 MVQTEAQY  | 102  | >PTPN11-Q5 MVQTEAHY  | 280  | 178  |
| >PTPN11-Q5 MVQTEAQYR | 175  | >PTPN11-Q5 MVQTEAHYR | 119  | 56   |
| >PTPN11-Q5 MVQTEAQY  | 104  | >PTPN11-Q5 MVQTEAHY  | 246  | 142  |
| >PTPN11-Q5 MVQTEAQYR | 368  | >PTPN11-Q5 MVQTEAHYR | 465  | 97   |
| >PTPN11-Q5 MVQTEAQYR | 111  | >PTPN11-Q5 MVQTEAHYR | 37   | 74   |
| >PTPN11-Q5 MVQTEAQYR | 357  | >PTPN11-Q5 MVQTEAHYR | 313  | 44   |
| >PTPN11-Q5 GMVQTEAQ\ | 277  | >PTPN11-Q5 GMVQTEAHY | 164  | 113  |
| >PTPN11-Q5 GMVQTEAQ\ | 37   | >PTPN11-Q5 GMVQTEAHY | 34   | 3    |
| >PTPN11-Q5 GMVQTEAQ\ | 357  | >PTPN11-Q5 GMVQTEAHY | 270  | 87   |
| >PTPN11-Q5 GMVQTEAQ\ | 95   | >PTPN11-Q5 GMVQTEAHY | 36   | 59   |
| >PTPN11-Q5 GMVQTEAQ\ | 756  | >PTPN11-Q5 GMVQTEAHY | 245  | 511  |
| >PTPN11-Q5 GMVQTEAQ\ | 260  | >PTPN11-Q5 GMVQTEAHY | 213  | 47   |
| >PTPN11-Q5 GMVQTEAQ\ | 86   | >PTPN11-Q5 GMVQTEAHY | 39   | 47   |
| >PTPN11-Q5 GMVQTEAQ\ | 135  | >PTPN11-Q5 GMVQTEAHY | 89   | 46   |
| >PTPN11-Q5 GMVQTEAQ\ | 312  | >PTPN11-Q5 GMVQTEAHY | 549  | 237  |
| >PTPN11-Q5 GMVQTEAQ\ | 249  | >PTPN11-Q5 GMVQTEAHY | 167  | 82   |
| >PTPN11-Q5 GMVQTEAQ\ | 128  | >PTPN11-Q5 GMVQTEAHY | 90   | 38   |
| >PTPN11-Q5 GMVQTEAQ\ | 59   | >PTPN11-Q5 GMVQTEAHY | 236  | 177  |
| >PTPN11-Q5 GMVQTEAQ\ | 162  | >PTPN11-Q5 GMVQTEAHY | 128  | 34   |
| >PTPN11-Q5 GMVQTEAQ\ | 387  | >PTPN11-Q5 GMVQTEAHY | 327  | 60   |
| >PTPN11-Q5 GMVQTEAQ\ | 120  | >PTPN11-Q5 GMVQTEAHY | 47   | 73   |
| >PTPN11-Q5 SGMVQTEAC | 100  | >PTPN11-Q5 SGMVQTEAH | 128  | 28   |
| >PTPN11-Q5 SGMVQTEAC | 297  | >PTPN11-Q5 SGMVQTEAH | 125  | 172  |
| >PTPN11-Q5 SGMVQTEAC | 836  | >PTPN11-Q5 SGMVQTEAH | 243  | 593  |
| >PTPN11-Q5 SGMVQTEAC | 514  | >PTPN11-Q5 SGMVQTEAH | 178  | 336  |
| >PTPN11-Q5 SGMVQTEAC | 436  | >PTPN11-Q5 SGMVQTEAH | 1033 | 597  |
| >PTPN11-Q5 SGMVQTEAC | 224  | >PTPN11-Q5 SGMVQTEAH | 570  | 346  |
| >PTPN11-Q5 SGMVQTEAC | 2298 | >PTPN11-Q5 SGMVQTEAH | 486  | 1812 |
| >PTPN11-Q5 SGMVQTEAC | 179  | >PTPN11-Q5 SGMVQTEAH | 88   | 91   |

|                       |      |                       |       |       |
|-----------------------|------|-----------------------|-------|-------|
| >PTPN11-Q5 RSGMVQTEA  | 84   | >PTPN11-Q5 RSGMVQTEA  | 44    | 40    |
| >PTPN11-Q5 RSGMVQTEA  | 620  | >PTPN11-Q5 RSGMVQTEA  | 176   | 444   |
| >PTPN11-Q5 RSGMVQTEA  | 203  | >PTPN11-Q5 RSGMVQTEA  | 86    | 117   |
| >PTPN11-Q5 RSGMVQTEA  | 9    | >PTPN11-Q5 RSGMVQTEA  | 10    | 1     |
| >PTPN11-Q5 RSGMVQTEA  | 428  | >PTPN11-Q5 RSGMVQTEA  | 415   | 13    |
| >PTPN11-Q5 RSGMVQTEA  | 20   | >PTPN11-Q5 RSGMVQTEA  | 21    | 1     |
| >PTPN11-Q5 RSGMVQTEA  | 46   | >PTPN11-Q5 RSGMVQTEA  | 154   | 108   |
| >PTPN11-Q5 QYRFIYMAV  | 1332 | >PTPN11-Q5 KYRFIYMAV  | 277   | 1055  |
| >PTPN11-Q5 QYRFIYMAV  | 134  | >PTPN11-Q5 KYRFIYMAV  | 79    | 55    |
| >PTPN11-Q5 QYRFIYMA   | 36   | >PTPN11-Q5 KYRFIYMA   | 5     | 31    |
| >PTPN11-Q5 QYRFIYMAV  | 8    | >PTPN11-Q5 KYRFIYMAV  | 3     | 5     |
| >PTPN11-Q5 QYRFIYMAVC | 144  | >PTPN11-Q5 KYRFIYMAVC | 8     | 136   |
| >PTPN11-Q5 QYRFIYMAVC | 888  | >PTPN11-Q5 KYRFIYMAVC | 24    | 864   |
| >PTPN11-Q5 QYRFIYMAV  | 5683 | >PTPN11-Q5 KYRFIYMAV  | 404   | 5279  |
| >PTPN11-Q5 QYRFIYMAVC | 4689 | >PTPN11-Q5 KYRFIYMAVC | 298   | 4391  |
| >PTPN11-Q5 QYRFIYMAV  | 195  | >PTPN11-Q5 KYRFIYMAV  | 297   | 102   |
| >PTPN11-Q5 QYRFIYMA   | 790  | >PTPN11-Q5 KYRFIYMA   | 170   | 620   |
| >PTPN11-Q5 QYRFIYMAV  | 338  | >PTPN11-Q5 KYRFIYMAV  | 83    | 255   |
| >PTPN11-Q5 AQYRFIYM   | 347  | >PTPN11-Q5 AKYRFIYM   | 3280  | 2933  |
| >PTPN11-Q5 AQYRFIYM   | 25   | >PTPN11-Q5 AKYRFIYM   | 85    | 60    |
| >PTPN11-Q5 AQYRFIYM   | 215  | >PTPN11-Q5 AKYRFIYM   | 18180 | 17965 |
| >PTPN11-Q5 AQYRFIYMA  | 57   | >PTPN11-Q5 AKYRFIYMA  | 14445 | 14388 |
| >PTPN11-Q5 AQYRFIYMA\ | 86   | >PTPN11-Q5 AKYRFIYMAV | 1673  | 1587  |
| >PTPN11-Q5 AQYRFIYM   | 487  | >PTPN11-Q5 AKYRFIYM   | 6433  | 5946  |
| >PTPN11-Q5 AQYRFIYMA  | 85   | >PTPN11-Q5 AKYRFIYMA  | 3012  | 2927  |
| >PTPN11-Q5 AQYRFIYMA\ | 39   | >PTPN11-Q5 AKYRFIYMAV | 738   | 699   |
| >PTPN11-Q5 AQYRFIYMA  | 76   | >PTPN11-Q5 AKYRFIYMA  | 6764  | 6688  |
| >PTPN11-Q5 AQYRFIYMA\ | 14   | >PTPN11-Q5 AKYRFIYMAV | 343   | 329   |
| >PTPN11-Q5 AQYRFIYM   | 20   | >PTPN11-Q5 AKYRFIYM   | 3188  | 3168  |
| >PTPN11-Q5 AQYRFIYMA  | 15   | >PTPN11-Q5 AKYRFIYMA  | 3450  | 3435  |
| >PTPN11-Q5 AQYRFIYMA\ | 55   | >PTPN11-Q5 AKYRFIYMAV | 780   | 725   |
| >PTPN11-Q5 AQYRFIYM   | 101  | >PTPN11-Q5 AKYRFIYM   | 2797  | 2696  |
| >PTPN11-Q5 AQYRFIYMA  | 26   | >PTPN11-Q5 AKYRFIYMA  | 718   | 692   |
| >PTPN11-Q5 AQYRFIYMA\ | 7    | >PTPN11-Q5 AKYRFIYMAV | 102   | 95    |
| >PTPN11-Q5 AQYRFIYMA\ | 32   | >PTPN11-Q5 AKYRFIYMAV | 4245  | 4213  |
| >PTPN11-Q5 AQYRFIYMA\ | 43   | >PTPN11-Q5 AKYRFIYMAV | 1736  | 1693  |
| >PTPN11-Q5 AQYRFIYMA\ | 46   | >PTPN11-Q5 AKYRFIYMAV | 825   | 779   |
| >PTPN11-Q5 AQYRFIYMA\ | 184  | >PTPN11-Q5 AKYRFIYMAV | 810   | 626   |
| >PTPN11-Q5 AQYRFIYM   | 68   | >PTPN11-Q5 AKYRFIYM   | 11209 | 11141 |
| >PTPN11-Q5 AQYRFIYMA\ | 281  | >PTPN11-Q5 AKYRFIYMAV | 17719 | 17438 |
| >PTPN11-Q5 AQYRFIYMA\ | 418  | >PTPN11-Q5 AKYRFIYMAV | 20070 | 19652 |
| >PTPN11-Q5 AQYRFIYM   | 5    | >PTPN11-Q5 AKYRFIYM   | 5     | 0     |
| >PTPN11-Q5 AQYRFIYMA  | 32   | >PTPN11-Q5 AKYRFIYMA  | 33    | 1     |

|                       |      |                       |      |      |
|-----------------------|------|-----------------------|------|------|
| >PTPN11-Q5 AQYRFIYMAV | 5    | >PTPN11-Q5 AKYRFIYMAV | 6    | 1    |
| >PTPN11-Q5 AQYRFIYMAV | 163  | >PTPN11-Q5 AKYRFIYMAV | 146  | 17   |
| >PTPN11-Q5 AQYRFIYM   | 236  | >PTPN11-Q5 AKYRFIYM   | 975  | 739  |
| >PTPN11-Q5 AQYRFIYMA  | 36   | >PTPN11-Q5 AKYRFIYMA  | 312  | 276  |
| >PTPN11-Q5 AQYRFIYMAV | 179  | >PTPN11-Q5 AKYRFIYMAV | 272  | 93   |
| >PTPN11-Q5 AQYRFIYMAV | 497  | >PTPN11-Q5 AKYRFIYMAV | 1493 | 996  |
| >PTPN11-Q5 QRSGMVQTE  | 5684 | >PTPN11-Q5 QRSGMVQTE  | 302  | 5382 |
| >PTPN11-Q5 EAQYRFIYM  | 359  | >PTPN11-Q5 EAKYRFIYM  | 539  | 180  |
| >PTPN11-Q5 EAQYRFIYM  | 740  | >PTPN11-Q5 EAKYRFIYM  | 320  | 420  |
| >PTPN11-Q5 EAQYRFIY   | 334  | >PTPN11-Q5 EAKYRFIY   | 306  | 28   |
| >PTPN11-Q5 EAQYRFIYMA | 18   | >PTPN11-Q5 EAKYRFIYMA | 26   | 8    |
| >PTPN11-Q5 EAQYRFIYMA | 61   | >PTPN11-Q5 EAKYRFIYMA | 234  | 173  |
| >PTPN11-Q5 EAQYRFIYM  | 170  | >PTPN11-Q5 EAKYRFIYM  | 29   | 141  |
| >PTPN11-Q5 EAQYRFIYMA | 237  | >PTPN11-Q5 EAKYRFIYMA | 45   | 192  |
| >PTPN11-Q5 EAQYRFIY   | 261  | >PTPN11-Q5 EAKYRFIY   | 953  | 692  |
| >PTPN11-Q5 TEAQYRFI   | 9    | >PTPN11-Q5 TEAKYRFI   | 8    | 1    |
| >PTPN11-Q5 TEAQYRFIY  | 245  | >PTPN11-Q5 TEAKYRFIY  | 444  | 199  |
| >PTPN11-Q5 TEAQYRFIYM | 42   | >PTPN11-Q5 TEAKYRFIYM | 66   | 24   |
| >PTPN11-Q5 TEAQYRFIYM | 444  | >PTPN11-Q5 TEAKYRFIYM | 731  | 287  |
| >PTPN11-Q5 TEAQYRFIY  | 336  | >PTPN11-Q5 TEAKYRFIY  | 451  | 115  |
| >PTPN11-Q5 TEAQYRFIY  | 11   | >PTPN11-Q5 TEAKYRFIY  | 11   | 0    |
| >PTPN11-Q5 TEAQYRFI   | 443  | >PTPN11-Q5 TEAKYRFI   | 471  | 28   |
| >PTPN11-Q5 TEAQYRFI   | 320  | >PTPN11-Q5 TEAKYRFI   | 547  | 227  |
| >PTPN11-Q5 TEAQYRFIYM | 172  | >PTPN11-Q5 TEAKYRFIYM | 212  | 40   |
| >PTPN11-Q5 TEAQYRFIYM | 100  | >PTPN11-Q5 TEAKYRFIYM | 155  | 55   |
| >PTPN11-Q5 TEAQYRFIYM | 217  | >PTPN11-Q5 TEAKYRFIYM | 308  | 91   |
| >PTPN11-Q5 TEAQYRFIY  | 78   | >PTPN11-Q5 TEAKYRFIY  | 158  | 80   |
| >PTPN11-Q5 TEAQYRFIYM | 264  | >PTPN11-Q5 TEAKYRFIYM | 412  | 148  |
| >PTPN11-Q5 TEAQYRFI   | 158  | >PTPN11-Q5 TEAKYRFI   | 301  | 143  |
| >PTPN11-Q5 TEAQYRFIY  | 256  | >PTPN11-Q5 TEAKYRFIY  | 532  | 276  |
| >PTPN11-Q5 TEAQYRFIYM | 6    | >PTPN11-Q5 TEAKYRFIYM | 8    | 2    |
| >PTPN11-Q5 TEAQYRFI   | 208  | >PTPN11-Q5 TEAKYRFI   | 148  | 60   |
| >PTPN11-Q5 TEAQYRFIYM | 375  | >PTPN11-Q5 TEAKYRFIYM | 525  | 150  |
| >PTPN11-Q5 QTEAQYRFI  | 303  | >PTPN11-Q5 QTEAKYRFI  | 466  | 163  |
| >PTPN11-Q5 QTEAQYRFIY | 121  | >PTPN11-Q5 QTEAKYRFIY | 159  | 38   |
| >PTPN11-Q5 QTEAQYRFIY | 279  | >PTPN11-Q5 QTEAKYRFIY | 331  | 52   |
| >PTPN11-Q5 QTEAQYRFIY | 454  | >PTPN11-Q5 QTEAKYRFIY | 466  | 12   |
| >PTPN11-Q5 QTEAQYRF   | 19   | >PTPN11-Q5 QTEAKYRF   | 24   | 5    |
| >PTPN11-Q5 QTEAQYRFIY | 63   | >PTPN11-Q5 QTEAKYRFIY | 70   | 7    |
| >PTPN11-Q5 QTEAQYRFIY | 380  | >PTPN11-Q5 QTEAKYRFIY | 294  | 86   |
| >PTPN11-Q5 QTEAQYRFIY | 198  | >PTPN11-Q5 QTEAKYRFIY | 198  | 0    |
| >PTPN11-Q5 QTEAQYRFIY | 50   | >PTPN11-Q5 QTEAKYRFIY | 62   | 12   |
| >PTPN11-Q5 QTEAQYRFIY | 316  | >PTPN11-Q5 QTEAKYRFIY | 310  | 6    |

|                       |       |                       |      |       |
|-----------------------|-------|-----------------------|------|-------|
| >PTPN11-Q5 QTEAQYRFI  | 209   | >PTPN11-Q5 QTEAKYRFI  | 273  | 64    |
| >PTPN11-Q5 VQTEAQYRFI | 116   | >PTPN11-Q5 VQTEAKYRFI | 94   | 22    |
| >PTPN11-Q5 VQTEAQYRFI | 33    | >PTPN11-Q5 VQTEAKYRFI | 50   | 17    |
| >PTPN11-Q5 VQTEAQYR   | 215   | >PTPN11-Q5 VQTEAKYR   | 250  | 35    |
| >PTPN11-Q5 VQTEAQYRF  | 51    | >PTPN11-Q5 VQTEAKYRF  | 120  | 69    |
| >PTPN11-Q5 VQTEAQYRFI | 67    | >PTPN11-Q5 VQTEAKYRFI | 91   | 24    |
| >PTPN11-Q5 VQTEAQYR   | 323   | >PTPN11-Q5 VQTEAKYR   | 241  | 82    |
| >PTPN11-Q5 MVQTEAQYR  | 265   | >PTPN11-Q5 MVQTEAKYR  | 510  | 245   |
| >PTPN11-Q5 MVQTEAQY   | 328   | >PTPN11-Q5 MVQTEAKY   | 555  | 227   |
| >PTPN11-Q5 MVQTEAQY   | 60    | >PTPN11-Q5 MVQTEAKY   | 103  | 43    |
| >PTPN11-Q5 MVQTEAQYR  | 322   | >PTPN11-Q5 MVQTEAKYR  | 506  | 184   |
| >PTPN11-Q5 MVQTEAQY   | 143   | >PTPN11-Q5 MVQTEAKY   | 78   | 65    |
| >PTPN11-Q5 MVQTEAQYR  | 74    | >PTPN11-Q5 MVQTEAKYR  | 102  | 28    |
| >PTPN11-Q5 MVQTEAQYR  | 14    | >PTPN11-Q5 MVQTEAKYR  | 20   | 6     |
| >PTPN11-Q5 MVQTEAQYR  | 290   | >PTPN11-Q5 MVQTEAKYR  | 539  | 249   |
| >PTPN11-Q5 MVQTEAQY   | 481   | >PTPN11-Q5 MVQTEAKY   | 1954 | 1473  |
| >PTPN11-Q5 MVQTEAQY   | 102   | >PTPN11-Q5 MVQTEAKY   | 180  | 78    |
| >PTPN11-Q5 MVQTEAQYR  | 175   | >PTPN11-Q5 MVQTEAKYR  | 277  | 102   |
| >PTPN11-Q5 MVQTEAQY   | 104   | >PTPN11-Q5 MVQTEAKY   | 161  | 57    |
| >PTPN11-Q5 MVQTEAQYR  | 368   | >PTPN11-Q5 MVQTEAKYR  | 3042 | 2674  |
| >PTPN11-Q5 MVQTEAQYR  | 111   | >PTPN11-Q5 MVQTEAKYR  | 93   | 18    |
| >PTPN11-Q5 MVQTEAQYR  | 357   | >PTPN11-Q5 MVQTEAKYR  | 395  | 38    |
| >PTPN11-Q5 GMVQTEAQ   | 27515 | >PTPN11-Q5 GMVQTEAK   | 421  | 27094 |
| >PTPN11-Q5 GMVQTEAQ\  | 277   | >PTPN11-Q5 GMVQTEAKY  | 284  | 7     |
| >PTPN11-Q5 GMVQTEAQ\  | 37    | >PTPN11-Q5 GMVQTEAKY  | 53   | 16    |
| >PTPN11-Q5 GMVQTEAQ\  | 357   | >PTPN11-Q5 GMVQTEAKY  | 782  | 425   |
| >PTPN11-Q5 GMVQTEAQ\  | 95    | >PTPN11-Q5 GMVQTEAKY  | 42   | 53    |
| >PTPN11-Q5 GMVQTEAQ\  | 260   | >PTPN11-Q5 GMVQTEAKY  | 731  | 471   |
| >PTPN11-Q5 GMVQTEAQ\  | 86    | >PTPN11-Q5 GMVQTEAKY  | 237  | 151   |
| >PTPN11-Q5 GMVQTEAQ\  | 135   | >PTPN11-Q5 GMVQTEAKY  | 202  | 67    |
| >PTPN11-Q5 GMVQTEAQ\  | 312   | >PTPN11-Q5 GMVQTEAKY  | 304  | 8     |
| >PTPN11-Q5 GMVQTEAQ\  | 249   | >PTPN11-Q5 GMVQTEAKY  | 286  | 37    |
| >PTPN11-Q5 GMVQTEAQ\  | 128   | >PTPN11-Q5 GMVQTEAKY  | 197  | 69    |
| >PTPN11-Q5 GMVQTEAQ\  | 59    | >PTPN11-Q5 GMVQTEAKY  | 136  | 77    |
| >PTPN11-Q5 GMVQTEAQ\  | 162   | >PTPN11-Q5 GMVQTEAKY  | 274  | 112   |
| >PTPN11-Q5 GMVQTEAQ\  | 387   | >PTPN11-Q5 GMVQTEAKY  | 1264 | 877   |
| >PTPN11-Q5 GMVQTEAQ\  | 120   | >PTPN11-Q5 GMVQTEAKY  | 104  | 16    |
| >PTPN11-Q5 SGMVQTEAC  | 26127 | >PTPN11-Q5 SGMVQTEAK  | 204  | 25923 |
| >PTPN11-Q5 SGMVQTEAC  | 100   | >PTPN11-Q5 SGMVQTEAK  | 85   | 15    |
| >PTPN11-Q5 SGMVQTEAC  | 297   | >PTPN11-Q5 SGMVQTEAK  | 472  | 175   |
| >PTPN11-Q5 SGMVQTEAC  | 436   | >PTPN11-Q5 SGMVQTEAK  | 703  | 267   |
| >PTPN11-Q5 SGMVQTEAC  | 224   | >PTPN11-Q5 SGMVQTEAK  | 154  | 70    |
| >PTPN11-Q5 SGMVQTEAC  | 179   | >PTPN11-Q5 SGMVQTEAK  | 161  | 18    |

|                        |       |                        |       |       |
|------------------------|-------|------------------------|-------|-------|
| >PTPN11-Q5 RSGMVQTEA   | 26539 | >PTPN11-Q5 RSGMVQTEA   | 249   | 26290 |
| >PTPN11-Q5 RSGMVQTEA   | 32781 | >PTPN11-Q5 RSGMVQTEA   | 169   | 32612 |
| >PTPN11-Q5 RSGMVQTEA   | 9326  | >PTPN11-Q5 RSGMVQTEA   | 273   | 9053  |
| >PTPN11-Q5 RSGMVQTEA   | 84    | >PTPN11-Q5 RSGMVQTEA   | 45    | 39    |
| >PTPN11-Q5 RSGMVQTEA   | 203   | >PTPN11-Q5 RSGMVQTEA   | 673   | 470   |
| >PTPN11-Q5 RSGMVQTEA   | 9     | >PTPN11-Q5 RSGMVQTEA   | 9     | 0     |
| >PTPN11-Q5 RSGMVQTEA   | 428   | >PTPN11-Q5 RSGMVQTEA   | 583   | 155   |
| >PTPN11-Q5 RSGMVQTEA   | 20    | >PTPN11-Q5 RSGMVQTEA   | 32    | 12    |
| >PTPN11-Q5 RSGMVQTEA   | 46    | >PTPN11-Q5 RSGMVQTEA   | 56    | 10    |
| >PTPN11-R1: RESQSHPGDI | 302   | >PTPN11-R1: QESQSHPGDI | 95    | 207   |
| >PTPN11-R1: RESQSHPGDI | 84    | >PTPN11-R1: QESQSHPGDI | 458   | 374   |
| >PTPN11-R1: RESQSHPGDI | 18    | >PTPN11-R1: QESQSHPGDI | 175   | 157   |
| >PTPN11-R1: RESQSHPGDI | 398   | >PTPN11-R1: QESQSHPGDI | 800   | 402   |
| >PTPN11-R1: RESQSHPGDI | 162   | >PTPN11-R1: QESQSHPGDI | 1222  | 1060  |
| >PTPN11-R1: RESQSHPGDI | 580   | >PTPN11-R1: QESQSHPGDI | 281   | 299   |
| >PTPN11-R1: RESQSHPGDI | 375   | >PTPN11-R1: QESQSHPGDI | 175   | 200   |
| >PTPN11-R1: RESQSHPG   | 271   | >PTPN11-R1: QESQSHPG   | 256   | 15    |
| >PTPN11-R1: RESQSHPGD  | 477   | >PTPN11-R1: QESQSHPGD  | 488   | 11    |
| >PTPN11-R1: RESQSHPGDI | 53    | >PTPN11-R1: QESQSHPGDI | 46    | 7     |
| >PTPN11-R1: RESQSHPGDI | 247   | >PTPN11-R1: QESQSHPGDI | 1200  | 953   |
| >PTPN11-R1: RESQSHPGDI | 129   | >PTPN11-R1: QESQSHPGDI | 1338  | 1209  |
| >PTPN11-R1: RESQSHPGDI | 49    | >PTPN11-R1: QESQSHPGDI | 328   | 279   |
| >PTPN11-R1: VRESQSHPGI | 679   | >PTPN11-R1: VQESQSHPGI | 132   | 547   |
| >PTPN11-R1: EKGKHGSFLV | 422   | >PTPN11-R1: EKGKHGSFLV | 23630 | 23208 |
| >PTPN11-R1: LVRESQSHP  | 487   | >PTPN11-R1: LVQESQSHP  | 13575 | 13088 |
| >PTPN11-R1: LVRESQSHPG | 46    | >PTPN11-R1: LVQESQSHPG | 7783  | 7737  |
| >PTPN11-R1: FLVRESQS   | 418   | >PTPN11-R1: FLVQESQS   | 230   | 188   |
| >PTPN11-R1: FLVRESQSHP | 124   | >PTPN11-R1: FLVQESQSHP | 77    | 47    |
| >PTPN11-R1: FLVRESQS   | 138   | >PTPN11-R1: FLVQESQS   | 104   | 34    |
| >PTPN11-R1: FLVRESQSHP | 443   | >PTPN11-R1: FLVQESQSHP | 328   | 115   |
| >PTPN11-R1: GSFLVRESQS | 187   | >PTPN11-R1: GSFLVQESQS | 200   | 13    |
| >PTPN11-R1: KHGSFLVR   | 30    | >PTPN11-R1: KHGSFLVQ   | 2515  | 2485  |
| >PTPN11-R1: KGKHGSFLVR | 116   | >PTPN11-R1: KGKHGSFLVC | 318   | 202   |
| >PTPN11-R1: KGKHGSFLVR | 200   | >PTPN11-R1: KGKHGSFLVC | 17653 | 17453 |
| >PTPN11-R1: KGKHGSFLVR | 78    | >PTPN11-R1: KGKHGSFLVC | 8157  | 8079  |
| >PTPN11-R1: SVRTGDDK   | 1516  | >PTPN11-R1: SVHTGDDK   | 147   | 1369  |
| >PTPN11-R1: SVRTGDDK   | 25    | >PTPN11-R1: SVHTGDDK   | 223   | 198   |
| >PTPN11-R1: SVRTGDDK   | 2381  | >PTPN11-R1: SVHTGDDK   | 461   | 1920  |
| >PTPN11-R1: VLSVRTGDDK | 322   | >PTPN11-R1: VLSVHTGDDK | 298   | 24    |
| >PTPN11-R1: VLSVRTGDDK | 347   | >PTPN11-R1: VLSVHTGDDK | 290   | 57    |
| >PTPN11-R1: FVLSVRTGDD | 327   | >PTPN11-R1: FVLSVHTGDD | 383   | 56    |
| >PTPN11-R1: FVLSVRTGDD | 99    | >PTPN11-R1: FVLSVHTGDD | 95    | 4     |
| >PTPN11-R1: HPGDFVLSVF | 176   | >PTPN11-R1: HPGDFVLSVF | 21523 | 21347 |



|                        |      |                        |       |       |
|------------------------|------|------------------------|-------|-------|
| >PTPN11-R2{YKNILPFDHTI | 390  | >PTPN11-R2{YKNILPFDHTI | 35393 | 35003 |
| >PTPN11-R2{HTRVVLHD    | 143  | >PTPN11-R2{HTGVVLHD    | 10912 | 10769 |
| >PTPN11-R2{HTRVVLHDG   | 118  | >PTPN11-R2{HTGVVLHDG   | 13755 | 13637 |
| >PTPN11-R2{FDHTRVVL    | 3868 | >PTPN11-R2{FDHTGVVL    | 277   | 3591  |
| >PTPN11-R2{FDHTRVVL    | 326  | >PTPN11-R2{FDHTGVVL    | 161   | 165   |
| >PTPN11-R2{LPFDHTRVVL  | 382  | >PTPN11-R2{LPFDHTGVVL  | 488   | 106   |
| >PTPN11-R2{LPFDHTRV    | 1555 | >PTPN11-R2{LPFDHTGV    | 378   | 1177  |
| >PTPN11-R2{LPFDHTRV    | 393  | >PTPN11-R2{LPFDHTGV    | 522   | 129   |
| >PTPN11-R2{LPFDHTRVV   | 22   | >PTPN11-R2{LPFDHTGVV   | 27    | 5     |
| >PTPN11-R2{LPFDHTRVVL  | 168  | >PTPN11-R2{LPFDHTGVVL  | 202   | 34    |
| >PTPN11-R2{LPFDHTRVVL  | 416  | >PTPN11-R2{LPFDHTGVVL  | 481   | 65    |
| >PTPN11-R2{LPFDHTRV    | 752  | >PTPN11-R2{LPFDHTGV    | 471   | 281   |
| >PTPN11-R2{LPFDHTRVV   | 174  | >PTPN11-R2{LPFDHTGVV   | 114   | 60    |
| >PTPN11-R2{LPFDHTRVVL  | 395  | >PTPN11-R2{LPFDHTGVVL  | 110   | 285   |
| >PTPN11-R2{LPFDHTRVVL  | 112  | >PTPN11-R2{LPFDHTGVVL  | 62    | 50    |
| >PTPN11-R2{LPFDHTRVVL  | 60   | >PTPN11-R2{LPFDHTGVVL  | 64    | 4     |
| >PTPN11-R2{LPFDHTRV    | 166  | >PTPN11-R2{LPFDHTGV    | 300   | 134   |
| >PTPN11-R2{LPFDHTRVV   | 133  | >PTPN11-R2{LPFDHTGVV   | 130   | 3     |
| >PTPN11-R2{LPFDHTRV    | 84   | >PTPN11-R2{LPFDHTGV    | 94    | 10    |
| >PTPN11-R2{LPFDHTRVV   | 41   | >PTPN11-R2{LPFDHTGVV   | 25    | 16    |
| >PTPN11-R2{LPFDHTRVVL  | 121  | >PTPN11-R2{LPFDHTGVVL  | 200   | 79    |
| >PTPN11-R2{LPFDHTRVV   | 159  | >PTPN11-R2{LPFDHTGVV   | 299   | 140   |
| >PTPN11-R2{LPFDHTRVVL  | 35   | >PTPN11-R2{LPFDHTGVVL  | 38    | 3     |
| >PTPN11-R2{ILPFDHTRV   | 53   | >PTPN11-R2{ILPFDHTGV   | 32    | 21    |
| >PTPN11-R2{ILPFDHTRVV  | 364  | >PTPN11-R2{ILPFDHTGVV  | 255   | 109   |
| >PTPN11-R2{ILPFDHTRVVI | 236  | >PTPN11-R2{ILPFDHTGVVI | 174   | 62    |
| >PTPN11-R2{ILPFDHTRV   | 13   | >PTPN11-R2{ILPFDHTGV   | 8     | 5     |
| >PTPN11-R2{ILPFDHTRVV  | 183  | >PTPN11-R2{ILPFDHTGVV  | 100   | 83    |
| >PTPN11-R2{ILPFDHTRVVI | 615  | >PTPN11-R2{ILPFDHTGVVI | 344   | 271   |
| >PTPN11-R2{ILPFDHTRV   | 597  | >PTPN11-R2{ILPFDHTGV   | 117   | 480   |
| >PTPN11-R2{ILPFDHTRV   | 10   | >PTPN11-R2{ILPFDHTGV   | 6     | 4     |
| >PTPN11-R2{ILPFDHTRVV  | 13   | >PTPN11-R2{ILPFDHTGVV  | 12    | 1     |
| >PTPN11-R2{ILPFDHTRVVI | 305  | >PTPN11-R2{ILPFDHTGVVI | 91    | 214   |
| >PTPN11-R2{ILPFDHTRV   | 561  | >PTPN11-R2{ILPFDHTGV   | 131   | 430   |
| >PTPN11-R2{ILPFDHTRVV  | 195  | >PTPN11-R2{ILPFDHTGVV  | 130   | 65    |
| >PTPN11-R2{ILPFDHTRV   | 79   | >PTPN11-R2{ILPFDHTGV   | 28    | 51    |
| >PTPN11-R2{ILPFDHTRVV  | 170  | >PTPN11-R2{ILPFDHTGVV  | 90    | 80    |
| >PTPN11-R2{ILPFDHTRVVI | 1234 | >PTPN11-R2{ILPFDHTGVVI | 403   | 831   |
| >PTPN11-R2{ILPFDHTRV   | 81   | >PTPN11-R2{ILPFDHTGV   | 24    | 57    |
| >PTPN11-R2{ILPFDHTRVV  | 91   | >PTPN11-R2{ILPFDHTGVV  | 79    | 12    |
| >PTPN11-R2{ILPFDHTRV   | 3    | >PTPN11-R2{ILPFDHTGV   | 3     | 0     |
| >PTPN11-R2{ILPFDHTRVV  | 7    | >PTPN11-R2{ILPFDHTGVV  | 6     | 1     |
| >PTPN11-R2{ILPFDHTRVVI | 21   | >PTPN11-R2{ILPFDHTGVVI | 22    | 1     |

|                        |      |                       |       |       |
|------------------------|------|-----------------------|-------|-------|
| >PTPN11-R2{ILPFDHTR    | 299  | >PTPN11-R2{ILPFDHTG   | 37763 | 37464 |
| >PTPN11-R2{ILPFDHTRVVI | 256  | >PTPN11-R2{ILPFDHTGVV | 186   | 70    |
| >PTPN11-R2{ILPFDHTR    | 197  | >PTPN11-R2{ILPFDHTG   | 33101 | 32904 |
| >PTPN11-R2{NILPFDHTRV  | 303  | >PTPN11-R2{NILPFDHTGV | 115   | 188   |
| >PTPN11-R2{NILPFDHTRV  | 584  | >PTPN11-R2{NILPFDHTGV | 365   | 219   |
| >PTPN11-R2{NILPFDHTRV  | 205  | >PTPN11-R2{NILPFDHTGV | 65    | 140   |
| >PTPN11-R2{NILPFDHTRV' | 521  | >PTPN11-R2{NILPFDHTGV | 305   | 216   |
| >PTPN11-R2{NILPFDHTRV  | 213  | >PTPN11-R2{NILPFDHTGV | 83    | 130   |
| >PTPN11-R2{NILPFDHTRV' | 201  | >PTPN11-R2{NILPFDHTGV | 140   | 61    |
| >PTPN11-R2{NILPFDHTRV  | 41   | >PTPN11-R2{NILPFDHTGV | 27    | 14    |
| >PTPN11-R2{NILPFDHTRV' | 51   | >PTPN11-R2{NILPFDHTGV | 51    | 0     |
| >PTPN11-R2{NILPFDHTRV  | 516  | >PTPN11-R2{NILPFDHTGV | 158   | 358   |
| >PTPN11-R2{NILPFDHTRV' | 210  | >PTPN11-R2{NILPFDHTGV | 185   | 25    |
| >PTPN11-R2{NILPFDHTRV  | 177  | >PTPN11-R2{NILPFDHTGV | 67    | 110   |
| >PTPN11-R2{NILPFDHTRV' | 395  | >PTPN11-R2{NILPFDHTGV | 277   | 118   |
| >PTPN11-R2{NILPFDHTRV  | 183  | >PTPN11-R2{NILPFDHTGV | 62    | 121   |
| >PTPN11-R2{NILPFDHTRV' | 185  | >PTPN11-R2{NILPFDHTGV | 187   | 2     |
| >PTPN11-R2{NILPFDHTRV  | 15   | >PTPN11-R2{NILPFDHTGV | 15    | 0     |
| >PTPN11-R2{NILPFDHTRV' | 82   | >PTPN11-R2{NILPFDHTGV | 60    | 22    |
| >PTPN11-R2{NILPFDHTR   | 153  | >PTPN11-R2{NILPFDHTG  | 22556 | 22403 |
| >PTPN11-R2{NILPFDHTR   | 83   | >PTPN11-R2{NILPFDHTG  | 25056 | 24973 |
| >PTPN11-R2{NILPFDHTR   | 27   | >PTPN11-R2{NILPFDHTG  | 26693 | 26666 |
| >PTPN11-R2{NILPFDHTRV' | 413  | >PTPN11-R2{NILPFDHTGV | 143   | 270   |
| >PTPN11-R2{NILPFDHTRV  | 30   | >PTPN11-R2{NILPFDHTGV | 11    | 19    |
| >PTPN11-R2{NILPFDHTRV' | 59   | >PTPN11-R2{NILPFDHTGV | 25    | 34    |
| >PTPN11-R2{NILPFDHTR   | 24   | >PTPN11-R2{NILPFDHTG  | 22452 | 22428 |
| >PTPN11-R2{KNILPFDHTR  | 129  | >PTPN11-R2{KNILPFDHTG | 26573 | 26444 |
| >PTPN11-R2{KNILPFDHTR  | 48   | >PTPN11-R2{KNILPFDHTG | 24532 | 24484 |
| >PTPN11-S5{SGMVQTEAC   | 100  | >PTPN11-S5{AGMVQTEAC  | 104   | 4     |
| >PTPN11-S5{SGMVQTEAC   | 297  | >PTPN11-S5{AGMVQTEAC  | 303   | 6     |
| >PTPN11-S5{SGMVQTEAC   | 514  | >PTPN11-S5{AGMVQTEAC  | 486   | 28    |
| >PTPN11-S5{SGMVQTEAC   | 436  | >PTPN11-S5{AGMVQTEAC  | 139   | 297   |
| >PTPN11-S5{SGMVQTEAC   | 224  | >PTPN11-S5{AGMVQTEAC  | 630   | 406   |
| >PTPN11-S5{SGMVQTEAC   | 179  | >PTPN11-S5{AGMVQTEAC  | 846   | 667   |
| >PTPN11-S5{RSGMVQTEA   | 84   | >PTPN11-S5{RAGMVQTEA  | 250   | 166   |
| >PTPN11-S5{RSGMVQTEA   | 203  | >PTPN11-S5{RAGMVQTEA  | 349   | 146   |
| >PTPN11-S5{RSGMVQTEA   | 9    | >PTPN11-S5{RAGMVQTEA  | 31    | 22    |
| >PTPN11-S5{RSGMVQTEA   | 428  | >PTPN11-S5{RAGMVQTEA  | 808   | 380   |
| >PTPN11-S5{RSGMVQTEA   | 20   | >PTPN11-S5{RAGMVQTEA  | 32    | 12    |
| >PTPN11-S5{RSGMVQTEA   | 46   | >PTPN11-S5{RAGMVQTEA  | 374   | 328   |
| >PTPN11-S5{KTIQMVRSQI  | 3773 | >PTPN11-S5{KTIQMVRSQI | 426   | 3347  |
| >PTPN11-S5{KTIQMVRSQI  | 375  | >PTPN11-S5{KTIQMVRSQI | 206   | 169   |
| >PTPN11-S5{SQRSGMVQT   | 833  | >PTPN11-S5{SQRAGMVQT  | 475   | 358   |

|                        |       |                       |      |       |
|------------------------|-------|-----------------------|------|-------|
| >PTPN11-S5C SQRSGMVQT  | 574   | >PTPN11-S5C SQRAGMVQT | 324  | 250   |
| >PTPN11-S5C SQRSGMVQ   | 352   | >PTPN11-S5C SQRAGMVQ  | 270  | 82    |
| >PTPN11-S5C SQRSGMVQT  | 512   | >PTPN11-S5C SQRAGMVQT | 374  | 138   |
| >PTPN11-S5C SQRSGMVQ   | 392   | >PTPN11-S5C SQRAGMVQ  | 968  | 576   |
| >PTPN11-S5C SQRSGMVQT  | 258   | >PTPN11-S5C SQRAGMVQT | 513  | 255   |
| >PTPN11-S5C RSQRSGMV   | 251   | >PTPN11-S5C RSQRAGMV  | 362  | 111   |
| >PTPN11-S5C RSQRSGMVC  | 380   | >PTPN11-S5C RSQRAGMVC | 303  | 77    |
| >PTPN11-S5C RSQRSGMV   | 224   | >PTPN11-S5C RSQRAGMV  | 548  | 324   |
| >PTPN11-S5C RSQRSGMVC  | 477   | >PTPN11-S5C RSQRAGMVC | 1080 | 603   |
| >PTPN11-S5C RSQRSGMV   | 246   | >PTPN11-S5C RSQRAGMV  | 374  | 128   |
| >PTPN11-S5C RSQRSGMVC  | 490   | >PTPN11-S5C RSQRAGMVC | 459  | 31    |
| >PTPN11-S5C RSQRSGMV   | 513   | >PTPN11-S5C RSQRAGMV  | 464  | 49    |
| >PTPN11-S5C VRSQRSGM   | 310   | >PTPN11-S5C VRSQRAGM  | 216  | 94    |
| >PTPN11-S5C MVRSQRSGM  | 485   | >PTPN11-S5C MVRSQRAGM | 878  | 393   |
| >PTPN11-S5C MVRSQRSGM  | 108   | >PTPN11-S5C MVRSQRAGM | 114  | 6     |
| >PTPN11-S5C MVRSQRSG   | 16    | >PTPN11-S5C MVRSQRAG  | 18   | 2     |
| >PTPN11-S5C MVRSQRSGM  | 9     | >PTPN11-S5C MVRSQRAGM | 7    | 2     |
| >PTPN11-S5C MVRSQRSGM  | 9     | >PTPN11-S5C MVRSQRAGM | 12   | 3     |
| >PTPN11-S5C MVRSQRSGM  | 14    | >PTPN11-S5C MVRSQRAGM | 11   | 3     |
| >PTPN11-S5C MVRSQRSGM  | 59    | >PTPN11-S5C MVRSQRAGM | 57   | 2     |
| >PTPN11-S5C MVRSQRSGM  | 438   | >PTPN11-S5C MVRSQRAGM | 457  | 19    |
| >PTPN11-S5C MVRSQRSGM  | 470   | >PTPN11-S5C MVRSQRAGM | 428  | 42    |
| >PTPN11-S5C MVRSQRSGM  | 115   | >PTPN11-S5C MVRSQRAGM | 84   | 31    |
| >PTPN11-S5C MVRSQRSGM  | 16    | >PTPN11-S5C MVRSQRAGM | 197  | 181   |
| >PTPN11-S5C QMVRSQRSC  | 64    | >PTPN11-S5C QMVRSQRAC | 92   | 28    |
| >PTPN11-S5C QMVRSQRSC  | 40    | >PTPN11-S5C QMVRSQRAC | 46   | 6     |
| >PTPN11-S5C QMVRSQRSC  | 450   | >PTPN11-S5C QMVRSQRAC | 660  | 210   |
| >PTPN11-S5C QMVRSQRS   | 12401 | >PTPN11-S5C QMVRSQRA  | 193  | 12208 |
| >PTPN11-S5C QMVRSQRSC  | 18    | >PTPN11-S5C QMVRSQRAC | 23   | 5     |
| >PTPN11-S5C QMVRSQRSC  | 503   | >PTPN11-S5C QMVRSQRAC | 399  | 104   |
| >PTPN11-S5C QMVRSQRSC  | 338   | >PTPN11-S5C QMVRSQRAC | 321  | 17    |
| >PTPN11-S5C QMVRSQRSC  | 47    | >PTPN11-S5C QMVRSQRAC | 91   | 44    |
| >PTPN11-S5C IQMVRSQRSC | 158   | >PTPN11-S5C IQMVRSQRA | 144  | 14    |
| >PTPN11-S5C IQMVRSQRS  | 4552  | >PTPN11-S5C IQMVRSQRA | 128  | 4424  |
| >PTPN11-S5C IQMVRSQRSC | 303   | >PTPN11-S5C IQMVRSQRA | 172  | 131   |
| >PTPN11-S5C IQMVRSQRSC | 83    | >PTPN11-S5C IQMVRSQRA | 82   | 1     |
| >PTPN11-S5C IQMVRSQRSC | 461   | >PTPN11-S5C IQMVRSQRA | 880  | 419   |
| >PTPN11-S5C IQMVRSQRS  | 1946  | >PTPN11-S5C IQMVRSQRA | 420  | 1526  |
| >PTPN11-S5C IQMVRSQRSC | 13    | >PTPN11-S5C IQMVRSQRA | 21   | 8     |
| >PTPN11-S5C SGMVQTEAC  | 100   | >PTPN11-S5C LGMVQTEAC | 110  | 10    |
| >PTPN11-S5C SGMVQTEAC  | 297   | >PTPN11-S5C LGMVQTEAC | 395  | 98    |
| >PTPN11-S5C SGMVQTEAC  | 514   | >PTPN11-S5C LGMVQTEAC | 280  | 234   |
| >PTPN11-S5C SGMVQTEAC  | 436   | >PTPN11-S5C LGMVQTEAC | 169  | 267   |

|                         |       |                         |       |       |
|-------------------------|-------|-------------------------|-------|-------|
| >PTPN11-S5C SGMVQTEAC   | 224   | >PTPN11-S5C LGMVQTEAC   | 189   | 35    |
| >PTPN11-S5C SGMVQTEAC   | 179   | >PTPN11-S5C LGMVQTEAC   | 280   | 101   |
| >PTPN11-S5C RSGMVQTEA   | 15651 | >PTPN11-S5C RLG MVQTEA  | 207   | 15444 |
| >PTPN11-S5C RSGMVQTEA   | 13750 | >PTPN11-S5C RLG MVQTEA  | 128   | 13622 |
| >PTPN11-S5C RSGMVQTEA   | 19380 | >PTPN11-S5C RLG MVQTEA  | 41    | 19339 |
| >PTPN11-S5C RSGMVQTEA   | 21985 | >PTPN11-S5C RLG MVQTEA  | 80    | 21905 |
| >PTPN11-S5C RSGMVQTEA   | 33267 | >PTPN11-S5C RLG MVQTEA  | 28    | 33239 |
| >PTPN11-S5C RSGMVQTEA   | 2745  | >PTPN11-S5C RLG MVQTEA  | 436   | 2309  |
| >PTPN11-S5C RSGMVQTEA   | 84    | >PTPN11-S5C RLG MVQTEA  | 135   | 51    |
| >PTPN11-S5C RSGMVQTEA   | 620   | >PTPN11-S5C RLG MVQTEA  | 57    | 563   |
| >PTPN11-S5C RSGMVQTEA   | 203   | >PTPN11-S5C RLG MVQTEA  | 107   | 96    |
| >PTPN11-S5C RSGMVQTEA   | 9     | >PTPN11-S5C RLG MVQTEA  | 654   | 645   |
| >PTPN11-S5C RSGMVQTEA   | 428   | >PTPN11-S5C RLG MVQTEA  | 12447 | 12019 |
| >PTPN11-S5C RSGMVQTEA   | 20    | >PTPN11-S5C RLG MVQTEA  | 1484  | 1464  |
| >PTPN11-S5C RSGMVQTEA   | 46    | >PTPN11-S5C RLG MVQTEA  | 1103  | 1057  |
| >PTPN11-S5C RSGMVQTEA   | 603   | >PTPN11-S5C RLG MVQTEA  | 322   | 281   |
| >PTPN11-S5C KTIQM VRSQI | 12676 | >PTPN11-S5C KTIQM VRSQI | 419   | 12257 |
| >PTPN11-S5C KTIQM VRSQI | 10832 | >PTPN11-S5C KTIQM VRSQI | 390   | 10442 |
| >PTPN11-S5C KTIQM VRSQI | 3428  | >PTPN11-S5C KTIQM VRSQI | 42    | 3386  |
| >PTPN11-S5C KTIQM VRSQI | 375   | >PTPN11-S5C KTIQM VRSQI | 3     | 372   |
| >PTPN11-S5C KTIQM VRSQI | 12623 | >PTPN11-S5C KTIQM VRSQI | 186   | 12437 |
| >PTPN11-S5C KTIQM VRSQI | 4741  | >PTPN11-S5C KTIQM VRSQI | 180   | 4561  |
| >PTPN11-S5C KTIQM VRSQI | 25978 | >PTPN11-S5C KTIQM VRSQI | 463   | 25515 |
| >PTPN11-S5C SQRSGMVQ    | 352   | >PTPN11-S5C SQRLGMVQ    | 951   | 599   |
| >PTPN11-S5C SQRSGMVQ    | 392   | >PTPN11-S5C SQRLGMVQ    | 2541  | 2149  |
| >PTPN11-S5C SQRSGMVQT   | 258   | >PTPN11-S5C SQRLGMVQT   | 1535  | 1277  |
| >PTPN11-S5C RSQRSGMV    | 251   | >PTPN11-S5C RSQRLGMV    | 738   | 487   |
| >PTPN11-S5C RSQRSGMVC   | 380   | >PTPN11-S5C RSQRLGMVC   | 1108  | 728   |
| >PTPN11-S5C RSQRSGMV    | 224   | >PTPN11-S5C RSQRLGMV    | 1179  | 955   |
| >PTPN11-S5C RSQRSGMVC   | 477   | >PTPN11-S5C RSQRLGMVC   | 1513  | 1036  |
| >PTPN11-S5C RSQRSGMV    | 246   | >PTPN11-S5C RSQRLGMV    | 427   | 181   |
| >PTPN11-S5C RSQRSGMVC   | 490   | >PTPN11-S5C RSQRLGMVC   | 431   | 59    |
| >PTPN11-S5C VRSQRSGM    | 310   | >PTPN11-S5C VRSQRLGM    | 155   | 155   |
| >PTPN11-S5C VRSQRSGMV   | 1067  | >PTPN11-S5C VRSQRLGMV   | 346   | 721   |
| >PTPN11-S5C MVRSQRSGM   | 485   | >PTPN11-S5C MVRSQRLGN   | 152   | 333   |
| >PTPN11-S5C MVRSQRSGM   | 108   | >PTPN11-S5C MVRSQRLGN   | 78    | 30    |
| >PTPN11-S5C MVRSQRSG    | 16    | >PTPN11-S5C MVRSQRLG    | 17    | 1     |
| >PTPN11-S5C MVRSQRSGM   | 9     | >PTPN11-S5C MVRSQRLGN   | 6     | 3     |
| >PTPN11-S5C MVRSQRSGM   | 9     | >PTPN11-S5C MVRSQRLGN   | 10    | 1     |
| >PTPN11-S5C MVRSQRSGM   | 14    | >PTPN11-S5C MVRSQRLGN   | 15    | 1     |
| >PTPN11-S5C MVRSQRSGM   | 59    | >PTPN11-S5C MVRSQRLGN   | 47    | 12    |
| >PTPN11-S5C MVRSQRSGM   | 438   | >PTPN11-S5C MVRSQRLGN   | 536   | 98    |
| >PTPN11-S5C MVRSQRSGM   | 470   | >PTPN11-S5C MVRSQRLGN   | 510   | 40    |

|                         |       |                         |       |       |
|-------------------------|-------|-------------------------|-------|-------|
| >PTPN11-S5C MVRSQRS GM  | 115   | >PTPN11-S5C MVRSQRLGM   | 124   | 9     |
| >PTPN11-S5C MVRSQRS GM  | 16    | >PTPN11-S5C MVRSQRLGM   | 321   | 305   |
| >PTPN11-S5C QMVRSQRS    | 16913 | >PTPN11-S5C QMVRSQRL    | 308   | 16605 |
| >PTPN11-S5C QMVRSQRSC   | 64    | >PTPN11-S5C QMVRSQRLG   | 41    | 23    |
| >PTPN11-S5C QMVRSQRS    | 12128 | >PTPN11-S5C QMVRSQRL    | 325   | 11803 |
| >PTPN11-S5C QMVRSQRSC   | 40    | >PTPN11-S5C QMVRSQRLG   | 30    | 10    |
| >PTPN11-S5C QMVRSQRSC   | 535   | >PTPN11-S5C QMVRSQRLG   | 450   | 85    |
| >PTPN11-S5C QMVRSQRSC   | 450   | >PTPN11-S5C QMVRSQRLG   | 438   | 12    |
| >PTPN11-S5C QMVRSQRS    | 12401 | >PTPN11-S5C QMVRSQRL    | 37    | 12364 |
| >PTPN11-S5C QMVRSQRSC   | 18    | >PTPN11-S5C QMVRSQRLG   | 15    | 3     |
| >PTPN11-S5C QMVRSQRSC   | 338   | >PTPN11-S5C QMVRSQRLG   | 542   | 204   |
| >PTPN11-S5C QMVRSQRS    | 6304  | >PTPN11-S5C QMVRSQRL    | 245   | 6059  |
| >PTPN11-S5C QMVRSQRSC   | 47    | >PTPN11-S5C QMVRSQRLG   | 100   | 53    |
| >PTPN11-S5C IQMVRSQRS   | 5503  | >PTPN11-S5C IQMVRSQRL   | 83    | 5420  |
| >PTPN11-S5C IQMVRSQRSC  | 158   | >PTPN11-S5C IQMVRSQRLC  | 202   | 44    |
| >PTPN11-S5C IQMVRSQRS   | 4552  | >PTPN11-S5C IQMVRSQRL   | 83    | 4469  |
| >PTPN11-S5C IQMVRSQRSC  | 303   | >PTPN11-S5C IQMVRSQRLC  | 176   | 127   |
| >PTPN11-S5C IQMVRSQRS   | 9813  | >PTPN11-S5C IQMVRSQRL   | 274   | 9539  |
| >PTPN11-S5C IQMVRSQRS   | 4932  | >PTPN11-S5C IQMVRSQRL   | 235   | 4697  |
| >PTPN11-S5C IQMVRSQRSC  | 83    | >PTPN11-S5C IQMVRSQRLC  | 85    | 2     |
| >PTPN11-S5C IQMVRSQRSC  | 461   | >PTPN11-S5C IQMVRSQRLC  | 1079  | 618   |
| >PTPN11-S5C IQMVRSQRS   | 1946  | >PTPN11-S5C IQMVRSQRL   | 34    | 1912  |
| >PTPN11-S5C IQMVRSQRSC  | 13    | >PTPN11-S5C IQMVRSQRLC  | 19    | 6     |
| >PTPN11-S5C SGMVQTEAC   | 100   | >PTPN11-S5C PGMVQTEAC   | 279   | 179   |
| >PTPN11-S5C SGMVQTEAC   | 297   | >PTPN11-S5C PGMVQTEAC   | 5831  | 5534  |
| >PTPN11-S5C SGMVQTEAC   | 436   | >PTPN11-S5C PGMVQTEAC   | 10445 | 10009 |
| >PTPN11-S5C SGMVQTEAC   | 224   | >PTPN11-S5C PGMVQTEAC   | 5380  | 5156  |
| >PTPN11-S5C SGMVQTEAC   | 179   | >PTPN11-S5C PGMVQTEAC   | 473   | 294   |
| >PTPN11-S5C RSGMVQTEA   | 84    | >PTPN11-S5C RPGMVQTEA   | 1874  | 1790  |
| >PTPN11-S5C RSGMVQTEA   | 23725 | >PTPN11-S5C RPGMVQTEA   | 451   | 23274 |
| >PTPN11-S5C RSGMVQTEA   | 203   | >PTPN11-S5C RPGMVQTEA   | 8098  | 7895  |
| >PTPN11-S5C RSGMVQTEA   | 9     | >PTPN11-S5C RPGMVQTEA   | 6702  | 6693  |
| >PTPN11-S5C RSGMVQTEA   | 8078  | >PTPN11-S5C RPGMVQTEA   | 144   | 7934  |
| >PTPN11-S5C RSGMVQTEA   | 428   | >PTPN11-S5C RPGMVQTEA   | 19216 | 18788 |
| >PTPN11-S5C RSGMVQTEA   | 20    | >PTPN11-S5C RPGMVQTEA   | 14745 | 14725 |
| >PTPN11-S5C RSGMVQTEA   | 46    | >PTPN11-S5C RPGMVQTEA   | 1463  | 1417  |
| >PTPN11-S5C RSGMVQTEA   | 11813 | >PTPN11-S5C RPGMVQTEA   | 190   | 11623 |
| >PTPN11-S5C KTIQMVR SQI | 375   | >PTPN11-S5C KTIQMVR SQI | 3567  | 3192  |
| >PTPN11-S5C SQRSGMVQT   | 833   | >PTPN11-S5C SQRPGMVQT   | 290   | 543   |
| >PTPN11-S5C SQRSGMVQT   | 574   | >PTPN11-S5C SQRPGMVQT   | 334   | 240   |
| >PTPN11-S5C SQRSGMVQ    | 352   | >PTPN11-S5C SQRPGMVQ    | 411   | 59    |
| >PTPN11-S5C SQRSGMVQT   | 512   | >PTPN11-S5C SQRPGMVQT   | 494   | 18    |
| >PTPN11-S5C SQRSGMVQ    | 392   | >PTPN11-S5C SQRPGMVQ    | 798   | 406   |

|                        |      |                        |      |      |
|------------------------|------|------------------------|------|------|
| >PTPN11-S5C SQRSGMVQT  | 258  | >PTPN11-S5C SQRPGMVQT  | 590  | 332  |
| >PTPN11-S5C RSQRSGMV   | 251  | >PTPN11-S5C RSQRPGMV   | 776  | 525  |
| >PTPN11-S5C RSQRSGMVC  | 380  | >PTPN11-S5C RSQRPGMVC  | 1381 | 1001 |
| >PTPN11-S5C RSQRSGMV   | 224  | >PTPN11-S5C RSQRPGMV   | 851  | 627  |
| >PTPN11-S5C RSQRSGMVC  | 477  | >PTPN11-S5C RSQRPGMVC  | 784  | 307  |
| >PTPN11-S5C RSQRSGMV   | 246  | >PTPN11-S5C RSQRPGMV   | 350  | 104  |
| >PTPN11-S5C RSQRSGMVC  | 490  | >PTPN11-S5C RSQRPGMVC  | 858  | 368  |
| >PTPN11-S5C RSQRSGMV   | 513  | >PTPN11-S5C RSQRPGMV   | 474  | 39   |
| >PTPN11-S5C VRSQRSGM   | 310  | >PTPN11-S5C VRSQRPGM   | 328  | 18   |
| >PTPN11-S5C VRSQRSGMV  | 1067 | >PTPN11-S5C VRSQRPGMV  | 403  | 664  |
| >PTPN11-S5C MVRSQRSGM  | 485  | >PTPN11-S5C MVRSQRPGM  | 243  | 242  |
| >PTPN11-S5C MVRSQRSGM  | 108  | >PTPN11-S5C MVRSQRPGM  | 141  | 33   |
| >PTPN11-S5C MVRSQRSG   | 16   | >PTPN11-S5C MVRSQRPG   | 10   | 6    |
| >PTPN11-S5C MVRSQRSGM  | 9    | >PTPN11-S5C MVRSQRPGM  | 5    | 4    |
| >PTPN11-S5C MVRSQRSGM  | 9    | >PTPN11-S5C MVRSQRPGM  | 10   | 1    |
| >PTPN11-S5C MVRSQRSGM  | 14   | >PTPN11-S5C MVRSQRPGM  | 14   | 0    |
| >PTPN11-S5C MVRSQRSGM  | 59   | >PTPN11-S5C MVRSQRPGM  | 153  | 94   |
| >PTPN11-S5C MVRSQRSGM  | 438  | >PTPN11-S5C MVRSQRPGM  | 1013 | 575  |
| >PTPN11-S5C MVRSQRSGM  | 470  | >PTPN11-S5C MVRSQRPGM  | 839  | 369  |
| >PTPN11-S5C MVRSQRSGM  | 115  | >PTPN11-S5C MVRSQRPGM  | 220  | 105  |
| >PTPN11-S5C MVRSQRSGM  | 16   | >PTPN11-S5C MVRSQRPGM  | 474  | 458  |
| >PTPN11-S5C MVRSQRSGM  | 664  | >PTPN11-S5C MVRSQRPGM  | 472  | 192  |
| >PTPN11-S5C QMVRSQRSC  | 64   | >PTPN11-S5C QMVRSQRPC  | 52   | 12   |
| >PTPN11-S5C QMVRSQRSC  | 40   | >PTPN11-S5C QMVRSQRPC  | 26   | 14   |
| >PTPN11-S5C QMVRSQRSC  | 450  | >PTPN11-S5C QMVRSQRPC  | 500  | 50   |
| >PTPN11-S5C QMVRSQRSC  | 18   | >PTPN11-S5C QMVRSQRPC  | 27   | 9    |
| >PTPN11-S5C QMVRSQRSC  | 503  | >PTPN11-S5C QMVRSQRPC  | 438  | 65   |
| >PTPN11-S5C QMVRSQRSC  | 338  | >PTPN11-S5C QMVRSQRPC  | 489  | 151  |
| >PTPN11-S5C QMVRSQRSC  | 47   | >PTPN11-S5C QMVRSQRPC  | 89   | 42   |
| >PTPN11-S5C IQMVRSQRSC | 158  | >PTPN11-S5C IQMVRSQRPC | 181  | 23   |
| >PTPN11-S5C IQMVRSQRSC | 303  | >PTPN11-S5C IQMVRSQRPC | 127  | 176  |
| >PTPN11-S5C IQMVRSQRSC | 642  | >PTPN11-S5C IQMVRSQRPC | 423  | 219  |
| >PTPN11-S5C IQMVRSQRSC | 83   | >PTPN11-S5C IQMVRSQRPC | 115  | 32   |
| >PTPN11-S5C IQMVRSQRSC | 461  | >PTPN11-S5C IQMVRSQRPC | 1734 | 1273 |
| >PTPN11-S5C IQMVRSQRSC | 13   | >PTPN11-S5C IQMVRSQRPC | 23   | 10   |
| >PTPN11-S5C SGMVQTEAC  | 100  | >PTPN11-S5C TGMVQTEAC  | 132  | 32   |
| >PTPN11-S5C SGMVQTEAC  | 297  | >PTPN11-S5C TGMVQTEAC  | 411  | 114  |
| >PTPN11-S5C SGMVQTEAC  | 836  | >PTPN11-S5C TGMVQTEAC  | 257  | 579  |
| >PTPN11-S5C SGMVQTEAC  | 436  | >PTPN11-S5C TGMVQTEAC  | 705  | 269  |
| >PTPN11-S5C SGMVQTEAC  | 224  | >PTPN11-S5C TGMVQTEAC  | 1000 | 776  |
| >PTPN11-S5C SGMVQTEAC  | 179  | >PTPN11-S5C TGMVQTEAC  | 204  | 25   |
| >PTPN11-S5C RSGMVQTEA  | 84   | >PTPN11-S5C RTGMVQTEA  | 83   | 1    |
| >PTPN11-S5C RSGMVQTEA  | 620  | >PTPN11-S5C RTGMVQTEA  | 77   | 543  |

|                          |      |                          |      |     |
|--------------------------|------|--------------------------|------|-----|
| >PTPN11-S5C RSGMVQTEA    | 203  | >PTPN11-S5C RTGMVQTEA    | 252  | 49  |
| >PTPN11-S5C RSGMVQTEA    | 9    | >PTPN11-S5C RTGMVQTEA    | 8    | 1   |
| >PTPN11-S5C RSGMVQTEA    | 428  | >PTPN11-S5C RTGMVQTEA    | 478  | 50  |
| >PTPN11-S5C RSGMVQTEA    | 20   | >PTPN11-S5C RTGMVQTEA    | 29   | 9   |
| >PTPN11-S5C RSGMVQTEA    | 46   | >PTPN11-S5C RTGMVQTEA    | 18   | 28  |
| >PTPN11-S5C RSGMVQTEA    | 603  | >PTPN11-S5C RTGMVQTEA    | 371  | 232 |
| >PTPN11-S5C KTIQMVR SQI  | 375  | >PTPN11-S5C KTIQMVR SQI  | 134  | 241 |
| >PTPN11-S5C SQRSGMVQT    | 574  | >PTPN11-S5C SQRTGMVQT    | 498  | 76  |
| >PTPN11-S5C SQRSGMVQ     | 352  | >PTPN11-S5C SQRTGMVQ     | 744  | 392 |
| >PTPN11-S5C SQRSGMVQ     | 392  | >PTPN11-S5C SQRTGMVQ     | 722  | 330 |
| >PTPN11-S5C SQRSGMVQT    | 258  | >PTPN11-S5C SQRTGMVQT    | 455  | 197 |
| >PTPN11-S5C RSQRSGMV     | 251  | >PTPN11-S5C RSQRTGMV     | 248  | 3   |
| >PTPN11-S5C RSQRSGMVC    | 380  | >PTPN11-S5C RSQRTGMVC    | 308  | 72  |
| >PTPN11-S5C RSQRSGMV     | 224  | >PTPN11-S5C RSQRTGMV     | 648  | 424 |
| >PTPN11-S5C RSQRSGMVC    | 477  | >PTPN11-S5C RSQRTGMVC    | 1049 | 572 |
| >PTPN11-S5C RSQRSGMV     | 246  | >PTPN11-S5C RSQRTGMV     | 187  | 59  |
| >PTPN11-S5C RSQRSGMVC    | 490  | >PTPN11-S5C RSQRTGMVC    | 694  | 204 |
| >PTPN11-S5C RSQRSGMV     | 513  | >PTPN11-S5C RSQRTGMV     | 443  | 70  |
| >PTPN11-S5C VRSQRSGM     | 310  | >PTPN11-S5C VRSQRTGM     | 249  | 61  |
| >PTPN11-S5C VRSQRSGMV    | 1067 | >PTPN11-S5C VRSQRTGMV    | 463  | 604 |
| >PTPN11-S5C MVR SQRS GM  | 485  | >PTPN11-S5C MVR SQRT GM  | 281  | 204 |
| >PTPN11-S5C MVR SQRS GM  | 108  | >PTPN11-S5C MVR SQRT GM  | 80   | 28  |
| >PTPN11-S5C MVR SQRS G   | 16   | >PTPN11-S5C MVR SQRT G   | 24   | 8   |
| >PTPN11-S5C MVR SQRS GM  | 9    | >PTPN11-S5C MVR SQRT GM  | 19   | 10  |
| >PTPN11-S5C MVR SQRS GM  | 9    | >PTPN11-S5C MVR SQRT GM  | 12   | 3   |
| >PTPN11-S5C MVR SQRS GM  | 14   | >PTPN11-S5C MVR SQRT GM  | 19   | 5   |
| >PTPN11-S5C MVR SQRS GM  | 59   | >PTPN11-S5C MVR SQRT GM  | 64   | 5   |
| >PTPN11-S5C MVR SQRS GM  | 438  | >PTPN11-S5C MVR SQRT GM  | 665  | 227 |
| >PTPN11-S5C MVR SQRS GM  | 470  | >PTPN11-S5C MVR SQRT GM  | 657  | 187 |
| >PTPN11-S5C MVR SQRS GM  | 115  | >PTPN11-S5C MVR SQRT GM  | 276  | 161 |
| >PTPN11-S5C MVR SQRS GM  | 16   | >PTPN11-S5C MVR SQRT GM  | 80   | 64  |
| >PTPN11-S5C QMVR SQRS C  | 64   | >PTPN11-S5C QMVR SQRT C  | 51   | 13  |
| >PTPN11-S5C QMVR SQRS C  | 40   | >PTPN11-S5C QMVR SQRT C  | 34   | 6   |
| >PTPN11-S5C QMVR SQRS C  | 535  | >PTPN11-S5C QMVR SQRT C  | 374  | 161 |
| >PTPN11-S5C QMVR SQRS C  | 450  | >PTPN11-S5C QMVR SQRT C  | 403  | 47  |
| >PTPN11-S5C QMVR SQRS C  | 18   | >PTPN11-S5C QMVR SQRT C  | 15   | 3   |
| >PTPN11-S5C QMVR SQRS C  | 338  | >PTPN11-S5C QMVR SQRT C  | 465  | 127 |
| >PTPN11-S5C QMVR SQRS C  | 47   | >PTPN11-S5C QMVR SQRT C  | 56   | 9   |
| >PTPN11-S5C IQMVR SQRS C | 158  | >PTPN11-S5C IQMVR SQRT C | 192  | 34  |
| >PTPN11-S5C IQMVR SQRS C | 303  | >PTPN11-S5C IQMVR SQRT C | 189  | 114 |
| >PTPN11-S5C IQMVR SQRS C | 83   | >PTPN11-S5C IQMVR SQRT C | 91   | 8   |
| >PTPN11-S5C IQMVR SQRS C | 461  | >PTPN11-S5C IQMVR SQRT C | 932  | 471 |
| >PTPN11-S5C IQMVR SQRS C | 13   | >PTPN11-S5C IQMVR SQRT C | 14   | 1   |

|                       |      |                       |       |       |
|-----------------------|------|-----------------------|-------|-------|
| >PTPN11-T5(TEAQYRFI   | 9    | >PTPN11-T5(KEAQYRFI   | 14    | 5     |
| >PTPN11-T5(TEAQYRFIY  | 245  | >PTPN11-T5(KEAQYRFIY  | 1287  | 1042  |
| >PTPN11-T5(TEAQYRFIYM | 42   | >PTPN11-T5(KEAQYRFIYM | 143   | 101   |
| >PTPN11-T5(TEAQYRFIYM | 444  | >PTPN11-T5(KEAQYRFIYM | 1811  | 1367  |
| >PTPN11-T5(TEAQYRFIY  | 336  | >PTPN11-T5(KEAQYRFIY  | 71    | 265   |
| >PTPN11-T5(TEAQYRFIY  | 1757 | >PTPN11-T5(KEAQYRFIY  | 294   | 1463  |
| >PTPN11-T5(TEAQYRFIY  | 11   | >PTPN11-T5(KEAQYRFIY  | 56    | 45    |
| >PTPN11-T5(TEAQYRFI   | 443  | >PTPN11-T5(KEAQYRFI   | 139   | 304   |
| >PTPN11-T5(TEAQYRFI   | 320  | >PTPN11-T5(KEAQYRFI   | 139   | 181   |
| >PTPN11-T5(TEAQYRFIYM | 172  | >PTPN11-T5(KEAQYRFIYM | 130   | 42    |
| >PTPN11-T5(TEAQYRFIYM | 100  | >PTPN11-T5(KEAQYRFIYM | 43    | 57    |
| >PTPN11-T5(TEAQYRFIYM | 217  | >PTPN11-T5(KEAQYRFIYM | 173   | 44    |
| >PTPN11-T5(TEAQYRFIY  | 78   | >PTPN11-T5(KEAQYRFIY  | 70    | 8     |
| >PTPN11-T5(TEAQYRFIYM | 264  | >PTPN11-T5(KEAQYRFIYM | 180   | 84    |
| >PTPN11-T5(TEAQYRFI   | 158  | >PTPN11-T5(KEAQYRFI   | 134   | 24    |
| >PTPN11-T5(TEAQYRFIY  | 256  | >PTPN11-T5(KEAQYRFIY  | 264   | 8     |
| >PTPN11-T5(TEAQYRFIYM | 6    | >PTPN11-T5(KEAQYRFIYM | 5     | 1     |
| >PTPN11-T5(TEAQYRFI   | 208  | >PTPN11-T5(KEAQYRFI   | 106   | 102   |
| >PTPN11-T5(TEAQYRFIY  | 987  | >PTPN11-T5(KEAQYRFIY  | 218   | 769   |
| >PTPN11-T5(TEAQYRFIYM | 375  | >PTPN11-T5(KEAQYRFIYM | 61    | 314   |
| >PTPN11-T5(TEAQYRFIY  | 1118 | >PTPN11-T5(KEAQYRFIY  | 428   | 690   |
| >PTPN11-T5(QTEAQYRFI  | 303  | >PTPN11-T5(QKEAQYRFI  | 118   | 185   |
| >PTPN11-T5(QTEAQYRFIY | 121  | >PTPN11-T5(QKEAQYRFIY | 10964 | 10843 |
| >PTPN11-T5(QTEAQYRFIY | 279  | >PTPN11-T5(QKEAQYRFIY | 1695  | 1416  |
| >PTPN11-T5(QTEAQYRFIY | 454  | >PTPN11-T5(QKEAQYRFIY | 3117  | 2663  |
| >PTPN11-T5(QTEAQYRF   | 4991 | >PTPN11-T5(QKEAQYRF   | 252   | 4739  |
| >PTPN11-T5(QTEAQYRFIY | 5144 | >PTPN11-T5(QKEAQYRFIY | 293   | 4851  |
| >PTPN11-T5(QTEAQYRF   | 19   | >PTPN11-T5(QKEAQYRF   | 22429 | 22410 |
| >PTPN11-T5(QTEAQYRFIY | 63   | >PTPN11-T5(QKEAQYRFIY | 25267 | 25204 |
| >PTPN11-T5(QTEAQYRFIY | 380  | >PTPN11-T5(QKEAQYRFIY | 26853 | 26473 |
| >PTPN11-T5(QTEAQYRFIY | 198  | >PTPN11-T5(QKEAQYRFIY | 19925 | 19727 |
| >PTPN11-T5(QTEAQYRFIY | 50   | >PTPN11-T5(QKEAQYRFIY | 7647  | 7597  |
| >PTPN11-T5(QTEAQYRFIY | 316  | >PTPN11-T5(QKEAQYRFIY | 16624 | 16308 |
| >PTPN11-T5(QTEAQYRFI  | 209  | >PTPN11-T5(QKEAQYRFI  | 6955  | 6746  |
| >PTPN11-T5(VRSQRSGMV  | 5782 | >PTPN11-T5(VRSQRSGMV  | 366   | 5416  |
| >PTPN11-T5(VQTEAQYRFI | 116  | >PTPN11-T5(VQKEAQYRFI | 181   | 65    |
| >PTPN11-T5(VQTEAQYRF  | 568  | >PTPN11-T5(VQKEAQYRF  | 462   | 106   |
| >PTPN11-T5(VQTEAQYRFI | 33   | >PTPN11-T5(VQKEAQYRFI | 31    | 2     |
| >PTPN11-T5(VQTEAQYR   | 215  | >PTPN11-T5(VQKEAQYR   | 33    | 182   |
| >PTPN11-T5(VQTEAQYRF  | 642  | >PTPN11-T5(VQKEAQYRF  | 70    | 572   |
| >PTPN11-T5(VQTEAQYRFI | 529  | >PTPN11-T5(VQKEAQYRFI | 61    | 468   |
| >PTPN11-T5(VQTEAQYRFI | 810  | >PTPN11-T5(VQKEAQYRFI | 465   | 345   |
| >PTPN11-T5(VQTEAQYRF  | 51   | >PTPN11-T5(VQKEAQYRF  | 18    | 33    |



|                       |      |                       |      |      |
|-----------------------|------|-----------------------|------|------|
| >PTPN11-T5(VQTEAQYRFI | 1055 | >PTPN11-T5(VQKEAQYRFI | 379  | 676  |
| >PTPN11-T5(VQTEAQYRFI | 67   | >PTPN11-T5(VQKEAQYRFI | 22   | 45   |
| >PTPN11-T5(VQTEAQYR   | 323  | >PTPN11-T5(VQKEAQYR   | 362  | 39   |
| >PTPN11-T5(MVQTEAQYR  | 265  | >PTPN11-T5(MVQKEAQYR  | 407  | 142  |
| >PTPN11-T5(MVQTEAQYR  | 567  | >PTPN11-T5(MVQKEAQYR  | 200  | 367  |
| >PTPN11-T5(MVQTEAQY   | 328  | >PTPN11-T5(MVQKEAQY   | 781  | 453  |
| >PTPN11-T5(MVQTEAQY   | 60   | >PTPN11-T5(MVQKEAQY   | 145  | 85   |
| >PTPN11-T5(MVQTEAQYR  | 322  | >PTPN11-T5(MVQKEAQYR  | 294  | 28   |
| >PTPN11-T5(MVQTEAQY   | 143  | >PTPN11-T5(MVQKEAQY   | 241  | 98   |
| >PTPN11-T5(MVQTEAQYR  | 74   | >PTPN11-T5(MVQKEAQYR  | 90   | 16   |
| >PTPN11-T5(MVQTEAQYR  | 14   | >PTPN11-T5(MVQKEAQYR  | 18   | 4    |
| >PTPN11-T5(MVQTEAQYR  | 290  | >PTPN11-T5(MVQKEAQYR  | 643  | 353  |
| >PTPN11-T5(MVQTEAQY   | 1142 | >PTPN11-T5(MVQKEAQY   | 445  | 697  |
| >PTPN11-T5(MVQTEAQY   | 481  | >PTPN11-T5(MVQKEAQY   | 348  | 133  |
| >PTPN11-T5(MVQTEAQY   | 102  | >PTPN11-T5(MVQKEAQY   | 115  | 13   |
| >PTPN11-T5(MVQTEAQYR  | 175  | >PTPN11-T5(MVQKEAQYR  | 164  | 11   |
| >PTPN11-T5(MVQTEAQY   | 104  | >PTPN11-T5(MVQKEAQY   | 218  | 114  |
| >PTPN11-T5(MVQTEAQYR  | 368  | >PTPN11-T5(MVQKEAQYR  | 456  | 88   |
| >PTPN11-T5(MVQTEAQY   | 2020 | >PTPN11-T5(MVQKEAQY   | 492  | 1528 |
| >PTPN11-T5(MVQTEAQYR  | 111  | >PTPN11-T5(MVQKEAQYR  | 101  | 10   |
| >PTPN11-T5(MVQTEAQYR  | 357  | >PTPN11-T5(MVQKEAQYR  | 320  | 37   |
| >PTPN11-T5(GMVQTEAQ\  | 277  | >PTPN11-T5(GMVQKEAQ\  | 655  | 378  |
| >PTPN11-T5(GMVQTEAQ\  | 37   | >PTPN11-T5(GMVQKEAQ\  | 66   | 29   |
| >PTPN11-T5(GMVQTEAQ\  | 357  | >PTPN11-T5(GMVQKEAQ\  | 560  | 203  |
| >PTPN11-T5(GMVQTEAQ\  | 95   | >PTPN11-T5(GMVQKEAQ\  | 172  | 77   |
| >PTPN11-T5(GMVQTEAQ\  | 260  | >PTPN11-T5(GMVQKEAQ\  | 682  | 422  |
| >PTPN11-T5(GMVQTEAQ\  | 86   | >PTPN11-T5(GMVQKEAQ\  | 177  | 91   |
| >PTPN11-T5(GMVQTEAQ\  | 135  | >PTPN11-T5(GMVQKEAQ\  | 259  | 124  |
| >PTPN11-T5(GMVQTEAQ\  | 312  | >PTPN11-T5(GMVQKEAQ\  | 1222 | 910  |
| >PTPN11-T5(GMVQTEAQ\  | 249  | >PTPN11-T5(GMVQKEAQ\  | 1462 | 1213 |
| >PTPN11-T5(GMVQTEAQ\  | 128  | >PTPN11-T5(GMVQKEAQ\  | 406  | 278  |
| >PTPN11-T5(GMVQTEAQ\  | 59   | >PTPN11-T5(GMVQKEAQ\  | 85   | 26   |
| >PTPN11-T5(GMVQTEAQ\  | 162  | >PTPN11-T5(GMVQKEAQ\  | 204  | 42   |
| >PTPN11-T5(GMVQTEAQ\  | 387  | >PTPN11-T5(GMVQKEAQ\  | 936  | 549  |
| >PTPN11-T5(GMVQTEAQ\  | 120  | >PTPN11-T5(GMVQKEAQ\  | 139  | 19   |
| >PTPN11-T5(SGMVQTEAC  | 100  | >PTPN11-T5(SGMVQKEAC  | 158  | 58   |
| >PTPN11-T5(SGMVQTEAC  | 297  | >PTPN11-T5(SGMVQKEAC  | 234  | 63   |
| >PTPN11-T5(SGMVQTEAC  | 436  | >PTPN11-T5(SGMVQKEAC  | 889  | 453  |
| >PTPN11-T5(SGMVQTEAC  | 224  | >PTPN11-T5(SGMVQKEAC  | 531  | 307  |
| >PTPN11-T5(SGMVQTEAC  | 179  | >PTPN11-T5(SGMVQKEAC  | 273  | 94   |
| >PTPN11-T5(RSGMVQTEA  | 84   | >PTPN11-T5(RSGMVQKEA  | 126  | 42   |
| >PTPN11-T5(RSGMVQTEA  | 203  | >PTPN11-T5(RSGMVQKEA  | 404  | 201  |
| >PTPN11-T5(RSGMVQTEA  | 9    | >PTPN11-T5(RSGMVQKEA  | 10   | 1    |

|                       |       |                       |      |       |
|-----------------------|-------|-----------------------|------|-------|
| >PTPN11-T5(RSGMVQTEA  | 428   | >PTPN11-T5(RSGMVQKEA  | 433  | 5     |
| >PTPN11-T5(RSGMVQTEA  | 20    | >PTPN11-T5(RSGMVQKEA  | 53   | 33    |
| >PTPN11-T5(RSGMVQTEA  | 46    | >PTPN11-T5(RSGMVQKEA  | 144  | 98    |
| >PTPN11-T5(QRSGMVQT   | 3492  | >PTPN11-T5(QRSGMVQK   | 145  | 3347  |
| >PTPN11-T5(SQRSGMVQT  | 21960 | >PTPN11-T5(SQRSGMVQK  | 286  | 21674 |
| >PTPN11-T5(SQRSGMVQT  | 28186 | >PTPN11-T5(SQRSGMVQK  | 257  | 27929 |
| >PTPN11-T5(SQRSGMVQT  | 4501  | >PTPN11-T5(SQRSGMVQK  | 12   | 4489  |
| >PTPN11-T5(SQRSGMVQT  | 574   | >PTPN11-T5(SQRSGMVQK  | 415  | 159   |
| >PTPN11-T5(SQRSGMVQT  | 16469 | >PTPN11-T5(SQRSGMVQK  | 288  | 16181 |
| >PTPN11-T5(SQRSGMVQT  | 1933  | >PTPN11-T5(SQRSGMVQK  | 477  | 1456  |
| >PTPN11-T5(SQRSGMVQT  | 258   | >PTPN11-T5(SQRSGMVQK  | 363  | 105   |
| >PTPN11-T5(RSQRSGMVC  | 25210 | >PTPN11-T5(RSQRSGMVC  | 119  | 25091 |
| >PTPN11-T5(RSQRSGMVC  | 33937 | >PTPN11-T5(RSQRSGMVC  | 73   | 33864 |
| >PTPN11-T5(RSQRSGMVC  | 2238  | >PTPN11-T5(RSQRSGMVC  | 8    | 2230  |
| >PTPN11-T5(RSQRSGMVC  | 477   | >PTPN11-T5(RSQRSGMVC  | 4044 | 3567  |
| >PTPN11-T5(RSQRSGMVC  | 490   | >PTPN11-T5(RSQRSGMVC  | 1209 | 719   |
| >PTPN11-T5(RSQRSGMVC  | 15057 | >PTPN11-T5(RSQRSGMVC  | 350  | 14707 |
| >PTPN11-T5;THIKIQNTGD | 281   | >PTPN11-T5;SHIKIQNTGD | 278  | 3     |
| >PTPN11-T5;THIKIQNTGD | 247   | >PTPN11-T5;SHIKIQNTGD | 136  | 111   |
| >PTPN11-T5;THIKIQNTGD | 301   | >PTPN11-T5;SHIKIQNTGD | 114  | 187   |
| >PTPN11-T5;RNGAVTHI   | 270   | >PTPN11-T5;RNGAVSHI   | 183  | 87    |
| >PTPN11-T5;RRNGAVTHIK | 650   | >PTPN11-T5;RRNGAVSHIK | 366  | 284   |
| >PTPN11-T5;RRNGAVTHI  | 407   | >PTPN11-T5;RRNGAVSHI  | 288  | 119   |
| >PTPN11-T5;RRNGAVTHIK | 568   | >PTPN11-T5;RRNGAVSHIK | 436  | 132   |
| >PTPN11-T5;RRNGAVTH   | 75    | >PTPN11-T5;RRNGAVSH   | 72   | 3     |
| >PTPN11-T5;RRNGAVTHI  | 28    | >PTPN11-T5;RRNGAVSHI  | 38   | 10    |
| >PTPN11-T5;RRNGAVTHIK | 19    | >PTPN11-T5;RRNGAVSHIK | 23   | 4     |
| >PTPN11-T5;RRNGAVTHIK | 31    | >PTPN11-T5;RRNGAVSHIK | 38   | 7     |
| >PTPN11-T5;RRNGAVTHI  | 238   | >PTPN11-T5;RRNGAVSHI  | 249  | 11    |
| >PTPN11-T5;RRNGAVTHIK | 134   | >PTPN11-T5;RRNGAVSHIK | 132  | 2     |
| >PTPN11-T5;RRNGAVTHIK | 158   | >PTPN11-T5;RRNGAVSHIK | 187  | 29    |
| >PTPN11-T5;RRNGAVTHI  | 164   | >PTPN11-T5;RRNGAVSHI  | 69   | 95    |
| >PTPN11-T5;RRNGAVTHIK | 89    | >PTPN11-T5;RRNGAVSHIK | 107  | 18    |
| >PTPN11-T5;RRNGAVTHIK | 146   | >PTPN11-T5;RRNGAVSHIK | 129  | 17    |
| >PTPN11-T5;VRRNGAVTH  | 471   | >PTPN11-T5;VRRNGAVSH  | 357  | 114   |
| >PTPN11-T5;VRRNGAVTH  | 185   | >PTPN11-T5;VRRNGAVSH  | 146  | 39    |
| >PTPN11-T5;VRRNGAVTH  | 418   | >PTPN11-T5;VRRNGAVSH  | 1099 | 681   |
| >PTPN11-T5;VRRNGAVTH  | 229   | >PTPN11-T5;VRRNGAVSH  | 397  | 168   |
| >PTPN11-T5;SVRRNGAVT  | 66    | >PTPN11-T5;SVRRNGAVS  | 31   | 35    |
| >PTPN11-T5;SVRRNGAVTI | 150   | >PTPN11-T5;SVRRNGAVSI | 113  | 37    |
| >PTPN11-T5;SVRRNGAVTI | 8     | >PTPN11-T5;SVRRNGAVSI | 6    | 2     |
| >PTPN11-T7;TLAELVQYYM | 36    | >PTPN11-T7;ILAELVQYYM | 24   | 12    |
| >PTPN11-T7;TLAELVQYY  | 296   | >PTPN11-T7;ILAELVQYY  | 151  | 145   |

|                       |      |                        |      |      |
|-----------------------|------|------------------------|------|------|
| >PTPN11-T7:TLAELVQYYM | 13   | >PTPN11-T7:ILAELVQYYM  | 11   | 2    |
| >PTPN11-T7:TLAELVQYYM | 820  | >PTPN11-T7:ILAELVQYYM  | 330  | 490  |
| >PTPN11-T7:TLAELVQYYM | 448  | >PTPN11-T7:ILAELVQYYM  | 392  | 56   |
| >PTPN11-T7:TLAELVQYYM | 556  | >PTPN11-T7:ILAELVQYYM  | 414  | 142  |
| >PTPN11-T7:TLAELVQYY  | 179  | >PTPN11-T7:ILAELVQYY   | 35   | 144  |
| >PTPN11-T7:TLAELVQYYM | 7    | >PTPN11-T7:ILAELVQYYM  | 3    | 4    |
| >PTPN11-T7:TLAELVQYYM | 25   | >PTPN11-T7:ILAELVQYYM  | 15   | 10   |
| >PTPN11-T7:TLAELVQYY  | 1123 | >PTPN11-T7:ILAELVQYY   | 468  | 655  |
| >PTPN11-T7:TLAELVQYYM | 21   | >PTPN11-T7:ILAELVQYYM  | 14   | 7    |
| >PTPN11-T7:TLAELVQYYM | 7    | >PTPN11-T7:ILAELVQYYM  | 4    | 3    |
| >PTPN11-T7:TLAELVQY   | 825  | >PTPN11-T7:ILAELVQY    | 202  | 623  |
| >PTPN11-T7:TLAELVQYY  | 389  | >PTPN11-T7:ILAELVQYY   | 88   | 301  |
| >PTPN11-T7:TLAELVQYYM | 26   | >PTPN11-T7:ILAELVQYYM  | 10   | 16   |
| >PTPN11-T7:TLAELVQYY  | 504  | >PTPN11-T7:ILAELVQYY   | 254  | 250  |
| >PTPN11-T7:TLAELVQYY  | 248  | >PTPN11-T7:ILAELVQYY   | 5921 | 5673 |
| >PTPN11-T7:TLAELVQY   | 243  | >PTPN11-T7:ILAELVQY    | 1776 | 1533 |
| >PTPN11-T7:TLAELVQYY  | 80   | >PTPN11-T7:ILAELVQYY   | 519  | 439  |
| >PTPN11-T7:TLAELVQY   | 64   | >PTPN11-T7:ILAELVQY    | 49   | 15   |
| >PTPN11-T7:TLAELVQYY  | 40   | >PTPN11-T7:ILAELVQYY   | 29   | 11   |
| >PTPN11-T7:TLAELVQY   | 681  | >PTPN11-T7:ILAELVQY    | 245  | 436  |
| >PTPN11-T7:TLAELVQYY  | 262  | >PTPN11-T7:ILAELVQYY   | 96   | 166  |
| >PTPN11-T7:TLAELVQYYM | 497  | >PTPN11-T7:ILAELVQYYM  | 2044 | 1547 |
| >PTPN11-T7:TLAELVQYYM | 91   | >PTPN11-T7:ILAELVQYYM  | 1533 | 1442 |
| >PTPN11-T7:TLAELVQY   | 182  | >PTPN11-T7:ILAELVQY    | 144  | 38   |
| >PTPN11-T7:TLAELVQYY  | 32   | >PTPN11-T7:ILAELVQYY   | 26   | 6    |
| >PTPN11-T7:TLAELVQY   | 204  | >PTPN11-T7:ILAELVQY    | 120  | 84   |
| >PTPN11-T7:TLAELVQYY  | 102  | >PTPN11-T7:ILAELVQYY   | 66   | 36   |
| >PTPN11-T7:TLAELVQY   | 332  | >PTPN11-T7:ILAELVQY    | 431  | 99   |
| >PTPN11-T7:TLAELVQYY  | 207  | >PTPN11-T7:ILAELVQYY   | 269  | 62   |
| >PTPN11-T7:TLAELVQY   | 1923 | >PTPN11-T7:ILAELVQY    | 296  | 1627 |
| >PTPN11-T7:TLAELVQYY  | 1108 | >PTPN11-T7:ILAELVQYY   | 140  | 968  |
| >PTPN11-T7:TLAELVQY   | 2642 | >PTPN11-T7:ILAELVQY    | 371  | 2271 |
| >PTPN11-T7:TLAELVQYYM | 3363 | >PTPN11-T7:ILAELVQYYM  | 432  | 2931 |
| >PTPN11-T7:TLAELVQYYM | 291  | >PTPN11-T7:ILAELVQYYM  | 464  | 173  |
| >PTPN11-T7:TLAELVQY   | 482  | >PTPN11-T7:ILAELVQY    | 189  | 293  |
| >PTPN11-T7:TLAELVQYY  | 545  | >PTPN11-T7:ILAELVQYY   | 291  | 254  |
| >PTPN11-T7:ATLAELVQYY | 167  | >PTPN11-T7:AILAELVQYY  | 1673 | 1506 |
| >PTPN11-T7:ATLAELVQYY | 442  | >PTPN11-T7:AILAELVQYYM | 105  | 337  |
| >PTPN11-T7:ATLAELVQYY | 558  | >PTPN11-T7:AILAELVQYYM | 178  | 380  |
| >PTPN11-T7:ATLAELVQYY | 285  | >PTPN11-T7:AILAELVQYYM | 113  | 172  |
| >PTPN11-T7:ATLAELVQYY | 247  | >PTPN11-T7:AILAELVQYYM | 56   | 191  |
| >PTPN11-T7:ATLAELVQYY | 2521 | >PTPN11-T7:AILAELVQYYM | 237  | 2284 |
| >PTPN11-T7:ATLAELVQYY | 371  | >PTPN11-T7:AILAELVQYY  | 332  | 39   |

|                       |      |                        |       |       |
|-----------------------|------|------------------------|-------|-------|
| >PTPN11-T7:ATLAELVQY  | 112  | >PTPN11-T7:AILAELVQY   | 382   | 270   |
| >PTPN11-T7:ATLAELVQYY | 73   | >PTPN11-T7:AILAELVQYY  | 268   | 195   |
| >PTPN11-T7:ATLAELVQYY | 152  | >PTPN11-T7:AILAELVQYY  | 579   | 427   |
| >PTPN11-T7:ATLAELVQY  | 8    | >PTPN11-T7:AILAELVQY   | 42    | 34    |
| >PTPN11-T7:ATLAELVQYY | 8    | >PTPN11-T7:AILAELVQYY  | 36    | 28    |
| >PTPN11-T7:ATLAELVQYY | 28   | >PTPN11-T7:AILAELVQYYM | 215   | 187   |
| >PTPN11-T7:ATLAELVQY  | 70   | >PTPN11-T7:AILAELVQY   | 155   | 85    |
| >PTPN11-T7:ATLAELVQYY | 196  | >PTPN11-T7:AILAELVQYY  | 615   | 419   |
| >PTPN11-T7:ATLAELVQYY | 72   | >PTPN11-T7:AILAELVQYY  | 557   | 485   |
| >PTPN11-T7:ATLAELVQY  | 342  | >PTPN11-T7:AILAELVQY   | 1385  | 1043  |
| >PTPN11-T7:ATLAELVQYY | 363  | >PTPN11-T7:AILAELVQYYM | 1589  | 1226  |
| >PTPN11-T7:ATLAELVQY  | 256  | >PTPN11-T7:AILAELVQY   | 469   | 213   |
| >PTPN11-T7:ATLAELVQYY | 70   | >PTPN11-T7:AILAELVQYY  | 122   | 52    |
| >PTPN11-T7:ATLAELVQYY | 556  | >PTPN11-T7:AILAELVQYY  | 422   | 134   |
| >PTPN11-T7:ATLAELVQYY | 290  | >PTPN11-T7:AILAELVQYY  | 598   | 308   |
| >PTPN11-T7:ATLAELVQY  | 5    | >PTPN11-T7:AILAELVQY   | 139   | 134   |
| >PTPN11-T7:ATLAELVQYY | 5    | >PTPN11-T7:AILAELVQYY  | 295   | 290   |
| >PTPN11-T7:ATLAELVQYY | 23   | >PTPN11-T7:AILAELVQYYM | 5510  | 5487  |
| >PTPN11-T7:ATLAELVQYY | 460  | >PTPN11-T7:AILAELVQYY  | 5476  | 5016  |
| >PTPN11-T7:ATLAELVQYY | 302  | >PTPN11-T7:AILAELVQYYM | 3016  | 2714  |
| >PTPN11-T7:ATLAELVQYY | 379  | >PTPN11-T7:AILAELVQYYM | 13370 | 12991 |
| >PTPN11-T7:ATLAELVQY  | 166  | >PTPN11-T7:AILAELVQY   | 4381  | 4215  |
| >PTPN11-T7:ATLAELVQYY | 136  | >PTPN11-T7:AILAELVQYY  | 5502  | 5366  |
| >PTPN11-T7:ATLAELVQYY | 137  | >PTPN11-T7:AILAELVQYYM | 5075  | 4938  |
| >PTPN11-T7:YDLYGGEKFA | 9143 | >PTPN11-T7:YDLYGGEKFA  | 149   | 8994  |
| >PTPN11-T7:YDLYGGEKFA | 9775 | >PTPN11-T7:YDLYGGEKFA  | 212   | 9563  |
| >PTPN11-T7:FATLAELVQY | 360  | >PTPN11-T7:FAILAELVQY  | 483   | 123   |
| >PTPN11-T7:FATLAELV   | 2281 | >PTPN11-T7:FAILAELV    | 325   | 1956  |
| >PTPN11-T7:FATLAELV   | 189  | >PTPN11-T7:FAILAELV    | 95    | 94    |
| >PTPN11-T7:FATLAELV   | 1117 | >PTPN11-T7:FAILAELV    | 269   | 848   |
| >PTPN11-T7:FATLAELV   | 38   | >PTPN11-T7:FAILAELV    | 11    | 27    |
| >PTPN11-T7:FATLAELV   | 97   | >PTPN11-T7:FAILAELV    | 157   | 60    |
| >PTPN11-T7:FATLAELVQY | 3450 | >PTPN11-T7:FAILAELVQY  | 242   | 3208  |
| >PTPN11-T7:FATLAELVQY | 1972 | >PTPN11-T7:FAILAELVQYY | 124   | 1848  |
| >PTPN11-T7:FATLAELVQY | 717  | >PTPN11-T7:FAILAELVQY  | 397   | 320   |
| >PTPN11-T7:FATLAELVQY | 99   | >PTPN11-T7:FAILAELVQYY | 31    | 68    |
| >PTPN11-T7:FATLAELVQY | 1566 | >PTPN11-T7:FAILAELVQY  | 295   | 1271  |
| >PTPN11-T7:FATLAELVQY | 693  | >PTPN11-T7:FAILAELVQY  | 246   | 447   |
| >PTPN11-T7:FATLAELVQY | 778  | >PTPN11-T7:FAILAELVQYY | 308   | 470   |
| >PTPN11-T7:FATLAELV   | 99   | >PTPN11-T7:FAILAELV    | 47    | 52    |
| >PTPN11-T7:FATLAELV   | 1002 | >PTPN11-T7:FAILAELV    | 249   | 753   |
| >PTPN11-T7:FATLAELVQY | 4400 | >PTPN11-T7:FAILAELVQY  | 381   | 4019  |
| >PTPN11-T7:FATLAELVQY | 2823 | >PTPN11-T7:FAILAELVQYY | 215   | 2608  |

|                       |       |                        |      |       |
|-----------------------|-------|------------------------|------|-------|
| >PTPN11-T7:FATLAELVQY | 1330  | >PTPN11-T7:FAILAELVQY  | 322  | 1008  |
| >PTPN11-T7:FATLAELVQY | 764   | >PTPN11-T7:FAILAELVQYY | 187  | 577   |
| >PTPN11-T7:FATLAELVQY | 41    | >PTPN11-T7:FAILAELVQY  | 15   | 26    |
| >PTPN11-T7:FATLAELVQY | 41    | >PTPN11-T7:FAILAELVQYY | 15   | 26    |
| >PTPN11-T7:FATLAELVQY | 27    | >PTPN11-T7:FAILAELVQYY | 20   | 7     |
| >PTPN11-T7:FATLAELVQY | 310   | >PTPN11-T7:FAILAELVQYY | 185  | 125   |
| >PTPN11-T7:FATLAELV   | 1144  | >PTPN11-T7:FAILAELV    | 461  | 683   |
| >PTPN11-T7:FATLAELVQY | 866   | >PTPN11-T7:FAILAELVQY  | 324  | 542   |
| >PTPN11-T7:FATLAELVQY | 221   | >PTPN11-T7:FAILAELVQYY | 92   | 129   |
| >PTPN11-T7:FATLAELVQY | 104   | >PTPN11-T7:FAILAELVQY  | 217  | 113   |
| >PTPN11-T7:KFATLAEL   | 82    | >PTPN11-T7:KFAILAEL    | 85   | 3     |
| >PTPN11-T7:KFATLAELV  | 64    | >PTPN11-T7:KFAILAELV   | 98   | 34    |
| >PTPN11-T7:KFATLAEL   | 221   | >PTPN11-T7:KFAILAEL    | 151  | 70    |
| >PTPN11-T7:KFATLAELVQ | 27    | >PTPN11-T7:KFAILAELVQY | 28   | 1     |
| >PTPN11-T7:KFATLAELVQ | 319   | >PTPN11-T7:KFAILAELVQY | 313  | 6     |
| >PTPN11-T7:KFATLAELVQ | 117   | >PTPN11-T7:KFAILAELVQY | 137  | 20    |
| >PTPN11-T7:KFATLAELVQ | 144   | >PTPN11-T7:KFAILAELVQY | 173  | 29    |
| >PTPN11-T7:KFATLAEL   | 210   | >PTPN11-T7:KFAILAEL    | 230  | 20    |
| >PTPN11-T7:KFATLAELV  | 149   | >PTPN11-T7:KFAILAELV   | 156  | 7     |
| >PTPN11-T7:EKFATLAEL  | 1348  | >PTPN11-T7:EKFAILAEL   | 52   | 1296  |
| >PTPN11-T7:EKFATLAELV | 809   | >PTPN11-T7:EKFAILAELV  | 410  | 399   |
| >PTPN11-T7:EKFATLAEL  | 36    | >PTPN11-T7:EKFAILAEL   | 168  | 132   |
| >PTPN11-T7:EKFATLAELV | 324   | >PTPN11-T7:EKFAILAELV  | 977  | 653   |
| >PTPN11-T7:EKFATLAEL  | 89    | >PTPN11-T7:EKFAILAEL   | 238  | 149   |
| >PTPN11-T7:GEKFATLA   | 283   | >PTPN11-T7:GEKFAILA    | 170  | 113   |
| >PTPN11-T7:GEKFATLAEL | 114   | >PTPN11-T7:GEKFAILAELV | 246  | 132   |
| >PTPN11-T7:GEKFATLAEL | 110   | >PTPN11-T7:GEKFAILAELV | 115  | 5     |
| >PTPN11-T7:GEKFATLA   | 277   | >PTPN11-T7:GEKFAILA    | 247  | 30    |
| >PTPN11-T7:GEKFATLAEL | 173   | >PTPN11-T7:GEKFAILAEL  | 128  | 45    |
| >PTPN11-T7:GEKFATLAEL | 367   | >PTPN11-T7:GEKFAILAELV | 262  | 105   |
| >PTPN11-T7:GEKFATLA   | 55    | >PTPN11-T7:GEKFAILA    | 29   | 26    |
| >PTPN11-T7:GEKFATLAEL | 309   | >PTPN11-T7:GEKFAILAELV | 239  | 70    |
| >PTPN11-T7:GEKFATLAEL | 478   | >PTPN11-T7:GEKFAILAEL  | 612  | 134   |
| >PTPN11-T7:GEKFATLAEL | 9     | >PTPN11-T7:GEKFAILAELV | 9    | 0     |
| >PTPN11-T7:YGGEKFATL  | 410   | >PTPN11-T7:YGGEKFAL    | 2439 | 2029  |
| >PTPN11-T7:YGGEKFATL  | 121   | >PTPN11-T7:YGGEKFAL    | 205  | 84    |
| >PTPN11-T7:LYGGEKFAT  | 19800 | >PTPN11-T7:LYGGEKFAL   | 400  | 19400 |
| >PTPN11-T7:LYGGEKFAT  | 14081 | >PTPN11-T7:LYGGEKFAL   | 420  | 13661 |
| >PTPN11-T7:LYGGEKFAT  | 1107  | >PTPN11-T7:LYGGEKFAL   | 8    | 1099  |
| >PTPN11-T7:LYGGEKFATL | 7     | >PTPN11-T7:LYGGEKFAL   | 13   | 6     |
| >PTPN11-T7:DLYGGEKFAT | 3746  | >PTPN11-T7:DLYGGEKFAL  | 460  | 3286  |
| >PTPN11-T7:DLYGGEKFAT | 827   | >PTPN11-T7:DLYGGEKFAL  | 103  | 724   |
| >PTPN11-T7:DLYGGEKFAT | 1024  | >PTPN11-T7:DLYGGEKFAL  | 35   | 989   |

|                        |       |                        |      |       |
|------------------------|-------|------------------------|------|-------|
| >PTPN11-T7: DLYGGEKFAT | 31    | >PTPN11-T7: DLYGGEKFAL | 196  | 165   |
| >PTPN11-T7: DLYGGEKFAT | 396   | >PTPN11-T7: DLYGGEKFAL | 1510 | 1114  |
| >PTPN11-T7: DLYGGEKFAT | 2993  | >PTPN11-T7: DLYGGEKFAL | 137  | 2856  |
| >PTPN11-T7: DLYGGEKFAT | 66    | >PTPN11-T7: DLYGGEKFAL | 202  | 136   |
| >PTPN11-T7: DLYGGEKFAT | 205   | >PTPN11-T7: DLYGGEKFAL | 654  | 449   |
| >PTPN11-T7: DLYGGEKFAT | 653   | >PTPN11-T7: DLYGGEKFAL | 57   | 596   |
| >PTPN11-T7: DLYGGEKFAT | 11    | >PTPN11-T7: DLYGGEKFAL | 28   | 17    |
| >PTPN11-V4: VRRNGAVTH  | 471   | >PTPN11-V4: LRRNGAVTHI | 158  | 313   |
| >PTPN11-V4: VRRNGAVTH  | 601   | >PTPN11-V4: LRRNGAVTH  | 389  | 212   |
| >PTPN11-V4: VRRNGAVTH  | 185   | >PTPN11-V4: LRRNGAVTHI | 110  | 75    |
| >PTPN11-V4: VRRNGAVTH  | 551   | >PTPN11-V4: LRRNGAVTHI | 400  | 151   |
| >PTPN11-V4: VRRNGAVTH  | 586   | >PTPN11-V4: LRRNGAVTHI | 281  | 305   |
| >PTPN11-V4: VRRNGAVTH  | 418   | >PTPN11-V4: LRRNGAVTHI | 654  | 236   |
| >PTPN11-V4: VRRNGAVTH  | 229   | >PTPN11-V4: LRRNGAVTHI | 336  | 107   |
| >PTPN11-V4: SVRRNGAV   | 520   | >PTPN11-V4: SLRRNGAV   | 21   | 499   |
| >PTPN11-V4: SVRRNGAVTI | 834   | >PTPN11-V4: SLRRNGAVTf | 43   | 791   |
| >PTPN11-V4: SVRRNGAV   | 1654  | >PTPN11-V4: SLRRNGAV   | 24   | 1630  |
| >PTPN11-V4: SVRRNGAVTI | 7072  | >PTPN11-V4: SLRRNGAVTf | 160  | 6912  |
| >PTPN11-V4: SVRRNGAV   | 6241  | >PTPN11-V4: SLRRNGAV   | 82   | 6159  |
| >PTPN11-V4: SVRRNGAVTI | 14489 | >PTPN11-V4: SLRRNGAVTf | 367  | 14122 |
| >PTPN11-V4: SVRRNGAV   | 9310  | >PTPN11-V4: SLRRNGAV   | 242  | 9068  |
| >PTPN11-V4: SVRRNGAVTI | 10876 | >PTPN11-V4: SLRRNGAVTf | 337  | 10539 |
| >PTPN11-V4: SVRRNGAV   | 332   | >PTPN11-V4: SLRRNGAV   | 5    | 327   |
| >PTPN11-V4: SVRRNGAVT  | 16432 | >PTPN11-V4: SLRRNGAVT  | 405  | 16027 |
| >PTPN11-V4: SVRRNGAVTI | 3545  | >PTPN11-V4: SLRRNGAVTf | 19   | 3526  |
| >PTPN11-V4: SVRRNGAV   | 10    | >PTPN11-V4: SLRRNGAV   | 57   | 47    |
| >PTPN11-V4: SVRRNGAVT  | 66    | >PTPN11-V4: SLRRNGAVT  | 744  | 678   |
| >PTPN11-V4: SVRRNGAVTI | 150   | >PTPN11-V4: SLRRNGAVTf | 1526 | 1376  |
| >PTPN11-V4: SVRRNGAVTI | 8     | >PTPN11-V4: SLRRNGAVTf | 37   | 29    |
| >PTPN11-V4: SVRRNGAV   | 65    | >PTPN11-V4: SLRRNGAV   | 691  | 626   |
| >PTPN11-V4: SVRRNGAV   | 2676  | >PTPN11-V4: SLRRNGAV   | 420  | 2256  |
| >PTPN11-V4: SVRRNGAVTI | 1302  | >PTPN11-V4: SLRRNGAVTf | 404  | 898   |
| >PTPN11-V4: KSNPGDFTLS | 128   | >PTPN11-V4: KSNPGDFTLS | 723  | 595   |
| >PTPN11-V4: KSNPGDFTLS | 86    | >PTPN11-V4: KSNPGDFTLS | 136  | 50    |
| >PTPN11-V4: KSNPGDFTLS | 193   | >PTPN11-V4: KSNPGDFTLS | 38   | 155   |
| >PTPN11-V4: KSNPGDFTLS | 978   | >PTPN11-V4: KSNPGDFTLS | 491  | 487   |
| >PTPN11-V4: KSNPGDFTLS | 30    | >PTPN11-V4: KSNPGDFTLS | 4    | 26    |
| >PTPN11-V4: KSNPGDFTLS | 2675  | >PTPN11-V4: KSNPGDFTLS | 340  | 2335  |
| >PTPN11-V4: KSNPGDFTLS | 55    | >PTPN11-V4: KSNPGDFTLS | 13   | 42    |
| >PTPN11-V4: KSNPGDFTLS | 225   | >PTPN11-V4: KSNPGDFTLS | 45   | 180   |
| >PTPN11-V4: LSVRRNGAVT | 639   | >PTPN11-V4: LSLRRNGAVT | 459  | 180   |
| >PTPN11-V4: TLSVRRNGAV | 548   | >PTPN11-V4: TLSLRRNGAV | 403  | 145   |
| >PTPN11-V4: TLSVRRNGAV | 69    | >PTPN11-V4: TLSLRRNGAV | 66   | 3     |

|                        |      |                        |       |       |
|------------------------|------|------------------------|-------|-------|
| >PTPN11-V4! TLSVRRNGA  | 481  | >PTPN11-V4! TLSLRRNGA  | 793   | 312   |
| >PTPN11-V4! TLSVRRNGAV | 15   | >PTPN11-V4! TLSLRRNGAV | 21    | 6     |
| >PTPN11-V4! FTLSVRRNGA | 495  | >PTPN11-V4! FTLSLRRNGA | 475   | 20    |
| >PTPN11-V4! FTLSVRRNGA | 528  | >PTPN11-V4! FTLSLRRNGA | 335   | 193   |
| >PTPN11-V4! FTLSVRRNGA | 180  | >PTPN11-V4! FTLSLRRNGA | 225   | 45    |
| >PTPN11-V4! FTLSVRRNGA | 160  | >PTPN11-V4! FTLSLRRNGA | 93    | 67    |
| >PTPN11-V4! FTLSVRRNGA | 71   | >PTPN11-V4! FTLSLRRNGA | 97    | 26    |
| >PTPN11-V4! FTLSVRRNGA | 18   | >PTPN11-V4! FTLSLRRNGA | 42    | 24    |
| >PTPN11-V4! FTLSVRRNGA | 331  | >PTPN11-V4! FTLSLRRNGA | 620   | 289   |
| >PTPN11-V4! FTLSVRRNGA | 337  | >PTPN11-V4! FTLSLRRNGA | 333   | 4     |
| >PTPN11-V4! FTLSVRRNGA | 25   | >PTPN11-V4! FTLSLRRNGA | 38    | 13    |
| >PTPN11-V4! FTLSVRRNGA | 321  | >PTPN11-V4! FTLSLRRNGA | 364   | 43    |
| >PTPN11-V4! FTLSVRRNGA | 18   | >PTPN11-V4! FTLSLRRNGA | 16    | 2     |
| >PTPN11-V4! FTLSVRRNGA | 222  | >PTPN11-V4! FTLSLRRNGA | 216   | 6     |
| >PTPN11-V4! DFTLSVRR   | 19   | >PTPN11-V4! DFTLSLRR   | 23    | 4     |
| >PTPN11-V4! DFTLSVRR   | 154  | >PTPN11-V4! DFTLSLRR   | 342   | 188   |
| >PTPN11-V4! DFTLSVRR   | 412  | >PTPN11-V4! DFTLSLRR   | 507   | 95    |
| >PTPN11-V4! NPGDFTLSV  | 52   | >PTPN11-V4! NPGDFTLSL  | 465   | 413   |
| >PTPN11-V4! NPGDFTLSV  | 166  | >PTPN11-V4! NPGDFTLSL  | 36    | 130   |
| >PTPN11-V4! NPGDFTLSV  | 1499 | >PTPN11-V4! NPGDFTLSL  | 153   | 1346  |
| >PTPN11-V4! NPGDFTLSV  | 4640 | >PTPN11-V4! NPGDFTLSL  | 329   | 4311  |
| >PTPN11-V4! NPGDFTLSV  | 740  | >PTPN11-V4! NPGDFTLSL  | 190   | 550   |
| >PTPN11-V4! NPGDFTLSVR | 392  | >PTPN11-V4! NPGDFTLSLR | 295   | 97    |
| >PTPN11-V4! NPGDFTLSVR | 62   | >PTPN11-V4! NPGDFTLSLR | 62    | 0     |
| >PTPN11-V4! SNPGDFTLSV | 196  | >PTPN11-V4! SNPGDFTLSL | 970   | 774   |
| >PTPN11-V4! SNPGDFTLSV | 1050 | >PTPN11-V4! SNPGDFTLSL | 128   | 922   |
| >PTPN11-Y6! YDLYGGEKF  | 303  | >PTPN11-Y6! CDLYGGEKF  | 2122  | 1819  |
| >PTPN11-Y6! YDLYGGEKF  | 183  | >PTPN11-Y6! CDLYGGEKF  | 4374  | 4191  |
| >PTPN11-Y6! YYDLYGGEKF | 31   | >PTPN11-Y6! YCDLYGGEKF | 3300  | 3269  |
| >PTPN11-Y6! YYDLYGGEKF | 76   | >PTPN11-Y6! YCDLYGGEKF | 11596 | 11520 |
| >PTPN11-Y6! YYDLYGGEKF | 7    | >PTPN11-Y6! YCDLYGGEKF | 12208 | 12201 |
| >PTPN11-Y6! YYDLYGGEKF | 47   | >PTPN11-Y6! YCDLYGGEKF | 608   | 561   |
| >PTPN11-Y6! HIKIQNTGDY | 472  | >PTPN11-Y6! HIKIQNTGDY | 3986  | 3514  |
| >PTPN11-Y6! HIKIQNTGDY | 197  | >PTPN11-Y6! HIKIQNTGDY | 24575 | 24378 |
| >PTPN11-Y6! HIKIQNTGDY | 402  | >PTPN11-Y6! HIKIQNTGDY | 18991 | 18589 |
| >PTPN11-Y6! HIKIQNTGDY | 297  | >PTPN11-Y6! HIKIQNTGDY | 23723 | 23426 |
| >PTPN11-Y6! DYYDLYGGEK | 108  | >PTPN11-Y6! DYCDLYGGEK | 759   | 651   |
| >PTPN11-Y6! DYYDLYGGEK | 44   | >PTPN11-Y6! DYCDLYGGEK | 66    | 22    |
| >PTPN11-Y6! TGDYDDLY   | 200  | >PTPN11-Y6! TGDYCDLY   | 981   | 781   |
| >PTPN11-Y6! TGDYDDLY   | 968  | >PTPN11-Y6! TGDYCDLY   | 490   | 478   |
| >PTPN11-Y6! NTGDYDDLY  | 33   | >PTPN11-Y6! NTGDYCDLY  | 173   | 140   |
| >PTPN11-Y6! NTGDYDDLY  | 429  | >PTPN11-Y6! NTGDYCDLY  | 1380  | 951   |
| >PTPN11-Y6! NTGDYDDLY  | 40   | >PTPN11-Y6! NTGDYCDLY  | 48    | 8     |

|                       |      |                       |       |       |
|-----------------------|------|-----------------------|-------|-------|
| >PTPN11-Y6:NTGDYYDL   | 213  | >PTPN11-Y6:NTGDYCDLY  | 209   | 4     |
| >PTPN11-Y6:NTGDYYDL   | 482  | >PTPN11-Y6:NTGDYCDL   | 2770  | 2288  |
| >PTPN11-Y6:NTGDYYDL   | 425  | >PTPN11-Y6:NTGDYCDL   | 1179  | 754   |
| >PTPN11-Y6:NTGDYYDL   | 255  | >PTPN11-Y6:NTGDYCDLY  | 472   | 217   |
| >PTPN11-Y6:NTGDYYDL   | 249  | >PTPN11-Y6:NTGDYCDLY  | 123   | 126   |
| >PTPN11-Y6:IQNTGDYY   | 329  | >PTPN11-Y6:IQNTGDYC   | 24556 | 24227 |
| >PTPN11-Y6:IQNTGDYYDL | 132  | >PTPN11-Y6:IQNTGDYCDL | 174   | 42    |
| >PTPN11-Y6:IQNTGDYY   | 23   | >PTPN11-Y6:IQNTGDYC   | 18338 | 18315 |
| >PTPN11-Y6:IQNTGDYYDL | 42   | >PTPN11-Y6:IQNTGDYCDL | 33    | 9     |
| >PTPN11-Y6:IQNTGDYY   | 73   | >PTPN11-Y6:IQNTGDYC   | 12922 | 12849 |
| >PTPN11-Y6:IQNTGDYYDL | 124  | >PTPN11-Y6:IQNTGDYCDL | 116   | 8     |
| >PTPN11-Y6:IQNTGDYY   | 245  | >PTPN11-Y6:IQNTGDYC   | 22300 | 22055 |
| >PTPN11-Y6:IQNTGDYY   | 27   | >PTPN11-Y6:IQNTGDYC   | 4546  | 4519  |
| >PTPN11-Y6:IQNTGDYYDL | 132  | >PTPN11-Y6:IQNTGDYCDL | 158   | 26    |
| >PTPN11-Y6:IQNTGDYYDL | 50   | >PTPN11-Y6:IQNTGDYCDL | 71    | 21    |
| >PTPN11-Y6:KIQNTGDYYC | 452  | >PTPN11-Y6:KIQNTGDYCC | 1184  | 732   |
| >PTPN11-Y6:KIQNTGDYY  | 212  | >PTPN11-Y6:KIQNTGDYC  | 23199 | 22987 |
| >PTPN11-Y6:KIQNTGDYY  | 32   | >PTPN11-Y6:KIQNTGDYC  | 16272 | 16240 |
| >PTPN11-Y6:KIQNTGDYYC | 219  | >PTPN11-Y6:KIQNTGDYCC | 1118  | 899   |
| >PTPN11-Y6:KIQNTGDYY  | 332  | >PTPN11-Y6:KIQNTGDYC  | 27078 | 26746 |
| >PTPN11-Y6:KIQNTGDYY  | 229  | >PTPN11-Y6:KIQNTGDYC  | 18475 | 18246 |
| >PTPN11-Y6:KIQNTGDYY  | 135  | >PTPN11-Y6:KIQNTGDYC  | 19464 | 19329 |
| >PTPN11-Y6:KIQNTGDYY  | 478  | >PTPN11-Y6:KIQNTGDYC  | 39018 | 38540 |
| >PTPN11-Y6:IKIQNTGDYY | 248  | >PTPN11-Y6:IKIQNTGDYC | 32707 | 32459 |
| >PTPN11-Y6:IKIQNTGDYY | 13   | >PTPN11-Y6:IKIQNTGDYC | 3154  | 3141  |
| >RAD51L1-A:WAVEILPPQ  | 1067 | >RAD51L1-A:WVPEILPPQ  | 186   | 881   |
| >RAD51L1-A:NWAVEILPP  | 600  | >RAD51L1-A:NWVPEILPP  | 334   | 266   |
| >RAD51L1-A:NWAVEILPPC | 830  | >RAD51L1-A:NWVPEILPPC | 481   | 349   |
| >RAD51L1-A:ELNWAPEI   | 733  | >RAD51L1-A:ELNWWPEI   | 272   | 461   |
| >RAD51L1-A:ELNWAPEI   | 17   | >RAD51L1-A:ELNWWPEI   | 5     | 12    |
| >RAD51L1-A:ELNWAPEIL  | 110  | >RAD51L1-A:ELNWWPEIL  | 23    | 87    |
| >RAD51L1-A:ELNWAPEI   | 60   | >RAD51L1-A:ELNWWPEI   | 35    | 25    |
| >RAD51L1-A:ELNWAPEIL  | 390  | >RAD51L1-A:ELNWWPEIL  | 185   | 205   |
| >RAD51L1-A:ELNWAPEI   | 50   | >RAD51L1-A:ELNWWPEI   | 38    | 12    |
| >RAD51L1-A:ELNWAPEIL  | 103  | >RAD51L1-A:ELNWWPEIL  | 136   | 33    |
| >RAD51L1-A:ELNWAPEI   | 32   | >RAD51L1-A:ELNWWPEI   | 27    | 5     |
| >RAD51L1-A:ELNWAPEIL  | 84   | >RAD51L1-A:ELNWWPEIL  | 131   | 47    |
| >RAD51L1-A:ELNWAPEI   | 888  | >RAD51L1-A:ELNWWPEI   | 372   | 516   |
| >RAD51L1-A:ELNWAPEI   | 30   | >RAD51L1-A:ELNWWPEI   | 35    | 5     |
| >RAD51L1-A:AELNWAPEI  | 15   | >RAD51L1-A:AELNWWPEI  | 17    | 2     |
| >RAD51L1-A:AELNWAPEI  | 604  | >RAD51L1-A:AELNWWPEI  | 361   | 243   |
| >RAD51L1-A:AELNWAPEI  | 1082 | >RAD51L1-A:AELNWWPEI  | 188   | 894   |
| >RAD51L1-A:AELNWAPEI  | 2120 | >RAD51L1-A:AELNWWPEI  | 384   | 1736  |



|                        |       |                        |      |       |
|------------------------|-------|------------------------|------|-------|
| >RAD51L1-A:AELNWAPEIL  | 436   | >RAD51L1-A:AELNWWPEIL  | 590  | 154   |
| >RAD51L1-A:AELNWAPEI   | 192   | >RAD51L1-A:AELNWWPEI   | 781  | 589   |
| >RAD51L1-A:AELNWAPE    | 815   | >RAD51L1-A:AELNWWPE    | 342  | 473   |
| >RAD51L1-A:AELNWAPEI   | 34    | >RAD51L1-A:AELNWWPEI   | 22   | 12    |
| >RAD51L1-A:AELNWAPEIL  | 555   | >RAD51L1-A:AELNWWPEIL  | 443  | 112   |
| >RAD51L1-A:AELNWAPEI   | 158   | >RAD51L1-A:AELNWWPEI   | 159  | 1     |
| >RAD51L1-A:AELNWAPEI   | 121   | >RAD51L1-A:AELNWWPEI   | 157  | 36    |
| >RAD51L1-A:AELNWAPE    | 162   | >RAD51L1-A:AELNWWPE    | 154  | 8     |
| >RAD51L1-A:AELNWAPEI   | 18    | >RAD51L1-A:AELNWWPEI   | 25   | 7     |
| >RAD51L1-A:AELNWAPEI   | 3     | >RAD51L1-A:AELNWWPEI   | 2    | 1     |
| >RAD51L1-A:AELNWAPEIL  | 9     | >RAD51L1-A:AELNWWPEIL  | 9    | 0     |
| >RAD51L1-A:AELNWAPEIL  | 310   | >RAD51L1-A:AELNWWPEIL  | 181  | 129   |
| >RAD51L1-A:TQAELNWAP   | 312   | >RAD51L1-A:TQAELNWVP   | 404  | 92    |
| >RAD51L1-A:TQAELNWA    | 765   | >RAD51L1-A:TQAELNWV    | 50   | 715   |
| >RAD51L1-A:TQAELNWAP   | 54    | >RAD51L1-A:TQAELNWVP   | 34   | 20    |
| >RAD51L1-A:TQAELNWA    | 110   | >RAD51L1-A:TQAELNWV    | 15   | 95    |
| >RAD51L1-A:TQAELNWAP   | 225   | >RAD51L1-A:TQAELNWVP   | 163  | 62    |
| >RAD51L1-A:TQAELNWA    | 224   | >RAD51L1-A:TQAELNWV    | 27   | 197   |
| >RAD51L1-A:TQAELNWAP   | 385   | >RAD51L1-A:TQAELNWVP   | 176  | 209   |
| >RAD51L1-A:TQAELNWA    | 22    | >RAD51L1-A:TQAELNWV    | 7    | 15    |
| >RAD51L1-A:TQAELNWAP   | 157   | >RAD51L1-A:TQAELNWVP   | 1096 | 939   |
| >RAD51L1-A:TQAELNWAP   | 7     | >RAD51L1-A:TQAELNWVP   | 8    | 1     |
| >RAD51L1-A:TQAELNWA    | 4988  | >RAD51L1-A:TQAELNWV    | 157  | 4831  |
| >RAD51L1-A:TQAELNWAP   | 263   | >RAD51L1-A:TQAELNWVP   | 144  | 119   |
| >RAD51L1-A:TQAELNWA    | 5579  | >RAD51L1-A:TQAELNWV    | 151  | 5428  |
| >RAD51L1-A:TQAELNWAP   | 418   | >RAD51L1-A:TQAELNWVP   | 212  | 206   |
| >RAD51L1-A:TQAELNWA    | 17175 | >RAD51L1-A:TQAELNWV    | 463  | 16712 |
| >RAD51L1-A:TQAELNWA    | 3591  | >RAD51L1-A:TQAELNWV    | 291  | 3300  |
| >RAD51L1-A:TQAELNWAP   | 328   | >RAD51L1-A:TQAELNWVP   | 521  | 193   |
| >RAD51L1-A:TQAELNWAP   | 86    | >RAD51L1-A:TQAELNWVP   | 122  | 36    |
| >RAD51L1-A:VTQAELNWA   | 1696  | >RAD51L1-A:VTQAELNWV   | 189  | 1507  |
| >RAD51L1-A:VTQAELNWA   | 1405  | >RAD51L1-A:VTQAELNWV   | 162  | 1243  |
| >RAD51L1-A:VTQAELNWA   | 2439  | >RAD51L1-A:VTQAELNWV   | 146  | 2293  |
| >RAD51L1-A:VTQAELNWA   | 10104 | >RAD51L1-A:VTQAELNWV   | 386  | 9718  |
| >RAD51L1-A:VTQAELNWA   | 11432 | >RAD51L1-A:VTQAELNWV   | 135  | 11297 |
| >RAD51L1-A:VTQAELNWA   | 3354  | >RAD51L1-A:VTQAELNWV   | 401  | 2953  |
| >RAD51L1-A:SVTQAELNW   | 1645  | >RAD51L1-A:SVTQAELNW   | 199  | 1446  |
| >RAD51L1-A:SVTQAELNW   | 889   | >RAD51L1-A:SVTQAELNW   | 156  | 733   |
| >RAD51L1-A:SVTQAELNW   | 5046  | >RAD51L1-A:SVTQAELNW   | 81   | 4965  |
| >RAD51L1-A:SVTQAELNW   | 2016  | >RAD51L1-A:SVTQAELNW   | 12   | 2004  |
| >RAF1-A319S:RAPVSGTQEK | 378   | >RAF1-A319S:RSPVSGTQEK | 121  | 257   |
| >RAF1-A319S:RAPVSGTQEK | 318   | >RAF1-A319S:RSPVSGTQEK | 115  | 203   |
| >RAF1-A319S:RERAPVSGT  | 256   | >RAF1-A319S:RERSPVSGT  | 746  | 490   |

|                       |       |                        |       |       |
|-----------------------|-------|------------------------|-------|-------|
| >RAF1-A319!RERAPVSGTC | 320   | >RAF1-A319!RERSPVSGTC  | 420   | 100   |
| >RAF1-A319!RERAPVSGT  | 453   | >RAF1-A319!RERSPVSGT   | 858   | 405   |
| >RAF1-A319!RERAPVSGT  | 37    | >RAF1-A319!RERSPVSGT   | 34    | 3     |
| >RAF1-A319!AQRERAPV   | 73    | >RAF1-A319!AQRERSPV    | 52    | 21    |
| >RAF1-A319!AQRERAPV   | 50    | >RAF1-A319!AQRERSPV    | 66    | 16    |
| >RAF1-A319!AQRERAPV   | 42    | >RAF1-A319!AQRERSPV    | 39    | 3     |
| >RAF1-A319!AQRERAPVS  | 770   | >RAF1-A319!AQRERSPVS   | 163   | 607   |
| >RAF1-A319!AQRERAPVSC | 402   | >RAF1-A319!AQRERSPVSC  | 217   | 185   |
| >RAF1-A319!AQRERAPV   | 254   | >RAF1-A319!AQRERSPV    | 152   | 102   |
| >RAF1-A319!AQRERAPVSC | 715   | >RAF1-A319!AQRERSPVSC  | 381   | 334   |
| >RAF1-A319!AQRERAPV   | 56    | >RAF1-A319!AQRERSPV    | 25    | 31    |
| >RAF1-A319!VPAQRERA   | 399   | >RAF1-A319!VPAQRERS    | 10381 | 9982  |
| >RAF1-A319!VPAQRERAPV | 56    | >RAF1-A319!VPAQRERSPV  | 59    | 3     |
| >RAF1-A319!VPAQRERAPV | 410   | >RAF1-A319!VPAQRERSPV  | 668   | 258   |
| >RAF1-A319!PVPAQRERAF | 307   | >RAF1-A319!PVPAQRERSF  | 552   | 245   |
| >RAF1-A319!TPVPAQRERA | 229   | >RAF1-A319!TPVPAQRERS  | 4880  | 4651  |
| >RAF1-N115!NTDAASLI   | 250   | >RAF1-N115!STDAASLI    | 747   | 497   |
| >RAF1-N115!NTDAASLI   | 36    | >RAF1-N115!STDAASLI    | 87    | 51    |
| >RAF1-N115!NTDAASLI   | 2226  | >RAF1-N115!STDAASLI    | 230   | 1996  |
| >RAF1-N115!NTDAASLI   | 184   | >RAF1-N115!STDAASLI    | 33    | 151   |
| >RAF1-N115!WNTDAASLI  | 162   | >RAF1-N115!WSTDAASLI   | 379   | 217   |
| >RAF1-N115!WNTDAASL   | 4542  | >RAF1-N115!WSTDAASL    | 366   | 4176  |
| >RAF1-N115!WNTDAASLI  | 2136  | >RAF1-N115!WSTDAASLI   | 129   | 2007  |
| >RAF1-N115!WNTDAASL   | 15729 | >RAF1-N115!WSTDAASL    | 14    | 15715 |
| >RAF1-N115!WNTDAASLI  | 21202 | >RAF1-N115!WSTDAASLI   | 61    | 21141 |
| >RAF1-N115!WNTDAASLI  | 8839  | >RAF1-N115!WSTDAASLI   | 63    | 8776  |
| >RAF1-N115!WNTDAASL   | 1344  | >RAF1-N115!WSTDAASL    | 67    | 1277  |
| >RAF1-N115!WNTDAASLI  | 89    | >RAF1-N115!WSTDAASLI   | 9     | 80    |
| >RAF1-N115!WNTDAASLI  | 476   | >RAF1-N115!WSTDAASLI   | 23    | 453   |
| >RAF1-N115!WNTDAASLI  | 455   | >RAF1-N115!WSTDAASLI   | 3393  | 2938  |
| >RAF1-N115!DWNTDAASL  | 706   | >RAF1-N115!DWSTDAASLI  | 490   | 216   |
| >RAF1-N115!LDWNTDAAS  | 86    | >RAF1-N115!LDWSTDAASLI | 105   | 19    |
| >RAF1-N115!LDWNTDAAS  | 114   | >RAF1-N115!LDWSTDAASLI | 95    | 19    |
| >RAF1-N115!LDWNTDAAS  | 563   | >RAF1-N115!LDWSTDAASLI | 383   | 180   |
| >RAF1-N115!LDWNTDAAS  | 34    | >RAF1-N115!LDWSTDAASLI | 29    | 5     |
| >RAF1-N115!RLDWNTDAA  | 674   | >RAF1-N115!RLDWSTDAA   | 447   | 227   |
| >RAF1-N115!RLDWNTDAA  | 96    | >RAF1-N115!RLDWSTDAA   | 79    | 17    |
| >RAF1-N115!RLDWNTDAA  | 400   | >RAF1-N115!RLDWSTDAA   | 255   | 145   |
| >RAF1-N115!RLDWNTDAA  | 80    | >RAF1-N115!RLDWSTDAA   | 56    | 24    |
| >RAF1-N115!RLDWNTDA   | 895   | >RAF1-N115!RLDWSTDA    | 407   | 488   |
| >RAF1-N115!RLDWNTDAA  | 484   | >RAF1-N115!RLDWSTDAA   | 251   | 233   |
| >RAF1-N115!RLDWNTDAA  | 274   | >RAF1-N115!RLDWSTDAA   | 186   | 88    |
| >RAF1-N115!RLDWNTDAA  | 264   | >RAF1-N115!RLDWSTDAA   | 191   | 73    |

|                       |      |                       |       |       |
|-----------------------|------|-----------------------|-------|-------|
| >RAF1-N115!RLDWNTDAA  | 187  | >RAF1-N115!RLDWSTDAA  | 162   | 25    |
| >RAF1-N115!RLDWNTDA   | 33   | >RAF1-N115!RLDWSTDA   | 41    | 8     |
| >RAF1-N115!RLDWNTDAA  | 6    | >RAF1-N115!RLDWSTDAA  | 10    | 4     |
| >RAF1-N115!RLDWNTDAA  | 211  | >RAF1-N115!RLDWSTDAA  | 385   | 174   |
| >RAF1-N115!RLDWNTDAA  | 4    | >RAF1-N115!RLDWSTDAA  | 5     | 1     |
| >RAF1-N115!RLDWNTDA   | 334  | >RAF1-N115!RLDWSTDA   | 554   | 220   |
| >RAF1-N115!RLDWNTDAA  | 17   | >RAF1-N115!RLDWSTDAA  | 54    | 37    |
| >RAF1-N115!RLDWNTDAA  | 7    | >RAF1-N115!RLDWSTDAA  | 12    | 5     |
| >RAF1-N115!RLDWNTDA   | 66   | >RAF1-N115!RLDWSTDA   | 42    | 24    |
| >RAF1-N115!RLDWNTDAA  | 61   | >RAF1-N115!RLDWSTDAA  | 53    | 8     |
| >RAF1-N115!RLDWNTDAA  | 24   | >RAF1-N115!RLDWSTDAA  | 21    | 3     |
| >RAF1-N115!RLDWNTDAA  | 95   | >RAF1-N115!RLDWSTDAA  | 283   | 188   |
| >RAF1-N115!RLDWNTDAA  | 12   | >RAF1-N115!RLDWSTDAA  | 20    | 8     |
| >RAF1-N115!RLDWNTDA   | 28   | >RAF1-N115!RLDWSTDA   | 27    | 1     |
| >RAF1-N115!RLDWNTDAA  | 50   | >RAF1-N115!RLDWSTDAA  | 65    | 15    |
| >RAF1-N115!RLDWNTDAA  | 7    | >RAF1-N115!RLDWSTDAA  | 7     | 0     |
| >RAF1-N115!RLDWNTDAA  | 65   | >RAF1-N115!RLDWSTDAA  | 116   | 51    |
| >RAF1-N115!KARLDWNT   | 555  | >RAF1-N115!KARLDWST   | 416   | 139   |
| >RAF1-N115!KARLDWNTD  | 446  | >RAF1-N115!KARLDWSTD  | 567   | 121   |
| >RAF1-N115!KARLDWNTD  | 60   | >RAF1-N115!KARLDWSTD, | 47    | 13    |
| >RAF1-N115!KARLDWNTD  | 24   | >RAF1-N115!KARLDWSTD, | 22    | 2     |
| >RAF1-Q335!QRDSSYYWEI | 529  | >RAF1-Q335!HRDSSYYWEI | 49    | 480   |
| >RAF1-Q335!QRDSSYYWEI | 545  | >RAF1-Q335!HRDSSYYWEI | 95    | 450   |
| >RAF1-Q335!QRDSSYYW   | 2665 | >RAF1-Q335!HRDSSYYW   | 116   | 2549  |
| >RAF1-Q335!GQRDSSYYW  | 372  | >RAF1-Q335!GHRDSSYYW  | 17003 | 16631 |
| >RAF1-Q335!GQRDSSYYW  | 48   | >RAF1-Q335!GHRDSSYYW  | 16032 | 15984 |
| >RAF1-Q335!GQRDSSYYW  | 341  | >RAF1-Q335!GHRDSSYYW  | 16107 | 15766 |
| >RAF1-Q335!GQRDSSYY   | 368  | >RAF1-Q335!GHRDSSYY   | 327   | 41    |
| >RAF1-Q335!GQRDSSYY   | 128  | >RAF1-Q335!GHRDSSYY   | 498   | 370   |
| >RAF1-Q335!GQRDSSYY   | 35   | >RAF1-Q335!GHRDSSYY   | 4859  | 4824  |
| >RAF1-Q335!GQRDSSYYW  | 141  | >RAF1-Q335!GHRDSSYYW  | 19493 | 19352 |
| >RAF1-Q335!GQRDSSYY   | 86   | >RAF1-Q335!GHRDSSYY   | 2012  | 1926  |
| >RAF1-Q335!GQRDSSYY   | 8    | >RAF1-Q335!GHRDSSYY   | 139   | 131   |
| >RAF1-Q335!GQRDSSYYW  | 197  | >RAF1-Q335!GHRDSSYYW  | 4140  | 3943  |
| >RAF1-Q335!GQRDSSYYW  | 79   | >RAF1-Q335!GHRDSSYYW  | 1303  | 1224  |
| >RAF1-Q335!GQRDSSYYW  | 184  | >RAF1-Q335!GHRDSSYYW  | 2740  | 2556  |
| >RAF1-Q335!GQRDSSYYW  | 780  | >RAF1-Q335!GHRDSSYYW  | 44    | 736   |
| >RAF1-Q335!RGQRDSSYY  | 5653 | >RAF1-Q335!RGHRDSSYY  | 208   | 5445  |
| >RAF1-Q335!RGQRDSSYY  | 94   | >RAF1-Q335!RGHRDSSYY  | 127   | 33    |
| >RAF1-Q335!RGQRDSSYY  | 55   | >RAF1-Q335!RGHRDSSYY  | 69    | 14    |
| >RAF1-Q335!RGQRDSSYY  | 156  | >RAF1-Q335!RGHRDSSYY  | 148   | 8     |
| >RAF1-Q335!RGQRDSSYY  | 198  | >RAF1-Q335!RGHRDSSYY  | 184   | 14    |
| >RAF1-Q335!RGQRDSSYY  | 944  | >RAF1-Q335!RGHRDSSYY  | 326   | 618   |

|                       |      |                       |      |      |
|-----------------------|------|-----------------------|------|------|
| >RAF1-Q335IRGQRDSSYY  | 687  | >RAF1-Q335IRGHRDSSYY  | 221  | 466  |
| >RAF1-Q335IRGQRDSSY   | 1220 | >RAF1-Q335IRGHRDSSY   | 382  | 838  |
| >RAF1-Q335IRGQRDSSYY  | 1579 | >RAF1-Q335IRGHRDSSYY  | 392  | 1187 |
| >RAF1-Q335IRGQRDSSYYV | 328  | >RAF1-Q335IRGHRDSSYYV | 110  | 218  |
| >RAF1-Q335IRGQRDSSYYV | 66   | >RAF1-Q335IRGHRDSSYYV | 59   | 7    |
| >RAF1-Q335IRGQRDSSYYV | 14   | >RAF1-Q335IRGHRDSSYYV | 20   | 6    |
| >RAF1-Q335IRGQRDSSYY  | 24   | >RAF1-Q335IRGHRDSSYY  | 38   | 14   |
| >RAF1-Q335IRPRGQRDS   | 261  | >RAF1-Q335IRPRGHRDS   | 82   | 179  |
| >RAF1-Q335IRPRGQRDSS  | 25   | >RAF1-Q335IRPRGHRDSS  | 18   | 7    |
| >RAF1-Q335IRPRGQRDSS\ | 89   | >RAF1-Q335IRPRGHRDSS\ | 73   | 16   |
| >RAF1-Q335IRPRGQRDSS\ | 70   | >RAF1-Q335IRPRGHRDSS\ | 33   | 37   |
| >RAF1-Q335IRPRGQRDSS\ | 356  | >RAF1-Q335IRPRGHRDSS\ | 253  | 103  |
| >RAF1-Q335IRPRGQRDSS\ | 64   | >RAF1-Q335IRPRGHRDSS\ | 90   | 26   |
| >RAF1-Q335IRPRGQRDSS\ | 300  | >RAF1-Q335IRPRGHRDSS\ | 339  | 39   |
| >RAF1-Q335IRPRGQRDSS  | 325  | >RAF1-Q335IRPRGHRDSS  | 223  | 102  |
| >RAF1-Q335IKIRPRGQR   | 348  | >RAF1-Q335IKIRPRGHR   | 286  | 62   |
| >RAF1-Q335IKIRPRGQR   | 12   | >RAF1-Q335IKIRPRGHR   | 9    | 3    |
| >RAF1-Q335IKIRPRGQRD  | 296  | >RAF1-Q335IKIRPRGHRD  | 327  | 31   |
| >RAF1-Q335IKIRPRGQRDS | 63   | >RAF1-Q335IKIRPRGHRDS | 36   | 27   |
| >RAF1-Q335IKIRPRGQRDS | 31   | >RAF1-Q335IKIRPRGHRDS | 34   | 3    |
| >RAF1-Q335IKIRPRGQR   | 15   | >RAF1-Q335IKIRPRGHR   | 11   | 4    |
| >RAF1-Q335IKIRPRGQR   | 178  | >RAF1-Q335IKIRPRGHR   | 51   | 127  |
| >RAF1-Q335IKNKIRPRGQF | 938  | >RAF1-Q335IKNKIRPRGHR | 378  | 560  |
| >RAF1-Q335IEKNKIRPRGQ | 222  | >RAF1-Q335IEKNKIRPRGH | 335  | 113  |
| >RAF1-S259A STPNVHMV  | 313  | >RAF1-S259A ATPNVHMV  | 275  | 38   |
| >RAF1-S259A STPNVHMV  | 218  | >RAF1-S259A ATPNVHMV  | 227  | 9    |
| >RAF1-S259A STPNVHMV  | 14   | >RAF1-S259A ATPNVHMV  | 17   | 3    |
| >RAF1-S259A STPNVHMV  | 41   | >RAF1-S259A ATPNVHMV  | 86   | 45   |
| >RAF1-S259A STPNVHMV  | 76   | >RAF1-S259A ATPNVHMV  | 54   | 22   |
| >RAF1-S259A STPNVHMV  | 9    | >RAF1-S259A ATPNVHMV  | 30   | 21   |
| >RAF1-S259A STPNVHMVS | 280  | >RAF1-S259A ATPNVHMVS | 1139 | 859  |
| >RAF1-S259A STPNVHMV  | 52   | >RAF1-S259A ATPNVHMV  | 569  | 517  |
| >RAF1-S259A STPNVHMV  | 7    | >RAF1-S259A ATPNVHMV  | 5    | 2    |
| >RAF1-S259A STPNVHMVS | 35   | >RAF1-S259A ATPNVHMVS | 76   | 41   |
| >RAF1-S259A STPNVHMVS | 78   | >RAF1-S259A ATPNVHMVS | 162  | 84   |
| >RAF1-S259A STPNVHMVS | 106  | >RAF1-S259A ATPNVHMVS | 216  | 110  |
| >RAF1-S259A TSTPNVHMV | 1133 | >RAF1-S259A TATPNVHMV | 413  | 720  |
| >RAF1-S259A TSTPNVHMV | 1407 | >RAF1-S259A TATPNVHMV | 195  | 1212 |
| >RAF1-S259A TSTPNVHMV | 644  | >RAF1-S259A TATPNVHMV | 12   | 632  |
| >RAF1-S259A TSTPNVHM  | 427  | >RAF1-S259A TATPNVHM  | 2526 | 2099 |
| >RAF1-S259A TSTPNVHMV | 15   | >RAF1-S259A TATPNVHMV | 11   | 4    |
| >RAF1-S259A TSTPNVHMV | 68   | >RAF1-S259A TATPNVHMV | 22   | 46   |
| >RAF1-S259A TSTPNVHM  | 46   | >RAF1-S259A TATPNVHM  | 349  | 303  |

|                        |      |                        |      |      |
|------------------------|------|------------------------|------|------|
| >RAF1-S259A TSTPNVHM   | 412  | >RAF1-S259A TATPNVHM   | 1143 | 731  |
| >RAF1-S259A TSTPNVHM   | 468  | >RAF1-S259A TATPNVHM   | 4681 | 4213 |
| >RAF1-S259A TSTPNVH MV | 69   | >RAF1-S259A TATPNVH MV | 238  | 169  |
| >RAF1-S259A TSTPNVHM   | 148  | >RAF1-S259A TATPNVHM   | 2687 | 2539 |
| >RAF1-S259A STSTPNVHM' | 423  | >RAF1-S259A STATPNVHM  | 455  | 32   |
| >RAF1-S259A STSTPNVHM' | 208  | >RAF1-S259A STATPNVHM  | 262  | 54   |
| >RAF1-S259A STSTPNVHM' | 61   | >RAF1-S259A STATPNVHM  | 36   | 25   |
| >RAF1-S259A STSTPNVHM' | 152  | >RAF1-S259A STATPNVHM  | 58   | 94   |
| >RAF1-S259A STSTPNVHM' | 73   | >RAF1-S259A STATPNVHM  | 51   | 22   |
| >RAF1-S259A STSTPNVHM  | 92   | >RAF1-S259A STATPNVHM  | 15   | 77   |
| >RAF1-S259A STSTPNVHM  | 115  | >RAF1-S259A STATPNVHM  | 29   | 86   |
| >RAF1-S259A STSTPNVHM' | 21   | >RAF1-S259A STATPNVHM  | 18   | 3    |
| >RAF1-S259A STSTPNVHM' | 736  | >RAF1-S259A STATPNVHM  | 161  | 575  |
| >RAF1-S259A STSTPNVHM  | 957  | >RAF1-S259A STATPNVHM  | 178  | 779  |
| >RAF1-S259A STSTPNVHM' | 12   | >RAF1-S259A STATPNVHM  | 6    | 6    |
| >RAF1-S259A STSTPNVHM  | 62   | >RAF1-S259A STATPNVHM  | 53   | 9    |
| >RAF1-S259A STSTPNVHM  | 172  | >RAF1-S259A STATPNVHM  | 65   | 107  |
| >RAF1-S259A STSTPNVHM' | 117  | >RAF1-S259A STATPNVHM  | 50   | 67   |
| >RAF1-S259A STSTPNVHM  | 41   | >RAF1-S259A STATPNVHM  | 43   | 2    |
| >RAF1-S259A STSTPNVHM' | 450  | >RAF1-S259A STATPNVHM  | 854  | 404  |
| >RAF1-S259A STSTPNVHM  | 600  | >RAF1-S259A STATPNVHM  | 258  | 342  |
| >RAF1-S259A RSTSTPNV   | 158  | >RAF1-S259A RSTATPNV   | 89   | 69   |
| >RAF1-S259A RSTSTPNVHM | 455  | >RAF1-S259A RSTATPNVHM | 259  | 196  |
| >RAF1-S259A RSTSTPNVHM | 615  | >RAF1-S259A RSTATPNVHM | 348  | 267  |
| >RAF1-S259A RSTSTPNV   | 464  | >RAF1-S259A RSTATPNV   | 963  | 499  |
| >RAF1-S259A RSTSTPNVHM | 55   | >RAF1-S259A RSTATPNVHM | 93   | 38   |
| >RAF1-S259A RSTSTPNVHM | 497  | >RAF1-S259A RSTATPNVHM | 882  | 385  |
| >RAF1-S259A RSTSTPNV   | 157  | >RAF1-S259A RSTATPNV   | 100  | 57   |
| >RAF1-S259A RSTSTPNVHM | 12   | >RAF1-S259A RSTATPNVHM | 8    | 4    |
| >RAF1-S259A RSTSTPNVHM | 200  | >RAF1-S259A RSTATPNVHM | 103  | 97   |
| >RAF1-S259A RSTSTPNVH  | 1044 | >RAF1-S259A RSTATPNVH  | 492  | 552  |
| >RAF1-S259A RSTSTPNVHM | 44   | >RAF1-S259A RSTATPNVHM | 34   | 10   |
| >RAF1-S259A RSTSTPNVHM | 431  | >RAF1-S259A RSTATPNVHM | 270  | 161  |
| >RAF1-S259A RSTSTPNVHM | 140  | >RAF1-S259A RSTATPNVHM | 177  | 37   |
| >RAF1-S259A RSTSTPNVHM | 139  | >RAF1-S259A RSTATPNVHM | 177  | 38   |
| >RAF1-S259A RSTSTPNV   | 68   | >RAF1-S259A RSTATPNV   | 64   | 4    |
| >RAF1-S259A RSTSTPNVH  | 50   | >RAF1-S259A RSTATPNVH  | 243  | 193  |
| >RAF1-S259A RSTSTPNVHM | 26   | >RAF1-S259A RSTATPNVHM | 28   | 2    |
| >RAF1-S259A RSTSTPNVHM | 156  | >RAF1-S259A RSTATPNVHM | 594  | 438  |
| >RAF1-S259A QRSTSTPNV  | 294  | >RAF1-S259A QRSTATPNV  | 720  | 426  |
| >RAF1-S259A QRSTSTPNV† | 81   | >RAF1-S259A QRSTATPNV† | 172  | 91   |
| >RAF1-S259A QRSTSTPNV† | 457  | >RAF1-S259A QRSTATPNV† | 289  | 168  |
| >RAF1-S259A RQRSTSTPNV | 250  | >RAF1-S259A RQRSTATPNV | 378  | 128  |

|                        |      |                        |     |      |
|------------------------|------|------------------------|-----|------|
| >RAF1-S259A RQRSTSTP   | 174  | >RAF1-S259A RQRSTATP   | 181 | 7    |
| >RAF1-S259A RQRSTSTPN  | 96   | >RAF1-S259A RQRSTATPN  | 352 | 256  |
| >RAF1-S259A RQRSTSTPNV | 6    | >RAF1-S259A RQRSTATPN\ | 9   | 3    |
| >RAF1-S259A RQRSTSTPNV | 171  | >RAF1-S259A RQRSTATPN\ | 307 | 136  |
| >RAF1-S259A RQRSTSTP   | 383  | >RAF1-S259A RQRSTATP   | 637 | 254  |
| >RAF1-S259A RQRSTSTPN  | 161  | >RAF1-S259A RQRSTATPN  | 566 | 405  |
| >RAF1-S259A RQRSTSTPNV | 177  | >RAF1-S259A RQRSTATPN\ | 298 | 121  |
| >RAF1-S259A RQRSTSTPNV | 93   | >RAF1-S259A RQRSTATPN\ | 123 | 30   |
| >RAF1-S259A RQRSTSTP   | 31   | >RAF1-S259A RQRSTATP   | 70  | 39   |
| >RAF1-S259A RQRSTSTPN  | 29   | >RAF1-S259A RQRSTATPN  | 46  | 17   |
| >RAF1-S259A RQRSTSTPNV | 5    | >RAF1-S259A RQRSTATPN\ | 8   | 3    |
| >RAF1-S259A RQRSTSTPNV | 7    | >RAF1-S259A RQRSTATPN\ | 9   | 2    |
| >RAF1-S259A QRQRSTSTPN | 354  | >RAF1-S259A QRQRSTATPI | 635 | 281  |
| >RAF1-S259A QRQRSTSTPN | 354  | >RAF1-S259A QRQRSTATPI | 415 | 61   |
| >RAF1-S259A QRQRSTSTPN | 247  | >RAF1-S259A QRQRSTATPI | 277 | 30   |
| >RAF1-S259A SQRQRSTS   | 1973 | >RAF1-S259A SQRQRSTA   | 168 | 1805 |
| >RAF1-S259A SQRQRSTS   | 2309 | >RAF1-S259A SQRQRSTA   | 280 | 2029 |
| >RAF1-S259A SQRQRSTS   | 1710 | >RAF1-S259A SQRQRSTA   | 395 | 1315 |
| >RAF1-S259A SLSQRQRSTS | 6436 | >RAF1-S259A SLSQRQRSTA | 336 | 6100 |
| >RAF1-S259A SLSQRQRSTS | 5726 | >RAF1-S259A SLSQRQRSTA | 193 | 5533 |
| >RAF1-S259A SLSQRQRSTS | 298  | >RAF1-S259A SLSQRQRSTA | 354 | 56   |
| >RAF1-S259A SLSQRQRSTS | 1683 | >RAF1-S259A SLSQRQRSTA | 15  | 1668 |
| >RAF1-S259A SLSQRQRSTS | 106  | >RAF1-S259A SLSQRQRSTA | 282 | 176  |
| >RANBP17-D DLFFNLYHSL  | 615  | >RANBP17-D HLFFNLYHSL  | 133 | 482  |
| >RANBP17-D DLFFNLYHS   | 5950 | >RANBP17-D HLFFNLYHS   | 146 | 5804 |
| >RANBP17-D DLFFNLYHSL  | 122  | >RANBP17-D HLFFNLYHSL  | 33  | 89   |
| >RANBP17-D DLFFNLYHSL  | 297  | >RANBP17-D HLFFNLYHSL  | 108 | 189  |
| >RANBP17-D DLFFNLYHS   | 3437 | >RANBP17-D HLFFNLYHS   | 316 | 3121 |
| >RANBP17-D DLFFNLYHSL  | 22   | >RANBP17-D HLFFNLYHSL  | 4   | 18   |
| >RANBP17-D DLFFNLYHS   | 2941 | >RANBP17-D HLFFNLYHS   | 135 | 2806 |
| >RANBP17-D DLFFNLYHSL  | 70   | >RANBP17-D HLFFNLYHSL  | 6   | 64   |
| >RANBP17-D DLFFNLYHSL  | 154  | >RANBP17-D HLFFNLYHSL  | 19  | 135  |
| >RANBP17-D DLFFNLYHSL  | 50   | >RANBP17-D HLFFNLYHSL  | 24  | 26   |
| >RANBP17-D DLFFNLYHSL  | 19   | >RANBP17-D HLFFNLYHSL  | 3   | 16   |
| >RANBP17-D DLFFNLYH    | 6117 | >RANBP17-D HLFFNLYH    | 120 | 5997 |
| >RANBP17-D DLFFNLYH    | 826  | >RANBP17-D HLFFNLYH    | 228 | 598  |
| >RANBP17-D DLFFNLYHSL  | 401  | >RANBP17-D HLFFNLYHSL  | 32  | 369  |
| >RANBP17-D DLFFNLYHSL  | 124  | >RANBP17-D HLFFNLYHSL  | 173 | 49   |
| >RANBP17-D DLFFNLYHSL  | 3258 | >RANBP17-D HLFFNLYHSL  | 220 | 3038 |
| >RANBP17-D DLFFNLYHSL  | 6879 | >RANBP17-D HLFFNLYHSL  | 284 | 6595 |
| >RANBP17-D LDLFFNLY    | 77   | >RANBP17-D LHLFFNLY    | 25  | 52   |
| >RANBP17-D LDLFFNLY    | 1672 | >RANBP17-D LHLFFNLY    | 330 | 1342 |
| >RANBP17-D LDLFFNLY    | 1909 | >RANBP17-D LHLFFNLY    | 395 | 1514 |

|                        |       |                        |      |       |
|------------------------|-------|------------------------|------|-------|
| >RANBP17-D LDLFFNLY    | 2041  | >RANBP17-D LHLFFNLY    | 91   | 1950  |
| >RANBP17-D LDLFFNLYHSI | 3687  | >RANBP17-D LHLFFNLYHSI | 192  | 3495  |
| >RANBP17-D LDLFFNLYHSI | 7784  | >RANBP17-D LHLFFNLYHSI | 104  | 7680  |
| >RANBP17-D LDLFFNLYHSI | 105   | >RANBP17-D LHLFFNLYHSI | 8886 | 8781  |
| >RANBP17-D LDLFFNLY    | 25870 | >RANBP17-D LHLFFNLY    | 174  | 25696 |
| >RANBP17-D RTIFLEPETLD | 5925  | >RANBP17-D RTIFLEPETLH | 232  | 5693  |
| >RANBP17-D RTIFLEPETLD | 3541  | >RANBP17-D RTIFLEPETLH | 66   | 3475  |
| >RANBP17-D TLDLFFNL    | 550   | >RANBP17-D TLHLFFNL    | 47   | 503   |
| >RANBP17-D TLDLFFNLY   | 11    | >RANBP17-D TLHLFFNLY   | 1572 | 1561  |
| >RANBP17-D TLDLFFNL    | 50    | >RANBP17-D TLHLFFNL    | 147  | 97    |
| >RANBP17-D TLDLFFNL    | 44    | >RANBP17-D TLHLFFNL    | 40   | 4     |
| >RANBP17-D TLDLFFNL    | 1408  | >RANBP17-D TLHLFFNL    | 197  | 1211  |
| >RANBP17-D TLDLFFNL    | 144   | >RANBP17-D TLHLFFNL    | 548  | 404   |
| >RANBP17-D TLDLFFNL    | 55    | >RANBP17-D TLHLFFNL    | 96   | 41    |
| >RANBP17-D TLDLFFNL    | 59    | >RANBP17-D TLHLFFNL    | 292  | 233   |
| >RANBP17-D TLDLFFNL    | 44    | >RANBP17-D TLHLFFNL    | 290  | 246   |
| >RANBP17-D TLDLFFNL    | 108   | >RANBP17-D TLHLFFNL    | 1586 | 1478  |
| >RANBP17-D TLDLFFNL    | 28    | >RANBP17-D TLHLFFNL    | 17   | 11    |
| >RANBP17-D TLDLFFNLY   | 1907  | >RANBP17-D TLHLFFNLY   | 282  | 1625  |
| >RANBP17-D TLDLFFNLY   | 470   | >RANBP17-D TLHLFFNLY   | 212  | 258   |
| >RANBP17-D TLDLFFNLY   | 7543  | >RANBP17-D TLHLFFNLY   | 423  | 7120  |
| >RANBP17-D TLDLFFNLY   | 96    | >RANBP17-D TLHLFFNLY   | 23   | 73    |
| >RANBP17-D TLDLFFNLY   | 321   | >RANBP17-D TLHLFFNLY   | 213  | 108   |
| >RANBP17-D TLDLFFNL    | 230   | >RANBP17-D TLHLFFNL    | 1772 | 1542  |
| >RANBP17-D TLDLFFNLY   | 39    | >RANBP17-D TLHLFFNLY   | 23   | 16    |
| >RANBP17-D TLDLFFNLY   | 1747  | >RANBP17-D TLHLFFNLY   | 388  | 1359  |
| >RANBP17-D ETLDLFFNLY  | 71    | >RANBP17-D ETLHLFFNLY  | 210  | 139   |
| >RANBP17-D ETLDLFFNL   | 102   | >RANBP17-D ETLHLFFNL   | 398  | 296   |
| >RANBP17-D ETLDLFFNL   | 437   | >RANBP17-D ETLHLFFNL   | 4481 | 4044  |
| >RANBP17-D ETLDLFFNLY  | 51    | >RANBP17-D ETLHLFFNLY  | 108  | 57    |
| >RANBP17-D ETLDLFFNLY  | 152   | >RANBP17-D ETLHLFFNLY  | 257  | 105   |
| >RANBP17-D ETLDLFFNL   | 75    | >RANBP17-D ETLHLFFNL   | 146  | 71    |
| >RANBP17-D ETLDLFFNLY  | 11    | >RANBP17-D ETLHLFFNLY  | 18   | 7     |
| >RANBP17-D ETLDLFFNL   | 30    | >RANBP17-D ETLHLFFNL   | 47   | 17    |
| >RANBP17-D ETLDLFFNLY  | 5     | >RANBP17-D ETLHLFFNLY  | 6    | 1     |
| >RANBP17-D ETLDLFFNLY† | 424   | >RANBP17-D ETLHLFFNLY† | 607  | 183   |
| >RANBP17-D ETLDLFFNLY  | 262   | >RANBP17-D ETLHLFFNLY  | 208  | 54    |
| >RANBP17-D ETLDLFFNLY  | 116   | >RANBP17-D ETLHLFFNLY  | 129  | 13    |
| >RANBP17-D ETLDLFFNLY  | 116   | >RANBP17-D ETLHLFFNLY  | 294  | 178   |
| >RANBP17-D ETLDLFFNLY† | 219   | >RANBP17-D ETLHLFFNLY† | 364  | 145   |
| >RANBP17-D ETLDLFFNL   | 6     | >RANBP17-D ETLHLFFNL   | 7    | 1     |
| >RANBP17-D ETLDLFFN    | 192   | >RANBP17-D ETLHLFFN    | 805  | 613   |
| >RANBP17-D ETLDLFFNL   | 3     | >RANBP17-D ETLHLFFNL   | 4    | 1     |

|                        |      |                        |      |      |
|------------------------|------|------------------------|------|------|
| >RANBP17-D ETLDLFFNLY  | 169  | >RANBP17-D ETLHLFFNLY  | 665  | 496  |
| >RANBP17-D ETLDLFFNLY† | 441  | >RANBP17-D ETLHLFFNLY† | 1633 | 1192 |
| >RANBP17-D ETLDLFFNLY  | 91   | >RANBP17-D ETLHLFFNLY  | 38   | 53   |
| >RANBP17-D ETLDLFFNL   | 127  | >RANBP17-D ETLHLFFNL   | 168  | 41   |
| >RANBP17-D ETLDLFFNLY  | 145  | >RANBP17-D ETLHLFFNLY  | 180  | 35   |
| >RANBP17-D ETLDLFFNL   | 472  | >RANBP17-D ETLHLFFNL   | 1678 | 1206 |
| >RANBP17-D ETLDLFFNL   | 683  | >RANBP17-D ETLHLFFNL   | 451  | 232  |
| >RANBP17-D ETLDLFFNLY† | 694  | >RANBP17-D ETLHLFFNLY† | 480  | 214  |
| >RANBP17-D PETLDLFF    | 1150 | >RANBP17-D PETLHLFF    | 287  | 863  |
| >RANBP17-D PETLDLFFNLY | 946  | >RANBP17-D PETLHLFFNLY | 434  | 512  |
| >RANBP17-D PETLDLFFNL  | 123  | >RANBP17-D PETLHLFFNL  | 183  | 60   |
| >RANBP17-D EPETLDLFF   | 250  | >RANBP17-D EPETLHLFF   | 216  | 34   |
| >RANBP17-D EPETLDLFFNI | 122  | >RANBP17-D EPETLHLFFNI | 104  | 18   |
| >RANBP17-D EPETLDF     | 72   | >RANBP17-D EPETLHLF    | 120  | 48   |
| >RANBP17-D EPETLDLFF   | 36   | >RANBP17-D EPETLHLFF   | 102  | 66   |
| >RANBP17-D EPETLDF     | 170  | >RANBP17-D EPETLHLF    | 176  | 6    |
| >RANBP17-D EPETLDLFF   | 130  | >RANBP17-D EPETLHLFF   | 465  | 335  |
| >RANBP17-D EPETLDLFFNI | 48   | >RANBP17-D EPETLHLFFNI | 99   | 51   |
| >RANBP17-D EPETLDF     | 102  | >RANBP17-D EPETLHLF    | 120  | 18   |
| >RANBP17-D EPETLDLFF   | 100  | >RANBP17-D EPETLHLFF   | 306  | 206  |
| >RANBP17-D EPETLDLFFNI | 307  | >RANBP17-D EPETLHLFFNI | 501  | 194  |
| >RANBP17-D LEPETLDF    | 40   | >RANBP17-D LEPETLHLF   | 29   | 11   |
| >RANBP17-D LEPETLDLFF  | 74   | >RANBP17-D LEPETLHLFF  | 51   | 23   |
| >RANBP17-D LEPETLDF    | 197  | >RANBP17-D LEPETLHLF   | 14   | 183  |
| >RANBP17-D LEPETLDF    | 609  | >RANBP17-D LEPETLHLF   | 75   | 534  |
| >RANBP17-D LEPETLDLFF  | 2064 | >RANBP17-D LEPETLHLFF  | 252  | 1812 |
| >RANBP17-D LEPETLDF    | 79   | >RANBP17-D LEPETLHLF   | 114  | 35   |
| >RANBP17-D FLEPETLDL   | 262  | >RANBP17-D FLEPETLHL   | 58   | 204  |
| >RANBP17-D FLEPETLDL   | 17   | >RANBP17-D FLEPETLHL   | 6    | 11   |
| >RANBP17-D FLEPETLDLFF | 181  | >RANBP17-D FLEPETLHLFF | 119  | 62   |
| >RANBP17-D FLEPETLDL   | 208  | >RANBP17-D FLEPETLHL   | 78   | 130  |
| >RANBP17-D FLEPETLDL   | 197  | >RANBP17-D FLEPETLHL   | 21   | 176  |
| >RANBP17-D FLEPETLDL   | 355  | >RANBP17-D FLEPETLHL   | 63   | 292  |
| >RANBP17-D FLEPETLDL   | 78   | >RANBP17-D FLEPETLHL   | 12   | 66   |
| >RANBP17-D FLEPETLDL   | 272  | >RANBP17-D FLEPETLHL   | 47   | 225  |
| >RANBP17-D FLEPETLDL   | 1350 | >RANBP17-D FLEPETLHL   | 465  | 885  |
| >RANBP17-D FLEPETLDL   | 3    | >RANBP17-D FLEPETLHL   | 3    | 0    |
| >RANBP17-D FLEPETLDF   | 748  | >RANBP17-D FLEPETLHLF  | 68   | 680  |
| >RANBP17-D FLEPETLDLFF | 167  | >RANBP17-D FLEPETLHLFF | 109  | 58   |
| >RANBP17-D FLEPETLDF   | 710  | >RANBP17-D FLEPETLHLF  | 409  | 301  |
| >RANBP17-D IFLEPETLDF  | 125  | >RANBP17-D IFLEPETLHLF | 52   | 73   |
| >RANBP17-D IFLEPETLDF  | 549  | >RANBP17-D IFLEPETLHLF | 210  | 339  |
| >RANBP17-D IFLEPETLDL  | 335  | >RANBP17-D IFLEPETLHL  | 174  | 161  |



|                         |      |                         |      |      |
|-------------------------|------|-------------------------|------|------|
| >RANBP17-D IFLEPETLDFL  | 36   | >RANBP17-D IFLEPETLHLF  | 29   | 7    |
| >RANBP17-D IFLEPETLDFL  | 997  | >RANBP17-D IFLEPETLHLF  | 187  | 810  |
| >RANBP17-D IFLEPETLDL   | 7320 | >RANBP17-D IFLEPETLHL   | 390  | 6930 |
| >RANBP17-D TIFLEPETLDL  | 1231 | >RANBP17-D TIFLEPETLHL  | 351  | 880  |
| >RANBP17-D TIFLEPETLDL  | 450  | >RANBP17-D TIFLEPETLHL  | 1105 | 655  |
| >RARA-A255' ADQITLLKAA  | 250  | >RARA-A255' TDQITLLKAA  | 2899 | 2649 |
| >RARA-A255' IADQITLLK   | 5028 | >RARA-A255' ITDQITLLK   | 150  | 4878 |
| >RARA-A255' IADQITLL    | 839  | >RARA-A255' ITDQITLL    | 303  | 536  |
| >RARA-A255' IADQITLLK   | 409  | >RARA-A255' ITDQITLLK   | 103  | 306  |
| >RARA-A255' IADQITLLK   | 42   | >RARA-A255' ITDQITLLK   | 16   | 26   |
| >RARA-A255' IADQITLLK   | 235  | >RARA-A255' ITDQITLLK   | 74   | 161  |
| >RARA-A255' IADQITLL    | 813  | >RARA-A255' ITDQITLL    | 37   | 776  |
| >RARA-A255' IADQITLL    | 3191 | >RARA-A255' ITDQITLL    | 285  | 2906 |
| >RARA-A255' QLPGFTTLTIA | 110  | >RARA-A255' QLPGFTTLTIT | 727  | 617  |
| >RARA-A255' QLPGFTTLTIA | 33   | >RARA-A255' QLPGFTTLTIT | 536  | 503  |
| >RARA-A255' QLPGFTTLTIA | 43   | >RARA-A255' QLPGFTTLTIT | 490  | 447  |
| >RARA-A255' TIADQITL    | 308  | >RARA-A255' TITDQITL    | 1568 | 1260 |
| >RARA-A255' TIADQITLL   | 90   | >RARA-A255' TITDQITLL   | 540  | 450  |
| >RARA-A255' TIADQITL    | 38   | >RARA-A255' TITDQITL    | 369  | 331  |
| >RARA-A255' TIADQITLL   | 5    | >RARA-A255' TITDQITLL   | 25   | 20   |
| >RARA-A255' TIADQITLLKA | 257  | >RARA-A255' TITDQITLLKA | 2209 | 1952 |
| >RARA-A255' TIADQITL    | 128  | >RARA-A255' TITDQITL    | 1048 | 920  |
| >RARA-A255' TIADQITLL   | 11   | >RARA-A255' TITDQITLL   | 80   | 69   |
| >RARA-A255' TIADQITLLKA | 51   | >RARA-A255' TITDQITLLKA | 413  | 362  |
| >RARA-A255' TIADQITL    | 115  | >RARA-A255' TITDQITL    | 347  | 232  |
| >RARA-A255' TIADQITLL   | 42   | >RARA-A255' TITDQITLL   | 114  | 72   |
| >RARA-A255' TIADQITLLKA | 276  | >RARA-A255' TITDQITLLKA | 718  | 442  |
| >RARA-A255' TIADQITL    | 339  | >RARA-A255' TITDQITL    | 832  | 493  |
| >RARA-A255' TIADQITLL   | 495  | >RARA-A255' TITDQITLL   | 1116 | 621  |
| >RARA-A255' TIADQITL    | 463  | >RARA-A255' TITDQITL    | 1125 | 662  |
| >RARA-A255' TIADQITL    | 15   | >RARA-A255' TITDQITL    | 17   | 2    |
| >RARA-A255' TIADQITLL   | 9    | >RARA-A255' TITDQITLL   | 11   | 2    |
| >RARA-A255' TIADQITLLKA | 155  | >RARA-A255' TITDQITLLKA | 184  | 29   |
| >RARA-A255' TIADQITLLK  | 29   | >RARA-A255' TITDQITLLK  | 43   | 14   |
| >RARA-A255' TIADQITLLK  | 14   | >RARA-A255' TITDQITLLK  | 14   | 0    |
| >RARA-A255' TIADQITLLK  | 7    | >RARA-A255' TITDQITLLK  | 17   | 10   |
| >RARA-A255' TIADQITL    | 73   | >RARA-A255' TITDQITL    | 487  | 414  |
| >RARA-A255' TIADQITLL   | 22   | >RARA-A255' TITDQITLL   | 111  | 89   |
| >RARA-A255' TIADQITLLKA | 312  | >RARA-A255' TITDQITLLKA | 1727 | 1415 |
| >RARA-A255' TIADQITL    | 455  | >RARA-A255' TITDQITL    | 2326 | 1871 |
| >RARA-A255' TIADQITLL   | 486  | >RARA-A255' TITDQITLL   | 2696 | 2210 |
| >RARA-A255' LTIADQITLL  | 123  | >RARA-A255' LTITDQITLL  | 155  | 32   |
| >RARA-A255' LTIADQITLL  | 262  | >RARA-A255' LTITDQITLL  | 387  | 125  |

|                         |     |                         |     |     |
|-------------------------|-----|-------------------------|-----|-----|
| >RARA-A255' LTIADQITL   | 277 | >RARA-A255' LTITDQITL   | 761 | 484 |
| >RARA-A255' LTIADQITLL  | 196 | >RARA-A255' LTITDQITLL  | 171 | 25  |
| >RARA-A255' LTIADQITLLK | 156 | >RARA-A255' LTITDQITLLK | 192 | 36  |
| >RARA-A255' LTIADQITLLK | 15  | >RARA-A255' LTITDQITLLK | 18  | 3   |
| >RARA-A255' LTIADQITL   | 166 | >RARA-A255' LTITDQITL   | 87  | 79  |
| >RARA-A255' LTIADQITLL  | 354 | >RARA-A255' LTITDQITLL  | 199 | 155 |
| >RARA-A255' LTIADQITLLK | 142 | >RARA-A255' LTITDQITLLK | 214 | 72  |
| >RARA-A255' LTIADQITLLK | 16  | >RARA-A255' LTITDQITLLK | 17  | 1   |
| >RARA-A255' LTIADQITL   | 323 | >RARA-A255' LTITDQITL   | 602 | 279 |
| >RARA-A255' LTIADQITLL  | 243 | >RARA-A255' LTITDQITLL  | 778 | 535 |
| >RARA-A255' LTIADQITL   | 14  | >RARA-A255' LTITDQITL   | 26  | 12  |
| >RARA-A255' LTIADQITLL  | 23  | >RARA-A255' LTITDQITLL  | 49  | 26  |
| >RARA-A255' LTIADQITL   | 96  | >RARA-A255' LTITDQITL   | 234 | 138 |
| >RARA-A255' LTIADQITLL  | 246 | >RARA-A255' LTITDQITLL  | 582 | 336 |
| >RARA-A255' LTIADQITLL  | 242 | >RARA-A255' LTITDQITLL  | 301 | 59  |
| >RARA-A255' LTIADQITLL  | 117 | >RARA-A255' LTITDQITLL  | 123 | 6   |
| >RARA-A255' LTIADQITLLK | 424 | >RARA-A255' LTITDQITLLK | 364 | 60  |
| >RARA-A255' LTIADQITL   | 310 | >RARA-A255' LTITDQITL   | 342 | 32  |
| >RARA-A255' LTIADQITLL  | 288 | >RARA-A255' LTITDQITLL  | 337 | 49  |
| >RARA-A255' TLTADQI     | 338 | >RARA-A255' TLTITDQI    | 291 | 47  |
| >RARA-A255' TLTADQITL   | 130 | >RARA-A255' TLTITDQITL  | 170 | 40  |
| >RARA-A255' TLTADQITLL  | 36  | >RARA-A255' TLTITDQITLL | 66  | 30  |
| >RARA-A255' TLTADQITLL  | 295 | >RARA-A255' TLTITDQITLL | 332 | 37  |
| >RARA-A255' TLTADQI     | 708 | >RARA-A255' TLTITDQI    | 359 | 349 |
| >RARA-A255' TLTADQITL   | 518 | >RARA-A255' TLTITDQITL  | 382 | 136 |
| >RARA-A255' TLTADQITLL  | 721 | >RARA-A255' TLTITDQITLL | 465 | 256 |
| >RARA-A255' TLTADQITL   | 456 | >RARA-A255' TLTITDQITL  | 302 | 154 |
| >RARA-A255' TLTADQI     | 248 | >RARA-A255' TLTITDQI    | 177 | 71  |
| >RARA-A255' TLTADQITL   | 89  | >RARA-A255' TLTITDQITL  | 96  | 7   |
| >RARA-A255' TLTADQITLL  | 121 | >RARA-A255' TLTITDQITLL | 108 | 13  |
| >RARA-A255' TLTADQI     | 101 | >RARA-A255' TLTITDQI    | 70  | 31  |
| >RARA-A255' TLTADQITL   | 14  | >RARA-A255' TLTITDQITL  | 13  | 1   |
| >RARA-A255' TLTADQITLL  | 13  | >RARA-A255' TLTITDQITLL | 12  | 1   |
| >RARA-A255' TTLTIADQI   | 138 | >RARA-A255' TTLTITDQI   | 103 | 35  |
| >RARA-A255' TTLTIADQI   | 79  | >RARA-A255' TTLTITDQI   | 31  | 48  |
| >RARA-A255' TTLTIADQITL | 81  | >RARA-A255' TTLTITDQITL | 55  | 26  |
| >RARA-A255' TTLTIADQI   | 22  | >RARA-A255' TTLTITDQI   | 11  | 11  |
| >RARA-A255' TTLTIADQITL | 101 | >RARA-A255' TTLTITDQITL | 74  | 27  |
| >RARA-A255' TTLTIADQI   | 38  | >RARA-A255' TTLTITDQI   | 27  | 11  |
| >RARA-A255' TTLTIADQITL | 70  | >RARA-A255' TTLTITDQITL | 70  | 0   |
| >RARA-A255' TTLTIADQITL | 75  | >RARA-A255' TTLTITDQITL | 144 | 69  |
| >RARA-A255' TTLTIADQI   | 156 | >RARA-A255' TTLTITDQI   | 381 | 225 |
| >RARA-A255' TTLTIADQITL | 148 | >RARA-A255' TTLTITDQITL | 229 | 81  |

|                         |       |                         |       |       |
|-------------------------|-------|-------------------------|-------|-------|
| >RARA-A255' TTLTIADQI   | 45    | >RARA-A255' TTLTITDQI   | 31    | 14    |
| >RARA-A255' FTTLTIADQI  | 323   | >RARA-A255' FTTLTITDQI  | 290   | 33    |
| >RARA-A255' FTTLTIADQI  | 326   | >RARA-A255' FTTLTITDQI  | 206   | 120   |
| >RARA-A255' FTTLTIADQI  | 112   | >RARA-A255' FTTLTITDQI  | 144   | 32    |
| >RARA-A255' FTTLTIADQI  | 450   | >RARA-A255' FTTLTITDQI  | 473   | 23    |
| >RARA-A255' FTTLTIADQI  | 238   | >RARA-A255' FTTLTITDQI  | 457   | 219   |
| >RARA-A255' FTTLTIADQI  | 88    | >RARA-A255' FTTLTITDQI  | 135   | 47    |
| >RARA-A255' FTTLTIADQI  | 588   | >RARA-A255' FTTLTITDQI  | 353   | 235   |
| >RARA-A255' GFTTLTIADQI | 637   | >RARA-A255' GFTTLTITDQI | 343   | 294   |
| >RARA-A255' LPGFTTLTIA  | 71    | >RARA-A255' LPGFTTLTIT  | 2925  | 2854  |
| >RARA-K380I KITDLRSI    | 378   | >RARA-K380I NITDLRSI    | 930   | 552   |
| >RARA-K380I KITDLRSI    | 324   | >RARA-K380I NITDLRSI    | 2097  | 1773  |
| >RARA-K380I KITDLRSISA  | 442   | >RARA-K380I NITDLRSISA  | 1301  | 859   |
| >RARA-K380I KITDLRSISA  | 368   | >RARA-K380I NITDLRSISA  | 2291  | 1923  |
| >RARA-K380I KITDLRSISAK | 92    | >RARA-K380I NITDLRSISAK | 2310  | 2218  |
| >RARA-K380I KITDLRSISAK | 34    | >RARA-K380I NITDLRSISAK | 337   | 303   |
| >RARA-K380I KITDLRSISA  | 227   | >RARA-K380I NITDLRSISA  | 13230 | 13003 |
| >RARA-K380I KITDLRSISAK | 37    | >RARA-K380I NITDLRSISAK | 7506  | 7469  |
| >RARA-K380I KITDLRSISAK | 184   | >RARA-K380I NITDLRSISAK | 4975  | 4791  |
| >RARA-K380I KITDLRSI    | 157   | >RARA-K380I NITDLRSI    | 8478  | 8321  |
| >RARA-K380I KITDLRSISAK | 1137  | >RARA-K380I NITDLRSISAK | 39    | 1098  |
| >RARA-K380I KITDLRSI    | 10102 | >RARA-K380I NITDLRSI    | 418   | 9684  |
| >RARA-K380I MKITDLRSI   | 31    | >RARA-K380I MNITDLRSI   | 2647  | 2616  |
| >RARA-K380I MKITDLRSISA | 137   | >RARA-K380I MNITDLRSISA | 8425  | 8288  |
| >RARA-K380I LMKITDLRSI  | 310   | >RARA-K380I LMNITDLRSI  | 223   | 87    |
| >RARA-K380I LMKITDLRSI  | 44    | >RARA-K380I LMNITDLRSI  | 49    | 5     |
| >RARA-K380I LMKITDLRSI  | 737   | >RARA-K380I LMNITDLRSI  | 277   | 460   |
| >RARA-K380I LMKITDLRSI  | 776   | >RARA-K380I LMNITDLRSI  | 32    | 744   |
| >RARA-K380I LMKITDLRSI  | 1714  | >RARA-K380I LMNITDLRSI  | 180   | 1534  |
| >RARA-K380I LMKITDLRSI  | 8176  | >RARA-K380I LMNITDLRSI  | 438   | 7738  |
| >RARA-K380I LMKITDLRSI  | 283   | >RARA-K380I LMNITDLRSI  | 64    | 219   |
| >RARA-K380I LMKITDLR    | 19    | >RARA-K380I LMNITDLR    | 33    | 14    |
| >RARA-K380I LMKITDLR    | 340   | >RARA-K380I LMNITDLR    | 857   | 517   |
| >RARA-K380I LMKITDLR    | 135   | >RARA-K380I LMNITDLR    | 94    | 41    |
| >RARA-K380I LMKITDLRSI  | 385   | >RARA-K380I LMNITDLRSI  | 783   | 398   |
| >RARA-K380I LMKITDLRSI  | 339   | >RARA-K380I LMNITDLRSI  | 478   | 139   |
| >RARA-K380I LMKITDLR    | 231   | >RARA-K380I LMNITDLR    | 266   | 35    |
| >RARA-K380I MLMKITDL    | 14    | >RARA-K380I MLMNITDL    | 11    | 3     |
| >RARA-K380I MLMKITDLRS  | 981   | >RARA-K380I MLMNITDLRS  | 304   | 677   |
| >RARA-K380I MLMKITDLRS  | 16    | >RARA-K380I MLMNITDLRS  | 12    | 4     |
| >RARA-K380I MLMKITDL    | 3     | >RARA-K380I MLMNITDL    | 3     | 0     |
| >RARA-K380I MLMKITDLR   | 53    | >RARA-K380I MLMNITDLR   | 38    | 15    |
| >RARA-K380I MLMKITDLRS  | 594   | >RARA-K380I MLMNITDLRS  | 154   | 440   |

|                        |      |                        |     |      |
|------------------------|------|------------------------|-----|------|
| >RARA-K380I MLMKITDLR! | 5    | >RARA-K380I MLMNITDLR! | 5   | 0    |
| >RARA-K380I MLMKITDL   | 6    | >RARA-K380I MLMNITDL   | 4   | 2    |
| >RARA-K380I MLMKITDLR! | 5    | >RARA-K380I MLMNITDLR! | 3   | 2    |
| >RARA-K380I MLMKITDL   | 41   | >RARA-K380I MLMNITDL   | 24  | 17   |
| >RARA-K380I MLMKITDLR! | 36   | >RARA-K380I MLMNITDLR! | 23  | 13   |
| >RARA-K380I MLMKITDL   | 24   | >RARA-K380I MLMNITDL   | 9   | 15   |
| >RARA-K380I MLMKITDLR! | 11   | >RARA-K380I MLMNITDLR! | 6   | 5    |
| >RARA-K380I MLMKITDL   | 24   | >RARA-K380I MLMNITDL   | 9   | 15   |
| >RARA-K380I MLMKITDLR! | 11   | >RARA-K380I MLMNITDLR! | 6   | 5    |
| >RARA-K380I MLMKITDL   | 50   | >RARA-K380I MLMNITDL   | 29  | 21   |
| >RARA-K380I MLMKITDLR! | 219  | >RARA-K380I MLMNITDLR! | 116 | 103  |
| >RARA-K380I MLMKITDL   | 11   | >RARA-K380I MLMNITDL   | 5   | 6    |
| >RARA-K380I MLMKITDLR! | 9    | >RARA-K380I MLMNITDLR! | 5   | 4    |
| >RARA-K380I MLMKITDL   | 4    | >RARA-K380I MLMNITDL   | 3   | 1    |
| >RARA-K380I MLMKITDLR! | 15   | >RARA-K380I MLMNITDLR! | 8   | 7    |
| >RARA-K380I MLMKITDLR  | 157  | >RARA-K380I MLMNITDLR  | 158 | 1    |
| >RARA-K380I MLMKITDLR  | 60   | >RARA-K380I MLMNITDLR  | 32  | 28   |
| >RARA-K380I MLMKITDLR  | 32   | >RARA-K380I MLMNITDLR  | 24  | 8    |
| >RARA-K380I MLMKITDL   | 189  | >RARA-K380I MLMNITDL   | 67  | 122  |
| >RARA-K380I MLMKITDLR! | 51   | >RARA-K380I MLMNITDLR! | 24  | 27   |
| >RARA-K380I MLMKITDLR  | 83   | >RARA-K380I MLMNITDLR  | 65  | 18   |
| >RARA-K380I MLMKITDLR  | 4    | >RARA-K380I MLMNITDLR  | 3   | 1    |
| >RARA-K380I MLMKITDL   | 313  | >RARA-K380I MLMNITDL   | 193 | 120  |
| >RARA-K380I MLMKITDLR! | 154  | >RARA-K380I MLMNITDLR! | 112 | 42   |
| >RARA-K380I MLMKITDL   | 71   | >RARA-K380I MLMNITDL   | 246 | 175  |
| >RARA-K380I MLMKITDLR! | 167  | >RARA-K380I MLMNITDLR! | 333 | 166  |
| >RARA-K380I MLMKITDL   | 483  | >RARA-K380I MLMNITDL   | 306 | 177  |
| >RARA-K380I MLMKITDLR  | 45   | >RARA-K380I MLMNITDLR  | 92  | 47   |
| >RARA-K380I KMLMKITDL  | 6912 | >RARA-K380I KMLMNITDL  | 11  | 6901 |
| >RARA-K380I KMLMKITDL  | 385  | >RARA-K380I KMLMNITDL  | 843 | 458  |
| >RARA-K380I KMLMKITDL  | 55   | >RARA-K380I KMLMNITDL  | 51  | 4    |
| >RARA-K380I KMLMKITDL  | 377  | >RARA-K380I KMLMNITDL  | 349 | 28   |
| >RARA-K380I KMLMKITDL  | 53   | >RARA-K380I KMLMNITDL  | 69  | 16   |
| >RARA-K380I KMLMKITDL  | 142  | >RARA-K380I KMLMNITDL  | 82  | 60   |
| >RARA-K380I KMLMKITDL  | 15   | >RARA-K380I KMLMNITDL  | 7   | 8    |
| >RARA-K380I KMLMKITDLF | 922  | >RARA-K380I KMLMNITDLI | 468 | 454  |
| >RARA-K380I KMLMKITDL  | 37   | >RARA-K380I KMLMNITDL  | 12  | 25   |
| >RARA-K380I KMLMKITDL  | 17   | >RARA-K380I KMLMNITDL  | 13  | 4    |
| >RARA-K380I KMLMKITDL  | 164  | >RARA-K380I KMLMNITDL  | 41  | 123  |
| >RARA-K380I KMLMKITDL  | 14   | >RARA-K380I KMLMNITDL  | 8   | 6    |
| >RARA-K380I KMLMKITDLF | 128  | >RARA-K380I KMLMNITDLI | 153 | 25   |
| >RARA-K380I KMLMKITDLF | 632  | >RARA-K380I KMLMNITDLI | 307 | 325  |
| >RARA-K380I KMLMKITDLF | 17   | >RARA-K380I KMLMNITDLI | 16  | 1    |

|                       |      |                       |       |       |
|-----------------------|------|-----------------------|-------|-------|
| >RARA-K380IKMLMKITDL  | 118  | >RARA-K380IKMLMNITDL  | 77    | 41    |
| >RARA-K380IKMLMKITDLF | 521  | >RARA-K380IKMLMNITDLI | 281   | 240   |
| >RARA-K380IKMLMKITDL  | 125  | >RARA-K380IKMLMNITDL  | 2926  | 2801  |
| >RARA-K380IKMLMKITDL  | 82   | >RARA-K380IKMLMNITDL  | 28    | 54    |
| >RARA-K380IKMLMKITDLF | 190  | >RARA-K380IKMLMNITDLI | 195   | 5     |
| >RARA-K380IKMLMKITDLF | 20   | >RARA-K380IKMLMNITDLI | 19    | 1     |
| >RARA-K380IFPKMLMKITE | 136  | >RARA-K380IFPKMLMNITI | 106   | 30    |
| >RARA-K380IFPKMLMKI   | 109  | >RARA-K380IFPKMLMNI   | 116   | 7     |
| >RARA-K380IFPKMLMKITE | 30   | >RARA-K380IFPKMLMNITI | 50    | 20    |
| >RARA-K380IFPKMLMKI   | 373  | >RARA-K380IFPKMLMNI   | 172   | 201   |
| >RARA-K380IFPKMLMKI   | 280  | >RARA-K380IFPKMLMNI   | 133   | 147   |
| >RARA-K380IFPKMLMKI   | 241  | >RARA-K380IFPKMLMNI   | 158   | 83    |
| >RARA-K380IFPKMLMKIT  | 82   | >RARA-K380IFPKMLMNIT  | 20    | 62    |
| >RARA-K380IFPKMLMKITE | 162  | >RARA-K380IFPKMLMNITI | 101   | 61    |
| >RARA-K380IMFPKMLMKI  | 68   | >RARA-K380IMFPKMLMNI  | 47    | 21    |
| >RARA-K380IMFPKMLMKI  | 218  | >RARA-K380IMFPKMLMNI  | 251   | 33    |
| >RARA-K380IMFPKMLMKI  | 6    | >RARA-K380IMFPKMLMNI  | 6     | 0     |
| >RARA-K380IMFPKMLMKI  | 487  | >RARA-K380IMFPKMLMNI  | 794   | 307   |
| >RARA-K380IMHFPKMLMI  | 72   | >RARA-K380IMHFPKMLMI  | 36    | 36    |
| >RARA-K380IMHFPKMLMI  | 34   | >RARA-K380IMHFPKMLMI  | 28    | 6     |
| >RARA-K380IMHFPKMLMI  | 1840 | >RARA-K380IMHFPKMLMI  | 377   | 1463  |
| >RARA-K380IMHFPKMLMI  | 31   | >RARA-K380IMHFPKMLMI  | 21    | 10    |
| >RARA-K380IMHFPKMLMI  | 386  | >RARA-K380IMHFPKMLMI  | 156   | 230   |
| >RARA-K380IMHFPKMLMI  | 173  | >RARA-K380IMHFPKMLMI  | 88    | 85    |
| >RARA-K380IMHFPKMLMI  | 11   | >RARA-K380IMHFPKMLMI  | 11    | 0     |
| >RARA-K380IMHFPKMLMI  | 38   | >RARA-K380IMHFPKMLMI  | 25    | 13    |
| >RARA-K380IMHFPKMLMI  | 29   | >RARA-K380IMHFPKMLMI  | 26    | 3     |
| >RARA-K380IMHFPKMLMI  | 10   | >RARA-K380IMHFPKMLMI  | 11    | 1     |
| >RARA-K380IMHFPKMLMI  | 24   | >RARA-K380IMHFPKMLMI  | 4294  | 4270  |
| >RARA-K380IMHFPKMLMI  | 11   | >RARA-K380IMHFPKMLMI  | 14243 | 14232 |
| >RARA-K380IMHFPKMLMI  | 17   | >RARA-K380IMHFPKMLMI  | 7597  | 7580  |
| >RARA-K380IMHFPKMLMI  | 242  | >RARA-K380IMHFPKMLMI  | 119   | 123   |
| >RARA-K380IMHFPKMLMI  | 41   | >RARA-K380IMHFPKMLMI  | 6191  | 6150  |
| >RARA-K380IMHFPKMLMI  | 82   | >RARA-K380IMHFPKMLMI  | 72    | 10    |
| >RARA-K380IMHFPKMLMI  | 491  | >RARA-K380IMHFPKMLMI  | 11421 | 10930 |
| >RARA-K380IMHFPKMLMI  | 126  | >RARA-K380IMHFPKMLMI  | 13651 | 13525 |
| >RARA-K380IMHFPKMLMI  | 925  | >RARA-K380IMHFPKMLMI  | 456   | 469   |
| >RARA-K380IMHFPKMLMI  | 167  | >RARA-K380IMHFPKMLMI  | 88    | 79    |
| >RARA-K380IMHFPKMLMI  | 232  | >RARA-K380IMHFPKMLMI  | 251   | 19    |
| >RARA-K380IMHFPKMLMI  | 475  | >RARA-K380IMHFPKMLMI  | 799   | 324   |
| >RARA-K380IMHFPKMLMI  | 101  | >RARA-K380IMHFPKMLMI  | 8289  | 8188  |
| >RB1-C706F- CSMYGICKV | 2529 | >RB1-C706F- FSMYGICKV | 43    | 2486  |
| >RB1-C706F- CSMYGICKV | 1505 | >RB1-C706F- FSMYGICKV | 39    | 1466  |

|                        |       |                        |      |       |
|------------------------|-------|------------------------|------|-------|
| >RB1-C706F- CSMYGICKV  | 1193  | >RB1-C706F- FSMYGICKV  | 75   | 1118  |
| >RB1-C706F- CSMYGICKV  | 1106  | >RB1-C706F- FSMYGICKV  | 17   | 1089  |
| >RB1-C706F- CSMYGICKV  | 5200  | >RB1-C706F- FSMYGICKV  | 107  | 5093  |
| >RB1-C706F- CSMYGICKV  | 12389 | >RB1-C706F- FSMYGICKV  | 433  | 11956 |
| >RB1-C706F- CSMYGICKV  | 11185 | >RB1-C706F- FSMYGICKV  | 126  | 11059 |
| >RB1-C706F- CSMYGICKVK | 43    | >RB1-C706F- FSMYGICKVK | 40   | 3     |
| >RB1-C706F- CSMYGICK   | 18    | >RB1-C706F- FSMYGICK   | 26   | 8     |
| >RB1-C706F- CSMYGICKVK | 31    | >RB1-C706F- FSMYGICKVK | 25   | 6     |
| >RB1-C706F- CSMYGICK   | 96    | >RB1-C706F- FSMYGICK   | 27   | 69    |
| >RB1-C706F- CSMYGICKVK | 170   | >RB1-C706F- FSMYGICKVK | 27   | 143   |
| >RB1-C706F- CSMYGICKV  | 48    | >RB1-C706F- FSMYGICKV  | 14   | 34    |
| >RB1-C706F- CSMYGICKV  | 1593  | >RB1-C706F- FSMYGICKV  | 75   | 1518  |
| >RB1-C706F- CSMYGICKV  | 2384  | >RB1-C706F- FSMYGICKV  | 358  | 2026  |
| >RB1-C706F- CSMYGICKV  | 895   | >RB1-C706F- FSMYGICKV  | 122  | 773   |
| >RB1-C706F- CSMYGICKV  | 460   | >RB1-C706F- FSMYGICKV  | 1355 | 895   |
| >RB1-C706F- MCSMYGICK' | 144   | >RB1-C706F- MFSMYGICK' | 106  | 38    |
| >RB1-C706F- MCSMYGICK  | 2106  | >RB1-C706F- MFSMYGICK  | 114  | 1992  |
| >RB1-C706F- MCSMYGICK  | 1044  | >RB1-C706F- MFSMYGICK  | 239  | 805   |
| >RB1-C706F- MCSMYGICK  | 6008  | >RB1-C706F- MFSMYGICK  | 160  | 5848  |
| >RB1-C706F- MCSMYGICK  | 1835  | >RB1-C706F- MFSMYGICK  | 142  | 1693  |
| >RB1-C706F- MCSMYGICK' | 3003  | >RB1-C706F- MFSMYGICK' | 362  | 2641  |
| >RB1-C706F- MCSMYGIC   | 26498 | >RB1-C706F- MFSMYGIC   | 248  | 26250 |
| >RB1-C706F- RDRHLDQIM  | 16840 | >RB1-C706F- RDRHLDQIM  | 121  | 16719 |
| >RB1-C706F- RDRHLDQIM  | 4006  | >RB1-C706F- RDRHLDQIM  | 399  | 3607  |
| >RB1-C706F- RDRHLDQIM  | 16616 | >RB1-C706F- RDRHLDQIM  | 234  | 16382 |
| >RB1-C706F- MMCSMYGI   | 7364  | >RB1-C706F- MMFSMYGI   | 353  | 7011  |
| >RB1-C706F- MMCSMYGIC  | 6229  | >RB1-C706F- MMFSMYGIC  | 249  | 5980  |
| >RB1-C706F- MMCSMYGIC  | 4656  | >RB1-C706F- MMFSMYGIC  | 175  | 4481  |
| >RB1-C706F- MMCSMYGI   | 32    | >RB1-C706F- MMFSMYGI   | 9    | 23    |
| >RB1-C706F- MMCSMYGIC  | 41    | >RB1-C706F- MMFSMYGIC  | 10   | 31    |
| >RB1-C706F- MMCSMYGI   | 11    | >RB1-C706F- MMFSMYGI   | 4    | 7     |
| >RB1-C706F- MMCSMYGIC  | 17    | >RB1-C706F- MMFSMYGIC  | 4    | 13    |
| >RB1-C706F- MMCSMYGI   | 9     | >RB1-C706F- MMFSMYGI   | 4    | 5     |
| >RB1-C706F- MMCSMYGIC  | 1912  | >RB1-C706F- MMFSMYGIC  | 194  | 1718  |
| >RB1-C706F- MMCSMYGIC  | 5     | >RB1-C706F- MMFSMYGIC  | 3    | 2     |
| >RB1-C706F- MMCSMYGI   | 69    | >RB1-C706F- MMFSMYGI   | 23   | 46    |
| >RB1-C706F- MMCSMYGIC  | 60    | >RB1-C706F- MMFSMYGIC  | 17   | 43    |
| >RB1-C706F- MMCSMYGI   | 7     | >RB1-C706F- MMFSMYGI   | 2    | 5     |
| >RB1-C706F- MMCSMYGIC  | 1121  | >RB1-C706F- MMFSMYGIC  | 135  | 986   |
| >RB1-C706F- MMCSMYGIC  | 3     | >RB1-C706F- MMFSMYGIC  | 2    | 1     |
| >RB1-C706F- MMCSMYGI   | 83    | >RB1-C706F- MMFSMYGI   | 10   | 73    |
| >RB1-C706F- MMCSMYGIC  | 73    | >RB1-C706F- MMFSMYGIC  | 6    | 67    |
| >RB1-C706F- MMCSMYGI   | 215   | >RB1-C706F- MMFSMYGI   | 11   | 204   |

|                       |      |                       |     |      |
|-----------------------|------|-----------------------|-----|------|
| >RB1-C706F- MMCSMYGIC | 17   | >RB1-C706F- MMFSMYGIC | 5   | 12   |
| >RB1-C706F- MMCSMYGI  | 140  | >RB1-C706F- MMFSMYGI  | 20  | 120  |
| >RB1-C706F- MMCSMYGIC | 21   | >RB1-C706F- MMFSMYGIC | 6   | 15   |
| >RB1-C706F- MMCSMYGI  | 15   | >RB1-C706F- MMFSMYGI  | 5   | 10   |
| >RB1-C706F- MMCSMYGIC | 1488 | >RB1-C706F- MMFSMYGIC | 164 | 1324 |
| >RB1-C706F- MMCSMYGIC | 2    | >RB1-C706F- MMFSMYGIC | 2   | 0    |
| >RB1-C706F- MMCSMYGIC | 23   | >RB1-C706F- MMFSMYGIC | 18  | 5    |
| >RB1-C706F- MMCSMYGIC | 20   | >RB1-C706F- MMFSMYGIC | 15  | 5    |
| >RB1-C706F- MMCSMYGI  | 1861 | >RB1-C706F- MMFSMYGI  | 358 | 1503 |
| >RB1-C706F- MMCSMYGI  | 2123 | >RB1-C706F- MMFSMYGI  | 410 | 1713 |
| >RB1-C706F- MMCSMYGIC | 281  | >RB1-C706F- MMFSMYGIC | 39  | 242  |
| >RB1-C706F- MMCSMYGIC | 39   | >RB1-C706F- MMFSMYGIC | 50  | 11   |
| >RB1-C706F- MMCSMYGI  | 523  | >RB1-C706F- MMFSMYGI  | 37  | 486  |
| >RB1-C706F- MMCSMYGIC | 194  | >RB1-C706F- MMFSMYGIC | 204 | 10   |
| >RB1-C706F- MMCSMYGIC | 85   | >RB1-C706F- MMFSMYGIC | 18  | 67   |
| >RB1-C706F- MMCSMYGI  | 397  | >RB1-C706F- MMFSMYGI  | 27  | 370  |
| >RB1-C706F- MMCSMYGIC | 1027 | >RB1-C706F- MMFSMYGIC | 52  | 975  |
| >RB1-C706F- MMCSMYGI  | 1874 | >RB1-C706F- MMFSMYGI  | 86  | 1788 |
| >RB1-C706F- MMCSMYGIC | 2034 | >RB1-C706F- MMFSMYGIC | 87  | 1947 |
| >RB1-C706F- MMCSMYGI  | 1212 | >RB1-C706F- MMFSMYGI  | 361 | 851  |
| >RB1-C706F- MMCSMYGI  | 495  | >RB1-C706F- MMFSMYGI  | 22  | 473  |
| >RB1-C706F- MMCSMYGIC | 1198 | >RB1-C706F- MMFSMYGIC | 52  | 1146 |
| >RB1-C706F- MMCSMYGIC | 699  | >RB1-C706F- MMFSMYGIC | 31  | 668  |
| >RB1-C706F- MMCSMYGI  | 2831 | >RB1-C706F- MMFSMYGI  | 342 | 2489 |
| >RB1-C706F- MMCSMYGI  | 2855 | >RB1-C706F- MMFSMYGI  | 208 | 2647 |
| >RB1-C706F- MMCSMYGI  | 718  | >RB1-C706F- MMFSMYGI  | 239 | 479  |
| >RB1-C706F- IMMCSMYGI | 359  | >RB1-C706F- IMMFSMYGI | 374 | 15   |
| >RB1-C706F- IMMCSMYGI | 7    | >RB1-C706F- IMMFSMYGI | 8   | 1    |
| >RB1-C706F- IMMCSMYG  | 198  | >RB1-C706F- IMMFSMYG  | 173 | 25   |
| >RB1-C706F- IMMCSMYGI | 3    | >RB1-C706F- IMMFSMYGI | 3   | 0    |
| >RB1-C706F- IMMCSMYG  | 340  | >RB1-C706F- IMMFSMYG  | 412 | 72   |
| >RB1-C706F- IMMCSMYGI | 3    | >RB1-C706F- IMMFSMYGI | 4   | 1    |
| >RB1-C706F- IMMCSMYGI | 9    | >RB1-C706F- IMMFSMYGI | 16  | 7    |
| >RB1-C706F- IMMCSMYG  | 293  | >RB1-C706F- IMMFSMYG  | 382 | 89   |
| >RB1-C706F- IMMCSMYGI | 4    | >RB1-C706F- IMMFSMYGI | 5   | 1    |
| >RB1-C706F- IMMCSMYGI | 293  | >RB1-C706F- IMMFSMYGI | 517 | 224  |
| >RB1-C706F- IMMCSMYGI | 3    | >RB1-C706F- IMMFSMYGI | 4   | 1    |
| >RB1-C706F- IMMCSMYGI | 261  | >RB1-C706F- IMMFSMYGI | 885 | 624  |
| >RB1-C706F- IMMCSMYGI | 69   | >RB1-C706F- IMMFSMYGI | 60  | 9    |
| >RB1-C706F- IMMCSMYGI | 6    | >RB1-C706F- IMMFSMYGI | 5   | 1    |
| >RB1-C706F- IMMCSMYGI | 59   | >RB1-C706F- IMMFSMYGI | 36  | 23   |
| >RB1-C706F- IMMCSMYGI | 36   | >RB1-C706F- IMMFSMYGI | 32  | 4    |
| >RB1-C706F- IMMCSMYGI | 8    | >RB1-C706F- IMMFSMYGI | 7   | 1    |

|                       |      |                       |     |      |
|-----------------------|------|-----------------------|-----|------|
| >RB1-C706F- IMMCSMYGI | 707  | >RB1-C706F- IMMFSMYGI | 495 | 212  |
| >RB1-C706F- IMMCSMYGI | 159  | >RB1-C706F- IMMFSMYGI | 110 | 49   |
| >RB1-C706F- IMMCSMYGI | 109  | >RB1-C706F- IMMFSMYGI | 54  | 55   |
| >RB1-C706F- IMMCSMYGI | 234  | >RB1-C706F- IMMFSMYGI | 100 | 134  |
| >RB1-C706F- IMMCSMYGI | 80   | >RB1-C706F- IMMFSMYGI | 93  | 13   |
| >RB1-C706F- IMMCSMYGI | 162  | >RB1-C706F- IMMFSMYGI | 350 | 188  |
| >RB1-C706F- IMMCSMYGI | 310  | >RB1-C706F- IMMFSMYGI | 473 | 163  |
| >RB1-C706F- IMMCSMYGI | 22   | >RB1-C706F- IMMFSMYGI | 77  | 55   |
| >RB1-C706F- IMMCSMYGI | 92   | >RB1-C706F- IMMFSMYGI | 217 | 125  |
| >RB1-C706F- IMMCSMYGI | 507  | >RB1-C706F- IMMFSMYGI | 329 | 178  |
| >RB1-C706F- QIMMCSMYC | 97   | >RB1-C706F- QIMMFSMYC | 50  | 47   |
| >RB1-C706F- QIMMCSMYC | 44   | >RB1-C706F- QIMMFSMYC | 34  | 10   |
| >RB1-C706F- QIMMCSMYC | 114  | >RB1-C706F- QIMMFSMYC | 57  | 57   |
| >RB1-C706F- QIMMCSMYC | 76   | >RB1-C706F- QIMMFSMYC | 52  | 24   |
| >RB1-C706F- QIMMCSMYC | 1222 | >RB1-C706F- QIMMFSMYC | 344 | 878  |
| >RB1-C706F- QIMMCSMYC | 372  | >RB1-C706F- QIMMFSMYC | 576 | 204  |
| >RB1-C706F- QIMMCSMYC | 287  | >RB1-C706F- QIMMFSMYC | 316 | 29   |
| >RB1-C706F- QIMMCSMY  | 318  | >RB1-C706F- QIMMFSMY  | 76  | 242  |
| >RB1-C706F- QIMMCSMY  | 690  | >RB1-C706F- QIMMFSMY  | 251 | 439  |
| >RB1-C706F- QIMMCSMY  | 85   | >RB1-C706F- QIMMFSMY  | 52  | 33   |
| >RB1-C706F- QIMMCSMY  | 76   | >RB1-C706F- QIMMFSMY  | 139 | 63   |
| >RB1-C706F- QIMMCSMYC | 182  | >RB1-C706F- QIMMFSMYC | 40  | 142  |
| >RB1-C706F- QIMMCSMY  | 783  | >RB1-C706F- QIMMFSMY  | 340 | 443  |
| >RB1-C706F- QIMMCSMYC | 367  | >RB1-C706F- QIMMFSMYC | 89  | 278  |
| >RB1-C706F- QIMMCSMYC | 112  | >RB1-C706F- QIMMFSMYC | 22  | 90   |
| >RB1-C706F- QIMMCSMY  | 564  | >RB1-C706F- QIMMFSMY  | 133 | 431  |
| >RB1-C706F- QIMMCSMY  | 125  | >RB1-C706F- QIMMFSMY  | 104 | 21   |
| >RB1-C706F- QIMMCSMY  | 538  | >RB1-C706F- QIMMFSMY  | 165 | 373  |
| >RB1-C706F- QIMMCSMY  | 265  | >RB1-C706F- QIMMFSMY  | 118 | 147  |
| >RB1-C706F- DQIMMCSM' | 335  | >RB1-C706F- DQIMMFSM' | 446 | 111  |
| >RB1-C706F- DQIMMCSM  | 695  | >RB1-C706F- DQIMMFSM  | 230 | 465  |
| >RB1-C706F- DQIMMCSM' | 703  | >RB1-C706F- DQIMMFSM' | 112 | 591  |
| >RB1-C706F- DQIMMCSM  | 1217 | >RB1-C706F- DQIMMFSM  | 315 | 902  |
| >RB1-C706F- DQIMMCSM' | 1350 | >RB1-C706F- DQIMMFSM' | 116 | 1234 |
| >RB1-C706F- DQIMMCSM' | 792  | >RB1-C706F- DQIMMFSM' | 429 | 363  |
| >RB1-C706F- DQIMMCSM' | 353  | >RB1-C706F- DQIMMFSM' | 377 | 24   |
| >RB1-C706F- DQIMMCSM  | 426  | >RB1-C706F- DQIMMFSM  | 690 | 264  |
| >RB1-C706F- DQIMMCSM' | 249  | >RB1-C706F- DQIMMFSM' | 125 | 124  |
| >RB1-C706F- DQIMMCSM' | 165  | >RB1-C706F- DQIMMFSM' | 96  | 69   |
| >RB1-C706F- DQIMMCSM  | 1451 | >RB1-C706F- DQIMMFSM  | 322 | 1129 |
| >RB1-C706F- DQIMMCSM' | 232  | >RB1-C706F- DQIMMFSM' | 94  | 138  |
| >RB1-C706F- LDQIMMCSM | 329  | >RB1-C706F- LDQIMMFSM | 525 | 196  |
| >RB1-C706F- LDQIMMCSM | 561  | >RB1-C706F- LDQIMMFSM | 198 | 363  |



|                         |       |                         |       |       |
|-------------------------|-------|-------------------------|-------|-------|
| >RB1-C706F- LDQIMMCSM   | 349   | >RB1-C706F- LDQIMMFSM   | 170   | 179   |
| >RB1-C706F- HLDQIMMCS   | 46    | >RB1-C706F- HLDQIMMFS   | 15    | 31    |
| >RB1-C706F- HLDQIMMCS   | 1438  | >RB1-C706F- HLDQIMMFS   | 298   | 1140  |
| >RB1-C706F- HLDQIMMCS   | 2563  | >RB1-C706F- HLDQIMMFS   | 312   | 2251  |
| >RB1-C706F- HLDQIMMCS   | 339   | >RB1-C706F- HLDQIMMFS   | 144   | 195   |
| >RB1-C706F- HLDQIMMC    | 149   | >RB1-C706F- HLDQIMMF    | 1782  | 1633  |
| >RB1-C706F- HLDQIMMCS   | 240   | >RB1-C706F- HLDQIMMFS   | 116   | 124   |
| >RB1-C706F- HLDQIMMCS   | 600   | >RB1-C706F- HLDQIMMFS   | 213   | 387   |
| >RB1-C706F- HLDQIMMCS   | 354   | >RB1-C706F- HLDQIMMFS   | 179   | 175   |
| >RB1-C706F- HLDQIMMC    | 159   | >RB1-C706F- HLDQIMMF    | 3415  | 3256  |
| >RB1-C706F- HLDQIMMCS   | 96    | >RB1-C706F- HLDQIMMFS   | 103   | 7     |
| >RB1-C706F- HLDQIMMCS   | 728   | >RB1-C706F- HLDQIMMFS   | 322   | 406   |
| >RB1-C706F- HLDQIMMCS   | 317   | >RB1-C706F- HLDQIMMFS   | 206   | 111   |
| >RB1-C706F- HLDQIMMCS   | 168   | >RB1-C706F- HLDQIMMFS   | 124   | 44    |
| >RB1-C706F- HLDQIMMCS   | 892   | >RB1-C706F- HLDQIMMFS   | 157   | 735   |
| >RB1-C706F- HLDQIMMCS   | 61    | >RB1-C706F- HLDQIMMFS   | 18    | 43    |
| >RB1-C706F- HLDQIMMCS   | 381   | >RB1-C706F- HLDQIMMFS   | 317   | 64    |
| >RB1-C706F- HLDQIMMCS   | 108   | >RB1-C706F- HLDQIMMFS   | 92    | 16    |
| >RB1-C706F- HLDQIMMCS   | 230   | >RB1-C706F- HLDQIMMFS   | 364   | 134   |
| >RB1-C706F- RHLDQIMMC   | 31526 | >RB1-C706F- RHLDQIMMF   | 496   | 31030 |
| >RB1-C706F- RHLDQIMMC   | 9656  | >RB1-C706F- RHLDQIMMF   | 17    | 9639  |
| >RB1-C706F- RHLDQIMMC   | 9018  | >RB1-C706F- RHLDQIMMF   | 9     | 9009  |
| >RB1-C706F- RHLDQIMMC   | 131   | >RB1-C706F- RHLDQIMMF   | 206   | 75    |
| >RB1-C706F- RHLDQIMMC   | 636   | >RB1-C706F- RHLDQIMMF   | 267   | 369   |
| >RB1-C706F- RHLDQIMMC   | 16746 | >RB1-C706F- RHLDQIMMF   | 85    | 16661 |
| >RB1-D718N- DLKFKIIV    | 1594  | >RB1-D718N- NLKFKIIV    | 43    | 1551  |
| >RB1-D718N- DLKFKIIVTA  | 951   | >RB1-D718N- NLKFKIIVTA  | 236   | 715   |
| >RB1-D718N- DLKFKIIV    | 3374  | >RB1-D718N- NLKFKIIV    | 321   | 3053  |
| >RB1-D718N- DLKFKIIV    | 121   | >RB1-D718N- NLKFKIIV    | 34    | 87    |
| >RB1-D718N- DLKFKIIVTA  | 1816  | >RB1-D718N- NLKFKIIVTA  | 421   | 1395  |
| >RB1-D718N- DLKFKIIV    | 988   | >RB1-D718N- NLKFKIIV    | 296   | 692   |
| >RB1-D718N- DLKFKIIVTAY | 1183  | >RB1-D718N- NLKFKIIVTAY | 128   | 1055  |
| >RB1-D718N- DLKFKIIVTAY | 1073  | >RB1-D718N- NLKFKIIVTAY | 300   | 773   |
| >RB1-D718N- IDLKFII     | 2565  | >RB1-D718N- INLKFII     | 102   | 2463  |
| >RB1-D718N- IDLKFIIIV   | 3762  | >RB1-D718N- INLKFIIIV   | 225   | 3537  |
| >RB1-D718N- IDLKFII     | 443   | >RB1-D718N- INLKFII     | 11723 | 11280 |
| >RB1-D718N- IDLKFII     | 194   | >RB1-D718N- INLKFII     | 2669  | 2475  |
| >RB1-D718N- IDLKFII     | 104   | >RB1-D718N- INLKFII     | 4019  | 3915  |
| >RB1-D718N- IDLKFIIIV   | 265   | >RB1-D718N- INLKFIIIV   | 7184  | 6919  |
| >RB1-D718N- NIDLKFII    | 877   | >RB1-D718N- NINLKFII    | 120   | 757   |
| >RB1-D718N- KNIDLKFK    | 812   | >RB1-D718N- KNINLKFK    | 385   | 427   |
| >RB1-D718N- VKNIDLKFII  | 412   | >RB1-D718N- VKNINLKFII  | 260   | 152   |
| >RB1-D718N- VKNIDLKF    | 29    | >RB1-D718N- VKNINLKF    | 17    | 12    |

|                         |       |                         |      |       |
|-------------------------|-------|-------------------------|------|-------|
| >RB1-D718N VKNIDLKFKII  | 547   | >RB1-D718N VKNINLKFKII  | 390  | 157   |
| >RB1-D718N KVKNIDLK     | 165   | >RB1-D718N KVKNINLK     | 60   | 105   |
| >RB1-D718N KVKNIDLKFK   | 121   | >RB1-D718N KVKNINLKFK   | 40   | 81    |
| >RB1-D718N KVKNIDLK     | 95    | >RB1-D718N KVKNINLK     | 57   | 38    |
| >RB1-D718N KVKNIDLKFK   | 181   | >RB1-D718N KVKNINLKFK   | 129  | 52    |
| >RB1-D718N KVKNIDLK     | 5     | >RB1-D718N KVKNINLK     | 3    | 2     |
| >RB1-D718N KVKNIDLKF    | 899   | >RB1-D718N KVKNINLKF    | 119  | 780   |
| >RB1-D718N KVKNIDLKFK   | 4     | >RB1-D718N KVKNINLKFK   | 3    | 1     |
| >RB1-D718N KVKNIDLKFKI  | 23    | >RB1-D718N KVKNINLKFKI  | 13   | 10    |
| >RB1-D718N KVKNIDLK     | 65    | >RB1-D718N KVKNINLK     | 27   | 38    |
| >RB1-D718N KVKNIDLKFK   | 184   | >RB1-D718N KVKNINLKFK   | 77   | 107   |
| >RB1-D718N KVKNIDLKF    | 38    | >RB1-D718N KVKNINLKF    | 16   | 22    |
| >RB1-D718N KVKNIDLKFKI  | 65    | >RB1-D718N KVKNINLKFKI  | 34   | 31    |
| >RB1-D718N KVKNIDLKF    | 1005  | >RB1-D718N KVKNINLKF    | 413  | 592   |
| >RB1-D718N KVKNIDLKF    | 144   | >RB1-D718N KVKNINLKF    | 172  | 28    |
| >RB1-D718N KVKNIDLKF    | 202   | >RB1-D718N KVKNINLKF    | 65   | 137   |
| >RB1-D718N CKVKNIDL     | 350   | >RB1-D718N CKVKNINL     | 164  | 186   |
| >RB1-D718N CKVKNIDLKF   | 31    | >RB1-D718N CKVKNINLKF   | 14   | 17    |
| >RB1-D718N ICKVKNIDLK   | 260   | >RB1-D718N ICKVKNINLK   | 31   | 229   |
| >RB1-D718N GICKVKNIDLK  | 766   | >RB1-D718N GICKVKNINLK  | 247  | 519   |
| >RB1-D718N GICKVKNIDLK  | 47    | >RB1-D718N GICKVKNINLK  | 39   | 8     |
| >RB1-H673P HPELEHIIW    | 436   | >RB1-H673P PPELEHIIW    | 5929 | 5493  |
| >RB1-H673P HPELEHIIWTI  | 138   | >RB1-H673P PPELEHIIWTL  | 4860 | 4722  |
| >RB1-H673P HPELEHIIWTI  | 37    | >RB1-H673P PPELEHIIWTL  | 7339 | 7302  |
| >RB1-H673P HPELEHII     | 228   | >RB1-H673P PPELEHII     | 709  | 481   |
| >RB1-H673P HPELEHIIW    | 45    | >RB1-H673P PPELEHIIW    | 105  | 60    |
| >RB1-H673P HPELEHIIWTI  | 149   | >RB1-H673P PPELEHIIWTL  | 418  | 269   |
| >RB1-H673P HPELEHIIW    | 23    | >RB1-H673P PPELEHIIW    | 40   | 17    |
| >RB1-H673P EHPELEHIIW   | 20521 | >RB1-H673P EPPELEHIIW   | 440  | 20081 |
| >RB1-H673P EHPELEHIIW   | 9285  | >RB1-H673P EPPELEHIIW   | 44   | 9241  |
| >RB1-H673P NTL CERLLSEF | 423   | >RB1-H673P NTL CERLLSEF | 8102 | 7679  |
| >RB1-H673P SEHPELEHI    | 29    | >RB1-H673P SEPPELEHI    | 31   | 2     |
| >RB1-H673P SEHPELEHII   | 15    | >RB1-H673P SEPPELEHII   | 20   | 5     |
| >RB1-H673P SEHPELEHII   | 355   | >RB1-H673P SEPPELEHII   | 489  | 134   |
| >RB1-H673P SEHPELEHIIM  | 280   | >RB1-H673P SEPPELEHIIM  | 753  | 473   |
| >RB1-H673P SEHPELEHIIM  | 65    | >RB1-H673P SEPPELEHIIM  | 447  | 382   |
| >RB1-H673P SEHPELEHI    | 9     | >RB1-H673P SEPPELEHI    | 35   | 26    |
| >RB1-H673P SEHPELEHII   | 141   | >RB1-H673P SEPPELEHII   | 192  | 51    |
| >RB1-H673P LSEHPELEHI   | 889   | >RB1-H673P LSEPPELEHI   | 287  | 602   |
| >RB1-H673P LSEHPELEHI   | 437   | >RB1-H673P LSEPPELEHI   | 514  | 77    |
| >RB1-H673P LSEHPELEHII  | 157   | >RB1-H673P LSEPPELEHII  | 64   | 93    |
| >RB1-H673P LLSEHP EL    | 29    | >RB1-H673P LLSEPPEL     | 29   | 0     |
| >RB1-H673P LLSEHP ELEHI | 45    | >RB1-H673P LLSEPPELEHI  | 81   | 36    |

|                         |     |                         |      |      |
|-------------------------|-----|-------------------------|------|------|
| >RB1-H673P-LLSEHPEL     | 6   | >RB1-H673P-LLSEPPEL     | 11   | 5    |
| >RB1-H673P-LLSEHPELEHI  | 5   | >RB1-H673P-LLSEPPELEHI  | 12   | 7    |
| >RB1-H673P-LLSEHPEL     | 17  | >RB1-H673P-LLSEPPEL     | 28   | 11   |
| >RB1-H673P-LLSEHPELEHI  | 6   | >RB1-H673P-LLSEPPELEHI  | 13   | 7    |
| >RB1-H673P-LLSEHPEL     | 126 | >RB1-H673P-LLSEPPEL     | 296  | 170  |
| >RB1-H673P-LLSEHPELEHI  | 46  | >RB1-H673P-LLSEPPELEHI  | 75   | 29   |
| >RB1-H673P-LLSEHPEL     | 5   | >RB1-H673P-LLSEPPEL     | 4    | 1    |
| >RB1-H673P-LLSEHPELEHI  | 7   | >RB1-H673P-LLSEPPELEHI  | 5    | 2    |
| >RB1-H673P-LLSEHPEL     | 30  | >RB1-H673P-LLSEPPEL     | 21   | 9    |
| >RB1-H673P-LLSEHPELEHI  | 11  | >RB1-H673P-LLSEPPELEHI  | 14   | 3    |
| >RB1-H673P-LLSEHPEL     | 20  | >RB1-H673P-LLSEPPEL     | 13   | 7    |
| >RB1-H673P-LLSEHPELEHI  | 37  | >RB1-H673P-LLSEPPELEHI  | 27   | 10   |
| >RB1-H673P-LLSEHPEL     | 24  | >RB1-H673P-LLSEPPEL     | 9    | 15   |
| >RB1-H673P-LLSEHPELEHI  | 35  | >RB1-H673P-LLSEPPELEHI  | 24   | 11   |
| >RB1-H673P-LLSEHPEL     | 3   | >RB1-H673P-LLSEPPEL     | 4    | 1    |
| >RB1-H673P-LLSEHPELEHI  | 8   | >RB1-H673P-LLSEPPELEHI  | 9    | 1    |
| >RB1-H673P-RLLSEHPEL    | 32  | >RB1-H673P-RLLSEPPEL    | 16   | 16   |
| >RB1-H673P-RLLSEHPEL    | 94  | >RB1-H673P-RLLSEPPEL    | 99   | 5    |
| >RB1-H673P-RLLSEHPEL    | 838 | >RB1-H673P-RLLSEPPEL    | 251  | 587  |
| >RB1-H673P-RLLSEHPEL    | 95  | >RB1-H673P-RLLSEPPEL    | 261  | 166  |
| >RB1-H673P-RLLSEHPEL    | 4   | >RB1-H673P-RLLSEPPEL    | 3    | 1    |
| >RB1-H673P-RLLSEHPEL    | 68  | >RB1-H673P-RLLSEPPEL    | 20   | 48   |
| >RB1-H673P-RLLSEHPEL    | 8   | >RB1-H673P-RLLSEPPEL    | 7    | 1    |
| >RB1-H673P-RLLSEHPEL    | 27  | >RB1-H673P-RLLSEPPEL    | 9    | 18   |
| >RB1-H673P-RLLSEHPEL    | 7   | >RB1-H673P-RLLSEPPEL    | 11   | 4    |
| >RB1-H673P-RLLSEHPEL    | 362 | >RB1-H673P-RLLSEPPEL    | 271  | 91   |
| >RB1-H673P-RLLSEHPEL    | 109 | >RB1-H673P-RLLSEPPEL    | 134  | 25   |
| >RB1-H673P-ERLLSEHPEL   | 81  | >RB1-H673P-ERLLSEPPEL   | 49   | 32   |
| >RB1-H673P-ERLLSEHPEL   | 375 | >RB1-H673P-ERLLSEPPEL   | 438  | 63   |
| >RB1-H673P-CERLLSEHPEL  | 423 | >RB1-H673P-CERLLSEPPEL  | 701  | 278  |
| >RB1-H673P-CERLLSEHPEL  | 51  | >RB1-H673P-CERLLSEPPEL  | 58   | 7    |
| >RB1-H673P-CERLLSEHPEL  | 123 | >RB1-H673P-CERLLSEPPEL  | 63   | 60   |
| >RB1-H673P-LCERLLSEH    | 247 | >RB1-H673P-LCERLLSEP    | 9840 | 9593 |
| >RB1-I126S-vISVHKFFNL   | 30  | >RB1-I126S-rSSVHKFFNL   | 50   | 20   |
| >RB1-I126S-vISVHKFFNL   | 539 | >RB1-I126S-rSSVHKFFNL   | 419  | 120  |
| >RB1-I126S-vISVHKFFNLLK | 80  | >RB1-I126S-rSSVHKFFNLLI | 126  | 46   |
| >RB1-I126S-vISVHKFFNLLK | 15  | >RB1-I126S-rSSVHKFFNLLI | 9    | 6    |
| >RB1-I126S-vISVHKFFNLLK | 143 | >RB1-I126S-rSSVHKFFNLLI | 59   | 84   |
| >RB1-I126S-vISVHKFFNLLK | 456 | >RB1-I126S-rSSVHKFFNLLI | 435  | 21   |
| >RB1-I126S-vISVHKFFNLLK | 113 | >RB1-I126S-rSSVHKFFNLLI | 103  | 10   |
| >RB1-I126S-vISVHKFFNL   | 708 | >RB1-I126S-rSSVHKFFNL   | 133  | 575  |
| >RB1-I126S-vISVHKFFNL   | 368 | >RB1-I126S-rSSVHKFFNL   | 1471 | 1103 |
| >RB1-I126S-vISVHKFFNLL  | 363 | >RB1-I126S-rSSVHKFFNLL  | 1371 | 1008 |

|                          |       |                          |       |       |
|--------------------------|-------|--------------------------|-------|-------|
| >RB1-I126S-v ISVHKFFNL   | 8     | >RB1-I126S-r SSVHKFFNL   | 18    | 10    |
| >RB1-I126S-v ISVHKFFNLL  | 60    | >RB1-I126S-r SSVHKFFNLL  | 256   | 196   |
| >RB1-I126S-v ISVHKFFNLL  | 64    | >RB1-I126S-r SSVHKFFNLL  | 74    | 10    |
| >RB1-I126S-v ISVHKFFNL   | 489   | >RB1-I126S-r SSVHKFFNL   | 146   | 343   |
| >RB1-I126S-v ISVHKFFNLL  | 1560  | >RB1-I126S-r SSVHKFFNLL  | 418   | 1142  |
| >RB1-I126S-v ISVHKFFNLLK | 158   | >RB1-I126S-r SSVHKFFNLLI | 72    | 86    |
| >RB1-I126S-v EISVHKFF    | 264   | >RB1-I126S-r ESSVHKFF    | 247   | 17    |
| >RB1-I126S-v EISVHKFFNL  | 350   | >RB1-I126S-r ESSVHKFFNL  | 253   | 97    |
| >RB1-I126S-v EISVHKFFNLL | 81    | >RB1-I126S-r ESSVHKFFNLI | 94    | 13    |
| >RB1-I126S-v EISVHKFFNL  | 95    | >RB1-I126S-r ESSVHKFFNL  | 501   | 406   |
| >RB1-I126S-v EISVHKFFNLL | 222   | >RB1-I126S-r ESSVHKFFNLI | 1033  | 811   |
| >RB1-I126S-v EISVHKFF    | 12352 | >RB1-I126S-r ESSVHKFF    | 60    | 12292 |
| >RB1-I126S-v EISVHKFFNLL | 7512  | >RB1-I126S-r ESSVHKFFNLI | 360   | 7152  |
| >RB1-I126S-v TLLSYRKTYEI | 55    | >RB1-I126S-r TLLSYRKTYES | 1952  | 1897  |
| >RB1-I126S-v TLLSYRKTYEI | 92    | >RB1-I126S-r TLLSYRKTYES | 2395  | 2303  |
| >RB1-I126S-v TLLSYRKTYEI | 262   | >RB1-I126S-r TLLSYRKTYES | 8824  | 8562  |
| >RB1-I126S-v TLLSYRKTYEI | 499   | >RB1-I126S-r TLLSYRKTYES | 7343  | 6844  |
| >RB1-I126S-v TLLSYRKTYEI | 16    | >RB1-I126S-r TLLSYRKTYES | 1585  | 1569  |
| >RB1-I126S-v TLLSYRKTYEI | 48    | >RB1-I126S-r TLLSYRKTYES | 4137  | 4089  |
| >RB1-I126S-v TLLSYRKTYEI | 98    | >RB1-I126S-r TLLSYRKTYES | 8142  | 8044  |
| >RB1-I126S-v TLLSYRKTYEI | 89    | >RB1-I126S-r TLLSYRKTYES | 10289 | 10200 |
| >RB1-I126S-v TLLSYRKTYEI | 20    | >RB1-I126S-r TLLSYRKTYES | 3125  | 3105  |
| >RB1-I126S-v TLLSYRKTYEI | 184   | >RB1-I126S-r TLLSYRKTYES | 14019 | 13835 |
| >RB1-I126S-v TLLSYRKTYEI | 296   | >RB1-I126S-r TLLSYRKTYES | 12561 | 12265 |
| >RB1-I126S-v TLLSYRKTYEI | 452   | >RB1-I126S-r TLLSYRKTYES | 7273  | 6821  |
| >RB1-I126S-v YEISVHKF    | 235   | >RB1-I126S-r YESSVHKF    | 317   | 82    |
| >RB1-I126S-v YEISVHKFF   | 72    | >RB1-I126S-r YESSVHKFF   | 38    | 34    |
| >RB1-I126S-v YEISVHKFFNL | 331   | >RB1-I126S-r YESSVHKFFN  | 202   | 129   |
| >RB1-I126S-v YEISVHKFFNL | 367   | >RB1-I126S-r YESSVHKFFN  | 1466  | 1099  |
| >RB1-I126S-v YEISVHKF    | 184   | >RB1-I126S-r YESSVHKF    | 1919  | 1735  |
| >RB1-I126S-v YEISVHKFF   | 452   | >RB1-I126S-r YESSVHKFF   | 968   | 516   |
| >RB1-I126S-v YEISVHKF    | 20    | >RB1-I126S-r YESSVHKF    | 30    | 10    |
| >RB1-I126S-v YEISVHKFF   | 15    | >RB1-I126S-r YESSVHKFF   | 24    | 9     |
| >RB1-I126S-v YEISVHKFFNL | 396   | >RB1-I126S-r YESSVHKFFN  | 726   | 330   |
| >RB1-I126S-v YEISVHKF    | 8     | >RB1-I126S-r YESSVHKF    | 11    | 3     |
| >RB1-I126S-v YEISVHKFF   | 9     | >RB1-I126S-r YESSVHKFF   | 12    | 3     |
| >RB1-I126S-v YEISVHKFFNL | 78    | >RB1-I126S-r YESSVHKFFN  | 134   | 56    |
| >RB1-I126S-v YEISVHKFFNL | 377   | >RB1-I126S-r YESSVHKFFN  | 835   | 458   |
| >RB1-I126S-v YEISVHKF    | 38    | >RB1-I126S-r YESSVHKF    | 56    | 18    |
| >RB1-I126S-v YEISVHKFF   | 43    | >RB1-I126S-r YESSVHKFF   | 70    | 27    |
| >RB1-I126S-v YEISVHKFFNL | 7     | >RB1-I126S-r YESSVHKFFN  | 8     | 1     |
| >RB1-I126S-v YEISVHKFF   | 449   | >RB1-I126S-r YESSVHKFF   | 829   | 380   |
| >RB1-I126S-v YEISVHKFFNL | 66    | >RB1-I126S-r YESSVHKFFN  | 109   | 43    |

|                          |      |                          |      |      |
|--------------------------|------|--------------------------|------|------|
| >RB1-I126S-v YEISVHKF    | 299  | >RB1-I126S-r YESSVHKF    | 389  | 90   |
| >RB1-I126S-v YEISVHKFF   | 181  | >RB1-I126S-r YESSVHKFF   | 215  | 34   |
| >RB1-I126S-v YEISVHKF    | 50   | >RB1-I126S-r YESSVHKF    | 162  | 112  |
| >RB1-I126S-v YEISVHKFF   | 24   | >RB1-I126S-r YESSVHKFF   | 65   | 41   |
| >RB1-I126S-v YEISVHKFFNL | 154  | >RB1-I126S-r YESSVHKFFNL | 622  | 468  |
| >RB1-I126S-v YEISVHKFF   | 460  | >RB1-I126S-r YESSVHKFF   | 212  | 248  |
| >RB1-I126S-v YEISVHKF    | 421  | >RB1-I126S-r YESSVHKF    | 3899 | 3478 |
| >RB1-I126S-v YEISVHKFF   | 104  | >RB1-I126S-r YESSVHKFF   | 510  | 406  |
| >RB1-I126S-v YEISVHKFFNL | 11   | >RB1-I126S-r YESSVHKFFNL | 26   | 15   |
| >RB1-I126S-v TYEISVHKF   | 26   | >RB1-I126S-r TYESSVHKF   | 18   | 8    |
| >RB1-I126S-v TYEISVHKFF  | 109  | >RB1-I126S-r TYESSVHKFF  | 95   | 14   |
| >RB1-I126S-v TYEISVHKF   | 130  | >RB1-I126S-r TYESSVHKF   | 98   | 32   |
| >RB1-I126S-v TYEISVHKFF  | 115  | >RB1-I126S-r TYESSVHKFF  | 100  | 15   |
| >RB1-I126S-v TYEISVHKF   | 11   | >RB1-I126S-r TYESSVHKF   | 7    | 4    |
| >RB1-I126S-v TYEISVHKFF  | 13   | >RB1-I126S-r TYESSVHKFF  | 9    | 4    |
| >RB1-I126S-v TYEISVHKFF  | 149  | >RB1-I126S-r TYESSVHKFF  | 136  | 13   |
| >RB1-I126S-v TYEISVHK    | 404  | >RB1-I126S-r TYESSVHK    | 453  | 49   |
| >RB1-I126S-v KTYEISVHKFF | 366  | >RB1-I126S-r KTYESSVHKFI | 492  | 126  |
| >RB1-I126S-v KTYEISVH    | 151  | >RB1-I126S-r KTYESSVH    | 122  | 29   |
| >RB1-I126S-v KTYEISVHK   | 28   | >RB1-I126S-r KTYESSVHK   | 27   | 1    |
| >RB1-I126S-v KTYEISVHK   | 15   | >RB1-I126S-r KTYESSVHK   | 13   | 2    |
| >RB1-I126S-v KTYEISVHKF  | 476  | >RB1-I126S-r KTYESSVHKF  | 641  | 165  |
| >RB1-I126S-v KTYEISVHKF  | 404  | >RB1-I126S-r KTYESSVHKF  | 192  | 212  |
| >RB1-I126S-v KTYEISVHKFF | 360  | >RB1-I126S-r KTYESSVHKFI | 242  | 118  |
| >RB1-I126S-v KTYEISVHK   | 5    | >RB1-I126S-r KTYESSVHK   | 4    | 1    |
| >RB1-I126S-v KTYEISVHKFF | 453  | >RB1-I126S-r KTYESSVHKFI | 216  | 237  |
| >RB1-I126S-v KTYEISVHKF  | 437  | >RB1-I126S-r KTYESSVHKF  | 530  | 93   |
| >RB1-I126S-v KTYEISVH    | 350  | >RB1-I126S-r KTYESSVH    | 977  | 627  |
| >RB1-I126S-v KTYEISVHK   | 18   | >RB1-I126S-r KTYESSVHK   | 27   | 9    |
| >RB1-I126S-v KTYEISVHKFF | 249  | >RB1-I126S-r KTYESSVHKFI | 509  | 260  |
| >RB1-I126S-v KTYEISVH    | 357  | >RB1-I126S-r KTYESSVH    | 959  | 602  |
| >RB1-I126S-v KTYEISVHK   | 126  | >RB1-I126S-r KTYESSVHK   | 745  | 619  |
| >RB1-I126S-v KTYEISVHKF  | 5    | >RB1-I126S-r KTYESSVHKF  | 9    | 4    |
| >RB1-I126S-v KTYEISVHKFF | 10   | >RB1-I126S-r KTYESSVHKFI | 20   | 10   |
| >RB1-I126S-v KTYEISVHK   | 33   | >RB1-I126S-r KTYESSVHK   | 93   | 60   |
| >RB1-I126S-v KTYEISVHKF  | 479  | >RB1-I126S-r KTYESSVHKF  | 184  | 295  |
| >RB1-I126S-v KTYEISVHKFF | 349  | >RB1-I126S-r KTYESSVHKFI | 184  | 165  |
| >RB1-I126S-v KTYEISVHKF  | 23   | >RB1-I126S-r KTYESSVHKF  | 7    | 16   |
| >RB1-I126S-v KTYEISVHKFF | 16   | >RB1-I126S-r KTYESSVHKFI | 7    | 9    |
| >RB1-I126S-v KTYEISVH    | 41   | >RB1-I126S-r KTYESSVH    | 11   | 30   |
| >RB1-I126S-v KTYEISVHK   | 2655 | >RB1-I126S-r KTYESSVHK   | 291  | 2364 |
| >RB1-I126S-v KTYEISVHKF  | 2    | >RB1-I126S-r KTYESSVHKF  | 2    | 0    |
| >RB1-I126S-v KTYEISVHKFF | 3    | >RB1-I126S-r KTYESSVHKFI | 2    | 1    |

|                          |      |                          |       |       |
|--------------------------|------|--------------------------|-------|-------|
| >RB1-I126S-v KTYEISVHKF  | 42   | >RB1-I126S-r KTYESSVHKF  | 41    | 1     |
| >RB1-I126S-v KTYEISVHKFF | 45   | >RB1-I126S-r KTYESSVHKFI | 44    | 1     |
| >RB1-I126S-v KTYEISVHKF  | 13   | >RB1-I126S-r KTYESSVHKF  | 12    | 1     |
| >RB1-I126S-v KTYEISVHKFF | 21   | >RB1-I126S-r KTYESSVHKFI | 18    | 3     |
| >RB1-I126S-v KTYEISVHKF  | 130  | >RB1-I126S-r KTYESSVHKF  | 97    | 33    |
| >RB1-I126S-v KTYEISVHKFF | 72   | >RB1-I126S-r KTYESSVHKFI | 57    | 15    |
| >RB1-I126S-v KTYEISVHKF  | 143  | >RB1-I126S-r KTYESSVHKF  | 112   | 31    |
| >RB1-I126S-v KTYEISVHKFF | 13   | >RB1-I126S-r KTYESSVHKFI | 21    | 8     |
| >RB1-I126S-v KTYEISVHKF  | 446  | >RB1-I126S-r KTYESSVHKF  | 443   | 3     |
| >RB1-I126S-v KTYEISVHK   | 448  | >RB1-I126S-r KTYESSVHK   | 166   | 282   |
| >RB1-I126S-v KTYEISVHK   | 77   | >RB1-I126S-r KTYESSVHK   | 201   | 124   |
| >RB1-I126S-v RKTYEISV    | 37   | >RB1-I126S-r RKTYESV     | 19    | 18    |
| >RB1-I126S-v RKTYEISVH   | 71   | >RB1-I126S-r RKTYESVH    | 47    | 24    |
| >RB1-I126S-v RKTYEISVHK  | 201  | >RB1-I126S-r RKTYESVHK   | 92    | 109   |
| >RB1-I126S-v RKTYEISVHKF | 4    | >RB1-I126S-r RKTYESVHKFI | 3     | 1     |
| >RB1-I126S-v YRKTYEISV   | 1398 | >RB1-I126S-r YRKTYESSV   | 405   | 993   |
| >RB1-I126S-v YRKTYEISV   | 127  | >RB1-I126S-r YRKTYESSV   | 46    | 81    |
| >RB1-I126S-v YRKTYEISVH  | 278  | >RB1-I126S-r YRKTYESSVH  | 168   | 110   |
| >RB1-I126S-v YRKTYEISVHK | 768  | >RB1-I126S-r YRKTYESSVHK | 301   | 467   |
| >RB1-I126S-v YRKTYEISV   | 368  | >RB1-I126S-r YRKTYESSV   | 597   | 229   |
| >RB1-I126S-v YRKTYEISVHK | 68   | >RB1-I126S-r YRKTYESSVHK | 99    | 31    |
| >RB1-I126S-v SYRKTYEI    | 45   | >RB1-I126S-r SYRKTYES    | 18391 | 18346 |
| >RB1-I126S-v SYRKTYEISV  | 419  | >RB1-I126S-r SYRKTYESSV  | 16    | 403   |
| >RB1-I126S-v SYRKTYEI    | 146  | >RB1-I126S-r SYRKTYES    | 17306 | 17160 |
| >RB1-I126S-v SYRKTYEI    | 173  | >RB1-I126S-r SYRKTYES    | 12934 | 12761 |
| >RB1-I126S-v SYRKTYEI    | 9    | >RB1-I126S-r SYRKTYES    | 2017  | 2008  |
| >RB1-I126S-v SYRKTYEI    | 13   | >RB1-I126S-r SYRKTYES    | 106   | 93    |
| >RB1-I126S-v SYRKTYEIS   | 272  | >RB1-I126S-r SYRKTYESS   | 119   | 153   |
| >RB1-I126S-v SYRKTYEISV  | 14   | >RB1-I126S-r SYRKTYESSV  | 20    | 6     |
| >RB1-I126S-v SYRKTYEISVH | 720  | >RB1-I126S-r SYRKTYESSVH | 404   | 316   |
| >RB1-I126S-v SYRKTYEISVH | 664  | >RB1-I126S-r SYRKTYESSVH | 487   | 177   |
| >RB1-I126S-v SYRKTYEI    | 463  | >RB1-I126S-r SYRKTYES    | 7832  | 7369  |
| >RB1-I126S-v SYRKTYEISV  | 272  | >RB1-I126S-r SYRKTYESSV  | 170   | 102   |
| >RB1-I126S-v LSYRKTYEI   | 166  | >RB1-I126S-r LSYRKTYES   | 3500  | 3334  |
| >RB1-I126S-v LSYRKTYEISV | 83   | >RB1-I126S-r LSYRKTYESSV | 83    | 0     |
| >RB1-I126S-v LSYRKTYEI   | 137  | >RB1-I126S-r LSYRKTYES   | 27761 | 27624 |
| >RB1-I126S-v LSYRKTYEISV | 301  | >RB1-I126S-r LSYRKTYESSV | 462   | 161   |
| >RB1-I126S-v LSYRKTYEI   | 68   | >RB1-I126S-r LSYRKTYES   | 9906  | 9838  |
| >RB1-I126S-v LSYRKTYEI   | 408  | >RB1-I126S-r LSYRKTYES   | 7647  | 7239  |
| >RB1-I126S-v LSYRKTYEI   | 480  | >RB1-I126S-r LSYRKTYES   | 8885  | 8405  |
| >RB1-I126S-v LSYRKTYEISV | 261  | >RB1-I126S-r LSYRKTYESSV | 135   | 126   |
| >RB1-I126S-v LSYRKTYEI   | 51   | >RB1-I126S-r LSYRKTYES   | 6531  | 6480  |
| >RB1-I126S-v LSYRKTYEISV | 341  | >RB1-I126S-r LSYRKTYESSV | 157   | 184   |

|                          |      |                          |       |       |
|--------------------------|------|--------------------------|-------|-------|
| >RB1-I126S-v LSYRKTYEI   | 72   | >RB1-I126S-r LSYRKTYES   | 12927 | 12855 |
| >RB1-I126S-v LSYRKTYEISV | 3361 | >RB1-I126S-r LSYRKTYESSV | 277   | 3084  |
| >RB1-I126S-v LSYRKTYEI   | 18   | >RB1-I126S-r LSYRKTYES   | 24520 | 24502 |
| >RB1-I126S-v LSYRKTYEISV | 547  | >RB1-I126S-r LSYRKTYESSV | 328   | 219   |
| >RB1-I126S-v LLSYRKTYEI  | 368  | >RB1-I126S-r LLSYRKTYES  | 11847 | 11479 |
| >RB1-I126S-v LLSYRKTYEI  | 52   | >RB1-I126S-r LLSYRKTYES  | 3661  | 3609  |
| >RB1-I126S-v LLSYRKTYEI  | 128  | >RB1-I126S-r LLSYRKTYES  | 5498  | 5370  |
| >RB1-I126S-v LLSYRKTYEI  | 108  | >RB1-I126S-r LLSYRKTYES  | 8016  | 7908  |
| >RB1-I126S-v LLSYRKTYEI  | 65   | >RB1-I126S-r LLSYRKTYES  | 7348  | 7283  |
| >RB1-I126S-v LLSYRKTYEI  | 386  | >RB1-I126S-r LLSYRKTYES  | 15865 | 15479 |
| >RB1-I126S-v LLSYRKTYEI  | 365  | >RB1-I126S-r LLSYRKTYES  | 17401 | 17036 |
| >RB1-I126S-v LLSYRKTYEI  | 19   | >RB1-I126S-r LLSYRKTYES  | 2675  | 2656  |
| >RB1-I138S-v EIDTSTKV    | 477  | >RB1-I138S-r ESDTSTKV    | 23199 | 22722 |
| >RB1-I138S-v EIDTSTKV    | 23   | >RB1-I138S-r ESDTSTKV    | 94    | 71    |
| >RB1-I138S-v KEIDTSTKV   | 283  | >RB1-I138S-r KESDTSTKV   | 1331  | 1048  |
| >RB1-I138S-v KEIDTSTKV   | 120  | >RB1-I138S-r KESDTSTKV   | 176   | 56    |
| >RB1-I138S-v KEIDTSTKV   | 336  | >RB1-I138S-r KESDTSTKV   | 622   | 286   |
| >RB1-I138S-v KEIDTSTKV   | 6    | >RB1-I138S-r KESDTSTKV   | 16    | 10    |
| >RB1-I138S-v LLKEIDTSTKV | 214  | >RB1-I138S-r LLKESDTSTKV | 454   | 240   |
| >RB1-I138S-v LLKEIDTST   | 395  | >RB1-I138S-r LLKESDTST   | 2409  | 2014  |
| >RB1-I138S-v LLKEIDTSTKV | 15   | >RB1-I138S-r LLKESDTSTKV | 28    | 13    |
| >RB1-I138S-v LLKEIDTST   | 64   | >RB1-I138S-r LLKESDTST   | 88    | 24    |
| >RB1-I138S-v LLKEIDTSTKV | 3    | >RB1-I138S-r LLKESDTSTKV | 4     | 1     |
| >RB1-I138S-v LLKEIDTSTKV | 207  | >RB1-I138S-r LLKESDTSTKV | 328   | 121   |
| >RB1-I138S-v LLKEIDTSTKV | 14   | >RB1-I138S-r LLKESDTSTKV | 22    | 8     |
| >RB1-I138S-v LLKEIDTSTKV | 23   | >RB1-I138S-r LLKESDTSTKV | 25    | 2     |
| >RB1-I138S-v LLKEIDTSTKV | 25   | >RB1-I138S-r LLKESDTSTKV | 32    | 7     |
| >RB1-I138S-v LLKEIDTSTKV | 92   | >RB1-I138S-r LLKESDTSTKV | 182   | 90    |
| >RB1-I138S-v LLKEIDTST   | 61   | >RB1-I138S-r LLKESDTST   | 64    | 3     |
| >RB1-I138S-v LLKEIDTSTKV | 2    | >RB1-I138S-r LLKESDTSTKV | 2     | 0     |
| >RB1-I138S-v LLKEIDTSTK  | 390  | >RB1-I138S-r LLKESDTSTK  | 194   | 196   |
| >RB1-I138S-v NLLKEIDTST  | 462  | >RB1-I138S-r NLLKESDTST  | 555   | 93    |
| >RB1-I138S-v FFFNLLKEI   | 405  | >RB1-I138S-r FFFNLLKES   | 14249 | 13844 |
| >RB1-I138S-v KFFNLLKEI   | 311  | >RB1-I138S-r KFFNLLKES   | 19382 | 19071 |
| >RB1-I138S-v KFFNLLKEI   | 30   | >RB1-I138S-r KFFNLLKES   | 7938  | 7908  |
| >RB1-I138S-v KFFNLLKEI   | 66   | >RB1-I138S-r KFFNLLKES   | 10534 | 10468 |
| >RB1-I138S-v KFFNLLKEI   | 189  | >RB1-I138S-r KFFNLLKES   | 1054  | 865   |
| >RB1-I138S-v HKFFNLLKEI  | 130  | >RB1-I138S-r HKFFNLLKES  | 25746 | 25616 |
| >RB1-I138S-v HKFFNLLKEI  | 37   | >RB1-I138S-r HKFFNLLKES  | 1721  | 1684  |
| >RB1-I388S-v MILNSASDQ   | 5777 | >RB1-I388S-r MSLNSASDQ   | 387   | 5390  |
| >RB1-I388S-v VMNTIQQLM   | 129  | >RB1-I388S-r VMNTIQQLM   | 10423 | 10294 |
| >RB1-I388S-v VMNTIQQLM   | 23   | >RB1-I388S-r VMNTIQQLM   | 2364  | 2341  |
| >RB1-I388S-v VMNTIQQLM   | 11   | >RB1-I388S-r VMNTIQQLM   | 1054  | 1043  |

|                         |      |                        |       |       |
|-------------------------|------|------------------------|-------|-------|
| >RB1-I388S-v VMNTIQQLM  | 11   | >RB1-I388S-r VMNTIQQLM | 1394  | 1383  |
| >RB1-I388S-v VMNTIQQLM  | 63   | >RB1-I388S-r VMNTIQQLM | 13288 | 13225 |
| >RB1-I388S-v VMNTIQQLM  | 49   | >RB1-I388S-r VMNTIQQLM | 8685  | 8636  |
| >RB1-I388S-v VMNTIQQLM  | 36   | >RB1-I388S-r VMNTIQQLM | 12987 | 12951 |
| >RB1-I388S-v VMNTIQQLM  | 13   | >RB1-I388S-r VMNTIQQLM | 2561  | 2548  |
| >RB1-I388S-v MMILNSAS   | 576  | >RB1-I388S-r MMSLNSAS  | 355   | 221   |
| >RB1-I388S-v MMILNSAS   | 345  | >RB1-I388S-r MMSLNSAS  | 484   | 139   |
| >RB1-I388S-v LMMILNSA   | 36   | >RB1-I388S-r LMMSLNSA  | 18    | 18    |
| >RB1-I388S-v LMMILNSA   | 15   | >RB1-I388S-r LMMSLNSA  | 6     | 9     |
| >RB1-I388S-v LMMILNSAS  | 429  | >RB1-I388S-r LMMSLNSAS | 95    | 334   |
| >RB1-I388S-v LMMILNSA   | 8    | >RB1-I388S-r LMMSLNSA  | 4     | 4     |
| >RB1-I388S-v LMMILNSAS  | 490  | >RB1-I388S-r LMMSLNSAS | 131   | 359   |
| >RB1-I388S-v LMMILNSA   | 76   | >RB1-I388S-r LMMSLNSA  | 27    | 49    |
| >RB1-I388S-v LMMILNSA   | 29   | >RB1-I388S-r LMMSLNSA  | 20    | 9     |
| >RB1-I388S-v LMMILNSA   | 65   | >RB1-I388S-r LMMSLNSA  | 24    | 41    |
| >RB1-I388S-v LMMILNSA   | 255  | >RB1-I388S-r LMMSLNSA  | 173   | 82    |
| >RB1-I388S-v LMMILNSA   | 82   | >RB1-I388S-r LMMSLNSA  | 20    | 62    |
| >RB1-I388S-v LMMILNSA   | 16   | >RB1-I388S-r LMMSLNSA  | 10    | 6     |
| >RB1-I388S-v LMMILNSAS  | 812  | >RB1-I388S-r LMMSLNSAS | 459   | 353   |
| >RB1-I388S-v LMMILNSA   | 260  | >RB1-I388S-r LMMSLNSA  | 122   | 138   |
| >RB1-I388S-v LMMILNSAS  | 671  | >RB1-I388S-r LMMSLNSAS | 277   | 394   |
| >RB1-I388S-v LMMILNSA   | 607  | >RB1-I388S-r LMMSLNSA  | 104   | 503   |
| >RB1-I388S-v LMMILNSAS  | 684  | >RB1-I388S-r LMMSLNSAS | 139   | 545   |
| >RB1-I388S-v LMMILNSAS  | 1266 | >RB1-I388S-r LMMSLNSAS | 331   | 935   |
| >RB1-I388S-v QLMMILNSA  | 69   | >RB1-I388S-r QLMMSLNSA | 139   | 70    |
| >RB1-I388S-v QLMMILNS   | 377  | >RB1-I388S-r QLMMSLNS  | 1059  | 682   |
| >RB1-I388S-v QLMMILNSA  | 11   | >RB1-I388S-r QLMMSLNSA | 19    | 8     |
| >RB1-I388S-v QLMMILNSA  | 8    | >RB1-I388S-r QLMMSLNSA | 8     | 0     |
| >RB1-I388S-v QLMMILNSA  | 47   | >RB1-I388S-r QLMMSLNSA | 43    | 4     |
| >RB1-I388S-v QLMMILNSA  | 313  | >RB1-I388S-r QLMMSLNSA | 609   | 296   |
| >RB1-I388S-v QLMMILNSA  | 191  | >RB1-I388S-r QLMMSLNSA | 180   | 11    |
| >RB1-I388S-v QLMMILNSA  | 124  | >RB1-I388S-r QLMMSLNSA | 315   | 191   |
| >RB1-I388S-v QLMMILNSA  | 35   | >RB1-I388S-r QLMMSLNSA | 37    | 2     |
| >RB1-I388S-v QLMMILNSA  | 356  | >RB1-I388S-r QLMMSLNSA | 2376  | 2020  |
| >RB1-I388S-v QLMMILNSA  | 423  | >RB1-I388S-r QLMMSLNSA | 537   | 114   |
| >RB1-I388S-v QQLMMILNS  | 437  | >RB1-I388S-r QQLMMSLNS | 410   | 27    |
| >RB1-I388S-v QQLMMILNS  | 143  | >RB1-I388S-r QQLMMSLNS | 166   | 23    |
| >RB1-I388S-v QQLMMILNS  | 680  | >RB1-I388S-r QQLMMSLNS | 286   | 394   |
| >RB1-I388S-v IQQLMMIL   | 634  | >RB1-I388S-r IQQLMMSL  | 144   | 490   |
| >RB1-I388S-v IQQLMMILNS | 145  | >RB1-I388S-r IQQLMMSLN | 164   | 19    |
| >RB1-I388S-v IQQLMMIL   | 2067 | >RB1-I388S-r IQQLMMSL  | 472   | 1595  |
| >RB1-I388S-v IQQLMMIL   | 249  | >RB1-I388S-r IQQLMMSL  | 123   | 126   |
| >RB1-I388S-v TIQQLMMIL  | 2247 | >RB1-I388S-r TIQQLMMSL | 479   | 1768  |



|                          |      |                          |       |       |
|--------------------------|------|--------------------------|-------|-------|
| >RB1-I388S-v NTIQQLMMII  | 1086 | >RB1-I388S-r NTIQQLMMS   | 362   | 724   |
| >RB1-I388S-v NTIQQLMMII  | 1007 | >RB1-I388S-r NTIQQLMMS   | 278   | 729   |
| >RB1-I388S-v NTIQQLMMII  | 702  | >RB1-I388S-r NTIQQLMMS   | 211   | 491   |
| >RB1-I388S-v NTIQQLMMII  | 1041 | >RB1-I388S-r NTIQQLMMS   | 93    | 948   |
| >RB1-I388S-v NTIQQLMMI   | 126  | >RB1-I388S-r NTIQQLMMS   | 1903  | 1777  |
| >RB1-I388S-v NTIQQLMMII  | 13   | >RB1-I388S-r NTIQQLMMS   | 11    | 2     |
| >RB1-I388S-v NTIQQLMMII  | 408  | >RB1-I388S-r NTIQQLMMS   | 111   | 297   |
| >RB1-I388S-v NTIQQLMMI   | 34   | >RB1-I388S-r NTIQQLMMS   | 1839  | 1805  |
| >RB1-I388S-v NTIQQLMMII  | 558  | >RB1-I388S-r NTIQQLMMS   | 194   | 364   |
| >RB1-I388S-v NTIQQLMMI   | 24   | >RB1-I388S-r NTIQQLMMS   | 6779  | 6755  |
| >RB1-I388S-v NTIQQLMMII  | 172  | >RB1-I388S-r NTIQQLMMS   | 35    | 137   |
| >RB1-I388S-v NTIQQLMMII  | 228  | >RB1-I388S-r NTIQQLMMS   | 78    | 150   |
| >RB1-I388S-v NTIQQLMMI   | 453  | >RB1-I388S-r NTIQQLMMS   | 32580 | 32127 |
| >RB1-L158S-1 LFALFSKL    | 452  | >RB1-L158S-i SFALFSKL    | 135   | 317   |
| >RB1-L158S-1 LFALFSKL    | 378  | >RB1-L158S-i SFALFSKL    | 465   | 87    |
| >RB1-L158S-1 LFALFSKLER  | 1996 | >RB1-L158S-i SFALFSKLER  | 406   | 1590  |
| >RB1-L158S-1 LFALFSKL    | 182  | >RB1-L158S-i SFALFSKL    | 246   | 64    |
| >RB1-L158S-1 LFALFSKLER  | 17   | >RB1-L158S-i SFALFSKLER  | 14    | 3     |
| >RB1-L158S-1 LFALFSKLER  | 42   | >RB1-L158S-i SFALFSKLER  | 40    | 2     |
| >RB1-L158S-1 LFALFSKLER  | 43   | >RB1-L158S-i SFALFSKLER  | 34    | 9     |
| >RB1-L158S-1 LFALFSKLER  | 559  | >RB1-L158S-i SFALFSKLER  | 110   | 449   |
| >RB1-L158S-1 LFALFSKLER  | 82   | >RB1-L158S-i SFALFSKLER  | 44    | 38    |
| >RB1-L158S-1 LFALFSKL    | 1596 | >RB1-L158S-i SFALFSKL    | 472   | 1124  |
| >RB1-L158S-1 VLFALFSKL   | 117  | >RB1-L158S-i VSFALFSKL   | 26    | 91    |
| >RB1-L158S-1 VLFALFSKL   | 31   | >RB1-L158S-i VSFALFSKL   | 8895  | 8864  |
| >RB1-L158S-1 VLFALFSKL   | 11   | >RB1-L158S-i VSFALFSKL   | 648   | 637   |
| >RB1-L158S-1 VLFALFSKL   | 13   | >RB1-L158S-i VSFALFSKL   | 4178  | 4165  |
| >RB1-L158S-1 VLFALFSKL   | 83   | >RB1-L158S-i VSFALFSKL   | 1361  | 1278  |
| >RB1-L158S-1 VLFALFSK    | 352  | >RB1-L158S-i VSFALFSK    | 22678 | 22326 |
| >RB1-L158S-1 VLFALFSKL   | 4    | >RB1-L158S-i VSFALFSKL   | 5783  | 5779  |
| >RB1-L158S-1 VLFALFSKL   | 59   | >RB1-L158S-i VSFALFSKL   | 19832 | 19773 |
| >RB1-L158S-1 VLFALFSKL   | 11   | >RB1-L158S-i VSFALFSKL   | 13483 | 13472 |
| >RB1-L158S-1 VLFALFSKL   | 135  | >RB1-L158S-i VSFALFSKL   | 23124 | 22989 |
| >RB1-L158S-1 VLFALFSK    | 125  | >RB1-L158S-i VSFALFSK    | 34140 | 34015 |
| >RB1-L158S-1 VLFALFSKL   | 3    | >RB1-L158S-i VSFALFSKL   | 17130 | 17127 |
| >RB1-L158S-1 VLFALFSK    | 27   | >RB1-L158S-i VSFALFSK    | 42    | 15    |
| >RB1-L158S-1 VLFALFSKLER | 71   | >RB1-L158S-i VSFALFSKLER | 385   | 314   |
| >RB1-L158S-1 VLFALFSK    | 9    | >RB1-L158S-i VSFALFSK    | 5     | 4     |
| >RB1-L158S-1 VLFALFSKLER | 104  | >RB1-L158S-i VSFALFSKLER | 25    | 79    |
| >RB1-L158S-1 VLFALFSK    | 523  | >RB1-L158S-i VSFALFSK    | 69    | 454   |
| >RB1-L158S-1 VLFALFSK    | 163  | >RB1-L158S-i VSFALFSK    | 63    | 100   |
| >RB1-L158S-1 VLFALFSKLER | 30   | >RB1-L158S-i VSFALFSKLER | 15    | 15    |
| >RB1-L158S-1 VLFALFSKLER | 305  | >RB1-L158S-i VSFALFSKLER | 482   | 177   |

|                         |       |                         |       |       |
|-------------------------|-------|-------------------------|-------|-------|
| >RB1-L158S-1VLFALFSK    | 165   | >RB1-L158S-1VSFALFSK    | 32    | 133   |
| >RB1-L158S-1VLFALFSKLER | 102   | >RB1-L158S-1VSFALFSKLER | 24    | 78    |
| >RB1-L158S-1VLFALFSKL   | 129   | >RB1-L158S-1VSFALFSKL   | 102   | 27    |
| >RB1-L158S-1VLFALFSKL   | 4655  | >RB1-L158S-1VSFALFSKL   | 8     | 4647  |
| >RB1-L158S-1VLFALFSKL   | 2761  | >RB1-L158S-1VSFALFSKL   | 129   | 2632  |
| >RB1-L158S-1VLFALFSKL   | 39    | >RB1-L158S-1VSFALFSKL   | 4     | 35    |
| >RB1-L158S-1VLFALFSK    | 2507  | >RB1-L158S-1VSFALFSK    | 129   | 2378  |
| >RB1-L158S-1VLFALFSKLER | 4364  | >RB1-L158S-1VSFALFSKLER | 182   | 4182  |
| >RB1-L158S-1VLFALFSKLER | 90    | >RB1-L158S-1VSFALFSKLER | 334   | 244   |
| >RB1-L158S-1VLFALFSKL   | 11904 | >RB1-L158S-1VSFALFSKL   | 170   | 11734 |
| >RB1-L158S-1MSRLLKKYDV  | 130   | >RB1-L158S-1MSRLLKKYDV  | 578   | 448   |
| >RB1-L158S-1MSRLLKKYDV  | 467   | >RB1-L158S-1MSRLLKKYDV  | 10618 | 10151 |
| >RB1-L158S-1MSRLLKKYDV  | 45    | >RB1-L158S-1MSRLLKKYDV  | 11207 | 11162 |
| >RB1-L158S-1MSRLLKKYDV  | 133   | >RB1-L158S-1MSRLLKKYDV  | 3626  | 3493  |
| >RB1-L158S-1DVLFALFSK   | 113   | >RB1-L158S-1DVSFALFSK   | 94    | 19    |
| >RB1-L158S-1DVLFALFSKL  | 275   | >RB1-L158S-1DVSFALFSKL  | 963   | 688   |
| >RB1-L158S-1DVLFALFSK   | 68    | >RB1-L158S-1DVSFALFSK   | 120   | 52    |
| >RB1-L158S-1DVLFALFSK   | 16    | >RB1-L158S-1DVSFALFSK   | 6     | 10    |
| >RB1-L158S-1DVLFALFSKL  | 1245  | >RB1-L158S-1DVSFALFSKL  | 245   | 1000  |
| >RB1-L158S-1DVLFALFSKL  | 29    | >RB1-L158S-1DVSFALFSKL  | 362   | 333   |
| >RB1-L158S-1YDVLFALF    | 350   | >RB1-L158S-1YDVSFALF    | 2481  | 2131  |
| >RB1-L158S-1YDVLFALF    | 756   | >RB1-L158S-1YDVSFALF    | 102   | 654   |
| >RB1-L158S-1YDVLFALFSKI | 285   | >RB1-L158S-1YDVSFALFSKI | 549   | 264   |
| >RB1-L158S-1YDVLFALFSKI | 408   | >RB1-L158S-1YDVSFALFSKI | 106   | 302   |
| >RB1-L158S-1YDVLFALFSKI | 115   | >RB1-L158S-1YDVSFALFSKI | 189   | 74    |
| >RB1-L158S-1YDVLFALFSKI | 453   | >RB1-L158S-1YDVSFALFSKI | 545   | 92    |
| >RB1-L158S-1KYDVLFAL    | 384   | >RB1-L158S-1KYDVSFAL    | 312   | 72    |
| >RB1-L158S-1KYDVLFAL    | 453   | >RB1-L158S-1KYDVSFAL    | 994   | 541   |
| >RB1-L158S-1KYDVLFALFSI | 242   | >RB1-L158S-1KYDVSFALFSI | 199   | 43    |
| >RB1-L158S-1KYDVLFALF   | 28    | >RB1-L158S-1KYDVSFALF   | 21    | 7     |
| >RB1-L158S-1KYDVLFALF   | 31    | >RB1-L158S-1KYDVSFALF   | 42    | 11    |
| >RB1-L158S-1KYDVLFAL    | 25    | >RB1-L158S-1KYDVSFAL    | 34    | 9     |
| >RB1-L158S-1KYDVLFALF   | 11    | >RB1-L158S-1KYDVSFALF   | 14    | 3     |
| >RB1-L158S-1KYDVLFALFSI | 181   | >RB1-L158S-1KYDVSFALFSI | 84    | 97    |
| >RB1-L158S-1KYDVLFALFSI | 97    | >RB1-L158S-1KYDVSFALFSI | 134   | 37    |
| >RB1-L158S-1KYDVLFALFSI | 221   | >RB1-L158S-1KYDVSFALFSI | 426   | 205   |
| >RB1-L158S-1KYDVLFAL    | 242   | >RB1-L158S-1KYDVSFAL    | 581   | 339   |
| >RB1-L158S-1KYDVLFAL    | 178   | >RB1-L158S-1KYDVSFAL    | 229   | 51    |
| >RB1-L158S-1KKYDVLFAL   | 165   | >RB1-L158S-1KKYDVSFAL   | 197   | 32    |
| >RB1-L158S-1KKYDVLFA    | 137   | >RB1-L158S-1KKYDVSFA    | 333   | 196   |
| >RB1-L158S-1KKYDVLFAL   | 15    | >RB1-L158S-1KKYDVSFAL   | 41    | 26    |
| >RB1-L158S-1KKYDVLFAL   | 45    | >RB1-L158S-1KKYDVSFAL   | 85    | 40    |
| >RB1-L158S-1KKYDVLFALF  | 1074  | >RB1-L158S-1KKYDVSFALF  | 387   | 687   |

|                           |      |                           |       |       |
|---------------------------|------|---------------------------|-------|-------|
| >RB1-L158S-1 KKYDVLFA     | 332  | >RB1-L158S-1 KKYDVSFAL    | 124   | 208   |
| >RB1-L158S-1 KKYDVLFA     | 336  | >RB1-L158S-1 KKYDVSFA     | 148   | 188   |
| >RB1-L158S-1 KKYDVLFA     | 16   | >RB1-L158S-1 KKYDVSFAL    | 8     | 8     |
| >RB1-L158S-1 KKYDVLFAF    | 3    | >RB1-L158S-1 KKYDVSFALF   | 2     | 1     |
| >RB1-L158S-1 KKYDVLFA     | 142  | >RB1-L158S-1 KKYDVSFAL    | 34    | 108   |
| >RB1-L158S-1 KKYDVLFA     | 93   | >RB1-L158S-1 KKYDVSFAL    | 68    | 25    |
| >RB1-L158S-1 KKYDVLFA     | 475  | >RB1-L158S-1 KKYDVSFAL    | 2113  | 1638  |
| >RB1-L158S-1 KKYDVLFA     | 304  | >RB1-L158S-1 KKYDVSFAL    | 557   | 253   |
| >RB1-L158S-1 LKKYDVL      | 5    | >RB1-L158S-1 LKKYDVSF     | 3     | 2     |
| >RB1-L158S-1 LKKYDVLFA    | 373  | >RB1-L158S-1 LKKYDVSFA    | 181   | 192   |
| >RB1-L158S-1 LKKYDVLFA    | 25   | >RB1-L158S-1 LKKYDVSFAL   | 14    | 11    |
| >RB1-L158S-1 LKKYDVLFAF   | 5    | >RB1-L158S-1 LKKYDVSFALI  | 3     | 2     |
| >RB1-L158S-1 LKKYDVLFAF   | 1057 | >RB1-L158S-1 LKKYDVSFALI  | 480   | 577   |
| >RB1-L158S-1 LLKKYDVLFAI  | 127  | >RB1-L158S-1 LLKKYDVSFAI  | 175   | 48    |
| >RB1-L158S-1 LLKKYDVL     | 125  | >RB1-L158S-1 LLKKYDVS     | 8312  | 8187  |
| >RB1-L158S-1 LLKKYDVLFA   | 236  | >RB1-L158S-1 LLKKYDVSFA   | 240   | 4     |
| >RB1-L158S-1 LLKKYDVLFAI  | 16   | >RB1-L158S-1 LLKKYDVSFAI  | 18    | 2     |
| >RB1-L158S-1 LLKKYDVL     | 305  | >RB1-L158S-1 LLKKYDVS     | 8756  | 8451  |
| >RB1-L158S-1 LLKKYDVLFA   | 108  | >RB1-L158S-1 LLKKYDVSFA   | 88    | 20    |
| >RB1-L158S-1 LLKKYDVLFAI  | 46   | >RB1-L158S-1 LLKKYDVSFAI  | 58    | 12    |
| >RB1-L158S-1 LLKKYDVLFAI  | 149  | >RB1-L158S-1 LLKKYDVSFAI  | 245   | 96    |
| >RB1-L158S-1 LLKKYDVLFAI  | 81   | >RB1-L158S-1 LLKKYDVSFAI  | 97    | 16    |
| >RB1-L158S-1 LLKKYDVLFAI  | 58   | >RB1-L158S-1 LLKKYDVSFAI  | 52    | 6     |
| >RB1-L158S-1 LLKKYDVL     | 43   | >RB1-L158S-1 LLKKYDVS     | 11481 | 11438 |
| >RB1-L158S-1 LLKKYDVLFA   | 54   | >RB1-L158S-1 LLKKYDVSFA   | 37    | 17    |
| >RB1-L158S-1 LLKKYDVLFAI  | 8    | >RB1-L158S-1 LLKKYDVSFAI  | 8     | 0     |
| >RB1-L158S-1 LLKKYDVLFA   | 404  | >RB1-L158S-1 LLKKYDVSFA   | 748   | 344   |
| >RB1-L158S-1 LLKKYDVL     | 78   | >RB1-L158S-1 LLKKYDVS     | 4582  | 4504  |
| >RB1-L158S-1 LLKKYDVL     | 904  | >RB1-L158S-1 LLKKYDVSF    | 77    | 827   |
| >RB1-L158S-1 LLKKYDVLFAI  | 125  | >RB1-L158S-1 LLKKYDVSFAI  | 74    | 51    |
| >RB1-L158S-1 LLKKYDVL     | 450  | >RB1-L158S-1 LLKKYDVS     | 7603  | 7153  |
| >RB1-L158S-1 LLKKYDVL     | 66   | >RB1-L158S-1 LLKKYDVSF    | 26    | 40    |
| >RB1-L158S-1 LLKKYDVLFAI  | 280  | >RB1-L158S-1 LLKKYDVSFAI  | 109   | 171   |
| >RB1-L158S-1 LLKKYDVL     | 1121 | >RB1-L158S-1 LLKKYDVSF    | 425   | 696   |
| >RB1-L158S-1 LLKKYDVL     | 47   | >RB1-L158S-1 LLKKYDVSF    | 14    | 33    |
| >RB1-L158S-1 LLKKYDVLFAI  | 762  | >RB1-L158S-1 LLKKYDVSFAI  | 391   | 371   |
| >RB1-L158S-1 RLLKKYDVLFA/ | 143  | >RB1-L158S-1 RLLKKYDVSFA/ | 257   | 114   |
| >RB1-L158S-1 RLLKKYDVL    | 346  | >RB1-L158S-1 RLLKKYDVS    | 15148 | 14802 |
| >RB1-L158S-1 RLLKKYDVLFA/ | 436  | >RB1-L158S-1 RLLKKYDVSFA/ | 269   | 167   |
| >RB1-L158S-1 RLLKKYDVLFA/ | 171  | >RB1-L158S-1 RLLKKYDVSFA/ | 59    | 112   |
| >RB1-L158S-1 RLLKKYDVLFA/ | 167  | >RB1-L158S-1 RLLKKYDVSFA/ | 183   | 16    |
| >RB1-L158S-1 RLLKKYDVL    | 27   | >RB1-L158S-1 RLLKKYDVS    | 4888  | 4861  |
| >RB1-L158S-1 RLLKKYDVLFA/ | 21   | >RB1-L158S-1 RLLKKYDVSFA/ | 19    | 2     |

|                           |      |                           |       |       |
|---------------------------|------|---------------------------|-------|-------|
| >RB1-L158S-l RLLKKYDVL    | 48   | >RB1-L158S-l RLLKKYDVS    | 13128 | 13080 |
| >RB1-L158S-l RLLKKYDVLF/  | 102  | >RB1-L158S-l RLLKKYDVSF/  | 70    | 32    |
| >RB1-L158S-l RLLKKYDVL    | 54   | >RB1-L158S-l RLLKKYDVS    | 11668 | 11614 |
| >RB1-L158S-l RLLKKYDVLF/  | 28   | >RB1-L158S-l RLLKKYDVSF/  | 30    | 2     |
| >RB1-L158S-l RLLKKYDVLF/  | 423  | >RB1-L158S-l RLLKKYDVSF/  | 288   | 135   |
| >RB1-L158S-l RLLKKYDVL    | 95   | >RB1-L158S-l RLLKKYDVS    | 16490 | 16395 |
| >RB1-L158S-l RLLKKYDVLF/  | 112  | >RB1-L158S-l RLLKKYDVSF/  | 87    | 25    |
| >RB1-L158S-l RLLKKYDVLF   | 391  | >RB1-L158S-l RLLKKYDVSF   | 1288  | 897   |
| >RB1-L158S-l RLLKKYDVLF   | 123  | >RB1-L158S-l RLLKKYDVSF   | 79    | 44    |
| >RB1-L158S-l RLLKKYDVLF/  | 213  | >RB1-L158S-l RLLKKYDVSF/  | 396   | 183   |
| >RB1-L158S-l RLLKKYDVLF   | 70   | >RB1-L158S-l RLLKKYDVSF   | 20    | 50    |
| >RB1-L158S-l RLLKKYDVL    | 115  | >RB1-L158S-l RLLKKYDVS    | 6491  | 6376  |
| >RB1-L158S-l RLLKKYDVLF   | 569  | >RB1-L158S-l RLLKKYDVSF   | 109   | 460   |
| >RB1-L158S-l RLLKKYDVLF   | 42   | >RB1-L158S-l RLLKKYDVSF   | 13    | 29    |
| >RB1-L158S-l RLLKKYDVLF   | 538  | >RB1-L158S-l RLLKKYDVSF   | 188   | 350   |
| >RB1-L158S-l S RLLKKYDVLF | 377  | >RB1-L158S-l S RLLKKYDVSF | 110   | 267   |
| >RB1-L158S-l S RLLKKYDVL  | 115  | >RB1-L158S-l S RLLKKYDVS  | 6513  | 6398  |
| >RB1-L158S-l S RLLKKYDVLF | 205  | >RB1-L158S-l S RLLKKYDVSF | 211   | 6     |
| >RB1-L158S-l S RLLKKYDVLF | 199  | >RB1-L158S-l S RLLKKYDVSF | 786   | 587   |
| >RB1-L607I-v LSPVRSPKK    | 1063 | >RB1-L607I-r ISPVRSPKK    | 395   | 668   |
| >RB1-L607I-v LSPVRSPK     | 389  | >RB1-L607I-r ISPVRSPK     | 196   | 193   |
| >RB1-L607I-v LSPVRSPKKK   | 593  | >RB1-L607I-r ISPVRSPKKK   | 468   | 125   |
| >RB1-L607I-v LSPVRSPK     | 430  | >RB1-L607I-r ISPVRSPK     | 418   | 12    |
| >RB1-L607I-v LSPVRSPKK    | 404  | >RB1-L607I-r ISPVRSPKK    | 395   | 9     |
| >RB1-L607I-v YLSPVRSPK    | 85   | >RB1-L607I-r YISPVRSPK    | 5541  | 5456  |
| >RB1-L607I-v YLSPVRSPKK   | 66   | >RB1-L607I-r YISPVRSPKK   | 5266  | 5200  |
| >RB1-L607I-v YLSPVRSPKKI  | 478  | >RB1-L607I-r YISPVRSPKKK  | 11775 | 11297 |
| >RB1-L607I-v YLSPVRSPK    | 47   | >RB1-L607I-r YISPVRSPK    | 79    | 32    |
| >RB1-L607I-v YLSPVRSPKK   | 49   | >RB1-L607I-r YISPVRSPKK   | 69    | 20    |
| >RB1-L607I-v YLSPVRSPKKI  | 102  | >RB1-L607I-r YISPVRSPKKK  | 230   | 128   |
| >RB1-L607I-v YLSPVRSPK    | 29   | >RB1-L607I-r YISPVRSPK    | 17    | 12    |
| >RB1-L607I-v YLSPVRSPKK   | 104  | >RB1-L607I-r YISPVRSPKK   | 57    | 47    |
| >RB1-L607I-v YLSPVRSPKKI  | 349  | >RB1-L607I-r YISPVRSPKKK  | 128   | 221   |
| >RB1-L607I-v YLSPVRSPK    | 633  | >RB1-L607I-r YISPVRSPK    | 206   | 427   |
| >RB1-L607I-v YLSPVRSPKK   | 1120 | >RB1-L607I-r YISPVRSPKK   | 398   | 722   |
| >RB1-L607I-v YLSPVRSPK    | 474  | >RB1-L607I-r YISPVRSPK    | 495   | 21    |
| >RB1-L607I-v YLSPVRSPK    | 47   | >RB1-L607I-r YISPVRSPK    | 14    | 33    |
| >RB1-L607I-v YLSPVRSPKK   | 111  | >RB1-L607I-r YISPVRSPKK   | 19    | 92    |
| >RB1-L607I-v YLSPVRSPKKI  | 348  | >RB1-L607I-r YISPVRSPKKK  | 96    | 252   |
| >RB1-L607I-v YLSPVRSPKK   | 296  | >RB1-L607I-r YISPVRSPKK   | 885   | 589   |
| >RB1-L607I-v MYLSPVRSPK   | 12   | >RB1-L607I-r MYISPVRSPK   | 28    | 16    |
| >RB1-L607I-v MYLSPVRSPK   | 19   | >RB1-L607I-r MYISPVRSPK   | 47    | 28    |
| >RB1-L607I-v MYLSPVRSPK   | 89   | >RB1-L607I-r MYISPVRSPK   | 84    | 5     |

|                         |      |                         |      |      |
|-------------------------|------|-------------------------|------|------|
| >RB1-L607I-v MYLSPVRSPK | 270  | >RB1-L607I-r MYISPVRSKP | 434  | 164  |
| >RB1-L607I-v MYLSPVRSPK | 431  | >RB1-L607I-r MYISPVRSKP | 358  | 73   |
| >RB1-L607I-v MYLSPVRSPK | 675  | >RB1-L607I-r MYISPVRSKP | 128  | 547  |
| >RB1-L607I-v MYLSPVRSPK | 1813 | >RB1-L607I-r MYISPVRSKP | 421  | 1392 |
| >RB1-L607I-v MYLSPVRSPK | 233  | >RB1-L607I-r MYISPVRSKP | 567  | 334  |
| >RB1-L607I-v MYLSPVRSPK | 483  | >RB1-L607I-r MYISPVRSKP | 1264 | 781  |
| >RB1-L607I-v MYLSPVRSP  | 274  | >RB1-L607I-r MYISPVRSKP | 553  | 279  |
| >RB1-L607I-v DMYLSPVRSF | 96   | >RB1-L607I-r DMYISPVRSF | 99   | 3    |
| >RB1-L607I-v DMYLSPVRSF | 155  | >RB1-L607I-r DMYISPVRSF | 209  | 54   |
| >RB1-L607I-v DMYLSPVR   | 590  | >RB1-L607I-r DMYISPVRSF | 370  | 220  |
| >RB1-L607I-v DMYLSPVR   | 42   | >RB1-L607I-r DMYISPVRSF | 58   | 16   |
| >RB1-L607I-v DMYLSPVRSF | 75   | >RB1-L607I-r DMYISPVRSF | 120  | 45   |
| >RB1-L607I-v DMYLSPVR   | 75   | >RB1-L607I-r DMYISPVRSF | 63   | 12   |
| >RB1-L607I-v DMYLSPVRSF | 74   | >RB1-L607I-r DMYISPVRSF | 77   | 3    |
| >RB1-L607I-v DMYLSPVR   | 221  | >RB1-L607I-r DMYISPVRSF | 227  | 6    |
| >RB1-L607I-v ADMYLSPV   | 76   | >RB1-L607I-r DMYISPVRSF | 110  | 34   |
| >RB1-L607I-v ADMYLSPV   | 79   | >RB1-L607I-r ADMYISPV   | 50   | 29   |
| >RB1-L607I-v ADMYLSPV   | 343  | >RB1-L607I-r ADMYISPV   | 395  | 52   |
| >RB1-L607I-v AADMYLSPV  | 178  | >RB1-L607I-r ADMYISPV   | 189  | 11   |
| >RB1-L607I-v AADMYLSPV  | 448  | >RB1-L607I-r AADMYISPV  | 536  | 88   |
| >RB1-L607I-v AADMYLSPV  | 144  | >RB1-L607I-r AADMYISPV  | 168  | 24   |
| >RB1-L607I-v AADMYLSPV  | 18   | >RB1-L607I-r AADMYISPV  | 26   | 8    |
| >RB1-L607I-v AADMYLSPV  | 55   | >RB1-L607I-r AADMYISPV  | 24   | 31   |
| >RB1-L607I-v AADMYLSPV  | 151  | >RB1-L607I-r AADMYISPV  | 79   | 72   |
| >RB1-L607I-v AADMYLSPVI | 493  | >RB1-L607I-r AADMYISPVF | 386  | 107  |
| >RB1-L607I-v AADMYLSPVI | 1063 | >RB1-L607I-r AADMYISPVF | 226  | 837  |
| >RB1-L607I-v AADMYLSPV  | 353  | >RB1-L607I-r AADMYISPV  | 409  | 56   |
| >RB1-L607I-v TAADMYLSP\ | 239  | >RB1-L607I-r TAADMYISPV | 320  | 81   |
| >RB1-L607I-v TAADMYLSP\ | 90   | >RB1-L607I-r TAADMYISPV | 113  | 23   |
| >RB1-L607I-v TAADMYLSP\ | 43   | >RB1-L607I-r TAADMYISPV | 54   | 11   |
| >RB1-L607I-v TAADMYLSP\ | 67   | >RB1-L607I-r TAADMYISPV | 87   | 20   |
| >RB1-L607I-v TAADMYLSP\ | 563  | >RB1-L607I-r TAADMYISPV | 276  | 287  |
| >RB1-L607I-v TAADMYLSP\ | 41   | >RB1-L607I-r TAADMYISPV | 27   | 14   |
| >RB1-L607I-v TAADMYLSP\ | 351  | >RB1-L607I-r TAADMYISPV | 237  | 114  |
| >RB1-L607I-v TAADMYLSP\ | 8    | >RB1-L607I-r TAADMYISPV | 6    | 2    |
| >RB1-L607I-v TAADMYLS   | 255  | >RB1-L607I-r TAADMYIS   | 832  | 577  |
| >RB1-L607I-v TAADMYLSP\ | 19   | >RB1-L607I-r TAADMYISPV | 19   | 0    |
| >RB1-L607I-v TAADMYLSP\ | 13   | >RB1-L607I-r TAADMYISPV | 12   | 1    |
| >RB1-L607I-v HTAADMYLSI | 116  | >RB1-L607I-r HTAADMYISF | 160  | 44   |
| >RB1-L607I-v HTAADMYL   | 28   | >RB1-L607I-r HTAADMYI   | 75   | 47   |
| >RB1-L607I-v HTAADMYLSI | 14   | >RB1-L607I-r HTAADMYISF | 18   | 4    |
| >RB1-L607I-v HTAADMYLSI | 14   | >RB1-L607I-r HTAADMYISF | 16   | 2    |
| >RB1-L607I-v HTAADMYL   | 410  | >RB1-L607I-r HTAADMYI   | 351  | 59   |

|                         |       |                         |       |       |
|-------------------------|-------|-------------------------|-------|-------|
| >RB1-L607I-v HTAADMYLSI | 27    | >RB1-L607I-r HTAADMYISF | 37    | 10    |
| >RB1-L607I-v HTAADMYLSI | 258   | >RB1-L607I-r HTAADMYISF | 186   | 72    |
| >RB1-L607I-v HTAADMYLSI | 332   | >RB1-L607I-r HTAADMYISF | 346   | 14    |
| >RB1-L607I-v HTAADMYLSI | 258   | >RB1-L607I-r HTAADMYISF | 207   | 51    |
| >RB1-L607I-v HTAADMYL   | 129   | >RB1-L607I-r HTAADMYI   | 615   | 486   |
| >RB1-L607I-v HTAADMYLSI | 79    | >RB1-L607I-r HTAADMYISF | 101   | 22    |
| >RB1-L607I-v HTAADMYL   | 7     | >RB1-L607I-r HTAADMYI   | 6     | 1     |
| >RB1-L607I-v HTAADMYLS  | 20    | >RB1-L607I-r HTAADMYIS  | 74    | 54    |
| >RB1-L607I-v HTAADMYLSI | 5     | >RB1-L607I-r HTAADMYISF | 5     | 0     |
| >RB1-L607I-v HTAADMYL   | 57    | >RB1-L607I-r HTAADMYI   | 34    | 23    |
| >RB1-L607I-v HTAADMYLSI | 6     | >RB1-L607I-r HTAADMYISF | 7     | 1     |
| >RB1-L607I-v HTAADMYL   | 23    | >RB1-L607I-r HTAADMYI   | 113   | 90    |
| >RB1-L607I-v HTAADMYLSI | 161   | >RB1-L607I-r HTAADMYISF | 155   | 6     |
| >RB1-L607I-v HTAADMYL   | 298   | >RB1-L607I-r HTAADMYI   | 130   | 168   |
| >RB1-L607I-v HTAADMYL   | 1008  | >RB1-L607I-r HTAADMYI   | 56    | 952   |
| >RB1-L607I-v NHTAADMYL  | 393   | >RB1-L607I-r NHTAADMYI  | 3834  | 3441  |
| >RB1-L607I-v NNHTAADM\  | 183   | >RB1-L607I-r NNHTAADM\  | 370   | 187   |
| >RB1-L688P- LQNEYELM    | 164   | >RB1-L688P- PQNEYELM    | 7761  | 7597  |
| >RB1-L688P- LQNEYELMR   | 301   | >RB1-L688P- PQNEYELMR   | 5429  | 5128  |
| >RB1-L688P- LQNEYELM    | 168   | >RB1-L688P- PQNEYELM    | 8125  | 7957  |
| >RB1-L688P- LQNEYELM    | 83    | >RB1-L688P- PQNEYELM    | 1607  | 1524  |
| >RB1-L688P- TLQNEYEL    | 31666 | >RB1-L688P- TPQNEYEL    | 131   | 31535 |
| >RB1-L688P- TLQNEYEL    | 133   | >RB1-L688P- TPQNEYEL    | 23746 | 23613 |
| >RB1-L688P- TLQNEYEL    | 31    | >RB1-L688P- TPQNEYEL    | 29733 | 29702 |
| >RB1-L688P- TLQNEYELM   | 419   | >RB1-L688P- TPQNEYELM   | 35359 | 34940 |
| >RB1-L688P- TLQNEYEL    | 70    | >RB1-L688P- TPQNEYEL    | 25319 | 25249 |
| >RB1-L688P- TLQNEYEL    | 24    | >RB1-L688P- TPQNEYEL    | 22058 | 22034 |
| >RB1-L688P- TLQNEYEL    | 334   | >RB1-L688P- TPQNEYEL    | 24925 | 24591 |
| >RB1-L688P- TLQNEYEL    | 303   | >RB1-L688P- TPQNEYEL    | 23217 | 22914 |
| >RB1-L688P- TLQNEYEL    | 9     | >RB1-L688P- TPQNEYEL    | 31580 | 31571 |
| >RB1-L688P- TLQNEYEL    | 28222 | >RB1-L688P- TPQNEYEL    | 444   | 27778 |
| >RB1-L688P- TLQNEYELM   | 24866 | >RB1-L688P- TPQNEYELM   | 194   | 24672 |
| >RB1-L688P- HIIWTLFQHT  | 176   | >RB1-L688P- HIIWTLFQHT  | 21311 | 21135 |
| >RB1-L688P- HIIWTLFQHT  | 114   | >RB1-L688P- HIIWTLFQHT  | 8442  | 8328  |
| >RB1-L688P- HIIWTLFQHT  | 280   | >RB1-L688P- HIIWTLFQHT  | 14715 | 14435 |
| >RB1-L688P- HIIWTLFQHT  | 82    | >RB1-L688P- HIIWTLFQHT  | 7104  | 7022  |
| >RB1-L688P- HIIWTLFQHT  | 47    | >RB1-L688P- HIIWTLFQHT  | 11862 | 11815 |
| >RB1-L688P- HIIWTLFQHT  | 123   | >RB1-L688P- HIIWTLFQHT  | 14713 | 14590 |
| >RB1-L688P- HIIWTLFQHT  | 371   | >RB1-L688P- HIIWTLFQHT  | 19441 | 19070 |
| >RB1-L688P- HIIWTLFQHT  | 10    | >RB1-L688P- HIIWTLFQHT  | 17172 | 17162 |
| >RB1-L688P- HIIWTLFQHT  | 196   | >RB1-L688P- HIIWTLFQHT  | 13390 | 13194 |
| >RB1-L688P- HIIWTLFQHT  | 103   | >RB1-L688P- HIIWTLFQHT  | 5079  | 4976  |
| >RB1-L688P- HIIWTLFQHT  | 148   | >RB1-L688P- HIIWTLFQHT  | 10999 | 10851 |

|                        |       |                        |       |       |
|------------------------|-------|------------------------|-------|-------|
| >RB1-L688P-·HIIWTLFQHT | 23    | >RB1-L688P-·HIIWTLFQHT | 6509  | 6486  |
| >RB1-L688P-·HIIWTLFQHT | 52    | >RB1-L688P-·HIIWTLFQHT | 17106 | 17054 |
| >RB1-L688P-·HTLQNEYEL  | 59    | >RB1-L688P-·HTPQNEYEL  | 345   | 286   |
| >RB1-L688P-·HTLQNEYEL  | 499   | >RB1-L688P-·HTPQNEYEL  | 6407  | 5908  |
| >RB1-L688P-·HTLQNEYELM | 225   | >RB1-L688P-·HTPQNEYELM | 325   | 100   |
| >RB1-L688P-·HTLQNEYELM | 371   | >RB1-L688P-·HTPQNEYELM | 339   | 32    |
| >RB1-L688P-·HTLQNEYELM | 165   | >RB1-L688P-·HTPQNEYELM | 1876  | 1711  |
| >RB1-L688P-·HTLQNEYEL  | 199   | >RB1-L688P-·HTPQNEYEL  | 742   | 543   |
| >RB1-L688P-·HTLQNEYELM | 125   | >RB1-L688P-·HTPQNEYELM | 869   | 744   |
| >RB1-L688P-·HTLQNEYELM | 17    | >RB1-L688P-·HTPQNEYELM | 22    | 5     |
| >RB1-L688P-·HTLQNEYEL  | 392   | >RB1-L688P-·HTPQNEYEL  | 69    | 323   |
| >RB1-L688P-·HTLQNEYEL  | 287   | >RB1-L688P-·HTPQNEYEL  | 6941  | 6654  |
| >RB1-L688P-·HTLQNEYELM | 325   | >RB1-L688P-·HTPQNEYELM | 7051  | 6726  |
| >RB1-L688P-·HTLQNEYEL  | 16    | >RB1-L688P-·HTPQNEYEL  | 1040  | 1024  |
| >RB1-L688P-·HTLQNEYELM | 47    | >RB1-L688P-·HTPQNEYELM | 2207  | 2160  |
| >RB1-L688P-·HTLQNEYEL  | 15802 | >RB1-L688P-·HTPQNEYEL  | 73    | 15729 |
| >RB1-L688P-·HTLQNEYELM | 5252  | >RB1-L688P-·HTPQNEYELM | 13    | 5239  |
| >RB1-L688P-·HTLQNEYELM | 186   | >RB1-L688P-·HTPQNEYELM | 196   | 10    |
| >RB1-L688P-·HTLQNEYELM | 61    | >RB1-L688P-·HTPQNEYELM | 98    | 37    |
| >RB1-L688P-·FQHTLQNEYE | 183   | >RB1-L688P-·FQHTPQNEYI | 422   | 239   |
| >RB1-L688P-·FQHTLQNEYE | 90    | >RB1-L688P-·FQHTPQNEYI | 189   | 99    |
| >RB1-L688P-·FQHTLQNEYE | 18    | >RB1-L688P-·FQHTPQNEYI | 71    | 53    |
| >RB1-L688P-·FQHTLQNEYE | 35    | >RB1-L688P-·FQHTPQNEYI | 51    | 16    |
| >RB1-L688P-·FQHTLQNEYE | 342   | >RB1-L688P-·FQHTPQNEYI | 214   | 128   |
| >RB1-L688P-·FQHTLQNEYE | 344   | >RB1-L688P-·FQHTPQNEYI | 394   | 50    |
| >RB1-L688P-·FQHTLQNEY  | 256   | >RB1-L688P-·FQHTPQNEY  | 525   | 269   |
| >RB1-L688P-·FQHTLQNEY  | 184   | >RB1-L688P-·FQHTPQNEY  | 333   | 149   |
| >RB1-L688P-·FQHTLQNEY  | 77    | >RB1-L688P-·FQHTPQNEY  | 89    | 12    |
| >RB1-L688P-·FQHTLQNEY  | 173   | >RB1-L688P-·FQHTPQNEY  | 37    | 136   |
| >RB1-L688P-·FQHTLQNEY  | 6     | >RB1-L688P-·FQHTPQNEY  | 4     | 2     |
| >RB1-L688P-·FQHTLQNEYE | 30    | >RB1-L688P-·FQHTPQNEYI | 18    | 12    |
| >RB1-L688P-·FQHTLQNEYE | 25    | >RB1-L688P-·FQHTPQNEYI | 36    | 11    |
| >RB1-L688P-·FQHTLQNEYE | 309   | >RB1-L688P-·FQHTPQNEYI | 232   | 77    |
| >RB1-L688P-·LFQHTLQNEY | 421   | >RB1-L688P-·LFQHTPQNEY | 245   | 176   |
| >RB1-L688P-·LFQHTLQNEY | 173   | >RB1-L688P-·LFQHTPQNEY | 241   | 68    |
| >RB1-L688P-·LFQHTLQNEY | 1078  | >RB1-L688P-·LFQHTPQNEY | 483   | 595   |
| >RB1-L688P-·TLFQHTLQ   | 153   | >RB1-L688P-·TLFQHTPQ   | 170   | 17    |
| >RB1-L688P-·TLFQHTLQNE | 222   | >RB1-L688P-·TLFQHTPQNE | 221   | 1     |
| >RB1-L688P-·TLFQHTLQNE | 19    | >RB1-L688P-·TLFQHTPQNE | 30    | 11    |
| >RB1-L688P-·TLFQHTLQNE | 140   | >RB1-L688P-·TLFQHTPQNE | 97    | 43    |
| >RB1-L688P-·TLFQHTLQNE | 45    | >RB1-L688P-·TLFQHTPQNE | 318   | 273   |
| >RB1-L688P-·TLFQHTLQNE | 83    | >RB1-L688P-·TLFQHTPQNE | 96    | 13    |
| >RB1-L688P-·TLFQHTLQNE | 64    | >RB1-L688P-·TLFQHTPQNE | 46    | 18    |

|                        |     |                        |       |       |
|------------------------|-----|------------------------|-------|-------|
| >RB1-L688P-TLFQHTLQNE  | 112 | >RB1-L688P-TLFQHTPQNE  | 91    | 21    |
| >RB1-L688P-TLFQHTLQNE  | 253 | >RB1-L688P-TLFQHTPQNE  | 278   | 25    |
| >RB1-L688P-TLFQHTLQNE  | 421 | >RB1-L688P-TLFQHTPQNE  | 560   | 139   |
| >RB1-L688P-WTLFQHTL    | 338 | >RB1-L688P-WTLFQHTP    | 18362 | 18024 |
| >RB1-L688P-WTLFQHTL    | 227 | >RB1-L688P-WTLFQHTP    | 17720 | 17493 |
| >RB1-L688P-WTLFQHTL    | 217 | >RB1-L688P-WTLFQHTP    | 14451 | 14234 |
| >RB1-L688P-WTLFQHTL    | 33  | >RB1-L688P-WTLFQHTP    | 7663  | 7630  |
| >RB1-L688P-WTLFQHTL    | 16  | >RB1-L688P-WTLFQHTP    | 11873 | 11857 |
| >RB1-L688P-WTLFQHTLQ   | 78  | >RB1-L688P-WTLFQHTPQ   | 928   | 850   |
| >RB1-L688P-IWTLFQHTL   | 91  | >RB1-L688P-IWTLFQHTP   | 4096  | 4005  |
| >RB1-L688P-IWTLFQHTL   | 315 | >RB1-L688P-IWTLFQHTP   | 11166 | 10851 |
| >RB1-L688P-IWTLFQHTL   | 452 | >RB1-L688P-IWTLFQHTP   | 15973 | 15521 |
| >RB1-L688P-IWTLFQHTLC  | 490 | >RB1-L688P-IWTLFQHTPC  | 276   | 214   |
| >RB1-L688P-IWTLFQHTL   | 78  | >RB1-L688P-IWTLFQHTP   | 235   | 157   |
| >RB1-L688P-IIWTLFQHTL  | 175 | >RB1-L688P-IIWTLFQHTP  | 14418 | 14243 |
| >RB1-L688P-IIWTLFQHTL  | 22  | >RB1-L688P-IIWTLFQHTP  | 9033  | 9011  |
| >RB1-L688P-IIWTLFQHTL  | 215 | >RB1-L688P-IIWTLFQHTP  | 17397 | 17182 |
| >RB1-L688P-IIWTLFQHTL  | 69  | >RB1-L688P-IIWTLFQHTP  | 17605 | 17536 |
| >RB1-L688P-IIWTLFQHTL  | 69  | >RB1-L688P-IIWTLFQHTP  | 19849 | 19780 |
| >RB1-L688P-IIWTLFQHTL  | 15  | >RB1-L688P-IIWTLFQHTP  | 15763 | 15748 |
| >RB1-L688P-IIWTLFQHTL  | 100 | >RB1-L688P-IIWTLFQHTP  | 4816  | 4716  |
| >RB1-L688P-IIWTLFQHTL  | 446 | >RB1-L688P-IIWTLFQHTP  | 6452  | 6006  |
| >RB1-L688P-IIWTLFQHTLC | 864 | >RB1-L688P-IIWTLFQHTPC | 380   | 484   |
| >RB1-M208V MEDDLVISFC  | 292 | >RB1-M208V VEDDLVISFQI | 691   | 399   |
| >RB1-M208V MEDDLVISF   | 8   | >RB1-M208V VEDDLVISF   | 23    | 15    |
| >RB1-M208V MEDDLVISFC  | 140 | >RB1-M208V VEDDLVISFQI | 716   | 576   |
| >RB1-M208V MEDDLVISFC  | 91  | >RB1-M208V VEDDLVISFQI | 1235  | 1144  |
| >RB1-M208V MEDDLVISF   | 67  | >RB1-M208V VEDDLVISF   | 159   | 92    |
| >RB1-M208V MEDDLVISFC  | 14  | >RB1-M208V VEDDLVISFQI | 31    | 17    |
| >RB1-M208V MEDDLVISF   | 279 | >RB1-M208V VEDDLVISF   | 495   | 216   |
| >RB1-M208V MEDDLVISFC  | 147 | >RB1-M208V VEDDLVISFQI | 334   | 187   |
| >RB1-M208V MEDDLVISF   | 251 | >RB1-M208V VEDDLVISF   | 667   | 416   |
| >RB1-M208V MEDDLVISF   | 49  | >RB1-M208V VEDDLVISF   | 191   | 142   |
| >RB1-M208V MEDDLVISFC  | 267 | >RB1-M208V VEDDLVISFQI | 1209  | 942   |
| >RB1-M208V MEDDLVISF   | 54  | >RB1-M208V VEDDLVISF   | 112   | 58    |
| >RB1-M208V MEDDLVISFC  | 18  | >RB1-M208V VEDDLVISFQI | 29    | 11    |
| >RB1-M208V QMEDDLVI    | 237 | >RB1-M208V QVEDDLVI    | 11645 | 11408 |
| >RB1-M208V QMEDDLVI    | 202 | >RB1-M208V QVEDDLVI    | 7208  | 7006  |
| >RB1-M208V QMEDDLVISF  | 350 | >RB1-M208V QVEDDLVISF  | 567   | 217   |
| >RB1-M208V QMEDDLVISF  | 394 | >RB1-M208V QVEDDLVISF  | 4125  | 3731  |
| >RB1-M208V QMEDDLVISF  | 175 | >RB1-M208V QVEDDLVISF  | 3304  | 3129  |
| >RB1-M208V FLLAKGEVLQ  | 43  | >RB1-M208V FLLAKGEVLQ  | 9     | 34    |
| >RB1-M208V FLLAKGEVLQ  | 57  | >RB1-M208V FLLAKGEVLQ  | 6     | 51    |



|                       |      |                        |      |      |
|-----------------------|------|------------------------|------|------|
| >RB1-M208V FLLAKGEVLQ | 145  | >RB1-M208V FLLAKGEVLQ  | 5    | 140  |
| >RB1-M208V FLLAKGEVLQ | 117  | >RB1-M208V FLLAKGEVLQ  | 6    | 111  |
| >RB1-M208V FLLAKGEVLQ | 5    | >RB1-M208V FLLAKGEVLQ  | 1    | 4    |
| >RB1-M208V FLLAKGEVLQ | 52   | >RB1-M208V FLLAKGEVLQ  | 3    | 49   |
| >RB1-M208V FLLAKGEVLQ | 18   | >RB1-M208V FLLAKGEVLQ  | 4    | 14   |
| >RB1-M208V FLLAKGEVLQ | 22   | >RB1-M208V FLLAKGEVLQ  | 2    | 20   |
| >RB1-M208V FLLAKGEVLQ | 8    | >RB1-M208V FLLAKGEVLQ  | 2    | 6    |
| >RB1-M208V FLLAKGEVLQ | 1632 | >RB1-M208V FLLAKGEVLQ  | 127  | 1505 |
| >RB1-M208V FLLAKGEVLQ | 428  | >RB1-M208V FLLAKGEVLQ  | 738  | 310  |
| >RB1-M208V FLLAKGEVLQ | 398  | >RB1-M208V FLLAKGEVLQ  | 5382 | 4984 |
| >RB1-M208V FLLAKGEVLQ | 312  | >RB1-M208V FLLAKGEVLQ  | 1887 | 1575 |
| >RB1-M208V LQMEDDLV   | 31   | >RB1-M208V LQVEDDLV    | 594  | 563  |
| >RB1-M208V LQMEDDLVI  | 172  | >RB1-M208V LQVEDDLVI   | 3785 | 3613 |
| >RB1-M208V LQMEDDLV   | 28   | >RB1-M208V LQVEDDLV    | 162  | 134  |
| >RB1-M208V LQMEDDLV   | 74   | >RB1-M208V LQVEDDLV    | 373  | 299  |
| >RB1-M208V LQMEDDLV   | 9    | >RB1-M208V LQVEDDLV    | 15   | 6    |
| >RB1-M208V LQMEDDLVI  | 21   | >RB1-M208V LQVEDDLVI   | 47   | 26   |
| >RB1-M208V LQMEDDLVIS | 16   | >RB1-M208V LQVEDDLVISI | 33   | 17   |
| >RB1-M208V LQMEDDLV   | 120  | >RB1-M208V LQVEDDLV    | 391  | 271  |
| >RB1-M208V LQMEDDLV   | 25   | >RB1-M208V LQVEDDLV    | 193  | 168  |
| >RB1-M208V LQMEDDLVI  | 122  | >RB1-M208V LQVEDDLVI   | 1545 | 1423 |
| >RB1-M208V LQMEDDLV   | 175  | >RB1-M208V LQVEDDLV    | 495  | 320  |
| >RB1-M208V LQMEDDLV   | 391  | >RB1-M208V LQVEDDLV    | 8755 | 8364 |
| >RB1-M208V LQMEDDLV   | 458  | >RB1-M208V LQVEDDLV    | 1076 | 618  |
| >RB1-M208V LQMEDDLVI  | 124  | >RB1-M208V LQVEDDLVI   | 297  | 173  |
| >RB1-M208V LQMEDDLVIS | 30   | >RB1-M208V LQVEDDLVISI | 35   | 5    |
| >RB1-M208V LQMEDDLVI  | 106  | >RB1-M208V LQVEDDLVI   | 223  | 117  |
| >RB1-M208V LQMEDDLVIS | 3    | >RB1-M208V LQVEDDLVISI | 5    | 2    |
| >RB1-M208V LQMEDDLVIS | 209  | >RB1-M208V LQVEDDLVISI | 247  | 38   |
| >RB1-M208V LQMEDDLVIS | 187  | >RB1-M208V LQVEDDLVISI | 215  | 28   |
| >RB1-M208V VLQMEDDLV  | 79   | >RB1-M208V VLQVEDDLV   | 76   | 3    |
| >RB1-M208V VLQMEDDLV  | 54   | >RB1-M208V VLQVEDDLV   | 141  | 87   |
| >RB1-M208V VLQMEDDLV  | 436  | >RB1-M208V VLQVEDDLVI  | 864  | 428  |
| >RB1-M208V VLQMEDDLV  | 35   | >RB1-M208V VLQVEDDLV   | 40   | 5    |
| >RB1-M208V VLQMEDDLV  | 164  | >RB1-M208V VLQVEDDLVI  | 156  | 8    |
| >RB1-M208V VLQMEDDLV  | 31   | >RB1-M208V VLQVEDDLV   | 40   | 9    |
| >RB1-M208V VLQMEDDLV  | 411  | >RB1-M208V VLQVEDDLV   | 273  | 138  |
| >RB1-M208V VLQMEDDL   | 58   | >RB1-M208V VLQVEDDL    | 100  | 42   |
| >RB1-M208V VLQMEDDLV  | 14   | >RB1-M208V VLQVEDDLV   | 18   | 4    |
| >RB1-M208V VLQMEDDLV  | 116  | >RB1-M208V VLQVEDDLVI  | 215  | 99   |
| >RB1-M208V EVLQMEDDL  | 344  | >RB1-M208V EVLQVEDDL   | 447  | 103  |
| >RB1-M208V EVLQMEDDL  | 178  | >RB1-M208V EVLQVEDDLV  | 98   | 80   |
| >RB1-M208V GEVLQMEDD  | 171  | >RB1-M208V GEVLQVEDDI  | 220  | 49   |

|                       |       |                       |      |       |
|-----------------------|-------|-----------------------|------|-------|
| >RB1-M208V GEVLQMEDD  | 333   | >RB1-M208V GEVLQVEDDI | 448  | 115   |
| >RB1-M208V GEVLQMEDD  | 420   | >RB1-M208V GEVLQVEDDI | 434  | 14    |
| >RB1-M208V GEVLQMEDD  | 9     | >RB1-M208V GEVLQVEDDI | 8    | 1     |
| >RB1-M208V AKGEVLQM   | 11275 | >RB1-M208V AKGEVLQV   | 437  | 10838 |
| >RB1-M208V LAKGEVLQM  | 9880  | >RB1-M208V LAKGEVLQV  | 367  | 9513  |
| >RB1-M208V LAKGEVLQM  | 15799 | >RB1-M208V LAKGEVLQV  | 44   | 15755 |
| >RB1-M208V LAKGEVLQM  | 24    | >RB1-M208V LAKGEVLQV  | 1370 | 1346  |
| >RB1-M208V LLAKGEVLQM | 1455  | >RB1-M208V LLAKGEVLQV | 108  | 1347  |
| >RB1-M208V LLAKGEVLQM | 121   | >RB1-M208V LLAKGEVLQV | 35   | 86    |
| >RB1-M208V LLAKGEVLQM | 684   | >RB1-M208V LLAKGEVLQV | 32   | 652   |
| >RB1-M208V LLAKGEVLQM | 4348  | >RB1-M208V LLAKGEVLQV | 268  | 4080  |
| >RB1-M208V LLAKGEVLQM | 213   | >RB1-M208V LLAKGEVLQV | 4    | 209   |
| >RB1-M208V LLAKGEVLQM | 4236  | >RB1-M208V LLAKGEVLQV | 24   | 4212  |
| >RB1-M208V LLAKGEVLQM | 142   | >RB1-M208V LLAKGEVLQV | 5    | 137   |
| >RB1-M208V LLAKGEVLQM | 306   | >RB1-M208V LLAKGEVLQV | 5    | 301   |
| >RB1-M208V LLAKGEVLQM | 14    | >RB1-M208V LLAKGEVLQV | 2    | 12    |
| >RB1-M208V LLAKGEVLQM | 266   | >RB1-M208V LLAKGEVLQV | 3449 | 3183  |
| >RB1-M704V MMCSMYGI   | 32    | >RB1-M704V VMCSMYGI   | 107  | 75    |
| >RB1-M704V MMCSMYGIC  | 41    | >RB1-M704V VMCSMYGIC  | 146  | 105   |
| >RB1-M704V MMCSMYGI   | 11    | >RB1-M704V VMCSMYGI   | 69   | 58    |
| >RB1-M704V MMCSMYGIC  | 17    | >RB1-M704V VMCSMYGIC  | 129  | 112   |
| >RB1-M704V MMCSMYGI   | 9     | >RB1-M704V VMCSMYGI   | 30   | 21    |
| >RB1-M704V MMCSMYGIC  | 5     | >RB1-M704V VMCSMYGIC  | 12   | 7     |
| >RB1-M704V MMCSMYGI   | 69    | >RB1-M704V VMCSMYGI   | 252  | 183   |
| >RB1-M704V MMCSMYGIC  | 60    | >RB1-M704V VMCSMYGIC  | 210  | 150   |
| >RB1-M704V MMCSMYGI   | 7     | >RB1-M704V VMCSMYGI   | 10   | 3     |
| >RB1-M704V MMCSMYGIC  | 3     | >RB1-M704V VMCSMYGIC  | 4    | 1     |
| >RB1-M704V MMCSMYGI   | 83    | >RB1-M704V VMCSMYGI   | 147  | 64    |
| >RB1-M704V MMCSMYGIC  | 73    | >RB1-M704V VMCSMYGIC  | 127  | 54    |
| >RB1-M704V MMCSMYGI   | 215   | >RB1-M704V VMCSMYGI   | 223  | 8     |
| >RB1-M704V MMCSMYGIC  | 17    | >RB1-M704V VMCSMYGIC  | 18   | 1     |
| >RB1-M704V MMCSMYGI   | 140   | >RB1-M704V VMCSMYGI   | 219  | 79    |
| >RB1-M704V MMCSMYGIC  | 21    | >RB1-M704V VMCSMYGIC  | 27   | 6     |
| >RB1-M704V MMCSMYGI   | 15    | >RB1-M704V VMCSMYGI   | 28   | 13    |
| >RB1-M704V MMCSMYGIC  | 2     | >RB1-M704V VMCSMYGIC  | 3    | 1     |
| >RB1-M704V MMCSMYGIC  | 23    | >RB1-M704V VMCSMYGIC  | 39   | 16    |
| >RB1-M704V MMCSMYGIC  | 20    | >RB1-M704V VMCSMYGIC  | 26   | 6     |
| >RB1-M704V MMCSMYGIC  | 281   | >RB1-M704V VMCSMYGIC  | 3536 | 3255  |
| >RB1-M704V MMCSMYGIC  | 39    | >RB1-M704V VMCSMYGIC  | 146  | 107   |
| >RB1-M704V MMCSMYGIC  | 194   | >RB1-M704V VMCSMYGIC  | 615  | 421   |
| >RB1-M704V MMCSMYGIC  | 85    | >RB1-M704V VMCSMYGIC  | 1298 | 1213  |
| >RB1-M704V MMCSMYGI   | 397   | >RB1-M704V VMCSMYGI   | 7446 | 7049  |
| >RB1-M704V MMCSMYGI   | 495   | >RB1-M704V VMCSMYGI   | 1450 | 955   |

|                      |       |                       |       |       |
|----------------------|-------|-----------------------|-------|-------|
| >RB1-M704V IMMCSMYGI | 359   | >RB1-M704V IVMCSMYGI  | 900   | 541   |
| >RB1-M704V IMMCSMYGI | 7     | >RB1-M704V IVMCSMYGI  | 19    | 12    |
| >RB1-M704V IMMCSMYG  | 198   | >RB1-M704V IVMCSMYG   | 4021  | 3823  |
| >RB1-M704V IMMCSMYGI | 3     | >RB1-M704V IVMCSMYGI  | 22    | 19    |
| >RB1-M704V IMMCSMYG  | 340   | >RB1-M704V IVMCSMYG   | 5034  | 4694  |
| >RB1-M704V IMMCSMYGI | 3     | >RB1-M704V IVMCSMYGI  | 23    | 20    |
| >RB1-M704V IMMCSMYGI | 9     | >RB1-M704V IVMCSMYGI  | 11    | 2     |
| >RB1-M704V IMMCSMYG  | 293   | >RB1-M704V IVMCSMYG   | 13263 | 12970 |
| >RB1-M704V IMMCSMYGI | 4     | >RB1-M704V IVMCSMYGI  | 150   | 146   |
| >RB1-M704V IMMCSMYGI | 293   | >RB1-M704V IVMCSMYGIC | 7796  | 7503  |
| >RB1-M704V IMMCSMYGI | 3     | >RB1-M704V IVMCSMYGI  | 45    | 42    |
| >RB1-M704V IMMCSMYGI | 261   | >RB1-M704V IVMCSMYGIC | 4933  | 4672  |
| >RB1-M704V IMMCSMYGI | 69    | >RB1-M704V IVMCSMYGI  | 5993  | 5924  |
| >RB1-M704V IMMCSMYGI | 6     | >RB1-M704V IVMCSMYGI  | 173   | 167   |
| >RB1-M704V IMMCSMYGI | 59    | >RB1-M704V IVMCSMYGI  | 4846  | 4787  |
| >RB1-M704V IMMCSMYGI | 36    | >RB1-M704V IVMCSMYGIC | 66    | 30    |
| >RB1-M704V IMMCSMYGI | 8     | >RB1-M704V IVMCSMYGIC | 9     | 1     |
| >RB1-M704V IMMCSMYGI | 707   | >RB1-M704V IVMCSMYGIC | 146   | 561   |
| >RB1-M704V IMMCSMYGI | 159   | >RB1-M704V IVMCSMYGIC | 370   | 211   |
| >RB1-M704V IMMCSMYGI | 109   | >RB1-M704V IVMCSMYGI  | 178   | 69    |
| >RB1-M704V IMMCSMYGI | 234   | >RB1-M704V IVMCSMYGIC | 35    | 199   |
| >RB1-M704V IMMCSMYGI | 80    | >RB1-M704V IVMCSMYGI  | 7     | 73    |
| >RB1-M704V IMMCSMYGI | 162   | >RB1-M704V IVMCSMYGI  | 46    | 116   |
| >RB1-M704V IMMCSMYGI | 310   | >RB1-M704V IVMCSMYGI  | 3725  | 3415  |
| >RB1-M704V IMMCSMYGI | 22    | >RB1-M704V IVMCSMYGI  | 1747  | 1725  |
| >RB1-M704V IMMCSMYGI | 92    | >RB1-M704V IVMCSMYGIC | 3264  | 3172  |
| >RB1-M704V IMMCSMYGI | 507   | >RB1-M704V IVMCSMYGI  | 245   | 262   |
| >RB1-M704V IMMCSMYGI | 895   | >RB1-M704V IVMCSMYGIC | 389   | 506   |
| >RB1-M704V LMRDRHLDQ | 2402  | >RB1-M704V LMRDRHLDQ  | 22    | 2380  |
| >RB1-M704V LMRDRHLDQ | 3357  | >RB1-M704V LMRDRHLDQ  | 40    | 3317  |
| >RB1-M704V LMRDRHLDQ | 7121  | >RB1-M704V LMRDRHLDQ  | 112   | 7009  |
| >RB1-M704V LMRDRHLDQ | 11253 | >RB1-M704V LMRDRHLDQ  | 97    | 11156 |
| >RB1-M704V LMRDRHLDQ | 124   | >RB1-M704V LMRDRHLDQ  | 3     | 121   |
| >RB1-M704V LMRDRHLDQ | 331   | >RB1-M704V LMRDRHLDQ  | 211   | 120   |
| >RB1-M704V LMRDRHLDQ | 184   | >RB1-M704V LMRDRHLDQ  | 287   | 103   |
| >RB1-M704V LMRDRHLDQ | 58    | >RB1-M704V LMRDRHLDQ  | 509   | 451   |
| >RB1-M704V LMRDRHLDQ | 47    | >RB1-M704V LMRDRHLDQ  | 196   | 149   |
| >RB1-M704V QIMMCSMYC | 97    | >RB1-M704V QIVMCSMYG  | 1673  | 1576  |
| >RB1-M704V QIMMCSMYC | 44    | >RB1-M704V QIVMCSMYG  | 276   | 232   |
| >RB1-M704V QIMMCSMYC | 114   | >RB1-M704V QIVMCSMYG  | 553   | 439   |
| >RB1-M704V QIMMCSMYC | 76    | >RB1-M704V QIVMCSMYG  | 158   | 82    |
| >RB1-M704V QIMMCSMYC | 372   | >RB1-M704V QIVMCSMYG  | 2400  | 2028  |
| >RB1-M704V QIMMCSMYC | 287   | >RB1-M704V QIVMCSMYG  | 7706  | 7419  |

|                       |      |                       |      |      |
|-----------------------|------|-----------------------|------|------|
| >RB1-M704V QIMMCSMY   | 318  | >RB1-M704V QIVMCSMY   | 4036 | 3718 |
| >RB1-M704V QIMMCSMY   | 690  | >RB1-M704V QIVMCSMY   | 192  | 498  |
| >RB1-M704V QIMMCSMY   | 85   | >RB1-M704V QIVMCSMY   | 72   | 13   |
| >RB1-M704V QIMMCSMY   | 76   | >RB1-M704V QIVMCSMY   | 156  | 80   |
| >RB1-M704V QIMMCSMYC  | 182  | >RB1-M704V QIVMCSMYG  | 1567 | 1385 |
| >RB1-M704V QIMMCSMYC  | 367  | >RB1-M704V QIVMCSMYG  | 514  | 147  |
| >RB1-M704V QIMMCSMYC  | 112  | >RB1-M704V QIVMCSMYG  | 425  | 313  |
| >RB1-M704V QIMMCSMY   | 125  | >RB1-M704V QIVMCSMY   | 309  | 184  |
| >RB1-M704V QIMMCSMY   | 265  | >RB1-M704V QIVMCSMY   | 705  | 440  |
| >RB1-M704V DQIMMCSM'  | 335  | >RB1-M704V DQIVMCSMY  | 678  | 343  |
| >RB1-M704V DQIMMCSM'  | 353  | >RB1-M704V DQIVMCSMY  | 371  | 18   |
| >RB1-M704V DQIMMCSM   | 426  | >RB1-M704V DQIVMCSM   | 716  | 290  |
| >RB1-M704V DQIMMCSM'  | 249  | >RB1-M704V DQIVMCSMY  | 436  | 187  |
| >RB1-M704V DQIMMCSM'  | 165  | >RB1-M704V DQIVMCSMY  | 222  | 57   |
| >RB1-M704V DQIMMCSM'  | 232  | >RB1-M704V DQIVMCSMY  | 302  | 70   |
| >RB1-M704V LDQIMMCSM  | 329  | >RB1-M704V LDQIVMCSM  | 282  | 47   |
| >RB1-M704V LDQIMMCSM  | 349  | >RB1-M704V LDQIVMCSM  | 873  | 524  |
| >RB1-M704V HLDQIMMCS  | 46   | >RB1-M704V HLDQIVMCSM | 73   | 27   |
| >RB1-M704V HLDQIMMCS  | 339  | >RB1-M704V HLDQIVMCSM | 327  | 12   |
| >RB1-M704V HLDQIMMCS  | 149  | >RB1-M704V HLDQIVMCS  | 75   | 74   |
| >RB1-M704V HLDQIMMCS  | 240  | >RB1-M704V HLDQIVMCSM | 52   | 188  |
| >RB1-M704V HLDQIMMCS  | 600  | >RB1-M704V HLDQIVMCSM | 296  | 304  |
| >RB1-M704V HLDQIMMCS  | 354  | >RB1-M704V HLDQIVMCSM | 109  | 245  |
| >RB1-M704V HLDQIMMCS  | 159  | >RB1-M704V HLDQIVMCS  | 119  | 40   |
| >RB1-M704V HLDQIMMCS  | 96   | >RB1-M704V HLDQIVMCSM | 81   | 15   |
| >RB1-M704V HLDQIMMCS  | 317  | >RB1-M704V HLDQIVMCSM | 460  | 143  |
| >RB1-M704V HLDQIMMCS  | 168  | >RB1-M704V HLDQIVMCSM | 258  | 90   |
| >RB1-M704V HLDQIMMCS  | 61   | >RB1-M704V HLDQIVMCSM | 84   | 23   |
| >RB1-M704V HLDQIMMCS  | 381  | >RB1-M704V HLDQIVMCSM | 409  | 28   |
| >RB1-M704V HLDQIMMCS  | 108  | >RB1-M704V HLDQIVMCSM | 171  | 63   |
| >RB1-M704V HLDQIMMCS  | 230  | >RB1-M704V HLDQIVMCSM | 140  | 90   |
| >RB1-M704V RHLDQIMM   | 327  | >RB1-M704V RHLDQIVM   | 191  | 136  |
| >RB1-M704V RHLDQIMMCS | 131  | >RB1-M704V RHLDQIVMCS | 139  | 8    |
| >RB1-M704V RHLDQIMM   | 1011 | >RB1-M704V RHLDQIVM   | 171  | 840  |
| >RB1-M704V RDRHLDQIM  | 357  | >RB1-M704V RDRHLDQIV  | 422  | 65   |
| >RB1-M704V RDRHLDQIM  | 396  | >RB1-M704V RDRHLDQIV  | 5964 | 5568 |
| >RB1-M704V RDRHLDQIM  | 350  | >RB1-M704V RDRHLDQIVM | 666  | 316  |
| >RB1-M704V RDRHLDQIM  | 6105 | >RB1-M704V RDRHLDQIV  | 497  | 5608 |
| >RB1-M704V MRDRHLDQI' | 185  | >RB1-M704V MRDRHLDQI' | 471  | 286  |
| >RB1-M704V MRDRHLDQI' | 1245 | >RB1-M704V MRDRHLDQI' | 221  | 1024 |
| >RB1-M704V MRDRHLDQI' | 465  | >RB1-M704V MRDRHLDQI' | 940  | 475  |
| >RB1-M704V MRDRHLDQI' | 313  | >RB1-M704V MRDRHLDQI' | 567  | 254  |
| >RB1-N328H KNKDLDRRLF | 163  | >RB1-N328H KHKDLDRRLF | 713  | 550  |

|                        |      |                        |      |      |
|------------------------|------|------------------------|------|------|
| >RB1-N328H KNKDLDRR    | 382  | >RB1-N328H KHKDLDRR    | 1349 | 967  |
| >RB1-N328H KNKDLDRRLF  | 2405 | >RB1-N328H KHKDLDRRLF  | 429  | 1976 |
| >RB1-N328H KNKDLDRR    | 310  | >RB1-N328H KHKDLDRR    | 228  | 82   |
| >RB1-N328H LKNKDLDRRL  | 21   | >RB1-N328H LKHKDLDRRL  | 14   | 7    |
| >RB1-N328H YLKNKDLDRR  | 377  | >RB1-N328H YLKHKDLDRR  | 328  | 49   |
| >RB1-N328H YLKNKDLDRR  | 98   | >RB1-N328H YLKHKDLDRR  | 89   | 9    |
| >RB1-N328H YLKNKDLDRR  | 423  | >RB1-N328H YLKHKDLDRR  | 894  | 471  |
| >RB1-N328H YLKNKDLDRR  | 412  | >RB1-N328H YLKHKDLDRR  | 653  | 241  |
| >RB1-N328H YLKNKDLDRR  | 10   | >RB1-N328H YLKHKDLDRR  | 21   | 11   |
| >RB1-N328H YLKNKDLDRR  | 78   | >RB1-N328H YLKHKDLDRR  | 75   | 3    |
| >RB1-N328H IYLNKDL     | 270  | >RB1-N328H IYLNKDL     | 2432 | 2162 |
| >RB1-N328H IYLNKDL     | 144  | >RB1-N328H IYLNKDL     | 234  | 90   |
| >RB1-N328H IYLNKDL     | 581  | >RB1-N328H IYLNKDL     | 410  | 171  |
| >RB1-N328H IYLNKDL     | 25   | >RB1-N328H IYLNKDL     | 24   | 1    |
| >RB1-N328H IYLNKDLDR   | 524  | >RB1-N328H IYLNKDLDR   | 320  | 204  |
| >RB1-N328H IYLNKDLDR   | 489  | >RB1-N328H IYLNKDLDR   | 217  | 272  |
| >RB1-N328H IYLNKDLDR   | 31   | >RB1-N328H IYLNKDLDR   | 33   | 2    |
| >RB1-N328H IYLNKDLDR   | 65   | >RB1-N328H IYLNKDLDR   | 68   | 3    |
| >RB1-N328H EIYLNKDLDF  | 231  | >RB1-N328H EIYLNKDLDF  | 171  | 60   |
| >RB1-N328H EIYLNKDLDF  | 46   | >RB1-N328H EIYLNKDLDF  | 42   | 4    |
| >RB1-N328H EIYLNKDL    | 601  | >RB1-N328H EIYLNKDL    | 102  | 499  |
| >RB1-N328H EIYLNKDLDF  | 135  | >RB1-N328H EIYLNKDLDF  | 129  | 6    |
| >RB1-N328H EEIYLNKDL   | 273  | >RB1-N328H EEIYLNKDL   | 288  | 15   |
| >RB1-N328H EEIYLNKDL   | 321  | >RB1-N328H EEIYLNKDL   | 537  | 216  |
| >RB1-N328H EEIYLNKDL   | 249  | >RB1-N328H EEIYLNKDL   | 230  | 19   |
| >RB1-N328H EEIYLNKDL   | 223  | >RB1-N328H EEIYLNKDL   | 441  | 218  |
| >RB1-N328H EEIYLNKDL   | 118  | >RB1-N328H EEIYLNKDL   | 228  | 110  |
| >RB1-N328H EEIYLNKDL   | 223  | >RB1-N328H EEIYLNKDL   | 697  | 474  |
| >RB1-N328H YEEIYLNKDL  | 35   | >RB1-N328H YEEIYLNKDL  | 41   | 6    |
| >RB1-N328H YEEIYLNKDL  | 159  | >RB1-N328H YEEIYLNKDL  | 141  | 18   |
| >RB1-N328H YEEIYLNKDL  | 84   | >RB1-N328H YEEIYLNKDL  | 110  | 26   |
| >RB1-N328H RYEEIYLNK   | 93   | >RB1-N328H RYEEIYLNK   | 65   | 28   |
| >RB1-N328H RYEEIYLNK   | 92   | >RB1-N328H RYEEIYLNK   | 60   | 32   |
| >RB1-N328H KRYEEIYLNK  | 55   | >RB1-N328H KRYEEIYLNK  | 26   | 29   |
| >RB1-N328H KRYEEIYLNK  | 34   | >RB1-N328H KRYEEIYLNK  | 32   | 2    |
| >RB1-N328H KRYEEIYLNK  | 135  | >RB1-N328H KRYEEIYLNK  | 110  | 25   |
| >RB1-N328H KRYEEIYLNK  | 134  | >RB1-N328H KRYEEIYLNK  | 111  | 23   |
| >RB1-N328H KRYEEIYLNK  | 273  | >RB1-N328H KRYEEIYLNK  | 181  | 92   |
| >RB1-N328H KRYEEIYLNK  | 343  | >RB1-N328H KRYEEIYLNK  | 227  | 116  |
| >RB1-P515L- PWILNVLNL  | 735  | >RB1-P515L- LWILNVLNL  | 490  | 245  |
| >RB1-P515L- PWILNVLNL  | 946  | >RB1-P515L- LWILNVLNL  | 69   | 877  |
| >RB1-P515L- PWILNVLNLK | 538  | >RB1-P515L- LWILNVLNLK | 294  | 244  |
| >RB1-P515L- PWILNVLNL  | 1149 | >RB1-P515L- LWILNVLNL  | 336  | 813  |

|                        |       |                        |       |       |
|------------------------|-------|------------------------|-------|-------|
| >RB1-P515L- PWILNVLNLK | 1265  | >RB1-P515L- LWILNVLNLK | 368   | 897   |
| >RB1-P515L- FPWILNVLNL | 73    | >RB1-P515L- FLWILNVLNL | 29351 | 29278 |
| >RB1-P515L- FPWILNVL   | 10736 | >RB1-P515L- FLWILNVL   | 13    | 10723 |
| >RB1-P515L- FPWILNVLNL | 8482  | >RB1-P515L- FLWILNVLNL | 21    | 8461  |
| >RB1-P515L- FPWILNVL   | 5638  | >RB1-P515L- FLWILNVL   | 15    | 5623  |
| >RB1-P515L- FPWILNVLNL | 3773  | >RB1-P515L- FLWILNVLNL | 23    | 3750  |
| >RB1-P515L- FPWILNVLNL | 28587 | >RB1-P515L- FLWILNVLNL | 431   | 28156 |
| >RB1-P515L- FPWILNVL   | 20074 | >RB1-P515L- FLWILNVL   | 66    | 20008 |
| >RB1-P515L- FPWILNVLNL | 7412  | >RB1-P515L- FLWILNVLNL | 31    | 7381  |
| >RB1-P515L- FPWILNVL   | 6920  | >RB1-P515L- FLWILNVL   | 69    | 6851  |
| >RB1-P515L- FPWILNVLNL | 1524  | >RB1-P515L- FLWILNVLNL | 73    | 1451  |
| >RB1-P515L- FPWILNVL   | 8792  | >RB1-P515L- FLWILNVL   | 2     | 8790  |
| >RB1-P515L- FPWILNVLN  | 28594 | >RB1-P515L- FLWILNVLN  | 329   | 28265 |
| >RB1-P515L- FPWILNVLNL | 6662  | >RB1-P515L- FLWILNVLNL | 2     | 6660  |
| >RB1-P515L- FPWILNVLNL | 28111 | >RB1-P515L- FLWILNVLNL | 251   | 27860 |
| >RB1-P515L- FPWILNVL   | 17138 | >RB1-P515L- FLWILNVL   | 7     | 17131 |
| >RB1-P515L- FPWILNVLNL | 17760 | >RB1-P515L- FLWILNVLNL | 11    | 17749 |
| >RB1-P515L- FPWILNVL   | 13372 | >RB1-P515L- FLWILNVL   | 6     | 13366 |
| >RB1-P515L- FPWILNVLNL | 9145  | >RB1-P515L- FLWILNVLNL | 5     | 9140  |
| >RB1-P515L- FPWILNVL   | 20114 | >RB1-P515L- FLWILNVL   | 9     | 20105 |
| >RB1-P515L- FPWILNVLNL | 19784 | >RB1-P515L- FLWILNVLNL | 8     | 19776 |
| >RB1-P515L- FPWILNVL   | 21896 | >RB1-P515L- FLWILNVL   | 3     | 21893 |
| >RB1-P515L- FPWILNVLNL | 18604 | >RB1-P515L- FLWILNVLNL | 3     | 18601 |
| >RB1-P515L- FPWILNVLNL | 37220 | >RB1-P515L- FLWILNVLNL | 171   | 37049 |
| >RB1-P515L- FPWILNVLNL | 15449 | >RB1-P515L- FLWILNVLNL | 189   | 15260 |
| >RB1-P515L- FPWILNVLNL | 9978  | >RB1-P515L- FLWILNVLNL | 236   | 9742  |
| >RB1-P515L- FPWILNVLNL | 959   | >RB1-P515L- FLWILNVLNL | 152   | 807   |
| >RB1-P515L- FPWILNVLNL | 678   | >RB1-P515L- FLWILNVLNL | 246   | 432   |
| >RB1-P515L- FPWILNVL   | 44    | >RB1-P515L- FLWILNVL   | 13447 | 13403 |
| >RB1-P515L- FPWILNVL   | 2594  | >RB1-P515L- FLWILNVL   | 391   | 2203  |
| >RB1-P515L- FPWILNVLNL | 2001  | >RB1-P515L- FLWILNVLNL | 276   | 1725  |
| >RB1-P515L- FPWILNVL   | 17    | >RB1-P515L- FLWILNVL   | 1738  | 1721  |
| >RB1-P515L- FPWILNVLN  | 276   | >RB1-P515L- FLWILNVLN  | 15021 | 14745 |
| >RB1-P515L- FPWILNVLNL | 460   | >RB1-P515L- FLWILNVLNL | 36306 | 35846 |
| >RB1-P515L- FPWILNVL   | 95    | >RB1-P515L- FLWILNVL   | 1246  | 1151  |
| >RB1-P515L- FPWILNVL   | 232   | >RB1-P515L- FLWILNVL   | 21047 | 20815 |
| >RB1-P515L- FPWILNVL   | 36    | >RB1-P515L- FLWILNVL   | 22093 | 22057 |
| >RB1-P515L- FPWILNVLNL | 70    | >RB1-P515L- FLWILNVLNL | 9989  | 9919  |
| >RB1-P515L- FPWILNVL   | 19    | >RB1-P515L- FLWILNVL   | 7791  | 7772  |
| >RB1-P515L- FPWILNVLN  | 8     | >RB1-P515L- FLWILNVLN  | 7449  | 7441  |
| >RB1-P515L- FPWILNVLNL | 7     | >RB1-P515L- FLWILNVLNL | 6574  | 6567  |
| >RB1-P515L- FPWILNVL   | 174   | >RB1-P515L- FLWILNVL   | 20967 | 20793 |
| >RB1-P515L- FPWILNVLNL | 64    | >RB1-P515L- FLWILNVLNL | 17721 | 17657 |

|                        |       |                        |       |       |
|------------------------|-------|------------------------|-------|-------|
| >RB1-P515L- NLDSGTDLSF | 21828 | >RB1-P515L- NLDSGTDLSF | 97    | 21731 |
| >RB1-P515L- NLDSGTDLSF | 4512  | >RB1-P515L- NLDSGTDLSF | 14    | 4498  |
| >RB1-P515L- NLDSGTDLSF | 14499 | >RB1-P515L- NLDSGTDLSF | 181   | 14318 |
| >RB1-P515L- NLDSGTDLSF | 8478  | >RB1-P515L- NLDSGTDLSF | 111   | 8367  |
| >RB1-P515L- NLDSGTDLSF | 10231 | >RB1-P515L- NLDSGTDLSF | 31    | 10200 |
| >RB1-P515L- NLDSGTDLSF | 12503 | >RB1-P515L- NLDSGTDLSF | 14    | 12489 |
| >RB1-P515L- NLDSGTDLSF | 13755 | >RB1-P515L- NLDSGTDLSF | 31    | 13724 |
| >RB1-P515L- NLDSGTDLSF | 16131 | >RB1-P515L- NLDSGTDLSF | 13    | 16118 |
| >RB1-P515L- NLDSGTDLSF | 16946 | >RB1-P515L- NLDSGTDLSF | 46    | 16900 |
| >RB1-P515L- SFPWILNVL  | 3232  | >RB1-P515L- SFLWILNVL  | 109   | 3123  |
| >RB1-P515L- SFPWILNV   | 2027  | >RB1-P515L- SFLWILNV   | 469   | 1558  |
| >RB1-P515L- SFPWILNV   | 348   | >RB1-P515L- SFLWILNV   | 38    | 310   |
| >RB1-P515L- SFPWILNV   | 255   | >RB1-P515L- SFLWILNV   | 28    | 227   |
| >RB1-P515L- SFPWILNV   | 222   | >RB1-P515L- SFLWILNV   | 75    | 147   |
| >RB1-P515L- SFPWILNVL  | 416   | >RB1-P515L- SFLWILNVL  | 867   | 451   |
| >RB1-P515L- SFPWILNVL  | 14    | >RB1-P515L- SFLWILNVL  | 18    | 4     |
| >RB1-P515L- SFPWILNVLN | 18    | >RB1-P515L- SFLWILNVLN | 24    | 6     |
| >RB1-P515L- SFPWILNV   | 4927  | >RB1-P515L- SFLWILNV   | 282   | 4645  |
| >RB1-P515L- SFPWILNVL  | 47    | >RB1-P515L- SFLWILNVL  | 19519 | 19472 |
| >RB1-P515L- SFPWILNVLN | 140   | >RB1-P515L- SFLWILNVLN | 23316 | 23176 |
| >RB1-P515L- SFPWILNV   | 101   | >RB1-P515L- SFLWILNV   | 98    | 3     |
| >RB1-P515L- SFPWILNVL  | 110   | >RB1-P515L- SFLWILNVL  | 100   | 10    |
| >RB1-P515L- SFPWILNVLN | 107   | >RB1-P515L- SFLWILNVLN | 98    | 9     |
| >RB1-P515L- SFPWILNV   | 152   | >RB1-P515L- SFLWILNV   | 58    | 94    |
| >RB1-P515L- SFPWILNVL  | 75    | >RB1-P515L- SFLWILNVL  | 37    | 38    |
| >RB1-P515L- SFPWILNVLN | 169   | >RB1-P515L- SFLWILNVLN | 71    | 98    |
| >RB1-P515L- LSPWILNV   | 356   | >RB1-P515L- LSFLWILNV  | 223   | 133   |
| >RB1-P515L- LSPWILNV   | 41    | >RB1-P515L- LSFLWILNV  | 141   | 100   |
| >RB1-P515L- LSPWILNV   | 178   | >RB1-P515L- LSFLWILNV  | 564   | 386   |
| >RB1-P515L- LSPWILNVL  | 222   | >RB1-P515L- LSFLWILNVL | 251   | 29    |
| >RB1-P515L- LSPWILNV   | 276   | >RB1-P515L- LSFLWILNV  | 783   | 507   |
| >RB1-P515L- LSPWILNV   | 34    | >RB1-P515L- LSFLWILNV  | 223   | 189   |
| >RB1-P515L- LSPWILNVL  | 498   | >RB1-P515L- LSFLWILNVL | 756   | 258   |
| >RB1-P515L- LSPWILNV   | 17    | >RB1-P515L- LSFLWILNV  | 69    | 52    |
| >RB1-P515L- LSPWILNV   | 128   | >RB1-P515L- LSFLWILNV  | 621   | 493   |
| >RB1-P515L- LSPWILNV   | 22    | >RB1-P515L- LSFLWILNV  | 343   | 321   |
| >RB1-P515L- LSPWILNV   | 35    | >RB1-P515L- LSFLWILNV  | 183   | 148   |
| >RB1-P515L- LSPWILNV   | 47    | >RB1-P515L- LSFLWILNV  | 119   | 72    |
| >RB1-P515L- LSPWILNVL  | 376   | >RB1-P515L- LSFLWILNVL | 1044  | 668   |
| >RB1-P515L- LSPWILNV   | 168   | >RB1-P515L- LSFLWILNV  | 579   | 411   |
| >RB1-P515L- LSPWILNVL  | 120   | >RB1-P515L- LSFLWILNVL | 311   | 191   |
| >RB1-P515L- LSPWILNV   | 36    | >RB1-P515L- LSFLWILNV  | 90    | 54    |
| >RB1-P515L- LSPWILNVL  | 17    | >RB1-P515L- LSFLWILNVL | 32    | 15    |

|                        |      |                        |      |      |
|------------------------|------|------------------------|------|------|
| >RB1-P515L-LSFPWILNVL  | 108  | >RB1-P515L-LSFLWILNVL  | 611  | 503  |
| >RB1-P515L-LSFPWILNVL  | 117  | >RB1-P515L-LSFLWILNVL  | 337  | 220  |
| >RB1-P515L-LSFPWILNV   | 417  | >RB1-P515L-LSFLWILNV   | 994  | 577  |
| >RB1-P515L-LSFPWILNVL  | 512  | >RB1-P515L-LSFLWILNVL  | 247  | 265  |
| >RB1-P515L-LSFPWILNV   | 101  | >RB1-P515L-LSFLWILNV   | 976  | 875  |
| >RB1-P515L-DLSFPWILNV  | 507  | >RB1-P515L-DLSFLWILNV  | 240  | 267  |
| >RB1-P515L-DLSFPWIL    | 1644 | >RB1-P515L-DLSFLWIL    | 407  | 1237 |
| >RB1-P515L-DLSFPWILNV  | 433  | >RB1-P515L-DLSFLWILNV  | 287  | 146  |
| >RB1-P515L-DLSFPWILNV  | 134  | >RB1-P515L-DLSFLWILNV  | 147  | 13   |
| >RB1-P515L-DLSFPWILNV  | 733  | >RB1-P515L-DLSFLWILNV  | 489  | 244  |
| >RB1-P515L-DLSFPWILNV  | 39   | >RB1-P515L-DLSFLWILNV  | 77   | 38   |
| >RB1-P515L-DLSFPWILNV  | 47   | >RB1-P515L-DLSFLWILNV  | 31   | 16   |
| >RB1-P515L-DLSFPWIL    | 444  | >RB1-P515L-DLSFLWIL    | 381  | 63   |
| >RB1-P515L-DLSFPWILNV  | 33   | >RB1-P515L-DLSFLWILNV  | 33   | 0    |
| >RB1-P515L-DLSFPWIL    | 235  | >RB1-P515L-DLSFLWIL    | 202  | 33   |
| >RB1-P515L-DLSFPWILNV  | 18   | >RB1-P515L-DLSFLWILNV  | 23   | 5    |
| >RB1-P515L-DLSFPWILNV  | 90   | >RB1-P515L-DLSFLWILNV  | 185  | 95   |
| >RB1-P515L-TDLSFPWILN' | 336  | >RB1-P515L-TDLSFLWILN' | 281  | 55   |
| >RB1-P515L-TDLSFPWIL   | 163  | >RB1-P515L-TDLSFLWIL   | 800  | 637  |
| >RB1-P515L-TDLSFPWIL   | 483  | >RB1-P515L-TDLSFLWIL   | 113  | 370  |
| >RB1-P515L-TDLSFPWI    | 549  | >RB1-P515L-TDLSFLWI    | 307  | 242  |
| >RB1-P515L-TDLSFPWIL   | 1633 | >RB1-P515L-TDLSFLWIL   | 379  | 1254 |
| >RB1-P515L-TDLSFPWILN' | 967  | >RB1-P515L-TDLSFLWILN' | 416  | 551  |
| >RB1-P515L-TDLSFPWI    | 58   | >RB1-P515L-TDLSFLWI    | 37   | 21   |
| >RB1-P515L-TDLSFPWIL   | 52   | >RB1-P515L-TDLSFLWIL   | 50   | 2    |
| >RB1-P515L-TDLSFPWILN' | 44   | >RB1-P515L-TDLSFLWILN' | 43   | 1    |
| >RB1-P515L-GTDLSFPWI   | 490  | >RB1-P515L-GTDLSFLWI   | 1301 | 811  |
| >RB1-P515L-GTDLSFPWIL  | 878  | >RB1-P515L-GTDLSFLWIL  | 343  | 535  |
| >RB1-P515L-GTDLSFPW    | 15   | >RB1-P515L-GTDLSFLW    | 18   | 3    |
| >RB1-P515L-GTDLSFPWI   | 357  | >RB1-P515L-GTDLSFLWI   | 151  | 206  |
| >RB1-P515L-GTDLSFPWIL  | 516  | >RB1-P515L-GTDLSFLWIL  | 341  | 175  |
| >RB1-P515L-GTDLSFPW    | 346  | >RB1-P515L-GTDLSFLW    | 267  | 79   |
| >RB1-P515L-GTDLSFPW    | 72   | >RB1-P515L-GTDLSFLW    | 27   | 45   |
| >RB1-P515L-GTDLSFPWI   | 83   | >RB1-P515L-GTDLSFLWI   | 123  | 40   |
| >RB1-P515L-GTDLSFPWIL  | 97   | >RB1-P515L-GTDLSFLWIL  | 69   | 28   |
| >RB1-P515L-GTDLSFPWI   | 747  | >RB1-P515L-GTDLSFLWI   | 445  | 302  |
| >RB1-P515L-GTDLSFPWIL  | 176  | >RB1-P515L-GTDLSFLWIL  | 413  | 237  |
| >RB1-P515L-GTDLSFPWI   | 611  | >RB1-P515L-GTDLSFLWI   | 279  | 332  |
| >RB1-P515L-GTDLSFPWI   | 236  | >RB1-P515L-GTDLSFLWI   | 260  | 24   |
| >RB1-P515L-SGTDLSFPW   | 141  | >RB1-P515L-SGTDLSFLW   | 43   | 98   |
| >RB1-P515L-SGTDLSFPWI  | 564  | >RB1-P515L-SGTDLSFLWI  | 227  | 337  |
| >RB1-P515L-DSGTDLSFP   | 6460 | >RB1-P515L-DSGTDLSFL   | 20   | 6440 |
| >RB1-P515L-LDSGTDLSFP' | 420  | >RB1-P515L-LDSGTDLSFL' | 167  | 253  |



|                        |      |                        |       |       |
|------------------------|------|------------------------|-------|-------|
| >RB1-P515L-LDSGTDLSFP\ | 1365 | >RB1-P515L-LDSGTDLSFL\ | 399   | 966   |
| >RB1-P515L-LDSGTDLSFP\ | 430  | >RB1-P515L-LDSGTDLSFL\ | 350   | 80    |
| >RB1-P515L-LDSGTDLSFP\ | 107  | >RB1-P515L-LDSGTDLSFL\ | 110   | 3     |
| >RB1-Q444H QRYKLGVRLY  | 143  | >RB1-Q444H HRYKLGVRLY  | 151   | 8     |
| >RB1-Q444H QRYKLGVRLY  | 1102 | >RB1-Q444H HRYKLGVRLY  | 409   | 693   |
| >RB1-Q444H QRYKLGVRLY  | 164  | >RB1-Q444H HRYKLGVRLY  | 69    | 95    |
| >RB1-Q444H QRYKLGVR    | 154  | >RB1-Q444H HRYKLGVR    | 173   | 19    |
| >RB1-Q444H QRYKLGVRLY  | 88   | >RB1-Q444H HRYKLGVRLY  | 86    | 2     |
| >RB1-Q444H QRYKLGVRLY  | 38   | >RB1-Q444H HRYKLGVRLY  | 37    | 1     |
| >RB1-Q444H QRYKLGVR    | 60   | >RB1-Q444H HRYKLGVR    | 31    | 29    |
| >RB1-Q444H QRYKLGVR    | 22   | >RB1-Q444H HRYKLGVR    | 15    | 7     |
| >RB1-Q444H QRYKLGVRLY  | 24   | >RB1-Q444H HRYKLGVRLY  | 9     | 15    |
| >RB1-Q444H QRYKLGVRLY  | 38   | >RB1-Q444H HRYKLGVRLY  | 21    | 17    |
| >RB1-Q444H QRYKLGVR    | 552  | >RB1-Q444H HRYKLGVR    | 57    | 495   |
| >RB1-Q444H QRYKLGVR    | 33   | >RB1-Q444H HRYKLGVR    | 58    | 25    |
| >RB1-Q444H QRYKLGVRLY  | 1126 | >RB1-Q444H HRYKLGVRLY  | 434   | 692   |
| >RB1-Q444H QRYKLGVRLY  | 131  | >RB1-Q444H HRYKLGVRLY  | 215   | 84    |
| >RB1-Q444H QRYKLGVR    | 20   | >RB1-Q444H HRYKLGVR    | 20    | 0     |
| >RB1-Q444H QRYKLGVRLY  | 165  | >RB1-Q444H HRYKLGVRLY  | 157   | 8     |
| >RB1-Q444H QRYKLGVR    | 314  | >RB1-Q444H HRYKLGVR    | 108   | 206   |
| >RB1-Q444H SQRYKLG     | 190  | >RB1-Q444H SHRYKLG     | 12674 | 12484 |
| >RB1-Q444H SQRYKLG     | 230  | >RB1-Q444H SHRYKLG     | 19768 | 19538 |
| >RB1-Q444H SQRYKLGVR   | 192  | >RB1-Q444H SHRYKLGVR   | 669   | 477   |
| >RB1-Q444H SQRYKLGVR   | 59   | >RB1-Q444H SHRYKLGVR   | 3371  | 3312  |
| >RB1-Q444H SQRYKLGVR   | 305  | >RB1-Q444H SHRYKLGVR   | 20976 | 20671 |
| >RB1-Q444H SQRYKLGVR   | 63   | >RB1-Q444H SHRYKLGVR   | 10968 | 10905 |
| >RB1-Q444H SQRYKLGVR   | 256  | >RB1-Q444H SHRYKLGVR   | 4910  | 4654  |
| >RB1-Q444H SQRYKLGVR   | 200  | >RB1-Q444H SHRYKLGVR   | 2441  | 2241  |
| >RB1-Q444H SQRYKLGVR   | 57   | >RB1-Q444H SHRYKLGVR   | 854   | 797   |
| >RB1-Q444H GSQRYKGVF   | 488  | >RB1-Q444H GSHRYKGVF   | 178   | 310   |
| >RB1-Q444H GSQRYKGVF   | 377  | >RB1-Q444H GSHRYKGVF   | 595   | 218   |
| >RB1-Q444H EIGSQRYKLG\ | 233  | >RB1-Q444H EIGSHRYKLG\ | 289   | 56    |
| >RB1-Q444H EIGSQRYK    | 60   | >RB1-Q444H EIGSHRYK    | 41    | 19    |
| >RB1-Q444H EIGSQRYKL   | 529  | >RB1-Q444H EIGSHRYKL   | 480   | 49    |
| >RB1-Q444H EIGSQRYKLG\ | 315  | >RB1-Q444H EIGSHRYKLG\ | 303   | 12    |
| >RB1-Q444H EIGSQRYKLG\ | 41   | >RB1-Q444H EIGSHRYKLG\ | 27    | 14    |
| >RB1-Q444H EIGSQRYKL   | 2932 | >RB1-Q444H EIGSHRYKL   | 470   | 2462  |
| >RB1-Q444H VEIGSQRY    | 1430 | >RB1-Q444H VEIGSHRY    | 400   | 1030  |
| >RB1-Q444H VEIGSQRY    | 1763 | >RB1-Q444H VEIGSHRY    | 491   | 1272  |
| >RB1-Q444H VEIGSQRY    | 160  | >RB1-Q444H VEIGSHRY    | 44    | 116   |
| >RB1-Q444H VEIGSQRYKL  | 135  | >RB1-Q444H VEIGSHRYKL  | 178   | 43    |
| >RB1-Q444H VEIGSQRY    | 91   | >RB1-Q444H VEIGSHRY    | 87    | 4     |
| >RB1-Q444H VEIGSQRYKL  | 18   | >RB1-Q444H VEIGSHRYKL  | 23    | 5     |

|                       |      |                       |       |       |
|-----------------------|------|-----------------------|-------|-------|
| >RB1-Q444H CVEIGSQRY  | 202  | >RB1-Q444H CVEIGSHRY  | 45    | 157   |
| >RB1-Q444H CVEIGSQRYK | 413  | >RB1-Q444H CVEIGSHRYK | 213   | 200   |
| >RB1-Q444H CVEIGSQRYK | 437  | >RB1-Q444H CVEIGSHRYK | 268   | 169   |
| >RB1-Q444H CVEIGSQRY  | 583  | >RB1-Q444H CVEIGSHRY  | 143   | 440   |
| >RB1-Q444H CVEIGSQRY  | 481  | >RB1-Q444H CVEIGSHRY  | 31    | 450   |
| >RB1-Q444H CVEIGSQR   | 194  | >RB1-Q444H CVEIGSHR   | 215   | 21    |
| >RB1-Q444H CVEIGSQRY  | 1477 | >RB1-Q444H CVEIGSHRY  | 332   | 1145  |
| >RB1-Q444H CVEIGSQRY  | 352  | >RB1-Q444H CVEIGSHRY  | 389   | 37    |
| >RB1-Q444H CVEIGSQRY  | 156  | >RB1-Q444H CVEIGSHRY  | 57    | 99    |
| >RB1-Q444H QGCVEIGSQF | 676  | >RB1-Q444H QGCVEIGSHF | 88    | 588   |
| >RB1-Q702K·QIMMCSMYC  | 97   | >RB1-Q702K·KIMMCSMYC  | 39    | 58    |
| >RB1-Q702K·QIMMCSMYC  | 44   | >RB1-Q702K·KIMMCSMYC  | 26    | 18    |
| >RB1-Q702K·QIMMCSMYC  | 114  | >RB1-Q702K·KIMMCSMYC  | 69    | 45    |
| >RB1-Q702K·QIMMCSMYC  | 76   | >RB1-Q702K·KIMMCSMYC  | 45    | 31    |
| >RB1-Q702K·QIMMCSMYC  | 1222 | >RB1-Q702K·KIMMCSMYC  | 128   | 1094  |
| >RB1-Q702K·QIMMCSMYC  | 372  | >RB1-Q702K·KIMMCSMYC  | 31    | 341   |
| >RB1-Q702K·QIMMCSMYC  | 287  | >RB1-Q702K·KIMMCSMYC  | 97    | 190   |
| >RB1-Q702K·QIMMCSMY   | 946  | >RB1-Q702K·KIMMCSMY   | 83    | 863   |
| >RB1-Q702K·QIMMCSMY   | 318  | >RB1-Q702K·KIMMCSMY   | 62    | 256   |
| >RB1-Q702K·QIMMCSMY   | 85   | >RB1-Q702K·KIMMCSMY   | 184   | 99    |
| >RB1-Q702K·QIMMCSMYC  | 6197 | >RB1-Q702K·KIMMCSMYC  | 216   | 5981  |
| >RB1-Q702K·QIMMCSMYC  | 5391 | >RB1-Q702K·KIMMCSMYC  | 315   | 5076  |
| >RB1-Q702K·QIMMCSMY   | 76   | >RB1-Q702K·KIMMCSMY   | 17    | 59    |
| >RB1-Q702K·QIMMCSMYC  | 182  | >RB1-Q702K·KIMMCSMYC  | 25    | 157   |
| >RB1-Q702K·QIMMCSMYC  | 367  | >RB1-Q702K·KIMMCSMYC  | 1861  | 1494  |
| >RB1-Q702K·QIMMCSMYC  | 112  | >RB1-Q702K·KIMMCSMYC  | 1412  | 1300  |
| >RB1-Q702K·QIMMCSMY   | 564  | >RB1-Q702K·KIMMCSMY   | 135   | 429   |
| >RB1-Q702K·QIMMCSMY   | 125  | >RB1-Q702K·KIMMCSMY   | 89    | 36    |
| >RB1-Q702K·QIMMCSMY   | 265  | >RB1-Q702K·KIMMCSMY   | 98    | 167   |
| >RB1-Q702K·QIMMCSMY   | 1069 | >RB1-Q702K·KIMMCSMY   | 158   | 911   |
| >RB1-Q702K·QIMMCSMY   | 585  | >RB1-Q702K·KIMMCSMY   | 307   | 278   |
| >RB1-Q702K·DQIMMCSM'  | 335  | >RB1-Q702K·DKIMMCSMY  | 593   | 258   |
| >RB1-Q702K·DQIMMCSM'  | 353  | >RB1-Q702K·DKIMMCSMY  | 1496  | 1143  |
| >RB1-Q702K·DQIMMCSM   | 426  | >RB1-Q702K·DKIMMCSM   | 18178 | 17752 |
| >RB1-Q702K·DQIMMCSM'  | 249  | >RB1-Q702K·DKIMMCSMY  | 15212 | 14963 |
| >RB1-Q702K·DQIMMCSM'  | 165  | >RB1-Q702K·DKIMMCSMY  | 162   | 3     |
| >RB1-Q702K·DQIMMCSM'  | 232  | >RB1-Q702K·DKIMMCSMY  | 2067  | 1835  |
| >RB1-Q702K·LDQIMMCSM  | 329  | >RB1-Q702K·LDKIMMCSM  | 901   | 572   |
| >RB1-Q702K·LDQIMMCSM  | 561  | >RB1-Q702K·LDKIMMCSM  | 331   | 230   |
| >RB1-Q702K·LDQIMMCSM  | 349  | >RB1-Q702K·LDKIMMCSM  | 1260  | 911   |
| >RB1-Q702K·HLDQIMMCS  | 46   | >RB1-Q702K·HLDKIMMCS  | 60    | 14    |
| >RB1-Q702K·HLDQIMMCS  | 339  | >RB1-Q702K·HLDKIMMCS  | 605   | 266   |
| >RB1-Q702K·HLDQIMMC   | 149  | >RB1-Q702K·HLDKIMMC   | 263   | 114   |

|                      |       |                      |      |       |
|----------------------|-------|----------------------|------|-------|
| >RB1-Q702K·HLDQIMMCS | 240   | >RB1-Q702K·HLDKIMMCS | 452  | 212   |
| >RB1-Q702K·HLDQIMMCS | 354   | >RB1-Q702K·HLDKIMMCS | 443  | 89    |
| >RB1-Q702K·HLDQIMMC  | 159   | >RB1-Q702K·HLDKIMMC  | 446  | 287   |
| >RB1-Q702K·HLDQIMMCS | 96    | >RB1-Q702K·HLDKIMMCS | 267  | 171   |
| >RB1-Q702K·HLDQIMMCS | 317   | >RB1-Q702K·HLDKIMMCS | 533  | 216   |
| >RB1-Q702K·HLDQIMMCS | 168   | >RB1-Q702K·HLDKIMMCS | 213  | 45    |
| >RB1-Q702K·HLDQIMMCS | 61    | >RB1-Q702K·HLDKIMMCS | 32   | 29    |
| >RB1-Q702K·HLDQIMMCS | 381   | >RB1-Q702K·HLDKIMMCS | 499  | 118   |
| >RB1-Q702K·HLDQIMMCS | 108   | >RB1-Q702K·HLDKIMMCS | 95   | 13    |
| >RB1-Q702K·HLDQIMMCS | 230   | >RB1-Q702K·HLDKIMMCS | 140  | 90    |
| >RB1-Q702K·RHLDQIMM  | 327   | >RB1-Q702K·RHLDKIMM  | 763  | 436   |
| >RB1-Q702K·RHLDQIMMC | 131   | >RB1-Q702K·RHLDKIMMC | 227  | 96    |
| >RB1-Q702K·RDRHLDQI  | 476   | >RB1-Q702K·RDRHLDKI  | 845  | 369   |
| >RB1-Q702K·RDRHLDQIM | 357   | >RB1-Q702K·RDRHLDKIM | 773  | 416   |
| >RB1-Q702K·RDRHLDQIM | 396   | >RB1-Q702K·RDRHLDKIM | 474  | 78    |
| >RB1-Q702K·RDRHLDQIM | 350   | >RB1-Q702K·RDRHLDKIM | 895  | 545   |
| >RB1-Q702K·RDRHLDQI  | 350   | >RB1-Q702K·RDRHLDKI  | 919  | 569   |
| >RB1-Q702K·RDRHLDQI  | 201   | >RB1-Q702K·RDRHLDKI  | 212  | 11    |
| >RB1-Q702K·MRDRHLDQI | 185   | >RB1-Q702K·MRDRHLDKI | 362  | 177   |
| >RB1-Q702K·MRDRHLDQI | 465   | >RB1-Q702K·MRDRHLDKI | 994  | 529   |
| >RB1-Q702K·MRDRHLDQI | 313   | >RB1-Q702K·MRDRHLDKI | 940  | 627   |
| >RB1-Q702K·LMRDRHLDQ | 446   | >RB1-Q702K·LMRDRHLDK | 385  | 61    |
| >RB1-Q702K·LMRDRHLDQ | 549   | >RB1-Q702K·LMRDRHLDK | 477  | 72    |
| >RB1-Q702K·LMRDRHLDQ | 59    | >RB1-Q702K·LMRDRHLDK | 109  | 50    |
| >RB1-Q702K·LMRDRHLDQ | 209   | >RB1-Q702K·LMRDRHLDK | 3291 | 3082  |
| >RB1-Q702K·LMRDRHLDQ | 11    | >RB1-Q702K·LMRDRHLDK | 18   | 7     |
| >RB1-Q702K·LMRDRHLDQ | 124   | >RB1-Q702K·LMRDRHLDK | 641  | 517   |
| >RB1-Q702K·LMRDRHLDQ | 16338 | >RB1-Q702K·LMRDRHLDK | 75   | 16263 |
| >RB1-Q702K·LMRDRHLDQ | 669   | >RB1-Q702K·LMRDRHLDK | 7    | 662   |
| >RB1-Q702K·LMRDRHLDQ | 286   | >RB1-Q702K·LMRDRHLDK | 375  | 89    |
| >RB1-Q702K·LMRDRHLDQ | 331   | >RB1-Q702K·LMRDRHLDK | 524  | 193   |
| >RB1-Q702K·LMRDRHLDQ | 184   | >RB1-Q702K·LMRDRHLDK | 185  | 1     |
| >RB1-Q702K·LMRDRHLDQ | 58    | >RB1-Q702K·LMRDRHLDK | 102  | 44    |
| >RB1-Q702K·LMRDRHLDQ | 47    | >RB1-Q702K·LMRDRHLDK | 69   | 22    |
| >RB1-Q702K·ELMRDRHLD | 309   | >RB1-Q702K·ELMRDRHLD | 462  | 153   |
| >RB1-Q702K·ELMRDRHLD | 363   | >RB1-Q702K·ELMRDRHLD | 690  | 327   |
| >RB1-Q702K·ELMRDRHLD | 86    | >RB1-Q702K·ELMRDRHLD | 199  | 113   |
| >RB1-Q702K·ELMRDRHLD | 115   | >RB1-Q702K·ELMRDRHLD | 272  | 157   |
| >RB1-Q702K·ELMRDRHLD | 24950 | >RB1-Q702K·ELMRDRHLD | 264  | 24686 |
| >RB1-Q702K·ELMRDRHLD | 33218 | >RB1-Q702K·ELMRDRHLD | 352  | 32866 |
| >RB1-Q702K·ELMRDRHLD | 299   | >RB1-Q702K·ELMRDRHLD | 306  | 7     |
| >RB1-Q702K·ELMRDRHLD | 125   | >RB1-Q702K·ELMRDRHLD | 288  | 163   |
| >RB1-R621S·RVNSTANA  | 175   | >RB1-R621S·SVNSTANA  | 174  | 1     |

|                         |       |                         |       |       |
|-------------------------|-------|-------------------------|-------|-------|
| >RB1-R621S- RVNSTANA    | 35    | >RB1-R621S- SVNSTANA    | 532   | 497   |
| >RB1-R621S- RVNSTANA    | 4618  | >RB1-R621S- SVNSTANA    | 316   | 4302  |
| >RB1-R621S- TRVNSTANA   | 9930  | >RB1-R621S- TSVNSTANA   | 97    | 9833  |
| >RB1-R621S- RSPKKKGSTT  | 74    | >RB1-R621S- RSPKKKGSTT  | 16710 | 16636 |
| >RB1-R621S- TTRVNSTAN/  | 1278  | >RB1-R621S- TTSVNSTANA  | 355   | 923   |
| >RB1-R621S- TTRVNSTA    | 20    | >RB1-R621S- TTSVNSTA    | 4692  | 4672  |
| >RB1-R621S- TTRVNSTAN/  | 11    | >RB1-R621S- TTSVNSTANA  | 1988  | 1977  |
| >RB1-R621S- TTRVNSTA    | 3537  | >RB1-R621S- TTSVNSTA    | 67    | 3470  |
| >RB1-R621S- TTRVNSTAN/  | 1711  | >RB1-R621S- TTSVNSTANA  | 115   | 1596  |
| >RB1-R621S- TTRVNSTAN/  | 1118  | >RB1-R621S- TTSVNSTANA  | 464   | 654   |
| >RB1-R621S- STTRVNSTA   | 115   | >RB1-R621S- STTSVNSTA   | 51    | 64    |
| >RB1-R621S- STTRVNSTAN  | 50    | >RB1-R621S- STTSVNSTAN  | 29    | 21    |
| >RB1-R621S- STTRVNSTA   | 21    | >RB1-R621S- STTSVNSTA   | 9     | 12    |
| >RB1-R621S- STTRVNSTAN  | 1008  | >RB1-R621S- STTSVNSTAN  | 418   | 590   |
| >RB1-R621S- KKGSTTRV    | 222   | >RB1-R621S- KKGSTTSV    | 28    | 194   |
| >RB1-R621S- KKKGSTTR    | 144   | >RB1-R621S- KKKGSTTS    | 820   | 676   |
| >RB1-R621S- KKKGSTTRV   | 142   | >RB1-R621S- KKKGSTTSV   | 19    | 123   |
| >RB1-R621S- KKKGSTTRVN  | 818   | >RB1-R621S- KKKGSTTSVN  | 433   | 385   |
| >RB1-R621S- KKKGSTTR    | 345   | >RB1-R621S- KKKGSTTS    | 27938 | 27593 |
| >RB1-R621S- PKKKGSTTRV  | 1927  | >RB1-R621S- PKKKGSTTSV  | 332   | 1595  |
| >RB1-R621S- SPKKKGSTTR' | 70    | >RB1-R621S- SPKKKGSTTS' | 23    | 47    |
| >RB1-R621S- SPKKKGSTTR' | 166   | >RB1-R621S- SPKKKGSTTS' | 56    | 110   |
| >RB1-R661W RLNTLCERL    | 533   | >RB1-R661W WLNTLCERL    | 458   | 75    |
| >RB1-R661W RLNTLCERL    | 15    | >RB1-R661W WLNTLCERL    | 11    | 4     |
| >RB1-R661W RLNTLCERLL   | 158   | >RB1-R661W WLNTLCERLL   | 121   | 37    |
| >RB1-R661W RLNTLCERL    | 131   | >RB1-R661W WLNTLCERL    | 109   | 22    |
| >RB1-R661W RLNTLCERL    | 109   | >RB1-R661W WLNTLCERL    | 85    | 24    |
| >RB1-R661W RLNTLCERLL   | 495   | >RB1-R661W WLNTLCERLL   | 396   | 99    |
| >RB1-R661W RLNTLCERL    | 864   | >RB1-R661W WLNTLCERL    | 441   | 423   |
| >RB1-R661W RLNTLCERL    | 485   | >RB1-R661W WLNTLCERL    | 44    | 441   |
| >RB1-R661W RLNTLCERLL   | 3276  | >RB1-R661W WLNTLCERLL   | 471   | 2805  |
| >RB1-R661W RLNTLCERL    | 33    | >RB1-R661W WLNTLCERL    | 12    | 21    |
| >RB1-R661W RLNTLCERLL   | 174   | >RB1-R661W WLNTLCERLL   | 48    | 126   |
| >RB1-R661W RLNTLCER     | 448   | >RB1-R661W WLNTLCER     | 12445 | 11997 |
| >RB1-R661W RLNTLCER     | 12    | >RB1-R661W WLNTLCER     | 686   | 674   |
| >RB1-R661W RLNTLCERL    | 242   | >RB1-R661W WLNTLCERL    | 16512 | 16270 |
| >RB1-R661W RLNTLCER     | 1904  | >RB1-R661W WLNTLCER     | 474   | 1430  |
| >RB1-R661W RLNTLCER     | 84    | >RB1-R661W WLNTLCER     | 391   | 307   |
| >RB1-R661W LRLNTLCERL   | 18816 | >RB1-R661W LWLNTLCERL   | 55    | 18761 |
| >RB1-R661W LRLNTLCERLL  | 21334 | >RB1-R661W LWLNTLCERL   | 143   | 21191 |
| >RB1-R661W LRLNTLCER    | 6018  | >RB1-R661W LWLNTLCER    | 131   | 5887  |
| >RB1-R661W LRLNTLCERLL  | 472   | >RB1-R661W LWLNTLCERL   | 6352  | 5880  |
| >RB1-R661W LRLNTLCER    | 184   | >RB1-R661W LWLNTLCER    | 17408 | 17224 |

|                         |       |                        |       |       |
|-------------------------|-------|------------------------|-------|-------|
| >RB1-R661W LRLNTLCERL   | 162   | >RB1-R661W LWLNTLCERL  | 11155 | 10993 |
| >RB1-R661W LRLNTLCERLI  | 139   | >RB1-R661W LWLNTLCERL  | 14929 | 14790 |
| >RB1-R661W LRLNTLCERL   | 409   | >RB1-R661W LWLNTLCERL  | 14402 | 13993 |
| >RB1-R661W LRLNTLCERLI  | 34    | >RB1-R661W LWLNTLCERL  | 19402 | 19368 |
| >RB1-R661W LRLNTLCER    | 1908  | >RB1-R661W LWLNTLCER   | 44    | 1864  |
| >RB1-R661W LRLNTLCE     | 35281 | >RB1-R661W LWLNTLCE    | 348   | 34933 |
| >RB1-R661W LRLNTLCER    | 34077 | >RB1-R661W LWLNTLCER   | 313   | 33764 |
| >RB1-R661W LRLNTLCERLI  | 27662 | >RB1-R661W LWLNTLCERL  | 107   | 27555 |
| >RB1-R661W YKKVYRLAYLI  | 296   | >RB1-R661W YKKVYRLAYLI | 104   | 192   |
| >RB1-R661W YKKVYRLAYLI  | 408   | >RB1-R661W YKKVYRLAYLI | 34541 | 34133 |
| >RB1-R661W YLRLNTLC     | 13023 | >RB1-R661W YLWLNNTLC   | 311   | 12712 |
| >RB1-R661W YLRLNTLCERL  | 1218  | >RB1-R661W YLWLNNTLCER | 13    | 1205  |
| >RB1-R661W YLRLNTLCERL  | 95    | >RB1-R661W YLWLNNTLCER | 34    | 61    |
| >RB1-R661W YLRLNTLCERL  | 125   | >RB1-R661W YLWLNNTLCER | 244   | 119   |
| >RB1-R661W YLRLNTLCERL  | 3564  | >RB1-R661W YLWLNNTLCER | 218   | 3346  |
| >RB1-R661W YLRLNTLC     | 1213  | >RB1-R661W YLWLNNTLC   | 11    | 1202  |
| >RB1-R661W YLRLNTLCER   | 9460  | >RB1-R661W YLWLNNTLCER | 206   | 9254  |
| >RB1-R661W YLRLNTLCERL  | 124   | >RB1-R661W YLWLNNTLCER | 3     | 121   |
| >RB1-R661W YLRLNTLC     | 3471  | >RB1-R661W YLWLNNTLC   | 53    | 3418  |
| >RB1-R661W YLRLNTLCERL  | 288   | >RB1-R661W YLWLNNTLCER | 11    | 277   |
| >RB1-R661W YLRLNTLC     | 8338  | >RB1-R661W YLWLNNTLC   | 84    | 8254  |
| >RB1-R661W YLRLNTLCERL  | 790   | >RB1-R661W YLWLNNTLCER | 8     | 782   |
| >RB1-R661W YLRLNTLC     | 10504 | >RB1-R661W YLWLNNTLC   | 49    | 10455 |
| >RB1-R661W YLRLNTLCERL  | 275   | >RB1-R661W YLWLNNTLCER | 4     | 271   |
| >RB1-R661W YLRLNTLC     | 31    | >RB1-R661W YLWLNNTLC   | 8     | 23    |
| >RB1-R661W YLRLNTLCER   | 1035  | >RB1-R661W YLWLNNTLCER | 84    | 951   |
| >RB1-R661W YLRLNTLCERL  | 6     | >RB1-R661W YLWLNNTLCER | 3     | 3     |
| >RB1-R661W YLRLNTLCER   | 45    | >RB1-R661W YLWLNNTLCER | 62    | 17    |
| >RB1-R661W YLRLNTLCER   | 235   | >RB1-R661W YLWLNNTLCER | 252   | 17    |
| >RB1-R661W YLRLNTLCER   | 567   | >RB1-R661W YLWLNNTLCER | 372   | 195   |
| >RB1-R661W YLRLNTLCERL  | 233   | >RB1-R661W YLWLNNTLCER | 2982  | 2749  |
| >RB1-R661W YLRLNTLCER   | 577   | >RB1-R661W YLWLNNTLCER | 207   | 370   |
| >RB1-R661W YLRLNTLCER   | 419   | >RB1-R661W YLWLNNTLCER | 45    | 374   |
| >RB1-R661W AYLRNLNTL    | 4     | >RB1-R661W AYLWLNNTL   | 15    | 11    |
| >RB1-R661W AYLRNLNTL    | 318   | >RB1-R661W AYLWLNNTL   | 272   | 46    |
| >RB1-R661W AYLRNLNTL    | 160   | >RB1-R661W AYLWLNNTL   | 129   | 31    |
| >RB1-R661W AYLRNLNTL    | 6     | >RB1-R661W AYLWLNNTL   | 6     | 0     |
| >RB1-R661W AYLRNLNTLCEI | 15    | >RB1-R661W AYLWLNNTLCE | 15    | 0     |
| >RB1-R661W AYLRNLNTL    | 637   | >RB1-R661W AYLWLNNTL   | 181   | 456   |
| >RB1-R661W AYLRNLNTLCEI | 222   | >RB1-R661W AYLWLNNTLCE | 133   | 89    |
| >RB1-R661W AYLRNLNTLCEI | 97    | >RB1-R661W AYLWLNNTLCE | 36    | 61    |
| >RB1-R661W AYLRNLNTL    | 357   | >RB1-R661W AYLWLNNTL   | 120   | 237   |
| >RB1-R661W AYLRNLNTL    | 393   | >RB1-R661W AYLWLNNTL   | 55    | 338   |

|                         |      |                        |      |      |
|-------------------------|------|------------------------|------|------|
| >RB1-R661W AYLRLNTLC    | 1921 | >RB1-R661W AYLWLNTLC   | 152  | 1769 |
| >RB1-R661W LAYLRLNNTL   | 14   | >RB1-R661W LAYLWLNNTL  | 15   | 1    |
| >RB1-R661W LAYLRLNNTL   | 339  | >RB1-R661W LAYLWLNNTL  | 180  | 159  |
| >RB1-R661W LAYLRLNNTL   | 4278 | >RB1-R661W LAYLWLNNTL  | 170  | 4108 |
| >RB1-R661W LAYLRLNNTL   | 3147 | >RB1-R661W LAYLWLNNTL  | 335  | 2812 |
| >RB1-R661W LAYLRLNNTL   | 7068 | >RB1-R661W LAYLWLNNTL  | 335  | 6733 |
| >RB1-R661W LAYLRLNNTL   | 60   | >RB1-R661W LAYLWLNNTL  | 3245 | 3185 |
| >RB1-R661W LAYLRLNNTL   | 34   | >RB1-R661W LAYLWLNNTL  | 47   | 13   |
| >RB1-R661W LAYLRLNNTL   | 2900 | >RB1-R661W LAYLWLNNTL  | 348  | 2552 |
| >RB1-R661W LAYLRLNNTL   | 969  | >RB1-R661W LAYLWLNNTL  | 274  | 695  |
| >RB1-R661W RLAYLRLNNTL  | 107  | >RB1-R661W RLAYLWLNNTL | 53   | 54   |
| >RB1-R661W RLAYLRLNNTL  | 35   | >RB1-R661W RLAYLWLNNTL | 26   | 9    |
| >RB1-R661W RLAYLRLNNTL  | 1104 | >RB1-R661W RLAYLWLNT   | 445  | 659  |
| >RB1-R661W RLAYLRLNNTL  | 49   | >RB1-R661W RLAYLWLNNTL | 52   | 3    |
| >RB1-R661W RLAYLRLNNTL  | 386  | >RB1-R661W RLAYLWLNNTL | 203  | 183  |
| >RB1-R661W RLAYLRLNNTL  | 356  | >RB1-R661W RLAYLWLNNTL | 35   | 321  |
| >RB1-R661W RLAYLRLNNTL  | 189  | >RB1-R661W RLAYLWLNNTL | 59   | 130  |
| >RB1-R661W RLAYLRLNNTL  | 238  | >RB1-R661W RLAYLWLNNTL | 34   | 204  |
| >RB1-R661W RLAYLRLNNTL  | 1762 | >RB1-R661W RLAYLWLNNTL | 234  | 1528 |
| >RB1-R661W RLAYLRLNNTL  | 32   | >RB1-R661W RLAYLWLNNTL | 26   | 6    |
| >RB1-R661W RLAYLRLNNTL  | 32   | >RB1-R661W RLAYLWLNNTL | 52   | 20   |
| >RB1-R661W RLAYLRLNNTL  | 864  | >RB1-R661W RLAYLWLNNTL | 475  | 389  |
| >RB1-R661W RLAYLRLNNTL  | 366  | >RB1-R661W RLAYLWLNNTL | 432  | 66   |
| >RB1-R661W RLAYLRLNNTL  | 1088 | >RB1-R661W RLAYLWLNNTL | 160  | 928  |
| >RB1-R661W YRLAYLRLNNTI | 934  | >RB1-R661W YRLAYLWLNT  | 132  | 802  |
| >RB1-R661W YRLAYLRLNNTI | 3312 | >RB1-R661W YRLAYLWLNT  | 475  | 2837 |
| >RB1-R661W YRLAYLRLNNTI | 424  | >RB1-R661W YRLAYLWLNT  | 1200 | 776  |
| >RB1-R661W YRLAYLRL     | 179  | >RB1-R661W YRLAYLWL    | 266  | 87   |
| >RB1-R661W YRLAYLRLNNTI | 123  | >RB1-R661W YRLAYLWLNT  | 113  | 10   |
| >RB1-R661W YRLAYLRL     | 21   | >RB1-R661W YRLAYLWL    | 29   | 8    |
| >RB1-R661W YRLAYLRLN    | 224  | >RB1-R661W YRLAYLWLN   | 132  | 92   |
| >RB1-R661W YRLAYLRLNNT  | 147  | >RB1-R661W YRLAYLWLNT  | 84   | 63   |
| >RB1-R661W YRLAYLRLNNTI | 35   | >RB1-R661W YRLAYLWLNT  | 28   | 7    |
| >RB1-R661W YRLAYLRL     | 42   | >RB1-R661W YRLAYLWL    | 50   | 8    |
| >RB1-R661W YRLAYLRLNNTI | 23   | >RB1-R661W YRLAYLWLNT  | 10   | 13   |
| >RB1-R661W YRLAYLRL     | 385  | >RB1-R661W YRLAYLWL    | 400  | 15   |
| >RB1-R661W YRLAYLRLNNTI | 91   | >RB1-R661W YRLAYLWLNT  | 81   | 10   |
| >RB1-R661W YRLAYLRL     | 187  | >RB1-R661W YRLAYLWL    | 203  | 16   |
| >RB1-R661W YRLAYLRLNNT  | 500  | >RB1-R661W YRLAYLWLNT  | 225  | 275  |
| >RB1-R661W YRLAYLRLNNTI | 10   | >RB1-R661W YRLAYLWLNT  | 23   | 13   |
| >RB1-R661W VYRLAYLRL    | 137  | >RB1-R661W VYRLAYLWL   | 563  | 426  |
| >RB1-R661W VYRLAYLR     | 5195 | >RB1-R661W VYRLAYLW    | 108  | 5087 |
| >RB1-R661W VYRLAYLRL    | 205  | >RB1-R661W VYRLAYLWL   | 243  | 38   |

|                        |       |                       |       |       |
|------------------------|-------|-----------------------|-------|-------|
| >RB1-R661W VYRLAYLR    | 3584  | >RB1-R661W VYRLAYLW   | 90    | 3494  |
| >RB1-R661W VYRLAYLRL   | 185   | >RB1-R661W VYRLAYLWL  | 218   | 33    |
| >RB1-R661W VYRLAYLR    | 6476  | >RB1-R661W VYRLAYLW   | 97    | 6379  |
| >RB1-R661W VYRLAYLRL   | 42    | >RB1-R661W VYRLAYLWL  | 16    | 26    |
| >RB1-R661W VYRLAYLR    | 198   | >RB1-R661W VYRLAYLW   | 3670  | 3472  |
| >RB1-R661W VYRLAYLRL   | 44    | >RB1-R661W VYRLAYLWL  | 44    | 0     |
| >RB1-R661W VYRLAYLRLN  | 249   | >RB1-R661W VYRLAYLWLN | 213   | 36    |
| >RB1-R661W VYRLAYLR    | 21    | >RB1-R661W VYRLAYLW   | 14767 | 14746 |
| >RB1-R661W VYRLAYLR    | 31    | >RB1-R661W VYRLAYLW   | 16636 | 16605 |
| >RB1-R661W VYRLAYLR    | 45    | >RB1-R661W VYRLAYLW   | 20842 | 20797 |
| >RB1-R661W KVYRLAYLRL  | 233   | >RB1-R661W KVYRLAYLWL | 202   | 31    |
| >RB1-R661W KVYRLAYLRL  | 376   | >RB1-R661W KVYRLAYLWL | 304   | 72    |
| >RB1-R661W KVYRLAYLRL  | 579   | >RB1-R661W KVYRLAYLWL | 202   | 377   |
| >RB1-R661W KVYRLAYLRL  | 231   | >RB1-R661W KVYRLAYLWL | 199   | 32    |
| >RB1-R661W KVYRLAYLRL  | 859   | >RB1-R661W KVYRLAYLWL | 356   | 503   |
| >RB1-R661W KVYRLAYLRL  | 497   | >RB1-R661W KVYRLAYLWL | 319   | 178   |
| >RB1-R661W KVYRLAYLR   | 49    | >RB1-R661W KVYRLAYLW  | 7063  | 7014  |
| >RB1-R661W KVYRLAYLR   | 16    | >RB1-R661W KVYRLAYLW  | 10947 | 10931 |
| >RB1-R661W KVYRLAYLR   | 311   | >RB1-R661W KVYRLAYLW  | 4856  | 4545  |
| >RB1-R661W KVYRLAYLRL  | 92    | >RB1-R661W KVYRLAYLWL | 96    | 4     |
| >RB1-R661W KVYRLAYLR   | 6     | >RB1-R661W KVYRLAYLW  | 1311  | 1305  |
| >RB1-R661W KVYRLAYLR   | 196   | >RB1-R661W KVYRLAYLW  | 7     | 189   |
| >RB1-R661W KVYRLAYLRL  | 39    | >RB1-R661W KVYRLAYLWL | 60    | 21    |
| >RB1-R661W KVYRLAYLR   | 25    | >RB1-R661W KVYRLAYLW  | 13967 | 13942 |
| >RB1-R661W KVYRLAYLR   | 15642 | >RB1-R661W KVYRLAYLW  | 22    | 15620 |
| >RB1-R661W KVYRLAYLRL  | 50    | >RB1-R661W KVYRLAYLWL | 72    | 22    |
| >RB1-R661W KVYRLAYLR   | 13368 | >RB1-R661W KVYRLAYLW  | 40    | 13328 |
| >RB1-R661W KVYRLAYLR   | 13482 | >RB1-R661W KVYRLAYLW  | 10    | 13472 |
| >RB1-R661W KVYRLAYLRL  | 77    | >RB1-R661W KVYRLAYLWL | 188   | 111   |
| >RB1-R661W KVYRLAYLR   | 4873  | >RB1-R661W KVYRLAYLW  | 202   | 4671  |
| >RB1-R661W KVYRLAYLRL  | 3566  | >RB1-R661W KVYRLAYLWL | 426   | 3140  |
| >RB1-R661W KVYRLAYLRL  | 1228  | >RB1-R661W KVYRLAYLWL | 412   | 816   |
| >RB1-R661W KVYRLAYLR   | 12    | >RB1-R661W KVYRLAYLW  | 3111  | 3099  |
| >RB1-R661W KKVYRLAYLR  | 62    | >RB1-R661W KKVYRLAYLW | 17917 | 17855 |
| >RB1-R661W KKVYRLAYLR  | 820   | >RB1-R661W KKVYRLAYLW | 354   | 466   |
| >RB1-R661W KKVYRLAYLRI | 62    | >RB1-R661W KKVYRLAYLW | 94    | 32    |
| >RB1-R661W KKVYRLAYLR  | 21889 | >RB1-R661W KKVYRLAYLW | 488   | 21401 |
| >RB1-R661W KKVYRLAYLRI | 576   | >RB1-R661W KKVYRLAYLW | 415   | 161   |
| >RB1-R661W KKVYRLAYLRI | 715   | >RB1-R661W KKVYRLAYLW | 320   | 395   |
| >RB1-R661W KKVYRLAYLR  | 54    | >RB1-R661W KKVYRLAYLW | 20148 | 20094 |
| >RB1-R698W RHLDQIMM    | 327   | >RB1-R698W WHLDQIMM   | 739   | 412   |
| >RB1-R698W RHLDQIMMC   | 131   | >RB1-R698W WHLDQIMM   | 306   | 175   |
| >RB1-R698W RHLDQIMM    | 1011  | >RB1-R698W WHLDQIMM   | 119   | 892   |

|                       |       |                       |      |       |
|-----------------------|-------|-----------------------|------|-------|
| >RB1-R698W RHLDQIMMC  | 636   | >RB1-R698W WHLDQIMM   | 77   | 559   |
| >RB1-R698W LQNEYELMRI | 32982 | >RB1-R698W LQNEYELMRI | 254  | 32728 |
| >RB1-R698W RDRHLDQI   | 476   | >RB1-R698W RDWHLDQI   | 573  | 97    |
| >RB1-R698W RDRHLDQIM  | 357   | >RB1-R698W RDWHLDQIM  | 441  | 84    |
| >RB1-R698W RDRHLDQIM  | 396   | >RB1-R698W RDWHLDQIM  | 1757 | 1361  |
| >RB1-R698W RDRHLDQIM  | 350   | >RB1-R698W RDWHLDQIM  | 6347 | 5997  |
| >RB1-R698W RDRHLDQI   | 350   | >RB1-R698W RDWHLDQI   | 228  | 122   |
| >RB1-R698W RDRHLDQI   | 1971  | >RB1-R698W RDWHLDQI   | 148  | 1823  |
| >RB1-R698W RDRHLDQI   | 201   | >RB1-R698W RDWHLDQI   | 92   | 109   |
| >RB1-R698W MRDRHLDQI  | 185   | >RB1-R698W MRDWHLDC   | 85   | 100   |
| >RB1-R698W MRDRHLDQI  | 1126  | >RB1-R698W MRDWHLDC   | 293  | 833   |
| >RB1-R698W MRDRHLDQI  | 1245  | >RB1-R698W MRDWHLDC   | 371  | 874   |
| >RB1-R698W MRDRHLDQI  | 465   | >RB1-R698W MRDWHLDC   | 422  | 43    |
| >RB1-R698W MRDRHLDQI  | 313   | >RB1-R698W MRDWHLDC   | 197  | 116   |
| >RB1-R698W LMRDRHLDQ  | 446   | >RB1-R698W LMRDWHLDC  | 65   | 381   |
| >RB1-R698W LMRDRHLDQ  | 549   | >RB1-R698W LMRDWHLDC  | 109  | 440   |
| >RB1-R698W LMRDRHLDQ  | 3807  | >RB1-R698W LMRDWHLDC  | 485  | 3322  |
| >RB1-R698W LMRDRHLDQ  | 59    | >RB1-R698W LMRDWHLDC  | 8    | 51    |
| >RB1-R698W LMRDRHLDQ  | 3357  | >RB1-R698W LMRDWHLDC  | 382  | 2975  |
| >RB1-R698W LMRDRHLDQ  | 1079  | >RB1-R698W LMRDWHLDC  | 215  | 864   |
| >RB1-R698W LMRDRHLDQ  | 2165  | >RB1-R698W LMRDWHLDC  | 289  | 1876  |
| >RB1-R698W LMRDRHLDQ  | 3872  | >RB1-R698W LMRDWHLDC  | 428  | 3444  |
| >RB1-R698W LMRDRHLDQ  | 209   | >RB1-R698W LMRDWHLDC  | 23   | 186   |
| >RB1-R698W LMRDRHLDQ  | 11    | >RB1-R698W LMRDWHLDC  | 5    | 6     |
| >RB1-R698W LMRDRHLDQ  | 124   | >RB1-R698W LMRDWHLDC  | 40   | 84    |
| >RB1-R698W LMRDRHLDQ  | 1936  | >RB1-R698W LMRDWHLDC  | 195  | 1741  |
| >RB1-R698W LMRDRHLDQ  | 286   | >RB1-R698W LMRDWHLDC  | 756  | 470   |
| >RB1-R698W LMRDRHLDQ  | 331   | >RB1-R698W LMRDWHLDC  | 674  | 343   |
| >RB1-R698W LMRDRHLDQ  | 184   | >RB1-R698W LMRDWHLDC  | 2500 | 2316  |
| >RB1-R698W LMRDRHLDQ  | 645   | >RB1-R698W LMRDWHLDC  | 416  | 229   |
| >RB1-R698W LMRDRHLDQ  | 58    | >RB1-R698W LMRDWHLDC  | 44   | 14    |
| >RB1-R698W LMRDRHLDQ  | 47    | >RB1-R698W LMRDWHLDC  | 40   | 7     |
| >RB1-R698W LMRDRHLDQ  | 897   | >RB1-R698W LMRDWHLDC  | 377  | 520   |
| >RB1-R698W ELMRDRHL   | 1060  | >RB1-R698W ELMRDWHL   | 76   | 984   |
| >RB1-R698W ELMRDRHLDI | 309   | >RB1-R698W ELMRDWHL   | 143  | 166   |
| >RB1-R698W ELMRDRHLDI | 790   | >RB1-R698W ELMRDWHL   | 448  | 342   |
| >RB1-R698W ELMRDRHL   | 10866 | >RB1-R698W ELMRDWHL   | 151  | 10715 |
| >RB1-R698W ELMRDRHL   | 1912  | >RB1-R698W ELMRDWHL   | 86   | 1826  |
| >RB1-R698W ELMRDRHLDI | 363   | >RB1-R698W ELMRDWHL   | 72   | 291   |
| >RB1-R698W ELMRDRHL   | 1725  | >RB1-R698W ELMRDWHL   | 38   | 1687  |
| >RB1-R698W ELMRDRHLDI | 696   | >RB1-R698W ELMRDWHL   | 329  | 367   |
| >RB1-R698W ELMRDRHL   | 3433  | >RB1-R698W ELMRDWHL   | 75   | 3358  |
| >RB1-R698W ELMRDRHL   | 855   | >RB1-R698W ELMRDWHL   | 21   | 834   |



|                       |      |                      |       |       |
|-----------------------|------|----------------------|-------|-------|
| >RB1-R698W ELMRDRHLDI | 86   | >RB1-R698W ELMRDWHL  | 23    | 63    |
| >RB1-R698W ELMRDRHL   | 158  | >RB1-R698W ELMRDWHL  | 15    | 143   |
| >RB1-R698W ELMRDRHLDI | 115  | >RB1-R698W ELMRDWHL  | 96    | 19    |
| >RB1-R698W ELMRDRHL   | 908  | >RB1-R698W ELMRDWHL  | 456   | 452   |
| >RB1-R698W ELMRDRHLDI | 760  | >RB1-R698W ELMRDWHL  | 465   | 295   |
| >RB1-R698W ELMRDRHL   | 1310 | >RB1-R698W ELMRDWHL  | 200   | 1110  |
| >RB1-R698W ELMRDRHLDI | 299  | >RB1-R698W ELMRDWHL  | 290   | 9     |
| >RB1-R698W ELMRDRHL   | 2479 | >RB1-R698W ELMRDWHL  | 291   | 2188  |
| >RB1-R698W ELMRDRHLDI | 125  | >RB1-R698W ELMRDWHL  | 66    | 59    |
| >RB1-R698W ELMRDRHL   | 204  | >RB1-R698W ELMRDWHL  | 212   | 8     |
| >RB1-R698W YELMRDRHL  | 169  | >RB1-R698W YELMRDWHL | 430   | 261   |
| >RB1-R698W YELMRDRHL  | 8574 | >RB1-R698W YELMRDWHL | 162   | 8412  |
| >RB1-R698W YELMRDRHL  | 206  | >RB1-R698W YELMRDWHL | 104   | 102   |
| >RB1-R698W YELMRDRHL  | 1437 | >RB1-R698W YELMRDWHL | 91    | 1346  |
| >RB1-R698W YELMRDRHL  | 421  | >RB1-R698W YELMRDWHL | 48    | 373   |
| >RB1-R698W YELMRDRHL  | 611  | >RB1-R698W YELMRDWHL | 239   | 372   |
| >RB1-R698W YELMRDRHL  | 133  | >RB1-R698W YELMRDWHL | 43    | 90    |
| >RB1-R698W EYELMRDRHI | 681  | >RB1-R698W EYELMRDWH | 402   | 279   |
| >RB1-R698W EYELMRDRHI | 869  | >RB1-R698W EYELMRDWH | 245   | 624   |
| >RB1-R698W EYELMRDRHI | 2448 | >RB1-R698W EYELMRDWH | 291   | 2157  |
| >RB1-R698W EYELMRDR   | 141  | >RB1-R698W EYELMRDW  | 28113 | 27972 |
| >RB1-R698W EYELMRDR   | 230  | >RB1-R698W EYELMRDW  | 33453 | 33223 |
| >RB1-R698W EYELMRDRHI | 1298 | >RB1-R698W EYELMRDWH | 281   | 1017  |
| >RB1-R698W NEYELMRDR  | 1033 | >RB1-R698W NEYELMRDW | 24    | 1009  |
| >RB1-R698W NEYELMRDR  | 1768 | >RB1-R698W NEYELMRDW | 421   | 1347  |
| >RB1-R698W NEYELMRDR  | 22   | >RB1-R698W NEYELMRDW | 44    | 22    |
| >RB1-R698W NEYELMRDR  | 168  | >RB1-R698W NEYELMRDW | 21    | 147   |
| >RB1-R698W NEYELMRDR  | 56   | >RB1-R698W NEYELMRDW | 16    | 40    |
| >RB1-R698W NEYELMRDR  | 912  | >RB1-R698W NEYELMRDW | 282   | 630   |
| >RB1-R698W NEYELMRDR  | 547  | >RB1-R698W NEYELMRDW | 284   | 263   |
| >RB1-R698W NEYELMRDR  | 3514 | >RB1-R698W NEYELMRDW | 52    | 3462  |
| >RB1-R698W NEYELMRDR  | 1244 | >RB1-R698W NEYELMRDW | 12    | 1232  |
| >RB1-R698W NEYELMRDR  | 373  | >RB1-R698W NEYELMRDW | 172   | 201   |
| >RB1-R698W NEYELMRDR  | 2068 | >RB1-R698W NEYELMRDW | 203   | 1865  |
| >RB1-R698W NEYELMRDR  | 111  | >RB1-R698W NEYELMRDW | 49    | 62    |
| >RB1-R798W RIPGGNIYI  | 95   | >RB1-R798W WIPGGNIYI | 46    | 49    |
| >RB1-R798W RIPGGNIYI  | 47   | >RB1-R798W WIPGGNIYI | 33    | 14    |
| >RB1-R798W RIPGGNIYI  | 579  | >RB1-R798W WIPGGNIYI | 251   | 328   |
| >RB1-R798W RIPGGNIYI  | 3079 | >RB1-R798W WIPGGNIYI | 265   | 2814  |
| >RB1-R798W RIPGGNIYI  | 360  | >RB1-R798W WIPGGNIYI | 61    | 299   |
| >RB1-R798W RIPGGNIY   | 1934 | >RB1-R798W WIPGGNIY  | 317   | 1617  |
| >RB1-R798W RIPGGNIY   | 1147 | >RB1-R798W WIPGGNIY  | 278   | 869   |
| >RB1-R798W RIPGGNIY   | 243  | >RB1-R798W WIPGGNIY  | 947   | 704   |

|                        |       |                        |       |       |
|------------------------|-------|------------------------|-------|-------|
| >RB1-R798W RIPGGNIYI   | 208   | >RB1-R798W WIPGGNIYI   | 11743 | 11535 |
| >RB1-R798W RIPGGNIYI   | 2327  | >RB1-R798W WIPGGNIYI   | 65    | 2262  |
| >RB1-R798W RIPGGNIY    | 721   | >RB1-R798W WIPGGNIY    | 99    | 622   |
| >RB1-R798W RIPGGNIYI   | 177   | >RB1-R798W WIPGGNIYI   | 964   | 787   |
| >RB1-R798W RIPGGNIY    | 458   | >RB1-R798W WIPGGNIY    | 1124  | 666   |
| >RB1-R798W RIPGGNIY    | 1516  | >RB1-R798W WIPGGNIY    | 429   | 1087  |
| >RB1-R798W LRIPGGNI    | 19275 | >RB1-R798W LWIPGGNI    | 81    | 19194 |
| >RB1-R798W LRIPGGNIYI  | 18314 | >RB1-R798W LWIPGGNIYI  | 33    | 18281 |
| >RB1-R798W LRIPGGNIY   | 593   | >RB1-R798W LWIPGGNIY   | 23    | 570   |
| >RB1-R798W LRIPGGNIY   | 256   | >RB1-R798W LWIPGGNIY   | 45    | 211   |
| >RB1-R798W LRIPGGNIY   | 26    | >RB1-R798W LWIPGGNIY   | 652   | 626   |
| >RB1-R798W LRIPGGNIYI  | 402   | >RB1-R798W LWIPGGNIYI  | 6558  | 6156  |
| >RB1-R798W LRIPGGNIYI  | 281   | >RB1-R798W LWIPGGNIYI  | 17343 | 17062 |
| >RB1-R798W LRIPGGNIY   | 487   | >RB1-R798W LWIPGGNIY   | 533   | 46    |
| >RB1-R798W LRIPGGNIYI  | 492   | >RB1-R798W LWIPGGNIYI  | 16580 | 16088 |
| >RB1-R798W LRIPGGNI    | 28926 | >RB1-R798W LWIPGGNI    | 200   | 28726 |
| >RB1-R798W LRIPGGNIY   | 32168 | >RB1-R798W LWIPGGNIY   | 206   | 31962 |
| >RB1-R798W LRIPGGNIYI  | 23130 | >RB1-R798W LWIPGGNIYI  | 148   | 22982 |
| >RB1-R798W LRIPGGNIYIS | 32612 | >RB1-R798W LWIPGGNIYIS | 318   | 32294 |
| >RB1-R798W SPYKFPSSPLR | 207   | >RB1-R798W SPYKFPSSPLV | 27950 | 27743 |
| >RB1-R798W SPYKFPSSPLR | 16211 | >RB1-R798W SPYKFPSSPLV | 22    | 16189 |
| >RB1-R798W SPYKFPSSPLR | 19216 | >RB1-R798W SPYKFPSSPLV | 12    | 19204 |
| >RB1-R798W SPYKFPSSPLR | 146   | >RB1-R798W SPYKFPSSPLV | 26825 | 26679 |
| >RB1-R798W PLRIPGGNI   | 7976  | >RB1-R798W PLWIPGGNI   | 131   | 7845  |
| >RB1-R798W PLRIPGGNIYI | 917   | >RB1-R798W PLWIPGGNIYI | 12    | 905   |
| >RB1-R798W PLRIPGGNIYI | 6000  | >RB1-R798W PLWIPGGNIYI | 78    | 5922  |
| >RB1-R798W PLRIPGGNIYI | 11036 | >RB1-R798W PLWIPGGNIYI | 333   | 10703 |
| >RB1-R798W PLRIPGGNIYI | 1075  | >RB1-R798W PLWIPGGNIYI | 145   | 930   |
| >RB1-R798W PLRIPGGNIY  | 724   | >RB1-R798W PLWIPGGNIY  | 107   | 617   |
| >RB1-R798W PLRIPGGNIY  | 97    | >RB1-R798W PLWIPGGNIY  | 106   | 9     |
| >RB1-R798W SPLRIPGGNI  | 175   | >RB1-R798W SPLWIPGGNI  | 971   | 796   |
| >RB1-R798W SPLRIPGGNIY | 1121  | >RB1-R798W SPLWIPGGNIY | 250   | 871   |
| >RB1-R798W SPLRIPGGNI  | 1020  | >RB1-R798W SPLWIPGGNI  | 283   | 737   |
| >RB1-R798W SPLRIPGGNI  | 134   | >RB1-R798W SPLWIPGGNI  | 315   | 181   |
| >RB1-R798W SPLRIPGGNIY | 125   | >RB1-R798W SPLWIPGGNIY | 55    | 70    |
| >RB1-R798W SPLRIPGGNIY | 186   | >RB1-R798W SPLWIPGGNIY | 183   | 3     |
| >RB1-R798W SSPLRIPGGNI | 396   | >RB1-R798W SSPLWIPGGNI | 292   | 104   |
| >RB1-R798W SSPLRIPGG   | 1271  | >RB1-R798W SSPLWIPGG   | 240   | 1031  |
| >RB1-R798W SSPLRIPGGNI | 23    | >RB1-R798W SSPLWIPGGNI | 10    | 13    |
| >RB1-R798W SSPLRIPGGNI | 80    | >RB1-R798W SSPLWIPGGNI | 62    | 18    |
| >RB1-R798W FPSSPLRI    | 274   | >RB1-R798W FPSSPLWI    | 272   | 2     |
| >RB1-R798W FPSSPLRIPG  | 2568  | >RB1-R798W FPSSPLWIPG  | 275   | 2293  |
| >RB1-R798W FPSSPLRI    | 91    | >RB1-R798W FPSSPLWI    | 72    | 19    |

|                         |       |                         |       |       |
|-------------------------|-------|-------------------------|-------|-------|
| >RB1-R798W FPSSPLRI     | 37    | >RB1-R798W FPSSPLWI     | 31    | 6     |
| >RB1-R798W FPSSPLRI     | 343   | >RB1-R798W FPSSPLWI     | 432   | 89    |
| >RB1-R798W FPSSPLRIP    | 97    | >RB1-R798W FPSSPLWIP    | 74    | 23    |
| >RB1-R798W FPSSPLRIPG   | 212   | >RB1-R798W FPSSPLWIPG   | 68    | 144   |
| >RB1-R798W FPSSPLRIPGC  | 217   | >RB1-R798W FPSSPLWIPG   | 127   | 90    |
| >RB1-R798W KFPSSPLR     | 10792 | >RB1-R798W KFPSSPLW     | 278   | 10514 |
| >RB1-R798W KFPSSPLRI    | 117   | >RB1-R798W KFPSSPLWI    | 230   | 113   |
| >RB1-R798W KFPSSPLR     | 4862  | >RB1-R798W KFPSSPLW     | 117   | 4745  |
| >RB1-R798W KFPSSPLRI    | 117   | >RB1-R798W KFPSSPLWI    | 122   | 5     |
| >RB1-R798W KFPSSPLR     | 8726  | >RB1-R798W KFPSSPLW     | 140   | 8586  |
| >RB1-R798W KFPSSPLRI    | 206   | >RB1-R798W KFPSSPLWI    | 74    | 132   |
| >RB1-R798W KFPSSPLR     | 36    | >RB1-R798W KFPSSPLW     | 15710 | 15674 |
| >RB1-R798W KFPSSPLRI    | 3302  | >RB1-R798W KFPSSPLWI    | 427   | 2875  |
| >RB1-R798W KFPSSPLR     | 18    | >RB1-R798W KFPSSPLW     | 12575 | 12557 |
| >RB1-R798W KFPSSPLR     | 1081  | >RB1-R798W KFPSSPLW     | 497   | 584   |
| >RB1-R798W KFPSSPLRI    | 406   | >RB1-R798W KFPSSPLWI    | 219   | 187   |
| >RB1-R798W YKFPSSPLRI   | 789   | >RB1-R798W YKFPSSPLWI   | 266   | 523   |
| >RB1-R798W YKFPSSPLR    | 64    | >RB1-R798W YKFPSSPLW    | 21511 | 21447 |
| >RB1-R798W YKFPSSPLR    | 17    | >RB1-R798W YKFPSSPLW    | 9     | 8     |
| >RB1-R798W YKFPSSPLRI   | 5     | >RB1-R798W YKFPSSPLWI   | 6     | 1     |
| >RB1-R798W YKFPSSPLRIP  | 57    | >RB1-R798W YKFPSSPLWIF  | 59    | 2     |
| >RB1-R798W YKFPSSPLR    | 21732 | >RB1-R798W YKFPSSPLW    | 25    | 21707 |
| >RB1-R798W YKFPSSPLRI   | 296   | >RB1-R798W YKFPSSPLWI   | 569   | 273   |
| >RB1-R798W YKFPSSPLR    | 22128 | >RB1-R798W YKFPSSPLW    | 372   | 21756 |
| >RB1-R798W YKFPSSPLR    | 31783 | >RB1-R798W YKFPSSPLW    | 277   | 31506 |
| >RB1-R798W YKFPSSPLR    | 20988 | >RB1-R798W YKFPSSPLW    | 25    | 20963 |
| >RB1-R798W YKFPSSPLR    | 407   | >RB1-R798W YKFPSSPLW    | 31242 | 30835 |
| >RB1-R798W PYKFPSSPLR   | 19361 | >RB1-R798W PYKFPSSPLW   | 58    | 19303 |
| >RB1-R798W PYKFPSSPLR   | 17867 | >RB1-R798W PYKFPSSPLW   | 111   | 17756 |
| >RB1-R798W PYKFPSSPLRI  | 478   | >RB1-R798W PYKFPSSPLW   | 522   | 44    |
| >RB1-R798W PYKFPSSPLR   | 183   | >RB1-R798W PYKFPSSPLW   | 31759 | 31576 |
| >RB1-S127I-v SVHKFFNL   | 12    | >RB1-S127I-r IVHKFFNL   | 6     | 6     |
| >RB1-S127I-v SVHKFFNLL  | 14    | >RB1-S127I-r IVHKFFNLL  | 9     | 5     |
| >RB1-S127I-v SVHKFFNL   | 231   | >RB1-S127I-r IVHKFFNL   | 263   | 32    |
| >RB1-S127I-v SVHKFFNLL  | 69    | >RB1-S127I-r IVHKFFNLL  | 106   | 37    |
| >RB1-S127I-v SVHKFFNL   | 143   | >RB1-S127I-r IVHKFFNL   | 153   | 10    |
| >RB1-S127I-v SVHKFFNLL  | 174   | >RB1-S127I-r IVHKFFNLL  | 154   | 20    |
| >RB1-S127I-v SVHKFFNLLK | 46    | >RB1-S127I-r IVHKFFNLLK | 43    | 3     |
| >RB1-S127I-v SVHKFFNLLK | 13    | >RB1-S127I-r IVHKFFNLLK | 32    | 19    |
| >RB1-S127I-v SVHKFFNLL  | 466   | >RB1-S127I-r IVHKFFNLL  | 715   | 249   |
| >RB1-S127I-v SVHKFFNL   | 111   | >RB1-S127I-r IVHKFFNL   | 299   | 188   |
| >RB1-S127I-v SVHKFFNLL  | 53    | >RB1-S127I-r IVHKFFNLL  | 128   | 75    |
| >RB1-S127I-v SVHKFFNLLK | 4     | >RB1-S127I-r IVHKFFNLLK | 5     | 1     |

|                          |       |                          |      |       |
|--------------------------|-------|--------------------------|------|-------|
| >RB1-S127I-v SVHKFFNLLK  | 191   | >RB1-S127I-r IVHKFFNLLK  | 283  | 92    |
| >RB1-S127I-v SVHKFFNLLK  | 52    | >RB1-S127I-r IVHKFFNLLK  | 98   | 46    |
| >RB1-S127I-v SVHKFFNL    | 86    | >RB1-S127I-r IVHKFFNL    | 382  | 296   |
| >RB1-S127I-v SVHKFFNLL   | 55    | >RB1-S127I-r IVHKFFNLL   | 227  | 172   |
| >RB1-S127I-v SVHKFFNL    | 408   | >RB1-S127I-r IVHKFFNL    | 1053 | 645   |
| >RB1-S127I-v SVHKFFNLL   | 430   | >RB1-S127I-r IVHKFFNLL   | 1120 | 690   |
| >RB1-S127I-v SVHKFFNLL   | 388   | >RB1-S127I-r IVHKFFNLL   | 362  | 26    |
| >RB1-S127I-v SVHKFFNLL   | 129   | >RB1-S127I-r IVHKFFNLL   | 100  | 29    |
| >RB1-S127I-v SVHKFFNLLK  | 374   | >RB1-S127I-r IVHKFFNLLK  | 1087 | 713   |
| >RB1-S127I-v SVHKFFNLLK  | 219   | >RB1-S127I-r IVHKFFNLLK  | 696  | 477   |
| >RB1-S127I-v SVHKFFNLLK  | 277   | >RB1-S127I-r IVHKFFNLLK  | 223  | 54    |
| >RB1-S127I-v ISVHKFFNL   | 30    | >RB1-S127I-r IIVHKFFNL   | 51   | 21    |
| >RB1-S127I-v ISVHKFFNL   | 8762  | >RB1-S127I-r IIVHKFFNL   | 324  | 8438  |
| >RB1-S127I-v ISVHKFFNL   | 924   | >RB1-S127I-r IIVHKFFNL   | 70   | 854   |
| >RB1-S127I-v ISVHKFFNL   | 6976  | >RB1-S127I-r IIVHKFFNL   | 274  | 6702  |
| >RB1-S127I-v ISVHKFFNL   | 539   | >RB1-S127I-r IIVHKFFNL   | 17   | 522   |
| >RB1-S127I-v ISVHKFFNLL  | 2948  | >RB1-S127I-r IIVHKFFNLL  | 340  | 2608  |
| >RB1-S127I-v ISVHKFFNL   | 22688 | >RB1-S127I-r IIVHKFFNL   | 381  | 22307 |
| >RB1-S127I-v ISVHKFFNLLK | 80    | >RB1-S127I-r IIVHKFFNLLK | 53   | 27    |
| >RB1-S127I-v ISVHKFFNLLK | 15    | >RB1-S127I-r IIVHKFFNLLK | 23   | 8     |
| >RB1-S127I-v ISVHKFFNLLK | 143   | >RB1-S127I-r IIVHKFFNLLK | 351  | 208   |
| >RB1-S127I-v ISVHKFFNLLK | 456   | >RB1-S127I-r IIVHKFFNLLK | 845  | 389   |
| >RB1-S127I-v ISVHKFFNLLK | 113   | >RB1-S127I-r IIVHKFFNLLK | 117  | 4     |
| >RB1-S127I-v ISVHKFFNL   | 708   | >RB1-S127I-r IIVHKFFNL   | 475  | 233   |
| >RB1-S127I-v ISVHKFFNL   | 368   | >RB1-S127I-r IIVHKFFNL   | 2296 | 1928  |
| >RB1-S127I-v ISVHKFFNLL  | 363   | >RB1-S127I-r IIVHKFFNLL  | 1863 | 1500  |
| >RB1-S127I-v ISVHKFFNL   | 8     | >RB1-S127I-r IIVHKFFNL   | 2157 | 2149  |
| >RB1-S127I-v ISVHKFFNLL  | 60    | >RB1-S127I-r IIVHKFFNLL  | 7987 | 7927  |
| >RB1-S127I-v ISVHKFFNLL  | 64    | >RB1-S127I-r IIVHKFFNLL  | 2222 | 2158  |
| >RB1-S127I-v ISVHKFFNL   | 489   | >RB1-S127I-r IIVHKFFNL   | 7452 | 6963  |
| >RB1-S127I-v ISVHKFFNLLK | 158   | >RB1-S127I-r IIVHKFFNLLK | 1228 | 1070  |
| >RB1-S127I-v ISVHKFFNLLK | 2337  | >RB1-S127I-r IIVHKFFNLLK | 336  | 2001  |
| >RB1-S127I-v LLSYRKTYEIS | 2570  | >RB1-S127I-r LLSYRKTYEII | 52   | 2518  |
| >RB1-S127I-v LLSYRKTYEIS | 5528  | >RB1-S127I-r LLSYRKTYEII | 96   | 5432  |
| >RB1-S127I-v LLSYRKTYEIS | 9398  | >RB1-S127I-r LLSYRKTYEII | 115  | 9283  |
| >RB1-S127I-v LLSYRKTYEIS | 6261  | >RB1-S127I-r LLSYRKTYEII | 439  | 5822  |
| >RB1-S127I-v EISVHKFFNLL | 1797  | >RB1-S127I-r EIIVHKFFNLL | 374  | 1423  |
| >RB1-S127I-v EISVHKFF    | 3778  | >RB1-S127I-r EIIVHKFF    | 232  | 3546  |
| >RB1-S127I-v EISVHKFF    | 264   | >RB1-S127I-r EIIVHKFF    | 7    | 257   |
| >RB1-S127I-v EISVHKFFNL  | 4922  | >RB1-S127I-r EIIVHKFFNL  | 66   | 4856  |
| >RB1-S127I-v EISVHKFFNLL | 5813  | >RB1-S127I-r EIIVHKFFNLL | 93   | 5720  |
| >RB1-S127I-v EISVHKFFNL  | 350   | >RB1-S127I-r EIIVHKFFNL  | 335  | 15    |
| >RB1-S127I-v EISVHKFFNLL | 81    | >RB1-S127I-r EIIVHKFFNLL | 49   | 32    |

|                          |      |                          |      |      |
|--------------------------|------|--------------------------|------|------|
| >RB1-S127I-v EISVHKFFNL  | 95   | >RB1-S127I-r EIIVHKFFNL  | 30   | 65   |
| >RB1-S127I-v EISVHKFFNLL | 222  | >RB1-S127I-r EIIVHKFFNLL | 65   | 157  |
| >RB1-S127I-v YEISVHKF    | 235  | >RB1-S127I-r YEIIVHKF    | 85   | 150  |
| >RB1-S127I-v YEISVHKFF   | 72   | >RB1-S127I-r YEIIVHKFF   | 32   | 40   |
| >RB1-S127I-v YEISVHKFFNL | 331  | >RB1-S127I-r YEIIVHKFFNL | 175  | 156  |
| >RB1-S127I-v YEISVHKFFNL | 367  | >RB1-S127I-r YEIIVHKFFNL | 509  | 142  |
| >RB1-S127I-v YEISVHKF    | 184  | >RB1-S127I-r YEIIVHKF    | 377  | 193  |
| >RB1-S127I-v YEISVHKFF   | 452  | >RB1-S127I-r YEIIVHKFF   | 1350 | 898  |
| >RB1-S127I-v YEISVHKF    | 20   | >RB1-S127I-r YEIIVHKF    | 103  | 83   |
| >RB1-S127I-v YEISVHKFF   | 15   | >RB1-S127I-r YEIIVHKFF   | 75   | 60   |
| >RB1-S127I-v YEISVHKFFNL | 396  | >RB1-S127I-r YEIIVHKFFNL | 1563 | 1167 |
| >RB1-S127I-v YEISVHKF    | 8    | >RB1-S127I-r YEIIVHKF    | 7    | 1    |
| >RB1-S127I-v YEISVHKFF   | 9    | >RB1-S127I-r YEIIVHKFF   | 8    | 1    |
| >RB1-S127I-v YEISVHKFFNL | 78   | >RB1-S127I-r YEIIVHKFFNL | 76   | 2    |
| >RB1-S127I-v YEISVHKFFNL | 377  | >RB1-S127I-r YEIIVHKFFNL | 1510 | 1133 |
| >RB1-S127I-v YEISVHKF    | 38   | >RB1-S127I-r YEIIVHKF    | 74   | 36   |
| >RB1-S127I-v YEISVHKFF   | 43   | >RB1-S127I-r YEIIVHKFF   | 111  | 68   |
| >RB1-S127I-v YEISVHKFFNL | 7    | >RB1-S127I-r YEIIVHKFFNL | 10   | 3    |
| >RB1-S127I-v YEISVHKF    | 540  | >RB1-S127I-r YEIIVHKF    | 378  | 162  |
| >RB1-S127I-v YEISVHKFF   | 449  | >RB1-S127I-r YEIIVHKFF   | 243  | 206  |
| >RB1-S127I-v YEISVHKFFNL | 66   | >RB1-S127I-r YEIIVHKFFNL | 46   | 20   |
| >RB1-S127I-v YEISVHKF    | 299  | >RB1-S127I-r YEIIVHKF    | 403  | 104  |
| >RB1-S127I-v YEISVHKFF   | 181  | >RB1-S127I-r YEIIVHKFF   | 254  | 73   |
| >RB1-S127I-v YEISVHKF    | 50   | >RB1-S127I-r YEIIVHKF    | 76   | 26   |
| >RB1-S127I-v YEISVHKFF   | 24   | >RB1-S127I-r YEIIVHKFF   | 36   | 12   |
| >RB1-S127I-v YEISVHKFFNL | 154  | >RB1-S127I-r YEIIVHKFFNL | 235  | 81   |
| >RB1-S127I-v YEISVHKFF   | 460  | >RB1-S127I-r YEIIVHKFF   | 2338 | 1878 |
| >RB1-S127I-v YEISVHKF    | 421  | >RB1-S127I-r YEIIVHKF    | 229  | 192  |
| >RB1-S127I-v YEISVHKFF   | 104  | >RB1-S127I-r YEIIVHKFF   | 131  | 27   |
| >RB1-S127I-v YEISVHKFFNL | 11   | >RB1-S127I-r YEIIVHKFFNL | 11   | 0    |
| >RB1-S127I-v TYEISVHKF   | 26   | >RB1-S127I-r TYEIVHKF    | 15   | 11   |
| >RB1-S127I-v TYEISVHKFF  | 109  | >RB1-S127I-r TYEIVHKFF   | 135  | 26   |
| >RB1-S127I-v TYEISVHKF   | 130  | >RB1-S127I-r TYEIVHKF    | 52   | 78   |
| >RB1-S127I-v TYEISVHKFF  | 115  | >RB1-S127I-r TYEIVHKFF   | 207  | 92   |
| >RB1-S127I-v TYEISVHKF   | 11   | >RB1-S127I-r TYEIVHKF    | 9    | 2    |
| >RB1-S127I-v TYEISVHKFF  | 13   | >RB1-S127I-r TYEIVHKFF   | 14   | 1    |
| >RB1-S127I-v TYEISVHKFF  | 149  | >RB1-S127I-r TYEIVHKFF   | 141  | 8    |
| >RB1-S127I-v TYEISVHK    | 876  | >RB1-S127I-r TYEIVHK     | 493  | 383  |
| >RB1-S127I-v TYEISVHK    | 404  | >RB1-S127I-r TYEIVHK     | 191  | 213  |
| >RB1-S127I-v KTYEISVHKFF | 366  | >RB1-S127I-r KTYEIVHKFF  | 324  | 42   |
| >RB1-S127I-v KTYEISVHKF  | 1229 | >RB1-S127I-r KTYEIVHKF   | 443  | 786  |
| >RB1-S127I-v KTYEISVH    | 151  | >RB1-S127I-r KTYEIVH     | 136  | 15   |
| >RB1-S127I-v KTYEISVHK   | 28   | >RB1-S127I-r KTYEIVHK    | 28   | 0    |

|                          |      |                          |      |      |
|--------------------------|------|--------------------------|------|------|
| >RB1-S127I-v KTYEISVH    | 674  | >RB1-S127I-r KTYEIIVH    | 331  | 343  |
| >RB1-S127I-v KTYEISVHK   | 15   | >RB1-S127I-r KTYEIIVHK   | 13   | 2    |
| >RB1-S127I-v KTYEISVHKF  | 476  | >RB1-S127I-r KTYEIIVHKF  | 273  | 203  |
| >RB1-S127I-v KTYEISVHKF  | 404  | >RB1-S127I-r KTYEIIVHKF  | 111  | 293  |
| >RB1-S127I-v KTYEISVHKFF | 360  | >RB1-S127I-r KTYEIIVHKFF | 121  | 239  |
| >RB1-S127I-v KTYEISVHK   | 5    | >RB1-S127I-r KTYEIIVHK   | 7    | 2    |
| >RB1-S127I-v KTYEISVHKFF | 453  | >RB1-S127I-r KTYEIIVHKFF | 722  | 269  |
| >RB1-S127I-v KTYEISVHKF  | 437  | >RB1-S127I-r KTYEIIVHKF  | 339  | 98   |
| >RB1-S127I-v KTYEISVH    | 350  | >RB1-S127I-r KTYEIIVH    | 255  | 95   |
| >RB1-S127I-v KTYEISVHK   | 18   | >RB1-S127I-r KTYEIIVHK   | 13   | 5    |
| >RB1-S127I-v KTYEISVHKFF | 249  | >RB1-S127I-r KTYEIIVHKFF | 160  | 89   |
| >RB1-S127I-v KTYEISVH    | 357  | >RB1-S127I-r KTYEIIVH    | 188  | 169  |
| >RB1-S127I-v KTYEISVHK   | 126  | >RB1-S127I-r KTYEIIVHK   | 326  | 200  |
| >RB1-S127I-v KTYEISVHKF  | 5    | >RB1-S127I-r KTYEIIVHKF  | 4    | 1    |
| >RB1-S127I-v KTYEISVHKFF | 10   | >RB1-S127I-r KTYEIIVHKFF | 13   | 3    |
| >RB1-S127I-v KTYEISVHK   | 33   | >RB1-S127I-r KTYEIIVHK   | 21   | 12   |
| >RB1-S127I-v KTYEISVHKF  | 479  | >RB1-S127I-r KTYEIIVHKF  | 1112 | 633  |
| >RB1-S127I-v KTYEISVHKFF | 349  | >RB1-S127I-r KTYEIIVHKFF | 628  | 279  |
| >RB1-S127I-v KTYEISVHKF  | 23   | >RB1-S127I-r KTYEIIVHKF  | 54   | 31   |
| >RB1-S127I-v KTYEISVHKFF | 16   | >RB1-S127I-r KTYEIIVHKFF | 25   | 9    |
| >RB1-S127I-v KTYEISVH    | 41   | >RB1-S127I-r KTYEIIVH    | 95   | 54   |
| >RB1-S127I-v KTYEISVHKF  | 2    | >RB1-S127I-r KTYEIIVHKF  | 3    | 1    |
| >RB1-S127I-v KTYEISVHKFF | 3    | >RB1-S127I-r KTYEIIVHKFF | 3    | 0    |
| >RB1-S127I-v KTYEISVHKF  | 42   | >RB1-S127I-r KTYEIIVHKF  | 39   | 3    |
| >RB1-S127I-v KTYEISVHKFF | 45   | >RB1-S127I-r KTYEIIVHKFF | 43   | 2    |
| >RB1-S127I-v KTYEISVHKF  | 13   | >RB1-S127I-r KTYEIIVHKF  | 14   | 1    |
| >RB1-S127I-v KTYEISVHKFF | 21   | >RB1-S127I-r KTYEIIVHKFF | 22   | 1    |
| >RB1-S127I-v KTYEISVHKF  | 130  | >RB1-S127I-r KTYEIIVHKF  | 126  | 4    |
| >RB1-S127I-v KTYEISVHKFF | 72   | >RB1-S127I-r KTYEIIVHKFF | 73   | 1    |
| >RB1-S127I-v KTYEISVHKF  | 143  | >RB1-S127I-r KTYEIIVHKF  | 124  | 19   |
| >RB1-S127I-v KTYEISVHKFF | 13   | >RB1-S127I-r KTYEIIVHKFF | 22   | 9    |
| >RB1-S127I-v KTYEISVHKF  | 446  | >RB1-S127I-r KTYEIIVHKF  | 581  | 135  |
| >RB1-S127I-v KTYEISVHK   | 448  | >RB1-S127I-r KTYEIIVHK   | 258  | 190  |
| >RB1-S127I-v KTYEISVHK   | 77   | >RB1-S127I-r KTYEIIVHK   | 45   | 32   |
| >RB1-S127I-v RKTYEISV    | 37   | >RB1-S127I-r RKTYEIIV    | 75   | 38   |
| >RB1-S127I-v RKTYEISVH   | 71   | >RB1-S127I-r RKTYEIIVH   | 166  | 95   |
| >RB1-S127I-v RKTYEISVHK  | 201  | >RB1-S127I-r RKTYEIIVHK  | 338  | 137  |
| >RB1-S127I-v RKTYEISVHKF | 4    | >RB1-S127I-r RKTYEIIVHKF | 6    | 2    |
| >RB1-S127I-v YRKTYEIS    | 2474 | >RB1-S127I-r YRKTYEII    | 160  | 2314 |
| >RB1-S127I-v YRKTYEISV   | 127  | >RB1-S127I-r YRKTYEIIV   | 198  | 71   |
| >RB1-S127I-v YRKTYEISVH  | 278  | >RB1-S127I-r YRKTYEIIVH  | 595  | 317  |
| >RB1-S127I-v YRKTYEIS    | 3902 | >RB1-S127I-r YRKTYEII    | 463  | 3439 |
| >RB1-S127I-v YRKTYEISV   | 368  | >RB1-S127I-r YRKTYEIIV   | 823  | 455  |

|                          |       |                          |      |       |
|--------------------------|-------|--------------------------|------|-------|
| >RB1-S127I-v YRKTYEISVHK | 68    | >RB1-S127I-r YRKTYEIVHK  | 55   | 13    |
| >RB1-S127I-v SYRKTYEIS   | 15340 | >RB1-S127I-r SYRKTYEII   | 27   | 15313 |
| >RB1-S127I-v SYRKTYEISV  | 419   | >RB1-S127I-r SYRKTYEIIV  | 2050 | 1631  |
| >RB1-S127I-v SYRKTYEIS   | 20307 | >RB1-S127I-r SYRKTYEII   | 149  | 20158 |
| >RB1-S127I-v SYRKTYEIS   | 10394 | >RB1-S127I-r SYRKTYEII   | 98   | 10296 |
| >RB1-S127I-v SYRKTYEIS   | 3759  | >RB1-S127I-r SYRKTYEII   | 14   | 3745  |
| >RB1-S127I-v SYRKTYEIS   | 272   | >RB1-S127I-r SYRKTYEII   | 22   | 250   |
| >RB1-S127I-v SYRKTYEISV  | 14    | >RB1-S127I-r SYRKTYEIIV  | 20   | 6     |
| >RB1-S127I-v SYRKTYEISVH | 720   | >RB1-S127I-r SYRKTYEIIVH | 327  | 393   |
| >RB1-S127I-v SYRKTYEISV  | 272   | >RB1-S127I-r SYRKTYEIIV  | 518  | 246   |
| >RB1-S127I-v LSYRKTYEISV | 83    | >RB1-S127I-r LSYRKTYEIIV | 92   | 9     |
| >RB1-S127I-v LSYRKTYEIS  | 28450 | >RB1-S127I-r LSYRKTYEII  | 319  | 28131 |
| >RB1-S127I-v LSYRKTYEISV | 301   | >RB1-S127I-r LSYRKTYEIIV | 1166 | 865   |
| >RB1-S127I-v LSYRKTYEIS  | 4819  | >RB1-S127I-r LSYRKTYEII  | 219  | 4600  |
| >RB1-S127I-v LSYRKTYEISV | 261   | >RB1-S127I-r LSYRKTYEIIV | 457  | 196   |
| >RB1-S127I-v LSYRKTYEIS  | 11753 | >RB1-S127I-r LSYRKTYEII  | 309  | 11444 |
| >RB1-S127I-v LSYRKTYEISV | 341   | >RB1-S127I-r LSYRKTYEIIV | 989  | 648   |
| >RB1-S127I-v LSYRKTYEIS  | 10004 | >RB1-S127I-r LSYRKTYEII  | 57   | 9947  |
| >RB1-S127I-v LSYRKTYEIS  | 7837  | >RB1-S127I-r LSYRKTYEII  | 348  | 7489  |
| >RB1-S127I-v LSYRKTYEIS  | 33239 | >RB1-S127I-r LSYRKTYEII  | 162  | 33077 |
| >RB1-S187T- SALVLKVSWI   | 384   | >RB1-S187T- TALVLKVSWI   | 1763 | 1379  |
| >RB1-S187T- SALVLKVSWI   | 498   | >RB1-S187T- TALVLKVSWI   | 959  | 461   |
| >RB1-S187T- SALVLKVS     | 75    | >RB1-S187T- TALVLKVS     | 113  | 38    |
| >RB1-S187T- SALVLKVS     | 110   | >RB1-S187T- TALVLKVS     | 49   | 61    |
| >RB1-S187T- SALVLKVS     | 90    | >RB1-S187T- TALVLKVS     | 61   | 29    |
| >RB1-S187T- SALVLKVS     | 34    | >RB1-S187T- TALVLKVS     | 28   | 6     |
| >RB1-S187T- SALVLKVS     | 223   | >RB1-S187T- TALVLKVS     | 90   | 133   |
| >RB1-S187T- NSALVLKVS    | 136   | >RB1-S187T- NTALVLKVS    | 112  | 24    |
| >RB1-S187T- NSALVLKV     | 2620  | >RB1-S187T- NTALVLKV     | 359  | 2261  |
| >RB1-S187T- NSALVLKVS    | 3381  | >RB1-S187T- NTALVLKVS    | 381  | 3000  |
| >RB1-S187T- NSALVLKV     | 54    | >RB1-S187T- NTALVLKV     | 12   | 42    |
| >RB1-S187T- NSALVLKVS    | 228   | >RB1-S187T- NTALVLKVS    | 26   | 202   |
| >RB1-S187T- NSALVLKV     | 568   | >RB1-S187T- NTALVLKV     | 30   | 538   |
| >RB1-S187T- NSALVLKVS    | 185   | >RB1-S187T- NTALVLKVS    | 149  | 36    |
| >RB1-S187T- NSALVLKVS    | 202   | >RB1-S187T- NTALVLKVS    | 221  | 19    |
| >RB1-S187T- NSALVLKVS    | 61    | >RB1-S187T- NTALVLKVS    | 135  | 74    |
| >RB1-S187T- NSALVLKVS    | 812   | >RB1-S187T- NTALVLKVS    | 286  | 526   |
| >RB1-S187T- NSALVLKVS    | 151   | >RB1-S187T- NTALVLKVS    | 103  | 48    |
| >RB1-S187T- INSALVLKVS   | 100   | >RB1-S187T- INTALVLKVS   | 117  | 17    |
| >RB1-S187T- INSALVLKVS   | 497   | >RB1-S187T- INTALVLKVS   | 521  | 24    |
| >RB1-S187T- EINSALVLKV   | 327   | >RB1-S187T- EINTALVLKV   | 517  | 190   |
| >RB1-S187T- EINSALVLKV   | 272   | >RB1-S187T- EINTALVLKV   | 604  | 332   |
| >RB1-S187T- EINSALVLKV   | 275   | >RB1-S187T- EINTALVLKV   | 507  | 232   |

|                         |      |                         |     |      |
|-------------------------|------|-------------------------|-----|------|
| >RB1-S187T- EINSALVLKV  | 175  | >RB1-S187T- EINTALVLKV  | 296 | 121  |
| >RB1-S187T- EINSALVLKV  | 104  | >RB1-S187T- EINTALVLKV  | 175 | 71   |
| >RB1-S187T- EINSALVLK   | 399  | >RB1-S187T- EINTALVLK   | 422 | 23   |
| >RB1-S187T- EINSALVLK   | 161  | >RB1-S187T- EINTALVLK   | 187 | 26   |
| >RB1-S187T- EINSALVLK   | 8    | >RB1-S187T- EINTALVLK   | 10  | 2    |
| >RB1-S187T- EINSALVLKV  | 288  | >RB1-S187T- EINTALVLKV  | 352 | 64   |
| >RB1-S187T- EINSALVL    | 309  | >RB1-S187T- EINTALVL    | 586 | 277  |
| >RB1-S187T- EINSALVLKV  | 14   | >RB1-S187T- EINTALVLKV  | 24  | 10   |
| >RB1-S187T- TEINSALV    | 21   | >RB1-S187T- TEINTALV    | 20  | 1    |
| >RB1-S187T- TEINSALVL   | 423  | >RB1-S187T- TEINTALVL   | 320 | 103  |
| >RB1-S187T- TEINSALVLKV | 266  | >RB1-S187T- TEINTALVLKV | 217 | 49   |
| >RB1-S187T- TEINSALVL   | 396  | >RB1-S187T- TEINTALVL   | 180 | 216  |
| >RB1-S187T- TEINSALVL   | 16   | >RB1-S187T- TEINTALVL   | 12  | 4    |
| >RB1-S187T- TEINSALV    | 118  | >RB1-S187T- TEINTALV    | 120 | 2    |
| >RB1-S187T- TEINSALVL   | 10   | >RB1-S187T- TEINTALVL   | 10  | 0    |
| >RB1-S187T- TEINSALVLKV | 115  | >RB1-S187T- TEINTALVLKV | 113 | 2    |
| >RB1-S187T- TEINSALVL   | 37   | >RB1-S187T- TEINTALVL   | 44  | 7    |
| >RB1-S187T- TEINSALVLKV | 158  | >RB1-S187T- TEINTALVLKV | 191 | 33   |
| >RB1-S187T- TEINSALV    | 464  | >RB1-S187T- TEINTALV    | 438 | 26   |
| >RB1-S187T- TEINSALVL   | 127  | >RB1-S187T- TEINTALVL   | 144 | 17   |
| >RB1-S187T- TEINSALVLKV | 267  | >RB1-S187T- TEINTALVLKV | 282 | 15   |
| >RB1-S187T- TEINSALV    | 256  | >RB1-S187T- TEINTALV    | 313 | 57   |
| >RB1-S187T- TEINSALVLKV | 174  | >RB1-S187T- TEINTALVLKV | 210 | 36   |
| >RB1-S187T- TEINSALV    | 245  | >RB1-S187T- TEINTALV    | 426 | 181  |
| >RB1-S187T- TEINSALVL   | 101  | >RB1-S187T- TEINTALVL   | 153 | 52   |
| >RB1-S187T- TEINSALVLKV | 21   | >RB1-S187T- TEINTALVLKV | 24  | 3    |
| >RB1-S187T- STEINSALV   | 432  | >RB1-S187T- STEINTALV   | 286 | 146  |
| >RB1-S187T- STEINSALVLK | 32   | >RB1-S187T- STEINTALVLK | 27  | 5    |
| >RB1-S187T- STEINSALVLK | 104  | >RB1-S187T- STEINTALVLK | 124 | 20   |
| >RB1-S187T- STEINSALVLK | 46   | >RB1-S187T- STEINTALVLK | 37  | 9    |
| >RB1-S187T- STEINSALV   | 167  | >RB1-S187T- STEINTALV   | 92  | 75   |
| >RB1-S187T- STEINSALV   | 256  | >RB1-S187T- STEINTALV   | 166 | 90   |
| >RB1-S187T- STEINSAL    | 48   | >RB1-S187T- STEINTAL    | 83  | 35   |
| >RB1-S187T- STEINSALVL  | 11   | >RB1-S187T- STEINTALVL  | 18  | 7    |
| >RB1-S187T- STEINSALV   | 63   | >RB1-S187T- STEINTALV   | 74  | 11   |
| >RB1-S187T- STEINSALVL  | 74   | >RB1-S187T- STEINTALVL  | 84  | 10   |
| >RB1-S187T- STEINSALVL  | 55   | >RB1-S187T- STEINTALVL  | 72  | 17   |
| >RB1-S187T- STEINSALVLK | 177  | >RB1-S187T- STEINTALVLK | 171 | 6    |
| >RB1-S187T- STEINSAL    | 359  | >RB1-S187T- STEINTAL    | 513 | 154  |
| >RB1-S187T- ISTEINSAL   | 330  | >RB1-S187T- ISTEINTAL   | 212 | 118  |
| >RB1-S187T- ISTEINSAL   | 2141 | >RB1-S187T- ISTEINTAL   | 469 | 1672 |
| >RB1-S187T- ISTEINSAL   | 395  | >RB1-S187T- ISTEINTAL   | 421 | 26   |
| >RB1-S187T- ISTEINSALV  | 183  | >RB1-S187T- ISTEINTALV  | 127 | 56   |



|                         |      |                         |       |       |
|-------------------------|------|-------------------------|-------|-------|
| >RB1-S187T- ISTEINSAL   | 470  | >RB1-S187T- ISTEINTAL   | 550   | 80    |
| >RB1-S187T- ISTEINSAL   | 27   | >RB1-S187T- ISTEINTAL   | 54    | 27    |
| >RB1-S187T- ISTEINSALV  | 14   | >RB1-S187T- ISTEINTALV  | 21    | 7     |
| >RB1-S187T- ISTEINSALV  | 238  | >RB1-S187T- ISTEINTALV  | 199   | 39    |
| >RB1-S187T- ISTEINSAL   | 105  | >RB1-S187T- ISTEINTAL   | 117   | 12    |
| >RB1-S187T- ISTEINSALV  | 57   | >RB1-S187T- ISTEINTALV  | 61    | 4     |
| >RB1-S187T- ISTEINSALV  | 52   | >RB1-S187T- ISTEINTALV  | 56    | 4     |
| >RB1-S187T- ISTEINSAL   | 30   | >RB1-S187T- ISTEINTAL   | 163   | 133   |
| >RB1-S187T- ISTEINSALV  | 418  | >RB1-S187T- ISTEINTALV  | 764   | 346   |
| >RB1-S187T- ISTEINSALV  | 60   | >RB1-S187T- ISTEINTALV  | 85    | 25    |
| >RB1-S187T- SISTEINSALV | 157  | >RB1-S187T- SISTEINTALV | 126   | 31    |
| >RB1-S187T- SISTEINSA   | 70   | >RB1-S187T- SISTEINTA   | 176   | 106   |
| >RB1-S187T- SISTEINSAL  | 46   | >RB1-S187T- SISTEINTAL  | 54    | 8     |
| >RB1-S187T- SISTEINSALV | 12   | >RB1-S187T- SISTEINTALV | 11    | 1     |
| >RB1-S187T- SISTEINSA   | 55   | >RB1-S187T- SISTEINTA   | 94    | 39    |
| >RB1-S187T- SISTEINSAL  | 122  | >RB1-S187T- SISTEINTAL  | 164   | 42    |
| >RB1-S187T- SISTEINSALV | 13   | >RB1-S187T- SISTEINTALV | 11    | 2     |
| >RB1-S187T- SISTEINSALV | 83   | >RB1-S187T- SISTEINTALV | 77    | 6     |
| >RB1-S187T- SISTEINSALV | 90   | >RB1-S187T- SISTEINTALV | 75    | 15    |
| >RB1-S187T- SISTEINSALV | 228  | >RB1-S187T- SISTEINTALV | 178   | 50    |
| >RB1-S187T- SISTEINSALV | 79   | >RB1-S187T- SISTEINTALV | 69    | 10    |
| >RB1-S187T- SISTEINSALV | 466  | >RB1-S187T- SISTEINTALV | 326   | 140   |
| >RB1-S187T- SISTEINSAL  | 277  | >RB1-S187T- SISTEINTAL  | 255   | 22    |
| >RB1-S187T- SISTEINSALV | 8    | >RB1-S187T- SISTEINTALV | 7     | 1     |
| >RB1-S187T- SISTEINSAL  | 432  | >RB1-S187T- SISTEINTAL  | 744   | 312   |
| >RB1-S187T- SISTEINSALV | 73   | >RB1-S187T- SISTEINTALV | 60    | 13    |
| >RB1-S187T- SSISTEINSAL | 152  | >RB1-S187T- SSISTEINTAL | 555   | 403   |
| >RB1-S187T- SSISTEINSAL | 1197 | >RB1-S187T- SSISTEINTAL | 456   | 741   |
| >RB1-S187T- SSISTEINSAL | 152  | >RB1-S187T- SSISTEINTAL | 190   | 38    |
| >RB1-S187T- SSISTEINSAL | 44   | >RB1-S187T- SSISTEINTAL | 63    | 19    |
| >RB1-S187T- SSISTEINSAL | 202  | >RB1-S187T- SSISTEINTAL | 304   | 102   |
| >RB1-S187T- SSISTEINSAL | 75   | >RB1-S187T- SSISTEINTAL | 215   | 140   |
| >RB1-S187T- SSISTEINSAL | 401  | >RB1-S187T- SSISTEINTAL | 679   | 278   |
| >RB1-S474N- SKLLNDNIFHI | 443  | >RB1-S474N- NKLLNDNIFH  | 2153  | 1710  |
| >RB1-S474N- SKLLNDNIF   | 15   | >RB1-S474N- NKLLNDNIF   | 72    | 57    |
| >RB1-S474N- SKLLNDNIFHI | 260  | >RB1-S474N- NKLLNDNIFH  | 1119  | 859   |
| >RB1-S474N- FSKLLNDNIF  | 146  | >RB1-S474N- FNKLLNDNIF  | 853   | 707   |
| >RB1-S474N- FSKLLNDNIF  | 72   | >RB1-S474N- FNKLLNDNIF  | 23418 | 23346 |
| >RB1-S474N- FSKLLNDNIF  | 81   | >RB1-S474N- FNKLLNDNIF  | 6014  | 5933  |
| >RB1-S474N- FSKLLNDNI   | 496  | >RB1-S474N- FNKLLNDNI   | 7539  | 7043  |
| >RB1-S474N- EEERLSIQNFS | 326  | >RB1-S474N- EEERLSIQNFI | 948   | 622   |
| >RB1-S474N- NFSKLLNDNI  | 595  | >RB1-S474N- NFNKLLNDNI  | 482   | 113   |
| >RB1-S474N- NFSKLLNDNII | 49   | >RB1-S474N- NFNKLLNDNII | 132   | 83    |

|                         |     |                         |      |      |
|-------------------------|-----|-------------------------|------|------|
| >RB1-S474N- IQNFSKLL    | 67  | >RB1-S474N- IQNFNKLL    | 171  | 104  |
| >RB1-S474N- SIQNFSKL    | 13  | >RB1-S474N- SIQNFNKL    | 36   | 23   |
| >RB1-S474N- SIQNFSKLL   | 427 | >RB1-S474N- SIQNFNKL    | 974  | 547  |
| >RB1-S474N- SIQNFSKL    | 213 | >RB1-S474N- SIQNFNKL    | 507  | 294  |
| >RB1-S474N- LSIQNFSKL   | 34  | >RB1-S474N- LSIQNFNKL   | 50   | 16   |
| >RB1-S474N- LSIQNFSKL   | 161 | >RB1-S474N- LSIQNFNKL   | 140  | 21   |
| >RB1-S474N- LSIQNFSK    | 31  | >RB1-S474N- LSIQNFNK    | 32   | 1    |
| >RB1-S474N- LSIQNFSK    | 36  | >RB1-S474N- LSIQNFNK    | 37   | 1    |
| >RB1-S474N- LSIQNFSKL   | 274 | >RB1-S474N- LSIQNFNKL   | 636  | 362  |
| >RB1-S474N- LSIQNFSKLL  | 399 | >RB1-S474N- LSIQNFNKL   | 579  | 180  |
| >RB1-S474N- LSIQNFSKL   | 17  | >RB1-S474N- LSIQNFNKL   | 143  | 126  |
| >RB1-S474N- LSIQNFSKLL  | 25  | >RB1-S474N- LSIQNFNKL   | 85   | 60   |
| >RB1-S474N- LSIQNFSKL   | 623 | >RB1-S474N- LSIQNFNKL   | 326  | 297  |
| >RB1-S474N- LSIQNFSKLL  | 172 | >RB1-S474N- LSIQNFNKL   | 189  | 17   |
| >RB1-S474N- LSIQNFSKL   | 59  | >RB1-S474N- LSIQNFNKL   | 907  | 848  |
| >RB1-S474N- LSIQNFSKLL  | 266 | >RB1-S474N- LSIQNFNKL   | 747  | 481  |
| >RB1-S474N- LSIQNFSK    | 241 | >RB1-S474N- LSIQNFNK    | 172  | 69   |
| >RB1-S474N- LSIQNFSKL   | 289 | >RB1-S474N- LSIQNFNKL   | 1297 | 1008 |
| >RB1-S474N- LSIQNFSKLL  | 299 | >RB1-S474N- LSIQNFNKL   | 218  | 81   |
| >RB1-S474N- RLSIQNFS    | 369 | >RB1-S474N- RLSIQNFN    | 2788 | 2419 |
| >RB1-S474N- RLSIQNFSKL  | 77  | >RB1-S474N- RLSIQNFNKL  | 122  | 45   |
| >RB1-S474N- RLSIQNFSKLL | 18  | >RB1-S474N- RLSIQNFNKLI | 19   | 1    |
| >RB1-S474N- RLSIQNFSKL  | 98  | >RB1-S474N- RLSIQNFNKL  | 238  | 140  |
| >RB1-S474N- RLSIQNFSKLL | 167 | >RB1-S474N- RLSIQNFNKLI | 291  | 124  |
| >RB1-S474N- RLSIQNFSKL  | 78  | >RB1-S474N- RLSIQNFNKL  | 148  | 70   |
| >RB1-S474N- RLSIQNFSKLL | 138 | >RB1-S474N- RLSIQNFNKLI | 210  | 72   |
| >RB1-S474N- RLSIQNFSKL  | 215 | >RB1-S474N- RLSIQNFNKL  | 240  | 25   |
| >RB1-S474N- RLSIQNFSKL  | 164 | >RB1-S474N- RLSIQNFNKL  | 219  | 55   |
| >RB1-S474N- RLSIQNFSKLL | 354 | >RB1-S474N- RLSIQNFNKLI | 565  | 211  |
| >RB1-S474N- RLSIQNFSKL  | 10  | >RB1-S474N- RLSIQNFNKL  | 18   | 8    |
| >RB1-S474N- RLSIQNFSKLL | 31  | >RB1-S474N- RLSIQNFNKLI | 42   | 11   |
| >RB1-S474N- RLSIQNFSK   | 37  | >RB1-S474N- RLSIQNFNK   | 35   | 2    |
| >RB1-S474N- RLSIQNFSK   | 22  | >RB1-S474N- RLSIQNFNK   | 21   | 1    |
| >RB1-S474N- RLSIQNFSK   | 26  | >RB1-S474N- RLSIQNFNK   | 38   | 12   |
| >RB1-S474N- RLSIQNFSK   | 82  | >RB1-S474N- RLSIQNFNK   | 44   | 38   |
| >RB1-S474N- RLSIQNFSKL  | 213 | >RB1-S474N- RLSIQNFNKL  | 348  | 135  |
| >RB1-S474N- RLSIQNFSK   | 936 | >RB1-S474N- RLSIQNFNK   | 441  | 495  |
| >RB1-S474N- ERLSIQNFSKL | 337 | >RB1-S474N- ERLSIQNFNKI | 575  | 238  |
| >RB1-S474N- ERLSIQNFSKL | 211 | >RB1-S474N- ERLSIQNFNKI | 310  | 99   |
| >RB1-S612P- SPKKKGST    | 313 | >RB1-S612P- PPKKKGST    | 7617 | 7304 |
| >RB1-S612P- SPKKKGSTT   | 342 | >RB1-S612P- PPKKKGSTT   | 8657 | 8315 |
| >RB1-S612P- SPKKKGSTTR  | 70  | >RB1-S612P- PPKKKGSTTR  | 1775 | 1705 |
| >RB1-S612P- SPKKKGSTTR  | 166 | >RB1-S612P- PPKKKGSTTR  | 1441 | 1275 |

|                          |       |                          |      |       |
|--------------------------|-------|--------------------------|------|-------|
| >RB1-S612P- RSPKKKGSTT   | 74    | >RB1-S612P- RPPKKKGSTT   | 6016 | 5942  |
| >RB1-S612P- RSPKKKGST    | 21901 | >RB1-S612P- RPPKKKGST    | 96   | 21805 |
| >RB1-S612P- RSPKKKGSTT   | 26904 | >RB1-S612P- RPPKKKGSTT   | 469  | 26435 |
| >RB1-S612P- RSPKKKGSTT   | 674   | >RB1-S612P- RPPKKKGSTT   | 412  | 262   |
| >RB1-S612P- PVRSPKKK     | 43    | >RB1-S612P- PVRPPKKK     | 35   | 8     |
| >RB1-S612P- LSPVRSPK     | 389   | >RB1-S612P- LSPVRPPK     | 435  | 46    |
| >RB1-S612P- LSPVRSPK     | 430   | >RB1-S612P- LSPVRPPK     | 224  | 206   |
| >RB1-S612P- LSPVRSPKK    | 404   | >RB1-S612P- LSPVRPPKK    | 945  | 541   |
| >RB1-S612P- YLSPVRSPK    | 85    | >RB1-S612P- YLSPVRPPK    | 39   | 46    |
| >RB1-S612P- YLSPVRSPKK   | 66    | >RB1-S612P- YLSPVRPPKK   | 65   | 1     |
| >RB1-S612P- YLSPVRSPKKI  | 478   | >RB1-S612P- YLSPVRPPKKI  | 422  | 56    |
| >RB1-S612P- YLSPVRSPK    | 47    | >RB1-S612P- YLSPVRPPK    | 63   | 16    |
| >RB1-S612P- YLSPVRSPKK   | 49    | >RB1-S612P- YLSPVRPPKK   | 104  | 55    |
| >RB1-S612P- YLSPVRSPKKI  | 102   | >RB1-S612P- YLSPVRPPKKI  | 112  | 10    |
| >RB1-S612P- YLSPVRSPK    | 29    | >RB1-S612P- YLSPVRPPK    | 35   | 6     |
| >RB1-S612P- YLSPVRSPKK   | 104   | >RB1-S612P- YLSPVRPPKK   | 148  | 44    |
| >RB1-S612P- YLSPVRSPKKI  | 349   | >RB1-S612P- YLSPVRPPKKI  | 386  | 37    |
| >RB1-S612P- YLSPVRSPK    | 633   | >RB1-S612P- YLSPVRPPK    | 127  | 506   |
| >RB1-S612P- YLSPVRSPK    | 474   | >RB1-S612P- YLSPVRPPK    | 1476 | 1002  |
| >RB1-S612P- YLSPVRSPK    | 47    | >RB1-S612P- YLSPVRPPK    | 116  | 69    |
| >RB1-S612P- YLSPVRSPKK   | 111   | >RB1-S612P- YLSPVRPPKK   | 275  | 164   |
| >RB1-S612P- YLSPVRSPKKI  | 348   | >RB1-S612P- YLSPVRPPKKI  | 602  | 254   |
| >RB1-S612P- YLSPVRSPKK   | 296   | >RB1-S612P- YLSPVRPPKK   | 229  | 67    |
| >RB1-S612P- MYLSPVRSPK   | 12    | >RB1-S612P- MYLSPVRPPK   | 8    | 4     |
| >RB1-S612P- MYLSPVRSPK   | 19    | >RB1-S612P- MYLSPVRPPK   | 22   | 3     |
| >RB1-S612P- MYLSPVRSPK   | 89    | >RB1-S612P- MYLSPVRPPK   | 184  | 95    |
| >RB1-S612P- MYLSPVRSPK   | 270   | >RB1-S612P- MYLSPVRPPK   | 250  | 20    |
| >RB1-S612P- MYLSPVRSPK   | 431   | >RB1-S612P- MYLSPVRPPK   | 1995 | 1564  |
| >RB1-S612P- MYLSPVRSPK   | 233   | >RB1-S612P- MYLSPVRPPK   | 140  | 93    |
| >RB1-S612P- MYLSPVRSPK   | 483   | >RB1-S612P- MYLSPVRPPK   | 354  | 129   |
| >RB1-S612P- MYLSPVRSP    | 274   | >RB1-S612P- MYLSPVRPP    | 382  | 108   |
| >RB1-S612P- DMYLSPVRSF   | 96    | >RB1-S612P- DMYLSPVRPF   | 132  | 36    |
| >RB1-S612P- DMYLSPVRSF   | 155   | >RB1-S612P- DMYLSPVRPF   | 165  | 10    |
| >RB1-S612P- DMYLSPVRSF   | 75    | >RB1-S612P- DMYLSPVRPF   | 127  | 52    |
| >RB1-S612P- DMYLSPVRSF   | 74    | >RB1-S612P- DMYLSPVRPF   | 135  | 61    |
| >RB1-S794I-v SSPLRIPGGNI | 396   | >RB1-S794I-r ISPLRIPGGNI | 350  | 46    |
| >RB1-S794I-v SSPLRIPGGNI | 23    | >RB1-S794I-r ISPLRIPGGNI | 18   | 5     |
| >RB1-S794I-v SSPLRIPGGNI | 80    | >RB1-S794I-r ISPLRIPGGNI | 149  | 69    |
| >RB1-S794I-v HIPRSPYKFPS | 2096  | >RB1-S794I-r HIPRSPYKFPI | 48   | 2048  |
| >RB1-S794I-v FPSSPLRI    | 1414  | >RB1-S794I-r FPISPLRI    | 108  | 1306  |
| >RB1-S794I-v FPSSPLRI    | 274   | >RB1-S794I-r FPISPLRI    | 270  | 4     |
| >RB1-S794I-v FPSSPLRI    | 91    | >RB1-S794I-r FPISPLRI    | 77   | 14    |
| >RB1-S794I-v FPSSPLRI    | 37    | >RB1-S794I-r FPISPLRI    | 29   | 8     |

|                          |       |                          |     |       |
|--------------------------|-------|--------------------------|-----|-------|
| >RB1-S794I-v FPSSPLRI    | 343   | >RB1-S794I-r FPISPLRI    | 39  | 304   |
| >RB1-S794I-v FPSSPLRIP   | 97    | >RB1-S794I-r FPISPLRIP   | 22  | 75    |
| >RB1-S794I-v FPSSPLRIPG  | 212   | >RB1-S794I-r FPISPLRIPG  | 73  | 139   |
| >RB1-S794I-v FPSSPLRIPGC | 217   | >RB1-S794I-r FPISPLRIPGG | 41  | 176   |
| >RB1-S794I-v KFPSSPLRI   | 117   | >RB1-S794I-r KFPISPLRI   | 424 | 307   |
| >RB1-S794I-v KFPSSPLRI   | 117   | >RB1-S794I-r KFPISPLRI   | 145 | 28    |
| >RB1-S794I-v KFPSSPLRI   | 206   | >RB1-S794I-r KFPISPLRI   | 448 | 242   |
| >RB1-S794I-v KFPSSPLR    | 36    | >RB1-S794I-r KFPISPLR    | 49  | 13    |
| >RB1-S794I-v KFPSSPLR    | 18    | >RB1-S794I-r KFPISPLR    | 14  | 4     |
| >RB1-S794I-v KFPSSPLRI   | 406   | >RB1-S794I-r KFPISPLRI   | 541 | 135   |
| >RB1-S794I-v YKFPSSPL    | 540   | >RB1-S794I-r YKFPISPL    | 171 | 369   |
| >RB1-S794I-v YKFPSSPL    | 343   | >RB1-S794I-r YKFPISPL    | 141 | 202   |
| >RB1-S794I-v YKFPSSPL    | 919   | >RB1-S794I-r YKFPISPL    | 301 | 618   |
| >RB1-S794I-v YKFPSSPLR   | 64    | >RB1-S794I-r YKFPISPLR   | 32  | 32    |
| >RB1-S794I-v YKFPSSPL    | 2     | >RB1-S794I-r YKFPISPL    | 3   | 1     |
| >RB1-S794I-v YKFPSSPLR   | 17    | >RB1-S794I-r YKFPISPLR   | 61  | 44    |
| >RB1-S794I-v YKFPSSPLRI  | 5     | >RB1-S794I-r YKFPISPLRI  | 16  | 11    |
| >RB1-S794I-v YKFPSSPLRIP | 57    | >RB1-S794I-r YKFPISPLRIP | 183 | 126   |
| >RB1-S794I-v YKFPSSPL    | 12    | >RB1-S794I-r YKFPISPL    | 15  | 3     |
| >RB1-S794I-v YKFPSSPLRI  | 296   | >RB1-S794I-r YKFPISPLRI  | 533 | 237   |
| >RB1-S794I-v YKFPSSPL    | 435   | >RB1-S794I-r YKFPISPL    | 344 | 91    |
| >RB1-S794I-v YKFPSSPLR   | 407   | >RB1-S794I-r YKFPISPLR   | 139 | 268   |
| >RB1-S794I-v PYKFPSSPLRI | 478   | >RB1-S794I-r PYKFPISPLRI | 565 | 87    |
| >RB1-S794I-v PYKFPSSPLR  | 183   | >RB1-S794I-r PYKFPISPLR  | 109 | 74    |
| >RB1-S794I-v SPYKFPSSPL  | 304   | >RB1-S794I-r SPYKFPISPL  | 187 | 117   |
| >RB1-S794I-v SPYKFPSSPLR | 207   | >RB1-S794I-r SPYKFPISPLR | 179 | 28    |
| >RB1-S794I-v SPYKFPSSPL  | 343   | >RB1-S794I-r SPYKFPISPL  | 280 | 63    |
| >RB1-S794I-v SPYKFPSSPL  | 29    | >RB1-S794I-r SPYKFPISPL  | 40  | 11    |
| >RB1-S794I-v SPYKFPSSPL  | 242   | >RB1-S794I-r SPYKFPISPL  | 418 | 176   |
| >RB1-S794I-v SPYKFPSSPL  | 46    | >RB1-S794I-r SPYKFPISPL  | 61  | 15    |
| >RB1-S794I-v SPYKFPSS    | 665   | >RB1-S794I-r SPYKFPIS    | 399 | 266   |
| >RB1-S794I-v SPYKFPSSPL  | 370   | >RB1-S794I-r SPYKFPISPL  | 459 | 89    |
| >RB1-S794I-v SPYKFPSSPLR | 146   | >RB1-S794I-r SPYKFPISPLR | 69  | 77    |
| >RB1-S794I-v RSPYKFPSSPL | 176   | >RB1-S794I-r RSPYKFPISPL | 193 | 17    |
| >RB1-S794I-v RSPYKFPS    | 7056  | >RB1-S794I-r RSPYKFPI    | 47  | 7009  |
| >RB1-S794I-v RSPYKFPSSPL | 138   | >RB1-S794I-r RSPYKFPISPL | 248 | 110   |
| >RB1-S794I-v RSPYKFPSSPL | 445   | >RB1-S794I-r RSPYKFPISPL | 568 | 123   |
| >RB1-S794I-v RSPYKFPSSPL | 36    | >RB1-S794I-r RSPYKFPISPL | 56  | 20    |
| >RB1-S794I-v RSPYKFPS    | 14078 | >RB1-S794I-r RSPYKFPI    | 64  | 14014 |
| >RB1-S794I-v RSPYKFPS    | 308   | >RB1-S794I-r RSPYKFPI    | 55  | 253   |
| >RB1-S794I-v RSPYKFPSSPL | 5     | >RB1-S794I-r RSPYKFPISPL | 4   | 1     |
| >RB1-S794I-v RSPYKFPS    | 24815 | >RB1-S794I-r RSPYKFPI    | 36  | 24779 |
| >RB1-S794I-v RSPYKFPSSPL | 130   | >RB1-S794I-r RSPYKFPISPL | 150 | 20    |

|                          |      |                          |      |      |
|--------------------------|------|--------------------------|------|------|
| >RB1-S794I-v IPRSPYKFPS  | 634  | >RB1-S794I-r IPRSPYKFPI  | 21   | 613  |
| >RB1-S794I-v IPRSPYKFPSS | 111  | >RB1-S794I-r IPRSPYKFPIS | 68   | 43   |
| >RB1-V654L- VYRLAYLRL    | 137  | >RB1-V654L- LYRLAYLRL    | 359  | 222  |
| >RB1-V654L- VYRLAYLRL    | 205  | >RB1-V654L- LYRLAYLRL    | 341  | 136  |
| >RB1-V654L- VYRLAYLRL    | 185  | >RB1-V654L- LYRLAYLRL    | 188  | 3    |
| >RB1-V654L- VYRLAYLRL    | 42   | >RB1-V654L- LYRLAYLRL    | 26   | 16   |
| >RB1-V654L- VYRLAYLR     | 198  | >RB1-V654L- LYRLAYLR     | 76   | 122  |
| >RB1-V654L- VYRLAYLRL    | 44   | >RB1-V654L- LYRLAYLRL    | 18   | 26   |
| >RB1-V654L- VYRLAYLRLN   | 981  | >RB1-V654L- LYRLAYLRLN   | 437  | 544  |
| >RB1-V654L- VYRLAYLRLN   | 249  | >RB1-V654L- LYRLAYLRLN   | 88   | 161  |
| >RB1-V654L- VYRLAYLR     | 21   | >RB1-V654L- LYRLAYLR     | 19   | 2    |
| >RB1-V654L- VYRLAYLR     | 31   | >RB1-V654L- LYRLAYLR     | 25   | 6    |
| >RB1-V654L- VYRLAYLR     | 45   | >RB1-V654L- LYRLAYLR     | 44   | 1    |
| >RB1-V654L- KVYRLAYL     | 9    | >RB1-V654L- KLYRLAYL     | 22   | 13   |
| >RB1-V654L- KVYRLAYL     | 78   | >RB1-V654L- KLYRLAYL     | 13   | 65   |
| >RB1-V654L- KVYRLAYLRL   | 1564 | >RB1-V654L- KLYRLAYLRL   | 95   | 1469 |
| >RB1-V654L- KVYRLAYL     | 41   | >RB1-V654L- KLYRLAYL     | 7    | 34   |
| >RB1-V654L- KVYRLAYLRL   | 233  | >RB1-V654L- KLYRLAYLRL   | 32   | 201  |
| >RB1-V654L- KVYRLAYL     | 71   | >RB1-V654L- KLYRLAYL     | 11   | 60   |
| >RB1-V654L- KVYRLAYLRL   | 376  | >RB1-V654L- KLYRLAYLRL   | 64   | 312  |
| >RB1-V654L- KVYRLAYL     | 16   | >RB1-V654L- KLYRLAYL     | 28   | 12   |
| >RB1-V654L- KVYRLAYLRL   | 579  | >RB1-V654L- KLYRLAYLRL   | 441  | 138  |
| >RB1-V654L- KVYRLAYL     | 20   | >RB1-V654L- KLYRLAYL     | 2    | 18   |
| >RB1-V654L- KVYRLAYLRL   | 231  | >RB1-V654L- KLYRLAYLRL   | 5    | 226  |
| >RB1-V654L- KVYRLAYL     | 143  | >RB1-V654L- KLYRLAYL     | 4    | 139  |
| >RB1-V654L- KVYRLAYLRL   | 2719 | >RB1-V654L- KLYRLAYLRL   | 37   | 2682 |
| >RB1-V654L- KVYRLAYL     | 138  | >RB1-V654L- KLYRLAYL     | 8    | 130  |
| >RB1-V654L- KVYRLAYLRL   | 859  | >RB1-V654L- KLYRLAYLRL   | 14   | 845  |
| >RB1-V654L- KVYRLAYL     | 2459 | >RB1-V654L- KLYRLAYL     | 22   | 2437 |
| >RB1-V654L- KVYRLAYL     | 119  | >RB1-V654L- KLYRLAYL     | 4    | 115  |
| >RB1-V654L- KVYRLAYLRL   | 497  | >RB1-V654L- KLYRLAYLRL   | 6    | 491  |
| >RB1-V654L- KVYRLAYLR    | 49   | >RB1-V654L- KLYRLAYLR    | 32   | 17   |
| >RB1-V654L- KVYRLAYLR    | 16   | >RB1-V654L- KLYRLAYLR    | 43   | 27   |
| >RB1-V654L- KVYRLAYL     | 47   | >RB1-V654L- KLYRLAYL     | 408  | 361  |
| >RB1-V654L- KVYRLAYLR    | 311  | >RB1-V654L- KLYRLAYLR    | 2416 | 2105 |
| >RB1-V654L- KVYRLAYLRL   | 92   | >RB1-V654L- KLYRLAYLRL   | 822  | 730  |
| >RB1-V654L- KVYRLAYL     | 108  | >RB1-V654L- KLYRLAYL     | 191  | 83   |
| >RB1-V654L- KVYRLAYLR    | 6    | >RB1-V654L- KLYRLAYLR    | 7    | 1    |
| >RB1-V654L- KVYRLAYL     | 83   | >RB1-V654L- KLYRLAYL     | 78   | 5    |
| >RB1-V654L- KVYRLAYLR    | 196  | >RB1-V654L- KLYRLAYLR    | 172  | 24   |
| >RB1-V654L- KVYRLAYLRL   | 39   | >RB1-V654L- KLYRLAYLRL   | 37   | 2    |
| >RB1-V654L- KVYRLAYLR    | 25   | >RB1-V654L- KLYRLAYLR    | 162  | 137  |
| >RB1-V654L- KVYRLAYL     | 1703 | >RB1-V654L- KLYRLAYL     | 320  | 1383 |

|                         |      |                         |      |      |
|-------------------------|------|-------------------------|------|------|
| >RB1-V654L- KVVYRLAYLRL | 2238 | >RB1-V654L- KLYRLAYLRL  | 490  | 1748 |
| >RB1-V654L- KVVYRLAYL   | 53   | >RB1-V654L- KLYRLAYL    | 408  | 355  |
| >RB1-V654L- KVVYRLAYLRL | 50   | >RB1-V654L- KLYRLAYLRL  | 393  | 343  |
| >RB1-V654L- KVVYRLAYL   | 97   | >RB1-V654L- KLYRLAYL    | 631  | 534  |
| >RB1-V654L- KVVYRLAYLRL | 77   | >RB1-V654L- KLYRLAYLRL  | 540  | 463  |
| >RB1-V654L- KVVYRLAYL   | 844  | >RB1-V654L- KLYRLAYL    | 415  | 429  |
| >RB1-V654L- KVVYRLAYLR  | 12   | >RB1-V654L- KLYRLAYLR   | 11   | 1    |
| >RB1-V654L- STSLSLFYKKV | 496  | >RB1-V654L- STSLSLFYKKL | 3441 | 2945 |
| >RB1-V654L- STSLSLFYKKV | 93   | >RB1-V654L- STSLSLFYKKL | 737  | 644  |
| >RB1-V654L- STSLSLFYKKV | 263  | >RB1-V654L- STSLSLFYKKL | 1812 | 1549 |
| >RB1-V654L- STSLSLFYKKV | 522  | >RB1-V654L- STSLSLFYKKL | 19   | 503  |
| >RB1-V654L- STSLSLFYKKV | 554  | >RB1-V654L- STSLSLFYKKL | 95   | 459  |
| >RB1-V654L- STSLSLFYKKV | 621  | >RB1-V654L- STSLSLFYKKL | 184  | 437  |
| >RB1-V654L- STSLSLFYKKV | 1156 | >RB1-V654L- STSLSLFYKKL | 226  | 930  |
| >RB1-V654L- KVVYRLAYLRI | 566  | >RB1-V654L- KKLYRLAYLRL | 447  | 119  |
| >RB1-V654L- KVVYRLAYL   | 612  | >RB1-V654L- KKLYRLAYL   | 459  | 153  |
| >RB1-V654L- KVVYRLAY    | 390  | >RB1-V654L- KKLYRLAY    | 326  | 64   |
| >RB1-V654L- KVVYRLAYLR  | 62   | >RB1-V654L- KKLYRLAYLR  | 32   | 30   |
| >RB1-V654L- KVVYRLAY    | 5    | >RB1-V654L- KKLYRLAY    | 5    | 0    |
| >RB1-V654L- KVVYRLAYL   | 35   | >RB1-V654L- KKLYRLAYL   | 25   | 10   |
| >RB1-V654L- KVVYRLAYLR  | 820  | >RB1-V654L- KKLYRLAYLR  | 474  | 346  |
| >RB1-V654L- KVVYRLAYLRI | 62   | >RB1-V654L- KKLYRLAYLRL | 42   | 20   |
| >RB1-V654L- KVVYRLAYLRI | 576  | >RB1-V654L- KKLYRLAYLRL | 321  | 255  |
| >RB1-V654L- KVVYRLAYLRI | 715  | >RB1-V654L- KKLYRLAYLRL | 394  | 321  |
| >RB1-V654L- KVVYRLAYLR  | 54   | >RB1-V654L- KKLYRLAYLR  | 43   | 11   |
| >RB1-V654L- YKKVYRLAY   | 322  | >RB1-V654L- YKKLYRLAY   | 271  | 51   |
| >RB1-V654L- YKKVYRLA    | 367  | >RB1-V654L- YKKLYRLA    | 853  | 486  |
| >RB1-V654L- YKKVYRLAY   | 3    | >RB1-V654L- YKKLYRLAY   | 5    | 2    |
| >RB1-V654L- YKKVYRLAYL  | 21   | >RB1-V654L- YKKLYRLAYL  | 41   | 20   |
| >RB1-V654L- YKKVYRLAYLI | 296  | >RB1-V654L- YKKLYRLAYLF | 668  | 372  |
| >RB1-V654L- YKKVYRLAYLI | 408  | >RB1-V654L- YKKLYRLAYLF | 187  | 221  |
| >RB1-V654L- FYKKVYRL    | 317  | >RB1-V654L- FYKKLYRL    | 375  | 58   |
| >RB1-V654L- FYKKVYRLAYI | 90   | >RB1-V654L- FYKKLYRLAYL | 121  | 31   |
| >RB1-V654L- FYKKVYRLAYI | 248  | >RB1-V654L- FYKKLYRLAYL | 257  | 9    |
| >RB1-V654L- FYKKVYRL    | 109  | >RB1-V654L- FYKKLYRL    | 135  | 26   |
| >RB1-V654L- FYKKVYRLAYI | 268  | >RB1-V654L- FYKKLYRLAYL | 471  | 203  |
| >RB1-V654L- FYKKVYRL    | 209  | >RB1-V654L- FYKKLYRL    | 312  | 103  |
| >RB1-V654L- FYKKVYRLAYI | 276  | >RB1-V654L- FYKKLYRLAYL | 388  | 112  |
| >RB1-V654L- FYKKVYRL    | 8    | >RB1-V654L- FYKKLYRL    | 9    | 1    |
| >RB1-V654L- FYKKVYRLAY  | 210  | >RB1-V654L- FYKKLYRLAY  | 267  | 57   |
| >RB1-V654L- FYKKVYRLAYI | 6    | >RB1-V654L- FYKKLYRLAYL | 6    | 0    |
| >RB1-V654L- FYKKVYRLAY  | 13   | >RB1-V654L- FYKKLYRLAY  | 24   | 11   |
| >RB1-V654L- FYKKVYRLAY  | 302  | >RB1-V654L- FYKKLYRLAY  | 228  | 74   |

|                          |      |                         |     |     |
|--------------------------|------|-------------------------|-----|-----|
| >RB1-V654L- FYKKVYRL     | 727  | >RB1-V654L- FYKKLYRL    | 491 | 236 |
| >RB1-V654L- FYKKVYRLAYI  | 647  | >RB1-V654L- FYKKLYRLAYL | 415 | 232 |
| >RB1-V654L- FYKKVYRLAY   | 226  | >RB1-V654L- FYKKLYRLAY  | 232 | 6   |
| >RB1-V654L- LFYKKVYRL    | 289  | >RB1-V654L- LFYKKLYRL   | 154 | 135 |
| >RB1-V654L- LFYKKVYRL    | 270  | >RB1-V654L- LFYKKLYRL   | 220 | 50  |
| >RB1-V654L- LFYKKVYRL    | 89   | >RB1-V654L- LFYKKLYRL   | 48  | 41  |
| >RB1-V654L- LFYKKVYRL    | 69   | >RB1-V654L- LFYKKLYRL   | 67  | 2   |
| >RB1-V654L- LFYKKVYRLA\  | 9    | >RB1-V654L- LFYKKLYRLAY | 8   | 1   |
| >RB1-V654L- LFYKKVYRLA\  | 350  | >RB1-V654L- LFYKKLYRLAY | 288 | 62  |
| >RB1-V654L- LFYKKVYR     | 6    | >RB1-V654L- LFYKKLYR    | 7   | 1   |
| >RB1-V654L- LFYKKVYR     | 26   | >RB1-V654L- LFYKKLYR    | 32  | 6   |
| >RB1-V654L- LFYKKVYR     | 137  | >RB1-V654L- LFYKKLYR    | 279 | 142 |
| >RB1-V654L- LFYKKVYRLA\  | 172  | >RB1-V654L- LFYKKLYRLAY | 162 | 10  |
| >RB1-V654L- LFYKKVYRL    | 222  | >RB1-V654L- LFYKKLYRL   | 279 | 57  |
| >RB1-V654L- LFYKKVYRLA\  | 179  | >RB1-V654L- LFYKKLYRLAY | 265 | 86  |
| >RB1-V654L- LFYKKVYRLA\  | 349  | >RB1-V654L- LFYKKLYRLAY | 433 | 84  |
| >RB1-V654L- LFYKKVYRLA\  | 297  | >RB1-V654L- LFYKKLYRLAY | 465 | 168 |
| >RB1-V654L- LFYKKVYRLA\  | 305  | >RB1-V654L- LFYKKLYRLAY | 404 | 99  |
| >RB1-V654L- LFYKKVYRLA\  | 110  | >RB1-V654L- LFYKKLYRLAY | 182 | 72  |
| >RB1-V654L- LFYKKVYRLA\  | 239  | >RB1-V654L- LFYKKLYRLAY | 245 | 6   |
| >RB1-V654L- LFYKKVYR     | 18   | >RB1-V654L- LFYKKLYR    | 17  | 1   |
| >RB1-V654L- SLFYKKVYRL   | 100  | >RB1-V654L- SLFYKKLYRL  | 41  | 59  |
| >RB1-V654L- SLFYKKVYRLA\ | 449  | >RB1-V654L- SLFYKKLYRLA | 459 | 10  |
| >RB1-V654L- SLFYKKVYRL   | 30   | >RB1-V654L- SLFYKKLYRL  | 21  | 9   |
| >RB1-V654L- SLFYKKVYRLA\ | 153  | >RB1-V654L- SLFYKKLYRLA | 230 | 77  |
| >RB1-V654L- SLFYKKVYRL   | 145  | >RB1-V654L- SLFYKKLYRL  | 86  | 59  |
| >RB1-V654L- SLFYKKVYRLA\ | 118  | >RB1-V654L- SLFYKKLYRLA | 131 | 13  |
| >RB1-V654L- SLFYKKVYRL   | 750  | >RB1-V654L- SLFYKKLYRL  | 229 | 521 |
| >RB1-V654L- SLFYKKVYRL   | 7    | >RB1-V654L- SLFYKKLYRL  | 9   | 2   |
| >RB1-V654L- SLFYKKVYRLA\ | 89   | >RB1-V654L- SLFYKKLYRLA | 154 | 65  |
| >RB1-V654L- SLFYKKVYRL   | 29   | >RB1-V654L- SLFYKKLYRL  | 35  | 6   |
| >RB1-V654L- SLFYKKVYRL   | 19   | >RB1-V654L- SLFYKKLYRL  | 24  | 5   |
| >RB1-V654L- SLFYKKVYRLA\ | 190  | >RB1-V654L- SLFYKKLYRLA | 271 | 81  |
| >RB1-V654L- SLFYKKVYRL   | 391  | >RB1-V654L- SLFYKKLYRL  | 730 | 339 |
| >RB1-V654L- SLFYKKVYRL   | 7    | >RB1-V654L- SLFYKKLYRL  | 8   | 1   |
| >RB1-V654L- SLFYKKVYRLA\ | 151  | >RB1-V654L- SLFYKKLYRLA | 180 | 29  |
| >RB1-V654L- SLFYKKVY     | 1268 | >RB1-V654L- SLFYKKLY    | 309 | 959 |
| >RB1-V654L- SLFYKKVYR    | 146  | >RB1-V654L- SLFYKKLYR   | 67  | 79  |
| >RB1-V654L- SLFYKKVYR    | 123  | >RB1-V654L- SLFYKKLYR   | 46  | 77  |
| >RB1-V654L- SLFYKKVY     | 240  | >RB1-V654L- SLFYKKLY    | 26  | 214 |
| >RB1-V654L- SLFYKKVY     | 141  | >RB1-V654L- SLFYKKLY    | 139 | 2   |
| >RB1-V654L- SLFYKKVYR    | 7    | >RB1-V654L- SLFYKKLYR   | 11  | 4   |
| >RB1-V654L- SLFYKKVYRL   | 58   | >RB1-V654L- SLFYKKLYRL  | 118 | 60  |

|                         |      |                         |      |      |
|-------------------------|------|-------------------------|------|------|
| >RB1-V654L- SLFYKKVYR   | 59   | >RB1-V654L- SLFYKKLYR   | 127  | 68   |
| >RB1-V654L- SLFYKKVYR   | 13   | >RB1-V654L- SLFYKKLYR   | 28   | 15   |
| >RB1-V654L- SLFYKKVY    | 1135 | >RB1-V654L- SLFYKKLY    | 66   | 1069 |
| >RB1-V654L- SLFYKKVY    | 91   | >RB1-V654L- SLFYKKLY    | 300  | 209  |
| >RB1-V654L- SLFYKKVY    | 77   | >RB1-V654L- SLFYKKLY    | 126  | 49   |
| >RB1-V654L- SLFYKKVY    | 67   | >RB1-V654L- SLFYKKLY    | 221  | 154  |
| >RB1-V654L- SLFYKKVY    | 638  | >RB1-V654L- SLFYKKLY    | 201  | 437  |
| >RB1-V654L- SLFYKKVYR   | 26   | >RB1-V654L- SLFYKKLYR   | 23   | 3    |
| >RB1-V654L- LSLFYKKV    | 173  | >RB1-V654L- LSLFYKKL    | 35   | 138  |
| >RB1-V654L- LSLFYKKVYRL | 260  | >RB1-V654L- LSLFYKKLYRL | 157  | 103  |
| >RB1-V654L- LSLFYKKVYR  | 168  | >RB1-V654L- LSLFYKKLYR  | 91   | 77   |
| >RB1-V654L- LSLFYKKVYR  | 96   | >RB1-V654L- LSLFYKKLYR  | 43   | 53   |
| >RB1-V654L- LSLFYKKVY   | 1437 | >RB1-V654L- LSLFYKKLY   | 107  | 1330 |
| >RB1-V654L- LSLFYKKVY   | 420  | >RB1-V654L- LSLFYKKLY   | 471  | 51   |
| >RB1-V654L- LSLFYKKVYR  | 4    | >RB1-V654L- LSLFYKKLYR  | 5    | 1    |
| >RB1-V654L- LSLFYKKVYR  | 149  | >RB1-V654L- LSLFYKKLYR  | 162  | 13   |
| >RB1-V654L- LSLFYKKVYR  | 21   | >RB1-V654L- LSLFYKKLYR  | 27   | 6    |
| >RB1-V654L- LSLFYKKVY   | 91   | >RB1-V654L- LSLFYKKLY   | 420  | 329  |
| >RB1-V654L- LSLFYKKV    | 951  | >RB1-V654L- LSLFYKKL    | 25   | 926  |
| >RB1-V654L- LSLFYKKVY   | 7    | >RB1-V654L- LSLFYKKLY   | 8    | 1    |
| >RB1-V654L- LSLFYKKVYRL | 14   | >RB1-V654L- LSLFYKKLYRL | 17   | 3    |
| >RB1-V654L- LSLFYKKVY   | 23   | >RB1-V654L- LSLFYKKLY   | 13   | 10   |
| >RB1-V654L- LSLFYKKVYRL | 388  | >RB1-V654L- LSLFYKKLYRL | 268  | 120  |
| >RB1-V654L- LSLFYKKVYR  | 387  | >RB1-V654L- LSLFYKKLYR  | 300  | 87   |
| >RB1-V654L- LSLFYKKVYR  | 194  | >RB1-V654L- LSLFYKKLYR  | 167  | 27   |
| >RB1-V654L- SLSLFYKKV   | 34   | >RB1-V654L- SLSLFYKKL   | 52   | 18   |
| >RB1-V654L- SLSLFYKKV   | 27   | >RB1-V654L- SLSLFYKKL   | 291  | 264  |
| >RB1-V654L- SLSLFYKKV   | 19   | >RB1-V654L- SLSLFYKKL   | 279  | 260  |
| >RB1-V654L- SLSLFYKKV   | 303  | >RB1-V654L- SLSLFYKKL   | 2945 | 2642 |
| >RB1-V654L- SLSLFYKKV   | 27   | >RB1-V654L- SLSLFYKKL   | 458  | 431  |
| >RB1-V654L- SLSLFYKKV   | 288  | >RB1-V654L- SLSLFYKKL   | 3978 | 3690 |
| >RB1-V654L- SLSLFYKKV   | 4    | >RB1-V654L- SLSLFYKKL   | 31   | 27   |
| >RB1-V654L- SLSLFYKKVY  | 959  | >RB1-V654L- SLSLFYKKLY  | 453  | 506  |
| >RB1-V654L- SLSLFYKKVYR | 847  | >RB1-V654L- SLSLFYKKLYR | 432  | 415  |
| >RB1-V654L- SLSLFYKKVYR | 263  | >RB1-V654L- SLSLFYKKLYR | 143  | 120  |
| >RB1-V654L- SLSLFYKKVY  | 272  | >RB1-V654L- SLSLFYKKLY  | 175  | 97   |
| >RB1-V654L- SLSLFYKKVY  | 478  | >RB1-V654L- SLSLFYKKLY  | 156  | 322  |
| >RB1-V654L- SLSLFYKKVYR | 17   | >RB1-V654L- SLSLFYKKLYR | 27   | 10   |
| >RB1-V654L- SLSLFYKKVYR | 240  | >RB1-V654L- SLSLFYKKLYR | 433  | 193  |
| >RB1-V654L- SLSLFYKKVYR | 85   | >RB1-V654L- SLSLFYKKLYR | 154  | 69   |
| >RB1-V654L- SLSLFYKKVY  | 429  | >RB1-V654L- SLSLFYKKLY  | 783  | 354  |
| >RB1-V654L- SLSLFYKKVY  | 481  | >RB1-V654L- SLSLFYKKLY  | 1390 | 909  |
| >RB1-V654L- SLSLFYKKVY  | 97   | >RB1-V654L- SLSLFYKKLY  | 70   | 27   |



|                         |      |                         |       |       |
|-------------------------|------|-------------------------|-------|-------|
| >RB1-V654L- SLSLFYKKVYR | 32   | >RB1-V654L- SLSLFYKKLYR | 31    | 1     |
| >RB1-V654L- TSLSLFYKKVY | 896  | >RB1-V654L- TSLSLFYKKLY | 269   | 627   |
| >RB1-V654L- TSLSLFYKKVY | 301  | >RB1-V654L- TSLSLFYKKLY | 53    | 248   |
| >RB1-V654L- TSLSLFYKKVY | 133  | >RB1-V654L- TSLSLFYKKLY | 147   | 14    |
| >RB1-V654L- TSLSLFYKKV  | 108  | >RB1-V654L- TSLSLFYKKL  | 918   | 810   |
| >RB1-V654L- TSLSLFYKKVY | 193  | >RB1-V654L- TSLSLFYKKLY | 638   | 445   |
| >RB1-V654L- TSLSLFYKKV  | 5609 | >RB1-V654L- TSLSLFYKKL  | 247   | 5362  |
| >RB1-V654L- TSLSLFYKKVY | 35   | >RB1-V654L- TSLSLFYKKLY | 45    | 10    |
| >RB1-V654L- TSLSLFYKKVY | 19   | >RB1-V654L- TSLSLFYKKLY | 13    | 6     |
| >RB1-V754G- VFYNSVFM    | 262  | >RB1-V754G- GFYNSVFM    | 4734  | 4472  |
| >RB1-V754G- VFYNSVFMQ   | 51   | >RB1-V754G- GFYNSVFMQ   | 629   | 578   |
| >RB1-V754G- VFYNSVFMQ   | 418  | >RB1-V754G- GFYNSVFMQ   | 492   | 74    |
| >RB1-V754G- VFYNSVFMQ   | 82   | >RB1-V754G- GFYNSVFMQ   | 297   | 215   |
| >RB1-V754G- VFYNSVFMQ   | 190  | >RB1-V754G- GFYNSVFMQ   | 227   | 37    |
| >RB1-V754G- VFYNSVFMQ   | 9    | >RB1-V754G- GFYNSVFMQ   | 16    | 7     |
| >RB1-V754G- VFYNSVFMQ   | 43   | >RB1-V754G- GFYNSVFMQ   | 126   | 83    |
| >RB1-V754G- VFYNSVFMQ   | 87   | >RB1-V754G- GFYNSVFMQ   | 140   | 53    |
| >RB1-V754G- VFYNSVFMQ   | 376  | >RB1-V754G- GFYNSVFMQ   | 277   | 99    |
| >RB1-V754G- VFYNSVFMQ   | 1084 | >RB1-V754G- GFYNSVFMQ   | 245   | 839   |
| >RB1-V754G- VFYNSVFMQ   | 112  | >RB1-V754G- GFYNSVFMQ   | 170   | 58    |
| >RB1-V754G- VFYNSVFM    | 287  | >RB1-V754G- GFYNSVFM    | 986   | 699   |
| >RB1-V754G- IVFYNSVFM   | 162  | >RB1-V754G- IGFYNSVFM   | 87    | 75    |
| >RB1-V754G- IVFYNSVFM   | 171  | >RB1-V754G- IGFYNSVFM   | 381   | 210   |
| >RB1-V754G- IVFYNSVFM   | 1251 | >RB1-V754G- IGFYNSVFM   | 202   | 1049  |
| >RB1-V754G- IVFYNSVFM   | 285  | >RB1-V754G- IGFYNSVFM   | 2585  | 2300  |
| >RB1-V754G- IVFYNSVFM   | 328  | >RB1-V754G- IGFYNSVFM   | 4628  | 4300  |
| >RB1-V754G- IVFYNSVFM   | 80   | >RB1-V754G- IGFYNSVFM   | 2551  | 2471  |
| >RB1-V754G- IVFYNSVFM   | 29   | >RB1-V754G- IGFYNSVFM   | 1288  | 1259  |
| >RB1-V754G- IVFYNSVF    | 454  | >RB1-V754G- IGFYNSVF    | 1526  | 1072  |
| >RB1-V754G- IVFYNSVFM   | 132  | >RB1-V754G- IGFYNSVFM   | 2714  | 2582  |
| >RB1-V754G- IVFYNSVFM   | 14   | >RB1-V754G- IGFYNSVFM   | 86    | 72    |
| >RB1-V754G- IVFYNSVF    | 31   | >RB1-V754G- IGFYNSVF    | 3062  | 3031  |
| >RB1-V754G- IVFYNSVFM   | 204  | >RB1-V754G- IGFYNSVFM   | 14700 | 14496 |
| >RB1-V754G- IVFYNSVFM   | 37   | >RB1-V754G- IGFYNSVFM   | 2438  | 2401  |
| >RB1-V754G- IVFYNSVFM   | 353  | >RB1-V754G- IGFYNSVFM   | 11221 | 10868 |
| >RB1-V754G- IVFYNSVFM   | 2    | >RB1-V754G- IGFYNSVFM   | 17    | 15    |
| >RB1-V754G- IVFYNSVFM   | 75   | >RB1-V754G- IGFYNSVFM   | 6846  | 6771  |
| >RB1-V754G- IVFYNSVF    | 41   | >RB1-V754G- IGFYNSVF    | 91    | 50    |
| >RB1-V754G- IVFYNSVFM   | 207  | >RB1-V754G- IGFYNSVFM   | 977   | 770   |
| >RB1-V754G- IVFYNSVF    | 216  | >RB1-V754G- IGFYNSVF    | 702   | 486   |
| >RB1-V754G- IVFYNSVF    | 6    | >RB1-V754G- IGFYNSVF    | 11    | 5     |
| >RB1-V754G- IVFYNSVFM   | 62   | >RB1-V754G- IGFYNSVFM   | 97    | 35    |
| >RB1-V754G- IVFYNSVF    | 19   | >RB1-V754G- IGFYNSVF    | 98    | 79    |

|                        |      |                        |      |      |
|------------------------|------|------------------------|------|------|
| >RB1-V754G·IVFYNSVFM   | 131  | >RB1-V754G·IGFYNSVFM   | 733  | 602  |
| >RB1-V754G·IVFYNSVF    | 157  | >RB1-V754G·IGFYNSVF    | 435  | 278  |
| >RB1-V754G·IVFYNSVFM   | 428  | >RB1-V754G·IGFYNSVFM   | 1129 | 701  |
| >RB1-V754G·IVFYNSVFM   | 76   | >RB1-V754G·IGFYNSVFM   | 249  | 173  |
| >RB1-V754G·IVFYNSVFM   | 228  | >RB1-V754G·IGFYNSVFM   | 388  | 160  |
| >RB1-V754G·IVFYNSVFM   | 98   | >RB1-V754G·IGFYNSVFM   | 98   | 0    |
| >RB1-V754G·IIVFYNSV    | 40   | >RB1-V754G·IIGFYNSV    | 485  | 445  |
| >RB1-V754G·IIVFYNSV    | 242  | >RB1-V754G·IIGFYNSV    | 469  | 227  |
| >RB1-V754G·IIVFYNSV    | 29   | >RB1-V754G·IIGFYNSV    | 65   | 36   |
| >RB1-V754G·IIVFYNSV    | 15   | >RB1-V754G·IIGFYNSV    | 63   | 48   |
| >RB1-V754G·IIVFYNSV    | 32   | >RB1-V754G·IIGFYNSV    | 269  | 237  |
| >RB1-V754G·IIVFYNSV    | 42   | >RB1-V754G·IIGFYNSV    | 39   | 3    |
| >RB1-V754G·IIVFYNSV    | 987  | >RB1-V754G·IIGFYNSV    | 215  | 772  |
| >RB1-V754G·IIVFYNSV    | 19   | >RB1-V754G·IIGFYNSV    | 17   | 2    |
| >RB1-V754G·IIVFYNSVF   | 442  | >RB1-V754G·IIGFYNSVF   | 8338 | 7896 |
| >RB1-V754G·IIVFYNSVFM  | 305  | >RB1-V754G·IIGFYNSVFM  | 8012 | 7707 |
| >RB1-V754G·IIVFYNSV    | 123  | >RB1-V754G·IIGFYNSV    | 1031 | 908  |
| >RB1-V754G·IIVFYNSVF   | 63   | >RB1-V754G·IIGFYNSVF   | 76   | 13   |
| >RB1-V754G·IIVFYNSVF   | 26   | >RB1-V754G·IIGFYNSVF   | 186  | 160  |
| >RB1-V754G·IIVFYNSVF   | 193  | >RB1-V754G·IIGFYNSVF   | 3687 | 3494 |
| >RB1-V754G·IIVFYNSVF   | 12   | >RB1-V754G·IIGFYNSVF   | 33   | 21   |
| >RB1-V754G·IIVFYNSVFM  | 196  | >RB1-V754G·IIGFYNSVFM  | 274  | 78   |
| >RB1-V754G·SIIVFYNSVFM | 491  | >RB1-V754G·SIIGFYNSVFM | 2509 | 2018 |
| >RB1-V754G·SIIVFYNS    | 179  | >RB1-V754G·SIIGFYNS    | 1091 | 912  |
| >RB1-V754G·SIIVFYNSV   | 17   | >RB1-V754G·SIIGFYNSV   | 21   | 4    |
| >RB1-V754G·SIIVFYNSVFM | 110  | >RB1-V754G·SIIGFYNSVFM | 134  | 24   |
| >RB1-V754G·SIIVFYNSV   | 123  | >RB1-V754G·SIIGFYNSV   | 42   | 81   |
| >RB1-V754G·SIIVFYNSVFM | 1333 | >RB1-V754G·SIIGFYNSVFM | 447  | 886  |
| >RB1-V754G·SIIVFYNSV   | 23   | >RB1-V754G·SIIGFYNSV   | 8    | 15   |
| >RB1-V754G·SIIVFYNSVFM | 296  | >RB1-V754G·SIIGFYNSVFM | 81   | 215  |
| >RB1-V754G·SIIVFYNSV   | 19   | >RB1-V754G·SIIGFYNSV   | 7    | 12   |
| >RB1-V754G·SIIVFYNSV   | 26   | >RB1-V754G·SIIGFYNSV   | 13   | 13   |
| >RB1-V754G·SIIVFYNSVFM | 686  | >RB1-V754G·SIIGFYNSVFM | 248  | 438  |
| >RB1-V754G·SIIVFYNSV   | 46   | >RB1-V754G·SIIGFYNSV   | 9    | 37   |
| >RB1-V754G·SIIVFYNSVFM | 2578 | >RB1-V754G·SIIGFYNSVFM | 476  | 2102 |
| >RB1-V754G·SIIVFYNSV   | 244  | >RB1-V754G·SIIGFYNSV   | 178  | 66   |
| >RB1-V754G·SIIVFYNSV   | 111  | >RB1-V754G·SIIGFYNSV   | 43   | 68   |
| >RB1-V754G·SIIVFYNSV   | 13   | >RB1-V754G·SIIGFYNSV   | 4    | 9    |
| >RB1-V754G·SIIVFYNSVFM | 513  | >RB1-V754G·SIIGFYNSVFM | 83   | 430  |
| >RB1-V754G·SIIVFYNSVF  | 72   | >RB1-V754G·SIIGFYNSVF  | 14   | 58   |
| >RB1-V754G·SIIVFYNSVFM | 53   | >RB1-V754G·SIIGFYNSVFM | 12   | 41   |
| >RB1-V754G·SIIVFYNSVF  | 720  | >RB1-V754G·SIIGFYNSVF  | 173  | 547  |
| >RB1-V754G·SIIVFYNSV   | 39   | >RB1-V754G·SIIGFYNSV   | 21   | 18   |

|                        |      |                        |       |       |
|------------------------|------|------------------------|-------|-------|
| >RB1-V754G·SIIVFYNSVFM | 493  | >RB1-V754G·SIIGFYNSVFM | 231   | 262   |
| >RB1-V754G·SIIVFYNSV   | 29   | >RB1-V754G·SIIGFYNSV   | 20    | 9     |
| >RB1-V754G·SIIVFYNSVFM | 364  | >RB1-V754G·SIIGFYNSVFM | 261   | 103   |
| >RB1-V754G·SIIVFYNSVF  | 64   | >RB1-V754G·SIIGFYNSVF  | 59    | 5     |
| >RB1-V754G·SIIVFYNSVF  | 419  | >RB1-V754G·SIIGFYNSVF  | 256   | 163   |
| >RB1-V754G·SIIVFYNSVF  | 41   | >RB1-V754G·SIIGFYNSVF  | 107   | 66    |
| >RB1-V754G·SIIVFYNSVF  | 167  | >RB1-V754G·SIIGFYNSVF  | 210   | 43    |
| >RB1-V754G·DSIIVFYNSVF | 55   | >RB1-V754G·DSIIGFYNSVF | 29    | 26    |
| >RB1-V754G·DSIIVFYNS   | 286  | >RB1-V754G·DSIIGFYNS   | 1913  | 1627  |
| >RB1-V754G·DSIIVFYNSV  | 117  | >RB1-V754G·DSIIGFYNSV  | 129   | 12    |
| >RB1-V754G·DSIIVFYNSV  | 78   | >RB1-V754G·DSIIGFYNSV  | 77    | 1     |
| >RB1-V754G·DSIIVFYNSVF | 489  | >RB1-V754G·DSIIGFYNSVF | 490   | 1     |
| >RB1-V754G·DSIIVFYNSVF | 198  | >RB1-V754G·DSIIGFYNSVF | 53    | 145   |
| >RB1-V754G·DSIIVFYNSVF | 217  | >RB1-V754G·DSIIGFYNSVF | 238   | 21    |
| >RB1-V754G·YDSIIVFYNSV | 190  | >RB1-V754G·YDSIIGFYNSV | 401   | 211   |
| >RB1-V754G·YDSIIVFY    | 107  | >RB1-V754G·YDSIIGFY    | 78    | 29    |
| >RB1-V754G·YDSIIVFY    | 1715 | >RB1-V754G·YDSIIGFY    | 443   | 1272  |
| >RB1-V754G·YDSIIVFY    | 657  | >RB1-V754G·YDSIIGFY    | 370   | 287   |
| >RB1-V754G·YDSIIVFYNSV | 119  | >RB1-V754G·YDSIIGFYNSV | 479   | 360   |
| >RB1-V754G·YDSIIVFYNSV | 182  | >RB1-V754G·YDSIIGFYNSV | 365   | 183   |
| >RB1-V754G·EYDSIIVF    | 297  | >RB1-V754G·EYDSIIGF    | 1359  | 1062  |
| >RB1-V754G·EYDSIIVF    | 449  | >RB1-V754G·EYDSIIGF    | 1755  | 1306  |
| >RB1-V754G·EYDSIIVF    | 31   | >RB1-V754G·EYDSIIGF    | 58    | 27    |
| >RB1-V754G·EYDSIIVFY   | 758  | >RB1-V754G·EYDSIIGFY   | 243   | 515   |
| >RB1-V754G·EYDSIIVFY   | 455  | >RB1-V754G·EYDSIIGFY   | 466   | 11    |
| >RB1-V754G·EYDSIIVFY   | 367  | >RB1-V754G·EYDSIIGFY   | 60    | 307   |
| >RB1-V754G·EYDSIIVFY   | 471  | >RB1-V754G·EYDSIIGFY   | 1071  | 600   |
| >RB1-V754G·EYDSIIVFY   | 381  | >RB1-V754G·EYDSIIGFY   | 144   | 237   |
| >RB1-V754G·EYDSIIVFY   | 752  | >RB1-V754G·EYDSIIGFY   | 380   | 372   |
| >RB1-V754G·EYDSIIVF    | 475  | >RB1-V754G·EYDSIIGF    | 752   | 277   |
| >RB1-V754G·EEYDSIIV    | 39   | >RB1-V754G·EEYDSIIG    | 1169  | 1130  |
| >RB1-V754G·EEYDSIIVFY  | 119  | >RB1-V754G·EEYDSIIGFY  | 79    | 40    |
| >RB1-V754G·EEYDSIIVFY  | 101  | >RB1-V754G·EEYDSIIGFY  | 54    | 47    |
| >RB1-V754G·EEYDSIIVFY  | 288  | >RB1-V754G·EEYDSIIGFY  | 556   | 268   |
| >RB1-V754G·EEYDSIIVFY  | 380  | >RB1-V754G·EEYDSIIGFY  | 65    | 315   |
| >RB1-V754G·EEYDSIIVF   | 390  | >RB1-V754G·EEYDSIIGF   | 1918  | 1528  |
| >RB1-V754G·EEYDSIIVF   | 46   | >RB1-V754G·EEYDSIIGF   | 167   | 121   |
| >RB1-V754G·EEYDSIIVFY  | 277  | >RB1-V754G·EEYDSIIGFY  | 1421  | 1144  |
| >RB1-V754G·EEYDSIIVF   | 31   | >RB1-V754G·EEYDSIIGF   | 48    | 17    |
| >RB1-V754G·EEYDSIIVFY  | 59   | >RB1-V754G·EEYDSIIGFY  | 107   | 48    |
| >RB1-V754G·EEYDSIIV    | 103  | >RB1-V754G·EEYDSIIG    | 11376 | 11273 |
| >RB1-V754G·EEYDSIIVF   | 118  | >RB1-V754G·EEYDSIIGF   | 120   | 2     |
| >RB1-V754G·EEYDSIIV    | 322  | >RB1-V754G·EEYDSIIG    | 11052 | 10730 |

|                         |     |                         |       |       |
|-------------------------|-----|-------------------------|-------|-------|
| >RB1-V754G·EEYDSIIVF    | 89  | >RB1-V754G·EEYDSIIGF    | 170   | 81    |
| >RB1-V754G·EEYDSIIVF    | 262 | >RB1-V754G·EEYDSIIGF    | 135   | 127   |
| >RB1-V754G·EEYDSIIVFY   | 28  | >RB1-V754G·EEYDSIIGFY   | 39    | 11    |
| >RB1-V754G·EEYDSIIV     | 281 | >RB1-V754G·EEYDSIIG     | 1925  | 1644  |
| >RB1-V754G·EEYDSIIVF    | 25  | >RB1-V754G·EEYDSIIGF    | 18    | 7     |
| >RB1-V754G·EEYDSIIVFY   | 24  | >RB1-V754G·EEYDSIIGFY   | 32    | 8     |
| >RB1-V754G·EEYDSIIVFYFN | 265 | >RB1-V754G·EEYDSIIGFYFN | 301   | 36    |
| >RB1-V754G·EEYDSIIV     | 24  | >RB1-V754G·EEYDSIIG     | 425   | 401   |
| >RB1-V754G·EEYDSIIVF    | 126 | >RB1-V754G·EEYDSIIGF    | 206   | 80    |
| >RB1-V754G·EEYDSIIVFY   | 440 | >RB1-V754G·EEYDSIIGFY   | 603   | 163   |
| >RB1-V754G·EEYDSIIVFYFN | 105 | >RB1-V754G·EEYDSIIGFYFN | 167   | 62    |
| >RB1-V754G·EEYDSIIVF    | 148 | >RB1-V754G·EEYDSIIGF    | 113   | 35    |
| >RB1-V754G·EEEYDSIIV    | 475 | >RB1-V754G·EEEYDSIIG    | 24304 | 23829 |
| >RB1-V754G·EEEYDSIIVFY  | 668 | >RB1-V754G·EEEYDSIIGFY  | 376   | 292   |
| >RB1-V754G·EEEYDSIIVF   | 301 | >RB1-V754G·EEEYDSIIGF   | 767   | 466   |
| >RB1-V754G·EEEYDSIIV    | 72  | >RB1-V754G·EEEYDSIIG    | 9624  | 9552  |
| >RB1-V754G·EEEYDSIIVF   | 148 | >RB1-V754G·EEEYDSIIGF   | 93    | 55    |
| >RB1-V754G·EEEYDSIIVF   | 429 | >RB1-V754G·EEEYDSIIGF   | 423   | 6     |
| >RB1-V754G·EEEYDSIIVFY  | 110 | >RB1-V754G·EEEYDSIIGFY  | 181   | 71    |
| >RB1-V754G·EEEYDSIIV    | 76  | >RB1-V754G·EEEYDSIIG    | 1320  | 1244  |
| >RB1-V754G·EEEYDSIIVF   | 440 | >RB1-V754G·EEEYDSIIGF   | 886   | 446   |
| >RB1-V754G·EEEYDSIIVF   | 420 | >RB1-V754G·EEEYDSIIGF   | 199   | 221   |
| >RB1-V754G·KEEEYDSIIVF  | 153 | >RB1-V754G·KEEEYDSIIGF  | 304   | 151   |
| >RB1-V754G·KEEEYDSIIVF  | 46  | >RB1-V754G·KEEEYDSIIGF  | 49    | 3     |
| >RB1-V754G·KEEEYDSIIVF  | 177 | >RB1-V754G·KEEEYDSIIGF  | 346   | 169   |
| >RB1-V754G·KEEEYDSIIVF  | 168 | >RB1-V754G·KEEEYDSIIGF  | 114   | 54    |
| >RB1-V754G·KEEEYDSIIV   | 275 | >RB1-V754G·KEEEYDSIIG   | 19763 | 19488 |
| >RB1-V754G·KEEEYDSIIVF  | 152 | >RB1-V754G·KEEEYDSIIGF  | 121   | 31    |
| >RB1-Y659F·YLRLNTLCERL  | 95  | >RB1-Y659F·FLRLNTLCERL  | 51    | 44    |
| >RB1-Y659F·YLRLNTLCERL  | 125 | >RB1-Y659F·FLRLNTLCERL  | 91    | 34    |
| >RB1-Y659F·YLRLNTLCERL  | 124 | >RB1-Y659F·FLRLNTLCERL  | 162   | 38    |
| >RB1-Y659F·YLRLNTLCERL  | 288 | >RB1-Y659F·FLRLNTLCERL  | 392   | 104   |
| >RB1-Y659F·YLRLNTLCERL  | 275 | >RB1-Y659F·FLRLNTLCERL  | 515   | 240   |
| >RB1-Y659F·YLRLNTLC     | 31  | >RB1-Y659F·FLRLNTLC     | 41    | 10    |
| >RB1-Y659F·YLRLNTLCERL  | 6   | >RB1-Y659F·FLRLNTLCERL  | 7     | 1     |
| >RB1-Y659F·YLRLNTLCER   | 45  | >RB1-Y659F·FLRLNTLCER   | 46    | 1     |
| >RB1-Y659F·YLRLNTLCER   | 235 | >RB1-Y659F·FLRLNTLCER   | 116   | 119   |
| >RB1-Y659F·YLRLNTLCERL  | 233 | >RB1-Y659F·FLRLNTLCERL  | 203   | 30    |
| >RB1-Y659F·YLRLNTLCER   | 419 | >RB1-Y659F·FLRLNTLCER   | 736   | 317   |
| >RB1-Y659F·AYLRLNTL     | 4   | >RB1-Y659F·AFLRLNTL     | 92    | 88    |
| >RB1-Y659F·AYLRLNTL     | 318 | >RB1-Y659F·AFLRLNTL     | 1368  | 1050  |
| >RB1-Y659F·AYLRLNTL     | 160 | >RB1-Y659F·AFLRLNTL     | 1325  | 1165  |
| >RB1-Y659F·AYLRLNTL     | 6   | >RB1-Y659F·AFLRLNTL     | 49    | 43    |

|                        |      |                        |       |       |
|------------------------|------|------------------------|-------|-------|
| >RB1-Y659F-AYLRLNTLCEI | 15   | >RB1-Y659F-AFLRLNTLCEI | 13    | 2     |
| >RB1-Y659F-AYLRLNTLCEI | 222  | >RB1-Y659F-AFLRLNTLCEI | 260   | 38    |
| >RB1-Y659F-AYLRLNTLCEI | 97   | >RB1-Y659F-AFLRLNTLCEI | 249   | 152   |
| >RB1-Y659F-AYLRLNTL    | 357  | >RB1-Y659F-AFLRLNTL    | 595   | 238   |
| >RB1-Y659F-AYLRLNTL    | 393  | >RB1-Y659F-AFLRLNTL    | 505   | 112   |
| >RB1-Y659F-LFYKKVYRLA\ | 5823 | >RB1-Y659F-LFYKKVYRLA\ | 52    | 5771  |
| >RB1-Y659F-LFYKKVYRLA\ | 4952 | >RB1-Y659F-LFYKKVYRLA\ | 15    | 4937  |
| >RB1-Y659F-LFYKKVYRLA\ | 9    | >RB1-Y659F-LFYKKVYRLA\ | 191   | 182   |
| >RB1-Y659F-LFYKKVYRLA\ | 350  | >RB1-Y659F-LFYKKVYRLA\ | 14872 | 14522 |
| >RB1-Y659F-LFYKKVYRLA\ | 172  | >RB1-Y659F-LFYKKVYRLA\ | 16637 | 16465 |
| >RB1-Y659F-LFYKKVYRLA\ | 6395 | >RB1-Y659F-LFYKKVYRLA\ | 368   | 6027  |
| >RB1-Y659F-LFYKKVYRLA\ | 179  | >RB1-Y659F-LFYKKVYRLA\ | 205   | 26    |
| >RB1-Y659F-LFYKKVYRLA\ | 349  | >RB1-Y659F-LFYKKVYRLA\ | 942   | 593   |
| >RB1-Y659F-LFYKKVYRLA\ | 297  | >RB1-Y659F-LFYKKVYRLA\ | 85    | 212   |
| >RB1-Y659F-LFYKKVYRLA\ | 305  | >RB1-Y659F-LFYKKVYRLA\ | 716   | 411   |
| >RB1-Y659F-LFYKKVYRLA\ | 110  | >RB1-Y659F-LFYKKVYRLA\ | 547   | 437   |
| >RB1-Y659F-LFYKKVYRLA\ | 239  | >RB1-Y659F-LFYKKVYRLA\ | 9210  | 8971  |
| >RB1-Y659F-LAYLRLNTL   | 14   | >RB1-Y659F-LAFLRLNTL   | 28    | 14    |
| >RB1-Y659F-LAYLRLNTL   | 339  | >RB1-Y659F-LAFLRLNTL   | 341   | 2     |
| >RB1-Y659F-LAYLRLNTL   | 60   | >RB1-Y659F-LAFLRLNTL   | 92    | 32    |
| >RB1-Y659F-LAYLRLNTL   | 34   | >RB1-Y659F-LAFLRLNTL   | 57    | 23    |
| >RB1-Y659F-LAYLRLNTL   | 969  | >RB1-Y659F-LAFLRLNTL   | 401   | 568   |
| >RB1-Y659F-RLAYLRLNTL  | 107  | >RB1-Y659F-RLAFLRLNTL  | 183   | 76    |
| >RB1-Y659F-RLAYLRLNTL  | 35   | >RB1-Y659F-RLAFLRLNTL  | 51    | 16    |
| >RB1-Y659F-RLAYLRLNTL  | 49   | >RB1-Y659F-RLAFLRLNTL  | 102   | 53    |
| >RB1-Y659F-RLAYLRLNTL  | 386  | >RB1-Y659F-RLAFLRLNTL  | 593   | 207   |
| >RB1-Y659F-RLAYLRLNTL  | 356  | >RB1-Y659F-RLAFLRLNTL  | 150   | 206   |
| >RB1-Y659F-RLAYLRLNTL  | 189  | >RB1-Y659F-RLAFLRLNTL  | 205   | 16    |
| >RB1-Y659F-RLAYLRLNTL  | 238  | >RB1-Y659F-RLAFLRLNTL  | 148   | 90    |
| >RB1-Y659F-RLAYLRLNTL  | 32   | >RB1-Y659F-RLAFLRLNTL  | 17    | 15    |
| >RB1-Y659F-RLAYLRLNTL  | 32   | >RB1-Y659F-RLAFLRLNTL  | 39    | 7     |
| >RB1-Y659F-RLAYLRLNTL  | 366  | >RB1-Y659F-RLAFLRLNTL  | 448   | 82    |
| >RB1-Y659F-YRLAYLRLNTI | 424  | >RB1-Y659F-YRLAFLRLNTI | 715   | 291   |
| >RB1-Y659F-YRLAYLRL    | 179  | >RB1-Y659F-YRLAFLRL    | 169   | 10    |
| >RB1-Y659F-YRLAYLRLNTI | 123  | >RB1-Y659F-YRLAFLRLNTI | 125   | 2     |
| >RB1-Y659F-YRLAYLRL    | 21   | >RB1-Y659F-YRLAFLRL    | 18    | 3     |
| >RB1-Y659F-YRLAYLRLN   | 224  | >RB1-Y659F-YRLAFLRLN   | 177   | 47    |
| >RB1-Y659F-YRLAYLRLNT  | 147  | >RB1-Y659F-YRLAFLRLNT  | 157   | 10    |
| >RB1-Y659F-YRLAYLRLNTI | 35   | >RB1-Y659F-YRLAFLRLNTI | 31    | 4     |
| >RB1-Y659F-YRLAYLRL    | 42   | >RB1-Y659F-YRLAFLRL    | 64    | 22    |
| >RB1-Y659F-YRLAYLRLNTI | 23   | >RB1-Y659F-YRLAFLRLNTI | 34    | 11    |
| >RB1-Y659F-YRLAYLRL    | 385  | >RB1-Y659F-YRLAFLRL    | 216   | 169   |
| >RB1-Y659F-YRLAYLRLNTI | 91   | >RB1-Y659F-YRLAFLRLNTI | 78    | 13    |

|                         |     |                         |     |     |
|-------------------------|-----|-------------------------|-----|-----|
| >RB1-Y659F- YRLAYLRL    | 187 | >RB1-Y659F- YRLAFLRL    | 134 | 53  |
| >RB1-Y659F- YRLAYLRLNTI | 10  | >RB1-Y659F- YRLAFLRLNTI | 10  | 0   |
| >RB1-Y659F- VYRLAYLRL   | 137 | >RB1-Y659F- VYRLAFLRL   | 243 | 106 |
| >RB1-Y659F- VYRLAYLRL   | 205 | >RB1-Y659F- VYRLAFLRL   | 123 | 82  |
| >RB1-Y659F- VYRLAYLRL   | 185 | >RB1-Y659F- VYRLAFLRL   | 173 | 12  |
| >RB1-Y659F- VYRLAYLRL   | 42  | >RB1-Y659F- VYRLAFLRL   | 53  | 11  |
| >RB1-Y659F- VYRLAYLR    | 198 | >RB1-Y659F- VYRLAFLR    | 207 | 9   |
| >RB1-Y659F- VYRLAYLRL   | 44  | >RB1-Y659F- VYRLAFLRL   | 84  | 40  |
| >RB1-Y659F- VYRLAYLRLN` | 249 | >RB1-Y659F- VYRLAFLRLN` | 334 | 85  |
| >RB1-Y659F- VYRLAYLR    | 21  | >RB1-Y659F- VYRLAFLR    | 17  | 4   |
| >RB1-Y659F- VYRLAYLR    | 31  | >RB1-Y659F- VYRLAFLR    | 25  | 6   |
| >RB1-Y659F- VYRLAYLR    | 45  | >RB1-Y659F- VYRLAFLR    | 54  | 9   |
| >RB1-Y659F- VYRLAYLRL   | 537 | >RB1-Y659F- VYRLAFLRL   | 216 | 321 |
| >RB1-Y659F- KVYRLAYL    | 9   | >RB1-Y659F- KVYRLAFL    | 11  | 2   |
| >RB1-Y659F- KVYRLAYL    | 78  | >RB1-Y659F- KVYRLAFL    | 99  | 21  |
| >RB1-Y659F- KVYRLAYL    | 41  | >RB1-Y659F- KVYRLAFL    | 47  | 6   |
| >RB1-Y659F- KVYRLAYLRL  | 233 | >RB1-Y659F- KVYRLAFLRL  | 208 | 25  |
| >RB1-Y659F- KVYRLAYL    | 71  | >RB1-Y659F- KVYRLAFL    | 78  | 7   |
| >RB1-Y659F- KVYRLAYLRL  | 376 | >RB1-Y659F- KVYRLAFLRL  | 244 | 132 |
| >RB1-Y659F- KVYRLAYL    | 16  | >RB1-Y659F- KVYRLAFL    | 12  | 4   |
| >RB1-Y659F- KVYRLAYLRL  | 579 | >RB1-Y659F- KVYRLAFLRL  | 223 | 356 |
| >RB1-Y659F- KVYRLAYL    | 20  | >RB1-Y659F- KVYRLAFL    | 45  | 25  |
| >RB1-Y659F- KVYRLAYLRL  | 231 | >RB1-Y659F- KVYRLAFLRL  | 219 | 12  |
| >RB1-Y659F- KVYRLAYL    | 143 | >RB1-Y659F- KVYRLAFL    | 288 | 145 |
| >RB1-Y659F- KVYRLAYL    | 138 | >RB1-Y659F- KVYRLAFL    | 105 | 33  |
| >RB1-Y659F- KVYRLAYL    | 119 | >RB1-Y659F- KVYRLAFL    | 157 | 38  |
| >RB1-Y659F- KVYRLAYLRL  | 497 | >RB1-Y659F- KVYRLAFLRL  | 301 | 196 |
| >RB1-Y659F- KVYRLAYLR   | 49  | >RB1-Y659F- KVYRLAFLR   | 36  | 13  |
| >RB1-Y659F- KVYRLAYLR   | 16  | >RB1-Y659F- KVYRLAFLR   | 12  | 4   |
| >RB1-Y659F- KVYRLAYL    | 47  | >RB1-Y659F- KVYRLAFL    | 31  | 16  |
| >RB1-Y659F- KVYRLAYLR   | 311 | >RB1-Y659F- KVYRLAFLR   | 184 | 127 |
| >RB1-Y659F- KVYRLAYLRL  | 92  | >RB1-Y659F- KVYRLAFLRL  | 107 | 15  |
| >RB1-Y659F- KVYRLAYL    | 108 | >RB1-Y659F- KVYRLAFL    | 134 | 26  |
| >RB1-Y659F- KVYRLAYLR   | 6   | >RB1-Y659F- KVYRLAFLR   | 6   | 0   |
| >RB1-Y659F- KVYRLAYL    | 83  | >RB1-Y659F- KVYRLAFL    | 89  | 6   |
| >RB1-Y659F- KVYRLAYLR   | 196 | >RB1-Y659F- KVYRLAFLR   | 656 | 460 |
| >RB1-Y659F- KVYRLAYLRL  | 39  | >RB1-Y659F- KVYRLAFLRL  | 31  | 8   |
| >RB1-Y659F- KVYRLAYLR   | 25  | >RB1-Y659F- KVYRLAFLR   | 16  | 9   |
| >RB1-Y659F- KVYRLAYL    | 53  | >RB1-Y659F- KVYRLAFL    | 54  | 1   |
| >RB1-Y659F- KVYRLAYLRL  | 50  | >RB1-Y659F- KVYRLAFLRL  | 48  | 2   |
| >RB1-Y659F- KVYRLAYL    | 97  | >RB1-Y659F- KVYRLAFL    | 143 | 46  |
| >RB1-Y659F- KVYRLAYLRL  | 77  | >RB1-Y659F- KVYRLAFLRL  | 83  | 6   |
| >RB1-Y659F- KVYRLAYLR   | 12  | >RB1-Y659F- KVYRLAFLR   | 21  | 9   |

|                         |      |                         |       |       |
|-------------------------|------|-------------------------|-------|-------|
| >RB1-Y659F- KKVYRLAY    | 390  | >RB1-Y659F- KKVYRLAF    | 17642 | 17252 |
| >RB1-Y659F- KKVYRLAYLR  | 62   | >RB1-Y659F- KKVYRLAFLR  | 58    | 4     |
| >RB1-Y659F- KKVYRLAY    | 5    | >RB1-Y659F- KKVYRLAF    | 3     | 2     |
| >RB1-Y659F- KKVYRLAYL   | 35   | >RB1-Y659F- KKVYRLAFL   | 53    | 18    |
| >RB1-Y659F- KKVYRLAYLRI | 62   | >RB1-Y659F- KKVYRLAFLRI | 64    | 2     |
| >RB1-Y659F- KKVYRLAYLRI | 576  | >RB1-Y659F- KKVYRLAFLRI | 457   | 119   |
| >RB1-Y659F- KKVYRLAYL   | 946  | >RB1-Y659F- KKVYRLAFL   | 459   | 487   |
| >RB1-Y659F- KKVYRLAYLRI | 715  | >RB1-Y659F- KKVYRLAFLRI | 388   | 327   |
| >RB1-Y659F- KKVYRLAYLR  | 586  | >RB1-Y659F- KKVYRLAFLR  | 409   | 177   |
| >RB1-Y659F- KKVYRLAYLR  | 54   | >RB1-Y659F- KKVYRLAFLR  | 103   | 49    |
| >RB1-Y659F- YKKVYRLAY   | 322  | >RB1-Y659F- YKKVYRLAF   | 9286  | 8964  |
| >RB1-Y659F- YKKVYRLAYLI | 679  | >RB1-Y659F- YKKVYRLAFLI | 455   | 224   |
| >RB1-Y659F- YKKVYRLAY   | 2796 | >RB1-Y659F- YKKVYRLAF   | 105   | 2691  |
| >RB1-Y659F- YKKVYRLAY   | 3    | >RB1-Y659F- YKKVYRLAF   | 2     | 1     |
| >RB1-Y659F- YKKVYRLAYL  | 21   | >RB1-Y659F- YKKVYRLAFL  | 28    | 7     |
| >RB1-Y659F- YKKVYRLAYLI | 296  | >RB1-Y659F- YKKVYRLAFLI | 417   | 121   |
| >RB1-Y659F- YKKVYRLAYLI | 408  | >RB1-Y659F- YKKVYRLAFLI | 872   | 464   |
| >RB1-Y659F- FYKKVYRLAYI | 90   | >RB1-Y659F- FYKKVYRLAFI | 116   | 26    |
| >RB1-Y659F- FYKKVYRLAYI | 248  | >RB1-Y659F- FYKKVYRLAFI | 245   | 3     |
| >RB1-Y659F- FYKKVYRLAY  | 1823 | >RB1-Y659F- FYKKVYRLAF  | 20    | 1803  |
| >RB1-Y659F- FYKKVYRLAYI | 268  | >RB1-Y659F- FYKKVYRLAFI | 270   | 2     |
| >RB1-Y659F- FYKKVYRLAY  | 1099 | >RB1-Y659F- FYKKVYRLAF  | 37    | 1062  |
| >RB1-Y659F- FYKKVYRLAYI | 276  | >RB1-Y659F- FYKKVYRLAFI | 170   | 106   |
| >RB1-Y659F- FYKKVYRLAY  | 210  | >RB1-Y659F- FYKKVYRLAF  | 5     | 205   |
| >RB1-Y659F- FYKKVYRLAYI | 6    | >RB1-Y659F- FYKKVYRLAFI | 7     | 1     |
| >RB1-Y659F- FYKKVYRLAY  | 13   | >RB1-Y659F- FYKKVYRLAF  | 51    | 38    |
| >RB1-Y659F- FYKKVYRLAY  | 302  | >RB1-Y659F- FYKKVYRLAF  | 15259 | 14957 |
| >RB1-Y659F- FYKKVYRLAY  | 226  | >RB1-Y659F- FYKKVYRLAF  | 58    | 168   |
| >RB1-Y728C- YKDLPHAV    | 182  | >RB1-Y728C- CKDLPHAV    | 7878  | 7696  |
| >RB1-Y728C- YKDLPHAV    | 190  | >RB1-Y728C- CKDLPHAV    | 3091  | 2901  |
| >RB1-Y728C- AYKDLPHAV   | 105  | >RB1-Y728C- ACKDLPHAV   | 285   | 180   |
| >RB1-Y728C- AYKDLPHA    | 31   | >RB1-Y728C- ACKDLPHA    | 444   | 413   |
| >RB1-Y728C- AYKDLPHAV   | 93   | >RB1-Y728C- ACKDLPHAV   | 1653  | 1560  |
| >RB1-Y728C- AYKDLPHAV(C | 453  | >RB1-Y728C- ACKDLPHAV(C | 3689  | 3236  |
| >RB1-Y728C- AYKDLPHAV   | 342  | >RB1-Y728C- ACKDLPHAV   | 9925  | 9583  |
| >RB1-Y728C- TAYKDLPHAV  | 67   | >RB1-Y728C- TACKDLPHAV  | 453   | 386   |
| >RB1-Y728C- TAYKDLPHA   | 268  | >RB1-Y728C- TACKDLPHA   | 2843  | 2575  |
| >RB1-Y728C- TAYKDLPHAV  | 206  | >RB1-Y728C- TACKDLPHAV  | 691   | 485   |
| >RB1-Y728C- TAYKDLPHAV  | 54   | >RB1-Y728C- TACKDLPHAV  | 866   | 812   |
| >RB1-Y728C- TAYKDLPHAV  | 294  | >RB1-Y728C- TACKDLPHAV  | 7775  | 7481  |
| >RB1-Y728C- TAYKDLPHAV  | 86   | >RB1-Y728C- TACKDLPHAV  | 1004  | 918   |
| >RB1-Y728C- TAYKDLPHAV  | 9    | >RB1-Y728C- TACKDLPHAV  | 268   | 259   |
| >RB1-Y728C- TAYKDLPH    | 411  | >RB1-Y728C- TACKDLPH    | 1834  | 1423  |

|                         |      |                         |       |       |
|-------------------------|------|-------------------------|-------|-------|
| >RB1-Y728C- VTAYKDLPHA  | 264  | >RB1-Y728C- VTACKDLPHA  | 291   | 27    |
| >RB1-Y728C- VTAYKDLPHA  | 163  | >RB1-Y728C- VTACKDLPHA  | 91    | 72    |
| >RB1-Y728C- VTAYKDLPHA  | 358  | >RB1-Y728C- VTACKDLPHA  | 230   | 128   |
| >RB1-Y728C- VTAYKDLPHA  | 276  | >RB1-Y728C- VTACKDLPHA  | 64    | 212   |
| >RB1-Y728C- VTAYKDLPHA  | 754  | >RB1-Y728C- VTACKDLPHA  | 174   | 580   |
| >RB1-Y728C- VTAYKDLPHA  | 20   | >RB1-Y728C- VTACKDLPHA  | 19    | 1     |
| >RB1-Y728C- VTAYKDLPHA  | 488  | >RB1-Y728C- VTACKDLPHA  | 228   | 260   |
| >RB1-Y728C- VTAYKDLPH   | 308  | >RB1-Y728C- VTACKDLPH   | 435   | 127   |
| >RB1-Y728C- VTAYKDLPHA  | 432  | >RB1-Y728C- VTACKDLPHA  | 608   | 176   |
| >RB1-Y728C- IVTAYKDL    | 289  | >RB1-Y728C- IVTACKDL    | 7714  | 7425  |
| >RB1-Y728C- IVTAYKDLPH  | 216  | >RB1-Y728C- IVTACKDLPH  | 313   | 97    |
| >RB1-Y728C- IIVTAYKDL   | 412  | >RB1-Y728C- IIVTACKDL   | 3944  | 3532  |
| >RB1-Y728C- KIIVTAYK    | 63   | >RB1-Y728C- KIIVTACK    | 186   | 123   |
| >RB1-Y728C- KIIVTAYK    | 15   | >RB1-Y728C- KIIVTACK    | 46    | 31    |
| >RB1-Y728C- KIIVTAYK    | 10   | >RB1-Y728C- KIIVTACK    | 36    | 26    |
| >RB1-Y728C- KIIVTAYK    | 37   | >RB1-Y728C- KIIVTACK    | 257   | 220   |
| >RB1-Y728C- KIIVTAYK    | 172  | >RB1-Y728C- KIIVTACK    | 633   | 461   |
| >RB1-Y728C- KIIVTAYK    | 94   | >RB1-Y728C- KIIVTACK    | 1466  | 1372  |
| >RB1-Y728C- FKIIVTAY    | 225  | >RB1-Y728C- FKIIVTAC    | 24793 | 24568 |
| >RB1-Y728C- FKIIVTAYK   | 42   | >RB1-Y728C- FKIIVTACK   | 147   | 105   |
| >RB1-Y728C- FKIIVTAY    | 5    | >RB1-Y728C- FKIIVTAC    | 706   | 701   |
| >RB1-Y728C- FKIIVTAYKDL | 49   | >RB1-Y728C- FKIIVTACKDL | 66    | 17    |
| >RB1-Y728C- FKIIVTAY    | 235  | >RB1-Y728C- FKIIVTAC    | 18183 | 17948 |
| >RB1-Y728C- KFKIIVTAYK  | 121  | >RB1-Y728C- KFKIIVTACK  | 507   | 386   |
| >RB1-Y728C- KFKIIVTAY   | 379  | >RB1-Y728C- KFKIIVTAC   | 25453 | 25074 |
| >RB1-Y728C- KFKIIVTAYK  | 4    | >RB1-Y728C- KFKIIVTACK  | 7     | 3     |
| >RB1-Y728C- KFKIIVTAY   | 164  | >RB1-Y728C- KFKIIVTAC   | 25701 | 25537 |
| >RB1-Y728C- KFKIIVTAY   | 269  | >RB1-Y728C- KFKIIVTAC   | 3462  | 3193  |
| >RB1-Y728C- KFKIIVTAYK  | 11   | >RB1-Y728C- KFKIIVTACK  | 19    | 8     |
| >RB1-Y728C- KFKIIVTAYK  | 329  | >RB1-Y728C- KFKIIVTACK  | 3796  | 3467  |
| >RB1-Y728C- KFKIIVTAYK  | 148  | >RB1-Y728C- KFKIIVTACK  | 778   | 630   |
| >RB1-Y728C- KFKIIVTAYK  | 38   | >RB1-Y728C- KFKIIVTACK  | 367   | 329   |
| >RB1-Y728C- LKFKIIVTAY  | 95   | >RB1-Y728C- LKFKIIVTAC  | 27636 | 27541 |
| >RB1-Y728C- LKFKIIVTAY  | 262  | >RB1-Y728C- LKFKIIVTAC  | 30634 | 30372 |
| >RB1-Y728C- LKFKIIVTAYK | 73   | >RB1-Y728C- LKFKIIVTACK | 247   | 174   |
| >RB1-Y728C- LKFKIIVTAY  | 2    | >RB1-Y728C- LKFKIIVTAC  | 87    | 85    |
| >RB1-Y728C- LKFKIIVTAYK | 91   | >RB1-Y728C- LKFKIIVTACK | 94    | 3     |
| >RB1-Y728C- LKFKIIVTAY  | 123  | >RB1-Y728C- LKFKIIVTAC  | 28305 | 28182 |
| >RB1-Y728C- LKFKIIVTAYK | 489  | >RB1-Y728C- LKFKIIVTACK | 3742  | 3253  |
| >RBM15-G5€ GARDRTPPLL   | 2711 | >RBM15-G5€ RARDRTPPLL   | 365   | 2346  |
| >RBM15-G5€ GARDRTPPLL   | 55   | >RBM15-G5€ RARDRTPPLL   | 124   | 69    |
| >RBM15-G5€ GARDRTPP     | 2883 | >RBM15-G5€ RARDRTPP     | 45    | 2838  |
| >RBM15-G5€ GARDRTPPL    | 19   | >RBM15-G5€ RARDRTPPL    | 4     | 15    |



|                       |       |                       |     |       |
|-----------------------|-------|-----------------------|-----|-------|
| >RBM15-G5€ GARDRTPPLL | 31    | >RBM15-G5€ RARDRTPPLL | 4   | 27    |
| >RBM15-G5€ GARDRTPPLL | 131   | >RBM15-G5€ RARDRTPPLL | 6   | 125   |
| >RBM15-G5€ GARDRTPPLL | 1374  | >RBM15-G5€ RARDRTPPLL | 46  | 1328  |
| >RBM15-G5€ GARDRTPPL  | 52    | >RBM15-G5€ RARDRTPPL  | 7   | 45    |
| >RBM15-G5€ GARDRTPPL  | 595   | >RBM15-G5€ RARDRTPPL  | 114 | 481   |
| >RBM15-G5€ GARDRTPPL  | 1798  | >RBM15-G5€ RARDRTPPL  | 363 | 1435  |
| >RBM15-G5€ GARDRTPPLL | 872   | >RBM15-G5€ RARDRTPPLL | 248 | 624   |
| >RBM15-G5€ GARDRTPPL  | 5423  | >RBM15-G5€ RARDRTPPL  | 370 | 5053  |
| >RBM15-G5€ GARDRTPPLL | 2238  | >RBM15-G5€ RARDRTPPLL | 202 | 2036  |
| >RBM15-G5€ GARDRTPPL  | 35    | >RBM15-G5€ RARDRTPPL  | 5   | 30    |
| >RBM15-G5€ GARDRTPPLL | 146   | >RBM15-G5€ RARDRTPPLL | 7   | 139   |
| >RBM15-G5€ GARDRTPPLL | 16    | >RBM15-G5€ RARDRTPPLL | 4   | 12    |
| >RBM15-G5€ GARDRTPPLL | 8376  | >RBM15-G5€ RARDRTPPLL | 467 | 7909  |
| >RBM15-G5€ GARDRTPPLL | 100   | >RBM15-G5€ RARDRTPPLL | 85  | 15    |
| >RBM15-G5€ GARDRTPPLL | 10468 | >RBM15-G5€ RARDRTPPLL | 498 | 9970  |
| >RBM15-G5€ RGARDRTPPL | 2406  | >RBM15-G5€ RRARDRTPPL | 63  | 2343  |
| >RBM15-G5€ RGARDRTPPL | 4536  | >RBM15-G5€ RRARDRTPPL | 160 | 4376  |
| >RBM15-G5€ RGARDRTPP  | 21676 | >RBM15-G5€ RRARDRTPP  | 244 | 21432 |
| >RBM15-G5€ RGARDRTPPL | 12207 | >RBM15-G5€ RRARDRTPPL | 19  | 12188 |
| >RBM15-G5€ RGARDRTPPL | 12148 | >RBM15-G5€ RRARDRTPPL | 34  | 12114 |
| >RBM15-G5€ RGARDRTPPL | 8245  | >RBM15-G5€ RRARDRTPPL | 273 | 7972  |
| >RBM15-G5€ RGARDRTP   | 16202 | >RBM15-G5€ RRARDRTP   | 62  | 16140 |
| >RBM15-G5€ RGARDRTPP  | 24578 | >RBM15-G5€ RRARDRTPP  | 313 | 24265 |
| >RBM15-G5€ RGARDRTPPL | 11218 | >RBM15-G5€ RRARDRTPPL | 40  | 11178 |
| >RBM15-G5€ RGARDRTPPL | 1670  | >RBM15-G5€ RRARDRTPPL | 16  | 1654  |
| >RBM15-G5€ RGARDRTPPL | 11723 | >RBM15-G5€ RRARDRTPPL | 38  | 11685 |
| >RBM15-G5€ RGARDRTPPL | 675   | >RBM15-G5€ RRARDRTPPL | 7   | 668   |
| >RBM15-G5€ LRGARDRTPF | 1070  | >RBM15-G5€ LRRARDRTPP | 70  | 1000  |
| >RBM15-G5€ LRGARDRTPF | 1995  | >RBM15-G5€ LRRARDRTPP | 233 | 1762  |
| >RBM15-G5€ LRGARDRTPF | 2489  | >RBM15-G5€ LRRARDRTPP | 339 | 2150  |
| >RBM15-G5€ LRGARDRTPF | 320   | >RBM15-G5€ LRRARDRTPP | 64  | 256   |
| >RBM15-G5€ RAPDPLRGAF | 74    | >RBM15-G5€ RAPDPLRRAF | 24  | 50    |
| >RBM15-G5€ RAPDPLRG   | 35323 | >RBM15-G5€ RAPDPLRR   | 216 | 35107 |
| >RBM15-G5€ HRAPDPLRG  | 7015  | >RBM15-G5€ HRAPDPLRR  | 195 | 6820  |
| >RBM15-G5€ HRAPDPLRG/ | 174   | >RBM15-G5€ HRAPDPLRR/ | 159 | 15    |
| >RBM15-G5€ HRAPDPLRG/ | 830   | >RBM15-G5€ HRAPDPLRR/ | 489 | 341   |
| >RBM15-G5€ HRAPDPLRG  | 34563 | >RBM15-G5€ HRAPDPLRR  | 227 | 34336 |
| >RBM15-K43 KLAMSGKI   | 103   | >RBM15-K43 RLAMSGKI   | 197 | 94    |
| >RBM15-K43 KLAMSGKIII | 208   | >RBM15-K43 RLAMSGKIII | 302 | 94    |
| >RBM15-K43 KLAMSGKI   | 21    | >RBM15-K43 RLAMSGKI   | 21  | 0     |
| >RBM15-K43 KLAMSGKII  | 82    | >RBM15-K43 RLAMSGKII  | 82  | 0     |
| >RBM15-K43 KLAMSGKIII | 322   | >RBM15-K43 RLAMSGKIII | 349 | 27    |
| >RBM15-K43 KLAMSGKI   | 119   | >RBM15-K43 RLAMSGKI   | 124 | 5     |

|                        |       |                        |      |       |
|------------------------|-------|------------------------|------|-------|
| >RBM15-K43 KLAMSGKIII  | 318   | >RBM15-K43 RLAMSGKIII  | 346  | 28    |
| >RBM15-K43 KLAMSGKI    | 156   | >RBM15-K43 RLAMSGKI    | 324  | 168   |
| >RBM15-K43 KLAMSGKIII  | 171   | >RBM15-K43 RLAMSGKIII  | 365  | 194   |
| >RBM15-K43 KLAMSGKI    | 109   | >RBM15-K43 RLAMSGKI    | 126  | 17    |
| >RBM15-K43 KLAMSGKII   | 493   | >RBM15-K43 RLAMSGKII   | 534  | 41    |
| >RBM15-K43 KLAMSGKIII  | 118   | >RBM15-K43 RLAMSGKIII  | 130  | 12    |
| >RBM15-K43 KLAMSGKIIIR | 267   | >RBM15-K43 RLAMSGKIIIR | 281  | 14    |
| >RBM15-K43 KLAMSGKIIIR | 63    | >RBM15-K43 RLAMSGKIIIR | 58   | 5     |
| >RBM15-K43 KLAMSGKII   | 128   | >RBM15-K43 RLAMSGKII   | 68   | 60    |
| >RBM15-K43 KLAMSGKIII  | 504   | >RBM15-K43 RLAMSGKIII  | 290  | 214   |
| >RBM15-K43 KLAMSGKIIIR | 92    | >RBM15-K43 RLAMSGKIIIR | 169  | 77    |
| >RBM15-K43 KLAMSGKI    | 678   | >RBM15-K43 RLAMSGKI    | 314  | 364   |
| >RBM15-K43 KLAMSGKII   | 1024  | >RBM15-K43 RLAMSGKII   | 462  | 562   |
| >RBM15-K43 AKLAMSGKII  | 56    | >RBM15-K43 ARLAMSGKII  | 258  | 202   |
| >RBM15-K43 AKLAMSGKIII | 170   | >RBM15-K43 ARLAMSGKIII | 922  | 752   |
| >RBM15-K43 AKLAMSGK    | 3903  | >RBM15-K43 ARLAMSGK    | 54   | 3849  |
| >RBM15-K43 AKLAMSGKI   | 6908  | >RBM15-K43 ARLAMSGKI   | 74   | 6834  |
| >RBM15-K43 AKLAMSGKII  | 8688  | >RBM15-K43 ARLAMSGKII  | 82   | 8606  |
| >RBM15-K43 AKLAMSGKIII | 8833  | >RBM15-K43 ARLAMSGKIII | 148  | 8685  |
| >RBM15-K43 AKLAMSGKIII | 8725  | >RBM15-K43 ARLAMSGKIII | 393  | 8332  |
| >RBM15-K43 AKLAMSGKI   | 17094 | >RBM15-K43 ARLAMSGKI   | 278  | 16816 |
| >RBM15-K43 AKLAMSGKIII | 9636  | >RBM15-K43 ARLAMSGKIII | 165  | 9471  |
| >RBM15-K43 RAKLAMSGK   | 415   | >RBM15-K43 RARLAMSGK   | 176  | 239   |
| >RBM15-K43 RAKLAMSGK   | 343   | >RBM15-K43 RARLAMSGK   | 1157 | 814   |
| >RBM15-K43 RAKLAMSG    | 54    | >RBM15-K43 RARLAMSG    | 13   | 41    |
| >RBM15-K43 RAKLAMSGK   | 5     | >RBM15-K43 RARLAMSGK   | 3    | 2     |
| >RBM15-K43 RAKLAMSGKI  | 19    | >RBM15-K43 RARLAMSGKI  | 7    | 12    |
| >RBM15-K43 RAKLAMSGKI  | 25    | >RBM15-K43 RARLAMSGKI  | 8    | 17    |
| >RBM15-K43 RAKLAMSGK   | 268   | >RBM15-K43 RARLAMSGK   | 618  | 350   |
| >RBM15-K43 RAKLAMSGKI  | 5272  | >RBM15-K43 RARLAMSGKI  | 180  | 5092  |
| >RBM15-K43 RAKLAMSGKI  | 833   | >RBM15-K43 RARLAMSGKI  | 435  | 398   |
| >RBM15-K43 RAKLAMSGKI  | 48    | >RBM15-K43 RARLAMSGKI  | 10   | 38    |
| >RBM15-K43 RAKLAMSGKI  | 60    | >RBM15-K43 RARLAMSGKI  | 12   | 48    |
| >RBM15-K43 RAKLAMSGKI  | 340   | >RBM15-K43 RARLAMSGKI  | 150  | 190   |
| >RBM15-K43 RAKLAMSGKI  | 1446  | >RBM15-K43 RARLAMSGKI  | 499  | 947   |
| >RBM15-K43 RAKLAMSGKI  | 1373  | >RBM15-K43 RARLAMSGKI  | 479  | 894   |
| >RBM15-K43 RAKLAMSGKI  | 154   | >RBM15-K43 RARLAMSGKI  | 97   | 57    |
| >RBM15-K43 HRAKLAMSG   | 653   | >RBM15-K43 HRARLAMSG   | 364  | 289   |
| >RBM15-K43 HRAKLAMS    | 534   | >RBM15-K43 HRARLAMSG   | 352  | 182   |
| >RBM15-K43 HRAKLAMSG   | 140   | >RBM15-K43 HRARLAMSG   | 112  | 28    |
| >RBM15-K43 HRAKLAMSG   | 50    | >RBM15-K43 HRARLAMSG   | 45   | 5     |
| >RBM15-K43 HRAKLAMSG   | 272   | >RBM15-K43 HRARLAMSG   | 199  | 73    |
| >RBM15-K43 SHRAKLAMSG  | 122   | >RBM15-K43 SHRARLAMSG  | 81   | 41    |

|                          |      |                          |      |      |
|--------------------------|------|--------------------------|------|------|
| >RBM15-K43 SHRAKLAM      | 1289 | >RBM15-K43 SHRARLAM      | 356  | 933  |
| >RBM15-K43 SHRAKLAM      | 623  | >RBM15-K43 SHRARLAM      | 273  | 350  |
| >RBM15-K43 MSHRAKLAM     | 385  | >RBM15-K43 MSHRARLAM     | 148  | 237  |
| >RBM15-K43 MSHRAKLA      | 21   | >RBM15-K43 MSHRARLA      | 12   | 9    |
| >RBM15-K43 MSHRAKLAM     | 17   | >RBM15-K43 MSHRARLAM     | 7    | 10   |
| >RBM15-K43 MSHRAKLAM     | 108  | >RBM15-K43 MSHRARLAM     | 43   | 65   |
| >RBM15-K43 MSHRAKLAM     | 40   | >RBM15-K43 MSHRARLAM     | 19   | 21   |
| >RBM15-K43 MSHRAKLAM     | 954  | >RBM15-K43 MSHRARLAM     | 142  | 812  |
| >RBM15-K43 MSHRAKLAM     | 1208 | >RBM15-K43 MSHRARLAM     | 443  | 765  |
| >RBM15-K43 MSHRAKLAM     | 274  | >RBM15-K43 MSHRARLAM     | 176  | 98   |
| >RBM15-K43 MSHRAKLAM     | 83   | >RBM15-K43 MSHRARLAM     | 35   | 48   |
| >RBM15-K43 MSHRAKLAM     | 31   | >RBM15-K43 MSHRARLAM     | 30   | 1    |
| >RBM15-K43 MSHRAKLAM     | 158  | >RBM15-K43 MSHRARLAM     | 125  | 33   |
| >RBM15-K43 MSHRAKLAM     | 618  | >RBM15-K43 MSHRARLAM     | 386  | 232  |
| >RBM15-K43 MSHRAKLAM     | 459  | >RBM15-K43 MSHRARLAM     | 453  | 6    |
| >RBM15-K43 LDMSHRAKL     | 387  | >RBM15-K43 LDMSHRARL     | 290  | 97   |
| >RBM15-K43 LDMSHRAKL     | 766  | >RBM15-K43 LDMSHRARL     | 498  | 268  |
| >RBM15-K43 LDMSHRAKL     | 155  | >RBM15-K43 LDMSHRARL     | 224  | 69   |
| >RBM15-K43 NLDMSHRAK     | 453  | >RBM15-K43 NLDMSHRAR     | 444  | 9    |
| >RBM15-K43 NLDMSHRAK     | 504  | >RBM15-K43 NLDMSHRAR     | 348  | 156  |
| >RBM15-K43 NLDMSHRAK     | 186  | >RBM15-K43 NLDMSHRAR     | 125  | 61   |
| >REL-E38Q-v EHSTDNNR     | 327  | >REL-E38Q-r QHSTDNNR     | 3477 | 3150 |
| >REL-E38Q-v EHSTDNNRT\   | 1355 | >REL-E38Q-r QHSTDNNRT    | 346  | 1009 |
| >REL-E38Q-v GEHSTDNNR'   | 1433 | >REL-E38Q-r QQHSTDNNR    | 137  | 1296 |
| >REL-E38Q-v GEHSTDNNR    | 9273 | >REL-E38Q-r QQHSTDNNR    | 193  | 9080 |
| >REL-E38Q-v GEHSTDNNR'   | 1319 | >REL-E38Q-r QQHSTDNNR    | 59   | 1260 |
| >REL-E38Q-v GEHSTDNNR'   | 1007 | >REL-E38Q-r QQHSTDNNR    | 98   | 909  |
| >REL-E38Q-v GEHSTDNNR'   | 798  | >REL-E38Q-r QQHSTDNNR    | 17   | 781  |
| >REL-E38Q-v GEHSTDNNR'   | 381  | >REL-E38Q-r QQHSTDNNR    | 8326 | 7945 |
| >REL-E38Q-v GEHSTDNNR'   | 138  | >REL-E38Q-r QQHSTDNNR    | 7458 | 7320 |
| >REL-E38Q-v RSAGSIPGE    | 207  | >REL-E38Q-r RSAGSIPGQ    | 66   | 141  |
| >REL-E38Q-v RSAGSIPGEH   | 96   | >REL-E38Q-r RSAGSIPGQH   | 51   | 45   |
| >REL-E38Q-v RSAGSIPGEH   | 1007 | >REL-E38Q-r RSAGSIPGQH   | 466  | 541  |
| >REL-E38Q-v RSAGSIPGEH   | 255  | >REL-E38Q-r RSAGSIPGQH   | 249  | 6    |
| >RET-A664D- AHKPPISSAEI  | 98   | >RET-A664D- DHKPPISSAEI  | 3302 | 3204 |
| >RET-A664D- FAHKPPISSA   | 171  | >RET-A664D- FDHKPPISSA   | 8064 | 7893 |
| >RET-A664D- KFAHKPPI     | 339  | >RET-A664D- KFDHKPPI     | 5491 | 5152 |
| >RET-A664D- KFAHKPPISSA/ | 458  | >RET-A664D- KFDHKPPISSA/ | 1001 | 543  |
| >RET-A664D- HKFAHKPP     | 364  | >RET-A664D- HKFDHKPP     | 604  | 240  |
| >RET-A664D- HKFAHKPPI    | 18   | >RET-A664D- HKFDHKPPI    | 38   | 20   |
| >RET-A664D- HKFAHKPPIS!  | 288  | >RET-A664D- HKFDHKPPIS!  | 589  | 301  |
| >RET-A664D- HKFAHKPPI    | 77   | >RET-A664D- HKFDHKPPI    | 195  | 118  |
| >RET-A664D- YHKFAHKPPI   | 389  | >RET-A664D- YHKFDHKPPI   | 601  | 212  |

|                        |      |                        |      |      |
|------------------------|------|------------------------|------|------|
| >RET-A664D- CYHKFAHKPF | 485  | >RET-A664D- CYHKFDHKPF | 1274 | 789  |
| >RET-A664D- CYHKFAHKPF | 363  | >RET-A664D- CYHKFDHKPF | 605  | 242  |
| >RET-A664D- CYHKFAHK   | 210  | >RET-A664D- CYHKFDHK   | 201  | 9    |
| >RET-A664D- CYHKFAHKP  | 355  | >RET-A664D- CYHKFDHKP  | 634  | 279  |
| >RET-A664D- CYHKFAHKPF | 15   | >RET-A664D- CYHKFDHKPF | 21   | 6    |
| >RET-A664D- CYHKFAHK   | 13   | >RET-A664D- CYHKFDHK   | 94   | 81   |
| >RET-A664D- CYHKFAHKPF | 96   | >RET-A664D- CYHKFDHKPF | 187  | 91   |
| >RET-A664D- CYHKFAHK   | 361  | >RET-A664D- CYHKFDHK   | 1629 | 1268 |
| >RET-A664D- CYHKFAHK   | 35   | >RET-A664D- CYHKFDHK   | 57   | 22   |
| >RET-A664D- HCYHKFAHK  | 104  | >RET-A664D- HCYHKFDHK  | 1358 | 1254 |
| >RET-A664D- HCYHKFAHK  | 37   | >RET-A664D- HCYHKFDHK  | 1061 | 1024 |
| >RET-A664D- HCYHKFAHK  | 119  | >RET-A664D- HCYHKFDHK  | 2301 | 2182 |
| >RET-A664D- HCYHKFAHK  | 356  | >RET-A664D- HCYHKFDHK  | 2520 | 2164 |
| >RET-A664D- HCYHKFAHK  | 70   | >RET-A664D- HCYHKFDHK  | 185  | 115  |
| >RET-A664D- CIHCYHKFAH | 250  | >RET-A664D- CIHCYHKFDH | 1255 | 1005 |
| >RET-A664D- CIHCYHKFAH | 236  | >RET-A664D- CIHCYHKFDH | 340  | 104  |
| >RET-A664D- CIHCYHKFA  | 115  | >RET-A664D- CIHCYHKFD  | 7157 | 7042 |
| >RET-A664D- CIHCYHKFAH | 14   | >RET-A664D- CIHCYHKFDH | 99   | 85   |
| >RET-A664D- CIHCYHKFAH | 341  | >RET-A664D- CIHCYHKFDH | 1918 | 1577 |
| >RET-A664D- CIHCYHKFAH | 377  | >RET-A664D- CIHCYHKFDH | 539  | 162  |
| >RET-A664D- CIHCYHKFAH | 269  | >RET-A664D- CIHCYHKFDH | 626  | 357  |
| >RET-A876V- AARNILVA   | 21   | >RET-A876V- VARNILVA   | 192  | 171  |
| >RET-A876V- AARNILVAEG | 271  | >RET-A876V- VARNILVAEG | 2688 | 2417 |
| >RET-A876V- AARNILVAEG | 125  | >RET-A876V- VARNILVAEG | 190  | 65   |
| >RET-A876V- AARNILVAEG | 519  | >RET-A876V- VARNILVAEG | 383  | 136  |
| >RET-A876V- LAARNILV   | 2273 | >RET-A876V- LVARNILV   | 228  | 2045 |
| >RET-A876V- LAARNILV   | 477  | >RET-A876V- LVARNILV   | 85   | 392  |
| >RET-A876V- LAARNILV   | 621  | >RET-A876V- LVARNILV   | 61   | 560  |
| >RET-A876V- LAARNILV   | 233  | >RET-A876V- LVARNILV   | 34   | 199  |
| >RET-A876V- LAARNILV   | 528  | >RET-A876V- LVARNILV   | 104  | 424  |
| >RET-A876V- LAARNILV   | 2363 | >RET-A876V- LVARNILV   | 209  | 2154 |
| >RET-A876V- LAARNILV   | 4207 | >RET-A876V- LVARNILV   | 466  | 3741 |
| >RET-A876V- LAARNILV   | 56   | >RET-A876V- LVARNILV   | 8    | 48   |
| >RET-A876V- LAARNILVA  | 6031 | >RET-A876V- LVARNILVA  | 442  | 5589 |
| >RET-A876V- LAARNILV   | 170  | >RET-A876V- LVARNILV   | 36   | 134  |
| >RET-A876V- LAARNILV   | 925  | >RET-A876V- LVARNILV   | 350  | 575  |
| >RET-A876V- AEMKLVHRD  | 2875 | >RET-A876V- AEMKLVHRD  | 40   | 2835 |
| >RET-A876V- AEMKLVHRD  | 4495 | >RET-A876V- AEMKLVHRD  | 144  | 4351 |
| >RET-A876V- AEMKLVHRD  | 54   | >RET-A876V- AEMKLVHRD  | 48   | 6    |
| >RET-A876V- AEMKLVHRD  | 371  | >RET-A876V- AEMKLVHRD  | 176  | 195  |
| >RET-A876V- AEMKLVHRD  | 8    | >RET-A876V- AEMKLVHRD  | 21   | 13   |
| >RET-A876V- AEMKLVHRD  | 12   | >RET-A876V- AEMKLVHRD  | 3    | 9    |
| >RET-A876V- DLAARNILV  | 181  | >RET-A876V- DLVARNILV  | 997  | 816  |

|                        |      |                        |       |       |
|------------------------|------|------------------------|-------|-------|
| >RET-A876V- DLAARNILV  | 268  | >RET-A876V- DLVARNILV  | 375   | 107   |
| >RET-A876V- DLAARNILV  | 63   | >RET-A876V- DLVARNILV  | 313   | 250   |
| >RET-A876V- DLAARNILV  | 186  | >RET-A876V- DLVARNILV  | 1007  | 821   |
| >RET-A876V- DLAARNIL   | 478  | >RET-A876V- DLVARNIL   | 857   | 379   |
| >RET-A876V- DLAARNILV  | 19   | >RET-A876V- DLVARNILV  | 27    | 8     |
| >RET-A876V- DLAARNILV  | 142  | >RET-A876V- DLVARNILV  | 408   | 266   |
| >RET-A876V- DLAARNILV  | 251  | >RET-A876V- DLVARNILV  | 458   | 207   |
| >RET-A876V- RDLAARNIL  | 162  | >RET-A876V- RDLVARNIL  | 238   | 76    |
| >RET-A876V- RDLAARNILV | 292  | >RET-A876V- RDLVARNILV | 439   | 147   |
| >RET-A876V- RDLAARNI   | 23   | >RET-A876V- RDLVARNI   | 38    | 15    |
| >RET-A876V- RDLAARNIL  | 514  | >RET-A876V- RDLVARNIL  | 286   | 228   |
| >RET-A876V- RDLAARNI   | 102  | >RET-A876V- RDLVARNI   | 92    | 10    |
| >RET-A876V- RDLAARNILV | 104  | >RET-A876V- RDLVARNILV | 81    | 23    |
| >RET-A876V- HRDLAARNI  | 603  | >RET-A876V- HRDLVARNI  | 340   | 263   |
| >RET-A876V- HRDLAARNIL | 51   | >RET-A876V- HRDLVARNIL | 43    | 8     |
| >RET-A876V- HRDLAARNIL | 30   | >RET-A876V- HRDLVARNIL | 32    | 2     |
| >RET-A876V- HRDLAARNIL | 272  | >RET-A876V- HRDLVARNIL | 258   | 14    |
| >RET-A876V- HRDLAARNIL | 811  | >RET-A876V- HRDLVARNIL | 495   | 316   |
| >RET-A876V- LVHRDLAA   | 291  | >RET-A876V- LVHRDLVA   | 494   | 203   |
| >RET-A876V- LVHRDLAARN | 270  | >RET-A876V- LVHRDLVARN | 520   | 250   |
| >RET-A876V- LVHRDLAAR  | 34   | >RET-A876V- LVHRDLVAR  | 44    | 10    |
| >RET-A876V- LVHRDLAAR  | 174  | >RET-A876V- LVHRDLVAR  | 249   | 75    |
| >RET-A876V- KLVHRDLA   | 1901 | >RET-A876V- KLVHRDLV   | 155   | 1746  |
| >RET-A876V- KLVHRDLA   | 368  | >RET-A876V- KLVHRDLV   | 35    | 333   |
| >RET-A876V- KLVHRDLA   | 171  | >RET-A876V- KLVHRDLV   | 21    | 150   |
| >RET-A876V- KLVHRDLAA  | 167  | >RET-A876V- KLVHRDLVA  | 574   | 407   |
| >RET-A876V- KLVHRDLA   | 623  | >RET-A876V- KLVHRDLV   | 48    | 575   |
| >RET-A876V- KLVHRDLAA  | 178  | >RET-A876V- KLVHRDLVA  | 1164  | 986   |
| >RET-A876V- KLVHRDLA   | 2093 | >RET-A876V- KLVHRDLV   | 33    | 2060  |
| >RET-A876V- KLVHRDLA   | 2106 | >RET-A876V- KLVHRDLV   | 49    | 2057  |
| >RET-A876V- KLVHRDLAA  | 428  | >RET-A876V- KLVHRDLVA  | 1168  | 740   |
| >RET-A876V- KLVHRDLA   | 2023 | >RET-A876V- KLVHRDLV   | 32    | 1991  |
| >RET-A876V- KLVHRDLA   | 420  | >RET-A876V- KLVHRDLV   | 12    | 408   |
| >RET-A876V- KLVHRDLAAF | 31   | >RET-A876V- KLVHRDLVAF | 44    | 13    |
| >RET-A876V- KLVHRDLAAF | 129  | >RET-A876V- KLVHRDLVAF | 114   | 15    |
| >RET-A876V- KLVHRDLAAF | 70   | >RET-A876V- KLVHRDLVAF | 47    | 23    |
| >RET-A876V- MKLVHRDLA  | 2017 | >RET-A876V- MKLVHRDLV  | 448   | 1569  |
| >RET-A876V- MKLVHRDLA  | 272  | >RET-A876V- MKLVHRDLV  | 445   | 173   |
| >RET-A876V- MKLVHRDLA  | 181  | >RET-A876V- MKLVHRDLV  | 118   | 63    |
| >RET-A876V- EMKLVHRDL  | 374  | >RET-A876V- EMKLVHRDL  | 649   | 275   |
| >RET-A883F- AEGRKMKISC | 3728 | >RET-A883F- FEGRKMKISD | 322   | 3406  |
| >RET-A883F- AEGRKMKISC | 133  | >RET-A883F- FEGRKMKISD | 706   | 573   |
| >RET-A883F- AEGRKMKI   | 445  | >RET-A883F- FEGRKMKI   | 12034 | 11589 |

|                        |       |                        |      |       |
|------------------------|-------|------------------------|------|-------|
| >RET-A883F- RDLAARNILV | 11610 | >RET-A883F- RDLAARNILV | 98   | 11512 |
| >RET-A883F- RDLAARNILV | 292   | >RET-A883F- RDLAARNILV | 188  | 104   |
| >RET-A883F- LVAEGRKMKI | 1056  | >RET-A883F- LVFEGRKMKI | 355  | 701   |
| >RET-A883F- LVAEGRKMKI | 3116  | >RET-A883F- LVFEGRKMKI | 454  | 2662  |
| >RET-A883F- LVAEGRKMKI | 358   | >RET-A883F- LVFEGRKMKI | 155  | 203   |
| >RET-A883F- LVAEGRKMK  | 610   | >RET-A883F- LVFEGRKMK  | 136  | 474   |
| >RET-A883F- LVAEGRKMK  | 547   | >RET-A883F- LVFEGRKMK  | 98   | 449   |
| >RET-A883F- LVAEGRKMK  | 1491  | >RET-A883F- LVFEGRKMK  | 110  | 1381  |
| >RET-A883F- LVAEGRKMK  | 148   | >RET-A883F- LVFEGRKMK  | 60   | 88    |
| >RET-A883F- LVAEGRKM   | 1735  | >RET-A883F- LVFEGRKM   | 240  | 1495  |
| >RET-A883F- ILVAEGRKMK | 445   | >RET-A883F- ILVFEGRKMK | 799  | 354   |
| >RET-A883F- ILVAEGRKMK | 169   | >RET-A883F- ILVFEGRKMK | 228  | 59    |
| >RET-A883F- ILVAEGRKMK | 133   | >RET-A883F- ILVFEGRKMK | 280  | 147   |
| >RET-A883F- ILVAEGRKMK | 52    | >RET-A883F- ILVFEGRKMK | 160  | 108   |
| >RET-A883F- ILVAEGRK   | 225   | >RET-A883F- ILVFEGRK   | 266  | 41    |
| >RET-A883F- ILVAEGRKMK | 195   | >RET-A883F- ILVFEGRKMK | 74   | 121   |
| >RET-A883F- NILVAEGR   | 952   | >RET-A883F- NILVFEGR   | 131  | 821   |
| >RET-A883F- NILVAEGR   | 94    | >RET-A883F- NILVFEGR   | 54   | 40    |
| >RET-A883F- NILVAEGRK  | 1053  | >RET-A883F- NILVFEGRK  | 373  | 680   |
| >RET-A883F- NILVAEGRKM | 902   | >RET-A883F- NILVFEGRKM | 467  | 435   |
| >RET-A883F- NILVAEGR   | 689   | >RET-A883F- NILVFEGR   | 147  | 542   |
| >RET-A883F- RNILVAEGR  | 2895  | >RET-A883F- RNILVFEGR  | 208  | 2687  |
| >RET-A883F- RNILVAEGR  | 596   | >RET-A883F- RNILVFEGR  | 189  | 407   |
| >RET-A883F- ARNILVAEGR | 884   | >RET-A883F- ARNILVFEGR | 232  | 652   |
| >RET-A883F- ARNILVAEGR | 361   | >RET-A883F- ARNILVFEGR | 212  | 149   |
| >RET-A883F- ARNILVAEGR | 122   | >RET-A883F- ARNILVFEGR | 78   | 44    |
| >RET-A883F- AARNILVA   | 21    | >RET-A883F- AARNILVF   | 690  | 669   |
| >RET-A883F- AARNILVAE  | 1764  | >RET-A883F- AARNILVFE  | 368  | 1396  |
| >RET-A883F- AARNILVAEG | 271   | >RET-A883F- AARNILVFEG | 273  | 2     |
| >RET-A883F- AARNILVAEG | 125   | >RET-A883F- AARNILVFEG | 31   | 94    |
| >RET-A883F- AARNILVAEG | 519   | >RET-A883F- AARNILVFEG | 371  | 148   |
| >RET-A883F- AARNILVA   | 4989  | >RET-A883F- AARNILVF   | 99   | 4890  |
| >RET-A883F- AARNILVA   | 3207  | >RET-A883F- AARNILVF   | 19   | 3188  |
| >RET-A883F- AARNILVA   | 10060 | >RET-A883F- AARNILVF   | 10   | 10050 |
| >RET-A883F- AARNILVA   | 13443 | >RET-A883F- AARNILVF   | 301  | 13142 |
| >RET-A883F- LAARNILVA  | 2996  | >RET-A883F- LAARNILVF  | 59   | 2937  |
| >RET-A883F- LAARNILVA  | 5913  | >RET-A883F- LAARNILVF  | 28   | 5885  |
| >RET-A883F- LAARNILVA  | 14603 | >RET-A883F- LAARNILVF  | 29   | 14574 |
| >RET-A883F- LAARNILVA  | 6325  | >RET-A883F- LAARNILVF  | 60   | 6265  |
| >RET-A883F- LAARNILVA  | 14912 | >RET-A883F- LAARNILVF  | 485  | 14427 |
| >RET-A883F- LAARNILVA  | 6496  | >RET-A883F- LAARNILVF  | 21   | 6475  |
| >RET-A883F- DLAARNILVA | 21011 | >RET-A883F- DLAARNILVF | 411  | 20600 |
| >RET-A883P- AEGRKMKISC | 133   | >RET-A883P- PEGRKMKISC | 2077 | 1944  |

|                        |       |                        |       |       |
|------------------------|-------|------------------------|-------|-------|
| >RET-A883P- AEGRKMKI   | 445   | >RET-A883P- PEGRKMKI   | 20701 | 20256 |
| >RET-A883P- VAEGRKMKI  | 19325 | >RET-A883P- VPEGRKMKI  | 454   | 18871 |
| >RET-A883P- RDLAARNILV | 292   | >RET-A883P- RDLAARNILV | 4608  | 4316  |
| >RET-A883P- LVAEGRKMKI | 358   | >RET-A883P- LVPEGRKMKI | 1106  | 748   |
| >RET-A883P- LVAEGRKMK  | 148   | >RET-A883P- LVPEGRKMK  | 2214  | 2066  |
| >RET-A883P- LVAEGRKM   | 1137  | >RET-A883P- LVPEGRKM   | 21    | 1116  |
| >RET-A883P- ILVAEGRKMK | 445   | >RET-A883P- ILVPEGRKMK | 605   | 160   |
| >RET-A883P- ILVAEGRKMK | 169   | >RET-A883P- ILVPEGRKMK | 188   | 19    |
| >RET-A883P- ILVAEGRKMK | 133   | >RET-A883P- ILVPEGRKMK | 128   | 5     |
| >RET-A883P- ILVAEGRKMK | 52    | >RET-A883P- ILVPEGRKMK | 27    | 25    |
| >RET-A883P- ILVAEGRK   | 225   | >RET-A883P- ILVPEGRK   | 288   | 63    |
| >RET-A883P- ILVAEGRKMK | 195   | >RET-A883P- ILVPEGRKMK | 185   | 10    |
| >RET-A883P- ILVAEGRKM  | 2636  | >RET-A883P- ILVPEGRKM  | 367   | 2269  |
| >RET-A883P- NILVAEGR   | 94    | >RET-A883P- NILVPEGR   | 233   | 139   |
| >RET-A883P- ARNILVAEGR | 361   | >RET-A883P- ARNILVPEGR | 115   | 246   |
| >RET-A883P- ARNILVAEGR | 122   | >RET-A883P- ARNILVPEGR | 207   | 85    |
| >RET-A883P- AARNILVA   | 21    | >RET-A883P- AARNILVP   | 731   | 710   |
| >RET-A883P- AARNILVAEG | 271   | >RET-A883P- AARNILVPEG | 128   | 143   |
| >RET-A883P- AARNILVAEG | 125   | >RET-A883P- AARNILVPEG | 105   | 20    |
| >RET-A883S- AEGRKMKISD | 133   | >RET-A883S- SEGRKMKISD | 261   | 128   |
| >RET-A883S- AEGRKMKI   | 445   | >RET-A883S- SEGRKMKI   | 1857  | 1412  |
| >RET-A883S- RDLAARNILV | 292   | >RET-A883S- RDLAARNILV | 1407  | 1115  |
| >RET-A883S- LVAEGRKMKI | 358   | >RET-A883S- LVSEGRKMKI | 605   | 247   |
| >RET-A883S- LVAEGRKMK  | 547   | >RET-A883S- LVSEGRKMK  | 347   | 200   |
| >RET-A883S- LVAEGRKMK  | 148   | >RET-A883S- LVSEGRKMK  | 377   | 229   |
| >RET-A883S- ILVAEGRKMK | 445   | >RET-A883S- ILVSEGRKMK | 622   | 177   |
| >RET-A883S- ILVAEGRKMK | 169   | >RET-A883S- ILVSEGRKMK | 195   | 26    |
| >RET-A883S- ILVAEGRKMK | 133   | >RET-A883S- ILVSEGRKMK | 154   | 21    |
| >RET-A883S- ILVAEGRKMK | 52    | >RET-A883S- ILVSEGRKMK | 57    | 5     |
| >RET-A883S- ILVAEGRK   | 225   | >RET-A883S- ILVSEGRK   | 249   | 24    |
| >RET-A883S- ILVAEGRKMK | 195   | >RET-A883S- ILVSEGRKMK | 211   | 16    |
| >RET-A883S- ILVAEGRKM  | 1078  | >RET-A883S- ILVSEGRKM  | 489   | 589   |
| >RET-A883S- NILVAEGR   | 94    | >RET-A883S- NILVSEGR   | 90    | 4     |
| >RET-A883S- ARNILVAEGR | 361   | >RET-A883S- ARNILVSEGR | 513   | 152   |
| >RET-A883S- ARNILVAEGR | 122   | >RET-A883S- ARNILVSEGR | 160   | 38    |
| >RET-A883S- AARNILVA   | 21    | >RET-A883S- AARNILVS   | 212   | 191   |
| >RET-A883S- AARNILVAEG | 271   | >RET-A883S- AARNILVSEG | 452   | 181   |
| >RET-A883S- AARNILVAEG | 125   | >RET-A883S- AARNILVSEG | 88    | 37    |
| >RET-A919V- AIESLFDHIY | 287   | >RET-A919V- VIESLFDHIY | 180   | 107   |
| >RET-A919V- AIESLFDHI  | 225   | >RET-A919V- VIESLFDHI  | 365   | 140   |
| >RET-A919V- AIESLFDHIY | 411   | >RET-A919V- VIESLFDHIY | 486   | 75    |
| >RET-A919V- AIESLFDHIY | 355   | >RET-A919V- VIESLFDHIY | 258   | 97    |
| >RET-A919V- AIESLFDHIY | 484   | >RET-A919V- VIESLFDHIY | 179   | 305   |

|                         |       |                         |      |       |
|-------------------------|-------|-------------------------|------|-------|
| >RET-A919V- MAIESLFDHI  | 448   | >RET-A919V- MVIESLFDHI  | 8718 | 8270  |
| >RET-A919V- MAIESLFDHI  | 507   | >RET-A919V- MVIESLFDHI  | 218  | 289   |
| >RET-A919V- MAIESLFDHI  | 628   | >RET-A919V- MVIESLFDHI  | 240  | 388   |
| >RET-A919V- MAIESLFDHI  | 77    | >RET-A919V- MVIESLFDHI  | 46   | 31    |
| >RET-A919V- MAIESLFDHI  | 744   | >RET-A919V- MVIESLFDHI  | 143  | 601   |
| >RET-A919V- MAIESLFDHI  | 1363  | >RET-A919V- MVIESLFDHI  | 108  | 1255  |
| >RET-A919V- MAIESLFDH   | 4006  | >RET-A919V- MVIESLFDH   | 400  | 3606  |
| >RET-A919V- MAIESLFDHI\ | 885   | >RET-A919V- MVIESLFDHI\ | 95   | 790   |
| >RET-A919V- MAIESLFDHI\ | 987   | >RET-A919V- MVIESLFDHI\ | 80   | 907   |
| >RET-A919V- MAIESLFDH   | 4875  | >RET-A919V- MVIESLFDH   | 332  | 4543  |
| >RET-A919V- MAIESLFDHI  | 3095  | >RET-A919V- MVIESLFDHI  | 114  | 2981  |
| >RET-A919V- MAIESLFDHI\ | 104   | >RET-A919V- MVIESLFDHI\ | 9    | 95    |
| >RET-A919V- MAIESLFDHI\ | 2324  | >RET-A919V- MVIESLFDHI\ | 253  | 2071  |
| >RET-A919V- MAIESLFDHI\ | 32    | >RET-A919V- MVIESLFDHI\ | 10   | 22    |
| >RET-A919V- MAIESLFDHI\ | 45    | >RET-A919V- MVIESLFDHI\ | 27   | 18    |
| >RET-A919V- MAIESLFDH   | 609   | >RET-A919V- MVIESLFDH   | 291  | 318   |
| >RET-A919V- MAIESLFDHI\ | 51    | >RET-A919V- MVIESLFDHI\ | 30   | 21    |
| >RET-A919V- MAIESLFDHI  | 60    | >RET-A919V- MVIESLFDHI  | 35   | 25    |
| >RET-A919V- MAIESLFDHI  | 68    | >RET-A919V- MVIESLFDHI  | 27   | 41    |
| >RET-A919V- MAIESLFDHI\ | 667   | >RET-A919V- MVIESLFDHI\ | 37   | 630   |
| >RET-A919V- MAIESLFDHI\ | 357   | >RET-A919V- MVIESLFDHI\ | 250  | 107   |
| >RET-A919V- MAIESLFDHI\ | 990   | >RET-A919V- MVIESLFDHI\ | 340  | 650   |
| >RET-A919V- MAIESLFDHI\ | 119   | >RET-A919V- MVIESLFDHI\ | 611  | 492   |
| >RET-A919V- MAIESLFDHI\ | 7     | >RET-A919V- MVIESLFDHI\ | 34   | 27    |
| >RET-A919V- MAIESLFDH   | 290   | >RET-A919V- MVIESLFDH   | 1129 | 839   |
| >RET-A919V- MAIESLFDHI\ | 9     | >RET-A919V- MVIESLFDHI\ | 17   | 8     |
| >RET-A919V- MAIESLFDHI\ | 53    | >RET-A919V- MVIESLFDHI\ | 514  | 461   |
| >RET-A919V- MAIESLFDHI\ | 166   | >RET-A919V- MVIESLFDHI\ | 2297 | 2131  |
| >RET-A919V- MAIESLFDHI  | 84    | >RET-A919V- MVIESLFDHI  | 483  | 399   |
| >RET-A919V- MAIESLFDHI\ | 21    | >RET-A919V- MVIESLFDHI\ | 78   | 57    |
| >RET-A919V- MAIESLFDHI\ | 79    | >RET-A919V- MVIESLFDHI\ | 43   | 36    |
| >RET-A919V- SQGRIPVKWI  | 915   | >RET-A919V- SQGRIPVKWI  | 79   | 836   |
| >RET-A919V- SQGRIPVKWI  | 982   | >RET-A919V- SQGRIPVKWI  | 23   | 959   |
| >RET-A919V- SQGRIPVKWI  | 7026  | >RET-A919V- SQGRIPVKWI  | 211  | 6815  |
| >RET-A919V- SQGRIPVKWI  | 1664  | >RET-A919V- SQGRIPVKWI  | 30   | 1634  |
| >RET-A919V- SQGRIPVKWI  | 14579 | >RET-A919V- SQGRIPVKWI  | 325  | 14254 |
| >RET-A919V- WMAIESLFDI  | 200   | >RET-A919V- WMVIESLFDI  | 688  | 488   |
| >RET-A919V- WMAIESLF    | 362   | >RET-A919V- WMVIESLF    | 1830 | 1468  |
| >RET-A919V- WMAIESLFDI  | 12    | >RET-A919V- WMVIESLFDI  | 54   | 42    |
| >RET-A919V- WMAIESLFDI  | 28    | >RET-A919V- WMVIESLFDI  | 96   | 68    |
| >RET-A919V- WMAIESLFDI  | 26    | >RET-A919V- WMVIESLFDI  | 25   | 1     |
| >RET-A919V- WMAIESLFDI  | 35    | >RET-A919V- WMVIESLFDI  | 41   | 6     |
| >RET-A919V- WMAIESLFDI  | 90    | >RET-A919V- WMVIESLFDI  | 99   | 9     |



|                          |      |                          |      |      |
|--------------------------|------|--------------------------|------|------|
| >RET-A919V- WMAIESLFDI   | 21   | >RET-A919V- WMVIESLFDI   | 66   | 45   |
| >RET-A919V- WMAIESLFDI   | 103  | >RET-A919V- WMVIESLFDI   | 1409 | 1306 |
| >RET-A919V- WMAIESLFDI   | 64   | >RET-A919V- WMVIESLFDI   | 162  | 98   |
| >RET-A919V- WMAIESLFDI   | 1112 | >RET-A919V- WMVIESLFDI   | 481  | 631  |
| >RET-A919V- WMAIESLFDI   | 111  | >RET-A919V- WMVIESLFDI   | 165  | 54   |
| >RET-A919V- WMAIESLFDI   | 95   | >RET-A919V- WMVIESLFDI   | 129  | 34   |
| >RET-A919V- WMAIESLFDI   | 184  | >RET-A919V- WMVIESLFDI   | 336  | 152  |
| >RET-A919V- WMAIESLFDI   | 16   | >RET-A919V- WMVIESLFDI   | 14   | 2    |
| >RET-A919V- WMAIESLFDI   | 724  | >RET-A919V- WMVIESLFDI   | 255  | 469  |
| >RET-A919V- WMAIESLFDI   | 157  | >RET-A919V- WMVIESLFDI   | 180  | 23   |
| >RET-A919V- KWMAIESL     | 72   | >RET-A919V- KWMVIESL     | 204  | 132  |
| >RET-A919V- KWMAIESL     | 61   | >RET-A919V- KWMVIESL     | 217  | 156  |
| >RET-A919V- KWMAIESL     | 391  | >RET-A919V- KWMVIESL     | 705  | 314  |
| >RET-A919V- KWMAIESLFDI  | 54   | >RET-A919V- KWMVIESLFDI  | 40   | 14   |
| >RET-A919V- KWMAIESLFDI  | 579  | >RET-A919V- KWMVIESLFDI  | 480  | 99   |
| >RET-A919V- KWMAIESLFDI  | 33   | >RET-A919V- KWMVIESLFDI  | 29   | 4    |
| >RET-A919V- KWMAIESLFDI  | 41   | >RET-A919V- KWMVIESLFDI  | 60   | 19   |
| >RET-A919V- KWMAIESLFDI  | 11   | >RET-A919V- KWMVIESLFDI  | 18   | 7    |
| >RET-A919V- KWMAIESLFDI  | 74   | >RET-A919V- KWMVIESLFDI  | 80   | 6    |
| >RET-A919V- KWMAIESLFDI  | 20   | >RET-A919V- KWMVIESLFDI  | 23   | 3    |
| >RET-A919V- KWMAIESLFDI  | 49   | >RET-A919V- KWMVIESLFDI  | 83   | 34   |
| >RET-A919V- KWMAIESLFDI  | 189  | >RET-A919V- KWMVIESLFDI  | 234  | 45   |
| >RET-A919V- VKWMAIESL    | 2384 | >RET-A919V- VKWMVIESL    | 403  | 1981 |
| >RET-A919V- VKWMAIESL    | 12   | >RET-A919V- VKWMVIESL    | 18   | 6    |
| >RET-A919V- VKWMAIESLFDI | 4    | >RET-A919V- VKWMVIESLFDI | 5    | 1    |
| >RET-A919V- IPVKWMAIES   | 412  | >RET-A919V- IPVKWMVIES   | 601  | 189  |
| >RET-A919V- IPVKWMAI     | 41   | >RET-A919V- IPVKWMVI     | 104  | 63   |
| >RET-A919V- IPVKWMAIES   | 43   | >RET-A919V- IPVKWMVIES   | 59   | 16   |
| >RET-A919V- IPVKWMAI     | 319  | >RET-A919V- IPVKWMVI     | 1218 | 899  |
| >RET-A919V- IPVKWMAIES   | 398  | >RET-A919V- IPVKWMVIES   | 427  | 29   |
| >RET-A919V- IPVKWMAI     | 202  | >RET-A919V- IPVKWMVI     | 165  | 37   |
| >RET-A919V- IPVKWMAI     | 63   | >RET-A919V- IPVKWMVI     | 54   | 9    |
| >RET-A919V- IPVKWMAIES   | 153  | >RET-A919V- IPVKWMVIES   | 88   | 65   |
| >RET-A919V- IPVKWMAI     | 48   | >RET-A919V- IPVKWMVI     | 99   | 51   |
| >RET-A919V- IPVKWMAIE    | 317  | >RET-A919V- IPVKWMVIE    | 215  | 102  |
| >RET-A919V- IPVKWMAI     | 333  | >RET-A919V- IPVKWMVI     | 922  | 589  |
| >RET-A919V- IPVKWMAIES   | 458  | >RET-A919V- IPVKWMVIES   | 403  | 55   |
| >RET-A919V- IPVKWMAI     | 442  | >RET-A919V- IPVKWMVI     | 424  | 18   |
| >RET-A919V- IPVKWMAIES   | 168  | >RET-A919V- IPVKWMVIES   | 96   | 72   |
| >RET-A919V- RIPVKWMA     | 760  | >RET-A919V- RIPVKWMV     | 50   | 710  |
| >RET-A919V- RIPVKWMAI    | 300  | >RET-A919V- RIPVKWMVI    | 1927 | 1627 |
| >RET-A919V- RIPVKWMA     | 1428 | >RET-A919V- RIPVKWMV     | 35   | 1393 |
| >RET-A919V- RIPVKWMA     | 3923 | >RET-A919V- RIPVKWMV     | 66   | 3857 |

|                        |       |                        |     |       |
|------------------------|-------|------------------------|-----|-------|
| >RET-A919V- RIPVKWMA   | 2706  | >RET-A919V- RIPVKWMV   | 33  | 2673  |
| >RET-A919V- RIPVKWMAI  | 312   | >RET-A919V- RIPVKWMVI  | 502 | 190   |
| >RET-A919V- GRIPVKWMA  | 688   | >RET-A919V- GRIPVKWMV  | 261 | 427   |
| >RET-A919V- GRIPVKWMA  | 102   | >RET-A919V- GRIPVKWMV  | 97  | 5     |
| >RET-A919V- GRIPVKWMA  | 1970  | >RET-A919V- GRIPVKWMV  | 234 | 1736  |
| >RET-A919V- GRIPVKWMA  | 346   | >RET-A919V- GRIPVKWMV  | 265 | 81    |
| >RET-A919V- QGRIPVKWM  | 357   | >RET-A919V- QGRIPVKWM  | 506 | 149   |
| >RET-C609Y- GTCNCFPEEE | 2639  | >RET-C609Y- GTYNCFPEEE | 169 | 2470  |
| >RET-C609Y- GTCNCFPEEE | 29    | >RET-C609Y- GTYNCFPEEE | 16  | 13    |
| >RET-C609Y- GTCNCFPEEE | 372   | >RET-C609Y- GTYNCFPEEE | 80  | 292   |
| >RET-C609Y- GTCNCFPE   | 1257  | >RET-C609Y- GTYNCFPE   | 418 | 839   |
| >RET-C609Y- GTCNCFPEE  | 696   | >RET-C609Y- GTYNCFPEE  | 278 | 418   |
| >RET-C609Y- GTCNCFPEEE | 234   | >RET-C609Y- GTYNCFPEEE | 119 | 115   |
| >RET-C609Y- GYGTCNCF   | 85    | >RET-C609Y- GYGTYNCF   | 119 | 34    |
| >RET-C609Y- GYGTCNCF   | 374   | >RET-C609Y- GYGTYNCF   | 264 | 110   |
| >RET-C609Y- GYGTCNCF   | 32    | >RET-C609Y- GYGTYNCF   | 20  | 12    |
| >RET-C609Y- AGYGTCNCF  | 3354  | >RET-C609Y- AGYGTYNCF  | 397 | 2957  |
| >RET-C609Y- AGYGTCNCF  | 159   | >RET-C609Y- AGYGTYNCF  | 68  | 91    |
| >RET-C609Y- AGYGTCNCF  | 454   | >RET-C609Y- AGYGTYNCF  | 947 | 493   |
| >RET-C609Y- KAGYGTCNCI | 143   | >RET-C609Y- KAGYGTYNCI | 88  | 55    |
| >RET-C609Y- KAGYGTCNCI | 569   | >RET-C609Y- KAGYGTYNCI | 273 | 296   |
| >RET-C609Y- IKAGYGTC   | 25326 | >RET-C609Y- IKAGYGTY   | 443 | 24883 |
| >RET-C609Y- IKAGYGTC   | 31069 | >RET-C609Y- IKAGYGTY   | 185 | 30884 |
| >RET-C609Y- IKAGYGTC   | 4181  | >RET-C609Y- IKAGYGTY   | 17  | 4164  |
| >RET-C609Y- IKAGYGTCNC | 5     | >RET-C609Y- IKAGYGTYNC | 4   | 1     |
| >RET-C609Y- GIKAGYGTC  | 24283 | >RET-C609Y- GIKAGYGTY  | 163 | 24120 |
| >RET-C609Y- GIKAGYGTC  | 25095 | >RET-C609Y- GIKAGYGTY  | 54  | 25041 |
| >RET-C609Y- GIKAGYGTC  | 16402 | >RET-C609Y- GIKAGYGTY  | 89  | 16313 |
| >RET-C609Y- GIKAGYGTC  | 20158 | >RET-C609Y- GIKAGYGTY  | 111 | 20047 |
| >RET-C609Y- GIKAGYGTC  | 17921 | >RET-C609Y- GIKAGYGTY  | 171 | 17750 |
| >RET-C609Y- RGIKAGYGTC | 20897 | >RET-C609Y- RGIKAGYGTY | 20  | 20877 |
| >RET-C609Y- RGIKAGYGTC | 15898 | >RET-C609Y- RGIKAGYGTY | 113 | 15785 |
| >RET-C609Y- RGIKAGYGTC | 20847 | >RET-C609Y- RGIKAGYGTY | 68  | 20779 |
| >RET-C609Y- RGIKAGYGTC | 21118 | >RET-C609Y- RGIKAGYGTY | 145 | 20973 |
| >RET-C609Y- RGIKAGYGTC | 32117 | >RET-C609Y- RGIKAGYGTY | 227 | 31890 |
| >RET-C618R- CFCEPEDI   | 574   | >RET-C618R- RFCEPEDI   | 422 | 152   |
| >RET-C618R- KCFCEPEDI  | 47    | >RET-C618R- KRFCEPEDI  | 840 | 793   |
| >RET-C618R- KCFCEPEDI  | 2188  | >RET-C618R- KRFCEPEDI  | 85  | 2103  |
| >RET-C618R- KCFCEPEDI  | 28091 | >RET-C618R- KRFCEPEDI  | 322 | 27769 |
| >RET-C618R- KCFCEPEDI  | 29230 | >RET-C618R- KRFCEPEDI  | 490 | 28740 |
| >RET-C618R- EEKCFCEPED | 92    | >RET-C618R- EEKRFCEPED | 49  | 43    |
| >RET-C618R- EEKCFCEPE  | 328   | >RET-C618R- EEKRFCEPE  | 389 | 61    |
| >RET-C618R- EEKCFCEPED | 253   | >RET-C618R- EEKRFCEPED | 331 | 78    |

|                         |       |                         |     |       |
|-------------------------|-------|-------------------------|-----|-------|
| >RET-C618R- EEKCFCEPED  | 100   | >RET-C618R- EEKRFCEPED  | 136 | 36    |
| >RET-C618R- FPEEEKCF    | 22    | >RET-C618R- FPEEEKRF    | 32  | 10    |
| >RET-C618R- FPEEEKCF    | 34    | >RET-C618R- FPEEEKRF    | 52  | 18    |
| >RET-C618R- FPEEEKCFCE  | 377   | >RET-C618R- FPEEEKRFCE  | 798 | 421   |
| >RET-C618R- FPEEEKCF    | 24    | >RET-C618R- FPEEEKRF    | 37  | 13    |
| >RET-C618R- CFPEEEKCF   | 27    | >RET-C618R- CFPEEEKRF   | 12  | 15    |
| >RET-C618R- CFPEEEKC    | 36437 | >RET-C618R- CFPEEEKR    | 135 | 36302 |
| >RET-C618R- NCFPEEEKC   | 36130 | >RET-C618R- NCFPEEEKR   | 290 | 35840 |
| >RET-C618Y- CFCEPEDI    | 574   | >RET-C618Y- YFCEPEDI    | 355 | 219   |
| >RET-C618Y- KCFCEPEDI   | 30935 | >RET-C618Y- KYFCEPEDI   | 385 | 30550 |
| >RET-C618Y- KCFCEPEDI   | 7395  | >RET-C618Y- KYFCEPEDI   | 34  | 7361  |
| >RET-C618Y- KCFCEPEDI   | 13410 | >RET-C618Y- KYFCEPEDI   | 162 | 13248 |
| >RET-C618Y- KCFCEPEDI   | 22092 | >RET-C618Y- KYFCEPEDI   | 27  | 22065 |
| >RET-C618Y- KCFCEPEDI   | 47    | >RET-C618Y- KYFCEPEDI   | 42  | 5     |
| >RET-C618Y- KCFCEPEDIQ  | 6040  | >RET-C618Y- KYFCEPEDIQ  | 421 | 5619  |
| >RET-C618Y- EKCFCPEPEDI | 3866  | >RET-C618Y- EKYFCEPEDI  | 490 | 3376  |
| >RET-C618Y- EEKCFCEPED  | 92    | >RET-C618Y- EEKYFCEPEDI | 63  | 29    |
| >RET-C618Y- EEKCFCEPE   | 328   | >RET-C618Y- EEKYFCEPE   | 283 | 45    |
| >RET-C618Y- EEKCFCEPED  | 1716  | >RET-C618Y- EEKYFCEPED  | 347 | 1369  |
| >RET-C618Y- EEKCFCEPED  | 253   | >RET-C618Y- EEKYFCEPEDI | 276 | 23    |
| >RET-C618Y- EEKCFCEPED  | 100   | >RET-C618Y- EEKYFCEPEDI | 99  | 1     |
| >RET-C618Y- EEEKCFCE    | 832   | >RET-C618Y- EEEKYFCE    | 260 | 572   |
| >RET-C618Y- FPEEEKCF    | 22    | >RET-C618Y- FPEEEKYF    | 34  | 12    |
| >RET-C618Y- FPEEEKCF    | 34    | >RET-C618Y- FPEEEKYF    | 28  | 6     |
| >RET-C618Y- FPEEEKCFCE  | 377   | >RET-C618Y- FPEEEKYFCE  | 426 | 49    |
| >RET-C618Y- FPEEEKCF    | 24    | >RET-C618Y- FPEEEKYF    | 25  | 1     |
| >RET-C618Y- CFPEEEKCF   | 27    | >RET-C618Y- CFPEEEKYF   | 6   | 21    |
| >RET-C620R- CEPEDIQDPL  | 660   | >RET-C620R- REPEDIQDPL  | 161 | 499   |
| >RET-C620R- CEPEDIQDPL  | 10198 | >RET-C620R- REPEDIQDPL  | 205 | 9993  |
| >RET-C620R- CEPEDIQDPL  | 2016  | >RET-C620R- REPEDIQDPL  | 377 | 1639  |
| >RET-C620R- FCEPEDIQDP  | 6881  | >RET-C620R- FREPEDIQDP  | 46  | 6835  |
| >RET-C620R- NCFPEEEKCF  | 32128 | >RET-C620R- NCFPEEEKCF  | 220 | 31908 |
| >RET-C620R- NCFPEEEKCF  | 37854 | >RET-C620R- NCFPEEEKCF  | 200 | 37654 |
| >RET-C620R- NCFPEEEKCF  | 29768 | >RET-C620R- NCFPEEEKCF  | 56  | 29712 |
| >RET-C620R- KCFCEPEDI   | 47    | >RET-C620R- KCFREPEDI   | 43  | 4     |
| >RET-C620R- EEKCFCEPED  | 92    | >RET-C620R- EEKCFREPEDI | 106 | 14    |
| >RET-C620R- EEKCFCEPE   | 328   | >RET-C620R- EEKCFREPE   | 661 | 333   |
| >RET-C620R- EEKCFCEPED  | 253   | >RET-C620R- EEKCFREPEDI | 359 | 106   |
| >RET-C620R- EEKCFCEPED  | 100   | >RET-C620R- EEKCFREPEDI | 119 | 19    |
| >RET-C620R- FPEEEKCFC   | 42264 | >RET-C620R- FPEEEKCFR   | 497 | 41767 |
| >RET-C620R- FPEEEKCFCE  | 377   | >RET-C620R- FPEEEKCFRE  | 637 | 260   |
| >RET-C620R- FPEEEKCFC   | 36938 | >RET-C620R- FPEEEKCFR   | 439 | 36499 |
| >RET-C620R- CFPEEEKCFC  | 31598 | >RET-C620R- CFPEEEKCFR  | 241 | 31357 |

|                          |       |                          |      |       |
|--------------------------|-------|--------------------------|------|-------|
| >RET-C620R- CFPEEEKCFC   | 21051 | >RET-C620R- CFPEEEKCFR   | 74   | 20977 |
| >RET-C620R- CFPEEEKCFC   | 38524 | >RET-C620R- CFPEEEKCFR   | 308  | 38216 |
| >RET-C620R- CFPEEEKCFC   | 29424 | >RET-C620R- CFPEEEKCFR   | 42   | 29382 |
| >RET-C620S- CEPEDIQDPL   | 1750  | >RET-C620S- SEPEDIQDPL   | 358  | 1392  |
| >RET-C620S- CEPEDIQDPL   | 660   | >RET-C620S- SEPEDIQDPL   | 315  | 345   |
| >RET-C620S- FCEPEDIQDP   | 635   | >RET-C620S- FSEPEDIQDPI  | 423  | 212   |
| >RET-C620S- FCEPEDIQDP   | 17026 | >RET-C620S- FSEPEDIQDPI  | 289  | 16737 |
| >RET-C620S- KCFCEPEDI    | 47    | >RET-C620S- KCFSEPEDI    | 47   | 0     |
| >RET-C620S- KCFCEPEDI    | 717   | >RET-C620S- KCFSEPEDI    | 455  | 262   |
| >RET-C620S- EEKCFCEPEDI  | 92    | >RET-C620S- EEKCFSEPEDI  | 102  | 10    |
| >RET-C620S- EEKCFCEPE    | 328   | >RET-C620S- EEKCFSEPE    | 459  | 131   |
| >RET-C620S- EEKCFCEPEDI  | 253   | >RET-C620S- EEKCFSEPEDI  | 315  | 62    |
| >RET-C620S- EEKCFCEPEDI  | 100   | >RET-C620S- EEKCFSEPEDI  | 93   | 7     |
| >RET-C620S- FPEEEKCFCEFI | 377   | >RET-C620S- FPEEEKCFSEFI | 521  | 144   |
| >RET-C630G- CDEL CRTVI   | 1419  | >RET-C630G- GDEL CRTVI   | 408  | 1011  |
| >RET-C630G- CDEL CRTV    | 185   | >RET-C630G- GDEL CRTV    | 799  | 614   |
| >RET-C630G- CDEL CRTVI   | 190   | >RET-C630G- GDEL CRTVI   | 799  | 609   |
| >RET-C630G- PLCDEL CRTV  | 22    | >RET-C630G- PLGDEL CRTV  | 20   | 2     |
| >RET-C630G- PLCDEL CRTV  | 924   | >RET-C630G- PLGDEL CRTV  | 224  | 700   |
| >RET-C630G- PLCDEL CRTV  | 261   | >RET-C630G- PLGDEL CRTV  | 53   | 208   |
| >RET-C630G- PLCDEL CRTV  | 249   | >RET-C630G- PLGDEL CRTV  | 28   | 221   |
| >RET-C630G- PLCDEL CRT   | 93    | >RET-C630G- PLGDEL CRT   | 62   | 31    |
| >RET-C630G- PLCDEL CRTV  | 7     | >RET-C630G- PLGDEL CRTV  | 5    | 2     |
| >RET-C630G- PLCDEL CRTVI | 129   | >RET-C630G- PLGDEL CRTV  | 97   | 32    |
| >RET-C630G- IQDPLCDEL    | 210   | >RET-C630G- IQDPLGDEL    | 365  | 155   |
| >RET-C630G- IQDPLCDEL    | 40    | >RET-C630G- IQDPLGDEL    | 69   | 29    |
| >RET-C630R- CDEL CRTVI   | 1419  | >RET-C630R- RDEL CRTVI   | 342  | 1077  |
| >RET-C630R- CDEL CRTV    | 185   | >RET-C630R- RDEL CRTV    | 582  | 397   |
| >RET-C630R- CDEL CRTVI   | 190   | >RET-C630R- RDEL CRTVI   | 618  | 428   |
| >RET-C630R- PLCDEL CRTV  | 22    | >RET-C630R- PLRDEL CRTV  | 134  | 112   |
| >RET-C630R- PLCDEL CRTV  | 261   | >RET-C630R- PLRDEL CRTV  | 732  | 471   |
| >RET-C630R- PLCDEL CRTV  | 249   | >RET-C630R- PLRDEL CRTV  | 1242 | 993   |
| >RET-C630R- PLCDEL CRT   | 93    | >RET-C630R- PLRDEL CRT   | 105  | 12    |
| >RET-C630R- PLCDEL CRTV  | 7     | >RET-C630R- PLRDEL CRTV  | 8    | 1     |
| >RET-C630R- PLCDEL CRTVI | 129   | >RET-C630R- PLRDEL CRTVI | 155  | 26    |
| >RET-C630R- IQDPLCDEL    | 210   | >RET-C630R- IQDPLRDEL    | 982  | 772   |
| >RET-C630R- IQDPLCDEL    | 40    | >RET-C630R- IQDPLRDEL    | 251  | 211   |
| >RET-C630R- EDIQDPLC     | 39851 | >RET-C630R- EDIQDPLR     | 336  | 39515 |
| >RET-C634A- CRTVIAAAVLI  | 262   | >RET-C634A- ARTVIAAAVLI  | 92   | 170   |
| >RET-C634A- CRTVIAAAV    | 553   | >RET-C634A- ARTVIAAAV    | 165  | 388   |
| >RET-C634A- CRTVIAAAVLI  | 197   | >RET-C634A- ARTVIAAAVLI  | 191  | 6     |
| >RET-C634A- CRTVIAAAVLI  | 149   | >RET-C634A- ARTVIAAAVLI  | 65   | 84    |
| >RET-C634A- CRTVIAAAVLI  | 228   | >RET-C634A- ARTVIAAAVLI  | 63   | 165   |

|                         |      |                         |      |      |
|-------------------------|------|-------------------------|------|------|
| >RET-C634A- CRTVIAAAVL  | 1829 | >RET-C634A- ARTVIAAAVL  | 239  | 1590 |
| >RET-C634A- CRTVIAAAV   | 957  | >RET-C634A- ARTVIAAAV   | 304  | 653  |
| >RET-C634A- CRTVIAAAVL  | 243  | >RET-C634A- ARTVIAAAVL  | 727  | 484  |
| >RET-C634A- CRTVIAAAVL  | 74   | >RET-C634A- ARTVIAAAVL  | 33   | 41   |
| >RET-C634A- CRTVIAAAVL  | 314  | >RET-C634A- ARTVIAAAVL  | 4310 | 3996 |
| >RET-C634A- LCRTVIAA    | 166  | >RET-C634A- LARTVIAA    | 37   | 129  |
| >RET-C634A- LCRTVIAAA   | 200  | >RET-C634A- LARTVIAAA   | 42   | 158  |
| >RET-C634A- LCRTVIAAAV  | 498  | >RET-C634A- LARTVIAAAV  | 86   | 412  |
| >RET-C634A- LCRTVIAAAV  | 860  | >RET-C634A- LARTVIAAAV  | 159  | 701  |
| >RET-C634A- LCRTVIAAAV  | 5900 | >RET-C634A- LARTVIAAAV  | 362  | 5538 |
| >RET-C634A- LCRTVIAAAV  | 7127 | >RET-C634A- LARTVIAAAV  | 135  | 6992 |
| >RET-C634A- LCRTVIAAAV  | 2267 | >RET-C634A- LARTVIAAAV  | 487  | 1780 |
| >RET-C634A- LCRTVIAAAV  | 6603 | >RET-C634A- LARTVIAAAV  | 43   | 6560 |
| >RET-C634A- LCRTVIAA    | 2110 | >RET-C634A- LARTVIAA    | 230  | 1880 |
| >RET-C634A- LCRTVIAAA   | 1341 | >RET-C634A- LARTVIAAA   | 119  | 1222 |
| >RET-C634A- LCRTVIAAAV  | 283  | >RET-C634A- LARTVIAAAV  | 330  | 47   |
| >RET-C634A- ELCRTVIAAA\ | 714  | >RET-C634A- ELARTVIAAA\ | 54   | 660  |
| >RET-C634A- ELCRTVIAA   | 2634 | >RET-C634A- ELARTVIAA   | 345  | 2289 |
| >RET-C634A- ELCRTVIAAA  | 142  | >RET-C634A- ELARTVIAAA  | 99   | 43   |
| >RET-C634A- ELCRTVIAAA\ | 359  | >RET-C634A- ELARTVIAAA\ | 34   | 325  |
| >RET-C634A- ELCRTVIAAA\ | 1653 | >RET-C634A- ELARTVIAAA\ | 348  | 1305 |
| >RET-C634A- ELCRTVIAA   | 173  | >RET-C634A- ELARTVIAA   | 177  | 4    |
| >RET-C634A- ELCRTVIAAA  | 102  | >RET-C634A- ELARTVIAAA  | 102  | 0    |
| >RET-C634A- ELCRTVIAAA\ | 11   | >RET-C634A- ELARTVIAAA\ | 9    | 2    |
| >RET-C634A- ELCRTVIAAA\ | 201  | >RET-C634A- ELARTVIAAA\ | 24   | 177  |
| >RET-C634A- ELCRTVIAA   | 3585 | >RET-C634A- ELARTVIAA   | 364  | 3221 |
| >RET-C634A- ELCRTVIAAA  | 3852 | >RET-C634A- ELARTVIAAA  | 422  | 3430 |
| >RET-C634A- ELCRTVIAAA\ | 234  | >RET-C634A- ELARTVIAAA\ | 27   | 207  |
| >RET-C634A- ELCRTVIAA   | 5181 | >RET-C634A- ELARTVIAA   | 387  | 4794 |
| >RET-C634A- ELCRTVIAAA  | 3257 | >RET-C634A- ELARTVIAAA  | 185  | 3072 |
| >RET-C634A- ELCRTVIAAA\ | 36   | >RET-C634A- ELARTVIAAA\ | 5    | 31   |
| >RET-C634A- ELCRTVIA    | 534  | >RET-C634A- ELARTVIA    | 168  | 366  |
| >RET-C634A- ELCRTVIAA   | 497  | >RET-C634A- ELARTVIAA   | 111  | 386  |
| >RET-C634A- ELCRTVIAAA  | 270  | >RET-C634A- ELARTVIAAA  | 60   | 210  |
| >RET-C634A- ELCRTVIAAA\ | 9    | >RET-C634A- ELARTVIAAA\ | 4    | 5    |
| >RET-C634A- ELCRTVIAAA  | 679  | >RET-C634A- ELARTVIAAA  | 201  | 478  |
| >RET-C634A- ELCRTVIAAA\ | 493  | >RET-C634A- ELARTVIAAA\ | 31   | 462  |
| >RET-C634A- ELCRTVIAA   | 4515 | >RET-C634A- ELARTVIAA   | 408  | 4107 |
| >RET-C634A- ELCRTVIAAA  | 4577 | >RET-C634A- ELARTVIAAA  | 335  | 4242 |
| >RET-C634A- ELCRTVIAAA\ | 128  | >RET-C634A- ELARTVIAAA\ | 9    | 119  |
| >RET-C634A- DELCRTVI    | 145  | >RET-C634A- DELARTVI    | 242  | 97   |
| >RET-C634A- DELCRTVI    | 139  | >RET-C634A- DELARTVI    | 123  | 16   |
| >RET-C634A- DELCRTVIAA  | 74   | >RET-C634A- DELARTVIAA  | 74   | 0    |

|                          |       |                          |      |       |
|--------------------------|-------|--------------------------|------|-------|
| >RET-C634A- DELCRTVIAA\  | 246   | >RET-C634A- DELARTVIAA\  | 186  | 60    |
| >RET-C634A- DELCRTVI     | 978   | >RET-C634A- DELARTVI     | 288  | 690   |
| >RET-C634A- CDELCRTV     | 185   | >RET-C634A- CDELARTV     | 72   | 113   |
| >RET-C634A- CDELCRTVI    | 190   | >RET-C634A- CDELARTVI    | 75   | 115   |
| >RET-C634A- LCDELCRTV    | 661   | >RET-C634A- LCDELARTV    | 211  | 450   |
| >RET-C634A- PLCDELCRTV   | 22    | >RET-C634A- PLCDELARTV   | 15   | 7     |
| >RET-C634A- PLCDELCRTV   | 261   | >RET-C634A- PLCDELARTV   | 280  | 19    |
| >RET-C634A- PLCDELCRTV   | 249   | >RET-C634A- PLCDELARTV   | 189  | 60    |
| >RET-C634A- PLCDEL CRT   | 93    | >RET-C634A- PLCDELART    | 197  | 104   |
| >RET-C634A- PLCDEL CRTV  | 7     | >RET-C634A- PLCDELARTV   | 7    | 0     |
| >RET-C634A- PLCDEL CRTV\ | 129   | >RET-C634A- PLCDELARTV   | 149  | 20    |
| >RET-C634R- CRTVIAAAVL   | 1849  | >RET-C634R- RRTVIAAAVL   | 410  | 1439  |
| >RET-C634R- CRTVIAAAVL\  | 262   | >RET-C634R- RRTVIAAAVL\  | 33   | 229   |
| >RET-C634R- CRTVIAAAA    | 1753  | >RET-C634R- RRTVIAAAA    | 87   | 1666  |
| >RET-C634R- CRTVIAAAV    | 553   | >RET-C634R- RRTVIAAAV    | 38   | 515   |
| >RET-C634R- CRTVIAAAVL   | 197   | >RET-C634R- RRTVIAAAVL   | 18   | 179   |
| >RET-C634R- CRTVIAAAVL\  | 149   | >RET-C634R- RRTVIAAAVL\  | 21   | 128   |
| >RET-C634R- CRTVIAAAVL   | 228   | >RET-C634R- RRTVIAAAVL   | 92   | 136   |
| >RET-C634R- CRTVIAAAA    | 7983  | >RET-C634R- RRTVIAAAA    | 121  | 7862  |
| >RET-C634R- CRTVIAAAV    | 6847  | >RET-C634R- RRTVIAAAV    | 68   | 6779  |
| >RET-C634R- CRTVIAAAVL   | 850   | >RET-C634R- RRTVIAAAVL   | 41   | 809   |
| >RET-C634R- CRTVIAAAVL\  | 1829  | >RET-C634R- RRTVIAAAVL\  | 38   | 1791  |
| >RET-C634R- CRTVIAAAV    | 957   | >RET-C634R- RRTVIAAAV    | 50   | 907   |
| >RET-C634R- CRTVIAAAVL   | 243   | >RET-C634R- RRTVIAAAVL   | 26   | 217   |
| >RET-C634R- CRTVIAAAVL\  | 74    | >RET-C634R- RRTVIAAAVL\  | 13   | 61    |
| >RET-C634R- CRTVIAAAVL\  | 314   | >RET-C634R- RRTVIAAAVL\  | 297  | 17    |
| >RET-C634R- LCRTVIAA     | 166   | >RET-C634R- LRRTVIAA     | 1701 | 1535  |
| >RET-C634R- LCRTVIAAA    | 200   | >RET-C634R- LRRTVIAAA    | 2067 | 1867  |
| >RET-C634R- LCRTVIAAAV   | 498   | >RET-C634R- LRRTVIAAAV   | 3930 | 3432  |
| >RET-C634R- LCRTVIAAAV   | 3041  | >RET-C634R- LRRTVIAAAV   | 207  | 2834  |
| >RET-C634R- LCRTVIAAAV\  | 2267  | >RET-C634R- LRRTVIAAAV\  | 151  | 2116  |
| >RET-C634R- LCRTVIAAAV\  | 25315 | >RET-C634R- LRRTVIAAAV\  | 404  | 24911 |
| >RET-C634R- LCRTVIAAAV\  | 283   | >RET-C634R- LRRTVIAAAV\  | 2766 | 2483  |
| >RET-C634R- LCRTVIAAAV\  | 23259 | >RET-C634R- LRRTVIAAAV\  | 150  | 23109 |
| >RET-C634R- LCRTVIAAAV   | 34826 | >RET-C634R- LRRTVIAAAV   | 466  | 34360 |
| >RET-C634R- LCRTVIAAAV\  | 32467 | >RET-C634R- LRRTVIAAAV\  | 55   | 32412 |
| >RET-C634R- DIQDPLCDEL   | 26424 | >RET-C634R- DIQDPLCDEL   | 43   | 26381 |
| >RET-C634R- DIQDPLCDEL\  | 36505 | >RET-C634R- DIQDPLCDEL\  | 92   | 36413 |
| >RET-C634R- ELCRTVIAAAA  | 142   | >RET-C634R- ELRRTVIAAAA  | 256  | 114   |
| >RET-C634R- ELCRTVIAAAA\ | 359   | >RET-C634R- ELRRTVIAAAA\ | 190  | 169   |
| >RET-C634R- ELCRTVIAA    | 173   | >RET-C634R- ELRRTVIAA    | 1424 | 1251  |
| >RET-C634R- ELCRTVIAAAA  | 102   | >RET-C634R- ELRRTVIAAAA  | 981  | 879   |
| >RET-C634R- ELCRTVIAAAA\ | 11    | >RET-C634R- ELRRTVIAAAA\ | 69   | 58    |

|                         |       |                         |      |       |
|-------------------------|-------|-------------------------|------|-------|
| >RET-C634R- ELCRTVIAAA\ | 201   | >RET-C634R- ELRRTVIAAA\ | 248  | 47    |
| >RET-C634R- ELCRTVIAAA\ | 234   | >RET-C634R- ELRRTVIAAA\ | 755  | 521   |
| >RET-C634R- ELCRTVIAAA\ | 36    | >RET-C634R- ELRRTVIAAA\ | 314  | 278   |
| >RET-C634R- ELCRTVIAA   | 497   | >RET-C634R- ELRRTVIAA   | 652  | 155   |
| >RET-C634R- ELCRTVIAAA  | 270   | >RET-C634R- ELRRTVIAAA  | 360  | 90    |
| >RET-C634R- ELCRTVIAAA\ | 9     | >RET-C634R- ELRRTVIAAA\ | 11   | 2     |
| >RET-C634R- ELCRTVIAAA\ | 493   | >RET-C634R- ELRRTVIAAA\ | 1923 | 1430  |
| >RET-C634R- ELCRTVIAAA\ | 128   | >RET-C634R- ELRRTVIAAA\ | 313  | 185   |
| >RET-C634R- ELCRTVIAAA\ | 6323  | >RET-C634R- ELRRTVIAAA\ | 274  | 6049  |
| >RET-C634R- DELCRTVI    | 145   | >RET-C634R- DELRRTVI    | 294  | 149   |
| >RET-C634R- DELCRTVI    | 139   | >RET-C634R- DELRRTVI    | 333  | 194   |
| >RET-C634R- DELCRTVIAA\ | 74    | >RET-C634R- DELRRTVIAA\ | 137  | 63    |
| >RET-C634R- DELCRTVIAA\ | 246   | >RET-C634R- DELRRTVIAA\ | 290  | 44    |
| >RET-C634R- DELCRTVI    | 978   | >RET-C634R- DELRRTVI    | 464  | 514   |
| >RET-C634R- CDELCRTV    | 185   | >RET-C634R- CDELRRTV    | 189  | 4     |
| >RET-C634R- CDELCRTVI   | 190   | >RET-C634R- CDELRRTVI   | 85   | 105   |
| >RET-C634R- PLCDELCRTV  | 22    | >RET-C634R- PLCDELRRTV  | 51   | 29    |
| >RET-C634R- PLCDELCRTV  | 261   | >RET-C634R- PLCDELRRTV  | 1381 | 1120  |
| >RET-C634R- PLCDELCRTV  | 249   | >RET-C634R- PLCDELRRTV  | 1438 | 1189  |
| >RET-C634R- PLCDELCRT   | 93    | >RET-C634R- PLCDELRRT   | 4061 | 3968  |
| >RET-C634R- PLCDELCRTV  | 7     | >RET-C634R- PLCDELRRTV  | 11   | 4     |
| >RET-C634R- PLCDELCRTV\ | 129   | >RET-C634R- PLCDELRRTV\ | 374  | 245   |
| >RET-C634T- CRTVIAAAVLI | 262   | >RET-C634T- TRTVIAAAVLI | 331  | 69    |
| >RET-C634T- CRTVIAAAVL  | 197   | >RET-C634T- TRTVIAAAVL  | 800  | 603   |
| >RET-C634T- CRTVIAAAVLI | 149   | >RET-C634T- TRTVIAAAVLI | 164  | 15    |
| >RET-C634T- CRTVIAAAV   | 2143  | >RET-C634T- TRTVIAAAV   | 188  | 1955  |
| >RET-C634T- CRTVIAAAVL  | 228   | >RET-C634T- TRTVIAAAVL  | 25   | 203   |
| >RET-C634T- CRTVIAAAVLI | 1829  | >RET-C634T- TRTVIAAAVLI | 453  | 1376  |
| >RET-C634T- CRTVIAAAVL  | 243   | >RET-C634T- TRTVIAAAVL  | 659  | 416   |
| >RET-C634T- CRTVIAAAVLI | 74    | >RET-C634T- TRTVIAAAVLI | 114  | 40    |
| >RET-C634T- CRTVIAAAVLI | 314   | >RET-C634T- TRTVIAAAVLI | 7044 | 6730  |
| >RET-C634T- LCRTVIAAA   | 4447  | >RET-C634T- LTRTVIAAA   | 196  | 4251  |
| >RET-C634T- LCRTVIAAAV  | 3773  | >RET-C634T- LTRTVIAAAV  | 286  | 3487  |
| >RET-C634T- LCRTVIAAAV  | 2998  | >RET-C634T- LTRTVIAAAV  | 319  | 2679  |
| >RET-C634T- LCRTVIAAAV  | 2916  | >RET-C634T- LTRTVIAAAV  | 388  | 2528  |
| >RET-C634T- LCRTVIAA    | 166   | >RET-C634T- LTRTVIAA    | 10   | 156   |
| >RET-C634T- LCRTVIAAA   | 200   | >RET-C634T- LTRTVIAAA   | 11   | 189   |
| >RET-C634T- LCRTVIAAAV  | 498   | >RET-C634T- LTRTVIAAAV  | 17   | 481   |
| >RET-C634T- LCRTVIAAAVI | 860   | >RET-C634T- LTRTVIAAAVI | 28   | 832   |
| >RET-C634T- LCRTVIAAAV  | 5900  | >RET-C634T- LTRTVIAAAV  | 53   | 5847  |
| >RET-C634T- LCRTVIAAAVI | 12012 | >RET-C634T- LTRTVIAAAVI | 484  | 11528 |
| >RET-C634T- LCRTVIAAAV  | 20653 | >RET-C634T- LTRTVIAAAV  | 165  | 20488 |
| >RET-C634T- LCRTVIAAAVI | 6603  | >RET-C634T- LTRTVIAAAVI | 7    | 6596  |

|                          |       |                          |     |       |
|--------------------------|-------|--------------------------|-----|-------|
| >RET-C634T- LCRTVIAAAVI  | 10808 | >RET-C634T- LTRTVIAAAVI  | 100 | 10708 |
| >RET-C634T- LCRTVIAAAV   | 21970 | >RET-C634T- LTRTVIAAAV   | 348 | 21622 |
| >RET-C634T- LCRTVIAAAVI  | 283   | >RET-C634T- LTRTVIAAAVI  | 16  | 267   |
| >RET-C634T- LCRTVIAAAVI  | 10244 | >RET-C634T- LTRTVIAAAVI  | 315 | 9929  |
| >RET-C634T- ELCRTVIAAAA\ | 714   | >RET-C634T- ELTRTVIAAAA\ | 408 | 306   |
| >RET-C634T- ELCRTVIAAAA  | 142   | >RET-C634T- ELTRTVIAAAA  | 181 | 39    |
| >RET-C634T- ELCRTVIAAAA\ | 359   | >RET-C634T- ELTRTVIAAAA\ | 258 | 101   |
| >RET-C634T- ELCRTVIAAA   | 173   | >RET-C634T- ELTRTVIAAA   | 414 | 241   |
| >RET-C634T- ELCRTVIAAAA  | 102   | >RET-C634T- ELTRTVIAAAA  | 254 | 152   |
| >RET-C634T- ELCRTVIAAAA\ | 11    | >RET-C634T- ELTRTVIAAAA\ | 19  | 8     |
| >RET-C634T- ELCRTVIAAAA\ | 201   | >RET-C634T- ELTRTVIAAAA\ | 33  | 168   |
| >RET-C634T- ELCRTVIAAAA\ | 234   | >RET-C634T- ELTRTVIAAAA\ | 50  | 184   |
| >RET-C634T- ELCRTVIAAAA\ | 36    | >RET-C634T- ELTRTVIAAAA\ | 16  | 20    |
| >RET-C634T- ELCRTVIA     | 534   | >RET-C634T- ELTRTVIA     | 194 | 340   |
| >RET-C634T- ELCRTVIAA    | 497   | >RET-C634T- ELTRTVIAA    | 140 | 357   |
| >RET-C634T- ELCRTVIAAAA  | 270   | >RET-C634T- ELTRTVIAAAA  | 74  | 196   |
| >RET-C634T- ELCRTVIAAAA\ | 9     | >RET-C634T- ELTRTVIAAAA\ | 4   | 5     |
| >RET-C634T- ELCRTVIAAAA  | 679   | >RET-C634T- ELTRTVIAAAA  | 468 | 211   |
| >RET-C634T- ELCRTVIAAAA\ | 493   | >RET-C634T- ELTRTVIAAAA\ | 118 | 375   |
| >RET-C634T- ELCRTVIAAAA\ | 128   | >RET-C634T- ELTRTVIAAAA\ | 37  | 91    |
| >RET-C634T- DELCRTVI     | 145   | >RET-C634T- DELTRTVI     | 244 | 99    |
| >RET-C634T- DELCRTVI     | 139   | >RET-C634T- DELTRTVI     | 142 | 3     |
| >RET-C634T- DELCRTVIAA\  | 74    | >RET-C634T- DELTRTVIAA\  | 78  | 4     |
| >RET-C634T- DELCRTVIAA\  | 246   | >RET-C634T- DELTRTVIAA\  | 346 | 100   |
| >RET-C634T- DELCRTVI     | 978   | >RET-C634T- DELTRTVI     | 308 | 670   |
| >RET-C634T- CDELCRTV     | 185   | >RET-C634T- CDELTRTV     | 54  | 131   |
| >RET-C634T- CDELCRTVI    | 190   | >RET-C634T- CDELTRTVI    | 41  | 149   |
| >RET-C634T- LCDELCRTV    | 661   | >RET-C634T- LCDELTRTV    | 135 | 526   |
| >RET-C634T- PLCDELCRTV   | 578   | >RET-C634T- PLCDELTRTV   | 338 | 240   |
| >RET-C634T- PLCDELCRTV   | 22    | >RET-C634T- PLCDELTRTV   | 13  | 9     |
| >RET-C634T- PLCDELCRTV   | 261   | >RET-C634T- PLCDELTRTV   | 200 | 61    |
| >RET-C634T- PLCDELCRTV   | 249   | >RET-C634T- PLCDELTRTV   | 125 | 124   |
| >RET-C634T- PLCDELCRT    | 93    | >RET-C634T- PLCDELTRT    | 299 | 206   |
| >RET-C634T- PLCDELCRTV   | 7     | >RET-C634T- PLCDELTRTV   | 6   | 1     |
| >RET-C634T- PLCDELCRTVI  | 129   | >RET-C634T- PLCDELTRTVI  | 161 | 32    |
| >RET-C634T- DPLCDELCRT   | 1262  | >RET-C634T- DPLCDELTRT'  | 455 | 807   |
| >RET-C634W CRTVIAAAVI    | 262   | >RET-C634W WRTVIAAAVI    | 88  | 174   |
| >RET-C634W CRTVIAAAA     | 1753  | >RET-C634W WRTVIAAAA     | 409 | 1344  |
| >RET-C634W CRTVIAAAV     | 553   | >RET-C634W WRTVIAAAV     | 120 | 433   |
| >RET-C634W CRTVIAAAVL    | 197   | >RET-C634W WRTVIAAAVI    | 61  | 136   |
| >RET-C634W CRTVIAAAVI    | 149   | >RET-C634W WRTVIAAAVI    | 38  | 111   |
| >RET-C634W CRTVIAAAV     | 2143  | >RET-C634W WRTVIAAAV     | 76  | 2067  |
| >RET-C634W CRTVIAAAVL    | 228   | >RET-C634W WRTVIAAAVI    | 19  | 209   |



|                        |       |                       |      |       |
|------------------------|-------|-----------------------|------|-------|
| >RET-C634W CRTVIAAAVL  | 850   | >RET-C634W WRTVIAAAVI | 186  | 664   |
| >RET-C634W CRTVIAAAV   | 957   | >RET-C634W WRTVIAAAV  | 254  | 703   |
| >RET-C634W CRTVIAAAVL  | 243   | >RET-C634W WRTVIAAAVI | 73   | 170   |
| >RET-C634W CRTVIAAAVLI | 74    | >RET-C634W WRTVIAAAVI | 29   | 45    |
| >RET-C634W CRTVIAAAVLI | 314   | >RET-C634W WRTVIAAAVI | 963  | 649   |
| >RET-C634W LCRTVIAA    | 166   | >RET-C634W LWRTVIAA   | 180  | 14    |
| >RET-C634W LCRTVIAAA   | 200   | >RET-C634W LWRTVIAAA  | 206  | 6     |
| >RET-C634W LCRTVIAAAV  | 498   | >RET-C634W LWRTVIAAA\ | 495  | 3     |
| >RET-C634W LCRTVIAAAVI | 283   | >RET-C634W LWRTVIAAA\ | 3309 | 3026  |
| >RET-C634W LCRTVIAA    | 33826 | >RET-C634W LWRTVIAA   | 109  | 33717 |
| >RET-C634W LCRTVIAAA   | 34085 | >RET-C634W LWRTVIAAA  | 108  | 33977 |
| >RET-C634W LCRTVIAAAVI | 36483 | >RET-C634W LWRTVIAAA\ | 269  | 36214 |
| >RET-C634W ELCRTVIAAA\ | 5157  | >RET-C634W ELWRTVIAAA | 179  | 4978  |
| >RET-C634W ELCRTVIAAA\ | 714   | >RET-C634W ELWRTVIAAA | 462  | 252   |
| >RET-C634W ELCRTVIAAA  | 142   | >RET-C634W ELWRTVIAAA | 98   | 44    |
| >RET-C634W ELCRTVIAAA\ | 359   | >RET-C634W ELWRTVIAAA | 372  | 13    |
| >RET-C634W ELCRTVIAAA\ | 1653  | >RET-C634W ELWRTVIAAA | 395  | 1258  |
| >RET-C634W ELCRTVIA    | 2338  | >RET-C634W ELWRTVIA   | 172  | 2166  |
| >RET-C634W ELCRTVIAA   | 173   | >RET-C634W ELWRTVIAA  | 12   | 161   |
| >RET-C634W ELCRTVIAAA  | 102   | >RET-C634W ELWRTVIAAA | 9    | 93    |
| >RET-C634W ELCRTVIAAA\ | 11    | >RET-C634W ELWRTVIAAA | 2    | 9     |
| >RET-C634W ELCRTVIAA   | 4568  | >RET-C634W ELWRTVIAA  | 154  | 4414  |
| >RET-C634W ELCRTVIAAA  | 3922  | >RET-C634W ELWRTVIAAA | 111  | 3811  |
| >RET-C634W ELCRTVIAAA\ | 201   | >RET-C634W ELWRTVIAAA | 8    | 193   |
| >RET-C634W ELCRTVIA    | 6201  | >RET-C634W ELWRTVIA   | 145  | 6056  |
| >RET-C634W ELCRTVIAA   | 3585  | >RET-C634W ELWRTVIAA  | 75   | 3510  |
| >RET-C634W ELCRTVIAAA  | 3852  | >RET-C634W ELWRTVIAAA | 83   | 3769  |
| >RET-C634W ELCRTVIAAA\ | 234   | >RET-C634W ELWRTVIAAA | 10   | 224   |
| >RET-C634W ELCRTVIA    | 9484  | >RET-C634W ELWRTVIA   | 244  | 9240  |
| >RET-C634W ELCRTVIAA   | 5181  | >RET-C634W ELWRTVIAA  | 59   | 5122  |
| >RET-C634W ELCRTVIAAA  | 3257  | >RET-C634W ELWRTVIAAA | 37   | 3220  |
| >RET-C634W ELCRTVIAAA\ | 36    | >RET-C634W ELWRTVIAAA | 3    | 33    |
| >RET-C634W ELCRTVIA    | 534   | >RET-C634W ELWRTVIA   | 63   | 471   |
| >RET-C634W ELCRTVIAA   | 497   | >RET-C634W ELWRTVIAA  | 46   | 451   |
| >RET-C634W ELCRTVIAAA  | 270   | >RET-C634W ELWRTVIAAA | 31   | 239   |
| >RET-C634W ELCRTVIAAA\ | 9     | >RET-C634W ELWRTVIAAA | 4    | 5     |
| >RET-C634W ELCRTVIAAA  | 679   | >RET-C634W ELWRTVIAAA | 345  | 334   |
| >RET-C634W ELCRTVIAAA\ | 493   | >RET-C634W ELWRTVIAAA | 150  | 343   |
| >RET-C634W ELCRTVIAA   | 4515  | >RET-C634W ELWRTVIAA  | 106  | 4409  |
| >RET-C634W ELCRTVIAAA  | 4577  | >RET-C634W ELWRTVIAAA | 85   | 4492  |
| >RET-C634W ELCRTVIAAA\ | 128   | >RET-C634W ELWRTVIAAA | 6    | 122   |
| >RET-C634W DELCRTVI    | 145   | >RET-C634W DELWRTVI   | 97   | 48    |
| >RET-C634W DELCRTVI    | 139   | >RET-C634W DELWRTVI   | 46   | 93    |

|                         |       |                         |      |       |
|-------------------------|-------|-------------------------|------|-------|
| >RET-C634W DELCRTVIA    | 572   | >RET-C634W DELWRTVIA    | 111  | 461   |
| >RET-C634W DELCRTVIAA   | 74    | >RET-C634W DELWRTVIAA   | 25   | 49    |
| >RET-C634W DELCRTVIA    | 1124  | >RET-C634W DELWRTVIA    | 413  | 711   |
| >RET-C634W DELCRTVIAA   | 246   | >RET-C634W DELWRTVIAA   | 133  | 113   |
| >RET-C634W DELCRTVI     | 978   | >RET-C634W DELWRTVI     | 237  | 741   |
| >RET-C634W CDELCRTV     | 185   | >RET-C634W CDELWRTV     | 169  | 16    |
| >RET-C634W CDELCRTVI    | 190   | >RET-C634W CDELWRTVI    | 129  | 61    |
| >RET-C634W LCDELCRTV    | 661   | >RET-C634W LCDELWRTV    | 90   | 571   |
| >RET-C634W PLCDELCRT    | 1071  | >RET-C634W PLCDELWRT    | 204  | 867   |
| >RET-C634W PLCDELCRTV   | 22    | >RET-C634W PLCDELWRT\   | 8    | 14    |
| >RET-C634W PLCDELCRTVI  | 778   | >RET-C634W PLCDELWRT\   | 233  | 545   |
| >RET-C634W PLCDELCRTV   | 924   | >RET-C634W PLCDELWRT\   | 433  | 491   |
| >RET-C634W PLCDELCRTV   | 261   | >RET-C634W PLCDELWRT\   | 79   | 182   |
| >RET-C634W PLCDELCRTV   | 249   | >RET-C634W PLCDELWRT\   | 164  | 85    |
| >RET-C634W PLCDELCRT    | 93    | >RET-C634W PLCDELWRT    | 33   | 60    |
| >RET-C634W PLCDELCRTV   | 7     | >RET-C634W PLCDELWRT\   | 7    | 0     |
| >RET-C634W PLCDELCRTVI  | 129   | >RET-C634W PLCDELWRT\   | 57   | 72    |
| >RET-C634W PLCDELCR     | 814   | >RET-C634W PLCDELWR     | 266  | 548   |
| >RET-C634W DPLCDEL      | 18136 | >RET-C634W DPLCDELW     | 44   | 18092 |
| >RET-C634W DPLCDEL      | 12523 | >RET-C634W DPLCDELW     | 11   | 12512 |
| >RET-C634W IQDPLCDEL    | 21679 | >RET-C634W IQDPLCDELW   | 342  | 21337 |
| >RET-C634W IQDPLCDEL    | 24732 | >RET-C634W IQDPLCDELW   | 106  | 24626 |
| >RET-C634Y- CRTVIAAAVL  | 1849  | >RET-C634Y- YRTVIAAAVL  | 421  | 1428  |
| >RET-C634Y- CRTVIAAAVLI | 262   | >RET-C634Y- YRTVIAAAVLI | 41   | 221   |
| >RET-C634Y- CRTVIAAAA   | 1753  | >RET-C634Y- YRTVIAAAA   | 245  | 1508  |
| >RET-C634Y- CRTVIAAAV   | 553   | >RET-C634Y- YRTVIAAAV   | 72   | 481   |
| >RET-C634Y- CRTVIAAAVL  | 197   | >RET-C634Y- YRTVIAAAVL  | 217  | 20    |
| >RET-C634Y- CRTVIAAAVLI | 149   | >RET-C634Y- YRTVIAAAVLI | 31   | 118   |
| >RET-C634Y- CRTVIAAAV   | 2143  | >RET-C634Y- YRTVIAAAV   | 59   | 2084  |
| >RET-C634Y- CRTVIAAAVL  | 228   | >RET-C634Y- YRTVIAAAVL  | 15   | 213   |
| >RET-C634Y- CRTVIAAAVLI | 6930  | >RET-C634Y- YRTVIAAAVLI | 432  | 6498  |
| >RET-C634Y- CRTVIAAAVLI | 1829  | >RET-C634Y- YRTVIAAAVLI | 418  | 1411  |
| >RET-C634Y- CRTVIAAAVL  | 243   | >RET-C634Y- YRTVIAAAVL  | 338  | 95    |
| >RET-C634Y- CRTVIAAAVLI | 74    | >RET-C634Y- YRTVIAAAVLI | 93   | 19    |
| >RET-C634Y- CRTVIAAAVLI | 314   | >RET-C634Y- YRTVIAAAVLI | 1037 | 723   |
| >RET-C634Y- LCRTVIAAAV  | 25043 | >RET-C634Y- LYRTVIAAAV  | 491  | 24552 |
| >RET-C634Y- LCRTVIAAAVI | 21993 | >RET-C634Y- LYRTVIAAAVI | 302  | 21691 |
| >RET-C634Y- LCRTVIAAAVI | 22342 | >RET-C634Y- LYRTVIAAAVI | 28   | 22314 |
| >RET-C634Y- LCRTVIAA    | 166   | >RET-C634Y- LYRTVIAA    | 16   | 150   |
| >RET-C634Y- LCRTVIAAAA  | 200   | >RET-C634Y- LYRTVIAAAA  | 18   | 182   |
| >RET-C634Y- LCRTVIAAAV  | 498   | >RET-C634Y- LYRTVIAAAV  | 32   | 466   |
| >RET-C634Y- LCRTVIAAAVI | 860   | >RET-C634Y- LYRTVIAAAVI | 56   | 804   |
| >RET-C634Y- LCRTVIAAAVI | 283   | >RET-C634Y- LYRTVIAAAVI | 2429 | 2146  |

|                          |       |                          |     |       |
|--------------------------|-------|--------------------------|-----|-------|
| >RET-C634Y- DIQDPLCDEL'  | 17572 | >RET-C634Y- DIQDPLCDEL'  | 444 | 17128 |
| >RET-C634Y- DIQDPLCDEL'  | 31913 | >RET-C634Y- DIQDPLCDEL'  | 307 | 31606 |
| >RET-C634Y- ELCRTVIAAAA  | 1424  | >RET-C634Y- ELYRTVIAAAA  | 270 | 1154  |
| >RET-C634Y- ELCRTVIAAAA\ | 714   | >RET-C634Y- ELYRTVIAAAA\ | 185 | 529   |
| >RET-C634Y- ELCRTVIAAA   | 2634  | >RET-C634Y- ELYRTVIAAA   | 171 | 2463  |
| >RET-C634Y- ELCRTVIAAAA  | 142   | >RET-C634Y- ELYRTVIAAAA  | 38  | 104   |
| >RET-C634Y- ELCRTVIAAAA\ | 359   | >RET-C634Y- ELYRTVIAAAA\ | 24  | 335   |
| >RET-C634Y- ELCRTVIAAAA\ | 1653  | >RET-C634Y- ELYRTVIAAAA\ | 326 | 1327  |
| >RET-C634Y- ELCRTVIA     | 2338  | >RET-C634Y- ELYRTVIA     | 193 | 2145  |
| >RET-C634Y- ELCRTVIAA    | 173   | >RET-C634Y- ELYRTVIAA    | 13  | 160   |
| >RET-C634Y- ELCRTVIAAAA  | 102   | >RET-C634Y- ELYRTVIAAAA  | 9   | 93    |
| >RET-C634Y- ELCRTVIAAAA\ | 11    | >RET-C634Y- ELYRTVIAAAA\ | 3   | 8     |
| >RET-C634Y- ELCRTVIAA    | 4568  | >RET-C634Y- ELYRTVIAA    | 196 | 4372  |
| >RET-C634Y- ELCRTVIAAAA  | 3922  | >RET-C634Y- ELYRTVIAAAA  | 132 | 3790  |
| >RET-C634Y- ELCRTVIAAAA\ | 201   | >RET-C634Y- ELYRTVIAAAA\ | 9   | 192   |
| >RET-C634Y- ELCRTVIA     | 6201  | >RET-C634Y- ELYRTVIA     | 226 | 5975  |
| >RET-C634Y- ELCRTVIAA    | 3585  | >RET-C634Y- ELYRTVIAA    | 111 | 3474  |
| >RET-C634Y- ELCRTVIAAAA  | 3852  | >RET-C634Y- ELYRTVIAAAA  | 117 | 3735  |
| >RET-C634Y- ELCRTVIAAAA\ | 234   | >RET-C634Y- ELYRTVIAAAA\ | 13  | 221   |
| >RET-C634Y- ELCRTVIAAAA  | 3257  | >RET-C634Y- ELYRTVIAAAA  | 438 | 2819  |
| >RET-C634Y- ELCRTVIAAAA\ | 36    | >RET-C634Y- ELYRTVIAAAA\ | 7   | 29    |
| >RET-C634Y- ELCRTVIA     | 534   | >RET-C634Y- ELYRTVIA     | 57  | 477   |
| >RET-C634Y- ELCRTVIAA    | 497   | >RET-C634Y- ELYRTVIAA    | 39  | 458   |
| >RET-C634Y- ELCRTVIAAAA  | 270   | >RET-C634Y- ELYRTVIAAAA  | 26  | 244   |
| >RET-C634Y- ELCRTVIAAAA\ | 9     | >RET-C634Y- ELYRTVIAAAA\ | 4   | 5     |
| >RET-C634Y- ELCRTVIAAAA  | 679   | >RET-C634Y- ELYRTVIAAAA  | 158 | 521   |
| >RET-C634Y- ELCRTVIAAAA\ | 493   | >RET-C634Y- ELYRTVIAAAA\ | 117 | 376   |
| >RET-C634Y- ELCRTVIAA    | 4515  | >RET-C634Y- ELYRTVIAA    | 150 | 4365  |
| >RET-C634Y- ELCRTVIAAAA  | 4577  | >RET-C634Y- ELYRTVIAAAA  | 122 | 4455  |
| >RET-C634Y- ELCRTVIAAAA\ | 128   | >RET-C634Y- ELYRTVIAAAA\ | 6   | 122   |
| >RET-C634Y- DELCRTVI     | 145   | >RET-C634Y- DELYRTVI     | 46  | 99    |
| >RET-C634Y- DELCRTVI     | 139   | >RET-C634Y- DELYRTVI     | 144 | 5     |
| >RET-C634Y- DELCRTVIAA\  | 74    | >RET-C634Y- DELYRTVIAA\  | 84  | 10    |
| >RET-C634Y- DELCRTVIAA\  | 246   | >RET-C634Y- DELYRTVIAA\  | 239 | 7     |
| >RET-C634Y- DELCRTVI     | 978   | >RET-C634Y- DELYRTVI     | 122 | 856   |
| >RET-C634Y- CDEL CRTV    | 185   | >RET-C634Y- CDELYRTV     | 59  | 126   |
| >RET-C634Y- CDEL CRTVI   | 190   | >RET-C634Y- CDELYRTVI    | 39  | 151   |
| >RET-C634Y- LCDEL CRTV   | 661   | >RET-C634Y- LCDELYRTV    | 117 | 544   |
| >RET-C634Y- PLCDEL CRTV  | 578   | >RET-C634Y- PLCDELYRTV   | 485 | 93    |
| >RET-C634Y- PLCDEL CRTV  | 22    | >RET-C634Y- PLCDELYRTV   | 10  | 12    |
| >RET-C634Y- PLCDEL CRTVI | 778   | >RET-C634Y- PLCDELYRTVI  | 499 | 279   |
| >RET-C634Y- PLCDEL CRTV  | 924   | >RET-C634Y- PLCDELYRTV   | 403 | 521   |
| >RET-C634Y- PLCDEL CRTV  | 261   | >RET-C634Y- PLCDELYRTV   | 179 | 82    |

|                          |       |                          |       |       |
|--------------------------|-------|--------------------------|-------|-------|
| >RET-C634Y- PLCDEL CRTV  | 249   | >RET-C634Y- PLCDELYRTV   | 168   | 81    |
| >RET-C634Y- PLCDEL CRT   | 93    | >RET-C634Y- PLCDELYRT    | 361   | 268   |
| >RET-C634Y- PLCDEL CRTV  | 7     | >RET-C634Y- PLCDELYRTV   | 6     | 1     |
| >RET-C634Y- PLCDEL CRTV  | 129   | >RET-C634Y- PLCDELYRTVI  | 143   | 14    |
| >RET-C634Y- PLCDEL CR    | 814   | >RET-C634Y- PLCDELYR     | 62    | 752   |
| >RET-C634Y- DPLCDEL CRT  | 1262  | >RET-C634Y- DPLCDELYRT   | 432   | 830   |
| >RET-C634Y- DPLCDEL C    | 6011  | >RET-C634Y- DPLCDELY     | 42    | 5969  |
| >RET-C634Y- DPLCDEL C    | 18136 | >RET-C634Y- DPLCDELY     | 226   | 17910 |
| >RET-C634Y- DPLCDEL C    | 12523 | >RET-C634Y- DPLCDELY     | 398   | 12125 |
| >RET-C634Y- DPLCDEL CR   | 5445  | >RET-C634Y- DPLCDELYR    | 309   | 5136  |
| >RET-C634Y- QDPLCDEL CR  | 2124  | >RET-C634Y- QDPLCDELYR   | 169   | 1955  |
| >RET-C634Y- IQDPLCDEL C  | 33183 | >RET-C634Y- IQDPLCDELY   | 308   | 32875 |
| >RET-C634Y- IQDPLCDEL CI | 2986  | >RET-C634Y- IQDPLCDELYI  | 262   | 2724  |
| >RET-D631G- DEL CRTVI    | 145   | >RET-D631G- GEL CRTVI    | 333   | 188   |
| >RET-D631G- DEL CRTVI    | 139   | >RET-D631G- GEL CRTVI    | 13208 | 13069 |
| >RET-D631G- DEL CRTVIAA  | 74    | >RET-D631G- GEL CRTVIAA  | 8897  | 8823  |
| >RET-D631G- DEL CRTVI    | 5212  | >RET-D631G- GEL CRTVI    | 177   | 5035  |
| >RET-D631G- DEL CRTVI    | 4284  | >RET-D631G- GEL CRTVI    | 180   | 4104  |
| >RET-D631G- DEL CRTVIA   | 1124  | >RET-D631G- GEL CRTVIA   | 59    | 1065  |
| >RET-D631G- DEL CRTVIAA  | 246   | >RET-D631G- GEL CRTVIAA  | 21    | 225   |
| >RET-D631G- DEL CRTVI    | 978   | >RET-D631G- GEL CRTVI    | 52    | 926   |
| >RET-D631G- DEL CRTVIA   | 7255  | >RET-D631G- GEL CRTVIA   | 55    | 7200  |
| >RET-D631G- DEL CRTVIAA  | 7739  | >RET-D631G- GEL CRTVIAA  | 55    | 7684  |
| >RET-D631G- CDEL CRTVI   | 1114  | >RET-D631G- CGEL CRTVI   | 407   | 707   |
| >RET-D631G- CDEL CRTV    | 185   | >RET-D631G- CGEL CRTV    | 16580 | 16395 |
| >RET-D631G- CDEL CRTVI   | 190   | >RET-D631G- CGEL CRTVI   | 15442 | 15252 |
| >RET-D631G- PLCDEL CRTV  | 22    | >RET-D631G- PLCGEL CRTV  | 37    | 15    |
| >RET-D631G- PLCDEL CRTV  | 261   | >RET-D631G- PLCGEL CRTV  | 429   | 168   |
| >RET-D631G- PLCDEL CRTV  | 249   | >RET-D631G- PLCGEL CRTV  | 613   | 364   |
| >RET-D631G- PLCDEL CRT   | 93    | >RET-D631G- PLCGEL CRT   | 227   | 134   |
| >RET-D631G- PLCDEL CRTV  | 7     | >RET-D631G- PLCGEL CRTV  | 11    | 4     |
| >RET-D631G- PLCDEL CRTVI | 129   | >RET-D631G- PLCGEL CRTVI | 233   | 104   |
| >RET-D631G- IQDPLCDEL    | 210   | >RET-D631G- IQDPLCGEL    | 1149  | 939   |
| >RET-D631G- IQDPLCDEL    | 40    | >RET-D631G- IQDPLCGEL    | 135   | 95    |
| >RET-D925H- DHIYTTQSDV   | 3457  | >RET-D925H- HHIYTTQSDV   | 278   | 3179  |
| >RET-D925H- DHIYTTQSDV   | 1817  | >RET-D925H- HHIYTTQSDV   | 394   | 1423  |
| >RET-D925H- DHIYTTQSDV   | 5182  | >RET-D925H- HHIYTTQSDV   | 192   | 4990  |
| >RET-D925H- DHIYTTQSDV   | 9819  | >RET-D925H- HHIYTTQSDV   | 460   | 9359  |
| >RET-D925H- DHIYTTQSDV   | 423   | >RET-D925H- HHIYTTQSDV   | 13    | 410   |
| >RET-D925H- FDHIYTTQSD   | 7654  | >RET-D925H- FHHIYTTQSD   | 422   | 7232  |
| >RET-D925H- FDHIYTTQSD   | 282   | >RET-D925H- FHHIYTTQSD   | 5624  | 5342  |
| >RET-D925H- FDHIYTTQSD   | 76    | >RET-D925H- FHHIYTTQSD   | 15536 | 15460 |
| >RET-D925H- VKWMAIESLI   | 4749  | >RET-D925H- VKWMAIESLI   | 180   | 4569  |

|                        |      |                        |      |      |
|------------------------|------|------------------------|------|------|
| >RET-D925H-SLFDHIYT    | 22   | >RET-D925H-SLFHHIYT    | 48   | 26   |
| >RET-D925H-SLFDHIYTT   | 13   | >RET-D925H-SLFHHIYTT   | 32   | 19   |
| >RET-D925H-SLFDHIYTTQ§ | 147  | >RET-D925H-SLFHHIYTTQ§ | 597  | 450  |
| >RET-D925H-SLFDHIYT    | 18   | >RET-D925H-SLFHHIYT    | 46   | 28   |
| >RET-D925H-SLFDHIYTT   | 10   | >RET-D925H-SLFHHIYTT   | 45   | 35   |
| >RET-D925H-SLFDHIYTTQ§ | 23   | >RET-D925H-SLFHHIYTTQ§ | 78   | 55   |
| >RET-D925H-SLFDHIYT    | 38   | >RET-D925H-SLFHHIYT    | 58   | 20   |
| >RET-D925H-SLFDHIYTT   | 8    | >RET-D925H-SLFHHIYTT   | 22   | 14   |
| >RET-D925H-SLFDHIYTTQ§ | 38   | >RET-D925H-SLFHHIYTTQ§ | 90   | 52   |
| >RET-D925H-SLFDHIYT    | 76   | >RET-D925H-SLFHHIYT    | 404  | 328  |
| >RET-D925H-SLFDHIYTT   | 61   | >RET-D925H-SLFHHIYTT   | 572  | 511  |
| >RET-D925H-SLFDHIYT    | 3    | >RET-D925H-SLFHHIYT    | 7    | 4    |
| >RET-D925H-SLFDHIYTT   | 2    | >RET-D925H-SLFHHIYTT   | 5    | 3    |
| >RET-D925H-SLFDHIYTTQ  | 27   | >RET-D925H-SLFHHIYTTQ  | 137  | 110  |
| >RET-D925H-SLFDHIYTTQ§ | 20   | >RET-D925H-SLFHHIYTTQ§ | 96   | 76   |
| >RET-D925H-SLFDHIYT    | 79   | >RET-D925H-SLFHHIYT    | 329  | 250  |
| >RET-D925H-SLFDHIYTT   | 10   | >RET-D925H-SLFHHIYTT   | 30   | 20   |
| >RET-D925H-SLFDHIYT    | 16   | >RET-D925H-SLFHHIYT    | 60   | 44   |
| >RET-D925H-SLFDHIYTT   | 11   | >RET-D925H-SLFHHIYTT   | 43   | 32   |
| >RET-D925H-SLFDHIYTTQ  | 84   | >RET-D925H-SLFHHIYTTQ  | 416  | 332  |
| >RET-D925H-SLFDHIYTTQ§ | 320  | >RET-D925H-SLFHHIYTTQ§ | 1575 | 1255 |
| >RET-D925H-SLFDHIYTT   | 230  | >RET-D925H-SLFHHIYTT   | 4511 | 4281 |
| >RET-D925H-SLFDHIYT    | 5    | >RET-D925H-SLFHHIYT    | 27   | 22   |
| >RET-D925H-SLFDHIYTT   | 3    | >RET-D925H-SLFHHIYTT   | 12   | 9    |
| >RET-D925H-SLFDHIYTTQ  | 5    | >RET-D925H-SLFHHIYTTQ  | 29   | 24   |
| >RET-D925H-SLFDHIYTTQ§ | 13   | >RET-D925H-SLFHHIYTTQ§ | 167  | 154  |
| >RET-D925H-SLFDHIYTT   | 150  | >RET-D925H-SLFHHIYTT   | 105  | 45   |
| >RET-D925H-SLFDHIYTTQ  | 523  | >RET-D925H-SLFHHIYTTQ  | 391  | 132  |
| >RET-D925H-ESLFDHIY    | 23   | >RET-D925H-ESLFHHIY    | 13   | 10   |
| >RET-D925H-ESLFDHIY    | 431  | >RET-D925H-ESLFHHIY    | 185  | 246  |
| >RET-D925H-ESLFDHIY    | 137  | >RET-D925H-ESLFHHIY    | 314  | 177  |
| >RET-D925H-ESLFDHIY    | 481  | >RET-D925H-ESLFHHIY    | 371  | 110  |
| >RET-D925H-ESLFDHIY    | 97   | >RET-D925H-ESLFHHIY    | 37   | 60   |
| >RET-D925H-ESLFDHIY    | 329  | >RET-D925H-ESLFHHIY    | 452  | 123  |
| >RET-D925H-IESLFDHI    | 212  | >RET-D925H-IESLFHHI    | 26   | 186  |
| >RET-D925H-IESLFDHIY   | 112  | >RET-D925H-IESLFHHIY   | 154  | 42   |
| >RET-D925H-IESLFDHIY   | 1267 | >RET-D925H-IESLFHHIY   | 241  | 1026 |
| >RET-D925H-IESLFDHI    | 2658 | >RET-D925H-IESLFHHI    | 307  | 2351 |
| >RET-D925H-IESLFDHIY   | 8    | >RET-D925H-IESLFHHIY   | 5    | 3    |
| >RET-D925H-IESLFDHIYTT | 191  | >RET-D925H-IESLFHHIYTT | 131  | 60   |
| >RET-D925H-IESLFDHI    | 101  | >RET-D925H-IESLFHHI    | 61   | 40   |
| >RET-D925H-IESLFDHI    | 1024 | >RET-D925H-IESLFHHI    | 486  | 538  |
| >RET-D925H-IESLFDHIYTT | 454  | >RET-D925H-IESLFHHIYTT | 236  | 218  |

|                        |      |                        |      |      |
|------------------------|------|------------------------|------|------|
| >RET-D925H-IESLFDHIY   | 243  | >RET-D925H-IESLFHHIY   | 405  | 162  |
| >RET-D925H-IESLFDHIYT  | 745  | >RET-D925H-IESLFHHIYT  | 400  | 345  |
| >RET-D925H-IESLFDHIYTT | 447  | >RET-D925H-IESLFHHIYTT | 152  | 295  |
| >RET-D925H-IESLFDHI    | 92   | >RET-D925H-IESLFHHI    | 79   | 13   |
| >RET-D925H-IESLFDHIYTT | 496  | >RET-D925H-IESLFHHIYTT | 495  | 1    |
| >RET-D925H-AIESLFDHIY  | 287  | >RET-D925H-AIESLFHHIY  | 259  | 28   |
| >RET-D925H-AIESLFDHI   | 635  | >RET-D925H-AIESLFHHI   | 323  | 312  |
| >RET-D925H-AIESLFDHI   | 225  | >RET-D925H-AIESLFHHI   | 94   | 131  |
| >RET-D925H-AIESLFDHI   | 8158 | >RET-D925H-AIESLFHHI   | 345  | 7813 |
| >RET-D925H-AIESLFDHIY  | 411  | >RET-D925H-AIESLFHHIY  | 443  | 32   |
| >RET-D925H-AIESLFDHIY  | 355  | >RET-D925H-AIESLFHHIY  | 532  | 177  |
| >RET-D925H-AIESLFDHIY  | 484  | >RET-D925H-AIESLFHHIY  | 106  | 378  |
| >RET-D925H-MAIESLFDHI  | 448  | >RET-D925H-MAIESLFHHI  | 1268 | 820  |
| >RET-D925H-MAIESLFDHI  | 507  | >RET-D925H-MAIESLFHHI  | 421  | 86   |
| >RET-D925H-MAIESLFDHI  | 628  | >RET-D925H-MAIESLFHHI  | 308  | 320  |
| >RET-D925H-MAIESLFDHI  | 77   | >RET-D925H-MAIESLFHHI  | 78   | 1    |
| >RET-D925H-MAIESLFDHI  | 744  | >RET-D925H-MAIESLFHHI  | 179  | 565  |
| >RET-D925H-MAIESLFDHI  | 1363 | >RET-D925H-MAIESLFHHI  | 363  | 1000 |
| >RET-D925H-MAIESLFDHI\ | 885  | >RET-D925H-MAIESLFHHI\ | 353  | 532  |
| >RET-D925H-MAIESLFDHI\ | 104  | >RET-D925H-MAIESLFHHI\ | 57   | 47   |
| >RET-D925H-MAIESLFDHI\ | 32   | >RET-D925H-MAIESLFHHI\ | 24   | 8    |
| >RET-D925H-MAIESLFDHI\ | 45   | >RET-D925H-MAIESLFHHI\ | 48   | 3    |
| >RET-D925H-MAIESLFD    | 6041 | >RET-D925H-MAIESLFH    | 299  | 5742 |
| >RET-D925H-MAIESLFDH   | 609  | >RET-D925H-MAIESLFHH   | 261  | 348  |
| >RET-D925H-MAIESLFDHI\ | 51   | >RET-D925H-MAIESLFHHI\ | 36   | 15   |
| >RET-D925H-MAIESLFDHI  | 60   | >RET-D925H-MAIESLFHHI  | 40   | 20   |
| >RET-D925H-MAIESLFDHI  | 68   | >RET-D925H-MAIESLFHHI  | 12   | 56   |
| >RET-D925H-MAIESLFDHI\ | 667  | >RET-D925H-MAIESLFHHI\ | 262  | 405  |
| >RET-D925H-MAIESLFDHI\ | 357  | >RET-D925H-MAIESLFHHI\ | 208  | 149  |
| >RET-D925H-MAIESLFDHI\ | 119  | >RET-D925H-MAIESLFHHI\ | 48   | 71   |
| >RET-D925H-MAIESLFDH   | 1130 | >RET-D925H-MAIESLFHH   | 287  | 843  |
| >RET-D925H-MAIESLFDHI  | 675  | >RET-D925H-MAIESLFHHI  | 198  | 477  |
| >RET-D925H-MAIESLFDHI\ | 7    | >RET-D925H-MAIESLFHHI\ | 6    | 1    |
| >RET-D925H-MAIESLFD    | 9069 | >RET-D925H-MAIESLFH    | 249  | 8820 |
| >RET-D925H-MAIESLFDH   | 290  | >RET-D925H-MAIESLFHH   | 631  | 341  |
| >RET-D925H-MAIESLFDHI\ | 9    | >RET-D925H-MAIESLFHHI\ | 11   | 2    |
| >RET-D925H-MAIESLFDHI\ | 53   | >RET-D925H-MAIESLFHHI\ | 90   | 37   |
| >RET-D925H-MAIESLFDHI\ | 166  | >RET-D925H-MAIESLFHHI\ | 111  | 55   |
| >RET-D925H-MAIESLFDH   | 5941 | >RET-D925H-MAIESLFHH   | 260  | 5681 |
| >RET-D925H-MAIESLFDHI  | 84   | >RET-D925H-MAIESLFHHI  | 23   | 61   |
| >RET-D925H-MAIESLFDHI\ | 21   | >RET-D925H-MAIESLFHHI\ | 19   | 2    |
| >RET-D925H-MAIESLFDHI\ | 79   | >RET-D925H-MAIESLFHHI\ | 97   | 18   |
| >RET-D925H-WMAIESLFDI  | 200  | >RET-D925H-WMAIESLFHI  | 62   | 138  |

|                        |       |                        |       |       |
|------------------------|-------|------------------------|-------|-------|
| >RET-D925H-WMAIESLFDI  | 12    | >RET-D925H-WMAIESLFHI  | 9     | 3     |
| >RET-D925H-WMAIESLFDI  | 28    | >RET-D925H-WMAIESLFHI  | 15    | 13    |
| >RET-D925H-WMAIESLFDI  | 26    | >RET-D925H-WMAIESLFHI  | 22    | 4     |
| >RET-D925H-WMAIESLFDI  | 35    | >RET-D925H-WMAIESLFHI  | 15    | 20    |
| >RET-D925H-WMAIESLFDI  | 90    | >RET-D925H-WMAIESLFHI  | 34    | 56    |
| >RET-D925H-WMAIESLFDI  | 21    | >RET-D925H-WMAIESLFHI  | 12    | 9     |
| >RET-D925H-WMAIESLFDI  | 103   | >RET-D925H-WMAIESLFHI  | 35    | 68    |
| >RET-D925H-WMAIESLFDI  | 64    | >RET-D925H-WMAIESLFHI  | 12    | 52    |
| >RET-D925H-WMAIESLFD   | 7394  | >RET-D925H-WMAIESLFH   | 104   | 7290  |
| >RET-D925H-WMAIESLFDI  | 1225  | >RET-D925H-WMAIESLFHI  | 248   | 977   |
| >RET-D925H-WMAIESLFDI  | 656   | >RET-D925H-WMAIESLFHI  | 395   | 261   |
| >RET-D925H-WMAIESLFDI  | 753   | >RET-D925H-WMAIESLFHI  | 352   | 401   |
| >RET-D925H-KWMAIESLFI  | 2445  | >RET-D925H-KWMAIESLFI  | 465   | 1980  |
| >RET-D925H-KWMAIESLFI  | 1035  | >RET-D925H-KWMAIESLFI  | 185   | 850   |
| >RET-D925H-KWMAIESLFI  | 1101  | >RET-D925H-KWMAIESLFI  | 373   | 728   |
| >RET-D925H-KWMAIESLFI  | 189   | >RET-D925H-KWMAIESLFI  | 181   | 8     |
| >RET-E178K-ENRPPGTFHC  | 15104 | >RET-E178K-KNRPPGTFHC  | 228   | 14876 |
| >RET-E178K-ENRPPGTF    | 589   | >RET-E178K-KNRPPGTF    | 59    | 530   |
| >RET-E178K-ENRPPGTFHC  | 325   | >RET-E178K-KNRPPGTFHC  | 32    | 293   |
| >RET-E178K-ENRPPGTF    | 3734  | >RET-E178K-KNRPPGTF    | 180   | 3554  |
| >RET-E178K-ENRPPGTFHC  | 2868  | >RET-E178K-KNRPPGTFHC  | 98    | 2770  |
| >RET-E178K-ENRPPGTFH   | 2734  | >RET-E178K-KNRPPGTFH   | 208   | 2526  |
| >RET-E178K-ENRPPGTFHC  | 581   | >RET-E178K-KNRPPGTFHC  | 53    | 528   |
| >RET-E178K-RENRPPTGF   | 57    | >RET-E178K-RKNRPPTGF   | 4     | 53    |
| >RET-E178K-RENRPPTGF   | 4147  | >RET-E178K-RKNRPPTGF   | 127   | 4020  |
| >RET-E178K-RENRPPTGF   | 344   | >RET-E178K-RKNRPPTGF   | 22691 | 22347 |
| >RET-E178K-RENRPPTG    | 337   | >RET-E178K-RKNRPPTG    | 31091 | 30754 |
| >RET-E178K-IRENRPPGTF  | 433   | >RET-E178K-IRKNRPPTGF  | 27    | 406   |
| >RET-E178K-IRENRPPGTF  | 101   | >RET-E178K-IRKNRPPTGF  | 48    | 53    |
| >RET-E178K-IRENRPPGTF  | 901   | >RET-E178K-IRKNRPPTGF  | 391   | 510   |
| >RET-E178K-IRENRPPGTF  | 194   | >RET-E178K-IRKNRPPTGF  | 116   | 78    |
| >RET-E178K-RIRENRPP    | 29    | >RET-E178K-RIRKNRPP    | 15    | 14    |
| >RET-E178K-RIRENRPPG   | 5     | >RET-E178K-RIRKNRPPG   | 4     | 1     |
| >RET-E178K-RIRENRPPGT  | 17    | >RET-E178K-RIRKNRPPGT  | 11    | 6     |
| >RET-E178K-RIRENRPPGT  | 42    | >RET-E178K-RIRKNRPPGT  | 27    | 15    |
| >RET-E178K-RIRENRPPGT  | 269   | >RET-E178K-RIRKNRPPGT  | 411   | 142   |
| >RET-E178K-RIRENRPPGT  | 253   | >RET-E178K-RIRKNRPPGT  | 162   | 91    |
| >RET-E178K-RIRENRPPGT  | 125   | >RET-E178K-RIRKNRPPGT  | 110   | 15    |
| >RET-E178K-RIRENRPPGT  | 68    | >RET-E178K-RIRKNRPPGT  | 48    | 20    |
| >RET-E178K-RIRENRPPGT  | 23    | >RET-E178K-RIRKNRPPGT  | 44    | 21    |
| >RET-E178K-RIRENRPPGT  | 657   | >RET-E178K-RIRKNRPPGT  | 190   | 467   |
| >RET-E178K-SFRIRENR    | 1100  | >RET-E178K-SFRIRKNR    | 240   | 860   |
| >RET-E178K-SFRIRENRPPC | 87    | >RET-E178K-SFRIRKNRPPC | 53    | 34    |

|                        |       |                        |       |       |
|------------------------|-------|------------------------|-------|-------|
| >RET-E178K-SFRIRENR    | 19    | >RET-E178K-SFRIRKNR    | 15    | 4     |
| >RET-E178K-SFRIRENR    | 69    | >RET-E178K-SFRIRKNR    | 95    | 26    |
| >RET-E178K-SFRIRENR    | 247   | >RET-E178K-SFRIRKNR    | 148   | 99    |
| >RET-E178K-PSFIRENR    | 99    | >RET-E178K-PSFIRKNR    | 138   | 39    |
| >RET-E178K-PSFIRENR    | 98    | >RET-E178K-PSFIRKNR    | 469   | 371   |
| >RET-E178K-RPSFIRENR   | 20    | >RET-E178K-RPSFIRKNR   | 17    | 3     |
| >RET-E178K-RPSFIRENR   | 469   | >RET-E178K-RPSFIRKNR   | 281   | 188   |
| >RET-E178K-TRPSFIRENF  | 431   | >RET-E178K-TRPSFIRKNF  | 276   | 155   |
| >RET-E178K-ETRPSFIRE   | 34629 | >RET-E178K-ETRPSFIRK   | 416   | 34213 |
| >RET-E178K-ETRPSFIRE   | 6101  | >RET-E178K-ETRPSFIRK   | 12    | 6089  |
| >RET-E178K-ETRPSFIRE   | 26599 | >RET-E178K-ETRPSFIRK   | 91    | 26508 |
| >RET-E178K-ETRPSFIRE   | 12066 | >RET-E178K-ETRPSFIRK   | 463   | 11603 |
| >RET-E768D-ELRDLLSEFN\ | 378   | >RET-E768D-DLRDLLSEFN\ | 1465  | 1087  |
| >RET-E768D-ELRDLLSEFN\ | 183   | >RET-E768D-DLRDLLSEFN\ | 580   | 397   |
| >RET-E768D-ELRDLLSEFN\ | 47    | >RET-E768D-DLRDLLSEFN\ | 176   | 129   |
| >RET-E768D-ELRDLLSEFN\ | 178   | >RET-E768D-DLRDLLSEFN\ | 660   | 482   |
| >RET-E768D-ELRDLLSEFN\ | 54    | >RET-E768D-DLRDLLSEFN\ | 112   | 58    |
| >RET-E768D-ELRDLLSEFN\ | 40    | >RET-E768D-DLRDLLSEFN\ | 166   | 126   |
| >RET-E768D-ELRDLLSEFN\ | 3     | >RET-E768D-DLRDLLSEFN\ | 6     | 3     |
| >RET-E768D-ELRDLLSEF   | 299   | >RET-E768D-DLRDLLSEF   | 1336  | 1037  |
| >RET-E768D-ELRDLLSEF   | 140   | >RET-E768D-DLRDLLSEF   | 1018  | 878   |
| >RET-E768D-ELRDLLSEF   | 63    | >RET-E768D-DLRDLLSEF   | 417   | 354   |
| >RET-E768D-ELRDLLSEFN\ | 263   | >RET-E768D-DLRDLLSEFN\ | 833   | 570   |
| >RET-E768D-ELRDLLSEF   | 145   | >RET-E768D-DLRDLLSEF   | 1263  | 1118  |
| >RET-E768D-ELRDLLSEF   | 202   | >RET-E768D-DLRDLLSEF   | 617   | 415   |
| >RET-E768D-ELRDLLSEF   | 123   | >RET-E768D-DLRDLLSEF   | 301   | 178   |
| >RET-E768D-SELRDLLS    | 470   | >RET-E768D-SDLRDLLS    | 16103 | 15633 |
| >RET-E768D-SELRDLLSEF  | 110   | >RET-E768D-SDLRDLLSEF  | 4315  | 4205  |
| >RET-E768D-SELRDLLSEF  | 91    | >RET-E768D-SDLRDLLSEF  | 970   | 879   |
| >RET-E768D-SELRDLLSEF  | 73    | >RET-E768D-SDLRDLLSEF  | 3228  | 3155  |
| >RET-E768D-SELRDLLSEF  | 64    | >RET-E768D-SDLRDLLSEF  | 3528  | 3464  |
| >RET-E768D-SELRDLLSEF  | 201   | >RET-E768D-SDLRDLLSEF  | 8474  | 8273  |
| >RET-E768D-SPSELRDL    | 90    | >RET-E768D-SPSDLRDL    | 75    | 15    |
| >RET-E768D-SPSELRDLL   | 142   | >RET-E768D-SPSDLRDLL   | 144   | 2     |
| >RET-E768D-ASPSELRDL   | 7     | >RET-E768D-ASPSDLRDL   | 19    | 12    |
| >RET-E768D-ASPSELRDLL  | 3     | >RET-E768D-ASPSDLRDLL  | 5     | 2     |
| >RET-E768D-ASPSELRDLLS | 412   | >RET-E768D-ASPSDLRDLLS | 907   | 495   |
| >RET-E768D-NASPSELR    | 15    | >RET-E768D-NASPSDLR    | 15    | 0     |
| >RET-E768D-NASPSELRDL  | 517   | >RET-E768D-NASPSDLRDL  | 254   | 263   |
| >RET-E768D-ENASPSELR   | 19    | >RET-E768D-ENASPSDLR   | 23    | 4     |
| >RET-E768D-ENASPSEL    | 145   | >RET-E768D-ENASPSDL    | 1443  | 1298  |
| >RET-E768D-KENASPSEL   | 103   | >RET-E768D-KENASPSDL   | 210   | 107   |
| >RET-E768D-KENASPSEL   | 65    | >RET-E768D-KENASPSDL   | 136   | 71    |



|                        |       |                        |       |       |
|------------------------|-------|------------------------|-------|-------|
| >RET-E768D- KENASPSEL  | 24    | >RET-E768D- KENASPSDL  | 81    | 57    |
| >RET-E768D- KENASPSEL  | 302   | >RET-E768D- KENASPSDL  | 456   | 154   |
| >RET-E768D- KENASPSEL  | 138   | >RET-E768D- KENASPSDL  | 161   | 23    |
| >RET-E768D- LKENASPSEL | 126   | >RET-E768D- LKENASPSDL | 220   | 94    |
| >RET-E768D- MLKENASPSE | 318   | >RET-E768D- MLKENASPSI | 2323  | 2005  |
| >RET-E768D- MLKENASPSE | 12    | >RET-E768D- MLKENASPSI | 75    | 63    |
| >RET-E768D- MLKENASPSE | 4     | >RET-E768D- MLKENASPSI | 7     | 3     |
| >RET-E768D- MLKENASPSE | 19    | >RET-E768D- MLKENASPSI | 151   | 132   |
| >RET-E768D- MLKENASPSE | 26    | >RET-E768D- MLKENASPSI | 119   | 93    |
| >RET-E768D- MLKENASPSE | 494   | >RET-E768D- MLKENASPSI | 3055  | 2561  |
| >RET-E768D- MLKENASPSE | 3     | >RET-E768D- MLKENASPSI | 6     | 3     |
| >RET-E768D- MLKENASPSE | 127   | >RET-E768D- MLKENASPSI | 144   | 17    |
| >RET-E768D- MLKENASPSE | 101   | >RET-E768D- MLKENASPSI | 182   | 81    |
| >RET-E884K- EGRKMKIS   | 15669 | >RET-E884K- KGRKMKIS   | 489   | 15180 |
| >RET-E884K- EGRKMKISDF | 13154 | >RET-E884K- KGRKMKISDF | 138   | 13016 |
| >RET-E884K- EGRKMKISDF | 2749  | >RET-E884K- KGRKMKISDF | 353   | 2396  |
| >RET-E884K- EGRKMKISDF | 6571  | >RET-E884K- KGRKMKISDF | 424   | 6147  |
| >RET-E884K- AEGRKMKISE | 1658  | >RET-E884K- AKGRKMKISE | 25    | 1633  |
| >RET-E884K- AEGRKMKISE | 133   | >RET-E884K- AKGRKMKISE | 15035 | 14902 |
| >RET-E884K- AEGRKMKI   | 445   | >RET-E884K- AKGRKMKI   | 32092 | 31647 |
| >RET-E884K- DLAARNILVA | 12810 | >RET-E884K- DLAARNILVA | 417   | 12393 |
| >RET-E884K- DLAARNILVA | 11628 | >RET-E884K- DLAARNILVA | 66    | 11562 |
| >RET-E884K- VAEGRKMK   | 7667  | >RET-E884K- VAKGRKMK   | 97    | 7570  |
| >RET-E884K- VAEGRKMKI  | 7184  | >RET-E884K- VAKGRKMKI  | 372   | 6812  |
| >RET-E884K- LVAEGRKMK  | 358   | >RET-E884K- LVAKGRKMK  | 2341  | 1983  |
| >RET-E884K- LVAEGRKMK  | 610   | >RET-E884K- LVAKGRKMK  | 369   | 241   |
| >RET-E884K- LVAEGRKMK  | 148   | >RET-E884K- LVAKGRKMK  | 198   | 50    |
| >RET-E884K- ILVAEGRKMK | 445   | >RET-E884K- ILVAKGRKMK | 680   | 235   |
| >RET-E884K- ILVAEGRKMK | 169   | >RET-E884K- ILVAKGRKMK | 117   | 52    |
| >RET-E884K- ILVAEGRKMK | 133   | >RET-E884K- ILVAKGRKMK | 122   | 11    |
| >RET-E884K- ILVAEGRKMK | 52    | >RET-E884K- ILVAKGRKMK | 55    | 3     |
| >RET-E884K- ILVAEGRK   | 225   | >RET-E884K- ILVAKGRK   | 106   | 119   |
| >RET-E884K- ILVAEGRKMK | 195   | >RET-E884K- ILVAKGRKMK | 71    | 124   |
| >RET-E884K- NILVAEGR   | 94    | >RET-E884K- NILVAKGR   | 300   | 206   |
| >RET-E884K- NILVAEGR   | 689   | >RET-E884K- NILVAKGR   | 393   | 296   |
| >RET-E884K- RNILVAEGR  | 596   | >RET-E884K- RNILVAKGR  | 285   | 311   |
| >RET-E884K- ARNILVAE   | 6232  | >RET-E884K- ARNILVAK   | 70    | 6162  |
| >RET-E884K- ARNILVAEGR | 361   | >RET-E884K- ARNILVAKGR | 246   | 115   |
| >RET-E884K- ARNILVAEGR | 122   | >RET-E884K- ARNILVAKGR | 81    | 41    |
| >RET-E884K- AARNILVAE  | 21803 | >RET-E884K- AARNILVAK  | 460   | 21343 |
| >RET-E884K- AARNILVAE  | 1764  | >RET-E884K- AARNILVAK  | 5     | 1759  |
| >RET-E884K- AARNILVAEG | 271   | >RET-E884K- AARNILVAKG | 384   | 113   |
| >RET-E884K- AARNILVAEG | 1137  | >RET-E884K- AARNILVAKG | 470   | 667   |

|                         |       |                         |      |       |
|-------------------------|-------|-------------------------|------|-------|
| >RET-E884K- AARNILVAE   | 12535 | >RET-E884K- AARNILVAK   | 201  | 12334 |
| >RET-E884K- AARNILVAEG  | 125   | >RET-E884K- AARNILVAKG  | 168  | 43    |
| >RET-E884K- LAARNILVAE  | 26855 | >RET-E884K- LAARNILVAK  | 397  | 26458 |
| >RET-E884K- LAARNILVAE  | 34146 | >RET-E884K- LAARNILVAK  | 122  | 34024 |
| >RET-E884K- LAARNILVAE  | 26892 | >RET-E884K- LAARNILVAK  | 70   | 26822 |
| >RET-E901K- EEDSYVKR    | 2732  | >RET-E901K- KEDSYVKR    | 216  | 2516  |
| >RET-E901K- YEEDSYVKR   | 482   | >RET-E901K- YKEDSYVKR   | 699  | 217   |
| >RET-E901K- VYEEDSYVK   | 10724 | >RET-E901K- VYKEDSYVK   | 147  | 10577 |
| >RET-E901K- VYEEDSYVKR  | 2827  | >RET-E901K- VYKEDSYVKR  | 332  | 2495  |
| >RET-E901K- VYEEDSYVKR  | 1326  | >RET-E901K- VYKEDSYVKR  | 486  | 840   |
| >RET-E901K- VYEEDSYVKR  | 69    | >RET-E901K- VYKEDSYVKR  | 60   | 9     |
| >RET-E901K- DVYEEDSYV   | 78    | >RET-E901K- DVYKEDSYV   | 866  | 788   |
| >RET-E901K- DVYEEDSYV   | 74    | >RET-E901K- DVYKEDSYV   | 452  | 378   |
| >RET-E901K- DVYEEDSYV   | 89    | >RET-E901K- DVYKEDSYV   | 563  | 474   |
| >RET-E901K- DVYEEDSYVK  | 296   | >RET-E901K- DVYKEDSYVK  | 353  | 57    |
| >RET-E901K- DVYEEDSY    | 177   | >RET-E901K- DVYKEDSY    | 308  | 131   |
| >RET-E901K- DVYEEDSY    | 64    | >RET-E901K- DVYKEDSY    | 124  | 60    |
| >RET-E901K- DVYEEDSYV   | 435   | >RET-E901K- DVYKEDSYV   | 1111 | 676   |
| >RET-E901K- DVYEEDSY    | 14    | >RET-E901K- DVYKEDSY    | 26   | 12    |
| >RET-E901K- DVYEEDSY    | 156   | >RET-E901K- DVYKEDSY    | 351  | 195   |
| >RET-E901K- DVYEEDSYVK  | 38    | >RET-E901K- DVYKEDSYVK  | 59   | 21    |
| >RET-E901K- DVYEEDSY    | 266   | >RET-E901K- DVYKEDSY    | 402  | 136   |
| >RET-E901K- DVYEEDSYVK  | 23    | >RET-E901K- DVYKEDSYVK  | 35   | 12    |
| >RET-E901K- DVYEEDSYVK  | 7     | >RET-E901K- DVYKEDSYVK  | 10   | 3     |
| >RET-E901K- DVYEEDSYV   | 20    | >RET-E901K- DVYKEDSYV   | 47   | 27    |
| >RET-E901K- DVYEEDSYV   | 20    | >RET-E901K- DVYKEDSYV   | 168  | 148   |
| >RET-E901K- DVYEEDSY    | 45    | >RET-E901K- DVYKEDSY    | 137  | 92    |
| >RET-E901K- DVYEEDSYVK  | 443   | >RET-E901K- DVYKEDSYVK  | 247  | 196   |
| >RET-E901K- LSRDVYEEDS' | 208   | >RET-E901K- LSRDVYKEDS' | 264  | 56    |
| >RET-E901K- LSRDVYEEDS' | 122   | >RET-E901K- LSRDVYKEDS' | 150  | 28    |
| >RET-E901K- LSRDVYEEDS' | 175   | >RET-E901K- LSRDVYKEDS' | 172  | 3     |
| >RET-E901K- LSRDVYEEDS' | 21    | >RET-E901K- LSRDVYKEDS' | 13   | 8     |
| >RET-E901K- LSRDVYEEDS' | 24    | >RET-E901K- LSRDVYKEDS' | 26   | 2     |
| >RET-E901K- GLSRDVYE    | 19283 | >RET-E901K- GLSRDVYK    | 85   | 19198 |
| >RET-E901K- GLSRDVYE    | 23030 | >RET-E901K- GLSRDVYK    | 45   | 22985 |
| >RET-E901K- DFGLSRDVYE  | 4572  | >RET-E901K- DFGLSRDVYK  | 460  | 4112  |
| >RET-E901K- DFGLSRDVYE  | 29400 | >RET-E901K- DFGLSRDVYK  | 399  | 29001 |
| >RET-E921K- ESLFDHIY    | 23    | >RET-E921K- KSLFDHIY    | 2334 | 2311  |
| >RET-E921K- ESLFDHIY    | 431   | >RET-E921K- KSLFDHIY    | 167  | 264   |
| >RET-E921K- ESLFDHIYT   | 16235 | >RET-E921K- KSLFDHIYT   | 288  | 15947 |
| >RET-E921K- ESLFDHIY    | 137   | >RET-E921K- KSLFDHIY    | 14   | 123   |
| >RET-E921K- ESLFDHIY    | 11719 | >RET-E921K- KSLFDHIY    | 468  | 11251 |
| >RET-E921K- ESLFDHIYTT  | 8641  | >RET-E921K- KSLFDHIYTT  | 281  | 8360  |

|                         |      |                         |       |       |
|-------------------------|------|-------------------------|-------|-------|
| >RET-E921K- ESLFDHIY    | 481  | >RET-E921K- KSLFDHIY    | 15572 | 15091 |
| >RET-E921K- ESLFDHIY    | 5713 | >RET-E921K- KSLFDHIY    | 179   | 5534  |
| >RET-E921K- ESLFDHIY    | 1730 | >RET-E921K- KSLFDHIY    | 135   | 1595  |
| >RET-E921K- ESLFDHIY    | 97   | >RET-E921K- KSLFDHIY    | 7     | 90    |
| >RET-E921K- ESLFDHIY    | 329  | >RET-E921K- KSLFDHIY    | 2698  | 2369  |
| >RET-E921K- ESLFDHIY    | 6594 | >RET-E921K- KSLFDHIY    | 146   | 6448  |
| >RET-E921K- ESLFDHIY    | 5629 | >RET-E921K- KSLFDHIY    | 33    | 5596  |
| >RET-E921K- IESLFDHI    | 212  | >RET-E921K- IKSLFDHI    | 27329 | 27117 |
| >RET-E921K- IESLFDHIY   | 112  | >RET-E921K- IKSLFDHIY   | 53    | 59    |
| >RET-E921K- IESLFDHI    | 5413 | >RET-E921K- IKSLFDHI    | 406   | 5007  |
| >RET-E921K- IESLFDHIY   | 1267 | >RET-E921K- IKSLFDHIY   | 26    | 1241  |
| >RET-E921K- IESLFDHIY   | 8    | >RET-E921K- IKSLFDHIY   | 1539  | 1531  |
| >RET-E921K- IESLFDHIYTT | 191  | >RET-E921K- IKSLFDHIYTT | 18184 | 17993 |
| >RET-E921K- IESLFDHI    | 101  | >RET-E921K- IKSLFDHI    | 20417 | 20316 |
| >RET-E921K- IESLFDHIYTT | 454  | >RET-E921K- IKSLFDHIYTT | 32951 | 32497 |
| >RET-E921K- IESLFDHIY   | 243  | >RET-E921K- IKSLFDHIY   | 22505 | 22262 |
| >RET-E921K- IESLFDHIYTT | 447  | >RET-E921K- IKSLFDHIYTT | 32823 | 32376 |
| >RET-E921K- IESLFDHI    | 92   | >RET-E921K- IKSLFDHI    | 6432  | 6340  |
| >RET-E921K- IESLFDHIYTT | 496  | >RET-E921K- IKSLFDHIYTT | 26951 | 26455 |
| >RET-E921K- GRIPVKWMA   | 6450 | >RET-E921K- GRIPVKWMA   | 150   | 6300  |
| >RET-E921K- GRIPVKWMA   | 6228 | >RET-E921K- GRIPVKWMA   | 166   | 6062  |
| >RET-E921K- AIESLFDHIY  | 287  | >RET-E921K- AIKSLFDHIY  | 1841  | 1554  |
| >RET-E921K- AIESLFDHI   | 5310 | >RET-E921K- AIKSLFDHI   | 318   | 4992  |
| >RET-E921K- AIESLFDHI   | 225  | >RET-E921K- AIKSLFDHI   | 433   | 208   |
| >RET-E921K- AIESLFDHIY  | 411  | >RET-E921K- AIKSLFDHIY  | 565   | 154   |
| >RET-E921K- AIESLFDHIY  | 355  | >RET-E921K- AIKSLFDHIY  | 541   | 186   |
| >RET-E921K- AIESLFDHIY  | 484  | >RET-E921K- AIKSLFDHIY  | 346   | 138   |
| >RET-E921K- AIESLFDHIY  | 3133 | >RET-E921K- AIKSLFDHIY  | 194   | 2939  |
| >RET-E921K- MAIESLFDHI  | 448  | >RET-E921K- MAIKSLFDHI  | 392   | 56    |
| >RET-E921K- MAIESLFDHI  | 77   | >RET-E921K- MAIKSLFDHI  | 199   | 122   |
| >RET-E921K- MAIESLFDHI  | 104  | >RET-E921K- MAIKSLFDHI  | 193   | 89    |
| >RET-E921K- MAIESLFDHI  | 32   | >RET-E921K- MAIKSLFDHI  | 52    | 20    |
| >RET-E921K- MAIESLFDHI  | 45   | >RET-E921K- MAIKSLFDHI  | 41    | 4     |
| >RET-E921K- MAIESLFDHI  | 51   | >RET-E921K- MAIKSLFDHI  | 63    | 12    |
| >RET-E921K- MAIESLFDHI  | 60   | >RET-E921K- MAIKSLFDHI  | 166   | 106   |
| >RET-E921K- MAIESLFDHI  | 68   | >RET-E921K- MAIKSLFDHI  | 507   | 439   |
| >RET-E921K- MAIESLFDHI  | 667  | >RET-E921K- MAIKSLFDHI  | 261   | 406   |
| >RET-E921K- MAIESLFDHI  | 357  | >RET-E921K- MAIKSLFDHI  | 326   | 31    |
| >RET-E921K- MAIESLFDHI  | 119  | >RET-E921K- MAIKSLFDHI  | 71    | 48    |
| >RET-E921K- MAIESLFDHI  | 7    | >RET-E921K- MAIKSLFDHI  | 10    | 3     |
| >RET-E921K- MAIESLFDH   | 290  | >RET-E921K- MAIKSLFDH   | 772   | 482   |
| >RET-E921K- MAIESLFDHI  | 9    | >RET-E921K- MAIKSLFDHI  | 13    | 4     |
| >RET-E921K- MAIESLFDHI  | 53   | >RET-E921K- MAIKSLFDHI  | 64    | 11    |

|                         |       |                         |      |       |
|-------------------------|-------|-------------------------|------|-------|
| >RET-E921K- MAIESLFDHI\ | 166   | >RET-E921K- MAIKSLFDHI\ | 146  | 20    |
| >RET-E921K- MAIESLFDHI  | 84    | >RET-E921K- MAIKSLFDHI  | 113  | 29    |
| >RET-E921K- MAIESLFDHI\ | 21    | >RET-E921K- MAIKSLFDHI\ | 25   | 4     |
| >RET-E921K- MAIESLFDHI\ | 79    | >RET-E921K- MAIKSLFDHI\ | 96   | 17    |
| >RET-E921K- WMAIESLFDI  | 200   | >RET-E921K- WMAIKSLFDI  | 230  | 30    |
| >RET-E921K- WMAIESLFI   | 362   | >RET-E921K- WMAIKSLFI   | 850  | 488   |
| >RET-E921K- WMAIESLFDI  | 12    | >RET-E921K- WMAIKSLFDI  | 17   | 5     |
| >RET-E921K- WMAIESLFDI  | 28    | >RET-E921K- WMAIKSLFDI  | 20   | 8     |
| >RET-E921K- WMAIESLFDI  | 26    | >RET-E921K- WMAIKSLFDI  | 37   | 11    |
| >RET-E921K- WMAIESLFDI  | 35    | >RET-E921K- WMAIKSLFDI  | 30   | 5     |
| >RET-E921K- WMAIESLFDI  | 90    | >RET-E921K- WMAIKSLFDI  | 93   | 3     |
| >RET-E921K- WMAIESLFDI  | 21    | >RET-E921K- WMAIKSLFDI  | 23   | 2     |
| >RET-E921K- WMAIESLFDI  | 103   | >RET-E921K- WMAIKSLFDI  | 106  | 3     |
| >RET-E921K- WMAIESLFDI  | 64    | >RET-E921K- WMAIKSLFDI  | 70   | 6     |
| >RET-E921K- WMAIESLFI   | 111   | >RET-E921K- WMAIKSLFI   | 109  | 2     |
| >RET-E921K- WMAIESLFI   | 95    | >RET-E921K- WMAIKSLFI   | 94   | 1     |
| >RET-E921K- WMAIESLFI   | 184   | >RET-E921K- WMAIKSLFI   | 141  | 43    |
| >RET-E921K- WMAIESLFI   | 16    | >RET-E921K- WMAIKSLFI   | 27   | 11    |
| >RET-E921K- WMAIESLFI   | 157   | >RET-E921K- WMAIKSLFI   | 630  | 473   |
| >RET-E921K- KWMAIESL    | 72    | >RET-E921K- KWMAIKSL    | 149  | 77    |
| >RET-E921K- KWMAIESL    | 61    | >RET-E921K- KWMAIKSL    | 411  | 350   |
| >RET-E921K- KWMAIESL    | 391   | >RET-E921K- KWMAIKSL    | 1861 | 1470  |
| >RET-E921K- KWMAIESLFI  | 54    | >RET-E921K- KWMAIKSLFI  | 45   | 9     |
| >RET-E921K- KWMAIESLFI  | 33    | >RET-E921K- KWMAIKSLFI  | 30   | 3     |
| >RET-E921K- KWMAIESL    | 41    | >RET-E921K- KWMAIKSL    | 82   | 41    |
| >RET-E921K- KWMAIESLFI  | 11    | >RET-E921K- KWMAIKSLFI  | 16   | 5     |
| >RET-E921K- KWMAIESLFI  | 74    | >RET-E921K- KWMAIKSLFI  | 41   | 33    |
| >RET-E921K- KWMAIESL    | 20    | >RET-E921K- KWMAIKSL    | 19   | 1     |
| >RET-E921K- KWMAIESLFI  | 49    | >RET-E921K- KWMAIKSLFI  | 34   | 15    |
| >RET-E921K- KWMAIESLFI  | 189   | >RET-E921K- KWMAIKSLFI  | 163  | 26    |
| >RET-E921K- VKWMAIESL   | 12    | >RET-E921K- VKWMAIKSL   | 7    | 5     |
| >RET-E921K- VKWMAIESLI  | 4     | >RET-E921K- VKWMAIKSLI  | 4    | 0     |
| >RET-E921K- PVKWMAIE    | 14082 | >RET-E921K- PVKWMAIK    | 89   | 13993 |
| >RET-E921K- PVKWMAIESI  | 694   | >RET-E921K- PVKWMAIKS   | 495  | 199   |
| >RET-E921K- IPVKWMAIES  | 412   | >RET-E921K- IPVKWMAIKS  | 545  | 133   |
| >RET-E921K- IPVKWMAIES  | 43    | >RET-E921K- IPVKWMAIKS  | 36   | 7     |
| >RET-E921K- IPVKWMAIES  | 398   | >RET-E921K- IPVKWMAIKS  | 604  | 206   |
| >RET-E921K- IPVKWMAIES  | 153   | >RET-E921K- IPVKWMAIKS  | 298  | 145   |
| >RET-E921K- IPVKWMAIE   | 317   | >RET-E921K- IPVKWMAIK   | 239  | 78    |
| >RET-E921K- IPVKWMAIES  | 458   | >RET-E921K- IPVKWMAIKS  | 262  | 196   |
| >RET-E921K- IPVKWMAIES  | 168   | >RET-E921K- IPVKWMAIKS  | 232  | 64    |
| >RET-E921K- RIPVKWMAIE  | 17232 | >RET-E921K- RIPVKWMAIH  | 166  | 17066 |
| >RET-E921K- RIPVKWMAIE  | 34141 | >RET-E921K- RIPVKWMAIH  | 372  | 33769 |

|                          |       |                          |      |       |
|--------------------------|-------|--------------------------|------|-------|
| >RET-E921K- RIPVKWMAIE   | 12901 | >RET-E921K- RIPVKWMAIE   | 69   | 12832 |
| >RET-F1112Y SPSAAKLMDT   | 25    | >RET-F1112Y SPSAAKLMDT   | 2056 | 2031  |
| >RET-F1112Y SPSAAKLMDT   | 130   | >RET-F1112Y SPSAAKLMDT   | 5345 | 5215  |
| >RET-F1112Y SPSAAKLMDT   | 33    | >RET-F1112Y SPSAAKLMDT   | 17   | 16    |
| >RET-F1112Y SPSAAKLMDT   | 322   | >RET-F1112Y SPSAAKLMDT   | 234  | 88    |
| >RET-F1112Y SPSAAKLMDT   | 602   | >RET-F1112Y SPSAAKLMDT   | 420  | 182   |
| >RET-F1112Y SPSAAKLMDT   | 22    | >RET-F1112Y SPSAAKLMDT   | 11   | 11    |
| >RET-F1112Y SPSAAKLMDT   | 466   | >RET-F1112Y SPSAAKLMDT   | 1725 | 1259  |
| >RET-F1112Y KLMDTFDS     | 197   | >RET-F1112Y KLMDTYDS     | 343  | 146   |
| >RET-F1112Y KLMDTFDS     | 145   | >RET-F1112Y KLMDTYDS     | 167  | 22    |
| >RET-F1112Y KLMDTFDS     | 90    | >RET-F1112Y KLMDTYDS     | 738  | 648   |
| >RET-F1112Y KLMDTFDS     | 347   | >RET-F1112Y KLMDTYDS     | 335  | 12    |
| >RET-F1112Y KLMDTFDS     | 454   | >RET-F1112Y KLMDTYDS     | 946  | 492   |
| >RET-F1112Y AAKLMDTF     | 23    | >RET-F1112Y AAKLMDTY     | 33   | 10    |
| >RET-F1112Y SAAKLMDTF    | 2121  | >RET-F1112Y SAAKLMDTY    | 383  | 1738  |
| >RET-F1112Y SAAKLMDTF    | 133   | >RET-F1112Y SAAKLMDTY    | 41   | 92    |
| >RET-F1112Y SAAKLMDTF    | 8946  | >RET-F1112Y SAAKLMDTY    | 114  | 8832  |
| >RET-F1112Y SAAKLMDTF    | 14722 | >RET-F1112Y SAAKLMDTY    | 116  | 14606 |
| >RET-F1112Y SAAKLMDTF    | 117   | >RET-F1112Y SAAKLMDTY    | 176  | 59    |
| >RET-F1112Y SAAKLMDTF    | 165   | >RET-F1112Y SAAKLMDTY    | 59   | 106   |
| >RET-F1112Y SAAKLMDTF    | 34    | >RET-F1112Y SAAKLMDTY    | 24   | 10    |
| >RET-F1112Y SAAKLMDTF    | 255   | >RET-F1112Y SAAKLMDTY    | 57   | 198   |
| >RET-F1112Y PSAAKLMDTI   | 345   | >RET-F1112Y PSAAKLMDTI   | 91   | 254   |
| >RET-F1112Y PSAAKLMDTI   | 411   | >RET-F1112Y PSAAKLMDTI   | 666  | 255   |
| >RET-F555L-1 FSTCSPSTK   | 310   | >RET-F555L-1 LSTCSPSTK   | 177  | 133   |
| >RET-F555L-1 FSTCSPSTK   | 4389  | >RET-F555L-1 LSTCSPSTK   | 281  | 4108  |
| >RET-F555L-1 FSTCSPSTK   | 41    | >RET-F555L-1 LSTCSPSTK   | 166  | 125   |
| >RET-F555L-1 FSTCSPSTK   | 413   | >RET-F555L-1 LSTCSPSTK   | 365  | 48    |
| >RET-F555L-1 NFSTCSPSTK  | 306   | >RET-F555L-1 NLSTCSPSTK  | 39   | 267   |
| >RET-F555L-1 NFSTCSPSTK  | 421   | >RET-F555L-1 NLSTCSPSTK  | 91   | 330   |
| >RET-F555L-1 NFSTCSPSTK  | 57    | >RET-F555L-1 NLSTCSPSTK  | 76   | 19    |
| >RET-F555L-1 RNFSTCSPSTI | 362   | >RET-F555L-1 RNLSTCSPSTI | 2153 | 1791  |
| >RET-F555L-1 RNFSTCSPSTI | 43    | >RET-F555L-1 RNLSTCSPSTI | 81   | 38    |
| >RET-F555L-1 RNFSTCSPSTI | 153   | >RET-F555L-1 RNLSTCSPSTI | 648  | 495   |
| >RET-F555L-1 RNFSTCSPSTI | 291   | >RET-F555L-1 RNLSTCSPSTI | 1331 | 1040  |
| >RET-F555L-1 ITRNFSTC    | 437   | >RET-F555L-1 ITRNLSTC    | 835  | 398   |
| >RET-F555L-1 ITRNFSTCS   | 446   | >RET-F555L-1 ITRNLSTCS   | 1200 | 754   |
| >RET-F555L-1 ITRNFSTCSP  | 84    | >RET-F555L-1 ITRNLSTCSP  | 171  | 87    |
| >RET-F555L-1 ITRNFSTCSPS | 67    | >RET-F555L-1 ITRNLSTCSPS | 120  | 53    |
| >RET-F555L-1 ITRNFSTCS   | 165   | >RET-F555L-1 ITRNLSTCS   | 143  | 22    |
| >RET-F555L-1 ITRNFSTCSPS | 57    | >RET-F555L-1 ITRNLSTCSPS | 52   | 5     |
| >RET-F555L-1 GKGITRNF    | 107   | >RET-F555L-1 GKGITRNL    | 2659 | 2552  |
| >RET-G593E- GGHEPGEPRI   | 22747 | >RET-G593E- GEHEPGEPRI   | 126  | 22621 |

|                         |       |                         |      |       |
|-------------------------|-------|-------------------------|------|-------|
| >RET-G593E- GGHEPGEPRI  | 39722 | >RET-G593E- GEHEPGEPRI  | 348  | 39374 |
| >RET-G593E- GGHEPGEPRI  | 22780 | >RET-G593E- GEHEPGEPRI  | 14   | 22766 |
| >RET-G593E- IVGGHEPGEP  | 492   | >RET-G593E- IVGEHEPGEP  | 707  | 215   |
| >RET-G748C- GRAGYTTV    | 256   | >RET-G748C- CRAGYTTV    | 882  | 626   |
| >RET-G748C- GRAGYTTVA\  | 264   | >RET-G748C- CRAGYTTVA\  | 531  | 267   |
| >RET-G748C- GRAGYTTVA\  | 69    | >RET-G748C- CRAGYTTVA\  | 191  | 122   |
| >RET-G748C- GRAGYTTVA\  | 155   | >RET-G748C- CRAGYTTVA\  | 136  | 19    |
| >RET-G748C- GRAGYTTVA\  | 261   | >RET-G748C- CRAGYTTVA\  | 1341 | 1080  |
| >RET-G748C- KGRAGYTT    | 332   | >RET-G748C- KCRAGYTT    | 221  | 111   |
| >RET-G748C- KGRAGYTTV   | 27    | >RET-G748C- KCRAGYTTV   | 20   | 7     |
| >RET-G748C- KGRAGYTTVA/ | 28    | >RET-G748C- KCRAGYTTVA/ | 20   | 8     |
| >RET-G748C- KGRAGYTTVA/ | 13    | >RET-G748C- KCRAGYTTVA/ | 10   | 3     |
| >RET-G748C- KGRAGYTTVA/ | 662   | >RET-G748C- KCRAGYTTVA/ | 455  | 207   |
| >RET-G748C- KGRAGYTTV   | 711   | >RET-G748C- KCRAGYTTV   | 303  | 408   |
| >RET-G748C- LKGRAGYTTV  | 110   | >RET-G748C- LKCRAGYTTV  | 65   | 45    |
| >RET-G748C- LKGRAGYTTV  | 895   | >RET-G748C- LKCRAGYTTV  | 338  | 557   |
| >RET-G748C- HLKGRAGYTT  | 124   | >RET-G748C- HLKCRAGYTT  | 239  | 115   |
| >RET-G748C- HLKGRAGYTT  | 7     | >RET-G748C- HLKCRAGYTT  | 5    | 2     |
| >RET-G748C- HLKGRAGYTT  | 91    | >RET-G748C- HLKCRAGYTT  | 126  | 35    |
| >RET-G748C- HLKGRAGYTT  | 152   | >RET-G748C- HLKCRAGYTT  | 28   | 124   |
| >RET-G748C- HLKGRAGYTT  | 267   | >RET-G748C- HLKCRAGYTT  | 754  | 487   |
| >RET-G748C- HLKGRAGYTT  | 3     | >RET-G748C- HLKCRAGYTT  | 9    | 6     |
| >RET-G748C- HLKGRAGY    | 196   | >RET-G748C- HLKCRAGY    | 1588 | 1392  |
| >RET-G748C- HLKGRAGYTT  | 313   | >RET-G748C- HLKCRAGYTT  | 227  | 86    |
| >RET-G748C- HLKGRAGY    | 129   | >RET-G748C- HLKCRAGY    | 307  | 178   |
| >RET-G748C- HLKGRAGYTT  | 430   | >RET-G748C- HLKCRAGYTT  | 116  | 314   |
| >RET-G748C- HLKGRAGY    | 103   | >RET-G748C- HLKCRAGY    | 86   | 17    |
| >RET-G748C- HLKGRAGY    | 37    | >RET-G748C- HLKCRAGY    | 95   | 58    |
| >RET-G748C- HLKGRAGY    | 267   | >RET-G748C- HLKCRAGY    | 274  | 7     |
| >RET-G748C- FHLKGRAGY   | 242   | >RET-G748C- FHLKCRAGY   | 524  | 282   |
| >RET-G748C- FHLKGRAGY   | 531   | >RET-G748C- FHLKCRAGY   | 371  | 160   |
| >RET-G748C- FHLKGRAGY   | 229   | >RET-G748C- FHLKCRAGY   | 3645 | 3416  |
| >RET-G748C- FHLKGRAGY   | 115   | >RET-G748C- FHLKCRAGY   | 74   | 41    |
| >RET-G748C- FHLKGRAGY   | 201   | >RET-G748C- FHLKCRAGY   | 193  | 8     |
| >RET-G748C- AFHLKGRAG\  | 153   | >RET-G748C- AFHLKCRAGY  | 316  | 163   |
| >RET-G748C- TAFHLKGRAC  | 252   | >RET-G748C- TAFHLKCRAG  | 530  | 278   |
| >RET-G748C- TAFHLKGRAC  | 55    | >RET-G748C- TAFHLKCRAG  | 115  | 60    |
| >RET-G748C- TAFHLKGR    | 75    | >RET-G748C- TAFHLKCR    | 46   | 29    |
| >RET-G748C- TAFHLKGR    | 349   | >RET-G748C- TAFHLKCR    | 202  | 147   |
| >RET-G748C- TAFHLKGR    | 15    | >RET-G748C- TAFHLKCR    | 14   | 1     |
| >RET-G748C- TAFHLKGRAC  | 205   | >RET-G748C- TAFHLKCRAG  | 177  | 28    |
| >RET-G748C- TAFHLKGRA   | 139   | >RET-G748C- TAFHLKCRA   | 213  | 74    |
| >RET-G748C- TAFHLKGRAC  | 380   | >RET-G748C- TAFHLKCRAG  | 311  | 69    |

|                       |       |                       |      |       |
|-----------------------|-------|-----------------------|------|-------|
| >RET-G748C-TAFHLKGRAC | 916   | >RET-G748C-TAFHLKCRAG | 370  | 546   |
| >RET-G748C-TAFHLKGRAC | 29    | >RET-G748C-TAFHLKCRAG | 30   | 1     |
| >RET-G748C-TAFHLKGRAC | 196   | >RET-G748C-TAFHLKCRAG | 153  | 43    |
| >RET-G748C-TAFHLKGRAC | 191   | >RET-G748C-TAFHLKCRAG | 282  | 91    |
| >RET-G748C-TAFHLKGR   | 355   | >RET-G748C-TAFHLKCR   | 429  | 74    |
| >RET-G748C-ATAFHLKGR  | 92    | >RET-G748C-ATAFHLKCR  | 58   | 34    |
| >RET-G748C-ATAFHLKGR  | 51    | >RET-G748C-ATAFHLKCR  | 68   | 17    |
| >RET-G748C-ATAFHLKGR  | 79    | >RET-G748C-ATAFHLKCR  | 70   | 9     |
| >RET-G748C-KATAFHLKGR | 779   | >RET-G748C-KATAFHLKCR | 417  | 362   |
| >RET-G748C-KATAFHLKGR | 47    | >RET-G748C-KATAFHLKCR | 26   | 21    |
| >RET-G748C-KATAFHLKGR | 67    | >RET-G748C-KATAFHLKCR | 118  | 51    |
| >RET-G911D-GRIPVKWM   | 262   | >RET-G911D-DRIPVKWM   | 2794 | 2532  |
| >RET-G911D-GRIPVKWMA  | 102   | >RET-G911D-DRIPVKWMA  | 1956 | 1854  |
| >RET-G911D-GRIPVKWMA  | 346   | >RET-G911D-DRIPVKWMA  | 2325 | 1979  |
| >RET-G911D-QGRIPVKWM  | 357   | >RET-G911D-QDRIPVKWM  | 5624 | 5267  |
| >RET-G911D-QGRIPVKW   | 218   | >RET-G911D-QDRIPVKW   | 5158 | 4940  |
| >RET-G911D-QGRIPVKWM  | 20206 | >RET-G911D-QDRIPVKWM  | 415  | 19791 |
| >RET-G911D-SQGRIPVKWI | 915   | >RET-G911D-SQDRIPVKWI | 152  | 763   |
| >RET-G911D-SQGRIPVKWI | 982   | >RET-G911D-SQDRIPVKWI | 332  | 650   |
| >RET-G911D-SQGRIPVK   | 114   | >RET-G911D-SQDRIPVK   | 113  | 1     |
| >RET-G911D-SQGRIPVKW  | 370   | >RET-G911D-SQDRIPVKW  | 732  | 362   |
| >RET-G911D-RSQGRIPVK  | 151   | >RET-G911D-RSQDRIPVK  | 318  | 167   |
| >RET-G911D-RSQGRIPVK  | 33    | >RET-G911D-RSQDRIPVK  | 26   | 7     |
| >RET-G911D-RSQGRIPV   | 75    | >RET-G911D-RSQDRIPV   | 94   | 19    |
| >RET-G911D-RSQGRIPVK  | 8     | >RET-G911D-RSQDRIPVK  | 8    | 0     |
| >RET-G911D-RSQGRIPVK  | 150   | >RET-G911D-RSQDRIPVK  | 105  | 45    |
| >RET-G911D-RSQGRIPVKV | 50    | >RET-G911D-RSQDRIPVKV | 121  | 71    |
| >RET-G911D-RSQGRIPV   | 141   | >RET-G911D-RSQDRIPV   | 169  | 28    |
| >RET-G911D-RSQGRIPVKV | 7     | >RET-G911D-RSQDRIPVKV | 6    | 1     |
| >RET-G911D-RSQGRIPVKV | 5     | >RET-G911D-RSQDRIPVKV | 5    | 0     |
| >RET-G911D-RSQGRIPVKV | 31    | >RET-G911D-RSQDRIPVKV | 42   | 11    |
| >RET-G911D-RSQGRIPVKV | 10    | >RET-G911D-RSQDRIPVKV | 11   | 1     |
| >RET-G911D-RSQGRIPVKV | 89    | >RET-G911D-RSQDRIPVKV | 78   | 11    |
| >RET-G911D-RSQGRIPVKV | 68    | >RET-G911D-RSQDRIPVKV | 77   | 9     |
| >RET-G911D-RSQGRIPVKV | 530   | >RET-G911D-RSQDRIPVKV | 469  | 61    |
| >RET-G911D-KRSQGRIPV  | 519   | >RET-G911D-KRSQDRIPV  | 490  | 29    |
| >RET-G911D-KRSQGRIPV  | 218   | >RET-G911D-KRSQDRIPV  | 232  | 14    |
| >RET-G911D-KRSQGRIPVK | 146   | >RET-G911D-KRSQDRIPVK | 140  | 6     |
| >RET-G911D-KRSQGRIPV  | 95    | >RET-G911D-KRSQDRIPV  | 156  | 61    |
| >RET-G911D-KRSQGRIPVK | 280   | >RET-G911D-KRSQDRIPVK | 414  | 134   |
| >RET-G911D-KRSQGRIPV  | 155   | >RET-G911D-KRSQDRIPV  | 379  | 224   |
| >RET-G911D-KRSQGRIPVK | 375   | >RET-G911D-KRSQDRIPVK | 339  | 36    |
| >RET-G911D-KRSQGRIPVK | 130   | >RET-G911D-KRSQDRIPVK | 126  | 4     |

|                       |     |                        |      |      |
|-----------------------|-----|------------------------|------|------|
| >RET-G911D-VKRSQGRIPV | 187 | >RET-G911D-VKRSQDRIPV  | 307  | 120  |
| >RET-G911D-VKRSQGRI   | 304 | >RET-G911D-VKRSQDRI    | 526  | 222  |
| >RET-G911D-VKRSQGRIPV | 21  | >RET-G911D-VKRSQDRIPV  | 56   | 35   |
| >RET-G911D-VKRSQGRIPV | 259 | >RET-G911D-VKRSQDRIPV  | 627  | 368  |
| >RET-G911D-YVKRSQGRIP | 43  | >RET-G911D-YVKRSQDRIP' | 75   | 32   |
| >RET-G911D-YVKRSQGRIP | 397 | >RET-G911D-YVKRSQDRIP' | 326  | 71   |
| >RET-G911D-YVKRSQGRIP | 11  | >RET-G911D-YVKRSQDRIP' | 13   | 2    |
| >RET-G911D-YVKRSQGRI  | 215 | >RET-G911D-YVKRSQDRI   | 1329 | 1114 |
| >RET-G911D-YVKRSQGRIP | 36  | >RET-G911D-YVKRSQDRIP' | 116  | 80   |
| >RET-G911D-YVKRSQGR   | 91  | >RET-G911D-YVKRSQDR    | 287  | 196  |
| >RET-G911D-YVKRSQGR   | 319 | >RET-G911D-YVKRSQDR    | 501  | 182  |
| >RET-G911D-YVKRSQGR   | 36  | >RET-G911D-YVKRSQDR    | 62   | 26   |
| >RET-G911D-YVKRSQGRIP | 136 | >RET-G911D-YVKRSQDRIP' | 159  | 23   |
| >RET-G911D-YVKRSQGRIP | 488 | >RET-G911D-YVKRSQDRIP' | 601  | 113  |
| >RET-G911D-SYVKRSQGRI | 4   | >RET-G911D-SYVKRSQDRI  | 5    | 1    |
| >RET-G911D-SYVKRSQGRI | 52  | >RET-G911D-SYVKRSQDRI  | 46   | 6    |
| >RET-G911D-SYVKRSQGR  | 235 | >RET-G911D-SYVKRSQDR   | 720  | 485  |
| >RET-G911D-SYVKRSQGR  | 33  | >RET-G911D-SYVKRSQDR   | 55   | 22   |
| >RET-G911D-DSYVKRSQGF | 269 | >RET-G911D-DSYVKRSQDF  | 565  | 296  |
| >RET-G911D-DSYVKRSQGF | 240 | >RET-G911D-DSYVKRSQDF  | 538  | 298  |
| >RET-G911D-DSYVKRSQGF | 62  | >RET-G911D-DSYVKRSQDF  | 134  | 72   |
| >RET-G911D-DSYVKRSQGF | 264 | >RET-G911D-DSYVKRSQDF  | 350  | 86   |
| >RET-G911D-EDSYVKRSQC | 246 | >RET-G911D-EDSYVKRSQC  | 486  | 240  |
| >RET-L923V-SLFDHIYT   | 22  | >RET-L923V-SVFDHIYT    | 277  | 255  |
| >RET-L923V-SLFDHIYTT  | 13  | >RET-L923V-SVFDHIYTT   | 71   | 58   |
| >RET-L923V-SLFDHIYTTQ | 147 | >RET-L923V-SVFDHIYTTQ  | 2169 | 2022 |
| >RET-L923V-SLFDHIYT   | 18  | >RET-L923V-SVFDHIYT    | 589  | 571  |
| >RET-L923V-SLFDHIYTT  | 10  | >RET-L923V-SVFDHIYTT   | 210  | 200  |
| >RET-L923V-SLFDHIYTTQ | 23  | >RET-L923V-SVFDHIYTTQ  | 1117 | 1094 |
| >RET-L923V-SLFDHIYT   | 38  | >RET-L923V-SVFDHIYT    | 698  | 660  |
| >RET-L923V-SLFDHIYTT  | 8   | >RET-L923V-SVFDHIYTT   | 109  | 101  |
| >RET-L923V-SLFDHIYTTQ | 38  | >RET-L923V-SVFDHIYTTQ  | 1007 | 969  |
| >RET-L923V-SLFDHIYT   | 76  | >RET-L923V-SVFDHIYT    | 66   | 10   |
| >RET-L923V-SLFDHIYTT  | 61  | >RET-L923V-SVFDHIYTT   | 29   | 32   |
| >RET-L923V-SLFDHIYT   | 3   | >RET-L923V-SVFDHIYT    | 71   | 68   |
| >RET-L923V-SLFDHIYTT  | 2   | >RET-L923V-SVFDHIYTT   | 25   | 23   |
| >RET-L923V-SLFDHIYTTQ | 27  | >RET-L923V-SVFDHIYTTQ  | 1437 | 1410 |
| >RET-L923V-SLFDHIYTTQ | 20  | >RET-L923V-SVFDHIYTTQ  | 1072 | 1052 |
| >RET-L923V-SLFDHIYT   | 79  | >RET-L923V-SVFDHIYT    | 6364 | 6285 |
| >RET-L923V-SLFDHIYTT  | 10  | >RET-L923V-SVFDHIYTT   | 534  | 524  |
| >RET-L923V-SLFDHIYT   | 16  | >RET-L923V-SVFDHIYT    | 1873 | 1857 |
| >RET-L923V-SLFDHIYTT  | 11  | >RET-L923V-SVFDHIYTT   | 1369 | 1358 |
| >RET-L923V-SLFDHIYTTQ | 84  | >RET-L923V-SVFDHIYTTQ  | 6422 | 6338 |



|                                                  |      |                                                  |       |       |
|--------------------------------------------------|------|--------------------------------------------------|-------|-------|
| >RET-L923V- <sup>-</sup> SLFDHIYTTQ <sup>!</sup> | 320  | >RET-L923V- <sup>-</sup> SVFDHIYTTQ <sup>!</sup> | 11221 | 10901 |
| >RET-L923V- <sup>-</sup> SLFDHIYTT               | 230  | >RET-L923V- <sup>-</sup> SVFDHIYTT               | 5568  | 5338  |
| >RET-L923V- <sup>-</sup> SLFDHIYT                | 5    | >RET-L923V- <sup>-</sup> SVFDHIYT                | 449   | 444   |
| >RET-L923V- <sup>-</sup> SLFDHIYTT               | 3    | >RET-L923V- <sup>-</sup> SVFDHIYTT               | 98    | 95    |
| >RET-L923V- <sup>-</sup> SLFDHIYTTQ              | 5    | >RET-L923V- <sup>-</sup> SVFDHIYTTQ              | 499   | 494   |
| >RET-L923V- <sup>-</sup> SLFDHIYTTQ <sup>!</sup> | 13   | >RET-L923V- <sup>-</sup> SVFDHIYTTQ <sup>!</sup> | 3115  | 3102  |
| >RET-L923V- <sup>-</sup> SLFDHIYTT               | 150  | >RET-L923V- <sup>-</sup> SVFDHIYTT               | 161   | 11    |
| >RET-L923V- <sup>-</sup> SLFDHIYT                | 3784 | >RET-L923V- <sup>-</sup> SVFDHIYT                | 209   | 3575  |
| >RET-L923V- <sup>-</sup> SLFDHIYTT               | 3699 | >RET-L923V- <sup>-</sup> SVFDHIYTT               | 111   | 3588  |
| >RET-L923V- <sup>-</sup> SLFDHIYTTQ <sup>!</sup> | 5708 | >RET-L923V- <sup>-</sup> SVFDHIYTTQ <sup>!</sup> | 380   | 5328  |
| >RET-L923V- <sup>-</sup> SLFDHIYTT               | 4288 | >RET-L923V- <sup>-</sup> SVFDHIYTT               | 433   | 3855  |
| >RET-L923V- <sup>-</sup> IPVKWMAIES              | 412  | >RET-L923V- <sup>-</sup> IPVKWMAIES              | 1429  | 1017  |
| >RET-L923V- <sup>-</sup> IPVKWMAIES              | 43   | >RET-L923V- <sup>-</sup> IPVKWMAIES              | 190   | 147   |
| >RET-L923V- <sup>-</sup> IPVKWMAIES              | 398  | >RET-L923V- <sup>-</sup> IPVKWMAIES              | 3485  | 3087  |
| >RET-L923V- <sup>-</sup> IPVKWMAIES              | 1519 | >RET-L923V- <sup>-</sup> IPVKWMAIES              | 352   | 1167  |
| >RET-L923V- <sup>-</sup> IPVKWMAIES              | 153  | >RET-L923V- <sup>-</sup> IPVKWMAIES              | 529   | 376   |
| >RET-L923V- <sup>-</sup> IPVKWMAIES              | 4232 | >RET-L923V- <sup>-</sup> IPVKWMAIES              | 83    | 4149  |
| >RET-L923V- <sup>-</sup> IPVKWMAIES              | 458  | >RET-L923V- <sup>-</sup> IPVKWMAIES              | 3570  | 3112  |
| >RET-L923V- <sup>-</sup> IPVKWMAIES              | 168  | >RET-L923V- <sup>-</sup> IPVKWMAIES              | 1440  | 1272  |
| >RET-L923V- <sup>-</sup> ESLFDHIY                | 23   | >RET-L923V- <sup>-</sup> ESVFDHIY                | 5     | 18    |
| >RET-L923V- <sup>-</sup> ESLFDHIYTT              | 3828 | >RET-L923V- <sup>-</sup> ESVFDHIYTT              | 408   | 3420  |
| >RET-L923V- <sup>-</sup> ESLFDHIY                | 431  | >RET-L923V- <sup>-</sup> ESVFDHIY                | 571   | 140   |
| >RET-L923V- <sup>-</sup> ESLFDHIY                | 137  | >RET-L923V- <sup>-</sup> ESVFDHIY                | 163   | 26    |
| >RET-L923V- <sup>-</sup> ESLFDHIY                | 481  | >RET-L923V- <sup>-</sup> ESVFDHIY                | 124   | 357   |
| >RET-L923V- <sup>-</sup> ESLFDHIYTT <sup>C</sup> | 1187 | >RET-L923V- <sup>-</sup> ESVFDHIYTT <sup>C</sup> | 315   | 872   |
| >RET-L923V- <sup>-</sup> ESLFDHIYTT              | 1162 | >RET-L923V- <sup>-</sup> ESVFDHIYTT              | 279   | 883   |
| >RET-L923V- <sup>-</sup> ESLFDHIY                | 97   | >RET-L923V- <sup>-</sup> ESVFDHIY                | 71    | 26    |
| >RET-L923V- <sup>-</sup> ESLFDHIY                | 329  | >RET-L923V- <sup>-</sup> ESVFDHIY                | 228   | 101   |
| >RET-L923V- <sup>-</sup> IESLFDHI                | 212  | >RET-L923V- <sup>-</sup> IESVFDHI                | 1143  | 931   |
| >RET-L923V- <sup>-</sup> IESLFDHIY               | 112  | >RET-L923V- <sup>-</sup> IESVFDHIY               | 52    | 60    |
| >RET-L923V- <sup>-</sup> IESLFDHIY               | 1267 | >RET-L923V- <sup>-</sup> IESVFDHIY               | 411   | 856   |
| >RET-L923V- <sup>-</sup> IESLFDHIY               | 8    | >RET-L923V- <sup>-</sup> IESVFDHIY               | 9     | 1     |
| >RET-L923V- <sup>-</sup> IESLFDHIYTT             | 191  | >RET-L923V- <sup>-</sup> IESVFDHIYTT             | 249   | 58    |
| >RET-L923V- <sup>-</sup> IESLFDHI                | 101  | >RET-L923V- <sup>-</sup> IESVFDHI                | 88    | 13    |
| >RET-L923V- <sup>-</sup> IESLFDHIYTT             | 454  | >RET-L923V- <sup>-</sup> IESVFDHIYTT             | 635   | 181   |
| >RET-L923V- <sup>-</sup> IESLFDHIY               | 243  | >RET-L923V- <sup>-</sup> IESVFDHIY               | 184   | 59    |
| >RET-L923V- <sup>-</sup> IESLFDHIYTT             | 447  | >RET-L923V- <sup>-</sup> IESVFDHIYTT             | 344   | 103   |
| >RET-L923V- <sup>-</sup> IESLFDHI                | 92   | >RET-L923V- <sup>-</sup> IESVFDHI                | 475   | 383   |
| >RET-L923V- <sup>-</sup> IESLFDHIYTT             | 496  | >RET-L923V- <sup>-</sup> IESVFDHIYTT             | 509   | 13    |
| >RET-L923V- <sup>-</sup> AIESLFDHIY              | 287  | >RET-L923V- <sup>-</sup> AIESVFDHIY              | 206   | 81    |
| >RET-L923V- <sup>-</sup> AIESLFDHI               | 225  | >RET-L923V- <sup>-</sup> AIESVFDHI               | 139   | 86    |
| >RET-L923V- <sup>-</sup> AIESLFDHIY              | 411  | >RET-L923V- <sup>-</sup> AIESVFDHIY              | 137   | 274   |
| >RET-L923V- <sup>-</sup> AIESLFDHIY              | 355  | >RET-L923V- <sup>-</sup> AIESVFDHIY              | 175   | 180   |

|                                       |     |                                       |      |      |
|---------------------------------------|-----|---------------------------------------|------|------|
| >RET-L923V- <sup>-1</sup> AIESLFDHIY  | 484 | >RET-L923V- <sup>-1</sup> AIESVFDHIY  | 583  | 99   |
| >RET-L923V- <sup>-1</sup> MAIESLFDHI  | 448 | >RET-L923V- <sup>-1</sup> MAIESVFDHI  | 1011 | 563  |
| >RET-L923V- <sup>-1</sup> MAIESLFDHI  | 77  | >RET-L923V- <sup>-1</sup> MAIESVFDHI  | 110  | 33   |
| >RET-L923V- <sup>-1</sup> MAIESLFDHI  | 744 | >RET-L923V- <sup>-1</sup> MAIESVFDHI  | 364  | 380  |
| >RET-L923V- <sup>-1</sup> MAIESLFDHI\ | 104 | >RET-L923V- <sup>-1</sup> MAIESVFDHI' | 143  | 39   |
| >RET-L923V- <sup>-1</sup> MAIESLFDHI\ | 32  | >RET-L923V- <sup>-1</sup> MAIESVFDHI' | 41   | 9    |
| >RET-L923V- <sup>-1</sup> MAIESLFDHI\ | 45  | >RET-L923V- <sup>-1</sup> MAIESVFDHI' | 57   | 12   |
| >RET-L923V- <sup>-1</sup> MAIESLFDH   | 609 | >RET-L923V- <sup>-1</sup> MAIESVFDH   | 265  | 344  |
| >RET-L923V- <sup>-1</sup> MAIESLFDHI\ | 51  | >RET-L923V- <sup>-1</sup> MAIESVFDHI' | 34   | 17   |
| >RET-L923V- <sup>-1</sup> MAIESLFDHI  | 60  | >RET-L923V- <sup>-1</sup> MAIESVFDHI  | 27   | 33   |
| >RET-L923V- <sup>-1</sup> MAIESLFDHI  | 68  | >RET-L923V- <sup>-1</sup> MAIESVFDHI  | 71   | 3    |
| >RET-L923V- <sup>-1</sup> MAIESLFDHI\ | 357 | >RET-L923V- <sup>-1</sup> MAIESVFDHI' | 228  | 129  |
| >RET-L923V- <sup>-1</sup> MAIESLFDHI\ | 119 | >RET-L923V- <sup>-1</sup> MAIESVFDHI' | 65   | 54   |
| >RET-L923V- <sup>-1</sup> MAIESLFDHI\ | 7   | >RET-L923V- <sup>-1</sup> MAIESVFDHI' | 7    | 0    |
| >RET-L923V- <sup>-1</sup> MAIESLFDH   | 290 | >RET-L923V- <sup>-1</sup> MAIESVFDH   | 158  | 132  |
| >RET-L923V- <sup>-1</sup> MAIESLFDHI\ | 9   | >RET-L923V- <sup>-1</sup> MAIESVFDHI' | 8    | 1    |
| >RET-L923V- <sup>-1</sup> MAIESLFDHI\ | 53  | >RET-L923V- <sup>-1</sup> MAIESVFDHI' | 39   | 14   |
| >RET-L923V- <sup>-1</sup> MAIESLFDHI\ | 166 | >RET-L923V- <sup>-1</sup> MAIESVFDHI' | 137  | 29   |
| >RET-L923V- <sup>-1</sup> MAIESLFDHI  | 84  | >RET-L923V- <sup>-1</sup> MAIESVFDHI  | 47   | 37   |
| >RET-L923V- <sup>-1</sup> MAIESLFDHI\ | 21  | >RET-L923V- <sup>-1</sup> MAIESVFDHI' | 16   | 5    |
| >RET-L923V- <sup>-1</sup> MAIESLFDHI\ | 79  | >RET-L923V- <sup>-1</sup> MAIESVFDHI' | 54   | 25   |
| >RET-L923V- <sup>-1</sup> WMAIESLFDI  | 200 | >RET-L923V- <sup>-1</sup> WMAIESVFD   | 195  | 5    |
| >RET-L923V- <sup>-1</sup> WMAIESLF    | 362 | >RET-L923V- <sup>-1</sup> WMAIESVF    | 1019 | 657  |
| >RET-L923V- <sup>-1</sup> WMAIESLFDI  | 12  | >RET-L923V- <sup>-1</sup> WMAIESVFD   | 10   | 2    |
| >RET-L923V- <sup>-1</sup> WMAIESLFDI  | 28  | >RET-L923V- <sup>-1</sup> WMAIESVFD   | 25   | 3    |
| >RET-L923V- <sup>-1</sup> WMAIESLFDI  | 26  | >RET-L923V- <sup>-1</sup> WMAIESVFD   | 22   | 4    |
| >RET-L923V- <sup>-1</sup> WMAIESLFDI  | 35  | >RET-L923V- <sup>-1</sup> WMAIESVFD   | 23   | 12   |
| >RET-L923V- <sup>-1</sup> WMAIESLFDI  | 90  | >RET-L923V- <sup>-1</sup> WMAIESVFD   | 59   | 31   |
| >RET-L923V- <sup>-1</sup> WMAIESLFDI  | 21  | >RET-L923V- <sup>-1</sup> WMAIESVFD   | 18   | 3    |
| >RET-L923V- <sup>-1</sup> WMAIESLFDI  | 103 | >RET-L923V- <sup>-1</sup> WMAIESVFD   | 71   | 32   |
| >RET-L923V- <sup>-1</sup> WMAIESLFDI  | 64  | >RET-L923V- <sup>-1</sup> WMAIESVFD   | 53   | 11   |
| >RET-L923V- <sup>-1</sup> WMAIESLF    | 523 | >RET-L923V- <sup>-1</sup> WMAIESVF    | 318  | 205  |
| >RET-L923V- <sup>-1</sup> WMAIESLF    | 111 | >RET-L923V- <sup>-1</sup> WMAIESVF    | 1547 | 1436 |
| >RET-L923V- <sup>-1</sup> WMAIESLF    | 95  | >RET-L923V- <sup>-1</sup> WMAIESVF    | 40   | 55   |
| >RET-L923V- <sup>-1</sup> WMAIESLF    | 184 | >RET-L923V- <sup>-1</sup> WMAIESVF    | 108  | 76   |
| >RET-L923V- <sup>-1</sup> WMAIESLF    | 16  | >RET-L923V- <sup>-1</sup> WMAIESVF    | 8    | 8    |
| >RET-L923V- <sup>-1</sup> WMAIESLF    | 157 | >RET-L923V- <sup>-1</sup> WMAIESVF    | 57   | 100  |
| >RET-L923V- <sup>-1</sup> KWMAIESL    | 72  | >RET-L923V- <sup>-1</sup> KWMAIESV    | 266  | 194  |
| >RET-L923V- <sup>-1</sup> KWMAIESL    | 61  | >RET-L923V- <sup>-1</sup> KWMAIESV    | 49   | 12   |
| >RET-L923V- <sup>-1</sup> KWMAIESL    | 391 | >RET-L923V- <sup>-1</sup> KWMAIESV    | 78   | 313  |
| >RET-L923V- <sup>-1</sup> KWMAIESLF   | 54  | >RET-L923V- <sup>-1</sup> KWMAIESVF   | 107  | 53   |
| >RET-L923V- <sup>-1</sup> KWMAIESLF   | 33  | >RET-L923V- <sup>-1</sup> KWMAIESVF   | 71   | 38   |
| >RET-L923V- <sup>-1</sup> KWMAIESL    | 41  | >RET-L923V- <sup>-1</sup> KWMAIESV    | 940  | 899  |

|                        |      |                        |       |       |
|------------------------|------|------------------------|-------|-------|
| >RET-L923V-KWMAIESLF   | 11   | >RET-L923V-KWMAIESVF   | 9     | 2     |
| >RET-L923V-KWMAIESLF   | 533  | >RET-L923V-KWMAIESVF   | 169   | 364   |
| >RET-L923V-KWMAIESLF   | 74   | >RET-L923V-KWMAIESVF   | 126   | 52    |
| >RET-L923V-KWMAIESL    | 20   | >RET-L923V-KWMAIESV    | 25    | 5     |
| >RET-L923V-KWMAIESLF   | 49   | >RET-L923V-KWMAIESVF   | 61    | 12    |
| >RET-L923V-KWMAIESLFI  | 189  | >RET-L923V-KWMAIESVFI  | 200   | 11    |
| >RET-L923V-VKWMAIESL   | 2210 | >RET-L923V-VKWMAIESV   | 488   | 1722  |
| >RET-L923V-VKWMAIESL   | 2384 | >RET-L923V-VKWMAIESV   | 128   | 2256  |
| >RET-L923V-VKWMAIESL   | 12   | >RET-L923V-VKWMAIESV   | 25    | 13    |
| >RET-L923V-VKWMAIESLI  | 4    | >RET-L923V-VKWMAIESV   | 3     | 1     |
| >RET-L923V-PVKWMAIES   | 6200 | >RET-L923V-PVKWMAIES'  | 284   | 5916  |
| >RET-M918T-MAIESLFDHI  | 448  | >RET-M918T-TAIESLFDHI  | 407   | 41    |
| >RET-M918T-MAIESLFDHI  | 77   | >RET-M918T-TAIESLFDHI  | 180   | 103   |
| >RET-M918T-MAIESLFDHI\ | 104  | >RET-M918T-TAIESLFDHIY | 40    | 64    |
| >RET-M918T-MAIESLFDHI\ | 32   | >RET-M918T-TAIESLFDHIY | 118   | 86    |
| >RET-M918T-MAIESLFDHI\ | 45   | >RET-M918T-TAIESLFDHIY | 88    | 43    |
| >RET-M918T-MAIESLFDHI\ | 51   | >RET-M918T-TAIESLFDHIY | 172   | 121   |
| >RET-M918T-MAIESLFDHI  | 60   | >RET-M918T-TAIESLFDHI  | 105   | 45    |
| >RET-M918T-MAIESLFDHI  | 68   | >RET-M918T-TAIESLFDHI  | 111   | 43    |
| >RET-M918T-MAIESLFDHI\ | 357  | >RET-M918T-TAIESLFDHIY | 1457  | 1100  |
| >RET-M918T-MAIESLFDHI\ | 119  | >RET-M918T-TAIESLFDHIY | 1212  | 1093  |
| >RET-M918T-MAIESLFDHI\ | 7    | >RET-M918T-TAIESLFDHIY | 25    | 18    |
| >RET-M918T-MAIESLFDH   | 290  | >RET-M918T-TAIESLFDH   | 2601  | 2311  |
| >RET-M918T-MAIESLFDHI\ | 9    | >RET-M918T-TAIESLFDHIY | 32    | 23    |
| >RET-M918T-MAIESLFDHI\ | 53   | >RET-M918T-TAIESLFDHIY | 399   | 346   |
| >RET-M918T-MAIESLFDHI\ | 166  | >RET-M918T-TAIESLFDHIY | 405   | 239   |
| >RET-M918T-MAIESLFDHI  | 84   | >RET-M918T-TAIESLFDHI  | 1040  | 956   |
| >RET-M918T-MAIESLFDHI\ | 21   | >RET-M918T-TAIESLFDHIY | 153   | 132   |
| >RET-M918T-MAIESLFDHI\ | 79   | >RET-M918T-TAIESLFDHIY | 460   | 381   |
| >RET-M918T-WMAIESLFDI  | 200  | >RET-M918T-WTAIESLFDH  | 7760  | 7560  |
| >RET-M918T-WMAIESLFI   | 362  | >RET-M918T-WTAIESLFI   | 6542  | 6180  |
| >RET-M918T-WMAIESLFDI  | 12   | >RET-M918T-WTAIESLFDH  | 352   | 340   |
| >RET-M918T-WMAIESLFDI  | 28   | >RET-M918T-WTAIESLFDH  | 2057  | 2029  |
| >RET-M918T-WMAIESLFDI  | 26   | >RET-M918T-WTAIESLFDH  | 171   | 145   |
| >RET-M918T-WMAIESLFDI  | 35   | >RET-M918T-WTAIESLFDH  | 4420  | 4385  |
| >RET-M918T-WMAIESLFDI  | 90   | >RET-M918T-WTAIESLFDH  | 11582 | 11492 |
| >RET-M918T-WMAIESLFDI  | 21   | >RET-M918T-WTAIESLFDH  | 3197  | 3176  |
| >RET-M918T-WMAIESLFDI  | 103  | >RET-M918T-WTAIESLFDH  | 16235 | 16132 |
| >RET-M918T-WMAIESLFDI  | 64   | >RET-M918T-WTAIESLFDH  | 17854 | 17790 |
| >RET-M918T-WMAIESLFI   | 111  | >RET-M918T-WTAIESLFI   | 693   | 582   |
| >RET-M918T-WMAIESLFDI  | 1306 | >RET-M918T-WTAIESLFDH  | 32    | 1274  |
| >RET-M918T-WMAIESLFDI  | 1225 | >RET-M918T-WTAIESLFDH  | 190   | 1035  |
| >RET-M918T-WMAIESLFI   | 95   | >RET-M918T-WTAIESLFI   | 1136  | 1041  |

|                       |       |                        |      |       |
|-----------------------|-------|------------------------|------|-------|
| >RET-M918T WMAIESLF   | 184   | >RET-M918T WTAIESLF    | 6325 | 6141  |
| >RET-M918T WMAIESLF   | 16    | >RET-M918T WTAIESLF    | 465  | 449   |
| >RET-M918T WMAIESLF   | 724   | >RET-M918T WTAIESLF    | 5    | 719   |
| >RET-M918T WMAIESLF   | 157   | >RET-M918T WTAIESLF    | 407  | 250   |
| >RET-M918T WMAIESLF   | 2154  | >RET-M918T WTAIESLF    | 328  | 1826  |
| >RET-M918T WMAIESLF   | 7550  | >RET-M918T WTAIESLF    | 195  | 7355  |
| >RET-M918T WMAIESLFDH | 11542 | >RET-M918T WTAIESLFDH  | 247  | 11295 |
| >RET-M918T WMAIESLFDH | 1416  | >RET-M918T WTAIESLFDH  | 34   | 1382  |
| >RET-M918T RSQGRIPVKV | 5     | >RET-M918T RSQGRIPVKV  | 701  | 696   |
| >RET-M918T RSQGRIPVKV | 68    | >RET-M918T RSQGRIPVKV  | 6042 | 5974  |
| >RET-M918T KWMAIESL   | 72    | >RET-M918T KWTAIESL    | 208  | 136   |
| >RET-M918T KWMAIESL   | 61    | >RET-M918T KWTAIESL    | 799  | 738   |
| >RET-M918T KWMAIESL   | 391   | >RET-M918T KWTAIESL    | 3105 | 2714  |
| >RET-M918T KWMAIESLF  | 54    | >RET-M918T KWTAIESLF   | 210  | 156   |
| >RET-M918T KWMAIESLF  | 33    | >RET-M918T KWTAIESLF   | 153  | 120   |
| >RET-M918T KWMAIESL   | 41    | >RET-M918T KWTAIESL    | 246  | 205   |
| >RET-M918T KWMAIESLF  | 11    | >RET-M918T KWTAIESLF   | 42   | 31    |
| >RET-M918T KWMAIESLF  | 74    | >RET-M918T KWTAIESLF   | 110  | 36    |
| >RET-M918T KWMAIESL   | 20    | >RET-M918T KWTAIESL    | 27   | 7     |
| >RET-M918T KWMAIESLF  | 49    | >RET-M918T KWTAIESLF   | 69   | 20    |
| >RET-M918T KWMAIESLFD | 189   | >RET-M918T KWTAIESLFD  | 273  | 84    |
| >RET-M918T VKWMAIESL  | 12    | >RET-M918T VKWTAIESL   | 11   | 1     |
| >RET-M918T VKWMAIESLF | 4     | >RET-M918T VKWTAIESLF  | 3    | 1     |
| >RET-M918T IPVKWMAIES | 412   | >RET-M918T IPVKWTAIESI | 282  | 130   |
| >RET-M918T IPVKWMAI   | 41    | >RET-M918T IPVKWTAI    | 26   | 15    |
| >RET-M918T IPVKWMAIES | 43    | >RET-M918T IPVKWTAIESI | 37   | 6     |
| >RET-M918T IPVKWMAI   | 319   | >RET-M918T IPVKWTAI    | 114  | 205   |
| >RET-M918T IPVKWMAIES | 398   | >RET-M918T IPVKWTAIESI | 163  | 235   |
| >RET-M918T IPVKWMAIES | 570   | >RET-M918T IPVKWTAIESI | 384  | 186   |
| >RET-M918T IPVKWMAI   | 202   | >RET-M918T IPVKWTAI    | 200  | 2     |
| >RET-M918T IPVKWMAI   | 63    | >RET-M918T IPVKWTAI    | 52   | 11    |
| >RET-M918T IPVKWMAIES | 153   | >RET-M918T IPVKWTAIESI | 111  | 42    |
| >RET-M918T IPVKWMAI   | 48    | >RET-M918T IPVKWTAI    | 63   | 15    |
| >RET-M918T IPVKWMAIE  | 317   | >RET-M918T IPVKWTAIE   | 542  | 225   |
| >RET-M918T IPVKWMAI   | 333   | >RET-M918T IPVKWTAI    | 243  | 90    |
| >RET-M918T IPVKWMAIES | 458   | >RET-M918T IPVKWTAIESI | 307  | 151   |
| >RET-M918T IPVKWMAI   | 442   | >RET-M918T IPVKWTAI    | 554  | 112   |
| >RET-M918T IPVKWMAIES | 168   | >RET-M918T IPVKWTAIESI | 111  | 57    |
| >RET-M918T RIPVKWMA   | 760   | >RET-M918T RIPVKWTA    | 435  | 325   |
| >RET-M918T RIPVKWMAI  | 300   | >RET-M918T RIPVKWTAI   | 245  | 55    |
| >RET-M918T RIPVKWMAI  | 312   | >RET-M918T RIPVKWTAI   | 3802 | 3490  |
| >RET-M918T GRIPVKWM   | 262   | >RET-M918T GRIPVKWT    | 4225 | 3963  |
| >RET-M918T GRIPVKWMA  | 102   | >RET-M918T GRIPVKWTAI  | 73   | 29    |

|                          |       |                          |       |       |
|--------------------------|-------|--------------------------|-------|-------|
| >RET-M918T GRIPVKWMA     | 346   | >RET-M918T GRIPVKWTAI    | 482   | 136   |
| >RET-M918T QGRIPVKWV     | 357   | >RET-M918T QGRIPVKWTI    | 1959  | 1602  |
| >RET-M918T SQGRIPVKWI    | 915   | >RET-M918T SQGRIPVKWI    | 464   | 451   |
| >RET-P766S-1 PSELRDLLSEF | 1323  | >RET-P766S-1 SSELRDLLSEF | 13    | 1310  |
| >RET-P766S-1 PSELRDLLSEF | 1912  | >RET-P766S-1 SSELRDLLSEF | 40    | 1872  |
| >RET-P766S-1 SPSELRDLL   | 8568  | >RET-P766S-1 SSELRDLL    | 278   | 8290  |
| >RET-P766S-1 SPSELRDLL   | 90    | >RET-P766S-1 SSELRDLL    | 23288 | 23198 |
| >RET-P766S-1 SPSELRDLL   | 142   | >RET-P766S-1 SSELRDLL    | 24850 | 24708 |
| >RET-P766S-1 SPSELRDLL   | 12379 | >RET-P766S-1 SSELRDLL    | 353   | 12026 |
| >RET-P766S-1 SPSELRDLL   | 6167  | >RET-P766S-1 SSELRDLL    | 240   | 5927  |
| >RET-P766S-1 ASPSELRDLL  | 7     | >RET-P766S-1 ASSSELRDLL  | 3139  | 3132  |
| >RET-P766S-1 ASPSELRDLL  | 3     | >RET-P766S-1 ASSSELRDLL  | 329   | 326   |
| >RET-P766S-1 ASPSELRDLLS | 412   | >RET-P766S-1 ASSSELRDLLS | 16534 | 16122 |
| >RET-P766S-1 NASPSELR    | 528   | >RET-P766S-1 NASSSELR    | 443   | 85    |
| >RET-P766S-1 NASPSELR    | 15    | >RET-P766S-1 NASSSELR    | 7     | 8     |
| >RET-P766S-1 ENASPSELR   | 19    | >RET-P766S-1 ENASSSELR   | 8     | 11    |
| >RET-P766S-1 ENASPSEL    | 145   | >RET-P766S-1 ENASSSEL    | 196   | 51    |
| >RET-P766S-1 KENASPSEL   | 2251  | >RET-P766S-1 KENASSSEL   | 455   | 1796  |
| >RET-P766S-1 KENASPSEL   | 103   | >RET-P766S-1 KENASSSEL   | 83    | 20    |
| >RET-P766S-1 KENASPSEL   | 65    | >RET-P766S-1 KENASSSEL   | 25    | 40    |
| >RET-P766S-1 KENASPSEL   | 24    | >RET-P766S-1 KENASSSEL   | 19    | 5     |
| >RET-P766S-1 KENASPSEL   | 302   | >RET-P766S-1 KENASSSEL   | 182   | 120   |
| >RET-P766S-1 KENASPSEL   | 138   | >RET-P766S-1 KENASSSEL   | 91    | 47    |
| >RET-P766S-1 LKENASPSEL  | 126   | >RET-P766S-1 LKENASSSEL  | 81    | 45    |
| >RET-P766S-1 MLKENASPSE  | 318   | >RET-P766S-1 MLKENASSSE  | 344   | 26    |
| >RET-P766S-1 MLKENASPSE  | 12    | >RET-P766S-1 MLKENASSSE  | 8     | 4     |
| >RET-P766S-1 MLKENASP    | 1643  | >RET-P766S-1 MLKENASS    | 167   | 1476  |
| >RET-P766S-1 MLKENASPS   | 59    | >RET-P766S-1 MLKENASSS   | 79    | 20    |
| >RET-P766S-1 MLKENASPSE  | 4     | >RET-P766S-1 MLKENASSSE  | 5     | 1     |
| >RET-P766S-1 MLKENASPSE  | 19    | >RET-P766S-1 MLKENASSSE  | 28    | 9     |
| >RET-P766S-1 MLKENASPSE  | 26    | >RET-P766S-1 MLKENASSSE  | 21    | 5     |
| >RET-P766S-1 MLKENASPSE  | 494   | >RET-P766S-1 MLKENASSSE  | 361   | 133   |
| >RET-P766S-1 MLKENASP    | 4471  | >RET-P766S-1 MLKENASS    | 402   | 4069  |
| >RET-P766S-1 MLKENASPS   | 644   | >RET-P766S-1 MLKENASSS   | 258   | 386   |
| >RET-P766S-1 MLKENASPSE  | 3     | >RET-P766S-1 MLKENASSSE  | 2     | 1     |
| >RET-P766S-1 MLKENASPSE  | 127   | >RET-P766S-1 MLKENASSSE  | 88    | 39    |
| >RET-P766S-1 MLKENASPSE  | 609   | >RET-P766S-1 MLKENASSSE  | 242   | 367   |
| >RET-P766S-1 MLKENASPSE  | 729   | >RET-P766S-1 MLKENASSSE  | 424   | 305   |
| >RET-P766S-1 MLKENASPSE  | 101   | >RET-P766S-1 MLKENASSSE  | 94    | 7     |
| >RET-R163Q- RELCFPET     | 67    | >RET-R163Q- QELCFPET     | 407   | 340   |
| >RET-R163Q- RELCFPETRP!  | 498   | >RET-R163Q- QELCFPETRP!  | 3243  | 2745  |
| >RET-R163Q- RELCFPET     | 42    | >RET-R163Q- QELCFPET     | 40    | 2     |
| >RET-R163Q- RELCFPETRP!  | 384   | >RET-R163Q- QELCFPETRP!  | 389   | 5     |

|                         |       |                         |       |       |
|-------------------------|-------|-------------------------|-------|-------|
| >RET-R163Q- RELCFPETR   | 418   | >RET-R163Q- QELCFPETR   | 2865  | 2447  |
| >RET-R163Q- RELCFPETR   | 41    | >RET-R163Q- QELCFPETR   | 96    | 55    |
| >RET-R163Q- SFPACSSLKPF | 98    | >RET-R163Q- SFPACSSLKPC | 17757 | 17659 |
| >RET-R163Q- SFPACSSLKPF | 27    | >RET-R163Q- SFPACSSLKPC | 3276  | 3249  |
| >RET-R163Q- KPRELCFPETI | 154   | >RET-R163Q- KPQELCFPETI | 144   | 10    |
| >RET-R163Q- LKPRELCF    | 36    | >RET-R163Q- LKPQELCF    | 46    | 10    |
| >RET-R163Q- SLKPRELC    | 282   | >RET-R163Q- SLKPQELC    | 193   | 89    |
| >RET-R163Q- SLKPRELCF   | 63    | >RET-R163Q- SLKPQELCF   | 1666  | 1603  |
| >RET-R163Q- SLKPRELCF   | 226   | >RET-R163Q- SLKPQELCF   | 196   | 30    |
| >RET-R163Q- SLKPRELCF   | 155   | >RET-R163Q- SLKPQELCF   | 132   | 23    |
| >RET-R163Q- SSLKPRELCF  | 56    | >RET-R163Q- SSLKPQELCF  | 56    | 0     |
| >RET-R163Q- SSLKPREL    | 131   | >RET-R163Q- SSLKPQEL    | 69    | 62    |
| >RET-R163Q- SSLKPRELCF  | 36    | >RET-R163Q- SSLKPQELCF  | 26    | 10    |
| >RET-R163Q- CSSLKPREL   | 856   | >RET-R163Q- CSSLKQEL    | 373   | 483   |
| >RET-R163Q- CSSLKPRELCF | 132   | >RET-R163Q- CSSLKQELCF  | 105   | 27    |
| >RET-R163Q- FPACSSLKPR  | 208   | >RET-R163Q- FPACSSLKQ   | 174   | 34    |
| >RET-R163Q- FPACSSLKPRI | 645   | >RET-R163Q- FPACSSLKQI  | 229   | 416   |
| >RET-R330W RVEHWPNET    | 580   | >RET-R330W WVEHWPNE     | 232   | 348   |
| >RET-R330W RVEHWPNET    | 488   | >RET-R330W WVEHWPNE     | 400   | 88    |
| >RET-R330W RVEHWPNET    | 84    | >RET-R330W WVEHWPNE     | 27    | 57    |
| >RET-R330W RVEHWPNET    | 4536  | >RET-R330W WVEHWPNE     | 228   | 4308  |
| >RET-R330W RVEHWPNET    | 4001  | >RET-R330W WVEHWPNE     | 458   | 3543  |
| >RET-R330W FRVEHWPNE    | 399   | >RET-R330W FWVEHWPNI    | 15363 | 14964 |
| >RET-R330W FRVEHWPNI    | 32856 | >RET-R330W FWVEHWPNI    | 372   | 32484 |
| >RET-R330W QTFRVEHW     | 82    | >RET-R330W QTFWVEHW     | 31    | 51    |
| >RET-R330W QTFRVEHW     | 18    | >RET-R330W QTFWVEHW     | 11    | 7     |
| >RET-R330W QTFRVEHW     | 42    | >RET-R330W QTFWVEHW     | 46    | 4     |
| >RET-R330W QTFRVEHW     | 11    | >RET-R330W QTFWVEHW     | 10    | 1     |
| >RET-R330W QTFRVEHW     | 439   | >RET-R330W QTFWVEHW     | 579   | 140   |
| >RET-R330W QQTFRVEHW    | 2477  | >RET-R330W QQTFWVEHV    | 384   | 2093  |
| >RET-R330W QQTFRVEHW    | 1951  | >RET-R330W QQTFWVEHV    | 351   | 1600  |
| >RET-R330W AQQTFRVEH'   | 511   | >RET-R330W AQQTFWVEH'   | 305   | 206   |
| >RET-R330W AQQTFRVEH    | 122   | >RET-R330W AQQTFWVEH'   | 149   | 27    |
| >RET-R330W AQQTFRVEH'   | 310   | >RET-R330W AQQTFWVEH'   | 341   | 31    |
| >RET-R330W AQQTFRVEH'   | 280   | >RET-R330W AQQTFWVEH'   | 301   | 21    |
| >RET-R330W AQQTFRVEH'   | 1235  | >RET-R330W AQQTFWVEH'   | 395   | 840   |
| >RET-R330W WAQQTFRV     | 301   | >RET-R330W WAQQTFWV     | 53    | 248   |
| >RET-R330W WAQQTFRV     | 397   | >RET-R330W WAQQTFWV     | 157   | 240   |
| >RET-R330W WAQQTFRV     | 82    | >RET-R330W WAQQTFWV     | 28    | 54    |
| >RET-R330W WAQQTFRV     | 249   | >RET-R330W WAQQTFWV     | 106   | 143   |
| >RET-R330W WAQQTFRVE    | 32    | >RET-R330W WAQQTFWV     | 38    | 6     |
| >RET-R330W WAQQTFRVE    | 173   | >RET-R330W WAQQTFWV     | 47    | 126   |
| >RET-R330W WAQQTFRVE    | 89    | >RET-R330W WAQQTFWV     | 60    | 29    |

|                        |       |                       |       |       |
|------------------------|-------|-----------------------|-------|-------|
| >RET-R330W WAQQTFRVE   | 22    | >RET-R330W WAQQTFWV   | 11    | 11    |
| >RET-R330W WAQQTFRVE   | 47    | >RET-R330W WAQQTFWV   | 26    | 21    |
| >RET-R330W TWAQQTFRV   | 1092  | >RET-R330W TWAQQTFW'  | 293   | 799   |
| >RET-R330W TWAQQTFR    | 12154 | >RET-R330W TWAQQTFW   | 422   | 11732 |
| >RET-R330W TWAQQTFR    | 11158 | >RET-R330W TWAQQTFW   | 170   | 10988 |
| >RET-R330W TWAQQTFRV   | 988   | >RET-R330W TWAQQTFW'  | 416   | 572   |
| >RET-R330W TWAQQTFR    | 204   | >RET-R330W TWAQQTFW   | 22354 | 22150 |
| >RET-R330W TWAQQTFR    | 175   | >RET-R330W TWAQQTFW   | 30362 | 30187 |
| >RET-R330W TWAQQTFR    | 17    | >RET-R330W TWAQQTFW   | 2869  | 2852  |
| >RET-R330W TWAQQTFR    | 324   | >RET-R330W TWAQQTFW   | 169   | 155   |
| >RET-R330W DTWAQQTFF   | 355   | >RET-R330W DTWAQQTFV  | 300   | 55    |
| >RET-R330W DTWAQQTFF   | 315   | >RET-R330W DTWAQQTFV  | 130   | 185   |
| >RET-R330W DTWAQQTFF   | 573   | >RET-R330W DTWAQQTFV  | 329   | 244   |
| >RET-R330W DTWAQQTFF   | 25    | >RET-R330W DTWAQQTFV  | 15373 | 15348 |
| >RET-R330W DTWAQQTFF   | 7     | >RET-R330W DTWAQQTFV  | 2712  | 2705  |
| >RET-R330W DTWAQQTFF   | 7     | >RET-R330W DTWAQQTFV  | 12067 | 12060 |
| >RET-R330W DTWAQQTFF   | 51    | >RET-R330W DTWAQQTFV  | 109   | 58    |
| >RET-R330W DTWAQQTFF   | 6     | >RET-R330W DTWAQQTFV  | 6     | 0     |
| >RET-R330W DTWAQQTFF   | 20783 | >RET-R330W DTWAQQTFV  | 70    | 20713 |
| >RET-R330W DTWAQQTFF   | 23551 | >RET-R330W DTWAQQTFV  | 76    | 23475 |
| >RET-R330W DTWAQQTFF   | 21269 | >RET-R330W DTWAQQTFV  | 159   | 21110 |
| >RET-R330W DTWAQQTFF   | 155   | >RET-R330W DTWAQQTFV  | 31371 | 31216 |
| >RET-R330W GDTWAQQTI   | 488   | >RET-R330W GDTWAQQTI  | 2564  | 2076  |
| >RET-R330W GDTWAQQTI   | 134   | >RET-R330W GDTWAQQTI  | 157   | 23    |
| >RET-R360W RNLSISENR   | 84    | >RET-R360W WNLSISENR  | 6073  | 5989  |
| >RET-R360W RNLSISENRTI | 411   | >RET-R360W WNLSISENRT | 733   | 322   |
| >RET-R360W RNLSISENRTI | 89    | >RET-R360W WNLSISENRT | 61    | 28    |
| >RET-R360W RNLSISENR   | 82    | >RET-R360W WNLSISENR  | 496   | 414   |
| >RET-R360W NRNLSISENR  | 1876  | >RET-R360W NWNLSISENF | 441   | 1435  |
| >RET-R360W NRNLSISENR  | 1674  | >RET-R360W NWNLSISENF | 357   | 1317  |
| >RET-R360W NRNLSISENR  | 4395  | >RET-R360W NWNLSISENF | 38    | 4357  |
| >RET-R360W TVHDYRLVLN  | 59    | >RET-R360W TVHDYRLVLN | 17367 | 17308 |
| >RET-R360W TVHDYRLVLN  | 44    | >RET-R360W TVHDYRLVLN | 17817 | 17773 |
| >RET-R360W TVHDYRLVLN  | 385   | >RET-R360W TVHDYRLVLN | 29686 | 29301 |
| >RET-R360W TVHDYRLVLN  | 19    | >RET-R360W TVHDYRLVLN | 15498 | 15479 |
| >RET-R360W TVHDYRLVLN  | 21662 | >RET-R360W TVHDYRLVLN | 154   | 21508 |
| >RET-R360W TVHDYRLVLN  | 22305 | >RET-R360W TVHDYRLVLN | 207   | 22098 |
| >RET-R360W TVHDYRLVLN  | 122   | >RET-R360W TVHDYRLVLN | 28173 | 28051 |
| >RET-R360W LNRNLSISENF | 1046  | >RET-R360W LNWNLSISEN | 251   | 795   |
| >RET-R360W LNRNLSISENF | 3763  | >RET-R360W LNWNLSISEN | 292   | 3471  |
| >RET-R360W VLNRNLSI    | 506   | >RET-R360W VLNWNLSI   | 74    | 432   |
| >RET-R360W VLNRNLSI    | 168   | >RET-R360W VLNWNLSI   | 88    | 80    |
| >RET-R360W VLNRNLSI    | 18    | >RET-R360W VLNWNLSI   | 11    | 7     |

|                       |      |                       |      |      |
|-----------------------|------|-----------------------|------|------|
| >RET-R360W VLNRNLSIS  | 771  | >RET-R360W VLNWNLSIS  | 266  | 505  |
| >RET-R360W VLNRNLSI   | 15   | >RET-R360W VLNWNLSI   | 4    | 11   |
| >RET-R360W VLNRNLSI   | 33   | >RET-R360W VLNWNLSI   | 24   | 9    |
| >RET-R360W VLNRNLSI   | 154  | >RET-R360W VLNWNLSI   | 28   | 126  |
| >RET-R360W VLNRNLSI   | 172  | >RET-R360W VLNWNLSI   | 19   | 153  |
| >RET-R360W VLNRNLSI   | 7    | >RET-R360W VLNWNLSI   | 4    | 3    |
| >RET-R360W VLNRNLSIS  | 1405 | >RET-R360W VLNWNLSIS  | 210  | 1195 |
| >RET-R360W VLNRNLSI   | 505  | >RET-R360W VLNWNLSI   | 160  | 345  |
| >RET-R360W LVLNRNLSI  | 874  | >RET-R360W LVLNWNLSI  | 71   | 803  |
| >RET-R360W LVLNRNLSI  | 70   | >RET-R360W LVLNWNLSI  | 32   | 38   |
| >RET-R360W LVLNRNLSI  | 979  | >RET-R360W LVLNWNLSI  | 27   | 952  |
| >RET-R360W LVLNRNLSI  | 2846 | >RET-R360W LVLNWNLSI  | 308  | 2538 |
| >RET-R360W LVLNRNLSI  | 4762 | >RET-R360W LVLNWNLSI  | 297  | 4465 |
| >RET-R360W LVLNRNLSI  | 4799 | >RET-R360W LVLNWNLSI  | 206  | 4593 |
| >RET-R360W LVLNRNLSI  | 1740 | >RET-R360W LVLNWNLSI  | 127  | 1613 |
| >RET-R360W LVLNRNLSI  | 275  | >RET-R360W LVLNWNLSI  | 915  | 640  |
| >RET-R360W LVLNRNLSI  | 107  | >RET-R360W LVLNWNLSI  | 52   | 55   |
| >RET-R360W LVLNRNLSI  | 2167 | >RET-R360W LVLNWNLSI  | 28   | 2139 |
| >RET-R360W LVLNRNLSI  | 196  | >RET-R360W LVLNWNLSI  | 8261 | 8065 |
| >RET-R360W LVLNRNLSI  | 188  | >RET-R360W LVLNWNLSI  | 138  | 50   |
| >RET-R360W RLVLNRNL   | 6523 | >RET-R360W RLVLNWNL   | 221  | 6302 |
| >RET-R360W RLVLNRNLSI | 279  | >RET-R360W RLVLNWNLSI | 113  | 166  |
| >RET-R360W RLVLNRNL   | 348  | >RET-R360W RLVLNWNL   | 36   | 312  |
| >RET-R360W RLVLNRNLSI | 227  | >RET-R360W RLVLNWNLSI | 136  | 91   |
| >RET-R360W RLVLNRNL   | 672  | >RET-R360W RLVLNWNL   | 217  | 455  |
| >RET-R360W RLVLNRNLSI | 97   | >RET-R360W RLVLNWNLSI | 99   | 2    |
| >RET-R360W RLVLNRNL   | 4920 | >RET-R360W RLVLNWNL   | 105  | 4815 |
| >RET-R360W RLVLNRNLSI | 464  | >RET-R360W RLVLNWNLSI | 189  | 275  |
| >RET-R360W RLVLNRNL   | 805  | >RET-R360W RLVLNWNL   | 32   | 773  |
| >RET-R360W RLVLNRNLSI | 469  | >RET-R360W RLVLNWNLSI | 47   | 422  |
| >RET-R360W RLVLNRNL   | 1546 | >RET-R360W RLVLNWNL   | 40   | 1506 |
| >RET-R360W RLVLNRNLSI | 529  | >RET-R360W RLVLNWNLSI | 103  | 426  |
| >RET-R360W RLVLNRNL   | 4296 | >RET-R360W RLVLNWNL   | 103  | 4193 |
| >RET-R360W RLVLNRNL   | 8525 | >RET-R360W RLVLNWNL   | 359  | 8166 |
| >RET-R360W RLVLNRNL   | 203  | >RET-R360W RLVLNWNL   | 20   | 183  |
| >RET-R360W RLVLNRNLSI | 172  | >RET-R360W RLVLNWNLSI | 100  | 72   |
| >RET-R360W RLVLNRNLSI | 55   | >RET-R360W RLVLNWNLSI | 102  | 47   |
| >RET-R360W YRLVLNRNL  | 205  | >RET-R360W YRLVLNWNL  | 253  | 48   |
| >RET-R360W YRLVLNRNLS | 125  | >RET-R360W YRLVLNWNLS | 123  | 2    |
| >RET-R360W YRLVLNRNL  | 26   | >RET-R360W YRLVLNWNL  | 17   | 9    |
| >RET-R360W YRLVLNRNLS | 25   | >RET-R360W YRLVLNWNLS | 21   | 4    |
| >RET-R360W YRLVLNRNL  | 423  | >RET-R360W YRLVLNWNL  | 31   | 392  |
| >RET-R360W YRLVLNRNLS | 321  | >RET-R360W YRLVLNWNLS | 82   | 239  |



|                        |       |                        |       |       |
|------------------------|-------|------------------------|-------|-------|
| >RET-R360W YRLVLNRNL   | 324   | >RET-R360W YRLVLNWNL   | 409   | 85    |
| >RET-R360W YRLVLNRNL   | 36    | >RET-R360W YRLVLNWNL   | 302   | 266   |
| >RET-R360W YRLVLNRNLS  | 239   | >RET-R360W YRLVLNWNLS  | 611   | 372   |
| >RET-R360W DYRLVLNRNL  | 1181  | >RET-R360W DYRLVLNWN   | 327   | 854   |
| >RET-R360W DYRLVLNRNL  | 3405  | >RET-R360W DYRLVLNWN   | 490   | 2915  |
| >RET-R360W DYRLVLNR    | 7     | >RET-R360W DYRLVLNW    | 4334  | 4327  |
| >RET-R360W DYRLVLNR    | 224   | >RET-R360W DYRLVLNW    | 29943 | 29719 |
| >RET-R360W HDYRLVLNRM  | 55    | >RET-R360W HDYRLVLNW   | 29    | 26    |
| >RET-R360W HDYRLVLNR   | 21551 | >RET-R360W HDYRLVLNW   | 480   | 21071 |
| >RET-R360W HDYRLVLNRM  | 506   | >RET-R360W HDYRLVLNW   | 205   | 301   |
| >RET-R360W HDYRLVLNR   | 31032 | >RET-R360W HDYRLVLNW   | 326   | 30706 |
| >RET-R360W HDYRLVLNR   | 120   | >RET-R360W HDYRLVLNW   | 29188 | 29068 |
| >RET-R360W HDYRLVLNRM  | 2427  | >RET-R360W HDYRLVLNW   | 371   | 2056  |
| >RET-R908K- RSQGRIPVK  | 151   | >RET-R908K- KSQGRIPVK  | 148   | 3     |
| >RET-R908K- RSQGRIPVK  | 33    | >RET-R908K- KSQGRIPVK  | 34    | 1     |
| >RET-R908K- RSQGRIPV   | 75    | >RET-R908K- KSQGRIPV   | 86    | 11    |
| >RET-R908K- RSQGRIPVK  | 8     | >RET-R908K- KSQGRIPVK  | 8     | 0     |
| >RET-R908K- RSQGRIPVK  | 150   | >RET-R908K- KSQGRIPVK  | 178   | 28    |
| >RET-R908K- RSQGRIPVKM | 50    | >RET-R908K- KSQGRIPVKM | 44    | 6     |
| >RET-R908K- RSQGRIPV   | 141   | >RET-R908K- KSQGRIPV   | 327   | 186   |
| >RET-R908K- RSQGRIPVKM | 7     | >RET-R908K- KSQGRIPVKM | 13    | 6     |
| >RET-R908K- RSQGRIPVKM | 5     | >RET-R908K- KSQGRIPVKM | 8     | 3     |
| >RET-R908K- RSQGRIPVKM | 31    | >RET-R908K- KSQGRIPVKM | 30    | 1     |
| >RET-R908K- RSQGRIPVKM | 10    | >RET-R908K- KSQGRIPVKM | 11    | 1     |
| >RET-R908K- RSQGRIPVKM | 89    | >RET-R908K- KSQGRIPVKM | 335   | 246   |
| >RET-R908K- RSQGRIPVKM | 68    | >RET-R908K- KSQGRIPVKM | 110   | 42    |
| >RET-R908K- KRSQGRIPV  | 519   | >RET-R908K- KKSQGRIPV  | 75    | 444   |
| >RET-R908K- KRSQGRIPVK | 1138  | >RET-R908K- KKSQGRIPVK | 280   | 858   |
| >RET-R908K- KRSQGRIPV  | 218   | >RET-R908K- KKSQGRIPV  | 5925  | 5707  |
| >RET-R908K- KRSQGRIPVK | 146   | >RET-R908K- KKSQGRIPVK | 10760 | 10614 |
| >RET-R908K- KRSQGRIPV  | 95    | >RET-R908K- KKSQGRIPV  | 2893  | 2798  |
| >RET-R908K- KRSQGRIPVK | 280   | >RET-R908K- KKSQGRIPVK | 6715  | 6435  |
| >RET-R908K- KRSQGRIPV  | 155   | >RET-R908K- KKSQGRIPV  | 5383  | 5228  |
| >RET-R908K- KRSQGRIPVK | 375   | >RET-R908K- KKSQGRIPVK | 11178 | 10803 |
| >RET-R908K- KRSQGRIPVK | 130   | >RET-R908K- KKSQGRIPVK | 1861  | 1731  |
| >RET-R908K- DVYEEDSYVK | 38    | >RET-R908K- DVYEEDSYVK | 599   | 561   |
| >RET-R908K- DVYEEDSYVK | 7     | >RET-R908K- DVYEEDSYVK | 12    | 5     |
| >RET-R908K- DVYEEDSYVK | 443   | >RET-R908K- DVYEEDSYVK | 10167 | 9724  |
| >RET-R908K- VKRSQGRIPV | 187   | >RET-R908K- VKKSQGRIPV | 1211  | 1024  |
| >RET-R908K- VKRSQGRIPV | 304   | >RET-R908K- VKKSQGRIPV | 656   | 352   |
| >RET-R908K- VKRSQGRIPV | 21    | >RET-R908K- VKKSQGRIPV | 50    | 29    |
| >RET-R908K- VKRSQGRIPV | 259   | >RET-R908K- VKKSQGRIPV | 590   | 331   |
| >RET-R908K- YVKRSQGRIP | 43    | >RET-R908K- YVKSQGRIP  | 41    | 2     |

|                         |     |                          |      |      |
|-------------------------|-----|--------------------------|------|------|
| >RET-R908K- YVKRSQGRIP  | 397 | >RET-R908K- YVKKSQGRIP'  | 371  | 26   |
| >RET-R908K- YVKRSQGRIP  | 11  | >RET-R908K- YVKKSQGRIP'  | 19   | 8    |
| >RET-R908K- YVKRSQGRIP  | 215 | >RET-R908K- YVKKSQGRIP'  | 511  | 296  |
| >RET-R908K- YVKRSQGRIP  | 36  | >RET-R908K- YVKKSQGRIP'  | 62   | 26   |
| >RET-R908K- YVKRSQGR    | 91  | >RET-R908K- YVKKSQGR     | 150  | 59   |
| >RET-R908K- YVKRSQGR    | 319 | >RET-R908K- YVKKSQGR     | 471  | 152  |
| >RET-R908K- YVKRSQGR    | 36  | >RET-R908K- YVKKSQGR     | 36   | 0    |
| >RET-R908K- YVKRSQGRIP  | 136 | >RET-R908K- YVKKSQGRIP'  | 152  | 16   |
| >RET-R908K- YVKRSQGRIP  | 488 | >RET-R908K- YVKKSQGRIP'  | 416  | 72   |
| >RET-R908K- SYVKRSQGRIP | 4   | >RET-R908K- SYVKKSQGRIP' | 9    | 5    |
| >RET-R908K- SYVKRSQGRIP | 52  | >RET-R908K- SYVKKSQGRIP' | 56   | 4    |
| >RET-R908K- SYVKRSQGR   | 235 | >RET-R908K- SYVKKSQGR    | 376  | 141  |
| >RET-R908K- SYVKRSQGR   | 33  | >RET-R908K- SYVKKSQGR    | 31   | 2    |
| >RET-R908K- DSYVKRSQGR  | 269 | >RET-R908K- DSYVKKSQGR   | 370  | 101  |
| >RET-R908K- DSYVKRSQGR  | 240 | >RET-R908K- DSYVKKSQGR   | 351  | 111  |
| >RET-R908K- DSYVKRSQGR  | 62  | >RET-R908K- DSYVKKSQGR   | 129  | 67   |
| >RET-R908K- DSYVKRSQGR  | 264 | >RET-R908K- DSYVKKSQGR   | 351  | 87   |
| >RET-R908K- EDSYVKRSQGR | 246 | >RET-R908K- EDSYVKKSQGR  | 305  | 59   |
| >RET-R908K- YEEDSYVKR   | 482 | >RET-R908K- YEEDSYVKK    | 8551 | 8069 |
| >RET-R908K- VYEEDSYVKR  | 69  | >RET-R908K- VYEEDSYVKK   | 1703 | 1634 |
| >RET-S922P-PLFDHIYT     | 22  | >RET-S922P-PLFDHIYT      | 943  | 921  |
| >RET-S922P-PLFDHIYTT    | 13  | >RET-S922P-PLFDHIYTT     | 178  | 165  |
| >RET-S922P-PLFDHIYTTQ   | 147 | >RET-S922P-PLFDHIYTTQ    | 6556 | 6409 |
| >RET-S922P-PLFDHIYT     | 18  | >RET-S922P-PLFDHIYT      | 363  | 345  |
| >RET-S922P-PLFDHIYTT    | 10  | >RET-S922P-PLFDHIYTT     | 175  | 165  |
| >RET-S922P-PLFDHIYTTQ   | 23  | >RET-S922P-PLFDHIYTTQ    | 664  | 641  |
| >RET-S922P-PLFDHIYT     | 38  | >RET-S922P-PLFDHIYT      | 1555 | 1517 |
| >RET-S922P-PLFDHIYTT    | 8   | >RET-S922P-PLFDHIYTT     | 405  | 397  |
| >RET-S922P-PLFDHIYTTQ   | 38  | >RET-S922P-PLFDHIYTTQ    | 2295 | 2257 |
| >RET-S922P-PLFDHIYT     | 76  | >RET-S922P-PLFDHIYT      | 2506 | 2430 |
| >RET-S922P-PLFDHIYTT    | 61  | >RET-S922P-PLFDHIYTT     | 1733 | 1672 |
| >RET-S922P-PLFDHIYT     | 3   | >RET-S922P-PLFDHIYT      | 26   | 23   |
| >RET-S922P-PLFDHIYTT    | 2   | >RET-S922P-PLFDHIYTT     | 9    | 7    |
| >RET-S922P-PLFDHIYTTQ   | 27  | >RET-S922P-PLFDHIYTTQ    | 562  | 535  |
| >RET-S922P-PLFDHIYTTQ   | 20  | >RET-S922P-PLFDHIYTTQ    | 420  | 400  |
| >RET-S922P-PLFDHIYT     | 79  | >RET-S922P-PLFDHIYT      | 3343 | 3264 |
| >RET-S922P-PLFDHIYTT    | 10  | >RET-S922P-PLFDHIYTT     | 319  | 309  |
| >RET-S922P-PLFDHIYT     | 16  | >RET-S922P-PLFDHIYT      | 707  | 691  |
| >RET-S922P-PLFDHIYTT    | 11  | >RET-S922P-PLFDHIYTT     | 477  | 466  |
| >RET-S922P-PLFDHIYTTQ   | 84  | >RET-S922P-PLFDHIYTTQ    | 3623 | 3539 |
| >RET-S922P-PLFDHIYTTQ   | 320 | >RET-S922P-PLFDHIYTTQ    | 7314 | 6994 |
| >RET-S922P-PLFDHIYTT    | 230 | >RET-S922P-PLFDHIYTT     | 640  | 410  |
| >RET-S922P-PLFDHIYT     | 5   | >RET-S922P-PLFDHIYT      | 58   | 53   |

|                         |       |                         |       |       |
|-------------------------|-------|-------------------------|-------|-------|
| >RET-S922P-1SLFDHIYTT   | 3     | >RET-S922P-1PLFDHIYTT   | 18    | 15    |
| >RET-S922P-1SLFDHIYTTQ  | 5     | >RET-S922P-1PLFDHIYTTQ  | 70    | 65    |
| >RET-S922P-1SLFDHIYTTQ5 | 13    | >RET-S922P-1PLFDHIYTTQ5 | 346   | 333   |
| >RET-S922P-1SLFDHIYTT   | 150   | >RET-S922P-1PLFDHIYTT   | 2813  | 2663  |
| >RET-S922P-1ESLFDHIY    | 23    | >RET-S922P-1EPLFDHIY    | 522   | 499   |
| >RET-S922P-1ESLFDHIY    | 431   | >RET-S922P-1EPLFDHIY    | 2965  | 2534  |
| >RET-S922P-1ESLFDHIY    | 137   | >RET-S922P-1EPLFDHIY    | 2519  | 2382  |
| >RET-S922P-1ESLFDHIY    | 481   | >RET-S922P-1EPLFDHIY    | 7881  | 7400  |
| >RET-S922P-1ESLFDHIY    | 97    | >RET-S922P-1EPLFDHIY    | 22350 | 22253 |
| >RET-S922P-1ESLFDHIY    | 329   | >RET-S922P-1EPLFDHIY    | 17    | 312   |
| >RET-S922P-1ESLFDHIY    | 11586 | >RET-S922P-1EPLFDHIY    | 87    | 11499 |
| >RET-S922P-1ESLFDHIY    | 16943 | >RET-S922P-1EPLFDHIY    | 252   | 16691 |
| >RET-S922P-1IESLFDHI    | 212   | >RET-S922P-1IEPLFDHI    | 801   | 589   |
| >RET-S922P-1IESLFDHIY   | 112   | >RET-S922P-1IEPLFDHIY   | 742   | 630   |
| >RET-S922P-1IESLFDHIY   | 8     | >RET-S922P-1IEPLFDHIY   | 26    | 18    |
| >RET-S922P-1IESLFDHIYTT | 191   | >RET-S922P-1IEPLFDHIYTT | 1764  | 1573  |
| >RET-S922P-1IESLFDHI    | 101   | >RET-S922P-1IEPLFDHI    | 3736  | 3635  |
| >RET-S922P-1IESLFDHIYTT | 454   | >RET-S922P-1IEPLFDHIYTT | 1952  | 1498  |
| >RET-S922P-1IESLFDHIY   | 243   | >RET-S922P-1IEPLFDHIY   | 1586  | 1343  |
| >RET-S922P-1IESLFDHIYTT | 447   | >RET-S922P-1IEPLFDHIYTT | 12262 | 11815 |
| >RET-S922P-1IESLFDHI    | 92    | >RET-S922P-1IEPLFDHI    | 213   | 121   |
| >RET-S922P-1IESLFDHIYTT | 496   | >RET-S922P-1IEPLFDHIYTT | 762   | 266   |
| >RET-S922P-1AIESLFDHIY  | 287   | >RET-S922P-1AIEPLFDHIY  | 835   | 548   |
| >RET-S922P-1AIESLFDHI   | 225   | >RET-S922P-1AIEPLFDHI   | 65    | 160   |
| >RET-S922P-1AIESLFDHIY  | 411   | >RET-S922P-1AIEPLFDHIY  | 644   | 233   |
| >RET-S922P-1AIESLFDHIY  | 355   | >RET-S922P-1AIEPLFDHIY  | 532   | 177   |
| >RET-S922P-1AIESLFDHIY  | 484   | >RET-S922P-1AIEPLFDHIY  | 705   | 221   |
| >RET-S922P-1MAIESLFDHI  | 448   | >RET-S922P-1MAIEPLFDHI  | 370   | 78    |
| >RET-S922P-1MAIESLFDHI  | 77    | >RET-S922P-1MAIEPLFDHI  | 82    | 5     |
| >RET-S922P-1MAIESLFDHI  | 744   | >RET-S922P-1MAIEPLFDHI  | 349   | 395   |
| >RET-S922P-1MAIESLFDHI\ | 104   | >RET-S922P-1MAIEPLFDHI\ | 54    | 50    |
| >RET-S922P-1MAIESLFDHI\ | 32    | >RET-S922P-1MAIEPLFDHI\ | 28    | 4     |
| >RET-S922P-1MAIESLFDHI\ | 45    | >RET-S922P-1MAIEPLFDHI\ | 64    | 19    |
| >RET-S922P-1MAIESLFDHI\ | 51    | >RET-S922P-1MAIEPLFDHI\ | 100   | 49    |
| >RET-S922P-1MAIESLFDHI  | 60    | >RET-S922P-1MAIEPLFDHI  | 48    | 12    |
| >RET-S922P-1MAIESLFDHI  | 68    | >RET-S922P-1MAIEPLFDHI  | 37    | 31    |
| >RET-S922P-1MAIESLFDHI\ | 357   | >RET-S922P-1MAIEPLFDHI\ | 694   | 337   |
| >RET-S922P-1MAIESLFDHI\ | 119   | >RET-S922P-1MAIEPLFDHI\ | 233   | 114   |
| >RET-S922P-1MAIESLFDHI\ | 7     | >RET-S922P-1MAIEPLFDHI\ | 10    | 3     |
| >RET-S922P-1MAIESLFDH   | 290   | >RET-S922P-1MAIEPLFDH   | 547   | 257   |
| >RET-S922P-1MAIESLFDHI\ | 9     | >RET-S922P-1MAIEPLFDHI\ | 11    | 2     |
| >RET-S922P-1MAIESLFDHI\ | 53    | >RET-S922P-1MAIEPLFDHI\ | 88    | 35    |
| >RET-S922P-1MAIESLFDHI\ | 166   | >RET-S922P-1MAIEPLFDHI\ | 315   | 149   |

|                          |      |                          |      |      |
|--------------------------|------|--------------------------|------|------|
| >RET-S922P-1 MAIESLFDHI  | 84   | >RET-S922P-1 MAIEPLFDHI  | 150  | 66   |
| >RET-S922P-1 MAIESLFDHI) | 21   | >RET-S922P-1 MAIEPLFDHI` | 34   | 13   |
| >RET-S922P-1 MAIESLFDHI) | 79   | >RET-S922P-1 MAIEPLFDHI` | 109  | 30   |
| >RET-S922P-1 WMAIESLFDI  | 200  | >RET-S922P-1 WMAIEPLFDI  | 210  | 10   |
| >RET-S922P-1 WMAIESLF    | 362  | >RET-S922P-1 WMAIEPLF    | 865  | 503  |
| >RET-S922P-1 WMAIESLFDI  | 12   | >RET-S922P-1 WMAIEPLFDI  | 18   | 6    |
| >RET-S922P-1 WMAIESLFDI  | 28   | >RET-S922P-1 WMAIEPLFDI  | 26   | 2    |
| >RET-S922P-1 WMAIESLFDI  | 26   | >RET-S922P-1 WMAIEPLFDI  | 58   | 32   |
| >RET-S922P-1 WMAIESLFDI  | 35   | >RET-S922P-1 WMAIEPLFDI  | 25   | 10   |
| >RET-S922P-1 WMAIESLFDI  | 90   | >RET-S922P-1 WMAIEPLFDI  | 115  | 25   |
| >RET-S922P-1 WMAIESLFDI  | 21   | >RET-S922P-1 WMAIEPLFDI  | 23   | 2    |
| >RET-S922P-1 WMAIESLFDI  | 103  | >RET-S922P-1 WMAIEPLFDI  | 127  | 24   |
| >RET-S922P-1 WMAIESLFDI  | 64   | >RET-S922P-1 WMAIEPLFDI  | 73   | 9    |
| >RET-S922P-1 WMAIESLF    | 111  | >RET-S922P-1 WMAIEPLF    | 65   | 46   |
| >RET-S922P-1 WMAIESLF    | 95   | >RET-S922P-1 WMAIEPLF    | 273  | 178  |
| >RET-S922P-1 WMAIESLF    | 184  | >RET-S922P-1 WMAIEPLF    | 1210 | 1026 |
| >RET-S922P-1 WMAIESLF    | 16   | >RET-S922P-1 WMAIEPLF    | 27   | 11   |
| >RET-S922P-1 WMAIESLF    | 157  | >RET-S922P-1 WMAIEPLF    | 261  | 104  |
| >RET-S922P-1 KWMAIESL    | 72   | >RET-S922P-1 KWMAIEPL    | 306  | 234  |
| >RET-S922P-1 KWMAIESL    | 61   | >RET-S922P-1 KWMAIEPL    | 66   | 5    |
| >RET-S922P-1 KWMAIESL    | 391  | >RET-S922P-1 KWMAIEPL    | 247  | 144  |
| >RET-S922P-1 KWMAIESLF   | 54   | >RET-S922P-1 KWMAIEPLF   | 58   | 4    |
| >RET-S922P-1 KWMAIESLF   | 33   | >RET-S922P-1 KWMAIEPLF   | 35   | 2    |
| >RET-S922P-1 KWMAIESL    | 41   | >RET-S922P-1 KWMAIEPL    | 112  | 71   |
| >RET-S922P-1 KWMAIESLF   | 11   | >RET-S922P-1 KWMAIEPLF   | 12   | 1    |
| >RET-S922P-1 KWMAIESLF   | 74   | >RET-S922P-1 KWMAIEPLF   | 2520 | 2446 |
| >RET-S922P-1 KWMAIESL    | 20   | >RET-S922P-1 KWMAIEPL    | 30   | 10   |
| >RET-S922P-1 KWMAIESLF   | 49   | >RET-S922P-1 KWMAIEPLF   | 76   | 27   |
| >RET-S922P-1 KWMAIESLFI  | 189  | >RET-S922P-1 KWMAIEPLFI  | 262  | 73   |
| >RET-S922P-1 VKWMAIESL   | 12   | >RET-S922P-1 VKWMAIEPL   | 11   | 1    |
| >RET-S922P-1 VKWMAIESLI  | 4    | >RET-S922P-1 VKWMAIEPLI  | 6    | 2    |
| >RET-S922P-1 VKWMAIESL   | 1237 | >RET-S922P-1 VKWMAIEPL   | 499  | 738  |
| >RET-S922P-1 IPVKWMAIES  | 412  | >RET-S922P-1 IPVKWMAIEF  | 1443 | 1031 |
| >RET-S922P-1 IPVKWMAIES  | 43   | >RET-S922P-1 IPVKWMAIEF  | 28   | 15   |
| >RET-S922P-1 IPVKWMAIES  | 398  | >RET-S922P-1 IPVKWMAIEF  | 116  | 282  |
| >RET-S922P-1 IPVKWMAIES  | 570  | >RET-S922P-1 IPVKWMAIEF  | 319  | 251  |
| >RET-S922P-1 IPVKWMAIES  | 153  | >RET-S922P-1 IPVKWMAIEF  | 252  | 99   |
| >RET-S922P-1 IPVKWMAIES  | 458  | >RET-S922P-1 IPVKWMAIEF  | 244  | 214  |
| >RET-S922P-1 IPVKWMAIES  | 168  | >RET-S922P-1 IPVKWMAIEF  | 197  | 29   |
| >RET-T636M TVIAAAVL      | 4247 | >RET-T636M MVIAAAVL      | 356  | 3891 |
| >RET-T636M TVIAAAVL      | 779  | >RET-T636M MVIAAAVL      | 73   | 706  |
| >RET-T636M TVIAAAVL      | 1180 | >RET-T636M MVIAAAVL      | 145  | 1035 |
| >RET-T636M TVIAAAVL      | 203  | >RET-T636M MVIAAAVL      | 23   | 180  |

|                        |      |                       |     |      |
|------------------------|------|-----------------------|-----|------|
| >RET-T636M TVIAAAVLF   | 774  | >RET-T636M MVIAAAVLF  | 97  | 677  |
| >RET-T636M TVIAAAVLFSF | 93   | >RET-T636M MVIAAAVLFS | 20  | 73   |
| >RET-T636M TVIAAAVL    | 2172 | >RET-T636M MVIAAAVL   | 210 | 1962 |
| >RET-T636M TVIAAAVLF   | 206  | >RET-T636M MVIAAAVLF  | 152 | 54   |
| >RET-T636M TVIAAAVLFSF | 147  | >RET-T636M MVIAAAVLFS | 83  | 64   |
| >RET-T636M TVIAAAVLF   | 1644 | >RET-T636M MVIAAAVLF  | 339 | 1305 |
| >RET-T636M TVIAAAVLFSF | 465  | >RET-T636M MVIAAAVLFS | 92  | 373  |
| >RET-T636M TVIAAAVLFSF | 399  | >RET-T636M MVIAAAVLFS | 460 | 61   |
| >RET-T636M TVIAAAVL    | 73   | >RET-T636M MVIAAAVL   | 207 | 134  |
| >RET-T636M TVIAAAVLF   | 87   | >RET-T636M MVIAAAVLF  | 251 | 164  |
| >RET-T636M TVIAAAVLFSF | 16   | >RET-T636M MVIAAAVLFS | 41  | 25   |
| >RET-T636M TVIAAAVLF   | 342  | >RET-T636M MVIAAAVLF  | 97  | 245  |
| >RET-T636M TVIAAAVLFSF | 434  | >RET-T636M MVIAAAVLFS | 115 | 319  |
| >RET-T636M TVIAAAVLF   | 581  | >RET-T636M MVIAAAVLF  | 186 | 395  |
| >RET-T636M TVIAAAVLFSF | 157  | >RET-T636M MVIAAAVLFS | 62  | 95   |
| >RET-T636M TVIAAAVLF   | 695  | >RET-T636M MVIAAAVLF  | 197 | 498  |
| >RET-T636M TVIAAAVLFSF | 837  | >RET-T636M MVIAAAVLFS | 248 | 589  |
| >RET-T636M TVIAAAVL    | 17   | >RET-T636M MVIAAAVL   | 9   | 8    |
| >RET-T636M TVIAAAVLF   | 1353 | >RET-T636M MVIAAAVLF  | 269 | 1084 |
| >RET-T636M TVIAAAVLFSF | 573  | >RET-T636M MVIAAAVLFS | 140 | 433  |
| >RET-T636M TVIAAAVL    | 262  | >RET-T636M MVIAAAVL   | 146 | 116  |
| >RET-T636M TVIAAAVL    | 5594 | >RET-T636M MVIAAAVL   | 395 | 5199 |
| >RET-T636M TVIAAAVL    | 1202 | >RET-T636M MVIAAAVL   | 273 | 929  |
| >RET-T636M TVIAAAVLF   | 444  | >RET-T636M MVIAAAVLF  | 121 | 323  |
| >RET-T636M TVIAAAVLFSF | 135  | >RET-T636M MVIAAAVLFS | 54  | 81   |
| >RET-T636M TVIAAAVLF   | 860  | >RET-T636M MVIAAAVLF  | 74  | 786  |
| >RET-T636M TVIAAAVLFSF | 619  | >RET-T636M MVIAAAVLFS | 70  | 549  |
| >RET-T636M TVIAAAVL    | 1096 | >RET-T636M MVIAAAVL   | 111 | 985  |
| >RET-T636M TVIAAAVLF   | 160  | >RET-T636M MVIAAAVLF  | 21  | 139  |
| >RET-T636M TVIAAAVLFSF | 117  | >RET-T636M MVIAAAVLFS | 18  | 99   |
| >RET-T636M TVIAAAVL    | 2677 | >RET-T636M MVIAAAVL   | 192 | 2485 |
| >RET-T636M TVIAAAVLF   | 367  | >RET-T636M MVIAAAVLF  | 39  | 328  |
| >RET-T636M TVIAAAVLFSF | 192  | >RET-T636M MVIAAAVLFS | 31  | 161  |
| >RET-T636M TVIAAAVL    | 42   | >RET-T636M MVIAAAVL   | 34  | 8    |
| >RET-T636M TVIAAAVLF   | 762  | >RET-T636M MVIAAAVLF  | 44  | 718  |
| >RET-T636M TVIAAAVLFSF | 138  | >RET-T636M MVIAAAVLFS | 20  | 118  |
| >RET-T636M TVIAAAVL    | 320  | >RET-T636M MVIAAAVL   | 162 | 158  |
| >RET-T636M TVIAAAVLF   | 781  | >RET-T636M MVIAAAVLF  | 299 | 482  |
| >RET-T636M TVIAAAVLFSF | 1046 | >RET-T636M MVIAAAVLFS | 445 | 601  |
| >RET-T636M TVIAAAVLFSF | 621  | >RET-T636M MVIAAAVLFS | 85  | 536  |
| >RET-T636M RTVIAAAV    | 4873 | >RET-T636M RMVIAAAV   | 106 | 4767 |
| >RET-T636M RTVIAAAV    | 990  | >RET-T636M RMVIAAAV   | 29  | 961  |
| >RET-T636M RTVIAAAVL   | 3843 | >RET-T636M RMVIAAAVL  | 238 | 3605 |

|                       |       |                       |       |       |
|-----------------------|-------|-----------------------|-------|-------|
| >RET-T636M RTVIAAAV   | 194   | >RET-T636M RMVIAAAV   | 7     | 187   |
| >RET-T636M RTVIAAAVL  | 5030  | >RET-T636M RMVIAAAVL  | 80    | 4950  |
| >RET-T636M RTVIAAAV   | 33    | >RET-T636M RMVIAAAV   | 14    | 19    |
| >RET-T636M RTVIAAAVL  | 1453  | >RET-T636M RMVIAAAVL  | 311   | 1142  |
| >RET-T636M RTVIAAAV   | 214   | >RET-T636M RMVIAAAV   | 4     | 210   |
| >RET-T636M RTVIAAAVL  | 6784  | >RET-T636M RMVIAAAVL  | 53    | 6731  |
| >RET-T636M RTVIAAAV   | 2086  | >RET-T636M RMVIAAAV   | 8     | 2078  |
| >RET-T636M RTVIAAAVL  | 13039 | >RET-T636M RMVIAAAVL  | 113   | 12926 |
| >RET-T636M RTVIAAAV   | 2811  | >RET-T636M RMVIAAAV   | 15    | 2796  |
| >RET-T636M RTVIAAAVL  | 13476 | >RET-T636M RMVIAAAVL  | 269   | 13207 |
| >RET-T636M RTVIAAAV   | 11519 | >RET-T636M RMVIAAAV   | 34    | 11485 |
| >RET-T636M RTVIAAAV   | 1537  | >RET-T636M RMVIAAAV   | 5     | 1532  |
| >RET-T636M RTVIAAAVL  | 14167 | >RET-T636M RMVIAAAVL  | 50    | 14117 |
| >RET-T636M RTVIAAAVLF | 677   | >RET-T636M RMVIAAAVLF | 215   | 462   |
| >RET-T636M RTVIAAAVLF | 605   | >RET-T636M RMVIAAAVLF | 242   | 363   |
| >RET-T636M RTVIAAAV   | 302   | >RET-T636M RMVIAAAV   | 2132  | 1830  |
| >RET-T636M RTVIAAAVL  | 436   | >RET-T636M RMVIAAAVL  | 2947  | 2511  |
| >RET-T636M RTVIAAAVLF | 187   | >RET-T636M RMVIAAAVLF | 1272  | 1085  |
| >RET-T636M RTVIAAAVLF | 390   | >RET-T636M RMVIAAAVLF | 550   | 160   |
| >RET-T636M RTVIAAAV   | 473   | >RET-T636M RMVIAAAV   | 629   | 156   |
| >RET-T636M RTVIAAAVL  | 489   | >RET-T636M RMVIAAAVL  | 630   | 141   |
| >RET-T636M RTVIAAAVLF | 41    | >RET-T636M RMVIAAAVLF | 75    | 34    |
| >RET-T636M RTVIAAAV   | 125   | >RET-T636M RMVIAAAV   | 3486  | 3361  |
| >RET-T636M RTVIAAAV   | 134   | >RET-T636M RMVIAAAV   | 1298  | 1164  |
| >RET-T636M RTVIAAAV   | 4414  | >RET-T636M RMVIAAAV   | 314   | 4100  |
| >RET-T636M RTVIAAAVL  | 847   | >RET-T636M RMVIAAAVL  | 76    | 771   |
| >RET-T636M RTVIAAAVLF | 308   | >RET-T636M RMVIAAAVLF | 58    | 250   |
| >RET-T636M RTVIAAAV   | 2492  | >RET-T636M RMVIAAAV   | 167   | 2325  |
| >RET-T636M RTVIAAAVL  | 1467  | >RET-T636M RMVIAAAVL  | 97    | 1370  |
| >RET-T636M RTVIAAAVLF | 112   | >RET-T636M RMVIAAAVLF | 7     | 105   |
| >RET-T636M RTVIAAAV   | 6     | >RET-T636M RMVIAAAV   | 819   | 813   |
| >RET-T636M RTVIAAAVL  | 2     | >RET-T636M RMVIAAAVL  | 18    | 16    |
| >RET-T636M RTVIAAAVLF | 2     | >RET-T636M RMVIAAAVLF | 9     | 7     |
| >RET-T636M RTVIAAAVLF | 45    | >RET-T636M RMVIAAAVLF | 6258  | 6213  |
| >RET-T636M RTVIAAAVL  | 2426  | >RET-T636M RMVIAAAVL  | 110   | 2316  |
| >RET-T636M RTVIAAAVL  | 1806  | >RET-T636M RMVIAAAVL  | 101   | 1705  |
| >RET-T636M RTVIAAAVLF | 93    | >RET-T636M RMVIAAAVLF | 1041  | 948   |
| >RET-T636M RTVIAAAVL  | 136   | >RET-T636M RMVIAAAVL  | 821   | 685   |
| >RET-T636M RTVIAAAVLF | 20    | >RET-T636M RMVIAAAVLF | 53    | 33    |
| >RET-T636M RTVIAAAVL  | 23    | >RET-T636M RMVIAAAVL  | 2347  | 2324  |
| >RET-T636M RTVIAAAVLF | 22    | >RET-T636M RMVIAAAVLF | 1822  | 1800  |
| >RET-T636M RTVIAAAV   | 461   | >RET-T636M RMVIAAAV   | 16688 | 16227 |
| >RET-T636M RTVIAAAVL  | 40    | >RET-T636M RMVIAAAVL  | 4432  | 4392  |

|                        |      |                        |      |      |
|------------------------|------|------------------------|------|------|
| >RET-T636M RTVIAAAVLF  | 15   | >RET-T636M RMVIAAAVLF  | 87   | 72   |
| >RET-T636M RTVIAAAVL   | 76   | >RET-T636M RMVIAAAVL   | 5005 | 4929 |
| >RET-T636M CRTVIAAAVLI | 262  | >RET-T636M CRMVIAAAVI  | 49   | 213  |
| >RET-T636M CRTVIAAAA   | 1753 | >RET-T636M CRMVIAAAA   | 408  | 1345 |
| >RET-T636M CRTVIAAAV   | 553  | >RET-T636M CRMVIAAAV   | 120  | 433  |
| >RET-T636M CRTVIAAAVL  | 197  | >RET-T636M CRMVIAAAVI  | 75   | 122  |
| >RET-T636M CRTVIAAAVLI | 149  | >RET-T636M CRMVIAAAVI  | 44   | 105  |
| >RET-T636M CRTVIAAAV   | 2143 | >RET-T636M CRMVIAAAV   | 112  | 2031 |
| >RET-T636M CRTVIAAAVL  | 228  | >RET-T636M CRMVIAAAVI  | 18   | 210  |
| >RET-T636M CRTVIAAAVL  | 850  | >RET-T636M CRMVIAAAVI  | 292  | 558  |
| >RET-T636M CRTVIAAAV   | 957  | >RET-T636M CRMVIAAAV   | 315  | 642  |
| >RET-T636M CRTVIAAAVL  | 243  | >RET-T636M CRMVIAAAVI  | 118  | 125  |
| >RET-T636M CRTVIAAAVLI | 74   | >RET-T636M CRMVIAAAVI  | 33   | 41   |
| >RET-T636M CRTVIAAAVLI | 314  | >RET-T636M CRMVIAAAVI  | 2080 | 1766 |
| >RET-T636M LCRTVIAA    | 166  | >RET-T636M LCRMVIAA    | 181  | 15   |
| >RET-T636M LCRTVIAAAA  | 200  | >RET-T636M LCRMVIAAAA  | 175  | 25   |
| >RET-T636M LCRTVIAAAV  | 498  | >RET-T636M LCRMVIAAAV  | 438  | 60   |
| >RET-T636M LCRTVIAAAVI | 283  | >RET-T636M LCRMVIAAAV  | 281  | 2    |
| >RET-T636M ELCRTVIAAAA | 142  | >RET-T636M ELCRMVIAAAA | 176  | 34   |
| >RET-T636M ELCRTVIAAAV | 359  | >RET-T636M ELCRMVIAAAV | 320  | 39   |
| >RET-T636M ELCRTVIAAA  | 173  | >RET-T636M ELCRMVIAAA  | 531  | 358  |
| >RET-T636M ELCRTVIAAAA | 102  | >RET-T636M ELCRMVIAAAA | 207  | 105  |
| >RET-T636M ELCRTVIAAAV | 11   | >RET-T636M ELCRMVIAAAV | 17   | 6    |
| >RET-T636M ELCRTVIAAAV | 201  | >RET-T636M ELCRMVIAAAV | 379  | 178  |
| >RET-T636M ELCRTVIAAAV | 234  | >RET-T636M ELCRMVIAAAV | 374  | 140  |
| >RET-T636M ELCRTVIAAAV | 36   | >RET-T636M ELCRMVIAAAV | 53   | 17   |
| >RET-T636M ELCRTVIAAA  | 497  | >RET-T636M ELCRMVIAAA  | 355  | 142  |
| >RET-T636M ELCRTVIAAAA | 270  | >RET-T636M ELCRMVIAAAA | 203  | 67   |
| >RET-T636M ELCRTVIAAAV | 9    | >RET-T636M ELCRMVIAAAV | 9    | 0    |
| >RET-T636M ELCRTVIAAAA | 679  | >RET-T636M ELCRMVIAAAA | 323  | 356  |
| >RET-T636M ELCRTVIAAAV | 493  | >RET-T636M ELCRMVIAAAV | 316  | 177  |
| >RET-T636M ELCRTVIAAAV | 128  | >RET-T636M ELCRMVIAAAV | 212  | 84   |
| >RET-T636M DELCRTVI    | 145  | >RET-T636M DELCRMVI    | 91   | 54   |
| >RET-T636M DELCRTVI    | 139  | >RET-T636M DELCRMVI    | 107  | 32   |
| >RET-T636M DELCRTVIA   | 572  | >RET-T636M DELCRMVIA   | 430  | 142  |
| >RET-T636M DELCRTVIAA  | 74   | >RET-T636M DELCRMVIAA  | 66   | 8    |
| >RET-T636M DELCRTVIAA  | 246  | >RET-T636M DELCRMVIAA  | 191  | 55   |
| >RET-T636M CDELCRTV    | 185  | >RET-T636M CDELCRMV    | 183  | 2    |
| >RET-T636M CDELCRTVI   | 190  | >RET-T636M CDELCRMVI   | 127  | 63   |
| >RET-T636M PLCDELCRT   | 1071 | >RET-T636M PLCDELCRM   | 325  | 746  |
| >RET-T636M PLCDELCRTV  | 22   | >RET-T636M PLCDELCRMV  | 26   | 4    |
| >RET-T636M PLCDELCRTV  | 261  | >RET-T636M PLCDELCRMV  | 312  | 51   |
| >RET-T636M PLCDELCRTV  | 249  | >RET-T636M PLCDELCRMV  | 463  | 214  |

|                        |       |                       |     |       |
|------------------------|-------|-----------------------|-----|-------|
| >RET-T636M PLCDELCRT   | 93    | >RET-T636M PLCDELCRM  | 60  | 33    |
| >RET-T636M PLCDELCRTV  | 7     | >RET-T636M PLCDELCRM\ | 12  | 5     |
| >RET-T636M PLCDELCRTV\ | 129   | >RET-T636M PLCDELCRM\ | 114 | 15    |
| >RET-T636M DPLCDELCRT  | 8117  | >RET-T636M DPLCDELCRM | 403 | 7714  |
| >RET-T930M TQSDVWSFG   | 176   | >RET-T930M MQSDVWSFC  | 46  | 130   |
| >RET-T930M TQSDVWSF    | 4656  | >RET-T930M MQSDVWSF   | 481 | 4175  |
| >RET-T930M TQSDVWSFG   | 116   | >RET-T930M MQSDVWSFC  | 34  | 82    |
| >RET-T930M TQSDVWSFG   | 807   | >RET-T930M MQSDVWSFC  | 71  | 736   |
| >RET-T930M TQSDVWSFG   | 318   | >RET-T930M MQSDVWSFC  | 143 | 175   |
| >RET-T930M TQSDVWSFG   | 608   | >RET-T930M MQSDVWSFC  | 75  | 533   |
| >RET-T930M TQSDVWSF    | 28    | >RET-T930M MQSDVWSF   | 8   | 20    |
| >RET-T930M TQSDVWSFG   | 318   | >RET-T930M MQSDVWSFC  | 51  | 267   |
| >RET-T930M TQSDVWSFG   | 54    | >RET-T930M MQSDVWSFC  | 30  | 24    |
| >RET-T930M TQSDVWSFG   | 55    | >RET-T930M MQSDVWSFC  | 13  | 42    |
| >RET-T930M TQSDVWSFG   | 25    | >RET-T930M MQSDVWSFC  | 6   | 19    |
| >RET-T930M TQSDVWSFG   | 3437  | >RET-T930M MQSDVWSFC  | 459 | 2978  |
| >RET-T930M TQSDVWSFG   | 92    | >RET-T930M MQSDVWSFC  | 22  | 70    |
| >RET-T930M TQSDVWSFG   | 30    | >RET-T930M MQSDVWSFC  | 14  | 16    |
| >RET-T930M TQSDVWSFG   | 87    | >RET-T930M MQSDVWSFC  | 18  | 69    |
| >RET-T930M TQSDVWSFG   | 143   | >RET-T930M MQSDVWSFC  | 17  | 126   |
| >RET-T930M TQSDVWSFG   | 437   | >RET-T930M MQSDVWSFC  | 271 | 166   |
| >RET-T930M TQSDVWSF    | 65    | >RET-T930M MQSDVWSF   | 37  | 28    |
| >RET-T930M TQSDVWSFG   | 2281  | >RET-T930M MQSDVWSFC  | 496 | 1785  |
| >RET-T930M TQSDVWSFG   | 274   | >RET-T930M MQSDVWSFC  | 90  | 184   |
| >RET-T930M TQSDVWSF    | 20    | >RET-T930M MQSDVWSF   | 4   | 16    |
| >RET-T930M TQSDVWSFG   | 2763  | >RET-T930M MQSDVWSFC  | 424 | 2339  |
| >RET-T930M TQSDVWSFG   | 843   | >RET-T930M MQSDVWSFC  | 103 | 740   |
| >RET-T930M TQSDVWSF    | 496   | >RET-T930M MQSDVWSF   | 193 | 303   |
| >RET-T930M TQSDVWSF    | 2636  | >RET-T930M MQSDVWSF   | 270 | 2366  |
| >RET-T930M TQSDVWSF    | 390   | >RET-T930M MQSDVWSF   | 286 | 104   |
| >RET-T930M TQSDVWSFG   | 546   | >RET-T930M MQSDVWSFC  | 392 | 154   |
| >RET-T930M TQSDVWSFG   | 28    | >RET-T930M MQSDVWSFC  | 23  | 5     |
| >RET-T930M TQSDVWSFG   | 551   | >RET-T930M MQSDVWSFC  | 181 | 370   |
| >RET-T930M TQSDVWSFG   | 1527  | >RET-T930M MQSDVWSFC  | 245 | 1282  |
| >RET-T930M TQSDVWSF    | 21041 | >RET-T930M MQSDVWSF   | 219 | 20822 |
| >RET-T930M TQSDVWSFG   | 22020 | >RET-T930M MQSDVWSFC  | 296 | 21724 |
| >RET-T930M TTQSDVWSFC  | 118   | >RET-T930M TMQSDVWSF  | 9   | 109   |
| >RET-T930M TTQSDVWSFC  | 778   | >RET-T930M TMQSDVWSF  | 13  | 765   |
| >RET-T930M TTQSDVWSFC  | 452   | >RET-T930M TMQSDVWSF  | 9   | 443   |
| >RET-T930M TTQSDVWSFC  | 45    | >RET-T930M TMQSDVWSF  | 10  | 35    |
| >RET-T930M TTQSDVWSF   | 12674 | >RET-T930M TMQSDVWSF  | 306 | 12368 |
| >RET-T930M TTQSDVWSFC  | 46    | >RET-T930M TMQSDVWSF  | 2   | 44    |
| >RET-T930M TTQSDVWSFC  | 64    | >RET-T930M TMQSDVWSF  | 2   | 62    |



|                        |       |                        |       |       |
|------------------------|-------|------------------------|-------|-------|
| >RET-T930M TTQSDVWSF   | 200   | >RET-T930M TMQSDVWSF   | 6     | 194   |
| >RET-T930M TTQSDVWSF   | 123   | >RET-T930M TMQSDVWSF   | 2     | 121   |
| >RET-T930M TTQSDVWSF   | 58    | >RET-T930M TMQSDVWSF   | 2     | 56    |
| >RET-T930M TTQSDVWSF   | 307   | >RET-T930M TMQSDVWSF   | 67    | 240   |
| >RET-T930M TTQSDVWSF   | 770   | >RET-T930M TMQSDVWSF   | 270   | 500   |
| >RET-T930M TTQSDVWSF   | 55    | >RET-T930M TMQSDVWSF   | 26    | 29    |
| >RET-T930M TTQSDVWSF   | 10    | >RET-T930M TMQSDVWSF   | 881   | 871   |
| >RET-T930M TTQSDVWSF   | 128   | >RET-T930M TMQSDVWSF   | 224   | 96    |
| >RET-T930M TTQSDVWSF   | 15    | >RET-T930M TMQSDVWSF   | 493   | 478   |
| >RET-T930M TTQSDVWSF   | 7     | >RET-T930M TMQSDVWSF   | 39    | 32    |
| >RET-T930M TTQSDVWSF   | 651   | >RET-T930M TMQSDVWSF   | 59    | 592   |
| >RET-T930M TTQSDVWSF   | 10876 | >RET-T930M TMQSDVWSF   | 472   | 10404 |
| >RET-T930M TTQSDVWSF   | 365   | >RET-T930M TMQSDVWSF   | 12    | 353   |
| >RET-T930M TTQSDVWSF   | 49    | >RET-T930M TMQSDVWSF   | 5402  | 5353  |
| >RET-T930M TTQSDVWSF   | 199   | >RET-T930M TMQSDVWSF   | 3032  | 2833  |
| >RET-T930M TTQSDVWSF   | 138   | >RET-T930M TMQSDVWSF   | 594   | 456   |
| >RET-T930M TTQSDVWSF   | 488   | >RET-T930M TMQSDVWSF   | 14138 | 13650 |
| >RET-T930M TTQSDVWSF   | 426   | >RET-T930M TMQSDVWSF   | 9886  | 9460  |
| >RET-T930M IESLFDHIYTT | 6081  | >RET-T930M IESLFDHIYTM | 402   | 5679  |
| >RET-T930M IESLFDHIYTT | 191   | >RET-T930M IESLFDHIYTM | 17    | 174   |
| >RET-T930M IESLFDHIYTT | 4415  | >RET-T930M IESLFDHIYTM | 57    | 4358  |
| >RET-T930M IESLFDHIYTT | 454   | >RET-T930M IESLFDHIYTM | 285   | 169   |
| >RET-T930M IESLFDHIYTT | 447   | >RET-T930M IESLFDHIYTM | 3941  | 3494  |
| >RET-T930M IESLFDHIYTT | 496   | >RET-T930M IESLFDHIYTM | 88    | 408   |
| >RET-T930M YTTQSDVWSI  | 1394  | >RET-T930M YTMQSDVWSI  | 419   | 975   |
| >RET-T930M YTTQSDVWSI  | 65    | >RET-T930M YTMQSDVWSI  | 16    | 49    |
| >RET-T930M YTTQSDVWSI  | 199   | >RET-T930M YTMQSDVWSI  | 94    | 105   |
| >RET-T930M YTTQSDVWSI  | 25    | >RET-T930M YTMQSDVWSI  | 10    | 15    |
| >RET-T930M YTTQSDVWSI  | 825   | >RET-T930M YTMQSDVWSI  | 233   | 592   |
| >RET-T930M YTTQSDVWSI  | 616   | >RET-T930M YTMQSDVWSI  | 231   | 385   |
| >RET-T930M YTTQSDVWSI  | 877   | >RET-T930M YTMQSDVWSI  | 78    | 799   |
| >RET-T930M YTTQSDVW    | 6934  | >RET-T930M YTMQSDVW    | 377   | 6557  |
| >RET-T930M YTTQSDVWSI  | 429   | >RET-T930M YTMQSDVWSI  | 42    | 387   |
| >RET-T930M YTTQSDVWSI  | 1465  | >RET-T930M YTMQSDVWSI  | 483   | 982   |
| >RET-T930M YTTQSDVWSI  | 49    | >RET-T930M YTMQSDVWSI  | 10    | 39    |
| >RET-T930M YTTQSDVW    | 5     | >RET-T930M YTMQSDVW    | 4     | 1     |
| >RET-T930M YTTQSDVWSI  | 1229  | >RET-T930M YTMQSDVWSI  | 300   | 929   |
| >RET-T930M YTTQSDVWSI  | 4     | >RET-T930M YTMQSDVWSI  | 3     | 1     |
| >RET-T930M YTTQSDVWSI  | 1914  | >RET-T930M YTMQSDVWSI  | 337   | 1577  |
| >RET-T930M YTTQSDVW    | 86    | >RET-T930M YTMQSDVW    | 52    | 34    |
| >RET-T930M YTTQSDVWSI  | 283   | >RET-T930M YTMQSDVWSI  | 110   | 173   |
| >RET-T930M YTTQSDVW    | 13    | >RET-T930M YTMQSDVW    | 9     | 4     |
| >RET-T930M YTTQSDVWSI  | 42    | >RET-T930M YTMQSDVWSI  | 21    | 21    |

|                         |      |                         |     |      |
|-------------------------|------|-------------------------|-----|------|
| >RET-T930M YTTQSDVWSI   | 27   | >RET-T930M YTMQSDVWS    | 161 | 134  |
| >RET-T930M YTTQSDVW     | 85   | >RET-T930M YTMQSDVW     | 294 | 209  |
| >RET-T930M YTTQSDVWSI   | 31   | >RET-T930M YTMQSDVWS    | 33  | 2    |
| >RET-T930M YTTQSDVWSI   | 457  | >RET-T930M YTMQSDVWS    | 340 | 117  |
| >RET-T930M YTTQSDVW     | 230  | >RET-T930M YTMQSDVW     | 162 | 68   |
| >RET-T930M IYTTQSDV     | 137  | >RET-T930M IYTMQSDV     | 201 | 64   |
| >RET-T930M IYTTQSDVWS   | 180  | >RET-T930M IYTMQSDVW    | 166 | 14   |
| >RET-T930M IYTTQSDVWS   | 73   | >RET-T930M IYTMQSDVW    | 81  | 8    |
| >RET-T930M IYTTQSDVW    | 52   | >RET-T930M IYTMQSDVW    | 48  | 4    |
| >RET-T930M IYTTQSDVWS   | 9    | >RET-T930M IYTMQSDVW    | 12  | 3    |
| >RET-T930M IYTTQSDVWS   | 381  | >RET-T930M IYTMQSDVW    | 413 | 32   |
| >RET-T930M IYTTQSDVW    | 135  | >RET-T930M IYTMQSDVW    | 142 | 7    |
| >RET-T930M HIYTTQSDV    | 64   | >RET-T930M HIYTMQSDV    | 44  | 20   |
| >RET-T930M HIYTTQSDV    | 309  | >RET-T930M HIYTMQSDV    | 843 | 534  |
| >RET-T930M HIYTTQSDV    | 150  | >RET-T930M HIYTMQSDV    | 308 | 158  |
| >RET-T930M HIYTTQSDV    | 13   | >RET-T930M HIYTMQSDV    | 12  | 1    |
| >RET-T930M HIYTTQSDVM   | 790  | >RET-T930M HIYTMQSDVM   | 440 | 350  |
| >RET-T930M HIYTTQSDV    | 469  | >RET-T930M HIYTMQSDV    | 243 | 226  |
| >RET-T930M HIYTTQSDVM   | 129  | >RET-T930M HIYTMQSDVM   | 209 | 80   |
| >RET-T930M HIYTTQSDVM   | 283  | >RET-T930M HIYTMQSDVM   | 408 | 125  |
| >RET-T930M HIYTTQSDVM   | 25   | >RET-T930M HIYTMQSDVM   | 34  | 9    |
| >RET-T930M HIYTTQSDVM   | 175  | >RET-T930M HIYTMQSDVM   | 121 | 54   |
| >RET-T930M DHIYTTQSDV   | 423  | >RET-T930M DHIYTMQSDV   | 439 | 16   |
| >RET-T930M FDHIYTTQSDV  | 282  | >RET-T930M FDHIYTMQSDV  | 143 | 139  |
| >RET-T930M FDHIYTTQSDV  | 76   | >RET-T930M FDHIYTMQSDV  | 87  | 11   |
| >RET-T930M SLFDHIYTT    | 9089 | >RET-T930M SLFDHIYTM    | 318 | 8771 |
| >RET-T930M SLFDHIYTT    | 13   | >RET-T930M SLFDHIYTM    | 9   | 4    |
| >RET-T930M SLFDHIYTTQSD | 147  | >RET-T930M SLFDHIYTMQSD | 110 | 37   |
| >RET-T930M SLFDHIYTT    | 10   | >RET-T930M SLFDHIYTM    | 6   | 4    |
| >RET-T930M SLFDHIYTTQSD | 23   | >RET-T930M SLFDHIYTMQSD | 34  | 11   |
| >RET-T930M SLFDHIYTT    | 8    | >RET-T930M SLFDHIYTM    | 9   | 1    |
| >RET-T930M SLFDHIYTTQSD | 38   | >RET-T930M SLFDHIYTMQSD | 49  | 11   |
| >RET-T930M SLFDHIYTT    | 61   | >RET-T930M SLFDHIYTM    | 44  | 17   |
| >RET-T930M SLFDHIYTT    | 2    | >RET-T930M SLFDHIYTM    | 2   | 0    |
| >RET-T930M SLFDHIYTTQ   | 27   | >RET-T930M SLFDHIYTMQ   | 33  | 6    |
| >RET-T930M SLFDHIYTTQSD | 20   | >RET-T930M SLFDHIYTMQSD | 15  | 5    |
| >RET-T930M SLFDHIYTT    | 10   | >RET-T930M SLFDHIYTM    | 4   | 6    |
| >RET-T930M SLFDHIYTT    | 11   | >RET-T930M SLFDHIYTM    | 8   | 3    |
| >RET-T930M SLFDHIYTTQ   | 84   | >RET-T930M SLFDHIYTMQ   | 106 | 22   |
| >RET-T930M SLFDHIYTTQSD | 320  | >RET-T930M SLFDHIYTMQSD | 252 | 68   |
| >RET-T930M SLFDHIYTT    | 230  | >RET-T930M SLFDHIYTM    | 20  | 210  |
| >RET-T930M SLFDHIYTT    | 3    | >RET-T930M SLFDHIYTM    | 2   | 1    |
| >RET-T930M SLFDHIYTTQ   | 5    | >RET-T930M SLFDHIYTMQ   | 9   | 4    |

|                        |       |                        |       |       |
|------------------------|-------|------------------------|-------|-------|
| >RET-T930M SLFDHIYTTQ  | 13    | >RET-T930M SLFDHIYTMQ  | 11    | 2     |
| >RET-T930M SLFDHIYTT   | 6702  | >RET-T930M SLFDHIYTM   | 459   | 6243  |
| >RET-T930M SLFDHIYTT   | 150   | >RET-T930M SLFDHIYTM   | 18    | 132   |
| >RET-T930M SLFDHIYTT   | 3131  | >RET-T930M SLFDHIYTM   | 243   | 2888  |
| >RET-T930M SLFDHIYTT   | 5245  | >RET-T930M SLFDHIYTM   | 69    | 5176  |
| >RET-T930M SLFDHIYTT   | 11228 | >RET-T930M SLFDHIYTM   | 231   | 10997 |
| >RET-T930M SLFDHIYTT   | 8844  | >RET-T930M SLFDHIYTM   | 313   | 8531  |
| >RET-T930M ESLFDHIYTT  | 3828  | >RET-T930M ESLFDHIYTM  | 11    | 3817  |
| >RET-T930M ESLFDHIYTT  | 1074  | >RET-T930M ESLFDHIYTM  | 88    | 986   |
| >RET-T930M ESLFDHIYTT  | 11950 | >RET-T930M ESLFDHIYTM  | 78    | 11872 |
| >RET-V145G-VYFSFFNT    | 158   | >RET-V145G-GYFSFFNT    | 3747  | 3589  |
| >RET-V145G-VYFSFFNTS   | 70    | >RET-V145G-GYFSFFNTS   | 2196  | 2126  |
| >RET-V145G-VYFSFFNTSF  | 419   | >RET-V145G-GYFSFFNTSF  | 772   | 353   |
| >RET-V145G-VYFSFFNTSF  | 9     | >RET-V145G-GYFSFFNTSF  | 12    | 3     |
| >RET-V145G-VYFSFFNTSF  | 18    | >RET-V145G-GYFSFFNTSF  | 23    | 5     |
| >RET-V145G-VYFSFFNT    | 213   | >RET-V145G-GYFSFFNT    | 236   | 23    |
| >RET-V145G-VYFSFFNTS   | 269   | >RET-V145G-GYFSFFNTS   | 305   | 36    |
| >RET-V145G-VYFSFFNTSF  | 7     | >RET-V145G-GYFSFFNTSF  | 6     | 1     |
| >RET-V145G-VYFSFFNTSF  | 22    | >RET-V145G-GYFSFFNTSF  | 23    | 1     |
| >RET-V145G-VYFSFFNTSF  | 37    | >RET-V145G-GYFSFFNTSF  | 39    | 2     |
| >RET-V145G-VYFSFFNTSF  | 7     | >RET-V145G-GYFSFFNTSF  | 20    | 13    |
| >RET-V145G-VYFSFFNT    | 2701  | >RET-V145G-GYFSFFNT    | 468   | 2233  |
| >RET-V145G-VYFSFFNTSF  | 402   | >RET-V145G-GYFSFFNTSF  | 541   | 139   |
| >RET-V145G-VYFSFFNTS   | 440   | >RET-V145G-GYFSFFNTS   | 1202  | 762   |
| >RET-V145G-VYFSFFNTSFF | 324   | >RET-V145G-GYFSFFNTSFF | 1047  | 723   |
| >RET-V145G-RVYFSFFNTSI | 211   | >RET-V145G-RGYFSFFNTSI | 690   | 479   |
| >RET-V145G-RVYFSFFNT   | 94    | >RET-V145G-RGYFSFFNT   | 4304  | 4210  |
| >RET-V145G-RVYFSFFNTSI | 383   | >RET-V145G-RGYFSFFNTSI | 3314  | 2931  |
| >RET-V145G-RVYFSFFN    | 199   | >RET-V145G-RGYFSFFN    | 8519  | 8320  |
| >RET-V145G-RVYFSFFNTSI | 158   | >RET-V145G-RGYFSFFNTSI | 537   | 379   |
| >RET-V145G-RVYFSFFNTSI | 400   | >RET-V145G-RGYFSFFNTSI | 5291  | 4891  |
| >RET-V145G-RVYFSFFN    | 279   | >RET-V145G-RGYFSFFN    | 3563  | 3284  |
| >RET-V145G-RVYFSFFNT   | 434   | >RET-V145G-RGYFSFFNT   | 5251  | 4817  |
| >RET-V145G-RVYFSFFNTS  | 216   | >RET-V145G-RGYFSFFNTS  | 3513  | 3297  |
| >RET-V145G-RVYFSFFN    | 322   | >RET-V145G-RGYFSFFN    | 4310  | 3988  |
| >RET-V145G-RVYFSFFNT   | 240   | >RET-V145G-RGYFSFFNT   | 5121  | 4881  |
| >RET-V145G-RVYFSFFNTS  | 320   | >RET-V145G-RGYFSFFNTS  | 12423 | 12103 |
| >RET-V145G-RVYFSFFNTSI | 5     | >RET-V145G-RGYFSFFNTSI | 135   | 130   |
| >RET-V145G-RVYFSFFNTSI | 32    | >RET-V145G-RGYFSFFNTSI | 66    | 34    |
| >RET-V145G-RVYFSFFNTSI | 5     | >RET-V145G-RGYFSFFNTSI | 8     | 3     |
| >RET-V145G-RVYFSFFNTSI | 4     | >RET-V145G-RGYFSFFNTSI | 8     | 4     |
| >RET-V145G-RVYFSFFNTSI | 48    | >RET-V145G-RGYFSFFNTSI | 168   | 120   |
| >RET-V145G-RVYFSFFNTSI | 15    | >RET-V145G-RGYFSFFNTSI | 42    | 27    |

|                        |     |                        |       |       |
|------------------------|-----|------------------------|-------|-------|
| >RET-V145G- GECQWPGCA  | 231 | >RET-V145G- GECQWPGCA  | 4206  | 3975  |
| >RET-V145G- GECQWPGCA  | 15  | >RET-V145G- GECQWPGCA  | 1686  | 1671  |
| >RET-V145G- ARVYFSFF   | 7   | >RET-V145G- ARGYFSFF   | 25    | 18    |
| >RET-V145G- ARVYFSFF   | 158 | >RET-V145G- ARGYFSFF   | 473   | 315   |
| >RET-V145G- ARVYFSFFNT | 346 | >RET-V145G- ARGYFSFFNT | 1338  | 992   |
| >RET-V145G- CARVYFSFF  | 325 | >RET-V145G- CARGYFSFF  | 556   | 231   |
| >RET-V145G- CARVYFSFFN | 497 | >RET-V145G- CARGYFSFFN | 750   | 253   |
| >RET-V145G- CARVYFSFF  | 387 | >RET-V145G- CARGYFSFF  | 1578  | 1191  |
| >RET-V145G- CARVYFSFF  | 560 | >RET-V145G- CARGYFSFF  | 489   | 71    |
| >RET-V145G- CARVYFSF   | 24  | >RET-V145G- CARGYFSF   | 53    | 29    |
| >RET-V145G- CARVYFSFF  | 17  | >RET-V145G- CARGYFSFF  | 44    | 27    |
| >RET-V145G- CARVYFSF   | 38  | >RET-V145G- CARGYFSF   | 27    | 11    |
| >RET-V145G- CARVYFSFF  | 64  | >RET-V145G- CARGYFSFF  | 86    | 22    |
| >RET-V145G- CARVYFSF   | 663 | >RET-V145G- CARGYFSF   | 375   | 288   |
| >RET-V145G- CARVYFSFF  | 959 | >RET-V145G- CARGYFSFF  | 497   | 462   |
| >RET-V145G- CARVYFSFF  | 34  | >RET-V145G- CARGYFSFF  | 18    | 16    |
| >RET-V145G- CARVYFSFF  | 754 | >RET-V145G- CARGYFSFF  | 312   | 442   |
| >RET-V145G- GCARVYFSF  | 202 | >RET-V145G- GCARGYFSF  | 229   | 27    |
| >RET-V145G- WPGCARVYF  | 5   | >RET-V145G- WPGCARGYF  | 6     | 1     |
| >RET-V145G- WPGCARVYF  | 25  | >RET-V145G- WPGCARGYF  | 25    | 0     |
| >RET-V145G- WPGCARVYF  | 114 | >RET-V145G- WPGCARGYF  | 80    | 34    |
| >RET-V145G- WPGCARVYF  | 169 | >RET-V145G- WPGCARGYF  | 96    | 73    |
| >RET-V145G- WPGCARVY   | 11  | >RET-V145G- WPGCARGY   | 16    | 5     |
| >RET-V145G- WPGCARVYF  | 38  | >RET-V145G- WPGCARGYF  | 75    | 37    |
| >RET-V145G- WPGCARVYF  | 16  | >RET-V145G- WPGCARGYF  | 19    | 3     |
| >RET-V145G- WPGCARVYF  | 468 | >RET-V145G- WPGCARGYF  | 1869  | 1401  |
| >RET-V145G- WPGCARVYF  | 141 | >RET-V145G- WPGCARGYF  | 208   | 67    |
| >RET-V145G- WPGCARVYF  | 167 | >RET-V145G- WPGCARGYF  | 331   | 164   |
| >RET-V145G- QWPGCARV\  | 16  | >RET-V145G- QWPGCARG\  | 22    | 6     |
| >RET-V145G- QWPGCARV\  | 35  | >RET-V145G- QWPGCARG\  | 45    | 10    |
| >RET-V145G- QWPGCARV\  | 7   | >RET-V145G- QWPGCARG\  | 10    | 3     |
| >RET-V145G- QWPGCARV\  | 140 | >RET-V145G- QWPGCARG\  | 303   | 163   |
| >RET-V145G- QWPGCARV\  | 100 | >RET-V145G- QWPGCARG\  | 208   | 108   |
| >RET-V145G- QWPGCARV\  | 249 | >RET-V145G- QWPGCARG\  | 303   | 54    |
| >RET-V145G- CQWPGCAR\  | 51  | >RET-V145G- CQWPGCAR\  | 19734 | 19683 |
| >RET-V145G- CQWPGCAR\  | 23  | >RET-V145G- CQWPGCAR\  | 10579 | 10556 |
| >RET-V145G- CQWPGCAR\  | 239 | >RET-V145G- CQWPGCAR\  | 609   | 370   |
| >RET-V145G- CQWPGCAR\  | 186 | >RET-V145G- CQWPGCAR\  | 24443 | 24257 |
| >RET-V145G- CQWPGCAR\  | 496 | >RET-V145G- CQWPGCAR\  | 20852 | 20356 |
| >RET-V145G- CQWPGCAR\  | 155 | >RET-V145G- CQWPGCAR\  | 35363 | 35208 |
| >RET-V145G- CQWPGCAR\  | 177 | >RET-V145G- CQWPGCAR\  | 666   | 489   |
| >RET-V145G- CQWPGCAR\  | 289 | >RET-V145G- CQWPGCAR\  | 492   | 203   |
| >RET-V145G- CQWPGCAR\  | 105 | >RET-V145G- CQWPGCAR\  | 220   | 115   |

|                        |      |                        |       |       |
|------------------------|------|------------------------|-------|-------|
| >RET-V145G-CQWPGCAR\   | 122  | >RET-V145G-CQWPGCARC   | 167   | 45    |
| >RET-V145G-CQWPGCAR\   | 368  | >RET-V145G-CQWPGCARC   | 331   | 37    |
| >RET-V145G-CQWPGCAR\   | 470  | >RET-V145G-CQWPGCARC   | 13477 | 13007 |
| >RET-V145G-CQWPGCAR\   | 18   | >RET-V145G-CQWPGCARC   | 47    | 29    |
| >RET-V145G-CQWPGCAR\   | 5    | >RET-V145G-CQWPGCARC   | 15    | 10    |
| >RET-V145G-ECQWPGCAR   | 2202 | >RET-V145G-ECQWPGCAR   | 383   | 1819  |
| >RET-V145G-ECQWPGCAR   | 259  | >RET-V145G-ECQWPGCAR   | 18823 | 18564 |
| >RET-V591I-\IVGGHEPGEP | 492  | >RET-V591I-rIIGGHEPGEP | 182   | 310   |
| >RET-V591I-\CPQDCLRGS  | 322  | >RET-V591I-rCPQDCLRGS  | 364   | 42    |
| >RET-V591I-\CPQDCLRGS  | 2816 | >RET-V591I-rCPQDCLRGS  | 326   | 2490  |
| >RET-V591I-\CPQDCLRGS  | 120  | >RET-V591I-rCPQDCLRGS  | 754   | 634   |
| >RET-V591I-\CPQDCLRGS  | 7809 | >RET-V591I-rCPQDCLRGS  | 161   | 7648  |
| >RET-V591I-\LRGSIVGGH  | 866  | >RET-V591I-rLRGSIIIGGH | 495   | 371   |
| >RET-V591I-\QDCLRGSIV  | 615  | >RET-V591I-rQDCLRGSII  | 296   | 319   |
| >RHOH-R23F-RFTSETFPEA\ | 40   | >RHOH-R23F-HFTSETFPEA\ | 24    | 16    |
| >RHOH-R23F-RFTSETFPEA\ | 216  | >RHOH-R23F-HFTSETFPEA\ | 421   | 205   |
| >RHOH-R23F-RFTSETFPEA\ | 55   | >RHOH-R23F-HFTSETFPEA\ | 167   | 112   |
| >RHOH-R23F-RFTSETFPEA\ | 1958 | >RHOH-R23F-HFTSETFPEA\ | 285   | 1673  |
| >RHOH-R23F-RFTSETFPEA\ | 597  | >RHOH-R23F-HFTSETFPEA\ | 65    | 532   |
| >RHOH-R23F-RFTSETFPEA\ | 254  | >RHOH-R23F-HFTSETFPEA\ | 116   | 138   |
| >RHOH-R23F-VRFTSETF    | 2525 | >RHOH-R23F-VHFTSETF    | 489   | 2036  |
| >RHOH-R23F-VRFTSETF    | 4    | >RHOH-R23F-VHFTSETF    | 4     | 0     |
| >RHOH-R23F-VRFTSETFPE/ | 210  | >RHOH-R23F-VHFTSETFPE/ | 521   | 311   |
| >RHOH-R23F-VRFTSETF    | 479  | >RHOH-R23F-VHFTSETF    | 21524 | 21045 |
| >RHOH-R23F-VRFTSETFPE/ | 268  | >RHOH-R23F-VHFTSETFPE/ | 5136  | 4868  |
| >RHOH-R23F-VRFTSETF    | 110  | >RHOH-R23F-VHFTSETF    | 39    | 71    |
| >RHOH-R23F-SAVGKTSLLV  | 99   | >RHOH-R23F-SAVGKTSLLV  | 12792 | 12693 |
| >RHOH-R23F-LVRFTSET    | 359  | >RHOH-R23F-LVHFTSET    | 3084  | 2725  |
| >RHOH-R23F-LVRFTSETFP  | 412  | >RHOH-R23F-LVHFTSETFP  | 3159  | 2747  |
| >RHOH-R23F-LVRFTSETFPE | 467  | >RHOH-R23F-LVHFTSETFPE | 3123  | 2656  |
| >RHOH-R23F-LVRFTSETF   | 225  | >RHOH-R23F-LVHFTSETF   | 65    | 160   |
| >RHOH-R23F-LVRFTSETF   | 30   | >RHOH-R23F-LVHFTSETF   | 37    | 7     |
| >RHOH-R23F-LVRFTSETF   | 45   | >RHOH-R23F-LVHFTSETF   | 75    | 30    |
| >RHOH-R23F-LVRFTSETF   | 12   | >RHOH-R23F-LVHFTSETF   | 31    | 19    |
| >RHOH-R23F-LVRFTSETF   | 758  | >RHOH-R23F-LVHFTSETF   | 364   | 394   |
| >RHOH-R23F-LVRFTSETF   | 13   | >RHOH-R23F-LVHFTSETF   | 60    | 47    |
| >RHOH-R23F-LLVRFTSET   | 119  | >RHOH-R23F-LLVHFTSET   | 71    | 48    |
| >RHOH-R23F-LLVRFTSETFP | 633  | >RHOH-R23F-LLVHFTSETFP | 462   | 171   |
| >RHOH-R23F-LLVRFTSET   | 73   | >RHOH-R23F-LLVHFTSET   | 33    | 40    |
| >RHOH-R23F-LLVRFTSET   | 232  | >RHOH-R23F-LLVHFTSET   | 288   | 56    |
| >RHOH-R23F-LLVRFTSET   | 18   | >RHOH-R23F-LLVHFTSET   | 42    | 24    |
| >RHOH-R23F-LLVRFTSETF  | 94   | >RHOH-R23F-LLVHFTSETF  | 75    | 19    |
| >RHOH-R23F-LLVRFTSETF  | 43   | >RHOH-R23F-LLVHFTSETF  | 36    | 7     |

|                        |      |                        |       |       |
|------------------------|------|------------------------|-------|-------|
| >RHOH-R23F LLVRFTSETF  | 263  | >RHOH-R23F LLVHFTSETF  | 185   | 78    |
| >RHOH-R23F LLVRFTSETF  | 14   | >RHOH-R23F LLVHFTSETF  | 11    | 3     |
| >RHOH-R23F LLVRFTSETF  | 437  | >RHOH-R23F LLVHFTSETF  | 99    | 338   |
| >RHOH-R23F LLVRFTSETF  | 166  | >RHOH-R23F LLVHFTSETF  | 368   | 202   |
| >RHOH-R23F SLLVRFTSET  | 656  | >RHOH-R23F SLLVHFTSET  | 400   | 256   |
| >RHOH-R23F SLLVRFTSET  | 114  | >RHOH-R23F SLLVHFTSET  | 86    | 28    |
| >RHOH-R23F SLLVRFTSET  | 601  | >RHOH-R23F SLLVHFTSET  | 364   | 237   |
| >RHOH-R23F SLLVRFTS    | 1003 | >RHOH-R23F SLLVHFTS    | 232   | 771   |
| >RHOH-R23F SLLVRFTSET  | 248  | >RHOH-R23F SLLVHFTSET  | 140   | 108   |
| >RHOH-R23F SLLVRFTSET  | 323  | >RHOH-R23F SLLVHFTSET  | 355   | 32    |
| >RHOH-R23F SLLVRFTSET  | 60   | >RHOH-R23F SLLVHFTSET  | 69    | 9     |
| >RHOH-R23F SLLVRFTSETF | 34   | >RHOH-R23F SLLVHFTSETF | 28    | 6     |
| >RHOH-R23F SLLVRFTSE   | 107  | >RHOH-R23F SLLVHFTSE   | 285   | 178   |
| >RHOH-R23F SLLVRFTSETF | 185  | >RHOH-R23F SLLVHFTSETF | 297   | 112   |
| >RHOH-R23F SLLVRFTSETF | 84   | >RHOH-R23F SLLVHFTSETF | 56    | 28    |
| >RHOH-R23F SLLVRFTSETF | 134  | >RHOH-R23F SLLVHFTSETF | 129   | 5     |
| >RHOH-R23F SLLVRFTSETF | 25   | >RHOH-R23F SLLVHFTSETF | 18    | 7     |
| >RHOH-R23F SLLVRFTSETF | 250  | >RHOH-R23F SLLVHFTSETF | 412   | 162   |
| >RHOH-R23F KTSLLVRF    | 21   | >RHOH-R23F KTSLLVHF    | 31    | 10    |
| >RHOH-R23F KTSLLVRFTS  | 887  | >RHOH-R23F KTSLLVHFTS  | 498   | 389   |
| >RHOH-R23F KTSLLVRF    | 1806 | >RHOH-R23F KTSLLVHF    | 340   | 1466  |
| >RHOH-R23F KTSLLVRF    | 743  | >RHOH-R23F KTSLLVHF    | 296   | 447   |
| >RHOH-R23F KTSLLVRF    | 4    | >RHOH-R23F KTSLLVHF    | 5     | 1     |
| >RHOH-R23F KTSLLVRF    | 222  | >RHOH-R23F KTSLLVHF    | 165   | 57    |
| >RHOH-R23F KTSLLVRF    | 32   | >RHOH-R23F KTSLLVHF    | 17    | 15    |
| >RHOH-R23F KTSLLVRF    | 242  | >RHOH-R23F KTSLLVHF    | 243   | 1     |
| >RHOH-R23F GKTSLLVRF   | 75   | >RHOH-R23F GKTSLLVHF   | 25    | 50    |
| >RHOH-R23F VGKTSLLVRF  | 1511 | >RHOH-R23F VGKTSLLVHF  | 293   | 1218  |
| >RHOH-R23F VGKTSLLVRF  | 499  | >RHOH-R23F VGKTSLLVHF  | 178   | 321   |
| >RHOH-R23F VGKTSLLVRF  | 381  | >RHOH-R23F VGKTSLLVHF  | 923   | 542   |
| >RHOH-R23F AVGKTSLLVR  | 321  | >RHOH-R23F AVGKTSLLVH  | 11001 | 10680 |
| >RHOH-R23F AVGKTSLLVR  | 212  | >RHOH-R23F AVGKTSLLVH  | 15019 | 14807 |
| >RHOH-R23F AVGKTSLLVR  | 421  | >RHOH-R23F AVGKTSLLVH  | 801   | 380   |
| >RHOH-R23F AVGKTSLLVR  | 327  | >RHOH-R23F AVGKTSLLVH  | 87    | 240   |
| >RHOH-R23F AVGKTSLLVR  | 422  | >RHOH-R23F AVGKTSLLVH  | 1088  | 666   |
| >RHOH-R23F AVGKTSLLVR  | 482  | >RHOH-R23F AVGKTSLLVH  | 27522 | 27040 |
| >RNF213-D2! LDGTVTEMA  | 309  | >RNF213-D2! LNGTVTEMA  | 9598  | 9289  |
| >RNF213-D2! LDGTVTEMA  | 196  | >RNF213-D2! LNGTVTEMA  | 7764  | 7568  |
| >RNF213-D2! NLDGTVTEM  | 226  | >RNF213-D2! NLNGTVTEM  | 43    | 183   |
| >RNF213-D2! NLDGTVTEM  | 394  | >RNF213-D2! NLNGTVTEM  | 364   | 30    |
| >RNF213-D2! NLDGTVTEM  | 318  | >RNF213-D2! NLNGTVTEM  | 82    | 236   |
| >RNF213-D2! NLDGTVTEM  | 1430 | >RNF213-D2! NLNGTVTEM  | 37    | 1393  |
| >RNF213-D2! NLDGTVTEM  | 538  | >RNF213-D2! NLNGTVTEM  | 259   | 279   |

|                        |       |                        |       |       |
|------------------------|-------|------------------------|-------|-------|
| >RNF213-D2!NLDGTVTEM   | 510   | >RNF213-D2!NLNGTVTEM   | 31    | 479   |
| >RNF213-D2!NLDGTVTEM   | 42    | >RNF213-D2!NLNGTVTEM   | 80    | 38    |
| >RNF213-D2!NLDGTVTEM   | 23    | >RNF213-D2!NLNGTVTEM   | 40    | 17    |
| >RNF213-D2!NLDGTVTEM   | 22    | >RNF213-D2!NLNGTVTEM   | 36    | 14    |
| >RNF213-D2!NLDGTVTEM   | 490   | >RNF213-D2!NLNGTVTEM   | 1296  | 806   |
| >RNF213-D2!NLDGTVTEM   | 29    | >RNF213-D2!NLNGTVTEM   | 70    | 41    |
| >RNF213-D2!NLDGTVTEM   | 192   | >RNF213-D2!NLNGTVTEM   | 676   | 484   |
| >RNF213-D2!NLDGTVTEM   | 75    | >RNF213-D2!NLNGTVTEM   | 271   | 196   |
| >RNF213-D2!NLDGTVTEM   | 78    | >RNF213-D2!NLNGTVTEM   | 263   | 185   |
| >RNF213-D2!NLDGTVTEM   | 89    | >RNF213-D2!NLNGTVTEM   | 156   | 67    |
| >RNF213-D2!NLDGTVTEM   | 82    | >RNF213-D2!NLNGTVTEM   | 138   | 56    |
| >RNF213-D2!NLDGTVTEM   | 91    | >RNF213-D2!NLNGTVTEM   | 150   | 59    |
| >RNF213-D2!NLDGTVTEM   | 93    | >RNF213-D2!NLNGTVTEM   | 51    | 42    |
| >RNF213-D2!NLDGTVTEM   | 111   | >RNF213-D2!NLNGTVTEM   | 61    | 50    |
| >RNF213-D2!NLDGTVTEM   | 86    | >RNF213-D2!NLNGTVTEM   | 50    | 36    |
| >RNF213-D2!SDSNLDGTV   | 83    | >RNF213-D2!SDSNLNGTV   | 92    | 9     |
| >RNF213-F14FKLLILQYL   | 463   | >RNF213-F14LKLLILQYL   | 866   | 403   |
| >RNF213-F14FKLLILQYL   | 223   | >RNF213-F14LKLLILQYL   | 1273  | 1050  |
| >RNF213-F14FKLLILQYL   | 77    | >RNF213-F14LKLLILQYL   | 1326  | 1249  |
| >RNF213-F14FKLLILQY    | 58    | >RNF213-F14LKLLILQY    | 256   | 198   |
| >RNF213-F14FKLLILQY    | 13    | >RNF213-F14LKLLILQY    | 24    | 11    |
| >RNF213-F14FKLLILQYL   | 77    | >RNF213-F14LKLLILQYL   | 146   | 69    |
| >RNF213-F14FKLLILQYLM  | 112   | >RNF213-F14LKLLILQYLM  | 227   | 115   |
| >RNF213-F14LFKLLILQYL  | 8537  | >RNF213-F14LLKLLILQYL  | 135   | 8402  |
| >RNF213-F14LFKLLILQYL  | 1306  | >RNF213-F14LLKLLILQYL  | 42    | 1264  |
| >RNF213-F14LFKLLILQYLM | 3808  | >RNF213-F14LLKLLILQYLM | 480   | 3328  |
| >RNF213-F14LFKLLILQYL  | 4601  | >RNF213-F14LLKLLILQYL  | 59    | 4542  |
| >RNF213-F14LFKLLILQYL  | 17309 | >RNF213-F14LLKLLILQYL  | 99    | 17210 |
| >RNF213-F14LFKLLILQYL  | 21401 | >RNF213-F14LLKLLILQYL  | 268   | 21133 |
| >RNF213-F14LFKLLILQYL  | 11519 | >RNF213-F14LLKLLILQYL  | 6     | 11513 |
| >RNF213-F14LFKLLILQYLM | 31561 | >RNF213-F14LLKLLILQYLM | 410   | 31151 |
| >RNF213-F14LFKLLILQYL  | 184   | >RNF213-F14LLKLLILQYL  | 14277 | 14093 |
| >RNF213-F14LFKLLILQY   | 17    | >RNF213-F14LLKLLILQY   | 38    | 21    |
| >RNF213-F14LFKLLILQY   | 525   | >RNF213-F14LLKLLILQY   | 83    | 442   |
| >RNF213-F14LFKLLILQY   | 755   | >RNF213-F14LLKLLILQY   | 70    | 685   |
| >RNF213-F14LFKLLILQY   | 12169 | >RNF213-F14LLKLLILQY   | 454   | 11715 |
| >RNF213-F14LFKLLILQYL  | 355   | >RNF213-F14LLKLLILQYL  | 1006  | 651   |
| >RNF213-F14SVQTGIWVFI  | 7496  | >RNF213-F14SVQTGIWVFI  | 54    | 7442  |
| >RNF213-F14SVQTGIWVFI  | 9632  | >RNF213-F14SVQTGIWVFI  | 243   | 9389  |
| >RNF213-F14SVQTGIWVFI  | 1307  | >RNF213-F14SVQTGIWVFI  | 54    | 1253  |
| >RNF213-F14SVQTGIWVFI  | 7138  | >RNF213-F14SVQTGIWVFI  | 142   | 6996  |
| >RNF213-F14SVQTGIWVFI  | 17065 | >RNF213-F14SVQTGIWVFI  | 385   | 16680 |
| >RNF213-F14SVQTGIWVFI  | 16164 | >RNF213-F14SVQTGIWVFI  | 231   | 15933 |

|                        |       |                        |      |       |
|------------------------|-------|------------------------|------|-------|
| >RNF213-F14SVQTGIWVFI  | 11199 | >RNF213-F14SVQTGIWVFI  | 30   | 11169 |
| >RNF213-F14SVQTGIWVFI  | 479   | >RNF213-F14SVQTGIWVFI  | 7973 | 7494  |
| >RNF213-F14SVQTGIWVFI  | 486   | >RNF213-F14SVQTGIWVFI  | 3459 | 2973  |
| >RNF213-F14SVQTGIWVFI  | 247   | >RNF213-F14SVQTGIWVFI  | 3264 | 3017  |
| >RNF213-F14SVQTGIWVFI  | 291   | >RNF213-F14SVQTGIWVFI  | 2462 | 2171  |
| >RNF213-F14SVQTGIWVFI  | 305   | >RNF213-F14SVQTGIWVFI  | 8211 | 7906  |
| >RNF213-F14SVQTGIWVFI  | 12917 | >RNF213-F14SVQTGIWVFI  | 272  | 12645 |
| >RNF213-F14SVQTGIWVFI  | 243   | >RNF213-F14SVQTGIWVFI  | 1498 | 1255  |
| >RNF213-F14FLFKLLIL    | 10    | >RNF213-F14FLLKLLIL    | 12   | 2     |
| >RNF213-F14FLFKLLILQ   | 225   | >RNF213-F14FLLKLLILQ   | 438  | 213   |
| >RNF213-F14FLFKLLILQY  | 117   | >RNF213-F14FLLKLLILQY  | 122  | 5     |
| >RNF213-F14FLFKLLILQYL | 8     | >RNF213-F14FLLKLLILQYL | 9    | 1     |
| >RNF213-F14FLFKLLIL    | 5     | >RNF213-F14FLLKLLIL    | 25   | 20    |
| >RNF213-F14FLFKLLILQ   | 28    | >RNF213-F14FLLKLLILQ   | 226  | 198   |
| >RNF213-F14FLFKLLILQY  | 297   | >RNF213-F14FLLKLLILQY  | 713  | 416   |
| >RNF213-F14FLFKLLILQYL | 2     | >RNF213-F14FLLKLLILQYL | 5    | 3     |
| >RNF213-F14FLFKLLIL    | 8     | >RNF213-F14FLLKLLIL    | 48   | 40    |
| >RNF213-F14FLFKLLILQYL | 6     | >RNF213-F14FLLKLLILQYL | 22   | 16    |
| >RNF213-F14FLFKLLIL    | 17    | >RNF213-F14FLLKLLIL    | 12   | 5     |
| >RNF213-F14FLFKLLILQYL | 8     | >RNF213-F14FLLKLLILQYL | 6    | 2     |
| >RNF213-F14FLFKLLIL    | 4     | >RNF213-F14FLLKLLIL    | 5    | 1     |
| >RNF213-F14FLFKLLILQ   | 68    | >RNF213-F14FLLKLLILQ   | 108  | 40    |
| >RNF213-F14FLFKLLILQY  | 87    | >RNF213-F14FLLKLLILQY  | 145  | 58    |
| >RNF213-F14FLFKLLILQYL | 2     | >RNF213-F14FLLKLLILQYL | 2    | 0     |
| >RNF213-F14FLFKLLIL    | 6     | >RNF213-F14FLLKLLIL    | 5    | 1     |
| >RNF213-F14FLFKLLILQYL | 4     | >RNF213-F14FLLKLLILQYL | 3    | 1     |
| >RNF213-F14FLFKLLIL    | 6     | >RNF213-F14FLLKLLIL    | 7    | 1     |
| >RNF213-F14FLFKLLILQ   | 83    | >RNF213-F14FLLKLLILQ   | 85   | 2     |
| >RNF213-F14FLFKLLILQY  | 474   | >RNF213-F14FLLKLLILQY  | 492  | 18    |
| >RNF213-F14FLFKLLILQYL | 4     | >RNF213-F14FLLKLLILQYL | 4    | 0     |
| >RNF213-F14FLFKLLIL    | 74    | >RNF213-F14FLLKLLIL    | 12   | 62    |
| >RNF213-F14FLFKLLILQYL | 6     | >RNF213-F14FLLKLLILQYL | 3    | 3     |
| >RNF213-F14FLFKLLIL    | 3     | >RNF213-F14FLLKLLIL    | 3    | 0     |
| >RNF213-F14FLFKLLILQ   | 14    | >RNF213-F14FLLKLLILQ   | 23   | 9     |
| >RNF213-F14FLFKLLILQY  | 67    | >RNF213-F14FLLKLLILQY  | 172  | 105   |
| >RNF213-F14FLFKLLILQYL | 2     | >RNF213-F14FLLKLLILQYL | 2    | 0     |
| >RNF213-F14FLFKLLILQY  | 83    | >RNF213-F14FLLKLLILQY  | 336  | 253   |
| >RNF213-F14FLFKLLILQY  | 414   | >RNF213-F14FLLKLLILQY  | 1004 | 590   |
| >RNF213-F14FLFKLLILQYL | 302   | >RNF213-F14FLLKLLILQYL | 2931 | 2629  |
| >RNF213-F14FLFKLLILQYL | 232   | >RNF213-F14FLLKLLILQYL | 102  | 130   |
| >RNF213-F14FLFKLLILQY  | 8     | >RNF213-F14FLLKLLILQY  | 8    | 0     |
| >RNF213-F14FLFKLLIL    | 279   | >RNF213-F14FLLKLLIL    | 156  | 123   |
| >RNF213-F14FLFKLLILQYL | 905   | >RNF213-F14FLLKLLILQYL | 482  | 423   |



|                        |     |                        |      |      |
|------------------------|-----|------------------------|------|------|
| >RNF213-F14FLFKLLILQY  | 62  | >RNF213-F14FLLKLLILQY  | 209  | 147  |
| >RNF213-F14FLFKLLILQY  | 62  | >RNF213-F14FLLKLLILQY  | 164  | 102  |
| >RNF213-F14FLFKLLIL    | 103 | >RNF213-F14FLLKLLIL    | 570  | 467  |
| >RNF213-F14FLFKLLILQY  | 31  | >RNF213-F14FLLKLLILQY  | 147  | 116  |
| >RNF213-F14FLFKLLILQYL | 130 | >RNF213-F14FLLKLLILQYL | 649  | 519  |
| >RNF213-F14FLFKLLILQY  | 179 | >RNF213-F14FLLKLLILQY  | 564  | 385  |
| >RNF213-F14FLFKLLIL    | 497 | >RNF213-F14FLLKLLIL    | 998  | 501  |
| >RNF213-F14VFLFKLLI    | 120 | >RNF213-F14VFLLKLLI    | 354  | 234  |
| >RNF213-F14VFLFKLLIL   | 251 | >RNF213-F14VFLLKLLIL   | 1121 | 870  |
| >RNF213-F14VFLFKLLI    | 352 | >RNF213-F14VFLLKLLI    | 482  | 130  |
| >RNF213-F14VFLFKLLI    | 396 | >RNF213-F14VFLLKLLI    | 447  | 51   |
| >RNF213-F14VFLFKLLIL   | 351 | >RNF213-F14VFLLKLLIL   | 408  | 57   |
| >RNF213-F14VFLFKLLILQY | 7   | >RNF213-F14VFLLKLLILQY | 9    | 2    |
| >RNF213-F14VFLFKLLILQY | 14  | >RNF213-F14VFLLKLLILQY | 38   | 24   |
| >RNF213-F14VFLFKLLI    | 428 | >RNF213-F14VFLLKLLI    | 895  | 467  |
| >RNF213-F14VFLFKLLIL   | 149 | >RNF213-F14VFLLKLLIL   | 251  | 102  |
| >RNF213-F14WVFLFKLL    | 26  | >RNF213-F14WVFLFKLL    | 1712 | 1686 |
| >RNF213-F14WVFLFKLLI   | 304 | >RNF213-F14WVFLFKLLI   | 1353 | 1049 |
| >RNF213-F14WVFLFKLLI   | 236 | >RNF213-F14WVFLFKLLI   | 305  | 69   |
| >RNF213-F14WVFLFKLLIL  | 163 | >RNF213-F14WVFLFKLLIL  | 328  | 165  |
| >RNF213-F14WVFLFKLLIL  | 213 | >RNF213-F14WVFLFKLLIL  | 440  | 227  |
| >RNF213-F14WVFLFKLL    | 239 | >RNF213-F14WVFLFKLL    | 353  | 114  |
| >RNF213-F14WVFLFKLLIL  | 208 | >RNF213-F14WVFLFKLLIL  | 315  | 107  |
| >RNF213-F14WVFLFKLL    | 103 | >RNF213-F14WVFLFKLL    | 222  | 119  |
| >RNF213-F14WVFLFKLLI   | 71  | >RNF213-F14WVFLFKLLI   | 108  | 37   |
| >RNF213-F14WVFLFKLLI   | 227 | >RNF213-F14WVFLFKLLI   | 853  | 626  |
| >RNF213-F14WVFLFKLLI   | 105 | >RNF213-F14WVFLFKLLI   | 107  | 2    |
| >RNF213-F14WVFLFKLLIL  | 477 | >RNF213-F14WVFLFKLLIL  | 703  | 226  |
| >RNF213-F14WVFLFKLLI   | 447 | >RNF213-F14WVFLFKLLI   | 1511 | 1064 |
| >RNF213-F14IWVFLFKLL   | 47  | >RNF213-F14IWVFLFKLL   | 165  | 118  |
| >RNF213-F14IWVFLFKLLI  | 437 | >RNF213-F14IWVFLFKLLI  | 642  | 205  |
| >RNF213-F14IWVFLFKLLIL | 197 | >RNF213-F14IWVFLFKLLIL | 357  | 160  |
| >RNF213-F14IWVFLFKL    | 98  | >RNF213-F14IWVFLFKL    | 334  | 236  |
| >RNF213-F14IWVFLFKLL   | 128 | >RNF213-F14IWVFLFKLL   | 404  | 276  |
| >RNF213-F14IWVFLFKLLI  | 293 | >RNF213-F14IWVFLFKLLI  | 844  | 551  |
| >RNF213-F14IWVFLFKLLIL | 255 | >RNF213-F14IWVFLFKLLIL | 574  | 319  |
| >RNF213-F14IWVFLFKL    | 260 | >RNF213-F14IWVFLFKL    | 840  | 580  |
| >RNF213-F14IWVFLFKLL   | 151 | >RNF213-F14IWVFLFKLL   | 558  | 407  |
| >RNF213-F14IWVFLFKLLIL | 363 | >RNF213-F14IWVFLFKLLIL | 700  | 337  |
| >RNF213-F14IWVFLFKL    | 374 | >RNF213-F14IWVFLFKL    | 947  | 573  |
| >RNF213-F14IWVFLFKL    | 492 | >RNF213-F14IWVFLFKL    | 543  | 51   |
| >RNF213-F14IWVFLFKL    | 73  | >RNF213-F14IWVFLFKL    | 90   | 17   |
| >RNF213-F14IWVFLFKLL   | 55  | >RNF213-F14IWVFLFKLL   | 74   | 19   |

|                        |       |                       |      |       |
|------------------------|-------|-----------------------|------|-------|
| >RNF213-F14IWVFLFKLLI  | 499   | >RNF213-F14IWVFLKLLI  | 601  | 102   |
| >RNF213-F14IWVFLFKLLIL | 86    | >RNF213-F14IWVFLKLLIL | 107  | 21    |
| >RNF213-F14GIWVFLFKL   | 25    | >RNF213-F14GIWVFLKLL  | 87   | 62    |
| >RNF213-F14GIWVFLFKLLI | 131   | >RNF213-F14GIWVFLKLLI | 245  | 114   |
| >RNF213-F14GIWVFLFKL   | 192   | >RNF213-F14GIWVFLKLL  | 1153 | 961   |
| >RNF213-F14GIWVFLFKLL  | 464   | >RNF213-F14GIWVFLKLL  | 417  | 47    |
| >RNF213-F14GIWVFLFKLL  | 630   | >RNF213-F14GIWVFLKLL  | 422  | 208   |
| >RNF213-F14GIWVFLFKL   | 146   | >RNF213-F14GIWVFLKLL  | 838  | 692   |
| >RNF213-F14GIWVFLFKL   | 18    | >RNF213-F14GIWVFLKLL  | 92   | 74    |
| >RNF213-F14GIWVFLFKLL  | 203   | >RNF213-F14GIWVFLKLL  | 262  | 59    |
| >RNF213-F14GIWVFLFKLLI | 114   | >RNF213-F14GIWVFLKLLI | 260  | 146   |
| >RNF213-F14GIWVFLFKL   | 128   | >RNF213-F14GIWVFLKLL  | 1251 | 1123  |
| >RNF213-F14GIWVFLFKL   | 23    | >RNF213-F14GIWVFLKLL  | 108  | 85    |
| >RNF213-F14GIWVFLFKLL  | 294   | >RNF213-F14GIWVFLKLL  | 414  | 120   |
| >RNF213-F14GIWVFLFKLLI | 233   | >RNF213-F14GIWVFLKLLI | 361  | 128   |
| >RNF213-F14GIWVFLFKL   | 149   | >RNF213-F14GIWVFLKLL  | 3774 | 3625  |
| >RNF213-F14GIWVFLFKL   | 28    | >RNF213-F14GIWVFLKLL  | 123  | 95    |
| >RNF213-F14GIWVFLFKLL  | 338   | >RNF213-F14GIWVFLKLL  | 429  | 91    |
| >RNF213-F14GIWVFLFK    | 63    | >RNF213-F14GIWVFLK    | 77   | 14    |
| >RNF213-F14GIWVFLFK    | 9     | >RNF213-F14GIWVFLK    | 11   | 2     |
| >RNF213-F14GIWVFLFK    | 336   | >RNF213-F14GIWVFLK    | 1063 | 727   |
| >RNF213-F14GIWVFLFK    | 68    | >RNF213-F14GIWVFLK    | 364  | 296   |
| >RNF213-F14GIWVFLFK    | 356   | >RNF213-F14GIWVFLK    | 679  | 323   |
| >RNF213-F14TGIWVFLF    | 3030  | >RNF213-F14TGIWVFL    | 422  | 2608  |
| >RNF213-F14TGIWVFLFK   | 188   | >RNF213-F14TGIWVFLK   | 318  | 130   |
| >RNF213-F14TGIWVFLFK   | 9     | >RNF213-F14TGIWVFLK   | 13   | 4     |
| >RNF213-F14TGIWVFLF    | 253   | >RNF213-F14TGIWVFL    | 3800 | 3547  |
| >RNF213-F14TGIWVFLF    | 401   | >RNF213-F14TGIWVFL    | 4079 | 3678  |
| >RNF213-F14TGIWVFLFK   | 19    | >RNF213-F14TGIWVFLK   | 45   | 26    |
| >RNF213-F14TGIWVFLF    | 13205 | >RNF213-F14TGIWVFL    | 305  | 12900 |
| >RNF213-F14TGIWVFLF    | 259   | >RNF213-F14TGIWVFL    | 5026 | 4767  |
| >RNF213-F14TGIWVFLF    | 285   | >RNF213-F14TGIWVFL    | 1464 | 1179  |
| >RNF213-F14TGIWVFLFK   | 418   | >RNF213-F14TGIWVFLK   | 448  | 30    |
| >RNF213-F14TGIWVFLFK   | 446   | >RNF213-F14TGIWVFLK   | 1306 | 860   |
| >RNF213-F14QTGIWVFLF   | 10778 | >RNF213-F14QTGIWVFL   | 265  | 10513 |
| >RNF213-F14QTGIWVFLFK  | 20    | >RNF213-F14QTGIWVFLK  | 33   | 13    |
| >RNF213-F14QTGIWVFLFK  | 12    | >RNF213-F14QTGIWVFLK  | 19   | 7     |
| >RNF213-F14QTGIWVFLF   | 461   | >RNF213-F14QTGIWVFL   | 9385 | 8924  |
| >RNF213-F14QTGIWVFLF   | 180   | >RNF213-F14QTGIWVFL   | 1958 | 1778  |
| >RNF213-F14QTGIWVFLF   | 100   | >RNF213-F14QTGIWVFL   | 5289 | 5189  |
| >RNF213-F14QTGIWVFLFK  | 336   | >RNF213-F14QTGIWVFLK  | 1238 | 902   |
| >RNF213-F14QTGIWVFLFK  | 154   | >RNF213-F14QTGIWVFLK  | 485  | 331   |
| >RNF213-F14QTGIWVFLF   | 199   | >RNF213-F14QTGIWVFL   | 1104 | 905   |

|                        |       |                        |      |       |
|------------------------|-------|------------------------|------|-------|
| >RNF213-F14QTGIWVFLFK  | 470   | >RNF213-F14QTGIWVFLK   | 2168 | 1698  |
| >RNF213-F14QTGIWVFLFK  | 33    | >RNF213-F14QTGIWVFLK   | 58   | 25    |
| >RNF213-F14QTGIWVFLF   | 10975 | >RNF213-F14QTGIWVFL    | 160  | 10815 |
| >RNF213-F14QTGIWVFLFK  | 424   | >RNF213-F14QTGIWVFLK   | 1933 | 1509  |
| >RNF213-F14QTGIWVFLF   | 4431  | >RNF213-F14QTGIWVFL    | 24   | 4407  |
| >RNF213-F14QTGIWVFLFK  | 39    | >RNF213-F14QTGIWVFLK   | 136  | 97    |
| >RNF213-F14QTGIWVFLF   | 14    | >RNF213-F14QTGIWVFL    | 116  | 102   |
| >RNF213-F14QTGIWVFLFK  | 63    | >RNF213-F14QTGIWVFLK   | 46   | 17    |
| >RNF213-F14QTGIWVFLF   | 85    | >RNF213-F14QTGIWVFL    | 3030 | 2945  |
| >RNF213-F14QTGIWVFLF   | 43    | >RNF213-F14QTGIWVFL    | 24   | 19    |
| >RNF213-F14QTGIWVFLFK  | 110   | >RNF213-F14QTGIWVFLK   | 208  | 98    |
| >RNF213-F14QTGIWVFLF   | 154   | >RNF213-F14QTGIWVFL    | 863  | 709   |
| >RNF213-F14QTGIWVFLFK  | 88    | >RNF213-F14QTGIWVFLK   | 86   | 2     |
| >RNF213-F14QTGIWVFLFK  | 539   | >RNF213-F14QTGIWVFLK   | 483  | 56    |
| >RNF213-F14VQTGIWVFLF  | 14556 | >RNF213-F14VQTGIWVFL   | 463  | 14093 |
| >RNF213-F14VQTGIWVFLF  | 7288  | >RNF213-F14VQTGIWVFL   | 248  | 7040  |
| >RNF213-F14VQTGIWVFLF  | 14123 | >RNF213-F14VQTGIWVFL   | 253  | 13870 |
| >RNF213-F14VQTGIWVFLF  | 134   | >RNF213-F14VQTGIWVFL   | 193  | 59    |
| >RNF213-F14VQTGIWVFLF  | 16    | >RNF213-F14VQTGIWVFL   | 23   | 7     |
| >RNF213-F14VQTGIWVFLF  | 310   | >RNF213-F14VQTGIWVFL   | 850  | 540   |
| >RNF213-F14VQTGIWVFLF  | 126   | >RNF213-F14VQTGIWVFL   | 1994 | 1868  |
| >RNF213-F14VQTGIWVFLF  | 772   | >RNF213-F14VQTGIWVFL   | 463  | 309   |
| >RNF213-F14VQTGIWVFLF  | 8047  | >RNF213-F14VQTGIWVFL   | 499  | 7548  |
| >RNF213-F83FLVGKPGSSK  | 392   | >RNF213-F83ILVGKPGSSK  | 5091 | 4699  |
| >RNF213-F83FLVGKPGS    | 455   | >RNF213-F83ILVGKPGS    | 4722 | 4267  |
| >RNF213-F83FLVGKPGSS   | 71    | >RNF213-F83ILVGKPGSS   | 1401 | 1330  |
| >RNF213-F83FLVGKPGSSK  | 100   | >RNF213-F83ILVGKPGSSK  | 1626 | 1526  |
| >RNF213-F83FLVGKPGS    | 188   | >RNF213-F83ILVGKPGS    | 1774 | 1586  |
| >RNF213-F83FLVGKPGSS   | 384   | >RNF213-F83ILVGKPGSS   | 3056 | 2672  |
| >RNF213-F83FLVGKPGSSK  | 479   | >RNF213-F83ILVGKPGSSK  | 3576 | 3097  |
| >RNF213-F83FLVGKPGS    | 74    | >RNF213-F83ILVGKPGS    | 938  | 864   |
| >RNF213-F83FLVGKPGSSK  | 273   | >RNF213-F83ILVGKPGSSK  | 3168 | 2895  |
| >RNF213-F83FLVGKPGSSK  | 152   | >RNF213-F83ILVGKPGSSK  | 1440 | 1288  |
| >RNF213-F83FLVGKPGSSK  | 35    | >RNF213-F83ILVGKPGSSK  | 20   | 15    |
| >RNF213-F83FLVGKPGSSK  | 292   | >RNF213-F83ILVGKPGSSK  | 212  | 80    |
| >RNF213-F83FLVGKPGSSK  | 360   | >RNF213-F83ILVGKPGSSK  | 2115 | 1755  |
| >RNF213-F83LFLVGKPGSSI | 5751  | >RNF213-F83LILVGKPGSSK | 252  | 5499  |
| >RNF213-F83LFLVGKPGSSI | 5714  | >RNF213-F83LILVGKPGSSK | 270  | 5444  |
| >RNF213-F83LFLVGKPGSSI | 524   | >RNF213-F83LILVGKPGSSK | 367  | 157   |
| >RNF213-F83VVCIELKIPLF | 213   | >RNF213-F83VVCIELKIPLI | 7754 | 7541  |
| >RNF213-F83KIPLFLVGK   | 272   | >RNF213-F83KIPLILVGK   | 339  | 67    |
| >RNF213-F83KIPLFLVGK   | 104   | >RNF213-F83KIPLILVGK   | 256  | 152   |
| >RNF213-F83KIPLFLVGK   | 93    | >RNF213-F83KIPLILVGK   | 239  | 146   |

|                        |      |                        |      |      |
|------------------------|------|------------------------|------|------|
| >RNF213-F83LKIPLFLV    | 56   | >RNF213-F83LKIPLILV    | 232  | 176  |
| >RNF213-F83LKIPLFLV    | 253  | >RNF213-F83LKIPLILV    | 250  | 3    |
| >RNF213-F83LKIPLFLVGK  | 361  | >RNF213-F83LKIPLILVGK  | 781  | 420  |
| >RNF213-F83ELKIPLFLV   | 357  | >RNF213-F83ELKIPLILV   | 524  | 167  |
| >RNF213-F83ELKIPLFLV   | 50   | >RNF213-F83ELKIPLILV   | 155  | 105  |
| >RNF213-F83ELKIPLFLV   | 328  | >RNF213-F83ELKIPLILV   | 1211 | 883  |
| >RNF213-F83ELKIPLFLV   | 491  | >RNF213-F83ELKIPLILV   | 3264 | 2773 |
| >RNF213-F83ELKIPLFL    | 206  | >RNF213-F83ELKIPLIL    | 587  | 381  |
| >RNF213-F83ELKIPLFLV   | 11   | >RNF213-F83ELKIPLILV   | 19   | 8    |
| >RNF213-F83ELKIPLFLVGK | 132  | >RNF213-F83ELKIPLILVGK | 175  | 43   |
| >RNF213-F83ELKIPLFLV   | 195  | >RNF213-F83ELKIPLILV   | 743  | 548  |
| >RNF213-F83ELKIPLFLV   | 60   | >RNF213-F83ELKIPLILV   | 211  | 151  |
| >RNF213-F83IELKIPLF    | 288  | >RNF213-F83IELKIPLI    | 22   | 266  |
| >RNF213-F83IELKIPLFL   | 38   | >RNF213-F83IELKIPLIL   | 355  | 317  |
| >RNF213-F83IELKIPLFLV  | 39   | >RNF213-F83IELKIPLILV  | 82   | 43   |
| >RNF213-F83IELKIPLF    | 104  | >RNF213-F83IELKIPLI    | 3271 | 3167 |
| >RNF213-F83IELKIPLF    | 32   | >RNF213-F83IELKIPLI    | 1839 | 1807 |
| >RNF213-F83IELKIPLFL   | 248  | >RNF213-F83IELKIPLIL   | 191  | 57   |
| >RNF213-F83IELKIPLF    | 587  | >RNF213-F83IELKIPLI    | 267  | 320  |
| >RNF213-F83IELKIPLFL   | 36   | >RNF213-F83IELKIPLIL   | 25   | 11   |
| >RNF213-F83IELKIPLF    | 351  | >RNF213-F83IELKIPLI    | 284  | 67   |
| >RNF213-F83IELKIPLFL   | 81   | >RNF213-F83IELKIPLIL   | 107  | 26   |
| >RNF213-F83IELKIPLFLV  | 160  | >RNF213-F83IELKIPLILV  | 727  | 567  |
| >RNF213-F83IELKIPLF    | 473  | >RNF213-F83IELKIPLI    | 2404 | 1931 |
| >RNF213-F83IELKIPLF    | 80   | >RNF213-F83IELKIPLI    | 958  | 878  |
| >RNF213-F83IELKIPLFL   | 229  | >RNF213-F83IELKIPLIL   | 493  | 264  |
| >RNF213-F83IELKIPLF    | 145  | >RNF213-F83IELKIPLI    | 9    | 136  |
| >RNF213-F83IELKIPLFL   | 27   | >RNF213-F83IELKIPLIL   | 16   | 11   |
| >RNF213-F83IELKIPLFLV  | 97   | >RNF213-F83IELKIPLILV  | 107  | 10   |
| >RNF213-F83CIELKIPLFLV | 144  | >RNF213-F83CIELKIPLILV | 254  | 110  |
| >RNF213-I56ISCIKEVL    | 78   | >RNF213-I56LSCIKEVL    | 174  | 96   |
| >RNF213-I56AISCIKEV    | 659  | >RNF213-I56ALSCIKEV    | 56   | 603  |
| >RNF213-I56AISCIKEV    | 43   | >RNF213-I56ALSCIKEV    | 6    | 37   |
| >RNF213-I56AISCIKEVL   | 84   | >RNF213-I56ALSCIKEVL   | 10   | 74   |
| >RNF213-I56AISCIKEV    | 33   | >RNF213-I56ALSCIKEV    | 8    | 25   |
| >RNF213-I56AISCIKEVL   | 3055 | >RNF213-I56ALSCIKEVL   | 390  | 2665 |
| >RNF213-I56AISCIKEV    | 261  | >RNF213-I56ALSCIKEV    | 220  | 41   |
| >RNF213-I56AISCIKEV    | 61   | >RNF213-I56ALSCIKEV    | 5    | 56   |
| >RNF213-I56AISCIKEVL   | 2246 | >RNF213-I56ALSCIKEVL   | 79   | 2167 |
| >RNF213-I56AISCIKEV    | 714  | >RNF213-I56ALSCIKEV    | 9    | 705  |
| >RNF213-I56AISCIKEVL   | 7430 | >RNF213-I56ALSCIKEVL   | 122  | 7308 |
| >RNF213-I56AISCIKEV    | 343  | >RNF213-I56ALSCIKEV    | 18   | 325  |
| >RNF213-I56AISCIKEV    | 695  | >RNF213-I56ALSCIKEV    | 21   | 674  |

|                          |       |                         |      |       |
|--------------------------|-------|-------------------------|------|-------|
| >RNF213-I56 AISCIKEV     | 21    | >RNF213-I56 ALSCIKEV    | 3    | 18    |
| >RNF213-I56 AISCIKEVL    | 2959  | >RNF213-I56 ALSCIKEVL   | 43   | 2916  |
| >RNF213-I56 AISCIKEVLC   | 12997 | >RNF213-I56 ALSCIKEVLC  | 490  | 12507 |
| >RNF213-I56 AISCIKEV     | 271   | >RNF213-I56 ALSCIKEV    | 1549 | 1278  |
| >RNF213-I56 FFDEANTTEA   | 126   | >RNF213-I56 FFDEANTTEA  | 39   | 87    |
| >RNF213-I56 FFDEANTTEA   | 244   | >RNF213-I56 FFDEANTTEA  | 260  | 16    |
| >RNF213-I56 FFDEANTTEA   | 382   | >RNF213-I56 FFDEANTTEA  | 445  | 63    |
| >RNF213-I56 FFDEANTTEA   | 685   | >RNF213-I56 FFDEANTTEA  | 473  | 212   |
| >RNF213-I56 FFDEANTTEA   | 5859  | >RNF213-I56 FFDEANTTEA  | 453  | 5406  |
| >RNF213-I56 EAISCIKEVL   | 204   | >RNF213-I56 EALSCIKEVL  | 3269 | 3065  |
| >RNF213-I56 EAISCIKEV    | 13    | >RNF213-I56 EALSCIKEV   | 104  | 91    |
| >RNF213-I56 EAISCIKEV    | 201   | >RNF213-I56 EALSCIKEV   | 57   | 144   |
| >RNF213-I56 TEAISCIKEV   | 15    | >RNF213-I56 TEALSCIKEV  | 13   | 2     |
| >RNF213-I56 TEAISCIKEVL  | 71    | >RNF213-I56 TEALSCIKEVL | 56   | 15    |
| >RNF213-I56 TEAISCIKEVL  | 44    | >RNF213-I56 TEALSCIKEVL | 36   | 8     |
| >RNF213-I56 TEAISCIKEVL  | 472   | >RNF213-I56 TEALSCIKEVL | 440  | 32    |
| >RNF213-I56 TEAISCIKEVL  | 265   | >RNF213-I56 TEALSCIKEVL | 259  | 6     |
| >RNF213-I56 TTEAISCIK    | 51    | >RNF213-I56 TTEALSCIK   | 50   | 1     |
| >RNF213-I56 TTEAISCIK    | 401   | >RNF213-I56 TTEALSCIK   | 465  | 64    |
| >RNF213-I56 TTEAISCIK    | 16    | >RNF213-I56 TTEALSCIK   | 62   | 46    |
| >RNF213-I56 TTEAISCI     | 88    | >RNF213-I56 TTEALSCI    | 452  | 364   |
| >RNF213-I56 TTEAISCIKEV  | 28    | >RNF213-I56 TTEALSCIKEV | 68   | 40    |
| >RNF213-I56 TTEAISCI     | 217   | >RNF213-I56 TTEALSCI    | 375  | 158   |
| >RNF213-I56 TTEAISCI     | 123   | >RNF213-I56 TTEALSCI    | 171  | 48    |
| >RNF213-I56 NTTEAISCI    | 782   | >RNF213-I56 NTTEALSCI   | 452  | 330   |
| >RNF213-I56 NTTEAISCIK   | 40    | >RNF213-I56 NTTEALSCIK  | 55   | 15    |
| >RNF213-I56 NTTEAISCI    | 634   | >RNF213-I56 NTTEALSCI   | 330  | 304   |
| >RNF213-I56 NTTEAISCIK   | 9     | >RNF213-I56 NTTEALSCIK  | 26   | 17    |
| >RNF213-I56 NTTEAISCI    | 17    | >RNF213-I56 NTTEALSCI   | 38   | 21    |
| >RNF213-I56 NTTEAISCI    | 322   | >RNF213-I56 NTTEALSCI   | 286  | 36    |
| >RNF213-I56 NTTEAISCI    | 112   | >RNF213-I56 NTTEALSCI   | 104  | 8     |
| >RNF213-I56 EANTTEAI     | 100   | >RNF213-I56 EANTTEAL    | 187  | 87    |
| >RNF213-I56 EANTTEAISCI  | 327   | >RNF213-I56 EANTTEALSC  | 385  | 58    |
| >RNF213-I56 EANTTEAI     | 369   | >RNF213-I56 EANTTEAL    | 621  | 252   |
| >RNF213-I56 DEANTTEAI    | 12    | >RNF213-I56 DEANTTEAL   | 128  | 116   |
| >RNF213-I56 DEANTTEAI    | 116   | >RNF213-I56 DEANTTEAL   | 26   | 90    |
| >RNF213-I56 DEANTTEAISCI | 499   | >RNF213-I56 DEANTTEALS  | 557  | 58    |
| >RNF213-I56 DEANTTEAI    | 538   | >RNF213-I56 DEANTTEAL   | 166  | 372   |
| >RNF213-I56 DEANTTEAI    | 237   | >RNF213-I56 DEANTTEAL   | 1457 | 1220  |
| >RNF213-I56 FDEANTTEAI   | 328   | >RNF213-I56 FDEANTTEAL  | 3864 | 3536  |
| >RNF213-I56 FDEANTTEAI   | 4049  | >RNF213-I56 FDEANTTEAL  | 339  | 3710  |
| >RNF213-I56 FDEANTTEAI   | 63    | >RNF213-I56 FDEANTTEAL  | 556  | 493   |
| >RNF213-I56 FDEANTTEAI   | 35    | >RNF213-I56 FDEANTTEAL  | 249  | 214   |

|                        |       |                        |       |       |
|------------------------|-------|------------------------|-------|-------|
| >RNF213-K74KSSVSKNHTE  | 9     | >RNF213-K74NSSVSKNHTE  | 167   | 158   |
| >RNF213-K74KSSVSKNHTE  | 10519 | >RNF213-K74NSSVSKNHTE  | 427   | 10092 |
| >RNF213-K74KSSVSKNHTE  | 329   | >RNF213-K74NSSVSKNHTE  | 18    | 311   |
| >RNF213-K74SKSSVSKNH   | 447   | >RNF213-K74SNSSVSKNH   | 12320 | 11873 |
| >RNF213-K74LLAQLNAFLSI | 57    | >RNF213-K74LLAQLNAFLSI | 16342 | 16285 |
| >RNF213-K74LLAQLNAFLSI | 181   | >RNF213-K74LLAQLNAFLSI | 23815 | 23634 |
| >RNF213-K74LLAQLNAFLSI | 299   | >RNF213-K74LLAQLNAFLSI | 21707 | 21408 |
| >RNF213-K74LSKSSVSK    | 300   | >RNF213-K74LSNSSVSK    | 101   | 199   |
| >RNF213-K74LSKSSVSK    | 237   | >RNF213-K74LSNSSVSK    | 29    | 208   |
| >RNF213-K74LSKSSVSK    | 7     | >RNF213-K74LSNSSVSK    | 57    | 50    |
| >RNF213-K74LSKSSVSK    | 391   | >RNF213-K74LSNSSVSK    | 535   | 144   |
| >RNF213-K74LSKSSVSK    | 318   | >RNF213-K74LSNSSVSK    | 151   | 167   |
| >RNF213-K74LSKSSVSK    | 374   | >RNF213-K74LSNSSVSK    | 539   | 165   |
| >RNF213-K74LSKSSVSKN   | 275   | >RNF213-K74LSNSSVSKN   | 592   | 317   |
| >RNF213-K74FLSKSSVS    | 121   | >RNF213-K74FLSNSSVS    | 100   | 21    |
| >RNF213-K74FLSKSSVSK   | 305   | >RNF213-K74FLSNSSVSK   | 239   | 66    |
| >RNF213-K74FLSKSSVS    | 191   | >RNF213-K74FLSNSSVS    | 93    | 98    |
| >RNF213-K74FLSKSSVS    | 356   | >RNF213-K74FLSNSSVS    | 109   | 247   |
| >RNF213-K74FLSKSSVSK   | 156   | >RNF213-K74FLSNSSVSK   | 47    | 109   |
| >RNF213-K74FLSKSSVSK   | 48    | >RNF213-K74FLSNSSVSK   | 49    | 1     |
| >RNF213-K74FLSKSSVSK   | 239   | >RNF213-K74FLSNSSVSK   | 121   | 118   |
| >RNF213-K74FLSKSSVSK   | 109   | >RNF213-K74FLSNSSVSK   | 92    | 17    |
| >RNF213-K74FLSKSSVSK   | 243   | >RNF213-K74FLSNSSVSK   | 179   | 64    |
| >RNF213-K74AFLSKSSV    | 847   | >RNF213-K74AFLSNSSV    | 235   | 612   |
| >RNF213-K74AFLSKSSV    | 457   | >RNF213-K74AFLSNSSV    | 234   | 223   |
| >RNF213-K74AFLSKSSVSK  | 35    | >RNF213-K74AFLSNSSVSK  | 42    | 7     |
| >RNF213-K74AFLSKSSVSK  | 69    | >RNF213-K74AFLSNSSVSK  | 39    | 30    |
| >RNF213-K74AFLSKSSVSK  | 27    | >RNF213-K74AFLSNSSVSK  | 22    | 5     |
| >RNF213-K74AFLSKSSVSK  | 362   | >RNF213-K74AFLSNSSVSK  | 399   | 37    |
| >RNF213-K74NAFLSKSSVSI | 95    | >RNF213-K74NAFLSNSSVSI | 66    | 29    |
| >RNF213-K74NAFLSKSSVSI | 14    | >RNF213-K74NAFLSNSSVSI | 9     | 5     |
| >RNF213-K74NAFLSKSSV   | 42    | >RNF213-K74NAFLSNSSV   | 20    | 22    |
| >RNF213-K74NAFLSKSSV   | 397   | >RNF213-K74NAFLSNSSV   | 113   | 284   |
| >RNF213-K74LNAFLSKSSV  | 1425  | >RNF213-K74LNAFLSNSSV  | 311   | 1114  |
| >RNF213-K74QLNAFLSKSS' | 274   | >RNF213-K74QLNAFLSNSS  | 101   | 173   |
| >RNF213-K74QLNAFLSKS   | 346   | >RNF213-K74QLNAFLSNS   | 140   | 206   |
| >RNF213-K74QLNAFLSKSS' | 18    | >RNF213-K74QLNAFLSNSS  | 7     | 11    |
| >RNF213-K74QLNAFLSKS   | 335   | >RNF213-K74QLNAFLSNS   | 137   | 198   |
| >RNF213-K74QLNAFLSKSS' | 6     | >RNF213-K74QLNAFLSNSS  | 4     | 2     |
| >RNF213-K74QLNAFLSKSS' | 242   | >RNF213-K74QLNAFLSNSS  | 110   | 132   |
| >RNF213-K74QLNAFLSKSS' | 10    | >RNF213-K74QLNAFLSNSS  | 8     | 2     |
| >RNF213-K74QLNAFLSKSS' | 53    | >RNF213-K74QLNAFLSNSS  | 25    | 28    |
| >RNF213-K74QLNAFLSKSS' | 64    | >RNF213-K74QLNAFLSNSS  | 54    | 10    |

|                         |       |                         |       |       |
|-------------------------|-------|-------------------------|-------|-------|
| >RNF213-K74QLNAFLSKSS'  | 26    | >RNF213-K74QLNAFLSNSS   | 12    | 14    |
| >RNF213-K74QLNAFLSKSS'  | 3     | >RNF213-K74QLNAFLSNSS   | 3     | 0     |
| >RNF213-K74QLNAFLSK     | 42    | >RNF213-K74QLNAFLSN     | 14890 | 14848 |
| >RNF213-K74QLNAFLSK     | 27    | >RNF213-K74QLNAFLSN     | 18699 | 18672 |
| >RNF213-K74QLNAFLSK     | 313   | >RNF213-K74QLNAFLSN     | 14732 | 14419 |
| >RNF213-K74QLNAFLSKSS'  | 327   | >RNF213-K74QLNAFLSNSS   | 192   | 135   |
| >RNF213-K74QLNAFLSKSS'  | 287   | >RNF213-K74QLNAFLSNSS   | 163   | 124   |
| >RNF213-K74AQLNAFLSK    | 432   | >RNF213-K74AQLNAFLSN    | 390   | 42    |
| >RNF213-K74AQLNAFLSKS   | 474   | >RNF213-K74AQLNAFLSNS   | 124   | 350   |
| >RNF213-K74AQLNAFLSK    | 113   | >RNF213-K74AQLNAFLSN    | 19828 | 19715 |
| >RNF213-K74AQLNAFLSK    | 14    | >RNF213-K74AQLNAFLSN    | 13025 | 13011 |
| >RNF213-K74AQLNAFLSK    | 28    | >RNF213-K74AQLNAFLSN    | 8231  | 8203  |
| >RNF213-K74AQLNAFLSK    | 39    | >RNF213-K74AQLNAFLSN    | 480   | 441   |
| >RNF213-K74AQLNAFLSKS   | 638   | >RNF213-K74AQLNAFLSNS   | 283   | 355   |
| >RNF213-K74AQLNAFLSKS   | 308   | >RNF213-K74AQLNAFLSNS   | 338   | 30    |
| >RNF213-K74AQLNAFLSK    | 180   | >RNF213-K74AQLNAFLSN    | 4040  | 3860  |
| >RNF213-K74AQLNAFLSK    | 102   | >RNF213-K74AQLNAFLSN    | 3892  | 3790  |
| >RNF213-K74LAQLNAFLSK   | 247   | >RNF213-K74LAQLNAFLSN   | 22757 | 22510 |
| >RNF213-K74LAQLNAFLSK   | 52    | >RNF213-K74LAQLNAFLSN   | 30615 | 30563 |
| >RNF213-K74LAQLNAFLSK   | 395   | >RNF213-K74LAQLNAFLSN   | 14607 | 14212 |
| >RNF213-P31PENAKLLSTFI  | 372   | >RNF213-P31LENAKLLSTFL  | 28    | 344   |
| >RNF213-P31PENAKLLSTF   | 8663  | >RNF213-P31LENAKLLSTF   | 131   | 8532  |
| >RNF213-P31PENAKLLSTF   | 1410  | >RNF213-P31LENAKLLSTF   | 104   | 1306  |
| >RNF213-P31PENAKLLSTFI  | 1335  | >RNF213-P31LENAKLLSTFL  | 68    | 1267  |
| >RNF213-P31PENAKLLST    | 1761  | >RNF213-P31LENAKLLST    | 88    | 1673  |
| >RNF213-P31PENAKLLSTF   | 777   | >RNF213-P31LENAKLLSTF   | 311   | 466   |
| >RNF213-P31PENAKLLSTFI  | 784   | >RNF213-P31LENAKLLSTFL  | 51    | 733   |
| >RNF213-P31PENAKLLSTF   | 875   | >RNF213-P31LENAKLLSTF   | 201   | 674   |
| >RNF213-P31PENAKLLSTF   | 1090  | >RNF213-P31LENAKLLSTF   | 343   | 747   |
| >RNF213-P31PENAKLLSTFI  | 3320  | >RNF213-P31LENAKLLSTFL  | 218   | 3102  |
| >RNF213-P31SPENAKLL     | 338   | >RNF213-P31SLENAKLL     | 25928 | 25590 |
| >RNF213-P31SPENAKLL     | 111   | >RNF213-P31SLENAKLL     | 23312 | 23201 |
| >RNF213-P31SPENAKLLSTFI | 26    | >RNF213-P31SLENAKLLSTFL | 17312 | 17286 |
| >RNF213-P31SPENAKLL     | 34407 | >RNF213-P31SLENAKLL     | 477   | 33930 |
| >RNF213-P31SPENAKLLST   | 23701 | >RNF213-P31SLENAKLLST   | 240   | 23461 |
| >RNF213-P31SPENAKLL     | 32127 | >RNF213-P31SLENAKLL     | 29    | 32098 |
| >RNF213-P31SPENAKLLST   | 35637 | >RNF213-P31SLENAKLLST   | 330   | 35307 |
| >RNF213-P31SPENAKLL     | 391   | >RNF213-P31SLENAKLL     | 22547 | 22156 |
| >RNF213-P31SPENAKLLSTFI | 276   | >RNF213-P31SLENAKLLSTFL | 22476 | 22200 |
| >RNF213-P31SPENAKLLSTFI | 4527  | >RNF213-P31SLENAKLLSTFL | 298   | 4229  |
| >RNF213-P31SPENAKLLSTFI | 70    | >RNF213-P31SLENAKLLSTFL | 5495  | 5425  |
| >RNF213-P31SPENAKLLSTFI | 63    | >RNF213-P31SLENAKLLSTFL | 50    | 13    |
| >RNF213-P31SPENAKLLSTFI | 70    | >RNF213-P31SLENAKLLSTFL | 3810  | 3740  |

|                        |       |                         |       |       |
|------------------------|-------|-------------------------|-------|-------|
| >RNF213-P3:SPENAKLLSTF | 240   | >RNF213-P3:LSLENAKLLSTF | 21154 | 20914 |
| >RNF213-P3:ISSRYKADLSP | 8090  | >RNF213-P3:ISSRYKADLSL  | 457   | 7633  |
| >RNF213-P3:ISSRYKADLSP | 14550 | >RNF213-P3:ISSRYKADLSL  | 23    | 14527 |
| >RNF213-P3:ISSRYKADLSP | 14763 | >RNF213-P3:ISSRYKADLSL  | 196   | 14567 |
| >RNF213-P3:LSPENAKLL   | 1124  | >RNF213-P3:LSLENAKLL    | 241   | 883   |
| >RNF213-P3:LSPENAKL    | 302   | >RNF213-P3:LSLENAKL     | 14    | 288   |
| >RNF213-P3:LSPENAKLL   | 487   | >RNF213-P3:LSLENAKLL    | 19    | 468   |
| >RNF213-P3:LSPENAKL    | 11    | >RNF213-P3:LSLENAKL     | 4708  | 4697  |
| >RNF213-P3:LSPENAKLL   | 2     | >RNF213-P3:LSLENAKLL    | 1430  | 1428  |
| >RNF213-P3:LSPENAKLLS  | 183   | >RNF213-P3:LSLENAKLLS   | 22273 | 22090 |
| >RNF213-P3:DLSPENAKL   | 415   | >RNF213-P3:DLSLENAKL    | 1392  | 977   |
| >RNF213-P3:DLSPENAKL   | 82    | >RNF213-P3:DLSLENAKL    | 1117  | 1035  |
| >RNF213-P3:DLSPENAKLL  | 192   | >RNF213-P3:DLSLENAKLL   | 1422  | 1230  |
| >RNF213-P3:DLSPENAK    | 629   | >RNF213-P3:DLSLENAK     | 458   | 171   |
| >RNF213-P3:ADLSPENAKL  | 1107  | >RNF213-P3:ADLSLENAKL   | 362   | 745   |
| >RNF213-P3:ADLSPENAKL  | 530   | >RNF213-P3:ADLSLENAKL   | 311   | 219   |
| >RNF213-P3:ADLSPENAKL  | 194   | >RNF213-P3:ADLSLENAKL   | 118   | 76    |
| >RNF213-P3:KADLSPENAK  | 51    | >RNF213-P3:KADLSLENAK   | 64    | 13    |
| >RNF213-P3:YKADLSPENA  | 477   | >RNF213-P3:YKADLSLENA   | 607   | 130   |
| >RNF213-P3:YKADLSPENA  | 252   | >RNF213-P3:YKADLSLENA   | 279   | 27    |
| >RNF213-P3:RYKADLSP    | 22132 | >RNF213-P3:RYKADLSL     | 184   | 21948 |
| >RNF213-P3:RYKADLSP    | 3759  | >RNF213-P3:RYKADLSL     | 10    | 3749  |
| >RNF213-P3:RYKADLSP    | 292   | >RNF213-P3:RYKADLSL     | 23    | 269   |
| >RNF213-P3:RYKADLSPEN  | 233   | >RNF213-P3:RYKADLSLEN   | 361   | 128   |
| >RNF213-P3:RYKADLSPEN  | 43    | >RNF213-P3:RYKADLSLEN   | 50    | 7     |
| >RNF213-P3:SRKADLSP    | 40360 | >RNF213-P3:SRKADLSL     | 202   | 40158 |
| >RNF213-P3:SRKADLSP    | 3259  | >RNF213-P3:SRKADLSL     | 139   | 3120  |
| >RNF213-P3:SRKADLSP    | 1899  | >RNF213-P3:SRKADLSL     | 58    | 1841  |
| >RNF213-P3:SRKADLSP    | 22648 | >RNF213-P3:SRKADLSL     | 151   | 22497 |
| >RNF213-P3:SRKADLSP    | 5103  | >RNF213-P3:SRKADLSL     | 120   | 4983  |
| >RNF213-P3:SRKADLSP    | 7312  | >RNF213-P3:SRKADLSL     | 53    | 7259  |
| >RNF213-P3:SSRYKADLSP  | 526   | >RNF213-P3:SSRYKADLSL   | 48    | 478   |
| >RNF213-P3:SSRYKADLSP  | 10157 | >RNF213-P3:SSRYKADLSL   | 13    | 10144 |
| >RNF213-P3:SSRYKADLSP  | 8260  | >RNF213-P3:SSRYKADLSL   | 77    | 8183  |
| >RNF213-P3:SSRYKADLSPI | 2239  | >RNF213-P3:SSRYKADLSLE  | 336   | 1903  |
| >RNF213-R2:RGMEFVQGL   | 355   | >RNF213-R2:QGMEFVQGL    | 203   | 152   |
| >RNF213-R2:RGMEFVQGL   | 307   | >RNF213-R2:QGMEFVQGL    | 371   | 64    |
| >RNF213-R2:RGMEFVQGL   | 214   | >RNF213-R2:QGMEFVQGL    | 715   | 501   |
| >RNF213-R2:RGMEFVQGL   | 435   | >RNF213-R2:QGMEFVQGL    | 2909  | 2474  |
| >RNF213-R2:RGMEFVQGL   | 288   | >RNF213-R2:QGMEFVQGL    | 3763  | 3475  |
| >RNF213-R2:RGMEFVQGL   | 56    | >RNF213-R2:QGMEFVQGL    | 279   | 223   |
| >RNF213-R2:RGMEFVQGL   | 43    | >RNF213-R2:QGMEFVQGL    | 2087  | 2044  |
| >RNF213-R2:RGMEFVQGL   | 102   | >RNF213-R2:QGMEFVQGL    | 2728  | 2626  |



|                        |      |                        |       |       |
|------------------------|------|------------------------|-------|-------|
| >RNF213-R2:QRGMEFVQC   | 1258 | >RNF213-R2:QQGMEFVQC   | 312   | 946   |
| >RNF213-R2:QRGMEFVQC   | 225  | >RNF213-R2:QQGMEFVQC   | 13049 | 12824 |
| >RNF213-R2:QRGMEFVQC   | 134  | >RNF213-R2:QQGMEFVQC   | 5944  | 5810  |
| >RNF213-R2:VYLVRKLSSQI | 47   | >RNF213-R2:VYLVRKLSSQI | 11365 | 11318 |
| >RNF213-R2:VYLVRKLSSQI | 82   | >RNF213-R2:VYLVRKLSSQI | 18526 | 18444 |
| >RNF213-R2:VYLVRKLSSQI | 125  | >RNF213-R2:VYLVRKLSSQI | 14058 | 13933 |
| >RNF213-R2:SQRGMEFV    | 3572 | >RNF213-R2:SQQGMEFV    | 130   | 3442  |
| >RNF213-R2:SQRGMEFV    | 1083 | >RNF213-R2:SQQGMEFV    | 258   | 825   |
| >RNF213-R2:SQRGMEFV    | 277  | >RNF213-R2:SQQGMEFV    | 518   | 241   |
| >RNF213-R2:SQRGMEFV    | 31   | >RNF213-R2:SQQGMEFV    | 11    | 20    |
| >RNF213-R2:SQRGMEFVQ   | 466  | >RNF213-R2:SQQGMEFVC   | 108   | 358   |
| >RNF213-R2:SQRGMEFV    | 577  | >RNF213-R2:SQQGMEFV    | 116   | 461   |
| >RNF213-R2:SQRGMEFV    | 5276 | >RNF213-R2:SQQGMEFV    | 347   | 4929  |
| >RNF213-R2:SQRGMEFV    | 544  | >RNF213-R2:SQQGMEFV    | 90    | 454   |
| >RNF213-R2:SQRGMEFV    | 628  | >RNF213-R2:SQQGMEFV    | 290   | 338   |
| >RNF213-R2:SQRGMEFVQ   | 323  | >RNF213-R2:SQQGMEFVC   | 1240  | 917   |
| >RNF213-R2:SQRGMEFVQ   | 2271 | >RNF213-R2:SQQGMEFVC   | 376   | 1895  |
| >RNF213-R2:SSQRGMEFV   | 388  | >RNF213-R2:SSQQGMEFV   | 293   | 95    |
| >RNF213-R2:SSQRGMEFV   | 174  | >RNF213-R2:SSQQGMEFV   | 238   | 64    |
| >RNF213-R2:SSQRGMEF    | 236  | >RNF213-R2:SSQQGMEF    | 146   | 90    |
| >RNF213-R2:SSQRGMEF    | 97   | >RNF213-R2:SSQQGMEF    | 160   | 63    |
| >RNF213-R2:SSQRGMEF    | 17   | >RNF213-R2:SSQQGMEF    | 8     | 9     |
| >RNF213-R2:SSQRGMEF    | 298  | >RNF213-R2:SSQQGMEF    | 334   | 36    |
| >RNF213-R2:SSQRGMEFV   | 371  | >RNF213-R2:SSQQGMEFV   | 297   | 74    |
| >RNF213-R2:LSSQRGMEF   | 941  | >RNF213-R2:LSSQQGMEF   | 392   | 549   |
| >RNF213-R2:LSSQRGMEF   | 73   | >RNF213-R2:LSSQQGMEF   | 70    | 3     |
| >RNF213-R2:LSSQRGMEF   | 18   | >RNF213-R2:LSSQQGMEF   | 14    | 4     |
| >RNF213-R2:LSSQRGMEF   | 5    | >RNF213-R2:LSSQQGMEF   | 5     | 0     |
| >RNF213-R2:LSSQRGMEF   | 1737 | >RNF213-R2:LSSQQGMEF   | 332   | 1405  |
| >RNF213-R2:LSSQRGMEF   | 902  | >RNF213-R2:LSSQQGMEF   | 449   | 453   |
| >RNF213-R2:LSSQRGMEF   | 90   | >RNF213-R2:LSSQQGMEF   | 48    | 42    |
| >RNF213-R2:LSSQRGMEF   | 41   | >RNF213-R2:LSSQQGMEF   | 73    | 32    |
| >RNF213-R2:LSSQRGMEF\  | 98   | >RNF213-R2:LSSQQGMEF'  | 112   | 14    |
| >RNF213-R2:KLSSQRGMEI  | 77   | >RNF213-R2:KLSSQQGME   | 35    | 42    |
| >RNF213-R2:KLSSQRGM    | 514  | >RNF213-R2:KLSSQQGM    | 99    | 415   |
| >RNF213-R2:KLSSQRGMEI  | 9    | >RNF213-R2:KLSSQQGME   | 5     | 4     |
| >RNF213-R2:KLSSQRGM    | 1005 | >RNF213-R2:KLSSQQGM    | 393   | 612   |
| >RNF213-R2:KLSSQRGMEI  | 8    | >RNF213-R2:KLSSQQGME   | 5     | 3     |
| >RNF213-R2:KLSSQRGMEI  | 76   | >RNF213-R2:KLSSQQGME   | 51    | 25    |
| >RNF213-R2:KLSSQRGM    | 1469 | >RNF213-R2:KLSSQQGM    | 381   | 1088  |
| >RNF213-R2:KLSSQRGMEI  | 11   | >RNF213-R2:KLSSQQGME   | 5     | 6     |
| >RNF213-R2:KLSSQRGMEI  | 40   | >RNF213-R2:KLSSQQGME   | 12    | 28    |
| >RNF213-R2:KLSSQRGMEI  | 12   | >RNF213-R2:KLSSQQGME   | 8     | 4     |

|                         |      |                        |       |       |
|-------------------------|------|------------------------|-------|-------|
| >RNF213-R2:KLSSQRGM EI  | 51   | >RNF213-R2:KLSSQQGME   | 10    | 41    |
| >RNF213-R2:KLSSQRGM     | 1069 | >RNF213-R2:KLSSQQGM    | 115   | 954   |
| >RNF213-R2:KLSSQRGM EI  | 5    | >RNF213-R2:KLSSQQGME   | 4     | 1     |
| >RNF213-R2:KLSSQRGM EI  | 511  | >RNF213-R2:KLSSQQGME   | 443   | 68    |
| >RNF213-R2:KLSSQRGM EI  | 155  | >RNF213-R2:KLSSQQGME   | 154   | 1     |
| >RNF213-R2:KLSSQRGM EI  | 26   | >RNF213-R2:KLSSQQGME   | 26    | 0     |
| >RNF213-R2:KLSSQRGM EI  | 221  | >RNF213-R2:KLSSQQGME   | 258   | 37    |
| >RNF213-R2:RKLSSQRG     | 911  | >RNF213-R2:RKLSSQQG    | 438   | 473   |
| >RNF213-R2:RKLSSQRGM    | 6    | >RNF213-R2:RKLSSQQGM   | 4     | 2     |
| >RNF213-R2:RKLSSQRGM I  | 2    | >RNF213-R2:RKLSSQQGM   | 2     | 0     |
| >RNF213-R2:RKLSSQRGM    | 386  | >RNF213-R2:RKLSSQQGM   | 497   | 111   |
| >RNF213-R2:VRKLSSQRGM   | 539  | >RNF213-R2:VRKLSSQQGM  | 227   | 312   |
| >RNF213-R2:VRKLSSQRGM   | 934  | >RNF213-R2:VRKLSSQQGM  | 447   | 487   |
| >RNF213-R2:VRKLSSQRGM   | 744  | >RNF213-R2:VRKLSSQQGM  | 364   | 380   |
| >RNF213-R2:LVRKLSSQR    | 70   | >RNF213-R2:LVRKLSSQQ   | 207   | 137   |
| >RNF213-R2:LVRKLSSQRG   | 182  | >RNF213-R2:LVRKLSSQQG  | 132   | 50    |
| >RNF213-R2:LVRKLSSQRG   | 80   | >RNF213-R2:LVRKLSSQQG  | 66    | 14    |
| >RNF213-R2:LVRKLSSQR    | 49   | >RNF213-R2:LVRKLSSQQ   | 14671 | 14622 |
| >RNF213-R2:LVRKLSSQR    | 380  | >RNF213-R2:LVRKLSSQQ   | 24733 | 24353 |
| >RNF213-R2:LVRKLSSQR    | 306  | >RNF213-R2:LVRKLSSQQ   | 16163 | 15857 |
| >RNF213-R2:LVRKLSSQRG   | 204  | >RNF213-R2:LVRKLSSQQG  | 421   | 217   |
| >RNF213-R2:LVRKLSSQRG   | 295  | >RNF213-R2:LVRKLSSQQG  | 172   | 123   |
| >RNF213-R2:LVRKLSSQRG   | 190  | >RNF213-R2:LVRKLSSQQG  | 107   | 83    |
| >RNF213-R2:LVRKLSSQR    | 165  | >RNF213-R2:LVRKLSSQQ   | 64    | 101   |
| >RNF213-R2:LVRKLSSQRG   | 58   | >RNF213-R2:LVRKLSSQQG  | 48    | 10    |
| >RNF213-R2:YLVRKLSSQR   | 788  | >RNF213-R2:YLVRKLSSQQ  | 12    | 776   |
| >RNF213-R2:YLVRKLSSQR I | 527  | >RNF213-R2:YLVRKLSSQQ  | 407   | 120   |
| >RNF213-S3(SDACEVLSV    | 114  | >RNF213-S3(NDACEVLSV   | 343   | 229   |
| >RNF213-S3(SDACEVLSV I  | 157  | >RNF213-S3(NDACEVLSV I | 456   | 299   |
| >RNF213-S3(YSDACEVLSV   | 299  | >RNF213-S3(YNDACEVLSV  | 16676 | 16377 |
| >RNF213-S3(YSDACEVLSV   | 209  | >RNF213-S3(YNDACEVLSV  | 411   | 202   |
| >RNF213-S3(YSDACEVLSV   | 327  | >RNF213-S3(YNDACEVLSV  | 6057  | 5730  |
| >RNF213-S3(YSDACEVLSV   | 264  | >RNF213-S3(YNDACEVLSV  | 414   | 150   |
| >RNF213-S3(YSDACEVLSV   | 344  | >RNF213-S3(YNDACEVLSV  | 760   | 416   |
| >RNF213-S3(YSDACEVLSV   | 144  | >RNF213-S3(YNDACEVLSV  | 283   | 139   |
| >RNF213-S3(YSDACEVLSV   | 146  | >RNF213-S3(YNDACEVLSV  | 1869  | 1723  |
| >RNF213-S3(YSDACEVLSV   | 215  | >RNF213-S3(YNDACEVLSV  | 1131  | 916   |
| >RNF213-S3(YSDACEVLSV   | 188  | >RNF213-S3(YNDACEVLSV  | 856   | 668   |
| >RNF213-S3(YSDACEVLSV   | 414  | >RNF213-S3(YNDACEVLSV  | 4076  | 3662  |
| >RNF213-S3(YSDACEVL     | 159  | >RNF213-S3(YNDACEVL    | 23240 | 23081 |
| >RNF213-S3(YSDACEVL     | 314  | >RNF213-S3(YNDACEVL    | 288   | 26    |
| >RNF213-S3(YSDACEVL     | 54   | >RNF213-S3(YNDACEVL    | 876   | 822   |
| >RNF213-S3(YSDACEVLSV   | 125  | >RNF213-S3(YNDACEVLSV  | 1731  | 1606  |

|                         |      |                        |      |      |
|-------------------------|------|------------------------|------|------|
| >RNF213-S3C SYSDACEVL   | 73   | >RNF213-S3C SYNDACEVL  | 49   | 24   |
| >RNF213-S3C SYSDACEV    | 313  | >RNF213-S3C SYNDACEV   | 269  | 44   |
| >RNF213-S3C SYSDACEV    | 34   | >RNF213-S3C SYNDACEV   | 42   | 8    |
| >RNF213-S3C SYSDACEVLS' | 101  | >RNF213-S3C SYNDACEVLS | 125  | 24   |
| >RNF213-S3C SYSDACEVL   | 19   | >RNF213-S3C SYNDACEVL  | 49   | 30   |
| >RNF213-S3C SYSDACEVLS' | 320  | >RNF213-S3C SYNDACEVLS | 1158 | 838  |
| >RNF213-S3C SYSDACEVL   | 451  | >RNF213-S3C SYNDACEVL  | 455  | 4    |
| >RNF213-S3C SYSDACEVLS' | 172  | >RNF213-S3C SYNDACEVLS | 172  | 0    |
| >RNF213-S3C SYSDACEVL   | 161  | >RNF213-S3C SYNDACEVL  | 429  | 268  |
| >RNF213-S3C SYSDACEVLS' | 245  | >RNF213-S3C SYNDACEVLS | 668  | 423  |
| >RNF213-S3C QSYSDACEV   | 323  | >RNF213-S3C QSYNDACEV  | 448  | 125  |
| >RNF213-S3C QSYSDACEV   | 70   | >RNF213-S3C QSYNDACEV  | 113  | 43   |
| >RNF213-S3C QSYSDACEV   | 325  | >RNF213-S3C QSYNDACEV  | 500  | 175  |
| >RNF213-S3C QSYSDACEVL  | 185  | >RNF213-S3C QSYNDACEVI | 262  | 77   |
| >RNF213-S3C QSYSDACEV   | 208  | >RNF213-S3C QSYNDACEV  | 244  | 36   |
| >RNF213-S3C QSYSDACEVL  | 48   | >RNF213-S3C QSYNDACEVI | 53   | 5    |
| >RNF213-S3C LQSYSDACEV  | 368  | >RNF213-S3C LQSYNDACEV | 579  | 211  |
| >RNF213-S3C LQSYSDACEV  | 250  | >RNF213-S3C LQSYNDACEV | 304  | 54   |
| >RNF213-S3C LQSYSDACEV  | 293  | >RNF213-S3C LQSYNDACEV | 314  | 21   |
| >RNF213-S3C LQSYSDACEV  | 394  | >RNF213-S3C LQSYNDACEV | 575  | 181  |
| >RNF213-S3C LQSYSDACEV  | 511  | >RNF213-S3C LQSYNDACEV | 169  | 342  |
| >RNF213-S3C LQSYSDACEV  | 246  | >RNF213-S3C LQSYNDACEV | 382  | 136  |
| >RNF213-S3C LQSYSDACEV  | 57   | >RNF213-S3C LQSYNDACEV | 76   | 19   |
| >RNF213-S3C LQSYSDACEV  | 57   | >RNF213-S3C LQSYNDACEV | 130  | 73   |
| >RNF213-S3C LQSYSDACEV  | 31   | >RNF213-S3C LQSYNDACEV | 64   | 33   |
| >RNF213-S3C QLQSYSDACE  | 88   | >RNF213-S3C QLQSYNDACI | 100  | 12   |
| >RNF213-S3C QLQSYSDACE  | 33   | >RNF213-S3C QLQSYNDACI | 45   | 12   |
| >RNF213-S3C QLQSYSDA    | 383  | >RNF213-S3C QLQSYNDA   | 1068 | 685  |
| >RNF213-S3C QLQSYSDACE  | 82   | >RNF213-S3C QLQSYNDACI | 134  | 52   |
| >RNF213-S3C QLQSYSDACE  | 317  | >RNF213-S3C QLQSYNDACI | 419  | 102  |
| >RNF213-S3C QLQSYSDACE  | 8    | >RNF213-S3C QLQSYNDACI | 9    | 1    |
| >RNF213-S3C QLQSYSDACE  | 13   | >RNF213-S3C QLQSYNDACI | 18   | 5    |
| >RNF213-S3C QLQSYSDACE  | 41   | >RNF213-S3C QLQSYNDACI | 60   | 19   |
| >RNF213-S3C QLQSYSDACE  | 16   | >RNF213-S3C QLQSYNDACI | 30   | 14   |
| >RNF213-S3C QLQSYSDA    | 305  | >RNF213-S3C QLQSYNDA   | 761  | 456  |
| >RNF213-S3C QLQSYSDACE  | 3    | >RNF213-S3C QLQSYNDACI | 4    | 1    |
| >RNF213-S3C GQLQSYSDA   | 339  | >RNF213-S3C GQLQSYNDA  | 991  | 652  |
| >RNF213-T1C TVCKRQDK    | 1214 | >RNF213-T1C MVCKRQDK   | 382  | 832  |
| >RNF213-T1C TVCKRQDK    | 188  | >RNF213-T1C MVCKRQDK   | 182  | 6    |
| >RNF213-T1C TVCKRQDKEF  | 100  | >RNF213-T1C MVCKRQDKE  | 283  | 183  |
| >RNF213-T1C TVCKRQDK    | 1829 | >RNF213-T1C MVCKRQDK   | 140  | 1689 |
| >RNF213-T1C TVCKRQDK    | 224  | >RNF213-T1C MVCKRQDK   | 77   | 147  |
| >RNF213-T1C TVCKRQDKEF  | 2999 | >RNF213-T1C MVCKRQDKE  | 342  | 2657 |

|                       |       |                       |      |       |
|-----------------------|-------|-----------------------|------|-------|
| >RNF213-T1(ETVCKRQDKE | 269   | >RNF213-T1(EMVCKRQDK  | 9081 | 8812  |
| >RNF213-T1(ETVCKRQDKE | 10    | >RNF213-T1(EMVCKRQDK  | 548  | 538   |
| >RNF213-T1(ETVCKRQDKE | 128   | >RNF213-T1(EMVCKRQDK  | 5397 | 5269  |
| >RNF213-T1(ETVCKRQDK  | 34    | >RNF213-T1(EMVCKRQDK  | 869  | 835   |
| >RNF213-T1(ETVCKRQDKE | 1640  | >RNF213-T1(EMVCKRQDK  | 52   | 1588  |
| >RNF213-T1(ETVCKRQDKE | 24    | >RNF213-T1(EMVCKRQDK  | 4714 | 4690  |
| >RNF213-T1(YFASFAKAYE | 774   | >RNF213-T1(YFASFAKAYE | 173  | 601   |
| >RNF213-T1(YFASFAKAYE | 3540  | >RNF213-T1(YFASFAKAYE | 228  | 3312  |
| >RNF213-T1(YFASFAKAYE | 2084  | >RNF213-T1(YFASFAKAYE | 114  | 1970  |
| >RNF213-T1(YFASFAKAYE | 5707  | >RNF213-T1(YFASFAKAYE | 146  | 5561  |
| >RNF213-T1(YFASFAKAYE | 15120 | >RNF213-T1(YFASFAKAYE | 443  | 14677 |
| >RNF213-T1(YETVCKRQD  | 2873  | >RNF213-T1(YEMVCKRQD  | 319  | 2554  |
| >RNF213-T1(YETVCKRQDK | 3464  | >RNF213-T1(YEMVCKRQD  | 290  | 3174  |
| >RNF213-T1(AYETVCKR   | 294   | >RNF213-T1(AYEMVCKR   | 172  | 122   |
| >RNF213-T1(AYETVCKR   | 178   | >RNF213-T1(AYEMVCKR   | 266  | 88    |
| >RNF213-T1(KAYETVCK   | 63    | >RNF213-T1(KAYEMVCK   | 59   | 4     |
| >RNF213-T1(KAYETVCKR  | 522   | >RNF213-T1(KAYEMVCKR  | 391  | 131   |
| >RNF213-T1(KAYETVCK   | 31    | >RNF213-T1(KAYEMVCK   | 22   | 9     |
| >RNF213-T1(KAYETVCKR  | 663   | >RNF213-T1(KAYEMVCKR  | 339  | 324   |
| >RNF213-T1(KAYETVCK   | 35    | >RNF213-T1(KAYEMVCK   | 71   | 36    |
| >RNF213-T1(KAYETVCK   | 194   | >RNF213-T1(KAYEMVCK   | 118  | 76    |
| >RNF213-T1(KAYETVCKR  | 14    | >RNF213-T1(KAYEMVCKR  | 11   | 3     |
| >RNF213-T1(KAYETVCK   | 352   | >RNF213-T1(KAYEMVCK   | 341  | 11    |
| >RNF213-T1(KAYETVCKR  | 97    | >RNF213-T1(KAYEMVCKR  | 65   | 32    |
| >RNF213-T1(KAYETVCKR  | 29    | >RNF213-T1(KAYEMVCKR  | 32   | 3     |
| >RNF213-T1(AKAYETVCK  | 291   | >RNF213-T1(AKAYEMVCK  | 479  | 188   |
| >RNF213-T1(AKAYETVCKR | 328   | >RNF213-T1(AKAYEMVCK  | 688  | 360   |
| >RNF213-T1(FAKAYETV   | 225   | >RNF213-T1(FAKAYEMV   | 236  | 11    |
| >RNF213-T1(FAKAYETV   | 48    | >RNF213-T1(FAKAYEMV   | 73   | 25    |
| >RNF213-T1(FAKAYETV   | 71    | >RNF213-T1(FAKAYEMV   | 157  | 86    |
| >RNF213-T1(FAKAYETV   | 496   | >RNF213-T1(FAKAYEMV   | 583  | 87    |
| >RNF213-T1(FAKAYETV   | 43    | >RNF213-T1(FAKAYEMV   | 103  | 60    |
| >RNF213-T1(FAKAYETVCK | 566   | >RNF213-T1(FAKAYEMVCI | 387  | 179   |
| >RNF213-T1(FAKAYETVCK | 189   | >RNF213-T1(FAKAYEMVCI | 197  | 8     |
| >RNF213-T1(FAKAYETVCK | 273   | >RNF213-T1(FAKAYEMVCI | 210  | 63    |
| >RNF213-T1(FAKAYETVCK | 93    | >RNF213-T1(FAKAYEMVCI | 139  | 46    |
| >RNF213-T1(FAKAYETVCK | 28    | >RNF213-T1(FAKAYEMVCI | 24   | 4     |
| >RNF213-T1(FAKAYETV   | 403   | >RNF213-T1(FAKAYEMV   | 287  | 116   |
| >RNF213-T1(SFAKAYETV  | 175   | >RNF213-T1(SFAKAYEMV  | 3034 | 2859  |
| >RNF213-T1(SFAKAYETV  | 334   | >RNF213-T1(SFAKAYEMV  | 312  | 22    |
| >RNF213-T1(SFAKAYETV  | 286   | >RNF213-T1(SFAKAYEMV  | 374  | 88    |
| >RNF213-T1(SFAKAYETV  | 340   | >RNF213-T1(SFAKAYEMV  | 239  | 101   |
| >RNF213-T1(SFAKAYETVC | 250   | >RNF213-T1(SFAKAYEMV  | 306  | 56    |

|                        |       |                        |      |       |
|------------------------|-------|------------------------|------|-------|
| >RNF213-T1(ASFAKAYET   | 7697  | >RNF213-T1(ASFAKAYEM   | 385  | 7312  |
| >RNF213-T1(ASFAKAYETV  | 246   | >RNF213-T1(ASFAKAYEM\  | 328  | 82    |
| >RNF213-T1(ASFAKAYET   | 1361  | >RNF213-T1(ASFAKAYEM   | 136  | 1225  |
| >RNF213-T1(ASFAKAYETV  | 200   | >RNF213-T1(ASFAKAYEM\  | 1311 | 1111  |
| >RNF213-T1(ASFAKAYETV  | 195   | >RNF213-T1(ASFAKAYEM\  | 486  | 291   |
| >RNF213-T1(ASFAKAYET   | 9499  | >RNF213-T1(ASFAKAYEM   | 166  | 9333  |
| >RNF213-T1(ASFAKAYETV  | 297   | >RNF213-T1(ASFAKAYEM\  | 501  | 204   |
| >RNF213-T1(ASFAKAYET   | 449   | >RNF213-T1(ASFAKAYEM   | 4    | 445   |
| >RNF213-T1(ASFAKAYETV  | 91    | >RNF213-T1(ASFAKAYEM\  | 224  | 133   |
| >RNF213-T1(ASFAKAYET   | 12233 | >RNF213-T1(ASFAKAYEM   | 144  | 12089 |
| >RNF213-T1(FASFAKAYET' | 34    | >RNF213-T1(FASFAKAYEM  | 32   | 2     |
| >RNF213-T1(FASFAKAYET' | 61    | >RNF213-T1(FASFAKAYEM  | 91   | 30    |
| >RNF213-T1(FASFAKAYET' | 32    | >RNF213-T1(FASFAKAYEM  | 56   | 24    |
| >RNF213-T1(FASFAKAYET' | 146   | >RNF213-T1(FASFAKAYEM  | 192  | 46    |
| >RNF213-T1(FASFAKAYET' | 258   | >RNF213-T1(FASFAKAYEM  | 620  | 362   |
| >RNF213-T1(FASFAKAYET' | 44    | >RNF213-T1(FASFAKAYEM  | 108  | 64    |
| >RNF213-T1(FASFAKAYET  | 386   | >RNF213-T1(FASFAKAYEM  | 760  | 374   |
| >RNF213-T1(FASFAKAYET' | 12    | >RNF213-T1(FASFAKAYEM  | 12   | 0     |
| >RNF213-T1(FASFAKAYET' | 131   | >RNF213-T1(FASFAKAYEM  | 75   | 56    |
| >RNF213-T1(FASFAKAYET  | 13758 | >RNF213-T1(FASFAKAYEM  | 200  | 13558 |
| >RNF213-T1(FASFAKAYET  | 24590 | >RNF213-T1(FASFAKAYEM  | 416  | 24174 |
| >RNF213-V2{VQQVEYSSI   | 494   | >RNF213-V2{IQQVEYSSI   | 358  | 136   |
| >RNF213-V2{VQQVEYSSI   | 43    | >RNF213-V2{IQQVEYSSI   | 17   | 26    |
| >RNF213-V2{VQQVEYSSIR  | 511   | >RNF213-V2{IQQVEYSSIR  | 193  | 318   |
| >RNF213-V2{NVQQVEYSSI  | 189   | >RNF213-V2{NIQQVEYSSIF | 220  | 31    |
| >RNF213-V2{NVQQVEYSSI  | 43    | >RNF213-V2{NIQQVEYSSIF | 72   | 29    |
| >RNF213-V2{FQNVQQVEY   | 456   | >RNF213-V2{FQNIQQVEY   | 374  | 82    |
| >RNF213-V2{FQNVQQVEY   | 466   | >RNF213-V2{FQNIQQVEY   | 412  | 54    |
| >RNF213-V2{FQNVQQVEY   | 77    | >RNF213-V2{FQNIQQVEY   | 87   | 10    |
| >RNF213-V2{FQNVQQVEY   | 293   | >RNF213-V2{FQNIQQVEY   | 458  | 165   |
| >RNF213-V2{FQNVQQVEY   | 5     | >RNF213-V2{FQNIQQVEY   | 7    | 2     |
| >RNF213-V2{FQNVQQVEY   | 328   | >RNF213-V2{FQNIQQVEY   | 362  | 34    |
| >RNF213-V2{QFQNVQQVE   | 189   | >RNF213-V2{QFQNIQQVE'  | 296  | 107   |
| >RNF213-V2{QFQNVQQVE   | 253   | >RNF213-V2{QFQNIQQVE'  | 297  | 44    |
| >RNF213-V2{QFQNVQQVE   | 438   | >RNF213-V2{QFQNIQQVE'  | 525  | 87    |
| >RNF213-V2{KQFQNVQQ\   | 78    | >RNF213-V2{KQFQNIQQV   | 59   | 19    |
| >RNF213-V2{KQFQNVQQ\   | 135   | >RNF213-V2{KQFQNIQQV   | 136  | 1     |
| >RNF213-V2{KQFQNVQQ\   | 30    | >RNF213-V2{KQFQNIQQV   | 36   | 6     |
| >RNF213-V2{KQFQNVQQ\   | 11    | >RNF213-V2{KQFQNIQQV   | 8    | 3     |
| >RNF213-V2{KQFQNVQQ\   | 5     | >RNF213-V2{KQFQNIQQV   | 4    | 1     |
| >RNF213-V2{KQFQNVQQ\   | 41    | >RNF213-V2{KQFQNIQQV   | 34   | 7     |
| >RNF213-V2{KQFQNVQQ\   | 20    | >RNF213-V2{KQFQNIQQV   | 19   | 1     |
| >RNF213-V2{KQFQNVQQ\   | 280   | >RNF213-V2{KQFQNIQQV   | 382  | 102   |

|                        |      |                        |      |      |
|------------------------|------|------------------------|------|------|
| >RNF213-V2{KQFQNVQQ\   | 30   | >RNF213-V2{KQFQNIQQV   | 19   | 11   |
| >RNF213-V2{KQFQNVQQ\   | 89   | >RNF213-V2{KQFQNIQQV   | 71   | 18   |
| >RNF213-V2{KQFQNVQQ\   | 365  | >RNF213-V2{KQFQNIQQV   | 732  | 367  |
| >RNF213-V2{KQFQNVQQ\   | 101  | >RNF213-V2{KQFQNIQQV   | 168  | 67   |
| >RNF213-V2{KQFQNVQQ\   | 242  | >RNF213-V2{KQFQNIQQV   | 348  | 106  |
| >RNF213-V2{KQFQNVQQ\   | 45   | >RNF213-V2{KQFQNIQQV   | 49   | 4    |
| >RNF213-V2{KQFQNVQQ\   | 392  | >RNF213-V2{KQFQNIQQV   | 404  | 12   |
| >RNF213-V2{KQFQNVQQ    | 275  | >RNF213-V2{KQFQNIQQ    | 570  | 295  |
| >RNF213-V2{KQFQNVQQ\   | 11   | >RNF213-V2{KQFQNIQQV   | 13   | 2    |
| >RNF213-V2{KQFQNVQQ\   | 472  | >RNF213-V2{KQFQNIQQV   | 612  | 140  |
| >RNF213-V2{KQFQNVQQ\   | 2    | >RNF213-V2{KQFQNIQQV   | 2    | 0    |
| >RNF213-V2{KQFQNVQQ\   | 266  | >RNF213-V2{KQFQNIQQV   | 261  | 5    |
| >RNF213-V2{KQFQNVQQ\   | 219  | >RNF213-V2{KQFQNIQQV   | 255  | 36   |
| >RNF213-V2{LVKQFQNV    | 140  | >RNF213-V2{LVKQFQNI    | 1017 | 877  |
| >RNF213-V2{LVKQFQNVQ   | 115  | >RNF213-V2{LVKQFQNIQC  | 129  | 14   |
| >RNF213-V2{LVKQFQNV    | 20   | >RNF213-V2{LVKQFQNI    | 3289 | 3269 |
| >RNF213-V2{LVKQFQNVQ   | 11   | >RNF213-V2{LVKQFQNIQC  | 10   | 1    |
| >RNF213-V2{LVKQFQNV    | 364  | >RNF213-V2{LVKQFQNI    | 204  | 160  |
| >RNF213-V2{DLVKQFQNV   | 456  | >RNF213-V2{DLVKQFQNI   | 4372 | 3916 |
| >RNF213-V2{DLVKQFQNV   | 152  | >RNF213-V2{DLVKQFQNI   | 4767 | 4615 |
| >RNF213-V2{DLVKQFQNV   | 22   | >RNF213-V2{DLVKQFQNI   | 1185 | 1163 |
| >RNF213-V2{DLVKQFQNV   | 182  | >RNF213-V2{DLVKQFQNI   | 1154 | 972  |
| >RNF213-V2{RDLVKQFQNI  | 2493 | >RNF213-V2{RDLVKQFQNI  | 308  | 2185 |
| >RNF213-V2{RDLVKQFQNI  | 58   | >RNF213-V2{RDLVKQFQNI  | 35   | 23   |
| >ROS1-A210{ARDIYKNDYY  | 471  | >ROS1-A210{TRDIYKNDYY  | 1813 | 1342 |
| >ROS1-A210{ARDIYKNDYY  | 885  | >ROS1-A210{TRDIYKNDYY  | 252  | 633  |
| >ROS1-A210{LARDIYKNDY  | 3080 | >ROS1-A210{LTRDIYKNDY  | 124  | 2956 |
| >ROS1-A210{LARDIYKNDY  | 8372 | >ROS1-A210{LTRDIYKNDY` | 310  | 8062 |
| >ROS1-A210{LARDIYKNDY  | 586  | >ROS1-A210{LTRDIYKNDY` | 74   | 512  |
| >ROS1-A210{LARDIYKNDY  | 2215 | >ROS1-A210{LTRDIYKNDY  | 409  | 1806 |
| >ROS1-A210{LARDIYKNDY  | 640  | >ROS1-A210{LTRDIYKNDY` | 103  | 537  |
| >ROS1-A210{LARDIYKNDY  | 1192 | >ROS1-A210{LTRDIYKNDY  | 460  | 732  |
| >ROS1-A210{LARDIYKNDY  | 390  | >ROS1-A210{LTRDIYKNDY` | 108  | 282  |
| >ROS1-A210{LARDIYKNDY  | 465  | >ROS1-A210{LTRDIYKNDY` | 333  | 132  |
| >ROS1-A210{LARDIYKNDY  | 273  | >ROS1-A210{LTRDIYKNDY  | 495  | 222  |
| >ROS1-A210{LARDIYKNDY  | 498  | >ROS1-A210{LTRDIYKNDY` | 899  | 401  |
| >ROS1-A210{LARDIYKNDY  | 157  | >ROS1-A210{LTRDIYKNDY  | 16   | 141  |
| >ROS1-A210{LARDIYKNDY  | 45   | >ROS1-A210{LTRDIYKNDY` | 8    | 37   |
| >ROS1-A210{LARDIYKNDY  | 1406 | >ROS1-A210{LTRDIYKNDY  | 35   | 1371 |
| >ROS1-A210{LARDIYKNDY  | 92   | >ROS1-A210{LTRDIYKNDY` | 7    | 85   |
| >ROS1-A210{RIVKIGDFGLA | 343  | >ROS1-A210{RIVKIGDFGLT | 2699 | 2356 |
| >ROS1-A210{GLARDIYK    | 63   | >ROS1-A210{GLTRDIYK    | 149  | 86   |
| >ROS1-A210{GLARDIYK    | 41   | >ROS1-A210{GLTRDIYK    | 65   | 24   |

|                        |       |                        |      |       |
|------------------------|-------|------------------------|------|-------|
| >ROS1-A210(GLARDIYKND  | 121   | >ROS1-A210(GLTRDIYKND  | 275  | 154   |
| >ROS1-A210(GLARDIYKND  | 87    | >ROS1-A210(GLTRDIYKND  | 183  | 96    |
| >ROS1-A210(GLARDIYKND  | 250   | >ROS1-A210(GLTRDIYKND  | 393  | 143   |
| >ROS1-A210(FGLARDIY    | 315   | >ROS1-A210(FGLTRDIY    | 864  | 549   |
| >ROS1-A210(FGLARDIY    | 166   | >ROS1-A210(FGLTRDIY    | 230  | 64    |
| >ROS1-A210(DFGLARDIYK  | 499   | >ROS1-A210(DFGLTRDIYK  | 494  | 5     |
| >ROS1-A210(DFGLARDIYK  | 343   | >ROS1-A210(DFGLTRDIYK  | 419  | 76    |
| >ROS1-A210(GDFGLARDI   | 642   | >ROS1-A210(GDFGLTRDI   | 300  | 342   |
| >ROS1-A210(GDFGLARDI   | 409   | >ROS1-A210(GDFGLTRDI   | 146  | 263   |
| >ROS1-A210(GDFGLARDI   | 313   | >ROS1-A210(GDFGLTRDI   | 537  | 224   |
| >ROS1-A210(IGDFGLARDI\ | 221   | >ROS1-A210(IGDFGLTRDI\ | 351  | 130   |
| >ROS1-A210(IGDFGLARDI\ | 529   | >ROS1-A210(IGDFGLTRDI\ | 295  | 234   |
| >ROS1-A210(KIGDFGLAR   | 171   | >ROS1-A210(KIGDFGLTR   | 248  | 77    |
| >ROS1-A210(KIGDFGLAR   | 94    | >ROS1-A210(KIGDFGLTR   | 125  | 31    |
| >ROS1-A210(KIGDFGLARD  | 131   | >ROS1-A210(KIGDFGLTRD  | 69   | 62    |
| >ROS1-A210(KIGDFGLAR   | 14    | >ROS1-A210(KIGDFGLTR   | 14   | 0     |
| >ROS1-A210(IVKIGDFGLAF | 36    | >ROS1-A210(IVKIGDFGLTR | 42   | 6     |
| >ROS1-A210(IVKIGDFGLAF | 135   | >ROS1-A210(IVKIGDFGLTR | 196  | 61    |
| >ROS1-A210(IVKIGDFGLAF | 147   | >ROS1-A210(IVKIGDFGLTR | 126  | 21    |
| >ROS1-F213(FTTQSDVWSI  | 89    | >ROS1-F213(STTQSDVWSI  | 379  | 290   |
| >ROS1-F213(FTTQSDVWSI  | 69    | >ROS1-F213(STTQSDVWSI  | 38   | 31    |
| >ROS1-F213(FTTQSDVWSI  | 2113  | >ROS1-F213(STTQSDVWSI  | 262  | 1851  |
| >ROS1-F213(FTTQSDVWSI  | 54    | >ROS1-F213(STTQSDVWSI  | 342  | 288   |
| >ROS1-F213(FTTQSDVW    | 7     | >ROS1-F213(STTQSDVW    | 12   | 5     |
| >ROS1-F213(FTTQSDVWSI  | 5     | >ROS1-F213(STTQSDVWSI  | 8    | 3     |
| >ROS1-F213(FTTQSDVW    | 406   | >ROS1-F213(STTQSDVW    | 5651 | 5245  |
| >ROS1-F213(FTTQSDVW    | 125   | >ROS1-F213(STTQSDVW    | 106  | 19    |
| >ROS1-F213(FTTQSDVWSI  | 508   | >ROS1-F213(STTQSDVWSI  | 370  | 138   |
| >ROS1-F213(FTTQSDVW    | 13    | >ROS1-F213(STTQSDVW    | 20   | 7     |
| >ROS1-F213(FTTQSDVWSI  | 41    | >ROS1-F213(STTQSDVWSI  | 129  | 88    |
| >ROS1-F213(FTTQSDVWSI  | 59    | >ROS1-F213(STTQSDVWSI  | 77   | 18    |
| >ROS1-F213(FTTQSDVW    | 128   | >ROS1-F213(STTQSDVW    | 854  | 726   |
| >ROS1-F213(FTTQSDVWSI  | 43    | >ROS1-F213(STTQSDVWSI  | 42   | 1     |
| >ROS1-F213(FTTQSDVW    | 48    | >ROS1-F213(STTQSDVW    | 1319 | 1271  |
| >ROS1-F213(FTTQSDVW    | 332   | >ROS1-F213(STTQSDVW    | 6735 | 6403  |
| >ROS1-F213(IFTTQSDVWS  | 318   | >ROS1-F213(ISTTQSDVWS  | 6349 | 6031  |
| >ROS1-F213(IFTTQSDVWS  | 265   | >ROS1-F213(ISTTQSDVWS  | 2585 | 2320  |
| >ROS1-F213(IFTTQSDVWS  | 24    | >ROS1-F213(ISTTQSDVWS  | 2869 | 2845  |
| >ROS1-F213(IFTTQSDVWS  | 650   | >ROS1-F213(ISTTQSDVWS  | 35   | 615   |
| >ROS1-F213(IFTTQSDVW   | 11017 | >ROS1-F213(ISTTQSDVW   | 10   | 11007 |
| >ROS1-F213(IFTTQSDVWS  | 19464 | >ROS1-F213(ISTTQSDVWS  | 9    | 19455 |
| >ROS1-F213(IFTTQSDVW   | 12697 | >ROS1-F213(ISTTQSDVW   | 60   | 12637 |
| >ROS1-F213(IFTTQSDVWS  | 20755 | >ROS1-F213(ISTTQSDVWS  | 177  | 20578 |

|                        |       |                        |       |       |
|------------------------|-------|------------------------|-------|-------|
| >ROS1-F213EIFTTQSDVW   | 384   | >ROS1-F213EISTTQSDVW   | 11    | 373   |
| >ROS1-F213EIFTTQSDVWS  | 3026  | >ROS1-F213EISTTQSDVWS  | 35    | 2991  |
| >ROS1-F213EIFTTQSDVWS  | 14385 | >ROS1-F213EISTTQSDVWS  | 398   | 13987 |
| >ROS1-F213EIFTTQSDVWS  | 4252  | >ROS1-F213EISTTQSDVWS  | 291   | 3961  |
| >ROS1-F213EIFTTQSDVW   | 713   | >ROS1-F213EISTTQSDVW   | 51    | 662   |
| >ROS1-F213EIMAPESLMDC  | 462   | >ROS1-F213EIMAPESLMDC  | 23324 | 22862 |
| >ROS1-F213EIMAPESLMDC  | 63    | >ROS1-F213EIMAPESLMDC  | 5773  | 5710  |
| >ROS1-F213EIMAPESLMDC  | 47    | >ROS1-F213EIMAPESLMDC  | 3228  | 3181  |
| >ROS1-F213EIMAPESLMDC  | 189   | >ROS1-F213EIMAPESLMDC  | 14109 | 13920 |
| >ROS1-F213EIGFTTQSDV   | 79    | >ROS1-F213EIGSTTQSDV   | 136   | 57    |
| >ROS1-F213EIGFTTQSDV   | 186   | >ROS1-F213EIGSTTQSDV   | 2726  | 2540  |
| >ROS1-F213EIGFTTQSDV   | 364   | >ROS1-F213EIGSTTQSDV   | 1474  | 1110  |
| >ROS1-F213EIGFTTQSDV   | 50    | >ROS1-F213EIGSTTQSDV   | 456   | 406   |
| >ROS1-F213EIGFTTQSDV   | 16    | >ROS1-F213EIGSTTQSDV   | 32    | 16    |
| >ROS1-F213EIGFTTQSDVM  | 127   | >ROS1-F213EIGSTTQSDVM  | 175   | 48    |
| >ROS1-F213EIMDGIFTTQSL | 345   | >ROS1-F213EIMDGISTTQSL | 216   | 129   |
| >ROS1-F213EIMDGIFTT    | 80    | >ROS1-F213EIMDGISTT    | 725   | 645   |
| >ROS1-F213EIMDGIFTT    | 184   | >ROS1-F213EIMDGISTT    | 411   | 227   |
| >ROS1-F213EIMDGIFTTQ   | 288   | >ROS1-F213EIMDGISTTQ   | 381   | 93    |
| >ROS1-F213EIMDGIFTT    | 137   | >ROS1-F213EIMDGISTT    | 1000  | 863   |
| >ROS1-F213EIMDGIFTT    | 11    | >ROS1-F213EIMDGISTT    | 18    | 7     |
| >ROS1-F213EIMDGIFTTQ   | 275   | >ROS1-F213EIMDGISTTQ   | 318   | 43    |
| >ROS1-F213EIMDGIFTTQS  | 208   | >ROS1-F213EIMDGISTTQS  | 358   | 150   |
| >ROS1-F213EIMDGIFTT    | 163   | >ROS1-F213EIMDGISTT    | 393   | 230   |
| >ROS1-F213EIMDGIFTT    | 48    | >ROS1-F213EIMDGISTT    | 120   | 72    |
| >ROS1-F213EIMDGIFTTQ   | 810   | >ROS1-F213EIMDGISTTQ   | 468   | 342   |
| >ROS1-F213EIMDGIFTT    | 73    | >ROS1-F213EIMDGISTT    | 205   | 132   |
| >ROS1-F213EIMDGIFTT    | 11    | >ROS1-F213EIMDGISTT    | 17    | 6     |
| >ROS1-F213EIMDGIFTTQ   | 21    | >ROS1-F213EIMDGISTTQ   | 30    | 9     |
| >ROS1-F213EIMDGIFTTQS  | 212   | >ROS1-F213EIMDGISTTQS  | 255   | 43    |
| >ROS1-F213EISLMDGIFT   | 19    | >ROS1-F213EISLMDGIST   | 36    | 17    |
| >ROS1-F213EISLMDGIFTT  | 8     | >ROS1-F213EISLMDGISTT  | 23    | 15    |
| >ROS1-F213EISLMDGIFTTQ | 302   | >ROS1-F213EISLMDGISTTQ | 961   | 659   |
| >ROS1-F213EISLMDGIFTTQ | 93    | >ROS1-F213EISLMDGISTTQ | 310   | 217   |
| >ROS1-F213EISLMDGIFT   | 18    | >ROS1-F213EISLMDGIST   | 69    | 51    |
| >ROS1-F213EISLMDGIFTT  | 13    | >ROS1-F213EISLMDGISTT  | 41    | 28    |
| >ROS1-F213EISLMDGIFTTQ | 158   | >ROS1-F213EISLMDGISTTQ | 288   | 130   |
| >ROS1-F213EISLMDGIFTTQ | 29    | >ROS1-F213EISLMDGISTTQ | 73    | 44    |
| >ROS1-F213EISLMDGIFT   | 30    | >ROS1-F213EISLMDGIST   | 22    | 8     |
| >ROS1-F213EISLMDGIFTT  | 9     | >ROS1-F213EISLMDGISTT  | 4     | 5     |
| >ROS1-F213EISLMDGIFTTQ | 36    | >ROS1-F213EISLMDGISTTQ | 26    | 10    |
| >ROS1-F213EISLMDGIFT   | 29    | >ROS1-F213EISLMDGIST   | 60    | 31    |
| >ROS1-F213EISLMDGIFTT  | 9     | >ROS1-F213EISLMDGISTT  | 37    | 28    |



|                         |     |                         |       |       |
|-------------------------|-----|-------------------------|-------|-------|
| >ROS1-F213&SLMDGIFTTQ   | 196 | >ROS1-F213&SLMDGISTTQ   | 371   | 175   |
| >ROS1-F213&SLMDGIFT     | 11  | >ROS1-F213&SLMDGIST     | 19    | 8     |
| >ROS1-F213&SLMDGIFTT    | 3   | >ROS1-F213&SLMDGISTT    | 5     | 2     |
| >ROS1-F213&SLMDGIFTTQ   | 60  | >ROS1-F213&SLMDGISTTQ   | 97    | 37    |
| >ROS1-F213&SLMDGIFTTQ   | 52  | >ROS1-F213&SLMDGISTTQ   | 120   | 68    |
| >ROS1-F213&SLMDGIFT     | 42  | >ROS1-F213&SLMDGIST     | 78    | 36    |
| >ROS1-F213&SLMDGIFTT    | 7   | >ROS1-F213&SLMDGISTT    | 17    | 10    |
| >ROS1-F213&SLMDGIFTTQ   | 254 | >ROS1-F213&SLMDGISTTQ   | 305   | 51    |
| >ROS1-F213&SLMDGIFT     | 22  | >ROS1-F213&SLMDGIST     | 96    | 74    |
| >ROS1-F213&SLMDGIFTT    | 7   | >ROS1-F213&SLMDGISTT    | 29    | 22    |
| >ROS1-F213&SLMDGIFTTQ   | 93  | >ROS1-F213&SLMDGISTTQ   | 145   | 52    |
| >ROS1-F213&SLMDGIFTTQ   | 302 | >ROS1-F213&SLMDGISTTQ   | 682   | 380   |
| >ROS1-F213&SLMDGIFT     | 50  | >ROS1-F213&SLMDGIST     | 136   | 86    |
| >ROS1-F213&SLMDGIFTT    | 4   | >ROS1-F213&SLMDGISTT    | 14    | 10    |
| >ROS1-F213&SLMDGIFTTQ   | 457 | >ROS1-F213&SLMDGISTTQ   | 825   | 368   |
| >ROS1-F213&SLMDGIFT     | 7   | >ROS1-F213&SLMDGIST     | 6     | 1     |
| >ROS1-F213&SLMDGIFTT    | 2   | >ROS1-F213&SLMDGISTT    | 2     | 0     |
| >ROS1-F213&SLMDGIFTTQ   | 3   | >ROS1-F213&SLMDGISTTQ   | 4     | 1     |
| >ROS1-F213&SLMDGIFTTQ   | 13  | >ROS1-F213&SLMDGISTTQ   | 15    | 2     |
| >ROS1-F213&ESLMDGIF     | 149 | >ROS1-F213&ESLMDGIS     | 17827 | 17678 |
| >ROS1-F213&ESLMDGIF     | 77  | >ROS1-F213&ESLMDGIS     | 22183 | 22106 |
| >ROS1-F213&APESLMDGIF   | 349 | >ROS1-F213&APESLMDGIS   | 5668  | 5319  |
| >ROS1-F213&APESLMDGIF   | 302 | >ROS1-F213&APESLMDGIS   | 15836 | 15534 |
| >ROS1-F213&APESLMDGIF   | 149 | >ROS1-F213&APESLMDGIS   | 19062 | 18913 |
| >ROS1-I1399 ITAKDSTQIY  | 37  | >ROS1-I1399 VTAKDSTQIY  | 27    | 10    |
| >ROS1-I1399 ITAKDSTQIY  | 229 | >ROS1-I1399 VTAKDSTQIY  | 153   | 76    |
| >ROS1-I1399 ITAKDSTQIY  | 136 | >ROS1-I1399 VTAKDSTQIY  | 201   | 65    |
| >ROS1-I1399 ITAKDSTQIY  | 81  | >ROS1-I1399 VTAKDSTQIY  | 96    | 15    |
| >ROS1-I1399 ITAKDSTQIYC | 439 | >ROS1-I1399 VTAKDSTQIY  | 1913  | 1474  |
| >ROS1-I1399 ITAKDSTQI   | 361 | >ROS1-I1399 VTAKDSTQI   | 636   | 275   |
| >ROS1-I1399 ITAKDSTQIY  | 82  | >ROS1-I1399 VTAKDSTQIY  | 45    | 37    |
| >ROS1-I1399 ITAKDSTQIY  | 156 | >ROS1-I1399 VTAKDSTQIY  | 217   | 61    |
| >ROS1-I1399 ITAKDSTQIY  | 104 | >ROS1-I1399 VTAKDSTQIY  | 236   | 132   |
| >ROS1-I1399 ITAKDSTQI   | 42  | >ROS1-I1399 VTAKDSTQI   | 95    | 53    |
| >ROS1-I1399 ITAKDSTQIY  | 7   | >ROS1-I1399 VTAKDSTQIY  | 10    | 3     |
| >ROS1-I1399 ITAKDSTQIY  | 291 | >ROS1-I1399 VTAKDSTQIY  | 1133  | 842   |
| >ROS1-I1399 ITAKDSTQI   | 362 | >ROS1-I1399 VTAKDSTQI   | 792   | 430   |
| >ROS1-I1399 ITAKDSTQIY  | 158 | >ROS1-I1399 VTAKDSTQIY  | 312   | 154   |
| >ROS1-I1399 ITAKDSTQI   | 50  | >ROS1-I1399 VTAKDSTQI   | 88    | 38    |
| >ROS1-I1399 ITAKDSTQIY  | 86  | >ROS1-I1399 VTAKDSTQIY  | 53    | 33    |
| >ROS1-I1399 ITAKDSTQIY  | 356 | >ROS1-I1399 VTAKDSTQIY  | 771   | 415   |
| >ROS1-I1399 ITAKDSTQI   | 19  | >ROS1-I1399 VTAKDSTQI   | 25    | 6     |
| >ROS1-I1399 IITAKDSTQIY | 469 | >ROS1-I1399 IVTAKDSTQIY | 271   | 198   |

|                         |      |                         |     |      |
|-------------------------|------|-------------------------|-----|------|
| >ROS1-I1399 IITAKDSTQIY | 212  | >ROS1-I1399 IVTAKDSTQIY | 169 | 43   |
| >ROS1-I1399 IITAKDSTQIY | 287  | >ROS1-I1399 IVTAKDSTQIY | 110 | 177  |
| >ROS1-I1399 IITAKDSTQIY | 208  | >ROS1-I1399 IVTAKDSTQIY | 278 | 70   |
| >ROS1-I1399 IITAKDSTQIY | 553  | >ROS1-I1399 IVTAKDSTQIY | 137 | 416  |
| >ROS1-I1399 IITAKDSTQIY | 685  | >ROS1-I1399 IVTAKDSTQIY | 180 | 505  |
| >ROS1-I1399 IITAKDSTQIY | 470  | >ROS1-I1399 IVTAKDSTQIY | 127 | 343  |
| >ROS1-I1399 TVDGDLIYWI  | 682  | >ROS1-I1399 TVDGDLIYWI  | 116 | 566  |
| >ROS1-I1399 TVDGDLIYWI  | 1371 | >ROS1-I1399 TVDGDLIYWI  | 387 | 984  |
| >ROS1-I1399 TVDGDLIYWI  | 83   | >ROS1-I1399 TVDGDLIYWI  | 14  | 69   |
| >ROS1-I1399 TVDGDLIYWI  | 595  | >ROS1-I1399 TVDGDLIYWI  | 52  | 543  |
| >ROS1-I1399 TVDGDLIYWI  | 1360 | >ROS1-I1399 TVDGDLIYWI  | 92  | 1268 |
| >ROS1-I1399 TVDGDLIYWI  | 1143 | >ROS1-I1399 TVDGDLIYWI  | 32  | 1111 |
| >ROS1-I1399 TVDGDLIYWI  | 1949 | >ROS1-I1399 TVDGDLIYWI  | 49  | 1900 |
| >ROS1-I1399 TVDGDLIYWI  | 1387 | >ROS1-I1399 TVDGDLIYWI  | 20  | 1367 |
| >ROS1-I1399 TVDGDLIYWI  | 729  | >ROS1-I1399 TVDGDLIYWI  | 196 | 533  |
| >ROS1-I1399 TVDGDLIYWI  | 151  | >ROS1-I1399 TVDGDLIYWI  | 25  | 126  |
| >ROS1-I1399 WIITAKDSTQ  | 276  | >ROS1-I1399 WIVTAKDSTC  | 524 | 248  |
| >ROS1-I1399 WIITAKDSTQ  | 188  | >ROS1-I1399 WIVTAKDSTC  | 304 | 116  |
| >ROS1-I1399 WIITAKDSTQ  | 240  | >ROS1-I1399 WIVTAKDSTC  | 438 | 198  |
| >ROS1-I1399 IYWIITAK    | 192  | >ROS1-I1399 IYWIVTAK    | 259 | 67   |
| >ROS1-I1399 IYWIITAK    | 52   | >ROS1-I1399 IYWIVTAK    | 80  | 28   |
| >ROS1-I1399 IYWIITAK    | 134  | >ROS1-I1399 IYWIVTAK    | 158 | 24   |
| >ROS1-I1399 IYWIITAK    | 60   | >ROS1-I1399 IYWIVTAK    | 100 | 40   |
| >ROS1-I1399 LIYWIITA    | 67   | >ROS1-I1399 LIYWIVTA    | 72  | 5    |
| >ROS1-I1399 LIYWIITA    | 329  | >ROS1-I1399 LIYWIVTA    | 213 | 116  |
| >ROS1-I1399 LIYWIITA    | 26   | >ROS1-I1399 LIYWIVTA    | 19  | 7    |
| >ROS1-I1399 LIYWIITA    | 110  | >ROS1-I1399 LIYWIVTA    | 131 | 21   |
| >ROS1-I1399 LIYWIITA    | 5    | >ROS1-I1399 LIYWIVTA    | 6   | 1    |
| >ROS1-I1399 LIYWIITA    | 46   | >ROS1-I1399 LIYWIVTA    | 48  | 2    |
| >ROS1-I1399 LIYWIITA    | 8    | >ROS1-I1399 LIYWIVTA    | 8   | 0    |
| >ROS1-I1399 LIYWIITAK   | 30   | >ROS1-I1399 LIYWIVTAK   | 31  | 1    |
| >ROS1-I1399 LIYWIITAK   | 18   | >ROS1-I1399 LIYWIVTAK   | 20  | 2    |
| >ROS1-I1399 LIYWIITAK   | 90   | >ROS1-I1399 LIYWIVTAK   | 188 | 98   |
| >ROS1-I1399 LIYWIITAK   | 14   | >ROS1-I1399 LIYWIVTAK   | 14  | 0    |
| >ROS1-I1399 DLIYWIITA   | 87   | >ROS1-I1399 DLIYWIVTA   | 100 | 13   |
| >ROS1-I1399 DLIYWIITA   | 167  | >ROS1-I1399 DLIYWIVTA   | 163 | 4    |
| >ROS1-I1399 DLIYWIITA   | 509  | >ROS1-I1399 DLIYWIVTA   | 490 | 19   |
| >ROS1-I1399 DLIYWIITA   | 105  | >ROS1-I1399 DLIYWIVTA   | 75  | 30   |
| >ROS1-I1399 DLIYWIITAK  | 42   | >ROS1-I1399 DLIYWIVTAK  | 42  | 0    |
| >ROS1-I1399 DLIYWIITAK  | 174  | >ROS1-I1399 DLIYWIVTAK  | 181 | 7    |
| >ROS1-I1399 DLIYWIITAK  | 70   | >ROS1-I1399 DLIYWIVTAK  | 54  | 16   |
| >ROS1-I1399 DLIYWIITA   | 670  | >ROS1-I1399 DLIYWIVTA   | 324 | 346  |
| >ROS1-I1399 DLIYWIITA   | 413  | >ROS1-I1399 DLIYWIVTA   | 522 | 109  |

|                        |       |                        |      |       |
|------------------------|-------|------------------------|------|-------|
| >ROS1-I1399 GDLIYWII   | 152   | >ROS1-I1399 GDLIYWIV   | 187  | 35    |
| >ROS1-I1399 GDLIYWIIT  | 252   | >ROS1-I1399 GDLIYWIVT  | 186  | 66    |
| >ROS1-I1399 GDLIYWII   | 10    | >ROS1-I1399 GDLIYWIV   | 51   | 41    |
| >ROS1-I1399 GDLIYWII   | 21    | >ROS1-I1399 GDLIYWIV   | 30   | 9     |
| >ROS1-I1399 VDGDLIYWII | 103   | >ROS1-I1399 VDGDLIYWIV | 626  | 523   |
| >ROS1-I1399 VDGDLIYWII | 45    | >ROS1-I1399 VDGDLIYWIV | 78   | 33    |
| >ROS1-K200: KFNHPNILK  | 115   | >ROS1-K200: RFNHPNILK  | 110  | 5     |
| >ROS1-K200: KFNHPNILK  | 142   | >ROS1-K200: RFNHPNILK  | 124  | 18    |
| >ROS1-K200: KFNHPNILKQ | 1335  | >ROS1-K200: RFNHPNILKQ | 271  | 1064  |
| >ROS1-K200: KFNHPNILK  | 9     | >ROS1-K200: RFNHPNILK  | 9    | 0     |
| >ROS1-K200: KFNHPNILK  | 37    | >ROS1-K200: RFNHPNILK  | 33   | 4     |
| >ROS1-K200: KFNHPNILK  | 291   | >ROS1-K200: RFNHPNILK  | 445  | 154   |
| >ROS1-K200: SKFNHPNILK | 692   | >ROS1-K200: SRFNHPNILK | 296  | 396   |
| >ROS1-K200: SKFNHPNILK | 598   | >ROS1-K200: SRFNHPNILK | 247  | 351   |
| >ROS1-K200: SKFNHPNI   | 15    | >ROS1-K200: SRFNHPNI   | 117  | 102   |
| >ROS1-K200: SKFNHPNIL  | 6     | >ROS1-K200: SRFNHPNIL  | 43   | 37    |
| >ROS1-K200: SKFNHPNILK | 182   | >ROS1-K200: SRFNHPNILK | 1227 | 1045  |
| >ROS1-K200: SKFNHPNI   | 9981  | >ROS1-K200: SRFNHPNI   | 112  | 9869  |
| >ROS1-K200: SKFNHPNIL  | 12333 | >ROS1-K200: SRFNHPNIL  | 170  | 12163 |
| >ROS1-K200: SKFNHPNILK | 9659  | >ROS1-K200: SRFNHPNILK | 109  | 9550  |
| >ROS1-K200: SKFNHPNILK | 14700 | >ROS1-K200: SRFNHPNILK | 471  | 14229 |
| >ROS1-K200: SKFNHPNIL  | 48    | >ROS1-K200: SRFNHPNIL  | 20   | 28    |
| >ROS1-K200: SKFNHPNIL  | 6501  | >ROS1-K200: SRFNHPNIL  | 300  | 6201  |
| >ROS1-K200: SKFNHPNIL  | 344   | >ROS1-K200: SRFNHPNIL  | 11   | 333   |
| >ROS1-K200: SKFNHPNILK | 474   | >ROS1-K200: SRFNHPNILK | 763  | 289   |
| >ROS1-K200: EFLKEAHLMS | 918   | >ROS1-K200: EFLKEAHLMS | 39   | 879   |
| >ROS1-K200: EFLKEAHLMS | 417   | >ROS1-K200: EFLKEAHLMS | 109  | 308   |
| >ROS1-K200: EFLKEAHLMS | 439   | >ROS1-K200: EFLKEAHLMS | 42   | 397   |
| >ROS1-K200: MSKFNHPNII | 97    | >ROS1-K200: MSRFNHPNII | 58   | 39    |
| >ROS1-K200: MSKFNHPNII | 28    | >ROS1-K200: MSRFNHPNII | 62   | 34    |
| >ROS1-K200: MSKFNHPNI  | 129   | >ROS1-K200: MSRFNHPNI  | 26   | 103   |
| >ROS1-K200: MSKFNHPNI  | 5     | >ROS1-K200: MSRFNHPNI  | 3    | 2     |
| >ROS1-K200: MSKFNHPNII | 17    | >ROS1-K200: MSRFNHPNII | 7    | 10    |
| >ROS1-K200: MSKFNHPNII | 3     | >ROS1-K200: MSRFNHPNII | 3    | 0     |
| >ROS1-K200: MSKFNHPNII | 50    | >ROS1-K200: MSRFNHPNII | 87   | 37    |
| >ROS1-K200: MSKFNHPNII | 18    | >ROS1-K200: MSRFNHPNII | 35   | 17    |
| >ROS1-K200: MSKFNHPNI  | 527   | >ROS1-K200: MSRFNHPNI  | 260  | 267   |
| >ROS1-K200: MSKFNHPNII | 314   | >ROS1-K200: MSRFNHPNII | 141  | 173   |
| >ROS1-K200: MSKFNHPNI  | 35    | >ROS1-K200: MSRFNHPNI  | 8    | 27    |
| >ROS1-K200: MSKFNHPNII | 140   | >ROS1-K200: MSRFNHPNII | 22   | 118   |
| >ROS1-K200: MSKFNHPNII | 65    | >ROS1-K200: MSRFNHPNII | 41   | 24    |
| >ROS1-K200: MSKFNHPNI  | 400   | >ROS1-K200: MSRFNHPNI  | 292  | 108   |
| >ROS1-K200: LMSKFNHPNI | 409   | >ROS1-K200: LMSRFNHPNI | 333  | 76    |

|                       |     |                       |     |     |
|-----------------------|-----|-----------------------|-----|-----|
| >ROS1-K200:LMSKFNHPN  | 178 | >ROS1-K200:LMSRFNHPN  | 262 | 84  |
| >ROS1-K200:LMSKFNHPN  | 59  | >ROS1-K200:LMSRFNHPN  | 58  | 1   |
| >ROS1-K200:LMSKFNHPN  | 7   | >ROS1-K200:LMSRFNHPN  | 9   | 2   |
| >ROS1-K200:LMSKFNHPN  | 73  | >ROS1-K200:LMSRFNHPN  | 62  | 11  |
| >ROS1-K200:LMSKFNHPN  | 30  | >ROS1-K200:LMSRFNHPN  | 32  | 2   |
| >ROS1-K200:LMSKFNHPN  | 589 | >ROS1-K200:LMSRFNHPN  | 462 | 127 |
| >ROS1-K200:LMSKFNHPN  | 17  | >ROS1-K200:LMSRFNHPN  | 14  | 3   |
| >ROS1-K200:LMSKFNHPN  | 87  | >ROS1-K200:LMSRFNHPN  | 70  | 17  |
| >ROS1-K200:LMSKFNHPN  | 63  | >ROS1-K200:LMSRFNHPN  | 51  | 12  |
| >ROS1-K200:LMSKFNHPN  | 55  | >ROS1-K200:LMSRFNHPN  | 46  | 9   |
| >ROS1-K200:LMSKFNHPN  | 63  | >ROS1-K200:LMSRFNHPN  | 92  | 29  |
| >ROS1-K200:LMSKFNHPN  | 358 | >ROS1-K200:LMSRFNHPN  | 522 | 164 |
| >ROS1-K200:LMSKFNHPN  | 70  | >ROS1-K200:LMSRFNHPN  | 62  | 8   |
| >ROS1-K200:LMSKFNHPN  | 527 | >ROS1-K200:LMSRFNHPN  | 446 | 81  |
| >ROS1-K200:LMSKFNHPN  | 11  | >ROS1-K200:LMSRFNHPN  | 8   | 3   |
| >ROS1-K200:LMSKFNHPN  | 21  | >ROS1-K200:LMSRFNHPN  | 14  | 7   |
| >ROS1-K200:LMSKFNHPN  | 410 | >ROS1-K200:LMSRFNHPN  | 377 | 33  |
| >ROS1-K200:LMSKFNHPN  | 101 | >ROS1-K200:LMSRFNHPN  | 106 | 5   |
| >ROS1-K200:LMSKFNHPN  | 47  | >ROS1-K200:LMSRFNHPN  | 49  | 2   |
| >ROS1-K200:LMSKFNHPN  | 410 | >ROS1-K200:LMSRFNHPN  | 708 | 298 |
| >ROS1-K200:HLMSKFNHPN | 52  | >ROS1-K200:HLMSRFNHPN | 48  | 4   |
| >ROS1-K200:HLMSKFNHPN | 19  | >ROS1-K200:HLMSRFNHPN | 19  | 0   |
| >ROS1-K200:HLMSKFNHPN | 19  | >ROS1-K200:HLMSRFNHPN | 20  | 1   |
| >ROS1-K200:HLMSKFNHPN | 175 | >ROS1-K200:HLMSRFNHPN | 123 | 52  |
| >ROS1-K200:HLMSKFNHPN | 50  | >ROS1-K200:HLMSRFNHPN | 60  | 10  |
| >ROS1-K200:HLMSKFNHPN | 26  | >ROS1-K200:HLMSRFNHPN | 32  | 6   |
| >ROS1-K200:HLMSKFNHPN | 173 | >ROS1-K200:HLMSRFNHPN | 177 | 4   |
| >ROS1-K200:HLMSKFNHPN | 43  | >ROS1-K200:HLMSRFNHPN | 72  | 29  |
| >ROS1-K200:HLMSKFNHPN | 27  | >ROS1-K200:HLMSRFNHPN | 23  | 4   |
| >ROS1-K200:HLMSKFNH   | 261 | >ROS1-K200:HLMSRFNH   | 128 | 133 |
| >ROS1-K200:HLMSKFNHPN | 413 | >ROS1-K200:HLMSRFNHPN | 277 | 136 |
| >ROS1-K200:HLMSKFNH   | 471 | >ROS1-K200:HLMSRFNH   | 308 | 163 |
| >ROS1-K200:HLMSKFNHPN | 499 | >ROS1-K200:HLMSRFNHPN | 432 | 67  |
| >ROS1-K200:HLMSKFNHPN | 174 | >ROS1-K200:HLMSRFNHPN | 172 | 2   |
| >ROS1-K200:HLMSKFNHPN | 428 | >ROS1-K200:HLMSRFNHPN | 193 | 235 |
| >ROS1-K200:HLMSKFNHPN | 152 | >ROS1-K200:HLMSRFNHPN | 120 | 32  |
| >ROS1-K200:HLMSKFNHPN | 735 | >ROS1-K200:HLMSRFNHPN | 484 | 251 |
| >ROS1-K200:EAHLMSKF   | 641 | >ROS1-K200:EAHLMSRF   | 404 | 237 |
| >ROS1-K200:EAHLMSKF   | 50  | >ROS1-K200:EAHLMSRF   | 47  | 3   |
| >ROS1-K200:KEAHLMSKF  | 57  | >ROS1-K200:KEAHLMSRF  | 91  | 34  |
| >ROS1-K200:KEAHLMSKF  | 176 | >ROS1-K200:KEAHLMSRF  | 165 | 11  |
| >ROS1-K200:KEAHLMSKF  | 137 | >ROS1-K200:KEAHLMSRF  | 120 | 17  |
| >ROS1-K200:KEAHLMSKF  | 59  | >ROS1-K200:KEAHLMSRF  | 35  | 24  |

|                        |      |                        |      |      |
|------------------------|------|------------------------|------|------|
| >ROS1-K200:KEAHLMSKF   | 21   | >ROS1-K200:KEAHLMSRF   | 25   | 4    |
| >ROS1-K200:KEAHLMSK    | 2744 | >ROS1-K200:KEAHLMSR    | 138  | 2606 |
| >ROS1-K200:LKEAHLMSKF  | 38   | >ROS1-K200:LKEAHLMSRF  | 56   | 18   |
| >ROS1-K200:FLKEAHLMSK  | 753  | >ROS1-K200:FLKEAHLMSR  | 428  | 325  |
| >ROS1-K200:FLKEAHLMSK  | 328  | >ROS1-K200:FLKEAHLMSR  | 313  | 15   |
| >ROS1-K200:FLKEAHLMSK  | 136  | >ROS1-K200:FLKEAHLMSR  | 129  | 7    |
| >ROS1-K200:FLKEAHLMSK  | 98   | >ROS1-K200:FLKEAHLMSR  | 662  | 564  |
| >ROS1-K200:FLKEAHLMSK  | 793  | >ROS1-K200:FLKEAHLMSR  | 451  | 342  |
| >ROS1-K200:FLKEAHLMSK  | 60   | >ROS1-K200:FLKEAHLMSR  | 1045 | 985  |
| >ROS1-K200:FLKEAHLMSK  | 189  | >ROS1-K200:FLKEAHLMSR  | 2690 | 2501 |
| >ROS1-K200:FLKEAHLMSK  | 70   | >ROS1-K200:FLKEAHLMSR  | 4964 | 4894 |
| >ROS1-K200:FLKEAHLMSK  | 3282 | >ROS1-K200:FLKEAHLMSR  | 266  | 3016 |
| >ROS1-K200:FLKEAHLMSK  | 7155 | >ROS1-K200:FLKEAHLMSR  | 292  | 6863 |
| >ROS1-K200:FLKEAHLMSK  | 1437 | >ROS1-K200:FLKEAHLMSR  | 469  | 968  |
| >ROS1-K200:FLKEAHLMSK  | 67   | >ROS1-K200:FLKEAHLMSR  | 43   | 24   |
| >ROS1-K200:FLKEAHLMSK  | 45   | >ROS1-K200:FLKEAHLMSR  | 61   | 16   |
| >ROS1-K200:FLKEAHLMSK  | 23   | >ROS1-K200:FLKEAHLMSR  | 32   | 9    |
| >ROS1-K200:FLKEAHLMSK  | 185  | >ROS1-K200:FLKEAHLMSR  | 120  | 65   |
| >ROS1-K200:FLKEAHLMSK  | 252  | >ROS1-K200:FLKEAHLMSR  | 175  | 77   |
| >ROS1-N149:EVNDRKNSS[  | 297  | >ROS1-N149:EVDDRKNSS[  | 4076 | 3779 |
| >ROS1-N149:YAEVNDRK    | 200  | >ROS1-N149:YAEVDDRK    | 337  | 137  |
| >ROS1-N149:YYAEVNDR    | 443  | >ROS1-N149:YYAEVDDR    | 473  | 30   |
| >ROS1-N149:YYAEVNDR    | 158  | >ROS1-N149:YYAEVDDR    | 365  | 207  |
| >ROS1-N149:YYAEVNDR    | 50   | >ROS1-N149:YYAEVDDR    | 63   | 13   |
| >ROS1-N149:YYAEVNDRK   | 56   | >ROS1-N149:YYAEVDDRK   | 78   | 22   |
| >ROS1-N149:YYAEVNDR    | 116  | >ROS1-N149:YYAEVDDR    | 171  | 55   |
| >ROS1-N149:VYYAEVNDR   | 66   | >ROS1-N149:VYYAEVDDR   | 107  | 41   |
| >ROS1-N149:LVYYAEVNDR  | 149  | >ROS1-N149:LVYYAEVDDR  | 398  | 249  |
| >ROS1-N149:LVYYAEVNDR  | 94   | >ROS1-N149:LVYYAEVDDR  | 186  | 92   |
| >ROS1-N149:LVYYAEVNDR  | 284  | >ROS1-N149:LVYYAEVDDR  | 1252 | 968  |
| >ROS1-N149:LVYYAEVNDR  | 38   | >ROS1-N149:LVYYAEVDDR  | 38   | 0    |
| >ROS1-N149:LVYYAEVNDR  | 15   | >ROS1-N149:LVYYAEVDDR  | 20   | 5    |
| >ROS1-N149:YLVYYAEVND  | 37   | >ROS1-N149:YLVYYAEVDD  | 40   | 3    |
| >ROS1-Q865:QSTGDTTITE[ | 295  | >ROS1-Q865:HSTGDTTITE[ | 317  | 22   |
| >ROS1-Q865:QSTGDTTI    | 237  | >ROS1-Q865:HSTGDTTI    | 312  | 75   |
| >ROS1-Q865:QSTGDTTITE[ | 189  | >ROS1-Q865:HSTGDTTITE[ | 173  | 16   |
| >ROS1-Q865:QSTGDTTI    | 393  | >ROS1-Q865:HSTGDTTI    | 118  | 275  |
| >ROS1-Q865:QSTGDTTITE[ | 26   | >ROS1-Q865:HSTGDTTITE[ | 15   | 11   |
| >ROS1-Q865:QSTGDTTITE[ | 604  | >ROS1-Q865:HSTGDTTITE[ | 169  | 435  |
| >ROS1-Q865:QSTGDTTITE[ | 320  | >ROS1-Q865:HSTGDTTITE[ | 97   | 223  |
| >ROS1-Q865:QSTGDTTITE[ | 108  | >ROS1-Q865:HSTGDTTITE[ | 112  | 4    |
| >ROS1-Q865:QSTGDTTI    | 78   | >ROS1-Q865:HSTGDTTI    | 40   | 38   |
| >ROS1-Q865:GQSTGDTTI   | 1773 | >ROS1-Q865:GHSTGDTTI   | 263  | 1510 |

|                        |       |                        |       |       |
|------------------------|-------|------------------------|-------|-------|
| >ROS1-Q865 GQSTGDTTI   | 303   | >ROS1-Q865 GHSTGDTTI   | 23504 | 23201 |
| >ROS1-Q865 VLRGQSTGD   | 175   | >ROS1-Q865 VLRGHSTGD   | 191   | 16    |
| >ROS1-Q865 YTAVLRGQS   | 703   | >ROS1-Q865 YTAVLRGHS   | 366   | 337   |
| >ROS1-Q865 YTAVLRGQST  | 456   | >ROS1-Q865 YTAVLRGHST  | 257   | 199   |
| >ROS1-Q865 YTAVLRGQST  | 158   | >ROS1-Q865 YTAVLRGHST  | 128   | 30    |
| >ROS1-S370\SSISIDWLY   | 86    | >ROS1-S370\YSISIDWLY   | 27    | 59    |
| >ROS1-S370\SSISIDWL    | 284   | >ROS1-S370\YSISIDWL    | 54    | 230   |
| >ROS1-S370\SSISIDWL    | 1376  | >ROS1-S370\YSISIDWL    | 152   | 1224  |
| >ROS1-S370\SSISIDWLY   | 63    | >ROS1-S370\YSISIDWLY   | 624   | 561   |
| >ROS1-S370\SSISIDWLYQF | 40    | >ROS1-S370\YSISIDWLYQF | 328   | 288   |
| >ROS1-S370\SSISIDWLY   | 276   | >ROS1-S370\YSISIDWLY   | 69    | 207   |
| >ROS1-S370\SSISIDWL    | 74    | >ROS1-S370\YSISIDWL    | 39    | 35    |
| >ROS1-S370\SSISIDWLY   | 107   | >ROS1-S370\YSISIDWLY   | 44    | 63    |
| >ROS1-S370\SSISIDWLY   | 7     | >ROS1-S370\YSISIDWLY   | 5     | 2     |
| >ROS1-S370\SSISIDWLY   | 7     | >ROS1-S370\YSISIDWLY   | 13    | 6     |
| >ROS1-S370\SSISIDWLYQF | 13    | >ROS1-S370\YSISIDWLYQF | 18    | 5     |
| >ROS1-S370\SSISIDWLYQF | 171   | >ROS1-S370\YSISIDWLYQF | 36    | 135   |
| >ROS1-S370\SSISIDWLY   | 87    | >ROS1-S370\YSISIDWLY   | 26    | 61    |
| >ROS1-S370\SSISIDWLYQF | 6     | >ROS1-S370\YSISIDWLYQF | 3     | 3     |
| >ROS1-S370\SSISIDWL    | 156   | >ROS1-S370\YSISIDWL    | 89    | 67    |
| >ROS1-S370\SSISIDWLY   | 6     | >ROS1-S370\YSISIDWLY   | 5     | 1     |
| >ROS1-S370\SSISIDWLY   | 2073  | >ROS1-S370\YSISIDWLY   | 323   | 1750  |
| >ROS1-S370\SSISIDWL    | 131   | >ROS1-S370\YSISIDWL    | 30    | 101   |
| >ROS1-S370\SSISIDWLY   | 46    | >ROS1-S370\YSISIDWLY   | 10    | 36    |
| >ROS1-S370\SSISIDWLY   | 466   | >ROS1-S370\YSISIDWLY   | 30    | 436   |
| >ROS1-S370\SSISIDWLY   | 153   | >ROS1-S370\YSISIDWLY   | 117   | 36    |
| >ROS1-S370\SSISIDWLY   | 38    | >ROS1-S370\YSISIDWLY   | 19    | 19    |
| >ROS1-S370\SSISIDWLY   | 56    | >ROS1-S370\YSISIDWLY   | 30    | 26    |
| >ROS1-S370\SSISIDWLY   | 262   | >ROS1-S370\YSISIDWLY   | 142   | 120   |
| >ROS1-S370\SSISIDWLYQF | 182   | >ROS1-S370\YSISIDWLYQF | 743   | 561   |
| >ROS1-S370\SSISIDWLYQF | 248   | >ROS1-S370\YSISIDWLYQF | 209   | 39    |
| >ROS1-S370\SSISIDWL    | 355   | >ROS1-S370\YSISIDWL    | 714   | 359   |
| >ROS1-S370\ISSISIDWL   | 14340 | >ROS1-S370\IYSISIDWL   | 74    | 14266 |
| >ROS1-S370\ISSISIDWLY  | 60    | >ROS1-S370\IYSISIDWLY  | 215   | 155   |
| >ROS1-S370\ISSISIDWLY  | 167   | >ROS1-S370\IYSISIDWLY  | 11820 | 11653 |
| >ROS1-S370\ISSISIDW    | 21704 | >ROS1-S370\IYSISIDW    | 455   | 21249 |
| >ROS1-S370\ISSISIDWLY  | 27659 | >ROS1-S370\IYSISIDWLY  | 430   | 27229 |
| >ROS1-S370\ISSISIDW    | 13575 | >ROS1-S370\IYSISIDW    | 263   | 13312 |
| >ROS1-S370\ISSISIDWLY  | 23761 | >ROS1-S370\IYSISIDWLY  | 235   | 23526 |
| >ROS1-S370\ISSISIDW    | 22474 | >ROS1-S370\IYSISIDW    | 68    | 22406 |
| >ROS1-S370\ISSISIDWL   | 19157 | >ROS1-S370\IYSISIDWL   | 21    | 19136 |
| >ROS1-S370\ISSISIDWLY  | 17    | >ROS1-S370\IYSISIDWLY  | 8     | 9     |
| >ROS1-S370\ISSISIDWLY  | 9     | >ROS1-S370\IYSISIDWLY  | 10    | 1     |

|                        |       |                        |       |       |
|------------------------|-------|------------------------|-------|-------|
| >ROS1-S370\ISSISIDWLY  | 107   | >ROS1-S370\IYSISIDWLY  | 1466  | 1359  |
| >ROS1-S370\ISSISIDWLY  | 209   | >ROS1-S370\IYSISIDWLY  | 71    | 138   |
| >ROS1-S370\ISSISIDW    | 5     | >ROS1-S370\IYSISIDW    | 4041  | 4036  |
| >ROS1-S370\ISSISIDWL   | 7     | >ROS1-S370\IYSISIDWL   | 20421 | 20414 |
| >ROS1-S370\ISSISIDWLY  | 6     | >ROS1-S370\IYSISIDWLY  | 12646 | 12640 |
| >ROS1-S370\ISSISIDW    | 42    | >ROS1-S370\IYSISIDW    | 13046 | 13004 |
| >ROS1-S370\ISSISIDWLY  | 120   | >ROS1-S370\IYSISIDWLY  | 19934 | 19814 |
| >ROS1-S370\ISSISIDW    | 15    | >ROS1-S370\IYSISIDW    | 3657  | 3642  |
| >ROS1-S370\ISSISIDWLY  | 41    | >ROS1-S370\IYSISIDWLY  | 11932 | 11891 |
| >ROS1-S370\ISSISIDWL   | 40    | >ROS1-S370\IYSISIDWL   | 5391  | 5351  |
| >ROS1-S370\ISSISIDWL   | 477   | >ROS1-S370\IYSISIDWL   | 11448 | 10971 |
| >ROS1-S370\ISSISIDWLY  | 46    | >ROS1-S370\IYSISIDWLY  | 6867  | 6821  |
| >ROS1-S370\RIFYRGSLIS  | 9783  | >ROS1-S370\RIFYRGSLIY  | 64    | 9719  |
| >ROS1-S370\RIFYRGSLIS  | 12612 | >ROS1-S370\RIFYRGSLIY  | 117   | 12495 |
| >ROS1-S370\RIFYRGSLIS  | 16562 | >ROS1-S370\RIFYRGSLIY  | 45    | 16517 |
| >ROS1-S370\RIFYRGSLIS  | 989   | >ROS1-S370\RIFYRGSLIY  | 373   | 616   |
| >ROS1-S370\RIFYRGSLIS  | 17792 | >ROS1-S370\RIFYRGSLIY  | 81    | 17711 |
| >ROS1-S370\RIFYRGSLIS  | 3064  | >ROS1-S370\RIFYRGSLIY  | 149   | 2915  |
| >ROS1-S370\RIFYRGSLIS  | 20257 | >ROS1-S370\RIFYRGSLIY  | 13    | 20244 |
| >ROS1-S370\RIFYRGSLIS  | 7359  | >ROS1-S370\RIFYRGSLIY  | 53    | 7306  |
| >ROS1-S370\RIFYRGSLIS  | 20332 | >ROS1-S370\RIFYRGSLIY  | 117   | 20215 |
| >ROS1-S370\RIFYRGSLIS  | 2753  | >ROS1-S370\RIFYRGSLIY  | 16    | 2737  |
| >ROS1-S370\RIFYRGSLIS  | 13453 | >ROS1-S370\RIFYRGSLIY  | 26    | 13427 |
| >ROS1-S370\RIFYRGSLIS  | 3083  | >ROS1-S370\RIFYRGSLIY  | 19    | 3064  |
| >ROS1-S370\RIFYRGSLIS  | 30546 | >ROS1-S370\RIFYRGSLIY  | 149   | 30397 |
| >ROS1-S370\LISSISIDWLY | 91    | >ROS1-S370\LIYSISIDWLY | 794   | 703   |
| >ROS1-S370\LISSISIDWL  | 55    | >ROS1-S370\LIYSISIDWL  | 35    | 20    |
| >ROS1-S370\LISSISIDWL  | 234   | >ROS1-S370\LIYSISIDWL  | 86    | 148   |
| >ROS1-S370\LISSISIDWL  | 265   | >ROS1-S370\LIYSISIDWL  | 114   | 151   |
| >ROS1-S370\LISSISIDWL  | 614   | >ROS1-S370\LIYSISIDWL  | 28    | 586   |
| >ROS1-S370\LISSISIDWL  | 1468  | >ROS1-S370\LIYSISIDWL  | 96    | 1372  |
| >ROS1-S370\LISSISIDWL  | 54    | >ROS1-S370\LIYSISIDWL  | 18    | 36    |
| >ROS1-S370\LISSISIDWLY | 1712  | >ROS1-S370\LIYSISIDWLY | 203   | 1509  |
| >ROS1-S370\LISSISIDWLY | 668   | >ROS1-S370\LIYSISIDWLY | 205   | 463   |
| >ROS1-S370\LISSISIDWLY | 9     | >ROS1-S370\LIYSISIDWLY | 6     | 3     |
| >ROS1-S370\LISSISIDWLY | 15    | >ROS1-S370\LIYSISIDWLY | 16    | 1     |
| >ROS1-S370\LISSISIDW   | 1920  | >ROS1-S370\LIYSISIDW   | 256   | 1664  |
| >ROS1-S370\LISSISIDWLY | 360   | >ROS1-S370\LIYSISIDWLY | 143   | 217   |
| >ROS1-S370\LISSISIDWLY | 13    | >ROS1-S370\LIYSISIDWLY | 11    | 2     |
| >ROS1-S370\LISSISIDWLY | 676   | >ROS1-S370\LIYSISIDWLY | 275   | 401   |
| >ROS1-S370\LISSISIDWLY | 2095  | >ROS1-S370\LIYSISIDWLY | 433   | 1662  |
| >ROS1-S370\LISSISIDW   | 1480  | >ROS1-S370\LIYSISIDW   | 138   | 1342  |
| >ROS1-S370\LISSISIDWLY | 176   | >ROS1-S370\LIYSISIDWLY | 109   | 67    |

|                        |       |                        |      |       |
|------------------------|-------|------------------------|------|-------|
| >ROS1-S370\LISSISIDW   | 115   | >ROS1-S370\LIYSISIDW   | 63   | 52    |
| >ROS1-S370\LISSISIDWLY | 546   | >ROS1-S370\LIYSISIDWLY | 279  | 267   |
| >ROS1-S370\LISSISIDWLY | 267   | >ROS1-S370\LIYSISIDWLY | 142  | 125   |
| >ROS1-S370\LISSISIDW   | 206   | >ROS1-S370\LIYSISIDW   | 63   | 143   |
| >ROS1-S370\LISSISIDWLY | 113   | >ROS1-S370\LIYSISIDWLY | 245  | 132   |
| >ROS1-S370\GLISSISI    | 37    | >ROS1-S370\GLIYSISI    | 41   | 4     |
| >ROS1-S370\GLISSISIDWL | 43    | >ROS1-S370\GLIYSISIDWL | 62   | 19    |
| >ROS1-S370\GLISSISI    | 20    | >ROS1-S370\GLIYSISI    | 30   | 10    |
| >ROS1-S370\GLISSISIDWL | 7     | >ROS1-S370\GLIYSISIDWL | 11   | 4     |
| >ROS1-S370\GLISSISI    | 8     | >ROS1-S370\GLIYSISI    | 15   | 7     |
| >ROS1-S370\GLISSISIDWL | 9     | >ROS1-S370\GLIYSISIDWL | 18   | 9     |
| >ROS1-S370\GLISSISI    | 126   | >ROS1-S370\GLIYSISI    | 233  | 107   |
| >ROS1-S370\GLISSISIDWL | 170   | >ROS1-S370\GLIYSISIDWL | 287  | 117   |
| >ROS1-S370\GLISSISI    | 14    | >ROS1-S370\GLIYSISI    | 40   | 26    |
| >ROS1-S370\GLISSISIDWL | 17    | >ROS1-S370\GLIYSISIDWL | 66   | 49    |
| >ROS1-S370\GLISSISI    | 7     | >ROS1-S370\GLIYSISI    | 10   | 3     |
| >ROS1-S370\GLISSISIDWL | 21    | >ROS1-S370\GLIYSISIDWL | 30   | 9     |
| >ROS1-S370\GLISSISI    | 38    | >ROS1-S370\GLIYSISI    | 147  | 109   |
| >ROS1-S370\GLISSISIDWL | 30    | >ROS1-S370\GLIYSISIDWL | 104  | 74    |
| >ROS1-S370\GLISSISI    | 12    | >ROS1-S370\GLIYSISI    | 41   | 29    |
| >ROS1-S370\GLISSISIDWL | 8     | >ROS1-S370\GLIYSISIDWL | 20   | 12    |
| >ROS1-S370\GLISSISI    | 1058  | >ROS1-S370\GLIYSISI    | 369  | 689   |
| >ROS1-S370\GLISSISIDW  | 462   | >ROS1-S370\GLIYSISIDW  | 769  | 307   |
| >ROS1-S370\SGLISSISIDW | 262   | >ROS1-S370\SGLIYSISIDW | 688  | 426   |
| >ROS1-S370\SGLISSISI   | 256   | >ROS1-S370\SGLIYSISI   | 275  | 19    |
| >ROS1-S370\GSGLISSISI  | 277   | >ROS1-S370\GSGLIYSISI  | 418  | 141   |
| >ROS1-S370\GSGLISSI    | 2348  | >ROS1-S370\GSGLIYSI    | 456  | 1892  |
| >ROS1-S370\GSGLISSI    | 75    | >ROS1-S370\GSGLIYSI    | 152  | 77    |
| >ROS1-S370\GSGLISSISI  | 161   | >ROS1-S370\GSGLIYSISI  | 197  | 36    |
| >ROS1-S370\RGSGLISSI   | 2728  | >ROS1-S370\RGSGLIYSI   | 172  | 2556  |
| >ROS1-S370\RGSGLISSI   | 194   | >ROS1-S370\RGSGLIYSI   | 4195 | 4001  |
| >ROS1-S370\RGSGLISSI   | 108   | >ROS1-S370\RGSGLIYSI   | 462  | 354   |
| >ROS1-S370\RGSGLISSISI | 147   | >ROS1-S370\RGSGLIYSISI | 255  | 108   |
| >ROS1-S370\YRGSGLIS    | 21785 | >ROS1-S370\YRGSGLIY    | 102  | 21683 |
| >ROS1-S370\YRGSGLIS    | 22746 | >ROS1-S370\YRGSGLIY    | 44   | 22702 |
| >ROS1-S370\YRGSGLIS    | 5697  | >ROS1-S370\YRGSGLIY    | 100  | 5597  |
| >ROS1-S370\YRGSGLISSI  | 417   | >ROS1-S370\YRGSGLIYSI  | 877  | 460   |
| >ROS1-S370\FYRGSGLISSI | 10    | >ROS1-S370\FYRGSGLIYSI | 46   | 36    |
| >ROS1-S370\FYRGSGLISSI | 629   | >ROS1-S370\FYRGSGLIYSI | 205  | 424   |
| >ROS1-S370\FYRGSGLISSI | 15    | >ROS1-S370\FYRGSGLIYSI | 14   | 1     |
| >ROS1-S370\FYRGSGLIS   | 11079 | >ROS1-S370\FYRGSGLIY   | 13   | 11066 |
| >ROS1-S370\FYRGSGLIS   | 25736 | >ROS1-S370\FYRGSGLIY   | 164  | 25572 |
| >ROS1-S370\FYRGSGLIS   | 11058 | >ROS1-S370\FYRGSGLIY   | 31   | 11027 |



|                       |       |                        |      |       |
|-----------------------|-------|------------------------|------|-------|
| >ROS1-S370\FYRGSGLIS  | 12401 | >ROS1-S370\FYRGSGLIY   | 126  | 12275 |
| >ROS1-S370\FYRGSGLIS  | 16730 | >ROS1-S370\FYRGSGLIY   | 203  | 16527 |
| >ROS1-S370\FYRGSGLIS  | 26844 | >ROS1-S370\FYRGSGLIY   | 67   | 26777 |
| >ROS1-S370\IFYRGSGLIS | 16953 | >ROS1-S370\IFYRGSGLIY  | 318  | 16635 |
| >ROS1-S370\IFYRGSGLIS | 18755 | >ROS1-S370\IFYRGSGLIY  | 30   | 18725 |
| >ROS1-S370\IFYRGSGLIS | 26534 | >ROS1-S370\IFYRGSGLIY  | 111  | 26423 |
| >ROS1-S370\IFYRGSGLIS | 22185 | >ROS1-S370\IFYRGSGLIY  | 26   | 22159 |
| >ROS1-S370\IFYRGSGLIS | 20349 | >ROS1-S370\IFYRGSGLIY  | 304  | 20045 |
| >ROS1-S370\IFYRGSGLIS | 9858  | >ROS1-S370\IFYRGSGLIY  | 34   | 9824  |
| >ROS1-S370\IFYRGSGLIS | 11594 | >ROS1-S370\IFYRGSGLIY  | 296  | 11298 |
| >ROS1-V166\VPENTSLQF  | 66    | >ROS1-V166\IPENTSLQF   | 47   | 19    |
| >ROS1-V166\VPENTSLQF  | 447   | >ROS1-V166\IPENTSLQF   | 318  | 129   |
| >ROS1-V166\VPENTSLQF  | 38    | >ROS1-V166\IPENTSLQF   | 29   | 9     |
| >ROS1-V166\VPENTSLQF  | 97    | >ROS1-V166\IPENTSLQF   | 43   | 54    |
| >ROS1-V166\VPENTSLQFN | 9     | >ROS1-V166\IPENTSLQFN  | 7    | 2     |
| >ROS1-V166\VPENTSLQF  | 699   | >ROS1-V166\IPENTSLQF   | 400  | 299   |
| >ROS1-V166\VPENTSLQF  | 310   | >ROS1-V166\IPENTSLQF   | 153  | 157   |
| >ROS1-V166\VPENTSLQF  | 38    | >ROS1-V166\IPENTSLQF   | 19   | 19    |
| >ROS1-V166\VPENTSLQFN | 7     | >ROS1-V166\IPENTSLQFN  | 5    | 2     |
| >ROS1-V166\VPENTSLQFN | 431   | >ROS1-V166\IPENTSLQFN  | 264  | 167   |
| >ROS1-V166\LVPENTSL   | 266   | >ROS1-V166\LIPENTSL    | 115  | 151   |
| >ROS1-V166\LVPENTSL   | 346   | >ROS1-V166\LIPENTSL    | 124  | 222   |
| >ROS1-V166\LVPENTSL   | 181   | >ROS1-V166\LIPENTSL    | 187  | 6     |
| >ROS1-V166\LVPENTSL   | 667   | >ROS1-V166\LIPENTSL    | 206  | 461   |
| >ROS1-V166\LVPENTSL   | 55    | >ROS1-V166\LIPENTSL    | 18   | 37    |
| >ROS1-V166\LVPENTSLQF | 63    | >ROS1-V166\LIPENTSLQF  | 302  | 239   |
| >ROS1-V166\LVPENTSL   | 405   | >ROS1-V166\LIPENTSL    | 1618 | 1213  |
| >ROS1-V166\LVPENTSLQF | 308   | >ROS1-V166\LIPENTSLQF  | 275  | 33    |
| >ROS1-V166\LVPENTSL   | 82    | >ROS1-V166\LIPENTSL    | 2720 | 2638  |
| >ROS1-V166\LVPENTSLQF | 93    | >ROS1-V166\LIPENTSLQF  | 291  | 198   |
| >ROS1-V166\LVPENTSLQF | 194   | >ROS1-V166\LIPENTSLQF  | 258  | 64    |
| >ROS1-V166\FNTPEKPYSL | 5945  | >ROS1-V166\FNTPEKPYSLI | 128  | 5817  |
| >ROS1-V166\SLVPENTSL  | 148   | >ROS1-V166\SLIPENTSL   | 36   | 112   |
| >ROS1-V166\SLVPENTSL  | 7     | >ROS1-V166\SLIPENTSL   | 5    | 2     |
| >ROS1-V166\SLVPENTSL  | 24    | >ROS1-V166\SLIPENTSL   | 12   | 12    |
| >ROS1-V166\SLVPENTSL  | 118   | >ROS1-V166\SLIPENTSL   | 70   | 48    |
| >ROS1-V166\SLVPENTSL  | 78    | >ROS1-V166\SLIPENTSL   | 48   | 30    |
| >ROS1-V166\SLVPENTSL  | 107   | >ROS1-V166\SLIPENTSL   | 26   | 81    |
| >ROS1-V166\SLVPENTSL  | 88    | >ROS1-V166\SLIPENTSL   | 64   | 24    |
| >ROS1-V166\SLVPENTSL  | 4     | >ROS1-V166\SLIPENTSL   | 4    | 0     |
| >ROS1-V166\SLVPENTSLQ | 69    | >ROS1-V166\SLIPENTSLQ  | 61   | 8     |
| >ROS1-V166\SLVPENTSLQ | 531   | >ROS1-V166\SLIPENTSLQF | 274  | 257   |
| >ROS1-V166\SLVPENTSLQ | 560   | >ROS1-V166\SLIPENTSLQF | 250  | 310   |

|                        |      |                        |       |       |
|------------------------|------|------------------------|-------|-------|
| >ROS1-V166(SLVPENTSL   | 960  | >ROS1-V166(SLIPENTSL   | 409   | 551   |
| >ROS1-V166(SLVPENTSLQ  | 68   | >ROS1-V166(SLIPENTSLQF | 44    | 24    |
| >ROS1-V166(SLVPENTSLQ  | 343  | >ROS1-V166(SLIPENTSLQF | 283   | 60    |
| >ROS1-V166(SLVPENTSLQ  | 61   | >ROS1-V166(SLIPENTSLQF | 42    | 19    |
| >ROS1-V166(SLVPENTSLQ  | 34   | >ROS1-V166(SLIPENTSLQF | 36    | 2     |
| >ROS1-V166(YSLVPENTSL  | 308  | >ROS1-V166(YSLIPENTSL  | 185   | 123   |
| >ROS1-V166(YSLVPENTSL  | 75   | >ROS1-V166(YSLIPENTSL  | 124   | 49    |
| >ROS1-V166(YSLVPENTSL  | 15   | >ROS1-V166(YSLIPENTSL  | 10    | 5     |
| >ROS1-V166(YSLVPENTSL  | 196  | >ROS1-V166(YSLIPENTSL  | 132   | 64    |
| >ROS1-V166(YSLVPENTSLQ | 197  | >ROS1-V166(YSLIPENTSLQ | 246   | 49    |
| >ROS1-V166(YSLVPENTSL  | 192  | >ROS1-V166(YSLIPENTSL  | 306   | 114   |
| >ROS1-V166(PYSLVPENTSI | 306  | >ROS1-V166(PYSLIPENTSL | 357   | 51    |
| >ROS1-V166(PYSLVPENTSI | 459  | >ROS1-V166(PYSLIPENTSL | 550   | 91    |
| >ROS1-V166(TPEKPYSLV   | 2587 | >ROS1-V166(TPEKPYSLI   | 319   | 2268  |
| >ROS1-V166(NTPEKPYSLV  | 466  | >ROS1-V166(NTPEKPYSLI  | 1642  | 1176  |
| >ROS1-V166(NTPEKPYSLV  | 266  | >ROS1-V166(NTPEKPYSLI  | 2744  | 2478  |
| >ROS1-V166(NTPEKPYSLV  | 30   | >ROS1-V166(NTPEKPYSLI  | 71    | 41    |
| >ROS1-V166(NTPEKPYSLV  | 78   | >ROS1-V166(NTPEKPYSLI  | 561   | 483   |
| >ROS1-V166(NTPEKPYSLV  | 40   | >ROS1-V166(NTPEKPYSLI  | 22    | 18    |
| >ROS1-V166(NTPEKPYSLV  | 5948 | >ROS1-V166(NTPEKPYSLI  | 86    | 5862  |
| >ROS1-Y419(YNGYVFYL    | 282  | >ROS1-Y419(HNGYVFYL    | 1778  | 1496  |
| >ROS1-Y419(YNGYVFYLL   | 258  | >ROS1-Y419(HNGYVFYLL   | 1444  | 1186  |
| >ROS1-Y419(YNGYVFYLLR  | 133  | >ROS1-Y419(HNGYVFYLLR  | 231   | 98    |
| >ROS1-Y419(YNGYVFYLLR  | 328  | >ROS1-Y419(HNGYVFYLLR  | 414   | 86    |
| >ROS1-Y419(YNGYVFYLL   | 384  | >ROS1-Y419(HNGYVFYLL   | 246   | 138   |
| >ROS1-Y419(YNGYVFYLL   | 406  | >ROS1-Y419(HNGYVFYLL   | 5590  | 5184  |
| >ROS1-Y419(YNGYVFYLLR  | 114  | >ROS1-Y419(HNGYVFYLLR  | 46    | 68    |
| >ROS1-Y419(SYNGYVFYL   | 16   | >ROS1-Y419(SHNGYVFYL   | 97    | 81    |
| >ROS1-Y419(SYNGYVFYL   | 289  | >ROS1-Y419(SHNGYVFYL   | 2620  | 2331  |
| >ROS1-Y419(SYNGYVFYL   | 38   | >ROS1-Y419(SHNGYVFYL   | 347   | 309   |
| >ROS1-Y419(SYNGYVFYL   | 225  | >ROS1-Y419(SHNGYVFYL   | 3436  | 3211  |
| >ROS1-Y419(SYNGYVFYL   | 262  | >ROS1-Y419(SHNGYVFYL   | 3949  | 3687  |
| >ROS1-Y419(SYNGYVFYLL  | 232  | >ROS1-Y419(SHNGYVFYLL  | 4823  | 4591  |
| >ROS1-Y419(SYNGYVFYLL  | 13   | >ROS1-Y419(SHNGYVFYLL  | 720   | 707   |
| >ROS1-Y419(SYNGYVFYL   | 201  | >ROS1-Y419(SHNGYVFYL   | 7763  | 7562  |
| >ROS1-Y419(SYNGYVFYLL  | 33   | >ROS1-Y419(SHNGYVFYLL  | 2283  | 2250  |
| >ROS1-Y419(SYNGYVFY    | 232  | >ROS1-Y419(SHNGYVFY    | 20537 | 20305 |
| >ROS1-Y419(SYNGYVFYL   | 10   | >ROS1-Y419(SHNGYVFYL   | 5197  | 5187  |
| >ROS1-Y419(SYNGYVFYLL  | 13   | >ROS1-Y419(SHNGYVFYLL  | 8275  | 8262  |
| >ROS1-Y419(SYNGYVFY    | 18   | >ROS1-Y419(SHNGYVFY    | 126   | 108   |
| >ROS1-Y419(SYNGYVFYLL  | 252  | >ROS1-Y419(SHNGYVFYLL  | 8016  | 7764  |
| >ROS1-Y419(SYNGYVFY    | 55   | >ROS1-Y419(SHNGYVFY    | 241   | 186   |
| >ROS1-Y419(SYNGYVFYL   | 185  | >ROS1-Y419(SHNGYVFYL   | 11065 | 10880 |

|                         |      |                         |       |       |
|-------------------------|------|-------------------------|-------|-------|
| >ROS1-Y419F SYNGYVFYLLI | 9    | >ROS1-Y419F SHNGYVFYLL  | 267   | 258   |
| >ROS1-Y419F SYNGYVFYLLI | 58   | >ROS1-Y419F SHNGYVFYLL  | 7329  | 7271  |
| >ROS1-Y419F SYNGYVFYLLI | 187  | >ROS1-Y419F SHNGYVFYLL  | 855   | 668   |
| >ROS1-Y419F SYNGYVFY    | 65   | >ROS1-Y419F SHNGYVFY    | 511   | 446   |
| >ROS1-Y419F SYNGYVFY    | 4033 | >ROS1-Y419F SHNGYVFY    | 480   | 3553  |
| >ROS1-Y419F SYNGYVFYL   | 3099 | >ROS1-Y419F SHNGYVFYL   | 48    | 3051  |
| >ROS1-Y419F SYNGYVFYLL  | 1867 | >ROS1-Y419F SHNGYVFYLL  | 31    | 1836  |
| >ROS1-Y419F SYNGYVFY    | 151  | >ROS1-Y419F SHNGYVFY    | 1607  | 1456  |
| >ROS1-Y419F SYNGYVFYLLI | 447  | >ROS1-Y419F SHNGYVFYLL  | 1623  | 1176  |
| >ROS1-Y419F SYNGYVFYLLI | 19   | >ROS1-Y419F SHNGYVFYLL  | 173   | 154   |
| >ROS1-Y419F SYNGYVFYL   | 130  | >ROS1-Y419F SHNGYVFYL   | 1007  | 877   |
| >ROS1-Y419F SYNGYVFYLL  | 45   | >ROS1-Y419F SHNGYVFYLL  | 888   | 843   |
| >ROS1-Y419F SYNGYVFYL   | 148  | >ROS1-Y419F SHNGYVFYL   | 10568 | 10420 |
| >ROS1-Y419F SYNGYVFYLL  | 49   | >ROS1-Y419F SHNGYVFYLL  | 3460  | 3411  |
| >ROS1-Y419F DSYNGYVFYL  | 121  | >ROS1-Y419F DSHNGYVFYL  | 2106  | 1985  |
| >ROS1-Y419F DSYNGYVFYL  | 145  | >ROS1-Y419F DSHNGYVFYL  | 1213  | 1068  |
| >ROS1-Y419F DSYNGYVFY   | 54   | >ROS1-Y419F DSHNGYVFY   | 97    | 43    |
| >ROS1-Y419F DSYNGYVF    | 392  | >ROS1-Y419F DSHNGYVF    | 669   | 277   |
| >ROS1-Y419F DSYNGYVFY   | 38   | >ROS1-Y419F DSHNGYVFY   | 56    | 18    |
| >ROS1-Y419F DSYNGYVFYL  | 443  | >ROS1-Y419F DSHNGYVFYL  | 723   | 280   |
| >ROS1-Y419F DSYNGYVFY   | 318  | >ROS1-Y419F DSHNGYVFY   | 239   | 79    |
| >ROS1-Y419F DSYNGYVFY   | 72   | >ROS1-Y419F DSHNGYVFY   | 315   | 243   |
| >ROS1-Y419F DSYNGYVFY   | 128  | >ROS1-Y419F DSHNGYVFY   | 214   | 86    |
| >ROS1-Y419F DSYNGYVFY   | 45   | >ROS1-Y419F DSHNGYVFY   | 326   | 281   |
| >ROS1-Y419F DSYNGYVFYL  | 68   | >ROS1-Y419F DSHNGYVFYL  | 575   | 507   |
| >ROS1-Y419F DSYNGYVFYL  | 65   | >ROS1-Y419F DSHNGYVFYL  | 120   | 55    |
| >ROS1-Y419F DSYNGYVFYL  | 50   | >ROS1-Y419F DSHNGYVFYL  | 1035  | 985   |
| >ROS1-Y419F DSYNGYVFYL  | 240  | >ROS1-Y419F DSHNGYVFYL  | 4301  | 4061  |
| >ROS1-Y419F DSYNGYVF    | 71   | >ROS1-Y419F DSHNGYVF    | 351   | 280   |
| >ROS1-Y419F DSYNGYVFY   | 190  | >ROS1-Y419F DSHNGYVFY   | 1055  | 865   |
| >ROS1-Y419F DSYNGYVF    | 46   | >ROS1-Y419F DSHNGYVF    | 543   | 497   |
| >ROS1-Y419F DSYNGYVFY   | 78   | >ROS1-Y419F DSHNGYVFY   | 1248  | 1170  |
| >ROS1-Y419F DSYNGYVFYL  | 150  | >ROS1-Y419F DSHNGYVFYL  | 1435  | 1285  |
| >ROS1-Y419F DSYNGYVF    | 419  | >ROS1-Y419F DSHNGYVF    | 1144  | 725   |
| >ROS1-Y419F DSYNGYVFY   | 394  | >ROS1-Y419F DSHNGYVFY   | 1955  | 1561  |
| >ROS1-Y419F ADSYNGYVFY  | 109  | >ROS1-Y419F AD SHNGYVF` | 175   | 66    |
| >ROS1-Y419F ADSYNGYVFY  | 483  | >ROS1-Y419F AD SHNGYVF` | 891   | 408   |
| >ROS1-Y419F ADSYNGYVF   | 250  | >ROS1-Y419F AD SHNGYVF  | 175   | 75    |
| >ROS1-Y419F ADSYNGYVFY  | 231  | >ROS1-Y419F AD SHNGYVF` | 326   | 95    |
| >ROS1-Y419F ADSYNGYVFY  | 332  | >ROS1-Y419F AD SHNGYVF` | 1904  | 1572  |
| >ROS1-Y419F ADSYNGYV    | 173  | >ROS1-Y419F AD SHNGYV   | 83    | 90    |
| >ROS1-Y419F ADSYNGYVFY  | 392  | >ROS1-Y419F AD SHNGYVF` | 152   | 240   |
| >ROS1-Y419F VADSYNGY    | 32   | >ROS1-Y419F VAD SHNGY   | 41    | 9     |

|                        |     |                        |      |      |
|------------------------|-----|------------------------|------|------|
| >ROS1-Y419F VADSYNGYVI | 18  | >ROS1-Y419F VADSHNGYV  | 25   | 7    |
| >ROS1-Y419F VADSYNGYV  | 460 | >ROS1-Y419F VADSHNGYV  | 1183 | 723  |
| >ROS1-Y419F VADSYNGYV  | 36  | >ROS1-Y419F VADSHNGYV  | 102  | 66   |
| >ROS1-Y419F VADSYNGYVI | 284 | >ROS1-Y419F VADSHNGYV  | 1480 | 1196 |
| >ROS1-Y419F VADSYNGYVI | 512 | >ROS1-Y419F VADSHNGYV  | 466  | 46   |
| >ROS1-Y419F VADSYNGY   | 145 | >ROS1-Y419F VADSHNGY   | 216  | 71   |
| >ROS1-Y419F VADSYNGYVI | 94  | >ROS1-Y419F VADSHNGYV  | 159  | 65   |
| >ROS1-Y419F VADSYNGYV  | 155 | >ROS1-Y419F VADSHNGYV  | 384  | 229  |
| >ROS1-Y419F VADSYNGY   | 276 | >ROS1-Y419F VADSHNGY   | 238  | 38   |
| >ROS1-Y419F VADSYNGYVI | 170 | >ROS1-Y419F VADSHNGYV  | 195  | 25   |
| >ROS1-Y419F VADSYNGYVI | 377 | >ROS1-Y419F VADSHNGYV  | 517  | 140  |
| >ROS1-Y419F VADSYNGY   | 301 | >ROS1-Y419F VADSHNGY   | 299  | 2    |
| >ROS1-Y419F VADSYNGYVI | 501 | >ROS1-Y419F VADSHNGYV  | 491  | 10   |
| >ROS1-Y419F VADSYNGYVI | 394 | >ROS1-Y419F VADSHNGYV  | 1180 | 786  |
| >ROS1-Y419F IVADSYNGYV | 133 | >ROS1-Y419F IVADSHNGYV | 384  | 251  |
| >ROS1-Y419F IVADSYNGYV | 31  | >ROS1-Y419F IVADSHNGYV | 64   | 33   |
| >ROS1-Y419F IVADSYNGYV | 38  | >ROS1-Y419F IVADSHNGYV | 62   | 24   |
| >ROS1-Y419F IVADSYNGYV | 120 | >ROS1-Y419F IVADSHNGYV | 294  | 174  |
| >ROS1-Y419F IVADSYNGYV | 17  | >ROS1-Y419F IVADSHNGYV | 25   | 8    |
| >ROS1-Y419F IVADSYNGYV | 456 | >ROS1-Y419F IVADSHNGYV | 1001 | 545  |
| >ROS1-Y419F IVADSYNGYV | 103 | >ROS1-Y419F IVADSHNGYV | 211  | 108  |
| >ROS1-Y419F IVADSYNGYV | 38  | >ROS1-Y419F IVADSHNGYV | 113  | 75   |
| >ROS1-Y419F IVADSYNGYV | 6   | >ROS1-Y419F IVADSHNGYV | 9    | 3    |
| >ROS1-Y419F IVADSYNGY  | 473 | >ROS1-Y419F IVADSHNGY  | 749  | 276  |
| >ROS1-Y419F IVADSYNGYV | 372 | >ROS1-Y419F IVADSHNGYV | 612  | 240  |
| >ROS1-Y419F IVADSYNGY  | 240 | >ROS1-Y419F IVADSHNGY  | 988  | 748  |
| >ROS1-Y419F IVADSYNGY  | 38  | >ROS1-Y419F IVADSHNGY  | 314  | 276  |
| >ROS1-Y419F IVADSYNGY  | 116 | >ROS1-Y419F IVADSHNGY  | 80   | 36   |
| >ROS1-Y419F IVADSYNGY  | 497 | >ROS1-Y419F IVADSHNGY  | 236  | 261  |
| >ROS1-Y419F IVADSYNGY  | 71  | >ROS1-Y419F IVADSHNGY  | 45   | 26   |
| >ROS1-Y419F IVADSYNGYV | 499 | >ROS1-Y419F IVADSHNGYV | 439  | 60   |
| >ROS1-Y419F IVADSYNGY  | 41  | >ROS1-Y419F IVADSHNGY  | 33   | 8    |
| >ROS1-Y419F IVADSYNGY  | 186 | >ROS1-Y419F IVADSHNGY  | 126  | 60   |
| >ROS1-Y419F IVADSYNGYV | 21  | >ROS1-Y419F IVADSHNGYV | 39   | 18   |
| >ROS1-Y419F IVADSYNGYV | 33  | >ROS1-Y419F IVADSHNGYV | 49   | 16   |
| >ROS1-Y419F IVADSYNGY  | 164 | >ROS1-Y419F IVADSHNGY  | 111  | 53   |
| >ROS1-Y419F IVADSYNGYV | 75  | >ROS1-Y419F IVADSHNGYV | 65   | 10   |
| >ROS1-Y419F IVADSYNGY  | 561 | >ROS1-Y419F IVADSHNGY  | 309  | 252  |
| >ROS1-Y419F IVADSYNGY  | 468 | >ROS1-Y419F IVADSHNGY  | 710  | 242  |
| >ROS1-Y419F IVADSYNGYV | 59  | >ROS1-Y419F IVADSHNGYV | 67   | 8    |
| >ROS1-Y419F IVADSYNGY  | 89  | >ROS1-Y419F IVADSHNGY  | 38   | 51   |
| >ROS1-Y419F IVADSYNGYV | 101 | >ROS1-Y419F IVADSHNGYV | 51   | 50   |
| >ROS1-Y419F IVADSYNGY  | 198 | >ROS1-Y419F IVADSHNGY  | 192  | 6    |

|                         |       |                         |       |       |
|-------------------------|-------|-------------------------|-------|-------|
| >ROS1-Y419F IVADSYNGYV  | 151   | >ROS1-Y419F IVADSHNGYV  | 141   | 10    |
| >ROS1-Y419F IVADSYNGYV  | 279   | >ROS1-Y419F IVADSHNGYV  | 315   | 36    |
| >ROS1-Y419F IVADSYNGY   | 242   | >ROS1-Y419F IVADSHNGY   | 119   | 123   |
| >ROS1-Y419F IVADSYNGYV  | 157   | >ROS1-Y419F IVADSHNGYV  | 122   | 35    |
| >ROS1-Y419F IVADSYNGYV  | 283   | >ROS1-Y419F IVADSHNGYV  | 437   | 154   |
| >ROS1-Y419F KIVADSYNGY  | 84    | >ROS1-Y419F KIVADSHNGY  | 177   | 93    |
| >ROS1-Y419F KIVADSYNGY  | 20    | >ROS1-Y419F KIVADSHNGY  | 31    | 11    |
| >ROS1-Y419F KIVADSYNGY  | 17    | >ROS1-Y419F KIVADSHNGY  | 14    | 3     |
| >ROS1-Y419F KIVADSYNGY  | 19    | >ROS1-Y419F KIVADSHNGY  | 28    | 9     |
| >ROS1-Y419F KIVADSYNGY  | 12    | >ROS1-Y419F KIVADSHNGY  | 17    | 5     |
| >ROS1-Y419F KIVADSYNGY  | 70    | >ROS1-Y419F KIVADSHNGY  | 106   | 36    |
| >ROS1-Y419F KIVADSYNGY  | 95    | >ROS1-Y419F KIVADSHNGY  | 123   | 28    |
| >ROS1-Y419F KIVADSYNGY  | 346   | >ROS1-Y419F KIVADSHNGY  | 469   | 123   |
| >ROS1-Y419F KIVADSYNGY  | 31    | >ROS1-Y419F KIVADSHNGY  | 32    | 1     |
| >ROS1-Y419F KIVADSYNGY  | 153   | >ROS1-Y419F KIVADSHNGY  | 112   | 41    |
| >ROS1-Y419F KIVADSYNGY  | 396   | >ROS1-Y419F KIVADSHNGY  | 231   | 165   |
| >ROS1-Y419F KIVADSYNGY  | 325   | >ROS1-Y419F KIVADSHNGY  | 919   | 594   |
| >ROS1-Y419F KIVADSYNGY  | 354   | >ROS1-Y419F KIVADSHNGY  | 647   | 293   |
| >ROS1-Y419F KIVADSYNGY  | 378   | >ROS1-Y419F KIVADSHNGY  | 368   | 10    |
| >ROS1-Y419F KIVADSYNGY  | 233   | >ROS1-Y419F KIVADSHNGY  | 118   | 115   |
| >ROS1-Y419F KIVADSYNGY  | 211   | >ROS1-Y419F KIVADSHNGY  | 179   | 32    |
| >ROS1-Y419F KIVADSYNGY  | 260   | >ROS1-Y419F KIVADSHNGY  | 123   | 137   |
| >ROS1-Y419F QKIVADSY    | 22    | >ROS1-Y419F QKIVADSH    | 1512  | 1490  |
| >ROS1-Y419F QKIVADSYNC  | 17    | >ROS1-Y419F QKIVADSHNC  | 19    | 2     |
| >ROS1-Y419F APQKIVADSY  | 18    | >ROS1-Y419F APQKIVADSH  | 9232  | 9214  |
| >RPN1-E99K- EVRETKIK    | 5771  | >RPN1-E99K- KVRETKIK    | 160   | 5611  |
| >RPN1-E99K- EVRETKIKGK  | 6126  | >RPN1-E99K- KVRETKIKGK  | 440   | 5686  |
| >RPN1-E99K- EVRETKIK    | 176   | >RPN1-E99K- KVRETKIK    | 3     | 173   |
| >RPN1-E99K- EVRETKIKG   | 7899  | >RPN1-E99K- KVRETKIKG   | 11    | 7888  |
| >RPN1-E99K- EVRETKIKGK  | 271   | >RPN1-E99K- KVRETKIKGK  | 3     | 268   |
| >RPN1-E99K- EVRETKIKGK! | 10792 | >RPN1-E99K- KVRETKIKGK! | 34    | 10758 |
| >RPN1-E99K- EVRETKIK    | 14043 | >RPN1-E99K- KVRETKIK    | 447   | 13596 |
| >RPN1-E99K- EVRETKIK    | 172   | >RPN1-E99K- KVRETKIK    | 10774 | 10602 |
| >RPN1-E99K- LEVRETKI    | 3895  | >RPN1-E99K- LKVRETKI    | 116   | 3779  |
| >RPN1-E99K- LEVRETKIK   | 8645  | >RPN1-E99K- LKVRETKIK   | 485   | 8160  |
| >RPN1-E99K- NLEVRETKI   | 2048  | >RPN1-E99K- NLKVRETKI   | 82    | 1966  |
| >RPN1-E99K- EEENNLEV    | 417   | >RPN1-E99K- EEENNLKV    | 318   | 99    |
| >RPN1-E99K- EEENNLEV    | 106   | >RPN1-E99K- EEENNLKV    | 264   | 158   |
| >RPN1-E99K- EEENNLEVRE  | 206   | >RPN1-E99K- EEENNLKVRE  | 249   | 43    |
| >RPN1-E99K- DEEENNLEV   | 420   | >RPN1-E99K- DEEENNLKV   | 1313  | 893   |
| >RPN1-E99K- DEEENNLEV   | 84    | >RPN1-E99K- DEEENNLKV   | 149   | 65    |
| >RPN1-E99K- EDEEENNLEV  | 225   | >RPN1-E99K- EDEEENNLKV  | 260   | 35    |
| >RPN1-E99K- GEDEEENNLE  | 299   | >RPN1-E99K- GEDEEENNLK  | 316   | 17    |

|                         |       |                         |       |       |
|-------------------------|-------|-------------------------|-------|-------|
| >RPN1-E99K-GEDEEENLLE   | 271   | >RPN1-E99K-GEDEEENLk    | 190   | 81    |
| >RPN1-I454T IIYVRLDFSIT | 460   | >RPN1-I454T TIYVRLDFSIT | 1015  | 555   |
| >RPN1-I454T IIYVRLDFS   | 258   | >RPN1-I454T TIYVRLDFS   | 392   | 134   |
| >RPN1-I454T IIYVRLDFS   | 106   | >RPN1-I454T TIYVRLDFS   | 164   | 58    |
| >RPN1-I454T IIYVRLDFS   | 470   | >RPN1-I454T TIYVRLDFS   | 467   | 3     |
| >RPN1-I454T IIYVRLDFS   | 171   | >RPN1-I454T TIYVRLDFS   | 217   | 46    |
| >RPN1-I454T IIYVRLDFS   | 86    | >RPN1-I454T TIYVRLDFS   | 442   | 356   |
| >RPN1-I454T IIYVRLDFS   | 326   | >RPN1-I454T TIYVRLDFS   | 723   | 397   |
| >RPN1-I454T IIYVRLDFS   | 380   | >RPN1-I454T TIYVRLDFS   | 1625  | 1245  |
| >RPN1-I454T IIYVRLDFS   | 226   | >RPN1-I454T TIYVRLDFS   | 340   | 114   |
| >RPN1-I454T IIYVRLDF    | 100   | >RPN1-I454T TIYVRLDF    | 549   | 449   |
| >RPN1-I454T IIYVRLDF    | 164   | >RPN1-I454T TIYVRLDF    | 1185  | 1021  |
| >RPN1-I454T VIIYVRLDFS  | 165   | >RPN1-I454T VTIIYVRLDFS | 299   | 134   |
| >RPN1-I454T VIIYVRLDF   | 482   | >RPN1-I454T VTIIYVRLDF  | 367   | 115   |
| >RPN1-I454T VIIYVRLDF   | 376   | >RPN1-I454T VTIIYVRLDF  | 193   | 183   |
| >RPN1-I454T VIIYVRLDF   | 230   | >RPN1-I454T VTIIYVRLDF  | 72    | 158   |
| >RPN1-I454T VIIYVRLDFS  | 117   | >RPN1-I454T VTIIYVRLDFS | 41    | 76    |
| >RPN1-I454T VIIYVRLDFS  | 315   | >RPN1-I454T VTIIYVRLDFS | 57    | 258   |
| >RPN1-I454T VIIYVRLDF   | 272   | >RPN1-I454T VTIIYVRLDF  | 163   | 109   |
| >RPN1-I454T VIIYVRLDF   | 6222  | >RPN1-I454T VTIIYVRLDF  | 20    | 6202  |
| >RPN1-I454T VIIYVRLDFS  | 12840 | >RPN1-I454T VTIIYVRLDFS | 132   | 12708 |
| >RPN1-I454T VIIYVRLDF   | 2345  | >RPN1-I454T VTIIYVRLDF  | 104   | 2241  |
| >RPN1-I454T VIIYVRLDFS  | 976   | >RPN1-I454T VTIIYVRLDFS | 73    | 903   |
| >RPN1-I454T VIIYVRLDF   | 4440  | >RPN1-I454T VTIIYVRLDF  | 158   | 4282  |
| >RPN1-I454T VIIYVRLDFS  | 5592  | >RPN1-I454T VTIIYVRLDFS | 61    | 5531  |
| >RPN1-I454T AAFYILFFTVI | 345   | >RPN1-I454T AAFYILFFTVT | 1569  | 1224  |
| >RPN1-I454T AAFYILFFTVI | 249   | >RPN1-I454T AAFYILFFTVT | 2342  | 2093  |
| >RPN1-I454T AAFYILFFTVI | 128   | >RPN1-I454T AAFYILFFTVT | 959   | 831   |
| >RPN1-I454T AAFYILFFTVI | 44    | >RPN1-I454T AAFYILFFTVT | 5344  | 5300  |
| >RPN1-I454T AAFYILFFTVI | 113   | >RPN1-I454T AAFYILFFTVT | 1872  | 1759  |
| >RPN1-I454T AAFYILFFTVI | 129   | >RPN1-I454T AAFYILFFTVT | 2529  | 2400  |
| >RPN1-I454T AAFYILFFTVI | 155   | >RPN1-I454T AAFYILFFTVT | 1183  | 1028  |
| >RPN1-I454T AAFYILFFTVI | 478   | >RPN1-I454T AAFYILFFTVT | 15793 | 15315 |
| >RPN1-I454T AAFYILFFTVI | 24    | >RPN1-I454T AAFYILFFTVT | 23162 | 23138 |
| >RPN1-I454T TVIIYVRL    | 11    | >RPN1-I454T TVTIYVRL    | 48    | 37    |
| >RPN1-I454T TVIIYVRL    | 256   | >RPN1-I454T TVTIYVRL    | 5134  | 4878  |
| >RPN1-I454T TVIIYVRLDF  | 162   | >RPN1-I454T TVTIYVRLDF  | 3261  | 3099  |
| >RPN1-I454T TVIIYVRL    | 38    | >RPN1-I454T TVTIYVRL    | 95    | 57    |
| >RPN1-I454T FTVIIYVRL   | 220   | >RPN1-I454T FTVTIYVRL   | 210   | 10    |
| >RPN1-I454T FTVIIYVRL   | 928   | >RPN1-I454T FTVTIYVRL   | 343   | 585   |
| >RPN1-I454T FTVIIYVRL   | 66    | >RPN1-I454T FTVTIYVRL   | 25    | 41    |
| >RPN1-I454T FTVIIYVRL   | 890   | >RPN1-I454T FTVTIYVRL   | 405   | 485   |
| >RPN1-I454T FTVIIYVRL   | 171   | >RPN1-I454T FTVTIYVRL   | 80    | 91    |

|                         |      |                         |      |      |
|-------------------------|------|-------------------------|------|------|
| >RPN1-I454T FTVIIYVRL   | 291  | >RPN1-I454T FTVTIYVRL   | 457  | 166  |
| >RPN1-I454T FTVIIYVRL   | 475  | >RPN1-I454T FTVTIYVRL   | 194  | 281  |
| >RPN1-I454T FTVIIYVRLDF | 223  | >RPN1-I454T FTVTIYVRLDF | 115  | 108  |
| >RPN1-I454T FTVIIYVRL   | 2804 | >RPN1-I454T FTVTIYVRL   | 334  | 2470 |
| >RPN1-I454T FTVIIYVRLDF | 1547 | >RPN1-I454T FTVTIYVRLDF | 202  | 1345 |
| >RPN1-I454T FTVIIYVRLDF | 128  | >RPN1-I454T FTVTIYVRLDF | 126  | 2    |
| >RPN1-I454T FTVIIYVR    | 65   | >RPN1-I454T FTVTIYVR    | 78   | 13   |
| >RPN1-I454T FTVIIYVR    | 87   | >RPN1-I454T FTVTIYVR    | 137  | 50   |
| >RPN1-I454T FTVIIYVR    | 4    | >RPN1-I454T FTVTIYVR    | 3    | 1    |
| >RPN1-I454T FTVIIYVRL   | 9    | >RPN1-I454T FTVTIYVRL   | 6    | 3    |
| >RPN1-I454T FTVIIYVRL   | 146  | >RPN1-I454T FTVTIYVRL   | 148  | 2    |
| >RPN1-I454T FTVIIYVRLDF | 142  | >RPN1-I454T FTVTIYVRLDF | 59   | 83   |
| >RPN1-I454T FTVIIYVRL   | 16   | >RPN1-I454T FTVTIYVRL   | 52   | 36   |
| >RPN1-I454T FTVIIYVRLDF | 8    | >RPN1-I454T FTVTIYVRLDF | 15   | 7    |
| >RPN1-I454T FTVIIYVRLDF | 457  | >RPN1-I454T FTVTIYVRLDF | 330  | 127  |
| >RPN1-I454T FTVIIYVRL   | 115  | >RPN1-I454T FTVTIYVRL   | 100  | 15   |
| >RPN1-I454T FTVIIYVRL   | 235  | >RPN1-I454T FTVTIYVRL   | 127  | 108  |
| >RPN1-I454T FTVIIYVRLDF | 208  | >RPN1-I454T FTVTIYVRLDF | 118  | 90   |
| >RPN1-I454T FTVIIYVR    | 144  | >RPN1-I454T FTVTIYVR    | 113  | 31   |
| >RPN1-I454T FTVIIYVRL   | 450  | >RPN1-I454T FTVTIYVRL   | 690  | 240  |
| >RPN1-I454T FFTVIIYV    | 298  | >RPN1-I454T FFTVTIYV    | 811  | 513  |
| >RPN1-I454T FFTVIIYV    | 28   | >RPN1-I454T FFTVTIYV    | 70   | 42   |
| >RPN1-I454T FFTVIIYV    | 102  | >RPN1-I454T FFTVTIYV    | 137  | 35   |
| >RPN1-I454T FFTVIIYV    | 61   | >RPN1-I454T FFTVTIYV    | 97   | 36   |
| >RPN1-I454T FFTVIIYV    | 47   | >RPN1-I454T FFTVTIYV    | 58   | 11   |
| >RPN1-I454T FFTVIIYV    | 21   | >RPN1-I454T FFTVTIYV    | 29   | 8    |
| >RPN1-I454T FFTVIIYVRL  | 41   | >RPN1-I454T FFTVTIYVRL  | 48   | 7    |
| >RPN1-I454T FFTVIIYVR   | 26   | >RPN1-I454T FFTVTIYVR   | 46   | 20   |
| >RPN1-I454T FFTVIIYVR   | 18   | >RPN1-I454T FFTVTIYVR   | 39   | 21   |
| >RPN1-I454T FFTVIIYVR   | 16   | >RPN1-I454T FFTVTIYVR   | 40   | 24   |
| >RPN1-I454T FFTVIIYV    | 325  | >RPN1-I454T FFTVTIYV    | 1199 | 874  |
| >RPN1-I454T FFTVIIYVR   | 32   | >RPN1-I454T FFTVTIYVR   | 59   | 27   |
| >RPN1-I454T LFFTVIIYV   | 105  | >RPN1-I454T LFFTVTIYV   | 196  | 91   |
| >RPN1-I454T LFFTVIIYV   | 66   | >RPN1-I454T LFFTVTIYV   | 44   | 22   |
| >RPN1-I454T LFFTVIIYVRL | 255  | >RPN1-I454T LFFTVTIYVRL | 195  | 60   |
| >RPN1-I454T LFFTVIIYV   | 191  | >RPN1-I454T LFFTVTIYV   | 300  | 109  |
| >RPN1-I454T LFFTVIIYV   | 6    | >RPN1-I454T LFFTVTIYV   | 15   | 9    |
| >RPN1-I454T LFFTVIIYV   | 24   | >RPN1-I454T LFFTVTIYV   | 39   | 15   |
| >RPN1-I454T LFFTVIIYV   | 43   | >RPN1-I454T LFFTVTIYV   | 113  | 70   |
| >RPN1-I454T LFFTVIIYVRL | 272  | >RPN1-I454T LFFTVTIYVRL | 263  | 9    |
| >RPN1-I454T LFFTVIIYVRL | 30   | >RPN1-I454T LFFTVTIYVRL | 25   | 5    |
| >RPN1-I454T LFFTVIIY    | 23   | >RPN1-I454T LFFTVTIY    | 22   | 1    |
| >RPN1-I454T LFFTVIIY    | 391  | >RPN1-I454T LFFTVTIY    | 364  | 27   |

|                         |     |                         |     |     |
|-------------------------|-----|-------------------------|-----|-----|
| >RPN1-I454T LFFTVIIYVR  | 14  | >RPN1-I454T LFFTVTIYVR  | 18  | 4   |
| >RPN1-I454T LFFTVIIYVR  | 68  | >RPN1-I454T LFFTVTIYVR  | 117 | 49  |
| >RPN1-I454T LFFTVIIYVR  | 23  | >RPN1-I454T LFFTVTIYVR  | 45  | 22  |
| >RPN1-I454T LFFTVIIYV   | 327 | >RPN1-I454T LFFTVTIYV   | 286 | 41  |
| >RPN1-I454T LFFTVIIY    | 799 | >RPN1-I454T LFFTVTIY    | 409 | 390 |
| >RPN1-I454T LFFTVIIY    | 344 | >RPN1-I454T LFFTVTIY    | 227 | 117 |
| >RPN1-I454T LFFTVIIY    | 303 | >RPN1-I454T LFFTVTIY    | 252 | 51  |
| >RPN1-I454T LFFTVIIY    | 192 | >RPN1-I454T LFFTVTIY    | 226 | 34  |
| >RPN1-I454T LFFTVIIYVR  | 24  | >RPN1-I454T LFFTVTIYVR  | 24  | 0   |
| >RPN1-I454T LFFTVIIYV   | 262 | >RPN1-I454T LFFTVTIYV   | 568 | 306 |
| >RPN1-I454T LFFTVIIYVRL | 488 | >RPN1-I454T LFFTVTIYVRL | 697 | 209 |
| >RPN1-I454T ILFFTVII    | 44  | >RPN1-I454T ILFFTVTI    | 40  | 4   |
| >RPN1-I454T ILFFTVIIYV  | 8   | >RPN1-I454T ILFFTVTIYV  | 8   | 0   |
| >RPN1-I454T ILFFTVII    | 51  | >RPN1-I454T ILFFTVTI    | 52  | 1   |
| >RPN1-I454T ILFFTVIIYV  | 18  | >RPN1-I454T ILFFTVTIYV  | 15  | 3   |
| >RPN1-I454T ILFFTVII    | 22  | >RPN1-I454T ILFFTVTI    | 15  | 7   |
| >RPN1-I454T ILFFTVIIYV  | 19  | >RPN1-I454T ILFFTVTIYV  | 16  | 3   |
| >RPN1-I454T ILFFTVII    | 382 | >RPN1-I454T ILFFTVTI    | 419 | 37  |
| >RPN1-I454T ILFFTVIIYV  | 50  | >RPN1-I454T ILFFTVTIYV  | 54  | 4   |
| >RPN1-I454T ILFFTVII    | 7   | >RPN1-I454T ILFFTVTI    | 3   | 4   |
| >RPN1-I454T ILFFTVIIYV  | 1   | >RPN1-I454T ILFFTVTIYV  | 1   | 0   |
| >RPN1-I454T ILFFTVII    | 28  | >RPN1-I454T ILFFTVTI    | 15  | 13  |
| >RPN1-I454T ILFFTVIIYV  | 3   | >RPN1-I454T ILFFTVTIYV  | 4   | 1   |
| >RPN1-I454T ILFFTVII    | 23  | >RPN1-I454T ILFFTVTI    | 12  | 11  |
| >RPN1-I454T ILFFTVIIYV  | 4   | >RPN1-I454T ILFFTVTIYV  | 4   | 0   |
| >RPN1-I454T ILFFTVII    | 56  | >RPN1-I454T ILFFTVTI    | 20  | 36  |
| >RPN1-I454T ILFFTVIIYV  | 2   | >RPN1-I454T ILFFTVTIYV  | 2   | 0   |
| >RPN1-I454T ILFFTVII    | 15  | >RPN1-I454T ILFFTVTI    | 6   | 9   |
| >RPN1-I454T ILFFTVIIYV  | 2   | >RPN1-I454T ILFFTVTIYV  | 2   | 0   |
| >RPN1-I454T ILFFTVIIY   | 91  | >RPN1-I454T ILFFTVTIY   | 115 | 24  |
| >RPN1-I454T ILFFTVIIYVR | 166 | >RPN1-I454T ILFFTVTIYVR | 203 | 37  |
| >RPN1-I454T ILFFTVIIYVR | 174 | >RPN1-I454T ILFFTVTIYVR | 300 | 126 |
| >RPN1-I454T ILFFTVIIY   | 35  | >RPN1-I454T ILFFTVTIY   | 47  | 12  |
| >RPN1-I454T ILFFTVIIY   | 79  | >RPN1-I454T ILFFTVTIY   | 70  | 9   |
| >RPN1-I454T ILFFTVIIYVR | 21  | >RPN1-I454T ILFFTVTIYVR | 19  | 2   |
| >RPN1-I454T ILFFTVII    | 15  | >RPN1-I454T ILFFTVTI    | 7   | 8   |
| >RPN1-I454T ILFFTVIIY   | 246 | >RPN1-I454T ILFFTVTIY   | 208 | 38  |
| >RPN1-I454T ILFFTVIIYV  | 965 | >RPN1-I454T ILFFTVTIYV  | 498 | 467 |
| >RPN1-I454T ILFFTVIIYVR | 69  | >RPN1-I454T ILFFTVTIYVR | 88  | 19  |
| >RPN1-I454T ILFFTVIIYVR | 11  | >RPN1-I454T ILFFTVTIYVR | 14  | 3   |
| >RPN1-I454T ILFFTVIIYV  | 163 | >RPN1-I454T ILFFTVTIYV  | 94  | 69  |
| >RPN1-I454T ILFFTVIIYV  | 293 | >RPN1-I454T ILFFTVTIYV  | 237 | 56  |
| >RPN1-I454T ILFFTVIIY   | 57  | >RPN1-I454T ILFFTVTIY   | 111 | 54  |



|                         |      |                        |      |      |
|-------------------------|------|------------------------|------|------|
| >RPN1-I454T ILFFTVIIY   | 86   | >RPN1-I454T ILFFVTIY   | 60   | 26   |
| >RPN1-I454T ILFFTVIIY   | 158  | >RPN1-I454T ILFFVTIY   | 92   | 66   |
| >RPN1-I454T ILFFTVII    | 55   | >RPN1-I454T ILFFVTI    | 43   | 12   |
| >RPN1-I454T ILFFTVIIY   | 8    | >RPN1-I454T ILFFVTIY   | 6    | 2    |
| >RPN1-I454T ILFFTVIIYV  | 184  | >RPN1-I454T ILFFVTIYV  | 134  | 50   |
| >RPN1-I454T ILFFTVIIYVR | 777  | >RPN1-I454T ILFFVTIYVR | 422  | 355  |
| >RPN1-I454T ILFFTVIIY   | 486  | >RPN1-I454T ILFFVTIY   | 261  | 225  |
| >RPN1-I454T ILFFTVIIY   | 103  | >RPN1-I454T ILFFVTIY   | 17   | 86   |
| >RPN1-I454T ILFFTVIIY   | 183  | >RPN1-I454T ILFFVTIY   | 270  | 87   |
| >RPN1-I454T ILFFTVIIYVR | 51   | >RPN1-I454T ILFFVTIYVR | 67   | 16   |
| >RPN1-I454T YILFFTVI    | 34   | >RPN1-I454T YILFFVT    | 568  | 534  |
| >RPN1-I454T YILFFTVII   | 28   | >RPN1-I454T YILFFVTI   | 19   | 9    |
| >RPN1-I454T YILFFTVIIYV | 7    | >RPN1-I454T YILFFVTIYV | 7    | 0    |
| >RPN1-I454T YILFFTVI    | 195  | >RPN1-I454T YILFFVT    | 1886 | 1691 |
| >RPN1-I454T YILFFTVII   | 180  | >RPN1-I454T YILFFVTI   | 118  | 62   |
| >RPN1-I454T YILFFTVIIYV | 17   | >RPN1-I454T YILFFVTIYV | 12   | 5    |
| >RPN1-I454T YILFFTVI    | 80   | >RPN1-I454T YILFFVT    | 1232 | 1152 |
| >RPN1-I454T YILFFTVII   | 159  | >RPN1-I454T YILFFVTI   | 80   | 79   |
| >RPN1-I454T YILFFTVIIYV | 17   | >RPN1-I454T YILFFVTIYV | 17   | 0    |
| >RPN1-I454T YILFFTVI    | 21   | >RPN1-I454T YILFFVT    | 158  | 137  |
| >RPN1-I454T YILFFTVII   | 56   | >RPN1-I454T YILFFVTI   | 34   | 22   |
| >RPN1-I454T YILFFTVIIYV | 6    | >RPN1-I454T YILFFVTIYV | 5    | 1    |
| >RPN1-I454T YILFFTVI    | 11   | >RPN1-I454T YILFFVT    | 282  | 271  |
| >RPN1-I454T YILFFTVII   | 24   | >RPN1-I454T YILFFVTI   | 4    | 20   |
| >RPN1-I454T YILFFTVIIYV | 2    | >RPN1-I454T YILFFVTIYV | 1    | 1    |
| >RPN1-I454T YILFFTVI    | 94   | >RPN1-I454T YILFFVT    | 5397 | 5303 |
| >RPN1-I454T YILFFTVII   | 53   | >RPN1-I454T YILFFVTI   | 20   | 33   |
| >RPN1-I454T YILFFTVIIYV | 4    | >RPN1-I454T YILFFVTIYV | 4    | 0    |
| >RPN1-I454T YILFFTVI    | 79   | >RPN1-I454T YILFFVT    | 3070 | 2991 |
| >RPN1-I454T YILFFTVII   | 85   | >RPN1-I454T YILFFVTI   | 23   | 62   |
| >RPN1-I454T YILFFTVIIYV | 5    | >RPN1-I454T YILFFVTIYV | 5    | 0    |
| >RPN1-I454T YILFFTVI    | 46   | >RPN1-I454T YILFFVT    | 1995 | 1949 |
| >RPN1-I454T YILFFTVII   | 29   | >RPN1-I454T YILFFVTI   | 7    | 22   |
| >RPN1-I454T YILFFTVIIYV | 2    | >RPN1-I454T YILFFVTIYV | 2    | 0    |
| >RPN1-I454T YILFFTVI    | 73   | >RPN1-I454T YILFFVT    | 1180 | 1107 |
| >RPN1-I454T YILFFTVII   | 125  | >RPN1-I454T YILFFVTI   | 18   | 107  |
| >RPN1-I454T YILFFTVIIYV | 2    | >RPN1-I454T YILFFVTIYV | 2    | 0    |
| >RPN1-I454T YILFFTVIIY  | 157  | >RPN1-I454T YILFFVTIY  | 171  | 14   |
| >RPN1-I454T YILFFTVIIY  | 331  | >RPN1-I454T YILFFVTIY  | 613  | 282  |
| >RPN1-I454T YILFFTVIIY  | 1399 | >RPN1-I454T YILFFVTIY  | 496  | 903  |
| >RPN1-I454T YILFFTVIIY  | 129  | >RPN1-I454T YILFFVTIY  | 177  | 48   |
| >RPN1-I454T YILFFTVIIY  | 89   | >RPN1-I454T YILFFVTIY  | 74   | 15   |
| >RPN1-I454T YILFFTVIIY  | 267  | >RPN1-I454T YILFFVTIY  | 187  | 80   |

|                         |      |                         |      |      |
|-------------------------|------|-------------------------|------|------|
| >RPN1-I454T YILFFTVI    | 107  | >RPN1-I454T YILFFTVT    | 6528 | 6421 |
| >RPN1-I454T YILFFTVII   | 14   | >RPN1-I454T YILFFTVTI   | 5    | 9    |
| >RPN1-I454T YILFFTVIII  | 636  | >RPN1-I454T YILFFTVTIY  | 462  | 174  |
| >RPN1-I454T YILFFTVIIY  | 398  | >RPN1-I454T YILFFTVTIY  | 484  | 86   |
| >RPN1-I454T YILFFTVI    | 481  | >RPN1-I454T YILFFTVT    | 4382 | 3901 |
| >RPN1-I454T YILFFTVII   | 383  | >RPN1-I454T YILFFTVTI   | 197  | 186  |
| >RPN1-I454T YILFFTVIIYV | 32   | >RPN1-I454T YILFFTVTIYV | 28   | 4    |
| >RPN1-I454T YILFFTVI    | 37   | >RPN1-I454T YILFFTVT    | 1371 | 1334 |
| >RPN1-I454T YILFFTVII   | 29   | >RPN1-I454T YILFFTVTI   | 10   | 19   |
| >RPN1-I454T YILFFTVIIYV | 4    | >RPN1-I454T YILFFTVTIYV | 3    | 1    |
| >RPN1-I454T YILFFTVIII  | 17   | >RPN1-I454T YILFFTVTIY  | 23   | 6    |
| >RPN1-I454T YILFFTVIIY  | 424  | >RPN1-I454T YILFFTVTIY  | 200  | 224  |
| >RPN1-I454T YILFFTVIII  | 206  | >RPN1-I454T YILFFTVTIY  | 143  | 63   |
| >RPN1-I454T YILFFTVI    | 378  | >RPN1-I454T YILFFTVT    | 5778 | 5400 |
| >RPN1-I454T YILFFTVII   | 306  | >RPN1-I454T YILFFTVTI   | 234  | 72   |
| >RPN1-I454T YILFFTVIII  | 48   | >RPN1-I454T YILFFTVTIY  | 33   | 15   |
| >RPN1-I454T YILFFTVIIY  | 1059 | >RPN1-I454T YILFFTVTIY  | 482  | 577  |
| >RPN1-I454T YILFFTVIII  | 119  | >RPN1-I454T YILFFTVTIY  | 195  | 76   |
| >RPN1-I454T YILFFTVIIY  | 278  | >RPN1-I454T YILFFTVTIY  | 230  | 48   |
| >RPN1-I454T FYILFFTVI   | 18   | >RPN1-I454T FYILFFTVT   | 2371 | 2353 |
| >RPN1-I454T FYILFFTVII  | 175  | >RPN1-I454T FYILFFTVTI  | 12   | 163  |
| >RPN1-I454T FYILFFTVI   | 402  | >RPN1-I454T FYILFFTVT   | 2835 | 2433 |
| >RPN1-I454T FYILFFTVI   | 170  | >RPN1-I454T FYILFFTVT   | 1651 | 1481 |
| >RPN1-I454T FYILFFTVII  | 549  | >RPN1-I454T FYILFFTVTI  | 229  | 320  |
| >RPN1-I454T FYILFFTVI   | 59   | >RPN1-I454T FYILFFTVT   | 5632 | 5573 |
| >RPN1-I454T FYILFFTVII  | 172  | >RPN1-I454T FYILFFTVTI  | 171  | 1    |
| >RPN1-I454T FYILFFTVI   | 92   | >RPN1-I454T FYILFFTVT   | 5669 | 5577 |
| >RPN1-I454T FYILFFTVII  | 376  | >RPN1-I454T FYILFFTVTI  | 310  | 66   |
| >RPN1-I454T FYILFFTVI   | 12   | >RPN1-I454T FYILFFTVT   | 414  | 402  |
| >RPN1-I454T FYILFFTVII  | 11   | >RPN1-I454T FYILFFTVTI  | 8    | 3    |
| >RPN1-I454T FYILFFTVIII | 282  | >RPN1-I454T FYILFFTVTIY | 421  | 139  |
| >RPN1-I454T FYILFFTVIIY | 691  | >RPN1-I454T FYILFFTVTIY | 322  | 369  |
| >RPN1-I454T FYILFFTVIII | 361  | >RPN1-I454T FYILFFTVTIY | 564  | 203  |
| >RPN1-I454T FYILFFTVIIY | 16   | >RPN1-I454T FYILFFTVTIY | 18   | 2    |
| >RPN1-I454T FYILFFTVII  | 2212 | >RPN1-I454T FYILFFTVTI  | 346  | 1866 |
| >RPN1-I454T FYILFFTVIII | 327  | >RPN1-I454T FYILFFTVTIY | 542  | 215  |
| >RPN1-I454T FYILFFTVIIY | 205  | >RPN1-I454T FYILFFTVTIY | 131  | 74   |
| >RPN1-I454T AFYILFFTVII | 172  | >RPN1-I454T AFYILFFTVTI | 81   | 91   |
| >RPN1-I454T AFYILFFTVII | 554  | >RPN1-I454T AFYILFFTVTI | 225  | 329  |
| >RPN1-I454T AFYILFFTVI  | 63   | >RPN1-I454T AFYILFFTVT  | 6568 | 6505 |
| >RPN1-I454T AFYILFFTVII | 63   | >RPN1-I454T AFYILFFTVTI | 25   | 38   |
| >RPN1-I454T AFYILFFTVII | 175  | >RPN1-I454T AFYILFFTVTI | 34   | 141  |
| >RPN1-I454T AFYILFFTVI  | 79   | >RPN1-I454T AFYILFFTVT  | 348  | 269  |

|                        |       |                        |       |       |
|------------------------|-------|------------------------|-------|-------|
| >RPN1-I454T AFYILFFTVI | 355   | >RPN1-I454T AFYILFFTVT | 3217  | 2862  |
| >RUNX1-A14 ATAAMKNQ\   | 172   | >RUNX1-A14 DTAAMKNQ\   | 8953  | 8781  |
| >RUNX1-A14 ATAAMKNQ\   | 74    | >RUNX1-A14 DTAAMKNQ\   | 7369  | 7295  |
| >RUNX1-A14 ATAAMKNQ\   | 212   | >RUNX1-A14 DTAAMKNQ\   | 11367 | 11155 |
| >RUNX1-A14 ATAAMKNQ\   | 25    | >RUNX1-A14 DTAAMKNQ\   | 683   | 658   |
| >RUNX1-A14 ATAAMKNQ\   | 3549  | >RUNX1-A14 DTAAMKNQ\   | 44    | 3505  |
| >RUNX1-A14 ATAAMKNQ\   | 14    | >RUNX1-A14 DTAAMKNQ\   | 3     | 11    |
| >RUNX1-A14 ATAAMKNQ\   | 26    | >RUNX1-A14 DTAAMKNQ\   | 9     | 17    |
| >RUNX1-A14 ATAAMKNQ\   | 218   | >RUNX1-A14 DTAAMKNQ\   | 119   | 99    |
| >RUNX1-A14 ATAAMKNQ\   | 506   | >RUNX1-A14 DTAAMKNQ\   | 22    | 484   |
| >RUNX1-A14 ATAAMKNQ\   | 390   | >RUNX1-A14 DTAAMKNQ\   | 5659  | 5269  |
| >RUNX1-A14 ATAAMKNQ\   | 156   | >RUNX1-A14 DTAAMKNQ\   | 1291  | 1135  |
| >RUNX1-A14 NATAAMKNC   | 242   | >RUNX1-A14 NDTAAMKNC   | 12209 | 11967 |
| >RUNX1-A14 NATAAMKNC   | 32298 | >RUNX1-A14 NDTAAMKNC   | 373   | 31925 |
| >RUNX1-A14 RNATAAMK    | 495   | >RUNX1-A14 RNDTAAMK    | 5638  | 5143  |
| >RUNX1-A14 LRNATAAM    | 83    | >RUNX1-A14 LRNDTAAM    | 160   | 77    |
| >RUNX1-A14 LRNATAAM    | 166   | >RUNX1-A14 LRNDTAAM    | 352   | 186   |
| >RUNX1-A14 LRNATAAMK   | 96    | >RUNX1-A14 LRNDTAAMK   | 190   | 94    |
| >RUNX1-A14 LRNATAAM    | 95    | >RUNX1-A14 LRNDTAAM    | 202   | 107   |
| >RUNX1-A14 ELRNATAAM   | 117   | >RUNX1-A14 ELRNDTAAM   | 767   | 650   |
| >RUNX1-A14 ELRNATAAM   | 47    | >RUNX1-A14 ELRNDTAAM   | 85    | 38    |
| >RUNX1-A14 ELRNATAAM   | 206   | >RUNX1-A14 ELRNDTAAM   | 70    | 136   |
| >RUNX1-A14 ELRNATAAM   | 25    | >RUNX1-A14 ELRNDTAAM   | 32    | 7     |
| >RUNX1-A14 ELRNATAAM   | 165   | >RUNX1-A14 ELRNDTAAM   | 1364  | 1199  |
| >RUNX1-A14 ELRNATAAM   | 375   | >RUNX1-A14 ELRNDTAAM   | 946   | 571   |
| >RUNX1-A14 ELRNATAAM   | 422   | >RUNX1-A14 ELRNDTAAM   | 583   | 161   |
| >RUNX1-A14 ELRNATAAM   | 81    | >RUNX1-A14 ELRNDTAAM   | 201   | 120   |
| >RUNX1-A14 ELRNATAAM   | 293   | >RUNX1-A14 ELRNDTAAM   | 508   | 215   |
| >RUNX1-A14 ELRNATAAM   | 374   | >RUNX1-A14 ELRNDTAAM   | 772   | 398   |
| >RUNX1-A14 ELRNATAAM   | 206   | >RUNX1-A14 ELRNDTAAM   | 391   | 185   |
| >RUNX1-A14 AELRNATAAM  | 344   | >RUNX1-A14 AELRNDTAAM  | 1974  | 1630  |
| >RUNX1-A14 AELRNATAAM  | 133   | >RUNX1-A14 AELRNDTAAM  | 351   | 218   |
| >RUNX1-A14 AELRNATA    | 443   | >RUNX1-A14 AELRNDTA    | 241   | 202   |
| >RUNX1-A14 AELRNATAA   | 77    | >RUNX1-A14 AELRNDTAA   | 70    | 7     |
| >RUNX1-A14 AELRNATAAM  | 247   | >RUNX1-A14 AELRNDTAAM  | 517   | 270   |
| >RUNX1-A14 AELRNATAAM  | 175   | >RUNX1-A14 AELRNDTAAM  | 420   | 245   |
| >RUNX1-A14 AELRNATA    | 10    | >RUNX1-A14 AELRNDTA    | 17    | 7     |
| >RUNX1-A14 AELRNATAA   | 6     | >RUNX1-A14 AELRNDTAA   | 12    | 6     |
| >RUNX1-A14 AELRNATAAM  | 441   | >RUNX1-A14 AELRNDTAAM  | 927   | 486   |
| >RUNX1-A14 AELRNATAAM  | 12    | >RUNX1-A14 AELRNDTAAM  | 25    | 13    |
| >RUNX1-A14 SAELRNATAA  | 495   | >RUNX1-A14 SAELRNDTAA  | 1730  | 1235  |
| >RUNX1-A14 SAELRNATAA  | 199   | >RUNX1-A14 SAELRNDTAA  | 228   | 29    |
| >RUNX1-A14 YSAELRNATA  | 493   | >RUNX1-A14 YSAELRNDTA  | 922   | 429   |

|                       |      |                       |       |       |
|-----------------------|------|-----------------------|-------|-------|
| >RUNX1-A14 YSAELRNATA | 345  | >RUNX1-A14 YSAELRNDTA | 665   | 320   |
| >RUNX1-A14 YSAELRNA   | 456  | >RUNX1-A14 YSAELRND   | 15559 | 15103 |
| >RUNX1-A14 YSAELRNATA | 201  | >RUNX1-A14 YSAELRNDTA | 414   | 213   |
| >RUNX1-A14 YSAELRNATA | 92   | >RUNX1-A14 YSAELRNDTA | 129   | 37    |
| >RUNX1-A60 APDAGAAL   | 98   | >RUNX1-A60 VPDAGAAL   | 84    | 14    |
| >RUNX1-A60 APDAGAAL   | 31   | >RUNX1-A60 VPDAGAAL   | 31    | 0     |
| >RUNX1-A60 APDAGAAL   | 507  | >RUNX1-A60 VPDAGAAL   | 181   | 326   |
| >RUNX1-A60 APDAGAAL   | 17   | >RUNX1-A60 VPDAGAAL   | 37    | 20    |
| >RUNX1-A60 APDAGAALA  | 2025 | >RUNX1-A60 VPDAGAALA  | 268   | 1757  |
| >RUNX1-A60 GAPDAGAAL  | 1472 | >RUNX1-A60 GVPDAGAAL  | 222   | 1250  |
| >RUNX1-A60 GAPDAGAAL  | 4088 | >RUNX1-A60 GVPDAGAAL  | 288   | 3800  |
| >RUNX1-A60 GAPDAGAAL  | 10   | >RUNX1-A60 GVPDAGAAL  | 52    | 42    |
| >RUNX1-A60 GAPDAGAAL  | 332  | >RUNX1-A60 GVPDAGAAL  | 2317  | 1985  |
| >RUNX1-A60 GKMSEALPLC | 1423 | >RUNX1-A60 GKMSEALPLC | 235   | 1188  |
| >RUNX1-A60 PLGAPDAGA/ | 275  | >RUNX1-A60 PLGVPDAGA/ | 931   | 656   |
| >RUNX1-A60 PLGAPDAGA/ | 97   | >RUNX1-A60 PLGVPDAGA/ | 231   | 134   |
| >RUNX1-A60 LPLGAPDA   | 338  | >RUNX1-A60 LPLGVPDA   | 1872  | 1534  |
| >RUNX1-A60 LPLGAPDAG/ | 221  | >RUNX1-A60 LPLGVPDAG/ | 424   | 203   |
| >RUNX1-A60 LPLGAPDAG  | 118  | >RUNX1-A60 LPLGVPDAG  | 185   | 67    |
| >RUNX1-A60 LPLGAPDAG/ | 76   | >RUNX1-A60 LPLGVPDAG/ | 98    | 22    |
| >RUNX1-A60 LPLGAPDA   | 18   | >RUNX1-A60 LPLGVPDA   | 16    | 2     |
| >RUNX1-A60 LPLGAPDAG  | 46   | >RUNX1-A60 LPLGVPDAG  | 42    | 4     |
| >RUNX1-A60 LPLGAPDAG/ | 17   | >RUNX1-A60 LPLGVPDAG/ | 12    | 5     |
| >RUNX1-A60 LPLGAPDAG/ | 8    | >RUNX1-A60 LPLGVPDAG/ | 8     | 0     |
| >RUNX1-A60 ALPLGAPDA  | 1642 | >RUNX1-A60 ALPLGVPDA  | 160   | 1482  |
| >RUNX1-A60 ALPLGAPDAC | 295  | >RUNX1-A60 ALPLGVPDAC | 150   | 145   |
| >RUNX1-A60 ALPLGAPDAC | 465  | >RUNX1-A60 ALPLGVPDAC | 267   | 198   |
| >RUNX1-A60 ALPLGAPDA  | 173  | >RUNX1-A60 ALPLGVPDA  | 77    | 96    |
| >RUNX1-A60 ALPLGAPDAC | 256  | >RUNX1-A60 ALPLGVPDAC | 197   | 59    |
| >RUNX1-A60 ALPLGAPDA  | 38   | >RUNX1-A60 ALPLGVPDA  | 17    | 21    |
| >RUNX1-A60 ALPLGAPDAC | 29   | >RUNX1-A60 ALPLGVPDAC | 23    | 6     |
| >RUNX1-A60 EALPLGAPDA | 177  | >RUNX1-A60 EALPLGVPDA | 255   | 78    |
| >RUNX1-A60 SEALPLGA   | 209  | >RUNX1-A60 SEALPLGV   | 18    | 191   |
| >RUNX1-A60 SEALPLGA   | 37   | >RUNX1-A60 SEALPLGV   | 149   | 112   |
| >RUNX1-A60 SEALPLGAPD | 23   | >RUNX1-A60 SEALPLGVPD | 24    | 1     |
| >RUNX1-A60 SEALPLGAPD | 707  | >RUNX1-A60 SEALPLGVPD | 288   | 419   |
| >RUNX1-A60 MSEALPLGA  | 512  | >RUNX1-A60 MSEALPLGV  | 259   | 253   |
| >RUNX1-A60 MSEALPLGA  | 4999 | >RUNX1-A60 MSEALPLGV  | 464   | 4535  |
| >RUNX1-A60 KMSEALPLG/ | 52   | >RUNX1-A60 KMSEALPLGV | 12    | 40    |
| >RUNX1-A60 KMSEALPLG/ | 32   | >RUNX1-A60 KMSEALPLGV | 10    | 22    |
| >RUNX1-A60 KMSEALPLG/ | 26   | >RUNX1-A60 KMSEALPLGV | 9     | 17    |
| >RUNX1-A60 KMSEALPLG/ | 87   | >RUNX1-A60 KMSEALPLGV | 31    | 56    |
| >RUNX1-A60 KMSEALPLG/ | 8    | >RUNX1-A60 KMSEALPLGV | 2     | 6     |

|                       |      |                       |     |      |
|-----------------------|------|-----------------------|-----|------|
| >RUNX1-A60 KMSEALPLG/ | 23   | >RUNX1-A60 KMSEALPLG\ | 3   | 20   |
| >RUNX1-A60 KMSEALPLG/ | 14   | >RUNX1-A60 KMSEALPLG\ | 4   | 10   |
| >RUNX1-A60 KMSEALPLG/ | 44   | >RUNX1-A60 KMSEALPLG\ | 2   | 42   |
| >RUNX1-A60 KMSEALPLG/ | 21   | >RUNX1-A60 KMSEALPLG\ | 2   | 19   |
| >RUNX1-A60 KMSEALPLG/ | 6722 | >RUNX1-A60 KMSEALPLG\ | 471 | 6251 |
| >RUNX1-D16 DLRFVGRSGF | 58   | >RUNX1-D16 ELRFVGRSGR | 61  | 3    |
| >RUNX1-D16 DLRFVGRSGF | 77   | >RUNX1-D16 ELRFVGRSGR | 237 | 160  |
| >RUNX1-D16 DLRFVGRSGF | 278  | >RUNX1-D16 ELRFVGRSGR | 143 | 135  |
| >RUNX1-D16 NDLRFVGR   | 548  | >RUNX1-D16 NELRFVGR   | 188 | 360  |
| >RUNX1-D16 FNDLRFVGR  | 707  | >RUNX1-D16 FNELRFVGR  | 333 | 374  |
| >RUNX1-D16 RFNDLRFV   | 349  | >RUNX1-D16 RFNELRFV   | 384 | 35   |
| >RUNX1-D16 RFNDLRFV   | 400  | >RUNX1-D16 RFNELRFV   | 413 | 13   |
| >RUNX1-D16 RFNDLRFVGF | 4    | >RUNX1-D16 RFNELRFVGR | 5   | 1    |
| >RUNX1-D16 RFNDLRFVGF | 60   | >RUNX1-D16 RFNELRFVGR | 116 | 56   |
| >RUNX1-D16 RFNDLRFVGF | 191  | >RUNX1-D16 RFNELRFVGR | 257 | 66   |
| >RUNX1-D16 RFNDLRFVGF | 20   | >RUNX1-D16 RFNELRFVGR | 27  | 7    |
| >RUNX1-D16 RFNDLRFV   | 209  | >RUNX1-D16 RFNELRFV   | 202 | 7    |
| >RUNX1-D16 ARFNDLRF   | 18   | >RUNX1-D16 ARFNELRF   | 14  | 4    |
| >RUNX1-D16 ARFNDLRFV  | 401  | >RUNX1-D16 ARFNELRFV  | 407 | 6    |
| >RUNX1-D16 ARFNDLRF   | 46   | >RUNX1-D16 ARFNELRF   | 52  | 6    |
| >RUNX1-D16 ARFNDLRFV  | 58   | >RUNX1-D16 ARFNELRFV  | 85  | 27   |
| >RUNX1-D16 ARFNDLRFV  | 27   | >RUNX1-D16 ARFNELRFV  | 31  | 4    |
| >RUNX1-D16 ARFNDLRFV  | 416  | >RUNX1-D16 ARFNELRFV  | 470 | 54   |
| >RUNX1-D16 ARFNDLRFV  | 80   | >RUNX1-D16 ARFNELRFV  | 193 | 113  |
| >RUNX1-D16 ARFNDLRFV  | 163  | >RUNX1-D16 ARFNELRFV  | 300 | 137  |
| >RUNX1-D16 VARFNDLRFV | 200  | >RUNX1-D16 VARFNELRFV | 165 | 35   |
| >RUNX1-D16 VARFNDL    | 287  | >RUNX1-D16 VARFNELR   | 165 | 122  |
| >RUNX1-D16 VARFNDL    | 549  | >RUNX1-D16 VARFNELR   | 418 | 131  |
| >RUNX1-D16 VARFNDL    | 249  | >RUNX1-D16 VARFNELR   | 232 | 17   |
| >RUNX1-D16 VARFNDLRF  | 876  | >RUNX1-D16 VARFNELRF  | 422 | 454  |
| >RUNX1-D16 VARFNDLRF  | 5    | >RUNX1-D16 VARFNELRF  | 6   | 1    |
| >RUNX1-D16 QVARFNDL   | 775  | >RUNX1-D16 QVARFNEL   | 74  | 701  |
| >RUNX1-D16 QVARFNDLRI | 105  | >RUNX1-D16 QVARFNELRF | 89  | 16   |
| >RUNX1-D16 QVARFNDLRI | 269  | >RUNX1-D16 QVARFNELRF | 267 | 2    |
| >RUNX1-D16 QVARFNDL   | 3019 | >RUNX1-D16 QVARFNEL   | 417 | 2602 |
| >RUNX1-D16 QVARFNDLRI | 86   | >RUNX1-D16 QVARFNELRF | 83  | 3    |
| >RUNX1-D16 QVARFNDL   | 348  | >RUNX1-D16 QVARFNELR  | 380 | 32   |
| >RUNX1-D16 QVARFNDLRI | 315  | >RUNX1-D16 QVARFNELRF | 355 | 40   |
| >RUNX1-D16 QVARFNDL   | 525  | >RUNX1-D16 QVARFNELR  | 166 | 359  |
| >RUNX1-D16 QVARFNDLRI | 464  | >RUNX1-D16 QVARFNELRF | 430 | 34   |
| >RUNX1-D16 QVARFNDL   | 4    | >RUNX1-D16 QVARFNELR  | 4   | 0    |
| >RUNX1-D16 QVARFNDL   | 133  | >RUNX1-D16 QVARFNEL   | 17  | 116  |
| >RUNX1-D16 QVARFNDLRI | 19   | >RUNX1-D16 QVARFNELRF | 21  | 2    |

|                        |      |                        |     |      |
|------------------------|------|------------------------|-----|------|
| >RUNX1-D16 QVARFNDL    | 2052 | >RUNX1-D16 QVARFNEL    | 347 | 1705 |
| >RUNX1-D16 QVARFNDLRF  | 51   | >RUNX1-D16 QVARFNELRF  | 52  | 1    |
| >RUNX1-D16 QVARFNDLR   | 203  | >RUNX1-D16 QVARFNELR   | 207 | 4    |
| >RUNX1-D16 NQVARFNDL   | 2132 | >RUNX1-D16 NQVARFNEL   | 140 | 1992 |
| >RUNX1-D16 NQVARFNDL   | 94   | >RUNX1-D16 NQVARFNEL   | 10  | 84   |
| >RUNX1-D16 NQVARFNDL   | 791  | >RUNX1-D16 NQVARFNELI  | 372 | 419  |
| >RUNX1-D16 NQVARFNDL   | 1171 | >RUNX1-D16 NQVARFNELI  | 432 | 739  |
| >RUNX1-D16 NQVARFNDL   | 92   | >RUNX1-D16 NQVARFNELI  | 40  | 52   |
| >RUNX1-D16 NQVARFNDL   | 527  | >RUNX1-D16 NQVARFNEL   | 453 | 74   |
| >RUNX1-D16 NQVARFNDL   | 123  | >RUNX1-D16 NQVARFNELI  | 180 | 57   |
| >RUNX1-D16 NQVARFNDL   | 460  | >RUNX1-D16 NQVARFNEL   | 239 | 221  |
| >RUNX1-D16 NQVARFNDL   | 73   | >RUNX1-D16 NQVARFNELI  | 49  | 24   |
| >RUNX1-D16 NQVARFNDL   | 115  | >RUNX1-D16 NQVARFNEL   | 38  | 77   |
| >RUNX1-D16 NQVARFNDL   | 1184 | >RUNX1-D16 NQVARFNEL   | 486 | 698  |
| >RUNX1-D16 NQVARFNDL   | 150  | >RUNX1-D16 NQVARFNELI  | 126 | 24   |
| >RUNX1-D16 KNQVARFND   | 146  | >RUNX1-D16 KNQVARFNEI  | 69  | 77   |
| >RUNX1-D16 KNQVARFND   | 337  | >RUNX1-D16 KNQVARFNEI  | 288 | 49   |
| >RUNX1-D16 MKNQVARFM   | 104  | >RUNX1-D16 MKNQVARFM   | 58  | 46   |
| >RUNX1-D16 MKNQVARFM   | 1084 | >RUNX1-D16 MKNQVARFM   | 352 | 732  |
| >RUNX1-D19 TVDGPREPR   | 527  | >RUNX1-D19 TVGGPREPR   | 481 | 46   |
| >RUNX1-D19 TVDGPREPR   | 862  | >RUNX1-D19 TVGGPREPR   | 213 | 649  |
| >RUNX1-D19 TVDGPREPR   | 700  | >RUNX1-D19 TVGGPREPR   | 361 | 339  |
| >RUNX1-D19 TVDGPREPR   | 79   | >RUNX1-D19 TVGGPREPR   | 83  | 4    |
| >RUNX1-D19 TVDGPREFR   | 234  | >RUNX1-D19 TVGGPREPRF  | 268 | 34   |
| >RUNX1-D19 TVDGPREPR   | 3108 | >RUNX1-D19 TVGGPREPR   | 443 | 2665 |
| >RUNX1-D19 ITVDGPREPR  | 583  | >RUNX1-D19 ITVGGPREPR  | 306 | 277  |
| >RUNX1-D19 ITVDGPREPR  | 462  | >RUNX1-D19 ITVGGPREPR  | 653 | 191  |
| >RUNX1-D19 ITVDGPREPR  | 29   | >RUNX1-D19 ITVGGPREPR  | 20  | 9    |
| >RUNX1-D19 ITVDGPREPR  | 37   | >RUNX1-D19 ITVGGPREPR  | 61  | 24   |
| >RUNX1-D19 KITVDGPR    | 84   | >RUNX1-D19 KITVGGPR    | 39  | 45   |
| >RUNX1-D19 KITVDGPREP  | 58   | >RUNX1-D19 KITVGGPREP  | 29  | 29   |
| >RUNX1-D19 KITVDGPR    | 142  | >RUNX1-D19 KITVGGPR    | 199 | 57   |
| >RUNX1-D19 KITVDGPREP  | 183  | >RUNX1-D19 KITVGGPREP  | 200 | 17   |
| >RUNX1-D19 AIKITVDGPR  | 921  | >RUNX1-D19 AIKITVGGPR  | 301 | 620  |
| >RUNX1-D19 AIKITVDGPR  | 207  | >RUNX1-D19 AIKITVGGPR  | 98  | 109  |
| >RUNX1-D19 RAIKITVDGPF | 17   | >RUNX1-D19 RAIKITVGGPF | 14  | 3    |
| >RUNX1-D19 RAIKITVDGPF | 92   | >RUNX1-D19 RAIKITVGGPF | 103 | 11   |
| >RUNX1-D19 RAIKITVDGPF | 77   | >RUNX1-D19 RAIKITVGGPF | 108 | 31   |
| >RUNX1-D19 TVDGPREPR   | 527  | >RUNX1-D19 TVNGPREPR   | 117 | 410  |
| >RUNX1-D19 TVDGPREPR   | 862  | >RUNX1-D19 TVNGPREPR   | 32  | 830  |
| >RUNX1-D19 TVDGPREFR   | 1569 | >RUNX1-D19 TVNGPREPRF  | 254 | 1315 |
| >RUNX1-D19 TVDGPREPR   | 700  | >RUNX1-D19 TVNGPREPR   | 122 | 578  |
| >RUNX1-D19 TVDGPREPR   | 79   | >RUNX1-D19 TVNGPREPR   | 22  | 57   |

|                        |       |                        |     |       |
|------------------------|-------|------------------------|-----|-------|
| >RUNX1-D19 TVDGPREF    | 234   | >RUNX1-D19 TVNGPREPR   | 86  | 148   |
| >RUNX1-D19 ITVDGPREF   | 583   | >RUNX1-D19 ITVNGPREPR  | 469 | 114   |
| >RUNX1-D19 ITVDGPREF   | 462   | >RUNX1-D19 ITVNGPREPR  | 264 | 198   |
| >RUNX1-D19 ITVDGPREF   | 29    | >RUNX1-D19 ITVNGPREPR  | 34  | 5     |
| >RUNX1-D19 ITVDGPREF   | 37    | >RUNX1-D19 ITVNGPREPR  | 58  | 21    |
| >RUNX1-D19 ITVDGPREF   | 681   | >RUNX1-D19 ITVNGPREPR  | 469 | 212   |
| >RUNX1-D19 KITVDGPR    | 84    | >RUNX1-D19 KITVNGPR    | 39  | 45    |
| >RUNX1-D19 KITVDGPREF  | 58    | >RUNX1-D19 KITVNGPREP  | 32  | 26    |
| >RUNX1-D19 KITVDGPR    | 142   | >RUNX1-D19 KITVNGPR    | 71  | 71    |
| >RUNX1-D19 KITVDGPREF  | 183   | >RUNX1-D19 KITVNGPREP  | 92  | 91    |
| >RUNX1-D19 AIKITVDGPR  | 921   | >RUNX1-D19 AIKITVNGPR  | 156 | 765   |
| >RUNX1-D19 AIKITVDGPR  | 207   | >RUNX1-D19 AIKITVNGPR  | 94  | 113   |
| >RUNX1-D19 RAIKITVDGPF | 17    | >RUNX1-D19 RAIKITVNGPF | 11  | 6     |
| >RUNX1-D19 RAIKITVDGPF | 92    | >RUNX1-D19 RAIKITVNGPF | 62  | 30    |
| >RUNX1-D19 RAIKITVDGPF | 77    | >RUNX1-D19 RAIKITVNGPF | 62  | 15    |
| >RUNX1-D19 VDGPREPR    | 9793  | >RUNX1-D19 VVGPREPR    | 134 | 9659  |
| >RUNX1-D19 VDGPREPRR   | 10374 | >RUNX1-D19 VVGPREPRR   | 209 | 10165 |
| >RUNX1-D19 TYHRAIKITV  | 12609 | >RUNX1-D19 TYHRAIKITVV | 77  | 12532 |
| >RUNX1-D19 TYHRAIKITV  | 4016  | >RUNX1-D19 TYHRAIKITVV | 304 | 3712  |
| >RUNX1-D19 TVDGPREF    | 527   | >RUNX1-D19 TVVGPREPR   | 282 | 245   |
| >RUNX1-D19 TVDGPREF    | 24790 | >RUNX1-D19 TVVGPREPR   | 474 | 24316 |
| >RUNX1-D19 TVDGPREF    | 862   | >RUNX1-D19 TVVGPREPR   | 117 | 745   |
| >RUNX1-D19 TVDGPREF    | 1569  | >RUNX1-D19 TVVGPREPR   | 418 | 1151  |
| >RUNX1-D19 TVDGPREF    | 700   | >RUNX1-D19 TVVGPREPR   | 202 | 498   |
| >RUNX1-D19 TVDGPREF    | 79    | >RUNX1-D19 TVVGPREPR   | 15  | 64    |
| >RUNX1-D19 TVDGPREF    | 234   | >RUNX1-D19 TVVGPREPR   | 26  | 208   |
| >RUNX1-D19 TVDGPREF    | 3108  | >RUNX1-D19 TVVGPREPR   | 474 | 2634  |
| >RUNX1-D19 ITVDGPREF   | 462   | >RUNX1-D19 ITVVGPREPR  | 277 | 185   |
| >RUNX1-D19 ITVDGPREF   | 29    | >RUNX1-D19 ITVVGPREPR  | 23  | 6     |
| >RUNX1-D19 ITVDGPREF   | 37    | >RUNX1-D19 ITVVGPREPR  | 86  | 49    |
| >RUNX1-D19 KITVDGPR    | 84    | >RUNX1-D19 KITVVGPR    | 24  | 60    |
| >RUNX1-D19 KITVDGPREF  | 58    | >RUNX1-D19 KITVVGPREP  | 21  | 37    |
| >RUNX1-D19 KITVDGPR    | 142   | >RUNX1-D19 KITVVGPR    | 123 | 19    |
| >RUNX1-D19 KITVDGPREF  | 183   | >RUNX1-D19 KITVVGPREP  | 166 | 17    |
| >RUNX1-D19 AIKITVDGPR  | 921   | >RUNX1-D19 AIKITVVGPR  | 196 | 725   |
| >RUNX1-D19 AIKITVDGPR  | 207   | >RUNX1-D19 AIKITVVGPR  | 76  | 131   |
| >RUNX1-D19 RAIKITVD    | 23091 | >RUNX1-D19 RAIKITVV    | 255 | 22836 |
| >RUNX1-D19 RAIKITVD    | 27880 | >RUNX1-D19 RAIKITVV    | 87  | 27793 |
| >RUNX1-D19 RAIKITVDGPF | 17    | >RUNX1-D19 RAIKITVVGPF | 12  | 5     |
| >RUNX1-D19 RAIKITVDGPF | 92    | >RUNX1-D19 RAIKITVVGPF | 56  | 36    |
| >RUNX1-D19 RAIKITVDGPF | 77    | >RUNX1-D19 RAIKITVVGPF | 69  | 8     |
| >RUNX1-D19 HRAIKITVD   | 5357  | >RUNX1-D19 HRAIKITVV   | 210 | 5147  |
| >RUNX1-D19 YHRAIKITVD  | 18165 | >RUNX1-D19 YHRAIKITVV  | 422 | 17743 |

|                      |       |                      |       |       |
|----------------------|-------|----------------------|-------|-------|
| >RUNX1-D75 DRSMVEVL  | 3984  | >RUNX1-D75 YRSMVEVL  | 198   | 3786  |
| >RUNX1-D75 DRSMVEVL  | 6240  | >RUNX1-D75 YRSMVEVL  | 186   | 6054  |
| >RUNX1-D75 DRSMVEVL  | 1616  | >RUNX1-D75 YRSMVEVL  | 32    | 1584  |
| >RUNX1-D75 GDRSMVEVL | 22187 | >RUNX1-D75 GYRSMVEVL | 89    | 22098 |
| >RUNX1-D75 GDRSMVEVL | 29713 | >RUNX1-D75 GYRSMVEVL | 471   | 29242 |
| >RUNX1-D75 GDRSMVEVL | 24924 | >RUNX1-D75 GYRSMVEVL | 33    | 24891 |
| >RUNX1-D75 GDRSMVEV  | 12631 | >RUNX1-D75 GYRSMVEV  | 240   | 12391 |
| >RUNX1-D75 GDRSMVEVL | 12975 | >RUNX1-D75 GYRSMVEVL | 273   | 12702 |
| >RUNX1-D75 GDRSMVEVL | 345   | >RUNX1-D75 GYRSMVEVL | 21213 | 20868 |
| >RUNX1-D75 GDRSMVEV  | 169   | >RUNX1-D75 GYRSMVEV  | 11680 | 11511 |
| >RUNX1-D75 GDRSMVEVL | 133   | >RUNX1-D75 GYRSMVEVL | 13764 | 13631 |
| >RUNX1-D75 GDRSMVEV  | 282   | >RUNX1-D75 GYRSMVEV  | 26191 | 25909 |
| >RUNX1-D75 AALAGKLRS | 31593 | >RUNX1-D75 AALAGKLRS | 151   | 31442 |
| >RUNX1-D75 AALAGKLRS | 14796 | >RUNX1-D75 AALAGKLRS | 12    | 14784 |
| >RUNX1-D75 AALAGKLRS | 24533 | >RUNX1-D75 AALAGKLRS | 171   | 24362 |
| >RUNX1-D75 RSGDRSMVE | 259   | >RUNX1-D75 RSGYRSMVE | 75    | 184   |
| >RUNX1-D75 RSGDRSMVE | 540   | >RUNX1-D75 RSGYRSMVE | 459   | 81    |
| >RUNX1-D75 RSGDRSMV  | 499   | >RUNX1-D75 RSGYRSMV  | 778   | 279   |
| >RUNX1-D75 RSGDRSMVE | 110   | >RUNX1-D75 RSGYRSMVE | 206   | 96    |
| >RUNX1-D75 RSGDRSMVE | 20    | >RUNX1-D75 RSGYRSMVE | 32    | 12    |
| >RUNX1-D75 RSGDRSMVE | 436   | >RUNX1-D75 RSGYRSMVE | 358   | 78    |
| >RUNX1-D75 RSGDRSMVE | 153   | >RUNX1-D75 RSGYRSMVE | 69    | 84    |
| >RUNX1-D75 RSGDRSMVE | 558   | >RUNX1-D75 RSGYRSMVE | 297   | 261   |
| >RUNX1-D75 RSGDRSMVE | 291   | >RUNX1-D75 RSGYRSMVE | 223   | 68    |
| >RUNX1-D75 LRS       | 838   | >RUNX1-D75 LRS       | 312   | 526   |
| >RUNX1-D75 LRS       | 255   | >RUNX1-D75 LRS       | 87    | 168   |
| >RUNX1-D75 LRS       | 691   | >RUNX1-D75 LRS       | 219   | 472   |
| >RUNX1-D75 LRS       | 2280  | >RUNX1-D75 LRS       | 326   | 1954  |
| >RUNX1-D75 KLRS      | 82    | >RUNX1-D75 KLRS      | 33    | 49    |
| >RUNX1-D75 KLRS      | 3916  | >RUNX1-D75 KLRS      | 351   | 3565  |
| >RUNX1-D75 KLRS      | 116   | >RUNX1-D75 KLRS      | 59    | 57    |
| >RUNX1-D75 KLRS      | 68    | >RUNX1-D75 KLRS      | 20    | 48    |
| >RUNX1-D75 KLRS      | 156   | >RUNX1-D75 KLRS      | 117   | 39    |
| >RUNX1-D75 KLRS      | 6     | >RUNX1-D75 KLRS      | 4     | 2     |
| >RUNX1-D75 KLRS      | 1513  | >RUNX1-D75 KLRS      | 157   | 1356  |
| >RUNX1-D75 KLRS      | 56    | >RUNX1-D75 KLRS      | 8     | 48    |
| >RUNX1-D75 KLRS      | 52    | >RUNX1-D75 KLRS      | 11    | 41    |
| >RUNX1-D75 KLRS      | 398   | >RUNX1-D75 KLRS      | 129   | 269   |
| >RUNX1-D75 KLRS      | 95    | >RUNX1-D75 KLRS      | 57    | 38    |
| >RUNX1-D75 KLRS      | 104   | >RUNX1-D75 KLRS      | 106   | 2     |
| >RUNX1-D75 KLRS      | 391   | >RUNX1-D75 KLRS      | 925   | 534   |
| >RUNX1-D75 KLRS      | 358   | >RUNX1-D75 KLRS      | 29    | 329   |
| >RUNX1-D75 KLRS      | 935   | >RUNX1-D75 KLRS      | 214   | 721   |



|                         |       |                         |       |       |
|-------------------------|-------|-------------------------|-------|-------|
| >RUNX1-D75 KLRSGDRSM    | 442   | >RUNX1-D75 KLRSGYRSM    | 193   | 249   |
| >RUNX1-D75 GKLRSGDRSM   | 68    | >RUNX1-D75 GKLRSGYRSM   | 15    | 53    |
| >RUNX1-D75 GKLRSGDRSM   | 235   | >RUNX1-D75 GKLRSGYRSM   | 98    | 137   |
| >RUNX1-D75 AGKLRSGD     | 35315 | >RUNX1-D75 AGKLRSGY     | 384   | 34931 |
| >RUNX1-D75 AGKLRSGDR    | 3936  | >RUNX1-D75 AGKLRSGYR    | 59    | 3877  |
| >RUNX1-D75 LAGKLRSGD    | 34458 | >RUNX1-D75 LAGKLRSGY    | 211   | 34247 |
| >RUNX1-D75 LAGKLRSGDR   | 2047  | >RUNX1-D75 LAGKLRSGYR   | 244   | 1803  |
| >RUNX1-D75 LAGKLRSGD    | 22250 | >RUNX1-D75 LAGKLRSGY    | 285   | 21965 |
| >RUNX1-D75 LAGKLRSGD    | 20670 | >RUNX1-D75 LAGKLRSGY    | 89    | 20581 |
| >RUNX1-D75 LAGKLRSGDR   | 4371  | >RUNX1-D75 LAGKLRSGYR   | 334   | 4037  |
| >RUNX1-D75 ALAGKLRSGD   | 19361 | >RUNX1-D75 ALAGKLRSGY   | 210   | 19151 |
| >RUNX1-D75 ALAGKLRSGD   | 1822  | >RUNX1-D75 ALAGKLRSGY   | 265   | 1557  |
| >RUNX1-D75 ALAGKLRSGD   | 34721 | >RUNX1-D75 ALAGKLRSGY   | 298   | 34423 |
| >RUNX1-D75 ALAGKLRSGD   | 30870 | >RUNX1-D75 ALAGKLRSGY   | 378   | 30492 |
| >RUNX1-D75 ALAGKLRSGD   | 3233  | >RUNX1-D75 ALAGKLRSGY   | 103   | 3130  |
| >RUNX1-D75 ALAGKLRSGD   | 20327 | >RUNX1-D75 ALAGKLRSGY   | 124   | 20203 |
| >RUNX1-D75 ALAGKLRSGD   | 31949 | >RUNX1-D75 ALAGKLRSGY   | 191   | 31758 |
| >RUNX1-E22. ERLSELEQL   | 1954  | >RUNX1-E22. GRLSELEQL   | 166   | 1788  |
| >RUNX1-E22. ERLSELEQLR  | 161   | >RUNX1-E22. GRLSELEQLR  | 44    | 117   |
| >RUNX1-E22. ERLSELEQLRF | 1264  | >RUNX1-E22. GRLSELEQLRI | 161   | 1103  |
| >RUNX1-E22. ERLSELEQL   | 10149 | >RUNX1-E22. GRLSELEQL   | 497   | 9652  |
| >RUNX1-E22. SERLSELE    | 89    | >RUNX1-E22. SGRLSELE    | 36442 | 36353 |
| >RUNX1-E22. SERLSELEQL  | 395   | >RUNX1-E22. SGRLSELEQL  | 26944 | 26549 |
| >RUNX1-E22. SERLSELEQL  | 207   | >RUNX1-E22. SGRLSELEQL  | 34366 | 34159 |
| >RUNX1-E22. SERLSELEQL  | 162   | >RUNX1-E22. SGRLSELEQL  | 34602 | 34440 |
| >RUNX1-E22. QTKPGSLSFSI | 1743  | >RUNX1-E22. QTKPGSLSFSI | 175   | 1568  |
| >RUNX1-E22. FSERLSEL    | 662   | >RUNX1-E22. FSGRLSEL    | 295   | 367   |
| >RUNX1-E22. FSERLSELEQL | 437   | >RUNX1-E22. FSGRLSELEQL | 190   | 247   |
| >RUNX1-E22. FSERLSEL    | 306   | >RUNX1-E22. FSGRLSEL    | 568   | 262   |
| >RUNX1-E22. FSERLSELEQL | 258   | >RUNX1-E22. FSGRLSELEQL | 637   | 379   |
| >RUNX1-E22. SFSERLSEL   | 178   | >RUNX1-E22. SFSGRLSEL   | 81    | 97    |
| >RUNX1-E22. SFSERLSEL   | 154   | >RUNX1-E22. SFSGRLSEL   | 214   | 60    |
| >RUNX1-E22. SFSERLSEL   | 198   | >RUNX1-E22. SFSGRLSEL   | 110   | 88    |
| >RUNX1-E22. SFSERLSEL   | 214   | >RUNX1-E22. SFSGRLSEL   | 188   | 26    |
| >RUNX1-E22. LSFERLSEL   | 254   | >RUNX1-E22. LSFSGRLSEL  | 163   | 91    |
| >RUNX1-E22. LSFERLSEL   | 35    | >RUNX1-E22. LSFSGRLSEL  | 42    | 7     |
| >RUNX1-E22. LSFERLSEL   | 13    | >RUNX1-E22. LSFSGRLSEL  | 6     | 7     |
| >RUNX1-E22. LSFERLSEL   | 299   | >RUNX1-E22. LSFSGRLSEL  | 255   | 44    |
| >RUNX1-E22. LSFERLSELE  | 1087  | >RUNX1-E22. LSFSGRLSELE | 460   | 627   |
| >RUNX1-E22. LSFERLSEL   | 375   | >RUNX1-E22. LSFSGRLSEL  | 427   | 52    |
| >RUNX1-E22. SLSFSERL    | 499   | >RUNX1-E22. SLSFSGRL    | 1624  | 1125  |
| >RUNX1-E22. SLSFSERLSEL | 272   | >RUNX1-E22. SLSFSGRLSEL | 383   | 111   |
| >RUNX1-E22. SLSFSERL    | 10    | >RUNX1-E22. SLSFSGRL    | 24    | 14    |

|                        |      |                        |      |      |
|------------------------|------|------------------------|------|------|
| >RUNX1-E22.SLSFSERLSEL | 9    | >RUNX1-E22.SLSFSGRLSEL | 10   | 1    |
| >RUNX1-E22.SLSFSERL    | 139  | >RUNX1-E22.SLSFSGRL    | 49   | 90   |
| >RUNX1-E22.SLSFSERLSEL | 35   | >RUNX1-E22.SLSFSGRLSEL | 19   | 16   |
| >RUNX1-E22.SLSFSERL    | 71   | >RUNX1-E22.SLSFSGRL    | 105  | 34   |
| >RUNX1-E22.SLSFSERLSEL | 76   | >RUNX1-E22.SLSFSGRLSEL | 61   | 15   |
| >RUNX1-E22.SLSFSERLSEL | 188  | >RUNX1-E22.SLSFSGRLSEL | 189  | 1    |
| >RUNX1-E22.SLSFSERL    | 118  | >RUNX1-E22.SLSFSGRL    | 278  | 160  |
| >RUNX1-E22.SLSFSERLSEL | 89   | >RUNX1-E22.SLSFSGRLSEL | 100  | 11   |
| >RUNX1-E22.SLSFSERL    | 378  | >RUNX1-E22.SLSFSGRL    | 1990 | 1612 |
| >RUNX1-E22.SLSFSERL    | 12   | >RUNX1-E22.SLSFSGRL    | 22   | 10   |
| >RUNX1-E22.SLSFSERLSEL | 10   | >RUNX1-E22.SLSFSGRLSEL | 10   | 0    |
| >RUNX1-E22.GSLSFSERL   | 268  | >RUNX1-E22.GSLSFSGRL   | 230  | 38   |
| >RUNX1-E22.GSLSFSER    | 134  | >RUNX1-E22.GSLSFSGR    | 193  | 59   |
| >RUNX1-E22.GSLSFSER    | 29   | >RUNX1-E22.GSLSFSGR    | 56   | 27   |
| >RUNX1-E22.GSLSFSER    | 215  | >RUNX1-E22.GSLSFSGR    | 367  | 152  |
| >RUNX1-E22.GSLSFSERL   | 74   | >RUNX1-E22.GSLSFSGRL   | 51   | 23   |
| >RUNX1-E22.GSLSFSERL   | 19   | >RUNX1-E22.GSLSFSGRL   | 16   | 3    |
| >RUNX1-E22.GSLSFSER    | 87   | >RUNX1-E22.GSLSFSGR    | 116  | 29   |
| >RUNX1-E22.GSLSFSERL   | 850  | >RUNX1-E22.GSLSFSGRL   | 385  | 465  |
| >RUNX1-E22.KPGSLSFSER  | 203  | >RUNX1-E22.KPGSLSFSGR  | 181  | 22   |
| >RUNX1-E22.KPGSLSFSERL | 235  | >RUNX1-E22.KPGSLSFSGR  | 59   | 176  |
| >RUNX1-E22.KPGSLSFSER  | 130  | >RUNX1-E22.KPGSLSFSGR  | 97   | 33   |
| >RUNX1-F11\AFKVVALG    | 1460 | >RUNX1-F11\ASKVVALG    | 432  | 1028 |
| >RUNX1-F11\AFKVVALGD\  | 1354 | >RUNX1-F11\ASKVVALGD\  | 394  | 960  |
| >RUNX1-F11\WRCNKTLPIA  | 34   | >RUNX1-F11\WRCNKTLPIA  | 6022 | 5988 |
| >RUNX1-F11\WRCNKTLPIA  | 221  | >RUNX1-F11\WRCNKTLPIA  | 6655 | 6434 |
| >RUNX1-F11\WRCNKTLPIA  | 62   | >RUNX1-F11\WRCNKTLPIA  | 4226 | 4164 |
| >RUNX1-F11\IAFKVVAL    | 30   | >RUNX1-F11\IAASKVVAL   | 1025 | 995  |
| >RUNX1-F11\IAFKVVAL    | 299  | >RUNX1-F11\IAASKVVAL   | 355  | 56   |
| >RUNX1-F11\IAFKVVALGD  | 242  | >RUNX1-F11\IAASKVVALGD | 384  | 142  |
| >RUNX1-F11\IAFKVVAL    | 290  | >RUNX1-F11\IAASKVVAL   | 1430 | 1140 |
| >RUNX1-F11\IAFKVVAL    | 184  | >RUNX1-F11\IAASKVVAL   | 3236 | 3052 |
| >RUNX1-F11\IAFKVVALGD  | 283  | >RUNX1-F11\IAASKVVALGD | 3179 | 2896 |
| >RUNX1-F11\IAFKVVAL    | 404  | >RUNX1-F11\IAASKVVAL   | 7027 | 6623 |
| >RUNX1-F11\IAFKVVAL    | 465  | >RUNX1-F11\IAASKVVAL   | 1599 | 1134 |
| >RUNX1-F11\IAFKVVALGD  | 338  | >RUNX1-F11\IAASKVVALGD | 1099 | 761  |
| >RUNX1-F11\IAFKVVAL    | 48   | >RUNX1-F11\IAASKVVAL   | 399  | 351  |
| >RUNX1-F11\IAFKVVAL    | 79   | >RUNX1-F11\IAASKVVAL   | 463  | 384  |
| >RUNX1-F11\LPIAFKVV    | 195  | >RUNX1-F11\LPIASKVV    | 66   | 129  |
| >RUNX1-F11\LPIAFKVVAL  | 37   | >RUNX1-F11\LPIASKVVAL  | 9    | 28   |
| >RUNX1-F11\LPIAFKVV    | 236  | >RUNX1-F11\LPIASKVV    | 96   | 140  |
| >RUNX1-F11\LPIAFKVVVA  | 532  | >RUNX1-F11\LPIASKVVVA  | 114  | 418  |
| >RUNX1-F11\LPIAFKVVVAL | 788  | >RUNX1-F11\LPIASKVVVAL | 334  | 454  |

|                        |      |                        |      |      |
|------------------------|------|------------------------|------|------|
| >RUNX1-F11 LPIAFKVVAL  | 44   | >RUNX1-F11 LPIASKVVAL  | 26   | 18   |
| >RUNX1-F11 LPIAFKVV    | 241  | >RUNX1-F11 LPIASKVV    | 225  | 16   |
| >RUNX1-F11 LPIAFKVV    | 350  | >RUNX1-F11 LPIASKVV    | 640  | 290  |
| >RUNX1-F11 LPIAFKVV    | 9    | >RUNX1-F11 LPIASKVV    | 16   | 7    |
| >RUNX1-F11 LPIAFKVVA   | 6    | >RUNX1-F11 LPIASKVVA   | 7    | 1    |
| >RUNX1-F11 LPIAFKVVALC | 51   | >RUNX1-F11 LPIASKVVALC | 67   | 16   |
| >RUNX1-F11 LPIAFKVVAL  | 39   | >RUNX1-F11 LPIASKVVAL  | 41   | 2    |
| >RUNX1-F11 LPIAFKVVAL  | 42   | >RUNX1-F11 LPIASKVVAL  | 88   | 46   |
| >RUNX1-F11 TLPIAFKV    | 262  | >RUNX1-F11 TLPIASKV    | 2156 | 1894 |
| >RUNX1-F11 TLPIAFKV    | 85   | >RUNX1-F11 TLPIASKV    | 174  | 89   |
| >RUNX1-F11 TLPIAFKVVAL | 199  | >RUNX1-F11 TLPIASKVVAL | 170  | 29   |
| >RUNX1-F11 TLPIAFKV    | 57   | >RUNX1-F11 TLPIASKV    | 33   | 24   |
| >RUNX1-F11 TLPIAFKVV   | 176  | >RUNX1-F11 TLPIASKVV   | 219  | 43   |
| >RUNX1-F11 TLPIAFKVVAL | 247  | >RUNX1-F11 TLPIASKVVAL | 273  | 26   |
| >RUNX1-F11 TLPIAFKV    | 83   | >RUNX1-F11 TLPIASKV    | 1107 | 1024 |
| >RUNX1-F11 TLPIAFKV    | 17   | >RUNX1-F11 TLPIASKV    | 42   | 25   |
| >RUNX1-F11 TLPIAFKVV   | 112  | >RUNX1-F11 TLPIASKVV   | 143  | 31   |
| >RUNX1-F11 TLPIAFKVVAL | 198  | >RUNX1-F11 TLPIASKVVAL | 187  | 11   |
| >RUNX1-F11 TLPIAFKV    | 181  | >RUNX1-F11 TLPIASKV    | 622  | 441  |
| >RUNX1-F11 TLPIAFKV    | 13   | >RUNX1-F11 TLPIASKV    | 32   | 19   |
| >RUNX1-F11 TLPIAFKVV   | 108  | >RUNX1-F11 TLPIASKVV   | 98   | 10   |
| >RUNX1-F11 TLPIAFKVVAL | 559  | >RUNX1-F11 TLPIASKVVAL | 449  | 110  |
| >RUNX1-F11 TLPIAFKV    | 92   | >RUNX1-F11 TLPIASKV    | 279  | 187  |
| >RUNX1-F11 TLPIAFKV    | 4    | >RUNX1-F11 TLPIASKV    | 6    | 2    |
| >RUNX1-F11 TLPIAFKVV   | 15   | >RUNX1-F11 TLPIASKVV   | 20   | 5    |
| >RUNX1-F11 TLPIAFKVVA  | 267  | >RUNX1-F11 TLPIASKVVA  | 308  | 41   |
| >RUNX1-F11 TLPIAFKVVAL | 47   | >RUNX1-F11 TLPIASKVVAL | 49   | 2    |
| >RUNX1-F11 TLPIAFKV    | 166  | >RUNX1-F11 TLPIASKV    | 425  | 259  |
| >RUNX1-F11 TLPIAFKVV   | 61   | >RUNX1-F11 TLPIASKVV   | 432  | 371  |
| >RUNX1-F11 TLPIAFKVVAL | 40   | >RUNX1-F11 TLPIASKVVAL | 68   | 28   |
| >RUNX1-F11 KTLPIAFKV   | 38   | >RUNX1-F11 KTLPIASKV   | 1069 | 1031 |
| >RUNX1-F11 KTLPIAFKV   | 92   | >RUNX1-F11 KTLPIASKV   | 322  | 230  |
| >RUNX1-F11 KTLPIAFKV   | 1467 | >RUNX1-F11 KTLPIASKV   | 401  | 1066 |
| >RUNX1-F11 KTLPIAFKVV  | 360  | >RUNX1-F11 KTLPIASKVV  | 583  | 223  |
| >RUNX1-F11 KTLPIAFKV   | 14   | >RUNX1-F11 KTLPIASKV   | 79   | 65   |
| >RUNX1-F11 KTLPIAFKVV  | 97   | >RUNX1-F11 KTLPIASKVV  | 263  | 166  |
| >RUNX1-F11 KTLPIAFKVV  | 308  | >RUNX1-F11 KTLPIASKVV  | 789  | 481  |
| >RUNX1-F11 KTLPIAFKV   | 10   | >RUNX1-F11 KTLPIASKV   | 34   | 24   |
| >RUNX1-F11 KTLPIAFKVV  | 62   | >RUNX1-F11 KTLPIASKVV  | 102  | 40   |
| >RUNX1-F11 KTLPIAFKV   | 39   | >RUNX1-F11 KTLPIASKV   | 481  | 442  |
| >RUNX1-F11 KTLPIAFKVV  | 461  | >RUNX1-F11 KTLPIASKVV  | 853  | 392  |
| >RUNX1-F11 KTLPIAFKV   | 15   | >RUNX1-F11 KTLPIASKV   | 96   | 81   |
| >RUNX1-F11 KTLPIAFKVV  | 144  | >RUNX1-F11 KTLPIASKVV  | 250  | 106  |

|                         |      |                         |       |       |
|-------------------------|------|-------------------------|-------|-------|
| >RUNX1-F11 KTLPIAFKV    | 47   | >RUNX1-F11 KTLPIASKV    | 687   | 640   |
| >RUNX1-F11 KTLPIAFKV    | 55   | >RUNX1-F11 KTLPIASKV    | 142   | 87    |
| >RUNX1-F11 KTLPIAFKVV   | 454  | >RUNX1-F11 KTLPIASKVV   | 741   | 287   |
| >RUNX1-F11 KTLPIAFK     | 38   | >RUNX1-F11 KTLPIASK     | 50    | 12    |
| >RUNX1-F11 KTLPIAFK     | 9    | >RUNX1-F11 KTLPIASK     | 14    | 5     |
| >RUNX1-F11 KTLPIAFK     | 5    | >RUNX1-F11 KTLPIASK     | 6     | 1     |
| >RUNX1-F11 KTLPIAFKV    | 163  | >RUNX1-F11 KTLPIASKV    | 246   | 83    |
| >RUNX1-F11 KTLPIAFKVV   | 117  | >RUNX1-F11 KTLPIASKVV   | 97    | 20    |
| >RUNX1-F11 KTLPIAFKVV#  | 59   | >RUNX1-F11 KTLPIASKVV#  | 65    | 6     |
| >RUNX1-F11 KTLPIAFK     | 12   | >RUNX1-F11 KTLPIASK     | 36    | 24    |
| >RUNX1-F11 KTLPIAFKV    | 328  | >RUNX1-F11 KTLPIASKV    | 2486  | 2158  |
| >RUNX1-F11 KTLPIAFKV    | 59   | >RUNX1-F11 KTLPIASKV    | 272   | 213   |
| >RUNX1-F11 KTLPIAFKVV   | 232  | >RUNX1-F11 KTLPIASKVV   | 273   | 41    |
| >RUNX1-F11 KTLPIAFKVV#  | 252  | >RUNX1-F11 KTLPIASKVV#  | 1048  | 796   |
| >RUNX1-F11 KTLPIAFK     | 108  | >RUNX1-F11 KTLPIASK     | 534   | 426   |
| >RUNX1-F11 KTLPIAFKV    | 88   | >RUNX1-F11 KTLPIASKV    | 323   | 235   |
| >RUNX1-F11 KTLPIAFKV    | 12   | >RUNX1-F11 KTLPIASKV    | 82    | 70    |
| >RUNX1-F11 KTLPIAFKVV   | 302  | >RUNX1-F11 KTLPIASKVV   | 746   | 444   |
| >RUNX1-F11 KTLPIAFKV    | 14   | >RUNX1-F11 KTLPIASKV    | 9     | 5     |
| >RUNX1-F11 KTLPIAFKVV   | 44   | >RUNX1-F11 KTLPIASKVV   | 18    | 26    |
| >RUNX1-F11 KTLPIAFKVV#  | 651  | >RUNX1-F11 KTLPIASKVV#  | 326   | 325   |
| >RUNX1-F11 KTLPIAFKV    | 400  | >RUNX1-F11 KTLPIASKV    | 1416  | 1016  |
| >RUNX1-F11 KTLPIAFKV    | 242  | >RUNX1-F11 KTLPIASKV    | 2086  | 1844  |
| >RUNX1-F11 KTLPIAFKV    | 85   | >RUNX1-F11 KTLPIASKV    | 7     | 78    |
| >RUNX1-F11 KTLPIAFKVV#  | 858  | >RUNX1-F11 KTLPIASKVV#  | 409   | 449   |
| >RUNX1-F11 KTLPIAFK     | 357  | >RUNX1-F11 KTLPIASK     | 638   | 281   |
| >RUNX1-F11 KTLPIAFK     | 151  | >RUNX1-F11 KTLPIASK     | 1300  | 1149  |
| >RUNX1-F11 KTLPIAFKV    | 199  | >RUNX1-F11 KTLPIASKV    | 129   | 70    |
| >RUNX1-F11 NKTLPIAF     | 33   | >RUNX1-F11 NKTLPIAS     | 15461 | 15428 |
| >RUNX1-F11 CNKTLPIAFK   | 83   | >RUNX1-F11 CNKTLPIASK   | 245   | 162   |
| >RUNX1-F11 CNKTLPIAF    | 168  | >RUNX1-F11 CNKTLPIAS    | 23039 | 22871 |
| >RUNX1-F11 RCNKTLPIAF#  | 282  | >RUNX1-F11 RCNKTLPIAS#  | 805   | 523   |
| >RUNX1-F11 RCNKTLPIAF#  | 9    | >RUNX1-F11 RCNKTLPIAS#  | 15    | 6     |
| >RUNX1-F11 RCNKTLPIAF#  | 155  | >RUNX1-F11 RCNKTLPIAS#  | 914   | 759   |
| >RUNX1-F11 RCNKTLPIAF   | 134  | >RUNX1-F11 RCNKTLPIAS   | 12474 | 12340 |
| >RUNX1-F11 RCNKTLPIAF   | 42   | >RUNX1-F11 RCNKTLPIAS   | 14343 | 14301 |
| >RUNX1-F16: FVGRSGRGK\$ | 110  | >RUNX1-F16: YVGRSGRGK\$ | 71    | 39    |
| >RUNX1-F16: FVGRSGRGK\$ | 188  | >RUNX1-F16: YVGRSGRGK\$ | 165   | 23    |
| >RUNX1-F16: FVGRSGRGK\$ | 145  | >RUNX1-F16: YVGRSGRGK\$ | 121   | 24    |
| >RUNX1-F16: FVGRSGRGK\$ | 791  | >RUNX1-F16: YVGRSGRGK\$ | 205   | 586   |
| >RUNX1-F16: FVGRSGRGK\$ | 1045 | >RUNX1-F16: YVGRSGRGK\$ | 377   | 668   |
| >RUNX1-F16: RFVGRSGRGI  | 115  | >RUNX1-F16: RYVGRSGRGI  | 999   | 884   |
| >RUNX1-F16: RFVGRSGRGI  | 115  | >RUNX1-F16: RYVGRSGRGI  | 36    | 79    |

|                       |       |                       |      |       |
|-----------------------|-------|-----------------------|------|-------|
| >RUNX1-F16:RFVGRSGR   | 20    | >RUNX1-F16:RYVGRSGR   | 26   | 6     |
| >RUNX1-F16:RFVGRSGRGI | 74    | >RUNX1-F16:RYVGRSGRGI | 225  | 151   |
| >RUNX1-F16:RFVGRSGRGI | 406   | >RUNX1-F16:RYVGRSGRGI | 4076 | 3670  |
| >RUNX1-F16:RFVGRSGR   | 42    | >RUNX1-F16:RYVGRSGR   | 21   | 21    |
| >RUNX1-F16:RFVGRSGRGI | 1134  | >RUNX1-F16:RYVGRSGRGI | 288  | 846   |
| >RUNX1-F16:NQVARFNDL  | 8461  | >RUNX1-F16:NQVARFNDL  | 404  | 8057  |
| >RUNX1-F16:NQVARFNDL  | 15415 | >RUNX1-F16:NQVARFNDL  | 380  | 15035 |
| >RUNX1-F16:NQVARFNDL  | 123   | >RUNX1-F16:NQVARFNDL  | 113  | 10    |
| >RUNX1-F16:NQVARFNDL  | 552   | >RUNX1-F16:NQVARFNDL  | 230  | 322   |
| >RUNX1-F16:NQVARFNDL  | 73    | >RUNX1-F16:NQVARFNDL  | 282  | 209   |
| >RUNX1-F16:LRVGRSGR   | 48    | >RUNX1-F16:LRYVGRSGR  | 72   | 24    |
| >RUNX1-F16:LRVGRSGRC  | 37    | >RUNX1-F16:LRYVGRSGRC | 51   | 14    |
| >RUNX1-F16:LRVGRSG    | 281   | >RUNX1-F16:LRYVGRSG   | 301  | 20    |
| >RUNX1-F16:LRVGRSGRC  | 303   | >RUNX1-F16:LRYVGRSGRC | 328  | 25    |
| >RUNX1-F16:LRVGRSGR   | 215   | >RUNX1-F16:LRYVGRSGR  | 112  | 103   |
| >RUNX1-F16:LRVGRSGRC  | 166   | >RUNX1-F16:LRYVGRSGRC | 89   | 77    |
| >RUNX1-F16:DLRFVGRSGF | 58    | >RUNX1-F16:DLRYVGRSGF | 126  | 68    |
| >RUNX1-F16:DLRFVGRSGF | 77    | >RUNX1-F16:DLRYVGRSGF | 84   | 7     |
| >RUNX1-F16:DLRFVGRSGF | 278   | >RUNX1-F16:DLRYVGRSGF | 586  | 308   |
| >RUNX1-F16:RFNDLRFV   | 959   | >RUNX1-F16:RFNDLRYV   | 373  | 586   |
| >RUNX1-F16:RFNDLRFV   | 349   | >RUNX1-F16:RFNDLRYV   | 570  | 221   |
| >RUNX1-F16:RFNDLRFV   | 400   | >RUNX1-F16:RFNDLRYV   | 308  | 92    |
| >RUNX1-F16:RFNDLRFVGF | 4     | >RUNX1-F16:RFNDLRYVGF | 5    | 1     |
| >RUNX1-F16:RFNDLRFVGF | 60    | >RUNX1-F16:RFNDLRYVGF | 79   | 19    |
| >RUNX1-F16:RFNDLRFVGF | 191   | >RUNX1-F16:RFNDLRYVGF | 132  | 59    |
| >RUNX1-F16:RFNDLRFVGF | 20    | >RUNX1-F16:RFNDLRYVGF | 20   | 0     |
| >RUNX1-F16:RFNDLRFV   | 209   | >RUNX1-F16:RFNDLRYV   | 335  | 126   |
| >RUNX1-F16:ARFNDLRF   | 18    | >RUNX1-F16:ARFNDLRY   | 68   | 50    |
| >RUNX1-F16:ARFNDLRFV  | 401   | >RUNX1-F16:ARFNDLRYV  | 236  | 165   |
| >RUNX1-F16:ARFNDLRF   | 46    | >RUNX1-F16:ARFNDLRY   | 56   | 10    |
| >RUNX1-F16:ARFNDLRFV  | 58    | >RUNX1-F16:ARFNDLRYV  | 82   | 24    |
| >RUNX1-F16:ARFNDLRFVC | 27    | >RUNX1-F16:ARFNDLRYVC | 31   | 4     |
| >RUNX1-F16:ARFNDLRFVC | 416   | >RUNX1-F16:ARFNDLRYVC | 308  | 108   |
| >RUNX1-F16:ARFNDLRFV  | 80    | >RUNX1-F16:ARFNDLRYV  | 143  | 63    |
| >RUNX1-F16:ARFNDLRFVC | 163   | >RUNX1-F16:ARFNDLRYVC | 325  | 162   |
| >RUNX1-F16:VARFNDLRF  | 3672  | >RUNX1-F16:VARFNDLRY  | 51   | 3621  |
| >RUNX1-F16:VARFNDLRFV | 200   | >RUNX1-F16:VARFNDLRYV | 293  | 93    |
| >RUNX1-F16:VARFNDLRF  | 14008 | >RUNX1-F16:VARFNDLRY  | 227  | 13781 |
| >RUNX1-F16:VARFNDLRF  | 615   | >RUNX1-F16:VARFNDLRY  | 457  | 158   |
| >RUNX1-F16:VARFNDLRF  | 5     | >RUNX1-F16:VARFNDLRY  | 5    | 0     |
| >RUNX1-F16:VARFNDLRF  | 776   | >RUNX1-F16:VARFNDLRY  | 284  | 492   |
| >RUNX1-F16:QVARFNDLRI | 105   | >RUNX1-F16:QVARFNDLR\ | 109  | 4     |
| >RUNX1-F16:QVARFNDLRI | 269   | >RUNX1-F16:QVARFNDLR\ | 234  | 35    |

|                       |       |                        |      |       |
|-----------------------|-------|------------------------|------|-------|
| >RUNX1-F16:QVARFNDLRI | 86    | >RUNX1-F16:QVARFNDLR\` | 98   | 12    |
| >RUNX1-F16:QVARFNDLRI | 865   | >RUNX1-F16:QVARFNDLR\` | 304  | 561   |
| >RUNX1-F16:QVARFNDLRI | 795   | >RUNX1-F16:QVARFNDLR\` | 459  | 336   |
| >RUNX1-F16:QVARFNDLRI | 315   | >RUNX1-F16:QVARFNDLR\` | 77   | 238   |
| >RUNX1-F16:QVARFNDLRI | 1354  | >RUNX1-F16:QVARFNDLR\` | 143  | 1211  |
| >RUNX1-F16:QVARFNDLRI | 11927 | >RUNX1-F16:QVARFNDLR\` | 432  | 11495 |
| >RUNX1-F16:QVARFNDLRI | 464   | >RUNX1-F16:QVARFNDLR\` | 5532 | 5068  |
| >RUNX1-F16:QVARFNDLRI | 19    | >RUNX1-F16:QVARFNDLR\` | 17   | 2     |
| >RUNX1-F16:QVARFNDLRI | 51    | >RUNX1-F16:QVARFNDLR\` | 34   | 17    |
| >RUNX1-F16:QVARFNDLRI | 5932  | >RUNX1-F16:QVARFNDLR\` | 24   | 5908  |
| >RUNX1-G16GRSGRGKSF   | 170   | >RUNX1-G16CRSGRGKSF    | 121  | 49    |
| >RUNX1-G16GRSGRGKSF   | 181   | >RUNX1-G16CRSGRGKSF    | 636  | 455   |
| >RUNX1-G16GRSGRGKSFT  | 120   | >RUNX1-G16CRSGRGKSFT   | 458  | 338   |
| >RUNX1-G16GRSGRGKSFT  | 590   | >RUNX1-G16CRSGRGKSFT   | 472  | 118   |
| >RUNX1-G16GRSGRGKSFT  | 188   | >RUNX1-G16CRSGRGKSFT   | 755  | 567   |
| >RUNX1-G16VGRSGRGK    | 151   | >RUNX1-G16VCRSGRGK     | 99   | 52    |
| >RUNX1-G16VGRSGRGKSF  | 170   | >RUNX1-G16VCRSGRGKSF   | 126  | 44    |
| >RUNX1-G16VGRSGRGKSF  | 213   | >RUNX1-G16VCRSGRGKSF   | 1024 | 811   |
| >RUNX1-G16FVGRSGRGK   | 1487  | >RUNX1-G16FVCRSGRGK    | 466  | 1021  |
| >RUNX1-G16FVGRSGRGKS  | 110   | >RUNX1-G16FVCRSGRGKS   | 101  | 9     |
| >RUNX1-G16FVGRSGRGKS  | 188   | >RUNX1-G16FVCRSGRGKS   | 182  | 6     |
| >RUNX1-G16FVGRSGRGKS  | 145   | >RUNX1-G16FVCRSGRGKS   | 66   | 79    |
| >RUNX1-G16FVGRSGRGKS  | 791   | >RUNX1-G16FVCRSGRGKS   | 123  | 668   |
| >RUNX1-G16RFVGRSGRGI  | 115   | >RUNX1-G16RFVCRSGRGI   | 99   | 16    |
| >RUNX1-G16RFVGRSGRGI  | 115   | >RUNX1-G16RFVCRSGRGI   | 81   | 34    |
| >RUNX1-G16RFVGRSGR    | 20    | >RUNX1-G16RFVCRSGR     | 18   | 2     |
| >RUNX1-G16RFVGRSGRGI  | 74    | >RUNX1-G16RFVCRSGRGI   | 82   | 8     |
| >RUNX1-G16RFVGRSGRGI  | 406   | >RUNX1-G16RFVCRSGRGI   | 203  | 203   |
| >RUNX1-G16RFVGRSGR    | 42    | >RUNX1-G16RFVCRSGR     | 25   | 17    |
| >RUNX1-G16LRFVGRSGR   | 647   | >RUNX1-G16LRFVCRSGR    | 370  | 277   |
| >RUNX1-G16LRFVGRSGR   | 48    | >RUNX1-G16LRFVCRSGR    | 80   | 32    |
| >RUNX1-G16LRFVGRSGRG  | 37    | >RUNX1-G16LRFVCRSGRG   | 49   | 12    |
| >RUNX1-G16LRFVGRSG    | 281   | >RUNX1-G16LRFVCRSG     | 481  | 200   |
| >RUNX1-G16LRFVGRSGRG  | 303   | >RUNX1-G16LRFVCRSGRG   | 611  | 308   |
| >RUNX1-G16LRFVGRSGR   | 215   | >RUNX1-G16LRFVCRSGR    | 124  | 91    |
| >RUNX1-G16LRFVGRSGRG  | 166   | >RUNX1-G16LRFVCRSGRG   | 126  | 40    |
| >RUNX1-G16DLRFVGRSGF  | 58    | >RUNX1-G16DLRFVCRSGR   | 24   | 34    |
| >RUNX1-G16DLRFVGRSGF  | 77    | >RUNX1-G16DLRFVCRSGR   | 58   | 19    |
| >RUNX1-G16DLRFVGRSGF  | 278   | >RUNX1-G16DLRFVCRSGR   | 382  | 104   |
| >RUNX1-G16RFNDLRFVGF  | 4     | >RUNX1-G16RFNDLRFVCR   | 3    | 1     |
| >RUNX1-G16RFNDLRFVGF  | 60    | >RUNX1-G16RFNDLRFVCR   | 21   | 39    |
| >RUNX1-G16RFNDLRFVGF  | 191   | >RUNX1-G16RFNDLRFVCR   | 106  | 85    |
| >RUNX1-G16RFNDLRFVGF  | 20    | >RUNX1-G16RFNDLRFVCR   | 27   | 7     |

|                       |      |                       |      |      |
|-----------------------|------|-----------------------|------|------|
| >RUNX1-G16 ARFNDRFVC  | 795  | >RUNX1-G16 ARFNDRFVC  | 396  | 399  |
| >RUNX1-G16 ARFNDRFVC  | 27   | >RUNX1-G16 ARFNDRFVC  | 31   | 4    |
| >RUNX1-G16 ARFNDRFVC  | 416  | >RUNX1-G16 ARFNDRFVC  | 378  | 38   |
| >RUNX1-G16 ARFNDRFVC  | 163  | >RUNX1-G16 ARFNDRFVC  | 318  | 155  |
| >RUNX1-G16 GRSGRGKSF  | 170  | >RUNX1-G16 DRSGRGKSF  | 851  | 681  |
| >RUNX1-G16 GRSGRGKSF  | 181  | >RUNX1-G16 DRSGRGKSF  | 2608 | 2427 |
| >RUNX1-G16 GRSGRGKSFT | 120  | >RUNX1-G16 DRSGRGKSFT | 2181 | 2061 |
| >RUNX1-G16 GRSGRGKSFT | 188  | >RUNX1-G16 DRSGRGKSFT | 4364 | 4176 |
| >RUNX1-G16 VGRSGRGK   | 151  | >RUNX1-G16 VDRSGRGK   | 3732 | 3581 |
| >RUNX1-G16 VGRSGRGKSF | 170  | >RUNX1-G16 VDRSGRGKSF | 354  | 184  |
| >RUNX1-G16 VGRSGRGKSF | 213  | >RUNX1-G16 VDRSGRGKSF | 9374 | 9161 |
| >RUNX1-G16 FVGRSGRGKS | 110  | >RUNX1-G16 FVDRSGRGKS | 1924 | 1814 |
| >RUNX1-G16 FVGRSGRGKS | 188  | >RUNX1-G16 FVDRSGRGKS | 361  | 173  |
| >RUNX1-G16 FVGRSGRGKS | 145  | >RUNX1-G16 FVDRSGRGKS | 761  | 616  |
| >RUNX1-G16 FVGRSGRGKS | 791  | >RUNX1-G16 FVDRSGRGKS | 416  | 375  |
| >RUNX1-G16 RFVGRSGRGH | 115  | >RUNX1-G16 RFVDRSGRGH | 142  | 27   |
| >RUNX1-G16 RFVGRSGRGH | 115  | >RUNX1-G16 RFVDRSGRGH | 103  | 12   |
| >RUNX1-G16 RFVGRSGR   | 20   | >RUNX1-G16 RFVDRSGR   | 19   | 1    |
| >RUNX1-G16 RFVGRSGRGH | 74   | >RUNX1-G16 RFVDRSGRGH | 113  | 39   |
| >RUNX1-G16 RFVGRSGRGH | 406  | >RUNX1-G16 RFVDRSGRGH | 698  | 292  |
| >RUNX1-G16 RFVGRSGR   | 42   | >RUNX1-G16 RFVDRSGR   | 36   | 6    |
| >RUNX1-G16 LRFVGRSGR  | 48   | >RUNX1-G16 LRFVDRSGR  | 55   | 7    |
| >RUNX1-G16 LRFVGRSGRC | 37   | >RUNX1-G16 LRFVDRSGRC | 40   | 3    |
| >RUNX1-G16 LRFVGRSG   | 281  | >RUNX1-G16 LRFVDRSG   | 410  | 129  |
| >RUNX1-G16 LRFVGRSGRC | 303  | >RUNX1-G16 LRFVDRSGRC | 452  | 149  |
| >RUNX1-G16 LRFVGRSGR  | 215  | >RUNX1-G16 LRFVDRSGR  | 432  | 217  |
| >RUNX1-G16 LRFVGRSGRC | 166  | >RUNX1-G16 LRFVDRSGRC | 248  | 82   |
| >RUNX1-G16 DLRFVGRSGF | 58   | >RUNX1-G16 DLRFVDRSGF | 139  | 81   |
| >RUNX1-G16 DLRFVGRSGF | 77   | >RUNX1-G16 DLRFVDRSGF | 151  | 74   |
| >RUNX1-G16 DLRFVGRSGF | 278  | >RUNX1-G16 DLRFVDRSGF | 159  | 119  |
| >RUNX1-G16 RFNDRFVGF  | 4    | >RUNX1-G16 RFNDRFVDF  | 6    | 2    |
| >RUNX1-G16 RFNDRFVGF  | 60   | >RUNX1-G16 RFNDRFVDF  | 138  | 78   |
| >RUNX1-G16 RFNDRFVGF  | 191  | >RUNX1-G16 RFNDRFVDF  | 398  | 207  |
| >RUNX1-G16 RFNDRFVGF  | 20   | >RUNX1-G16 RFNDRFVDF  | 20   | 0    |
| >RUNX1-G16 ARFNDRFVC  | 27   | >RUNX1-G16 ARFNDRFVC  | 67   | 40   |
| >RUNX1-G16 ARFNDRFVC  | 416  | >RUNX1-G16 ARFNDRFVC  | 559  | 143  |
| >RUNX1-G16 ARFNDRFVC  | 163  | >RUNX1-G16 ARFNDRFVC  | 554  | 391  |
| >RUNX1-G16 GRSGRGKSF  | 170  | >RUNX1-G16 VRSGRGKSF  | 64   | 106  |
| >RUNX1-G16 GRSGRGKSF  | 181  | >RUNX1-G16 VRSGRGKSF  | 539  | 358  |
| >RUNX1-G16 GRSGRGKSFT | 120  | >RUNX1-G16 VRSGRGKSFT | 354  | 234  |
| >RUNX1-G16 GRSGRGKSFT | 590  | >RUNX1-G16 VRSGRGKSFT | 426  | 164  |
| >RUNX1-G16 GRSGRGKSFT | 188  | >RUNX1-G16 VRSGRGKSFT | 920  | 732  |
| >RUNX1-G16 VGRSGRGK   | 6952 | >RUNX1-G16 VVRSGRGK   | 191  | 6761 |

|                       |      |                       |     |      |
|-----------------------|------|-----------------------|-----|------|
| >RUNX1-G16 VGRSGRGK   | 151  | >RUNX1-G16 VVRSGRGK   | 10  | 141  |
| >RUNX1-G16 VGRSGRGKSF | 3729 | >RUNX1-G16 VVRSGRGKSF | 389 | 3340 |
| >RUNX1-G16 VGRSGRGKSF | 639  | >RUNX1-G16 VVRSGRGKSF | 154 | 485  |
| >RUNX1-G16 VGRSGRGKSF | 922  | >RUNX1-G16 VVRSGRGKSF | 303 | 619  |
| >RUNX1-G16 VGRSGRGKSF | 170  | >RUNX1-G16 VVRSGRGKSF | 103 | 67   |
| >RUNX1-G16 VGRSGRGKSF | 213  | >RUNX1-G16 VVRSGRGKSF | 36  | 177  |
| >RUNX1-G16 VGRSGRGKSF | 1364 | >RUNX1-G16 VVRSGRGKSF | 453 | 911  |
| >RUNX1-G16 VARFNDLRFV | 1828 | >RUNX1-G16 VARFNDLRFV | 315 | 1513 |
| >RUNX1-G16 FVGRSGRGKS | 3900 | >RUNX1-G16 FVVRSGRGKS | 151 | 3749 |
| >RUNX1-G16 FVGRSGRGK  | 1721 | >RUNX1-G16 FVVRSGRGK  | 256 | 1465 |
| >RUNX1-G16 FVGRSGRGKS | 110  | >RUNX1-G16 FVVRSGRGKS | 96  | 14   |
| >RUNX1-G16 FVGRSGRGKS | 188  | >RUNX1-G16 FVVRSGRGKS | 105 | 83   |
| >RUNX1-G16 FVGRSGRGKS | 145  | >RUNX1-G16 FVVRSGRGKS | 22  | 123  |
| >RUNX1-G16 FVGRSGRGKS | 791  | >RUNX1-G16 FVVRSGRGKS | 32  | 759  |
| >RUNX1-G16 FVGRSGRGKS | 1045 | >RUNX1-G16 FVVRSGRGKS | 284 | 761  |
| >RUNX1-G16 RFVGRSGRGI | 115  | >RUNX1-G16 RFVVRSGRGI | 189 | 74   |
| >RUNX1-G16 RFVGRSGRGI | 115  | >RUNX1-G16 RFVVRSGRGI | 72  | 43   |
| >RUNX1-G16 RFVGRSGR   | 20   | >RUNX1-G16 RFVVRSGR   | 12  | 8    |
| >RUNX1-G16 RFVGRSGRGI | 74   | >RUNX1-G16 RFVVRSGRGI | 154 | 80   |
| >RUNX1-G16 RFVGRSGRGI | 406  | >RUNX1-G16 RFVVRSGRGI | 782 | 376  |
| >RUNX1-G16 RFVGRSGR   | 42   | >RUNX1-G16 RFVVRSGR   | 76  | 34   |
| >RUNX1-G16 LRFVGRSGR  | 1551 | >RUNX1-G16 LRFVVRSGR  | 295 | 1256 |
| >RUNX1-G16 LRFVGRSGR  | 48   | >RUNX1-G16 LRFVVRSGR  | 32  | 16   |
| >RUNX1-G16 LRFVGRSGRC | 37   | >RUNX1-G16 LRFVVRSGRG | 29  | 8    |
| >RUNX1-G16 LRFVGRSG   | 281  | >RUNX1-G16 LRFVVRSRG  | 306 | 25   |
| >RUNX1-G16 LRFVGRSGRC | 303  | >RUNX1-G16 LRFVVRSGRG | 285 | 18   |
| >RUNX1-G16 LRFVGRSGR  | 215  | >RUNX1-G16 LRFVVRSGR  | 163 | 52   |
| >RUNX1-G16 LRFVGRSGRC | 166  | >RUNX1-G16 LRFVVRSGRG | 138 | 28   |
| >RUNX1-G16 DLRFVGRSGF | 58   | >RUNX1-G16 DLRFVVRSGR | 27  | 31   |
| >RUNX1-G16 DLRFVGRSGF | 77   | >RUNX1-G16 DLRFVVRSGR | 53  | 24   |
| >RUNX1-G16 DLRFVGRSGF | 278  | >RUNX1-G16 DLRFVVRSGR | 88  | 190  |
| >RUNX1-G16 NDLRFVGR   | 548  | >RUNX1-G16 NDLRFVVR   | 448 | 100  |
| >RUNX1-G16 RFNDLRFVG  | 1017 | >RUNX1-G16 RFNDLRFVV  | 105 | 912  |
| >RUNX1-G16 RFNDLRFVGF | 4    | >RUNX1-G16 RFNDLRFVVR | 5   | 1    |
| >RUNX1-G16 RFNDLRFVGF | 60   | >RUNX1-G16 RFNDLRFVVR | 93  | 33   |
| >RUNX1-G16 RFNDLRFVGF | 191  | >RUNX1-G16 RFNDLRFVVR | 145 | 46   |
| >RUNX1-G16 RFNDLRFVGF | 20   | >RUNX1-G16 RFNDLRFVVR | 18  | 2    |
| >RUNX1-G16 ARFNDLRFVC | 5317 | >RUNX1-G16 ARFNDLRFVV | 182 | 5135 |
| >RUNX1-G16 ARFNDLRFVC | 795  | >RUNX1-G16 ARFNDLRFVV | 295 | 500  |
| >RUNX1-G16 ARFNDLRFVC | 1962 | >RUNX1-G16 ARFNDLRFVV | 325 | 1637 |
| >RUNX1-G16 ARFNDLRFVC | 27   | >RUNX1-G16 ARFNDLRFVV | 31  | 4    |
| >RUNX1-G16 ARFNDLRFVC | 416  | >RUNX1-G16 ARFNDLRFVV | 624 | 208  |
| >RUNX1-G16 ARFNDLRFVC | 163  | >RUNX1-G16 ARFNDLRFVV | 248 | 85   |



|                        |       |                        |     |       |
|------------------------|-------|------------------------|-----|-------|
| >RUNX1-G17 GKSFTLTI    | 6804  | >RUNX1-G17 RKSFTLTI    | 318 | 6486  |
| >RUNX1-G17 GKSFTLTI    | 309   | >RUNX1-G17 RKSFTLTI    | 21  | 288   |
| >RUNX1-G17 GKSFTLTITV  | 521   | >RUNX1-G17 RKSFTLTITV  | 30  | 491   |
| >RUNX1-G17 GKSFTLTITVF | 7     | >RUNX1-G17 RKSFTLTITVF | 2   | 5     |
| >RUNX1-G17 GKSFTLTITVF | 251   | >RUNX1-G17 RKSFTLTITVF | 211 | 40    |
| >RUNX1-G17 GKSFTLTI    | 3864  | >RUNX1-G17 RKSFTLTI    | 324 | 3540  |
| >RUNX1-G17 RGKSFTLTI   | 17    | >RUNX1-G17 RRKSFTLTI   | 82  | 65    |
| >RUNX1-G17 RGKSFTLTITV | 27    | >RUNX1-G17 RRKSFTLTITV | 170 | 143   |
| >RUNX1-G17 RGKSFTLTI   | 272   | >RUNX1-G17 RRKSFTLTI   | 178 | 94    |
| >RUNX1-G17 RGKSFTLTI   | 774   | >RUNX1-G17 RRKSFTLTI   | 29  | 745   |
| >RUNX1-G17 RGKSFTLTITV | 1762  | >RUNX1-G17 RRKSFTLTITV | 75  | 1687  |
| >RUNX1-G17 RGKSFTLT    | 19255 | >RUNX1-G17 RRKSFTLT    | 261 | 18994 |
| >RUNX1-G17 RGKSFTLTI   | 14355 | >RUNX1-G17 RRKSFTLTI   | 30  | 14325 |
| >RUNX1-G17 RGKSFTLTIT  | 18618 | >RUNX1-G17 RRKSFTLTIT  | 34  | 18584 |
| >RUNX1-G17 RGKSFTLTITV | 17512 | >RUNX1-G17 RRKSFTLTITV | 56  | 17456 |
| >RUNX1-G17 RGKSFTLT    | 12738 | >RUNX1-G17 RRKSFTLT    | 31  | 12707 |
| >RUNX1-G17 RGKSFTLTI   | 1330  | >RUNX1-G17 RRKSFTLTI   | 15  | 1315  |
| >RUNX1-G17 RGKSFTLTIT  | 15141 | >RUNX1-G17 RRKSFTLTIT  | 55  | 15086 |
| >RUNX1-G17 RGKSFTLTITV | 2587  | >RUNX1-G17 RRKSFTLTITV | 21  | 2566  |
| >RUNX1-G17 RGKSFTLTI   | 4893  | >RUNX1-G17 RRKSFTLTI   | 15  | 4878  |
| >RUNX1-G17 RGKSFTLTIT  | 15255 | >RUNX1-G17 RRKSFTLTIT  | 58  | 15197 |
| >RUNX1-G17 RGKSFTLTITV | 8040  | >RUNX1-G17 RRKSFTLTITV | 33  | 8007  |
| >RUNX1-G17 RGKSFTLTI   | 57    | >RUNX1-G17 RRKSFTLTI   | 348 | 291   |
| >RUNX1-G17 DLRFVGRSGF  | 22292 | >RUNX1-G17 DLRFVGRSGF  | 29  | 22263 |
| >RUNX1-G17 GRGKSFTL    | 1990  | >RUNX1-G17 GRRKSFTL    | 227 | 1763  |
| >RUNX1-G17 GRGKSFTLTI  | 1297  | >RUNX1-G17 GRRKSFTLTI  | 135 | 1162  |
| >RUNX1-G17 GRGKSFTL    | 572   | >RUNX1-G17 GRRKSFTL    | 252 | 320   |
| >RUNX1-G17 GRGKSFTLTI  | 152   | >RUNX1-G17 GRRKSFTLTI  | 55  | 97    |
| >RUNX1-G17 GRGKSFTLT   | 3013  | >RUNX1-G17 GRRKSFTLT   | 400 | 2613  |
| >RUNX1-G17 GRGKSFTLTI  | 786   | >RUNX1-G17 GRRKSFTLTI  | 120 | 666   |
| >RUNX1-G17 GRGKSFTLTI  | 361   | >RUNX1-G17 GRRKSFTLTI  | 122 | 239   |
| >RUNX1-G17 SGRGKSFTL   | 312   | >RUNX1-G17 SGRRKSFTL   | 65  | 247   |
| >RUNX1-G17 SGRGKSFTLTI | 63    | >RUNX1-G17 SGRRKSFTLTI | 22  | 41    |
| >RUNX1-G17 SGRGKSFTL   | 612   | >RUNX1-G17 SGRRKSFTL   | 82  | 530   |
| >RUNX1-G17 SGRGKSFTLTI | 1537  | >RUNX1-G17 SGRRKSFTLTI | 268 | 1269  |
| >RUNX1-G17 SGRGKSFTL   | 202   | >RUNX1-G17 SGRRKSFTL   | 813 | 611   |
| >RUNX1-G17 RSGRGKSF    | 476   | >RUNX1-G17 RSGRRKSF    | 365 | 111   |
| >RUNX1-G17 RSGRGKSFTL  | 238   | >RUNX1-G17 RSGRRKSFTL  | 258 | 20    |
| >RUNX1-G17 RSGRGKSF    | 140   | >RUNX1-G17 RSGRRKSF    | 339 | 199   |
| >RUNX1-G17 RSGRGKSF    | 34    | >RUNX1-G17 RSGRRKSF    | 52  | 18    |
| >RUNX1-G17 RSGRGKSF    | 9     | >RUNX1-G17 RSGRRKSF    | 16  | 7     |
| >RUNX1-G17 RSGRGKSFTL  | 15    | >RUNX1-G17 RSGRRKSFTL  | 19  | 4     |
| >RUNX1-G17 RSGRGKSF    | 389   | >RUNX1-G17 RSGRRKSF    | 264 | 125   |

|                        |       |                        |      |       |
|------------------------|-------|------------------------|------|-------|
| >RUNX1-G17 RSGRGKSF    | 194   | >RUNX1-G17 RSGRRKSF    | 348  | 154   |
| >RUNX1-G17 RSGRGKSFTL  | 164   | >RUNX1-G17 RSGRRKSFTL  | 302  | 138   |
| >RUNX1-G17 RSGRGKSF    | 22    | >RUNX1-G17 RSGRRKSF    | 47   | 25    |
| >RUNX1-G17 RSGRGKSFTL  | 187   | >RUNX1-G17 RSGRRKSFTL  | 102  | 85    |
| >RUNX1-G17 GRSGRGKSF   | 170   | >RUNX1-G17 GRSGRRKSF   | 343  | 173   |
| >RUNX1-G17 GRSGRGKSF   | 181   | >RUNX1-G17 GRSGRRKSF   | 125  | 56    |
| >RUNX1-G17 GRSGRGKSFT  | 120   | >RUNX1-G17 GRSGRRKSF   | 99   | 21    |
| >RUNX1-G17 GRSGRGKSFT  | 698   | >RUNX1-G17 GRSGRRKSF   | 379  | 319   |
| >RUNX1-G17 GRSGRGKSF   | 818   | >RUNX1-G17 GRSGRRKSF   | 210  | 608   |
| >RUNX1-G17 GRSGRGKSFT  | 188   | >RUNX1-G17 GRSGRRKSF   | 74   | 114   |
| >RUNX1-G17 VGRSGRGK    | 151   | >RUNX1-G17 VGRSGRRK    | 119  | 32    |
| >RUNX1-G17 VGRSGRGKSF  | 170   | >RUNX1-G17 VGRSGRRKSF  | 142  | 28    |
| >RUNX1-G17 VGRSGRGKSF  | 213   | >RUNX1-G17 VGRSGRRKSF  | 451  | 238   |
| >RUNX1-G17 FVGRSGRG    | 36790 | >RUNX1-G17 FVGRSGRR    | 246  | 36544 |
| >RUNX1-G17 FVGRSGRGKSF | 110   | >RUNX1-G17 FVGRSGRRKSF | 210  | 100   |
| >RUNX1-G17 FVGRSGRGKSF | 188   | >RUNX1-G17 FVGRSGRRKSF | 639  | 451   |
| >RUNX1-G17 FVGRSGRGKSF | 145   | >RUNX1-G17 FVGRSGRRKSF | 210  | 65    |
| >RUNX1-G17 RFVGRSGRGI  | 115   | >RUNX1-G17 RFVGRSGRRK  | 134  | 19    |
| >RUNX1-G17 RFVGRSGRGI  | 115   | >RUNX1-G17 RFVGRSGRRK  | 100  | 15    |
| >RUNX1-G17 RFVGRSGRG   | 21195 | >RUNX1-G17 RFVGRSGRR   | 28   | 21167 |
| >RUNX1-G17 RFVGRSGRGI  | 74    | >RUNX1-G17 RFVGRSGRRK  | 66   | 8     |
| >RUNX1-G17 RFVGRSGRGI  | 406   | >RUNX1-G17 RFVGRSGRRK  | 388  | 18    |
| >RUNX1-G17 RFVGRSGRG   | 31357 | >RUNX1-G17 RFVGRSGRR   | 46   | 31311 |
| >RUNX1-G17 LRFVGRSGRC  | 3714  | >RUNX1-G17 LRFVGRSGRR  | 169  | 3545  |
| >RUNX1-G17 LRFVGRSGRC  | 37    | >RUNX1-G17 LRFVGRSGRR  | 44   | 7     |
| >RUNX1-G17 LRFVGRSGRC  | 303   | >RUNX1-G17 LRFVGRSGRR  | 1766 | 1463  |
| >RUNX1-G17 LRFVGRSGRC  | 166   | >RUNX1-G17 LRFVGRSGRR  | 281  | 115   |
| >RUNX1-G19 GPREPRRH    | 914   | >RUNX1-G19 APREPRRH    | 188  | 726   |
| >RUNX1-G19 GPREPRRHR   | 1369  | >RUNX1-G19 APREPRRHR   | 156  | 1213  |
| >RUNX1-G19 GPREPRRHRC  | 843   | >RUNX1-G19 APREPRRHRC  | 125  | 718   |
| >RUNX1-G19 DGPREPRR    | 7434  | >RUNX1-G19 DAPREPRR    | 490  | 6944  |
| >RUNX1-G19 TVDGPREPR   | 527   | >RUNX1-G19 TVDAPREPR   | 243  | 284   |
| >RUNX1-G19 TVDGPREPR   | 862   | >RUNX1-G19 TVDAPREPR   | 338  | 524   |
| >RUNX1-G19 TVDGPREPR   | 79    | >RUNX1-G19 TVDAPREPR   | 63   | 16    |
| >RUNX1-G19 TVDGPREPRF  | 234   | >RUNX1-G19 TVDAPREPRF  | 188  | 46    |
| >RUNX1-G19 ITVDGPREPR  | 583   | >RUNX1-G19 ITVDAPREPR  | 415  | 168   |
| >RUNX1-G19 ITVDGPREPR  | 462   | >RUNX1-G19 ITVDAPREPR  | 518  | 56    |
| >RUNX1-G19 ITVDGPREPR  | 29    | >RUNX1-G19 ITVDAPREPR  | 21   | 8     |
| >RUNX1-G19 ITVDGPREPR  | 37    | >RUNX1-G19 ITVDAPREPR  | 24   | 13    |
| >RUNX1-G19 KITVDGPR    | 84    | >RUNX1-G19 KITVDAPR    | 44   | 40    |
| >RUNX1-G19 KITVDGPREP  | 58    | >RUNX1-G19 KITVDAPREPI | 72   | 14    |
| >RUNX1-G19 KITVDGPR    | 142   | >RUNX1-G19 KITVDAPR    | 62   | 80    |
| >RUNX1-G19 KITVDGPREP  | 183   | >RUNX1-G19 KITVDAPREPI | 117  | 66    |

|                        |      |                        |     |      |
|------------------------|------|------------------------|-----|------|
| >RUNX1-G19 IKITVDGPR   | 1469 | >RUNX1-G19 IKITVDAPR   | 409 | 1060 |
| >RUNX1-G19 IKITVDGPR   | 2855 | >RUNX1-G19 IKITVDAPR   | 475 | 2380 |
| >RUNX1-G19 AIKITVDG    | 4089 | >RUNX1-G19 AIKITVDA    | 486 | 3603 |
| >RUNX1-G19 AIKITVDGPR  | 921  | >RUNX1-G19 AIKITVDAPR  | 388 | 533  |
| >RUNX1-G19 AIKITVDGPR  | 207  | >RUNX1-G19 AIKITVDAPR  | 47  | 160  |
| >RUNX1-G19 AIKITVDGPR  | 875  | >RUNX1-G19 AIKITVDAPR  | 61  | 814  |
| >RUNX1-G19 RAIKITVDGPF | 17   | >RUNX1-G19 RAIKITVDAPF | 9   | 8    |
| >RUNX1-G19 RAIKITVDGPF | 92   | >RUNX1-G19 RAIKITVDAPF | 37  | 55   |
| >RUNX1-G19 RAIKITVDGPF | 77   | >RUNX1-G19 RAIKITVDAPF | 43  | 34   |
| >RUNX1-G19 HRAIKITVDG  | 990  | >RUNX1-G19 HRAIKITVDA  | 183 | 807  |
| >RUNX1-G19 GPREPRRHR   | 4964 | >RUNX1-G19 NPREPRRHR   | 298 | 4666 |
| >RUNX1-G19 GPREPRRHRC  | 843  | >RUNX1-G19 NPREPRRHRC  | 477 | 366  |
| >RUNX1-G19 TVDGPREPR   | 527  | >RUNX1-G19 TVDNPREPR   | 346 | 181  |
| >RUNX1-G19 TVDGPREPR   | 862  | >RUNX1-G19 TVDNPREPR   | 357 | 505  |
| >RUNX1-G19 TVDGPREPR   | 79   | >RUNX1-G19 TVDNPREPR   | 82  | 3    |
| >RUNX1-G19 TVDGPREPRF  | 234  | >RUNX1-G19 TVDNPREPRF  | 459 | 225  |
| >RUNX1-G19 ITVDGPREPR  | 583  | >RUNX1-G19 ITVDNPREPR  | 367 | 216  |
| >RUNX1-G19 ITVDGPREPR  | 462  | >RUNX1-G19 ITVDNPREPR  | 453 | 9    |
| >RUNX1-G19 ITVDGPREPR  | 29   | >RUNX1-G19 ITVDNPREPR  | 34  | 5    |
| >RUNX1-G19 ITVDGPREPR  | 37   | >RUNX1-G19 ITVDNPREPR  | 24  | 13   |
| >RUNX1-G19 ITVDGPREPR  | 866  | >RUNX1-G19 ITVDNPREPR  | 486 | 380  |
| >RUNX1-G19 KITVDGPR    | 84   | >RUNX1-G19 KITVDNPR    | 51  | 33   |
| >RUNX1-G19 KITVDGPREP  | 58   | >RUNX1-G19 KITVDNPREP  | 47  | 11   |
| >RUNX1-G19 KITVDGPR    | 142  | >RUNX1-G19 KITVDNPR    | 66  | 76   |
| >RUNX1-G19 KITVDGPREP  | 183  | >RUNX1-G19 KITVDNPREP  | 108 | 75   |
| >RUNX1-G19 IKITVDGPR   | 2855 | >RUNX1-G19 IKITVDNPR   | 450 | 2405 |
| >RUNX1-G19 AIKITVDGPR  | 207  | >RUNX1-G19 AIKITVDNPR  | 94  | 113  |
| >RUNX1-G19 AIKITVDGPR  | 875  | >RUNX1-G19 AIKITVDNPR  | 175 | 700  |
| >RUNX1-G19 RAIKITVDGPF | 17   | >RUNX1-G19 RAIKITVDNPF | 13  | 4    |
| >RUNX1-G19 RAIKITVDGPF | 92   | >RUNX1-G19 RAIKITVDNPF | 51  | 41   |
| >RUNX1-G19 RAIKITVDGPF | 77   | >RUNX1-G19 RAIKITVDNPF | 50  | 27   |
| >RUNX1-G19 TVDGPREPR   | 79   | >RUNX1-G19 TVDQPREPR   | 92  | 13   |
| >RUNX1-G19 TVDGPREPRF  | 234  | >RUNX1-G19 TVDQPREPRF  | 953 | 719  |
| >RUNX1-G19 ITVDGPREPR  | 462  | >RUNX1-G19 ITVDQPREPR  | 372 | 90   |
| >RUNX1-G19 ITVDGPREPR  | 29   | >RUNX1-G19 ITVDQPREPR  | 47  | 18   |
| >RUNX1-G19 ITVDGPREPR  | 37   | >RUNX1-G19 ITVDQPREPR  | 38  | 1    |
| >RUNX1-G19 ITVDGPREPR  | 866  | >RUNX1-G19 ITVDQPREPR  | 364 | 502  |
| >RUNX1-G19 KITVDGPR    | 84   | >RUNX1-G19 KITVDQPR    | 54  | 30   |
| >RUNX1-G19 KITVDGPREP  | 58   | >RUNX1-G19 KITVDQPREP  | 50  | 8    |
| >RUNX1-G19 KITVDGPR    | 142  | >RUNX1-G19 KITVDQPR    | 85  | 57   |
| >RUNX1-G19 KITVDGPREP  | 183  | >RUNX1-G19 KITVDQPREP  | 131 | 52   |
| >RUNX1-G19 IKITVDGPR   | 2855 | >RUNX1-G19 IKITVDQPR   | 226 | 2629 |
| >RUNX1-G19 AIKITVDGPR  | 207  | >RUNX1-G19 AIKITVDQPR  | 131 | 76   |

|                        |       |                        |      |       |
|------------------------|-------|------------------------|------|-------|
| >RUNX1-G19 AIKITVDGPR  | 875   | >RUNX1-G19 AIKITVDQPR  | 238  | 637   |
| >RUNX1-G19 RAIKITVDGPF | 17    | >RUNX1-G19 RAIKITVDQPF | 14   | 3     |
| >RUNX1-G19 RAIKITVDGPF | 92    | >RUNX1-G19 RAIKITVDQPF | 89   | 3     |
| >RUNX1-G19 RAIKITVDGPF | 77    | >RUNX1-G19 RAIKITVDQPF | 53   | 24    |
| >RUNX1-G19 HRAIKITVDG  | 990   | >RUNX1-G19 HRAIKITVDQ  | 380  | 610   |
| >RUNX1-G19 GPREPRRHRC  | 5282  | >RUNX1-G19 RPREPRRHRC  | 122  | 5160  |
| >RUNX1-G19 GPREPRRHR   | 5180  | >RUNX1-G19 RPREPRRHR   | 482  | 4698  |
| >RUNX1-G19 GPREPRRH    | 914   | >RUNX1-G19 RPREPRRH    | 60   | 854   |
| >RUNX1-G19 GPREPRRHR   | 1369  | >RUNX1-G19 RPREPRRHR   | 45   | 1324  |
| >RUNX1-G19 GPREPRRHRC  | 843   | >RUNX1-G19 RPREPRRHRC  | 38   | 805   |
| >RUNX1-G19 YHRAIKITVDC | 35181 | >RUNX1-G19 YHRAIKITVDF | 428  | 34753 |
| >RUNX1-G19 TVDGPREPR   | 527   | >RUNX1-G19 TVDRPREPR   | 379  | 148   |
| >RUNX1-G19 TVDGPREPR   | 862   | >RUNX1-G19 TVDRPREPR   | 289  | 573   |
| >RUNX1-G19 TVDGPREPR   | 79    | >RUNX1-G19 TVDRPREPR   | 99   | 20    |
| >RUNX1-G19 TVDGPREPRF  | 234   | >RUNX1-G19 TVDRPREPRF  | 1647 | 1413  |
| >RUNX1-G19 ITVDGPREPR  | 583   | >RUNX1-G19 ITVDRPREPR  | 187  | 396   |
| >RUNX1-G19 ITVDGPREPR  | 462   | >RUNX1-G19 ITVDRPREPRI | 182  | 280   |
| >RUNX1-G19 ITVDGPREPR  | 1827  | >RUNX1-G19 ITVDRPREPR  | 402  | 1425  |
| >RUNX1-G19 ITVDGPREPR  | 982   | >RUNX1-G19 ITVDRPREPRI | 499  | 483   |
| >RUNX1-G19 ITVDGPREPR  | 29    | >RUNX1-G19 ITVDRPREPR  | 37   | 8     |
| >RUNX1-G19 ITVDGPREPR  | 37    | >RUNX1-G19 ITVDRPREPRI | 34   | 3     |
| >RUNX1-G19 KITVDGPR    | 84    | >RUNX1-G19 KITVDRPR    | 41   | 43    |
| >RUNX1-G19 KITVDGPREP  | 58    | >RUNX1-G19 KITVDRPREPI | 22   | 36    |
| >RUNX1-G19 KITVDGPR    | 142   | >RUNX1-G19 KITVDRPR    | 86   | 56    |
| >RUNX1-G19 KITVDGPREP  | 183   | >RUNX1-G19 KITVDRPREPI | 107  | 76    |
| >RUNX1-G19 AIKITVDG    | 22133 | >RUNX1-G19 AIKITVDR    | 107  | 22026 |
| >RUNX1-G19 AIKITVDGPR  | 207   | >RUNX1-G19 AIKITVDRPR  | 58   | 149   |
| >RUNX1-G19 RAIKITVDG   | 17668 | >RUNX1-G19 RAIKITVDR   | 26   | 17642 |
| >RUNX1-G19 RAIKITVDGPF | 17    | >RUNX1-G19 RAIKITVDRPF | 16   | 1     |
| >RUNX1-G19 RAIKITVDG   | 31077 | >RUNX1-G19 RAIKITVDR   | 43   | 31034 |
| >RUNX1-G19 RAIKITVDGPF | 92    | >RUNX1-G19 RAIKITVDRPF | 133  | 41    |
| >RUNX1-G19 RAIKITVDG   | 32647 | >RUNX1-G19 RAIKITVDR   | 45   | 32602 |
| >RUNX1-G19 RAIKITVDGPF | 77    | >RUNX1-G19 RAIKITVDRPF | 69   | 8     |
| >RUNX1-G19 HRAIKITVDG  | 37395 | >RUNX1-G19 HRAIKITVDR  | 397  | 36998 |
| >RUNX1-G19 HRAIKITVDG  | 990   | >RUNX1-G19 HRAIKITVDR  | 44   | 946   |
| >RUNX1-G19 HRAIKITVDG  | 34178 | >RUNX1-G19 HRAIKITVDR  | 192  | 33986 |
| >RUNX1-G59 GAPDAGAAL   | 10    | >RUNX1-G59 DAPDAGAAL   | 163  | 153   |
| >RUNX1-G59 GAPDAGAAL   | 332   | >RUNX1-G59 DAPDAGAAL   | 5393 | 5061  |
| >RUNX1-G59 PLGAPDAGA/  | 275   | >RUNX1-G59 PLDAPDAGA/  | 97   | 178   |
| >RUNX1-G59 PLGAPDAGA/  | 97    | >RUNX1-G59 PLDAPDAGA/  | 114  | 17    |
| >RUNX1-G59 LPLGAPDA    | 338   | >RUNX1-G59 LPLDAPDA    | 4075 | 3737  |
| >RUNX1-G59 LPLGAPDAG/  | 221   | >RUNX1-G59 LPLDAPDAG/  | 347  | 126   |
| >RUNX1-G59 LPLGAPDAG   | 118   | >RUNX1-G59 LPLDAPDAG   | 90   | 28    |

|                        |       |                        |      |       |
|------------------------|-------|------------------------|------|-------|
| >RUNX1-G59 LPLGAPDAG/  | 76    | >RUNX1-G59 LPLDAPDAG/  | 56   | 20    |
| >RUNX1-G59 LPLGAPDA    | 18    | >RUNX1-G59 LPLDAPDA    | 24   | 6     |
| >RUNX1-G59 LPLGAPDAG   | 46    | >RUNX1-G59 LPLDAPDAG   | 58   | 12    |
| >RUNX1-G59 LPLGAPDAG/  | 17    | >RUNX1-G59 LPLDAPDAG/  | 12   | 5     |
| >RUNX1-G59 LPLGAPDAG/  | 8     | >RUNX1-G59 LPLDAPDAG/  | 9    | 1     |
| >RUNX1-G59 ALPLGAPDAC  | 295   | >RUNX1-G59 ALPLDAPDAC  | 456  | 161   |
| >RUNX1-G59 ALPLGAPDAC  | 465   | >RUNX1-G59 ALPLDAPDAC  | 640  | 175   |
| >RUNX1-G59 ALPLGAPDA   | 173   | >RUNX1-G59 ALPLDAPDA   | 436  | 263   |
| >RUNX1-G59 ALPLGAPDAC  | 256   | >RUNX1-G59 ALPLDAPDAC  | 422  | 166   |
| >RUNX1-G59 ALPLGAPDA   | 38    | >RUNX1-G59 ALPLDAPDA   | 68   | 30    |
| >RUNX1-G59 ALPLGAPDAC  | 29    | >RUNX1-G59 ALPLDAPDAC  | 45   | 16    |
| >RUNX1-G59 EALPLGAPDA  | 177   | >RUNX1-G59 EALPLDAPDA  | 472  | 295   |
| >RUNX1-G59 SEALPLGA    | 209   | >RUNX1-G59 SEALPLDA    | 362  | 153   |
| >RUNX1-G59 SEALPLGA    | 37    | >RUNX1-G59 SEALPLDA    | 41   | 4     |
| >RUNX1-G59 SEALPLGAPD  | 579   | >RUNX1-G59 SEALPLDAPD  | 413  | 166   |
| >RUNX1-G59 SEALPLGAPD  | 23    | >RUNX1-G59 SEALPLDAPD  | 22   | 1     |
| >RUNX1-G59 KMSEALPLG/  | 52    | >RUNX1-G59 KMSEALPLD/  | 158  | 106   |
| >RUNX1-G59 KMSEALPLG   | 404   | >RUNX1-G59 KMSEALPLD   | 1569 | 1165  |
| >RUNX1-G59 KMSEALPLG/  | 32    | >RUNX1-G59 KMSEALPLD/  | 96   | 64    |
| >RUNX1-G59 KMSEALPLG/  | 26    | >RUNX1-G59 KMSEALPLD/  | 59   | 33    |
| >RUNX1-G59 KMSEALPLG   | 272   | >RUNX1-G59 KMSEALPLD   | 2489 | 2217  |
| >RUNX1-G59 KMSEALPLG/  | 87    | >RUNX1-G59 KMSEALPLD/  | 405  | 318   |
| >RUNX1-G59 KMSEALPLG/  | 8     | >RUNX1-G59 KMSEALPLD/  | 52   | 44    |
| >RUNX1-G59 KMSEALPLG/  | 23    | >RUNX1-G59 KMSEALPLD/  | 120  | 97    |
| >RUNX1-G59 KMSEALPLG/  | 14    | >RUNX1-G59 KMSEALPLD/  | 26   | 12    |
| >RUNX1-G59 KMSEALPLG/  | 44    | >RUNX1-G59 KMSEALPLD/  | 447  | 403   |
| >RUNX1-G59 KMSEALPLG/  | 21    | >RUNX1-G59 KMSEALPLD/  | 56   | 35    |
| >RUNX1-G69 GKLRSGDR    | 2829  | >RUNX1-G69 RKLRS GDR   | 240  | 2589  |
| >RUNX1-G69 GKLRSGDRSM  | 68    | >RUNX1-G69 RKLRS GDRSM | 7    | 61    |
| >RUNX1-G69 GKLRSGDRSM  | 235   | >RUNX1-G69 RKLRS GDRSM | 17   | 218   |
| >RUNX1-G69 GKLRSGDRSM  | 9204  | >RUNX1-G69 RKLRS GDRSM | 295  | 8909  |
| >RUNX1-G69 AGKLRS GDRS | 21902 | >RUNX1-G69 ARKLRS GDRS | 384  | 21518 |
| >RUNX1-G69 LAGKLRS GDR | 2047  | >RUNX1-G69 LARKLRS GDR | 423  | 1624  |
| >RUNX1-G69 ALAGKLRS    | 228   | >RUNX1-G69 ALARKLRS    | 1344 | 1116  |
| >RUNX1-G69 AALAGKLR    | 171   | >RUNX1-G69 AALARKLR    | 37   | 134   |
| >RUNX1-G69 GAALAGKLR   | 919   | >RUNX1-G69 GAALARKLR   | 296  | 623   |
| >RUNX1-G69 DAGAALAG    | 35953 | >RUNX1-G69 DAGAALAR    | 314  | 35639 |
| >RUNX1-G69 DAGAALAGKI  | 446   | >RUNX1-G69 DAGAALARKI  | 133  | 313   |
| >RUNX1-G69 DAGAALAG    | 38015 | >RUNX1-G69 DAGAALAR    | 130  | 37885 |
| >RUNX1-G69 DAGAALAGK   | 241   | >RUNX1-G69 DAGAALARK   | 217  | 24    |
| >RUNX1-G69 DAGAALAGKI  | 185   | >RUNX1-G69 DAGAALARKI  | 96   | 89    |
| >RUNX1-G69 PDAGAALAGI  | 211   | >RUNX1-G69 PDAGAALARI  | 811  | 600   |
| >RUNX1-H10 HWRCNKTL    | 320   | >RUNX1-H10 QWRCNKTL    | 2570 | 2250  |

|                       |       |                       |      |       |
|-----------------------|-------|-----------------------|------|-------|
| >RUNX1-H10 HWRCNKTL   | 23    | >RUNX1-H10 QWRCNKTL   | 168  | 145   |
| >RUNX1-H10 HWRCNKTL   | 32    | >RUNX1-H10 QWRCNKTL   | 274  | 242   |
| >RUNX1-H10 HWRCNKTL   | 393   | >RUNX1-H10 QWRCNKTL   | 289  | 104   |
| >RUNX1-H10 HWRCNKTL   | 1009  | >RUNX1-H10 QWRCNKTL   | 400  | 609   |
| >RUNX1-H10 THWRCNKTL  | 233   | >RUNX1-H10 TQWRCNKTL  | 136  | 97    |
| >RUNX1-H10 THWRCNKTL  | 19203 | >RUNX1-H10 TQWRCNKTL  | 266  | 18937 |
| >RUNX1-H10 THWRCNKTL  | 21473 | >RUNX1-H10 TQWRCNKTL  | 132  | 21341 |
| >RUNX1-H10 THWRCNKTL  | 2849  | >RUNX1-H10 TQWRCNKTL  | 190  | 2659  |
| >RUNX1-H10 THWRCNKTL  | 462   | >RUNX1-H10 TQWRCNKTL  | 32   | 430   |
| >RUNX1-H10 THWRCNKTL  | 625   | >RUNX1-H10 TQWRCNKTL  | 43   | 582   |
| >RUNX1-H10 THWRCNKTL  | 277   | >RUNX1-H10 TQWRCNKTL  | 6362 | 6085  |
| >RUNX1-H10 THWRCNKTL  | 312   | >RUNX1-H10 TQWRCNKTL  | 726  | 414   |
| >RUNX1-H10 PTHWRCNK   | 690   | >RUNX1-H10 PTQWRCNK   | 449  | 241   |
| >RUNX1-H10 PTHWRCNK   | 71    | >RUNX1-H10 PTQWRCNK   | 1967 | 1896  |
| >RUNX1-H10 PTHWRCNK   | 1255  | >RUNX1-H10 PTQWRCNK   | 370  | 885   |
| >RUNX1-H10 LPTHWRCNK  | 48    | >RUNX1-H10 LPTQWRCNK  | 40   | 8     |
| >RUNX1-H10 LPTHWRCNK  | 184   | >RUNX1-H10 LPTQWRCNK  | 146  | 38    |
| >RUNX1-H10 LPTHWRCNK  | 85    | >RUNX1-H10 LPTQWRCNK  | 77   | 8     |
| >RUNX1-H10 LPTHWRCNK  | 122   | >RUNX1-H10 LPTQWRCNK  | 312  | 190   |
| >RUNX1-H10 VLPTHWRC   | 97    | >RUNX1-H10 VLPTQWRC   | 163  | 66    |
| >RUNX1-H10 VLPTHWRC   | 58    | >RUNX1-H10 VLPTQWRC   | 50   | 8     |
| >RUNX1-H10 VLPTHWRCN  | 242   | >RUNX1-H10 VLPTQWRCN  | 605  | 363   |
| >RUNX1-H10 SVLPTHWRC  | 93    | >RUNX1-H10 SVLPTQWRC  | 153  | 60    |
| >RUNX1-H10 SVLPTHWRC  | 147   | >RUNX1-H10 SVLPTQWRC  | 103  | 44    |
| >RUNX1-H10 SVLPTHWRCI | 178   | >RUNX1-H10 SVLPTQWRCI | 172  | 6     |
| >RUNX1-H10 SVLPTHWR   | 35    | >RUNX1-H10 SVLPTQWR   | 121  | 86    |
| >RUNX1-H10 SVLPTHWRCI | 10    | >RUNX1-H10 SVLPTQWRCI | 12   | 2     |
| >RUNX1-H10 SVLPTHWRCI | 9     | >RUNX1-H10 SVLPTQWRCI | 16   | 7     |
| >RUNX1-H10 SVLPTHWR   | 15    | >RUNX1-H10 SVLPTQWR   | 39   | 24    |
| >RUNX1-H10 SVLPTHWRCI | 70    | >RUNX1-H10 SVLPTQWRCI | 179  | 109   |
| >RUNX1-H10 SVLPTHWR   | 349   | >RUNX1-H10 SVLPTQWR   | 898  | 549   |
| >RUNX1-H10 SVLPTHWR   | 39    | >RUNX1-H10 SVLPTQWR   | 107  | 68    |
| >RUNX1-H10 SVLPTHWRCI | 233   | >RUNX1-H10 SVLPTQWRCI | 291  | 58    |
| >RUNX1-H10 SVLPTHWR   | 114   | >RUNX1-H10 SVLPTQWR   | 321  | 207   |
| >RUNX1-H10 SVLPTHWRCI | 234   | >RUNX1-H10 SVLPTQWRCI | 249  | 15    |
| >RUNX1-H10 SVLPTHWR   | 83    | >RUNX1-H10 SVLPTQWR   | 187  | 104   |
| >RUNX1-H10 CSVLPTHWR  | 146   | >RUNX1-H10 CSVLPTQWR  | 703  | 557   |
| >RUNX1-H10 CSVLPTHWR  | 41    | >RUNX1-H10 CSVLPTQWR  | 193  | 152   |
| >RUNX1-H10 CSVLPTHW   | 7     | >RUNX1-H10 CSVLPTQW   | 6    | 1     |
| >RUNX1-H10 CSVLPTHW   | 69    | >RUNX1-H10 CSVLPTQW   | 72   | 3     |
| >RUNX1-H10 CSVLPTHW   | 11    | >RUNX1-H10 CSVLPTQW   | 12   | 1     |
| >RUNX1-H10 CSVLPTHWR  | 113   | >RUNX1-H10 CSVLPTQWR  | 536  | 423   |
| >RUNX1-H10 LCSVLPTHWF | 244   | >RUNX1-H10 LCSVLPTQWF | 815  | 571   |

|                        |       |                        |       |       |
|------------------------|-------|------------------------|-------|-------|
| >RUNX1-H10 LCSVLPTHW   | 86    | >RUNX1-H10 LCSVLPTQW   | 79    | 7     |
| >RUNX1-H10 LCSVLPTHWF  | 297   | >RUNX1-H10 LCSVLPTQWF  | 968   | 671   |
| >RUNX1-H10 FLCSVLPTH   | 1330  | >RUNX1-H10 FLCSVLPTQ   | 128   | 1202  |
| >RUNX1-H10 FLCSVLPTHW  | 413   | >RUNX1-H10 FLCSVLPTQW  | 834   | 421   |
| >RUNX1-H10 FLCSVLPTH   | 452   | >RUNX1-H10 FLCSVLPTQ   | 19    | 433   |
| >RUNX1-H10 FLCSVLPTH   | 7355  | >RUNX1-H10 FLCSVLPTQ   | 130   | 7225  |
| >RUNX1-H10 FLCSVLPTH   | 1219  | >RUNX1-H10 FLCSVLPTQ   | 7     | 1212  |
| >RUNX1-H10 FLCSVLPTHW  | 202   | >RUNX1-H10 FLCSVLPTQW  | 536   | 334   |
| >RUNX1-H10 FLCSVLPTHW  | 171   | >RUNX1-H10 FLCSVLPTQW  | 436   | 265   |
| >RUNX1-H10 FLCSVLPTHW  | 87    | >RUNX1-H10 FLCSVLPTQW  | 157   | 70    |
| >RUNX1-H10 FLCSVLPTHW  | 23    | >RUNX1-H10 FLCSVLPTQW  | 57    | 34    |
| >RUNX1-H10 FLCSVLPTHW  | 433   | >RUNX1-H10 FLCSVLPTQW  | 242   | 191   |
| >RUNX1-H10 FLCSVLPTHW  | 111   | >RUNX1-H10 FLCSVLPTQW  | 119   | 8     |
| >RUNX1-H10 FLCSVLPTHW  | 360   | >RUNX1-H10 FLCSVLPTQW  | 795   | 435   |
| >RUNX1-H10 NFLCSVLPTH  | 321   | >RUNX1-H10 NFLCSVLPTQ  | 499   | 178   |
| >RUNX1-H10 HWRCNKTL    | 1835  | >RUNX1-H10 YWRCNKTL    | 380   | 1455  |
| >RUNX1-H10 HWRCNKTL    | 1356  | >RUNX1-H10 YWRCNKTL    | 366   | 990   |
| >RUNX1-H10 HWRCNKTL    | 320   | >RUNX1-H10 YWRCNKTL    | 3985  | 3665  |
| >RUNX1-H10 HWRCNKTLPI  | 23    | >RUNX1-H10 YWRCNKTLPI  | 284   | 261   |
| >RUNX1-H10 HWRCNKTLPI  | 32    | >RUNX1-H10 YWRCNKTLPI  | 501   | 469   |
| >RUNX1-H10 HWRCNKTL    | 393   | >RUNX1-H10 YWRCNKTL    | 405   | 12    |
| >RUNX1-H10 THWRCNKTL   | 13476 | >RUNX1-H10 TYWRCNKTL   | 136   | 13340 |
| >RUNX1-H10 THWRCNKTL   | 16989 | >RUNX1-H10 TYWRCNKTLI  | 212   | 16777 |
| >RUNX1-H10 THWRCNKTL   | 233   | >RUNX1-H10 TYWRCNKTLI  | 662   | 429   |
| >RUNX1-H10 THWRCNKTL   | 1640  | >RUNX1-H10 TYWRCNKTL   | 27    | 1613  |
| >RUNX1-H10 THWRCNKTL   | 2079  | >RUNX1-H10 TYWRCNKTLI  | 49    | 2030  |
| >RUNX1-H10 THWRCNKTL   | 6267  | >RUNX1-H10 TYWRCNKTL   | 110   | 6157  |
| >RUNX1-H10 THWRCNKTL   | 4115  | >RUNX1-H10 TYWRCNKTLI  | 81    | 4034  |
| >RUNX1-H10 THWRCNKTL   | 17135 | >RUNX1-H10 TYWRCNKTL   | 25    | 17110 |
| >RUNX1-H10 THWRCNKTL   | 17634 | >RUNX1-H10 TYWRCNKTLI  | 45    | 17589 |
| >RUNX1-H10 THWRCNKTL   | 2849  | >RUNX1-H10 TYWRCNKTLI  | 344   | 2505  |
| >RUNX1-H10 THWRCNKTL   | 462   | >RUNX1-H10 TYWRCNKTL   | 2788  | 2326  |
| >RUNX1-H10 THWRCNKTL   | 277   | >RUNX1-H10 TYWRCNKTL   | 7070  | 6793  |
| >RUNX1-H10 THWRCNKTL   | 312   | >RUNX1-H10 TYWRCNKTL   | 11563 | 11251 |
| >RUNX1-H10 PNFLCSVLPTI | 16367 | >RUNX1-H10 PNFLCSVLPTI | 451   | 15916 |
| >RUNX1-H10 PTHWRCNK    | 1938  | >RUNX1-H10 PTYWRCNK    | 155   | 1783  |
| >RUNX1-H10 PTHWRCNK    | 690   | >RUNX1-H10 PTYWRCNK    | 125   | 565   |
| >RUNX1-H10 PTHWRCNK    | 71    | >RUNX1-H10 PTYWRCNK    | 760   | 689   |
| >RUNX1-H10 PTHWRCNK    | 2204  | >RUNX1-H10 PTYWRCNKI   | 480   | 1724  |
| >RUNX1-H10 PTHWRCNK    | 970   | >RUNX1-H10 PTYWRCNK    | 296   | 674   |
| >RUNX1-H10 PTHWRCNK    | 1255  | >RUNX1-H10 PTYWRCNKI   | 410   | 845   |
| >RUNX1-H10 LPTHWRCNK   | 48    | >RUNX1-H10 LPTYWRCNK   | 85    | 37    |
| >RUNX1-H10 LPTHWRCNK   | 184   | >RUNX1-H10 LPTYWRCNK   | 229   | 45    |

|                       |       |                        |     |       |
|-----------------------|-------|------------------------|-----|-------|
| >RUNX1-H10 LPTHWRCNK  | 85    | >RUNX1-H10 LPTYWRCNK   | 80  | 5     |
| >RUNX1-H10 LPTHWRCNK  | 122   | >RUNX1-H10 LPTYWRCNK   | 223 | 101   |
| >RUNX1-H10 VLPHTWRC   | 97    | >RUNX1-H10 VLPTYWRC    | 55  | 42    |
| >RUNX1-H10 VLPHTWRC   | 58    | >RUNX1-H10 VLPTYWRC    | 37  | 21    |
| >RUNX1-H10 VLPHTWRCN  | 242   | >RUNX1-H10 VLPTYWRCNI  | 248 | 6     |
| >RUNX1-H10 VLPHTWRCN  | 544   | >RUNX1-H10 VLPTYWRCNI  | 389 | 155   |
| >RUNX1-H10 VLPHTWRCN  | 548   | >RUNX1-H10 VLPTYWRCNI  | 441 | 107   |
| >RUNX1-H10 VLPHTWRCN  | 601   | >RUNX1-H10 VLPTYWRCNI  | 402 | 199   |
| >RUNX1-H10 SVLPHTWRC  | 655   | >RUNX1-H10 SVLPTYWRC   | 242 | 413   |
| >RUNX1-H10 SVLPHTWRC  | 93    | >RUNX1-H10 SVLPTYWRC   | 94  | 1     |
| >RUNX1-H10 SVLPHTWRC  | 147   | >RUNX1-H10 SVLPTYWRC   | 126 | 21    |
| >RUNX1-H10 SVLPHTWRCI | 178   | >RUNX1-H10 SVLPTYWRCI  | 172 | 6     |
| >RUNX1-H10 SVLPHTWR   | 35    | >RUNX1-H10 SVLPTYWR    | 22  | 13    |
| >RUNX1-H10 SVLPHTWRCI | 10    | >RUNX1-H10 SVLPTYWRCI  | 9   | 1     |
| >RUNX1-H10 SVLPHTWRCI | 9     | >RUNX1-H10 SVLPTYWRCI  | 10  | 1     |
| >RUNX1-H10 SVLPHTWR   | 15    | >RUNX1-H10 SVLPTYWR    | 13  | 2     |
| >RUNX1-H10 SVLPHTWRCI | 70    | >RUNX1-H10 SVLPTYWRCI  | 72  | 2     |
| >RUNX1-H10 SVLPHTWR   | 349   | >RUNX1-H10 SVLPTYWR    | 204 | 145   |
| >RUNX1-H10 SVLPHTWR   | 39    | >RUNX1-H10 SVLPTYWR    | 47  | 8     |
| >RUNX1-H10 SVLPHTWRCI | 233   | >RUNX1-H10 SVLPTYWRCI  | 235 | 2     |
| >RUNX1-H10 SVLPHTWR   | 114   | >RUNX1-H10 SVLPTYWR    | 114 | 0     |
| >RUNX1-H10 SVLPHTWRCI | 234   | >RUNX1-H10 SVLPTYWRCI  | 218 | 16    |
| >RUNX1-H10 SVLPHTWR   | 83    | >RUNX1-H10 SVLPTYWR    | 72  | 11    |
| >RUNX1-H10 CSVLPHTWR  | 146   | >RUNX1-H10 CSVLPTYWR   | 59  | 87    |
| >RUNX1-H10 CSVLPHTWR  | 1105  | >RUNX1-H10 CSVLPTYWR   | 433 | 672   |
| >RUNX1-H10 CSVLPHTWR  | 41    | >RUNX1-H10 CSVLPTYWR   | 34  | 7     |
| >RUNX1-H10 CSVLPHTW   | 7     | >RUNX1-H10 CSVLPTYW    | 7   | 0     |
| >RUNX1-H10 CSVLPHTW   | 69    | >RUNX1-H10 CSVLPTYW    | 56  | 13    |
| >RUNX1-H10 CSVLPHTW   | 11    | >RUNX1-H10 CSVLPTYW    | 11  | 0     |
| >RUNX1-H10 CSVLPHTWR  | 113   | >RUNX1-H10 CSVLPTYWR   | 67  | 46    |
| >RUNX1-H10 LCSVLPHT   | 20551 | >RUNX1-H10 LCSVLPHTY   | 358 | 20193 |
| >RUNX1-H10 LCSVLPHTWF | 244   | >RUNX1-H10 LCSVLPHTYWR | 125 | 119   |
| >RUNX1-H10 LCSVLPHTWF | 1902  | >RUNX1-H10 LCSVLPHTYWR | 406 | 1496  |
| >RUNX1-H10 LCSVLPHTW  | 86    | >RUNX1-H10 LCSVLPHTY   | 78  | 8     |
| >RUNX1-H10 LCSVLPHTWF | 297   | >RUNX1-H10 LCSVLPHTYWR | 163 | 134   |
| >RUNX1-H10 FLCSVLPHTW | 2431  | >RUNX1-H10 FLCSVLPHTY  | 350 | 2081  |
| >RUNX1-H10 FLCSVLPHTW | 413   | >RUNX1-H10 FLCSVLPHTY  | 297 | 116   |
| >RUNX1-H10 FLCSVLPHT  | 452   | >RUNX1-H10 FLCSVLPHTY  | 36  | 416   |
| >RUNX1-H10 FLCSVLPHTW | 1303  | >RUNX1-H10 FLCSVLPHTY  | 193 | 1110  |
| >RUNX1-H10 FLCSVLPHT  | 1219  | >RUNX1-H10 FLCSVLPHTY  | 75  | 1144  |
| >RUNX1-H10 FLCSVLPHTW | 202   | >RUNX1-H10 FLCSVLPHTY  | 731 | 529   |
| >RUNX1-H10 FLCSVLPHT  | 9100  | >RUNX1-H10 FLCSVLPHTY  | 101 | 8999  |
| >RUNX1-H10 FLCSVLPHT  | 3773  | >RUNX1-H10 FLCSVLPHTY  | 20  | 3753  |



|                        |       |                        |      |       |
|------------------------|-------|------------------------|------|-------|
| >RUNX1-H10 FLCSVLPTH   | 4771  | >RUNX1-H10 FLCSVLPTY   | 40   | 4731  |
| >RUNX1-H10 FLCSVLPTHW  | 171   | >RUNX1-H10 FLCSVLPTYW  | 106  | 65    |
| >RUNX1-H10 FLCSVLPTHW  | 87    | >RUNX1-H10 FLCSVLPTYW  | 51   | 36    |
| >RUNX1-H10 FLCSVLPTHW  | 23    | >RUNX1-H10 FLCSVLPTYW  | 22   | 1     |
| >RUNX1-H10 FLCSVLPTH   | 18199 | >RUNX1-H10 FLCSVLPTY   | 181  | 18018 |
| >RUNX1-H10 FLCSVLPTH   | 3070  | >RUNX1-H10 FLCSVLPTY   | 57   | 3013  |
| >RUNX1-H10 FLCSVLPTH   | 10831 | >RUNX1-H10 FLCSVLPTY   | 245  | 10586 |
| >RUNX1-H10 FLCSVLPTH   | 6977  | >RUNX1-H10 FLCSVLPTY   | 187  | 6790  |
| >RUNX1-H10 FLCSVLPTHW  | 433   | >RUNX1-H10 FLCSVLPTYW  | 324  | 109   |
| >RUNX1-H10 FLCSVLPTH   | 4002  | >RUNX1-H10 FLCSVLPTY   | 270  | 3732  |
| >RUNX1-H10 FLCSVLPTHW  | 111   | >RUNX1-H10 FLCSVLPTYW  | 103  | 8     |
| >RUNX1-H10 FLCSVLPTH   | 3671  | >RUNX1-H10 FLCSVLPTY   | 212  | 3459  |
| >RUNX1-H10 FLCSVLPTHW  | 567   | >RUNX1-H10 FLCSVLPTYW  | 289  | 278   |
| >RUNX1-H10 FLCSVLPTH   | 17930 | >RUNX1-H10 FLCSVLPTY   | 325  | 17605 |
| >RUNX1-H10 FLCSVLPTHW  | 360   | >RUNX1-H10 FLCSVLPTYW  | 250  | 110   |
| >RUNX1-H10 NFLCSVLPTH' | 321   | >RUNX1-H10 NFLCSVLPTY\ | 548  | 227   |
| >RUNX1-H10 NFLCSVLPTH' | 812   | >RUNX1-H10 NFLCSVLPTY\ | 433  | 379   |
| >RUNX1-H10 NFLCSVLPTH  | 19330 | >RUNX1-H10 NFLCSVLPTY  | 151  | 19179 |
| >RUNX1-H10 NFLCSVLPTH  | 27003 | >RUNX1-H10 NFLCSVLPTY  | 353  | 26650 |
| >RUNX1-H85 ADHPGELV    | 344   | >RUNX1-H85 ADNPGELV    | 1292 | 948   |
| >RUNX1-H85 ADHPGELV    | 137   | >RUNX1-H85 ADNPGELV    | 90   | 47    |
| >RUNX1-H85 LADHPGELV   | 336   | >RUNX1-H85 LADNPGELV   | 106  | 230   |
| >RUNX1-H85 VLADHPGEL   | 52    | >RUNX1-H85 VLADNPGEL   | 127  | 75    |
| >RUNX1-H85 VLADHPGELV  | 103   | >RUNX1-H85 VLADNPGELV  | 89   | 14    |
| >RUNX1-H85 VLADHPGEL   | 7     | >RUNX1-H85 VLADNPGEL   | 13   | 6     |
| >RUNX1-H85 VLADHPGELV  | 24    | >RUNX1-H85 VLADNPGELV  | 23   | 1     |
| >RUNX1-H85 VLADHPGEL   | 5     | >RUNX1-H85 VLADNPGEL   | 9    | 4     |
| >RUNX1-H85 VLADHPGELV  | 99    | >RUNX1-H85 VLADNPGELV  | 92   | 7     |
| >RUNX1-H85 VLADHPGEL   | 5     | >RUNX1-H85 VLADNPGEL   | 4    | 1     |
| >RUNX1-H85 VLADHPGELV  | 2     | >RUNX1-H85 VLADNPGELV  | 2    | 0     |
| >RUNX1-H85 VLADHPGEL   | 57    | >RUNX1-H85 VLADNPGEL   | 14   | 43    |
| >RUNX1-H85 VLADHPGELV  | 11    | >RUNX1-H85 VLADNPGELV  | 6    | 5     |
| >RUNX1-H85 VLADHPGEL   | 57    | >RUNX1-H85 VLADNPGEL   | 29   | 28    |
| >RUNX1-H85 VLADHPGELV  | 7     | >RUNX1-H85 VLADNPGELV  | 6    | 1     |
| >RUNX1-H85 VLADHPGEL   | 96    | >RUNX1-H85 VLADNPGEL   | 17   | 79    |
| >RUNX1-H85 VLADHPGELV  | 7     | >RUNX1-H85 VLADNPGELV  | 4    | 3     |
| >RUNX1-H85 VLADHPGEL   | 3     | >RUNX1-H85 VLADNPGEL   | 3    | 0     |
| >RUNX1-H85 VLADHPGELV  | 2     | >RUNX1-H85 VLADNPGELV  | 2    | 0     |
| >RUNX1-H85 EVLADHPGEL  | 275   | >RUNX1-H85 EVLADNPGEL  | 319  | 44    |
| >RUNX1-H85 EVLADHPGEL  | 377   | >RUNX1-H85 EVLADNPGEL  | 189  | 188   |
| >RUNX1-H85 EVLADHPGEL  | 283   | >RUNX1-H85 EVLADNPGEL  | 282  | 1     |
| >RUNX1-H85 EVLADHPGEL  | 35    | >RUNX1-H85 EVLADNPGEL  | 68   | 33    |
| >RUNX1-H85 EVLADHPGEL  | 32    | >RUNX1-H85 EVLADNPGEL  | 27   | 5     |

|                        |       |                       |      |       |
|------------------------|-------|-----------------------|------|-------|
| >RUNX1-H85 EVLADHPGEL  | 13    | >RUNX1-H85 EVLADNPGEL | 14   | 1     |
| >RUNX1-H85 EVLADHPGEL  | 5     | >RUNX1-H85 EVLADNPGEL | 5    | 0     |
| >RUNX1-H85 VEVLADHPGI  | 354   | >RUNX1-H85 VEVLADNPGI | 826  | 472   |
| >RUNX1-H85 VEVLADHPGI  | 61    | >RUNX1-H85 VEVLADNPGI | 89   | 28    |
| >RUNX1-H85 VEVLADHPGI  | 362   | >RUNX1-H85 VEVLADNPGI | 361  | 1     |
| >RUNX1-H85 VEVLADHPGI  | 109   | >RUNX1-H85 VEVLADNPGI | 153  | 44    |
| >RUNX1-H85 SMVEVLADH   | 286   | >RUNX1-H85 SMVEVLADN  | 858  | 572   |
| >RUNX1-H85 RSMVEVLADI  | 140   | >RUNX1-H85 RSMVEVLADI | 3022 | 2882  |
| >RUNX1-I177ITVFTNPPQV  | 166   | >RUNX1-I177TTVFTNPPQV | 253  | 87    |
| >RUNX1-I177ITVFTNPPQV  | 87    | >RUNX1-I177TTVFTNPPQV | 433  | 346   |
| >RUNX1-I177ITVFTNPPQV  | 326   | >RUNX1-I177TTVFTNPPQV | 1142 | 816   |
| >RUNX1-I177ITVFTNPPQ   | 1153  | >RUNX1-I177TTVFTNPPQ  | 294  | 859   |
| >RUNX1-I177ITVFTNPPQV  | 861   | >RUNX1-I177TTVFTNPPQV | 204  | 657   |
| >RUNX1-I177ITVFTNPPQV  | 1940  | >RUNX1-I177TTVFTNPPQV | 141  | 1799  |
| >RUNX1-I177ITVFTNPPQV  | 31    | >RUNX1-I177TTVFTNPPQV | 5    | 26    |
| >RUNX1-I177ITVFTNPPQV  | 36    | >RUNX1-I177TTVFTNPPQV | 308  | 272   |
| >RUNX1-I177ITVFTNPPQV  | 514   | >RUNX1-I177TTVFTNPPQV | 331  | 183   |
| >RUNX1-I177TITVFTNPPQ' | 342   | >RUNX1-I177TTTVFTNPPQ | 2485 | 2143  |
| >RUNX1-I177TITVFTNPPQ' | 258   | >RUNX1-I177TTTVFTNPPQ | 1120 | 862   |
| >RUNX1-I177TITVFTNPPQ' | 174   | >RUNX1-I177TTTVFTNPPQ | 1107 | 933   |
| >RUNX1-I177TITVFTNPPQ' | 481   | >RUNX1-I177TTTVFTNPPQ | 6594 | 6113  |
| >RUNX1-I177TITVFTNPPQ' | 18    | >RUNX1-I177TTTVFTNPPQ | 487  | 469   |
| >RUNX1-I177TITVFTNPPQ' | 192   | >RUNX1-I177TTTVFTNPPQ | 34   | 158   |
| >RUNX1-I177TITVFTNPPQ' | 31    | >RUNX1-I177TTTVFTNPPQ | 11   | 20    |
| >RUNX1-I177TITVFTNPPQ' | 11309 | >RUNX1-I177TTTVFTNPPQ | 222  | 11087 |
| >RUNX1-I177SGRGKSFTLTI | 63    | >RUNX1-I177SGRGKSFTLT | 1416 | 1353  |
| >RUNX1-I177TLTITVFT    | 446   | >RUNX1-I177TLTTTVFT   | 545  | 99    |
| >RUNX1-I177TLTITVFT    | 172   | >RUNX1-I177TLTTTVFT   | 174  | 2     |
| >RUNX1-I177FTLTITVFT   | 199   | >RUNX1-I177FTLTTTVFT  | 633  | 434   |
| >RUNX1-I177FTLTITVFT   | 143   | >RUNX1-I177FTLTTTVFT  | 1106 | 963   |
| >RUNX1-I177FTLTITVF    | 240   | >RUNX1-I177FTLTTTVF   | 318  | 78    |
| >RUNX1-I177FTLTITVFT   | 44    | >RUNX1-I177FTLTTTVFT  | 53   | 9     |
| >RUNX1-I177FTLTITVF    | 156   | >RUNX1-I177FTLTTTVF   | 166  | 10    |
| >RUNX1-I177FTLTITVF    | 160   | >RUNX1-I177FTLTTTVF   | 238  | 78    |
| >RUNX1-I177FTLTITVF    | 123   | >RUNX1-I177FTLTTTVF   | 127  | 4     |
| >RUNX1-I177FTLTITVFT   | 40    | >RUNX1-I177FTLTTTVFT  | 450  | 410   |
| >RUNX1-I177FTLTITVFT   | 132   | >RUNX1-I177FTLTTTVFT  | 141  | 9     |
| >RUNX1-I177FTLTITVF    | 336   | >RUNX1-I177FTLTTTVF   | 169  | 167   |
| >RUNX1-I177FTLTITVF    | 13    | >RUNX1-I177FTLTTTVF   | 7    | 6     |
| >RUNX1-I177FTLTITVF    | 7     | >RUNX1-I177FTLTTTVF   | 5    | 2     |
| >RUNX1-I177FTLTITVF    | 288   | >RUNX1-I177FTLTTTVF   | 232  | 56    |
| >RUNX1-I177FTLTITVF    | 374   | >RUNX1-I177FTLTTTVF   | 422  | 48    |
| >RUNX1-I177FTLTITVF    | 74    | >RUNX1-I177FTLTTTVF   | 45   | 29    |

|                        |      |                        |       |       |
|------------------------|------|------------------------|-------|-------|
| >RUNX1-1177FTLTITVF    | 33   | >RUNX1-1177FTLTTTVF    | 21    | 12    |
| >RUNX1-1177SFTLTITV    | 570  | >RUNX1-1177SFTLTTTV    | 42    | 528   |
| >RUNX1-1177SFTLTITVF   | 66   | >RUNX1-1177SFTLTTTVF   | 41    | 25    |
| >RUNX1-1177SFTLTITVF   | 452  | >RUNX1-1177SFTLTTTVF   | 456   | 4     |
| >RUNX1-1177SFTLTITV    | 417  | >RUNX1-1177SFTLTTTV    | 571   | 154   |
| >RUNX1-1177KSFTLTITV   | 8019 | >RUNX1-1177KSFTLTTTV   | 488   | 7531  |
| >RUNX1-1177KSFTLTITV   | 158  | >RUNX1-1177KSFTLTTTV   | 326   | 168   |
| >RUNX1-1177KSFTLTITV   | 613  | >RUNX1-1177KSFTLTTTV   | 197   | 416   |
| >RUNX1-1177KSFTLTITV   | 1103 | >RUNX1-1177KSFTLTTTV   | 292   | 811   |
| >RUNX1-1177KSFTLTITV   | 71   | >RUNX1-1177KSFTLTTTV   | 71    | 0     |
| >RUNX1-1177KSFTLTITV   | 255  | >RUNX1-1177KSFTLTTTV   | 667   | 412   |
| >RUNX1-1177KSFTLTITV   | 399  | >RUNX1-1177KSFTLTTTV   | 876   | 477   |
| >RUNX1-1177KSFTLTITV   | 21   | >RUNX1-1177KSFTLTTTV   | 194   | 173   |
| >RUNX1-1177KSFTLTITVFT | 136  | >RUNX1-1177KSFTLTTTVFT | 192   | 56    |
| >RUNX1-1177KSFTLTIT    | 524  | >RUNX1-1177KSFTLTTT    | 79    | 445   |
| >RUNX1-1177KSFTLTITV   | 9    | >RUNX1-1177KSFTLTTTV   | 7     | 2     |
| >RUNX1-1177KSFTLTITVF  | 5    | >RUNX1-1177KSFTLTTTVF  | 4     | 1     |
| >RUNX1-1177KSFTLTITVFT | 95   | >RUNX1-1177KSFTLTTTVFT | 153   | 58    |
| >RUNX1-1177KSFTLTITV   | 381  | >RUNX1-1177KSFTLTTTV   | 340   | 41    |
| >RUNX1-1177KSFTLTITVF  | 60   | >RUNX1-1177KSFTLTTTVF  | 45    | 15    |
| >RUNX1-1177KSFTLTITV   | 141  | >RUNX1-1177KSFTLTTTV   | 66    | 75    |
| >RUNX1-1177KSFTLTITVF  | 4    | >RUNX1-1177KSFTLTTTVF  | 3     | 1     |
| >RUNX1-1177KSFTLTIT    | 1976 | >RUNX1-1177KSFTLTTT    | 313   | 1663  |
| >RUNX1-1177KSFTLTITV   | 36   | >RUNX1-1177KSFTLTTTV   | 23    | 13    |
| >RUNX1-1177KSFTLTITVF  | 3    | >RUNX1-1177KSFTLTTTVF  | 3     | 0     |
| >RUNX1-1177KSFTLTITVF  | 70   | >RUNX1-1177KSFTLTTTVF  | 71    | 1     |
| >RUNX1-1177KSFTLTITV   | 271  | >RUNX1-1177KSFTLTTTV   | 260   | 11    |
| >RUNX1-1177KSFTLTITVF  | 11   | >RUNX1-1177KSFTLTTTVF  | 10    | 1     |
| >RUNX1-1177KSFTLTITV   | 118  | >RUNX1-1177KSFTLTTTV   | 20    | 98    |
| >RUNX1-1177KSFTLTITVF  | 82   | >RUNX1-1177KSFTLTTTVF  | 57    | 25    |
| >RUNX1-1177KSFTLTITV   | 180  | >RUNX1-1177KSFTLTTTV   | 178   | 2     |
| >RUNX1-1177GKSFTLTI    | 309  | >RUNX1-1177GKSFTLTT    | 7774  | 7465  |
| >RUNX1-1177GKSFTLTITV  | 521  | >RUNX1-1177GKSFTLTTTV  | 297   | 224   |
| >RUNX1-1177GKSFTLTITVF | 7    | >RUNX1-1177GKSFTLTTTVF | 7     | 0     |
| >RUNX1-1177GKSFTLTITVF | 251  | >RUNX1-1177GKSFTLTTTVF | 223   | 28    |
| >RUNX1-1177RGKSFTLTI   | 17   | >RUNX1-1177RGKSFTLTT   | 315   | 298   |
| >RUNX1-1177RGKSFTLTITV | 27   | >RUNX1-1177RGKSFTLTTV  | 124   | 97    |
| >RUNX1-1177RGKSFTLTI   | 272  | >RUNX1-1177RGKSFTLTT   | 12108 | 11836 |
| >RUNX1-1177RGKSFTLTI   | 57   | >RUNX1-1177RGKSFTLTT   | 28372 | 28315 |
| >RUNX1-1177GRGKSFTLTI  | 152  | >RUNX1-1177GRGKSFTLTT  | 1182  | 1030  |
| >RUNX1-1177GRGKSFTLTI  | 361  | >RUNX1-1177GRGKSFTLTT  | 1331  | 970   |
| >RUNX1-1193AIKITVDGPR  | 921  | >RUNX1-1193ATKITVDGPR  | 181   | 740   |
| >RUNX1-1193AIKITVDGPR  | 207  | >RUNX1-1193ATKITVDGPR  | 222   | 15    |

|                         |      |                         |      |      |
|-------------------------|------|-------------------------|------|------|
| >RUNX1-I19E AIKITVDGPR  | 875  | >RUNX1-I19E ATKITVDGPR  | 254  | 621  |
| >RUNX1-I19E RAIKITVDGPF | 17   | >RUNX1-I19E RATKITVDGP  | 24   | 7    |
| >RUNX1-I19E RAIKITVDGPF | 92   | >RUNX1-I19E RATKITVDGP  | 134  | 42   |
| >RUNX1-I19E RAIKITVDGPF | 77   | >RUNX1-I19E RATKITVDGP  | 98   | 21   |
| >RUNX1-I19E HRAIKITV    | 223  | >RUNX1-I19E HRATKITV    | 214  | 9    |
| >RUNX1-I19E HRAIKITV    | 1139 | >RUNX1-I19E HRATKITV    | 304  | 835  |
| >RUNX1-I19E HRAIKITV    | 575  | >RUNX1-I19E HRATKITV    | 262  | 313  |
| >RUNX1-I19E YHRAIKITV   | 857  | >RUNX1-I19E YHRATKITV   | 200  | 657  |
| >RUNX1-I19E YHRAIKITV   | 604  | >RUNX1-I19E YHRATKITV   | 485  | 119  |
| >RUNX1-I19E YHRAIKITV   | 366  | >RUNX1-I19E YHRATKITV   | 135  | 231  |
| >RUNX1-I19E TYHRAIKI    | 133  | >RUNX1-I19E TYHRATKI    | 16   | 117  |
| >RUNX1-I19E TYHRAIKITV  | 109  | >RUNX1-I19E TYHRATKITV  | 115  | 6    |
| >RUNX1-I19E TYHRAIKI    | 468  | >RUNX1-I19E TYHRATKI    | 518  | 50   |
| >RUNX1-I19E TYHRAIKI    | 199  | >RUNX1-I19E TYHRATKI    | 246  | 47   |
| >RUNX1-I19E TYHRAIKI    | 11   | >RUNX1-I19E TYHRATKI    | 15   | 4    |
| >RUNX1-I19E TYHRAIKITV  | 201  | >RUNX1-I19E TYHRATKITV  | 204  | 3    |
| >RUNX1-I19E TYHRAIKI    | 193  | >RUNX1-I19E TYHRATKI    | 596  | 403  |
| >RUNX1-I19E TYHRAIKITV  | 168  | >RUNX1-I19E TYHRATKITV  | 87   | 81   |
| >RUNX1-I19E ATYHRAIKI   | 332  | >RUNX1-I19E ATYHRATKI   | 482  | 150  |
| >RUNX1-I19E ATYHRAIKITV | 256  | >RUNX1-I19E ATYHRATKITV | 271  | 15   |
| >RUNX1-I19E ATYHRAIKI   | 1190 | >RUNX1-I19E ATYHRATKI   | 236  | 954  |
| >RUNX1-I19E ATYHRAIKITV | 131  | >RUNX1-I19E ATYHRATKITV | 103  | 28   |
| >RUNX1-I19E ATYHRAIKITV | 79   | >RUNX1-I19E ATYHRATKITV | 101  | 22   |
| >RUNX1-I19E ATYHRAIKITV | 24   | >RUNX1-I19E ATYHRATKITV | 33   | 9    |
| >RUNX1-I19E ATYHRAIKITV | 462  | >RUNX1-I19E ATYHRATKITV | 497  | 35   |
| >RUNX1-I19E ATYHRAIKITV | 85   | >RUNX1-I19E ATYHRATKITV | 109  | 24   |
| >RUNX1-I19E ATYHRAIKITV | 59   | >RUNX1-I19E ATYHRATKITV | 55   | 4    |
| >RUNX1-I19E ATYHRAIK    | 33   | >RUNX1-I19E ATYHRATK    | 33   | 0    |
| >RUNX1-I19E ATYHRAIK    | 14   | >RUNX1-I19E ATYHRATK    | 16   | 2    |
| >RUNX1-I19E ATYHRAIK    | 10   | >RUNX1-I19E ATYHRATK    | 13   | 3    |
| >RUNX1-I19E ATYHRAIKI   | 231  | >RUNX1-I19E ATYHRATKI   | 2141 | 1910 |
| >RUNX1-I19E ATYHRAIKITV | 260  | >RUNX1-I19E ATYHRATKITV | 349  | 89   |
| >RUNX1-I19E ATYHRAIK    | 102  | >RUNX1-I19E ATYHRATK    | 63   | 39   |
| >RUNX1-I19E ATYHRAIKI   | 39   | >RUNX1-I19E ATYHRATKI   | 28   | 11   |
| >RUNX1-I19E ATYHRAIKITV | 138  | >RUNX1-I19E ATYHRATKITV | 182  | 44   |
| >RUNX1-I19E ATYHRAIK    | 73   | >RUNX1-I19E ATYHRATK    | 48   | 25   |
| >RUNX1-I19E ATYHRAIKITV | 215  | >RUNX1-I19E ATYHRATKITV | 513  | 298  |
| >RUNX1-I19E ATYHRAIKITV | 261  | >RUNX1-I19E ATYHRATKITV | 355  | 94   |
| >RUNX1-I19E ATYHRAIKI   | 8    | >RUNX1-I19E ATYHRATKI   | 7    | 1    |
| >RUNX1-I19E ATYHRAIKITV | 48   | >RUNX1-I19E ATYHRATKITV | 30   | 18   |
| >RUNX1-I19E ATYHRAIKI   | 590  | >RUNX1-I19E ATYHRATKI   | 91   | 499  |
| >RUNX1-I19E ATYHRAIKITV | 300  | >RUNX1-I19E ATYHRATKITV | 180  | 120  |
| >RUNX1-I19E ATYHRAIK    | 98   | >RUNX1-I19E ATYHRATK    | 106  | 8    |

|                        |      |                        |       |       |
|------------------------|------|------------------------|-------|-------|
| >RUNX1-I19E ATYHRAIKI  | 17   | >RUNX1-I19E ATYHRATKI  | 12    | 5     |
| >RUNX1-I19E VATYHRAIK  | 545  | >RUNX1-I19E VATYHRATK  | 444   | 101   |
| >RUNX1-I19E VATYHRAIK  | 626  | >RUNX1-I19E VATYHRATK  | 421   | 205   |
| >RUNX1-I19E VATYHRAIK  | 659  | >RUNX1-I19E VATYHRATK  | 353   | 306   |
| >RUNX1-I19E VATYHRAIK  | 287  | >RUNX1-I19E VATYHRATK  | 131   | 156   |
| >RUNX1-I19E QVATYHRAIK | 226  | >RUNX1-I19E QVATYHRATI | 124   | 102   |
| >RUNX1-I19E QVATYHRAIK | 464  | >RUNX1-I19E QVATYHRATI | 289   | 175   |
| >RUNX1-I19E QVATYHRAIK | 137  | >RUNX1-I19E QVATYHRATI | 96    | 41    |
| >RUNX1-I19E QVATYHRAIK | 39   | >RUNX1-I19E QVATYHRATI | 20    | 19    |
| >RUNX1-I19E QVATYHRAI  | 167  | >RUNX1-I19E QVATYHRAT  | 5092  | 4925  |
| >RUNX1-I19E QVATYHRAIK | 128  | >RUNX1-I19E QVATYHRATI | 112   | 16    |
| >RUNX1-I19E PQVATYHRAI | 229  | >RUNX1-I19E PQVATYHRAI | 6457  | 6228  |
| >RUNX1-K11 KTLPIAFKV   | 38   | >RUNX1-K11 NTLPIAFKV   | 379   | 341   |
| >RUNX1-K11 KTLPIAFKV   | 92   | >RUNX1-K11 NTLPIAFKV   | 181   | 89    |
| >RUNX1-K11 KTLPIAFKVV  | 360  | >RUNX1-K11 NTLPIAFKVV  | 567   | 207   |
| >RUNX1-K11 KTLPIAFKV   | 14   | >RUNX1-K11 NTLPIAFKV   | 34    | 20    |
| >RUNX1-K11 KTLPIAFKVV  | 97   | >RUNX1-K11 NTLPIAFKVV  | 221   | 124   |
| >RUNX1-K11 KTLPIAFKVV/ | 308  | >RUNX1-K11 NTLPIAFKVV/ | 1381  | 1073  |
| >RUNX1-K11 KTLPIAFKV   | 10   | >RUNX1-K11 NTLPIAFKV   | 55    | 45    |
| >RUNX1-K11 KTLPIAFKVV  | 62   | >RUNX1-K11 NTLPIAFKVV  | 448   | 386   |
| >RUNX1-K11 KTLPIAFKV   | 39   | >RUNX1-K11 NTLPIAFKV   | 279   | 240   |
| >RUNX1-K11 KTLPIAFKVV  | 461  | >RUNX1-K11 NTLPIAFKVV  | 1645  | 1184  |
| >RUNX1-K11 KTLPIAFKV   | 15   | >RUNX1-K11 NTLPIAFKV   | 94    | 79    |
| >RUNX1-K11 KTLPIAFKVV  | 144  | >RUNX1-K11 NTLPIAFKVV  | 1119  | 975   |
| >RUNX1-K11 KTLPIAFKV   | 47   | >RUNX1-K11 NTLPIAFKV   | 83    | 36    |
| >RUNX1-K11 KTLPIAFKV   | 55   | >RUNX1-K11 NTLPIAFKV   | 359   | 304   |
| >RUNX1-K11 KTLPIAFKVV  | 454  | >RUNX1-K11 NTLPIAFKVV  | 1873  | 1419  |
| >RUNX1-K11 KTLPIAFK    | 38   | >RUNX1-K11 NTLPIAFK    | 318   | 280   |
| >RUNX1-K11 KTLPIAFK    | 9    | >RUNX1-K11 NTLPIAFK    | 20    | 11    |
| >RUNX1-K11 KTLPIAFK    | 5    | >RUNX1-K11 NTLPIAFK    | 180   | 175   |
| >RUNX1-K11 KTLPIAFKV   | 163  | >RUNX1-K11 NTLPIAFKV   | 11536 | 11373 |
| >RUNX1-K11 KTLPIAFKVV  | 117  | >RUNX1-K11 NTLPIAFKVV  | 10931 | 10814 |
| >RUNX1-K11 KTLPIAFKVV/ | 59   | >RUNX1-K11 NTLPIAFKVV/ | 9478  | 9419  |
| >RUNX1-K11 KTLPIAFK    | 12   | >RUNX1-K11 NTLPIAFK    | 144   | 132   |
| >RUNX1-K11 KTLPIAFKV   | 328  | >RUNX1-K11 NTLPIAFKV   | 7155  | 6827  |
| >RUNX1-K11 KTLPIAFKV   | 59   | >RUNX1-K11 NTLPIAFKV   | 1803  | 1744  |
| >RUNX1-K11 KTLPIAFKVV  | 232  | >RUNX1-K11 NTLPIAFKVV  | 5559  | 5327  |
| >RUNX1-K11 KTLPIAFKVV/ | 252  | >RUNX1-K11 NTLPIAFKVV/ | 11655 | 11403 |
| >RUNX1-K11 KTLPIAFK    | 3319 | >RUNX1-K11 NTLPIAFK    | 168   | 3151  |
| >RUNX1-K11 KTLPIAFK    | 108  | >RUNX1-K11 NTLPIAFK    | 7     | 101   |
| >RUNX1-K11 KTLPIAFKV   | 88   | >RUNX1-K11 NTLPIAFKV   | 8     | 80    |
| >RUNX1-K11 KTLPIAFKVV  | 6848 | >RUNX1-K11 NTLPIAFKVV  | 492   | 6356  |
| >RUNX1-K11 KTLPIAFKVV/ | 3887 | >RUNX1-K11 NTLPIAFKVV/ | 67    | 3820  |

|                        |      |                        |       |       |
|------------------------|------|------------------------|-------|-------|
| >RUNX1-K11 KTLPIAFKV   | 12   | >RUNX1-K11 NTLPIAFKV   | 3     | 9     |
| >RUNX1-K11 KTLPIAFKVV  | 302  | >RUNX1-K11 NTLPIAFKVV  | 17    | 285   |
| >RUNX1-K11 KTLPIAFKVVV | 2534 | >RUNX1-K11 NTLPIAFKVVV | 109   | 2425  |
| >RUNX1-K11 KTLPIAFKV   | 14   | >RUNX1-K11 NTLPIAFKV   | 964   | 950   |
| >RUNX1-K11 KTLPIAFKVV  | 44   | >RUNX1-K11 NTLPIAFKVV  | 3445  | 3401  |
| >RUNX1-K11 KTLPIAFKV   | 400  | >RUNX1-K11 NTLPIAFKV   | 12828 | 12428 |
| >RUNX1-K11 KTLPIAFKV   | 242  | >RUNX1-K11 NTLPIAFKV   | 13186 | 12944 |
| >RUNX1-K11 KTLPIAFKV   | 85   | >RUNX1-K11 NTLPIAFKV   | 811   | 726   |
| >RUNX1-K11 KTLPIAFK    | 357  | >RUNX1-K11 NTLPIAFK    | 808   | 451   |
| >RUNX1-K11 KTLPIAFK    | 151  | >RUNX1-K11 NTLPIAFK    | 2608  | 2457  |
| >RUNX1-K11 KTLPIAFKV   | 199  | >RUNX1-K11 NTLPIAFKV   | 1381  | 1182  |
| >RUNX1-K11 NKTLPIAFK   | 921  | >RUNX1-K11 NNTLPIAFK   | 206   | 715   |
| >RUNX1-K11 NKTLPIAF    | 33   | >RUNX1-K11 NNTLPIAF    | 3359  | 3326  |
| >RUNX1-K11 SVLPTHWRCI  | 178  | >RUNX1-K11 SVLPTHWRCI  | 20417 | 20239 |
| >RUNX1-K11 SVLPTHWRCI  | 10   | >RUNX1-K11 SVLPTHWRCI  | 9455  | 9445  |
| >RUNX1-K11 SVLPTHWRCI  | 9    | >RUNX1-K11 SVLPTHWRCI  | 3772  | 3763  |
| >RUNX1-K11 SVLPTHWRCI  | 70   | >RUNX1-K11 SVLPTHWRCI  | 9891  | 9821  |
| >RUNX1-K11 SVLPTHWRCI  | 233  | >RUNX1-K11 SVLPTHWRCI  | 23720 | 23487 |
| >RUNX1-K11 SVLPTHWRCI  | 234  | >RUNX1-K11 SVLPTHWRCI  | 7143  | 6909  |
| >RUNX1-K11 CNKTLPIAFK  | 83   | >RUNX1-K11 CNNTLPIAFK  | 2001  | 1918  |
| >RUNX1-K11 CNKTLPIAF   | 168  | >RUNX1-K11 CNNTLPIAF   | 245   | 77    |
| >RUNX1-K11 RCNKTLPIAFK | 282  | >RUNX1-K11 RCNNTLPIAFI | 286   | 4     |
| >RUNX1-K11 RCNKTLPI    | 129  | >RUNX1-K11 RCNNTLPI    | 139   | 10    |
| >RUNX1-K11 RCNKTLPIA   | 146  | >RUNX1-K11 RCNNTLPIA   | 176   | 30    |
| >RUNX1-K11 RCNKTLPIAFK | 9    | >RUNX1-K11 RCNNTLPIAFI | 9     | 0     |
| >RUNX1-K11 RCNKTLPIAFK | 155  | >RUNX1-K11 RCNNTLPIAFI | 124   | 31    |
| >RUNX1-K11 RCNKTLPI    | 134  | >RUNX1-K11 RCNNTLPI    | 49    | 85    |
| >RUNX1-K11 RCNKTLPIAF  | 134  | >RUNX1-K11 RCNNTLPIAF  | 64    | 70    |
| >RUNX1-K11 RCNKTLPIAF  | 42   | >RUNX1-K11 RCNNTLPIAF  | 38    | 4     |
| >RUNX1-K11 WRCNKTLPI   | 433  | >RUNX1-K11 WRCNNTLPI   | 166   | 267   |
| >RUNX1-K11 WRCNKTLPIA  | 34   | >RUNX1-K11 WRCNNTLPIA  | 20    | 14    |
| >RUNX1-K11 WRCNKTLPI   | 652  | >RUNX1-K11 WRCNNTLPI   | 493   | 159   |
| >RUNX1-K11 WRCNKTLPIA  | 176  | >RUNX1-K11 WRCNNTLPIA  | 166   | 10    |
| >RUNX1-K11 WRCNKTLPI   | 400  | >RUNX1-K11 WRCNNTLPI   | 87    | 313   |
| >RUNX1-K11 WRCNKTLPIA  | 221  | >RUNX1-K11 WRCNNTLPIA  | 69    | 152   |
| >RUNX1-K11 WRCNKTLPI   | 288  | >RUNX1-K11 WRCNNTLPI   | 159   | 129   |
| >RUNX1-K11 WRCNKTLPIA  | 245  | >RUNX1-K11 WRCNNTLPIA  | 289   | 44    |
| >RUNX1-K11 WRCNKTLPIA  | 62   | >RUNX1-K11 WRCNNTLPIA  | 41    | 21    |
| >RUNX1-K11 HWRCNKTL    | 320  | >RUNX1-K11 HWRCNNTL    | 121   | 199   |
| >RUNX1-K11 HWRCNKTLPI  | 23   | >RUNX1-K11 HWRCNNTLP   | 14    | 9     |
| >RUNX1-K11 HWRCNKTLPI  | 32   | >RUNX1-K11 HWRCNNTLP   | 19    | 13    |
| >RUNX1-K11 HWRCNKTL    | 393  | >RUNX1-K11 HWRCNNTL    | 255   | 138   |
| >RUNX1-K11 HWRCNKTLPI  | 1009 | >RUNX1-K11 HWRCNNTLP   | 364   | 645   |

|                        |      |                        |       |       |
|------------------------|------|------------------------|-------|-------|
| >RUNX1-K11 THWRCNKTL   | 233  | >RUNX1-K11 THWRCNNTL   | 297   | 64    |
| >RUNX1-K11 THWRCNKTL   | 462  | >RUNX1-K11 THWRCNNTL   | 501   | 39    |
| >RUNX1-K11 THWRCNKTL   | 625  | >RUNX1-K11 THWRCNNTL   | 406   | 219   |
| >RUNX1-K11 THWRCNKTL   | 277  | >RUNX1-K11 THWRCNNTL   | 162   | 115   |
| >RUNX1-K11 THWRCNKTL   | 312  | >RUNX1-K11 THWRCNNTL   | 48    | 264   |
| >RUNX1-K11 THWRCNKTL   | 974  | >RUNX1-K11 THWRCNNTL   | 332   | 642   |
| >RUNX1-K11 PTHWRCNK    | 71   | >RUNX1-K11 PTHWRCNN    | 10751 | 10680 |
| >RUNX1-K11 LPTHWRCNK   | 48   | >RUNX1-K11 LPTHWRCNN   | 34    | 14    |
| >RUNX1-K11 LPTHWRCNK   | 184  | >RUNX1-K11 LPTHWRCNN   | 82    | 102   |
| >RUNX1-K11 LPTHWRCNK   | 85   | >RUNX1-K11 LPTHWRCNN   | 75    | 10    |
| >RUNX1-K11 LPTHWRCNK   | 652  | >RUNX1-K11 LPTHWRCNN   | 220   | 432   |
| >RUNX1-K11 LPTHWRCNK   | 122  | >RUNX1-K11 LPTHWRCNN   | 144   | 22    |
| >RUNX1-K11 VLPTHWRCN   | 242  | >RUNX1-K11 VLPTHWRCN   | 25849 | 25607 |
| >RUNX1-K11 KTLPIAFKV   | 38   | >RUNX1-K11 QTLPIAFKV   | 517   | 479   |
| >RUNX1-K11 KTLPIAFKV   | 92   | >RUNX1-K11 QTLPIAFKV   | 253   | 161   |
| >RUNX1-K11 KTLPIAFKVV  | 360  | >RUNX1-K11 QTLPIAFKVV  | 667   | 307   |
| >RUNX1-K11 KTLPIAFKV   | 14   | >RUNX1-K11 QTLPIAFKV   | 37    | 23    |
| >RUNX1-K11 KTLPIAFKVV  | 97   | >RUNX1-K11 QTLPIAFKVV  | 226   | 129   |
| >RUNX1-K11 KTLPIAFKVV/ | 308  | >RUNX1-K11 QTLPIAFKVV/ | 1324  | 1016  |
| >RUNX1-K11 KTLPIAFKV   | 10   | >RUNX1-K11 QTLPIAFKV   | 64    | 54    |
| >RUNX1-K11 KTLPIAFKVV  | 62   | >RUNX1-K11 QTLPIAFKVV  | 516   | 454   |
| >RUNX1-K11 KTLPIAFKV   | 39   | >RUNX1-K11 QTLPIAFKV   | 777   | 738   |
| >RUNX1-K11 KTLPIAFKVV  | 461  | >RUNX1-K11 QTLPIAFKVV  | 3072  | 2611  |
| >RUNX1-K11 KTLPIAFKV   | 15   | >RUNX1-K11 QTLPIAFKV   | 107   | 92    |
| >RUNX1-K11 KTLPIAFKVV  | 144  | >RUNX1-K11 QTLPIAFKVV  | 1451  | 1307  |
| >RUNX1-K11 KTLPIAFKV   | 47   | >RUNX1-K11 QTLPIAFKV   | 163   | 116   |
| >RUNX1-K11 KTLPIAFKV   | 55   | >RUNX1-K11 QTLPIAFKV   | 211   | 156   |
| >RUNX1-K11 KTLPIAFKVV  | 454  | >RUNX1-K11 QTLPIAFKVV  | 1479  | 1025  |
| >RUNX1-K11 KTLPIAFK    | 38   | >RUNX1-K11 QTLPIAFK    | 118   | 80    |
| >RUNX1-K11 KTLPIAFK    | 9    | >RUNX1-K11 QTLPIAFK    | 13    | 4     |
| >RUNX1-K11 KTLPIAFK    | 5    | >RUNX1-K11 QTLPIAFK    | 20    | 15    |
| >RUNX1-K11 KTLPIAFKV   | 163  | >RUNX1-K11 QTLPIAFKV   | 5034  | 4871  |
| >RUNX1-K11 KTLPIAFKVV  | 117  | >RUNX1-K11 QTLPIAFKVV  | 4032  | 3915  |
| >RUNX1-K11 KTLPIAFKVV/ | 59   | >RUNX1-K11 QTLPIAFKVV/ | 2641  | 2582  |
| >RUNX1-K11 KTLPIAFK    | 12   | >RUNX1-K11 QTLPIAFK    | 86    | 74    |
| >RUNX1-K11 KTLPIAFKV   | 328  | >RUNX1-K11 QTLPIAFKV   | 5214  | 4886  |
| >RUNX1-K11 KTLPIAFKV   | 59   | >RUNX1-K11 QTLPIAFKV   | 353   | 294   |
| >RUNX1-K11 KTLPIAFKVV  | 232  | >RUNX1-K11 QTLPIAFKVV  | 1319  | 1087  |
| >RUNX1-K11 KTLPIAFKVV/ | 252  | >RUNX1-K11 QTLPIAFKVV/ | 2574  | 2322  |
| >RUNX1-K11 KTLPIAFK    | 108  | >RUNX1-K11 QTLPIAFK    | 12    | 96    |
| >RUNX1-K11 KTLPIAFKV   | 88   | >RUNX1-K11 QTLPIAFKV   | 10    | 78    |
| >RUNX1-K11 KTLPIAFKVV/ | 3887 | >RUNX1-K11 QTLPIAFKVV/ | 126   | 3761  |
| >RUNX1-K11 KTLPIAFKV   | 12   | >RUNX1-K11 QTLPIAFKV   | 4     | 8     |

|                        |       |                        |       |       |
|------------------------|-------|------------------------|-------|-------|
| >RUNX1-K11 KTLPIAFKVV  | 302   | >RUNX1-K11 QTLPIAFKVV  | 28    | 274   |
| >RUNX1-K11 KTLPIAFKVV/ | 2534  | >RUNX1-K11 QTLPIAFKVV/ | 201   | 2333  |
| >RUNX1-K11 KTLPIAFKV   | 14    | >RUNX1-K11 QTLPIAFKV   | 78    | 64    |
| >RUNX1-K11 KTLPIAFKVV  | 44    | >RUNX1-K11 QTLPIAFKVV  | 364   | 320   |
| >RUNX1-K11 KTLPIAFKV   | 400   | >RUNX1-K11 QTLPIAFKV   | 9453  | 9053  |
| >RUNX1-K11 KTLPIAFKV   | 242   | >RUNX1-K11 QTLPIAFKV   | 5180  | 4938  |
| >RUNX1-K11 KTLPIAFKV   | 85    | >RUNX1-K11 QTLPIAFKV   | 233   | 148   |
| >RUNX1-K11 KTLPIAFK    | 357   | >RUNX1-K11 QTLPIAFK    | 184   | 173   |
| >RUNX1-K11 KTLPIAFK    | 151   | >RUNX1-K11 QTLPIAFK    | 1140  | 989   |
| >RUNX1-K11 KTLPIAFKV   | 199   | >RUNX1-K11 QTLPIAFKV   | 619   | 420   |
| >RUNX1-K11 NKTLPIAFKVV | 10975 | >RUNX1-K11 NQTLPIAFKV  | 147   | 10828 |
| >RUNX1-K11 NKTLPIAFK   | 11945 | >RUNX1-K11 NQTLPIAFK   | 169   | 11776 |
| >RUNX1-K11 NKTLPIAFK   | 921   | >RUNX1-K11 NQTLPIAFK   | 440   | 481   |
| >RUNX1-K11 NKTLPIAF    | 33    | >RUNX1-K11 NQTLPIAF    | 33    | 0     |
| >RUNX1-K11 SVLPTHWRCI  | 178   | >RUNX1-K11 SVLPTHWRCI  | 19533 | 19355 |
| >RUNX1-K11 SVLPTHWRCI  | 10    | >RUNX1-K11 SVLPTHWRCI  | 9982  | 9972  |
| >RUNX1-K11 SVLPTHWRCI  | 9     | >RUNX1-K11 SVLPTHWRCI  | 1196  | 1187  |
| >RUNX1-K11 SVLPTHWRCI  | 70    | >RUNX1-K11 SVLPTHWRCI  | 5420  | 5350  |
| >RUNX1-K11 SVLPTHWRCI  | 233   | >RUNX1-K11 SVLPTHWRCI  | 10742 | 10509 |
| >RUNX1-K11 SVLPTHWRCI  | 234   | >RUNX1-K11 SVLPTHWRCI  | 3935  | 3701  |
| >RUNX1-K11 CNKTLPIAFK  | 83    | >RUNX1-K11 CNQTLPIAFK  | 4600  | 4517  |
| >RUNX1-K11 CNKTLPIAF   | 168   | >RUNX1-K11 CNQTLPIAF   | 670   | 502   |
| >RUNX1-K11 RCNKTLPIAF  | 282   | >RUNX1-K11 RCNQTLPIAF  | 616   | 334   |
| >RUNX1-K11 RCNKTLPI    | 129   | >RUNX1-K11 RCNQTLPI    | 370   | 241   |
| >RUNX1-K11 RCNKTLPIA   | 146   | >RUNX1-K11 RCNQTLPIA   | 690   | 544   |
| >RUNX1-K11 RCNKTLPIAF  | 9     | >RUNX1-K11 RCNQTLPIAF  | 16    | 7     |
| >RUNX1-K11 RCNKTLPIAF  | 155   | >RUNX1-K11 RCNQTLPIAF  | 383   | 228   |
| >RUNX1-K11 RCNKTLPI    | 134   | >RUNX1-K11 RCNQTLPI    | 101   | 33    |
| >RUNX1-K11 RCNKTLPIAF  | 134   | >RUNX1-K11 RCNQTLPIAF  | 110   | 24    |
| >RUNX1-K11 RCNKTLPIAF  | 42    | >RUNX1-K11 RCNQTLPIAF  | 69    | 27    |
| >RUNX1-K11 WRCNKTLPI   | 433   | >RUNX1-K11 WRCNQTLPI   | 226   | 207   |
| >RUNX1-K11 WRCNKTLPIA  | 34    | >RUNX1-K11 WRCNQTLPIA  | 22    | 12    |
| >RUNX1-K11 WRCNKTLPI   | 652   | >RUNX1-K11 WRCNQTLPI   | 441   | 211   |
| >RUNX1-K11 WRCNKTLPIA  | 176   | >RUNX1-K11 WRCNQTLPIA  | 117   | 59    |
| >RUNX1-K11 WRCNKTLPI   | 400   | >RUNX1-K11 WRCNQTLPI   | 140   | 260   |
| >RUNX1-K11 WRCNKTLPIA  | 221   | >RUNX1-K11 WRCNQTLPIA  | 96    | 125   |
| >RUNX1-K11 WRCNKTLPI   | 288   | >RUNX1-K11 WRCNQTLPI   | 298   | 10    |
| >RUNX1-K11 WRCNKTLPIA  | 245   | >RUNX1-K11 WRCNQTLPIA  | 209   | 36    |
| >RUNX1-K11 WRCNKTLPIA  | 62    | >RUNX1-K11 WRCNQTLPIA  | 67    | 5     |
| >RUNX1-K11 HWRCNKTL    | 320   | >RUNX1-K11 HWRCNQTL    | 134   | 186   |
| >RUNX1-K11 HWRCNKTL    | 23    | >RUNX1-K11 HWRCNQTL    | 14    | 9     |
| >RUNX1-K11 HWRCNKTL    | 32    | >RUNX1-K11 HWRCNQTL    | 24    | 8     |
| >RUNX1-K11 HWRCNKTL    | 393   | >RUNX1-K11 HWRCNQTL    | 491   | 98    |



|                        |      |                        |       |       |
|------------------------|------|------------------------|-------|-------|
| >RUNX1-K11 HWRCNKTLP   | 1009 | >RUNX1-K11 HWRCNQTLP   | 428   | 581   |
| >RUNX1-K11 THWRCNKTL   | 233  | >RUNX1-K11 THWRCNQTL   | 335   | 102   |
| >RUNX1-K11 THWRCNKTL   | 462  | >RUNX1-K11 THWRCNQTL   | 312   | 150   |
| >RUNX1-K11 THWRCNKTL   | 625  | >RUNX1-K11 THWRCNQTL   | 418   | 207   |
| >RUNX1-K11 THWRCNKTL   | 277  | >RUNX1-K11 THWRCNQTL   | 146   | 131   |
| >RUNX1-K11 THWRCNKTL   | 312  | >RUNX1-K11 THWRCNQTL   | 75    | 237   |
| >RUNX1-K11 THWRCNKTL   | 974  | >RUNX1-K11 THWRCNQTL   | 467   | 507   |
| >RUNX1-K11 PTHWRCNK    | 71   | >RUNX1-K11 PTHWRCNQ    | 5606  | 5535  |
| >RUNX1-K11 LPTHWRCNK   | 48   | >RUNX1-K11 LPTHWRCNQ   | 34    | 14    |
| >RUNX1-K11 LPTHWRCNK   | 184  | >RUNX1-K11 LPTHWRCNQ   | 100   | 84    |
| >RUNX1-K11 LPTHWRCNK   | 85   | >RUNX1-K11 LPTHWRCNQ   | 84    | 1     |
| >RUNX1-K11 LPTHWRCNK   | 122  | >RUNX1-K11 LPTHWRCNQ   | 153   | 31    |
| >RUNX1-K11 VLPTHWRCN   | 2733 | >RUNX1-K11 VLPTHWRCN   | 453   | 2280  |
| >RUNX1-K11 VLPTHWRCN   | 242  | >RUNX1-K11 VLPTHWRCN   | 23174 | 22932 |
| >RUNX1-K11 KTLPIAFKV   | 38   | >RUNX1-K11 RTLPIAFKV   | 91    | 53    |
| >RUNX1-K11 KTLPIAFKV   | 92   | >RUNX1-K11 RTLPIAFKV   | 224   | 132   |
| >RUNX1-K11 KTLPIAFKVV  | 360  | >RUNX1-K11 RTLPIAFKVV  | 373   | 13    |
| >RUNX1-K11 KTLPIAFKV   | 14   | >RUNX1-K11 RTLPIAFKV   | 12    | 2     |
| >RUNX1-K11 KTLPIAFKVV  | 97   | >RUNX1-K11 RTLPIAFKVV  | 128   | 31    |
| >RUNX1-K11 KTLPIAFKVV/ | 308  | >RUNX1-K11 RTLPIAFKVV/ | 391   | 83    |
| >RUNX1-K11 KTLPIAFKV   | 10   | >RUNX1-K11 RTLPIAFKV   | 10    | 0     |
| >RUNX1-K11 KTLPIAFKVV  | 62   | >RUNX1-K11 RTLPIAFKVV  | 66    | 4     |
| >RUNX1-K11 KTLPIAFKV   | 39   | >RUNX1-K11 RTLPIAFKV   | 89    | 50    |
| >RUNX1-K11 KTLPIAFKVV  | 461  | >RUNX1-K11 RTLPIAFKVV  | 905   | 444   |
| >RUNX1-K11 KTLPIAFKV   | 15   | >RUNX1-K11 RTLPIAFKV   | 20    | 5     |
| >RUNX1-K11 KTLPIAFKVV  | 144  | >RUNX1-K11 RTLPIAFKVV  | 281   | 137   |
| >RUNX1-K11 KTLPIAFKV   | 47   | >RUNX1-K11 RTLPIAFKV   | 54    | 7     |
| >RUNX1-K11 KTLPIAFKV   | 55   | >RUNX1-K11 RTLPIAFKV   | 60    | 5     |
| >RUNX1-K11 KTLPIAFKVV  | 454  | >RUNX1-K11 RTLPIAFKVV  | 510   | 56    |
| >RUNX1-K11 KTLPIAFK    | 38   | >RUNX1-K11 RTLPIAFK    | 37    | 1     |
| >RUNX1-K11 KTLPIAFK    | 9    | >RUNX1-K11 RTLPIAFK    | 8     | 1     |
| >RUNX1-K11 KTLPIAFK    | 5    | >RUNX1-K11 RTLPIAFK    | 4     | 1     |
| >RUNX1-K11 KTLPIAFKV   | 163  | >RUNX1-K11 RTLPIAFKV   | 146   | 17    |
| >RUNX1-K11 KTLPIAFKVV  | 117  | >RUNX1-K11 RTLPIAFKVV  | 103   | 14    |
| >RUNX1-K11 KTLPIAFKVV/ | 59   | >RUNX1-K11 RTLPIAFKVV/ | 53    | 6     |
| >RUNX1-K11 KTLPIAFK    | 12   | >RUNX1-K11 RTLPIAFK    | 11    | 1     |
| >RUNX1-K11 KTLPIAFKV   | 328  | >RUNX1-K11 RTLPIAFKV   | 295   | 33    |
| >RUNX1-K11 KTLPIAFKV   | 59   | >RUNX1-K11 RTLPIAFKV   | 58    | 1     |
| >RUNX1-K11 KTLPIAFKVV  | 232  | >RUNX1-K11 RTLPIAFKVV  | 244   | 12    |
| >RUNX1-K11 KTLPIAFKVV/ | 252  | >RUNX1-K11 RTLPIAFKVV/ | 262   | 10    |
| >RUNX1-K11 KTLPIAFK    | 108  | >RUNX1-K11 RTLPIAFK    | 72    | 36    |
| >RUNX1-K11 KTLPIAFKV   | 88   | >RUNX1-K11 RTLPIAFKV   | 53    | 35    |
| >RUNX1-K11 KTLPIAFKV   | 12   | >RUNX1-K11 RTLPIAFKV   | 9     | 3     |

|                        |      |                        |      |      |
|------------------------|------|------------------------|------|------|
| >RUNX1-K11 KTLPIAFKVV  | 302  | >RUNX1-K11 RTLPIAFKVV  | 222  | 80   |
| >RUNX1-K11 KTLPIAFKV   | 14   | >RUNX1-K11 RTLPIAFKV   | 9    | 5    |
| >RUNX1-K11 KTLPIAFKVV  | 44   | >RUNX1-K11 RTLPIAFKVV  | 25   | 19   |
| >RUNX1-K11 KTLPIAFKVV# | 651  | >RUNX1-K11 RTLPIAFKVV# | 303  | 348  |
| >RUNX1-K11 KTLPIAFKV   | 400  | >RUNX1-K11 RTLPIAFKV   | 434  | 34   |
| >RUNX1-K11 KTLPIAFKV   | 242  | >RUNX1-K11 RTLPIAFKV   | 376  | 134  |
| >RUNX1-K11 KTLPIAFKV   | 85   | >RUNX1-K11 RTLPIAFKV   | 47   | 38   |
| >RUNX1-K11 KTLPIAFKVV# | 858  | >RUNX1-K11 RTLPIAFKVV# | 481  | 377  |
| >RUNX1-K11 KTLPIAFK    | 357  | >RUNX1-K11 RTLPIAFK    | 429  | 72   |
| >RUNX1-K11 KTLPIAFK    | 151  | >RUNX1-K11 RTLPIAFK    | 274  | 123  |
| >RUNX1-K11 KTLPIAFKV   | 199  | >RUNX1-K11 RTLPIAFKV   | 106  | 93   |
| >RUNX1-K11 NKTLPIAF    | 33   | >RUNX1-K11 NRTLPIAF    | 298  | 265  |
| >RUNX1-K11 SVLPTHWRCI  | 178  | >RUNX1-K11 SVLPTHWRCI  | 3501 | 3323 |
| >RUNX1-K11 SVLPTHWRCI  | 10   | >RUNX1-K11 SVLPTHWRCI  | 31   | 21   |
| >RUNX1-K11 SVLPTHWRCI  | 9    | >RUNX1-K11 SVLPTHWRCI  | 438  | 429  |
| >RUNX1-K11 SVLPTHWRCI  | 70   | >RUNX1-K11 SVLPTHWRCI  | 12   | 58   |
| >RUNX1-K11 SVLPTHWRCI  | 1830 | >RUNX1-K11 SVLPTHWRCI  | 82   | 1748 |
| >RUNX1-K11 SVLPTHWRCI  | 233  | >RUNX1-K11 SVLPTHWRCI  | 63   | 170  |
| >RUNX1-K11 SVLPTHWRCI  | 234  | >RUNX1-K11 SVLPTHWRCI  | 336  | 102  |
| >RUNX1-K11 SVLPTHWRCI  | 914  | >RUNX1-K11 SVLPTHWRCI  | 68   | 846  |
| >RUNX1-K11 CNKTLPIAFK  | 83   | >RUNX1-K11 CNRTLPIAFK  | 17   | 66   |
| >RUNX1-K11 CNKTLPIAF   | 168  | >RUNX1-K11 CNRTLPIAF   | 74   | 94   |
| >RUNX1-K11 RCNKTLPIAF# | 282  | >RUNX1-K11 RCNRTLPIAF# | 270  | 12   |
| >RUNX1-K11 RCNKTLPI    | 129  | >RUNX1-K11 RCNRTLPI    | 57   | 72   |
| >RUNX1-K11 RCNKTLPIA   | 146  | >RUNX1-K11 RCNRTLPIA   | 59   | 87   |
| >RUNX1-K11 RCNKTLPIAF# | 9    | >RUNX1-K11 RCNRTLPIAF# | 7    | 2    |
| >RUNX1-K11 RCNKTLPIAF# | 155  | >RUNX1-K11 RCNRTLPIAF# | 119  | 36   |
| >RUNX1-K11 RCNKTLPI    | 134  | >RUNX1-K11 RCNRTLPI    | 93   | 41   |
| >RUNX1-K11 RCNKTLPIAF  | 134  | >RUNX1-K11 RCNRTLPIAF  | 120  | 14   |
| >RUNX1-K11 RCNKTLPIAF  | 42   | >RUNX1-K11 RCNRTLPIAF  | 43   | 1    |
| >RUNX1-K11 WRCNKTLPI   | 433  | >RUNX1-K11 WRCNRTLPI   | 273  | 160  |
| >RUNX1-K11 WRCNKTLPIA  | 34   | >RUNX1-K11 WRCNRTLPIA  | 26   | 8    |
| >RUNX1-K11 WRCNKTLPI   | 652  | >RUNX1-K11 WRCNRTLPI   | 270  | 382  |
| >RUNX1-K11 WRCNKTLPIA  | 176  | >RUNX1-K11 WRCNRTLPIA  | 112  | 64   |
| >RUNX1-K11 WRCNKTLPIA  | 659  | >RUNX1-K11 WRCNRTLPIA  | 381  | 278  |
| >RUNX1-K11 WRCNKTLPI   | 400  | >RUNX1-K11 WRCNRTLPI   | 136  | 264  |
| >RUNX1-K11 WRCNKTLPIA  | 221  | >RUNX1-K11 WRCNRTLPIA  | 103  | 118  |
| >RUNX1-K11 WRCNKTLPIA  | 598  | >RUNX1-K11 WRCNRTLPIA  | 324  | 274  |
| >RUNX1-K11 WRCNKTLPI   | 288  | >RUNX1-K11 WRCNRTLPI   | 57   | 231  |
| >RUNX1-K11 WRCNKTLPIA  | 245  | >RUNX1-K11 WRCNRTLPIA  | 154  | 91   |
| >RUNX1-K11 WRCNKTLPIA  | 62   | >RUNX1-K11 WRCNRTLPIA  | 24   | 38   |
| >RUNX1-K11 HWRCNKTL    | 320  | >RUNX1-K11 HWRCNRTL    | 112  | 208  |
| >RUNX1-K11 HWRCNKTLP   | 23   | >RUNX1-K11 HWRCNRTL    | 11   | 12   |

|                        |      |                        |       |       |
|------------------------|------|------------------------|-------|-------|
| >RUNX1-K11 HWRCNKTLP   | 32   | >RUNX1-K11 HWRCNRTL    | 14    | 18    |
| >RUNX1-K11 HWRCNKTL    | 393  | >RUNX1-K11 HWRCNRTL    | 310   | 83    |
| >RUNX1-K11 HWRCNKTLP   | 1009 | >RUNX1-K11 HWRCNRTL    | 444   | 565   |
| >RUNX1-K11 THWRCNKTL   | 233  | >RUNX1-K11 THWRCNRTL   | 215   | 18    |
| >RUNX1-K11 THWRCNKTL   | 462  | >RUNX1-K11 THWRCNRTL   | 816   | 354   |
| >RUNX1-K11 THWRCNKTL   | 277  | >RUNX1-K11 THWRCNRTL   | 242   | 35    |
| >RUNX1-K11 THWRCNKTL   | 312  | >RUNX1-K11 THWRCNRTL   | 281   | 31    |
| >RUNX1-K11 PTHWRCNK    | 71   | >RUNX1-K11 PTHWRCNR    | 3396  | 3325  |
| >RUNX1-K11 PTHWRCNK    | 3842 | >RUNX1-K11 PTHWRCNR    | 251   | 3591  |
| >RUNX1-K11 PTHWRCNK    | 3859 | >RUNX1-K11 PTHWRCNR    | 164   | 3695  |
| >RUNX1-K11 PTHWRCNK    | 970  | >RUNX1-K11 PTHWRCNR    | 353   | 617   |
| >RUNX1-K11 PTHWRCNK    | 7732 | >RUNX1-K11 PTHWRCNR    | 433   | 7299  |
| >RUNX1-K11 LPTHWRCNK   | 4165 | >RUNX1-K11 LPTHWRCNR   | 193   | 3972  |
| >RUNX1-K11 LPTHWRCNK   | 48   | >RUNX1-K11 LPTHWRCNR   | 21    | 27    |
| >RUNX1-K11 LPTHWRCNK   | 184  | >RUNX1-K11 LPTHWRCNR   | 147   | 37    |
| >RUNX1-K11 LPTHWRCNK   | 85   | >RUNX1-K11 LPTHWRCNR   | 90    | 5     |
| >RUNX1-K11 LPTHWRCNK   | 122  | >RUNX1-K11 LPTHWRCNR   | 116   | 6     |
| >RUNX1-K11 LPTHWRCNK   | 3197 | >RUNX1-K11 LPTHWRCNR   | 348   | 2849  |
| >RUNX1-K11 VLPTHWRCN   | 242  | >RUNX1-K11 VLPTHWRCN   | 4069  | 3827  |
| >RUNX1-K11 VLPTHWRCN   | 548  | >RUNX1-K11 VLPTHWRCN   | 37    | 511   |
| >RUNX1-K11 VLPTHWRCN   | 601  | >RUNX1-K11 VLPTHWRCN   | 284   | 317   |
| >RUNX1-K11 VLPTHWRCN   | 3069 | >RUNX1-K11 VLPTHWRCN   | 225   | 2844  |
| >RUNX1-K17 KSFTLTITV   | 158  | >RUNX1-K17 NSFTLTITV   | 1771  | 1613  |
| >RUNX1-K17 KSFTLTITV   | 71   | >RUNX1-K17 NSFTLTITV   | 398   | 327   |
| >RUNX1-K17 KSFTLTITV   | 255  | >RUNX1-K17 NSFTLTITV   | 2312  | 2057  |
| >RUNX1-K17 KSFTLTITV   | 399  | >RUNX1-K17 NSFTLTITV   | 5246  | 4847  |
| >RUNX1-K17 KSFTLTITV   | 21   | >RUNX1-K17 NSFTLTITV   | 6021  | 6000  |
| >RUNX1-K17 KSFTLTITVFT | 136  | >RUNX1-K17 NSFTLTITVFT | 11236 | 11100 |
| >RUNX1-K17 KSFTLTITV   | 9    | >RUNX1-K17 NSFTLTITV   | 198   | 189   |
| >RUNX1-K17 KSFTLTITVF  | 5    | >RUNX1-K17 NSFTLTITVF  | 126   | 121   |
| >RUNX1-K17 KSFTLTITVFT | 95   | >RUNX1-K17 NSFTLTITVFT | 6250  | 6155  |
| >RUNX1-K17 KSFTLTITV   | 381  | >RUNX1-K17 NSFTLTITV   | 9     | 372   |
| >RUNX1-K17 KSFTLTITVFT | 3601 | >RUNX1-K17 NSFTLTITVFT | 87    | 3514  |
| >RUNX1-K17 KSFTLTITV   | 1627 | >RUNX1-K17 NSFTLTITV   | 47    | 1580  |
| >RUNX1-K17 KSFTLTITVF  | 60   | >RUNX1-K17 NSFTLTITVF  | 160   | 100   |
| >RUNX1-K17 KSFTLTITV   | 141  | >RUNX1-K17 NSFTLTITV   | 1190  | 1049  |
| >RUNX1-K17 KSFTLTITVF  | 4    | >RUNX1-K17 NSFTLTITVF  | 13    | 9     |
| >RUNX1-K17 KSFTLTITV   | 36   | >RUNX1-K17 NSFTLTITV   | 5902  | 5866  |
| >RUNX1-K17 KSFTLTITVF  | 3    | >RUNX1-K17 NSFTLTITVF  | 24    | 21    |
| >RUNX1-K17 KSFTLTITVF  | 70   | >RUNX1-K17 NSFTLTITVF  | 3527  | 3457  |
| >RUNX1-K17 KSFTLTITV   | 271  | >RUNX1-K17 NSFTLTITV   | 16544 | 16273 |
| >RUNX1-K17 KSFTLTITVF  | 11   | >RUNX1-K17 NSFTLTITVF  | 401   | 390   |
| >RUNX1-K17 KSFTLTITV   | 118  | >RUNX1-K17 NSFTLTITV   | 1096  | 978   |

|                        |      |                        |       |       |
|------------------------|------|------------------------|-------|-------|
| >RUNX1-K17 KSFTLTITVF  | 82   | >RUNX1-K17 NSFTLTITVF  | 490   | 408   |
| >RUNX1-K17 KSFTLTITV   | 180  | >RUNX1-K17 NSFTLTITV   | 1315  | 1135  |
| >RUNX1-K17 GKSFTLTI    | 309  | >RUNX1-K17 GNSFTLTI    | 11290 | 10981 |
| >RUNX1-K17 GKSFTLTITVF | 7    | >RUNX1-K17 GNSFTLTITVF | 595   | 588   |
| >RUNX1-K17 GKSFTLTITV  | 251  | >RUNX1-K17 GNSFTLTITV  | 72    | 179   |
| >RUNX1-K17 LRFVGRSGRC  | 37   | >RUNX1-K17 LRFVGRSGRC  | 570   | 533   |
| >RUNX1-K17 LRFVGRSGRC  | 166  | >RUNX1-K17 LRFVGRSGRC  | 1390  | 1224  |
| >RUNX1-K17 RGKSFTLTI   | 17   | >RUNX1-K17 RGNSFTLTI   | 336   | 319   |
| >RUNX1-K17 RGKSFTLTITV | 27   | >RUNX1-K17 RGNSFTLTITV | 704   | 677   |
| >RUNX1-K17 RGKSFTLTI   | 272  | >RUNX1-K17 RGNSFTLTI   | 53    | 219   |
| >RUNX1-K17 RGKSFTLTI   | 4759 | >RUNX1-K17 RGNSFTLTI   | 112   | 4647  |
| >RUNX1-K17 RGKSFTLTI   | 57   | >RUNX1-K17 RGNSFTLTI   | 30    | 27    |
| >RUNX1-K17 GRGKSFTLTI  | 152  | >RUNX1-K17 GRGNSFTLTI  | 119   | 33    |
| >RUNX1-K17 GRGKSFTLTI  | 361  | >RUNX1-K17 GRGNSFTLTI  | 288   | 73    |
| >RUNX1-K17 SGRGKSFTL   | 312  | >RUNX1-K17 SGRGNSFTL   | 202   | 110   |
| >RUNX1-K17 SGRGKSFTLTI | 63   | >RUNX1-K17 SGRGNSFTLTI | 49    | 14    |
| >RUNX1-K17 SGRGKSFTL   | 202  | >RUNX1-K17 SGRGNSFTL   | 237   | 35    |
| >RUNX1-K17 RSGRGKSF    | 476  | >RUNX1-K17 RSGRGNSF    | 188   | 288   |
| >RUNX1-K17 RSGRGKSFTL  | 238  | >RUNX1-K17 RSGRGNSFTL  | 105   | 133   |
| >RUNX1-K17 RSGRGKSF    | 140  | >RUNX1-K17 RSGRGNSF    | 77    | 63    |
| >RUNX1-K17 RSGRGKSF    | 34   | >RUNX1-K17 RSGRGNSF    | 24    | 10    |
| >RUNX1-K17 RSGRGKSF    | 9    | >RUNX1-K17 RSGRGNSF    | 13    | 4     |
| >RUNX1-K17 RSGRGKSFTL  | 15   | >RUNX1-K17 RSGRGNSFTL  | 11    | 4     |
| >RUNX1-K17 RSGRGKSF    | 389  | >RUNX1-K17 RSGRGNSF    | 719   | 330   |
| >RUNX1-K17 RSGRGKSF    | 194  | >RUNX1-K17 RSGRGNSF    | 86    | 108   |
| >RUNX1-K17 RSGRGKSFTL  | 164  | >RUNX1-K17 RSGRGNSFTL  | 77    | 87    |
| >RUNX1-K17 RSGRGKSF    | 22   | >RUNX1-K17 RSGRGNSF    | 13    | 9     |
| >RUNX1-K17 RSGRGKSFTL  | 187  | >RUNX1-K17 RSGRGNSFTL  | 84    | 103   |
| >RUNX1-K17 GRSGRGKSF   | 170  | >RUNX1-K17 GRSGRGNSF   | 204   | 34    |
| >RUNX1-K17 GRSGRGKSF   | 181  | >RUNX1-K17 GRSGRGNSF   | 487   | 306   |
| >RUNX1-K17 GRSGRGKSFT  | 120  | >RUNX1-K17 GRSGRGNSFT  | 156   | 36    |
| >RUNX1-K17 GRSGRGKSFT  | 590  | >RUNX1-K17 GRSGRGNSFT  | 178   | 412   |
| >RUNX1-K17 GRSGRGKSF   | 818  | >RUNX1-K17 GRSGRGNSF   | 380   | 438   |
| >RUNX1-K17 GRSGRGKSFT  | 188  | >RUNX1-K17 GRSGRGNSFT  | 112   | 76    |
| >RUNX1-K17 VGRSGRGK    | 151  | >RUNX1-K17 VGRSGRGN    | 11177 | 11026 |
| >RUNX1-K17 VGRSGRGKSF  | 639  | >RUNX1-K17 VGRSGRGNSI  | 361   | 278   |
| >RUNX1-K17 VGRSGRGKSF  | 170  | >RUNX1-K17 VGRSGRGNSI  | 152   | 18    |
| >RUNX1-K17 VGRSGRGKSF  | 213  | >RUNX1-K17 VGRSGRGNSI  | 790   | 577   |
| >RUNX1-K17 FVGRSGRGK   | 110  | >RUNX1-K17 FVGRSGRGN   | 81    | 29    |
| >RUNX1-K17 FVGRSGRGK   | 188  | >RUNX1-K17 FVGRSGRGN   | 183   | 5     |
| >RUNX1-K17 FVGRSGRGK   | 145  | >RUNX1-K17 FVGRSGRGN   | 149   | 4     |
| >RUNX1-K17 RFVGRSGRGI  | 115  | >RUNX1-K17 RFVGRSGRGI  | 24403 | 24288 |
| >RUNX1-K17 RFVGRSGRGI  | 115  | >RUNX1-K17 RFVGRSGRGI  | 12230 | 12115 |

|                         |       |                         |       |       |
|-------------------------|-------|-------------------------|-------|-------|
| >RUNX1-K17 RFVGRSGRGI   | 74    | >RUNX1-K17 RFVGRSGRGI   | 4412  | 4338  |
| >RUNX1-K17 RFVGRSGRGI   | 406   | >RUNX1-K17 RFVGRSGRGI   | 18796 | 18390 |
| >RUNX1-L11: LPIAFKVV    | 195   | >RUNX1-L11: PPIAFKVV    | 659   | 464   |
| >RUNX1-L11: LPIAFKVVAL  | 37    | >RUNX1-L11: PPIAFKVVAL  | 124   | 87    |
| >RUNX1-L11: LPIAFKVV    | 236   | >RUNX1-L11: PPIAFKVV    | 4748  | 4512  |
| >RUNX1-L11: LPIAFKVVAL  | 44    | >RUNX1-L11: PPIAFKVVAL  | 544   | 500   |
| >RUNX1-L11: LPIAFKVV    | 241   | >RUNX1-L11: PPIAFKVV    | 4366  | 4125  |
| >RUNX1-L11: LPIAFKVV    | 350   | >RUNX1-L11: PPIAFKVV    | 2999  | 2649  |
| >RUNX1-L11: LPIAFKVV    | 9     | >RUNX1-L11: PPIAFKVV    | 570   | 561   |
| >RUNX1-L11: LPIAFKVVA   | 6     | >RUNX1-L11: PPIAFKVVA   | 226   | 220   |
| >RUNX1-L11: LPIAFKVVALC | 51    | >RUNX1-L11: PPIAFKVVALC | 2442  | 2391  |
| >RUNX1-L11: LPIAFKVVAL  | 39    | >RUNX1-L11: PPIAFKVVAL  | 245   | 206   |
| >RUNX1-L11: LPIAFKVVAL  | 42    | >RUNX1-L11: PPIAFKVVAL  | 878   | 836   |
| >RUNX1-L11: TLPIAFKVVAL | 7612  | >RUNX1-L11: TPPIAFKVVAI | 413   | 7199  |
| >RUNX1-L11: TLPIAFKV    | 23569 | >RUNX1-L11: TPPIAFKV    | 83    | 23486 |
| >RUNX1-L11: TLPIAFKVV   | 21370 | >RUNX1-L11: TPPIAFKVV   | 151   | 21219 |
| >RUNX1-L11: TLPIAFKVVAL | 16191 | >RUNX1-L11: TPPIAFKVVAI | 75    | 16116 |
| >RUNX1-L11: TLPIAFKV    | 262   | >RUNX1-L11: TPPIAFKV    | 23098 | 22836 |
| >RUNX1-L11: TLPIAFKV    | 85    | >RUNX1-L11: TPPIAFKV    | 29485 | 29400 |
| >RUNX1-L11: TLPIAFKVVAL | 199   | >RUNX1-L11: TPPIAFKVVAI | 30965 | 30766 |
| >RUNX1-L11: TLPIAFKV    | 57    | >RUNX1-L11: TPPIAFKV    | 22221 | 22164 |
| >RUNX1-L11: TLPIAFKVV   | 176   | >RUNX1-L11: TPPIAFKVV   | 22936 | 22760 |
| >RUNX1-L11: TLPIAFKVVAL | 247   | >RUNX1-L11: TPPIAFKVVAI | 23612 | 23365 |
| >RUNX1-L11: TLPIAFKV    | 83    | >RUNX1-L11: TPPIAFKV    | 16465 | 16382 |
| >RUNX1-L11: TLPIAFKV    | 17    | >RUNX1-L11: TPPIAFKV    | 20020 | 20003 |
| >RUNX1-L11: TLPIAFKVV   | 112   | >RUNX1-L11: TPPIAFKVV   | 27160 | 27048 |
| >RUNX1-L11: TLPIAFKVVAL | 198   | >RUNX1-L11: TPPIAFKVVAI | 27201 | 27003 |
| >RUNX1-L11: TLPIAFKV    | 181   | >RUNX1-L11: TPPIAFKV    | 25165 | 24984 |
| >RUNX1-L11: TLPIAFKV    | 13    | >RUNX1-L11: TPPIAFKV    | 18168 | 18155 |
| >RUNX1-L11: TLPIAFKVV   | 108   | >RUNX1-L11: TPPIAFKVV   | 24717 | 24609 |
| >RUNX1-L11: TLPIAFKV    | 92    | >RUNX1-L11: TPPIAFKV    | 25866 | 25774 |
| >RUNX1-L11: TLPIAFKV    | 4     | >RUNX1-L11: TPPIAFKV    | 23834 | 23830 |
| >RUNX1-L11: TLPIAFKVV   | 15    | >RUNX1-L11: TPPIAFKVV   | 31291 | 31276 |
| >RUNX1-L11: TLPIAFKVVA  | 267   | >RUNX1-L11: TPPIAFKVVA  | 36511 | 36244 |
| >RUNX1-L11: TLPIAFKVVAL | 47    | >RUNX1-L11: TPPIAFKVVAI | 33898 | 33851 |
| >RUNX1-L11: TLPIAFKV    | 166   | >RUNX1-L11: TPPIAFKV    | 1383  | 1217  |
| >RUNX1-L11: TLPIAFKVVA  | 31563 | >RUNX1-L11: TPPIAFKVVA  | 303   | 31260 |
| >RUNX1-L11: TLPIAFKVVAL | 20010 | >RUNX1-L11: TPPIAFKVVAI | 324   | 19686 |
| >RUNX1-L11: TLPIAFKVV   | 21797 | >RUNX1-L11: TPPIAFKVV   | 125   | 21672 |
| >RUNX1-L11: TLPIAFKVVA  | 26044 | >RUNX1-L11: TPPIAFKVVA  | 268   | 25776 |
| >RUNX1-L11: TLPIAFKV    | 1495  | >RUNX1-L11: TPPIAFKV    | 80    | 1415  |
| >RUNX1-L11: TLPIAFKVV   | 61    | >RUNX1-L11: TPPIAFKVV   | 87    | 26    |
| >RUNX1-L11: TLPIAFKVVAL | 40    | >RUNX1-L11: TPPIAFKVVAI | 65    | 25    |

|                        |       |                        |       |       |
|------------------------|-------|------------------------|-------|-------|
| >RUNX1-L11:LPTHWRCNK   | 48    | >RUNX1-L11:LPTHWRCNK   | 21030 | 20982 |
| >RUNX1-L11:LPTHWRCNK   | 184   | >RUNX1-L11:LPTHWRCNK   | 7278  | 7094  |
| >RUNX1-L11:LPTHWRCNK   | 85    | >RUNX1-L11:LPTHWRCNK   | 3375  | 3290  |
| >RUNX1-L11:LPTHWRCNK   | 652   | >RUNX1-L11:LPTHWRCNK   | 177   | 475   |
| >RUNX1-L11:LPTHWRCNK   | 122   | >RUNX1-L11:LPTHWRCNK   | 14666 | 14544 |
| >RUNX1-L11:KTLPIAFKV   | 38    | >RUNX1-L11:KTPPIAFKV   | 518   | 480   |
| >RUNX1-L11:KTLPIAFKV   | 92    | >RUNX1-L11:KTPPIAFKV   | 159   | 67    |
| >RUNX1-L11:KTLPIAFKVV  | 360   | >RUNX1-L11:KTPPIAFKVV  | 1049  | 689   |
| >RUNX1-L11:KTLPIAFKV   | 14    | >RUNX1-L11:KTPPIAFKV   | 50    | 36    |
| >RUNX1-L11:KTLPIAFKVV  | 97    | >RUNX1-L11:KTPPIAFKVV  | 367   | 270   |
| >RUNX1-L11:KTLPIAFKVV/ | 308   | >RUNX1-L11:KTPPIAFKVV/ | 1646  | 1338  |
| >RUNX1-L11:KTLPIAFKV   | 10    | >RUNX1-L11:KTPPIAFKV   | 59    | 49    |
| >RUNX1-L11:KTLPIAFKVV  | 62    | >RUNX1-L11:KTPPIAFKVV  | 447   | 385   |
| >RUNX1-L11:KTLPIAFKV   | 39    | >RUNX1-L11:KTPPIAFKV   | 1510  | 1471  |
| >RUNX1-L11:KTLPIAFKVV  | 461   | >RUNX1-L11:KTPPIAFKVV  | 4766  | 4305  |
| >RUNX1-L11:KTLPIAFKV   | 15    | >RUNX1-L11:KTPPIAFKV   | 84    | 69    |
| >RUNX1-L11:KTLPIAFKVV  | 144   | >RUNX1-L11:KTPPIAFKVV  | 1004  | 860   |
| >RUNX1-L11:KTLPIAFKV   | 47    | >RUNX1-L11:KTPPIAFKV   | 1127  | 1080  |
| >RUNX1-L11:KTLPIAFKV   | 55    | >RUNX1-L11:KTPPIAFKV   | 149   | 94    |
| >RUNX1-L11:KTLPIAFKVV  | 454   | >RUNX1-L11:KTPPIAFKVV  | 881   | 427   |
| >RUNX1-L11:KTLPIAFK    | 38    | >RUNX1-L11:KTPPIAFK    | 71    | 33    |
| >RUNX1-L11:KTLPIAFK    | 9     | >RUNX1-L11:KTPPIAFK    | 19    | 10    |
| >RUNX1-L11:KTLPIAFK    | 5     | >RUNX1-L11:KTPPIAFK    | 15    | 10    |
| >RUNX1-L11:KTLPIAFKV   | 163   | >RUNX1-L11:KTPPIAFKV   | 3563  | 3400  |
| >RUNX1-L11:KTLPIAFKVV  | 117   | >RUNX1-L11:KTPPIAFKVV  | 2922  | 2805  |
| >RUNX1-L11:KTLPIAFKVV/ | 59    | >RUNX1-L11:KTPPIAFKVV/ | 1786  | 1727  |
| >RUNX1-L11:KTLPIAFK    | 12    | >RUNX1-L11:KTPPIAFK    | 61    | 49    |
| >RUNX1-L11:KTLPIAFKV   | 328   | >RUNX1-L11:KTPPIAFKV   | 3022  | 2694  |
| >RUNX1-L11:KTLPIAFKV   | 59    | >RUNX1-L11:KTPPIAFKV   | 152   | 93    |
| >RUNX1-L11:KTLPIAFKVV  | 232   | >RUNX1-L11:KTPPIAFKVV  | 673   | 441   |
| >RUNX1-L11:KTLPIAFKVV/ | 252   | >RUNX1-L11:KTPPIAFKVV/ | 730   | 478   |
| >RUNX1-L11:KTLPIAFK    | 108   | >RUNX1-L11:KTPPIAFK    | 153   | 45    |
| >RUNX1-L11:KTLPIAFKV   | 88    | >RUNX1-L11:KTPPIAFKV   | 24    | 64    |
| >RUNX1-L11:KTLPIAFKV   | 12    | >RUNX1-L11:KTPPIAFKV   | 496   | 484   |
| >RUNX1-L11:KTLPIAFKVV  | 302   | >RUNX1-L11:KTPPIAFKVV  | 5220  | 4918  |
| >RUNX1-L11:KTLPIAFKV   | 14    | >RUNX1-L11:KTPPIAFKV   | 408   | 394   |
| >RUNX1-L11:KTLPIAFKVV  | 44    | >RUNX1-L11:KTPPIAFKVV  | 1699  | 1655  |
| >RUNX1-L11:KTLPIAFKV   | 400   | >RUNX1-L11:KTPPIAFKV   | 5075  | 4675  |
| >RUNX1-L11:KTLPIAFKV   | 242   | >RUNX1-L11:KTPPIAFKV   | 8843  | 8601  |
| >RUNX1-L11:KTLPIAFK    | 16479 | >RUNX1-L11:KTPPIAFK    | 53    | 16426 |
| >RUNX1-L11:KTLPIAFKV   | 1066  | >RUNX1-L11:KTPPIAFKV   | 3     | 1063  |
| >RUNX1-L11:KTLPIAFKVV  | 1304  | >RUNX1-L11:KTPPIAFKVV  | 3     | 1301  |
| >RUNX1-L11:KTLPIAFKVV/ | 10391 | >RUNX1-L11:KTPPIAFKVV/ | 26    | 10365 |

|                        |       |                        |       |       |
|------------------------|-------|------------------------|-------|-------|
| >RUNX1-L11:KTLPIAFKV   | 85    | >RUNX1-L11:KTPPIAFKV   | 1716  | 1631  |
| >RUNX1-L11:KTLPIAFK    | 357   | >RUNX1-L11:KTPPIAFK    | 2159  | 1802  |
| >RUNX1-L11:KTLPIAFK    | 151   | >RUNX1-L11:KTPPIAFK    | 403   | 252   |
| >RUNX1-L11:KTLPIAFKV   | 199   | >RUNX1-L11:KTPPIAFKV   | 346   | 147   |
| >RUNX1-L11:NKTLPIAF    | 33    | >RUNX1-L11:NKTPPIAF    | 12    | 21    |
| >RUNX1-L11:CNKTLPIAFK  | 83    | >RUNX1-L11:CNKTPPIAFK  | 79    | 4     |
| >RUNX1-L11:CNKTLPIAF   | 168   | >RUNX1-L11:CNKTPPIAF   | 74    | 94    |
| >RUNX1-L11:RCNKTLPIAFK | 282   | >RUNX1-L11:RCNKTPPIAFI | 241   | 41    |
| >RUNX1-L11:RCNKTLPI    | 129   | >RUNX1-L11:RCNKTPPI    | 89    | 40    |
| >RUNX1-L11:RCNKTLPIA   | 146   | >RUNX1-L11:RCNKTPPIA   | 126   | 20    |
| >RUNX1-L11:RCNKTLPIAFK | 9     | >RUNX1-L11:RCNKTPPIAFI | 8     | 1     |
| >RUNX1-L11:RCNKTLPIAFK | 155   | >RUNX1-L11:RCNKTPPIAFI | 245   | 90    |
| >RUNX1-L11:RCNKTLPI    | 134   | >RUNX1-L11:RCNKTPPI    | 182   | 48    |
| >RUNX1-L11:RCNKTLPIAF  | 134   | >RUNX1-L11:RCNKTPPIAF  | 120   | 14    |
| >RUNX1-L11:RCNKTLPIAF  | 42    | >RUNX1-L11:RCNKTPPIAF  | 21    | 21    |
| >RUNX1-L11:WRCNKTLPI   | 433   | >RUNX1-L11:WRCNKTPPI   | 600   | 167   |
| >RUNX1-L11:WRCNKTLPIA  | 34    | >RUNX1-L11:WRCNKTPPIA  | 28    | 6     |
| >RUNX1-L11:WRCNKTLPIA  | 176   | >RUNX1-L11:WRCNKTPPIA  | 78    | 98    |
| >RUNX1-L11:WRCNKTLPI   | 400   | >RUNX1-L11:WRCNKTPPI   | 553   | 153   |
| >RUNX1-L11:WRCNKTLPIA  | 221   | >RUNX1-L11:WRCNKTPPIA  | 294   | 73    |
| >RUNX1-L11:WRCNKTLPI   | 874   | >RUNX1-L11:WRCNKTPPI   | 324   | 550   |
| >RUNX1-L11:WRCNKTLPI   | 288   | >RUNX1-L11:WRCNKTPPI   | 543   | 255   |
| >RUNX1-L11:WRCNKTLPIA  | 245   | >RUNX1-L11:WRCNKTPPIA  | 250   | 5     |
| >RUNX1-L11:WRCNKTLPIA  | 62    | >RUNX1-L11:WRCNKTPPIA  | 130   | 68    |
| >RUNX1-L11:HWRCNKTL    | 320   | >RUNX1-L11:HWRCNKTP    | 2584  | 2264  |
| >RUNX1-L11:HWRCNKTLPI  | 23    | >RUNX1-L11:HWRCNKTPPI  | 17    | 6     |
| >RUNX1-L11:HWRCNKTLPI  | 32    | >RUNX1-L11:HWRCNKTPPI  | 28    | 4     |
| >RUNX1-L11:HWRCNKTL    | 393   | >RUNX1-L11:HWRCNKTP    | 1106  | 713   |
| >RUNX1-L11:THWRCNKTL   | 233   | >RUNX1-L11:THWRCNKTP   | 315   | 82    |
| >RUNX1-L11:THWRCNKTL   | 462   | >RUNX1-L11:THWRCNKTP   | 7812  | 7350  |
| >RUNX1-L11:THWRCNKTL   | 277   | >RUNX1-L11:THWRCNKTP   | 3225  | 2948  |
| >RUNX1-L11:THWRCNKTL   | 312   | >RUNX1-L11:THWRCNKTP   | 24691 | 24379 |
| >RUNX1-L14:LRNATAAM    | 83    | >RUNX1-L14:PRNATAAM    | 1153  | 1070  |
| >RUNX1-L14:LRNATAAM    | 166   | >RUNX1-L14:PRNATAAM    | 2122  | 1956  |
| >RUNX1-L14:LRNATAAMK   | 96    | >RUNX1-L14:PRNATAAMK   | 1218  | 1122  |
| >RUNX1-L14:LRNATAAM    | 95    | >RUNX1-L14:PRNATAAM    | 1776  | 1681  |
| >RUNX1-L14:ELRNATAAM   | 117   | >RUNX1-L14:EPRNATAAM   | 11616 | 11499 |
| >RUNX1-L14:ELRNATAAM   | 47    | >RUNX1-L14:EPRNATAAM   | 2500  | 2453  |
| >RUNX1-L14:ELRNATAAM   | 206   | >RUNX1-L14:EPRNATAAM   | 950   | 744   |
| >RUNX1-L14:ELRNATAAM   | 25    | >RUNX1-L14:EPRNATAAM   | 373   | 348   |
| >RUNX1-L14:ELRNATAAM   | 165   | >RUNX1-L14:EPRNATAAM   | 11161 | 10996 |
| >RUNX1-L14:ELRNATAAM   | 375   | >RUNX1-L14:EPRNATAAM   | 3496  | 3121  |
| >RUNX1-L14:ELRNATAA    | 15895 | >RUNX1-L14:EPRNATAA    | 59    | 15836 |

|                       |       |                       |       |       |
|-----------------------|-------|-----------------------|-------|-------|
| >RUNX1-L14:ELRNATAAM  | 775   | >RUNX1-L14:EPRNATAAM  | 12    | 763   |
| >RUNX1-L14:ELRNATAAM  | 422   | >RUNX1-L14:EPRNATAAM  | 470   | 48    |
| >RUNX1-L14:ELRNATAAM  | 81    | >RUNX1-L14:EPRNATAAM  | 10928 | 10847 |
| >RUNX1-L14:ELRNATAAM  | 293   | >RUNX1-L14:EPRNATAAM  | 4439  | 4146  |
| >RUNX1-L14:ELRNATAAM  | 374   | >RUNX1-L14:EPRNATAAM  | 3770  | 3396  |
| >RUNX1-L14:ELRNATAA   | 17195 | >RUNX1-L14:EPRNATAA   | 326   | 16869 |
| >RUNX1-L14:ELRNATAAM  | 206   | >RUNX1-L14:EPRNATAAM  | 9     | 197   |
| >RUNX1-L14:ELRNATAA   | 25731 | >RUNX1-L14:EPRNATAA   | 65    | 25666 |
| >RUNX1-L14:ELRNATAAM  | 14205 | >RUNX1-L14:EPRNATAAM  | 432   | 13773 |
| >RUNX1-L14:AGNDENYSAI | 369   | >RUNX1-L14:AGNDENYSAI | 15259 | 14890 |
| >RUNX1-L14:AELRNATAAM | 344   | >RUNX1-L14:AEPRNATAAI | 1286  | 942   |
| >RUNX1-L14:AELRNATAAM | 133   | >RUNX1-L14:AEPRNATAAI | 2364  | 2231  |
| >RUNX1-L14:AELRNATA   | 443   | >RUNX1-L14:AEPRNATA   | 5268  | 4825  |
| >RUNX1-L14:AELRNATAA  | 77    | >RUNX1-L14:AEPRNATAA  | 1244  | 1167  |
| >RUNX1-L14:AELRNATAAM | 247   | >RUNX1-L14:AEPRNATAAI | 264   | 17    |
| >RUNX1-L14:AELRNATAAM | 175   | >RUNX1-L14:AEPRNATAAI | 595   | 420   |
| >RUNX1-L14:AELRNATA   | 10    | >RUNX1-L14:AEPRNATA   | 369   | 359   |
| >RUNX1-L14:AELRNATAA  | 6     | >RUNX1-L14:AEPRNATAA  | 156   | 150   |
| >RUNX1-L14:AELRNATAAM | 441   | >RUNX1-L14:AEPRNATAAI | 8145  | 7704  |
| >RUNX1-L14:AELRNATAAM | 12    | >RUNX1-L14:AEPRNATAAI | 87    | 75    |
| >RUNX1-L14:SAELRNATAA | 733   | >RUNX1-L14:SAEPRNATAA | 394   | 339   |
| >RUNX1-L14:SAELRNATAA | 495   | >RUNX1-L14:SAEPRNATAA | 94    | 401   |
| >RUNX1-L14:SAELRNATAA | 199   | >RUNX1-L14:SAEPRNATAA | 117   | 82    |
| >RUNX1-L14:YSAELRNATA | 493   | >RUNX1-L14:YSAEPRNATA | 1514  | 1021  |
| >RUNX1-L14:YSAELRNATA | 345   | >RUNX1-L14:YSAEPRNATA | 463   | 118   |
| >RUNX1-L14:YSAELRNA   | 456   | >RUNX1-L14:YSAEPRNA   | 386   | 70    |
| >RUNX1-L14:YSAELRNAT  | 536   | >RUNX1-L14:YSAEPRNAT  | 322   | 214   |
| >RUNX1-L14:YSAELRNATA | 201   | >RUNX1-L14:YSAEPRNATA | 286   | 85    |
| >RUNX1-L14:YSAELRNATA | 92    | >RUNX1-L14:YSAEPRNATA | 72    | 20    |
| >RUNX1-L14:YSAELRNATA | 676   | >RUNX1-L14:YSAEPRNATA | 375   | 301   |
| >RUNX1-L14:ENYSAELR   | 11    | >RUNX1-L14:ENYSAEPR   | 21    | 10    |
| >RUNX1-L14:ENYSAELR   | 687   | >RUNX1-L14:ENYSAEPR   | 432   | 255   |
| >RUNX1-L14:DENYSAEL   | 325   | >RUNX1-L14:DENYSAEP   | 8702  | 8377  |
| >RUNX1-L14:DENYSAELR  | 110   | >RUNX1-L14:DENYSAEPR  | 320   | 210   |
| >RUNX1-L14:DENYSAEL   | 75    | >RUNX1-L14:DENYSAEP   | 3672  | 3597  |
| >RUNX1-L14:DENYSAELR  | 3799  | >RUNX1-L14:DENYSAEPR  | 448   | 3351  |
| >RUNX1-L14:DENYSAEL   | 489   | >RUNX1-L14:DENYSAEP   | 15333 | 14844 |
| >RUNX1-L56:LPLGAPDA   | 338   | >RUNX1-L56:SPLGAPDA   | 265   | 73    |
| >RUNX1-L56:LPLGAPDAG/ | 221   | >RUNX1-L56:SPLGAPDAG/ | 188   | 33    |
| >RUNX1-L56:LPLGAPDAG  | 118   | >RUNX1-L56:SPLGAPDAG  | 755   | 637   |
| >RUNX1-L56:LPLGAPDAG/ | 76    | >RUNX1-L56:SPLGAPDAG/ | 484   | 408   |
| >RUNX1-L56:LPLGAPDA   | 18    | >RUNX1-L56:SPLGAPDA   | 431   | 413   |
| >RUNX1-L56:LPLGAPDAG  | 46    | >RUNX1-L56:SPLGAPDAG  | 1195  | 1149  |



|                       |     |                       |       |       |
|-----------------------|-----|-----------------------|-------|-------|
| >RUNX1-L56:LPLGAPDAG/ | 17  | >RUNX1-L56:SPLGAPDAG/ | 38    | 21    |
| >RUNX1-L56:LPLGAPDAG/ | 8   | >RUNX1-L56:SPLGAPDAG/ | 68    | 60    |
| >RUNX1-L56:ALPLGAPDAC | 295 | >RUNX1-L56:ASPLGAPDAC | 14330 | 14035 |
| >RUNX1-L56:ALPLGAPDAC | 465 | >RUNX1-L56:ASPLGAPDAC | 24184 | 23719 |
| >RUNX1-L56:ALPLGAPDA  | 173 | >RUNX1-L56:ASPLGAPDA  | 21669 | 21496 |
| >RUNX1-L56:ALPLGAPDAC | 256 | >RUNX1-L56:ASPLGAPDAC | 20230 | 19974 |
| >RUNX1-L56:ALPLGAPDA  | 38  | >RUNX1-L56:ASPLGAPDA  | 31612 | 31574 |
| >RUNX1-L56:ALPLGAPDAC | 29  | >RUNX1-L56:ASPLGAPDAC | 31058 | 31029 |
| >RUNX1-L56:ALSPGKMSE/ | 384 | >RUNX1-L56:ALSPGKMSE/ | 13910 | 13526 |
| >RUNX1-L56:ALSPGKMSE/ | 13  | >RUNX1-L56:ALSPGKMSE/ | 1303  | 1290  |
| >RUNX1-L56:ALSPGKMSE/ | 33  | >RUNX1-L56:ALSPGKMSE/ | 2739  | 2706  |
| >RUNX1-L56:ALSPGKMSE/ | 189 | >RUNX1-L56:ALSPGKMSE/ | 6244  | 6055  |
| >RUNX1-L56:ALSPGKMSE/ | 42  | >RUNX1-L56:ALSPGKMSE/ | 4553  | 4511  |
| >RUNX1-L56:ALSPGKMSE/ | 64  | >RUNX1-L56:ALSPGKMSE/ | 13244 | 13180 |
| >RUNX1-L56:ALSPGKMSE/ | 77  | >RUNX1-L56:ALSPGKMSE/ | 10034 | 9957  |
| >RUNX1-L56:ALSPGKMSE/ | 131 | >RUNX1-L56:ALSPGKMSE/ | 16574 | 16443 |
| >RUNX1-L56:ALSPGKMSE/ | 4   | >RUNX1-L56:ALSPGKMSE/ | 468   | 464   |
| >RUNX1-L56:ALSPGKMSE/ | 394 | >RUNX1-L56:ALSPGKMSE/ | 6781  | 6387  |
| >RUNX1-L56:EALPLGAPDA | 177 | >RUNX1-L56:EASPLGAPDA | 2106  | 1929  |
| >RUNX1-L56:SEALPLGA   | 209 | >RUNX1-L56:SEASPLGA   | 2183  | 1974  |
| >RUNX1-L56:SEALPLGA   | 37  | >RUNX1-L56:SEASPLGA   | 28    | 9     |
| >RUNX1-L56:SEALPLGAPD | 23  | >RUNX1-L56:SEASPLGAPD | 21    | 2     |
| >RUNX1-L56:KMSEALPL   | 14  | >RUNX1-L56:KMSEASPL   | 28    | 14    |
| >RUNX1-L56:KMSEALPLG/ | 52  | >RUNX1-L56:KMSEASPLG/ | 96    | 44    |
| >RUNX1-L56:KMSEALPL   | 6   | >RUNX1-L56:KMSEASPL   | 6     | 0     |
| >RUNX1-L56:KMSEALPLG  | 404 | >RUNX1-L56:KMSEASPLG  | 858   | 454   |
| >RUNX1-L56:KMSEALPLG/ | 32  | >RUNX1-L56:KMSEASPLG/ | 46    | 14    |
| >RUNX1-L56:KMSEALPL   | 8   | >RUNX1-L56:KMSEASPL   | 8     | 0     |
| >RUNX1-L56:KMSEALPLG/ | 26  | >RUNX1-L56:KMSEASPLG/ | 25    | 1     |
| >RUNX1-L56:KMSEALPL   | 8   | >RUNX1-L56:KMSEASPL   | 18    | 10    |
| >RUNX1-L56:KMSEALPLG  | 272 | >RUNX1-L56:KMSEASPLG  | 1793  | 1521  |
| >RUNX1-L56:KMSEALPLG/ | 87  | >RUNX1-L56:KMSEASPLG/ | 229   | 142   |
| >RUNX1-L56:KMSEALPL   | 7   | >RUNX1-L56:KMSEASPL   | 9     | 2     |
| >RUNX1-L56:KMSEALPLG/ | 8   | >RUNX1-L56:KMSEASPLG/ | 12    | 4     |
| >RUNX1-L56:KMSEALPL   | 7   | >RUNX1-L56:KMSEASPL   | 7     | 0     |
| >RUNX1-L56:KMSEALPLG/ | 23  | >RUNX1-L56:KMSEASPLG/ | 26    | 3     |
| >RUNX1-L56:KMSEALPL   | 11  | >RUNX1-L56:KMSEASPL   | 16    | 5     |
| >RUNX1-L56:KMSEALPLG/ | 14  | >RUNX1-L56:KMSEASPLG/ | 16    | 2     |
| >RUNX1-L56:KMSEALPL   | 21  | >RUNX1-L56:KMSEASPL   | 20    | 1     |
| >RUNX1-L56:KMSEALPLG/ | 44  | >RUNX1-L56:KMSEASPLG/ | 35    | 9     |
| >RUNX1-L56:KMSEALPL   | 7   | >RUNX1-L56:KMSEASPL   | 8     | 1     |
| >RUNX1-L56:KMSEALPLG/ | 21  | >RUNX1-L56:KMSEASPLG/ | 25    | 4     |
| >RUNX1-L56:KMSEALPLG/ | 615 | >RUNX1-L56:KMSEASPLG/ | 249   | 366   |

|                       |     |                       |       |       |
|-----------------------|-----|-----------------------|-------|-------|
| >RUNX1-L56!KMSEALPL   | 82  | >RUNX1-L56!KMSEASPL   | 129   | 47    |
| >RUNX1-L56!KMSEALPL   | 185 | >RUNX1-L56!KMSEASPL   | 119   | 66    |
| >RUNX1-L56!KMSEALPL   | 70  | >RUNX1-L56!KMSEASPL   | 32    | 38    |
| >RUNX1-L56!KMSEALPL   | 248 | >RUNX1-L56!KMSEASPL   | 202   | 46    |
| >RUNX1-L56!KMSEALPL   | 553 | >RUNX1-L56!KMSEASPL   | 319   | 234   |
| >RUNX1-L56!KMSEALPL   | 460 | >RUNX1-L56!KMSEASPL   | 318   | 142   |
| >RUNX1-L56!GKMSEALPL  | 17  | >RUNX1-L56!GKMSEASPL  | 10    | 7     |
| >RUNX1-L56!GKMSEALPL  | 39  | >RUNX1-L56!GKMSEASPL  | 47    | 8     |
| >RUNX1-L56!SPGKMSEAL  | 433 | >RUNX1-L56!SPGKMSEAS  | 39969 | 39536 |
| >RUNX1-L56!SPGKMSEAL  | 22  | >RUNX1-L56!SPGKMSEAS  | 12129 | 12107 |
| >RUNX1-L56!SPGKMSEALF | 22  | >RUNX1-L56!SPGKMSEASF | 22    | 0     |
| >RUNX1-L56!SPGKMSEAL  | 432 | >RUNX1-L56!SPGKMSEAS  | 2843  | 2411  |
| >RUNX1-L56!SPGKMSEALF | 367 | >RUNX1-L56!SPGKMSEASF | 359   | 8     |
| >RUNX1-L56!SPGKMSEAL  | 256 | >RUNX1-L56!SPGKMSEAS  | 8456  | 8200  |
| >RUNX1-L56!LSPGKMSEAL | 435 | >RUNX1-L56!LSPGKMSEAS | 14823 | 14388 |
| >RUNX1-L56!LSPGKMSEAL | 8   | >RUNX1-L56!LSPGKMSEAS | 2163  | 2155  |
| >RUNX1-L56!LSPGKMSEAL | 361 | >RUNX1-L56!LSPGKMSEAS | 2758  | 2397  |
| >RUNX1-L56!LSPGKMSEAL | 402 | >RUNX1-L56!LSPGKMSEAS | 10458 | 10056 |
| >RUNX1-M4{MAPSARLEE\  | 14  | >RUNX1-M4{LAPSARLEEA\ | 351   | 337   |
| >RUNX1-M4{MAPSARLEE\  | 404 | >RUNX1-M4{LAPSARLEEA\ | 314   | 90    |
| >RUNX1-M4{NMAPSARL    | 474 | >RUNX1-M4{NLAPSARL    | 616   | 142   |
| >RUNX1-M4{NMAPSARL    | 17  | >RUNX1-M4{NLAPSARL    | 16    | 1     |
| >RUNX1-M4{NMAPSARLEI  | 40  | >RUNX1-M4{NLAPSARLEE  | 36    | 4     |
| >RUNX1-M4{NMAPSARL    | 36  | >RUNX1-M4{NLAPSARL    | 44    | 8     |
| >RUNX1-M4{NMAPSARLEI  | 20  | >RUNX1-M4{NLAPSARLEE  | 24    | 4     |
| >RUNX1-M4{NMAPSARLEI  | 183 | >RUNX1-M4{NLAPSARLEE  | 278   | 95    |
| >RUNX1-M4{NMAPSARL    | 88  | >RUNX1-M4{NLAPSARL    | 149   | 61    |
| >RUNX1-M4{NMAPSARLEI  | 298 | >RUNX1-M4{NLAPSARLEE  | 528   | 230   |
| >RUNX1-M4{NMAPSARL    | 167 | >RUNX1-M4{NLAPSARL    | 279   | 112   |
| >RUNX1-M4{NMAPSARL    | 417 | >RUNX1-M4{NLAPSARL    | 448   | 31    |
| >RUNX1-M4{NMAPSARL    | 65  | >RUNX1-M4{NLAPSARL    | 80    | 15    |
| >RUNX1-M4{NMAPSARL    | 20  | >RUNX1-M4{NLAPSARL    | 13    | 7     |
| >RUNX1-M4{NMAPSARLEI  | 124 | >RUNX1-M4{NLAPSARLEE  | 63    | 61    |
| >RUNX1-M4{NMAPSARL    | 452 | >RUNX1-M4{NLAPSARL    | 249   | 203   |
| >RUNX1-M4{NMAPSARLEI  | 879 | >RUNX1-M4{NLAPSARLEE  | 451   | 428   |
| >RUNX1-M4{NMAPSARL    | 294 | >RUNX1-M4{NLAPSARL    | 2441  | 2147  |
| >RUNX1-M4{TNMAPSAR    | 224 | >RUNX1-M4{TNLAPSAR    | 1113  | 889   |
| >RUNX1-M4{TNMAPSARL   | 69  | >RUNX1-M4{TNLAPSARL   | 2450  | 2381  |
| >RUNX1-M4{TNMAPSARL   | 284 | >RUNX1-M4{TNLAPSARL   | 1587  | 1303  |
| >RUNX1-M4{SPTNMAPSAI  | 127 | >RUNX1-M4{SPTNLAPSAR  | 214   | 87    |
| >RUNX1-M4{SPTNMAPSA   | 399 | >RUNX1-M4{SPTNLAPSA   | 1094  | 695   |
| >RUNX1-M4{SPTNMAPSAI  | 71  | >RUNX1-M4{SPTNLAPSAR  | 121   | 50    |
| >RUNX1-M4{SPTNMAPSA   | 54  | >RUNX1-M4{SPTNLAPSA   | 109   | 55    |

|                      |      |                      |       |       |
|----------------------|------|----------------------|-------|-------|
| >RUNX1-M4(NSPTNMAPS  | 139  | >RUNX1-M4(NSPTNLAPSA | 201   | 62    |
| >RUNX1-M4(NSPTNMAPS  | 394  | >RUNX1-M4(NSPTNLAPS  | 1384  | 990   |
| >RUNX1-M4(HSNSPTNM   | 385  | >RUNX1-M4(HSNSPTNL   | 1730  | 1345  |
| >RUNX1-M4(HSNSPTNMA  | 765  | >RUNX1-M4(HSNSPTNLA  | 317   | 448   |
| >RUNX1-M4(HSNSPTNM   | 3110 | >RUNX1-M4(HSNSPTNL   | 356   | 2754  |
| >RUNX1-M4(HSNSPTNMA  | 141  | >RUNX1-M4(HSNSPTNLA  | 78    | 63    |
| >RUNX1-M4(HSNSPTNMA  | 490  | >RUNX1-M4(HSNSPTNLAP | 785   | 295   |
| >RUNX1-M4(HSNSPTNM   | 174  | >RUNX1-M4(HSNSPTNL   | 332   | 158   |
| >RUNX1-M4(HSNSPTNM   | 32   | >RUNX1-M4(HSNSPTNL   | 47    | 15    |
| >RUNX1-M4(HSNSPTNM   | 287  | >RUNX1-M4(HSNSPTNL   | 1371  | 1084  |
| >RUNX1-M4(SHSNSPTNM  | 58   | >RUNX1-M4(SHSNSPTNL  | 100   | 42    |
| >RUNX1-M4(SHSNSPTNM  | 976  | >RUNX1-M4(SHSNSPTNL  | 475   | 501   |
| >RUNX1-M4(SHSNSPTNM  | 1515 | >RUNX1-M4(SHSNSPTNL  | 248   | 1267  |
| >RUNX1-M4(GSHSNSPTNM | 261  | >RUNX1-M4(GSHSNSPTNL | 139   | 122   |
| >RUNX1-M4(GSHSNSPTNM | 228  | >RUNX1-M4(GSHSNSPTNL | 388   | 160   |
| >RUNX1-M4(GSHSNSPTNM | 25   | >RUNX1-M4(GSHSNSPTNL | 39    | 14    |
| >RUNX1-M4(GSHSNSPTNM | 36   | >RUNX1-M4(GSHSNSPTNL | 232   | 196   |
| >RUNX1-M4(GSHSNSPTNM | 4756 | >RUNX1-M4(GSHSNSPTNL | 377   | 4379  |
| >RUNX1-M5(KMSEALPL   | 14   | >RUNX1-M5(KKSEALPL   | 14035 | 14021 |
| >RUNX1-M5(KMSEALPLG  | 52   | >RUNX1-M5(KKSEALPLGA | 19058 | 19006 |
| >RUNX1-M5(KMSEALPL   | 6    | >RUNX1-M5(KKSEALPL   | 4103  | 4097  |
| >RUNX1-M5(KMSEALPLG  | 404  | >RUNX1-M5(KKSEALPLG  | 24460 | 24056 |
| >RUNX1-M5(KMSEALPLG  | 32   | >RUNX1-M5(KKSEALPLGA | 12261 | 12229 |
| >RUNX1-M5(KMSEALPL   | 8    | >RUNX1-M5(KKSEALPL   | 10446 | 10438 |
| >RUNX1-M5(KMSEALPLG  | 26   | >RUNX1-M5(KKSEALPLGA | 9564  | 9538  |
| >RUNX1-M5(KMSEALPL   | 8    | >RUNX1-M5(KKSEALPL   | 1362  | 1354  |
| >RUNX1-M5(KMSEALPLG  | 272  | >RUNX1-M5(KKSEALPLG  | 13172 | 12900 |
| >RUNX1-M5(KMSEALPLG  | 87   | >RUNX1-M5(KKSEALPLGA | 5572  | 5485  |
| >RUNX1-M5(KMSEALPL   | 7    | >RUNX1-M5(KKSEALPL   | 11948 | 11941 |
| >RUNX1-M5(KMSEALPLG  | 8    | >RUNX1-M5(KKSEALPLGA | 13233 | 13225 |
| >RUNX1-M5(KMSEALPL   | 7    | >RUNX1-M5(KKSEALPL   | 13031 | 13024 |
| >RUNX1-M5(KMSEALPLG  | 23   | >RUNX1-M5(KKSEALPLGA | 17718 | 17695 |
| >RUNX1-M5(KMSEALPL   | 11   | >RUNX1-M5(KKSEALPL   | 12091 | 12080 |
| >RUNX1-M5(KMSEALPLG  | 14   | >RUNX1-M5(KKSEALPLGA | 13605 | 13591 |
| >RUNX1-M5(KMSEALPL   | 21   | >RUNX1-M5(KKSEALPL   | 19591 | 19570 |
| >RUNX1-M5(KMSEALPLG  | 44   | >RUNX1-M5(KKSEALPLGA | 17475 | 17431 |
| >RUNX1-M5(KMSEALPL   | 7    | >RUNX1-M5(KKSEALPL   | 20745 | 20738 |
| >RUNX1-M5(KMSEALPLG  | 21   | >RUNX1-M5(KKSEALPLGA | 26392 | 26371 |
| >RUNX1-M5(KMSEALPL   | 82   | >RUNX1-M5(KKSEALPL   | 8313  | 8231  |
| >RUNX1-M5(KMSEALPL   | 185  | >RUNX1-M5(KKSEALPL   | 14945 | 14760 |
| >RUNX1-M5(KMSEALPL   | 70   | >RUNX1-M5(KKSEALPL   | 26    | 44    |
| >RUNX1-M5(KMSEALPL   | 248  | >RUNX1-M5(KKSEALPL   | 13628 | 13380 |
| >RUNX1-M5(KMSEALPL   | 460  | >RUNX1-M5(KKSEALPL   | 1405  | 945   |

|                       |       |                       |       |       |
|-----------------------|-------|-----------------------|-------|-------|
| >RUNX1-M5;PPSTALSPGKI | 90    | >RUNX1-M5;PPSTALSPGKI | 33553 | 33463 |
| >RUNX1-M5;GKMSEALPL   | 17    | >RUNX1-M5;GKKSEALPL   | 42    | 25    |
| >RUNX1-M5;GKMSEALPL   | 39    | >RUNX1-M5;GKKSEALPL   | 5820  | 5781  |
| >RUNX1-M5;SPGKMSEAL   | 433   | >RUNX1-M5;SPGKKSEAL   | 3827  | 3394  |
| >RUNX1-M5;SPGKMSEAL   | 22    | >RUNX1-M5;SPGKKSEAL   | 21    | 1     |
| >RUNX1-M5;SPGKMSEALF  | 22    | >RUNX1-M5;SPGKKSEALP  | 21    | 1     |
| >RUNX1-M5;SPGKMSEAL   | 1219  | >RUNX1-M5;SPGKKSEAL   | 113   | 1106  |
| >RUNX1-M5;SPGKMSEALF  | 1172  | >RUNX1-M5;SPGKKSEALP  | 270   | 902   |
| >RUNX1-M5;SPGKMSEAL   | 432   | >RUNX1-M5;SPGKKSEAL   | 2664  | 2232  |
| >RUNX1-M5;SPGKMSEALF  | 367   | >RUNX1-M5;SPGKKSEALP  | 1288  | 921   |
| >RUNX1-M5;SPGKMSEAL   | 256   | >RUNX1-M5;SPGKKSEAL   | 788   | 532   |
| >RUNX1-M5;LSPGKMSEAL  | 435   | >RUNX1-M5;LSPGKKSEAL  | 1515  | 1080  |
| >RUNX1-M5;LSPGKMSEAL  | 8     | >RUNX1-M5;LSPGKKSEAL  | 57    | 49    |
| >RUNX1-M5;LSPGKMSEAL  | 361   | >RUNX1-M5;LSPGKKSEALF | 1843  | 1482  |
| >RUNX1-M5;LSPGKMSEAL  | 402   | >RUNX1-M5;LSPGKKSEAL  | 1748  | 1346  |
| >RUNX1-M5;ALSPGKMSE/  | 384   | >RUNX1-M5;ALSPGKKSEA  | 1191  | 807   |
| >RUNX1-M5;ALSPGKMSE/  | 145   | >RUNX1-M5;ALSPGKKSEA  | 729   | 584   |
| >RUNX1-M5;ALSPGKMSE/  | 13    | >RUNX1-M5;ALSPGKKSEA  | 30    | 17    |
| >RUNX1-M5;ALSPGKMSE/  | 109   | >RUNX1-M5;ALSPGKKSEA  | 523   | 414   |
| >RUNX1-M5;ALSPGKMSE/  | 33    | >RUNX1-M5;ALSPGKKSEA  | 77    | 44    |
| >RUNX1-M5;ALSPGKMSE/  | 189   | >RUNX1-M5;ALSPGKKSEA  | 757   | 568   |
| >RUNX1-M5;ALSPGKMSE/  | 151   | >RUNX1-M5;ALSPGKKSEA  | 420   | 269   |
| >RUNX1-M5;ALSPGKMSE/  | 42    | >RUNX1-M5;ALSPGKKSEA  | 63    | 21    |
| >RUNX1-M5;ALSPGKMSE/  | 64    | >RUNX1-M5;ALSPGKKSEA  | 142   | 78    |
| >RUNX1-M5;ALSPGKMSE/  | 120   | >RUNX1-M5;ALSPGKKSEA  | 450   | 330   |
| >RUNX1-M5;ALSPGKMSE/  | 77    | >RUNX1-M5;ALSPGKKSEA  | 213   | 136   |
| >RUNX1-M5;ALSPGKMSE/  | 131   | >RUNX1-M5;ALSPGKKSEA  | 336   | 205   |
| >RUNX1-M5;ALSPGKMSE/  | 3     | >RUNX1-M5;ALSPGKKSEA  | 5     | 2     |
| >RUNX1-M5;ALSPGKMSE/  | 4     | >RUNX1-M5;ALSPGKKSEA  | 6     | 2     |
| >RUNX1-M5;ALSPGKMSE/  | 394   | >RUNX1-M5;ALSPGKKSEA  | 748   | 354   |
| >RUNX1-M5;TALSPGKM    | 24425 | >RUNX1-M5;TALSPGKK    | 166   | 24259 |
| >RUNX1-M5;TALSPGKM    | 279   | >RUNX1-M5;TALSPGKK    | 22239 | 21960 |
| >RUNX1-M5;STALSPGKM   | 20288 | >RUNX1-M5;STALSPGKK   | 140   | 20148 |
| >RUNX1-M5;STALSPGKM   | 14802 | >RUNX1-M5;STALSPGKK   | 20    | 14782 |
| >RUNX1-M5;STALSPGKM   | 265   | >RUNX1-M5;STALSPGKK   | 22599 | 22334 |
| >RUNX1-M5;STALSPGKM   | 8895  | >RUNX1-M5;STALSPGKK   | 361   | 8534  |
| >RUNX1-M5;STALSPGKM   | 13533 | >RUNX1-M5;STALSPGKK   | 67    | 13466 |
| >RUNX1-M5;STALSPGKM   | 12    | >RUNX1-M5;STALSPGKK   | 11897 | 11885 |
| >RUNX1-M5;STALSPGKM   | 32    | >RUNX1-M5;STALSPGKK   | 7865  | 7833  |
| >RUNX1-M5;STALSPGKM   | 2819  | >RUNX1-M5;STALSPGKK   | 98    | 2721  |
| >RUNX1-M5;STALSPGKM   | 211   | >RUNX1-M5;STALSPGKK   | 25568 | 25357 |
| >RUNX1-M5;PSTALSPGKN  | 41    | >RUNX1-M5;PSTALSPGKK  | 6081  | 6040  |
| >RUNX1-N14NATAAMKNC   | 5828  | >RUNX1-N14IATAAMKNQ   | 482   | 5346  |

|                       |       |                       |      |       |
|-----------------------|-------|-----------------------|------|-------|
| >RUNX1-N14 NATAAMKNC  | 242   | >RUNX1-N14 IATAAMKNQ  | 3473 | 3231  |
| >RUNX1-N14 RNATAAMKN  | 11146 | >RUNX1-N14 RIATAAMKN  | 147  | 10999 |
| >RUNX1-N14 RNATAAMKN  | 14314 | >RUNX1-N14 RIATAAMKN  | 42   | 14272 |
| >RUNX1-N14 RNATAAMKN  | 13993 | >RUNX1-N14 RIATAAMKN  | 243  | 13750 |
| >RUNX1-N14 RNATAAMKN  | 18205 | >RUNX1-N14 RIATAAMKN  | 400  | 17805 |
| >RUNX1-N14 RNATAAMKN  | 16526 | >RUNX1-N14 RIATAAMKN  | 209  | 16317 |
| >RUNX1-N14 RNATAAMKN  | 20875 | >RUNX1-N14 RIATAAMKN  | 19   | 20856 |
| >RUNX1-N14 RNATAAMK   | 3256  | >RUNX1-N14 RIATAAMK   | 42   | 3214  |
| >RUNX1-N14 RNATAAMK   | 2770  | >RUNX1-N14 RIATAAMK   | 31   | 2739  |
| >RUNX1-N14 RNATAAMK   | 495   | >RUNX1-N14 RIATAAMK   | 31   | 464   |
| >RUNX1-N14 RNATAAMK   | 2358  | >RUNX1-N14 RIATAAMK   | 188  | 2170  |
| >RUNX1-N14 RNATAAMKN  | 6516  | >RUNX1-N14 RIATAAMKN  | 432  | 6084  |
| >RUNX1-N14 NDENYSAELR | 23941 | >RUNX1-N14 NDENYSAELR | 148  | 23793 |
| >RUNX1-N14 LRNATAAM   | 83    | >RUNX1-N14 LRIATAAM   | 52   | 31    |
| >RUNX1-N14 LRNATAAM   | 166   | >RUNX1-N14 LRIATAAM   | 103  | 63    |
| >RUNX1-N14 LRNATAAMK  | 96    | >RUNX1-N14 LRIATAAMK  | 68   | 28    |
| >RUNX1-N14 LRNATAAM   | 95    | >RUNX1-N14 LRIATAAM   | 30   | 65    |
| >RUNX1-N14 ELRNATAAM  | 117   | >RUNX1-N14 ELRIATAAMK | 161  | 44    |
| >RUNX1-N14 ELRNATAAM  | 47    | >RUNX1-N14 ELRIATAAM  | 434  | 387   |
| >RUNX1-N14 ELRNATAAM  | 206   | >RUNX1-N14 ELRIATAAM  | 650  | 444   |
| >RUNX1-N14 ELRNATAAM  | 25    | >RUNX1-N14 ELRIATAAM  | 107  | 82    |
| >RUNX1-N14 ELRNATAAM  | 165   | >RUNX1-N14 ELRIATAAMK | 223  | 58    |
| >RUNX1-N14 ELRNATAAM  | 375   | >RUNX1-N14 ELRIATAAMK | 228  | 147   |
| >RUNX1-N14 ELRNATAAM  | 422   | >RUNX1-N14 ELRIATAAM  | 232  | 190   |
| >RUNX1-N14 ELRNATAAM  | 81    | >RUNX1-N14 ELRIATAAM  | 163  | 82    |
| >RUNX1-N14 ELRNATAAM  | 293   | >RUNX1-N14 ELRIATAAM  | 698  | 405   |
| >RUNX1-N14 ELRNATAAM  | 374   | >RUNX1-N14 ELRIATAAM  | 1961 | 1587  |
| >RUNX1-N14 ELRNATAAM  | 206   | >RUNX1-N14 ELRIATAAM  | 275  | 69    |
| >RUNX1-N14 AELRNATAAM | 344   | >RUNX1-N14 AELRIATAAM | 142  | 202   |
| >RUNX1-N14 AELRNATAAM | 133   | >RUNX1-N14 AELRIATAAM | 295  | 162   |
| >RUNX1-N14 AELRNATA   | 443   | >RUNX1-N14 AELRIATA   | 291  | 152   |
| >RUNX1-N14 AELRNATAA  | 77    | >RUNX1-N14 AELRIATAA  | 60   | 17    |
| >RUNX1-N14 AELRNATAAM | 247   | >RUNX1-N14 AELRIATAAM | 297  | 50    |
| >RUNX1-N14 AELRNATAAM | 175   | >RUNX1-N14 AELRIATAAM | 208  | 33    |
| >RUNX1-N14 AELRNATA   | 785   | >RUNX1-N14 AELRIATA   | 324  | 461   |
| >RUNX1-N14 AELRNATAA  | 656   | >RUNX1-N14 AELRIATAA  | 226  | 430   |
| >RUNX1-N14 AELRNATAAM | 593   | >RUNX1-N14 AELRIATAAM | 222  | 371   |
| >RUNX1-N14 AELRNATAAM | 963   | >RUNX1-N14 AELRIATAAM | 465  | 498   |
| >RUNX1-N14 AELRNATA   | 10    | >RUNX1-N14 AELRIATA   | 8    | 2     |
| >RUNX1-N14 AELRNATAA  | 6     | >RUNX1-N14 AELRIATAA  | 5    | 1     |
| >RUNX1-N14 AELRNATAAM | 441   | >RUNX1-N14 AELRIATAAM | 297  | 144   |
| >RUNX1-N14 AELRNATAA  | 685   | >RUNX1-N14 AELRIATAA  | 194  | 491   |
| >RUNX1-N14 AELRNATAAM | 12    | >RUNX1-N14 AELRIATAAM | 10   | 2     |

|                        |       |                        |      |       |
|------------------------|-------|------------------------|------|-------|
| >RUNX1-N14 SAELRNATAA  | 495   | >RUNX1-N14 SAELRIATAA  | 300  | 195   |
| >RUNX1-N14 SAELRNATAA  | 199   | >RUNX1-N14 SAELRIATAA  | 255  | 56    |
| >RUNX1-N14 YSAELRNATA  | 493   | >RUNX1-N14 YSAELRIATAA | 390  | 103   |
| >RUNX1-N14 YSAELRNATA  | 1134  | >RUNX1-N14 YSAELRIATA  | 455  | 679   |
| >RUNX1-N14 YSAELRNATA  | 345   | >RUNX1-N14 YSAELRIATAA | 256  | 89    |
| >RUNX1-N14 YSAELRNA    | 456   | >RUNX1-N14 YSAELRIA    | 1288 | 832   |
| >RUNX1-N14 YSAELRNATA  | 201   | >RUNX1-N14 YSAELRIATA  | 142  | 59    |
| >RUNX1-N14 YSAELRNATA  | 92    | >RUNX1-N14 YSAELRIATAA | 56   | 36    |
| >RUNX1-N14 NYSAELRN    | 26930 | >RUNX1-N14 NYSAELRI    | 296  | 26634 |
| >RUNX1-N14 NYSAELRN    | 5801  | >RUNX1-N14 NYSAELRI    | 44   | 5757  |
| >RUNX1-N14 DENYSAELRN  | 14909 | >RUNX1-N14 DENYSAELRI  | 71   | 14838 |
| >RUNX1-N14 DENYSAELRN  | 35125 | >RUNX1-N14 DENYSAELRI  | 473  | 34652 |
| >RUNX1-N96 NFLCSVLPTH' | 321   | >RUNX1-N96 SFLCSVLPTH\ | 574  | 253   |
| >RUNX1-N96 NFLCSVLPTH' | 812   | >RUNX1-N96 SFLCSVLPTH\ | 352  | 460   |
| >RUNX1-N96 SPNFLCSV    | 340   | >RUNX1-N96 SPSFLCSV    | 322  | 18    |
| >RUNX1-N96 SPNFLCSVL   | 57    | >RUNX1-N96 SPSFLCSVL   | 47   | 10    |
| >RUNX1-N96 SPNFLCSVL   | 557   | >RUNX1-N96 SPSFLCSVL   | 394  | 163   |
| >RUNX1-N96 SPNFLCSVL   | 65    | >RUNX1-N96 SPSFLCSVL   | 34   | 31    |
| >RUNX1-N96 SPNFLCSVL   | 653   | >RUNX1-N96 SPSFLCSVL   | 453  | 200   |
| >RUNX1-N96 DSPNFLCSV   | 125   | >RUNX1-N96 DSPSFLCSV   | 99   | 26    |
| >RUNX1-N96 DSPNFLCSV   | 435   | >RUNX1-N96 DSPSFLCSV   | 262  | 173   |
| >RUNX1-N96 DSPNFLCSV   | 1076  | >RUNX1-N96 DSPSFLCSV   | 210  | 866   |
| >RUNX1-N96 DSPNFLCSVL  | 87    | >RUNX1-N96 DSPSFLCSVL  | 31   | 56    |
| >RUNX1-N96 DSPNFLCSVL  | 991   | >RUNX1-N96 DSPSFLCSVL  | 466  | 525   |
| >RUNX1-N96 TDSPNFLCSV  | 82    | >RUNX1-N96 TDSPSFLCSV  | 64   | 18    |
| >RUNX1-N96 TDSPNFLCSV  | 441   | >RUNX1-N96 TDSPSFLCSVL | 336  | 105   |
| >RUNX1-N96 RTDSPNFLCS' | 203   | >RUNX1-N96 RTDSPSFLCS\ | 174  | 29    |
| >RUNX1-N96 RTDSPNFLCS' | 34    | >RUNX1-N96 RTDSPSFLCS\ | 25   | 9     |
| >RUNX1-N96 RTDSPNFL    | 411   | >RUNX1-N96 RTDSPSFL    | 188  | 223   |
| >RUNX1-N96 RTDSPNFLCS' | 10    | >RUNX1-N96 RTDSPSFLCS\ | 8    | 2     |
| >RUNX1-N96 RTDSPNFLCS' | 329   | >RUNX1-N96 RTDSPSFLCS\ | 259  | 70    |
| >RUNX1-N96 RTDSPNFLCS' | 100   | >RUNX1-N96 RTDSPSFLCS\ | 62   | 38    |
| >RUNX1-N96 RTDSPNFLCS' | 189   | >RUNX1-N96 RTDSPSFLCS\ | 159  | 30    |
| >RUNX1-N96 RTDSPNFLCS' | 440   | >RUNX1-N96 RTDSPSFLCS\ | 465  | 25    |
| >RUNX1-N96 RTDSPNFLCS' | 22    | >RUNX1-N96 RTDSPSFLCS\ | 18   | 4     |
| >RUNX1-N96 RTDSPNFL    | 20    | >RUNX1-N96 RTDSPSFL    | 6    | 14    |
| >RUNX1-N96 RTDSPNFLCS' | 105   | >RUNX1-N96 RTDSPSFLCS\ | 57   | 48    |
| >RUNX1-N96 RTDSPNFLC   | 223   | >RUNX1-N96 RTDSPSFLC   | 125  | 98    |
| >RUNX1-N96 RTDSPNFLCS' | 543   | >RUNX1-N96 RTDSPSFLCS\ | 353  | 190   |
| >RUNX1-N96 RTDSPNFL    | 34    | >RUNX1-N96 RTDSPSFL    | 97   | 63    |
| >RUNX1-N96 RTDSPNFLCS' | 226   | >RUNX1-N96 RTDSPSFLCS\ | 192  | 34    |
| >RUNX1-N96 RTDSPNFL    | 244   | >RUNX1-N96 RTDSPSFL    | 98   | 146   |
| >RUNX1-N96 VRTDSPNF    | 51    | >RUNX1-N96 VRTDSPSF    | 26   | 25    |

|                       |       |                       |       |       |
|-----------------------|-------|-----------------------|-------|-------|
| >RUNX1-N96 VRTDSPNFL  | 750   | >RUNX1-N96 VRTDPSFL   | 372   | 378   |
| >RUNX1-N96 VRTDSPNFL  | 142   | >RUNX1-N96 VRTDPSFL   | 83    | 59    |
| >RUNX1-N96 LVRTDSPNFL | 504   | >RUNX1-N96 LVRTDPSFL  | 272   | 232   |
| >RUNX1-N96 LVRTDSPNFL | 852   | >RUNX1-N96 LVRTDPSFL  | 312   | 540   |
| >RUNX1-N96 LVRTDSPNF  | 495   | >RUNX1-N96 LVRTDPSF   | 775   | 280   |
| >RUNX1-N96 LVRTDSPN   | 1367  | >RUNX1-N96 LVRTDPS    | 311   | 1056  |
| >RUNX1-N96 LVRTDSPNF  | 475   | >RUNX1-N96 LVRTDPSF   | 285   | 190   |
| >RUNX1-N96 LVRTDSPNFL | 16    | >RUNX1-N96 LVRTDPSFL  | 18    | 2     |
| >RUNX1-N96 LVRTDSPNF  | 158   | >RUNX1-N96 LVRTDPSF   | 41    | 117   |
| >RUNX1-N96 LVRTDSPNF  | 70    | >RUNX1-N96 LVRTDPSF   | 35    | 35    |
| >RUNX1-N96 LVRTDSPNF  | 60    | >RUNX1-N96 LVRTDPSF   | 59    | 1     |
| >RUNX1-N96 LVRTDSPNF  | 1236  | >RUNX1-N96 LVRTDPSF   | 307   | 929   |
| >RUNX1-N96 LVRTDSPNF  | 523   | >RUNX1-N96 LVRTDPSF   | 176   | 347   |
| >RUNX1-N96 LVRTDSPNFL | 481   | >RUNX1-N96 LVRTDPSFL  | 295   | 186   |
| >RUNX1-N96 LVRTDSPNFL | 4393  | >RUNX1-N96 LVRTDPSFL  | 397   | 3996  |
| >RUNX1-N96 ELVRTDSPNF | 396   | >RUNX1-N96 ELVRTDPSFI | 574   | 178   |
| >RUNX1-N96 ELVRTDSPNF | 418   | >RUNX1-N96 ELVRTDPSFI | 253   | 165   |
| >RUNX1-N96 ELVRTDSPNF | 471   | >RUNX1-N96 ELVRTDPSFI | 441   | 30    |
| >RUNX1-N96 ELVRTDSPNF | 114   | >RUNX1-N96 ELVRTDPSFI | 64    | 50    |
| >RUNX1-N96 ELVRTDSPNF | 23    | >RUNX1-N96 ELVRTDPSF  | 30    | 7     |
| >RUNX1-N96 ELVRTDSPNF | 113   | >RUNX1-N96 ELVRTDPSFI | 78    | 35    |
| >RUNX1-N96 ELVRTDSPNF | 427   | >RUNX1-N96 ELVRTDPSFI | 581   | 154   |
| >RUNX1-N96 ELVRTDSPNF | 947   | >RUNX1-N96 ELVRTDPSF  | 167   | 780   |
| >RUNX1-N96 ELVRTDSPNF | 173   | >RUNX1-N96 ELVRTDPSF  | 95    | 78    |
| >RUNX1-N96 GELVRTDSPN | 645   | >RUNX1-N96 GELVRTDPS  | 366   | 279   |
| >RUNX1-N96 GELVRTDSPN | 274   | >RUNX1-N96 GELVRTDPS  | 133   | 141   |
| >RUNX1-N96 GELVRTDSPN | 117   | >RUNX1-N96 GELVRTDPS  | 118   | 1     |
| >RUNX1-N96 GELVRTDSPN | 196   | >RUNX1-N96 GELVRTDPS  | 203   | 7     |
| >RUNX1-N96 GELVRTDSPN | 21    | >RUNX1-N96 GELVRTDPS  | 18    | 3     |
| >RUNX1-P11 PIAFKVVAL  | 13471 | >RUNX1-P11 LIAFKVVAL  | 459   | 13012 |
| >RUNX1-P11 PIAFKVVAL  | 942   | >RUNX1-P11 LIAFKVVAL  | 23    | 919   |
| >RUNX1-P11 PIAFKVVA   | 6190  | >RUNX1-P11 LIAFKVVA   | 280   | 5910  |
| >RUNX1-P11 PIAFKVVAL  | 1968  | >RUNX1-P11 LIAFKVVAL  | 28    | 1940  |
| >RUNX1-P11 PIAFKVVAL  | 11195 | >RUNX1-P11 LIAFKVVAL  | 333   | 10862 |
| >RUNX1-P11 PIAFKVVAL  | 5099  | >RUNX1-P11 LIAFKVVAL  | 293   | 4806  |
| >RUNX1-P11 PIAFKVVAL  | 6368  | >RUNX1-P11 LIAFKVVAL  | 148   | 6220  |
| >RUNX1-P11 PIAFKVVAL  | 3940  | >RUNX1-P11 LIAFKVVAL  | 240   | 3700  |
| >RUNX1-P11 PIAFKVVAL  | 1630  | >RUNX1-P11 LIAFKVVAL  | 107   | 1523  |
| >RUNX1-P11 LPIAFKVV   | 195   | >RUNX1-P11 LLIAFKVV   | 29710 | 29515 |
| >RUNX1-P11 LPIAFKVVAL | 37    | >RUNX1-P11 LLIAFKVVAL | 29211 | 29174 |
| >RUNX1-P11 LPIAFKVV   | 21291 | >RUNX1-P11 LLIAFKVV   | 58    | 21233 |
| >RUNX1-P11 LPIAFKVVA  | 23776 | >RUNX1-P11 LLIAFKVVA  | 297   | 23479 |
| >RUNX1-P11 LPIAFKVVAL | 17396 | >RUNX1-P11 LLIAFKVVAL | 96    | 17300 |

|                        |       |                        |       |       |
|------------------------|-------|------------------------|-------|-------|
| >RUNX1-P11 LPIAFKVV    | 18006 | >RUNX1-P11 LLIAFKVV    | 65    | 17941 |
| >RUNX1-P11 LPIAFKVVA   | 25187 | >RUNX1-P11 LLIAFKVVA   | 170   | 25017 |
| >RUNX1-P11 LPIAFKVVAL  | 6750  | >RUNX1-P11 LLIAFKVVAL  | 25    | 6725  |
| >RUNX1-P11 LPIAFKVVALC | 26587 | >RUNX1-P11 LLIAFKVVALC | 321   | 26266 |
| >RUNX1-P11 LPIAFKVV    | 14155 | >RUNX1-P11 LLIAFKVV    | 13    | 14142 |
| >RUNX1-P11 LPIAFKVVA   | 20089 | >RUNX1-P11 LLIAFKVVA   | 221   | 19868 |
| >RUNX1-P11 LPIAFKVVAL  | 10911 | >RUNX1-P11 LLIAFKVVAL  | 35    | 10876 |
| >RUNX1-P11 LPIAFKVV    | 10202 | >RUNX1-P11 LLIAFKVV    | 42    | 10160 |
| >RUNX1-P11 LPIAFKVVAL  | 8376  | >RUNX1-P11 LLIAFKVVAL  | 141   | 8235  |
| >RUNX1-P11 LPIAFKVV    | 14151 | >RUNX1-P11 LLIAFKVV    | 5     | 14146 |
| >RUNX1-P11 LPIAFKVVA   | 24843 | >RUNX1-P11 LLIAFKVVA   | 55    | 24788 |
| >RUNX1-P11 LPIAFKVVAL  | 16532 | >RUNX1-P11 LLIAFKVVAL  | 7     | 16525 |
| >RUNX1-P11 LPIAFKVV    | 20442 | >RUNX1-P11 LLIAFKVV    | 11    | 20431 |
| >RUNX1-P11 LPIAFKVVAL  | 19880 | >RUNX1-P11 LLIAFKVVAL  | 19    | 19861 |
| >RUNX1-P11 LPIAFKVV    | 22665 | >RUNX1-P11 LLIAFKVV    | 30    | 22635 |
| >RUNX1-P11 LPIAFKVVAL  | 25228 | >RUNX1-P11 LLIAFKVVAL  | 140   | 25088 |
| >RUNX1-P11 LPIAFKVV    | 23473 | >RUNX1-P11 LLIAFKVV    | 121   | 23352 |
| >RUNX1-P11 LPIAFKVVAL  | 24349 | >RUNX1-P11 LLIAFKVVAL  | 405   | 23944 |
| >RUNX1-P11 LPIAFKVV    | 18269 | >RUNX1-P11 LLIAFKVV    | 3     | 18266 |
| >RUNX1-P11 LPIAFKVVA   | 32012 | >RUNX1-P11 LLIAFKVVA   | 12    | 32000 |
| >RUNX1-P11 LPIAFKVVAL  | 25946 | >RUNX1-P11 LLIAFKVVAL  | 4     | 25942 |
| >RUNX1-P11 LPIAFKVVAL  | 15169 | >RUNX1-P11 LLIAFKVVAL  | 381   | 14788 |
| >RUNX1-P11 LPIAFKVV    | 236   | >RUNX1-P11 LLIAFKVV    | 22420 | 22184 |
| >RUNX1-P11 LPIAFKVVAL  | 12676 | >RUNX1-P11 LLIAFKVVAL  | 172   | 12504 |
| >RUNX1-P11 LPIAFKVVAL  | 1051  | >RUNX1-P11 LLIAFKVVAL  | 161   | 890   |
| >RUNX1-P11 LPIAFKVVAL  | 44    | >RUNX1-P11 LLIAFKVVAL  | 407   | 363   |
| >RUNX1-P11 LPIAFKVV    | 241   | >RUNX1-P11 LLIAFKVV    | 20103 | 19862 |
| >RUNX1-P11 LPIAFKVV    | 350   | >RUNX1-P11 LLIAFKVV    | 32065 | 31715 |
| >RUNX1-P11 LPIAFKVV    | 9     | >RUNX1-P11 LLIAFKVV    | 6010  | 6001  |
| >RUNX1-P11 LPIAFKVVA   | 6     | >RUNX1-P11 LLIAFKVVA   | 2674  | 2668  |
| >RUNX1-P11 LPIAFKVVALC | 51    | >RUNX1-P11 LLIAFKVVALC | 21604 | 21553 |
| >RUNX1-P11 LPIAFKVVAL  | 39    | >RUNX1-P11 LLIAFKVVAL  | 2163  | 2124  |
| >RUNX1-P11 LPIAFKVVAL  | 42    | >RUNX1-P11 LLIAFKVVAL  | 14118 | 14076 |
| >RUNX1-P11 TLPIAFKV    | 262   | >RUNX1-P11 TLLIAFKV    | 36    | 226   |
| >RUNX1-P11 TLPIAFKVVAL | 1631  | >RUNX1-P11 TLLIAFKVVAL | 247   | 1384  |
| >RUNX1-P11 TLPIAFKV    | 85    | >RUNX1-P11 TLLIAFKV    | 80    | 5     |
| >RUNX1-P11 TLPIAFKVVAL | 199   | >RUNX1-P11 TLLIAFKVVAL | 271   | 72    |
| >RUNX1-P11 TLPIAFKV    | 57    | >RUNX1-P11 TLLIAFKV    | 150   | 93    |
| >RUNX1-P11 TLPIAFKVV   | 176   | >RUNX1-P11 TLLIAFKVV   | 502   | 326   |
| >RUNX1-P11 TLPIAFKVVAL | 247   | >RUNX1-P11 TLLIAFKVVAL | 577   | 330   |
| >RUNX1-P11 TLPIAFKV    | 83    | >RUNX1-P11 TLLIAFKV    | 23    | 60    |
| >RUNX1-P11 TLPIAFKVV   | 608   | >RUNX1-P11 TLLIAFKVV   | 138   | 470   |
| >RUNX1-P11 TLPIAFKVVAL | 789   | >RUNX1-P11 TLLIAFKVVAL | 253   | 536   |



|                        |      |                        |       |       |
|------------------------|------|------------------------|-------|-------|
| >RUNX1-P11 TLPIAFKV    | 17   | >RUNX1-P11 TLLIAFKV    | 4     | 13    |
| >RUNX1-P11 TLPIAFKVV   | 112  | >RUNX1-P11 TLLIAFKVV   | 15    | 97    |
| >RUNX1-P11 TLPIAFKVVA  | 1951 | >RUNX1-P11 TLLIAFKVVA  | 298   | 1653  |
| >RUNX1-P11 TLPIAFKVVAL | 198  | >RUNX1-P11 TLLIAFKVVAL | 26    | 172   |
| >RUNX1-P11 TLPIAFKV    | 181  | >RUNX1-P11 TLLIAFKV    | 16    | 165   |
| >RUNX1-P11 TLPIAFKVV   | 1907 | >RUNX1-P11 TLLIAFKVV   | 90    | 1817  |
| >RUNX1-P11 TLPIAFKVVAL | 1396 | >RUNX1-P11 TLLIAFKVVAL | 113   | 1283  |
| >RUNX1-P11 TLPIAFKV    | 13   | >RUNX1-P11 TLLIAFKV    | 6     | 7     |
| >RUNX1-P11 TLPIAFKVV   | 108  | >RUNX1-P11 TLLIAFKVV   | 17    | 91    |
| >RUNX1-P11 TLPIAFKVVA  | 3106 | >RUNX1-P11 TLLIAFKVVA  | 363   | 2743  |
| >RUNX1-P11 TLPIAFKVVAL | 559  | >RUNX1-P11 TLLIAFKVVAL | 77    | 482   |
| >RUNX1-P11 TLPIAFKV    | 92   | >RUNX1-P11 TLLIAFKV    | 6     | 86    |
| >RUNX1-P11 TLPIAFKVV   | 3800 | >RUNX1-P11 TLLIAFKVV   | 48    | 3752  |
| >RUNX1-P11 TLPIAFKVVAL | 3665 | >RUNX1-P11 TLLIAFKVVAL | 143   | 3522  |
| >RUNX1-P11 TLPIAFKV    | 4    | >RUNX1-P11 TLLIAFKV    | 3     | 1     |
| >RUNX1-P11 TLPIAFKVV   | 15   | >RUNX1-P11 TLLIAFKVV   | 10    | 5     |
| >RUNX1-P11 TLPIAFKVVA  | 267  | >RUNX1-P11 TLLIAFKVVA  | 131   | 136   |
| >RUNX1-P11 TLPIAFKVVAL | 47   | >RUNX1-P11 TLLIAFKVVAL | 24    | 23    |
| >RUNX1-P11 TLPIAFKV    | 166  | >RUNX1-P11 TLLIAFKV    | 764   | 598   |
| >RUNX1-P11 TLPIAFKV    | 702  | >RUNX1-P11 TLLIAFKV    | 29    | 673   |
| >RUNX1-P11 TLPIAFKVVAL | 1292 | >RUNX1-P11 TLLIAFKVVAL | 222   | 1070  |
| >RUNX1-P11 TLPIAFKVV   | 61   | >RUNX1-P11 TLLIAFKVV   | 14471 | 14410 |
| >RUNX1-P11 TLPIAFKVVAL | 40   | >RUNX1-P11 TLLIAFKVVAL | 10709 | 10669 |
| >RUNX1-P11 KTLPIAFKV   | 38   | >RUNX1-P11 KTLLIAFKV   | 114   | 76    |
| >RUNX1-P11 KTLPIAFKV   | 92   | >RUNX1-P11 KTLLIAFKV   | 407   | 315   |
| >RUNX1-P11 KTLPIAFKVV  | 360  | >RUNX1-P11 KTLLIAFKVV  | 561   | 201   |
| >RUNX1-P11 KTLPIAFKV   | 14   | >RUNX1-P11 KTLLIAFKV   | 18    | 4     |
| >RUNX1-P11 KTLPIAFKVV  | 97   | >RUNX1-P11 KTLLIAFKVV  | 169   | 72    |
| >RUNX1-P11 KTLPIAFKVVA | 308  | >RUNX1-P11 KTLLIAFKVVA | 1120  | 812   |
| >RUNX1-P11 KTLPIAFKV   | 10   | >RUNX1-P11 KTLLIAFKV   | 44    | 34    |
| >RUNX1-P11 KTLPIAFKVV  | 62   | >RUNX1-P11 KTLLIAFKVV  | 288   | 226   |
| >RUNX1-P11 KTLPIAFKV   | 39   | >RUNX1-P11 KTLLIAFKV   | 189   | 150   |
| >RUNX1-P11 KTLPIAFKVV  | 461  | >RUNX1-P11 KTLLIAFKVV  | 1160  | 699   |
| >RUNX1-P11 KTLPIAFKV   | 15   | >RUNX1-P11 KTLLIAFKV   | 28    | 13    |
| >RUNX1-P11 KTLPIAFKVV  | 144  | >RUNX1-P11 KTLLIAFKVV  | 364   | 220   |
| >RUNX1-P11 KTLPIAFKV   | 47   | >RUNX1-P11 KTLLIAFKV   | 103   | 56    |
| >RUNX1-P11 KTLPIAFKV   | 55   | >RUNX1-P11 KTLLIAFKV   | 890   | 835   |
| >RUNX1-P11 KTLPIAFKVV  | 454  | >RUNX1-P11 KTLLIAFKVV  | 3257  | 2803  |
| >RUNX1-P11 KTLPIAFK    | 38   | >RUNX1-P11 KTLLIAFK    | 48    | 10    |
| >RUNX1-P11 KTLPIAFK    | 9    | >RUNX1-P11 KTLLIAFK    | 11    | 2     |
| >RUNX1-P11 KTLPIAFK    | 5    | >RUNX1-P11 KTLLIAFK    | 5     | 0     |
| >RUNX1-P11 KTLPIAFKV   | 163  | >RUNX1-P11 KTLLIAFKV   | 456   | 293   |
| >RUNX1-P11 KTLPIAFKVV  | 117  | >RUNX1-P11 KTLLIAFKVV  | 274   | 157   |

|                        |       |                        |      |       |
|------------------------|-------|------------------------|------|-------|
| >RUNX1-P11 KTLPIAFKVVA | 59    | >RUNX1-P11 KTLPIAFKVVA | 135  | 76    |
| >RUNX1-P11 KTLPIAFK    | 12    | >RUNX1-P11 KTLPIAFK    | 13   | 1     |
| >RUNX1-P11 KTLPIAFKV   | 328   | >RUNX1-P11 KTLPIAFKV   | 583  | 255   |
| >RUNX1-P11 KTLPIAFKV   | 59    | >RUNX1-P11 KTLPIAFKV   | 42   | 17    |
| >RUNX1-P11 KTLPIAFKVV  | 232   | >RUNX1-P11 KTLPIAFKVV  | 188  | 44    |
| >RUNX1-P11 KTLPIAFKVVA | 252   | >RUNX1-P11 KTLPIAFKVVA | 194  | 58    |
| >RUNX1-P11 KTLPIAFK    | 108   | >RUNX1-P11 KTLPIAFK    | 111  | 3     |
| >RUNX1-P11 KTLPIAFKV   | 88    | >RUNX1-P11 KTLPIAFKV   | 374  | 286   |
| >RUNX1-P11 KTLPIAFKV   | 12    | >RUNX1-P11 KTLPIAFKV   | 24   | 12    |
| >RUNX1-P11 KTLPIAFKVV  | 302   | >RUNX1-P11 KTLPIAFKVV  | 636  | 334   |
| >RUNX1-P11 KTLPIAFKV   | 14    | >RUNX1-P11 KTLPIAFKV   | 35   | 21    |
| >RUNX1-P11 KTLPIAFKVV  | 44    | >RUNX1-P11 KTLPIAFKVV  | 133  | 89    |
| >RUNX1-P11 KTLPIAFKV   | 400   | >RUNX1-P11 KTLPIAFKV   | 3821 | 3421  |
| >RUNX1-P11 KTLPIAFKV   | 242   | >RUNX1-P11 KTLPIAFKV   | 1505 | 1263  |
| >RUNX1-P11 KTLPIAFKV   | 85    | >RUNX1-P11 KTLPIAFKV   | 194  | 109   |
| >RUNX1-P11 KTLPIAFK    | 357   | >RUNX1-P11 KTLPIAFK    | 564  | 207   |
| >RUNX1-P11 KTLPIAFK    | 151   | >RUNX1-P11 KTLPIAFK    | 161  | 10    |
| >RUNX1-P11 KTLPIAFKV   | 199   | >RUNX1-P11 KTLPIAFKV   | 1217 | 1018  |
| >RUNX1-P11 NKTLPIAF    | 33    | >RUNX1-P11 NKTLPIAF    | 96   | 63    |
| >RUNX1-P11 CNKTLPIAFK  | 83    | >RUNX1-P11 CNKTLPIAFK  | 86   | 3     |
| >RUNX1-P11 CNKTLPIAF   | 168   | >RUNX1-P11 CNKTLPIAF   | 339  | 171   |
| >RUNX1-P11 RCNKTLPIAFK | 282   | >RUNX1-P11 RCNKTLPIAFK | 235  | 47    |
| >RUNX1-P11 RCNKTLPI    | 129   | >RUNX1-P11 RCNKTLPI    | 323  | 194   |
| >RUNX1-P11 RCNKTLPIA   | 146   | >RUNX1-P11 RCNKTLPIA   | 261  | 115   |
| >RUNX1-P11 RCNKTLPIAFK | 9     | >RUNX1-P11 RCNKTLPIAFK | 9    | 0     |
| >RUNX1-P11 RCNKTLPIAFK | 155   | >RUNX1-P11 RCNKTLPIAFK | 132  | 23    |
| >RUNX1-P11 RCNKTLPI    | 134   | >RUNX1-P11 RCNKTLPI    | 511  | 377   |
| >RUNX1-P11 RCNKTLPIAF  | 134   | >RUNX1-P11 RCNKTLPIAF  | 129  | 5     |
| >RUNX1-P11 RCNKTLPIAF  | 42    | >RUNX1-P11 RCNKTLPIAF  | 60   | 18    |
| >RUNX1-P11 RCNKTLPIAF  | 2451  | >RUNX1-P11 RCNKTLPIAF  | 481  | 1970  |
| >RUNX1-P11 RCNKTLPIAFK | 1271  | >RUNX1-P11 RCNKTLPIAFK | 489  | 782   |
| >RUNX1-P11 WRCNKTLPI   | 1197  | >RUNX1-P11 WRCNKTLPI   | 447  | 750   |
| >RUNX1-P11 WRCNKTLPI   | 433   | >RUNX1-P11 WRCNKTLPI   | 2215 | 1782  |
| >RUNX1-P11 WRCNKTLPIA  | 34    | >RUNX1-P11 WRCNKTLPIA  | 55   | 21    |
| >RUNX1-P11 WRCNKTLPIA  | 176   | >RUNX1-P11 WRCNKTLPIA  | 115  | 61    |
| >RUNX1-P11 WRCNKTLPI   | 22649 | >RUNX1-P11 WRCNKTLPI   | 295  | 22354 |
| >RUNX1-P11 WRCNKTLPI   | 400   | >RUNX1-P11 WRCNKTLPI   | 1703 | 1303  |
| >RUNX1-P11 WRCNKTLPIA  | 221   | >RUNX1-P11 WRCNKTLPIA  | 559  | 338   |
| >RUNX1-P11 WRCNKTLPI   | 874   | >RUNX1-P11 WRCNKTLPI   | 66   | 808   |
| >RUNX1-P11 WRCNKTLPIA  | 598   | >RUNX1-P11 WRCNKTLPIA  | 130  | 468   |
| >RUNX1-P11 WRCNKTLPI   | 4711  | >RUNX1-P11 WRCNKTLPI   | 142  | 4569  |
| >RUNX1-P11 WRCNKTLPI   | 288   | >RUNX1-P11 WRCNKTLPI   | 66   | 222   |
| >RUNX1-P11 WRCNKTLPIA  | 245   | >RUNX1-P11 WRCNKTLPIA  | 77   | 168   |

|                        |       |                        |      |       |
|------------------------|-------|------------------------|------|-------|
| >RUNX1-P11 WRCNKTLPIA  | 62    | >RUNX1-P11 WRCNKTLLIA  | 44   | 18    |
| >RUNX1-P11 HWRCNKTLPL  | 3350  | >RUNX1-P11 HWRCNKTL    | 489  | 2861  |
| >RUNX1-P11 HWRCNKTLPL  | 23    | >RUNX1-P11 HWRCNKTL    | 35   | 12    |
| >RUNX1-P11 HWRCNKTLPL  | 32    | >RUNX1-P11 HWRCNKTL    | 42   | 10    |
| >RUNX1-P11 THWRCNKTL   | 233   | >RUNX1-P11 THWRCNKTL   | 90   | 143   |
| >RUNX1-P11 THWRCNKTL   | 4909  | >RUNX1-P11 THWRCNKTL   | 406  | 4503  |
| >RUNX1-P11 THWRCNKTL   | 25389 | >RUNX1-P11 THWRCNKTL   | 488  | 24901 |
| >RUNX1-P18 PPQVATYHR/  | 565   | >RUNX1-P18 APQVATYHR/  | 29   | 536   |
| >RUNX1-P18 PPQVATYHR/  | 3378  | >RUNX1-P18 APQVATYHR/  | 337  | 3041  |
| >RUNX1-P18 PPQVATYHR   | 462   | >RUNX1-P18 APQVATYHR   | 941  | 479   |
| >RUNX1-P18 NPPQVATYH   | 220   | >RUNX1-P18 NAPQVATYH   | 13   | 207   |
| >RUNX1-P18 NPPQVATYH   | 6916  | >RUNX1-P18 NAPQVATYH   | 238  | 6678  |
| >RUNX1-P18 NPPQVATY    | 29    | >RUNX1-P18 NAPQVATY    | 96   | 67    |
| >RUNX1-P18 NPPQVATY    | 351   | >RUNX1-P18 NAPQVATY    | 4105 | 3754  |
| >RUNX1-P18 NPPQVATY    | 58    | >RUNX1-P18 NAPQVATY    | 2121 | 2063  |
| >RUNX1-P18 NPPQVATYH   | 121   | >RUNX1-P18 NAPQVATYH   | 150  | 29    |
| >RUNX1-P18 FTLTITVFTNP | 17287 | >RUNX1-P18 FTLTITVFTNA | 105  | 17182 |
| >RUNX1-P18 FTLTITVFTNP | 2902  | >RUNX1-P18 FTLTITVFTNA | 73   | 2829  |
| >RUNX1-P18 FTLTITVFTNP | 10642 | >RUNX1-P18 FTLTITVFTNA | 230  | 10412 |
| >RUNX1-P18 FTLTITVFTNP | 2250  | >RUNX1-P18 FTLTITVFTNA | 16   | 2234  |
| >RUNX1-P18 FTLTITVFTNP | 14886 | >RUNX1-P18 FTLTITVFTNA | 387  | 14499 |
| >RUNX1-P18 FTLTITVFTNP | 15436 | >RUNX1-P18 FTLTITVFTNA | 402  | 15034 |
| >RUNX1-P18 FTLTITVFTNP | 2912  | >RUNX1-P18 FTLTITVFTNA | 16   | 2896  |
| >RUNX1-P18 FTLTITVFTNP | 4716  | >RUNX1-P18 FTLTITVFTNA | 36   | 4680  |
| >RUNX1-P18 TNPPQVATY   | 2537  | >RUNX1-P18 TNAPQVATY   | 365  | 2172  |
| >RUNX1-P18 TNPPQVATY   | 2348  | >RUNX1-P18 TNAPQVATY   | 393  | 1955  |
| >RUNX1-P18 TNPPQVATYH  | 1558  | >RUNX1-P18 TNAPQVATYH  | 322  | 1236  |
| >RUNX1-P18 TNPPQVATYH  | 655   | >RUNX1-P18 TNAPQVATYH  | 60   | 595   |
| >RUNX1-P18 TNPPQVATY   | 2841  | >RUNX1-P18 TNAPQVATY   | 393  | 2448  |
| >RUNX1-P18 TNPPQVATY   | 6468  | >RUNX1-P18 TNAPQVATY   | 101  | 6367  |
| >RUNX1-P18 TNPPQVATYH  | 125   | >RUNX1-P18 TNAPQVATYH  | 183  | 58    |
| >RUNX1-P18 FTNPPQVATY  | 95    | >RUNX1-P18 FTNAPQVATY  | 54   | 41    |
| >RUNX1-P18 FTNPPQVA    | 677   | >RUNX1-P18 FTNAPQVA    | 434  | 243   |
| >RUNX1-P18 FTNPPQVA    | 445   | >RUNX1-P18 FTNAPQVA    | 649  | 204   |
| >RUNX1-P18 FTNPPQVATY  | 88    | >RUNX1-P18 FTNAPQVATY  | 104  | 16    |
| >RUNX1-P18 FTNPPQVATY  | 569   | >RUNX1-P18 FTNAPQVATY  | 312  | 257   |
| >RUNX1-P18 FTNPPQVATY  | 42    | >RUNX1-P18 FTNAPQVATY  | 25   | 17    |
| >RUNX1-P18 FTNPPQVATY  | 117   | >RUNX1-P18 FTNAPQVATY  | 71   | 46    |
| >RUNX1-P18 FTNPPQVATY  | 219   | >RUNX1-P18 FTNAPQVATY  | 127  | 92    |
| >RUNX1-P18 FTNPPQVATY  | 489   | >RUNX1-P18 FTNAPQVATY  | 461  | 28    |
| >RUNX1-P18 FTNPPQVA    | 74    | >RUNX1-P18 FTNAPQVA    | 75   | 1     |
| >RUNX1-P18 FTNPPQVAT   | 98    | >RUNX1-P18 FTNAPQVAT   | 83   | 15    |
| >RUNX1-P18 FTNPPQVATY  | 56    | >RUNX1-P18 FTNAPQVATY  | 57   | 1     |

|                        |       |                        |     |       |
|------------------------|-------|------------------------|-----|-------|
| >RUNX1-P18 FTNPPQVAT\  | 338   | >RUNX1-P18 FTNAPQVAT\  | 177 | 161   |
| >RUNX1-P18 FTNPPQVAT\  | 50    | >RUNX1-P18 FTNAPQVAT\  | 57  | 7     |
| >RUNX1-P18 FTNPPQVAT\  | 3     | >RUNX1-P18 FTNAPQVAT\  | 4   | 1     |
| >RUNX1-P18 FTNPPQVAT\  | 43    | >RUNX1-P18 FTNAPQVAT\  | 51  | 8     |
| >RUNX1-P18 FTNPPQVAT\  | 110   | >RUNX1-P18 FTNAPQVAT\  | 95  | 15    |
| >RUNX1-P18 FTNPPQVAT\  | 118   | >RUNX1-P18 FTNAPQVAT\  | 190 | 72    |
| >RUNX1-P18 FTNPPQVAT\  | 45    | >RUNX1-P18 FTNAPQVAT\  | 38  | 7     |
| >RUNX1-P18 VFTNPPQV    | 226   | >RUNX1-P18 VFTNAPQV    | 176 | 50    |
| >RUNX1-P18 VFTNPPQVA\  | 57    | >RUNX1-P18 VFTNAPQVA\  | 66  | 9     |
| >RUNX1-P18 VFTNPPQVA\  | 261   | >RUNX1-P18 VFTNAPQVA\  | 164 | 97    |
| >RUNX1-P18 VFTNPPQVA\  | 289   | >RUNX1-P18 VFTNAPQVA\  | 555 | 266   |
| >RUNX1-P18 VFTNPPQVA\  | 935   | >RUNX1-P18 VFTNAPQVA\  | 418 | 517   |
| >RUNX1-P18 VFTNPPQVA\  | 440   | >RUNX1-P18 VFTNAPQVA\  | 874 | 434   |
| >RUNX1-P18 TVFTNPPQV   | 179   | >RUNX1-P18 TVFTNAPQV   | 463 | 284   |
| >RUNX1-P18 TVFTNPPQV   | 146   | >RUNX1-P18 TVFTNAPQV   | 301 | 155   |
| >RUNX1-P18 TVFTNPPQV/  | 493   | >RUNX1-P18 TVFTNAPQV/  | 627 | 134   |
| >RUNX1-P18 TVFTNPPQV   | 502   | >RUNX1-P18 TVFTNAPQV   | 69  | 433   |
| >RUNX1-P18 TVFTNPPQV   | 18    | >RUNX1-P18 TVFTNAPQV   | 48  | 30    |
| >RUNX1-P18 TVFTNPPQV   | 56    | >RUNX1-P18 TVFTNAPQV   | 74  | 18    |
| >RUNX1-P18 TVFTNPPQV   | 102   | >RUNX1-P18 TVFTNAPQV   | 166 | 64    |
| >RUNX1-P18 TVFTNPPQV   | 18    | >RUNX1-P18 TVFTNAPQV   | 15  | 3     |
| >RUNX1-P18 TVFTNPPQ    | 407   | >RUNX1-P18 TVFTNAPQ    | 146 | 261   |
| >RUNX1-P18 TVFTNPPQV   | 23    | >RUNX1-P18 TVFTNAPQV   | 23  | 0     |
| >RUNX1-P18 TVFTNPPQV/  | 283   | >RUNX1-P18 TVFTNAPQV/  | 255 | 28    |
| >RUNX1-P18 TVFTNPPQV   | 8     | >RUNX1-P18 TVFTNAPQV   | 6   | 2     |
| >RUNX1-P18 ITVFTNPPQV  | 166   | >RUNX1-P18 ITVFTNAPQV  | 294 | 128   |
| >RUNX1-P18 ITVFTNPPQV  | 87    | >RUNX1-P18 ITVFTNAPQV  | 159 | 72    |
| >RUNX1-P18 ITVFTNPPQV  | 326   | >RUNX1-P18 ITVFTNAPQV  | 304 | 22    |
| >RUNX1-P18 ITVFTNPPQ   | 1153  | >RUNX1-P18 ITVFTNAPQ   | 498 | 655   |
| >RUNX1-P18 ITVFTNPPQV  | 861   | >RUNX1-P18 ITVFTNAPQV  | 73  | 788   |
| >RUNX1-P18 ITVFTNPPQV  | 31    | >RUNX1-P18 ITVFTNAPQV  | 26  | 5     |
| >RUNX1-P18 ITVFTNPPQ   | 842   | >RUNX1-P18 ITVFTNAPQ   | 326 | 516   |
| >RUNX1-P18 ITVFTNPPQV  | 36    | >RUNX1-P18 ITVFTNAPQV  | 17  | 19    |
| >RUNX1-P18 TITVFTNPPQ' | 342   | >RUNX1-P18 TITVFTNAPQ' | 507 | 165   |
| >RUNX1-P18 TITVFTNPPQ' | 613   | >RUNX1-P18 TITVFTNAPQ' | 300 | 313   |
| >RUNX1-P18 TITVFTNPPQ' | 258   | >RUNX1-P18 TITVFTNAPQ' | 443 | 185   |
| >RUNX1-P18 TITVFTNPPQ' | 174   | >RUNX1-P18 TITVFTNAPQ' | 226 | 52    |
| >RUNX1-P18 TITVFTNPPQ' | 481   | >RUNX1-P18 TITVFTNAPQ' | 580 | 99    |
| >RUNX1-P18 TITVFTNPPQ' | 18    | >RUNX1-P18 TITVFTNAPQ' | 16  | 2     |
| >RUNX1-P18 TITVFTNP    | 12221 | >RUNX1-P18 TITVFTNA    | 176 | 12045 |
| >RUNX1-P18 TITVFTNPPQ' | 192   | >RUNX1-P18 TITVFTNAPQ' | 198 | 6     |
| >RUNX1-P18 TITVFTNPPQ' | 31    | >RUNX1-P18 TITVFTNAPQ' | 26  | 5     |
| >RUNX1-P18 LTITVFTNP   | 12294 | >RUNX1-P18 LTITVFTNA   | 243 | 12051 |

|                        |       |                        |       |       |
|------------------------|-------|------------------------|-------|-------|
| >RUNX1-P18 LTITVFTNP   | 8276  | >RUNX1-P18 LTITVFTNA   | 82    | 8194  |
| >RUNX1-P18 LTITVFTNPPC | 779   | >RUNX1-P18 LTITVFTNAPC | 416   | 363   |
| >RUNX1-P18 LTITVFTNP   | 3534  | >RUNX1-P18 LTITVFTNA   | 24    | 3510  |
| >RUNX1-P18 TLTITVFTNP  | 10071 | >RUNX1-P18 TLTITVFTNA  | 406   | 9665  |
| >RUNX1-P18 TLTITVFTNP  | 5594  | >RUNX1-P18 TLTITVFTNA  | 98    | 5496  |
| >RUNX1-P18 TLTITVFTNP  | 12110 | >RUNX1-P18 TLTITVFTNA  | 363   | 11747 |
| >RUNX1-P18 TLTITVFTNP  | 14523 | >RUNX1-P18 TLTITVFTNA  | 469   | 14054 |
| >RUNX1-P18 TLTITVFTNP  | 13016 | >RUNX1-P18 TLTITVFTNA  | 124   | 12892 |
| >RUNX1-P18 TLTITVFTNP  | 12983 | >RUNX1-P18 TLTITVFTNA  | 23    | 12960 |
| >RUNX1-P20 PREPRRHRQF  | 1835  | >RUNX1-P20 SREPRRHRQF  | 247   | 1588  |
| >RUNX1-P20 PREPRRHRQF  | 99    | >RUNX1-P20 SREPRRHRQF  | 18    | 81    |
| >RUNX1-P20 GPREPRRHR   | 16433 | >RUNX1-P20 GSREPRRHR   | 194   | 16239 |
| >RUNX1-P20 GPREPRRHRC  | 5282  | >RUNX1-P20 GSREPRRHRC  | 6     | 5276  |
| >RUNX1-P20 GPREPRRHR   | 5180  | >RUNX1-P20 GSREPRRHR   | 64    | 5116  |
| >RUNX1-P20 TVDGPREPR   | 527   | >RUNX1-P20 TVDGSREPR   | 465   | 62    |
| >RUNX1-P20 TVDGPREPR   | 79    | >RUNX1-P20 TVDGSREPR   | 35    | 44    |
| >RUNX1-P20 TVDGPREPRF  | 234   | >RUNX1-P20 TVDGSREPRF  | 393   | 159   |
| >RUNX1-P20 ITVDGPREPR  | 583   | >RUNX1-P20 ITVDGSREPR  | 99    | 484   |
| >RUNX1-P20 ITVDGPREPR  | 462   | >RUNX1-P20 ITVDGSREPRI | 370   | 92    |
| >RUNX1-P20 ITVDGPREPR  | 1827  | >RUNX1-P20 ITVDGSREPR  | 396   | 1431  |
| >RUNX1-P20 ITVDGPREPR  | 29    | >RUNX1-P20 ITVDGSREPR  | 17    | 12    |
| >RUNX1-P20 ITVDGPREPR  | 37    | >RUNX1-P20 ITVDGSREPRI | 26    | 11    |
| >RUNX1-P20 KITVDGPR    | 84    | >RUNX1-P20 KITVDGSR    | 248   | 164   |
| >RUNX1-P20 KITVDGPREPI | 58    | >RUNX1-P20 KITVDGSREPI | 46    | 12    |
| >RUNX1-P20 KITVDGPR    | 142   | >RUNX1-P20 KITVDGSR    | 559   | 417   |
| >RUNX1-P20 KITVDGPREPI | 183   | >RUNX1-P20 KITVDGSREPI | 198   | 15    |
| >RUNX1-P20 AIKITVDGPR  | 207   | >RUNX1-P20 AIKITVDGSR  | 421   | 214   |
| >RUNX1-P20 RAIKITVDGPF | 17    | >RUNX1-P20 RAIKITVDGSF | 39    | 22    |
| >RUNX1-P20 RAIKITVDGPF | 92    | >RUNX1-P20 RAIKITVDGSF | 83    | 9     |
| >RUNX1-P20 RAIKITVDGPF | 77    | >RUNX1-P20 RAIKITVDGSF | 224   | 147   |
| >RUNX1-P42 SPPRILPPC   | 22987 | >RUNX1-P42 SQPRILPPC   | 86    | 22901 |
| >RUNX1-P42 RSPPRILPP   | 170   | >RUNX1-P42 RSQPRILPP   | 18929 | 18759 |
| >RUNX1-P42 RSPPRILPPC  | 29    | >RUNX1-P42 RSQPRILPPC  | 7034  | 7005  |
| >RUNX1-P42 ERSPPRIL    | 408   | >RUNX1-P42 ERSQPRIL    | 308   | 100   |
| >RUNX1-P42 GERSPPRI    | 875   | >RUNX1-P42 GERSQPRI    | 309   | 566   |
| >RUNX1-P42 GERSPPRIL   | 987   | >RUNX1-P42 GERSQPRIL   | 246   | 741   |
| >RUNX1-P42 GERSPPRI    | 114   | >RUNX1-P42 GERSQPRI    | 147   | 33    |
| >RUNX1-P42 GERSPPRIL   | 70    | >RUNX1-P42 GERSQPRIL   | 68    | 2     |
| >RUNX1-P42 MVGGERSPP   | 299   | >RUNX1-P42 MVGGERSQF   | 153   | 146   |
| >RUNX1-P42 MVGGERSPP   | 301   | >RUNX1-P42 MVGGERSQF   | 243   | 58    |
| >RUNX1-P42 MVGGERSPP   | 68    | >RUNX1-P42 MVGGERSQF   | 72    | 4     |
| >RUNX1-P42 MVGGERSPP   | 152   | >RUNX1-P42 MVGGERSQF   | 223   | 71    |
| >RUNX1-P42 SMVGGERSP   | 142   | >RUNX1-P42 SMVGGERSQ   | 158   | 16    |

|                       |      |                       |      |      |
|-----------------------|------|-----------------------|------|------|
| >RUNX1-P42 SMVGGERSP  | 228  | >RUNX1-P42 SMVGGERSQ  | 222  | 6    |
| >RUNX1-Q18 QVATYHRAIK | 226  | >RUNX1-Q18 HVATYHRAIK | 195  | 31   |
| >RUNX1-Q18 QVATYHRAIK | 464  | >RUNX1-Q18 HVATYHRAIK | 610  | 146  |
| >RUNX1-Q18 QVATYHRAI  | 3686 | >RUNX1-Q18 HVATYHRAI  | 310  | 3376 |
| >RUNX1-Q18 QVATYHRAIK | 137  | >RUNX1-Q18 HVATYHRAIK | 14   | 123  |
| >RUNX1-Q18 QVATYHRAIK | 39   | >RUNX1-Q18 HVATYHRAIK | 18   | 21   |
| >RUNX1-Q18 QVATYHRA   | 58   | >RUNX1-Q18 HVATYHRA   | 33   | 25   |
| >RUNX1-Q18 QVATYHRAI  | 167  | >RUNX1-Q18 HVATYHRAI  | 70   | 97   |
| >RUNX1-Q18 QVATYHRAIK | 128  | >RUNX1-Q18 HVATYHRAIK | 58   | 70   |
| >RUNX1-Q18 QVATYHRAI  | 517  | >RUNX1-Q18 HVATYHRAI  | 359  | 158  |
| >RUNX1-Q18 QVATYHRAIK | 532  | >RUNX1-Q18 HVATYHRAIK | 364  | 168  |
| >RUNX1-Q18 QVATYHRAI  | 2160 | >RUNX1-Q18 HVATYHRAI  | 302  | 1858 |
| >RUNX1-Q18 PQVATYHR   | 446  | >RUNX1-Q18 PHVATYHR   | 7616 | 7170 |
| >RUNX1-Q18 PQVATYHRAI | 229  | >RUNX1-Q18 PHVATYHRAI | 2808 | 2579 |
| >RUNX1-Q18 PQVATYHR   | 78   | >RUNX1-Q18 PHVATYHR   | 135  | 57   |
| >RUNX1-Q18 PPQVATYHR/ | 565  | >RUNX1-Q18 PPHVATYHR/ | 263  | 302  |
| >RUNX1-Q18 PPQVATYHR  | 462  | >RUNX1-Q18 PPHVATYHR  | 250  | 212  |
| >RUNX1-Q18 NPPQVATYHI | 220  | >RUNX1-Q18 NPPHVATYHI | 206  | 14   |
| >RUNX1-Q18 NPPQVATY   | 29   | >RUNX1-Q18 NPPHVATY   | 32   | 3    |
| >RUNX1-Q18 NPPQVATY   | 351  | >RUNX1-Q18 NPPHVATY   | 369  | 18   |
| >RUNX1-Q18 NPPQVATYHI | 580  | >RUNX1-Q18 NPPHVATYHI | 271  | 309  |
| >RUNX1-Q18 NPPQVATY   | 58   | >RUNX1-Q18 NPPHVATY   | 124  | 66   |
| >RUNX1-Q18 NPPQVATYHI | 121  | >RUNX1-Q18 NPPHVATYHI | 195  | 74   |
| >RUNX1-Q18 TNPPQVATYH | 655  | >RUNX1-Q18 TNPPHVATYH | 470  | 185  |
| >RUNX1-Q18 TNPPQVATYH | 125  | >RUNX1-Q18 TNPPHVATYH | 132  | 7    |
| >RUNX1-Q18 FTNPPQVATY | 95   | >RUNX1-Q18 FTNPPHVATY | 200  | 105  |
| >RUNX1-Q18 FTNPPQVA   | 677  | >RUNX1-Q18 FTNPPHVA   | 458  | 219  |
| >RUNX1-Q18 FTNPPQVA   | 445  | >RUNX1-Q18 FTNPPHVA   | 180  | 265  |
| >RUNX1-Q18 FTNPPQVATY | 88   | >RUNX1-Q18 FTNPPHVATY | 107  | 19   |
| >RUNX1-Q18 FTNPPQVATY | 42   | >RUNX1-Q18 FTNPPHVATY | 26   | 16   |
| >RUNX1-Q18 FTNPPQVATY | 117  | >RUNX1-Q18 FTNPPHVATY | 148  | 31   |
| >RUNX1-Q18 FTNPPQVATY | 219  | >RUNX1-Q18 FTNPPHVATY | 222  | 3    |
| >RUNX1-Q18 FTNPPQVATY | 489  | >RUNX1-Q18 FTNPPHVATY | 437  | 52   |
| >RUNX1-Q18 FTNPPQVA   | 74   | >RUNX1-Q18 FTNPPHVA   | 25   | 49   |
| >RUNX1-Q18 FTNPPQVAT  | 98   | >RUNX1-Q18 FTNPPHVAT  | 132  | 34   |
| >RUNX1-Q18 FTNPPQVA   | 1376 | >RUNX1-Q18 FTNPPHVA   | 260  | 1116 |
| >RUNX1-Q18 FTNPPQVATY | 56   | >RUNX1-Q18 FTNPPHVATY | 38   | 18   |
| >RUNX1-Q18 FTNPPQVATY | 338  | >RUNX1-Q18 FTNPPHVATY | 239  | 99   |
| >RUNX1-Q18 FTNPPQVATY | 50   | >RUNX1-Q18 FTNPPHVATY | 41   | 9    |
| >RUNX1-Q18 FTNPPQVATY | 3    | >RUNX1-Q18 FTNPPHVATY | 3    | 0    |
| >RUNX1-Q18 FTNPPQVATY | 624  | >RUNX1-Q18 FTNPPHVATY | 428  | 196  |
| >RUNX1-Q18 FTNPPQVATY | 43   | >RUNX1-Q18 FTNPPHVATY | 91   | 48   |
| >RUNX1-Q18 FTNPPQVATY | 110  | >RUNX1-Q18 FTNPPHVATY | 80   | 30   |

|                       |      |                       |      |      |
|-----------------------|------|-----------------------|------|------|
| >RUNX1-Q18FTNPPQVATY  | 118  | >RUNX1-Q18FTNPPHVATY  | 83   | 35   |
| >RUNX1-Q18FTNPPQVATY  | 45   | >RUNX1-Q18FTNPPHVATY  | 100  | 55   |
| >RUNX1-Q18VFTNPPQV    | 226  | >RUNX1-Q18VFTNPPHV    | 333  | 107  |
| >RUNX1-Q18VFTNPPQVA7  | 57   | >RUNX1-Q18VFTNPPHVA7  | 31   | 26   |
| >RUNX1-Q18VFTNPPQVA7  | 261  | >RUNX1-Q18VFTNPPHVA7  | 125  | 136  |
| >RUNX1-Q18VFTNPPQVA7  | 289  | >RUNX1-Q18VFTNPPHVA7  | 269  | 20   |
| >RUNX1-Q18VFTNPPQVA7  | 440  | >RUNX1-Q18VFTNPPHVA7  | 522  | 82   |
| >RUNX1-Q18VFTNPPQVA7  | 703  | >RUNX1-Q18VFTNPPHVA7  | 392  | 311  |
| >RUNX1-Q18TVFTNPPQV   | 179  | >RUNX1-Q18TVFTNPPHV   | 177  | 2    |
| >RUNX1-Q18TVFTNPPQV   | 146  | >RUNX1-Q18TVFTNPPHV   | 169  | 23   |
| >RUNX1-Q18TVFTNPPQVA7 | 493  | >RUNX1-Q18TVFTNPPHVA7 | 294  | 199  |
| >RUNX1-Q18TVFTNPPQV   | 502  | >RUNX1-Q18TVFTNPPHV   | 133  | 369  |
| >RUNX1-Q18TVFTNPPQV   | 18   | >RUNX1-Q18TVFTNPPHV   | 30   | 12   |
| >RUNX1-Q18TVFTNPPQV   | 763  | >RUNX1-Q18TVFTNPPHV   | 232  | 531  |
| >RUNX1-Q18TVFTNPPQV   | 56   | >RUNX1-Q18TVFTNPPHV   | 30   | 26   |
| >RUNX1-Q18TVFTNPPQV   | 102  | >RUNX1-Q18TVFTNPPHV   | 623  | 521  |
| >RUNX1-Q18TVFTNPPQV   | 18   | >RUNX1-Q18TVFTNPPHV   | 26   | 8    |
| >RUNX1-Q18TVFTNPPQ    | 9278 | >RUNX1-Q18TVFTNPPH    | 462  | 8816 |
| >RUNX1-Q18TVFTNPPQV   | 1231 | >RUNX1-Q18TVFTNPPHV   | 487  | 744  |
| >RUNX1-Q18TVFTNPPQ    | 407  | >RUNX1-Q18TVFTNPPH    | 743  | 336  |
| >RUNX1-Q18TVFTNPPQV   | 23   | >RUNX1-Q18TVFTNPPHV   | 16   | 7    |
| >RUNX1-Q18TVFTNPPQVA7 | 283  | >RUNX1-Q18TVFTNPPHVA7 | 302  | 19   |
| >RUNX1-Q18TVFTNPPQV   | 8    | >RUNX1-Q18TVFTNPPHV   | 14   | 6    |
| >RUNX1-Q18ITVFTNPPQV  | 166  | >RUNX1-Q18ITVFTNPPHV  | 154  | 12   |
| >RUNX1-Q18ITVFTNPPQV  | 87   | >RUNX1-Q18ITVFTNPPHV  | 149  | 62   |
| >RUNX1-Q18ITVFTNPPQV  | 326  | >RUNX1-Q18ITVFTNPPHV  | 615  | 289  |
| >RUNX1-Q18ITVFTNPPQV  | 31   | >RUNX1-Q18ITVFTNPPHV  | 57   | 26   |
| >RUNX1-Q18ITVFTNPPQ   | 842  | >RUNX1-Q18ITVFTNPPH   | 92   | 750  |
| >RUNX1-Q18ITVFTNPPQV  | 36   | >RUNX1-Q18ITVFTNPPHV  | 114  | 78   |
| >RUNX1-Q18TITVFTNPPQ7 | 342  | >RUNX1-Q18TITVFTNPPH7 | 410  | 68   |
| >RUNX1-Q18TITVFTNPPQ7 | 613  | >RUNX1-Q18TITVFTNPPH7 | 228  | 385  |
| >RUNX1-Q18TITVFTNPPQ7 | 258  | >RUNX1-Q18TITVFTNPPH7 | 442  | 184  |
| >RUNX1-Q18TITVFTNPPQ7 | 174  | >RUNX1-Q18TITVFTNPPH7 | 120  | 54   |
| >RUNX1-Q18TITVFTNPPQ7 | 481  | >RUNX1-Q18TITVFTNPPH7 | 1960 | 1479 |
| >RUNX1-Q18TITVFTNPPQ7 | 18   | >RUNX1-Q18TITVFTNPPH7 | 29   | 11   |
| >RUNX1-Q18TITVFTNPPQ7 | 192  | >RUNX1-Q18TITVFTNPPH7 | 125  | 67   |
| >RUNX1-Q18TITVFTNPPQ7 | 31   | >RUNX1-Q18TITVFTNPPH7 | 57   | 26   |
| >RUNX1-Q39QASSPSYHLY  | 383  | >RUNX1-Q39RASSPSYHLY  | 386  | 3    |
| >RUNX1-Q39QASSPSYHLY  | 1785 | >RUNX1-Q39RASSPSYHLY  | 327  | 1458 |
| >RUNX1-Q39QASSPSYHLY  | 2841 | >RUNX1-Q39RASSPSYHLY7 | 216  | 2625 |
| >RUNX1-Q39QASSPSYHLY  | 361  | >RUNX1-Q39RASSPSYHLY  | 165  | 196  |
| >RUNX1-Q39QASSPSYHLY  | 340  | >RUNX1-Q39RASSPSYHLY7 | 68   | 272  |
| >RUNX1-Q39QASSPSYHLY  | 16   | >RUNX1-Q39RASSPSYHLY7 | 25   | 9    |

|                       |      |                       |       |       |
|-----------------------|------|-----------------------|-------|-------|
| >RUNX1-Q39 QASSPSYHLY | 6289 | >RUNX1-Q39 RASSPSYHLY | 271   | 6018  |
| >RUNX1-Q39 QASSPSYHLY | 35   | >RUNX1-Q39 RASSPSYHLY | 13    | 22    |
| >RUNX1-Q39 QASSPSYHLY | 94   | >RUNX1-Q39 RASSPSYHLY | 34    | 60    |
| >RUNX1-Q39 QASSPSYHLY | 274  | >RUNX1-Q39 RASSPSYHLY | 905   | 631   |
| >RUNX1-Q39 QASSPSYHL  | 35   | >RUNX1-Q39 RASSPSYHL  | 868   | 833   |
| >RUNX1-Q39 QASSPSYHL  | 412  | >RUNX1-Q39 RASSPSYHL  | 4697  | 4285  |
| >RUNX1-Q39 QASSPSYHLY | 787  | >RUNX1-Q39 RASSPSYHLY | 85    | 702   |
| >RUNX1-Q39 QASSPSYHLY | 124  | >RUNX1-Q39 RASSPSYHLY | 23    | 101   |
| >RUNX1-Q39 QASSPSYHLY | 960  | >RUNX1-Q39 RASSPSYHLY | 207   | 753   |
| >RUNX1-Q39 QASSPSYHLY | 217  | >RUNX1-Q39 RASSPSYHLY | 71    | 146   |
| >RUNX1-Q39 QASSPSYHL  | 1077 | >RUNX1-Q39 RASSPSYHL  | 150   | 927   |
| >RUNX1-Q39 QASSPSYHLY | 246  | >RUNX1-Q39 RASSPSYHLY | 51    | 195   |
| >RUNX1-Q39 QASSPSYHLY | 116  | >RUNX1-Q39 RASSPSYHLY | 24    | 92    |
| >RUNX1-Q39 QASSPSYHL  | 673  | >RUNX1-Q39 RASSPSYHL  | 21    | 652   |
| >RUNX1-Q39 QASSPSYHLY | 60   | >RUNX1-Q39 RASSPSYHLY | 6     | 54    |
| >RUNX1-Q39 QASSPSYHLY | 28   | >RUNX1-Q39 RASSPSYHLY | 4     | 24    |
| >RUNX1-Q39 QASSPSYHLY | 105  | >RUNX1-Q39 RASSPSYHLY | 342   | 237   |
| >RUNX1-Q39 QASSPSYHLY | 3506 | >RUNX1-Q39 RASSPSYHLY | 118   | 3388  |
| >RUNX1-Q39 QASSPSYHLY | 4708 | >RUNX1-Q39 RASSPSYHLY | 144   | 4564  |
| >RUNX1-Q39 QASSPSYHL  | 3373 | >RUNX1-Q39 RASSPSYHL  | 69    | 3304  |
| >RUNX1-Q39 QASSPSYHLY | 295  | >RUNX1-Q39 RASSPSYHLY | 17    | 278   |
| >RUNX1-Q39 QASSPSYHLY | 311  | >RUNX1-Q39 RASSPSYHLY | 15    | 296   |
| >RUNX1-Q39 QASSPSYHL  | 355  | >RUNX1-Q39 RASSPSYHL  | 137   | 218   |
| >RUNX1-Q39 QASSPSYHLY | 2039 | >RUNX1-Q39 RASSPSYHLY | 406   | 1633  |
| >RUNX1-Q39 QASSPSYHLY | 173  | >RUNX1-Q39 RASSPSYHLY | 37    | 136   |
| >RUNX1-Q39 QASSPSYHLY | 565  | >RUNX1-Q39 RASSPSYHLY | 231   | 334   |
| >RUNX1-Q39 QASSPSYHLY | 261  | >RUNX1-Q39 RASSPSYHLY | 154   | 107   |
| >RUNX1-Q39 QASSPSYHL  | 2234 | >RUNX1-Q39 RASSPSYHL  | 219   | 2015  |
| >RUNX1-Q39 FQASSPSYHL | 480  | >RUNX1-Q39 FRASSPSYHL | 3643  | 3163  |
| >RUNX1-Q39 FQASSPSYHL | 319  | >RUNX1-Q39 FRASSPSYHL | 10892 | 10573 |
| >RUNX1-Q39 FQASSPSYHL | 12   | >RUNX1-Q39 FRASSPSYHL | 536   | 524   |
| >RUNX1-Q39 FQASSPSYHL | 275  | >RUNX1-Q39 FRASSPSYHL | 9974  | 9699  |
| >RUNX1-Q39 FQASSPSY   | 196  | >RUNX1-Q39 FRASSPSY   | 24808 | 24612 |
| >RUNX1-Q39 FQASSPSYHL | 64   | >RUNX1-Q39 FRASSPSYHL | 2118  | 2054  |
| >RUNX1-Q39 FQASSPSYHL | 254  | >RUNX1-Q39 FRASSPSYHL | 26075 | 25821 |
| >RUNX1-Q39 FQASSPSYHL | 112  | >RUNX1-Q39 FRASSPSYHL | 7149  | 7037  |
| >RUNX1-Q39 FQASSPSYHL | 65   | >RUNX1-Q39 FRASSPSYHL | 10959 | 10894 |
| >RUNX1-Q39 FQASSPSYHL | 192  | >RUNX1-Q39 FRASSPSYHL | 11849 | 11657 |
| >RUNX1-Q39 FQASSPSYHL | 481  | >RUNX1-Q39 FRASSPSYHL | 15461 | 14980 |
| >RUNX1-Q39 FQASSPSY   | 83   | >RUNX1-Q39 FRASSPSY   | 280   | 197   |
| >RUNX1-Q39 FQASSPSYHL | 17   | >RUNX1-Q39 FRASSPSYHL | 35    | 18    |
| >RUNX1-Q39 FQASSPSY   | 61   | >RUNX1-Q39 FRASSPSY   | 319   | 258   |
| >RUNX1-Q39 FQASSPSYHL | 46   | >RUNX1-Q39 FRASSPSYHL | 229   | 183   |



|                        |       |                        |       |       |
|------------------------|-------|------------------------|-------|-------|
| >RUNX1-Q39 FQASSPSYHL' | 380   | >RUNX1-Q39 FRASSPSYHL\ | 952   | 572   |
| >RUNX1-Q39 FQASSPSY    | 32    | >RUNX1-Q39 FRASSPSY    | 1916  | 1884  |
| >RUNX1-Q39 FQASSPSYHL  | 87    | >RUNX1-Q39 FRASSPSYHL  | 14686 | 14599 |
| >RUNX1-Q39 FQASSPSYHL' | 45    | >RUNX1-Q39 FRASSPSYHL\ | 8625  | 8580  |
| >RUNX1-Q39 FQASSPSY    | 23    | >RUNX1-Q39 FRASSPSY    | 442   | 419   |
| >RUNX1-Q39 FQASSPSYH   | 421   | >RUNX1-Q39 FRASSPSYH   | 8005  | 7584  |
| >RUNX1-Q39 FQASSPSYHL' | 29    | >RUNX1-Q39 FRASSPSYHL\ | 485   | 456   |
| >RUNX1-Q39 FQASSPSY    | 2     | >RUNX1-Q39 FRASSPSY    | 5     | 3     |
| >RUNX1-Q39 FQASSPSYH   | 15    | >RUNX1-Q39 FRASSPSYH   | 62    | 47    |
| >RUNX1-Q39 FQASSPSYHL  | 5     | >RUNX1-Q39 FRASSPSYHL  | 19    | 14    |
| >RUNX1-Q39 FQASSPSYHL' | 3     | >RUNX1-Q39 FRASSPSYHL\ | 9     | 6     |
| >RUNX1-Q39 FQASSPSY    | 5686  | >RUNX1-Q39 FRASSPSY    | 241   | 5445  |
| >RUNX1-Q39 FQASSPSYHL  | 10383 | >RUNX1-Q39 FRASSPSYHL  | 144   | 10239 |
| >RUNX1-Q39 FQASSPSYHL' | 3176  | >RUNX1-Q39 FRASSPSYHL\ | 125   | 3051  |
| >RUNX1-Q39 FQASSPSY    | 96    | >RUNX1-Q39 FRASSPSY    | 986   | 890   |
| >RUNX1-Q39 FQASSPSYHL' | 495   | >RUNX1-Q39 FRASSPSYHL\ | 3352  | 2857  |
| >RUNX1-Q39 FQASSPSYHL  | 14    | >RUNX1-Q39 FRASSPSYHL  | 16    | 2     |
| >RUNX1-Q39 FQASSPSYHL  | 473   | >RUNX1-Q39 FRASSPSYHL  | 11482 | 11009 |
| >RUNX1-Q39 FQASSPSYHL' | 631   | >RUNX1-Q39 FRASSPSYHL\ | 345   | 286   |
| >RUNX1-Q39 FQASSPSYHL' | 311   | >RUNX1-Q39 FRASSPSYHL\ | 475   | 164   |
| >RUNX1-Q39 GSSQAQGGP   | 17654 | >RUNX1-Q39 GSSQAQGGP   | 291   | 17363 |
| >RUNX1-Q39 PFQASSPSYH  | 454   | >RUNX1-Q39 PFRASSPSYHI | 2006  | 1552  |
| >RUNX1-Q39 PFQASSPSY   | 157   | >RUNX1-Q39 PFRASSPSY   | 176   | 19    |
| >RUNX1-Q39 PFQASSPSY   | 8639  | >RUNX1-Q39 PFRASSPSY   | 54    | 8585  |
| >RUNX1-Q39 PFQASSPSYH  | 11034 | >RUNX1-Q39 PFRASSPSYHI | 179   | 10855 |
| >RUNX1-Q39 PFQASSPSY   | 342   | >RUNX1-Q39 PFRASSPSY   | 723   | 381   |
| >RUNX1-Q39 PFQASSPSY   | 590   | >RUNX1-Q39 PFRASSPSY   | 434   | 156   |
| >RUNX1-Q39 GPFQASSPSY  | 366   | >RUNX1-Q39 GPFRASSPSY  | 295   | 71    |
| >RUNX1-Q39 GPFQASSPSY  | 457   | >RUNX1-Q39 GPFRASSPSY  | 803   | 346   |
| >RUNX1-Q39 GPFQASSPSY  | 220   | >RUNX1-Q39 GPFRASSPSY  | 398   | 178   |
| >RUNX1-Q39 GPFQASSPSY  | 243   | >RUNX1-Q39 GPFRASSPSY  | 144   | 99    |
| >RUNX1-Q39 GPFQASSPS   | 206   | >RUNX1-Q39 GPFRASSPS   | 1077  | 871   |
| >RUNX1-Q39 GPFQASSPSY  | 220   | >RUNX1-Q39 GPFRASSPSYI | 274   | 54    |
| >RUNX1-Q39 GPFQASSPSY  | 11    | >RUNX1-Q39 GPFRASSPSY  | 11    | 0     |
| >RUNX1-Q39 GGPFQASSP   | 538   | >RUNX1-Q39 GGPFRASSP   | 121   | 417   |
| >RUNX1-Q39 GGPFQASSPS  | 167   | >RUNX1-Q39 GGPFRASSPS  | 71    | 96    |
| >RUNX1-Q39 GGPFQASSPS  | 282   | >RUNX1-Q39 GGPFRASSPS  | 399   | 117   |
| >RUNX1-Q39 AQGGPFQA    | 219   | >RUNX1-Q39 AQGGPFRA    | 464   | 245   |
| >RUNX1-Q39 AQGGPFQA    | 418   | >RUNX1-Q39 AQGGPFRA    | 284   | 134   |
| >RUNX1-Q39 QAQGGPFQ    | 19694 | >RUNX1-Q39 QAQGGPFR    | 300   | 19394 |
| >RUNX1-Q39 QAQGGPFQ    | 14844 | >RUNX1-Q39 QAQGGPFR    | 174   | 14670 |
| >RUNX1-Q39 SQAQGGPFQ   | 370   | >RUNX1-Q39 SQAQGGPFR   | 1113  | 743   |
| >RUNX1-Q39 SQAQGGPFQ   | 302   | >RUNX1-Q39 SQAQGGPFR   | 642   | 340   |

|                       |       |                       |       |       |
|-----------------------|-------|-----------------------|-------|-------|
| >RUNX1-Q39SQAQGGPFQ   | 19153 | >RUNX1-Q39SQAQGGPFR   | 380   | 18773 |
| >RUNX1-Q39SSQAQGGPFI  | 26360 | >RUNX1-Q39SSQAQGGPFI  | 213   | 26147 |
| >RUNX1-Q39SSQAQGGPFI  | 21481 | >RUNX1-Q39SSQAQGGPFI  | 123   | 21358 |
| >RUNX1-Q39SSQAQGGPFI  | 32354 | >RUNX1-Q39SSQAQGGPFI  | 210   | 32144 |
| >RUNX1-R10RCNKTLPIAFk | 282   | >RUNX1-R10CCNKTLPIAFk | 2651  | 2369  |
| >RUNX1-R10RCNKTLPI    | 129   | >RUNX1-R10CCNKTLPI    | 6098  | 5969  |
| >RUNX1-R10RCNKTLPIA   | 146   | >RUNX1-R10CCNKTLPIA   | 7117  | 6971  |
| >RUNX1-R10RCNKTLPIAFk | 9     | >RUNX1-R10CCNKTLPIAFk | 285   | 276   |
| >RUNX1-R10RCNKTLPIAFk | 155   | >RUNX1-R10CCNKTLPIAFk | 2619  | 2464  |
| >RUNX1-R10RCNKTLPI    | 134   | >RUNX1-R10CCNKTLPI    | 9606  | 9472  |
| >RUNX1-R10RCNKTLPIAF  | 134   | >RUNX1-R10CCNKTLPIAF  | 8504  | 8370  |
| >RUNX1-R10RCNKTLPIAF  | 42    | >RUNX1-R10CCNKTLPIAF  | 273   | 231   |
| >RUNX1-R10WRCNKTLPI   | 433   | >RUNX1-R10WCCNKTLPI   | 6517  | 6084  |
| >RUNX1-R10WRCNKTLPIA  | 34    | >RUNX1-R10WCCNKTLPIA  | 276   | 242   |
| >RUNX1-R10WRCNKTLPIA  | 176   | >RUNX1-R10WCCNKTLPIA  | 30716 | 30540 |
| >RUNX1-R10WRCNKTLPIA  | 2855  | >RUNX1-R10WCCNKTLPIA  | 325   | 2530  |
| >RUNX1-R10WRCNKTLPI   | 400   | >RUNX1-R10WCCNKTLPI   | 16810 | 16410 |
| >RUNX1-R10WRCNKTLPIA  | 221   | >RUNX1-R10WCCNKTLPIA  | 14438 | 14217 |
| >RUNX1-R10WRCNKTLPI   | 288   | >RUNX1-R10WCCNKTLPI   | 35820 | 35532 |
| >RUNX1-R10WRCNKTLPIA  | 245   | >RUNX1-R10WCCNKTLPIA  | 28988 | 28743 |
| >RUNX1-R10WRCNKTLPIA  | 62    | >RUNX1-R10WCCNKTLPIA  | 32148 | 32086 |
| >RUNX1-R10FLCSVLPTHW  | 413   | >RUNX1-R10FLCSVLPTHW  | 139   | 274   |
| >RUNX1-R10FLCSVLPTHW  | 4973  | >RUNX1-R10FLCSVLPTHW  | 269   | 4704  |
| >RUNX1-R10FLCSVLPTHW  | 568   | >RUNX1-R10FLCSVLPTHW  | 6     | 562   |
| >RUNX1-R10FLCSVLPTHW  | 8313  | >RUNX1-R10FLCSVLPTHW  | 233   | 8080  |
| >RUNX1-R10FLCSVLPTHW  | 18798 | >RUNX1-R10FLCSVLPTHW  | 314   | 18484 |
| >RUNX1-R10FLCSVLPTHW  | 202   | >RUNX1-R10FLCSVLPTHW  | 4     | 198   |
| >RUNX1-R10FLCSVLPTHW  | 171   | >RUNX1-R10FLCSVLPTHW  | 20894 | 20723 |
| >RUNX1-R10FLCSVLPTHW  | 87    | >RUNX1-R10FLCSVLPTHW  | 28356 | 28269 |
| >RUNX1-R10FLCSVLPTHW  | 23    | >RUNX1-R10FLCSVLPTHW  | 26917 | 26894 |
| >RUNX1-R10FLCSVLPTHW  | 360   | >RUNX1-R10FLCSVLPTHW  | 35896 | 35536 |
| >RUNX1-R10HWRCNKTL    | 1356  | >RUNX1-R10HWCCNKTL    | 351   | 1005  |
| >RUNX1-R10HWRCNKTL    | 320   | >RUNX1-R10HWCCNKTL    | 11021 | 10701 |
| >RUNX1-R10HWRCNKTLP   | 23    | >RUNX1-R10HWCCNKTLP   | 2251  | 2228  |
| >RUNX1-R10HWRCNKTLP   | 32    | >RUNX1-R10HWCCNKTLP   | 3789  | 3757  |
| >RUNX1-R10HWRCNKTL    | 393   | >RUNX1-R10HWCCNKTL    | 413   | 20    |
| >RUNX1-R10THWRCNKTL   | 233   | >RUNX1-R10THWCCNKTL   | 645   | 412   |
| >RUNX1-R10THWRCNKTL   | 462   | >RUNX1-R10THWCCNKTL   | 251   | 211   |
| >RUNX1-R10THWRCNKTL   | 625   | >RUNX1-R10THWCCNKTL   | 391   | 234   |
| >RUNX1-R10THWRCNKTL   | 277   | >RUNX1-R10THWCCNKTL   | 479   | 202   |
| >RUNX1-R10THWRCNKTL   | 312   | >RUNX1-R10THWCCNKTL   | 253   | 59    |
| >RUNX1-R10PTHWRCNK    | 71    | >RUNX1-R10PTHWCCNK    | 379   | 308   |
| >RUNX1-R10LPTHWRCNK   | 48    | >RUNX1-R10LPTHWCCNK   | 221   | 173   |

|                        |       |                        |       |       |
|------------------------|-------|------------------------|-------|-------|
| >RUNX1-R10 LPTHWRCNK   | 184   | >RUNX1-R10 LPTHWCCNK   | 114   | 70    |
| >RUNX1-R10 LPTHWRCNK   | 85    | >RUNX1-R10 LPTHWCCNK   | 86    | 1     |
| >RUNX1-R10 LPTHWRCNK   | 122   | >RUNX1-R10 LPTHWCCNK   | 127   | 5     |
| >RUNX1-R10 VLPTHWRC    | 97    | >RUNX1-R10 VLPTHWCC    | 202   | 105   |
| >RUNX1-R10 VLPTHWRC    | 58    | >RUNX1-R10 VLPTHWCC    | 72    | 14    |
| >RUNX1-R10 VLPTHWRCN   | 242   | >RUNX1-R10 VLPTHWCCN   | 185   | 57    |
| >RUNX1-R10 VLPTHWRCN   | 544   | >RUNX1-R10 VLPTHWCCN   | 265   | 279   |
| >RUNX1-R10 VLPTHWRCN   | 601   | >RUNX1-R10 VLPTHWCCN   | 201   | 400   |
| >RUNX1-R10 SVLPTHWR    | 14159 | >RUNX1-R10 SVLPTHWC    | 386   | 13773 |
| >RUNX1-R10 SVLPTHWRC   | 93    | >RUNX1-R10 SVLPTHWCC   | 418   | 325   |
| >RUNX1-R10 SVLPTHWR    | 12214 | >RUNX1-R10 SVLPTHWC    | 315   | 11899 |
| >RUNX1-R10 SVLPTHWRC   | 147   | >RUNX1-R10 SVLPTHWCC   | 903   | 756   |
| >RUNX1-R10 SVLPTHWRCI  | 178   | >RUNX1-R10 SVLPTHWCCI  | 262   | 84    |
| >RUNX1-R10 SVLPTHWR    | 35    | >RUNX1-R10 SVLPTHWC    | 20797 | 20762 |
| >RUNX1-R10 SVLPTHWRCI  | 10    | >RUNX1-R10 SVLPTHWCCI  | 13    | 3     |
| >RUNX1-R10 SVLPTHWRCI  | 9     | >RUNX1-R10 SVLPTHWCCI  | 22    | 13    |
| >RUNX1-R10 SVLPTHWR    | 15    | >RUNX1-R10 SVLPTHWC    | 18593 | 18578 |
| >RUNX1-R10 SVLPTHWRCI  | 70    | >RUNX1-R10 SVLPTHWCCI  | 166   | 96    |
| >RUNX1-R10 SVLPTHWR    | 349   | >RUNX1-R10 SVLPTHWC    | 34483 | 34134 |
| >RUNX1-R10 SVLPTHWR    | 39    | >RUNX1-R10 SVLPTHWC    | 31292 | 31253 |
| >RUNX1-R10 SVLPTHWRCI  | 233   | >RUNX1-R10 SVLPTHWCCI  | 237   | 4     |
| >RUNX1-R10 SVLPTHWR    | 114   | >RUNX1-R10 SVLPTHWC    | 8952  | 8838  |
| >RUNX1-R10 SVLPTHWRCI  | 234   | >RUNX1-R10 SVLPTHWCCI  | 194   | 40    |
| >RUNX1-R10 SVLPTHWR    | 83    | >RUNX1-R10 SVLPTHWC    | 32751 | 32668 |
| >RUNX1-R10 CSVLPTHWR   | 146   | >RUNX1-R10 CSVLPTHWC   | 23691 | 23545 |
| >RUNX1-R10 CSVLPTHWR   | 41    | >RUNX1-R10 CSVLPTHWC   | 28490 | 28449 |
| >RUNX1-R10 CSVLPTHWR   | 113   | >RUNX1-R10 CSVLPTHWC   | 36182 | 36069 |
| >RUNX1-R10 LCSVLPTHWF  | 244   | >RUNX1-R10 LCSVLPTHWC  | 27429 | 27185 |
| >RUNX1-R10 LCSVLPTHWF  | 297   | >RUNX1-R10 LCSVLPTHWC  | 36656 | 36359 |
| >RUNX1-R10 RCNKTLPiAFI | 282   | >RUNX1-R10 HCNKTLPiAFI | 716   | 434   |
| >RUNX1-R10 RCNKTLPi    | 129   | >RUNX1-R10 HCNKTLPi    | 519   | 390   |
| >RUNX1-R10 RCNKTLPiA   | 146   | >RUNX1-R10 HCNKTLPiA   | 627   | 481   |
| >RUNX1-R10 RCNKTLPiAFI | 9     | >RUNX1-R10 HCNKTLPiAFI | 17    | 8     |
| >RUNX1-R10 RCNKTLPiAFI | 155   | >RUNX1-R10 HCNKTLPiAFI | 627   | 472   |
| >RUNX1-R10 RCNKTLPi    | 134   | >RUNX1-R10 HCNKTLPi    | 1462  | 1328  |
| >RUNX1-R10 RCNKTLPiAF  | 134   | >RUNX1-R10 HCNKTLPiAF  | 1433  | 1299  |
| >RUNX1-R10 RCNKTLPiAF  | 42    | >RUNX1-R10 HCNKTLPiAF  | 134   | 92    |
| >RUNX1-R10 WRCNKTLPi   | 433   | >RUNX1-R10 WHCNKTLPi   | 1327  | 894   |
| >RUNX1-R10 WRCNKTLPiA  | 34    | >RUNX1-R10 WHCNKTLPiA  | 33    | 1     |
| >RUNX1-R10 WRCNKTLPiA  | 176   | >RUNX1-R10 WHCNKTLPiA  | 12431 | 12255 |
| >RUNX1-R10 WRCNKTLPi   | 400   | >RUNX1-R10 WHCNKTLPi   | 225   | 175   |
| >RUNX1-R10 WRCNKTLPiA  | 221   | >RUNX1-R10 WHCNKTLPiA  | 124   | 97    |
| >RUNX1-R10 WRCNKTLPi   | 288   | >RUNX1-R10 WHCNKTLPi   | 21203 | 20915 |

|                       |      |                       |       |       |
|-----------------------|------|-----------------------|-------|-------|
| >RUNX1-R10 WRCNKTLPIA | 245  | >RUNX1-R10 WHCNKTLPIA | 18191 | 17946 |
| >RUNX1-R10 WRCNKTLPIA | 62   | >RUNX1-R10 WHCNKTLPIA | 15977 | 15915 |
| >RUNX1-R10 FLCSVLPTHW | 413  | >RUNX1-R10 FLCSVLPTHW | 629   | 216   |
| >RUNX1-R10 FLCSVLPTHW | 202  | >RUNX1-R10 FLCSVLPTHW | 570   | 368   |
| >RUNX1-R10 FLCSVLPTHW | 171  | >RUNX1-R10 FLCSVLPTHW | 10381 | 10210 |
| >RUNX1-R10 FLCSVLPTHW | 87   | >RUNX1-R10 FLCSVLPTHW | 16728 | 16641 |
| >RUNX1-R10 FLCSVLPTHW | 23   | >RUNX1-R10 FLCSVLPTHW | 5099  | 5076  |
| >RUNX1-R10 FLCSVLPTHW | 360  | >RUNX1-R10 FLCSVLPTHW | 25234 | 24874 |
| >RUNX1-R10 HWRCNKTL   | 1356 | >RUNX1-R10 HWHCNKTL   | 168   | 1188  |
| >RUNX1-R10 HWRCNKTL   | 2258 | >RUNX1-R10 HWHCNKTL   | 403   | 1855  |
| >RUNX1-R10 HWRCNKTL   | 320  | >RUNX1-R10 HWHCNKTL   | 1881  | 1561  |
| >RUNX1-R10 HWRCNKTL   | 23   | >RUNX1-R10 HWHCNKTL   | 131   | 108   |
| >RUNX1-R10 HWRCNKTL   | 32   | >RUNX1-R10 HWHCNKTL   | 207   | 175   |
| >RUNX1-R10 HWRCNKTL   | 393  | >RUNX1-R10 HWHCNKTL   | 383   | 10    |
| >RUNX1-R10 THWRCNKTL  | 233  | >RUNX1-R10 THWHCNKTL  | 263   | 30    |
| >RUNX1-R10 THWRCNKTL  | 462  | >RUNX1-R10 THWHCNKTL  | 189   | 273   |
| >RUNX1-R10 THWRCNKTL  | 625  | >RUNX1-R10 THWHCNKTL  | 322   | 303   |
| >RUNX1-R10 THWRCNKTL  | 277  | >RUNX1-R10 THWHCNKTL  | 306   | 29    |
| >RUNX1-R10 THWRCNKTL  | 312  | >RUNX1-R10 THWHCNKTL  | 137   | 175   |
| >RUNX1-R10 PTHWRCNK   | 71   | >RUNX1-R10 PTHWHCNK   | 73    | 2     |
| >RUNX1-R10 LPTHWRCNK  | 48   | >RUNX1-R10 LPTHWHCNK  | 80    | 32    |
| >RUNX1-R10 LPTHWRCNK  | 184  | >RUNX1-R10 LPTHWHCNK  | 110   | 74    |
| >RUNX1-R10 LPTHWRCNK  | 85   | >RUNX1-R10 LPTHWHCNK  | 79    | 6     |
| >RUNX1-R10 LPTHWRCN   | 739  | >RUNX1-R10 LPTHWHCN   | 373   | 366   |
| >RUNX1-R10 LPTHWRCNK  | 122  | >RUNX1-R10 LPTHWHCNK  | 80    | 42    |
| >RUNX1-R10 VLPTHWRC   | 97   | >RUNX1-R10 VLPTHWHC   | 87    | 10    |
| >RUNX1-R10 VLPTHWRC   | 58   | >RUNX1-R10 VLPTHWHC   | 31    | 27    |
| >RUNX1-R10 VLPTHWRCN  | 242  | >RUNX1-R10 VLPTHWHCN  | 136   | 106   |
| >RUNX1-R10 VLPTHWRCN  | 544  | >RUNX1-R10 VLPTHWHCN  | 304   | 240   |
| >RUNX1-R10 VLPTHWRCN  | 601  | >RUNX1-R10 VLPTHWHCN  | 301   | 300   |
| >RUNX1-R10 SVLPTHWRC  | 655  | >RUNX1-R10 SVLPTHWHC  | 105   | 550   |
| >RUNX1-R10 SVLPTHWRC  | 93   | >RUNX1-R10 SVLPTHWHC  | 132   | 39    |
| >RUNX1-R10 SVLPTHWRC  | 1938 | >RUNX1-R10 SVLPTHWHC  | 467   | 1471  |
| >RUNX1-R10 SVLPTHWRC  | 147  | >RUNX1-R10 SVLPTHWHC  | 278   | 131   |
| >RUNX1-R10 SVLPTHWRCI | 178  | >RUNX1-R10 SVLPTHWHC  | 207   | 29    |
| >RUNX1-R10 SVLPTHWR   | 35   | >RUNX1-R10 SVLPTHWH   | 708   | 673   |
| >RUNX1-R10 SVLPTHWRCI | 10   | >RUNX1-R10 SVLPTHWHC  | 11    | 1     |
| >RUNX1-R10 SVLPTHWRCI | 9    | >RUNX1-R10 SVLPTHWHC  | 8     | 1     |
| >RUNX1-R10 SVLPTHWR   | 15   | >RUNX1-R10 SVLPTHWH   | 2518  | 2503  |
| >RUNX1-R10 SVLPTHWRCI | 70   | >RUNX1-R10 SVLPTHWHC  | 54    | 16    |
| >RUNX1-R10 SVLPTHWR   | 349  | >RUNX1-R10 SVLPTHWH   | 25456 | 25107 |
| >RUNX1-R10 SVLPTHWR   | 39   | >RUNX1-R10 SVLPTHWH   | 7381  | 7342  |
| >RUNX1-R10 SVLPTHWRCI | 233  | >RUNX1-R10 SVLPTHWHC  | 226   | 7     |

|                       |      |                       |       |       |
|-----------------------|------|-----------------------|-------|-------|
| >RUNX1-R10 SVLPTHWR   | 114  | >RUNX1-R10 SVLPTHWH   | 501   | 387   |
| >RUNX1-R10 SVLPTHWRCI | 234  | >RUNX1-R10 SVLPTHWHCI | 150   | 84    |
| >RUNX1-R10 SVLPTHWR   | 83   | >RUNX1-R10 SVLPTHWH   | 17611 | 17528 |
| >RUNX1-R10 CSVLPTHWR  | 146  | >RUNX1-R10 CSVLPTHWH  | 13969 | 13823 |
| >RUNX1-R10 CSVLPTHWR  | 41   | >RUNX1-R10 CSVLPTHWH  | 6086  | 6045  |
| >RUNX1-R10 CSVLPTHWR  | 113  | >RUNX1-R10 CSVLPTHWH  | 29503 | 29390 |
| >RUNX1-R10 LCSVLPTHWF | 244  | >RUNX1-R10 LCSVLPTHWF | 13941 | 13697 |
| >RUNX1-R10 LCSVLPTHWF | 297  | >RUNX1-R10 LCSVLPTHWF | 30722 | 30425 |
| >RUNX1-R16 RFVGRSGRGI | 115  | >RUNX1-R16 GFVGRSGRGI | 401   | 286   |
| >RUNX1-R16 RFVGRSGRGI | 115  | >RUNX1-R16 GFVGRSGRGI | 5346  | 5231  |
| >RUNX1-R16 RFVGRSGR   | 20   | >RUNX1-R16 GFVGRSGR   | 229   | 209   |
| >RUNX1-R16 RFVGRSGRGI | 74   | >RUNX1-R16 GFVGRSGRGI | 971   | 897   |
| >RUNX1-R16 RFVGRSGRGI | 406  | >RUNX1-R16 GFVGRSGRGI | 3002  | 2596  |
| >RUNX1-R16 RFVGRSGR   | 42   | >RUNX1-R16 GFVGRSGR   | 740   | 698   |
| >RUNX1-R16 LRFVGRSGR  | 5949 | >RUNX1-R16 LGFVGRSGR  | 219   | 5730  |
| >RUNX1-R16 LRFVGRSGR  | 1551 | >RUNX1-R16 LGFVGRSGR  | 397   | 1154  |
| >RUNX1-R16 LRFVGRSGR  | 48   | >RUNX1-R16 LGFVGRSGR  | 22744 | 22696 |
| >RUNX1-R16 LRFVGRSGRC | 37   | >RUNX1-R16 LGFVGRSGRC | 20731 | 20694 |
| >RUNX1-R16 LRFVGRSG   | 281  | >RUNX1-R16 LGFVGRSG   | 19417 | 19136 |
| >RUNX1-R16 LRFVGRSGRC | 303  | >RUNX1-R16 LGFVGRSGRC | 19195 | 18892 |
| >RUNX1-R16 LRFVGRSGR  | 215  | >RUNX1-R16 LGFVGRSGR  | 28387 | 28172 |
| >RUNX1-R16 LRFVGRSGRC | 166  | >RUNX1-R16 LGFVGRSGRC | 27815 | 27649 |
| >RUNX1-R16 KNQVARFND  | 146  | >RUNX1-R16 KNQVARFND  | 20164 | 20018 |
| >RUNX1-R16 KNQVARFND  | 337  | >RUNX1-R16 KNQVARFND  | 33040 | 32703 |
| >RUNX1-R16 DLRFVGRSGF | 58   | >RUNX1-R16 DLGFVGRSGF | 247   | 189   |
| >RUNX1-R16 DLRFVGRSGF | 77   | >RUNX1-R16 DLGFVGRSGF | 180   | 103   |
| >RUNX1-R16 DLRFVGRSGF | 278  | >RUNX1-R16 DLGFVGRSGF | 265   | 13    |
| >RUNX1-R16 NDLRFVGR   | 548  | >RUNX1-R16 NDLGfVGR   | 341   | 207   |
| >RUNX1-R16 RFNDLRFV   | 712  | >RUNX1-R16 RFNDLGFV   | 374   | 338   |
| >RUNX1-R16 RFNDLRFV   | 959  | >RUNX1-R16 RFNDLGFV   | 388   | 571   |
| >RUNX1-R16 RFNDLRFV   | 349  | >RUNX1-R16 RFNDLGFV   | 839   | 490   |
| >RUNX1-R16 RFNDLRFV   | 400  | >RUNX1-R16 RFNDLGFV   | 704   | 304   |
| >RUNX1-R16 RFNDLRFVGF | 4    | >RUNX1-R16 RFNDLGFVGF | 8     | 4     |
| >RUNX1-R16 RFNDLRFVGF | 60   | >RUNX1-R16 RFNDLGFVGF | 113   | 53    |
| >RUNX1-R16 RFNDLRFVGF | 191  | >RUNX1-R16 RFNDLGFVGF | 273   | 82    |
| >RUNX1-R16 RFNDLRFVGF | 20   | >RUNX1-R16 RFNDLGFVGF | 27    | 7     |
| >RUNX1-R16 RFNDLRFV   | 209  | >RUNX1-R16 RFNDLGFV   | 305   | 96    |
| >RUNX1-R16 ARFNDLRF   | 18   | >RUNX1-R16 ARFNDLGF   | 19    | 1     |
| >RUNX1-R16 ARFNDLRFV  | 401  | >RUNX1-R16 ARFNDLGFV  | 1163  | 762   |
| >RUNX1-R16 ARFNDLRF   | 46   | >RUNX1-R16 ARFNDLGF   | 41    | 5     |
| >RUNX1-R16 ARFNDLRFV  | 58   | >RUNX1-R16 ARFNDLGFV  | 81    | 23    |
| >RUNX1-R16 ARFNDLRFVC | 27   | >RUNX1-R16 ARFNDLGFVC | 31    | 4     |
| >RUNX1-R16 ARFNDLRFVC | 416  | >RUNX1-R16 ARFNDLGFVC | 645   | 229   |

|                       |       |                       |       |       |
|-----------------------|-------|-----------------------|-------|-------|
| >RUNX1-R16 ARFNDLRFV  | 80    | >RUNX1-R16 ARFNDLGFV  | 192   | 112   |
| >RUNX1-R16 ARFNDLRFVC | 163   | >RUNX1-R16 ARFNDLGFVC | 271   | 108   |
| >RUNX1-R16 VARFNDLRFV | 200   | >RUNX1-R16 VARFNDLGFV | 258   | 58    |
| >RUNX1-R16 VARFNDLR   | 287   | >RUNX1-R16 VARFNDLG   | 23060 | 22773 |
| >RUNX1-R16 VARFNDLR   | 249   | >RUNX1-R16 VARFNDLG   | 38182 | 37933 |
| >RUNX1-R16 VARFNDLRF  | 615   | >RUNX1-R16 VARFNDLGF  | 366   | 249   |
| >RUNX1-R16 VARFNDLRF  | 5     | >RUNX1-R16 VARFNDLGF  | 5     | 0     |
| >RUNX1-R16 VARFNDLRF  | 776   | >RUNX1-R16 VARFNDLGF  | 465   | 311   |
| >RUNX1-R16 QVARFNDLRI | 105   | >RUNX1-R16 QVARFNDLGI | 66    | 39    |
| >RUNX1-R16 QVARFNDLRI | 269   | >RUNX1-R16 QVARFNDLGI | 142   | 127   |
| >RUNX1-R16 QVARFNDLRI | 86    | >RUNX1-R16 QVARFNDLGI | 51    | 35    |
| >RUNX1-R16 QVARFNDLR  | 348   | >RUNX1-R16 QVARFNDLG  | 24500 | 24152 |
| >RUNX1-R16 QVARFNDLRI | 315   | >RUNX1-R16 QVARFNDLGI | 291   | 24    |
| >RUNX1-R16 QVARFNDLRI | 464   | >RUNX1-R16 QVARFNDLGI | 337   | 127   |
| >RUNX1-R16 QVARFNDLR  | 4     | >RUNX1-R16 QVARFNDLG  | 12608 | 12604 |
| >RUNX1-R16 QVARFNDLRI | 19    | >RUNX1-R16 QVARFNDLGI | 10    | 9     |
| >RUNX1-R16 QVARFNDLRI | 51    | >RUNX1-R16 QVARFNDLGI | 24    | 27    |
| >RUNX1-R16 QVARFNDLR  | 203   | >RUNX1-R16 QVARFNDLG  | 36306 | 36103 |
| >RUNX1-R16 NQVARFNDL  | 711   | >RUNX1-R16 NQVARFNDLI | 201   | 510   |
| >RUNX1-R16 NQVARFNDL  | 92    | >RUNX1-R16 NQVARFNDLI | 34723 | 34631 |
| >RUNX1-R16 NQVARFNDL  | 123   | >RUNX1-R16 NQVARFNDLI | 88    | 35    |
| >RUNX1-R16 NQVARFNDL  | 552   | >RUNX1-R16 NQVARFNDLI | 235   | 317   |
| >RUNX1-R16 NQVARFNDL  | 73    | >RUNX1-R16 NQVARFNDLI | 53    | 20    |
| >RUNX1-R16 NQVARFNDL  | 150   | >RUNX1-R16 NQVARFNDLI | 32534 | 32384 |
| >RUNX1-R16 RFVGRSGRGI | 115   | >RUNX1-R16 MFVGRSGRG  | 185   | 70    |
| >RUNX1-R16 RFVGRSGRGI | 115   | >RUNX1-R16 MFVGRSGRG  | 621   | 506   |
| >RUNX1-R16 RFVGRSGR   | 20    | >RUNX1-R16 MFVGRSGR   | 38    | 18    |
| >RUNX1-R16 RFVGRSGRGI | 74    | >RUNX1-R16 MFVGRSGRG  | 125   | 51    |
| >RUNX1-R16 RFVGRSGR   | 721   | >RUNX1-R16 MFVGRSGR   | 32    | 689   |
| >RUNX1-R16 RFVGRSGR   | 2654  | >RUNX1-R16 MFVGRSGR   | 58    | 2596  |
| >RUNX1-R16 RFVGRSGRGI | 3681  | >RUNX1-R16 MFVGRSGRG  | 354   | 3327  |
| >RUNX1-R16 RFVGRSGRGI | 406   | >RUNX1-R16 MFVGRSGRG  | 2068  | 1662  |
| >RUNX1-R16 RFVGRSGR   | 42    | >RUNX1-R16 MFVGRSGR   | 91    | 49    |
| >RUNX1-R16 LRFVGRSGR  | 20398 | >RUNX1-R16 LMFVGRSGR  | 237   | 20161 |
| >RUNX1-R16 LRFVGRSGRG | 16701 | >RUNX1-R16 LMFVGRSGRG | 51    | 16650 |
| >RUNX1-R16 LRFVGRSGRG | 19728 | >RUNX1-R16 LMFVGRSGRG | 139   | 19589 |
| >RUNX1-R16 LRFVGRSGRG | 6027  | >RUNX1-R16 LMFVGRSGRG | 324   | 5703  |
| >RUNX1-R16 LRFVGRSGR  | 5949  | >RUNX1-R16 LMFVGRSGR  | 12    | 5937  |
| >RUNX1-R16 LRFVGRSGR  | 3829  | >RUNX1-R16 LMFVGRSGR  | 73    | 3756  |
| >RUNX1-R16 LRFVGRSGR  | 1551  | >RUNX1-R16 LMFVGRSGR  | 62    | 1489  |
| >RUNX1-R16 LRFVGRSG   | 20636 | >RUNX1-R16 LMFVGRSG   | 270   | 20366 |
| >RUNX1-R16 LRFVGRSGR  | 647   | >RUNX1-R16 LMFVGRSGR  | 207   | 440   |
| >RUNX1-R16 LRFVGRSGRG | 791   | >RUNX1-R16 LMFVGRSGRG | 281   | 510   |

|                       |       |                       |       |       |
|-----------------------|-------|-----------------------|-------|-------|
| >RUNX1-R16 LRFVGRSGR  | 48    | >RUNX1-R16 LMFVGRSGR  | 7232  | 7184  |
| >RUNX1-R16 LRFVGRSGRC | 37    | >RUNX1-R16 LMFVGRSGRC | 4972  | 4935  |
| >RUNX1-R16 LRFVGRSG   | 281   | >RUNX1-R16 LMFVGRSG   | 14501 | 14220 |
| >RUNX1-R16 LRFVGRSGRC | 303   | >RUNX1-R16 LMFVGRSGRC | 14649 | 14346 |
| >RUNX1-R16 LRFVGRSGR  | 215   | >RUNX1-R16 LMFVGRSGR  | 16780 | 16565 |
| >RUNX1-R16 LRFVGRSGRC | 166   | >RUNX1-R16 LMFVGRSGRC | 15916 | 15750 |
| >RUNX1-R16 KNQVARFND  | 146   | >RUNX1-R16 KNQVARFND  | 17034 | 16888 |
| >RUNX1-R16 KNQVARFND  | 337   | >RUNX1-R16 KNQVARFND  | 28813 | 28476 |
| >RUNX1-R16 DLRFVGRSGF | 2371  | >RUNX1-R16 DLMFVGRSG  | 353   | 2018  |
| >RUNX1-R16 DLRFVGRSGF | 58    | >RUNX1-R16 DLMFVGRSG  | 33    | 25    |
| >RUNX1-R16 DLRFVGRSGF | 77    | >RUNX1-R16 DLMFVGRSG  | 52    | 25    |
| >RUNX1-R16 DLRFVGRSGF | 278   | >RUNX1-R16 DLMFVGRSG  | 17    | 261   |
| >RUNX1-R16 NDLRFVGR   | 548   | >RUNX1-R16 NDLMFVGR   | 377   | 171   |
| >RUNX1-R16 RFNDLRFV   | 712   | >RUNX1-R16 RFNDLMFV   | 99    | 613   |
| >RUNX1-R16 RFNDLRFV   | 2732  | >RUNX1-R16 RFNDLMFV   | 357   | 2375  |
| >RUNX1-R16 RFNDLRFV   | 959   | >RUNX1-R16 RFNDLMFV   | 202   | 757   |
| >RUNX1-R16 RFNDLRFV   | 2567  | >RUNX1-R16 RFNDLMFV   | 244   | 2323  |
| >RUNX1-R16 RFNDLRFV   | 1370  | >RUNX1-R16 RFNDLMFV   | 313   | 1057  |
| >RUNX1-R16 RFNDLRFV   | 349   | >RUNX1-R16 RFNDLMFV   | 195   | 154   |
| >RUNX1-R16 RFNDLRFV   | 400   | >RUNX1-R16 RFNDLMFV   | 275   | 125   |
| >RUNX1-R16 RFNDLRFVGF | 4     | >RUNX1-R16 RFNDLMFVG  | 5     | 1     |
| >RUNX1-R16 RFNDLRFVGF | 60    | >RUNX1-R16 RFNDLMFVG  | 55    | 5     |
| >RUNX1-R16 RFNDLRFVGF | 711   | >RUNX1-R16 RFNDLMFVG  | 263   | 448   |
| >RUNX1-R16 RFNDLRFVGF | 191   | >RUNX1-R16 RFNDLMFVG  | 521   | 330   |
| >RUNX1-R16 RFNDLRFVGF | 20    | >RUNX1-R16 RFNDLMFVG  | 19    | 1     |
| >RUNX1-R16 RFNDLRFV   | 209   | >RUNX1-R16 RFNDLMFV   | 287   | 78    |
| >RUNX1-R16 ARFNDLRFV  | 2326  | >RUNX1-R16 ARFNDLMFV  | 257   | 2069  |
| >RUNX1-R16 ARFNDLRF   | 18    | >RUNX1-R16 ARFNDLMF   | 7     | 11    |
| >RUNX1-R16 ARFNDLRFV  | 401   | >RUNX1-R16 ARFNDLMFV  | 105   | 296   |
| >RUNX1-R16 ARFNDLRF   | 46    | >RUNX1-R16 ARFNDLMF   | 40    | 6     |
| >RUNX1-R16 ARFNDLRFV  | 58    | >RUNX1-R16 ARFNDLMFV  | 71    | 13    |
| >RUNX1-R16 ARFNDLRFVC | 27    | >RUNX1-R16 ARFNDLMFV  | 28    | 1     |
| >RUNX1-R16 ARFNDLRFVC | 416   | >RUNX1-R16 ARFNDLMFV  | 601   | 185   |
| >RUNX1-R16 ARFNDLRFV  | 80    | >RUNX1-R16 ARFNDLMFV  | 165   | 85    |
| >RUNX1-R16 ARFNDLRFVC | 163   | >RUNX1-R16 ARFNDLMFV  | 173   | 10    |
| >RUNX1-R16 VARFNDLRFV | 200   | >RUNX1-R16 VARFNDLMF  | 72    | 128   |
| >RUNX1-R16 VARFNDLR   | 287   | >RUNX1-R16 VARFNDLM   | 20099 | 19812 |
| >RUNX1-R16 VARFNDLR   | 249   | >RUNX1-R16 VARFNDLM   | 32136 | 31887 |
| >RUNX1-R16 VARFNDLRF  | 615   | >RUNX1-R16 VARFNDLMF  | 423   | 192   |
| >RUNX1-R16 VARFNDLRF  | 876   | >RUNX1-R16 VARFNDLMF  | 251   | 625   |
| >RUNX1-R16 VARFNDLR   | 13489 | >RUNX1-R16 VARFNDLM   | 210   | 13279 |
| >RUNX1-R16 VARFNDLRF  | 5     | >RUNX1-R16 VARFNDLMF  | 7     | 2     |
| >RUNX1-R16 VARFNDLRF  | 776   | >RUNX1-R16 VARFNDLMF  | 401   | 375   |

|                       |       |                       |       |       |
|-----------------------|-------|-----------------------|-------|-------|
| >RUNX1-R16 VARFNDLRF  | 946   | >RUNX1-R16 VARFNDLMF  | 422   | 524   |
| >RUNX1-R16 QVARFNDLRI | 2957  | >RUNX1-R16 QVARFNDLM  | 428   | 2529  |
| >RUNX1-R16 QVARFNDLRI | 105   | >RUNX1-R16 QVARFNDLM  | 30    | 75    |
| >RUNX1-R16 QVARFNDLRI | 269   | >RUNX1-R16 QVARFNDLM  | 96    | 173   |
| >RUNX1-R16 QVARFNDLRI | 86    | >RUNX1-R16 QVARFNDLM  | 22    | 64    |
| >RUNX1-R16 QVARFNDLRI | 865   | >RUNX1-R16 QVARFNDLM  | 426   | 439   |
| >RUNX1-R16 QVARFNDLRI | 2532  | >RUNX1-R16 QVARFNDLM  | 493   | 2039  |
| >RUNX1-R16 QVARFNDLRI | 2171  | >RUNX1-R16 QVARFNDLM  | 400   | 1771  |
| >RUNX1-R16 QVARFNDLRI | 795   | >RUNX1-R16 QVARFNDLM  | 104   | 691   |
| >RUNX1-R16 QVARFNDLR  | 348   | >RUNX1-R16 QVARFNDLM  | 17357 | 17009 |
| >RUNX1-R16 QVARFNDLR  | 21410 | >RUNX1-R16 QVARFNDLM  | 295   | 21115 |
| >RUNX1-R16 QVARFNDLRI | 315   | >RUNX1-R16 QVARFNDLM  | 458   | 143   |
| >RUNX1-R16 QVARFNDLRI | 464   | >RUNX1-R16 QVARFNDLM  | 423   | 41    |
| >RUNX1-R16 QVARFNDLR  | 4     | >RUNX1-R16 QVARFNDLM  | 4019  | 4015  |
| >RUNX1-R16 QVARFNDLR  | 9611  | >RUNX1-R16 QVARFNDLM  | 141   | 9470  |
| >RUNX1-R16 QVARFNDLRI | 19    | >RUNX1-R16 QVARFNDLM  | 8     | 11    |
| >RUNX1-R16 QVARFNDLRI | 51    | >RUNX1-R16 QVARFNDLM  | 13    | 38    |
| >RUNX1-R16 QVARFNDLR  | 15134 | >RUNX1-R16 QVARFNDLM  | 126   | 15008 |
| >RUNX1-R16 QVARFNDLRI | 1021  | >RUNX1-R16 QVARFNDLM  | 271   | 750   |
| >RUNX1-R16 QVARFNDLR  | 203   | >RUNX1-R16 QVARFNDLM  | 31185 | 30982 |
| >RUNX1-R16 NQVARFNDL  | 711   | >RUNX1-R16 NQVARFNDL  | 416   | 295   |
| >RUNX1-R16 NQVARFNDL  | 92    | >RUNX1-R16 NQVARFNDL  | 32654 | 32562 |
| >RUNX1-R16 NQVARFNDL  | 123   | >RUNX1-R16 NQVARFNDL  | 100   | 23    |
| >RUNX1-R16 NQVARFNDL  | 552   | >RUNX1-R16 NQVARFNDL  | 313   | 239   |
| >RUNX1-R16 NQVARFNDL  | 73    | >RUNX1-R16 NQVARFNDL  | 30    | 43    |
| >RUNX1-R16 NQVARFNDL  | 16463 | >RUNX1-R16 NQVARFNDL  | 480   | 15983 |
| >RUNX1-R16 NQVARFNDL  | 150   | >RUNX1-R16 NQVARFNDL  | 28036 | 27886 |
| >RUNX1-R16 RFVGRSGRGI | 115   | >RUNX1-R16 SFVGRSGRGK | 208   | 93    |
| >RUNX1-R16 RFVGRSGRGI | 115   | >RUNX1-R16 SFVGRSGRGK | 1693  | 1578  |
| >RUNX1-R16 RFVGRSGR   | 20    | >RUNX1-R16 SFVGRSGR   | 106   | 86    |
| >RUNX1-R16 RFVGRSGRGI | 74    | >RUNX1-R16 SFVGRSGRGK | 214   | 140   |
| >RUNX1-R16 RFVGRSGR   | 721   | >RUNX1-R16 SFVGRSGR   | 246   | 475   |
| >RUNX1-R16 RFVGRSGR   | 2654  | >RUNX1-R16 SFVGRSGR   | 481   | 2173  |
| >RUNX1-R16 RFVGRSGRGI | 406   | >RUNX1-R16 SFVGRSGRGK | 763   | 357   |
| >RUNX1-R16 RFVGRSGR   | 42    | >RUNX1-R16 SFVGRSGR   | 117   | 75    |
| >RUNX1-R16 LRFVGRSGRG | 16701 | >RUNX1-R16 LSFVGRSGRG | 225   | 16476 |
| >RUNX1-R16 LRFVGRSGRG | 19728 | >RUNX1-R16 LSFVGRSGRG | 107   | 19621 |
| >RUNX1-R16 LRFVGRSGRG | 6027  | >RUNX1-R16 LSFVGRSGRG | 86    | 5941  |
| >RUNX1-R16 LRFVGRSGR  | 5949  | >RUNX1-R16 LSFVGRSGR  | 22    | 5927  |
| >RUNX1-R16 LRFVGRSGR  | 3829  | >RUNX1-R16 LSFVGRSGR  | 172   | 3657  |
| >RUNX1-R16 LRFVGRSGR  | 1551  | >RUNX1-R16 LSFVGRSGR  | 21    | 1530  |
| >RUNX1-R16 LRFVGRSGRG | 8921  | >RUNX1-R16 LSFVGRSGRG | 193   | 8728  |
| >RUNX1-R16 LRFVGRSGR  | 48    | >RUNX1-R16 LSFVGRSGR  | 17537 | 17489 |



|                        |      |                       |       |       |
|------------------------|------|-----------------------|-------|-------|
| >RUNX1-R16 LRFVGRSGRC  | 37   | >RUNX1-R16 LSFVGRSGRG | 14762 | 14725 |
| >RUNX1-R16 LRFVGRSG    | 281  | >RUNX1-R16 LSFVGRSG   | 12995 | 12714 |
| >RUNX1-R16 LRFVGRSGRC  | 303  | >RUNX1-R16 LSFVGRSGRG | 13049 | 12746 |
| >RUNX1-R16 LRFVGRSGR   | 215  | >RUNX1-R16 LSFVGRSGR  | 26793 | 26578 |
| >RUNX1-R16 LRFVGRSGRC  | 166  | >RUNX1-R16 LSFVGRSGRG | 25681 | 25515 |
| >RUNX1-R16 KNQVARFND   | 146  | >RUNX1-R16 KNQVARFND  | 16752 | 16606 |
| >RUNX1-R16 KNQVARFND   | 337  | >RUNX1-R16 KNQVARFND  | 28976 | 28639 |
| >RUNX1-R16 DLRFVGRSGF  | 58   | >RUNX1-R16 DLSFVGRSGR | 67    | 9     |
| >RUNX1-R16 DLRFVGRSGF  | 77   | >RUNX1-R16 DLSFVGRSGR | 110   | 33    |
| >RUNX1-R16 DLRFVGRSGF  | 278  | >RUNX1-R16 DLSFVGRSGR | 34    | 244   |
| >RUNX1-R16 NDLRVGR     | 548  | >RUNX1-R16 NDLSFVGR   | 389   | 159   |
| >RUNX1-R16 RFNDLRFV    | 712  | >RUNX1-R16 RFNDLSFV   | 85    | 627   |
| >RUNX1-R16 RFNDLRFV    | 959  | >RUNX1-R16 RFNDLSFV   | 214   | 745   |
| >RUNX1-R16 RFNDLRFV    | 2567 | >RUNX1-R16 RFNDLSFV   | 303   | 2264  |
| >RUNX1-R16 RFNDLRFV    | 1370 | >RUNX1-R16 RFNDLSFV   | 343   | 1027  |
| >RUNX1-R16 RFNDLRFV    | 349  | >RUNX1-R16 RFNDLSFV   | 375   | 26    |
| >RUNX1-R16 RFNDLRFV    | 400  | >RUNX1-R16 RFNDLSFV   | 360   | 40    |
| >RUNX1-R16 RFNDLRFVGF  | 4    | >RUNX1-R16 RFNDLSFVGR | 5     | 1     |
| >RUNX1-R16 RFNDLRFVGF  | 60   | >RUNX1-R16 RFNDLSFVGR | 55    | 5     |
| >RUNX1-R16 RFNDLRFVGF  | 711  | >RUNX1-R16 RFNDLSFVGR | 348   | 363   |
| >RUNX1-R16 RFNDLRFVGF  | 191  | >RUNX1-R16 RFNDLSFVGR | 178   | 13    |
| >RUNX1-R16 RFNDLRFVGF  | 20   | >RUNX1-R16 RFNDLSFVGR | 19    | 1     |
| >RUNX1-R16 RFNDLRFV    | 209  | >RUNX1-R16 RFNDLSFV   | 338   | 129   |
| >RUNX1-R16 ARFNDLRFV   | 2326 | >RUNX1-R16 ARFNDLSFV  | 403   | 1923  |
| >RUNX1-R16 ARFNDLRF    | 18   | >RUNX1-R16 ARFNDLSF   | 5     | 13    |
| >RUNX1-R16 ARFNDLRFV   | 401  | >RUNX1-R16 ARFNDLSFV  | 99    | 302   |
| >RUNX1-R16 ARFNDLRFVCG | 795  | >RUNX1-R16 ARFNDLSFVG | 302   | 493   |
| >RUNX1-R16 ARFNDLRF    | 46   | >RUNX1-R16 ARFNDLSF   | 43    | 3     |
| >RUNX1-R16 ARFNDLRFV   | 58   | >RUNX1-R16 ARFNDLSFV  | 85    | 27    |
| >RUNX1-R16 ARFNDLRFVCG | 27   | >RUNX1-R16 ARFNDLSFVG | 33    | 6     |
| >RUNX1-R16 ARFNDLRFVCG | 416  | >RUNX1-R16 ARFNDLSFVG | 563   | 147   |
| >RUNX1-R16 ARFNDLRFV   | 80   | >RUNX1-R16 ARFNDLSFV  | 73    | 7     |
| >RUNX1-R16 ARFNDLRFVCG | 163  | >RUNX1-R16 ARFNDLSFVG | 232   | 69    |
| >RUNX1-R16 VARFNDLRFV  | 200  | >RUNX1-R16 VARFNDLSFV | 163   | 37    |
| >RUNX1-R16 VARFNDLR    | 287  | >RUNX1-R16 VARFNDLS   | 21467 | 21180 |
| >RUNX1-R16 VARFNDLR    | 249  | >RUNX1-R16 VARFNDLS   | 31359 | 31110 |
| >RUNX1-R16 VARFNDLRF   | 615  | >RUNX1-R16 VARFNDLSF  | 99    | 516   |
| >RUNX1-R16 VARFNDLRF   | 876  | >RUNX1-R16 VARFNDLSF  | 64    | 812   |
| >RUNX1-R16 VARFNDLRF   | 5    | >RUNX1-R16 VARFNDLSF  | 6     | 1     |
| >RUNX1-R16 VARFNDLRF   | 776  | >RUNX1-R16 VARFNDLSF  | 163   | 613   |
| >RUNX1-R16 QVARFNDLRI  | 105  | >RUNX1-R16 QVARFNDLSF | 27    | 78    |
| >RUNX1-R16 QVARFNDLRI  | 269  | >RUNX1-R16 QVARFNDLSF | 74    | 195   |
| >RUNX1-R16 QVARFNDLRI  | 86   | >RUNX1-R16 QVARFNDLSF | 28    | 58    |

|                       |      |                       |       |       |
|-----------------------|------|-----------------------|-------|-------|
| >RUNX1-R16 QVARFNDLRI | 865  | >RUNX1-R16 QVARFNDLSF | 475   | 390   |
| >RUNX1-R16 QVARFNDLRI | 795  | >RUNX1-R16 QVARFNDLSF | 120   | 675   |
| >RUNX1-R16 QVARFNDLR  | 348  | >RUNX1-R16 QVARFNDLS  | 18869 | 18521 |
| >RUNX1-R16 QVARFNDLRI | 315  | >RUNX1-R16 QVARFNDLSF | 349   | 34    |
| >RUNX1-R16 QVARFNDLRI | 1108 | >RUNX1-R16 QVARFNDLSF | 433   | 675   |
| >RUNX1-R16 QVARFNDLRI | 464  | >RUNX1-R16 QVARFNDLSF | 105   | 359   |
| >RUNX1-R16 QVARFNDLR  | 4    | >RUNX1-R16 QVARFNDLS  | 4117  | 4113  |
| >RUNX1-R16 QVARFNDLR  | 9611 | >RUNX1-R16 QVARFNDLS  | 410   | 9201  |
| >RUNX1-R16 QVARFNDLRI | 19   | >RUNX1-R16 QVARFNDLSF | 10    | 9     |
| >RUNX1-R16 QVARFNDLRI | 51   | >RUNX1-R16 QVARFNDLSF | 20    | 31    |
| >RUNX1-R16 QVARFNDLRI | 2047 | >RUNX1-R16 QVARFNDLSF | 442   | 1605  |
| >RUNX1-R16 QVARFNDLRI | 1713 | >RUNX1-R16 QVARFNDLSF | 402   | 1311  |
| >RUNX1-R16 QVARFNDLRI | 1021 | >RUNX1-R16 QVARFNDLSF | 291   | 730   |
| >RUNX1-R16 QVARFNDLR  | 203  | >RUNX1-R16 QVARFNDLS  | 33169 | 32966 |
| >RUNX1-R16 NQVARFNDL  | 711  | >RUNX1-R16 NQVARFNDL  | 177   | 534   |
| >RUNX1-R16 NQVARFNDL  | 92   | >RUNX1-R16 NQVARFNDL  | 31683 | 31591 |
| >RUNX1-R16 NQVARFNDL  | 123  | >RUNX1-R16 NQVARFNDL  | 59    | 64    |
| >RUNX1-R16 NQVARFNDL  | 552  | >RUNX1-R16 NQVARFNDL  | 239   | 313   |
| >RUNX1-R16 NQVARFNDL  | 73   | >RUNX1-R16 NQVARFNDL  | 15    | 58    |
| >RUNX1-R16 NQVARFNDL  | 150  | >RUNX1-R16 NQVARFNDL  | 28071 | 27921 |
| >RUNX1-R16 RSGRGKSF   | 476  | >RUNX1-R16 GSGRGKSF   | 8025  | 7549  |
| >RUNX1-R16 RSGRGKSFTL | 238  | >RUNX1-R16 GSGRGKSFTL | 3117  | 2879  |
| >RUNX1-R16 RSGRGKSF   | 140  | >RUNX1-R16 GSGRGKSF   | 659   | 519   |
| >RUNX1-R16 RSGRGKSF   | 34   | >RUNX1-R16 GSGRGKSF   | 932   | 898   |
| >RUNX1-R16 RSGRGKSF   | 9    | >RUNX1-R16 GSGRGKSF   | 120   | 111   |
| >RUNX1-R16 RSGRGKSFTL | 15   | >RUNX1-R16 GSGRGKSFTL | 373   | 358   |
| >RUNX1-R16 RSGRGKSF   | 389  | >RUNX1-R16 GSGRGKSF   | 8274  | 7885  |
| >RUNX1-R16 RSGRGKSF   | 194  | >RUNX1-R16 GSGRGKSF   | 8932  | 8738  |
| >RUNX1-R16 RSGRGKSFTL | 164  | >RUNX1-R16 GSGRGKSFTL | 7493  | 7329  |
| >RUNX1-R16 RSGRGKSF   | 22   | >RUNX1-R16 GSGRGKSF   | 593   | 571   |
| >RUNX1-R16 RSGRGKSFTL | 187  | >RUNX1-R16 GSGRGKSFTL | 1575  | 1388  |
| >RUNX1-R16 GRSGRGKSF  | 170  | >RUNX1-R16 GGSGRGKSF  | 4822  | 4652  |
| >RUNX1-R16 GRSGRGKSF  | 181  | >RUNX1-R16 GGSGRGKSF  | 21667 | 21486 |
| >RUNX1-R16 GRSGRGKSFT | 120  | >RUNX1-R16 GGSGRGKSFT | 22372 | 22252 |
| >RUNX1-R16 GRSGRGKSFT | 188  | >RUNX1-R16 GGSGRGKSFT | 24000 | 23812 |
| >RUNX1-R16 ARFNDLRFVC | 27   | >RUNX1-R16 ARFNDLRFVC | 492   | 465   |
| >RUNX1-R16 ARFNDLRFVC | 163  | >RUNX1-R16 ARFNDLRFVC | 615   | 452   |
| >RUNX1-R16 VGRSGRGK   | 151  | >RUNX1-R16 VGGSGRGK   | 12530 | 12379 |
| >RUNX1-R16 VGRSGRGKSF | 170  | >RUNX1-R16 VGGSGRGKSI | 2318  | 2148  |
| >RUNX1-R16 VGRSGRGKSF | 213  | >RUNX1-R16 VGGSGRGKSI | 4874  | 4661  |
| >RUNX1-R16 FVGRSGRGK  | 110  | >RUNX1-R16 FVGGSGRGK  | 110   | 0     |
| >RUNX1-R16 FVGRSGRGK  | 188  | >RUNX1-R16 FVGGSGRGK  | 90    | 98    |
| >RUNX1-R16 FVGRSGRGK  | 145  | >RUNX1-R16 FVGGSGRGK  | 550   | 405   |

|                       |       |                       |       |       |
|-----------------------|-------|-----------------------|-------|-------|
| >RUNX1-R16 FVGRSGRGK! | 791   | >RUNX1-R16 FVGGSGRGK! | 242   | 549   |
| >RUNX1-R16 RFVGRSGRGI | 115   | >RUNX1-R16 RFVGGSGRGI | 128   | 13    |
| >RUNX1-R16 RFVGRSGRGI | 115   | >RUNX1-R16 RFVGGSGRGI | 227   | 112   |
| >RUNX1-R16 RFVGRSGR   | 20    | >RUNX1-R16 RFVGGSGR   | 56    | 36    |
| >RUNX1-R16 RFVGRSGRGI | 74    | >RUNX1-R16 RFVGGSGRGI | 180   | 106   |
| >RUNX1-R16 RFVGRSGRGI | 406   | >RUNX1-R16 RFVGGSGRGI | 482   | 76    |
| >RUNX1-R16 RFVGRSGR   | 42    | >RUNX1-R16 RFVGGSGR   | 82    | 40    |
| >RUNX1-R16 LRFVGRSGR  | 647   | >RUNX1-R16 LRFVGGSGR  | 405   | 242   |
| >RUNX1-R16 LRFVGRSGR  | 48    | >RUNX1-R16 LRFVGGSGR  | 58    | 10    |
| >RUNX1-R16 LRFVGRSGRC | 37    | >RUNX1-R16 LRFVGGSGRC | 38    | 1     |
| >RUNX1-R16 LRFVGRSG   | 281   | >RUNX1-R16 LRFVGGSG   | 374   | 93    |
| >RUNX1-R16 LRFVGRSGRC | 303   | >RUNX1-R16 LRFVGGSGRC | 311   | 8     |
| >RUNX1-R16 LRFVGRSGR  | 215   | >RUNX1-R16 LRFVGGSGR  | 982   | 767   |
| >RUNX1-R16 LRFVGRSGRC | 166   | >RUNX1-R16 LRFVGGSGRC | 417   | 251   |
| >RUNX1-R16 DLRFVGRSGF | 58    | >RUNX1-R16 DLRFVGGSGF | 213   | 155   |
| >RUNX1-R16 DLRFVGRSGF | 77    | >RUNX1-R16 DLRFVGGSGF | 86    | 9     |
| >RUNX1-R16 DLRFVGRSGF | 278   | >RUNX1-R16 DLRFVGGSGF | 133   | 145   |
| >RUNX1-R16 RFNDLRFVGF | 4     | >RUNX1-R16 RFNDLRFVGC | 4834  | 4830  |
| >RUNX1-R16 RFNDLRFVGF | 60    | >RUNX1-R16 RFNDLRFVGC | 17753 | 17693 |
| >RUNX1-R16 RFNDLRFVGF | 191   | >RUNX1-R16 RFNDLRFVGC | 27076 | 26885 |
| >RUNX1-R16 RFNDLRFVGF | 20    | >RUNX1-R16 RFNDLRFVGC | 11973 | 11953 |
| >RUNX1-R16 RSGRGKSF   | 476   | >RUNX1-R16 PSGRGKSF   | 15689 | 15213 |
| >RUNX1-R16 RSGRGKSFTL | 238   | >RUNX1-R16 PSGRGKSFTL | 6925  | 6687  |
| >RUNX1-R16 RSGRGKSF   | 140   | >RUNX1-R16 PSGRGKSF   | 8894  | 8754  |
| >RUNX1-R16 RSGRGKSF   | 34    | >RUNX1-R16 PSGRGKSF   | 2127  | 2093  |
| >RUNX1-R16 RSGRGKSF   | 9     | >RUNX1-R16 PSGRGKSF   | 4071  | 4062  |
| >RUNX1-R16 RSGRGKSFTL | 15    | >RUNX1-R16 PSGRGKSFTL | 6196  | 6181  |
| >RUNX1-R16 RSGRGKSF   | 389   | >RUNX1-R16 PSGRGKSF   | 17608 | 17219 |
| >RUNX1-R16 RSGRGKSF   | 194   | >RUNX1-R16 PSGRGKSF   | 18079 | 17885 |
| >RUNX1-R16 RSGRGKSFTL | 164   | >RUNX1-R16 PSGRGKSFTL | 17618 | 17454 |
| >RUNX1-R16 RSGRGKSF   | 22    | >RUNX1-R16 PSGRGKSF   | 1521  | 1499  |
| >RUNX1-R16 RSGRGKSFTL | 187   | >RUNX1-R16 PSGRGKSFTL | 7420  | 7233  |
| >RUNX1-R16 GRSGRGKSF  | 22072 | >RUNX1-R16 GPSGRGKSF  | 22    | 22050 |
| >RUNX1-R16 GRSGRGKSFT | 21154 | >RUNX1-R16 GPSGRGKSFT | 30    | 21124 |
| >RUNX1-R16 GRSGRGKSF  | 170   | >RUNX1-R16 GPSGRGKSF  | 3659  | 3489  |
| >RUNX1-R16 GRSGRGKSF  | 181   | >RUNX1-R16 GPSGRGKSF  | 23177 | 22996 |
| >RUNX1-R16 GRSGRGKSFT | 120   | >RUNX1-R16 GPSGRGKSFT | 23378 | 23258 |
| >RUNX1-R16 GRSGRGKSFT | 188   | >RUNX1-R16 GPSGRGKSFT | 24093 | 23905 |
| >RUNX1-R16 ARFNDLRFVC | 27    | >RUNX1-R16 ARFNDLRFVC | 287   | 260   |
| >RUNX1-R16 ARFNDLRFVC | 163   | >RUNX1-R16 ARFNDLRFVC | 923   | 760   |
| >RUNX1-R16 VGRSGRGKSF | 9914  | >RUNX1-R16 VGPSGRGKSF | 72    | 9842  |
| >RUNX1-R16 VGRSGRGK   | 151   | >RUNX1-R16 VGPSGRGK   | 14453 | 14302 |
| >RUNX1-R16 VGRSGRGKSF | 170   | >RUNX1-R16 VGPSGRGKSF | 2548  | 2378  |

|                       |       |                       |       |       |
|-----------------------|-------|-----------------------|-------|-------|
| >RUNX1-R16 VGRSGRGKSF | 213   | >RUNX1-R16 VGPSGRGKSF | 9651  | 9438  |
| >RUNX1-R16 FVGRSGRGKS | 110   | >RUNX1-R16 FVGPSGRGKS | 79    | 31    |
| >RUNX1-R16 FVGRSGRGKS | 188   | >RUNX1-R16 FVGPSGRGKS | 135   | 53    |
| >RUNX1-R16 FVGRSGRGKS | 145   | >RUNX1-R16 FVGPSGRGKS | 120   | 25    |
| >RUNX1-R16 FVGRSGRGKS | 791   | >RUNX1-R16 FVGPSGRGKS | 43    | 748   |
| >RUNX1-R16 RFVGRSGRGI | 115   | >RUNX1-R16 RFVGPSGRGI | 180   | 65    |
| >RUNX1-R16 RFVGRSGRGI | 115   | >RUNX1-R16 RFVGPSGRGI | 260   | 145   |
| >RUNX1-R16 RFVGRSGR   | 20    | >RUNX1-R16 RFVGPSGR   | 54    | 34    |
| >RUNX1-R16 RFVGRSGRGI | 74    | >RUNX1-R16 RFVGPSGRGI | 116   | 42    |
| >RUNX1-R16 RFVGRSGRGI | 406   | >RUNX1-R16 RFVGPSGRGI | 470   | 64    |
| >RUNX1-R16 RFVGRSGR   | 42    | >RUNX1-R16 RFVGPSGR   | 47    | 5     |
| >RUNX1-R16 LRFVGRSGR  | 647   | >RUNX1-R16 LRFVGPSGR  | 456   | 191   |
| >RUNX1-R16 LRFVGRSGR  | 48    | >RUNX1-R16 LRFVGPSGR  | 61    | 13    |
| >RUNX1-R16 LRFVGRSGRC | 37    | >RUNX1-R16 LRFVGPSGRC | 44    | 7     |
| >RUNX1-R16 LRFVGRSG   | 281   | >RUNX1-R16 LRFVGPSG   | 241   | 40    |
| >RUNX1-R16 LRFVGRSGRC | 303   | >RUNX1-R16 LRFVGPSGRC | 475   | 172   |
| >RUNX1-R16 LRFVGRSGR  | 215   | >RUNX1-R16 LRFVGPSGR  | 412   | 197   |
| >RUNX1-R16 LRFVGRSGRC | 166   | >RUNX1-R16 LRFVGPSGRC | 201   | 35    |
| >RUNX1-R16 DLRFVGRSGF | 58    | >RUNX1-R16 DLRFVGPSGF | 274   | 216   |
| >RUNX1-R16 DLRFVGRSGF | 77    | >RUNX1-R16 DLRFVGPSGF | 258   | 181   |
| >RUNX1-R16 DLRFVGRSGF | 278   | >RUNX1-R16 DLRFVGPSGF | 316   | 38    |
| >RUNX1-R16 RFNDLRFVGF | 4     | >RUNX1-R16 RFNDLRFVGF | 5350  | 5346  |
| >RUNX1-R16 RFNDLRFVGF | 60    | >RUNX1-R16 RFNDLRFVGF | 18641 | 18581 |
| >RUNX1-R16 RFNDLRFVGF | 191   | >RUNX1-R16 RFNDLRFVGF | 25356 | 25165 |
| >RUNX1-R16 RFNDLRFVGF | 20    | >RUNX1-R16 RFNDLRFVGF | 13608 | 13588 |
| >RUNX1-R16 RSGRGKSF   | 476   | >RUNX1-R16 QSGRGKSF   | 3572  | 3096  |
| >RUNX1-R16 RSGRGKSFTL | 238   | >RUNX1-R16 QSGRGKSFTL | 1160  | 922   |
| >RUNX1-R16 RSGRGKSF   | 140   | >RUNX1-R16 QSGRGKSF   | 768   | 628   |
| >RUNX1-R16 RSGRGKSF   | 34    | >RUNX1-R16 QSGRGKSF   | 268   | 234   |
| >RUNX1-R16 RSGRGKSF   | 9     | >RUNX1-R16 QSGRGKSF   | 86    | 77    |
| >RUNX1-R16 RSGRGKSFTL | 15    | >RUNX1-R16 QSGRGKSFTL | 208   | 193   |
| >RUNX1-R16 RSGRGKSF   | 389   | >RUNX1-R16 QSGRGKSF   | 9493  | 9104  |
| >RUNX1-R16 RSGRGKSF   | 194   | >RUNX1-R16 QSGRGKSF   | 5406  | 5212  |
| >RUNX1-R16 RSGRGKSFTL | 164   | >RUNX1-R16 QSGRGKSFTL | 4219  | 4055  |
| >RUNX1-R16 RSGRGKSF   | 22    | >RUNX1-R16 QSGRGKSF   | 311   | 289   |
| >RUNX1-R16 RSGRGKSFTL | 187   | >RUNX1-R16 QSGRGKSFTL | 1182  | 995   |
| >RUNX1-R16 GRSGRGKSFT | 15242 | >RUNX1-R16 GQSGRGKSFT | 478   | 14764 |
| >RUNX1-R16 GRSGRGKSFT | 19005 | >RUNX1-R16 GQSGRGKSFT | 151   | 18854 |
| >RUNX1-R16 GRSGRGKSF  | 15115 | >RUNX1-R16 GQSGRGKSF  | 72    | 15043 |
| >RUNX1-R16 GRSGRGKSF  | 7018  | >RUNX1-R16 GQSGRGKSF  | 224   | 6794  |
| >RUNX1-R16 GRSGRGKSF  | 170   | >RUNX1-R16 GQSGRGKSF  | 20    | 150   |
| >RUNX1-R16 GRSGRGKSF  | 181   | >RUNX1-R16 GQSGRGKSF  | 4806  | 4625  |
| >RUNX1-R16 GRSGRGKSFT | 120   | >RUNX1-R16 GQSGRGKSFT | 3076  | 2956  |

|                        |     |                        |       |       |
|------------------------|-----|------------------------|-------|-------|
| >RUNX1-R16 GRSGRGKSFT  | 188 | >RUNX1-R16 GQSGRGKSFT  | 3674  | 3486  |
| >RUNX1-R16 ARFNDRFVGC  | 27  | >RUNX1-R16 ARFNDRFVGC  | 217   | 190   |
| >RUNX1-R16 ARFNDRFVGC  | 163 | >RUNX1-R16 ARFNDRFVGC  | 480   | 317   |
| >RUNX1-R16 VGRSGRGK    | 151 | >RUNX1-R16 VGQSGRGK    | 9533  | 9382  |
| >RUNX1-R16 VGRSGRGKS   | 170 | >RUNX1-R16 VGQSGRGKS   | 1168  | 998   |
| >RUNX1-R16 VGRSGRGKS   | 213 | >RUNX1-R16 VGQSGRGKS   | 2122  | 1909  |
| >RUNX1-R16 FVGRSGRGK   | 110 | >RUNX1-R16 FVGQSGRGK   | 75    | 35    |
| >RUNX1-R16 FVGRSGRGK   | 188 | >RUNX1-R16 FVGQSGRGK   | 108   | 80    |
| >RUNX1-R16 FVGRSGRGK   | 145 | >RUNX1-R16 FVGQSGRGK   | 211   | 66    |
| >RUNX1-R16 FVGRSGRGK   | 791 | >RUNX1-R16 FVGQSGRGK   | 136   | 655   |
| >RUNX1-R16 RFVGRSGRG   | 115 | >RUNX1-R16 RFVGQSGRG   | 220   | 105   |
| >RUNX1-R16 RFVGRSGRG   | 115 | >RUNX1-R16 RFVGQSGRG   | 168   | 53    |
| >RUNX1-R16 RFVGRSGR    | 20  | >RUNX1-R16 RFVGQSGR    | 40    | 20    |
| >RUNX1-R16 RFVGRSGRG   | 74  | >RUNX1-R16 RFVGQSGRG   | 173   | 99    |
| >RUNX1-R16 RFVGRSGRG   | 406 | >RUNX1-R16 RFVGQSGRG   | 666   | 260   |
| >RUNX1-R16 RFVGRSGR    | 42  | >RUNX1-R16 RFVGQSGR    | 42    | 0     |
| >RUNX1-R16 LRFVGRSGR   | 48  | >RUNX1-R16 LRFVGQSGR   | 50    | 2     |
| >RUNX1-R16 LRFVGRSGR   | 37  | >RUNX1-R16 LRFVGQSGR   | 38    | 1     |
| >RUNX1-R16 LRFVGRSG    | 281 | >RUNX1-R16 LRFVGQSG    | 363   | 82    |
| >RUNX1-R16 LRFVGRSGR   | 303 | >RUNX1-R16 LRFVGQSGR   | 332   | 29    |
| >RUNX1-R16 LRFVGRSGR   | 215 | >RUNX1-R16 LRFVGQSGR   | 831   | 616   |
| >RUNX1-R16 LRFVGRSGR   | 166 | >RUNX1-R16 LRFVGQSGR   | 296   | 130   |
| >RUNX1-R16 DLRFVGRSGF  | 58  | >RUNX1-R16 DLRFVGQSGF  | 251   | 193   |
| >RUNX1-R16 DLRFVGRSGF  | 77  | >RUNX1-R16 DLRFVGQSGF  | 183   | 106   |
| >RUNX1-R16 DLRFVGRSGF  | 278 | >RUNX1-R16 DLRFVGQSGF  | 329   | 51    |
| >RUNX1-R16 RFNDRFVGF   | 4   | >RUNX1-R16 RFNDRFVGC   | 1051  | 1047  |
| >RUNX1-R16 RFNDRFVGF   | 60  | >RUNX1-R16 RFNDRFVGC   | 10445 | 10385 |
| >RUNX1-R16 RFNDRFVGF   | 191 | >RUNX1-R16 RFNDRFVGC   | 9703  | 9512  |
| >RUNX1-R16 RFNDRFVGF   | 20  | >RUNX1-R16 RFNDRFVGC   | 559   | 539   |
| >RUNX1-R20 REPRRHRQK   | 442 | >RUNX1-R20 QEPRRHRQK   | 905   | 463   |
| >RUNX1-R20 REPRRHRQK   | 177 | >RUNX1-R20 QEPRRHRQK   | 1361  | 1184  |
| >RUNX1-R20 REPRRHRQK   | 353 | >RUNX1-R20 QEPRRHRQK   | 9090  | 8737  |
| >RUNX1-R20 PREPRRHRQ   | 99  | >RUNX1-R20 PQEPRRHRQ   | 7879  | 7780  |
| >RUNX1-R20 RAIKITVDGPF | 17  | >RUNX1-R20 RAIKITVDGPC | 8474  | 8457  |
| >RUNX1-R20 RAIKITVDGPF | 92  | >RUNX1-R20 RAIKITVDGPC | 10135 | 10043 |
| >RUNX1-R20 RAIKITVDGPF | 77  | >RUNX1-R20 RAIKITVDGPC | 10562 | 10485 |
| >RUNX1-R20 TVDGPREPR   | 79  | >RUNX1-R20 TVDGPQEPR   | 103   | 24    |
| >RUNX1-R20 TVDGPREPR   | 234 | >RUNX1-R20 TVDGPQEPR   | 262   | 28    |
| >RUNX1-R20 ITVDGPREPR  | 462 | >RUNX1-R20 ITVDGPQEPR  | 548   | 86    |
| >RUNX1-R20 ITVDGPREPR  | 29  | >RUNX1-R20 ITVDGPQEPR  | 33    | 4     |
| >RUNX1-R20 ITVDGPREPR  | 37  | >RUNX1-R20 ITVDGPQEPR  | 30    | 7     |
| >RUNX1-R20 KITVDGPR    | 84  | >RUNX1-R20 KITVDGPQ    | 14980 | 14896 |
| >RUNX1-R20 KITVDGPREP  | 58  | >RUNX1-R20 KITVDGPQEP  | 98    | 40    |

|                        |      |                        |       |       |
|------------------------|------|------------------------|-------|-------|
| >RUNX1-R20 KITVDGPR    | 142  | >RUNX1-R20 KITVDGPQ    | 18594 | 18452 |
| >RUNX1-R20 KITVDGPREP  | 183  | >RUNX1-R20 KITVDGPQEP  | 242   | 59    |
| >RUNX1-R20 AIKITVDGPR  | 207  | >RUNX1-R20 AIKITVDGPQ  | 23951 | 23744 |
| >RUNX1-R20 RRHRQKLD    | 171  | >RUNX1-R20 QRHRQKLD    | 8637  | 8466  |
| >RUNX1-R20 RRHRQKLDD   | 307  | >RUNX1-R20 QRHRQKLDD   | 5188  | 4881  |
| >RUNX1-R20 RRHRQKLDDI  | 183  | >RUNX1-R20 QRHRQKLDD   | 5545  | 5362  |
| >RUNX1-R20 RRHRQKLDDI  | 321  | >RUNX1-R20 QRHRQKLDD   | 4747  | 4426  |
| >RUNX1-R20 PRRHRQKL    | 2016 | >RUNX1-R20 PQRHRQKL    | 465   | 1551  |
| >RUNX1-R20 KITVDGPREP  | 58   | >RUNX1-R20 KITVDGPREP  | 12439 | 12381 |
| >RUNX1-R20 KITVDGPREP  | 183  | >RUNX1-R20 KITVDGPREP  | 17724 | 17541 |
| >RUNX1-R20 EPRRHRQKL   | 14   | >RUNX1-R20 EPQRHRQKL   | 143   | 129   |
| >RUNX1-R20 EPRRHRQKL   | 13   | >RUNX1-R20 EPQRHRQKL   | 41    | 28    |
| >RUNX1-R20 REPRRHRQKL  | 442  | >RUNX1-R20 REPQRHRQKL  | 280   | 162   |
| >RUNX1-R20 REPRRHRQKL  | 177  | >RUNX1-R20 REPQRHRQKL  | 339   | 162   |
| >RUNX1-R20 REPRRHRQKL  | 353  | >RUNX1-R20 REPQRHRQKL  | 370   | 17    |
| >RUNX1-R20 PREPRRHRQKL | 99   | >RUNX1-R20 PREPQRHRQKL | 390   | 291   |
| >RUNX1-R20 TVDGPREPR   | 79   | >RUNX1-R20 TVDGPREPQ   | 9110  | 9031  |
| >RUNX1-R20 TVDGPREPRF  | 234  | >RUNX1-R20 TVDGPREPQI  | 211   | 23    |
| >RUNX1-R20 ITVDGPREPR  | 462  | >RUNX1-R20 ITVDGPREPQ  | 445   | 17    |
| >RUNX1-R20 ITVDGPREPR  | 29   | >RUNX1-R20 ITVDGPREPQ  | 24722 | 24693 |
| >RUNX1-R20 ITVDGPREPR  | 37   | >RUNX1-R20 ITVDGPREPQ  | 27    | 10    |
| >RUNX1-R25 RASLNHSTA   | 171  | >RUNX1-R25 HASLNHSTA   | 681   | 510   |
| >RUNX1-R25 RASLNHSTAF  | 301  | >RUNX1-R25 HASLNHSTAF  | 2965  | 2664  |
| >RUNX1-R25 RASLNHSTAF  | 82   | >RUNX1-R25 HASLNHSTAF  | 174   | 92    |
| >RUNX1-R25 RASLNHSTAF  | 11   | >RUNX1-R25 HASLNHSTAF  | 29    | 18    |
| >RUNX1-R25 RASLNHSTAF  | 5    | >RUNX1-R25 HASLNHSTAF  | 15    | 10    |
| >RUNX1-R25 RASLNHSTAF  | 119  | >RUNX1-R25 HASLNHSTAF  | 2029  | 1910  |
| >RUNX1-R25 RASLNHSTAF  | 38   | >RUNX1-R25 HASLNHSTAF  | 332   | 294   |
| >RUNX1-R25 RASLNHSTAF  | 1136 | >RUNX1-R25 HASLNHSTAF  | 402   | 734   |
| >RUNX1-R25 PRASLNHSTA  | 48   | >RUNX1-R25 PHASLNHSTA  | 71    | 23    |
| >RUNX1-R25 NPRASLNHST  | 24   | >RUNX1-R25 NPHASLNHST  | 361   | 337   |
| >RUNX1-R25 NPRASLNHST  | 85   | >RUNX1-R25 NPHASLNHST  | 104   | 19    |
| >RUNX1-R25 TPNPRASL    | 408  | >RUNX1-R25 TPNPHASL    | 1211  | 803   |
| >RUNX1-R25 TPNPRASL    | 22   | >RUNX1-R25 TPNPHASL    | 27    | 5     |
| >RUNX1-R25 TPNPRASL    | 1176 | >RUNX1-R25 TPNPHASL    | 256   | 920   |
| >RUNX1-R25 TPNPRASL    | 157  | >RUNX1-R25 TPNPHASL    | 99    | 58    |
| >RUNX1-R25 PTPNPRASL   | 10   | >RUNX1-R25 PTPNPHASL   | 3     | 7     |
| >RUNX1-R25 PTPNPRASLN  | 1336 | >RUNX1-R25 PTPNPHASLN  | 289   | 1047  |
| >RUNX1-R25 APTPNPRASL  | 266  | >RUNX1-R25 APTPNPHASL  | 96    | 170   |
| >RUNX1-R25 APTPNPRASL  | 57   | >RUNX1-R25 APTPNPHASL  | 115   | 58    |
| >RUNX1-R25 APTPNPRASL  | 953  | >RUNX1-R25 APTPNPHASL  | 355   | 598   |
| >RUNX1-R25 PAPTNPTRAS  | 65   | >RUNX1-R25 PAPTNPTRAS  | 25    | 40    |
| >RUNX1-R25 HPAPTNPTR   | 1864 | >RUNX1-R25 HPAPTNPTR   | 157   | 1707  |

|                       |      |                       |       |       |
|-----------------------|------|-----------------------|-------|-------|
| >RUNX1-R25 HPAPTPNPR/ | 379  | >RUNX1-R25 HPAPTPNPH/ | 522   | 143   |
| >RUNX1-R25 HPAPTPNPR  | 302  | >RUNX1-R25 HPAPTPNPH  | 22    | 280   |
| >RUNX1-R25 HPAPTPNPR/ | 85   | >RUNX1-R25 HPAPTPNPH/ | 45    | 40    |
| >RUNX1-R25 HPAPTPNPR/ | 97   | >RUNX1-R25 HPAPTPNPH/ | 76    | 21    |
| >RUNX1-R25 HPAPTPNPR/ | 493  | >RUNX1-R25 HPAPTPNPH/ | 194   | 299   |
| >RUNX1-R25 HPAPTPNPR  | 102  | >RUNX1-R25 HPAPTPNPH  | 26398 | 26296 |
| >RUNX1-R25 HHPAPTPNPI | 76   | >RUNX1-R25 HHPAPTPNPI | 24392 | 24316 |
| >RUNX1-R76 RSMVEVLA   | 357  | >RUNX1-R76 HSMVEVLA   | 1339  | 982   |
| >RUNX1-R76 RSMVEVLADI | 140  | >RUNX1-R76 HSMVEVLAD  | 1383  | 1243  |
| >RUNX1-R76 DRSMVEVL   | 5574 | >RUNX1-R76 DHSMVEVL   | 303   | 5271  |
| >RUNX1-R76 GDRSMVEV   | 835  | >RUNX1-R76 GDHSMVEV   | 444   | 391   |
| >RUNX1-R76 GDRSMVEVL  | 345  | >RUNX1-R76 GDHSMVEVL  | 208   | 137   |
| >RUNX1-R76 GDRSMVEV   | 169  | >RUNX1-R76 GDHSMVEV   | 102   | 67    |
| >RUNX1-R76 GDRSMVEVL  | 133  | >RUNX1-R76 GDHSMVEVL  | 89    | 44    |
| >RUNX1-R76 GDRSMVEV   | 282  | >RUNX1-R76 GDHSMVEV   | 280   | 2     |
| >RUNX1-R76 RSGDRSMVE' | 259  | >RUNX1-R76 RSGDHSMVE  | 215   | 44    |
| >RUNX1-R76 RSGDRSMVE' | 540  | >RUNX1-R76 RSGDHSMVE  | 313   | 227   |
| >RUNX1-R76 RSGDRSMV   | 499  | >RUNX1-R76 RSGDHSMV   | 303   | 196   |
| >RUNX1-R76 RSGDRSMVE' | 110  | >RUNX1-R76 RSGDHSMVE  | 101   | 9     |
| >RUNX1-R76 RSGDRSMVE' | 20   | >RUNX1-R76 RSGDHSMVE  | 22    | 2     |
| >RUNX1-R76 RSGDRSMVE' | 436  | >RUNX1-R76 RSGDHSMVE  | 219   | 217   |
| >RUNX1-R76 RSGDRSMVE' | 153  | >RUNX1-R76 RSGDHSMVE  | 287   | 134   |
| >RUNX1-R76 RSGDRSMVE' | 291  | >RUNX1-R76 RSGDHSMVE  | 240   | 51    |
| >RUNX1-R76 LRSGDRSM   | 255  | >RUNX1-R76 LRSGDHSM   | 290   | 35    |
| >RUNX1-R76 KLRSGDRSM\ | 82   | >RUNX1-R76 KLRSGDHSM' | 60    | 22    |
| >RUNX1-R76 KLRSGDRSM\ | 116  | >RUNX1-R76 KLRSGDHSM' | 76    | 40    |
| >RUNX1-R76 KLRSGDRSM\ | 68   | >RUNX1-R76 KLRSGDHSM' | 11    | 57    |
| >RUNX1-R76 KLRSGDRSM\ | 573  | >RUNX1-R76 KLRSGDHSM' | 86    | 487   |
| >RUNX1-R76 KLRSGDRSM\ | 156  | >RUNX1-R76 KLRSGDHSM' | 33    | 123   |
| >RUNX1-R76 KLRSGDRSM  | 4007 | >RUNX1-R76 KLRSGDHSM  | 33    | 3974  |
| >RUNX1-R76 KLRSGDRSM\ | 6    | >RUNX1-R76 KLRSGDHSM' | 3     | 3     |
| >RUNX1-R76 KLRSGDRSM  | 56   | >RUNX1-R76 KLRSGDHSM  | 47    | 9     |
| >RUNX1-R76 KLRSGDRSM\ | 52   | >RUNX1-R76 KLRSGDHSM' | 41    | 11    |
| >RUNX1-R76 KLRSGDRSM\ | 398  | >RUNX1-R76 KLRSGDHSM' | 429   | 31    |
| >RUNX1-R76 KLRSGDRSM  | 95   | >RUNX1-R76 KLRSGDHSM  | 147   | 52    |
| >RUNX1-R76 KLRSGDRSM  | 104  | >RUNX1-R76 KLRSGDHSM  | 77    | 27    |
| >RUNX1-R76 KLRSGDRSM  | 391  | >RUNX1-R76 KLRSGDHSM  | 219   | 172   |
| >RUNX1-R76 KLRSGDRSM  | 358  | >RUNX1-R76 KLRSGDHSM  | 232   | 126   |
| >RUNX1-R76 KLRSGDRSM  | 538  | >RUNX1-R76 KLRSGDHSM  | 231   | 307   |
| >RUNX1-R76 KLRSGDRSM  | 442  | >RUNX1-R76 KLRSGDHSM  | 394   | 48    |
| >RUNX1-R76 GKLRSGDRSM | 68   | >RUNX1-R76 GKLRSGDHSM | 49    | 19    |
| >RUNX1-R76 GKLRSGDRSM | 235  | >RUNX1-R76 GKLRSGDHSM | 160   | 75    |
| >RUNX1-R76 RSMVEVLA   | 357  | >RUNX1-R76 SSMVEVLA   | 3692  | 3335  |

|                       |      |                       |      |      |
|-----------------------|------|-----------------------|------|------|
| >RUNX1-R76 RSMVEVLADI | 140  | >RUNX1-R76 SSMVEVLADI | 3024 | 2884 |
| >RUNX1-R76 GDRSMVEVL  | 345  | >RUNX1-R76 GDSSMVEVL  | 912  | 567  |
| >RUNX1-R76 GDRSMVEV   | 169  | >RUNX1-R76 GDSSMVEV   | 690  | 521  |
| >RUNX1-R76 GDRSMVEVL  | 133  | >RUNX1-R76 GDSSMVEVL  | 204  | 71   |
| >RUNX1-R76 GDRSMVEV   | 282  | >RUNX1-R76 GDSSMVEV   | 166  | 116  |
| >RUNX1-R76 GDRSMVEVL  | 842  | >RUNX1-R76 GDSSMVEVL  | 465  | 377  |
| >RUNX1-R76 RSGDRSMVE  | 259  | >RUNX1-R76 RSGDSSMVE  | 396  | 137  |
| >RUNX1-R76 RSGDRSMVE  | 540  | >RUNX1-R76 RSGDSSMVE  | 294  | 246  |
| >RUNX1-R76 RSGDRSMV   | 499  | >RUNX1-R76 RSGDSSMV   | 84   | 415  |
| >RUNX1-R76 RSGDRSMVE  | 110  | >RUNX1-R76 RSGDSSMVE  | 36   | 74   |
| >RUNX1-R76 RSGDRSMVE  | 20   | >RUNX1-R76 RSGDSSMVE  | 12   | 8    |
| >RUNX1-R76 RSGDRSMVE  | 436  | >RUNX1-R76 RSGDSSMVE  | 104  | 332  |
| >RUNX1-R76 RSGDRSMV   | 876  | >RUNX1-R76 RSGDSSMV   | 328  | 548  |
| >RUNX1-R76 RSGDRSMVE  | 153  | >RUNX1-R76 RSGDSSMVE  | 191  | 38   |
| >RUNX1-R76 RSGDRSMVE  | 558  | >RUNX1-R76 RSGDSSMVE  | 370  | 188  |
| >RUNX1-R76 RSGDRSMVE  | 291  | >RUNX1-R76 RSGDSSMVE  | 229  | 62   |
| >RUNX1-R76 LRSGDRSM   | 838  | >RUNX1-R76 LRSGDSSM   | 374  | 464  |
| >RUNX1-R76 LRSGDRSM   | 255  | >RUNX1-R76 LRSGDSSM   | 406  | 151  |
| >RUNX1-R76 KLRSGDRSM  | 82   | >RUNX1-R76 KLRSGDSSM  | 49   | 33   |
| >RUNX1-R76 KLRSGDRSM  | 3916 | >RUNX1-R76 KLRSGDSSM  | 487  | 3429 |
| >RUNX1-R76 KLRSGDRSM  | 116  | >RUNX1-R76 KLRSGDSSM  | 54   | 62   |
| >RUNX1-R76 KLRSGDRSM  | 68   | >RUNX1-R76 KLRSGDSSM  | 17   | 51   |
| >RUNX1-R76 KLRSGDRSM  | 573  | >RUNX1-R76 KLRSGDSSM  | 61   | 512  |
| >RUNX1-R76 KLRSGDRSM  | 156  | >RUNX1-R76 KLRSGDSSM  | 31   | 125  |
| >RUNX1-R76 KLRSGDRSM  | 4007 | >RUNX1-R76 KLRSGDSSM  | 339  | 3668 |
| >RUNX1-R76 KLRSGDRSM  | 6    | >RUNX1-R76 KLRSGDSSM  | 3    | 3    |
| >RUNX1-R76 KLRSGDRSM  | 56   | >RUNX1-R76 KLRSGDSSM  | 58   | 2    |
| >RUNX1-R76 KLRSGDRSM  | 52   | >RUNX1-R76 KLRSGDSSM  | 55   | 3    |
| >RUNX1-R76 KLRSGDRSM  | 398  | >RUNX1-R76 KLRSGDSSM  | 369  | 29   |
| >RUNX1-R76 KLRSGDRSM  | 95   | >RUNX1-R76 KLRSGDSSM  | 93   | 2    |
| >RUNX1-R76 KLRSGDRSM  | 104  | >RUNX1-R76 KLRSGDSSM  | 48   | 56   |
| >RUNX1-R76 KLRSGDRSM  | 391  | >RUNX1-R76 KLRSGDSSM  | 121  | 270  |
| >RUNX1-R76 KLRSGDRSM  | 358  | >RUNX1-R76 KLRSGDSSM  | 66   | 292  |
| >RUNX1-R76 KLRSGDRSM  | 935  | >RUNX1-R76 KLRSGDSSM  | 458  | 477  |
| >RUNX1-R76 KLRSGDRSM  | 538  | >RUNX1-R76 KLRSGDSSM  | 103  | 435  |
| >RUNX1-R76 KLRSGDRSM  | 442  | >RUNX1-R76 KLRSGDSSM  | 20   | 422  |
| >RUNX1-R76 GKLRSGDRSM | 68   | >RUNX1-R76 GKLRSGDSSM | 19   | 49   |
| >RUNX1-R76 GKLRSGDRSM | 235  | >RUNX1-R76 GKLRSGDSSM | 132  | 103  |
| >RUNX1-R76 AGKLRSGDRS | 4021 | >RUNX1-R76 AGKLRSGDSS | 487  | 3534 |
| >RUNX1-S10 SVLPTHWRC  | 655  | >RUNX1-S10 FVLPTHWRC  | 30   | 625  |
| >RUNX1-S10 SVLPTHWRC  | 93   | >RUNX1-S10 FVLPTHWRC  | 16   | 77   |
| >RUNX1-S10 SVLPTHWRC  | 147  | >RUNX1-S10 FVLPTHWRC  | 16   | 131  |
| >RUNX1-S10 SVLPTHWRCI | 178  | >RUNX1-S10 FVLPTHWRCI | 609  | 431  |



|                         |       |                         |       |       |
|-------------------------|-------|-------------------------|-------|-------|
| >RUNX1-S10 SVLP THWR    | 35    | >RUNX1-S10 FVLP THWR    | 536   | 501   |
| >RUNX1-S10 SVLP THWRCI  | 10    | >RUNX1-S10 FVLP THWRCI  | 57    | 47    |
| >RUNX1-S10 SVLP THWRCI  | 9     | >RUNX1-S10 FVLP THWRCI  | 223   | 214   |
| >RUNX1-S10 SVLP THWR    | 15    | >RUNX1-S10 FVLP THWR    | 73    | 58    |
| >RUNX1-S10 SVLP THWRCI  | 70    | >RUNX1-S10 FVLP THWRCI  | 741   | 671   |
| >RUNX1-S10 SVLP THWR    | 349   | >RUNX1-S10 FVLP THWR    | 105   | 244   |
| >RUNX1-S10 SVLP THWR    | 39    | >RUNX1-S10 FVLP THWR    | 14    | 25    |
| >RUNX1-S10 SVLP THWRCI  | 233   | >RUNX1-S10 FVLP THWRCI  | 64    | 169   |
| >RUNX1-S10 SVLP THWR    | 114   | >RUNX1-S10 FVLP THWR    | 1238  | 1124  |
| >RUNX1-S10 SVLP THWRCI  | 234   | >RUNX1-S10 FVLP THWRCI  | 2919  | 2685  |
| >RUNX1-S10 SVLP THWR    | 83    | >RUNX1-S10 FVLP THWR    | 122   | 39    |
| >RUNX1-S10 CSVLP THWR   | 146   | >RUNX1-S10 CFVLP THWR   | 71    | 75    |
| >RUNX1-S10 CSVLP THWR   | 1105  | >RUNX1-S10 CFVLP THWR   | 166   | 939   |
| >RUNX1-S10 CSVLP THWR   | 41    | >RUNX1-S10 CFVLP THWR   | 215   | 174   |
| >RUNX1-S10 CSVLP THW    | 7     | >RUNX1-S10 CFVLP THW    | 8369  | 8362  |
| >RUNX1-S10 CSVLP THW    | 69    | >RUNX1-S10 CFVLP THW    | 17510 | 17441 |
| >RUNX1-S10 CSVLP THW    | 11    | >RUNX1-S10 CFVLP THW    | 595   | 584   |
| >RUNX1-S10 CSVLP THWR   | 113   | >RUNX1-S10 CFVLP THWR   | 22    | 91    |
| >RUNX1-S10 VRTDSPNFLC   | 6241  | >RUNX1-S10 VRTDSPNFLC   | 42    | 6199  |
| >RUNX1-S10 VRTDSPNFLC   | 11121 | >RUNX1-S10 VRTDSPNFLC   | 242   | 10879 |
| >RUNX1-S10 LCSVLP THWF  | 244   | >RUNX1-S10 LCFVLP THWF  | 208   | 36    |
| >RUNX1-S10 LCSVLP THW   | 1615  | >RUNX1-S10 LCFVLP THW   | 365   | 1250  |
| >RUNX1-S10 LCSVLP THW   | 2991  | >RUNX1-S10 LCFVLP THW   | 438   | 2553  |
| >RUNX1-S10 LCSVLP THW   | 86    | >RUNX1-S10 LCFVLP THW   | 69    | 17    |
| >RUNX1-S10 LCSVLP THWF  | 297   | >RUNX1-S10 LCFVLP THWF  | 84    | 213   |
| >RUNX1-S10 FLCSVLPT     | 37    | >RUNX1-S10 FLCFVLPT     | 61    | 24    |
| >RUNX1-S10 FLCSVLPT     | 25    | >RUNX1-S10 FLCFVLPT     | 56    | 31    |
| >RUNX1-S10 FLCSVLP THW  | 413   | >RUNX1-S10 FLCFVLP THW  | 938   | 525   |
| >RUNX1-S10 FLCSVLPT     | 16    | >RUNX1-S10 FLCFVLPT     | 32    | 16    |
| >RUNX1-S10 FLCSVLPT     | 85    | >RUNX1-S10 FLCFVLPT     | 252   | 167   |
| >RUNX1-S10 FLCSVLPT     | 11    | >RUNX1-S10 FLCFVLPT     | 15    | 4     |
| >RUNX1-S10 FLCSVLP TH   | 452   | >RUNX1-S10 FLCFVLP TH   | 865   | 413   |
| >RUNX1-S10 FLCSVLPT     | 193   | >RUNX1-S10 FLCFVLPT     | 497   | 304   |
| >RUNX1-S10 FLCSVLPT     | 16    | >RUNX1-S10 FLCFVLPT     | 43    | 27    |
| >RUNX1-S10 FLCSVLP THW  | 202   | >RUNX1-S10 FLCFVLP THW  | 611   | 409   |
| >RUNX1-S10 FLCSVLP THW  | 171   | >RUNX1-S10 FLCFVLP THW  | 255   | 84    |
| >RUNX1-S10 FLCSVLP THW  | 87    | >RUNX1-S10 FLCFVLP THW  | 54    | 33    |
| >RUNX1-S10 FLCSVLP THW  | 23    | >RUNX1-S10 FLCFVLP THW  | 18    | 5     |
| >RUNX1-S10 FLCSVLP THW  | 433   | >RUNX1-S10 FLCFVLP THW  | 604   | 171   |
| >RUNX1-S10 FLCSVLP THW  | 111   | >RUNX1-S10 FLCFVLP THW  | 191   | 80    |
| >RUNX1-S10 FLCSVLP THW  | 567   | >RUNX1-S10 FLCFVLP THW  | 455   | 112   |
| >RUNX1-S10 FLCSVLP THW  | 360   | >RUNX1-S10 FLCFVLP THW  | 328   | 32    |
| >RUNX1-S10 NFLCSVLP TH' | 321   | >RUNX1-S10 NFLCFVLP TH' | 459   | 138   |

|                        |       |                        |      |       |
|------------------------|-------|------------------------|------|-------|
| >RUNX1-S10 NFLCSVLPTH' | 812   | >RUNX1-S10 NFLCFVLPTH' | 482  | 330   |
| >RUNX1-S10 SPNFLCSVL   | 1873  | >RUNX1-S10 SPNFLCFVL   | 184  | 1689  |
| >RUNX1-S10 SPNFLCSV    | 896   | >RUNX1-S10 SPNFLCFV    | 415  | 481   |
| >RUNX1-S10 SPNFLCSV    | 340   | >RUNX1-S10 SPNFLCFV    | 4524 | 4184  |
| >RUNX1-S10 SPNFLCSVL   | 57    | >RUNX1-S10 SPNFLCFVL   | 155  | 98    |
| >RUNX1-S10 SPNFLCSVL   | 557   | >RUNX1-S10 SPNFLCFVL   | 423  | 134   |
| >RUNX1-S10 SPNFLCSVLP1 | 529   | >RUNX1-S10 SPNFLCFVLP1 | 441  | 88    |
| >RUNX1-S10 SPNFLCSVL   | 65    | >RUNX1-S10 SPNFLCFVL   | 1667 | 1602  |
| >RUNX1-S10 SPNFLCSVL   | 653   | >RUNX1-S10 SPNFLCFVL   | 275  | 378   |
| >RUNX1-S10 DSPNFLCSV   | 125   | >RUNX1-S10 DSPNFLCFV   | 53   | 72    |
| >RUNX1-S10 DSPNFLCSVL  | 587   | >RUNX1-S10 DSPNFLCFVL  | 330  | 257   |
| >RUNX1-S10 DSPNFLCSV   | 435   | >RUNX1-S10 DSPNFLCFV   | 231  | 204   |
| >RUNX1-S10 DSPNFLCSV   | 1076  | >RUNX1-S10 DSPNFLCFV   | 130  | 946   |
| >RUNX1-S10 DSPNFLCSVL  | 87    | >RUNX1-S10 DSPNFLCFVL  | 26   | 61    |
| >RUNX1-S10 TDSPNFLCSV  | 1104  | >RUNX1-S10 TDSPNFLCFV  | 153  | 951   |
| >RUNX1-S10 TDSPNFLCSV  | 82    | >RUNX1-S10 TDSPNFLCFV  | 49   | 33    |
| >RUNX1-S10 TDSPNFLCSV  | 441   | >RUNX1-S10 TDSPNFLCFV  | 155  | 286   |
| >RUNX1-S10 RTDSPNFLCS  | 13344 | >RUNX1-S10 RTDSPNFLCF  | 268  | 13076 |
| >RUNX1-S10 RTDSPNFLCS' | 203   | >RUNX1-S10 RTDSPNFLCF' | 92   | 111   |
| >RUNX1-S10 RTDSPNFLCS' | 1291  | >RUNX1-S10 RTDSPNFLCF' | 444  | 847   |
| >RUNX1-S10 RTDSPNFLCS' | 34    | >RUNX1-S10 RTDSPNFLCF' | 16   | 18    |
| >RUNX1-S10 RTDSPNFLCS' | 10    | >RUNX1-S10 RTDSPNFLCF' | 7    | 3     |
| >RUNX1-S10 RTDSPNFLCS' | 329   | >RUNX1-S10 RTDSPNFLCF' | 173  | 156   |
| >RUNX1-S10 RTDSPNFLCS' | 100   | >RUNX1-S10 RTDSPNFLCF' | 29   | 71    |
| >RUNX1-S10 RTDSPNFLCS' | 189   | >RUNX1-S10 RTDSPNFLCF' | 259  | 70    |
| >RUNX1-S10 RTDSPNFLCS  | 15184 | >RUNX1-S10 RTDSPNFLCF  | 228  | 14956 |
| >RUNX1-S10 RTDSPNFLCS' | 440   | >RUNX1-S10 RTDSPNFLCF' | 2871 | 2431  |
| >RUNX1-S10 RTDSPNFLCS' | 22    | >RUNX1-S10 RTDSPNFLCF' | 15   | 7     |
| >RUNX1-S10 RTDSPNFLCS  | 20730 | >RUNX1-S10 RTDSPNFLCF  | 498  | 20232 |
| >RUNX1-S10 RTDSPNFLCS  | 6169  | >RUNX1-S10 RTDSPNFLCF  | 7    | 6162  |
| >RUNX1-S10 RTDSPNFLCS' | 105   | >RUNX1-S10 RTDSPNFLCF' | 208  | 103   |
| >RUNX1-S10 RTDSPNFLCS  | 17794 | >RUNX1-S10 RTDSPNFLCF  | 61   | 17733 |
| >RUNX1-S10 RTDSPNFLCS  | 4508  | >RUNX1-S10 RTDSPNFLCF  | 168  | 4340  |
| >RUNX1-S10 RTDSPNFLCS' | 543   | >RUNX1-S10 RTDSPNFLCF' | 163  | 380   |
| >RUNX1-S10 RTDSPNFLCS  | 14536 | >RUNX1-S10 RTDSPNFLCF  | 120  | 14416 |
| >RUNX1-S10 RTDSPNFLCS' | 226   | >RUNX1-S10 RTDSPNFLCF' | 213  | 13    |
| >RUNX1-S14 SAELRNATAA  | 495   | >RUNX1-S14 LAELRNATAA  | 184  | 311   |
| >RUNX1-S14 SAELRNATAA  | 199   | >RUNX1-S14 LAELRNATAA  | 54   | 145   |
| >RUNX1-S14 YSAELRNA    | 8282  | >RUNX1-S14 YLAELRNA    | 34   | 8248  |
| >RUNX1-S14 YSAELRNAT   | 17115 | >RUNX1-S14 YLAELRNAT   | 217  | 16898 |
| >RUNX1-S14 YSAELRNATA  | 6424  | >RUNX1-S14 YLAELRNATA  | 39   | 6385  |
| >RUNX1-S14 YSAELRNATA  | 7494  | >RUNX1-S14 YLAELRNATA  | 30   | 7464  |
| >RUNX1-S14 YSAELRNA    | 1409  | >RUNX1-S14 YLAELRNA    | 6    | 1403  |

|                       |       |                       |      |       |
|-----------------------|-------|-----------------------|------|-------|
| >RUNX1-S14 YSAELRNAT  | 3218  | >RUNX1-S14 YLAELRNAT  | 12   | 3206  |
| >RUNX1-S14 YSAELRNATA | 2122  | >RUNX1-S14 YLAELRNATA | 17   | 2105  |
| >RUNX1-S14 YSAELRNATA | 493   | >RUNX1-S14 YLAELRNATA | 5    | 488   |
| >RUNX1-S14 YSAELRNA   | 1938  | >RUNX1-S14 YLAELRNA   | 4    | 1934  |
| >RUNX1-S14 YSAELRNAT  | 10411 | >RUNX1-S14 YLAELRNAT  | 23   | 10388 |
| >RUNX1-S14 YSAELRNATA | 2445  | >RUNX1-S14 YLAELRNATA | 21   | 2424  |
| >RUNX1-S14 YSAELRNATA | 1273  | >RUNX1-S14 YLAELRNATA | 4    | 1269  |
| >RUNX1-S14 YSAELRNA   | 1767  | >RUNX1-S14 YLAELRNA   | 45   | 1722  |
| >RUNX1-S14 YSAELRNAT  | 3321  | >RUNX1-S14 YLAELRNAT  | 81   | 3240  |
| >RUNX1-S14 YSAELRNATA | 1134  | >RUNX1-S14 YLAELRNATA | 121  | 1013  |
| >RUNX1-S14 YSAELRNATA | 345   | >RUNX1-S14 YLAELRNATA | 12   | 333   |
| >RUNX1-S14 YSAELRNA   | 9533  | >RUNX1-S14 YLAELRNA   | 12   | 9521  |
| >RUNX1-S14 YSAELRNAT  | 18238 | >RUNX1-S14 YLAELRNAT  | 109  | 18129 |
| >RUNX1-S14 YSAELRNATA | 6044  | >RUNX1-S14 YLAELRNATA | 8    | 6036  |
| >RUNX1-S14 YSAELRNATA | 6128  | >RUNX1-S14 YLAELRNATA | 9    | 6119  |
| >RUNX1-S14 YSAELRNA   | 18684 | >RUNX1-S14 YLAELRNA   | 51   | 18633 |
| >RUNX1-S14 YSAELRNATA | 11211 | >RUNX1-S14 YLAELRNATA | 17   | 11194 |
| >RUNX1-S14 YSAELRNATA | 13438 | >RUNX1-S14 YLAELRNATA | 20   | 13418 |
| >RUNX1-S14 YSAELRNA   | 15929 | >RUNX1-S14 YLAELRNA   | 18   | 15911 |
| >RUNX1-S14 YSAELRNAT  | 23400 | >RUNX1-S14 YLAELRNAT  | 230  | 23170 |
| >RUNX1-S14 YSAELRNATA | 12460 | >RUNX1-S14 YLAELRNATA | 14   | 12446 |
| >RUNX1-S14 YSAELRNATA | 15384 | >RUNX1-S14 YLAELRNATA | 16   | 15368 |
| >RUNX1-S14 YSAELRNA   | 20809 | >RUNX1-S14 YLAELRNA   | 57   | 20752 |
| >RUNX1-S14 YSAELRNATA | 18964 | >RUNX1-S14 YLAELRNATA | 32   | 18932 |
| >RUNX1-S14 YSAELRNATA | 19436 | >RUNX1-S14 YLAELRNATA | 63   | 19373 |
| >RUNX1-S14 YSAELRNA   | 19955 | >RUNX1-S14 YLAELRNA   | 4    | 19951 |
| >RUNX1-S14 YSAELRNAT  | 28142 | >RUNX1-S14 YLAELRNAT  | 12   | 28130 |
| >RUNX1-S14 YSAELRNATA | 12663 | >RUNX1-S14 YLAELRNATA | 3    | 12660 |
| >RUNX1-S14 YSAELRNATA | 15832 | >RUNX1-S14 YLAELRNATA | 3    | 15829 |
| >RUNX1-S14 YSAELRNA   | 456   | >RUNX1-S14 YLAELRNA   | 1420 | 964   |
| >RUNX1-S14 YSAELRNATA | 201   | >RUNX1-S14 YLAELRNATA | 529  | 328   |
| >RUNX1-S14 YSAELRNATA | 92    | >RUNX1-S14 YLAELRNATA | 389  | 297   |
| >RUNX1-S14 TVMAGNDEM  | 15122 | >RUNX1-S14 TVMAGNDEM  | 332  | 14790 |
| >RUNX1-S14 TVMAGNDEM  | 6246  | >RUNX1-S14 TVMAGNDEM  | 27   | 6219  |
| >RUNX1-S14 TVMAGNDEM  | 3191  | >RUNX1-S14 TVMAGNDEM  | 67   | 3124  |
| >RUNX1-S14 TVMAGNDEM  | 10180 | >RUNX1-S14 TVMAGNDEM  | 235  | 9945  |
| >RUNX1-S14 TVMAGNDEM  | 139   | >RUNX1-S14 TVMAGNDEM  | 13   | 126   |
| >RUNX1-S14 TVMAGNDEM  | 7385  | >RUNX1-S14 TVMAGNDEM  | 170  | 7215  |
| >RUNX1-S14 ENYSAELR   | 11    | >RUNX1-S14 ENYLAELR   | 24   | 13    |
| >RUNX1-S14 DENYSAEL   | 325   | >RUNX1-S14 DENYLAEL   | 776  | 451   |
| >RUNX1-S14 DENYSAELR  | 110   | >RUNX1-S14 DENYLAELR  | 160  | 50    |
| >RUNX1-S14 DENYSAEL   | 75    | >RUNX1-S14 DENYLAEL   | 29   | 46    |
| >RUNX1-S14 DENYSAEL   | 489   | >RUNX1-S14 DENYLAEL   | 530  | 41    |

|                        |       |                        |      |       |
|------------------------|-------|------------------------|------|-------|
| >RUNX1-S14:AGNDENYSA   | 369   | >RUNX1-S14:AGNDENYLA   | 259  | 110   |
| >RUNX1-S14:VMAGNDEN\   | 11067 | >RUNX1-S14:VMAGNDEN\   | 212  | 10855 |
| >RUNX1-S14:VMAGNDEN\   | 123   | >RUNX1-S14:VMAGNDEN\   | 98   | 25    |
| >RUNX1-S14:VMAGNDEN\   | 3271  | >RUNX1-S14:VMAGNDEN\   | 28   | 3243  |
| >RUNX1-S14:VMAGNDEN\   | 20    | >RUNX1-S14:VMAGNDEN\   | 15   | 5     |
| >RUNX1-S14:VMAGNDEN\   | 9228  | >RUNX1-S14:VMAGNDEN\   | 354  | 8874  |
| >RUNX1-S14:VMAGNDEN\   | 48    | >RUNX1-S14:VMAGNDEN\   | 67   | 19    |
| >RUNX1-S14:VMAGNDEN\   | 224   | >RUNX1-S14:VMAGNDEN\   | 350  | 126   |
| >RUNX1-S14:VMAGNDEN\   | 531   | >RUNX1-S14:VMAGNDEN\   | 8    | 523   |
| >RUNX1-S14:VMAGNDEN\   | 16    | >RUNX1-S14:VMAGNDEN\   | 24   | 8     |
| >RUNX1-S14:VMAGNDEN\   | 5239  | >RUNX1-S14:VMAGNDEN\   | 12   | 5227  |
| >RUNX1-S14:VMAGNDEN\   | 35    | >RUNX1-S14:VMAGNDEN\   | 71   | 36    |
| >RUNX1-S14:VMAGNDEN\   | 3288  | >RUNX1-S14:VMAGNDEN\   | 14   | 3274  |
| >RUNX1-S14:VMAGNDEN\   | 41    | >RUNX1-S14:VMAGNDEN\   | 42   | 1     |
| >RUNX1-S14:VMAGNDEN\   | 3328  | >RUNX1-S14:VMAGNDEN\   | 8    | 3320  |
| >RUNX1-S14:VMAGNDEN\   | 19    | >RUNX1-S14:VMAGNDEN\   | 36   | 17    |
| >RUNX1-S14:VMAGNDEN\   | 809   | >RUNX1-S14:VMAGNDEN\   | 4    | 805   |
| >RUNX1-S14:VMAGNDEN\   | 8     | >RUNX1-S14:VMAGNDEN\   | 10   | 2     |
| >RUNX1-S94:SPNFLCSV    | 340   | >RUNX1-S94:IPNFLCSV    | 382  | 42    |
| >RUNX1-S94:SPNFLCSVL   | 57    | >RUNX1-S94:IPNFLCSVL   | 56   | 1     |
| >RUNX1-S94:SPNFLCSVL   | 557   | >RUNX1-S94:IPNFLCSVL   | 228  | 329   |
| >RUNX1-S94:SPNFLCSVLPT | 529   | >RUNX1-S94:IPNFLCSVLPT | 253  | 276   |
| >RUNX1-S94:SPNFLCSV    | 4264  | >RUNX1-S94:IPNFLCSV    | 411  | 3853  |
| >RUNX1-S94:SPNFLCSV    | 748   | >RUNX1-S94:IPNFLCSV    | 64   | 684   |
| >RUNX1-S94:SPNFLCSVLPT | 3842  | >RUNX1-S94:IPNFLCSVLPT | 360  | 3482  |
| >RUNX1-S94:SPNFLCSVL   | 65    | >RUNX1-S94:IPNFLCSVL   | 59   | 6     |
| >RUNX1-S94:DSPNFLCSV   | 7220  | >RUNX1-S94:DIPNFLCSV   | 94   | 7126  |
| >RUNX1-S94:DSPNFLCSV   | 15519 | >RUNX1-S94:DIPNFLCSV   | 339  | 15180 |
| >RUNX1-S94:DSPNFLCSV   | 13698 | >RUNX1-S94:DIPNFLCSV   | 38   | 13660 |
| >RUNX1-S94:DSPNFLCSV   | 125   | >RUNX1-S94:DIPNFLCSV   | 102  | 23    |
| >RUNX1-S94:DSPNFLCSV   | 435   | >RUNX1-S94:DIPNFLCSV   | 92   | 343   |
| >RUNX1-S94:DSPNFLCSVL  | 87    | >RUNX1-S94:DIPNFLCSVL  | 5911 | 5824  |
| >RUNX1-S94:TDSPNFLCSV  | 1197  | >RUNX1-S94:TDIPNFLCSVL | 354  | 843   |
| >RUNX1-S94:TDSPNFLCSV  | 82    | >RUNX1-S94:TDIPNFLCSV  | 58   | 24    |
| >RUNX1-S94:TDSPNFLCSV  | 441   | >RUNX1-S94:TDIPNFLCSVL | 280  | 161   |
| >RUNX1-S94:RTDSPNFLCS\ | 203   | >RUNX1-S94:RTDIPNFLCS\ | 692  | 489   |
| >RUNX1-S94:RTDSPNFLCS\ | 34    | >RUNX1-S94:RTDIPNFLCS\ | 50   | 16    |
| >RUNX1-S94:RTDSPNFL    | 411   | >RUNX1-S94:RTDIPNFL    | 550  | 139   |
| >RUNX1-S94:RTDSPNFLCS\ | 10    | >RUNX1-S94:RTDIPNFLCS\ | 13   | 3     |
| >RUNX1-S94:RTDSPNFLCS\ | 329   | >RUNX1-S94:RTDIPNFLCS\ | 651  | 322   |
| >RUNX1-S94:RTDSPNFLCS\ | 100   | >RUNX1-S94:RTDIPNFLCS\ | 125  | 25    |
| >RUNX1-S94:RTDSPNFLCS\ | 189   | >RUNX1-S94:RTDIPNFLCS\ | 292  | 103   |
| >RUNX1-S94:RTDSPNFLCS\ | 440   | >RUNX1-S94:RTDIPNFLCS\ | 812  | 372   |

|                        |       |                        |      |       |
|------------------------|-------|------------------------|------|-------|
| >RUNX1-S94 RTDSPNFLCS' | 22    | >RUNX1-S94 RTDIPNFLCS\ | 39   | 17    |
| >RUNX1-S94 RTDSPNFL    | 20    | >RUNX1-S94 RTDIPNFL    | 17   | 3     |
| >RUNX1-S94 RTDSPNFLCS' | 105   | >RUNX1-S94 RTDIPNFLCS\ | 40   | 65    |
| >RUNX1-S94 RTDSPNFLC   | 223   | >RUNX1-S94 RTDIPNFLC   | 411  | 188   |
| >RUNX1-S94 RTDSPNFL    | 34    | >RUNX1-S94 RTDIPNFL    | 56   | 22    |
| >RUNX1-S94 RTDSPNFLCS' | 226   | >RUNX1-S94 RTDIPNFLCS\ | 935  | 709   |
| >RUNX1-S94 RTDSPNFL    | 244   | >RUNX1-S94 RTDIPNFL    | 217  | 27    |
| >RUNX1-S94 VRTDSPNF    | 51    | >RUNX1-S94 VRTDIPNF    | 164  | 113   |
| >RUNX1-S94 VRTDSPNFL   | 142   | >RUNX1-S94 VRTDIPNFL   | 36   | 106   |
| >RUNX1-S94 LVRTDSPNFL  | 504   | >RUNX1-S94 LVRTDIPNFL  | 325  | 179   |
| >RUNX1-S94 LVRTDSPNF   | 495   | >RUNX1-S94 LVRTDIPNF   | 34   | 461   |
| >RUNX1-S94 LVRTDSPNF   | 475   | >RUNX1-S94 LVRTDIPNF   | 1257 | 782   |
| >RUNX1-S94 LVRTDSPNFL  | 16    | >RUNX1-S94 LVRTDIPNFL  | 28   | 12    |
| >RUNX1-S94 LVRTDSPNF   | 158   | >RUNX1-S94 LVRTDIPNF   | 395  | 237   |
| >RUNX1-S94 LVRTDSPNF   | 70    | >RUNX1-S94 LVRTDIPNF   | 111  | 41    |
| >RUNX1-S94 LVRTDSPNF   | 60    | >RUNX1-S94 LVRTDIPNF   | 129  | 69    |
| >RUNX1-S94 LVRTDSPNFL  | 481   | >RUNX1-S94 LVRTDIPNFL  | 508  | 27    |
| >RUNX1-S94 ELVRTDSPNF  | 396   | >RUNX1-S94 ELVRTDIPNFL | 299  | 97    |
| >RUNX1-S94 ELVRTDSPNF  | 418   | >RUNX1-S94 ELVRTDIPNFL | 293  | 125   |
| >RUNX1-S94 ELVRTDSPNF  | 471   | >RUNX1-S94 ELVRTDIPNFL | 412  | 59    |
| >RUNX1-S94 ELVRTDSPNF  | 667   | >RUNX1-S94 ELVRTDIPNFL | 441  | 226   |
| >RUNX1-S94 ELVRTDSPNF  | 114   | >RUNX1-S94 ELVRTDIPNFL | 121  | 7     |
| >RUNX1-S94 ELVRTDSPNF  | 23    | >RUNX1-S94 ELVRTDIPNF  | 17   | 6     |
| >RUNX1-S94 ELVRTDSPNF  | 113   | >RUNX1-S94 ELVRTDIPNFL | 201  | 88    |
| >RUNX1-S94 ELVRTDSPNF  | 427   | >RUNX1-S94 ELVRTDIPNFL | 267  | 160   |
| >RUNX1-S94 ELVRTDSPNF  | 173   | >RUNX1-S94 ELVRTDIPNF  | 293  | 120   |
| >RUNX1-S94 GELVRTDS    | 3107  | >RUNX1-S94 GELVRTDI    | 285  | 2822  |
| >RUNX1-S94 GELVRTDSPN  | 274   | >RUNX1-S94 GELVRTDIPN  | 223  | 51    |
| >RUNX1-S94 GELVRTDSPN  | 117   | >RUNX1-S94 GELVRTDIPN  | 133  | 16    |
| >RUNX1-S94 GELVRTDSPN  | 196   | >RUNX1-S94 GELVRTDIPN  | 146  | 50    |
| >RUNX1-S94 GELVRTDS    | 21388 | >RUNX1-S94 GELVRTDI    | 31   | 21357 |
| >RUNX1-S94 GELVRTDSP   | 385   | >RUNX1-S94 GELVRTDIP   | 444  | 59    |
| >RUNX1-S94 GELVRTDSPN  | 21    | >RUNX1-S94 GELVRTDIPN  | 14   | 7     |
| >RUNX1-S94 HPGELVRTDS  | 8675  | >RUNX1-S94 HPGELVRTDI  | 398  | 8277  |
| >RUNX1-T11 TLPIAFKV    | 262   | >RUNX1-T11 NLPIAFKV    | 568  | 306   |
| >RUNX1-T11 TLPIAFKV    | 85    | >RUNX1-T11 NLPIAFKV    | 102  | 17    |
| >RUNX1-T11 TLPIAFKVVAL | 199   | >RUNX1-T11 NLPIAFKVVA  | 230  | 31    |
| >RUNX1-T11 TLPIAFKV    | 57    | >RUNX1-T11 NLPIAFKV    | 85   | 28    |
| >RUNX1-T11 TLPIAFKVV   | 176   | >RUNX1-T11 NLPIAFKVV   | 232  | 56    |
| >RUNX1-T11 TLPIAFKVVAL | 247   | >RUNX1-T11 NLPIAFKVVA  | 334  | 87    |
| >RUNX1-T11 TLPIAFKV    | 83    | >RUNX1-T11 NLPIAFKV    | 97   | 14    |
| >RUNX1-T11 TLPIAFKV    | 17    | >RUNX1-T11 NLPIAFKV    | 29   | 12    |
| >RUNX1-T11 TLPIAFKVV   | 112   | >RUNX1-T11 NLPIAFKVV   | 189  | 77    |

|                         |     |                         |       |       |
|-------------------------|-----|-------------------------|-------|-------|
| >RUNX1-T11 TLPIAFKVVAl  | 198 | >RUNX1-T11 NLPIAFKVVAl  | 310   | 112   |
| >RUNX1-T11 TLPIAFKV     | 181 | >RUNX1-T11 NLPIAFKV     | 166   | 15    |
| >RUNX1-T11 TLPIAFKV     | 13  | >RUNX1-T11 NLPIAFKV     | 22    | 9     |
| >RUNX1-T11 TLPIAFKVV    | 108 | >RUNX1-T11 NLPIAFKVV    | 272   | 164   |
| >RUNX1-T11 TLPIAFKV     | 92  | >RUNX1-T11 NLPIAFKV     | 68    | 24    |
| >RUNX1-T11 TLPIAFKV     | 4   | >RUNX1-T11 NLPIAFKV     | 9     | 5     |
| >RUNX1-T11 TLPIAFKVV    | 15  | >RUNX1-T11 NLPIAFKVV    | 39    | 24    |
| >RUNX1-T11 TLPIAFKVVA   | 267 | >RUNX1-T11 NLPIAFKVVA   | 876   | 609   |
| >RUNX1-T11 TLPIAFKVVAl  | 47  | >RUNX1-T11 NLPIAFKVVAl  | 161   | 114   |
| >RUNX1-T11 TLPIAFKV     | 166 | >RUNX1-T11 NLPIAFKV     | 214   | 48    |
| >RUNX1-T11 TLPIAFKVV    | 61  | >RUNX1-T11 NLPIAFKVV    | 819   | 758   |
| >RUNX1-T11 TLPIAFKVVAl  | 40  | >RUNX1-T11 NLPIAFKVVAl  | 421   | 381   |
| >RUNX1-T11 KTLPIAFKV    | 38  | >RUNX1-T11 KNLPIAFKV    | 7120  | 7082  |
| >RUNX1-T11 KTLPIAFKV    | 92  | >RUNX1-T11 KNLPIAFKV    | 2234  | 2142  |
| >RUNX1-T11 KTLPIAFKVV   | 360 | >RUNX1-T11 KNLPIAFKVV   | 5799  | 5439  |
| >RUNX1-T11 KTLPIAFKV    | 14  | >RUNX1-T11 KNLPIAFKV    | 545   | 531   |
| >RUNX1-T11 KTLPIAFKVV   | 97  | >RUNX1-T11 KNLPIAFKVV   | 1445  | 1348  |
| >RUNX1-T11 KTLPIAFKVVAl | 308 | >RUNX1-T11 KNLPIAFKVVAl | 8277  | 7969  |
| >RUNX1-T11 KTLPIAFKV    | 10  | >RUNX1-T11 KNLPIAFKV    | 1201  | 1191  |
| >RUNX1-T11 KTLPIAFKVV   | 62  | >RUNX1-T11 KNLPIAFKVV   | 4774  | 4712  |
| >RUNX1-T11 KTLPIAFKV    | 39  | >RUNX1-T11 KNLPIAFKV    | 9224  | 9185  |
| >RUNX1-T11 KTLPIAFKVV   | 461 | >RUNX1-T11 KNLPIAFKVV   | 14230 | 13769 |
| >RUNX1-T11 KTLPIAFKV    | 15  | >RUNX1-T11 KNLPIAFKV    | 729   | 714   |
| >RUNX1-T11 KTLPIAFKVV   | 144 | >RUNX1-T11 KNLPIAFKVV   | 5034  | 4890  |
| >RUNX1-T11 KTLPIAFKV    | 47  | >RUNX1-T11 KNLPIAFKV    | 9821  | 9774  |
| >RUNX1-T11 KTLPIAFKV    | 55  | >RUNX1-T11 KNLPIAFKV    | 7453  | 7398  |
| >RUNX1-T11 KTLPIAFKVV   | 454 | >RUNX1-T11 KNLPIAFKVV   | 14600 | 14146 |
| >RUNX1-T11 KTLPIAFK     | 38  | >RUNX1-T11 KNLPIAFK     | 1081  | 1043  |
| >RUNX1-T11 KTLPIAFK     | 9   | >RUNX1-T11 KNLPIAFK     | 199   | 190   |
| >RUNX1-T11 KTLPIAFK     | 5   | >RUNX1-T11 KNLPIAFK     | 32    | 27    |
| >RUNX1-T11 KTLPIAFKV    | 163 | >RUNX1-T11 KNLPIAFKV    | 6882  | 6719  |
| >RUNX1-T11 KTLPIAFKVV   | 117 | >RUNX1-T11 KNLPIAFKVV   | 5835  | 5718  |
| >RUNX1-T11 KTLPIAFKVVAl | 59  | >RUNX1-T11 KNLPIAFKVVAl | 4019  | 3960  |
| >RUNX1-T11 KTLPIAFK     | 12  | >RUNX1-T11 KNLPIAFK     | 184   | 172   |
| >RUNX1-T11 KTLPIAFKV    | 328 | >RUNX1-T11 KNLPIAFKV    | 8727  | 8399  |
| >RUNX1-T11 KTLPIAFKV    | 59  | >RUNX1-T11 KNLPIAFKV    | 2597  | 2538  |
| >RUNX1-T11 KTLPIAFKVV   | 232 | >RUNX1-T11 KNLPIAFKVV   | 7576  | 7344  |
| >RUNX1-T11 KTLPIAFKVVAl | 252 | >RUNX1-T11 KNLPIAFKVVAl | 12811 | 12559 |
| >RUNX1-T11 KTLPIAFK     | 108 | >RUNX1-T11 KNLPIAFK     | 5959  | 5851  |
| >RUNX1-T11 KTLPIAFKV    | 88  | >RUNX1-T11 KNLPIAFKV    | 7756  | 7668  |
| >RUNX1-T11 KTLPIAFKV    | 12  | >RUNX1-T11 KNLPIAFKV    | 3809  | 3797  |
| >RUNX1-T11 KTLPIAFKVV   | 302 | >RUNX1-T11 KNLPIAFKVV   | 11539 | 11237 |
| >RUNX1-T11 KTLPIAFKV    | 14  | >RUNX1-T11 KNLPIAFKV    | 13864 | 13850 |

|                        |     |                        |       |       |
|------------------------|-----|------------------------|-------|-------|
| >RUNX1-T11 KTLPIAFKVV  | 44  | >RUNX1-T11 KNLPIAFKVV  | 18321 | 18277 |
| >RUNX1-T11 KTLPIAFKV   | 400 | >RUNX1-T11 KNLPIAFKV   | 15465 | 15065 |
| >RUNX1-T11 KTLPIAFKV   | 242 | >RUNX1-T11 KNLPIAFKV   | 12112 | 11870 |
| >RUNX1-T11 KTLPIAFKV   | 85  | >RUNX1-T11 KNLPIAFKV   | 4568  | 4483  |
| >RUNX1-T11 KTLPIAFK    | 357 | >RUNX1-T11 KNLPIAFK    | 4736  | 4379  |
| >RUNX1-T11 KTLPIAFK    | 151 | >RUNX1-T11 KNLPIAFK    | 219   | 68    |
| >RUNX1-T11 KTLPIAFKV   | 199 | >RUNX1-T11 KNLPIAFKV   | 4102  | 3903  |
| >RUNX1-T11 NKTLPIAF    | 33  | >RUNX1-T11 NKNLPIAF    | 16    | 17    |
| >RUNX1-T11 CNKTLPIAFK  | 83  | >RUNX1-T11 CNKNLPIAFK  | 85    | 2     |
| >RUNX1-T11 CNKTLPIAF   | 168 | >RUNX1-T11 CNKNLPIAF   | 127   | 41    |
| >RUNX1-T11 RCNKTLPIAFK | 282 | >RUNX1-T11 RCNKNLPIAFK | 293   | 11    |
| >RUNX1-T11 RCNKTLPI    | 129 | >RUNX1-T11 RCNKNLPI    | 229   | 100   |
| >RUNX1-T11 RCNKTLPIA   | 146 | >RUNX1-T11 RCNKNLPIA   | 342   | 196   |
| >RUNX1-T11 RCNKTLPIAFK | 9   | >RUNX1-T11 RCNKNLPIAFK | 11    | 2     |
| >RUNX1-T11 RCNKTLPIAFK | 155 | >RUNX1-T11 RCNKNLPIAFK | 197   | 42    |
| >RUNX1-T11 RCNKTLPI    | 134 | >RUNX1-T11 RCNKNLPI    | 246   | 112   |
| >RUNX1-T11 RCNKTLPIAF  | 134 | >RUNX1-T11 RCNKNLPIAF  | 134   | 0     |
| >RUNX1-T11 RCNKTLPIAF  | 42  | >RUNX1-T11 RCNKNLPIAF  | 57    | 15    |
| >RUNX1-T11 WRCNKTLPI   | 433 | >RUNX1-T11 WRCNKNLPI   | 470   | 37    |
| >RUNX1-T11 WRCNKTLPIA  | 34  | >RUNX1-T11 WRCNKNLPIA  | 36    | 2     |
| >RUNX1-T11 WRCNKTLPIA  | 176 | >RUNX1-T11 WRCNKNLPIA  | 224   | 48    |
| >RUNX1-T11 WRCNKTLPI   | 400 | >RUNX1-T11 WRCNKNLPI   | 554   | 154   |
| >RUNX1-T11 WRCNKTLPIA  | 221 | >RUNX1-T11 WRCNKNLPIA  | 289   | 68    |
| >RUNX1-T11 WRCNKTLPI   | 288 | >RUNX1-T11 WRCNKNLPI   | 602   | 314   |
| >RUNX1-T11 WRCNKTLPIA  | 245 | >RUNX1-T11 WRCNKNLPIA  | 294   | 49    |
| >RUNX1-T11 WRCNKTLPIA  | 62  | >RUNX1-T11 WRCNKNLPIA  | 86    | 24    |
| >RUNX1-T11 HWRCNKTL    | 320 | >RUNX1-T11 HWRCNKNL    | 264   | 56    |
| >RUNX1-T11 HWRCNKTL    | 23  | >RUNX1-T11 HWRCNKNL    | 16    | 7     |
| >RUNX1-T11 HWRCNKTL    | 32  | >RUNX1-T11 HWRCNKNL    | 24    | 8     |
| >RUNX1-T11 HWRCNKTL    | 393 | >RUNX1-T11 HWRCNKNL    | 716   | 323   |
| >RUNX1-T11 THWRCNKTL   | 233 | >RUNX1-T11 THWRCNKNL   | 602   | 369   |
| >RUNX1-T11 THWRCNKTL   | 462 | >RUNX1-T11 THWRCNKNL   | 621   | 159   |
| >RUNX1-T11 THWRCNKTL   | 277 | >RUNX1-T11 THWRCNKNL   | 979   | 702   |
| >RUNX1-T11 THWRCNKTL   | 312 | >RUNX1-T11 THWRCNKNL   | 2966  | 2654  |
| >RUNX1-T11 LPTHWRCNK   | 48  | >RUNX1-T11 LPTHWRCNK   | 97    | 49    |
| >RUNX1-T11 LPTHWRCNK   | 184 | >RUNX1-T11 LPTHWRCNK   | 1210  | 1026  |
| >RUNX1-T11 LPTHWRCNK   | 85  | >RUNX1-T11 LPTHWRCNK   | 87    | 2     |
| >RUNX1-T11 LPTHWRCNK   | 122 | >RUNX1-T11 LPTHWRCNK   | 268   | 146   |
| >RUNX1-V13 VMAGNDENY   | 123 | >RUNX1-V13 LMAGNDENY   | 91    | 32    |
| >RUNX1-V13 VMAGNDENY   | 20  | >RUNX1-V13 LMAGNDENY   | 8     | 12    |
| >RUNX1-V13 VMAGNDENY   | 48  | >RUNX1-V13 LMAGNDENY   | 31    | 17    |
| >RUNX1-V13 VMAGNDENY   | 224 | >RUNX1-V13 LMAGNDENY   | 129   | 95    |
| >RUNX1-V13 VMAGNDENY   | 16  | >RUNX1-V13 LMAGNDENY   | 18    | 2     |

|                       |      |                       |       |       |
|-----------------------|------|-----------------------|-------|-------|
| >RUNX1-V13 VMAGNDEN\  | 35   | >RUNX1-V13 LMAGNDENY  | 29    | 6     |
| >RUNX1-V13 VMAGNDEN\  | 41   | >RUNX1-V13 LMAGNDENY  | 57    | 16    |
| >RUNX1-V13 VMAGNDEN\  | 19   | >RUNX1-V13 LMAGNDENY  | 23    | 4     |
| >RUNX1-V13 VMAGNDEN\  | 809  | >RUNX1-V13 LMAGNDENY  | 470   | 339   |
| >RUNX1-V13 VMAGNDEN\  | 8    | >RUNX1-V13 LMAGNDENY  | 7     | 1     |
| >RUNX1-V13 VMAGNDEN\  | 21   | >RUNX1-V13 LMAGNDENY  | 16    | 5     |
| >RUNX1-V13 VMAGNDEN\  | 36   | >RUNX1-V13 LMAGNDENY  | 79    | 43    |
| >RUNX1-V13 VMAGNDEN\  | 97   | >RUNX1-V13 LMAGNDENY  | 56    | 41    |
| >RUNX1-V13 VMAGNDEN\  | 64   | >RUNX1-V13 LMAGNDENY  | 65    | 1     |
| >RUNX1-V13 VMAGNDEN\  | 530  | >RUNX1-V13 LMAGNDENY  | 348   | 182   |
| >RUNX1-V13 VMAGNDEN\  | 636  | >RUNX1-V13 LMAGNDENY  | 170   | 466   |
| >RUNX1-V13 VMAGNDEN\  | 534  | >RUNX1-V13 LMAGNDENY  | 420   | 114   |
| >RUNX1-V13 TVMAGNDEN  | 6246 | >RUNX1-V13 TLMAGNDEN  | 192   | 6054  |
| >RUNX1-V13 TVMAGNDEN  | 367  | >RUNX1-V13 TLMAGNDEN  | 918   | 551   |
| >RUNX1-V13 TVMAGNDEN  | 17   | >RUNX1-V13 TLMAGNDEN  | 505   | 488   |
| >RUNX1-V13 TVMAGNDEN  | 320  | >RUNX1-V13 TLMAGNDEN  | 1924  | 1604  |
| >RUNX1-V13 TVMAGNDEN  | 146  | >RUNX1-V13 TLMAGNDEN  | 111   | 35    |
| >RUNX1-V13 TVMAGNDEN  | 153  | >RUNX1-V13 TLMAGNDEN  | 1272  | 1119  |
| >RUNX1-V13 TVMAGNDEN  | 139  | >RUNX1-V13 TLMAGNDEN  | 2516  | 2377  |
| >RUNX1-V13 TVMAGNDEN  | 206  | >RUNX1-V13 TLMAGNDEN  | 208   | 2     |
| >RUNX1-V13 TVMAGNDEN  | 316  | >RUNX1-V13 TLMAGNDEN  | 139   | 177   |
| >RUNX1-V13 TVMAGNDEN  | 99   | >RUNX1-V13 TLMAGNDEN  | 22    | 77    |
| >RUNX1-V13 GDVPDGLTV\ | 176  | >RUNX1-V13 GDVPDGLTV\ | 952   | 776   |
| >RUNX1-V13 VTMAGNDE   | 35   | >RUNX1-V13 VTLMAGNDE  | 334   | 299   |
| >RUNX1-V13 VTMAGNDE   | 155  | >RUNX1-V13 VTLMAGNDE  | 233   | 78    |
| >RUNX1-V13 VTMAGNDE   | 141  | >RUNX1-V13 VTLMAGNDE  | 101   | 40    |
| >RUNX1-V13 VTMAGNDE   | 192  | >RUNX1-V13 VTLMAGNDE  | 160   | 32    |
| >RUNX1-V13 VTMAGNDE   | 7    | >RUNX1-V13 VTLMAGNDE  | 7     | 0     |
| >RUNX1-V13 VTMAGNDE   | 108  | >RUNX1-V13 VTLMAGNDE  | 81    | 27    |
| >RUNX1-V13 PDGTLVTV   | 335  | >RUNX1-V13 PDGTLVTL   | 2040  | 1705  |
| >RUNX1-V13 VPDGTLVTV  | 664  | >RUNX1-V13 VPDGTLVTL  | 180   | 484   |
| >RUNX1-V13 VPDGTLVTVM | 141  | >RUNX1-V13 VPDGTLVTLM | 193   | 52    |
| >RUNX1-V13 VPDGTLVTV  | 687  | >RUNX1-V13 VPDGTLVTL  | 109   | 578   |
| >RUNX1-V13 VPDGTLVTVM | 189  | >RUNX1-V13 VPDGTLVTLM | 592   | 403   |
| >RUNX1-V13 VPDGTLVTV  | 3251 | >RUNX1-V13 VPDGTLVTL  | 446   | 2805  |
| >RUNX1-V13 VPDGTLVTV  | 2199 | >RUNX1-V13 VPDGTLVTL  | 103   | 2096  |
| >RUNX1-V13 VPDGTLVTV  | 1395 | >RUNX1-V13 VPDGTLVTL  | 432   | 963   |
| >RUNX1-V13 VPDGTLVTV  | 225  | >RUNX1-V13 VPDGTLVTL  | 12464 | 12239 |
| >RUNX1-V13 VPDGTLVTVM | 80   | >RUNX1-V13 VPDGTLVTLM | 278   | 198   |
| >RUNX1-V13 DVPDGLVTV\ | 399  | >RUNX1-V13 DVPDGLVTVL | 2043  | 1644  |
| >RUNX1-V13 DVPDGLVTV\ | 58   | >RUNX1-V13 DVPDGLVTVL | 1306  | 1248  |
| >RUNX1-V13 DVPDGLVTV\ | 109  | >RUNX1-V13 DVPDGLVTVL | 61    | 48    |
| >RUNX1-V13 DVPDGLVTV\ | 4204 | >RUNX1-V13 DVPDGLVTVL | 384   | 3820  |



|                      |      |                      |       |       |
|----------------------|------|----------------------|-------|-------|
| >RUNX1-V13 DVPDGLVTL | 58   | >RUNX1-V13 DVPDGLVTL | 165   | 107   |
| >RUNX1-V13 DVPDGLVTL | 337  | >RUNX1-V13 DVPDGLVTL | 301   | 36    |
| >RUNX1-V13 DVPDGLVTL | 58   | >RUNX1-V13 DVPDGLVTL | 275   | 217   |
| >RUNX1-V13 DVPDGLVTL | 77   | >RUNX1-V13 DVPDGLVTL | 1003  | 926   |
| >RUNX1-W1(WRCNKTLP   | 433  | >RUNX1-W1(CRCNKTLP   | 1774  | 1341  |
| >RUNX1-W1(WRCNKTLP   | 34   | >RUNX1-W1(CRCNKTLP   | 70    | 36    |
| >RUNX1-W1(WRCNKTLP   | 176  | >RUNX1-W1(CRCNKTLP   | 705   | 529   |
| >RUNX1-W1(WRCNKTLP   | 400  | >RUNX1-W1(CRCNKTLP   | 5243  | 4843  |
| >RUNX1-W1(WRCNKTLP   | 221  | >RUNX1-W1(CRCNKTLP   | 3358  | 3137  |
| >RUNX1-W1(WRCNKTLP   | 288  | >RUNX1-W1(CRCNKTLP   | 1055  | 767   |
| >RUNX1-W1(WRCNKTLP   | 245  | >RUNX1-W1(CRCNKTLP   | 857   | 612   |
| >RUNX1-W1(WRCNKTLP   | 62   | >RUNX1-W1(CRCNKTLP   | 171   | 109   |
| >RUNX1-W1(HWRCNKTL   | 320  | >RUNX1-W1(HCRCNKTL   | 306   | 14    |
| >RUNX1-W1(HWRCNKTL   | 23   | >RUNX1-W1(HCRCNKTL   | 21    | 2     |
| >RUNX1-W1(HWRCNKTL   | 32   | >RUNX1-W1(HCRCNKTL   | 29    | 3     |
| >RUNX1-W1(HWRCNKTL   | 393  | >RUNX1-W1(HCRCNKTL   | 37031 | 36638 |
| >RUNX1-W1(NFLCSVLPTH | 321  | >RUNX1-W1(NFLCSVLPTH | 17394 | 17073 |
| >RUNX1-W1(THWRCNKTL  | 233  | >RUNX1-W1(THCRCNKTL  | 1081  | 848   |
| >RUNX1-W1(THWRCNKTL  | 462  | >RUNX1-W1(THCRCNKTL  | 2511  | 2049  |
| >RUNX1-W1(THWRCNKTL  | 277  | >RUNX1-W1(THCRCNKTL  | 825   | 548   |
| >RUNX1-W1(THWRCNKTL  | 312  | >RUNX1-W1(THCRCNKTL  | 181   | 131   |
| >RUNX1-W1(PTHWRCNK   | 71   | >RUNX1-W1(PTHCRCNK   | 39    | 32    |
| >RUNX1-W1(LPTHWRCNK  | 3194 | >RUNX1-W1(LPTHCRCNK  | 313   | 2881  |
| >RUNX1-W1(LPTHWRCNK  | 48   | >RUNX1-W1(LPTHCRCNK  | 28    | 20    |
| >RUNX1-W1(LPTHWRCNK  | 184  | >RUNX1-W1(LPTHCRCNK  | 168   | 16    |
| >RUNX1-W1(LPTHWRCNK  | 85   | >RUNX1-W1(LPTHCRCNK  | 81    | 4     |
| >RUNX1-W1(LPTHWRCNK  | 780  | >RUNX1-W1(LPTHCRCNK  | 386   | 394   |
| >RUNX1-W1(LPTHWRCNK  | 652  | >RUNX1-W1(LPTHCRCNK  | 420   | 232   |
| >RUNX1-W1(LPTHWRCNK  | 122  | >RUNX1-W1(LPTHCRCNK  | 203   | 81    |
| >RUNX1-W1(VLPTHWRC   | 97   | >RUNX1-W1(VLPTHCRC   | 534   | 437   |
| >RUNX1-W1(VLPTHWRC   | 58   | >RUNX1-W1(VLPTHCRC   | 88    | 30    |
| >RUNX1-W1(VLPTHWRCN  | 242  | >RUNX1-W1(VLPTHCRCNK | 128   | 114   |
| >RUNX1-W1(VLPTHWRCN  | 548  | >RUNX1-W1(VLPTHCRCNK | 397   | 151   |
| >RUNX1-W1(SVLPTHWRC  | 93   | >RUNX1-W1(SVLPTHCRC  | 562   | 469   |
| >RUNX1-W1(SVLPTHWRC  | 147  | >RUNX1-W1(SVLPTHCRC  | 653   | 506   |
| >RUNX1-W1(SVLPTHWRCI | 178  | >RUNX1-W1(SVLPTHCRCN | 173   | 5     |
| >RUNX1-W1(SVLPTHWR   | 35   | >RUNX1-W1(SVLPTHCR   | 35    | 0     |
| >RUNX1-W1(SVLPTHWRCI | 10   | >RUNX1-W1(SVLPTHCRCN | 14    | 4     |
| >RUNX1-W1(SVLPTHWRCI | 9    | >RUNX1-W1(SVLPTHCRCN | 8     | 1     |
| >RUNX1-W1(SVLPTHWR   | 15   | >RUNX1-W1(SVLPTHCR   | 21    | 6     |
| >RUNX1-W1(SVLPTHWRCI | 70   | >RUNX1-W1(SVLPTHCRCN | 107   | 37    |
| >RUNX1-W1(SVLPTHWR   | 349  | >RUNX1-W1(SVLPTHCR   | 422   | 73    |
| >RUNX1-W1(SVLPTHWR   | 39   | >RUNX1-W1(SVLPTHCR   | 47    | 8     |

|                      |       |                       |       |       |
|----------------------|-------|-----------------------|-------|-------|
| >RUNX1-W1(SVLPTHWRCI | 233   | >RUNX1-W1(SVLPTHCRCN  | 273   | 40    |
| >RUNX1-W1(SVLPTHWR   | 114   | >RUNX1-W1(SVLPTHCR    | 285   | 171   |
| >RUNX1-W1(SVLPTHWRCI | 234   | >RUNX1-W1(SVLPTHCRCN  | 367   | 133   |
| >RUNX1-W1(SVLPTHWR   | 83    | >RUNX1-W1(SVLPTHCR    | 193   | 110   |
| >RUNX1-W1(CSVLPTHWR  | 146   | >RUNX1-W1(CSVLPTHCR   | 263   | 117   |
| >RUNX1-W1(CSVLPTHWR  | 41    | >RUNX1-W1(CSVLPTHCR   | 52    | 11    |
| >RUNX1-W1(CSVLPTHW   | 7     | >RUNX1-W1(CSVLPTHCR   | 16225 | 16218 |
| >RUNX1-W1(CSVLPTHW   | 69    | >RUNX1-W1(CSVLPTHCR   | 21932 | 21863 |
| >RUNX1-W1(CSVLPTHW   | 11    | >RUNX1-W1(CSVLPTHCR   | 12028 | 12017 |
| >RUNX1-W1(CSVLPTHWR  | 113   | >RUNX1-W1(CSVLPTHCR   | 443   | 330   |
| >RUNX1-W1(LCSVLPTHWF | 244   | >RUNX1-W1(LCSVLPTHCR  | 569   | 325   |
| >RUNX1-W1(LCSVLPTHW  | 86    | >RUNX1-W1(LCSVLPTHCR  | 19853 | 19767 |
| >RUNX1-W1(LCSVLPTHWF | 297   | >RUNX1-W1(LCSVLPTHCR  | 845   | 548   |
| >RUNX1-W1(FLCSVLPTHW | 2431  | >RUNX1-W1(FLCSVLPTHCR | 370   | 2061  |
| >RUNX1-W1(FLCSVLPTHW | 413   | >RUNX1-W1(FLCSVLPTHCR | 967   | 554   |
| >RUNX1-W1(FLCSVLPTHW | 5445  | >RUNX1-W1(FLCSVLPTHCR | 474   | 4971  |
| >RUNX1-W1(FLCSVLPTHW | 1303  | >RUNX1-W1(FLCSVLPTHCR | 16    | 1287  |
| >RUNX1-W1(FLCSVLPTHW | 6358  | >RUNX1-W1(FLCSVLPTHCR | 253   | 6105  |
| >RUNX1-W1(FLCSVLPTHW | 3552  | >RUNX1-W1(FLCSVLPTHCR | 18    | 3534  |
| >RUNX1-W1(FLCSVLPTHW | 202   | >RUNX1-W1(FLCSVLPTHCR | 1198  | 996   |
| >RUNX1-W1(FLCSVLPTHW | 171   | >RUNX1-W1(FLCSVLPTHCR | 201   | 30    |
| >RUNX1-W1(FLCSVLPTHW | 87    | >RUNX1-W1(FLCSVLPTHCR | 91    | 4     |
| >RUNX1-W1(FLCSVLPTHW | 23    | >RUNX1-W1(FLCSVLPTHCR | 31    | 8     |
| >RUNX1-W1(FLCSVLPTHW | 433   | >RUNX1-W1(FLCSVLPTHCR | 28760 | 28327 |
| >RUNX1-W1(FLCSVLPTHW | 111   | >RUNX1-W1(FLCSVLPTHCR | 21105 | 20994 |
| >RUNX1-W1(FLCSVLPTHW | 360   | >RUNX1-W1(FLCSVLPTHCR | 792   | 432   |
| >RUNX1-W1(WRCNKTLPI  | 433   | >RUNX1-W1(WRCNKTLPI   | 519   | 86    |
| >RUNX1-W1(WRCNKTLPIA | 34    | >RUNX1-W1(WRCNKTLPIA  | 30    | 4     |
| >RUNX1-W1(WRCNKTLPIA | 176   | >RUNX1-W1(WRCNKTLPIA  | 1151  | 975   |
| >RUNX1-W1(WRCNKTLPI  | 400   | >RUNX1-W1(WRCNKTLPI   | 4135  | 3735  |
| >RUNX1-W1(WRCNKTLPIA | 221   | >RUNX1-W1(WRCNKTLPIA  | 2949  | 2728  |
| >RUNX1-W1(WRCNKTLPI  | 288   | >RUNX1-W1(WRCNKTLPI   | 1169  | 881   |
| >RUNX1-W1(WRCNKTLPIA | 245   | >RUNX1-W1(WRCNKTLPIA  | 1218  | 973   |
| >RUNX1-W1(WRCNKTLPIA | 62    | >RUNX1-W1(WRCNKTLPIA  | 195   | 133   |
| >RUNX1-W1(HWRCNKTLPI | 21150 | >RUNX1-W1(HWRCNKTLPI  | 284   | 20866 |
| >RUNX1-W1(HWRCNKTLPI | 19484 | >RUNX1-W1(HWRCNKTLPI/ | 364   | 19120 |
| >RUNX1-W1(HWRCNKTL   | 23712 | >RUNX1-W1(HWRCNKTL    | 289   | 23423 |
| >RUNX1-W1(HWRCNKTLPI | 21350 | >RUNX1-W1(HWRCNKTLPI  | 130   | 21220 |
| >RUNX1-W1(HWRCNKTL   | 33422 | >RUNX1-W1(HWRCNKTL    | 162   | 33260 |
| >RUNX1-W1(HWRCNKTLPI | 34053 | >RUNX1-W1(HWRCNKTLPI/ | 455   | 33598 |
| >RUNX1-W1(HWRCNKTL   | 320   | >RUNX1-W1(HWRCNKTL    | 157   | 163   |
| >RUNX1-W1(HWRCNKTLPI | 23    | >RUNX1-W1(HWRCNKTLPI  | 14    | 9     |
| >RUNX1-W1(HWRCNKTLPI | 32    | >RUNX1-W1(HWRCNKTLPI/ | 19    | 13    |

|                       |       |                       |       |       |
|-----------------------|-------|-----------------------|-------|-------|
| >RUNX1-W1(HWRCNKTL    | 4546  | >RUNX1-W1(HLRCNKTL    | 123   | 4423  |
| >RUNX1-W1(HWRCNKTL    | 4969  | >RUNX1-W1(HLRCNKTL    | 413   | 4556  |
| >RUNX1-W1(HWRCNKTLPI  | 6058  | >RUNX1-W1(HLRCNKTLPI  | 494   | 5564  |
| >RUNX1-W1(HWRCNKTL    | 393   | >RUNX1-W1(HLRCNKTL    | 30673 | 30280 |
| >RUNX1-W1(NFLCSVLPTH' | 23020 | >RUNX1-W1(NFLCSVLPTH  | 282   | 22738 |
| >RUNX1-W1(NFLCSVLPTH' | 321   | >RUNX1-W1(NFLCSVLPTH  | 476   | 155   |
| >RUNX1-W1(THWRCNKTL   | 233   | >RUNX1-W1(THLRCNKTLPI | 345   | 112   |
| >RUNX1-W1(THWRCNKTL   | 462   | >RUNX1-W1(THLRCNKTL   | 900   | 438   |
| >RUNX1-W1(THWRCNKTL   | 277   | >RUNX1-W1(THLRCNKTL   | 726   | 449   |
| >RUNX1-W1(THWRCNKTL   | 312   | >RUNX1-W1(THLRCNKTL   | 91    | 221   |
| >RUNX1-W1(THWRCNKTL   | 974   | >RUNX1-W1(THLRCNKTLPI | 323   | 651   |
| >RUNX1-W1(PTHWRCNK    | 71    | >RUNX1-W1(PTHLRCNK    | 45    | 26    |
| >RUNX1-W1(LPTHWRCNK'  | 48    | >RUNX1-W1(LPTHLRCNK   | 48    | 0     |
| >RUNX1-W1(LPTHWRCNK'  | 184   | >RUNX1-W1(LPTHLRCNK   | 250   | 66    |
| >RUNX1-W1(LPTHWRCNK'  | 85    | >RUNX1-W1(LPTHLRCNK   | 119   | 34    |
| >RUNX1-W1(LPTHWRCNK'  | 122   | >RUNX1-W1(LPTHLRCNK   | 216   | 94    |
| >RUNX1-W1(VLPTHWRC    | 97    | >RUNX1-W1(VLPTHLRC    | 482   | 385   |
| >RUNX1-W1(VLPTHWRC    | 58    | >RUNX1-W1(VLPTHLRC    | 115   | 57    |
| >RUNX1-W1(VLPTHWRCN   | 242   | >RUNX1-W1(VLPTHLRCNK  | 159   | 83    |
| >RUNX1-W1(VLPTHWRCN   | 544   | >RUNX1-W1(VLPTHLRCNK  | 340   | 204   |
| >RUNX1-W1(SVLPTHWRC   | 93    | >RUNX1-W1(SVLPTHLRC   | 1575  | 1482  |
| >RUNX1-W1(SVLPTHWRC   | 147   | >RUNX1-W1(SVLPTHLRC   | 2453  | 2306  |
| >RUNX1-W1(SVLPTHWRCI  | 178   | >RUNX1-W1(SVLPTHLRCN  | 132   | 46    |
| >RUNX1-W1(SVLPTHWR    | 35    | >RUNX1-W1(SVLPTHLR    | 19    | 16    |
| >RUNX1-W1(SVLPTHWRCI  | 10    | >RUNX1-W1(SVLPTHLRCN  | 11    | 1     |
| >RUNX1-W1(SVLPTHWRCI  | 9     | >RUNX1-W1(SVLPTHLRCN  | 7     | 2     |
| >RUNX1-W1(SVLPTHWR    | 15    | >RUNX1-W1(SVLPTHLR    | 14    | 1     |
| >RUNX1-W1(SVLPTHWRCI  | 70    | >RUNX1-W1(SVLPTHLRCN  | 159   | 89    |
| >RUNX1-W1(SVLPTHWR    | 349   | >RUNX1-W1(SVLPTHLR    | 366   | 17    |
| >RUNX1-W1(SVLPTHWR    | 39    | >RUNX1-W1(SVLPTHLR    | 39    | 0     |
| >RUNX1-W1(SVLPTHWRCI  | 233   | >RUNX1-W1(SVLPTHLRCN  | 351   | 118   |
| >RUNX1-W1(SVLPTHWR    | 114   | >RUNX1-W1(SVLPTHLR    | 195   | 81    |
| >RUNX1-W1(SVLPTHWRCI  | 234   | >RUNX1-W1(SVLPTHLRCN  | 300   | 66    |
| >RUNX1-W1(SVLPTHWR    | 83    | >RUNX1-W1(SVLPTHLR    | 83    | 0     |
| >RUNX1-W1(CSVLPTHWR   | 1608  | >RUNX1-W1(CSVLPTHLR   | 336   | 1272  |
| >RUNX1-W1(CSVLPTHWR   | 146   | >RUNX1-W1(CSVLPTHLR   | 101   | 45    |
| >RUNX1-W1(CSVLPTHWR   | 41    | >RUNX1-W1(CSVLPTHLR   | 40    | 1     |
| >RUNX1-W1(CSVLPTHW    | 7     | >RUNX1-W1(CSVLPTH     | 168   | 161   |
| >RUNX1-W1(CSVLPTHW    | 69    | >RUNX1-W1(CSVLPTH     | 14157 | 14088 |
| >RUNX1-W1(CSVLPTHW    | 11    | >RUNX1-W1(CSVLPTH     | 1752  | 1741  |
| >RUNX1-W1(CSVLPTHWR   | 113   | >RUNX1-W1(CSVLPTHLR   | 146   | 33    |
| >RUNX1-W1(CSVLPTHW    | 25843 | >RUNX1-W1(CSVLPTH     | 295   | 25548 |
| >RUNX1-W1(LCSVLPTHWF  | 244   | >RUNX1-W1(LCSVLPTHLR  | 664   | 420   |

|                       |       |                       |       |       |
|-----------------------|-------|-----------------------|-------|-------|
| >RUNX1-W1(LCSVLPTHW   | 86    | >RUNX1-W1(LCSVLPTHL   | 11805 | 11719 |
| >RUNX1-W1(LCSVLPTHWF  | 297   | >RUNX1-W1(LCSVLPTHLR  | 296   | 1     |
| >RUNX1-W1(FLCSVLPTHW  | 2688  | >RUNX1-W1(FLCSVLPTHL  | 35    | 2653  |
| >RUNX1-W1(FLCSVLPTHW  | 2431  | >RUNX1-W1(FLCSVLPTHL  | 10    | 2421  |
| >RUNX1-W1(FLCSVLPTHW  | 413   | >RUNX1-W1(FLCSVLPTHLF | 396   | 17    |
| >RUNX1-W1(FLCSVLPTHW  | 5445  | >RUNX1-W1(FLCSVLPTHL  | 17    | 5428  |
| >RUNX1-W1(FLCSVLPTHW  | 12633 | >RUNX1-W1(FLCSVLPTHL  | 85    | 12548 |
| >RUNX1-W1(FLCSVLPTHW  | 1303  | >RUNX1-W1(FLCSVLPTHL  | 4     | 1299  |
| >RUNX1-W1(FLCSVLPTHW  | 15666 | >RUNX1-W1(FLCSVLPTHL  | 52    | 15614 |
| >RUNX1-W1(FLCSVLPTHW  | 6358  | >RUNX1-W1(FLCSVLPTHL  | 11    | 6347  |
| >RUNX1-W1(FLCSVLPTHW  | 19853 | >RUNX1-W1(FLCSVLPTHL  | 76    | 19777 |
| >RUNX1-W1(FLCSVLPTHW  | 3552  | >RUNX1-W1(FLCSVLPTHL  | 3     | 3549  |
| >RUNX1-W1(FLCSVLPTHW  | 202   | >RUNX1-W1(FLCSVLPTHLF | 463   | 261   |
| >RUNX1-W1(FLCSVLPTHW  | 171   | >RUNX1-W1(FLCSVLPTHLF | 137   | 34    |
| >RUNX1-W1(FLCSVLPTHW  | 87    | >RUNX1-W1(FLCSVLPTHLF | 80    | 7     |
| >RUNX1-W1(FLCSVLPTHW  | 23    | >RUNX1-W1(FLCSVLPTHLF | 21    | 2     |
| >RUNX1-W1(FLCSVLPTHW  | 433   | >RUNX1-W1(FLCSVLPTHL  | 14680 | 14247 |
| >RUNX1-W1(FLCSVLPTHW  | 111   | >RUNX1-W1(FLCSVLPTHL  | 16001 | 15890 |
| >RUNX1-W1(FLCSVLPTHW  | 360   | >RUNX1-W1(FLCSVLPTHLF | 336   | 24    |
| >RUNX1T1-A AERKAHDM   | 108   | >RUNX1T1-A VERKAHDM   | 99    | 9     |
| >RUNX1T1-A AERKAHDMI  | 164   | >RUNX1T1-A VERKAHDMI  | 77    | 87    |
| >RUNX1T1-A AERKAHDM   | 3693  | >RUNX1T1-A VERKAHDM   | 481   | 3212  |
| >RUNX1T1-A AERKAHDMI  | 196   | >RUNX1T1-A VERKAHDMI  | 795   | 599   |
| >RUNX1T1-A AERKAHDM   | 177   | >RUNX1T1-A VERKAHDM   | 856   | 679   |
| >RUNX1T1-A AERKAHDMI  | 54    | >RUNX1T1-A VERKAHDMI  | 240   | 186   |
| >RUNX1T1-A AERKAHDMI  | 115   | >RUNX1T1-A VERKAHDMI  | 544   | 429   |
| >RUNX1T1-A AERKAHDMI  | 110   | >RUNX1T1-A VERKAHDMI  | 4705  | 4595  |
| >RUNX1T1-A AERKAHDMI  | 181   | >RUNX1T1-A VERKAHDMI  | 2749  | 2568  |
| >RUNX1T1-A AERKAHDMI  | 31    | >RUNX1T1-A VERKAHDMI  | 1285  | 1254  |
| >RUNX1T1-A AERKAHDM   | 103   | >RUNX1T1-A VERKAHDM   | 611   | 508   |
| >RUNX1T1-A AERKAHDMI  | 11    | >RUNX1T1-A VERKAHDMI  | 25    | 14    |
| >RUNX1T1-A AERKAHDMI  | 184   | >RUNX1T1-A VERKAHDMI  | 790   | 606   |
| >RUNX1T1-A MTELQKAVSI | 18855 | >RUNX1T1-A MTELQKAVSI | 434   | 18421 |
| >RUNX1T1-A MTELQKAVSI | 620   | >RUNX1T1-A MTELQKAVSI | 63    | 557   |
| >RUNX1T1-A MTELQKAVSI | 2861  | >RUNX1T1-A MTELQKAVSI | 428   | 2433  |
| >RUNX1T1-A SEAERKAHDM | 31    | >RUNX1T1-A SEVERKAHDM | 91    | 60    |
| >RUNX1T1-A SEAERKAHDM | 7     | >RUNX1T1-A SEVERKAHDM | 10    | 3     |
| >RUNX1T1-A SEAERKAHDM | 358   | >RUNX1T1-A SEVERKAHDM | 183   | 175   |
| >RUNX1T1-A SEAERKAHDM | 451   | >RUNX1T1-A SEVERKAHDM | 421   | 30    |
| >RUNX1T1-A SEAERKAHDM | 32    | >RUNX1T1-A SEVERKAHDM | 25    | 7     |
| >RUNX1T1-A VSEAERKAHC | 303   | >RUNX1T1-A VSEVERKAHC | 356   | 53    |
| >RUNX1T1-A AVSEAERK   | 67    | >RUNX1T1-A AVSEVERK   | 40    | 27    |
| >RUNX1T1-A AVSEAERK   | 498   | >RUNX1T1-A AVSEVERK   | 252   | 246   |

|                        |       |                        |       |       |
|------------------------|-------|------------------------|-------|-------|
| >RUNX1T1-A KAVSEAER    | 84    | >RUNX1T1-A KAVSEVER    | 61    | 23    |
| >RUNX1T1-A KAVSEAER    | 205   | >RUNX1T1-A KAVSEVER    | 215   | 10    |
| >RUNX1T1-A KAVSEAER    | 347   | >RUNX1T1-A KAVSEVER    | 155   | 192   |
| >RUNX1T1-A QKAVSEAER   | 781   | >RUNX1T1-A QKAVSEVER   | 309   | 472   |
| >RUNX1T1-A LQKAVSEA    | 1946  | >RUNX1T1-A LQKAVSEV    | 226   | 1720  |
| >RUNX1T1-A LQKAVSEA    | 103   | >RUNX1T1-A LQKAVSEV    | 15    | 88    |
| >RUNX1T1-A LQKAVSEA    | 325   | >RUNX1T1-A LQKAVSEV    | 29    | 296   |
| >RUNX1T1-A LQKAVSEAER  | 154   | >RUNX1T1-A LQKAVSEVER  | 231   | 77    |
| >RUNX1T1-A LQKAVSEAER  | 474   | >RUNX1T1-A LQKAVSEVER  | 578   | 104   |
| >RUNX1T1-A LQKAVSEA    | 114   | >RUNX1T1-A LQKAVSEV    | 113   | 1     |
| >RUNX1T1-A LQKAVSEAE   | 236   | >RUNX1T1-A LQKAVSEVE   | 214   | 22    |
| >RUNX1T1-A LQKAVSEA    | 307   | >RUNX1T1-A LQKAVSEV    | 65    | 242   |
| >RUNX1T1-A LQKAVSEAER  | 443   | >RUNX1T1-A LQKAVSEVER  | 273   | 170   |
| >RUNX1T1-A ELQKAVSEA   | 3016  | >RUNX1T1-A ELQKAVSEV   | 252   | 2764  |
| >RUNX1T1-A ELQKAVSEA   | 1022  | >RUNX1T1-A ELQKAVSEV   | 94    | 928   |
| >RUNX1T1-A ELQKAVSEA   | 1633  | >RUNX1T1-A ELQKAVSEV   | 20    | 1613  |
| >RUNX1T1-A ELQKAVSEA   | 4132  | >RUNX1T1-A ELQKAVSEV   | 60    | 4072  |
| >RUNX1T1-A ELQKAVSEA   | 1965  | >RUNX1T1-A ELQKAVSEV   | 39    | 1926  |
| >RUNX1T1-A ELQKAVSEA   | 1840  | >RUNX1T1-A ELQKAVSEV   | 10    | 1830  |
| >RUNX1T1-A ELQKAVSEA   | 164   | >RUNX1T1-A ELQKAVSEV   | 4     | 160   |
| >RUNX1T1-A ELQKAVSEAE  | 228   | >RUNX1T1-A ELQKAVSEVE  | 338   | 110   |
| >RUNX1T1-A ELQKAVSEAE  | 30    | >RUNX1T1-A ELQKAVSEVE  | 30    | 0     |
| >RUNX1T1-A ELQKAVSEA   | 2666  | >RUNX1T1-A ELQKAVSEV   | 317   | 2349  |
| >RUNX1T1-A ELQKAVSEA   | 3570  | >RUNX1T1-A ELQKAVSEV   | 172   | 3398  |
| >RUNX1T1-A TELQKAVSEA  | 698   | >RUNX1T1-A TELQKAVSEV  | 14    | 684   |
| >RUNX1T1-A TELQKAVSEA  | 1007  | >RUNX1T1-A TELQKAVSEV  | 393   | 614   |
| >RUNX1T1-A TELQKAVSEA  | 1972  | >RUNX1T1-A TELQKAVSEV  | 68    | 1904  |
| >RUNX1T1-R REELNYWI    | 47    | >RUNX1T1-R WEELNYWI    | 10    | 37    |
| >RUNX1T1-R REELNYWI    | 7163  | >RUNX1T1-R WEELNYWI    | 274   | 6889  |
| >RUNX1T1-R REELNYWIR   | 3828  | >RUNX1T1-R WEELNYWIR   | 69    | 3759  |
| >RUNX1T1-R REELNYWIRR  | 555   | >RUNX1T1-R WEELNYWIRI  | 30    | 525   |
| >RUNX1T1-R REELNYWI    | 19    | >RUNX1T1-R WEELNYWI    | 26    | 7     |
| >RUNX1T1-R REELNYWI    | 274   | >RUNX1T1-R WEELNYWI    | 2876  | 2602  |
| >RUNX1T1-R REELNYWI    | 67    | >RUNX1T1-R WEELNYWI    | 20    | 47    |
| >RUNX1T1-R REELNYWIR   | 75    | >RUNX1T1-R WEELNYWIR   | 226   | 151   |
| >RUNX1T1-R REELNYWIRR  | 117   | >RUNX1T1-R WEELNYWIRI  | 429   | 312   |
| >RUNX1T1-R DREELNYWIR  | 1961  | >RUNX1T1-R DWEELNYWI   | 118   | 1843  |
| >RUNX1T1-R DREELNYWIR  | 1535  | >RUNX1T1-R DWEELNYWI   | 27    | 1508  |
| >RUNX1T1-R DREELNYWIR  | 2455  | >RUNX1T1-R DWEELNYWI   | 27    | 2428  |
| >RUNX1T1-R DREELNYW    | 37419 | >RUNX1T1-R DWEELNYW    | 281   | 37138 |
| >RUNX1T1-R DREELNYWI   | 37682 | >RUNX1T1-R DWEELNYWI   | 417   | 37265 |
| >RUNX1T1-R TVLRRQCQEAC | 264   | >RUNX1T1-R TVLRRQCQEAC | 22334 | 22070 |
| >RUNX1T1-R TVLRRQCQEAC | 246   | >RUNX1T1-R TVLRRQCQEAC | 31597 | 31351 |

|                       |       |                       |       |       |
|-----------------------|-------|-----------------------|-------|-------|
| >RUNX1T1-R TVLRRQCQAC | 115   | >RUNX1T1-R TVLRRQCQAC | 30751 | 30636 |
| >RUNX1T1-R TVLRRQCQAC | 24647 | >RUNX1T1-R TVLRRQCQAC | 385   | 24262 |
| >RUNX1T1-R ADREELNYW  | 2239  | >RUNX1T1-R ADWEELNYW  | 454   | 1785  |
| >RUNX1T1-R ADREELNYW  | 63    | >RUNX1T1-R ADWEELNYW  | 26    | 37    |
| >RUNX1T1-R ADREELNYW  | 81    | >RUNX1T1-R ADWEELNYW  | 43    | 38    |
| >RUNX1T1-R EADREELNY  | 73    | >RUNX1T1-R EADWEELNY  | 105   | 32    |
| >RUNX1T1-R EADREELNY  | 474   | >RUNX1T1-R EADWEELNY' | 84    | 390   |
| >RUNX1T1-R EADREELNY  | 409   | >RUNX1T1-R EADWEELNY  | 63    | 346   |
| >RUNX1T1-R EADREELNY  | 682   | >RUNX1T1-R EADWEELNY  | 187   | 495   |
| >RUNX1T1-R EADREELNY  | 170   | >RUNX1T1-R EADWEELNY' | 186   | 16    |
| >RUNX1T1-R EADREELNY  | 834   | >RUNX1T1-R EADWEELNY  | 131   | 703   |
| >RUNX1T1-R QEADREELNY | 395   | >RUNX1T1-R QEADWEELN  | 518   | 123   |
| >RUNX1T1-R QEADREEL   | 105   | >RUNX1T1-R QEADWEEL   | 55    | 50    |
| >RUNX1T1-R QEADREELNY | 216   | >RUNX1T1-R QEADWEELN  | 215   | 1     |
| >RUNX1T1-R QEADREELNY | 332   | >RUNX1T1-R QEADWEELN  | 187   | 145   |
| >RUNX1T1-R QEADREELNY | 103   | >RUNX1T1-R QEADWEELN  | 94    | 9     |
| >RUNX1T1-R QEADREELNY | 911   | >RUNX1T1-R QEADWEELN  | 291   | 620   |
| >RUNX1T1-R CQEADREEL  | 6720  | >RUNX1T1-R CQEADWEEL  | 407   | 6313  |
| >RUNX1T1-R CQEADREELN | 254   | >RUNX1T1-R CQEADWEEL  | 135   | 119   |
| >RUNX1T1-R RRCQEADR   | 87    | >RUNX1T1-R RRCQEADW   | 157   | 70    |
| >RUNX1T1-R RRCQEADREI | 278   | >RUNX1T1-R RRCQEADWE  | 348   | 70    |
| >RUNX1T1-R RRCQEADREI | 83    | >RUNX1T1-R RRCQEADWE  | 71    | 12    |
| >RUNX1T1-R RRCQEADR   | 1608  | >RUNX1T1-R RRCQEADW   | 274   | 1334  |
| >RUNX1T1-R RRCQEADREI | 45    | >RUNX1T1-R RRCQEADWE  | 52    | 7     |
| >RUNX1T1-R RRCQEADR   | 24643 | >RUNX1T1-R RRCQEADW   | 28    | 24615 |
| >RUNX1T1-R RRCQEADR   | 259   | >RUNX1T1-R RRCQEADW   | 33957 | 33698 |
| >RUNX1T1-R LRRCQEADR  | 19513 | >RUNX1T1-R LRRCQEADW  | 23    | 19490 |
| >RUNX1T1-R VLRRQCQADF | 325   | >RUNX1T1-R VLRRQCQAD\ | 31177 | 30852 |
| >RUNX1T1-R VLRRQCQADF | 24640 | >RUNX1T1-R VLRRQCQAD\ | 312   | 24328 |
| >RUNX1T1-R RYSDAEDL   | 15    | >RUNX1T1-R WYSDAEDL   | 19    | 4     |
| >RUNX1T1-R RYSDAEDLK  | 224   | >RUNX1T1-R WYSDAEDLK  | 13721 | 13497 |
| >RUNX1T1-R RYSDAEDLKK | 107   | >RUNX1T1-R WYSDAEDLKI | 12102 | 11995 |
| >RUNX1T1-R RYSDAEDLKK | 142   | >RUNX1T1-R WYSDAEDLKI | 611   | 469   |
| >RUNX1T1-R RRYSDAEDL  | 19974 | >RUNX1T1-R RWYSDAEDL  | 61    | 19913 |
| >RUNX1T1-R RRYSDAEDL  | 54    | >RUNX1T1-R RWYSDAEDL  | 1709  | 1655  |
| >RUNX1T1-R RRYSDAEDL  | 49    | >RUNX1T1-R RWYSDAEDL  | 12167 | 12118 |
| >RUNX1T1-R RRYSDAEDLK | 33    | >RUNX1T1-R RWYSDAEDLI | 2888  | 2855  |
| >RUNX1T1-R RRYSDAEDLK | 25    | >RUNX1T1-R RWYSDAEDLI | 3646  | 3621  |
| >RUNX1T1-R RRYSDAED   | 169   | >RUNX1T1-R RWYSDAED   | 10844 | 10675 |
| >RUNX1T1-R RRYSDAEDL  | 27    | >RUNX1T1-R RWYSDAEDL  | 1704  | 1677  |
| >RUNX1T1-R RRYSDAEDLK | 180   | >RUNX1T1-R RWYSDAEDLI | 6941  | 6761  |
| >RUNX1T1-R RRYSDAEDLK | 179   | >RUNX1T1-R RWYSDAEDLI | 12572 | 12393 |
| >RUNX1T1-R RRYSDAEDL  | 79    | >RUNX1T1-R RWYSDAEDL  | 10451 | 10372 |

|                        |       |                       |       |       |
|------------------------|-------|-----------------------|-------|-------|
| >RUNX1T1-R RRYSDAEDLK  | 231   | >RUNX1T1-R RWYSDAEDLI | 10034 | 9803  |
| >RUNX1T1-R RRYSDAEDLK  | 255   | >RUNX1T1-R RWYSDAEDLI | 16920 | 16665 |
| >RUNX1T1-R RRYSDAEDLK  | 6661  | >RUNX1T1-R RWYSDAEDLI | 52    | 6609  |
| >RUNX1T1-R RRYSDAEDLK  | 1730  | >RUNX1T1-R RWYSDAEDLI | 28    | 1702  |
| >RUNX1T1-R RRYSDAEDL   | 30163 | >RUNX1T1-R RWYSDAEDL  | 182   | 29981 |
| >RUNX1T1-R IRRYSDAEDL  | 101   | >RUNX1T1-R IRWYSDAEDL | 87    | 14    |
| >RUNX1T1-R IRRYSDAEDL  | 268   | >RUNX1T1-R IRWYSDAEDL | 89    | 179   |
| >RUNX1T1-R IRRYSDAEDLI | 3449  | >RUNX1T1-R IRWYSDAEDL | 165   | 3284  |
| >RUNX1T1-R IRRYSDAE    | 3714  | >RUNX1T1-R IRWYSDAE   | 296   | 3418  |
| >RUNX1T1-R IRRYSDAED   | 1844  | >RUNX1T1-R IRWYSDAED  | 190   | 1654  |
| >RUNX1T1-R IRRYSDAEDL  | 347   | >RUNX1T1-R IRWYSDAEDL | 278   | 69    |
| >RUNX1T1-R IRRYSDAEDL  | 292   | >RUNX1T1-R IRWYSDAEDL | 287   | 5     |
| >RUNX1T1-R WIRRYSDA    | 1012  | >RUNX1T1-R WIRWYSDA   | 379   | 633   |
| >RUNX1T1-R WIRRYSDAEC  | 1188  | >RUNX1T1-R WIRWYSDAE  | 380   | 808   |
| >RUNX1T1-R YWIRRYSD    | 741   | >RUNX1T1-R YWIRWYSD   | 259   | 482   |
| >RUNX1T1-R YWIRRYSDA   | 432   | >RUNX1T1-R YWIRWYSDA  | 101   | 331   |
| >RUNX1T1-R NYWIRRY     | 1940  | >RUNX1T1-R NYWIRWYS   | 265   | 1675  |
| >RUNX1T1-R LNYWIRRY    | 206   | >RUNX1T1-R LNYWIRWY   | 347   | 141   |
| >RUNX1T1-R LNYWIRRY    | 306   | >RUNX1T1-R LNYWIRWY   | 278   | 28    |
| >RUNX1T1-R LNYWIRRY    | 376   | >RUNX1T1-R LNYWIRWY   | 1666  | 1290  |
| >RUNX1T1-R ELNYWIRRY   | 33    | >RUNX1T1-R ELNYWIRWY  | 32    | 1     |
| >RUNX1T1-R ELNYWIRRY   | 53    | >RUNX1T1-R ELNYWIRWY  | 24    | 29    |
| >RUNX1T1-R ELNYWIRRY   | 387   | >RUNX1T1-R ELNYWIRWY  | 1411  | 1024  |
| >RUNX1T1-R ELNYWIRRY   | 126   | >RUNX1T1-R ELNYWIRWY  | 204   | 78    |
| >RUNX1T1-R ELNYWIRR    | 164   | >RUNX1T1-R ELNYWIRW   | 19037 | 18873 |
| >RUNX1T1-R ELNYWIRR    | 28    | >RUNX1T1-R ELNYWIRW   | 15362 | 15334 |
| >RUNX1T1-R ELNYWIRR    | 28    | >RUNX1T1-R ELNYWIRW   | 19201 | 19173 |
| >RUNX1T1-R ELNYWIRRY   | 486   | >RUNX1T1-R ELNYWIRWY  | 1472  | 986   |
| >RUNX1T1-R ELNYWIRR    | 370   | >RUNX1T1-R ELNYWIRW   | 30522 | 30152 |
| >RUNX1T1-R EELNYWIRRY  | 1834  | >RUNX1T1-R EELNYWIRW' | 420   | 1414  |
| >RUNX1T1-R EELNYWIRRY  | 1399  | >RUNX1T1-R EELNYWIRW' | 492   | 907   |
| >RUNX1T1-R EELNYWIRRY  | 1003  | >RUNX1T1-R EELNYWIRW' | 480   | 523   |
| >RUNX1T1-R EELNYWIRR   | 7815  | >RUNX1T1-R EELNYWIRW  | 106   | 7709  |
| >RUNX1T1-R EELNYWIRRY  | 331   | >RUNX1T1-R EELNYWIRW' | 159   | 172   |
| >RUNX1T1-R EELNYWIRR   | 263   | >RUNX1T1-R EELNYWIRW  | 6     | 257   |
| >RUNX1T1-R EELNYWIRRY  | 377   | >RUNX1T1-R EELNYWIRW' | 115   | 262   |
| >RUNX1T1-R EELNYWIRRY  | 414   | >RUNX1T1-R EELNYWIRW' | 187   | 227   |
| >RUNX1T1-R EELNYWIRR   | 243   | >RUNX1T1-R EELNYWIRW  | 244   | 1     |
| >RUNX1T1-R EELNYWIRRY  | 85    | >RUNX1T1-R EELNYWIRW' | 31    | 54    |
| >RUNX1T1-R EELNYWIRR   | 3840  | >RUNX1T1-R EELNYWIRW  | 281   | 3559  |
| >RUNX1T1-R EELNYWIRR   | 32704 | >RUNX1T1-R EELNYWIRW  | 230   | 32474 |
| >RUNX1T1-R EELNYWIRR   | 256   | >RUNX1T1-R EELNYWIRW  | 29318 | 29062 |
| >RUNX1T1-R REELNYWIRR  | 555   | >RUNX1T1-R REELNYWIRV | 289   | 266   |

|                        |       |                        |       |       |
|------------------------|-------|------------------------|-------|-------|
| >RUNX1T1-R REELNYWIRR  | 3623  | >RUNX1T1-R REELNYWIRV  | 11    | 3612  |
| >RUNX1T1-R REELNYWIRR  | 10072 | >RUNX1T1-R REELNYWIRV  | 52    | 10020 |
| >RUNX1T1-R REELNYWIRR  | 706   | >RUNX1T1-R REELNYWIRV  | 353   | 353   |
| >RUNX1T1-R REELNYWIRR  | 16746 | >RUNX1T1-R REELNYWIRV  | 349   | 16397 |
| >RUNX1T1-R REELNYWIRR  | 117   | >RUNX1T1-R REELNYWIRV  | 29114 | 28997 |
| >RUNX1T1-S:SKLKRFLTTL  | 23    | >RUNX1T1-S:GKLRFLTTL   | 52    | 29    |
| >RUNX1T1-S:LSKLRFL     | 217   | >RUNX1T1-S:LGKLRFL     | 3464  | 3247  |
| >RUNX1T1-S:LSKLRFLTTL  | 173   | >RUNX1T1-S:LGKLRFLTTL  | 175   | 2     |
| >RUNX1T1-S:LSKLRFL     | 222   | >RUNX1T1-S:LGKLRFL     | 17527 | 17305 |
| >RUNX1T1-S:LSKLRFLTTL  | 31    | >RUNX1T1-S:LGKLRFLTTL  | 8009  | 7978  |
| >RUNX1T1-S:LSKLRFLTTL  | 173   | >RUNX1T1-S:LGKLRFLTTL  | 2032  | 1859  |
| >RUNX1T1-S:LPPACGARQI  | 166   | >RUNX1T1-S:LPPACGARQI  | 245   | 79    |
| >RUNX1T1-S:QLSKLRFL    | 147   | >RUNX1T1-S:QLGKLRFL    | 1415  | 1268  |
| >RUNX1T1-S:RQLSKLRFL   | 389   | >RUNX1T1-S:RQLGKLRFL   | 282   | 107   |
| >RUNX1T1-S:RQLSKLKR    | 13    | >RUNX1T1-S:RQLGKLR     | 25    | 12    |
| >RUNX1T1-S:RQLSKLKR    | 950   | >RUNX1T1-S:RQLGKLR     | 261   | 689   |
| >RUNX1T1-S:RQLSKLKR    | 227   | >RUNX1T1-S:RQLGKLR     | 355   | 128   |
| >RUNX1T1-S:RQLSKLKR    | 360   | >RUNX1T1-S:RQLGKLR     | 2855  | 2495  |
| >RUNX1T1-S:RQLSKLKR    | 4     | >RUNX1T1-S:RQLGKLR     | 26    | 22    |
| >RUNX1T1-S:RQLSKLKRFL  | 74    | >RUNX1T1-S:RQLGKLRFL   | 511   | 437   |
| >RUNX1T1-S:RQLSKLKR    | 185   | >RUNX1T1-S:RQLGKLR     | 135   | 50    |
| >RUNX1T1-S:RQLSKLKR    | 179   | >RUNX1T1-S:RQLGKLR     | 101   | 78    |
| >RUNX1T1-S:RQLSKLKR    | 501   | >RUNX1T1-S:RQLGKLR     | 290   | 211   |
| >RUNX1T1-S:RQLSKLKRFL  | 246   | >RUNX1T1-S:RQLGKLRFL   | 232   | 14    |
| >RUNX1T1-S:RQLSKLKRFL  | 480   | >RUNX1T1-S:RQLGKLRFL   | 313   | 167   |
| >RUNX1T1-S:RQLSKLKRFL  | 244   | >RUNX1T1-S:RQLGKLRFL   | 316   | 72    |
| >RUNX1T1-S:RQLSKLKRFL  | 233   | >RUNX1T1-S:RQLGKLRFL   | 238   | 5     |
| >RUNX1T1-S:RQLSKLKR    | 57    | >RUNX1T1-S:RQLGKLR     | 52    | 5     |
| >RUNX1T1-S:ARQLSKLKR   | 305   | >RUNX1T1-S:ARQLGKLR    | 957   | 652   |
| >RUNX1T1-S:ARQLSKLKR   | 133   | >RUNX1T1-S:ARQLGKLR    | 125   | 8     |
| >RUNX1T1-S:ARQLSKLKR   | 188   | >RUNX1T1-S:ARQLGKLR    | 177   | 11    |
| >RUNX1T1-S:ARQLSKLKR   | 175   | >RUNX1T1-S:ARQLGKLR    | 205   | 30    |
| >RUNX1T1-S:ARQLSKLKR   | 181   | >RUNX1T1-S:ARQLGKLR    | 175   | 6     |
| >RUNX1T1-S:ARQLSKLKR   | 63    | >RUNX1T1-S:ARQLGKLR    | 49    | 14    |
| >RUNX1T1-S:ARQLSKLKR   | 471   | >RUNX1T1-S:ARQLGKLR    | 228   | 243   |
| >RUNX1T1-S:ARQLSKLKR   | 7     | >RUNX1T1-S:ARQLGKLR    | 6     | 1     |
| >RUNX1T1-S:GARQLSKLKR  | 17    | >RUNX1T1-S:GARQLGKLR   | 64    | 47    |
| >RUNX1T1-S:GARQLSKLKR  | 336   | >RUNX1T1-S:GARQLGKLR   | 795   | 459   |
| >RUNX1T1-S:GARQLSKL    | 58    | >RUNX1T1-S:GARQLGKL    | 227   | 169   |
| >RUNX1T1-S:GARQLSKLKR  | 10    | >RUNX1T1-S:GARQLGKLR   | 12    | 2     |
| >RUNX1T1-S:GARQLSKLKR  | 53    | >RUNX1T1-S:GARQLGKLR   | 63    | 10    |
| >SBDS-H171I HMRLRFILPV | 179   | >SBDS-H171I LMRLRFILPV | 105   | 74    |
| >SBDS-H171I HMRLRFILPV | 157   | >SBDS-H171I LMRLRFILPV | 84    | 73    |



|                       |       |                       |      |       |
|-----------------------|-------|-----------------------|------|-------|
| >SBDS-H171IHMRLRFILPV | 55    | >SBDS-H171ILMRLRFILPV | 29   | 26    |
| >SBDS-H171IHMRLRFILPV | 308   | >SBDS-H171ILMRLRFILPV | 127  | 181   |
| >SBDS-H171IHMRLRFILPV | 59    | >SBDS-H171ILMRLRFILPV | 17   | 42    |
| >SBDS-H171IHMRLRFILPV | 67    | >SBDS-H171ILMRLRFILPV | 55   | 12    |
| >SBDS-H171IHMRLRFILPV | 204   | >SBDS-H171ILMRLRFILPV | 89   | 115   |
| >SBDS-H171IHMRLRFIL   | 171   | >SBDS-H171ILMRLRFIL   | 33   | 138   |
| >SBDS-H171IHMRLRFILPV | 8     | >SBDS-H171ILMRLRFILPV | 4    | 4     |
| >SBDS-H171IHMRLRFIL   | 21    | >SBDS-H171ILMRLRFIL   | 196  | 175   |
| >SBDS-H171IHMRLRFILP  | 60    | >SBDS-H171ILMRLRFILP  | 738  | 678   |
| >SBDS-H171IHMRLRFILPV | 6     | >SBDS-H171ILMRLRFILPV | 18   | 12    |
| >SBDS-H171IHMRLRFILPV | 177   | >SBDS-H171ILMRLRFILPV | 1664 | 1487  |
| >SBDS-H171IHMRLRFIL   | 51    | >SBDS-H171ILMRLRFIL   | 39   | 12    |
| >SBDS-H171IHMRLRFILPV | 438   | >SBDS-H171ILMRLRFILPV | 178  | 260   |
| >SBDS-H171IHMRLRFIL   | 265   | >SBDS-H171ILMRLRFIL   | 137  | 128   |
| >SBDS-H171IHMRLRFILPV | 142   | >SBDS-H171ILMRLRFILPV | 72   | 70    |
| >SBDS-H171IAHMRLRFI   | 21049 | >SBDS-H171IALMRLRFI   | 40   | 21009 |
| >SBDS-H171IAHMRLRFIL  | 21355 | >SBDS-H171IALMRLRFIL  | 38   | 21317 |
| >SBDS-H171IAHMRLRFILP | 9130  | >SBDS-H171IALMRLRFILP | 10   | 9120  |
| >SBDS-H171IAHMRLRFI   | 8833  | >SBDS-H171IALMRLRFI   | 17   | 8816  |
| >SBDS-H171IAHMRLRFIL  | 9464  | >SBDS-H171IALMRLRFIL  | 14   | 9450  |
| >SBDS-H171IAHMRLRFILP | 2722  | >SBDS-H171IALMRLRFILP | 7    | 2715  |
| >SBDS-H171IAHMRLRFI   | 14492 | >SBDS-H171IALMRLRFI   | 20   | 14472 |
| >SBDS-H171IAHMRLRFIL  | 21367 | >SBDS-H171IALMRLRFIL  | 231  | 21136 |
| >SBDS-H171IAHMRLRFILP | 6650  | >SBDS-H171IALMRLRFILP | 6    | 6644  |
| >SBDS-H171IAHMRLRFI   | 11371 | >SBDS-H171IALMRLRFI   | 105  | 11266 |
| >SBDS-H171IAHMRLRFIL  | 16326 | >SBDS-H171IALMRLRFIL  | 115  | 16211 |
| >SBDS-H171IAHMRLRFILP | 1933  | >SBDS-H171IALMRLRFILP | 9    | 1924  |
| >SBDS-H171IAHMRLRFI   | 19863 | >SBDS-H171IALMRLRFI   | 18   | 19845 |
| >SBDS-H171IAHMRLRFIL  | 25557 | >SBDS-H171IALMRLRFIL  | 196  | 25361 |
| >SBDS-H171IAHMRLRFILP | 4769  | >SBDS-H171IALMRLRFILP | 4    | 4765  |
| >SBDS-H171IAHMRLRFI   | 21639 | >SBDS-H171IALMRLRFI   | 41   | 21598 |
| >SBDS-H171IAHMRLRFIL  | 22704 | >SBDS-H171IALMRLRFIL  | 69   | 22635 |
| >SBDS-H171IAHMRLRFILP | 11898 | >SBDS-H171IALMRLRFILP | 6    | 11892 |
| >SBDS-H171IAHMRLRFI   | 24020 | >SBDS-H171IALMRLRFI   | 111  | 23909 |
| >SBDS-H171IAHMRLRFIL  | 23817 | >SBDS-H171IALMRLRFIL  | 106  | 23711 |
| >SBDS-H171IAHMRLRFILP | 10051 | >SBDS-H171IALMRLRFILP | 9    | 10042 |
| >SBDS-H171IAHMRLRFI   | 20788 | >SBDS-H171IALMRLRFI   | 120  | 20668 |
| >SBDS-H171IAHMRLRFIL  | 20992 | >SBDS-H171IALMRLRFIL  | 189  | 20803 |
| >SBDS-H171IAHMRLRFILP | 17159 | >SBDS-H171IALMRLRFILP | 8    | 17151 |
| >SBDS-H171IAHMRLRFI   | 30087 | >SBDS-H171IALMRLRFI   | 18   | 30069 |
| >SBDS-H171IAHMRLRFIL  | 23150 | >SBDS-H171IALMRLRFIL  | 5    | 23145 |
| >SBDS-H171IAHMRLRFILP | 6209  | >SBDS-H171IALMRLRFILP | 2    | 6207  |
| >SBDS-H171IAHMRLRFILP | 7225  | >SBDS-H171IALMRLRFILP | 472  | 6753  |

|                       |       |                        |      |       |
|-----------------------|-------|------------------------|------|-------|
| >SBDS-H171IAHMRLRFI   | 11170 | >SBDS-H171IALMRLRFI    | 399  | 10771 |
| >SBDS-H171IAHMRLRFIL  | 6729  | >SBDS-H171IALMRLRFIL   | 139  | 6590  |
| >SBDS-H171IAHMRLRFILP | 9179  | >SBDS-H171IALMRLRFILP\ | 231  | 8948  |
| >SBDS-H171IAHMRLRFILP | 15054 | >SBDS-H171IALMRLRFILP\ | 235  | 14819 |
| >SBDS-H171IAHMRLRFIL  | 7720  | >SBDS-H171IALMRLRFIL   | 273  | 7447  |
| >SBDS-H171IAHMRLRFILP | 9583  | >SBDS-H171IALMRLRFILP\ | 451  | 9132  |
| >SBDS-H171IAHMRLRFILP | 262   | >SBDS-H171IALMRLRFILP\ | 395  | 133   |
| >SBDS-H171IAHMRLRFIL  | 16    | >SBDS-H171IALMRLRFIL   | 676  | 660   |
| >SBDS-H171IAHMRLRFILP | 115   | >SBDS-H171IALMRLRFILP\ | 6184 | 6069  |
| >SBDS-H171IAHMRLRFI   | 366   | >SBDS-H171IALMRLRFI    | 2358 | 1992  |
| >SBDS-H171IRAHMRLRFI  | 320   | >SBDS-H171IRALMRLRFI   | 98   | 222   |
| >SBDS-H171IRAHMRLRFI  | 3415  | >SBDS-H171IRALMRLRFI   | 333  | 3082  |
| >SBDS-H171IRAHMRLRF   | 444   | >SBDS-H171IRALMRLRF    | 3300 | 2856  |
| >SBDS-H171IRAHMRLRFI  | 7     | >SBDS-H171IRALMRLRFI   | 28   | 21    |
| >SBDS-H171IRAHMRLRFIL | 22    | >SBDS-H171IRALMRLRFIL  | 191  | 169   |
| >SBDS-H171IRAHMRLRFIL | 105   | >SBDS-H171IRALMRLRFILI | 1277 | 1172  |
| >SBDS-H171IRAHMRLRFI  | 187   | >SBDS-H171IRALMRLRFI   | 294  | 107   |
| >SBDS-H171IRAHMRLRF   | 340   | >SBDS-H171IRALMRLRF    | 1195 | 855   |
| >SBDS-H171IRAHMRLRF   | 88    | >SBDS-H171IRALMRLRF    | 76   | 12    |
| >SBDS-H171IRAHMRLRF   | 5     | >SBDS-H171IRALMRLRF    | 4    | 1     |
| >SBDS-H171IRAHMRLRFI  | 114   | >SBDS-H171IRALMRLRFI   | 66   | 48    |
| >SBDS-H171IRAHMRLRFIL | 78    | >SBDS-H171IRALMRLRFIL  | 55   | 23    |
| >SBDS-H171IRAHMRLRF   | 625   | >SBDS-H171IRALMRLRF    | 402  | 223   |
| >SBDS-H171IRAHMRLRF   | 360   | >SBDS-H171IRALMRLRF    | 102  | 258   |
| >SBDS-H171IRAHMRLRFI  | 38    | >SBDS-H171IRALMRLRFI   | 52   | 14    |
| >SBDS-H171IERAHMRLRFI | 50    | >SBDS-H171IERALMRLRFI  | 40   | 10    |
| >SBDS-H171IERAHMRLR   | 224   | >SBDS-H171IERALMRLR    | 281  | 57    |
| >SBDS-H171IERAHMRLRF  | 349   | >SBDS-H171IERALMRLRF   | 1339 | 990   |
| >SBDS-H171IERAHMRLRF  | 685   | >SBDS-H171IERALMRLRF   | 499  | 186   |
| >SBDS-H171IERAHMRLRFI | 568   | >SBDS-H171IERALMRLRFI  | 439  | 129   |
| >SBDS-H171IERAHMRLRFI | 522   | >SBDS-H171IERALMRLRFII | 399  | 123   |
| >SBDS-H171IERAHMRLRFI | 112   | >SBDS-H171IERALMRLRFII | 136  | 24    |
| >SBDS-H171IERAHMRLRF  | 239   | >SBDS-H171IERALMRLRF   | 288  | 49    |
| >SBDS-H171IERAHMRLRFI | 101   | >SBDS-H171IERALMRLRFII | 121  | 20    |
| >SBDS-H171IERAHMRLRF  | 131   | >SBDS-H171IERALMRLRF   | 74   | 57    |
| >SBDS-H171IERAHMRLRFI | 91    | >SBDS-H171IERALMRLRFII | 59   | 32    |
| >SBDS-H171IERAHMRLRF  | 9     | >SBDS-H171IERALMRLRFI  | 7    | 2     |
| >SBDS-H171IERAHMRLRF  | 493   | >SBDS-H171IERALMRLRF   | 897  | 404   |
| >SBDS-H171IERAHMRLRF  | 74    | >SBDS-H171IERALMRLRF   | 187  | 113   |
| >SBDS-H171IERAHMRL    | 227   | >SBDS-H171IERALMRL     | 137  | 90    |
| >SBDS-H171IERAHMRLRF  | 317   | >SBDS-H171IERALMRLRFI  | 155  | 162   |
| >SBDS-H171IERAHMRLRF  | 12    | >SBDS-H171IERALMRLRFI  | 12   | 0     |
| >SBDS-H171KIERAHMRL   | 676   | >SBDS-H171KIERALMRL    | 346  | 330   |

|                        |       |                        |      |       |
|------------------------|-------|------------------------|------|-------|
| >SBDS-H171I KIERAHMRL  | 190   | >SBDS-H171I KIERALMRL  | 964  | 774   |
| >SBDS-H171I KIERAHMR   | 35    | >SBDS-H171I KIERALMR   | 180  | 145   |
| >SBDS-H171I KIERAHMRLR | 123   | >SBDS-H171I KIERALMRLR | 75   | 48    |
| >SBDS-H171I KIERAHMRLR | 426   | >SBDS-H171I KIERALMRLR | 637  | 211   |
| >SBDS-H171I KIERAHMRLR | 276   | >SBDS-H171I KIERALMRLR | 203  | 73    |
| >SBDS-H171I KIERAHMR   | 93    | >SBDS-H171I KIERALMR   | 107  | 14    |
| >SBDS-H171I KIERAHMRLR | 148   | >SBDS-H171I KIERALMRLR | 173  | 25    |
| >SBDS-H171I MKIERAHMR  | 46    | >SBDS-H171I MKIERALMR  | 195  | 149   |
| >SBDS-H171I MKIERAHMR  | 147   | >SBDS-H171I MKIERALMRI | 209  | 62    |
| >SBDS-H171I MKIERAHM   | 25    | >SBDS-H171I MKIERALM   | 40   | 15    |
| >SBDS-H171I MKIERAHMR  | 805   | >SBDS-H171I MKIERALMR  | 438  | 367   |
| >SBDS-H171I MKIERAHMR  | 47    | >SBDS-H171I MKIERALMRI | 52   | 5     |
| >SBDS-H171I MKIERAHM   | 564   | >SBDS-H171I MKIERALM   | 205  | 359   |
| >SBDS-H171I MKIERAHMR  | 69    | >SBDS-H171I MKIERALMRI | 158  | 89    |
| >SBDS-H171I KMKIERAHM  | 860   | >SBDS-H171I KMKIERALMI | 294  | 566   |
| >SBDS-H171I KMKIERAH   | 22586 | >SBDS-H171I KMKIERAL   | 443  | 22143 |
| >SBDS-H171I KMKIERAHM  | 274   | >SBDS-H171I KMKIERALMI | 84   | 190   |
| >SBDS-H171I KMKIERAHM  | 53    | >SBDS-H171I KMKIERALMI | 38   | 15    |
| >SBDS-H171I KMKIERAH   | 2496  | >SBDS-H171I KMKIERAL   | 199  | 2297  |
| >SBDS-H171I KMKIERAHM  | 30    | >SBDS-H171I KMKIERALM  | 31   | 1     |
| >SBDS-H171I KMKIERAHM  | 182   | >SBDS-H171I KMKIERALMI | 106  | 76    |
| >SBDS-H171I KMKIERAHM  | 21    | >SBDS-H171I KMKIERALMI | 34   | 13    |
| >SBDS-H171I KMKIERAHM  | 11    | >SBDS-H171I KMKIERALMI | 15   | 4     |
| >SBDS-H171I KMKIERAH   | 16090 | >SBDS-H171I KMKIERAL   | 279  | 15811 |
| >SBDS-H171I KMKIERAHM  | 429   | >SBDS-H171I KMKIERALM  | 1499 | 1070  |
| >SBDS-H171I KMKIERAHM  | 297   | >SBDS-H171I KMKIERALMI | 623  | 326   |
| >SBDS-H171I KMKIERAHM  | 74    | >SBDS-H171I KMKIERALM  | 473  | 399   |
| >SBDS-H171I KMKIERAH   | 1499  | >SBDS-H171I KMKIERAL   | 143  | 1356  |
| >SBDS-H171I KMKIERAHM  | 109   | >SBDS-H171I KMKIERALM  | 257  | 148   |
| >SBDS-H171I KMKIERAHM  | 236   | >SBDS-H171I KMKIERALMI | 424  | 188   |
| >SBDS-H171I KMKIERAHM  | 160   | >SBDS-H171I KMKIERALMI | 121  | 39    |
| >SBDS-H171I KMKIERAHM  | 32    | >SBDS-H171I KMKIERALMI | 34   | 2     |
| >SBDS-H171I EKMKIERAHM | 69    | >SBDS-H171I EKMKIERALM | 155  | 86    |
| >SBDS-H171I EKMKIERAH  | 1953  | >SBDS-H171I EKMKIERAL  | 247  | 1706  |
| >SBDS-H171I EKMKIERAHM | 259   | >SBDS-H171I EKMKIERALM | 539  | 280   |
| >SBDS-H171I EKMKIERAH  | 19327 | >SBDS-H171I EKMKIERAL  | 277  | 19050 |
| >SBDS-H171I KEKMKIERAH | 3913  | >SBDS-H171I KEKMKIERAL | 205  | 3708  |
| >SBDS-H171I KEKMKIERAH | 14716 | >SBDS-H171I KEKMKIERAL | 58   | 14658 |
| >SBDS-H171I KEKMKIERAH | 97    | >SBDS-H171I KEKMKIERAL | 61   | 36    |
| >SDHAF2-D1 DIYYWATEA   | 13713 | >SDHAF2-D1 GIYYWATEA   | 248  | 13465 |
| >SDHAF2-D1 DIYYWATEA   | 1371  | >SDHAF2-D1 GIYYWATEA   | 28   | 1343  |
| >SDHAF2-D1 DIYYWATEA   | 4656  | >SDHAF2-D1 GIYYWATEA   | 363  | 4293  |
| >SDHAF2-D1 DIYYWATEA   | 3814  | >SDHAF2-D1 GIYYWATEA   | 154  | 3660  |

|                       |      |                       |       |       |
|-----------------------|------|-----------------------|-------|-------|
| >SDHAF2-D1 DIYYWATEA  | 5314 | >SDHAF2-D1 GIYYWATEA  | 211   | 5103  |
| >SDHAF2-D1 DIYYWATEA  | 6858 | >SDHAF2-D1 GIYYWATEA  | 202   | 6656  |
| >SDHAF2-D1 DIYYWATEAK | 33   | >SDHAF2-D1 GIYYWATEAK | 12    | 21    |
| >SDHAF2-D1 DIYYWATEAK | 130  | >SDHAF2-D1 GIYYWATEAK | 25    | 105   |
| >SDHAF2-D1 DIYYWATEAK | 180  | >SDHAF2-D1 GIYYWATEAK | 4078  | 3898  |
| >SDHAF2-D1 DIYYWATEAK | 17   | >SDHAF2-D1 GIYYWATEAK | 131   | 114   |
| >SDHAF2-D1 DIYYWATEA  | 167  | >SDHAF2-D1 GIYYWATEA  | 5719  | 5552  |
| >SDHAF2-D1 DIYYWATEA  | 53   | >SDHAF2-D1 GIYYWATEA  | 4670  | 4617  |
| >SDHAF2-D1 DIYYWATEAK | 488  | >SDHAF2-D1 GIYYWATEAK | 248   | 240   |
| >SDHAF2-D1 WDIYYWAT   | 194  | >SDHAF2-D1 WGIYYWAT   | 19328 | 19134 |
| >SDHAF2-D1 DWDIYYWAT  | 129  | >SDHAF2-D1 DWGIYYWAT  | 156   | 27    |
| >SDHAF2-D1 DWDIYYWAT  | 344  | >SDHAF2-D1 DWGIYYWAT  | 355   | 11    |
| >SDHAF2-D1 NDWDIYYW   | 326  | >SDHAF2-D1 NDWGIYYW   | 330   | 4     |
| >SDHAF2-D1 SNDWDIYY   | 542  | >SDHAF2-D1 SNDWGIYY   | 298   | 244   |
| >SDHAF2-D1 SNDWDIYY   | 412  | >SDHAF2-D1 SNDWGIYY   | 398   | 14    |
| >SDHAF2-D1 SNDWDIYY   | 274  | >SDHAF2-D1 SNDWGIYY   | 307   | 33    |
| >SDHAF2-D1 PSNDWDIY   | 118  | >SDHAF2-D1 PSNDWGIY   | 96    | 22    |
| >SDHAF2-D1 PSNDWDIYY  | 30   | >SDHAF2-D1 PSNDWGIYY  | 28    | 2     |
| >SDHAF2-D1 PSNDWDIY   | 719  | >SDHAF2-D1 PSNDWGIY   | 313   | 406   |
| >SDHAF2-D1 PSNDWDIYY  | 27   | >SDHAF2-D1 PSNDWGIYY  | 22    | 5     |
| >SDHAF2-D1 PSNDWDIY   | 179  | >SDHAF2-D1 PSNDWGIY   | 76    | 103   |
| >SDHAF2-D1 PSNDWDIYY  | 75   | >SDHAF2-D1 PSNDWGIYY  | 82    | 7     |
| >SDHAF2-D1 PSNDWDIYY\ | 532  | >SDHAF2-D1 PSNDWGIYY\ | 238   | 294   |
| >SDHAF2-D1 PSNDWDIYY\ | 161  | >SDHAF2-D1 PSNDWGIYY\ | 205   | 44    |
| >SDHAF2-D1 PSNDWDIYY\ | 121  | >SDHAF2-D1 PSNDWGIYY\ | 177   | 56    |
| >SDHAF2-D1 EPSNDWDIY  | 9    | >SDHAF2-D1 EPSNDWGIY  | 12    | 3     |
| >SDHAF2-D1 EPSNDWDIY\ | 157  | >SDHAF2-D1 EPSNDWGIY\ | 263   | 106   |
| >SDHAF2-D1 EPSNDWDIY\ | 402  | >SDHAF2-D1 EPSNDWGIY\ | 508   | 106   |
| >SDHAF2-D1 EPSNDWDI   | 60   | >SDHAF2-D1 EPSNDWGI   | 100   | 40    |
| >SDHAF2-D1 EPSNDWDIY  | 47   | >SDHAF2-D1 EPSNDWGIY  | 87    | 40    |
| >SDHAF2-D1 EPSNDWDIY\ | 8    | >SDHAF2-D1 EPSNDWGIY\ | 9     | 1     |
| >SDHAF2-D1 EPSNDWDIY  | 106  | >SDHAF2-D1 EPSNDWGIY  | 72    | 34    |
| >SDHAF2-D1 EPSNDWDIY\ | 237  | >SDHAF2-D1 EPSNDWGIY\ | 141   | 96    |
| >SDHAF2-D1 EPSNDWDIY\ | 311  | >SDHAF2-D1 EPSNDWGIY\ | 891   | 580   |
| >SDHAF2-D1 EPSNDWDIY\ | 18   | >SDHAF2-D1 EPSNDWGIY\ | 19    | 1     |
| >SDHAF2-D1 EPSNDWDIY\ | 147  | >SDHAF2-D1 EPSNDWGIY\ | 170   | 23    |
| >SDHAF2-D1 NEPSNDWDI  | 346  | >SDHAF2-D1 NEPSNDWGI  | 298   | 48    |
| >SDHAF2-D1 NEPSNDWDI' | 103  | >SDHAF2-D1 NEPSNDWGI' | 70    | 33    |
| >SDHAF2-D1 NEPSNDWDI' | 381  | >SDHAF2-D1 NEPSNDWGI' | 373   | 8     |
| >SDHAF2-D1 NEPSNDWDI  | 495  | >SDHAF2-D1 NEPSNDWGI  | 372   | 123   |
| >SDHAF2-D1 INEPSNDWDI | 482  | >SDHAF2-D1 INEPSNDWGI | 273   | 209   |
| >SDHAF2-D1 LINEPSNDWC | 1292 | >SDHAF2-D1 LINEPSNDWC | 222   | 1070  |
| >SDHAF2-D1 LINEPSNDWC | 964  | >SDHAF2-D1 LINEPSNDWC | 195   | 769   |

|                       |      |                        |       |       |
|-----------------------|------|------------------------|-------|-------|
| >SDHAF2-D1 LINEPSNDWC | 976  | >SDHAF2-D1 LINEPSNDWC  | 84    | 892   |
| >SDHAF2-D1 LINEPSNDWC | 165  | >SDHAF2-D1 LINEPSNDWC  | 24    | 141   |
| >SDHAF2-D1 LINEPSNDWC | 344  | >SDHAF2-D1 LINEPSNDWC  | 63    | 281   |
| >SDHAF2-D1 LINEPSNDWC | 917  | >SDHAF2-D1 LINEPSNDWC  | 255   | 662   |
| >SDHAF2-D1 LINEPSNDWC | 2600 | >SDHAF2-D1 LINEPSNDWC  | 214   | 2386  |
| >SDHAF2-D1 LINEPSNDWC | 153  | >SDHAF2-D1 LINEPSNDWC  | 61    | 92    |
| >SDHAF2-D1 LINEPSNDWC | 2279 | >SDHAF2-D1 LINEPSNDWC  | 318   | 1961  |
| >SDHAF2-D1 LINEPSNDWC | 1761 | >SDHAF2-D1 LINEPSNDWC  | 237   | 1524  |
| >SDHB-S198I SYWWNGDK' | 207  | >SDHB-S198I NYWWNGDK   | 1774  | 1567  |
| >SDHB-S198I SYWWNGDK' | 414  | >SDHB-S198I NYWWNGDK   | 639   | 225   |
| >SDHB-S198I SYWWNGDK' | 277  | >SDHB-S198I NYWWNGDK   | 527   | 250   |
| >SDHB-S198I SYWWNGDK' | 266  | >SDHB-S198I NYWWNGDK   | 727   | 461   |
| >SDHB-S198I SYWWNGDK' | 11   | >SDHB-S198I NYWWNGDK   | 19    | 8     |
| >SDHB-S198I SYWWNGDK' | 27   | >SDHB-S198I NYWWNGDK   | 46    | 19    |
| >SDHB-S198I SYWWNGDK' | 39   | >SDHB-S198I NYWWNGDK   | 167   | 128   |
| >SDHB-S198I SYWWNGDK' | 431  | >SDHB-S198I NYWWNGDK   | 761   | 330   |
| >SDHB-S198I SYWWNGDK  | 119  | >SDHB-S198I NYWWNGDK   | 160   | 41    |
| >SDHB-S198I SYWWNGDK  | 198  | >SDHB-S198I NYWWNGDK   | 688   | 490   |
| >SDHB-S198I SYWWNGDK' | 217  | >SDHB-S198I NYWWNGDK   | 747   | 530   |
| >SDHB-S198I SYWWNGDK' | 25   | >SDHB-S198I NYWWNGDK   | 58    | 33    |
| >SDHB-S198I SYWWNGDK' | 181  | >SDHB-S198I NYWWNGDK   | 589   | 408   |
| >SDHB-S198I PSYWWNGD  | 76   | >SDHB-S198I PNYWWNGD   | 430   | 354   |
| >SDHB-S198I PSYWWNGD  | 337  | >SDHB-S198I PNYWWNGD   | 20175 | 19838 |
| >SDHB-S198I CPSYWWNGI | 310  | >SDHB-S198I CPNYWWNG   | 319   | 9     |
| >SDHB-S198I CPSYWWNGI | 19   | >SDHB-S198I CPNYWWNG   | 20    | 1     |
| >SDHB-S198I CPSYWWNGI | 97   | >SDHB-S198I CPNYWWNG   | 86    | 11    |
| >SDHB-S198I CPSYWWNGI | 983  | >SDHB-S198I CPNYWWNG   | 374   | 609   |
| >SDHB-S198I CPSYWWNGI | 326  | >SDHB-S198I CPNYWWNG   | 443   | 117   |
| >SDHB-S198I TSCPSYWW  | 5    | >SDHB-S198I TSCP NYWW  | 9     | 4     |
| >SDHB-S198I TSCPSYWW  | 42   | >SDHB-S198I TSCP NYWW  | 49    | 7     |
| >SDHB-S198I TSCPSYWW  | 38   | >SDHB-S198I TSCP NYWW  | 58    | 20    |
| >SDHB-S198I STSCPSYWW | 304  | >SDHB-S198I STSCP NYWW | 353   | 49    |
| >SDHB-S198I STSCPSYW  | 8    | >SDHB-S198I STSCP NYW  | 24    | 16    |
| >SDHB-S198I STSCPSYWW | 7    | >SDHB-S198I STSCP NYWW | 12    | 5     |
| >SDHB-S198I STSCPSYW  | 85   | >SDHB-S198I STSCP NYW  | 100   | 15    |
| >SDHB-S198I STSCPSYWW | 73   | >SDHB-S198I STSCP NYWW | 95    | 22    |
| >SDHB-S198I STSCPSYW  | 27   | >SDHB-S198I STSCP NYW  | 40    | 13    |
| >SDHB-S198I STSCPSYWW | 127  | >SDHB-S198I STSCP NYWW | 255   | 128   |
| >SDHB-S198I STSCPSYWW | 187  | >SDHB-S198I STSCP NYWW | 307   | 120   |
| >SDHB-S198I STSCPSYWW | 33   | >SDHB-S198I STSCP NYWW | 36    | 3     |
| >SDHB-S198I CSTSCPSY  | 426  | >SDHB-S198I CSTSCP NY  | 420   | 6     |
| >SDHB-S198I CSTSCPSY  | 14   | >SDHB-S198I CSTSCP NY  | 26    | 12    |
| >SDHB-S198I CSTSCPSY  | 181  | >SDHB-S198I CSTSCP NY  | 398   | 217   |

|                         |      |                         |      |      |
|-------------------------|------|-------------------------|------|------|
| >SDHB-S198I CSTSCPSY    | 62   | >SDHB-S198I CSTSCPNY    | 111  | 49   |
| >SDHB-S198I CSTSCPSYW   | 27   | >SDHB-S198I CSTSCPNYW   | 148  | 121  |
| >SDHB-S198I CSTSCPSYWV  | 23   | >SDHB-S198I CSTSCPNYWV  | 62   | 39   |
| >SDHB-S198I CSTSCPSYW   | 170  | >SDHB-S198I CSTSCPNYW   | 259  | 89   |
| >SDHB-S198I CSTSCPSYW   | 47   | >SDHB-S198I CSTSCPNYW   | 44   | 3    |
| >SDHB-S198I CSTSCPSYWV  | 52   | >SDHB-S198I CSTSCPNYWV  | 58   | 6    |
| >SDHB-S198I CSTSCPSYW   | 10   | >SDHB-S198I CSTSCPNYW   | 11   | 1    |
| >SDHB-S198I CSTSCPSYWV  | 19   | >SDHB-S198I CSTSCPNYWV  | 24   | 5    |
| >SDHB-S198I CSTSCPSYWV  | 477  | >SDHB-S198I CSTSCPNYWV  | 510  | 33   |
| >SDHB-S198I CSTSCPSY    | 59   | >SDHB-S198I CSTSCPNY    | 90   | 31   |
| >SDHB-S198I CSTSCPSYW   | 69   | >SDHB-S198I CSTSCPNYW   | 1115 | 1046 |
| >SDHB-S198I CSTSCPSYW   | 74   | >SDHB-S198I CSTSCPNYW   | 145  | 71   |
| >SDHB-S198I CSTSCPSYWV  | 270  | >SDHB-S198I CSTSCPNYWV  | 175  | 95   |
| >SDHB-S198I CSTSCPSY    | 194  | >SDHB-S198I CSTSCPNY    | 198  | 4    |
| >SDHB-S198I CCSTSCPSY   | 85   | >SDHB-S198I CCSTSCPNY   | 225  | 140  |
| >SDHB-S198I CCSTSCPSYW  | 378  | >SDHB-S198I CCSTSCPNYW  | 760  | 382  |
| >SDHB-S198I ACCSTSCPSY  | 241  | >SDHB-S198I ACCSTSCPNY  | 404  | 163  |
| >SDHB-S198I ACCSTSCPSYV | 372  | >SDHB-S198I ACCSTSCPNYV | 842  | 470  |
| >SDHB-S198I CACCSTSCPS' | 301  | >SDHB-S198I CACCSTSCPNI | 657  | 356  |
| >SDHB-S198I CACCSTSCPS' | 295  | >SDHB-S198I CACCSTSCPNI | 1521 | 1226 |
| >SDHB-S198I CACCSTSCPS' | 178  | >SDHB-S198I CACCSTSCPNI | 329  | 151  |
| >SDHB-S198I CACCSTSCPS' | 169  | >SDHB-S198I CACCSTSCPNI | 183  | 14   |
| >SDHB-S198I CACCSTSCPS' | 52   | >SDHB-S198I CACCSTSCPNI | 124  | 72   |
| >SDHD-A126 AGLLALSALTF  | 233  | >SDHD-A126 SGLLALSALTF  | 626  | 393  |
| >SDHD-A126 AGLLALSALTF  | 25   | >SDHD-A126 SGLLALSALTF  | 64   | 39   |
| >SDHD-A126 AGLLALSALTF  | 375  | >SDHD-A126 SGLLALSALTF  | 145  | 230  |
| >SDHD-A126 KAGLLALSAL   | 2341 | >SDHD-A126 KSGLLALSAL   | 352  | 1989 |
| >SDHD-A126 KAGLLALSAL   | 200  | >SDHD-A126 KSGLLALSAL   | 24   | 176  |
| >SDHD-A126 AKAGLLALSA   | 419  | >SDHD-A126 AKSGLLALSAI  | 910  | 491  |
| >SDHD-A126 AKAGLLAL     | 182  | >SDHD-A126 AKSGLLAL     | 178  | 4    |
| >SDHD-A126 AKAGLLALSA   | 150  | >SDHD-A126 AKSGLLALSAI  | 150  | 0    |
| >SDHD-A126 AKAGLLAL     | 90   | >SDHD-A126 AKSGLLAL     | 134  | 44   |
| >SDHD-A126 AKAGLLALSA   | 107  | >SDHD-A126 AKSGLLALSAI  | 163  | 56   |
| >SDHD-A126 AAKAGLLA     | 33   | >SDHD-A126 AAKSGLLA     | 59   | 26   |
| >SDHD-A126 AAKAGLLAL    | 75   | >SDHD-A126 AAKSGLLAL    | 152  | 77   |
| >SDHD-A126 AAKAGLLALS   | 459  | >SDHD-A126 AAKSGLLALS   | 801  | 342  |
| >SDHD-A126 AAKAGLLALS   | 28   | >SDHD-A126 AAKSGLLALS   | 45   | 17   |
| >SDHD-A126 AAKAGLLAL    | 189  | >SDHD-A126 AAKSGLLAL    | 278  | 89   |
| >SDHD-A126 AAKAGLLAL    | 441  | >SDHD-A126 AAKSGLLAL    | 688  | 247  |
| >SDHD-A126 AAKAGLLAL    | 845  | >SDHD-A126 AAKSGLLAL    | 417  | 428  |
| >SDHD-A126 AAKAGLLAL    | 34   | >SDHD-A126 AAKSGLLAL    | 70   | 36   |
| >SDHD-A126 KAAKAGLLAL   | 518  | >SDHD-A126 KAAKSGLLAL   | 459  | 59   |
| >SDHD-A126 KAAKAGLLA    | 260  | >SDHD-A126 KAAKSGLLA    | 349  | 89   |

|                        |       |                        |       |       |
|------------------------|-------|------------------------|-------|-------|
| >SDHD-A126 KAAKAGLLAL  | 498   | >SDHD-A126 KAAKSGLLAL  | 180   | 318   |
| >SDHD-A126 KAAKAGLL    | 118   | >SDHD-A126 KAAKSGLL    | 55    | 63    |
| >SDHD-A126 KAAKAGLLAL  | 25    | >SDHD-A126 KAAKSGLLAL  | 12    | 13    |
| >SDHD-A126 KAAKAGLL    | 534   | >SDHD-A126 KAAKSGLL    | 346   | 188   |
| >SDHD-A126 KAAKAGLLAL  | 219   | >SDHD-A126 KAAKSGLLAL  | 171   | 48    |
| >SDHD-A126 KAAKAGLL    | 487   | >SDHD-A126 KAAKSGLL    | 536   | 49    |
| >SDHD-A126 QKAAKAGLLA  | 234   | >SDHD-A126 QKAAKSGLLA  | 154   | 80    |
| >SDHD-A126 QKAAKAGLLA  | 130   | >SDHD-A126 QKAAKSGLLA  | 168   | 38    |
| >SDHD-A126 LQKAAKAGLL  | 378   | >SDHD-A126 LQKAAKSGLL  | 528   | 150   |
| >SDHD-A126 LQKAAKAG    | 257   | >SDHD-A126 LQKAAKSG    | 285   | 28    |
| >SDHD-A126 LQKAAKAGL   | 90    | >SDHD-A126 LQKAAKSGL   | 95    | 5     |
| >SDHD-A126 LQKAAKAGLL  | 266   | >SDHD-A126 LQKAAKSGLL  | 151   | 115   |
| >SDHD-A126 LQKAAKAGLL  | 197   | >SDHD-A126 LQKAAKSGLL  | 202   | 5     |
| >SDHD-A126 LQKAAKAGL   | 359   | >SDHD-A126 LQKAAKSGL   | 113   | 246   |
| >SDHD-A126 LQKAAKAGL   | 389   | >SDHD-A126 LQKAAKSGL   | 533   | 144   |
| >SDHD-A126 ALQKAAKAGI  | 296   | >SDHD-A126 ALQKAAKSGI  | 173   | 123   |
| >SDHD-A126 ALQKAAKA    | 390   | >SDHD-A126 ALQKAAKS    | 10551 | 10161 |
| >SDHD-A126 ALQKAAKAGI  | 506   | >SDHD-A126 ALQKAAKSGI  | 356   | 150   |
| >SDHD-A126 ALQKAAKAGI  | 202   | >SDHD-A126 ALQKAAKSGI  | 321   | 119   |
| >SDHD-A126 ALQKAAKAGI  | 119   | >SDHD-A126 ALQKAAKSGI  | 258   | 139   |
| >SDHD-A126 ALQKAAKA    | 36    | >SDHD-A126 ALQKAAKS    | 5278  | 5242  |
| >SDHD-A126 ALQKAAKAGI  | 11    | >SDHD-A126 ALQKAAKSGI  | 11    | 0     |
| >SDHD-A126 ALQKAAKAGI  | 50    | >SDHD-A126 ALQKAAKSGI  | 39    | 11    |
| >SDHD-A126 DALQKAAKA   | 207   | >SDHD-A126 DALQKAAKSC  | 446   | 239   |
| >SEPT6-K171 KKLDSKVNI  | 26    | >SEPT6-K171 RKLDSKVNI  | 17    | 9     |
| >SEPT6-K171 KKLDSKVNII | 29    | >SEPT6-K171 RKLDSKVNII | 17    | 12    |
| >SEPT6-K171 MKKLDSKV   | 330   | >SEPT6-K171 MRKLDSKV   | 1380  | 1050  |
| >SEPT6-K171 MKKLDSKVN  | 54    | >SEPT6-K171 MRKLDSKVN  | 408   | 354   |
| >SEPT6-K171 MKKLDSKVN  | 76    | >SEPT6-K171 MRKLDSKVN  | 596   | 520   |
| >SEPT6-K171 MKKLDSKVN  | 17147 | >SEPT6-K171 MRKLDSKVN  | 374   | 16773 |
| >SEPT6-K171 SLKSLDLVTM | 176   | >SEPT6-K171 SLKSLDLVTM | 3600  | 3424  |
| >SEPT6-K171 SLKSLDLVTM | 189   | >SEPT6-K171 SLKSLDLVTM | 4868  | 4679  |
| >SEPT6-K171 SLKSLDLVTM | 175   | >SEPT6-K171 SLKSLDLVTM | 7496  | 7321  |
| >SEPT6-K171 SLKSLDLVTM | 656   | >SEPT6-K171 SLKSLDLVTM | 37    | 619   |
| >SEPT6-K171 SLKSLDLVTM | 1162  | >SEPT6-K171 SLKSLDLVTM | 330   | 832   |
| >SEPT6-K171 SLKSLDLVTM | 7320  | >SEPT6-K171 SLKSLDLVTM | 488   | 6832  |
| >SEPT6-K171 TMKKLDSKV  | 43    | >SEPT6-K171 TMRKLDSKV  | 101   | 58    |
| >SEPT6-K171 TMKKLDSKV  | 413   | >SEPT6-K171 TMRKLDSKV  | 848   | 435   |
| >SEPT6-K171 TMKKLDSKV  | 575   | >SEPT6-K171 TMRKLDSKV  | 230   | 345   |
| >SEPT6-K171 TMKKLDSKV  | 24    | >SEPT6-K171 TMRKLDSKV  | 18    | 6     |
| >SEPT6-K171 TMKKLDSK   | 734   | >SEPT6-K171 TMRKLDSK   | 277   | 457   |
| >SEPT6-K171 TMKKLDSK   | 407   | >SEPT6-K171 TMRKLDSK   | 1446  | 1039  |
| >SEPT6-K171 TMKKLDSK   | 363   | >SEPT6-K171 TMRKLDSK   | 48    | 315   |

|                         |      |                         |      |      |
|-------------------------|------|-------------------------|------|------|
| >SEPT6-K171 VTMKKLDSK\  | 296  | >SEPT6-K171 VTMRKLDSK\  | 258  | 38   |
| >SEPT6-K171 VTMKKLDSK\  | 445  | >SEPT6-K171 VTMRKLDSK\  | 341  | 104  |
| >SEPT6-K171 VTMKKLDSK\  | 862  | >SEPT6-K171 VTMRKLDSK\  | 426  | 436  |
| >SEPT6-K171 VTMKKLDSK   | 468  | >SEPT6-K171 VTMRKLDSK   | 429  | 39   |
| >SEPT6-K171 VTMKKLDSK   | 14   | >SEPT6-K171 VTMRKLDSK   | 14   | 0    |
| >SEPT6-K171 VTMKKLDSK   | 394  | >SEPT6-K171 VTMRKLDSK   | 420  | 26   |
| >SEPT6-K171 VTMKKLDSK\  | 370  | >SEPT6-K171 VTMRKLDSK\  | 525  | 155  |
| >SEPT6-K171 VTMKKLDSK\  | 929  | >SEPT6-K171 VTMRKLDSK\  | 319  | 610  |
| >SEPT6-K171 LVTMKKLDSK  | 38   | >SEPT6-K171 LVTMRKLDSK  | 30   | 8    |
| >SEPT6-K171 LVTMKKLDSK  | 292  | >SEPT6-K171 LVTMRKLDSK  | 223  | 69   |
| >SEPT6-K171 LVTMKKLDSK  | 150  | >SEPT6-K171 LVTMRKLDSK  | 105  | 45   |
| >SEPT6-K171 DLVTMKKLD\$ | 694  | >SEPT6-K171 DLVTMRKLD\$ | 453  | 241  |
| >SEPT6-K171 LDLVTMKKL   | 340  | >SEPT6-K171 LDLVTMRKL   | 405  | 65   |
| >SEPT6-K171 SLDLVTMKKL  | 401  | >SEPT6-K171 SLDLVTMRKL  | 245  | 156  |
| >SEPT6-K171 SLDLVTMKKL  | 596  | >SEPT6-K171 SLDLVTMRKL  | 456  | 140  |
| >SEPT6-K171 SLDLVTMKKL  | 55   | >SEPT6-K171 SLDLVTMRKL  | 40   | 15   |
| >SEPT6-K171 SLDLVTMKKL  | 266  | >SEPT6-K171 SLDLVTMRKL  | 268  | 2    |
| >SEPT6-K171 SLDLVTMKKL  | 31   | >SEPT6-K171 SLDLVTMRKL  | 38   | 7    |
| >SEPT6-K171 SLDLVTMKKL  | 69   | >SEPT6-K171 SLDLVTMRKL  | 109  | 40   |
| >SEPT6-K171 SLDLVTMK    | 175  | >SEPT6-K171 SLDLVTMR    | 3311 | 3136 |
| >SEPT6-K171 SLDLVTMKK   | 55   | >SEPT6-K171 SLDLVTMRK   | 56   | 1    |
| >SEPT6-K171 SLDLVTMK    | 46   | >SEPT6-K171 SLDLVTMR    | 1427 | 1381 |
| >SEPT6-K171 SLDLVTMKK   | 17   | >SEPT6-K171 SLDLVTMRK   | 19   | 2    |
| >SEPT6-K171 SLDLVTMK    | 1488 | >SEPT6-K171 SLDLVTMR    | 460  | 1028 |
| >SEPT6-K171 KSLDLVTMK   | 133  | >SEPT6-K171 KSLDLVTMR   | 2751 | 2618 |
| >SEPT6-K171 KSLDLVTMKK  | 16   | >SEPT6-K171 KSLDLVTMRK  | 17   | 1    |
| >SEPT6-K171 KSLDLVTMK   | 14   | >SEPT6-K171 KSLDLVTMR   | 197  | 183  |
| >SEPT6-K171 KSLDLVTMKK  | 9    | >SEPT6-K171 KSLDLVTMRK  | 10   | 1    |
| >SEPT6-K171 KSLDLVTMK   | 53   | >SEPT6-K171 KSLDLVTMR   | 3697 | 3644 |
| >SEPT6-K171 KSLDLVTMKK  | 15   | >SEPT6-K171 KSLDLVTMRK  | 14   | 1    |
| >SEPT6-K171 KSLDLVTMK   | 90   | >SEPT6-K171 KSLDLVTMR   | 12   | 78   |
| >SEPT6-K171 KSLDLVTMKK  | 79   | >SEPT6-K171 KSLDLVTMRK  | 70   | 9    |
| >SEPT6-K171 KSLDLVTMKK  | 210  | >SEPT6-K171 KSLDLVTMRK  | 167  | 43   |
| >SEPT6-K171 KSLDLVTMKK  | 432  | >SEPT6-K171 KSLDLVTMRK  | 685  | 253  |
| >SEPT6-K171 KSLDLVTMKK  | 4    | >SEPT6-K171 KSLDLVTMRK  | 4    | 0    |
| >SEPT6-K171 KSLDLVTMKK  | 320  | >SEPT6-K171 KSLDLVTMRK  | 468  | 148  |
| >SEPT6-K171 KSLDLVTMKK  | 128  | >SEPT6-K171 KSLDLVTMRK  | 137  | 9    |
| >SEPT6-K171 KSLDLVTMK   | 495  | >SEPT6-K171 KSLDLVTMR   | 827  | 332  |
| >SEPT6-K171 KSLDLVTMKK  | 414  | >SEPT6-K171 KSLDLVTMRK  | 268  | 146  |
| >SEPT6-K171 KSLDLVTMK   | 1116 | >SEPT6-K171 KSLDLVTMR   | 72   | 1044 |
| >SEPT6-K171 KSLDLVTMKK  | 465  | >SEPT6-K171 KSLDLVTMRK  | 575  | 110  |
| >SEPT6-K171 KSLDLVTMKK  | 442  | >SEPT6-K171 KSLDLVTMRK  | 431  | 11   |
| >SEPT6-P18T PLAGHVGFD\$ | 5590 | >SEPT6-P18T TLAGHVGFD\$ | 125  | 5465 |



|                        |       |                        |       |       |
|------------------------|-------|------------------------|-------|-------|
| >SEPT6-P18T PLAGHVGF   | 4568  | >SEPT6-P18T TLAGHVGF   | 475   | 4093  |
| >SEPT6-P18T PLAGHVGFD  | 31    | >SEPT6-P18T TLAGHVGFD  | 5     | 26    |
| >SEPT6-P18T PLAGHVGFD  | 266   | >SEPT6-P18T TLAGHVGFD  | 10    | 256   |
| >SEPT6-P18T PLAGHVGFD  | 2379  | >SEPT6-P18T TLAGHVGFD  | 97    | 2282  |
| >SEPT6-P18T PLAGHVGFD  | 206   | >SEPT6-P18T TLAGHVGFD  | 41    | 165   |
| >SEPT6-P18T PLAGHVGFD  | 4767  | >SEPT6-P18T TLAGHVGFD  | 302   | 4465  |
| >SEPT6-P18T PLAGHVGFD  | 427   | >SEPT6-P18T TLAGHVGFD  | 68    | 359   |
| >SEPT6-P18T PLAGHVGFD  | 322   | >SEPT6-P18T TLAGHVGFD  | 82    | 240   |
| >SEPT6-P18T PLAGHVGFD  | 28    | >SEPT6-P18T TLAGHVGFD  | 6     | 22    |
| >SEPT6-P18T PLAGHVGF   | 1764  | >SEPT6-P18T TLAGHVGF   | 453   | 1311  |
| >SEPT6-P18T PLAGHVGFD  | 10894 | >SEPT6-P18T TLAGHVGFD  | 263   | 10631 |
| >SEPT6-P18T PLAGHVGF   | 2834  | >SEPT6-P18T TLAGHVGF   | 141   | 2693  |
| >SEPT6-P18T PLAGHVGF   | 1322  | >SEPT6-P18T TLAGHVGF   | 134   | 1188  |
| >SEPT6-P18T VPLAGHVGF  | 11    | >SEPT6-P18T VTLAGHVGF  | 12869 | 12858 |
| >SEPT6-P18T VPLAGHVGF  | 21643 | >SEPT6-P18T VTLAGHVGF  | 488   | 21155 |
| >SEPT6-P18T VPLAGHVGF  | 16108 | >SEPT6-P18T VTLAGHVGF  | 68    | 16040 |
| >SEPT6-P18T VPLAGHVGF  | 283   | >SEPT6-P18T VTLAGHVGF  | 18878 | 18595 |
| >SEPT6-P18T VPLAGHVGF  | 12499 | >SEPT6-P18T VTLAGHVGF  | 383   | 12116 |
| >SEPT6-P18T VPLAGHVGF  | 258   | >SEPT6-P18T VTLAGHVGF  | 80    | 178   |
| >SEPT6-P18T VPLAGHVGF  | 3595  | >SEPT6-P18T VTLAGHVGF  | 3     | 3592  |
| >SEPT6-P18T VPLAGHVGF  | 57    | >SEPT6-P18T VTLAGHVGF  | 3900  | 3843  |
| >SEPT6-P18T VPLAGHVGF  | 20233 | >SEPT6-P18T VTLAGHVGF  | 242   | 19991 |
| >SEPT6-P18T VPLAGHVGF  | 5632  | >SEPT6-P18T VTLAGHVGF  | 100   | 5532  |
| >SEPT6-P18T VPLAGHVGF  | 334   | >SEPT6-P18T VTLAGHVGF  | 16382 | 16048 |
| >SEPT6-P18T TVPLAGHV   | 19    | >SEPT6-P18T TVTLAGHV   | 22    | 3     |
| >SEPT6-P18T TVPLAGHV   | 1170  | >SEPT6-P18T TVTLAGHV   | 346   | 824   |
| >SEPT6-P18T TVPLAGHV   | 367   | >SEPT6-P18T TVTLAGHV   | 18334 | 17967 |
| >SEPT6-P18T TVPLAGHVGF | 101   | >SEPT6-P18T TVTLAGHVGF | 3746  | 3645  |
| >SEPT6-P18T TVPLAGHVGF | 1068  | >SEPT6-P18T TVTLAGHVGF | 242   | 826   |
| >SEPT6-P18T RTVPLAGHV  | 125   | >SEPT6-P18T RTVTLAGHV  | 380   | 255   |
| >SEPT6-P18T RTVPLAGHVC | 270   | >SEPT6-P18T RTVTLAGHVC | 1309  | 1039  |
| >SEPT6-P18T RTVPLAGHVC | 166   | >SEPT6-P18T RTVTLAGHVC | 66    | 100   |
| >SEPT6-P18T RTVPLAGHVC | 36    | >SEPT6-P18T RTVTLAGHVC | 30    | 6     |
| >SEPT6-P18T RTVPLAGHV  | 87    | >SEPT6-P18T RTVTLAGHV  | 157   | 70    |
| >SEPT6-P18T RTVPLAGHV  | 456   | >SEPT6-P18T RTVTLAGHV  | 891   | 435   |
| >SEPT6-P18T RTVPLAGHVC | 107   | >SEPT6-P18T RTVTLAGHVC | 220   | 113   |
| >SEPT6-P18T RTVPLAGHVC | 161   | >SEPT6-P18T RTVTLAGHVC | 133   | 28    |
| >SEPT6-P18T RTVPLAGH   | 8     | >SEPT6-P18T RTVTLAGH   | 21    | 13    |
| >SEPT6-P18T RTVPLAGHV  | 15    | >SEPT6-P18T RTVTLAGHV  | 40    | 25    |
| >SEPT6-P18T RTVPLAGHVC | 400   | >SEPT6-P18T RTVTLAGHVC | 1912  | 1512  |
| >SEPT6-P18T RTVPLAGHVC | 2     | >SEPT6-P18T RTVTLAGHVC | 3     | 1     |
| >SEPT6-P18T RTVPLAGHVC | 102   | >SEPT6-P18T RTVTLAGHVC | 327   | 225   |
| >SEPT6-P18T RTVPLAGHVC | 21    | >SEPT6-P18T RTVTLAGHVC | 38    | 17    |

|                         |       |                         |       |       |
|-------------------------|-------|-------------------------|-------|-------|
| >SEPT6-P18T RTVPLAGHVC  | 326   | >SEPT6-P18T RTVTLAGHVC  | 685   | 359   |
| >SEPT6-P18T RTVPLAGHV   | 141   | >SEPT6-P18T RTVTLAGHV   | 186   | 45    |
| >SEPT6-P18T RTVPLAGHVC  | 22    | >SEPT6-P18T RTVTLAGHVC  | 26    | 4     |
| >SEPT6-P18T RTVPLAGHV   | 205   | >SEPT6-P18T RTVTLAGHV   | 722   | 517   |
| >SEPT6-P18T CRTVPLAGHV  | 378   | >SEPT6-P18T CRTVTLAGHV  | 514   | 136   |
| >SEPT6-P18T GCRTVPLA    | 241   | >SEPT6-P18T GCRTVTLA    | 984   | 743   |
| >SEPT6-P18T GEGCRTVPL   | 108   | >SEPT6-P18T GEGCRTVTL   | 110   | 2     |
| >SEPT6-P18T GEGCRTVPL   | 286   | >SEPT6-P18T GEGCRTVTL   | 1748  | 1462  |
| >SEPT6-P18T GEGCRTVP    | 7383  | >SEPT6-P18T GEGCRTVT    | 355   | 7028  |
| >SEPT6-P18T GEGCRTVPL   | 22    | >SEPT6-P18T GEGCRTVTL   | 30    | 8     |
| >SEPT6-P18T QVGEGCRTV   | 337   | >SEPT6-P18T QVGEGCRTV   | 185   | 152   |
| >SEPT6-P18T QVGEGCRTV   | 299   | >SEPT6-P18T QVGEGCRTV   | 1019  | 720   |
| >SEPT9-E508 ENTTHCEFAY  | 462   | >SEPT9-E508 KNTTHCEFAY  | 16949 | 16487 |
| >SEPT9-E508 ENTTHCEF    | 2062  | >SEPT9-E508 KNTTHCEF    | 204   | 1858  |
| >SEPT9-E508 VENTTHCEFA  | 356   | >SEPT9-E508 VKNTTHCEFA  | 15758 | 15402 |
| >SEPT9-E508 VENTTHCEFA  | 297   | >SEPT9-E508 VKNTTHCEFA  | 141   | 156   |
| >SEPT9-E508 VENTTHCEF   | 50    | >SEPT9-E508 VKNTTHCEF   | 4     | 46    |
| >SEPT9-E508 VENTTHCEFA  | 177   | >SEPT9-E508 VKNTTHCEFA  | 7     | 170   |
| >SEPT9-E508 VENTTHCEF   | 86    | >SEPT9-E508 VKNTTHCEF   | 13373 | 13287 |
| >SEPT9-E508 VENTTHCEFA  | 37    | >SEPT9-E508 VKNTTHCEFA  | 6750  | 6713  |
| >SEPT9-E508 VENTTHCEF   | 228   | >SEPT9-E508 VKNTTHCEF   | 15458 | 15230 |
| >SEPT9-E508 VENTTHCEFA  | 447   | >SEPT9-E508 VKNTTHCEFA  | 15402 | 14955 |
| >SEPT9-E508 VENTTHCEF   | 419   | >SEPT9-E508 VKNTTHCEF   | 25971 | 25552 |
| >SEPT9-E508 VENTTHCEFA  | 211   | >SEPT9-E508 VKNTTHCEFA  | 20942 | 20731 |
| >SEPT9-E508 RKTkwGTIEV  | 3387  | >SEPT9-E508 RKTkwGTIEV  | 324   | 3063  |
| >SEPT9-E508 RKTkwGTIEV  | 11082 | >SEPT9-E508 RKTkwGTIEV  | 407   | 10675 |
| >SEPT9-E508 EVENTTHCEF  | 956   | >SEPT9-E508 EVKNTTHCEF  | 160   | 796   |
| >SEPT9-E508 EVENTTHCEF  | 338   | >SEPT9-E508 EVKNTTHCEF  | 202   | 136   |
| >SEPT9-E508 EVENTTHCEF  | 6453  | >SEPT9-E508 EVKNTTHCEF  | 319   | 6134  |
| >SEPT9-E508 EVENTTHCEF  | 4598  | >SEPT9-E508 EVKNTTHCEF  | 467   | 4131  |
| >SEPT9-E508 IEVENTTHCEI | 455   | >SEPT9-E508 IEVKNTTHCEI | 422   | 33    |
| >SEPT9-E508 IEVENTTHCEI | 28    | >SEPT9-E508 IEVKNTTHCEI | 22    | 6     |
| >SEPT9-E508 IEVENTTH    | 174   | >SEPT9-E508 IEVKNTTH    | 615   | 441   |
| >SEPT9-E508 IEVENTTHCEI | 11    | >SEPT9-E508 IEVKNTTHCEI | 22    | 11    |
| >SEPT9-E508 IEVENTTHCEI | 167   | >SEPT9-E508 IEVKNTTHCEI | 343   | 176   |
| >SEPT9-E508 IEVENTTHCEI | 392   | >SEPT9-E508 IEVKNTTHCEI | 418   | 26    |
| >SEPT9-E508 IEVENTTHCEI | 248   | >SEPT9-E508 IEVKNTTHCEI | 363   | 115   |
| >SEPT9-E508 IEVENTTHC   | 133   | >SEPT9-E508 IEVKNTTHC   | 233   | 100   |
| >SEPT9-E508 IEVENTTHCEI | 71    | >SEPT9-E508 IEVKNTTHCEI | 109   | 38    |
| >SEPT9-E508 KWGTIEVE    | 1196  | >SEPT9-E508 KWGTIEVK    | 19    | 1177  |
| >SEPT9-E508 KWGTIEVEN   | 1359  | >SEPT9-E508 KWGTIEVKN   | 445   | 914   |
| >SEPT9-E508 KWGTIEVE    | 470   | >SEPT9-E508 KWGTIEVK    | 446   | 24    |
| >SEPT9-E508 KWGTIEVENT  | 320   | >SEPT9-E508 KWGTIEVKN   | 269   | 51    |

|                          |       |                         |       |       |
|--------------------------|-------|-------------------------|-------|-------|
| >SEPT9-E508 KTKWGTIEVE   | 24234 | >SEPT9-E508 KTKWGTIEVK  | 110   | 24124 |
| >SEPT9-E508 KTKWGTIEVE   | 32913 | >SEPT9-E508 KTKWGTIEVK  | 132   | 32781 |
| >SEPT9-E508 KTKWGTIEVE   | 1416  | >SEPT9-E508 KTKWGTIEVK  | 5     | 1411  |
| >SEPT9-R384 RIPDTRVHCC   | 144   | >SEPT9-R384 HIPDTRVHCC  | 157   | 13    |
| >SEPT9-R384 KRIPDTRV     | 29    | >SEPT9-R384 KHIPDTRV    | 4571  | 4542  |
| >SEPT9-R384 KRIPDTRVH    | 382   | >SEPT9-R384 KHIPDTRVH   | 12772 | 12390 |
| >SEPT9-R384 KKRI PDTRV   | 351   | >SEPT9-R384 KKHIPDTRV   | 566   | 215   |
| >SEPT9-R384 KKRI PDTRVH  | 353   | >SEPT9-R384 KKHIPDTRVH  | 475   | 122   |
| >SEPT9-R384 KKRI PDTR    | 792   | >SEPT9-R384 KKHIPDTR    | 376   | 416   |
| >SEPT9-R384 RKKRI PDTR   | 499   | >SEPT9-R384 RKKHIPDTR   | 207   | 292   |
| >SEPT9-R384 RKKRI PDTRV  | 258   | >SEPT9-R384 RKKHIPDTRV  | 128   | 130   |
| >SEPT9-R384 RKKRI PDTRVH | 234   | >SEPT9-R384 RKKHIPDTRVH | 118   | 116   |
| >SEPT9-R384 NRKKRI PDTR  | 488   | >SEPT9-R384 NRKKHIPDTR  | 819   | 331   |
| >SEPT9-R384 VNINRKKRI    | 218   | >SEPT9-R384 VNINRKKHI   | 197   | 21    |
| >SEPT9-R384 EVNINRKKR    | 18    | >SEPT9-R384 EVNINRKKH   | 4845  | 4827  |
| >SEPT9-R384 EEVNINRKKR   | 38    | >SEPT9-R384 EEVNINRKKH  | 35    | 3     |
| >SEPT9-R384 EEVNINRKKR   | 401   | >SEPT9-R384 EEVNINRKKH  | 394   | 7     |
| >SEPT9-R384 EEVNINRKKR   | 352   | >SEPT9-R384 EEVNINRKKH  | 401   | 49    |
| >SETD2-A11☹AAGGKMKK      | 343   | >SETD2-A11☹VAGGKMKK     | 624   | 281   |
| >SETD2-A11☹AAGGKMKKE     | 421   | >SETD2-A11☹VAGGKMKKE    | 783   | 362   |
| >SETD2-A11☹RAAGGKMK      | 517   | >SETD2-A11☹RVAGGKMK     | 98    | 419   |
| >SETD2-A11☹RAAGGKMKK     | 97    | >SETD2-A11☹RVAGGKMKK    | 38    | 59    |
| >SETD2-A11☹RAAGGKMK      | 482   | >SETD2-A11☹RVAGGKMK     | 71    | 411   |
| >SETD2-A11☹RAAGGKMKK     | 104   | >SETD2-A11☹RVAGGKMKK    | 20    | 84    |
| >SETD2-A11☹RAAGGKMK      | 352   | >SETD2-A11☹RVAGGKMK     | 88    | 264   |
| >SETD2-A11☹RAAGGKMKK     | 107   | >SETD2-A11☹RVAGGKMKK    | 29    | 78    |
| >SETD2-A11☹RAAGGKMKK     | 67    | >SETD2-A11☹RVAGGKMKK    | 44    | 23    |
| >SETD2-A11☹RAAGGKMKK     | 498   | >SETD2-A11☹RVAGGKMKK    | 289   | 209   |
| >SETD2-A11☹RAAGGKMKK     | 716   | >SETD2-A11☹RVAGGKMKK    | 291   | 425   |
| >SETD2-A11☹IRAAGGKM      | 570   | >SETD2-A11☹IRVAGGKM     | 489   | 81    |
| >SETD2-A11☹IRAAGGKM      | 203   | >SETD2-A11☹IRVAGGKM     | 223   | 20    |
| >SETD2-A11☹IRAAGGKMK     | 366   | >SETD2-A11☹IRVAGGKMK    | 401   | 35    |
| >SETD2-A11☹IRAAGGKMKI    | 875   | >SETD2-A11☹IRVAGGKMKI   | 406   | 469   |
| >SETD2-A11☹SIRAAGGK      | 146   | >SETD2-A11☹SIRVAGGK     | 276   | 130   |
| >SETD2-A11☹SIRAAGGKMI    | 55    | >SETD2-A11☹SIRVAGGKMI   | 117   | 62    |
| >SETD2-A11☹SIRAAGGKMI    | 74    | >SETD2-A11☹SIRVAGGKMI   | 123   | 49    |
| >SETD2-A11☹SIRAAGGKMI    | 212   | >SETD2-A11☹SIRVAGGKMI   | 386   | 174   |
| >SETD2-A11☹SIRAAGGKMI    | 264   | >SETD2-A11☹SIRVAGGKMI   | 438   | 174   |
| >SETD2-A11☹SIRAAGGK      | 6     | >SETD2-A11☹SIRVAGGK     | 7     | 1     |
| >SETD2-A11☹SIRAAGGKM     | 84    | >SETD2-A11☹SIRVAGGKM    | 139   | 55    |
| >SETD2-A11☹SIRAAGGKMI    | 6     | >SETD2-A11☹SIRVAGGKMI   | 6     | 0     |
| >SETD2-A11☹SIRAAGGKMI    | 4     | >SETD2-A11☹SIRVAGGKMI   | 5     | 1     |
| >SETD2-A11☹SIRAAGGKM     | 288   | >SETD2-A11☹SIRVAGGKM    | 836   | 548   |

|                       |       |                       |     |       |
|-----------------------|-------|-----------------------|-----|-------|
| >SETD2-A11ϵSIRAAGGKM  | 267   | >SETD2-A11ϵSIRVAGGKM  | 631 | 364   |
| >SETD2-A11ϵSIRAAGGKM  | 283   | >SETD2-A11ϵSIRVAGGKM  | 270 | 13    |
| >SETD2-A11ϵVSIRAAGGK  | 776   | >SETD2-A11ϵVSIRVAGGK  | 324 | 452   |
| >SETD2-A11ϵVSIRAAGGK  | 133   | >SETD2-A11ϵVSIRVAGGK  | 57  | 76    |
| >SETD2-A11ϵVSIRAAGGKM | 141   | >SETD2-A11ϵVSIRVAGGKM | 81  | 60    |
| >SETD2-A11ϵVSIRAAGGKM | 235   | >SETD2-A11ϵVSIRVAGGKM | 460 | 225   |
| >SETD2-A11ϵVSIRAAGGK  | 434   | >SETD2-A11ϵVSIRVAGGK  | 155 | 279   |
| >SETD2-A11ϵVSIRAAGGKM | 14    | >SETD2-A11ϵVSIRVAGGKM | 34  | 20    |
| >SETD2-A11ϵVSIRAAGGKM | 707   | >SETD2-A11ϵVSIRVAGGKM | 327 | 380   |
| >SETD2-A11ϵVSIRAAGGKM | 26    | >SETD2-A11ϵVSIRVAGGKM | 30  | 4     |
| >SETD2-A11ϵRVSIRAAGGK | 42    | >SETD2-A11ϵRVSIRVAGGK | 40  | 2     |
| >SETD2-A11ϵRVSIRAAGGK | 135   | >SETD2-A11ϵRVSIRVAGGK | 69  | 66    |
| >SETD2-A11ϵRVSIRAAGGK | 20    | >SETD2-A11ϵRVSIRVAGGK | 26  | 6     |
| >SETD2-A11ϵRVSIRAAGGK | 506   | >SETD2-A11ϵRVSIRVAGGK | 221 | 285   |
| >SETD2-A11ϵRVSIRAAGGK | 36    | >SETD2-A11ϵRVSIRVAGGK | 48  | 12    |
| >SETD2-A11ϵRVSIRAAGGK | 194   | >SETD2-A11ϵRVSIRVAGGK | 325 | 131   |
| >SETD2-A11ϵNRVSIRAAGC | 218   | >SETD2-A11ϵNRVSIRVAGC | 204 | 14    |
| >SETD2-A11ϵNRVSIRAAG  | 473   | >SETD2-A11ϵNRVSIRVAG  | 350 | 123   |
| >SETD2-A11ϵGENRVSIRA  | 12819 | >SETD2-A11ϵGENRVSIRV  | 298 | 12521 |
| >SETD2-A11ϵGENRVSIRA  | 6361  | >SETD2-A11ϵGENRVSIRV  | 220 | 6141  |
| >SETD2-A11ϵGENRVSIRA  | 31    | >SETD2-A11ϵGENRVSIRV  | 107 | 76    |
| >SETD2-A11ϵGENRVSIRAA | 341   | >SETD2-A11ϵGENRVSIRVA | 585 | 244   |
| >SETD2-A11ϵGENRVSIRA  | 623   | >SETD2-A11ϵGENRVSIRV  | 18  | 605   |
| >SETD2-A11ϵGENRVSIRAA | 462   | >SETD2-A11ϵGENRVSIRVA | 637 | 175   |
| >SETD2-C112SCEPNCETQK | 17949 | >SETD2-C112SYEPNCETQK | 229 | 17720 |
| >SETD2-C112SCEPNCETQK | 23122 | >SETD2-C112SYEPNCETQK | 443 | 22679 |
| >SETD2-C112SCEPNCETQK | 17971 | >SETD2-C112SYEPNCETQK | 13  | 17958 |
| >SETD2-C112SCEPNCETQ  | 30341 | >SETD2-C112SYEPNCETQ  | 433 | 29908 |
| >SETD2-C112GNCSRFMNH  | 25592 | >SETD2-C112GNCSRFMNH  | 345 | 25247 |
| >SETD2-C112GNCSRFMNH  | 29200 | >SETD2-C112GNCSRFMNH  | 200 | 29000 |
| >SETD2-C112GNCSRFMNH  | 23430 | >SETD2-C112GNCSRFMNH  | 474 | 22956 |
| >SETD2-C112HSCEPNCETC | 815   | >SETD2-C112HSYEPNCETC | 56  | 759   |
| >SETD2-C112HSCEPNCETC | 210   | >SETD2-C112HSYEPNCETC | 60  | 150   |
| >SETD2-C112HSCEPNCETC | 657   | >SETD2-C112HSYEPNCETC | 282 | 375   |
| >SETD2-C112HSCEPNCETC | 136   | >SETD2-C112HSYEPNCETC | 33  | 103   |
| >SETD2-C112FMNHSCEP   | 355   | >SETD2-C112FMNHSYEP   | 97  | 258   |
| >SETD2-C112FMNHSCEPN  | 826   | >SETD2-C112FMNHSYEPN  | 450 | 376   |
| >SETD2-C112FMNHSCEP   | 656   | >SETD2-C112FMNHSYEP   | 414 | 242   |
| >SETD2-C112FMNHSCEPN  | 93    | >SETD2-C112FMNHSYEPN  | 23  | 70    |
| >SETD2-C112FMNHSCEPN  | 300   | >SETD2-C112FMNHSYEPN  | 136 | 164   |
| >SETD2-C112FMNHSCEPN  | 522   | >SETD2-C112FMNHSYEPN  | 265 | 257   |
| >SETD2-C112FMNHSCEPN  | 321   | >SETD2-C112FMNHSYEPN  | 406 | 85    |
| >SETD2-C112FMNHSCEPN  | 36    | >SETD2-C112FMNHSYEPN  | 22  | 14    |

|                        |       |                        |     |       |
|------------------------|-------|------------------------|-----|-------|
| >SETD2-C112FMNHSCEPN   | 1159  | >SETD2-C112FMNHSYEPN   | 405 | 754   |
| >SETD2-C112SRFMNHSC    | 25465 | >SETD2-C112SRFMNHSY    | 425 | 25040 |
| >SETD2-C112SRFMNHSC    | 22220 | >SETD2-C112SRFMNHSY    | 62  | 22158 |
| >SETD2-C112SRFMNHSC    | 1260  | >SETD2-C112SRFMNHSY    | 11  | 1249  |
| >SETD2-C112SRFMNHSC    | 1387  | >SETD2-C112SRFMNHSY    | 103 | 1284  |
| >SETD2-C112CSRFMNHSC   | 20650 | >SETD2-C112CSRFMNHSY   | 498 | 20152 |
| >SETD2-C112CSRFMNHSC   | 25789 | >SETD2-C112CSRFMNHSY   | 265 | 25524 |
| >SETD2-C112CSRFMNHSC   | 1343  | >SETD2-C112CSRFMNHSY   | 80  | 1263  |
| >SETD2-C112CSRFMNHSC   | 9456  | >SETD2-C112CSRFMNHSY   | 12  | 9444  |
| >SETD2-C112CSRFMNHSC   | 18100 | >SETD2-C112CSRFMNHSY   | 344 | 17756 |
| >SETD2-C112CSRFMNHSC   | 19633 | >SETD2-C112CSRFMNHSY   | 373 | 19260 |
| >SETD2-C112CSRFMNHSC   | 11457 | >SETD2-C112CSRFMNHSY   | 10  | 11447 |
| >SETD2-C112CSRFMNHSC   | 9301  | >SETD2-C112CSRFMNHSY   | 72  | 9229  |
| >SETD2-C112CSRFMNHSC   | 36443 | >SETD2-C112CSRFMNHSY   | 172 | 36271 |
| >SETD2-C112NCSRFMNHS   | 26476 | >SETD2-C112NCSRFMNHS   | 118 | 26358 |
| >SETD2-C112NCSRFMNHS   | 26725 | >SETD2-C112NCSRFMNHS   | 381 | 26344 |
| >SETD2-C112NCSRFMNHS   | 34657 | >SETD2-C112NCSRFMNHS   | 283 | 34374 |
| >SETD2-C112CRGYLGGENF  | 370   | >SETD2-C112FRGYLGGENF  | 472 | 102   |
| >SETD2-C112NCRGYLGGENF | 5894  | >SETD2-C112NFRGYLGGENF | 213 | 5681  |
| >SETD2-C112NCRGYLGGENF | 823   | >SETD2-C112NFRGYLGGENF | 40  | 783   |
| >SETD2-C112AQKCFCSAIF  | 4079  | >SETD2-C112AQKCFCSAIF  | 30  | 4049  |
| >SETD2-C112AQKCFCSAIF  | 21011 | >SETD2-C112AQKCFCSAIF  | 390 | 20621 |
| >SETD2-C112AQKCFCSAIF  | 993   | >SETD2-C112AQKCFCSAIF  | 4   | 989   |
| >SETD2-C112GSANFRGY    | 553   | >SETD2-C112GSANFRGY    | 320 | 233   |
| >SETD2-C112GSANFRGY    | 36    | >SETD2-C112GSANFRGY    | 50  | 14    |
| >SETD2-C112GSANFRGY    | 69    | >SETD2-C112GSANFRGY    | 65  | 4     |
| >SETD2-C112GSANFRGY    | 398   | >SETD2-C112GSANFRGY    | 638 | 240   |
| >SETD2-C112GSANFRGYL   | 39    | >SETD2-C112GSANFRGYL   | 45  | 6     |
| >SETD2-C112GSANFRGYL   | 637   | >SETD2-C112GSANFRGYL   | 442 | 195   |
| >SETD2-C112CGSANFRGY   | 343   | >SETD2-C112CGSANFRGY   | 314 | 29    |
| >SETD2-C112FCGSANFRGY  | 308   | >SETD2-C112FCGSANFRGY  | 210 | 98    |
| >SETD2-C112FCGSANFRGY  | 616   | >SETD2-C112FCGSANFRGY  | 308 | 308   |
| >SETD2-C112FCGSANFRGY  | 642   | >SETD2-C112FCGSANFRGY  | 361 | 281   |
| >SETD2-C112FCGSANFR    | 2090  | >SETD2-C112FCGSANFR    | 424 | 1666  |
| >SETD2-C112FCGSANFR    | 1233  | >SETD2-C112FCGSANFR    | 282 | 951   |
| >SETD2-C112CFCGSANF    | 28457 | >SETD2-C112CFCGSANF    | 175 | 28282 |
| >SETD2-C112CFCGSANF    | 10376 | >SETD2-C112CFCGSANF    | 12  | 10364 |
| >SETD2-C112CFCGSANFR   | 562   | >SETD2-C112CFCGSANFR   | 166 | 396   |
| >SETD2-C112CFCGSANFR   | 161   | >SETD2-C112CFCGSANFR   | 92  | 69    |
| >SETD2-C112CFCGSANFR   | 714   | >SETD2-C112CFCGSANFR   | 121 | 593   |
| >SETD2-C112CFCGSANFR   | 285   | >SETD2-C112CFCGSANFR   | 47  | 238   |
| >SETD2-C112CFCGSANFR   | 311   | >SETD2-C112CFCGSANFR   | 57  | 254   |
| >SETD2-C112CFCGSANFR   | 253   | >SETD2-C112CFCGSANFR   | 423 | 170   |

|                       |       |                        |     |       |
|-----------------------|-------|------------------------|-----|-------|
| >SETD2-C11&CFCGSANCR  | 126   | >SETD2-C11&CFCGSANFR   | 32  | 94    |
| >SETD2-C11&KCFCGSANCF | 3334  | >SETD2-C11&KCFCGSANFR  | 364 | 2970  |
| >SETD2-C11&KCFCGSANCF | 73    | >SETD2-C11&KCFCGSANFR  | 23  | 50    |
| >SETD2-C11&KCFCGSANC  | 3999  | >SETD2-C11&KCFCGSANF   | 33  | 3966  |
| >SETD2-C11&KCFCGSANC  | 8450  | >SETD2-C11&KCFCGSANF   | 17  | 8433  |
| >SETD2-C11&KCFCGSANC  | 18393 | >SETD2-C11&KCFCGSANF   | 88  | 18305 |
| >SETD2-C11&KCFCGSANC  | 8866  | >SETD2-C11&KCFCGSANF   | 62  | 8804  |
| >SETD2-C11&KCFCGSANCF | 676   | >SETD2-C11&KCFCGSANFR  | 205 | 471   |
| >SETD2-C11&KCFCGSANCF | 41    | >SETD2-C11&KCFCGSANFR  | 17  | 24    |
| >SETD2-C11&QKFCGSANCF | 3328  | >SETD2-C11&QKFCGSANFR  | 11  | 3317  |
| >SETD2-C11&QKFCGSANCF | 2102  | >SETD2-C11&QKFCGSANFR  | 360 | 1742  |
| >SETD2-C99&CTPLSKDER  | 115   | >SETD2-C99&GTPLSKDER   | 543 | 428   |
| >SETD2-C99&MQCECTPL   | 60    | >SETD2-C99&MQCEGTPL    | 199 | 139   |
| >SETD2-C99&MQCECTPL   | 41    | >SETD2-C99&MQCEGTPL    | 126 | 85    |
| >SETD2-C99&MQCECTPL   | 133   | >SETD2-C99&MQCEGTPL    | 130 | 3     |
| >SETD2-C99&MQCECTPL   | 11    | >SETD2-C99&MQCEGTPL    | 9   | 2     |
| >SETD2-C99&MQCECTPLS  | 197   | >SETD2-C99&MQCEGTPLS   | 110 | 87    |
| >SETD2-C99&MQCECTPL   | 834   | >SETD2-C99&MQCEGTPL    | 268 | 566   |
| >SETD2-C99&MQCECTPLSF | 112   | >SETD2-C99&MQCEGTPLSI  | 142 | 30    |
| >SETD2-C99&MQCECTPLSF | 48    | >SETD2-C99&MQCEGTPLSI  | 42  | 6     |
| >SETD2-C99&MQCECTPLSF | 301   | >SETD2-C99&MQCEGTPLSI  | 176 | 125   |
| >SETD2-C99&MQCECTPL   | 140   | >SETD2-C99&MQCEGTPL    | 96  | 44    |
| >SETD2-C99&MQCECTPL   | 39    | >SETD2-C99&MQCEGTPL    | 41  | 2     |
| >SETD2-C99&MQCECTPLSF | 253   | >SETD2-C99&MQCEGTPLSI  | 698 | 445   |
| >SETD2-C99&MQCECTPL   | 32    | >SETD2-C99&MQCEGTPL    | 18  | 14    |
| >SETD2-C99&MQCECTPL   | 204   | >SETD2-C99&MQCEGTPL    | 131 | 73    |
| >SETD2-C99&RMQCECTPL  | 76    | >SETD2-C99&RMQCEGTPL   | 317 | 241   |
| >SETD2-C99&RMQCECTPL  | 41    | >SETD2-C99&RMQCEGTPL   | 78  | 37    |
| >SETD2-C99&RMQCECTPL  | 25    | >SETD2-C99&RMQCEGTPL   | 30  | 5     |
| >SETD2-C99&RMQCECTPL  | 192   | >SETD2-C99&RMQCEGTPL   | 347 | 155   |
| >SETD2-C99&RMQCECTPL  | 165   | >SETD2-C99&RMQCEGTPL   | 41  | 124   |
| >SETD2-C99&RMQCECTPL  | 24    | >SETD2-C99&RMQCEGTPL   | 9   | 15    |
| >SETD2-C99&RMQCECTPL  | 314   | >SETD2-C99&RMQCEGTPL   | 358 | 44    |
| >SETD2-C99&RMQCECTPLS | 73    | >SETD2-C99&RMQCEGTPLSI | 79  | 6     |
| >SETD2-C99&RMQCECTPLS | 28    | >SETD2-C99&RMQCEGTPLSI | 30  | 2     |
| >SETD2-C99&RMQCECTPLS | 80    | >SETD2-C99&RMQCEGTPLSI | 58  | 22    |
| >SETD2-C99&RMQCECTPL  | 113   | >SETD2-C99&RMQCEGTPL   | 165 | 52    |
| >SETD2-C99&RMQCECTPL  | 68    | >SETD2-C99&RMQCEGTPL   | 53  | 15    |
| >SETD2-C99&RMQCECTPL  | 28    | >SETD2-C99&RMQCEGTPL   | 12  | 16    |
| >SETD2-C99&RMQCECTPLS | 269   | >SETD2-C99&RMQCEGTPLSI | 237 | 32    |
| >SETD2-C99&RMQCECTPL  | 808   | >SETD2-C99&RMQCEGTPL   | 340 | 468   |
| >SETD2-C99&KRMQCECTPL | 76    | >SETD2-C99&KRMQCEGTP   | 82  | 6     |
| >SETD2-C99&KRMQCECTPL | 18    | >SETD2-C99&KRMQCEGTP   | 13  | 5     |

|                       |       |                       |     |       |
|-----------------------|-------|-----------------------|-----|-------|
| >SETD2-C998KRMQCECTP  | 194   | >SETD2-C998KRMQCEGTP  | 164 | 30    |
| >SETD2-C998KRMQCECTP  | 23    | >SETD2-C998KRMQCEGTP  | 21  | 2     |
| >SETD2-C998KRMQCECTP  | 267   | >SETD2-C998KRMQCEGTP  | 296 | 29    |
| >SETD2-C998KRMQCECTP  | 44    | >SETD2-C998KRMQCEGTP  | 36  | 8     |
| >SETD2-C998IKRMQCECTP | 11    | >SETD2-C998IKRMQCEGTP | 9   | 2     |
| >SETD2-D111DATQKGNCS  | 616   | >SETD2-D111NATQKGNCS  | 332 | 284   |
| >SETD2-D111DATQKGNCS  | 1588  | >SETD2-D111NATQKGNCS  | 475 | 1113  |
| >SETD2-D111EIIDATQK   | 9     | >SETD2-D111EIINATQK   | 8   | 1     |
| >SETD2-D111DEIIDATQ   | 97    | >SETD2-D111DEIINATQ   | 47  | 50    |
| >SETD2-D111ALKNDEIIDA | 507   | >SETD2-D111ALKNDEIINA | 161 | 346   |
| >SETD2-D111ALKNDEIIDA | 335   | >SETD2-D111ALKNDEIINA | 118 | 217   |
| >SETD2-D111ALKNDEIIDA | 673   | >SETD2-D111ALKNDEIINA | 359 | 314   |
| >SETD2-D111ALKNDEIIDA | 49    | >SETD2-D111ALKNDEIINA | 27  | 22    |
| >SETD2-D676DPLGHPNSEE | 1831  | >SETD2-D676HPLGHPNSEE | 243 | 1588  |
| >SETD2-D676KSDPLGHP   | 16361 | >SETD2-D676KSHPLGHP   | 446 | 15915 |
| >SETD2-D676KSDPLGHPN  | 14764 | >SETD2-D676KSHPLGHPN  | 182 | 14582 |
| >SETD2-D676KSDPLGHPNS | 8709  | >SETD2-D676KSHPLGHPNS | 27  | 8682  |
| >SETD2-D676KSDPLGHPNS | 15824 | >SETD2-D676KSHPLGHPNS | 468 | 15356 |
| >SETD2-D676HTDVKSDPL  | 1596  | >SETD2-D676HTDVKSHPL  | 387 | 1209  |
| >SETD2-D676HTDVKSDPLC | 305   | >SETD2-D676HTDVKSHPLC | 167 | 138   |
| >SETD2-D676HTDVKSDPL  | 1099  | >SETD2-D676HTDVKSHPL  | 366 | 733   |
| >SETD2-D676HTDVKSDPL  | 687   | >SETD2-D676HTDVKSHPL  | 39  | 648   |
| >SETD2-D676HTDVKSDPL  | 63    | >SETD2-D676HTDVKSHPL  | 12  | 51    |
| >SETD2-D676HTDVKSDPL  | 4517  | >SETD2-D676HTDVKSHPL  | 382 | 4135  |
| >SETD2-D676SHTDVKSDPL | 275   | >SETD2-D676SHTDVKSHPL | 73  | 202   |
| >SETD2-D676TSHTDVKSDP | 609   | >SETD2-D676TSHTDVKSHP | 287 | 322   |
| >SETD2-D676TSHTDVKSDP | 389   | >SETD2-D676TSHTDVKSHP | 96  | 293   |
| >SETD2-G115GSELTFDY   | 60    | >SETD2-G115VSELTFDY   | 21  | 39    |
| >SETD2-G115GSELTFDYQF | 1292  | >SETD2-G115VSELTFDYQF | 415 | 877   |
| >SETD2-G115GSELTFDY   | 338   | >SETD2-G115VSELTFDY   | 536 | 198   |
| >SETD2-G115GSELTFDYQF | 177   | >SETD2-G115VSELTFDYQF | 155 | 22    |
| >SETD2-G115GSELTFDY   | 452   | >SETD2-G115VSELTFDY   | 240 | 212   |
| >SETD2-G115GSELTFDYQF | 1318  | >SETD2-G115VSELTFDYQF | 480 | 838   |
| >SETD2-G115GSELTFDY   | 256   | >SETD2-G115VSELTFDY   | 52  | 204   |
| >SETD2-G115GSELTFDYQF | 77    | >SETD2-G115VSELTFDYQF | 24  | 53    |
| >SETD2-G115GSELTFDYQF | 1280  | >SETD2-G115VSELTFDYQF | 327 | 953   |
| >SETD2-G115GSELTFDY   | 1145  | >SETD2-G115VSELTFDY   | 472 | 673   |
| >SETD2-G115GSELTFDY   | 452   | >SETD2-G115VSELTFDY   | 867 | 415   |
| >SETD2-G115SGSELTFDY  | 6285  | >SETD2-G115SVSELTFDY  | 251 | 6034  |
| >SETD2-G115SGSELTFDY  | 3580  | >SETD2-G115SVSELTFDY  | 31  | 3549  |
| >SETD2-G115SGSELTFDY  | 142   | >SETD2-G115SVSELTFDY  | 15  | 127   |
| >SETD2-G115SGSELTFDYQ | 4077  | >SETD2-G115SVSELTFDYQ | 204 | 3873  |
| >SETD2-G115SGSELTFDY  | 88    | >SETD2-G115SVSELTFDY  | 45  | 43    |

|                        |       |                        |      |       |
|------------------------|-------|------------------------|------|-------|
| >SETD2-G11!SGSELTFDYQ  | 5116  | >SETD2-G11!SVSELTFDYQ  | 58   | 5058  |
| >SETD2-G11!SGSELTFDY   | 57    | >SETD2-G11!SVSELTFDY   | 5    | 52    |
| >SETD2-G11!SGSELTFDYQ  | 1670  | >SETD2-G11!SVSELTFDYQ  | 356  | 1314  |
| >SETD2-G11!SGSELTFDY   | 290   | >SETD2-G11!SVSELTFDY   | 113  | 177   |
| >SETD2-G11!SGSELTFDYQ  | 465   | >SETD2-G11!SVSELTFDYQ  | 154  | 311   |
| >SETD2-G11!SGSELTFDY   | 679   | >SETD2-G11!SVSELTFDY   | 133  | 546   |
| >SETD2-G11!SGSELTFDYQ  | 942   | >SETD2-G11!SVSELTFDYQ  | 215  | 727   |
| >SETD2-G11!SGSELTFDY   | 2472  | >SETD2-G11!SVSELTFDY   | 462  | 2010  |
| >SETD2-G11!GFFTTKLVPSC | 23615 | >SETD2-G11!GFFTTKLVPSC | 201  | 23414 |
| >SETD2-G11!GFFTTKLVPSC | 35417 | >SETD2-G11!GFFTTKLVPSC | 436  | 34981 |
| >SETD2-G11!PSGSELTF    | 6962  | >SETD2-G11!PSVSELTF    | 423  | 6539  |
| >SETD2-G11!PSGSELTFDY  | 1639  | >SETD2-G11!PSVSELTFDY  | 81   | 1558  |
| >SETD2-G11!PSGSELTF    | 1303  | >SETD2-G11!PSVSELTF    | 222  | 1081  |
| >SETD2-G11!PSGSELTF    | 1343  | >SETD2-G11!PSVSELTF    | 88   | 1255  |
| >SETD2-G11!VPSGSELTF   | 100   | >SETD2-G11!VPSVSELTF   | 388  | 288   |
| >SETD2-G11!VPSGSELTFD' | 493   | >SETD2-G11!VPSVSELTFD' | 883  | 390   |
| >SETD2-G11!VPSGSELTF   | 364   | >SETD2-G11!VPSVSELTF   | 1408 | 1044  |
| >SETD2-G11!VPSGSELTF   | 679   | >SETD2-G11!VPSVSELTF   | 237  | 442   |
| >SETD2-G11!VPSGSELTF   | 14    | >SETD2-G11!VPSVSELTF   | 19   | 5     |
| >SETD2-G11!VPSGSELTFD' | 13    | >SETD2-G11!VPSVSELTFD' | 16   | 3     |
| >SETD2-G11!VPSGSELTF   | 58    | >SETD2-G11!VPSVSELTF   | 52   | 6     |
| >SETD2-G11!VPSGSELTFD' | 56    | >SETD2-G11!VPSVSELTFD' | 50   | 6     |
| >SETD2-G11!VPSGSELTF   | 202   | >SETD2-G11!VPSVSELTF   | 136  | 66    |
| >SETD2-G11!VPSGSELTFD' | 158   | >SETD2-G11!VPSVSELTFD' | 111  | 47    |
| >SETD2-G11!VPSGSELTF   | 122   | >SETD2-G11!VPSVSELTF   | 95   | 27    |
| >SETD2-G11!VPSGSELTFD' | 440   | >SETD2-G11!VPSVSELTFD' | 352  | 88    |
| >SETD2-G11!LVPSGSEL    | 699   | >SETD2-G11!LVPSVSEL    | 156  | 543   |
| >SETD2-G11!LVPSGSEL    | 875   | >SETD2-G11!LVPSVSEL    | 363  | 512   |
| >SETD2-G11!LVPSGSEL    | 802   | >SETD2-G11!LVPSVSEL    | 415  | 387   |
| >SETD2-G11!LVPSGSEL    | 175   | >SETD2-G11!LVPSVSEL    | 213  | 38    |
| >SETD2-G11!LVPSGSELTF  | 97    | >SETD2-G11!LVPSVSELTF  | 85   | 12    |
| >SETD2-G11!LVPSGSEL    | 873   | >SETD2-G11!LVPSVSEL    | 111  | 762   |
| >SETD2-G11!LVPSGSELTF  | 254   | >SETD2-G11!LVPSVSELTF  | 356  | 102   |
| >SETD2-G11!LVPSGSEL    | 20    | >SETD2-G11!LVPSVSEL    | 204  | 184   |
| >SETD2-G11!LVPSGSELTF  | 232   | >SETD2-G11!LVPSVSELTF  | 104  | 128   |
| >SETD2-G11!LVPSGSELTF  | 444   | >SETD2-G11!LVPSVSELTF  | 473  | 29    |
| >SETD2-G11!KLVPSGSEL   | 449   | >SETD2-G11!KLVPSVSEL   | 36   | 413   |
| >SETD2-G11!KLVPSGSEL   | 20    | >SETD2-G11!KLVPSVSEL   | 6    | 14    |
| >SETD2-G11!KLVPSGSELT  | 541   | >SETD2-G11!KLVPSVSELT  | 258  | 283   |
| >SETD2-G11!KLVPSGSEL   | 20    | >SETD2-G11!KLVPSVSEL   | 5    | 15    |
| >SETD2-G11!KLVPSGSELT  | 447   | >SETD2-G11!KLVPSVSELT  | 396  | 51    |
| >SETD2-G11!KLVPSGSEL   | 102   | >SETD2-G11!KLVPSVSEL   | 25   | 77    |
| >SETD2-G11!KLVPSGSEL   | 21    | >SETD2-G11!KLVPSVSEL   | 6    | 15    |



|                         |       |                         |      |       |
|-------------------------|-------|-------------------------|------|-------|
| >SETD2-G11!KLVPSGSELT   | 795   | >SETD2-G11!KLVPSVSELT   | 228  | 567   |
| >SETD2-G11!KLVPSGSEL    | 25    | >SETD2-G11!KLVPSVSEL    | 13   | 12    |
| >SETD2-G11!KLVPSGSEL    | 60    | >SETD2-G11!KLVPSVSEL    | 16   | 44    |
| >SETD2-G11!KLVPSGSEL    | 1582  | >SETD2-G11!KLVPSVSEL    | 71   | 1511  |
| >SETD2-G11!KLVPSGSEL    | 5     | >SETD2-G11!KLVPSVSEL    | 3    | 2     |
| >SETD2-G11!KLVPSGSELT   | 169   | >SETD2-G11!KLVPSVSELT   | 142  | 27    |
| >SETD2-G11!KLVPSGSELTF  | 422   | >SETD2-G11!KLVPSVSELTF  | 287  | 135   |
| >SETD2-G11!KLVPSGSELTF  | 109   | >SETD2-G11!KLVPSVSELTF  | 56   | 53    |
| >SETD2-G11!KLVPSGSEL    | 391   | >SETD2-G11!KLVPSVSEL    | 379  | 12    |
| >SETD2-G11!KLVPSGSELTF  | 68    | >SETD2-G11!KLVPSVSELTF  | 67   | 1     |
| >SETD2-G11!KLVPSGSELTF  | 393   | >SETD2-G11!KLVPSVSELTF  | 993  | 600   |
| >SETD2-G11!KLVPSGSEL    | 61    | >SETD2-G11!KLVPSVSEL    | 73   | 12    |
| >SETD2-G11!KLVPSGSELTF  | 10    | >SETD2-G11!KLVPSVSELTF  | 9    | 1     |
| >SETD2-G11!KLVPSGSEL    | 15    | >SETD2-G11!KLVPSVSEL    | 14   | 1     |
| >SETD2-G11!KLVPSGSELTF  | 5     | >SETD2-G11!KLVPSVSELTF  | 5    | 0     |
| >SETD2-G11!KLVPSGSELTF  | 86    | >SETD2-G11!KLVPSVSELTF  | 36   | 50    |
| >SETD2-G11!KLVPSGSEL    | 437   | >SETD2-G11!KLVPSVSEL    | 1119 | 682   |
| >SETD2-G11!KLVPSGSELTF  | 283   | >SETD2-G11!KLVPSVSELTF  | 461  | 178   |
| >SETD2-G11!TKLVPSGSEL   | 51    | >SETD2-G11!TKLVPSVSEL   | 20   | 31    |
| >SETD2-G11!TKLVPSGSEL   | 651   | >SETD2-G11!TKLVPSVSEL   | 164  | 487   |
| >SETD2-G11!TTKLVPSPG    | 20797 | >SETD2-G11!TTKLVPSPV    | 329  | 20468 |
| >SETD2-G11!TTKLVPSPG    | 1258  | >SETD2-G11!TTKLVPSPV    | 169  | 1089  |
| >SETD2-G11!TTKLVPSPG    | 14828 | >SETD2-G11!TTKLVPSPV    | 165  | 14663 |
| >SETD2-G11!TTKLVPSPGSEI | 511   | >SETD2-G11!TTKLVPSPVSEI | 235  | 276   |
| >SETD2-G11!TTKLVPSPG    | 19042 | >SETD2-G11!TTKLVPSPV    | 406  | 18636 |
| >SETD2-G11!TTKLVPSPGSEI | 57    | >SETD2-G11!TTKLVPSPVSEI | 61   | 4     |
| >SETD2-G11!TTKLVPSPGS   | 2276  | >SETD2-G11!TTKLVPSPVS   | 382  | 1894  |
| >SETD2-G11!TTKLVPSPGSEI | 30    | >SETD2-G11!TTKLVPSPVSEI | 30   | 0     |
| >SETD2-G11!FTTKLVPSG    | 18701 | >SETD2-G11!FTTKLVPSV    | 29   | 18672 |
| >SETD2-G11!FTTKLVPSG    | 9138  | >SETD2-G11!FTTKLVPSV    | 37   | 9101  |
| >SETD2-G11!FTTKLVPSG    | 14490 | >SETD2-G11!FTTKLVPSV    | 21   | 14469 |
| >SETD2-G11!FTTKLVPSG    | 7335  | >SETD2-G11!FTTKLVPSV    | 7    | 7328  |
| >SETD2-G11!FTTKLVPSG    | 11913 | >SETD2-G11!FTTKLVPSV    | 16   | 11897 |
| >SETD2-G11!FTTKLVPSG    | 19793 | >SETD2-G11!FTTKLVPSV    | 234  | 19559 |
| >SETD2-G11!FTTKLVPSG    | 15136 | >SETD2-G11!FTTKLVPSV    | 10   | 15126 |
| >SETD2-G11!FTTKLVPSG    | 23855 | >SETD2-G11!FTTKLVPSV    | 7    | 23848 |
| >SETD2-G11!FTTKLVPSG    | 8787  | >SETD2-G11!FTTKLVPSV    | 74   | 8713  |
| >SETD2-G11!FTTKLVPSG    | 11402 | >SETD2-G11!FTTKLVPSV    | 10   | 11392 |
| >SETD2-G11!FTTKLVPSG    | 2945  | >SETD2-G11!FTTKLVPSV    | 104  | 2841  |
| >SETD2-G11!FTTKLVPSG    | 6678  | >SETD2-G11!FTTKLVPSV    | 356  | 6322  |
| >SETD2-G11!FFTTKLVPSPG  | 22777 | >SETD2-G11!FFTTKLVPSPV  | 252  | 22525 |
| >SETD2-G11!FFTTKLVPSPG  | 29221 | >SETD2-G11!FFTTKLVPSPV  | 31   | 29190 |
| >SETD2-G75(LGWDFSQEK    | 2720  | >SETD2-G75(LVWDFSQEK    | 31   | 2689  |

|                         |      |                         |      |      |
|-------------------------|------|-------------------------|------|------|
| >SETD2-G75(LGWDFSQEK    | 3247 | >SETD2-G75(LVWDFSQEK    | 171  | 3076 |
| >SETD2-G75(LGWDFSQEK    | 3945 | >SETD2-G75(LVWDFSQEK    | 487  | 3458 |
| >SETD2-G75(LGWDFSQEK    | 4556 | >SETD2-G75(LVWDFSQEK    | 238  | 4318 |
| >SETD2-G75(NLGWDFSQ     | 397  | >SETD2-G75(NLVWDFSQ     | 392  | 5    |
| >SETD2-G75(NLGWDFSQE    | 849  | >SETD2-G75(NLVWDFSQE    | 264  | 585  |
| >SETD2-G75(NLGWDFSQE    | 2050 | >SETD2-G75(NLVWDFSQE    | 265  | 1785 |
| >SETD2-G75(RNLGWDFSQ    | 360  | >SETD2-G75(RNLVWDFSQ    | 238  | 122  |
| >SETD2-G75(LRNLGWDF     | 196  | >SETD2-G75(LRNLVWDF     | 233  | 37   |
| >SETD2-G75(LRNLGWDF     | 832  | >SETD2-G75(LRNLVWDF     | 468  | 364  |
| >SETD2-G75(ELRNLGWDF    | 481  | >SETD2-G75(ELRNLVWDF    | 780  | 299  |
| >SETD2-G75(ELRNLGWDF    | 226  | >SETD2-G75(ELRNLVWDF    | 273  | 47   |
| >SETD2-G75(EELRNLGW     | 341  | >SETD2-G75(EELRNLVW     | 112  | 229  |
| >SETD2-G75(EELRNLGWD    | 493  | >SETD2-G75(EELRNLVWDI   | 383  | 110  |
| >SETD2-G75(EELRNLGWD    | 476  | >SETD2-G75(EELRNLVWDI   | 313  | 163  |
| >SETD2-G75(EELRNLGW     | 110  | >SETD2-G75(EELRNLVW     | 156  | 46   |
| >SETD2-G75(EELRNLGWD    | 66   | >SETD2-G75(EELRNLVWDI   | 62   | 4    |
| >SETD2-G75(EELRNLGW     | 17   | >SETD2-G75(EELRNLVW     | 21   | 4    |
| >SETD2-G75(EELRNLGWD    | 158  | >SETD2-G75(EELRNLVWDI   | 199  | 41   |
| >SETD2-G75(EELRNLGWD    | 246  | >SETD2-G75(EELRNLVWDI   | 159  | 87   |
| >SETD2-G75(EELRNLGWD    | 133  | >SETD2-G75(EELRNLVWDI   | 78   | 55   |
| >SETD2-G75(EELRNLGW     | 1494 | >SETD2-G75(EELRNLVW     | 326  | 1168 |
| >SETD2-G75(SEELRNLG     | 426  | >SETD2-G75(SEELRNLV     | 9    | 417  |
| >SETD2-G75(SEELRNLGWI   | 340  | >SETD2-G75(SEELRNLVWI   | 274  | 66   |
| >SETD2-G75(SEELRNLGW    | 82   | >SETD2-G75(SEELRNLVW    | 151  | 69   |
| >SETD2-G75(SEELRNLGWI   | 307  | >SETD2-G75(SEELRNLVWI   | 255  | 52   |
| >SETD2-G75(SEELRNLGW    | 171  | >SETD2-G75(SEELRNLVW    | 296  | 125  |
| >SETD2-G75(SEELRNLGWI   | 175  | >SETD2-G75(SEELRNLVWI   | 192  | 17   |
| >SETD2-G75(SEELRNLG     | 7383 | >SETD2-G75(SEELRNLV     | 490  | 6893 |
| >SETD2-G75(SSEELRNLGW   | 26   | >SETD2-G75(SSEELRNLVW   | 37   | 11   |
| >SETD2-G75(SSEELRNLGW   | 1102 | >SETD2-G75(SSEELRNLVW   | 322  | 780  |
| >SETD2-G75(HSSEELRNLG   | 8    | >SETD2-G75(HSSEELRNLV'  | 9    | 1    |
| >SETD2-G75(HSSEELRNLG   | 60   | >SETD2-G75(HSSEELRNLV'  | 53   | 7    |
| >SETD2-G75(HSSEELRNLG   | 24   | >SETD2-G75(HSSEELRNLV'  | 15   | 9    |
| >SETD2-I129'IIKTLEHLPI  | 480  | >SETD2-I129'NIKTLEHLPI  | 1267 | 787  |
| >SETD2-I129'IIKTLEHLPI  | 244  | >SETD2-I129'NIKTLEHLPI  | 538  | 294  |
| >SETD2-I129'IIKTLEHLPI  | 171  | >SETD2-I129'NIKTLEHLPI  | 2008 | 1837 |
| >SETD2-I129'EIIKTLEH    | 142  | >SETD2-I129'ENIKTLEH    | 5260 | 5118 |
| >SETD2-I129'EIIKTLEHL   | 3    | >SETD2-I129'ENIKTLEHL   | 62   | 59   |
| >SETD2-I129'EIIKTLEHLPI | 80   | >SETD2-I129'ENIKTLEHLPI | 3980 | 3900 |
| >SETD2-I129'EIIKTLEHL   | 93   | >SETD2-I129'ENIKTLEHL   | 2097 | 2004 |
| >SETD2-I129'EIIKTLEHLPI | 91   | >SETD2-I129'ENIKTLEHLPI | 1815 | 1724 |
| >SETD2-I129'EIIKTLEHL   | 125  | >SETD2-I129'ENIKTLEHL   | 7801 | 7676 |
| >SETD2-I129'EIIKTLEHLPI | 33   | >SETD2-I129'ENIKTLEHLPI | 2651 | 2618 |

|                         |       |                          |       |       |
|-------------------------|-------|--------------------------|-------|-------|
| >SETD2-I129' RESNQKLQEE | 50    | >SETD2-I129' RESNQKLQEE  | 26880 | 26830 |
| >SETD2-I129' RESNQKLQEE | 40    | >SETD2-I129' RESNQKLQEE  | 5720  | 5680  |
| >SETD2-I129' RESNQKLQEE | 67    | >SETD2-I129' RESNQKLQEE  | 2295  | 2228  |
| >SETD2-I129' RESNQKLQEE | 11    | >SETD2-I129' RESNQKLQEE  | 4613  | 4602  |
| >SETD2-I129' EEIIKTLEHL | 465   | >SETD2-I129' EENIKTLEHL  | 281   | 184   |
| >SETD2-I129' EEIIKTLEHL | 453   | >SETD2-I129' EENIKTLEHL  | 602   | 149   |
| >SETD2-I129' EEIIKTLEHL | 189   | >SETD2-I129' EENIKTLEHL  | 682   | 493   |
| >SETD2-I129' QEIIKT     | 17    | >SETD2-I129' QEENIKTL    | 29    | 12    |
| >SETD2-I129' QEIIKTLEHL | 134   | >SETD2-I129' QEENIKTLEHI | 227   | 93    |
| >SETD2-I129' QEIIKT     | 68    | >SETD2-I129' QEENIKTL    | 44    | 24    |
| >SETD2-I129' QEIIKTLEHL | 54    | >SETD2-I129' QEENIKTLEHI | 31    | 23    |
| >SETD2-I129' QEIIKTLEHL | 177   | >SETD2-I129' QEENIKTLEHI | 230   | 53    |
| >SETD2-I129' LQEIIKT    | 63    | >SETD2-I129' LQEENIKTL   | 235   | 172   |
| >SETD2-I129' KLQEIIKT   | 180   | >SETD2-I129' KLQEENIKT   | 793   | 613   |
| >SETD2-I129' KLQEIIKT   | 96    | >SETD2-I129' KLQEENIKTL  | 162   | 66    |
| >SETD2-I129' KLQEIIKT   | 115   | >SETD2-I129' KLQEENIKTL  | 223   | 108   |
| >SETD2-I129' KLQEIIKT   | 51    | >SETD2-I129' KLQEENIKT   | 472   | 421   |
| >SETD2-I129' KLQEIIKT   | 4     | >SETD2-I129' KLQEENIKTL  | 9     | 5     |
| >SETD2-I129' KLQEIIKT   | 230   | >SETD2-I129' KLQEENIKT   | 842   | 612   |
| >SETD2-I129' KLQEIIKT   | 5     | >SETD2-I129' KLQEENIKTL  | 7     | 2     |
| >SETD2-I129' KLQEIIKT   | 33    | >SETD2-I129' KLQEENIKTL  | 80    | 47    |
| >SETD2-I129' KLQEIIKT   | 47    | >SETD2-I129' KLQEENIKTL  | 119   | 72    |
| >SETD2-I129' KLQEIIKT   | 57    | >SETD2-I129' KLQEENIKT   | 464   | 407   |
| >SETD2-I129' KLQEIIKT   | 4     | >SETD2-I129' KLQEENIKTL  | 6     | 2     |
| >SETD2-I129' KLQEIIK    | 181   | >SETD2-I129' KLQEENIK    | 609   | 428   |
| >SETD2-I129' KLQEIIK    | 138   | >SETD2-I129' KLQEENIK    | 494   | 356   |
| >SETD2-I129' KLQEIIKT   | 56    | >SETD2-I129' KLQEENIKTL  | 64    | 8     |
| >SETD2-I129' QKLQEII    | 412   | >SETD2-I129' QKLQEENI    | 454   | 42    |
| >SETD2-I129' QKLQEIIKT  | 94    | >SETD2-I129' QKLQEENIKT  | 69    | 25    |
| >SETD2-S139ISDATSELEGK  | 226   | >SETD2-S139IFDATSELEGK   | 4792  | 4566  |
| >SETD2-S139ISDATSEL     | 15    | >SETD2-S139IFDATSEL      | 23531 | 23516 |
| >SETD2-S139ISDATSEL     | 337   | >SETD2-S139IFDATSEL      | 19296 | 18959 |
| >SETD2-S139ISENSMDSAII  | 16798 | >SETD2-S139ISENSMDSAII   | 173   | 16625 |
| >SETD2-S139ISENSMDSAII  | 7730  | >SETD2-S139ISENSMDSAII   | 7     | 7723  |
| >SETD2-S139ISENSMDSAII  | 10507 | >SETD2-S139ISENSMDSAII   | 401   | 10106 |
| >SETD2-S139ISENSMDSAII  | 2687  | >SETD2-S139ISENSMDSAII   | 14    | 2673  |
| >SETD2-S139AISDATSEL    | 8785  | >SETD2-S139AIFDATSEL     | 456   | 8329  |
| >SETD2-S139AISDATSEL    | 240   | >SETD2-S139AIFDATSEL     | 29    | 211   |
| >SETD2-S139AISDATSEL    | 7     | >SETD2-S139AIFDATSEL     | 4     | 3     |
| >SETD2-S139AISDATSEL    | 16    | >SETD2-S139AIFDATSEL     | 11    | 5     |
| >SETD2-S139AISDATSEL    | 84    | >SETD2-S139AIFDATSEL     | 18    | 66    |
| >SETD2-S139AISDATSEL    | 317   | >SETD2-S139AIFDATSEL     | 15    | 302   |
| >SETD2-S139AISDATSEL    | 1058  | >SETD2-S139AIFDATSEL     | 156   | 902   |

|                         |       |                         |     |       |
|-------------------------|-------|-------------------------|-----|-------|
| >SETD2-S139 AISDATSEL   | 352   | >SETD2-S139 AIFDATSEL   | 28  | 324   |
| >SETD2-S139 AISDATSEL   | 218   | >SETD2-S139 AIFDATSEL   | 199 | 19    |
| >SETD2-S139 AISDATSEL   | 5     | >SETD2-S139 AIFDATSEL   | 3   | 2     |
| >SETD2-S139 AISDATSEL   | 4042  | >SETD2-S139 AIFDATSEL   | 226 | 3816  |
| >SETD2-S139 AISDATSEL   | 643   | >SETD2-S139 AIFDATSEL   | 128 | 515   |
| >SETD2-S139 AISDATSEL   | 1292  | >SETD2-S139 AIFDATSEL   | 385 | 907   |
| >SETD2-S139 AISDATSEL   | 2686  | >SETD2-S139 AIFDATSEL   | 443 | 2243  |
| >SETD2-S139 AISDATSEL   | 2020  | >SETD2-S139 AIFDATSEL   | 248 | 1772  |
| >SETD2-S139 AISDATSEL   | 2115  | >SETD2-S139 AIFDATSEL   | 470 | 1645  |
| >SETD2-S139 SAISDATSEL  | 174   | >SETD2-S139 SAIFDATSEL  | 591 | 417   |
| >SETD2-S139 SAISDATSEL  | 255   | >SETD2-S139 SAIFDATSEL  | 812 | 557   |
| >SETD2-S139 SAISDATSEL  | 448   | >SETD2-S139 SAIFDATSEL  | 540 | 92    |
| >SETD2-S139 SAISDATSEL  | 142   | >SETD2-S139 SAIFDATSEL  | 150 | 8     |
| >SETD2-S139 DSAISDATSEL | 149   | >SETD2-S139 DSAIFDATSEL | 70  | 79    |
| >SETD2-S139 DSAISDATSEL | 172   | >SETD2-S139 DSAIFDATSEL | 450 | 278   |
| >SETD2-S139 SMDSAISDA   | 398   | >SETD2-S139 SMDSAIFDA   | 19  | 379   |
| >SETD2-S139 SMDSAISDA   | 623   | >SETD2-S139 SMDSAIFDA   | 137 | 486   |
| >SETD2-S139 SMDSAISDAT  | 373   | >SETD2-S139 SMDSAIFDAT  | 202 | 171   |
| >SETD2-S139 SMDSAISDA   | 86    | >SETD2-S139 SMDSAIFDA   | 287 | 201   |
| >SETD2-S139 SMDSAISDAT  | 630   | >SETD2-S139 SMDSAIFDAT  | 303 | 327   |
| >SETD2-S139 SMDSAISDA   | 666   | >SETD2-S139 SMDSAIFDA   | 47  | 619   |
| >SETD2-S139 SMDSAISDA   | 41    | >SETD2-S139 SMDSAIFDA   | 10  | 31    |
| >SETD2-S139 SMDSAISDAT  | 73    | >SETD2-S139 SMDSAIFDAT  | 41  | 32    |
| >SETD2-S139 SMDSAISDAT  | 414   | >SETD2-S139 SMDSAIFDAT  | 158 | 256   |
| >SETD2-S139 SMDSAISDA   | 157   | >SETD2-S139 SMDSAIFDA   | 25  | 132   |
| >SETD2-S139 SMDSAISDAT  | 683   | >SETD2-S139 SMDSAIFDAT  | 430 | 253   |
| >SETD2-S139 SMDSAISDA   | 17    | >SETD2-S139 SMDSAIFDA   | 7   | 10    |
| >SETD2-S139 SMDSAISDAT  | 130   | >SETD2-S139 SMDSAIFDAT  | 88  | 42    |
| >SETD2-S139 SMDSAISDAT  | 985   | >SETD2-S139 SMDSAIFDAT  | 406 | 579   |
| >SETD2-S139 SMDSAISDA   | 1728  | >SETD2-S139 SMDSAIFDA   | 79  | 1649  |
| >SETD2-S139 SMDSAISDA   | 32    | >SETD2-S139 SMDSAIFDA   | 15  | 17    |
| >SETD2-S139 NSMDSAISD/  | 639   | >SETD2-S139 NSMDSAIFD/  | 358 | 281   |
| >SETD2-S139 NSMDSAISD/  | 780   | >SETD2-S139 NSMDSAIFD/  | 422 | 358   |
| >SETD2-S139 NSMDSAIS    | 16645 | >SETD2-S139 NSMDSAIF    | 266 | 16379 |
| >SETD2-S139 NSMDSAIS    | 15522 | >SETD2-S139 NSMDSAIF    | 57  | 15465 |
| >SETD2-S139 NSMDSAIS    | 12815 | >SETD2-S139 NSMDSAIF    | 9   | 12806 |
| >SETD2-S139 NSMDSAIS    | 13012 | >SETD2-S139 NSMDSAIF    | 375 | 12637 |
| >SETD2-S139 SENSMDSAIS  | 18665 | >SETD2-S139 SENSMDSAIF  | 346 | 18319 |
| >SETD2-S139 SENSMDSAIS  | 18790 | >SETD2-S139 SENSMDSAIF  | 132 | 18658 |
| >SETD2-S139 SENSMDSAIS  | 9266  | >SETD2-S139 SENSMDSAIF  | 86  | 9180  |
| >SETD2-S139 SENSMDSAIS  | 7280  | >SETD2-S139 SENSMDSAIF  | 132 | 7148  |
| >SETD2-S139 SENSMDSAIS  | 1063  | >SETD2-S139 SENSMDSAIF  | 448 | 615   |
| >SETD2-V10E VILTEKKGWC  | 265   | >SETD2-V10E GILTEKKGWC  | 476 | 211   |

|                         |     |                         |       |       |
|-------------------------|-----|-------------------------|-------|-------|
| >SETD2-V10E VILTEKKGWC  | 102 | >SETD2-V10E GILTEKKGWC  | 218   | 116   |
| >SETD2-V10E VILTEKKGWC  | 353 | >SETD2-V10E GILTEKKGWC  | 187   | 166   |
| >SETD2-V10E VILTEKKGWC  | 267 | >SETD2-V10E GILTEKKGWC  | 288   | 21    |
| >SETD2-V10E VILTEKKGWC  | 387 | >SETD2-V10E GILTEKKGWC  | 2433  | 2046  |
| >SETD2-V10E VILTEKKGWC  | 96  | >SETD2-V10E GILTEKKGWC  | 247   | 151   |
| >SETD2-V10E EVILTEKKGW  | 397 | >SETD2-V10E EGILTEKKGW  | 22556 | 22159 |
| >SETD2-V10E EVILTEKK    | 9   | >SETD2-V10E EGILTEKK    | 597   | 588   |
| >SETD2-V10E FQRKQHADV   | 147 | >SETD2-V10E FQRKQHADV   | 15942 | 15795 |
| >SETD2-V10E FQRKQHADV   | 43  | >SETD2-V10E FQRKQHADV   | 12415 | 12372 |
| >SETD2-V10E FQRKQHADV   | 361 | >SETD2-V10E FQRKQHADV   | 35810 | 35449 |
| >SETD2-V10E FQRKQHADV   | 326 | >SETD2-V10E FQRKQHADV   | 599   | 273   |
| >SETD2-V10E FQRKQHADV   | 24  | >SETD2-V10E FQRKQHADV   | 1883  | 1859  |
| >SETD2-V10E VEVILTEKKG\ | 103 | >SETD2-V10E VEGILTEKKG\ | 179   | 76    |
| >SETD2-V10E VEVILTEKKG\ | 46  | >SETD2-V10E VEGILTEKKG\ | 119   | 73    |
| >SETD2-V10E DVEVILTEK   | 38  | >SETD2-V10E DVEGILTEK   | 42    | 4     |
| >SETD2-V10E DVEVILTEKK  | 313 | >SETD2-V10E DVEGILTEKK  | 210   | 103   |
| >SETD2-V10E HADVEVIL    | 466 | >SETD2-V10E HADVEGIL    | 2895  | 2429  |
| >SETD2-V10E QHADVEVIL   | 341 | >SETD2-V10E QHADVEGIL   | 718   | 377   |
| >SETD2-V10E QHADVEVIL   | 31  | >SETD2-V10E QHADVEGIL   | 252   | 221   |
| >SETD2-V10E KQHADVEV    | 131 | >SETD2-V10E KQHADVEG    | 21527 | 21396 |
| >SETD2-V10E KQHADVEV    | 357 | >SETD2-V10E KQHADVEG    | 17072 | 16715 |
| >SETD2-V10E KQHADVEV    | 119 | >SETD2-V10E KQHADVEG    | 16553 | 16434 |
| >SETD2-V10E KQHADVEVI   | 470 | >SETD2-V10E KQHADVEGI   | 109   | 361   |
| >SETD2-V10E KQHADVEV    | 13  | >SETD2-V10E KQHADVEG    | 6178  | 6165  |
| >SETD2-V10E KQHADVEVI   | 107 | >SETD2-V10E KQHADVEGI   | 25    | 82    |
| >SETD2-V10E KQHADVEV    | 93  | >SETD2-V10E KQHADVEG    | 21623 | 21530 |
| >SETD2-V10E KQHADVEVI   | 800 | >SETD2-V10E KQHADVEGI   | 318   | 482   |
| >SETD2-V10E KQHADVEV    | 283 | >SETD2-V10E KQHADVEG    | 19520 | 19237 |
| >SETD2-V10E KQHADVEV    | 218 | >SETD2-V10E KQHADVEG    | 23165 | 22947 |
| >SETD2-V10E KQHADVEVI   | 167 | >SETD2-V10E KQHADVEGI   | 311   | 144   |
| >SETD2-V10E KQHADVEVIL  | 491 | >SETD2-V10E KQHADVEGIL  | 4774  | 4283  |
| >SETD2-V10E KQHADVEVI   | 210 | >SETD2-V10E KQHADVEGI   | 872   | 662   |
| >SETD2-V10E KQHADVEV    | 48  | >SETD2-V10E KQHADVEG    | 4679  | 4631  |
| >SETD2-V10E KQHADVEVI   | 25  | >SETD2-V10E KQHADVEGI   | 107   | 82    |
| >SETD2-V10E KQHADVEVIL  | 17  | >SETD2-V10E KQHADVEGIL  | 150   | 133   |
| >SETD2-V10E KQHADVEVIL  | 166 | >SETD2-V10E KQHADVEGIL  | 1403  | 1237  |
| >SETD2-V10E KQHADVEVIL  | 103 | >SETD2-V10E KQHADVEGIL  | 242   | 139   |
| >SETD2-V10E RKQHADVEV   | 47  | >SETD2-V10E RKQHADVEG   | 3776  | 3729  |
| >SETD2-V10E RKQHADVEV   | 31  | >SETD2-V10E RKQHADVEG   | 93    | 62    |
| >SETD2-V10E RKQHADVEV   | 24  | >SETD2-V10E RKQHADVEG   | 162   | 138   |
| >SETD2-V10E RKQHADVEV   | 235 | >SETD2-V10E RKQHADVEG   | 604   | 369   |
| >SETD2-V10E RKQHADVEV   | 216 | >SETD2-V10E RKQHADVEG   | 327   | 111   |
| >SETD2-V10E RKQHADVEV   | 337 | >SETD2-V10E RKQHADVEG   | 647   | 310   |

|                        |     |                        |     |     |
|------------------------|-----|------------------------|-----|-----|
| >SETD2_ENS' AAGGKMKK   | 343 | >SETD2_ENS' VAGGKMKK   | 624 | 281 |
| >SETD2_ENS' AAGGKMKKE  | 421 | >SETD2_ENS' VAGGKMKKE  | 783 | 362 |
| >SETD2_ENS' RAAGGKMK   | 517 | >SETD2_ENS' RVAGGKMK   | 98  | 419 |
| >SETD2_ENS' RAAGGKMKK  | 97  | >SETD2_ENS' RVAGGKMKK  | 38  | 59  |
| >SETD2_ENS' RAAGGKMK   | 482 | >SETD2_ENS' RVAGGKMK   | 71  | 411 |
| >SETD2_ENS' RAAGGKMKK  | 104 | >SETD2_ENS' RVAGGKMKK  | 20  | 84  |
| >SETD2_ENS' RAAGGKMK   | 352 | >SETD2_ENS' RVAGGKMK   | 88  | 264 |
| >SETD2_ENS' RAAGGKMKK  | 107 | >SETD2_ENS' RVAGGKMKK  | 29  | 78  |
| >SETD2_ENS' RAAGGKMKK  | 67  | >SETD2_ENS' RVAGGKMKK  | 44  | 23  |
| >SETD2_ENS' RAAGGKMKK  | 498 | >SETD2_ENS' RVAGGKMKK  | 289 | 209 |
| >SETD2_ENS' RAAGGKMKK  | 716 | >SETD2_ENS' RVAGGKMKK  | 291 | 425 |
| >SETD2_ENS' IRAAGGKM   | 570 | >SETD2_ENS' IRVAGGKM   | 489 | 81  |
| >SETD2_ENS' IRAAGGKM   | 203 | >SETD2_ENS' IRVAGGKM   | 223 | 20  |
| >SETD2_ENS' IRAAGGKMK  | 366 | >SETD2_ENS' IRVAGGKMK  | 401 | 35  |
| >SETD2_ENS' IRAAGGKMKI | 875 | >SETD2_ENS' IRVAGGKMKI | 406 | 469 |
| >SETD2_ENS' SIRAAGGK   | 146 | >SETD2_ENS' SIRVAGGK   | 276 | 130 |
| >SETD2_ENS' SIRAAGGKMI | 55  | >SETD2_ENS' SIRVAGGKMI | 117 | 62  |
| >SETD2_ENS' SIRAAGGKMI | 74  | >SETD2_ENS' SIRVAGGKMI | 123 | 49  |
| >SETD2_ENS' SIRAAGGKMI | 212 | >SETD2_ENS' SIRVAGGKMI | 386 | 174 |
| >SETD2_ENS' SIRAAGGKMI | 264 | >SETD2_ENS' SIRVAGGKMI | 438 | 174 |
| >SETD2_ENS' SIRAAGGK   | 6   | >SETD2_ENS' SIRVAGGK   | 7   | 1   |
| >SETD2_ENS' SIRAAGGKM  | 84  | >SETD2_ENS' SIRVAGGKM  | 139 | 55  |
| >SETD2_ENS' SIRAAGGKMI | 6   | >SETD2_ENS' SIRVAGGKMI | 6   | 0   |
| >SETD2_ENS' SIRAAGGKMI | 4   | >SETD2_ENS' SIRVAGGKMI | 5   | 1   |
| >SETD2_ENS' SIRAAGGKM  | 288 | >SETD2_ENS' SIRVAGGKM  | 836 | 548 |
| >SETD2_ENS' SIRAAGGKM  | 267 | >SETD2_ENS' SIRVAGGKM  | 631 | 364 |
| >SETD2_ENS' SIRAAGGKM  | 283 | >SETD2_ENS' SIRVAGGKM  | 270 | 13  |
| >SETD2_ENS' VSIRAAGGK  | 776 | >SETD2_ENS' VSIRVAGGK  | 324 | 452 |
| >SETD2_ENS' VSIRAAGGK  | 133 | >SETD2_ENS' VSIRVAGGK  | 57  | 76  |
| >SETD2_ENS' VSIRAAGGKM | 141 | >SETD2_ENS' VSIRVAGGKM | 81  | 60  |
| >SETD2_ENS' VSIRAAGGKM | 235 | >SETD2_ENS' VSIRVAGGKM | 460 | 225 |
| >SETD2_ENS' VSIRAAGGK  | 434 | >SETD2_ENS' VSIRVAGGK  | 155 | 279 |
| >SETD2_ENS' VSIRAAGGKM | 14  | >SETD2_ENS' VSIRVAGGKM | 34  | 20  |
| >SETD2_ENS' VSIRAAGGKM | 707 | >SETD2_ENS' VSIRVAGGKM | 327 | 380 |
| >SETD2_ENS' VSIRAAGGKM | 26  | >SETD2_ENS' VSIRVAGGKM | 30  | 4   |
| >SETD2_ENS' RVSIRAAGGK | 42  | >SETD2_ENS' RVSIRVAGGK | 40  | 2   |
| >SETD2_ENS' RVSIRAAGGK | 135 | >SETD2_ENS' RVSIRVAGGK | 69  | 66  |
| >SETD2_ENS' RVSIRAAGGK | 20  | >SETD2_ENS' RVSIRVAGGK | 26  | 6   |
| >SETD2_ENS' RVSIRAAGGK | 506 | >SETD2_ENS' RVSIRVAGGK | 221 | 285 |
| >SETD2_ENS' RVSIRAAGGK | 36  | >SETD2_ENS' RVSIRVAGGK | 48  | 12  |
| >SETD2_ENS' RVSIRAAGGK | 194 | >SETD2_ENS' RVSIRVAGGK | 325 | 131 |
| >SETD2_ENS' NRVSIRAAGC | 218 | >SETD2_ENS' NRVSIRVAGC | 204 | 14  |
| >SETD2_ENS' NRVSIRAAG  | 473 | >SETD2_ENS' NRVSIRVAG  | 350 | 123 |

|                        |       |                        |     |       |
|------------------------|-------|------------------------|-----|-------|
| >SETD2_ENS' GENRVSIRA  | 12819 | >SETD2_ENS' GENRVSIRV  | 298 | 12521 |
| >SETD2_ENS' GENRVSIRA  | 6361  | >SETD2_ENS' GENRVSIRV  | 220 | 6141  |
| >SETD2_ENS' GENRVSIRA  | 31    | >SETD2_ENS' GENRVSIRV  | 107 | 76    |
| >SETD2_ENS' GENRVSIRAA | 341   | >SETD2_ENS' GENRVSIRVA | 585 | 244   |
| >SETD2_ENS' GENRVSIRA  | 623   | >SETD2_ENS' GENRVSIRV  | 18  | 605   |
| >SETD2_ENS' GENRVSIRAA | 462   | >SETD2_ENS' GENRVSIRVA | 637 | 175   |
| >SETD2_ENS' DPLGHPNSEE | 1831  | >SETD2_ENS' HPLGHPNSEE | 243 | 1588  |
| >SETD2_ENS' KSDPLGHP   | 16361 | >SETD2_ENS' KSHPLGHP   | 446 | 15915 |
| >SETD2_ENS' KSDPLGHPN  | 14764 | >SETD2_ENS' KSHPLGHPN  | 182 | 14582 |
| >SETD2_ENS' KSDPLGHPNS | 8709  | >SETD2_ENS' KSHPLGHPNS | 27  | 8682  |
| >SETD2_ENS' KSDPLGHPNS | 15824 | >SETD2_ENS' KSHPLGHPNS | 468 | 15356 |
| >SETD2_ENS' HTDVKSDPL  | 1596  | >SETD2_ENS' HTDVKSHPL  | 387 | 1209  |
| >SETD2_ENS' HTDVKSDPLC | 305   | >SETD2_ENS' HTDVKSHPLC | 167 | 138   |
| >SETD2_ENS' HTDVKSDPL  | 1099  | >SETD2_ENS' HTDVKSHPL  | 366 | 733   |
| >SETD2_ENS' HTDVKSDPL  | 687   | >SETD2_ENS' HTDVKSHPL  | 39  | 648   |
| >SETD2_ENS' HTDVKSDPL  | 63    | >SETD2_ENS' HTDVKSHPL  | 12  | 51    |
| >SETD2_ENS' HTDVKSDPL  | 4517  | >SETD2_ENS' HTDVKSHPL  | 382 | 4135  |
| >SETD2_ENS' SHTDVKSDPL | 275   | >SETD2_ENS' SHTDVKSHPL | 73  | 202   |
| >SETD2_ENS' TSHTDVKSDP | 609   | >SETD2_ENS' TSHTDVKSHP | 287 | 322   |
| >SETD2_ENS' TSHTDVKSDP | 389   | >SETD2_ENS' TSHTDVKSHP | 96  | 293   |
| >SETD2_ENS' GSELTFDY   | 60    | >SETD2_ENS' VSELTFDY   | 21  | 39    |
| >SETD2_ENS' GSELTFDYQF | 1292  | >SETD2_ENS' VSELTFDYQF | 415 | 877   |
| >SETD2_ENS' GSELTFDY   | 338   | >SETD2_ENS' VSELTFDY   | 536 | 198   |
| >SETD2_ENS' GSELTFDYQF | 177   | >SETD2_ENS' VSELTFDYQF | 155 | 22    |
| >SETD2_ENS' GSELTFDY   | 452   | >SETD2_ENS' VSELTFDY   | 240 | 212   |
| >SETD2_ENS' GSELTFDYQF | 1318  | >SETD2_ENS' VSELTFDYQF | 480 | 838   |
| >SETD2_ENS' GSELTFDY   | 256   | >SETD2_ENS' VSELTFDY   | 52  | 204   |
| >SETD2_ENS' GSELTFDYQF | 77    | >SETD2_ENS' VSELTFDYQF | 24  | 53    |
| >SETD2_ENS' GSELTFDYQF | 1280  | >SETD2_ENS' VSELTFDYQF | 327 | 953   |
| >SETD2_ENS' GSELTFDY   | 1145  | >SETD2_ENS' VSELTFDY   | 472 | 673   |
| >SETD2_ENS' GSELTFDY   | 452   | >SETD2_ENS' VSELTFDY   | 867 | 415   |
| >SETD2_ENS' SGSELTFDY  | 6285  | >SETD2_ENS' SVSELTFDY  | 251 | 6034  |
| >SETD2_ENS' SGSELTFDY  | 3580  | >SETD2_ENS' SVSELTFDY  | 31  | 3549  |
| >SETD2_ENS' SGSELTFDY  | 142   | >SETD2_ENS' SVSELTFDY  | 15  | 127   |
| >SETD2_ENS' SGSELTFDYQ | 4077  | >SETD2_ENS' SVSELTFDYQ | 204 | 3873  |
| >SETD2_ENS' SGSELTFDY  | 88    | >SETD2_ENS' SVSELTFDY  | 45  | 43    |
| >SETD2_ENS' SGSELTFDYQ | 5116  | >SETD2_ENS' SVSELTFDYQ | 58  | 5058  |
| >SETD2_ENS' SGSELTFDY  | 57    | >SETD2_ENS' SVSELTFDY  | 5   | 52    |
| >SETD2_ENS' SGSELTFDYQ | 1670  | >SETD2_ENS' SVSELTFDYQ | 356 | 1314  |
| >SETD2_ENS' SGSELTFDY  | 290   | >SETD2_ENS' SVSELTFDY  | 113 | 177   |
| >SETD2_ENS' SGSELTFDYQ | 465   | >SETD2_ENS' SVSELTFDYQ | 154 | 311   |
| >SETD2_ENS' SGSELTFDY  | 679   | >SETD2_ENS' SVSELTFDY  | 133 | 546   |
| >SETD2_ENS' SGSELTFDYQ | 942   | >SETD2_ENS' SVSELTFDYQ | 215 | 727   |

|                         |       |                         |      |       |
|-------------------------|-------|-------------------------|------|-------|
| >SETD2_ENS' SGSELTFDY   | 2472  | >SETD2_ENS' SVSELTFDY   | 462  | 2010  |
| >SETD2_ENS' GFFTTKLVPSC | 23615 | >SETD2_ENS' GFFTTKLVPSC | 201  | 23414 |
| >SETD2_ENS' GFFTTKLVPSC | 35417 | >SETD2_ENS' GFFTTKLVPSC | 436  | 34981 |
| >SETD2_ENS' PSGSELTF    | 6962  | >SETD2_ENS' PSVSELTF    | 423  | 6539  |
| >SETD2_ENS' PSGSELTFDY  | 1639  | >SETD2_ENS' PSVSELTFDY  | 81   | 1558  |
| >SETD2_ENS' PSGSELTF    | 1303  | >SETD2_ENS' PSVSELTF    | 222  | 1081  |
| >SETD2_ENS' PSGSELTF    | 1343  | >SETD2_ENS' PSVSELTF    | 88   | 1255  |
| >SETD2_ENS' VPSGSELTF   | 100   | >SETD2_ENS' VPSVSELTF   | 388  | 288   |
| >SETD2_ENS' VPSGSELTFD' | 493   | >SETD2_ENS' VPSVSELTFD' | 883  | 390   |
| >SETD2_ENS' VPSGSELTF   | 364   | >SETD2_ENS' VPSVSELTF   | 1408 | 1044  |
| >SETD2_ENS' VPSGSELTF   | 679   | >SETD2_ENS' VPSVSELTF   | 237  | 442   |
| >SETD2_ENS' VPSGSELTF   | 14    | >SETD2_ENS' VPSVSELTF   | 19   | 5     |
| >SETD2_ENS' VPSGSELTFD' | 13    | >SETD2_ENS' VPSVSELTFD' | 16   | 3     |
| >SETD2_ENS' VPSGSELTF   | 58    | >SETD2_ENS' VPSVSELTF   | 52   | 6     |
| >SETD2_ENS' VPSGSELTFD' | 56    | >SETD2_ENS' VPSVSELTFD' | 50   | 6     |
| >SETD2_ENS' VPSGSELTF   | 202   | >SETD2_ENS' VPSVSELTF   | 136  | 66    |
| >SETD2_ENS' VPSGSELTFD' | 158   | >SETD2_ENS' VPSVSELTFD' | 111  | 47    |
| >SETD2_ENS' VPSGSELTF   | 122   | >SETD2_ENS' VPSVSELTF   | 95   | 27    |
| >SETD2_ENS' VPSGSELTFD' | 440   | >SETD2_ENS' VPSVSELTFD' | 352  | 88    |
| >SETD2_ENS' LVPSGSEL    | 699   | >SETD2_ENS' LVPSVSEL    | 156  | 543   |
| >SETD2_ENS' LVPSGSEL    | 875   | >SETD2_ENS' LVPSVSEL    | 363  | 512   |
| >SETD2_ENS' LVPSGSEL    | 802   | >SETD2_ENS' LVPSVSEL    | 415  | 387   |
| >SETD2_ENS' LVPSGSEL    | 175   | >SETD2_ENS' LVPSVSEL    | 213  | 38    |
| >SETD2_ENS' LVPSGSELTF  | 97    | >SETD2_ENS' LVPSVSELTF  | 85   | 12    |
| >SETD2_ENS' LVPSGSEL    | 873   | >SETD2_ENS' LVPSVSEL    | 111  | 762   |
| >SETD2_ENS' LVPSGSELTF  | 254   | >SETD2_ENS' LVPSVSELTF  | 356  | 102   |
| >SETD2_ENS' LVPSGSEL    | 20    | >SETD2_ENS' LVPSVSEL    | 204  | 184   |
| >SETD2_ENS' LVPSGSELTF  | 232   | >SETD2_ENS' LVPSVSELTF  | 104  | 128   |
| >SETD2_ENS' LVPSGSELTF  | 444   | >SETD2_ENS' LVPSVSELTF  | 473  | 29    |
| >SETD2_ENS' KLVPSGSEL   | 449   | >SETD2_ENS' KLVPSVSEL   | 36   | 413   |
| >SETD2_ENS' KLVPSGSEL   | 20    | >SETD2_ENS' KLVPSVSEL   | 6    | 14    |
| >SETD2_ENS' KLVPSGSELT  | 541   | >SETD2_ENS' KLVPSVSELT  | 258  | 283   |
| >SETD2_ENS' KLVPSGSEL   | 20    | >SETD2_ENS' KLVPSVSEL   | 5    | 15    |
| >SETD2_ENS' KLVPSGSELT  | 447   | >SETD2_ENS' KLVPSVSELT  | 396  | 51    |
| >SETD2_ENS' KLVPSGSEL   | 102   | >SETD2_ENS' KLVPSVSEL   | 25   | 77    |
| >SETD2_ENS' KLVPSGSEL   | 21    | >SETD2_ENS' KLVPSVSEL   | 6    | 15    |
| >SETD2_ENS' KLVPSGSELT  | 795   | >SETD2_ENS' KLVPSVSELT  | 228  | 567   |
| >SETD2_ENS' KLVPSGSEL   | 25    | >SETD2_ENS' KLVPSVSEL   | 13   | 12    |
| >SETD2_ENS' KLVPSGSEL   | 60    | >SETD2_ENS' KLVPSVSEL   | 16   | 44    |
| >SETD2_ENS' KLVPSGSEL   | 1582  | >SETD2_ENS' KLVPSVSEL   | 71   | 1511  |
| >SETD2_ENS' KLVPSGSEL   | 5     | >SETD2_ENS' KLVPSVSEL   | 3    | 2     |
| >SETD2_ENS' KLVPSGSELT  | 169   | >SETD2_ENS' KLVPSVSELT  | 142  | 27    |
| >SETD2_ENS' KLVPSGSELTF | 422   | >SETD2_ENS' KLVPSVSELTF | 287  | 135   |



|                         |       |                         |      |       |
|-------------------------|-------|-------------------------|------|-------|
| >SETD2_ENS' KLVPSGSELTF | 109   | >SETD2_ENS' KLVPSVSELTF | 56   | 53    |
| >SETD2_ENS' KLVPSGSEL   | 391   | >SETD2_ENS' KLVPSVSEL   | 379  | 12    |
| >SETD2_ENS' KLVPSGSELTF | 68    | >SETD2_ENS' KLVPSVSELTF | 67   | 1     |
| >SETD2_ENS' KLVPSGSELTF | 393   | >SETD2_ENS' KLVPSVSELTF | 993  | 600   |
| >SETD2_ENS' KLVPSGSEL   | 61    | >SETD2_ENS' KLVPSVSEL   | 73   | 12    |
| >SETD2_ENS' KLVPSGSELTF | 10    | >SETD2_ENS' KLVPSVSELTF | 9    | 1     |
| >SETD2_ENS' KLVPSGSEL   | 15    | >SETD2_ENS' KLVPSVSEL   | 14   | 1     |
| >SETD2_ENS' KLVPSGSELTF | 5     | >SETD2_ENS' KLVPSVSELTF | 5    | 0     |
| >SETD2_ENS' KLVPSGSELTF | 86    | >SETD2_ENS' KLVPSVSELTF | 36   | 50    |
| >SETD2_ENS' KLVPSGSEL   | 437   | >SETD2_ENS' KLVPSVSEL   | 1119 | 682   |
| >SETD2_ENS' KLVPSGSELTF | 283   | >SETD2_ENS' KLVPSVSELTF | 461  | 178   |
| >SETD2_ENS' TKLVPSGSEL  | 51    | >SETD2_ENS' TKLVPSVSEL  | 20   | 31    |
| >SETD2_ENS' TKLVPSGSEL  | 651   | >SETD2_ENS' TKLVPSVSEL  | 164  | 487   |
| >SETD2_ENS' TTKLVPSG    | 20797 | >SETD2_ENS' TTKLVPSV    | 329  | 20468 |
| >SETD2_ENS' TTKLVPSG    | 1258  | >SETD2_ENS' TTKLVPSV    | 169  | 1089  |
| >SETD2_ENS' TTKLVPSG    | 14828 | >SETD2_ENS' TTKLVPSV    | 165  | 14663 |
| >SETD2_ENS' TTKLVPSGSEI | 511   | >SETD2_ENS' TTKLVPSVSEI | 235  | 276   |
| >SETD2_ENS' TTKLVPSG    | 19042 | >SETD2_ENS' TTKLVPSV    | 406  | 18636 |
| >SETD2_ENS' TTKLVPSGSEI | 57    | >SETD2_ENS' TTKLVPSVSEI | 61   | 4     |
| >SETD2_ENS' TTKLVPSGS   | 2276  | >SETD2_ENS' TTKLVPSVS   | 382  | 1894  |
| >SETD2_ENS' TTKLVPSGSEI | 30    | >SETD2_ENS' TTKLVPSVSEI | 30   | 0     |
| >SETD2_ENS' FTTKLVPSPG  | 18701 | >SETD2_ENS' FTTKLVPSPV  | 29   | 18672 |
| >SETD2_ENS' FTTKLVPSPG  | 9138  | >SETD2_ENS' FTTKLVPSPV  | 37   | 9101  |
| >SETD2_ENS' FTTKLVPSPG  | 14490 | >SETD2_ENS' FTTKLVPSPV  | 21   | 14469 |
| >SETD2_ENS' FTTKLVPSPG  | 7335  | >SETD2_ENS' FTTKLVPSPV  | 7    | 7328  |
| >SETD2_ENS' FTTKLVPSPG  | 11913 | >SETD2_ENS' FTTKLVPSPV  | 16   | 11897 |
| >SETD2_ENS' FTTKLVPSPG  | 19793 | >SETD2_ENS' FTTKLVPSPV  | 234  | 19559 |
| >SETD2_ENS' FTTKLVPSPG  | 15136 | >SETD2_ENS' FTTKLVPSPV  | 10   | 15126 |
| >SETD2_ENS' FTTKLVPSPG  | 23855 | >SETD2_ENS' FTTKLVPSPV  | 7    | 23848 |
| >SETD2_ENS' FTTKLVPSPG  | 8787  | >SETD2_ENS' FTTKLVPSPV  | 74   | 8713  |
| >SETD2_ENS' FTTKLVPSPG  | 11402 | >SETD2_ENS' FTTKLVPSPV  | 10   | 11392 |
| >SETD2_ENS' FTTKLVPSPG  | 2945  | >SETD2_ENS' FTTKLVPSPV  | 104  | 2841  |
| >SETD2_ENS' FTTKLVPSPG  | 6678  | >SETD2_ENS' FTTKLVPSPV  | 356  | 6322  |
| >SETD2_ENS' FFTTKLVPSG  | 22777 | >SETD2_ENS' FFTTKLVPSV  | 252  | 22525 |
| >SETD2_ENS' FFTTKLVPSG  | 29221 | >SETD2_ENS' FFTTKLVPSV  | 31   | 29190 |
| >SETD2_ENS' IIKTLEHLPI  | 480   | >SETD2_ENS' NIKTLEHLPI  | 1267 | 787   |
| >SETD2_ENS' IIKTLEHLPI  | 244   | >SETD2_ENS' NIKTLEHLPI  | 538  | 294   |
| >SETD2_ENS' IIKTLEHLPI  | 171   | >SETD2_ENS' NIKTLEHLPI  | 2008 | 1837  |
| >SETD2_ENS' EIIKTLEH    | 142   | >SETD2_ENS' ENIKTLEH    | 5260 | 5118  |
| >SETD2_ENS' EIIKTLEHL   | 3     | >SETD2_ENS' ENIKTLEHL   | 62   | 59    |
| >SETD2_ENS' EIIKTLEHLPI | 80    | >SETD2_ENS' ENIKTLEHLPI | 3980 | 3900  |
| >SETD2_ENS' EIIKTLEHL   | 93    | >SETD2_ENS' ENIKTLEHL   | 2097 | 2004  |
| >SETD2_ENS' EIIKTLEHLPI | 91    | >SETD2_ENS' ENIKTLEHLPI | 1815 | 1724  |

|                         |       |                         |       |       |
|-------------------------|-------|-------------------------|-------|-------|
| >SETD2_ENS' EIIKTLEHL   | 125   | >SETD2_ENS' ENIKTLEHL   | 7801  | 7676  |
| >SETD2_ENS' EIIKTLEHLPI | 33    | >SETD2_ENS' ENIKTLEHLPI | 2651  | 2618  |
| >SETD2_ENS' RESNQKLQEE  | 50    | >SETD2_ENS' RESNQKLQEE  | 26880 | 26830 |
| >SETD2_ENS' RESNQKLQEE  | 40    | >SETD2_ENS' RESNQKLQEE  | 5720  | 5680  |
| >SETD2_ENS' RESNQKLQEE  | 67    | >SETD2_ENS' RESNQKLQEE  | 2295  | 2228  |
| >SETD2_ENS' RESNQKLQEE  | 11    | >SETD2_ENS' RESNQKLQEE  | 4613  | 4602  |
| >SETD2_ENS' EIIKTLEHL   | 465   | >SETD2_ENS' EENIKTLEHL  | 281   | 184   |
| >SETD2_ENS' EIIKTLEHL   | 453   | >SETD2_ENS' EENIKTLEHL  | 602   | 149   |
| >SETD2_ENS' EIIKTLEHL   | 189   | >SETD2_ENS' EENIKTLEHL  | 682   | 493   |
| >SETD2_ENS' QEIIKT      | 17    | >SETD2_ENS' QEENIKTL    | 29    | 12    |
| >SETD2_ENS' QEIIKTLEHL  | 134   | >SETD2_ENS' QEENIKLEHI  | 227   | 93    |
| >SETD2_ENS' QEIIKT      | 68    | >SETD2_ENS' QEENIKTL    | 44    | 24    |
| >SETD2_ENS' QEIIKTLEHL  | 54    | >SETD2_ENS' QEENIKLEHI  | 31    | 23    |
| >SETD2_ENS' QEIIKTLEHL  | 177   | >SETD2_ENS' QEENIKLEHI  | 230   | 53    |
| >SETD2_ENS' LQEIIKT     | 63    | >SETD2_ENS' LQEENIKTL   | 235   | 172   |
| >SETD2_ENS' KLQEIIKT    | 180   | >SETD2_ENS' KLQEENIKT   | 793   | 613   |
| >SETD2_ENS' KLQEIIKT    | 96    | >SETD2_ENS' KLQEENIKTL  | 162   | 66    |
| >SETD2_ENS' KLQEIIKT    | 115   | >SETD2_ENS' KLQEENIKTL  | 223   | 108   |
| >SETD2_ENS' KLQEIIKT    | 51    | >SETD2_ENS' KLQEENIKT   | 472   | 421   |
| >SETD2_ENS' KLQEIIKT    | 4     | >SETD2_ENS' KLQEENIKTL  | 9     | 5     |
| >SETD2_ENS' KLQEIIKT    | 230   | >SETD2_ENS' KLQEENIKT   | 842   | 612   |
| >SETD2_ENS' KLQEIIKT    | 5     | >SETD2_ENS' KLQEENIKTL  | 7     | 2     |
| >SETD2_ENS' KLQEIIKT    | 33    | >SETD2_ENS' KLQEENIKTL  | 80    | 47    |
| >SETD2_ENS' KLQEIIKT    | 47    | >SETD2_ENS' KLQEENIKTL  | 119   | 72    |
| >SETD2_ENS' KLQEIIKT    | 57    | >SETD2_ENS' KLQEENIKT   | 464   | 407   |
| >SETD2_ENS' KLQEIIKT    | 4     | >SETD2_ENS' KLQEENIKTL  | 6     | 2     |
| >SETD2_ENS' KLQEIIK     | 181   | >SETD2_ENS' KLQEENIK    | 609   | 428   |
| >SETD2_ENS' KLQEIIK     | 138   | >SETD2_ENS' KLQEENIK    | 494   | 356   |
| >SETD2_ENS' KLQEIIKT    | 56    | >SETD2_ENS' KLQEENIKTL  | 64    | 8     |
| >SETD2_ENS' QKLQEEII    | 412   | >SETD2_ENS' QKLQEENI    | 454   | 42    |
| >SETD2_ENS' QKLQEEIIKT  | 94    | >SETD2_ENS' QKLQEENIKT  | 69    | 25    |
| >SETD2_ENS' ISDATSELEGG | 226   | >SETD2_ENS' IFDATSELEGG | 4792  | 4566  |
| >SETD2_ENS' ISDATSEL    | 15    | >SETD2_ENS' IFDATSEL    | 23531 | 23516 |
| >SETD2_ENS' ISDATSEL    | 337   | >SETD2_ENS' IFDATSEL    | 19296 | 18959 |
| >SETD2_ENS' ISENSMDSAII | 16798 | >SETD2_ENS' ISENSMDSAII | 173   | 16625 |
| >SETD2_ENS' ISENSMDSAII | 7730  | >SETD2_ENS' ISENSMDSAII | 7     | 7723  |
| >SETD2_ENS' ISENSMDSAII | 10507 | >SETD2_ENS' ISENSMDSAII | 401   | 10106 |
| >SETD2_ENS' ISENSMDSAII | 2687  | >SETD2_ENS' ISENSMDSAII | 14    | 2673  |
| >SETD2_ENS' AISDATSEL   | 8785  | >SETD2_ENS' AIFDATSEL   | 456   | 8329  |
| >SETD2_ENS' AISDATSEL   | 240   | >SETD2_ENS' AIFDATSEL   | 29    | 211   |
| >SETD2_ENS' AISDATSEL   | 7     | >SETD2_ENS' AIFDATSEL   | 4     | 3     |
| >SETD2_ENS' AISDATSEL   | 16    | >SETD2_ENS' AIFDATSEL   | 11    | 5     |
| >SETD2_ENS' AISDATSEL   | 84    | >SETD2_ENS' AIFDATSEL   | 18    | 66    |

|                         |       |                         |     |       |
|-------------------------|-------|-------------------------|-----|-------|
| >SETD2_ENS' AISDATSEL   | 317   | >SETD2_ENS' AIFDATSEL   | 15  | 302   |
| >SETD2_ENS' AISDATSEL   | 1058  | >SETD2_ENS' AIFDATSEL   | 156 | 902   |
| >SETD2_ENS' AISDATSEL   | 352   | >SETD2_ENS' AIFDATSEL   | 28  | 324   |
| >SETD2_ENS' AISDATSEL   | 218   | >SETD2_ENS' AIFDATSEL   | 199 | 19    |
| >SETD2_ENS' AISDATSEL   | 5     | >SETD2_ENS' AIFDATSEL   | 3   | 2     |
| >SETD2_ENS' AISDATSEL   | 4042  | >SETD2_ENS' AIFDATSEL   | 226 | 3816  |
| >SETD2_ENS' AISDATSEL   | 643   | >SETD2_ENS' AIFDATSEL   | 128 | 515   |
| >SETD2_ENS' AISDATSEL   | 1292  | >SETD2_ENS' AIFDATSEL   | 385 | 907   |
| >SETD2_ENS' AISDATSEL   | 2686  | >SETD2_ENS' AIFDATSEL   | 443 | 2243  |
| >SETD2_ENS' AISDATSEL   | 2020  | >SETD2_ENS' AIFDATSEL   | 248 | 1772  |
| >SETD2_ENS' AISDATSEL   | 2115  | >SETD2_ENS' AIFDATSEL   | 470 | 1645  |
| >SETD2_ENS' SAISDATSEL  | 174   | >SETD2_ENS' SAIFDATSEL  | 591 | 417   |
| >SETD2_ENS' SAISDATSEL  | 255   | >SETD2_ENS' SAIFDATSEL  | 812 | 557   |
| >SETD2_ENS' SAISDATSEL  | 448   | >SETD2_ENS' SAIFDATSEL  | 540 | 92    |
| >SETD2_ENS' SAISDATSEL  | 142   | >SETD2_ENS' SAIFDATSEL  | 150 | 8     |
| >SETD2_ENS' DSAISDATSEL | 149   | >SETD2_ENS' DSAIFDATSEL | 70  | 79    |
| >SETD2_ENS' DSAISDATSEL | 172   | >SETD2_ENS' DSAIFDATSEL | 450 | 278   |
| >SETD2_ENS' SMDSAISDA   | 398   | >SETD2_ENS' SMDSAIFDA   | 19  | 379   |
| >SETD2_ENS' SMDSAISDA   | 623   | >SETD2_ENS' SMDSAIFDA   | 137 | 486   |
| >SETD2_ENS' SMDSAISDAT  | 373   | >SETD2_ENS' SMDSAIFDAT  | 202 | 171   |
| >SETD2_ENS' SMDSAISDA   | 86    | >SETD2_ENS' SMDSAIFDA   | 287 | 201   |
| >SETD2_ENS' SMDSAISDAT  | 630   | >SETD2_ENS' SMDSAIFDAT  | 303 | 327   |
| >SETD2_ENS' SMDSAISDA   | 666   | >SETD2_ENS' SMDSAIFDA   | 47  | 619   |
| >SETD2_ENS' SMDSAISDA   | 41    | >SETD2_ENS' SMDSAIFDA   | 10  | 31    |
| >SETD2_ENS' SMDSAISDAT  | 73    | >SETD2_ENS' SMDSAIFDAT  | 41  | 32    |
| >SETD2_ENS' SMDSAISDAT  | 414   | >SETD2_ENS' SMDSAIFDAT  | 158 | 256   |
| >SETD2_ENS' SMDSAISDA   | 157   | >SETD2_ENS' SMDSAIFDA   | 25  | 132   |
| >SETD2_ENS' SMDSAISDAT  | 683   | >SETD2_ENS' SMDSAIFDAT  | 430 | 253   |
| >SETD2_ENS' SMDSAISDA   | 17    | >SETD2_ENS' SMDSAIFDA   | 7   | 10    |
| >SETD2_ENS' SMDSAISDAT  | 130   | >SETD2_ENS' SMDSAIFDAT  | 88  | 42    |
| >SETD2_ENS' SMDSAISDAT  | 985   | >SETD2_ENS' SMDSAIFDAT  | 406 | 579   |
| >SETD2_ENS' SMDSAISDA   | 1728  | >SETD2_ENS' SMDSAIFDA   | 79  | 1649  |
| >SETD2_ENS' SMDSAISDA   | 32    | >SETD2_ENS' SMDSAIFDA   | 15  | 17    |
| >SETD2_ENS' NSMDSAISD/  | 639   | >SETD2_ENS' NSMDSAIFD/  | 358 | 281   |
| >SETD2_ENS' NSMDSAISD/  | 780   | >SETD2_ENS' NSMDSAIFD/  | 422 | 358   |
| >SETD2_ENS' NSMDSAIS    | 16645 | >SETD2_ENS' NSMDSAIF    | 266 | 16379 |
| >SETD2_ENS' NSMDSAIS    | 15522 | >SETD2_ENS' NSMDSAIF    | 57  | 15465 |
| >SETD2_ENS' NSMDSAIS    | 12815 | >SETD2_ENS' NSMDSAIF    | 9   | 12806 |
| >SETD2_ENS' NSMDSAIS    | 13012 | >SETD2_ENS' NSMDSAIF    | 375 | 12637 |
| >SETD2_ENS' SENSMDSAIS  | 18665 | >SETD2_ENS' SENSMDSAIF  | 346 | 18319 |
| >SETD2_ENS' SENSMDSAIS  | 18790 | >SETD2_ENS' SENSMDSAIF  | 132 | 18658 |
| >SETD2_ENS' SENSMDSAIS  | 9266  | >SETD2_ENS' SENSMDSAIF  | 86  | 9180  |
| >SETD2_ENS' SENSMDSAIS  | 7280  | >SETD2_ENS' SENSMDSAIF  | 132 | 7148  |

|                         |       |                         |       |       |
|-------------------------|-------|-------------------------|-------|-------|
| >SETD2_ENS`SENSMDSAIS   | 1063  | >SETD2_ENS`SENSMDSAIF   | 448   | 615   |
| >SFPQ-P444`PVIVEPLEQL   | 5477  | >SFPQ-P444`SVIVEPLEQL   | 304   | 5173  |
| >SFPQ-P444`PVIVEPLEQL   | 11677 | >SFPQ-P444`SVIVEPLEQL   | 217   | 11460 |
| >SFPQ-P444`PVIVEPLEQL   | 403   | >SFPQ-P444`SVIVEPLEQL   | 110   | 293   |
| >SFPQ-P444`RPVIVEPL     | 11521 | >SFPQ-P444`RSVIVEPL     | 237   | 11284 |
| >SFPQ-P444`RPVIVEPL     | 29    | >SFPQ-P444`RSVIVEPL     | 18299 | 18270 |
| >SFPQ-P444`RPVIVEPLEQI  | 154   | >SFPQ-P444`RSVIVEPLEQI  | 23552 | 23398 |
| >SFPQ-P444`RPVIVEPL     | 12961 | >SFPQ-P444`RSVIVEPL     | 5     | 12956 |
| >SFPQ-P444`RPVIVEPLEQI  | 8825  | >SFPQ-P444`RSVIVEPLEQI  | 6     | 8819  |
| >SFPQ-P444`RPVIVEPL     | 369   | >SFPQ-P444`RSVIVEPL     | 12644 | 12275 |
| >SFPQ-P444`RPVIVEPL     | 19651 | >SFPQ-P444`RSVIVEPL     | 102   | 19549 |
| >SFPQ-P444`RPVIVEPLEQI  | 18154 | >SFPQ-P444`RSVIVEPLEQI  | 45    | 18109 |
| >SFPQ-P444`RPVIVEPLEQI  | 5825  | >SFPQ-P444`RSVIVEPLEQI  | 287   | 5538  |
| >SFPQ-P444`RPVIVEPLEQI  | 8756  | >SFPQ-P444`RSVIVEPLEQI  | 353   | 8403  |
| >SFPQ-P444`TPRPVIVEPL   | 55    | >SFPQ-P444`TPRSVIVEPL   | 22    | 33    |
| >SFPQ-P444`TTPRPVIVEPL  | 82    | >SFPQ-P444`TTPRSVIVEPL  | 121   | 39    |
| >SFPQ-P444`TTPRPVIVEPL  | 447   | >SFPQ-P444`TTPRSVIVEPL  | 612   | 165   |
| >SFPQ-P444`TTPRPVIV     | 18    | >SFPQ-P444`TTPRSVIV     | 21    | 3     |
| >SFPQ-P444`TTPRPVIVEPL  | 9     | >SFPQ-P444`TTPRSVIVEPL  | 13    | 4     |
| >SFPQ-P444`TTPRPVIV     | 6     | >SFPQ-P444`TTPRSVIV     | 6     | 0     |
| >SFPQ-P444`TTPRPVIVE    | 62    | >SFPQ-P444`TTPRSVIVE    | 88    | 26    |
| >SFPQ-P444`TTPRPVIVEP   | 190   | >SFPQ-P444`TTPRSVIVEP   | 261   | 71    |
| >SFPQ-P444`TTPRPVIVEPL  | 3     | >SFPQ-P444`TTPRSVIVEPL  | 3     | 0     |
| >SFPQ-P444`TTTTPRPVIV   | 524   | >SFPQ-P444`TTTTPRSVIV   | 429   | 95    |
| >SFPQ-P444`TTTTPRPVI    | 185   | >SFPQ-P444`TTTTPRSVI    | 34    | 151   |
| >SFPQ-P444`TTTTPRPVIV   | 42    | >SFPQ-P444`TTTTPRSVIV   | 24    | 18    |
| >SFPQ-P444`TTTTPRPVI    | 315   | >SFPQ-P444`TTTTPRSVI    | 141   | 174   |
| >SFPQ-P444`TTTTPRPVIV   | 423   | >SFPQ-P444`TTTTPRSVIV   | 94    | 329   |
| >SFPQ-P444`TTTTPRPVI    | 784   | >SFPQ-P444`TTTTPRSVI    | 441   | 343   |
| >SFPQ-P444`TTTTPRPVI    | 29    | >SFPQ-P444`TTTTPRSVI    | 21    | 8     |
| >SFPQ-P444`LTTTTPRPVIV  | 216   | >SFPQ-P444`LTTTTPRSVIV  | 263   | 47    |
| >SFPQ-P444`LTTTTPRPV    | 56    | >SFPQ-P444`LTTTTPRSV    | 109   | 53    |
| >SFPQ-P444`LTTTTPRPVI   | 1549  | >SFPQ-P444`LTTTTPRSVI   | 120   | 1429  |
| >SFPQ-P444`LTTTTPRPVIV  | 1395  | >SFPQ-P444`LTTTTPRSVIV  | 188   | 1207  |
| >SFPQ-P444`LTTTTPRPV    | 389   | >SFPQ-P444`LTTTTPRSV    | 1398  | 1009  |
| >SFPQ-P444`LTTTTPRPVI   | 766   | >SFPQ-P444`LTTTTPRSVI   | 371   | 395   |
| >SFPQ-P444`LTTTTPRPVI   | 74    | >SFPQ-P444`LTTTTPRSVI   | 99    | 25    |
| >SFPQ-P444`LTTTTPRPVIV  | 157   | >SFPQ-P444`LTTTTPRSVIV  | 85    | 72    |
| >SFPQ-P444`LTTTTPRPVI   | 127   | >SFPQ-P444`LTTTTPRSVI   | 6     | 121   |
| >SFPQ-P444`LTTTTPRPVIV  | 35    | >SFPQ-P444`LTTTTPRSVIV  | 42    | 7     |
| >SFPQ-P444`LTTTTPRPVI   | 21    | >SFPQ-P444`LTTTTPRSVI   | 15    | 6     |
| >SFPQ-P444`LLTTTTPRPVIV | 294   | >SFPQ-P444`LLTTTTPRSVIV | 334   | 40    |
| >SFPQ-P444`LLTTTTPRPV   | 342   | >SFPQ-P444`LLTTTTPRSV   | 422   | 80    |

|                          |      |                          |      |      |
|--------------------------|------|--------------------------|------|------|
| >SFPQ-P444\$ LLTTTPRPVI  | 241  | >SFPQ-P444\$ LLTTTPRSVI  | 115  | 126  |
| >SFPQ-P444\$ LLTTTPRPVIV | 231  | >SFPQ-P444\$ LLTTTPRSVIV | 126  | 105  |
| >SFPQ-P444\$ LLTTTPRPV   | 10   | >SFPQ-P444\$ LLTTTPRSV   | 14   | 4    |
| >SFPQ-P444\$ LLTTTPRPVI  | 390  | >SFPQ-P444\$ LLTTTPRSVI  | 123  | 267  |
| >SFPQ-P444\$ LLTTTPRPVIV | 22   | >SFPQ-P444\$ LLTTTPRSVIV | 25   | 3    |
| >SFPQ-P444\$ LLTTTPRPV   | 7    | >SFPQ-P444\$ LLTTTPRSV   | 8    | 1    |
| >SFPQ-P444\$ LLTTTPRPVI  | 194  | >SFPQ-P444\$ LLTTTPRSVI  | 329  | 135  |
| >SFPQ-P444\$ LLTTTPRPVIV | 17   | >SFPQ-P444\$ LLTTTPRSVIV | 24   | 7    |
| >SFPQ-P444\$ LLTTTPRPV   | 15   | >SFPQ-P444\$ LLTTTPRSV   | 26   | 11   |
| >SFPQ-P444\$ LLTTTPRPVIV | 15   | >SFPQ-P444\$ LLTTTPRSVIV | 13   | 2    |
| >SFPQ-P444\$ LLTTTPRPV   | 32   | >SFPQ-P444\$ LLTTTPRSV   | 45   | 13   |
| >SFPQ-P444\$ LLTTTPRPVI  | 492  | >SFPQ-P444\$ LLTTTPRSVI  | 1892 | 1400 |
| >SFPQ-P444\$ LLTTTPRPVIV | 20   | >SFPQ-P444\$ LLTTTPRSVIV | 20   | 0    |
| >SFPQ-P444\$ LLTTTPRPV   | 163  | >SFPQ-P444\$ LLTTTPRSV   | 74   | 89   |
| >SFPQ-P444\$ LLTTTPRPVIV | 78   | >SFPQ-P444\$ LLTTTPRSVIV | 56   | 22   |
| >SFPQ-P444\$ LLTTTPRPV   | 4    | >SFPQ-P444\$ LLTTTPRSV   | 3    | 1    |
| >SFPQ-P444\$ LLTTTPRPVI  | 42   | >SFPQ-P444\$ LLTTTPRSVI  | 43   | 1    |
| >SFPQ-P444\$ LLTTTPRPVIV | 5    | >SFPQ-P444\$ LLTTTPRSVIV | 3    | 2    |
| >SFPQ-P444\$ LLTTTPRPVI  | 1090 | >SFPQ-P444\$ LLTTTPRSVI  | 221  | 869  |
| >SFPQ-P444\$ FLLTTTPRP   | 6949 | >SFPQ-P444\$ FLLTTTPRS   | 229  | 6720 |
| >SFPQ-P444\$ FLLTTTPRPV  | 10   | >SFPQ-P444\$ FLLTTTPRSV  | 10   | 0    |
| >SFPQ-P444\$ FLLTTTPRPVI | 18   | >SFPQ-P444\$ FLLTTTPRSVI | 46   | 28   |
| >SFPQ-P444\$ FLLTTTPRPV  | 11   | >SFPQ-P444\$ FLLTTTPRSV  | 13   | 2    |
| >SFPQ-P444\$ FLLTTTPRPVI | 197  | >SFPQ-P444\$ FLLTTTPRSVI | 126  | 71   |
| >SFPQ-P444\$ FLLTTTPRPV  | 6    | >SFPQ-P444\$ FLLTTTPRSV  | 6    | 0    |
| >SFPQ-P444\$ FLLTTTPRPVI | 70   | >SFPQ-P444\$ FLLTTTPRSVI | 26   | 44   |
| >SFPQ-P444\$ FLLTTTPRPV  | 18   | >SFPQ-P444\$ FLLTTTPRSV  | 20   | 2    |
| >SFPQ-P444\$ FLLTTTPRPVI | 24   | >SFPQ-P444\$ FLLTTTPRSVI | 68   | 44   |
| >SFPQ-P444\$ FLLTTTPRP   | 320  | >SFPQ-P444\$ FLLTTTPRS   | 48   | 272  |
| >SFPQ-P444\$ FLLTTTPRPV  | 1    | >SFPQ-P444\$ FLLTTTPRSV  | 1    | 0    |
| >SFPQ-P444\$ FLLTTTPRPVI | 4    | >SFPQ-P444\$ FLLTTTPRSVI | 5    | 1    |
| >SFPQ-P444\$ FLLTTTPRPV  | 2    | >SFPQ-P444\$ FLLTTTPRSV  | 3    | 1    |
| >SFPQ-P444\$ FLLTTTPRPVI | 11   | >SFPQ-P444\$ FLLTTTPRSVI | 10   | 1    |
| >SFPQ-P444\$ FLLTTTPRP   | 925  | >SFPQ-P444\$ FLLTTTPRS   | 123  | 802  |
| >SFPQ-P444\$ FLLTTTPRPV  | 4    | >SFPQ-P444\$ FLLTTTPRSV  | 5    | 1    |
| >SFPQ-P444\$ FLLTTTPRPVI | 8    | >SFPQ-P444\$ FLLTTTPRSVI | 17   | 9    |
| >SFPQ-P444\$ FLLTTTPRP   | 5322 | >SFPQ-P444\$ FLLTTTPRS   | 484  | 4838 |
| >SFPQ-P444\$ FLLTTTPRPV  | 2    | >SFPQ-P444\$ FLLTTTPRSV  | 2    | 0    |
| >SFPQ-P444\$ FLLTTTPRPVI | 13   | >SFPQ-P444\$ FLLTTTPRSVI | 25   | 12   |
| >SFPQ-P444\$ FLLTTTPRP   | 284  | >SFPQ-P444\$ FLLTTTPRS   | 26   | 258  |
| >SFPQ-P444\$ FLLTTTPRPV  | 2    | >SFPQ-P444\$ FLLTTTPRSV  | 2    | 0    |
| >SFPQ-P444\$ FLLTTTPRPVI | 5    | >SFPQ-P444\$ FLLTTTPRSVI | 5    | 0    |
| >SFPQ-P444\$ FLLTTTPRPV  | 24   | >SFPQ-P444\$ FLLTTTPRSV  | 68   | 44   |

|                          |       |                           |       |       |
|--------------------------|-------|---------------------------|-------|-------|
| >SFPQ-P444\$ FLLTTTTPRVI | 151   | >SFPQ-P444\$ FLLTTTTPRSVI | 519   | 368   |
| >SFPQ-P444\$ FLLTTTTPRPV | 152   | >SFPQ-P444\$ FLLTTTTPRSV  | 168   | 16    |
| >SFPQ-P444\$ FLLTTTTPRVI | 196   | >SFPQ-P444\$ FLLTTTTPRSVI | 90    | 106   |
| >SH3GL1-Y2\$ YHRQAVQI    | 291   | >SH3GL1-Y2\$ DHRQAVQI     | 9364  | 9073  |
| >SH3GL1-Y2\$ YHRQAVQIL   | 43    | >SH3GL1-Y2\$ DHRQAVQIL    | 3357  | 3314  |
| >SH3GL1-Y2\$ YHRQAVQIL   | 226   | >SH3GL1-Y2\$ DHRQAVQIL    | 629   | 403   |
| >SH3GL1-Y2\$ YHRQAVQIL   | 60    | >SH3GL1-Y2\$ DHRQAVQIL    | 2675  | 2615  |
| >SH3GL1-Y2\$ YHRQAVQI    | 106   | >SH3GL1-Y2\$ DHRQAVQI     | 4439  | 4333  |
| >SH3GL1-Y2\$ DYHRQAVQI   | 71    | >SH3GL1-Y2\$ DDHRQAVQI    | 26301 | 26230 |
| >SH3GL1-Y2\$ DYHRQAVQII  | 123   | >SH3GL1-Y2\$ DDHRQAVQII   | 26776 | 26653 |
| >SH3GL1-Y2\$ DYHRQAVQI   | 20545 | >SH3GL1-Y2\$ DDHRQAVQI    | 260   | 20285 |
| >SH3GL1-Y2\$ LSALVDAQLD  | 28    | >SH3GL1-Y2\$ LSALVDAQLD   | 20524 | 20496 |
| >SH3GL1-Y2\$ LSALVDAQLD  | 43    | >SH3GL1-Y2\$ LSALVDAQLD   | 24255 | 24212 |
| >SH3GL1-Y2\$ LSALVDAQLD  | 134   | >SH3GL1-Y2\$ LSALVDAQLD   | 29539 | 29405 |
| >SH3GL1-Y2\$ LSALVDAQLD  | 392   | >SH3GL1-Y2\$ LSALVDAQLD   | 21226 | 20834 |
| >SH3GL1-Y2\$ LSALVDAQLD  | 15    | >SH3GL1-Y2\$ LSALVDAQLD   | 18923 | 18908 |
| >SH3GL1-Y2\$ LSALVDAQLD  | 284   | >SH3GL1-Y2\$ LSALVDAQLD   | 23599 | 23315 |
| >SH3GL1-Y2\$ LSALVDAQLD  | 48    | >SH3GL1-Y2\$ LSALVDAQLD   | 14880 | 14832 |
| >SH3GL1-Y2\$ LSALVDAQLD  | 439   | >SH3GL1-Y2\$ LSALVDAQLD   | 26272 | 25833 |
| >SH3GL1-Y2\$ LDYHRQAVQ   | 27    | >SH3GL1-Y2\$ LDDHRQAVQ    | 708   | 681   |
| >SH3GL1-Y2\$ LDYHRQAV    | 367   | >SH3GL1-Y2\$ LDDHRQAV     | 750   | 383   |
| >SH3GL1-Y2\$ LDYHRQAVQ   | 45    | >SH3GL1-Y2\$ LDDHRQAVQ    | 71    | 26    |
| >SH3GL1-Y2\$ QLDYHRQAV   | 1561  | >SH3GL1-Y2\$ QLDDHRQAV    | 276   | 1285  |
| >SH3GL1-Y2\$ QLDYHRQAV   | 213   | >SH3GL1-Y2\$ QLDDHRQAV    | 91    | 122   |
| >SH3GL1-Y2\$ QLDYHRQAV   | 999   | >SH3GL1-Y2\$ QLDDHRQAV    | 364   | 635   |
| >SH3GL1-Y2\$ QLDYHRQAV   | 635   | >SH3GL1-Y2\$ QLDDHRQAV    | 182   | 453   |
| >SH3GL1-Y2\$ QLDYHRQAV   | 603   | >SH3GL1-Y2\$ QLDDHRQAV    | 143   | 460   |
| >SH3GL1-Y2\$ QLDYHRQA    | 2029  | >SH3GL1-Y2\$ QLDDHRQA     | 281   | 1748  |
| >SH3GL1-Y2\$ QLDYHRQAV   | 152   | >SH3GL1-Y2\$ QLDDHRQAV    | 11    | 141   |
| >SH3GL1-Y2\$ QLDYHRQAV   | 746   | >SH3GL1-Y2\$ QLDDHRQAV    | 59    | 687   |
| >SH3GL1-Y2\$ QLDYHRQAV   | 217   | >SH3GL1-Y2\$ QLDDHRQAV    | 61    | 156   |
| >SH3GL1-Y2\$ QLDYHRQAV   | 1238  | >SH3GL1-Y2\$ QLDDHRQAV    | 418   | 820   |
| >SH3GL1-Y2\$ QLDYHRQAV   | 1284  | >SH3GL1-Y2\$ QLDDHRQAV    | 107   | 1177  |
| >SH3GL1-Y2\$ QLDYHRQAV   | 2862  | >SH3GL1-Y2\$ QLDDHRQAV    | 205   | 2657  |
| >SH3GL1-Y2\$ QLDYHRQA    | 2128  | >SH3GL1-Y2\$ QLDDHRQA     | 89    | 2039  |
| >SH3GL1-Y2\$ QLDYHRQAV   | 24    | >SH3GL1-Y2\$ QLDDHRQAV    | 3     | 21    |
| >SH3GL1-Y2\$ QLDYHRQAV   | 556   | >SH3GL1-Y2\$ QLDDHRQAV    | 23    | 533   |
| >SH3GL1-Y2\$ QLDYHRQAV   | 245   | >SH3GL1-Y2\$ QLDDHRQAV    | 972   | 727   |
| >SH3GL1-Y2\$ QLDYHRQAV   | 1153  | >SH3GL1-Y2\$ QLDDHRQAV    | 258   | 895   |
| >SH3GL1-Y2\$ AQLDYHRQA   | 472   | >SH3GL1-Y2\$ AQLDDHRQA    | 504   | 32    |
| >SH3GL1-Y2\$ AQLDYHRQA   | 151   | >SH3GL1-Y2\$ AQLDDHRQA    | 266   | 115   |
| >SH3GL1-Y2\$ AQLDYHRQA   | 419   | >SH3GL1-Y2\$ AQLDDHRQA    | 390   | 29    |
| >SH3GL1-Y2\$ AQLDYHRQA   | 314   | >SH3GL1-Y2\$ AQLDDHRQA    | 1373  | 1059  |

|                       |       |                       |       |       |
|-----------------------|-------|-----------------------|-------|-------|
| >SH3GL1-Y22AQLDYHRQA  | 33    | >SH3GL1-Y22AQLDDHRQA  | 40    | 7     |
| >SH3GL1-Y22AQLDYHRQA  | 229   | >SH3GL1-Y22AQLDDHRQA  | 153   | 76    |
| >SH3GL1-Y22AQLDYHRQA  | 108   | >SH3GL1-Y22AQLDDHRQA  | 68    | 40    |
| >SH3GL1-Y22AQLDYHRQA  | 24    | >SH3GL1-Y22AQLDDHRQA  | 48    | 24    |
| >SH3GL1-Y22DAQLDYHR   | 20    | >SH3GL1-Y22DAQLDDHR   | 77    | 57    |
| >SH3GL1-Y22DAQLDYHR   | 105   | >SH3GL1-Y22DAQLDDHR   | 159   | 54    |
| >SH3GL1-Y22VDAQLDYHR  | 158   | >SH3GL1-Y22VDAQLDDHR  | 4921  | 4763  |
| >SH3GL1-Y22LVDAQLDY   | 16    | >SH3GL1-Y22LVDAQLDD   | 18038 | 18022 |
| >SH3GL1-Y22LVDAQLDY   | 122   | >SH3GL1-Y22LVDAQLDD   | 22827 | 22705 |
| >SH3GL1-Y22LVDAQLDYHF | 492   | >SH3GL1-Y22LVDAQLDDH  | 6888  | 6396  |
| >SH3GL1-Y22LVDAQLDYHF | 236   | >SH3GL1-Y22LVDAQLDDH  | 1083  | 847   |
| >SH3GL1-Y22LVDAQLDY   | 33    | >SH3GL1-Y22LVDAQLDD   | 22467 | 22434 |
| >SH3GL1-Y22LVDAQLDY   | 387   | >SH3GL1-Y22LVDAQLDD   | 37348 | 36961 |
| >SH3GL1-Y22LVDAQLDYHF | 416   | >SH3GL1-Y22LVDAQLDDH  | 4437  | 4021  |
| >SH3GL1-Y22ALVDAQLDY  | 18    | >SH3GL1-Y22ALVDAQLDD  | 19679 | 19661 |
| >SH3GL1-Y22ALVDAQLDY  | 300   | >SH3GL1-Y22ALVDAQLDD  | 31240 | 30940 |
| >SH3GL1-Y22ALVDAQLDYF | 154   | >SH3GL1-Y22ALVDAQLDDI | 2165  | 2011  |
| >SH3GL1-Y22ALVDAQLDY  | 37    | >SH3GL1-Y22ALVDAQLDD  | 24268 | 24231 |
| >SH3GL1-Y22ALVDAQLDY  | 160   | >SH3GL1-Y22ALVDAQLDD  | 20520 | 20360 |
| >SH3GL1-Y22ALVDAQLDY  | 495   | >SH3GL1-Y22ALVDAQLDD  | 25078 | 24583 |
| >SH3GL1-Y22ALVDAQLDYF | 135   | >SH3GL1-Y22ALVDAQLDDI | 943   | 808   |
| >SH3GL1-Y22SALVDAQLDY | 175   | >SH3GL1-Y22SALVDAQLDI | 24596 | 24421 |
| >SH3GL1-Y22SALVDAQLDY | 86    | >SH3GL1-Y22SALVDAQLDI | 22674 | 22588 |
| >SLC45A3-P3EPGTEARRHY | 1395  | >SLC45A3-P3ELGTEARRHY | 457   | 938   |
| >SLC45A3-P3EPGTEARR   | 1095  | >SLC45A3-P3ELGTEARR   | 170   | 925   |
| >SLC45A3-P3EPGTEARR   | 1657  | >SLC45A3-P3ELGTEARR   | 333   | 1324  |
| >SLC45A3-P3GLYQGVPRAI | 18266 | >SLC45A3-P3GLYQGVPRAI | 77    | 18189 |
| >SLC45A3-P3GLYQGVPRAI | 8336  | >SLC45A3-P3GLYQGVPRAI | 49    | 8287  |
| >SLC45A3-P3GLYQGVPRAI | 4747  | >SLC45A3-P3GLYQGVPRAI | 27    | 4720  |
| >SLC45A3-P3GLYQGVPRAI | 1298  | >SLC45A3-P3GLYQGVPRAI | 5     | 1293  |
| >SLC45A3-P3GLYQGVPRAI | 10473 | >SLC45A3-P3GLYQGVPRAI | 40    | 10433 |
| >SLC45A3-P3GLYQGVPRAI | 3033  | >SLC45A3-P3GLYQGVPRAI | 13    | 3020  |
| >SLC45A3-P3GLYQGVPRAI | 22245 | >SLC45A3-P3GLYQGVPRAI | 338   | 21907 |
| >SLC45A3-P3GLYQGVPRAI | 903   | >SLC45A3-P3GLYQGVPRAI | 3     | 900   |
| >SLC45A3-P3AEPGTEARRH | 5946  | >SLC45A3-P3AELGTEARRH | 465   | 5481  |
| >SLC45A3-P3AEPGTEARRH | 2057  | >SLC45A3-P3AELGTEARRH | 269   | 1788  |
| >SLC45A3-P3AEPGTEARRH | 1044  | >SLC45A3-P3AELGTEARRH | 62    | 982   |
| >SLC45A3-P3AEPGTEAR   | 6843  | >SLC45A3-P3AELGTEAR   | 286   | 6557  |
| >SLC45A3-P3RAEPGTEAR  | 103   | >SLC45A3-P3RAELGTEAR  | 204   | 101   |
| >SLC45A3-P3RAEPGTEARF | 835   | >SLC45A3-P3RAELGTEARR | 470   | 365   |
| >SLC45A3-P3VPRAEPGTEA | 93    | >SLC45A3-P3VPRAELGTEA | 55    | 38    |
| >SLC45A3-P3YQGVPRAE   | 14116 | >SLC45A3-P3YQGVPRAE   | 393   | 13723 |
| >SLC45A3-P3YQGVPRAE   | 8384  | >SLC45A3-P3YQGVPRAE   | 449   | 7935  |

|                         |       |                         |       |       |
|-------------------------|-------|-------------------------|-------|-------|
| >SLC45A3-P3YQGVPRAE     | 4250  | >SLC45A3-P3YQGVPRAE     | 96    | 4154  |
| >SLC45A3-P3LYQGVPRAE    | 26213 | >SLC45A3-P3LYQGVPRAE    | 144   | 26069 |
| >SLC45A3-P3LYQGVPRAE    | 1361  | >SLC45A3-P3LYQGVPRAE    | 8     | 1353  |
| >SLC45A3-R2RRLFVAEL     | 152   | >SLC45A3-R2RRLFVAEL     | 2055  | 1903  |
| >SLC45A3-R2RRLFVAELCS\  | 490   | >SLC45A3-R2RRLFVAELCS\  | 3460  | 2970  |
| >SLC45A3-R2RRLFVAEL     | 23    | >SLC45A3-R2RRLFVAEL     | 129   | 106   |
| >SLC45A3-R2RRLFVAELCS   | 119   | >SLC45A3-R2RRLFVAELCS   | 1282  | 1163  |
| >SLC45A3-R2RRLFVAELCS\  | 319   | >SLC45A3-R2RRLFVAELCS\  | 2324  | 2005  |
| >SLC45A3-R2RRLFVAEL     | 14    | >SLC45A3-R2RRLFVAEL     | 818   | 804   |
| >SLC45A3-R2RRLFVAELC    | 63    | >SLC45A3-R2RRLFVAELC    | 1362  | 1299  |
| >SLC45A3-R2RRLFVAELCS   | 245   | >SLC45A3-R2RRLFVAELCS   | 6038  | 5793  |
| >SLC45A3-R2RRLFVAELCS\  | 216   | >SLC45A3-R2RRLFVAELCS\  | 3292  | 3076  |
| >SLC45A3-R2RRLFVAEL     | 70    | >SLC45A3-R2RRLFVAEL     | 2127  | 2057  |
| >SLC45A3-R2RRLFVAELC    | 75    | >SLC45A3-R2RRLFVAELC    | 280   | 205   |
| >SLC45A3-R2RRLFVAELCS   | 164   | >SLC45A3-R2RRLFVAELCS   | 2893  | 2729  |
| >SLC45A3-R2RRLFVAELCS\  | 23    | >SLC45A3-R2RRLFVAELCS\  | 332   | 309   |
| >SLC45A3-R2LRRLFVAEL    | 210   | >SLC45A3-R2LRRLFVAEL    | 3287  | 3077  |
| >SLC45A3-R2LRRLFVAEL    | 365   | >SLC45A3-R2LRRLFVAEL    | 24019 | 23654 |
| >SLC45A3-R2LRRLFVAEL    | 117   | >SLC45A3-R2LRRLFVAEL    | 20816 | 20699 |
| >SLC45A3-R2LRRLFVAEL    | 16    | >SLC45A3-R2LRRLFVAEL    | 20526 | 20510 |
| >SLC45A3-R2QLCCRMPTI    | 69    | >SLC45A3-R2QLCCRMPTI    | 15832 | 15763 |
| >SLC45A3-R2QLCCRMPTI    | 76    | >SLC45A3-R2QLCCRMPTI    | 27289 | 27213 |
| >SLC45A3-R2QLCCRMPTI    | 327   | >SLC45A3-R2QLCCRMPTI    | 37502 | 37175 |
| >SLC45A3-R2QLCCRMPTI    | 187   | >SLC45A3-R2QLCCRMPTI    | 34311 | 34124 |
| >SLC45A3-R2TLRRLFVAEL   | 1457  | >SLC45A3-R2TLRRLFVAEL   | 389   | 1068  |
| >SLC45A3-R2TLRRLFVAEL   | 340   | >SLC45A3-R2TLRRLFVAEL   | 131   | 209   |
| >SLC45A3-R2TLRRLFVA     | 220   | >SLC45A3-R2TLRRLFVA     | 722   | 502   |
| >SLC45A3-R2TLRRLFVAEL   | 88    | >SLC45A3-R2TLRRLFVAEL   | 73    | 15    |
| >SLC45A3-R2TLRRLFVA     | 2491  | >SLC45A3-R2TLRRLFVA     | 306   | 2185  |
| >SLC45A3-R2TLRRLFVAEL   | 296   | >SLC45A3-R2TLRRLFVAEL   | 33    | 263   |
| >SLC45A3-R2TLRRLFVA     | 4596  | >SLC45A3-R2TLRRLFVA     | 469   | 4127  |
| >SLC45A3-R2TLRRLFVAEL   | 1187  | >SLC45A3-R2TLRRLFVAEL   | 80    | 1107  |
| >SLC45A3-R2TLRRLFVA     | 5222  | >SLC45A3-R2TLRRLFVA     | 344   | 4878  |
| >SLC45A3-R2TLRRLFVAEL   | 1830  | >SLC45A3-R2TLRRLFVAEL   | 103   | 1727  |
| >SLC45A3-R2TLRRLFVAEL   | 5858  | >SLC45A3-R2TLRRLFVAEL   | 213   | 5645  |
| >SLC45A3-R2TLRRLFVA     | 106   | >SLC45A3-R2TLRRLFVA     | 53    | 53    |
| >SLC45A3-R2TLRRLFVAEL   | 12    | >SLC45A3-R2TLRRLFVAEL   | 7     | 5     |
| >SLC45A3-R2TLRRLFVA     | 219   | >SLC45A3-R2TLRRLFVA     | 15263 | 15044 |
| >SLC45A3-R2TLRRLFVAEL   | 448   | >SLC45A3-R2TLRRLFVAEL   | 15855 | 15407 |
| >SLC45A3-R2RTLRRRLFVAEI | 440   | >SLC45A3-R2RTLRRRLFVAEI | 812   | 372   |
| >SLC45A3-R2RTLRRRLFV    | 451   | >SLC45A3-R2RTLRRRLFV    | 150   | 301   |
| >SLC45A3-R2RTLRRRLFVAEI | 497   | >SLC45A3-R2RTLRRRLFVAEI | 167   | 330   |
| >SLC45A3-R2RTLRRRLFVAEI | 1288  | >SLC45A3-R2RTLRRRLFVAEI | 369   | 919   |



|                          |      |                          |      |      |
|--------------------------|------|--------------------------|------|------|
| >SLC45A3-R2 RTLRRRLFV    | 20   | >SLC45A3-R2 RTLGRRLFV    | 11   | 9    |
| >SLC45A3-R2 RTLRRRLFVA   | 81   | >SLC45A3-R2 RTLGRRLFVA   | 26   | 55   |
| >SLC45A3-R2 RTLRRRLFVAEI | 95   | >SLC45A3-R2 RTLGRRLFVAEI | 43   | 52   |
| >SLC45A3-R2 RTLRRRLFV    | 53   | >SLC45A3-R2 RTLGRRLFV    | 20   | 33   |
| >SLC45A3-R2 RTLRRRLFVA   | 1347 | >SLC45A3-R2 RTLGRRLFVA   | 330  | 1017 |
| >SLC45A3-R2 RTLRRRLFVAEI | 128  | >SLC45A3-R2 RTLGRRLFVAEI | 42   | 86   |
| >SLC45A3-R2 RTLRRRLFV    | 100  | >SLC45A3-R2 RTLGRRLFV    | 33   | 67   |
| >SLC45A3-R2 RTLRRRLFV    | 279  | >SLC45A3-R2 RTLGRRLFV    | 93   | 186  |
| >SLC45A3-R2 RTLRRRLFVAEI | 527  | >SLC45A3-R2 RTLGRRLFVAEI | 414  | 113  |
| >SLC45A3-R2 RTLRRRLFV    | 7    | >SLC45A3-R2 RTLGRRLFV    | 15   | 8    |
| >SLC45A3-R2 RTLRRRLFVA   | 15   | >SLC45A3-R2 RTLGRRLFVA   | 43   | 28   |
| >SLC45A3-R2 RTLRRRLFVAEI | 30   | >SLC45A3-R2 RTLGRRLFVAEI | 93   | 63   |
| >SLC45A3-R2 RTLRRRLFV    | 220  | >SLC45A3-R2 RTLGRRLFV    | 561  | 341  |
| >SLC45A3-R2 RTLRRRLFVAEI | 312  | >SLC45A3-R2 RTLGRRLFVAEI | 629  | 317  |
| >SLC45A3-R2 RTLRRRLFV    | 804  | >SLC45A3-R2 RTLGRRLFV    | 418  | 386  |
| >SLC45A3-R2 RTLRRRLFVA   | 995  | >SLC45A3-R2 RTLGRRLFVA   | 423  | 572  |
| >SLC45A3-R2 RTLRRRLFVAE  | 383  | >SLC45A3-R2 RTLGRRLFVAE  | 182  | 201  |
| >SLC45A3-R2 RTLRRRLFVAEI | 27   | >SLC45A3-R2 RTLGRRLFVAEI | 14   | 13   |
| >SLC45A3-R2 RTLRRRLFV    | 335  | >SLC45A3-R2 RTLGRRLFV    | 161  | 174  |
| >SLC45A3-R2 RTLRRRLFV    | 84   | >SLC45A3-R2 RTLGRRLFV    | 26   | 58   |
| >SLC45A3-R2 RTLRRRLFVA   | 1023 | >SLC45A3-R2 RTLGRRLFVA   | 252  | 771  |
| >SLC45A3-R2 RTLRRRLFVAEI | 4    | >SLC45A3-R2 RTLGRRLFVAEI | 3    | 1    |
| >SLC45A3-R2 RTLRRRLFVAEI | 483  | >SLC45A3-R2 RTLGRRLFVAEI | 565  | 82   |
| >SLC45A3-R2 RTLRRRLFVAEI | 118  | >SLC45A3-R2 RTLGRRLFVAEI | 218  | 100  |
| >SLC45A3-R2 RTLRRRLFVAEI | 101  | >SLC45A3-R2 RTLGRRLFVAEI | 89   | 12   |
| >SLC45A3-R2 RTLRRRLFVAEI | 139  | >SLC45A3-R2 RTLGRRLFVAEI | 187  | 48   |
| >SLC45A3-R2 PRTLRRRLFV   | 314  | >SLC45A3-R2 PRTLGRRLFV   | 1041 | 727  |
| >SLC45A3-R2 MPRTLRRRL    | 10   | >SLC45A3-R2 MPRTLGRRL    | 11   | 1    |
| >SLC45A3-R2 MPRTLRRRLF   | 11   | >SLC45A3-R2 MPRTLGRRLF   | 20   | 9    |
| >SLC45A3-R2 MPRTLRRRLFV  | 61   | >SLC45A3-R2 MPRTLGRRLFV  | 48   | 13   |
| >SLC45A3-R2 MPRTLRRRLFV  | 18   | >SLC45A3-R2 MPRTLGRRLFV  | 24   | 6    |
| >SLC45A3-R2 MPRTLRRRL    | 59   | >SLC45A3-R2 MPRTLGRRL    | 293  | 234  |
| >SLC45A3-R2 MPRTLRRRLF   | 208  | >SLC45A3-R2 MPRTLGRRLF   | 2529 | 2321 |
| >SLC45A3-R2 MPRTLRRRLFV  | 124  | >SLC45A3-R2 MPRTLGRRLFV  | 508  | 384  |
| >SLC45A3-R2 MPRTLRRRLF   | 317  | >SLC45A3-R2 MPRTLGRRLF   | 207  | 110  |
| >SLC45A3-R2 MPRTLRRRLF   | 168  | >SLC45A3-R2 MPRTLGRRLF   | 98   | 70   |
| >SLC45A3-R2 MPRTLRRRLF   | 406  | >SLC45A3-R2 MPRTLGRRLF   | 821  | 415  |
| >SLC45A3-R2 MPRTLRRRLFV  | 136  | >SLC45A3-R2 MPRTLGRRLFV  | 98   | 38   |
| >SLC45A3-R2 MPRTLRRRLFV  | 6    | >SLC45A3-R2 MPRTLGRRLFV  | 6    | 0    |
| >SLC45A3-R2 MPRTLRRRLF   | 214  | >SLC45A3-R2 MPRTLGRRLF   | 102  | 112  |
| >SLC45A3-R2 RMPRTLRRRLF  | 336  | >SLC45A3-R2 RMPRTLGRRLF  | 256  | 80   |
| >SLC45A3-R2 RMPRTLRRRLF  | 428  | >SLC45A3-R2 RMPRTLGRRLF  | 346  | 82   |
| >SLC45A3-R2 RMPRTLRRRL   | 214  | >SLC45A3-R2 RMPRTLGRRL   | 70   | 144  |

|                           |       |                           |       |       |
|---------------------------|-------|---------------------------|-------|-------|
| >SLC45A3-R2 RMPRTLRRFL    | 23    | >SLC45A3-R2 RMPRTLGRFL    | 18    | 5     |
| >SLC45A3-R2 RMPRTLRRFL    | 68    | >SLC45A3-R2 RMPRTLGRFL    | 45    | 23    |
| >SLC45A3-R2 RMPRTLRRLL    | 28    | >SLC45A3-R2 RMPRTLGRLL    | 25    | 3     |
| >SLC45A3-R2 RMPRTLRRFL    | 9     | >SLC45A3-R2 RMPRTLGRFL    | 6     | 3     |
| >SLC45A3-R2 RMPRTLRRFL    | 87    | >SLC45A3-R2 RMPRTLGRFL    | 56    | 31    |
| >SLC45A3-R2 RMPRTLRRFL    | 21    | >SLC45A3-R2 RMPRTLGRFL    | 13    | 8     |
| >SLC45A3-R2 RMPRTLRRFL    | 362   | >SLC45A3-R2 RMPRTLGRFL    | 198   | 164   |
| >SLC45A3-R2 RMPRTLRRLL    | 72    | >SLC45A3-R2 RMPRTLGRLL    | 52    | 20    |
| >SLC45A3-R2 RMPRTLRRFL    | 9     | >SLC45A3-R2 RMPRTLGRFL    | 7     | 2     |
| >SLC45A3-R2 RMPRTLRR      | 433   | >SLC45A3-R2 RMPRTLGR      | 490   | 57    |
| >SLC45A3-R2 RMPRTLRRFL    | 400   | >SLC45A3-R2 RMPRTLGRFL    | 336   | 64    |
| >SLC45A3-R2 RMPRTLRRFL    | 254   | >SLC45A3-R2 RMPRTLGRFL    | 214   | 40    |
| >SLC45A3-R2 RMPRTLRRFL    | 117   | >SLC45A3-R2 RMPRTLGRFL    | 95    | 22    |
| >SLC45A3-R2 RMPRTLRRFL    | 260   | >SLC45A3-R2 RMPRTLGRFL    | 360   | 100   |
| >SLC45A3-R2 RMPRTLRR      | 24    | >SLC45A3-R2 RMPRTLGR      | 42    | 18    |
| >SLC45A3-R2 RMPRTLRRFL    | 282   | >SLC45A3-R2 RMPRTLGRFL    | 599   | 317   |
| >SLC45A3-R2 RMPRTLRRFL    | 414   | >SLC45A3-R2 RMPRTLGRFL    | 223   | 191   |
| >SLC45A3-R2 RMPRTLRRFL    | 33    | >SLC45A3-R2 RMPRTLGRFL    | 46    | 13    |
| >SLC45A3-R2 RMPRTLRRLL    | 282   | >SLC45A3-R2 RMPRTLGRLL    | 685   | 403   |
| >SLC45A3-R2 RMPRTLRRFL    | 136   | >SLC45A3-R2 RMPRTLGRFL    | 116   | 20    |
| >SLC45A3-R2 RMPRTLRRLL    | 327   | >SLC45A3-R2 RMPRTLGRLL    | 954   | 627   |
| >SLC45A3-R2 RMPRTLRR      | 48    | >SLC45A3-R2 RMPRTLGR      | 60    | 12    |
| >SLC45A3-R2 CRMPRTLRRLL   | 96    | >SLC45A3-R2 CRMPRTLGRLL   | 64    | 32    |
| >SLC45A3-R2 CRMPRTLRR     | 132   | >SLC45A3-R2 CRMPRTLGR     | 4340  | 4208  |
| >SLC45A3-R2 CRMPRTLRR     | 118   | >SLC45A3-R2 CRMPRTLGR     | 95    | 23    |
| >SLC45A3-R2 CRMPRTLRRLL   | 38    | >SLC45A3-R2 CRMPRTLGRLL   | 30    | 8     |
| >SLC45A3-R2 CRMPRTLRRLL   | 88    | >SLC45A3-R2 CRMPRTLGRLL   | 103   | 15    |
| >SLC45A3-R2 CRMPRTLRR     | 592   | >SLC45A3-R2 CRMPRTLGR     | 364   | 228   |
| >SLC45A3-R2 CRMPRTLRRLL   | 116   | >SLC45A3-R2 CRMPRTLGRLL   | 120   | 4     |
| >SLC45A3-R2 CRMPRTLRR     | 141   | >SLC45A3-R2 CRMPRTLGR     | 68    | 73    |
| >SLC45A3-R2 CRMPRTLRRLL   | 43    | >SLC45A3-R2 CRMPRTLGRLL   | 28    | 15    |
| >SLC45A3-R2 CRMPRTLRRLL   | 7     | >SLC45A3-R2 CRMPRTLGRLL   | 11    | 4     |
| >SLC45A3-R2 CRMPRTLRR     | 233   | >SLC45A3-R2 CRMPRTLGR     | 34491 | 34258 |
| >SLC45A3-R2 CRMPRTLRR     | 93    | >SLC45A3-R2 CRMPRTLGR     | 99    | 6     |
| >SLC45A3-R2 CCRMPRTLRR    | 206   | >SLC45A3-R2 CCRMPRTLGR    | 22131 | 21925 |
| >SLC45A3-R2 CCRMPRTLRRFL  | 231   | >SLC45A3-R2 CCRMPRTLGRFL  | 224   | 7     |
| >SLC45A3-R2 CCRMPRTLRR    | 119   | >SLC45A3-R2 CCRMPRTLGR    | 29527 | 29408 |
| >SLC45A3-R2 CCRMPRTLRRFL  | 316   | >SLC45A3-R2 CCRMPRTLGRFL  | 332   | 16    |
| >SLC45A3-R2 LCCRMPRTLRR   | 116   | >SLC45A3-R2 LCCRMPRTLGR   | 30872 | 30756 |
| >SLC45A3-R2 LCCRMPRTLRRFL | 387   | >SLC45A3-R2 LCCRMPRTLGRFL | 405   | 18    |
| >SLC45A3-S3 LSHSVAVV      | 22234 | >SLC45A3-S3 LPHSVAVV      | 62    | 22172 |
| >SLC45A3-S3 LSHSVAVVTA    | 272   | >SLC45A3-S3 LPHSVAVVTA    | 16488 | 16216 |
| >SLC45A3-S3 LSHSVAVV      | 334   | >SLC45A3-S3 LPHSVAVV      | 6118  | 5784  |

|                        |       |                        |      |       |
|------------------------|-------|------------------------|------|-------|
| >SLC45A3-S3 LSHSVAVV   | 21683 | >SLC45A3-S3 LPHSVAVV   | 102  | 21581 |
| >SLC45A3-S3 LSHSVAVV   | 398   | >SLC45A3-S3 LPHSVAVV   | 3803 | 3405  |
| >SLC45A3-S3 LSHSVAVVT  | 15505 | >SLC45A3-S3 LPHSVAVVT  | 301  | 15204 |
| >SLC45A3-S3 LSHSVAVVTA | 10605 | >SLC45A3-S3 LPHSVAVVTA | 168  | 10437 |
| >SLC45A3-S3 LSHSVAVV   | 16553 | >SLC45A3-S3 LPHSVAVV   | 328  | 16225 |
| >SLC45A3-S3 LSHSVAVV   | 18360 | >SLC45A3-S3 LPHSVAVV   | 39   | 18321 |
| >SLC45A3-S3 LSHSVAVVT  | 22624 | >SLC45A3-S3 LPHSVAVVT  | 67   | 22557 |
| >SLC45A3-S3 LSHSVAVVTA | 3032  | >SLC45A3-S3 LPHSVAVVTA | 8    | 3024  |
| >SLC45A3-S3 LSHSVAVVTA | 21230 | >SLC45A3-S3 LPHSVAVVTA | 107  | 21123 |
| >SLC45A3-S3 FPVAAGATCL | 111   | >SLC45A3-S3 FPVAAGATCL | 971  | 860   |
| >SLC45A3-S3 FPVAAGATCL | 10    | >SLC45A3-S3 FPVAAGATCL | 12   | 2     |
| >SLC45A3-S3 CLSHSVAV   | 91    | >SLC45A3-S3 CLPHSVAV   | 217  | 126   |
| >SLC45A3-S3 CLSHSVAVV  | 120   | >SLC45A3-S3 CLPHSVAVV  | 295  | 175   |
| >SLC45A3-S3 CLSHSVAV   | 10    | >SLC45A3-S3 CLPHSVAV   | 72   | 62    |
| >SLC45A3-S3 CLSHSVAVV  | 22    | >SLC45A3-S3 CLPHSVAVV  | 197  | 175   |
| >SLC45A3-S3 CLSHSVAVVT | 142   | >SLC45A3-S3 CLPHSVAVVT | 1274 | 1132  |
| >SLC45A3-S3 CLSHSVAV   | 7     | >SLC45A3-S3 CLPHSVAV   | 13   | 6     |
| >SLC45A3-S3 CLSHSVAVV  | 4     | >SLC45A3-S3 CLPHSVAVV  | 7    | 3     |
| >SLC45A3-S3 CLSHSVAVVT | 26    | >SLC45A3-S3 CLPHSVAVVT | 58   | 32    |
| >SLC45A3-S3 CLSHSVAV   | 168   | >SLC45A3-S3 CLPHSVAV   | 146  | 22    |
| >SLC45A3-S3 CLSHSVAV   | 16    | >SLC45A3-S3 CLPHSVAV   | 15   | 1     |
| >SLC45A3-S3 CLSHSVAVV  | 18    | >SLC45A3-S3 CLPHSVAVV  | 17   | 1     |
| >SLC45A3-S3 CLSHSVAVVT | 528   | >SLC45A3-S3 CLPHSVAVVT | 438  | 90    |
| >SLC45A3-S3 CLSHSVAV   | 9     | >SLC45A3-S3 CLPHSVAV   | 20   | 11    |
| >SLC45A3-S3 CLSHSVAVV  | 9     | >SLC45A3-S3 CLPHSVAVV  | 18   | 9     |
| >SLC45A3-S3 CLSHSVAVVT | 251   | >SLC45A3-S3 CLPHSVAVVT | 754  | 503   |
| >SLC45A3-S3 CLSHSVAV   | 72    | >SLC45A3-S3 CLPHSVAV   | 96   | 24    |
| >SLC45A3-S3 CLSHSVAVV  | 64    | >SLC45A3-S3 CLPHSVAVV  | 96   | 32    |
| >SLC45A3-S3 CLSHSVAV   | 13    | >SLC45A3-S3 CLPHSVAV   | 73   | 60    |
| >SLC45A3-S3 CLSHSVAVV  | 5     | >SLC45A3-S3 CLPHSVAVV  | 16   | 11    |
| >SLC45A3-S3 CLSHSVAV   | 5     | >SLC45A3-S3 CLPHSVAV   | 8    | 3     |
| >SLC45A3-S3 CLSHSVAVV  | 4     | >SLC45A3-S3 CLPHSVAVV  | 7    | 3     |
| >SLC45A3-S3 CLSHSVAVVT | 60    | >SLC45A3-S3 CLPHSVAVVT | 91   | 31    |
| >SLC45A3-S3 CLSHSVAV   | 492   | >SLC45A3-S3 CLPHSVAV   | 473  | 19    |
| >SLC45A3-S3 CLSHSVAVV  | 14872 | >SLC45A3-S3 CLPHSVAVV  | 340  | 14532 |
| >SLC45A3-S3 TCLSHSVAV  | 60    | >SLC45A3-S3 TCLPHSVAV  | 61   | 1     |
| >SLC45A3-S3 TCLSHSVAVV | 267   | >SLC45A3-S3 TCLPHSVAVV | 286  | 19    |
| >SLC45A3-S3 ATCLSHSV   | 407   | >SLC45A3-S3 ATCLPHSV   | 1092 | 685   |
| >SLC45A3-S3 ATCLSHSVAV | 465   | >SLC45A3-S3 ATCLPHSVAV | 555  | 90    |
| >SLC45A3-S3 ATCLSHSV   | 314   | >SLC45A3-S3 ATCLPHSV   | 127  | 187   |
| >SLC45A3-S3 ATCLSHSVAV | 507   | >SLC45A3-S3 ATCLPHSVAV | 275  | 232   |
| >SLC45A3-S3 ATCLSHSVAV | 566   | >SLC45A3-S3 ATCLPHSVAV | 320  | 246   |
| >SLC45A3-S3 ATCLSHSV   | 171   | >SLC45A3-S3 ATCLPHSV   | 291  | 120   |

|                        |       |                        |      |       |
|------------------------|-------|------------------------|------|-------|
| >SLC45A3-S3 ATCLSHSVA  | 339   | >SLC45A3-S3 ATCLPHSVA  | 1382 | 1043  |
| >SLC45A3-S3 ATCLSHSV   | 642   | >SLC45A3-S3 ATCLPHSV   | 453  | 189   |
| >SLC45A3-S3 ATCLSHSV   | 199   | >SLC45A3-S3 ATCLPHSV   | 595  | 396   |
| >SLC45A3-S3 ATCLSHSVAV | 186   | >SLC45A3-S3 ATCLPHSVAV | 354  | 168   |
| >SLC45A3-S3 ATCLSHSVAV | 61    | >SLC45A3-S3 ATCLPHSVAV | 152  | 91    |
| >SLC45A3-S3 ATCLSHSVA  | 341   | >SLC45A3-S3 ATCLPHSVA  | 168  | 173   |
| >SLC45A3-S3 ATCLSHSVAV | 165   | >SLC45A3-S3 ATCLPHSVAV | 263  | 98    |
| >SLC45A3-S3 ATCLSHSVAV | 393   | >SLC45A3-S3 ATCLPHSVAV | 255  | 138   |
| >SLC45A3-S3 GATCLSHSV  | 240   | >SLC45A3-S3 GATCLPHSV  | 1785 | 1545  |
| >SLC45A3-S3 GATCLSHSVA | 301   | >SLC45A3-S3 GATCLPHSVA | 663  | 362   |
| >SLC45A3-S3 GATCLSHSV  | 648   | >SLC45A3-S3 GATCLPHSV  | 299  | 349   |
| >SLC45A3-S3 GATCLSHSV  | 248   | >SLC45A3-S3 GATCLPHSV  | 396  | 148   |
| >SLC45A3-S3 GATCLSHSV  | 367   | >SLC45A3-S3 GATCLPHSV  | 862  | 495   |
| >SLC45A3-S3 GATCLSHSV  | 432   | >SLC45A3-S3 GATCLPHSV  | 1045 | 613   |
| >SLC45A3-S3 AAGATCLSHS | 308   | >SLC45A3-S3 AAGATCLPHS | 778  | 470   |
| >SLC45A3-S3 AAGATCLSHS | 427   | >SLC45A3-S3 AAGATCLPHS | 284  | 143   |
| >SLC45A3-S3 AAGATCLSHS | 65    | >SLC45A3-S3 AAGATCLPHS | 113  | 48    |
| >SMAD4-A11YAFDLKCDSV   | 4418  | >SMAD4-A11YEFDLKCDSV   | 11   | 4407  |
| >SMAD4-A11YAFDLKCDSV   | 76    | >SMAD4-A11YEFDLKCDSV   | 2455 | 2379  |
| >SMAD4-A11YAFDLKCDSV   | 123   | >SMAD4-A11YEFDLKCDSV   | 1165 | 1042  |
| >SMAD4-A11YAFDLKCDSV   | 52    | >SMAD4-A11YEFDLKCDSV   | 1358 | 1306  |
| >SMAD4-A11YAFDLKCDSV   | 36    | >SMAD4-A11YEFDLKCDSV   | 338  | 302   |
| >SMAD4-A11YAFDLKCDSV   | 20    | >SMAD4-A11YEFDLKCDSV   | 280  | 260   |
| >SMAD4-A11YAFDLKCDSV   | 403   | >SMAD4-A11YEFDLKCDSV   | 2786 | 2383  |
| >SMAD4-A11YAFDLKCDSV   | 59    | >SMAD4-A11YEFDLKCDSV   | 400  | 341   |
| >SMAD4-A11YAFDLKCDSV   | 9     | >SMAD4-A11YEFDLKCDSV   | 185  | 176   |
| >SMAD4-A11YAFDLKCDSV   | 23    | >SMAD4-A11YEFDLKCDSV   | 1093 | 1070  |
| >SMAD4-A11YAFDLKCDSV   | 91    | >SMAD4-A11YEFDLKCDSV   | 8795 | 8704  |
| >SMAD4-A11YAFDLKCD     | 23566 | >SMAD4-A11YEFDLKCD     | 324  | 23242 |
| >SMAD4-A11YAFDLKCDSV   | 22305 | >SMAD4-A11YEFDLKCDSV   | 445  | 21860 |
| >SMAD4-A11YAFDLKCDSV   | 22014 | >SMAD4-A11YEFDLKCDSV   | 145  | 21869 |
| >SMAD4-A11YAFDLKCDSV   | 23004 | >SMAD4-A11YEFDLKCDSV   | 490  | 22514 |
| >SMAD4-A11YAFDLKCDS    | 34344 | >SMAD4-A11YEFDLKCDS    | 340  | 34004 |
| >SMAD4-A11YAFDLKCDSV   | 31283 | >SMAD4-A11YEFDLKCDSV   | 227  | 31056 |
| >SMAD4-A11YAFDLKCDSV   | 26930 | >SMAD4-A11YEFDLKCDSV   | 158  | 26772 |
| >SMAD4-A11YAFDLKCDS    | 35199 | >SMAD4-A11YEFDLKCDS    | 280  | 34919 |
| >SMAD4-A11YAFDLKCDSV   | 23723 | >SMAD4-A11YEFDLKCDSV   | 52   | 23671 |
| >SMAD4-A11YAFDLKCDSV   | 26879 | >SMAD4-A11YEFDLKCDSV   | 63   | 26816 |
| >SMAD4-A11QYAFDLKCDS   | 233   | >SMAD4-A11QYEFDLKCDS   | 278  | 45    |
| >SMAD4-A11CQYAFDLK     | 187   | >SMAD4-A11CQYEFDLK     | 422  | 235   |
| >SMAD4-A11CQYAFDLK     | 30    | >SMAD4-A11CQYEFDLK     | 45   | 15    |
| >SMAD4-A11CQYAFDLK     | 357   | >SMAD4-A11CQYEFDLK     | 503  | 146   |
| >SMAD4-A11KYCQYAFDL    | 436   | >SMAD4-A11KYCQYFDL     | 427  | 9     |

|                      |       |                      |       |       |
|----------------------|-------|----------------------|-------|-------|
| >SMAD4-A11KYCQYAFDL  | 188   | >SMAD4-A11KYCQYEFDL  | 359   | 171   |
| >SMAD4-A11KYCQYAFDL  | 10    | >SMAD4-A11KYCQYEFDL  | 11    | 1     |
| >SMAD4-A11KYCQYAFDLK | 137   | >SMAD4-A11KYCQYEFDLK | 450   | 313   |
| >SMAD4-A11KYCQYAFDLK | 355   | >SMAD4-A11KYCQYEFDLK | 544   | 189   |
| >SMAD4-A11KYCQYAFDLK | 350   | >SMAD4-A11KYCQYEFDLK | 2184  | 1834  |
| >SMAD4-A11KYCQYAFDLK | 29    | >SMAD4-A11KYCQYEFDLK | 30    | 1     |
| >SMAD4-A11KYCQYAFDL  | 244   | >SMAD4-A11KYCQYEFDL  | 360   | 116   |
| >SMAD4-A11KYCQYAFDL  | 306   | >SMAD4-A11KYCQYEFDL  | 669   | 363   |
| >SMAD4-A11VKYCQYAF   | 706   | >SMAD4-A11VKYCQYEF   | 293   | 413   |
| >SMAD4-A11VKYCQYAF   | 2     | >SMAD4-A11VKYCQYEF   | 2     | 0     |
| >SMAD4-A11VKYCQYAFDL | 15    | >SMAD4-A11VKYCQYEFDL | 21    | 6     |
| >SMAD4-A11VKYCQYAFDL | 351   | >SMAD4-A11VKYCQYEFDL | 415   | 64    |
| >SMAD4-A11HVKYCQYAF  | 775   | >SMAD4-A11HVKYCQYEF  | 260   | 515   |
| >SMAD4-A11HVKYCQYAF  | 249   | >SMAD4-A11HVKYCQYEF  | 766   | 517   |
| >SMAD4-A11HVKYCQYA   | 17    | >SMAD4-A11HVKYCQYE   | 1404  | 1387  |
| >SMAD4-A11HVKYCQYAF  | 256   | >SMAD4-A11HVKYCQYEF  | 1101  | 845   |
| >SMAD4-A11HVKYCQYAF  | 379   | >SMAD4-A11HVKYCQYEF  | 741   | 362   |
| >SMAD4-A11HVKYCQYAF  | 155   | >SMAD4-A11HVKYCQYEF  | 586   | 431   |
| >SMAD4-A11HVKYCQYA   | 286   | >SMAD4-A11HVKYCQYE   | 20853 | 20567 |
| >SMAD4-A11HVKYCQYAF  | 111   | >SMAD4-A11HVKYCQYEF  | 324   | 213   |
| >SMAD4-A11HVKYCQYAF  | 50    | >SMAD4-A11HVKYCQYEF  | 142   | 92    |
| >SMAD4-A11HVKYCQYAF  | 105   | >SMAD4-A11HVKYCQYEF  | 360   | 255   |
| >SMAD4-A11KHVKYCQYAF | 8     | >SMAD4-A11KHVKYCQYEF | 13    | 5     |
| >SMAD4-A11LKHVKYCQYA | 431   | >SMAD4-A11LKHVKYCQYE | 3395  | 2964  |
| >SMAD4-A11LKHVKYCQYA | 4     | >SMAD4-A11LKHVKYCQYE | 6     | 2     |
| >SMAD4-A11YAFDLKCDSV | 76    | >SMAD4-A11YVFDLKCDSV | 33    | 43    |
| >SMAD4-A11YAFDLKCDSV | 123   | >SMAD4-A11YVFDLKCDSV | 49    | 74    |
| >SMAD4-A11YAFDLKCDSV | 52    | >SMAD4-A11YVFDLKCDSV | 21    | 31    |
| >SMAD4-A11YAFDLKCDSV | 36    | >SMAD4-A11YVFDLKCDSV | 25    | 11    |
| >SMAD4-A11YAFDLKCDSV | 20    | >SMAD4-A11YVFDLKCDSV | 6     | 14    |
| >SMAD4-A11YAFDLKCDSV | 1603  | >SMAD4-A11YVFDLKCDSV | 459   | 1144  |
| >SMAD4-A11YAFDLKCDSV | 403   | >SMAD4-A11YVFDLKCDSV | 28    | 375   |
| >SMAD4-A11YAFDLKCDSV | 59    | >SMAD4-A11YVFDLKCDSV | 14    | 45    |
| >SMAD4-A11YAFDLKCDSV | 679   | >SMAD4-A11YVFDLKCDSV | 49    | 630   |
| >SMAD4-A11YAFDLKCDSV | 9     | >SMAD4-A11YVFDLKCDSV | 3     | 6     |
| >SMAD4-A11YAFDLKCDSV | 2180  | >SMAD4-A11YVFDLKCDSV | 205   | 1975  |
| >SMAD4-A11YAFDLKCDSV | 23    | >SMAD4-A11YVFDLKCDSV | 17    | 6     |
| >SMAD4-A11YAFDLKCDSV | 91    | >SMAD4-A11YVFDLKCDSV | 38    | 53    |
| >SMAD4-A11ELKHVKYCQY | 3167  | >SMAD4-A11ELKHVKYCQY | 374   | 2793  |
| >SMAD4-A11ELKHVKYCQY | 2106  | >SMAD4-A11ELKHVKYCQY | 329   | 1777  |
| >SMAD4-A11ELKHVKYCQY | 4085  | >SMAD4-A11ELKHVKYCQY | 98    | 3987  |
| >SMAD4-A11ELKHVKYCQY | 10604 | >SMAD4-A11ELKHVKYCQY | 379   | 10225 |
| >SMAD4-A11ELKHVKYCQY | 1556  | >SMAD4-A11ELKHVKYCQY | 19    | 1537  |

|                       |       |                       |      |       |
|-----------------------|-------|-----------------------|------|-------|
| >SMAD4-A11ELKHVKYCQY  | 1578  | >SMAD4-A11ELKHVKYCQY  | 221  | 1357  |
| >SMAD4-A11QYAFDLKCD\$ | 233   | >SMAD4-A11QYVFDLKCD\$ | 173  | 60    |
| >SMAD4-A11QYAFDLKCD\$ | 508   | >SMAD4-A11QYVFDLKCD\$ | 366  | 142   |
| >SMAD4-A11CQYAFDLK    | 187   | >SMAD4-A11CQYVFDLK    | 381  | 194   |
| >SMAD4-A11CQYAFDLK    | 30    | >SMAD4-A11CQYVFDLK    | 46   | 16    |
| >SMAD4-A11CQYAFDLK    | 357   | >SMAD4-A11CQYVFDLK    | 1210 | 853   |
| >SMAD4-A11KYCQYAFDL   | 436   | >SMAD4-A11KYCQYVFDL   | 212  | 224   |
| >SMAD4-A11KYCQYAFDL   | 188   | >SMAD4-A11KYCQYVFDL   | 98   | 90    |
| >SMAD4-A11KYCQYAFDL   | 10    | >SMAD4-A11KYCQYVFDL   | 8    | 2     |
| >SMAD4-A11KYCQYAFDLK  | 649   | >SMAD4-A11KYCQYVFDLK  | 461  | 188   |
| >SMAD4-A11KYCQYAFDLK  | 137   | >SMAD4-A11KYCQYVFDLK  | 172  | 35    |
| >SMAD4-A11KYCQYAFDLK  | 355   | >SMAD4-A11KYCQYVFDLK  | 187  | 168   |
| >SMAD4-A11KYCQYAFDLK  | 350   | >SMAD4-A11KYCQYVFDLK  | 950  | 600   |
| >SMAD4-A11KYCQYAFDLK  | 29    | >SMAD4-A11KYCQYVFDLK  | 30   | 1     |
| >SMAD4-A11KYCQYAFDL   | 244   | >SMAD4-A11KYCQYVFDL   | 185  | 59    |
| >SMAD4-A11KYCQYAFDL   | 306   | >SMAD4-A11KYCQYVFDL   | 261  | 45    |
| >SMAD4-A11VKYCQYAF    | 2     | >SMAD4-A11VKYCQYVF    | 2    | 0     |
| >SMAD4-A11VKYCQYAFDL  | 15    | >SMAD4-A11VKYCQYVFDL  | 10   | 5     |
| >SMAD4-A11VKYCQYAFDL  | 351   | >SMAD4-A11VKYCQYVFDL  | 316  | 35    |
| >SMAD4-A11HVKYCQYA    | 3773  | >SMAD4-A11HVKYCQYV    | 476  | 3297  |
| >SMAD4-A11HVKYCQYA    | 1882  | >SMAD4-A11HVKYCQYV    | 224  | 1658  |
| >SMAD4-A11HVKYCQYA    | 13262 | >SMAD4-A11HVKYCQYV    | 461  | 12801 |
| >SMAD4-A11HVKYCQYAF   | 249   | >SMAD4-A11HVKYCQYVF   | 714  | 465   |
| >SMAD4-A11HVKYCQYA    | 17    | >SMAD4-A11HVKYCQYV    | 26   | 9     |
| >SMAD4-A11HVKYCQYAFI  | 256   | >SMAD4-A11HVKYCQYVFI  | 345  | 89    |
| >SMAD4-A11HVKYCQYAFI  | 379   | >SMAD4-A11HVKYCQYVFI  | 343  | 36    |
| >SMAD4-A11HVKYCQYAF   | 155   | >SMAD4-A11HVKYCQYVF   | 457  | 302   |
| >SMAD4-A11HVKYCQYA    | 286   | >SMAD4-A11HVKYCQYV    | 34   | 252   |
| >SMAD4-A11HVKYCQYAFI  | 609   | >SMAD4-A11HVKYCQYVFI  | 476  | 133   |
| >SMAD4-A11HVKYCQYAF   | 111   | >SMAD4-A11HVKYCQYVF   | 110  | 1     |
| >SMAD4-A11HVKYCQYAF   | 50    | >SMAD4-A11HVKYCQYVF   | 111  | 61    |
| >SMAD4-A11HVKYCQYAF   | 105   | >SMAD4-A11HVKYCQYVF   | 411  | 306   |
| >SMAD4-A11HVKYCQYAF   | 1178  | >SMAD4-A11HVKYCQYVF   | 340  | 838   |
| >SMAD4-A11KHKYKQYAF   | 628   | >SMAD4-A11KHKYKQYVF   | 198  | 430   |
| >SMAD4-A11KHKYKQYA    | 1271  | >SMAD4-A11KHKYKQYV    | 380  | 891   |
| >SMAD4-A11KHKYKQYAF   | 8     | >SMAD4-A11KHKYKQYVF   | 10   | 2     |
| >SMAD4-A11LKHVKYCQYA  | 431   | >SMAD4-A11LKHVKYCQYV  | 91   | 340   |
| >SMAD4-A11LKHVKYCQYA  | 4     | >SMAD4-A11LKHVKYCQYV  | 5    | 1     |
| >SMAD4-A22NIPVASTSQP. | 364   | >SMAD4-A22NIPVASTSQP' | 3387 | 3023  |
| >SMAD4-A22TSQPASIL    | 38    | >SMAD4-A22TSQPPTSIL   | 54   | 16    |
| >SMAD4-A22TSQPASIL    | 151   | >SMAD4-A22TSQPPTSIL   | 253  | 102   |
| >SMAD4-A22TSQPASIL    | 932   | >SMAD4-A22TSQPPTSIL   | 434  | 498   |
| >SMAD4-A22TSQPASIL    | 115   | >SMAD4-A22TSQPPTSIL   | 96   | 19    |

|                       |     |                        |       |       |
|-----------------------|-----|------------------------|-------|-------|
| >SMAD4-A22STSQPASIL   | 943 | >SMAD4-A22STSQPTSIL    | 327   | 616   |
| >SMAD4-A22STSQPASI    | 195 | >SMAD4-A22STSQPTSI     | 80    | 115   |
| >SMAD4-A22STSQPASI    | 61  | >SMAD4-A22STSQPTSI     | 71    | 10    |
| >SMAD4-A22STSQPASIL   | 653 | >SMAD4-A22STSQPTSIL    | 191   | 462   |
| >SMAD4-A22STSQPASI    | 241 | >SMAD4-A22STSQPTSI     | 367   | 126   |
| >SMAD4-A22STSQPASI    | 35  | >SMAD4-A22STSQPTSI     | 94    | 59    |
| >SMAD4-A22STSQPASIL   | 10  | >SMAD4-A22STSQPTSIL    | 22    | 12    |
| >SMAD4-A22STSQPASIL   | 40  | >SMAD4-A22STSQPTSIL    | 37    | 3     |
| >SMAD4-A22STSQPASIL   | 3   | >SMAD4-A22STSQPTSIL    | 4     | 1     |
| >SMAD4-A22STSQPASI    | 14  | >SMAD4-A22STSQPTSI     | 13    | 1     |
| >SMAD4-A22STSQPASIL   | 43  | >SMAD4-A22STSQPTSIL    | 45    | 2     |
| >SMAD4-A22ASTSQPASI   | 590 | >SMAD4-A22ASTSQPTSI    | 290   | 300   |
| >SMAD4-A22ASTSQPASI   | 809 | >SMAD4-A22ASTSQPTSI    | 369   | 440   |
| >SMAD4-A22ASTSQPASIL  | 579 | >SMAD4-A22ASTSQPTSIL   | 377   | 202   |
| >SMAD4-A22ASTSQPASI   | 88  | >SMAD4-A22ASTSQPTSI    | 246   | 158   |
| >SMAD4-A22ASTSQPASIL  | 26  | >SMAD4-A22ASTSQPTSIL   | 57    | 31    |
| >SMAD4-A22ASTSQPASIL  | 139 | >SMAD4-A22ASTSQPTSIL   | 217   | 78    |
| >SMAD4-A22ASTSQPASIL  | 113 | >SMAD4-A22ASTSQPTSIL   | 75    | 38    |
| >SMAD4-A22ASTSQPASI   | 35  | >SMAD4-A22ASTSQPTSI    | 37    | 2     |
| >SMAD4-A22ASTSQPASIL  | 154 | >SMAD4-A22ASTSQPTSIL   | 112   | 42    |
| >SMAD4-A22VASTSQPASI  | 684 | >SMAD4-A22VASTSQPTSI   | 459   | 225   |
| >SMAD4-A22VASTSQPASIL | 508 | >SMAD4-A22VASTSQPTSIL  | 478   | 30    |
| >SMAD4-A22VASTSQPASI  | 315 | >SMAD4-A22VASTSQPTSI   | 444   | 129   |
| >SMAD4-A22VASTSQPASIL | 133 | >SMAD4-A22VASTSQPTSIL  | 196   | 63    |
| >SMAD4-A22VASTSQPASI  | 338 | >SMAD4-A22VASTSQPTSI   | 358   | 20    |
| >SMAD4-A22VASTSQPASIL | 583 | >SMAD4-A22VASTSQPTSIL  | 494   | 89    |
| >SMAD4-A22VASTSQPASIL | 236 | >SMAD4-A22VASTSQPTSIL  | 315   | 79    |
| >SMAD4-A22VASTSQPASI  | 62  | >SMAD4-A22VASTSQPTSI   | 59    | 3     |
| >SMAD4-A22IPVASTSQPAI | 108 | >SMAD4-A22IPVASTSQPTSI | 238   | 130   |
| >SMAD4-A22IPVASTSQPAI | 108 | >SMAD4-A22IPVASTSQPTSI | 299   | 191   |
| >SMAD4-A27APYTPNLPH   | 145 | >SMAD4-A27EPYTPNLPH    | 5535  | 5390  |
| >SMAD4-A27APYTPNLPH   | 167 | >SMAD4-A27EPYTPNLPH    | 39    | 128   |
| >SMAD4-A27TAPYTPNL    | 428 | >SMAD4-A27TEPYTPNL     | 16183 | 15755 |
| >SMAD4-A27RTAPYTPNL   | 164 | >SMAD4-A27RTEPYTPNL    | 5094  | 4930  |
| >SMAD4-A27RTAPYTPNL   | 77  | >SMAD4-A27RTEPYTPNL    | 2345  | 2268  |
| >SMAD4-A27RTAPYTPNL   | 459 | >SMAD4-A27RTEPYTPNL    | 9171  | 8712  |
| >SMAD4-A27RTAPYTPNL   | 92  | >SMAD4-A27RTEPYTPNL    | 896   | 804   |
| >SMAD4-A27RTAPYTPNLP  | 461 | >SMAD4-A27RTEPYTPNLP   | 6090  | 5629  |
| >SMAD4-A27RTAPYTPNLP  | 189 | >SMAD4-A27RTEPYTPNLP   | 1878  | 1689  |
| >SMAD4-A27RTAPYTPNL   | 49  | >SMAD4-A27RTEPYTPNL    | 137   | 88    |
| >SMAD4-A27RTAPYTPNL   | 115 | >SMAD4-A27RTEPYTPNL    | 446   | 331   |
| >SMAD4-A27RTAPYTPNL   | 62  | >SMAD4-A27RTEPYTPNL    | 1676  | 1614  |
| >SMAD4-A27RTAPYTPN    | 488 | >SMAD4-A27RTEPYTPN     | 1758  | 1270  |

|                      |     |                      |       |       |
|----------------------|-----|----------------------|-------|-------|
| >SMAD4-A27RTAPYTPNL  | 3   | >SMAD4-A27RTEPYTPNL  | 4     | 1     |
| >SMAD4-A27RTAPYTPNLP | 14  | >SMAD4-A27RTEPYTPNLP | 35    | 21    |
| >SMAD4-A27RTAPYTPNL  | 37  | >SMAD4-A27RTEPYTPNL  | 3970  | 3933  |
| >SMAD4-A27RTAPYTPNL  | 8   | >SMAD4-A27RTEPYTPNL  | 21    | 13    |
| >SMAD4-A27RTAPYTPNL  | 424 | >SMAD4-A27RTEPYTPNL  | 791   | 367   |
| >SMAD4-A27RTAPYTPNL  | 19  | >SMAD4-A27RTEPYTPNL  | 55    | 36    |
| >SMAD4-A27SRTAPYTPNL | 453 | >SMAD4-A27SRTEPYTPNL | 572   | 119   |
| >SMAD4-A27SRTAPYTPNL | 56  | >SMAD4-A27SRTEPYTPNL | 57    | 1     |
| >SMAD4-A27SRTAPYTPNL | 226 | >SMAD4-A27SRTEPYTPNL | 176   | 50    |
| >SMAD4-A27GSRTAPYT   | 137 | >SMAD4-A27GSRTEPYT   | 778   | 641   |
| >SMAD4-A27GSRTAPYTPN | 24  | >SMAD4-A27GSRTEPYTPN | 96    | 72    |
| >SMAD4-A27GSRTAPYTPN | 17  | >SMAD4-A27GSRTEPYTPN | 30    | 13    |
| >SMAD4-A27TGSRTAPY   | 317 | >SMAD4-A27TGSRTEPY   | 967   | 650   |
| >SMAD4-A27TGSRTAPY   | 471 | >SMAD4-A27TGSRTEPY   | 968   | 497   |
| >SMAD4-A27TGSRTAPY   | 213 | >SMAD4-A27TGSRTEPY   | 409   | 196   |
| >SMAD4-A27WTGSRTAPY  | 29  | >SMAD4-A27WTGSRTEPY  | 25    | 4     |
| >SMAD4-A27WTGSRTAPY  | 392 | >SMAD4-A27WTGSRTEPY  | 2094  | 1702  |
| >SMAD4-A27WTGSRTAPY  | 75  | >SMAD4-A27WTGSRTEPY  | 147   | 72    |
| >SMAD4-A27WTGSRTAPY  | 11  | >SMAD4-A27WTGSRTEPY  | 26    | 15    |
| >SMAD4-A27WTGSRTAPY  | 52  | >SMAD4-A27WTGSRTEPY  | 89    | 37    |
| >SMAD4-A27WTGSRTAPY  | 233 | >SMAD4-A27WTGSRTEPY  | 1595  | 1362  |
| >SMAD4-A27WTGSRTAPY  | 193 | >SMAD4-A27WTGSRTEPY  | 146   | 47    |
| >SMAD4-A27WTGSRTAPY  | 44  | >SMAD4-A27WTGSRTEPY  | 53    | 9     |
| >SMAD4-A27WTGSRTAPY  | 9   | >SMAD4-A27WTGSRTEPY  | 41    | 32    |
| >SMAD4-A27WTGSRTAPY  | 143 | >SMAD4-A27WTGSRTEPY  | 549   | 406   |
| >SMAD4-A27WTGSRTAPY  | 81  | >SMAD4-A27WTGSRTEPY  | 111   | 30    |
| >SMAD4-A27WTGSRTAPY  | 469 | >SMAD4-A27WTGSRTEPY  | 741   | 272   |
| >SMAD4-A27TWTGSRTAP' | 60  | >SMAD4-A27TWTGSRTEP\ | 101   | 41    |
| >SMAD4-A27TWTGSRTAP' | 115 | >SMAD4-A27TWTGSRTEP\ | 483   | 368   |
| >SMAD4-A27TWTGSRTA   | 221 | >SMAD4-A27TWTGSRTE   | 554   | 333   |
| >SMAD4-A27TWTGSRTAP  | 151 | >SMAD4-A27TWTGSRTEP  | 531   | 380   |
| >SMAD4-A27TWTGSRTAP' | 194 | >SMAD4-A27TWTGSRTEP\ | 272   | 78    |
| >SMAD4-A27TTWTGSRTAI | 270 | >SMAD4-A27TTWTGSRTEF | 433   | 163   |
| >SMAD4-A27TTWTGSRTAI | 93  | >SMAD4-A27TTWTGSRTEF | 342   | 249   |
| >SMAD4-A27TTWTGSRTAI | 49  | >SMAD4-A27TTWTGSRTEF | 68    | 19    |
| >SMAD4-A27TTWTGSRTAI | 34  | >SMAD4-A27TTWTGSRTEF | 68    | 34    |
| >SMAD4-A27TTWTGSRTAI | 20  | >SMAD4-A27TTWTGSRTEF | 24    | 4     |
| >SMAD4-A27TTWTGSRTAI | 36  | >SMAD4-A27TTWTGSRTEF | 122   | 86    |
| >SMAD4-A27TTWTGSRTAI | 151 | >SMAD4-A27TTWTGSRTEF | 105   | 46    |
| >SMAD4-A27TTWTGSRTA  | 473 | >SMAD4-A27TTWTGSRTE  | 13906 | 13433 |
| >SMAD4-A27TTWTGSRTAI | 254 | >SMAD4-A27TTWTGSRTEF | 221   | 33    |
| >SMAD4-A27TTWTGSRTAI | 158 | >SMAD4-A27TTWTGSRTEF | 209   | 51    |
| >SMAD4-A27TTWTGSRTAI | 238 | >SMAD4-A27TTWTGSRTEF | 343   | 105   |



|                       |      |                       |      |      |
|-----------------------|------|-----------------------|------|------|
| >SMAD4-A27TTWTGSRTAI  | 267  | >SMAD4-A27TTWTGSRTEF  | 340  | 73   |
| >SMAD4-A27TTWTGSRTAI  | 5    | >SMAD4-A27TTWTGSRTEF  | 8    | 3    |
| >SMAD4-A27TTWTGSRTAI  | 38   | >SMAD4-A27TTWTGSRTEF  | 68   | 30   |
| >SMAD4-A27TTWTGSRTAI  | 118  | >SMAD4-A27TTWTGSRTEF  | 141  | 23   |
| >SMAD4-A37ARLHIGKGV   | 333  | >SMAD4-A37TRLHIGKGV   | 1368 | 1035 |
| >SMAD4-A37ARLHIGKVC   | 127  | >SMAD4-A37TRLHIGKGVQ  | 559  | 432  |
| >SMAD4-A37ARLHIGKGV   | 129  | >SMAD4-A37TRLHIGKGV   | 406  | 277  |
| >SMAD4-A37ARLHIGKVC   | 55   | >SMAD4-A37TRLHIGKGVQ  | 156  | 101  |
| >SMAD4-A37ARLHIGKVC   | 1172 | >SMAD4-A37TRLHIGKGVQ  | 382  | 790  |
| >SMAD4-A37ARLHIGKVC   | 357  | >SMAD4-A37TRLHIGKGVQ  | 708  | 351  |
| >SMAD4-A37ARLHIGKVC   | 127  | >SMAD4-A37TRLHIGKGVQ  | 513  | 386  |
| >SMAD4-A37RARLHIGK    | 149  | >SMAD4-A37RTRLHIGK    | 58   | 91   |
| >SMAD4-A37RARLHIGK    | 1104 | >SMAD4-A37RTRLHIGK    | 143  | 961  |
| >SMAD4-A37RARLHIGK    | 3    | >SMAD4-A37RTRLHIGK    | 3    | 0    |
| >SMAD4-A37RARLHIGKG   | 105  | >SMAD4-A37RTRLHIGKG   | 20   | 85   |
| >SMAD4-A37RARLHIGKGV  | 29   | >SMAD4-A37RTRLHIGKGV  | 9    | 20   |
| >SMAD4-A37RARLHIGKGV  | 127  | >SMAD4-A37RTRLHIGKGV  | 27   | 100  |
| >SMAD4-A37RARLHIGK    | 160  | >SMAD4-A37RTRLHIGK    | 36   | 124  |
| >SMAD4-A37RARLHIGKGV  | 109  | >SMAD4-A37RTRLHIGKGV  | 15   | 94   |
| >SMAD4-A37RARLHIGKGV  | 5780 | >SMAD4-A37RTRLHIGKGV  | 102  | 5678 |
| >SMAD4-A37NVHRTEAIER  | 409  | >SMAD4-A37NVHRTEAIER  | 3549 | 3140 |
| >SMAD4-A37ERARLHIGK   | 383  | >SMAD4-A37ERTRLHIGK   | 383  | 0    |
| >SMAD4-A37IERARLHI    | 269  | >SMAD4-A37IERTRLHI    | 242  | 27   |
| >SMAD4-A37IERARLHIGK  | 212  | >SMAD4-A37IERTRLHIGK  | 303  | 91   |
| >SMAD4-A37IERARLHI    | 105  | >SMAD4-A37IERTRLHI    | 109  | 4    |
| >SMAD4-A37AIERARLHIGK | 117  | >SMAD4-A37AIERTRLHIGK | 102  | 15   |
| >SMAD4-A37AIERARLHI   | 341  | >SMAD4-A37AIERTRLHI   | 343  | 2    |
| >SMAD4-A37AIERARLHIGK | 57   | >SMAD4-A37AIERTRLHIGK | 58   | 1    |
| >SMAD4-A37EAIERARLH   | 1784 | >SMAD4-A37EAIERTRLH   | 405  | 1379 |
| >SMAD4-A37EAIERARL    | 308  | >SMAD4-A37EAIERTRL    | 569  | 261  |
| >SMAD4-A37EAIERARLH   | 3565 | >SMAD4-A37EAIERTRLH   | 481  | 3084 |
| >SMAD4-A37EAIERARL    | 102  | >SMAD4-A37EAIERTRL    | 99   | 3    |
| >SMAD4-A37EAIERARLHI  | 288  | >SMAD4-A37EAIERTRLHI  | 137  | 151  |
| >SMAD4-A37EAIERARL    | 263  | >SMAD4-A37EAIERTRL    | 388  | 125  |
| >SMAD4-A37EAIERARLHI  | 162  | >SMAD4-A37EAIERTRLHI  | 137  | 25   |
| >SMAD4-A37EAIERARL    | 359  | >SMAD4-A37EAIERTRL    | 1036 | 677  |
| >SMAD4-A37TEAIERARLHI | 21   | >SMAD4-A37TEAIERTRLHI | 21   | 0    |
| >SMAD4-A37TEAIERARL   | 247  | >SMAD4-A37TEAIERTRL   | 217  | 30   |
| >SMAD4-A37TEAIERARLHI | 48   | >SMAD4-A37TEAIERTRLHI | 56   | 8    |
| >SMAD4-A37RTEAIERAR   | 47   | >SMAD4-A37RTEAIERTR   | 60   | 13   |
| >SMAD4-A37RTEAIERARL  | 666  | >SMAD4-A37RTEAIERTRL  | 397  | 269  |
| >SMAD4-A37RTEAIERAR   | 301  | >SMAD4-A37RTEAIERTR   | 190  | 111  |
| >SMAD4-A37RTEAIERARL  | 15   | >SMAD4-A37RTEAIERTRL  | 16   | 1    |

|                       |      |                       |      |      |
|-----------------------|------|-----------------------|------|------|
| >SMAD4-A37RTEAIERARL  | 379  | >SMAD4-A37RTEAIERTRL  | 348  | 31   |
| >SMAD4-A37RTEAIERARLF | 261  | >SMAD4-A37RTEAIERTRLF | 326  | 65   |
| >SMAD4-A37HRTEAIERA   | 374  | >SMAD4-A37HRTEAIIERT  | 790  | 416  |
| >SMAD4-A37HRTEAIERAR  | 28   | >SMAD4-A37HRTEAIERTR  | 27   | 1    |
| >SMAD4-A37HRTEAIERARI | 73   | >SMAD4-A37HRTEAIERTRI | 71   | 2    |
| >SMAD4-A37HRTEAIERARI | 422  | >SMAD4-A37HRTEAIERTRI | 879  | 457  |
| >SMAD4-A37HRTEAIERARI | 134  | >SMAD4-A37HRTEAIERTRI | 150  | 16   |
| >SMAD4-A39AIESLVKCLK  | 383  | >SMAD4-A39TIESLVKCLK  | 1166 | 783  |
| >SMAD4-A39AIESLVKK    | 130  | >SMAD4-A39TIESLVKK    | 123  | 7    |
| >SMAD4-A39AIESLVKCLK  | 167  | >SMAD4-A39TIESLVKCLK  | 299  | 132  |
| >SMAD4-A39AIESLVKK    | 3190 | >SMAD4-A39TIESLVKK    | 214  | 2976 |
| >SMAD4-A39RAIESLVK    | 311  | >SMAD4-A39RTIESLVK    | 80   | 231  |
| >SMAD4-A39RAIESLVKK   | 215  | >SMAD4-A39RTIESLVKK   | 62   | 153  |
| >SMAD4-A39RAIESLVKCLK | 474  | >SMAD4-A39RTIESLVKCLK | 108  | 366  |
| >SMAD4-A39RAIESLVK    | 43   | >SMAD4-A39RTIESLVK    | 12   | 31   |
| >SMAD4-A39RAIESLVKK   | 35   | >SMAD4-A39RTIESLVKK   | 11   | 24   |
| >SMAD4-A39RAIESLVKCLK | 75   | >SMAD4-A39RTIESLVKCLK | 18   | 57   |
| >SMAD4-A39RAIESLVKCL  | 4531 | >SMAD4-A39RTIESLVKCL  | 73   | 4458 |
| >SMAD4-A39RAIESLVK    | 31   | >SMAD4-A39RTIESLVK    | 9    | 22   |
| >SMAD4-A39RAIESLVKK   | 54   | >SMAD4-A39RTIESLVKK   | 13   | 41   |
| >SMAD4-A39RAIESLVKCLK | 81   | >SMAD4-A39RTIESLVKCLK | 18   | 63   |
| >SMAD4-A39RAIESLVK    | 1450 | >SMAD4-A39RTIESLVK    | 380  | 1070 |
| >SMAD4-A39RAIESLVKK   | 330  | >SMAD4-A39RTIESLVKK   | 72   | 258  |
| >SMAD4-A39RAIESLVKCLK | 381  | >SMAD4-A39RTIESLVKCLK | 86   | 295  |
| >SMAD4-A39RAIESLVKCL  | 1911 | >SMAD4-A39RTIESLVKCL  | 86   | 1825 |
| >SMAD4-A39RAIESLVK    | 975  | >SMAD4-A39RTIESLVK    | 214  | 761  |
| >SMAD4-A39RAIESLVKK   | 250  | >SMAD4-A39RTIESLVKK   | 53   | 197  |
| >SMAD4-A39RAIESLVKCLK | 452  | >SMAD4-A39RTIESLVKCLK | 86   | 366  |
| >SMAD4-A39RAIESLVKCL  | 411  | >SMAD4-A39RTIESLVKCL  | 667  | 256  |
| >SMAD4-A39RAIESLVKK   | 3363 | >SMAD4-A39RTIESLVKK   | 432  | 2931 |
| >SMAD4-A39RAIESLVKCL  | 5    | >SMAD4-A39RTIESLVKCL  | 3    | 2    |
| >SMAD4-A39RAIESLVKCL  | 403  | >SMAD4-A39RTIESLVKCL  | 273  | 130  |
| >SMAD4-A39RAIESLVKCL  | 4059 | >SMAD4-A39RTIESLVKCL  | 498  | 3561 |
| >SMAD4-A39RAIESLVKCL  | 9172 | >SMAD4-A39RTIESLVKCL  | 132  | 9040 |
| >SMAD4-A39RAIESLVKK   | 1305 | >SMAD4-A39RTIESLVKK   | 402  | 903  |
| >SMAD4-A39KRAIESLVK   | 244  | >SMAD4-A39KRTIESLVK   | 301  | 57   |
| >SMAD4-A39KRAIESLVKK  | 191  | >SMAD4-A39KRTIESLVKK  | 152  | 39   |
| >SMAD4-A39KRAIESLVKCL | 134  | >SMAD4-A39KRTIESLVKCL | 133  | 1    |
| >SMAD4-A39KRAIESLV    | 155  | >SMAD4-A39KRTIESLV    | 311  | 156  |
| >SMAD4-A39KRAIESLVKCL | 130  | >SMAD4-A39KRTIESLVKCL | 131  | 1    |
| >SMAD4-A39KRAIESLVKCL | 113  | >SMAD4-A39KRTIESLVKCL | 175  | 62   |
| >SMAD4-A39AKRAIESLVK  | 44   | >SMAD4-A39AKRTIESLVK  | 61   | 17   |
| >SMAD4-A39AKRAIESLVKK | 80   | >SMAD4-A39AKRTIESLVKK | 116  | 36   |

|                        |     |                        |      |     |
|------------------------|-----|------------------------|------|-----|
| >SMAD4-A3C AKRAIESL    | 22  | >SMAD4-A3C AKRTIESL    | 18   | 4   |
| >SMAD4-A3C AKRAIESLV   | 144 | >SMAD4-A3C AKRTIESLV   | 119  | 25  |
| >SMAD4-A3C AKRAIESLVK  | 268 | >SMAD4-A3C AKRTIESLVK  | 242  | 26  |
| >SMAD4-A3C AKRAIESLVKK | 392 | >SMAD4-A3C AKRTIESLVKK | 366  | 26  |
| >SMAD4-A3C FAKRAIESL   | 324 | >SMAD4-A3C FAKRTIESL   | 572  | 248 |
| >SMAD4-A3C FAKRAIESLV  | 391 | >SMAD4-A3C FAKRTIESLV  | 518  | 127 |
| >SMAD4-A3C FAKRAIESL   | 438 | >SMAD4-A3C FAKRTIESL   | 540  | 102 |
| >SMAD4-A3C FAKRAIESLV  | 173 | >SMAD4-A3C FAKRTIESLV  | 150  | 23  |
| >SMAD4-A3C FAKRAIESL   | 226 | >SMAD4-A3C FAKRTIESL   | 399  | 173 |
| >SMAD4-A3C FAKRAIESLV  | 67  | >SMAD4-A3C FAKRTIESLV  | 75   | 8   |
| >SMAD4-A3C FAKRAIESLVK | 165 | >SMAD4-A3C FAKRTIESLVK | 168  | 3   |
| >SMAD4-A3C FAKRAIESLVK | 403 | >SMAD4-A3C FAKRTIESLVK | 428  | 25  |
| >SMAD4-A3C FAKRAIESLV  | 389 | >SMAD4-A3C FAKRTIESLV  | 805  | 416 |
| >SMAD4-A3C FAKRAIESL   | 176 | >SMAD4-A3C FAKRTIESL   | 86   | 90  |
| >SMAD4-A3C FAKRAIESL   | 269 | >SMAD4-A3C FAKRTIESL   | 113  | 156 |
| >SMAD4-A3C TFAKRAIESL  | 908 | >SMAD4-A3C TFAKRTIESL  | 424  | 484 |
| >SMAD4-A3C TFAKRAIESL  | 249 | >SMAD4-A3C TFAKRTIESL  | 178  | 71  |
| >SMAD4-A3C ETFAKRAIESL | 472 | >SMAD4-A3C ETFAKRTIESL | 751  | 279 |
| >SMAD4-A3C ETFAKRAIESL | 364 | >SMAD4-A3C ETFAKRTIESL | 652  | 288 |
| >SMAD4-A3C ETFAKRAI    | 495 | >SMAD4-A3C ETFAKRTI    | 634  | 139 |
| >SMAD4-A3C ETFAKRAIESL | 127 | >SMAD4-A3C ETFAKRTIESL | 140  | 13  |
| >SMAD4-A3C ETFAKRAI    | 177 | >SMAD4-A3C ETFAKRTI    | 81   | 96  |
| >SMAD4-A3C ETFAKRAIESL | 236 | >SMAD4-A3C ETFAKRTIESL | 163  | 73  |
| >SMAD4-A3C ETFAKRAIE   | 209 | >SMAD4-A3C ETFAKRTIE   | 256  | 47  |
| >SMAD4-A3C ETFAKRAI    | 10  | >SMAD4-A3C ETFAKRTI    | 16   | 6   |
| >SMAD4-A3C ETFAKRAIESL | 6   | >SMAD4-A3C ETFAKRTIESL | 7    | 1   |
| >SMAD4-A3C ETFAKRAI    | 81  | >SMAD4-A3C ETFAKRTI    | 121  | 40  |
| >SMAD4-A3C ETFAKRAIESL | 58  | >SMAD4-A3C ETFAKRTIESL | 90   | 32  |
| >SMAD4-A3C ETFAKRAI    | 550 | >SMAD4-A3C ETFAKRTI    | 192  | 358 |
| >SMAD4-A3C ETFAKRAIESL | 57  | >SMAD4-A3C ETFAKRTIESL | 70   | 13  |
| >SMAD4-A3C ETFAKRAI    | 258 | >SMAD4-A3C ETFAKRTI    | 121  | 137 |
| >SMAD4-A3C SETFAKRA    | 50  | >SMAD4-A3C SETFAKRT    | 82   | 32  |
| >SMAD4-A3C SETFAKRAI   | 12  | >SMAD4-A3C SETFAKRTI   | 9    | 3   |
| >SMAD4-A3C SETFAKRAI   | 111 | >SMAD4-A3C SETFAKRTI   | 133  | 22  |
| >SMAD4-A3C SETFAKRA    | 53  | >SMAD4-A3C SETFAKRT    | 342  | 289 |
| >SMAD4-A3C SETFAKRAI   | 414 | >SMAD4-A3C SETFAKRTI   | 1383 | 969 |
| >SMAD4-A3C ESETFAKRAI  | 548 | >SMAD4-A3C ESETFAKRTI  | 350  | 198 |
| >SMAD4-A3C GESETFAKRA  | 32  | >SMAD4-A3C GESETFAKRTI | 26   | 6   |
| >SMAD4-A3C GESETFAKRA  | 23  | >SMAD4-A3C GESETFAKRTI | 28   | 5   |
| >SMAD4-A3C GESETFAKRA  | 230 | >SMAD4-A3C GESETFAKRTI | 569  | 339 |
| >SMAD4-A3C GESETFAKRA  | 199 | >SMAD4-A3C GESETFAKRTI | 469  | 270 |
| >SMAD4-A3C GESETFAKRA  | 20  | >SMAD4-A3C GESETFAKRTI | 20   | 0   |
| >SMAD4-A4C AVFVQSYL    | 172 | >SMAD4-A4C TVFVQSYL    | 116  | 56  |

|                       |      |                       |      |      |
|-----------------------|------|-----------------------|------|------|
| >SMAD4-A4C AVFVQSYYL  | 46   | >SMAD4-A4C TVFVQSYYL  | 96   | 50   |
| >SMAD4-A4C AVFVQSYYL  | 8    | >SMAD4-A4C TVFVQSYYL  | 15   | 7    |
| >SMAD4-A4C AVFVQSYYL  | 43   | >SMAD4-A4C TVFVQSYYL  | 101  | 58   |
| >SMAD4-A4C AVFVQSYYL  | 50   | >SMAD4-A4C TVFVQSYYL  | 235  | 185  |
| >SMAD4-A4C AVFVQSYYL  | 76   | >SMAD4-A4C TVFVQSYYL  | 299  | 223  |
| >SMAD4-A4C AVFVQSYYL  | 125  | >SMAD4-A4C TVFVQSYYL  | 510  | 385  |
| >SMAD4-A4C AVFVQSYYL  | 135  | >SMAD4-A4C TVFVQSYYL  | 891  | 756  |
| >SMAD4-A4C AVFVQSYY   | 118  | >SMAD4-A4C TVFVQSYY   | 147  | 29   |
| >SMAD4-A4C AVFVQSYY   | 35   | >SMAD4-A4C TVFVQSYY   | 37   | 2    |
| >SMAD4-A4C AVFVQSYYLD | 47   | >SMAD4-A4C TVFVQSYYLD | 48   | 1    |
| >SMAD4-A4C AVFVQSYY   | 1719 | >SMAD4-A4C TVFVQSYY   | 187  | 1532 |
| >SMAD4-A4C AVFVQSYY   | 411  | >SMAD4-A4C TVFVQSYY   | 347  | 64   |
| >SMAD4-A4C AVFVQSYY   | 15   | >SMAD4-A4C TVFVQSYY   | 12   | 3    |
| >SMAD4-A4C AVFVQSYY   | 327  | >SMAD4-A4C TVFVQSYY   | 2468 | 2141 |
| >SMAD4-A4C AVFVQSYYL  | 60   | >SMAD4-A4C TVFVQSYYL  | 603  | 543  |
| >SMAD4-A4C AVFVQSYY   | 17   | >SMAD4-A4C TVFVQSYY   | 27   | 10   |
| >SMAD4-A4C AVFVQSYYL  | 365  | >SMAD4-A4C TVFVQSYYL  | 496  | 131  |
| >SMAD4-A4C AVFVQSYYLD | 34   | >SMAD4-A4C TVFVQSYYLD | 45   | 11   |
| >SMAD4-A4C AVFVQSYYL  | 94   | >SMAD4-A4C TVFVQSYYL  | 353  | 259  |
| >SMAD4-A4C AVFVQSYYLD | 1118 | >SMAD4-A4C TVFVQSYYLD | 178  | 940  |
| >SMAD4-A4C AVFVQSYY   | 304  | >SMAD4-A4C TVFVQSYY   | 20   | 284  |
| >SMAD4-A4C AVFVQSYYLD | 69   | >SMAD4-A4C TVFVQSYYLD | 8    | 61   |
| >SMAD4-A4C AVFVQSYYL  | 50   | >SMAD4-A4C TVFVQSYYL  | 7    | 43   |
| >SMAD4-A4C AVFVQSYYL  | 881  | >SMAD4-A4C TVFVQSYYL  | 49   | 832  |
| >SMAD4-A4C AVFVQSYY   | 55   | >SMAD4-A4C TVFVQSYY   | 42   | 13   |
| >SMAD4-A4C AVFVQSYY   | 137  | >SMAD4-A4C TVFVQSYY   | 275  | 138  |
| >SMAD4-A4C AVFVQSYY   | 490  | >SMAD4-A4C TVFVQSYY   | 238  | 252  |
| >SMAD4-A4C AVFVQSYY   | 203  | >SMAD4-A4C TVFVQSYY   | 738  | 535  |
| >SMAD4-A4C AVFVQSYY   | 31   | >SMAD4-A4C TVFVQSYY   | 123  | 92   |
| >SMAD4-A4C AVFVQSYYL  | 232  | >SMAD4-A4C TVFVQSYYL  | 1276 | 1044 |
| >SMAD4-A4C AVFVQSYY   | 1311 | >SMAD4-A4C TVFVQSYY   | 390  | 921  |
| >SMAD4-A4C AVFVQSYY   | 296  | >SMAD4-A4C TVFVQSYY   | 964  | 668  |
| >SMAD4-A4C AVFVQSYY   | 224  | >SMAD4-A4C TVFVQSYY   | 240  | 16   |
| >SMAD4-A4C AVFVQSYYLD | 81   | >SMAD4-A4C TVFVQSYYLD | 236  | 155  |
| >SMAD4-A4C AVFVQSYYLD | 555  | >SMAD4-A4C TVFVQSYYLD | 177  | 378  |
| >SMAD4-A4C HAVFVQSYY  | 9274 | >SMAD4-A4C HTVFVQSYY  | 402  | 8872 |
| >SMAD4-A4C HAVFVQSYYL | 653  | >SMAD4-A4C HTVFVQSYYL | 306  | 347  |
| >SMAD4-A4C HAVFVQSYY  | 1518 | >SMAD4-A4C HTVFVQSYY  | 251  | 1267 |
| >SMAD4-A4C HAVFVQSYY  | 3390 | >SMAD4-A4C HTVFVQSYY  | 328  | 3062 |
| >SMAD4-A4C HAVFVQSY   | 506  | >SMAD4-A4C HTVFVQSY   | 24   | 482  |
| >SMAD4-A4C HAVFVQSYY  | 1466 | >SMAD4-A4C HTVFVQSYY  | 54   | 1412 |
| >SMAD4-A4C HAVFVQSY   | 508  | >SMAD4-A4C HTVFVQSY   | 16   | 492  |
| >SMAD4-A4C HAVFVQSYY  | 155  | >SMAD4-A4C HTVFVQSYY  | 10   | 145  |

|                       |       |                       |      |       |
|-----------------------|-------|-----------------------|------|-------|
| >SMAD4-A4C HAVFVQSY   | 225   | >SMAD4-A4C HTVFVQSY   | 11   | 214   |
| >SMAD4-A4C HAVFVQSYY  | 188   | >SMAD4-A4C HTVFVQSYY  | 11   | 177   |
| >SMAD4-A4C HAVFVQSYYL | 2509  | >SMAD4-A4C HTVFVQSYYL | 151  | 2358  |
| >SMAD4-A4C HAVFVQSY   | 6259  | >SMAD4-A4C HTVFVQSY   | 252  | 6007  |
| >SMAD4-A4C HAVFVQSY   | 566   | >SMAD4-A4C HTVFVQSY   | 80   | 486   |
| >SMAD4-A4C HAVFVQSYY  | 68    | >SMAD4-A4C HTVFVQSYY  | 17   | 51    |
| >SMAD4-A4C HAVFVQSYYL | 2144  | >SMAD4-A4C HTVFVQSYYL | 440  | 1704  |
| >SMAD4-A4C HAVFVQSY   | 312   | >SMAD4-A4C HTVFVQSY   | 106  | 206   |
| >SMAD4-A4C HAVFVQSYY  | 36    | >SMAD4-A4C HTVFVQSYY  | 16   | 20    |
| >SMAD4-A4C HAVFVQSY   | 292   | >SMAD4-A4C HTVFVQSY   | 64   | 228   |
| >SMAD4-A4C HAVFVQSYY  | 21    | >SMAD4-A4C HTVFVQSYY  | 6    | 15    |
| >SMAD4-A4C HAVFVQSYY  | 3117  | >SMAD4-A4C HTVFVQSYY  | 467  | 2650  |
| >SMAD4-A4C HAVFVQSYYL | 188   | >SMAD4-A4C HTVFVQSYYL | 26   | 162   |
| >SMAD4-A4C HAVFVQSYYL | 290   | >SMAD4-A4C HTVFVQSYYL | 72   | 218   |
| >SMAD4-A4C HAVFVQSY   | 1977  | >SMAD4-A4C HTVFVQSY   | 154  | 1823  |
| >SMAD4-A4C HAVFVQSYY  | 390   | >SMAD4-A4C HTVFVQSYY  | 38   | 352   |
| >SMAD4-A4C HAVFVQSY   | 233   | >SMAD4-A4C HTVFVQSY   | 168  | 65    |
| >SMAD4-A4C HAVFVQSY   | 238   | >SMAD4-A4C HTVFVQSY   | 416  | 178   |
| >SMAD4-A4C HAVFVQSY   | 22    | >SMAD4-A4C HTVFVQSY   | 5    | 17    |
| >SMAD4-A4C HAVFVQSYY  | 38    | >SMAD4-A4C HTVFVQSYY  | 7    | 31    |
| >SMAD4-A4C HAVFVQSYYL | 255   | >SMAD4-A4C HTVFVQSYYL | 18   | 237   |
| >SMAD4-A4C HAVFVQSY   | 25    | >SMAD4-A4C HTVFVQSY   | 350  | 325   |
| >SMAD4-A4C HAVFVQSYY  | 57    | >SMAD4-A4C HTVFVQSYY  | 1547 | 1490  |
| >SMAD4-A4C HAVFVQSY   | 766   | >SMAD4-A4C HTVFVQSY   | 439  | 327   |
| >SMAD4-A4C HAVFVQSYY  | 643   | >SMAD4-A4C HTVFVQSYY  | 386  | 257   |
| >SMAD4-A4C HAVFVQSY   | 362   | >SMAD4-A4C HTVFVQSY   | 267  | 95    |
| >SMAD4-A4C HAVFVQSYY  | 47    | >SMAD4-A4C HTVFVQSYY  | 38   | 9     |
| >SMAD4-A4C HAVFVQSYYL | 416   | >SMAD4-A4C HTVFVQSYYL | 316  | 100   |
| >SMAD4-A4C HAVFVQSYYL | 3454  | >SMAD4-A4C HTVFVQSYYL | 338  | 3116  |
| >SMAD4-A4C HAVFVQSY   | 2086  | >SMAD4-A4C HTVFVQSY   | 269  | 1817  |
| >SMAD4-A4C HAVFVQSYY  | 25    | >SMAD4-A4C HTVFVQSYY  | 3    | 22    |
| >SMAD4-A4C HAVFVQSYYL | 12776 | >SMAD4-A4C HTVFVQSYYL | 336  | 12440 |
| >SMAD4-A4C HAVFVQSY   | 72    | >SMAD4-A4C HTVFVQSY   | 95   | 23    |
| >SMAD4-A4C HAVFVQSYY  | 233   | >SMAD4-A4C HTVFVQSYY  | 385  | 152   |
| >SMAD4-A4C HAVFVQSY   | 1065  | >SMAD4-A4C HTVFVQSY   | 282  | 783   |
| >SMAD4-A4C HAVFVQSYY  | 176   | >SMAD4-A4C HTVFVQSYY  | 65   | 111   |
| >SMAD4-A4C DHAVFVQSY  | 490   | >SMAD4-A4C DHTVFVQSY  | 814  | 324   |
| >SMAD4-A4C DHAVFVQSY  | 410   | >SMAD4-A4C DHTVFVQSY  | 1105 | 695   |
| >SMAD4-A4C DHAVFVQSY  | 352   | >SMAD4-A4C DHTVFVQSY  | 668  | 316   |
| >SMAD4-A4C DHAVFVQSY  | 388   | >SMAD4-A4C DHTVFVQSY  | 934  | 546   |
| >SMAD4-A4C DHAVFVQSY  | 304   | >SMAD4-A4C DHTVFVQSY  | 406  | 102   |
| >SMAD4-A4C SDHAVFVQSY | 191   | >SMAD4-A4C SDHTVFVQSY | 143  | 48    |
| >SMAD4-A4C LSDHAVFV   | 461   | >SMAD4-A4C LSDHTVFFV  | 229  | 232   |

|                        |     |                           |     |     |
|------------------------|-----|---------------------------|-----|-----|
| >SMAD4-A4C LSDHAVFVQ\$ | 18  | >SMAD4-A4C LSDHTVQ\$      | 14  | 4   |
| >SMAD4-A4C LSDHAVFV    | 101 | >SMAD4-A4C LSDHTVQ\$      | 103 | 2   |
| >SMAD4-A4C LSDHAVFV    | 699 | >SMAD4-A4C LSDHTVQ\$      | 386 | 313 |
| >SMAD4-A4C LSDHAVFVQ\$ | 306 | >SMAD4-A4C LSDHTVQ\$      | 278 | 28  |
| >SMAD4-A4C LSDHAVFV    | 542 | >SMAD4-A4C LSDHTVQ\$      | 489 | 53  |
| >SMAD4-A4C LSDHAVFVQ\$ | 229 | >SMAD4-A4C LSDHTVQ\$      | 259 | 30  |
| >SMAD4-A4C LSDHAVFVQ\$ | 361 | >SMAD4-A4C LSDHTVQ\$      | 213 | 148 |
| >SMAD4-A4C LSDHAVFVQ\$ | 5   | >SMAD4-A4C LSDHTVQ\$      | 5   | 0   |
| >SMAD4-A4C LSDHAVFVQ\$ | 268 | >SMAD4-A4C LSDHTVQ\$      | 469 | 201 |
| >SMAD4-A4C LSDHAVFVQ\$ | 59  | >SMAD4-A4C LSDHTVQ\$      | 49  | 10  |
| >SMAD4-A4C LSDHAVFVQ\$ | 196 | >SMAD4-A4C LSDHTVQ\$      | 119 | 77  |
| >SMAD4-A4C LSDHAVFVQ\$ | 388 | >SMAD4-A4C LSDHTVQ\$      | 349 | 39  |
| >SMAD4-A4C CLSDHAVFV   | 18  | >SMAD4-A4C CLSDHTVQ\$     | 10  | 8   |
| >SMAD4-A4C CLSDHAVFV   | 4   | >SMAD4-A4C CLSDHTVQ\$     | 2   | 2   |
| >SMAD4-A4C CLSDHAVFVC  | 413 | >SMAD4-A4C CLSDHTVQ\$     | 202 | 211 |
| >SMAD4-A4C CLSDHAVFV   | 5   | >SMAD4-A4C CLSDHTVQ\$     | 3   | 2   |
| >SMAD4-A4C CLSDHAVFV   | 17  | >SMAD4-A4C CLSDHTVQ\$     | 12  | 5   |
| >SMAD4-A4C CLSDHAVFV   | 5   | >SMAD4-A4C CLSDHTVQ\$     | 4   | 1   |
| >SMAD4-A4C CLSDHAVFV   | 6   | >SMAD4-A4C CLSDHTVQ\$     | 4   | 2   |
| >SMAD4-A4C CLSDHAVFV   | 10  | >SMAD4-A4C CLSDHTVQ\$     | 9   | 1   |
| >SMAD4-A4C CLSDHAVFV   | 3   | >SMAD4-A4C CLSDHTVQ\$     | 2   | 1   |
| >SMAD4-A4C CLSDHAVFV   | 3   | >SMAD4-A4C CLSDHTVQ\$     | 2   | 1   |
| >SMAD4-A4C CLSDHAVFVC  | 257 | >SMAD4-A4C CLSDHTVQ\$     | 181 | 76  |
| >SMAD4-A4C CLSDHAVFV   | 183 | >SMAD4-A4C CLSDHTVQ\$     | 52  | 131 |
| >SMAD4-A4C CLSDHAVFV   | 504 | >SMAD4-A4C CLSDHTVQ\$     | 318 | 186 |
| >SMAD4-A4C CLSDHAVF    | 138 | >SMAD4-A4C CLSDHTVQ\$     | 118 | 20  |
| >SMAD4-A4C CLSDHAVF    | 178 | >SMAD4-A4C CLSDHTVQ\$     | 98  | 80  |
| >SMAD4-A4C RCLSDHAV    | 265 | >SMAD4-A4C RCLSDHTVQ\$    | 226 | 39  |
| >SMAD4-A4C RCLSDHAVFV  | 142 | >SMAD4-A4C RCLSDHTVQ\$    | 159 | 17  |
| >SMAD4-A4C RCLSDHAVFV  | 414 | >SMAD4-A4C RCLSDHTVQ\$    | 295 | 119 |
| >SMAD4-A4C RCLSDHAVF   | 462 | >SMAD4-A4C RCLSDHTVQ\$    | 272 | 190 |
| >SMAD4-A4C RCLSDHAVF   | 23  | >SMAD4-A4C RCLSDHTVQ\$    | 16  | 7   |
| >SMAD4-A4C RCLSDHAVF   | 37  | >SMAD4-A4C RCLSDHTVQ\$    | 18  | 19  |
| >SMAD4-A4C VRCLSDHAVF  | 94  | >SMAD4-A4C VRCLSDHTVQ\$   | 72  | 22  |
| >SMAD4-A4C WVRCLSDHA   | 522 | >SMAD4-A4C WVRCLSDHTVQ\$  | 331 | 191 |
| >SMAD4-A4C WVRCLSDHA   | 255 | >SMAD4-A4C WVRCLSDHTVQ\$  | 110 | 145 |
| >SMAD4-A4C WVRCLSDHA   | 38  | >SMAD4-A4C WVRCLSDHTVQ\$  | 40  | 2   |
| >SMAD4-A4C WVRCLSDHA   | 77  | >SMAD4-A4C WVRCLSDHTVQ\$  | 51  | 26  |
| >SMAD4-A4C WVRCLSDHA   | 150 | >SMAD4-A4C WVRCLSDHTVQ\$  | 292 | 142 |
| >SMAD4-A4C WVRCLSDHA   | 110 | >SMAD4-A4C WVRCLSDHTVQ\$  | 118 | 8   |
| >SMAD4-A4C WVRCLSDHA   | 15  | >SMAD4-A4C WVRCLSDHTVQ\$  | 10  | 5   |
| >SMAD4-A4C VWVRCLSDH   | 831 | >SMAD4-A4C VWVRCLSDHTVQ\$ | 283 | 548 |
| >SMAD4-A4C VWVRCLSDH   | 91  | >SMAD4-A4C VWVRCLSDHTVQ\$ | 138 | 47  |

|                        |      |                        |      |      |
|------------------------|------|------------------------|------|------|
| >SMAD4-A43AYIKVFDL     | 118  | >SMAD4-A43TYIKVFDL     | 81   | 37   |
| >SMAD4-A43AYIKVFDL     | 115  | >SMAD4-A43TYIKVFDL     | 38   | 77   |
| >SMAD4-A43AYIKVFDLR    | 1119 | >SMAD4-A43TYIKVFDLR    | 262  | 857  |
| >SMAD4-A43AYIKVFDL     | 108  | >SMAD4-A43TYIKVFDL     | 51   | 57   |
| >SMAD4-A43AYIKVFDL     | 6    | >SMAD4-A43TYIKVFDL     | 7    | 1    |
| >SMAD4-A43AYIKVFDLR    | 184  | >SMAD4-A43TYIKVFDLR    | 240  | 56   |
| >SMAD4-A43AYIKVFDLRQI  | 405  | >SMAD4-A43TYIKVFDLRQI  | 555  | 150  |
| >SMAD4-A43AYIKVFDLR    | 37   | >SMAD4-A43TYIKVFDLR    | 48   | 11   |
| >SMAD4-A43AYIKVFDLR    | 135  | >SMAD4-A43TYIKVFDLR    | 25   | 110  |
| >SMAD4-A43AYIKVFDLR    | 180  | >SMAD4-A43TYIKVFDLR    | 16   | 164  |
| >SMAD4-A43AYIKVFDLR    | 371  | >SMAD4-A43TYIKVFDLR    | 1894 | 1523 |
| >SMAD4-A43AYIKVFDLR    | 62   | >SMAD4-A43TYIKVFDLR    | 24   | 38   |
| >SMAD4-A43AYIKVFDL     | 121  | >SMAD4-A43TYIKVFDL     | 301  | 180  |
| >SMAD4-A43SAYIKVFDL    | 103  | >SMAD4-A43STYIKVFDL    | 161  | 58   |
| >SMAD4-A43SAYIKVFDL    | 1112 | >SMAD4-A43STYIKVFDL    | 268  | 844  |
| >SMAD4-A43SAYIKVFDL    | 1051 | >SMAD4-A43STYIKVFDL    | 210  | 841  |
| >SMAD4-A43SAYIKVFDLR   | 1405 | >SMAD4-A43STYIKVFDLR   | 367  | 1038 |
| >SMAD4-A43SAYIKVFDLR   | 309  | >SMAD4-A43STYIKVFDLR   | 52   | 257  |
| >SMAD4-A43SAYIKVFDLR   | 44   | >SMAD4-A43STYIKVFDLR   | 27   | 17   |
| >SMAD4-A43SAYIKVFDL    | 4127 | >SMAD4-A43STYIKVFDL    | 208  | 3919 |
| >SMAD4-A43SAYIKVFDLR   | 209  | >SMAD4-A43STYIKVFDLR   | 130  | 79   |
| >SMAD4-A43SAYIKVFDLR   | 18   | >SMAD4-A43STYIKVFDLR   | 7    | 11   |
| >SMAD4-A43SAYIKVFDL    | 21   | >SMAD4-A43STYIKVFDL    | 5    | 16   |
| >SMAD4-A43SAYIKVFDLRQI | 1828 | >SMAD4-A43STYIKVFDLRQI | 286  | 1542 |
| >SMAD4-A43SAYIKVFDL    | 1362 | >SMAD4-A43STYIKVFDL    | 296  | 1066 |
| >SMAD4-A43SAYIKVFDLR   | 194  | >SMAD4-A43STYIKVFDLR   | 65   | 129  |
| >SMAD4-A43SAYIKVFDLRQI | 2037 | >SMAD4-A43STYIKVFDLRQI | 332  | 1705 |
| >SMAD4-A43SAYIKVFDLR   | 406  | >SMAD4-A43STYIKVFDLR   | 269  | 137  |
| >SMAD4-A43SAYIKVFDL    | 1283 | >SMAD4-A43STYIKVFDL    | 237  | 1046 |
| >SMAD4-A43PSAYIKVFDLFI | 44   | >SMAD4-A43PSTYIKVFDLFI | 97   | 53   |
| >SMAD4-A43PSAYIKVF     | 465  | >SMAD4-A43PSTYIKVF     | 907  | 442  |
| >SMAD4-A43PSAYIKVF     | 253  | >SMAD4-A43PSTYIKVF     | 119  | 134  |
| >SMAD4-A43YPSAYIKVFDL  | 69   | >SMAD4-A43YPSTYIKVFDL  | 100  | 31   |
| >SMAD4-A43YPSAYIKV     | 386  | >SMAD4-A43YPSTYIKV     | 725  | 339  |
| >SMAD4-A43YPSAYIKV     | 459  | >SMAD4-A43YPSTYIKV     | 1004 | 545  |
| >SMAD4-A43YPSAYIKVF    | 79   | >SMAD4-A43YPSTYIKVF    | 178  | 99   |
| >SMAD4-A43YPSAYIKVFDL  | 83   | >SMAD4-A43YPSTYIKVFDL  | 121  | 38   |
| >SMAD4-A43YPSAYIKVF    | 436  | >SMAD4-A43YPSTYIKVF    | 391  | 45   |
| >SMAD4-A43YPSAYIKVFDL  | 332  | >SMAD4-A43YPSTYIKVFDL  | 304  | 28   |
| >SMAD4-A43YPSAYIKVF    | 35   | >SMAD4-A43YPSTYIKVF    | 27   | 8    |
| >SMAD4-A43YPSAYIKVF    | 14   | >SMAD4-A43YPSTYIKVF    | 16   | 2    |
| >SMAD4-A43YPSAYIKVFDL  | 127  | >SMAD4-A43YPSTYIKVFDL  | 140  | 13   |
| >SMAD4-A43YPSAYIKVF    | 417  | >SMAD4-A43YPSTYIKVF    | 888  | 471  |

|                       |     |                       |     |     |
|-----------------------|-----|-----------------------|-----|-----|
| >SMAD4-A43YPSAYIKVFDL | 87  | >SMAD4-A43YPSTYIKVFDL | 139 | 52  |
| >SMAD4-A43YPSAYIKV    | 334 | >SMAD4-A43YPSTYIKV    | 431 | 97  |
| >SMAD4-A43YPSAYIKVF   | 164 | >SMAD4-A43YPSTYIKVF   | 126 | 38  |
| >SMAD4-A43YPSAYIKVFDL | 249 | >SMAD4-A43YPSTYIKVFDL | 197 | 52  |
| >SMAD4-A43YPSAYIKV    | 223 | >SMAD4-A43YPSTYIKV    | 364 | 141 |
| >SMAD4-A43YPSAYIKVF   | 7   | >SMAD4-A43YPSTYIKVF   | 10  | 3   |
| >SMAD4-A43YPSAYIKVFDL | 106 | >SMAD4-A43YPSTYIKVFDL | 296 | 190 |
| >SMAD4-A43YPSAYIKVF   | 23  | >SMAD4-A43YPSTYIKVF   | 23  | 0   |
| >SMAD4-A43YPSAYIKVFDL | 271 | >SMAD4-A43YPSTYIKVFDL | 275 | 4   |
| >SMAD4-A43IYPSAYIK    | 625 | >SMAD4-A43IYPSTYIK    | 359 | 266 |
| >SMAD4-A43IYPSAYIKVF  | 18  | >SMAD4-A43IYPSTYIKVF  | 13  | 5   |
| >SMAD4-A43IYPSAYIK    | 472 | >SMAD4-A43IYPSTYIK    | 384 | 88  |
| >SMAD4-A43IYPSAYIKV   | 130 | >SMAD4-A43IYPSTYIKV   | 115 | 15  |
| >SMAD4-A43IYPSAYIKVF  | 32  | >SMAD4-A43IYPSTYIKVF  | 26  | 6   |
| >SMAD4-A43IYPSAYIKV   | 13  | >SMAD4-A43IYPSTYIKV   | 19  | 6   |
| >SMAD4-A43IYPSAYIKVF  | 4   | >SMAD4-A43IYPSTYIKVF  | 5   | 1   |
| >SMAD4-A43IYPSAYIKVF  | 334 | >SMAD4-A43IYPSTYIKVF  | 202 | 132 |
| >SMAD4-A43IYPSAYIKV   | 243 | >SMAD4-A43IYPSTYIKV   | 368 | 125 |
| >SMAD4-A43IYPSAYIKVF  | 56  | >SMAD4-A43IYPSTYIKVF  | 77  | 21  |
| >SMAD4-A43IYPSAYIK    | 130 | >SMAD4-A43IYPSTYIK    | 81  | 49  |
| >SMAD4-A43IYPSAYIKV   | 345 | >SMAD4-A43IYPSTYIKV   | 190 | 155 |
| >SMAD4-A43KIYPSAYI    | 40  | >SMAD4-A43KIYPSTYI    | 30  | 10  |
| >SMAD4-A43KIYPSAYIKV  | 91  | >SMAD4-A43KIYPSTYIKV  | 96  | 5   |
| >SMAD4-A43KIYPSAYI    | 39  | >SMAD4-A43KIYPSTYI    | 22  | 17  |
| >SMAD4-A43KIYPSAYIKV  | 84  | >SMAD4-A43KIYPSTYIKV  | 72  | 12  |
| >SMAD4-A43KIYPSAYI    | 17  | >SMAD4-A43KIYPSTYI    | 10  | 7   |
| >SMAD4-A43KIYPSAYIKV  | 52  | >SMAD4-A43KIYPSTYIKV  | 36  | 16  |
| >SMAD4-A43KIYPSAYI    | 11  | >SMAD4-A43KIYPSTYI    | 10  | 1   |
| >SMAD4-A43KIYPSAYIKV  | 67  | >SMAD4-A43KIYPSTYIKV  | 56  | 11  |
| >SMAD4-A43KIYPSAYI    | 7   | >SMAD4-A43KIYPSTYI    | 7   | 0   |
| >SMAD4-A43KIYPSAYIKV  | 6   | >SMAD4-A43KIYPSTYIKV  | 4   | 2   |
| >SMAD4-A43KIYPSAYI    | 38  | >SMAD4-A43KIYPSTYI    | 74  | 36  |
| >SMAD4-A43KIYPSAYIKV  | 44  | >SMAD4-A43KIYPSTYIKV  | 24  | 20  |
| >SMAD4-A43KIYPSAYI    | 37  | >SMAD4-A43KIYPSTYI    | 31  | 6   |
| >SMAD4-A43KIYPSAYIKV  | 9   | >SMAD4-A43KIYPSTYIKV  | 8   | 1   |
| >SMAD4-A43KIYPSAYI    | 344 | >SMAD4-A43KIYPSTYI    | 549 | 205 |
| >SMAD4-A43KIYPSAYIKV  | 186 | >SMAD4-A43KIYPSTYIKV  | 110 | 76  |
| >SMAD4-A43KIYPSAYI    | 57  | >SMAD4-A43KIYPSTYI    | 53  | 4   |
| >SMAD4-A43KIYPSAYIKV  | 5   | >SMAD4-A43KIYPSTYIKV  | 4   | 1   |
| >SMAD4-A43KIYPSAYIK   | 27  | >SMAD4-A43KIYPSTYIK   | 26  | 1   |
| >SMAD4-A43KIYPSAYIK   | 8   | >SMAD4-A43KIYPSTYIK   | 6   | 2   |
| >SMAD4-A43KIYPSAYIKVF | 666 | >SMAD4-A43KIYPSTYIKVF | 448 | 218 |
| >SMAD4-A43KIYPSAYI    | 39  | >SMAD4-A43KIYPSTYI    | 76  | 37  |



|                       |      |                       |     |      |
|-----------------------|------|-----------------------|-----|------|
| >SMAD4-A43KIYPSAYIK   | 13   | >SMAD4-A43KIYPSTYIK   | 8   | 5    |
| >SMAD4-A43KIYPSAYIKV  | 121  | >SMAD4-A43KIYPSTYIKV  | 72  | 49   |
| >SMAD4-A43KIYPSAYIK   | 51   | >SMAD4-A43KIYPSTYIK   | 22  | 29   |
| >SMAD4-A43KIYPSAYI    | 83   | >SMAD4-A43KIYPSTYI    | 48  | 35   |
| >SMAD4-A43KIYPSAYIK   | 1380 | >SMAD4-A43KIYPSTYIK   | 397 | 983  |
| >SMAD4-A43KIYPSAYIKV  | 487  | >SMAD4-A43KIYPSTYIKV  | 266 | 221  |
| >SMAD4-A43KIYPSAYIKVF | 28   | >SMAD4-A43KIYPSTYIKVF | 22  | 6    |
| >SMAD4-A43KIYPSAYIK   | 292  | >SMAD4-A43KIYPSTYIK   | 251 | 41   |
| >SMAD4-A43KIYPSAYI    | 378  | >SMAD4-A43KIYPSTYI    | 583 | 205  |
| >SMAD4-A43KIYPSAYIKV  | 250  | >SMAD4-A43KIYPSTYIKV  | 206 | 44   |
| >SMAD4-A43KIYPSAYIKVF | 68   | >SMAD4-A43KIYPSTYIKVF | 62  | 6    |
| >SMAD4-A43KIYPSAYI    | 584  | >SMAD4-A43KIYPSTYI    | 353 | 231  |
| >SMAD4-A43KIYPSAYIKV  | 596  | >SMAD4-A43KIYPSTYIKV  | 427 | 169  |
| >SMAD4-A43KIYPSAYIKVF | 8    | >SMAD4-A43KIYPSTYIKVF | 7   | 1    |
| >SMAD4-A43KIYPSAYI    | 25   | >SMAD4-A43KIYPSTYI    | 61  | 36   |
| >SMAD4-A43KIYPSAYIKV  | 412  | >SMAD4-A43KIYPSTYIKV  | 600 | 188  |
| >SMAD4-A43KIYPSAYIKVF | 5    | >SMAD4-A43KIYPSTYIKVF | 7   | 2    |
| >SMAD4-A43KIYPSAYIKVF | 235  | >SMAD4-A43KIYPSTYIKVF | 282 | 47   |
| >SMAD4-A43KIYPSAYI    | 54   | >SMAD4-A43KIYPSTYI    | 63  | 9    |
| >SMAD4-A43KIYPSAYIKVF | 41   | >SMAD4-A43KIYPSTYIKVF | 47  | 6    |
| >SMAD4-A43KIYPSAYIKVF | 297  | >SMAD4-A43KIYPSTYIKVF | 504 | 207  |
| >SMAD4-A43KIYPSAYIKVF | 398  | >SMAD4-A43KIYPSTYIKVF | 300 | 98   |
| >SMAD4-A43KIYPSAYIK   | 36   | >SMAD4-A43KIYPSTYIK   | 22  | 14   |
| >SMAD4-A43KIYPSAYI    | 94   | >SMAD4-A43KIYPSTYI    | 91  | 3    |
| >SMAD4-A43HKIYPSAY    | 292  | >SMAD4-A43HKIYPSTY    | 887 | 595  |
| >SMAD4-A43HKIYPSAYIK  | 501  | >SMAD4-A43HKIYPSTYIK  | 411 | 90   |
| >SMAD4-A43HKIYPSAYI   | 122  | >SMAD4-A43HKIYPSTYI   | 300 | 178  |
| >SMAD4-A43HKIYPSAYIKV | 382  | >SMAD4-A43HKIYPSTYIKV | 694 | 312  |
| >SMAD4-A43HKIYPSAY    | 289  | >SMAD4-A43HKIYPSTY    | 488 | 199  |
| >SMAD4-A43HKIYPSAY    | 3    | >SMAD4-A43HKIYPSTY    | 4   | 1    |
| >SMAD4-A43HKIYPSAYI   | 25   | >SMAD4-A43HKIYPSTYI   | 14  | 11   |
| >SMAD4-A43HKIYPSAYIK  | 191  | >SMAD4-A43HKIYPSTYIK  | 129 | 62   |
| >SMAD4-A43HKIYPSAYIKV | 60   | >SMAD4-A43HKIYPSTYIKV | 37  | 23   |
| >SMAD4-A43HKIYPSAY    | 384  | >SMAD4-A43HKIYPSTY    | 771 | 387  |
| >SMAD4-A43VHKIYPSAY   | 243  | >SMAD4-A43VHKIYPSTY   | 269 | 26   |
| >SMAD4-A43VHKIYPSAY   | 17   | >SMAD4-A43VHKIYPSTY   | 29  | 12   |
| >SMAD4-A43VHKIYPSAY   | 1512 | >SMAD4-A43VHKIYPSTY   | 313 | 1199 |
| >SMAD4-A43AVHKIYPSAYI | 401  | >SMAD4-A43AVHKIYPSTYI | 468 | 67   |
| >SMAD4-A43AVHKIYPSAYI | 220  | >SMAD4-A43AVHKIYPSTYI | 224 | 4    |
| >SMAD4-A43AVHKIYPSAYI | 511  | >SMAD4-A43AVHKIYPSTYI | 493 | 18   |
| >SMAD4-A43AVHKIYPSAYI | 235  | >SMAD4-A43AVHKIYPSTYI | 454 | 219  |
| >SMAD4-A43AVHKIYPSAY  | 47   | >SMAD4-A43AVHKIYPSTY  | 108 | 61   |
| >SMAD4-A43AVHKIYPSAY  | 410  | >SMAD4-A43AVHKIYPSTY  | 845 | 435  |

|                        |      |                        |      |      |
|------------------------|------|------------------------|------|------|
| >SMAD4-A43 AVHKIYPSA   | 7    | >SMAD4-A43 AVHKIYPST   | 67   | 60   |
| >SMAD4-A43 AVHKIYPSAY  | 80   | >SMAD4-A43 AVHKIYPSTY  | 77   | 3    |
| >SMAD4-A43 AVHKIYPSAYI | 7    | >SMAD4-A43 AVHKIYPSTYI | 15   | 8    |
| >SMAD4-A43 AVHKIYPSAYI | 101  | >SMAD4-A43 AVHKIYPSTYI | 179  | 78   |
| >SMAD4-A43 AVHKIYPSAY  | 123  | >SMAD4-A43 AVHKIYPSTY  | 84   | 39   |
| >SMAD4-A43 AVHKIYPSAY  | 134  | >SMAD4-A43 AVHKIYPSTY  | 199  | 65   |
| >SMAD4-A43 AVHKIYPSAY  | 105  | >SMAD4-A43 AVHKIYPSTY  | 179  | 74   |
| >SMAD4-A43 AVHKIYPSAY  | 439  | >SMAD4-A43 AVHKIYPSTY  | 141  | 298  |
| >SMAD4-A43 AVHKIYPSAY  | 1608 | >SMAD4-A43 AVHKIYPSTY  | 433  | 1175 |
| >SMAD4-A43 AVHKIYPSAYI | 297  | >SMAD4-A43 AVHKIYPSTYI | 321  | 24   |
| >SMAD4-A43 DAVHKIYPSA  | 225  | >SMAD4-A43 DAVHKIYPST  | 761  | 536  |
| >SMAD4-A43 DAVHKIYPSA  | 38   | >SMAD4-A43 DAVHKIYPST  | 85   | 47   |
| >SMAD4-A43 DAVHKIYPSA  | 694  | >SMAD4-A43 DAVHKIYPST  | 191  | 503  |
| >SMAD4-A43 DAVHKIYPSA  | 33   | >SMAD4-A43 DAVHKIYPST  | 45   | 12   |
| >SMAD4-A43 AYIKVFDL    | 118  | >SMAD4-A43 VYIKVFDL    | 235  | 117  |
| >SMAD4-A43 AYIKVFDL    | 115  | >SMAD4-A43 VYIKVFDL    | 36   | 79   |
| >SMAD4-A43 AYIKVFDLR   | 1119 | >SMAD4-A43 VYIKVFDLR   | 228  | 891  |
| >SMAD4-A43 AYIKVFDL    | 108  | >SMAD4-A43 VYIKVFDL    | 56   | 52   |
| >SMAD4-A43 AYIKVFDL    | 6    | >SMAD4-A43 VYIKVFDL    | 7    | 1    |
| >SMAD4-A43 AYIKVFDLR   | 184  | >SMAD4-A43 VYIKVFDLR   | 284  | 100  |
| >SMAD4-A43 AYIKVFDLRQI | 405  | >SMAD4-A43 VYIKVFDLRQI | 609  | 204  |
| >SMAD4-A43 AYIKVFDLR   | 37   | >SMAD4-A43 VYIKVFDLR   | 91   | 54   |
| >SMAD4-A43 AYIKVFDLR   | 135  | >SMAD4-A43 VYIKVFDLR   | 58   | 77   |
| >SMAD4-A43 AYIKVFDLR   | 180  | >SMAD4-A43 VYIKVFDLR   | 194  | 14   |
| >SMAD4-A43 AYIKVFDLR   | 371  | >SMAD4-A43 VYIKVFDLR   | 4062 | 3691 |
| >SMAD4-A43 AYIKVFDLR   | 62   | >SMAD4-A43 VYIKVFDLR   | 36   | 26   |
| >SMAD4-A43 AYIKVFDL    | 121  | >SMAD4-A43 VYIKVFDL    | 236  | 115  |
| >SMAD4-A43 SAYIKVFDL   | 103  | >SMAD4-A43 SVYIKVFDL   | 110  | 7    |
| >SMAD4-A43 SAYIKVFDL   | 4207 | >SMAD4-A43 SVYIKVFDL   | 499  | 3708 |
| >SMAD4-A43 SAYIKVFDL   | 3789 | >SMAD4-A43 SVYIKVFDL   | 494  | 3295 |
| >SMAD4-A43 SAYIKVFDL   | 2200 | >SMAD4-A43 SVYIKVFDL   | 425  | 1775 |
| >SMAD4-A43 SAYIKVFDL   | 1112 | >SMAD4-A43 SVYIKVFDL   | 195  | 917  |
| >SMAD4-A43 SAYIKVFDL   | 1051 | >SMAD4-A43 SVYIKVFDL   | 76   | 975  |
| >SMAD4-A43 SAYIKVFDL   | 2185 | >SMAD4-A43 SVYIKVFDL   | 141  | 2044 |
| >SMAD4-A43 SAYIKVFDLR  | 1405 | >SMAD4-A43 SVYIKVFDLR  | 433  | 972  |
| >SMAD4-A43 SAYIKVFDLR  | 309  | >SMAD4-A43 SVYIKVFDLR  | 138  | 171  |
| >SMAD4-A43 SAYIKVFDLR  | 44   | >SMAD4-A43 SVYIKVFDLR  | 34   | 10   |
| >SMAD4-A43 SAYIKVFDLR  | 209  | >SMAD4-A43 SVYIKVFDLR  | 108  | 101  |
| >SMAD4-A43 SAYIKVFDLR  | 18   | >SMAD4-A43 SVYIKVFDLR  | 11   | 7    |
| >SMAD4-A43 SAYIKVFDL   | 21   | >SMAD4-A43 SVYIKVFDL   | 254  | 233  |
| >SMAD4-A43 SAYIKVFDLR  | 194  | >SMAD4-A43 SVYIKVFDLR  | 188  | 6    |
| >SMAD4-A43 SAYIKVFDLR  | 406  | >SMAD4-A43 SVYIKVFDLR  | 160  | 246  |
| >SMAD4-A43 GDAVHKIYPS  | 5858 | >SMAD4-A43 GDAVHKIYPS  | 301  | 5557 |

|                        |     |                        |      |      |
|------------------------|-----|------------------------|------|------|
| >SMAD4-A43 PSAYIKVFDLF | 44  | >SMAD4-A43 PSVYIKVFDLF | 105  | 61   |
| >SMAD4-A43 PSAYIKVF    | 465 | >SMAD4-A43 PSVYIKVF    | 367  | 98   |
| >SMAD4-A43 PSAYIKVF    | 253 | >SMAD4-A43 PSVYIKVF    | 379  | 126  |
| >SMAD4-A43 YPSAYIKVFDL | 69  | >SMAD4-A43 YPSVYIKVFDL | 461  | 392  |
| >SMAD4-A43 YPSAYIKV    | 386 | >SMAD4-A43 YPSVYIKV    | 805  | 419  |
| >SMAD4-A43 YPSAYIKV    | 459 | >SMAD4-A43 YPSVYIKV    | 1445 | 986  |
| >SMAD4-A43 YPSAYIKVF   | 79  | >SMAD4-A43 YPSVYIKVF   | 181  | 102  |
| >SMAD4-A43 YPSAYIKVFDL | 83  | >SMAD4-A43 YPSVYIKVFDL | 133  | 50   |
| >SMAD4-A43 YPSAYIKVF   | 436 | >SMAD4-A43 YPSVYIKVF   | 410  | 26   |
| >SMAD4-A43 YPSAYIKVFDL | 332 | >SMAD4-A43 YPSVYIKVFDL | 332  | 0    |
| >SMAD4-A43 YPSAYIKVF   | 35  | >SMAD4-A43 YPSVYIKVF   | 42   | 7    |
| >SMAD4-A43 YPSAYIKVF   | 14  | >SMAD4-A43 YPSVYIKVF   | 20   | 6    |
| >SMAD4-A43 YPSAYIKVFDL | 127 | >SMAD4-A43 YPSVYIKVFDL | 215  | 88   |
| >SMAD4-A43 YPSAYIKVF   | 417 | >SMAD4-A43 YPSVYIKVF   | 2082 | 1665 |
| >SMAD4-A43 YPSAYIKVFDL | 87  | >SMAD4-A43 YPSVYIKVFDL | 256  | 169  |
| >SMAD4-A43 YPSAYIKV    | 334 | >SMAD4-A43 YPSVYIKV    | 244  | 90   |
| >SMAD4-A43 YPSAYIKVF   | 164 | >SMAD4-A43 YPSVYIKVF   | 138  | 26   |
| >SMAD4-A43 YPSAYIKVFDL | 249 | >SMAD4-A43 YPSVYIKVFDL | 249  | 0    |
| >SMAD4-A43 YPSAYIKV    | 223 | >SMAD4-A43 YPSVYIKV    | 239  | 16   |
| >SMAD4-A43 YPSAYIKVF   | 7   | >SMAD4-A43 YPSVYIKVF   | 9    | 2    |
| >SMAD4-A43 YPSAYIKVFDL | 106 | >SMAD4-A43 YPSVYIKVFDL | 230  | 124  |
| >SMAD4-A43 YPSAYIKVF   | 23  | >SMAD4-A43 YPSVYIKVF   | 18   | 5    |
| >SMAD4-A43 YPSAYIKVFDL | 271 | >SMAD4-A43 YPSVYIKVFDL | 184  | 87   |
| >SMAD4-A43 IYPSAYIK    | 625 | >SMAD4-A43 IYPSVYIK    | 416  | 209  |
| >SMAD4-A43 IYPSAYIKVF  | 18  | >SMAD4-A43 IYPSVYIKVF  | 14   | 4    |
| >SMAD4-A43 IYPSAYIK    | 472 | >SMAD4-A43 IYPSVYIK    | 272  | 200  |
| >SMAD4-A43 IYPSAYIKV   | 130 | >SMAD4-A43 IYPSVYIKV   | 86   | 44   |
| >SMAD4-A43 IYPSAYIKVF  | 32  | >SMAD4-A43 IYPSVYIKVF  | 33   | 1    |
| >SMAD4-A43 IYPSAYIK    | 556 | >SMAD4-A43 IYPSVYIK    | 406  | 150  |
| >SMAD4-A43 IYPSAYIKV   | 13  | >SMAD4-A43 IYPSVYIKV   | 12   | 1    |
| >SMAD4-A43 IYPSAYIKVF  | 4   | >SMAD4-A43 IYPSVYIKVF  | 5    | 1    |
| >SMAD4-A43 IYPSAYIKVF  | 782 | >SMAD4-A43 IYPSVYIKVF  | 394  | 388  |
| >SMAD4-A43 IYPSAYIKVF  | 334 | >SMAD4-A43 IYPSVYIKVF  | 461  | 127  |
| >SMAD4-A43 IYPSAYIKV   | 243 | >SMAD4-A43 IYPSVYIKV   | 449  | 206  |
| >SMAD4-A43 IYPSAYIKVF  | 56  | >SMAD4-A43 IYPSVYIKVF  | 100  | 44   |
| >SMAD4-A43 IYPSAYIK    | 130 | >SMAD4-A43 IYPSVYIK    | 151  | 21   |
| >SMAD4-A43 IYPSAYIKV   | 345 | >SMAD4-A43 IYPSVYIKV   | 245  | 100  |
| >SMAD4-A43 KIYPSAYI    | 40  | >SMAD4-A43 KIYPSVYI    | 24   | 16   |
| >SMAD4-A43 KIYPSAYIKV  | 91  | >SMAD4-A43 KIYPSVYIKV  | 76   | 15   |
| >SMAD4-A43 KIYPSAYI    | 39  | >SMAD4-A43 KIYPSVYI    | 32   | 7    |
| >SMAD4-A43 KIYPSAYIKV  | 84  | >SMAD4-A43 KIYPSVYIKV  | 69   | 15   |
| >SMAD4-A43 KIYPSAYI    | 17  | >SMAD4-A43 KIYPSVYI    | 15   | 2    |
| >SMAD4-A43 KIYPSAYIKV  | 52  | >SMAD4-A43 KIYPSVYIKV  | 43   | 9    |

|                       |     |                       |     |     |
|-----------------------|-----|-----------------------|-----|-----|
| >SMAD4-A43KIYPSAYI    | 11  | >SMAD4-A43KIYPSVYI    | 10  | 1   |
| >SMAD4-A43KIYPSAYIKV  | 67  | >SMAD4-A43KIYPSVYIKV  | 61  | 6   |
| >SMAD4-A43KIYPSAYI    | 7   | >SMAD4-A43KIYPSVYI    | 5   | 2   |
| >SMAD4-A43KIYPSAYIKV  | 6   | >SMAD4-A43KIYPSVYIKV  | 3   | 3   |
| >SMAD4-A43KIYPSAYI    | 38  | >SMAD4-A43KIYPSVYI    | 38  | 0   |
| >SMAD4-A43KIYPSAYIKV  | 44  | >SMAD4-A43KIYPSVYIKV  | 27  | 17  |
| >SMAD4-A43KIYPSAYI    | 37  | >SMAD4-A43KIYPSVYI    | 20  | 17  |
| >SMAD4-A43KIYPSAYIKV  | 9   | >SMAD4-A43KIYPSVYIKV  | 7   | 2   |
| >SMAD4-A43KIYPSAYI    | 344 | >SMAD4-A43KIYPSVYI    | 310 | 34  |
| >SMAD4-A43KIYPSAYIKV  | 186 | >SMAD4-A43KIYPSVYIKV  | 116 | 70  |
| >SMAD4-A43KIYPSAYI    | 57  | >SMAD4-A43KIYPSVYI    | 44  | 13  |
| >SMAD4-A43KIYPSAYIKV  | 5   | >SMAD4-A43KIYPSVYIKV  | 4   | 1   |
| >SMAD4-A43KIYPSAYIK   | 27  | >SMAD4-A43KIYPSVYIK   | 27  | 0   |
| >SMAD4-A43KIYPSAYIK   | 8   | >SMAD4-A43KIYPSVYIK   | 6   | 2   |
| >SMAD4-A43KIYPSAYIKVF | 666 | >SMAD4-A43KIYPSVYIKVF | 498 | 168 |
| >SMAD4-A43KIYPSAYI    | 39  | >SMAD4-A43KIYPSVYI    | 45  | 6   |
| >SMAD4-A43KIYPSAYIK   | 13  | >SMAD4-A43KIYPSVYIK   | 11  | 2   |
| >SMAD4-A43KIYPSAYIKV  | 121 | >SMAD4-A43KIYPSVYIKV  | 158 | 37  |
| >SMAD4-A43KIYPSAYIK   | 51  | >SMAD4-A43KIYPSVYIK   | 24  | 27  |
| >SMAD4-A43KIYPSAYI    | 83  | >SMAD4-A43KIYPSVYI    | 33  | 50  |
| >SMAD4-A43KIYPSAYIKV  | 487 | >SMAD4-A43KIYPSVYIKV  | 319 | 168 |
| >SMAD4-A43KIYPSAYIKVF | 28  | >SMAD4-A43KIYPSVYIKVF | 32  | 4   |
| >SMAD4-A43KIYPSAYIK   | 292 | >SMAD4-A43KIYPSVYIK   | 293 | 1   |
| >SMAD4-A43KIYPSAYI    | 378 | >SMAD4-A43KIYPSVYI    | 620 | 242 |
| >SMAD4-A43KIYPSAYIKV  | 250 | >SMAD4-A43KIYPSVYIKV  | 312 | 62  |
| >SMAD4-A43KIYPSAYIKVF | 68  | >SMAD4-A43KIYPSVYIKVF | 60  | 8   |
| >SMAD4-A43KIYPSAYI    | 584 | >SMAD4-A43KIYPSVYI    | 284 | 300 |
| >SMAD4-A43KIYPSAYIKVF | 8   | >SMAD4-A43KIYPSVYIKVF | 7   | 1   |
| >SMAD4-A43KIYPSAYI    | 25  | >SMAD4-A43KIYPSVYI    | 63  | 38  |
| >SMAD4-A43KIYPSAYIKV  | 412 | >SMAD4-A43KIYPSVYIKV  | 758 | 346 |
| >SMAD4-A43KIYPSAYIKVF | 5   | >SMAD4-A43KIYPSVYIKVF | 6   | 1   |
| >SMAD4-A43KIYPSAYIKVF | 235 | >SMAD4-A43KIYPSVYIKVF | 253 | 18  |
| >SMAD4-A43KIYPSAYI    | 54  | >SMAD4-A43KIYPSVYI    | 71  | 17  |
| >SMAD4-A43KIYPSAYIKVF | 41  | >SMAD4-A43KIYPSVYIKVF | 42  | 1   |
| >SMAD4-A43KIYPSAYIKVF | 297 | >SMAD4-A43KIYPSVYIKVF | 490 | 193 |
| >SMAD4-A43KIYPSAYIKVF | 398 | >SMAD4-A43KIYPSVYIKVF | 238 | 160 |
| >SMAD4-A43KIYPSAYIK   | 36  | >SMAD4-A43KIYPSVYIK   | 39  | 3   |
| >SMAD4-A43KIYPSAYI    | 94  | >SMAD4-A43KIYPSVYI    | 152 | 58  |
| >SMAD4-A43HKIYPSAY    | 292 | >SMAD4-A43HKIYPSVY    | 839 | 547 |
| >SMAD4-A43HKIYPSAYI   | 122 | >SMAD4-A43HKIYPSVYI   | 156 | 34  |
| >SMAD4-A43HKIYPSAYIKV | 382 | >SMAD4-A43HKIYPSVYIKV | 285 | 97  |
| >SMAD4-A43HKIYPSAY    | 289 | >SMAD4-A43HKIYPSVY    | 628 | 339 |
| >SMAD4-A43HKIYPSAY    | 3   | >SMAD4-A43HKIYPSVY    | 4   | 1   |

|                        |      |                        |      |      |
|------------------------|------|------------------------|------|------|
| >SMAD4-A43 HKIYPSAYI   | 25   | >SMAD4-A43 HKIYPSVYI   | 13   | 12   |
| >SMAD4-A43 HKIYPSAYIK  | 191  | >SMAD4-A43 HKIYPSVYIK  | 116  | 75   |
| >SMAD4-A43 HKIYPSAYIKV | 60   | >SMAD4-A43 HKIYPSVYIKV | 58   | 2    |
| >SMAD4-A43 HKIYPSAY    | 384  | >SMAD4-A43 HKIYPSVY    | 1375 | 991  |
| >SMAD4-A43 VHKIYPSAY   | 243  | >SMAD4-A43 VHKIYPSVY   | 301  | 58   |
| >SMAD4-A43 VHKIYPSAY   | 17   | >SMAD4-A43 VHKIYPSVY   | 35   | 18   |
| >SMAD4-A43 VHKIYPSAY   | 1512 | >SMAD4-A43 VHKIYPSVY   | 467  | 1045 |
| >SMAD4-A43 AVHKIYPSA   | 5485 | >SMAD4-A43 AVHKIYPSV   | 387  | 5098 |
| >SMAD4-A43 AVHKIYPSA   | 3892 | >SMAD4-A43 AVHKIYPSV   | 352  | 3540 |
| >SMAD4-A43 AVHKIYPSAYI | 401  | >SMAD4-A43 AVHKIYPSVYI | 596  | 195  |
| >SMAD4-A43 AVHKIYPSA   | 577  | >SMAD4-A43 AVHKIYPSV   | 41   | 536  |
| >SMAD4-A43 AVHKIYPSAYI | 220  | >SMAD4-A43 AVHKIYPSVYI | 625  | 405  |
| >SMAD4-A43 AVHKIYPSA   | 980  | >SMAD4-A43 AVHKIYPSV   | 44   | 936  |
| >SMAD4-A43 AVHKIYPSA   | 3814 | >SMAD4-A43 AVHKIYPSV   | 56   | 3758 |
| >SMAD4-A43 AVHKIYPSAYI | 235  | >SMAD4-A43 AVHKIYPSVYI | 281  | 46   |
| >SMAD4-A43 AVHKIYPSA   | 5256 | >SMAD4-A43 AVHKIYPSV   | 79   | 5177 |
| >SMAD4-A43 AVHKIYPSA   | 1200 | >SMAD4-A43 AVHKIYPSV   | 10   | 1190 |
| >SMAD4-A43 AVHKIYPSAY  | 47   | >SMAD4-A43 AVHKIYPSVY  | 101  | 54   |
| >SMAD4-A43 AVHKIYPSAY  | 410  | >SMAD4-A43 AVHKIYPSVY  | 679  | 269  |
| >SMAD4-A43 AVHKIYPSA   | 7    | >SMAD4-A43 AVHKIYPSV   | 9    | 2    |
| >SMAD4-A43 AVHKIYPSAY  | 80   | >SMAD4-A43 AVHKIYPSVY  | 123  | 43   |
| >SMAD4-A43 AVHKIYPSAYI | 7    | >SMAD4-A43 AVHKIYPSVYI | 9    | 2    |
| >SMAD4-A43 AVHKIYPSAYI | 1308 | >SMAD4-A43 AVHKIYPSVYI | 406  | 902  |
| >SMAD4-A43 AVHKIYPSAYI | 101  | >SMAD4-A43 AVHKIYPSVYI | 114  | 13   |
| >SMAD4-A43 AVHKIYPSA   | 7712 | >SMAD4-A43 AVHKIYPSV   | 393  | 7319 |
| >SMAD4-A43 AVHKIYPSAY  | 123  | >SMAD4-A43 AVHKIYPSVY  | 99   | 24   |
| >SMAD4-A43 AVHKIYPSAY  | 134  | >SMAD4-A43 AVHKIYPSVY  | 126  | 8    |
| >SMAD4-A43 AVHKIYPSAY  | 105  | >SMAD4-A43 AVHKIYPSVY  | 204  | 99   |
| >SMAD4-A43 AVHKIYPSAY  | 439  | >SMAD4-A43 AVHKIYPSVY  | 450  | 11   |
| >SMAD4-A43 AVHKIYPSAYI | 297  | >SMAD4-A43 AVHKIYPSVYI | 356  | 59   |
| >SMAD4-A43 DAVHKIYPSA  | 225  | >SMAD4-A43 DAVHKIYPSV  | 692  | 467  |
| >SMAD4-A43 DAVHKIYPSA  | 38   | >SMAD4-A43 DAVHKIYPSV  | 76   | 38   |
| >SMAD4-A43 DAVHKIYPSA  | 2293 | >SMAD4-A43 DAVHKIYPSV  | 457  | 1836 |
| >SMAD4-A43 DAVHKIYPSA  | 2057 | >SMAD4-A43 DAVHKIYPSV  | 60   | 1997 |
| >SMAD4-A43 DAVHKIYPSA  | 33   | >SMAD4-A43 DAVHKIYPSV  | 86   | 53   |
| >SMAD4-A45 AAAAQAAAV   | 79   | >SMAD4-A45 SAAQAQAAV   | 94   | 15   |
| >SMAD4-A45 AAAAQAAAV   | 87   | >SMAD4-A45 SAAQAQAAV   | 99   | 12   |
| >SMAD4-A45 AAAAQAAAV   | 59   | >SMAD4-A45 SAAQAQAAV   | 60   | 1    |
| >SMAD4-A45 AAAAQAAAV   | 591  | >SMAD4-A45 SAAQAQAAV   | 424  | 167  |
| >SMAD4-A45 AAAAQAAAV   | 100  | >SMAD4-A45 SAAQAQAAV   | 152  | 52   |
| >SMAD4-A45 AAAAQAAA    | 1544 | >SMAD4-A45 SAAQAQAAA   | 155  | 1389 |
| >SMAD4-A45 AAAAQAAAV   | 106  | >SMAD4-A45 SAAQAQAAV   | 17   | 89   |
| >SMAD4-A45 AAAAQAAAV   | 262  | >SMAD4-A45 SAAQAQAAV   | 24   | 238  |

|                       |      |                      |      |      |
|-----------------------|------|----------------------|------|------|
| >SMAD4-A45 AAAAAQAAA  | 465  | >SMAD4-A45 ASAAAQAAA | 620  | 155  |
| >SMAD4-A45 AAAAAQAAA  | 493  | >SMAD4-A45 ASAAAQAAA | 2163 | 1670 |
| >SMAD4-A45 AAAAAQAAA  | 76   | >SMAD4-A45 ASAAAQAAA | 4049 | 3973 |
| >SMAD4-A45 AAAAAQAAA  | 1281 | >SMAD4-A45 ASAAAQAAA | 441  | 840  |
| >SMAD4-A45 AAAAAQAAA  | 344  | >SMAD4-A45 ASAAAQAAA | 403  | 59   |
| >SMAD4-A45 AAAAAQAAA  | 72   | >SMAD4-A45 ASAAAQAAA | 69   | 3    |
| >SMAD4-A45 AAAAAQAAA  | 210  | >SMAD4-A45 ASAAAQAAA | 721  | 511  |
| >SMAD4-A45 AAAAAQAAA  | 1581 | >SMAD4-A45 ASAAAQAAA | 183  | 1398 |
| >SMAD4-A45 MQQQAATAI  | 56   | >SMAD4-A45 MQQQAATAI | 2090 | 2034 |
| >SMAD4-A45 MQQQAATAI  | 140  | >SMAD4-A45 MQQQAATAI | 1076 | 936  |
| >SMAD4-A45 MQQQAATAI  | 136  | >SMAD4-A45 MQQQAATAI | 749  | 613  |
| >SMAD4-A45 MQQQAATAI  | 250  | >SMAD4-A45 MQQQAATAI | 5729 | 5479 |
| >SMAD4-A45 QAAAAAQAA  | 304  | >SMAD4-A45 QASAAAQAA | 797  | 493  |
| >SMAD4-A45 QAAAAAQAA  | 143  | >SMAD4-A45 QASAAAQAA | 418  | 275  |
| >SMAD4-A45 QAAAAAQA   | 136  | >SMAD4-A45 QASAAAQA  | 798  | 662  |
| >SMAD4-A45 QAAAAAQAA  | 262  | >SMAD4-A45 QASAAAQAA | 1321 | 1059 |
| >SMAD4-A45 QAAAAAQAA  | 15   | >SMAD4-A45 QASAAAQAA | 37   | 22   |
| >SMAD4-A45 QAAAAAQAA  | 18   | >SMAD4-A45 QASAAAQAA | 68   | 50   |
| >SMAD4-A45 AQAAAAAQAA | 169  | >SMAD4-A45 AQASAAAQA | 248  | 79   |
| >SMAD4-A45 AQAAAAAQAA | 103  | >SMAD4-A45 AQASAAAQA | 142  | 39   |
| >SMAD4-A45 AQAAAAAQAA | 129  | >SMAD4-A45 AQASAAAQA | 152  | 23   |
| >SMAD4-A45 AQAAAAAQAA | 94   | >SMAD4-A45 AQASAAAQA | 108  | 14   |
| >SMAD4-A45 AQAAAAAQAA | 28   | >SMAD4-A45 AQASAAAQA | 63   | 35   |
| >SMAD4-A45 AQAAAAAQAA | 16   | >SMAD4-A45 AQASAAAQA | 29   | 13   |
| >SMAD4-A45 AQAAAAAQ   | 357  | >SMAD4-A45 AQASAAAQ  | 495  | 138  |
| >SMAD4-A45 AQAAAAAQAA | 281  | >SMAD4-A45 AQASAAAQA | 414  | 133  |
| >SMAD4-A45 AQAAAAAQAA | 138  | >SMAD4-A45 AQASAAAQA | 179  | 41   |
| >SMAD4-A45 AQAAAAAQAA | 118  | >SMAD4-A45 AQASAAAQA | 147  | 29   |
| >SMAD4-A45 AQAAAAAQAA | 204  | >SMAD4-A45 AQASAAAQA | 100  | 104  |
| >SMAD4-A45 AQAAAAAQAA | 421  | >SMAD4-A45 AQASAAAQA | 194  | 227  |
| >SMAD4-A45 AQAAAAAQAA | 126  | >SMAD4-A45 AQASAAAQA | 227  | 101  |
| >SMAD4-A45 ATAQAAAAA  | 819  | >SMAD4-A45 ATAQASAAA | 305  | 514  |
| >SMAD4-A45 ATAQAAAAA  | 658  | >SMAD4-A45 ATAQASAAA | 372  | 286  |
| >SMAD4-A45 ATAQAAAAA  | 410  | >SMAD4-A45 ATAQASAAA | 357  | 53   |
| >SMAD4-A45 ATAQAAAAA  | 375  | >SMAD4-A45 ATAQASAA  | 510  | 135  |
| >SMAD4-A45 ATAQAAAAA  | 239  | >SMAD4-A45 ATAQASAAA | 128  | 111  |
| >SMAD4-A45 ATAQAAAAA  | 315  | >SMAD4-A45 ATAQASAAA | 252  | 63   |
| >SMAD4-A45 ATAQAAAAA  | 2033 | >SMAD4-A45 ATAQASAAA | 452  | 1581 |
| >SMAD4-A45 ATAQAAAAA  | 325  | >SMAD4-A45 ATAQASAAA | 475  | 150  |
| >SMAD4-A45 QAATAQAA   | 359  | >SMAD4-A45 QAATAQAS  | 4117 | 3758 |
| >SMAD4-A45 QAATAQAAA  | 56   | >SMAD4-A45 QAATAQASA | 56   | 0    |
| >SMAD4-A45 QAATAQAAA  | 77   | >SMAD4-A45 QAATAQASA | 60   | 17   |
| >SMAD4-A45 QQAATAQAA  | 487  | >SMAD4-A45 QQAATAQAS | 426  | 61   |

|                       |       |                       |      |       |
|-----------------------|-------|-----------------------|------|-------|
| >SMAD4-A45 QQAATAQAA  | 72    | >SMAD4-A45 QQAATAQAS  | 1845 | 1773  |
| >SMAD4-A45 QQAATAQAA  | 50    | >SMAD4-A45 QQAATAQAS  | 82   | 32    |
| >SMAD4-A45 QQAATAQAA  | 404   | >SMAD4-A45 QQAATAQAS  | 3404 | 3000  |
| >SMAD4-A45 QQAATAQAA  | 345   | >SMAD4-A45 QQAATAQAS  | 376  | 31    |
| >SMAD4-A45 QQAATAQAA  | 321   | >SMAD4-A45 QQAATAQAS  | 339  | 18    |
| >SMAD4-A45 QQAATAQAA  | 90    | >SMAD4-A45 QQAATAQAS  | 435  | 345   |
| >SMAD4-A45 QQAATAQAA  | 222   | >SMAD4-A45 QQAATAQAS  | 252  | 30    |
| >SMAD4-A45 QQAATAQAA  | 249   | >SMAD4-A45 QQAATAQAS  | 116  | 133   |
| >SMAD4-A45 QQAATAQAA  | 426   | >SMAD4-A45 QQAATAQAS  | 8129 | 7703  |
| >SMAD4-A45 QQQAATAQ/  | 231   | >SMAD4-A45 QQQAATAQ/  | 275  | 44    |
| >SMAD4-A45 QQQAATAQ/  | 325   | >SMAD4-A45 QQQAATAQ/  | 2506 | 2181  |
| >SMAD4-A45 QQQAATAQ/  | 285   | >SMAD4-A45 QQQAATAQ/  | 309  | 24    |
| >SMAD4-C11 CQYAFDLK   | 187   | >SMAD4-C11 RQYAFDLK   | 44   | 143   |
| >SMAD4-C11 CQYAFDLK   | 30    | >SMAD4-C11 RQYAFDLK   | 14   | 16    |
| >SMAD4-C11 CQYAFDLK   | 5248  | >SMAD4-C11 RQYAFDLK   | 133  | 5115  |
| >SMAD4-C11 CQYAFDLK   | 1618  | >SMAD4-C11 RQYAFDLK   | 62   | 1556  |
| >SMAD4-C11 CQYAFDLK   | 1668  | >SMAD4-C11 RQYAFDLK   | 181  | 1487  |
| >SMAD4-C11 CQYAFDLK   | 2879  | >SMAD4-C11 RQYAFDLK   | 53   | 2826  |
| >SMAD4-C11 CQYAFDLKC  | 8197  | >SMAD4-C11 RQYAFDLKC  | 234  | 7963  |
| >SMAD4-C11 CQYAFDLK   | 12996 | >SMAD4-C11 RQYAFDLK   | 413  | 12583 |
| >SMAD4-C11 CQYAFDLKC  | 18762 | >SMAD4-C11 RQYAFDLKC  | 325  | 18437 |
| >SMAD4-C11 CQYAFDLK   | 357   | >SMAD4-C11 RQYAFDLK   | 95   | 262   |
| >SMAD4-C11 YCQYAFDL   | 5715  | >SMAD4-C11 YRQYAFDL   | 462  | 5253  |
| >SMAD4-C11 YCQYAFDL   | 22740 | >SMAD4-C11 YRQYAFDL   | 89   | 22651 |
| >SMAD4-C11 YCQYAFDLK  | 20314 | >SMAD4-C11 YRQYAFDLK  | 45   | 20269 |
| >SMAD4-C11 YCQYAFDL   | 9494  | >SMAD4-C11 YRQYAFDL   | 240  | 9254  |
| >SMAD4-C11 YCQYAFDL   | 25686 | >SMAD4-C11 YRQYAFDL   | 235  | 25451 |
| >SMAD4-C11 YCQYAFDLK  | 31817 | >SMAD4-C11 YRQYAFDLK  | 82   | 31735 |
| >SMAD4-C11 HKNELKHVKY | 32467 | >SMAD4-C11 HKNELKHVKY | 59   | 32408 |
| >SMAD4-C11 KYCQYAFDL  | 436   | >SMAD4-C11 KYRQYAFDL  | 473  | 37    |
| >SMAD4-C11 KYCQYAFDL  | 188   | >SMAD4-C11 KYRQYAFDL  | 219  | 31    |
| >SMAD4-C11 KYCQYAFDL  | 10    | >SMAD4-C11 KYRQYAFDL  | 24   | 14    |
| >SMAD4-C11 KYCQYAFD   | 2699  | >SMAD4-C11 KYRQYAFD   | 83   | 2616  |
| >SMAD4-C11 KYCQYAFDL  | 6913  | >SMAD4-C11 KYRQYAFDL  | 43   | 6870  |
| >SMAD4-C11 KYCQYAFDLK | 137   | >SMAD4-C11 KYRQYAFDLK | 4    | 133   |
| >SMAD4-C11 KYCQYAFDLK | 10357 | >SMAD4-C11 KYRQYAFDLK | 380  | 9977  |
| >SMAD4-C11 KYCQYAFDLK | 355   | >SMAD4-C11 KYRQYAFDLK | 429  | 74    |
| >SMAD4-C11 KYCQYAFDLK | 350   | >SMAD4-C11 KYRQYAFDLK | 549  | 199   |
| >SMAD4-C11 KYCQYAFDLK | 29    | >SMAD4-C11 KYRQYAFDLK | 52   | 23    |
| >SMAD4-C11 KYCQYAFDL  | 244   | >SMAD4-C11 KYRQYAFDL  | 431  | 187   |
| >SMAD4-C11 KYCQYAFDL  | 306   | >SMAD4-C11 KYRQYAFDL  | 262  | 44    |
| >SMAD4-C11 VKYCQYAF   | 2     | >SMAD4-C11 VKYRQYAF   | 2    | 0     |
| >SMAD4-C11 VKYCQYAFDL | 15    | >SMAD4-C11 VKYRQYAFDL | 21   | 6     |

|                      |       |                      |      |       |
|----------------------|-------|----------------------|------|-------|
| >SMAD4-C11VKYCQYAFDL | 351   | >SMAD4-C11VKYRQYAFDL | 597  | 246   |
| >SMAD4-C11HVKYCQYAF  | 249   | >SMAD4-C11HVKYRQYAF  | 533  | 284   |
| >SMAD4-C11HVKYCQYA   | 17    | >SMAD4-C11HVKYRQYA   | 7    | 10    |
| >SMAD4-C11HVKYCQYAF  | 1345  | >SMAD4-C11HVKYRQYAF  | 254  | 1091  |
| >SMAD4-C11HVKYCQYAFI | 256   | >SMAD4-C11HVKYRQYAFI | 123  | 133   |
| >SMAD4-C11HVKYCQYAFI | 379   | >SMAD4-C11HVKYRQYAFI | 127  | 252   |
| >SMAD4-C11HVKYCQYAF  | 155   | >SMAD4-C11HVKYRQYAF  | 76   | 79    |
| >SMAD4-C11HVKYCQYA   | 286   | >SMAD4-C11HVKYRQYA   | 640  | 354   |
| >SMAD4-C11HVKYCQYAF  | 2318  | >SMAD4-C11HVKYRQYAF  | 35   | 2283  |
| >SMAD4-C11HVKYCQYAFI | 3006  | >SMAD4-C11HVKYRQYAFI | 253  | 2753  |
| >SMAD4-C11HVKYCQYAF  | 111   | >SMAD4-C11HVKYRQYAF  | 124  | 13    |
| >SMAD4-C11HVKYCQYAF  | 50    | >SMAD4-C11HVKYRQYAF  | 157  | 107   |
| >SMAD4-C11HVKYCQYAF  | 105   | >SMAD4-C11HVKYRQYAF  | 621  | 516   |
| >SMAD4-C11HVKYCQYAF  | 520   | >SMAD4-C11HVKYRQYAF  | 238  | 282   |
| >SMAD4-C11KHVKYCQYAF | 628   | >SMAD4-C11KHVKYRQYAF | 223  | 405   |
| >SMAD4-C11KHVKYCQY   | 80    | >SMAD4-C11KHVKYRQY   | 106  | 26    |
| >SMAD4-C11KHVKYCQYAF | 8     | >SMAD4-C11KHVKYRQYAF | 8    | 0     |
| >SMAD4-C11LKHVKYCQYA | 1041  | >SMAD4-C11LKHVKYRQYA | 346  | 695   |
| >SMAD4-C11LKHVKYCQY  | 18    | >SMAD4-C11LKHVKYRQY  | 33   | 15    |
| >SMAD4-C11LKHVKYCQYA | 431   | >SMAD4-C11LKHVKYRQYA | 539  | 108   |
| >SMAD4-C11LKHVKYCQYA | 4     | >SMAD4-C11LKHVKYRQYA | 5    | 1     |
| >SMAD4-C11ELKHVKYCQY | 339   | >SMAD4-C11ELKHVKYRQY | 572  | 233   |
| >SMAD4-C11ELKHVKYC   | 20275 | >SMAD4-C11ELKHVKYR   | 80   | 20195 |
| >SMAD4-C11ELKHVKYC   | 24889 | >SMAD4-C11ELKHVKYR   | 30   | 24859 |
| >SMAD4-C11ELKHVKYC   | 34047 | >SMAD4-C11ELKHVKYR   | 31   | 34016 |
| >SMAD4-C11ELKHVKYCQY | 342   | >SMAD4-C11ELKHVKYRQY | 978  | 636   |
| >SMAD4-C11ELKHVKYC   | 35225 | >SMAD4-C11ELKHVKYR   | 125  | 35100 |
| >SMAD4-C11NELKHVKYCC | 108   | >SMAD4-C11NELKHVKYRC | 147  | 39    |
| >SMAD4-C11NELKHVKYCC | 26    | >SMAD4-C11NELKHVKYRC | 17   | 9     |
| >SMAD4-C11NELKHVKYCC | 205   | >SMAD4-C11NELKHVKYRC | 177  | 28    |
| >SMAD4-C11NELKHVKYCC | 149   | >SMAD4-C11NELKHVKYRC | 108  | 41    |
| >SMAD4-C11NELKHVKYC  | 31741 | >SMAD4-C11NELKHVKYR  | 71   | 31670 |
| >SMAD4-C11KNELKHVKYC | 22796 | >SMAD4-C11KNELKHVKYR | 69   | 22727 |
| >SMAD4-C25CHRQGGESE  | 4362  | >SMAD4-C25YHRQGGESE  | 192  | 4170  |
| >SMAD4-C25CHRQGGESE  | 43    | >SMAD4-C25YHRQGGESE  | 8    | 35    |
| >SMAD4-C25CHRQGGESE  | 3004  | >SMAD4-C25YHRQGGESE  | 203  | 2801  |
| >SMAD4-C25CHRQGGESE  | 353   | >SMAD4-C25YHRQGGESE  | 1323 | 970   |
| >SMAD4-C25MCHRQGGES  | 22151 | >SMAD4-C25MYHRQGGES  | 457  | 21694 |
| >SMAD4-C25MCHRQGGES  | 22066 | >SMAD4-C25MYHRQGGES  | 289  | 21777 |
| >SMAD4-C25MCHRQGGES  | 3419  | >SMAD4-C25MYHRQGGES  | 383  | 3036  |
| >SMAD4-C25ACLSIVHSLM | 21361 | >SMAD4-C25ACLSIVHSLM | 68   | 21293 |
| >SMAD4-C25ACLSIVHSLM | 27955 | >SMAD4-C25ACLSIVHSLM | 345  | 27610 |
| >SMAD4-C25ACLSIVHSLM | 24670 | >SMAD4-C25ACLSIVHSLM | 32   | 24638 |



|                       |       |                       |      |       |
|-----------------------|-------|-----------------------|------|-------|
| >SMAD4-C25 ACLSIVHSLM | 11582 | >SMAD4-C25 ACLSIVHSLM | 74   | 11508 |
| >SMAD4-C25 SLMCHRQGG  | 270   | >SMAD4-C25 SLMYHRQGG  | 319  | 49    |
| >SMAD4-C25 VHSLMCHR   | 864   | >SMAD4-C25 VHSLMYHR   | 413  | 451   |
| >SMAD4-C25 IVHSLMCH   | 2290  | >SMAD4-C25 IVHSLMYH   | 391  | 1899  |
| >SMAD4-C25 IVHSLMCHR  | 564   | >SMAD4-C25 IVHSLMYHR  | 136  | 428   |
| >SMAD4-C25 IVHSLMCHR  | 470   | >SMAD4-C25 IVHSLMYHR  | 1149 | 679   |
| >SMAD4-C25 IVHSLMCHR  | 9     | >SMAD4-C25 IVHSLMYHR  | 7    | 2     |
| >SMAD4-C25 IVHSLMCHR  | 66    | >SMAD4-C25 IVHSLMYHR  | 31   | 35    |
| >SMAD4-C25 IVHSLMCHR  | 34    | >SMAD4-C25 IVHSLMYHR  | 24   | 10    |
| >SMAD4-C25 IVHSLMCHR  | 2091  | >SMAD4-C25 IVHSLMYHR  | 444  | 1647  |
| >SMAD4-C25 IVHSLMCHR  | 48    | >SMAD4-C25 IVHSLMYHR  | 27   | 21    |
| >SMAD4-C25 SIVHSLMC   | 23058 | >SMAD4-C25 SIVHSLMY   | 263  | 22795 |
| >SMAD4-C25 SIVHSLMCH  | 1688  | >SMAD4-C25 SIVHSLMYH  | 277  | 1411  |
| >SMAD4-C25 SIVHSLMCHR | 158   | >SMAD4-C25 SIVHSLMYHR | 48   | 110   |
| >SMAD4-C25 SIVHSLMC   | 17891 | >SMAD4-C25 SIVHSLMY   | 218  | 17673 |
| >SMAD4-C25 SIVHSLMC   | 22969 | >SMAD4-C25 SIVHSLMY   | 59   | 22910 |
| >SMAD4-C25 SIVHSLMCH  | 1582  | >SMAD4-C25 SIVHSLMYH  | 416  | 1166  |
| >SMAD4-C25 SIVHSLMC   | 14564 | >SMAD4-C25 SIVHSLMY   | 21   | 14543 |
| >SMAD4-C25 SIVHSLMC   | 28702 | >SMAD4-C25 SIVHSLMY   | 276  | 28426 |
| >SMAD4-C25 SIVHSLMCHR | 50    | >SMAD4-C25 SIVHSLMYHR | 31   | 19    |
| >SMAD4-C25 SIVHSLMCHR | 94    | >SMAD4-C25 SIVHSLMYHR | 53   | 41    |
| >SMAD4-C25 SIVHSLMC   | 24021 | >SMAD4-C25 SIVHSLMY   | 27   | 23994 |
| >SMAD4-C25 SIVHSLMC   | 15782 | >SMAD4-C25 SIVHSLMY   | 103  | 15679 |
| >SMAD4-C25 SIVHSLMC   | 30296 | >SMAD4-C25 SIVHSLMY   | 497  | 29799 |
| >SMAD4-C25 SIVHSLMC   | 16131 | >SMAD4-C25 SIVHSLMY   | 467  | 15664 |
| >SMAD4-C25 SIVHSLMC   | 19476 | >SMAD4-C25 SIVHSLMY   | 104  | 19372 |
| >SMAD4-C25 SIVHSLMCHR | 92    | >SMAD4-C25 SIVHSLMYHR | 97   | 5     |
| >SMAD4-C25 SIVHSLMCHR | 957   | >SMAD4-C25 SIVHSLMYHR | 310  | 647   |
| >SMAD4-C25 SIVHSLMCHR | 85    | >SMAD4-C25 SIVHSLMYHR | 41   | 44    |
| >SMAD4-C25 LSIVHSLMC  | 18930 | >SMAD4-C25 LSIVHSLMY  | 64   | 18866 |
| >SMAD4-C25 LSIVHSLMC  | 33469 | >SMAD4-C25 LSIVHSLMY  | 498  | 32971 |
| >SMAD4-C25 LSIVHSLMC  | 15169 | >SMAD4-C25 LSIVHSLMY  | 9    | 15160 |
| >SMAD4-C25 LSIVHSLMC  | 30096 | >SMAD4-C25 LSIVHSLMY  | 326  | 29770 |
| >SMAD4-C25 LSIVHSLMCH | 28    | >SMAD4-C25 LSIVHSLMYH | 18   | 10    |
| >SMAD4-C25 LSIVHSLMCH | 447   | >SMAD4-C25 LSIVHSLMYH | 253  | 194   |
| >SMAD4-C25 LSIVHSLMCH | 5253  | >SMAD4-C25 LSIVHSLMYH | 482  | 4771  |
| >SMAD4-C25 LSIVHSLMCH | 43    | >SMAD4-C25 LSIVHSLMYH | 29   | 14    |
| >SMAD4-C25 LSIVHSLMC  | 24205 | >SMAD4-C25 LSIVHSLMY  | 302  | 23903 |
| >SMAD4-C25 LSIVHSLMC  | 9553  | >SMAD4-C25 LSIVHSLMY  | 41   | 9512  |
| >SMAD4-C25 LSIVHSLMC  | 7299  | >SMAD4-C25 LSIVHSLMY  | 57   | 7242  |
| >SMAD4-C25 LSIVHSLMC  | 2107  | >SMAD4-C25 LSIVHSLMY  | 3    | 2104  |
| >SMAD4-C25 LSIVHSLMCH | 1672  | >SMAD4-C25 LSIVHSLMYH | 277  | 1395  |
| >SMAD4-C25 LSIVHSLMC  | 19716 | >SMAD4-C25 LSIVHSLMY  | 160  | 19556 |

|                       |       |                       |      |       |
|-----------------------|-------|-----------------------|------|-------|
| >SMAD4-C25 LSIVHSLMC  | 3552  | >SMAD4-C25 LSIVHSLMY  | 43   | 3509  |
| >SMAD4-C25 LSIVHSLMC  | 14787 | >SMAD4-C25 LSIVHSLMY  | 92   | 14695 |
| >SMAD4-C25 LSIVHSLMCH | 221   | >SMAD4-C25 LSIVHSLMYH | 134  | 87    |
| >SMAD4-C25 CLSIVHSLMC | 33401 | >SMAD4-C25 CLSIVHSLMY | 461  | 32940 |
| >SMAD4-C25 CLSIVHSLMC | 12952 | >SMAD4-C25 CLSIVHSLMY | 235  | 12717 |
| >SMAD4-C25 CLSIVHSLMC | 25428 | >SMAD4-C25 CLSIVHSLMY | 123  | 25305 |
| >SMAD4-C25 CLSIVHSLMC | 30344 | >SMAD4-C25 CLSIVHSLMY | 441  | 29903 |
| >SMAD4-C25 CLSIVHSLMC | 24551 | >SMAD4-C25 CLSIVHSLMY | 30   | 24521 |
| >SMAD4-C25 CLSIVHSLMC | 19499 | >SMAD4-C25 CLSIVHSLMY | 362  | 19137 |
| >SMAD4-C25 CLSIVHSLMC | 17672 | >SMAD4-C25 CLSIVHSLMY | 103  | 17569 |
| >SMAD4-C32 CSIAYFEM   | 2390  | >SMAD4-C32 YSIAYFEM   | 210  | 2180  |
| >SMAD4-C32 CSIAYFEM   | 299   | >SMAD4-C32 YSIAYFEM   | 75   | 224   |
| >SMAD4-C32 CSIAYFEM   | 6832  | >SMAD4-C32 YSIAYFEM   | 229  | 6603  |
| >SMAD4-C32 CSIAYFEMDV | 2836  | >SMAD4-C32 YSIAYFEMDV | 181  | 2655  |
| >SMAD4-C32 CSIAYFEM   | 2570  | >SMAD4-C32 YSIAYFEM   | 221  | 2349  |
| >SMAD4-C32 CSIAYFEMDV | 2890  | >SMAD4-C32 YSIAYFEMDV | 265  | 2625  |
| >SMAD4-C32 CSIAYFEM   | 2234  | >SMAD4-C32 YSIAYFEM   | 38   | 2196  |
| >SMAD4-C32 CSIAYFEMDV | 1773  | >SMAD4-C32 YSIAYFEMDV | 95   | 1678  |
| >SMAD4-C32 CSIAYFEM   | 209   | >SMAD4-C32 YSIAYFEM   | 28   | 181   |
| >SMAD4-C32 CSIAYFEMDV | 1395  | >SMAD4-C32 YSIAYFEMDV | 204  | 1191  |
| >SMAD4-C32 CSIAYFEM   | 908   | >SMAD4-C32 YSIAYFEM   | 239  | 669   |
| >SMAD4-C32 CSIAYFEMDV | 56    | >SMAD4-C32 YSIAYFEMDV | 22   | 34    |
| >SMAD4-C32 CSIAYFEM   | 5273  | >SMAD4-C32 YSIAYFEM   | 177  | 5096  |
| >SMAD4-C32 CSIAYFEMDV | 4824  | >SMAD4-C32 YSIAYFEMDV | 240  | 4584  |
| >SMAD4-C32 CSIAYFEM   | 2225  | >SMAD4-C32 YSIAYFEM   | 132  | 2093  |
| >SMAD4-C32 CSIAYFEM   | 622   | >SMAD4-C32 YSIAYFEM   | 51   | 571   |
| >SMAD4-C32 CSIAYFEMDV | 1353  | >SMAD4-C32 YSIAYFEMDV | 148  | 1205  |
| >SMAD4-C32 CSIAYFEM   | 93    | >SMAD4-C32 YSIAYFEM   | 7    | 86    |
| >SMAD4-C32 CSIAYFEM   | 688   | >SMAD4-C32 YSIAYFEM   | 78   | 610   |
| >SMAD4-C32 CSIAYFEM   | 85    | >SMAD4-C32 YSIAYFEM   | 47   | 38    |
| >SMAD4-C32 CSIAYFEM   | 962   | >SMAD4-C32 YSIAYFEM   | 96   | 866   |
| >SMAD4-C32 CSIAYFEM   | 317   | >SMAD4-C32 YSIAYFEM   | 2128 | 1811  |
| >SMAD4-C32 WCSIAYFEM  | 17712 | >SMAD4-C32 WYSIAYFEM  | 227  | 17485 |
| >SMAD4-C32 WCSIAYFEM  | 16042 | >SMAD4-C32 WYSIAYFEM  | 241  | 15801 |
| >SMAD4-C32 WCSIAYFEM  | 9871  | >SMAD4-C32 WYSIAYFEM  | 7    | 9864  |
| >SMAD4-C32 WCSIAYFEMI | 21181 | >SMAD4-C32 WYSIAYFEMI | 287  | 20894 |
| >SMAD4-C32 WCSIAYFEMI | 20671 | >SMAD4-C32 WYSIAYFEMI | 35   | 20636 |
| >SMAD4-C32 WCSIAYFEM  | 143   | >SMAD4-C32 WYSIAYFEM  | 354  | 211   |
| >SMAD4-C32 ISNHPAPEYV | 23735 | >SMAD4-C32 ISNHPAPEYV | 383  | 23352 |
| >SMAD4-C32 ISNHPAPEYV | 17108 | >SMAD4-C32 ISNHPAPEYV | 25   | 17083 |
| >SMAD4-C32 ISNHPAPEYV | 15660 | >SMAD4-C32 ISNHPAPEYV | 255  | 15405 |
| >SMAD4-C32 ISNHPAPEYV | 5126  | >SMAD4-C32 ISNHPAPEYV | 5    | 5121  |
| >SMAD4-C32 ISNHPAPEYV | 12838 | >SMAD4-C32 ISNHPAPEYV | 205  | 12633 |

|                        |       |                        |      |       |
|------------------------|-------|------------------------|------|-------|
| >SMAD4-C32 ISNHPAPEYM  | 12020 | >SMAD4-C32 ISNHPAPEYM  | 154  | 11866 |
| >SMAD4-C32 ISNHPAPEYM  | 7854  | >SMAD4-C32 ISNHPAPEYM  | 26   | 7828  |
| >SMAD4-C32 ISNHPAPEYM  | 36219 | >SMAD4-C32 ISNHPAPEYM  | 172  | 36047 |
| >SMAD4-C32 YWCSIAYF    | 46    | >SMAD4-C32 YWYSIAYF    | 15   | 31    |
| >SMAD4-C32 YWCSIAYFEM  | 277   | >SMAD4-C32 YWYSIAYFEM  | 180  | 97    |
| >SMAD4-C32 YWCSIAYF    | 100   | >SMAD4-C32 YWYSIAYF    | 57   | 43    |
| >SMAD4-C32 YWCSIAYF    | 6     | >SMAD4-C32 YWYSIAYF    | 5    | 1     |
| >SMAD4-C32 YWCSIAYFEM  | 29    | >SMAD4-C32 YWYSIAYFEM  | 23   | 6     |
| >SMAD4-C32 YWCSIAYF    | 92    | >SMAD4-C32 YWYSIAYF    | 31   | 61    |
| >SMAD4-C32 YWCSIAYFE   | 757   | >SMAD4-C32 YWYSIAYFE   | 143  | 614   |
| >SMAD4-C32 YWCSIAYF    | 552   | >SMAD4-C32 YWYSIAYF    | 38   | 514   |
| >SMAD4-C32 YWCSIAYFEM  | 5652  | >SMAD4-C32 YWYSIAYFEM  | 464  | 5188  |
| >SMAD4-C32 YWCSIAYFE   | 349   | >SMAD4-C32 YWYSIAYFE   | 178  | 171   |
| >SMAD4-C32 YWCSIAYF    | 120   | >SMAD4-C32 YWYSIAYF    | 49   | 71    |
| >SMAD4-C32 YWCSIAYFE   | 131   | >SMAD4-C32 YWYSIAYFE   | 48   | 83    |
| >SMAD4-C32 YWCSIAYFEM  | 2592  | >SMAD4-C32 YWYSIAYFEM  | 358  | 2234  |
| >SMAD4-C32 YWCSIAYFEM  | 701   | >SMAD4-C32 YWYSIAYFEM  | 261  | 440   |
| >SMAD4-C32 EYWCSIAYF   | 23    | >SMAD4-C32 EYWYSIAYF   | 23   | 0     |
| >SMAD4-C32 EYWCSIAYFEI | 309   | >SMAD4-C32 EYWYSIAYFEI | 339  | 30    |
| >SMAD4-C32 EYWCSIAYF   | 271   | >SMAD4-C32 EYWYSIAYF   | 214  | 57    |
| >SMAD4-C32 EYWCSIAYF   | 20    | >SMAD4-C32 EYWYSIAYF   | 25   | 5     |
| >SMAD4-C32 EYWCSIAYFEI | 102   | >SMAD4-C32 EYWYSIAYFEI | 134  | 32    |
| >SMAD4-C32 EYWCSIAY    | 199   | >SMAD4-C32 EYWYSIAY    | 116  | 83    |
| >SMAD4-C32 EYWCSIAYF   | 52    | >SMAD4-C32 EYWYSIAYF   | 28   | 24    |
| >SMAD4-C32 EYWCSIAYFEI | 645   | >SMAD4-C32 EYWYSIAYFEI | 400  | 245   |
| >SMAD4-C32 EYWCSIAY    | 161   | >SMAD4-C32 EYWYSIAY    | 667  | 506   |
| >SMAD4-C32 EYWCSIAY    | 60    | >SMAD4-C32 EYWYSIAY    | 36   | 24    |
| >SMAD4-C32 EYWCSIAYF   | 1021  | >SMAD4-C32 EYWYSIAYF   | 405  | 616   |
| >SMAD4-C32 EYWCSIAY    | 1095  | >SMAD4-C32 EYWYSIAY    | 257  | 838   |
| >SMAD4-C32 EYWCSIAYF   | 590   | >SMAD4-C32 EYWYSIAYF   | 398  | 192   |
| >SMAD4-C32 EYWCSIAYFEI | 430   | >SMAD4-C32 EYWYSIAYFEI | 1105 | 675   |
| >SMAD4-C32 EYWCSIAY    | 466   | >SMAD4-C32 EYWYSIAY    | 438  | 28    |
| >SMAD4-C32 EYWCSIAYF   | 218   | >SMAD4-C32 EYWYSIAYF   | 220  | 2     |
| >SMAD4-C32 EYWCSIAY    | 41    | >SMAD4-C32 EYWYSIAY    | 65   | 24    |
| >SMAD4-C32 EYWCSIAYFEI | 326   | >SMAD4-C32 EYWYSIAYFEI | 628  | 302   |
| >SMAD4-C32 EYWCSIAYFE  | 292   | >SMAD4-C32 EYWYSIAYFE  | 520  | 228   |
| >SMAD4-C32 EYWCSIAYFEI | 502   | >SMAD4-C32 EYWYSIAYFEI | 273  | 229   |
| >SMAD4-C32 PEYWCSIAYF  | 362   | >SMAD4-C32 PEYWYSIAYF  | 274  | 88    |
| >SMAD4-C32 PEYWCSIAY   | 8     | >SMAD4-C32 PEYWYSIAY   | 7    | 1     |
| >SMAD4-C32 PEYWCSIAY   | 201   | >SMAD4-C32 PEYWYSIAY   | 305  | 104   |
| >SMAD4-C32 PEYWCSIAYF  | 177   | >SMAD4-C32 PEYWYSIAYF  | 603  | 426   |
| >SMAD4-C32 PEYWCSIAYF  | 84    | >SMAD4-C32 PEYWYSIAYF  | 87   | 3     |
| >SMAD4-C32 PEYWCSIAY   | 185   | >SMAD4-C32 PEYWYSIAY   | 169  | 16    |

|                        |       |                        |      |       |
|------------------------|-------|------------------------|------|-------|
| >SMAD4-C32 PEYWCSIA YF | 133   | >SMAD4-C32 PEYWYSIA YF | 112  | 21    |
| >SMAD4-C32 PEYWCSIA    | 482   | >SMAD4-C32 PEYWYSIA    | 131  | 351   |
| >SMAD4-C32 APEYWCSIA Y | 226   | >SMAD4-C32 APEYWYSIA Y | 209  | 17    |
| >SMAD4-C32 APEYWCSI    | 309   | >SMAD4-C32 APEYWYSI    | 236  | 73    |
| >SMAD4-C32 APEYWCSIA Y | 518   | >SMAD4-C32 APEYWYSIA Y | 285  | 233   |
| >SMAD4-C32 APEYWCSI    | 320   | >SMAD4-C32 APEYWYSI    | 88   | 232   |
| >SMAD4-C32 APEYWCSIA Y | 1104  | >SMAD4-C32 APEYWYSIA Y | 438  | 666   |
| >SMAD4-C32 APEYWCSIA Y | 519   | >SMAD4-C32 APEYWYSIA Y | 194  | 325   |
| >SMAD4-C32 APEYWCSIA   | 1321  | >SMAD4-C32 APEYWYSIA   | 315  | 1006  |
| >SMAD4-C32 APEYWCSIA Y | 416   | >SMAD4-C32 APEYWYSIA Y | 597  | 181   |
| >SMAD4-C32 APEYWCSIA Y | 47    | >SMAD4-C32 APEYWYSIA Y | 29   | 18    |
| >SMAD4-C32 APEYWCSIA Y | 107   | >SMAD4-C32 APEYWYSIA Y | 33   | 74    |
| >SMAD4-C32 APEYWCSIA Y | 64    | >SMAD4-C32 APEYWYSIA Y | 23   | 41    |
| >SMAD4-C32 PAPEYWCSIA  | 144   | >SMAD4-C32 PAPEYWYSIA  | 109  | 35    |
| >SMAD4-C32 PAPEYWCSI   | 2038  | >SMAD4-C32 PAPEYWYSI   | 136  | 1902  |
| >SMAD4-C32 HPAPEYWCSI  | 655   | >SMAD4-C32 HPAPEYWYSI  | 338  | 317   |
| >SMAD4-C32 HPAPEYWC    | 1234  | >SMAD4-C32 HPAPEYWY    | 13   | 1221  |
| >SMAD4-C32 HPAPEYWCS   | 425   | >SMAD4-C32 HPAPEYWYS   | 1364 | 939   |
| >SMAD4-C32 HPAPEYWCSI  | 281   | >SMAD4-C32 HPAPEYWYSI  | 556  | 275   |
| >SMAD4-C32 HPAPEYWCSI  | 249   | >SMAD4-C32 HPAPEYWYSI  | 285  | 36    |
| >SMAD4-C32 HPAPEYWCSI  | 289   | >SMAD4-C32 HPAPEYWYSI  | 131  | 158   |
| >SMAD4-C32 HPAPEYWC    | 9465  | >SMAD4-C32 HPAPEYWY    | 69   | 9396  |
| >SMAD4-C32 HPAPEYWCSI  | 1116  | >SMAD4-C32 HPAPEYWYSI  | 199  | 917   |
| >SMAD4-C32 HPAPEYWCSI  | 81    | >SMAD4-C32 HPAPEYWYSI  | 46   | 35    |
| >SMAD4-C32 HPAPEYWC    | 18576 | >SMAD4-C32 HPAPEYWY    | 11   | 18565 |
| >SMAD4-C32 HPAPEYWCSI  | 509   | >SMAD4-C32 HPAPEYWYSI  | 116  | 393   |
| >SMAD4-C32 HPAPEYWC    | 36743 | >SMAD4-C32 HPAPEYWY    | 234  | 36509 |
| >SMAD4-C36 CLGQLSNV    | 964   | >SMAD4-C36 RLGQLSNV    | 260  | 704   |
| >SMAD4-C36 CLGQLSNV    | 112   | >SMAD4-C36 RLGQLSNV    | 28   | 84    |
| >SMAD4-C36 CLGQLSNV    | 71    | >SMAD4-C36 RLGQLSNV    | 14   | 57    |
| >SMAD4-C36 CLGQLSNV    | 2574  | >SMAD4-C36 RLGQLSNV    | 339  | 2235  |
| >SMAD4-C36 CLGQLSNV    | 21    | >SMAD4-C36 RLGQLSNV    | 4    | 17    |
| >SMAD4-C36 CLGQLSNVHF  | 1399  | >SMAD4-C36 RLGQLSNVHF  | 167  | 1232  |
| >SMAD4-C36 CLGQLSNV    | 46    | >SMAD4-C36 RLGQLSNV    | 11   | 35    |
| >SMAD4-C36 CLGQLSNV    | 44    | >SMAD4-C36 RLGQLSNV    | 9    | 35    |
| >SMAD4-C36 CLGQLSNV    | 18    | >SMAD4-C36 RLGQLSNV    | 16   | 2     |
| >SMAD4-C36 CLGQLSNV    | 5     | >SMAD4-C36 RLGQLSNV    | 3    | 2     |
| >SMAD4-C36 CLGQLSNVHF  | 352   | >SMAD4-C36 RLGQLSNVHF  | 92   | 260   |
| >SMAD4-C36 CLGQLSNVHF  | 471   | >SMAD4-C36 RLGQLSNVHF  | 61   | 410   |
| >SMAD4-C36 CLGQLSNVH   | 5777  | >SMAD4-C36 RLGQLSNVH   | 415  | 5362  |
| >SMAD4-C36 CLGQLSNVHF  | 235   | >SMAD4-C36 RLGQLSNVHF  | 61   | 174   |
| >SMAD4-C36 CLGQLSNVHF  | 50    | >SMAD4-C36 RLGQLSNVHF  | 23   | 27    |
| >SMAD4-C36 FCLGQLSNV   | 139   | >SMAD4-C36 FRLGQLSNV   | 2072 | 1933  |

|                        |       |                        |      |       |
|------------------------|-------|------------------------|------|-------|
| >SMAD4-C3E FCLGQLSNV   | 35    | >SMAD4-C3E FRLGQLSNV   | 619  | 584   |
| >SMAD4-C3E FCLGQLSNV   | 277   | >SMAD4-C3E FRLGQLSNV   | 4358 | 4081  |
| >SMAD4-C3E FCLGQLSNV   | 89    | >SMAD4-C3E FRLGQLSNV   | 1655 | 1566  |
| >SMAD4-C3E FCLGQLSNV   | 10    | >SMAD4-C3E FRLGQLSNV   | 131  | 121   |
| >SMAD4-C3E FCLGQLSNV   | 212   | >SMAD4-C3E FRLGQLSNV   | 7901 | 7689  |
| >SMAD4-C3E FCLGQLSNV   | 22825 | >SMAD4-C3E FRLGQLSNV   | 88   | 22737 |
| >SMAD4-C3E FCLGQLSNVF  | 20026 | >SMAD4-C3E FRLGQLSNVF  | 43   | 19983 |
| >SMAD4-C3E FCLGQLSNVF  | 120   | >SMAD4-C3E FRLGQLSNVF  | 331  | 211   |
| >SMAD4-C3E YVDPSSGGDRI | 36444 | >SMAD4-C3E YVDPSSGGDRI | 96   | 36348 |
| >SMAD4-C3E RFCLGQLS    | 7154  | >SMAD4-C3E RFRLGQLS    | 37   | 7117  |
| >SMAD4-C3E RFCLGQLSN   | 5951  | >SMAD4-C3E RFRLGQLSN   | 61   | 5890  |
| >SMAD4-C3E RFCLGQLSNV  | 1511  | >SMAD4-C3E RFRLGQLSNV  | 8    | 1503  |
| >SMAD4-C3E RFCLGQLSNV  | 9045  | >SMAD4-C3E RFRLGQLSNV  | 127  | 8918  |
| >SMAD4-C3E RFCLGQLSNV  | 236   | >SMAD4-C3E RFRLGQLSNV  | 256  | 20    |
| >SMAD4-C3E DRFCLGQL    | 469   | >SMAD4-C3E DRFRLGQL    | 248  | 221   |
| >SMAD4-C3E GDRFCLGQL   | 454   | >SMAD4-C3E GDRFRLGQL   | 1468 | 1014  |
| >SMAD4-C3E GDRFCLGQL   | 307   | >SMAD4-C3E GDRFRLGQL   | 346  | 39    |
| >SMAD4-C3E DPSGGDRFC   | 37043 | >SMAD4-C3E DPSGGDRFR   | 270  | 36773 |
| >SMAD4-C3E CLGQLSNV    | 964   | >SMAD4-C3E SLGQLSNV    | 138  | 826   |
| >SMAD4-C3E CLGQLSNV    | 112   | >SMAD4-C3E SLGQLSNV    | 16   | 96    |
| >SMAD4-C3E CLGQLSNV    | 71    | >SMAD4-C3E SLGQLSNV    | 17   | 54    |
| >SMAD4-C3E CLGQLSNV    | 21    | >SMAD4-C3E SLGQLSNV    | 4    | 17    |
| >SMAD4-C3E CLGQLSNVHF  | 1399  | >SMAD4-C3E SLGQLSNVHF  | 147  | 1252  |
| >SMAD4-C3E CLGQLSNV    | 46    | >SMAD4-C3E SLGQLSNV    | 13   | 33    |
| >SMAD4-C3E CLGQLSNV    | 44    | >SMAD4-C3E SLGQLSNV    | 6    | 38    |
| >SMAD4-C3E CLGQLSNVHF  | 8114  | >SMAD4-C3E SLGQLSNVHF  | 292  | 7822  |
| >SMAD4-C3E CLGQLSNV    | 18    | >SMAD4-C3E SLGQLSNV    | 24   | 6     |
| >SMAD4-C3E CLGQLSNV    | 5     | >SMAD4-C3E SLGQLSNV    | 2    | 3     |
| >SMAD4-C3E CLGQLSNVHF  | 352   | >SMAD4-C3E SLGQLSNVHF  | 37   | 315   |
| >SMAD4-C3E CLGQLSNVHF  | 471   | >SMAD4-C3E SLGQLSNVHF  | 157  | 314   |
| >SMAD4-C3E CLGQLSNVHF  | 235   | >SMAD4-C3E SLGQLSNVHF  | 106  | 129   |
| >SMAD4-C3E CLGQLSNVHF  | 50    | >SMAD4-C3E SLGQLSNVHF  | 50   | 0     |
| >SMAD4-C3E FCLGQLSNV   | 549   | >SMAD4-C3E FSLGQLSNV   | 217  | 332   |
| >SMAD4-C3E FCLGQLSNV   | 139   | >SMAD4-C3E FSLGQLSNV   | 79   | 60    |
| >SMAD4-C3E FCLGQLSNV   | 513   | >SMAD4-C3E FSLGQLSNV   | 130  | 383   |
| >SMAD4-C3E FCLGQLSNV   | 594   | >SMAD4-C3E FSLGQLSNV   | 38   | 556   |
| >SMAD4-C3E FCLGQLSNV   | 35    | >SMAD4-C3E FSLGQLSNV   | 68   | 33    |
| >SMAD4-C3E FCLGQLSNV   | 277   | >SMAD4-C3E FSLGQLSNV   | 1787 | 1510  |
| >SMAD4-C3E FCLGQLSNV   | 89    | >SMAD4-C3E FSLGQLSNV   | 324  | 235   |
| >SMAD4-C3E FCLGQLSNV   | 10    | >SMAD4-C3E FSLGQLSNV   | 65   | 55    |
| >SMAD4-C3E FCLGQLSNVF  | 4312  | >SMAD4-C3E FSLGQLSNVH  | 244  | 4068  |
| >SMAD4-C3E FCLGQLSNVF  | 696   | >SMAD4-C3E FSLGQLSNVH  | 224  | 472   |
| >SMAD4-C3E FCLGQLSNVF  | 3225  | >SMAD4-C3E FSLGQLSNVH  | 86   | 3139  |

|                       |       |                       |      |       |
|-----------------------|-------|-----------------------|------|-------|
| >SMAD4-C3E FCLGQLSNV  | 2369  | >SMAD4-C3E FSLGQLSNV  | 447  | 1922  |
| >SMAD4-C3E FCLGQLSNV  | 212   | >SMAD4-C3E FSLGQLSNV  | 67   | 145   |
| >SMAD4-C3E FCLGQLSNV  | 13518 | >SMAD4-C3E FSLGQLSNV  | 196  | 13322 |
| >SMAD4-C3E FCLGQLSNV  | 1511  | >SMAD4-C3E FSLGQLSNV  | 317  | 1194  |
| >SMAD4-C3E FCLGQLSNVH | 120   | >SMAD4-C3E FSLGQLSNVH | 483  | 363   |
| >SMAD4-C3E RFCLGQLSNV | 236   | >SMAD4-C3E RFSLGQLSNV | 217  | 19    |
| >SMAD4-C3E DRFCLGQL   | 469   | >SMAD4-C3E DRFSLGQL   | 402  | 67    |
| >SMAD4-C3E GDRFCLGQL  | 454   | >SMAD4-C3E GDRFSLGQL  | 985  | 531   |
| >SMAD4-C3E GDRFCLGQL  | 307   | >SMAD4-C3E GDRFSLGQL  | 378  | 71    |
| >SMAD4-C4C CLSDHAVFV  | 18    | >SMAD4-C4C RLSDHAVFV  | 10   | 8     |
| >SMAD4-C4C CLSDHAVFV  | 4     | >SMAD4-C4C RLSDHAVFV  | 3    | 1     |
| >SMAD4-C4C CLSDHAVFVC | 413   | >SMAD4-C4C RLSDHAVFVC | 184  | 229   |
| >SMAD4-C4C CLSDHAVFV  | 5     | >SMAD4-C4C RLSDHAVFV  | 3    | 2     |
| >SMAD4-C4C CLSDHAVFVC | 1488  | >SMAD4-C4C RLSDHAVFVC | 423  | 1065  |
| >SMAD4-C4C CLSDHAVFV  | 17    | >SMAD4-C4C RLSDHAVFV  | 5    | 12    |
| >SMAD4-C4C CLSDHAVFV  | 5     | >SMAD4-C4C RLSDHAVFV  | 2    | 3     |
| >SMAD4-C4C CLSDHAVFV  | 6     | >SMAD4-C4C RLSDHAVFV  | 3    | 3     |
| >SMAD4-C4C CLSDHAVFV  | 10    | >SMAD4-C4C RLSDHAVFV  | 5    | 5     |
| >SMAD4-C4C CLSDHAVFV  | 3     | >SMAD4-C4C RLSDHAVFV  | 3    | 0     |
| >SMAD4-C4C CLSDHAVFV  | 3     | >SMAD4-C4C RLSDHAVFV  | 2    | 1     |
| >SMAD4-C4C CLSDHAVFVC | 257   | >SMAD4-C4C RLSDHAVFVC | 69   | 188   |
| >SMAD4-C4C CLSDHAVFVC | 1420  | >SMAD4-C4C RLSDHAVFVC | 275  | 1145  |
| >SMAD4-C4C CLSDHAVF   | 8524  | >SMAD4-C4C RLSDHAVF   | 72   | 8452  |
| >SMAD4-C4C CLSDHAVFV  | 183   | >SMAD4-C4C RLSDHAVFV  | 1886 | 1703  |
| >SMAD4-C4C CLSDHAVFV  | 504   | >SMAD4-C4C RLSDHAVFV  | 473  | 31    |
| >SMAD4-C4C CLSDHAVF   | 138   | >SMAD4-C4C RLSDHAVF   | 40   | 98    |
| >SMAD4-C4C CLSDHAVF   | 178   | >SMAD4-C4C RLSDHAVF   | 20   | 158   |
| >SMAD4-C4C CLSDHAVF   | 4742  | >SMAD4-C4C RLSDHAVF   | 56   | 4686  |
| >SMAD4-C4C RCLSDHAV   | 265   | >SMAD4-C4C RRLSDHAV   | 3268 | 3003  |
| >SMAD4-C4C RCLSDHAVFV | 142   | >SMAD4-C4C RRLSDHAVFV | 2063 | 1921  |
| >SMAD4-C4C RCLSDHAVFV | 414   | >SMAD4-C4C RRLSDHAVFV | 4335 | 3921  |
| >SMAD4-C4C RCLSDHAVF  | 462   | >SMAD4-C4C RRLSDHAVF  | 4430 | 3968  |
| >SMAD4-C4C RCLSDHAV   | 2499  | >SMAD4-C4C RRLSDHAV   | 67   | 2432  |
| >SMAD4-C4C RCLSDHAVF  | 23    | >SMAD4-C4C RRLSDHAVF  | 3    | 20    |
| >SMAD4-C4C RCLSDHAVFV | 2396  | >SMAD4-C4C RRLSDHAVFV | 79   | 2317  |
| >SMAD4-C4C RCLSDHAV   | 20682 | >SMAD4-C4C RRLSDHAV   | 58   | 20624 |
| >SMAD4-C4C RCLSDHAVF  | 17945 | >SMAD4-C4C RRLSDHAVF  | 73   | 17872 |
| >SMAD4-C4C RCLSDHAVFV | 24021 | >SMAD4-C4C RRLSDHAVFV | 44   | 23977 |
| >SMAD4-C4C RCLSDHAVFV | 24390 | >SMAD4-C4C RRLSDHAVFV | 244  | 24146 |
| >SMAD4-C4C RCLSDHAVF  | 37    | >SMAD4-C4C RRLSDHAVF  | 434  | 397   |
| >SMAD4-C4C RCLSDHAV   | 16183 | >SMAD4-C4C RRLSDHAV   | 99   | 16084 |
| >SMAD4-C4C RCLSDHAVF  | 18384 | >SMAD4-C4C RRLSDHAVF  | 73   | 18311 |
| >SMAD4-C4C RCLSDHAVFV | 19390 | >SMAD4-C4C RRLSDHAVFV | 128  | 19262 |

|                       |       |                        |      |       |
|-----------------------|-------|------------------------|------|-------|
| >SMAD4-C4C RCLSDHAVFV | 28404 | >SMAD4-C4C RRLSDHAVFV  | 402  | 28002 |
| >SMAD4-C4C RCLSDHAVF  | 22343 | >SMAD4-C4C RRLSDHAVF   | 87   | 22256 |
| >SMAD4-C4C RCLSDHAVFV | 22353 | >SMAD4-C4C RRLSDHAVFV  | 75   | 22278 |
| >SMAD4-C4C RCLSDHAVF  | 12914 | >SMAD4-C4C RRLSDHAVF   | 160  | 12754 |
| >SMAD4-C4C VRCLSDHAVF | 94    | >SMAD4-C4C VRRLSHDHAVF | 22   | 72    |
| >SMAD4-C4C VRCLSDHAVF | 717   | >SMAD4-C4C VRRLSHDHAVF | 285  | 432   |
| >SMAD4-C4C WVRCLSDHA  | 255   | >SMAD4-C4C WVRRLSDHA   | 85   | 170   |
| >SMAD4-C4C WVRCLSDHA  | 38    | >SMAD4-C4C WVRRLSDHA   | 47   | 9     |
| >SMAD4-C4C WVRCLSDHA  | 77    | >SMAD4-C4C WVRRLSDHA   | 109  | 32    |
| >SMAD4-C4C WVRCLSDHA  | 150   | >SMAD4-C4C WVRRLSDHA   | 230  | 80    |
| >SMAD4-C4C WVRCLSDHA  | 110   | >SMAD4-C4C WVRRLSDHA   | 297  | 187   |
| >SMAD4-C4C WVRCLSDHA  | 15    | >SMAD4-C4C WVRRLSDHA   | 14   | 1     |
| >SMAD4-C4C VWVRCLSDH  | 1031  | >SMAD4-C4C VWVRRLSDH   | 425  | 606   |
| >SMAD4-C4C VWVRCLSD   | 439   | >SMAD4-C4C VWVRRLSD    | 518  | 79    |
| >SMAD4-C4C VWVRCLSDH  | 91    | >SMAD4-C4C VWVRRLSDH   | 85   | 6     |
| >SMAD4-C4C GDVWVRCL   | 412   | >SMAD4-C4C GDVWVRRL    | 838  | 426   |
| >SMAD4-C4C GEGDVWVR(C | 462   | >SMAD4-C4C GEGDVWVR(F  | 3117 | 2655  |
| >SMAD4-C4C GEGDVWVR(C | 69    | >SMAD4-C4C GEGDVWVR(F  | 409  | 340   |
| >SMAD4-C4C GEGDVWVR(C | 186   | >SMAD4-C4C GEGDVWVR(F  | 594  | 408   |
| >SMAD4-C4C GEGDVWVR(C | 467   | >SMAD4-C4C GEGDVWVR(F  | 997  | 530   |
| >SMAD4-C4C KEGGDVWVF  | 33715 | >SMAD4-C4C KEGGDVWVF   | 81   | 33634 |
| >SMAD4-C49 CILRMSFV   | 279   | >SMAD4-C49 YILRMSFV    | 12   | 267   |
| >SMAD4-C49 CILRMSFV   | 471   | >SMAD4-C49 YILRMSFV    | 24   | 447   |
| >SMAD4-C49 CILRMSFV   | 235   | >SMAD4-C49 YILRMSFV    | 11   | 224   |
| >SMAD4-C49 CILRMSFV   | 42    | >SMAD4-C49 YILRMSFV    | 4    | 38    |
| >SMAD4-C49 CILRMSFV   | 65    | >SMAD4-C49 YILRMSFV    | 3    | 62    |
| >SMAD4-C49 CILRMSFV   | 201   | >SMAD4-C49 YILRMSFV    | 7    | 194   |
| >SMAD4-C49 CILRMSFV   | 100   | >SMAD4-C49 YILRMSFV    | 6    | 94    |
| >SMAD4-C49 CILRMSFV   | 59    | >SMAD4-C49 YILRMSFV    | 3    | 56    |
| >SMAD4-C49 CILRMSFV   | 35    | >SMAD4-C49 YILRMSFV    | 2    | 33    |
| >SMAD4-C49 CILRMSFVK  | 106   | >SMAD4-C49 YILRMSFVK   | 112  | 6     |
| >SMAD4-C49 CILRMSFVK  | 19    | >SMAD4-C49 YILRMSFVK   | 17   | 2     |
| >SMAD4-C49 CILRMSFVK  | 109   | >SMAD4-C49 YILRMSFVK   | 121  | 12    |
| >SMAD4-C49 CILRMSFVK  | 419   | >SMAD4-C49 YILRMSFVK   | 101  | 318   |
| >SMAD4-C49 CILRMSFV   | 485   | >SMAD4-C49 YILRMSFV    | 176  | 309   |
| >SMAD4-C49 CILRMSFV   | 369   | >SMAD4-C49 YILRMSFV    | 10   | 359   |
| >SMAD4-C49 CILRMSFVKG | 667   | >SMAD4-C49 YILRMSFVKG  | 45   | 622   |
| >SMAD4-C49 CILRMSFVKG | 547   | >SMAD4-C49 YILRMSFVKG  | 336  | 211   |
| >SMAD4-C49 CILRMSFVKG | 125   | >SMAD4-C49 YILRMSFVKG  | 74   | 51    |
| >SMAD4-C49 CILRMSFVKG | 669   | >SMAD4-C49 YILRMSFVKG  | 248  | 421   |
| >SMAD4-C49 LCILRMSFV  | 26339 | >SMAD4-C49 LYILRMSFV   | 40   | 26299 |
| >SMAD4-C49 LCILRMSFV  | 548   | >SMAD4-C49 LYILRMSFV   | 400  | 148   |
| >SMAD4-C49 LCILRMSFV  | 2463  | >SMAD4-C49 LYILRMSFV   | 226  | 2237  |

|                        |       |                        |     |       |
|------------------------|-------|------------------------|-----|-------|
| >SMAD4-C49 LCILRMSF    | 9869  | >SMAD4-C49 LYILRMSF    | 47  | 9822  |
| >SMAD4-C49 LCILRMSF    | 9472  | >SMAD4-C49 LYILRMSF    | 103 | 9369  |
| >SMAD4-C49 LCILRMSF    | 4559  | >SMAD4-C49 LYILRMSF    | 9   | 4550  |
| >SMAD4-C49 LCILRMSFV   | 26255 | >SMAD4-C49 LYILRMSFV   | 274 | 25981 |
| >SMAD4-C49 LCILRMSFVK  | 2301  | >SMAD4-C49 LYILRMSFVK  | 223 | 2078  |
| >SMAD4-C49 LCILRMSFVK  | 1088  | >SMAD4-C49 LYILRMSFVK  | 293 | 795   |
| >SMAD4-C49 LCILRMSF    | 274   | >SMAD4-C49 LYILRMSF    | 356 | 82    |
| >SMAD4-C49 GIGVDDLRLR  | 22150 | >SMAD4-C49 GIGVDDLRLR  | 79  | 22071 |
| >SMAD4-C49 RLCILRMSFV  | 44    | >SMAD4-C49 RLYILRMSFV  | 16  | 28    |
| >SMAD4-C49 RLCILRMSFV  | 100   | >SMAD4-C49 RLYILRMSFV  | 31  | 69    |
| >SMAD4-C49 RLCILRMSFV  | 31    | >SMAD4-C49 RLYILRMSFV  | 13  | 18    |
| >SMAD4-C49 RLCILRMSFV  | 131   | >SMAD4-C49 RLYILRMSFV  | 65  | 66    |
| >SMAD4-C49 RLCILRMSFV  | 9     | >SMAD4-C49 RLYILRMSFV  | 2   | 7     |
| >SMAD4-C49 RLCILRMSFV  | 444   | >SMAD4-C49 RLYILRMSFV  | 22  | 422   |
| >SMAD4-C49 RLCILRMSFV  | 33    | >SMAD4-C49 RLYILRMSFV  | 6   | 27    |
| >SMAD4-C49 RLCILRMSFV  | 1874  | >SMAD4-C49 RLYILRMSFV  | 263 | 1611  |
| >SMAD4-C49 RLCILRMSFV  | 7     | >SMAD4-C49 RLYILRMSFV  | 3   | 4     |
| >SMAD4-C49 RLCILRMSFVI | 41    | >SMAD4-C49 RLYILRMSFVI | 23  | 18    |
| >SMAD4-C49 RLCILRMSFVI | 25    | >SMAD4-C49 RLYILRMSFVI | 15  | 10    |
| >SMAD4-C49 RLCILRMSF   | 574   | >SMAD4-C49 RLYILRMSF   | 331 | 243   |
| >SMAD4-C49 RLCILRMSFV  | 425   | >SMAD4-C49 RLYILRMSFV  | 152 | 273   |
| >SMAD4-C49 RLCILRMSFVI | 29    | >SMAD4-C49 RLYILRMSFVI | 15  | 14    |
| >SMAD4-C49 RLCILRMSFVI | 47    | >SMAD4-C49 RLYILRMSFVI | 22  | 25    |
| >SMAD4-C49 RLCILRMSF   | 29    | >SMAD4-C49 RLYILRMSF   | 9   | 20    |
| >SMAD4-C49 RLCILRMSF   | 1984  | >SMAD4-C49 RLYILRMSF   | 287 | 1697  |
| >SMAD4-C49 RLCILRMSF   | 75    | >SMAD4-C49 RLYILRMSF   | 39  | 36    |
| >SMAD4-C49 RLCILRMSF   | 62    | >SMAD4-C49 RLYILRMSF   | 5   | 57    |
| >SMAD4-C49 RLCILRMSFV  | 4566  | >SMAD4-C49 RLYILRMSFV  | 488 | 4078  |
| >SMAD4-C49 RLCILRMSF   | 243   | >SMAD4-C49 RLYILRMSF   | 19  | 224   |
| >SMAD4-C49 RLCILRMSF   | 4884  | >SMAD4-C49 RLYILRMSF   | 227 | 4657  |
| >SMAD4-C49 RLCILRMSF   | 1244  | >SMAD4-C49 RLYILRMSF   | 321 | 923   |
| >SMAD4-C49 RLCILRMSFV  | 1181  | >SMAD4-C49 RLYILRMSFV  | 305 | 876   |
| >SMAD4-C49 RLCILRMSFVI | 400   | >SMAD4-C49 RLYILRMSFVI | 175 | 225   |
| >SMAD4-C49 RRLCILRMSF  | 471   | >SMAD4-C49 RRLYLIRMSF  | 172 | 299   |
| >SMAD4-C49 RRLCILRM    | 117   | >SMAD4-C49 RRLYLIRM    | 113 | 4     |
| >SMAD4-C49 RRLCILRMSF  | 4     | >SMAD4-C49 RRLYLIRMSF  | 4   | 0     |
| >SMAD4-C49 RRLCILRMSF\ | 247   | >SMAD4-C49 RRLYLIRMSF\ | 270 | 23    |
| >SMAD4-C49 RRLCILRM    | 11    | >SMAD4-C49 RRLYLIRM    | 11  | 0     |
| >SMAD4-C49 RRLCILRMS   | 40    | >SMAD4-C49 RRLYLIRMS   | 53  | 13    |
| >SMAD4-C49 RRLCILRMSF  | 25    | >SMAD4-C49 RRLYLIRMSF  | 13  | 12    |
| >SMAD4-C49 RRLCILRMSF\ | 23    | >SMAD4-C49 RRLYLIRMSF\ | 29  | 6     |
| >SMAD4-C49 RRLCILRM    | 13    | >SMAD4-C49 RRLYLIRM    | 13  | 0     |
| >SMAD4-C49 RRLCILRMS   | 97    | >SMAD4-C49 RRLYLIRMS   | 71  | 26    |



|                        |       |                        |      |       |
|------------------------|-------|------------------------|------|-------|
| >SMAD4-C49 RRLCILRMSF  | 46    | >SMAD4-C49 RRLYILRMSF  | 55   | 9     |
| >SMAD4-C49 RRLCILRMSF\ | 36    | >SMAD4-C49 RRLYILRMSF\ | 29   | 7     |
| >SMAD4-C49 RRLCILRM    | 28    | >SMAD4-C49 RRLYILRM    | 46   | 18    |
| >SMAD4-C49 RRLCILRMS   | 319   | >SMAD4-C49 RRLYILRMS   | 120  | 199   |
| >SMAD4-C49 RRLCILRMSF  | 57    | >SMAD4-C49 RRLYILRMSF  | 36   | 21    |
| >SMAD4-C49 RRLCILRMSF\ | 29    | >SMAD4-C49 RRLYILRMSF\ | 15   | 14    |
| >SMAD4-C49 LRRLCILRMSF | 1581  | >SMAD4-C49 LRRLYILRMSF | 454  | 1127  |
| >SMAD4-C49 LRRLCILRM   | 580   | >SMAD4-C49 LRRLYILRM   | 384  | 196   |
| >SMAD4-C49 LRRLCILRMSF | 24    | >SMAD4-C49 LRRLYILRMSF | 16   | 8     |
| >SMAD4-C49 LRRLCILR    | 864   | >SMAD4-C49 LRRLYILR    | 185  | 679   |
| >SMAD4-C49 LRRLCILRM   | 209   | >SMAD4-C49 LRRLYILRM   | 53   | 156   |
| >SMAD4-C49 LRRLCILRMSF | 421   | >SMAD4-C49 LRRLYILRMSF | 161  | 260   |
| >SMAD4-C49 LRRLCILRM   | 308   | >SMAD4-C49 LRRLYILRM   | 182  | 126   |
| >SMAD4-C49 LRRLCILRMSF | 424   | >SMAD4-C49 LRRLYILRMSF | 327  | 97    |
| >SMAD4-C49 LRRLCILRM   | 58    | >SMAD4-C49 LRRLYILRM   | 41   | 17    |
| >SMAD4-C49 LRRLCILRMS  | 436   | >SMAD4-C49 LRRLYILRMS  | 510  | 74    |
| >SMAD4-C49 LRRLCILRMSF | 43    | >SMAD4-C49 LRRLYILRMSF | 36   | 7     |
| >SMAD4-C49 DLRRRCILR   | 767   | >SMAD4-C49 DLRRLYILR   | 116  | 651   |
| >SMAD4-C49 DLRRRCILR   | 10    | >SMAD4-C49 DLRRLYILR   | 9    | 1     |
| >SMAD4-C49 DLRRRCILR   | 337   | >SMAD4-C49 DLRRLYILR   | 457  | 120   |
| >SMAD4-C49 DLRRRCIL    | 181   | >SMAD4-C49 DLRRLYIL    | 128  | 53    |
| >SMAD4-C49 DDLRRRCILR  | 658   | >SMAD4-C49 DDLRRLYILR  | 316  | 342   |
| >SMAD4-C49 VDDLRRRCI   | 359   | >SMAD4-C49 VDDLRRLYI   | 424  | 65    |
| >SMAD4-C49 VDDLRRRCI   | 551   | >SMAD4-C49 VDDLRRLYI   | 486  | 65    |
| >SMAD4-C49 VDDLRRRCI   | 616   | >SMAD4-C49 VDDLRRLYI   | 346  | 270   |
| >SMAD4-C49 GVDDLRRRC   | 20979 | >SMAD4-C49 GVDDLRRLY   | 155  | 20824 |
| >SMAD4-C49 GVDDLRRRC   | 15352 | >SMAD4-C49 GVDDLRRLY   | 139  | 15213 |
| >SMAD4-C52 CWIEIHLHRA  | 454   | >SMAD4-C52 WWIEIHLHR/  | 1791 | 1337  |
| >SMAD4-C52 CWIEIHLHRA  | 80    | >SMAD4-C52 WWIEIHLHR/  | 92   | 12    |
| >SMAD4-C52 CWIEIHLH    | 1253  | >SMAD4-C52 WWIEIHLH    | 360  | 893   |
| >SMAD4-C52 CWIEIHLHR   | 203   | >SMAD4-C52 WWIEIHLHR   | 1034 | 831   |
| >SMAD4-C52 CWIEIHLHR   | 220   | >SMAD4-C52 WWIEIHLHR   | 694  | 474   |
| >SMAD4-C52 CWIEIHLHR   | 9     | >SMAD4-C52 WWIEIHLHR   | 9    | 0     |
| >SMAD4-C52 CWIEIHLH    | 491   | >SMAD4-C52 WWIEIHLH    | 1166 | 675   |
| >SMAD4-C52 CWIEIHLHRA  | 79    | >SMAD4-C52 WWIEIHLHR/  | 225  | 146   |
| >SMAD4-C52 PCWIEIHLH   | 13781 | >SMAD4-C52 PWWIEIHLH   | 446  | 13335 |
| >SMAD4-C52 PCWIEIHLHR  | 31    | >SMAD4-C52 PWWIEIHLHF  | 9    | 22    |
| >SMAD4-C52 PCWIEIHL    | 37893 | >SMAD4-C52 PWWIEIHL    | 457  | 37436 |
| >SMAD4-C52 PCWIEIHLHR  | 37847 | >SMAD4-C52 PWWIEIHLHF  | 332  | 37515 |
| >SMAD4-C52 YPRQSIKETP\ | 33    | >SMAD4-C52 YPRQSIKETP\ | 15   | 18    |
| >SMAD4-C52 YPRQSIKETP\ | 22530 | >SMAD4-C52 YPRQSIKETP\ | 136  | 22394 |
| >SMAD4-C52 YPRQSIKETP\ | 824   | >SMAD4-C52 YPRQSIKETP\ | 139  | 685   |
| >SMAD4-C52 YPRQSIKETP\ | 25681 | >SMAD4-C52 YPRQSIKETP\ | 139  | 25542 |

|                       |       |                       |     |       |
|-----------------------|-------|-----------------------|-----|-------|
| >SMAD4-C52YPRQSIKETPC | 18686 | >SMAD4-C52YPRQSIKETPV | 23  | 18663 |
| >SMAD4-C52TPCWIEIHL   | 192   | >SMAD4-C52TPWWIEIHL   | 245 | 53    |
| >SMAD4-C52TPCWIEIHLHI | 2111  | >SMAD4-C52TPWWIEIHLF  | 450 | 1661  |
| >SMAD4-C52TPCWIEIHLHI | 677   | >SMAD4-C52TPWWIEIHLF  | 227 | 450   |
| >SMAD4-C52TPCWIEIHLHI | 94    | >SMAD4-C52TPWWIEIHLF  | 186 | 92    |
| >SMAD4-C52TPCWIEIH    | 328   | >SMAD4-C52TPWWIEIH    | 40  | 288   |
| >SMAD4-C52TPCWIEIHL   | 1010  | >SMAD4-C52TPWWIEIHL   | 92  | 918   |
| >SMAD4-C52TPCWIEIHL   | 1691  | >SMAD4-C52TPWWIEIHL   | 151 | 1540  |
| >SMAD4-C52TPCWIEIHLHI | 63    | >SMAD4-C52TPWWIEIHLF  | 22  | 41    |
| >SMAD4-C52ETPCWIEI    | 1636  | >SMAD4-C52ETPWWIEI    | 321 | 1315  |
| >SMAD4-C52ETPCWIEI    | 635   | >SMAD4-C52ETPWWIEI    | 418 | 217   |
| >SMAD4-C52ETPCWIEIH   | 70    | >SMAD4-C52ETPWWIEIH   | 58  | 12    |
| >SMAD4-C52ETPCWIEIHL  | 38    | >SMAD4-C52ETPWWIEIHL  | 36  | 2     |
| >SMAD4-C52ETPCWIEIHLF | 173   | >SMAD4-C52ETPWWIEIHL  | 154 | 19    |
| >SMAD4-C52ETPCWIEIHL  | 403   | >SMAD4-C52ETPWWIEIHL  | 926 | 523   |
| >SMAD4-C52ETPCWIEIHLF | 646   | >SMAD4-C52ETPWWIEIHL  | 311 | 335   |
| >SMAD4-C52ETPCWIEI    | 6     | >SMAD4-C52ETPWWIEI    | 7   | 1     |
| >SMAD4-C52ETPCWIEIHL  | 18    | >SMAD4-C52ETPWWIEIHL  | 16  | 2     |
| >SMAD4-C52ETPCWIEI    | 41    | >SMAD4-C52ETPWWIEI    | 12  | 29    |
| >SMAD4-C52ETPCWIEIHL  | 109   | >SMAD4-C52ETPWWIEIHL  | 57  | 52    |
| >SMAD4-C52ETPCWIEIH   | 1060  | >SMAD4-C52ETPWWIEIH   | 269 | 791   |
| >SMAD4-C52ETPCWIEIHL  | 23    | >SMAD4-C52ETPWWIEIHL  | 10  | 13    |
| >SMAD4-C52ETPCWIEIHLF | 127   | >SMAD4-C52ETPWWIEIHL  | 42  | 85    |
| >SMAD4-C52ETPCWIEI    | 419   | >SMAD4-C52ETPWWIEI    | 224 | 195   |
| >SMAD4-C52KETPCWIEI   | 71    | >SMAD4-C52KETPWWIEI   | 39  | 32    |
| >SMAD4-C52KETPCWIEI   | 1143  | >SMAD4-C52KETPWWIEI   | 412 | 731   |
| >SMAD4-C52KETPCWIEI   | 20    | >SMAD4-C52KETPWWIEI   | 70  | 50    |
| >SMAD4-C52KETPCWIEIHI | 11    | >SMAD4-C52KETPWWIEIF  | 22  | 11    |
| >SMAD4-C52KETPCWIEI   | 20    | >SMAD4-C52KETPWWIEI   | 56  | 36    |
| >SMAD4-C52KETPCWIEIHI | 68    | >SMAD4-C52KETPWWIEIF  | 139 | 71    |
| >SMAD4-C52KETPCWIEI   | 406   | >SMAD4-C52KETPWWIEI   | 779 | 373   |
| >SMAD4-C52KETPCWIEI   | 462   | >SMAD4-C52KETPWWIEI   | 121 | 341   |
| >SMAD4-C52KETPCWIEI   | 10    | >SMAD4-C52KETPWWIEI   | 6   | 4     |
| >SMAD4-C52KETPCWIEIHI | 87    | >SMAD4-C52KETPWWIEIF  | 59  | 28    |
| >SMAD4-C52SIKETPCWI   | 5736  | >SMAD4-C52SIKETPWWI   | 330 | 5406  |
| >SMAD4-C52SIKETPCWIEI | 1742  | >SMAD4-C52SIKETPWWIE  | 495 | 1247  |
| >SMAD4-C52SIKETPCWI   | 75    | >SMAD4-C52SIKETPWWI   | 49  | 26    |
| >SMAD4-C52SIKETPCWIEI | 186   | >SMAD4-C52SIKETPWWIE  | 136 | 50    |
| >SMAD4-C52SIKETPCWIEI | 1008  | >SMAD4-C52SIKETPWWIE  | 391 | 617   |
| >SMAD4-C52SIKETPCWI   | 146   | >SMAD4-C52SIKETPWWI   | 25  | 121   |
| >SMAD4-C52SIKETPCWIEI | 332   | >SMAD4-C52SIKETPWWIE  | 66  | 266   |
| >SMAD4-C52SIKETPCWI   | 4389  | >SMAD4-C52SIKETPWWI   | 410 | 3979  |
| >SMAD4-C52SIKETPCWI   | 1710  | >SMAD4-C52SIKETPWWI   | 260 | 1450  |

|                        |       |                       |       |       |
|------------------------|-------|-----------------------|-------|-------|
| >SMAD4-C52 SIKETPCWI   | 232   | >SMAD4-C52 SIKETPWWI  | 54    | 178   |
| >SMAD4-C52 SIKETPCWIEI | 597   | >SMAD4-C52 SIKETPWWIE | 175   | 422   |
| >SMAD4-C52 SIKETPCWI   | 101   | >SMAD4-C52 SIKETPWWI  | 496   | 395   |
| >SMAD4-C52 SIKETPCWIEI | 47    | >SMAD4-C52 SIKETPWWIE | 71    | 24    |
| >SMAD4-C52 QSIKETPCW   | 759   | >SMAD4-C52 QSIKETPWW  | 193   | 566   |
| >SMAD4-C52 QSIKETPC    | 14584 | >SMAD4-C52 QSIKETPW   | 12    | 14572 |
| >SMAD4-C52 QSIKETPCW   | 39    | >SMAD4-C52 QSIKETPWW  | 16    | 23    |
| >SMAD4-C52 QSIKETPCWI  | 240   | >SMAD4-C52 QSIKETPWW  | 253   | 13    |
| >SMAD4-C52 QSIKETPC    | 23386 | >SMAD4-C52 QSIKETPW   | 104   | 23282 |
| >SMAD4-C52 QSIKETPCW   | 322   | >SMAD4-C52 QSIKETPWW  | 93    | 229   |
| >SMAD4-C52 QSIKETPC    | 17879 | >SMAD4-C52 QSIKETPW   | 26    | 17853 |
| >SMAD4-C52 QSIKETPCW   | 22    | >SMAD4-C52 QSIKETPWW  | 19    | 3     |
| >SMAD4-C52 QSIKETPCWI  | 183   | >SMAD4-C52 QSIKETPWW  | 3560  | 3377  |
| >SMAD4-C52 RQSIKETPCW  | 944   | >SMAD4-C52 RQSIKETPWW | 161   | 783   |
| >SMAD4-C52 RQSIKETPC   | 2658  | >SMAD4-C52 RQSIKETPW  | 207   | 2451  |
| >SMAD4-C52 RQSIKETPCW  | 386   | >SMAD4-C52 RQSIKETPWW | 1492  | 1106  |
| >SMAD4-C52 RQSIKETPCW  | 377   | >SMAD4-C52 RQSIKETPWW | 513   | 136   |
| >SMAD4-C52 RQSIKETPC   | 22848 | >SMAD4-C52 RQSIKETPW  | 265   | 22583 |
| >SMAD4-C52 RQSIKETPCW  | 1418  | >SMAD4-C52 RQSIKETPWW | 290   | 1128  |
| >SMAD4-C52 RQSIKETPC   | 33790 | >SMAD4-C52 RQSIKETPW  | 57    | 33733 |
| >SMAD4-D3ε DVQVGETFK\  | 7335  | >SMAD4-D3ε GVQVGETFK\ | 343   | 6992  |
| >SMAD4-D3ε DVQVGETFK\  | 4518  | >SMAD4-D3ε GVQVGETFK\ | 231   | 4287  |
| >SMAD4-D3ε DVQVGETFK\  | 1477  | >SMAD4-D3ε GVQVGETFK\ | 36    | 1441  |
| >SMAD4-D3ε DVQVGETFK   | 1288  | >SMAD4-D3ε GVQVGETFK  | 36    | 1252  |
| >SMAD4-D3ε DVQVGETFK   | 116   | >SMAD4-D3ε GVQVGETFK  | 8064  | 7948  |
| >SMAD4-D3ε DVQVGETFK   | 43    | >SMAD4-D3ε GVQVGETFK  | 747   | 704   |
| >SMAD4-D3ε DVQVGETFK\  | 385   | >SMAD4-D3ε GVQVGETFK\ | 5820  | 5435  |
| >SMAD4-D3ε MDVQVGETF   | 901   | >SMAD4-D3ε MGVQVGETF  | 192   | 709   |
| >SMAD4-D3ε MDVQVGETF   | 1721  | >SMAD4-D3ε MGVQVGETF  | 184   | 1537  |
| >SMAD4-D3ε MDVQVGETF   | 466   | >SMAD4-D3ε MGVQVGETF  | 306   | 160   |
| >SMAD4-D3ε MDVQVGETF   | 11162 | >SMAD4-D3ε MGVQVGETF  | 316   | 10846 |
| >SMAD4-D3ε MDVQVGETF   | 379   | >SMAD4-D3ε MGVQVGETF  | 83    | 296   |
| >SMAD4-D3ε MDVQVGETF   | 13183 | >SMAD4-D3ε MGVQVGETF  | 205   | 12978 |
| >SMAD4-D3ε MDVQVGETF   | 216   | >SMAD4-D3ε MGVQVGETF  | 69    | 147   |
| >SMAD4-D3ε MDVQVGETF   | 208   | >SMAD4-D3ε MGVQVGETF  | 18262 | 18054 |
| >SMAD4-D3ε MDVQVGETF   | 1417  | >SMAD4-D3ε MGVQVGETF  | 338   | 1079  |
| >SMAD4-D3ε MDVQVGETF   | 204   | >SMAD4-D3ε MGVQVGETF  | 13904 | 13700 |
| >SMAD4-D3ε YWCSIAYFEN  | 701   | >SMAD4-D3ε YWCSIAYFEN | 412   | 289   |
| >SMAD4-D3ε EMDVQVGET   | 242   | >SMAD4-D3ε EMGVQVGET  | 186   | 56    |
| >SMAD4-D3ε EMDVQVGET   | 2322  | >SMAD4-D3ε EMGVQVGET  | 150   | 2172  |
| >SMAD4-D3ε EMDVQVGET   | 1671  | >SMAD4-D3ε EMGVQVGET  | 357   | 1314  |
| >SMAD4-D3ε FEMDVQVGE   | 259   | >SMAD4-D3ε FEMGVQVGE  | 930   | 671   |
| >SMAD4-D3ε FEMDVQVGE   | 143   | >SMAD4-D3ε FEMGVQVGE  | 188   | 45    |

|                      |      |                      |     |      |
|----------------------|------|----------------------|-----|------|
| >SMAD4-D3:FEMDVQVGE  | 770  | >SMAD4-D3:FEMGVQVGE  | 390 | 380  |
| >SMAD4-D3:FEMDVQVGE  | 23   | >SMAD4-D3:FEMGVQVGE  | 46  | 23   |
| >SMAD4-D3:FEMDVQVGE  | 11   | >SMAD4-D3:FEMGVQVGE  | 10  | 1    |
| >SMAD4-D3:FEMDVQVGE  | 25   | >SMAD4-D3:FEMGVQVGE  | 16  | 9    |
| >SMAD4-D3:FEMDVQVGE  | 250  | >SMAD4-D3:FEMGVQVGE  | 215 | 35   |
| >SMAD4-D3:FEMDVQVGE  | 133  | >SMAD4-D3:FEMGVQVGE  | 333 | 200  |
| >SMAD4-D3:FEMDVQVGE  | 67   | >SMAD4-D3:FEMGVQVGE  | 67  | 0    |
| >SMAD4-D3:FEMDVQVGE  | 281  | >SMAD4-D3:FEMGVQVGE  | 881 | 600  |
| >SMAD4-D3:FEMDVQVGE  | 341  | >SMAD4-D3:FEMGVQVGE  | 131 | 210  |
| >SMAD4-D3:FEMDVQVGE  | 15   | >SMAD4-D3:FEMGVQVGE  | 38  | 23   |
| >SMAD4-D3:YFEMDVQV   | 98   | >SMAD4-D3:YFEMGVQV   | 53  | 45   |
| >SMAD4-D3:AYFEMDVQV  | 251  | >SMAD4-D3:AYFEMGVQV  | 200 | 51   |
| >SMAD4-D3:AYFEMDVQV  | 217  | >SMAD4-D3:AYFEMGVQV  | 67  | 150  |
| >SMAD4-D3:AYFEMDVQV  | 86   | >SMAD4-D3:AYFEMGVQV  | 102 | 16   |
| >SMAD4-D3:AYFEMDVQV  | 30   | >SMAD4-D3:AYFEMGVQV  | 20  | 10   |
| >SMAD4-D3:AYFEMDVQV  | 135  | >SMAD4-D3:AYFEMGVQV  | 114 | 21   |
| >SMAD4-D3:IAYFEMDV   | 1197 | >SMAD4-D3:IAYFEMGV   | 480 | 717  |
| >SMAD4-D3:IAYFEMDV   | 563  | >SMAD4-D3:IAYFEMGV   | 118 | 445  |
| >SMAD4-D3:IAYFEMDV   | 1362 | >SMAD4-D3:IAYFEMGV   | 178 | 1184 |
| >SMAD4-D3:IAYFEMDVQ\ | 438  | >SMAD4-D3:IAYFEMGVQ\ | 363 | 75   |
| >SMAD4-D3:IAYFEMDV   | 818  | >SMAD4-D3:IAYFEMGV   | 91  | 727  |
| >SMAD4-D3:IAYFEMDVQ\ | 174  | >SMAD4-D3:IAYFEMGVQ\ | 112 | 62   |
| >SMAD4-D3:IAYFEMDV   | 548  | >SMAD4-D3:IAYFEMGV   | 208 | 340  |
| >SMAD4-D3:IAYFEMDVQ\ | 239  | >SMAD4-D3:IAYFEMGVQ\ | 225 | 14   |
| >SMAD4-D3:IAYFEMDV   | 1729 | >SMAD4-D3:IAYFEMGV   | 308 | 1421 |
| >SMAD4-D3:IAYFEMDV   | 3146 | >SMAD4-D3:IAYFEMGV   | 358 | 2788 |
| >SMAD4-D3:IAYFEMDV   | 2732 | >SMAD4-D3:IAYFEMGV   | 484 | 2248 |
| >SMAD4-D3:IAYFEMDVQ\ | 303  | >SMAD4-D3:IAYFEMGVQ\ | 158 | 145  |
| >SMAD4-D3:SIAYFEMDV  | 1478 | >SMAD4-D3:SIAYFEMGV  | 437 | 1041 |
| >SMAD4-D3:SIAYFEMDV  | 550  | >SMAD4-D3:SIAYFEMGV  | 70  | 480  |
| >SMAD4-D3:SIAYFEMDVC | 130  | >SMAD4-D3:SIAYFEMGVC | 114 | 16   |
| >SMAD4-D3:SIAYFEMDV  | 164  | >SMAD4-D3:SIAYFEMGV  | 17  | 147  |
| >SMAD4-D3:SIAYFEMDVC | 28   | >SMAD4-D3:SIAYFEMGVC | 20  | 8    |
| >SMAD4-D3:SIAYFEMDV  | 175  | >SMAD4-D3:SIAYFEMGV  | 32  | 143  |
| >SMAD4-D3:SIAYFEMDVC | 90   | >SMAD4-D3:SIAYFEMGVC | 43  | 47   |
| >SMAD4-D3:SIAYFEMDV  | 1204 | >SMAD4-D3:SIAYFEMGV  | 67  | 1137 |
| >SMAD4-D3:SIAYFEMDVC | 214  | >SMAD4-D3:SIAYFEMGVC | 123 | 91   |
| >SMAD4-D3:SIAYFEMDV  | 1032 | >SMAD4-D3:SIAYFEMGV  | 68  | 964  |
| >SMAD4-D3:SIAYFEMDVC | 144  | >SMAD4-D3:SIAYFEMGVC | 53  | 91   |
| >SMAD4-D3:SIAYFEMDV  | 1821 | >SMAD4-D3:SIAYFEMGV  | 339 | 1482 |
| >SMAD4-D3:SIAYFEMDV  | 129  | >SMAD4-D3:SIAYFEMGV  | 28  | 101  |
| >SMAD4-D3:SIAYFEMDVC | 33   | >SMAD4-D3:SIAYFEMGVC | 27  | 6    |
| >SMAD4-D3:SIAYFEMDV  | 45   | >SMAD4-D3:SIAYFEMGV  | 15  | 30   |

|                        |      |                        |      |      |
|------------------------|------|------------------------|------|------|
| >SMAD4-D3E SIAYFEMDVC  | 13   | >SMAD4-D3E SIAYFEMGVC  | 9    | 4    |
| >SMAD4-D3E SIAYFEMDV   | 65   | >SMAD4-D3E SIAYFEMGV   | 13   | 52   |
| >SMAD4-D3E SIAYFEMDVC  | 23   | >SMAD4-D3E SIAYFEMGVC  | 27   | 4    |
| >SMAD4-D3E SIAYFEMDV   | 1519 | >SMAD4-D3E SIAYFEMGV   | 74   | 1445 |
| >SMAD4-D3E SIAYFEMDVC  | 348  | >SMAD4-D3E SIAYFEMGVC  | 95   | 253  |
| >SMAD4-D3E CSIAYFEMDV  | 1773 | >SMAD4-D3E CSIAYFEMGV  | 392  | 1381 |
| >SMAD4-D3E CSIAYFEMDV  | 56   | >SMAD4-D3E CSIAYFEMGV  | 26   | 30   |
| >SMAD4-D3E WCSIAYFEMI  | 1376 | >SMAD4-D3E WCSIAYFEMK  | 213  | 1163 |
| >SMAD4-D3E VPSSCPIVTVI | 3474 | >SMAD4-D3E VPSSCPIVTVI | 78   | 3396 |
| >SMAD4-D3E TVDGYVDPS   | 3686 | >SMAD4-D3E TVHGYVDPS   | 199  | 3487 |
| >SMAD4-D3E IVTVHGYV    | 1037 | >SMAD4-D3E IVTVHGYV    | 289  | 748  |
| >SMAD4-D3E IVTVHGYV    | 155  | >SMAD4-D3E IVTVHGYV    | 134  | 21   |
| >SMAD4-D3E IVTVHGYV    | 398  | >SMAD4-D3E IVTVHGYV    | 163  | 235  |
| >SMAD4-D3E IVTVHGYV    | 454  | >SMAD4-D3E IVTVHGYV    | 1060 | 606  |
| >SMAD4-D3E IVTVHGYV    | 87   | >SMAD4-D3E IVTVHGYV    | 72   | 15   |
| >SMAD4-D3E IVTVHGYV    | 178  | >SMAD4-D3E IVTVHGYV    | 157  | 21   |
| >SMAD4-D3E PIVTVHGYV   | 966  | >SMAD4-D3E PIVTVHGYV   | 183  | 783  |
| >SMAD4-D3E PIVTVHGY    | 82   | >SMAD4-D3E PIVTVHGY    | 50   | 32   |
| >SMAD4-D3E PIVTVHGY    | 1228 | >SMAD4-D3E PIVTVHGY    | 257  | 971  |
| >SMAD4-D3E PIVTVHGY    | 1338 | >SMAD4-D3E PIVTVHGY    | 335  | 1003 |
| >SMAD4-D3E CPIVTVHGYV  | 544  | >SMAD4-D3E CPIVTVHGYV  | 318  | 226  |
| >SMAD4-D3E CPIVTVHGY   | 538  | >SMAD4-D3E CPIVTVHGY   | 431  | 107  |
| >SMAD4-D3E CPIVTVHGY   | 4576 | >SMAD4-D3E CPIVTVHGY   | 490  | 4086 |
| >SMAD4-D3E CPIVTVHGYV  | 1726 | >SMAD4-D3E CPIVTVHGYV  | 460  | 1266 |
| >SMAD4-D3E CPIVTVHGY   | 21   | >SMAD4-D3E CPIVTVHGY   | 22   | 1    |
| >SMAD4-D3E CPIVTVHGY   | 75   | >SMAD4-D3E CPIVTVHGY   | 42   | 33   |
| >SMAD4-D3E CPIVTVHG    | 981  | >SMAD4-D3E CPIVTVHG    | 398  | 583  |
| >SMAD4-D3E CPIVTVHGYV  | 122  | >SMAD4-D3E CPIVTVHGYV  | 113  | 9    |
| >SMAD4-D3E CPIVTVHGYV  | 318  | >SMAD4-D3E CPIVTVHGYV  | 219  | 99   |
| >SMAD4-D3E CPIVTVHGY   | 1958 | >SMAD4-D3E CPIVTVHGY   | 449  | 1509 |
| >SMAD4-D3E CPIVTVHGY   | 409  | >SMAD4-D3E CPIVTVHGY   | 241  | 168  |
| >SMAD4-D3E SCPIVTVHGY' | 804  | >SMAD4-D3E SCPIVTVHGY' | 317  | 487  |
| >SMAD4-D3E SCPIVTVHGY  | 731  | >SMAD4-D3E SCPIVTVHGY  | 240  | 491  |
| >SMAD4-D3E SCPIVTVHGY' | 143  | >SMAD4-D3E SCPIVTVHGY' | 115  | 28   |
| >SMAD4-D3E SSCPIVTVHG' | 691  | >SMAD4-D3E SSCPIVTVHG' | 225  | 466  |
| >SMAD4-D3E SSCPIVTVHG' | 106  | >SMAD4-D3E SSCPIVTVHG' | 84   | 22   |
| >SMAD4-D3E SSCPIVTVHG' | 896  | >SMAD4-D3E SSCPIVTVHG' | 221  | 675  |
| >SMAD4-D3E SSCPIVTVHG' | 84   | >SMAD4-D3E SSCPIVTVHG' | 25   | 59   |
| >SMAD4-D3E SSCPIVTVHG' | 1252 | >SMAD4-D3E SSCPIVTVHG' | 297  | 955  |
| >SMAD4-D3E SSCPIVTVHG' | 232  | >SMAD4-D3E SSCPIVTVHG' | 135  | 97   |
| >SMAD4-D3E SSCPIVTVHG' | 7    | >SMAD4-D3E SSCPIVTVHG' | 4    | 3    |
| >SMAD4-D3E SSCPIVTVH   | 5984 | >SMAD4-D3E SSCPIVTVH   | 101  | 5883 |
| >SMAD4-D3E SSCPIVTVHG' | 82   | >SMAD4-D3E SSCPIVTVHG' | 85   | 3    |

|                                     |       |                                     |     |       |
|-------------------------------------|-------|-------------------------------------|-----|-------|
| >SMAD4-D3 <sup>ε</sup> TVDGYVDPS    | 3686  | >SMAD4-D3 <sup>ε</sup> TVNGYVDPS    | 177 | 3509  |
| >SMAD4-D3 <sup>ε</sup> IVTVDGYV     | 155   | >SMAD4-D3 <sup>ε</sup> IVTVNGYV     | 170 | 15    |
| >SMAD4-D3 <sup>ε</sup> IVTVDGYV     | 398   | >SMAD4-D3 <sup>ε</sup> IVTVNGYV     | 169 | 229   |
| >SMAD4-D3 <sup>ε</sup> IVTVDGYV     | 454   | >SMAD4-D3 <sup>ε</sup> IVTVNGYV     | 645 | 191   |
| >SMAD4-D3 <sup>ε</sup> IVTVDGYV     | 87    | >SMAD4-D3 <sup>ε</sup> IVTVNGYV     | 58  | 29    |
| >SMAD4-D3 <sup>ε</sup> IVTVDGYV     | 178   | >SMAD4-D3 <sup>ε</sup> IVTVNGYV     | 91  | 87    |
| >SMAD4-D3 <sup>ε</sup> PIVTVDGYV    | 966   | >SMAD4-D3 <sup>ε</sup> PIVTVNGYV    | 445 | 521   |
| >SMAD4-D3 <sup>ε</sup> PIVTVDGY     | 82    | >SMAD4-D3 <sup>ε</sup> PIVTVNGY     | 98  | 16    |
| >SMAD4-D3 <sup>ε</sup> PIVTVDGYV    | 566   | >SMAD4-D3 <sup>ε</sup> PIVTVNGYV    | 429 | 137   |
| >SMAD4-D3 <sup>ε</sup> CPIVTVDGY    | 21    | >SMAD4-D3 <sup>ε</sup> CPIVTVNGY    | 27  | 6     |
| >SMAD4-D3 <sup>ε</sup> CPIVTVDGY    | 75    | >SMAD4-D3 <sup>ε</sup> CPIVTVNGY    | 89  | 14    |
| >SMAD4-D3 <sup>ε</sup> CPIVTVDGY    | 981   | >SMAD4-D3 <sup>ε</sup> CPIVTVNG     | 451 | 530   |
| >SMAD4-D3 <sup>ε</sup> CPIVTVDGYV   | 122   | >SMAD4-D3 <sup>ε</sup> CPIVTVNGYV   | 171 | 49    |
| >SMAD4-D3 <sup>ε</sup> CPIVTVDGYV   | 318   | >SMAD4-D3 <sup>ε</sup> CPIVTVNGYV   | 150 | 168   |
| >SMAD4-D3 <sup>ε</sup> CPIVTVDGY    | 409   | >SMAD4-D3 <sup>ε</sup> CPIVTVNGY    | 708 | 299   |
| >SMAD4-D3 <sup>ε</sup> SCPIVTVDGY'  | 804   | >SMAD4-D3 <sup>ε</sup> SCPIVTVNGY'  | 488 | 316   |
| >SMAD4-D3 <sup>ε</sup> SCPIVTVDGY   | 731   | >SMAD4-D3 <sup>ε</sup> SCPIVTVNGY   | 343 | 388   |
| >SMAD4-D3 <sup>ε</sup> SCPIVTVDGY'  | 143   | >SMAD4-D3 <sup>ε</sup> SCPIVTVNGY'  | 91  | 52    |
| >SMAD4-D3 <sup>ε</sup> SSCPIVTVDGY' | 106   | >SMAD4-D3 <sup>ε</sup> SSCPIVTVNGY' | 117 | 11    |
| >SMAD4-D3 <sup>ε</sup> SSCPIVTVDGY' | 84    | >SMAD4-D3 <sup>ε</sup> SSCPIVTVNGY' | 47  | 37    |
| >SMAD4-D3 <sup>ε</sup> SSCPIVTVDGY' | 232   | >SMAD4-D3 <sup>ε</sup> SSCPIVTVNGY' | 143 | 89    |
| >SMAD4-D3 <sup>ε</sup> SSCPIVTVDGY' | 7     | >SMAD4-D3 <sup>ε</sup> SSCPIVTVNGY' | 7   | 0     |
| >SMAD4-D3 <sup>ε</sup> SSCPIVTVDGY' | 82    | >SMAD4-D3 <sup>ε</sup> SSCPIVTVNGY' | 43  | 39    |
| >SMAD4-D3 <sup>ε</sup> DPSGGDRF     | 10824 | >SMAD4-D3 <sup>ε</sup> APSGGDRF     | 392 | 10432 |
| >SMAD4-D3 <sup>ε</sup> DPSGGDRF     | 9291  | >SMAD4-D3 <sup>ε</sup> APSGGDRF     | 178 | 9113  |
| >SMAD4-D3 <sup>ε</sup> DPSGGDRFCL   | 5325  | >SMAD4-D3 <sup>ε</sup> APSGGDRFCL   | 221 | 5104  |
| >SMAD4-D3 <sup>ε</sup> DPSGGDRF     | 107   | >SMAD4-D3 <sup>ε</sup> APSGGDRF     | 158 | 51    |
| >SMAD4-D3 <sup>ε</sup> DPSGGDRFCL   | 1593  | >SMAD4-D3 <sup>ε</sup> APSGGDRFCL   | 362 | 1231  |
| >SMAD4-D3 <sup>ε</sup> DPSGGDRF     | 680   | >SMAD4-D3 <sup>ε</sup> APSGGDRF     | 472 | 208   |
| >SMAD4-D3 <sup>ε</sup> VDPSGGDRF    | 20207 | >SMAD4-D3 <sup>ε</sup> VAPSGGDRF    | 103 | 20104 |
| >SMAD4-D3 <sup>ε</sup> VDPSGGDRFCL  | 13718 | >SMAD4-D3 <sup>ε</sup> VAPSGGDRFCL  | 36  | 13682 |
| >SMAD4-D3 <sup>ε</sup> CPIVTVDGYV   | 318   | >SMAD4-D3 <sup>ε</sup> CPIVTVDGYV   | 8   | 310   |
| >SMAD4-D3 <sup>ε</sup> YVDPSGGDRF   | 11283 | >SMAD4-D3 <sup>ε</sup> YVAPSGGDRF   | 111 | 11172 |
| >SMAD4-D3 <sup>ε</sup> YVDPSGGDR    | 714   | >SMAD4-D3 <sup>ε</sup> YVAPSGGDR    | 38  | 676   |
| >SMAD4-D3 <sup>ε</sup> YVDPSGGDRF   | 2140  | >SMAD4-D3 <sup>ε</sup> YVAPSGGDRF   | 83  | 2057  |
| >SMAD4-D3 <sup>ε</sup> YVDPSGGDRF   | 447   | >SMAD4-D3 <sup>ε</sup> YVAPSGGDRF   | 82  | 365   |
| >SMAD4-D3 <sup>ε</sup> YVDPSGGDRF   | 4153  | >SMAD4-D3 <sup>ε</sup> YVAPSGGDRF   | 368 | 3785  |
| >SMAD4-D3 <sup>ε</sup> YVDPSGGDRF   | 41    | >SMAD4-D3 <sup>ε</sup> YVAPSGGDRF   | 15  | 26    |
| >SMAD4-D3 <sup>ε</sup> GYVDPSGGDR   | 321   | >SMAD4-D3 <sup>ε</sup> GYVAPSGGDR   | 309 | 12    |
| >SMAD4-D3 <sup>ε</sup> GYVDPSGGDR   | 34    | >SMAD4-D3 <sup>ε</sup> GYVAPSGGDR   | 20  | 14    |
| >SMAD4-D3 <sup>ε</sup> DPSGGDRF     | 107   | >SMAD4-D3 <sup>ε</sup> EPSSGGDRF    | 36  | 71    |
| >SMAD4-D3 <sup>ε</sup> DPSGGDRFCL   | 1593  | >SMAD4-D3 <sup>ε</sup> EPSSGGDRFCL  | 334 | 1259  |
| >SMAD4-D3 <sup>ε</sup> DPSGGDRF     | 1645  | >SMAD4-D3 <sup>ε</sup> EPSSGGDRF    | 247 | 1398  |

|                        |       |                        |      |       |
|------------------------|-------|------------------------|------|-------|
| >SMAD4-D3E DPSGGDRF    | 680   | >SMAD4-D3E EPSGGDRF    | 414  | 266   |
| >SMAD4-D3E VDPSGGDRFC  | 8097  | >SMAD4-D3E VEPSGGDRFC  | 173  | 7924  |
| >SMAD4-D3E CPIVTVDGYV  | 318   | >SMAD4-D3E CPIVTVDGYV  | 463  | 145   |
| >SMAD4-D3E YVDPSGGDR   | 714   | >SMAD4-D3E YVEPSGGDR   | 317  | 397   |
| >SMAD4-D3E YVDPSGGDRI  | 447   | >SMAD4-D3E YVEPSGGDRF  | 216  | 231   |
| >SMAD4-D3E YVDPSGGDRI  | 41    | >SMAD4-D3E YVEPSGGDRF  | 33   | 8     |
| >SMAD4-D3E GYVDPSGGD   | 321   | >SMAD4-D3E GYVEPSGGDI  | 368  | 47    |
| >SMAD4-D3E GYVDPSGGD   | 34    | >SMAD4-D3E GYVEPSGGDI  | 21   | 13    |
| >SMAD4-D3E DPSGGDRF    | 107   | >SMAD4-D3E GPSGGDRF    | 335  | 228   |
| >SMAD4-D3E VDPSGGDRF   | 10971 | >SMAD4-D3E VGPSGGDRF   | 307  | 10664 |
| >SMAD4-D3E CPIVTVDGYV  | 318   | >SMAD4-D3E CPIVTVDGYV  | 131  | 187   |
| >SMAD4-D3E YVDPSGGDRI  | 3721  | >SMAD4-D3E YVGPSGGDRI  | 499  | 3222  |
| >SMAD4-D3E YVDPSGGDR   | 714   | >SMAD4-D3E YVGPSGGDR   | 499  | 215   |
| >SMAD4-D3E YVDPSGGDRI  | 2140  | >SMAD4-D3E YVGPSGGDRI  | 128  | 2012  |
| >SMAD4-D3E YVDPSGGDRI  | 447   | >SMAD4-D3E YVGPSGGDRI  | 250  | 197   |
| >SMAD4-D3E YVDPSGGDRI  | 41    | >SMAD4-D3E YVGPSGGDRI  | 58   | 17    |
| >SMAD4-D3E GYVDPSGGD   | 321   | >SMAD4-D3E GYVGPSGGD   | 342  | 21    |
| >SMAD4-D3E GYVDPSGGD   | 34    | >SMAD4-D3E GYVGPSGGD   | 18   | 16    |
| >SMAD4-D3E DPSGGDRFCI  | 5325  | >SMAD4-D3E NPSGGDRFCI  | 488  | 4837  |
| >SMAD4-D3E DPSGGDRF    | 107   | >SMAD4-D3E NPSGGDRF    | 49   | 58    |
| >SMAD4-D3E DPSGGDRFCI  | 1593  | >SMAD4-D3E NPSGGDRFCI  | 129  | 1464  |
| >SMAD4-D3E DPSGGDRF    | 1645  | >SMAD4-D3E NPSGGDRF    | 213  | 1432  |
| >SMAD4-D3E CPIVTVDGYV  | 318   | >SMAD4-D3E CPIVTVDGYV  | 275  | 43    |
| >SMAD4-D3E YVDPSGGDR   | 714   | >SMAD4-D3E YVNPSGGDR   | 135  | 579   |
| >SMAD4-D3E YVDPSGGDRI  | 2140  | >SMAD4-D3E YVNPSGGDRI  | 85   | 2055  |
| >SMAD4-D3E YVDPSGGDRI  | 447   | >SMAD4-D3E YVNPSGGDRI  | 155  | 292   |
| >SMAD4-D3E YVDPSGGDRI  | 4153  | >SMAD4-D3E YVNPSGGDRI  | 327  | 3826  |
| >SMAD4-D3E YVDPSGGDRI  | 41    | >SMAD4-D3E YVNPSGGDRI  | 20   | 21    |
| >SMAD4-D3E GYVDPSGGD   | 321   | >SMAD4-D3E GYVNPSGGD   | 189  | 132   |
| >SMAD4-D3E GYVDPSGGD   | 34    | >SMAD4-D3E GYVNPSGGD   | 20   | 14    |
| >SMAD4-D3E GYVDPSGGD   | 918   | >SMAD4-D3E GYVNPSGGD   | 496  | 422   |
| >SMAD4-D4E DDLRRLCI    | 3858  | >SMAD4-D4E ADLRRLCI    | 188  | 3670  |
| >SMAD4-D4E DDLRRLCIL   | 9396  | >SMAD4-D4E ADLRRLCIL   | 132  | 9264  |
| >SMAD4-D4E DDLRRLCILRM | 19184 | >SMAD4-D4E ADLRRLCILRM | 482  | 18702 |
| >SMAD4-D4E DDLRRLCI    | 1086  | >SMAD4-D4E ADLRRLCI    | 121  | 965   |
| >SMAD4-D4E DDLRRLCIL   | 2141  | >SMAD4-D4E ADLRRLCIL   | 256  | 1885  |
| >SMAD4-D4E VDDLRLRLCI  | 359   | >SMAD4-D4E VADLRRLCI   | 7542 | 7183  |
| >SMAD4-D4E SLSAAAGIGV  | 11154 | >SMAD4-D4E SLSAAAGIGV  | 179  | 10975 |
| >SMAD4-D4E SLSAAAGIGV  | 12463 | >SMAD4-D4E SLSAAAGIGV  | 17   | 12446 |
| >SMAD4-D4E SLSAAAGIGV  | 17140 | >SMAD4-D4E SLSAAAGIGV  | 330  | 16810 |
| >SMAD4-D4E SLSAAAGIGV  | 20316 | >SMAD4-D4E SLSAAAGIGV  | 194  | 20122 |
| >SMAD4-D4E SLSAAAGIGV  | 18356 | >SMAD4-D4E SLSAAAGIGV  | 59   | 18297 |
| >SMAD4-D4E GVDDLRLRL   | 3472  | >SMAD4-D4E GVADLRRL    | 382  | 3090  |

|                      |       |                       |      |       |
|----------------------|-------|-----------------------|------|-------|
| >SMAD4-D4ϵGVDDLRRLCI | 3181  | >SMAD4-D4ϵGVADLRRLCII | 412  | 2769  |
| >SMAD4-D4ϵGVDDLRRLCI | 728   | >SMAD4-D4ϵGVADLRRLCII | 261  | 467   |
| >SMAD4-D4ϵAAGIGVDDLF | 264   | >SMAD4-D4ϵAAGIGVADLF  | 238  | 26    |
| >SMAD4-D4ϵAAGIGVDDL  | 3237  | >SMAD4-D4ϵAAGIGVADL   | 242  | 2995  |
| >SMAD4-D4ϵAAAGIGVDDI | 28    | >SMAD4-D4ϵAAAGIGVADI  | 20   | 8     |
| >SMAD4-D4ϵAAAGIGVDDI | 1708  | >SMAD4-D4ϵAAAGIGVADI  | 228  | 1480  |
| >SMAD4-D4ϵSAAAGIGVD  | 17791 | >SMAD4-D4ϵSAAAGIGVA   | 439  | 17352 |
| >SMAD4-D4ϵSAAAGIGVDE | 880   | >SMAD4-D4ϵSAAAGIGVAE  | 488  | 392   |
| >SMAD4-D4ϵSAAAGIGVDE | 1385  | >SMAD4-D4ϵSAAAGIGVAE  | 279  | 1106  |
| >SMAD4-D4ϵDDLRRLCIL  | 1017  | >SMAD4-D4ϵHDLRRLCIL   | 316  | 701   |
| >SMAD4-D4ϵDDLRRLCIL  | 905   | >SMAD4-D4ϵHDLRRLCIL   | 366  | 539   |
| >SMAD4-D4ϵDDLRRLCI   | 3858  | >SMAD4-D4ϵHDLRRLCI    | 340  | 3518  |
| >SMAD4-D4ϵDDLRRLCIL  | 9396  | >SMAD4-D4ϵHDLRRLCIL   | 266  | 9130  |
| >SMAD4-D4ϵDDLRRLCILR | 5584  | >SMAD4-D4ϵHDLRRLCILR  | 321  | 5263  |
| >SMAD4-D4ϵDDLRRLCI   | 1086  | >SMAD4-D4ϵHDLRRLCI    | 205  | 881   |
| >SMAD4-D4ϵDDLRRLCIL  | 2141  | >SMAD4-D4ϵHDLRRLCIL   | 463  | 1678  |
| >SMAD4-D4ϵVDDLRRLCI  | 359   | >SMAD4-D4ϵVHDLRRLCI   | 887  | 528   |
| >SMAD4-D4ϵGVDDLRRLCI | 728   | >SMAD4-D4ϵGVHDLRRLCI  | 435  | 293   |
| >SMAD4-D4ϵGVDDLRRLCI | 15870 | >SMAD4-D4ϵGVHDLRRLCI  | 408  | 15462 |
| >SMAD4-D4ϵAGIGVDDL   | 868   | >SMAD4-D4ϵAGIGVHDL    | 404  | 464   |
| >SMAD4-D4ϵAAGIGVDDLF | 264   | >SMAD4-D4ϵAAGIGVHDLF  | 564  | 300   |
| >SMAD4-D4ϵAAAGIGVDDI | 4180  | >SMAD4-D4ϵAAAGIGVHDI  | 399  | 3781  |
| >SMAD4-D4ϵAAAGIGVDDI | 1367  | >SMAD4-D4ϵAAAGIGVHDI  | 226  | 1141  |
| >SMAD4-D4ϵAAAGIGVDDI | 28    | >SMAD4-D4ϵAAAGIGVHDI  | 18   | 10    |
| >SMAD4-D4ϵSAAAGIGVDE | 880   | >SMAD4-D4ϵSAAAGIGVHE  | 480  | 400   |
| >SMAD4-D4ϵDDLRRLCIL  | 1017  | >SMAD4-D4ϵNDLRRLCIL   | 268  | 749   |
| >SMAD4-D4ϵDDLRRLCIL  | 905   | >SMAD4-D4ϵNDLRRLCIL   | 210  | 695   |
| >SMAD4-D4ϵVDDLRRLCI  | 359   | >SMAD4-D4ϵVNDLRRLCI   | 1351 | 992   |
| >SMAD4-D4ϵGVDDLRRLCI | 728   | >SMAD4-D4ϵGVNDLRRLCI  | 480  | 248   |
| >SMAD4-D4ϵAAGIGVDDLF | 264   | >SMAD4-D4ϵAAGIGVNDLF  | 205  | 59    |
| >SMAD4-D4ϵAAAGIGVDDI | 28    | >SMAD4-D4ϵAAAGIGVNDI  | 20   | 8     |
| >SMAD4-D4ϵDLRRLCIL   | 8197  | >SMAD4-D4ϵGLRRLCIL    | 424  | 7773  |
| >SMAD4-D4ϵDLRRLCIL   | 527   | >SMAD4-D4ϵGLRRLCIL    | 28   | 499   |
| >SMAD4-D4ϵDLRRLCILR  | 6842  | >SMAD4-D4ϵGLRRLCILR   | 246  | 6596  |
| >SMAD4-D4ϵDLRRLCILR  | 767   | >SMAD4-D4ϵGLRRLCILR   | 45   | 722   |
| >SMAD4-D4ϵDLRRLCILR  | 10    | >SMAD4-D4ϵGLRRLCILR   | 467  | 457   |
| >SMAD4-D4ϵDLRRLCILR  | 337   | >SMAD4-D4ϵGLRRLCILR   | 3489 | 3152  |
| >SMAD4-D4ϵDLRRLCIL   | 181   | >SMAD4-D4ϵGLRRLCIL    | 364  | 183   |
| >SMAD4-D4ϵDLRRLCILRM | 1237  | >SMAD4-D4ϵGLRRLCILRM  | 313  | 924   |
| >SMAD4-D4ϵDDLRRLCILR | 658   | >SMAD4-D4ϵDGLRRLCILR  | 379  | 279   |
| >SMAD4-D4ϵDDLRRLCIL  | 905   | >SMAD4-D4ϵDGLRRLCIL   | 249  | 656   |
| >SMAD4-D4ϵVDDLRRLCI  | 359   | >SMAD4-D4ϵVDGLRRLCI   | 236  | 123   |
| >SMAD4-D4ϵAAGIGVDDLF | 264   | >SMAD4-D4ϵAAGIGVDGLF  | 815  | 551   |



|                       |       |                       |       |       |
|-----------------------|-------|-----------------------|-------|-------|
| >SMAD4-D4☺AAAGIGVDDI  | 28    | >SMAD4-D4☺AAAGIGVDGI  | 44    | 16    |
| >SMAD4-D4☺AAAGIGVDDI  | 1708  | >SMAD4-D4☺AAAGIGVDGI  | 401   | 1307  |
| >SMAD4-D4☺SAAAGIGVDC  | 1532  | >SMAD4-D4☺SAAAGIGVDC  | 294   | 1238  |
| >SMAD4-D4☺SAAAGIGVDC  | 3512  | >SMAD4-D4☺SAAAGIGVDC  | 323   | 3189  |
| >SMAD4-D4☺SAAAGIGVDC  | 880   | >SMAD4-D4☺SAAAGIGVDC  | 102   | 778   |
| >SMAD4-D4☺SAAAGIGVDC  | 1385  | >SMAD4-D4☺SAAAGIGVDC  | 391   | 994   |
| >SMAD4-D5☺DEVLHTMP    | 2048  | >SMAD4-D5☺YEVLHTMP    | 292   | 1756  |
| >SMAD4-D5☺DEVLHTMPI   | 14    | >SMAD4-D5☺YEVLHTMPI   | 10    | 4     |
| >SMAD4-D5☺DEVLHTMPI   | 20386 | >SMAD4-D5☺YEVLHTMPI   | 377   | 20009 |
| >SMAD4-D5☺DEVLHTMPI   | 12608 | >SMAD4-D5☺YEVLHTMPI   | 357   | 12251 |
| >SMAD4-D5☺DEVLHTMPI   | 15    | >SMAD4-D5☺YEVLHTMPI   | 47    | 32    |
| >SMAD4-D5☺DEVLHTMPIA  | 35    | >SMAD4-D5☺YEVLHTMPIA  | 134   | 99    |
| >SMAD4-D5☺DEVLHTMPI   | 9636  | >SMAD4-D5☺YEVLHTMPI   | 301   | 9335  |
| >SMAD4-D5☺DEVLHTMPI   | 730   | >SMAD4-D5☺YEVLHTMPI   | 24    | 706   |
| >SMAD4-D5☺DEVLHTMPI   | 1153  | >SMAD4-D5☺YEVLHTMPI   | 41    | 1112  |
| >SMAD4-D5☺DEVLHTMPI   | 23    | >SMAD4-D5☺YEVLHTMPI   | 2     | 21    |
| >SMAD4-D5☺DEVLHTMPIA  | 7471  | >SMAD4-D5☺YEVLHTMPIA  | 441   | 7030  |
| >SMAD4-D5☺DEVLHTMPIA  | 9866  | >SMAD4-D5☺YEVLHTMPIA  | 172   | 9694  |
| >SMAD4-D5☺LDEVLHTM    | 24480 | >SMAD4-D5☺LYEVLHTM    | 188   | 24292 |
| >SMAD4-D5☺LDEVLHTMPI  | 21501 | >SMAD4-D5☺LYEVLHTMPI  | 114   | 21387 |
| >SMAD4-D5☺LDEVLHTM    | 26177 | >SMAD4-D5☺LYEVLHTM    | 219   | 25958 |
| >SMAD4-D5☺LDEVLHTMPI  | 24311 | >SMAD4-D5☺LYEVLHTMPI  | 53    | 24258 |
| >SMAD4-D5☺LDEVLHTMPI  | 98    | >SMAD4-D5☺LYEVLHTMPI  | 17973 | 17875 |
| >SMAD4-D5☺IHLHRALQLL\ | 16947 | >SMAD4-D5☺IHLHRALQLL\ | 13    | 16934 |
| >SMAD4-D5☺IHLHRALQLL\ | 22411 | >SMAD4-D5☺IHLHRALQLL\ | 9     | 22402 |
| >SMAD4-D5☺IHLHRALQLL\ | 21511 | >SMAD4-D5☺IHLHRALQLL\ | 95    | 21416 |
| >SMAD4-D5☺LLDEVLHT    | 142   | >SMAD4-D5☺LLYEVLHT    | 56    | 86    |
| >SMAD4-D5☺LLDEVLHTM   | 19    | >SMAD4-D5☺LLYEVLHTM   | 16    | 3     |
| >SMAD4-D5☺LLDEVLHTMF  | 11    | >SMAD4-D5☺LLYEVLHTMP  | 9     | 2     |
| >SMAD4-D5☺LLDEVLHT    | 530   | >SMAD4-D5☺LLYEVLHT    | 114   | 416   |
| >SMAD4-D5☺LLDEVLHTM   | 59    | >SMAD4-D5☺LLYEVLHTM   | 31    | 28    |
| >SMAD4-D5☺LLDEVLHTMF  | 17    | >SMAD4-D5☺LLYEVLHTMP  | 8     | 9     |
| >SMAD4-D5☺LLDEVLHT    | 824   | >SMAD4-D5☺LLYEVLHT    | 19    | 805   |
| >SMAD4-D5☺LLDEVLHTM   | 236   | >SMAD4-D5☺LLYEVLHTM   | 10    | 226   |
| >SMAD4-D5☺LLDEVLHTMF  | 13    | >SMAD4-D5☺LLYEVLHTMP  | 2     | 11    |
| >SMAD4-D5☺LLDEVLHT    | 125   | >SMAD4-D5☺LLYEVLHT    | 60    | 65    |
| >SMAD4-D5☺LLDEVLHTM   | 28    | >SMAD4-D5☺LLYEVLHTM   | 22    | 6     |
| >SMAD4-D5☺LLDEVLHTMF  | 13    | >SMAD4-D5☺LLYEVLHTMP  | 10    | 3     |
| >SMAD4-D5☺LLDEVLHT    | 15    | >SMAD4-D5☺LLYEVLHT    | 5     | 10    |
| >SMAD4-D5☺LLDEVLHTM   | 2     | >SMAD4-D5☺LLYEVLHTM   | 1     | 1     |
| >SMAD4-D5☺LLDEVLHTMF  | 244   | >SMAD4-D5☺LLYEVLHTMP  | 53    | 191   |
| >SMAD4-D5☺LLDEVLHTMF  | 3     | >SMAD4-D5☺LLYEVLHTMP  | 2     | 1     |
| >SMAD4-D5☺LLDEVLHT    | 154   | >SMAD4-D5☺LLYEVLHT    | 91    | 63    |

|                       |       |                       |      |       |
|-----------------------|-------|-----------------------|------|-------|
| >SMAD4-D53LLDEVLHTM   | 3     | >SMAD4-D53LLYEVLHTM   | 3    | 0     |
| >SMAD4-D53LLDEVLHTMF  | 3     | >SMAD4-D53LLYEVLHTMP  | 3    | 0     |
| >SMAD4-D53LLDEVLHT    | 35    | >SMAD4-D53LLYEVLHT    | 17   | 18    |
| >SMAD4-D53LLDEVLHTM   | 8     | >SMAD4-D53LLYEVLHTM   | 6    | 2     |
| >SMAD4-D53LLDEVLHTMF  | 9     | >SMAD4-D53LLYEVLHTMP  | 6    | 3     |
| >SMAD4-D53LLDEVLHTM   | 4     | >SMAD4-D53LLYEVLHTM   | 5    | 1     |
| >SMAD4-D53LLDEVLHTMF  | 9     | >SMAD4-D53LLYEVLHTMP  | 11   | 2     |
| >SMAD4-D53LLDEVLHT    | 23    | >SMAD4-D53LLYEVLHT    | 7    | 16    |
| >SMAD4-D53LLDEVLHTM   | 3     | >SMAD4-D53LLYEVLHTM   | 2    | 1     |
| >SMAD4-D53LLDEVLHTMF  | 2750  | >SMAD4-D53LLYEVLHTMP  | 386  | 2364  |
| >SMAD4-D53LLDEVLHTMF  | 5     | >SMAD4-D53LLYEVLHTMP  | 3    | 2     |
| >SMAD4-D53LLDEVLHTMF  | 726   | >SMAD4-D53LLYEVLHTMP  | 45   | 681   |
| >SMAD4-D53LLDEVLHTMF  | 3928  | >SMAD4-D53LLYEVLHTMP  | 372  | 3556  |
| >SMAD4-D53LLDEVLHTM   | 245   | >SMAD4-D53LLYEVLHTM   | 79   | 166   |
| >SMAD4-D53LLDEVLHTMF  | 69    | >SMAD4-D53LLYEVLHTMP  | 28   | 41    |
| >SMAD4-D53LLDEVLHTM   | 6019  | >SMAD4-D53LLYEVLHTM   | 106  | 5913  |
| >SMAD4-D53LLDEVLHTMF  | 8723  | >SMAD4-D53LLYEVLHTMP  | 259  | 8464  |
| >SMAD4-D53LLDEVLHTM   | 7258  | >SMAD4-D53LLYEVLHTM   | 345  | 6913  |
| >SMAD4-D53LLDEVLHTM   | 13358 | >SMAD4-D53LLYEVLHTM   | 396  | 12962 |
| >SMAD4-D53LLDEVLHTMF  | 9273  | >SMAD4-D53LLYEVLHTMP  | 194  | 9079  |
| >SMAD4-D53LLDEVLHTM   | 1866  | >SMAD4-D53LLYEVLHTM   | 293  | 1573  |
| >SMAD4-D53LLDEVLHTM   | 3686  | >SMAD4-D53LLYEVLHTM   | 376  | 3310  |
| >SMAD4-D53LLDEVLHTM   | 3249  | >SMAD4-D53LLYEVLHTM   | 487  | 2762  |
| >SMAD4-D53QLLDEVLHTM  | 40    | >SMAD4-D53QLLYEVLHTM  | 66   | 26    |
| >SMAD4-D53QLLDEVLHTM  | 37    | >SMAD4-D53QLLYEVLHTM  | 91   | 54    |
| >SMAD4-D53QLLDEVLHTM  | 130   | >SMAD4-D53QLLYEVLHTM  | 214  | 84    |
| >SMAD4-D53QLLDEVLHT   | 193   | >SMAD4-D53QLLYEVLHT   | 2037 | 1844  |
| >SMAD4-D53QLLDEVLHTM  | 193   | >SMAD4-D53QLLYEVLHTM  | 409  | 216   |
| >SMAD4-D53QLLDEVLHT   | 157   | >SMAD4-D53QLLYEVLHT   | 2839 | 2682  |
| >SMAD4-D53QLLDEVLHTM  | 8     | >SMAD4-D53QLLYEVLHTM  | 94   | 86    |
| >SMAD4-D53QLLDEVLHTM  | 13    | >SMAD4-D53QLLYEVLHTM  | 68   | 55    |
| >SMAD4-D53QLLDEVLHT   | 276   | >SMAD4-D53QLLYEVLHT   | 3771 | 3495  |
| >SMAD4-D53QLLDEVLHTM  | 45    | >SMAD4-D53QLLYEVLHTM  | 495  | 450   |
| >SMAD4-D53QLLDEVLHTM  | 10    | >SMAD4-D53QLLYEVLHTM  | 139  | 129   |
| >SMAD4-D53QLLDEVLHT   | 53    | >SMAD4-D53QLLYEVLHT   | 4926 | 4873  |
| >SMAD4-D53QLLDEVLHTM  | 8     | >SMAD4-D53QLLYEVLHTM  | 232  | 224   |
| >SMAD4-D53QLLDEVLHTM  | 923   | >SMAD4-D53QLLYEVLHTM  | 271  | 652   |
| >SMAD4-D53QLLDEVLHTM  | 147   | >SMAD4-D53QLLYEVLHTM  | 656  | 509   |
| >SMAD4-D53LQLLDEVL    | 251   | >SMAD4-D53LQLLYEVL    | 87   | 164   |
| >SMAD4-D53LQLLDEVLHT  | 343   | >SMAD4-D53LQLLYEVLHT  | 433  | 90    |
| >SMAD4-D53LQLLDEVLHTI | 80    | >SMAD4-D53LQLLYEVLHTI | 56   | 24    |
| >SMAD4-D53LQLLDEVL    | 211   | >SMAD4-D53LQLLYEVL    | 47   | 164   |
| >SMAD4-D53LQLLDEVLHTI | 86    | >SMAD4-D53LQLLYEVLHTI | 38   | 48    |

|                       |       |                       |     |       |
|-----------------------|-------|-----------------------|-----|-------|
| >SMAD4-D5E LQLLDEVL   | 1235  | >SMAD4-D5E LQLLYEVL   | 271 | 964   |
| >SMAD4-D5E LQLLDEVL   | 899   | >SMAD4-D5E LQLLYEVL   | 334 | 565   |
| >SMAD4-D5E ALQLLDEV   | 86    | >SMAD4-D5E ALQLLYEV   | 25  | 61    |
| >SMAD4-D5E ALQLLDEV   | 29    | >SMAD4-D5E ALQLLYEV   | 13  | 16    |
| >SMAD4-D5E ALQLLDEVL  | 309   | >SMAD4-D5E ALQLLYEVL  | 144 | 165   |
| >SMAD4-D5E ALQLLDEV   | 113   | >SMAD4-D5E ALQLLYEV   | 42  | 71    |
| >SMAD4-D5E ALQLLDEV   | 218   | >SMAD4-D5E ALQLLYEV   | 143 | 75    |
| >SMAD4-D5E ALQLLDEV   | 15    | >SMAD4-D5E ALQLLYEV   | 5   | 10    |
| >SMAD4-D5E ALQLLDEVL  | 1181  | >SMAD4-D5E ALQLLYEVL  | 247 | 934   |
| >SMAD4-D5E ALQLLDEV   | 13    | >SMAD4-D5E ALQLLYEV   | 7   | 6     |
| >SMAD4-D5E ALQLLDEVL  | 411   | >SMAD4-D5E ALQLLYEVL  | 349 | 62    |
| >SMAD4-D5E ALQLLDEV   | 19    | >SMAD4-D5E ALQLLYEV   | 14  | 5     |
| >SMAD4-D5E ALQLLDEV   | 65    | >SMAD4-D5E ALQLLYEV   | 12  | 53    |
| >SMAD4-D5E ALQLLDEV   | 4     | >SMAD4-D5E ALQLLYEV   | 2   | 2     |
| >SMAD4-D5E ALQLLDEVL  | 104   | >SMAD4-D5E ALQLLYEVL  | 37  | 67    |
| >SMAD4-D5E RALQLLDEV  | 163   | >SMAD4-D5E RALQLLYEV  | 192 | 29    |
| >SMAD4-D5E RALQLLDEV  | 1069  | >SMAD4-D5E RALQLLYEV  | 36  | 1033  |
| >SMAD4-D5E RALQLLDEV  | 801   | >SMAD4-D5E RALQLLYEV  | 335 | 466   |
| >SMAD4-D5E RALQLLDEV  | 21    | >SMAD4-D5E RALQLLYEV  | 10  | 11    |
| >SMAD4-D5E RALQLLDEV  | 46    | >SMAD4-D5E RALQLLYEV  | 12  | 34    |
| >SMAD4-D5E RALQLLDEV  | 2130  | >SMAD4-D5E RALQLLYEV  | 152 | 1978  |
| >SMAD4-D5E RALQLLDEV  | 189   | >SMAD4-D5E RALQLLYEV  | 80  | 109   |
| >SMAD4-D5E RALQLLDEV  | 3869  | >SMAD4-D5E RALQLLYEV  | 344 | 3525  |
| >SMAD4-D5E RALQLLDEV  | 1183  | >SMAD4-D5E RALQLLYEV  | 150 | 1033  |
| >SMAD4-D5E RALQLLDEV  | 826   | >SMAD4-D5E RALQLLYEV  | 116 | 710   |
| >SMAD4-D5E RALQLLDEVL | 55    | >SMAD4-D5E RALQLLYEVL | 45  | 10    |
| >SMAD4-D5E RALQLLDEVL | 108   | >SMAD4-D5E RALQLLYEVL | 74  | 34    |
| >SMAD4-D5E HRALQLLD   | 23999 | >SMAD4-D5E HRALQLLY   | 96  | 23903 |
| >SMAD4-D5E HRALQLLD   | 24667 | >SMAD4-D5E HRALQLLY   | 45  | 24622 |
| >SMAD4-D5E HRALQLLD   | 2635  | >SMAD4-D5E HRALQLLY   | 77  | 2558  |
| >SMAD4-D5E HRALQLLDEV | 229   | >SMAD4-D5E HRALQLLYEV | 74  | 155   |
| >SMAD4-D5E HRALQLLDEV | 183   | >SMAD4-D5E HRALQLLYEV | 87  | 96    |
| >SMAD4-D5E HRALQLLDEV | 149   | >SMAD4-D5E HRALQLLYEV | 82  | 67    |
| >SMAD4-D5E HRALQLLDEV | 642   | >SMAD4-D5E HRALQLLYEV | 332 | 310   |
| >SMAD4-D5E HRALQLLDEV | 142   | >SMAD4-D5E HRALQLLYEV | 47  | 95    |
| >SMAD4-D5E HRALQLLD   | 37984 | >SMAD4-D5E HRALQLLY   | 441 | 37543 |
| >SMAD4-D5E LHRALQLLD  | 21505 | >SMAD4-D5E LHRALQLLY  | 24  | 21481 |
| >SMAD4-D5E LHRALQLLD  | 23770 | >SMAD4-D5E LHRALQLLY  | 20  | 23750 |
| >SMAD4-D5E LHRALQLLD  | 23703 | >SMAD4-D5E LHRALQLLY  | 240 | 23463 |
| >SMAD4-D5E LHRALQLLD  | 13681 | >SMAD4-D5E LHRALQLLY  | 180 | 13501 |
| >SMAD4-D5E HLHRALQLLD | 17137 | >SMAD4-D5E HLHRALQLLY | 423 | 16714 |
| >SMAD4-D5E HLHRALQLLD | 33557 | >SMAD4-D5E HLHRALQLLY | 445 | 33112 |
| >SMAD4-D5E HLHRALQLLD | 1622  | >SMAD4-D5E HLHRALQLLY | 78  | 1544  |

|                      |       |                      |       |       |
|----------------------|-------|----------------------|-------|-------|
| >SMAD4-D5EHLHRALQLLD | 18437 | >SMAD4-D5EHLHRALQLLY | 8     | 18429 |
| >SMAD4-D5EHLHRALQLLD | 21690 | >SMAD4-D5EHLHRALQLLY | 186   | 21504 |
| >SMAD4-D5EHLHRALQLLD | 30300 | >SMAD4-D5EHLHRALQLLY | 161   | 30139 |
| >SMAD4-E33EMDVQVGET  | 4486  | >SMAD4-E33AMDVQVGET  | 448   | 4038  |
| >SMAD4-E33EMDVQVGET  | 2287  | >SMAD4-E33AMDVQVGET  | 154   | 2133  |
| >SMAD4-E33EMDVQVGET  | 1316  | >SMAD4-E33AMDVQVGET  | 44    | 1272  |
| >SMAD4-E33EMDVQVGET  | 242   | >SMAD4-E33AMDVQVGET  | 7720  | 7478  |
| >SMAD4-E33EMDVQVGET  | 2322  | >SMAD4-E33AMDVQVGET  | 322   | 2000  |
| >SMAD4-E33EMDVQVGET  | 1671  | >SMAD4-E33AMDVQVGET  | 291   | 1380  |
| >SMAD4-E33FEMDVQVGE  | 5534  | >SMAD4-E33FAMDVQVGE  | 266   | 5268  |
| >SMAD4-E33FEMDVQVGE  | 4979  | >SMAD4-E33FAMDVQVGE  | 367   | 4612  |
| >SMAD4-E33FEMDVQVGE  | 259   | >SMAD4-E33FAMDVQVGE  | 42    | 217   |
| >SMAD4-E33FEMDVQVGE  | 2639  | >SMAD4-E33FAMDVQVGE  | 298   | 2341  |
| >SMAD4-E33FEMDVQVGE  | 143   | >SMAD4-E33FAMDVQVGE  | 88    | 55    |
| >SMAD4-E33FEMDVQVGE  | 23    | >SMAD4-E33FAMDVQVGE  | 18    | 5     |
| >SMAD4-E33FEMDVQVGE  | 17135 | >SMAD4-E33FAMDVQVGE  | 20    | 17115 |
| >SMAD4-E33FEMDVQVGE  | 11    | >SMAD4-E33FAMDVQVGE  | 4473  | 4462  |
| >SMAD4-E33FEMDVQVGE  | 1182  | >SMAD4-E33FAMDVQVGE  | 17    | 1165  |
| >SMAD4-E33FEMDVQVGE  | 25    | >SMAD4-E33FAMDVQVGE  | 17492 | 17467 |
| >SMAD4-E33FEMDVQVGE  | 250   | >SMAD4-E33FAMDVQVGE  | 28870 | 28620 |
| >SMAD4-E33FEMDVQVGE  | 133   | >SMAD4-E33FAMDVQVGE  | 14426 | 14293 |
| >SMAD4-E33FEMDVQVGE  | 67    | >SMAD4-E33FAMDVQVGE  | 19091 | 19024 |
| >SMAD4-E33FEMDVQVGE  | 1037  | >SMAD4-E33FAMDVQVGE  | 36    | 1001  |
| >SMAD4-E33FEMDVQVGE  | 7393  | >SMAD4-E33FAMDVQVGE  | 153   | 7240  |
| >SMAD4-E33FEMDVQVGE  | 11584 | >SMAD4-E33FAMDVQVGE  | 23    | 11561 |
| >SMAD4-E33FEMDVQVGE  | 1187  | >SMAD4-E33FAMDVQVGE  | 125   | 1062  |
| >SMAD4-E33FEMDVQVGE  | 281   | >SMAD4-E33FAMDVQVGE  | 33937 | 33656 |
| >SMAD4-E33FEMDVQVGE  | 341   | >SMAD4-E33FAMDVQVGE  | 36094 | 35753 |
| >SMAD4-E33FEMDVQVGE  | 15    | >SMAD4-E33FAMDVQVGE  | 15978 | 15963 |
| >SMAD4-E33FEMDVQVGE  | 1828  | >SMAD4-E33FAMDVQVGE  | 405   | 1423  |
| >SMAD4-E33PEYWCSIAYF | 6923  | >SMAD4-E33PEYWCSIAYF | 104   | 6819  |
| >SMAD4-E33YFEMDVQV   | 4065  | >SMAD4-E33YFAMDVQV   | 146   | 3919  |
| >SMAD4-E33YFEMDVQV   | 2543  | >SMAD4-E33YFAMDVQV   | 347   | 2196  |
| >SMAD4-E33YFEMDVQV   | 4171  | >SMAD4-E33YFAMDVQV   | 118   | 4053  |
| >SMAD4-E33YFEMDVQV   | 98    | >SMAD4-E33YFAMDVQV   | 19    | 79    |
| >SMAD4-E33AYFEMDVQV  | 251   | >SMAD4-E33AYFAMDVQV  | 21    | 230   |
| >SMAD4-E33AYFEMDVQV  | 217   | >SMAD4-E33AYFAMDVQV  | 1105  | 888   |
| >SMAD4-E33AYFEMDVQV  | 86    | >SMAD4-E33AYFAMDVQV  | 440   | 354   |
| >SMAD4-E33AYFEMDVQV  | 30    | >SMAD4-E33AYFAMDVQV  | 79    | 49    |
| >SMAD4-E33AYFEMDVQV  | 135   | >SMAD4-E33AYFAMDVQV  | 111   | 24    |
| >SMAD4-E33IAYFEMDV   | 1197  | >SMAD4-E33IAYFAMDV   | 363   | 834   |
| >SMAD4-E33IAYFEMDV   | 563   | >SMAD4-E33IAYFAMDV   | 202   | 361   |
| >SMAD4-E33IAYFEMDV   | 1362  | >SMAD4-E33IAYFAMDV   | 434   | 928   |

|                       |      |                       |     |      |
|-----------------------|------|-----------------------|-----|------|
| >SMAD4-E33 IAYFEMDVQ\ | 438  | >SMAD4-E33 IAYFAMDVQ\ | 517 | 79   |
| >SMAD4-E33 IAYFEMDVQ\ | 174  | >SMAD4-E33 IAYFAMDVQ\ | 191 | 17   |
| >SMAD4-E33 IAYFEMDV   | 548  | >SMAD4-E33 IAYFAMDV   | 423 | 125  |
| >SMAD4-E33 IAYFEMDVQ\ | 239  | >SMAD4-E33 IAYFAMDVQ\ | 242 | 3    |
| >SMAD4-E33 IAYFEMDV   | 1729 | >SMAD4-E33 IAYFAMDV   | 332 | 1397 |
| >SMAD4-E33 IAYFEMDVQ\ | 303  | >SMAD4-E33 IAYFAMDVQ\ | 174 | 129  |
| >SMAD4-E33 SIAYFEMDV  | 550  | >SMAD4-E33 SIAYFAMDV  | 431 | 119  |
| >SMAD4-E33 SIAYFEMDVC | 130  | >SMAD4-E33 SIAYFAMDVC | 132 | 2    |
| >SMAD4-E33 SIAYFEMDV  | 164  | >SMAD4-E33 SIAYFAMDV  | 95  | 69   |
| >SMAD4-E33 SIAYFEMDVC | 28   | >SMAD4-E33 SIAYFAMDVC | 22  | 6    |
| >SMAD4-E33 SIAYFEMDV  | 175  | >SMAD4-E33 SIAYFAMDV  | 35  | 140  |
| >SMAD4-E33 SIAYFEMDVC | 90   | >SMAD4-E33 SIAYFAMDVC | 47  | 43   |
| >SMAD4-E33 SIAYFEMDV  | 1204 | >SMAD4-E33 SIAYFAMDV  | 199 | 1005 |
| >SMAD4-E33 SIAYFEMDVC | 214  | >SMAD4-E33 SIAYFAMDVC | 121 | 93   |
| >SMAD4-E33 SIAYFEMDVC | 144  | >SMAD4-E33 SIAYFAMDVC | 145 | 1    |
| >SMAD4-E33 SIAYFEMDV  | 129  | >SMAD4-E33 SIAYFAMDV  | 142 | 13   |
| >SMAD4-E33 SIAYFEMDVC | 33   | >SMAD4-E33 SIAYFAMDVC | 37  | 4    |
| >SMAD4-E33 SIAYFEMDV  | 45   | >SMAD4-E33 SIAYFAMDV  | 33  | 12   |
| >SMAD4-E33 SIAYFEMDVC | 13   | >SMAD4-E33 SIAYFAMDVC | 12  | 1    |
| >SMAD4-E33 SIAYFEMDV  | 65   | >SMAD4-E33 SIAYFAMDV  | 31  | 34   |
| >SMAD4-E33 SIAYFEMDVC | 23   | >SMAD4-E33 SIAYFAMDVC | 16  | 7    |
| >SMAD4-E33 SIAYFEMDV  | 1519 | >SMAD4-E33 SIAYFAMDV  | 70  | 1449 |
| >SMAD4-E33 SIAYFEMDVC | 348  | >SMAD4-E33 SIAYFAMDVC | 110 | 238  |
| >SMAD4-E33 CSIAYFEM   | 299  | >SMAD4-E33 CSIAYFAM   | 105 | 194  |
| >SMAD4-E33 CSIAYFEM   | 209  | >SMAD4-E33 CSIAYFAM   | 67  | 142  |
| >SMAD4-E33 CSIAYFEMDV | 56   | >SMAD4-E33 CSIAYFAMDV | 27  | 29   |
| >SMAD4-E33 CSIAYFEM   | 622  | >SMAD4-E33 CSIAYFAM   | 246 | 376  |
| >SMAD4-E33 CSIAYFEM   | 93   | >SMAD4-E33 CSIAYFAM   | 67  | 26   |
| >SMAD4-E33 CSIAYFEM   | 688  | >SMAD4-E33 CSIAYFAM   | 172 | 516  |
| >SMAD4-E33 CSIAYFEM   | 85   | >SMAD4-E33 CSIAYFAM   | 154 | 69   |
| >SMAD4-E33 CSIAYFEM   | 1555 | >SMAD4-E33 CSIAYFAM   | 281 | 1274 |
| >SMAD4-E33 CSIAYFEM   | 317  | >SMAD4-E33 CSIAYFAM   | 194 | 123  |
| >SMAD4-E33 WCSIAYFEM  | 143  | >SMAD4-E33 WCSIAYFAM  | 45  | 98   |
| >SMAD4-E33 YWCSIAYFE  | 8578 | >SMAD4-E33 YWCSIAYFA  | 99  | 8479 |
| >SMAD4-E33 YWCSIAYFEM | 277  | >SMAD4-E33 YWCSIAYFAM | 304 | 27   |
| >SMAD4-E33 YWCSIAYFEM | 29   | >SMAD4-E33 YWCSIAYFAM | 77  | 48   |
| >SMAD4-E33 YWCSIAYFE  | 349  | >SMAD4-E33 YWCSIAYFA  | 232 | 117  |
| >SMAD4-E33 YWCSIAYFE  | 131  | >SMAD4-E33 YWCSIAYFA  | 48  | 83   |
| >SMAD4-E33 EYWCSIAYFE | 309  | >SMAD4-E33 EYWCSIAYFA | 541 | 232  |
| >SMAD4-E33 EYWCSIAYFE | 102  | >SMAD4-E33 EYWCSIAYFA | 266 | 164  |
| >SMAD4-E33 EYWCSIAYFE | 645  | >SMAD4-E33 EYWCSIAYFA | 322 | 323  |
| >SMAD4-E33 EYWCSIAYFE | 430  | >SMAD4-E33 EYWCSIAYFA | 362 | 68   |
| >SMAD4-E33 EYWCSIAYFE | 326  | >SMAD4-E33 EYWCSIAYFA | 101 | 225  |

|                       |       |                       |       |       |
|-----------------------|-------|-----------------------|-------|-------|
| >SMAD4-E33 EYWCSIAYFE | 292   | >SMAD4-E33 EYWCSIAYFA | 231   | 61    |
| >SMAD4-E33 EYWCSIAYFE | 6627  | >SMAD4-E33 EYWCSIAYFA | 442   | 6185  |
| >SMAD4-E33 EYWCSIAYFE | 4596  | >SMAD4-E33 EYWCSIAYFA | 237   | 4359  |
| >SMAD4-E33 EMDVQVGET  | 4486  | >SMAD4-E33 KMDVQVGET  | 376   | 4110  |
| >SMAD4-E33 EMDVQVGET  | 2287  | >SMAD4-E33 KMDVQVGET  | 59    | 2228  |
| >SMAD4-E33 EMDVQVGET  | 1316  | >SMAD4-E33 KMDVQVGET  | 53    | 1263  |
| >SMAD4-E33 EMDVQVGET  | 12666 | >SMAD4-E33 KMDVQVGET  | 343   | 12323 |
| >SMAD4-E33 EMDVQVGET  | 2767  | >SMAD4-E33 KMDVQVGET  | 90    | 2677  |
| >SMAD4-E33 EMDVQVGET  | 242   | >SMAD4-E33 KMDVQVGET  | 10720 | 10478 |
| >SMAD4-E33 EMDVQVGET  | 2322  | >SMAD4-E33 KMDVQVGET  | 457   | 1865  |
| >SMAD4-E33 EMDVQVGET  | 1671  | >SMAD4-E33 KMDVQVGET  | 187   | 1484  |
| >SMAD4-E33 EMDVQVGET  | 14368 | >SMAD4-E33 KMDVQVGET  | 113   | 14255 |
| >SMAD4-E33 FEMDVQVGE  | 259   | >SMAD4-E33 FKMDVQVGE  | 457   | 198   |
| >SMAD4-E33 FEMDVQVGE  | 143   | >SMAD4-E33 FKMDVQVGE  | 1234  | 1091  |
| >SMAD4-E33 FEMDVQVGE  | 23    | >SMAD4-E33 FKMDVQVGE  | 3     | 20    |
| >SMAD4-E33 FEMDVQVGE  | 11    | >SMAD4-E33 FKMDVQVGE  | 2972  | 2961  |
| >SMAD4-E33 FEMDVQVGE  | 1416  | >SMAD4-E33 FKMDVQVGE  | 405   | 1011  |
| >SMAD4-E33 FEMDVQVGE  | 25    | >SMAD4-E33 FKMDVQVGE  | 14631 | 14606 |
| >SMAD4-E33 FEMDVQVGE  | 250   | >SMAD4-E33 FKMDVQVGE  | 22407 | 22157 |
| >SMAD4-E33 FEMDVQVGE  | 133   | >SMAD4-E33 FKMDVQVGE  | 10949 | 10816 |
| >SMAD4-E33 FEMDVQVGE  | 67    | >SMAD4-E33 FKMDVQVGE  | 10369 | 10302 |
| >SMAD4-E33 FEMDVQVGE  | 281   | >SMAD4-E33 FKMDVQVGE  | 26996 | 26715 |
| >SMAD4-E33 FEMDVQVGE  | 341   | >SMAD4-E33 FKMDVQVGE  | 29981 | 29640 |
| >SMAD4-E33 FEMDVQVGE  | 15    | >SMAD4-E33 FKMDVQVGE  | 8254  | 8239  |
| >SMAD4-E33 PEYWCSIAYF | 14060 | >SMAD4-E33 PEYWCSIAYF | 216   | 13844 |
| >SMAD4-E33 YFEMDVQV   | 98    | >SMAD4-E33 YFKMDVQV   | 118   | 20    |
| >SMAD4-E33 AYFEMDVQV  | 251   | >SMAD4-E33 AYFKMDVQV  | 78    | 173   |
| >SMAD4-E33 AYFEMDVQV  | 217   | >SMAD4-E33 AYFKMDVQV  | 2089  | 1872  |
| >SMAD4-E33 AYFEMDVQV  | 86    | >SMAD4-E33 AYFKMDVQV  | 536   | 450   |
| >SMAD4-E33 AYFEMDVQV  | 30    | >SMAD4-E33 AYFKMDVQV  | 176   | 146   |
| >SMAD4-E33 AYFEMDVQV  | 135   | >SMAD4-E33 AYFKMDVQV  | 69    | 66    |
| >SMAD4-E33 IAYFEMDV   | 563   | >SMAD4-E33 IAYFKMDV   | 418   | 145   |
| >SMAD4-E33 IAYFEMDVQ\ | 438   | >SMAD4-E33 IAYFKMDVQ\ | 989   | 551   |
| >SMAD4-E33 IAYFEMDVQ\ | 174   | >SMAD4-E33 IAYFKMDVQ\ | 253   | 79    |
| >SMAD4-E33 IAYFEMDVQ\ | 239   | >SMAD4-E33 IAYFKMDVQ\ | 349   | 110   |
| >SMAD4-E33 IAYFEMDVQ\ | 303   | >SMAD4-E33 IAYFKMDVQ\ | 187   | 116   |
| >SMAD4-E33 SIAYFEMDVC | 130   | >SMAD4-E33 SIAYFKMDVC | 339   | 209   |
| >SMAD4-E33 SIAYFEMDV  | 164   | >SMAD4-E33 SIAYFKMDV  | 399   | 235   |
| >SMAD4-E33 SIAYFEMDVC | 28    | >SMAD4-E33 SIAYFKMDVC | 50    | 22    |
| >SMAD4-E33 SIAYFEMDV  | 175   | >SMAD4-E33 SIAYFKMDV  | 182   | 7     |
| >SMAD4-E33 SIAYFEMDVC | 90    | >SMAD4-E33 SIAYFKMDVC | 118   | 28    |
| >SMAD4-E33 SIAYFEMDVC | 214   | >SMAD4-E33 SIAYFKMDVC | 361   | 147   |
| >SMAD4-E33 SIAYFEMDVC | 144   | >SMAD4-E33 SIAYFKMDVC | 232   | 88    |

|                       |       |                       |      |       |
|-----------------------|-------|-----------------------|------|-------|
| >SMAD4-E33 SIAYFEMDV  | 129   | >SMAD4-E33 SIAYFKMDV  | 341  | 212   |
| >SMAD4-E33 SIAYFEMDVC | 33    | >SMAD4-E33 SIAYFKMDVC | 57   | 24    |
| >SMAD4-E33 SIAYFEMDV  | 45    | >SMAD4-E33 SIAYFKMDV  | 44   | 1     |
| >SMAD4-E33 SIAYFEMDVC | 13    | >SMAD4-E33 SIAYFKMDVC | 15   | 2     |
| >SMAD4-E33 SIAYFEMDV  | 65    | >SMAD4-E33 SIAYFKMDV  | 46   | 19    |
| >SMAD4-E33 SIAYFEMDVC | 23    | >SMAD4-E33 SIAYFKMDVC | 23   | 0     |
| >SMAD4-E33 SIAYFEMDV  | 1519  | >SMAD4-E33 SIAYFKMDV  | 382  | 1137  |
| >SMAD4-E33 SIAYFEMDVC | 348   | >SMAD4-E33 SIAYFKMDVC | 242  | 106   |
| >SMAD4-E33 CSIAYFEM   | 299   | >SMAD4-E33 CSIAYFKM   | 141  | 158   |
| >SMAD4-E33 CSIAYFEM   | 209   | >SMAD4-E33 CSIAYFKM   | 360  | 151   |
| >SMAD4-E33 CSIAYFEMDV | 56    | >SMAD4-E33 CSIAYFKMDV | 98   | 42    |
| >SMAD4-E33 CSIAYFEM   | 93    | >SMAD4-E33 CSIAYFKM   | 62   | 31    |
| >SMAD4-E33 CSIAYFEM   | 85    | >SMAD4-E33 CSIAYFKM   | 148  | 63    |
| >SMAD4-E33 CSIAYFEM   | 317   | >SMAD4-E33 CSIAYFKM   | 195  | 122   |
| >SMAD4-E33 WCSIAYFEM  | 143   | >SMAD4-E33 WCSIAYFKM  | 677  | 534   |
| >SMAD4-E33 YWCSIAYFEM | 277   | >SMAD4-E33 YWCSIAYFKM | 304  | 27    |
| >SMAD4-E33 YWCSIAYFEM | 29    | >SMAD4-E33 YWCSIAYFKM | 56   | 27    |
| >SMAD4-E33 YWCSIAYFE  | 10448 | >SMAD4-E33 YWCSIAYFK  | 214  | 10234 |
| >SMAD4-E33 YWCSIAYFE  | 12351 | >SMAD4-E33 YWCSIAYFK  | 106  | 12245 |
| >SMAD4-E33 YWCSIAYFE  | 349   | >SMAD4-E33 YWCSIAYFK  | 16   | 333   |
| >SMAD4-E33 YWCSIAYFE  | 131   | >SMAD4-E33 YWCSIAYFK  | 116  | 15    |
| >SMAD4-E33 EYWCSIAYFE | 309   | >SMAD4-E33 EYWCSIAYFK | 316  | 7     |
| >SMAD4-E33 EYWCSIAYFE | 102   | >SMAD4-E33 EYWCSIAYFK | 206  | 104   |
| >SMAD4-E33 EYWCSIAYFE | 10283 | >SMAD4-E33 EYWCSIAYFK | 357  | 9926  |
| >SMAD4-E33 EYWCSIAYFE | 2245  | >SMAD4-E33 EYWCSIAYFK | 230  | 2015  |
| >SMAD4-E33 EYWCSIAYFE | 28427 | >SMAD4-E33 EYWCSIAYFK | 116  | 28311 |
| >SMAD4-E33 EYWCSIAYFE | 430   | >SMAD4-E33 EYWCSIAYFK | 692  | 262   |
| >SMAD4-E33 EYWCSIAYFE | 326   | >SMAD4-E33 EYWCSIAYFK | 1236 | 910   |
| >SMAD4-E33 EYWCSIAYFE | 11091 | >SMAD4-E33 EYWCSIAYFK | 495  | 10596 |
| >SMAD4-E33 EYWCSIAYFE | 292   | >SMAD4-E33 EYWCSIAYFK | 14   | 278   |
| >SMAD4-E33 EMDVQVGET  | 2287  | >SMAD4-E33 QMDVQVGE   | 423  | 1864  |
| >SMAD4-E33 EMDVQVGET  | 1316  | >SMAD4-E33 QMDVQVGE   | 206  | 1110  |
| >SMAD4-E33 EMDVQVGET  | 242   | >SMAD4-E33 QMDVQVGE   | 2322 | 2080  |
| >SMAD4-E33 EMDVQVGET  | 1671  | >SMAD4-E33 QMDVQVGE   | 446  | 1225  |
| >SMAD4-E33 FEMDVQVGE  | 9497  | >SMAD4-E33 FQMDVQVGI  | 303  | 9194  |
| >SMAD4-E33 FEMDVQVGE  | 4646  | >SMAD4-E33 FQMDVQVGI  | 196  | 4450  |
| >SMAD4-E33 FEMDVQVGE  | 5534  | >SMAD4-E33 FQMDVQVGI  | 114  | 5420  |
| >SMAD4-E33 FEMDVQVG   | 9487  | >SMAD4-E33 FQMDVQVG   | 94   | 9393  |
| >SMAD4-E33 FEMDVQVGE  | 9061  | >SMAD4-E33 FQMDVQVGI  | 64   | 8997  |
| >SMAD4-E33 FEMDVQVGE  | 4979  | >SMAD4-E33 FQMDVQVGI  | 135  | 4844  |
| >SMAD4-E33 FEMDVQVGE  | 259   | >SMAD4-E33 FQMDVQVGI  | 5    | 254   |
| >SMAD4-E33 FEMDVQVGE  | 7054  | >SMAD4-E33 FQMDVQVGI  | 427  | 6627  |
| >SMAD4-E33 FEMDVQVGE  | 2639  | >SMAD4-E33 FQMDVQVGI  | 261  | 2378  |

|                       |      |                       |       |       |
|-----------------------|------|-----------------------|-------|-------|
| >SMAD4-E33 FEMDVQVGE  | 3451 | >SMAD4-E33 FQMDVQVGI  | 295   | 3156  |
| >SMAD4-E33 FEMDVQVG   | 5946 | >SMAD4-E33 FQMDVQVG   | 240   | 5706  |
| >SMAD4-E33 FEMDVQVGE  | 143  | >SMAD4-E33 FQMDVQVGI  | 37    | 106   |
| >SMAD4-E33 FEMDVQVGE  | 770  | >SMAD4-E33 FQMDVQVGI  | 60    | 710   |
| >SMAD4-E33 FEMDVQVGE  | 23   | >SMAD4-E33 FQMDVQVGI  | 3     | 20    |
| >SMAD4-E33 FEMDVQVGE  | 11   | >SMAD4-E33 FQMDVQVGI  | 378   | 367   |
| >SMAD4-E33 FEMDVQVGE  | 1182 | >SMAD4-E33 FQMDVQVGI  | 426   | 756   |
| >SMAD4-E33 FEMDVQVGE  | 1416 | >SMAD4-E33 FQMDVQVGI  | 105   | 1311  |
| >SMAD4-E33 FEMDVQVGE  | 25   | >SMAD4-E33 FQMDVQVGI  | 1690  | 1665  |
| >SMAD4-E33 FEMDVQVGE  | 250  | >SMAD4-E33 FQMDVQVGI  | 8299  | 8049  |
| >SMAD4-E33 FEMDVQVGE  | 133  | >SMAD4-E33 FQMDVQVGI  | 6794  | 6661  |
| >SMAD4-E33 FEMDVQVGE  | 67   | >SMAD4-E33 FQMDVQVGI  | 3335  | 3268  |
| >SMAD4-E33 FEMDVQVGE  | 1037 | >SMAD4-E33 FQMDVQVGI  | 358   | 679   |
| >SMAD4-E33 FEMDVQVGE  | 281  | >SMAD4-E33 FQMDVQVGI  | 20223 | 19942 |
| >SMAD4-E33 FEMDVQVGE  | 341  | >SMAD4-E33 FQMDVQVGI  | 26594 | 26253 |
| >SMAD4-E33 FEMDVQVGE  | 15   | >SMAD4-E33 FQMDVQVGI  | 2987  | 2972  |
| >SMAD4-E33 PEYWCSIAYF | 1612 | >SMAD4-E33 PEYWCSIAYF | 435   | 1177  |
| >SMAD4-E33 YFEMDVQV   | 98   | >SMAD4-E33 YFQMDVQV   | 39    | 59    |
| >SMAD4-E33 AYFEMDVQV  | 251  | >SMAD4-E33 AYFQMDVQV  | 155   | 96    |
| >SMAD4-E33 AYFEMDVQV  | 217  | >SMAD4-E33 AYFQMDVQV  | 1255  | 1038  |
| >SMAD4-E33 AYFEMDVQV  | 86   | >SMAD4-E33 AYFQMDVQV  | 415   | 329   |
| >SMAD4-E33 AYFEMDVQV  | 30   | >SMAD4-E33 AYFQMDVQV  | 68    | 38    |
| >SMAD4-E33 AYFEMDVQV  | 135  | >SMAD4-E33 AYFQMDVQV  | 72    | 63    |
| >SMAD4-E33 IAYFEMDV   | 1197 | >SMAD4-E33 IAYFQMDV   | 440   | 757   |
| >SMAD4-E33 IAYFEMDV   | 563  | >SMAD4-E33 IAYFQMDV   | 308   | 255   |
| >SMAD4-E33 IAYFEMDVQ\ | 438  | >SMAD4-E33 IAYFQMDVQ\ | 845   | 407   |
| >SMAD4-E33 IAYFEMDVQ\ | 174  | >SMAD4-E33 IAYFQMDVQ\ | 215   | 41    |
| >SMAD4-E33 IAYFEMDV   | 548  | >SMAD4-E33 IAYFQMDV   | 327   | 221   |
| >SMAD4-E33 IAYFEMDVQ\ | 239  | >SMAD4-E33 IAYFQMDVQ\ | 225   | 14    |
| >SMAD4-E33 IAYFEMDVQ\ | 303  | >SMAD4-E33 IAYFQMDVQ\ | 196   | 107   |
| >SMAD4-E33 SIAYFEMDV  | 550  | >SMAD4-E33 SIAYFQMDV  | 256   | 294   |
| >SMAD4-E33 SIAYFEMDVC | 130  | >SMAD4-E33 SIAYFQMDVC | 136   | 6     |
| >SMAD4-E33 SIAYFEMDV  | 164  | >SMAD4-E33 SIAYFQMDV  | 64    | 100   |
| >SMAD4-E33 SIAYFEMDVC | 28   | >SMAD4-E33 SIAYFQMDVC | 24    | 4     |
| >SMAD4-E33 SIAYFEMDV  | 175  | >SMAD4-E33 SIAYFQMDV  | 49    | 126   |
| >SMAD4-E33 SIAYFEMDVC | 90   | >SMAD4-E33 SIAYFQMDVC | 68    | 22    |
| >SMAD4-E33 SIAYFEMDVC | 214  | >SMAD4-E33 SIAYFQMDVC | 235   | 21    |
| >SMAD4-E33 SIAYFEMDVC | 144  | >SMAD4-E33 SIAYFQMDVC | 154   | 10    |
| >SMAD4-E33 SIAYFEMDV  | 129  | >SMAD4-E33 SIAYFQMDV  | 105   | 24    |
| >SMAD4-E33 SIAYFEMDVC | 33   | >SMAD4-E33 SIAYFQMDVC | 34    | 1     |
| >SMAD4-E33 SIAYFEMDV  | 45   | >SMAD4-E33 SIAYFQMDV  | 23    | 22    |
| >SMAD4-E33 SIAYFEMDVC | 13   | >SMAD4-E33 SIAYFQMDVC | 11    | 2     |
| >SMAD4-E33 SIAYFEMDV  | 65   | >SMAD4-E33 SIAYFQMDV  | 29    | 36    |



|                        |       |                        |       |       |
|------------------------|-------|------------------------|-------|-------|
| >SMAD4-E33 SIAYFEMDVC  | 23    | >SMAD4-E33 SIAYFQMDVC  | 20    | 3     |
| >SMAD4-E33 SIAYFEMDV   | 1519  | >SMAD4-E33 SIAYFQMDV   | 272   | 1247  |
| >SMAD4-E33 SIAYFEMDVC  | 348   | >SMAD4-E33 SIAYFQMDVC  | 197   | 151   |
| >SMAD4-E33 CSIAYFEM    | 299   | >SMAD4-E33 CSIAYFQM    | 86    | 213   |
| >SMAD4-E33 CSIAYFEM    | 209   | >SMAD4-E33 CSIAYFQM    | 203   | 6     |
| >SMAD4-E33 CSIAYFEMDV  | 56    | >SMAD4-E33 CSIAYFQMDV  | 47    | 9     |
| >SMAD4-E33 CSIAYFEM    | 93    | >SMAD4-E33 CSIAYFQM    | 40    | 53    |
| >SMAD4-E33 CSIAYFEM    | 85    | >SMAD4-E33 CSIAYFQM    | 60    | 25    |
| >SMAD4-E33 CSIAYFEM    | 317   | >SMAD4-E33 CSIAYFQM    | 155   | 162   |
| >SMAD4-E33 WCSIAYFEM   | 143   | >SMAD4-E33 WCSIAYFQM   | 504   | 361   |
| >SMAD4-E33 WCSIAYFEM   | 730   | >SMAD4-E33 WCSIAYFQM   | 405   | 325   |
| >SMAD4-E33 YWCSIAYFEM  | 277   | >SMAD4-E33 YWCSIAYFQM  | 389   | 112   |
| >SMAD4-E33 YWCSIAYFEM  | 29    | >SMAD4-E33 YWCSIAYFQM  | 38    | 9     |
| >SMAD4-E33 YWCSIAYFE   | 757   | >SMAD4-E33 YWCSIAYFQ   | 186   | 571   |
| >SMAD4-E33 YWCSIAYFE   | 349   | >SMAD4-E33 YWCSIAYFQ   | 62    | 287   |
| >SMAD4-E33 YWCSIAYFE   | 131   | >SMAD4-E33 YWCSIAYFQ   | 107   | 24    |
| >SMAD4-E33 EYWCSIAYFE  | 309   | >SMAD4-E33 EYWCSIAYFQ  | 335   | 26    |
| >SMAD4-E33 EYWCSIAYFE  | 102   | >SMAD4-E33 EYWCSIAYFQ  | 139   | 37    |
| >SMAD4-E33 EYWCSIAYFE  | 430   | >SMAD4-E33 EYWCSIAYFQ  | 302   | 128   |
| >SMAD4-E33 EYWCSIAYFE  | 326   | >SMAD4-E33 EYWCSIAYFQ  | 889   | 563   |
| >SMAD4-E33 EYWCSIAYFE  | 292   | >SMAD4-E33 EYWCSIAYFQ  | 46    | 246   |
| >SMAD4-F33 FKVPSSCPI   | 322   | >SMAD4-F33 SKVPSSCPI   | 318   | 4     |
| >SMAD4-F33 FKVPSSCPI   | 160   | >SMAD4-F33 SKVPSSCPI   | 1519  | 1359  |
| >SMAD4-F33 FKVPSSCPIV  | 298   | >SMAD4-F33 SKVPSSCPIV  | 2093  | 1795  |
| >SMAD4-F33 FKVPSSCPIV  | 327   | >SMAD4-F33 SKVPSSCPIV  | 2525  | 2198  |
| >SMAD4-F33 FKVPSSCP    | 254   | >SMAD4-F33 SKVPSSCP    | 880   | 626   |
| >SMAD4-F33 FKVPSSCPI   | 7     | >SMAD4-F33 SKVPSSCPI   | 17    | 10    |
| >SMAD4-F33 FKVPSSCPIV  | 12    | >SMAD4-F33 SKVPSSCPIV  | 37    | 25    |
| >SMAD4-F33 FKVPSSCPIVT | 164   | >SMAD4-F33 SKVPSSCPIVT | 754   | 590   |
| >SMAD4-F33 FKVPSSCPI   | 105   | >SMAD4-F33 SKVPSSCPI   | 676   | 571   |
| >SMAD4-F33 FKVPSSCPIV  | 364   | >SMAD4-F33 SKVPSSCPIV  | 2768  | 2404  |
| >SMAD4-F33 TFKVPSSCPI  | 125   | >SMAD4-F33 TSKVPSSCPI  | 42    | 83    |
| >SMAD4-F33 TFKVPSSCPIV | 1493  | >SMAD4-F33 TSKVPSSCPIV | 449   | 1044  |
| >SMAD4-F33 TFKVPSSCPI  | 24033 | >SMAD4-F33 TSKVPSSCPI  | 62    | 23971 |
| >SMAD4-F33 TFKVPSSCPI  | 16427 | >SMAD4-F33 TSKVPSSCPI  | 161   | 16266 |
| >SMAD4-F33 FEMDVQVGE   | 259   | >SMAD4-F33 FEMDVQVGE   | 1840  | 1581  |
| >SMAD4-F33 FEMDVQVGE   | 143   | >SMAD4-F33 FEMDVQVGE   | 15390 | 15247 |
| >SMAD4-F33 FEMDVQVGE   | 23    | >SMAD4-F33 FEMDVQVGE   | 13601 | 13578 |
| >SMAD4-F33 FEMDVQVGE   | 11    | >SMAD4-F33 FEMDVQVGE   | 682   | 671   |
| >SMAD4-F33 FEMDVQVGE   | 25    | >SMAD4-F33 FEMDVQVGE   | 3028  | 3003  |
| >SMAD4-F33 FEMDVQVGE   | 250   | >SMAD4-F33 FEMDVQVGE   | 904   | 654   |
| >SMAD4-F33 FEMDVQVGE   | 133   | >SMAD4-F33 FEMDVQVGE   | 3297  | 3164  |
| >SMAD4-F33 FEMDVQVGE   | 67    | >SMAD4-F33 FEMDVQVGE   | 2393  | 2326  |

|                        |      |                        |       |       |
|------------------------|------|------------------------|-------|-------|
| >SMAD4-F33 FEMDVQVGE   | 15   | >SMAD4-F33 FEMDVQVGE   | 207   | 192   |
| >SMAD4-F33 ETFKVPSSCPI | 35   | >SMAD4-F33 ETSKVPSSCPI | 917   | 882   |
| >SMAD4-F33 ETFKVPSS    | 418  | >SMAD4-F33 ETSKVPSS    | 2132  | 1714  |
| >SMAD4-F33 ETFKVPSS    | 229  | >SMAD4-F33 ETSKVPSS    | 896   | 667   |
| >SMAD4-F33 ETFKVPSSC   | 197  | >SMAD4-F33 ETSKVPSSC   | 716   | 519   |
| >SMAD4-F33 ETFKVPSSCPI | 5    | >SMAD4-F33 ETSKVPSSCPI | 6     | 1     |
| >SMAD4-F33 ETFKVPSSCPI | 9    | >SMAD4-F33 ETSKVPSSCPI | 21    | 12    |
| >SMAD4-F33 ETFKVPSSCPI | 119  | >SMAD4-F33 ETSKVPSSCPI | 658   | 539   |
| >SMAD4-F33 ETFKVPSSCPI | 49   | >SMAD4-F33 ETSKVPSSCPI | 249   | 200   |
| >SMAD4-F33 QVGETFKV    | 118  | >SMAD4-F33 QVGETSKV    | 1387  | 1269  |
| >SMAD4-F33 QVGETFKV    | 157  | >SMAD4-F33 QVGETSKV    | 452   | 295   |
| >SMAD4-F33 QVGETFKV    | 291  | >SMAD4-F33 QVGETSKV    | 1083  | 792   |
| >SMAD4-F33 QVGETFKV    | 203  | >SMAD4-F33 QVGETSKV    | 1094  | 891   |
| >SMAD4-F33 QVGETFKV    | 52   | >SMAD4-F33 QVGETSKV    | 113   | 61    |
| >SMAD4-F33 QVGETFKV    | 194  | >SMAD4-F33 QVGETSKV    | 577   | 383   |
| >SMAD4-F33 QVGETFKV    | 23   | >SMAD4-F33 QVGETSKV    | 79    | 56    |
| >SMAD4-F33 VQVGETFKV   | 147  | >SMAD4-F33 VQVGETSKV   | 4186  | 4039  |
| >SMAD4-F33 VQVGETFKV   | 83   | >SMAD4-F33 VQVGETSKV   | 389   | 306   |
| >SMAD4-F33 VQVGETFKV   | 236  | >SMAD4-F33 VQVGETSKV   | 66    | 170   |
| >SMAD4-F33 VQVGETFKV   | 7    | >SMAD4-F33 VQVGETSKV   | 33    | 26    |
| >SMAD4-F33 VQVGETFKV   | 59   | >SMAD4-F33 VQVGETSKV   | 344   | 285   |
| >SMAD4-F33 VQVGETFKV   | 201  | >SMAD4-F33 VQVGETSKV   | 1475  | 1274  |
| >SMAD4-F33 VQVGETFKV   | 83   | >SMAD4-F33 VQVGETSKV   | 1224  | 1141  |
| >SMAD4-F33 VQVGETFKV   | 466  | >SMAD4-F33 VQVGETSKV   | 4197  | 3731  |
| >SMAD4-F33 VQVGETFKV   | 61   | >SMAD4-F33 VQVGETSKV   | 181   | 120   |
| >SMAD4-F33 VQVGETFK    | 132  | >SMAD4-F33 VQVGETSK    | 1097  | 965   |
| >SMAD4-F33 DVQVGETFK   | 116  | >SMAD4-F33 DVQVGETSK   | 735   | 619   |
| >SMAD4-F33 DVQVGETFK   | 43   | >SMAD4-F33 DVQVGETSK   | 319   | 276   |
| >SMAD4-F33 DVQVGETFK\  | 385  | >SMAD4-F33 DVQVGETSK\  | 1562  | 1177  |
| >SMAD4-F33 MDVQVGETF   | 466  | >SMAD4-F33 MDVQVGETS   | 23575 | 23109 |
| >SMAD4-F33 MDVQVGETF   | 379  | >SMAD4-F33 MDVQVGETS   | 13379 | 13000 |
| >SMAD4-F33 MDVQVGETF   | 216  | >SMAD4-F33 MDVQVGETS   | 15505 | 15289 |
| >SMAD4-F33 MDVQVGETF   | 208  | >SMAD4-F33 MDVQVGETS   | 397   | 189   |
| >SMAD4-F33 MDVQVGETF   | 204  | >SMAD4-F33 MDVQVGETS   | 584   | 380   |
| >SMAD4-F33 EMDVQVGET   | 242  | >SMAD4-F33 EMDVQVGET   | 1039  | 797   |
| >SMAD4-F40 FVQSYLDR    | 797  | >SMAD4-F40 SVQSYLDR    | 54    | 743   |
| >SMAD4-F40 FVQSYLDR    | 609  | >SMAD4-F40 SVQSYLDR    | 66    | 543   |
| >SMAD4-F40 FVQSYLDR    | 112  | >SMAD4-F40 SVQSYLDR    | 281   | 169   |
| >SMAD4-F40 FVQSYLDR    | 1860 | >SMAD4-F40 SVQSYLDR    | 188   | 1672  |
| >SMAD4-F40 VFVQSYLL    | 5895 | >SMAD4-F40 VSVQSYLL    | 207   | 5688  |
| >SMAD4-F40 VFVQSYLL    | 201  | >SMAD4-F40 VSVQSYLL    | 49    | 152   |
| >SMAD4-F40 VFVQSYLL    | 406  | >SMAD4-F40 VSVQSYLL    | 794   | 388   |
| >SMAD4-F40 VFVQSYLLDR  | 2530 | >SMAD4-F40 VSVQSYLLDR  | 195   | 2335  |

|                      |       |                       |       |       |
|----------------------|-------|-----------------------|-------|-------|
| >SMAD4-F40 VVQSYLL   | 69    | >SMAD4-F40 VSVQSYLL   | 2781  | 2712  |
| >SMAD4-F40 VVQSYLL   | 76    | >SMAD4-F40 VSVQSYLL   | 13080 | 13004 |
| >SMAD4-F40 VVQSYLLDR | 232   | >SMAD4-F40 VSVQSYLLDR | 400   | 168   |
| >SMAD4-F40 VVQSYLLDR | 327   | >SMAD4-F40 VSVQSYLLDR | 2303  | 1976  |
| >SMAD4-F40 VVQSYLLDR | 1628  | >SMAD4-F40 VSVQSYLLDR | 478   | 1150  |
| >SMAD4-F40 VVQSYLL   | 21096 | >SMAD4-F40 VSVQSYLL   | 11    | 21085 |
| >SMAD4-F40 VVQSYLL   | 11930 | >SMAD4-F40 VSVQSYLL   | 113   | 11817 |
| >SMAD4-F40 VVQSYLL   | 7581  | >SMAD4-F40 VSVQSYLL   | 16    | 7565  |
| >SMAD4-F40 VVQSYLLDR | 3590  | >SMAD4-F40 VSVQSYLLDR | 324   | 3266  |
| >SMAD4-F40 VVQSYLLDR | 85    | >SMAD4-F40 VSVQSYLLDR | 846   | 761   |
| >SMAD4-F40 VVQSYLL   | 162   | >SMAD4-F40 VSVQSYLL   | 20405 | 20243 |
| >SMAD4-F40 WVRCLSDHA | 38    | >SMAD4-F40 WVRCLSDHA  | 5665  | 5627  |
| >SMAD4-F40 WVRCLSDHA | 77    | >SMAD4-F40 WVRCLSDHA  | 14009 | 13932 |
| >SMAD4-F40 WVRCLSDHA | 150   | >SMAD4-F40 WVRCLSDHA  | 18151 | 18001 |
| >SMAD4-F40 WVRCLSDHA | 110   | >SMAD4-F40 WVRCLSDHA  | 6300  | 6190  |
| >SMAD4-F40 WVRCLSDHA | 15    | >SMAD4-F40 WVRCLSDHA  | 1054  | 1039  |
| >SMAD4-F40 AVVQSYLL  | 172   | >SMAD4-F40 AVSVQSYLL  | 3604  | 3432  |
| >SMAD4-F40 AVVQSYLL  | 46    | >SMAD4-F40 AVSVQSYLL  | 462   | 416   |
| >SMAD4-F40 AVVQSYLL  | 8     | >SMAD4-F40 AVSVQSYLL  | 11    | 3     |
| >SMAD4-F40 AVVQSYLL  | 43    | >SMAD4-F40 AVSVQSYLL  | 203   | 160   |
| >SMAD4-F40 AVVQSYLL  | 50    | >SMAD4-F40 AVSVQSYLL  | 1047  | 997   |
| >SMAD4-F40 AVVQSYLL  | 76    | >SMAD4-F40 AVSVQSYLL  | 470   | 394   |
| >SMAD4-F40 AVVQSYLL  | 125   | >SMAD4-F40 AVSVQSYLL  | 1282  | 1157  |
| >SMAD4-F40 AVVQSYLL  | 135   | >SMAD4-F40 AVSVQSYLL  | 560   | 425   |
| >SMAD4-F40 AVVQSY    | 118   | >SMAD4-F40 AVSVQSY    | 428   | 310   |
| >SMAD4-F40 AVVQSY    | 35    | >SMAD4-F40 AVSVQSY    | 65    | 30    |
| >SMAD4-F40 AVVQSYLD  | 47    | >SMAD4-F40 AVSVQSYLD  | 121   | 74    |
| >SMAD4-F40 AVVQSY    | 411   | >SMAD4-F40 AVSVQSY    | 243   | 168   |
| >SMAD4-F40 AVVQSY    | 15    | >SMAD4-F40 AVSVQSY    | 39    | 24    |
| >SMAD4-F40 AVVQSY    | 327   | >SMAD4-F40 AVSVQSY    | 1749  | 1422  |
| >SMAD4-F40 AVVQSYLL  | 60    | >SMAD4-F40 AVSVQSYLL  | 375   | 315   |
| >SMAD4-F40 AVVQSY    | 17    | >SMAD4-F40 AVSVQSY    | 17    | 0     |
| >SMAD4-F40 AVVQSYLL  | 365   | >SMAD4-F40 AVSVQSYLL  | 2912  | 2547  |
| >SMAD4-F40 AVVQSYLD  | 34    | >SMAD4-F40 AVSVQSYLD  | 168   | 134   |
| >SMAD4-F40 AVVQSYLL  | 94    | >SMAD4-F40 AVSVQSYLL  | 2431  | 2337  |
| >SMAD4-F40 AVVQSY    | 304   | >SMAD4-F40 AVSVQSY    | 1913  | 1609  |
| >SMAD4-F40 AVVQSYLD  | 69    | >SMAD4-F40 AVSVQSYLD  | 458   | 389   |
| >SMAD4-F40 AVVQSYLL  | 50    | >SMAD4-F40 AVSVQSYLL  | 208   | 158   |
| >SMAD4-F40 AVVQSY    | 55    | >SMAD4-F40 AVSVQSY    | 118   | 63    |
| >SMAD4-F40 AVVQSY    | 137   | >SMAD4-F40 AVSVQSY    | 272   | 135   |
| >SMAD4-F40 AVVQSY    | 490   | >SMAD4-F40 AVSVQSY    | 2558  | 2068  |
| >SMAD4-F40 AVVQSY    | 203   | >SMAD4-F40 AVSVQSY    | 1575  | 1372  |
| >SMAD4-F40 AVVQSY    | 31    | >SMAD4-F40 AVSVQSY    | 191   | 160   |

|                        |      |                        |      |      |
|------------------------|------|------------------------|------|------|
| >SMAD4-F40 AVFVQSYYL   | 232  | >SMAD4-F40 AVSVQSYYL   | 1790 | 1558 |
| >SMAD4-F40 AVFVQSYY    | 296  | >SMAD4-F40 AVSVQSYY    | 265  | 31   |
| >SMAD4-F40 AVFVQSYY    | 224  | >SMAD4-F40 AVSVQSYY    | 341  | 117  |
| >SMAD4-F40 AVFVQSYYLD  | 81   | >SMAD4-F40 AVSVQSYYLD  | 161  | 80   |
| >SMAD4-F40 HAVFVQSYYL  | 653  | >SMAD4-F40 HAVSVQSYYL  | 191  | 462  |
| >SMAD4-F40 HAVFVQSYY   | 508  | >SMAD4-F40 HAVSVQSYY   | 309  | 199  |
| >SMAD4-F40 HAVFVQSYY   | 155  | >SMAD4-F40 HAVSVQSYY   | 78   | 77   |
| >SMAD4-F40 HAVFVQSYY   | 225  | >SMAD4-F40 HAVSVQSYY   | 118  | 107  |
| >SMAD4-F40 HAVFVQSYY   | 188  | >SMAD4-F40 HAVSVQSYY   | 94   | 94   |
| >SMAD4-F40 HAVFVQSYY   | 68   | >SMAD4-F40 HAVSVQSYY   | 99   | 31   |
| >SMAD4-F40 HAVFVQSYY   | 312  | >SMAD4-F40 HAVSVQSYY   | 250  | 62   |
| >SMAD4-F40 HAVFVQSYY   | 36   | >SMAD4-F40 HAVSVQSYY   | 25   | 11   |
| >SMAD4-F40 HAVFVQSYY   | 292  | >SMAD4-F40 HAVSVQSYY   | 361  | 69   |
| >SMAD4-F40 HAVFVQSYY   | 21   | >SMAD4-F40 HAVSVQSYY   | 23   | 2    |
| >SMAD4-F40 HAVFVQSYYL  | 188  | >SMAD4-F40 HAVSVQSYYL  | 429  | 241  |
| >SMAD4-F40 HAVFVQSYYL  | 290  | >SMAD4-F40 HAVSVQSYYL  | 250  | 40   |
| >SMAD4-F40 HAVFVQSYY   | 390  | >SMAD4-F40 HAVSVQSYY   | 435  | 45   |
| >SMAD4-F40 HAVFVQSYY   | 233  | >SMAD4-F40 HAVSVQSYY   | 147  | 86   |
| >SMAD4-F40 HAVFVQSYY   | 796  | >SMAD4-F40 HAVSVQSYY   | 493  | 303  |
| >SMAD4-F40 HAVFVQSYY   | 238  | >SMAD4-F40 HAVSVQSYY   | 60   | 178  |
| >SMAD4-F40 HAVFVQSYY   | 1048 | >SMAD4-F40 HAVSVQSYY   | 195  | 853  |
| >SMAD4-F40 HAVFVQSYY   | 22   | >SMAD4-F40 HAVSVQSYY   | 18   | 4    |
| >SMAD4-F40 HAVFVQSYY   | 38   | >SMAD4-F40 HAVSVQSYY   | 47   | 9    |
| >SMAD4-F40 HAVFVQSYYL  | 255  | >SMAD4-F40 HAVSVQSYYL  | 246  | 9    |
| >SMAD4-F40 HAVFVQSYY   | 25   | >SMAD4-F40 HAVSVQSYY   | 21   | 4    |
| >SMAD4-F40 HAVFVQSYY   | 57   | >SMAD4-F40 HAVSVQSYY   | 37   | 20   |
| >SMAD4-F40 HAVFVQSYY   | 766  | >SMAD4-F40 HAVSVQSYY   | 456  | 310  |
| >SMAD4-F40 HAVFVQSYY   | 643  | >SMAD4-F40 HAVSVQSYY   | 304  | 339  |
| >SMAD4-F40 HAVFVQSYY   | 362  | >SMAD4-F40 HAVSVQSYY   | 148  | 214  |
| >SMAD4-F40 HAVFVQSYY   | 47   | >SMAD4-F40 HAVSVQSYY   | 23   | 24   |
| >SMAD4-F40 HAVFVQSYYL  | 416  | >SMAD4-F40 HAVSVQSYYL  | 179  | 237  |
| >SMAD4-F40 HAVFVQSYY   | 25   | >SMAD4-F40 HAVSVQSYY   | 13   | 12   |
| >SMAD4-F40 HAVFVQSYY   | 72   | >SMAD4-F40 HAVSVQSYY   | 39   | 33   |
| >SMAD4-F40 HAVFVQSYY   | 233  | >SMAD4-F40 HAVSVQSYY   | 77   | 156  |
| >SMAD4-F40 HAVFVQSYY   | 176  | >SMAD4-F40 HAVSVQSYY   | 325  | 149  |
| >SMAD4-F40 DHAVFVQSYY  | 490  | >SMAD4-F40 DHAVSVQSYY  | 665  | 175  |
| >SMAD4-F40 DHAVFVQSYY  | 410  | >SMAD4-F40 DHAVSVQSYY  | 402  | 8    |
| >SMAD4-F40 DHAVFVQSYY  | 352  | >SMAD4-F40 DHAVSVQSYY  | 265  | 87   |
| >SMAD4-F40 DHAVFVQSYY  | 388  | >SMAD4-F40 DHAVSVQSYY  | 214  | 174  |
| >SMAD4-F40 DHAVFVQSYY  | 304  | >SMAD4-F40 DHAVSVQSYY  | 1399 | 1095 |
| >SMAD4-F40 DHAVFVQSYY  | 549  | >SMAD4-F40 DHAVSVQSYY  | 489  | 60   |
| >SMAD4-F40 SDHAVFVQSYY | 191  | >SMAD4-F40 SDHAVSVQSYY | 182  | 9    |
| >SMAD4-F40 LSDHAVFV    | 461  | >SMAD4-F40 LSDHAVSV    | 2075 | 1614 |

|                        |      |                        |       |       |
|------------------------|------|------------------------|-------|-------|
| >SMAD4-F40 LSDHAVFVQ   | 18   | >SMAD4-F40 LSDHAVSVQ   | 23    | 5     |
| >SMAD4-F40 LSDHAVFV    | 101  | >SMAD4-F40 LSDHAVSV    | 512   | 411   |
| >SMAD4-F40 LSDHAVFVQ   | 306  | >SMAD4-F40 LSDHAVSVQ   | 397   | 91    |
| >SMAD4-F40 LSDHAVFVQ   | 229  | >SMAD4-F40 LSDHAVSVQ   | 133   | 96    |
| >SMAD4-F40 LSDHAVFVQ   | 361  | >SMAD4-F40 LSDHAVSVQ   | 248   | 113   |
| >SMAD4-F40 LSDHAVFVQ   | 5    | >SMAD4-F40 LSDHAVSVQ   | 4     | 1     |
| >SMAD4-F40 LSDHAVFVQ   | 268  | >SMAD4-F40 LSDHAVSVQ   | 308   | 40    |
| >SMAD4-F40 LSDHAVFVQ   | 59   | >SMAD4-F40 LSDHAVSVQ   | 92    | 33    |
| >SMAD4-F40 LSDHAVFVQ   | 196  | >SMAD4-F40 LSDHAVSVQ   | 88    | 108   |
| >SMAD4-F40 LSDHAVFVQ   | 388  | >SMAD4-F40 LSDHAVSVQ   | 621   | 233   |
| >SMAD4-F40 CLSDHAVFV   | 18   | >SMAD4-F40 CLSDHAVSV   | 36    | 18    |
| >SMAD4-F40 CLSDHAVFV   | 4    | >SMAD4-F40 CLSDHAVSV   | 6     | 2     |
| >SMAD4-F40 CLSDHAVFVC  | 413  | >SMAD4-F40 CLSDHAVSVC  | 686   | 273   |
| >SMAD4-F40 CLSDHAVFV   | 5    | >SMAD4-F40 CLSDHAVSV   | 5     | 0     |
| >SMAD4-F40 CLSDHAVFV   | 17   | >SMAD4-F40 CLSDHAVSV   | 36    | 19    |
| >SMAD4-F40 CLSDHAVFV   | 5    | >SMAD4-F40 CLSDHAVSV   | 6     | 1     |
| >SMAD4-F40 CLSDHAVFV   | 6    | >SMAD4-F40 CLSDHAVSV   | 8     | 2     |
| >SMAD4-F40 CLSDHAVFV   | 10   | >SMAD4-F40 CLSDHAVSV   | 42    | 32    |
| >SMAD4-F40 CLSDHAVFV   | 3    | >SMAD4-F40 CLSDHAVSV   | 6     | 3     |
| >SMAD4-F40 CLSDHAVFV   | 3    | >SMAD4-F40 CLSDHAVSV   | 2     | 1     |
| >SMAD4-F40 CLSDHAVFVC  | 257  | >SMAD4-F40 CLSDHAVSVC  | 465   | 208   |
| >SMAD4-F40 CLSDHAVFV   | 183  | >SMAD4-F40 CLSDHAVSV   | 670   | 487   |
| >SMAD4-F40 CLSDHAVF    | 138  | >SMAD4-F40 CLSDHAVS    | 15211 | 15073 |
| >SMAD4-F40 CLSDHAVF    | 178  | >SMAD4-F40 CLSDHAVS    | 21427 | 21249 |
| >SMAD4-F40 RCLSDHAVFV  | 142  | >SMAD4-F40 RCLSDHAVSV  | 271   | 129   |
| >SMAD4-F40 RCLSDHAVFV  | 414  | >SMAD4-F40 RCLSDHAVSV  | 1753  | 1339  |
| >SMAD4-F40 RCLSDHAVF   | 462  | >SMAD4-F40 RCLSDHAVS   | 20871 | 20409 |
| >SMAD4-F40 RCLSDHAVF   | 23   | >SMAD4-F40 RCLSDHAVS   | 11460 | 11437 |
| >SMAD4-F40 RCLSDHAVF   | 37   | >SMAD4-F40 RCLSDHAVS   | 4953  | 4916  |
| >SMAD4-F40 VRCLSDHAVF  | 94   | >SMAD4-F40 VRCLSDHAVS  | 9862  | 9768  |
| >SMAD4-G24 QPGQQQNGI   | 163  | >SMAD4-G24 QPEQQQNGI   | 83    | 80    |
| >SMAD4-G24 LQIASGPQPG  | 111  | >SMAD4-G24 LQIASGPQPE  | 381   | 270   |
| >SMAD4-G3E IERARLHIGKC | 1309 | >SMAD4-G3E IERARLHIGKC | 95    | 1214  |
| >SMAD4-G3E HIGKGVQL    | 384  | >SMAD4-G3E HIGKCVQL    | 691   | 307   |
| >SMAD4-G3E LHIGKGVQL   | 273  | >SMAD4-G3E LHIGKCVQL   | 789   | 516   |
| >SMAD4-G3E RLHIGKGV    | 27   | >SMAD4-G3E RLHIGKCV    | 181   | 154   |
| >SMAD4-G3E RLHIGKGV    | 5    | >SMAD4-G3E RLHIGKCV    | 11    | 6     |
| >SMAD4-G3E RLHIGKGVQL  | 38   | >SMAD4-G3E RLHIGKCVQL  | 36    | 2     |
| >SMAD4-G3E RLHIGKGV    | 150  | >SMAD4-G3E RLHIGKCV    | 188   | 38    |
| >SMAD4-G3E RLHIGKGV    | 46   | >SMAD4-G3E RLHIGKCV    | 29    | 17    |
| >SMAD4-G3E RLHIGKGVQL  | 358  | >SMAD4-G3E RLHIGKCVQL  | 212   | 146   |
| >SMAD4-G3E RLHIGKGV    | 6    | >SMAD4-G3E RLHIGKCV    | 11    | 5     |
| >SMAD4-G3E RLHIGKGVQ   | 6919 | >SMAD4-G3E RLHIGKCVQ   | 301   | 6618  |

|                       |       |                        |      |       |
|-----------------------|-------|------------------------|------|-------|
| >SMAD4-G3εRLHIGKGVQL  | 18    | >SMAD4-G3εRLHIGKCVQL   | 9    | 9     |
| >SMAD4-G3εRLHIGKGVQL  | 318   | >SMAD4-G3εRLHIGKCVQL   | 432  | 114   |
| >SMAD4-G3εARLHIGKGV   | 333   | >SMAD4-G3εARLHIGKCV    | 146  | 187   |
| >SMAD4-G3εARLHIGKGV   | 127   | >SMAD4-G3εARLHIGKCVQ   | 173  | 46    |
| >SMAD4-G3εARLHIGKGV   | 129   | >SMAD4-G3εARLHIGKCV    | 221  | 92    |
| >SMAD4-G3εARLHIGKGV   | 55    | >SMAD4-G3εARLHIGKCVQ   | 130  | 75    |
| >SMAD4-G3εARLHIGKGV   | 357   | >SMAD4-G3εARLHIGKCVQ   | 396  | 39    |
| >SMAD4-G3εARLHIGKGV   | 127   | >SMAD4-G3εARLHIGKCVQ   | 129  | 2     |
| >SMAD4-G3εRARLHIGKG   | 105   | >SMAD4-G3εRARLHIGKC    | 594  | 489   |
| >SMAD4-G3εRARLHIGKGV  | 29    | >SMAD4-G3εRARLHIGKCV   | 39   | 10    |
| >SMAD4-G3εRARLHIGKGV  | 127   | >SMAD4-G3εRARLHIGKCV   | 63   | 64    |
| >SMAD4-G3εRARLHIGKGV  | 109   | >SMAD4-G3εRARLHIGKCV   | 1609 | 1500  |
| >SMAD4-G3εKGVQLECK    | 22394 | >SMAD4-G3εKRVQLECK     | 162  | 22232 |
| >SMAD4-G3εHIGKGVQL    | 384   | >SMAD4-G3εHIGKRVQL     | 729  | 345   |
| >SMAD4-G3εHIGKGVQL    | 9724  | >SMAD4-G3εHIGKRVQL     | 455  | 9269  |
| >SMAD4-G3εLHIGKGVQL   | 273   | >SMAD4-G3εLHIGKRVQL    | 185  | 88    |
| >SMAD4-G3εRLHIGKGV    | 27    | >SMAD4-G3εRLHIGKRV     | 65   | 38    |
| >SMAD4-G3εRLHIGKGV    | 5     | >SMAD4-G3εRLHIGKRV     | 7    | 2     |
| >SMAD4-G3εRLHIGKGVQL  | 38    | >SMAD4-G3εRLHIGKRVQL   | 114  | 76    |
| >SMAD4-G3εRLHIGKGV    | 150   | >SMAD4-G3εRLHIGKRV     | 664  | 514   |
| >SMAD4-G3εRLHIGKGV    | 46    | >SMAD4-G3εRLHIGKRV     | 97   | 51    |
| >SMAD4-G3εRLHIGKGVQL  | 358   | >SMAD4-G3εRLHIGKRVQL   | 1056 | 698   |
| >SMAD4-G3εRLHIGKGV    | 6     | >SMAD4-G3εRLHIGKRV     | 6    | 0     |
| >SMAD4-G3εRLHIGKGVQL  | 18    | >SMAD4-G3εRLHIGKRVQL   | 21   | 3     |
| >SMAD4-G3εRLHIGKGVQL  | 761   | >SMAD4-G3εRLHIGKRVQL   | 296  | 465   |
| >SMAD4-G3εRLHIGKGVQL  | 318   | >SMAD4-G3εRLHIGKRVQL   | 769  | 451   |
| >SMAD4-G3εARLHIGKGV   | 333   | >SMAD4-G3εARLHIGKRV    | 472  | 139   |
| >SMAD4-G3εARLHIGKGV   | 127   | >SMAD4-G3εARLHIGKRVQ   | 191  | 64    |
| >SMAD4-G3εARLHIGKG    | 2121  | >SMAD4-G3εARLHIGKR     | 59   | 2062  |
| >SMAD4-G3εARLHIGKGV   | 129   | >SMAD4-G3εARLHIGKRV    | 170  | 41    |
| >SMAD4-G3εARLHIGKGV   | 55    | >SMAD4-G3εARLHIGKRVQ   | 49   | 6     |
| >SMAD4-G3εARLHIGKGV   | 357   | >SMAD4-G3εARLHIGKRVQ   | 217  | 140   |
| >SMAD4-G3εARLHIGKGV   | 127   | >SMAD4-G3εARLHIGKRVQ   | 68   | 59    |
| >SMAD4-G3εRARLHIGKG   | 105   | >SMAD4-G3εRARLHIGKR    | 36   | 69    |
| >SMAD4-G3εRARLHIGKGV  | 29    | >SMAD4-G3εRARLHIGKRV   | 26   | 3     |
| >SMAD4-G3εRARLHIGKGV  | 127   | >SMAD4-G3εRARLHIGKRV   | 101  | 26    |
| >SMAD4-G3εRARLHIGKG   | 17192 | >SMAD4-G3εRARLHIGKR    | 12   | 17180 |
| >SMAD4-G3εRARLHIGKGV  | 109   | >SMAD4-G3εRARLHIGKRV   | 101  | 8     |
| >SMAD4-G3εERARLHIGKG  | 5263  | >SMAD4-G3εERARLHIGKR   | 370  | 4893  |
| >SMAD4-G4ϵGVDDLRRLCI  | 728   | >SMAD4-G4ϵVVDDLRRLCII  | 300  | 428   |
| >SMAD4-G4ϵIGVDDLRRRL  | 5915  | >SMAD4-G4ϵIVVDDLRRRL   | 353  | 5562  |
| >SMAD4-G4ϵIGVDDLRRRLC | 7997  | >SMAD4-G4ϵIVVDDLRRRLCI | 460  | 7537  |
| >SMAD4-G4ϵIGVDDLRRRL  | 16044 | >SMAD4-G4ϵIVVDDLRRRL   | 215  | 15829 |

|                                  |       |                                  |      |       |
|----------------------------------|-------|----------------------------------|------|-------|
| >SMAD4-G4 $\epsilon$ IGVDDLRR    | 20858 | >SMAD4-G4 $\epsilon$ IVVDDLRR    | 67   | 20791 |
| >SMAD4-G4 $\epsilon$ IGVDDLRR    | 2584  | >SMAD4-G4 $\epsilon$ IVVDDLRR    | 63   | 2521  |
| >SMAD4-G4 $\epsilon$ IGVDDLRR    | 619   | >SMAD4-G4 $\epsilon$ IVVDDLRR    | 442  | 177   |
| >SMAD4-G4 $\epsilon$ AISLSAAAGIC | 22533 | >SMAD4-G4 $\epsilon$ AISLSAAAGIV | 421  | 22112 |
| >SMAD4-G4 $\epsilon$ AISLSAAAGIC | 16716 | >SMAD4-G4 $\epsilon$ AISLSAAAGIV | 53   | 16663 |
| >SMAD4-G4 $\epsilon$ AISLSAAAGIC | 34624 | >SMAD4-G4 $\epsilon$ AISLSAAAGIV | 117  | 34507 |
| >SMAD4-G4 $\epsilon$ GIGVDDL     | 1482  | >SMAD4-G4 $\epsilon$ GIVVDDL     | 263  | 1219  |
| >SMAD4-G4 $\epsilon$ AAGIGVDDL   | 264   | >SMAD4-G4 $\epsilon$ AAGIVVDDL   | 102  | 162   |
| >SMAD4-G4 $\epsilon$ AAAGIGVDDI  | 28    | >SMAD4-G4 $\epsilon$ AAAGIVVDDI  | 17   | 11    |
| >SMAD4-G4 $\epsilon$ SAAAGIGV    | 130   | >SMAD4-G4 $\epsilon$ SAAAGIVV    | 396  | 266   |
| >SMAD4-G4 $\epsilon$ SAAAGIGV    | 42    | >SMAD4-G4 $\epsilon$ SAAAGIVV    | 102  | 60    |
| >SMAD4-G4 $\epsilon$ SAAAGIGV    | 131   | >SMAD4-G4 $\epsilon$ SAAAGIVV    | 223  | 92    |
| >SMAD4-G4 $\epsilon$ SAAAGIGV    | 88    | >SMAD4-G4 $\epsilon$ SAAAGIVV    | 136  | 48    |
| >SMAD4-G4 $\epsilon$ SAAAGIGV    | 68    | >SMAD4-G4 $\epsilon$ SAAAGIVV    | 92   | 24    |
| >SMAD4-G4 $\epsilon$ SAAAGIGV    | 26    | >SMAD4-G4 $\epsilon$ SAAAGIVV    | 58   | 32    |
| >SMAD4-G4 $\epsilon$ SAAAGIGVDE  | 880   | >SMAD4-G4 $\epsilon$ SAAAGIVVDE  | 333  | 547   |
| >SMAD4-G4 $\epsilon$ SAAAGIGV    | 40    | >SMAD4-G4 $\epsilon$ SAAAGIVV    | 201  | 161   |
| >SMAD4-G4 $\epsilon$ LSAAAGIGV   | 440   | >SMAD4-G4 $\epsilon$ LSAAAGIVV   | 2134 | 1694  |
| >SMAD4-G4 $\epsilon$ LSAAAGIG    | 18018 | >SMAD4-G4 $\epsilon$ LSAAAGIV    | 408  | 17610 |
| >SMAD4-G4 $\epsilon$ LSAAAGIGV   | 129   | >SMAD4-G4 $\epsilon$ LSAAAGIVV   | 516  | 387   |
| >SMAD4-G4 $\epsilon$ LSAAAGIGV   | 258   | >SMAD4-G4 $\epsilon$ LSAAAGIVV   | 2172 | 1914  |
| >SMAD4-G4 $\epsilon$ LSAAAGIGV   | 492   | >SMAD4-G4 $\epsilon$ LSAAAGIVV   | 1082 | 590   |
| >SMAD4-G4 $\epsilon$ LSAAAGIGV   | 427   | >SMAD4-G4 $\epsilon$ LSAAAGIVV   | 142  | 285   |
| >SMAD4-G4 $\epsilon$ SLSAAAGIGV  | 41    | >SMAD4-G4 $\epsilon$ SLSAAAGIVV  | 70   | 29    |
| >SMAD4-G4 $\epsilon$ SLSAAAGIG   | 8301  | >SMAD4-G4 $\epsilon$ SLSAAAGIV   | 23   | 8278  |
| >SMAD4-G4 $\epsilon$ SLSAAAGIGV  | 18    | >SMAD4-G4 $\epsilon$ SLSAAAGIVV  | 26   | 8     |
| >SMAD4-G4 $\epsilon$ SLSAAAGIG   | 6138  | >SMAD4-G4 $\epsilon$ SLSAAAGIV   | 7    | 6131  |
| >SMAD4-G4 $\epsilon$ SLSAAAGIGV  | 23    | >SMAD4-G4 $\epsilon$ SLSAAAGIVV  | 44   | 21    |
| >SMAD4-G4 $\epsilon$ SLSAAAGIGV  | 96    | >SMAD4-G4 $\epsilon$ SLSAAAGIVV  | 206  | 110   |
| >SMAD4-G4 $\epsilon$ SLSAAAGIG   | 20548 | >SMAD4-G4 $\epsilon$ SLSAAAGIV   | 45   | 20503 |
| >SMAD4-G4 $\epsilon$ SLSAAAGIGV  | 6     | >SMAD4-G4 $\epsilon$ SLSAAAGIVV  | 10   | 4     |
| >SMAD4-G4 $\epsilon$ SLSAAAGIG   | 25128 | >SMAD4-G4 $\epsilon$ SLSAAAGIV   | 65   | 25063 |
| >SMAD4-G4 $\epsilon$ SLSAAAGIGV  | 13    | >SMAD4-G4 $\epsilon$ SLSAAAGIVV  | 18   | 5     |
| >SMAD4-G4 $\epsilon$ SLSAAAGIG   | 18406 | >SMAD4-G4 $\epsilon$ SLSAAAGIV   | 15   | 18391 |
| >SMAD4-G4 $\epsilon$ SLSAAAGIGV  | 6     | >SMAD4-G4 $\epsilon$ SLSAAAGIVV  | 8    | 2     |
| >SMAD4-G4 $\epsilon$ SLSAAAGIG   | 26410 | >SMAD4-G4 $\epsilon$ SLSAAAGIV   | 378  | 26032 |
| >SMAD4-G4 $\epsilon$ SLSAAAGIGV  | 26    | >SMAD4-G4 $\epsilon$ SLSAAAGIVV  | 55   | 29    |
| >SMAD4-G4 $\epsilon$ SLSAAAGIG   | 21334 | >SMAD4-G4 $\epsilon$ SLSAAAGIV   | 5    | 21329 |
| >SMAD4-G4 $\epsilon$ SLSAAAGIGV  | 3     | >SMAD4-G4 $\epsilon$ SLSAAAGIVV  | 3    | 0     |
| >SMAD4-G4 $\epsilon$ SLSAAAGIGV  | 163   | >SMAD4-G4 $\epsilon$ SLSAAAGIVV  | 254  | 91    |
| >SMAD4-G4 $\epsilon$ SLSAAAGIGV  | 247   | >SMAD4-G4 $\epsilon$ SLSAAAGIVV  | 1509 | 1262  |
| >SMAD4-G4 $\epsilon$ ISLSAAAGIGV | 304   | >SMAD4-G4 $\epsilon$ ISLSAAAGIVV | 1055 | 751   |
| >SMAD4-G4 $\epsilon$ ISLSAAAGIGV | 135   | >SMAD4-G4 $\epsilon$ ISLSAAAGIVV | 888  | 753   |

|                       |       |                       |      |       |
|-----------------------|-------|-----------------------|------|-------|
| >SMAD4-G4ϵISLSAAAGIGV | 644   | >SMAD4-G4ϵISLSAAAGIVV | 189  | 455   |
| >SMAD4-G4ϵISLSAAAGIG  | 5031  | >SMAD4-G4ϵISLSAAAGIV  | 214  | 4817  |
| >SMAD4-G4ϵISLSAAAGIGV | 69    | >SMAD4-G4ϵISLSAAAGIVV | 116  | 47    |
| >SMAD4-G4ϵISLSAAAGIGV | 1116  | >SMAD4-G4ϵISLSAAAGIVV | 189  | 927   |
| >SMAD4-G8ϵGRKGFPHVIY  | 260   | >SMAD4-G8ϵVRKGFPHVIY  | 101  | 159   |
| >SMAD4-G8ϵGRKGFPHV    | 431   | >SMAD4-G8ϵVRKGFPHV    | 1057 | 626   |
| >SMAD4-G8ϵGRKGFPHVI   | 113   | >SMAD4-G8ϵVRKGFPHVI   | 280  | 167   |
| >SMAD4-G8ϵGRKGFPHVIY  | 25    | >SMAD4-G8ϵVRKGFPHVIY  | 64   | 39    |
| >SMAD4-G8ϵGRKGFPHVI   | 218   | >SMAD4-G8ϵVRKGFPHVI   | 1060 | 842   |
| >SMAD4-G8ϵAGRKGFPHV   | 13538 | >SMAD4-G8ϵAVRKGFPHV   | 285  | 13253 |
| >SMAD4-G8ϵAGRKGFPHV   | 1872  | >SMAD4-G8ϵAVRKGFPHV   | 21   | 1851  |
| >SMAD4-G8ϵAGRKGFPHV   | 7397  | >SMAD4-G8ϵAVRKGFPHV   | 233  | 7164  |
| >SMAD4-G8ϵAGRKGFPHV   | 4491  | >SMAD4-G8ϵAVRKGFPHV   | 19   | 4472  |
| >SMAD4-G8ϵAGRKGFPHVI  | 17577 | >SMAD4-G8ϵAVRKGFPHVI  | 130  | 17447 |
| >SMAD4-G8ϵAGRKGFPHVI  | 5499  | >SMAD4-G8ϵAVRKGFPHVI  | 337  | 5162  |
| >SMAD4-G8ϵAGRKGFPH    | 1748  | >SMAD4-G8ϵAVRKGFPH    | 69   | 1679  |
| >SMAD4-G8ϵAGRKGFPHV   | 29    | >SMAD4-G8ϵAVRKGFPHV   | 5    | 24    |
| >SMAD4-G8ϵAGRKGFPHVI  | 74    | >SMAD4-G8ϵAVRKGFPHVI  | 7    | 67    |
| >SMAD4-G8ϵAGRKGFPHVI  | 195   | >SMAD4-G8ϵAVRKGFPHVI  | 11   | 184   |
| >SMAD4-G8ϵAGRKGFPHVI  | 516   | >SMAD4-G8ϵAVRKGFPHVI  | 240  | 276   |
| >SMAD4-G8ϵAGRKGFPHVI  | 6631  | >SMAD4-G8ϵAVRKGFPHVI  | 389  | 6242  |
| >SMAD4-G8ϵAGRKGFPHVI  | 274   | >SMAD4-G8ϵAVRKGFPHVI  | 100  | 174   |
| >SMAD4-G8ϵAGRKGFPHVI  | 268   | >SMAD4-G8ϵAVRKGFPHVI  | 141  | 127   |
| >SMAD4-G8ϵAGRKGFPHVI  | 1093  | >SMAD4-G8ϵAVRKGFPHVI  | 153  | 940   |
| >SMAD4-G8ϵAGRKGFPHVI  | 124   | >SMAD4-G8ϵAVRKGFPHVI  | 41   | 83    |
| >SMAD4-G8ϵRTLDGRLQV/  | 22760 | >SMAD4-G8ϵRTLDGRLQV/  | 368  | 22392 |
| >SMAD4-G8ϵRTLDGRLQV/  | 9724  | >SMAD4-G8ϵRTLDGRLQV/  | 31   | 9693  |
| >SMAD4-G8ϵRTLDGRLQV/  | 13722 | >SMAD4-G8ϵRTLDGRLQV/  | 21   | 13701 |
| >SMAD4-G8ϵRTLDGRLQV/  | 18304 | >SMAD4-G8ϵRTLDGRLQV/  | 333  | 17971 |
| >SMAD4-G8ϵRTLDGRLQV/  | 20961 | >SMAD4-G8ϵRTLDGRLQV/  | 87   | 20874 |
| >SMAD4-G8ϵRTLDGRLQV/  | 31531 | >SMAD4-G8ϵRTLDGRLQV/  | 44   | 31487 |
| >SMAD4-G8ϵRTLDGRLQV/  | 287   | >SMAD4-G8ϵRTLDGRLQV/  | 36   | 251   |
| >SMAD4-G8ϵRTLDGRLQV/  | 712   | >SMAD4-G8ϵRTLDGRLQV/  | 69   | 643   |
| >SMAD4-G8ϵRTLDGRLQV/  | 13798 | >SMAD4-G8ϵRTLDGRLQV/  | 50   | 13748 |
| >SMAD4-G8ϵRTLDGRLQV/  | 1609  | >SMAD4-G8ϵRTLDGRLQV/  | 34   | 1575  |
| >SMAD4-G8ϵVAGRKGFPH\  | 193   | >SMAD4-G8ϵVAVRKGFPH\  | 185  | 8     |
| >SMAD4-G8ϵVAGRKGFPH\  | 1229  | >SMAD4-G8ϵVAVRKGFPH\  | 257  | 972   |
| >SMAD4-G8ϵQVAGRKGFPI  | 81    | >SMAD4-G8ϵQVAVRKGFPI  | 115  | 34    |
| >SMAD4-G8ϵQVAGRKGFPI  | 365   | >SMAD4-G8ϵQVAVRKGFPI  | 793  | 428   |
| >SMAD4-G8ϵQVAGRKGFPI  | 49    | >SMAD4-G8ϵQVAVRKGFPI  | 285  | 236   |
| >SMAD4-G8ϵQVAGRKGF    | 375   | >SMAD4-G8ϵQVAVRKGF    | 2792 | 2417  |
| >SMAD4-G8ϵQVAGRKGFPI  | 36    | >SMAD4-G8ϵQVAVRKGFPI  | 80   | 44    |
| >SMAD4-G8ϵQVAGRKGFPI  | 83    | >SMAD4-G8ϵQVAVRKGFPI  | 109  | 26    |



|                       |       |                       |      |       |
|-----------------------|-------|-----------------------|------|-------|
| >SMAD4-G8E LQVAGRKGF  | 62    | >SMAD4-G8E LQVAVRKGF  | 76   | 14    |
| >SMAD4-G8E LQVAGRKGF  | 262   | >SMAD4-G8E LQVAVRKGF  | 360  | 98    |
| >SMAD4-G8E LQVAGRKGF  | 199   | >SMAD4-G8E LQVAVRKGF  | 1277 | 1078  |
| >SMAD4-G8E LQVAGRKGF  | 7     | >SMAD4-G8E LQVAVRKGF  | 10   | 3     |
| >SMAD4-G8E LQVAGRKGF  | 426   | >SMAD4-G8E LQVAVRKGF  | 457  | 31    |
| >SMAD4-G8E RLQVAGRK   | 103   | >SMAD4-G8E RLQVAVRK   | 80   | 23    |
| >SMAD4-G8E RLQVAGRK   | 314   | >SMAD4-G8E RLQVAVRK   | 114  | 200   |
| >SMAD4-G8E RLQVAGRK   | 231   | >SMAD4-G8E RLQVAVRK   | 130  | 101   |
| >SMAD4-G8E RLQVAGRK   | 1340  | >SMAD4-G8E RLQVAVRK   | 415  | 925   |
| >SMAD4-G8E RLQVAGRKGI | 1346  | >SMAD4-G8E RLQVAVRKGI | 290  | 1056  |
| >SMAD4-G8E RLQVAGRKGI | 125   | >SMAD4-G8E RLQVAVRKGI | 133  | 8     |
| >SMAD4-G8E RLQVAGRKGI | 279   | >SMAD4-G8E RLQVAVRKGI | 1275 | 996   |
| >SMAD4-G8E RLQVAGRKGI | 83    | >SMAD4-G8E RLQVAVRKGI | 96   | 13    |
| >SMAD4-G8E RLQVAGRKGI | 207   | >SMAD4-G8E RLQVAVRKGI | 386  | 179   |
| >SMAD4-G8E RLQVAGRKGI | 270   | >SMAD4-G8E RLQVAVRKGI | 249  | 21    |
| >SMAD4-G8E GRLQVAGRK  | 466   | >SMAD4-G8E GRLQVAVRK  | 279  | 187   |
| >SMAD4-G8E GRLQVAGR   | 94    | >SMAD4-G8E GRLQVAVR   | 113  | 19    |
| >SMAD4-G8E GRLQVAGRK  | 72    | >SMAD4-G8E GRLQVAVRK  | 48   | 24    |
| >SMAD4-G8E GRLQVAGRK  | 85    | >SMAD4-G8E GRLQVAVRK  | 60   | 25    |
| >SMAD4-G8E GRLQVAGRK  | 239   | >SMAD4-G8E GRLQVAVRK  | 135  | 104   |
| >SMAD4-G8E GRLQVAGRK  | 41    | >SMAD4-G8E GRLQVAVRK  | 31   | 10    |
| >SMAD4-G8E TLDGRLQVAC | 20103 | >SMAD4-G8E TLDGRLQVAV | 314  | 19789 |
| >SMAD4-G8E TLDGRLQVAC | 19273 | >SMAD4-G8E TLDGRLQVAV | 272  | 19001 |
| >SMAD4-G8E TLDGRLQVAC | 21130 | >SMAD4-G8E TLDGRLQVAV | 237  | 20893 |
| >SMAD4-G8E TLDGRLQVAC | 4623  | >SMAD4-G8E TLDGRLQVAV | 4    | 4619  |
| >SMAD4-G8E TLDGRLQVAC | 13701 | >SMAD4-G8E TLDGRLQVAV | 8    | 13693 |
| >SMAD4-G8E TLDGRLQVAC | 13425 | >SMAD4-G8E TLDGRLQVAV | 8    | 13417 |
| >SMAD4-G8E TLDGRLQVAC | 23126 | >SMAD4-G8E TLDGRLQVAV | 11   | 23115 |
| >SMAD4-G8E TLDGRLQVAC | 8597  | >SMAD4-G8E TLDGRLQVAV | 2    | 8595  |
| >SMAD4-H1E HYERVVSPGI | 272   | >SMAD4-H1E LYERVVSPGI | 291  | 19    |
| >SMAD4-H1E HYERVVSPGI | 36    | >SMAD4-H1E LYERVVSPGI | 32   | 4     |
| >SMAD4-H1E YHYERVVSPG | 58    | >SMAD4-H1E YLYERVVSPG | 1012 | 954   |
| >SMAD4-H1E YHYERVVS   | 23271 | >SMAD4-H1E YLYERVVS   | 268  | 23003 |
| >SMAD4-H1E YHYERVVSPG | 6414  | >SMAD4-H1E YLYERVVSPG | 7    | 6407  |
| >SMAD4-H1E YHYERVVS   | 23770 | >SMAD4-H1E YLYERVVS   | 266  | 23504 |
| >SMAD4-H1E YHYERVVSP  | 17658 | >SMAD4-H1E YLYERVVSP  | 77   | 17581 |
| >SMAD4-H1E YHYERVVSPG | 22009 | >SMAD4-H1E YLYERVVSPG | 199  | 21810 |
| >SMAD4-H1E YHYERVVSPG | 3696  | >SMAD4-H1E YLYERVVSPG | 6    | 3690  |
| >SMAD4-H1E YHYERVVS   | 19503 | >SMAD4-H1E YLYERVVS   | 91   | 19412 |
| >SMAD4-H1E YHYERVVSP  | 19919 | >SMAD4-H1E YLYERVVSP  | 38   | 19881 |
| >SMAD4-H1E YHYERVVSPG | 4034  | >SMAD4-H1E YLYERVVSPG | 3    | 4031  |
| >SMAD4-H1E YHYERVVS   | 21340 | >SMAD4-H1E YLYERVVS   | 265  | 21075 |
| >SMAD4-H1E YHYERVVSP  | 18856 | >SMAD4-H1E YLYERVVSP  | 306  | 18550 |

|                      |       |                      |       |       |
|----------------------|-------|----------------------|-------|-------|
| >SMAD4-H1EYHYERVVSPG | 576   | >SMAD4-H1EYLYERVVSPG | 5     | 571   |
| >SMAD4-H1EYHYERVVS   | 14362 | >SMAD4-H1EYLYERVVS   | 18    | 14344 |
| >SMAD4-H1EYHYERVVSP  | 12783 | >SMAD4-H1EYLYERVVSP  | 9     | 12774 |
| >SMAD4-H1EYHYERVVSPG | 8778  | >SMAD4-H1EYLYERVVSPG | 5     | 8773  |
| >SMAD4-H1EYHYERVVSPG | 162   | >SMAD4-H1EYLYERVVSPG | 1     | 161   |
| >SMAD4-H1EYHYERVVS   | 21415 | >SMAD4-H1EYLYERVVS   | 351   | 21064 |
| >SMAD4-H1EYHYERVVSP  | 17163 | >SMAD4-H1EYLYERVVSP  | 249   | 16914 |
| >SMAD4-H1EYHYERVVSPG | 16118 | >SMAD4-H1EYLYERVVSPG | 71    | 16047 |
| >SMAD4-H1EYHYERVVSPG | 2287  | >SMAD4-H1EYLYERVVSPG | 3     | 2284  |
| >SMAD4-H1EYHYERVVS   | 22867 | >SMAD4-H1EYLYERVVS   | 152   | 22715 |
| >SMAD4-H1EYHYERVVSP  | 21123 | >SMAD4-H1EYLYERVVSP  | 144   | 20979 |
| >SMAD4-H1EYHYERVVSPG | 19969 | >SMAD4-H1EYLYERVVSPG | 66    | 19903 |
| >SMAD4-H1EYHYERVVSPG | 657   | >SMAD4-H1EYLYERVVSPG | 4     | 653   |
| >SMAD4-H1EYHYERVVSPG | 13496 | >SMAD4-H1EYLYERVVSPG | 3     | 13493 |
| >SMAD4-H1EYHYERVVS   | 29683 | >SMAD4-H1EYLYERVVS   | 14    | 29669 |
| >SMAD4-H1EYHYERVVSP  | 30141 | >SMAD4-H1EYLYERVVSP  | 15    | 30126 |
| >SMAD4-H1EYHYERVVSPG | 31404 | >SMAD4-H1EYLYERVVSPG | 27    | 31377 |
| >SMAD4-H1EYHYERVVSPG | 6197  | >SMAD4-H1EYLYERVVSPG | 2     | 6195  |
| >SMAD4-H1EYHYERVVSPG | 8666  | >SMAD4-H1EYLYERVVSPG | 239   | 8427  |
| >SMAD4-H1EYHYERVVSPG | 6627  | >SMAD4-H1EYLYERVVSPG | 17    | 6610  |
| >SMAD4-H1EYHYERVVSPG | 13944 | >SMAD4-H1EYLYERVVSPG | 214   | 13730 |
| >SMAD4-H1EYHYERVVSPG | 18339 | >SMAD4-H1EYLYERVVSPG | 462   | 17877 |
| >SMAD4-H1EYHYERVVSPG | 233   | >SMAD4-H1EYLYERVVSPG | 335   | 102   |
| >SMAD4-H1EYHYERVVSPG | 432   | >SMAD4-H1EYLYERVVSPG | 14153 | 13721 |
| >SMAD4-H1EYHYERVVSPG | 68    | >SMAD4-H1EYLYERVVSPG | 4120  | 4052  |
| >SMAD4-H1EYHYERVVSPG | 147   | >SMAD4-H1EYLYERVVSPG | 1635  | 1488  |
| >SMAD4-H1ENPYHYERVV  | 151   | >SMAD4-H1ENPYLYERVV  | 236   | 85    |
| >SMAD4-H1ENPYHYERV   | 640   | >SMAD4-H1ENPYLYERV   | 490   | 150   |
| >SMAD4-H1ENPYHYERVV  | 151   | >SMAD4-H1ENPYLYERVV  | 127   | 24    |
| >SMAD4-H1ENVNPYHYERV | 58    | >SMAD4-H1ENVNPYLYERV | 94    | 36    |
| >SMAD4-H1ECVNPYHYERV | 829   | >SMAD4-H1ECVNPYLYERV | 319   | 510   |
| >SMAD4-H1ECVNPYHYERV | 196   | >SMAD4-H1ECVNPYLYERV | 145   | 51    |
| >SMAD4-H1ECVNPYHYERV | 84    | >SMAD4-H1ECVNPYLYERV | 68    | 16    |
| >SMAD4-H1ECVNPYHYERV | 556   | >SMAD4-H1ECVNPYLYERV | 430   | 126   |
| >SMAD4-H1ECVNPYHYER  | 69    | >SMAD4-H1ECVNPYLYER  | 66    | 3     |
| >SMAD4-H1ECVNPYHYER  | 9     | >SMAD4-H1ECVNPYLYER  | 10    | 1     |
| >SMAD4-H1ECVNPYHYER  | 52    | >SMAD4-H1ECVNPYLYER  | 121   | 69    |
| >SMAD4-H1ECVNPYHYER  | 18    | >SMAD4-H1ECVNPYLYER  | 36    | 18    |
| >SMAD4-H1ECVNPYHYERV | 424   | >SMAD4-H1ECVNPYLYERV | 454   | 30    |
| >SMAD4-H1ECVNPYHYER  | 125   | >SMAD4-H1ECVNPYLYER  | 339   | 214   |
| >SMAD4-H1EVCVNPYHYEF | 428   | >SMAD4-H1EVCVNPYLYER | 681   | 253   |
| >SMAD4-H1EVCVNPYHY   | 369   | >SMAD4-H1EVCVNPYLY   | 1924  | 1555  |
| >SMAD4-H1EVCVNPYHY   | 153   | >SMAD4-H1EVCVNPYLY   | 50    | 103   |

|                      |       |                      |      |       |
|----------------------|-------|----------------------|------|-------|
| >SMAD4-H1EVCVNPYHY   | 470   | >SMAD4-H1EVCVNPYLY   | 719  | 249   |
| >SMAD4-H1EVCVNPYHYEF | 146   | >SMAD4-H1EVCVNPYLYER | 228  | 82    |
| >SMAD4-H1EVCVNPYHY   | 309   | >SMAD4-H1EVCVNPYLY   | 112  | 197   |
| >SMAD4-H1EVCVNPYHYEF | 220   | >SMAD4-H1EVCVNPYLYER | 397  | 177   |
| >SMAD4-H1ESVCVNPYH   | 25487 | >SMAD4-H1ESVCVNPYL   | 260  | 25227 |
| >SMAD4-H1ESVCVNPYH   | 473   | >SMAD4-H1ESVCVNPYL   | 8981 | 8508  |
| >SMAD4-H1ESVCVNPYHY  | 175   | >SMAD4-H1ESVCVNPYLY  | 38   | 137   |
| >SMAD4-H1ESVCVNPYHYE | 54    | >SMAD4-H1ESVCVNPYLYE | 43   | 11    |
| >SMAD4-H1ESVCVNPYHY  | 51    | >SMAD4-H1ESVCVNPYLY  | 561  | 510   |
| >SMAD4-H1ESVCVNPYHY  | 12    | >SMAD4-H1ESVCVNPYLY  | 8    | 4     |
| >SMAD4-H1ESVCVNPYHY  | 36    | >SMAD4-H1ESVCVNPYLY  | 37   | 1     |
| >SMAD4-H1ESVCVNPYHYE | 14    | >SMAD4-H1ESVCVNPYLYE | 16   | 2     |
| >SMAD4-H1ESVCVNPYHYE | 202   | >SMAD4-H1ESVCVNPYLYE | 276  | 74    |
| >SMAD4-H1ESVCVNPYHYE | 19    | >SMAD4-H1ESVCVNPYLYE | 24   | 5     |
| >SMAD4-H1ESVCVNPYHY  | 16    | >SMAD4-H1ESVCVNPYLY  | 9    | 7     |
| >SMAD4-H1ESVCVNPYHY  | 407   | >SMAD4-H1ESVCVNPYLY  | 3583 | 3176  |
| >SMAD4-H1ESVCVNPYHY  | 209   | >SMAD4-H1ESVCVNPYLY  | 75   | 134   |
| >SMAD4-H1ESVCVNPYHYE | 191   | >SMAD4-H1ESVCVNPYLYE | 207  | 16    |
| >SMAD4-H1ESVCVNPYHYE | 151   | >SMAD4-H1ESVCVNPYLYE | 262  | 111   |
| >SMAD4-H1ESVVCVNPYH) | 273   | >SMAD4-H1ESVVCVNPYLY | 411  | 138   |
| >SMAD4-H1ESVVCVNPYH  | 1873  | >SMAD4-H1ESVVCVNPYL  | 234  | 1639  |
| >SMAD4-H1ESVVCVNPYH) | 18    | >SMAD4-H1ESVVCVNPYLY | 100  | 82    |
| >SMAD4-H1ESVVCVNPYH) | 382   | >SMAD4-H1ESVVCVNPYLY | 355  | 27    |
| >SMAD4-H1ESVVCVNPYH) | 50    | >SMAD4-H1ESVVCVNPYLY | 36   | 14    |
| >SMAD4-H1ESVVCVNPYH) | 149   | >SMAD4-H1ESVVCVNPYLY | 69   | 80    |
| >SMAD4-H1ESVVCVNPYH) | 470   | >SMAD4-H1ESVVCVNPYLY | 108  | 362   |
| >SMAD4-H1ESVVCVNPYH  | 19772 | >SMAD4-H1ESVVCVNPYL  | 139  | 19633 |
| >SMAD4-H1ESVVCVNPYH  | 13338 | >SMAD4-H1ESVVCVNPYL  | 108  | 13230 |
| >SMAD4-H1ECDSVCVNPYH | 1030  | >SMAD4-H1ECDSVCVNPYL | 395  | 635   |
| >SMAD4-H1ECDSVCVNPYH | 316   | >SMAD4-H1ECDSVCVNPYL | 140  | 176   |
| >SMAD4-H2EHNSTTTWTG  | 178   | >SMAD4-H2ERNSTTTWTG! | 2714 | 2536  |
| >SMAD4-H2EHNSTTTWTG  | 111   | >SMAD4-H2ERNSTTTWTG! | 101  | 10    |
| >SMAD4-H2EHHNSTTTW   | 655   | >SMAD4-H2EHRNSTTTW   | 312  | 343   |
| >SMAD4-H2EHHNSTTTW   | 284   | >SMAD4-H2EHRNSTTTW   | 6729 | 6445  |
| >SMAD4-H2EHHNSTTTWT  | 16006 | >SMAD4-H2EHRNSTTTWT! | 269  | 15737 |
| >SMAD4-H2EHHNSTTTW   | 21    | >SMAD4-H2EHRNSTTTW   | 51   | 30    |
| >SMAD4-H2EGFTGQPATYH | 7763  | >SMAD4-H2EGFTGQPATYH | 50   | 7713  |
| >SMAD4-H2EGFTGQPATYH | 28867 | >SMAD4-H2EGFTGQPATYH | 435  | 28432 |
| >SMAD4-H2EGFTGQPATYH | 20860 | >SMAD4-H2EGFTGQPATYH | 72   | 20788 |
| >SMAD4-H2EYHHNSTTTW  | 43    | >SMAD4-H2EYHRNSTTTW  | 27   | 16    |
| >SMAD4-H2EYHHNSTTTW  | 377   | >SMAD4-H2EYHRNSTTTW  | 1184 | 807   |
| >SMAD4-H2EYHHNSTTTW  | 412   | >SMAD4-H2EYHRNSTTTW  | 1857 | 1445  |
| >SMAD4-H2EYHHNSTTTW  | 16    | >SMAD4-H2EYHRNSTTTW  | 22   | 6     |

|                      |       |                      |      |       |
|----------------------|-------|----------------------|------|-------|
| >SMAD4-H2€TYHHNSTT   | 876   | >SMAD4-H2€TYHRNSTT   | 180  | 696   |
| >SMAD4-H2€TYHHNSTTT  | 423   | >SMAD4-H2€TYHRNSTTT  | 82   | 341   |
| >SMAD4-H2€TYHHNSTTTV | 1200  | >SMAD4-H2€TYHRNSTTTV | 334  | 866   |
| >SMAD4-H2€TYHHNSTTTV | 126   | >SMAD4-H2€TYHRNSTTTV | 221  | 95    |
| >SMAD4-H2€TYHHNSTTTV | 125   | >SMAD4-H2€TYHRNSTTTV | 150  | 25    |
| >SMAD4-H2€TYHHNSTTTV | 13    | >SMAD4-H2€TYHRNSTTTV | 11   | 2     |
| >SMAD4-H2€ATYHHNSTTT | 405   | >SMAD4-H2€ATYHRNSTTT | 490  | 85    |
| >SMAD4-H2€ATYHHNSTTT | 8     | >SMAD4-H2€ATYHRNSTTT | 10   | 2     |
| >SMAD4-H2€ATYHHNSTTT | 161   | >SMAD4-H2€ATYHRNSTTT | 269  | 108   |
| >SMAD4-H2€ATYHHNSTT  | 136   | >SMAD4-H2€ATYHRNSTT  | 111  | 25    |
| >SMAD4-H2€ATYHHNSTTT | 115   | >SMAD4-H2€ATYHRNSTTT | 131  | 16    |
| >SMAD4-H2€ATYHHNSTTT | 3     | >SMAD4-H2€ATYHRNSTTT | 3    | 0     |
| >SMAD4-H2€ATYHHNSTTT | 73    | >SMAD4-H2€ATYHRNSTTT | 59   | 14    |
| >SMAD4-H2€ATYHHNSTTT | 15    | >SMAD4-H2€ATYHRNSTTT | 18   | 3     |
| >SMAD4-H2€ATYHHNSTT  | 193   | >SMAD4-H2€ATYHRNSTT  | 75   | 118   |
| >SMAD4-H2€ATYHHNSTTT | 40    | >SMAD4-H2€ATYHRNSTTT | 22   | 18    |
| >SMAD4-H2€ATYHHNSTTT | 50    | >SMAD4-H2€ATYHRNSTTT | 111  | 61    |
| >SMAD4-H2€QPATYHHNS  | 448   | >SMAD4-H2€QPATYHRNS  | 1256 | 808   |
| >SMAD4-H2€GQPATYHH   | 10743 | >SMAD4-H2€GQPATYHR   | 90   | 10653 |
| >SMAD4-H2€GQPATYHH   | 28995 | >SMAD4-H2€GQPATYHR   | 155  | 28840 |
| >SMAD4-H2€TGQPATYHH  | 10771 | >SMAD4-H2€TGQPATYHR  | 76   | 10695 |
| >SMAD4-H2€TGQPATYHH  | 22292 | >SMAD4-H2€TGQPATYHR  | 486  | 21806 |
| >SMAD4-H2€TGQPATYHH  | 21163 | >SMAD4-H2€TGQPATYHR  | 73   | 21090 |
| >SMAD4-H2€FTGQPATYHF | 13820 | >SMAD4-H2€FTGQPATYHF | 401  | 13419 |
| >SMAD4-H2€FTGQPATYHF | 16230 | >SMAD4-H2€FTGQPATYHF | 250  | 15980 |
| >SMAD4-H2€FTGQPATYHF | 8267  | >SMAD4-H2€FTGQPATYHF | 29   | 8238  |
| >SMAD4-H2€FTGQPATYHF | 23794 | >SMAD4-H2€FTGQPATYHF | 85   | 23709 |
| >SMAD4-H31HPAPEYWCS  | 425   | >SMAD4-H31QPAPEYWCS  | 2128 | 1703  |
| >SMAD4-H31HPAPEYWCS  | 281   | >SMAD4-H31QPAPEYWCS  | 1244 | 963   |
| >SMAD4-H31HPAPEYWCS  | 249   | >SMAD4-H31QPAPEYWCS  | 1141 | 892   |
| >SMAD4-H31HPAPEYWCS  | 289   | >SMAD4-H31QPAPEYWCS  | 2606 | 2317  |
| >SMAD4-H31HPAPEYWCS  | 81    | >SMAD4-H31QPAPEYWCS  | 425  | 344   |
| >SMAD4-H31HPAPEYWCS  | 744   | >SMAD4-H31QPAPEYWCS  | 480  | 264   |
| >SMAD4-H31NHPAPEYWC  | 17284 | >SMAD4-H31NQPPEYWC   | 121  | 17163 |
| >SMAD4-H31NHPAPEYW   | 318   | >SMAD4-H31NQPPEYW    | 6449 | 6131  |
| >SMAD4-H31SNHPAPEYW  | 311   | >SMAD4-H31SNQPPEYW   | 542  | 231   |
| >SMAD4-H31SNHPAPEY   | 175   | >SMAD4-H31SNQPPEY    | 285  | 110   |
| >SMAD4-H31SNHPAPEY   | 19    | >SMAD4-H31SNQPPEY    | 26   | 7     |
| >SMAD4-H31SNHPAPEY   | 256   | >SMAD4-H31SNQPPEY    | 228  | 28    |
| >SMAD4-H31SNHPAPEY   | 39    | >SMAD4-H31SNQPPEY    | 89   | 50    |
| >SMAD4-H31SNHPAPEY   | 3     | >SMAD4-H31SNQPPEY    | 3    | 0     |
| >SMAD4-H31SNHPAPEYV  | 4     | >SMAD4-H31SNQPPEYV   | 5    | 1     |
| >SMAD4-H31SNHPAPEY   | 326   | >SMAD4-H31SNQPPEY    | 254  | 72    |

|                       |       |                       |      |       |
|-----------------------|-------|-----------------------|------|-------|
| >SMAD4-H31ISNHPAPEYW  | 30    | >SMAD4-H31ISNQPPEYW   | 31   | 1     |
| >SMAD4-H31ISNHPAPEY   | 69    | >SMAD4-H31ISNQPPEY    | 70   | 1     |
| >SMAD4-H31ISNHPAPEYW  | 8     | >SMAD4-H31ISNQPPEYW   | 8    | 0     |
| >SMAD4-H31ISNHPAPEY   | 28    | >SMAD4-H31ISNQPPEY    | 22   | 6     |
| >SMAD4-H31ISNHPAPEYW  | 106   | >SMAD4-H31ISNQPPEYW   | 194  | 88    |
| >SMAD4-H31PPISNHPAPE' | 475   | >SMAD4-H31PPISNQPPE'  | 311  | 164   |
| >SMAD4-H31PPISNHPAPE' | 420   | >SMAD4-H31PPISNQPPE'  | 397  | 23    |
| >SMAD4-H31PPISNHPAPE' | 51    | >SMAD4-H31PPISNQPPE'  | 50   | 1     |
| >SMAD4-H31PPISNHPAPE' | 363   | >SMAD4-H31PPISNQPPE'  | 206  | 157   |
| >SMAD4-H31PPISNHPA    | 150   | >SMAD4-H31PPISNQPA    | 448  | 298   |
| >SMAD4-H31PPISNHPAPE' | 473   | >SMAD4-H31PPISNQPPE'  | 237  | 236   |
| >SMAD4-H31QPPISNHPA   | 127   | >SMAD4-H31QPPISNQPA   | 1056 | 929   |
| >SMAD4-H31FQPPISNHPA  | 345   | >SMAD4-H31FQPPISNQPA  | 715  | 370   |
| >SMAD4-H31FQPPISNHP   | 368   | >SMAD4-H31FQPPISNQP   | 905  | 537   |
| >SMAD4-H31FQPPISNHPA  | 62    | >SMAD4-H31FQPPISNQPA  | 104  | 42    |
| >SMAD4-H31FQPPISNHPA  | 301   | >SMAD4-H31FQPPISNQPA  | 387  | 86    |
| >SMAD4-H31HPAPEYWCSI  | 2485  | >SMAD4-H31RPAPEYWCSI  | 446  | 2039  |
| >SMAD4-H31HPAPEYWCSI  | 717   | >SMAD4-H31RPAPEYWCSI  | 185  | 532   |
| >SMAD4-H31HPAPEYWCS   | 425   | >SMAD4-H31RPAPEYWCS   | 5844 | 5419  |
| >SMAD4-H31HPAPEYWCSI  | 281   | >SMAD4-H31RPAPEYWCSI  | 3295 | 3014  |
| >SMAD4-H31HPAPEYWCSI  | 249   | >SMAD4-H31RPAPEYWCSI  | 2807 | 2558  |
| >SMAD4-H31HPAPEYWCSI  | 289   | >SMAD4-H31RPAPEYWCSI  | 2479 | 2190  |
| >SMAD4-H31HPAPEYWCSI  | 81    | >SMAD4-H31RPAPEYWCSI  | 659  | 578   |
| >SMAD4-H31NHPAPEYW    | 318   | >SMAD4-H31NRPAPEYW    | 1501 | 1183  |
| >SMAD4-H31ELAFQPPISNf | 23996 | >SMAD4-H31ELAFQPPISNf | 305  | 23691 |
| >SMAD4-H31ELAFQPPISNf | 3028  | >SMAD4-H31ELAFQPPISNf | 14   | 3014  |
| >SMAD4-H31SNHPAPEYW   | 311   | >SMAD4-H31SNRPAPEYW   | 132  | 179   |
| >SMAD4-H31ISNHPAPEY   | 175   | >SMAD4-H31ISNRPAPEY   | 574  | 399   |
| >SMAD4-H31ISNHPAPEY   | 19    | >SMAD4-H31ISNRPAPEY   | 54   | 35    |
| >SMAD4-H31ISNHPAPEY   | 256   | >SMAD4-H31ISNRPAPEY   | 428  | 172   |
| >SMAD4-H31ISNHPAPEY   | 39    | >SMAD4-H31ISNRPAPEY   | 53   | 14    |
| >SMAD4-H31ISNHPAPEY   | 3     | >SMAD4-H31ISNRPAPEY   | 5    | 2     |
| >SMAD4-H31ISNHPAPEYW  | 4     | >SMAD4-H31ISNRPAPEYW  | 7    | 3     |
| >SMAD4-H31ISNHPAPEY   | 326   | >SMAD4-H31ISNRPAPEY   | 1027 | 701   |
| >SMAD4-H31ISNHPAPEY   | 1162  | >SMAD4-H31ISNRPAPEY   | 433  | 729   |
| >SMAD4-H31ISNHPAPEYW  | 30    | >SMAD4-H31ISNRPAPEYW  | 29   | 1     |
| >SMAD4-H31ISNHPAPEY   | 69    | >SMAD4-H31ISNRPAPEY   | 48   | 21    |
| >SMAD4-H31ISNHPAPEYW  | 8     | >SMAD4-H31ISNRPAPEYW  | 8    | 0     |
| >SMAD4-H31ISNHPAPEY   | 28    | >SMAD4-H31ISNRPAPEY   | 27   | 1     |
| >SMAD4-H31ISNHPAPEYW  | 106   | >SMAD4-H31ISNRPAPEYW  | 137  | 31    |
| >SMAD4-H31PPISNHPAPE' | 475   | >SMAD4-H31PPISNRPAPE' | 319  | 156   |
| >SMAD4-H31PPISNHPAPE' | 420   | >SMAD4-H31PPISNRPAPE' | 661  | 241   |
| >SMAD4-H31PPISNHPAPE' | 51    | >SMAD4-H31PPISNRPAPE' | 67   | 16    |

|                        |       |                        |       |       |
|------------------------|-------|------------------------|-------|-------|
| >SMAD4-H31PPISNHPAPE'  | 363   | >SMAD4-H31PPISNRPAPE'  | 282   | 81    |
| >SMAD4-H31PPISNHPA     | 150   | >SMAD4-H31PPISNRPA     | 303   | 153   |
| >SMAD4-H31PPISNHPAPE'  | 473   | >SMAD4-H31PPISNRPAPE'  | 229   | 244   |
| >SMAD4-H31QPPISNHPA    | 127   | >SMAD4-H31QPPISNRPA    | 786   | 659   |
| >SMAD4-H31FQPPISNHPA   | 345   | >SMAD4-H31FQPPISNRPA   | 1047  | 702   |
| >SMAD4-H31FQPPISNHP    | 368   | >SMAD4-H31FQPPISNRP    | 1374  | 1006  |
| >SMAD4-H31FQPPISNHPA   | 62    | >SMAD4-H31FQPPISNRPA   | 107   | 45    |
| >SMAD4-H31FQPPISNHPA   | 301   | >SMAD4-H31FQPPISNRPA   | 533   | 232   |
| >SMAD4-H31FQPPISNH     | 33225 | >SMAD4-H31FQPPISNR     | 441   | 32784 |
| >SMAD4-H31AFQPPISNH    | 2785  | >SMAD4-H31AFQPPISNR    | 26    | 2759  |
| >SMAD4-H31AFQPPISNH    | 29560 | >SMAD4-H31AFQPPISNR    | 426   | 29134 |
| >SMAD4-H31LAFQPPISNH   | 10574 | >SMAD4-H31LAFQPPISNR   | 36    | 10538 |
| >SMAD4-H31LAFQPPISNH   | 32167 | >SMAD4-H31LAFQPPISNR   | 447   | 31720 |
| >SMAD4-I31·ISNHPAPEY   | 175   | >SMAD4-I31·NSNHPAPEY   | 562   | 387   |
| >SMAD4-I31·ISNHPAPEY   | 19    | >SMAD4-I31·NSNHPAPEY   | 89    | 70    |
| >SMAD4-I31·ISNHPAPEY   | 256   | >SMAD4-I31·NSNHPAPEY   | 1051  | 795   |
| >SMAD4-I31·ISNHPAPEY   | 39    | >SMAD4-I31·NSNHPAPEY   | 465   | 426   |
| >SMAD4-I31·ISNHPAPEY   | 3     | >SMAD4-I31·NSNHPAPEY   | 22    | 19    |
| >SMAD4-I31·ISNHPAPEY\  | 4     | >SMAD4-I31·NSNHPAPEY\  | 29    | 25    |
| >SMAD4-I31·ISNHPAPEY   | 326   | >SMAD4-I31·NSNHPAPEY   | 335   | 9     |
| >SMAD4-I31·ISNHPAPEY\  | 30    | >SMAD4-I31·NSNHPAPEY\  | 74    | 44    |
| >SMAD4-I31·ISNHPAPEY   | 69    | >SMAD4-I31·NSNHPAPEY   | 4490  | 4421  |
| >SMAD4-I31·ISNHPAPEY\  | 8     | >SMAD4-I31·NSNHPAPEY\  | 18    | 10    |
| >SMAD4-I31·ISNHPAPEY   | 28    | >SMAD4-I31·NSNHPAPEY   | 475   | 447   |
| >SMAD4-I31·ISNHPAPEY\  | 106   | >SMAD4-I31·NSNHPAPEY\  | 1501  | 1395  |
| >SMAD4-I31·PPISNHPAPE' | 475   | >SMAD4-I31·PPNSNHPAPE' | 3306  | 2831  |
| >SMAD4-I31·PPISNHPAPE' | 420   | >SMAD4-I31·PPNSNHPAPE' | 7346  | 6926  |
| >SMAD4-I31·PPISNHPAPE' | 51    | >SMAD4-I31·PPNSNHPAPE' | 60    | 9     |
| >SMAD4-I31·PPISNHPAPE' | 363   | >SMAD4-I31·PPNSNHPAPE' | 381   | 18    |
| >SMAD4-I31·PPISNHPA    | 150   | >SMAD4-I31·PPNSNHPA    | 286   | 136   |
| >SMAD4-I31·PPISNHPAPE' | 473   | >SMAD4-I31·PPNSNHPAPE' | 714   | 241   |
| >SMAD4-I31·QPPISNHPA   | 127   | >SMAD4-I31·QPPNSNHPA   | 174   | 47    |
| >SMAD4-I31·FQPPISNHPA  | 345   | >SMAD4-I31·FQPPNSNHP/  | 568   | 223   |
| >SMAD4-I31·FQPPISNHP   | 368   | >SMAD4-I31·FQPPNSNHP   | 590   | 222   |
| >SMAD4-I31·FQPPISNHPA  | 62    | >SMAD4-I31·FQPPNSNHP/  | 104   | 42    |
| >SMAD4-I31·FQPPISNHPA  | 301   | >SMAD4-I31·FQPPNSNHP/  | 461   | 160   |
| >SMAD4-I31·FQPPISNHPA  | 1053  | >SMAD4-I31·FQPPNSNHP/  | 332   | 721   |
| >SMAD4-I31·ELAFQPPI    | 329   | >SMAD4-I31·ELAFQPPN    | 17673 | 17344 |
| >SMAD4-I31·ELAFQPPI    | 331   | >SMAD4-I31·ELAFQPPN    | 21821 | 21490 |
| >SMAD4-I31·ELAFQPPI    | 187   | >SMAD4-I31·ELAFQPPN    | 18011 | 17824 |
| >SMAD4-I31·ELAFQPPI    | 214   | >SMAD4-I31·ELAFQPPN    | 18594 | 18380 |
| >SMAD4-I31·ELAFQPPI    | 134   | >SMAD4-I31·ELAFQPPN    | 20791 | 20657 |
| >SMAD4-I31·ELAFQPPI    | 193   | >SMAD4-I31·ELAFQPPN    | 22187 | 21994 |

|                         |       |                         |       |       |
|-------------------------|-------|-------------------------|-------|-------|
| >SMAD4-I31: ELAFQPPI    | 119   | >SMAD4-I31: ELAFQPPN    | 11460 | 11341 |
| >SMAD4-I31: ELAFQPPI    | 24    | >SMAD4-I31: ELAFQPPN    | 11453 | 11429 |
| >SMAD4-I31: NELAFQPPI   | 13    | >SMAD4-I31: NELAFQPPN   | 9622  | 9609  |
| >SMAD4-I31: NELAFQPPI   | 28    | >SMAD4-I31: NELAFQPPN   | 103   | 75    |
| >SMAD4-I31: NELAFQPPISI | 429   | >SMAD4-I31: NELAFQPPNS  | 878   | 449   |
| >SMAD4-I31: NELAFQPPI   | 295   | >SMAD4-I31: NELAFQPPN   | 14801 | 14506 |
| >SMAD4-I31: NELAFQPPI   | 21    | >SMAD4-I31: NELAFQPPN   | 571   | 550   |
| >SMAD4-I31: NELAFQPPI   | 291   | >SMAD4-I31: NELAFQPPN   | 1688  | 1397  |
| >SMAD4-I31: NELAFQPPI   | 30    | >SMAD4-I31: NELAFQPPN   | 192   | 162   |
| >SMAD4-I31: NELAFQPPI   | 11    | >SMAD4-I31: NELAFQPPN   | 1876  | 1865  |
| >SMAD4-I38: IGKGVQLECK  | 1653  | >SMAD4-I38: KGKGVQLECK  | 99    | 1554  |
| >SMAD4-I38: HIGKGVQL    | 384   | >SMAD4-I38: HKGKGVQL    | 21761 | 21377 |
| >SMAD4-I38: HIGKGVQL    | 11686 | >SMAD4-I38: HKGKGVQL    | 487   | 11199 |
| >SMAD4-I38: TEAIERARLHI | 21    | >SMAD4-I38: TEAIERARLHI | 16701 | 16680 |
| >SMAD4-I38: TEAIERARLHI | 48    | >SMAD4-I38: TEAIERARLHI | 9668  | 9620  |
| >SMAD4-I38: LHIGKGVQL   | 273   | >SMAD4-I38: LHKGKGVQL   | 10618 | 10345 |
| >SMAD4-I38: RLHIGKGV    | 27    | >SMAD4-I38: RLHKGKGV    | 24    | 3     |
| >SMAD4-I38: RLHIGKGV    | 5     | >SMAD4-I38: RLHKGKGV    | 7     | 2     |
| >SMAD4-I38: RLHIGKGVQL  | 38    | >SMAD4-I38: RLHKGKGVQL  | 50    | 12    |
| >SMAD4-I38: RLHIGKGV    | 150   | >SMAD4-I38: RLHKGKGV    | 109   | 41    |
| >SMAD4-I38: RLHIGKGV    | 46    | >SMAD4-I38: RLHKGKGV    | 47    | 1     |
| >SMAD4-I38: RLHIGKGVQL  | 358   | >SMAD4-I38: RLHKGKGVQL  | 356   | 2     |
| >SMAD4-I38: RLHIGKGV    | 6     | >SMAD4-I38: RLHKGKGV    | 7     | 1     |
| >SMAD4-I38: RLHIGKGVQL  | 18    | >SMAD4-I38: RLHKGKGVQL  | 21    | 3     |
| >SMAD4-I38: RLHIGKGVQL  | 318   | >SMAD4-I38: RLHKGKGVQL  | 980   | 662   |
| >SMAD4-I38: ARLHIGKGV   | 333   | >SMAD4-I38: ARLHKGKGV   | 610   | 277   |
| >SMAD4-I38: ARLHIGKGV   | 127   | >SMAD4-I38: ARLHKGKGV   | 182   | 55    |
| >SMAD4-I38: ARLHIGKGV   | 129   | >SMAD4-I38: ARLHKGKGV   | 374   | 245   |
| >SMAD4-I38: ARLHIGKGV   | 55    | >SMAD4-I38: ARLHKGKGV   | 104   | 49    |
| >SMAD4-I38: ARLHIGKGV   | 357   | >SMAD4-I38: ARLHKGKGV   | 716   | 359   |
| >SMAD4-I38: ARLHIGKGV   | 127   | >SMAD4-I38: ARLHKGKGV   | 379   | 252   |
| >SMAD4-I38: RARLHIGK    | 149   | >SMAD4-I38: RARLHKGK    | 708   | 559   |
| >SMAD4-I38: RARLHIGK    | 3     | >SMAD4-I38: RARLHKGK    | 4     | 1     |
| >SMAD4-I38: RARLHIGK    | 105   | >SMAD4-I38: RARLHKGK    | 236   | 131   |
| >SMAD4-I38: RARLHIGKGV  | 29    | >SMAD4-I38: RARLHKGK    | 39    | 10    |
| >SMAD4-I38: RARLHIGKGV  | 127   | >SMAD4-I38: RARLHKGK    | 176   | 49    |
| >SMAD4-I38: RARLHIGK    | 160   | >SMAD4-I38: RARLHKGK    | 324   | 164   |
| >SMAD4-I38: RARLHIGKGV  | 109   | >SMAD4-I38: RARLHKGK    | 186   | 77    |
| >SMAD4-I38: ERARLHIGK   | 383   | >SMAD4-I38: ERARLHKGK   | 541   | 158   |
| >SMAD4-I38: IERARLHI    | 269   | >SMAD4-I38: IERARLHK    | 13018 | 12749 |
| >SMAD4-I38: IERARLHI    | 2201  | >SMAD4-I38: IERARLHK    | 118   | 2083  |
| >SMAD4-I38: IERARLHIGK  | 212   | >SMAD4-I38: IERARLHKGK  | 821   | 609   |
| >SMAD4-I38: IERARLHI    | 105   | >SMAD4-I38: IERARLHK    | 27036 | 26931 |

|                         |       |                         |       |       |
|-------------------------|-------|-------------------------|-------|-------|
| >SMAD4-I38: AIERARLHI   | 20809 | >SMAD4-I38: AIERARLHK   | 322   | 20487 |
| >SMAD4-I38: AIERARLHI   | 24397 | >SMAD4-I38: AIERARLHK   | 159   | 24238 |
| >SMAD4-I38: AIERARLHIGK | 117   | >SMAD4-I38: AIERARLHKG  | 722   | 605   |
| >SMAD4-I38: AIERARLHI   | 341   | >SMAD4-I38: AIERARLHK   | 21    | 320   |
| >SMAD4-I38: AIERARLHIGK | 57    | >SMAD4-I38: AIERARLHKG  | 190   | 133   |
| >SMAD4-I38: EAIERARLHI  | 34055 | >SMAD4-I38: EAIERARLHK  | 456   | 33599 |
| >SMAD4-I38: EAIERARLHI  | 28272 | >SMAD4-I38: EAIERARLHK  | 107   | 28165 |
| >SMAD4-I38: EAIERARLHI  | 288   | >SMAD4-I38: EAIERARLHK  | 23777 | 23489 |
| >SMAD4-I38: EAIERARLHI  | 162   | >SMAD4-I38: EAIERARLHK  | 13176 | 13014 |
| >SMAD4-I52: IHLHRALQL   | 503   | >SMAD4-I52: VHLHRALQL   | 445   | 58    |
| >SMAD4-I52: IHLHRALQL   | 405   | >SMAD4-I52: VHLHRALQL   | 981   | 576   |
| >SMAD4-I52: IHLHRALQL   | 235   | >SMAD4-I52: VHLHRALQL   | 208   | 27    |
| >SMAD4-I52: EIHLHRAL    | 682   | >SMAD4-I52: EVHLHRAL    | 138   | 544   |
| >SMAD4-I52: EIHLHRALQLI | 671   | >SMAD4-I52: EVHLHRALQL  | 141   | 530   |
| >SMAD4-I52: EIHLHRALQ   | 1074  | >SMAD4-I52: EVHLHRALQ   | 378   | 696   |
| >SMAD4-I52: EIHLHRAL    | 1155  | >SMAD4-I52: EVHLHRAL    | 244   | 911   |
| >SMAD4-I52: EIHLHRALQLI | 431   | >SMAD4-I52: EVHLHRALQL  | 87    | 344   |
| >SMAD4-I52: EIHLHRAL    | 80    | >SMAD4-I52: EVHLHRAL    | 219   | 139   |
| >SMAD4-I52: SIKETPCWIEI | 1742  | >SMAD4-I52: SIKETPCWIEV | 311   | 1431  |
| >SMAD4-I52: SIKETPCWIEI | 186   | >SMAD4-I52: SIKETPCWIEV | 24    | 162   |
| >SMAD4-I52: SIKETPCWIEI | 1008  | >SMAD4-I52: SIKETPCWIEV | 144   | 864   |
| >SMAD4-I52: SIKETPCWIEI | 332   | >SMAD4-I52: SIKETPCWIEV | 30    | 302   |
| >SMAD4-I52: SIKETPCWIEI | 3776  | >SMAD4-I52: SIKETPCWIEV | 414   | 3362  |
| >SMAD4-I52: SIKETPCWIEI | 1954  | >SMAD4-I52: SIKETPCWIEV | 63    | 1891  |
| >SMAD4-I52: SIKETPCWIEI | 597   | >SMAD4-I52: SIKETPCWIEV | 9     | 588   |
| >SMAD4-I52: SIKETPCWIEI | 47    | >SMAD4-I52: SIKETPCWIEV | 80    | 33    |
| >SMAD4-I52: IEIHLHRALQL | 197   | >SMAD4-I52: IEVHLHRALQ  | 173   | 24    |
| >SMAD4-I52: IEIHLHRAL   | 257   | >SMAD4-I52: IEVHLHRAL   | 327   | 70    |
| >SMAD4-I52: IEIHLHRAL   | 32    | >SMAD4-I52: IEVHLHRAL   | 30    | 2     |
| >SMAD4-I52: IEIHLHRALQL | 340   | >SMAD4-I52: IEVHLHRALQ  | 316   | 24    |
| >SMAD4-I52: IEIHLHRAL   | 13    | >SMAD4-I52: IEVHLHRAL   | 16    | 3     |
| >SMAD4-I52: IEIHLHRALQL | 38    | >SMAD4-I52: IEVHLHRALQ  | 45    | 7     |
| >SMAD4-I52: IEIHLHRAL   | 41    | >SMAD4-I52: IEVHLHRAL   | 57    | 16    |
| >SMAD4-I52: IEIHLHRALQL | 99    | >SMAD4-I52: IEVHLHRALQ  | 153   | 54    |
| >SMAD4-I52: IEIHLHRAL   | 404   | >SMAD4-I52: IEVHLHRAL   | 657   | 253   |
| >SMAD4-I52: IEIHLHRALQL | 364   | >SMAD4-I52: IEVHLHRALQ  | 571   | 207   |
| >SMAD4-I52: IEIHLHRA    | 230   | >SMAD4-I52: IEVHLHRA    | 331   | 101   |
| >SMAD4-I52: IEIHLHRAL   | 203   | >SMAD4-I52: IEVHLHRAL   | 444   | 241   |
| >SMAD4-I52: IEIHLHRALQL | 44    | >SMAD4-I52: IEVHLHRALQ  | 97    | 53    |
| >SMAD4-I52: WIEIHLHRA   | 220   | >SMAD4-I52: WIEVHLHRA   | 312   | 92    |
| >SMAD4-I52: WIEIHLHR    | 88    | >SMAD4-I52: WIEVHLHR    | 187   | 99    |
| >SMAD4-I52: CWIEIHLHRA  | 454   | >SMAD4-I52: CWIEVHLHR/  | 616   | 162   |
| >SMAD4-I52: CWIEIHLHRA  | 80    | >SMAD4-I52: CWIEVHLHR/  | 68    | 12    |



|                         |      |                        |       |       |
|-------------------------|------|------------------------|-------|-------|
| >SMAD4-I52: CWIEIHLHR   | 203  | >SMAD4-I52: CWIEVHLHR  | 270   | 67    |
| >SMAD4-I52: CWIEIHLHR   | 220  | >SMAD4-I52: CWIEVHLHR  | 162   | 58    |
| >SMAD4-I52: CWIEIHLHR   | 9    | >SMAD4-I52: CWIEVHLHR  | 19    | 10    |
| >SMAD4-I52: CWIEIHLH    | 491  | >SMAD4-I52: CWIEVHLH   | 534   | 43    |
| >SMAD4-I52: CWIEIHLHRA  | 79   | >SMAD4-I52: CWIEVHLHRA | 84    | 5     |
| >SMAD4-I52: PCWIEIHLHR  | 31   | >SMAD4-I52: PCWIEVHLHF | 51    | 20    |
| >SMAD4-I52: TPCWIEIHL   | 192  | >SMAD4-I52: TPCWIEVHL  | 257   | 65    |
| >SMAD4-I52: TPCWIEIHLHI | 94   | >SMAD4-I52: TPCWIEVHLH | 91    | 3     |
| >SMAD4-I52: TPCWIEIH    | 328  | >SMAD4-I52: TPCWIEVH   | 249   | 79    |
| >SMAD4-I52: TPCWIEIHLHI | 63   | >SMAD4-I52: TPCWIEVHLH | 83    | 20    |
| >SMAD4-I52: ETPCWIEI    | 1636 | >SMAD4-I52: ETPCWIEV   | 147   | 1489  |
| >SMAD4-I52: ETPCWIEIH   | 70   | >SMAD4-I52: ETPCWIEVH  | 45    | 25    |
| >SMAD4-I52: ETPCWIEIHL  | 38   | >SMAD4-I52: ETPCWIEVHL | 50    | 12    |
| >SMAD4-I52: ETPCWIEIHLF | 173  | >SMAD4-I52: ETPCWIEVHL | 152   | 21    |
| >SMAD4-I52: ETPCWIEIHL  | 403  | >SMAD4-I52: ETPCWIEVHL | 774   | 371   |
| >SMAD4-I52: ETPCWIEI    | 6    | >SMAD4-I52: ETPCWIEV   | 5     | 1     |
| >SMAD4-I52: ETPCWIEIHL  | 18   | >SMAD4-I52: ETPCWIEVHL | 20    | 2     |
| >SMAD4-I52: ETPCWIEI    | 41   | >SMAD4-I52: ETPCWIEV   | 12    | 29    |
| >SMAD4-I52: ETPCWIEIHL  | 109  | >SMAD4-I52: ETPCWIEVHL | 136   | 27    |
| >SMAD4-I52: ETPCWIEIHL  | 23   | >SMAD4-I52: ETPCWIEVHL | 34    | 11    |
| >SMAD4-I52: ETPCWIEIHLF | 127  | >SMAD4-I52: ETPCWIEVHL | 198   | 71    |
| >SMAD4-I52: ETPCWIEI    | 419  | >SMAD4-I52: ETPCWIEV   | 16105 | 15686 |
| >SMAD4-I52: KETPCWIEI   | 71   | >SMAD4-I52: KETPCWIEV  | 625   | 554   |
| >SMAD4-I52: KETPCWIEI   | 1143 | >SMAD4-I52: KETPCWIEV  | 212   | 931   |
| >SMAD4-I52: KETPCWIEI   | 20   | >SMAD4-I52: KETPCWIEV  | 34    | 14    |
| >SMAD4-I52: KETPCWIEIHI | 11   | >SMAD4-I52: KETPCWIEVH | 13    | 2     |
| >SMAD4-I52: KETPCWIEI   | 20   | >SMAD4-I52: KETPCWIEV  | 24    | 4     |
| >SMAD4-I52: KETPCWIEIHI | 68   | >SMAD4-I52: KETPCWIEVH | 86    | 18    |
| >SMAD4-I52: KETPCWIEI   | 406  | >SMAD4-I52: KETPCWIEV  | 521   | 115   |
| >SMAD4-I52: KETPCWIEI   | 462  | >SMAD4-I52: KETPCWIEV  | 109   | 353   |
| >SMAD4-I52: KETPCWIEI   | 10   | >SMAD4-I52: KETPCWIEV  | 18    | 8     |
| >SMAD4-I52: KETPCWIEIHI | 87   | >SMAD4-I52: KETPCWIEVH | 81    | 6     |
| >SMAD4-K34KVPSSCPIVTV   | 272  | >SMAD4-K34EVPSSCPIVTV  | 11748 | 11476 |
| >SMAD4-K34KVPSSCPIV     | 435  | >SMAD4-K34EVPSSCPIV    | 7521  | 7086  |
| >SMAD4-K34KVPSSCPIVTV   | 119  | >SMAD4-K34EVPSSCPIVTV  | 3253  | 3134  |
| >SMAD4-K34KVPSSCPI      | 171  | >SMAD4-K34EVPSSCPI     | 5909  | 5738  |
| >SMAD4-K34KVPSSCPIV     | 149  | >SMAD4-K34EVPSSCPIV    | 2394  | 2245  |
| >SMAD4-K34KVPSSCPIVTV   | 26   | >SMAD4-K34EVPSSCPIVTV  | 782   | 756   |
| >SMAD4-K34KVPSSCPIVTV   | 74   | >SMAD4-K34EVPSSCPIVTV  | 657   | 583   |
| >SMAD4-K34KVPSSCPIV     | 326  | >SMAD4-K34EVPSSCPIV    | 3283  | 2957  |
| >SMAD4-K34KVPSSCPIVTV   | 116  | >SMAD4-K34EVPSSCPIVTV  | 1523  | 1407  |
| >SMAD4-K34KVPSSCPIV     | 83   | >SMAD4-K34EVPSSCPIV    | 515   | 432   |
| >SMAD4-K34KVPSSCPIVTV   | 33   | >SMAD4-K34EVPSSCPIVTV  | 152   | 119   |

|                        |       |                        |       |       |
|------------------------|-------|------------------------|-------|-------|
| >SMAD4-K34KVPSSCPI     | 334   | >SMAD4-K34EVPSSCPI     | 15783 | 15449 |
| >SMAD4-K34KVPSSCPI     | 110   | >SMAD4-K34EVPSSCPI     | 4853  | 4743  |
| >SMAD4-K34KVPSSCPIVTV  | 402   | >SMAD4-K34EVPSSCPIVTV  | 7285  | 6883  |
| >SMAD4-K34KVPSSCPI     | 2541  | >SMAD4-K34EVPSSCPI     | 18    | 2523  |
| >SMAD4-K34KVPSSCPIV    | 11002 | >SMAD4-K34EVPSSCPIV    | 201   | 10801 |
| >SMAD4-K34KVPSSCPIVTV  | 604   | >SMAD4-K34EVPSSCPIVTV  | 16    | 588   |
| >SMAD4-K34KVPSSCPI     | 8582  | >SMAD4-K34EVPSSCPI     | 94    | 8488  |
| >SMAD4-K34KVPSSCPIV    | 7980  | >SMAD4-K34EVPSSCPIV    | 129   | 7851  |
| >SMAD4-K34KVPSSCPIVTV  | 3392  | >SMAD4-K34EVPSSCPIVTV  | 35    | 3357  |
| >SMAD4-K34KVPSSCPI     | 12    | >SMAD4-K34EVPSSCPI     | 92    | 80    |
| >SMAD4-K34KVPSSCPIV    | 45    | >SMAD4-K34EVPSSCPIV    | 400   | 355   |
| >SMAD4-K34KVPSSCPIVTV  | 76    | >SMAD4-K34EVPSSCPIVTV  | 743   | 667   |
| >SMAD4-K34FKVPSSCPI    | 322   | >SMAD4-K34FEVPSSCPI    | 11    | 311   |
| >SMAD4-K34FKVPSSCPIV   | 3905  | >SMAD4-K34FEVPSSCPIV   | 51    | 3854  |
| >SMAD4-K34FKVPSSCPI    | 160   | >SMAD4-K34FEVPSSCPI    | 91    | 69    |
| >SMAD4-K34FKVPSSCPIV   | 298   | >SMAD4-K34FEVPSSCPIV   | 354   | 56    |
| >SMAD4-K34FKVPSSCPIV   | 327   | >SMAD4-K34FEVPSSCPIV   | 534   | 207   |
| >SMAD4-K34FKVPSSCPI    | 3877  | >SMAD4-K34FEVPSSCPI    | 406   | 3471  |
| >SMAD4-K34FKVPSSCP     | 254   | >SMAD4-K34FEVPSSCP     | 6324  | 6070  |
| >SMAD4-K34FKVPSSCPI    | 7     | >SMAD4-K34FEVPSSCPI    | 107   | 100   |
| >SMAD4-K34FKVPSSCPIV   | 12    | >SMAD4-K34FEVPSSCPIV   | 300   | 288   |
| >SMAD4-K34FKVPSSCPIVTV | 164   | >SMAD4-K34FEVPSSCPIVTV | 4443  | 4279  |
| >SMAD4-K34FKVPSSCPI    | 105   | >SMAD4-K34FEVPSSCPI    | 298   | 193   |
| >SMAD4-K34FKVPSSCPIV   | 364   | >SMAD4-K34FEVPSSCPIV   | 1302  | 938   |
| >SMAD4-K34FKVPSSCPI    | 16554 | >SMAD4-K34FEVPSSCPI    | 62    | 16492 |
| >SMAD4-K34FKVPSSCPIV   | 15222 | >SMAD4-K34FEVPSSCPIV   | 214   | 15008 |
| >SMAD4-K34FKVPSSCPI    | 19685 | >SMAD4-K34FEVPSSCPI    | 47    | 19638 |
| >SMAD4-K34FKVPSSCPIV   | 27414 | >SMAD4-K34FEVPSSCPIV   | 318   | 27096 |
| >SMAD4-K34FKVPSSCPIVTV | 29615 | >SMAD4-K34FEVPSSCPIVTV | 199   | 29416 |
| >SMAD4-K34FKVPSSCPI    | 5247  | >SMAD4-K34FEVPSSCPI    | 8     | 5239  |
| >SMAD4-K34FKVPSSCPIV   | 9952  | >SMAD4-K34FEVPSSCPIV   | 18    | 9934  |
| >SMAD4-K34EMDVQVGET    | 242   | >SMAD4-K34EMDVQVGET    | 19497 | 19255 |
| >SMAD4-K34TFKVPSSCPI   | 125   | >SMAD4-K34TFEVPSSCPI   | 9344  | 9219  |
| >SMAD4-K34ETFKVPSSCPI  | 760   | >SMAD4-K34ETFEVPSSCPI  | 489   | 271   |
| >SMAD4-K34ETFKVPSSCPI  | 835   | >SMAD4-K34ETFEVPSSCPI  | 76    | 759   |
| >SMAD4-K34ETFKVPSSCPI  | 1157  | >SMAD4-K34ETFEVPSSCPI  | 448   | 709   |
| >SMAD4-K34ETFKVPSSCPI  | 35    | >SMAD4-K34ETFEVPSSCPI  | 24    | 11    |
| >SMAD4-K34ETFKVPSS     | 418   | >SMAD4-K34ETFEVPSS     | 327   | 91    |
| >SMAD4-K34ETFKVPSS     | 229   | >SMAD4-K34ETFEVPSS     | 104   | 125   |
| >SMAD4-K34ETFKVPSSC    | 197   | >SMAD4-K34ETFEVPSSC    | 54    | 143   |
| >SMAD4-K34ETFKVPSSCPI  | 5     | >SMAD4-K34ETFEVPSSCPI  | 4     | 1     |
| >SMAD4-K34ETFKVPSS     | 1555  | >SMAD4-K34ETFEVPSS     | 286   | 1269  |
| >SMAD4-K34ETFKVPSSC    | 2241  | >SMAD4-K34ETFEVPSSC    | 311   | 1930  |

|                        |       |                        |       |       |
|------------------------|-------|------------------------|-------|-------|
| >SMAD4-K34 ETKVPSSCPI  | 9     | >SMAD4-K34 ETFEVPSSCPI | 5     | 4     |
| >SMAD4-K34 ETKVPSSCPI  | 119   | >SMAD4-K34 ETFEVPSSCPI | 59    | 60    |
| >SMAD4-K34 ETKVPSSCPI  | 49    | >SMAD4-K34 ETFEVPSSCPI | 46    | 3     |
| >SMAD4-K34 QVGETFKV    | 1897  | >SMAD4-K34 QVGETFEV    | 451   | 1446  |
| >SMAD4-K34 QVGETFKV    | 997   | >SMAD4-K34 QVGETFEV    | 257   | 740   |
| >SMAD4-K34 QVGETFKV    | 118   | >SMAD4-K34 QVGETFEV    | 20    | 98    |
| >SMAD4-K34 QVGETFKV    | 157   | >SMAD4-K34 QVGETFEV    | 52    | 105   |
| >SMAD4-K34 QVGETFKV    | 507   | >SMAD4-K34 QVGETFEV    | 180   | 327   |
| >SMAD4-K34 QVGETFKV    | 291   | >SMAD4-K34 QVGETFEV    | 132   | 159   |
| >SMAD4-K34 QVGETFKV    | 203   | >SMAD4-K34 QVGETFEV    | 80    | 123   |
| >SMAD4-K34 QVGETFKV    | 52    | >SMAD4-K34 QVGETFEV    | 21    | 31    |
| >SMAD4-K34 QVGETFKV    | 194   | >SMAD4-K34 QVGETFEV    | 43    | 151   |
| >SMAD4-K34 QVGETFKV    | 23    | >SMAD4-K34 QVGETFEV    | 14    | 9     |
| >SMAD4-K34 VQVGETFKV   | 147   | >SMAD4-K34 VQVGETFEV   | 32    | 115   |
| >SMAD4-K34 VQVGETFKV   | 83    | >SMAD4-K34 VQVGETFEV   | 22    | 61    |
| >SMAD4-K34 VQVGETFKV   | 236   | >SMAD4-K34 VQVGETFEV   | 102   | 134   |
| >SMAD4-K34 VQVGETFKV   | 7     | >SMAD4-K34 VQVGETFEV   | 3     | 4     |
| >SMAD4-K34 VQVGETFKVF  | 629   | >SMAD4-K34 VQVGETFEVF  | 390   | 239   |
| >SMAD4-K34 VQVGETFKV   | 59    | >SMAD4-K34 VQVGETFEV   | 26    | 33    |
| >SMAD4-K34 VQVGETFKV   | 201   | >SMAD4-K34 VQVGETFEV   | 64    | 137   |
| >SMAD4-K34 VQVGETFKV   | 83    | >SMAD4-K34 VQVGETFEV   | 45    | 38    |
| >SMAD4-K34 VQVGETFKV   | 466   | >SMAD4-K34 VQVGETFEV   | 264   | 202   |
| >SMAD4-K34 VQVGETFKV   | 61    | >SMAD4-K34 VQVGETFEV   | 27    | 34    |
| >SMAD4-K34 VQVGETFK    | 132   | >SMAD4-K34 VQVGETFE    | 27334 | 27202 |
| >SMAD4-K34 DVQVGETFK   | 116   | >SMAD4-K34 DVQVGETFE   | 4766  | 4650  |
| >SMAD4-K34 DVQVGETFK   | 43    | >SMAD4-K34 DVQVGETFE   | 9924  | 9881  |
| >SMAD4-K34 DVQVGETFK\  | 385   | >SMAD4-K34 DVQVGETFE\  | 281   | 104   |
| >SMAD4-K34 MDVQVGETF   | 901   | >SMAD4-K34 MDVQVGETF   | 341   | 560   |
| >SMAD4-K34 MDVQVGETF   | 208   | >SMAD4-K34 MDVQVGETF   | 290   | 82    |
| >SMAD4-K34 MDVQVGETF   | 204   | >SMAD4-K34 MDVQVGETF   | 177   | 27    |
| >SMAD4-K50 KGWGPDPYR   | 16    | >SMAD4-K50 QGWGPDPYF   | 174   | 158   |
| >SMAD4-K50 KGWGPDPYR   | 11    | >SMAD4-K50 QGWGPDPYF   | 20    | 9     |
| >SMAD4-K50 VKGWGPDY    | 751   | >SMAD4-K50 VQGWPDPY    | 208   | 543   |
| >SMAD4-K50 VKGWGPDY    | 206   | >SMAD4-K50 VQGWPDPY    | 46    | 160   |
| >SMAD4-K50 VKGWGPDY    | 13206 | >SMAD4-K50 VQGWPDPY    | 279   | 12927 |
| >SMAD4-K50 VKGWGPDPYF  | 213   | >SMAD4-K50 VQGWPDPYF   | 72    | 141   |
| >SMAD4-K50 RLCILRMSFVI | 41    | >SMAD4-K50 RLCILRMSFVI | 11874 | 11833 |
| >SMAD4-K50 RLCILRMSFVI | 25    | >SMAD4-K50 RLCILRMSFVI | 15815 | 15790 |
| >SMAD4-K50 RLCILRMSFVI | 29    | >SMAD4-K50 RLCILRMSFVI | 4143  | 4114  |
| >SMAD4-K50 RLCILRMSFVI | 47    | >SMAD4-K50 RLCILRMSFVI | 1798  | 1751  |
| >SMAD4-K50 RLCILRMSFVI | 400   | >SMAD4-K50 RLCILRMSFVI | 3306  | 2906  |
| >SMAD4-K50 FVKGWGPDY   | 35    | >SMAD4-K50 FVQGWGPDY   | 71    | 36    |
| >SMAD4-K50 FVKGWGPDY   | 104   | >SMAD4-K50 FVQGWGPDY   | 110   | 6     |

|                      |      |                      |       |       |
|----------------------|------|----------------------|-------|-------|
| >SMAD4-K50 FVKGWGPDY | 10   | >SMAD4-K50 FVQGWGPDY | 7     | 3     |
| >SMAD4-K50 FVKGWGPDY | 82   | >SMAD4-K50 FVQGWGPDY | 73    | 9     |
| >SMAD4-K50 FVKGWGPDY | 77   | >SMAD4-K50 FVQGWGPDY | 214   | 137   |
| >SMAD4-K50 FVKGWGPDY | 56   | >SMAD4-K50 FVQGWGPDY | 95    | 39    |
| >SMAD4-K50 FVKGWGPDY | 45   | >SMAD4-K50 FVQGWGPDY | 73    | 28    |
| >SMAD4-K50 FVKGWGPDY | 92   | >SMAD4-K50 FVQGWGPDY | 156   | 64    |
| >SMAD4-K50 FVKGWGPDY | 169  | >SMAD4-K50 FVQGWGPDY | 140   | 29    |
| >SMAD4-K50 FVKGWGPDY | 484  | >SMAD4-K50 FVQGWGPDY | 155   | 329   |
| >SMAD4-K50 FVKGWGPDY | 418  | >SMAD4-K50 FVQGWGPDY | 548   | 130   |
| >SMAD4-K50 FVKGWGPDY | 175  | >SMAD4-K50 FVQGWGPDY | 303   | 128   |
| >SMAD4-K50 SFVKGWGPD | 870  | >SMAD4-K50 SFVQGWGPE | 481   | 389   |
| >SMAD4-K50 SFVKGWGPD | 264  | >SMAD4-K50 SFVQGWGPE | 234   | 30    |
| >SMAD4-K50 SFVKGWGPD | 433  | >SMAD4-K50 SFVQGWGPE | 1118  | 685   |
| >SMAD4-K50 SFVKGWGPD | 189  | >SMAD4-K50 SFVQGWGPE | 141   | 48    |
| >SMAD4-K50 SFVKGWGP  | 638  | >SMAD4-K50 SFVQGWGP  | 395   | 243   |
| >SMAD4-K50 SFVKGWGPD | 245  | >SMAD4-K50 SFVQGWGPE | 150   | 95    |
| >SMAD4-K50 MSFVKGWGI | 382  | >SMAD4-K50 MSFVQGWG  | 331   | 51    |
| >SMAD4-K50 MSFVKGWGI | 525  | >SMAD4-K50 MSFVQGWG  | 455   | 70    |
| >SMAD4-K50 MSFVKGWGI | 18   | >SMAD4-K50 MSFVQGWG  | 14    | 4     |
| >SMAD4-K50 MSFVKGWGI | 22   | >SMAD4-K50 MSFVQGWG  | 21    | 1     |
| >SMAD4-K50 MSFVKGWGI | 701  | >SMAD4-K50 MSFVQGWG  | 489   | 212   |
| >SMAD4-K50 MSFVKGWGI | 222  | >SMAD4-K50 MSFVQGWG  | 161   | 61    |
| >SMAD4-K50 MSFVKGWGI | 39   | >SMAD4-K50 MSFVQGWG  | 24    | 15    |
| >SMAD4-K50 MSFVKGWGI | 4    | >SMAD4-K50 MSFVQGWG  | 5     | 1     |
| >SMAD4-K50 MSFVKGWGI | 226  | >SMAD4-K50 MSFVQGWG  | 70    | 156   |
| >SMAD4-K50 MSFVKGWGI | 305  | >SMAD4-K50 MSFVQGWG  | 201   | 104   |
| >SMAD4-K50 MSFVKGWGI | 612  | >SMAD4-K50 MSFVQGWG  | 376   | 236   |
| >SMAD4-K50 MSFVKGWGI | 147  | >SMAD4-K50 MSFVQGWG  | 152   | 5     |
| >SMAD4-K50 MSFVKGWGI | 376  | >SMAD4-K50 MSFVQGWG  | 270   | 106   |
| >SMAD4-K50 MSFVKGWGI | 462  | >SMAD4-K50 MSFVQGWG  | 553   | 91    |
| >SMAD4-K50 RMSFVKGW  | 172  | >SMAD4-K50 RMSFVQGW  | 81    | 91    |
| >SMAD4-K50 RMSFVKGW  | 1283 | >SMAD4-K50 RMSFVQGW  | 470   | 813   |
| >SMAD4-K50 RMSFVKGW  | 130  | >SMAD4-K50 RMSFVQGW  | 80    | 50    |
| >SMAD4-K50 RMSFVKGW  | 161  | >SMAD4-K50 RMSFVQGW  | 127   | 34    |
| >SMAD4-K50 RMSFVKGW  | 20   | >SMAD4-K50 RMSFVQGW  | 11    | 9     |
| >SMAD4-K50 RMSFVKGW  | 501  | >SMAD4-K50 RMSFVQGW  | 84    | 417   |
| >SMAD4-K50 LRMSFVKGW | 176  | >SMAD4-K50 LRMSFVQGW | 118   | 58    |
| >SMAD4-K50 LRMSFVKGW | 220  | >SMAD4-K50 LRMSFVQGW | 263   | 43    |
| >SMAD4-K50 LRMSFVKGW | 418  | >SMAD4-K50 LRMSFVQGW | 381   | 37    |
| >SMAD4-K50 LRMSFVKGW | 355  | >SMAD4-K50 LRMSFVQGW | 433   | 78    |
| >SMAD4-K50 LRMSFVKGW | 620  | >SMAD4-K50 LRMSFVQGW | 119   | 501   |
| >SMAD4-K50 ILRMSFVK  | 4628 | >SMAD4-K50 ILRMSFVQ  | 370   | 4258  |
| >SMAD4-K50 ILRMSFVK  | 36   | >SMAD4-K50 ILRMSFVQ  | 13202 | 13166 |

|                        |      |                        |       |       |
|------------------------|------|------------------------|-------|-------|
| >SMAD4-K50 ILRMSFVK    | 388  | >SMAD4-K50 ILRMSFVQ    | 25366 | 24978 |
| >SMAD4-K50 ILRMSFVK    | 9    | >SMAD4-K50 ILRMSFVQ    | 982   | 973   |
| >SMAD4-K50 ILRMSFVK    | 239  | >SMAD4-K50 ILRMSFVQ    | 9172  | 8933  |
| >SMAD4-K50 ILRMSFVKGV  | 232  | >SMAD4-K50 ILRMSFVQGV  | 168   | 64    |
| >SMAD4-K50 ILRMSFVKGV  | 19   | >SMAD4-K50 ILRMSFVQGV  | 15    | 4     |
| >SMAD4-K50 ILRMSFVKGV  | 173  | >SMAD4-K50 ILRMSFVQGV  | 154   | 19    |
| >SMAD4-K50 CILRMSFVK   | 106  | >SMAD4-K50 CILRMSFVQ   | 17424 | 17318 |
| >SMAD4-K50 CILRMSFVK   | 19   | >SMAD4-K50 CILRMSFVQ   | 16912 | 16893 |
| >SMAD4-K50 CILRMSFVK   | 109  | >SMAD4-K50 CILRMSFVQ   | 9323  | 9214  |
| >SMAD4-K50 CILRMSFVK   | 419  | >SMAD4-K50 CILRMSFVQ   | 11658 | 11239 |
| >SMAD4-K50 CILRMSFVKG  | 125  | >SMAD4-K50 CILRMSFVQG  | 47    | 78    |
| >SMAD4-L43 LVKKLKEK    | 1919 | >SMAD4-L43 SVKKLKEK    | 228   | 1691  |
| >SMAD4-L43 LVKKLKEKK   | 1824 | >SMAD4-L43 SVKKLKEKK   | 201   | 1623  |
| >SMAD4-L43 LVKKLKEK    | 34   | >SMAD4-L43 SVKKLKEK    | 16    | 18    |
| >SMAD4-L43 LVKKLKEKK   | 377  | >SMAD4-L43 SVKKLKEKK   | 141   | 236   |
| >SMAD4-L43 LVKKLKEK    | 538  | >SMAD4-L43 SVKKLKEK    | 383   | 155   |
| >SMAD4-L43 LVKKLKEKK   | 454  | >SMAD4-L43 SVKKLKEKK   | 297   | 157   |
| >SMAD4-L43 LVKKLKEKK   | 673  | >SMAD4-L43 SVKKLKEKK   | 372   | 301   |
| >SMAD4-L43 SLVKKLKEKK  | 406  | >SMAD4-L43 SSVKKLKEKK  | 2224  | 1818  |
| >SMAD4-L43 SLVKKLKEK   | 1508 | >SMAD4-L43 SSVKKLKEK   | 313   | 1195  |
| >SMAD4-L43 SLVKKLKEKK  | 418  | >SMAD4-L43 SSVKKLKEKK  | 132   | 286   |
| >SMAD4-L43 SLVKKLKEK   | 3597 | >SMAD4-L43 SSVKKLKEK   | 303   | 3294  |
| >SMAD4-L43 SLVKKLKEKK  | 5731 | >SMAD4-L43 SSVKKLKEKK  | 383   | 5348  |
| >SMAD4-L43 ETFAKRAIESL | 472  | >SMAD4-L43 ETFAKRAIESS | 9257  | 8785  |
| >SMAD4-L43 ETFAKRAIESL | 364  | >SMAD4-L43 ETFAKRAIESS | 8613  | 8249  |
| >SMAD4-L43 ETFAKRAIESL | 127  | >SMAD4-L43 ETFAKRAIESS | 8186  | 8059  |
| >SMAD4-L43 ETFAKRAIESL | 236  | >SMAD4-L43 ETFAKRAIESS | 10537 | 10301 |
| >SMAD4-L43 ETFAKRAIESL | 6    | >SMAD4-L43 ETFAKRAIESS | 23    | 17    |
| >SMAD4-L43 ETFAKRAIESL | 58   | >SMAD4-L43 ETFAKRAIESS | 4682  | 4624  |
| >SMAD4-L43 ETFAKRAIESL | 57   | >SMAD4-L43 ETFAKRAIESS | 11274 | 11217 |
| >SMAD4-L43 ESLVKKLK    | 290  | >SMAD4-L43 ESSVKKLK    | 63    | 227   |
| >SMAD4-L43 ESLVKKLKEKK | 444  | >SMAD4-L43 ESSVKKLKEKK | 92    | 352   |
| >SMAD4-L43 IESLVKKL    | 27   | >SMAD4-L43 IESSVKKL    | 202   | 175   |
| >SMAD4-L43 IESLVKKL    | 496  | >SMAD4-L43 IESSVKKL    | 833   | 337   |
| >SMAD4-L43 IESLVKKL    | 169  | >SMAD4-L43 IESSVKKL    | 104   | 65    |
| >SMAD4-L43 AIESLVKKLK  | 383  | >SMAD4-L43 AIESSVKKLK  | 519   | 136   |
| >SMAD4-L43 AIESLVKK    | 130  | >SMAD4-L43 AIESSVKK    | 121   | 9     |
| >SMAD4-L43 AIESLVKKLK  | 167  | >SMAD4-L43 AIESSVKKLK  | 158   | 9     |
| >SMAD4-L43 RAIESLVK    | 311  | >SMAD4-L43 RAIESSVK    | 318   | 7     |
| >SMAD4-L43 RAIESLVKK   | 215  | >SMAD4-L43 RAIESSVKK   | 124   | 91    |
| >SMAD4-L43 RAIESLVKKLK | 474  | >SMAD4-L43 RAIESSVKKLK | 312   | 162   |
| >SMAD4-L43 RAIESLVK    | 43   | >SMAD4-L43 RAIESSVK    | 70    | 27    |
| >SMAD4-L43 RAIESLVKK   | 35   | >SMAD4-L43 RAIESSVKK   | 44    | 9     |

|                        |      |                         |       |       |
|------------------------|------|-------------------------|-------|-------|
| >SMAD4-L43 RAIESLVKKLK | 75   | >SMAD4-L43 RAIESSVKKLK  | 78    | 3     |
| >SMAD4-L43 RAIESLVK    | 31   | >SMAD4-L43 RAIESSVK     | 38    | 7     |
| >SMAD4-L43 RAIESLVKK   | 54   | >SMAD4-L43 RAIESSVKK    | 25    | 29    |
| >SMAD4-L43 RAIESLVKKLK | 81   | >SMAD4-L43 RAIESSVKKLK  | 54    | 27    |
| >SMAD4-L43 RAIESLVKK   | 330  | >SMAD4-L43 RAIESSVKK    | 720   | 390   |
| >SMAD4-L43 RAIESLVKKLK | 381  | >SMAD4-L43 RAIESSVKKLK  | 469   | 88    |
| >SMAD4-L43 RAIESLVKK   | 250  | >SMAD4-L43 RAIESSVKK    | 315   | 65    |
| >SMAD4-L43 RAIESLVKKLK | 452  | >SMAD4-L43 RAIESSVKKLK  | 389   | 63    |
| >SMAD4-L43 RAIESLVKKL  | 411  | >SMAD4-L43 RAIESSVKKL   | 115   | 296   |
| >SMAD4-L43 RAIESLVKKL  | 5    | >SMAD4-L43 RAIESSVKKL   | 4     | 1     |
| >SMAD4-L43 RAIESLVKKL  | 403  | >SMAD4-L43 RAIESSVKKL   | 378   | 25    |
| >SMAD4-L43 KRAIESLV    | 1394 | >SMAD4-L43 KRAIESSV     | 399   | 995   |
| >SMAD4-L43 KRAIESLVKKL | 555  | >SMAD4-L43 KRAIESSVKKL  | 237   | 318   |
| >SMAD4-L43 KRAIESLVK   | 244  | >SMAD4-L43 KRAIESSVK    | 470   | 226   |
| >SMAD4-L43 KRAIESLVKK  | 191  | >SMAD4-L43 KRAIESSVKK   | 361   | 170   |
| >SMAD4-L43 KRAIESLVKKL | 134  | >SMAD4-L43 KRAIESSVKKL  | 270   | 136   |
| >SMAD4-L43 KRAIESLV    | 155  | >SMAD4-L43 KRAIESSV     | 242   | 87    |
| >SMAD4-L43 KRAIESLVKKL | 130  | >SMAD4-L43 KRAIESSVKKL  | 223   | 93    |
| >SMAD4-L43 KRAIESLVKKL | 113  | >SMAD4-L43 KRAIESSVKKL  | 200   | 87    |
| >SMAD4-L43 AKRAIESLVK  | 44   | >SMAD4-L43 AKRAIESSVK   | 75    | 31    |
| >SMAD4-L43 AKRAIESLVKK | 80   | >SMAD4-L43 AKRAIESSVKK  | 53    | 27    |
| >SMAD4-L43 AKRAIESL    | 22   | >SMAD4-L43 AKRAIESS     | 998   | 976   |
| >SMAD4-L43 AKRAIESLV   | 144  | >SMAD4-L43 AKRAIESSV    | 28    | 116   |
| >SMAD4-L43 AKRAIESLVK  | 268  | >SMAD4-L43 AKRAIESSVK   | 136   | 132   |
| >SMAD4-L43 AKRAIESLVKK | 392  | >SMAD4-L43 AKRAIESSVKK  | 194   | 198   |
| >SMAD4-L43 FAKRAIESL   | 324  | >SMAD4-L43 FAKRAIESS    | 15290 | 14966 |
| >SMAD4-L43 FAKRAIESLV  | 391  | >SMAD4-L43 FAKRAIESSV   | 369   | 22    |
| >SMAD4-L43 FAKRAIESL   | 438  | >SMAD4-L43 FAKRAIESS    | 10035 | 9597  |
| >SMAD4-L43 FAKRAIESLV  | 173  | >SMAD4-L43 FAKRAIESSV   | 86    | 87    |
| >SMAD4-L43 FAKRAIESL   | 226  | >SMAD4-L43 FAKRAIESS    | 11161 | 10935 |
| >SMAD4-L43 FAKRAIESLV  | 67   | >SMAD4-L43 FAKRAIESSV   | 39    | 28    |
| >SMAD4-L43 FAKRAIESLVK | 165  | >SMAD4-L43 FAKRAIESSVK  | 306   | 141   |
| >SMAD4-L43 FAKRAIESLVK | 403  | >SMAD4-L43 FAKRAIESSVKK | 165   | 238   |
| >SMAD4-L43 FAKRAIESLV  | 389  | >SMAD4-L43 FAKRAIESSV   | 252   | 137   |
| >SMAD4-L43 FAKRAIESL   | 176  | >SMAD4-L43 FAKRAIESS    | 9260  | 9084  |
| >SMAD4-L43 FAKRAIESL   | 269  | >SMAD4-L43 FAKRAIESS    | 10029 | 9760  |
| >SMAD4-L43 FAKRAIESLV  | 2214 | >SMAD4-L43 FAKRAIESSV   | 486   | 1728  |
| >SMAD4-L43 TFAKRAIESLV | 3639 | >SMAD4-L43 TFAKRAIESSV  | 385   | 3254  |
| >SMAD4-L43 TFAKRAIESL  | 249  | >SMAD4-L43 TFAKRAIESS   | 14912 | 14663 |
| >SMAD4-L53 LQLLDEVL    | 6096 | >SMAD4-L53 FQLLDEVL     | 493   | 5603  |
| >SMAD4-L53 LQLLDEVLHT  | 1962 | >SMAD4-L53 FQLLDEVLHT   | 250   | 1712  |
| >SMAD4-L53 LQLLDEVL    | 251  | >SMAD4-L53 FQLLDEVL     | 16    | 235   |
| >SMAD4-L53 LQLLDEVLHT  | 343  | >SMAD4-L53 FQLLDEVLHT   | 91    | 252   |

|                        |       |                        |       |       |
|------------------------|-------|------------------------|-------|-------|
| >SMAD4-L53 LQLLDEVLHT  | 80    | >SMAD4-L53 FQLLDEVLHT  | 13    | 67    |
| >SMAD4-L53 LQLLDEVLHT  | 1709  | >SMAD4-L53 FQLLDEVLHT  | 366   | 1343  |
| >SMAD4-L53 LQLLDEVL    | 3890  | >SMAD4-L53 FQLLDEVL    | 315   | 3575  |
| >SMAD4-L53 LQLLDEVLHT  | 936   | >SMAD4-L53 FQLLDEVLHT  | 124   | 812   |
| >SMAD4-L53 LQLLDEVL    | 211   | >SMAD4-L53 FQLLDEVL    | 108   | 103   |
| >SMAD4-L53 LQLLDEVLHT  | 86    | >SMAD4-L53 FQLLDEVLHT  | 42    | 44    |
| >SMAD4-L53 LQLLDEVL    | 1235  | >SMAD4-L53 FQLLDEVL    | 38    | 1197  |
| >SMAD4-L53 LQLLDEVLHT  | 1259  | >SMAD4-L53 FQLLDEVLHT  | 49    | 1210  |
| >SMAD4-L53 ALQQLLDEV   | 86    | >SMAD4-L53 AFQQLLDEV   | 13804 | 13718 |
| >SMAD4-L53 ALQQLLDEV   | 29    | >SMAD4-L53 AFQQLLDEV   | 1741  | 1712  |
| >SMAD4-L53 ALQQLLDEVL  | 309   | >SMAD4-L53 AFQQLLDEVL  | 6520  | 6211  |
| >SMAD4-L53 ALQQLLDEV   | 113   | >SMAD4-L53 AFQQLLDEV   | 10172 | 10059 |
| >SMAD4-L53 ALQQLLDEV   | 218   | >SMAD4-L53 AFQQLLDEV   | 6459  | 6241  |
| >SMAD4-L53 ALQQLLDEV   | 15    | >SMAD4-L53 AFQQLLDEV   | 7755  | 7740  |
| >SMAD4-L53 ALQQLLDEV   | 13    | >SMAD4-L53 AFQQLLDEV   | 10826 | 10813 |
| >SMAD4-L53 ALQQLLDEVL  | 411   | >SMAD4-L53 AFQQLLDEVL  | 22357 | 21946 |
| >SMAD4-L53 ALQQLLDEV   | 19    | >SMAD4-L53 AFQQLLDEV   | 8036  | 8017  |
| >SMAD4-L53 ALQQLLDEV   | 65    | >SMAD4-L53 AFQQLLDEV   | 16708 | 16643 |
| >SMAD4-L53 ALQQLLDEV   | 4     | >SMAD4-L53 AFQQLLDEV   | 6285  | 6281  |
| >SMAD4-L53 ALQQLLDEVL  | 104   | >SMAD4-L53 AFQQLLDEVL  | 28895 | 28791 |
| >SMAD4-L53 ALQQLLDEVL  | 15136 | >SMAD4-L53 AFQQLLDEVL  | 353   | 14783 |
| >SMAD4-L53 CWIEIHLHRA  | 454   | >SMAD4-L53 CWIEIHLHRA  | 1114  | 660   |
| >SMAD4-L53 CWIEIHLHRA  | 1017  | >SMAD4-L53 CWIEIHLHRA  | 74    | 943   |
| >SMAD4-L53 CWIEIHLHRA  | 2271  | >SMAD4-L53 CWIEIHLHRA  | 324   | 1947  |
| >SMAD4-L53 CWIEIHLHRA  | 80    | >SMAD4-L53 CWIEIHLHRA  | 11    | 69    |
| >SMAD4-L53 CWIEIHLHRA  | 79    | >SMAD4-L53 CWIEIHLHRA  | 138   | 59    |
| >SMAD4-L53 RALQQLLDEV  | 163   | >SMAD4-L53 RAFQQLLDEV  | 403   | 240   |
| >SMAD4-L53 RALQQLLDEV  | 1069  | >SMAD4-L53 RAFQQLLDEV  | 407   | 662   |
| >SMAD4-L53 RALQQLLDEV  | 801   | >SMAD4-L53 RAFQQLLDEV  | 106   | 695   |
| >SMAD4-L53 RALQQLLDEVL | 1065  | >SMAD4-L53 RAFQQLLDEVL | 425   | 640   |
| >SMAD4-L53 RALQQLLDEV  | 2179  | >SMAD4-L53 RAFQQLLDEV  | 392   | 1787  |
| >SMAD4-L53 RALQQLLDEV  | 21    | >SMAD4-L53 RAFQQLLDEV  | 20    | 1     |
| >SMAD4-L53 RALQQLLDEV  | 46    | >SMAD4-L53 RAFQQLLDEV  | 29    | 17    |
| >SMAD4-L53 RALQQLLDEV  | 189   | >SMAD4-L53 RAFQQLLDEV  | 200   | 11    |
| >SMAD4-L53 RALQQLLDEV  | 1183  | >SMAD4-L53 RAFQQLLDEV  | 438   | 745   |
| >SMAD4-L53 RALQQLLDEVL | 986   | >SMAD4-L53 RAFQQLLDEVL | 172   | 814   |
| >SMAD4-L53 RALQQLLDEVL | 55    | >SMAD4-L53 RAFQQLLDEVL | 21    | 34    |
| >SMAD4-L53 RALQQLLDEVL | 108   | >SMAD4-L53 RAFQQLLDEVL | 79    | 29    |
| >SMAD4-L53 HRALQQLLDEV | 229   | >SMAD4-L53 HRAFQQLLDEV | 409   | 180   |
| >SMAD4-L53 HRALQQLLDEV | 183   | >SMAD4-L53 HRAFQQLLDEV | 324   | 141   |
| >SMAD4-L53 HRALQQLLDEV | 149   | >SMAD4-L53 HRAFQQLLDEV | 223   | 74    |
| >SMAD4-L53 HRALQQLLDEV | 642   | >SMAD4-L53 HRAFQQLLDEV | 450   | 192   |
| >SMAD4-L53 HRALQQLLDEV | 142   | >SMAD4-L53 HRAFQQLLDEV | 101   | 41    |

|                        |      |                        |     |      |
|------------------------|------|------------------------|-----|------|
| >SMAD4-L53 LHRALQLL    | 840  | >SMAD4-L53 LHRAFQLL    | 210 | 630  |
| >SMAD4-L53 HLHRALQL    | 144  | >SMAD4-L53 HLHRAFQL    | 47  | 97   |
| >SMAD4-L53 HLHRALQLL   | 24   | >SMAD4-L53 HLHRAFQLL   | 33  | 9    |
| >SMAD4-L53 HLHRALQL    | 160  | >SMAD4-L53 HLHRAFQL    | 217 | 57   |
| >SMAD4-L53 HLHRALQLL   | 53   | >SMAD4-L53 HLHRAFQLL   | 142 | 89   |
| >SMAD4-L53 HLHRALQL    | 105  | >SMAD4-L53 HLHRAFQL    | 47  | 58   |
| >SMAD4-L53 HLHRALQLL   | 107  | >SMAD4-L53 HLHRAFQLL   | 199 | 92   |
| >SMAD4-L53 HLHRALQL    | 456  | >SMAD4-L53 HLHRAFQL    | 122 | 334  |
| >SMAD4-L53 HLHRALQLL   | 114  | >SMAD4-L53 HLHRAFQLL   | 346 | 232  |
| >SMAD4-L53 HLHRALQL    | 439  | >SMAD4-L53 HLHRAFQL    | 154 | 285  |
| >SMAD4-L53 HLHRALQLL   | 368  | >SMAD4-L53 HLHRAFQLL   | 547 | 179  |
| >SMAD4-L53 HLHRALQL    | 8    | >SMAD4-L53 HLHRAFQL    | 5   | 3    |
| >SMAD4-L53 HLHRALQLL   | 8    | >SMAD4-L53 HLHRAFQLL   | 10  | 2    |
| >SMAD4-L53 HLHRALQL    | 143  | >SMAD4-L53 HLHRAFQL    | 182 | 39   |
| >SMAD4-L53 HLHRALQLL   | 47   | >SMAD4-L53 HLHRAFQLL   | 36  | 11   |
| >SMAD4-L53 HLHRALQL    | 555  | >SMAD4-L53 HLHRAFQL    | 360 | 195  |
| >SMAD4-L53 HLHRALQLL   | 2491 | >SMAD4-L53 HLHRAFQLL   | 242 | 2249 |
| >SMAD4-L53 IHLHRALQL   | 503  | >SMAD4-L53 IHLHRAFQL   | 355 | 148  |
| >SMAD4-L53 IHLHRALQL   | 405  | >SMAD4-L53 IHLHRAFQL   | 938 | 533  |
| >SMAD4-L53 IHLHRALQLL  | 518  | >SMAD4-L53 IHLHRAFQLL  | 307 | 211  |
| >SMAD4-L53 IHLHRALQL   | 235  | >SMAD4-L53 IHLHRAFQL   | 134 | 101  |
| >SMAD4-L53 IHLHRALQLL  | 791  | >SMAD4-L53 IHLHRAFQLL  | 425 | 366  |
| >SMAD4-L53 EIHLHRAL    | 682  | >SMAD4-L53 EIHLHRAF    | 59  | 623  |
| >SMAD4-L53 EIHLHRALQ   | 1074 | >SMAD4-L53 EIHLHRAFQ   | 437 | 637  |
| >SMAD4-L53 EIHLHRALQLI | 431  | >SMAD4-L53 EIHLHRAFQLI | 199 | 232  |
| >SMAD4-L53 EIHLHRAL    | 80   | >SMAD4-L53 EIHLHRAF    | 275 | 195  |
| >SMAD4-L53 EIHLHRALQLI | 523  | >SMAD4-L53 EIHLHRAFQLI | 177 | 346  |
| >SMAD4-L53 IEIHLHRALQL | 197  | >SMAD4-L53 IEIHLHRAFQL | 168 | 29   |
| >SMAD4-L53 IEIHLHRAL   | 3865 | >SMAD4-L53 IEIHLHRAF   | 164 | 3701 |
| >SMAD4-L53 IEIHLHRAL   | 257  | >SMAD4-L53 IEIHLHRAF   | 17  | 240  |
| >SMAD4-L53 IEIHLHRAL   | 32   | >SMAD4-L53 IEIHLHRAF   | 7   | 25   |
| >SMAD4-L53 IEIHLHRALQL | 340  | >SMAD4-L53 IEIHLHRAFQL | 225 | 115  |
| >SMAD4-L53 IEIHLHRAL   | 13   | >SMAD4-L53 IEIHLHRAF   | 97  | 84   |
| >SMAD4-L53 IEIHLHRALQL | 38   | >SMAD4-L53 IEIHLHRAFQL | 22  | 16   |
| >SMAD4-L53 IEIHLHRAL   | 41   | >SMAD4-L53 IEIHLHRAF   | 151 | 110  |
| >SMAD4-L53 IEIHLHRALQL | 99   | >SMAD4-L53 IEIHLHRAFQL | 115 | 16   |
| >SMAD4-L53 IEIHLHRAL   | 1495 | >SMAD4-L53 IEIHLHRAF   | 270 | 1225 |
| >SMAD4-L53 IEIHLHRAL   | 404  | >SMAD4-L53 IEIHLHRAF   | 62  | 342  |
| >SMAD4-L53 IEIHLHRALQL | 364  | >SMAD4-L53 IEIHLHRAFQL | 302 | 62   |
| >SMAD4-L53 IEIHLHRAL   | 203  | >SMAD4-L53 IEIHLHRAF   | 820 | 617  |
| >SMAD4-L53 IEIHLHRALQL | 44   | >SMAD4-L53 IEIHLHRAFQL | 29  | 15   |
| >SMAD4-L53 LQLLDEVL    | 251  | >SMAD4-L53 VQLLDEVL    | 331 | 80   |
| >SMAD4-L53 LQLLDEVLHT  | 343  | >SMAD4-L53 VQLLDEVLHT  | 981 | 638  |



|                       |     |                       |       |       |
|-----------------------|-----|-----------------------|-------|-------|
| >SMAD4-L53 LQLLDEVLHT | 80  | >SMAD4-L53 VQLLDEVLHT | 118   | 38    |
| >SMAD4-L53 LQLLDEVL   | 211 | >SMAD4-L53 VQLLDEVL   | 378   | 167   |
| >SMAD4-L53 LQLLDEVLHT | 86  | >SMAD4-L53 VQLLDEVLHT | 152   | 66    |
| >SMAD4-L53 ALQLLDEV   | 86  | >SMAD4-L53 AVQLLDEV   | 1688  | 1602  |
| >SMAD4-L53 ALQLLDEV   | 29  | >SMAD4-L53 AVQLLDEV   | 569   | 540   |
| >SMAD4-L53 ALQLLDEVL  | 309 | >SMAD4-L53 AVQLLDEVL  | 3494  | 3185  |
| >SMAD4-L53 ALQLLDEV   | 113 | >SMAD4-L53 AVQLLDEV   | 1201  | 1088  |
| >SMAD4-L53 ALQLLDEV   | 218 | >SMAD4-L53 AVQLLDEV   | 169   | 49    |
| >SMAD4-L53 ALQLLDEV   | 15  | >SMAD4-L53 AVQLLDEV   | 978   | 963   |
| >SMAD4-L53 ALQLLDEV   | 13  | >SMAD4-L53 AVQLLDEV   | 1217  | 1204  |
| >SMAD4-L53 ALQLLDEVL  | 411 | >SMAD4-L53 AVQLLDEVL  | 13664 | 13253 |
| >SMAD4-L53 ALQLLDEV   | 19  | >SMAD4-L53 AVQLLDEV   | 1121  | 1102  |
| >SMAD4-L53 ALQLLDEV   | 65  | >SMAD4-L53 AVQLLDEV   | 4474  | 4409  |
| >SMAD4-L53 ALQLLDEV   | 4   | >SMAD4-L53 AVQLLDEV   | 147   | 143   |
| >SMAD4-L53 ALQLLDEVL  | 104 | >SMAD4-L53 AVQLLDEVL  | 12941 | 12837 |
| >SMAD4-L53 CWIEIHLHRA | 454 | >SMAD4-L53 CWIEIHLHRA | 1945  | 1491  |
| >SMAD4-L53 CWIEIHLHRA | 80  | >SMAD4-L53 CWIEIHLHRA | 2128  | 2048  |
| >SMAD4-L53 CWIEIHLHRA | 79  | >SMAD4-L53 CWIEIHLHRA | 97    | 18    |
| >SMAD4-L53 RALQLLDEV  | 163 | >SMAD4-L53 RAVQLLDEV  | 317   | 154   |
| >SMAD4-L53 RALQLLDEV  | 801 | >SMAD4-L53 RAVQLLDEV  | 425   | 376   |
| >SMAD4-L53 RALQLLDEV  | 21  | >SMAD4-L53 RAVQLLDEV  | 25    | 4     |
| >SMAD4-L53 RALQLLDEV  | 46  | >SMAD4-L53 RAVQLLDEV  | 383   | 337   |
| >SMAD4-L53 RALQLLDEV  | 189 | >SMAD4-L53 RAVQLLDEV  | 1817  | 1628  |
| >SMAD4-L53 RALQLLDEVL | 55  | >SMAD4-L53 RAVQLLDEVL | 43    | 12    |
| >SMAD4-L53 RALQLLDEVL | 108 | >SMAD4-L53 RAVQLLDEVL | 91    | 17    |
| >SMAD4-L53 HRALQLLDEV | 229 | >SMAD4-L53 HRAVQLLDEV | 392   | 163   |
| >SMAD4-L53 HRALQLLDEV | 183 | >SMAD4-L53 HRAVQLLDEV | 169   | 14    |
| >SMAD4-L53 HRALQLLDEV | 149 | >SMAD4-L53 HRAVQLLDEV | 108   | 41    |
| >SMAD4-L53 HRALQLLDEV | 642 | >SMAD4-L53 HRAVQLLDEV | 436   | 206   |
| >SMAD4-L53 HRALQLLDEV | 142 | >SMAD4-L53 HRAVQLLDEV | 124   | 18    |
| >SMAD4-L53 HLHRALQL   | 144 | >SMAD4-L53 HLHRAVQL   | 84    | 60    |
| >SMAD4-L53 HLHRALQLL  | 24  | >SMAD4-L53 HLHRAVQLL  | 30    | 6     |
| >SMAD4-L53 HLHRALQL   | 160 | >SMAD4-L53 HLHRAVQL   | 186   | 26    |
| >SMAD4-L53 HLHRALQLL  | 53  | >SMAD4-L53 HLHRAVQLL  | 48    | 5     |
| >SMAD4-L53 HLHRALQL   | 105 | >SMAD4-L53 HLHRAVQL   | 61    | 44    |
| >SMAD4-L53 HLHRALQLL  | 107 | >SMAD4-L53 HLHRAVQLL  | 55    | 52    |
| >SMAD4-L53 HLHRALQL   | 456 | >SMAD4-L53 HLHRAVQL   | 280   | 176   |
| >SMAD4-L53 HLHRALQLL  | 114 | >SMAD4-L53 HLHRAVQLL  | 152   | 38    |
| >SMAD4-L53 HLHRALQL   | 439 | >SMAD4-L53 HLHRAVQL   | 268   | 171   |
| >SMAD4-L53 HLHRALQLL  | 368 | >SMAD4-L53 HLHRAVQLL  | 178   | 190   |
| >SMAD4-L53 HLHRALQL   | 8   | >SMAD4-L53 HLHRAVQL   | 7     | 1     |
| >SMAD4-L53 HLHRALQLL  | 8   | >SMAD4-L53 HLHRAVQLL  | 7     | 1     |
| >SMAD4-L53 HLHRALQL   | 143 | >SMAD4-L53 HLHRAVQL   | 232   | 89    |

|                        |       |                        |       |       |
|------------------------|-------|------------------------|-------|-------|
| >SMAD4-L53 HLHRALQLL   | 47    | >SMAD4-L53 HLHRAVQLL   | 50    | 3     |
| >SMAD4-L53 IHLHRALQL   | 503   | >SMAD4-L53 IHLHRAVQL   | 330   | 173   |
| >SMAD4-L53 IHLHRALQL   | 405   | >SMAD4-L53 IHLHRAVQL   | 194   | 211   |
| >SMAD4-L53 IHLHRALQLL  | 518   | >SMAD4-L53 IHLHRAVQLL  | 249   | 269   |
| >SMAD4-L53 IHLHRALQL   | 235   | >SMAD4-L53 IHLHRAVQL   | 138   | 97    |
| >SMAD4-L53 IHLHRALQLL  | 791   | >SMAD4-L53 IHLHRAVQLL  | 322   | 469   |
| >SMAD4-L53 EIHLHRAL    | 1155  | >SMAD4-L53 EIHLHRAV    | 111   | 1044  |
| >SMAD4-L53 EIHLHRALQLI | 431   | >SMAD4-L53 EIHLHRAVQL  | 405   | 26    |
| >SMAD4-L53 EIHLHRAL    | 80    | >SMAD4-L53 EIHLHRAV    | 267   | 187   |
| >SMAD4-L53 EIHLHRALQLI | 523   | >SMAD4-L53 EIHLHRAVQL  | 400   | 123   |
| >SMAD4-L53 IEIHLHRAL   | 1197  | >SMAD4-L53 IEIHLHRAV   | 489   | 708   |
| >SMAD4-L53 IEIHLHRALQL | 197   | >SMAD4-L53 IEIHLHRAVQL | 249   | 52    |
| >SMAD4-L53 IEIHLHRAL   | 257   | >SMAD4-L53 IEIHLHRAV   | 535   | 278   |
| >SMAD4-L53 IEIHLHRAL   | 32    | >SMAD4-L53 IEIHLHRAV   | 118   | 86    |
| >SMAD4-L53 IEIHLHRALQL | 340   | >SMAD4-L53 IEIHLHRAVQL | 377   | 37    |
| >SMAD4-L53 IEIHLHRAL   | 13    | >SMAD4-L53 IEIHLHRAV   | 88    | 75    |
| >SMAD4-L53 IEIHLHRALQL | 38    | >SMAD4-L53 IEIHLHRAVQL | 30    | 8     |
| >SMAD4-L53 IEIHLHRAL   | 41    | >SMAD4-L53 IEIHLHRAV   | 96    | 55    |
| >SMAD4-L53 IEIHLHRALQL | 99    | >SMAD4-L53 IEIHLHRAVQL | 181   | 82    |
| >SMAD4-L53 IEIHLHRAL   | 404   | >SMAD4-L53 IEIHLHRAV   | 947   | 543   |
| >SMAD4-L53 IEIHLHRALQL | 364   | >SMAD4-L53 IEIHLHRAVQL | 523   | 159   |
| >SMAD4-L53 IEIHLHRAL   | 3652  | >SMAD4-L53 IEIHLHRAV   | 310   | 3342  |
| >SMAD4-L53 IEIHLHRAL   | 203   | >SMAD4-L53 IEIHLHRAV   | 122   | 81    |
| >SMAD4-L53 IEIHLHRALQL | 44    | >SMAD4-L53 IEIHLHRAVQL | 37    | 7     |
| >SMAD4-L53 WIEIHLHRAL  | 3663  | >SMAD4-L53 WIEIHLHRAV  | 289   | 3374  |
| >SMAD4-L53 WIEIHLHRAL  | 1277  | >SMAD4-L53 WIEIHLHRAV  | 112   | 1165  |
| >SMAD4-L54 VLHTMPIA    | 69    | >SMAD4-L54 VRHTMPIA    | 19227 | 19158 |
| >SMAD4-L54 VLHTMPIA    | 271   | >SMAD4-L54 VRHTMPIA    | 26209 | 25938 |
| >SMAD4-L54 VLHTMPIA    | 433   | >SMAD4-L54 VRHTMPIA    | 25201 | 24768 |
| >SMAD4-L54 VLHTMPIA    | 30    | >SMAD4-L54 VRHTMPIA    | 30229 | 30199 |
| >SMAD4-L54 HRALQLLDEV  | 183   | >SMAD4-L54 HRALQLLDEV  | 246   | 63    |
| >SMAD4-L54 HRALQLLDEV  | 149   | >SMAD4-L54 HRALQLLDEV  | 17772 | 17623 |
| >SMAD4-L54 HRALQLLDEV  | 142   | >SMAD4-L54 HRALQLLDEV  | 4502  | 4360  |
| >SMAD4-L54 HRALQLLDEV  | 33805 | >SMAD4-L54 HRALQLLDEV  | 447   | 33358 |
| >SMAD4-L54 EVLHTMPI    | 212   | >SMAD4-L54 EVRHTMPI    | 372   | 160   |
| >SMAD4-L54 EVLHTMPIA   | 355   | >SMAD4-L54 EVRHTMPIA   | 729   | 374   |
| >SMAD4-L54 EVLHTMPI    | 5902  | >SMAD4-L54 EVRHTMPI    | 85    | 5817  |
| >SMAD4-L54 EVLHTMPIA   | 8137  | >SMAD4-L54 EVRHTMPIA   | 140   | 7997  |
| >SMAD4-L54 EVLHTMPI    | 393   | >SMAD4-L54 EVRHTMPI    | 2965  | 2572  |
| >SMAD4-L54 EVLHTMPI    | 21    | >SMAD4-L54 EVRHTMPI    | 81    | 60    |
| >SMAD4-L54 EVLHTMPI    | 5     | >SMAD4-L54 EVRHTMPI    | 109   | 104   |
| >SMAD4-L54 EVLHTMPIA   | 32    | >SMAD4-L54 EVRHTMPIA   | 3568  | 3536  |
| >SMAD4-L54 DEVLHTMPI   | 14    | >SMAD4-L54 DEVRHTMPI   | 18    | 4     |

|                       |     |                        |      |      |
|-----------------------|-----|------------------------|------|------|
| >SMAD4-L54 DEVLHTMPI  | 15  | >SMAD4-L54 DEVRHTMPI   | 33   | 18   |
| >SMAD4-L54 DEVLHTMPIA | 35  | >SMAD4-L54 DEVRHTMPIA  | 79   | 44   |
| >SMAD4-L54 DEVLHTMPI  | 23  | >SMAD4-L54 DEVRHTMPI   | 32   | 9    |
| >SMAD4-L54 LDEVLHTMPI | 98  | >SMAD4-L54 LDEVVRHTMPI | 111  | 13   |
| >SMAD4-L54 LLDEVLHT   | 142 | >SMAD4-L54 LLDEVVRHT   | 2658 | 2516 |
| >SMAD4-L54 LLDEVLHTM  | 19  | >SMAD4-L54 LLDEVVRHTM  | 151  | 132  |
| >SMAD4-L54 LLDEVLHTMF | 11  | >SMAD4-L54 LLDEVVRHTMF | 20   | 9    |
| >SMAD4-L54 LLDEVLHTM  | 59  | >SMAD4-L54 LLDEVVRHTM  | 326  | 267  |
| >SMAD4-L54 LLDEVLHTMF | 17  | >SMAD4-L54 LLDEVVRHTMF | 37   | 20   |
| >SMAD4-L54 LLDEVLHTM  | 236 | >SMAD4-L54 LLDEVVRHTM  | 2259 | 2023 |
| >SMAD4-L54 LLDEVLHTMF | 13  | >SMAD4-L54 LLDEVVRHTMF | 35   | 22   |
| >SMAD4-L54 LLDEVLHT   | 125 | >SMAD4-L54 LLDEVVRHT   | 1798 | 1673 |
| >SMAD4-L54 LLDEVLHTM  | 28  | >SMAD4-L54 LLDEVVRHTM  | 437  | 409  |
| >SMAD4-L54 LLDEVLHTMF | 13  | >SMAD4-L54 LLDEVVRHTMF | 31   | 18   |
| >SMAD4-L54 LLDEVLHT   | 15  | >SMAD4-L54 LLDEVVRHT   | 56   | 41   |
| >SMAD4-L54 LLDEVLHTM  | 2   | >SMAD4-L54 LLDEVVRHTM  | 6    | 4    |
| >SMAD4-L54 LLDEVLHTMF | 244 | >SMAD4-L54 LLDEVVRHTMF | 1432 | 1188 |
| >SMAD4-L54 LLDEVLHTMF | 3   | >SMAD4-L54 LLDEVVRHTMF | 3    | 0    |
| >SMAD4-L54 LLDEVLHT   | 154 | >SMAD4-L54 LLDEVVRHT   | 2040 | 1886 |
| >SMAD4-L54 LLDEVLHTM  | 3   | >SMAD4-L54 LLDEVVRHTM  | 22   | 19   |
| >SMAD4-L54 LLDEVLHTMF | 3   | >SMAD4-L54 LLDEVVRHTMF | 6    | 3    |
| >SMAD4-L54 LLDEVLHT   | 35  | >SMAD4-L54 LLDEVVRHT   | 271  | 236  |
| >SMAD4-L54 LLDEVLHTM  | 8   | >SMAD4-L54 LLDEVVRHTM  | 29   | 21   |
| >SMAD4-L54 LLDEVLHTMF | 9   | >SMAD4-L54 LLDEVVRHTMF | 12   | 3    |
| >SMAD4-L54 LLDEVLHTM  | 4   | >SMAD4-L54 LLDEVVRHTM  | 79   | 75   |
| >SMAD4-L54 LLDEVLHTMF | 9   | >SMAD4-L54 LLDEVVRHTMF | 41   | 32   |
| >SMAD4-L54 LLDEVLHT   | 23  | >SMAD4-L54 LLDEVVRHT   | 155  | 132  |
| >SMAD4-L54 LLDEVLHTM  | 3   | >SMAD4-L54 LLDEVVRHTM  | 5    | 2    |
| >SMAD4-L54 LLDEVLHTMF | 5   | >SMAD4-L54 LLDEVVRHTMF | 5    | 0    |
| >SMAD4-L54 LLDEVLHTM  | 245 | >SMAD4-L54 LLDEVVRHTM  | 1118 | 873  |
| >SMAD4-L54 LLDEVLHTMF | 69  | >SMAD4-L54 LLDEVVRHTMF | 134  | 65   |
| >SMAD4-L54 QLLDEVLHTM | 40  | >SMAD4-L54 QLLDEVVRHTM | 261  | 221  |
| >SMAD4-L54 QLLDEVLHTM | 37  | >SMAD4-L54 QLLDEVVRHTM | 106  | 69   |
| >SMAD4-L54 QLLDEVLHTM | 130 | >SMAD4-L54 QLLDEVVRHTM | 793  | 663  |
| >SMAD4-L54 QLLDEVLHT  | 193 | >SMAD4-L54 QLLDEVVRHT  | 2426 | 2233 |
| >SMAD4-L54 QLLDEVLHTM | 193 | >SMAD4-L54 QLLDEVVRHTM | 1753 | 1560 |
| >SMAD4-L54 QLLDEVLHT  | 157 | >SMAD4-L54 QLLDEVVRHT  | 386  | 229  |
| >SMAD4-L54 QLLDEVLHTM | 8   | >SMAD4-L54 QLLDEVVRHTM | 32   | 24   |
| >SMAD4-L54 QLLDEVLHTM | 13  | >SMAD4-L54 QLLDEVVRHTM | 99   | 86   |
| >SMAD4-L54 QLLDEVLHT  | 276 | >SMAD4-L54 QLLDEVVRHT  | 2668 | 2392 |
| >SMAD4-L54 QLLDEVLHTM | 45  | >SMAD4-L54 QLLDEVVRHTM | 338  | 293  |
| >SMAD4-L54 QLLDEVLHTM | 10  | >SMAD4-L54 QLLDEVVRHTM | 73   | 63   |
| >SMAD4-L54 QLLDEVLHT  | 53  | >SMAD4-L54 QLLDEVVRHT  | 703  | 650  |

|                           |       |                           |       |       |
|---------------------------|-------|---------------------------|-------|-------|
| >SMAD4-L54 QLLDEVLHTM     | 8     | >SMAD4-L54 QLLDEVRHTM     | 24    | 16    |
| >SMAD4-L54 QLLDEVLHTM     | 147   | >SMAD4-L54 QLLDEVRHTM     | 556   | 409   |
| >SMAD4-L54 LQLLDEVL       | 251   | >SMAD4-L54 LQLLDEVLR      | 17898 | 17647 |
| >SMAD4-L54 LQLLDEVLHT     | 343   | >SMAD4-L54 LQLLDEVLRHT    | 1566  | 1223  |
| >SMAD4-L54 LQLLDEVLHT     | 80    | >SMAD4-L54 LQLLDEVLRHT    | 307   | 227   |
| >SMAD4-L54 LQLLDEVL       | 211   | >SMAD4-L54 LQLLDEVLR      | 2258  | 2047  |
| >SMAD4-L54 LQLLDEVLHT     | 86    | >SMAD4-L54 LQLLDEVLRHT    | 70    | 16    |
| >SMAD4-L54 ALQLLDEVL      | 309   | >SMAD4-L54 ALQLLDEVLR     | 20743 | 20434 |
| >SMAD4-L54 ALQLLDEVL      | 411   | >SMAD4-L54 ALQLLDEVLR     | 26991 | 26580 |
| >SMAD4-L54 ALQLLDEVL      | 104   | >SMAD4-L54 ALQLLDEVLR     | 26658 | 26554 |
| >SMAD4-L54 RALQLLDEVL     | 20595 | >SMAD4-L54 RALQLLDEVLR    | 308   | 20287 |
| >SMAD4-L54 RALQLLDEVL     | 55    | >SMAD4-L54 RALQLLDEVLR    | 13888 | 13833 |
| >SMAD4-L54 RALQLLDEVL     | 108   | >SMAD4-L54 RALQLLDEVLR    | 13855 | 13747 |
| >SMAD4-L54 RALQLLDEVL     | 30897 | >SMAD4-L54 RALQLLDEVLR    | 140   | 30757 |
| >SMAD4-L54 LDSLITAI       | 40    | >SMAD4-L54 SDSLITAI       | 61    | 21    |
| >SMAD4-L54 LDSLITAI       | 102   | >SMAD4-L54 SDSLITAI       | 70    | 32    |
| >SMAD4-L54 ELDSLITAI      | 195   | >SMAD4-L54 ESDSLITAI      | 8748  | 8553  |
| >SMAD4-L54 ELDSLITA       | 71    | >SMAD4-L54 ESDSLITA       | 18452 | 18381 |
| >SMAD4-L54 ELDSLITAI      | 20    | >SMAD4-L54 ESDSLITAI      | 12382 | 12362 |
| >SMAD4-L54 ELDSLITA       | 498   | >SMAD4-L54 ESDSLITA       | 23527 | 23029 |
| >SMAD4-L54 ELDSLITAI      | 215   | >SMAD4-L54 ESDSLITAI      | 23642 | 23427 |
| >SMAD4-L54 ELDSLITA       | 112   | >SMAD4-L54 ESDSLITA       | 22862 | 22750 |
| >SMAD4-L54 ELDSLITAI      | 155   | >SMAD4-L54 ESDSLITAI      | 21008 | 20853 |
| >SMAD4-L54 ELDSLITA       | 455   | >SMAD4-L54 ESDSLITA       | 21459 | 21004 |
| >SMAD4-L54 ELDSLITAI      | 114   | >SMAD4-L54 ESDSLITAI      | 22021 | 21907 |
| >SMAD4-L54 ELDSLITA       | 132   | >SMAD4-L54 ESDSLITA       | 32366 | 32234 |
| >SMAD4-L54 ELDSLITAI      | 219   | >SMAD4-L54 ESDSLITAI      | 32550 | 32331 |
| >SMAD4-L54 ELDSLITAI      | 1797  | >SMAD4-L54 ESDSLITAI      | 458   | 1339  |
| >SMAD4-L54 ELDSLITA       | 471   | >SMAD4-L54 ESDSLITA       | 935   | 464   |
| >SMAD4-L54 ELDSLITAI      | 67    | >SMAD4-L54 ESDSLITAI      | 119   | 52    |
| >SMAD4-L54 DELDSLITAI     | 21    | >SMAD4-L54 DESDSLITAI     | 92    | 71    |
| >SMAD4-L54 DELDSLIT       | 251   | >SMAD4-L54 DESDSLIT       | 663   | 412   |
| >SMAD4-L54 DELDSLITA      | 18    | >SMAD4-L54 DESDSLITA      | 36    | 18    |
| >SMAD4-L54 DELDSLITAIT    | 112   | >SMAD4-L54 DESDSLITAIT    | 297   | 185   |
| >SMAD4-L54 DELDSLITA      | 245   | >SMAD4-L54 DESDSLITA      | 167   | 78    |
| >SMAD4-L54 DELDSLITAI     | 51    | >SMAD4-L54 DESDSLITAI     | 138   | 87    |
| >SMAD4-L54 KDELDSLITAI    | 49    | >SMAD4-L54 KDESDSLITAI    | 54    | 5     |
| >SMAD4-L54 KDELDSLITAI    | 67    | >SMAD4-L54 KDESDSLITAI    | 84    | 17    |
| >SMAD4-L54 KEKKDELDSLITAI | 188   | >SMAD4-L54 KEKKDESDSLITAI | 173   | 15    |
| >SMAD4-L54 KEKKDELDSLITAI | 246   | >SMAD4-L54 KEKKDESDSLITAI | 228   | 18    |
| >SMAD4-L54 KEKKDELDSLITAI | 437   | >SMAD4-L54 KEKKDESDSLITAI | 772   | 335   |
| >SMAD4-L54 KEKKDELDSLITAI | 21    | >SMAD4-L54 KEKKDESDSLITAI | 26    | 5     |
| >SMAD4-L54 KLKEKKDEL      | 194   | >SMAD4-L54 KLKEKKDES      | 12059 | 11865 |

|                       |      |                       |       |       |
|-----------------------|------|-----------------------|-------|-------|
| >SMAD4-L54 KLKEKKDEL  | 403  | >SMAD4-L54 KLKEKKDES  | 10352 | 9949  |
| >SMAD4-L54 KLKEKKDEL  | 328  | >SMAD4-L54 KLKEKKDES  | 11703 | 11375 |
| >SMAD4-L54 KLKEKKDEL  | 383  | >SMAD4-L54 KLKEKKDES  | 16589 | 16206 |
| >SMAD4-L54 KLKEKKDEL  | 45   | >SMAD4-L54 KLKEKKDES  | 12658 | 12613 |
| >SMAD4-L54 KKLKEKKDEL | 210  | >SMAD4-L54 KKLKEKKDES | 7944  | 7734  |
| >SMAD4-M3 MDVQVGETF   | 466  | >SMAD4-M3 TDVQVGETF   | 2426  | 1960  |
| >SMAD4-M3 MDVQVGETF   | 379  | >SMAD4-M3 TDVQVGETF   | 4014  | 3635  |
| >SMAD4-M3 MDVQVGETF   | 216  | >SMAD4-M3 TDVQVGETF   | 572   | 356   |
| >SMAD4-M3 MDVQVGETF   | 208  | >SMAD4-M3 TDVQVGETF   | 1068  | 860   |
| >SMAD4-M3 MDVQVGETF   | 204  | >SMAD4-M3 TDVQVGETF   | 126   | 78    |
| >SMAD4-M3 EMDVQVGET   | 242  | >SMAD4-M3 ETDVQVGET   | 17    | 225   |
| >SMAD4-M3 EMDVQVGET   | 8528 | >SMAD4-M3 ETDVQVGET   | 66    | 8462  |
| >SMAD4-M3 EYWCSIAYPE  | 309  | >SMAD4-M3 EYWCSIAYPE  | 3764  | 3455  |
| >SMAD4-M3 EYWCSIAYPE  | 102  | >SMAD4-M3 EYWCSIAYPE  | 1290  | 1188  |
| >SMAD4-M3 EYWCSIAYPE  | 430  | >SMAD4-M3 EYWCSIAYPE  | 4022  | 3592  |
| >SMAD4-M3 EYWCSIAYPE  | 326  | >SMAD4-M3 EYWCSIAYPE  | 11427 | 11101 |
| >SMAD4-M3 FEMDVQVGE   | 259  | >SMAD4-M3 FETDVQVGE   | 2790  | 2531  |
| >SMAD4-M3 FEMDVQVGE   | 143  | >SMAD4-M3 FETDVQVGE   | 2809  | 2666  |
| >SMAD4-M3 FEMDVQVGE   | 23   | >SMAD4-M3 FETDVQVGE   | 164   | 141   |
| >SMAD4-M3 FEMDVQVGE   | 11   | >SMAD4-M3 FETDVQVGE   | 27    | 16    |
| >SMAD4-M3 FEMDVQVGE   | 25   | >SMAD4-M3 FETDVQVGE   | 25    | 0     |
| >SMAD4-M3 FEMDVQVGE   | 250  | >SMAD4-M3 FETDVQVGE   | 706   | 456   |
| >SMAD4-M3 FEMDVQVGE   | 133  | >SMAD4-M3 FETDVQVGE   | 293   | 160   |
| >SMAD4-M3 FEMDVQVGE   | 67   | >SMAD4-M3 FETDVQVGE   | 161   | 94    |
| >SMAD4-M3 FEMDVQVGE   | 281  | >SMAD4-M3 FETDVQVGE   | 3580  | 3299  |
| >SMAD4-M3 FEMDVQVGE   | 341  | >SMAD4-M3 FETDVQVGE   | 5687  | 5346  |
| >SMAD4-M3 FEMDVQVGE   | 15   | >SMAD4-M3 FETDVQVGE   | 136   | 121   |
| >SMAD4-M3 YFEMDVQV    | 98   | >SMAD4-M3 YFETDVQV    | 153   | 55    |
| >SMAD4-M3 AYFEMDVQV   | 251  | >SMAD4-M3 AYFETDVQV   | 1051  | 800   |
| >SMAD4-M3 AYFEMDVQV   | 217  | >SMAD4-M3 AYFETDVQV   | 78    | 139   |
| >SMAD4-M3 AYFEMDVQV   | 86   | >SMAD4-M3 AYFETDVQV   | 44    | 42    |
| >SMAD4-M3 AYFEMDVQV   | 30   | >SMAD4-M3 AYFETDVQV   | 36    | 6     |
| >SMAD4-M3 AYFEMDVQV   | 135  | >SMAD4-M3 AYFETDVQV   | 129   | 6     |
| >SMAD4-M3 IAYFEMDVQ\  | 438  | >SMAD4-M3 IAYFETDVQV  | 336   | 102   |
| >SMAD4-M3 IAYFEMDVQ\  | 174  | >SMAD4-M3 IAYFETDVQV  | 111   | 63    |
| >SMAD4-M3 IAYFEMDVQ\  | 239  | >SMAD4-M3 IAYFETDVQV  | 190   | 49    |
| >SMAD4-M3 IAYFEMDVQ\  | 303  | >SMAD4-M3 IAYFETDVQV  | 480   | 177   |
| >SMAD4-M3 SIAYFEMDVC  | 130  | >SMAD4-M3 SIAYFETDVQ\ | 178   | 48    |
| >SMAD4-M3 SIAYFEMDV   | 164  | >SMAD4-M3 SIAYFETDV   | 70    | 94    |
| >SMAD4-M3 SIAYFEMDVC  | 28   | >SMAD4-M3 SIAYFETDVQ\ | 25    | 3     |
| >SMAD4-M3 SIAYFEMDV   | 175  | >SMAD4-M3 SIAYFETDV   | 117   | 58    |
| >SMAD4-M3 SIAYFEMDVC  | 90   | >SMAD4-M3 SIAYFETDVQ\ | 86    | 4     |
| >SMAD4-M3 SIAYFEMDVC  | 214  | >SMAD4-M3 SIAYFETDVQ\ | 200   | 14    |

|                       |      |                       |       |       |
|-----------------------|------|-----------------------|-------|-------|
| >SMAD4-M3 SIAYFEMDVC  | 144  | >SMAD4-M3 SIAYFETDVQ' | 127   | 17    |
| >SMAD4-M3 SIAYFEMDV   | 129  | >SMAD4-M3 SIAYFETDV   | 190   | 61    |
| >SMAD4-M3 SIAYFEMDVC  | 33   | >SMAD4-M3 SIAYFETDVQ' | 33    | 0     |
| >SMAD4-M3 SIAYFEMDV   | 45   | >SMAD4-M3 SIAYFETDV   | 56    | 11    |
| >SMAD4-M3 SIAYFEMDVC  | 13   | >SMAD4-M3 SIAYFETDVQ' | 14    | 1     |
| >SMAD4-M3 SIAYFEMDV   | 65   | >SMAD4-M3 SIAYFETDV   | 142   | 77    |
| >SMAD4-M3 SIAYFEMDVC  | 23   | >SMAD4-M3 SIAYFETDVQ' | 37    | 14    |
| >SMAD4-M3 SIAYFEMDVC  | 348  | >SMAD4-M3 SIAYFETDVQ' | 350   | 2     |
| >SMAD4-M3 CSIAYFEM    | 299  | >SMAD4-M3 CSIAYFET    | 8209  | 7910  |
| >SMAD4-M3 CSIAYFEM    | 209  | >SMAD4-M3 CSIAYFET    | 20152 | 19943 |
| >SMAD4-M3 CSIAYFEMDV  | 56   | >SMAD4-M3 CSIAYFETDV  | 156   | 100   |
| >SMAD4-M3 CSIAYFEM    | 93   | >SMAD4-M3 CSIAYFET    | 13304 | 13211 |
| >SMAD4-M3 CSIAYFEM    | 85   | >SMAD4-M3 CSIAYFET    | 12137 | 12052 |
| >SMAD4-M3 CSIAYFEM    | 317  | >SMAD4-M3 CSIAYFET    | 25319 | 25002 |
| >SMAD4-M3 WCSIAYFEM   | 143  | >SMAD4-M3 WCSIAYFET   | 6887  | 6744  |
| >SMAD4-M3 YWCSIAYFEM  | 277  | >SMAD4-M3 YWCSIAYFET  | 4075  | 3798  |
| >SMAD4-M3 YWCSIAYFEM  | 29   | >SMAD4-M3 YWCSIAYFET  | 487   | 458   |
| >SMAD4-N12 NPYHYERVV  | 151  | >SMAD4-N12 KPYHYERVV  | 43    | 108   |
| >SMAD4-N12 NPYHYERVV  | 151  | >SMAD4-N12 KPYHYERVV  | 444   | 293   |
| >SMAD4-N12 VNPYHYERV  | 58   | >SMAD4-N12 VKPYHYERV  | 443   | 385   |
| >SMAD4-N12 CVNPYHYERV | 196  | >SMAD4-N12 CVKPYHYERV | 3609  | 3413  |
| >SMAD4-N12 CVNPYHYERV | 84   | >SMAD4-N12 CVKPYHYERV | 309   | 225   |
| >SMAD4-N12 CVNPYHYER  | 69   | >SMAD4-N12 CVKPYHYER  | 622   | 553   |
| >SMAD4-N12 CVNPYHYER  | 5390 | >SMAD4-N12 CVKPYHYER  | 315   | 5075  |
| >SMAD4-N12 CVNPYHYER  | 9    | >SMAD4-N12 CVKPYHYER  | 9     | 0     |
| >SMAD4-N12 CVNPYHYER  | 52   | >SMAD4-N12 CVKPYHYER  | 31    | 21    |
| >SMAD4-N12 CVNPYHYER  | 18   | >SMAD4-N12 CVKPYHYER  | 28    | 10    |
| >SMAD4-N12 CVNPYHYERV | 424  | >SMAD4-N12 CVKPYHYERV | 2120  | 1696  |
| >SMAD4-N12 CVNPYHYER  | 125  | >SMAD4-N12 CVKPYHYER  | 88    | 37    |
| >SMAD4-N12 VCVNPYHYEF | 428  | >SMAD4-N12 VCVKPYHYER | 1178  | 750   |
| >SMAD4-N12 VCVNPYHY   | 369  | >SMAD4-N12 VCVKPYHY   | 403   | 34    |
| >SMAD4-N12 VCVNPYHY   | 153  | >SMAD4-N12 VCVKPYHY   | 344   | 191   |
| >SMAD4-N12 VCVNPYHY   | 470  | >SMAD4-N12 VCVKPYHY   | 892   | 422   |
| >SMAD4-N12 VCVNPYHYEF | 146  | >SMAD4-N12 VCVKPYHYER | 117   | 29    |
| >SMAD4-N12 VCVNPYHY   | 309  | >SMAD4-N12 VCVKPYHY   | 112   | 197   |
| >SMAD4-N12 VCVNPYHYEF | 220  | >SMAD4-N12 VCVKPYHYER | 95    | 125   |
| >SMAD4-N12 SVCVNPYH   | 473  | >SMAD4-N12 SVCVKPYH   | 819   | 346   |
| >SMAD4-N12 SVCVNPYHY  | 175  | >SMAD4-N12 SVCVKPYHY  | 275   | 100   |
| >SMAD4-N12 SVCVNPYHYE | 54   | >SMAD4-N12 SVCVKPYHYE | 66    | 12    |
| >SMAD4-N12 SVCVNPYHY  | 51   | >SMAD4-N12 SVCVKPYHY  | 142   | 91    |
| >SMAD4-N12 SVCVNPYHY  | 12   | >SMAD4-N12 SVCVKPYHY  | 19    | 7     |
| >SMAD4-N12 SVCVNPYHY  | 36   | >SMAD4-N12 SVCVKPYHY  | 68    | 32    |
| >SMAD4-N12 SVCVNPYHYE | 14   | >SMAD4-N12 SVCVKPYHYE | 10    | 4     |

|                      |      |                      |      |      |
|----------------------|------|----------------------|------|------|
| >SMAD4-N12SVCVNPYHYE | 202  | >SMAD4-N12SVCVKPYHYE | 79   | 123  |
| >SMAD4-N12SVCVNPYHYE | 19   | >SMAD4-N12SVCVKPYHYE | 39   | 20   |
| >SMAD4-N12SVCVNPYHY  | 16   | >SMAD4-N12SVCVKPYHY  | 10   | 6    |
| >SMAD4-N12SVCVNPYHY  | 407  | >SMAD4-N12SVCVKPYHY  | 785  | 378  |
| >SMAD4-N12SVCVNPYHY  | 209  | >SMAD4-N12SVCVKPYHY  | 384  | 175  |
| >SMAD4-N12SVCVNPYHYE | 191  | >SMAD4-N12SVCVKPYHYE | 281  | 90   |
| >SMAD4-N12SVCVNPYHYE | 151  | >SMAD4-N12SVCVKPYHYE | 194  | 43   |
| >SMAD4-N12DSVCVNPYH) | 273  | >SMAD4-N12DSVCVKPYHY | 305  | 32   |
| >SMAD4-N12DSVCVNPY   | 17   | >SMAD4-N12DSVCVKPY   | 29   | 12   |
| >SMAD4-N12DSVCVNPYH) | 18   | >SMAD4-N12DSVCVKPYHY | 33   | 15   |
| >SMAD4-N12DSVCVNPY   | 60   | >SMAD4-N12DSVCVKPY   | 379  | 319  |
| >SMAD4-N12DSVCVNPYH) | 382  | >SMAD4-N12DSVCVKPYHY | 550  | 168  |
| >SMAD4-N12DSVCVNPYH) | 50   | >SMAD4-N12DSVCVKPYHY | 102  | 52   |
| >SMAD4-N12DSVCVNPYH) | 149  | >SMAD4-N12DSVCVKPYHY | 149  | 0    |
| >SMAD4-N12DSVCVNPYH) | 470  | >SMAD4-N12DSVCVKPYHY | 1026 | 556  |
| >SMAD4-N12DSVCVNPY   | 745  | >SMAD4-N12DSVCVKPY   | 418  | 327  |
| >SMAD4-N12DSVCVNPY   | 93   | >SMAD4-N12DSVCVKPY   | 303  | 210  |
| >SMAD4-N12CDSVCVNPYH | 316  | >SMAD4-N12CDSVCVKPYH | 501  | 185  |
| >SMAD4-N12KCDSVCVNPY | 413  | >SMAD4-N12KCDSVCVKPY | 878  | 465  |
| >SMAD4-N12LKCDSCVNF  | 272  | >SMAD4-N12LKCDSCVVKP | 408  | 136  |
| >SMAD4-N12LKCDSCVNF  | 2267 | >SMAD4-N12LKCDSCVVK  | 276  | 1991 |
| >SMAD4-N12LKCDSCVNF  | 7    | >SMAD4-N12LKCDSCVVKP | 6    | 1    |
| >SMAD4-N2(NSTTTWTGSF | 4243 | >SMAD4-N2(SSTTTWTGSF | 491  | 3752 |
| >SMAD4-N2(NSTTTWTGSF | 834  | >SMAD4-N2(SSTTTWTGSF | 212  | 622  |
| >SMAD4-N2(NSTTTWTGSF | 136  | >SMAD4-N2(SSTTTWTGSF | 293  | 157  |
| >SMAD4-N2(NSTTTWTGSF | 2179 | >SMAD4-N2(SSTTTWTGSF | 226  | 1953 |
| >SMAD4-N2(NSTTTWTGSF | 3248 | >SMAD4-N2(SSTTTWTGSF | 353  | 2895 |
| >SMAD4-N2(HNSTTTWTG  | 1628 | >SMAD4-N2(HSSTTTWTG  | 87   | 1541 |
| >SMAD4-N2(HNSTTTWTG  | 4934 | >SMAD4-N2(HSSTTTWTG  | 258  | 4676 |
| >SMAD4-N2(HNSTTTWTG  | 178  | >SMAD4-N2(HSSTTTWTG  | 16   | 162  |
| >SMAD4-N2(HNSTTTWTG  | 111  | >SMAD4-N2(HSSTTTWTG  | 156  | 45   |
| >SMAD4-N2(HHNSTTTW   | 284  | >SMAD4-N2(HHSSTTTW   | 261  | 23   |
| >SMAD4-N2(HHNSTTTWT  | 548  | >SMAD4-N2(HHSSTTTWT  | 496  | 52   |
| >SMAD4-N2(HHNSTTTW   | 21   | >SMAD4-N2(HHSSTTTW   | 10   | 11   |
| >SMAD4-N2(YHHNSTTTW  | 43   | >SMAD4-N2(YHHSSTTTW  | 30   | 13   |
| >SMAD4-N2(YHHNSTTT   | 591  | >SMAD4-N2(YHHSSTTT   | 411  | 180  |
| >SMAD4-N2(YHHNSTTTW  | 377  | >SMAD4-N2(YHHSSTTTW  | 228  | 149  |
| >SMAD4-N2(YHHNSTTTW  | 1122 | >SMAD4-N2(YHHSSTTTW  | 472  | 650  |
| >SMAD4-N2(YHHNSTTTW  | 412  | >SMAD4-N2(YHHSSTTTW  | 240  | 172  |
| >SMAD4-N2(YHHNSTTTW  | 16   | >SMAD4-N2(YHHSSTTTW  | 28   | 12   |
| >SMAD4-N2(TYHHNSTTT  | 423  | >SMAD4-N2(TYHHSSTTT  | 157  | 266  |
| >SMAD4-N2(TYHHNSTTTV | 126  | >SMAD4-N2(TYHHSSTTTV | 85   | 41   |
| >SMAD4-N2(TYHHNSTTTV | 125  | >SMAD4-N2(TYHHSSTTTV | 97   | 28   |

|                      |      |                      |      |      |
|----------------------|------|----------------------|------|------|
| >SMAD4-N2€TYHHNSTTTV | 13   | >SMAD4-N2€TYHHSSTTTM | 20   | 7    |
| >SMAD4-N2€ATYHHNSTT  | 628  | >SMAD4-N2€ATYHHSSTT  | 262  | 366  |
| >SMAD4-N2€ATYHHNSTTT | 405  | >SMAD4-N2€ATYHHSSTTT | 443  | 38   |
| >SMAD4-N2€ATYHHNSTTT | 8    | >SMAD4-N2€ATYHHSSTTT | 8    | 0    |
| >SMAD4-N2€ATYHHNSTTT | 576  | >SMAD4-N2€ATYHHSSTTT | 333  | 243  |
| >SMAD4-N2€ATYHHNSTTT | 161  | >SMAD4-N2€ATYHHSSTTT | 136  | 25   |
| >SMAD4-N2€ATYHHNST   | 1284 | >SMAD4-N2€ATYHHSST   | 176  | 1108 |
| >SMAD4-N2€ATYHHNSTT  | 136  | >SMAD4-N2€ATYHHSSTT  | 39   | 97   |
| >SMAD4-N2€ATYHHNSTTT | 115  | >SMAD4-N2€ATYHHSSTTT | 39   | 76   |
| >SMAD4-N2€ATYHHNSTTT | 3    | >SMAD4-N2€ATYHHSSTTT | 2    | 1    |
| >SMAD4-N2€ATYHHNSTTT | 73   | >SMAD4-N2€ATYHHSSTTT | 61   | 12   |
| >SMAD4-N2€ATYHHNSTTT | 15   | >SMAD4-N2€ATYHHSSTTT | 14   | 1    |
| >SMAD4-N2€ATYHHNSTT  | 193  | >SMAD4-N2€ATYHHSSTT  | 171  | 22   |
| >SMAD4-N2€ATYHHNSTTT | 40   | >SMAD4-N2€ATYHHSSTTT | 36   | 4    |
| >SMAD4-N2€ATYHHNSTTT | 50   | >SMAD4-N2€ATYHHSSTTT | 45   | 5    |
| >SMAD4-N2€QPATYHHNS' | 448  | >SMAD4-N2€QPATYHHSST | 238  | 210  |
| >SMAD4-N3€NVHRTEAIER | 391  | >SMAD4-N3€DVHRTEAIER | 153  | 238  |
| >SMAD4-N3€NVHRTEAIER | 38   | >SMAD4-N3€DVHRTEAIER | 70   | 32   |
| >SMAD4-N3€NVHRTEAI   | 154  | >SMAD4-N3€DVHRTEAI   | 328  | 174  |
| >SMAD4-N3€NVHRTEAIER | 409  | >SMAD4-N3€DVHRTEAIER | 805  | 396  |
| >SMAD4-N3€SNVHRTEAI  | 1021 | >SMAD4-N3€SDVHRTEAI  | 215  | 806  |
| >SMAD4-N3€SNVHRTEAI  | 8987 | >SMAD4-N3€SDVHRTEAI  | 430  | 8557 |
| >SMAD4-N3€SNVHRTEAI  | 2638 | >SMAD4-N3€SDVHRTEAI  | 39   | 2599 |
| >SMAD4-N3€LSNVHRTEAI | 496  | >SMAD4-N3€LSDVHRTEAI | 6971 | 6475 |
| >SMAD4-N3€LSNVHRTEAI | 376  | >SMAD4-N3€LSDVHRTEAI | 513  | 137  |
| >SMAD4-N3€QLSNVHRT   | 962  | >SMAD4-N3€QLSDVHRT   | 223  | 739  |
| >SMAD4-N3€QLSNVHRTEA | 353  | >SMAD4-N3€QLSDVHRTEA | 305  | 48   |
| >SMAD4-N3€QLSNVHRTEA | 64   | >SMAD4-N3€QLSDVHRTEA | 22   | 42   |
| >SMAD4-N3€QLSNVHRTEA | 502  | >SMAD4-N3€QLSDVHRTEA | 480  | 22   |
| >SMAD4-N3€QLSNVHRTEA | 108  | >SMAD4-N3€QLSDVHRTEA | 45   | 63   |
| >SMAD4-N3€QLSNVHRT   | 842  | >SMAD4-N3€QLSDVHRT   | 393  | 449  |
| >SMAD4-N3€QLSNVHRTEA | 1127 | >SMAD4-N3€QLSDVHRTEA | 477  | 650  |
| >SMAD4-N3€QLSNVHRTEA | 78   | >SMAD4-N3€QLSDVHRTEA | 38   | 40   |
| >SMAD4-N3€QLSNVHRTEA | 408  | >SMAD4-N3€QLSDVHRTEA | 209  | 199  |
| >SMAD4-N3€QLSNVHRTEA | 1404 | >SMAD4-N3€QLSDVHRTEA | 441  | 963  |
| >SMAD4-N3€QLSNVHRT   | 201  | >SMAD4-N3€QLSDVHRT   | 48   | 153  |
| >SMAD4-N3€QLSNVHRTEA | 160  | >SMAD4-N3€QLSDVHRTEA | 30   | 130  |
| >SMAD4-N3€QLSNVHRTEA | 442  | >SMAD4-N3€QLSDVHRTEA | 67   | 375  |
| >SMAD4-N3€QLSNVHRTEA | 27   | >SMAD4-N3€QLSDVHRTEA | 59   | 32   |
| >SMAD4-N3€QLSNVHRTEA | 1057 | >SMAD4-N3€QLSDVHRTEA | 474  | 583  |
| >SMAD4-N3€GQLSNVHRTI | 173  | >SMAD4-N3€GQLSDVHRTI | 138  | 35   |
| >SMAD4-N3€GQLSNVHR   | 32   | >SMAD4-N3€GQLSDVHR   | 74   | 42   |
| >SMAD4-N3€GQLSNVHR   | 473  | >SMAD4-N3€GQLSDVHR   | 1274 | 801  |



|                      |       |                      |       |       |
|----------------------|-------|----------------------|-------|-------|
| >SMAD4-N3€GQLSNVHR   | 345   | >SMAD4-N3€GQLSDVHR   | 681   | 336   |
| >SMAD4-N3€CLGQLSNV   | 112   | >SMAD4-N3€CLGQLSDV   | 481   | 369   |
| >SMAD4-N3€CLGQLSNV   | 71    | >SMAD4-N3€CLGQLSDV   | 204   | 133   |
| >SMAD4-N3€CLGQLSNV   | 21    | >SMAD4-N3€CLGQLSDV   | 75    | 54    |
| >SMAD4-N3€CLGQLSNV   | 46    | >SMAD4-N3€CLGQLSDV   | 135   | 89    |
| >SMAD4-N3€CLGQLSNV   | 44    | >SMAD4-N3€CLGQLSDV   | 86    | 42    |
| >SMAD4-N3€CLGQLSNV   | 18    | >SMAD4-N3€CLGQLSDV   | 112   | 94    |
| >SMAD4-N3€CLGQLSNV   | 5     | >SMAD4-N3€CLGQLSDV   | 8     | 3     |
| >SMAD4-N3€CLGQLSNVHF | 352   | >SMAD4-N3€CLGQLSDVHF | 494   | 142   |
| >SMAD4-N3€CLGQLSNVHF | 471   | >SMAD4-N3€CLGQLSDVHF | 858   | 387   |
| >SMAD4-N3€CLGQLSNVHF | 235   | >SMAD4-N3€CLGQLSDVHF | 392   | 157   |
| >SMAD4-N3€CLGQLSNVHF | 50    | >SMAD4-N3€CLGQLSDVHF | 60    | 10    |
| >SMAD4-N3€FCLGQLSNV  | 139   | >SMAD4-N3€FCLGQLSDV  | 1218  | 1079  |
| >SMAD4-N3€FCLGQLSNV  | 35    | >SMAD4-N3€FCLGQLSDV  | 203   | 168   |
| >SMAD4-N3€FCLGQLSNV  | 277   | >SMAD4-N3€FCLGQLSDV  | 820   | 543   |
| >SMAD4-N3€FCLGQLSNV  | 89    | >SMAD4-N3€FCLGQLSDV  | 237   | 148   |
| >SMAD4-N3€FCLGQLSNV  | 10    | >SMAD4-N3€FCLGQLSDV  | 19    | 9     |
| >SMAD4-N3€FCLGQLSNV  | 212   | >SMAD4-N3€FCLGQLSDV  | 2021  | 1809  |
| >SMAD4-N3€FCLGQLSNVH | 120   | >SMAD4-N3€FCLGQLSDVH | 159   | 39    |
| >SMAD4-N3€RFCLGQLSNV | 236   | >SMAD4-N3€RFCLGQLSDV | 2491  | 2255  |
| >SMAD4-P10PDLHKNELKH | 275   | >SMAD4-P10LDLHKNELKH | 382   | 107   |
| >SMAD4-P10WPDHLKNEL  | 26309 | >SMAD4-P10WLDLHKNEL  | 95    | 26214 |
| >SMAD4-P10WPDHLKNEL  | 27577 | >SMAD4-P10WLDLHKNEL  | 169   | 27408 |
| >SMAD4-P10WPDHLKNEL  | 25656 | >SMAD4-P10WLDLHKNEL  | 347   | 25309 |
| >SMAD4-P10WPDHLKNEL  | 34114 | >SMAD4-P10WLDLHKNEL  | 45    | 34069 |
| >SMAD4-P10WPDHLKNELI | 17250 | >SMAD4-P10WLDLHKNELI | 467   | 16783 |
| >SMAD4-P10WPDHLKNEL  | 60    | >SMAD4-P10WLDLHKNEL  | 12963 | 12903 |
| >SMAD4-P10WPDHLKNEL  | 252   | >SMAD4-P10WLDLHKNEL  | 12612 | 12360 |
| >SMAD4-P10WPDHLKNELI | 311   | >SMAD4-P10WLDLHKNELI | 10516 | 10205 |
| >SMAD4-P10WPDHLKNEL  | 241   | >SMAD4-P10WLDLHKNEL  | 3258  | 3017  |
| >SMAD4-P10WPDHLKNELI | 12946 | >SMAD4-P10WLDLHKNELI | 246   | 12700 |
| >SMAD4-P10HVIYARLWRV | 11033 | >SMAD4-P10HVIYARLWRV | 54    | 10979 |
| >SMAD4-P10HVIYARLWRV | 13271 | >SMAD4-P10HVIYARLWRV | 71    | 13200 |
| >SMAD4-P10RWPDLHKNE  | 295   | >SMAD4-P10RWLDLHKNE  | 275   | 20    |
| >SMAD4-P10RWPDLHKNE  | 318   | >SMAD4-P10RWLDLHKNE  | 2226  | 1908  |
| >SMAD4-P10RWPDLHKNE  | 16    | >SMAD4-P10RWLDLHKNE  | 20    | 4     |
| >SMAD4-P10RWPDLHKNE  | 3351  | >SMAD4-P10RWLDLHKNE  | 185   | 3166  |
| >SMAD4-P10RWPDLHKNE  | 2911  | >SMAD4-P10RWLDLHKNE  | 356   | 2555  |
| >SMAD4-P10RWPDLHKN   | 687   | >SMAD4-P10RWLDLHKN   | 290   | 397   |
| >SMAD4-P10RWPDLHKNE  | 724   | >SMAD4-P10RWLDLHKNE  | 284   | 440   |
| >SMAD4-P10RWPDLHKNE  | 24    | >SMAD4-P10RWLDLHKNE  | 16    | 8     |
| >SMAD4-P10RWPDLHKN   | 573   | >SMAD4-P10RWLDLHKN   | 200   | 373   |
| >SMAD4-P10RWPDLHKNE  | 634   | >SMAD4-P10RWLDLHKNE  | 229   | 405   |

|                      |      |                      |     |     |
|----------------------|------|----------------------|-----|-----|
| >SMAD4-P10 RWPDLHKNE | 130  | >SMAD4-P10 RWLDLHKNE | 102 | 28  |
| >SMAD4-P10 RWPDLHKNE | 448  | >SMAD4-P10 RWLDLHKNE | 168 | 280 |
| >SMAD4-P10 WRWPDHLKI | 311  | >SMAD4-P10 WRWDLHKI  | 846 | 535 |
| >SMAD4-P10 WRWPDHLK  | 40   | >SMAD4-P10 WRWDLHK   | 24  | 16  |
| >SMAD4-P10 WRWPDHLKI | 267  | >SMAD4-P10 WRWDLHKI  | 162 | 105 |
| >SMAD4-P10 WRWPDHLKI | 431  | >SMAD4-P10 WRWDLHKI  | 190 | 241 |
| >SMAD4-P10 WRWPDHLKI | 104  | >SMAD4-P10 WRWDLHKI  | 63  | 41  |
| >SMAD4-P10 WRWPDHLKI | 261  | >SMAD4-P10 WRWDLHKI  | 473 | 212 |
| >SMAD4-P10 WRWPDHLKI | 310  | >SMAD4-P10 WRWDLHKI  | 250 | 60  |
| >SMAD4-P10 WRWPDHLKI | 584  | >SMAD4-P10 WRWDLHKI  | 496 | 88  |
| >SMAD4-P10 WRWPDHLK  | 97   | >SMAD4-P10 WRWDLHK   | 113 | 16  |
| >SMAD4-P10 WRWPDHLKI | 247  | >SMAD4-P10 WRWDLHKI  | 271 | 24  |
| >SMAD4-P10 WRWPDHLKI | 427  | >SMAD4-P10 WRWDLHKI  | 649 | 222 |
| >SMAD4-P10 WRWPDHLKI | 6    | >SMAD4-P10 WRWDLHKI  | 7   | 1   |
| >SMAD4-P10 LWRWPDHLK | 80   | >SMAD4-P10 LWRWDLHK  | 68  | 12  |
| >SMAD4-P10 LWRWPDHLK | 89   | >SMAD4-P10 LWRWDLHK  | 41  | 48  |
| >SMAD4-P10 LWRWPDHL  | 153  | >SMAD4-P10 LWRWDLH   | 84  | 69  |
| >SMAD4-P10 LWRWPDHLK | 594  | >SMAD4-P10 LWRWDLHK  | 220 | 374 |
| >SMAD4-P10 LWRWPDHLK | 505  | >SMAD4-P10 LWRWDLHK  | 264 | 241 |
| >SMAD4-P10 RLWRWPD   | 25   | >SMAD4-P10 RLWRWDL   | 29  | 4   |
| >SMAD4-P10 RLWRWPD   | 337  | >SMAD4-P10 RLWRWDL   | 204 | 133 |
| >SMAD4-P10 RLWRWPD   | 5    | >SMAD4-P10 RLWRWDL   | 6   | 1   |
| >SMAD4-P10 RLWRWPDH  | 410  | >SMAD4-P10 RLWRWDLH  | 517 | 107 |
| >SMAD4-P10 RLWRWPDH  | 111  | >SMAD4-P10 RLWRWDLH  | 162 | 51  |
| >SMAD4-P10 RLWRWPD   | 61   | >SMAD4-P10 RLWRWDL   | 56  | 5   |
| >SMAD4-P10 RLWRWPD   | 8    | >SMAD4-P10 RLWRWDL   | 11  | 3   |
| >SMAD4-P10 RLWRWPD   | 48   | >SMAD4-P10 RLWRWDL   | 106 | 58  |
| >SMAD4-P10 RLWRWPD   | 9    | >SMAD4-P10 RLWRWDL   | 7   | 2   |
| >SMAD4-P10 RLWRWPDH  | 24   | >SMAD4-P10 RLWRWDLH  | 28  | 4   |
| >SMAD4-P10 RLWRWPDH  | 164  | >SMAD4-P10 RLWRWDLH  | 135 | 29  |
| >SMAD4-P10 RLWRWPDH  | 184  | >SMAD4-P10 RLWRWDLH  | 182 | 2   |
| >SMAD4-P10 RLWRWPDH  | 1163 | >SMAD4-P10 RLWRWDLH  | 281 | 882 |
| >SMAD4-P10 RLWRWPDH  | 1223 | >SMAD4-P10 RLWRWDLH  | 308 | 915 |
| >SMAD4-P10 RLWRWPD   | 111  | >SMAD4-P10 RLWRWDL   | 74  | 37  |
| >SMAD4-P10 RLWRWPD   | 301  | >SMAD4-P10 RLWRWDL   | 332 | 31  |
| >SMAD4-P10 RLWRWPD   | 198  | >SMAD4-P10 RLWRWDL   | 152 | 46  |
| >SMAD4-P10 RLWRWPDH  | 18   | >SMAD4-P10 RLWRWDLH  | 31  | 13  |
| >SMAD4-P10 RLWRWPDH  | 104  | >SMAD4-P10 RLWRWDLH  | 101 | 3   |
| >SMAD4-P10 ARLWRWPD  | 134  | >SMAD4-P10 ARLWRWDL  | 48  | 86  |
| >SMAD4-P10 ARLWRWPD  | 64   | >SMAD4-P10 ARLWRWDL  | 132 | 68  |
| >SMAD4-P10 ARLWRWPD  | 50   | >SMAD4-P10 ARLWRWDL  | 29  | 21  |
| >SMAD4-P10 ARLWRWPD  | 63   | >SMAD4-P10 ARLWRWDL  | 31  | 32  |
| >SMAD4-P10 ARLWRWPD  | 12   | >SMAD4-P10 ARLWRWDL  | 8   | 4   |

|                      |       |                      |       |       |
|----------------------|-------|----------------------|-------|-------|
| >SMAD4-P10ARLWRWPD   | 159   | >SMAD4-P10ARLWRWLDL  | 67    | 92    |
| >SMAD4-P10YARLWRWP   | 21767 | >SMAD4-P10YARLWRWL   | 93    | 21674 |
| >SMAD4-P10YARLWRWP   | 19668 | >SMAD4-P10YARLWRWL   | 51    | 19617 |
| >SMAD4-P10YARLWRWPE  | 96    | >SMAD4-P10YARLWRWLD  | 80    | 16    |
| >SMAD4-P10YARLWRWPE  | 913   | >SMAD4-P10YARLWRWLD  | 429   | 484   |
| >SMAD4-P10IYARLWRWPI | 440   | >SMAD4-P10IYARLWRWLI | 442   | 2     |
| >SMAD4-P10IYARLWRWP  | 20588 | >SMAD4-P10IYARLWRWL  | 54    | 20534 |
| >SMAD4-P10IYARLWRWPI | 346   | >SMAD4-P10IYARLWRWLI | 203   | 143   |
| >SMAD4-P10IYARLWRWPI | 434   | >SMAD4-P10IYARLWRWLI | 455   | 21    |
| >SMAD4-P10IYARLWRWP  | 1801  | >SMAD4-P10IYARLWRWL  | 54    | 1747  |
| >SMAD4-P10IYARLWRWPI | 41    | >SMAD4-P10IYARLWRWLI | 34    | 7     |
| >SMAD4-P10IYARLWRWP  | 9855  | >SMAD4-P10IYARLWRWL  | 39    | 9816  |
| >SMAD4-P10IYARLWRWPI | 78    | >SMAD4-P10IYARLWRWLI | 59    | 19    |
| >SMAD4-P10VIYARLWRW  | 7584  | >SMAD4-P10VIYARLWRW  | 27    | 7557  |
| >SMAD4-P10VIYARLWRW  | 18753 | >SMAD4-P10VIYARLWRW  | 274   | 18479 |
| >SMAD4-P10VIYARLWRW  | 14200 | >SMAD4-P10VIYARLWRW  | 53    | 14147 |
| >SMAD4-P10VIYARLWRW  | 12025 | >SMAD4-P10VIYARLWRW  | 287   | 11738 |
| >SMAD4-P13NPYHYERV   | 3716  | >SMAD4-P13NSYHYERV   | 55    | 3661  |
| >SMAD4-P13NPYHYERVV  | 11861 | >SMAD4-P13NSYHYERVV  | 481   | 11380 |
| >SMAD4-P13NPYHYERV   | 1947  | >SMAD4-P13NSYHYERV   | 68    | 1879  |
| >SMAD4-P13NPYHYERV   | 676   | >SMAD4-P13NSYHYERV   | 455   | 221   |
| >SMAD4-P13NPYHYERVV  | 151   | >SMAD4-P13NSYHYERVV  | 23843 | 23692 |
| >SMAD4-P13NPYHYERVV  | 151   | >SMAD4-P13NSYHYERVV  | 28246 | 28095 |
| >SMAD4-P13VNPYHYERV  | 58    | >SMAD4-P13VNSYHYERV  | 185   | 127   |
| >SMAD4-P13VNPYHYER   | 1250  | >SMAD4-P13VNSYHYER   | 230   | 1020  |
| >SMAD4-P13VNPYHYER   | 2560  | >SMAD4-P13VNSYHYER   | 441   | 2119  |
| >SMAD4-P13CVNPYHYER\ | 196   | >SMAD4-P13CVNSYHYERV | 221   | 25    |
| >SMAD4-P13CVNPYHYER\ | 84    | >SMAD4-P13CVNSYHYERV | 222   | 138   |
| >SMAD4-P13CVNPYHYER  | 69    | >SMAD4-P13CVNSYHYER  | 85    | 16    |
| >SMAD4-P13CVNPYHYER  | 9     | >SMAD4-P13CVNSYHYER  | 7     | 2     |
| >SMAD4-P13CVNPYHYER  | 52    | >SMAD4-P13CVNSYHYER  | 46    | 6     |
| >SMAD4-P13CVNPYHYER  | 18    | >SMAD4-P13CVNSYHYER  | 12    | 6     |
| >SMAD4-P13CVNPYHYER\ | 1275  | >SMAD4-P13CVNSYHYERV | 420   | 855   |
| >SMAD4-P13CVNPYHYER\ | 424   | >SMAD4-P13CVNSYHYERV | 591   | 167   |
| >SMAD4-P13CVNPYHYER  | 125   | >SMAD4-P13CVNSYHYER  | 123   | 2     |
| >SMAD4-P13VCVNPYHYEF | 428   | >SMAD4-P13VCVNSYHYEF | 838   | 410   |
| >SMAD4-P13VCVNPYHY   | 369   | >SMAD4-P13VCVNSYHY   | 609   | 240   |
| >SMAD4-P13VCVNPYHY   | 153   | >SMAD4-P13VCVNSYHY   | 205   | 52    |
| >SMAD4-P13VCVNPYHY   | 470   | >SMAD4-P13VCVNSYHY   | 244   | 226   |
| >SMAD4-P13VCVNPYHYEF | 146   | >SMAD4-P13VCVNSYHYEF | 166   | 20    |
| >SMAD4-P13VCVNPYHY   | 309   | >SMAD4-P13VCVNSYHY   | 252   | 57    |
| >SMAD4-P13VCVNPYHYEF | 220   | >SMAD4-P13VCVNSYHYEF | 208   | 12    |
| >SMAD4-P13SVCVNPYH   | 473   | >SMAD4-P13SVCVNSYH   | 416   | 57    |

|                         |       |                         |     |       |
|-------------------------|-------|-------------------------|-----|-------|
| >SMAD4-P13 SVCVNPYHY    | 175   | >SMAD4-P13 SVCVNSYHY    | 117 | 58    |
| >SMAD4-P13 SVCVNPYHYE   | 54    | >SMAD4-P13 SVCVNSYHYE   | 53  | 1     |
| >SMAD4-P13 SVCVNPYHY    | 51    | >SMAD4-P13 SVCVNSYHY    | 59  | 8     |
| >SMAD4-P13 SVCVNPYHY    | 12    | >SMAD4-P13 SVCVNSYHY    | 14  | 2     |
| >SMAD4-P13 SVCVNPYHY    | 36    | >SMAD4-P13 SVCVNSYHY    | 22  | 14    |
| >SMAD4-P13 SVCVNPYHYE   | 14    | >SMAD4-P13 SVCVNSYHYE   | 13  | 1     |
| >SMAD4-P13 SVCVNPYHYE   | 202   | >SMAD4-P13 SVCVNSYHYE   | 181 | 21    |
| >SMAD4-P13 SVCVNPYHYE   | 19    | >SMAD4-P13 SVCVNSYHYE   | 13  | 6     |
| >SMAD4-P13 SVCVNPYHY    | 16    | >SMAD4-P13 SVCVNSYHY    | 18  | 2     |
| >SMAD4-P13 SVCVNPYHY    | 407   | >SMAD4-P13 SVCVNSYHY    | 79  | 328   |
| >SMAD4-P13 SVCVNPYHY    | 1454  | >SMAD4-P13 SVCVNSYHY    | 368 | 1086  |
| >SMAD4-P13 SVCVNPYHY    | 209   | >SMAD4-P13 SVCVNSYHY    | 238 | 29    |
| >SMAD4-P13 SVCVNPYHYE   | 191   | >SMAD4-P13 SVCVNSYHYE   | 276 | 85    |
| >SMAD4-P13 SVCVNPYHYE   | 151   | >SMAD4-P13 SVCVNSYHYE   | 153 | 2     |
| >SMAD4-P13 DSVCVNPYH\   | 273   | >SMAD4-P13 DSVCVNSYH\   | 322 | 49    |
| >SMAD4-P13 DSVCVNPY     | 1286  | >SMAD4-P13 DSVCVNSY     | 183 | 1103  |
| >SMAD4-P13 DSVCVNPY     | 17    | >SMAD4-P13 DSVCVNSY     | 21  | 4     |
| >SMAD4-P13 DSVCVNPYH\   | 18    | >SMAD4-P13 DSVCVNSYH\   | 21  | 3     |
| >SMAD4-P13 DSVCVNPY     | 60    | >SMAD4-P13 DSVCVNSY     | 49  | 11    |
| >SMAD4-P13 DSVCVNPYH\   | 382   | >SMAD4-P13 DSVCVNSYH\   | 346 | 36    |
| >SMAD4-P13 DSVCVNPYH\   | 50    | >SMAD4-P13 DSVCVNSYH\   | 58  | 8     |
| >SMAD4-P13 DSVCVNPYH\   | 149   | >SMAD4-P13 DSVCVNSYH\   | 108 | 41    |
| >SMAD4-P13 DSVCVNPY     | 520   | >SMAD4-P13 DSVCVNSY     | 396 | 124   |
| >SMAD4-P13 DSVCVNPYH    | 756   | >SMAD4-P13 DSVCVNSYH    | 319 | 437   |
| >SMAD4-P13 DSVCVNPYH\   | 470   | >SMAD4-P13 DSVCVNSYH\   | 263 | 207   |
| >SMAD4-P13 DSVCVNPYH\   | 749   | >SMAD4-P13 DSVCVNSYH\   | 397 | 352   |
| >SMAD4-P13 DSVCVNPY     | 93    | >SMAD4-P13 DSVCVNSY     | 253 | 160   |
| >SMAD4-P13 DSVCVNPY     | 1222  | >SMAD4-P13 DSVCVNSY     | 391 | 831   |
| >SMAD4-P13 DSVCVNPYH    | 8996  | >SMAD4-P13 DSVCVNSYH    | 406 | 8590  |
| >SMAD4-P13 CDSVCVNPYH   | 744   | >SMAD4-P13 CDSVCVNSYH   | 489 | 255   |
| >SMAD4-P13 CDSVCVNPYH   | 316   | >SMAD4-P13 CDSVCVNSYH   | 313 | 3     |
| >SMAD4-P13 KCDSVCVNPY   | 413   | >SMAD4-P13 KCDSVCVNSY   | 290 | 123   |
| >SMAD4-P13 KCDSVCVNPY   | 4323  | >SMAD4-P13 KCDSVCVNSY   | 423 | 3900  |
| >SMAD4-P13 LKCD SVCVNF  | 272   | >SMAD4-P13 LKCD SVCVNS  | 411 | 139   |
| >SMAD4-P13 LKCD SVCVNF  | 7     | >SMAD4-P13 LKCD SVCVNS  | 7   | 0     |
| >SMAD4-P20 APSES NATST, | 23239 | >SMAD4-P20 ALSES NATST, | 128 | 23111 |
| >SMAD4-P20 APSES NAT    | 28098 | >SMAD4-P20 ALSES NAT    | 72  | 28026 |
| >SMAD4-P20 APSES NATS   | 33258 | >SMAD4-P20 ALSES NATS   | 374 | 32884 |
| >SMAD4-P20 APSES NATST  | 22869 | >SMAD4-P20 ALSES NATST  | 197 | 22672 |
| >SMAD4-P20 APSES NATST, | 24991 | >SMAD4-P20 ALSES NATST, | 19  | 24972 |
| >SMAD4-P20 APSES NAT    | 21284 | >SMAD4-P20 ALSES NAT    | 78  | 21206 |
| >SMAD4-P20 APSES NATS   | 22882 | >SMAD4-P20 ALSES NATS   | 268 | 22614 |
| >SMAD4-P20 APSES NATST  | 20927 | >SMAD4-P20 ALSES NATST  | 182 | 20745 |

|                        |       |                        |       |       |
|------------------------|-------|------------------------|-------|-------|
| >SMAD4-P20 APSESATST   | 13911 | >SMAD4-P20 ALSESATST/  | 6     | 13905 |
| >SMAD4-P20 APSESATST   | 17253 | >SMAD4-P20 ALSESATST/  | 222   | 17031 |
| >SMAD4-P20 APSESAT     | 28050 | >SMAD4-P20 ALSESAT     | 406   | 27644 |
| >SMAD4-P20 APSESATST   | 27921 | >SMAD4-P20 ALSESATST   | 297   | 27624 |
| >SMAD4-P20 APSESATST   | 21171 | >SMAD4-P20 ALSESATST/  | 23    | 21148 |
| >SMAD4-P20 APSESATST   | 20737 | >SMAD4-P20 ALSESATST/  | 20    | 20717 |
| >SMAD4-P20 APSESATST   | 23384 | >SMAD4-P20 ALSESATST/  | 30    | 23354 |
| >SMAD4-P20 APSESATST   | 22477 | >SMAD4-P20 ALSESATST/  | 48    | 22429 |
| >SMAD4-P20 APSESAT     | 35442 | >SMAD4-P20 ALSESAT     | 60    | 35382 |
| >SMAD4-P20 APSESATS    | 36137 | >SMAD4-P20 ALSESATS    | 80    | 36057 |
| >SMAD4-P20 APSESATST   | 33406 | >SMAD4-P20 ALSESATST   | 12    | 33394 |
| >SMAD4-P20 APSESATST   | 27357 | >SMAD4-P20 ALSESATST/  | 3     | 27354 |
| >SMAD4-P20 APSESAT     | 494   | >SMAD4-P20 ALSESAT     | 22382 | 21888 |
| >SMAD4-P20 APSESATST   | 140   | >SMAD4-P20 ALSESATST/  | 19524 | 19384 |
| >SMAD4-P20 APSESAT     | 497   | >SMAD4-P20 ALSESAT     | 15230 | 14733 |
| >SMAD4-P20 APSESATST   | 480   | >SMAD4-P20 ALSESATST/  | 14721 | 14241 |
| >SMAD4-P20 APSESATST   | 305   | >SMAD4-P20 ALSESATST/  | 8102  | 7797  |
| >SMAD4-P20 ETYSTPALLAF | 10932 | >SMAD4-P20 ETYSTPALLAL | 312   | 10620 |
| >SMAD4-P20 ETYSTPALLAF | 1730  | >SMAD4-P20 ETYSTPALLAL | 15    | 1715  |
| >SMAD4-P20 ETYSTPALLAF | 10213 | >SMAD4-P20 ETYSTPALLAL | 58    | 10155 |
| >SMAD4-P20 ETYSTPALLAF | 11589 | >SMAD4-P20 ETYSTPALLAL | 375   | 11214 |
| >SMAD4-P20 ETYSTPALLAF | 6782  | >SMAD4-P20 ETYSTPALLAL | 32    | 6750  |
| >SMAD4-P20 ETYSTPALLAF | 1287  | >SMAD4-P20 ETYSTPALLAL | 7     | 1280  |
| >SMAD4-P20 ETYSTPALLAF | 11609 | >SMAD4-P20 ETYSTPALLAL | 15    | 11594 |
| >SMAD4-P20 ETYSTPALLAF | 24824 | >SMAD4-P20 ETYSTPALLAL | 477   | 24347 |
| >SMAD4-P20 ETYSTPALLAF | 17557 | >SMAD4-P20 ETYSTPALLAL | 388   | 17169 |
| >SMAD4-P20 ETYSTPALLAF | 13966 | >SMAD4-P20 ETYSTPALLAL | 459   | 13507 |
| >SMAD4-P20 ETYSTPALLAF | 22010 | >SMAD4-P20 ETYSTPALLAL | 373   | 21637 |
| >SMAD4-P20 LAPSESAT    | 2582  | >SMAD4-P20 LALSESAT    | 376   | 2206  |
| >SMAD4-P20 LLAPSESNA   | 26    | >SMAD4-P20 LLALSESNA   | 59    | 33    |
| >SMAD4-P20 LLAPSESAT   | 299   | >SMAD4-P20 LLALSESAT   | 297   | 2     |
| >SMAD4-P20 LLAPSESAT   | 341   | >SMAD4-P20 LLALSESAT   | 865   | 524   |
| >SMAD4-P20 LLAPSESNA   | 14    | >SMAD4-P20 LLALSESNA   | 47    | 33    |
| >SMAD4-P20 LLAPSESAT   | 410   | >SMAD4-P20 LLALSESAT   | 384   | 26    |
| >SMAD4-P20 LLAPSESAT   | 471   | >SMAD4-P20 LLALSESAT   | 1213  | 742   |
| >SMAD4-P20 LLAPSESNA   | 403   | >SMAD4-P20 LLALSESNA   | 2202  | 1799  |
| >SMAD4-P20 LLAPSESNA   | 88    | >SMAD4-P20 LLALSESNA   | 608   | 520   |
| >SMAD4-P20 LLAPSESNA   | 5     | >SMAD4-P20 LLALSESNA   | 31    | 26    |
| >SMAD4-P20 LLAPSESAT   | 45    | >SMAD4-P20 LLALSESAT   | 495   | 450   |
| >SMAD4-P20 LLAPSESAT   | 60    | >SMAD4-P20 LLALSESAT   | 791   | 731   |
| >SMAD4-P20 ALLAPSESNA  | 1643  | >SMAD4-P20 ALLALSESNA  | 373   | 1270  |
| >SMAD4-P20 ALLAPSESNA  | 120   | >SMAD4-P20 ALLALSESNA  | 61    | 59    |
| >SMAD4-P20 ALLAPSESNA  | 958   | >SMAD4-P20 ALLALSESNA  | 233   | 725   |

|                        |       |                        |      |       |
|------------------------|-------|------------------------|------|-------|
| >SMAD4-P20 ALLAPSESNA  | 81    | >SMAD4-P20 ALLALSESNA  | 64   | 17    |
| >SMAD4-P20 ALLAPSESNA  | 687   | >SMAD4-P20 ALLALSESNA  | 426  | 261   |
| >SMAD4-P20 ALLAPSES    | 196   | >SMAD4-P20 ALLALSES    | 316  | 120   |
| >SMAD4-P20 ALLAPSESNA  | 23    | >SMAD4-P20 ALLALSESNA  | 44   | 21    |
| >SMAD4-P20 ALLAPSESNA  | 80    | >SMAD4-P20 ALLALSESNA  | 127  | 47    |
| >SMAD4-P20 ALLAPSESNA  | 181   | >SMAD4-P20 ALLALSESNA  | 170  | 11    |
| >SMAD4-P20 ALLAPSESNA  | 36    | >SMAD4-P20 ALLALSESNA  | 31   | 5     |
| >SMAD4-P20 ALLAPSESNA  | 304   | >SMAD4-P20 ALLALSESNA  | 338  | 34    |
| >SMAD4-P20 ALLAPSES    | 664   | >SMAD4-P20 ALLALSES    | 391  | 273   |
| >SMAD4-P20 ALLAPSESNA  | 13    | >SMAD4-P20 ALLALSESNA  | 15   | 2     |
| >SMAD4-P20 ALLAPSESNA  | 208   | >SMAD4-P20 ALLALSESNA  | 216  | 8     |
| >SMAD4-P20 TPALLAPS    | 470   | >SMAD4-P20 TPALLALS    | 3581 | 3111  |
| >SMAD4-P20 TPALLAPSES  | 860   | >SMAD4-P20 TPALLALSES  | 453  | 407   |
| >SMAD4-P20 STPALLAP    | 12778 | >SMAD4-P20 STPALLAL    | 121  | 12657 |
| >SMAD4-P20 STPALLAP    | 18001 | >SMAD4-P20 STPALLAL    | 284  | 17717 |
| >SMAD4-P20 STPALLAP    | 11538 | >SMAD4-P20 STPALLAL    | 398  | 11140 |
| >SMAD4-P20 STPALLAP    | 13525 | >SMAD4-P20 STPALLAL    | 88   | 13437 |
| >SMAD4-P20 STPALLAPS   | 65    | >SMAD4-P20 STPALLALS   | 289  | 224   |
| >SMAD4-P20 STPALLAP    | 23249 | >SMAD4-P20 STPALLAL    | 481  | 22768 |
| >SMAD4-P20 STPALLAP    | 4406  | >SMAD4-P20 STPALLAL    | 13   | 4393  |
| >SMAD4-P20 STPALLAPS   | 10    | >SMAD4-P20 STPALLALS   | 3    | 7     |
| >SMAD4-P20 STPALLAPSE  | 59    | >SMAD4-P20 STPALLALSE  | 40   | 19    |
| >SMAD4-P20 STPALLAPSES | 139   | >SMAD4-P20 STPALLALSES | 37   | 102   |
| >SMAD4-P20 YSTPALLAP   | 5136  | >SMAD4-P20 YSTPALLAL   | 41   | 5095  |
| >SMAD4-P20 YSTPALLAP   | 7061  | >SMAD4-P20 YSTPALLAL   | 324  | 6737  |
| >SMAD4-P20 YSTPALLAP   | 5687  | >SMAD4-P20 YSTPALLAL   | 6    | 5681  |
| >SMAD4-P20 YSTPALLAP   | 11170 | >SMAD4-P20 YSTPALLAL   | 404  | 10766 |
| >SMAD4-P20 YSTPALLAP   | 18584 | >SMAD4-P20 YSTPALLAL   | 431  | 18153 |
| >SMAD4-P20 YSTPALLAP   | 1259  | >SMAD4-P20 YSTPALLAL   | 10   | 1249  |
| >SMAD4-P20 YSTPALLAPS  | 297   | >SMAD4-P20 YSTPALLALS  | 77   | 220   |
| >SMAD4-P20 YSTPALLAP   | 13483 | >SMAD4-P20 YSTPALLAL   | 254  | 13229 |
| >SMAD4-P20 YSTPALLAP   | 24068 | >SMAD4-P20 YSTPALLAL   | 122  | 23946 |
| >SMAD4-P20 TYSTPALLAP  | 32251 | >SMAD4-P20 TYSTPALLAL  | 425  | 31826 |
| >SMAD4-P20 TYSTPALLAP  | 22030 | >SMAD4-P20 TYSTPALLAL  | 222  | 21808 |
| >SMAD4-P20 TYSTPALLAP  | 8529  | >SMAD4-P20 TYSTPALLAL  | 23   | 8506  |
| >SMAD4-P20 TYSTPALLAP  | 21620 | >SMAD4-P20 TYSTPALLAL  | 349  | 21271 |
| >SMAD4-P20 TYSTPALLAP  | 7872  | >SMAD4-P20 TYSTPALLAL  | 112  | 7760  |
| >SMAD4-P20 TYSTPALLAP  | 11667 | >SMAD4-P20 TYSTPALLAL  | 138  | 11529 |
| >SMAD4-P35 DPSGGDRFCL  | 22516 | >SMAD4-P35 DLSGGDRFCL  | 218  | 22298 |
| >SMAD4-P35 DPSGGDRFCL  | 22038 | >SMAD4-P35 DLSGGDRFCL  | 442  | 21596 |
| >SMAD4-P35 DPSGGDRFCL  | 34315 | >SMAD4-P35 DLSGGDRFCL  | 137  | 34178 |
| >SMAD4-P35 DPSGGDRF    | 6279  | >SMAD4-P35 DLSGGDRF    | 481  | 5798  |
| >SMAD4-P35 DPSGGDRF    | 107   | >SMAD4-P35 DLSGGDRF    | 2055 | 1948  |

|                       |       |                        |     |       |
|-----------------------|-------|------------------------|-----|-------|
| >SMAD4-P35 VDPSGGDRF  | 4305  | >SMAD4-P35 VDLSSGGDRF  | 288 | 4017  |
| >SMAD4-P35 YVDPSGGDRF | 447   | >SMAD4-P35 YVDLSSGGDRF | 955 | 508   |
| >SMAD4-P35 YVDPSGGDRF | 41    | >SMAD4-P35 YVDLSSGGDRF | 318 | 277   |
| >SMAD4-P35 GYVDPSGGD  | 321   | >SMAD4-P35 GYVDLSSGGDI | 136 | 185   |
| >SMAD4-P35 GYVDPSGGD  | 34    | >SMAD4-P35 GYVDLSSGGDI | 23  | 11    |
| >SMAD4-P35 VTVDGYVDP  | 10837 | >SMAD4-P35 VTVDGYVDL   | 321 | 10516 |
| >SMAD4-P35 VTVDGYVDP  | 28804 | >SMAD4-P35 VTVDGYVDL   | 422 | 28382 |
| >SMAD4-P35 VTVDGYVDP  | 16787 | >SMAD4-P35 VTVDGYVDL   | 21  | 16766 |
| >SMAD4-P55 PIADPQPL   | 440   | >SMAD4-P55 PIADPQSL    | 263 | 177   |
| >SMAD4-P55 MPIADPQPL  | 763   | >SMAD4-P55 MPIADPQSL   | 85  | 678   |
| >SMAD4-P55 MPIADPQPL  | 25    | >SMAD4-P55 MPIADPQSL   | 43  | 18    |
| >SMAD4-P55 MPIADPQP   | 793   | >SMAD4-P55 MPIADPQS    | 94  | 699   |
| >SMAD4-P55 MPIADPQPL  | 12    | >SMAD4-P55 MPIADPQSL   | 23  | 11    |
| >SMAD4-P55 MPIADPQPL  | 11    | >SMAD4-P55 MPIADPQSL   | 16  | 5     |
| >SMAD4-P55 MPIADPQPL  | 69    | >SMAD4-P55 MPIADPQSL   | 32  | 37    |
| >SMAD4-P55 MPIADPQP   | 105   | >SMAD4-P55 MPIADPQS    | 62  | 43    |
| >SMAD4-P55 TMPIADPQPI | 144   | >SMAD4-P55 TMPIADPQSL  | 213 | 69    |
| >SMAD4-P55 TMPIADPQPI | 319   | >SMAD4-P55 TMPIADPQSL  | 240 | 79    |
| >SMAD4-P55 TMPIADPQPI | 125   | >SMAD4-P55 TMPIADPQSL  | 134 | 9     |
| >SMAD4-P55 TMPIADPQPI | 113   | >SMAD4-P55 TMPIADPQSL  | 156 | 43    |
| >SMAD4-P55 TMPIADPQPI | 55    | >SMAD4-P55 TMPIADPQSL  | 32  | 23    |
| >SMAD4-P55 HTMPIADPQI | 44    | >SMAD4-P55 HTMPIADPQI  | 54  | 10    |
| >SMAD4-P55 HTMPIADPQI | 231   | >SMAD4-P55 HTMPIADPQI  | 425 | 194   |
| >SMAD4-P55 HTMPIADPQI | 472   | >SMAD4-P55 HTMPIADPQI  | 862 | 390   |
| >SMAD4-P55 HTMPIADPQI | 57    | >SMAD4-P55 HTMPIADPQI  | 44  | 13    |
| >SMAD4-P55 HTMPIADPQI | 8     | >SMAD4-P55 HTMPIADPQI  | 13  | 5     |
| >SMAD4-P55 HTMPIADPQI | 24    | >SMAD4-P55 HTMPIADPQI  | 55  | 31    |
| >SMAD4-P55 HTMPIADPQI | 7     | >SMAD4-P55 HTMPIADPQI  | 8   | 1     |
| >SMAD4-P55 HTMPIADPQI | 77    | >SMAD4-P55 HTMPIADPQI  | 129 | 52    |
| >SMAD4-P55 HTMPIADPQI | 497   | >SMAD4-P55 HTMPIADPQI  | 375 | 122   |
| >SMAD4-P55 HTMPIADPQI | 992   | >SMAD4-P55 HTMPIADPQI  | 262 | 730   |
| >SMAD4-P55 HTMPIADPQI | 153   | >SMAD4-P55 HTMPIADPQI  | 61  | 92    |
| >SMAD4-R1C RWPD LHKNE | 295   | >SMAD4-R1C TWPDLHKNE   | 848 | 553   |
| >SMAD4-R1C RWPD LHKNE | 318   | >SMAD4-R1C TWPDLHKNE   | 597 | 279   |
| >SMAD4-R1C RWPD LHKNE | 16    | >SMAD4-R1C TWPDLHKNE   | 92  | 76    |
| >SMAD4-R1C RWPD LHKNE | 24    | >SMAD4-R1C TWPDLHKNE   | 91  | 67    |
| >SMAD4-R1C RWPD LHKNE | 130   | >SMAD4-R1C TWPDLHKNE   | 354 | 224   |
| >SMAD4-R1C RWPD LHKNE | 448   | >SMAD4-R1C TWPDLHKNE   | 910 | 462   |
| >SMAD4-R1C WRWPD LHKI | 17381 | >SMAD4-R1C WTWPD LHKI  | 478 | 16903 |
| >SMAD4-R1C WRWPD LHKI | 9588  | >SMAD4-R1C WTWPD LHKI  | 407 | 9181  |
| >SMAD4-R1C WRWPD LHKI | 6657  | >SMAD4-R1C WTWPD LHKI  | 214 | 6443  |
| >SMAD4-R1C WRWPD LHKI | 9081  | >SMAD4-R1C WTWPD LHKI  | 207 | 8874  |
| >SMAD4-R1C WRWPD LHKI | 3774  | >SMAD4-R1C WTWPD LHKI  | 228 | 3546  |

|                       |       |                       |       |       |
|-----------------------|-------|-----------------------|-------|-------|
| >SMAD4-R1C WRWPDLHKI  | 19526 | >SMAD4-R1C WTWPDLHKI  | 108   | 19418 |
| >SMAD4-R1C WRWPDLHKI  | 15269 | >SMAD4-R1C WTWPDLHKI  | 64    | 15205 |
| >SMAD4-R1C WRWPDLHKI  | 311   | >SMAD4-R1C WTWPDLHKI  | 1760  | 1449  |
| >SMAD4-R1C WRWPDLHKI  | 24999 | >SMAD4-R1C WTWPDLHKI  | 58    | 24941 |
| >SMAD4-R1C WRWPDLHK   | 40    | >SMAD4-R1C WTWPDLHK   | 11617 | 11577 |
| >SMAD4-R1C WRWPDLHKI  | 267   | >SMAD4-R1C WTWPDLHKI  | 19006 | 18739 |
| >SMAD4-R1C WRWPDLHKI  | 431   | >SMAD4-R1C WTWPDLHKI  | 28890 | 28459 |
| >SMAD4-R1C WRWPDLHKI  | 104   | >SMAD4-R1C WTWPDLHKI  | 16976 | 16872 |
| >SMAD4-R1C WRWPDLHKI  | 261   | >SMAD4-R1C WTWPDLHKI  | 9262  | 9001  |
| >SMAD4-R1C WRWPDLHKI  | 310   | >SMAD4-R1C WTWPDLHKI  | 14049 | 13739 |
| >SMAD4-R1C WRWPDLHKI  | 13975 | >SMAD4-R1C WTWPDLHKI  | 206   | 13769 |
| >SMAD4-R1C WRWPDLHK   | 97    | >SMAD4-R1C WTWPDLHK   | 15645 | 15548 |
| >SMAD4-R1C WRWPDLHKI  | 247   | >SMAD4-R1C WTWPDLHKI  | 13230 | 12983 |
| >SMAD4-R1C WRWPDLHKI  | 427   | >SMAD4-R1C WTWPDLHKI  | 29845 | 29418 |
| >SMAD4-R1C WRWPDLHKI  | 6     | >SMAD4-R1C WTWPDLHKI  | 5039  | 5033  |
| >SMAD4-R1C WRWPDLHKI  | 11066 | >SMAD4-R1C WTWPDLHKI  | 338   | 10728 |
| >SMAD4-R1C FPHVIYARLW | 129   | >SMAD4-R1C FPHVIYARLW | 31686 | 31557 |
| >SMAD4-R1C FPHVIYARLW | 599   | >SMAD4-R1C FPHVIYARLW | 53    | 546   |
| >SMAD4-R1C LWRWPDLHK  | 80    | >SMAD4-R1C LWTWPDLHK  | 9866  | 9786  |
| >SMAD4-R1C LWRWPDLHK  | 89    | >SMAD4-R1C LWTWPDLHK  | 79    | 10    |
| >SMAD4-R1C LWRWPDLH   | 153   | >SMAD4-R1C LWTWPDLH   | 113   | 40    |
| >SMAD4-R1C LWRWPDLHK  | 594   | >SMAD4-R1C LWTWPDLHK  | 458   | 136   |
| >SMAD4-R1C LWRWPDLHK  | 505   | >SMAD4-R1C LWTWPDLHK  | 376   | 129   |
| >SMAD4-R1C RLWRWPDL   | 25    | >SMAD4-R1C RLWTWPDL   | 16    | 9     |
| >SMAD4-R1C RLWRWPDL   | 337   | >SMAD4-R1C RLWTWPDL   | 254   | 83    |
| >SMAD4-R1C RLWRWPDL   | 5     | >SMAD4-R1C RLWTWPDL   | 5     | 0     |
| >SMAD4-R1C RLWRWPDLF  | 410   | >SMAD4-R1C RLWTWPDLF  | 542   | 132   |
| >SMAD4-R1C RLWRWPDLF  | 111   | >SMAD4-R1C RLWTWPDLF  | 159   | 48    |
| >SMAD4-R1C RLWRWPDL   | 61    | >SMAD4-R1C RLWTWPDL   | 49    | 12    |
| >SMAD4-R1C RLWRWPDL   | 8     | >SMAD4-R1C RLWTWPDL   | 7     | 1     |
| >SMAD4-R1C RLWRWPDL   | 48    | >SMAD4-R1C RLWTWPDL   | 21    | 27    |
| >SMAD4-R1C RLWRWPDL   | 9     | >SMAD4-R1C RLWTWPDL   | 9     | 0     |
| >SMAD4-R1C RLWRWPDLF  | 24    | >SMAD4-R1C RLWTWPDLF  | 19    | 5     |
| >SMAD4-R1C RLWRWPDLF  | 164   | >SMAD4-R1C RLWTWPDLF  | 78    | 86    |
| >SMAD4-R1C RLWRWPDLF  | 184   | >SMAD4-R1C RLWTWPDLF  | 400   | 216   |
| >SMAD4-R1C RLWRWPDL   | 111   | >SMAD4-R1C RLWTWPDL   | 118   | 7     |
| >SMAD4-R1C RLWRWPDL   | 301   | >SMAD4-R1C RLWTWPDL   | 254   | 47    |
| >SMAD4-R1C RLWRWPDL   | 198   | >SMAD4-R1C RLWTWPDL   | 230   | 32    |
| >SMAD4-R1C RLWRWPDLF  | 18    | >SMAD4-R1C RLWTWPDLF  | 21    | 3     |
| >SMAD4-R1C RLWRWPDLF  | 104   | >SMAD4-R1C RLWTWPDLF  | 55    | 49    |
| >SMAD4-R1C ARLWRWPDL  | 134   | >SMAD4-R1C ARLWTWPDL  | 194   | 60    |
| >SMAD4-R1C ARLWRWPDL  | 64    | >SMAD4-R1C ARLWTWPDL  | 96    | 32    |
| >SMAD4-R1C ARLWRWPDL  | 50    | >SMAD4-R1C ARLWTWPDL  | 58    | 8     |



|                       |       |                       |       |       |
|-----------------------|-------|-----------------------|-------|-------|
| >SMAD4-R1C ARLWRWPDI  | 1278  | >SMAD4-R1C ARLWTWPDI  | 243   | 1035  |
| >SMAD4-R1C ARLWRWPDI  | 63    | >SMAD4-R1C ARLWTWPDI  | 63    | 0     |
| >SMAD4-R1C ARLWRWPDI  | 12    | >SMAD4-R1C ARLWTWPDI  | 20    | 8     |
| >SMAD4-R1C ARLWRWPDI  | 159   | >SMAD4-R1C ARLWTWPDI  | 261   | 102   |
| >SMAD4-R1C YARLWRWPC  | 96    | >SMAD4-R1C YARLWTWPC  | 47    | 49    |
| >SMAD4-R1C IYARLWRWPI | 440   | >SMAD4-R1C IYARLWTWPI | 599   | 159   |
| >SMAD4-R1C IYARLWRWPI | 346   | >SMAD4-R1C IYARLWTWPI | 111   | 235   |
| >SMAD4-R1C IYARLWRW   | 53    | >SMAD4-R1C IYARLWTW   | 43    | 10    |
| >SMAD4-R1C IYARLWRWPI | 434   | >SMAD4-R1C IYARLWTWPI | 236   | 198   |
| >SMAD4-R1C IYARLWRW   | 19    | >SMAD4-R1C IYARLWTW   | 13    | 6     |
| >SMAD4-R1C IYARLWRWPI | 41    | >SMAD4-R1C IYARLWTWPI | 43    | 2     |
| >SMAD4-R1C IYARLWRW   | 27    | >SMAD4-R1C IYARLWTW   | 15    | 12    |
| >SMAD4-R1C IYARLWRWPI | 78    | >SMAD4-R1C IYARLWTWPI | 61    | 17    |
| >SMAD4-R1C IYARLWRW   | 257   | >SMAD4-R1C IYARLWTW   | 110   | 147   |
| >SMAD4-R1C VIYARLWR   | 14199 | >SMAD4-R1C VIYARLWT   | 418   | 13781 |
| >SMAD4-R1C VIYARLWR   | 66    | >SMAD4-R1C VIYARLWT   | 9136  | 9070  |
| >SMAD4-R1C VIYARLWR   | 108   | >SMAD4-R1C VIYARLWT   | 19491 | 19383 |
| >SMAD4-R1C VIYARLWR   | 24    | >SMAD4-R1C VIYARLWT   | 15905 | 15881 |
| >SMAD4-R1C VIYARLWRW  | 2320  | >SMAD4-R1C VIYARLWTW  | 116   | 2204  |
| >SMAD4-R1C VIYARLWR   | 124   | >SMAD4-R1C VIYARLWT   | 23813 | 23689 |
| >SMAD4-R1C VIYARLWR   | 94    | >SMAD4-R1C VIYARLWT   | 26855 | 26761 |
| >SMAD4-R1C VIYARLWRW  | 25    | >SMAD4-R1C VIYARLWTW  | 17    | 8     |
| >SMAD4-R1C VIYARLWRW  | 63    | >SMAD4-R1C VIYARLWTW  | 52    | 11    |
| >SMAD4-R1C VIYARLWRW  | 15    | >SMAD4-R1C VIYARLWTW  | 13    | 2     |
| >SMAD4-R1C VIYARLWR   | 82    | >SMAD4-R1C VIYARLWT   | 23820 | 23738 |
| >SMAD4-R1C HVIYARLWRV | 322   | >SMAD4-R1C HVIYARLWTV | 326   | 4     |
| >SMAD4-R1C HVIYARLWR  | 441   | >SMAD4-R1C HVIYARLWT  | 2541  | 2100  |
| >SMAD4-R1C HVIYARLWR  | 25    | >SMAD4-R1C HVIYARLWT  | 16879 | 16854 |
| >SMAD4-R1C HVIYARLWRV | 1677  | >SMAD4-R1C HVIYARLWTV | 177   | 1500  |
| >SMAD4-R1C HVIYARLWR  | 36    | >SMAD4-R1C HVIYARLWT  | 18793 | 18757 |
| >SMAD4-R1C HVIYARLWR  | 4     | >SMAD4-R1C HVIYARLWT  | 4606  | 4602  |
| >SMAD4-R1C HVIYARLWRV | 133   | >SMAD4-R1C HVIYARLWTV | 91    | 42    |
| >SMAD4-R1C HVIYARLWRV | 69    | >SMAD4-R1C HVIYARLWTV | 59    | 10    |
| >SMAD4-R1C HVIYARLWRV | 20    | >SMAD4-R1C HVIYARLWTV | 18    | 2     |
| >SMAD4-R1C HVIYARLWR  | 168   | >SMAD4-R1C HVIYARLWT  | 24766 | 24598 |
| >SMAD4-R1C PHVIYARLWF | 599   | >SMAD4-R1C PHVIYARLWT | 344   | 255   |
| >SMAD4-R3€ RFCLGQLSNV | 236   | >SMAD4-R3€ CFCLGQLSNV | 1950  | 1714  |
| >SMAD4-R3€ DRFCLGQLSN | 3434  | >SMAD4-R3€ DCFCLGQLSN | 201   | 3233  |
| >SMAD4-R3€ DRFCLGQLSN | 11960 | >SMAD4-R3€ DCFCLGQLSN | 367   | 11593 |
| >SMAD4-R3€ DRFCLGQL   | 469   | >SMAD4-R3€ DCFCLGQL   | 26371 | 25902 |
| >SMAD4-R3€ GDRFCLGQL  | 454   | >SMAD4-R3€ GDCFCLGQL  | 2627  | 2173  |
| >SMAD4-R3€ GDRFCLGQL  | 307   | >SMAD4-R3€ GDCFCLGQL  | 777   | 470   |
| >SMAD4-R3€ DPSGGDRF   | 107   | >SMAD4-R3€ DPSGGDCF   | 61    | 46    |

|                       |       |                       |       |       |
|-----------------------|-------|-----------------------|-------|-------|
| >SMAD4-R3€ DPSGGDRF   | 680   | >SMAD4-R3€ DPSGGDCF   | 465   | 215   |
| >SMAD4-R3€ YVDPSGGDRI | 2132  | >SMAD4-R3€ YVDPSGGDCI | 356   | 1776  |
| >SMAD4-R3€ YVDPSGGDRI | 1633  | >SMAD4-R3€ YVDPSGGDCI | 491   | 1142  |
| >SMAD4-R3€ YVDPSGGDRI | 447   | >SMAD4-R3€ YVDPSGGDCI | 418   | 29    |
| >SMAD4-R3€ YVDPSGGDRI | 41    | >SMAD4-R3€ YVDPSGGDCI | 396   | 355   |
| >SMAD4-R3€ GYVDPSGGD  | 321   | >SMAD4-R3€ GYVDPSGGD  | 558   | 237   |
| >SMAD4-R3€ GYVDPSGGD  | 34    | >SMAD4-R3€ GYVDPSGGD  | 90    | 56    |
| >SMAD4-R3€ RFCLGQLSNV | 236   | >SMAD4-R3€ HFCLGQLSNV | 1301  | 1065  |
| >SMAD4-R3€ DRFCLGQL   | 469   | >SMAD4-R3€ DHFCLGQL   | 23715 | 23246 |
| >SMAD4-R3€ GDRFCLGQL  | 506   | >SMAD4-R3€ GDHFCLGQL  | 260   | 246   |
| >SMAD4-R3€ GDRFCLGQL  | 454   | >SMAD4-R3€ GDHFCLGQL  | 2631  | 2177  |
| >SMAD4-R3€ GDRFCLGQL  | 307   | >SMAD4-R3€ GDHFCLGQL  | 227   | 80    |
| >SMAD4-R3€ DPSGGDRF   | 107   | >SMAD4-R3€ DPSGGDHF   | 156   | 49    |
| >SMAD4-R3€ DPSGGDRF   | 680   | >SMAD4-R3€ DPSGGDHF   | 456   | 224   |
| >SMAD4-R3€ YVDPSGGDRI | 2132  | >SMAD4-R3€ YVDPSGGDH  | 273   | 1859  |
| >SMAD4-R3€ YVDPSGGDRI | 1633  | >SMAD4-R3€ YVDPSGGDH  | 438   | 1195  |
| >SMAD4-R3€ YVDPSGGDRI | 5805  | >SMAD4-R3€ YVDPSGGDH  | 402   | 5403  |
| >SMAD4-R3€ YVDPSGGDRI | 2140  | >SMAD4-R3€ YVDPSGGDH  | 442   | 1698  |
| >SMAD4-R3€ YVDPSGGDRI | 447   | >SMAD4-R3€ YVDPSGGDH  | 506   | 59    |
| >SMAD4-R3€ YVDPSGGDRI | 41    | >SMAD4-R3€ YVDPSGGDH  | 78    | 37    |
| >SMAD4-R3€ GYVDPSGGD  | 321   | >SMAD4-R3€ GYVDPSGGD  | 251   | 70    |
| >SMAD4-R3€ GYVDPSGGD  | 34    | >SMAD4-R3€ GYVDPSGGD  | 22    | 12    |
| >SMAD4-R3€ RFCLGQLSNV | 1077  | >SMAD4-R3€ SFCLGQLSNV | 458   | 619   |
| >SMAD4-R3€ RFCLGQLSNV | 236   | >SMAD4-R3€ SFCLGQLSNV | 261   | 25    |
| >SMAD4-R3€ DRFCLGQL   | 14711 | >SMAD4-R3€ DSFCLGQL   | 339   | 14372 |
| >SMAD4-R3€ DRFCLGQLSN | 3434  | >SMAD4-R3€ DSFCLGQLSN | 28    | 3406  |
| >SMAD4-R3€ DRFCLGQLSN | 11960 | >SMAD4-R3€ DSFCLGQLSN | 123   | 11837 |
| >SMAD4-R3€ DRFCLGQL   | 469   | >SMAD4-R3€ DSFCLGQL   | 23273 | 22804 |
| >SMAD4-R3€ GDRFCLGQL  | 454   | >SMAD4-R3€ GDSFCLGQL  | 1431  | 977   |
| >SMAD4-R3€ GDRFCLGQL  | 307   | >SMAD4-R3€ GDSFCLGQL  | 511   | 204   |
| >SMAD4-R3€ DPSGGDRF   | 107   | >SMAD4-R3€ DPSGGDSF   | 46    | 61    |
| >SMAD4-R3€ DPSGGDRF   | 680   | >SMAD4-R3€ DPSGGDSF   | 495   | 185   |
| >SMAD4-R3€ YVDPSGGDRI | 2140  | >SMAD4-R3€ YVDPSGGDSF | 431   | 1709  |
| >SMAD4-R3€ YVDPSGGDRI | 447   | >SMAD4-R3€ YVDPSGGDSF | 183   | 264   |
| >SMAD4-R3€ YVDPSGGDRI | 41    | >SMAD4-R3€ YVDPSGGDSF | 46    | 5     |
| >SMAD4-R3€ GYVDPSGGD  | 321   | >SMAD4-R3€ GYVDPSGGD  | 712   | 391   |
| >SMAD4-R3€ GYVDPSGGD  | 34    | >SMAD4-R3€ GYVDPSGGD  | 22    | 12    |
| >SMAD4-R41 REAGRAPGD, | 1064  | >SMAD4-R41 SEAGRAPGD, | 270   | 794   |
| >SMAD4-R41 REAGRAPGD, | 17    | >SMAD4-R41 SEAGRAPGD, | 120   | 103   |
| >SMAD4-R41 REAGRAPGD, | 395   | >SMAD4-R41 SEAGRAPGD, | 193   | 202   |
| >SMAD4-R41 REAGRAPGD, | 57    | >SMAD4-R41 SEAGRAPGD, | 30    | 27    |
| >SMAD4-R41 REAGRAPGD, | 34    | >SMAD4-R41 SEAGRAPGD, | 245   | 211   |
| >SMAD4-R41 AVFVQSYLD  | 47    | >SMAD4-R41 AVFVQSYLD  | 6519  | 6472  |

|                      |      |                      |       |       |
|----------------------|------|----------------------|-------|-------|
| >SMAD4-R41AVFVQSYILD | 34   | >SMAD4-R41AVFVQSYILD | 11418 | 11384 |
| >SMAD4-R41AVFVQSYILD | 69   | >SMAD4-R41AVFVQSYILD | 23969 | 23900 |
| >SMAD4-R41AVFVQSYILD | 81   | >SMAD4-R41AVFVQSYILD | 1040  | 959   |
| >SMAD4-R41YLDREAGRA  | 1910 | >SMAD4-R41YLDSEAGRA  | 487   | 1423  |
| >SMAD4-R41YLDREAGRA  | 606  | >SMAD4-R41YLDSEAGRA  | 197   | 409   |
| >SMAD4-R41YLDREAGRA  | 32   | >SMAD4-R41YLDSEAGRA  | 18    | 14    |
| >SMAD4-R41YLDREAGRA  | 289  | >SMAD4-R41YLDSEAGRA  | 200   | 89    |
| >SMAD4-R41YLDREAGRA  | 167  | >SMAD4-R41YLDSEAGRA  | 87    | 80    |
| >SMAD4-R41YLDREAGRA  | 1766 | >SMAD4-R41YLDSEAGRA  | 415   | 1351  |
| >SMAD4-R41YLDREAGRA  | 18   | >SMAD4-R41YLDSEAGRA  | 15    | 3     |
| >SMAD4-R41YLDREAGR   | 728  | >SMAD4-R41YLDSEAGR   | 318   | 410   |
| >SMAD4-R41YYLDREAGR  | 195  | >SMAD4-R41YYLDSEAGR  | 513   | 318   |
| >SMAD4-R41YYLDREAGR  | 21   | >SMAD4-R41YYLDSEAGR  | 67    | 46    |
| >SMAD4-R41YYLDREAGR  | 366  | >SMAD4-R41YYLDSEAGR  | 160   | 206   |
| >SMAD4-R41YYLDREAGR  | 39   | >SMAD4-R41YYLDSEAGR  | 48    | 9     |
| >SMAD4-R41SYILDREAGR | 78   | >SMAD4-R41SYILDSEAGR | 96    | 18    |
| >SMAD4-R41SYILDREAGR | 203  | >SMAD4-R41SYILDSEAGR | 176   | 27    |
| >SMAD4-R41SYILDREAGR | 51   | >SMAD4-R41SYILDSEAGR | 49    | 2     |
| >SMAD4-R41QSYILDREAG | 131  | >SMAD4-R41QSYILDSEAG | 125   | 6     |
| >SMAD4-R41QSYILDREAG | 457  | >SMAD4-R41QSYILDSEAG | 540   | 83    |
| >SMAD4-R41QSYILDREAG | 18   | >SMAD4-R41QSYILDSEAG | 8     | 10    |
| >SMAD4-R41QSYILDREA  | 2099 | >SMAD4-R41QSYILDSEA  | 233   | 1866  |
| >SMAD4-R41FVQSYILDRE | 760  | >SMAD4-R41FVQSYILDSE | 259   | 501   |
| >SMAD4-R41FVQSYILDRE | 991  | >SMAD4-R41FVQSYILDSE | 240   | 751   |
| >SMAD4-R41FVQSYILDRE | 537  | >SMAD4-R41FVQSYILDSE | 141   | 396   |
| >SMAD4-R41FVQSYILDRE | 800  | >SMAD4-R41FVQSYILDSE | 205   | 595   |
| >SMAD4-R41FVQSYILDRE | 1766 | >SMAD4-R41FVQSYILDSE | 398   | 1368  |
| >SMAD4-R41FVQSYILDR  | 112  | >SMAD4-R41FVQSYILDS  | 25544 | 25432 |
| >SMAD4-R41VFVQSYILDR | 232  | >SMAD4-R41VFVQSYILDS | 21781 | 21549 |
| >SMAD4-R41VFVQSYILDR | 327  | >SMAD4-R41VFVQSYILDS | 20668 | 20341 |
| >SMAD4-R41VFVQSYILDR | 85   | >SMAD4-R41VFVQSYILDS | 20450 | 20365 |
| >SMAD4-R42RAPGDAVHK  | 3202 | >SMAD4-R42HAPGDAVHK  | 339   | 2863  |
| >SMAD4-R42RAPGDAVHK  | 30   | >SMAD4-R42HAPGDAVHK  | 165   | 135   |
| >SMAD4-R42GRAPGDAVH  | 290  | >SMAD4-R42GHAPGDAVH  | 20769 | 20479 |
| >SMAD4-R42GRAPGDAVH  | 188  | >SMAD4-R42GHAPGDAVH  | 19084 | 18896 |
| >SMAD4-R42QSYILDREAG | 131  | >SMAD4-R42QSYILDREAG | 11630 | 11499 |
| >SMAD4-R42QSYILDREAG | 457  | >SMAD4-R42QSYILDREAG | 27296 | 26839 |
| >SMAD4-R42QSYILDREAG | 18   | >SMAD4-R42QSYILDREAG | 3980  | 3962  |
| >SMAD4-R42AGRAPGDAV  | 27   | >SMAD4-R42AGHAPGDAV  | 222   | 195   |
| >SMAD4-R42EAGRAPGDA  | 347  | >SMAD4-R42EAGHAPGDA  | 276   | 71    |
| >SMAD4-R42EAGRAPGDA  | 159  | >SMAD4-R42EAGHAPGDA  | 146   | 13    |
| >SMAD4-R42REAGRAPGD  | 17   | >SMAD4-R42REAGHAPGD  | 9     | 8     |
| >SMAD4-R42REAGRAPGD  | 759  | >SMAD4-R42REAGHAPGD  | 425   | 334   |

|                       |      |                        |       |       |
|-----------------------|------|------------------------|-------|-------|
| >SMAD4-R42 REAGRAPG   | 1107 | >SMAD4-R42 REAGHAPG    | 376   | 731   |
| >SMAD4-R42 REAGRAPGD, | 395  | >SMAD4-R42 REAGHAPGD   | 276   | 119   |
| >SMAD4-R42 REAGRAPGD, | 57   | >SMAD4-R42 REAGHAPGD   | 34    | 23    |
| >SMAD4-R42 REAGRAPGD, | 1945 | >SMAD4-R42 REAGHAPGD   | 443   | 1502  |
| >SMAD4-R42 REAGRAPGD, | 34   | >SMAD4-R42 REAGHAPGD   | 23    | 11    |
| >SMAD4-R42 YLDREAGRA  | 606  | >SMAD4-R42 YLDREAGHA   | 455   | 151   |
| >SMAD4-R42 YLDREAGRA  | 32   | >SMAD4-R42 YLDREAGHA   | 52    | 20    |
| >SMAD4-R42 YLDREAGRAF | 1606 | >SMAD4-R42 YLDREAGHAF  | 497   | 1109  |
| >SMAD4-R42 YLDREAGRA  | 289  | >SMAD4-R42 YLDREAGHA   | 81    | 208   |
| >SMAD4-R42 YLDREAGRA  | 167  | >SMAD4-R42 YLDREAGHA   | 44    | 123   |
| >SMAD4-R42 YLDREAGRA  | 18   | >SMAD4-R42 YLDREAGHA   | 29    | 11    |
| >SMAD4-R42 YYLDREAGR  | 195  | >SMAD4-R42 YYLDREAGH   | 13565 | 13370 |
| >SMAD4-R42 YYLDREAGR  | 21   | >SMAD4-R42 YYLDREAGH   | 6674  | 6653  |
| >SMAD4-R42 YYLDREAGR  | 366  | >SMAD4-R42 YYLDREAGH   | 22602 | 22236 |
| >SMAD4-R42 YYLDREAGR  | 39   | >SMAD4-R42 YYLDREAGH   | 8181  | 8142  |
| >SMAD4-R42 SYLDREAGR  | 78   | >SMAD4-R42 SYLDREAGH   | 7239  | 7161  |
| >SMAD4-R42 SYLDREAGR  | 203  | >SMAD4-R42 SYLDREAGH   | 10591 | 10388 |
| >SMAD4-R42 SYLDREAGR  | 51   | >SMAD4-R42 SYLDREAGH   | 13512 | 13461 |
| >SMAD4-R44 LRQCHRQM   | 438  | >SMAD4-R44 LCQCHRQM    | 6775  | 6337  |
| >SMAD4-R44 LRQCHRQM   | 153  | >SMAD4-R44 LCQCHRQM    | 22376 | 22223 |
| >SMAD4-R44 LRQCHRQM   | 276  | >SMAD4-R44 LCQCHRQM    | 15354 | 15078 |
| >SMAD4-R44 PSAYIKVFDL | 44   | >SMAD4-R44 PSAYIKVFDLC | 30865 | 30821 |
| >SMAD4-R44 FDLRQCHR   | 1396 | >SMAD4-R44 FDLCQCHR    | 396   | 1000  |
| >SMAD4-R44 VFDLRQCHR  | 182  | >SMAD4-R44 VFDLCQCHR   | 185   | 3     |
| >SMAD4-R44 VFDLRQCHR  | 66   | >SMAD4-R44 VFDLCQCHR   | 146   | 80    |
| >SMAD4-R44 VFDLRQCHR  | 158  | >SMAD4-R44 VFDLCQCHR   | 50    | 108   |
| >SMAD4-R44 KVFDLRQC   | 2573 | >SMAD4-R44 KVFDLCQC    | 365   | 2208  |
| >SMAD4-R44 KVFDLRQC   | 1587 | >SMAD4-R44 KVFDLCQC    | 356   | 1231  |
| >SMAD4-R44 KVFDLRQCHF | 423  | >SMAD4-R44 KVFDLCQCHF  | 455   | 32    |
| >SMAD4-R44 KVFDLRQCHF | 76   | >SMAD4-R44 KVFDLCQCHF  | 409   | 333   |
| >SMAD4-R44 KVFDLRQCH  | 324  | >SMAD4-R44 KVFDLCQCH   | 930   | 606   |
| >SMAD4-R44 KVFDLRQCHF | 7    | >SMAD4-R44 KVFDLCQCHF  | 8     | 1     |
| >SMAD4-R44 KVFDLRQCHF | 92   | >SMAD4-R44 KVFDLCQCHF  | 193   | 101   |
| >SMAD4-R44 KVFDLRQCHF | 57   | >SMAD4-R44 KVFDLCQCHF  | 40    | 17    |
| >SMAD4-R44 KVFDLRQCHF | 14   | >SMAD4-R44 KVFDLCQCHF  | 14    | 0     |
| >SMAD4-R44 IKVFDLRQCH | 1234 | >SMAD4-R44 IKVFDLCQCH  | 437   | 797   |
| >SMAD4-R44 YIKVFDLR   | 51   | >SMAD4-R44 YIKVFDLC    | 20730 | 20679 |
| >SMAD4-R44 YIKVFDLR   | 74   | >SMAD4-R44 YIKVFDLC    | 28831 | 28757 |
| >SMAD4-R44 YIKVFDLR   | 12   | >SMAD4-R44 YIKVFDLC    | 29504 | 29492 |
| >SMAD4-R44 YIKVFDLR   | 143  | >SMAD4-R44 YIKVFDLC    | 35539 | 35396 |
| >SMAD4-R44 AYIKVFDLR  | 184  | >SMAD4-R44 AYIKVFDLC   | 186   | 2     |
| >SMAD4-R44 AYIKVFDLRQ | 405  | >SMAD4-R44 AYIKVFDLCQ  | 359   | 46    |
| >SMAD4-R44 AYIKVFDLR  | 37   | >SMAD4-R44 AYIKVFDLC   | 18461 | 18424 |

|                       |       |                       |       |       |
|-----------------------|-------|-----------------------|-------|-------|
| >SMAD4-R44AYIKVFDLR   | 135   | >SMAD4-R44AYIKVFDLC   | 34414 | 34279 |
| >SMAD4-R44AYIKVFDLR   | 180   | >SMAD4-R44AYIKVFDLC   | 39474 | 39294 |
| >SMAD4-R44AYIKVFDLR   | 371   | >SMAD4-R44AYIKVFDLC   | 19022 | 18651 |
| >SMAD4-R44AYIKVFDLR   | 62    | >SMAD4-R44AYIKVFDLC   | 34995 | 34933 |
| >SMAD4-R44AYIKVFDLR   | 2287  | >SMAD4-R44AYIKVFDLC   | 479   | 1808  |
| >SMAD4-R44SAYIKVFDLR  | 309   | >SMAD4-R44SAYIKVFDLC  | 32941 | 32632 |
| >SMAD4-R44SAYIKVFDLR  | 44    | >SMAD4-R44SAYIKVFDLC  | 17401 | 17357 |
| >SMAD4-R44SAYIKVFDLR  | 209   | >SMAD4-R44SAYIKVFDLC  | 24615 | 24406 |
| >SMAD4-R44SAYIKVFDLR  | 18    | >SMAD4-R44SAYIKVFDLC  | 28875 | 28857 |
| >SMAD4-R44SAYIKVFDLR  | 194   | >SMAD4-R44SAYIKVFDLC  | 12591 | 12397 |
| >SMAD4-R44SAYIKVFDLR  | 406   | >SMAD4-R44SAYIKVFDLC  | 36640 | 36234 |
| >SMAD4-R44LRQCHRQM    | 31280 | >SMAD4-R44LPQCHRQM    | 377   | 30903 |
| >SMAD4-R44LRQCHRQM    | 18637 | >SMAD4-R44LPQCHRQM    | 19    | 18618 |
| >SMAD4-R44LRQCHRQM    | 2484  | >SMAD4-R44LPQCHRQM    | 340   | 2144  |
| >SMAD4-R44LRQCHRQM    | 438   | >SMAD4-R44LPQCHRQM    | 6713  | 6275  |
| >SMAD4-R44LRQCHRQM    | 153   | >SMAD4-R44LPQCHRQM    | 22067 | 21914 |
| >SMAD4-R44LRQCHRQM    | 19828 | >SMAD4-R44LPQCHRQM    | 60    | 19768 |
| >SMAD4-R44LRQCHRQMC   | 37675 | >SMAD4-R44LPQCHRQMC   | 376   | 37299 |
| >SMAD4-R44LRQCHRQMC   | 29842 | >SMAD4-R44LPQCHRQMC   | 257   | 29585 |
| >SMAD4-R44LRQCHRQM    | 276   | >SMAD4-R44LPQCHRQM    | 15370 | 15094 |
| >SMAD4-R44PSAYIKVFDLF | 44    | >SMAD4-R44PSAYIKVFDLF | 25713 | 25669 |
| >SMAD4-R44VFDLRQCHR   | 182   | >SMAD4-R44VFDLPQCHR   | 652   | 470   |
| >SMAD4-R44VFDLRQCHR   | 66    | >SMAD4-R44VFDLPQCHR   | 256   | 190   |
| >SMAD4-R44VFDLRQCHR   | 158   | >SMAD4-R44VFDLPQCHR   | 255   | 97    |
| >SMAD4-R44KVFDLRQC    | 2573  | >SMAD4-R44KVFDLPQC    | 422   | 2151  |
| >SMAD4-R44KVFDLRQC    | 1587  | >SMAD4-R44KVFDLPQC    | 188   | 1399  |
| >SMAD4-R44KVFDLRQCHF  | 423   | >SMAD4-R44KVFDLPQCHF  | 420   | 3     |
| >SMAD4-R44KVFDLRQCHF  | 76    | >SMAD4-R44KVFDLPQCHF  | 173   | 97    |
| >SMAD4-R44KVFDLRQCH   | 324   | >SMAD4-R44KVFDLPQCH   | 1710  | 1386  |
| >SMAD4-R44KVFDLRQCHF  | 7     | >SMAD4-R44KVFDLPQCHF  | 30    | 23    |
| >SMAD4-R44KVFDLRQCHF  | 92    | >SMAD4-R44KVFDLPQCHF  | 77    | 15    |
| >SMAD4-R44KVFDLRQCHF  | 57    | >SMAD4-R44KVFDLPQCHF  | 48    | 9     |
| >SMAD4-R44KVFDLRQCHF  | 14    | >SMAD4-R44KVFDLPQCHF  | 14    | 0     |
| >SMAD4-R44YIKVFDLR    | 51    | >SMAD4-R44YIKVFDLP    | 21188 | 21137 |
| >SMAD4-R44YIKVFDLR    | 74    | >SMAD4-R44YIKVFDLP    | 27116 | 27042 |
| >SMAD4-R44YIKVFDLR    | 12    | >SMAD4-R44YIKVFDLP    | 23640 | 23628 |
| >SMAD4-R44YIKVFDLR    | 143   | >SMAD4-R44YIKVFDLP    | 33996 | 33853 |
| >SMAD4-R44AYIKVFDLR   | 184   | >SMAD4-R44AYIKVFDLP   | 623   | 439   |
| >SMAD4-R44AYIKVFDLRQI | 405   | >SMAD4-R44AYIKVFDLPQI | 240   | 165   |
| >SMAD4-R44AYIKVFDLR   | 37    | >SMAD4-R44AYIKVFDLP   | 18574 | 18537 |
| >SMAD4-R44AYIKVFDLR   | 135   | >SMAD4-R44AYIKVFDLP   | 33619 | 33484 |
| >SMAD4-R44AYIKVFDLR   | 180   | >SMAD4-R44AYIKVFDLP   | 36083 | 35903 |
| >SMAD4-R44AYIKVFDLR   | 371   | >SMAD4-R44AYIKVFDLP   | 14023 | 13652 |

|                       |      |                       |       |       |
|-----------------------|------|-----------------------|-------|-------|
| >SMAD4-R44AYIKVFDLR   | 62   | >SMAD4-R44AYIKVFDLP   | 32168 | 32106 |
| >SMAD4-R44SAYIKVFDLR  | 309  | >SMAD4-R44SAYIKVFDLP  | 29561 | 29252 |
| >SMAD4-R44SAYIKVFDLR  | 44   | >SMAD4-R44SAYIKVFDLP  | 21525 | 21481 |
| >SMAD4-R44SAYIKVFDLR  | 209  | >SMAD4-R44SAYIKVFDLP  | 26298 | 26089 |
| >SMAD4-R44SAYIKVFDLR  | 18   | >SMAD4-R44SAYIKVFDLP  | 24988 | 24970 |
| >SMAD4-R44SAYIKVFDLR  | 194  | >SMAD4-R44SAYIKVFDLP  | 9189  | 8995  |
| >SMAD4-R44SAYIKVFDLR  | 406  | >SMAD4-R44SAYIKVFDLP  | 35346 | 34940 |
| >SMAD4-R49RRLCILRMSF\ | 1648 | >SMAD4-R49HRLCILRMSF\ | 492   | 1156  |
| >SMAD4-R49RRLCILRMSF  | 471  | >SMAD4-R49HRLCILRMSF  | 5349  | 4878  |
| >SMAD4-R49RRLCILRM    | 117  | >SMAD4-R49HRLCILRM    | 713   | 596   |
| >SMAD4-R49RRLCILRMSF  | 4    | >SMAD4-R49HRLCILRMSF  | 13    | 9     |
| >SMAD4-R49RRLCILRMSF\ | 247  | >SMAD4-R49HRLCILRMSF\ | 1278  | 1031  |
| >SMAD4-R49RRLCILRM    | 11   | >SMAD4-R49HRLCILRM    | 16    | 5     |
| >SMAD4-R49RRLCILRMS   | 40   | >SMAD4-R49HRLCILRMS   | 118   | 78    |
| >SMAD4-R49RRLCILRMSF  | 25   | >SMAD4-R49HRLCILRMSF  | 45    | 20    |
| >SMAD4-R49RRLCILRMSF\ | 23   | >SMAD4-R49HRLCILRMSF\ | 51    | 28    |
| >SMAD4-R49RRLCILRM    | 13   | >SMAD4-R49HRLCILRM    | 325   | 312   |
| >SMAD4-R49RRLCILRMS   | 97   | >SMAD4-R49HRLCILRMS   | 3246  | 3149  |
| >SMAD4-R49RRLCILRMSF  | 46   | >SMAD4-R49HRLCILRMSF  | 435   | 389   |
| >SMAD4-R49RRLCILRMSF\ | 36   | >SMAD4-R49HRLCILRMSF\ | 739   | 703   |
| >SMAD4-R49RRLCILRM    | 28   | >SMAD4-R49HRLCILRM    | 330   | 302   |
| >SMAD4-R49RRLCILRMS   | 319  | >SMAD4-R49HRLCILRMS   | 2649  | 2330  |
| >SMAD4-R49RRLCILRMSF  | 57   | >SMAD4-R49HRLCILRMSF  | 758   | 701   |
| >SMAD4-R49RRLCILRMSF\ | 29   | >SMAD4-R49HRLCILRMSF\ | 174   | 145   |
| >SMAD4-R49LRRRCILRMSF | 24   | >SMAD4-R49LHRLCILRMSI | 20    | 4     |
| >SMAD4-R49LRRRCILRM   | 209  | >SMAD4-R49LHRLCILRM   | 15805 | 15596 |
| >SMAD4-R49LRRRCILRMSF | 421  | >SMAD4-R49LHRLCILRMSI | 20173 | 19752 |
| >SMAD4-R49LRRRCILRM   | 308  | >SMAD4-R49LHRLCILRM   | 12331 | 12023 |
| >SMAD4-R49LRRRCILRMSF | 424  | >SMAD4-R49LHRLCILRMSI | 13305 | 12881 |
| >SMAD4-R49LRRRCILRM   | 58   | >SMAD4-R49LHRLCILRM   | 12744 | 12686 |
| >SMAD4-R49LRRRCILRMS  | 436  | >SMAD4-R49LHRLCILRMS  | 25051 | 24615 |
| >SMAD4-R49LRRRCILRMSF | 43   | >SMAD4-R49LHRLCILRMSI | 17383 | 17340 |
| >SMAD4-R49AAAGIGVDDI  | 28   | >SMAD4-R49AAAGIGVDDI  | 8260  | 8232  |
| >SMAD4-R49DLRRRCIL    | 527  | >SMAD4-R49DLHRLCIL    | 210   | 317   |
| >SMAD4-R49DLRRRCILR   | 10   | >SMAD4-R49DLHRLCILR   | 20    | 10    |
| >SMAD4-R49DLRRRCILR   | 337  | >SMAD4-R49DLHRLCILR   | 52    | 285   |
| >SMAD4-R49DLRRRCIL    | 181  | >SMAD4-R49DLHRLCIL    | 558   | 377   |
| >SMAD4-R49VDDLRRRCI   | 359  | >SMAD4-R49VDDLHRLCI   | 1389  | 1030  |
| >SMAD4-R49VDDLRRRCI   | 616  | >SMAD4-R49VDDLHRLCI   | 482   | 134   |
| >SMAD4-R49GVDDLRRRL   | 1758 | >SMAD4-R49GVDDLHRL    | 206   | 1552  |
| >SMAD4-R49GVDDLRRRL   | 1709 | >SMAD4-R49GVDDLHRL    | 110   | 1599  |
| >SMAD4-R49IGVDDLRR    | 619  | >SMAD4-R49IGVDDLHR    | 187   | 432   |
| >SMAD4-R49GIGVDDLRRRL | 2445 | >SMAD4-R49GIGVDDLHRL  | 188   | 2257  |

|                        |      |                        |       |       |
|------------------------|------|------------------------|-------|-------|
| >SMAD4-R49 AAGIGVDDL   | 264  | >SMAD4-R49 AAGIGVDDL   | 21568 | 21304 |
| >SMAD4-R49 RLCILRMSFV  | 44   | >SMAD4-R49 HLCILRMSFV  | 80    | 36    |
| >SMAD4-R49 RLCILRMSFV  | 100  | >SMAD4-R49 HLCILRMSFV  | 132   | 32    |
| >SMAD4-R49 RLCILRMSFV  | 31   | >SMAD4-R49 HLCILRMSFV  | 55    | 24    |
| >SMAD4-R49 RLCILRMSFV  | 131  | >SMAD4-R49 HLCILRMSFV  | 283   | 152   |
| >SMAD4-R49 RLCILRMSFV  | 9    | >SMAD4-R49 HLCILRMSFV  | 28    | 19    |
| >SMAD4-R49 RLCILRMSFV  | 444  | >SMAD4-R49 HLCILRMSFV  | 559   | 115   |
| >SMAD4-R49 RLCILRMSFV  | 33   | >SMAD4-R49 HLCILRMSFV  | 60    | 27    |
| >SMAD4-R49 RLCILRMSFV  | 7    | >SMAD4-R49 HLCILRMSFV  | 6     | 1     |
| >SMAD4-R49 RLCILRMSFVI | 41   | >SMAD4-R49 HLCILRMSFVI | 66    | 25    |
| >SMAD4-R49 RLCILRMSFVI | 25   | >SMAD4-R49 HLCILRMSFVI | 96    | 71    |
| >SMAD4-R49 RLCILRMSFV  | 425  | >SMAD4-R49 HLCILRMSFV  | 1427  | 1002  |
| >SMAD4-R49 RLCILRMSFVI | 29   | >SMAD4-R49 HLCILRMSFVI | 90    | 61    |
| >SMAD4-R49 RLCILRMSFVI | 47   | >SMAD4-R49 HLCILRMSFVI | 152   | 105   |
| >SMAD4-R49 RLCILRMSF   | 29   | >SMAD4-R49 HLCILRMSF   | 327   | 298   |
| >SMAD4-R49 RLCILRMSFVI | 3735 | >SMAD4-R49 HLCILRMSFVI | 303   | 3432  |
| >SMAD4-R49 RLCILRMSF   | 75   | >SMAD4-R49 HLCILRMSF   | 158   | 83    |
| >SMAD4-R49 RLCILRMSF   | 62   | >SMAD4-R49 HLCILRMSF   | 217   | 155   |
| >SMAD4-R49 RLCILRMSF   | 243  | >SMAD4-R49 HLCILRMSF   | 1917  | 1674  |
| >SMAD4-R49 RLCILRMSFVI | 400  | >SMAD4-R49 HLCILRMSFVI | 502   | 102   |
| >SMAD4-R49 RRLCILRMSF  | 2198 | >SMAD4-R49 RHLCILRMSF  | 72    | 2126  |
| >SMAD4-R49 RRLCILRMSF  | 471  | >SMAD4-R49 RHLCILRMSF  | 293   | 178   |
| >SMAD4-R49 RRLCILRM    | 117  | >SMAD4-R49 RHLCILRM    | 314   | 197   |
| >SMAD4-R49 RRLCILRMSF  | 4    | >SMAD4-R49 RHLCILRMSF  | 6     | 2     |
| >SMAD4-R49 RRLCILRMSF  | 247  | >SMAD4-R49 RHLCILRMSF  | 904   | 657   |
| >SMAD4-R49 RRLCILRM    | 11   | >SMAD4-R49 RHLCILRM    | 1692  | 1681  |
| >SMAD4-R49 RRLCILRMS   | 40   | >SMAD4-R49 RHLCILRMS   | 7550  | 7510  |
| >SMAD4-R49 RRLCILRMSF  | 25   | >SMAD4-R49 RHLCILRMSF  | 2002  | 1977  |
| >SMAD4-R49 RRLCILRMSF  | 23   | >SMAD4-R49 RHLCILRMSF  | 5793  | 5770  |
| >SMAD4-R49 RRLCILRM    | 13   | >SMAD4-R49 RHLCILRM    | 732   | 719   |
| >SMAD4-R49 RRLCILRMS   | 97   | >SMAD4-R49 RHLCILRMS   | 4402  | 4305  |
| >SMAD4-R49 RRLCILRMSF  | 46   | >SMAD4-R49 RHLCILRMSF  | 5910  | 5864  |
| >SMAD4-R49 RRLCILRMSF  | 36   | >SMAD4-R49 RHLCILRMSF  | 1193  | 1157  |
| >SMAD4-R49 RRLCILRM    | 28   | >SMAD4-R49 RHLCILRM    | 681   | 653   |
| >SMAD4-R49 RRLCILRMS   | 319  | >SMAD4-R49 RHLCILRMS   | 15210 | 14891 |
| >SMAD4-R49 RRLCILRMSF  | 57   | >SMAD4-R49 RHLCILRMSF  | 8295  | 8238  |
| >SMAD4-R49 RRLCILRMSF  | 29   | >SMAD4-R49 RHLCILRMSF  | 3326  | 3297  |
| >SMAD4-R49 LRRLCILRMSF | 24   | >SMAD4-R49 LRHLCILRMSI | 31    | 7     |
| >SMAD4-R49 LRRLCILR    | 864  | >SMAD4-R49 LRHLCILR    | 383   | 481   |
| >SMAD4-R49 LRRLCILRM   | 209  | >SMAD4-R49 LRHLCILRM   | 94    | 115   |
| >SMAD4-R49 LRRLCILRMSF | 421  | >SMAD4-R49 LRHLCILRMSI | 158   | 263   |
| >SMAD4-R49 LRRLCILRM   | 308  | >SMAD4-R49 LRHLCILRM   | 892   | 584   |
| >SMAD4-R49 LRRLCILRMSF | 424  | >SMAD4-R49 LRHLCILRMSI | 1190  | 766   |

|                        |      |                        |       |       |
|------------------------|------|------------------------|-------|-------|
| >SMAD4-R49 LRRLCILRM   | 58   | >SMAD4-R49 LRHLCILRM   | 81    | 23    |
| >SMAD4-R49 LRRLCILRMS  | 436  | >SMAD4-R49 LRHLCILRMS  | 842   | 406   |
| >SMAD4-R49 LRRLCILRMSF | 43   | >SMAD4-R49 LRHLCILRMSI | 88    | 45    |
| >SMAD4-R49 LRRLCILR    | 548  | >SMAD4-R49 LRHLCILR    | 248   | 300   |
| >SMAD4-R49 DLRRRCILR   | 10   | >SMAD4-R49 DLRHLCILR   | 9     | 1     |
| >SMAD4-R49 DLRRRCILR   | 337  | >SMAD4-R49 DLRHLCILR   | 314   | 23    |
| >SMAD4-R49 DLRRRCIL    | 181  | >SMAD4-R49 DLRHLCIL    | 492   | 311   |
| >SMAD4-R49 VDDLRRLCI   | 359  | >SMAD4-R49 VDDLRRHLCI  | 1514  | 1155  |
| >SMAD4-R49 VDDLRRLCI   | 616  | >SMAD4-R49 VDDLRRHLCI  | 493   | 123   |
| >SMAD4-R49 GVDDLRRLCI  | 728  | >SMAD4-R49 GVDDLRRHLCI | 215   | 513   |
| >SMAD4-R5C RMSFVKGW    | 172  | >SMAD4-R5C GMSFVKGW    | 4077  | 3905  |
| >SMAD4-R5C RMSFVKGW    | 130  | >SMAD4-R5C GMSFVKGW    | 1286  | 1156  |
| >SMAD4-R5C RMSFVKGW    | 161  | >SMAD4-R5C GMSFVKGW    | 1858  | 1697  |
| >SMAD4-R5C RMSFVKGW    | 20   | >SMAD4-R5C GMSFVKGW    | 984   | 964   |
| >SMAD4-R5C LRMSFVKGW   | 176  | >SMAD4-R5C LGMSFVKGW   | 2997  | 2821  |
| >SMAD4-R5C LRMSFVKGW   | 4431 | >SMAD4-R5C LGMSFVKGW   | 59    | 4372  |
| >SMAD4-R5C LRMSFVKGW   | 220  | >SMAD4-R5C LGMSFVKGW   | 25670 | 25450 |
| >SMAD4-R5C LRMSFVKGW   | 418  | >SMAD4-R5C LGMSFVKGW   | 25220 | 24802 |
| >SMAD4-R5C LRMSFVKGW   | 4286 | >SMAD4-R5C LGMSFVKGW   | 59    | 4227  |
| >SMAD4-R5C LRMSFVKGW   | 8784 | >SMAD4-R5C LGMSFVKGW   | 76    | 8708  |
| >SMAD4-R5C LRMSFVKGW   | 355  | >SMAD4-R5C LGMSFVKGW   | 194   | 161   |
| >SMAD4-R5C ILRMSFVK    | 36   | >SMAD4-R5C ILGMSFVK    | 54    | 18    |
| >SMAD4-R5C ILRMSFVK    | 388  | >SMAD4-R5C ILGMSFVK    | 51    | 337   |
| >SMAD4-R5C ILRMSFVK    | 9    | >SMAD4-R5C ILGMSFVK    | 3718  | 3709  |
| >SMAD4-R5C ILRMSFVK    | 239  | >SMAD4-R5C ILGMSFVK    | 1475  | 1236  |
| >SMAD4-R5C ILRMSFVKGV  | 232  | >SMAD4-R5C ILGMSFVKGV  | 3289  | 3057  |
| >SMAD4-R5C ILRMSFVKGV  | 19   | >SMAD4-R5C ILGMSFVKGV  | 409   | 390   |
| >SMAD4-R5C ILRMSFVKGV  | 173  | >SMAD4-R5C ILGMSFVKGV  | 1184  | 1011  |
| >SMAD4-R5C CILRMSFV    | 279  | >SMAD4-R5C CILGMSFV    | 101   | 178   |
| >SMAD4-R5C CILRMSFV    | 471  | >SMAD4-R5C CILGMSFV    | 163   | 308   |
| >SMAD4-R5C CILRMSFV    | 235  | >SMAD4-R5C CILGMSFV    | 151   | 84    |
| >SMAD4-R5C CILRMSFV    | 42   | >SMAD4-R5C CILGMSFV    | 24    | 18    |
| >SMAD4-R5C CILRMSFV    | 65   | >SMAD4-R5C CILGMSFV    | 21    | 44    |
| >SMAD4-R5C CILRMSFV    | 201  | >SMAD4-R5C CILGMSFV    | 162   | 39    |
| >SMAD4-R5C CILRMSFV    | 100  | >SMAD4-R5C CILGMSFV    | 36    | 64    |
| >SMAD4-R5C CILRMSFV    | 59   | >SMAD4-R5C CILGMSFV    | 11    | 48    |
| >SMAD4-R5C CILRMSFV    | 35   | >SMAD4-R5C CILGMSFV    | 10    | 25    |
| >SMAD4-R5C CILRMSFVK   | 106  | >SMAD4-R5C CILGMSFVK   | 153   | 47    |
| >SMAD4-R5C CILRMSFVK   | 19   | >SMAD4-R5C CILGMSFVK   | 23    | 4     |
| >SMAD4-R5C CILRMSFVK   | 109  | >SMAD4-R5C CILGMSFVK   | 554   | 445   |
| >SMAD4-R5C CILRMSFVK   | 419  | >SMAD4-R5C CILGMSFVK   | 314   | 105   |
| >SMAD4-R5C CILRMSFV    | 485  | >SMAD4-R5C CILGMSFV    | 196   | 289   |
| >SMAD4-R5C CILRMSFV    | 369  | >SMAD4-R5C CILGMSFV    | 196   | 173   |



|                        |     |                        |      |     |
|------------------------|-----|------------------------|------|-----|
| >SMAD4-R5C CILRMSFVKG  | 667 | >SMAD4-R5C CILGMSFVKG  | 316  | 351 |
| >SMAD4-R5C CILRMSFVKG  | 125 | >SMAD4-R5C CILGMSFVKG  | 225  | 100 |
| >SMAD4-R5C LCILRMSFV   | 819 | >SMAD4-R5C LCILGMSFV   | 411  | 408 |
| >SMAD4-R5C LCILRMSF    | 274 | >SMAD4-R5C LCILGMSF    | 211  | 63  |
| >SMAD4-R5C LCILRMSFV   | 679 | >SMAD4-R5C LCILGMSFV   | 301  | 378 |
| >SMAD4-R5C RLCILRMSFV  | 44  | >SMAD4-R5C RLCILGMSFV  | 44   | 0   |
| >SMAD4-R5C RLCILRMSFV  | 100 | >SMAD4-R5C RLCILGMSFV  | 66   | 34  |
| >SMAD4-R5C RLCILRMSFV  | 31  | >SMAD4-R5C RLCILGMSFV  | 20   | 11  |
| >SMAD4-R5C RLCILRMSFV  | 131 | >SMAD4-R5C RLCILGMSFV  | 128  | 3   |
| >SMAD4-R5C RLCILRMSFV  | 9   | >SMAD4-R5C RLCILGMSFV  | 4    | 5   |
| >SMAD4-R5C RLCILRMSFV  | 444 | >SMAD4-R5C RLCILGMSFV  | 135  | 309 |
| >SMAD4-R5C RLCILRMSFV  | 33  | >SMAD4-R5C RLCILGMSFV  | 14   | 19  |
| >SMAD4-R5C RLCILRMSFV  | 7   | >SMAD4-R5C RLCILGMSFV  | 5    | 2   |
| >SMAD4-R5C RLCILRMSFVI | 41  | >SMAD4-R5C RLCILGMSFVI | 48   | 7   |
| >SMAD4-R5C RLCILRMSFVI | 25  | >SMAD4-R5C RLCILGMSFVI | 28   | 3   |
| >SMAD4-R5C RLCILRMSFV  | 425 | >SMAD4-R5C RLCILGMSFV  | 1075 | 650 |
| >SMAD4-R5C RLCILRMSFVI | 29  | >SMAD4-R5C RLCILGMSFVI | 70   | 41  |
| >SMAD4-R5C RLCILRMSFVI | 47  | >SMAD4-R5C RLCILGMSFVI | 105  | 58  |
| >SMAD4-R5C RLCILRMSF   | 29  | >SMAD4-R5C RLCILGMSF   | 49   | 20  |
| >SMAD4-R5C RLCILRMSF   | 75  | >SMAD4-R5C RLCILGMSF   | 54   | 21  |
| >SMAD4-R5C RLCILRMSF   | 62  | >SMAD4-R5C RLCILGMSF   | 40   | 22  |
| >SMAD4-R5C RLCILRMSF   | 243 | >SMAD4-R5C RLCILGMSF   | 61   | 182 |
| >SMAD4-R5C RLCILRMSFVI | 400 | >SMAD4-R5C RLCILGMSFVI | 645  | 245 |
| >SMAD4-R5C RRLCILRMSF  | 471 | >SMAD4-R5C RRLCILGMSF  | 1034 | 563 |
| >SMAD4-R5C RRLCILRM    | 117 | >SMAD4-R5C RRLCILGM    | 118  | 1   |
| >SMAD4-R5C RRLCILRMSF  | 4   | >SMAD4-R5C RRLCILGMSF  | 6    | 2   |
| >SMAD4-R5C RRLCILRMSF  | 247 | >SMAD4-R5C RRLCILGMSF  | 335  | 88  |
| >SMAD4-R5C RRLCILRM    | 11  | >SMAD4-R5C RRLCILGM    | 11   | 0   |
| >SMAD4-R5C RRLCILRMS   | 40  | >SMAD4-R5C RRLCILGMS   | 40   | 0   |
| >SMAD4-R5C RRLCILRMSF  | 25  | >SMAD4-R5C RRLCILGMSF  | 17   | 8   |
| >SMAD4-R5C RRLCILRMSF  | 23  | >SMAD4-R5C RRLCILGMSF  | 28   | 5   |
| >SMAD4-R5C RRLCILRM    | 13  | >SMAD4-R5C RRLCILGM    | 23   | 10  |
| >SMAD4-R5C RRLCILRMS   | 97  | >SMAD4-R5C RRLCILGMS   | 160  | 63  |
| >SMAD4-R5C RRLCILRMSF  | 46  | >SMAD4-R5C RRLCILGMSF  | 51   | 5   |
| >SMAD4-R5C RRLCILRMSF  | 36  | >SMAD4-R5C RRLCILGMSF  | 42   | 6   |
| >SMAD4-R5C RRLCILRM    | 28  | >SMAD4-R5C RRLCILGM    | 36   | 8   |
| >SMAD4-R5C RRLCILRMS   | 319 | >SMAD4-R5C RRLCILGMS   | 664  | 345 |
| >SMAD4-R5C RRLCILRMSF  | 57  | >SMAD4-R5C RRLCILGMSF  | 42   | 15  |
| >SMAD4-R5C RRLCILRMSF  | 29  | >SMAD4-R5C RRLCILGMSF  | 43   | 14  |
| >SMAD4-R5C LRRRCILRM   | 580 | >SMAD4-R5C LRRRCILGM   | 458  | 122 |
| >SMAD4-R5C LRRRCILRMSF | 24  | >SMAD4-R5C LRRRCILGMSI | 19   | 5   |
| >SMAD4-R5C LRRRCILRM   | 209 | >SMAD4-R5C LRRRCILGM   | 159  | 50  |
| >SMAD4-R5C LRRRCILRMSF | 421 | >SMAD4-R5C LRRRCILGMSI | 538  | 117 |

|                        |       |                        |       |       |
|------------------------|-------|------------------------|-------|-------|
| >SMAD4-R5C LRRLCILRM   | 308   | >SMAD4-R5C LRRLCILGM   | 392   | 84    |
| >SMAD4-R5C LRRLCILRMSF | 424   | >SMAD4-R5C LRRLCILGMSI | 678   | 254   |
| >SMAD4-R5C LRRLCILRM   | 58    | >SMAD4-R5C LRRLCILGM   | 31    | 27    |
| >SMAD4-R5C LRRLCILRMS  | 436   | >SMAD4-R5C LRRLCILGMS  | 245   | 191   |
| >SMAD4-R5C LRRLCILRMSF | 43    | >SMAD4-R5C LRRLCILGMSI | 75    | 32    |
| >SMAD4-R5C DLRRRCILR   | 10    | >SMAD4-R5C DLRRRCILG   | 10543 | 10533 |
| >SMAD4-R5C DLRRRCILR   | 337   | >SMAD4-R5C DLRRRCILG   | 39614 | 39277 |
| >SMAD4-R53 RALQLLDEV   | 163   | >SMAD4-R53 WALQLLDEV   | 121   | 42    |
| >SMAD4-R53 RALQLLDEV   | 801   | >SMAD4-R53 WALQLLDEV   | 370   | 431   |
| >SMAD4-R53 RALQLLDEV   | 21    | >SMAD4-R53 WALQLLDEV   | 18    | 3     |
| >SMAD4-R53 RALQLLDEV   | 46    | >SMAD4-R53 WALQLLDEV   | 45    | 1     |
| >SMAD4-R53 RALQLLDEV   | 189   | >SMAD4-R53 WALQLLDEV   | 119   | 70    |
| >SMAD4-R53 RALQLLDEV   | 3869  | >SMAD4-R53 WALQLLDEV   | 436   | 3433  |
| >SMAD4-R53 RALQLLDEV   | 1183  | >SMAD4-R53 WALQLLDEV   | 190   | 993   |
| >SMAD4-R53 RALQLLDEV   | 7863  | >SMAD4-R53 WALQLLDEV   | 379   | 7484  |
| >SMAD4-R53 RALQLLDEV   | 826   | >SMAD4-R53 WALQLLDEV   | 41    | 785   |
| >SMAD4-R53 RALQLLDEVL  | 55    | >SMAD4-R53 WALQLLDEVI  | 1550  | 1495  |
| >SMAD4-R53 RALQLLDEVL  | 108   | >SMAD4-R53 WALQLLDEVI  | 3338  | 3230  |
| >SMAD4-R53 HRALQLLDEV  | 21068 | >SMAD4-R53 HWALQLLDE'  | 237   | 20831 |
| >SMAD4-R53 HRALQLLDEV  | 229   | >SMAD4-R53 HWALQLLDE'  | 14578 | 14349 |
| >SMAD4-R53 HRALQLLDEV  | 183   | >SMAD4-R53 HWALQLLDE'  | 16980 | 16797 |
| >SMAD4-R53 HRALQLLDEV  | 149   | >SMAD4-R53 HWALQLLDE'  | 8748  | 8599  |
| >SMAD4-R53 HRALQLLDEV  | 142   | >SMAD4-R53 HWALQLLDE'  | 21744 | 21602 |
| >SMAD4-R53 HRALQLLDEV  | 36191 | >SMAD4-R53 HWALQLLDE'  | 479   | 35712 |
| >SMAD4-R53 TPCWIEIHLHI | 94    | >SMAD4-R53 TPCWIEIHLH' | 29401 | 29307 |
| >SMAD4-R53 TPCWIEIHLHI | 18551 | >SMAD4-R53 TPCWIEIHLH' | 89    | 18462 |
| >SMAD4-R53 TPCWIEIHLHI | 24461 | >SMAD4-R53 TPCWIEIHLH' | 33    | 24428 |
| >SMAD4-R53 TPCWIEIHLHI | 63    | >SMAD4-R53 TPCWIEIHLH' | 27242 | 27179 |
| >SMAD4-R53 LHRALQLL    | 840   | >SMAD4-R53 LHWALQLL    | 492   | 348   |
| >SMAD4-R53 HLHRALQL    | 1980  | >SMAD4-R53 HLHWALQL    | 259   | 1721  |
| >SMAD4-R53 HLHRALQLL   | 912   | >SMAD4-R53 HLHWALQLL   | 124   | 788   |
| >SMAD4-R53 HLHRALQL    | 144   | >SMAD4-R53 HLHWALQL    | 78    | 66    |
| >SMAD4-R53 HLHRALQLL   | 24    | >SMAD4-R53 HLHWALQLL   | 14    | 10    |
| >SMAD4-R53 HLHRALQL    | 160   | >SMAD4-R53 HLHWALQL    | 71    | 89    |
| >SMAD4-R53 HLHRALQLL   | 53    | >SMAD4-R53 HLHWALQLL   | 27    | 26    |
| >SMAD4-R53 HLHRALQLL   | 1217  | >SMAD4-R53 HLHWALQLL   | 453   | 764   |
| >SMAD4-R53 HLHRALQL    | 105   | >SMAD4-R53 HLHWALQL    | 12    | 93    |
| >SMAD4-R53 HLHRALQLL   | 107   | >SMAD4-R53 HLHWALQLL   | 14    | 93    |
| >SMAD4-R53 HLHRALQL    | 456   | >SMAD4-R53 HLHWALQL    | 300   | 156   |
| >SMAD4-R53 HLHRALQLL   | 114   | >SMAD4-R53 HLHWALQLL   | 155   | 41    |
| >SMAD4-R53 HLHRALQL    | 439   | >SMAD4-R53 HLHWALQL    | 51    | 388   |
| >SMAD4-R53 HLHRALQLL   | 368   | >SMAD4-R53 HLHWALQLL   | 52    | 316   |
| >SMAD4-R53 HLHRALQL    | 8     | >SMAD4-R53 HLHWALQL    | 3     | 5     |

|                        |       |                       |       |       |
|------------------------|-------|-----------------------|-------|-------|
| >SMAD4-R53 HLHRALQLL   | 8     | >SMAD4-R53 HLHWALQLL  | 3     | 5     |
| >SMAD4-R53 HLHRALQL    | 143   | >SMAD4-R53 HLHWALQL   | 970   | 827   |
| >SMAD4-R53 HLHRALQLL   | 47    | >SMAD4-R53 HLHWALQLL  | 381   | 334   |
| >SMAD4-R53 IHLHRALQL   | 405   | >SMAD4-R53 IHLHWALQL  | 256   | 149   |
| >SMAD4-R53 IHLHRALQL   | 235   | >SMAD4-R53 IHLHWALQL  | 33    | 202   |
| >SMAD4-R53 IHLHRALQLL  | 791   | >SMAD4-R53 IHLHWALQLL | 151   | 640   |
| >SMAD4-R53 EIHLHRAL    | 682   | >SMAD4-R53 EIHLHWAL   | 296   | 386   |
| >SMAD4-R53 EIHLHRALQLI | 671   | >SMAD4-R53 EIHLHWALQL | 423   | 248   |
| >SMAD4-R53 EIHLHRAL    | 1155  | >SMAD4-R53 EIHLHWAL   | 201   | 954   |
| >SMAD4-R53 EIHLHRALQLI | 431   | >SMAD4-R53 EIHLHWALQL | 406   | 25    |
| >SMAD4-R53 EIHLHRAL    | 5476  | >SMAD4-R53 EIHLHWAL   | 468   | 5008  |
| >SMAD4-R53 EIHLHRALQL  | 2365  | >SMAD4-R53 EIHLHWALQL | 471   | 1894  |
| >SMAD4-R53 EIHLHRAL    | 80    | >SMAD4-R53 EIHLHWAL   | 78    | 2     |
| >SMAD4-R53 IEIHLHRALQL | 197   | >SMAD4-R53 IEIHLHWALQ | 318   | 121   |
| >SMAD4-R53 IEIHLHRAL   | 257   | >SMAD4-R53 IEIHLHWAL  | 268   | 11    |
| >SMAD4-R53 IEIHLHRAL   | 32    | >SMAD4-R53 IEIHLHWAL  | 7     | 25    |
| >SMAD4-R53 IEIHLHRALQL | 340   | >SMAD4-R53 IEIHLHWALQ | 126   | 214   |
| >SMAD4-R53 IEIHLHRAL   | 2885  | >SMAD4-R53 IEIHLHWAL  | 137   | 2748  |
| >SMAD4-R53 IEIHLHRAL   | 13    | >SMAD4-R53 IEIHLHWAL  | 6     | 7     |
| >SMAD4-R53 IEIHLHRALQL | 38    | >SMAD4-R53 IEIHLHWALQ | 21    | 17    |
| >SMAD4-R53 IEIHLHRAL   | 41    | >SMAD4-R53 IEIHLHWAL  | 18    | 23    |
| >SMAD4-R53 IEIHLHRALQL | 99    | >SMAD4-R53 IEIHLHWALQ | 57    | 42    |
| >SMAD4-R53 IEIHLHRAL   | 404   | >SMAD4-R53 IEIHLHWAL  | 116   | 288   |
| >SMAD4-R53 IEIHLHRALQL | 364   | >SMAD4-R53 IEIHLHWALQ | 213   | 151   |
| >SMAD4-R53 IEIHLHRA    | 230   | >SMAD4-R53 IEIHLHWA   | 70    | 160   |
| >SMAD4-R53 IEIHLHRAL   | 203   | >SMAD4-R53 IEIHLHWAL  | 46    | 157   |
| >SMAD4-R53 IEIHLHRALQL | 44    | >SMAD4-R53 IEIHLHWALQ | 20    | 24    |
| >SMAD4-R53 WIEIHLHRA   | 1445  | >SMAD4-R53 WIEIHLHWA  | 412   | 1033  |
| >SMAD4-R53 WIEIHLHRAL  | 3663  | >SMAD4-R53 WIEIHLHWAL | 415   | 3248  |
| >SMAD4-R53 WIEIHLHRA   | 220   | >SMAD4-R53 WIEIHLHWA  | 174   | 46    |
| >SMAD4-R53 WIEIHLHRAL  | 1277  | >SMAD4-R53 WIEIHLHWAL | 91    | 1186  |
| >SMAD4-R53 WIEIHLHR    | 25876 | >SMAD4-R53 WIEIHLHW   | 377   | 25499 |
| >SMAD4-R53 WIEIHLHRAL  | 3213  | >SMAD4-R53 WIEIHLHWAL | 418   | 2795  |
| >SMAD4-R53 WIEIHLHR    | 31247 | >SMAD4-R53 WIEIHLHW   | 455   | 30792 |
| >SMAD4-R53 WIEIHLHR    | 88    | >SMAD4-R53 WIEIHLHW   | 28926 | 28838 |
| >SMAD4-R53 CWIEIHLHRA  | 454   | >SMAD4-R53 CWIEIHLHW/ | 911   | 457   |
| >SMAD4-R53 CWIEIHLHR   | 3579  | >SMAD4-R53 CWIEIHLHW  | 51    | 3528  |
| >SMAD4-R53 CWIEIHLHRA  | 1017  | >SMAD4-R53 CWIEIHLHW/ | 98    | 919   |
| >SMAD4-R53 CWIEIHLHR   | 7787  | >SMAD4-R53 CWIEIHLHW  | 189   | 7598  |
| >SMAD4-R53 CWIEIHLHRA  | 2271  | >SMAD4-R53 CWIEIHLHW/ | 407   | 1864  |
| >SMAD4-R53 CWIEIHLHR   | 4451  | >SMAD4-R53 CWIEIHLHW  | 40    | 4411  |
| >SMAD4-R53 CWIEIHLHRA  | 80    | >SMAD4-R53 CWIEIHLHW/ | 15    | 65    |
| >SMAD4-R53 CWIEIHLHR   | 203   | >SMAD4-R53 CWIEIHLHW  | 17711 | 17508 |

|                       |       |                        |       |       |
|-----------------------|-------|------------------------|-------|-------|
| >SMAD4-R53CWIEIHLHR   | 220   | >SMAD4-R53CWIEIHLHW    | 26312 | 26092 |
| >SMAD4-R53CWIEIHLHR   | 22252 | >SMAD4-R53CWIEIHLHW    | 314   | 21938 |
| >SMAD4-R53CWIEIHLHR   | 9     | >SMAD4-R53CWIEIHLHW    | 1902  | 1893  |
| >SMAD4-R53CWIEIHLHR   | 789   | >SMAD4-R53CWIEIHLHW    | 348   | 441   |
| >SMAD4-R53CWIEIHLHRA  | 79    | >SMAD4-R53CWIEIHLHW/   | 41    | 38    |
| >SMAD4-R53PCWIEIHLHR  | 31    | >SMAD4-R53PCWIEIHLHW   | 14103 | 14072 |
| >SMAD4-R7E RTLDGRLQV  | 80    | >SMAD4-R7E ITLDGRLQV   | 113   | 33    |
| >SMAD4-R7E RTLDGRLQV  | 42    | >SMAD4-R7E ITLDGRLQV   | 42    | 0     |
| >SMAD4-R7E RTLDGRLQV  | 106   | >SMAD4-R7E ITLDGRLQV   | 158   | 52    |
| >SMAD4-R7E RTLDGRLQV  | 14    | >SMAD4-R7E ITLDGRLQV   | 7     | 7     |
| >SMAD4-R7E RTLDGRLQV  | 25    | >SMAD4-R7E ITLDGRLQV   | 1063  | 1038  |
| >SMAD4-R7E RTLDGRLQV/ | 32    | >SMAD4-R7E ITLDGRLQVA  | 1199  | 1167  |
| >SMAD4-R7E RTLDGRLQV/ | 287   | >SMAD4-R7E ITLDGRLQVA  | 6173  | 5886  |
| >SMAD4-R7E RTLDGRLQV  | 39    | >SMAD4-R7E ITLDGRLQV   | 31    | 8     |
| >SMAD4-R7E RTLDGRLQV  | 8     | >SMAD4-R7E ITLDGRLQV   | 20    | 12    |
| >SMAD4-R7E RTLDGRLQV/ | 282   | >SMAD4-R7E ITLDGRLQVA  | 1185  | 903   |
| >SMAD4-R7E RTLDGRLQV  | 159   | >SMAD4-R7E ITLDGRLQV   | 201   | 42    |
| >SMAD4-R7E QRTLDGRLQ\ | 19664 | >SMAD4-R7E QITLDGRLQV  | 169   | 19495 |
| >SMAD4-R7E QRTLDGRL   | 465   | >SMAD4-R7E QITLDGRL    | 21917 | 21452 |
| >SMAD4-R7E IQRTLDGRLQ | 1585  | >SMAD4-R7E IQITLDGRLQ\ | 409   | 1176  |
| >SMAD4-R7E IQRTLDGRLQ | 1641  | >SMAD4-R7E IQITLDGRLQ\ | 49    | 1592  |
| >SMAD4-R7E IQRTLDGR   | 396   | >SMAD4-R7E IQITLDGR    | 901   | 505   |
| >SMAD4-R7E IQRTLDGRLQ | 271   | >SMAD4-R7E IQITLDGRLQ\ | 412   | 141   |
| >SMAD4-R7E IQRTLDGR   | 723   | >SMAD4-R7E IQITLDGR    | 355   | 368   |
| >SMAD4-R7E TIQRTLDGR  | 141   | >SMAD4-R7E TIQITLDGR   | 125   | 16    |
| >SMAD4-R7E VTIQRTLDGR | 192   | >SMAD4-R7E VTIQITLDGRL | 730   | 538   |
| >SMAD4-R7E VTIQRTLDGR | 269   | >SMAD4-R7E VTIQITLDGR  | 244   | 25    |
| >SMAD4-R7E VTIQRTLDGR | 370   | >SMAD4-R7E VTIQITLDGRL | 237   | 133   |
| >SMAD4-R7E VTIQRTLDGR | 273   | >SMAD4-R7E VTIQITLDGR  | 321   | 48    |
| >SMAD4-R7E VTIQRTLDGR | 140   | >SMAD4-R7E VTIQITLDGR  | 47    | 93    |
| >SMAD4-R7E VTIQRTLDGR | 3358  | >SMAD4-R7E VTIQITLDGRL | 463   | 2895  |
| >SMAD4-R7E VTIQRTLDGR | 11    | >SMAD4-R7E VTIQITLDGRL | 15    | 4     |
| >SMAD4-R7E VTIQRTLDGR | 434   | >SMAD4-R7E VTIQITLDGRL | 157   | 277   |
| >SMAD4-R7E CVTIQRTLDG | 61    | >SMAD4-R7E CVTIQITLDGF | 67    | 6     |
| >SMAD4-R7E KCVTIQRTL  | 255   | >SMAD4-R7E KCVTIQITL   | 115   | 140   |
| >SMAD4-R7E SKCVTIQRTL | 225   | >SMAD4-R7E SKCVTIQITL  | 156   | 69    |
| >SMAD4-R7E SKCVTIQRTL | 1369  | >SMAD4-R7E SKCVTIQITL  | 199   | 1170  |
| >SMAD4-R7E HPSKCVTIQR | 33019 | >SMAD4-R7E HPSKCVTIQI  | 244   | 32775 |
| >SMAD4-R7E HPSKCVTIQR | 347   | >SMAD4-R7E HPSKCVTIQI  | 27085 | 26738 |
| >SMAD4-R7E HPSKCVTIQR | 195   | >SMAD4-R7E HPSKCVTIQI  | 33312 | 33117 |
| >SMAD4-R7E HPSKCVTIQR | 71    | >SMAD4-R7E HPSKCVTIQI  | 32006 | 31935 |
| >SMAD4-S43 SAYIKVFDL  | 103   | >SMAD4-S43 GAYIKVFDL   | 801   | 698   |
| >SMAD4-S43 SAYIKVFDLR | 309   | >SMAD4-S43 GAYIKVFDLR  | 1158  | 849   |

|                        |      |                        |      |      |
|------------------------|------|------------------------|------|------|
| >SMAD4-S43 SAYIKVFDLR  | 44   | >SMAD4-S43 GAYIKVFDLR  | 139  | 95   |
| >SMAD4-S43 SAYIKVFDLR  | 209  | >SMAD4-S43 GAYIKVFDLR  | 1154 | 945  |
| >SMAD4-S43 SAYIKVFDLR  | 18   | >SMAD4-S43 GAYIKVFDLR  | 69   | 51   |
| >SMAD4-S43 SAYIKVFDL   | 21   | >SMAD4-S43 GAYIKVFDL   | 43   | 22   |
| >SMAD4-S43 SAYIKVFDLR  | 194  | >SMAD4-S43 GAYIKVFDLR  | 268  | 74   |
| >SMAD4-S43 SAYIKVFDLR  | 406  | >SMAD4-S43 GAYIKVFDLR  | 2236 | 1830 |
| >SMAD4-S43 PSAYIKVFDL  | 44   | >SMAD4-S43 PGAYIKVFDL  | 871  | 827  |
| >SMAD4-S43 PSAYIKVF    | 465  | >SMAD4-S43 PGAYIKVF    | 3876 | 3411 |
| >SMAD4-S43 PSAYIKVF    | 253  | >SMAD4-S43 PGAYIKVF    | 9987 | 9734 |
| >SMAD4-S43 YPSAYIKVFDL | 69   | >SMAD4-S43 YPGAYIKVFDL | 62   | 7    |
| >SMAD4-S43 YPSAYIKV    | 386  | >SMAD4-S43 YPGAYIKV    | 505  | 119  |
| >SMAD4-S43 YPSAYIKV    | 459  | >SMAD4-S43 YPGAYIKV    | 1224 | 765  |
| >SMAD4-S43 YPSAYIKVF   | 79   | >SMAD4-S43 YPGAYIKVF   | 207  | 128  |
| >SMAD4-S43 YPSAYIKVFDL | 83   | >SMAD4-S43 YPGAYIKVFDL | 208  | 125  |
| >SMAD4-S43 YPSAYIKVF   | 436  | >SMAD4-S43 YPGAYIKVF   | 863  | 427  |
| >SMAD4-S43 YPSAYIKVFDL | 332  | >SMAD4-S43 YPGAYIKVFDL | 640  | 308  |
| >SMAD4-S43 YPSAYIKVF   | 35   | >SMAD4-S43 YPGAYIKVF   | 153  | 118  |
| >SMAD4-S43 YPSAYIKVF   | 14   | >SMAD4-S43 YPGAYIKVF   | 29   | 15   |
| >SMAD4-S43 YPSAYIKVFDL | 127  | >SMAD4-S43 YPGAYIKVFDL | 674  | 547  |
| >SMAD4-S43 YPSAYIKVF   | 417  | >SMAD4-S43 YPGAYIKVF   | 4680 | 4263 |
| >SMAD4-S43 YPSAYIKVFDL | 87   | >SMAD4-S43 YPGAYIKVFDL | 938  | 851  |
| >SMAD4-S43 YPSAYIKV    | 334  | >SMAD4-S43 YPGAYIKV    | 1160 | 826  |
| >SMAD4-S43 YPSAYIKVF   | 164  | >SMAD4-S43 YPGAYIKVF   | 755  | 591  |
| >SMAD4-S43 YPSAYIKVFDL | 249  | >SMAD4-S43 YPGAYIKVFDL | 722  | 473  |
| >SMAD4-S43 YPSAYIKV    | 223  | >SMAD4-S43 YPGAYIKV    | 626  | 403  |
| >SMAD4-S43 YPSAYIKVF   | 7    | >SMAD4-S43 YPGAYIKVF   | 33   | 26   |
| >SMAD4-S43 YPSAYIKVFDL | 106  | >SMAD4-S43 YPGAYIKVFDL | 1826 | 1720 |
| >SMAD4-S43 YPSAYIKVF   | 23   | >SMAD4-S43 YPGAYIKVF   | 105  | 82   |
| >SMAD4-S43 YPSAYIKVFDL | 271  | >SMAD4-S43 YPGAYIKVFDL | 1759 | 1488 |
| >SMAD4-S43 IYPSAYIKV   | 1715 | >SMAD4-S43 IYPGAYIKV   | 350  | 1365 |
| >SMAD4-S43 IYPSAYIKVF  | 18   | >SMAD4-S43 IYPGAYIKVF  | 22   | 4    |
| >SMAD4-S43 IYPSAYIK    | 472  | >SMAD4-S43 IYPGAYIK    | 645  | 173  |
| >SMAD4-S43 IYPSAYIKV   | 130  | >SMAD4-S43 IYPGAYIKV   | 169  | 39   |
| >SMAD4-S43 IYPSAYIKVF  | 32   | >SMAD4-S43 IYPGAYIKVF  | 35   | 3    |
| >SMAD4-S43 IYPSAYIK    | 556  | >SMAD4-S43 IYPGAYIK    | 433  | 123  |
| >SMAD4-S43 IYPSAYIKV   | 13   | >SMAD4-S43 IYPGAYIKV   | 11   | 2    |
| >SMAD4-S43 IYPSAYIKVF  | 4    | >SMAD4-S43 IYPGAYIKVF  | 4    | 0    |
| >SMAD4-S43 IYPSAYIKVF  | 334  | >SMAD4-S43 IYPGAYIKVF  | 1602 | 1268 |
| >SMAD4-S43 IYPSAYIKV   | 243  | >SMAD4-S43 IYPGAYIKV   | 464  | 221  |
| >SMAD4-S43 IYPSAYIKVF  | 56   | >SMAD4-S43 IYPGAYIKVF  | 100  | 44   |
| >SMAD4-S43 IYPSAYIK    | 130  | >SMAD4-S43 IYPGAYIK    | 124  | 6    |
| >SMAD4-S43 IYPSAYIKV   | 345  | >SMAD4-S43 IYPGAYIKV   | 652  | 307  |
| >SMAD4-S43 KIYPSAYI    | 40   | >SMAD4-S43 KIYPGAYI    | 55   | 15   |

|                        |     |                        |      |     |
|------------------------|-----|------------------------|------|-----|
| >SMAD4-S43 KIYPSAYIKV  | 91  | >SMAD4-S43 KIYPGAYIKV  | 76   | 15  |
| >SMAD4-S43 KIYPSAYI    | 39  | >SMAD4-S43 KIYPGAYI    | 92   | 53  |
| >SMAD4-S43 KIYPSAYIKV  | 84  | >SMAD4-S43 KIYPGAYIKV  | 64   | 20  |
| >SMAD4-S43 KIYPSAYI    | 17  | >SMAD4-S43 KIYPGAYI    | 20   | 3   |
| >SMAD4-S43 KIYPSAYIKV  | 52  | >SMAD4-S43 KIYPGAYIKV  | 59   | 7   |
| >SMAD4-S43 KIYPSAYI    | 11  | >SMAD4-S43 KIYPGAYI    | 12   | 1   |
| >SMAD4-S43 KIYPSAYIKV  | 67  | >SMAD4-S43 KIYPGAYIKV  | 83   | 16  |
| >SMAD4-S43 KIYPSAYI    | 7   | >SMAD4-S43 KIYPGAYI    | 5    | 2   |
| >SMAD4-S43 KIYPSAYIKV  | 6   | >SMAD4-S43 KIYPGAYIKV  | 5    | 1   |
| >SMAD4-S43 KIYPSAYI    | 38  | >SMAD4-S43 KIYPGAYI    | 54   | 16  |
| >SMAD4-S43 KIYPSAYIKV  | 44  | >SMAD4-S43 KIYPGAYIKV  | 46   | 2   |
| >SMAD4-S43 KIYPSAYI    | 37  | >SMAD4-S43 KIYPGAYI    | 36   | 1   |
| >SMAD4-S43 KIYPSAYIKV  | 9   | >SMAD4-S43 KIYPGAYIKV  | 7    | 2   |
| >SMAD4-S43 KIYPSAYI    | 344 | >SMAD4-S43 KIYPGAYI    | 647  | 303 |
| >SMAD4-S43 KIYPSAYIKV  | 186 | >SMAD4-S43 KIYPGAYIKV  | 122  | 64  |
| >SMAD4-S43 KIYPSAYI    | 57  | >SMAD4-S43 KIYPGAYI    | 45   | 12  |
| >SMAD4-S43 KIYPSAYIKV  | 5   | >SMAD4-S43 KIYPGAYIKV  | 4    | 1   |
| >SMAD4-S43 KIYPSAYIK   | 27  | >SMAD4-S43 KIYPGAYIK   | 30   | 3   |
| >SMAD4-S43 KIYPSAYIK   | 8   | >SMAD4-S43 KIYPGAYIK   | 10   | 2   |
| >SMAD4-S43 KIYPSAYI    | 39  | >SMAD4-S43 KIYPGAYI    | 103  | 64  |
| >SMAD4-S43 KIYPSAYIK   | 13  | >SMAD4-S43 KIYPGAYIK   | 22   | 9   |
| >SMAD4-S43 KIYPSAYIKV  | 121 | >SMAD4-S43 KIYPGAYIKV  | 226  | 105 |
| >SMAD4-S43 KIYPSAYIK   | 51  | >SMAD4-S43 KIYPGAYIK   | 74   | 23  |
| >SMAD4-S43 KIYPSAYI    | 83  | >SMAD4-S43 KIYPGAYI    | 151  | 68  |
| >SMAD4-S43 KIYPSAYIKV  | 487 | >SMAD4-S43 KIYPGAYIKV  | 379  | 108 |
| >SMAD4-S43 KIYPSAYIKVF | 28  | >SMAD4-S43 KIYPGAYIKVF | 24   | 4   |
| >SMAD4-S43 KIYPSAYIK   | 292 | >SMAD4-S43 KIYPGAYIK   | 771  | 479 |
| >SMAD4-S43 KIYPSAYI    | 378 | >SMAD4-S43 KIYPGAYI    | 619  | 241 |
| >SMAD4-S43 KIYPSAYIKV  | 250 | >SMAD4-S43 KIYPGAYIKV  | 225  | 25  |
| >SMAD4-S43 KIYPSAYIKVF | 68  | >SMAD4-S43 KIYPGAYIKVF | 78   | 10  |
| >SMAD4-S43 KIYPSAYIKVF | 8   | >SMAD4-S43 KIYPGAYIKVF | 15   | 7   |
| >SMAD4-S43 KIYPSAYI    | 25  | >SMAD4-S43 KIYPGAYI    | 47   | 22  |
| >SMAD4-S43 KIYPSAYIKV  | 412 | >SMAD4-S43 KIYPGAYIKV  | 697  | 285 |
| >SMAD4-S43 KIYPSAYIKVF | 5   | >SMAD4-S43 KIYPGAYIKVF | 7    | 2   |
| >SMAD4-S43 KIYPSAYIKVF | 235 | >SMAD4-S43 KIYPGAYIKVF | 529  | 294 |
| >SMAD4-S43 KIYPSAYI    | 54  | >SMAD4-S43 KIYPGAYI    | 122  | 68  |
| >SMAD4-S43 KIYPSAYIKVF | 41  | >SMAD4-S43 KIYPGAYIKVF | 55   | 14  |
| >SMAD4-S43 KIYPSAYIKVF | 297 | >SMAD4-S43 KIYPGAYIKVF | 247  | 50  |
| >SMAD4-S43 KIYPSAYIKVF | 398 | >SMAD4-S43 KIYPGAYIKVF | 1220 | 822 |
| >SMAD4-S43 KIYPSAYIK   | 36  | >SMAD4-S43 KIYPGAYIK   | 58   | 22  |
| >SMAD4-S43 KIYPSAYI    | 94  | >SMAD4-S43 KIYPGAYI    | 76   | 18  |
| >SMAD4-S43 HKIYPSAY    | 292 | >SMAD4-S43 HKIYPGAY    | 342  | 50  |
| >SMAD4-S43 HKIYPSAYI   | 122 | >SMAD4-S43 HKIYPGAYI   | 864  | 742 |

|                        |       |                        |       |       |
|------------------------|-------|------------------------|-------|-------|
| >SMAD4-S43 HKIYPSAYIKV | 382   | >SMAD4-S43 HKIYPGAYIKV | 841   | 459   |
| >SMAD4-S43 HKIYPSAY    | 289   | >SMAD4-S43 HKIYPGAY    | 348   | 59    |
| >SMAD4-S43 HKIYPSAY    | 3     | >SMAD4-S43 HKIYPGAY    | 8     | 5     |
| >SMAD4-S43 HKIYPSAYI   | 25    | >SMAD4-S43 HKIYPGAYI   | 21    | 4     |
| >SMAD4-S43 HKIYPSAYIK  | 191   | >SMAD4-S43 HKIYPGAYIK  | 293   | 102   |
| >SMAD4-S43 HKIYPSAYIKV | 60    | >SMAD4-S43 HKIYPGAYIKV | 84    | 24    |
| >SMAD4-S43 HKIYPSAY    | 384   | >SMAD4-S43 HKIYPGAY    | 959   | 575   |
| >SMAD4-S43 VHKIYPSAY   | 243   | >SMAD4-S43 VHKIYPGAY   | 119   | 124   |
| >SMAD4-S43 VHKIYPSAY   | 17    | >SMAD4-S43 VHKIYPGAY   | 476   | 459   |
| >SMAD4-S43 AVHKIYPSAYI | 401   | >SMAD4-S43 AVHKIYPGAY  | 760   | 359   |
| >SMAD4-S43 AVHKIYPSAYI | 220   | >SMAD4-S43 AVHKIYPGAY  | 308   | 88    |
| >SMAD4-S43 AVHKIYPSAYI | 235   | >SMAD4-S43 AVHKIYPGAY  | 241   | 6     |
| >SMAD4-S43 AVHKIYPSAY  | 47    | >SMAD4-S43 AVHKIYPGAY  | 51    | 4     |
| >SMAD4-S43 AVHKIYPSAY  | 410   | >SMAD4-S43 AVHKIYPGAY  | 483   | 73    |
| >SMAD4-S43 AVHKIYPS    | 164   | >SMAD4-S43 AVHKIYPG    | 172   | 8     |
| >SMAD4-S43 AVHKIYPSA   | 7     | >SMAD4-S43 AVHKIYPGA   | 14    | 7     |
| >SMAD4-S43 AVHKIYPSAY  | 80    | >SMAD4-S43 AVHKIYPGAY  | 123   | 43    |
| >SMAD4-S43 AVHKIYPSAYI | 7     | >SMAD4-S43 AVHKIYPGAY  | 12    | 5     |
| >SMAD4-S43 AVHKIYPSAY  | 616   | >SMAD4-S43 AVHKIYPGAY  | 357   | 259   |
| >SMAD4-S43 AVHKIYPSAYI | 101   | >SMAD4-S43 AVHKIYPGAY  | 231   | 130   |
| >SMAD4-S43 AVHKIYPSAY  | 123   | >SMAD4-S43 AVHKIYPGAY  | 81    | 42    |
| >SMAD4-S43 AVHKIYPSAY  | 134   | >SMAD4-S43 AVHKIYPGAY  | 259   | 125   |
| >SMAD4-S43 AVHKIYPSAY  | 105   | >SMAD4-S43 AVHKIYPGAY  | 1050  | 945   |
| >SMAD4-S43 AVHKIYPSAY  | 439   | >SMAD4-S43 AVHKIYPGAY  | 1090  | 651   |
| >SMAD4-S43 AVHKIYPSAYI | 297   | >SMAD4-S43 AVHKIYPGAY  | 365   | 68    |
| >SMAD4-S43 DAVHKIYPSA  | 225   | >SMAD4-S43 DAVHKIYPGA  | 143   | 82    |
| >SMAD4-S43 DAVHKIYPSA  | 38    | >SMAD4-S43 DAVHKIYPGA  | 51    | 13    |
| >SMAD4-S43 DAVHKIYPS   | 416   | >SMAD4-S43 DAVHKIYPG   | 2026  | 1610  |
| >SMAD4-S43 DAVHKIYPSA  | 33    | >SMAD4-S43 DAVHKIYPGA  | 48    | 15    |
| >SMAD4-S50 SFVKGWGP    | 264   | >SMAD4-S50 RFVKGWGP    | 354   | 90    |
| >SMAD4-S50 SFVKGWGP    | 433   | >SMAD4-S50 RFVKGWGP    | 169   | 264   |
| >SMAD4-S50 SFVKGWGP    | 792   | >SMAD4-S50 RFVKGWGP    | 316   | 476   |
| >SMAD4-S50 SFVKGWGP    | 189   | >SMAD4-S50 RFVKGWGP    | 693   | 504   |
| >SMAD4-S50 SFVKGWGP    | 245   | >SMAD4-S50 RFVKGWGP    | 233   | 12    |
| >SMAD4-S50 MSFVKGWGI   | 382   | >SMAD4-S50 MRFVKGWGI   | 20512 | 20130 |
| >SMAD4-S50 MSFVKGWGI   | 18    | >SMAD4-S50 MRFVKGWGI   | 82    | 64    |
| >SMAD4-S50 MSFVKGWGI   | 22    | >SMAD4-S50 MRFVKGWGI   | 193   | 171   |
| >SMAD4-S50 MSFVKGWGI   | 222   | >SMAD4-S50 MRFVKGWGI   | 8651  | 8429  |
| >SMAD4-S50 MSFVKGWGI   | 39    | >SMAD4-S50 MRFVKGWGI   | 34    | 5     |
| >SMAD4-S50 MSFVKGWGI   | 4     | >SMAD4-S50 MRFVKGWGI   | 15123 | 15119 |
| >SMAD4-S50 MSFVKGWGI   | 20138 | >SMAD4-S50 MRFVKGWGI   | 215   | 19923 |
| >SMAD4-S50 MSFVKGWGI   | 226   | >SMAD4-S50 MRFVKGWGI   | 5225  | 4999  |
| >SMAD4-S50 MSFVKGWGI   | 305   | >SMAD4-S50 MRFVKGWGI   | 22639 | 22334 |

|                       |       |                       |      |       |
|-----------------------|-------|-----------------------|------|-------|
| >SMAD4-S50 MSFVKGWG   | 16271 | >SMAD4-S50 MRFVKGWG   | 302  | 15969 |
| >SMAD4-S50 MSFVKGWGI  | 13048 | >SMAD4-S50 MRFVKGWGI  | 332  | 12716 |
| >SMAD4-S50 MSFVKGWGI  | 147   | >SMAD4-S50 MRFVKGWGI  | 5202 | 5055  |
| >SMAD4-S50 MSFVKGWGI  | 376   | >SMAD4-S50 MRFVKGWGI  | 66   | 310   |
| >SMAD4-S50 MSFVKGWGI  | 462   | >SMAD4-S50 MRFVKGWGI  | 1955 | 1493  |
| >SMAD4-S50 DLRRRCILRM | 12399 | >SMAD4-S50 DLRRRCILRM | 19   | 12380 |
| >SMAD4-S50 RMSFVKGW   | 10947 | >SMAD4-S50 RMRFVKGW   | 267  | 10680 |
| >SMAD4-S50 RMSFVKGW   | 7182  | >SMAD4-S50 RMRFVKGW   | 183  | 6999  |
| >SMAD4-S50 RMSFVKGW   | 172   | >SMAD4-S50 RMRFVKGW   | 503  | 331   |
| >SMAD4-S50 RMSFVKGW   | 130   | >SMAD4-S50 RMRFVKGW   | 49   | 81    |
| >SMAD4-S50 RMSFVKGW   | 161   | >SMAD4-S50 RMRFVKGW   | 85   | 76    |
| >SMAD4-S50 RMSFVKGW   | 20    | >SMAD4-S50 RMRFVKGW   | 313  | 293   |
| >SMAD4-S50 LRMSFVKGW  | 176   | >SMAD4-S50 LRMRFVKGW  | 296  | 120   |
| >SMAD4-S50 LRMSFVKGW  | 220   | >SMAD4-S50 LRMRFVKGW  | 129  | 91    |
| >SMAD4-S50 LRMSFVKGW  | 418   | >SMAD4-S50 LRMRFVKGW  | 292  | 126   |
| >SMAD4-S50 LRMSFVKGW  | 355   | >SMAD4-S50 LRMRFVKGW  | 495  | 140   |
| >SMAD4-S50 LRMSFVKGW  | 620   | >SMAD4-S50 LRMRFVKGW  | 465  | 155   |
| >SMAD4-S50 ILRMSFVK   | 36    | >SMAD4-S50 ILRMRFVK   | 37   | 1     |
| >SMAD4-S50 ILRMSFVK   | 388   | >SMAD4-S50 ILRMRFVK   | 665  | 277   |
| >SMAD4-S50 ILRMSFVK   | 9     | >SMAD4-S50 ILRMRFVK   | 10   | 1     |
| >SMAD4-S50 ILRMSFVK   | 239   | >SMAD4-S50 ILRMRFVK   | 66   | 173   |
| >SMAD4-S50 ILRMSFVK   | 1567  | >SMAD4-S50 ILRMRFVK   | 330  | 1237  |
| >SMAD4-S50 ILRMSFVKG  | 2199  | >SMAD4-S50 ILRMRFVKG  | 83   | 2116  |
| >SMAD4-S50 ILRMSFVKGV | 232   | >SMAD4-S50 ILRMRFVKGV | 1069 | 837   |
| >SMAD4-S50 ILRMSFVKGV | 19    | >SMAD4-S50 ILRMRFVKGV | 48   | 29    |
| >SMAD4-S50 ILRMSFVKGV | 173   | >SMAD4-S50 ILRMRFVKGV | 347  | 174   |
| >SMAD4-S50 CILRMSFV   | 279   | >SMAD4-S50 CILRMRFV   | 1797 | 1518  |
| >SMAD4-S50 CILRMSFV   | 471   | >SMAD4-S50 CILRMRFV   | 1995 | 1524  |
| >SMAD4-S50 CILRMSFV   | 235   | >SMAD4-S50 CILRMRFV   | 996  | 761   |
| >SMAD4-S50 CILRMSFV   | 42    | >SMAD4-S50 CILRMRFV   | 350  | 308   |
| >SMAD4-S50 CILRMSFV   | 65    | >SMAD4-S50 CILRMRFV   | 297  | 232   |
| >SMAD4-S50 CILRMSFV   | 201   | >SMAD4-S50 CILRMRFV   | 1711 | 1510  |
| >SMAD4-S50 CILRMSFV   | 100   | >SMAD4-S50 CILRMRFV   | 956  | 856   |
| >SMAD4-S50 CILRMSFV   | 59    | >SMAD4-S50 CILRMRFV   | 871  | 812   |
| >SMAD4-S50 CILRMSFV   | 35    | >SMAD4-S50 CILRMRFV   | 171  | 136   |
| >SMAD4-S50 CILRMSFVK  | 106   | >SMAD4-S50 CILRMRFVK  | 136  | 30    |
| >SMAD4-S50 CILRMSFVK  | 19    | >SMAD4-S50 CILRMRFVK  | 19   | 0     |
| >SMAD4-S50 CILRMSFVK  | 109   | >SMAD4-S50 CILRMRFVK  | 94   | 15    |
| >SMAD4-S50 CILRMSFVK  | 518   | >SMAD4-S50 CILRMRFVK  | 105  | 413   |
| >SMAD4-S50 CILRMSFVK  | 419   | >SMAD4-S50 CILRMRFVK  | 295  | 124   |
| >SMAD4-S50 CILRMSFV   | 485   | >SMAD4-S50 CILRMRFV   | 1449 | 964   |
| >SMAD4-S50 CILRMSFV   | 369   | >SMAD4-S50 CILRMRFV   | 1715 | 1346  |
| >SMAD4-S50 CILRMSFVKG | 547   | >SMAD4-S50 CILRMRFVKG | 431  | 116   |



|                        |       |                        |      |       |
|------------------------|-------|------------------------|------|-------|
| >SMAD4-S50 CILRMSFVKG  | 125   | >SMAD4-S50 CILRMRFVKG  | 152  | 27    |
| >SMAD4-S50 LCILRMSFVK  | 1088  | >SMAD4-S50 LCILRMRFVK  | 285  | 803   |
| >SMAD4-S50 LCILRMSF    | 274   | >SMAD4-S50 LCILRMRF    | 1951 | 1677  |
| >SMAD4-S50 RLCILRMSFV  | 44    | >SMAD4-S50 RLCILRMRFV  | 117  | 73    |
| >SMAD4-S50 RLCILRMSFV  | 100   | >SMAD4-S50 RLCILRMRFV  | 337  | 237   |
| >SMAD4-S50 RLCILRMSFV  | 31    | >SMAD4-S50 RLCILRMRFV  | 69   | 38    |
| >SMAD4-S50 RLCILRMSFV  | 131   | >SMAD4-S50 RLCILRMRFV  | 311  | 180   |
| >SMAD4-S50 RLCILRMSFV  | 9     | >SMAD4-S50 RLCILRMRFV  | 15   | 6     |
| >SMAD4-S50 RLCILRMSFV  | 444   | >SMAD4-S50 RLCILRMRFV  | 1529 | 1085  |
| >SMAD4-S50 RLCILRMSFV  | 33    | >SMAD4-S50 RLCILRMRFV  | 131  | 98    |
| >SMAD4-S50 RLCILRMSFV  | 7     | >SMAD4-S50 RLCILRMRFV  | 16   | 9     |
| >SMAD4-S50 RLCILRMSFVI | 41    | >SMAD4-S50 RLCILRMRFV  | 43   | 2     |
| >SMAD4-S50 RLCILRMSFVI | 25    | >SMAD4-S50 RLCILRMRFV  | 28   | 3     |
| >SMAD4-S50 RLCILRMSFV  | 425   | >SMAD4-S50 RLCILRMRFV  | 537  | 112   |
| >SMAD4-S50 RLCILRMSFVI | 29    | >SMAD4-S50 RLCILRMRFV  | 33   | 4     |
| >SMAD4-S50 RLCILRMS    | 7002  | >SMAD4-S50 RLCILRMR    | 20   | 6982  |
| >SMAD4-S50 RLCILRMSFVI | 47    | >SMAD4-S50 RLCILRMRFV  | 29   | 18    |
| >SMAD4-S50 RLCILRMSF   | 29    | >SMAD4-S50 RLCILRMRF   | 159  | 130   |
| >SMAD4-S50 RLCILRMSF   | 75    | >SMAD4-S50 RLCILRMRF   | 243  | 168   |
| >SMAD4-S50 RLCILRMSF   | 62    | >SMAD4-S50 RLCILRMRF   | 427  | 365   |
| >SMAD4-S50 RLCILRMSF   | 243   | >SMAD4-S50 RLCILRMRF   | 186  | 57    |
| >SMAD4-S50 RLCILRMS    | 28267 | >SMAD4-S50 RLCILRMR    | 122  | 28145 |
| >SMAD4-S50 RLCILRMSFVI | 400   | >SMAD4-S50 RLCILRMRFV  | 359  | 41    |
| >SMAD4-S50 RRLCILRMSF  | 471   | >SMAD4-S50 RRLCILRMRF  | 2496 | 2025  |
| >SMAD4-S50 RRLCILRMSF  | 4     | >SMAD4-S50 RRLCILRMRF  | 12   | 8     |
| >SMAD4-S50 RRLCILRMSF  | 247   | >SMAD4-S50 RRLCILRMRF  | 607  | 360   |
| >SMAD4-S50 RRLCILRMS   | 40    | >SMAD4-S50 RRLCILRMR   | 16   | 24    |
| >SMAD4-S50 RRLCILRMSF  | 25    | >SMAD4-S50 RRLCILRMRF  | 21   | 4     |
| >SMAD4-S50 RRLCILRMSF  | 23    | >SMAD4-S50 RRLCILRMRF  | 20   | 3     |
| >SMAD4-S50 RRLCILRMS   | 97    | >SMAD4-S50 RRLCILRMR   | 92   | 5     |
| >SMAD4-S50 RRLCILRMSF  | 46    | >SMAD4-S50 RRLCILRMRF  | 50   | 4     |
| >SMAD4-S50 RRLCILRMSF  | 36    | >SMAD4-S50 RRLCILRMRF  | 38   | 2     |
| >SMAD4-S50 RRLCILRMS   | 319   | >SMAD4-S50 RRLCILRMR   | 151  | 168   |
| >SMAD4-S50 RRLCILRMSF  | 57    | >SMAD4-S50 RRLCILRMRF  | 53   | 4     |
| >SMAD4-S50 RRLCILRMSF  | 29    | >SMAD4-S50 RRLCILRMRF  | 31   | 2     |
| >SMAD4-S50 RRLCILRMS   | 28360 | >SMAD4-S50 RRLCILRMR   | 246  | 28114 |
| >SMAD4-S50 LRRLCILRMS  | 13836 | >SMAD4-S50 LRRLCILRMR  | 55   | 13781 |
| >SMAD4-S50 LRRLCILRMSF | 24    | >SMAD4-S50 LRRLCILRMRI | 79   | 55    |
| >SMAD4-S50 LRRLCILRMS  | 997   | >SMAD4-S50 LRRLCILRMR  | 48   | 949   |
| >SMAD4-S50 LRRLCILRMSF | 421   | >SMAD4-S50 LRRLCILRMRI | 527  | 106   |
| >SMAD4-S50 LRRLCILRMSF | 424   | >SMAD4-S50 LRRLCILRMRI | 266  | 158   |
| >SMAD4-S50 LRRLCILRMS  | 436   | >SMAD4-S50 LRRLCILRMR  | 204  | 232   |
| >SMAD4-S50 LRRLCILRMSF | 43    | >SMAD4-S50 LRRLCILRMRI | 34   | 9     |

|                           |      |                        |      |      |
|---------------------------|------|------------------------|------|------|
| >SMAD4-V12V12VCVNPYPHYEF  | 428  | >SMAD4-V12ACVNPYPHYEF  | 583  | 155  |
| >SMAD4-V12V12VCVNPYPHY    | 369  | >SMAD4-V12ACVNPYPHY    | 123  | 246  |
| >SMAD4-V12V12VCVNPYPHY    | 153  | >SMAD4-V12ACVNPYPHY    | 275  | 122  |
| >SMAD4-V12V12VCVNPYPHY    | 470  | >SMAD4-V12ACVNPYPHY    | 762  | 292  |
| >SMAD4-V12V12VCVNPYPHYEF  | 146  | >SMAD4-V12ACVNPYPHYEF  | 82   | 64   |
| >SMAD4-V12V12VCVNPYPHY    | 309  | >SMAD4-V12ACVNPYPHY    | 836  | 527  |
| >SMAD4-V12V12VCVNPYPHYEF  | 220  | >SMAD4-V12ACVNPYPHYEF  | 531  | 311  |
| >SMAD4-V12V12SVCVNPYPHY   | 473  | >SMAD4-V12SACVNPYPHY   | 3918 | 3445 |
| >SMAD4-V12V12SVCVNPYPHY   | 175  | >SMAD4-V12SACVNPYPHY   | 1474 | 1299 |
| >SMAD4-V12V12SVCVNPYPHYE  | 54   | >SMAD4-V12SACVNPYPHYE  | 307  | 253  |
| >SMAD4-V12V12SVCVNPYPHY   | 51   | >SMAD4-V12SACVNPYPHY   | 1806 | 1755 |
| >SMAD4-V12V12SVCVNPYPHY   | 12   | >SMAD4-V12SACVNPYPHY   | 42   | 30   |
| >SMAD4-V12V12SVCVNPYPHY   | 36   | >SMAD4-V12SACVNPYPHY   | 61   | 25   |
| >SMAD4-V12V12SVCVNPYPHYE  | 14   | >SMAD4-V12SACVNPYPHYE  | 15   | 1    |
| >SMAD4-V12V12SVCVNPYPHYE  | 202  | >SMAD4-V12SACVNPYPHYE  | 366  | 164  |
| >SMAD4-V12V12SVCVNPYPHYE  | 19   | >SMAD4-V12SACVNPYPHYE  | 32   | 13   |
| >SMAD4-V12V12SVCVNPYPHY   | 16   | >SMAD4-V12SACVNPYPHY   | 207  | 191  |
| >SMAD4-V12V12SVCVNPYPHY   | 407  | >SMAD4-V12SACVNPYPHY   | 659  | 252  |
| >SMAD4-V12V12SVCVNPYPHY   | 1454 | >SMAD4-V12SACVNPYPHY   | 112  | 1342 |
| >SMAD4-V12V12SVCVNPYPHY   | 209  | >SMAD4-V12SACVNPYPHY   | 548  | 339  |
| >SMAD4-V12V12SVCVNPYPHYE  | 191  | >SMAD4-V12SACVNPYPHYE  | 253  | 62   |
| >SMAD4-V12V12SVCVNPYPHYE  | 151  | >SMAD4-V12SACVNPYPHYE  | 368  | 217  |
| >SMAD4-V12V12QYAFDLKCDSD  | 233  | >SMAD4-V12QYAFDLKCDSD  | 1684 | 1451 |
| >SMAD4-V12V12DSVCVNPYPHY  | 273  | >SMAD4-V12DSACVNPYPHY  | 73   | 200  |
| >SMAD4-V12V12DSVCVNPYP    | 17   | >SMAD4-V12DSACVNPYP    | 46   | 29   |
| >SMAD4-V12V12DSVCVNPYPHY  | 18   | >SMAD4-V12DSACVNPYPHY  | 57   | 39   |
| >SMAD4-V12V12DSVCVNPYP    | 60   | >SMAD4-V12DSACVNPYP    | 532  | 472  |
| >SMAD4-V12V12DSVCVNPYPHY  | 382  | >SMAD4-V12DSACVNPYPHY  | 2767 | 2385 |
| >SMAD4-V12V12DSVCVNPYPHY  | 50   | >SMAD4-V12DSACVNPYPHY  | 34   | 16   |
| >SMAD4-V12V12DSVCVNPYP    | 1492 | >SMAD4-V12DSACVNPYP    | 471  | 1021 |
| >SMAD4-V12V12DSVCVNPYPHY  | 149  | >SMAD4-V12DSACVNPYPHY  | 121  | 28   |
| >SMAD4-V12V12DSVCVNPYP    | 520  | >SMAD4-V12DSACVNPYP    | 189  | 331  |
| >SMAD4-V12V12DSVCVNPYPHY  | 756  | >SMAD4-V12DSACVNPYPHY  | 301  | 455  |
| >SMAD4-V12V12DSVCVNPYPHY  | 470  | >SMAD4-V12DSACVNPYPHY  | 302  | 168  |
| >SMAD4-V12V12DSVCVNPYP    | 93   | >SMAD4-V12DSACVNPYP    | 77   | 16   |
| >SMAD4-V12V12CDSVCVNPYP   | 700  | >SMAD4-V12CDSACVNPYP   | 392  | 308  |
| >SMAD4-V12V12CDSVCVNPYPH  | 316  | >SMAD4-V12CDSACVNPYPH  | 302  | 14   |
| >SMAD4-V12V12KCDSDVCVNPYP | 413  | >SMAD4-V12KCDSDACVNPYP | 444  | 31   |
| >SMAD4-V12V12LKCDSVCVNP   | 272  | >SMAD4-V12LKCDSACVNP   | 331  | 59   |
| >SMAD4-V12V12LKCDSVCV     | 125  | >SMAD4-V12LKCDSACV     | 256  | 131  |
| >SMAD4-V12V12LKCDSVCVNP   | 7    | >SMAD4-V12LKCDSACVNP   | 8    | 1    |
| >SMAD4-V12V12DLKCDSVCV    | 172  | >SMAD4-V12DLKCDSACV    | 115  | 57   |
| >SMAD4-V12V12DLKCDSVCV    | 306  | >SMAD4-V12DLKCDSACV    | 246  | 60   |

|                      |      |                     |      |      |
|----------------------|------|---------------------|------|------|
| >SMAD4-V12FDLKCDV    | 312  | >SMAD4-V12FDLKDSA   | 9026 | 8714 |
| >SMAD4-V12YAFDLKCDV  | 76   | >SMAD4-V12YAFDLKDSA | 931  | 855  |
| >SMAD4-V12YAFDLKCDV  | 123  | >SMAD4-V12YAFDLKDSA | 576  | 453  |
| >SMAD4-V12YAFDLKCDV  | 52   | >SMAD4-V12YAFDLKDSA | 303  | 251  |
| >SMAD4-V12YAFDLKCDV  | 36   | >SMAD4-V12YAFDLKDSA | 109  | 73   |
| >SMAD4-V12YAFDLKCDV  | 20   | >SMAD4-V12YAFDLKDSA | 620  | 600  |
| >SMAD4-V12YAFDLKCDV  | 403  | >SMAD4-V12YAFDLKDSA | 8241 | 7838 |
| >SMAD4-V12YAFDLKCDV  | 59   | >SMAD4-V12YAFDLKDSA | 2078 | 2019 |
| >SMAD4-V12YAFDLKCDV  | 9    | >SMAD4-V12YAFDLKDSA | 543  | 534  |
| >SMAD4-V12YAFDLKCDV  | 23   | >SMAD4-V12YAFDLKDSA | 126  | 103  |
| >SMAD4-V12YAFDLKCDV  | 91   | >SMAD4-V12YAFDLKDSA | 2056 | 1965 |
| >SMAD4-V12YAFDLKCDV  | 1394 | >SMAD4-V12YAFDLKDSA | 460  | 934  |
| >SMAD4-V12VNPYHYERV  | 58   | >SMAD4-V12MNPYHYERV | 151  | 93   |
| >SMAD4-V12VNPYHYER   | 1250 | >SMAD4-V12MNPYHYER  | 163  | 1087 |
| >SMAD4-V12VNPYHYER   | 2560 | >SMAD4-V12MNPYHYER  | 85   | 2475 |
| >SMAD4-V12VNPYHYERV  | 4174 | >SMAD4-V12MNPYHYERV | 38   | 4136 |
| >SMAD4-V12VNPYHYER   | 1241 | >SMAD4-V12MNPYHYER  | 310  | 931  |
| >SMAD4-V12CVNPYHYER\ | 3278 | >SMAD4-V12CMNPYHYER | 246  | 3032 |
| >SMAD4-V12CVNPYHYER\ | 1359 | >SMAD4-V12CMNPYHYER | 137  | 1222 |
| >SMAD4-V12CVNPYHYER\ | 3370 | >SMAD4-V12CMNPYHYER | 490  | 2880 |
| >SMAD4-V12CVNPYHYER\ | 829  | >SMAD4-V12CMNPYHYER | 39   | 790  |
| >SMAD4-V12CVNPYHYER\ | 196  | >SMAD4-V12CMNPYHYER | 5    | 191  |
| >SMAD4-V12CVNPYHYER\ | 662  | >SMAD4-V12CMNPYHYER | 10   | 652  |
| >SMAD4-V12CVNPYHYER\ | 3959 | >SMAD4-V12CMNPYHYER | 48   | 3911 |
| >SMAD4-V12CVNPYHYER\ | 3716 | >SMAD4-V12CMNPYHYER | 64   | 3652 |
| >SMAD4-V12CVNPYHYER\ | 6560 | >SMAD4-V12CMNPYHYER | 120  | 6440 |
| >SMAD4-V12CVNPYHYER\ | 8996 | >SMAD4-V12CMNPYHYER | 308  | 8688 |
| >SMAD4-V12CVNPYHYER\ | 2172 | >SMAD4-V12CMNPYHYER | 16   | 2156 |
| >SMAD4-V12CVNPYHYER\ | 3840 | >SMAD4-V12CMNPYHYER | 97   | 3743 |
| >SMAD4-V12CVNPYHYER\ | 84   | >SMAD4-V12CMNPYHYER | 5    | 79   |
| >SMAD4-V12CVNPYHYER\ | 556  | >SMAD4-V12CMNPYHYER | 13   | 543  |
| >SMAD4-V12CVNPYHYER  | 69   | >SMAD4-V12CMNPYHYER | 155  | 86   |
| >SMAD4-V12CVNPYHYER  | 9    | >SMAD4-V12CMNPYHYER | 6    | 3    |
| >SMAD4-V12CVNPYHYER  | 52   | >SMAD4-V12CMNPYHYER | 25   | 27   |
| >SMAD4-V12CVNPYHYER  | 18   | >SMAD4-V12CMNPYHYER | 63   | 45   |
| >SMAD4-V12CVNPYHYER\ | 424  | >SMAD4-V12CMNPYHYER | 3553 | 3129 |
| >SMAD4-V12CVNPYHYER\ | 8289 | >SMAD4-V12CMNPYHYER | 402  | 7887 |
| >SMAD4-V12CVNPYHYER  | 125  | >SMAD4-V12CMNPYHYER | 32   | 93   |
| >SMAD4-V12VCVNPYHYEF | 428  | >SMAD4-V12VCMNPYHYE | 142  | 286  |
| >SMAD4-V12VCVNPYHYEF | 1023 | >SMAD4-V12VCMNPYHYE | 464  | 559  |
| >SMAD4-V12VCVNPYHY   | 369  | >SMAD4-V12VCMNPYHY  | 952  | 583  |
| >SMAD4-V12VCVNPYHY   | 153  | >SMAD4-V12VCMNPYHY  | 169  | 16   |
| >SMAD4-V12VCVNPYHY   | 470  | >SMAD4-V12VCMNPYHY  | 214  | 256  |

|                       |      |                       |       |       |
|-----------------------|------|-----------------------|-------|-------|
| >SMAD4-V12VCVNPYHYEF  | 146  | >SMAD4-V12VCMNPYHYE   | 29    | 117   |
| >SMAD4-V12VCVNPYHYEF  | 1141 | >SMAD4-V12VCMNPYHYE   | 395   | 746   |
| >SMAD4-V12VCVNPYHY    | 309  | >SMAD4-V12VCMNPYHY    | 178   | 131   |
| >SMAD4-V12VCVNPYHY    | 1122 | >SMAD4-V12VCMNPYHY    | 415   | 707   |
| >SMAD4-V12VCVNPYHYEF  | 220  | >SMAD4-V12VCMNPYHYE   | 191   | 29    |
| >SMAD4-V12SVCVNPYH    | 473  | >SMAD4-V12SVCMNPYH    | 277   | 196   |
| >SMAD4-V12SVCVNPYHY   | 175  | >SMAD4-V12SVCMNPYHY   | 92    | 83    |
| >SMAD4-V12SVCVNPYHYE  | 54   | >SMAD4-V12SVCMNPYHY   | 38    | 16    |
| >SMAD4-V12SVCVNPYHY   | 51   | >SMAD4-V12SVCMNPYHY   | 29    | 22    |
| >SMAD4-V12SVCVNPYHY   | 12   | >SMAD4-V12SVCMNPYHY   | 12    | 0     |
| >SMAD4-V12SVCVNPYHY   | 36   | >SMAD4-V12SVCMNPYHY   | 34    | 2     |
| >SMAD4-V12SVCVNPYHYE  | 14   | >SMAD4-V12SVCMNPYHY   | 13    | 1     |
| >SMAD4-V12SVCVNPYHYE  | 202  | >SMAD4-V12SVCMNPYHY   | 132   | 70    |
| >SMAD4-V12SVCVNPYHYE  | 19   | >SMAD4-V12SVCMNPYHY   | 15    | 4     |
| >SMAD4-V12SVCVNPYHY   | 16   | >SMAD4-V12SVCMNPYHY   | 14    | 2     |
| >SMAD4-V12SVCVNPYHY   | 407  | >SMAD4-V12SVCMNPYHY   | 215   | 192   |
| >SMAD4-V12SVCVNPYHY   | 209  | >SMAD4-V12SVCMNPYHY   | 246   | 37    |
| >SMAD4-V12SVCVNPYHYE  | 191  | >SMAD4-V12SVCMNPYHY   | 213   | 22    |
| >SMAD4-V12SVCVNPYHYE  | 151  | >SMAD4-V12SVCMNPYHY   | 76    | 75    |
| >SMAD4-V12DSVCVNPYH   | 273  | >SMAD4-V12DSVCMNPYH   | 293   | 20    |
| >SMAD4-V12DSVCVNPY    | 607  | >SMAD4-V12DSVCMNPY    | 435   | 172   |
| >SMAD4-V12DSVCVNPY    | 17   | >SMAD4-V12DSVCMNPY    | 10    | 7     |
| >SMAD4-V12DSVCVNPYH   | 18   | >SMAD4-V12DSVCMNPYH   | 12    | 6     |
| >SMAD4-V12DSVCVNPY    | 60   | >SMAD4-V12DSVCMNPY    | 46    | 14    |
| >SMAD4-V12DSVCVNPYH   | 382  | >SMAD4-V12DSVCMNPYH   | 219   | 163   |
| >SMAD4-V12DSVCVNPYH   | 50   | >SMAD4-V12DSVCMNPYH   | 71    | 21    |
| >SMAD4-V12DSVCVNPYH   | 149  | >SMAD4-V12DSVCMNPYH   | 131   | 18    |
| >SMAD4-V12DSVCVNPYH   | 470  | >SMAD4-V12DSVCMNPYH   | 769   | 299   |
| >SMAD4-V12DSVCVNPY    | 745  | >SMAD4-V12DSVCMNPY    | 262   | 483   |
| >SMAD4-V12DSVCVNPYH   | 749  | >SMAD4-V12DSVCMNPYH   | 282   | 467   |
| >SMAD4-V12DSVCVNPY    | 93   | >SMAD4-V12DSVCMNPY    | 96    | 3     |
| >SMAD4-V12CDSVCVNPYH  | 744  | >SMAD4-V12CDSVCMNPY   | 461   | 283   |
| >SMAD4-V12CDSVCVNPYH  | 316  | >SMAD4-V12CDSVCMNPY   | 562   | 246   |
| >SMAD4-V12KCDSVCVNPY  | 413  | >SMAD4-V12KCDSVCMNP   | 374   | 39    |
| >SMAD4-V12KCDSVCVNPY  | 1096 | >SMAD4-V12KCDSVCMNP   | 247   | 849   |
| >SMAD4-V12LKCDSVCVNF  | 272  | >SMAD4-V12LKCDSVCMN   | 474   | 202   |
| >SMAD4-V12LKCDSVCV    | 125  | >SMAD4-V12LKCDSVCM    | 37    | 88    |
| >SMAD4-V12LKCDSVCVNF  | 7    | >SMAD4-V12LKCDSVCMN   | 9     | 2     |
| >SMAD4-V12DLKCDSVCV   | 172  | >SMAD4-V12DLKCDSVCM   | 8843  | 8671  |
| >SMAD4-V12DLKCDSVCV   | 306  | >SMAD4-V12DLKCDSVCM   | 15500 | 15194 |
| >SMAD4-V35KVPSSCPIVTL | 272  | >SMAD4-V35KVPSSCPIVTL | 23897 | 23625 |
| >SMAD4-V35KVPSSCPIVTL | 119  | >SMAD4-V35KVPSSCPIVTL | 23936 | 23817 |
| >SMAD4-V35KVPSSCPIVTL | 26   | >SMAD4-V35KVPSSCPIVTL | 21798 | 21772 |

|                         |       |                         |       |       |
|-------------------------|-------|-------------------------|-------|-------|
| >SMAD4-V35 KVPSSCPIVTV  | 74    | >SMAD4-V35 KVPSSCPIVTE  | 25169 | 25095 |
| >SMAD4-V35 KVPSSCPIVTV  | 116   | >SMAD4-V35 KVPSSCPIVTE  | 24801 | 24685 |
| >SMAD4-V35 KVPSSCPIVTV  | 33    | >SMAD4-V35 KVPSSCPIVTE  | 32151 | 32118 |
| >SMAD4-V35 KVPSSCPIVTV  | 402   | >SMAD4-V35 KVPSSCPIVTE  | 3761  | 3359  |
| >SMAD4-V35 KVPSSCPIVTV  | 76    | >SMAD4-V35 KVPSSCPIVTE  | 8562  | 8486  |
| >SMAD4-V35 IVTVDDGYV    | 941   | >SMAD4-V35 IVTDDGYV     | 241   | 700   |
| >SMAD4-V35 IVTVDDGYV    | 1037  | >SMAD4-V35 IVTDDGYV     | 245   | 792   |
| >SMAD4-V35 IVTVDDGYV    | 155   | >SMAD4-V35 IVTDDGYV     | 64    | 91    |
| >SMAD4-V35 IVTVDDGYV    | 398   | >SMAD4-V35 IVTDDGYV     | 61    | 337   |
| >SMAD4-V35 IVTVDDGYV    | 1985  | >SMAD4-V35 IVTDDGYV     | 373   | 1612  |
| >SMAD4-V35 IVTVDDGYV    | 454   | >SMAD4-V35 IVTDDGYV     | 134   | 320   |
| >SMAD4-V35 IVTVDDGYV    | 2385  | >SMAD4-V35 IVTDDGYV     | 354   | 2031  |
| >SMAD4-V35 IVTVDDGYV    | 87    | >SMAD4-V35 IVTDDGYV     | 9     | 78    |
| >SMAD4-V35 IVTVDDGYV    | 178   | >SMAD4-V35 IVTDDGYV     | 87    | 91    |
| >SMAD4-V35 PIVTDDGY     | 82    | >SMAD4-V35 PIVTDDGY     | 78    | 4     |
| >SMAD4-V35 CPIVTVDDGY   | 21    | >SMAD4-V35 CPIVTVDDGY   | 14    | 7     |
| >SMAD4-V35 CPIVTVDDGY   | 75    | >SMAD4-V35 CPIVTVDDGY   | 94    | 19    |
| >SMAD4-V35 CPIVTVDDGYV  | 122   | >SMAD4-V35 CPIVTVDDGYV  | 642   | 520   |
| >SMAD4-V35 CPIVTVDDGYV  | 318   | >SMAD4-V35 CPIVTVDDGYV  | 454   | 136   |
| >SMAD4-V35 CPIVTVDDGY   | 409   | >SMAD4-V35 CPIVTVDDGY   | 789   | 380   |
| >SMAD4-V35 SCPIVTVDDGY' | 143   | >SMAD4-V35 SCPIVTVDDGY' | 377   | 234   |
| >SMAD4-V35 SSCPIVTV     | 250   | >SMAD4-V35 SSCPIVTD     | 29162 | 28912 |
| >SMAD4-V35 SSCPIVTV     | 375   | >SMAD4-V35 SSCPIVTD     | 29097 | 28722 |
| >SMAD4-V35 SSCPIVTVDDG' | 106   | >SMAD4-V35 SSCPIVTVDDG' | 355   | 249   |
| >SMAD4-V35 SSCPIVTVDDG' | 84    | >SMAD4-V35 SSCPIVTVDDG' | 72    | 12    |
| >SMAD4-V35 SSCPIVTV     | 64    | >SMAD4-V35 SSCPIVTD     | 18383 | 18319 |
| >SMAD4-V35 SSCPIVTVDDG' | 232   | >SMAD4-V35 SSCPIVTVDDG' | 476   | 244   |
| >SMAD4-V35 SSCPIVTV     | 397   | >SMAD4-V35 SSCPIVTD     | 10641 | 10244 |
| >SMAD4-V35 SSCPIVTVDDG' | 7     | >SMAD4-V35 SSCPIVTVDDG' | 12    | 5     |
| >SMAD4-V35 SSCPIVTVDDG' | 82    | >SMAD4-V35 SSCPIVTVDDG' | 151   | 69    |
| >SMAD4-V35 SSCPIVTV     | 199   | >SMAD4-V35 SSCPIVTD     | 20829 | 20630 |
| >SMAD4-V35 VPSSCPIVTV   | 190   | >SMAD4-V35 VPSSCPIVTD   | 35013 | 34823 |
| >SMAD4-V35 VPSSCPIVTV   | 66    | >SMAD4-V35 VPSSCPIVTD   | 2099  | 2033  |
| >SMAD4-V45 VDDLRRICI    | 359   | >SMAD4-V45 FDDLRRICI    | 81    | 278   |
| >SMAD4-V45 ISLSAAAGIGV  | 304   | >SMAD4-V45 ISLSAAAGIGF  | 5193  | 4889  |
| >SMAD4-V45 ISLSAAAGIGV  | 135   | >SMAD4-V45 ISLSAAAGIGF  | 13440 | 13305 |
| >SMAD4-V45 ISLSAAAGIGV  | 12725 | >SMAD4-V45 ISLSAAAGIGF  | 375   | 12350 |
| >SMAD4-V45 ISLSAAAGIGV  | 644   | >SMAD4-V45 ISLSAAAGIGF  | 13    | 631   |
| >SMAD4-V45 ISLSAAAGIGV  | 69    | >SMAD4-V45 ISLSAAAGIGF  | 3     | 66    |
| >SMAD4-V45 ISLSAAAGIGV  | 11408 | >SMAD4-V45 ISLSAAAGIGF  | 173   | 11235 |
| >SMAD4-V45 ISLSAAAGIGV  | 11143 | >SMAD4-V45 ISLSAAAGIGF  | 78    | 11065 |
| >SMAD4-V45 ISLSAAAGIGV  | 1116  | >SMAD4-V45 ISLSAAAGIGF  | 45    | 1071  |
| >SMAD4-V45 IGVDDLRR     | 619   | >SMAD4-V45 IGFDDLRR     | 199   | 420   |

|                      |       |                      |       |       |
|----------------------|-------|----------------------|-------|-------|
| >SMAD4-V4☉AAGIGVDDL  | 264   | >SMAD4-V4☉AAGIGFDDL  | 280   | 16    |
| >SMAD4-V4☉AAAGIGVDDI | 28    | >SMAD4-V4☉AAAGIGFDDL | 21    | 7     |
| >SMAD4-V4☉SAAAGIGV   | 130   | >SMAD4-V4☉SAAAGIGF   | 16497 | 16367 |
| >SMAD4-V4☉SAAAGIGV   | 42    | >SMAD4-V4☉SAAAGIGF   | 2267  | 2225  |
| >SMAD4-V4☉SAAAGIGV   | 131   | >SMAD4-V4☉SAAAGIGF   | 19792 | 19661 |
| >SMAD4-V4☉SAAAGIGV   | 88    | >SMAD4-V4☉SAAAGIGF   | 19778 | 19690 |
| >SMAD4-V4☉SAAAGIGV   | 68    | >SMAD4-V4☉SAAAGIGF   | 28303 | 28235 |
| >SMAD4-V4☉SAAAGIGV   | 26    | >SMAD4-V4☉SAAAGIGF   | 12597 | 12571 |
| >SMAD4-V4☉SAAAGIGVDC | 880   | >SMAD4-V4☉SAAAGIGFDC | 433   | 447   |
| >SMAD4-V4☉SAAAGIGV   | 40    | >SMAD4-V4☉SAAAGIGF   | 9916  | 9876  |
| >SMAD4-V4☉SAAAGIGV   | 10910 | >SMAD4-V4☉SAAAGIGF   | 236   | 10674 |
| >SMAD4-V4☉SAAAGIGV   | 11581 | >SMAD4-V4☉SAAAGIGF   | 478   | 11103 |
| >SMAD4-V4☉SAAAGIGV   | 5087  | >SMAD4-V4☉SAAAGIGF   | 25    | 5062  |
| >SMAD4-V4☉SAAAGIGV   | 12130 | >SMAD4-V4☉SAAAGIGF   | 239   | 11891 |
| >SMAD4-V4☉LSAAAGIGV  | 440   | >SMAD4-V4☉LSAAAGIGF  | 6103  | 5663  |
| >SMAD4-V4☉LSAAAGIGV  | 129   | >SMAD4-V4☉LSAAAGIGF  | 16984 | 16855 |
| >SMAD4-V4☉LSAAAGIGV  | 258   | >SMAD4-V4☉LSAAAGIGF  | 15627 | 15369 |
| >SMAD4-V4☉LSAAAGIGV  | 2541  | >SMAD4-V4☉LSAAAGIGF  | 57    | 2484  |
| >SMAD4-V4☉LSAAAGIGV  | 2197  | >SMAD4-V4☉LSAAAGIGF  | 44    | 2153  |
| >SMAD4-V4☉LSAAAGIGV  | 492   | >SMAD4-V4☉LSAAAGIGF  | 4     | 488   |
| >SMAD4-V4☉LSAAAGIGV  | 12390 | >SMAD4-V4☉LSAAAGIGF  | 205   | 12185 |
| >SMAD4-V4☉LSAAAGIGV  | 10523 | >SMAD4-V4☉LSAAAGIGF  | 51    | 10472 |
| >SMAD4-V4☉LSAAAGIGV  | 427   | >SMAD4-V4☉LSAAAGIGF  | 125   | 302   |
| >SMAD4-V4☉LSAAAGIGV  | 5832  | >SMAD4-V4☉LSAAAGIGF  | 325   | 5507  |
| >SMAD4-V4☉SLSAAAGIGV | 41    | >SMAD4-V4☉SLSAAAGIGF | 5784  | 5743  |
| >SMAD4-V4☉SLSAAAGIGV | 18    | >SMAD4-V4☉SLSAAAGIGF | 2522  | 2504  |
| >SMAD4-V4☉SLSAAAGIGV | 23    | >SMAD4-V4☉SLSAAAGIGF | 6767  | 6744  |
| >SMAD4-V4☉SLSAAAGIGV | 96    | >SMAD4-V4☉SLSAAAGIGF | 13214 | 13118 |
| >SMAD4-V4☉SLSAAAGIGV | 6     | >SMAD4-V4☉SLSAAAGIGF | 3872  | 3866  |
| >SMAD4-V4☉SLSAAAGIGV | 13    | >SMAD4-V4☉SLSAAAGIGF | 14449 | 14436 |
| >SMAD4-V4☉SLSAAAGIGV | 6     | >SMAD4-V4☉SLSAAAGIGF | 7858  | 7852  |
| >SMAD4-V4☉SLSAAAGIGV | 26    | >SMAD4-V4☉SLSAAAGIGF | 17673 | 17647 |
| >SMAD4-V4☉SLSAAAGIGV | 3     | >SMAD4-V4☉SLSAAAGIGF | 3336  | 3333  |
| >SMAD4-V4☉SLSAAAGIGV | 163   | >SMAD4-V4☉SLSAAAGIGF | 17145 | 16982 |
| >SMAD4-V4☉SLSAAAGIGV | 247   | >SMAD4-V4☉SLSAAAGIGF | 16888 | 16641 |
| >SMAD4-V4☉SLSAAAGIGV | 3803  | >SMAD4-V4☉SLSAAAGIGF | 77    | 3726  |
| >SMAD4-V4☉SLSAAAGIGV | 2582  | >SMAD4-V4☉SLSAAAGIGF | 71    | 2511  |
| >SMAD4-V4☉SLSAAAGIGV | 7664  | >SMAD4-V4☉SLSAAAGIGF | 274   | 7390  |
| >SMAD4-V4☉SLSAAAGIGV | 917   | >SMAD4-V4☉SLSAAAGIGF | 90    | 827   |
| >SMAD4-V5☉VKGWGPDY   | 751   | >SMAD4-V5☉MKGWGPDY   | 187   | 564   |
| >SMAD4-V5☉VKGWGPDY   | 206   | >SMAD4-V5☉MKGWGPDY   | 283   | 77    |
| >SMAD4-V5☉VKGWGPDY   | 511   | >SMAD4-V5☉MKGWGPDY   | 153   | 358   |
| >SMAD4-V5☉VKGWGPDYF  | 213   | >SMAD4-V5☉MKGWGPDYF  | 63    | 150   |

|                        |       |                        |      |       |
|------------------------|-------|------------------------|------|-------|
| >SMAD4-V5C FVKGWGPDY   | 13102 | >SMAD4-V5C FMKGWGPD'   | 443  | 12659 |
| >SMAD4-V5C FVKGWGPDY   | 8218  | >SMAD4-V5C FMKGWGPD'   | 106  | 8112  |
| >SMAD4-V5C FVKGWGPDY   | 35    | >SMAD4-V5C FMKGWGPD'   | 2050 | 2015  |
| >SMAD4-V5C FVKGWGPDY   | 104   | >SMAD4-V5C FMKGWGPD'   | 3128 | 3024  |
| >SMAD4-V5C FVKGWGPDY   | 10    | >SMAD4-V5C FMKGWGPD'   | 7    | 3     |
| >SMAD4-V5C FVKGWGPDY   | 82    | >SMAD4-V5C FMKGWGPD'   | 29   | 53    |
| >SMAD4-V5C FVKGWGPDY   | 77    | >SMAD4-V5C FMKGWGPD'   | 31   | 46    |
| >SMAD4-V5C FVKGWGPDY   | 56    | >SMAD4-V5C FMKGWGPD'   | 29   | 27    |
| >SMAD4-V5C FVKGWGPDY   | 45    | >SMAD4-V5C FMKGWGPD'   | 193  | 148   |
| >SMAD4-V5C FVKGWGPDY   | 92    | >SMAD4-V5C FMKGWGPD'   | 42   | 50    |
| >SMAD4-V5C FVKGWGPDY   | 169   | >SMAD4-V5C FMKGWGPD'   | 29   | 140   |
| >SMAD4-V5C FVKGWGPDY   | 1729  | >SMAD4-V5C FMKGWGPD'   | 31   | 1698  |
| >SMAD4-V5C FVKGWGPDY   | 484   | >SMAD4-V5C FMKGWGPD'   | 942  | 458   |
| >SMAD4-V5C FVKGWGPDY   | 418   | >SMAD4-V5C FMKGWGPD'   | 2995 | 2577  |
| >SMAD4-V5C FVKGWGPDY   | 703   | >SMAD4-V5C FMKGWGPD'   | 474  | 229   |
| >SMAD4-V5C FVKGWGPDY   | 175   | >SMAD4-V5C FMKGWGPD'   | 60   | 115   |
| >SMAD4-V5C RRLCILRMSF\ | 247   | >SMAD4-V5C RRLCILRMSFI | 70   | 177   |
| >SMAD4-V5C RRLCILRMSF\ | 23    | >SMAD4-V5C RRLCILRMSFI | 14   | 9     |
| >SMAD4-V5C RRLCILRMSF\ | 1502  | >SMAD4-V5C RRLCILRMSFI | 77   | 1425  |
| >SMAD4-V5C RRLCILRMSF\ | 36    | >SMAD4-V5C RRLCILRMSFI | 40   | 4     |
| >SMAD4-V5C RRLCILRMSF\ | 29    | >SMAD4-V5C RRLCILRMSFI | 27   | 2     |
| >SMAD4-V5C SFVKGWGPDI  | 264   | >SMAD4-V5C SFMKGWGPI   | 115  | 149   |
| >SMAD4-V5C SFVKGWGPDI  | 433   | >SMAD4-V5C SFMKGWGPI   | 133  | 300   |
| >SMAD4-V5C SFVKGWGPDI  | 792   | >SMAD4-V5C SFMKGWGPI   | 484  | 308   |
| >SMAD4-V5C SFVKGWGPDI  | 189   | >SMAD4-V5C SFMKGWGPI   | 81   | 108   |
| >SMAD4-V5C SFVKGWGPDI  | 245   | >SMAD4-V5C SFMKGWGPI   | 261  | 16    |
| >SMAD4-V5C MSFVKGWGI   | 382   | >SMAD4-V5C MSFMKGWG    | 225  | 157   |
| >SMAD4-V5C MSFVKGWGI   | 525   | >SMAD4-V5C MSFMKGWG    | 267  | 258   |
| >SMAD4-V5C MSFVKGWGI   | 18    | >SMAD4-V5C MSFMKGWG    | 17   | 1     |
| >SMAD4-V5C MSFVKGWGI   | 22    | >SMAD4-V5C MSFMKGWG    | 21   | 1     |
| >SMAD4-V5C MSFVKGWGI   | 659   | >SMAD4-V5C MSFMKGWG    | 420  | 239   |
| >SMAD4-V5C MSFVKGWGI   | 222   | >SMAD4-V5C MSFMKGWG    | 140  | 82    |
| >SMAD4-V5C MSFVKGWGI   | 39    | >SMAD4-V5C MSFMKGWG    | 28   | 11    |
| >SMAD4-V5C MSFVKGWGI   | 4     | >SMAD4-V5C MSFMKGWG    | 4    | 0     |
| >SMAD4-V5C MSFVKGWGI   | 226   | >SMAD4-V5C MSFMKGWG    | 174  | 52    |
| >SMAD4-V5C MSFVKGWGI   | 305   | >SMAD4-V5C MSFMKGWG    | 531  | 226   |
| >SMAD4-V5C MSFVKGWGI   | 147   | >SMAD4-V5C MSFMKGWG    | 104  | 43    |
| >SMAD4-V5C MSFVKGWGI   | 376   | >SMAD4-V5C MSFMKGWG    | 384  | 8     |
| >SMAD4-V5C MSFVKGWGI   | 462   | >SMAD4-V5C MSFMKGWG    | 500  | 38    |
| >SMAD4-V5C RMSFVKGW    | 172   | >SMAD4-V5C RMSFMKGW    | 257  | 85    |
| >SMAD4-V5C RMSFVKGW    | 130   | >SMAD4-V5C RMSFMKGW    | 59   | 71    |
| >SMAD4-V5C RMSFVKGW    | 161   | >SMAD4-V5C RMSFMKGW    | 282  | 121   |
| >SMAD4-V5C RMSFVKGW    | 20    | >SMAD4-V5C RMSFMKGW    | 44   | 24    |

|                       |      |                       |       |       |
|-----------------------|------|-----------------------|-------|-------|
| >SMAD4-V5C RMSFVKGW   | 501  | >SMAD4-V5C RMSFMKGW   | 375   | 126   |
| >SMAD4-V5C LRMSFVKGW  | 176  | >SMAD4-V5C LRMSFMKGV  | 321   | 145   |
| >SMAD4-V5C LRMSFVKGW  | 220  | >SMAD4-V5C LRMSFMKGV  | 330   | 110   |
| >SMAD4-V5C LRMSFVKGW  | 418  | >SMAD4-V5C LRMSFMKGV  | 502   | 84    |
| >SMAD4-V5C LRMSFVKGW  | 355  | >SMAD4-V5C LRMSFMKGV  | 1087  | 732   |
| >SMAD4-V5C LRMSFVKGW  | 620  | >SMAD4-V5C LRMSFMKGV  | 198   | 422   |
| >SMAD4-V5C ILRMSFVK   | 36   | >SMAD4-V5C ILRMSFMK   | 31    | 5     |
| >SMAD4-V5C ILRMSFVK   | 388  | >SMAD4-V5C ILRMSFMK   | 169   | 219   |
| >SMAD4-V5C ILRMSFVK   | 9    | >SMAD4-V5C ILRMSFMK   | 8     | 1     |
| >SMAD4-V5C ILRMSFVKG  | 1228 | >SMAD4-V5C ILRMSFMKG  | 357   | 871   |
| >SMAD4-V5C ILRMSFVK   | 239  | >SMAD4-V5C ILRMSFMK   | 253   | 14    |
| >SMAD4-V5C ILRMSFVKGV | 232  | >SMAD4-V5C ILRMSFMKG\ | 329   | 97    |
| >SMAD4-V5C ILRMSFVKGV | 19   | >SMAD4-V5C ILRMSFMKG\ | 16    | 3     |
| >SMAD4-V5C ILRMSFVKGV | 173  | >SMAD4-V5C ILRMSFMKG\ | 138   | 35    |
| >SMAD4-V5C CILRMSFV   | 279  | >SMAD4-V5C CILRMSFM   | 5913  | 5634  |
| >SMAD4-V5C CILRMSFV   | 471  | >SMAD4-V5C CILRMSFM   | 4920  | 4449  |
| >SMAD4-V5C CILRMSFV   | 235  | >SMAD4-V5C CILRMSFM   | 4746  | 4511  |
| >SMAD4-V5C CILRMSFV   | 42   | >SMAD4-V5C CILRMSFM   | 1775  | 1733  |
| >SMAD4-V5C CILRMSFV   | 65   | >SMAD4-V5C CILRMSFM   | 5406  | 5341  |
| >SMAD4-V5C CILRMSFV   | 201  | >SMAD4-V5C CILRMSFM   | 8978  | 8777  |
| >SMAD4-V5C CILRMSFV   | 100  | >SMAD4-V5C CILRMSFM   | 12099 | 11999 |
| >SMAD4-V5C CILRMSFV   | 59   | >SMAD4-V5C CILRMSFM   | 4636  | 4577  |
| >SMAD4-V5C CILRMSFV   | 35   | >SMAD4-V5C CILRMSFM   | 9864  | 9829  |
| >SMAD4-V5C CILRMSFVK  | 106  | >SMAD4-V5C CILRMSFMK  | 80    | 26    |
| >SMAD4-V5C CILRMSFVK  | 19   | >SMAD4-V5C CILRMSFMK  | 16    | 3     |
| >SMAD4-V5C CILRMSFV   | 6754 | >SMAD4-V5C CILRMSFM   | 231   | 6523  |
| >SMAD4-V5C CILRMSFVK  | 109  | >SMAD4-V5C CILRMSFMK  | 128   | 19    |
| >SMAD4-V5C CILRMSFVK  | 518  | >SMAD4-V5C CILRMSFMK  | 405   | 113   |
| >SMAD4-V5C CILRMSFVK  | 419  | >SMAD4-V5C CILRMSFMK  | 234   | 185   |
| >SMAD4-V5C CILRMSFV   | 485  | >SMAD4-V5C CILRMSFM   | 11154 | 10669 |
| >SMAD4-V5C CILRMSFV   | 369  | >SMAD4-V5C CILRMSFM   | 4371  | 4002  |
| >SMAD4-V5C CILRMSFVKG | 667  | >SMAD4-V5C CILRMSFMKC | 472   | 195   |
| >SMAD4-V5C CILRMSFVKG | 125  | >SMAD4-V5C CILRMSFMKC | 312   | 187   |
| >SMAD4-V5C LCILRMSFVK | 853  | >SMAD4-V5C LCILRMSFMK | 434   | 419   |
| >SMAD4-V5C LCILRMSFVK | 708  | >SMAD4-V5C LCILRMSFMK | 397   | 311   |
| >SMAD4-V5C LCILRMSFV  | 3400 | >SMAD4-V5C LCILRMSFM  | 31    | 3369  |
| >SMAD4-V5C LCILRMSFV  | 679  | >SMAD4-V5C LCILRMSFM  | 38    | 641   |
| >SMAD4-V5C RLCILRMSFV | 44   | >SMAD4-V5C RLCILRMSFM | 539   | 495   |
| >SMAD4-V5C RLCILRMSFV | 100  | >SMAD4-V5C RLCILRMSFM | 277   | 177   |
| >SMAD4-V5C RLCILRMSFV | 31   | >SMAD4-V5C RLCILRMSFM | 406   | 375   |
| >SMAD4-V5C RLCILRMSFV | 131  | >SMAD4-V5C RLCILRMSFM | 1793  | 1662  |
| >SMAD4-V5C RLCILRMSFV | 9    | >SMAD4-V5C RLCILRMSFM | 797   | 788   |
| >SMAD4-V5C RLCILRMSFV | 444  | >SMAD4-V5C RLCILRMSFM | 11341 | 10897 |



|                        |      |                       |       |       |
|------------------------|------|-----------------------|-------|-------|
| >SMAD4-V5C RLCILRMSFV  | 33   | >SMAD4-V5C RLCILRMSFM | 6179  | 6146  |
| >SMAD4-V5C RLCILRMSFV  | 7    | >SMAD4-V5C RLCILRMSFM | 1173  | 1166  |
| >SMAD4-V5C RLCILRMSFVI | 41   | >SMAD4-V5C RLCILRMSFM | 37    | 4     |
| >SMAD4-V5C RLCILRMSFVI | 25   | >SMAD4-V5C RLCILRMSFM | 19    | 6     |
| >SMAD4-V5C RLCILRMSFV  | 425  | >SMAD4-V5C RLCILRMSFM | 663   | 238   |
| >SMAD4-V5C RLCILRMSFVI | 29   | >SMAD4-V5C RLCILRMSFM | 31    | 2     |
| >SMAD4-V5C RLCILRMSFVI | 47   | >SMAD4-V5C RLCILRMSFM | 39    | 8     |
| >SMAD4-V5C RLCILRMSFV  | 1181 | >SMAD4-V5C RLCILRMSFM | 51    | 1130  |
| >SMAD4-V5C RLCILRMSFVI | 400  | >SMAD4-V5C RLCILRMSFM | 580   | 180   |
| >SMAD4-V53 VLHTMPIA    | 69   | >SMAD4-V53 GLHTMPIA   | 76    | 7     |
| >SMAD4-V53 VLHTMPIA    | 271  | >SMAD4-V53 GLHTMPIA   | 669   | 398   |
| >SMAD4-V53 VLHTMPIA    | 433  | >SMAD4-V53 GLHTMPIA   | 378   | 55    |
| >SMAD4-V53 VLHTMPIA    | 30   | >SMAD4-V53 GLHTMPIA   | 56    | 26    |
| >SMAD4-V53 EVLHTMPI    | 212  | >SMAD4-V53 EGLHTMPI   | 22816 | 22604 |
| >SMAD4-V53 EVLHTMPIA   | 355  | >SMAD4-V53 EGLHTMPIA  | 26586 | 26231 |
| >SMAD4-V53 EVLHTMPI    | 393  | >SMAD4-V53 EGLHTMPI   | 15756 | 15363 |
| >SMAD4-V53 EVLHTMPI    | 21   | >SMAD4-V53 EGLHTMPI   | 1108  | 1087  |
| >SMAD4-V53 EVLHTMPI    | 5    | >SMAD4-V53 EGLHTMPI   | 151   | 146   |
| >SMAD4-V53 EVLHTMPIA   | 32   | >SMAD4-V53 EGLHTMPIA  | 3460  | 3428  |
| >SMAD4-V53 DEVLHTMPI   | 14   | >SMAD4-V53 DEGLHTMPI  | 18    | 4     |
| >SMAD4-V53 DEVLHTMPI   | 15   | >SMAD4-V53 DEGLHTMPI  | 71    | 56    |
| >SMAD4-V53 DEVLHTMPIA  | 35   | >SMAD4-V53 DEGLHTMPIA | 243   | 208   |
| >SMAD4-V53 DEVLHTMPI   | 23   | >SMAD4-V53 DEGLHTMPI  | 94    | 71    |
| >SMAD4-V53 LDEVLHTMPI  | 567  | >SMAD4-V53 LDEGLHTMPI | 354   | 213   |
| >SMAD4-V53 LDEVLHTMPI  | 98   | >SMAD4-V53 LDEGLHTMPI | 235   | 137   |
| >SMAD4-V53 LLDEVLHT    | 142  | >SMAD4-V53 LLDEGLHT   | 459   | 317   |
| >SMAD4-V53 LLDEVLHTM   | 19   | >SMAD4-V53 LLDEGLHTM  | 19    | 0     |
| >SMAD4-V53 LLDEVLHTMF  | 11   | >SMAD4-V53 LLDEGLHTMF | 11    | 0     |
| >SMAD4-V53 LLDEVLHTM   | 59   | >SMAD4-V53 LLDEGLHTM  | 97    | 38    |
| >SMAD4-V53 LLDEVLHTMF  | 17   | >SMAD4-V53 LLDEGLHTMF | 22    | 5     |
| >SMAD4-V53 LLDEVLHTM   | 236  | >SMAD4-V53 LLDEGLHTM  | 200   | 36    |
| >SMAD4-V53 LLDEVLHTMF  | 13   | >SMAD4-V53 LLDEGLHTMF | 10    | 3     |
| >SMAD4-V53 LLDEVLHT    | 125  | >SMAD4-V53 LLDEGLHT   | 153   | 28    |
| >SMAD4-V53 LLDEVLHTM   | 28   | >SMAD4-V53 LLDEGLHTM  | 16    | 12    |
| >SMAD4-V53 LLDEVLHTMF  | 13   | >SMAD4-V53 LLDEGLHTMF | 11    | 2     |
| >SMAD4-V53 LLDEVLHT    | 15   | >SMAD4-V53 LLDEGLHT   | 40    | 25    |
| >SMAD4-V53 LLDEVLHTM   | 2    | >SMAD4-V53 LLDEGLHTM  | 3     | 1     |
| >SMAD4-V53 LLDEVLHTMF  | 244  | >SMAD4-V53 LLDEGLHTMF | 448   | 204   |
| >SMAD4-V53 LLDEVLHTMF  | 3    | >SMAD4-V53 LLDEGLHTMF | 3     | 0     |
| >SMAD4-V53 LLDEVLHT    | 154  | >SMAD4-V53 LLDEGLHT   | 229   | 75    |
| >SMAD4-V53 LLDEVLHTM   | 3    | >SMAD4-V53 LLDEGLHTM  | 3     | 0     |
| >SMAD4-V53 LLDEVLHTMF  | 3    | >SMAD4-V53 LLDEGLHTMF | 3     | 0     |
| >SMAD4-V53 LLDEVLHT    | 35   | >SMAD4-V53 LLDEGLHT   | 67    | 32    |

|                      |      |                      |       |       |
|----------------------|------|----------------------|-------|-------|
| >SMAD4-V53LLDEVLHTM  | 8    | >SMAD4-V53LLDEGLHTM  | 9     | 1     |
| >SMAD4-V53LLDEVLHTMF | 9    | >SMAD4-V53LLDEGLHTMF | 10    | 1     |
| >SMAD4-V53LLDEVLHTM  | 4    | >SMAD4-V53LLDEGLHTM  | 3     | 1     |
| >SMAD4-V53LLDEVLHTMF | 9    | >SMAD4-V53LLDEGLHTMF | 8     | 1     |
| >SMAD4-V53LLDEVLHT   | 23   | >SMAD4-V53LLDEGLHT   | 25    | 2     |
| >SMAD4-V53LLDEVLHTM  | 3    | >SMAD4-V53LLDEGLHTM  | 2     | 1     |
| >SMAD4-V53LLDEVLHTMF | 5    | >SMAD4-V53LLDEGLHTMF | 4     | 1     |
| >SMAD4-V53LLDEVLHTM  | 245  | >SMAD4-V53LLDEGLHTM  | 260   | 15    |
| >SMAD4-V53LLDEVLHTMF | 69   | >SMAD4-V53LLDEGLHTMF | 69    | 0     |
| >SMAD4-V53QLLDEVLHTM | 40   | >SMAD4-V53QLLDEGLHTM | 92    | 52    |
| >SMAD4-V53QLLDEVLHTM | 37   | >SMAD4-V53QLLDEGLHTM | 59    | 22    |
| >SMAD4-V53QLLDEVLHTM | 130  | >SMAD4-V53QLLDEGLHTM | 132   | 2     |
| >SMAD4-V53QLLDEVLHT  | 193  | >SMAD4-V53QLLDEGLHT  | 718   | 525   |
| >SMAD4-V53QLLDEVLHTM | 193  | >SMAD4-V53QLLDEGLHTM | 413   | 220   |
| >SMAD4-V53QLLDEVLHT  | 157  | >SMAD4-V53QLLDEGLHT  | 639   | 482   |
| >SMAD4-V53QLLDEVLHTM | 8    | >SMAD4-V53QLLDEGLHTM | 19    | 11    |
| >SMAD4-V53QLLDEVLHTM | 13   | >SMAD4-V53QLLDEGLHTM | 20    | 7     |
| >SMAD4-V53QLLDEVLHT  | 276  | >SMAD4-V53QLLDEGLHT  | 959   | 683   |
| >SMAD4-V53QLLDEVLHTM | 45   | >SMAD4-V53QLLDEGLHTM | 109   | 64    |
| >SMAD4-V53QLLDEVLHTM | 10   | >SMAD4-V53QLLDEGLHTM | 30    | 20    |
| >SMAD4-V53QLLDEVLHT  | 53   | >SMAD4-V53QLLDEGLHT  | 221   | 168   |
| >SMAD4-V53QLLDEVLHTM | 8    | >SMAD4-V53QLLDEGLHTM | 12    | 4     |
| >SMAD4-V53QLLDEVLHTM | 147  | >SMAD4-V53QLLDEGLHTM | 256   | 109   |
| >SMAD4-V53LQLLDEVL   | 251  | >SMAD4-V53LQLLDEGL   | 128   | 123   |
| >SMAD4-V53LQLLDEVLHT | 343  | >SMAD4-V53LQLLDEGLHT | 292   | 51    |
| >SMAD4-V53LQLLDEVLHT | 80   | >SMAD4-V53LQLLDEGLHT | 142   | 62    |
| >SMAD4-V53LQLLDEVL   | 211  | >SMAD4-V53LQLLDEGL   | 1099  | 888   |
| >SMAD4-V53LQLLDEVLHT | 86   | >SMAD4-V53LQLLDEGLHT | 216   | 130   |
| >SMAD4-V53ALQLLDEV   | 86   | >SMAD4-V53ALQLLDEG   | 20050 | 19964 |
| >SMAD4-V53ALQLLDEV   | 29   | >SMAD4-V53ALQLLDEG   | 4846  | 4817  |
| >SMAD4-V53ALQLLDEV   | 309  | >SMAD4-V53ALQLLDEGL  | 112   | 197   |
| >SMAD4-V53ALQLLDEV   | 113  | >SMAD4-V53ALQLLDEG   | 17259 | 17146 |
| >SMAD4-V53ALQLLDEV   | 218  | >SMAD4-V53ALQLLDEG   | 17694 | 17476 |
| >SMAD4-V53ALQLLDEV   | 15   | >SMAD4-V53ALQLLDEG   | 13818 | 13803 |
| >SMAD4-V53ALQLLDEV   | 1181 | >SMAD4-V53ALQLLDEGL  | 470   | 711   |
| >SMAD4-V53ALQLLDEV   | 13   | >SMAD4-V53ALQLLDEG   | 15998 | 15985 |
| >SMAD4-V53ALQLLDEV   | 411  | >SMAD4-V53ALQLLDEGL  | 156   | 255   |
| >SMAD4-V53ALQLLDEV   | 19   | >SMAD4-V53ALQLLDEG   | 18086 | 18067 |
| >SMAD4-V53ALQLLDEV   | 65   | >SMAD4-V53ALQLLDEG   | 24396 | 24331 |
| >SMAD4-V53ALQLLDEV   | 4    | >SMAD4-V53ALQLLDEG   | 18212 | 18208 |
| >SMAD4-V53ALQLLDEV   | 104  | >SMAD4-V53ALQLLDEGL  | 45    | 59    |
| >SMAD4-V53RALQLLDEV  | 163  | >SMAD4-V53RALQLLDEG  | 3357  | 3194  |
| >SMAD4-V53RALQLLDEV  | 21   | >SMAD4-V53RALQLLDEG  | 11946 | 11925 |

|                      |       |                      |       |       |
|----------------------|-------|----------------------|-------|-------|
| >SMAD4-V53RALQLLDEVL | 1000  | >SMAD4-V53RALQLLDEGL | 346   | 654   |
| >SMAD4-V53RALQLLDEV  | 46    | >SMAD4-V53RALQLLDEG  | 21379 | 21333 |
| >SMAD4-V53RALQLLDEV  | 189   | >SMAD4-V53RALQLLDEG  | 23890 | 23701 |
| >SMAD4-V53RALQLLDEVL | 55    | >SMAD4-V53RALQLLDEGL | 26    | 29    |
| >SMAD4-V53RALQLLDEVL | 108   | >SMAD4-V53RALQLLDEGL | 388   | 280   |
| >SMAD4-V53HRALQLLDEV | 229   | >SMAD4-V53HRALQLLDEC | 1565  | 1336  |
| >SMAD4-V53HRALQLLDEV | 183   | >SMAD4-V53HRALQLLDEC | 112   | 71    |
| >SMAD4-V53HRALQLLDEV | 149   | >SMAD4-V53HRALQLLDEC | 1433  | 1284  |
| >SMAD4-V53HRALQLLDEV | 142   | >SMAD4-V53HRALQLLDEC | 107   | 35    |
| >SMAD4-W3WPVHNELAF   | 3515  | >SMAD4-W3RPVHNELAF   | 293   | 3222  |
| >SMAD4-W3WPVHNELAF   | 49    | >SMAD4-W3RPVHNELAF   | 13    | 36    |
| >SMAD4-W3WPVHNELAF   | 51    | >SMAD4-W3RPVHNELAF   | 27    | 24    |
| >SMAD4-W3WPVHNELA    | 323   | >SMAD4-W3RPVHNELA    | 5908  | 5585  |
| >SMAD4-W3WPVHNELAF   | 6     | >SMAD4-W3RPVHNELAF   | 12    | 6     |
| >SMAD4-W3WPVHNELAF   | 38    | >SMAD4-W3RPVHNELAF   | 579   | 541   |
| >SMAD4-W3WPVHNELA    | 25    | >SMAD4-W3RPVHNELA    | 445   | 420   |
| >SMAD4-W3WPVHNELAF   | 343   | >SMAD4-W3RPVHNELAF   | 4717  | 4374  |
| >SMAD4-W3WPVHNELAF   | 557   | >SMAD4-W3RPVHNELAF   | 166   | 391   |
| >SMAD4-W3WPVHNELAF   | 16    | >SMAD4-W3RPVHNELAF   | 141   | 125   |
| >SMAD4-W3YWPVHNELA   | 22    | >SMAD4-W3YRPVHNELAF  | 5148  | 5126  |
| >SMAD4-W3YWPVHNEL    | 280   | >SMAD4-W3YRPVHNEL    | 16569 | 16289 |
| >SMAD4-W3YWPVHNELA   | 27    | >SMAD4-W3YRPVHNELAF  | 2880  | 2853  |
| >SMAD4-W3YWPVHNEL    | 9     | >SMAD4-W3YRPVHNEL    | 10286 | 10277 |
| >SMAD4-W3YWPVHNELA   | 5     | >SMAD4-W3YRPVHNELAF  | 3226  | 3221  |
| >SMAD4-W3YWPVHNELA   | 216   | >SMAD4-W3YRPVHNELAF  | 5146  | 4930  |
| >SMAD4-W3YWPVHNELA   | 754   | >SMAD4-W3YRPVHNELAF  | 30    | 724   |
| >SMAD4-W3YWPVHNEL    | 372   | >SMAD4-W3YRPVHNEL    | 36566 | 36194 |
| >SMAD4-W3YWPVHNELA   | 453   | >SMAD4-W3YRPVHNELAF  | 36333 | 35880 |
| >SMAD4-W3PPMPPHPGH   | 101   | >SMAD4-W3PPMPPHPGH   | 25272 | 25171 |
| >SMAD4-W3PPMPPHPGH   | 62    | >SMAD4-W3PPMPPHPGH   | 29219 | 29157 |
| >SMAD4-W3PPMPPHPGH   | 31962 | >SMAD4-W3PPMPPHPGH   | 325   | 31637 |
| >SMAD4-W3HYWPVHNEL   | 34    | >SMAD4-W3HYRPVHNEL   | 82    | 48    |
| >SMAD4-W3HYWPVHNEL   | 33    | >SMAD4-W3HYRPVHNEL   | 168   | 135   |
| >SMAD4-W3HYWPVHNEL   | 21    | >SMAD4-W3HYRPVHNEL/  | 72    | 51    |
| >SMAD4-W3HYWPVHNEL   | 231   | >SMAD4-W3HYRPVHNEL   | 548   | 317   |
| >SMAD4-W3HYWPVHNEL   | 168   | >SMAD4-W3HYRPVHNEL/  | 335   | 167   |
| >SMAD4-W3HYWPVHNEL   | 5     | >SMAD4-W3HYRPVHNEL   | 7     | 2     |
| >SMAD4-W3HYWPVHNEL   | 4     | >SMAD4-W3HYRPVHNEL/  | 6     | 2     |
| >SMAD4-W3HYWPVHNEL   | 78    | >SMAD4-W3HYRPVHNEL/  | 1382  | 1304  |
| >SMAD4-W3HYWPVHNE    | 12121 | >SMAD4-W3HYRPVHNE    | 192   | 11929 |
| >SMAD4-W3HYWPVHNEL   | 1121  | >SMAD4-W3HYRPVHNEL   | 7     | 1114  |
| >SMAD4-W3HYWPVHNEL   | 1668  | >SMAD4-W3HYRPVHNEL/  | 9     | 1659  |
| >SMAD4-W3HYWPVHNEL   | 7733  | >SMAD4-W3HYRPVHNEL/  | 41    | 7692  |

|                     |       |                      |       |       |
|---------------------|-------|----------------------|-------|-------|
| >SMAD4-W3 HYWPVHNEL | 199   | >SMAD4-W3 HYRPVHNEL/ | 5531  | 5332  |
| >SMAD4-W3 HYWPVHNEL | 82    | >SMAD4-W3 HYRPVHNEL/ | 144   | 62    |
| >SMAD4-W3 HYWPVHNEL | 67    | >SMAD4-W3 HYRPVHNEL/ | 1463  | 1396  |
| >SMAD4-W3 HYWPVHNEL | 188   | >SMAD4-W3 HYRPVHNEL  | 708   | 520   |
| >SMAD4-W3 GHYWPVHNE | 2064  | >SMAD4-W3 GHYRPVHNE  | 488   | 1576  |
| >SMAD4-W3 GHYWPVHNE | 249   | >SMAD4-W3 GHYRPVHNE  | 221   | 28    |
| >SMAD4-W3 GHYWPVHNE | 143   | >SMAD4-W3 GHYRPVHNE  | 496   | 353   |
| >SMAD4-W3 HPGHYWPV  | 139   | >SMAD4-W3 HPGHYRPV   | 958   | 819   |
| >SMAD4-W3 HPGHYWPV  | 102   | >SMAD4-W3 HPGHYRPV   | 20    | 82    |
| >SMAD4-W3 HPGHYWPV† | 96    | >SMAD4-W3 HPGHYRPVH  | 280   | 184   |
| >SMAD4-W3 HPGHYWPV  | 205   | >SMAD4-W3 HPGHYRPV   | 511   | 306   |
| >SMAD4-W3 PPHPGHYW  | 134   | >SMAD4-W3 PPHPGHYR   | 24727 | 24593 |
| >SMAD4-W3 PPHPGHYW  | 49    | >SMAD4-W3 PPHPGHYR   | 29628 | 29579 |
| >SMAD4-W3 PPHPGHYW  | 33017 | >SMAD4-W3 PPHPGHYR   | 311   | 32706 |
| >SMAD4-W3 MPPHPGHYV | 27    | >SMAD4-W3 MPPHPGHYR  | 193   | 166   |
| >SMAD4-W3 MPPHPGHYV | 118   | >SMAD4-W3 MPPHPGHYR  | 696   | 578   |
| >SMAD4-W3 MPPHPGHYV | 64    | >SMAD4-W3 MPPHPGHYR  | 29    | 35    |
| >SMAD4-W3 MPPHPGHYV | 447   | >SMAD4-W3 MPPHPGHYR  | 8599  | 8152  |
| >SMAD4-W3 MPPHPGHYV | 225   | >SMAD4-W3 MPPHPGHYR  | 234   | 9     |
| >SMAD4-W3 MPPHPGHYV | 27    | >SMAD4-W3 MPPHPGHYR  | 20859 | 20832 |
| >SMAD4-W3 MPPHPGHYV | 237   | >SMAD4-W3 MPPHPGHYR  | 520   | 283   |
| >SMAD4-W3 MPPHPGHYV | 218   | >SMAD4-W3 MPPHPGHYR  | 248   | 30    |
| >SMAD4-W3 MPPHPGHYV | 9     | >SMAD4-W3 MPPHPGHYR  | 10    | 1     |
| >SMAD4-W3 MPPHPGHYV | 386   | >SMAD4-W3 MPPHPGHYR  | 7606  | 7220  |
| >SMAD4-W3 MPPHPGHYV | 355   | >SMAD4-W3 MPPHPGHYR  | 1165  | 810   |
| >SMAD4-W3 MPPHPGHYV | 18    | >SMAD4-W3 MPPHPGHYR  | 26695 | 26677 |
| >SMAD4-W3 MPPHPGHYV | 205   | >SMAD4-W3 MPPHPGHYR  | 32147 | 31942 |
| >SMAD4-W3 MPPHPGHYV | 28452 | >SMAD4-W3 MPPHPGHYR  | 118   | 28334 |
| >SMAD4-W3 PMPPHPGHY | 391   | >SMAD4-W3 PMPPHPGHY  | 29340 | 28949 |
| >SMAD4-W3 PMPPHPGHY | 28291 | >SMAD4-W3 PMPPHPGHY  | 103   | 28188 |
| >SMAD4-W3 PMPPHPGHY | 22373 | >SMAD4-W3 PMPPHPGHY  | 59    | 22314 |
| >SMAD4-W9 WRWPDLHKI | 311   | >SMAD4-W9 RRWPDLHKN  | 104   | 207   |
| >SMAD4-W9 WRWPDLHK  | 40    | >SMAD4-W9 RRWPDLHK   | 16    | 24    |
| >SMAD4-W9 WRWPDLHKI | 267   | >SMAD4-W9 RRWPDLHKN  | 33    | 234   |
| >SMAD4-W9 WRWPDLHKI | 431   | >SMAD4-W9 RRWPDLHKN  | 120   | 311   |
| >SMAD4-W9 WRWPDLHKI | 104   | >SMAD4-W9 RRWPDLHKN  | 17    | 87    |
| >SMAD4-W9 WRWPDLHKI | 261   | >SMAD4-W9 RRWPDLHKN  | 2865  | 2604  |
| >SMAD4-W9 WRWPDLHKI | 310   | >SMAD4-W9 RRWPDLHKN  | 526   | 216   |
| >SMAD4-W9 WRWPDLHK  | 97    | >SMAD4-W9 RRWPDLHK   | 12    | 85    |
| >SMAD4-W9 WRWPDLHKI | 4511  | >SMAD4-W9 RRWPDLHKN  | 75    | 4436  |
| >SMAD4-W9 WRWPDLHKI | 1062  | >SMAD4-W9 RRWPDLHKN  | 179   | 883   |
| >SMAD4-W9 WRWPDLHKI | 247   | >SMAD4-W9 RRWPDLHKN  | 15    | 232   |
| >SMAD4-W9 WRWPDLHK  | 2070  | >SMAD4-W9 RRWPDLHK   | 131   | 1939  |

|                       |       |                       |       |       |
|-----------------------|-------|-----------------------|-------|-------|
| >SMAD4-W9 WRWPDHLKI   | 427   | >SMAD4-W9 RRWPDHLKN   | 60    | 367   |
| >SMAD4-W9 WRWPDHLKI   | 1014  | >SMAD4-W9 RRWPDHLKN   | 253   | 761   |
| >SMAD4-W9 WRWPDHLKI   | 6     | >SMAD4-W9 RRWPDHLKN   | 3     | 3     |
| >SMAD4-W9 WRWPDHLK    | 1514  | >SMAD4-W9 RRWPDHLK    | 287   | 1227  |
| >SMAD4-W9 LWRWPDHLK   | 80    | >SMAD4-W9 LRRWPDHLK   | 904   | 824   |
| >SMAD4-W9 LWRWPDHLK   | 18544 | >SMAD4-W9 LRRWPDHLK   | 477   | 18067 |
| >SMAD4-W9 LWRWPDHLK   | 89    | >SMAD4-W9 LRRWPDHLK   | 9675  | 9586  |
| >SMAD4-W9 LWRWPDHL    | 153   | >SMAD4-W9 LRRWPDHL    | 29798 | 29645 |
| >SMAD4-W9 GFPHVIYARLI | 181   | >SMAD4-W9 GFPHVIYARLI | 7449  | 7268  |
| >SMAD4-W9 GFPHVIYARLI | 19328 | >SMAD4-W9 GFPHVIYARLI | 240   | 19088 |
| >SMAD4-W9 RLWRWPD     | 25    | >SMAD4-W9 RLRRWPD     | 5726  | 5701  |
| >SMAD4-W9 RLWRWPD     | 337   | >SMAD4-W9 RLRRWPD     | 5350  | 5013  |
| >SMAD4-W9 RLWRWPD     | 5     | >SMAD4-W9 RLRRWPD     | 211   | 206   |
| >SMAD4-W9 RLWRWPDH    | 410   | >SMAD4-W9 RLRRWPDH    | 12896 | 12486 |
| >SMAD4-W9 RLWRWPDH    | 111   | >SMAD4-W9 RLRRWPDH    | 8227  | 8116  |
| >SMAD4-W9 RLWRWPD     | 61    | >SMAD4-W9 RLRRWPD     | 1980  | 1919  |
| >SMAD4-W9 RLWRWPD     | 8     | >SMAD4-W9 RLRRWPD     | 787   | 779   |
| >SMAD4-W9 RLWRWPD     | 48    | >SMAD4-W9 RLRRWPD     | 7568  | 7520  |
| >SMAD4-W9 RLWRWPD     | 9     | >SMAD4-W9 RLRRWPD     | 27    | 18    |
| >SMAD4-W9 RLWRWPDH    | 24    | >SMAD4-W9 RLRRWPDH    | 20    | 4     |
| >SMAD4-W9 RLWRWPDH    | 164   | >SMAD4-W9 RLRRWPDH    | 455   | 291   |
| >SMAD4-W9 RLWRWPD     | 4347  | >SMAD4-W9 RLRRWPD     | 25    | 4322  |
| >SMAD4-W9 RLWRWPDH    | 184   | >SMAD4-W9 RLRRWPDH    | 4     | 180   |
| >SMAD4-W9 RLWRWPD     | 111   | >SMAD4-W9 RLRRWPD     | 2289  | 2178  |
| >SMAD4-W9 RLWRWPD     | 301   | >SMAD4-W9 RLRRWPD     | 531   | 230   |
| >SMAD4-W9 RLWRWPD     | 198   | >SMAD4-W9 RLRRWPD     | 856   | 658   |
| >SMAD4-W9 RLWRWPDH    | 18    | >SMAD4-W9 RLRRWPDH    | 26    | 8     |
| >SMAD4-W9 RLWRWPDH    | 104   | >SMAD4-W9 RLRRWPDH    | 824   | 720   |
| >SMAD4-W9 ARLWRWPD    | 1943  | >SMAD4-W9 ARLRRWPD    | 475   | 1468  |
| >SMAD4-W9 ARLWRWPD    | 134   | >SMAD4-W9 ARLRRWPD    | 133   | 1     |
| >SMAD4-W9 ARLWRWPD    | 64    | >SMAD4-W9 ARLRRWPD    | 137   | 73    |
| >SMAD4-W9 ARLWRWPD    | 50    | >SMAD4-W9 ARLRRWPD    | 47    | 3     |
| >SMAD4-W9 ARLWRWPD    | 63    | >SMAD4-W9 ARLRRWPD    | 56    | 7     |
| >SMAD4-W9 ARLWRWPD    | 12    | >SMAD4-W9 ARLRRWPD    | 17    | 5     |
| >SMAD4-W9 ARLWRWPD    | 159   | >SMAD4-W9 ARLRRWPD    | 231   | 72    |
| >SMAD4-W9 YARLWRWPD   | 694   | >SMAD4-W9 YARLRRWPD   | 238   | 456   |
| >SMAD4-W9 YARLWRWPD   | 5989  | >SMAD4-W9 YARLRRWPD   | 144   | 5845  |
| >SMAD4-W9 YARLWRWPD   | 96    | >SMAD4-W9 YARLRRWPD   | 93    | 3     |
| >SMAD4-W9 IYARLWRWPD  | 440   | >SMAD4-W9 IYARLRRWPD  | 781   | 341   |
| >SMAD4-W9 IYARLWRWPD  | 346   | >SMAD4-W9 IYARLRRWPD  | 258   | 88    |
| >SMAD4-W9 IYARLWRW    | 53    | >SMAD4-W9 IYARLRRW    | 240   | 187   |
| >SMAD4-W9 IYARLWRWPD  | 434   | >SMAD4-W9 IYARLRRWPD  | 585   | 151   |
| >SMAD4-W9 IYARLWRW    | 19    | >SMAD4-W9 IYARLRRW    | 103   | 84    |

|                       |       |                       |       |       |
|-----------------------|-------|-----------------------|-------|-------|
| >SMAD4-W9 IYARLWRWPI  | 41    | >SMAD4-W9 IYARLRRWPC  | 134   | 93    |
| >SMAD4-W9 IYARLWRW    | 27    | >SMAD4-W9 IYARLRRW    | 81    | 54    |
| >SMAD4-W9 IYARLWRWPI  | 78    | >SMAD4-W9 IYARLRRWPC  | 72    | 6     |
| >SMAD4-W9 IYARLWRW    | 257   | >SMAD4-W9 IYARLRRW    | 2598  | 2341  |
| >SMAD4-W9 VIYARLWR    | 66    | >SMAD4-W9 VIYARLRR    | 65    | 1     |
| >SMAD4-W9 VIYARLWR    | 108   | >SMAD4-W9 VIYARLRR    | 179   | 71    |
| >SMAD4-W9 VIYARLWR    | 24    | >SMAD4-W9 VIYARLRR    | 41    | 17    |
| >SMAD4-W9 VIYARLWR    | 124   | >SMAD4-W9 VIYARLRR    | 417   | 293   |
| >SMAD4-W9 VIYARLWR    | 94    | >SMAD4-W9 VIYARLRR    | 274   | 180   |
| >SMAD4-W9 VIYARLWRW   | 25    | >SMAD4-W9 VIYARLRRW   | 23    | 2     |
| >SMAD4-W9 VIYARLWRW   | 63    | >SMAD4-W9 VIYARLRRW   | 147   | 84    |
| >SMAD4-W9 VIYARLWRW   | 15    | >SMAD4-W9 VIYARLRRW   | 450   | 435   |
| >SMAD4-W9 VIYARLWR    | 82    | >SMAD4-W9 VIYARLRR    | 116   | 34    |
| >SMAD4-W9 HVIYARLWRV  | 322   | >SMAD4-W9 HVIYARLRRV  | 496   | 174   |
| >SMAD4-W9 HVIYARLWR   | 441   | >SMAD4-W9 HVIYARLRR   | 427   | 14    |
| >SMAD4-W9 HVIYARLW    | 15418 | >SMAD4-W9 HVIYARLR    | 40    | 15378 |
| >SMAD4-W9 HVIYARLWR   | 25    | >SMAD4-W9 HVIYARLRR   | 37    | 12    |
| >SMAD4-W9 HVIYARLW    | 22428 | >SMAD4-W9 HVIYARLR    | 69    | 22359 |
| >SMAD4-W9 HVIYARLWR   | 36    | >SMAD4-W9 HVIYARLRR   | 66    | 30    |
| >SMAD4-W9 HVIYARLW    | 6257  | >SMAD4-W9 HVIYARLR    | 6     | 6251  |
| >SMAD4-W9 HVIYARLWR   | 4     | >SMAD4-W9 HVIYARLRR   | 6     | 2     |
| >SMAD4-W9 HVIYARLW    | 192   | >SMAD4-W9 HVIYARLR    | 23992 | 23800 |
| >SMAD4-W9 HVIYARLWRV  | 133   | >SMAD4-W9 HVIYARLRRV  | 102   | 31    |
| >SMAD4-W9 HVIYARLW    | 97    | >SMAD4-W9 HVIYARLR    | 22990 | 22893 |
| >SMAD4-W9 HVIYARLWRV  | 69    | >SMAD4-W9 HVIYARLRRV  | 105   | 36    |
| >SMAD4-W9 HVIYARLW    | 65    | >SMAD4-W9 HVIYARLR    | 22022 | 21957 |
| >SMAD4-W9 HVIYARLWRV  | 20    | >SMAD4-W9 HVIYARLRRV  | 182   | 162   |
| >SMAD4-W9 HVIYARLW    | 30245 | >SMAD4-W9 HVIYARLR    | 242   | 30003 |
| >SMAD4-W9 HVIYARLWR   | 168   | >SMAD4-W9 HVIYARLRR   | 120   | 48    |
| >SMAD4-W9 FPHVIYARLW  | 129   | >SMAD4-W9 FPHVIYARLRf | 327   | 198   |
| >SMAD4-W9 FPHVIYARLW  | 77    | >SMAD4-W9 FPHVIYARLR  | 3340  | 3263  |
| >SMAD4-W9 FPHVIYARLW  | 266   | >SMAD4-W9 FPHVIYARLR  | 121   | 145   |
| >SMAD4-W9 FPHVIYARLW  | 4     | >SMAD4-W9 FPHVIYARLR  | 3561  | 3557  |
| >SMAD4-Y13 YHYERVVSPG | 58    | >SMAD4-Y13 CHYERVVSPG | 494   | 436   |
| >SMAD4-Y13 YHYERVVSPG | 162   | >SMAD4-Y13 CHYERVVSPG | 6216  | 6054  |
| >SMAD4-Y13 YHYERVVSPG | 233   | >SMAD4-Y13 CHYERVVSPG | 1593  | 1360  |
| >SMAD4-Y13 YHYERVVSPG | 432   | >SMAD4-Y13 CHYERVVSPG | 1586  | 1154  |
| >SMAD4-Y13 YHYERVVSPG | 68    | >SMAD4-Y13 CHYERVVSPG | 1723  | 1655  |
| >SMAD4-Y13 YHYERVVSPG | 147   | >SMAD4-Y13 CHYERVVSPG | 853   | 706   |
| >SMAD4-Y13 LKCDSVCVNF | 272   | >SMAD4-Y13 LKCDSVCVNF | 17965 | 17693 |
| >SMAD4-Y13 LKCDSVCVNF | 7     | >SMAD4-Y13 LKCDSVCVNF | 1233  | 1226  |
| >SMAD4-Y13 NPYHYERVV  | 151   | >SMAD4-Y13 NPCHYERVV  | 3674  | 3523  |
| >SMAD4-Y13 NPYHYERVV  | 151   | >SMAD4-Y13 NPCHYERVV  | 2082  | 1931  |

|                       |     |                        |       |       |
|-----------------------|-----|------------------------|-------|-------|
| >SMAD4-Y13 VNPYHYERV  | 58  | >SMAD4-Y13 VNPCHYERV   | 201   | 143   |
| >SMAD4-Y13 CVNPYHYER\ | 196 | >SMAD4-Y13 CVNPCHYER\  | 587   | 391   |
| >SMAD4-Y13 CVNPYHYER\ | 84  | >SMAD4-Y13 CVNPCHYER\  | 122   | 38    |
| >SMAD4-Y13 CVNPYHYER  | 69  | >SMAD4-Y13 CVNPCHYER   | 119   | 50    |
| >SMAD4-Y13 CVNPYHYER  | 9   | >SMAD4-Y13 CVNPCHYER   | 9     | 0     |
| >SMAD4-Y13 CVNPYHYER  | 52  | >SMAD4-Y13 CVNPCHYER   | 55    | 3     |
| >SMAD4-Y13 CVNPYHYER  | 18  | >SMAD4-Y13 CVNPCHYER   | 35    | 17    |
| >SMAD4-Y13 CVNPYHYER\ | 424 | >SMAD4-Y13 CVNPCHYER\  | 331   | 93    |
| >SMAD4-Y13 CVNPYHYER  | 125 | >SMAD4-Y13 CVNPCHYER   | 46    | 79    |
| >SMAD4-Y13 VCVNPYHYEF | 428 | >SMAD4-Y13 VCVNPCHYEF  | 704   | 276   |
| >SMAD4-Y13 VCVNPYHY   | 369 | >SMAD4-Y13 VCVNPCHY    | 1211  | 842   |
| >SMAD4-Y13 VCVNPYHY   | 153 | >SMAD4-Y13 VCVNPCHY    | 1418  | 1265  |
| >SMAD4-Y13 VCVNPYHY   | 470 | >SMAD4-Y13 VCVNPCHY    | 1556  | 1086  |
| >SMAD4-Y13 VCVNPYHYEF | 146 | >SMAD4-Y13 VCVNPCHYEF  | 92    | 54    |
| >SMAD4-Y13 VCVNPYHY   | 309 | >SMAD4-Y13 VCVNPCHY    | 1605  | 1296  |
| >SMAD4-Y13 VCVNPYHYEF | 220 | >SMAD4-Y13 VCVNPCHYEF  | 231   | 11    |
| >SMAD4-Y13 SVCVNPYH   | 473 | >SMAD4-Y13 SVCVNPCH    | 2561  | 2088  |
| >SMAD4-Y13 SVCVNPYHY  | 175 | >SMAD4-Y13 SVCVNPCHY   | 789   | 614   |
| >SMAD4-Y13 SVCVNPYHYE | 54  | >SMAD4-Y13 SVCVNPCHYE  | 91    | 37    |
| >SMAD4-Y13 SVCVNPYHY  | 51  | >SMAD4-Y13 SVCVNPCHY   | 262   | 211   |
| >SMAD4-Y13 SVCVNPYHY  | 12  | >SMAD4-Y13 SVCVNPCHY   | 305   | 293   |
| >SMAD4-Y13 SVCVNPYHY  | 36  | >SMAD4-Y13 SVCVNPCHY   | 487   | 451   |
| >SMAD4-Y13 SVCVNPYHYE | 14  | >SMAD4-Y13 SVCVNPCHYE  | 22    | 8     |
| >SMAD4-Y13 SVCVNPYHYE | 202 | >SMAD4-Y13 SVCVNPCHYE  | 275   | 73    |
| >SMAD4-Y13 SVCVNPYHYE | 19  | >SMAD4-Y13 SVCVNPCHYE  | 28    | 9     |
| >SMAD4-Y13 SVCVNPYHY  | 16  | >SMAD4-Y13 SVCVNPCHY   | 196   | 180   |
| >SMAD4-Y13 SVCVNPYHY  | 407 | >SMAD4-Y13 SVCVNPCHY   | 153   | 254   |
| >SMAD4-Y13 SVCVNPYHY  | 209 | >SMAD4-Y13 SVCVNPCHY   | 3667  | 3458  |
| >SMAD4-Y13 SVCVNPYHYE | 191 | >SMAD4-Y13 SVCVNPCHYE  | 351   | 160   |
| >SMAD4-Y13 SVCVNPYHYE | 151 | >SMAD4-Y13 SVCVNPCHYE  | 139   | 12    |
| >SMAD4-Y13 DSVCVNPYH\ | 273 | >SMAD4-Y13 DSVCVNPCH\  | 734   | 461   |
| >SMAD4-Y13 DSVCVNPY   | 17  | >SMAD4-Y13 DSVCVNPC    | 11700 | 11683 |
| >SMAD4-Y13 DSVCVNPYH\ | 18  | >SMAD4-Y13 DSVCVNPCH\  | 42    | 24    |
| >SMAD4-Y13 DSVCVNPY   | 60  | >SMAD4-Y13 DSVCVNPC    | 22695 | 22635 |
| >SMAD4-Y13 DSVCVNPYH\ | 382 | >SMAD4-Y13 DSVCVNPCH\  | 635   | 253   |
| >SMAD4-Y13 DSVCVNPYH\ | 50  | >SMAD4-Y13 DSVCVNPCH\  | 143   | 93    |
| >SMAD4-Y13 DSVCVNPYH\ | 149 | >SMAD4-Y13 DSVCVNPCH\  | 274   | 125   |
| >SMAD4-Y13 DSVCVNPYH\ | 470 | >SMAD4-Y13 DSVCVNPCH\  | 804   | 334   |
| >SMAD4-Y13 DSVCVNPY   | 93  | >SMAD4-Y13 DSVCVNPC    | 14734 | 14641 |
| >SMAD4-Y13 CDSVCVNPYH | 316 | >SMAD4-Y13 CDSVCVNPCH  | 2205  | 1889  |
| >SMAD4-Y13 KCDSVCVNPY | 413 | >SMAD4-Y13 KCDSVCVNPCH | 30646 | 30233 |
| >SMAD4-Y35 YVDPSGGDRI | 447 | >SMAD4-Y35 CVDPSGGDRI  | 8331  | 7884  |
| >SMAD4-Y35 YVDPSGGDRI | 41  | >SMAD4-Y35 CVDPSGGDRI  | 897   | 856   |

|                       |      |                       |       |       |
|-----------------------|------|-----------------------|-------|-------|
| >SMAD4-Y35 GYVDPSGGD  | 321  | >SMAD4-Y35 GCVDPSSGGD | 20808 | 20487 |
| >SMAD4-Y35 GYVDPSGGD  | 34   | >SMAD4-Y35 GCVDPSSGGD | 18149 | 18115 |
| >SMAD4-Y35 GYVDPSGGD  | 918  | >SMAD4-Y35 GCVDPSSGGD | 89    | 829   |
| >SMAD4-Y35 SSCPIVTDG' | 106  | >SMAD4-Y35 SSCPIVTDG' | 27548 | 27442 |
| >SMAD4-Y35 SSCPIVTDG' | 84   | >SMAD4-Y35 SSCPIVTDG' | 25276 | 25192 |
| >SMAD4-Y35 SSCPIVTDG' | 232  | >SMAD4-Y35 SSCPIVTDG' | 17641 | 17409 |
| >SMAD4-Y35 SSCPIVTDG' | 7    | >SMAD4-Y35 SSCPIVTDG' | 10935 | 10928 |
| >SMAD4-Y35 SSCPIVTDG' | 82   | >SMAD4-Y35 SSCPIVTDG' | 12840 | 12758 |
| >SMAD4-Y35 IVTVDGYV   | 155  | >SMAD4-Y35 IVTVDGCV   | 1811  | 1656  |
| >SMAD4-Y35 IVTVDGYV   | 398  | >SMAD4-Y35 IVTVDGCV   | 3930  | 3532  |
| >SMAD4-Y35 IVTVDGYV   | 454  | >SMAD4-Y35 IVTVDGCV   | 1337  | 883   |
| >SMAD4-Y35 IVTVDGYV   | 87   | >SMAD4-Y35 IVTVDGCV   | 416   | 329   |
| >SMAD4-Y35 IVTVDGYV   | 178  | >SMAD4-Y35 IVTVDGCV   | 1574  | 1396  |
| >SMAD4-Y35 PIVTVDGY   | 82   | >SMAD4-Y35 PIVTVDGC   | 25008 | 24926 |
| >SMAD4-Y35 CPIVTDGY   | 21   | >SMAD4-Y35 CPIVTDGC   | 9135  | 9114  |
| >SMAD4-Y35 CPIVTDGY   | 75   | >SMAD4-Y35 CPIVTDGC   | 10179 | 10104 |
| >SMAD4-Y35 CPIVTDGYV  | 122  | >SMAD4-Y35 CPIVTDGCV  | 238   | 116   |
| >SMAD4-Y35 CPIVTDGYV  | 318  | >SMAD4-Y35 CPIVTDGCV  | 438   | 120   |
| >SMAD4-Y35 CPIVTDGY   | 409  | >SMAD4-Y35 CPIVTDGC   | 12253 | 11844 |
| >SMAD4-Y35 SCPIVTDGY' | 143  | >SMAD4-Y35 SCPIVTDGC' | 1060  | 917   |
| >SMAD4-Y95 YARLWRWPE  | 96   | >SMAD4-Y95 NARLWRWPI  | 5195  | 5099  |
| >SMAD4-Y95 IYARLWRWPI | 440  | >SMAD4-Y95 INARLWRWP  | 386   | 54    |
| >SMAD4-Y95 IYARLWRWPI | 346  | >SMAD4-Y95 INARLWRWP  | 21975 | 21629 |
| >SMAD4-Y95 IYARLWRW   | 53   | >SMAD4-Y95 INARLWRW   | 7736  | 7683  |
| >SMAD4-Y95 IYARLWRWPI | 434  | >SMAD4-Y95 INARLWRWP  | 20589 | 20155 |
| >SMAD4-Y95 IYARLWRW   | 19   | >SMAD4-Y95 INARLWRW   | 2469  | 2450  |
| >SMAD4-Y95 IYARLWRWPI | 41   | >SMAD4-Y95 INARLWRWP  | 8595  | 8554  |
| >SMAD4-Y95 IYARLWRW   | 27   | >SMAD4-Y95 INARLWRW   | 21811 | 21784 |
| >SMAD4-Y95 IYARLWRWPI | 78   | >SMAD4-Y95 INARLWRWP  | 26531 | 26453 |
| >SMAD4-Y95 IYARLWRW   | 1104 | >SMAD4-Y95 INARLWRW   | 147   | 957   |
| >SMAD4-Y95 IYARLWRW   | 257  | >SMAD4-Y95 INARLWRW   | 83    | 174   |
| >SMAD4-Y95 AGRKGFPHVI | 195  | >SMAD4-Y95 AGRKGFPHVI | 1610  | 1415  |
| >SMAD4-Y95 AGRKGFPHVI | 274  | >SMAD4-Y95 AGRKGFPHVI | 18354 | 18080 |
| >SMAD4-Y95 AGRKGFPHVI | 268  | >SMAD4-Y95 AGRKGFPHVI | 18091 | 17823 |
| >SMAD4-Y95 AGRKGFPHVI | 124  | >SMAD4-Y95 AGRKGFPHVI | 13228 | 13104 |
| >SMAD4-Y95 VIYARLWR   | 66   | >SMAD4-Y95 VINARLWR   | 354   | 288   |
| >SMAD4-Y95 VIYARLWR   | 108  | >SMAD4-Y95 VINARLWR   | 346   | 238   |
| >SMAD4-Y95 VIYARLWR   | 24   | >SMAD4-Y95 VINARLWR   | 28    | 4     |
| >SMAD4-Y95 VIYARLWR   | 124  | >SMAD4-Y95 VINARLWR   | 291   | 167   |
| >SMAD4-Y95 VIYARLWR   | 94   | >SMAD4-Y95 VINARLWR   | 322   | 228   |
| >SMAD4-Y95 VIYARLWRW  | 25   | >SMAD4-Y95 VINARLWRW  | 529   | 504   |
| >SMAD4-Y95 VIYARLWRW  | 63   | >SMAD4-Y95 VINARLWRW  | 97    | 34    |
| >SMAD4-Y95 VIYARLWRW  | 15   | >SMAD4-Y95 VINARLWRW  | 16    | 1     |



|                       |     |                       |       |       |
|-----------------------|-----|-----------------------|-------|-------|
| >SMAD4-Y95 VIYARLWR   | 82  | >SMAD4-Y95 VINARLWR   | 253   | 171   |
| >SMAD4-Y95 HVIYARLWR  | 648 | >SMAD4-Y95 HVINARLWR  | 378   | 270   |
| >SMAD4-Y95 HVIYARLWRV | 322 | >SMAD4-Y95 HVINARLWRV | 589   | 267   |
| >SMAD4-Y95 HVIYARLWR  | 441 | >SMAD4-Y95 HVINARLWR  | 501   | 60    |
| >SMAD4-Y95 HVIYARLWR  | 25  | >SMAD4-Y95 HVINARLWR  | 30    | 5     |
| >SMAD4-Y95 HVIYARLWR  | 36  | >SMAD4-Y95 HVINARLWR  | 64    | 28    |
| >SMAD4-Y95 HVIYARLWR  | 4   | >SMAD4-Y95 HVINARLWR  | 6     | 2     |
| >SMAD4-Y95 HVIYARLW   | 192 | >SMAD4-Y95 HVINARLW   | 152   | 40    |
| >SMAD4-Y95 HVIYARLWRV | 133 | >SMAD4-Y95 HVINARLWRV | 110   | 23    |
| >SMAD4-Y95 HVIYARLW   | 97  | >SMAD4-Y95 HVINARLW   | 108   | 11    |
| >SMAD4-Y95 HVIYARLWRV | 69  | >SMAD4-Y95 HVINARLWRV | 77    | 8     |
| >SMAD4-Y95 HVIYARLW   | 65  | >SMAD4-Y95 HVINARLW   | 92    | 27    |
| >SMAD4-Y95 HVIYARLWRV | 20  | >SMAD4-Y95 HVINARLWRV | 23    | 3     |
| >SMAD4-Y95 HVIYARLWR  | 168 | >SMAD4-Y95 HVINARLWR  | 186   | 18    |
| >SMAD4-Y95 FPHVIYARL  | 202 | >SMAD4-Y95 FPHVINARL  | 576   | 374   |
| >SMAD4-Y95 FPHVIYAR   | 375 | >SMAD4-Y95 FPHVINAR   | 1017  | 642   |
| >SMAD4-Y95 FPHVIYAR   | 144 | >SMAD4-Y95 FPHVINAR   | 182   | 38    |
| >SMAD4-Y95 FPHVIYARLW | 129 | >SMAD4-Y95 FPHVINARLW | 117   | 12    |
| >SMAD4-Y95 FPHVIYARL  | 269 | >SMAD4-Y95 FPHVINARL  | 148   | 121   |
| >SMAD4-Y95 FPHVIYARL  | 171 | >SMAD4-Y95 FPHVINARL  | 503   | 332   |
| >SMAD4-Y95 FPHVIYARL  | 279 | >SMAD4-Y95 FPHVINARL  | 228   | 51    |
| >SMAD4-Y95 FPHVIYARL  | 227 | >SMAD4-Y95 FPHVINARL  | 176   | 51    |
| >SMAD4-Y95 FPHVIYARL  | 108 | >SMAD4-Y95 FPHVINARL  | 113   | 5     |
| >SMAD4-Y95 FPHVIYARLW | 77  | >SMAD4-Y95 FPHVINARLW | 66    | 11    |
| >SMAD4-Y95 FPHVIYAR   | 26  | >SMAD4-Y95 FPHVINAR   | 47    | 21    |
| >SMAD4-Y95 FPHVIYARL  | 155 | >SMAD4-Y95 FPHVINARL  | 681   | 526   |
| >SMAD4-Y95 FPHVIYARLW | 266 | >SMAD4-Y95 FPHVINARLW | 431   | 165   |
| >SMAD4-Y95 FPHVIYARL  | 29  | >SMAD4-Y95 FPHVINARL  | 95    | 66    |
| >SMAD4-Y95 FPHVIYARLW | 4   | >SMAD4-Y95 FPHVINARLW | 5     | 1     |
| >SMAD4-Y95 GFPHVIYARL | 37  | >SMAD4-Y95 GFPHVINARL | 165   | 128   |
| >SMAD4-Y95 GFPHVIYARL | 181 | >SMAD4-Y95 GFPHVINARL | 158   | 23    |
| >SMAD4-Y95 GFPHVIYAR  | 26  | >SMAD4-Y95 GFPHVINAR  | 216   | 190   |
| >SMAD4-Y95 GFPHVIYAR  | 252 | >SMAD4-Y95 GFPHVINAR  | 986   | 734   |
| >SMAD4-Y95 GFPHVIYAR  | 129 | >SMAD4-Y95 GFPHVINAR  | 1369  | 1240  |
| >SMAD4-Y95 KGFPHVIYAR | 95  | >SMAD4-Y95 KGFPHVINAR | 553   | 458   |
| >SMAD4-Y95 KGFPHVIYAR | 403 | >SMAD4-Y95 KGFPHVINAR | 497   | 94    |
| >SMAD4-Y95 KGFPHVIYA  | 228 | >SMAD4-Y95 KGFPHVINA  | 2561  | 2333  |
| >SMAD4-Y95 KGFPHVIYA  | 45  | >SMAD4-Y95 KGFPHVINA  | 159   | 114   |
| >SMAD4-Y95 KGFPHVIY   | 240 | >SMAD4-Y95 KGFPHVIN   | 26951 | 26711 |
| >SMAD4-Y95 KGFPHVIYAR | 49  | >SMAD4-Y95 KGFPHVINAR | 178   | 129   |
| >SMAD4-Y95 KGFPHVIY   | 288 | >SMAD4-Y95 KGFPHVIN   | 20045 | 19757 |
| >SMAD4-Y95 KGFPHVIY   | 40  | >SMAD4-Y95 KGFPHVIN   | 13046 | 13006 |
| >SMAD4-Y95 KGFPHVIY   | 40  | >SMAD4-Y95 KGFPHVIN   | 18739 | 18699 |

|                        |       |                       |       |       |
|------------------------|-------|-----------------------|-------|-------|
| >SMAD4-Y95 KGFPHVIYAR  | 63    | >SMAD4-Y95 KGFPHVINAR | 48    | 15    |
| >SMAD4-Y95 KGFPHVIY    | 428   | >SMAD4-Y95 KGFPHVIN   | 19289 | 18861 |
| >SMAD4-Y95 KGFPHVIYAR  | 239   | >SMAD4-Y95 KGFPHVINAR | 731   | 492   |
| >SMAD4-Y95 KGFPHVIYAR  | 17    | >SMAD4-Y95 KGFPHVINAR | 41    | 24    |
| >SMAD4-Y95 KGFPHVIYAR  | 336   | >SMAD4-Y95 KGFPHVINAR | 463   | 127   |
| >SMAD4-Y95 RKGFPHVIIYA | 485   | >SMAD4-Y95 RKGFPHVINA | 1906  | 1421  |
| >SMAD4-Y95 RKGFPHVIIY  | 10    | >SMAD4-Y95 RKGFPHVIN  | 3114  | 3104  |
| >SMAD4-Y95 RKGFPHVIIYA | 382   | >SMAD4-Y95 RKGFPHVINA | 337   | 45    |
| >SMAD4-Y95 RKGFPHVIIYA | 93    | >SMAD4-Y95 RKGFPHVINA | 363   | 270   |
| >SMAD4-Y95 GRKGFPHVIY  | 260   | >SMAD4-Y95 GRKGFPHVIN | 15874 | 15614 |
| >SMAD4-Y95 GRKGFPHVIY  | 25    | >SMAD4-Y95 GRKGFPHVIN | 1314  | 1289  |
| >SMAD4-Y95 YARLWRWPC   | 694   | >SMAD4-Y95 SARLWRWPC  | 89    | 605   |
| >SMAD4-Y95 YARLWRWPC   | 96    | >SMAD4-Y95 SARLWRWPC  | 677   | 581   |
| >SMAD4-Y95 IYARLWRWPI  | 440   | >SMAD4-Y95 ISARLWRWPI | 259   | 181   |
| >SMAD4-Y95 IYARLWRWPI  | 346   | >SMAD4-Y95 ISARLWRWPI | 24579 | 24233 |
| >SMAD4-Y95 IYARLWRW    | 53    | >SMAD4-Y95 ISARLWRW   | 5376  | 5323  |
| >SMAD4-Y95 IYARLWRWPI  | 434   | >SMAD4-Y95 ISARLWRWPI | 18322 | 17888 |
| >SMAD4-Y95 IYARLWRW    | 19    | >SMAD4-Y95 ISARLWRW   | 748   | 729   |
| >SMAD4-Y95 IYARLWRWPI  | 41    | >SMAD4-Y95 ISARLWRWPI | 3556  | 3515  |
| >SMAD4-Y95 IYARLWRW    | 27    | >SMAD4-Y95 ISARLWRW   | 14924 | 14897 |
| >SMAD4-Y95 IYARLWRWPI  | 78    | >SMAD4-Y95 ISARLWRWPI | 23588 | 23510 |
| >SMAD4-Y95 IYARLWRW    | 9550  | >SMAD4-Y95 ISARLWRW   | 12    | 9538  |
| >SMAD4-Y95 IYARLWRWPI  | 24935 | >SMAD4-Y95 ISARLWRWPI | 122   | 24813 |
| >SMAD4-Y95 IYARLWRW    | 1104  | >SMAD4-Y95 ISARLWRW   | 31    | 1073  |
| >SMAD4-Y95 IYARLWRW    | 257   | >SMAD4-Y95 ISARLWRW   | 10    | 247   |
| >SMAD4-Y95 IYARLWRW    | 1298  | >SMAD4-Y95 ISARLWRW   | 415   | 883   |
| >SMAD4-Y95 AGRKGFPHVI  | 195   | >SMAD4-Y95 AGRKGFPHVI | 489   | 294   |
| >SMAD4-Y95 AGRKGFPHVI  | 274   | >SMAD4-Y95 AGRKGFPHVI | 16827 | 16553 |
| >SMAD4-Y95 AGRKGFPHVI  | 268   | >SMAD4-Y95 AGRKGFPHVI | 14672 | 14404 |
| >SMAD4-Y95 AGRKGFPHVI  | 124   | >SMAD4-Y95 AGRKGFPHVI | 13404 | 13280 |
| >SMAD4-Y95 VIYARLWR    | 66    | >SMAD4-Y95 VISARLWR   | 491   | 425   |
| >SMAD4-Y95 VIYARLWR    | 108   | >SMAD4-Y95 VISARLWR   | 389   | 281   |
| >SMAD4-Y95 VIYARLWR    | 24    | >SMAD4-Y95 VISARLWR   | 106   | 82    |
| >SMAD4-Y95 VIYARLWR    | 124   | >SMAD4-Y95 VISARLWR   | 367   | 243   |
| >SMAD4-Y95 VIYARLWR    | 94    | >SMAD4-Y95 VISARLWR   | 177   | 83    |
| >SMAD4-Y95 VIYARLWRW   | 25    | >SMAD4-Y95 VISARLWRW  | 332   | 307   |
| >SMAD4-Y95 VIYARLWRW   | 63    | >SMAD4-Y95 VISARLWRW  | 122   | 59    |
| >SMAD4-Y95 VIYARLWRW   | 15    | >SMAD4-Y95 VISARLWRW  | 17    | 2     |
| >SMAD4-Y95 VIYARLWR    | 82    | >SMAD4-Y95 VISARLWR   | 189   | 107   |
| >SMAD4-Y95 HVIYARLWR   | 648   | >SMAD4-Y95 HVISARLWR  | 412   | 236   |
| >SMAD4-Y95 HVIYARLWRV  | 322   | >SMAD4-Y95 HVISARLWRV | 261   | 61    |
| >SMAD4-Y95 HVIYARLWR   | 441   | >SMAD4-Y95 HVISARLWR  | 579   | 138   |
| >SMAD4-Y95 HVIYARLWR   | 25    | >SMAD4-Y95 HVISARLWR  | 24    | 1     |

|                        |     |                        |       |       |
|------------------------|-----|------------------------|-------|-------|
| >SMAD4-Y95 HVIYARLWR   | 36  | >SMAD4-Y95 HVISARLWR   | 59    | 23    |
| >SMAD4-Y95 HVIYARLWR   | 4   | >SMAD4-Y95 HVISARLWR   | 5     | 1     |
| >SMAD4-Y95 HVIYARLW    | 192 | >SMAD4-Y95 HVISARLW    | 77    | 115   |
| >SMAD4-Y95 HVIYARLWRV  | 133 | >SMAD4-Y95 HVISARLWRV  | 73    | 60    |
| >SMAD4-Y95 HVIYARLW    | 97  | >SMAD4-Y95 HVISARLW    | 90    | 7     |
| >SMAD4-Y95 HVIYARLWRV  | 69  | >SMAD4-Y95 HVISARLWRV  | 69    | 0     |
| >SMAD4-Y95 HVIYARLW    | 65  | >SMAD4-Y95 HVISARLW    | 47    | 18    |
| >SMAD4-Y95 HVIYARLWRV  | 20  | >SMAD4-Y95 HVISARLWRV  | 18    | 2     |
| >SMAD4-Y95 HVIYARLWR   | 168 | >SMAD4-Y95 HVISARLWR   | 134   | 34    |
| >SMAD4-Y95 FPHVIYARL   | 202 | >SMAD4-Y95 FPHVISARL   | 494   | 292   |
| >SMAD4-Y95 FPHVIYAR    | 375 | >SMAD4-Y95 FPHVISAR    | 969   | 594   |
| >SMAD4-Y95 FPHVIYAR    | 144 | >SMAD4-Y95 FPHVISAR    | 159   | 15    |
| >SMAD4-Y95 FPHVIYARLW  | 129 | >SMAD4-Y95 FPHVISARLW  | 131   | 2     |
| >SMAD4-Y95 FPHVIYARL   | 269 | >SMAD4-Y95 FPHVISARL   | 77    | 192   |
| >SMAD4-Y95 FPHVIYARL   | 171 | >SMAD4-Y95 FPHVISARL   | 223   | 52    |
| >SMAD4-Y95 FPHVIYARL   | 279 | >SMAD4-Y95 FPHVISARL   | 103   | 176   |
| >SMAD4-Y95 FPHVIYARLW  | 530 | >SMAD4-Y95 FPHVISARLW  | 488   | 42    |
| >SMAD4-Y95 FPHVIYARL   | 227 | >SMAD4-Y95 FPHVISARL   | 106   | 121   |
| >SMAD4-Y95 FPHVIYARL   | 108 | >SMAD4-Y95 FPHVISARL   | 112   | 4     |
| >SMAD4-Y95 FPHVIYARLW  | 77  | >SMAD4-Y95 FPHVISARLW  | 102   | 25    |
| >SMAD4-Y95 FPHVIYAR    | 26  | >SMAD4-Y95 FPHVISAR    | 75    | 49    |
| >SMAD4-Y95 FPHVIYARL   | 155 | >SMAD4-Y95 FPHVISARL   | 512   | 357   |
| >SMAD4-Y95 FPHVIYARLW  | 266 | >SMAD4-Y95 FPHVISARLW  | 601   | 335   |
| >SMAD4-Y95 FPHVIYARL   | 29  | >SMAD4-Y95 FPHVISARL   | 74    | 45    |
| >SMAD4-Y95 FPHVIYARLW  | 4   | >SMAD4-Y95 FPHVISARLW  | 4     | 0     |
| >SMAD4-Y95 GFPHVIYARL  | 37  | >SMAD4-Y95 GFPHVISARL  | 142   | 105   |
| >SMAD4-Y95 GFPHVIYARL' | 181 | >SMAD4-Y95 GFPHVISARL' | 249   | 68    |
| >SMAD4-Y95 GFPHVIYAR   | 26  | >SMAD4-Y95 GFPHVISAR   | 143   | 117   |
| >SMAD4-Y95 GFPHVIYAR   | 252 | >SMAD4-Y95 GFPHVISAR   | 563   | 311   |
| >SMAD4-Y95 GFPHVIYAR   | 129 | >SMAD4-Y95 GFPHVISAR   | 2523  | 2394  |
| >SMAD4-Y95 KGFPHVIYAR  | 95  | >SMAD4-Y95 KGFPHVISAR  | 310   | 215   |
| >SMAD4-Y95 KGFPHVIYAR  | 403 | >SMAD4-Y95 KGFPHVISAR  | 371   | 32    |
| >SMAD4-Y95 KGFPHVIYA   | 228 | >SMAD4-Y95 KGFPHVISA   | 492   | 264   |
| >SMAD4-Y95 KGFPHVIYA   | 45  | >SMAD4-Y95 KGFPHVISA   | 99    | 54    |
| >SMAD4-Y95 KGFPHVIY    | 240 | >SMAD4-Y95 KGFPHVIS    | 25989 | 25749 |
| >SMAD4-Y95 KGFPHVIYAR  | 49  | >SMAD4-Y95 KGFPHVISAR  | 155   | 106   |
| >SMAD4-Y95 KGFPHVIY    | 288 | >SMAD4-Y95 KGFPHVIS    | 18865 | 18577 |
| >SMAD4-Y95 KGFPHVIY    | 40  | >SMAD4-Y95 KGFPHVIS    | 8893  | 8853  |
| >SMAD4-Y95 KGFPHVIY    | 40  | >SMAD4-Y95 KGFPHVIS    | 17909 | 17869 |
| >SMAD4-Y95 KGFPHVIYAR  | 63  | >SMAD4-Y95 KGFPHVISAR  | 28    | 35    |
| >SMAD4-Y95 KGFPHVIY    | 428 | >SMAD4-Y95 KGFPHVIS    | 19058 | 18630 |
| >SMAD4-Y95 KGFPHVIYAR  | 239 | >SMAD4-Y95 KGFPHVISAR  | 782   | 543   |
| >SMAD4-Y95 KGFPHVIYAR  | 17  | >SMAD4-Y95 KGFPHVISAR  | 57    | 40    |

|                        |      |                        |       |       |
|------------------------|------|------------------------|-------|-------|
| >SMAD4-Y95 KGFPHVIYAR  | 336  | >SMAD4-Y95 KGFPHVISAR  | 286   | 50    |
| >SMAD4-Y95 RKGFPHVIIYA | 485  | >SMAD4-Y95 RKGFPHVISA  | 1496  | 1011  |
| >SMAD4-Y95 RKGFPHVIIY  | 10   | >SMAD4-Y95 RKGFPHVIS   | 1799  | 1789  |
| >SMAD4-Y95 RKGFPHVIIYA | 957  | >SMAD4-Y95 RKGFPHVISA  | 462   | 495   |
| >SMAD4-Y95 RKGFPHVIIYA | 382  | >SMAD4-Y95 RKGFPHVISA  | 230   | 152   |
| >SMAD4-Y95 RKGFPHVIIYA | 93   | >SMAD4-Y95 RKGFPHVISA  | 554   | 461   |
| >SMAD4-Y95 GRKGFPHVIY  | 260  | >SMAD4-Y95 GRKGFPHVIS  | 10952 | 10692 |
| >SMAD4-Y95 GRKGFPHVIY  | 25   | >SMAD4-Y95 GRKGFPHVIS  | 1677  | 1652  |
| >SMARCA4-A AQDRAHRI    | 342  | >SMARCA4-A VQDRAHRI    | 477   | 135   |
| >SMARCA4-A QAQDRAHR    | 82   | >SMARCA4-A QVQDRAHR    | 60    | 22    |
| >SMARCA4-A QAQDRAHR    | 189  | >SMARCA4-A QVQDRAHR    | 170   | 19    |
| >SMARCA4-A QAQDRAHR    | 125  | >SMARCA4-A QVQDRAHR    | 86    | 39    |
| >SMARCA4-A QAQDRAHR    | 640  | >SMARCA4-A QVQDRAHR    | 306   | 334   |
| >SMARCA4-A QAQDRAHRI   | 405  | >SMARCA4-A QVQDRAHRI   | 2708  | 2303  |
| >SMARCA4-A LQAQDRAHR   | 146  | >SMARCA4-A LQVQDRAHR   | 148   | 2     |
| >SMARCA4-A LQAQDRAHR   | 533  | >SMARCA4-A LQVQDRAHR   | 365   | 168   |
| >SMARCA4-A DLQAQDRAH   | 457  | >SMARCA4-A DLQVQDRAH   | 861   | 404   |
| >SMARCA4-L NPDLEEPPL   | 187  | >SMARCA4-L NPNLEEPPL   | 91    | 96    |
| >SMARCA4-L NPDLEEPPL   | 221  | >SMARCA4-L NPNLEEPPL   | 605   | 384   |
| >SMARCA4-L NPDLEEPPL   | 723  | >SMARCA4-L NPNLEEPPL   | 348   | 375   |
| >SMARCA4-L GVNPDLLEEPF | 406  | >SMARCA4-L GVNPDLLEEPF | 499   | 93    |
| >SMARCA4-L GVNPDLLEEPF | 440  | >SMARCA4-L GVNPDLLEEPF | 322   | 118   |
| >SMARCA4-L PPAGVNPDL   | 33   | >SMARCA4-L PPAGVNPDL   | 39    | 6     |
| >SMARCA4-L PPPAGVNPDI  | 13   | >SMARCA4-L PPPAGVNPDI  | 14    | 1     |
| >SMARCA4-L APPPAGVNPI  | 1055 | >SMARCA4-L APPPAGVNPI  | 471   | 584   |
| >SMARCA4-L APPPAGVNPI  | 4    | >SMARCA4-L APPPAGVNPI  | 5     | 1     |
| >SMARCA4-L APPPAGVNPI  | 331  | >SMARCA4-L APPPAGVNPI  | 279   | 52    |
| >SMARCA4-L APPPAGVNPI  | 266  | >SMARCA4-L APPPAGVNPI  | 88    | 178   |
| >SMARCA4-E EEPPLKEEDE\ | 136  | >SMARCA4-E AEPPLKEEDE' | 396   | 260   |
| >SMARCA4-E EEPPLKEEDE\ | 6968 | >SMARCA4-E AEPPLKEEDE' | 295   | 6673  |
| >SMARCA4-E DLEEPPLK    | 1594 | >SMARCA4-E DLAEPPLK    | 212   | 1382  |
| >SMARCA4-E NPDLEEPPL   | 2321 | >SMARCA4-E NPDLEEPPL   | 197   | 2124  |
| >SMARCA4-E NPDLEEPPL   | 187  | >SMARCA4-E NPDLEEPPL   | 116   | 71    |
| >SMARCA4-E NPDLEEPPL   | 221  | >SMARCA4-E NPDLEEPPL   | 123   | 98    |
| >SMARCA4-E GVNPDLLEEPF | 524  | >SMARCA4-E GVNPDLLEEPF | 471   | 53    |
| >SMARCA4-E GVNPDLLEEPF | 966  | >SMARCA4-E GVNPDLLEEPF | 483   | 483   |
| >SMARCA4-E GVNPDLLEEPF | 406  | >SMARCA4-E GVNPDLLEEPF | 244   | 162   |
| >SMARCA4-E GVNPDLLEEPF | 440  | >SMARCA4-E GVNPDLLEEPF | 276   | 164   |
| >SMARCA4-E ELKALRLL    | 1686 | >SMARCA4-E ELKALRLL    | 160   | 1526  |
| >SMARCA4-E ELKALRLL    | 2060 | >SMARCA4-E ELKALRLL    | 97    | 1963  |
| >SMARCA4-E ELKALRLL    | 833  | >SMARCA4-E ELKALRLL    | 85    | 748   |
| >SMARCA4-E ELKALRLL    | 484  | >SMARCA4-E ELKALRLL    | 2661  | 2177  |
| >SMARCA4-E ELKALRLLNF  | 468  | >SMARCA4-E ELKALRLLNF  | 151   | 317   |

|                        |       |                        |       |       |
|------------------------|-------|------------------------|-------|-------|
| >SMARCA4-E IELKALRL    | 2037  | >SMARCA4-E IGLKALRL    | 210   | 1827  |
| >SMARCA4-E IELKALRL    | 49    | >SMARCA4-E IGLKALRL    | 34896 | 34847 |
| >SMARCA4-E IELKALRLL   | 13    | >SMARCA4-E IGLKALRLL   | 6233  | 6220  |
| >SMARCA4-E IELKALRLLNF | 136   | >SMARCA4-E IGLKALRLLNF | 21478 | 21342 |
| >SMARCA4-E IELKALRLLNF | 70    | >SMARCA4-E IGLKALRLLNF | 356   | 286   |
| >SMARCA4-E IELKALRLLNF | 10651 | >SMARCA4-E IGLKALRLLNF | 181   | 10470 |
| >SMARCA4-E IELKALRL    | 325   | >SMARCA4-E IGLKALRL    | 24916 | 24591 |
| >SMARCA4-E IELKALRLL   | 66    | >SMARCA4-E IGLKALRLL   | 21882 | 21816 |
| >SMARCA4-E IELKALRLLNF | 14    | >SMARCA4-E IGLKALRLLNF | 14929 | 14915 |
| >SMARCA4-E IELKALRL    | 109   | >SMARCA4-E IGLKALRL    | 22641 | 22532 |
| >SMARCA4-E IELKALRLL   | 98    | >SMARCA4-E IGLKALRLL   | 22706 | 22608 |
| >SMARCA4-E IELKALRL    | 314   | >SMARCA4-E IGLKALRL    | 36606 | 36292 |
| >SMARCA4-E IELKALRLL   | 193   | >SMARCA4-E IGLKALRLL   | 38520 | 38327 |
| >SMARCA4-E IELKALRLLNF | 285   | >SMARCA4-E IGLKALRLLNF | 35791 | 35506 |
| >SMARCA4-E IELKALRLLNF | 278   | >SMARCA4-E IGLKALRLLNF | 21443 | 21165 |
| >SMARCA4-E IELKALRLLNF | 141   | >SMARCA4-E IGLKALRLLNF | 34179 | 34038 |
| >SMARCA4-E IELKALRL    | 231   | >SMARCA4-E IGLKALRL    | 24472 | 24241 |
| >SMARCA4-E IELKALRLL   | 10    | >SMARCA4-E IGLKALRLL   | 22269 | 22259 |
| >SMARCA4-E IELKALRLLNF | 35    | >SMARCA4-E IGLKALRLLNF | 31492 | 31457 |
| >SMARCA4-E TIELKALR    | 342   | >SMARCA4-E TIGLKALR    | 230   | 112   |
| >SMARCA4-E TIELKALR    | 62    | >SMARCA4-E TIGLKALR    | 136   | 74    |
| >SMARCA4-E TIELKALR    | 413   | >SMARCA4-E TIGLKALR    | 142   | 271   |
| >SMARCA4-E ATIELKALRLL | 466   | >SMARCA4-E ATIGLKALRLL | 571   | 105   |
| >SMARCA4-E ATIELKAL    | 276   | >SMARCA4-E ATIGLKAL    | 650   | 374   |
| >SMARCA4-E ATIELKALRLL | 345   | >SMARCA4-E ATIGLKALRLL | 977   | 632   |
| >SMARCA4-E ATIELKALR   | 83    | >SMARCA4-E ATIGLKALR   | 81    | 2     |
| >SMARCA4-E ATIELKAL    | 26    | >SMARCA4-E ATIGLKAL    | 18    | 8     |
| >SMARCA4-E ATIELKALRL  | 323   | >SMARCA4-E ATIGLKALRL  | 209   | 114   |
| >SMARCA4-E ATIELKALRLL | 104   | >SMARCA4-E ATIGLKALRLL | 73    | 31    |
| >SMARCA4-E ATIELKALR   | 11    | >SMARCA4-E ATIGLKALR   | 11    | 0     |
| >SMARCA4-E ATIELKAL    | 444   | >SMARCA4-E ATIGLKAL    | 207   | 237   |
| >SMARCA4-E ATIELKALRL  | 816   | >SMARCA4-E ATIGLKALRL  | 388   | 428   |
| >SMARCA4-E ATIELKALR   | 112   | >SMARCA4-E ATIGLKALR   | 160   | 48    |
| >SMARCA4-E ATIELKALR   | 10    | >SMARCA4-E ATIGLKALR   | 11    | 1     |
| >SMARCA4-E ATIELKAL    | 21    | >SMARCA4-E ATIGLKAL    | 13    | 8     |
| >SMARCA4-E ATIELKALRL  | 8     | >SMARCA4-E ATIGLKALRL  | 6     | 2     |
| >SMARCA4-E ATIELKALRLL | 52    | >SMARCA4-E ATIGLKALRLL | 30    | 22    |
| >SMARCA4-E ATIELKALRLL | 136   | >SMARCA4-E ATIGLKALRLL | 114   | 22    |
| >SMARCA4-E ATIELKALRLL | 346   | >SMARCA4-E ATIGLKALRLL | 112   | 234   |
| >SMARCA4-E ATIELKALR   | 262   | >SMARCA4-E ATIGLKALR   | 339   | 77    |
| >SMARCA4-E KATIELKALR  | 69    | >SMARCA4-E KATIGLKALR  | 35    | 34    |
| >SMARCA4-E KATIELKALR  | 440   | >SMARCA4-E KATIGLKALR  | 213   | 227   |
| >SMARCA4-E KATIELKAL   | 78    | >SMARCA4-E KATIGLKAL   | 25    | 53    |

|                        |       |                        |      |       |
|------------------------|-------|------------------------|------|-------|
| >SMARCA4-E KATIELKALRL | 16    | >SMARCA4-E KATIGLKALRL | 9    | 7     |
| >SMARCA4-E KATIELKALR  | 225   | >SMARCA4-E KATIGLKALR  | 398  | 173   |
| >SMARCA4-E TKATIELK    | 394   | >SMARCA4-E TKATIGLK    | 830  | 436   |
| >SMARCA4-E TKATIELKALR | 82    | >SMARCA4-E TKATIGLKALF | 125  | 43    |
| >SMARCA4-E TKATIELKAL  | 311   | >SMARCA4-E TKATIGLKAL  | 166  | 145   |
| >SMARCA4-E TKATIELKAL  | 309   | >SMARCA4-E TKATIGLKAL  | 166  | 143   |
| >SMARCA4-E RTKATIELK   | 118   | >SMARCA4-E RTKATIGLK   | 45   | 73    |
| >SMARCA4-E RTKATIELK   | 39    | >SMARCA4-E RTKATIGLK   | 36   | 3     |
| >SMARCA4-E RTKATIEL    | 7     | >SMARCA4-E RTKATIGL    | 6    | 1     |
| >SMARCA4-E RTKATIELK   | 4     | >SMARCA4-E RTKATIGLK   | 3    | 1     |
| >SMARCA4-E RTKATIELKA  | 9     | >SMARCA4-E RTKATIGLKA  | 5    | 4     |
| >SMARCA4-E RTKATIELKAL | 16    | >SMARCA4-E RTKATIGLKAI | 8    | 8     |
| >SMARCA4-E RTKATIELK   | 16    | >SMARCA4-E RTKATIGLK   | 20   | 4     |
| >SMARCA4-E RTKATIEL    | 201   | >SMARCA4-E RTKATIGL    | 422  | 221   |
| >SMARCA4-E RTKATIELKAL | 462   | >SMARCA4-E RTKATIGLKAI | 950  | 488   |
| >SMARCA4-E RTKATIELK   | 168   | >SMARCA4-E RTKATIGLK   | 424  | 256   |
| >SMARCA4-E RTKATIELKAL | 422   | >SMARCA4-E RTKATIGLKAI | 661  | 239   |
| >SMARCA4-E RTKATIEL    | 6     | >SMARCA4-E RTKATIGL    | 5    | 1     |
| >SMARCA4-E RTKATIELKAL | 7     | >SMARCA4-E RTKATIGLKAI | 5    | 2     |
| >SMARCA4-E RTKATIEL    | 69    | >SMARCA4-E RTKATIGL    | 183  | 114   |
| >SMARCA4-E RTKATIELKAL | 299   | >SMARCA4-E RTKATIGLKAI | 158  | 141   |
| >SMARCA4-E RTKATIELKAL | 683   | >SMARCA4-E RTKATIGLKAI | 442  | 241   |
| >SMARCA4-E LRTKATIEL   | 173   | >SMARCA4-E LRTKATIGL   | 94   | 79    |
| >SMARCA4-E LRTKATIELK  | 643   | >SMARCA4-E LRTKATIGLK  | 215  | 428   |
| >SMARCA4-E LRTKATIEL   | 291   | >SMARCA4-E LRTKATIGL   | 509  | 218   |
| >SMARCA4-E LRTKATIEL   | 63    | >SMARCA4-E LRTKATIGL   | 51   | 12    |
| >SMARCA4-F FCQMTSLMT   | 314   | >SMARCA4-F LCQMTSLMT   | 1957 | 1643  |
| >SMARCA4-F FCQMTSLMT   | 43    | >SMARCA4-F LCQMTSLMT   | 33   | 10    |
| >SMARCA4-F LFCQMTSL    | 124   | >SMARCA4-F LLCQMTSL    | 2999 | 2875  |
| >SMARCA4-F LFCQMTSLM'  | 41    | >SMARCA4-F LLCQMTSLM'  | 915  | 874   |
| >SMARCA4-F LFCQMTSL    | 20302 | >SMARCA4-F LLCQMTSL    | 264  | 20038 |
| >SMARCA4-F LFCQMTSLM'  | 18549 | >SMARCA4-F LLCQMTSLM'  | 238  | 18311 |
| >SMARCA4-F LFCQMTSL    | 1966  | >SMARCA4-F LLCQMTSL    | 29   | 1937  |
| >SMARCA4-F LFCQMTSLM   | 7256  | >SMARCA4-F LLCQMTSLM   | 206  | 7050  |
| >SMARCA4-F LFCQMTSLM'  | 4628  | >SMARCA4-F LLCQMTSLM'  | 215  | 4413  |
| >SMARCA4-F LFCQMTSL    | 12202 | >SMARCA4-F LLCQMTSL    | 42   | 12160 |
| >SMARCA4-F LFCQMTSLM   | 18415 | >SMARCA4-F LLCQMTSLM   | 331  | 18084 |
| >SMARCA4-F LFCQMTSLM'  | 18633 | >SMARCA4-F LLCQMTSLM'  | 279  | 18354 |
| >SMARCA4-F LFCQMTSLM'  | 7824  | >SMARCA4-F LLCQMTSLM'  | 27   | 7797  |
| >SMARCA4-F LFCQMTSL    | 15317 | >SMARCA4-F LLCQMTSL    | 44   | 15273 |
| >SMARCA4-F LFCQMTSLM'  | 11549 | >SMARCA4-F LLCQMTSLM'  | 18   | 11531 |
| >SMARCA4-F LFCQMTSLM'  | 20318 | >SMARCA4-F LLCQMTSLM'  | 219  | 20099 |
| >SMARCA4-F LFCQMTSLM'  | 20178 | >SMARCA4-F LLCQMTSLM'  | 303  | 19875 |

|                       |       |                       |       |       |
|-----------------------|-------|-----------------------|-------|-------|
| >SMARCA4-F LFCQMTSLM' | 21333 | >SMARCA4-F LLCQMTSLM' | 369   | 20964 |
| >SMARCA4-F LFCQMTSL   | 7339  | >SMARCA4-F LLCQMTSL   | 3     | 7336  |
| >SMARCA4-F LFCQMTSLM  | 24198 | >SMARCA4-F LLCQMTSLM  | 26    | 24172 |
| >SMARCA4-F LFCQMTSLM' | 28582 | >SMARCA4-F LLCQMTSLM' | 101   | 28481 |
| >SMARCA4-F LFCQMTSLM' | 11430 | >SMARCA4-F LLCQMTSLM' | 4     | 11426 |
| >SMARCA4-F LFCQMTSLM' | 313   | >SMARCA4-F LLCQMTSLM' | 6714  | 6401  |
| >SMARCA4-F LFCQMTSLM' | 465   | >SMARCA4-F LLCQMTSLM' | 6150  | 5685  |
| >SMARCA4-F LFCQMTSL   | 148   | >SMARCA4-F LLCQMTSL   | 14304 | 14156 |
| >SMARCA4-F LFCQMTSLM' | 30    | >SMARCA4-F LLCQMTSLM' | 7196  | 7166  |
| >SMARCA4-F LFCQMTSL   | 5449  | >SMARCA4-F LLCQMTSL   | 249   | 5200  |
| >SMARCA4-F LFCQMTSLM  | 3840  | >SMARCA4-F LLCQMTSLM  | 160   | 3680  |
| >SMARCA4-F LFCQMTSLM  | 60    | >SMARCA4-F LLCQMTSLM  | 36    | 24    |
| >SMARCA4-F LRATNHKVLL | 26    | >SMARCA4-F LRATNHKVLL | 394   | 368   |
| >SMARCA4-F LRATNHKVLL | 328   | >SMARCA4-F LRATNHKVLL | 243   | 85    |
| >SMARCA4-F LRATNHKVLL | 756   | >SMARCA4-F LRATNHKVLL | 246   | 510   |
| >SMARCA4-F LRATNHKVLL | 86    | >SMARCA4-F LRATNHKVLL | 30    | 56    |
| >SMARCA4-F LLFCQMTSL  | 17    | >SMARCA4-F LLLCQMTSL  | 22    | 5     |
| >SMARCA4-F LLFCQMTSLM | 299   | >SMARCA4-F LLLCQMTSLM | 298   | 1     |
| >SMARCA4-F LLFCQMTSLM | 236   | >SMARCA4-F LLLCQMTSLM | 588   | 352   |
| >SMARCA4-F LLFCQMTSL  | 5     | >SMARCA4-F LLLCQMTSL  | 18    | 13    |
| >SMARCA4-F LLFCQMTSLM | 35    | >SMARCA4-F LLLCQMTSLM | 88    | 53    |
| >SMARCA4-F LLFCQMTSLM | 356   | >SMARCA4-F LLLCQMTSLM | 2481  | 2125  |
| >SMARCA4-F LLFCQMTS   | 419   | >SMARCA4-F LLLCQMTS   | 2600  | 2181  |
| >SMARCA4-F LLFCQMTSL  | 5     | >SMARCA4-F LLLCQMTSL  | 23    | 18    |
| >SMARCA4-F LLFCQMTSLM | 100   | >SMARCA4-F LLLCQMTSLM | 227   | 127   |
| >SMARCA4-F LLFCQMTSLM | 125   | >SMARCA4-F LLLCQMTSLM | 927   | 802   |
| >SMARCA4-F LLFCQMTSL  | 48    | >SMARCA4-F LLLCQMTSL  | 27    | 21    |
| >SMARCA4-F LLFCQMTS   | 377   | >SMARCA4-F LLLCQMTS   | 661   | 284   |
| >SMARCA4-F LLFCQMTSL  | 8     | >SMARCA4-F LLLCQMTSL  | 11    | 3     |
| >SMARCA4-F LLFCQMTSLM | 50    | >SMARCA4-F LLLCQMTSLM | 83    | 33    |
| >SMARCA4-F LLFCQMTSLM | 65    | >SMARCA4-F LLLCQMTSLM | 112   | 47    |
| >SMARCA4-F LLFCQMTSL  | 17    | >SMARCA4-F LLLCQMTSL  | 12    | 5     |
| >SMARCA4-F LLFCQMTSLM | 172   | >SMARCA4-F LLLCQMTSLM | 102   | 70    |
| >SMARCA4-F LLFCQMTSL  | 46    | >SMARCA4-F LLLCQMTSL  | 43    | 3     |
| >SMARCA4-F LLFCQMTSL  | 1238  | >SMARCA4-F LLLCQMTSL  | 185   | 1053  |
| >SMARCA4-F LLFCQMTSLM | 2987  | >SMARCA4-F LLLCQMTSLM | 431   | 2556  |
| >SMARCA4-F LLFCQMTS   | 440   | >SMARCA4-F LLLCQMTS   | 1030  | 590   |
| >SMARCA4-F LLFCQMTSL  | 4     | >SMARCA4-F LLLCQMTSL  | 5     | 1     |
| >SMARCA4-F LLFCQMTSLM | 37    | >SMARCA4-F LLLCQMTSLM | 75    | 38    |
| >SMARCA4-F LLFCQMTSLM | 135   | >SMARCA4-F LLLCQMTSLM | 301   | 166   |
| >SMARCA4-F LLFCQMTSL  | 381   | >SMARCA4-F LLLCQMTSL  | 2425  | 2044  |
| >SMARCA4-F LLFCQMTSL  | 234   | >SMARCA4-F LLLCQMTSL  | 143   | 91    |
| >SMARCA4-F LLFCQMTSL  | 94    | >SMARCA4-F LLLCQMTSL  | 740   | 646   |

|                       |       |                       |      |      |
|-----------------------|-------|-----------------------|------|------|
| >SMARCA4-F LLFCQMTSLN | 80    | >SMARCA4-F LLLCQMTSLN | 540  | 460  |
| >SMARCA4-F LLFCQMTSL  | 23    | >SMARCA4-F LLLCQMTSL  | 122  | 99   |
| >SMARCA4-F LLFCQMTSLN | 58    | >SMARCA4-F LLLCQMTSLN | 376  | 318  |
| >SMARCA4-F LLFCQMTSLN | 97    | >SMARCA4-F LLLCQMTSLN | 126  | 29   |
| >SMARCA4-F VLLFCQMTSL | 92    | >SMARCA4-F VLLLCQMTSL | 73   | 19   |
| >SMARCA4-F VLLFCQMTSL | 164   | >SMARCA4-F VLLLCQMTSL | 344  | 180  |
| >SMARCA4-F VLLFCQMTSL | 82    | >SMARCA4-F VLLLCQMTSL | 69   | 13   |
| >SMARCA4-F VLLFCQMTSL | 279   | >SMARCA4-F VLLLCQMTSL | 180  | 99   |
| >SMARCA4-F VLLFCQMT   | 259   | >SMARCA4-F VLLLCQMT   | 777  | 518  |
| >SMARCA4-F VLLFCQMTSL | 18    | >SMARCA4-F VLLLCQMTSL | 40   | 22   |
| >SMARCA4-F VLLFCQMTSL | 167   | >SMARCA4-F VLLLCQMTSL | 406  | 239  |
| >SMARCA4-F VLLFCQMTSL | 25    | >SMARCA4-F VLLLCQMTSL | 36   | 11   |
| >SMARCA4-F VLLFCQMTSL | 291   | >SMARCA4-F VLLLCQMTSL | 495  | 204  |
| >SMARCA4-F VLLFCQMTSL | 31    | >SMARCA4-F VLLLCQMTSL | 35   | 4    |
| >SMARCA4-F VLLFCQMTSL | 358   | >SMARCA4-F VLLLCQMTSL | 477  | 119  |
| >SMARCA4-F VLLFCQMTSL | 22    | >SMARCA4-F VLLLCQMTSL | 34   | 12   |
| >SMARCA4-F VLLFCQMTSL | 39    | >SMARCA4-F VLLLCQMTSL | 78   | 39   |
| >SMARCA4-F VLLFCQMT   | 122   | >SMARCA4-F VLLLCQMT   | 186  | 64   |
| >SMARCA4-F VLLFCQMTSL | 5     | >SMARCA4-F VLLLCQMTSL | 6    | 1    |
| >SMARCA4-F VLLFCQMTSL | 46    | >SMARCA4-F VLLLCQMTSL | 65   | 19   |
| >SMARCA4-F VLLFCQMTSL | 445   | >SMARCA4-F VLLLCQMTSL | 738  | 293  |
| >SMARCA4-F VLLFCQMTSL | 28    | >SMARCA4-F VLLLCQMTSL | 61   | 33   |
| >SMARCA4-F KVLLFCQM   | 52    | >SMARCA4-F KVLLLCQM   | 2031 | 1979 |
| >SMARCA4-F KVLLFCQMTS | 244   | >SMARCA4-F KVLLLCQMTS | 1053 | 809  |
| >SMARCA4-F KVLLFCQMTS | 393   | >SMARCA4-F KVLLLCQMTS | 723  | 330  |
| >SMARCA4-F KVLLFCQMTS | 496   | >SMARCA4-F KVLLLCQMTS | 744  | 248  |
| >SMARCA4-F KVLLFCQM   | 382   | >SMARCA4-F KVLLLCQM   | 670  | 288  |
| >SMARCA4-F KVLLFCQMTS | 48    | >SMARCA4-F KVLLLCQMTS | 66   | 18   |
| >SMARCA4-F KVLLFCQM   | 362   | >SMARCA4-F KVLLLCQM   | 722  | 360  |
| >SMARCA4-F KVLLFCQM   | 371   | >SMARCA4-F KVLLLCQM   | 579  | 208  |
| >SMARCA4-F KVLLFCQMTS | 35    | >SMARCA4-F KVLLLCQMTS | 49   | 14   |
| >SMARCA4-F KVLLFCQM   | 198   | >SMARCA4-F KVLLLCQM   | 136  | 62   |
| >SMARCA4-F KVLLFCQMTS | 190   | >SMARCA4-F KVLLLCQMTS | 201  | 11   |
| >SMARCA4-F KVLLFCQM   | 564   | >SMARCA4-F KVLLLCQM   | 439  | 125  |
| >SMARCA4-F KVLLFCQMTS | 329   | >SMARCA4-F KVLLLCQMTS | 321  | 8    |
| >SMARCA4-F HKVLLFCQM  | 307   | >SMARCA4-F HKVLLLCQM  | 1082 | 775  |
| >SMARCA4-F TNHKVLLF   | 274   | >SMARCA4-F TNHKVLLL   | 1367 | 1093 |
| >SMARCA4-F ATNHKVLLF  | 10238 | >SMARCA4-F ATNHKVLLL  | 285  | 9953 |
| >SMARCA4-F ATNHKVLLF  | 4074  | >SMARCA4-F ATNHKVLLL  | 426  | 3648 |
| >SMARCA4-F ATNHKVLLF  | 97    | >SMARCA4-F ATNHKVLLL  | 492  | 395  |
| >SMARCA4-F ATNHKVLLF  | 424   | >SMARCA4-F ATNHKVLLL  | 8255 | 7831 |
| >SMARCA4-F ATNHKVLLF  | 221   | >SMARCA4-F ATNHKVLLL  | 4842 | 4621 |
| >SMARCA4-F ATNHKVLLF  | 3     | >SMARCA4-F ATNHKVLLL  | 11   | 8    |



|                        |       |                        |      |       |
|------------------------|-------|------------------------|------|-------|
| >SMARCA4-F ATNHKVLFF   | 64    | >SMARCA4-F ATNHKVLLL   | 1614 | 1550  |
| >SMARCA4-F ATNHKVLFF   | 122   | >SMARCA4-F ATNHKVLLL   | 836  | 714   |
| >SMARCA4-F RATNHKVLFF  | 128   | >SMARCA4-F RATNHKVLLL  | 2598 | 2470  |
| >SMARCA4-F RATNHKVLFF  | 17    | >SMARCA4-F RATNHKVLLL  | 137  | 120   |
| >SMARCA4-F RATNHKVLFF  | 56    | >SMARCA4-F RATNHKVLLL  | 600  | 544   |
| >SMARCA4-F RATNHKVLFF  | 843   | >SMARCA4-F RATNHKVLLL  | 423  | 420   |
| >SMARCA4-F RATNHKVLFF  | 381   | >SMARCA4-F RATNHKVLLL  | 4053 | 3672  |
| >SMARCA4-F MFDQKSSSHI  | 133   | >SMARCA4-F MLDQKSSSHI  | 544  | 411   |
| >SMARCA4-F MFDQKSSSHI  | 289   | >SMARCA4-F MLDQKSSSHI  | 1413 | 1124  |
| >SMARCA4-F MFDQKSSSHI  | 285   | >SMARCA4-F MLDQKSSSHI  | 177  | 108   |
| >SMARCA4-F MFDQKSSSHI  | 199   | >SMARCA4-F MLDQKSSSHI  | 984  | 785   |
| >SMARCA4-F GMFDQKSSS   | 390   | >SMARCA4-F GMLDQKSSS   | 670  | 280   |
| >SMARCA4-F GMFDQKSSS   | 163   | >SMARCA4-F GMLDQKSSS   | 428  | 265   |
| >SMARCA4-F GMFDQKSSSI  | 286   | >SMARCA4-F GMLDQKSSSI  | 2368 | 2082  |
| >SMARCA4-F QAGMFDQK    | 341   | >SMARCA4-F QAGMLDQK    | 907  | 566   |
| >SMARCA4-F IQAGMFDQK   | 75    | >SMARCA4-F IQAGMLDQK   | 190  | 115   |
| >SMARCA4-F VIQAGMFDQ   | 152   | >SMARCA4-F VIQAGMLDQ   | 183  | 31    |
| >SMARCA4-F VIQAGMFDQ   | 145   | >SMARCA4-F VIQAGMLDQ   | 142  | 3     |
| >SMARCA4-F KVIQAGMF    | 2950  | >SMARCA4-F KVIQAGML    | 473  | 2477  |
| >SMARCA4-F KVIQAGMFDI  | 289   | >SMARCA4-F KVIQAGMLDI  | 455  | 166   |
| >SMARCA4-F KVIQAGMFDI  | 29    | >SMARCA4-F KVIQAGMLDI  | 38   | 9     |
| >SMARCA4-F KVIQAGMF    | 481   | >SMARCA4-F KVIQAGML    | 6855 | 6374  |
| >SMARCA4-F KVIQAGMF    | 97    | >SMARCA4-F KVIQAGML    | 835  | 738   |
| >SMARCA4-F KVIQAGMFDI  | 92    | >SMARCA4-F KVIQAGMLDI  | 117  | 25    |
| >SMARCA4-F KVIQAGMF    | 363   | >SMARCA4-F KVIQAGML    | 1733 | 1370  |
| >SMARCA4-F KVIQAGMFDI  | 251   | >SMARCA4-F KVIQAGMLDI  | 430  | 179   |
| >SMARCA4-F KVIQAGMF    | 178   | >SMARCA4-F KVIQAGML    | 3207 | 3029  |
| >SMARCA4-F KVIQAGMF    | 465   | >SMARCA4-F KVIQAGML    | 5708 | 5243  |
| >SMARCA4-F KVIQAGMF    | 22    | >SMARCA4-F KVIQAGML    | 128  | 106   |
| >SMARCA4-F KVIQAGMF    | 153   | >SMARCA4-F KVIQAGML    | 3681 | 3528  |
| >SMARCA4-F QKVIQAGMF   | 104   | >SMARCA4-F QKVIQAGML   | 2865 | 2761  |
| >SMARCA4-C GLGLNLQSA   | 253   | >SMARCA4-C RLGLNLQSA   | 138  | 115   |
| >SMARCA4-C GLGLNLQSA   | 174   | >SMARCA4-C RLGLNLQSA   | 75   | 99    |
| >SMARCA4-C GLGLNLQSA   | 26    | >SMARCA4-C RLGLNLQSA   | 46   | 20    |
| >SMARCA4-C GLGLNLQSA   | 449   | >SMARCA4-C RLGLNLQSA   | 876  | 427   |
| >SMARCA4-C GLGLNLQSA   | 17    | >SMARCA4-C RLGLNLQSA   | 20   | 3     |
| >SMARCA4-C GGLGLNLQS   | 22245 | >SMARCA4-C GRLGLNLQS   | 254  | 21991 |
| >SMARCA4-C GGLGLNLQS/  | 26939 | >SMARCA4-C GRLGLNLQSA  | 93   | 26846 |
| >SMARCA4-C FIFLLSTRAGG | 19169 | >SMARCA4-C FIFLLSTRAGR | 167  | 19002 |
| >SMARCA4-C FIFLLSTRAGG | 23126 | >SMARCA4-C FIFLLSTRAGR | 59   | 23067 |
| >SMARCA4-C FIFLLSTRAGG | 13250 | >SMARCA4-C FIFLLSTRAGR | 6    | 13244 |
| >SMARCA4-C FIFLLSTRAGG | 31129 | >SMARCA4-C FIFLLSTRAGR | 96   | 31033 |
| >SMARCA4-C AGGLGLNLQSA | 13693 | >SMARCA4-C AGRLGLNLQSA | 101  | 13592 |

|                       |       |                       |      |       |
|-----------------------|-------|-----------------------|------|-------|
| >SMARCA4-C RAGGLGLNL  | 46    | >SMARCA4-C RAGRLGLNL  | 180  | 134   |
| >SMARCA4-C TRAGGLGL   | 276   | >SMARCA4-C TRAGRLGL   | 129  | 147   |
| >SMARCA4-C TRAGGLGLNI | 158   | >SMARCA4-C TRAGRLGLNL | 93   | 65    |
| >SMARCA4-C TRAGGLGL   | 93    | >SMARCA4-C TRAGRLGL   | 176  | 83    |
| >SMARCA4-C TRAGGLGLNI | 161   | >SMARCA4-C TRAGRLGLNL | 556  | 395   |
| >SMARCA4-C TRAGGLGL   | 2602  | >SMARCA4-C TRAGRLGL   | 376  | 2226  |
| >SMARCA4-C TRAGGLGLNI | 428   | >SMARCA4-C TRAGRLGLNL | 186  | 242   |
| >SMARCA4-C STRAGGLGL  | 109   | >SMARCA4-C STRAGRLGL  | 308  | 199   |
| >SMARCA4-C STRAGGLGLN | 165   | >SMARCA4-C STRAGRLGLN | 323  | 158   |
| >SMARCA4-C STRAGGLG   | 62    | >SMARCA4-C STRAGRLG   | 29   | 33    |
| >SMARCA4-C STRAGGLGL  | 20    | >SMARCA4-C STRAGRLGL  | 7    | 13    |
| >SMARCA4-C STRAGGLGLN | 280   | >SMARCA4-C STRAGRLGLN | 111  | 169   |
| >SMARCA4-C STRAGGLGLN | 14    | >SMARCA4-C STRAGRLGLN | 8    | 6     |
| >SMARCA4-C STRAGGLGL  | 143   | >SMARCA4-C STRAGRLGL  | 115  | 28    |
| >SMARCA4-C STRAGGLGLN | 180   | >SMARCA4-C STRAGRLGLN | 155  | 25    |
| >SMARCA4-C STRAGGLGL  | 4     | >SMARCA4-C STRAGRLGL  | 6    | 2     |
| >SMARCA4-C STRAGGLGLN | 4     | >SMARCA4-C STRAGRLGLN | 7    | 3     |
| >SMARCA4-C STRAGGLGL  | 94    | >SMARCA4-C STRAGRLGL  | 187  | 93    |
| >SMARCA4-C STRAGGLGLN | 56    | >SMARCA4-C STRAGRLGLN | 81   | 25    |
| >SMARCA4-C LSTRAGGL   | 70    | >SMARCA4-C LSTRAGRL   | 58   | 12    |
| >SMARCA4-C LSTRAGGLGL | 32    | >SMARCA4-C LSTRAGRLGL | 57   | 25    |
| >SMARCA4-C LSTRAGGLGL | 353   | >SMARCA4-C LSTRAGRLGL | 407  | 54    |
| >SMARCA4-C LSTRAGGL   | 714   | >SMARCA4-C LSTRAGRL   | 333  | 381   |
| >SMARCA4-C LSTRAGGLGL | 74    | >SMARCA4-C LSTRAGRLGL | 104  | 30    |
| >SMARCA4-C LSTRAGGL   | 391   | >SMARCA4-C LSTRAGRL   | 324  | 67    |
| >SMARCA4-C LSTRAGGLGL | 305   | >SMARCA4-C LSTRAGRLGL | 837  | 532   |
| >SMARCA4-C LLSTRAGGL  | 56    | >SMARCA4-C LLSTRAGRL  | 107  | 51    |
| >SMARCA4-C LLSTRAGGLG | 39    | >SMARCA4-C LLSTRAGRLG | 55   | 16    |
| >SMARCA4-C LLSTRAGGL  | 35    | >SMARCA4-C LLSTRAGRL  | 83   | 48    |
| >SMARCA4-C LLSTRAGGLG | 35    | >SMARCA4-C LLSTRAGRLG | 71   | 36    |
| >SMARCA4-C LLSTRAGGLG | 149   | >SMARCA4-C LLSTRAGRLG | 531  | 382   |
| >SMARCA4-C LLSTRAGGLG | 219   | >SMARCA4-C LLSTRAGRLG | 1125 | 906   |
| >SMARCA4-C LLSTRAGGLG | 255   | >SMARCA4-C LLSTRAGRLG | 734  | 479   |
| >SMARCA4-C LLSTRAGGL  | 15    | >SMARCA4-C LLSTRAGRL  | 14   | 1     |
| >SMARCA4-C LLSTRAGGLG | 7     | >SMARCA4-C LLSTRAGRLG | 6    | 1     |
| >SMARCA4-C LLSTRAGG   | 21157 | >SMARCA4-C LLSTRAGR   | 252  | 20905 |
| >SMARCA4-C LLSTRAGG   | 37799 | >SMARCA4-C LLSTRAGR   | 167  | 37632 |
| >SMARCA4-C LLSTRAGGL  | 1090  | >SMARCA4-C LLSTRAGRL  | 469  | 621   |
| >SMARCA4-C FLLSTRAGGL | 71    | >SMARCA4-C FLLSTRAGRL | 170  | 99    |
| >SMARCA4-C FLLSTRAGGL | 18    | >SMARCA4-C FLLSTRAGRL | 25   | 7     |
| >SMARCA4-C FLLSTRAGGL | 22    | >SMARCA4-C FLLSTRAGRL | 45   | 23    |
| >SMARCA4-C FLLSTRAGGL | 104   | >SMARCA4-C FLLSTRAGRL | 279  | 175   |
| >SMARCA4-C FLLSTRAGG  | 421   | >SMARCA4-C FLLSTRAGR  | 2430 | 2009  |

|                       |       |                       |      |       |
|-----------------------|-------|-----------------------|------|-------|
| >SMARCA4-C FLLSTRAGGL | 4     | >SMARCA4-C FLLSTRAGRL | 5    | 1     |
| >SMARCA4-C FLLSTRAGGL | 11    | >SMARCA4-C FLLSTRAGRL | 24   | 13    |
| >SMARCA4-C FLLSTRAGGL | 11    | >SMARCA4-C FLLSTRAGRL | 22   | 11    |
| >SMARCA4-C FLLSTRAGGL | 12    | >SMARCA4-C FLLSTRAGRL | 30   | 18    |
| >SMARCA4-C FLLSTRAGG  | 302   | >SMARCA4-C FLLSTRAGR  | 421  | 119   |
| >SMARCA4-C FLLSTRAGGL | 3     | >SMARCA4-C FLLSTRAGRL | 3    | 0     |
| >SMARCA4-C FLLSTRAGG  | 19394 | >SMARCA4-C FLLSTRAGR  | 105  | 19289 |
| >SMARCA4-C FLLSTRAGG  | 27819 | >SMARCA4-C FLLSTRAGR  | 122  | 27697 |
| >SMARCA4-C FLLSTRAGG  | 33374 | >SMARCA4-C FLLSTRAGR  | 50   | 33324 |
| >SMARCA4-C FLLSTRAGGL | 241   | >SMARCA4-C FLLSTRAGRL | 895  | 654   |
| >SMARCA4-C FLLSTRAGG  | 35392 | >SMARCA4-C FLLSTRAGR  | 413  | 34979 |
| >SMARCA4-C IFLLSTRAGG | 9302  | >SMARCA4-C IFLLSTRAGR | 8    | 9294  |
| >SMARCA4-C IFLLSTRAGG | 16415 | >SMARCA4-C IFLLSTRAGR | 75   | 16340 |
| >SMARCA4-C IFLLSTRAGG | 29816 | >SMARCA4-C IFLLSTRAGR | 76   | 29740 |
| >SMARCA4-C GMFDQKSSS  | 390   | >SMARCA4-C DMFDQKSSS  | 5814 | 5424  |
| >SMARCA4-C GMFDQKSSS  | 163   | >SMARCA4-C DMFDQKSSS  | 5705 | 5542  |
| >SMARCA4-C GMFDQKSSS  | 286   | >SMARCA4-C DMFDQKSSS  | 5343 | 5057  |
| >SMARCA4-C QAGMFDQK   | 539   | >SMARCA4-C QADMFDQK   | 436  | 103   |
| >SMARCA4-C QAGMFDQK   | 341   | >SMARCA4-C QADMFDQK   | 468  | 127   |
| >SMARCA4-C IQAGMFDQK  | 75    | >SMARCA4-C IQADMFDQK  | 50   | 25    |
| >SMARCA4-C IQAGMFDQK  | 807   | >SMARCA4-C IQADMFDQK  | 451  | 356   |
| >SMARCA4-C VIQAGMFDQ  | 152   | >SMARCA4-C VIQADMFDQ  | 787  | 635   |
| >SMARCA4-C VIQAGMFDQ  | 145   | >SMARCA4-C VIQADMFDQ  | 194  | 49    |
| >SMARCA4-C KVIQAGMFD  | 289   | >SMARCA4-C KVIQADMFD  | 534  | 245   |
| >SMARCA4-C KVIQAGMFD  | 29    | >SMARCA4-C KVIQADMFD  | 36   | 7     |
| >SMARCA4-C KVIQAGMF   | 481   | >SMARCA4-C KVIQADMF   | 424  | 57    |
| >SMARCA4-C KVIQAGMF   | 97    | >SMARCA4-C KVIQADMF   | 85   | 12    |
| >SMARCA4-C KVIQAGMFD  | 92    | >SMARCA4-C KVIQADMFD  | 126  | 34    |
| >SMARCA4-C KVIQAGMF   | 363   | >SMARCA4-C KVIQADMF   | 89   | 274   |
| >SMARCA4-C KVIQAGMFD  | 251   | >SMARCA4-C KVIQADMFD  | 154  | 97    |
| >SMARCA4-C KVIQAGMF   | 178   | >SMARCA4-C KVIQADMF   | 350  | 172   |
| >SMARCA4-C KVIQAGMF   | 465   | >SMARCA4-C KVIQADMF   | 726  | 261   |
| >SMARCA4-C KVIQAGMF   | 22    | >SMARCA4-C KVIQADMF   | 40   | 18    |
| >SMARCA4-C KVIQAGMF   | 153   | >SMARCA4-C KVIQADMF   | 66   | 87    |
| >SMARCA4-C QKVIQAGM   | 686   | >SMARCA4-C QKVIQADM   | 425  | 261   |
| >SMARCA4-C QKVIQAGMF  | 104   | >SMARCA4-C QKVIQADMF  | 56   | 48    |
| >SMARCA4-C NVDQKVIQAI | 353   | >SMARCA4-C NVDQKVIQAI | 2955 | 2602  |
| >SMARCA4-C GPSPGPPSA  | 2674  | >SMARCA4-C RPSPGPPSA  | 66   | 2608  |
| >SMARCA4-C MMGPSPGPF  | 159   | >SMARCA4-C MMRPSPGPF  | 1310 | 1151  |
| >SMARCA4-C MMGPSPGPF  | 271   | >SMARCA4-C MMRPSPGPF  | 1360 | 1089  |
| >SMARCA4-C MMGPSPGPF  | 11    | >SMARCA4-C MMRPSPGPF  | 6    | 5     |
| >SMARCA4-C MMGPSPGPF  | 418   | >SMARCA4-C MMRPSPGPF  | 1471 | 1053  |
| >SMARCA4-C MMGPSPGPF  | 290   | >SMARCA4-C MMRPSPGPF  | 2479 | 2189  |

|                       |       |                       |       |       |
|-----------------------|-------|-----------------------|-------|-------|
| >SMARCA4-C MMGPSPGPF  | 8     | >SMARCA4-C MMRPSPGPF  | 48    | 40    |
| >SMARCA4-C MMGPSPGPF  | 78    | >SMARCA4-C MMRPSPGPF  | 1372  | 1294  |
| >SMARCA4-C MMGPSPGPF  | 40    | >SMARCA4-C MMRPSPGPF  | 630   | 590   |
| >SMARCA4-C MMGPSPGPF  | 75    | >SMARCA4-C MMRPSPGPF  | 2227  | 2152  |
| >SMARCA4-C MMGPSPGPF  | 8     | >SMARCA4-C MMRPSPGPF  | 14    | 6     |
| >SMARCA4-C MMGPSPGP   | 14820 | >SMARCA4-C MMRPSPGP   | 202   | 14618 |
| >SMARCA4-C MMGPSPGPF  | 12424 | >SMARCA4-C MMRPSPGPF  | 60    | 12364 |
| >SMARCA4-C MMGPSPGPF  | 7347  | >SMARCA4-C MMRPSPGPF  | 19    | 7328  |
| >SMARCA4-C MMGPSPGPF  | 1868  | >SMARCA4-C MMRPSPGPF  | 5     | 1863  |
| >SMARCA4-C MMGPSPGPF  | 706   | >SMARCA4-C MMRPSPGPF  | 233   | 473   |
| >SMARCA4-C MMGPSPGPF  | 2748  | >SMARCA4-C MMRPSPGPF  | 203   | 2545  |
| >SMARCA4-C MMGPSPGPF  | 1194  | >SMARCA4-C MMRPSPGPF  | 84    | 1110  |
| >SMARCA4-C SMMGPSPG   | 258   | >SMARCA4-C SMMRPSPG   | 1008  | 750   |
| >SMARCA4-C SMMGPSPGF  | 346   | >SMARCA4-C SMMRPSPGF  | 1147  | 801   |
| >SMARCA4-C SMMGPSPGF  | 59    | >SMARCA4-C SMMRPSPGF  | 176   | 117   |
| >SMARCA4-C SMMGPSPG   | 351   | >SMARCA4-C SMMRPSPG   | 435   | 84    |
| >SMARCA4-C GSAHSMMG   | 21790 | >SMARCA4-C GSAHSMMR   | 160   | 21630 |
| >SMARCA4-C GSAHSMMG   | 23605 | >SMARCA4-C GSAHSMMR   | 235   | 23370 |
| >SMARCA4-C GSAHSMMG   | 31946 | >SMARCA4-C GSAHSMMR   | 72    | 31874 |
| >SMARCA4-C GSAHSMMG   | 5387  | >SMARCA4-C GSAHSMMR   | 86    | 5301  |
| >SMARCA4-K LPVEEKKKI  | 342   | >SMARCA4-K LPVEEEKKI  | 389   | 47    |
| >SMARCA4-K LPVEEKKKI  | 76    | >SMARCA4-K LPVEEEKKI  | 66    | 10    |
| >SMARCA4-L LNLQSADTVI | 231   | >SMARCA4-L PNLQSADTVI | 5141  | 4910  |
| >SMARCA4-L GLNLQSADT\ | 266   | >SMARCA4-L GPNLQSADT\ | 21427 | 21161 |
| >SMARCA4-L GLNLQSADT\ | 265   | >SMARCA4-L GPNLQSADT\ | 32091 | 31826 |
| >SMARCA4-L GLNLQSADT\ | 215   | >SMARCA4-L GPNLQSADT\ | 22310 | 22095 |
| >SMARCA4-L GLNLQSADT\ | 83    | >SMARCA4-L GPNLQSADT\ | 22264 | 22181 |
| >SMARCA4-L GLNLQSADT\ | 17    | >SMARCA4-L GPNLQSADT\ | 20705 | 20688 |
| >SMARCA4-L GLNLQSADT\ | 6     | >SMARCA4-L GPNLQSADT\ | 17377 | 17371 |
| >SMARCA4-L GLNLQSADT\ | 134   | >SMARCA4-L GPNLQSADT\ | 23505 | 23371 |
| >SMARCA4-L GLNLQSADT\ | 12    | >SMARCA4-L GPNLQSADT\ | 18808 | 18796 |
| >SMARCA4-L GLNLQSADT\ | 300   | >SMARCA4-L GPNLQSADT\ | 25462 | 25162 |
| >SMARCA4-L GLNLQSADT\ | 32    | >SMARCA4-L GPNLQSADT\ | 22904 | 22872 |
| >SMARCA4-L GLNLQSADT\ | 9     | >SMARCA4-L GPNLQSADT\ | 26882 | 26873 |
| >SMARCA4-L GLNLQSADT\ | 206   | >SMARCA4-L GPNLQSADT\ | 36966 | 36760 |
| >SMARCA4-L LLSTRAGGLG | 39    | >SMARCA4-L LLSTRAGGLG | 9931  | 9892  |
| >SMARCA4-L LLSTRAGGLG | 35    | >SMARCA4-L LLSTRAGGLG | 8255  | 8220  |
| >SMARCA4-L LLSTRAGGLG | 149   | >SMARCA4-L LLSTRAGGLG | 16657 | 16508 |
| >SMARCA4-L LLSTRAGGLG | 219   | >SMARCA4-L LLSTRAGGLG | 21861 | 21642 |
| >SMARCA4-L LLSTRAGGLG | 255   | >SMARCA4-L LLSTRAGGLG | 17050 | 16795 |
| >SMARCA4-L LLSTRAGGLG | 7     | >SMARCA4-L LLSTRAGGLG | 12427 | 12420 |
| >SMARCA4-L GLGLNLQSA  | 907   | >SMARCA4-L GLGPNLQSA  | 166   | 741   |
| >SMARCA4-L GLGLNLQSA  | 253   | >SMARCA4-L GLGPNLQSA  | 35    | 218   |

|                       |       |                       |       |       |
|-----------------------|-------|-----------------------|-------|-------|
| >SMARCA4-L GLGLNLQSA  | 174   | >SMARCA4-L GLGPNLQSA  | 23    | 151   |
| >SMARCA4-L GLGLNLQSA  | 26    | >SMARCA4-L GLGPNLQSA  | 9     | 17    |
| >SMARCA4-L GLGLNLQSA  | 449   | >SMARCA4-L GLGPNLQSA  | 57    | 392   |
| >SMARCA4-L GLGLNLQSA  | 2431  | >SMARCA4-L GLGPNLQSA  | 423   | 2008  |
| >SMARCA4-L GLGLNLQSA  | 17    | >SMARCA4-L GLGPNLQSA  | 4     | 13    |
| >SMARCA4-L GLGLNLQSAI | 1133  | >SMARCA4-L GLGPNLQSAI | 117   | 1016  |
| >SMARCA4-L RAGGLGLNL  | 46    | >SMARCA4-L RAGGLGPNL  | 102   | 56    |
| >SMARCA4-L TRAGGLGL   | 276   | >SMARCA4-L TRAGGLGP   | 6070  | 5794  |
| >SMARCA4-L TRAGGLGLNI | 158   | >SMARCA4-L TRAGGLGPNI | 231   | 73    |
| >SMARCA4-L TRAGGLGL   | 93    | >SMARCA4-L TRAGGLGP   | 19084 | 18991 |
| >SMARCA4-L TRAGGLGLNI | 161   | >SMARCA4-L TRAGGLGPNI | 152   | 9     |
| >SMARCA4-L TRAGGLGLNI | 428   | >SMARCA4-L TRAGGLGPNI | 1467  | 1039  |
| >SMARCA4-L STRAGGLGL  | 109   | >SMARCA4-L STRAGGLGP  | 13750 | 13641 |
| >SMARCA4-L STRAGGLGLN | 165   | >SMARCA4-L STRAGGLGPN | 389   | 224   |
| >SMARCA4-L STRAGGLGL  | 20    | >SMARCA4-L STRAGGLGP  | 249   | 229   |
| >SMARCA4-L STRAGGLGLN | 280   | >SMARCA4-L STRAGGLGPN | 142   | 138   |
| >SMARCA4-L STRAGGLGLN | 14    | >SMARCA4-L STRAGGLGPN | 12    | 2     |
| >SMARCA4-L STRAGGLGL  | 143   | >SMARCA4-L STRAGGLGP  | 24081 | 23938 |
| >SMARCA4-L STRAGGLGLN | 180   | >SMARCA4-L STRAGGLGPN | 544   | 364   |
| >SMARCA4-L STRAGGLGL  | 4     | >SMARCA4-L STRAGGLGP  | 2174  | 2170  |
| >SMARCA4-L STRAGGLGLN | 4     | >SMARCA4-L STRAGGLGPN | 6     | 2     |
| >SMARCA4-L STRAGGLGL  | 94    | >SMARCA4-L STRAGGLGP  | 4631  | 4537  |
| >SMARCA4-L STRAGGLGLN | 56    | >SMARCA4-L STRAGGLGPN | 74    | 18    |
| >SMARCA4-L LSTRAGGLGL | 32    | >SMARCA4-L LSTRAGGLGP | 16839 | 16807 |
| >SMARCA4-L LSTRAGGLGL | 353   | >SMARCA4-L LSTRAGGLGP | 19542 | 19189 |
| >SMARCA4-L LSTRAGGLGL | 74    | >SMARCA4-L LSTRAGGLGP | 8561  | 8487  |
| >SMARCA4-L LSTRAGGLGL | 305   | >SMARCA4-L LSTRAGGLGP | 32109 | 31804 |
| >SMARCA4-L RLKGGRRRPS | 354   | >SMARCA4-L RPKGRRRPS  | 18770 | 18416 |
| >SMARCA4-L RLKGGRRR   | 478   | >SMARCA4-L RPKGRRR    | 14127 | 13649 |
| >SMARCA4-L RLKGGRRRPS | 83    | >SMARCA4-L RPKGRRRPS  | 11030 | 10947 |
| >SMARCA4-L RLKGGRRRPS | 24    | >SMARCA4-L RPKGRRRPS  | 5887  | 5863  |
| >SMARCA4-L RLKGGRRR   | 22    | >SMARCA4-L RPKGRRR    | 1336  | 1314  |
| >SMARCA4-L RLKGGRRRPS | 13    | >SMARCA4-L RPKGRRRPS  | 435   | 422   |
| >SMARCA4-L RLKGGRRRPS | 23930 | >SMARCA4-L RPKGRRRPS  | 141   | 23789 |
| >SMARCA4-L RLKGGRRRPS | 19135 | >SMARCA4-L RPKGRRRPS  | 268   | 18867 |
| >SMARCA4-L RLKGGRRRPS | 406   | >SMARCA4-L RPKGRRRPS  | 1553  | 1147  |
| >SMARCA4-L KAQDRKGG   | 68    | >SMARCA4-L KAQDRPKGG  | 398   | 330   |
| >SMARCA4-L KAQDRKGG   | 45    | >SMARCA4-L KAQDRPKGG  | 64    | 19    |
| >SMARCA4-L KAQDRKGG   | 439   | >SMARCA4-L KAQDRPKGG  | 493   | 54    |
| >SMARCA4-L EKAQDRKGG  | 499   | >SMARCA4-L EKAQDRPKGG | 591   | 92    |
| >SMARCA4-L KEKAQDRK   | 260   | >SMARCA4-L KEKAQDRPK  | 99    | 161   |
| >SMARCA4-L KEKAQDRL   | 403   | >SMARCA4-L KEKAQDRP   | 16837 | 16434 |
| >SMARCA4-L KEKAQDRL   | 94    | >SMARCA4-L KEKAQDRP   | 5331  | 5237  |

|                       |       |                       |       |       |
|-----------------------|-------|-----------------------|-------|-------|
| >SMARCA4-L GRKEKAQDR  | 199   | >SMARCA4-L GRKEKAQDR  | 14450 | 14251 |
| >SMARCA4-N MFDQKSSSH  | 133   | >SMARCA4-N MFDQKSSSHE | 783   | 650   |
| >SMARCA4-N MFDQKSSSH  | 289   | >SMARCA4-N MFDQKSSSHE | 739   | 450   |
| >SMARCA4-N MFDQKSSSH  | 285   | >SMARCA4-N MFDQKSSSHE | 1956  | 1671  |
| >SMARCA4-N MFDQKSSSH  | 199   | >SMARCA4-N MFDQKSSSHE | 272   | 73    |
| >SMARCA4-N GMFDQKSSS  | 390   | >SMARCA4-N GIFDQKSSS  | 7831  | 7441  |
| >SMARCA4-N GMFDQKSSS  | 163   | >SMARCA4-N GIFDQKSSS  | 6250  | 6087  |
| >SMARCA4-N GMFDQKSSS  | 286   | >SMARCA4-N GIFDQKSSSH | 2970  | 2684  |
| >SMARCA4-N NVDQKVIQA  | 353   | >SMARCA4-N NVDQKVIQA  | 130   | 223   |
| >SMARCA4-N QAGMFDQK   | 341   | >SMARCA4-N QAGIFDQK   | 403   | 62    |
| >SMARCA4-N IQAGMFDQK  | 75    | >SMARCA4-N IQAGIFDQK  | 96    | 21    |
| >SMARCA4-N IQAGMFDQK  | 807   | >SMARCA4-N IQAGIFDQK  | 360   | 447   |
| >SMARCA4-N VIQAGMFDQ  | 152   | >SMARCA4-N VIQAGIFDQK | 159   | 7     |
| >SMARCA4-N VIQAGMFDQ  | 145   | >SMARCA4-N VIQAGIFDQK | 136   | 9     |
| >SMARCA4-N KVIQAGMFD  | 289   | >SMARCA4-N KVIQAGIFDQ | 332   | 43    |
| >SMARCA4-N KVIQAGMFD  | 29    | >SMARCA4-N KVIQAGIFDQ | 33    | 4     |
| >SMARCA4-N KVIQAGMF   | 481   | >SMARCA4-N KVIQAGIF   | 2344  | 1863  |
| >SMARCA4-N KVIQAGMF   | 97    | >SMARCA4-N KVIQAGIF   | 89    | 8     |
| >SMARCA4-N KVIQAGMFD  | 92    | >SMARCA4-N KVIQAGIFDQ | 105   | 13    |
| >SMARCA4-N KVIQAGMF   | 363   | >SMARCA4-N KVIQAGIF   | 323   | 40    |
| >SMARCA4-N KVIQAGMFD  | 251   | >SMARCA4-N KVIQAGIFDQ | 240   | 11    |
| >SMARCA4-N KVIQAGMF   | 178   | >SMARCA4-N KVIQAGIF   | 240   | 62    |
| >SMARCA4-N KVIQAGMF   | 465   | >SMARCA4-N KVIQAGIF   | 381   | 84    |
| >SMARCA4-N KVIQAGMF   | 22    | >SMARCA4-N KVIQAGIF   | 41    | 19    |
| >SMARCA4-N KVIQAGMF   | 153   | >SMARCA4-N KVIQAGIF   | 87    | 66    |
| >SMARCA4-N QKVIQAGMF  | 104   | >SMARCA4-N QKVIQAGIF  | 73    | 31    |
| >SMARCA4-N VDQKVIQAGI | 6359  | >SMARCA4-N VDQKVIQAGI | 261   | 6098  |
| >SMARCA4-F PDHLQMAV   | 95    | >SMARCA4-F SDHLQMAV   | 95    | 0     |
| >SMARCA4-F LPDHLQMAV  | 18268 | >SMARCA4-F LSDHLQMAV  | 87    | 18181 |
| >SMARCA4-F LPDHLQMAV  | 252   | >SMARCA4-F LSDHLQMAV  | 24249 | 23997 |
| >SMARCA4-F LPDHLQMAV  | 358   | >SMARCA4-F LSDHLQMAV  | 15833 | 15475 |
| >SMARCA4-F LPDHLQMAV  | 383   | >SMARCA4-F LSDHLQMAV  | 24550 | 24167 |
| >SMARCA4-F LPDHLQMA   | 53    | >SMARCA4-F LSDHLQMA   | 22969 | 22916 |
| >SMARCA4-F LPDHLQMAV  | 41    | >SMARCA4-F LSDHLQMAV  | 19255 | 19214 |
| >SMARCA4-F PLPDHLQMA  | 1469  | >SMARCA4-F PLSDHLQMA  | 147   | 1322  |
| >SMARCA4-F PLPDHLQMA  | 683   | >SMARCA4-F PLSDHLQMA' | 184   | 499   |
| >SMARCA4-F PLPDHLQMA  | 211   | >SMARCA4-F PLSDHLQMA  | 65    | 146   |
| >SMARCA4-F PLPDHLQMA  | 1295  | >SMARCA4-F PLSDHLQMA' | 425   | 870   |
| >SMARCA4-F PLPDHLQMA  | 181   | >SMARCA4-F PLSDHLQMA  | 217   | 36    |
| >SMARCA4-F PLPDHLQMA  | 14    | >SMARCA4-F PLSDHLQMA' | 15    | 1     |
| >SMARCA4-F PLPDHLQMA  | 213   | >SMARCA4-F PLSDHLQMA' | 85    | 128   |
| >SMARCA4-F PLPDHLQMA  | 44    | >SMARCA4-F PLSDHLQMA' | 36    | 8     |
| >SMARCA4-F PLPDHLQMA  | 79    | >SMARCA4-F PLSDHLQMA' | 15    | 64    |

|                        |       |                        |       |       |
|------------------------|-------|------------------------|-------|-------|
| >SMARCA4-F PLPDHLQM    | 274   | >SMARCA4-F PLSDHLQM    | 165   | 109   |
| >SMARCA4-F PLPDHLQMA   | 29    | >SMARCA4-F PLSDHLQMA   | 19    | 10    |
| >SMARCA4-F PLPDHLQMA   | 4     | >SMARCA4-F PLSDHLQMA'  | 3     | 1     |
| >SMARCA4-F QPLPDHLQM   | 1118  | >SMARCA4-F QPLSDHLQM   | 158   | 960   |
| >SMARCA4-F QPLPDHLQM   | 219   | >SMARCA4-F QPLSDHLQM   | 183   | 36    |
| >SMARCA4-F QPLPDHLQM   | 359   | >SMARCA4-F QPLSDHLQM   | 324   | 35    |
| >SMARCA4-F QPLPDHLQM   | 54    | >SMARCA4-F QPLSDHLQM   | 46    | 8     |
| >SMARCA4-F QPLPDHLQM   | 216   | >SMARCA4-F QPLSDHLQM   | 149   | 67    |
| >SMARCA4-F RGQPLPDHLC  | 228   | >SMARCA4-F RGQPLSDHLC  | 215   | 13    |
| >SMARCA4-F RGQPLPDHLC  | 401   | >SMARCA4-F RGQPLSDHLC  | 580   | 179   |
| >SMARCA4-F RGQPLPDHLC  | 581   | >SMARCA4-F RGQPLSDHLC  | 317   | 264   |
| >SMARCA4-F ARGQPLPDHI  | 112   | >SMARCA4-F ARGQPLSDHI  | 474   | 362   |
| >SMARCA4-F ARGQPLPDHI  | 382   | >SMARCA4-F ARGQPLSDHI  | 906   | 524   |
| >SMARCA4-F LARGQPLP    | 1093  | >SMARCA4-F LARGQPLS    | 332   | 761   |
| >SMARCA4-F LARGQPLPDI  | 449   | >SMARCA4-F LARGQPLSDI  | 332   | 117   |
| >SMARCA4-F LARGQPLPDI  | 135   | >SMARCA4-F LARGQPLSDI  | 80    | 55    |
| >SMARCA4-F MLARGQPLP   | 500   | >SMARCA4-F MLARGQPLS   | 42    | 458   |
| >SMARCA4-F KMLARGQPL   | 3080  | >SMARCA4-F KMLARGQPL   | 498   | 2582  |
| >SMARCA4-C QALGQQNR    | 664   | >SMARCA4-C RALGQQNR    | 26    | 638   |
| >SMARCA4-C QALGQQNR    | 602   | >SMARCA4-C RALGQQNR    | 154   | 448   |
| >SMARCA4-C PLDGADPQA   | 138   | >SMARCA4-C PLDGADPRAI  | 326   | 188   |
| >SMARCA4-C PLDGADPQA   | 63    | >SMARCA4-C PLDGADPRA   | 151   | 88    |
| >SMARCA4-C PLDGADPQA   | 152   | >SMARCA4-C PLDGADPRAI  | 812   | 660   |
| >SMARCA4-C PLDGADPQA   | 483   | >SMARCA4-C PLDGADPRA   | 1603  | 1120  |
| >SMARCA4-C PLDGADPQA   | 247   | >SMARCA4-C PLDGADPRAI  | 1507  | 1260  |
| >SMARCA4-C PLDGADPQA   | 89    | >SMARCA4-C PLDGADPRA   | 114   | 25    |
| >SMARCA4-C PLDGADPQA   | 55    | >SMARCA4-C PLDGADPRAI  | 409   | 354   |
| >SMARCA4-C APLDGADPQ   | 43    | >SMARCA4-C APLDGADPR/  | 27    | 16    |
| >SMARCA4-C APLDGADPQ   | 230   | >SMARCA4-C APLDGADPR/  | 316   | 86    |
| >SMARCA4-C APLDGADPQ   | 32    | >SMARCA4-C APLDGADPR/  | 69    | 37    |
| >SMARCA4-F RAGGLGLNL   | 46    | >SMARCA4-F WAGGLGLNL   | 827   | 781   |
| >SMARCA4-F TRAGGLGL    | 22526 | >SMARCA4-F TWAGGLGL    | 397   | 22129 |
| >SMARCA4-F TRAGGLGLNL  | 21407 | >SMARCA4-F TWAGGLGLN   | 204   | 21203 |
| >SMARCA4-F TRAGGLGL    | 276   | >SMARCA4-F TWAGGLGL    | 17286 | 17010 |
| >SMARCA4-F TRAGGLGLNL  | 158   | >SMARCA4-F TWAGGLGLN   | 11715 | 11557 |
| >SMARCA4-F TRAGGLGL    | 93    | >SMARCA4-F TWAGGLGL    | 8334  | 8241  |
| >SMARCA4-F TRAGGLGLNL  | 161   | >SMARCA4-F TWAGGLGLN   | 10488 | 10327 |
| >SMARCA4-F TRAGGLGLNL  | 428   | >SMARCA4-F TWAGGLGLN   | 14669 | 14241 |
| >SMARCA4-F TRAGGLGL    | 29868 | >SMARCA4-F TWAGGLGL    | 309   | 29559 |
| >SMARCA4-F TRAGGLGLNL  | 17383 | >SMARCA4-F TWAGGLGLN   | 43    | 17340 |
| >SMARCA4-F SEYFIFLLSTR | 2958  | >SMARCA4-F SEYFIFLLSTW | 112   | 2846  |
| >SMARCA4-F SEYFIFLLSTR | 436   | >SMARCA4-F SEYFIFLLSTW | 20223 | 19787 |
| >SMARCA4-F SEYFIFLLSTR | 157   | >SMARCA4-F SEYFIFLLSTW | 26975 | 26818 |

|                        |       |                        |       |       |
|------------------------|-------|------------------------|-------|-------|
| >SMARCA4-F SEYFIFLLSTR | 445   | >SMARCA4-F SEYFIFLLSTW | 35    | 410   |
| >SMARCA4-F SEYFIFLLSTR | 1416  | >SMARCA4-F SEYFIFLLSTW | 473   | 943   |
| >SMARCA4-F SEYFIFLLSTR | 7322  | >SMARCA4-F SEYFIFLLSTW | 84    | 7238  |
| >SMARCA4-F SEYFIFLLSTR | 865   | >SMARCA4-F SEYFIFLLSTW | 14    | 851   |
| >SMARCA4-F SEYFIFLLSTR | 3736  | >SMARCA4-F SEYFIFLLSTW | 234   | 3502  |
| >SMARCA4-F SEYFIFLLSTR | 563   | >SMARCA4-F SEYFIFLLSTW | 45    | 518   |
| >SMARCA4-F SEYFIFLLSTR | 31417 | >SMARCA4-F SEYFIFLLSTW | 154   | 31263 |
| >SMARCA4-F SEYFIFLLSTR | 265   | >SMARCA4-F SEYFIFLLSTW | 27486 | 27221 |
| >SMARCA4-F STRAGGLGL   | 18695 | >SMARCA4-F STWAGGLGL   | 462   | 18233 |
| >SMARCA4-F STRAGGLGL   | 3288  | >SMARCA4-F STWAGGLGL   | 215   | 3073  |
| >SMARCA4-F STRAGGLGL   | 6672  | >SMARCA4-F STWAGGLGL   | 73    | 6599  |
| >SMARCA4-F STRAGGLGLM  | 9873  | >SMARCA4-F STWAGGLGL   | 185   | 9688  |
| >SMARCA4-F STRAGGLGL   | 7227  | >SMARCA4-F STWAGGLGL   | 70    | 7157  |
| >SMARCA4-F STRAGGLGLM  | 10634 | >SMARCA4-F STWAGGLGL   | 109   | 10525 |
| >SMARCA4-F STRAGGLGL   | 109   | >SMARCA4-F STWAGGLGL   | 461   | 352   |
| >SMARCA4-F STRAGGLGLM  | 165   | >SMARCA4-F STWAGGLGL   | 617   | 452   |
| >SMARCA4-F STRAGGLG    | 62    | >SMARCA4-F STWAGGLG    | 8033  | 7971  |
| >SMARCA4-F STRAGGLGL   | 20    | >SMARCA4-F STWAGGLGL   | 4747  | 4727  |
| >SMARCA4-F STRAGGLGLM  | 280   | >SMARCA4-F STWAGGLGL   | 9768  | 9488  |
| >SMARCA4-F STRAGGLGLM  | 14    | >SMARCA4-F STWAGGLGL   | 3081  | 3067  |
| >SMARCA4-F STRAGGLGL   | 9084  | >SMARCA4-F STWAGGLGL   | 447   | 8637  |
| >SMARCA4-F STRAGGLGLM  | 5542  | >SMARCA4-F STWAGGLGL   | 241   | 5301  |
| >SMARCA4-F STRAGGLGL   | 4397  | >SMARCA4-F STWAGGLGL   | 43    | 4354  |
| >SMARCA4-F STRAGGLGLM  | 5720  | >SMARCA4-F STWAGGLGL   | 69    | 5651  |
| >SMARCA4-F STRAGGLGL   | 143   | >SMARCA4-F STWAGGLGL   | 1955  | 1812  |
| >SMARCA4-F STRAGGLGLM  | 180   | >SMARCA4-F STWAGGLGL   | 3043  | 2863  |
| >SMARCA4-F STRAGGLGL   | 4     | >SMARCA4-F STWAGGLGL   | 4     | 0     |
| >SMARCA4-F STRAGGLGLM  | 4     | >SMARCA4-F STWAGGLGL   | 6     | 2     |
| >SMARCA4-F STRAGGLGLM  | 1143  | >SMARCA4-F STWAGGLGL   | 346   | 797   |
| >SMARCA4-F STRAGGLGL   | 94    | >SMARCA4-F STWAGGLGL   | 369   | 275   |
| >SMARCA4-F STRAGGLGLM  | 56    | >SMARCA4-F STWAGGLGL   | 223   | 167   |
| >SMARCA4-F STRAGGLGL   | 1227  | >SMARCA4-F STWAGGLGL   | 63    | 1164  |
| >SMARCA4-F STRAGGLGLM  | 1448  | >SMARCA4-F STWAGGLGL   | 87    | 1361  |
| >SMARCA4-F LSTRAGGL    | 70    | >SMARCA4-F LSTWAGGL    | 23    | 47    |
| >SMARCA4-F LSTRAGGLGL  | 32    | >SMARCA4-F LSTWAGGLG   | 13    | 19    |
| >SMARCA4-F LSTRAGGLGL  | 353   | >SMARCA4-F LSTWAGGLG   | 116   | 237   |
| >SMARCA4-F LSTRAGGL    | 714   | >SMARCA4-F LSTWAGGL    | 46    | 668   |
| >SMARCA4-F LSTRAGGLGL  | 74    | >SMARCA4-F LSTWAGGLG   | 50    | 24    |
| >SMARCA4-F LSTRAGGL    | 391   | >SMARCA4-F LSTWAGGL    | 158   | 233   |
| >SMARCA4-F LSTRAGGLGL  | 305   | >SMARCA4-F LSTWAGGLG   | 34    | 271   |
| >SMARCA4-F LLSTRAGGLG  | 883   | >SMARCA4-F LLSTWAGGLC  | 203   | 680   |
| >SMARCA4-F LLSTRAGGL   | 56    | >SMARCA4-F LLSTWAGGL   | 48    | 8     |
| >SMARCA4-F LLSTRAGGLG  | 39    | >SMARCA4-F LLSTWAGGLC  | 36    | 3     |



|                        |      |                       |     |      |
|------------------------|------|-----------------------|-----|------|
| >SMARCA4-F LLSTRAGGL   | 35   | >SMARCA4-F LLSTWAGGL  | 19  | 16   |
| >SMARCA4-F LLSTRAGGLG  | 35   | >SMARCA4-F LLSTWAGGLC | 28  | 7    |
| >SMARCA4-F LLSTRAGGLG  | 619  | >SMARCA4-F LLSTWAGGLC | 242 | 377  |
| >SMARCA4-F LLSTRAGGL   | 571  | >SMARCA4-F LLSTWAGGL  | 16  | 555  |
| >SMARCA4-F LLSTRAGGLG  | 149  | >SMARCA4-F LLSTWAGGLC | 16  | 133  |
| >SMARCA4-F LLSTRAGGL   | 749  | >SMARCA4-F LLSTWAGGL  | 50  | 699  |
| >SMARCA4-F LLSTRAGGLG  | 219  | >SMARCA4-F LLSTWAGGLC | 38  | 181  |
| >SMARCA4-F LLSTRAGGL   | 1725 | >SMARCA4-F LLSTWAGGL  | 161 | 1564 |
| >SMARCA4-F LLSTRAGGLG  | 255  | >SMARCA4-F LLSTWAGGLC | 52  | 203  |
| >SMARCA4-F LLSTRAGGL   | 1995 | >SMARCA4-F LLSTWAGGL  | 57  | 1938 |
| >SMARCA4-F LLSTRAGGLG  | 516  | >SMARCA4-F LLSTWAGGLC | 43  | 473  |
| >SMARCA4-F LLSTRAGGL   | 15   | >SMARCA4-F LLSTWAGGL  | 5   | 10   |
| >SMARCA4-F LLSTRAGGLG  | 7    | >SMARCA4-F LLSTWAGGLC | 4   | 3    |
| >SMARCA4-F FLLSTRAGGL  | 71   | >SMARCA4-F FLLSTWAGGL | 33  | 38   |
| >SMARCA4-F FLLSTRAG    | 1446 | >SMARCA4-F FLLSTWAG   | 129 | 1317 |
| >SMARCA4-F FLLSTRAGG   | 1458 | >SMARCA4-F FLLSTWAGG  | 457 | 1001 |
| >SMARCA4-F FLLSTRAGGL  | 18   | >SMARCA4-F FLLSTWAGGL | 14  | 4    |
| >SMARCA4-F FLLSTRAGGL  | 22   | >SMARCA4-F FLLSTWAGGL | 22  | 0    |
| >SMARCA4-F FLLSTRAG    | 3057 | >SMARCA4-F FLLSTWAG   | 109 | 2948 |
| >SMARCA4-F FLLSTRAGG   | 1905 | >SMARCA4-F FLLSTWAGG  | 244 | 1661 |
| >SMARCA4-F FLLSTRAGGL  | 104  | >SMARCA4-F FLLSTWAGGL | 55  | 49   |
| >SMARCA4-F FLLSTRAG    | 426  | >SMARCA4-F FLLSTWAG   | 17  | 409  |
| >SMARCA4-F FLLSTRAGG   | 421  | >SMARCA4-F FLLSTWAGG  | 29  | 392  |
| >SMARCA4-F FLLSTRAGGL  | 4    | >SMARCA4-F FLLSTWAGGL | 2   | 2    |
| >SMARCA4-F FLLSTRAGGL  | 1013 | >SMARCA4-F FLLSTWAGGL | 210 | 803  |
| >SMARCA4-F FLLSTRAG    | 2988 | >SMARCA4-F FLLSTWAG   | 142 | 2846 |
| >SMARCA4-F FLLSTRAGGL  | 11   | >SMARCA4-F FLLSTWAGGL | 5   | 6    |
| >SMARCA4-F FLLSTRAG    | 5940 | >SMARCA4-F FLLSTWAG   | 196 | 5744 |
| >SMARCA4-F FLLSTRAGG   | 2885 | >SMARCA4-F FLLSTWAGG  | 366 | 2519 |
| >SMARCA4-F FLLSTRAGGL  | 11   | >SMARCA4-F FLLSTWAGGL | 5   | 6    |
| >SMARCA4-F FLLSTRAGGL  | 12   | >SMARCA4-F FLLSTWAGGL | 3   | 9    |
| >SMARCA4-F FLLSTRAG    | 2347 | >SMARCA4-F FLLSTWAG   | 125 | 2222 |
| >SMARCA4-F FLLSTRAGG   | 302  | >SMARCA4-F FLLSTWAGG  | 414 | 112  |
| >SMARCA4-F FLLSTRAGGL  | 3    | >SMARCA4-F FLLSTWAGGL | 3   | 0    |
| >SMARCA4-F FLLSTRAGGL  | 241  | >SMARCA4-F FLLSTWAGGL | 44  | 197  |
| >SMARCA4-F FLLSTRAGGL  | 511  | >SMARCA4-F FLLSTWAGGL | 249 | 262  |
| >SMARCA4-F FLLSTRAGGL  | 832  | >SMARCA4-F FLLSTWAGGL | 378 | 454  |
| >SMARCA4-F IFLLSTRAGGL | 878  | >SMARCA4-F IFLLSTWAGG | 239 | 639  |
| >SMARCA4-F IFLLSTRAGGL | 1688 | >SMARCA4-F IFLLSTWAGG | 459 | 1229 |
| >SMARCA4-F FIFLLSTRA   | 110  | >SMARCA4-F FIFLLSTWA  | 54  | 56   |
| >SMARCA4-F FIFLLSTRAG  | 6770 | >SMARCA4-F FIFLLSTWAG | 423 | 6347 |
| >SMARCA4-F FIFLLSTRA   | 23   | >SMARCA4-F FIFLLSTWA  | 15  | 8    |
| >SMARCA4-F FIFLLSTRA   | 19   | >SMARCA4-F FIFLLSTWA  | 10  | 9    |

|                       |       |                       |       |       |
|-----------------------|-------|-----------------------|-------|-------|
| >SMARCA4-F FIFLLSTRA  | 189   | >SMARCA4-F FIFLLSTWA  | 85    | 104   |
| >SMARCA4-F FIFLLSTRAG | 3347  | >SMARCA4-F FIFLLSTWAG | 470   | 2877  |
| >SMARCA4-F FIFLLSTRA  | 191   | >SMARCA4-F FIFLLSTWA  | 172   | 19    |
| >SMARCA4-F FIFLLSTRA  | 287   | >SMARCA4-F FIFLLSTWA  | 132   | 155   |
| >SMARCA4-F FIFLLSTRA  | 101   | >SMARCA4-F FIFLLSTWA  | 69    | 32    |
| >SMARCA4-F FIFLLSTR   | 232   | >SMARCA4-F FIFLLSTW   | 17683 | 17451 |
| >SMARCA4-F FIFLLSTR   | 12098 | >SMARCA4-F FIFLLSTW   | 330   | 11768 |
| >SMARCA4-F FIFLLSTR   | 58    | >SMARCA4-F FIFLLSTW   | 19635 | 19577 |
| >SMARCA4-F FIFLLSTR   | 9     | >SMARCA4-F FIFLLSTW   | 9013  | 9004  |
| >SMARCA4-F FIFLLSTRA  | 138   | >SMARCA4-F FIFLLSTWA  | 201   | 63    |
| >SMARCA4-F FIFLLSTR   | 21625 | >SMARCA4-F FIFLLSTW   | 41    | 21584 |
| >SMARCA4-F FIFLLSTR   | 22123 | >SMARCA4-F FIFLLSTW   | 33    | 22090 |
| >SMARCA4-F FIFLLSTR   | 29464 | >SMARCA4-F FIFLLSTW   | 87    | 29377 |
| >SMARCA4-F FIFLLSTR   | 30771 | >SMARCA4-F FIFLLSTW   | 303   | 30468 |
| >SMARCA4-F FIFLLSTR   | 124   | >SMARCA4-F FIFLLSTW   | 27782 | 27658 |
| >SMARCA4-F YFIFLLSTR  | 1316  | >SMARCA4-F YFIFLLSTW  | 28    | 1288  |
| >SMARCA4-F YFIFLLSTR  | 2646  | >SMARCA4-F YFIFLLSTW  | 89    | 2557  |
| >SMARCA4-F YFIFLLSTR  | 2816  | >SMARCA4-F YFIFLLSTW  | 23    | 2793  |
| >SMARCA4-F YFIFLLSTR  | 28    | >SMARCA4-F YFIFLLSTW  | 16472 | 16444 |
| >SMARCA4-F YFIFLLSTR  | 15    | >SMARCA4-F YFIFLLSTW  | 13811 | 13796 |
| >SMARCA4-F YFIFLLSTR  | 31    | >SMARCA4-F YFIFLLSTW  | 17490 | 17459 |
| >SMARCA4-F YFIFLLSTR  | 22366 | >SMARCA4-F YFIFLLSTW  | 239   | 22127 |
| >SMARCA4-F YFIFLLSTR  | 1802  | >SMARCA4-F YFIFLLSTW  | 71    | 1731  |
| >SMARCA4-F YFIFLLSTR  | 251   | >SMARCA4-F YFIFLLSTW  | 28890 | 28639 |
| >SMARCA4-F EYFIFLLSTR | 15758 | >SMARCA4-F EYFIFLLSTW | 26    | 15732 |
| >SMARCA4-F EYFIFLLSTR | 14872 | >SMARCA4-F EYFIFLLSTW | 65    | 14807 |
| >SMARCA4-F EYFIFLLSTR | 3140  | >SMARCA4-F EYFIFLLSTW | 39    | 3101  |
| >SMARCA4-F EYFIFLLSTR | 6748  | >SMARCA4-F EYFIFLLSTW | 291   | 6457  |
| >SMARCA4-F EYFIFLLSTR | 3692  | >SMARCA4-F EYFIFLLSTW | 376   | 3316  |
| >SMARCA4-F EYFIFLLSTR | 79    | >SMARCA4-F EYFIFLLSTW | 19277 | 19198 |
| >SMARCA4-F EYFIFLLSTR | 31    | >SMARCA4-F EYFIFLLSTW | 4724  | 4693  |
| >SMARCA4-F EYFIFLLSTR | 36    | >SMARCA4-F EYFIFLLSTW | 21713 | 21677 |
| >SMARCA4-F EYFIFLLSTR | 29626 | >SMARCA4-F EYFIFLLSTW | 465   | 29161 |
| >SMARCA4-F EYFIFLLSTR | 25    | >SMARCA4-F EYFIFLLSTW | 6956  | 6931  |
| >SMARCA4-F RAHRIGQQ   | 320   | >SMARCA4-F QAHRIGQQ   | 6215  | 5895  |
| >SMARCA4-F RAHRIGQQN  | 25    | >SMARCA4-F QAHRIGQQN  | 1336  | 1311  |
| >SMARCA4-F RAHRIGQQN  | 2156  | >SMARCA4-F QAHRIGQQN  | 108   | 2048  |
| >SMARCA4-F AQDRAHRI   | 342   | >SMARCA4-F AQDQAHR    | 295   | 47    |
| >SMARCA4-F QAQDRAHR   | 82    | >SMARCA4-F QAQDQAHR   | 236   | 154   |
| >SMARCA4-F QAQDRAHR   | 189   | >SMARCA4-F QAQDQAHR   | 738   | 549   |
| >SMARCA4-F QAQDRAHR   | 125   | >SMARCA4-F QAQDQAHR   | 166   | 41    |
| >SMARCA4-F QAQDRAHRI  | 405   | >SMARCA4-F QAQDQAHR   | 671   | 266   |
| >SMARCA4-F LQAQDRAHR  | 146   | >SMARCA4-F LQAQDQAHR  | 701   | 555   |

|                        |       |                        |       |       |
|------------------------|-------|------------------------|-------|-------|
| >SMARCA4-F LQAQDRAH    | 523   | >SMARCA4-F LQAQDQAH    | 318   | 205   |
| >SMARCA4-F DLQAQDRAH   | 457   | >SMARCA4-F DLQAQDQAH   | 216   | 241   |
| >SMARCA4-F RLMEEDEL    | 23    | >SMARCA4-F HLMEEDEL    | 41    | 18    |
| >SMARCA4-F RLMEEDELPS  | 388   | >SMARCA4-F HLMEEDELPS  | 613   | 225   |
| >SMARCA4-F RLMEEDEL    | 4     | >SMARCA4-F HLMEEDEL    | 4     | 0     |
| >SMARCA4-F RLMEEDEL P  | 821   | >SMARCA4-F HLMEEDEL P  | 497   | 324   |
| >SMARCA4-F RLMEEDELPS  | 367   | >SMARCA4-F HLMEEDELPS  | 490   | 123   |
| >SMARCA4-F RLMEEDEL    | 70    | >SMARCA4-F HLMEEDEL    | 187   | 117   |
| >SMARCA4-F RLMEEDEL    | 57    | >SMARCA4-F HLMEEDEL    | 189   | 132   |
| >SMARCA4-F RLMEEDEL    | 9     | >SMARCA4-F HLMEEDEL    | 27    | 18    |
| >SMARCA4-F RLMEEDEL    | 8     | >SMARCA4-F HLMEEDEL    | 8     | 0     |
| >SMARCA4-F RLMEEDEL    | 26    | >SMARCA4-F HLMEEDEL    | 45    | 19    |
| >SMARCA4-F RLMEEDEL    | 15    | >SMARCA4-F HLMEEDEL    | 22    | 7     |
| >SMARCA4-F RLMEEDEL    | 11    | >SMARCA4-F HLMEEDEL    | 10    | 1     |
| >SMARCA4-F RLMEEDEL    | 166   | >SMARCA4-F HLMEEDEL    | 2694  | 2528  |
| >SMARCA4-F RLMEEDELPS  | 53    | >SMARCA4-F HLMEEDELPS  | 617   | 564   |
| >SMARCA4-F RLMEEDELPS  | 34    | >SMARCA4-F HLMEEDELPS  | 162   | 128   |
| >SMARCA4-F RLMEEDELPS  | 164   | >SMARCA4-F HLMEEDELPS  | 330   | 166   |
| >SMARCA4-F RLMEEDELPS  | 17    | >SMARCA4-F HLMEEDELPS  | 78    | 61    |
| >SMARCA4-F KPRLMEEDEL  | 259   | >SMARCA4-F KPHLMEEDEL  | 605   | 346   |
| >SMARCA4-F RKPRLMEEDI  | 701   | >SMARCA4-F RKPRLMEEDI  | 383   | 318   |
| >SMARCA4-F KRKPRLMEE   | 474   | >SMARCA4-F KRKPRLMEE   | 604   | 130   |
| >SMARCA4-F PKRKPRLM    | 570   | >SMARCA4-F PKRKPHLM    | 480   | 90    |
| >SMARCA4-F NPKRKPRL    | 308   | >SMARCA4-F NPKRKPHL    | 416   | 108   |
| >SMARCA4-F NPKRKPRLM   | 390   | >SMARCA4-F NPKRKPHLM   | 610   | 220   |
| >SMARCA4-F NPKRKPRL    | 28    | >SMARCA4-F NPKRKPHL    | 23    | 5     |
| >SMARCA4-F NPKRKPRLM   | 56    | >SMARCA4-F NPKRKPHLM   | 35    | 21    |
| >SMARCA4-F RNPKRKPR    | 54    | >SMARCA4-F RNPKRKPH    | 20998 | 20944 |
| >SMARCA4-F ARNPKRKPR   | 373   | >SMARCA4-F ARNPKRKPH   | 878   | 505   |
| >SMARCA4-F ARNPKRKPR L | 198   | >SMARCA4-F ARNPKRKPH L | 193   | 5     |
| >SMARCA4-F ARNPKRKPR L | 175   | >SMARCA4-F ARNPKRKPH L | 113   | 62    |
| >SMARCA4-F ARNPKRKPR L | 179   | >SMARCA4-F ARNPKRKPH L | 207   | 28    |
| >SMARCA4-F EARNPKRKPF  | 270   | >SMARCA4-F EARNPKRKPF  | 16324 | 16054 |
| >SMARCA4-F GRKEKAQDR I | 199   | >SMARCA4-F GWKEKAQDF   | 14677 | 14478 |
| >SMARCA4-F RSVKVKIKLGF | 36    | >SMARCA4-F RSVKVKIKLG\ | 13125 | 13089 |
| >SMARCA4-F RSVKVKIKLGF | 273   | >SMARCA4-F RSVKVKIKLG\ | 35500 | 35227 |
| >SMARCA4-F RSVKVKIKLGF | 7873  | >SMARCA4-F RSVKVKIKLG\ | 6     | 7867  |
| >SMARCA4-F RSVKVKIKLGF | 18159 | >SMARCA4-F RSVKVKIKLG\ | 34    | 18125 |
| >SMARCA4-F RSVKVKIKLGF | 16264 | >SMARCA4-F RSVKVKIKLG\ | 8     | 16256 |
| >SMARCA4-F RSVKVKIKLGF | 84    | >SMARCA4-F RSVKVKIKLG\ | 30041 | 29957 |
| >SMARCA4-F LGRKEKAQDF  | 4832  | >SMARCA4-F LGWKEKAQD   | 383   | 4449  |
| >SMARCA4-F KLGRKEKA    | 708   | >SMARCA4-F KLGWKEKA    | 54    | 654   |
| >SMARCA4-F KLGRKEKA    | 1510  | >SMARCA4-F KLGWKEKA    | 121   | 1389  |

|                        |       |                       |       |       |
|------------------------|-------|-----------------------|-------|-------|
| >SMARCA4-F KLGRKEKA    | 210   | >SMARCA4-F KLGWKEKA   | 39    | 171   |
| >SMARCA4-F KLGRKEKAQI  | 285   | >SMARCA4-F KLGWKEKAQ  | 81    | 204   |
| >SMARCA4-F KIKLGRKEK   | 5     | >SMARCA4-F KIKLGWKEK  | 4     | 1     |
| >SMARCA4-F KIKLGRKEKA  | 212   | >SMARCA4-F KIKLGWKEKA | 243   | 31    |
| >SMARCA4-F KIKLGRKEK   | 176   | >SMARCA4-F KIKLGWKEK  | 186   | 10    |
| >SMARCA4-F KVKIKLGRK   | 116   | >SMARCA4-F KVKIKLGWK  | 124   | 8     |
| >SMARCA4-F KVKIKLGRKEI | 434   | >SMARCA4-F KVKIKLGWKE | 487   | 53    |
| >SMARCA4-F KVKIKLGR    | 55    | >SMARCA4-F KVKIKLGW   | 2054  | 1999  |
| >SMARCA4-F KVKIKLGRK   | 5     | >SMARCA4-F KVKIKLGWK  | 5     | 0     |
| >SMARCA4-F KVKIKLGRKEI | 4     | >SMARCA4-F KVKIKLGWKE | 4     | 0     |
| >SMARCA4-F KVKIKLGR    | 14    | >SMARCA4-F KVKIKLGW   | 8886  | 8872  |
| >SMARCA4-F KVKIKLGRK   | 59    | >SMARCA4-F KVKIKLGWK  | 45    | 14    |
| >SMARCA4-F KVKIKLGRKEI | 55    | >SMARCA4-F KVKIKLGWKE | 57    | 2     |
| >SMARCA4-F KVKIKLGR    | 18455 | >SMARCA4-F KVKIKLGW   | 70    | 18385 |
| >SMARCA4-F KVKIKLGR    | 23915 | >SMARCA4-F KVKIKLGW   | 230   | 23685 |
| >SMARCA4-F KVKIKLGR    | 22436 | >SMARCA4-F KVKIKLGW   | 330   | 22106 |
| >SMARCA4-F KVKIKLGR    | 106   | >SMARCA4-F KVKIKLGW   | 25583 | 25477 |
| >SMARCA4-F VKVKIKLGR   | 329   | >SMARCA4-F VKVKIKLGW  | 34742 | 34413 |
| >SMARCA4-F SVKVKIKLGR  | 254   | >SMARCA4-F SVKVKIKLGW | 326   | 72    |
| >SMARCA4-F SVKVKIKLGR  | 10    | >SMARCA4-F SVKVKIKLGW | 10    | 0     |
| >SMARCA4-F SVKVKIKLGR  | 36    | >SMARCA4-F SVKVKIKLGW | 14002 | 13966 |
| >SMARCA4-F SVKVKIKLGR  | 333   | >SMARCA4-F SVKVKIKLGW | 223   | 110   |
| >SMARCA4-F SVKVKIKLGR  | 491   | >SMARCA4-F SVKVKIKLGW | 29354 | 28863 |
| >SMARCA4-F SVKVKIKLGR  | 169   | >SMARCA4-F SVKVKIKLGW | 35783 | 35614 |
| >SMARCA4-F SVKVKIKLGR  | 23878 | >SMARCA4-F SVKVKIKLGW | 358   | 23520 |
| >SMARCA4-F RMKNHHCKL   | 55    | >SMARCA4-F CMKNHHCKL  | 251   | 196   |
| >SMARCA4-F RMKNHHCKL   | 83    | >SMARCA4-F CMKNHHCKL  | 891   | 808   |
| >SMARCA4-F RMKNHHCKL   | 22    | >SMARCA4-F CMKNHHCKL  | 88    | 66    |
| >SMARCA4-F RMKNHHCK    | 65    | >SMARCA4-F CMKNHHCK   | 298   | 233   |
| >SMARCA4-F RMKNHHCK    | 98    | >SMARCA4-F CMKNHHCK   | 340   | 242   |
| >SMARCA4-F RMKNHHCK    | 5     | >SMARCA4-F CMKNHHCK   | 47    | 42    |
| >SMARCA4-F RMKNHHCKL   | 13    | >SMARCA4-F CMKNHHCKL  | 959   | 946   |
| >SMARCA4-F RMKNHHCKL   | 292   | >SMARCA4-F CMKNHHCKL  | 7469  | 7177  |
| >SMARCA4-F RMKNHHCKL   | 80    | >SMARCA4-F CMKNHHCKL  | 3411  | 3331  |
| >SMARCA4-F RMKNHHCK    | 11    | >SMARCA4-F CMKNHHCK   | 43    | 32    |
| >SMARCA4-F RMKNHHCKL   | 189   | >SMARCA4-F CMKNHHCKL  | 3168  | 2979  |
| >SMARCA4-F RMKNHHCKL   | 401   | >SMARCA4-F CMKNHHCKL  | 16841 | 16440 |
| >SMARCA4-F RMKNHHCKL   | 21    | >SMARCA4-F CMKNHHCKL  | 29    | 8     |
| >SMARCA4-F RMKNHHCKL   | 109   | >SMARCA4-F CMKNHHCKL  | 1455  | 1346  |
| >SMARCA4-F RMKNHHCKL   | 391   | >SMARCA4-F CMKNHHCKL  | 4211  | 3820  |
| >SMARCA4-F RMKNHHCK    | 370   | >SMARCA4-F CMKNHHCK   | 3265  | 2895  |
| >SMARCA4-F RMKNHHCKL   | 75    | >SMARCA4-F CMKNHHCKL  | 376   | 301   |
| >SMARCA4-F HRMKNHHCK   | 1000  | >SMARCA4-F HCMKNHHCK  | 107   | 893   |

|                       |       |                       |       |       |
|-----------------------|-------|-----------------------|-------|-------|
| >SMARCA4-F HRMKNHHCH  | 303   | >SMARCA4-F HCMKNHHCH  | 3543  | 3240  |
| >SMARCA4-F HRMKNHHCH  | 29    | >SMARCA4-F HCMKNHHCH  | 18201 | 18172 |
| >SMARCA4-F HRMKNHHCH  | 23    | >SMARCA4-F HCMKNHHCH  | 19105 | 19082 |
| >SMARCA4-F HRMKNHHCH  | 49    | >SMARCA4-F HCMKNHHCH  | 3795  | 3746  |
| >SMARCA4-F HRMKNHHCH  | 60    | >SMARCA4-F HCMKNHHCH  | 18888 | 18828 |
| >SMARCA4-F HRMKNHHCH  | 435   | >SMARCA4-F HCMKNHHCH  | 35255 | 34820 |
| >SMARCA4-F HRMKNHHCH  | 274   | >SMARCA4-F HCMKNHHCH  | 31743 | 31469 |
| >SMARCA4-F HRMKNHHCH  | 1110  | >SMARCA4-F HCMKNHHCH  | 467   | 643   |
| >SMARCA4-F EGHRMKNHFI | 407   | >SMARCA4-F EGHCMKNHFI | 285   | 122   |
| >SMARCA4-F IVDEGHRMK  | 474   | >SMARCA4-F IVDEGHCMK  | 159   | 315   |
| >SMARCA4-F MIVDEGHRM  | 193   | >SMARCA4-F MIVDEGHCM  | 318   | 125   |
| >SMARCA4-F MIVDEGHRM  | 396   | >SMARCA4-F MIVDEGHCM  | 485   | 89    |
| >SMARCA4-F MIVDEGHRM  | 410   | >SMARCA4-F MIVDEGHCM  | 1426  | 1016  |
| >SMARCA4-F MIVDEGHRM  | 35    | >SMARCA4-F MIVDEGHCM  | 282   | 247   |
| >SMARCA4-F MIVDEGHRM  | 144   | >SMARCA4-F MIVDEGHCM  | 87    | 57    |
| >SMARCA4-F MIVDEGHRM  | 450   | >SMARCA4-F MIVDEGHCM  | 157   | 293   |
| >SMARCA4-F MIVDEGHRM  | 437   | >SMARCA4-F MIVDEGHCM  | 4344  | 3907  |
| >SMARCA4-F MIVDEGHRM  | 134   | >SMARCA4-F MIVDEGHCM  | 121   | 13    |
| >SMARCA4-F MIVDEGHR   | 437   | >SMARCA4-F MIVDEGHC   | 25526 | 25089 |
| >SMARCA4-F MIVDEGHR   | 22    | >SMARCA4-F MIVDEGHC   | 26526 | 26504 |
| >SMARCA4-F MIVDEGHRM  | 616   | >SMARCA4-F MIVDEGHCM  | 71    | 545   |
| >SMARCA4-F MIVDEGHRM  | 285   | >SMARCA4-F MIVDEGHCM  | 6507  | 6222  |
| >SMARCA4-F MIVDEGHRM  | 522   | >SMARCA4-F MIVDEGHCM  | 280   | 242   |
| >SMARCA4-F MIVDEGHR   | 125   | >SMARCA4-F MIVDEGHC   | 33579 | 33454 |
| >SMARCA4-F YMIVDEGHRI | 504   | >SMARCA4-F YMIVDEGHCI | 339   | 165   |
| >SMARCA4-F YMIVDEGHRI | 113   | >SMARCA4-F YMIVDEGHCI | 146   | 33    |
| >SMARCA4-F YMIVDEGHRI | 233   | >SMARCA4-F YMIVDEGHCI | 182   | 51    |
| >SMARCA4-F YMIVDEGHR  | 16662 | >SMARCA4-F YMIVDEGHC  | 470   | 16192 |
| >SMARCA4-F YMIVDEGHRI | 42    | >SMARCA4-F YMIVDEGHCI | 118   | 76    |
| >SMARCA4-F YMIVDEGHR  | 17258 | >SMARCA4-F YMIVDEGHC  | 245   | 17013 |
| >SMARCA4-F YMIVDEGHRI | 36    | >SMARCA4-F YMIVDEGHCI | 23    | 13    |
| >SMARCA4-F YMIVDEGHRI | 269   | >SMARCA4-F YMIVDEGHCI | 141   | 128   |
| >SMARCA4-F YMIVDEGHRI | 336   | >SMARCA4-F YMIVDEGHCI | 215   | 121   |
| >SMARCA4-F YMIVDEGHR  | 15572 | >SMARCA4-F YMIVDEGHC  | 367   | 15205 |
| >SMARCA4-F YMIVDEGHRI | 24    | >SMARCA4-F YMIVDEGHCI | 71    | 47    |
| >SMARCA4-F YMIVDEGHRI | 148   | >SMARCA4-F YMIVDEGHCI | 129   | 19    |
| >SMARCA4-F YMIVDEGHR  | 360   | >SMARCA4-F YMIVDEGHC  | 37377 | 37017 |
| >SMARCA4-F YMIVDEGHR  | 187   | >SMARCA4-F YMIVDEGHC  | 37129 | 36942 |
| >SMARCA4-F YMIVDEGHRI | 353   | >SMARCA4-F YMIVDEGHCI | 147   | 206   |
| >SMARCA4-F YMIVDEGHRI | 142   | >SMARCA4-F YMIVDEGHCI | 124   | 18    |
| >SMARCA4-F YMIVDEGHRI | 387   | >SMARCA4-F YMIVDEGHCI | 389   | 2     |
| >SMARCA4-F YMIVDEGHRI | 191   | >SMARCA4-F YMIVDEGHCI | 95    | 96    |
| >SMARCA4-F KYMIVDEGHI | 340   | >SMARCA4-F KYMIVDEGHI | 890   | 550   |

|                        |       |                        |       |       |
|------------------------|-------|------------------------|-------|-------|
| >SMARCA4-F KYMIVDEGHI  | 372   | >SMARCA4-F KYMIVDEGHI  | 546   | 174   |
| >SMARCA4-F KYMIVDEGHI  | 496   | >SMARCA4-F KYMIVDEGHI  | 463   | 33    |
| >SMARCA4-F KYMIVDEGHI  | 57    | >SMARCA4-F KYMIVDEGHI  | 213   | 156   |
| >SMARCA4-F KYMIVDEGHI  | 107   | >SMARCA4-F KYMIVDEGHI  | 26515 | 26408 |
| >SMARCA4-F KYMIVDEGHI  | 21    | >SMARCA4-F KYMIVDEGHI  | 28032 | 28011 |
| >SMARCA4-F KYMIVDEGHI  | 260   | >SMARCA4-F KYMIVDEGHI  | 222   | 38    |
| >SMARCA4-F RRLHKVLRPF  | 6     | >SMARCA4-F WRLHKVLRPI  | 14    | 8     |
| >SMARCA4-F RRLHKVLRPF  | 111   | >SMARCA4-F WRLHKVLRPI  | 395   | 284   |
| >SMARCA4-F RRLHKVLR    | 27    | >SMARCA4-F WRLHKVLR    | 69    | 42    |
| >SMARCA4-F RRLHKVLRP   | 257   | >SMARCA4-F WRLHKVLRP   | 1630  | 1373  |
| >SMARCA4-F RRLHKVLRPF  | 15    | >SMARCA4-F WRLHKVLRPI  | 34    | 19    |
| >SMARCA4-F RRLHKVLRPF  | 21    | >SMARCA4-F WRLHKVLRPI  | 58    | 37    |
| >SMARCA4-F RRLHKVLRPF  | 2859  | >SMARCA4-F WRLHKVLRPI  | 315   | 2544  |
| >SMARCA4-F RRLHKVLR    | 51    | >SMARCA4-F WRLHKVLR    | 971   | 920   |
| >SMARCA4-F RRLHKVLRP   | 214   | >SMARCA4-F WRLHKVLRP   | 8469  | 8255  |
| >SMARCA4-F RRLHKVLRPF  | 66    | >SMARCA4-F WRLHKVLRPI  | 301   | 235   |
| >SMARCA4-F RRLHKVLRPF  | 16    | >SMARCA4-F WRLHKVLRPI  | 175   | 159   |
| >SMARCA4-F RRLHKVLRPF  | 78    | >SMARCA4-F WRLHKVLRPI  | 205   | 127   |
| >SMARCA4-F RRLHKVLRPF  | 5     | >SMARCA4-F WRLHKVLRPI  | 12    | 7     |
| >SMARCA4-F RRLHKVLR    | 61    | >SMARCA4-F WRLHKVLR    | 144   | 83    |
| >SMARCA4-F IRRLHKVLRPF | 4055  | >SMARCA4-F IWRLHKVLRP  | 340   | 3715  |
| >SMARCA4-F IRRLHKVLR   | 2513  | >SMARCA4-F IWRLHKVLR   | 25    | 2488  |
| >SMARCA4-F IRRLHKVLR   | 3105  | >SMARCA4-F IWRLHKVLR   | 186   | 2919  |
| >SMARCA4-F IRRLHKVL    | 231   | >SMARCA4-F IWRLHKVL    | 5816  | 5585  |
| >SMARCA4-F IRRLHKVLRPF | 24    | >SMARCA4-F IWRLHKVLRP  | 521   | 497   |
| >SMARCA4-F IRRLHKVLR   | 280   | >SMARCA4-F IWRLHKVLR   | 26948 | 26668 |
| >SMARCA4-F IRRLHKVLRPF | 46    | >SMARCA4-F IWRLHKVLRP  | 21211 | 21165 |
| >SMARCA4-F IRRLHKVLR   | 490   | >SMARCA4-F IWRLHKVLR   | 23    | 467   |
| >SMARCA4-F IRRLHKVL    | 36839 | >SMARCA4-F IWRLHKVL    | 447   | 36392 |
| >SMARCA4-F LNEEETILIIR | 30695 | >SMARCA4-F LNEEETILIIW | 87    | 30608 |
| >SMARCA4-F IIRRLHKV    | 866   | >SMARCA4-F IIRRLHKV    | 116   | 750   |
| >SMARCA4-F IIRRLHKV    | 9500  | >SMARCA4-F IIRRLHKV    | 94    | 9406  |
| >SMARCA4-F IIRRLHKV    | 2742  | >SMARCA4-F IIRRLHKV    | 436   | 2306  |
| >SMARCA4-F IIRRLHKV    | 216   | >SMARCA4-F IIRRLHKV    | 427   | 211   |
| >SMARCA4-F IIRRLHKV    | 2301  | >SMARCA4-F IIRRLHKV    | 162   | 2139  |
| >SMARCA4-F IIRRLHKV    | 398   | >SMARCA4-F IIRRLHKV    | 5     | 393   |
| >SMARCA4-F IIRRLHKVL   | 12225 | >SMARCA4-F IIRRLHKVL   | 333   | 11892 |
| >SMARCA4-F IIRRLHKV    | 6211  | >SMARCA4-F IIRRLHKV    | 206   | 6005  |
| >SMARCA4-F IIRRLHKV    | 3653  | >SMARCA4-F IIRRLHKV    | 23    | 3630  |
| >SMARCA4-F IIRRLHKV    | 6276  | >SMARCA4-F IIRRLHKV    | 35    | 6241  |
| >SMARCA4-F IIRRLHKV    | 16    | >SMARCA4-F IIRRLHKV    | 5     | 11    |
| >SMARCA4-F IIRRLHKV    | 79    | >SMARCA4-F IIRRLHKV    | 9800  | 9721  |
| >SMARCA4-F IIRRLHKVL   | 75    | >SMARCA4-F IIRRLHKVL   | 8960  | 8885  |

|                        |      |                        |      |      |
|------------------------|------|------------------------|------|------|
| >SMARCA4-F IIRRLHKVLR  | 111  | >SMARCA4-F IIWRLHKVLR  | 9834 | 9723 |
| >SMARCA4-F IIRRLHKVLR  | 26   | >SMARCA4-F IIWRLHKVLR  | 39   | 13   |
| >SMARCA4-F IIRRLHKVLR  | 109  | >SMARCA4-F IIWRLHKVLR  | 145  | 36   |
| >SMARCA4-F IIRRLHKV    | 9003 | >SMARCA4-F IIWRLHKV    | 292  | 8711 |
| >SMARCA4-F IIRRLHKVL   | 89   | >SMARCA4-F IIWRLHKVL   | 1324 | 1235 |
| >SMARCA4-F IIRRLHKVL   | 274  | >SMARCA4-F IIWRLHKVL   | 1034 | 760  |
| >SMARCA4-F IIRRLHKVLR  | 180  | >SMARCA4-F IIWRLHKVLR  | 34   | 146  |
| >SMARCA4-F LIIRRLHKV   | 140  | >SMARCA4-F LIIWRLHKV   | 30   | 110  |
| >SMARCA4-F LIIRRLHKV   | 81   | >SMARCA4-F LIIWRLHKV   | 36   | 45   |
| >SMARCA4-F LIIRRLHKV   | 11   | >SMARCA4-F LIIWRLHKV   | 7    | 4    |
| >SMARCA4-F LIIRRLHKV   | 14   | >SMARCA4-F LIIWRLHKV   | 6    | 8    |
| >SMARCA4-F LIIRRLHKV   | 24   | >SMARCA4-F LIIWRLHKV   | 5    | 19   |
| >SMARCA4-F LIIRRLHKVL  | 2268 | >SMARCA4-F LIIWRLHKVL  | 388  | 1880 |
| >SMARCA4-F LIIRRLHKV   | 69   | >SMARCA4-F LIIWRLHKV   | 75   | 6    |
| >SMARCA4-F LIIRRLHKV   | 238  | >SMARCA4-F LIIWRLHKV   | 34   | 204  |
| >SMARCA4-F LIIRRLHKV   | 970  | >SMARCA4-F LIIWRLHKV   | 127  | 843  |
| >SMARCA4-F LIIRRLHKV   | 3    | >SMARCA4-F LIIWRLHKV   | 2    | 1    |
| >SMARCA4-F LIIRRLHKVL  | 306  | >SMARCA4-F LIIWRLHKVL  | 97   | 209  |
| >SMARCA4-F LIIRRLHK    | 98   | >SMARCA4-F LIIWRLHK    | 96   | 2    |
| >SMARCA4-F LIIRRLHK    | 63   | >SMARCA4-F LIIWRLHK    | 39   | 24   |
| >SMARCA4-F LIIRRLHKVLR | 955  | >SMARCA4-F LIIWRLHKVLF | 467  | 488  |
| >SMARCA4-F LIIRRLHK    | 105  | >SMARCA4-F LIIWRLHK    | 625  | 520  |
| >SMARCA4-F LIIRRLHKVLR | 16   | >SMARCA4-F LIIWRLHKVLF | 16   | 0    |
| >SMARCA4-F LIIRRLHKVLR | 169  | >SMARCA4-F LIIWRLHKVLF | 81   | 88   |
| >SMARCA4-F LIIRRLHK    | 401  | >SMARCA4-F LIIWRLHK    | 170  | 231  |
| >SMARCA4-F LIIRRLHKVLR | 56   | >SMARCA4-F LIIWRLHKVLF | 25   | 31   |
| >SMARCA4-F LIIRRLHKV   | 788  | >SMARCA4-F LIIWRLHKV   | 382  | 406  |
| >SMARCA4-F LIIRRLHKV   | 650  | >SMARCA4-F LIIWRLHKV   | 70   | 580  |
| >SMARCA4-F LIIRRLHKV   | 176  | >SMARCA4-F LIIWRLHKV   | 818  | 642  |
| >SMARCA4-F LIIRRLHKVLR | 297  | >SMARCA4-F LIIWRLHKVLF | 102  | 195  |
| >SMARCA4-F ILIIRRLHKV  | 174  | >SMARCA4-F ILIIRRLHKV  | 31   | 143  |
| >SMARCA4-F ILIIRRLHKV  | 185  | >SMARCA4-F ILIIRRLHKV  | 48   | 137  |
| >SMARCA4-F ILIIRRLHKV  | 35   | >SMARCA4-F ILIIRRLHKV  | 12   | 23   |
| >SMARCA4-F ILIIRRLHKV  | 175  | >SMARCA4-F ILIIRRLHKV  | 51   | 124  |
| >SMARCA4-F ILIIRRLHKV  | 12   | >SMARCA4-F ILIIRRLHKV  | 3    | 9    |
| >SMARCA4-F ILIIRRLHKVL | 525  | >SMARCA4-F ILIIRRLHKVL | 64   | 461  |
| >SMARCA4-F ILIIRRLHKV  | 55   | >SMARCA4-F ILIIRRLHKV  | 15   | 40   |
| >SMARCA4-F ILIIRRLHKV  | 27   | >SMARCA4-F ILIIRRLHKV  | 9    | 18   |
| >SMARCA4-F ILIIRRLHKV  | 268  | >SMARCA4-F ILIIRRLHKV  | 36   | 232  |
| >SMARCA4-F ILIIRRLHKV  | 2    | >SMARCA4-F ILIIRRLHKV  | 2    | 0    |
| >SMARCA4-F ILIIRRLHKVL | 46   | >SMARCA4-F ILIIRRLHKVL | 17   | 29   |
| >SMARCA4-F ILIIRRLHK   | 38   | >SMARCA4-F ILIIRRLHK   | 46   | 8    |
| >SMARCA4-F ILIIRRLHK   | 161  | >SMARCA4-F ILIIRRLHK   | 88   | 73   |

|                        |      |                        |      |      |
|------------------------|------|------------------------|------|------|
| >SMARCA4-F ILIIRRLHK   | 232  | >SMARCA4-F ILIIWRLHK   | 727  | 495  |
| >SMARCA4-F ILIIRRLHK   | 358  | >SMARCA4-F ILIIWRLHK   | 364  | 6    |
| >SMARCA4-F ILIIRRLHKV  | 3954 | >SMARCA4-F ILIIWRLHKV  | 471  | 3483 |
| >SMARCA4-F ILIIRRLHKVL | 72   | >SMARCA4-F ILIIWRLHKVL | 814  | 742  |
| >SMARCA4-F ILIIRRLHK   | 1685 | >SMARCA4-F ILIIWRLHK   | 418  | 1267 |
| >SMARCA4-F TILIIRRL    | 392  | >SMARCA4-F TILIIWRL    | 794  | 402  |
| >SMARCA4-F TILIIRRL    | 7096 | >SMARCA4-F TILIIWRL    | 295  | 6801 |
| >SMARCA4-F TILIIRRLHKV | 1027 | >SMARCA4-F TILIIWRLHKV | 339  | 688  |
| >SMARCA4-F TILIIRRLHKV | 661  | >SMARCA4-F TILIIWRLHKV | 426  | 235  |
| >SMARCA4-F TILIIRRL    | 3993 | >SMARCA4-F TILIIWRL    | 147  | 3846 |
| >SMARCA4-F TILIIRRLHKV | 275  | >SMARCA4-F TILIIWRLHKV | 60   | 215  |
| >SMARCA4-F TILIIRRL    | 1345 | >SMARCA4-F TILIIWRL    | 67   | 1278 |
| >SMARCA4-F TILIIRRLHKV | 125  | >SMARCA4-F TILIIWRLHKV | 24   | 101  |
| >SMARCA4-F TILIIRRL    | 6800 | >SMARCA4-F TILIIWRL    | 230  | 6570 |
| >SMARCA4-F TILIIRRLHKV | 204  | >SMARCA4-F TILIIWRLHKV | 39   | 165  |
| >SMARCA4-F TILIIRRLHKV | 559  | >SMARCA4-F TILIIWRLHKV | 158  | 401  |
| >SMARCA4-F TILIIRRL    | 2011 | >SMARCA4-F TILIIWRL    | 93   | 1918 |
| >SMARCA4-F TILIIRRLHKV | 25   | >SMARCA4-F TILIIWRLHKV | 24   | 1    |
| >SMARCA4-F TILIIRRLHK  | 41   | >SMARCA4-F TILIIWRLHK  | 94   | 53   |
| >SMARCA4-F TILIIRRLHK  | 19   | >SMARCA4-F TILIIWRLHK  | 22   | 3    |
| >SMARCA4-F TILIIRRLHK  | 97   | >SMARCA4-F TILIIWRLHK  | 116  | 19   |
| >SMARCA4-F TILIIRRLHK  | 119  | >SMARCA4-F TILIIWRLHK  | 188  | 69   |
| >SMARCA4-F TILIIRRLHK  | 200  | >SMARCA4-F TILIIWRLHK  | 191  | 9    |
| >SMARCA4-F TILIIRRL    | 2192 | >SMARCA4-F TILIIWRL    | 406  | 1786 |
| >SMARCA4-F TILIIRRLHKV | 204  | >SMARCA4-F TILIIWRLHKV | 199  | 5    |
| >SMARCA4-F TILIIRRL    | 3013 | >SMARCA4-F TILIIWRL    | 209  | 2804 |
| >SMARCA4-F TILIIRRLHKV | 57   | >SMARCA4-F TILIIWRLHKV | 32   | 25   |
| >SMARCA4-F TILIIRRLHK  | 798  | >SMARCA4-F TILIIWRLHK  | 369  | 429  |
| >SMARCA4-F ETILIIRRLHK | 280  | >SMARCA4-F ETILIIWRLHK | 93   | 187  |
| >SMARCA4-F ETILIIRRL   | 386  | >SMARCA4-F ETILIIWRL   | 1470 | 1084 |
| >SMARCA4-F ETILIIRRL   | 93   | >SMARCA4-F ETILIIWRL   | 26   | 67   |
| >SMARCA4-F ETILIIRR    | 291  | >SMARCA4-F ETILIIWR    | 101  | 190  |
| >SMARCA4-F ETILIIRRL   | 7    | >SMARCA4-F ETILIIWRL   | 6    | 1    |
| >SMARCA4-F ETILIIRRLH  | 213  | >SMARCA4-F ETILIIWRLH  | 153  | 60   |
| >SMARCA4-F ETILIIRR    | 487  | >SMARCA4-F ETILIIWR    | 232  | 255  |
| >SMARCA4-F ETILIIRR    | 20   | >SMARCA4-F ETILIIWR    | 13   | 7    |
| >SMARCA4-F ETILIIRRLHK | 148  | >SMARCA4-F ETILIIWRLHK | 63   | 85   |
| >SMARCA4-F ETILIIRR    | 2    | >SMARCA4-F ETILIIWR    | 2    | 0    |
| >SMARCA4-F ETILIIRRLHK | 6    | >SMARCA4-F ETILIIWRLHK | 5    | 1    |
| >SMARCA4-F ETILIIRRL   | 9    | >SMARCA4-F ETILIIWRL   | 4    | 5    |
| >SMARCA4-F ETILIIRRL   | 382  | >SMARCA4-F ETILIIWRL   | 10   | 372  |
| >SMARCA4-F ETILIIRRL   | 156  | >SMARCA4-F ETILIIWRL   | 110  | 46   |
| >SMARCA4-F ETILIIRR    | 386  | >SMARCA4-F ETILIIWR    | 145  | 241  |



|                        |       |                        |       |       |
|------------------------|-------|------------------------|-------|-------|
| >SMARCA4-F EETILIRRL   | 410   | >SMARCA4-F EETILIIWRL  | 1065  | 655   |
| >SMARCA4-F EETILIR     | 273   | >SMARCA4-F EETILIIW    | 34833 | 34560 |
| >SMARCA4-F EETILIRR    | 247   | >SMARCA4-F EETILIIWR   | 86    | 161   |
| >SMARCA4-F EETILIR     | 6364  | >SMARCA4-F EETILIIW    | 465   | 5899  |
| >SMARCA4-F EETILIRRL   | 1062  | >SMARCA4-F EETILIIWRL  | 465   | 597   |
| >SMARCA4-F EETILIR     | 7768  | >SMARCA4-F EETILIIW    | 103   | 7665  |
| >SMARCA4-F EETILIRRL   | 382   | >SMARCA4-F EETILIIWRL  | 261   | 121   |
| >SMARCA4-F EETILIR     | 1462  | >SMARCA4-F EETILIIW    | 21    | 1441  |
| >SMARCA4-F EETILIRRLH  | 1148  | >SMARCA4-F EETILIIWRLH | 379   | 769   |
| >SMARCA4-F EETILIRRL   | 1032  | >SMARCA4-F EETILIIWRL  | 164   | 868   |
| >SMARCA4-F EETILIRR    | 439   | >SMARCA4-F EETILIIWR   | 178   | 261   |
| >SMARCA4-F EETILIRRL   | 213   | >SMARCA4-F EETILIIWRL  | 593   | 380   |
| >SMARCA4-F EETILIR     | 6762  | >SMARCA4-F EETILIIW    | 457   | 6305  |
| >SMARCA4-F EETILIRRL   | 300   | >SMARCA4-F EETILIIWRL  | 74    | 226   |
| >SMARCA4-F EETILIR     | 12379 | >SMARCA4-F EETILIIW    | 322   | 12057 |
| >SMARCA4-F EETILIR     | 3015  | >SMARCA4-F EETILIIW    | 29    | 2986  |
| >SMARCA4-F EETILIRRL   | 687   | >SMARCA4-F EETILIIWRL  | 299   | 388   |
| >SMARCA4-F EETILIRRL   | 1066  | >SMARCA4-F EETILIIWRL  | 410   | 656   |
| >SMARCA4-F EETILIRRL   | 259   | >SMARCA4-F EETILIIWRL  | 111   | 148   |
| >SMARCA4-F EETILIR     | 33081 | >SMARCA4-F EETILIIW    | 377   | 32704 |
| >SMARCA4-F EETILIRR    | 697   | >SMARCA4-F EETILIIWR   | 329   | 368   |
| >SMARCA4-F NEEETILIR   | 21487 | >SMARCA4-F NEEETILIIW  | 66    | 21421 |
| >SMARCA4-F NEEETILIR   | 20739 | >SMARCA4-F NEEETILIIW  | 155   | 20584 |
| >SMARCA4-F NEEETILIR   | 16798 | >SMARCA4-F NEEETILIIW  | 381   | 16417 |
| >SMARCA4-F NEEETILIR   | 33064 | >SMARCA4-F NEEETILIIW  | 305   | 32759 |
| >SMARCA4-S IIFDSDWNPH  | 118   | >SMARCA4-S IIFDCDWNPH  | 135   | 17    |
| >SMARCA4-S VIIFDSDW    | 326   | >SMARCA4-S VIIFDCDW    | 290   | 36    |
| >SMARCA4-S TVIIFDSDW   | 438   | >SMARCA4-S TVIIFDCDW   | 659   | 221   |
| >SMARCA4-S TVIIFDSDW   | 716   | >SMARCA4-S TVIIFDCDW   | 294   | 422   |
| >SMARCA4-S TVIIFDSDW   | 241   | >SMARCA4-S TVIIFDCDW   | 208   | 33    |
| >SMARCA4-S TVIIFDSDW   | 427   | >SMARCA4-S TVIIFDCDW   | 114   | 313   |
| >SMARCA4-S TVIIFDSDW   | 349   | >SMARCA4-S TVIIFDCDW   | 420   | 71    |
| >SMARCA4-S DTVIIFDSDW  | 285   | >SMARCA4-S DTVIIFDCDW  | 544   | 259   |
| >SMARCA4-S DTVIIFDSDW  | 499   | >SMARCA4-S DTVIIFDCDW  | 548   | 49    |
| >SMARCA4-S DTVIIFDSDW  | 442   | >SMARCA4-S DTVIIFDCDW  | 532   | 90    |
| >SMARCA4-S ADTVIIFDSDV | 506   | >SMARCA4-S ADTVIIFDCDV | 473   | 33    |
| >SMARCA4-S SLYNNNLNGI  | 29    | >SMARCA4-S FLYNNNLNGI  | 10    | 19    |
| >SMARCA4-S SLYNNNLNGI  | 213   | >SMARCA4-S FLYNNNLNGI  | 27    | 186   |
| >SMARCA4-S SLYNNNLN    | 5118  | >SMARCA4-S FLYNNNLN    | 420   | 4698  |
| >SMARCA4-S SLYNNNLNG   | 5915  | >SMARCA4-S FLYNNNLNG   | 430   | 5485  |
| >SMARCA4-S SLYNNNLNGI  | 11    | >SMARCA4-S FLYNNNLNGI  | 6     | 5     |
| >SMARCA4-S SLYNNNLNGI  | 110   | >SMARCA4-S FLYNNNLNGI  | 11    | 99    |
| >SMARCA4-S SLYNNNLNG   | 3048  | >SMARCA4-S FLYNNNLNG   | 373   | 2675  |

|                       |       |                       |       |       |
|-----------------------|-------|-----------------------|-------|-------|
| >SMARCA4-S SLYNNNLNGI | 9     | >SMARCA4-S FLYNNNLNGI | 6     | 3     |
| >SMARCA4-S SLYNNNLNGI | 42    | >SMARCA4-S FLYNNNLNGI | 7     | 35    |
| >SMARCA4-S SLYNNNLNGI | 124   | >SMARCA4-S FLYNNNLNGI | 30    | 94    |
| >SMARCA4-S SLYNNNLNGI | 2350  | >SMARCA4-S FLYNNNLNGI | 89    | 2261  |
| >SMARCA4-S SLYNNNLN   | 1618  | >SMARCA4-S FLYNNNLN   | 208   | 1410  |
| >SMARCA4-S SLYNNNLNG  | 708   | >SMARCA4-S FLYNNNLNG  | 77    | 631   |
| >SMARCA4-S SLYNNNLNGI | 3     | >SMARCA4-S FLYNNNLNGI | 2     | 1     |
| >SMARCA4-S SLYNNNLNGI | 11    | >SMARCA4-S FLYNNNLNGI | 4     | 7     |
| >SMARCA4-S SLYNNNLNG  | 4066  | >SMARCA4-S FLYNNNLNG  | 487   | 3579  |
| >SMARCA4-S SLYNNNLNGI | 5     | >SMARCA4-S FLYNNNLNGI | 3     | 2     |
| >SMARCA4-S SLYNNNLNGI | 31    | >SMARCA4-S FLYNNNLNGI | 5     | 26    |
| >SMARCA4-S SLYNNNLNGI | 8     | >SMARCA4-S FLYNNNLNGI | 5     | 3     |
| >SMARCA4-S SLYNNNLNGI | 20    | >SMARCA4-S FLYNNNLNGI | 12    | 8     |
| >SMARCA4-S SLYNNNLNGI | 142   | >SMARCA4-S FLYNNNLNGI | 8     | 134   |
| >SMARCA4-S SLYNNNLNGI | 2676  | >SMARCA4-S FLYNNNLNGI | 113   | 2563  |
| >SMARCA4-S SLYNNNLNG  | 3989  | >SMARCA4-S FLYNNNLNG  | 270   | 3719  |
| >SMARCA4-S SLYNNNLNGI | 4     | >SMARCA4-S FLYNNNLNGI | 2     | 2     |
| >SMARCA4-S SLYNNNLNGI | 10    | >SMARCA4-S FLYNNNLNGI | 3     | 7     |
| >SMARCA4-S SLYNNNLNGI | 94    | >SMARCA4-S FLYNNNLNGI | 921   | 827   |
| >SMARCA4-S SLYNNNLNGI | 329   | >SMARCA4-S FLYNNNLNGI | 98    | 231   |
| >SMARCA4-S SLYNNNLNGI | 800   | >SMARCA4-S FLYNNNLNGI | 249   | 551   |
| >SMARCA4-S SLYNNNLNGI | 246   | >SMARCA4-S FLYNNNLNGI | 75    | 171   |
| >SMARCA4-S SLYNNNLNGI | 781   | >SMARCA4-S FLYNNNLNGI | 172   | 609   |
| >SMARCA4-S SLYNNNLNGI | 745   | >SMARCA4-S FLYNNNLNGI | 166   | 579   |
| >SMARCA4-S SLYNNNLNGI | 331   | >SMARCA4-S FLYNNNLNGI | 767   | 436   |
| >SMARCA4-S VSLYNNNL   | 128   | >SMARCA4-S VFLYNNNL   | 462   | 334   |
| >SMARCA4-S VSLYNNNLNC | 394   | >SMARCA4-S VFLYNNNLNC | 2631  | 2237  |
| >SMARCA4-S VSLYNNNL   | 7380  | >SMARCA4-S VFLYNNNL   | 111   | 7269  |
| >SMARCA4-S VSLYNNNLNC | 9369  | >SMARCA4-S VFLYNNNLNC | 194   | 9175  |
| >SMARCA4-S VSLYNNNL   | 17449 | >SMARCA4-S VFLYNNNL   | 214   | 17235 |
| >SMARCA4-S VSLYNNNLNC | 15293 | >SMARCA4-S VFLYNNNLNC | 203   | 15090 |
| >SMARCA4-S VSLYNNNL   | 428   | >SMARCA4-S VFLYNNNL   | 5642  | 5214  |
| >SMARCA4-S VSLYNNNL   | 52    | >SMARCA4-S VFLYNNNL   | 25601 | 25549 |
| >SMARCA4-S VSLYNNNLNC | 344   | >SMARCA4-S VFLYNNNLNC | 27329 | 26985 |
| >SMARCA4-S YQIKGLEWL  | 85    | >SMARCA4-S YQIKGLEWL  | 19    | 66    |
| >SMARCA4-S YQIKGLEWL  | 25017 | >SMARCA4-S YQIKGLEWL  | 169   | 24848 |
| >SMARCA4-S YQIKGLEWL  | 23310 | >SMARCA4-S YQIKGLEWL  | 326   | 22984 |
| >SMARCA4-S YQIKGLEWL  | 19905 | >SMARCA4-S YQIKGLEWL  | 278   | 19627 |
| >SMARCA4-S YQIKGLEWL  | 16051 | >SMARCA4-S YQIKGLEWL  | 221   | 15830 |
| >SMARCA4-S YQIKGLEWL  | 718   | >SMARCA4-S YQIKGLEWL  | 25    | 693   |
| >SMARCA4-S YQIKGLEWL  | 8330  | >SMARCA4-S YQIKGLEWL  | 87    | 8243  |
| >SMARCA4-S YQIKGLEWL  | 1418  | >SMARCA4-S YQIKGLEWL  | 3     | 1415  |
| >SMARCA4-S YQIKGLEWL  | 15697 | >SMARCA4-S YQIKGLEWL  | 404   | 15293 |

|                      |      |                      |     |      |
|----------------------|------|----------------------|-----|------|
| >SMARCA4-SYQIKGLEWLV | 6239 | >SMARCA4-SYQIKGLEWLV | 196 | 6043 |
| >SMARCA4-SLVSLYNNNL  | 1762 | >SMARCA4-SLVFLYNNNL  | 53  | 1709 |
| >SMARCA4-SLVSLYNNNL  | 30   | >SMARCA4-SLVFLYNNNL  | 25  | 5    |
| >SMARCA4-SLVSLYNNNL  | 2062 | >SMARCA4-SLVFLYNNNL  | 414 | 1648 |
| >SMARCA4-SLVSLYNNNL  | 658  | >SMARCA4-SLVFLYNNNL  | 137 | 521  |
| >SMARCA4-SWLVS LYNNN | 20   | >SMARCA4-SWL VFLYNNN | 60  | 40   |
| >SMARCA4-SWLVS LYNNN | 97   | >SMARCA4-SWL VFLYNNN | 338 | 241  |
| >SMARCA4-SWLVS LYNNN | 306  | >SMARCA4-SWL VFLYNNN | 439 | 133  |
| >SMARCA4-SWLVS LYNNN | 92   | >SMARCA4-SWL VFLYNNN | 168 | 76   |
| >SMARCA4-SWLVS LYNNN | 171  | >SMARCA4-SWL VFLYNNN | 242 | 71   |
| >SMARCA4-SWLVS LYNNN | 201  | >SMARCA4-SWL VFLYNNN | 353 | 152  |
| >SMARCA4-SWLVS LYNNN | 322  | >SMARCA4-SWL VFLYNNN | 378 | 56   |
| >SMARCA4-SWLVS LYNNN | 24   | >SMARCA4-SWL VFLYNNN | 51  | 27   |
| >SMARCA4-SWLVS LYNNN | 379  | >SMARCA4-SWL VFLYNNN | 983 | 604  |
| >SMARCA4-SEWLVSLYNNI | 2241 | >SMARCA4-SEWLVFLYNNI | 365 | 1876 |
| >SMARCA4-SEWLVSLY    | 1666 | >SMARCA4-SEWLVFLY    | 271 | 1395 |
| >SMARCA4-SEWLVSLY    | 354  | >SMARCA4-SEWLVFLY    | 197 | 157  |
| >SMARCA4-SEWLVSLYNN  | 800  | >SMARCA4-SEWLVFLYNN  | 459 | 341  |
| >SMARCA4-SEWLVSLYNNI | 155  | >SMARCA4-SEWLVFLYNNI | 108 | 47   |
| >SMARCA4-SLEWLVSLY   | 76   | >SMARCA4-SLEWLVFLY   | 30  | 46   |
| >SMARCA4-SLEWLVSLY   | 89   | >SMARCA4-SLEWLVFLY   | 29  | 60   |
| >SMARCA4-SLEWLVSLY   | 1456 | >SMARCA4-SLEWLVFLY   | 359 | 1097 |
| >SMARCA4-SLEWLVSLY   | 377  | >SMARCA4-SLEWLVFLY   | 654 | 277  |
| >SMARCA4-SLEWLVSLY   | 15   | >SMARCA4-SLEWLVFLY   | 9   | 6    |
| >SMARCA4-SLEWLVSLYN  | 969  | >SMARCA4-SLEWLVFLYN  | 317 | 652  |
| >SMARCA4-SLEWLVSLY   | 174  | >SMARCA4-SLEWLVFLY   | 216 | 42   |
| >SMARCA4-SLEWLVSLY   | 122  | >SMARCA4-SLEWLVFLY   | 58  | 64   |
| >SMARCA4-SGLEWLVSL   | 227  | >SMARCA4-SGLEWLVFL   | 68  | 159  |
| >SMARCA4-SGLEWLVSL   | 47   | >SMARCA4-SGLEWLVFL   | 18  | 29   |
| >SMARCA4-SGLEWLVSL   | 441  | >SMARCA4-SGLEWLVFL   | 683 | 242  |
| >SMARCA4-SGLEWLVSL   | 23   | >SMARCA4-SGLEWLVFL   | 14  | 9    |
| >SMARCA4-SGLEWLVSL   | 60   | >SMARCA4-SGLEWLVFL   | 29  | 31   |
| >SMARCA4-SGLEWLVSL   | 73   | >SMARCA4-SGLEWLVFL   | 23  | 50   |
| >SMARCA4-SGLEWLVSL   | 4    | >SMARCA4-SGLEWLVFL   | 5   | 1    |
| >SMARCA4-SGLEWLVSLY  | 4371 | >SMARCA4-SGLEWLVFLY  | 477 | 3894 |
| >SMARCA4-SGLEWLVSLY  | 68   | >SMARCA4-SGLEWLVFLY  | 17  | 51   |
| >SMARCA4-SGLEWLVSLY  | 122  | >SMARCA4-SGLEWLVFLY  | 105 | 17   |
| >SMARCA4-SGLEWLVSLY  | 1919 | >SMARCA4-SGLEWLVFLY  | 347 | 1572 |
| >SMARCA4-SGLEWLVSLY  | 12   | >SMARCA4-SGLEWLVFLY  | 340 | 328  |
| >SMARCA4-SGLEWLVSLY  | 53   | >SMARCA4-SGLEWLVFLY  | 18  | 35   |
| >SMARCA4-SKGLEWLVSL  | 328  | >SMARCA4-SKGLEWLVFL  | 138 | 190  |
| >SMARCA4-SKGLEWLVSL  | 26   | >SMARCA4-SKGLEWLVFL  | 14  | 12   |
| >SMARCA4-SKGLEWLVSL  | 77   | >SMARCA4-SKGLEWLVFL  | 39  | 38   |

|                       |       |                       |       |       |
|-----------------------|-------|-----------------------|-------|-------|
| >SMARCA4-S KGLEWLVS   | 333   | >SMARCA4-S KGLEWLVFL  | 60    | 273   |
| >SMARCA4-S KGLEWLVSLY | 234   | >SMARCA4-S KGLEWLVFLY | 464   | 230   |
| >SMARCA4-S KGLEWLVS   | 487   | >SMARCA4-S KGLEWLVFL  | 6155  | 5668  |
| >SMARCA4-S KGLEWLVSLY | 381   | >SMARCA4-S KGLEWLVFLY | 64    | 317   |
| >SMARCA4-S KGLEWLVS   | 22799 | >SMARCA4-S KGLEWLVF   | 251   | 22548 |
| >SMARCA4-S KGLEWLVS   | 20794 | >SMARCA4-S KGLEWLVF   | 99    | 20695 |
| >SMARCA4-S KGLEWLVSLY | 138   | >SMARCA4-S KGLEWLVFLY | 189   | 51    |
| >SMARCA4-S KGLEWLVS   | 19099 | >SMARCA4-S KGLEWLVF   | 114   | 18985 |
| >SMARCA4-S KGLEWLVSLY | 510   | >SMARCA4-S KGLEWLVFLY | 131   | 379   |
| >SMARCA4-S IKGLEWLVS  | 673   | >SMARCA4-S IKGLEWLVFL | 160   | 513   |
| >SMARCA4-S IKGLEWLVS  | 1486  | >SMARCA4-S IKGLEWLVFL | 382   | 1104  |
| >SMARCA4-S IKGLEWLVS  | 12233 | >SMARCA4-S IKGLEWLVF  | 21    | 12212 |
| >SMARCA4-S IKGLEWLVS  | 257   | >SMARCA4-S IKGLEWLVFL | 771   | 514   |
| >SMARCA4-S IKGLEWLVS  | 159   | >SMARCA4-S IKGLEWLVFL | 417   | 258   |
| >SMARCA4-S QIKGLEWLVS | 605   | >SMARCA4-S QIKGLEWLVF | 247   | 358   |
| >SMARCA4-S QIKGLEWLVS | 199   | >SMARCA4-S QIKGLEWLVF | 307   | 108   |
| >SMARCA4-S QIKGLEWLVS | 18371 | >SMARCA4-S QIKGLEWLVF | 480   | 17891 |
| >SMARCA4-T TLSNWAYEF  | 2079  | >SMARCA4-T KLSNWAYEF  | 346   | 1733  |
| >SMARCA4-T TLSNWAYEF  | 683   | >SMARCA4-T KLSNWAYEF  | 269   | 414   |
| >SMARCA4-T TLSNWAYEF  | 296   | >SMARCA4-T KLSNWAYEF  | 58    | 238   |
| >SMARCA4-T TLSNWAYEF  | 1180  | >SMARCA4-T KLSNWAYEF  | 149   | 1031  |
| >SMARCA4-T TLSNWAYEF  | 114   | >SMARCA4-T KLSNWAYEFI | 45    | 69    |
| >SMARCA4-T TLSNWAYEFI | 25    | >SMARCA4-T KLSNWAYEFI | 28    | 3     |
| >SMARCA4-T TLSNWAYEF  | 66    | >SMARCA4-T KLSNWAYEF  | 91    | 25    |
| >SMARCA4-T TLSNWAYEF  | 65    | >SMARCA4-T KLSNWAYEF  | 141   | 76    |
| >SMARCA4-T TLSNWAYEF  | 1259  | >SMARCA4-T KLSNWAYEF  | 249   | 1010  |
| >SMARCA4-T TLSNWAYEFI | 3412  | >SMARCA4-T KLSNWAYEFI | 315   | 3097  |
| >SMARCA4-T TLSNWAYEF  | 56    | >SMARCA4-T KLSNWAYEF  | 7     | 49    |
| >SMARCA4-T TLSNWAYEFI | 142   | >SMARCA4-T KLSNWAYEFI | 3917  | 3775  |
| >SMARCA4-T TLSNWAYEF  | 183   | >SMARCA4-T KLSNWAYEF  | 114   | 69    |
| >SMARCA4-T TLSNWAYEF  | 171   | >SMARCA4-T KLSNWAYEF  | 29    | 142   |
| >SMARCA4-T TLSNWAYEF  | 460   | >SMARCA4-T KLSNWAYEF  | 2721  | 2261  |
| >SMARCA4-T TLSNWAYEF  | 9289  | >SMARCA4-T KLSNWAYEF  | 367   | 8922  |
| >SMARCA4-T STLSNWAY   | 233   | >SMARCA4-T SKLSNWAY   | 19942 | 19709 |
| >SMARCA4-T STLSNWAY   | 77    | >SMARCA4-T SKLSNWAY   | 19705 | 19628 |
| >SMARCA4-T STLSNWAYEF | 82    | >SMARCA4-T SKLSNWAYEF | 2824  | 2742  |
| >SMARCA4-T STLSNWAY   | 366   | >SMARCA4-T SKLSNWAY   | 19860 | 19494 |
| >SMARCA4-T STLSNWAY   | 17    | >SMARCA4-T SKLSNWAY   | 5983  | 5966  |
| >SMARCA4-T STLSNWAYEF | 50    | >SMARCA4-T SKLSNWAYEF | 9768  | 9718  |
| >SMARCA4-T STLSNWAY   | 132   | >SMARCA4-T SKLSNWAY   | 7821  | 7689  |
| >SMARCA4-T STLSNWAY   | 14    | >SMARCA4-T SKLSNWAY   | 302   | 288   |
| >SMARCA4-T STLSNWAYEF | 196   | >SMARCA4-T SKLSNWAYEF | 1629  | 1433  |
| >SMARCA4-T STLSNWAY   | 17    | >SMARCA4-T SKLSNWAY   | 142   | 125   |

|                       |      |                       |       |       |
|-----------------------|------|-----------------------|-------|-------|
| >SMARCA4-T STLSNWAYEF | 88   | >SMARCA4-T SKLSNWAYEF | 4445  | 4357  |
| >SMARCA4-T STLSNWAY   | 98   | >SMARCA4-T SKLSNWAY   | 1701  | 1603  |
| >SMARCA4-T STLSNWAY   | 457  | >SMARCA4-T SKLSNWAY   | 7793  | 7336  |
| >SMARCA4-T STLSNWAY   | 344  | >SMARCA4-T SKLSNWAY   | 621   | 277   |
| >SMARCA4-T STLSNWAY   | 143  | >SMARCA4-T SKLSNWAY   | 7     | 136   |
| >SMARCA4-T STLSNWAYEF | 63   | >SMARCA4-T SKLSNWAYEF | 5     | 58    |
| >SMARCA4-T STLSNWAY   | 9    | >SMARCA4-T SKLSNWAY   | 15289 | 15280 |
| >SMARCA4-T STLSNWAYEF | 5    | >SMARCA4-T SKLSNWAYEF | 12232 | 12227 |
| >SMARCA4-T STLSNWAY   | 311  | >SMARCA4-T SKLSNWAY   | 2338  | 2027  |
| >SMARCA4-T STLSNWAYEF | 393  | >SMARCA4-T SKLSNWAYEF | 21796 | 21403 |
| >SMARCA4-T STLSNWAYEF | 470  | >SMARCA4-T SKLSNWAYEF | 19205 | 18735 |
| >SMARCA4-T STLSNWAYEF | 60   | >SMARCA4-T SKLSNWAYEF | 7950  | 7890  |
| >SMARCA4-T STLSNWAY   | 457  | >SMARCA4-T SKLSNWAY   | 3253  | 2796  |
| >SMARCA4-T STLSNWAY   | 237  | >SMARCA4-T SKLSNWAY   | 9541  | 9304  |
| >SMARCA4-T STLSNWAYE  | 313  | >SMARCA4-T SKLSNWAYE  | 10261 | 9948  |
| >SMARCA4-T STLSNWAYEF | 314  | >SMARCA4-T SKLSNWAYEF | 7727  | 7413  |
| >SMARCA4-T LSTLSNWAY  | 18   | >SMARCA4-T LSKLSNWAY  | 66    | 48    |
| >SMARCA4-T LSTLSNWAY  | 229  | >SMARCA4-T LSKLSNWAY  | 895   | 666   |
| >SMARCA4-T LSTLSNWA   | 8213 | >SMARCA4-T LSKLSNWA   | 229   | 7984  |
| >SMARCA4-T LSTLSNWAY  | 39   | >SMARCA4-T LSKLSNWAY  | 37    | 2     |
| >SMARCA4-T LSTLSNWAY  | 1473 | >SMARCA4-T LSKLSNWAY  | 102   | 1371  |
| >SMARCA4-T LSTLSNWAYE | 2298 | >SMARCA4-T LSKLSNWAYE | 131   | 2167  |
| >SMARCA4-T LSTLSNWAY  | 113  | >SMARCA4-T LSKLSNWAY  | 45    | 68    |
| >SMARCA4-T LSTLSNWAYE | 77   | >SMARCA4-T LSKLSNWAYE | 31    | 46    |
| >SMARCA4-T LSTLSNWAY  | 7    | >SMARCA4-T LSKLSNWAY  | 6     | 1     |
| >SMARCA4-T LSTLSNWAYE | 5    | >SMARCA4-T LSKLSNWAYE | 5     | 0     |
| >SMARCA4-T LSTLSNWAY  | 41   | >SMARCA4-T LSKLSNWAY  | 308   | 267   |
| >SMARCA4-T LSTLSNWAYE | 195  | >SMARCA4-T LSKLSNWAYE | 1690  | 1495  |
| >SMARCA4-T LSTLSNWAYE | 468  | >SMARCA4-T LSKLSNWAYE | 258   | 210   |
| >SMARCA4-T LSTLSNWAY  | 103  | >SMARCA4-T LSKLSNWAY  | 2683  | 2580  |
| >SMARCA4-T LSTLSNWAYE | 38   | >SMARCA4-T LSKLSNWAYE | 586   | 548   |
| >SMARCA4-T LSTLSNWAYE | 110  | >SMARCA4-T LSKLSNWAYE | 1636  | 1526  |
| >SMARCA4-T LSTLSNWAYE | 212  | >SMARCA4-T LSKLSNWAYE | 217   | 5     |
| >SMARCA4-T LSTLSNWAY  | 425  | >SMARCA4-T LSKLSNWAY  | 695   | 270   |
| >SMARCA4-T PLSTLSNWA  | 215  | >SMARCA4-T PLSKLSNWA  | 309   | 94    |
| >SMARCA4-T PLSTLSNWAY | 139  | >SMARCA4-T PLSKLSNWAY | 152   | 13    |
| >SMARCA4-T PLSTLSNWAY | 773  | >SMARCA4-T PLSKLSNWAY | 478   | 295   |
| >SMARCA4-T PLSTLSNWAY | 729  | >SMARCA4-T PLSKLSNWAY | 310   | 419   |
| >SMARCA4-T VPLSTLSNWA | 159  | >SMARCA4-T VPLSKLSNWA | 237   | 78    |
| >SMARCA4-T VPLSTLSNWA | 139  | >SMARCA4-T VPLSKLSNWA | 578   | 439   |
| >SMARCA4-T VPLSTLSNWA | 400  | >SMARCA4-T VPLSKLSNWA | 945   | 545   |
| >SMARCA4-T VPLSTLSNWA | 15   | >SMARCA4-T VPLSKLSNWA | 25    | 10    |
| >SMARCA4-T VPLSTLSNW  | 494  | >SMARCA4-T VPLSKLSNW  | 760   | 266   |

|                        |       |                        |      |       |
|------------------------|-------|------------------------|------|-------|
| >SMARCA4-T VPLSTLSNW   | 14    | >SMARCA4-T VPLSKLSNW   | 32   | 18    |
| >SMARCA4-T VPLSTLSNW/  | 48    | >SMARCA4-T VPLSKLSNW/  | 101  | 53    |
| >SMARCA4-T VPLSTLSNW/  | 41    | >SMARCA4-T VPLSKLSNW/  | 70   | 29    |
| >SMARCA4-T VPLSTLSNW   | 489   | >SMARCA4-T VPLSKLSNW   | 2633 | 2144  |
| >SMARCA4-T VPLSTLSNW/  | 75    | >SMARCA4-T VPLSKLSNW/  | 79   | 4     |
| >SMARCA4-T VPLSTLSNW   | 5     | >SMARCA4-T VPLSKLSNW   | 5    | 0     |
| >SMARCA4-T VPLSTLSNW/  | 68    | >SMARCA4-T VPLSKLSNW/  | 93   | 25    |
| >SMARCA4-T IVPLSTLSNW  | 368   | >SMARCA4-T IVPLSKLSNW  | 779  | 411   |
| >SMARCA4-T IIVPLSTL    | 202   | >SMARCA4-T IIVPLSKL    | 142  | 60    |
| >SMARCA4-T IIVPLSTL    | 178   | >SMARCA4-T IIVPLSKL    | 265  | 87    |
| >SMARCA4-T IIVPLSTL    | 96    | >SMARCA4-T IIVPLSKL    | 292  | 196   |
| >SMARCA4-T IIVPLSTL    | 42    | >SMARCA4-T IIVPLSKL    | 334  | 292   |
| >SMARCA4-T IIVPLSTL    | 231   | >SMARCA4-T IIVPLSKL    | 850  | 619   |
| >SMARCA4-T IIVPLSTL    | 44    | >SMARCA4-T IIVPLSKL    | 138  | 94    |
| >SMARCA4-T IIVPLSTL    | 78    | >SMARCA4-T IIVPLSKL    | 196  | 118   |
| >SMARCA4-T IIVPLSTLSNW | 9     | >SMARCA4-T IIVPLSKLSNW | 10   | 1     |
| >SMARCA4-T IIVPLSTLSNW | 172   | >SMARCA4-T IIVPLSKLSNW | 185  | 13    |
| >SMARCA4-T IIVPLSTLSNW | 22    | >SMARCA4-T IIVPLSKLSNW | 49   | 27    |
| >SMARCA4-T IIVPLSTLSNW | 365   | >SMARCA4-T IIVPLSKLSNW | 1091 | 726   |
| >SMARCA4-T LIIVPLSTL   | 155   | >SMARCA4-T LIIVPLSKL   | 289  | 134   |
| >SMARCA4-T LIIVPLSTL   | 125   | >SMARCA4-T LIIVPLSKL   | 386  | 261   |
| >SMARCA4-T LIIVPLSTL   | 246   | >SMARCA4-T LIIVPLSKL   | 973  | 727   |
| >SMARCA4-T LIIVPLSTL   | 66    | >SMARCA4-T LIIVPLSKL   | 197  | 131   |
| >SMARCA4-T LIIVPLST    | 19516 | >SMARCA4-T LIIVPLSK    | 210  | 19306 |
| >SMARCA4-T LIIVPLST    | 26141 | >SMARCA4-T LIIVPLSK    | 39   | 26102 |
| >SMARCA4-T LIIVPLSTL   | 99    | >SMARCA4-T LIIVPLSKL   | 177  | 78    |
| >SMARCA4-T LIIVPLST    | 28615 | >SMARCA4-T LIIVPLSK    | 437  | 28178 |
| >SMARCA4-T LIIVPLSTL   | 391   | >SMARCA4-T LIIVPLSKL   | 1075 | 684   |
| >SMARCA4-T LIIVPLSTL   | 97    | >SMARCA4-T LIIVPLSKL   | 296  | 199   |
| >SMARCA4-T FLIIVPLST   | 77    | >SMARCA4-T FLIIVPLSK   | 6950 | 6873  |
| >SMARCA4-T FLIIVPLSTL  | 26    | >SMARCA4-T FLIIVPLSKL  | 51   | 25    |
| >SMARCA4-T FLIIVPLSTLS | 458   | >SMARCA4-T FLIIVPLSKLS | 1858 | 1400  |
| >SMARCA4-T FLIIVPLST   | 222   | >SMARCA4-T FLIIVPLSK   | 1492 | 1270  |
| >SMARCA4-T FLIIVPLSTL  | 8     | >SMARCA4-T FLIIVPLSKL  | 11   | 3     |
| >SMARCA4-T FLIIVPLSTLS | 59    | >SMARCA4-T FLIIVPLSKLS | 314  | 255   |
| >SMARCA4-T FLIIVPLST   | 50    | >SMARCA4-T FLIIVPLSK   | 2681 | 2631  |
| >SMARCA4-T FLIIVPLSTL  | 14    | >SMARCA4-T FLIIVPLSKL  | 21   | 7     |
| >SMARCA4-T FLIIVPLSTLS | 96    | >SMARCA4-T FLIIVPLSKLS | 461  | 365   |
| >SMARCA4-T FLIIVPLSTL  | 33    | >SMARCA4-T FLIIVPLSKL  | 51   | 18    |
| >SMARCA4-T FLIIVPLST   | 11    | >SMARCA4-T FLIIVPLSK   | 314  | 303   |
| >SMARCA4-T FLIIVPLSTL  | 2     | >SMARCA4-T FLIIVPLSKL  | 3    | 1     |
| >SMARCA4-T FLIIVPLSTLS | 218   | >SMARCA4-T FLIIVPLSKLS | 432  | 214   |
| >SMARCA4-T FLIIVPLSTL  | 7     | >SMARCA4-T FLIIVPLSKL  | 16   | 9     |

|                        |       |                        |       |       |
|------------------------|-------|------------------------|-------|-------|
| >SMARCA4-T FLIIVPLST   | 172   | >SMARCA4-T FLIIVPLSK   | 5176  | 5004  |
| >SMARCA4-T FLIIVPLSTL  | 10    | >SMARCA4-T FLIIVPLSKL  | 13    | 3     |
| >SMARCA4-T FLIIVPLSTL  | 95    | >SMARCA4-T FLIIVPLSKL  | 184   | 89    |
| >SMARCA4-T FLIIVPLST   | 35    | >SMARCA4-T FLIIVPLSK   | 994   | 959   |
| >SMARCA4-T FLIIVPLSTL  | 3     | >SMARCA4-T FLIIVPLSKL  | 3     | 0     |
| >SMARCA4-T FLIIVPLSTLS | 397   | >SMARCA4-T FLIIVPLSKLS | 1517  | 1120  |
| >SMARCA4-T FLIIVPLST   | 18529 | >SMARCA4-T FLIIVPLSK   | 140   | 18389 |
| >SMARCA4-T FLIIVPLST   | 27966 | >SMARCA4-T FLIIVPLSK   | 80    | 27886 |
| >SMARCA4-T FLIIVPLST   | 23717 | >SMARCA4-T FLIIVPLSK   | 176   | 23541 |
| >SMARCA4-T FLIIVPLSTL  | 439   | >SMARCA4-T FLIIVPLSKL  | 1164  | 725   |
| >SMARCA4-T FLIIVPLSTL  | 399   | >SMARCA4-T FLIIVPLSKL  | 2984  | 2585  |
| >SMARCA4-T PFLIIVPLSTL | 464   | >SMARCA4-T PFLIIVPLSKL | 676   | 212   |
| >SMARCA4-T LTGTPLQNK   | 3386  | >SMARCA4-T LMGTPLQNK   | 195   | 3191  |
| >SMARCA4-T LTGTPLQNK   | 6067  | >SMARCA4-T LMGTPLQNK   | 38    | 6029  |
| >SMARCA4-T LTGTPLQNK   | 10762 | >SMARCA4-T LMGTPLQNK   | 86    | 10676 |
| >SMARCA4-T LTGTPLQNK   | 12152 | >SMARCA4-T LMGTPLQNK   | 208   | 11944 |
| >SMARCA4-T LTGTPLQNK   | 18419 | >SMARCA4-T LMGTPLQNK   | 123   | 18296 |
| >SMARCA4-T LTGTPLQNK   | 6607  | >SMARCA4-T LMGTPLQNK   | 9     | 6598  |
| >SMARCA4-T LTGTPLQNK   | 563   | >SMARCA4-T LMGTPLQNK   | 115   | 448   |
| >SMARCA4-T LTGTPLQNK   | 140   | >SMARCA4-T LMGTPLQNK   | 422   | 282   |
| >SMARCA4-T LTGTPLQNK   | 479   | >SMARCA4-T LMGTPLQNK   | 13672 | 13193 |
| >SMARCA4-T LTGTPLQNK   | 211   | >SMARCA4-T LMGTPLQNK   | 14229 | 14018 |
| >SMARCA4-T LTGTPLQNK   | 173   | >SMARCA4-T LMGTPLQNK   | 9674  | 9501  |
| >SMARCA4-T HYVAPRRLL   | 5325  | >SMARCA4-T HYVAPRRLL   | 389   | 4936  |
| >SMARCA4-T LLTGTPLQNK  | 919   | >SMARCA4-T LLMGTPLQNI  | 36    | 883   |
| >SMARCA4-T LLTGTPLQ    | 1937  | >SMARCA4-T LLMGTPLQ    | 218   | 1719  |
| >SMARCA4-T LLTGTPLQNK  | 46    | >SMARCA4-T LLMGTPLQNI  | 10    | 36    |
| >SMARCA4-T LLTGTPLQNK  | 355   | >SMARCA4-T LLMGTPLQNI  | 25    | 330   |
| >SMARCA4-T LLTGTPLQNK  | 2814  | >SMARCA4-T LLMGTPLQNI  | 467   | 2347  |
| >SMARCA4-T LLTGTPLQ    | 2724  | >SMARCA4-T LLMGTPLQ    | 486   | 2238  |
| >SMARCA4-T LLTGTPLQNK  | 53    | >SMARCA4-T LLMGTPLQNI  | 11    | 42    |
| >SMARCA4-T LLTGTPLQNK  | 260   | >SMARCA4-T LLMGTPLQNI  | 19    | 241   |
| >SMARCA4-T LLTGTPLQNK  | 42    | >SMARCA4-T LLMGTPLQNI  | 35    | 7     |
| >SMARCA4-T LLTGTPLQNK  | 200   | >SMARCA4-T LLMGTPLQNI  | 5     | 195   |
| >SMARCA4-T LLTGTPLQ    | 16    | >SMARCA4-T LLMGTPLQ    | 14    | 2     |
| >SMARCA4-T LLTGTPLQNK  | 215   | >SMARCA4-T LLMGTPLQNI  | 197   | 18    |
| >SMARCA4-T LLTGTPLQNK  | 3     | >SMARCA4-T LLMGTPLQNI  | 3     | 0     |
| >SMARCA4-T LLTGTPLQNK  | 76    | >SMARCA4-T LLMGTPLQNI  | 16    | 60    |
| >SMARCA4-T LLTGTPLQNK  | 102   | >SMARCA4-T LLMGTPLQNI  | 21    | 81    |
| >SMARCA4-T LLTGTPLQNK  | 335   | >SMARCA4-T LLMGTPLQNI  | 183   | 152   |
| >SMARCA4-T LLLTGTP     | 24    | >SMARCA4-T LLLMGTP     | 29    | 5     |
| >SMARCA4-T LLLTGTP     | 55    | >SMARCA4-T LLLMGTP     | 106   | 51    |
| >SMARCA4-T LLLTGTP     | 42    | >SMARCA4-T LLLMGTP     | 51    | 9     |

|                     |      |                     |     |     |
|---------------------|------|---------------------|-----|-----|
| >SMARCA4-T LLLTGTP  | 25   | >SMARCA4-T LLLMGTP  | 36  | 11  |
| >SMARCA4-T LLLTGTP  | 7    | >SMARCA4-T LLLMGTP  | 7   | 0   |
| >SMARCA4-T LLLTGTP  | 9    | >SMARCA4-T LLLMGTP  | 16  | 7   |
| >SMARCA4-T LLLTGTP  | 11   | >SMARCA4-T LLLMGTP  | 10  | 1   |
| >SMARCA4-T LLLTGTP  | 414  | >SMARCA4-T LLLMGTP  | 302 | 112 |
| >SMARCA4-T LLLTGTP  | 17   | >SMARCA4-T LLLMGTP  | 25  | 8   |
| >SMARCA4-T LLLTGTP  | 4    | >SMARCA4-T LLLMGTP  | 4   | 0   |
| >SMARCA4-T LLLTGTP  | 20   | >SMARCA4-T LLLMGTP  | 19  | 1   |
| >SMARCA4-T LLLTGTP  | 328  | >SMARCA4-T LLLMGTP  | 234 | 94  |
| >SMARCA4-T LLLTGTP  | 65   | >SMARCA4-T LLLMGTP  | 81  | 16  |
| >SMARCA4-T LLLTGTP  | 253  | >SMARCA4-T LLLMGTP  | 215 | 38  |
| >SMARCA4-T LLLTGTP  | 418  | >SMARCA4-T LLLMGTP  | 372 | 46  |
| >SMARCA4-T LLLTGTP  | 676  | >SMARCA4-T LLLMGTP  | 328 | 348 |
| >SMARCA4-T LLLTGTP  | 179  | >SMARCA4-T LLLMGTP  | 247 | 68  |
| >SMARCA4-T RLLLTGTP | 1131 | >SMARCA4-T RLLLMGTP | 137 | 994 |
| >SMARCA4-T RLLLTGTP | 292  | >SMARCA4-T RLLLMGTP | 171 | 121 |
| >SMARCA4-T RLLLTGTP | 408  | >SMARCA4-T RLLLMGTP | 320 | 88  |
| >SMARCA4-T RLLLTGTP | 136  | >SMARCA4-T RLLLMGTP | 120 | 16  |
| >SMARCA4-T RLLLTGTP | 216  | >SMARCA4-T RLLLMGTP | 171 | 45  |
| >SMARCA4-T RLLLTGTP | 17   | >SMARCA4-T RLLLMGTP | 51  | 34  |
| >SMARCA4-T RLLLTGTP | 28   | >SMARCA4-T RLLLMGTP | 81  | 53  |
| >SMARCA4-T RLLLTGTP | 29   | >SMARCA4-T RLLLMGTP | 58  | 29  |
| >SMARCA4-T RLLLTGTP | 37   | >SMARCA4-T RLLLMGTP | 33  | 4   |
| >SMARCA4-T RLLLTGTP | 477  | >SMARCA4-T RLLLMGTP | 383 | 94  |
| >SMARCA4-T RLLLTGTP | 70   | >SMARCA4-T RLLLMGTP | 38  | 32  |
| >SMARCA4-T RLLLTGTP | 222  | >SMARCA4-T RLLLMGTP | 333 | 111 |
| >SMARCA4-T RLLLTGTP | 417  | >SMARCA4-T RLLLMGTP | 583 | 166 |
| >SMARCA4-T RLLLTGTP | 66   | >SMARCA4-T RLLLMGTP | 347 | 281 |
| >SMARCA4-T RLLLTGTP | 157  | >SMARCA4-T RLLLMGTP | 307 | 150 |
| >SMARCA4-T RLLLTGTP | 115  | >SMARCA4-T RLLLMGTP | 212 | 97  |
| >SMARCA4-T RLLLTGTP | 69   | >SMARCA4-T RLLLMGTP | 81  | 12  |
| >SMARCA4-T RLLLTGTP | 198  | >SMARCA4-T RLLLMGTP | 165 | 33  |
| >SMARCA4-T RLLLTGTP | 7    | >SMARCA4-T RLLLMGTP | 7   | 0   |
| >SMARCA4-T RLLLTGTP | 164  | >SMARCA4-T RLLLMGTP | 149 | 15  |
| >SMARCA4-T RLLLTGTP | 319  | >SMARCA4-T RLLLMGTP | 615 | 296 |
| >SMARCA4-T RLLLTGTP | 47   | >SMARCA4-T RLLLMGTP | 145 | 98  |
| >SMARCA4-T RLLLTGTP | 168  | >SMARCA4-T RLLLMGTP | 220 | 52  |
| >SMARCA4-T RLLLTGTP | 15   | >SMARCA4-T RLLLMGTP | 15  | 0   |
| >SMARCA4-T RLLLTGTP | 90   | >SMARCA4-T RLLLMGTP | 110 | 20  |
| >SMARCA4-T RLLLTGTP | 92   | >SMARCA4-T RLLLMGTP | 103 | 11  |
| >SMARCA4-T RLLLTGTP | 299  | >SMARCA4-T RLLLMGTP | 456 | 157 |
| >SMARCA4-T RLLLTGTP | 13   | >SMARCA4-T RLLLMGTP | 13  | 0   |
| >SMARCA4-T RLLLTGTP | 79   | >SMARCA4-T RLLLMGTP | 110 | 31  |



|                        |       |                        |       |       |
|------------------------|-------|------------------------|-------|-------|
| >SMARCA4-T PRRLLLTGTP  | 547   | >SMARCA4-T PRRLLLMGTP  | 422   | 125   |
| >SMARCA4-T PRRLLLTGTP  | 207   | >SMARCA4-T PRRLLLMGTP  | 120   | 87    |
| >SMARCA4-T APRRLLLT    | 238   | >SMARCA4-T APRRLLLM    | 21    | 217   |
| >SMARCA4-T VAPRRLLLT   | 1657  | >SMARCA4-T VAPRRLLLM   | 487   | 1170  |
| >SMARCA4-T VAPRRLLLT   | 2179  | >SMARCA4-T VAPRRLLLM   | 68    | 2111  |
| >SMARCA4-T VAPRRLLLT   | 1545  | >SMARCA4-T VAPRRLLLM   | 11    | 1534  |
| >SMARCA4-T YVAPRRLLLT  | 1295  | >SMARCA4-T YVAPRRLLLM  | 335   | 960   |
| >SMARCA4-T YVAPRRLLLT  | 418   | >SMARCA4-T YVAPRRLLLM  | 653   | 235   |
| >SMARCA4-T YVAPRRLLLT  | 337   | >SMARCA4-T YVAPRRLLLM  | 286   | 51    |
| >SMARCA4-T YVAPRRLLLT  | 808   | >SMARCA4-T YVAPRRLLLM  | 479   | 329   |
| >SMARCA4-T YVAPRRLLLT  | 14473 | >SMARCA4-T YVAPRRLLLM  | 224   | 14249 |
| >SMARCA4-T YVAPRRLLLT  | 9586  | >SMARCA4-T YVAPRRLLLM  | 58    | 9528  |
| >SMARCA4-V WLVS LYNNN  | 624   | >SMARCA4-V RLVSLYNNNL  | 494   | 130   |
| >SMARCA4-V WLVS LYNNN  | 20    | >SMARCA4-V RLVSLYNNNL  | 24    | 4     |
| >SMARCA4-V WLVS LYNNN  | 97    | >SMARCA4-V RLVSLYNNNL  | 108   | 11    |
| >SMARCA4-V WLVS LYNNN  | 306   | >SMARCA4-V RLVSLYNNNL  | 465   | 159   |
| >SMARCA4-V WLVS LYNNN  | 92    | >SMARCA4-V RLVSLYNNNL  | 104   | 12    |
| >SMARCA4-V WLVS LYNNN  | 171   | >SMARCA4-V RLVSLYNNNL  | 214   | 43    |
| >SMARCA4-V WLVS LYNNN  | 201   | >SMARCA4-V RLVSLYNNNL  | 372   | 171   |
| >SMARCA4-V WLVS LYNNN  | 322   | >SMARCA4-V RLVSLYNNNL  | 3106  | 2784  |
| >SMARCA4-V WLVS LYNNN  | 24    | >SMARCA4-V RLVSLYNNNL  | 44    | 20    |
| >SMARCA4-V WLVS LYNNN  | 379   | >SMARCA4-V RLVSLYNNNL  | 208   | 171   |
| >SMARCA4-V EWLVSLYN    | 354   | >SMARCA4-V ERLVSLYN    | 30769 | 30415 |
| >SMARCA4-V EWLVSLYNNI  | 155   | >SMARCA4-V ERLVSLYNNN  | 31639 | 31484 |
| >SMARCA4-V LKQYQIKGLE' | 493   | >SMARCA4-V LKQYQIKGLEI | 961   | 468   |
| >SMARCA4-V LKQYQIKGLE' | 465   | >SMARCA4-V LKQYQIKGLEI | 33428 | 32963 |
| >SMARCA4-V LEWLVS LY   | 76    | >SMARCA4-V LERLVSLY    | 57    | 19    |
| >SMARCA4-V LEWLVS LY   | 89    | >SMARCA4-V LERLVSLY    | 1893  | 1804  |
| >SMARCA4-V LEWLVS LY   | 1403  | >SMARCA4-V LERLVSLY    | 382   | 1021  |
| >SMARCA4-V LEWLVS LY   | 377   | >SMARCA4-V LERLVSLY    | 649   | 272   |
| >SMARCA4-V LEWLVS LY   | 15    | >SMARCA4-V LERLVSLY    | 35    | 20    |
| >SMARCA4-V LEWLVS LY   | 174   | >SMARCA4-V LERLVSLY    | 981   | 807   |
| >SMARCA4-V LEWLVS LY   | 122   | >SMARCA4-V LERLVSLY    | 449   | 327   |
| >SMARCA4-V GLEWLVS L   | 227   | >SMARCA4-V GLERLVSL    | 1508  | 1281  |
| >SMARCA4-V GLEWLVS L   | 47    | >SMARCA4-V GLERLVSL    | 82    | 35    |
| >SMARCA4-V GLEWLVS L   | 441   | >SMARCA4-V GLERLVSL    | 796   | 355   |
| >SMARCA4-V GLEWLVS L   | 23    | >SMARCA4-V GLERLVSL    | 234   | 211   |
| >SMARCA4-V GLEWLVS L   | 60    | >SMARCA4-V GLERLVSL    | 71    | 11    |
| >SMARCA4-V GLEWLVS L   | 73    | >SMARCA4-V GLERLVSL    | 713   | 640   |
| >SMARCA4-V GLEWLVS L   | 4     | >SMARCA4-V GLERLVSL    | 11    | 7     |
| >SMARCA4-V GLEWLVS LY  | 68    | >SMARCA4-V GLERLVSLY   | 279   | 211   |
| >SMARCA4-V GLEWLVS LY  | 122   | >SMARCA4-V GLERLVSLY   | 651   | 529   |
| >SMARCA4-V GLEWLVS LY  | 12    | >SMARCA4-V GLERLVSLY   | 14    | 2     |

|                      |      |                       |       |       |
|----------------------|------|-----------------------|-------|-------|
| >SMARCA4-VGLEWLVSLY  | 53   | >SMARCA4-VGLERLVSLY   | 201   | 148   |
| >SMARCA4-VKGLEWLVSL  | 328  | >SMARCA4-VKGLERLVSL   | 3949  | 3621  |
| >SMARCA4-VKGLEWLVSL  | 26   | >SMARCA4-VKGLERLVSL   | 128   | 102   |
| >SMARCA4-VKGLEWLVSL  | 77   | >SMARCA4-VKGLERLVSL   | 2697  | 2620  |
| >SMARCA4-VKGLEWLVSL  | 333  | >SMARCA4-VKGLERLVSL   | 4428  | 4095  |
| >SMARCA4-VKGLEWLVSLY | 234  | >SMARCA4-VKGLERLVSLY  | 400   | 166   |
| >SMARCA4-VKGLEWLVSL  | 487  | >SMARCA4-VKGLERLVSL   | 1391  | 904   |
| >SMARCA4-VKGLEWLVSLY | 381  | >SMARCA4-VKGLERLVSLY  | 419   | 38    |
| >SMARCA4-VKGLEWLVSLY | 138  | >SMARCA4-VKGLERLVSLY  | 113   | 25    |
| >SMARCA4-VIKGLEWLVSL | 257  | >SMARCA4-VIKGLERLVSL  | 244   | 13    |
| >SMARCA4-VIKGLEWLVSL | 159  | >SMARCA4-VIKGLERLVSLY | 99    | 60    |
| >SMARCA4-VQIKGLEWLV  | 294  | >SMARCA4-VQIKGLERLV   | 3429  | 3135  |
| >SMARCA4-VQIKGLEWLV  | 11   | >SMARCA4-VQIKGLERLV   | 1896  | 1885  |
| >SMARCA4-VQIKGLEWLV  | 199  | >SMARCA4-VQIKGLERLVSL | 1704  | 1505  |
| >SMARCA4-VYQIKGLEWL  | 33   | >SMARCA4-VYQIKGLERL   | 64    | 31    |
| >SMARCA4-VYQIKGLEWLV | 28   | >SMARCA4-VYQIKGLERLV  | 539   | 511   |
| >SMARCA4-VYQIKGLEWL  | 16   | >SMARCA4-VYQIKGLERL   | 41    | 25    |
| >SMARCA4-VYQIKGLEWLV | 24   | >SMARCA4-VYQIKGLERLV  | 143   | 119   |
| >SMARCA4-VYQIKGLEWL  | 34   | >SMARCA4-VYQIKGLERL   | 84    | 50    |
| >SMARCA4-VYQIKGLEWLV | 115  | >SMARCA4-VYQIKGLERLV  | 134   | 19    |
| >SMARCA4-VYQIKGLEWL  | 3    | >SMARCA4-VYQIKGLERL   | 5     | 2     |
| >SMARCA4-VYQIKGLEWLV | 23   | >SMARCA4-VYQIKGLERLV  | 104   | 81    |
| >SMARCA4-VYQIKGLEWLV | 85   | >SMARCA4-VYQIKGLERLV  | 425   | 340   |
| >SMARCA4-VYQIKGLEWL  | 131  | >SMARCA4-VYQIKGLERL   | 162   | 31    |
| >SMARCA4-VYQIKGLEWLV | 8    | >SMARCA4-VYQIKGLERLV  | 69    | 61    |
| >SMARCA4-VYQIKGLEWL  | 308  | >SMARCA4-VYQIKGLERL   | 329   | 21    |
| >SMARCA4-VYQIKGLEWLV | 8    | >SMARCA4-VYQIKGLERLV  | 160   | 152   |
| >SMARCA4-VYQIKGLEWLV | 15   | >SMARCA4-VYQIKGLERLV  | 227   | 212   |
| >SMARCA4-VYQIKGLEWLV | 280  | >SMARCA4-VYQIKGLERLV  | 4567  | 4287  |
| >SMARCA4-VYQIKGLEWLV | 14   | >SMARCA4-VYQIKGLERLV  | 304   | 290   |
| >SMARCA4-VYQIKGLEWL  | 66   | >SMARCA4-VYQIKGLERL   | 219   | 153   |
| >SMARCA4-VYQIKGLEW   | 106  | >SMARCA4-VYQIKGLER    | 4294  | 4188  |
| >SMARCA4-VYQIKGLEWL  | 277  | >SMARCA4-VYQIKGLERL   | 122   | 155   |
| >SMARCA4-VYQIKGLEW   | 60   | >SMARCA4-VYQIKGLER    | 193   | 133   |
| >SMARCA4-VYQIKGLEWL  | 236  | >SMARCA4-VYQIKGLERL   | 146   | 90    |
| >SMARCA4-VYQIKGLEWLV | 414  | >SMARCA4-VYQIKGLERLV  | 381   | 33    |
| >SMARCA4-VYQIKGLEW   | 346  | >SMARCA4-VYQIKGLER    | 26232 | 25886 |
| >SMARCA4-VYQIKGLEWL  | 382  | >SMARCA4-VYQIKGLERL   | 214   | 168   |
| >SMARCA4-VYQIKGLEWLV | 279  | >SMARCA4-VYQIKGLERLV  | 2212  | 1933  |
| >SMARCA4-VYQIKGLEWL  | 134  | >SMARCA4-VYQIKGLERL   | 488   | 354   |
| >SMARCA4-VYQIKGLEW   | 436  | >SMARCA4-VYQIKGLER    | 22290 | 21854 |
| >SMARCA4-VYQIKGLEWL  | 1427 | >SMARCA4-VYQIKGLERL   | 291   | 1136  |
| >SMARCA4-VYQIKGLEW   | 240  | >SMARCA4-VYQIKGLER    | 32634 | 32394 |

|                        |       |                        |       |       |
|------------------------|-------|------------------------|-------|-------|
| >SMARCA4-V QYQIKGLEWI  | 446   | >SMARCA4-V QYQIKGLERL  | 432   | 14    |
| >SMARCA4-V QYQIKGLEW   | 15    | >SMARCA4-V QYQIKGLER   | 1633  | 1618  |
| >SMARCA4-V QYQIKGLEWI  | 12    | >SMARCA4-V QYQIKGLERL  | 20    | 8     |
| >SMARCA4-V QYQIKGLEWI  | 146   | >SMARCA4-V QYQIKGLERL' | 1362  | 1216  |
| >SMARCA4-V QYQIKGLEW   | 22114 | >SMARCA4-V QYQIKGLER   | 391   | 21723 |
| >SMARCA4-V QYQIKGLEW   | 29946 | >SMARCA4-V QYQIKGLER   | 73    | 29873 |
| >SMARCA4-V QYQIKGLEWI  | 456   | >SMARCA4-V QYQIKGLERL' | 944   | 488   |
| >SMARCA4-V QYQIKGLEWI  | 255   | >SMARCA4-V QYQIKGLERL  | 3378  | 3123  |
| >SMARCA4-V KQYQIKGLEW  | 146   | >SMARCA4-V KQYQIKGLER  | 318   | 172   |
| >SMARCA4-V KQYQIKGLEW  | 391   | >SMARCA4-V KQYQIKGLER  | 811   | 420   |
| >SMARCA4-V KQYQIKGLEW  | 36    | >SMARCA4-V KQYQIKGLER  | 70    | 34    |
| >SMARCA4-V KQYQIKGLEW  | 221   | >SMARCA4-V KQYQIKGLER  | 276   | 55    |
| >SMARCA4-V KQYQIKGLEW  | 13897 | >SMARCA4-V KQYQIKGLER  | 22    | 13875 |
| >SMARCA4-V KQYQIKGLEW  | 394   | >SMARCA4-V KQYQIKGLER  | 12842 | 12448 |
| >SMARCA4-V KQYQIKGLEW  | 159   | >SMARCA4-V KQYQIKGLER  | 409   | 250   |
| >SMARCA4-V KQYQIKGLEW  | 355   | >SMARCA4-V KQYQIKGLER  | 265   | 90    |
| >SMARCA4-V KQYQIKGLEW  | 121   | >SMARCA4-V KQYQIKGLER  | 21656 | 21535 |
| >SMARCA4-V KQYQIKGLEW  | 328   | >SMARCA4-V KQYQIKGLER  | 933   | 605   |
| >SMARCA4-V KQYQIKGLEW  | 341   | >SMARCA4-V KQYQIKGLER  | 25804 | 25463 |
| >SMARCA4-V KQYQIKGLEW  | 203   | >SMARCA4-V KQYQIKGLER  | 166   | 37    |
| >SMARCA4-V KQYQIKGLEW  | 66    | >SMARCA4-V KQYQIKGLER  | 21814 | 21748 |
| >SMARCA4-V KQYQIKGLEW  | 117   | >SMARCA4-V KQYQIKGLER  | 154   | 37    |
| >SMARCA4-V KQYQIKGLEW  | 63    | >SMARCA4-V KQYQIKGLER  | 156   | 93    |
| >SMARCA4-V KQYQIKGLEW  | 18280 | >SMARCA4-V KQYQIKGLER  | 22    | 18258 |
| >SMARCB1-A AVSISTEPPTY | 378   | >SMARCB1-A TVSISTEPPTY | 442   | 64    |
| >SMARCB1-A AVSISTEPPTY | 450   | >SMARCB1-A TVSISTEPPTY | 365   | 85    |
| >SMARCB1-A AVSISTEPPTY | 138   | >SMARCB1-A TVSISTEPPTY | 76    | 62    |
| >SMARCB1-A AVSISTEPPTY | 48    | >SMARCB1-A TVSISTEPPTY | 77    | 29    |
| >SMARCB1-A AVSISTEPPTY | 278   | >SMARCB1-A TVSISTEPPTY | 568   | 290   |
| >SMARCB1-A AVSISTEPPTY | 31    | >SMARCB1-A TVSISTEPPTY | 119   | 88    |
| >SMARCB1-A AVSISTEPPTY | 231   | >SMARCB1-A TVSISTEPPTY | 72    | 159   |
| >SMARCB1-A ILDGNDEKYK  | 27    | >SMARCB1-A ILDGNDEKYK  | 163   | 136   |
| >SMARCB1-A ILDGNDEKYK  | 158   | >SMARCB1-A ILDGNDEKYK  | 2107  | 1949  |
| >SMARCB1-A ILDGNDEKYK  | 91    | >SMARCB1-A ILDGNDEKYK  | 1324  | 1233  |
| >SMARCB1-A ILDGNDEKYK  | 154   | >SMARCB1-A ILDGNDEKYK  | 1318  | 1164  |
| >SMARCB1-A ILDGNDEKYK  | 15    | >SMARCB1-A ILDGNDEKYK  | 111   | 96    |
| >SMARCB1-A YKAVSIST    | 275   | >SMARCB1-A YKTVSIST    | 662   | 387   |
| >SMARCB1-A YKAVSISTE   | 379   | >SMARCB1-A YKTVSISTE   | 917   | 538   |
| >SMARCB1-A YKAVSISTEP  | 168   | >SMARCB1-A YKTVSISTEP  | 366   | 198   |
| >SMARCB1-A YKAVSISTEPP | 179   | >SMARCB1-A YKTVSISTEPP | 380   | 201   |
| >SMARCB1-A KYKAVSIS    | 37    | >SMARCB1-A KYKTVSIS    | 50    | 13    |
| >SMARCB1-A KYKAVSIST   | 12    | >SMARCB1-A KYKTVSIST   | 15    | 3     |
| >SMARCB1-A KYKAVSISTE  | 162   | >SMARCB1-A KYKTVSISTE  | 222   | 60    |

|                        |      |                        |     |      |
|------------------------|------|------------------------|-----|------|
| >SMARCB1-A KYKAVSISTEP | 171  | >SMARCB1-A KYKTVSISTEP | 228 | 57   |
| >SMARCB1-A EKYKAVSI    | 36   | >SMARCB1-A EKYKTVSI    | 22  | 14   |
| >SMARCB1-A EKYKAVSIS   | 844  | >SMARCB1-A EKYKTVSIS   | 454 | 390  |
| >SMARCB1-A DEKYKAVSI   | 47   | >SMARCB1-A DEKYKTVSI   | 36  | 11   |
| >SMARCB1-A DEKYKAVSI   | 1514 | >SMARCB1-A DEKYKTVSI   | 346 | 1168 |
| >SMARCB1-A NDEKYKAVSI  | 214  | >SMARCB1-A NDEKYKTVSI  | 190 | 24   |
| >SMARCB1-A NDEKYKAV    | 744  | >SMARCB1-A NDEKYKTV    | 409 | 335  |
| >SMARCB1-A NDEKYKAVSI  | 205  | >SMARCB1-A NDEKYKTVSI  | 294 | 89   |
| >SMARCB1-A AFTWNMNEI   | 233  | >SMARCB1-A TFTWNMNEI   | 288 | 55   |
| >SMARCB1-A AFTWNMNEI   | 1284 | >SMARCB1-A TFTWNMNEI   | 72  | 1212 |
| >SMARCB1-A AFTWNMNEI   | 359  | >SMARCB1-A TFTWNMNEI   | 414 | 55   |
| >SMARCB1-A DAFTWNMN    | 1736 | >SMARCB1-A DTFTWNMNI   | 333 | 1403 |
| >SMARCB1-A DAFTWNMN    | 690  | >SMARCB1-A DTFTWNMNI   | 89  | 601  |
| >SMARCB1-A DAFTWNMN    | 5948 | >SMARCB1-A DTFTWNMNI   | 257 | 5691 |
| >SMARCB1-A DAFTWNMN    | 45   | >SMARCB1-A DTFTWNMNI   | 16  | 29   |
| >SMARCB1-A DAFTWNMN    | 66   | >SMARCB1-A DTFTWNMNI   | 12  | 54   |
| >SMARCB1-A DAFTWNMN    | 226  | >SMARCB1-A DTFTWNMNI   | 51  | 175  |
| >SMARCB1-A DAFTWNMN    | 6723 | >SMARCB1-A DTFTWNMNI   | 383 | 6340 |
| >SMARCB1-A DAFTWNMN    | 765  | >SMARCB1-A DTFTWNMNI   | 164 | 601  |
| >SMARCB1-A MEIDGQKLRI  | 39   | >SMARCB1-A MEIDGQKLRI  | 240 | 201  |
| >SMARCB1-A MEIDGQKLRI  | 416  | >SMARCB1-A MEIDGQKLRI  | 305 | 111  |
| >SMARCB1-A LRDAFTWNV   | 235  | >SMARCB1-A LRDTFTWNM   | 309 | 74   |
| >SMARCB1-A LRDAFTWNV   | 284  | >SMARCB1-A LRDTFTWNM   | 479 | 195  |
| >SMARCB1-A KLRDAFTWN   | 349  | >SMARCB1-A KLRDTFTWNI  | 404 | 55   |
| >SMARCB1-A KLRDAFTWN   | 110  | >SMARCB1-A KLRDTFTWNI  | 144 | 34   |
| >SMARCB1-A KLRDAFTWN   | 543  | >SMARCB1-A KLRDTFTWNI  | 475 | 68   |
| >SMARCB1-A KLRDAFTWN   | 105  | >SMARCB1-A KLRDTFTWNI  | 75  | 30   |
| >SMARCB1-A KLRDAFTWN   | 161  | >SMARCB1-A KLRDTFTWNI  | 109 | 52   |
| >SMARCB1-A KLRDAFTWN   | 414  | >SMARCB1-A KLRDTFTWNI  | 434 | 20   |
| >SMARCB1-A KLRDAFTWN   | 12   | >SMARCB1-A KLRDTFTWNI  | 12  | 0    |
| >SMARCB1-A KLRDAFTWN   | 17   | >SMARCB1-A KLRDTFTWNI  | 18  | 1    |
| >SMARCB1-A KLRDAFTWN   | 139  | >SMARCB1-A KLRDTFTWNI  | 139 | 0    |
| >SMARCB1-A KLRDAFTW    | 109  | >SMARCB1-A KLRDTFTW    | 50  | 59   |
| >SMARCB1-A KLRDAFTWN   | 190  | >SMARCB1-A KLRDTFTWNI  | 118 | 72   |
| >SMARCB1-A KLRDAFTW    | 39   | >SMARCB1-A KLRDTFTW    | 30  | 9    |
| >SMARCB1-A KLRDAFTWN   | 369  | >SMARCB1-A KLRDTFTWNI  | 338 | 31   |
| >SMARCB1-A KLRDAFTW    | 79   | >SMARCB1-A KLRDTFTW    | 98  | 19   |
| >SMARCB1-A KLRDAFTW    | 135  | >SMARCB1-A KLRDTFTW    | 75  | 60   |
| >SMARCB1-A KLRDAFTWN   | 325  | >SMARCB1-A KLRDTFTWNI  | 465 | 140  |
| >SMARCB1-A QKLRDAFTW   | 257  | >SMARCB1-A QKLRDTFTW   | 185 | 72   |
| >SMARCB1-A QKLRDAFTW   | 30   | >SMARCB1-A QKLRDTFTW   | 26  | 4    |
| >SMARCB1-A QKLRDAFTW   | 141  | >SMARCB1-A QKLRDTFTW   | 52  | 89   |
| >SMARCB1-A GQKLRDAF    | 81   | >SMARCB1-A GQKLRDTF    | 118 | 37   |

|                        |      |                        |      |      |
|------------------------|------|------------------------|------|------|
| >SMARCB1-A GQKLRDAF    | 83   | >SMARCB1-A GQKLRDTF    | 121  | 38   |
| >SMARCB1-A AFSENPLPTV  | 115  | >SMARCB1-A TFSENPLPTV  | 398  | 283  |
| >SMARCB1-A AFSENPLPTV  | 296  | >SMARCB1-A TFSENPLPTV  | 1123 | 827  |
| >SMARCB1-A AFSENPLPTV  | 66   | >SMARCB1-A TFSENPLPTV  | 363  | 297  |
| >SMARCB1-A AFSENPLPTV  | 375  | >SMARCB1-A TFSENPLPTV  | 701  | 326  |
| >SMARCB1-A AFSENPLPTV  | 355  | >SMARCB1-A TFSENPLPTV  | 566  | 211  |
| >SMARCB1-A YAFSENPL    | 187  | >SMARCB1-A YTFSENPL    | 63   | 124  |
| >SMARCB1-A YAFSENPLPT  | 539  | >SMARCB1-A YTFSENPLPT  | 255  | 284  |
| >SMARCB1-A YAFSENPLPT\ | 17   | >SMARCB1-A YTFSENPLPT\ | 11   | 6    |
| >SMARCB1-A YAFSENPL    | 38   | >SMARCB1-A YTFSENPL    | 15   | 23   |
| >SMARCB1-A YAFSENPLPT  | 254  | >SMARCB1-A YTFSENPLPT  | 93   | 161  |
| >SMARCB1-A YAFSENPLPT\ | 110  | >SMARCB1-A YTFSENPLPT\ | 39   | 71   |
| >SMARCB1-A YAFSENPL    | 1039 | >SMARCB1-A YTFSENPL    | 333  | 706  |
| >SMARCB1-A YAFSENPLPT  | 123  | >SMARCB1-A YTFSENPLPT  | 56   | 67   |
| >SMARCB1-A YAFSENPLPT\ | 65   | >SMARCB1-A YTFSENPLPT\ | 25   | 40   |
| >SMARCB1-A YAFSENPL    | 100  | >SMARCB1-A YTFSENPL    | 59   | 41   |
| >SMARCB1-A YAFSENPLPT  | 277  | >SMARCB1-A YTFSENPLPT  | 114  | 163  |
| >SMARCB1-A YAFSENPLPT\ | 7    | >SMARCB1-A YTFSENPLPT\ | 6    | 1    |
| >SMARCB1-A YAFSENPL    | 333  | >SMARCB1-A YTFSENPL    | 71   | 262  |
| >SMARCB1-A YAFSENPLPT  | 1306 | >SMARCB1-A YTFSENPLPT  | 374  | 932  |
| >SMARCB1-A YAFSENPLPT\ | 5    | >SMARCB1-A YTFSENPLPT\ | 3    | 2    |
| >SMARCB1-A YAFSENPL    | 2243 | >SMARCB1-A YTFSENPL    | 370  | 1873 |
| >SMARCB1-A YAFSENPLPT\ | 57   | >SMARCB1-A YTFSENPLPT\ | 14   | 43   |
| >SMARCB1-A YAFSENPL    | 1825 | >SMARCB1-A YTFSENPL    | 418  | 1407 |
| >SMARCB1-A YAFSENPLPT\ | 12   | >SMARCB1-A YTFSENPLPT\ | 7    | 5    |
| >SMARCB1-A YAFSENPLPT\ | 84   | >SMARCB1-A YTFSENPLPT\ | 56   | 28   |
| >SMARCB1-A YAFSENPL    | 556  | >SMARCB1-A YTFSENPL    | 399  | 157  |
| >SMARCB1-A YAFSENPLPT\ | 6    | >SMARCB1-A YTFSENPLPT\ | 5    | 1    |
| >SMARCB1-A YAFSENPL    | 6261 | >SMARCB1-A YTFSENPL    | 290  | 5971 |
| >SMARCB1-A YAFSENPL    | 196  | >SMARCB1-A YTFSENPL    | 30   | 166  |
| >SMARCB1-A YAFSENPLPT\ | 461  | >SMARCB1-A YTFSENPLPT\ | 50   | 411  |
| >SMARCB1-A YAFSENPL    | 302  | >SMARCB1-A YTFSENPL    | 53   | 249  |
| >SMARCB1-A YAFSENPLPT  | 1377 | >SMARCB1-A YTFSENPLPT  | 218  | 1159 |
| >SMARCB1-A YAFSENPLPT\ | 9    | >SMARCB1-A YTFSENPLPT\ | 4    | 5    |
| >SMARCB1-A YAFSENPL    | 20   | >SMARCB1-A YTFSENPL    | 30   | 10   |
| >SMARCB1-A YAFSENPLPT\ | 77   | >SMARCB1-A YTFSENPLPT\ | 141  | 64   |
| >SMARCB1-A YAFSENPL    | 62   | >SMARCB1-A YTFSENPL    | 11   | 51   |
| >SMARCB1-A YAFSENPLPT\ | 384  | >SMARCB1-A YTFSENPLPT\ | 51   | 333  |
| >SMARCB1-A YAFSENPL    | 50   | >SMARCB1-A YTFSENPL    | 792  | 742  |
| >SMARCB1-A YAFSENPL    | 96   | >SMARCB1-A YTFSENPL    | 226  | 130  |
| >SMARCB1-A YAFSENPLPT\ | 758  | >SMARCB1-A YTFSENPLPT\ | 82   | 676  |
| >SMARCB1-A YAFSENPLPT\ | 210  | >SMARCB1-A YTFSENPLPT\ | 11   | 199  |
| >SMARCB1-A YAFSENPL    | 1099 | >SMARCB1-A YTFSENPL    | 238  | 861  |

|                        |      |                        |      |      |
|------------------------|------|------------------------|------|------|
| >SMARCB1-A YAFSENPLPT\ | 1053 | >SMARCB1-A YTFSENPLPT\ | 235  | 818  |
| >SMARCB1-A GQLSWHQKT   | 80   | >SMARCB1-A GQLSWHQKT   | 672  | 592  |
| >SMARCB1-A GQLSWHQKT   | 317  | >SMARCB1-A GQLSWHQKT   | 1528 | 1211 |
| >SMARCB1-A TYAFSENPL   | 7    | >SMARCB1-A TYTFSENPL   | 11   | 4    |
| >SMARCB1-A TYAFSENPL   | 156  | >SMARCB1-A TYTFSENPL   | 235  | 79   |
| >SMARCB1-A KTYAFSENPL  | 23   | >SMARCB1-A KTYTFSENPL  | 28   | 5    |
| >SMARCB1-A KTYAFSENPL  | 126  | >SMARCB1-A KTYTFSENPL  | 204  | 78   |
| >SMARCB1-A KTYAFSENPL  | 313  | >SMARCB1-A KTYTFSENPL  | 274  | 39   |
| >SMARCB1-A KTYAFSENPL  | 191  | >SMARCB1-A KTYTFSENPL  | 454  | 263  |
| >SMARCB1-A KTYAFSENPL  | 61   | >SMARCB1-A KTYTFSENPL  | 82   | 21   |
| >SMARCB1-A KTYAFSENP   | 141  | >SMARCB1-A KTYTFSENP   | 229  | 88   |
| >SMARCB1-A KTYAFSENPL  | 8    | >SMARCB1-A KTYTFSENPL  | 9    | 1    |
| >SMARCB1-A KTYAFSENPL  | 91   | >SMARCB1-A KTYTFSENPL  | 259  | 168  |
| >SMARCB1-A KTYAFSENPL  | 374  | >SMARCB1-A KTYTFSENPL  | 766  | 392  |
| >SMARCB1-A KTYAFSENPL  | 79   | >SMARCB1-A KTYTFSENPL  | 75   | 4    |
| >SMARCB1-A KTYAFSENPL  | 4    | >SMARCB1-A KTYTFSENPL  | 5    | 1    |
| >SMARCB1-A KTYAFSENPL  | 220  | >SMARCB1-A KTYTFSENPL  | 408  | 188  |
| >SMARCB1-A KTYAFSENPL  | 121  | >SMARCB1-A KTYTFSENPL  | 313  | 192  |
| >SMARCB1-A KTYAFSENPL  | 141  | >SMARCB1-A KTYTFSENPL  | 189  | 48   |
| >SMARCB1-A KTYAFSENPL  | 191  | >SMARCB1-A KTYTFSENPL  | 199  | 8    |
| >SMARCB1-A QKTYAFSENP  | 24   | >SMARCB1-A QKTYTFSENP  | 16   | 8    |
| >SMARCB1-A HQKTYAFS    | 285  | >SMARCB1-A HQKTYTFS    | 685  | 400  |
| >SMARCB1-A WHQKTYAF    | 231  | >SMARCB1-A WHQKTYTF    | 107  | 124  |
| >SMARCB1-A WHQKTYAF    | 79   | >SMARCB1-A WHQKTYTF    | 48   | 31   |
| >SMARCB1-A WHQKTYAF    | 19   | >SMARCB1-A WHQKTYTF    | 26   | 7    |
| >SMARCB1-A WHQKTYAF    | 118  | >SMARCB1-A WHQKTYTF    | 340  | 222  |
| >SMARCB1-A SWHQKTYAF   | 210  | >SMARCB1-A SWHQKTYTF   | 62   | 148  |
| >SMARCB1-A SWHQKTYAF   | 497  | >SMARCB1-A SWHQKTYTF   | 56   | 441  |
| >SMARCB1-A SWHQKTYAF   | 7    | >SMARCB1-A SWHQKTYTF   | 6    | 1    |
| >SMARCB1-A SWHQKTYAF   | 958  | >SMARCB1-A SWHQKTYTF   | 388  | 570  |
| >SMARCB1-A SWHQKTYA    | 91   | >SMARCB1-A SWHQKTYT    | 217  | 126  |
| >SMARCB1-A SWHQKTYAF   | 95   | >SMARCB1-A SWHQKTYTF   | 182  | 87   |
| >SMARCB1-A SWHQKTYAF   | 308  | >SMARCB1-A SWHQKTYTF!  | 349  | 41   |
| >SMARCB1-A LSWHQKTYA   | 89   | >SMARCB1-A LSWHQKTYTI  | 55   | 34   |
| >SMARCB1-A LSWHQKTYA   | 133  | >SMARCB1-A LSWHQKTYTI  | 214  | 81   |
| >SMARCB1-A LSWHQKTYA   | 8    | >SMARCB1-A LSWHQKTYTI  | 10   | 2    |
| >SMARCB1-A LSWHQKTYA   | 5    | >SMARCB1-A LSWHQKTYTI  | 4    | 1    |
| >SMARCB1-A LSWHQKTYA   | 399  | >SMARCB1-A LSWHQKTYTI  | 76   | 323  |
| >SMARCB1-A LSWHQKTYA   | 121  | >SMARCB1-A LSWHQKTYTI  | 42   | 79   |
| >SMARCB1-A QLSWHQKTY   | 384  | >SMARCB1-A QLSWHQKTY   | 1244 | 860  |
| >SMARCB1-A QLSWHQKTY   | 315  | >SMARCB1-A QLSWHQKTY   | 842  | 527  |
| >SMARCB1-A QLSWHQKTY   | 266  | >SMARCB1-A QLSWHQKTY   | 1566 | 1300 |
| >SMARCB1-A QLSWHQKTY   | 36   | >SMARCB1-A QLSWHQKTY   | 381  | 345  |

|                       |     |                        |      |      |
|-----------------------|-----|------------------------|------|------|
| >SMARCB1-A QLSWHQKTY  | 25  | >SMARCB1-A QLSWHQKTY   | 16   | 9    |
| >SMARCB1-A QLSWHQKTY  | 366 | >SMARCB1-A QLSWHQKTY   | 558  | 192  |
| >SMARCB1-A QLSWHQKTY  | 261 | >SMARCB1-A QLSWHQKTY   | 433  | 172  |
| >SMARCB1-A QLSWHQKTY  | 143 | >SMARCB1-A QLSWHQKTY   | 255  | 112  |
| >SMARCB1-A QLSWHQKTY  | 166 | >SMARCB1-A QLSWHQKTY   | 322  | 156  |
| >SMARCB1-N INRNRMGRD  | 195 | >SMARCB1-N IDRNRMGRD   | 2527 | 2332 |
| >SMARCB1-N INRNRMGRD  | 220 | >SMARCB1-N IDRNRMGRD   | 2371 | 2151 |
| >SMARCB1-N TINRNRMGR  | 303 | >SMARCB1-N TIDRNRMGR   | 1946 | 1643 |
| >SMARCB1-N TINRNRMGR  | 238 | >SMARCB1-N TIDRNRMGR   | 909  | 671  |
| >SMARCB1-N TINRNRMGR  | 162 | >SMARCB1-N TIDRNRMGR   | 482  | 320  |
| >SMARCB1-N TINRNRMGR  | 46  | >SMARCB1-N TIDRNRMGR   | 1930 | 1884 |
| >SMARCB1-N TINRNRMGR  | 23  | >SMARCB1-N TIDRNRMGR   | 107  | 84   |
| >SMARCB1-N TINRNRMGR  | 324 | >SMARCB1-N TIDRNRMGR   | 735  | 411  |
| >SMARCB1-N TTINRNRMGI | 477 | >SMARCB1-N TTIDRNRMGI  | 660  | 183  |
| >SMARCB1-N TTINRNRMGI | 72  | >SMARCB1-N TTIDRNRMGI  | 73   | 1    |
| >SMARCB1-N TTINRNRM   | 69  | >SMARCB1-N TTIDRNRM    | 41   | 28   |
| >SMARCB1-N TTINRNRM   | 21  | >SMARCB1-N TTIDRNRM    | 14   | 7    |
| >SMARCB1-N TTINRNRM   | 65  | >SMARCB1-N TTIDRNRM    | 104  | 39   |
| >SMARCB1-N TTINRNRMGI | 21  | >SMARCB1-N TTIDRNRMGI  | 26   | 5    |
| >SMARCB1-N TTINRNRMGI | 556 | >SMARCB1-N TTIDRNRMGI  | 359  | 197  |
| >SMARCB1-N TTINRNRMGI | 10  | >SMARCB1-N TTIDRNRMGI  | 8    | 2    |
| >SMARCB1-N TTINRNRM   | 389 | >SMARCB1-N TTIDRNRM    | 186  | 203  |
| >SMARCB1-N TTINRNRM   | 85  | >SMARCB1-N TTIDRNRM    | 54   | 31   |
| >SMARCB1-N TTINRNRM   | 144 | >SMARCB1-N TTIDRNRM    | 183  | 39   |
| >SMARCB1-N STTINRNRMC | 338 | >SMARCB1-N STTIDRNRMC  | 499  | 161  |
| >SMARCB1-N STTINRNR   | 68  | >SMARCB1-N STTIDRNR    | 176  | 108  |
| >SMARCB1-N STTINRNRMC | 73  | >SMARCB1-N STTIDRNRMC  | 158  | 85   |
| >SMARCB1-N STTINRNR   | 15  | >SMARCB1-N STTIDRNR    | 25   | 10   |
| >SMARCB1-N STTINRNRMC | 9   | >SMARCB1-N STTIDRNRMC  | 13   | 4    |
| >SMARCB1-N STTINRNRM  | 165 | >SMARCB1-N STTIDRNRM   | 707  | 542  |
| >SMARCB1-N STTINRNRM  | 315 | >SMARCB1-N STTIDRNRM   | 795  | 480  |
| >SMARCB1-N STTINRNRM  | 49  | >SMARCB1-N STTIDRNRM   | 32   | 17   |
| >SMARCB1-N STTINRNR   | 420 | >SMARCB1-N STTIDRNR    | 544  | 124  |
| >SMARCB1-N CSTTINRNR  | 380 | >SMARCB1-N CSTTIDRNR   | 828  | 448  |
| >SMARCB1-N CSTTINRNR  | 46  | >SMARCB1-N CSTTIDRNR   | 61   | 15   |
| >SMARCB1-N CSTTINRNRM | 176 | >SMARCB1-N CSTTIDRNRM  | 268  | 92   |
| >SMARCB1-N PCSTTINR   | 388 | >SMARCB1-N PCSTTIDR    | 1237 | 849  |
| >SMARCB1-N VPCSTTINR  | 332 | >SMARCB1-N VPCSTTIDR   | 1056 | 724  |
| >SMARCB1-N AVPCSTTINR | 74  | >SMARCB1-N AVPCSTTIDR  | 141  | 67   |
| >SMARCB1-N AVPCSTTINR | 140 | >SMARCB1-N AVPCSTTIDR  | 420  | 280  |
| >SMARCB1-N AVPCSTTINR | 49  | >SMARCB1-N AVPCSTTIDR  | 85   | 36   |
| >SMARCB1-N DAVPCSTTIN | 55  | >SMARCB1-N DAVPCSTTIDR | 133  | 78   |
| >SMARCB1-N DAVPCSTTIN | 15  | >SMARCB1-N DAVPCSTTIDR | 29   | 14   |

|                        |       |                        |     |       |
|------------------------|-------|------------------------|-----|-------|
| >SMARCB1-P PPTYLREQK   | 11878 | >SMARCB1-P TPTYLREQK   | 227 | 11651 |
| >SMARCB1-P PPTYLREQKA  | 1119  | >SMARCB1-P TPTYLREQKA  | 48  | 1071  |
| >SMARCB1-P EPPTYLREQK  | 21633 | >SMARCB1-P ETPTYLREQK  | 438 | 21195 |
| >SMARCB1-P EPPTYLREQ   | 13243 | >SMARCB1-P ETPTYLREQ   | 127 | 13116 |
| >SMARCB1-P EPPTYLREQK  | 4130  | >SMARCB1-P ETPTYLREQK  | 38  | 4092  |
| >SMARCB1-P EPPTYLREQK  | 16267 | >SMARCB1-P ETPTYLREQK  | 371 | 15896 |
| >SMARCB1-P KYKAVSISTEP | 2735  | >SMARCB1-P KYKAVSISTET | 228 | 2507  |
| >SMARCB1-P KYKAVSISTEP | 171   | >SMARCB1-P KYKAVSISTET | 106 | 65    |
| >SMARCB1-P TEPPTYLR    | 1824  | >SMARCB1-P TETPTYLR    | 424 | 1400  |
| >SMARCB1-P TEPPTYLR    | 144   | >SMARCB1-P TETPTYLR    | 201 | 57    |
| >SMARCB1-P STEPPTYLR   | 42    | >SMARCB1-P STETPTYLR   | 54  | 12    |
| >SMARCB1-P STEPPTYLR   | 24    | >SMARCB1-P STETPTYLR   | 28  | 4     |
| >SMARCB1-P STEPPTYLR   | 455   | >SMARCB1-P STETPTYLR   | 595 | 140   |
| >SMARCB1-P STEPPTYLR   | 22    | >SMARCB1-P STETPTYLR   | 11  | 11    |
| >SMARCB1-P STEPPTYL    | 149   | >SMARCB1-P STETPTYL    | 321 | 172   |
| >SMARCB1-P STEPPTYL    | 39    | >SMARCB1-P STETPTYL    | 217 | 178   |
| >SMARCB1-P STEPPTYLR   | 155   | >SMARCB1-P STETPTYLR   | 242 | 87    |
| >SMARCB1-P STEPPTYLR   | 104   | >SMARCB1-P STETPTYLR   | 127 | 23    |
| >SMARCB1-P STEPPTYL    | 165   | >SMARCB1-P STETPTYL    | 577 | 412   |
| >SMARCB1-P ISTEPPTYLR  | 133   | >SMARCB1-P ISTETPTYLR  | 129 | 4     |
| >SMARCB1-P ISTEPPTY    | 329   | >SMARCB1-P ISTETPTY    | 301 | 28    |
| >SMARCB1-P ISTEPPTY    | 110   | >SMARCB1-P ISTETPTY    | 57  | 53    |
| >SMARCB1-P ISTEPPTYLR  | 267   | >SMARCB1-P ISTETPTYLR  | 445 | 178   |
| >SMARCB1-P ISTEPPTYLR  | 14    | >SMARCB1-P ISTETPTYLR  | 19  | 5     |
| >SMARCB1-P ISTEPPTY    | 159   | >SMARCB1-P ISTETPTY    | 101 | 58    |
| >SMARCB1-P ISTEPPTYL   | 727   | >SMARCB1-P ISTETPTYL   | 345 | 382   |
| >SMARCB1-P ISTEPPTY    | 4     | >SMARCB1-P ISTETPTY    | 4   | 0     |
| >SMARCB1-P ISTEPPTYL   | 18    | >SMARCB1-P ISTETPTYL   | 27  | 9     |
| >SMARCB1-P ISTEPPTY    | 203   | >SMARCB1-P ISTETPTY    | 114 | 89    |
| >SMARCB1-P ISTEPPTY    | 414   | >SMARCB1-P ISTETPTY    | 410 | 4     |
| >SMARCB1-P ISTEPPTY    | 83    | >SMARCB1-P ISTETPTY    | 41  | 42    |
| >SMARCB1-P ISTEPPTYL   | 218   | >SMARCB1-P ISTETPTYL   | 49  | 169   |
| >SMARCB1-P ISTEPPTYL   | 26    | >SMARCB1-P ISTETPTYL   | 33  | 7     |
| >SMARCB1-P ISTEPPTY    | 592   | >SMARCB1-P ISTETPTY    | 234 | 358   |
| >SMARCB1-P ISTEPPTYL   | 183   | >SMARCB1-P ISTETPTYL   | 212 | 29    |
| >SMARCB1-P ISTEPPTYLR  | 339   | >SMARCB1-P ISTETPTYLR  | 252 | 87    |
| >SMARCB1-P SISTEPPTYL  | 237   | >SMARCB1-P SISTETPTYL  | 197 | 40    |
| >SMARCB1-P SISTEPPTYL  | 20    | >SMARCB1-P SISTETPTYL  | 21  | 1     |
| >SMARCB1-P SISTEPPTYL  | 34    | >SMARCB1-P SISTETPTYL  | 29  | 5     |
| >SMARCB1-P SISTEPPTYL  | 516   | >SMARCB1-P SISTETPTYL  | 264 | 252   |
| >SMARCB1-P SISTEPPTYL  | 136   | >SMARCB1-P SISTETPTYL  | 203 | 67    |
| >SMARCB1-P SISTEPPTYL  | 262   | >SMARCB1-P SISTETPTYL  | 152 | 110   |
| >SMARCB1-P SISTEPPTYL  | 139   | >SMARCB1-P SISTETPTYL  | 80  | 59    |



|                        |       |                        |     |       |
|------------------------|-------|------------------------|-----|-------|
| >SMARCB1-P SISTEPPTYLR | 72    | >SMARCB1-P SISTETPTYLR | 54  | 18    |
| >SMARCB1-P SISTEPPTY   | 404   | >SMARCB1-P SISTETPTY   | 104 | 300   |
| >SMARCB1-P SISTEPPTY   | 102   | >SMARCB1-P SISTETPTY   | 107 | 5     |
| >SMARCB1-P SISTEPPTY   | 32    | >SMARCB1-P SISTETPTY   | 20  | 12    |
| >SMARCB1-P SISTEPPTYLR | 199   | >SMARCB1-P SISTETPTYLR | 145 | 54    |
| >SMARCB1-P SISTEPPTYLR | 45    | >SMARCB1-P SISTETPTYLR | 23  | 22    |
| >SMARCB1-P SISTEPPTY   | 820   | >SMARCB1-P SISTETPTY   | 182 | 638   |
| >SMARCB1-P SISTEPPTY   | 1418  | >SMARCB1-P SISTETPTY   | 275 | 1143  |
| >SMARCB1-P SISTEPPTY   | 498   | >SMARCB1-P SISTETPTY   | 171 | 327   |
| >SMARCB1-P SISTEPPTYL  | 225   | >SMARCB1-P SISTETPTYL  | 312 | 87    |
| >SMARCB1-P SISTEPPTY   | 12340 | >SMARCB1-P SISTETPTY   | 304 | 12036 |
| >SMARCB1-P SISTEPPTY   | 478   | >SMARCB1-P SISTETPTY   | 603 | 125   |
| >SMARCB1-P SISTEPPTYLR | 60    | >SMARCB1-P SISTETPTYLR | 46  | 14    |
| >SMARCB1-P VSISTEPPTYL | 991   | >SMARCB1-P VSISTETPTYL | 493 | 498   |
| >SMARCB1-P VSISTEPPTYL | 433   | >SMARCB1-P VSISTETPTYL | 382 | 51    |
| >SMARCB1-P VSISTEPPTY  | 96    | >SMARCB1-P VSISTETPTY  | 100 | 4     |
| >SMARCB1-P VSISTEPPTY  | 251   | >SMARCB1-P VSISTETPTY  | 188 | 63    |
| >SMARCB1-P VSISTEPPTY  | 38    | >SMARCB1-P VSISTETPTY  | 38  | 0     |
| >SMARCB1-P VSISTEPPTY  | 294   | >SMARCB1-P VSISTETPTY  | 230 | 64    |
| >SMARCB1-P VSISTEPPTY  | 118   | >SMARCB1-P VSISTETPTY  | 74  | 44    |
| >SMARCB1-P VSISTEPPTY  | 243   | >SMARCB1-P VSISTETPTY  | 113 | 130   |
| >SMARCB1-P VSISTEPPTY  | 32    | >SMARCB1-P VSISTETPTY  | 26  | 6     |
| >SMARCB1-P VSISTEPPTYL | 193   | >SMARCB1-P VSISTETPTYL | 133 | 60    |
| >SMARCB1-P VSISTEPPTY  | 5     | >SMARCB1-P VSISTETPTY  | 5   | 0     |
| >SMARCB1-P VSISTEPPTYL | 27    | >SMARCB1-P VSISTETPTYL | 33  | 6     |
| >SMARCB1-P VSISTEPPTY  | 39    | >SMARCB1-P VSISTETPTY  | 42  | 3     |
| >SMARCB1-P VSISTEPPTYL | 102   | >SMARCB1-P VSISTETPTYL | 71  | 31    |
| >SMARCB1-P VSISTEPPTYL | 264   | >SMARCB1-P VSISTETPTYL | 442 | 178   |
| >SMARCB1-P VSISTEPPTY  | 52    | >SMARCB1-P VSISTETPTY  | 87  | 35    |
| >SMARCB1-P VSISTEPPTYL | 264   | >SMARCB1-P VSISTETPTYL | 149 | 115   |
| >SMARCB1-P AVSISTEPPTY | 378   | >SMARCB1-P AVSISTETPTY | 335 | 43    |
| >SMARCB1-P AVSISTEPPTY | 450   | >SMARCB1-P AVSISTETPTY | 280 | 170   |
| >SMARCB1-P AVSISTEPPTY | 138   | >SMARCB1-P AVSISTETPTY | 157 | 19    |
| >SMARCB1-P AVSISTEPPTY | 48    | >SMARCB1-P AVSISTETPTY | 33  | 15    |
| >SMARCB1-P AVSISTEPPTY | 830   | >SMARCB1-P AVSISTETPTY | 470 | 360   |
| >SMARCB1-P AVSISTEPPTY | 278   | >SMARCB1-P AVSISTETPTY | 144 | 134   |
| >SMARCB1-P AVSISTEPPTY | 31    | >SMARCB1-P AVSISTETPTY | 26  | 5     |
| >SMARCB1-P AVSISTEPPTY | 231   | >SMARCB1-P AVSISTETPTY | 157 | 74    |
| >SMARCB1-P AVSISTEPPTY | 1137  | >SMARCB1-P AVSISTETPTY | 156 | 981   |
| >SMARCB1-P YKAVSISTEP  | 168   | >SMARCB1-P YKAVSISTET  | 175 | 7     |
| >SMARCB1-P YKAVSISTEP  | 179   | >SMARCB1-P YKAVSISTET  | 223 | 44    |
| >SMARCB1-P DPAVIHENA   | 2482  | >SMARCB1-P DSAVIHENA   | 53  | 2429  |
| >SMARCB1-P DDHDAVI     | 531   | >SMARCB1-P DDHDSA VI   | 301 | 230   |

|                         |       |                         |      |       |
|-------------------------|-------|-------------------------|------|-------|
| >SMARCB1-P DDHDP AVI    | 673   | >SMARCB1-P DDHDS AVI    | 227  | 446   |
| >SMARCB1-P FDDHDP AVI   | 938   | >SMARCB1-P FDDHDS AVI   | 436  | 502   |
| >SMARCB1-P FDDHDP AV    | 523   | >SMARCB1-P FDDHDS AV    | 323  | 200   |
| >SMARCB1-P FDDHDP AVI   | 93    | >SMARCB1-P FDDHDS AVI   | 69   | 24    |
| >SMARCB1-P LCFDDHDP A\  | 441   | >SMARCB1-P LCFDDHDS A\  | 203  | 238   |
| >SMARCB1-P LCFDDHDP A\  | 71    | >SMARCB1-P LCFDDHDS A\  | 122  | 51    |
| >SMARCB1-P LCFDDHDP A\  | 54    | >SMARCB1-P LCFDDHDS A\  | 64   | 10    |
| >SMARCB1-P LCFDDHDP A\  | 124   | >SMARCB1-P LCFDDHDS A\  | 97   | 27    |
| >SMARCB1-P PLCFDDHDP A\ | 120   | >SMARCB1-P PLCFDDHDS A\ | 180  | 60    |
| >SMARCB1-P PLCFDDHDP A\ | 365   | >SMARCB1-P PLCFDDHDS A\ | 1158 | 793   |
| >SMARCB1-P PLCFDDHDP A\ | 25    | >SMARCB1-P PLCFDDHDS A\ | 32   | 7     |
| >SMARCB1-P FPLCFDDHDF   | 34    | >SMARCB1-P FPLCFDDHDS   | 76   | 42    |
| >SMARCB1-P FPLCFDDHDF   | 127   | >SMARCB1-P FPLCFDDHDS   | 67   | 60    |
| >SMARCB1-P FPLCFDDHDF   | 5     | >SMARCB1-P FPLCFDDHDS   | 7    | 2     |
| >SMARCB1-P PEVLVPIRLD N | 4339  | >SMARCB1-P LEVLVPIRLD N | 480  | 3859  |
| >SMARCB1-P PEVLVPIRLD N | 3504  | >SMARCB1-P LEVLVPIRLD N | 202  | 3302  |
| >SMARCB1-P PEVLVPIRL    | 796   | >SMARCB1-P LEVLVPIRL    | 39   | 757   |
| >SMARCB1-P PEVLVPIRLD N | 3286  | >SMARCB1-P LEVLVPIRLD N | 225  | 3061  |
| >SMARCB1-P PEVLVPIRL    | 369   | >SMARCB1-P LEVLVPIRL    | 33   | 336   |
| >SMARCB1-P PEVLVPIRLD N | 1898  | >SMARCB1-P LEVLVPIRLD N | 143  | 1755  |
| >SMARCB1-P QPEVLVPI     | 28890 | >SMARCB1-P QLEVLVPI     | 346  | 28544 |
| >SMARCB1-P QPEVLVPIRL   | 34882 | >SMARCB1-P QLEVLVPIRL   | 171  | 34711 |
| >SMARCB1-P QPEVLVPI     | 19624 | >SMARCB1-P QLEVLVPI     | 420  | 19204 |
| >SMARCB1-P SQPEVLVPI    | 212   | >SMARCB1-P SQLEVLVPI    | 85   | 127   |
| >SMARCB1-P SQPEVLVPI    | 59    | >SMARCB1-P SQLEVLVPI    | 15   | 44    |
| >SMARCB1-P SQPEVLVPIRL  | 342   | >SMARCB1-P SQLEVLVPIRL  | 61   | 281   |
| >SMARCB1-P SQPEVLVPI    | 238   | >SMARCB1-P SQLEVLVPI    | 186  | 52    |
| >SMARCB1-P SQPEVLVPI    | 61    | >SMARCB1-P SQLEVLVPI    | 112  | 51    |
| >SMARCB1-P SQPEVLVPI    | 4     | >SMARCB1-P SQLEVLVPI    | 3    | 1     |
| >SMARCB1-P SQPEVLVPIRL  | 50    | >SMARCB1-P SQLEVLVPIRL  | 16   | 34    |
| >SMARCB1-P SQPEVLVPI    | 43    | >SMARCB1-P SQLEVLVPI    | 8    | 35    |
| >SMARCB1-P SQPEVLVPIRL  | 89    | >SMARCB1-P SQLEVLVPIRL  | 14   | 75    |
| >SMARCB1-P SQPEVLVPI    | 219   | >SMARCB1-P SQLEVLVPI    | 12   | 207   |
| >SMARCB1-P SQPEVLVPIRL  | 2484  | >SMARCB1-P SQLEVLVPIRL  | 123  | 2361  |
| >SMARCB1-P SQPEVLVPI    | 134   | >SMARCB1-P SQLEVLVPI    | 19   | 115   |
| >SMARCB1-P SQPEVLVPIRL  | 473   | >SMARCB1-P SQLEVLVPIRL  | 41   | 432   |
| >SMARCB1-P SQPEVLVPI    | 132   | >SMARCB1-P SQLEVLVPI    | 38   | 94    |
| >SMARCB1-P SQPEVLVPI    | 7663  | >SMARCB1-P SQLEVLVPI    | 318  | 7345  |
| >SMARCB1-P SQPEVLVPI    | 1015  | >SMARCB1-P SQLEVLVPI    | 78   | 937   |
| >SMARCB1-P SQPEVLVPIRL  | 3729  | >SMARCB1-P SQLEVLVPIRL  | 439  | 3290  |
| >SMARCB1-P SQPEVLVPI    | 3737  | >SMARCB1-P SQLEVLVPI    | 140  | 3597  |
| >SMARCB1-P SQPEVLVPIRL  | 1399  | >SMARCB1-P SQLEVLVPIRL  | 64   | 1335  |
| >SMARCB1-P SQPEVLVPI    | 507   | >SMARCB1-P SQLEVLVPI    | 187  | 320   |

|                        |       |                        |       |       |
|------------------------|-------|------------------------|-------|-------|
| >SMARCB1-P SQPEVLVPIRL | 966   | >SMARCB1-P SQLEVLVPIRL | 362   | 604   |
| >SMARCB1-P SQPEVLVPI   | 1162  | >SMARCB1-P SQLEVLVPI   | 225   | 937   |
| >SMARCB1-P SQPEVLVPIR  | 844   | >SMARCB1-P SQLEVLVPIR  | 460   | 384   |
| >SMARCB1-P ASQPEVLVPII | 479   | >SMARCB1-P ASQLEVLVPIF | 797   | 318   |
| >SMARCB1-P ASQPEVLVPII | 376   | >SMARCB1-P ASQLEVLVPIF | 785   | 409   |
| >SMARCB1-P ASQPEVLVPI  | 190   | >SMARCB1-P ASQLEVLVPI  | 164   | 26    |
| >SMARCB1-P ASQPEVLVPI  | 104   | >SMARCB1-P ASQLEVLVPI  | 274   | 170   |
| >SMARCB1-P ASQPEVLVPII | 143   | >SMARCB1-P ASQLEVLVPIF | 337   | 194   |
| >SMARCB1-P NASQPEVLV   | 71    | >SMARCB1-P NASQLEVLV   | 118   | 47    |
| >SMARCB1-P NASQPEVLVF  | 49    | >SMARCB1-P NASQLEVLVP  | 70    | 21    |
| >SMARCB1-P NASQPELVF   | 368   | >SMARCB1-P NASQLEVLVP  | 597   | 229   |
| >SMARCB1-P ENASQPEV    | 177   | >SMARCB1-P ENASQLEV    | 92    | 85    |
| >SMARCB1-P HENASQPEV   | 218   | >SMARCB1-P HENASQLEV   | 149   | 69    |
| >SMARCB1-P HENASQPEVI  | 392   | >SMARCB1-P HENASQLEVL  | 114   | 278   |
| >SMARCB1-P HENASQPEVI  | 86    | >SMARCB1-P HENASQLEVL  | 183   | 97    |
| >SMARCB1-P HENASQPEV   | 250   | >SMARCB1-P HENASQLEV   | 132   | 118   |
| >SMARCB1-P HENASQPEVI  | 163   | >SMARCB1-P HENASQLEVL  | 107   | 56    |
| >SMARCB1-P HENASQPEV   | 24    | >SMARCB1-P HENASQLEV   | 18    | 6     |
| >SMARCB1-P HENASQPEVI  | 170   | >SMARCB1-P HENASQLEVL  | 147   | 23    |
| >SMARCB1-P HENASQPEVI  | 163   | >SMARCB1-P HENASQLEVL  | 64    | 99    |
| >SMARCB1-P HENASQPEV   | 228   | >SMARCB1-P HENASQLEV   | 277   | 49    |
| >SMARCB1-P HENASQPEV   | 22    | >SMARCB1-P HENASQLEV   | 41    | 19    |
| >SMARCB1-P HENASQPEVI  | 95    | >SMARCB1-P HENASQLEVL  | 95    | 0     |
| >SMARCB1-P HENASQPEV   | 42    | >SMARCB1-P HENASQLEV   | 131   | 89    |
| >SMARCB1-P HENASQPEVI  | 469   | >SMARCB1-P HENASQLEVL  | 600   | 131   |
| >SMARCB1-P HENASQPEVI  | 56    | >SMARCB1-P HENASQLEVL  | 58    | 2     |
| >SMARCB1-P IHENASQPEV  | 144   | >SMARCB1-P IHENASQLEV  | 456   | 312   |
| >SMARCB1-P VIHENASQPE  | 364   | >SMARCB1-P VIHENASQLE  | 464   | 100   |
| >SMARCB1-P VIHENASQP   | 14073 | >SMARCB1-P VIHENASQL   | 182   | 13891 |
| >SMARCB1-P VIHENASQPE  | 38    | >SMARCB1-P VIHENASQLE  | 31    | 7     |
| >SMARCB1-P VIHENASQPE  | 96    | >SMARCB1-P VIHENASQLE  | 130   | 34    |
| >SMARCB1-P VIHENASQP   | 12926 | >SMARCB1-P VIHENASQL   | 33    | 12893 |
| >SMARCB1-P VIHENASQPE  | 5     | >SMARCB1-P VIHENASQLE  | 6     | 1     |
| >SMARCB1-P VIHENASQPE  | 106   | >SMARCB1-P VIHENASQLE  | 127   | 21    |
| >SMARCB1-P VIHENASQPE  | 24    | >SMARCB1-P VIHENASQLE  | 46    | 22    |
| >SMARCB1-P VIHENASQPE  | 84    | >SMARCB1-P VIHENASQLE  | 267   | 183   |
| >SMARCB1-P VIHENASQP   | 20891 | >SMARCB1-P VIHENASQL   | 12    | 20879 |
| >SMARCB1-P VIHENASQPE  | 3     | >SMARCB1-P VIHENASQLE  | 3     | 0     |
| >SMARCB1-P VIHENASQP   | 23272 | >SMARCB1-P VIHENASQL   | 232   | 23040 |
| >SMARCB1-P AVIHENASQF  | 31437 | >SMARCB1-P AVIHENASQL  | 466   | 30971 |
| >SMARCB1-P AVIHENASQF  | 11142 | >SMARCB1-P AVIHENASQL  | 55    | 11087 |
| >SMARCB1-P AVIHENASQF  | 17422 | >SMARCB1-P AVIHENASQL  | 103   | 17319 |
| >SMARCB1-P VPIRLDMEI   | 41    | >SMARCB1-P VLIRLDMEI   | 28235 | 28194 |

|                        |       |                        |       |       |
|------------------------|-------|------------------------|-------|-------|
| >SMARCB1-P VPIRLDMEI   | 23468 | >SMARCB1-P VLIRLDMEI   | 116   | 23352 |
| >SMARCB1-P VPIRLDMEI   | 29537 | >SMARCB1-P VLIRLDMEI   | 219   | 29318 |
| >SMARCB1-P VPIRLDMEI   | 20818 | >SMARCB1-P VLIRLDMEI   | 112   | 20706 |
| >SMARCB1-P VPIRLDMEI   | 16563 | >SMARCB1-P VLIRLDMEI   | 438   | 16125 |
| >SMARCB1-P VPIRLDMEI   | 25028 | >SMARCB1-P VLIRLDMEI   | 43    | 24985 |
| >SMARCB1-P VPIRLDMEI   | 22137 | >SMARCB1-P VLIRLDMEI   | 32    | 22105 |
| >SMARCB1-P VPIRLDMEI   | 24510 | >SMARCB1-P VLIRLDMEI   | 57    | 24453 |
| >SMARCB1-P VPIRLDMEI   | 32956 | >SMARCB1-P VLIRLDMEI   | 12    | 32944 |
| >SMARCB1-P VPIRLDMEI   | 101   | >SMARCB1-P VLIRLDMEI   | 23093 | 22992 |
| >SMARCB1-P VPIRLDMEI   | 369   | >SMARCB1-P VLIRLDMEI   | 25166 | 24797 |
| >SMARCB1-P LVPIRLDMEI  | 1088  | >SMARCB1-P LVLIRLDMEI  | 449   | 639   |
| >SMARCB1-P LVPIRLDMEI  | 245   | >SMARCB1-P LVLIRLDMEI  | 86    | 159   |
| >SMARCB1-P VLVPIRLDMEI | 366   | >SMARCB1-P VLVLIRLDMEI | 1072  | 706   |
| >SMARCB1-P VLVPIRLDMEI | 157   | >SMARCB1-P VLVLIRLDMEI | 549   | 392   |
| >SMARCB1-P VLVPIRLDMEI | 103   | >SMARCB1-P VLVLIRLDMEI | 354   | 251   |
| >SMARCB1-P VLVPIRLDMEI | 260   | >SMARCB1-P VLVLIRLDMEI | 1350  | 1090  |
| >SMARCB1-P VLVPIRLDMEI | 82    | >SMARCB1-P VLVLIRLDMEI | 391   | 309   |
| >SMARCB1-P VLVPIRLDMEI | 283   | >SMARCB1-P VLVLIRLDMEI | 892   | 609   |
| >SMARCB1-P VLVPIRLDMEI | 106   | >SMARCB1-P VLVLIRLDMEI | 432   | 326   |
| >SMARCB1-P VLVPIRLDM   | 105   | >SMARCB1-P VLVLIRLDM   | 1609  | 1504  |
| >SMARCB1-P VLVPIRLDMEI | 8     | >SMARCB1-P VLVLIRLDMEI | 42    | 34    |
| >SMARCB1-P EVLVPIRL    | 189   | >SMARCB1-P EVLVLIRL    | 139   | 50    |
| >SMARCB1-P EVLVPIRLDM  | 96    | >SMARCB1-P EVLVLIRLDM  | 267   | 171   |
| >SMARCB1-P EVLVPIRLDM  | 191   | >SMARCB1-P EVLVLIRLDM  | 371   | 180   |
| >SMARCB1-P EVLVPIRL    | 175   | >SMARCB1-P EVLVLIRL    | 230   | 55    |
| >SMARCB1-P EVLVPIRL    | 26    | >SMARCB1-P EVLVLIRL    | 34    | 8     |
| >SMARCB1-P EVLVPIRLDM  | 213   | >SMARCB1-P EVLVLIRLDM  | 519   | 306   |
| >SMARCB1-P PEVLVPIRL   | 796   | >SMARCB1-P PEVLVLIRL   | 308   | 488   |
| >SMARCB1-P PEVLVPIRL   | 369   | >SMARCB1-P PEVLVLIRL   | 60    | 309   |
| >SMARCB1-P SQPEVLVPI   | 537   | >SMARCB1-P SQPEVLVLI   | 262   | 275   |
| >SMARCB1-P SQPEVLVPI   | 212   | >SMARCB1-P SQPEVLVLI   | 73    | 139   |
| >SMARCB1-P SQPEVLVPI   | 59    | >SMARCB1-P SQPEVLVLI   | 115   | 56    |
| >SMARCB1-P SQPEVLVPIRL | 342   | >SMARCB1-P SQPEVLVLIRL | 234   | 108   |
| >SMARCB1-P SQPEVLVPI   | 238   | >SMARCB1-P SQPEVLVLI   | 216   | 22    |
| >SMARCB1-P SQPEVLVPIRL | 936   | >SMARCB1-P SQPEVLVLIRL | 451   | 485   |
| >SMARCB1-P SQPEVLVPI   | 61    | >SMARCB1-P SQPEVLVLI   | 145   | 84    |
| >SMARCB1-P SQPEVLVP    | 3033  | >SMARCB1-P SQPEVLVL    | 25    | 3008  |
| >SMARCB1-P SQPEVLVPI   | 4     | >SMARCB1-P SQPEVLVLI   | 6     | 2     |
| >SMARCB1-P SQPEVLVPIRL | 50    | >SMARCB1-P SQPEVLVLIRL | 14    | 36    |
| >SMARCB1-P SQPEVLVP    | 17314 | >SMARCB1-P SQPEVLVL    | 258   | 17056 |
| >SMARCB1-P SQPEVLVPI   | 43    | >SMARCB1-P SQPEVLVLI   | 71    | 28    |
| >SMARCB1-P SQPEVLVPIRL | 89    | >SMARCB1-P SQPEVLVLIRL | 98    | 9     |
| >SMARCB1-P SQPEVLVPI   | 219   | >SMARCB1-P SQPEVLVLI   | 1354  | 1135  |

|                        |       |                        |       |       |
|------------------------|-------|------------------------|-------|-------|
| >SMARCB1-P SQPEVLVPI   | 134   | >SMARCB1-P SQPEVLVLI   | 175   | 41    |
| >SMARCB1-P SQPEVLVPIRI | 473   | >SMARCB1-P SQPEVLVLIRL | 392   | 81    |
| >SMARCB1-P SQPEVLVPI   | 132   | >SMARCB1-P SQPEVLVLI   | 959   | 827   |
| >SMARCB1-P SQPEVLVLP   | 22266 | >SMARCB1-P SQPEVLVL    | 298   | 21968 |
| >SMARCB1-P SQPEVLVPI   | 2635  | >SMARCB1-P SQPEVLVLI   | 248   | 2387  |
| >SMARCB1-P ASQPEVLVPII | 479   | >SMARCB1-P ASQPEVLVLIF | 200   | 279   |
| >SMARCB1-P ASQPEVLVPII | 376   | >SMARCB1-P ASQPEVLVLIF | 548   | 172   |
| >SMARCB1-P ASQPEVLVPI  | 190   | >SMARCB1-P ASQPEVLVLI  | 940   | 750   |
| >SMARCB1-P ASQPEVLVLP  | 10806 | >SMARCB1-P ASQPEVLVL   | 21    | 10785 |
| >SMARCB1-P ASQPEVLVPI  | 104   | >SMARCB1-P ASQPEVLVLI  | 260   | 156   |
| >SMARCB1-P ASQPEVLVPI  | 1840  | >SMARCB1-P ASQPEVLVLI  | 467   | 1373  |
| >SMARCB1-P ASQPEVLVPI  | 2057  | >SMARCB1-P ASQPEVLVLI  | 468   | 1589  |
| >SMARCB1-P ASQPEVLVPII | 143   | >SMARCB1-P ASQPEVLVLIF | 119   | 24    |
| >SMARCB1-P ASQPEVLVLP  | 22523 | >SMARCB1-P ASQPEVLVL   | 194   | 22329 |
| >SMARCB1-P ASQPEVLVPI  | 1547  | >SMARCB1-P ASQPEVLVLI  | 418   | 1129  |
| >SMARCB1-P NASQPEVLVLF | 49    | >SMARCB1-P NASQPEVLVL  | 129   | 80    |
| >SMARCB1-P NASQPEVLVLF | 368   | >SMARCB1-P NASQPEVLVL  | 1469  | 1101  |
| >SMARCB1-P PIRLDMEI    | 3256  | >SMARCB1-P SIRLDMEI    | 238   | 3018  |
| >SMARCB1-P VPIRLDMEI   | 41    | >SMARCB1-P VSIRLDMEI   | 21816 | 21775 |
| >SMARCB1-P VPIRLDMEI   | 23304 | >SMARCB1-P VSIRLDMEI   | 398   | 22906 |
| >SMARCB1-P VPIRLDMEI   | 101   | >SMARCB1-P VSIRLDMEI   | 11253 | 11152 |
| >SMARCB1-P VPIRLDMEI   | 16322 | >SMARCB1-P VSIRLDMEI   | 36    | 16286 |
| >SMARCB1-P VPIRLDMEI   | 369   | >SMARCB1-P VSIRLDMEI   | 20044 | 19675 |
| >SMARCB1-P LVPIRLDMEI  | 1088  | >SMARCB1-P LVSIRLDMEI  | 348   | 740   |
| >SMARCB1-P LVPIRLDMEI  | 245   | >SMARCB1-P LVSIRLDMEI  | 273   | 28    |
| >SMARCB1-P LVPIRLDMEI  | 564   | >SMARCB1-P LVSIRLDMEI  | 428   | 136   |
| >SMARCB1-P VLVPIRLDME  | 366   | >SMARCB1-P VLVSIRLDME  | 336   | 30    |
| >SMARCB1-P VLVPIRLDME  | 157   | >SMARCB1-P VLVSIRLDME  | 131   | 26    |
| >SMARCB1-P VLVPIRLDME  | 103   | >SMARCB1-P VLVSIRLDME  | 102   | 1     |
| >SMARCB1-P VLVPIRLDME  | 260   | >SMARCB1-P VLVSIRLDME  | 619   | 359   |
| >SMARCB1-P VLVPIRLDME  | 82    | >SMARCB1-P VLVSIRLDME  | 92    | 10    |
| >SMARCB1-P VLVPIRLDME  | 283   | >SMARCB1-P VLVSIRLDME  | 421   | 138   |
| >SMARCB1-P VLVPIRLDME  | 106   | >SMARCB1-P VLVSIRLDME  | 145   | 39    |
| >SMARCB1-P VLVPIRLDM   | 105   | >SMARCB1-P VLVSIRLDM   | 345   | 240   |
| >SMARCB1-P VLVPIRLDME  | 8     | >SMARCB1-P VLVSIRLDME  | 13    | 5     |
| >SMARCB1-P EVLVPIRL    | 189   | >SMARCB1-P EVLVSIRL    | 386   | 197   |
| >SMARCB1-P EVLVPIRLDM  | 96    | >SMARCB1-P EVLVSIRLDM  | 137   | 41    |
| >SMARCB1-P EVLVPIRLDM  | 191   | >SMARCB1-P EVLVSIRLDM  | 254   | 63    |
| >SMARCB1-P EVLVPIRL    | 175   | >SMARCB1-P EVLVSIRL    | 264   | 89    |
| >SMARCB1-P EVLVPIRL    | 26    | >SMARCB1-P EVLVSIRL    | 38    | 12    |
| >SMARCB1-P EVLVPIRLDM  | 213   | >SMARCB1-P EVLVSIRLDM  | 475   | 262   |
| >SMARCB1-P PEVLVPIRL   | 796   | >SMARCB1-P PEVLVSIRL   | 310   | 486   |
| >SMARCB1-P PEVLVPIRL   | 369   | >SMARCB1-P PEVLVSIRL   | 280   | 89    |

|                        |      |                        |       |       |
|------------------------|------|------------------------|-------|-------|
| >SMARCB1-P QPEVLVPI    | 537  | >SMARCB1-P QPEVLVSI    | 262   | 275   |
| >SMARCB1-P SQPEVLVPI   | 212  | >SMARCB1-P SQPEVLVSI   | 161   | 51    |
| >SMARCB1-P SQPEVLVPI   | 59   | >SMARCB1-P SQPEVLVSI   | 127   | 68    |
| >SMARCB1-P SQPEVLVPIRI | 342  | >SMARCB1-P SQPEVLVSIRL | 376   | 34    |
| >SMARCB1-P SQPEVLVPI   | 238  | >SMARCB1-P SQPEVLVSI   | 310   | 72    |
| >SMARCB1-P SQPEVLVPI   | 61   | >SMARCB1-P SQPEVLVSI   | 89    | 28    |
| >SMARCB1-P SQPEVLVPI   | 4    | >SMARCB1-P SQPEVLVSI   | 4     | 0     |
| >SMARCB1-P SQPEVLVPIRI | 50   | >SMARCB1-P SQPEVLVSIRL | 21    | 29    |
| >SMARCB1-P SQPEVLVPI   | 43   | >SMARCB1-P SQPEVLVSI   | 43    | 0     |
| >SMARCB1-P SQPEVLVPIRI | 89   | >SMARCB1-P SQPEVLVSIRL | 128   | 39    |
| >SMARCB1-P SQPEVLVPI   | 219  | >SMARCB1-P SQPEVLVSI   | 518   | 299   |
| >SMARCB1-P SQPEVLVPI   | 134  | >SMARCB1-P SQPEVLVSI   | 169   | 35    |
| >SMARCB1-P SQPEVLVPIRI | 473  | >SMARCB1-P SQPEVLVSIRL | 407   | 66    |
| >SMARCB1-P SQPEVLVPI   | 132  | >SMARCB1-P SQPEVLVSI   | 145   | 13    |
| >SMARCB1-P ASQPEVLVPII | 479  | >SMARCB1-P ASQPEVLVSIF | 451   | 28    |
| >SMARCB1-P ASQPEVLVPII | 376  | >SMARCB1-P ASQPEVLVSIF | 283   | 93    |
| >SMARCB1-P ASQPEVLVPI  | 190  | >SMARCB1-P ASQPEVLVSI  | 186   | 4     |
| >SMARCB1-P ASQPEVLVPI  | 104  | >SMARCB1-P ASQPEVLVSI  | 111   | 7     |
| >SMARCB1-P ASQPEVLVPII | 143  | >SMARCB1-P ASQPEVLVSIF | 267   | 124   |
| >SMARCB1-P NASQPEVLVVF | 49   | >SMARCB1-P NASQPEVLVS  | 163   | 114   |
| >SMARCB1-P NASQPEVLVVF | 368  | >SMARCB1-P NASQPEVLVS  | 1003  | 635   |
| >SMARCB1-P NASQPEVLVVF | 859  | >SMARCB1-P NASQPEVLVS  | 348   | 511   |
| >SMARCB1-P PLETLTDA    | 5416 | >SMARCB1-P SLETLTDA    | 39    | 5377  |
| >SMARCB1-P PLETLTDAEM  | 3381 | >SMARCB1-P SLETLTDAEM  | 58    | 3323  |
| >SMARCB1-P PLETLTDA    | 3234 | >SMARCB1-P SLETLTDA    | 207   | 3027  |
| >SMARCB1-P PLETLTDAEM  | 2801 | >SMARCB1-P SLETLTDAEM  | 332   | 2469  |
| >SMARCB1-P PLETLTDA    | 1015 | >SMARCB1-P SLETLTDA    | 17    | 998   |
| >SMARCB1-P PLETLTDAEM  | 6744 | >SMARCB1-P SLETLTDAEM  | 397   | 6347  |
| >SMARCB1-P PLETLTDA    | 2188 | >SMARCB1-P SLETLTDA    | 20    | 2168  |
| >SMARCB1-P PLETLTDAEM  | 3653 | >SMARCB1-P SLETLTDAEM  | 177   | 3476  |
| >SMARCB1-P PLETLTDA    | 236  | >SMARCB1-P SLETLTDA    | 8     | 228   |
| >SMARCB1-P PLETLTDAEM  | 146  | >SMARCB1-P SLETLTDAEM  | 9     | 137   |
| >SMARCB1-P PLETLTDA    | 1411 | >SMARCB1-P SLETLTDA    | 19    | 1392  |
| >SMARCB1-P PLETLTDAEM  | 682  | >SMARCB1-P SLETLTDAEM  | 16    | 666   |
| >SMARCB1-P PLETLTDA    | 93   | >SMARCB1-P SLETLTDA    | 7     | 86    |
| >SMARCB1-P PLETLTDAEM  | 299  | >SMARCB1-P SLETLTDAEM  | 12    | 287   |
| >SMARCB1-P PLETLTDA    | 563  | >SMARCB1-P SLETLTDA    | 291   | 272   |
| >SMARCB1-P PLETLTDAEM  | 161  | >SMARCB1-P SLETLTDAEM  | 65    | 96    |
| >SMARCB1-P PLETLTDA    | 80   | >SMARCB1-P SLETLTDA    | 4     | 76    |
| >SMARCB1-P PLETLTDAEM  | 305  | >SMARCB1-P SLETLTDAEM  | 13    | 292   |
| >SMARCB1-P CPLETLT     | 391  | >SMARCB1-P CSLETLT     | 30081 | 29690 |
| >SMARCB1-P CPLETLTDA   | 202  | >SMARCB1-P CSLETLTDA   | 21217 | 21015 |
| >SMARCB1-P QWCPLLETL   | 501  | >SMARCB1-P QWCSLETL    | 496   | 5     |

|                        |       |                        |       |       |
|------------------------|-------|------------------------|-------|-------|
| >SMARCB1-P QWCPLLETL   | 35    | >SMARCB1-P QWCSLLETL   | 91    | 56    |
| >SMARCB1-P QWCPLLETL   | 413   | >SMARCB1-P QWCSLLETL   | 168   | 245   |
| >SMARCB1-P QWCPLLET    | 444   | >SMARCB1-P QWCSLLET    | 464   | 20    |
| >SMARCB1-P QWCPLLETL   | 50    | >SMARCB1-P QWCSLLETL   | 59    | 9     |
| >SMARCB1-P DQWCPLLETL  | 363   | >SMARCB1-P DQWCSLLETL  | 178   | 185   |
| >SMARCB1-P ADQWCPLLET  | 499   | >SMARCB1-P ADQWCSLLET  | 334   | 165   |
| >SMARCB1-P DADQWCPL    | 88    | >SMARCB1-P DADQWCSL    | 340   | 252   |
| >SMARCB1-P DADQWCPLL   | 40    | >SMARCB1-P DADQWCSLL   | 290   | 250   |
| >SMARCB1-P GDADQWCPI   | 331   | >SMARCB1-P GDADQWCSL   | 440   | 109   |
| >SMARCB1-P GDADQWCPI   | 322   | >SMARCB1-P GDADQWCSL   | 323   | 1     |
| >SMARCB1-P NTGDADQW    | 132   | >SMARCB1-P NTGDADQW    | 506   | 374   |
| >SMARCB1-P NTGDADQW    | 255   | >SMARCB1-P NTGDADQW    | 786   | 531   |
| >SMARCB1-P PSLWRRRLATV | 6871  | >SMARCB1-P SSLWRRRLATV | 474   | 6397  |
| >SMARCB1-P PSLWRRRLATV | 10669 | >SMARCB1-P SSLWRRRLATV | 344   | 10325 |
| >SMARCB1-P PSLWRRRLATV | 4513  | >SMARCB1-P SSLWRRRLATV | 281   | 4232  |
| >SMARCB1-P PSLWRRRLATV | 4242  | >SMARCB1-P SSLWRRRLATV | 159   | 4083  |
| >SMARCB1-P PSLWRRRLATV | 9728  | >SMARCB1-P SSLWRRRLATV | 176   | 9552  |
| >SMARCB1-P PSLWRRRLATV | 4391  | >SMARCB1-P SSLWRRRLATV | 173   | 4218  |
| >SMARCB1-P YPSLWRRRL   | 6229  | >SMARCB1-P YSSLWRRRL   | 478   | 5751  |
| >SMARCB1-P YPSLWRRRLAT | 4927  | >SMARCB1-P YSSLWRRRLAT | 296   | 4631  |
| >SMARCB1-P YPSLWRRRLAT | 2722  | >SMARCB1-P YSSLWRRRLAT | 234   | 2488  |
| >SMARCB1-P YPSLWRRRLAT | 2552  | >SMARCB1-P YSSLWRRRLAT | 409   | 2143  |
| >SMARCB1-P YPSLWRRRLAT | 6235  | >SMARCB1-P YSSLWRRRLAT | 229   | 6006  |
| >SMARCB1-P YPSLWRRRL   | 19    | >SMARCB1-P YSSLWRRRL   | 14039 | 14020 |
| >SMARCB1-P YPSLWRRRLA  | 108   | >SMARCB1-P YSSLWRRRLA  | 23488 | 23380 |
| >SMARCB1-P YPSLWRRRLAT | 31    | >SMARCB1-P YSSLWRRRLAT | 20439 | 20408 |
| >SMARCB1-P YPSLWRRRLAT | 479   | >SMARCB1-P YSSLWRRRLAT | 3061  | 2582  |
| >SMARCB1-P YPSLWRRRL   | 19256 | >SMARCB1-P YSSLWRRRL   | 27    | 19229 |
| >SMARCB1-P YPSLWRRRLAT | 21830 | >SMARCB1-P YSSLWRRRLAT | 283   | 21547 |
| >SMARCB1-P YPSLWRRRL   | 205   | >SMARCB1-P YSSLWRRRL   | 11343 | 11138 |
| >SMARCB1-P YPSLWRRRL   | 443   | >SMARCB1-P YSSLWRRRL   | 18976 | 18533 |
| >SMARCB1-P YPSLWRRRLA  | 15    | >SMARCB1-P YSSLWRRRLA  | 16864 | 16849 |
| >SMARCB1-P YPSLWRRRLAT | 54    | >SMARCB1-P YSSLWRRRLAT | 21263 | 21209 |
| >SMARCB1-P YPSLWRRRL   | 13690 | >SMARCB1-P YSSLWRRRL   | 121   | 13569 |
| >SMARCB1-P YPSLWRRRLAT | 4451  | >SMARCB1-P YSSLWRRRLAT | 167   | 4284  |
| >SMARCB1-P YPSLWRRRL   | 370   | >SMARCB1-P YSSLWRRRL   | 16788 | 16418 |
| >SMARCB1-P MFRGSLYKRY  | 278   | >SMARCB1-P MFRGSLYKRY  | 83    | 195   |
| >SMARCB1-P MFRGSLYKRY  | 476   | >SMARCB1-P MFRGSLYKRY  | 771   | 295   |
| >SMARCB1-P RYPSLWRRRL  | 1979  | >SMARCB1-P RYSSLWRRRL  | 68    | 1911  |
| >SMARCB1-P RYPSLWRRR   | 421   | >SMARCB1-P RYSSLWRRR   | 1121  | 700   |
| >SMARCB1-P RYPSLWRRRL  | 46    | >SMARCB1-P RYSSLWRRRL  | 99    | 53    |
| >SMARCB1-P RYPSLWRRR   | 100   | >SMARCB1-P RYSSLWRRR   | 329   | 229   |
| >SMARCB1-P RYPSLWRRRL  | 9     | >SMARCB1-P RYSSLWRRRL  | 22    | 13    |

|                        |      |                        |      |      |
|------------------------|------|------------------------|------|------|
| >SMARCB1-P RYPSLWRRRLA | 403  | >SMARCB1-P RYSSLWRRRLA | 1788 | 1385 |
| >SMARCB1-P RYPSLWRRRLA | 181  | >SMARCB1-P RYSSLWRRRLA | 821  | 640  |
| >SMARCB1-P RYPSLWRRRLA | 1317 | >SMARCB1-P RYSSLWRRRLA | 118  | 1199 |
| >SMARCB1-P RYPSLWRR    | 17   | >SMARCB1-P RYSSLWRR    | 8    | 9    |
| >SMARCB1-P RYPSLWRR    | 1299 | >SMARCB1-P RYSSLWRR    | 324  | 975  |
| >SMARCB1-P RYPSLWRR    | 14   | >SMARCB1-P RYSSLWRR    | 14   | 0    |
| >SMARCB1-P RYPSLWRR    | 1117 | >SMARCB1-P RYSSLWRR    | 465  | 652  |
| >SMARCB1-P RYPSLWRRRL  | 615  | >SMARCB1-P RYSSLWRRRL  | 250  | 365  |
| >SMARCB1-P RYPSLWRRRLA | 121  | >SMARCB1-P RYSSLWRRRLA | 219  | 98   |
| >SMARCB1-P RYPSLWRRRLA | 730  | >SMARCB1-P RYSSLWRRRLA | 272  | 458  |
| >SMARCB1-P KRYPSLWRR   | 272  | >SMARCB1-P KRYSSLWRR   | 245  | 27   |
| >SMARCB1-P KRYPSLWR    | 549  | >SMARCB1-P KRYSSLWR    | 279  | 270  |
| >SMARCB1-P KRYPSLWRR   | 812  | >SMARCB1-P KRYSSLWRR   | 490  | 322  |
| >SMARCB1-P KRYPSLWRRRL | 167  | >SMARCB1-P KRYSSLWRRRL | 92   | 75   |
| >SMARCB1-P KRYPSLWR    | 122  | >SMARCB1-P KRYSSLWR    | 73   | 49   |
| >SMARCB1-P KRYPSLWRR   | 47   | >SMARCB1-P KRYSSLWRR   | 32   | 15   |
| >SMARCB1-P KRYPSLWRRRL | 16   | >SMARCB1-P KRYSSLWRRRL | 12   | 4    |
| >SMARCB1-P KRYPSLWRRRL | 110  | >SMARCB1-P KRYSSLWRRRL | 71   | 39   |
| >SMARCB1-P KRYPSLWRRRL | 469  | >SMARCB1-P KRYSSLWRRRL | 405  | 64   |
| >SMARCB1-P KRYPSLWR    | 134  | >SMARCB1-P KRYSSLWR    | 181  | 47   |
| >SMARCB1-P KRYPSLWRR   | 268  | >SMARCB1-P KRYSSLWRR   | 286  | 18   |
| >SMARCB1-P KRYPSLWRRRL | 46   | >SMARCB1-P KRYSSLWRRRL | 46   | 0    |
| >SMARCB1-P KRYPSLWRRRL | 76   | >SMARCB1-P KRYSSLWRRRL | 80   | 4    |
| >SMARCB1-P KRYPSLWRRRL | 28   | >SMARCB1-P KRYSSLWRRRL | 34   | 6    |
| >SMARCB1-P KRYPSLWRRRL | 114  | >SMARCB1-P KRYSSLWRRRL | 292  | 178  |
| >SMARCB1-P KRYPSLWR    | 32   | >SMARCB1-P KRYSSLWR    | 38   | 6    |
| >SMARCB1-P KRYPSLWRR   | 32   | >SMARCB1-P KRYSSLWRR   | 39   | 7    |
| >SMARCB1-P YKRYPSLWRF  | 165  | >SMARCB1-P YKRYSSLWRR  | 182  | 17   |
| >SMARCB1-P YKRYPSLW    | 24   | >SMARCB1-P YKRYSSLW    | 14   | 10   |
| >SMARCB1-P YKRYPSLWR   | 115  | >SMARCB1-P YKRYSSLWR   | 67   | 48   |
| >SMARCB1-P YKRYPSLWRF  | 142  | >SMARCB1-P YKRYSSLWRR  | 81   | 61   |
| >SMARCB1-P YKRYPSLWRF  | 25   | >SMARCB1-P YKRYSSLWRR  | 17   | 8    |
| >SMARCB1-P YKRYPSLW    | 1266 | >SMARCB1-P YKRYSSLW    | 448  | 818  |
| >SMARCB1-P YKRYPSLWRF  | 835  | >SMARCB1-P YKRYSSLWRR  | 485  | 350  |
| >SMARCB1-P LYKRYPSL    | 852  | >SMARCB1-P LYKRYSSL    | 456  | 396  |
| >SMARCB1-P LYKRYPSL    | 4639 | >SMARCB1-P LYKRYSSL    | 185  | 4454 |
| >SMARCB1-P LYKRYPSLW   | 111  | >SMARCB1-P LYKRYSSLW   | 345  | 234  |
| >SMARCB1-P LYKRYPSL    | 167  | >SMARCB1-P LYKRYSSL    | 195  | 28   |
| >SMARCB1-P LYKRYPSLW   | 38   | >SMARCB1-P LYKRYSSLW   | 50   | 12   |
| >SMARCB1-P LYKRYPSL    | 18   | >SMARCB1-P LYKRYSSL    | 14   | 4    |
| >SMARCB1-P LYKRYPSLW   | 91   | >SMARCB1-P LYKRYSSLW   | 35   | 56   |
| >SMARCB1-P LYKRYPSL    | 45   | >SMARCB1-P LYKRYSSL    | 73   | 28   |
| >SMARCB1-P LYKRYPSLWR  | 228  | >SMARCB1-P LYKRYSSLWR  | 94   | 134  |



|                        |      |                        |     |      |
|------------------------|------|------------------------|-----|------|
| >SMARCB1-P LYKRYPSLWR  | 669  | >SMARCB1-P LYKRYSSLWR  | 477 | 192  |
| >SMARCB1-P LYKRYPSLWR  | 73   | >SMARCB1-P LYKRYSSLWR  | 16  | 57   |
| >SMARCB1-P LYKRYPSLWR  | 10   | >SMARCB1-P LYKRYSSLWR  | 9   | 1    |
| >SMARCB1-P LYKRYPSLWR  | 202  | >SMARCB1-P LYKRYSSLWR  | 70  | 132  |
| >SMARCB1-P LYKRYPSLWR  | 34   | >SMARCB1-P LYKRYSSLWR  | 32  | 2    |
| >SMARCB1-P LYKRYPSL    | 257  | >SMARCB1-P LYKRYSSL    | 131 | 126  |
| >SMARCB1-P LYKRYPSLW   | 1161 | >SMARCB1-P LYKRYSSLW   | 446 | 715  |
| >SMARCB1-P LYKRYPSLW   | 352  | >SMARCB1-P LYKRYSSLW   | 149 | 203  |
| >SMARCB1-P LYKRYPSLWR  | 104  | >SMARCB1-P LYKRYSSLWR  | 113 | 9    |
| >SMARCB1-P LYKRYPSLWR  | 116  | >SMARCB1-P LYKRYSSLWR  | 127 | 11   |
| >SMARCB1-P SLYKRYPSL   | 15   | >SMARCB1-P SLYKRYSSL   | 17  | 2    |
| >SMARCB1-P SLYKRYPSL   | 27   | >SMARCB1-P SLYKRYSSL   | 94  | 67   |
| >SMARCB1-P SLYKRYPSL   | 43   | >SMARCB1-P SLYKRYSSL   | 24  | 19   |
| >SMARCB1-P SLYKRYPSL   | 19   | >SMARCB1-P SLYKRYSSL   | 9   | 10   |
| >SMARCB1-P SLYKRYPSL   | 174  | >SMARCB1-P SLYKRYSSL   | 776 | 602  |
| >SMARCB1-P SLYKRYPSL   | 5    | >SMARCB1-P SLYKRYSSL   | 7   | 2    |
| >SMARCB1-P SLYKRYPSL   | 55   | >SMARCB1-P SLYKRYSSL   | 44  | 11   |
| >SMARCB1-P SLYKRYPSL   | 6    | >SMARCB1-P SLYKRYSSL   | 12  | 6    |
| >SMARCB1-P SLYKRYPSL   | 4    | >SMARCB1-P SLYKRYSSL   | 4   | 0    |
| >SMARCB1-P SLYKRYPSLW  | 39   | >SMARCB1-P SLYKRYSSLW  | 36  | 3    |
| >SMARCB1-P SLYKRYPSLW  | 136  | >SMARCB1-P SLYKRYSSLW  | 120 | 16   |
| >SMARCB1-P SLYKRYPSLW  | 36   | >SMARCB1-P SLYKRYSSLW  | 30  | 6    |
| >SMARCB1-P SLYKRYPSLW  | 538  | >SMARCB1-P SLYKRYSSLW  | 373 | 165  |
| >SMARCB1-P SLYKRYPSLW  | 191  | >SMARCB1-P SLYKRYSSLW  | 93  | 98   |
| >SMARCB1-P SLYKRYPS    | 492  | >SMARCB1-P SLYKRYSS    | 333 | 159  |
| >SMARCB1-P SLYKRYPSL   | 15   | >SMARCB1-P SLYKRYSSL   | 11  | 4    |
| >SMARCB1-P SLYKRYPSL   | 512  | >SMARCB1-P SLYKRYSSL   | 278 | 234  |
| >SMARCB1-P SLYKRYPSL   | 2651 | >SMARCB1-P SLYKRYSSL   | 309 | 2342 |
| >SMARCB1-P SLYKRYPSL   | 122  | >SMARCB1-P SLYKRYSSL   | 45  | 77   |
| >SMARCB1-P SLYKRYPSLW  | 223  | >SMARCB1-P SLYKRYSSLW  | 130 | 93   |
| >SMARCB1-P SLYKRYPSL   | 6637 | >SMARCB1-P SLYKRYSSL   | 220 | 6417 |
| >SMARCB1-P SLYKRYPSLW  | 508  | >SMARCB1-P SLYKRYSSLW  | 425 | 83   |
| >SMARCB1-P SLYKRYPSLW  | 82   | >SMARCB1-P SLYKRYSSLW  | 92  | 10   |
| >SMARCB1-P GSLYKRYPSL  | 96   | >SMARCB1-P GSLYKRYSSL  | 62  | 34   |
| >SMARCB1-P GSLYKRYPSL\ | 19   | >SMARCB1-P GSLYKRYSSL\ | 14  | 5    |
| >SMARCB1-P GSLYKRYPSL\ | 69   | >SMARCB1-P GSLYKRYSSL\ | 79  | 10   |
| >SMARCB1-P GSLYKRYPSL\ | 45   | >SMARCB1-P GSLYKRYSSL\ | 38  | 7    |
| >SMARCB1-P GSLYKRYPSL  | 1152 | >SMARCB1-P GSLYKRYSSL  | 405 | 747  |
| >SMARCB1-P GSLYKRYPSL\ | 70   | >SMARCB1-P GSLYKRYSSL\ | 40  | 30   |
| >SMARCB1-C QDRNTRRMF   | 7283 | >SMARCB1-C RDRNTRRMR   | 392 | 6891 |
| >SMARCB1-C QDRNTRRMF   | 673  | >SMARCB1-C RDRNTRRMR   | 123 | 550  |
| >SMARCB1-C KIRDQDRNT   | 234  | >SMARCB1-C KIRDQRDRNT  | 241 | 7    |
| >SMARCB1-C KIRDQDRNTF  | 23   | >SMARCB1-C KIRDQRDRNTR | 18  | 5    |

|                        |       |                        |       |       |
|------------------------|-------|------------------------|-------|-------|
| >SMARCB1-C KIRDQDRNTF  | 58    | >SMARCB1-C KIRDRDRNTR  | 59    | 1     |
| >SMARCB1-C KIRDQDRNTF  | 51    | >SMARCB1-C KIRDRDRNTR  | 21    | 30    |
| >SMARCB1-C KIRDQDRNTF  | 25    | >SMARCB1-C KIRDRDRNTR  | 17    | 8     |
| >SMARCB1-C KIRDQDRNTF  | 101   | >SMARCB1-C KIRDRDRNTR  | 118   | 17    |
| >SMARCB1-C KIRDQDRNTF  | 58    | >SMARCB1-C KIRDRDRNTR  | 61    | 3     |
| >SMARCB1-C KKIRDQDRNT  | 402   | >SMARCB1-C KKIRDRDRNT  | 336   | 66    |
| >SMARCB1-C MEKKIRDQD   | 377   | >SMARCB1-C MEKKIRD     | 852   | 475   |
| >SMARCB1-C AEMEKKIRDC  | 166   | >SMARCB1-C AEMEKKIRDF  | 299   | 133   |
| >SMARCB1-R RNSQWVPTL   | 379   | >SMARCB1-R GNSQWVPTL   | 4103  | 3724  |
| >SMARCB1-R RNSQWVPTL   | 414   | >SMARCB1-R GNSQWVPTL   | 2234  | 1820  |
| >SMARCB1-R KRNSQWVPT   | 110   | >SMARCB1-R KGNSQWVPT   | 2606  | 2496  |
| >SMARCB1-R KRNSQWVPT   | 461   | >SMARCB1-R KGNSQWVPT   | 22957 | 22496 |
| >SMARCB1-R KRNSQWVPT   | 15    | >SMARCB1-R KGNSQWVPT   | 13858 | 13843 |
| >SMARCB1-R KRNSQWVPT   | 258   | >SMARCB1-R KGNSQWVPT   | 11076 | 10818 |
| >SMARCB1-R KRNSQWVPT   | 61    | >SMARCB1-R KGNSQWVPT   | 15905 | 15844 |
| >SMARCB1-R KRNSQWVPT   | 54    | >SMARCB1-R KGNSQWVPT   | 16997 | 16943 |
| >SMARCB1-R AKRNSQWV    | 45    | >SMARCB1-R AKGNSQWV    | 697   | 652   |
| >SMARCB1-R AKRNSQWVF   | 171   | >SMARCB1-R AKGNSQWVF   | 1680  | 1509  |
| >SMARCB1-R AKRNSQWVF   | 131   | >SMARCB1-R AKGNSQWVF   | 1530  | 1399  |
| >SMARCB1-R AKRNSQWVF   | 10    | >SMARCB1-R AKGNSQWVF   | 67    | 57    |
| >SMARCB1-R KAKRNSQWV   | 491   | >SMARCB1-R KAKGNSQWV   | 95    | 396   |
| >SMARCB1-R KAKRNSQWV   | 9     | >SMARCB1-R KAKGNSQWV   | 23    | 14    |
| >SMARCB1-R KAKRNSQWV   | 231   | >SMARCB1-R KAKGNSQWV   | 828   | 597   |
| >SMARCB1-R KAKRNSQWV   | 16    | >SMARCB1-R KAKGNSQWV   | 44    | 28    |
| >SMARCB1-R KAKRNSQW    | 21    | >SMARCB1-R KAKGNSQW    | 15    | 6     |
| >SMARCB1-R KAKRNSQW    | 37    | >SMARCB1-R KAKGNSQW    | 36    | 1     |
| >SMARCB1-R KAKRNSQW    | 17    | >SMARCB1-R KAKGNSQW    | 17    | 0     |
| >SMARCB1-R QKAKRNSQV   | 435   | >SMARCB1-R QKAKGNSQV   | 375   | 60    |
| >SMARCB1-R REQKAKRNSQ  | 95    | >SMARCB1-R REQKAKGNSQ  | 145   | 50    |
| >SMARCB1-R REQKAKRNSQ  | 166   | >SMARCB1-R REQKAKGNSQ  | 207   | 41    |
| >SMARCB1-R REQKAKRNSQ  | 223   | >SMARCB1-R REQKAKGNSQ  | 178   | 45    |
| >SMARCB1-R YLREQKAKR   | 55    | >SMARCB1-R YLREQKAKG   | 21509 | 21454 |
| >SMARCB1-R YLREQKAKR   | 153   | >SMARCB1-R YLREQKAKG   | 29647 | 29494 |
| >SMARCB1-R TYLREQKAKR  | 63    | >SMARCB1-R TYLREQKAKG  | 26595 | 26532 |
| >SMARCB1-R IRQQIESY    | 333   | >SMARCB1-R IKQQIESY    | 332   | 1     |
| >SMARCB1-R IRQQIESY    | 191   | >SMARCB1-R IKQQIESY    | 21    | 170   |
| >SMARCB1-R TFVPAIASAIR | 11370 | >SMARCB1-R TFVPAIASAIK | 454   | 10916 |
| >SMARCB1-R TFVPAIASAIR | 59    | >SMARCB1-R TFVPAIASAIK | 1513  | 1454  |
| >SMARCB1-R TFVPAIASAIR | 272   | >SMARCB1-R TFVPAIASAIK | 5313  | 5041  |
| >SMARCB1-R TFVPAIASAIR | 75    | >SMARCB1-R TFVPAIASAIK | 290   | 215   |
| >SMARCB1-R TFVPAIASAIR | 124   | >SMARCB1-R TFVPAIASAIK | 1966  | 1842  |
| >SMARCB1-R AIRQQIESY   | 939   | >SMARCB1-R AIKQQIESY   | 496   | 443   |
| >SMARCB1-R AIRQQIESY   | 36    | >SMARCB1-R AIKQQIESY   | 58    | 22    |

|                       |       |                       |      |       |
|-----------------------|-------|-----------------------|------|-------|
| >SMARCB1-RAIRQQIES    | 437   | >SMARCB1-RAIKQQIES    | 2185 | 1748  |
| >SMARCB1-RAIRQQIESY   | 557   | >SMARCB1-RAIKQQIESY   | 278  | 279   |
| >SMARCB1-RAIRQQIESY   | 51    | >SMARCB1-RAIKQQIESY   | 51   | 0     |
| >SMARCB1-RAIRQQIESY   | 442   | >SMARCB1-RAIKQQIESY   | 1052 | 610   |
| >SMARCB1-RAIRQQIESY   | 136   | >SMARCB1-RAIKQQIESY   | 1023 | 887   |
| >SMARCB1-RAIRQQIESY   | 24    | >SMARCB1-RAIKQQIESY   | 41   | 17    |
| >SMARCB1-RAIRQQIESY   | 368   | >SMARCB1-RAIKQQIESY   | 300  | 68    |
| >SMARCB1-RAIRQQIESY   | 174   | >SMARCB1-RAIKQQIESY   | 141  | 33    |
| >SMARCB1-RAIRQQIESY   | 288   | >SMARCB1-RAIKQQIESY   | 312  | 24    |
| >SMARCB1-RAIRQQIESY   | 91    | >SMARCB1-RAIKQQIESY   | 62   | 29    |
| >SMARCB1-RAIRQQIESY   | 388   | >SMARCB1-RAIKQQIESY   | 966  | 578   |
| >SMARCB1-RAIRQQIESY   | 241   | >SMARCB1-RAIKQQIESY   | 165  | 76    |
| >SMARCB1-RASAIRQQIES\ | 570   | >SMARCB1-RASAIRQQIES\ | 448  | 122   |
| >SMARCB1-RASAIRQQIES\ | 84    | >SMARCB1-RASAIRQQIES\ | 70   | 14    |
| >SMARCB1-RASAIRQQIES\ | 193   | >SMARCB1-RASAIRQQIES\ | 260  | 67    |
| >SMARCB1-RASAIRQQIES\ | 393   | >SMARCB1-RASAIRQQIES\ | 590  | 197   |
| >SMARCB1-RASAIRQQI    | 86    | >SMARCB1-RASAIRQQI    | 85   | 1     |
| >SMARCB1-RASAIRQQIES\ | 7     | >SMARCB1-RASAIRQQIES\ | 7    | 0     |
| >SMARCB1-RASAIRQQIES\ | 336   | >SMARCB1-RASAIRQQIES\ | 490  | 154   |
| >SMARCB1-RASAIRQQI    | 41    | >SMARCB1-RASAIRQQI    | 54   | 13    |
| >SMARCB1-RIASAIRQQI   | 422   | >SMARCB1-RIASAIRQQI   | 2047 | 1625  |
| >SMARCB1-RIASAIRQQI   | 354   | >SMARCB1-RIASAIRQQI   | 522  | 168   |
| >SMARCB1-RIASAIRQQI   | 306   | >SMARCB1-RIASAIRQQI   | 448  | 142   |
| >SMARCB1-RAIASAIRQQI  | 737   | >SMARCB1-RAIASAIRQQI  | 495  | 242   |
| >SMARCB1-RAIASAIRQQI  | 118   | >SMARCB1-RAIASAIRQQI  | 95   | 23    |
| >SMARCB1-RAIASAIRQQI  | 221   | >SMARCB1-RAIASAIRQQI  | 823  | 602   |
| >SMARCB1-RFVPAIASAIR  | 4834  | >SMARCB1-RFVPAIASAIR  | 304  | 4530  |
| >SMARCB1-RFVPAIASAIR  | 2303  | >SMARCB1-RFVPAIASAIR  | 159  | 2144  |
| >SMARCB1-RFVPAIASAIR  | 427   | >SMARCB1-RFVPAIASAIR  | 8482 | 8055  |
| >SMARCB1-RFVPAIASAIR  | 5     | >SMARCB1-RFVPAIASAIR  | 10   | 5     |
| >SMARCB1-RRNTGDADQV   | 90    | >SMARCB1-RRNTGDADQV   | 578  | 488   |
| >SMARCB1-RRNTGDADQV   | 3315  | >SMARCB1-RRNTGDADQV   | 294  | 3021  |
| >SMARCB1-RRNTGDADQV   | 100   | >SMARCB1-RRNTGDADQV   | 85   | 15    |
| >SMARCB1-RIRNTGDADQ\  | 32174 | >SMARCB1-RIRNTGDADQ\  | 41   | 32133 |
| >SMARCB1-RIRNTGDADQ\  | 9241  | >SMARCB1-RIRNTGDADQ\  | 482  | 8759  |
| >SMARCB1-RIRNTGDADQ\  | 4978  | >SMARCB1-RIRNTGDADQ\  | 61   | 4917  |
| >SMARCB1-RIRNTGDADQ\  | 105   | >SMARCB1-RIRNTGDADQ\  | 798  | 693   |
| >SMARCB1-RNPLPTVEIAIR | 13649 | >SMARCB1-RNPLPTVEIAIR | 40   | 13609 |
| >SMARCB1-RNPLPTVEIAIR | 14021 | >SMARCB1-RNPLPTVEIAIR | 290  | 13731 |
| >SMARCB1-RNPLPTVEIAIR | 13935 | >SMARCB1-RNPLPTVEIAIR | 350  | 13585 |
| >SMARCB1-RAIRNTGDA    | 81    | >SMARCB1-RAIRNTGDA    | 6153 | 6072  |
| >SMARCB1-RAIRNTGDADC  | 285   | >SMARCB1-RAIRNTGDADC  | 424  | 139   |
| >SMARCB1-RAIRNTGDADC  | 6220  | >SMARCB1-RAIRNTGDADC  | 475  | 5745  |

|                        |       |                        |       |       |
|------------------------|-------|------------------------|-------|-------|
| >SMARCB1-R EIAIRNTGDA  | 1114  | >SMARCB1-REIAILNTGDA   | 405   | 709   |
| >SMARCB1-R VEIAIRNT    | 418   | >SMARCB1-R VEIAILNT    | 178   | 240   |
| >SMARCB1-R VEIAIRNTGD/ | 401   | >SMARCB1-R VEIAILNTGD/ | 340   | 61    |
| >SMARCB1-R VEIAIRNTGD/ | 329   | >SMARCB1-R VEIAILNTGD/ | 137   | 192   |
| >SMARCB1-R PTVEIAIR    | 8767  | >SMARCB1-R PTVEIAIL    | 279   | 8488  |
| >SMARCB1-R PTVEIAIR    | 185   | >SMARCB1-R PTVEIAIL    | 28072 | 27887 |
| >SMARCB1-R LPTVEIAIR   | 7633  | >SMARCB1-R LPTVEIAIL   | 271   | 7362  |
| >SMARCB1-R LPTVEIAIR   | 5592  | >SMARCB1-R LPTVEIAIL   | 65    | 5527  |
| >SMARCB1-R LPTVEIAIR   | 9163  | >SMARCB1-R LPTVEIAIL   | 189   | 8974  |
| >SMARCB1-R PLPTVEIAIR  | 23769 | >SMARCB1-R PLPTVEIAIL  | 250   | 23519 |
| >SMARCB1-R PLPTVEIAIR  | 17840 | >SMARCB1-R PLPTVEIAIL  | 308   | 17532 |
| >SMARCB1-R RMRRRLANT   | 456   | >SMARCB1-R QMRRLANT    | 1580  | 1124  |
| >SMARCB1-R RMRRRLANTA  | 136   | >SMARCB1-R QMRRLANTA   | 777   | 641   |
| >SMARCB1-R RMRRRLANTA  | 22    | >SMARCB1-R QMRRLANTA   | 87    | 65    |
| >SMARCB1-R RMRRRLANTA  | 438   | >SMARCB1-R QMRRLANTA   | 2950  | 2512  |
| >SMARCB1-R RMRRRLANTA  | 254   | >SMARCB1-R QMRRLANTA   | 781   | 527   |
| >SMARCB1-R RMRRRLANT   | 30    | >SMARCB1-R QMRRLANT    | 1723  | 1693  |
| >SMARCB1-R RMRRRLANTA  | 5     | >SMARCB1-R QMRRLANTA   | 68    | 63    |
| >SMARCB1-R RMRRRLANTA  | 77    | >SMARCB1-R QMRRLANTA   | 3557  | 3480  |
| >SMARCB1-R RMRRRLANTA  | 4     | >SMARCB1-R QMRRLANTA   | 17    | 13    |
| >SMARCB1-R RMRRRLANTA  | 350   | >SMARCB1-R QMRRLANTA   | 7006  | 6656  |
| >SMARCB1-R RMRRRLANTA  | 460   | >SMARCB1-R QMRRLANTA   | 2946  | 2486  |
| >SMARCB1-R RMRRRLANTA  | 114   | >SMARCB1-R QMRRLANTA   | 396   | 282   |
| >SMARCB1-R RMRRRLANTA  | 243   | >SMARCB1-R QMRRLANTA   | 1007  | 764   |
| >SMARCB1-R RMRRRLANTA  | 420   | >SMARCB1-R QMRRLANTA   | 1536  | 1116  |
| >SMARCB1-R RMRRRLANTA  | 164   | >SMARCB1-R QMRRLANTA   | 567   | 403   |
| >SMARCB1-R RRMRRRLANT  | 17182 | >SMARCB1-R RQMRRRLANT  | 493   | 16689 |
| >SMARCB1-R RRMRRRLANT  | 20152 | >SMARCB1-R RQMRRRLANT  | 81    | 20071 |
| >SMARCB1-R RRMRRRLANT. | 2851  | >SMARCB1-R RQMRRRLANT  | 323   | 2528  |
| >SMARCB1-R RRMRRRLANT. | 21164 | >SMARCB1-R RQMRRRLANT  | 313   | 20851 |
| >SMARCB1-R RRMRRRLANT. | 637   | >SMARCB1-R RQMRRRLANT  | 92    | 545   |
| >SMARCB1-R RRMRRRLANT. | 738   | >SMARCB1-R RQMRRRLANT  | 174   | 564   |
| >SMARCB1-R RRMRRRLAN   | 51    | >SMARCB1-R RQMRRRLAN   | 475   | 424   |
| >SMARCB1-R RRMRRRLANT  | 40    | >SMARCB1-R RQMRRRLANT  | 334   | 294   |
| >SMARCB1-R RRMRRRLANT. | 35    | >SMARCB1-R RQMRRRLANT  | 1924  | 1889  |
| >SMARCB1-R RRMRRRLANT. | 73    | >SMARCB1-R RQMRRRLANT  | 913   | 840   |
| >SMARCB1-R RRMRRRLAN   | 131   | >SMARCB1-R RQMRRRLAN   | 2660  | 2529  |
| >SMARCB1-R RRMRRRLANT  | 119   | >SMARCB1-R RQMRRRLANT  | 2491  | 2372  |
| >SMARCB1-R RRMRRRLANT. | 45    | >SMARCB1-R RQMRRRLANT  | 853   | 808   |
| >SMARCB1-R RRMRRRLANT. | 263   | >SMARCB1-R RQMRRRLANT  | 5018  | 4755  |
| >SMARCB1-R RRMRRRLANT  | 200   | >SMARCB1-R RQMRRRLANT  | 1653  | 1453  |
| >SMARCB1-R RRMRRRLANT. | 63    | >SMARCB1-R RQMRRRLANT  | 1546  | 1483  |
| >SMARCB1-R KIRDQDRNTF  | 58    | >SMARCB1-R KIRDQDRNTF  | 173   | 115   |

|                       |      |                       |       |       |
|-----------------------|------|-----------------------|-------|-------|
| >SMARCB1-R KIRDQDRNTF | 25   | >SMARCB1-R KIRDQDRNTF | 10200 | 10175 |
| >SMARCB1-R KIRDQDRNTF | 58   | >SMARCB1-R KIRDQDRNTF | 7366  | 7308  |
| >SMARCB1-R TRRMRRLAN  | 388  | >SMARCB1-R TRQMRRLAN  | 1715  | 1327  |
| >SMARCB1-R TRRMRRLAN  | 606  | >SMARCB1-R TRQMRRLAN  | 493   | 113   |
| >SMARCB1-R TRRMRRLAN  | 540  | >SMARCB1-R TRQMRRLAN  | 385   | 155   |
| >SMARCB1-R NTRRMRRL   | 397  | >SMARCB1-R NTRQMRRL   | 2007  | 1610  |
| >SMARCB1-R NTRRMRRLA  | 18   | >SMARCB1-R NTRQMRRLA  | 185   | 167   |
| >SMARCB1-R NTRRMRRL   | 292  | >SMARCB1-R NTRQMRRL   | 80    | 212   |
| >SMARCB1-R RNTRRMRR   | 84   | >SMARCB1-R RNTRQMRR   | 261   | 177   |
| >SMARCB1-R RNTRRMRR   | 446  | >SMARCB1-R RNTRQMRR   | 475   | 29    |
| >SMARCB1-R DRNTRRMRR  | 474  | >SMARCB1-R DRNTRQMRF  | 1597  | 1123  |
| >SMARCB1-R RLANTAPA   | 106  | >SMARCB1-R HLANTAPA   | 225   | 119   |
| >SMARCB1-R RLANTAPA   | 48   | >SMARCB1-R HLANTAPA   | 32    | 16    |
| >SMARCB1-R RLANTAPA   | 8    | >SMARCB1-R HLANTAPA   | 14    | 6     |
| >SMARCB1-R RLANTAPA   | 63   | >SMARCB1-R HLANTAPA   | 150   | 87    |
| >SMARCB1-R RLANTAPA   | 20   | >SMARCB1-R HLANTAPA   | 87    | 67    |
| >SMARCB1-R RLANTAPA   | 27   | >SMARCB1-R HLANTAPA   | 31    | 4     |
| >SMARCB1-R RLANTAPA   | 32   | >SMARCB1-R HLANTAPA   | 56    | 24    |
| >SMARCB1-R RLANTAPA   | 153  | >SMARCB1-R HLANTAPA   | 257   | 104   |
| >SMARCB1-R RLANTAPA   | 12   | >SMARCB1-R HLANTAPA   | 11    | 1     |
| >SMARCB1-R RLANTAPA   | 464  | >SMARCB1-R HLANTAPA   | 1633  | 1169  |
| >SMARCB1-R RLANTAPAW  | 47   | >SMARCB1-R HLANTAPAW  | 384   | 337   |
| >SMARCB1-R RLANTAPA   | 4754 | >SMARCB1-R HLANTAPA   | 252   | 4502  |
| >SMARCB1-R RLANTAPA   | 360  | >SMARCB1-R HLANTAPA   | 1038  | 678   |
| >SMARCB1-R RLANTAPAW  | 296  | >SMARCB1-R HLANTAPAW  | 1131  | 835   |
| >SMARCB1-R RLANTAPAW  | 255  | >SMARCB1-R HLANTAPAW  | 1029  | 774   |
| >SMARCB1-R RLANTAPAW  | 48   | >SMARCB1-R HLANTAPAW  | 224   | 176   |
| >SMARCB1-R RLANTAPAW  | 27   | >SMARCB1-R HLANTAPAW  | 211   | 184   |
| >SMARCB1-R RRLANTAPA  | 193  | >SMARCB1-R RHLANTAPA  | 717   | 524   |
| >SMARCB1-R RRLANTAPAV | 67   | >SMARCB1-R RHLANTAPAV | 142   | 75    |
| >SMARCB1-R RRLANTAP   | 363  | >SMARCB1-R RHLANTAP   | 17656 | 17293 |
| >SMARCB1-R RRLANTAPA  | 57   | >SMARCB1-R RHLANTAPA  | 8712  | 8655  |
| >SMARCB1-R RRLANTAPAV | 25   | >SMARCB1-R RHLANTAPAV | 1671  | 1646  |
| >SMARCB1-R RRLANTAPAV | 2158 | >SMARCB1-R RHLANTAPAV | 144   | 2014  |
| >SMARCB1-R RRLANTAP   | 182  | >SMARCB1-R RHLANTAP   | 15343 | 15161 |
| >SMARCB1-R RRLANTAPA  | 349  | >SMARCB1-R RHLANTAPA  | 13180 | 12831 |
| >SMARCB1-R RRLANTAPAV | 172  | >SMARCB1-R RHLANTAPAV | 15765 | 15593 |
| >SMARCB1-R RRLANTAPAV | 140  | >SMARCB1-R RHLANTAPAV | 15635 | 15495 |
| >SMARCB1-R RRLANTAPAV | 487  | >SMARCB1-R RHLANTAPAV | 389   | 98    |
| >SMARCB1-R MRRLANTAP  | 65   | >SMARCB1-R MRHLANTAP  | 642   | 577   |
| >SMARCB1-R MRRLANTAP  | 192  | >SMARCB1-R MRHLANTAP  | 258   | 66    |
| >SMARCB1-R MRRLANTAP  | 341  | >SMARCB1-R MRHLANTAP  | 502   | 161   |
| >SMARCB1-R MRRLANTAP  | 30   | >SMARCB1-R MRHLANTAP  | 21    | 9     |

|                       |     |                       |       |       |
|-----------------------|-----|-----------------------|-------|-------|
| >SMARCB1-R RMRRLANT   | 456 | >SMARCB1-R RMRHLANT   | 176   | 280   |
| >SMARCB1-R RMRRLANTA  | 136 | >SMARCB1-R RMRHLANTA  | 52    | 84    |
| >SMARCB1-R RMRRLANTA  | 22  | >SMARCB1-R RMRHLANTA  | 12    | 10    |
| >SMARCB1-R RMRRLANTA  | 438 | >SMARCB1-R RMRHLANTA  | 510   | 72    |
| >SMARCB1-R RMRRLANTA  | 526 | >SMARCB1-R RMRHLANTA  | 314   | 212   |
| >SMARCB1-R RMRRLANTA  | 254 | >SMARCB1-R RMRHLANTA  | 527   | 273   |
| >SMARCB1-R RMRRLANT   | 30  | >SMARCB1-R RMRHLANT   | 51    | 21    |
| >SMARCB1-R RMRRLANTA  | 5   | >SMARCB1-R RMRHLANTA  | 7     | 2     |
| >SMARCB1-R RMRRLANTA  | 77  | >SMARCB1-R RMRHLANTA  | 140   | 63    |
| >SMARCB1-R RMRRLANTA  | 4   | >SMARCB1-R RMRHLANTA  | 4     | 0     |
| >SMARCB1-R RMRRLANTA  | 350 | >SMARCB1-R RMRHLANTA  | 412   | 62    |
| >SMARCB1-R RMRRLANTA  | 460 | >SMARCB1-R RMRHLANTA  | 275   | 185   |
| >SMARCB1-R RMRRLANTA  | 114 | >SMARCB1-R RMRHLANTA  | 82    | 32    |
| >SMARCB1-R RMRRLANTA  | 243 | >SMARCB1-R RMRHLANTA  | 145   | 98    |
| >SMARCB1-R RMRRLANTA  | 420 | >SMARCB1-R RMRHLANTA  | 273   | 147   |
| >SMARCB1-R RMRRLANTA  | 164 | >SMARCB1-R RMRHLANTA  | 111   | 53    |
| >SMARCB1-R RRMRLANT   | 637 | >SMARCB1-R RRMRLANT   | 376   | 261   |
| >SMARCB1-R RRMRLAN    | 51  | >SMARCB1-R RRMRLAN    | 77    | 26    |
| >SMARCB1-R RRMRLANT   | 40  | >SMARCB1-R RRMRLANT   | 52    | 12    |
| >SMARCB1-R RRMRLANT   | 35  | >SMARCB1-R RRMRLANT   | 54    | 19    |
| >SMARCB1-R RRMRLANT   | 73  | >SMARCB1-R RRMRLANT   | 89    | 16    |
| >SMARCB1-R RRMRLAN    | 131 | >SMARCB1-R RRMRLAN    | 424   | 293   |
| >SMARCB1-R RRMRLANT   | 119 | >SMARCB1-R RRMRLANT   | 142   | 23    |
| >SMARCB1-R RRMRLANT   | 45  | >SMARCB1-R RRMRLANT   | 77    | 32    |
| >SMARCB1-R RRMRLANT   | 263 | >SMARCB1-R RRMRLANT   | 312   | 49    |
| >SMARCB1-R RRMRLANT   | 200 | >SMARCB1-R RRMRLANT   | 225   | 25    |
| >SMARCB1-R RRMRLANT   | 63  | >SMARCB1-R RRMRLANT   | 153   | 90    |
| >SMARCB1-R TRRMRLAN   | 388 | >SMARCB1-R TRRMRLAN   | 490   | 102   |
| >SMARCB1-R NTRRMRL    | 397 | >SMARCB1-R NTRRMRL    | 132   | 265   |
| >SMARCB1-R NTRRMRLA   | 18  | >SMARCB1-R NTRRMRLA   | 16    | 2     |
| >SMARCB1-R NTRRMRL    | 292 | >SMARCB1-R NTRRMRL    | 599   | 307   |
| >SMARCB1-R RNTRRMRR   | 84  | >SMARCB1-R RNTRRMRH   | 12220 | 12136 |
| >SMARCB1-R RNTRRMRL   | 604 | >SMARCB1-R RNTRRMRL   | 438   | 166   |
| >SMARCB1-R RNTRRMRR   | 446 | >SMARCB1-R RNTRRMRH   | 31754 | 31308 |
| >SMARCB1-R DRNTRRMRR  | 474 | >SMARCB1-R DRNTRRMRH  | 28704 | 28230 |
| >SMARCB1-S SEKENSPEK  | 499 | >SMARCB1-S LEKENSPEK  | 1309  | 810   |
| >SMARCB1-S SEKENSPEKF | 218 | >SMARCB1-S LEKENSPEKF | 104   | 114   |
| >SMARCB1-S SEKENSPEKF | 145 | >SMARCB1-S LEKENSPEKF | 1857  | 1712  |
| >SMARCB1-S SEKENSPEKF | 43  | >SMARCB1-S LEKENSPEKF | 503   | 460   |
| >SMARCB1-S SEKENSPEKF | 392 | >SMARCB1-S LEKENSPEKF | 429   | 37    |
| >SMARCB1-S MSEKENSPEK | 153 | >SMARCB1-S MLEKENSPEK | 1091  | 938   |
| >SMARCB1-S MSEKENSPEK | 339 | >SMARCB1-S MLEKENSPEK | 434   | 95    |
| >SMARCB1-S MSEKENSPEK | 14  | >SMARCB1-S MLEKENSPEK | 3780  | 3766  |

|                       |       |                       |      |       |
|-----------------------|-------|-----------------------|------|-------|
| >SMARCB1-S MSEKENSPEK | 77    | >SMARCB1-S MLEKENSPEK | 1776 | 1699  |
| >SMARCB1-S SLVDQFEWD  | 9061  | >SMARCB1-S SLVDQFEWD  | 97   | 8964  |
| >SMARCB1-S SLVDQFEWD  | 589   | >SMARCB1-S SLVDQFEWD  | 9    | 580   |
| >SMARCB1-S SLVDQFEWD  | 4325  | >SMARCB1-S SLVDQFEWD  | 96   | 4229  |
| >SMARCB1-S SLVDQFEWD  | 810   | >SMARCB1-S SLVDQFEWD  | 31   | 779   |
| >SMARCB1-S SLVDQFEWD  | 1213  | >SMARCB1-S SLVDQFEWD  | 12   | 1201  |
| >SMARCB1-S SLVDQFEWD  | 13699 | >SMARCB1-S SLVDQFEWD  | 86   | 13613 |
| >SMARCB1-S SLVDQFEWD  | 4149  | >SMARCB1-S SLVDQFEWD  | 17   | 4132  |
| >SMARCB1-S SLVDQFEWD  | 1158  | >SMARCB1-S SLVDQFEWD  | 9    | 1149  |
| >SMARCB1-S DMSEKENSPI | 452   | >SMARCB1-S DMLEKENSPI | 2015 | 1563  |
| >SMARCB1-S FEWDMSEKE  | 460   | >SMARCB1-S FEWDMLEKE  | 122  | 338   |
| >SMARCB1-S DQFEWDMSI  | 1557  | >SMARCB1-S DQFEWDMLE  | 461  | 1096  |
| >SMARCB1-S DQFEWDMSI  | 491   | >SMARCB1-S DQFEWDMLE  | 521  | 30    |
| >SMARCB1-S VDQFEWDM   | 24304 | >SMARCB1-S VDQFEWDM   | 408  | 23896 |
| >SMARCB1-S LVDQFEWDM  | 11986 | >SMARCB1-S LVDQFEWDM  | 428  | 11558 |
| >SMARCB1-V VIIKLNIHV  | 187   | >SMARCB1-V IIIKLNIHV  | 107  | 80    |
| >SMARCB1-V VIIKLNIHV  | 413   | >SMARCB1-V IIIKLNIHV  | 189  | 224   |
| >SMARCB1-V VIIKLNIHV  | 295   | >SMARCB1-V IIIKLNIHV  | 221  | 74    |
| >SMARCB1-V VIIKLNIHV  | 28    | >SMARCB1-V IIIKLNIHV  | 24   | 4     |
| >SMARCB1-V VIIKLNIHV  | 82    | >SMARCB1-V IIIKLNIHV  | 104  | 22    |
| >SMARCB1-V VIIKLNIHV  | 251   | >SMARCB1-V IIIKLNIHV  | 374  | 123   |
| >SMARCB1-V VIIKLNIHV  | 51    | >SMARCB1-V IIIKLNIHV  | 96   | 45    |
| >SMARCB1-V VIIKLNIHV  | 29    | >SMARCB1-V IIIKLNIHV  | 41   | 12    |
| >SMARCB1-V VIIKLNIHV  | 354   | >SMARCB1-V IIIKLNIHV  | 216  | 138   |
| >SMARCB1-V RVIIKLNIHV | 554   | >SMARCB1-V RIIIKLNIHV | 331  | 223   |
| >SMARCB1-V RVIIKLNI   | 705   | >SMARCB1-V RIIIKLNI   | 348  | 357   |
| >SMARCB1-V RVIIKLNIHV | 398   | >SMARCB1-V RIIIKLNIHV | 252  | 146   |
| >SMARCB1-V RVIIKLNIHV | 79    | >SMARCB1-V RIIIKLNIHV | 81   | 2     |
| >SMARCB1-V RVIIKLNIHV | 415   | >SMARCB1-V RIIIKLNIHV | 118  | 297   |
| >SMARCB1-V RVIIKLNIHV | 602   | >SMARCB1-V RIIIKLNIHV | 308  | 294   |
| >SMARCB1-V RVIIKLNIHV | 632   | >SMARCB1-V RIIIKLNIHV | 201  | 431   |
| >SMARCB1-V RVIIKLNIHV | 257   | >SMARCB1-V RIIIKLNIHV | 84   | 173   |
| >SMARCB1-V RVIIKLNI   | 366   | >SMARCB1-V RIIIKLNI   | 1103 | 737   |
| >SMARCB1-V RVIIKLNIHV | 189   | >SMARCB1-V RIIIKLNIHV | 629  | 440   |
| >SMARCB1-V RVIIKLNI   | 235   | >SMARCB1-V RIIIKLNI   | 305  | 70    |
| >SMARCB1-V RVIIKLNIHV | 292   | >SMARCB1-V RIIIKLNIHV | 612  | 320   |
| >SMARCB1-V RVIIKLNI   | 345   | >SMARCB1-V RIIIKLNI   | 1362 | 1017  |
| >SMARCB1-V SILEDQSDQR | 252   | >SMARCB1-V SILEDQSDQR | 1324 | 1072  |
| >SMARCB1-V SILEDQSDQR | 487   | >SMARCB1-V SILEDQSDQR | 2792 | 2305  |
| >SMARCB1-V SILEDQSDQR | 134   | >SMARCB1-V SILEDQSDQR | 848  | 714   |
| >SMARCB1-V SILEDQSDQR | 9     | >SMARCB1-V SILEDQSDQR | 75   | 66    |
| >SMARCB1-V SILEDQSDQR | 62    | >SMARCB1-V SILEDQSDQR | 451  | 389   |
| >SMARCB1-V SILEDQSDQR | 9     | >SMARCB1-V SILEDQSDQR | 108  | 99    |

|                       |      |                       |      |      |
|-----------------------|------|-----------------------|------|------|
| >SMARCB1-V SILEDQSDQR | 95   | >SMARCB1-V SILEDQSDQR | 1983 | 1888 |
| >SMARCB1-V SILEDQSDQR | 4    | >SMARCB1-V SILEDQSDQR | 114  | 110  |
| >SMARCB1-V SILEDQSDQR | 161  | >SMARCB1-V SILEDQSDQR | 1056 | 895  |
| >SMARCB1-V QRVIKLN    | 179  | >SMARCB1-V QRVIKLN    | 120  | 59   |
| >SMARCB1-V QRVIKLNHV  | 276  | >SMARCB1-V QRVIKLNHV  | 188  | 88   |
| >SMARCB1-V QRVIKLN    | 537  | >SMARCB1-V QRVIKLN    | 276  | 261  |
| >SMARCB1-V QRVIKLN    | 206  | >SMARCB1-V QRVIKLN    | 96   | 110  |
| >SMARCB1-V QRVIKLNHV  | 522  | >SMARCB1-V QRVIKLNHV  | 251  | 271  |
| >SMARCB1-V SDQRVIKLN  | 354  | >SMARCB1-V SDQRVIKLN  | 376  | 22   |
| >SMARCB1-V SDQRVIKLN  | 327  | >SMARCB1-V SDQRVIKLN  | 349  | 22   |
| >SMARCB1-V QSDQRVIK   | 413  | >SMARCB1-V QSDQRVIK   | 281  | 132  |
| >SMARCB1-V QSDQRVIK   | 177  | >SMARCB1-V QSDQRVIK   | 175  | 2    |
| >SMARCB1-V QSDQRVIK   | 268  | >SMARCB1-V QSDQRVIK   | 214  | 54   |
| >SMARCB1-V QSDQRVII   | 334  | >SMARCB1-V QSDQRVII   | 277  | 57   |
| >SMARCB1-V EDQSDQRV   | 849  | >SMARCB1-V EDQSDQRV   | 366  | 483  |
| >SMARCB1-V EDQSDQRVI  | 255  | >SMARCB1-V EDQSDQRVI  | 204  | 51   |
| >SMARCB1-V EDQSDQRVII | 256  | >SMARCB1-V EDQSDQRVII | 293  | 37   |
| >SMARCB1-V LEDQSDQRVI | 125  | >SMARCB1-V LEDQSDQRVI | 107  | 18   |
| >SMARCB1-V LEDQSDQRVI | 109  | >SMARCB1-V LEDQSDQRVI | 102  | 7    |
| >SMARCB1-V LEDQSDQRV  | 1485 | >SMARCB1-V LEDQSDQRV  | 468  | 1017 |
| >SMARCB1-V LEDQSDQRVI | 90   | >SMARCB1-V LEDQSDQRVI | 77   | 13   |
| >SMARCB1-V LEDQSDQRV  | 1157 | >SMARCB1-V LEDQSDQRV  | 296  | 861  |
| >SMARCB1-V LEDQSDQRVI | 93   | >SMARCB1-V LEDQSDQRVI | 78   | 15   |
| >SMARCB1-V LEDQSDQRVI | 68   | >SMARCB1-V LEDQSDQRVI | 72   | 4    |
| >SMARCB1-V ILEDQSDQRV | 393  | >SMARCB1-V ILEDQSDQRV | 881  | 488  |
| >SMARCB1-V ILEDQSDQRV | 487  | >SMARCB1-V ILEDQSDQRV | 430  | 57   |
| >SMARCB1-V ILEDQSDQRV | 15   | >SMARCB1-V ILEDQSDQRV | 173  | 158  |
| >SMARCB1-V ILEDQSDQRV | 367  | >SMARCB1-V ILEDQSDQRV | 845  | 478  |
| >SMARCB1-V ILEDQSDQRV | 36   | >SMARCB1-V ILEDQSDQRV | 300  | 264  |
| >SMARCB1-V ILEDQSDQRV | 452  | >SMARCB1-V ILEDQSDQRV | 566  | 114  |
| >SMARCB1-V ILEDQSDQRV | 55   | >SMARCB1-V ILEDQSDQRV | 1753 | 1698 |
| >SMARCB1-V ILEDQSDQRV | 147  | >SMARCB1-V ILEDQSDQRV | 2846 | 2699 |
| >SMARCB1-V ILEDQSDQRV | 2    | >SMARCB1-V ILEDQSDQRV | 12   | 10   |
| >SMARCB1-V ILEDQSDQRV | 74   | >SMARCB1-V ILEDQSDQRV | 102  | 28   |
| >SMO-A324T ALMAGVWV   | 230  | >SMO-A324T ALMAGVWV   | 634  | 404  |
| >SMO-A324T ALMAGVWV   | 5    | >SMO-A324T ALMAGVWV   | 5    | 0    |
| >SMO-A324T ALMAGVWV   | 7    | >SMO-A324T ALMAGVWV   | 8    | 1    |
| >SMO-A324T ALMAGVWV   | 63   | >SMO-A324T ALMAGVWV   | 138  | 75   |
| >SMO-A324T ALMAGVWV   | 6    | >SMO-A324T ALMAGVWV   | 6    | 0    |
| >SMO-A324T ALMAGVWV   | 4    | >SMO-A324T ALMAGVWV   | 5    | 1    |
| >SMO-A324T ALMAGVWV   | 197  | >SMO-A324T ALMAGVWV   | 399  | 202  |
| >SMO-A324T ALMAGVWV   | 12   | >SMO-A324T ALMAGVWV   | 12   | 0    |
| >SMO-A324T ALMAGVWV   | 5    | >SMO-A324T ALMAGVWV   | 7    | 2    |



|                     |      |                     |      |      |
|---------------------|------|---------------------|------|------|
| >SMO-A324TALMAGVVWI | 301  | >SMO-A324TTLMAGVVWF | 490  | 189  |
| >SMO-A324TALMAGVVWI | 32   | >SMO-A324TTLMAGVVWF | 29   | 3    |
| >SMO-A324TALMAGVVWI | 5    | >SMO-A324TTLMAGVVWF | 6    | 1    |
| >SMO-A324TALMAGVVWI | 129  | >SMO-A324TTLMAGVVWF | 639  | 510  |
| >SMO-A324TALMAGVVWI | 1    | >SMO-A324TTLMAGVVWF | 1    | 0    |
| >SMO-A324TALMAGVVWI | 2    | >SMO-A324TTLMAGVVWF | 2    | 0    |
| >SMO-A324TALMAGVVWI | 3    | >SMO-A324TTLMAGVVWF | 3    | 0    |
| >SMO-A324TALMAGVVWI | 3    | >SMO-A324TTLMAGVVWF | 4    | 1    |
| >SMO-A324TALMAGVVWI | 4    | >SMO-A324TTLMAGVVWF | 4    | 0    |
| >SMO-A324TALMAGVVWI | 4    | >SMO-A324TTLMAGVVWF | 5    | 1    |
| >SMO-A324TALMAGVVWI | 2    | >SMO-A324TTLMAGVVWF | 2    | 0    |
| >SMO-A324TALMAGVVWI | 2    | >SMO-A324TTLMAGVVWF | 2    | 0    |
| >SMO-A324TALMAGVVWI | 56   | >SMO-A324TTLMAGVVWF | 421  | 365  |
| >SMO-A324TALMAGVVWI | 1    | >SMO-A324TTLMAGVVWF | 1    | 0    |
| >SMO-A324TALMAGVVWI | 2    | >SMO-A324TTLMAGVVWF | 2    | 0    |
| >SMO-A324TALMAGVVWI | 225  | >SMO-A324TTLMAGVVWF | 287  | 62   |
| >SMO-A324TALMAGVVWI | 210  | >SMO-A324TTLMAGVVWF | 178  | 32   |
| >SMO-A324TALMAGVVW  | 95   | >SMO-A324TTLMAGVVW  | 338  | 243  |
| >SMO-A324TALMAGVVWI | 58   | >SMO-A324TTLMAGVVWF | 157  | 99   |
| >SMO-A324TALMAGVVWI | 100  | >SMO-A324TTLMAGVVWF | 28   | 72   |
| >SMO-A324TALMAGVVWI | 328  | >SMO-A324TTLMAGVVWF | 19   | 309  |
| >SMO-A324TALMAGVVWI | 56   | >SMO-A324TTLMAGVVWF | 8    | 48   |
| >SMO-A324TALMAGVVWI | 644  | >SMO-A324TTLMAGVVWF | 37   | 607  |
| >SMO-A324TALMAGVVW  | 141  | >SMO-A324TTLMAGVVW  | 349  | 208  |
| >SMO-A324TALMAGVVWI | 83   | >SMO-A324TTLMAGVVWF | 140  | 57   |
| >SMO-A324TALMAGVVWI | 488  | >SMO-A324TTLMAGVVWF | 1362 | 874  |
| >SMO-A324TALMAGVVWI | 131  | >SMO-A324TTLMAGVVWF | 75   | 56   |
| >SMO-A324TALMAGVVW  | 454  | >SMO-A324TTLMAGVVW  | 2027 | 1573 |
| >SMO-A324TALMAGVVWI | 29   | >SMO-A324TTLMAGVVWF | 153  | 124  |
| >SMO-A324TALMAGVVW  | 71   | >SMO-A324TTLMAGVVW  | 362  | 291  |
| >SMO-A324TALMAGVVWI | 81   | >SMO-A324TTLMAGVVWF | 564  | 483  |
| >SMO-A324TALMAGVVWI | 604  | >SMO-A324TTLMAGVVWF | 167  | 437  |
| >SMO-A324TALMAGVVW  | 148  | >SMO-A324TTLMAGVVW  | 115  | 33   |
| >SMO-A324TALMAGVVWI | 113  | >SMO-A324TTLMAGVVWF | 209  | 96   |
| >SMO-A324TYALMAGVVW | 33   | >SMO-A324TYTLMAGVVW | 20   | 13   |
| >SMO-A324TYALMAGVVW | 127  | >SMO-A324TYTLMAGVVW | 57   | 70   |
| >SMO-A324TYALMAGVV  | 1216 | >SMO-A324TYTLMAGVV  | 470  | 746  |
| >SMO-A324TYALMAGVVW | 250  | >SMO-A324TYTLMAGVVW | 100  | 150  |
| >SMO-A324TYALMAGVV  | 91   | >SMO-A324TYTLMAGVV  | 59   | 32   |
| >SMO-A324TYALMAGVVW | 6    | >SMO-A324TYTLMAGVVW | 5    | 1    |
| >SMO-A324TYALMAGVV  | 57   | >SMO-A324TYTLMAGVV  | 16   | 41   |
| >SMO-A324TYALMAGVVW | 4    | >SMO-A324TYTLMAGVVW | 2    | 2    |
| >SMO-A324TYALMAGVV  | 1025 | >SMO-A324TYTLMAGVV  | 159  | 866  |

|                      |      |                      |      |      |
|----------------------|------|----------------------|------|------|
| >SMO-A324TYALMAGVVV  | 21   | >SMO-A324TYTLMAGVVV  | 7    | 14   |
| >SMO-A324TYALMAGVV   | 168  | >SMO-A324TYTLMAGVV   | 43   | 125  |
| >SMO-A324TYALMAGVVV  | 7    | >SMO-A324TYTLMAGVVV  | 5    | 2    |
| >SMO-A324TYALMAGVV   | 761  | >SMO-A324TYTLMAGVV   | 469  | 292  |
| >SMO-A324TYALMAGVVV  | 10   | >SMO-A324TYTLMAGVVV  | 8    | 2    |
| >SMO-A324TYALMAGVV   | 98   | >SMO-A324TYTLMAGVV   | 69   | 29   |
| >SMO-A324TYALMAGVVV  | 7    | >SMO-A324TYTLMAGVVV  | 6    | 1    |
| >SMO-A324TYALMAGVVV  | 153  | >SMO-A324TYTLMAGVVV  | 40   | 113  |
| >SMO-A324TYALMAGVVV  | 1574 | >SMO-A324TYTLMAGVVV  | 39   | 1535 |
| >SMO-A324TYALMAGVVV  | 849  | >SMO-A324TYTLMAGVVV  | 201  | 648  |
| >SMO-A324TYALMAGVVV  | 7842 | >SMO-A324TYTLMAGVVV  | 468  | 7374 |
| >SMO-A324TYALMAGVV   | 2360 | >SMO-A324TYTLMAGVV   | 315  | 2045 |
| >SMO-A324TYALMAGVVV  | 134  | >SMO-A324TYTLMAGVVV  | 28   | 106  |
| >SMO-A324TYALMAGVV   | 112  | >SMO-A324TYTLMAGVV   | 23   | 89   |
| >SMO-A324TYALMAGVVV  | 13   | >SMO-A324TYTLMAGVVV  | 6    | 7    |
| >SMO-A324TYALMAGVVV  | 394  | >SMO-A324TYTLMAGVVV  | 268  | 126  |
| >SMO-A324TYALMAGVVV  | 197  | >SMO-A324TYTLMAGVVV  | 316  | 119  |
| >SMO-A324TYALMAGVVV  | 18   | >SMO-A324TYTLMAGVVV  | 26   | 8    |
| >SMO-A324TYALMAGVV   | 1435 | >SMO-A324TYTLMAGVV   | 102  | 1333 |
| >SMO-A324TYALMAGVVV  | 6    | >SMO-A324TYTLMAGVVV  | 4    | 2    |
| >SMO-A324TYALMAGVVV  | 6    | >SMO-A324TYTLMAGVVV  | 3    | 3    |
| >SMO-A324TYALMAGVVV  | 1714 | >SMO-A324TYTLMAGVVV  | 141  | 1573 |
| >SMO-A324TYALMAGVVV  | 306  | >SMO-A324TYTLMAGVVV  | 3065 | 2759 |
| >SMO-A324TYALMAGVVV  | 270  | >SMO-A324TYTLMAGVVV  | 3115 | 2845 |
| >SMO-A324TYALMAGVVV  | 72   | >SMO-A324TYTLMAGVVV  | 55   | 17   |
| >SMO-A324TYALMAGVVV  | 17   | >SMO-A324TYTLMAGVVV  | 16   | 1    |
| >SMO-A324TYALMAGVVV  | 942  | >SMO-A324TYTLMAGVVV  | 122  | 820  |
| >SMO-A324TYALMAGVVV  | 599  | >SMO-A324TYTLMAGVVV  | 72   | 527  |
| >SMO-A324TYALMAGVVV  | 1079 | >SMO-A324TYTLMAGVVV  | 55   | 1024 |
| >SMO-A324TYALMAGVVV  | 282  | >SMO-A324TYTLMAGVVV  | 23   | 259  |
| >SMO-A324TYALMAGVVV  | 3847 | >SMO-A324TYTLMAGVVV  | 278  | 3569 |
| >SMO-A324TYALMAGVVV  | 30   | >SMO-A324TYTLMAGVVV  | 97   | 67   |
| >SMO-A324TCVIFVIVYYA | 291  | >SMO-A324TCVIFVIVYYT | 1678 | 1387 |
| >SMO-A324TCVIFVIVYYA | 25   | >SMO-A324TCVIFVIVYYT | 176  | 151  |
| >SMO-A324TYALMAGV    | 277  | >SMO-A324TYTLMAGV    | 462  | 185  |
| >SMO-A324TYALMAGVV   | 23   | >SMO-A324TYTLMAGVV   | 36   | 13   |
| >SMO-A324TYALMAGV    | 138  | >SMO-A324TYTLMAGV    | 1179 | 1041 |
| >SMO-A324TYALMAGV    | 225  | >SMO-A324TYTLMAGV    | 524  | 299  |
| >SMO-A324TYALMAGV    | 78   | >SMO-A324TYTLMAGV    | 89   | 11   |
| >SMO-A324TYALMAGVV   | 26   | >SMO-A324TYTLMAGVV   | 32   | 6    |
| >SMO-A324TYALMAGVV   | 101  | >SMO-A324TYTLMAGVV   | 144  | 43   |
| >SMO-A324TYALMAGVV   | 57   | >SMO-A324TYTLMAGVV   | 74   | 17   |
| >SMO-A324TYALMAGVV   | 40   | >SMO-A324TYTLMAGVV   | 99   | 59   |

|                      |     |                      |      |     |
|----------------------|-----|----------------------|------|-----|
| >SMO-A324TYYALMAGV   | 164 | >SMO-A324TYYTLMAGV   | 224  | 60  |
| >SMO-A324TYYALMAGVV  | 102 | >SMO-A324TYYTLMAGVV  | 142  | 40  |
| >SMO-A324TYYALMAGVV  | 8   | >SMO-A324TYYTLMAGVV  | 10   | 2   |
| >SMO-A324TYYALMAGVV  | 4   | >SMO-A324TYYTLMAGVV  | 4    | 0   |
| >SMO-A324TVYYALMAGV  | 70  | >SMO-A324TVYYTLMAGV  | 77   | 7   |
| >SMO-A324TVYYALMAGV  | 472 | >SMO-A324TVYYTLMAGV  | 1329 | 857 |
| >SMO-A324TVYYALMAGV  | 96  | >SMO-A324TVYYTLMAGV  | 187  | 91  |
| >SMO-A324TVYYALMAGV  | 185 | >SMO-A324TVYYTLMAGV  | 527  | 342 |
| >SMO-A324TVYYALMAGV  | 325 | >SMO-A324TVYYTLMAGV  | 601  | 276 |
| >SMO-A324TVYYALMAGV  | 143 | >SMO-A324TVYYTLMAGV  | 369  | 226 |
| >SMO-A324TVYYALMAGV  | 51  | >SMO-A324TVYYTLMAGV  | 155  | 104 |
| >SMO-A324TVYYALMAGV  | 270 | >SMO-A324TVYYTLMAGV  | 674  | 404 |
| >SMO-A324TVYYALMAGV  | 73  | >SMO-A324TVYYTLMAGV  | 177  | 104 |
| >SMO-A324TVYYALMAGV  | 92  | >SMO-A324TVYYTLMAGV  | 150  | 58  |
| >SMO-A324TVYYALMAGV  | 282 | >SMO-A324TVYYTLMAGV  | 243  | 39  |
| >SMO-A324TVYYALMAGV  | 376 | >SMO-A324TVYYTLMAGV  | 696  | 320 |
| >SMO-A324TVYYALMAGV  | 298 | >SMO-A324TVYYTLMAGV  | 497  | 199 |
| >SMO-A324TVYYALMAGV  | 16  | >SMO-A324TVYYTLMAGV  | 24   | 8   |
| >SMO-A324TIVYYALMAGV | 600 | >SMO-A324TIVYYTLMAGV | 474  | 126 |
| >SMO-A324TIVYYALMAGV | 146 | >SMO-A324TIVYYTLMAGV | 168  | 22  |
| >SMO-A324TIVYYALMA   | 663 | >SMO-A324TIVYYTLMA   | 485  | 178 |
| >SMO-A324TIVYYALMAGV | 110 | >SMO-A324TIVYYTLMAGV | 126  | 16  |
| >SMO-A324TIVYYALMAGV | 70  | >SMO-A324TIVYYTLMAGV | 92   | 22  |
| >SMO-A324TIVYYALMAGV | 476 | >SMO-A324TIVYYTLMAGV | 748  | 272 |
| >SMO-A324TIVYYALMA   | 123 | >SMO-A324TIVYYTLMA   | 97   | 26  |
| >SMO-A324TIVYYALMAGV | 24  | >SMO-A324TIVYYTLMAGV | 21   | 3   |
| >SMO-A324TIVYYALMAGV | 26  | >SMO-A324TIVYYTLMAGV | 28   | 2   |
| >SMO-A324TIVYYALMA   | 163 | >SMO-A324TIVYYTLMA   | 225  | 62  |
| >SMO-A324TIVYYALMAGV | 63  | >SMO-A324TIVYYTLMAGV | 49   | 14  |
| >SMO-A324TIVYYALMAGV | 82  | >SMO-A324TIVYYTLMAGV | 115  | 33  |
| >SMO-A324TIVYYALMAGV | 15  | >SMO-A324TIVYYTLMAGV | 11   | 4   |
| >SMO-A324TIVYYALMAGV | 165 | >SMO-A324TIVYYTLMAGV | 102  | 63  |
| >SMO-A324TIVYYALMAGV | 73  | >SMO-A324TIVYYTLMAGV | 48   | 25  |
| >SMO-A324TIVYYALMAGV | 57  | >SMO-A324TIVYYTLMAGV | 61   | 4   |
| >SMO-A324TIVYYALMAGV | 191 | >SMO-A324TIVYYTLMAGV | 240  | 49  |
| >SMO-A324TIVYYALMAGV | 12  | >SMO-A324TIVYYTLMAGV | 11   | 1   |
| >SMO-A324TIVYYALMAGV | 119 | >SMO-A324TIVYYTLMAGV | 112  | 7   |
| >SMO-A324TIVYYALMAGV | 39  | >SMO-A324TIVYYTLMAGV | 74   | 35  |
| >SMO-A324TIVYYALMAGV | 104 | >SMO-A324TIVYYTLMAGV | 241  | 137 |
| >SMO-A324TIVYYALMAGV | 19  | >SMO-A324TIVYYTLMAGV | 24   | 5   |
| >SMO-A324TIVYYALMAGV | 337 | >SMO-A324TIVYYTLMAGV | 367  | 30  |
| >SMO-A324TIVYYALMAGV | 361 | >SMO-A324TIVYYTLMAGV | 199  | 162 |
| >SMO-A324TIVYYALM    | 12  | >SMO-A324TIVYYTLM    | 33   | 21  |

|                       |      |                       |      |      |
|-----------------------|------|-----------------------|------|------|
| >SMO-A324T VIVYYALMAC | 332  | >SMO-A324T VIVYYTLMAG | 273  | 59   |
| >SMO-A324T VIVYYALMAC | 125  | >SMO-A324T VIVYYTLMAG | 71   | 54   |
| >SMO-A324T VIVYYALMAC | 75   | >SMO-A324T VIVYYTLMAG | 53   | 22   |
| >SMO-A324T VIVYYALMA  | 931  | >SMO-A324T VIVYYTLMA  | 411  | 520  |
| >SMO-A324T VIVYYALMAC | 24   | >SMO-A324T VIVYYTLMAG | 19   | 5    |
| >SMO-A324T VIVYYALMA  | 499  | >SMO-A324T VIVYYTLMA  | 429  | 70   |
| >SMO-A324T VIVYYALMAC | 14   | >SMO-A324T VIVYYTLMAG | 15   | 1    |
| >SMO-A324T VIVYYALMAC | 37   | >SMO-A324T VIVYYTLMAG | 35   | 2    |
| >SMO-A324T VIVYYALMAC | 239  | >SMO-A324T VIVYYTLMAG | 168  | 71   |
| >SMO-A324T VIVYYALMAC | 375  | >SMO-A324T VIVYYTLMAG | 317  | 58   |
| >SMO-A324T VIVYYALMAC | 806  | >SMO-A324T VIVYYTLMAG | 483  | 323  |
| >SMO-A324T VIVYYALMAC | 19   | >SMO-A324T VIVYYTLMAG | 16   | 3    |
| >SMO-A324T VIVYYALMAC | 128  | >SMO-A324T VIVYYTLMAG | 90   | 38   |
| >SMO-A324T VIVYYALMAC | 115  | >SMO-A324T VIVYYTLMAG | 111  | 4    |
| >SMO-A324T FVIVYYALM  | 2233 | >SMO-A324T FVIVYYTLM  | 471  | 1762 |
| >SMO-A324T FVIVYYAL   | 16   | >SMO-A324T FVIVYYTL   | 24   | 8    |
| >SMO-A324T FVIVYYALM  | 16   | >SMO-A324T FVIVYYTLM  | 19   | 3    |
| >SMO-A324T FVIVYYAL   | 25   | >SMO-A324T FVIVYYTL   | 26   | 1    |
| >SMO-A324T FVIVYYALM  | 86   | >SMO-A324T FVIVYYTLM  | 103  | 17   |
| >SMO-A324T FVIVYYALMA | 569  | >SMO-A324T FVIVYYTLMA | 350  | 219  |
| >SMO-A324T FVIVYYAL   | 9    | >SMO-A324T FVIVYYTL   | 16   | 7    |
| >SMO-A324T FVIVYYALM  | 41   | >SMO-A324T FVIVYYTLM  | 39   | 2    |
| >SMO-A324T FVIVYYALMA | 282  | >SMO-A324T FVIVYYTLMA | 189  | 93   |
| >SMO-A324T FVIVYYAL   | 39   | >SMO-A324T FVIVYYTL   | 53   | 14   |
| >SMO-A324T FVIVYYALM  | 137  | >SMO-A324T FVIVYYTLM  | 150  | 13   |
| >SMO-A324T FVIVYYALMA | 302  | >SMO-A324T FVIVYYTLMA | 130  | 172  |
| >SMO-A324T FVIVYYAL   | 7    | >SMO-A324T FVIVYYTL   | 10   | 3    |
| >SMO-A324T FVIVYYALM  | 40   | >SMO-A324T FVIVYYTLM  | 34   | 6    |
| >SMO-A324T FVIVYYALMA | 90   | >SMO-A324T FVIVYYTLMA | 62   | 28   |
| >SMO-A324T FVIVYYAL   | 59   | >SMO-A324T FVIVYYTL   | 55   | 4    |
| >SMO-A324T FVIVYYAL   | 65   | >SMO-A324T FVIVYYTL   | 62   | 3    |
| >SMO-A324T FVIVYYAL   | 1205 | >SMO-A324T FVIVYYTL   | 449  | 756  |
| >SMO-A324T FVIVYYAL   | 82   | >SMO-A324T FVIVYYTL   | 31   | 51   |
| >SMO-A324T FVIVYYAL   | 989  | >SMO-A324T FVIVYYTL   | 369  | 620  |
| >SMO-A324T FVIVYYAL   | 472  | >SMO-A324T FVIVYYTL   | 1966 | 1494 |
| >SMO-A324T FVIVYYALM  | 15   | >SMO-A324T FVIVYYTLM  | 31   | 16   |
| >SMO-A324T FVIVYYAL   | 170  | >SMO-A324T FVIVYYTL   | 600  | 430  |
| >SMO-A324T FVIVYYALM  | 55   | >SMO-A324T FVIVYYTLM  | 355  | 300  |
| >SMO-A324T FVIVYYALM  | 175  | >SMO-A324T FVIVYYTLM  | 384  | 209  |
| >SMO-A324T FVIVYYAL   | 18   | >SMO-A324T FVIVYYTL   | 25   | 7    |
| >SMO-A324T FVIVYYALM  | 109  | >SMO-A324T FVIVYYTLM  | 232  | 123  |
| >SMO-A324T FVIVYYAL   | 69   | >SMO-A324T FVIVYYTL   | 115  | 46   |
| >SMO-A324T FVIVYYALM  | 84   | >SMO-A324T FVIVYYTLM  | 224  | 140  |

|                        |     |                        |      |      |
|------------------------|-----|------------------------|------|------|
| >SMO-A324T FVIVYYALMA  | 126 | >SMO-A324T FVIVYYTLMA  | 146  | 20   |
| >SMO-A324T FVIVYYAL    | 357 | >SMO-A324T FVIVYYTL    | 528  | 171  |
| >SMO-A324T FVIVYYALM   | 877 | >SMO-A324T FVIVYYTLM   | 461  | 416  |
| >SMO-A324T FVIVYYAL    | 220 | >SMO-A324T FVIVYYTL    | 462  | 242  |
| >SMO-A324T FVIVYYALM   | 209 | >SMO-A324T FVIVYYTLM   | 303  | 94   |
| >SMO-A324T FVIVYYAL    | 47  | >SMO-A324T FVIVYYTL    | 140  | 93   |
| >SMO-A324T FVIVYYAL    | 282 | >SMO-A324T FVIVYYTL    | 739  | 457  |
| >SMO-A324T FVIVYYALM   | 140 | >SMO-A324T FVIVYYTLM   | 57   | 83   |
| >SMO-A324T IFVIVYYAL   | 478 | >SMO-A324T IFVIVYYTL   | 742  | 264  |
| >SMO-A324T IFVIVYYAL   | 33  | >SMO-A324T IFVIVYYTL   | 17   | 16   |
| >SMO-A324T IFVIVYYAL   | 332 | >SMO-A324T IFVIVYYTL   | 43   | 289  |
| >SMO-A324T IFVIVYYAL   | 109 | >SMO-A324T IFVIVYYTL   | 52   | 57   |
| >SMO-A324T IFVIVYYAL   | 420 | >SMO-A324T IFVIVYYTL   | 422  | 2    |
| >SMO-A324T IFVIVYYA    | 401 | >SMO-A324T IFVIVYYT    | 1211 | 810  |
| >SMO-A324T IFVIVYYAL   | 198 | >SMO-A324T IFVIVYYTL   | 225  | 27   |
| >SMO-A324T IIFVIVYYALM | 29  | >SMO-A324T IIFVIVYYTLM | 34   | 5    |
| >SMO-A324T IIFVIVYYA   | 21  | >SMO-A324T IIFVIVYYT   | 71   | 50   |
| >SMO-A324T IIFVIVYYAL  | 245 | >SMO-A324T IIFVIVYYTL  | 178  | 67   |
| >SMO-A324T IIFVIVYYALM | 146 | >SMO-A324T IIFVIVYYTLM | 201  | 55   |
| >SMO-A324T IIFVIVYYA   | 14  | >SMO-A324T IIFVIVYYT   | 66   | 52   |
| >SMO-A324T IIFVIVYYAL  | 63  | >SMO-A324T IIFVIVYYTL  | 49   | 14   |
| >SMO-A324T IIFVIVYYALM | 84  | >SMO-A324T IIFVIVYYTLM | 81   | 3    |
| >SMO-A324T IIFVIVYYA   | 70  | >SMO-A324T IIFVIVYYT   | 776  | 706  |
| >SMO-A324T IIFVIVYYAL  | 347 | >SMO-A324T IIFVIVYYTL  | 304  | 43   |
| >SMO-A324T IIFVIVYYA   | 185 | >SMO-A324T IIFVIVYYT   | 711  | 526  |
| >SMO-A324T IIFVIVYYAL  | 167 | >SMO-A324T IIFVIVYYTL  | 182  | 15   |
| >SMO-A324T IIFVIVYYA   | 9   | >SMO-A324T IIFVIVYYT   | 41   | 32   |
| >SMO-A324T IIFVIVYYAL  | 9   | >SMO-A324T IIFVIVYYTL  | 8    | 1    |
| >SMO-A324T IIFVIVYYALM | 263 | >SMO-A324T IIFVIVYYTLM | 486  | 223  |
| >SMO-A324T IIFVIVYYAL  | 291 | >SMO-A324T IIFVIVYYTL  | 178  | 113  |
| >SMO-A324T IIFVIVYYA   | 108 | >SMO-A324T IIFVIVYYT   | 1040 | 932  |
| >SMO-A324T IIFVIVYYAL  | 152 | >SMO-A324T IIFVIVYYTL  | 59   | 93   |
| >SMO-A324T IIFVIVYYA   | 41  | >SMO-A324T IIFVIVYYT   | 458  | 417  |
| >SMO-A324T IIFVIVYYAL  | 202 | >SMO-A324T IIFVIVYYTL  | 121  | 81   |
| >SMO-A324T IIFVIVYYA   | 148 | >SMO-A324T IIFVIVYYT   | 1912 | 1764 |
| >SMO-A324T IIFVIVYYAL  | 109 | >SMO-A324T IIFVIVYYTL  | 40   | 69   |
| >SMO-A324T IIFVIVYYAL  | 25  | >SMO-A324T IIFVIVYYTL  | 16   | 9    |
| >SMO-A324T IIFVIVYYA   | 18  | >SMO-A324T IIFVIVYYT   | 139  | 121  |
| >SMO-A324T IIFVIVYYAL  | 306 | >SMO-A324T IIFVIVYYTL  | 480  | 174  |
| >SMO-A324T IIFVIVYYALM | 391 | >SMO-A324T IIFVIVYYTLM | 248  | 143  |
| >SMO-A324T IIFVIVYYALM | 46  | >SMO-A324T IIFVIVYYTLM | 26   | 20   |
| >SMO-A324T IIFVIVYYAL  | 449 | >SMO-A324T IIFVIVYYTL  | 550  | 101  |
| >SMO-A324T VIIFVIVYYAL | 445 | >SMO-A324T VIIFVIVYYTL | 437  | 8    |

|                        |      |                        |      |      |
|------------------------|------|------------------------|------|------|
| >SMO-A324T VIIFVIVYYA  | 206  | >SMO-A324T VIIFVIVYYT  | 618  | 412  |
| >SMO-A324T VIIFVIVYYAL | 111  | >SMO-A324T VIIFVIVYYTL | 110  | 1    |
| >SMO-A324T VIIFVIVYYA  | 253  | >SMO-A324T VIIFVIVYYT  | 722  | 469  |
| >SMO-A324T VIIFVIVYYAL | 71   | >SMO-A324T VIIFVIVYYTL | 150  | 79   |
| >SMO-A324T VIIFVIVYYAL | 162  | >SMO-A324T VIIFVIVYYTL | 229  | 67   |
| >SMO-A324T VIIFVIVYYA  | 220  | >SMO-A324T VIIFVIVYYT  | 612  | 392  |
| >SMO-A324T VIIFVIVYYAL | 84   | >SMO-A324T VIIFVIVYYTL | 186  | 102  |
| >SMO-A324T VIIFVIVYYA  | 16   | >SMO-A324T VIIFVIVYYT  | 83   | 67   |
| >SMO-A324T VIIFVIVYYAL | 16   | >SMO-A324T VIIFVIVYYTL | 13   | 3    |
| >SMO-A324T VIIFVIVYYA  | 461  | >SMO-A324T VIIFVIVYYT  | 4597 | 4136 |
| >SMO-A324T VIIFVIVYYAL | 265  | >SMO-A324T VIIFVIVYYTL | 156  | 109  |
| >SMO-A324T VIIFVIVYYA  | 326  | >SMO-A324T VIIFVIVYYT  | 3211 | 2885 |
| >SMO-A324T VIIFVIVYYAL | 536  | >SMO-A324T VIIFVIVYYTL | 181  | 355  |
| >SMO-A324T VIIFVIVYYA  | 355  | >SMO-A324T VIIFVIVYYT  | 2464 | 2109 |
| >SMO-A324T VIIFVIVYYA  | 402  | >SMO-A324T VIIFVIVYYT  | 3861 | 3459 |
| >SMO-A324T VIIFVIVYYAL | 260  | >SMO-A324T VIIFVIVYYTL | 99   | 161  |
| >SMO-A324T VIIFVIVYYAL | 889  | >SMO-A324T VIIFVIVYYTL | 309  | 580  |
| >SMO-A324T VIIFVIVYYAL | 228  | >SMO-A324T VIIFVIVYYTL | 116  | 112  |
| >SMO-A324T VIIFVIVYYA  | 81   | >SMO-A324T VIIFVIVYYT  | 241  | 160  |
| >SMO-A324T VIIFVIVYYAL | 68   | >SMO-A324T VIIFVIVYYTL | 114  | 46   |
| >SMO-A652\QANLWLVEA    | 840  | >SMO-A652\QVNLWLVEA    | 110  | 730  |
| >SMO-A652\QANLWLVEA    | 362  | >SMO-A652\QVNLWLVEA    | 53   | 309  |
| >SMO-A652\QANLWLVEA    | 978  | >SMO-A652\QVNLWLVEA    | 425  | 553  |
| >SMO-A652\QANLWLVEA    | 987  | >SMO-A652\QVNLWLVEA    | 467  | 520  |
| >SMO-A652\VATPVPPEEC   | 6026 | >SMO-A652\VATPVPPEEC   | 169  | 5857 |
| >SMO-A652\VATPVPPEEC   | 9675 | >SMO-A652\VATPVPPEEC   | 424  | 9251 |
| >SMO-A652\VATPVPPEEC   | 8322 | >SMO-A652\VATPVPPEEC   | 57   | 8265 |
| >SMO-A652\EQANLWLVLV   | 363  | >SMO-A652\EQVNLWLVLV   | 1482 | 1119 |
| >SMO-A652\EQANLWLVLV   | 11   | >SMO-A652\EQVNLWLVLV   | 9    | 2    |
| >SMO-A652\EQANLWLVE.   | 822  | >SMO-A652\EQVNLWLVE.   | 400  | 422  |
| >SMO-A652\EQANLWLVLV   | 299  | >SMO-A652\EQVNLWLVLV   | 369  | 70   |
| >SMO-A652\EQANLWLVLV   | 158  | >SMO-A652\EQVNLWLVLV   | 641  | 483  |
| >SMO-A652\EQANLWLVLV   | 479  | >SMO-A652\EQVNLWLVLV   | 1891 | 1412 |
| >SMO-A652\EQANLWLVLV   | 96   | >SMO-A652\EQVNLWLVLV   | 375  | 279  |
| >SMO-A652\EQANLWLVLV   | 259  | >SMO-A652\EQVNLWLVLV   | 491  | 232  |
| >SMO-A652\EEQANLWL     | 30   | >SMO-A652\EEQVNLWL     | 16   | 14   |
| >SMO-A652\EEQANLWLVLV  | 249  | >SMO-A652\EEQVNLWLVLV  | 134  | 115  |
| >SMO-A652\EEQANLWL     | 160  | >SMO-A652\EEQVNLWL     | 336  | 176  |
| >SMO-A652\EEQANLWLVLV  | 453  | >SMO-A652\EEQVNLWLVLV  | 790  | 337  |
| >SMO-A652\EEQANLWL     | 272  | >SMO-A652\EEQVNLWL     | 333  | 61   |
| >SMO-A652\EEQANLWL     | 167  | >SMO-A652\EEQVNLWL     | 230  | 63   |
| >SMO-A652\EEQANLWLVLV  | 15   | >SMO-A652\EEQVNLWLVLV  | 22   | 7    |
| >SMO-A652\EEQANLWLVLV  | 281  | >SMO-A652\EEQVNLWLVLV  | 363  | 82   |

|                       |       |                       |      |       |
|-----------------------|-------|-----------------------|------|-------|
| >SMO-A652\ EEQANLWLV  | 7     | >SMO-A652\ EEQVNLWLV  | 9    | 2     |
| >SMO-A652\ EEQANLWLV  | 70    | >SMO-A652\ EEQVNLWLV  | 65   | 5     |
| >SMO-A652\ PEEQANLWL' | 709   | >SMO-A652\ PEEQVNLWL' | 498  | 211   |
| >SMO-A652\ PEEQANLWL  | 146   | >SMO-A652\ PEEQVNLWL  | 152  | 6     |
| >SMO-A652\ PEEQANLW   | 264   | >SMO-A652\ PEEQVNLW   | 281  | 17    |
| >SMO-A652\ PEEQANLWL' | 401   | >SMO-A652\ PEEQVNLWL' | 341  | 60    |
| >SMO-A652\ PPEEQANLW  | 40    | >SMO-A652\ PPEEQVNLW  | 20   | 20    |
| >SMO-A652\ PPEEQANLW  | 21    | >SMO-A652\ PPEEQVNLW  | 11   | 10    |
| >SMO-A652\ VPPEEQANL  | 110   | >SMO-A652\ VPPEEQVNL  | 25   | 85    |
| >SMO-A652\ VPPEEQANLV | 140   | >SMO-A652\ VPPEEQVNLV | 197  | 57    |
| >SMO-A652\ VPPEEQANL  | 221   | >SMO-A652\ VPPEEQVNL  | 719  | 498   |
| >SMO-A652\ VPPEEQANLV | 50    | >SMO-A652\ VPPEEQVNLV | 89   | 39    |
| >SMO-A652\ VPPEEQANLV | 46    | >SMO-A652\ VPPEEQVNLV | 29   | 17    |
| >SMO-A652\ PVPPEEQA   | 13957 | >SMO-A652\ PVPPEEQV   | 297  | 13660 |
| >SMO-A652\ TPVPPEEQAN | 160   | >SMO-A652\ TPVPPEEQVN | 58   | 102   |
| >SMO-A652\ TPVPPEEQA  | 297   | >SMO-A652\ TPVPPEEQV  | 1588 | 1291  |
| >SMO-A652\ ATPVPPEEQA | 7847  | >SMO-A652\ ATPVPPEEQV | 228  | 7619  |
| >SMO-A652\ ATPVPPEEQA | 17278 | >SMO-A652\ ATPVPPEEQV | 493  | 16785 |
| >SMO-A652\ ATPVPPEEQA | 2514  | >SMO-A652\ ATPVPPEEQV | 294  | 2220  |
| >SMO-A652\ ATPVPPEEQA | 2088  | >SMO-A652\ ATPVPPEEQV | 71   | 2017  |
| >SMO-A68V- APCEPLRYNV | 279   | >SMO-A68V- VPCEPLRYNV | 231  | 48    |
| >SMO-A68V- APCEPLRY   | 307   | >SMO-A68V- VPCEPLRY   | 115  | 192   |
| >SMO-A68V- APCEPLRYNV | 2824  | >SMO-A68V- VPCEPLRYNV | 402  | 2422  |
| >SMO-A68V- AAPCEPLRYN | 2886  | >SMO-A68V- AVPCEPLRYN | 460  | 2426  |
| >SMO-A68V- AAPCEPLRYN | 1791  | >SMO-A68V- AVPCEPLRYN | 365  | 1426  |
| >SMO-A68V- AAPCEPLRYN | 2570  | >SMO-A68V- AVPCEPLRYN | 207  | 2363  |
| >SMO-A68V- AAPCEPLRY  | 544   | >SMO-A68V- AVPCEPLRY  | 58   | 486   |
| >SMO-A68V- AAPCEPLRYN | 402   | >SMO-A68V- AVPCEPLRYN | 121  | 281   |
| >SMO-A68V- AAPCEPLRY  | 681   | >SMO-A68V- AVPCEPLRY  | 47   | 634   |
| >SMO-A68V- RAAPCEPL   | 401   | >SMO-A68V- RAVPCEPL   | 294  | 107   |
| >SMO-A68V- RAAPCEPLRY | 282   | >SMO-A68V- RAVPCEPLRY | 578  | 296   |
| >SMO-A68V- RAAPCEPLR  | 30    | >SMO-A68V- RAVPCEPLR  | 32   | 2     |
| >SMO-A68V- RAAPCEPLR  | 204   | >SMO-A68V- RAVPCEPLR  | 373  | 169   |
| >SMO-A68V- RAAPCEPLRY | 85    | >SMO-A68V- RAVPCEPLRY | 132  | 47    |
| >SMO-A68V- RAAPCEPL   | 111   | >SMO-A68V- RAVPCEPL   | 840  | 729   |
| >SMO-A68V- RAAPCEPLRY | 405   | >SMO-A68V- RAVPCEPLRY | 357  | 48    |
| >SMO-A68V- RAAPCEPL   | 20    | >SMO-A68V- RAVPCEPL   | 10   | 10    |
| >SMO-A68V- RAAPCEPLRY | 4     | >SMO-A68V- RAVPCEPLRY | 3    | 1     |
| >SMO-A68V- RAAPCEPLRY | 118   | >SMO-A68V- RAVPCEPLRY | 114  | 4     |
| >SMO-A68V- RAAPCEPL   | 341   | >SMO-A68V- RAVPCEPL   | 615  | 274   |
| >SMO-A68V- RAAPCEPLRY | 18    | >SMO-A68V- RAVPCEPLRY | 22   | 4     |
| >SMO-A68V- RAAPCEPLRY | 188   | >SMO-A68V- RAVPCEPLRY | 482  | 294   |
| >SMO-A68V- RAAPCEPLR  | 104   | >SMO-A68V- RAVPCEPLR  | 84   | 20    |

|                        |       |                        |      |       |
|------------------------|-------|------------------------|------|-------|
| >SMO-A68V- RAAPCEPL    | 136   | >SMO-A68V- RAVPCEPL    | 470  | 334   |
| >SMO-A68V- GRAAPCEPLR  | 396   | >SMO-A68V- GRAVPCEPLR  | 568  | 172   |
| >SMO-A68V- GRAAPCEPLR  | 147   | >SMO-A68V- GRAVPCEPLR  | 260  | 113   |
| >SMO-A68V- GRAAPCEPL   | 275   | >SMO-A68V- GRAVPCEPL   | 167  | 108   |
| >SMO-A68V- LSHCGRAA    | 320   | >SMO-A68V- LSHCGRAV    | 598  | 278   |
| >SMO-A68V- PLSHCGRAA   | 10388 | >SMO-A68V- PLSHCGRAV   | 179  | 10209 |
| >SMO-A68V- PPLSHCGRAA  | 491   | >SMO-A68V- PPLSHCGRAV  | 1298 | 807   |
| >SMO-D473† DFFNQA EW   | 2496  | >SMO-D473† HFFNQA EW   | 44   | 2452  |
| >SMO-D473† DFFNQA EWE  | 189   | >SMO-D473† HFFNQA EWE  | 47   | 142   |
| >SMO-D473† DFFNQA EWE  | 36    | >SMO-D473† HFFNQA EWE  | 171  | 135   |
| >SMO-D473† DFFNQA EWE  | 61    | >SMO-D473† HFFNQA EWE  | 44   | 17    |
| >SMO-D473† DFFNQA EW   | 8014  | >SMO-D473† HFFNQA EW   | 491  | 7523  |
| >SMO-D473† DFFNQA EW   | 10110 | >SMO-D473† HFFNQA EW   | 193  | 9917  |
| >SMO-D473† DFFNQA EWE  | 485   | >SMO-D473† HFFNQA EWE  | 135  | 350   |
| >SMO-D473† DFFNQA EWE  | 131   | >SMO-D473† HFFNQA EWE  | 27   | 104   |
| >SMO-D473† YDFFNQA EW  | 67    | >SMO-D473† YHFFNQA EW  | 58   | 9     |
| >SMO-D473† YDFFNQA EW  | 5491  | >SMO-D473† YHFFNQA EW  | 309  | 5182  |
| >SMO-D473† YDFFNQA EW  | 15747 | >SMO-D473† YHFFNQA EW  | 226  | 15521 |
| >SMO-D473† YDFFNQA EW  | 1226  | >SMO-D473† YHFFNQA EW  | 7    | 1219  |
| >SMO-D473† YDFFNQA EW  | 825   | >SMO-D473† YHFFNQA EW  | 308  | 517   |
| >SMO-D473† FYDFFNQA EV | 441   | >SMO-D473† FYHFFNQA EV | 369  | 72    |
| >SMO-D473† FYDFFNQA    | 1511  | >SMO-D473† FYHFFNQA    | 212  | 1299  |
| >SMO-D473† FYDFFNQA EV | 23    | >SMO-D473† FYHFFNQA EV | 8    | 15    |
| >SMO-D473† FYDFFNQA EV | 375   | >SMO-D473† FYHFFNQA EV | 347  | 28    |
| >SMO-D473† FYDFFNQA EV | 954   | >SMO-D473† FYHFFNQA EV | 151  | 803   |
| >SMO-D473† HFYDFFNQA   | 349   | >SMO-D473† HFYHFFNQA   | 348  | 1     |
| >SMO-D473† HFYDFFNQA   | 190   | >SMO-D473† HFYHFFNQA   | 586  | 396   |
| >SMO-D473† HFYDFFNQA E | 184   | >SMO-D473† HFYHFFNQA E | 140  | 44    |
| >SMO-D473† HFYDFFNQA E | 48    | >SMO-D473† HFYHFFNQA E | 32   | 16    |
| >SMO-D473† HFYDFFNQA   | 986   | >SMO-D473† HFYHFFNQA   | 446  | 540   |
| >SMO-D473† HFYDFFNQA   | 442   | >SMO-D473† HFYHFFNQA   | 356  | 86    |
| >SMO-D473† HFYDFFNQA E | 236   | >SMO-D473† HFYHFFNQA E | 118  | 118   |
| >SMO-D473† HFYDFFNQA E | 412   | >SMO-D473† HFYHFFNQA E | 278  | 134   |
| >SMO-D473† HFYDFFNQ    | 64    | >SMO-D473† HFYHFFNQ    | 75   | 11    |
| >SMO-D473† HFYDFFNQA   | 460   | >SMO-D473† HFYHFFNQA   | 681  | 221   |
| >SMO-D473† SCHFYDFFNC  | 1162  | >SMO-D473† SCHFYHFFNC  | 252  | 910   |
| >SMO-D473† FSCHFYDF    | 876   | >SMO-D473† FSCHFYHF    | 339  | 537   |
| >SMO-D473† FSCHFYDF    | 645   | >SMO-D473† FSCHFYHF    | 300  | 345   |
| >SMO-D473† FSCHFYDFF   | 116   | >SMO-D473† FSCHFYHFF   | 85   | 31    |
| >SMO-D473† FSCHFYDF    | 1501  | >SMO-D473† FSCHFYHF    | 402  | 1099  |
| >SMO-D473† FSCHFYDFF   | 314   | >SMO-D473† FSCHFYHFF   | 203  | 111   |
| >SMO-D473† FSCHFYDF    | 491   | >SMO-D473† FSCHFYHF    | 277  | 214   |
| >SMO-D473† FSCHFYDFF   | 1380  | >SMO-D473† FSCHFYHFF   | 178  | 1202  |



|                       |       |                        |     |       |
|-----------------------|-------|------------------------|-----|-------|
| >SMO-D473† FSCHFYDFFN | 2227  | >SMO-D473† FSCHFYHFFN  | 473 | 1754  |
| >SMO-D473† FSCHFYDFFN | 926   | >SMO-D473† FSCHFYHFFN  | 249 | 677   |
| >SMO-D473† FSCHFYDF   | 407   | >SMO-D473† FSCHFYHF    | 81  | 326   |
| >SMO-D473† FSCHFYDF   | 889   | >SMO-D473† FSCHFYHFF   | 405 | 484   |
| >SMO-D473† FSCHFYDF   | 23    | >SMO-D473† FSCHFYHF    | 17  | 6     |
| >SMO-D473† FSCHFYDF   | 34    | >SMO-D473† FSCHFYHFF   | 15  | 19    |
| >SMO-D473† FSCHFYDF   | 48    | >SMO-D473† FSCHFYHF    | 18  | 30    |
| >SMO-D473† FSCHFYDF   | 83    | >SMO-D473† FSCHFYHFF   | 20  | 63    |
| >SMO-D473† FSCHFYDF   | 1416  | >SMO-D473† FSCHFYHF    | 73  | 1343  |
| >SMO-D473† FSCHFYDF   | 173   | >SMO-D473† FSCHFYHFF   | 32  | 141   |
| >SMO-D473† FSCHFYDF   | 306   | >SMO-D473† FSCHFYHFF   | 55  | 251   |
| >SMO-D473† FSCHFYDF   | 784   | >SMO-D473† FSCHFYHF    | 454 | 330   |
| >SMO-D473† FSCHFYDF   | 111   | >SMO-D473† FSCHFYHFF   | 112 | 1     |
| >SMO-D473† FSCHFYDF   | 537   | >SMO-D473† FSCHFYHFF   | 349 | 188   |
| >SMO-D473† TFSCHFYDF  | 16    | >SMO-D473† TFSCHFYHF   | 12  | 4     |
| >SMO-D473† TFSCHFYDF  | 149   | >SMO-D473† TFSCHFYHFF  | 31  | 118   |
| >SMO-D473† TFSCHFYDF  | 88    | >SMO-D473† TFSCHFYHF   | 59  | 29    |
| >SMO-D473† TFSCHFYDF  | 277   | >SMO-D473† TFSCHFYHFF  | 95  | 182   |
| >SMO-D473† TFSCHFYDF  | 19    | >SMO-D473† TFSCHFYHF   | 12  | 7     |
| >SMO-D473† TFSCHFYDF  | 10    | >SMO-D473† TFSCHFYHFF  | 9   | 1     |
| >SMO-D473† TFSCHFYD   | 7949  | >SMO-D473† TFSCHFYH    | 181 | 7768  |
| >SMO-D473† TFSCHFYDF  | 49    | >SMO-D473† TFSCHFYHF   | 35  | 14    |
| >SMO-D473† TFSCHFYDF  | 112   | >SMO-D473† TFSCHFYHFF  | 55  | 57    |
| >SMO-D473† TFSCHFYD   | 5610  | >SMO-D473† TFSCHFYH    | 261 | 5349  |
| >SMO-D473† TFSCHFYDF  | 3678  | >SMO-D473† TFSCHFYHF   | 319 | 3359  |
| >SMO-D473† TFSCHFYDF  | 482   | >SMO-D473† TFSCHFYHF   | 281 | 201   |
| >SMO-D473† TFSCHFYDF  | 425   | >SMO-D473† TFSCHFYHFF  | 228 | 197   |
| >SMO-D473† ITFSCHFYDF | 90    | >SMO-D473† ITFSCHFYHFF | 90  | 0     |
| >SMO-D473† ITFSCHFYDF | 201   | >SMO-D473† ITFSCHFYHF  | 515 | 314   |
| >SMO-D473† ITFSCHFYDF | 282   | >SMO-D473† ITFSCHFYHFF | 141 | 141   |
| >SMO-D473† ITFSCHFYDF | 384   | >SMO-D473† ITFSCHFYHFF | 276 | 108   |
| >SMO-D473† ITFSCHFYD  | 11757 | >SMO-D473† ITFSCHFYH   | 155 | 11602 |
| >SMO-D473† ITFSCHFYD  | 3672  | >SMO-D473† ITFSCHFYH   | 20  | 3652  |
| >SMO-D473† ITFSCHFYDF | 669   | >SMO-D473† ITFSCHFYHF  | 252 | 417   |
| >SMO-D473† ITFSCHFYDF | 126   | >SMO-D473† ITFSCHFYHFF | 43  | 83    |
| >SMO-D473† ITFSCHFYDF | 382   | >SMO-D473† ITFSCHFYHFF | 133 | 249   |
| >SMO-D473† ITFSCHFYDF | 483   | >SMO-D473† ITFSCHFYHF  | 225 | 258   |
| >SMO-D473† ITFSCHFYDF | 163   | >SMO-D473† ITFSCHFYHFF | 117 | 46    |
| >SMO-D473† ITFSCHFYD  | 4786  | >SMO-D473† ITFSCHFYH   | 61  | 4725  |
| >SMO-D473† ITFSCHFYDF | 119   | >SMO-D473† ITFSCHFYHF  | 60  | 59    |
| >SMO-D473† ITFSCHFYDF | 137   | >SMO-D473† ITFSCHFYHFF | 31  | 106   |
| >SMO-D473† ITFSCHFYD  | 4513  | >SMO-D473† ITFSCHFYH   | 283 | 4230  |
| >SMO-D473† ITFSCHFYDF | 460   | >SMO-D473† ITFSCHFYHFF | 83  | 377   |

|                        |       |                        |       |       |
|------------------------|-------|------------------------|-------|-------|
| >SMO-D473F ITFSCHFYD   | 348   | >SMO-D473F ITFSCHFYH   | 15    | 333   |
| >SMO-D473F ITFSCHFYDF  | 553   | >SMO-D473F ITFSCHFYHFF | 97    | 456   |
| >SMO-D473F ITFSCHFYDF  | 24    | >SMO-D473F ITFSCHFYHF  | 49    | 25    |
| >SMO-D473F ITFSCHFYDF  | 244   | >SMO-D473F ITFSCHFYHFF | 179   | 65    |
| >SMO-D473F ITFSCHFYD   | 1375  | >SMO-D473F ITFSCHFYH   | 485   | 890   |
| >SMO-D473F ITFSCHFYD   | 573   | >SMO-D473F ITFSCHFYH   | 26    | 547   |
| >SMO-D473F ITFSCHFYDF  | 98    | >SMO-D473F ITFSCHFYHFF | 54    | 44    |
| >SMO-D473F ITFSCHFYDF  | 172   | >SMO-D473F ITFSCHFYHF  | 48    | 124   |
| >SMO-D473F ITFSCHFYDF  | 456   | >SMO-D473F ITFSCHFYHFF | 265   | 191   |
| >SMO-D473F ITFSCHFYDF  | 7     | >SMO-D473F ITFSCHFYHF  | 6     | 1     |
| >SMO-D473F ITFSCHFYDF  | 11    | >SMO-D473F ITFSCHFYHFF | 6     | 5     |
| >SMO-D473F ITFSCHFYD   | 3045  | >SMO-D473F ITFSCHFYH   | 95    | 2950  |
| >SMO-D473F ITFSCHFYDF  | 6     | >SMO-D473F ITFSCHFYHF  | 4     | 2     |
| >SMO-D473F ITFSCHFYDF  | 6     | >SMO-D473F ITFSCHFYHFF | 4     | 2     |
| >SMO-D473F ITFSCHFYD   | 2488  | >SMO-D473F ITFSCHFYH   | 285   | 2203  |
| >SMO-D473F ITFSCHFYDF  | 90    | >SMO-D473F ITFSCHFYHF  | 58    | 32    |
| >SMO-D473F ITFSCHFYDF  | 55    | >SMO-D473F ITFSCHFYHFF | 41    | 14    |
| >SMO-D473F ITFSCHFYDF  | 191   | >SMO-D473F ITFSCHFYHF  | 24    | 167   |
| >SMO-D473F ITFSCHFYDF  | 31    | >SMO-D473F ITFSCHFYHFF | 17    | 14    |
| >SMO-D473F ITFSCHFYD   | 854   | >SMO-D473F ITFSCHFYH   | 399   | 455   |
| >SMO-D473F ITFSCHFYDF  | 45    | >SMO-D473F ITFSCHFYHF  | 26    | 19    |
| >SMO-D473F ITFSCHFYDF  | 25    | >SMO-D473F ITFSCHFYHFF | 11    | 14    |
| >SMO-D473F ITFSCHFYD   | 247   | >SMO-D473F ITFSCHFYH   | 6     | 241   |
| >SMO-D473F ITFSCHFYDF  | 3     | >SMO-D473F ITFSCHFYHFF | 3     | 0     |
| >SMO-D473F ITFSCHFYD   | 776   | >SMO-D473F ITFSCHFYH   | 118   | 658   |
| >SMO-D473F ITFSCHFYDF  | 225   | >SMO-D473F ITFSCHFYHF  | 217   | 8     |
| >SMO-D473F ITFSCHFYDF  | 789   | >SMO-D473F ITFSCHFYHFF | 325   | 464   |
| >SMO-D473F LITFSCHFYDF | 426   | >SMO-D473F LITFSCHFYHF | 201   | 225   |
| >SMO-D473F LITFSCHFYDF | 391   | >SMO-D473F LITFSCHFYHF | 339   | 52    |
| >SMO-D473F LITFSCHFYD  | 2081  | >SMO-D473F LITFSCHFYH  | 149   | 1932  |
| >SMO-D473F LITFSCHFYDF | 1372  | >SMO-D473F LITFSCHFYHF | 182   | 1190  |
| >SMO-D473F LITFSCHFYDF | 376   | >SMO-D473F LITFSCHFYHF | 277   | 99    |
| >SMO-K575N KRHELLQN    | 202   | >SMO-K575N MRHELLQN    | 5809  | 5607  |
| >SMO-K575N SKRHELLQNP  | 5627  | >SMO-K575N SMRHELLQN   | 254   | 5373  |
| >SMO-K575N KSKMIAKAFS  | 139   | >SMO-K575N KSKMIAKAFS  | 19540 | 19401 |
| >SMO-K575N KSKMIAKAFS  | 76    | >SMO-K575N KSKMIAKAFS  | 18139 | 18063 |
| >SMO-K575N KSKMIAKAFS  | 4     | >SMO-K575N KSKMIAKAFS  | 17    | 13    |
| >SMO-K575N KSKMIAKAFS  | 40    | >SMO-K575N KSKMIAKAFS  | 3483  | 3443  |
| >SMO-K575N KSKMIAKAFS  | 4293  | >SMO-K575N KSKMIAKAFS  | 269   | 4024  |
| >SMO-K575N KSKMIAKAFS  | 4623  | >SMO-K575N KSKMIAKAFS  | 9     | 4614  |
| >SMO-K575N KSKMIAKAFS  | 14790 | >SMO-K575N KSKMIAKAFS  | 299   | 14491 |
| >SMO-K575N KSKMIAKAFS  | 20193 | >SMO-K575N KSKMIAKAFS  | 480   | 19713 |
| >SMO-K575N KSKMIAKAFS  | 5693  | >SMO-K575N KSKMIAKAFS  | 43    | 5650  |

|                        |       |                       |     |       |
|------------------------|-------|-----------------------|-----|-------|
| >SMO-K575N FSKRHELL    | 5285  | >SMO-K575N FSMRHELL   | 271 | 5014  |
| >SMO-K575N FSKRHELL    | 2774  | >SMO-K575N FSMRHELL   | 65  | 2709  |
| >SMO-K575N FSKRHELL    | 8809  | >SMO-K575N FSMRHELL   | 284 | 8525  |
| >SMO-K575N FSKRHELL    | 10455 | >SMO-K575N FSMRHELL   | 438 | 10017 |
| >SMO-K575N FSKRHELL    | 234   | >SMO-K575N FSMRHELL   | 378 | 144   |
| >SMO-K575N FSKRHELL    | 1080  | >SMO-K575N FSMRHELL   | 444 | 636   |
| >SMO-K575N FSKRHELL    | 694   | >SMO-K575N FSMRHELL   | 183 | 511   |
| >SMO-K575N FSKRHELL    | 8517  | >SMO-K575N FSMRHELL   | 228 | 8289  |
| >SMO-K575N FSKRHELL    | 373   | >SMO-K575N FSMRHELL   | 241 | 132   |
| >SMO-K575N FSKRHELL    | 2455  | >SMO-K575N FSMRHELL   | 382 | 2073  |
| >SMO-K575N AFSKRHEL    | 151   | >SMO-K575N AFSMRHEL   | 296 | 145   |
| >SMO-K575N AFSKRHEL    | 364   | >SMO-K575N AFSMRHEL   | 337 | 27    |
| >SMO-K575N AFSKRHELL   | 329   | >SMO-K575N AFSMRHELL  | 321 | 8     |
| >SMO-K575N AFSKRHEL    | 904   | >SMO-K575N AFSMRHEL   | 437 | 467   |
| >SMO-K575N KAFSKRHEL   | 350   | >SMO-K575N KAFSMRHEL  | 421 | 71    |
| >SMO-K575N KAFSKRHEL   | 520   | >SMO-K575N KAFSMRHEL  | 235 | 285   |
| >SMO-K575N KAFSKRHELL  | 474   | >SMO-K575N KAFSMRHELL | 288 | 186   |
| >SMO-K575N KAFSKRHEL   | 1026  | >SMO-K575N KAFSMRHEL  | 412 | 614   |
| >SMO-K575N KAFSKRHEL   | 244   | >SMO-K575N KAFSMRHEL  | 203 | 41    |
| >SMO-K575N KAFSKRHELL  | 545   | >SMO-K575N KAFSMRHELL | 490 | 55    |
| >SMO-K575N KAFSKRHEL   | 349   | >SMO-K575N KAFSMRHEL  | 351 | 2     |
| >SMO-K575N KAFSKRHEL   | 707   | >SMO-K575N KAFSMRHEL  | 181 | 526   |
| >SMO-K575N KAFSKRHELL  | 604   | >SMO-K575N KAFSMRHELL | 223 | 381   |
| >SMO-K575N KAFSKRHEL   | 236   | >SMO-K575N KAFSMRHEL  | 193 | 43    |
| >SMO-K575N KAFSKRHELL  | 527   | >SMO-K575N KAFSMRHELL | 412 | 115   |
| >SMO-K575N KAFSKRHEL   | 28    | >SMO-K575N KAFSMRHEL  | 34  | 6     |
| >SMO-K575N KAFSKRHELL  | 51    | >SMO-K575N KAFSMRHELL | 56  | 5     |
| >SMO-K575N KAFSKRHEL   | 417   | >SMO-K575N KAFSMRHEL  | 348 | 69    |
| >SMO-K575N KAFSKRHELL  | 352   | >SMO-K575N KAFSMRHELL | 362 | 10    |
| >SMO-K575N KAFSKRHEL   | 460   | >SMO-K575N KAFSMRHEL  | 102 | 358   |
| >SMO-K575N KAFSKRHELL  | 392   | >SMO-K575N KAFSMRHELL | 151 | 241   |
| >SMO-K575N KAFSKRHEL   | 1865  | >SMO-K575N KAFSMRHEL  | 351 | 1514  |
| >SMO-K575N AKAFSKRHEL  | 104   | >SMO-K575N AKAFSMRHEI | 71  | 33    |
| >SMO-K575N AKAFSKRHEL  | 212   | >SMO-K575N AKAFSMRHEI | 144 | 68    |
| >SMO-K575N IAKAFSKRHEI | 454   | >SMO-K575N IAKAFSMRHE | 194 | 260   |
| >SMO-K575N IAKAFSKR    | 19    | >SMO-K575N IAKAFSMR   | 17  | 2     |
| >SMO-K575N IAKAFSKR    | 179   | >SMO-K575N IAKAFSMR   | 85  | 94    |
| >SMO-K575N IAKAFSKR    | 51    | >SMO-K575N IAKAFSMR   | 27  | 24    |
| >SMO-K575N IAKAFSKRHEI | 312   | >SMO-K575N IAKAFSMRHE | 582 | 270   |
| >SMO-K575N IAKAFSKRHEI | 543   | >SMO-K575N IAKAFSMRHE | 384 | 159   |
| >SMO-K575N IAKAFSKRHEI | 143   | >SMO-K575N IAKAFSMRHE | 165 | 22    |
| >SMO-K575N IAKAFSKR    | 460   | >SMO-K575N IAKAFSMR   | 599 | 139   |
| >SMO-K575N MIAKAFSK    | 20284 | >SMO-K575N MIAKAFSM   | 427 | 19857 |

|                      |       |                      |       |       |
|----------------------|-------|----------------------|-------|-------|
| >SMO-K575N MIAKAFSK  | 5990  | >SMO-K575N MIAKAFSM  | 41    | 5949  |
| >SMO-K575N MIAKAFSK  | 13521 | >SMO-K575N MIAKAFSM  | 348   | 13173 |
| >SMO-K575N MIAKAFSK  | 6461  | >SMO-K575N MIAKAFSM  | 38    | 6423  |
| >SMO-K575N MIAKAFSK  | 40    | >SMO-K575N MIAKAFSM  | 15309 | 15269 |
| >SMO-K575N MIAKAFSKR | 165   | >SMO-K575N MIAKAFSMR | 190   | 25    |
| >SMO-K575N MIAKAFSK  | 14    | >SMO-K575N MIAKAFSM  | 14348 | 14334 |
| >SMO-K575N MIAKAFSKR | 288   | >SMO-K575N MIAKAFSMR | 155   | 133   |
| >SMO-K575N MIAKAFSK  | 97    | >SMO-K575N MIAKAFSM  | 4550  | 4453  |
| >SMO-K575N MIAKAFSKR | 32    | >SMO-K575N MIAKAFSMR | 32    | 0     |
| >SMO-K575N MIAKAFSKR | 375   | >SMO-K575N MIAKAFSMR | 219   | 156   |
| >SMO-K575N MIAKAFSK  | 7     | >SMO-K575N MIAKAFSM  | 2518  | 2511  |
| >SMO-K575N MIAKAFSKR | 4     | >SMO-K575N MIAKAFSMR | 3     | 1     |
| >SMO-K575N MIAKAFSK  | 7628  | >SMO-K575N MIAKAFSM  | 113   | 7515  |
| >SMO-K575N MIAKAFSK  | 11830 | >SMO-K575N MIAKAFSM  | 121   | 11709 |
| >SMO-K575N MIAKAFSK  | 10956 | >SMO-K575N MIAKAFSM  | 437   | 10519 |
| >SMO-K575N MIAKAFSK  | 14274 | >SMO-K575N MIAKAFSM  | 224   | 14050 |
| >SMO-K575N MIAKAFSK  | 15604 | >SMO-K575N MIAKAFSM  | 137   | 15467 |
| >SMO-K575N MIAKAFSKR | 115   | >SMO-K575N MIAKAFSMR | 190   | 75    |
| >SMO-K575N MIAKAFSK  | 9681  | >SMO-K575N MIAKAFSM  | 20    | 9661  |
| >SMO-K575N MIAKAFSK  | 5011  | >SMO-K575N MIAKAFSM  | 41    | 4970  |
| >SMO-K575N MIAKAFSK  | 9698  | >SMO-K575N MIAKAFSM  | 83    | 9615  |
| >SMO-K575N MIAKAFSK  | 2943  | >SMO-K575N MIAKAFSM  | 17    | 2926  |
| >SMO-K575N MIAKAFSK  | 3080  | >SMO-K575N MIAKAFSM  | 25    | 3055  |
| >SMO-K575N MIAKAFSK  | 5441  | >SMO-K575N MIAKAFSM  | 16    | 5425  |
| >SMO-K575N MIAKAFSK  | 12096 | >SMO-K575N MIAKAFSM  | 252   | 11844 |
| >SMO-K575N MIAKAFSK  | 19276 | >SMO-K575N MIAKAFSM  | 354   | 18922 |
| >SMO-K575N MIAKAFSK  | 4120  | >SMO-K575N MIAKAFSM  | 151   | 3969  |
| >SMO-K575N MIAKAFSK  | 28    | >SMO-K575N MIAKAFSM  | 9790  | 9762  |
| >SMO-K575N MIAKAFSKR | 66    | >SMO-K575N MIAKAFSMI | 46    | 20    |
| >SMO-K575N MIAKAFSKR | 688   | >SMO-K575N MIAKAFSMI | 135   | 553   |
| >SMO-K575N MIAKAFSK  | 10    | >SMO-K575N MIAKAFSM  | 8680  | 8670  |
| >SMO-K575N MIAKAFSKR | 424   | >SMO-K575N MIAKAFSMI | 307   | 117   |
| >SMO-K575N MIAKAFSK  | 25    | >SMO-K575N MIAKAFSM  | 1923  | 1898  |
| >SMO-K575N MIAKAFSK  | 20    | >SMO-K575N MIAKAFSM  | 1981  | 1961  |
| >SMO-K575N MIAKAFSKR | 13    | >SMO-K575N MIAKAFSMI | 11    | 2     |
| >SMO-K575N MIAKAFSKR | 983   | >SMO-K575N MIAKAFSMI | 477   | 506   |
| >SMO-K575N MIAKAFSK  | 632   | >SMO-K575N MIAKAFSM  | 53    | 579   |
| >SMO-K575N MIAKAFSKR | 479   | >SMO-K575N MIAKAFSMI | 353   | 126   |
| >SMO-K575N MIAKAFSKR | 385   | >SMO-K575N MIAKAFSMI | 220   | 165   |
| >SMO-K575N MIAKAFSK  | 9362  | >SMO-K575N MIAKAFSM  | 72    | 9290  |
| >SMO-K575N MIAKAFSK  | 1330  | >SMO-K575N MIAKAFSM  | 47    | 1283  |
| >SMO-K575N MIAKAFSKR | 652   | >SMO-K575N MIAKAFSMI | 363   | 289   |
| >SMO-K575N MIAKAFSK  | 14253 | >SMO-K575N MIAKAFSM  | 30    | 14223 |

|                         |       |                         |       |       |
|-------------------------|-------|-------------------------|-------|-------|
| >SMO-K575N KMIAKAFSK    | 15208 | >SMO-K575N KMIAKAFSM    | 31    | 15177 |
| >SMO-K575N KMIAKAFSKR   | 82    | >SMO-K575N KMIAKAFSMI   | 70    | 12    |
| >SMO-K575N KMIAKAFSK    | 154   | >SMO-K575N KMIAKAFSM    | 9425  | 9271  |
| >SMO-K575N KMIAKAFSKR   | 18    | >SMO-K575N KMIAKAFSMI   | 25    | 7     |
| >SMO-K575N SKMIAKAFSK   | 290   | >SMO-K575N SKMIAKAFSN   | 33132 | 32842 |
| >SMO-K575N SKMIAKAFSK   | 1887  | >SMO-K575N SKMIAKAFSN   | 61    | 1826  |
| >SMO-K575N SKMIAKAFSK   | 13376 | >SMO-K575N SKMIAKAFSN   | 359   | 13017 |
| >SMO-K575N SKMIAKAFSK   | 28268 | >SMO-K575N SKMIAKAFSN   | 376   | 27892 |
| >SMO-L514F SLLVEKINL    | 672   | >SMO-L514F FLLVEKINL    | 53    | 619   |
| >SMO-L514F SLLVEKINLFA  | 227   | >SMO-L514F FLLVEKINLFA  | 33    | 194   |
| >SMO-L514F SLLVEKINL    | 514   | >SMO-L514F FLLVEKINL    | 43    | 471   |
| >SMO-L514F SLLVEKINLFA  | 481   | >SMO-L514F FLLVEKINLFA  | 38    | 443   |
| >SMO-L514F SLLVEKINLFA  | 1578  | >SMO-L514F FLLVEKINLFA  | 249   | 1329  |
| >SMO-L514F SLLVEKINL    | 2644  | >SMO-L514F FLLVEKINL    | 125   | 2519  |
| >SMO-L514F SLLVEKINLFA  | 856   | >SMO-L514F FLLVEKINLFA  | 52    | 804   |
| >SMO-L514F SLLVEKINL    | 79    | >SMO-L514F FLLVEKINL    | 14    | 65    |
| >SMO-L514F SLLVEKINLF   | 2056  | >SMO-L514F FLLVEKINLF   | 394   | 1662  |
| >SMO-L514F SLLVEKINLFA  | 70    | >SMO-L514F FLLVEKINLFA  | 14    | 56    |
| >SMO-L514F SLLVEKINL    | 172   | >SMO-L514F FLLVEKINL    | 25    | 147   |
| >SMO-L514F SLLVEKINLFA  | 297   | >SMO-L514F FLLVEKINLFA  | 36    | 261   |
| >SMO-L514F SLLVEKINL    | 18    | >SMO-L514F FLLVEKINL    | 10    | 8     |
| >SMO-L514F SLLVEKINLFA  | 18    | >SMO-L514F FLLVEKINLFA  | 11    | 7     |
| >SMO-L514F SLLVEKINL    | 1088  | >SMO-L514F FLLVEKINL    | 23    | 1065  |
| >SMO-L514F SLLVEKINLFA  | 1606  | >SMO-L514F FLLVEKINLFA  | 55    | 1551  |
| >SMO-L514F SLLVEKINL    | 20    | >SMO-L514F FLLVEKINL    | 5     | 15    |
| >SMO-L514F SLLVEKINLFA  | 52    | >SMO-L514F FLLVEKINLFA  | 9     | 43    |
| >SMO-L514F SLLVEKINLF   | 1552  | >SMO-L514F FLLVEKINLF   | 437   | 1115  |
| >SMO-L514F SLLVEKINLF   | 470   | >SMO-L514F FLLVEKINLF   | 85    | 385   |
| >SMO-L514F PSELLVEKINLF | 8016  | >SMO-L514F PSELLVEKINLF | 263   | 7753  |
| >SMO-L514F PSELLVEKINLF | 8323  | >SMO-L514F PSELLVEKINLF | 155   | 8168  |
| >SMO-L514F IPDCEIKNRPS  | 14973 | >SMO-L514F IPDCEIKNRPF  | 269   | 14704 |
| >SMO-L514F IPDCEIKNRPS  | 4480  | >SMO-L514F IPDCEIKNRPF  | 68    | 4412  |
| >SMO-L514F IPDCEIKNRPS  | 22559 | >SMO-L514F IPDCEIKNRPF  | 226   | 22333 |
| >SMO-L514F RPSLLVEKINL  | 2033  | >SMO-L514F RPSELLVEKINL | 37    | 1996  |
| >SMO-L514F RPSLLVEKI    | 5173  | >SMO-L514F RPSELLVEKI   | 491   | 4682  |
| >SMO-L514F RPSLLVEKINL  | 151   | >SMO-L514F RPSELLVEKINL | 499   | 348   |
| >SMO-L514F RPSLLVEKI    | 1770  | >SMO-L514F RPSELLVEKI   | 210   | 1560  |
| >SMO-L514F NRPSLLVEK    | 876   | >SMO-L514F NRPSLLVEK    | 194   | 682   |
| >SMO-L514F KNRPSLLV     | 12    | >SMO-L514F KNRPSLLV     | 15    | 3     |
| >SMO-L514F KNRPSLLVEK   | 5     | >SMO-L514F KNRPSLLVEK   | 5     | 0     |
| >SMO-L514F KNRPSLLVEKI  | 176   | >SMO-L514F KNRPSLLVEKI  | 185   | 9     |
| >SMO-L514F KNRPSLLVEKI  | 301   | >SMO-L514F KNRPSLLVEKI  | 176   | 125   |
| >SMO-L514F IKNRPSLL     | 25    | >SMO-L514F IKNRPSLL     | 57    | 32    |

|                        |       |                        |      |       |
|------------------------|-------|------------------------|------|-------|
| >SMO-L514F IKNRPSLLV   | 50    | >SMO-L514F IKNRPFLLV   | 38   | 12    |
| >SMO-L514F IKNRPSLLVEK | 219   | >SMO-L514F IKNRPFLLVEK | 224  | 5     |
| >SMO-L514F EIKNRPSLLV  | 545   | >SMO-L514F EIKNRPFLLV  | 256  | 289   |
| >SMO-L514F EIKNRPSLLV  | 842   | >SMO-L514F EIKNRPFLLV  | 493  | 349   |
| >SMO-L514F EIKNRPSLLV  | 1192  | >SMO-L514F EIKNRPFLLV  | 397  | 795   |
| >SMO-L514F EIKNRPSLLV  | 670   | >SMO-L514F EIKNRPFLLV  | 269  | 401   |
| >SMO-L514F EIKNRPSL    | 40    | >SMO-L514F EIKNRPFLL   | 170  | 130   |
| >SMO-L514F EIKNRPSL    | 73    | >SMO-L514F EIKNRPFLL   | 219  | 146   |
| >SMO-L514F CEIKNRPSL   | 5070  | >SMO-L514F CEIKNRPFLL  | 373  | 4697  |
| >SMO-L514F CEIKNRPS    | 20869 | >SMO-L514F CEIKNRPF    | 123  | 20746 |
| >SMO-L514F CEIKNRPS    | 2395  | >SMO-L514F CEIKNRPF    | 26   | 2369  |
| >SMO-L514F CEIKNRPSL   | 124   | >SMO-L514F CEIKNRPFLL  | 327  | 203   |
| >SMO-L514F CEIKNRPSL   | 80    | >SMO-L514F CEIKNRPFLL  | 88   | 8     |
| >SMO-L514F CEIKNRPSLL  | 234   | >SMO-L514F CEIKNRPFLLV | 214  | 20    |
| >SMO-L514F CEIKNRPSLLV | 762   | >SMO-L514F CEIKNRPFLLV | 476  | 286   |
| >SMO-L514F CEIKNRPS    | 1318  | >SMO-L514F CEIKNRPF    | 240  | 1078  |
| >SMO-L514F CEIKNRPSL   | 43    | >SMO-L514F CEIKNRPFLL  | 78   | 35    |
| >SMO-L514F CEIKNRPSLL  | 210   | >SMO-L514F CEIKNRPFLLV | 71   | 139   |
| >SMO-L514F CEIKNRPSLLV | 302   | >SMO-L514F CEIKNRPFLLV | 196  | 106   |
| >SMO-L514F CEIKNRPS    | 7700  | >SMO-L514F CEIKNRPF    | 428  | 7272  |
| >SMO-L514F CEIKNRPS    | 8457  | >SMO-L514F CEIKNRPF    | 216  | 8241  |
| >SMO-L514F CEIKNRPSLLV | 530   | >SMO-L514F CEIKNRPFLLV | 272  | 258   |
| >SMO-L514F CEIKNRPSL   | 22    | >SMO-L514F CEIKNRPFLL  | 26   | 4     |
| >SMO-L514F CEIKNRPSLLV | 17    | >SMO-L514F CEIKNRPFLLV | 14   | 3     |
| >SMO-P755F PVAWAHGR    | 4759  | >SMO-P755F FVAWAHGR    | 490  | 4269  |
| >SMO-P755F PVAWAHGR    | 122   | >SMO-P755F FVAWAHGR    | 3    | 119   |
| >SMO-P755F PVAWAHGRF   | 340   | >SMO-P755F FVAWAHGRF   | 5    | 335   |
| >SMO-P755F PVAWAHGR    | 405   | >SMO-P755F FVAWAHGR    | 299  | 106   |
| >SMO-P755F APVAWAHGF   | 7522  | >SMO-P755F AFVAWAHGF   | 46   | 7476  |
| >SMO-P755F APVAWAHGF   | 1435  | >SMO-P755F AFVAWAHGF   | 57   | 1378  |
| >SMO-P755F APVAWAHGF   | 14890 | >SMO-P755F AFVAWAHGF   | 383  | 14507 |
| >SMO-P755F APVAWAHGF   | 437   | >SMO-P755F AFVAWAHGF   | 73   | 364   |
| >SMO-P755F APVAWAHGF   | 2049  | >SMO-P755F AFVAWAHGF   | 160  | 1889  |
| >SMO-P755F APVAWAHGF   | 36284 | >SMO-P755F AFVAWAHGF   | 397  | 35887 |
| >SMO-P755F PAPVAWAHC   | 1643  | >SMO-P755F PAFVAWAHC   | 366  | 1277  |
| >SMO-P755F APAPVAWAH   | 984   | >SMO-P755F APAFVAWAH   | 334  | 650   |
| >SMO-P755F APAPVAWA    | 196   | >SMO-P755F APAFVAWA    | 527  | 331   |
| >SMO-P755F APAPVAWAH   | 379   | >SMO-P755F APAFVAWAH   | 1187 | 808   |
| >SMO-P755F APAPVAWAH   | 48    | >SMO-P755F APAFVAWAH   | 76   | 28    |
| >SMO-P755F SAPAPVAWA   | 1545  | >SMO-P755F SAPAFVAWA   | 396  | 1149  |
| >SMO-P755F SAPAPVAWA   | 106   | >SMO-P755F SAPAFVAWA   | 114  | 8     |
| >SMO-P755F SAPAPVAWA   | 13    | >SMO-P755F SAPAFVAWA   | 10   | 3     |
| >SMO-P755F SAPAPVAWA   | 159   | >SMO-P755F SAPAFVAWA   | 177  | 18    |

|                       |      |                       |      |      |
|-----------------------|------|-----------------------|------|------|
| >SMO-P755F SAPAPVAWA  | 272  | >SMO-P755F SAPAFVAWA  | 216  | 56   |
| >SMO-P755F SAPAPVAW   | 2250 | >SMO-P755F SAPAFVAW   | 177  | 2073 |
| >SMO-P755F PSAPAPVAW  | 59   | >SMO-P755F PSAPAFVAW  | 126  | 67   |
| >SMO-P755F PSAPAPVAW  | 236  | >SMO-P755F PSAPAFVAW  | 385  | 149  |
| >SMO-P755F PSAPAPVAW  | 369  | >SMO-P755F PSAPAFVAW  | 580  | 211  |
| >SMO-P755F PSAPAPVAW  | 5157 | >SMO-P755F PSAPAFVAW  | 225  | 4932 |
| >SMO-P755F LPSAPAPV   | 3769 | >SMO-P755F LPSAPAFV   | 109  | 3660 |
| >SMO-P755F LPSAPAPV   | 372  | >SMO-P755F LPSAPAFV   | 552  | 180  |
| >SMO-P755F LPSAPAPV   | 56   | >SMO-P755F LPSAPAFV   | 517  | 461  |
| >SMO-P755F LPSAPAPVA  | 256  | >SMO-P755F LPSAPAFVA  | 152  | 104  |
| >SMO-P755F LPSAPAPV   | 248  | >SMO-P755F LPSAPAFV   | 2063 | 1815 |
| >SMO-P755F LPSAPAPVA  | 338  | >SMO-P755F LPSAPAFVA  | 185  | 153  |
| >SMO-P755F LPSAPAPVAW | 260  | >SMO-P755F LPSAPAFVAW | 542  | 282  |
| >SMO-P755F LPSAPAPV   | 136  | >SMO-P755F LPSAPAFV   | 174  | 38   |
| >SMO-P755F LPSAPAPVAW | 214  | >SMO-P755F LPSAPAFVAW | 154  | 60   |
| >SMO-P755F LPSAPAPV   | 16   | >SMO-P755F LPSAPAFV   | 101  | 85   |
| >SMO-P755F LPSAPAPVA  | 9    | >SMO-P755F LPSAPAFVA  | 8    | 1    |
| >SMO-P755F LPSAPAPVAW | 25   | >SMO-P755F LPSAPAFVAW | 30   | 5    |
| >SMO-P755F LPSAPAPVAW | 2674 | >SMO-P755F LPSAPAFVAW | 283  | 2391 |
| >SMO-P755F LPSAPAPVAW | 7    | >SMO-P755F LPSAPAFVAW | 4    | 3    |
| >SMO-P755F LPSAPAPVAW | 367  | >SMO-P755F LPSAPAFVAW | 157  | 210  |
| >SMO-P755F FLPSAPAPV  | 7    | >SMO-P755F FLPSAPAFV  | 8    | 1    |
| >SMO-P755F FLPSAPAPVA | 500  | >SMO-P755F FLPSAPAFVA | 128  | 372  |
| >SMO-P755F FLPSAPAP   | 1438 | >SMO-P755F FLPSAPAF   | 351  | 1087 |
| >SMO-P755F FLPSAPAPV  | 3    | >SMO-P755F FLPSAPAFV  | 2    | 1    |
| >SMO-P755F FLPSAPAPVA | 57   | >SMO-P755F FLPSAPAFVA | 18   | 39   |
| >SMO-P755F FLPSAPAP   | 1747 | >SMO-P755F FLPSAPAF   | 474  | 1273 |
| >SMO-P755F FLPSAPAPV  | 2    | >SMO-P755F FLPSAPAFV  | 2    | 0    |
| >SMO-P755F FLPSAPAPVA | 160  | >SMO-P755F FLPSAPAFVA | 149  | 11   |
| >SMO-P755F FLPSAPAP   | 2109 | >SMO-P755F FLPSAPAF   | 121  | 1988 |
| >SMO-P755F FLPSAPAPV  | 7    | >SMO-P755F FLPSAPAFV  | 7    | 0    |
| >SMO-P755F FLPSAPAPVA | 335  | >SMO-P755F FLPSAPAFVA | 237  | 98   |
| >SMO-P755F FLPSAPAP   | 1919 | >SMO-P755F FLPSAPAF   | 211  | 1708 |
| >SMO-P755F FLPSAPAPV  | 2    | >SMO-P755F FLPSAPAFV  | 1    | 1    |
| >SMO-P755F FLPSAPAPVA | 10   | >SMO-P755F FLPSAPAFVA | 6    | 4    |
| >SMO-P755F FLPSAPAPV  | 3    | >SMO-P755F FLPSAPAFV  | 3    | 0    |
| >SMO-P755F FLPSAPAPVA | 129  | >SMO-P755F FLPSAPAFVA | 36   | 93   |
| >SMO-P755F FLPSAPAPV  | 4    | >SMO-P755F FLPSAPAFV  | 4    | 0    |
| >SMO-P755F FLPSAPAPVA | 18   | >SMO-P755F FLPSAPAFVA | 14   | 4    |
| >SMO-P755F FLPSAPAPV  | 3    | >SMO-P755F FLPSAPAFV  | 2    | 1    |
| >SMO-P755F FLPSAPAPVA | 153  | >SMO-P755F FLPSAPAFVA | 48   | 105  |
| >SMO-P755F FLPSAPAP   | 1927 | >SMO-P755F FLPSAPAF   | 417  | 1510 |
| >SMO-P755F FLPSAPAPV  | 2    | >SMO-P755F FLPSAPAFV  | 2    | 0    |

|                        |       |                        |       |       |
|------------------------|-------|------------------------|-------|-------|
| >SMO-P755F FLPSAPAPVA  | 8     | >SMO-P755F FLPSAPAFVA  | 6     | 2     |
| >SMO-P755F FLPSAPAP    | 19009 | >SMO-P755F FLPSAPAF    | 245   | 18764 |
| >SMO-P755F FLPSAPAPV   | 25    | >SMO-P755F FLPSAPAFV   | 33    | 8     |
| >SMO-P755F FLPSAPAPV   | 81    | >SMO-P755F FLPSAPAFV   | 156   | 75    |
| >SMO-P755F FLPSAPAP    | 15104 | >SMO-P755F FLPSAPAF    | 128   | 14976 |
| >SMO-P755F FLPSAPAP    | 21564 | >SMO-P755F FLPSAPAF    | 101   | 21463 |
| >SMO-P755F FLPSAPAP    | 12586 | >SMO-P755F FLPSAPAF    | 26    | 12560 |
| >SMO-P755F FLPSAPAP    | 22145 | >SMO-P755F FLPSAPAF    | 315   | 21830 |
| >SMO-P755F FLPSAPAPV   | 146   | >SMO-P755F FLPSAPAFV   | 27    | 119   |
| >SMO-P755F FLPSAPAPVA  | 1268  | >SMO-P755F FLPSAPAFVA' | 135   | 1133  |
| >SMO-P755F PFLPSAPAP   | 28073 | >SMO-P755F PFLPSAPAF   | 147   | 27926 |
| >SMO-P755F PFLPSAPAP   | 14384 | >SMO-P755F PFLPSAPAF   | 57    | 14327 |
| >SMO-P755F PFLPSAPAPV  | 914   | >SMO-P755F PFLPSAPAFV  | 364   | 550   |
| >SMO-P755F DPFLPSAPAP' | 75    | >SMO-P755F DPFLPSAPAF' | 98    | 23    |
| >SMO-P755F DPFLPSAPAP' | 33    | >SMO-P755F DPFLPSAPAF' | 52    | 19    |
| >SMO-P755F DPFLPSAPAP' | 87    | >SMO-P755F DPFLPSAPAF' | 755   | 668   |
| >SMO-P755F DPFLPSAPAP  | 23243 | >SMO-P755F DPFLPSAPAF  | 212   | 23031 |
| >SMO-P755F DPFLPSAPAP  | 28027 | >SMO-P755F DPFLPSAPAF  | 323   | 27704 |
| >SMO-R117L RCWAVIQPL   | 50    | >SMO-R117L LCWAVIQPL   | 53    | 3     |
| >SMO-R117L RCWAVIQPLI  | 341   | >SMO-R117L LCWAVIQPLI  | 351   | 10    |
| >SMO-R117L RCWAVIQPL   | 61    | >SMO-R117L LCWAVIQPL   | 2277  | 2216  |
| >SMO-R117L RCWAVIQPLI  | 365   | >SMO-R117L LCWAVIQPLI  | 9072  | 8707  |
| >SMO-R117L RCWAVIQPL   | 362   | >SMO-R117L LCWAVIQPL   | 803   | 441   |
| >SMO-R117L RCWAVIQPL   | 228   | >SMO-R117L LCWAVIQPL   | 2353  | 2125  |
| >SMO-R117L RCWAVIQPLI  | 217   | >SMO-R117L LCWAVIQPLI  | 2225  | 2008  |
| >SMO-R117L PRCWAVIQPI  | 20824 | >SMO-R117L PLCWAVIQPL  | 18    | 20806 |
| >SMO-R117L PRCWAVIQPI  | 25724 | >SMO-R117L PLCWAVIQPL  | 106   | 25618 |
| >SMO-R117L PRCWAVIQPI  | 24009 | >SMO-R117L PLCWAVIQPL  | 226   | 23783 |
| >SMO-R117L PRCWAVIQPI  | 25269 | >SMO-R117L PLCWAVIQPL  | 256   | 25013 |
| >SMO-R117L PRCWAVIQPI  | 29595 | >SMO-R117L PLCWAVIQPL  | 16    | 29579 |
| >SMO-R117L PRCWAVIQPI  | 29221 | >SMO-R117L PLCWAVIQPL  | 25    | 29196 |
| >SMO-R117L PRCWAVIQPI  | 268   | >SMO-R117L PLCWAVIQPL  | 26680 | 26412 |
| >SMO-R117L PRCWAVIQPI  | 56    | >SMO-R117L PLCWAVIQPL  | 19908 | 19852 |
| >SMO-R117L VLWSGLRNA   | 9818  | >SMO-R117L VLWSGLRNA   | 16    | 9802  |
| >SMO-R117L VLWSGLRNA   | 11571 | >SMO-R117L VLWSGLRNA   | 58    | 11513 |
| >SMO-R117L VLWSGLRNA   | 13539 | >SMO-R117L VLWSGLRNA   | 46    | 13493 |
| >SMO-R117L VLWSGLRNA   | 8938  | >SMO-R117L VLWSGLRNA   | 147   | 8791  |
| >SMO-R117L VLWSGLRNA   | 2645  | >SMO-R117L VLWSGLRNA   | 4     | 2641  |
| >SMO-R117L VLWSGLRNA   | 14353 | >SMO-R117L VLWSGLRNA   | 11    | 14342 |
| >SMO-R117L VLWSGLRNA   | 9367  | >SMO-R117L VLWSGLRNA   | 13    | 9354  |
| >SMO-R117L VLWSGLRNA   | 15544 | >SMO-R117L VLWSGLRNA   | 7     | 15537 |
| >SMO-R117L VLWSGLRNA   | 2228  | >SMO-R117L VLWSGLRNA   | 4     | 2224  |
| >SMO-R117L VLWSGLRNA   | 15    | >SMO-R117L VLWSGLRNA   | 4765  | 4750  |



|                       |       |                       |       |       |
|-----------------------|-------|-----------------------|-------|-------|
| >SMO-R117L VLWSGLRNA  | 82    | >SMO-R117L VLWSGLRNA  | 10522 | 10440 |
| >SMO-R117L VLWSGLRNA  | 2087  | >SMO-R117L VLWSGLRNA  | 279   | 1808  |
| >SMO-R117L VLWSGLRNA  | 216   | >SMO-R117L VLWSGLRNA  | 20948 | 20732 |
| >SMO-R117L APRCWAVIQ  | 9402  | >SMO-R117L APLCWAVIQ  | 357   | 9045  |
| >SMO-R117L APRCWAVI   | 23    | >SMO-R117L APLCWAVI   | 153   | 130   |
| >SMO-R117L APRCWAVIQ  | 335   | >SMO-R117L APLCWAVIQ  | 11887 | 11552 |
| >SMO-R117L APRCWAVIQ  | 15    | >SMO-R117L APLCWAVIQ  | 42    | 27    |
| >SMO-R117L APRCWAVIQ  | 375   | >SMO-R117L APLCWAVIQ  | 1832  | 1457  |
| >SMO-R117L APRCWAVIQ  | 775   | >SMO-R117L APLCWAVIQ  | 228   | 547   |
| >SMO-R117L APRCWAVIQ  | 964   | >SMO-R117L APLCWAVIQ  | 46    | 918   |
| >SMO-R117L APRCWAVI   | 2893  | >SMO-R117L APLCWAVI   | 389   | 2504  |
| >SMO-R117L APRCWAVIQ  | 6507  | >SMO-R117L APLCWAVIQ  | 483   | 6024  |
| >SMO-R117L NAPRCWAVI  | 103   | >SMO-R117L NAPLCWAVI  | 310   | 207   |
| >SMO-R117L NAPRCWAV   | 153   | >SMO-R117L NAPLCWAV   | 104   | 49    |
| >SMO-R117L NAPRCWAV   | 40    | >SMO-R117L NAPLCWAV   | 32    | 8     |
| >SMO-R117L NAPRCWAVI  | 169   | >SMO-R117L NAPLCWAVI  | 170   | 1     |
| >SMO-R117L NAPRCWAVI  | 162   | >SMO-R117L NAPLCWAVI  | 289   | 127   |
| >SMO-R117L RNAPRCWAV  | 280   | >SMO-R117L RNAPLCWAV  | 284   | 4     |
| >SMO-R117L RNAPRCWAV  | 282   | >SMO-R117L RNAPLCWAV  | 307   | 25    |
| >SMO-R117L LRNAPRCW   | 932   | >SMO-R117L LRNAPLCW   | 172   | 760   |
| >SMO-R117L GLRNAPRCW  | 451   | >SMO-R117L GLRNAPLCW  | 188   | 263   |
| >SMO-R117L GLRNAPRCW  | 1132  | >SMO-R117L GLRNAPLCW  | 219   | 913   |
| >SMO-R117L GLRNAPRCW  | 211   | >SMO-R117L GLRNAPLCW  | 118   | 93    |
| >SMO-R117L GLRNAPRCW  | 1262  | >SMO-R117L GLRNAPLCW  | 192   | 1070  |
| >SMO-R117L GLRNAPRCW  | 14    | >SMO-R117L GLRNAPLCW  | 13    | 1     |
| >SMO-R117L GLRNAPRCW  | 473   | >SMO-R117L GLRNAPLCW  | 248   | 225   |
| >SMO-R117L GLRNAPRCW  | 1892  | >SMO-R117L GLRNAPLCW  | 349   | 1543  |
| >SMO-R117L GLRNAPRCW  | 14    | >SMO-R117L GLRNAPLCW  | 9     | 5     |
| >SMO-R117L GLRNAPRCW  | 16    | >SMO-R117L GLRNAPLCW  | 8     | 8     |
| >SMO-R117L GLRNAPRCW  | 2268  | >SMO-R117L GLRNAPLCW  | 392   | 1876  |
| >SMO-R117L GLRNAPRCW  | 32    | >SMO-R117L GLRNAPLCW  | 12    | 20    |
| >SMO-R117L GLRNAPRCW  | 545   | >SMO-R117L GLRNAPLCW  | 210   | 335   |
| >SMO-R117L GLRNAPRC   | 346   | >SMO-R117L GLRNAPLC   | 354   | 8     |
| >SMO-R117L GLRNAPRCW  | 96    | >SMO-R117L GLRNAPLCW  | 32    | 64    |
| >SMO-R117L GLRNAPRCW  | 5     | >SMO-R117L GLRNAPLCW  | 4     | 1     |
| >SMO-R117L GLRNAPRCW  | 183   | >SMO-R117L GLRNAPLCW  | 238   | 55    |
| >SMO-R117L SGLRNAPR   | 13062 | >SMO-R117L SGLRNAPL   | 98    | 12964 |
| >SMO-R117L SGLRNAPR   | 16007 | >SMO-R117L SGLRNAPL   | 179   | 15828 |
| >SMO-R117L SGLRNAPR   | 217   | >SMO-R117L SGLRNAPL   | 19148 | 18931 |
| >SMO-R117L SGLRNAPRCV | 2196  | >SMO-R117L SGLRNAPLCV | 275   | 1921  |
| >SMO-R117L SGLRNAPR   | 194   | >SMO-R117L SGLRNAPL   | 30451 | 30257 |
| >SMO-R117L WSGLRNAPR  | 437   | >SMO-R117L WSGLRNAPL  | 20826 | 20389 |
| >SMO-R117L WSGLRNAPR  | 18711 | >SMO-R117L WSGLRNAPL  | 67    | 18644 |

|                       |       |                       |       |       |
|-----------------------|-------|-----------------------|-------|-------|
| >SMO-R117L WSGLRNAPR  | 74    | >SMO-R117L WSGLRNAPL  | 28    | 46    |
| >SMO-R117L WSGLRNAPR  | 433   | >SMO-R117L WSGLRNAPL  | 695   | 262   |
| >SMO-R117L WSGLRNAPR  | 1493  | >SMO-R117L WSGLRNAPL  | 149   | 1344  |
| >SMO-R117L WSGLRNAPR  | 304   | >SMO-R117L WSGLRNAPL  | 32574 | 32270 |
| >SMO-R117L LWSGLRNAPI | 21    | >SMO-R117L LWSGLRNAPI | 4890  | 4869  |
| >SMO-R117L LWSGLRNAPI | 177   | >SMO-R117L LWSGLRNAPI | 10724 | 10547 |
| >SMO-R117L LWSGLRNAPI | 17    | >SMO-R117L LWSGLRNAPI | 8768  | 8751  |
| >SMO-R117L LWSGLRNAPI | 8156  | >SMO-R117L LWSGLRNAPI | 257   | 7899  |
| >SMO-R117L LWSGLRNAPI | 267   | >SMO-R117L LWSGLRNAPI | 157   | 110   |
| >SMO-R199V RTDNPKSWY  | 108   | >SMO-R199V WTDNPKSWY  | 13    | 95    |
| >SMO-R199V RTDNPKSWY  | 315   | >SMO-R199V WTDNPKSWY  | 959   | 644   |
| >SMO-R199V RTDNPKSW   | 170   | >SMO-R199V WTDNPKSW   | 12274 | 12104 |
| >SMO-R199V RTDNPKSW   | 8     | >SMO-R199V WTDNPKSW   | 13    | 5     |
| >SMO-R199V RTDNPKSWY  | 7     | >SMO-R199V WTDNPKSWY  | 19    | 12    |
| >SMO-R199V RTDNPKSW   | 62    | >SMO-R199V WTDNPKSW   | 234   | 172   |
| >SMO-R199V RTDNPKSW   | 20    | >SMO-R199V WTDNPKSW   | 278   | 258   |
| >SMO-R199V RTDNPKSW   | 106   | >SMO-R199V WTDNPKSW   | 296   | 190   |
| >SMO-R199V RTDNPKSWY  | 2     | >SMO-R199V WTDNPKSWY  | 2     | 0     |
| >SMO-R199V RTDNPKSWY  | 90    | >SMO-R199V WTDNPKSWY  | 36    | 54    |
| >SMO-R199V VRTDNPKSW  | 6716  | >SMO-R199V VWTDNPKSW  | 267   | 6449  |
| >SMO-R199V VRTDNPKSW  | 2388  | >SMO-R199V VWTDNPKSW  | 165   | 2223  |
| >SMO-R199V VRTDNPKSW  | 346   | >SMO-R199V VWTDNPKSW  | 15324 | 14978 |
| >SMO-R199V VRTDNPKSW  | 34775 | >SMO-R199V VWTDNPKSW  | 159   | 34616 |
| >SMO-R199V VRTDNPKSW  | 29843 | >SMO-R199V VWTDNPKSW  | 153   | 29690 |
| >SMO-R199V SSGQCEVPLV | 19531 | >SMO-R199V SSGQCEVPLV | 54    | 19477 |
| >SMO-R199V SSGQCEVPLV | 24433 | >SMO-R199V SSGQCEVPLV | 91    | 24342 |
| >SMO-R199V SSGQCEVPLV | 20970 | >SMO-R199V SSGQCEVPLV | 22    | 20948 |
| >SMO-R199V SSGQCEVPLV | 149   | >SMO-R199V SSGQCEVPLV | 30246 | 30097 |
| >SMO-R199V LVRTDNP    | 2029  | >SMO-R199V LVWTDNPK   | 140   | 1889  |
| >SMO-R199V LVRTDNP    | 57    | >SMO-R199V LVWTDNPKS' | 107   | 50    |
| >SMO-R199V LVRTDNP    | 1250  | >SMO-R199V LVWTDNPKS' | 65    | 1185  |
| >SMO-R199V LVRTDNP    | 5     | >SMO-R199V LVWTDNPK   | 571   | 566   |
| >SMO-R199V LVRTDNP    | 154   | >SMO-R199V LVWTDNPKS' | 40    | 114   |
| >SMO-R199V LVRTDNP    | 1108  | >SMO-R199V LVWTDNPK   | 389   | 719   |
| >SMO-R199V LVRTDNP    | 113   | >SMO-R199V LVWTDNPKS' | 105   | 8     |
| >SMO-R199V LVRTDNP    | 259   | >SMO-R199V LVWTDNPKS' | 269   | 10    |
| >SMO-R199V LVRTDNP    | 2165  | >SMO-R199V LVWTDNPKS' | 106   | 2059  |
| >SMO-R199V LVRTDNP    | 238   | >SMO-R199V LVWTDNPKS' | 196   | 42    |
| >SMO-R199V LVRTDNP    | 1893  | >SMO-R199V LVWTDNPKS' | 91    | 1802  |
| >SMO-R199V LVRTDNP    | 10    | >SMO-R199V LVWTDNPKS' | 28    | 18    |
| >SMO-R199V EVPLVRTDNF | 25    | >SMO-R199V EVPLVWTDN  | 29    | 4     |
| >SMO-R199V CEVPLVRTD  | 389   | >SMO-R199V CEVPLVWTD  | 50    | 339   |
| >SMO-R199V CEVPLVRT   | 487   | >SMO-R199V CEVPLVWT   | 134   | 353   |

|                       |       |                       |       |       |
|-----------------------|-------|-----------------------|-------|-------|
| >SMO-R199VSGQCEVPLVF  | 22993 | >SMO-R199VSGQCEVPLVV  | 286   | 22707 |
| >SMO-R290S RREIVCRA   | 168   | >SMO-R290S SREIVCRA   | 8350  | 8182  |
| >SMO-R290S RREIVCRADG | 370   | >SMO-R290S SREIVCRADG | 7952  | 7582  |
| >SMO-R290S ARREIVCR   | 8125  | >SMO-R290S ASREIVCR   | 196   | 7929  |
| >SMO-R290S ARREIVCRA  | 2096  | >SMO-R290S ASREIVCRA  | 17    | 2079  |
| >SMO-R290S ARREIVCRAD | 9692  | >SMO-R290S ASREIVCRAD | 358   | 9334  |
| >SMO-R290S ARREIVCR   | 8516  | >SMO-R290S ASREIVCR   | 51    | 8465  |
| >SMO-R290S ARREIVCR   | 380   | >SMO-R290S ASREIVCR   | 18664 | 18284 |
| >SMO-R290S GWLAQFMDI  | 35    | >SMO-R290S GWLAQFMDI  | 15957 | 15922 |
| >SMO-R290S GARREIVCRA | 274   | >SMO-R290S GASREIVCRA | 11993 | 11719 |
| >SMO-R290S GARREIVCR  | 221   | >SMO-R290S GASREIVCR  | 792   | 571   |
| >SMO-R290S GARREIVCR  | 3165  | >SMO-R290S GASREIVCR  | 496   | 2669  |
| >SMO-R290S MDGARREIV  | 1090  | >SMO-R290S MDGASREIV  | 468   | 622   |
| >SMO-R290S FMDGARREI  | 176   | >SMO-R290S FMDGASREI  | 27    | 149   |
| >SMO-R290S FMDGARREI  | 110   | >SMO-R290S FMDGASREI  | 58    | 52    |
| >SMO-R290S FMDGARREI  | 94    | >SMO-R290S FMDGASREI  | 14    | 80    |
| >SMO-R290S FMDGARREI  | 41    | >SMO-R290S FMDGASREI  | 22    | 19    |
| >SMO-R290S FMDGARREI  | 329   | >SMO-R290S FMDGASREI  | 41    | 288   |
| >SMO-R290S FMDGARREI  | 75    | >SMO-R290S FMDGASREI  | 40    | 35    |
| >SMO-R290S FMDGARREI  | 304   | >SMO-R290S FMDGASREI  | 71    | 233   |
| >SMO-R290S FMDGARREI  | 149   | >SMO-R290S FMDGASREI  | 106   | 43    |
| >SMO-R290S FMDGARREI  | 10    | >SMO-R290S FMDGASREI  | 3     | 7     |
| >SMO-R290S FMDGARREI  | 5     | >SMO-R290S FMDGASREI  | 3     | 2     |
| >SMO-R290S FMDGARREI  | 43    | >SMO-R290S FMDGASREI  | 14    | 29    |
| >SMO-R290S FMDGARREI  | 262   | >SMO-R290S FMDGASREI  | 9     | 253   |
| >SMO-R290S FMDGARREI  | 24    | >SMO-R290S FMDGASREI  | 6     | 18    |
| >SMO-R290S FMDGARREI  | 838   | >SMO-R290S FMDGASREI  | 158   | 680   |
| >SMO-R290S FMDGARREI  | 44    | >SMO-R290S FMDGASREI  | 11    | 33    |
| >SMO-R290S FMDGARREI  | 9     | >SMO-R290S FMDGASREI  | 6     | 3     |
| >SMO-R290S FMDGARREI  | 630   | >SMO-R290S FMDGASREI  | 158   | 472   |
| >SMO-R290S FMDGARREI  | 693   | >SMO-R290S FMDGASREI  | 18    | 675   |
| >SMO-R290S FMDGARREI  | 25    | >SMO-R290S FMDGASREI  | 6     | 19    |
| >SMO-R290S FMDGARREI  | 2250  | >SMO-R290S FMDGASREI  | 425   | 1825  |
| >SMO-R290S FMDGARREI  | 9     | >SMO-R290S FMDGASREI  | 7     | 2     |
| >SMO-R290S FMDGARREI  | 3     | >SMO-R290S FMDGASREI  | 2     | 1     |
| >SMO-R290S FMDGARREI  | 34    | >SMO-R290S FMDGASREI  | 29    | 5     |
| >SMO-R290S QFMDGARRE  | 459   | >SMO-R290S QFMDGASRE  | 262   | 197   |
| >SMO-R290S QFMDGARR   | 142   | >SMO-R290S QFMDGASR   | 134   | 8     |
| >SMO-R290S QFMDGARR   | 240   | >SMO-R290S QFMDGASR   | 108   | 132   |
| >SMO-R290S QFMDGARR   | 472   | >SMO-R290S QFMDGASR   | 324   | 148   |
| >SMO-R290S QFMDGARR   | 143   | >SMO-R290S QFMDGASR   | 180   | 37    |
| >SMO-R290S AQFMDGARF  | 274   | >SMO-R290S AQFMDGASR  | 86    | 188   |
| >SMO-R290S AQFMDGAR   | 78    | >SMO-R290S AQFMDGAS   | 18643 | 18565 |

|                       |      |                       |       |       |
|-----------------------|------|-----------------------|-------|-------|
| >SMO-R290S AQFMDGARF  | 48   | >SMO-R290S AQFMDGASF  | 65    | 17    |
| >SMO-R290S AQFMDGARF  | 479  | >SMO-R290S AQFMDGASF  | 178   | 301   |
| >SMO-R290S AQFMDGAR   | 224  | >SMO-R290S AQFMDGAS   | 998   | 774   |
| >SMO-R290S AQFMDGARF  | 215  | >SMO-R290S AQFMDGASF  | 24    | 191   |
| >SMO-R290S AQFMDGARF  | 18   | >SMO-R290S AQFMDGASF  | 12    | 6     |
| >SMO-R290S LAQFMDGAR  | 363  | >SMO-R290S LAQFMDGAS  | 22822 | 22459 |
| >SMO-R290S LAQFMDGAR  | 130  | >SMO-R290S LAQFMDGAS  | 168   | 38    |
| >SMO-R290S LAQFMDGAR  | 200  | >SMO-R290S LAQFMDGAS  | 30812 | 30612 |
| >SMO-R290S LAQFMDGAR  | 49   | >SMO-R290S LAQFMDGAS  | 51    | 2     |
| >SMO-R290S WLAQFMDG,  | 380  | >SMO-R290S WLAQFMDG,  | 36374 | 35994 |
| >SMO-R290S WLAQFMDG,  | 152  | >SMO-R290S WLAQFMDG,  | 158   | 6     |
| >SMO-R290S WLAQFMDG,  | 108  | >SMO-R290S WLAQFMDG,  | 15918 | 15810 |
| >SMO-R290S WLAQFMDG,  | 255  | >SMO-R290S WLAQFMDG,  | 30475 | 30220 |
| >SMO-R290S WLAQFMDG,  | 249  | >SMO-R290S WLAQFMDG,  | 296   | 47    |
| >SMO-R484V SFRDYVLCQA | 36   | >SMO-R484V SWRDYVLCQ  | 157   | 121   |
| >SMO-R484V SFRDYVLCQA | 260  | >SMO-R484V SWRDYVLCQ  | 1241  | 981   |
| >SMO-R484V SFRDYVLC   | 1452 | >SMO-R484V SWRDYVLC   | 140   | 1312  |
| >SMO-R484V SFRDYVLCQ  | 5051 | >SMO-R484V SWRDYVLCQ  | 315   | 4736  |
| >SMO-R484V SFRDYVLCQA | 2681 | >SMO-R484V SWRDYVLCQ  | 147   | 2534  |
| >SMO-R484V FFNQAEWER  | 359  | >SMO-R484V FFNQAEWER  | 2093  | 1734  |
| >SMO-R484V FFNQAEWER  | 19   | >SMO-R484V FFNQAEWER  | 190   | 171   |
| >SMO-R484V FFNQAEWER  | 181  | >SMO-R484V FFNQAEWER  | 5324  | 5143  |
| >SMO-R484V RSFRDYVL   | 417  | >SMO-R484V RSWRDYVL   | 3170  | 2753  |
| >SMO-R484V RSFRDYVLCQ | 34   | >SMO-R484V RSWRDYVLCQ | 350   | 316   |
| >SMO-R484V RSFRDYVL   | 30   | >SMO-R484V RSWRDYVL   | 52    | 22    |
| >SMO-R484V RSFRDYVL   | 47   | >SMO-R484V RSWRDYVL   | 96    | 49    |
| >SMO-R484V RSFRDYVL   | 12   | >SMO-R484V RSWRDYVL   | 13    | 1     |
| >SMO-R484V RSFRDYVL   | 151  | >SMO-R484V RSWRDYVL   | 159   | 8     |
| >SMO-R484V RSFRDYVL   | 50   | >SMO-R484V RSWRDYVL   | 81    | 31    |
| >SMO-R484V RSFRDYVL   | 1210 | >SMO-R484V RSWRDYVL   | 242   | 968   |
| >SMO-R484V RSFRDYVL   | 40   | >SMO-R484V RSWRDYVL   | 44    | 4     |
| >SMO-R484V ERSFRDYV   | 398  | >SMO-R484V ERSWRDYV   | 966   | 568   |
| >SMO-R484V ERSFRDYVL  | 403  | >SMO-R484V ERSWRDYVL  | 67    | 336   |
| >SMO-R484V WERSFRDYV  | 31   | >SMO-R484V WERSWRDY\  | 46    | 15    |
| >SMO-R484V WERSFRDY   | 70   | >SMO-R484V WERSWRDY   | 197   | 127   |
| >SMO-R484V WERSFRDY   | 13   | >SMO-R484V WERSWRDY   | 32    | 19    |
| >SMO-R484V WERSFRDYV  | 293  | >SMO-R484V WERSWRDY\  | 1414  | 1121  |
| >SMO-R484V WERSFRDYV  | 423  | >SMO-R484V WERSWRDY\  | 1892  | 1469  |
| >SMO-R484V WERSFRDYVI | 405  | >SMO-R484V WERSWRDY\  | 1509  | 1104  |
| >SMO-R484V WERSFRDYV  | 93   | >SMO-R484V WERSWRDY\  | 151   | 58    |
| >SMO-R484V WERSFRDYVI | 139  | >SMO-R484V WERSWRDY\  | 252   | 113   |
| >SMO-R484V WERSFRDYV  | 8    | >SMO-R484V WERSWRDY\  | 7     | 1     |
| >SMO-R484V WERSFRDYVI | 16   | >SMO-R484V WERSWRDY\  | 15    | 1     |

|                        |       |                       |      |      |
|------------------------|-------|-----------------------|------|------|
| >SMO-R484V WERSFRDYVI  | 46    | >SMO-R484V WERSWRDY\  | 35   | 11   |
| >SMO-R484V EWERSFRDY\  | 166   | >SMO-R484V EWERSWRDY  | 81   | 85   |
| >SMO-R484V EWERSFRDY\  | 507   | >SMO-R484V EWERSWRDY  | 419  | 88   |
| >SMO-R484V AEWERSFRD'  | 24    | >SMO-R484V AEWERSWRE  | 38   | 14   |
| >SMO-R484V AEWERSFRD'  | 255   | >SMO-R484V AEWERSWRE  | 168  | 87   |
| >SMO-R484V AEWERSFRD'  | 115   | >SMO-R484V AEWERSWRE  | 53   | 62   |
| >SMO-R484V AEWERSFRD'  | 218   | >SMO-R484V AEWERSWRE  | 105  | 113  |
| >SMO-R484V AEWERSFRD'  | 901   | >SMO-R484V AEWERSWRE  | 323  | 578  |
| >SMO-R484V AEWERSFRD'  | 1229  | >SMO-R484V AEWERSWRE  | 459  | 770  |
| >SMO-R484V AEWERSFR    | 158   | >SMO-R484V AEWERSWR   | 825  | 667  |
| >SMO-R484V AEWERSFRD'  | 210   | >SMO-R484V AEWERSWRE  | 338  | 128  |
| >SMO-R484V AEWERSFRD'  | 284   | >SMO-R484V AEWERSWRE  | 662  | 378  |
| >SMO-R484V AEWERSFRD'  | 162   | >SMO-R484V AEWERSWRE  | 226  | 64   |
| >SMO-R484V AEWERSFRD'  | 28    | >SMO-R484V AEWERSWRE  | 17   | 11   |
| >SMO-R484V AEWERSFRD'  | 37    | >SMO-R484V AEWERSWRE  | 33   | 4    |
| >SMO-R484V AEWERSFRD'  | 254   | >SMO-R484V AEWERSWRE  | 323  | 69   |
| >SMO-R484V AEWERSFRD'  | 30    | >SMO-R484V AEWERSWRE  | 39   | 9    |
| >SMO-R484V AEWERSFRD   | 170   | >SMO-R484V AEWERSWRE  | 395  | 225  |
| >SMO-R484V AEWERSFRD'  | 301   | >SMO-R484V AEWERSWRE  | 542  | 241  |
| >SMO-R484V AEWERSFRD'  | 7     | >SMO-R484V AEWERSWRE  | 8    | 1    |
| >SMO-R484V QAEWERSFR   | 339   | >SMO-R484V QAEWERSWF  | 1687 | 1348 |
| >SMO-R484V QAEWERSFR   | 200   | >SMO-R484V QAEWERSWF  | 1200 | 1000 |
| >SMO-R484V QAEWERSFR   | 14    | >SMO-R484V QAEWERSWF  | 33   | 19   |
| >SMO-R484V QAEWERSF    | 297   | >SMO-R484V QAEWERSW   | 6100 | 5803 |
| >SMO-R484V QAEWERSFR   | 475   | >SMO-R484V QAEWERSWF  | 360  | 115  |
| >SMO-R484V QAEWERSF    | 7205  | >SMO-R484V QAEWERSW   | 364  | 6841 |
| >SMO-R484V QAEWERSFR   | 487   | >SMO-R484V QAEWERSWF  | 992  | 505  |
| >SMO-R484V NQAEWERSF   | 140   | >SMO-R484V NQAEWERSV  | 232  | 92   |
| >SMO-R484V NQAEWERSF   | 133   | >SMO-R484V NQAEWERSV  | 652  | 519  |
| >SMO-R484V NQAEWERSF   | 43    | >SMO-R484V NQAEWERSV  | 91   | 48   |
| >SMO-R484V NQAEWERSF   | 146   | >SMO-R484V NQAEWERSV  | 3858 | 3712 |
| >SMO-R484V NQAEWERSF   | 32    | >SMO-R484V NQAEWERSV  | 3652 | 3620 |
| >SMO-R484V FNQAEWERS   | 184   | >SMO-R484V FNQAEWERS  | 438  | 254  |
| >SMO-R484V FNQAEWERS   | 432   | >SMO-R484V FNQAEWERS  | 9796 | 9364 |
| >SMO-R484V FNQAEWERS   | 10246 | >SMO-R484V FNQAEWERS  | 295  | 9951 |
| >SMO-R562C RIKKSKMIAK  | 45    | >SMO-R562C QIKKSKMIAK | 206  | 161  |
| >SMO-R562C RIKKSKMIAK  | 127   | >SMO-R562C QIKKSKMIAK | 314  | 187  |
| >SMO-R562C RIKKSKMI    | 20    | >SMO-R562C QIKKSKMI   | 603  | 583  |
| >SMO-R562C RIKKSKMIA   | 8     | >SMO-R562C QIKKSKMIA  | 137  | 129  |
| >SMO-R562C RIKKSKMIAK  | 3     | >SMO-R562C QIKKSKMIAK | 10   | 7    |
| >SMO-R562C RIKKSKMIAK/ | 12    | >SMO-R562C QIKKSKMIAK | 324  | 312  |
| >SMO-R562C RIKKSKMIAK  | 113   | >SMO-R562C QIKKSKMIAK | 846  | 733  |
| >SMO-R562C RIKKSKMIAK  | 288   | >SMO-R562C QIKKSKMIAK | 1570 | 1282 |

|                        |       |                       |       |       |
|------------------------|-------|-----------------------|-------|-------|
| >SMO-R562C KRIKKSMMIAI | 14391 | >SMO-R562C KQIKKSKMIA | 206   | 14185 |
| >SMO-R562C KRIKKSMMIAI | 12993 | >SMO-R562C KQIKKSKMIA | 108   | 12885 |
| >SMO-R562C KRIKKSMMIAI | 756   | >SMO-R562C KQIKKSKMIA | 68    | 688   |
| >SMO-R562C KRIKKSMMIAI | 13932 | >SMO-R562C KQIKKSKMIA | 173   | 13759 |
| >SMO-R562C KRIKKSMM    | 19456 | >SMO-R562C KQIKKSKM   | 439   | 19017 |
| >SMO-R562C KRIKKSMM    | 322   | >SMO-R562C KQIKKSKM   | 35    | 287   |
| >SMO-R562C KRIKKSMMI   | 449   | >SMO-R562C KQIKKSKMI  | 49    | 400   |
| >SMO-R562C KRIKKSMMIA  | 1307  | >SMO-R562C KQIKKSKMIA | 185   | 1122  |
| >SMO-R562C KRIKKSMMIAI | 1517  | >SMO-R562C KQIKKSKMIA | 263   | 1254  |
| >SMO-R562C KRIKKSMM    | 72    | >SMO-R562C KQIKKSKM   | 1272  | 1200  |
| >SMO-R562C KRIKKSMMI   | 132   | >SMO-R562C KQIKKSKMI  | 3280  | 3148  |
| >SMO-R562C KRIKKSMMIA  | 364   | >SMO-R562C KQIKKSKMIA | 12695 | 12331 |
| >SMO-R562C KRIKKSMMIAI | 100   | >SMO-R562C KQIKKSKMIA | 1238  | 1138  |
| >SMO-R562C KRIKKSMM    | 31    | >SMO-R562C KQIKKSKM   | 667   | 636   |
| >SMO-R562C KRIKKSMMI   | 261   | >SMO-R562C KQIKKSKMI  | 5184  | 4923  |
| >SMO-R562C KRIKKSMMIA  | 99    | >SMO-R562C KQIKKSKMIA | 3373  | 3274  |
| >SMO-R562C KRIKKSMM    | 143   | >SMO-R562C KQIKKSKM   | 1561  | 1418  |
| >SMO-R562C KRIKKSMMIA  | 354   | >SMO-R562C KQIKKSKMIA | 8364  | 8010  |
| >SMO-R562C LTGQSDDEPK  | 192   | >SMO-R562C LTGQSDDEPK | 14038 | 13846 |
| >SMO-R562C EPKRIKKSMM  | 460   | >SMO-R562C EPKQIKKSKM | 736   | 276   |
| >SMO-R562C EPKRIKKSMM  | 79    | >SMO-R562C EPKQIKKSKM | 123   | 44    |
| >SMO-R562C SDDEPKRI    | 529   | >SMO-R562C SDDEPKQI   | 413   | 116   |
| >SMO-R562C QSDDEPKRI   | 621   | >SMO-R562C QSDDEPKQI  | 379   | 242   |
| >SMO-S533N STWVWTKAT   | 321   | >SMO-S533N NTWVWTKA`  | 2158  | 1837  |
| >SMO-S533N STWVWTKAT   | 389   | >SMO-S533N NTWVWTKA`  | 916   | 527   |
| >SMO-S533N STWVWTKAT   | 235   | >SMO-S533N NTWVWTKA`  | 574   | 339   |
| >SMO-S533N STWVWTKAT   | 394   | >SMO-S533N NTWVWTKA`  | 1348  | 954   |
| >SMO-S533N STWVWTKAT   | 51    | >SMO-S533N NTWVWTKA`  | 453   | 402   |
| >SMO-S533N STWVWTKAT   | 366   | >SMO-S533N NTWVWTKA`  | 2601  | 2235  |
| >SMO-S533N STWVWTKA    | 361   | >SMO-S533N NTWVWTKA   | 5451  | 5090  |
| >SMO-S533N STWVWTKAT   | 198   | >SMO-S533N NTWVWTKA`  | 3538  | 3340  |
| >SMO-S533N STWVWTKAT   | 432   | >SMO-S533N NTWVWTKA`  | 4989  | 4557  |
| >SMO-S533N STWVWTKAT   | 457   | >SMO-S533N NTWVWTKA`  | 5175  | 4718  |
| >SMO-S533N STWVWTKAT   | 39    | >SMO-S533N NTWVWTKA`  | 299   | 260   |
| >SMO-S533N STWVWTKAT   | 117   | >SMO-S533N NTWVWTKA`  | 1164  | 1047  |
| >SMO-S533N STWVWTKA    | 516   | >SMO-S533N NTWVWTKA   | 190   | 326   |
| >SMO-S533N STWVWTKAT   | 115   | >SMO-S533N NTWVWTKA`  | 85    | 30    |
| >SMO-S533N STWVWTKAT   | 446   | >SMO-S533N NTWVWTKA`  | 184   | 262   |
| >SMO-S533N STWVWTKA    | 194   | >SMO-S533N NTWVWTKA   | 86    | 108   |
| >SMO-S533N STWVWTKAT   | 444   | >SMO-S533N NTWVWTKA`  | 191   | 253   |
| >SMO-S533N STWVWTKAT   | 27    | >SMO-S533N NTWVWTKA`  | 15    | 12    |
| >SMO-S533N STWVWTKAT   | 72    | >SMO-S533N NTWVWTKA`  | 36    | 36    |
| >SMO-S533N STWVWTKAT   | 7     | >SMO-S533N NTWVWTKA`  | 49    | 42    |

|                       |     |                       |       |       |
|-----------------------|-----|-----------------------|-------|-------|
| >SMO-S533N STWVWTKAT  | 13  | >SMO-S533N NTWVWTKA`  | 180   | 167   |
| >SMO-S533N STWVWTKAT  | 237 | >SMO-S533N NTWVWTKA`  | 2604  | 2367  |
| >SMO-S533N STWVWTKAT  | 171 | >SMO-S533N NTWVWTKA`  | 1822  | 1651  |
| >SMO-S533N STWVWTKAT  | 41  | >SMO-S533N NTWVWTKA`  | 409   | 368   |
| >SMO-S533N STWVWTKAT  | 59  | >SMO-S533N NTWVWTKA`  | 337   | 278   |
| >SMO-S533N MSTWVWTK   | 272 | >SMO-S533N MNTWVWTK   | 9892  | 9620  |
| >SMO-S533N MSTWVWTK   | 14  | >SMO-S533N MNTWVWTK   | 812   | 798   |
| >SMO-S533N MSTWVWTK   | 364 | >SMO-S533N MNTWVWTK   | 6623  | 6259  |
| >SMO-S533N MSTWVWTK   | 77  | >SMO-S533N MNTWVWTK   | 2310  | 2233  |
| >SMO-S533N MSTWVWTK   | 6   | >SMO-S533N MNTWVWTK   | 39    | 33    |
| >SMO-S533N MSTWVWTK   | 49  | >SMO-S533N MNTWVWTK   | 823   | 774   |
| >SMO-S533N MSTWVWTK   | 88  | >SMO-S533N MNTWVWTK   | 1173  | 1085  |
| >SMO-S533N MSTWVWTK   | 14  | >SMO-S533N MNTWVWTK   | 14198 | 14184 |
| >SMO-S533N MSTWVWTK   | 339 | >SMO-S533N MNTWVWTK   | 1915  | 1576  |
| >SMO-S533N MSTWVWTK   | 62  | >SMO-S533N MNTWVWTK   | 11534 | 11472 |
| >SMO-S533N MSTWVWTK   | 123 | >SMO-S533N MNTWVWTK   | 10952 | 10829 |
| >SMO-S533N MSTWVWTK   | 51  | >SMO-S533N MNTWVWTK   | 926   | 875   |
| >SMO-S533N MSTWVWTK   | 349 | >SMO-S533N MNTWVWTK   | 2840  | 2491  |
| >SMO-S533N MSTWVWTK   | 107 | >SMO-S533N MNTWVWTK   | 2244  | 2137  |
| >SMO-S533N FAMFGTGIAA | 495 | >SMO-S533N FAMFGTGIAA | 7737  | 7242  |
| >SMO-S533N AMSTWVWT   | 183 | >SMO-S533N AMNTWVWT   | 266   | 83    |
| >SMO-S533N AMSTWVWT   | 178 | >SMO-S533N AMNTWVWT   | 409   | 231   |
| >SMO-S533N AMSTWVWT   | 60  | >SMO-S533N AMNTWVWT   | 244   | 184   |
| >SMO-S533N AMSTWVWT   | 116 | >SMO-S533N AMNTWVWT   | 89    | 27    |
| >SMO-S533N AMSTWVWT   | 55  | >SMO-S533N AMNTWVWT   | 106   | 51    |
| >SMO-S533N AMSTWVWT   | 63  | >SMO-S533N AMNTWVWT   | 49    | 14    |
| >SMO-S533N AMSTWVWT   | 63  | >SMO-S533N AMNTWVWT   | 34    | 29    |
| >SMO-S533N AMSTWVWT   | 38  | >SMO-S533N AMNTWVWT   | 20    | 18    |
| >SMO-S533N AMSTWVWT   | 12  | >SMO-S533N AMNTWVWT   | 8     | 4     |
| >SMO-S533N AMSTWVWT   | 60  | >SMO-S533N AMNTWVWT   | 33    | 27    |
| >SMO-S533N AMSTWVWT   | 274 | >SMO-S533N AMNTWVWT   | 226   | 48    |
| >SMO-S533N AMSTWVWT   | 530 | >SMO-S533N AMNTWVWT   | 413   | 117   |
| >SMO-S533N AMSTWVWT   | 187 | >SMO-S533N AMNTWVWT   | 177   | 10    |
| >SMO-S533N AMSTWVWT   | 545 | >SMO-S533N AMNTWVWT   | 446   | 99    |
| >SMO-S533N AMSTWVWT   | 20  | >SMO-S533N AMNTWVWT   | 20    | 0     |
| >SMO-S533N AMSTWVWT   | 588 | >SMO-S533N AMNTWVWT   | 495   | 93    |
| >SMO-S533N AMSTWVWT   | 143 | >SMO-S533N AMNTWVWT   | 128   | 15    |
| >SMO-S533N AMSTWVWT   | 529 | >SMO-S533N AMNTWVWT   | 498   | 31    |
| >SMO-S533N AMSTWVWT   | 22  | >SMO-S533N AMNTWVWT   | 24    | 2     |
| >SMO-S533N AMSTWVWT   | 18  | >SMO-S533N AMNTWVWT   | 19    | 1     |
| >SMO-S533N AMSTWVWT   | 8   | >SMO-S533N AMNTWVWT   | 9     | 1     |
| >SMO-S533N AMSTWVWT   | 60  | >SMO-S533N AMNTWVWT   | 68    | 8     |
| >SMO-S533N AMSTWVWT   | 67  | >SMO-S533N AMNTWVWT   | 59    | 8     |

|                      |     |                      |     |     |
|----------------------|-----|----------------------|-----|-----|
| >SMO-S533N AMSTWVWT  | 9   | >SMO-S533N AMNTWVWT  | 8   | 1   |
| >SMO-S533N AMSTWVWT  | 151 | >SMO-S533N AMNTWVWT  | 37  | 114 |
| >SMO-S533N AMSTWVWT  | 336 | >SMO-S533N AMNTWVWT  | 842 | 506 |
| >SMO-S533N IAMSTWVWT | 212 | >SMO-S533N IAMNTWVW  | 170 | 42  |
| >SMO-S533N IAMSTWVWT | 73  | >SMO-S533N IAMNTWVW  | 63  | 10  |
| >SMO-S533N IAMSTWVWT | 18  | >SMO-S533N IAMNTWVW  | 20  | 2   |
| >SMO-S533N IAMSTWVWT | 232 | >SMO-S533N IAMNTWVW  | 205 | 27  |
| >SMO-S533N IAMSTWVWT | 257 | >SMO-S533N IAMNTWVW  | 231 | 26  |
| >SMO-S533N IAMSTWVWT | 37  | >SMO-S533N IAMNTWVW  | 56  | 19  |
| >SMO-S533N IAMSTWVW  | 232 | >SMO-S533N IAMNTWVW  | 406 | 174 |
| >SMO-S533N IAMSTWVW  | 7   | >SMO-S533N IAMNTWVW  | 12  | 5   |
| >SMO-S533N IAMSTWVW  | 16  | >SMO-S533N IAMNTWVW  | 18  | 2   |
| >SMO-S533N IAMSTWVW  | 31  | >SMO-S533N IAMNTWVW  | 33  | 2   |
| >SMO-S533N IAMSTWVW  | 8   | >SMO-S533N IAMNTWVW  | 8   | 0   |
| >SMO-S533N IAMSTWVW  | 20  | >SMO-S533N IAMNTWVW  | 26  | 6   |
| >SMO-S533N IAMSTWVW  | 298 | >SMO-S533N IAMNTWVW  | 171 | 127 |
| >SMO-S533N IAMSTWVWT | 410 | >SMO-S533N IAMNTWVW  | 449 | 39  |
| >SMO-S533N IAMSTWVWT | 231 | >SMO-S533N IAMNTWVW  | 198 | 33  |
| >SMO-S533N GIAMSTWV  | 143 | >SMO-S533N GIAMNTWV  | 188 | 45  |
| >SMO-S533N GIAMSTWV  | 15  | >SMO-S533N GIAMNTWV  | 21  | 6   |
| >SMO-S533N GIAMSTWV  | 7   | >SMO-S533N GIAMNTWV  | 12  | 5   |
| >SMO-S533N GIAMSTWV  | 63  | >SMO-S533N GIAMNTWV  | 96  | 33  |
| >SMO-S533N GIAMSTWV  | 89  | >SMO-S533N GIAMNTWV  | 74  | 15  |
| >SMO-S533N GIAMSTWV  | 560 | >SMO-S533N GIAMNTWV  | 405 | 155 |
| >SMO-S533N GIAMSTWV  | 20  | >SMO-S533N GIAMNTWV  | 29  | 9   |
| >SMO-S533N GIAMSTWV  | 334 | >SMO-S533N GIAMNTWV  | 384 | 50  |
| >SMO-S533N GIAMSTWV  | 6   | >SMO-S533N GIAMNTWV  | 6   | 0   |
| >SMO-S533N GIAMSTWV\ | 183 | >SMO-S533N GIAMNTWV\ | 303 | 120 |
| >SMO-S533N GIAMSTWV\ | 13  | >SMO-S533N GIAMNTWV\ | 19  | 6   |
| >SMO-S533N GIAMSTWV\ | 177 | >SMO-S533N GIAMNTWV\ | 198 | 21  |
| >SMO-S533N GIAMSTWV\ | 325 | >SMO-S533N GIAMNTWV\ | 660 | 335 |
| >SMO-S533N GIAMSTWV\ | 16  | >SMO-S533N GIAMNTWV\ | 22  | 6   |
| >SMO-S533N TGIAMSTWV | 163 | >SMO-S533N TGIAMNTWV | 166 | 3   |
| >SMO-S533N TGIAMSTW  | 127 | >SMO-S533N TGIAMNTW  | 622 | 495 |
| >SMO-S533N TGIAMSTW  | 199 | >SMO-S533N TGIAMNTW  | 243 | 44  |
| >SMO-S533N TGIAMSTWV | 122 | >SMO-S533N TGIAMNTWV | 168 | 46  |
| >SMO-S533N TGIAMSTW  | 62  | >SMO-S533N TGIAMNTW  | 107 | 45  |
| >SMO-S533N TGIAMSTWV | 25  | >SMO-S533N TGIAMNTWV | 33  | 8   |
| >SMO-S533N TGIAMSTWV | 460 | >SMO-S533N TGIAMNTWV | 470 | 10  |
| >SMO-S533N GTGIAMSTW | 422 | >SMO-S533N GTGIAMNTV | 851 | 429 |
| >SMO-S533N GTGIAMSTW | 383 | >SMO-S533N GTGIAMNTV | 710 | 327 |
| >SMO-S533N GTGIAMSTW | 8   | >SMO-S533N GTGIAMNTV | 14  | 6   |
| >SMO-S533N GTGIAMSTW | 16  | >SMO-S533N GTGIAMNTV | 30  | 14  |



|                        |       |                        |      |       |
|------------------------|-------|------------------------|------|-------|
| >SMO-S533N GTGIAMSTW   | 88    | >SMO-S533N GTGIAMNTW   | 89   | 1     |
| >SMO-S533N GTGIAMSTW   | 69    | >SMO-S533N GTGIAMNTW   | 78   | 9     |
| >SMO-S533N GTGIAMSTW   | 240   | >SMO-S533N GTGIAMNTW   | 431  | 191   |
| >SMO-S533N GTGIAMSTW   | 40    | >SMO-S533N GTGIAMNTW   | 54   | 14    |
| >SMO-S533N GTGIAMSTW   | 17    | >SMO-S533N GTGIAMNTW   | 242  | 225   |
| >SMO-S533N GTGIAMSTW   | 41    | >SMO-S533N GTGIAMNTW   | 69   | 28    |
| >SMO-S533N FGTGIAMSTV  | 67    | >SMO-S533N FGTGIAMNTV  | 90   | 23    |
| >SMO-S533N FGTGIAMSTV  | 157   | >SMO-S533N FGTGIAMNTV  | 330  | 173   |
| >SMO-S533N FGTGIAMSTV  | 36    | >SMO-S533N FGTGIAMNTV  | 53   | 17    |
| >SMO-S533N FGTGIAMSTV  | 162   | >SMO-S533N FGTGIAMNTV  | 166  | 4     |
| >SMO-S533N FGTGIAMSTV  | 188   | >SMO-S533N FGTGIAMNTV  | 655  | 467   |
| >SMO-S533N FGTGIAMSTV  | 386   | >SMO-S533N FGTGIAMNTV  | 475  | 89    |
| >SMO-S533N FGTGIAMSTV  | 55    | >SMO-S533N FGTGIAMNTV  | 93   | 38    |
| >SMO-S533N FGTGIAMSTV  | 100   | >SMO-S533N FGTGIAMNTV  | 142  | 42    |
| >SMO-S533N MFGTGIAMS   | 425   | >SMO-S533N MFGTGIAMN   | 415  | 10    |
| >SMO-S533N MFGTGIAMS   | 73    | >SMO-S533N MFGTGIAMN   | 54   | 19    |
| >SMO-S533N AMFGTGIAM   | 334   | >SMO-S533N AMFGTGIAM   | 579  | 245   |
| >SMO-S533N AMFGTGIAM   | 330   | >SMO-S533N AMFGTGIAM   | 361  | 31    |
| >SMO-S533N AMFGTGIAM   | 388   | >SMO-S533N AMFGTGIAM   | 3813 | 3425  |
| >SMO-S533N AMFGTGIAM   | 97    | >SMO-S533N AMFGTGIAM   | 159  | 62    |
| >SMO-S533N AMFGTGIAM   | 20    | >SMO-S533N AMFGTGIAM   | 81   | 61    |
| >SMO-S533N AMFGTGIAM   | 11    | >SMO-S533N AMFGTGIAM   | 17   | 6     |
| >SMO-S533N AMFGTGIAM   | 84    | >SMO-S533N AMFGTGIAM   | 77   | 7     |
| >SMO-S533N AMFGTGIAM   | 84    | >SMO-S533N AMFGTGIAM   | 947  | 863   |
| >SMO-S533N AMFGTGIAM   | 11    | >SMO-S533N AMFGTGIAM   | 17   | 6     |
| >SMO-S533N AMFGTGIAM   | 201   | >SMO-S533N AMFGTGIAM   | 633  | 432   |
| >SMO-S533N AMFGTGIAM   | 413   | >SMO-S533N AMFGTGIAM   | 790  | 377   |
| >SMO-T349I-TYQPLSGKTS' | 243   | >SMO-T349I-IYQPLSGKTSY | 531  | 288   |
| >SMO-T349I-TYQPLSGKTS' | 441   | >SMO-T349I-IYQPLSGKTSY | 711  | 270   |
| >SMO-T349I-TYQPLSGKTS' | 118   | >SMO-T349I-IYQPLSGKTSY | 93   | 25    |
| >SMO-T349I-TYQPLSGKTS' | 80    | >SMO-T349I-IYQPLSGKTSY | 35   | 45    |
| >SMO-T349I-TYQPLSGKTS' | 893   | >SMO-T349I-IYQPLSGKTSY | 237  | 656   |
| >SMO-T349I-TTYQPLSGK   | 41    | >SMO-T349I-TIYQPLSGK   | 37   | 4     |
| >SMO-T349I-TTYQPLSGK   | 11    | >SMO-T349I-TIYQPLSGK   | 15   | 4     |
| >SMO-T349I-TTYQPLSGK   | 159   | >SMO-T349I-TIYQPLSGK   | 2074 | 1915  |
| >SMO-T349I-TTYQPLSGK   | 10    | >SMO-T349I-TIYQPLSGK   | 62   | 52    |
| >SMO-T349I-WHTSFKALG`  | 23295 | >SMO-T349I-WHTSFKALG`  | 253  | 23042 |
| >SMO-T349I-WHTSFKALG`  | 8033  | >SMO-T349I-WHTSFKALG`  | 307  | 7726  |
| >SMO-T349I-GTTYQPLSGK  | 37    | >SMO-T349I-GTIYQPLSGK  | 21   | 16    |
| >SMO-T349I-GTTYQPLSGK  | 31    | >SMO-T349I-GTIYQPLSGK  | 16   | 15    |
| >SMO-T349I-GTTYQPLSGK  | 586   | >SMO-T349I-GTIYQPLSGK  | 140  | 446   |
| >SMO-T349I-GTTYQPLSGK  | 425   | >SMO-T349I-GTIYQPLSGK  | 218  | 207   |
| >SMO-T349I-LGTTYQPL    | 140   | >SMO-T349I-LGTIYQPL    | 166  | 26    |

|                          |      |                         |      |      |
|--------------------------|------|-------------------------|------|------|
| >SMO-T349I- ALGTTYQPL    | 541  | >SMO-T349I- ALGTIYQPL   | 176  | 365  |
| >SMO-T349I- ALGTTYQPL    | 41   | >SMO-T349I- ALGTIYQPL   | 9    | 32   |
| >SMO-T349I- ALGTTYQPL    | 107  | >SMO-T349I- ALGTIYQPL   | 58   | 49   |
| >SMO-T349I- ALGTTYQPL    | 20   | >SMO-T349I- ALGTIYQPL   | 23   | 3    |
| >SMO-T349I- ALGTTYQPL    | 27   | >SMO-T349I- ALGTIYQPL   | 44   | 17   |
| >SMO-T349I- ALGTTYQPL    | 32   | >SMO-T349I- ALGTIYQPL   | 38   | 6    |
| >SMO-T349I- ALGTTYQPL    | 276  | >SMO-T349I- ALGTIYQPL   | 117  | 159  |
| >SMO-T349I- ALGTTYQPL    | 4    | >SMO-T349I- ALGTIYQPL   | 5    | 1    |
| >SMO-T349I- ALGTTYQPL    | 237  | >SMO-T349I- ALGTIYQPL   | 1139 | 902  |
| >SMO-T349I- KALGTTYQPL   | 595  | >SMO-T349I- KALGTIYQPL  | 449  | 146  |
| >SMO-T349I- KALGTTYQPL   | 218  | >SMO-T349I- KALGTIYQPL  | 226  | 8    |
| >SMO-T349I- KALGTTYQPL   | 277  | >SMO-T349I- KALGTIYQPL  | 128  | 149  |
| >SMO-T349I- KALGTTYQ     | 1415 | >SMO-T349I- KALGTIYQ    | 498  | 917  |
| >SMO-T349I- KALGTTYQPL   | 71   | >SMO-T349I- KALGTIYQPL  | 141  | 70   |
| >SMO-T349I- KALGTTYQPL   | 105  | >SMO-T349I- KALGTIYQPL  | 126  | 21   |
| >SMO-T349I- KALGTTYQPL   | 204  | >SMO-T349I- KALGTIYQPL  | 356  | 152  |
| >SMO-T349I- KALGTTYQPL   | 13   | >SMO-T349I- KALGTIYQPL  | 20   | 7    |
| >SMO-T349I- KALGTTYQPL   | 524  | >SMO-T349I- KALGTIYQPL  | 457  | 67   |
| >SMO-T349I- KALGTTYQPL   | 129  | >SMO-T349I- KALGTIYQPL  | 217  | 88   |
| >SMO-T349I- FKALGTTYQP   | 256  | >SMO-T349I- FKALGTIYQPI | 187  | 69   |
| >SMO-T349I- FKALGTTY     | 274  | >SMO-T349I- FKALGTIY    | 369  | 95   |
| >SMO-T349I- FKALGTTY     | 340  | >SMO-T349I- FKALGTIY    | 495  | 155  |
| >SMO-T349I- FKALGTTY     | 6    | >SMO-T349I- FKALGTIY    | 7    | 1    |
| >SMO-T349I- FKALGTTYQP   | 12   | >SMO-T349I- FKALGTIYQPI | 19   | 7    |
| >SMO-T349I- FKALGTTY     | 298  | >SMO-T349I- FKALGTIY    | 866  | 568  |
| >SMO-T349I- FKALGTTYQP   | 22   | >SMO-T349I- FKALGTIYQPI | 19   | 3    |
| >SMO-T349I- SFKALGTT     | 2399 | >SMO-T349I- SFKALGTI    | 14   | 2385 |
| >SMO-T349I- SFKALGTTY    | 92   | >SMO-T349I- SFKALGTIY   | 167  | 75   |
| >SMO-T349I- SFKALGTT     | 4988 | >SMO-T349I- SFKALGTI    | 340  | 4648 |
| >SMO-T349I- SFKALGTTY    | 493  | >SMO-T349I- SFKALGTIY   | 270  | 223  |
| >SMO-T349I- SFKALGTTY    | 173  | >SMO-T349I- SFKALGTIY   | 431  | 258  |
| >SMO-T349I- SFKALGTTY    | 80   | >SMO-T349I- SFKALGTIY   | 101  | 21   |
| >SMO-T349I- SFKALGTTY    | 61   | >SMO-T349I- SFKALGTIY   | 86   | 25   |
| >SMO-T349I- TSFKALGTTY   | 1280 | >SMO-T349I- TSFKALGTIY  | 473  | 807  |
| >SMO-T349I- TSFKALGTTY   | 297  | >SMO-T349I- TSFKALGTIY  | 633  | 336  |
| >SMO-T349I- TSFKALGTTY   | 128  | >SMO-T349I- TSFKALGTIY  | 95   | 33   |
| >SMO-T349I- TSFKALGTTY   | 41   | >SMO-T349I- TSFKALGTIY  | 36   | 5    |
| >SMO-T349I- TSFKALGTTY   | 373  | >SMO-T349I- TSFKALGTIY  | 791  | 418  |
| >SMO-T349I- TSFKALGTTY(C | 229  | >SMO-T349I- TSFKALGTIYC | 277  | 48   |
| >SMO-T349I- TSFKALGTT    | 5270 | >SMO-T349I- TSFKALGTI   | 134  | 5136 |
| >SMO-T349I- TSFKALGTTY   | 78   | >SMO-T349I- TSFKALGTIY  | 146  | 68   |
| >SMO-T349I- TSFKALGTTY   | 52   | >SMO-T349I- TSFKALGTIY  | 61   | 9    |
| >SMO-T349I- TSFKALGTT    | 5066 | >SMO-T349I- TSFKALGTI   | 132  | 4934 |

|                       |       |                        |      |       |
|-----------------------|-------|------------------------|------|-------|
| >SMO-T349I-TSFKALGTTY | 6     | >SMO-T349I-TSFKALGTIY  | 13   | 7     |
| >SMO-T349I-TSFKALGTTY | 138   | >SMO-T349I-TSFKALGTIY  | 298  | 160   |
| >SMO-T349I-TSFKALGTT  | 880   | >SMO-T349I-TSFKALGTI   | 80   | 800   |
| >SMO-T349I-TSFKALGTTY | 150   | >SMO-T349I-TSFKALGTIY  | 143  | 7     |
| >SMO-T349I-TSFKALGTTY | 184   | >SMO-T349I-TSFKALGTIY  | 1391 | 1207  |
| >SMO-T349I-TSFKALGTT  | 16716 | >SMO-T349I-TSFKALGTI   | 8    | 16708 |
| >SMO-T349I-HTSFKALGTT | 37    | >SMO-T349I-HTSFKALGTIY | 35   | 2     |
| >SMO-T349I-HTSFKALGTT | 424   | >SMO-T349I-HTSFKALGTIY | 2815 | 2391  |
| >SMO-T349I-HTSFKALGTT | 39    | >SMO-T349I-HTSFKALGTIY | 59   | 20    |
| >SMO-T349I-HTSFKALGTT | 5168  | >SMO-T349I-HTSFKALGTI  | 334  | 4834  |
| >SMO-T349I-HTSFKALGTT | 130   | >SMO-T349I-HTSFKALGTIY | 137  | 7     |
| >SMO-T349I-HTSFKALGTT | 13209 | >SMO-T349I-HTSFKALGTI  | 340  | 12869 |
| >SMO-T349I-HTSFKALGTT | 221   | >SMO-T349I-HTSFKALGTIY | 333  | 112   |
| >SMO-T349I-HTSFKALGTT | 807   | >SMO-T349I-HTSFKALGTI  | 90   | 717   |
| >SMO-T349I-HTSFKALGTT | 57    | >SMO-T349I-HTSFKALGTIY | 38   | 19    |
| >SMO-T349I-HTSFKALGTT | 248   | >SMO-T349I-HTSFKALGTIY | 608  | 360   |
| >SMO-T349I-HTSFKALGTT | 1224  | >SMO-T349I-HTSFKALGTI  | 26   | 1198  |
| >SMO-T349I-HTSFKALGTT | 3     | >SMO-T349I-HTSFKALGTIY | 6    | 3     |
| >SMO-T349I-HTSFKALGTT | 272   | >SMO-T349I-HTSFKALGTIY | 939  | 667   |
| >SMO-T349I-HTSFKALGTT | 469   | >SMO-T349I-HTSFKALGTI  | 60   | 409   |
| >SMO-T349I-HTSFKALGTT | 12    | >SMO-T349I-HTSFKALGTIY | 15   | 3     |
| >SMO-T349I-HTSFKALGTT | 209   | >SMO-T349I-HTSFKALGTIY | 1259 | 1050  |
| >SMO-T349I-HTSFKALGTT | 68    | >SMO-T349I-HTSFKALGTIY | 86   | 18    |
| >SMO-T349I-HTSFKALGTT | 26058 | >SMO-T349I-HTSFKALGTI  | 107  | 25951 |
| >SMO-T640AVTPVATPV    | 444   | >SMO-T640AVAPVATPV     | 1239 | 795   |
| >SMO-T640AVTPVATPV    | 120   | >SMO-T640AVAPVATPV     | 184  | 64    |
| >SMO-T640AVTPVATPV    | 47    | >SMO-T640AVAPVATPV     | 294  | 247   |
| >SMO-T640AVTPVATPV    | 5     | >SMO-T640AVAPVATPV     | 48   | 43    |
| >SMO-T640AVTPVATPVP   | 56    | >SMO-T640AVAPVATPVP    | 1113 | 1057  |
| >SMO-T640AVTPVATPVPP  | 184   | >SMO-T640AVAPVATPVPP   | 3194 | 3010  |
| >SMO-T640AVTPVATPVPP  | 54    | >SMO-T640AVAPVATPVPP   | 1043 | 989   |
| >SMO-T640ASVTPVATPV   | 546   | >SMO-T640ASVAPVATPV    | 100  | 446   |
| >SMO-T640ASVTPVATPV   | 130   | >SMO-T640ASVAPVATPV    | 16   | 114   |
| >SMO-T640ASVTPVATPV   | 29    | >SMO-T640ASVAPVATPV    | 7    | 22    |
| >SMO-T640ASVTPVATPV   | 10    | >SMO-T640ASVAPVATPV    | 6    | 4     |
| >SMO-T640ASVTPVATPV   | 78    | >SMO-T640ASVAPVATPV    | 30   | 48    |
| >SMO-T640ASVTPVATPV   | 739   | >SMO-T640ASVAPVATPV    | 444  | 295   |
| >SMO-T640ASVTPVATPV   | 30    | >SMO-T640ASVAPVATPV    | 18   | 12    |
| >SMO-T640ASVTPVATPV   | 9     | >SMO-T640ASVAPVATPV    | 8    | 1     |
| >SMO-T640ASVTPVATPV   | 6     | >SMO-T640ASVAPVATPV    | 5    | 1     |
| >SMO-T640ASVTPVATPV   | 25    | >SMO-T640ASVAPVATPV    | 8    | 17    |
| >SMO-T640ASVTPVATPV   | 74    | >SMO-T640ASVAPVATPV    | 29   | 45    |
| >SMO-T640ASVTPVATPV   | 694   | >SMO-T640ASVAPVATPV    | 306  | 388   |

|                        |      |                        |     |      |
|------------------------|------|------------------------|-----|------|
| >SMO-T640A ISVTPVATPV  | 189  | >SMO-T640A ISVAPVATPV  | 215 | 26   |
| >SMO-T640A ISVTPVATPV  | 36   | >SMO-T640A ISVAPVATPV  | 23  | 13   |
| >SMO-T640A ISVTPVATPV  | 563  | >SMO-T640A ISVAPVATPV  | 467 | 96   |
| >SMO-T640A DISVTPVATP\ | 62   | >SMO-T640A DISVAPVATP' | 32  | 30   |
| >SMO-T640A DISVTPVATP\ | 58   | >SMO-T640A DISVAPVATP' | 54  | 4    |
| >SMO-T640A QDISVTPV    | 432  | >SMO-T640A QDISVAPV    | 348 | 84   |
| >SMO-T640A QDISVTPV    | 243  | >SMO-T640A QDISVAPV    | 218 | 25   |
| >SMO-T640A QDISVTPV    | 213  | >SMO-T640A QDISVAPV    | 145 | 68   |
| >SMO-T640A PQDISVTPV   | 357  | >SMO-T640A PQDISVAPV   | 283 | 74   |
| >SMO-T640A PQDISVTPV   | 1108 | >SMO-T640A PQDISVAPV   | 488 | 620  |
| >SMO-T640A LPQDISVTPV  | 88   | >SMO-T640A LPQDISVAPV  | 101 | 13   |
| >SMO-T640A LPQDISVT    | 412  | >SMO-T640A LPQDISVA    | 497 | 85   |
| >SMO-T640A LPQDISVTP   | 972  | >SMO-T640A LPQDISVAP   | 331 | 641  |
| >SMO-T640A LPQDISVTPV, | 164  | >SMO-T640A LPQDISVAPV, | 214 | 50   |
| >SMO-T640A LPQDISVT    | 520  | >SMO-T640A LPQDISVA    | 24  | 496  |
| >SMO-T640A LPQDISVTP   | 686  | >SMO-T640A LPQDISVAP   | 209 | 477  |
| >SMO-T640A LPQDISVTPV  | 18   | >SMO-T640A LPQDISVAPV  | 14  | 4    |
| >SMO-T640A LPQDISVTPV, | 12   | >SMO-T640A LPQDISVAPV, | 12  | 0    |
| >SMO-T640A ILPQDISVTPV | 42   | >SMO-T640A ILPQDISVAPV | 34  | 8    |
| >SMO-T640A ILPQDISVT   | 2675 | >SMO-T640A ILPQDISVA   | 490 | 2185 |
| >SMO-T640A ILPQDISVTPV | 16   | >SMO-T640A ILPQDISVAPV | 17  | 1    |
| >SMO-T640A ILPQDISVT   | 533  | >SMO-T640A ILPQDISVA   | 30  | 503  |
| >SMO-T640A ILPQDISVTPV | 3    | >SMO-T640A ILPQDISVAPV | 3   | 0    |
| >SMO-T640A ILPQDISVTPV | 26   | >SMO-T640A ILPQDISVAPV | 26  | 0    |
| >SMO-T640A ILPQDISVT   | 432  | >SMO-T640A ILPQDISVA   | 60  | 372  |
| >SMO-T640A ILPQDISVTPV | 3    | >SMO-T640A ILPQDISVAPV | 2   | 1    |
| >SMO-T640A ILPQDISVTPV | 15   | >SMO-T640A ILPQDISVAPV | 7   | 8    |
| >SMO-T640A ILPQDISVT   | 3906 | >SMO-T640A ILPQDISVA   | 437 | 3469 |
| >SMO-T640A ILPQDISVTPV | 7    | >SMO-T640A ILPQDISVAPV | 7   | 0    |
| >SMO-T640A ILPQDISVTPV | 9    | >SMO-T640A ILPQDISVAPV | 5   | 4    |
| >SMO-T640A ILPQDISVT   | 56   | >SMO-T640A ILPQDISVA   | 11  | 45   |
| >SMO-T640A ILPQDISVTPV | 2    | >SMO-T640A ILPQDISVAPV | 2   | 0    |
| >SMO-T640A ILPQDISVTPV | 733  | >SMO-T640A ILPQDISVAPV | 253 | 480  |
| >SMO-T640A AILPQDISVT  | 1174 | >SMO-T640A AILPQDISVA  | 468 | 706  |
| >SMO-T640A AILPQDISVT  | 1661 | >SMO-T640A AILPQDISVA  | 169 | 1492 |
| >SMO-V404M VLAPIGLV    | 34   | >SMO-V404M MLAPIGLV    | 15  | 19   |
| >SMO-V404M VLAPIGLVL   | 177  | >SMO-V404M MLAPIGLVL   | 39  | 138  |
| >SMO-V404M VLAPIGLVLI  | 229  | >SMO-V404M MLAPIGLVLI  | 52  | 177  |
| >SMO-V404M VLAPIGLVLIV | 32   | >SMO-V404M MLAPIGLVLIV | 15  | 17   |
| >SMO-V404M VLAPIGLV    | 6    | >SMO-V404M MLAPIGLV    | 3   | 3    |
| >SMO-V404M VLAPIGLVL   | 24   | >SMO-V404M MLAPIGLVL   | 6   | 18   |
| >SMO-V404M VLAPIGLVLI  | 65   | >SMO-V404M MLAPIGLVLI  | 18  | 47   |
| >SMO-V404M VLAPIGLVLIV | 13   | >SMO-V404M MLAPIGLVLIV | 4   | 9    |

|                        |      |                        |     |      |
|------------------------|------|------------------------|-----|------|
| >SMO-V404M VLAPIGLV    | 4    | >SMO-V404M MLAPIGLV    | 2   | 2    |
| >SMO-V404M VLAPIGLVL   | 43   | >SMO-V404M MLAPIGLVL   | 11  | 32   |
| >SMO-V404M VLAPIGLVLI  | 74   | >SMO-V404M MLAPIGLVLI  | 23  | 51   |
| >SMO-V404M VLAPIGLVLIV | 5    | >SMO-V404M MLAPIGLVLIV | 3   | 2    |
| >SMO-V404M VLAPIGLV    | 24   | >SMO-V404M MLAPIGLV    | 9   | 15   |
| >SMO-V404M VLAPIGLVL   | 238  | >SMO-V404M MLAPIGLVL   | 44  | 194  |
| >SMO-V404M VLAPIGLVLI  | 521  | >SMO-V404M MLAPIGLVLI  | 118 | 403  |
| >SMO-V404M VLAPIGLVLIV | 27   | >SMO-V404M MLAPIGLVLIV | 10  | 17   |
| >SMO-V404M VLAPIGLV    | 3    | >SMO-V404M MLAPIGLV    | 2   | 1    |
| >SMO-V404M VLAPIGLVL   | 21   | >SMO-V404M MLAPIGLVL   | 13  | 8    |
| >SMO-V404M VLAPIGLVLI  | 13   | >SMO-V404M MLAPIGLVLI  | 8   | 5    |
| >SMO-V404M VLAPIGLVLIV | 5    | >SMO-V404M MLAPIGLVLIV | 3   | 2    |
| >SMO-V404M VLAPIGLV    | 17   | >SMO-V404M MLAPIGLV    | 12  | 5    |
| >SMO-V404M VLAPIGLVL   | 105  | >SMO-V404M MLAPIGLVL   | 58  | 47   |
| >SMO-V404M VLAPIGLVLI  | 74   | >SMO-V404M MLAPIGLVLI  | 38  | 36   |
| >SMO-V404M VLAPIGLVLIV | 11   | >SMO-V404M MLAPIGLVLIV | 8   | 3    |
| >SMO-V404M VLAPIGLV    | 7    | >SMO-V404M MLAPIGLV    | 7   | 0    |
| >SMO-V404M VLAPIGLVL   | 19   | >SMO-V404M MLAPIGLVL   | 19  | 0    |
| >SMO-V404M VLAPIGLVLI  | 14   | >SMO-V404M MLAPIGLVLI  | 13  | 1    |
| >SMO-V404M VLAPIGLVLIV | 6    | >SMO-V404M MLAPIGLVLIV | 6   | 0    |
| >SMO-V404M VLAPIGLV    | 6    | >SMO-V404M MLAPIGLV    | 5   | 1    |
| >SMO-V404M VLAPIGLVL   | 37   | >SMO-V404M MLAPIGLVL   | 31  | 6    |
| >SMO-V404M VLAPIGLVLI  | 42   | >SMO-V404M MLAPIGLVLI  | 31  | 11   |
| >SMO-V404M VLAPIGLVLIV | 5    | >SMO-V404M MLAPIGLVLIV | 5   | 0    |
| >SMO-V404M VLAPIGLV    | 2    | >SMO-V404M MLAPIGLV    | 2   | 0    |
| >SMO-V404M VLAPIGLVL   | 4    | >SMO-V404M MLAPIGLVL   | 3   | 1    |
| >SMO-V404M VLAPIGLVLI  | 4    | >SMO-V404M MLAPIGLVLI  | 3   | 1    |
| >SMO-V404M VLAPIGLVLIV | 2    | >SMO-V404M MLAPIGLVLIV | 2   | 0    |
| >SMO-V404M VLAPIGLV    | 287  | >SMO-V404M MLAPIGLV    | 10  | 277  |
| >SMO-V404M VLAPIGLVL   | 5344 | >SMO-V404M MLAPIGLVL   | 315 | 5029 |
| >SMO-V404M VLAPIGLVLIV | 1649 | >SMO-V404M MLAPIGLVLIV | 54  | 1595 |
| >SMO-V404M VLAPIGLV    | 2689 | >SMO-V404M MLAPIGLV    | 102 | 2587 |
| >SMO-V404M VLAPIGLVLIV | 5560 | >SMO-V404M MLAPIGLVLIV | 377 | 5183 |
| >SMO-V404M VLAPIGLVL   | 1050 | >SMO-V404M MLAPIGLVL   | 291 | 759  |
| >SMO-V404M VLAPIGLVL   | 328  | >SMO-V404M MLAPIGLVL   | 150 | 178  |
| >SMO-V404M VLAPIGLVL   | 1284 | >SMO-V404M MLAPIGLVL   | 476 | 808  |
| >SMO-V404M VLAPIGLVL   | 4053 | >SMO-V404M MLAPIGLVL   | 237 | 3816 |
| >SMO-V404M FVLAPIGL    | 41   | >SMO-V404M FMLAPIGL    | 9   | 32   |
| >SMO-V404M FVLAPIGLV   | 26   | >SMO-V404M FMLAPIGLV   | 8   | 18   |
| >SMO-V404M FVLAPIGLVL  | 255  | >SMO-V404M FMLAPIGLVL  | 23  | 232  |
| >SMO-V404M FVLAPIGLVLI | 42   | >SMO-V404M FMLAPIGLVLI | 10  | 32   |
| >SMO-V404M FVLAPIGL    | 211  | >SMO-V404M FMLAPIGL    | 14  | 197  |
| >SMO-V404M FVLAPIGLV   | 84   | >SMO-V404M FMLAPIGLV   | 8   | 76   |

|                        |      |                        |      |      |
|------------------------|------|------------------------|------|------|
| >SMO-V404M FVLAPIGLVL  | 93   | >SMO-V404M FMLAPIGLVL  | 14   | 79   |
| >SMO-V404M FVLAPIGLVLI | 128  | >SMO-V404M FMLAPIGLVLI | 13   | 115  |
| >SMO-V404M FVLAPIGL    | 289  | >SMO-V404M FMLAPIGL    | 13   | 276  |
| >SMO-V404M FVLAPIGLV   | 14   | >SMO-V404M FMLAPIGLV   | 3    | 11   |
| >SMO-V404M FVLAPIGLVL  | 202  | >SMO-V404M FMLAPIGLVL  | 35   | 167  |
| >SMO-V404M FVLAPIGLVLI | 99   | >SMO-V404M FMLAPIGLVLI | 8    | 91   |
| >SMO-V404M FVLAPIGL    | 10   | >SMO-V404M FMLAPIGL    | 8    | 2    |
| >SMO-V404M FVLAPIGLV   | 4    | >SMO-V404M FMLAPIGLV   | 4    | 0    |
| >SMO-V404M FVLAPIGLVL  | 53   | >SMO-V404M FMLAPIGLVL  | 41   | 12   |
| >SMO-V404M FVLAPIGLVLI | 8    | >SMO-V404M FMLAPIGLVLI | 7    | 1    |
| >SMO-V404M FVLAPIGL    | 7    | >SMO-V404M FMLAPIGL    | 1    | 6    |
| >SMO-V404M FVLAPIGLV   | 3    | >SMO-V404M FMLAPIGLV   | 1    | 2    |
| >SMO-V404M FVLAPIGLVL  | 22   | >SMO-V404M FMLAPIGLVL  | 2    | 20   |
| >SMO-V404M FVLAPIGLVLI | 11   | >SMO-V404M FMLAPIGLVLI | 2    | 9    |
| >SMO-V404M FVLAPIGL    | 94   | >SMO-V404M FMLAPIGL    | 4    | 90   |
| >SMO-V404M FVLAPIGLV   | 76   | >SMO-V404M FMLAPIGLV   | 3    | 73   |
| >SMO-V404M FVLAPIGLVL  | 633  | >SMO-V404M FMLAPIGLVL  | 5    | 628  |
| >SMO-V404M FVLAPIGLVLI | 326  | >SMO-V404M FMLAPIGLVLI | 6    | 320  |
| >SMO-V404M FVLAPIGL    | 52   | >SMO-V404M FMLAPIGL    | 5    | 47   |
| >SMO-V404M FVLAPIGLV   | 18   | >SMO-V404M FMLAPIGLV   | 4    | 14   |
| >SMO-V404M FVLAPIGLVL  | 183  | >SMO-V404M FMLAPIGLVL  | 7    | 176  |
| >SMO-V404M FVLAPIGLVLI | 104  | >SMO-V404M FMLAPIGLVLI | 7    | 97   |
| >SMO-V404M FVLAPIGL    | 75   | >SMO-V404M FMLAPIGL    | 3    | 72   |
| >SMO-V404M FVLAPIGLV   | 73   | >SMO-V404M FMLAPIGLV   | 2    | 71   |
| >SMO-V404M FVLAPIGLVL  | 740  | >SMO-V404M FMLAPIGLVL  | 7    | 733  |
| >SMO-V404M FVLAPIGLVLI | 656  | >SMO-V404M FMLAPIGLVLI | 8    | 648  |
| >SMO-V404M FVLAPIGL    | 24   | >SMO-V404M FMLAPIGL    | 2    | 22   |
| >SMO-V404M FVLAPIGLV   | 5    | >SMO-V404M FMLAPIGLV   | 2    | 3    |
| >SMO-V404M FVLAPIGLVL  | 66   | >SMO-V404M FMLAPIGLVL  | 3    | 63   |
| >SMO-V404M FVLAPIGLVLI | 74   | >SMO-V404M FMLAPIGLVLI | 3    | 71   |
| >SMO-V404M FVLAPIGL    | 87   | >SMO-V404M FMLAPIGL    | 2946 | 2859 |
| >SMO-V404M FVLAPIGLV   | 8    | >SMO-V404M FMLAPIGLV   | 224  | 216  |
| >SMO-V404M FVLAPIGLVLI | 28   | >SMO-V404M FMLAPIGLVLI | 1358 | 1330 |
| >SMO-V404M FVLAPIGL    | 13   | >SMO-V404M FMLAPIGL    | 40   | 27   |
| >SMO-V404M FVLAPIGLV   | 7    | >SMO-V404M FMLAPIGLV   | 13   | 6    |
| >SMO-V404M FVLAPIGLVL  | 102  | >SMO-V404M FMLAPIGLVL  | 441  | 339  |
| >SMO-V404M FVLAPIGLVLI | 20   | >SMO-V404M FMLAPIGLVLI | 56   | 36   |
| >SMO-V404M FVLAPIGLVL  | 2035 | >SMO-V404M FMLAPIGLVL  | 205  | 1830 |
| >SMO-V404M FVLAPIGL    | 2103 | >SMO-V404M FMLAPIGL    | 216  | 1887 |
| >SMO-V404M FVLAPIGLV   | 2197 | >SMO-V404M FMLAPIGLV   | 185  | 2012 |
| >SMO-V404M FVLAPIGLVL  | 1134 | >SMO-V404M FMLAPIGLVL  | 108  | 1026 |
| >SMO-V404M FVLAPIGL    | 4063 | >SMO-V404M FMLAPIGL    | 63   | 4000 |
| >SMO-V404M FVLAPIGLVL  | 1673 | >SMO-V404M FMLAPIGLVL  | 35   | 1638 |

|                        |       |                        |      |       |
|------------------------|-------|------------------------|------|-------|
| >SMO-V404M FVLAPIGLVLI | 6518  | >SMO-V404M FMLAPIGLVLI | 202  | 6316  |
| >SMO-V404M FVLAPIGL    | 1104  | >SMO-V404M FMLAPIGL    | 82   | 1022  |
| >SMO-V404M FVLAPIGLVL  | 246   | >SMO-V404M FMLAPIGLVL  | 29   | 217   |
| >SMO-V404M FVLAPIGL    | 10732 | >SMO-V404M FMLAPIGL    | 424  | 10308 |
| >SMO-V404M FVLAPIGLVL  | 6916  | >SMO-V404M FMLAPIGLVL  | 228  | 6688  |
| >SMO-V404M FVLAPIGLVLI | 198   | >SMO-V404M FMLAPIGLVLI | 736  | 538   |
| >SMO-V404M YKNYRYRAGF  | 135   | >SMO-V404M YKNYRYRAGF  | 311  | 176   |
| >SMO-V404M YKNYRYRAGF  | 254   | >SMO-V404M YKNYRYRAGF  | 63   | 191   |
| >SMO-V404M GFVLAPIGLVI | 1517  | >SMO-V404M GFMLAPIGLV  | 207  | 1310  |
| >SMO-V404M AGFVLAPI    | 204   | >SMO-V404M AGFMLAPI    | 145  | 59    |
| >SMO-V404M AGFVLAPI    | 244   | >SMO-V404M AGFMLAPI    | 331  | 87    |
| >SMO-V404M RAGFVLAPI   | 598   | >SMO-V404M RAGFMLAPI   | 409  | 189   |
| >SMO-V404M RAGFVLAPI   | 150   | >SMO-V404M RAGFMLAPI   | 161  | 11    |
| >SMO-V404M RAGFVLAPI   | 676   | >SMO-V404M RAGFMLAPI   | 138  | 538   |
| >SMO-V404M RAGFVLAPIG  | 246   | >SMO-V404M RAGFMLAPIC  | 88   | 158   |
| >SMO-V404M RAGFVLAPI   | 102   | >SMO-V404M RAGFMLAPI   | 149  | 47    |
| >SMO-V404M YRAGFVLAPI  | 368   | >SMO-V404M YRAGFMLAPI  | 355  | 13    |
| >SMO-V404M YRAGFVLAPI  | 256   | >SMO-V404M YRAGFMLAPI  | 278  | 22    |
| >SMO-V404M YRAGFVLAPI  | 309   | >SMO-V404M YRAGFMLAPI  | 444  | 135   |
| >SMO-V404M YRAGFVLA    | 149   | >SMO-V404M YRAGFMLA    | 248  | 99    |
| >SMO-V404M YRAGFVLAP   | 446   | >SMO-V404M YRAGFMLAP   | 687  | 241   |
| >SMO-V404M YRAGFVLAPI  | 236   | >SMO-V404M YRAGFMLAPI  | 397  | 161   |
| >SMO-V404M YRAGFVLAPI  | 43    | >SMO-V404M YRAGFMLAPI  | 50   | 7     |
| >SMO-V404M RYRAGFVL    | 362   | >SMO-V404M RYRAGFML    | 578  | 216   |
| >SMO-V404M RYRAGFVLAP  | 18    | >SMO-V404M RYRAGFMLAI  | 15   | 3     |
| >SMO-V404M RYRAGFVL    | 285   | >SMO-V404M RYRAGFML    | 250  | 35    |
| >SMO-V404M RYRAGFVLAP  | 171   | >SMO-V404M RYRAGFMLAI  | 157  | 14    |
| >SMO-V404M RYRAGFVL    | 178   | >SMO-V404M RYRAGFML    | 166  | 12    |
| >SMO-V404M RYRAGFVLAP  | 123   | >SMO-V404M RYRAGFMLAI  | 120  | 3     |
| >SMO-V404M RYRAGFVL    | 6     | >SMO-V404M RYRAGFML    | 5    | 1     |
| >SMO-V404M RYRAGFVLA   | 502   | >SMO-V404M RYRAGFMLA   | 202  | 300   |
| >SMO-V404M RYRAGFVLAP  | 14    | >SMO-V404M RYRAGFMLAI  | 16   | 2     |
| >SMO-V404M RYRAGFVL    | 6     | >SMO-V404M RYRAGFML    | 6    | 0     |
| >SMO-V404M RYRAGFVLA   | 4     | >SMO-V404M RYRAGFMLA   | 3    | 1     |
| >SMO-V404M RYRAGFVLAP  | 11    | >SMO-V404M RYRAGFMLAI  | 9    | 2     |
| >SMO-V404M RYRAGFVLAP  | 3     | >SMO-V404M RYRAGFMLAI  | 3    | 0     |
| >SMO-V404M YRYRAGFV    | 393   | >SMO-V404M YRYRAGFM    | 9939 | 9546  |
| >SMO-V404M YRYRAGFV    | 323   | >SMO-V404M YRYRAGFM    | 112  | 211   |
| >SMO-V404M YRYRAGFVL   | 13    | >SMO-V404M YRYRAGFML   | 20   | 7     |
| >SMO-V404M YRYRAGFVLA  | 184   | >SMO-V404M YRYRAGFMLA  | 193  | 9     |
| >SMO-V404M YRYRAGFVLA  | 188   | >SMO-V404M YRYRAGFMLA  | 311  | 123   |
| >SMO-V404M YRYRAGFV    | 37    | >SMO-V404M YRYRAGFM    | 15   | 22    |
| >SMO-V404M YRYRAGFVL   | 14    | >SMO-V404M YRYRAGFML   | 11   | 3     |

|                       |       |                       |      |       |
|-----------------------|-------|-----------------------|------|-------|
| >SMO-V404M YRYRAGFVLA | 185   | >SMO-V404M YRYRAGFML/ | 192  | 7     |
| >SMO-V404M YRYRAGFVLA | 181   | >SMO-V404M YRYRAGFML/ | 199  | 18    |
| >SMO-V404M YRYRAGFVL  | 13    | >SMO-V404M YRYRAGFML  | 50   | 37    |
| >SMO-V404M YRYRAGFVL  | 450   | >SMO-V404M YRYRAGFML  | 542  | 92    |
| >SMO-V404M YRYRAGFVLA | 151   | >SMO-V404M YRYRAGFML/ | 163  | 12    |
| >SMO-V404M YRYRAGFVLA | 489   | >SMO-V404M YRYRAGFML/ | 456  | 33    |
| >SMO-V404M YRYRAGFVL  | 90    | >SMO-V404M YRYRAGFML  | 101  | 11    |
| >SMO-V404M YRYRAGFVLA | 932   | >SMO-V404M YRYRAGFML/ | 337  | 595   |
| >SMO-V404M YRYRAGFVL  | 64    | >SMO-V404M YRYRAGFML  | 39   | 25    |
| >SMO-V404M YRYRAGFVLA | 348   | >SMO-V404M YRYRAGFML/ | 185  | 163   |
| >SMO-V404M NYRYRAGFVL | 186   | >SMO-V404M NYRYRAGFM  | 272  | 86    |
| >SMO-V404M NYRYRAGFVL | 159   | >SMO-V404M NYRYRAGFM  | 207  | 48    |
| >SMO-V404M NYRYRAGFVL | 79    | >SMO-V404M NYRYRAGFM  | 51   | 28    |
| >SMO-V404M NYRYRAGFV  | 176   | >SMO-V404M NYRYRAGFM  | 283  | 107   |
| >SMO-V404M NYRYRAGFVL | 177   | >SMO-V404M NYRYRAGFM  | 70   | 107   |
| >SMO-V404M KNYRYRAGFV | 447   | >SMO-V404M KNYRYRAGFM | 410  | 37    |
| >SMO-V404M KNYRYRAGFV | 77    | >SMO-V404M KNYRYRAGFM | 41   | 36    |
| >SMO-V404M KNYRYRAGFV | 121   | >SMO-V404M KNYRYRAGFM | 452  | 331   |
| >SMO-V404M KNYRYRAGFV | 300   | >SMO-V404M KNYRYRAGFM | 484  | 184   |
| >SMO-V404M KNYRYRAGFV | 223   | >SMO-V404M KNYRYRAGFM | 231  | 8     |
| >SMO-W535 WVWTKATLL   | 399   | >SMO-W535 LVWTKATLLI  | 593  | 194   |
| >SMO-W535 WVWTKATLL   | 422   | >SMO-W535 LVWTKATLL   | 447  | 25    |
| >SMO-W535 WVWTKATLL   | 306   | >SMO-W535 LVWTKATLLI  | 256  | 50    |
| >SMO-W535 WVWTKATL    | 249   | >SMO-W535 LVWTKATL    | 678  | 429   |
| >SMO-W535 WVWTKATLL   | 209   | >SMO-W535 LVWTKATLL   | 538  | 329   |
| >SMO-W535 WVWTKATLL   | 435   | >SMO-W535 LVWTKATLLI  | 359  | 76    |
| >SMO-W535 WVWTKATL    | 194   | >SMO-W535 LVWTKATL    | 257  | 63    |
| >SMO-W535 WVWTKATL    | 241   | >SMO-W535 LVWTKATL    | 977  | 736   |
| >SMO-W535 WVWTKATL    | 114   | >SMO-W535 LVWTKATL    | 66   | 48    |
| >SMO-W535 WVWTKATLL   | 325   | >SMO-W535 LVWTKATLL   | 184  | 141   |
| >SMO-W535 WVWTKATLL   | 483   | >SMO-W535 LVWTKATLL   | 2704 | 2221  |
| >SMO-W535 WVWTKATL    | 301   | >SMO-W535 LVWTKATL    | 1941 | 1640  |
| >SMO-W535 WVWTKATLL   | 140   | >SMO-W535 LVWTKATLLI  | 890  | 750   |
| >SMO-W535 WVWTKATL    | 285   | >SMO-W535 LVWTKATL    | 183  | 102   |
| >SMO-W535 WVWTKATLL   | 21    | >SMO-W535 LVWTKATLLI  | 24   | 3     |
| >SMO-W535 WVWTKATL    | 328   | >SMO-W535 LVWTKATL    | 1239 | 911   |
| >SMO-W535 WVWTKATLL   | 437   | >SMO-W535 LVWTKATLLI  | 195  | 242   |
| >SMO-W535 WVWTKATLL   | 483   | >SMO-W535 LVWTKATLLI  | 203  | 280   |
| >SMO-W535 WVWTKATLL   | 56    | >SMO-W535 LVWTKATLLI  | 25   | 31    |
| >SMO-W535 WVWTKATLL   | 162   | >SMO-W535 LVWTKATLL   | 396  | 234   |
| >SMO-W535 WVWTKATLL   | 96    | >SMO-W535 LVWTKATLLI  | 73   | 23    |
| >SMO-W535 TWVWTKATL   | 374   | >SMO-W535 TLVWTKATL   | 3444 | 3070  |
| >SMO-W535 TWVWTKATL   | 20388 | >SMO-W535 TLVWTKATLL  | 422  | 19966 |



|                     |       |                      |       |       |
|---------------------|-------|----------------------|-------|-------|
| >SMO-W535 TWVWTKATL | 14725 | >SMO-W535 TLVWTKATLL | 197   | 14528 |
| >SMO-W535 TWVWTKATL | 12657 | >SMO-W535 TLVWTKATLL | 353   | 12304 |
| >SMO-W535 TWVWTKATL | 20630 | >SMO-W535 TLVWTKATL  | 230   | 20400 |
| >SMO-W535 TWVWTKATL | 20352 | >SMO-W535 TLVWTKATLL | 285   | 20067 |
| >SMO-W535 TWVWTKATL | 15113 | >SMO-W535 TLVWTKATLL | 101   | 15012 |
| >SMO-W535 TWVWTKATL | 15482 | >SMO-W535 TLVWTKATL  | 16    | 15466 |
| >SMO-W535 TWVWTKATL | 21238 | >SMO-W535 TLVWTKATLL | 108   | 21130 |
| >SMO-W535 TWVWTKATL | 18954 | >SMO-W535 TLVWTKATLL | 59    | 18895 |
| >SMO-W535 TWVWTKATL | 22112 | >SMO-W535 TLVWTKATL  | 144   | 21968 |
| >SMO-W535 TWVWTKATL | 23349 | >SMO-W535 TLVWTKATL  | 83    | 23266 |
| >SMO-W535 TWVWTKATL | 23643 | >SMO-W535 TLVWTKATLL | 213   | 23430 |
| >SMO-W535 TWVWTKATL | 23458 | >SMO-W535 TLVWTKATLL | 158   | 23300 |
| >SMO-W535 TWVWTKATL | 26077 | >SMO-W535 TLVWTKATL  | 423   | 25654 |
| >SMO-W535 TWVWTKAT  | 36410 | >SMO-W535 TLVWTKAT   | 488   | 35922 |
| >SMO-W535 TWVWTKATL | 19908 | >SMO-W535 TLVWTKATL  | 4     | 19904 |
| >SMO-W535 TWVWTKATL | 24621 | >SMO-W535 TLVWTKATLL | 9     | 24612 |
| >SMO-W535 TWVWTKATL | 29774 | >SMO-W535 TLVWTKATLL | 20    | 29754 |
| >SMO-W535 TWVWTKATL | 131   | >SMO-W535 TLVWTKATLL | 12778 | 12647 |
| >SMO-W535 TWVWTKATL | 152   | >SMO-W535 TLVWTKATLL | 3640  | 3488  |
| >SMO-W535 TWVWTKATL | 495   | >SMO-W535 TLVWTKATLL | 21270 | 20775 |
| >SMO-W535 TWVWTKATL | 128   | >SMO-W535 TLVWTKATLL | 3552  | 3424  |
| >SMO-W535 TWVWTKATL | 9643  | >SMO-W535 TLVWTKATLL | 311   | 9332  |
| >SMO-W535 TWVWTKATL | 808   | >SMO-W535 TLVWTKATL  | 106   | 702   |
| >SMO-W535 TWVWTKAT  | 59    | >SMO-W535 TLVWTKAT   | 11195 | 11136 |
| >SMO-W535 TWVWTKATL | 42    | >SMO-W535 TLVWTKATL  | 2844  | 2802  |
| >SMO-W535 TWVWTKATL | 350   | >SMO-W535 TLVWTKATLL | 19019 | 18669 |
| >SMO-W535 TWVWTKATL | 77    | >SMO-W535 TLVWTKATLL | 5679  | 5602  |
| >SMO-W535 MFGTGIAMS | 425   | >SMO-W535 MFGTGIAMS  | 932   | 507   |
| >SMO-W535 MFGTGIAMS | 73    | >SMO-W535 MFGTGIAMS  | 46    | 27    |
| >SMO-W535 STVWTKAT  | 321   | >SMO-W535 STLWTKATL  | 299   | 22    |
| >SMO-W535 STVWTKAT  | 389   | >SMO-W535 STLWTKATL  | 274   | 115   |
| >SMO-W535 STVWTKAT  | 235   | >SMO-W535 STLWTKATL  | 205   | 30    |
| >SMO-W535 STVWTKAT  | 394   | >SMO-W535 STLWTKATL  | 179   | 215   |
| >SMO-W535 STVWTKAT  | 51    | >SMO-W535 STLWTKATL  | 129   | 78    |
| >SMO-W535 STVWTKAT  | 366   | >SMO-W535 STLWTKATL  | 889   | 523   |
| >SMO-W535 STVWTKA   | 361   | >SMO-W535 STLWTKA    | 921   | 560   |
| >SMO-W535 STVWTKAT  | 198   | >SMO-W535 STLWTKATL  | 490   | 292   |
| >SMO-W535 STVWTKAT  | 432   | >SMO-W535 STLWTKATL  | 975   | 543   |
| >SMO-W535 STVWTKAT  | 457   | >SMO-W535 STLWTKATL  | 1310  | 853   |
| >SMO-W535 STVWTKAT  | 39    | >SMO-W535 STLWTKATL  | 73    | 34    |
| >SMO-W535 STVWTKAT  | 117   | >SMO-W535 STLWTKATL  | 312   | 195   |
| >SMO-W535 STVWTKAT  | 115   | >SMO-W535 STLWTKATL  | 498   | 383   |
| >SMO-W535 STVWTKAT  | 446   | >SMO-W535 STLWTKATL  | 1460  | 1014  |

|                     |      |                      |      |      |
|---------------------|------|----------------------|------|------|
| >SMO-W535 STWVWTKA  | 194  | >SMO-W535 STLVWTKA   | 238  | 44   |
| >SMO-W535 STWVWTKAT | 444  | >SMO-W535 STLVWTKAT  | 587  | 143  |
| >SMO-W535 STWVWTKAT | 27   | >SMO-W535 STLVWTKATL | 33   | 6    |
| >SMO-W535 STWVWTKAT | 72   | >SMO-W535 STLVWTKATL | 92   | 20   |
| >SMO-W535 STWVWTKAT | 7    | >SMO-W535 STLVWTKATL | 8    | 1    |
| >SMO-W535 STWVWTKAT | 13   | >SMO-W535 STLVWTKATL | 18   | 5    |
| >SMO-W535 STWVWTKAT | 237  | >SMO-W535 STLVWTKATL | 919  | 682  |
| >SMO-W535 STWVWTKAT | 171  | >SMO-W535 STLVWTKATL | 673  | 502  |
| >SMO-W535 STWVWTKAT | 1248 | >SMO-W535 STLVWTKATL | 128  | 1120 |
| >SMO-W535 STWVWTKAT | 41   | >SMO-W535 STLVWTKATL | 26   | 15   |
| >SMO-W535 STWVWTKAT | 59   | >SMO-W535 STLVWTKATL | 196  | 137  |
| >SMO-W535 MSTWVWTK  | 272  | >SMO-W535 MSTLVWTK   | 708  | 436  |
| >SMO-W535 MSTWVWTK  | 14   | >SMO-W535 MSTLVWTK   | 25   | 11   |
| >SMO-W535 MSTWVWTK  | 364  | >SMO-W535 MSTLVWTK   | 209  | 155  |
| >SMO-W535 MSTWVWTK  | 77   | >SMO-W535 MSTLVWTK   | 163  | 86   |
| >SMO-W535 MSTWVWTK  | 6    | >SMO-W535 MSTLVWTK   | 13   | 7    |
| >SMO-W535 MSTWVWTK. | 49   | >SMO-W535 MSTLVWTKA  | 107  | 58   |
| >SMO-W535 MSTWVWTK. | 88   | >SMO-W535 MSTLVWTKA  | 167  | 79   |
| >SMO-W535 MSTWVWTK. | 14   | >SMO-W535 MSTLVWTKA  | 19   | 5    |
| >SMO-W535 MSTWVWTK. | 339  | >SMO-W535 MSTLVWTKA  | 1653 | 1314 |
| >SMO-W535 MSTWVWTK. | 62   | >SMO-W535 MSTLVWTKA  | 241  | 179  |
| >SMO-W535 MSTWVWTK. | 123  | >SMO-W535 MSTLVWTKA  | 179  | 56   |
| >SMO-W535 MSTWVWTK. | 51   | >SMO-W535 MSTLVWTKA  | 78   | 27   |
| >SMO-W535 MSTWVWTK. | 349  | >SMO-W535 MSTLVWTKA  | 1581 | 1232 |
| >SMO-W535 MSTWVWTK. | 107  | >SMO-W535 MSTLVWTKA  | 274  | 167  |
| >SMO-W535 AMSTWVWT  | 183  | >SMO-W535 AMSTLVWT   | 312  | 129  |
| >SMO-W535 AMSTWVWT  | 178  | >SMO-W535 AMSTLVWT   | 54   | 124  |
| >SMO-W535 AMSTWVWT  | 60   | >SMO-W535 AMSTLVWTK  | 156  | 96   |
| >SMO-W535 AMSTWVWT  | 626  | >SMO-W535 AMSTLVWTK  | 388  | 238  |
| >SMO-W535 AMSTWVWT  | 116  | >SMO-W535 AMSTLVWT   | 73   | 43   |
| >SMO-W535 AMSTWVWT  | 55   | >SMO-W535 AMSTLVWTK  | 134  | 79   |
| >SMO-W535 AMSTWVWT  | 63   | >SMO-W535 AMSTLVWTK  | 107  | 44   |
| >SMO-W535 AMSTWVWT  | 63   | >SMO-W535 AMSTLVWT   | 201  | 138  |
| >SMO-W535 AMSTWVWT  | 38   | >SMO-W535 AMSTLVWTK  | 474  | 436  |
| >SMO-W535 AMSTWVWT  | 12   | >SMO-W535 AMSTLVWTK  | 58   | 46   |
| >SMO-W535 AMSTWVWT  | 60   | >SMO-W535 AMSTLVWTK  | 217  | 157  |
| >SMO-W535 AMSTWVWT  | 274  | >SMO-W535 AMSTLVWTK  | 697  | 423  |
| >SMO-W535 AMSTWVWT  | 187  | >SMO-W535 AMSTLVWT   | 458  | 271  |
| >SMO-W535 AMSTWVWT  | 20   | >SMO-W535 AMSTLVWTK  | 43   | 23   |
| >SMO-W535 AMSTWVWT  | 143  | >SMO-W535 AMSTLVWTK  | 692  | 549  |
| >SMO-W535 AMSTWVWT  | 22   | >SMO-W535 AMSTLVWT   | 38   | 16   |
| >SMO-W535 AMSTWVWT  | 18   | >SMO-W535 AMSTLVWTK  | 111  | 93   |
| >SMO-W535 AMSTWVWT  | 8    | >SMO-W535 AMSTLVWTK  | 25   | 17   |

|                     |       |                      |       |       |
|---------------------|-------|----------------------|-------|-------|
| >SMO-W535 AMSTWVWT  | 60    | >SMO-W535 AMSTLVWTK  | 212   | 152   |
| >SMO-W535 AMSTWVWT  | 67    | >SMO-W535 AMSTLVWTK  | 81    | 14    |
| >SMO-W535 AMSTWVWT  | 9     | >SMO-W535 AMSTLVWTK  | 9     | 0     |
| >SMO-W535 AMSTWVWT  | 151   | >SMO-W535 AMSTLVWTK  | 236   | 85    |
| >SMO-W535 AMSTWVWT  | 336   | >SMO-W535 AMSTLVWTK  | 469   | 133   |
| >SMO-W535 IAMSTWVWT | 212   | >SMO-W535 IAMSTLVWTf | 246   | 34    |
| >SMO-W535 IAMSTWVWT | 73    | >SMO-W535 IAMSTLVWTf | 51    | 22    |
| >SMO-W535 IAMSTWVWT | 18    | >SMO-W535 IAMSTLVWTf | 15    | 3     |
| >SMO-W535 IAMSTWVWT | 232   | >SMO-W535 IAMSTLVWTf | 413   | 181   |
| >SMO-W535 IAMSTWVWT | 257   | >SMO-W535 IAMSTLVWTf | 414   | 157   |
| >SMO-W535 IAMSTWVWT | 37    | >SMO-W535 IAMSTLVWTf | 40    | 3     |
| >SMO-W535 IAMSTWVW  | 232   | >SMO-W535 IAMSTLVW   | 176   | 56    |
| >SMO-W535 IAMSTWVW  | 7     | >SMO-W535 IAMSTLVW   | 5     | 2     |
| >SMO-W535 IAMSTWVW  | 16    | >SMO-W535 IAMSTLVW   | 24    | 8     |
| >SMO-W535 IAMSTWVW  | 31    | >SMO-W535 IAMSTLVW   | 35    | 4     |
| >SMO-W535 IAMSTWVW  | 8     | >SMO-W535 IAMSTLVW   | 9     | 1     |
| >SMO-W535 IAMSTWVW  | 20    | >SMO-W535 IAMSTLVW   | 24    | 4     |
| >SMO-W535 IAMSTWVW  | 298   | >SMO-W535 IAMSTLVW   | 743   | 445   |
| >SMO-W535 IAMSTWVWT | 410   | >SMO-W535 IAMSTLVWTf | 2349  | 1939  |
| >SMO-W535 IAMSTWVWT | 231   | >SMO-W535 IAMSTLVWTf | 646   | 415   |
| >SMO-W535 GIAMSTWV  | 143   | >SMO-W535 GIAMSTLV   | 200   | 57    |
| >SMO-W535 GIAMSTWV  | 15    | >SMO-W535 GIAMSTLV   | 22    | 7     |
| >SMO-W535 GIAMSTWV  | 7     | >SMO-W535 GIAMSTLV   | 9     | 2     |
| >SMO-W535 GIAMSTWV  | 63    | >SMO-W535 GIAMSTLV   | 76    | 13    |
| >SMO-W535 GIAMSTWV  | 89    | >SMO-W535 GIAMSTLV   | 254   | 165   |
| >SMO-W535 GIAMSTWV  | 20    | >SMO-W535 GIAMSTLV   | 36    | 16    |
| >SMO-W535 GIAMSTWV  | 334   | >SMO-W535 GIAMSTLV   | 1020  | 686   |
| >SMO-W535 GIAMSTWV  | 6     | >SMO-W535 GIAMSTLV   | 12    | 6     |
| >SMO-W535 GIAMSTWVW | 183   | >SMO-W535 GIAMSTLVW  | 152   | 31    |
| >SMO-W535 GIAMSTWVW | 13    | >SMO-W535 GIAMSTLVW  | 14    | 1     |
| >SMO-W535 GIAMSTWVW | 177   | >SMO-W535 GIAMSTLVW  | 232   | 55    |
| >SMO-W535 GIAMSTWVW | 809   | >SMO-W535 GIAMSTLVW  | 156   | 653   |
| >SMO-W535 GIAMSTWVW | 325   | >SMO-W535 GIAMSTLVW  | 3035  | 2710  |
| >SMO-W535 GIAMSTWVW | 16    | >SMO-W535 GIAMSTLVW  | 23    | 7     |
| >SMO-W535 TGIAMSTW  | 17976 | >SMO-W535 TGIAMSTL   | 323   | 17653 |
| >SMO-W535 TGIAMSTWV | 163   | >SMO-W535 TGIAMSTLV  | 78    | 85    |
| >SMO-W535 TGIAMSTW  | 127   | >SMO-W535 TGIAMSTL   | 1450  | 1323  |
| >SMO-W535 TGIAMSTWV | 539   | >SMO-W535 TGIAMSTLVV | 174   | 365   |
| >SMO-W535 TGIAMSTW  | 199   | >SMO-W535 TGIAMSTL   | 20252 | 20053 |
| >SMO-W535 TGIAMSTWV | 122   | >SMO-W535 TGIAMSTLVV | 394   | 272   |
| >SMO-W535 TGIAMSTW  | 62    | >SMO-W535 TGIAMSTL   | 14738 | 14676 |
| >SMO-W535 TGIAMSTWV | 25    | >SMO-W535 TGIAMSTLVV | 22    | 3     |
| >SMO-W535 TGIAMSTWV | 460   | >SMO-W535 TGIAMSTLVV | 469   | 9     |

|                       |       |                       |       |       |
|-----------------------|-------|-----------------------|-------|-------|
| >SMO-W535 GTGIAMSTW   | 422   | >SMO-W535 GTGIAMSTLV  | 585   | 163   |
| >SMO-W535 GTGIAMSTW   | 383   | >SMO-W535 GTGIAMSTLV  | 833   | 450   |
| >SMO-W535 GTGIAMSTW   | 8     | >SMO-W535 GTGIAMSTL   | 9     | 1     |
| >SMO-W535 GTGIAMSTW   | 16    | >SMO-W535 GTGIAMSTLV  | 8     | 8     |
| >SMO-W535 GTGIAMSTW   | 88    | >SMO-W535 GTGIAMSTL   | 17939 | 17851 |
| >SMO-W535 GTGIAMSTW   | 69    | >SMO-W535 GTGIAMSTLV  | 159   | 90    |
| >SMO-W535 GTGIAMSTW   | 240   | >SMO-W535 GTGIAMSTL   | 17216 | 16976 |
| >SMO-W535 GTGIAMSTW   | 40    | >SMO-W535 GTGIAMSTLV  | 52    | 12    |
| >SMO-W535 GTGIAMSTW   | 5043  | >SMO-W535 GTGIAMSTL   | 349   | 4694  |
| >SMO-W535 GTGIAMSTW   | 17    | >SMO-W535 GTGIAMSTL   | 12    | 5     |
| >SMO-W535 GTGIAMSTW   | 41    | >SMO-W535 GTGIAMSTLV  | 98    | 57    |
| >SMO-W535 GTGIAMSTW   | 738   | >SMO-W535 GTGIAMSTLV  | 285   | 453   |
| >SMO-W535 GTGIAMSTW   | 25114 | >SMO-W535 GTGIAMSTL   | 325   | 24789 |
| >SMO-W535 FGTGIAMSTV  | 67    | >SMO-W535 FGTGIAMSTL  | 58    | 9     |
| >SMO-W535 FGTGIAMSTV  | 157   | >SMO-W535 FGTGIAMSTL  | 127   | 30    |
| >SMO-W535 FGTGIAMSTV  | 36    | >SMO-W535 FGTGIAMSTL  | 85    | 49    |
| >SMO-W535 FGTGIAMSTV  | 162   | >SMO-W535 FGTGIAMSTL  | 85    | 77    |
| >SMO-W535 FGTGIAMSTV  | 188   | >SMO-W535 FGTGIAMSTL  | 1887  | 1699  |
| >SMO-W535 FGTGIAMSTV  | 386   | >SMO-W535 FGTGIAMSTL  | 21359 | 20973 |
| >SMO-W535 FGTGIAMSTV  | 55    | >SMO-W535 FGTGIAMSTL  | 13387 | 13332 |
| >SMO-W535 FGTGIAMSTV  | 100   | >SMO-W535 FGTGIAMSTL  | 15571 | 15471 |
| >SOCS1-A167TAAEPRRR   | 49    | >SOCS1-A167TTAEPRRR   | 15    | 34    |
| >SOCS1-A167QVAADNAVS  | 181   | >SOCS1-A167QVAADNAVS  | 1948  | 1767  |
| >SOCS1-A167QVAADNAVS  | 38    | >SOCS1-A167QVAADNAVS  | 649   | 611   |
| >SOCS1-A167STAAEPRR   | 340   | >SOCS1-A167STTAEPRR   | 776   | 436   |
| >SOCS1-A167STAAEPRR   | 19    | >SOCS1-A167STTAEPRR   | 33    | 14    |
| >SOCS1-A167STAAEPRRR  | 74    | >SOCS1-A167STTAEPRRR  | 157   | 83    |
| >SOCS1-A167STAAEPRR   | 168   | >SOCS1-A167STTAEPRR   | 422   | 254   |
| >SOCS1-A167STAAEPRRR  | 124   | >SOCS1-A167STTAEPRRR  | 310   | 186   |
| >SOCS1-A167VSTAAEPR   | 148   | >SOCS1-A167VSTTAEPR   | 158   | 10    |
| >SOCS1-A167VSTAAEPRR  | 230   | >SOCS1-A167VSTTAEPRR  | 269   | 39    |
| >SOCS1-A167AVSTAAEPR  | 257   | >SOCS1-A167AVSTTAEPR  | 187   | 70    |
| >SOCS1-A167AVSTAAEPRR | 264   | >SOCS1-A167AVSTTAEPRR | 362   | 98    |
| >SOCS1-A167AVSTAAEPR  | 564   | >SOCS1-A167AVSTTAEPR  | 229   | 335   |
| >SOCS1-A167AVSTAAEPRR | 494   | >SOCS1-A167AVSTTAEPRR | 503   | 9     |
| >SOCS1-A167AVSTAAEPR  | 57    | >SOCS1-A167AVSTTAEPR  | 57    | 0     |
| >SOCS1-A167AVSTAAEPRR | 185   | >SOCS1-A167AVSTTAEPRR | 263   | 78    |
| >SOCS1-A167AVSTAAEPRR | 363   | >SOCS1-A167AVSTTAEPRR | 386   | 23    |
| >SOCS1-A167NAVSTAAEPF | 10    | >SOCS1-A167NAVSTTAEPR | 10    | 0     |
| >SOCS1-A167NAVSTAAEPF | 12    | >SOCS1-A167NAVSTTAEPR | 12    | 0     |
| >SOCS1-A167DNAVSTAAEF | 56    | >SOCS1-A167DNAVSTTAEF | 60    | 4     |
| >SOCS1-A167VAADNAVST, | 264   | >SOCS1-A167VAADNAVST, | 344   | 80    |
| >SOCS1-A177VAADNAVST, | 264   | >SOCS1-A177VAADNAVST, | 2487  | 2223  |

|                       |      |                       |       |       |
|-----------------------|------|-----------------------|-------|-------|
| >SOCS1-A17TAAEPRRR    | 49   | >SOCS1-A17TATEPRRR    | 75    | 26    |
| >SOCS1-A17STAAEPRR    | 340  | >SOCS1-A17STATEPRR    | 469   | 129   |
| >SOCS1-A17STAAEPRR    | 19   | >SOCS1-A17STATEPRR    | 20    | 1     |
| >SOCS1-A17STAAEPRRR   | 74   | >SOCS1-A17STATEPRRR   | 85    | 11    |
| >SOCS1-A17STAAEPRR    | 168  | >SOCS1-A17STATEPRR    | 145   | 23    |
| >SOCS1-A17STAAEPRRR   | 124  | >SOCS1-A17STATEPRRR   | 112   | 12    |
| >SOCS1-A17VSTAAEPR    | 604  | >SOCS1-A17VSTATEPR    | 234   | 370   |
| >SOCS1-A17VSTAAEPR    | 148  | >SOCS1-A17VSTATEPR    | 128   | 20    |
| >SOCS1-A17VSTAAEPRR   | 230  | >SOCS1-A17VSTATEPRR   | 217   | 13    |
| >SOCS1-A17AVSTAAEPR   | 257  | >SOCS1-A17AVSTATEPR   | 110   | 147   |
| >SOCS1-A17AVSTAAEPRR  | 264  | >SOCS1-A17AVSTATEPRR  | 148   | 116   |
| >SOCS1-A17AVSTAAEPR   | 564  | >SOCS1-A17AVSTATEPR   | 149   | 415   |
| >SOCS1-A17AVSTAAEPRR  | 494  | >SOCS1-A17AVSTATEPRR  | 293   | 201   |
| >SOCS1-A17AVSTAAEPR   | 57   | >SOCS1-A17AVSTATEPR   | 41    | 16    |
| >SOCS1-A17AVSTAAEPRR  | 185  | >SOCS1-A17AVSTATEPRR  | 153   | 32    |
| >SOCS1-A17AVSTAAEPRR  | 363  | >SOCS1-A17AVSTATEPRR  | 316   | 47    |
| >SOCS1-A17NAVSTAAEPF  | 586  | >SOCS1-A17NAVSTATEPR  | 379   | 207   |
| >SOCS1-A17NAVSTAAEPF  | 10   | >SOCS1-A17NAVSTATEPR  | 8     | 2     |
| >SOCS1-A17NAVSTAAEPF  | 12   | >SOCS1-A17NAVSTATEPR  | 13    | 1     |
| >SOCS1-A17DNAVSTAAEF  | 56   | >SOCS1-A17DNAVSTATEF  | 49    | 7     |
| >SOCS1-A3T-AHNQVAADM  | 472  | >SOCS1-A3T-THNQVAADM  | 141   | 331   |
| >SOCS1-A3T-VAHNQVAA   | 1162 | >SOCS1-A3T-VTHNQVAA   | 210   | 952   |
| >SOCS1-A3T-MVAHNQVA   | 493  | >SOCS1-A3T-MVTHNQVA   | 4191  | 3698  |
| >SOCS1-A3T-MVAHNQVA   | 124  | >SOCS1-A3T-MVTHNQVA   | 1622  | 1498  |
| >SOCS1-A3T-MVAHNQVA   | 315  | >SOCS1-A3T-MVTHNQVA   | 2196  | 1881  |
| >SOCS1-A3T-MVAHNQVA   | 184  | >SOCS1-A3T-MVTHNQVA   | 1450  | 1266  |
| >SOCS1-A3T-MVAHNQVA   | 162  | >SOCS1-A3T-MVTHNQVA   | 511   | 349   |
| >SOCS1-A3T-MVAHNQVA   | 20   | >SOCS1-A3T-MVTHNQVA   | 79    | 59    |
| >SOCS1-A3T-MVAHNQVA   | 6    | >SOCS1-A3T-MVTHNQVA   | 13    | 7     |
| >SOCS1-A3T-MVAHNQVA   | 381  | >SOCS1-A3T-MVTHNQVA   | 811   | 430   |
| >SOCS1-A3T-MVAHNQVA   | 123  | >SOCS1-A3T-MVTHNQVA   | 172   | 49    |
| >SOCS1-F79C FYWGPLSV  | 128  | >SOCS1-F79C CYWGPLSV  | 6447  | 6319  |
| >SOCS1-F79C FYWGPLSV  | 343  | >SOCS1-F79C CYWGPLSV  | 4661  | 4318  |
| >SOCS1-F79C FYWGPLSV  | 70   | >SOCS1-F79C CYWGPLSV  | 2859  | 2789  |
| >SOCS1-F79C FYWGPLSVH | 362  | >SOCS1-F79C CYWGPLSVH | 9667  | 9305  |
| >SOCS1-F79C FYWGPLSV  | 7    | >SOCS1-F79C CYWGPLSV  | 345   | 338   |
| >SOCS1-F79C FYWGPLSVH | 89   | >SOCS1-F79C CYWGPLSVH | 4158  | 4069  |
| >SOCS1-F79C FYWGPLSV  | 28   | >SOCS1-F79C CYWGPLSV  | 2682  | 2654  |
| >SOCS1-F79C FYWGPLSVH | 492  | >SOCS1-F79C CYWGPLSVH | 11919 | 11427 |
| >SOCS1-F79C FYWGPLSV  | 6    | >SOCS1-F79C CYWGPLSV  | 471   | 465   |
| >SOCS1-F79C FYWGPLSVH | 129  | >SOCS1-F79C CYWGPLSVH | 8891  | 8762  |
| >SOCS1-F79C FYWGPLSV  | 105  | >SOCS1-F79C CYWGPLSV  | 102   | 3     |
| >SOCS1-F79C FYWGPLSV  | 412  | >SOCS1-F79C CYWGPLSV  | 2816  | 2404  |

|                        |      |                        |       |       |
|------------------------|------|------------------------|-------|-------|
| >SOCS1-F79C FYWGPLSV   | 295  | >SOCS1-F79C CYWGPLSV   | 361   | 66    |
| >SOCS1-F79C FYWGPLSVH  | 404  | >SOCS1-F79C CYWGPLSVH  | 494   | 90    |
| >SOCS1-F79C GFYWGPLSV  | 24   | >SOCS1-F79C GCYWGPLSV  | 17    | 7     |
| >SOCS1-F79C GFYWGPLSV  | 38   | >SOCS1-F79C GCYWGPLSV  | 51    | 13    |
| >SOCS1-F79C GFYWGPLSV  | 69   | >SOCS1-F79C GCYWGPLSV  | 87    | 18    |
| >SOCS1-F79C GFYWGPLSV  | 291  | >SOCS1-F79C GCYWGPLSV  | 7042  | 6751  |
| >SOCS1-F79C GFYWGPLSV  | 147  | >SOCS1-F79C GCYWGPLSV  | 14744 | 14597 |
| >SOCS1-F79C RASALLDACG | 169  | >SOCS1-F79C RASALLDACG | 17925 | 17756 |
| >SOCS1-F79C RASALLDACG | 199  | >SOCS1-F79C RASALLDACG | 14196 | 13997 |
| >SOCS1-F79C RASALLDACG | 13   | >SOCS1-F79C RASALLDACG | 4920  | 4907  |
| >SOCS1-F79C RASALLDACG | 29   | >SOCS1-F79C RASALLDACG | 5721  | 5692  |
| >SOCS1-F79C CGFYWGPL   | 338  | >SOCS1-F79C CGCYWGPL   | 6042  | 5704  |
| >SOCS1-F79C CGFYWGPLSV | 365  | >SOCS1-F79C CGCYWGPLSV | 3442  | 3077  |
| >SOCS1-F79C CGFYWGPL   | 267  | >SOCS1-F79C CGCYWGPL   | 773   | 506   |
| >SOCS1-F79C LLDACGFY   | 38   | >SOCS1-F79C LLDACGCY   | 143   | 105   |
| >SOCS1-F79C LLDACGFYW  | 411  | >SOCS1-F79C LLDACGCYW  | 901   | 490   |
| >SOCS1-F79C LLDACGFY   | 117  | >SOCS1-F79C LLDACGCY   | 679   | 562   |
| >SOCS1-F79C LLDACGFY   | 62   | >SOCS1-F79C LLDACGCY   | 343   | 281   |
| >SOCS1-F79C LLDACGFY   | 71   | >SOCS1-F79C LLDACGCY   | 657   | 586   |
| >SOCS1-F79C LLDACGFYW  | 310  | >SOCS1-F79C LLDACGCYW  | 607   | 297   |
| >SOCS1-F79C LLDACGFYW  | 24   | >SOCS1-F79C LLDACGCYW  | 57    | 33    |
| >SOCS1-F79C LLDACGFY   | 136  | >SOCS1-F79C LLDACGCY   | 364   | 228   |
| >SOCS1-F79C ALLDACGFYV | 434  | >SOCS1-F79C ALLDACGCYV | 1654  | 1220  |
| >SOCS1-F79C ALLDACGF   | 84   | >SOCS1-F79C ALLDACGC   | 216   | 132   |
| >SOCS1-F79C ALLDACGF   | 187  | >SOCS1-F79C ALLDACGC   | 22    | 165   |
| >SOCS1-F79C ALLDACGFYV | 443  | >SOCS1-F79C ALLDACGCYV | 1153  | 710   |
| >SOCS1-F79C ALLDACGF   | 1872 | >SOCS1-F79C ALLDACGC   | 115   | 1757  |
| >SOCS1-F79C ALLDACGF   | 1340 | >SOCS1-F79C ALLDACGC   | 127   | 1213  |
| >SOCS1-F79C ALLDACGF   | 1811 | >SOCS1-F79C ALLDACGC   | 58    | 1753  |
| >SOCS1-F79C ALLDACGF   | 151  | >SOCS1-F79C ALLDACGC   | 7     | 144   |
| >SOCS1-F79C ALLDACGFY  | 471  | >SOCS1-F79C ALLDACGCY  | 5068  | 4597  |
| >SOCS1-F79C ALLDACGFY  | 23   | >SOCS1-F79C ALLDACGCY  | 88    | 65    |
| >SOCS1-F79C ALLDACGFY  | 19   | >SOCS1-F79C ALLDACGCY  | 104   | 85    |
| >SOCS1-F79C ALLDACGFY  | 170  | >SOCS1-F79C ALLDACGCY  | 1329  | 1159  |
| >SOCS1-F79C ALLDACGF   | 162  | >SOCS1-F79C ALLDACGC   | 16410 | 16248 |
| >SOCS1-F79C ALLDACGFY  | 186  | >SOCS1-F79C ALLDACGCY  | 191   | 5     |
| >SOCS1-F79C ALLDACGF   | 160  | >SOCS1-F79C ALLDACGC   | 17047 | 16887 |
| >SOCS1-F79C ALLDACGF   | 213  | >SOCS1-F79C ALLDACGC   | 24043 | 23830 |
| >SOCS1-F79C ALLDACGFYV | 124  | >SOCS1-F79C ALLDACGCYV | 179   | 55    |
| >SOCS1-F79C ALLDACGFYV | 163  | >SOCS1-F79C ALLDACGCYV | 1103  | 940   |
| >SOCS1-F79C ALLDACGFYV | 433  | >SOCS1-F79C ALLDACGCYV | 1105  | 672   |
| >SOCS1-F79C SALLDACGFY | 23   | >SOCS1-F79C SALLDACGCY | 53    | 30    |
| >SOCS1-F79C SALLDACGF  | 32   | >SOCS1-F79C SALLDACGC  | 12856 | 12824 |

|                        |       |                        |       |       |
|------------------------|-------|------------------------|-------|-------|
| >SOCS1-F79C SALLDACGFY | 228   | >SOCS1-F79C SALLDACGCY | 792   | 564   |
| >SOCS1-F79C SALLDACGFY | 31    | >SOCS1-F79C SALLDACGCY | 47    | 16    |
| >SOCS1-F79C SALLDACGFY | 117   | >SOCS1-F79C SALLDACGCY | 168   | 51    |
| >SOCS1-F79C SALLDACGFY | 59    | >SOCS1-F79C SALLDACGCY | 71    | 12    |
| >SOCS1-F79C SALLDACGFY | 19    | >SOCS1-F79C SALLDACGCY | 26    | 7     |
| >SOCS1-F79C SALLDACGFY | 425   | >SOCS1-F79C SALLDACGCY | 2386  | 1961  |
| >SOCS1-F79C ASALLDACGF | 199   | >SOCS1-F79C ASALLDACGC | 703   | 504   |
| >SOCS1-F79C ASALLDACGF | 146   | >SOCS1-F79C ASALLDACGC | 428   | 282   |
| >SOCS1-F79C ASALLDACGF | 120   | >SOCS1-F79C ASALLDACGC | 616   | 496   |
| >SOCS1-F79C ASALLDACGF | 17    | >SOCS1-F79C ASALLDACGC | 64    | 47    |
| >SOCS1-F79C ASALLDACGF | 470   | >SOCS1-F79C ASALLDACGC | 18199 | 17729 |
| >SOCS1-F79C ASALLDACGF | 475   | >SOCS1-F79C ASALLDACGC | 484   | 9     |
| >SOCS1-F79C ASALLDACGF | 6     | >SOCS1-F79C ASALLDACGC | 8473  | 8467  |
| >SOCS1-F79C ASALLDACGF | 21    | >SOCS1-F79C ASALLDACGC | 81    | 60    |
| >SOCS1-F79C ASALLDACGF | 339   | >SOCS1-F79C ASALLDACGC | 17934 | 17595 |
| >SOCS1-F79C ASALLDACGF | 61    | >SOCS1-F79C ASALLDACGC | 13566 | 13505 |
| >SOCS1-F79C ASALLDACGF | 59    | >SOCS1-F79C ASALLDACGC | 270   | 211   |
| >SOCS1-G82I GPLSVHGAHI | 4488  | >SOCS1-G82I EPLSVHGAHE | 90    | 4398  |
| >SOCS1-G82I GPLSVHGA   | 8292  | >SOCS1-G82I EPLSVHGA   | 126   | 8166  |
| >SOCS1-G82I GPLSVHGAH  | 621   | >SOCS1-G82I EPLSVHGAH  | 49    | 572   |
| >SOCS1-G82I GPLSVHGA   | 955   | >SOCS1-G82I EPLSVHGA   | 303   | 652   |
| >SOCS1-G82I WGPLSVHGA  | 36378 | >SOCS1-G82I WEPLSVHGA  | 317   | 36061 |
| >SOCS1-G82I ALLDACGFYV | 443   | >SOCS1-G82I ALLDACGFYV | 2389  | 1946  |
| >SOCS1-G82I YWGPLSVHG  | 547   | >SOCS1-G82I YWEPLSVHG  | 341   | 206   |
| >SOCS1-G82I FYWGPLSV   | 128   | >SOCS1-G82I FYWEPLSV   | 57    | 71    |
| >SOCS1-G82I FYWGPLSV   | 343   | >SOCS1-G82I FYWEPLSV   | 266   | 77    |
| >SOCS1-G82I FYWGPLSV   | 70    | >SOCS1-G82I FYWEPLSV   | 30    | 40    |
| >SOCS1-G82I FYWGPLSVHC | 362   | >SOCS1-G82I FYWEPLSVHC | 125   | 237   |
| >SOCS1-G82I FYWGPLSV   | 7     | >SOCS1-G82I FYWEPLSV   | 5     | 2     |
| >SOCS1-G82I FYWGPLSVHC | 89    | >SOCS1-G82I FYWEPLSVHC | 38    | 51    |
| >SOCS1-G82I FYWGPLSV   | 610   | >SOCS1-G82I FYWEPLSV   | 80    | 530   |
| >SOCS1-G82I FYWGPLSV   | 28    | >SOCS1-G82I FYWEPLSV   | 21    | 7     |
| >SOCS1-G82I FYWGPLSVHC | 492   | >SOCS1-G82I FYWEPLSVHC | 218   | 274   |
| >SOCS1-G82I FYWGPLSV   | 6     | >SOCS1-G82I FYWEPLSV   | 9     | 3     |
| >SOCS1-G82I FYWGPLSVHC | 129   | >SOCS1-G82I FYWEPLSVHC | 158   | 29    |
| >SOCS1-G82I FYWGPLSV   | 105   | >SOCS1-G82I FYWEPLSV   | 151   | 46    |
| >SOCS1-G82I FYWGPLSV   | 412   | >SOCS1-G82I FYWEPLSV   | 1026  | 614   |
| >SOCS1-G82I FYWGPLSV   | 878   | >SOCS1-G82I FYWEPLSV   | 172   | 706   |
| >SOCS1-G82I FYWGPLSV   | 295   | >SOCS1-G82I FYWEPLSV   | 493   | 198   |
| >SOCS1-G82I FYWGPLSVHC | 404   | >SOCS1-G82I FYWEPLSVHC | 561   | 157   |
| >SOCS1-G82I GFYWGPLSV  | 24    | >SOCS1-G82I GFYWEPLSV  | 56    | 32    |
| >SOCS1-G82I GFYWGPLSV  | 38    | >SOCS1-G82I GFYWEPLSV  | 113   | 75    |
| >SOCS1-G82I GFYWGPLSV  | 69    | >SOCS1-G82I GFYWEPLSV  | 185   | 116   |

|                        |       |                        |       |       |
|------------------------|-------|------------------------|-------|-------|
| >SOCS1-G82IGFYWGPLSV   | 291   | >SOCS1-G82IGFYWEPLSV   | 930   | 639   |
| >SOCS1-G82IGFYWGPLSV   | 147   | >SOCS1-G82IGFYWEPLSV   | 334   | 187   |
| >SOCS1-G82ICGFYWGPL    | 338   | >SOCS1-G82ICGFYWEPL    | 1348  | 1010  |
| >SOCS1-G82ICGFYWGPLSV  | 365   | >SOCS1-G82ICGFYWEPLSV  | 801   | 436   |
| >SOCS1-G82ICGFYWGPL    | 267   | >SOCS1-G82ICGFYWEPL    | 542   | 275   |
| >SOCS1-G82ILLDACGFYW   | 746   | >SOCS1-G82ILLDACGFYW   | 431   | 315   |
| >SOCS1-G82ILLDACGFYW   | 411   | >SOCS1-G82ILLDACGFYW   | 430   | 19    |
| >SOCS1-P19ÆPVLRDYLSSF  | 1296  | >SOCS1-P19ÆSVLRDYLSSF  | 196   | 1100  |
| >SOCS1-P19ÆPVLRDYLSSF  | 111   | >SOCS1-P19ÆSVLRDYLSSF  | 25    | 86    |
| >SOCS1-P19ÆPVLRDYLSSF  | 4286  | >SOCS1-P19ÆSVLRDYLSSF  | 459   | 3827  |
| >SOCS1-P19ÆPVLRDYLSSF  | 6597  | >SOCS1-P19ÆSVLRDYLSSF  | 228   | 6369  |
| >SOCS1-P19ÆPVLRDYLSSF  | 443   | >SOCS1-P19ÆSVLRDYLSSF  | 55    | 388   |
| >SOCS1-P19ÆPVLRDYLSSF  | 6415  | >SOCS1-P19ÆSVLRDYLSSF  | 259   | 6156  |
| >SOCS1-P19ÆNPVLRDYL    | 447   | >SOCS1-P19ÆNSVLRDYL    | 33558 | 33111 |
| >SOCS1-P19ÆNPVLRDYLSS  | 3520  | >SOCS1-P19ÆNSVLRDYLSSI | 304   | 3216  |
| >SOCS1-P19ÆNPVLRDYL    | 7061  | >SOCS1-P19ÆNSVLRDYL    | 357   | 6704  |
| >SOCS1-P19ÆNPVLRDYL    | 268   | >SOCS1-P19ÆNSVLRDYL    | 24990 | 24722 |
| >SOCS1-P19ÆNPVLRDYLSS  | 135   | >SOCS1-P19ÆNSVLRDYLSSI | 21371 | 21236 |
| >SOCS1-P19ÆNPVLRDYLSS  | 2737  | >SOCS1-P19ÆNSVLRDYLSSI | 492   | 2245  |
| >SOCS1-P19ÆNPVLRDYLSS  | 15872 | >SOCS1-P19ÆNSVLRDYLSSI | 14    | 15858 |
| >SOCS1-P19ÆNPVLRDYLSS  | 29    | >SOCS1-P19ÆNSVLRDYLSSI | 1439  | 1410  |
| >SOCS1-P19ÆNPVLRDYL    | 494   | >SOCS1-P19ÆNSVLRDYL    | 23248 | 22754 |
| >SOCS1-P19ÆNPVLRDYLSS  | 105   | >SOCS1-P19ÆNSVLRDYLSSI | 14377 | 14272 |
| >SOCS1-P19ÆNPVLRDYLSS  | 3336  | >SOCS1-P19ÆNSVLRDYLSSI | 183   | 3153  |
| >SOCS1-P19ÆNPVLRDYLSS  | 168   | >SOCS1-P19ÆNSVLRDYLSSI | 9283  | 9115  |
| >SOCS1-P19ÆNPVLRDYLSS  | 329   | >SOCS1-P19ÆNSVLRDYLSSI | 17387 | 17058 |
| >SOCS1-P19ÆRENLARIPLN  | 1165  | >SOCS1-P19ÆRENLARIPLN  | 252   | 913   |
| >SOCS1-P19ÆLNPVLRDYL   | 497   | >SOCS1-P19ÆLNSVLRDYL   | 17899 | 17402 |
| >SOCS1-P19ÆPLNPVLRDYL  | 971   | >SOCS1-P19ÆPLNSVLRDYL  | 344   | 627   |
| >SOCS1-P19ÆPLNPVLRDYL  | 207   | >SOCS1-P19ÆPLNSVLRDYL  | 235   | 28    |
| >SOCS1-P19ÆPLNPVLRDYL  | 482   | >SOCS1-P19ÆPLNSVLRDYL  | 693   | 211   |
| >SOCS1-P19ÆPLNPVLRDYL  | 162   | >SOCS1-P19ÆPLNSVLRDYL  | 413   | 251   |
| >SOCS1-P19ÆPLNPVLRDY   | 662   | >SOCS1-P19ÆPLNSVLRDY   | 411   | 251   |
| >SOCS1-P19ÆIPLNPVLRDYL | 9     | >SOCS1-P19ÆIPLNSVLRDYL | 6     | 3     |
| >SOCS1-P19ÆIPLNPVLRDYL | 126   | >SOCS1-P19ÆIPLNSVLRDYL | 166   | 40    |
| >SOCS1-P19ÆIPLNPVLRDY  | 837   | >SOCS1-P19ÆIPLNSVLRDY  | 418   | 419   |
| >SOCS1-P19ÆIPLNPVLRDY  | 173   | >SOCS1-P19ÆIPLNSVLRDY  | 209   | 36    |
| >SOCS1-P19ÆIPLNPVLRDY  | 183   | >SOCS1-P19ÆIPLNSVLRDY  | 268   | 85    |
| >SOCS1-P19ÆIPLNPVLRDYL | 356   | >SOCS1-P19ÆIPLNSVLRDYL | 274   | 82    |
| >SOCS1-P19ÆIPLNPVLRDY  | 263   | >SOCS1-P19ÆIPLNSVLRDY  | 165   | 98    |
| >SOCS1-P19ÆIPLNPVLRDY  | 151   | >SOCS1-P19ÆIPLNSVLRDY  | 84    | 67    |
| >SOCS1-P19ÆIPLNPVLRDYL | 599   | >SOCS1-P19ÆIPLNSVLRDYL | 377   | 222   |
| >SOCS1-P19ÆIPLNPVLR    | 289   | >SOCS1-P19ÆIPLNSVLR    | 267   | 22    |



|                         |      |                         |      |      |
|-------------------------|------|-------------------------|------|------|
| >SOCS1-P19\xRIPLNPLVR   | 199  | >SOCS1-P19\xRIPLNSVLR   | 120  | 79   |
| >SOCS1-P19\xRIPLNPLV    | 405  | >SOCS1-P19\xRIPLNSVL    | 490  | 85   |
| >SOCS1-P19\xRIPLNPLVR   | 20   | >SOCS1-P19\xRIPLNSVLR   | 27   | 7    |
| >SOCS1-P19\xARIPLNPLVR  | 511  | >SOCS1-P19\xARIPLNSVLR  | 429  | 82   |
| >SOCS1-P19\xARIPLNPLVR  | 1199 | >SOCS1-P19\xARIPLNSVLR  | 438  | 761  |
| >SOCS1-P19\xARIPLNPV    | 528  | >SOCS1-P19\xARIPLNSV    | 477  | 51   |
| >SOCS1-P19\xARIPLNPV    | 343  | >SOCS1-P19\xARIPLNSVL   | 124  | 219  |
| >SOCS1-P19\xARIPLNPV    | 455  | >SOCS1-P19\xARIPLNSV    | 597  | 142  |
| >SOCS1-P19\xARIPLNPV    | 226  | >SOCS1-P19\xARIPLNSVL   | 192  | 34   |
| >SOCS1-P19\xARIPLNPLVR  | 35   | >SOCS1-P19\xARIPLNSVLR  | 85   | 50   |
| >SOCS1-P19\xARIPLNPV    | 29   | >SOCS1-P19\xARIPLNSVL   | 21   | 8    |
| >SOCS1-P19\xARIPLNPV    | 89   | >SOCS1-P19\xARIPLNSVL   | 89   | 0    |
| >SOCS1-P19\xARIPLNPV    | 10   | >SOCS1-P19\xARIPLNSVL   | 9    | 1    |
| >SOCS1-P19\xLARIPLNPV   | 66   | >SOCS1-P19\xLARIPLNSV   | 148  | 82   |
| >SOCS1-P19\xLARIPLNPV   | 142  | >SOCS1-P19\xLARIPLNSVL  | 487  | 345  |
| >SOCS1-P19\xLARIPLNPVLF | 340  | >SOCS1-P19\xLARIPLNSVLR | 243  | 97   |
| >SOCS1-P19\xLARIPLNPVLF | 56   | >SOCS1-P19\xLARIPLNSVLR | 59   | 3    |
| >SOCS1-P19\xLARIPLNPVLF | 325  | >SOCS1-P19\xLARIPLNSVLR | 324  | 1    |
| >SOCS1-P19\xLARIPLNPV   | 322  | >SOCS1-P19\xLARIPLNSV   | 576  | 254  |
| >SOCS1-P19\xLARIPLNPV   | 849  | >SOCS1-P19\xLARIPLNSVL  | 437  | 412  |
| >SOCS1-P19\xLARIPLNPV   | 29   | >SOCS1-P19\xLARIPLNSVL  | 25   | 4    |
| >SOCS1-P19\xLARIPLNPV   | 53   | >SOCS1-P19\xLARIPLNSV   | 216  | 163  |
| >SOCS1-P19\xNLARIPLNPV  | 76   | >SOCS1-P19\xNLARIPLNSV  | 108  | 32   |
| >SOCS1-P19\xNLARIPLNPV  | 361  | >SOCS1-P19\xNLARIPLNSVI | 1302 | 941  |
| >SOCS1-P19\xNLARIPLNPV  | 25   | >SOCS1-P19\xNLARIPLNSV  | 33   | 8    |
| >SOCS1-P19\xNLARIPLNPV  | 30   | >SOCS1-P19\xNLARIPLNSVI | 21   | 9    |
| >SOCS1-P19\xNLARIPLNPV  | 14   | >SOCS1-P19\xNLARIPLNSV  | 13   | 1    |
| >SOCS1-P19\xNLARIPLNPV  | 198  | >SOCS1-P19\xNLARIPLNSVI | 67   | 131  |
| >SOCS1-P19\xNLARIPLNPV  | 159  | >SOCS1-P19\xNLARIPLNSV  | 265  | 106  |
| >SOCS1-P19\xNLARIPLNPV  | 10   | >SOCS1-P19\xNLARIPLNSV  | 10   | 0    |
| >SOCS1-P19\xNLARIPLNPV  | 190  | >SOCS1-P19\xNLARIPLNSVI | 313  | 123  |
| >SOCS1-P19\xNLARIPLNPV  | 13   | >SOCS1-P19\xNLARIPLNSV  | 18   | 5    |
| >SOCS1-P19\xNLARIPLNPV  | 20   | >SOCS1-P19\xNLARIPLNSV  | 26   | 6    |
| >SOCS1-P19\xNLARIPLNPV  | 162  | >SOCS1-P19\xNLARIPLNSVI | 663  | 501  |
| >SOCS1-P19\xNLARIPLNPV  | 12   | >SOCS1-P19\xNLARIPLNSV  | 8    | 4    |
| >SOCS1-P19\xNLARIPLNPV  | 83   | >SOCS1-P19\xNLARIPLNSVI | 217  | 134  |
| >SOCS1-P19\xNLARIPLNPV  | 7    | >SOCS1-P19\xNLARIPLNSV  | 5    | 2    |
| >SOCS1-P19\xNLARIPLNPV  | 44   | >SOCS1-P19\xNLARIPLNSVI | 68   | 24   |
| >SOCS1-P19\xNLARIPLNPV  | 255  | >SOCS1-P19\xNLARIPLNSV  | 349  | 94   |
| >SOCS1-P19\xNLARIPLNPV  | 26   | >SOCS1-P19\xNLARIPLNSV  | 71   | 45   |
| >SOCS1-P19\xENLARIPLNPV | 349  | >SOCS1-P19\xENLARIPLNSV | 1137 | 788  |
| >SOCS1-P19\xENLARIPLNPV | 75   | >SOCS1-P19\xENLARIPLNSV | 214  | 139  |
| >SOCS1-P43\xCPAVPAPA    | 5114 | >SOCS1-P43\xCSAVPAPA    | 186  | 4928 |

|                       |      |                       |       |       |
|-----------------------|------|-----------------------|-------|-------|
| >SOCS1-P43:CPAVPAPA   | 311  | >SOCS1-P43:CSAVPAPA   | 20895 | 20584 |
| >SOCS1-P43:CPAVPAPA   | 8    | >SOCS1-P43:CSAVPAPA   | 5300  | 5292  |
| >SOCS1-P43:CPAVPAPAP  | 64   | >SOCS1-P43:CSAVPAPAP  | 18020 | 17956 |
| >SOCS1-P43:RPCPAVPA   | 245  | >SOCS1-P43:RPCSAVPA   | 275   | 30    |
| >SOCS1-P43:RPCPAVPAPA | 365  | >SOCS1-P43:RPCSAVPAPA | 113   | 252   |
| >SOCS1-P43:RPCPAVPA   | 160  | >SOCS1-P43:RPCSAVPA   | 212   | 52    |
| >SOCS1-P43:RPCPAVPAPA | 108  | >SOCS1-P43:RPCSAVPAPA | 89    | 19    |
| >SOCS1-P43:RPRPCPAV   | 9    | >SOCS1-P43:RPRPCSAV   | 7     | 2     |
| >SOCS1-P43:RPRPCPAVP  | 293  | >SOCS1-P43:RPRPCSAVP  | 70    | 223   |
| >SOCS1-P43:RPRPCPAVPA | 205  | >SOCS1-P43:RPRPCSAVPA | 220   | 15    |
| >SOCS1-P43:RPRPCPAVPA | 120  | >SOCS1-P43:RPRPCSAVPA | 64    | 56    |
| >SOCS1-P43:RPRPCPAV   | 248  | >SOCS1-P43:RPRPCSAV   | 478   | 230   |
| >SOCS1-P43:RPRPCPAVPA | 256  | >SOCS1-P43:RPRPCSAVPA | 426   | 170   |
| >SOCS1-P43:ARPRPCPAV  | 1086 | >SOCS1-P43:ARPRPCSAV  | 442   | 644   |
| >SOCS1-P43:PARPRPCPA  | 34   | >SOCS1-P43:PARPRPCSA  | 59    | 25    |
| >SOCS1-P43:PARPRPCPAV | 208  | >SOCS1-P43:PARPRPCSAV | 614   | 406   |
| >SOCS1-P43:APARPRPCPA | 455  | >SOCS1-P43:APARPRPCSA | 1244  | 789   |
| >SOCS1-P43:APARPRPCPA | 23   | >SOCS1-P43:APARPRPCSA | 15    | 8     |
| >SOCS1-P43:APARPRPCPA | 313  | >SOCS1-P43:APARPRPCSA | 697   | 384   |
| >SOCS1-Q13:QAGRFHLDG  | 1738 | >SOCS1-Q13:KAGRFHLDG  | 73    | 1665  |
| >SOCS1-Q13:QAGRFHLDG  | 432  | >SOCS1-Q13:KAGRFHLDG  | 2845  | 2413  |
| >SOCS1-Q13:QAGRFHLDG  | 664  | >SOCS1-Q13:KAGRFHLDG  | 103   | 561   |
| >SOCS1-Q13:FQAGRFHL   | 36   | >SOCS1-Q13:FKAGRFHL   | 13244 | 13208 |
| >SOCS1-Q13:FQAGRFHL   | 10   | >SOCS1-Q13:FKAGRFHL   | 228   | 218   |
| >SOCS1-Q13:FQAGRFHLD  | 282  | >SOCS1-Q13:FKAGRFHLD  | 7510  | 7228  |
| >SOCS1-Q13:FQAGRFHL   | 82   | >SOCS1-Q13:FKAGRFHL   | 7819  | 7737  |
| >SOCS1-Q13:FQAGRFHL   | 3    | >SOCS1-Q13:FKAGRFHL   | 202   | 199   |
| >SOCS1-Q13:FQAGRFHLD  | 197  | >SOCS1-Q13:FKAGRFHLD  | 18151 | 17954 |
| >SOCS1-Q13:FQAGRFHLD  | 15   | >SOCS1-Q13:FKAGRFHLD  | 4263  | 4248  |
| >SOCS1-Q13:FQAGRFHL   | 353  | >SOCS1-Q13:FKAGRFHL   | 6321  | 5968  |
| >SOCS1-Q13:FQAGRFHL   | 180  | >SOCS1-Q13:FKAGRFHL   | 6772  | 6592  |
| >SOCS1-Q13:FQAGRFHL   | 107  | >SOCS1-Q13:FKAGRFHL   | 1740  | 1633  |
| >SOCS1-Q13:FQAGRFHL   | 174  | >SOCS1-Q13:FKAGRFHL   | 15480 | 15306 |
| >SOCS1-Q13:FQAGRFHL   | 212  | >SOCS1-Q13:FKAGRFHL   | 191   | 21    |
| >SOCS1-Q13:FQAGRFHL   | 414  | >SOCS1-Q13:FKAGRFHL   | 1681  | 1267  |
| >SOCS1-Q13:FQAGRFHL   | 26   | >SOCS1-Q13:FKAGRFHL   | 83    | 57    |
| >SOCS1-Q13:HFQAGRFHL  | 258  | >SOCS1-Q13:HFKAGRFHL  | 1531  | 1273  |
| >SOCS1-Q13:HFQAGRFHL  | 144  | >SOCS1-Q13:HFKAGRFHL  | 773   | 629   |
| >SOCS1-Q13:HFQAGRFHL  | 27   | >SOCS1-Q13:HFKAGRFHL  | 145   | 118   |
| >SOCS1-Q13:HFQAGRFH   | 7779 | >SOCS1-Q13:HFKAGRFH   | 358   | 7421  |
| >SOCS1-Q13:HFQAGRFHL  | 1483 | >SOCS1-Q13:HFKAGRFHL  | 21    | 1462  |
| >SOCS1-Q13:HFQAGRFHLI | 7025 | >SOCS1-Q13:HFKAGRFHLI | 209   | 6816  |
| >SOCS1-Q13:HFQAGRFHL  | 452  | >SOCS1-Q13:HFKAGRFHL  | 168   | 284   |

|                       |       |                       |     |       |
|-----------------------|-------|-----------------------|-----|-------|
| >SOCS1-Q13:VHFQAGRFH  | 560   | >SOCS1-Q13:VHFKAGRFHI | 356 | 204   |
| >SOCS1-Q13:VHFQAGRF   | 84    | >SOCS1-Q13:VHFKAGRF   | 71  | 13    |
| >SOCS1-Q13:VHFQAGRFH  | 344   | >SOCS1-Q13:VHFKAGRFHI | 193 | 151   |
| >SOCS1-Q13:VHFQAGRFH  | 313   | >SOCS1-Q13:VHFKAGRFHI | 521 | 208   |
| >SOCS1-Q13:VHFQAGRF   | 256   | >SOCS1-Q13:VHFKAGRF   | 186 | 70    |
| >SOCS1-Q13:RVHFQAGR   | 29    | >SOCS1-Q13:RVHFKAGR   | 59  | 30    |
| >SOCS1-Q13:RVHFQAGRFI | 61    | >SOCS1-Q13:RVHFKAGRFI | 75  | 14    |
| >SOCS1-Q13:RVHFQAGRFI | 11    | >SOCS1-Q13:RVHFKAGRFI | 14  | 3     |
| >SOCS1-Q13:RVHFQAGR   | 18    | >SOCS1-Q13:RVHFKAGR   | 15  | 3     |
| >SOCS1-Q13:RVHFQAGRFI | 563   | >SOCS1-Q13:RVHFKAGRFI | 436 | 127   |
| >SOCS1-Q13:RVHFQAGR   | 437   | >SOCS1-Q13:RVHFKAGR   | 564 | 127   |
| >SOCS1-Q13:RVHFQAGR   | 110   | >SOCS1-Q13:RVHFKAGR   | 148 | 38    |
| >SOCS1-Q13:RVHFQAGR   | 13    | >SOCS1-Q13:RVHFKAGR   | 12  | 1     |
| >SOCS1-Q13:RVHFQAGRFI | 234   | >SOCS1-Q13:RVHFKAGRFI | 207 | 27    |
| >SOCS1-Q13:RVHFQAGR   | 143   | >SOCS1-Q13:RVHFKAGR   | 149 | 6     |
| >SOCS1-Q13:RVHFQAGR   | 132   | >SOCS1-Q13:RVHFKAGR   | 143 | 11    |
| >SOCS1-Q13:IRVHFQAGR  | 79    | >SOCS1-Q13:IRVHFKAGR  | 135 | 56    |
| >SOCS1-Q13:IRVHFQAGR  | 175   | >SOCS1-Q13:IRVHFKAGR  | 284 | 109   |
| >SOCS1-Q13:IRVHFQAGR  | 68    | >SOCS1-Q13:IRVHFKAGR  | 103 | 35    |
| >SOCS1-Q13:IRVHFQAGR  | 176   | >SOCS1-Q13:IRVHFKAGR  | 145 | 31    |
| >SOCS1-Q13:SIRVHFQA   | 17    | >SOCS1-Q13:SIRVHFKA   | 25  | 8     |
| >SOCS1-Q13:SIRVHFQAG  | 127   | >SOCS1-Q13:SIRVHFKAG  | 360 | 233   |
| >SOCS1-Q13:SIRVHFQAGR | 72    | >SOCS1-Q13:SIRVHFKAGR | 165 | 93    |
| >SOCS1-Q13:SIRVHFQAGR | 18    | >SOCS1-Q13:SIRVHFKAGR | 13  | 5     |
| >SOCS1-Q13:SIRVHFQAGR | 683   | >SOCS1-Q13:SIRVHFKAGR | 357 | 326   |
| >SOCS1-Q13:SIRVHFQAGR | 79    | >SOCS1-Q13:SIRVHFKAGR | 93  | 14    |
| >SOCS1-Q13:SIRVHFQA   | 497   | >SOCS1-Q13:SIRVHFKA   | 686 | 189   |
| >SOCS1-Q13:SIRVHFQAG  | 38    | >SOCS1-Q13:SIRVHFKAG  | 37  | 1     |
| >SOCS1-Q13:SIRVHFQAGR | 360   | >SOCS1-Q13:SIRVHFKAGR | 198 | 162   |
| >SOCS1-Q13:SIRVHFQAGR | 193   | >SOCS1-Q13:SIRVHFKAGR | 310 | 117   |
| >SOCS1-Q13:SIRVHFQAGR | 370   | >SOCS1-Q13:SIRVHFKAGR | 425 | 55    |
| >SOCS1-Q13:SIRVHFQAGR | 465   | >SOCS1-Q13:SIRVHFKAGR | 505 | 40    |
| >SOCS1-Q13:SIRVHFQAGR | 364   | >SOCS1-Q13:SIRVHFKAGR | 284 | 80    |
| >SOCS1-Q13:TSIRVHFQ   | 19594 | >SOCS1-Q13:TSIRVHFK   | 153 | 19441 |
| >SOCS1-Q13:TSIRVHFQ   | 8526  | >SOCS1-Q13:TSIRVHFK   | 6   | 8520  |
| >SOCS1-Q13:TSIRVHFQAG | 120   | >SOCS1-Q13:TSIRVHFKAG | 153 | 33    |
| >SOCS1-Q13:TSIRVHFQ   | 7349  | >SOCS1-Q13:TSIRVHFK   | 59  | 7290  |
| >SOCS1-Q13:TSIRVHFQ   | 4636  | >SOCS1-Q13:TSIRVHFK   | 52  | 4584  |
| >SOCS1-Q13:TSIRVHFQAG | 18    | >SOCS1-Q13:TSIRVHFKAG | 13  | 5     |
| >SOCS1-Q13:TSIRVHFQAG | 133   | >SOCS1-Q13:TSIRVHFKAG | 138 | 5     |
| >SOCS1-Q13:TSIRVHFQ   | 111   | >SOCS1-Q13:TSIRVHFK   | 4   | 107   |
| >SOCS1-Q13:TSIRVHFQAG | 4     | >SOCS1-Q13:TSIRVHFKAG | 4   | 0     |
| >SOCS1-Q13:TSIRVHFQA  | 38    | >SOCS1-Q13:TSIRVHFKA  | 47  | 9     |

|                        |       |                        |      |       |
|------------------------|-------|------------------------|------|-------|
| >SOCS1-Q13:TSIRVHFQ    | 3002  | >SOCS1-Q13:TSIRVHFK    | 204  | 2798  |
| >SOCS1-Q13:PTSIRVHFQ   | 23300 | >SOCS1-Q13:PTSIRVHFK   | 69   | 23231 |
| >SOCS1-Q13:PTSIRVHFQ   | 10416 | >SOCS1-Q13:PTSIRVHFK   | 162  | 10254 |
| >SOCS1-Q13:PTSIRVHFQ   | 7255  | >SOCS1-Q13:PTSIRVHFK   | 204  | 7051  |
| >SOCS1-Q13:PTSIRVHFQ   | 3824  | >SOCS1-Q13:PTSIRVHFK   | 178  | 3646  |
| >SOCS1-Q13:GPTSIRVHFQ  | 120   | >SOCS1-Q13:GPTSIRVHFK  | 341  | 221   |
| >SOCS1-Q21 LSSFPFQI    | 325   | >SOCS1-Q21 LSSFPFHI    | 125  | 200   |
| >SOCS1-Q21 LSSFPFQI    | 110   | >SOCS1-Q21 LSSFPFHI    | 299  | 189   |
| >SOCS1-Q21 LSSFPFQI    | 159   | >SOCS1-Q21 LSSFPFHI    | 99   | 60    |
| >SOCS1-Q21 LSSFPFQI    | 372   | >SOCS1-Q21 LSSFPFHI    | 268  | 104   |
| >SOCS1-Q21 LSSFPFQI    | 17    | >SOCS1-Q21 LSSFPFHI    | 16   | 1     |
| >SOCS1-Q21 YLSSFPFQ    | 301   | >SOCS1-Q21 YLSSFPFH    | 7893 | 7592  |
| >SOCS1-Q21 YLSSFPFQI   | 7     | >SOCS1-Q21 YLSSFPFHI   | 7    | 0     |
| >SOCS1-Q21 YLSSFPFQ    | 15    | >SOCS1-Q21 YLSSFPFH    | 264  | 249   |
| >SOCS1-Q21 YLSSFPFQI   | 2     | >SOCS1-Q21 YLSSFPFHI   | 3    | 1     |
| >SOCS1-Q21 YLSSFPFQ    | 467   | >SOCS1-Q21 YLSSFPFH    | 5435 | 4968  |
| >SOCS1-Q21 YLSSFPFQI   | 4     | >SOCS1-Q21 YLSSFPFHI   | 4    | 0     |
| >SOCS1-Q21 YLSSFPFQI   | 52    | >SOCS1-Q21 YLSSFPFHI   | 13   | 39    |
| >SOCS1-Q21 YLSSFPFQ    | 69    | >SOCS1-Q21 YLSSFPFH    | 1643 | 1574  |
| >SOCS1-Q21 YLSSFPFQI   | 2     | >SOCS1-Q21 YLSSFPFHI   | 2    | 0     |
| >SOCS1-Q21 YLSSFPFQI   | 5     | >SOCS1-Q21 YLSSFPFHI   | 3    | 2     |
| >SOCS1-Q21 YLSSFPFQ    | 56    | >SOCS1-Q21 YLSSFPFH    | 5963 | 5907  |
| >SOCS1-Q21 YLSSFPFQI   | 5     | >SOCS1-Q21 YLSSFPFHI   | 5    | 0     |
| >SOCS1-Q21 YLSSFPFQI   | 2     | >SOCS1-Q21 YLSSFPFHI   | 3    | 1     |
| >SOCS1-Q21 YLSSFPFQ    | 7     | >SOCS1-Q21 YLSSFPFH    | 854  | 847   |
| >SOCS1-Q21 YLSSFPFQI   | 2     | >SOCS1-Q21 YLSSFPFHI   | 2    | 0     |
| >SOCS1-Q21 YLSSFPFQ    | 1071  | >SOCS1-Q21 YLSSFPFH    | 278  | 793   |
| >SOCS1-Q21 YLSSFPFQI   | 240   | >SOCS1-Q21 YLSSFPFHI   | 1208 | 968   |
| >SOCS1-Q21 YLSSFPFQI   | 493   | >SOCS1-Q21 YLSSFPFHI   | 232  | 261   |
| >SOCS1-Q21 YLSSFPFQI   | 37    | >SOCS1-Q21 YLSSFPFHI   | 73   | 36    |
| >SOCS1-Q21 YLSSFPFQI   | 364   | >SOCS1-Q21 YLSSFPFHI   | 217  | 147   |
| >SOCS1-Q21 DYLSSFPFQI  | 392   | >SOCS1-Q21 DYLSSFPFHI  | 226  | 166   |
| >SOCS1-Q21 DYLSSFPFQI  | 118   | >SOCS1-Q21 DYLSSFPFHI  | 30   | 88    |
| >SOCS1-Q21 DYLSSFPFQI  | 241   | >SOCS1-Q21 DYLSSFPFHI  | 82   | 159   |
| >SOCS1-Q21 DYLSSFPFQI  | 32    | >SOCS1-Q21 DYLSSFPFHI  | 43   | 11    |
| >SOCS1-Q21 DYLSSFPFQ   | 497   | >SOCS1-Q21 DYLSSFPFH   | 644  | 147   |
| >SOCS1-Q21 DYLSSFPFQI  | 5046  | >SOCS1-Q21 DYLSSFPFHI  | 319  | 4727  |
| >SOCS1-Q21 RDYLSSFPFQI | 97    | >SOCS1-Q21 RDYLSSFPFHI | 203  | 106   |
| >SOCS1-Q21 RDYLSSFPFQI | 170   | >SOCS1-Q21 RDYLSSFPFHI | 286  | 116   |
| >SOCS1-Q21 RDYLSSFPFQI | 9     | >SOCS1-Q21 RDYLSSFPFHI | 12   | 3     |
| >SOCS1-Q21 RDYLSSFPFQI | 60    | >SOCS1-Q21 RDYLSSFPFHI | 60   | 0     |
| >SOCS1-Q21 RDYLSSFPFQI | 22    | >SOCS1-Q21 RDYLSSFPFHI | 29   | 7     |
| >SOCS1-S11€SVKMASGPT:  | 114   | >SOCS1-S11€NVKMASGPT   | 308  | 194   |

|                       |     |                       |       |       |
|-----------------------|-----|-----------------------|-------|-------|
| >SOCS1-S11€SVKMASGPT  | 66  | >SOCS1-S11€NVKMASGPT  | 2928  | 2862  |
| >SOCS1-S11€SVKMASGPT! | 47  | >SOCS1-S11€NVKMASGPT  | 2041  | 1994  |
| >SOCS1-S11€SVKMASGPT! | 25  | >SOCS1-S11€NVKMASGPT  | 809   | 784   |
| >SOCS1-S11€SVKMASGPT! | 405 | >SOCS1-S11€NVKMASGPT  | 2674  | 2269  |
| >SOCS1-S11€SRQRNCFFAL | 816 | >SOCS1-S11€SRQRNCFFAL | 436   | 380   |
| >SOCS1-S11€SRQRNCFFAL | 636 | >SOCS1-S11€SRQRNCFFAL | 482   | 154   |
| >SOCS1-S11€ALSVKMASGI | 104 | >SOCS1-S11€ALNVKMASG  | 72    | 32    |
| >SOCS1-S11€FALSVKMA   | 481 | >SOCS1-S11€FALNVKMA   | 403   | 78    |
| >SOCS1-S11€FALSVKMA   | 555 | >SOCS1-S11€FALNVKMA   | 356   | 199   |
| >SOCS1-S11€FALSVKMA   | 188 | >SOCS1-S11€FALNVKMA   | 130   | 58    |
| >SOCS1-S11€CFFALSVK   | 390 | >SOCS1-S11€CFFALNVK   | 619   | 229   |
| >SOCS1-S11€CFFALSVKM  | 165 | >SOCS1-S11€CFFALNVKM  | 275   | 110   |
| >SOCS1-S11€CFFALSVK   | 433 | >SOCS1-S11€CFFALNVK   | 450   | 17    |
| >SOCS1-S11€CFFALSVK   | 431 | >SOCS1-S11€CFFALNVK   | 533   | 102   |
| >SOCS1-S11€CFFALSVK   | 331 | >SOCS1-S11€CFFALNVK   | 381   | 50    |
| >SOCS1-S11€CFFALSVK   | 244 | >SOCS1-S11€CFFALNVK   | 154   | 90    |
| >SOCS1-S11€NCFFALSV   | 78  | >SOCS1-S11€NCFFALNV   | 80    | 2     |
| >SOCS1-S11€NCFFALSV   | 135 | >SOCS1-S11€NCFFALNV   | 113   | 22    |
| >SOCS1-S11€RNCFFALSVK | 299 | >SOCS1-S11€RNCFFALNVK | 1128  | 829   |
| >SOCS1-S11€RNCFFALSVK | 197 | >SOCS1-S11€RNCFFALNVK | 172   | 25    |
| >SOCS1-S11€RNCFFALSVK | 496 | >SOCS1-S11€RNCFFALNVK | 639   | 143   |
| >SOCS1-S11€QRNCFFALSV | 162 | >SOCS1-S11€QRNCFFALN\ | 281   | 119   |
| >SOCS1-S11€QRNCFFALSV | 89  | >SOCS1-S11€QRNCFFALN\ | 147   | 58    |
| >SOCS1-S11€QRNCFFALSV | 462 | >SOCS1-S11€QRNCFFALN\ | 599   | 137   |
| >SOCS1-S11€RQRNCFFALS | 79  | >SOCS1-S11€RQRNCFFALN | 132   | 53    |
| >SOCS1-S11€RQRNCFFALS | 11  | >SOCS1-S11€RQRNCFFALN | 32    | 21    |
| >SOCS1-S11€RQRNCFFALS | 71  | >SOCS1-S11€RQRNCFFALN | 300   | 229   |
| >SOCS1-S11€RQRNCFFALS | 15  | >SOCS1-S11€RQRNCFFALN | 20    | 5     |
| >SOCS1-S11€RQRNCFFALS | 78  | >SOCS1-S11€RQRNCFFALN | 317   | 239   |
| >SOCS1-S11€RQRNCFFALS | 180 | >SOCS1-S11€RQRNCFFALN | 502   | 322   |
| >SOCS1-S11€RQRNCFFALS | 7   | >SOCS1-S11€RQRNCFFALN | 11    | 4     |
| >SOCS1-S11€RQRNCFFALS | 478 | >SOCS1-S11€RQRNCFFALN | 1015  | 537   |
| >SOCS1-S11€RQRNCFFALS | 283 | >SOCS1-S11€RQRNCFFALN | 275   | 8     |
| >SOCS1-S11€RQRNCFFALS | 478 | >SOCS1-S11€RQRNCFFALN | 842   | 364   |
| >SOCS1-S11€RQRNCFFALS | 129 | >SOCS1-S11€RQRNCFFALN | 108   | 21    |
| >SOCS1-S20€LSSFPPQI   | 325 | >SOCS1-S20€LNSFPFQI   | 3603  | 3278  |
| >SOCS1-S20€LSSFPPQI   | 110 | >SOCS1-S20€LNSFPFQI   | 19332 | 19222 |
| >SOCS1-S20€LSSFPPQI   | 159 | >SOCS1-S20€LNSFPFQI   | 11972 | 11813 |
| >SOCS1-S20€LSSFPPQI   | 372 | >SOCS1-S20€LNSFPFQI   | 21235 | 20863 |
| >SOCS1-S20€LSSFPPQI   | 17  | >SOCS1-S20€LNSFPFQI   | 234   | 217   |
| >SOCS1-S20€YLSSFPPQ   | 301 | >SOCS1-S20€YLNSFPFQ   | 470   | 169   |
| >SOCS1-S20€YLSSFPPQI  | 7   | >SOCS1-S20€YLNSFPFQI  | 7     | 0     |
| >SOCS1-S20€YLSSFPPQ   | 15  | >SOCS1-S20€YLNSFPFQ   | 29    | 14    |

|                        |     |                       |     |     |
|------------------------|-----|-----------------------|-----|-----|
| >SOCS1-S205YLSSFPFQI   | 2   | >SOCS1-S205YLNSFPFQI  | 3   | 1   |
| >SOCS1-S205YLSSFPFQ    | 467 | >SOCS1-S205YLNSFPFQ   | 363 | 104 |
| >SOCS1-S205YLSSFPFQI   | 4   | >SOCS1-S205YLNSFPFQI  | 3   | 1   |
| >SOCS1-S205YLSSFPFQI   | 52  | >SOCS1-S205YLNSFPFQI  | 112 | 60  |
| >SOCS1-S205YLSSFPFQ    | 69  | >SOCS1-S205YLNSFPFQ   | 33  | 36  |
| >SOCS1-S205YLSSFPFQI   | 2   | >SOCS1-S205YLNSFPFQI  | 1   | 1   |
| >SOCS1-S205YLSSFPFQI   | 5   | >SOCS1-S205YLNSFPFQI  | 4   | 1   |
| >SOCS1-S205YLSSFPFQ    | 56  | >SOCS1-S205YLNSFPFQ   | 53  | 3   |
| >SOCS1-S205YLSSFPFQI   | 5   | >SOCS1-S205YLNSFPFQI  | 5   | 0   |
| >SOCS1-S205YLSSFPFQI   | 2   | >SOCS1-S205YLNSFPFQI  | 2   | 0   |
| >SOCS1-S205YLSSFPFQ    | 7   | >SOCS1-S205YLNSFPFQ   | 8   | 1   |
| >SOCS1-S205YLSSFPFQI   | 2   | >SOCS1-S205YLNSFPFQI  | 2   | 0   |
| >SOCS1-S205YLSSFPFQI   | 240 | >SOCS1-S205YLNSFPFQI  | 86  | 154 |
| >SOCS1-S205YLSSFPFQI   | 493 | >SOCS1-S205YLNSFPFQI  | 671 | 178 |
| >SOCS1-S205YLSSFPFQI   | 37  | >SOCS1-S205YLNSFPFQI  | 26  | 11  |
| >SOCS1-S205YLSSFPFQI   | 364 | >SOCS1-S205YLNSFPFQI  | 420 | 56  |
| >SOCS1-S205DYLSSFPFQI  | 392 | >SOCS1-S205DYLNSFPFQI | 773 | 381 |
| >SOCS1-S205DYLSSFPF    | 54  | >SOCS1-S205DYLNSFPF   | 44  | 10  |
| >SOCS1-S205DYLSSFPFQI  | 118 | >SOCS1-S205DYLNSFPFQI | 194 | 76  |
| >SOCS1-S205DYLSSFPF    | 85  | >SOCS1-S205DYLNSFPF   | 93  | 8   |
| >SOCS1-S205DYLSSFPFQI  | 241 | >SOCS1-S205DYLNSFPFQI | 392 | 151 |
| >SOCS1-S205DYLSSFPF    | 22  | >SOCS1-S205DYLNSFPF   | 20  | 2   |
| >SOCS1-S205DYLSSFPFQI  | 32  | >SOCS1-S205DYLNSFPFQI | 33  | 1   |
| >SOCS1-S205DYLSSFPFQ   | 497 | >SOCS1-S205DYLNSFPFQ  | 515 | 18  |
| >SOCS1-S205RDYLSSFPFQI | 97  | >SOCS1-S205RDYLNSFPFQ | 121 | 24  |
| >SOCS1-S205RDYLSSFPF   | 361 | >SOCS1-S205RDYLNSFPF  | 137 | 224 |
| >SOCS1-S205RDYLSSFPFQI | 762 | >SOCS1-S205RDYLNSFPFQ | 475 | 287 |
| >SOCS1-S205RDYLSSFPF   | 227 | >SOCS1-S205RDYLNSFPF  | 540 | 313 |
| >SOCS1-S205RDYLSSFPF   | 20  | >SOCS1-S205RDYLNSFPF  | 68  | 48  |
| >SOCS1-S205RDYLSSFPF   | 54  | >SOCS1-S205RDYLNSFPF  | 257 | 203 |
| >SOCS1-S205RDYLSSFPF   | 43  | >SOCS1-S205RDYLNSFPF  | 51  | 8   |
| >SOCS1-S205RDYLSSFPFQI | 170 | >SOCS1-S205RDYLNSFPFQ | 211 | 41  |
| >SOCS1-S205RDYLSSFPF   | 141 | >SOCS1-S205RDYLNSFPF  | 150 | 9   |
| >SOCS1-S205RDYLSSFPFQI | 9   | >SOCS1-S205RDYLNSFPFQ | 9   | 0   |
| >SOCS1-S205RDYLSSFPFQI | 60  | >SOCS1-S205RDYLNSFPFQ | 110 | 50  |
| >SOCS1-S205RDYLSSFPFQI | 22  | >SOCS1-S205RDYLNSFPFQ | 25  | 3   |
| >SOCS1-S205LRDYLSSF    | 129 | >SOCS1-S205LRDYLNSF   | 231 | 102 |
| >SOCS1-S205LRDYLSSFPF  | 127 | >SOCS1-S205LRDYLNSFPF | 208 | 81  |
| >SOCS1-S205LRDYLSSFPF  | 517 | >SOCS1-S205LRDYLNSFPF | 400 | 117 |
| >SOCS1-S205VLRDYLSSF   | 515 | >SOCS1-S205VLRDYLNSF  | 295 | 220 |
| >SOCS1-S205VLRDYLSSF   | 129 | >SOCS1-S205VLRDYLNSF  | 448 | 319 |
| >SOCS1-S205VLRDYLSSFPF | 437 | >SOCS1-S205VLRDYLNSFP | 450 | 13  |
| >SOCS1-S205VLRDYLSS    | 181 | >SOCS1-S205VLRDYLNS   | 432 | 251 |

|                         |     |                         |      |      |
|-------------------------|-----|-------------------------|------|------|
| >SOCS1-S205 VLRDYLSSF   | 102 | >SOCS1-S205 VLRDYLNSF   | 324  | 222  |
| >SOCS1-S205 VLRDYLSSFPF | 320 | >SOCS1-S205 VLRDYLNSFPF | 432  | 112  |
| >SOCS1-S205 VLRDYLSSF   | 27  | >SOCS1-S205 VLRDYLNSF   | 39   | 12   |
| >SOCS1-S205 VLRDYLSSFPF | 27  | >SOCS1-S205 VLRDYLNSFPF | 33   | 6    |
| >SOCS1-S205 VLRDYLSSF   | 231 | >SOCS1-S205 VLRDYLNSF   | 668  | 437  |
| >SOCS1-S205 VLRDYLSSFPF | 144 | >SOCS1-S205 VLRDYLNSFPF | 228  | 84   |
| >SOCS1-S205 VLRDYLSSF   | 11  | >SOCS1-S205 VLRDYLNSF   | 22   | 11   |
| >SOCS1-S205 VLRDYLSSFPF | 12  | >SOCS1-S205 VLRDYLNSFPF | 19   | 7    |
| >SOCS1-S205 VLRDYLSSF   | 30  | >SOCS1-S205 VLRDYLNSF   | 247  | 217  |
| >SOCS1-S205 VLRDYLSSFPF | 22  | >SOCS1-S205 VLRDYLNSFPF | 61   | 39   |
| >SOCS1-S205 VLRDYLSSF   | 20  | >SOCS1-S205 VLRDYLNSF   | 230  | 210  |
| >SOCS1-S205 PVLRDYLSSF  | 111 | >SOCS1-S205 PVLRDYLNSF  | 145  | 34   |
| >SOCS1-S205 PVLRDYLSSF  | 443 | >SOCS1-S205 PVLRDYLNSF  | 875  | 432  |
| >SOCS1-S205 NPVLRDYLSS  | 135 | >SOCS1-S205 NPVLRDYLNS  | 205  | 70   |
| >SOCS1-S205 NPVLRDYLSS  | 29  | >SOCS1-S205 NPVLRDYLNS  | 39   | 10   |
| >SOCS1-S205 NPVLRDYLSS  | 105 | >SOCS1-S205 NPVLRDYLNS  | 149  | 44   |
| >SOCS1-S205 NPVLRDYLSS  | 168 | >SOCS1-S205 NPVLRDYLNS  | 120  | 48   |
| >SOCS1-S205 NPVLRDYLSS  | 329 | >SOCS1-S205 NPVLRDYLNS  | 493  | 164  |
| >SOCS1-S206 LSSFPFQI    | 325 | >SOCS1-S206 LSPFPFQI    | 308  | 17   |
| >SOCS1-S206 LSSFPFQI    | 110 | >SOCS1-S206 LSPFPFQI    | 1810 | 1700 |
| >SOCS1-S206 LSSFPFQI    | 159 | >SOCS1-S206 LSPFPFQI    | 8183 | 8024 |
| >SOCS1-S206 LSSFPFQI    | 372 | >SOCS1-S206 LSPFPFQI    | 4    | 368  |
| >SOCS1-S206 LSSFPFQI    | 17  | >SOCS1-S206 LSPFPFQI    | 31   | 14   |
| >SOCS1-S206 YLSSFPFQ    | 301 | >SOCS1-S206 YLSPFPFQ    | 380  | 79   |
| >SOCS1-S206 YLSSFPFQI   | 7   | >SOCS1-S206 YLSPFPFQI   | 7    | 0    |
| >SOCS1-S206 YLSSFPFQ    | 15  | >SOCS1-S206 YLSPFPFQ    | 22   | 7    |
| >SOCS1-S206 YLSSFPFQI   | 2   | >SOCS1-S206 YLSPFPFQI   | 3    | 1    |
| >SOCS1-S206 YLSSFPFQ    | 467 | >SOCS1-S206 YLSPFPFQ    | 604  | 137  |
| >SOCS1-S206 YLSSFPFQI   | 4   | >SOCS1-S206 YLSPFPFQI   | 4    | 0    |
| >SOCS1-S206 YLSSFPFQ    | 586 | >SOCS1-S206 YLSPFPFQ    | 307  | 279  |
| >SOCS1-S206 YLSSFPFQI   | 52  | >SOCS1-S206 YLSPFPFQI   | 15   | 37   |
| >SOCS1-S206 YLSSFPFQ    | 69  | >SOCS1-S206 YLSPFPFQ    | 50   | 19   |
| >SOCS1-S206 YLSSFPFQI   | 2   | >SOCS1-S206 YLSPFPFQI   | 2    | 0    |
| >SOCS1-S206 YLSSFPFQI   | 5   | >SOCS1-S206 YLSPFPFQI   | 4    | 1    |
| >SOCS1-S206 YLSSFPFQ    | 56  | >SOCS1-S206 YLSPFPFQ    | 42   | 14   |
| >SOCS1-S206 YLSSFPFQI   | 5   | >SOCS1-S206 YLSPFPFQI   | 5    | 0    |
| >SOCS1-S206 YLSSFPFQI   | 2   | >SOCS1-S206 YLSPFPFQI   | 2    | 0    |
| >SOCS1-S206 YLSSFPFQ    | 7   | >SOCS1-S206 YLSPFPFQ    | 5    | 2    |
| >SOCS1-S206 YLSSFPFQI   | 2   | >SOCS1-S206 YLSPFPFQI   | 2    | 0    |
| >SOCS1-S206 YLSSFPFQI   | 558 | >SOCS1-S206 YLSPFPFQI   | 412  | 146  |
| >SOCS1-S206 YLSSFPFQI   | 240 | >SOCS1-S206 YLSPFPFQI   | 537  | 297  |
| >SOCS1-S206 YLSSFPFQI   | 493 | >SOCS1-S206 YLSPFPFQI   | 268  | 225  |
| >SOCS1-S206 YLSSFPFQI   | 37  | >SOCS1-S206 YLSPFPFQI   | 42   | 5    |

|                        |      |                         |      |      |
|------------------------|------|-------------------------|------|------|
| >SOCS1-S20€YLSSFPFQI   | 364  | >SOCS1-S20€YLSPFPFQI    | 793  | 429  |
| >SOCS1-S20€YLSSFPFQI   | 708  | >SOCS1-S20€YLSPFPFQI    | 177  | 531  |
| >SOCS1-S20€DYLSSFPFQI  | 392  | >SOCS1-S20€DYLSFPFPFQI  | 4457 | 4065 |
| >SOCS1-S20€DYLSSFPF    | 54   | >SOCS1-S20€DYLSFPFPF    | 83   | 29   |
| >SOCS1-S20€DYLSSFPFQI  | 118  | >SOCS1-S20€DYLSFPFPFQI  | 131  | 13   |
| >SOCS1-S20€DYLSSFPF    | 85   | >SOCS1-S20€DYLSFPFPF    | 102  | 17   |
| >SOCS1-S20€DYLSSFPFQI  | 241  | >SOCS1-S20€DYLSFPFPFQI  | 431  | 190  |
| >SOCS1-S20€DYLSSFPF    | 22   | >SOCS1-S20€DYLSFPFPF    | 28   | 6    |
| >SOCS1-S20€DYLSSFPFQI  | 32   | >SOCS1-S20€DYLSFPFPFQI  | 30   | 2    |
| >SOCS1-S20€DYLSSFPFQ   | 497  | >SOCS1-S20€DYLSFPFPFQ   | 418  | 79   |
| >SOCS1-S20€DYLSSFPFQI  | 811  | >SOCS1-S20€DYLSFPFPFQI  | 331  | 480  |
| >SOCS1-S20€DYLSSFPF    | 784  | >SOCS1-S20€DYLSFPFPF    | 497  | 287  |
| >SOCS1-S20€RDYLSSFPFQI | 97   | >SOCS1-S20€RDYLSFPFPFQI | 174  | 77   |
| >SOCS1-S20€RDYLSSFPF   | 361  | >SOCS1-S20€RDYLSFPFPF   | 490  | 129  |
| >SOCS1-S20€RDYLSSFPF   | 227  | >SOCS1-S20€RDYLSFPFPF   | 2242 | 2015 |
| >SOCS1-S20€RDYLSSFPF   | 20   | >SOCS1-S20€RDYLSFPFPF   | 29   | 9    |
| >SOCS1-S20€RDYLSSFPF   | 54   | >SOCS1-S20€RDYLSFPFPF   | 167  | 113  |
| >SOCS1-S20€RDYLSSFPF   | 43   | >SOCS1-S20€RDYLSFPFPF   | 87   | 44   |
| >SOCS1-S20€RDYLSSFPFQI | 170  | >SOCS1-S20€RDYLSFPFPFQI | 250  | 80   |
| >SOCS1-S20€RDYLSSFPF   | 141  | >SOCS1-S20€RDYLSFPFPF   | 215  | 74   |
| >SOCS1-S20€RDYLSSFPFQI | 9    | >SOCS1-S20€RDYLSFPFPFQI | 11   | 2    |
| >SOCS1-S20€RDYLSSFPFQI | 60   | >SOCS1-S20€RDYLSFPFPFQI | 66   | 6    |
| >SOCS1-S20€RDYLSSFPFQI | 22   | >SOCS1-S20€RDYLSFPFPFQI | 24   | 2    |
| >SOCS1-S20€LRDYLSSF    | 129  | >SOCS1-S20€LRDYLSPF     | 135  | 6    |
| >SOCS1-S20€LRDYLSSFPF  | 127  | >SOCS1-S20€LRDYLSFPFPF  | 195  | 68   |
| >SOCS1-S20€LRDYLSSFPF  | 517  | >SOCS1-S20€LRDYLSFPFPF  | 120  | 397  |
| >SOCS1-S20€VLRDYLSSF   | 1195 | >SOCS1-S20€VLRDYLSPF    | 306  | 889  |
| >SOCS1-S20€VLRDYLSSF   | 515  | >SOCS1-S20€VLRDYLSPF    | 414  | 101  |
| >SOCS1-S20€VLRDYLSSF   | 129  | >SOCS1-S20€VLRDYLSPF    | 81   | 48   |
| >SOCS1-S20€VLRDYLSSF   | 873  | >SOCS1-S20€VLRDYLSPF    | 437  | 436  |
| >SOCS1-S20€VLRDYLSSFPF | 437  | >SOCS1-S20€VLRDYLSFPFPF | 799  | 362  |
| >SOCS1-S20€VLRDYLSS    | 181  | >SOCS1-S20€VLRDYLSF     | 1983 | 1802 |
| >SOCS1-S20€VLRDYLSSF   | 102  | >SOCS1-S20€VLRDYLSPF    | 252  | 150  |
| >SOCS1-S20€VLRDYLSSFPF | 320  | >SOCS1-S20€VLRDYLSFPFPF | 482  | 162  |
| >SOCS1-S20€VLRDYLSSF   | 27   | >SOCS1-S20€VLRDYLSPF    | 24   | 3    |
| >SOCS1-S20€VLRDYLSSFPF | 27   | >SOCS1-S20€VLRDYLSFPFPF | 41   | 14   |
| >SOCS1-S20€VLRDYLSSF   | 231  | >SOCS1-S20€VLRDYLSPF    | 137  | 94   |
| >SOCS1-S20€VLRDYLSSFPF | 144  | >SOCS1-S20€VLRDYLSFPFPF | 228  | 84   |
| >SOCS1-S20€VLRDYLSSF   | 11   | >SOCS1-S20€VLRDYLSPF    | 10   | 1    |
| >SOCS1-S20€VLRDYLSSFPF | 12   | >SOCS1-S20€VLRDYLSFPFPF | 13   | 1    |
| >SOCS1-S20€VLRDYLSSF   | 30   | >SOCS1-S20€VLRDYLSPF    | 36   | 6    |
| >SOCS1-S20€VLRDYLSSFPF | 22   | >SOCS1-S20€VLRDYLSFPFPF | 36   | 14   |
| >SOCS1-S20€VLRDYLSSF   | 1144 | >SOCS1-S20€VLRDYLSPF    | 377  | 767  |



|                         |       |                         |       |       |
|-------------------------|-------|-------------------------|-------|-------|
| >SOCS1-S20€ VLRDYLSSF   | 20    | >SOCS1-S20€ VLRDYLSPF   | 82    | 62    |
| >SOCS1-S20€ PVLRDYLSSF  | 111   | >SOCS1-S20€ PVLRDYLSPF  | 80    | 31    |
| >SOCS1-S20€ PVLRDYLSSF  | 443   | >SOCS1-S20€ PVLRDYLSPF  | 430   | 13    |
| >SOCS1-S20€ NPVLRDYLSS  | 135   | >SOCS1-S20€ NPVLRDYLSP  | 88    | 47    |
| >SOCS1-S20€ NPVLRDYLSS  | 29    | >SOCS1-S20€ NPVLRDYLSP  | 16    | 13    |
| >SOCS1-S20€ NPVLRDYLSS  | 105   | >SOCS1-S20€ NPVLRDYLSP  | 215   | 110   |
| >SOCS1-S20€ NPVLRDYLSS  | 168   | >SOCS1-S20€ NPVLRDYLSP  | 93    | 75    |
| >SOCS1-S20€ NPVLRDYLSS  | 329   | >SOCS1-S20€ NPVLRDYLSP  | 403   | 74    |
| >SOCS1-S27F SSSSSSPA    | 4302  | >SOCS1-S27F FSSSSSPA    | 284   | 4018  |
| >SOCS1-S27F SSSSSSPAAP/ | 4069  | >SOCS1-S27F FSSSSSPAAP/ | 318   | 3751  |
| >SOCS1-S27F SSSSSSPA    | 3106  | >SOCS1-S27F FSSSSSPA    | 399   | 2707  |
| >SOCS1-S27F SSSSSSPAA   | 4592  | >SOCS1-S27F FSSSSSPAA   | 283   | 4309  |
| >SOCS1-S27F SSSSSSPAAP/ | 5482  | >SOCS1-S27F FSSSSSPAAP/ | 369   | 5113  |
| >SOCS1-S27F SSSSSSPA    | 396   | >SOCS1-S27F FSSSSSPA    | 8102  | 7706  |
| >SOCS1-S27F SSSSSSPAA   | 142   | >SOCS1-S27F FSSSSSPAA   | 6030  | 5888  |
| >SOCS1-S27F SSSSSSPAAP/ | 309   | >SOCS1-S27F FSSSSSPAAP/ | 6814  | 6505  |
| >SOCS1-S27F SSSSSSPA    | 707   | >SOCS1-S27F FSSSSSPA    | 177   | 530   |
| >SOCS1-S27F SSSSSSPAAP/ | 402   | >SOCS1-S27F FSSSSSPAAP/ | 120   | 282   |
| >SOCS1-S27F SSSSSSPA    | 963   | >SOCS1-S27F FSSSSSPA    | 217   | 746   |
| >SOCS1-S27F SSSSSSPAA   | 597   | >SOCS1-S27F FSSSSSPAA   | 152   | 445   |
| >SOCS1-S27F SSSSSSPAAP/ | 1248  | >SOCS1-S27F FSSSSSPAAP/ | 315   | 933   |
| >SOCS1-S27F SSSSSSPA    | 241   | >SOCS1-S27F SFSSSSSPA   | 944   | 703   |
| >SOCS1-S27F SSSSSSPAA   | 208   | >SOCS1-S27F SFSSSSPAA   | 820   | 612   |
| >SOCS1-S27F SSSSSSPA    | 319   | >SOCS1-S27F SFSSSSSPA   | 11308 | 10989 |
| >SOCS1-S27F SSSSSSPA    | 341   | >SOCS1-S27F SFSSSSSPA   | 2844  | 2503  |
| >SOCS1-S27F SSSSSSPA    | 254   | >SOCS1-S27F SFSSSSSPA   | 4777  | 4523  |
| >SOCS1-S27F SSSSSSPAA   | 434   | >SOCS1-S27F SFSSSSPAA   | 6530  | 6096  |
| >SOCS1-S27F SSSSSSPA    | 363   | >SOCS1-S27F SFSSSSSPA   | 5518  | 5155  |
| >SOCS1-S27F SSSSSSPA    | 24552 | >SOCS1-S27F SFSSSSSPA   | 319   | 24233 |
| >SOCS1-S27F SSSSSSPAA   | 23489 | >SOCS1-S27F SFSSSSPAA   | 450   | 23039 |
| >SOCS1-S27F AEPRRRPEPS  | 4798  | >SOCS1-S27F AEPRRRPEPS  | 289   | 4509  |
| >SOCS1-S27F PSSSSSSSPA  | 1559  | >SOCS1-S27F PSFSSSSSPA  | 267   | 1292  |
| >SOCS1-S27F PSSSSSSPAA  | 2243  | >SOCS1-S27F PSFSSSSPAA  | 469   | 1774  |
| >SOCS1-S27F EPSSSSSSSPA | 442   | >SOCS1-S27F EPSFSSSSSPA | 772   | 330   |
| >SOCS1-S27F EPSSSSSS    | 379   | >SOCS1-S27F EPSFSSSS    | 581   | 202   |
| >SOCS1-S27F EPSSSSSSS   | 248   | >SOCS1-S27F EPSFSSSSS   | 451   | 203   |
| >SOCS1-S27F EPSSSSSSSPA | 70    | >SOCS1-S27F EPSFSSSSSPA | 105   | 35    |
| >SOCS1-S27F EPSSSSSSSPA | 471   | >SOCS1-S27F EPSFSSSSSPA | 588   | 117   |
| >SOCS1-S27F RPEPSSSSS   | 297   | >SOCS1-S27F RPEPSFSSS   | 479   | 182   |
| >SOCS1-S27F RPEPSSSSSSS | 306   | >SOCS1-S27F RPEPSFSSSSS | 432   | 126   |
| >SOCS1-S27F RRPEPSSSSS  | 877   | >SOCS1-S27F RRPEPSFSSS  | 488   | 389   |
| >SOCS1-S27F RRPEPSSSSS  | 906   | >SOCS1-S27F RRPEPSFSSS  | 322   | 584   |
| >SOCS1-S27F RRRPEPSSS   | 1859  | >SOCS1-S27F RRRPEPSFS   | 491   | 1368  |

|                         |       |                         |       |       |
|-------------------------|-------|-------------------------|-------|-------|
| >SOCS1-S27F RRRPEPSS    | 1430  | >SOCS1-S27F RRRPEPSF    | 4     | 1426  |
| >SOCS1-S27F RRRPEPSSS   | 362   | >SOCS1-S27F RRRPEPSFS   | 1577  | 1215  |
| >SOCS1-S27F RRRPEPSSSS  | 297   | >SOCS1-S27F RRRPEPSFSS  | 975   | 678   |
| >SOCS1-S27F RRRPEPSSSSS | 200   | >SOCS1-S27F RRRPEPSFSSS | 213   | 13    |
| >SOCS1-S27F RRRPEPSS    | 2534  | >SOCS1-S27F RRRPEPSF    | 365   | 2169  |
| >SOCS1-S27F RRRPEPSS    | 378   | >SOCS1-S27F RRRPEPSF    | 75    | 303   |
| >SOCS1-S27F RRRPEPSSS   | 645   | >SOCS1-S27F RRRPEPSFS   | 270   | 375   |
| >SOCS1-S27F RRRPEPSSSS  | 408   | >SOCS1-S27F RRRPEPSFSS  | 371   | 37    |
| >SOCS1-S27F RRRPEPSSSSS | 622   | >SOCS1-S27F RRRPEPSFSSS | 317   | 305   |
| >SOCS1-S27F RRRPEPSS    | 3134  | >SOCS1-S27F RRRPEPSF    | 150   | 2984  |
| >SOCS1-S27F RRRPEPSSSS  | 353   | >SOCS1-S27F RRRPEPSFSS  | 272   | 81    |
| >SOCS1-S27F PRRRPEPSS   | 11187 | >SOCS1-S27F PRRRPEPSF   | 61    | 11126 |
| >SOCS1-S28F SSSSSPAAPAI | 177   | >SOCS1-S28F FSSSSPAAPAI | 2919  | 2742  |
| >SOCS1-S28F SSSSSPAAPAI | 152   | >SOCS1-S28F FSSSSPAAPAI | 1126  | 974   |
| >SOCS1-S28F SSSSSPAAPAI | 34    | >SOCS1-S28F FSSSSPAAPAI | 13    | 21    |
| >SOCS1-S28F SSSSSPAAPA  | 129   | >SOCS1-S28F FSSSSPAAPA  | 84    | 45    |
| >SOCS1-S28F SSSSSPAA    | 1638  | >SOCS1-S28F FSSSSPAA    | 409   | 1229  |
| >SOCS1-S28F SSSSSPAAPA  | 1362  | >SOCS1-S28F FSSSSPAAPA  | 347   | 1015  |
| >SOCS1-S28F SSSSSPAAPAI | 1288  | >SOCS1-S28F FSSSSPAAPAI | 344   | 944   |
| >SOCS1-S28F SSSSSPAAPAI | 218   | >SOCS1-S28F FSSSSPAAPAI | 2620  | 2402  |
| >SOCS1-S28F SSSSSSPA    | 396   | >SOCS1-S28F SFSSSSPA    | 1428  | 1032  |
| >SOCS1-S28F SSSSSSPAA   | 142   | >SOCS1-S28F SFSSSSPAA   | 592   | 450   |
| >SOCS1-S28F SSSSSSPAAP/ | 309   | >SOCS1-S28F SFSSSSPAAP/ | 1048  | 739   |
| >SOCS1-S28F SSSSSSPAAP/ | 402   | >SOCS1-S28F SFSSSSPAAP/ | 10958 | 10556 |
| >SOCS1-S28F SSSSSSPA    | 25031 | >SOCS1-S28F SFSSSSPA    | 326   | 24705 |
| >SOCS1-S28F SSSSSSPAA   | 23667 | >SOCS1-S28F SFSSSSPAA   | 270   | 23397 |
| >SOCS1-S28F SSSSSSPAAP/ | 25502 | >SOCS1-S28F SFSSSSPAAP/ | 427   | 25075 |
| >SOCS1-S28F EPRRRPEPSSI | 6363  | >SOCS1-S28F EPRRRPEPSSI | 64    | 6299  |
| >SOCS1-S28F EPRRRPEPSSI | 623   | >SOCS1-S28F EPRRRPEPSSI | 65    | 558   |
| >SOCS1-S28F EPRRRPEPSSI | 21793 | >SOCS1-S28F EPRRRPEPSSI | 391   | 21402 |
| >SOCS1-S28F EPRRRPEPSSI | 10634 | >SOCS1-S28F EPRRRPEPSSI | 291   | 10343 |
| >SOCS1-S28F SSSSSSSPA   | 241   | >SOCS1-S28F SSFSSSSPA   | 42    | 199   |
| >SOCS1-S28F SSSSSSSPAA  | 208   | >SOCS1-S28F SSFSSSSPAA  | 38    | 170   |
| >SOCS1-S28F SSSSSSSPA   | 319   | >SOCS1-S28F SSFSSSSPA   | 62    | 257   |
| >SOCS1-S28F SSSSSSSPAA  | 968   | >SOCS1-S28F SSFSSSSPAA  | 476   | 492   |
| >SOCS1-S28F SSSSSSSPA   | 341   | >SOCS1-S28F SSFSSSSPA   | 138   | 203   |
| >SOCS1-S28F SSSSSSSPAA  | 728   | >SOCS1-S28F SSFSSSSPAA  | 270   | 458   |
| >SOCS1-S28F SSSSSSSP    | 2681  | >SOCS1-S28F SSFSSSSP    | 384   | 2297  |
| >SOCS1-S28F SSSSSSSPA   | 254   | >SOCS1-S28F SSFSSSSPA   | 41    | 213   |
| >SOCS1-S28F SSSSSSSPAA  | 434   | >SOCS1-S28F SSFSSSSPAA  | 63    | 371   |
| >SOCS1-S28F SSSSSSSPAAF | 1583  | >SOCS1-S28F SSFSSSSPAAF | 272   | 1311  |
| >SOCS1-S28F SSSSSSSPA   | 1122  | >SOCS1-S28F SSFSSSSPA   | 198   | 924   |
| >SOCS1-S28F SSSSSSSPA   | 363   | >SOCS1-S28F SSFSSSSPA   | 71    | 292   |

|                         |       |                         |       |       |
|-------------------------|-------|-------------------------|-------|-------|
| >SOCS1-S28F EPSSSSSSSPA | 442   | >SOCS1-S28F EPSSFSSSSPA | 1145  | 703   |
| >SOCS1-S28F EPSSSSSS    | 379   | >SOCS1-S28F EPSSFSSS    | 493   | 114   |
| >SOCS1-S28F EPSSSSSSS   | 248   | >SOCS1-S28F EPSSFSSSS   | 210   | 38    |
| >SOCS1-S28F EPSSSSSSSPA | 70    | >SOCS1-S28F EPSSFSSSSPA | 63    | 7     |
| >SOCS1-S28F EPSSSSSSSPA | 471   | >SOCS1-S28F EPSSFSSSSPA | 323   | 148   |
| >SOCS1-S28F RPEPSSSSS   | 297   | >SOCS1-S28F RPEPSSFSS   | 1560  | 1263  |
| >SOCS1-S28F RPEPSSSSSS  | 306   | >SOCS1-S28F RPEPSSFSSS  | 863   | 557   |
| >SOCS1-S28F RRPEPSSS    | 4898  | >SOCS1-S28F RRPEPSSF    | 10    | 4888  |
| >SOCS1-S28F RRRPEPSSS   | 1168  | >SOCS1-S28F RRRPEPSSF   | 361   | 807   |
| >SOCS1-S28F RRRPEPSSSS  | 579   | >SOCS1-S28F RRRPEPSSFSS | 454   | 125   |
| >SOCS1-S28F RRRPEPSSS   | 362   | >SOCS1-S28F RRRPEPSSF   | 2     | 360   |
| >SOCS1-S28F RRRPEPSSSS  | 297   | >SOCS1-S28F RRRPEPSSFSS | 970   | 673   |
| >SOCS1-S28F RRRPEPSSSS  | 200   | >SOCS1-S28F RRRPEPSSFSS | 496   | 296   |
| >SOCS1-S28F RRRPEPSSS   | 2269  | >SOCS1-S28F RRRPEPSSF   | 315   | 1954  |
| >SOCS1-S28F RRRPEPSSS   | 10457 | >SOCS1-S28F RRRPEPSSF   | 161   | 10296 |
| >SOCS1-S28F RRRPEPSSS   | 645   | >SOCS1-S28F RRRPEPSSF   | 88    | 557   |
| >SOCS1-S28F RRRPEPSSSS  | 408   | >SOCS1-S28F RRRPEPSSFSS | 200   | 208   |
| >SOCS1-S28F RRRPEPSSS   | 1558  | >SOCS1-S28F RRRPEPSSF   | 41    | 1517  |
| >SOCS1-S28F RRRPEPSSSS  | 353   | >SOCS1-S28F RRRPEPSSFSS | 141   | 212   |
| >SOCS1-S28F PRRRPEPSSS  | 7662  | >SOCS1-S28F PRRRPEPSSF  | 26    | 7636  |
| >SOCS1-W81 SALLDACGFY   | 21255 | >SOCS1-W81 SALLDACGFY   | 185   | 21070 |
| >SOCS1-W81 SALLDACGFY   | 12788 | >SOCS1-W81 SALLDACGFY   | 45    | 12743 |
| >SOCS1-W81 SALLDACGFY   | 31136 | >SOCS1-W81 SALLDACGFY   | 458   | 30678 |
| >SOCS1-W81 SALLDACGFY   | 25494 | >SOCS1-W81 SALLDACGFY   | 82    | 25412 |
| >SOCS1-W81 SALLDACGFY   | 31    | >SOCS1-W81 SALLDACGFY   | 15362 | 15331 |
| >SOCS1-W81 SALLDACGFY   | 117   | >SOCS1-W81 SALLDACGFY   | 28973 | 28856 |
| >SOCS1-W81 SALLDACGFY   | 59    | >SOCS1-W81 SALLDACGFY   | 21435 | 21376 |
| >SOCS1-W81 SALLDACGFY   | 19    | >SOCS1-W81 SALLDACGFY   | 21156 | 21137 |
| >SOCS1-W81 SALLDACGFY   | 23027 | >SOCS1-W81 SALLDACGFY   | 108   | 22919 |
| >SOCS1-W81 FYWGPLSV     | 128   | >SOCS1-W81 FYRGPLSV     | 14077 | 13949 |
| >SOCS1-W81 FYWGPLSV     | 343   | >SOCS1-W81 FYRGPLSV     | 3185  | 2842  |
| >SOCS1-W81 FYWGPLSV     | 70    | >SOCS1-W81 FYRGPLSV     | 1366  | 1296  |
| >SOCS1-W81 FYWGPLSVH    | 362   | >SOCS1-W81 FYRGPLSVHG   | 5450  | 5088  |
| >SOCS1-W81 FYWGPLSV     | 7     | >SOCS1-W81 FYRGPLSV     | 658   | 651   |
| >SOCS1-W81 FYWGPLSVH    | 89    | >SOCS1-W81 FYRGPLSVHG   | 5950  | 5861  |
| >SOCS1-W81 FYWGPLSV     | 28    | >SOCS1-W81 FYRGPLSV     | 5659  | 5631  |
| >SOCS1-W81 FYWGPLSVH    | 492   | >SOCS1-W81 FYRGPLSVHG   | 15558 | 15066 |
| >SOCS1-W81 FYWGPLSV     | 6     | >SOCS1-W81 FYRGPLSV     | 34    | 28    |
| >SOCS1-W81 FYWGPLSVH    | 129   | >SOCS1-W81 FYRGPLSVHG   | 1387  | 1258  |
| >SOCS1-W81 FYWGPLSV     | 105   | >SOCS1-W81 FYRGPLSV     | 463   | 358   |
| >SOCS1-W81 FYWGPLSV     | 412   | >SOCS1-W81 FYRGPLSV     | 5532  | 5120  |
| >SOCS1-W81 FYWGPLSVH    | 715   | >SOCS1-W81 FYRGPLSVH    | 111   | 604   |
| >SOCS1-W81 FYWGPLSV     | 295   | >SOCS1-W81 FYRGPLSV     | 1020  | 725   |

|                         |       |                         |       |       |
|-------------------------|-------|-------------------------|-------|-------|
| >SOCS1-W81 FYWGPLSVH    | 404   | >SOCS1-W81 FYRGPLSVHG   | 1362  | 958   |
| >SOCS1-W81 GFYWGPLSV    | 24    | >SOCS1-W81 GFYRGPLSV    | 227   | 203   |
| >SOCS1-W81 GFYWGPLSV    | 38    | >SOCS1-W81 GFYRGPLSV    | 259   | 221   |
| >SOCS1-W81 GFYWGPLSV    | 69    | >SOCS1-W81 GFYRGPLSV    | 213   | 144   |
| >SOCS1-W81 GFYWGPLSV    | 291   | >SOCS1-W81 GFYRGPLSV    | 902   | 611   |
| >SOCS1-W81 GFYWGPLSV    | 147   | >SOCS1-W81 GFYRGPLSV    | 992   | 845   |
| >SOCS1-W81 CGFYWGPL     | 338   | >SOCS1-W81 CGFYRGPL     | 2258  | 1920  |
| >SOCS1-W81 CGFYWGPLSV   | 365   | >SOCS1-W81 CGFYRGPLSV   | 788   | 423   |
| >SOCS1-W81 CGFYWGPL     | 267   | >SOCS1-W81 CGFYRGPL     | 412   | 145   |
| >SOCS1-W81 DACGFYWGPI   | 547   | >SOCS1-W81 DACGFYRGPI   | 321   | 226   |
| >SOCS1-W81 LDACGFYR     | 32899 | >SOCS1-W81 LDACGFYR     | 429   | 32470 |
| >SOCS1-W81 LDACGFYR     | 33231 | >SOCS1-W81 LDACGFYR     | 362   | 32869 |
| >SOCS1-W81 LLDACGFYR    | 411   | >SOCS1-W81 LLDACGFYR    | 2873  | 2462  |
| >SOCS1-W81 LLDACGFYR    | 13441 | >SOCS1-W81 LLDACGFYR    | 26    | 13415 |
| >SOCS1-W81 LLDACGFYR    | 30533 | >SOCS1-W81 LLDACGFYR    | 316   | 30217 |
| >SOCS1-W81 LLDACGFYR    | 310   | >SOCS1-W81 LLDACGFYR    | 24368 | 24058 |
| >SOCS1-W81 LLDACGFYR    | 24    | >SOCS1-W81 LLDACGFYR    | 21659 | 21635 |
| >SOCS1-W81 LLDACGFYR    | 13331 | >SOCS1-W81 LLDACGFYR    | 85    | 13246 |
| >SOCS1-W81 ALLDACGFYR   | 434   | >SOCS1-W81 ALLDACGFYR   | 238   | 196   |
| >SOCS1-W81 ALLDACGFYR   | 443   | >SOCS1-W81 ALLDACGFYR   | 466   | 23    |
| >SOCS1-W81 ALLDACGFYR   | 5062  | >SOCS1-W81 ALLDACGFYR   | 42    | 5020  |
| >SOCS1-W81 ALLDACGFYR   | 19824 | >SOCS1-W81 ALLDACGFYR   | 30    | 19794 |
| >SOCS1-W81 ALLDACGFYR   | 4829  | >SOCS1-W81 ALLDACGFYR   | 9     | 4820  |
| >SOCS1-W81 ALLDACGFYR   | 17813 | >SOCS1-W81 ALLDACGFYR   | 88    | 17725 |
| >SOCS1-W81 ALLDACGFYR   | 32120 | >SOCS1-W81 ALLDACGFYR   | 180   | 31940 |
| >SOCS1-W81 ALLDACGFYR   | 124   | >SOCS1-W81 ALLDACGFYR   | 22232 | 22108 |
| >SOCS1-W81 ALLDACGFYR   | 163   | >SOCS1-W81 ALLDACGFYR   | 23712 | 23549 |
| >SOCS1-W81 ALLDACGFYR   | 433   | >SOCS1-W81 ALLDACGFYR   | 22051 | 21618 |
| >SOCS1-W81 ALLDACGFYR   | 20485 | >SOCS1-W81 ALLDACGFYR   | 47    | 20438 |
| >SOCS1-W81 ALLDACGFYR   | 15873 | >SOCS1-W81 ALLDACGFYR   | 136   | 15737 |
| >SOCS1-Y64N YRRITRASA   | 372   | >SOCS1-Y64N YRRITRASA   | 1178  | 806   |
| >SOCS1-Y64N YRRITRASA   | 371   | >SOCS1-Y64N YRRITRASA   | 3290  | 2919  |
| >SOCS1-Y64N YRRITRASAL  | 26    | >SOCS1-Y64N YRRITRASAL  | 325   | 299   |
| >SOCS1-Y64N YRRITRASALL | 132   | >SOCS1-Y64N YRRITRASALI | 1179  | 1047  |
| >SOCS1-Y64N YRRITRASAL  | 98    | >SOCS1-Y64N YRRITRASAL  | 331   | 233   |
| >SOCS1-Y64N YRRITRASALL | 155   | >SOCS1-Y64N YRRITRASALI | 1474  | 1319  |
| >SOCS1-Y64N YRRITRASAL  | 61    | >SOCS1-Y64N YRRITRASAL  | 201   | 140   |
| >SOCS1-Y64N YRRITRASALL | 331   | >SOCS1-Y64N YRRITRASALI | 1329  | 998   |
| >SOCS1-Y64N YRRITRASA   | 751   | >SOCS1-Y64N YRRITRASA   | 476   | 275   |
| >SOCS1-Y64N YRRITRASAL  | 404   | >SOCS1-Y64N YRRITRASAL  | 221   | 183   |
| >SOCS1-Y64N YRRITRASALL | 128   | >SOCS1-Y64N YRRITRASALI | 166   | 38    |
| >SOCS1-Y64N YRRITRASAL  | 124   | >SOCS1-Y64N YRRITRASAL  | 208   | 84    |
| >SOCS1-Y64N YRRITRASALL | 41    | >SOCS1-Y64N YRRITRASALI | 48    | 7     |

|                        |      |                        |       |       |
|------------------------|------|------------------------|-------|-------|
| >SOCS1-Y64M DYRRITRASA | 131  | >SOCS1-Y64M DNRRITRASA | 18938 | 18807 |
| >SOCS1-Y64M DYRRITRASA | 208  | >SOCS1-Y64M DNRRITRASA | 3656  | 3448  |
| >SOCS1-Y64M DYRRITRASA | 1131 | >SOCS1-Y64M DNRRITRASA | 367   | 764   |
| >SOCS1-Y64M HFRTFRSHAD | 83   | >SOCS1-Y64M HFRTFRSHAD | 20380 | 20297 |
| >SOCS1-Y64M HFRTFRSHAD | 18   | >SOCS1-Y64M HFRTFRSHAD | 155   | 137   |
| >SOCS1-Y64M HFRTFRSHAD | 437  | >SOCS1-Y64M HFRTFRSHAD | 23313 | 22876 |
| >SOCS1-Y64M HFRTFRSHAD | 168  | >SOCS1-Y64M HFRTFRSHAD | 22960 | 22792 |
| >SOCS1-Y64M HFRTFRSHAD | 272  | >SOCS1-Y64M HFRTFRSHAD | 32934 | 32662 |
| >SOCS1-Y64M HADYRRITR  | 104  | >SOCS1-Y64M HADNRRITR  | 119   | 15    |
| >SOCS1-Y64M HADYRRITR  | 37   | >SOCS1-Y64M HADNRRITR  | 68    | 31    |
| >SOCS1-Y64M HADYRRITR  | 66   | >SOCS1-Y64M HADNRRITR  | 153   | 87    |
| >SOCS1-Y64M SHADYRRITR | 296  | >SOCS1-Y64M SHADNRRITR | 760   | 464   |
| >SOCS1-Y64M RSHADYRR   | 191  | >SOCS1-Y64M RSHADNRR   | 193   | 2     |
| >SOCS1-Y64M RSHADYRRI  | 27   | >SOCS1-Y64M RSHADNRR   | 49    | 22    |
| >SOCS1-Y64M RSHADYRRIT | 273  | >SOCS1-Y64M RSHADNRRIT | 377   | 104   |
| >SOCS1-Y64M RSHADYRRIT | 20   | >SOCS1-Y64M RSHADNRRIT | 27    | 7     |
| >SOCS1-Y64M RSHADYRR   | 13   | >SOCS1-Y64M RSHADNRR   | 39    | 26    |
| >SOCS1-Y64M RSHADYRRIT | 12   | >SOCS1-Y64M RSHADNRRIT | 21    | 9     |
| >SOCS1-Y64M RSHADYRRI  | 59   | >SOCS1-Y64M RSHADNRR   | 42    | 17    |
| >SOCS1-Y64M RSHADYRR   | 116  | >SOCS1-Y64M RSHADNRR   | 509   | 393   |
| >SOCS1-Y64M RSHADYRRIT | 289  | >SOCS1-Y64M RSHADNRRIT | 287   | 2     |
| >SOCS1-Y64M RSHADYRRI  | 23   | >SOCS1-Y64M RSHADNRR   | 44    | 21    |
| >SOCS1-Y64M FRSHADYR   | 394  | >SOCS1-Y64M FRSHADNR   | 1420  | 1026  |
| >SOCS1-Y64M FRSHADYRR  | 254  | >SOCS1-Y64M FRSHADNRR  | 1496  | 1242  |
| >SOCS1-Y64M FRSHADYR   | 478  | >SOCS1-Y64M FRSHADNR   | 2580  | 2102  |
| >SOCS1-Y64M TFRSHADY   | 39   | >SOCS1-Y64M TFRSHADN   | 18496 | 18457 |
| >SOCS1-Y64M TFRSHADYR  | 18   | >SOCS1-Y64M TFRSHADNR  | 78    | 60    |
| >SOCS1-Y64M TFRSHADYRR | 30   | >SOCS1-Y64M TFRSHADNRF | 110   | 80    |
| >SOCS1-Y64M TFRSHADYR  | 107  | >SOCS1-Y64M TFRSHADNR  | 365   | 258   |
| >SOCS1-Y64M TFRSHADYR  | 189  | >SOCS1-Y64M TFRSHADNR  | 714   | 525   |
| >SOCS1-Y64M TFRSHADYRR | 128  | >SOCS1-Y64M TFRSHADNRF | 532   | 404   |
| >SOCS1-Y64M TFRSHADY   | 305  | >SOCS1-Y64M TFRSHADN   | 28382 | 28077 |
| >SOCS1-Y64M TFRSHADYRR | 264  | >SOCS1-Y64M TFRSHADNRF | 1287  | 1023  |
| >SOCS1-Y64M TFRSHADYR  | 56   | >SOCS1-Y64M TFRSHADNR  | 336   | 280   |
| >SOCS1-Y64M TFRSHADYRR | 81   | >SOCS1-Y64M TFRSHADNRF | 376   | 295   |
| >SOCS1-Y64M RTFRSHADY  | 123  | >SOCS1-Y64M RTFRSHADN  | 12350 | 12227 |
| >SOCS1-Y64M RTFRSHADYR | 362  | >SOCS1-Y64M RTFRSHADNF | 416   | 54    |
| >SOCS1-Y64M RTFRSHADY  | 123  | >SOCS1-Y64M RTFRSHADN  | 11548 | 11425 |
| >SOCS1-Y64M RTFRSHADYR | 351  | >SOCS1-Y64M RTFRSHADNF | 1398  | 1047  |
| >SOCS1-Y64M RTFRSHADYR | 42   | >SOCS1-Y64M RTFRSHADNF | 106   | 64    |
| >SOCS1-Y64M RTFRSHADY  | 391  | >SOCS1-Y64M RTFRSHADN  | 30207 | 29816 |
| >SOCS1-Y64M RTFRSHADY  | 64   | >SOCS1-Y64M RTFRSHADN  | 20207 | 20143 |
| >SOCS1-Y64M RTFRSHADY  | 15   | >SOCS1-Y64M RTFRSHADN  | 152   | 137   |

|                        |      |                        |       |       |
|------------------------|------|------------------------|-------|-------|
| >SOCS1-Y64M RTFRSHADYR | 43   | >SOCS1-Y64M RTFRSHADNF | 102   | 59    |
| >SOCS1-Y64M RTFRSHADYR | 53   | >SOCS1-Y64M RTFRSHADNF | 41    | 12    |
| >SOCS1-Y64M RTFRSHADY  | 52   | >SOCS1-Y64M RTFRSHADN  | 12437 | 12385 |
| >SOCS1-Y64M RTFRSHADYR | 22   | >SOCS1-Y64M RTFRSHADNF | 69    | 47    |
| >SOCS1-Y64M RTFRSHADYR | 5    | >SOCS1-Y64M RTFRSHADNF | 7     | 2     |
| >SOCS1-Y64M RTFRSHADY  | 72   | >SOCS1-Y64M RTFRSHADN  | 1782  | 1710  |
| >SOCS1-Y64M RTFRSHADYR | 382  | >SOCS1-Y64M RTFRSHADNF | 1033  | 651   |
| >SOCS1-Y64M RTFRSHADYR | 22   | >SOCS1-Y64M RTFRSHADNF | 125   | 103   |
| >SOCS1-Y64M RTFRSHADYR | 11   | >SOCS1-Y64M RTFRSHADNF | 16    | 5     |
| >SOCS1-Y64M RTFRSHADY  | 46   | >SOCS1-Y64M RTFRSHADN  | 21579 | 21533 |
| >SOCS1-Y64M RTFRSHADY  | 67   | >SOCS1-Y64M RTFRSHADN  | 15505 | 15438 |
| >SOCS1-Y64M RTFRSHADY  | 7    | >SOCS1-Y64M RTFRSHADN  | 6158  | 6151  |
| >SOCS1-Y64M RTFRSHADY  | 3    | >SOCS1-Y64M RTFRSHADN  | 377   | 374   |
| >SOCS1-Y64M RTFRSHADYR | 327  | >SOCS1-Y64M RTFRSHADNF | 741   | 414   |
| >SOCS1-Y64M RTFRSHADY  | 46   | >SOCS1-Y64M RTFRSHADN  | 1878  | 1832  |
| >SOCS1-Y64M RTFRSHADY  | 49   | >SOCS1-Y64M RTFRSHADN  | 13450 | 13401 |
| >SOCS1-Y64M RTFRSHADY  | 7    | >SOCS1-Y64M RTFRSHADN  | 1529  | 1522  |
| >SOCS1-Y64M RTFRSHADY  | 497  | >SOCS1-Y64M RTFRSHADN  | 34726 | 34229 |
| >SOCS1-Y64M RTFRSHADYR | 223  | >SOCS1-Y64M RTFRSHADNF | 1002  | 779   |
| >SOCS1-Y64M RTFRSHADYR | 184  | >SOCS1-Y64M RTFRSHADNF | 193   | 9     |
| >SOCS1-Y64M RTFRSHADYR | 181  | >SOCS1-Y64M RTFRSHADNF | 464   | 283   |
| >SOCS1-Y64M RTFRSHADYR | 42   | >SOCS1-Y64M RTFRSHADNF | 143   | 101   |
| >SOCS1-Y64M RTFRSHADYR | 51   | >SOCS1-Y64M RTFRSHADNF | 129   | 78    |
| >SOCS1-Y64M FRTFRSHADY | 200  | >SOCS1-Y64M FRTFRSHADN | 682   | 482   |
| >SOCS1-Y64M FRTFRSHADY | 150  | >SOCS1-Y64M FRTFRSHADN | 12337 | 12187 |
| >SOCS1-Y64M FRTFRSHADY | 132  | >SOCS1-Y64M FRTFRSHADN | 6432  | 6300  |
| >SOCS1-Y64M FRTFRSHADY | 308  | >SOCS1-Y64M FRTFRSHADN | 232   | 76    |
| >SRC-D407H·ADFGLARLI   | 77   | >SRC-D407H·AHFGLARLI   | 187   | 110   |
| >SRC-D407H·ADFGLARL    | 8718 | >SRC-D407H·AHFGLARL    | 57    | 8661  |
| >SRC-D407H·ADFGLARL    | 306  | >SRC-D407H·AHFGLARL    | 12704 | 12398 |
| >SRC-D407H·ADFGLARLI   | 246  | >SRC-D407H·AHFGLARLI   | 17024 | 16778 |
| >SRC-D407H·ADFGLARLI   | 125  | >SRC-D407H·AHFGLARLI   | 2669  | 2544  |
| >SRC-D407H·ADFGLARLI   | 38   | >SRC-D407H·AHFGLARLI   | 9073  | 9035  |
| >SRC-D407H·VADFGLARL   | 1880 | >SRC-D407H·VAHFGLARL   | 331   | 1549  |
| >SRC-D407H·VADFGLAR    | 2577 | >SRC-D407H·VAHFGLAR    | 155   | 2422  |
| >SRC-D407H·VADFGLAR    | 1935 | >SRC-D407H·VAHFGLAR    | 387   | 1548  |
| >SRC-D407H·VADFGLARL   | 70   | >SRC-D407H·VAHFGLARL   | 16    | 54    |
| >SRC-D407H·VADFGLARLI  | 375  | >SRC-D407H·VAHFGLARLI  | 257   | 118   |
| >SRC-D407H·KVADFGLA    | 204  | >SRC-D407H·KVAHFGLA    | 517   | 313   |
| >SRC-D407H·KVADFGLARL  | 48   | >SRC-D407H·KVAHFGLARL  | 291   | 243   |
| >SRC-D407H·KVADFGLARL  | 129  | >SRC-D407H·KVAHFGLARL  | 383   | 254   |
| >SRC-D407H·KVADFGLA    | 88   | >SRC-D407H·KVAHFGLA    | 127   | 39    |
| >SRC-D407H·KVADFGLARL  | 104  | >SRC-D407H·KVAHFGLARL  | 229   | 125   |

|                       |      |                       |      |      |
|-----------------------|------|-----------------------|------|------|
| >SRC-D407H·KVADFGLARL | 192  | >SRC-D407H·KVAHFGLARL | 352  | 160  |
| >SRC-D407H·KVADFGLA   | 38   | >SRC-D407H·KVAHFGLA   | 134  | 96   |
| >SRC-D407H·KVADFGLARL | 297  | >SRC-D407H·KVAHFGLARL | 1028 | 731  |
| >SRC-D407H·KVADFGLARL | 119  | >SRC-D407H·KVAHFGLARL | 464  | 345  |
| >SRC-D407H·KVADFGLARL | 144  | >SRC-D407H·KVAHFGLARL | 911  | 767  |
| >SRC-D407H·KVADFGLARL | 46   | >SRC-D407H·KVAHFGLARL | 778  | 732  |
| >SRC-D407H·KVADFGLAR  | 411  | >SRC-D407H·KVAHFGLAR  | 147  | 264  |
| >SRC-D407H·KVADFGLAR  | 30   | >SRC-D407H·KVAHFGLAR  | 57   | 27   |
| >SRC-D407H·KVADFGLA   | 868  | >SRC-D407H·KVAHFGLA   | 291  | 577  |
| >SRC-D407H·KVADFGLARL | 590  | >SRC-D407H·KVAHFGLARL | 307  | 283  |
| >SRC-D407H·KVADFGLAR  | 36   | >SRC-D407H·KVAHFGLAR  | 27   | 9    |
| >SRC-D407H·KVADFGLARL | 467  | >SRC-D407H·KVAHFGLARL | 352  | 115  |
| >SRC-D407H·KVADFGLARL | 82   | >SRC-D407H·KVAHFGLARL | 66   | 16   |
| >SRC-D407H·KVADFGLAR  | 150  | >SRC-D407H·KVAHFGLAR  | 351  | 201  |
| >SRC-D407H·KVADFGLARL | 57   | >SRC-D407H·KVAHFGLARL | 67   | 10   |
| >SRC-D407H·KVADFGLAR  | 22   | >SRC-D407H·KVAHFGLAR  | 36   | 14   |
| >SRC-D407H·KVADFGLARL | 106  | >SRC-D407H·KVAHFGLARL | 143  | 37   |
| >SRC-D407H·CKVADFGLAF | 590  | >SRC-D407H·CKVAHFGLAF | 387  | 203  |
| >SRC-D407H·CKVADFGLAF | 369  | >SRC-D407H·CKVAHFGLAF | 207  | 162  |
| >SRC-D407H·VCKVADFGLA | 837  | >SRC-D407H·VCKVAHFGLA | 261  | 576  |
| >SRC-D407H·LVCKVADFGL | 466  | >SRC-D407H·LVCKVAHFGL | 842  | 376  |
| >SRC-D407H·LVCKVADFGL | 1269 | >SRC-D407H·LVCKVAHFGL | 390  | 879  |
| >SRC-D407H·LVCKVADFGL | 2161 | >SRC-D407H·LVCKVAHFGL | 445  | 1716 |
| >SRC-D407H·LVCKVADF   | 1039 | >SRC-D407H·LVCKVAHF   | 239  | 800  |
| >SRC-D407H·LVCKVADF   | 376  | >SRC-D407H·LVCKVAHF   | 77   | 299  |
| >SRC-D407H·LVCKVADF   | 1061 | >SRC-D407H·LVCKVAHF   | 304  | 757  |
| >SRC-D407H·NLVCKVADFC | 347  | >SRC-D407H·NLVCKVAHFC | 322  | 25   |
| >SRC-D407H·NLVCKVADFC | 35   | >SRC-D407H·NLVCKVAHFC | 26   | 9    |
| >SRC-D407H·NLVCKVADFC | 106  | >SRC-D407H·NLVCKVAHFC | 62   | 44   |
| >SRC-D407H·NLVCKVADFC | 134  | >SRC-D407H·NLVCKVAHFC | 107  | 27   |
| >SRC-D407H·NLVCKVADFC | 107  | >SRC-D407H·NLVCKVAHFC | 35   | 72   |
| >SRC-D407H·NLVCKVADFC | 18   | >SRC-D407H·NLVCKVAHFC | 19   | 1    |
| >SRC-D407H·NLVCKVADFC | 467  | >SRC-D407H·NLVCKVAHFC | 475  | 8    |
| >SRC-D407H·NLVCKVADFC | 225  | >SRC-D407H·NLVCKVAHFC | 138  | 87   |
| >SRC-D407H·NLVCKVADFC | 131  | >SRC-D407H·NLVCKVAHFC | 75   | 56   |
| >SRC-D407H·NLVCKVADF  | 1317 | >SRC-D407H·NLVCKVAHF  | 166  | 1151 |
| >SRC-D407H·NLVCKVADFC | 369  | >SRC-D407H·NLVCKVAHFC | 282  | 87   |
| >SRC-D407H·NLVCKVADFC | 1120 | >SRC-D407H·NLVCKVAHFC | 267  | 853  |
| >SRC-D407H·NLVCKVADF  | 1079 | >SRC-D407H·NLVCKVAHF  | 455  | 624  |
| >SRC-D407H·NLVCKVADF  | 652  | >SRC-D407H·NLVCKVAHF  | 76   | 576  |
| >SRC-D407H·NLVCKVADF  | 692  | >SRC-D407H·NLVCKVAHF  | 384  | 308  |
| >SRC-D407H·GENLVCKVAH | 155  | >SRC-D407H·GENLVCKVAH | 140  | 15   |
| >SRC-D407H·GENLVCKVAH | 215  | >SRC-D407H·GENLVCKVAH | 299  | 84   |

|                       |      |                       |      |      |
|-----------------------|------|-----------------------|------|------|
| >SRC-D407H·GENLVCKVAI | 173  | >SRC-D407H·GENLVCKVAI | 157  | 16   |
| >SRGAP3-K6:KTIHHHEA   | 490  | >SRGAP3-K6:QTIHHHEA   | 1172 | 682  |
| >SRGAP3-K6:KTIHHHEAI  | 331  | >SRGAP3-K6:QTIHHHEAI  | 1006 | 675  |
| >SRGAP3-K6:KTIHHHEAIF | 120  | >SRGAP3-K6:QTIHHHEAIF | 20   | 100  |
| >SRGAP3-K6:KTIHHHEA   | 83   | >SRGAP3-K6:QTIHHHEA   | 3833 | 3750 |
| >SRGAP3-K6:KTIHHHEAI  | 323  | >SRGAP3-K6:QTIHHHEAI  | 6205 | 5882 |
| >SRGAP3-K6:KTIHHHEAI  | 10   | >SRGAP3-K6:QTIHHHEAI  | 38   | 28   |
| >SRGAP3-K6:KTIHHHEAIF | 21   | >SRGAP3-K6:QTIHHHEAIF | 190  | 169  |
| >SRGAP3-K6:KTIHHHEA   | 142  | >SRGAP3-K6:QTIHHHEA   | 9    | 133  |
| >SRGAP3-K6:KTIHHHEAI  | 504  | >SRGAP3-K6:QTIHHHEAI  | 92   | 412  |
| >SRGAP3-K6:KTIHHHEA   | 2336 | >SRGAP3-K6:QTIHHHEA   | 134  | 2202 |
| >SRGAP3-K6:KTIHHHEAI  | 1714 | >SRGAP3-K6:QTIHHHEAI  | 96   | 1618 |
| >SRGAP3-K6:KTIHHHEAIF | 120  | >SRGAP3-K6:QTIHHHEAIF | 294  | 174  |
| >SRGAP3-K6:KTIHHHEAI  | 16   | >SRGAP3-K6:QTIHHHEAI  | 148  | 132  |
| >SRGAP3-K6:KTIHHHEAIF | 3    | >SRGAP3-K6:QTIHHHEAIF | 5    | 2    |
| >SRGAP3-K6:KTIHHHEAIF | 89   | >SRGAP3-K6:QTIHHHEAIF | 2237 | 2148 |
| >SRGAP3-K6:KTIHHHEAI  | 112  | >SRGAP3-K6:QTIHHHEAI  | 5409 | 5297 |
| >SRGAP3-K6:KTIHHHEAIF | 17   | >SRGAP3-K6:QTIHHHEAIF | 169  | 152  |
| >SRGAP3-K6:KTIHHHEAIF | 358  | >SRGAP3-K6:QTIHHHEAIF | 603  | 245  |
| >SRGAP3-K6:KTIHHHEAIF | 45   | >SRGAP3-K6:QTIHHHEAIF | 129  | 84   |
| >SRGAP3-K6:IKTIHHHEAI | 8837 | >SRGAP3-K6:IQTIHHHEAI | 72   | 8765 |
| >SRGAP3-K6:IKTIHHHEAI | 227  | >SRGAP3-K6:IQTIHHHEAI | 226  | 1    |
| >SRGAP3-K6:VIKTIHHHEA | 345  | >SRGAP3-K6:VIQTIHHHEA | 1254 | 909  |
| >SRGAP3-K6:VIKTIHHHEA | 379  | >SRGAP3-K6:VIQTIHHHEA | 112  | 267  |
| >SRGAP3-K6:EVIKTIIH   | 197  | >SRGAP3-K6:EVIQTIIH   | 500  | 303  |
| >SRGAP3-K6:EVIKTIII   | 45   | >SRGAP3-K6:EVIQTIII   | 23   | 22   |
| >SRGAP3-K6:EVIKTIIH   | 25   | >SRGAP3-K6:EVIQTIIH   | 16   | 9    |
| >SRGAP3-K6:EVIKTIIHH  | 9    | >SRGAP3-K6:EVIQTIIHH  | 6    | 3    |
| >SRGAP3-K6:EVIKTIIHHE | 40   | >SRGAP3-K6:EVIQTIIHHE | 26   | 14   |
| >SRGAP3-K6:EVIKTIII   | 851  | >SRGAP3-K6:EVIQTIII   | 355  | 496  |
| >SRGAP3-K6:EVIKTIIH   | 1055 | >SRGAP3-K6:EVIQTIIH   | 256  | 799  |
| >SRGAP3-K6:EVIKTIIHH  | 990  | >SRGAP3-K6:EVIQTIIHH  | 282  | 708  |
| >SRGAP3-K6:EVIKTIII   | 40   | >SRGAP3-K6:EVIQTIII   | 44   | 4    |
| >SRGAP3-K6:EVIKTIII   | 73   | >SRGAP3-K6:EVIQTIII   | 44   | 29   |
| >SRGAP3-K6:NEVIKTII   | 83   | >SRGAP3-K6:NEVIQTII   | 57   | 26   |
| >SRGAP3-K6:NEVIKTIII  | 10   | >SRGAP3-K6:NEVIQTIII  | 9    | 1    |
| >SRGAP3-K6:NEVIKTII   | 431  | >SRGAP3-K6:NEVIQTII   | 169  | 262  |
| >SRGAP3-K6:NEVIKTIII  | 21   | >SRGAP3-K6:NEVIQTIII  | 12   | 9    |
| >SRGAP3-K6:HINEVIKTI  | 835  | >SRGAP3-K6:HINEVIQTI  | 155  | 680  |
| >SRGAP3-K6:HINEVIKTIH | 961  | >SRGAP3-K6:HINEVIQTIH | 498  | 463  |
| >SRGAP3-K6:HINEVIKTI  | 50   | >SRGAP3-K6:HINEVIQTI  | 24   | 26   |
| >SRGAP3-K6:HINEVIKTIH | 171  | >SRGAP3-K6:HINEVIQTIH | 143  | 28   |
| >SRGAP3-K6:HINEVIKTI  | 1020 | >SRGAP3-K6:HINEVIQTI  | 122  | 898  |



|                        |      |                        |       |       |
|------------------------|------|------------------------|-------|-------|
| >SRGAP3-K6:HINEVIKTI   | 21   | >SRGAP3-K6:HINEVIQTI   | 6     | 15    |
| >SRGAP3-K6:HINEVIKTII  | 582  | >SRGAP3-K6:HINEVIQTII  | 291   | 291   |
| >SRGAP3-K6:HINEVIKTIII | 260  | >SRGAP3-K6:HINEVIQTIII | 162   | 98    |
| >SRGAP3-K6:HINEVIKTI   | 554  | >SRGAP3-K6:HINEVIQTI   | 63    | 491   |
| >SRGAP3-K6:HINEVIKTI   | 688  | >SRGAP3-K6:HINEVIQTI   | 91    | 597   |
| >SRGAP3-K6:HINEVIKTI   | 828  | >SRGAP3-K6:HINEVIQTI   | 66    | 762   |
| >SRGAP3-K6:HINEVIKTI   | 66   | >SRGAP3-K6:HINEVIQTI   | 44    | 22    |
| >SRGAP3-K6:HINEVIKTII  | 524  | >SRGAP3-K6:HINEVIQTII  | 257   | 267   |
| >SRGAP3-K6:HINEVIKTIII | 226  | >SRGAP3-K6:HINEVIQTIII | 186   | 40    |
| >SRGAP3-K6:HINEVIKTI   | 337  | >SRGAP3-K6:HINEVIQTI   | 66    | 271   |
| >SRGAP3-K6:HINEVIKTIII | 432  | >SRGAP3-K6:HINEVIQTIII | 235   | 197   |
| >SRGAP3-K6:HINEVIKTI   | 650  | >SRGAP3-K6:HINEVIQTI   | 117   | 533   |
| >SRGAP3-K6:HINEVIKTIII | 792  | >SRGAP3-K6:HINEVIQTIII | 357   | 435   |
| >SRGAP3-K6:HINEVIKTI   | 375  | >SRGAP3-K6:HINEVIQTI   | 244   | 131   |
| >SRGAP3-K6:AHINEVIKTI  | 506  | >SRGAP3-K6:AHINEVIQTI  | 356   | 150   |
| >SRGAP3-K6:AHINEVIKTI  | 1351 | >SRGAP3-K6:AHINEVIQTI  | 436   | 915   |
| >SRGAP3-K6:QAHINEVIKTI | 587  | >SRGAP3-K6:QAHINEVIQT  | 298   | 289   |
| >SRGAP3-K6:QAHINEVIK   | 247  | >SRGAP3-K6:QAHINEVIQ   | 10209 | 9962  |
| >SRGAP3-K6:QAHINEVIK   | 324  | >SRGAP3-K6:QAHINEVIQ   | 11328 | 11004 |
| >SRGAP3-K6:QAHINEVIKTI | 241  | >SRGAP3-K6:QAHINEVIQT  | 267   | 26    |
| >SRGAP3-L6:LPRVVIVV    | 58   | >SRGAP3-L6:IPRVVIVV    | 49    | 9     |
| >SRGAP3-L6:LPRVVIVVM   | 21   | >SRGAP3-L6:IPRVVIVVM   | 19    | 2     |
| >SRGAP3-L6:LPRVVIVVM   | 42   | >SRGAP3-L6:IPRVVIVVM   | 85    | 43    |
| >SRGAP3-L6:LPRVVIVVMF  | 51   | >SRGAP3-L6:IPRVVIVVMR  | 115   | 64    |
| >SRGAP3-L6:LPRVVIVV    | 132  | >SRGAP3-L6:IPRVVIVV    | 228   | 96    |
| >SRGAP3-L6:LPRVVIVVM   | 488  | >SRGAP3-L6:IPRVVIVVM   | 1006  | 518   |
| >SRGAP3-L6:LPRVVIVVMF  | 137  | >SRGAP3-L6:IPRVVIVVMR  | 264   | 127   |
| >SRGAP3-L6:LPRVVIVV    | 16   | >SRGAP3-L6:IPRVVIVV    | 44    | 28    |
| >SRGAP3-L6:LPRVVIVVM   | 326  | >SRGAP3-L6:IPRVVIVVM   | 985   | 659   |
| >SRGAP3-L6:LPRVVIVVMF  | 429  | >SRGAP3-L6:IPRVVIVVMR  | 313   | 116   |
| >SRGAP3-L6:LPRVVIVVMF  | 181  | >SRGAP3-L6:IPRVVIVVMR  | 163   | 18    |
| >SRGAP3-L6:LPRVVIVVMF  | 203  | >SRGAP3-L6:IPRVVIVVMR  | 359   | 156   |
| >SRGAP3-L6:TLPRVVIV    | 211  | >SRGAP3-L6:TIPRVVIV    | 2499  | 2288  |
| >SRGAP3-L6:TLPRVVIV    | 120  | >SRGAP3-L6:TIPRVVIV    | 1951  | 1831  |
| >SRGAP3-L6:TLPRVVIV    | 149  | >SRGAP3-L6:TIPRVVIV    | 2150  | 2001  |
| >SRGAP3-L6:TLPRVVIV    | 265  | >SRGAP3-L6:TIPRVVIV    | 2815  | 2550  |
| >SRGAP3-L6:TLPRVVIV    | 21   | >SRGAP3-L6:TIPRVVIV    | 165   | 144   |
| >SRGAP3-L6:TLPRVVIV    | 26   | >SRGAP3-L6:TIPRVVIV    | 236   | 210   |
| >SRGAP3-L6:TLPRVVIV    | 265  | >SRGAP3-L6:TIPRVVIV    | 508   | 243   |
| >SRGAP3-L6:TLPRVVIV    | 285  | >SRGAP3-L6:TIPRVVIV    | 460   | 175   |
| >SRGAP3-L6:TLPRVVIV    | 10   | >SRGAP3-L6:TIPRVVIV    | 201   | 191   |
| >SRGAP3-L6:TLPRVVIV    | 4    | >SRGAP3-L6:TIPRVVIV    | 32    | 28    |
| >SRGAP3-L6:TLPRVVIVVM  | 162  | >SRGAP3-L6:TIPRVVIVVM  | 2934  | 2772  |

|                        |      |                        |      |      |
|------------------------|------|------------------------|------|------|
| >SRGAP3-L62TLPRVVIV    | 37   | >SRGAP3-L62TIPRVVIV    | 4185 | 4148 |
| >SRGAP3-L62TLPRVVIVV   | 21   | >SRGAP3-L62TIPRVVIVV   | 2735 | 2714 |
| >SRGAP3-L62TLPRVVIV    | 12   | >SRGAP3-L62TIPRVVIV    | 239  | 227  |
| >SRGAP3-L62TLPRVVIVV   | 9    | >SRGAP3-L62TIPRVVIVV   | 78   | 69   |
| >SRGAP3-L62TLPRVVIV    | 121  | >SRGAP3-L62TIPRVVIV    | 5260 | 5139 |
| >SRGAP3-L62TLPRVVIVV   | 35   | >SRGAP3-L62TIPRVVIVV   | 3230 | 3195 |
| >SRGAP3-L62TLPRVVIV    | 4    | >SRGAP3-L62TIPRVVIV    | 56   | 52   |
| >SRGAP3-L62TLPRVVIVV   | 4    | >SRGAP3-L62TIPRVVIVV   | 63   | 59   |
| >SRGAP3-L62TLPRVVIVVM  | 477  | >SRGAP3-L62TIPRVVIVVM  | 8959 | 8482 |
| >SRGAP3-L62TLPRVVIVVM  | 70   | >SRGAP3-L62TIPRVVIVVM  | 28   | 42   |
| >SRGAP3-L62TLPRVVIV    | 316  | >SRGAP3-L62TIPRVVIV    | 62   | 254  |
| >SRGAP3-L62TLPRVVIVV   | 180  | >SRGAP3-L62TIPRVVIVV   | 39   | 141  |
| >SRGAP3-L62TLPRVVIVVM  | 88   | >SRGAP3-L62TIPRVVIVVM  | 166  | 78   |
| >SRGAP3-L62VTLPRVVIV   | 602  | >SRGAP3-L62VTIPRVVIV   | 70   | 532  |
| >SRGAP3-L62VTLPRVVIV   | 75   | >SRGAP3-L62VTIPRVVIV   | 59   | 16   |
| >SRGAP3-L62VTLPRVVIVV  | 268  | >SRGAP3-L62VTIPRVVIVV  | 345  | 77   |
| >SRGAP3-L62VTLPRVVIV   | 48   | >SRGAP3-L62VTIPRVVIV   | 219  | 171  |
| >SRGAP3-L62VTLPRVVIVV  | 11   | >SRGAP3-L62VTIPRVVIVV  | 39   | 28   |
| >SRGAP3-L62VTLPRVVIV   | 330  | >SRGAP3-L62VTIPRVVIV   | 804  | 474  |
| >SRGAP3-L62VTLPRVVIVV  | 210  | >SRGAP3-L62VTIPRVVIVV  | 523  | 313  |
| >SRGAP3-L62VTLPRVVIV   | 63   | >SRGAP3-L62VTIPRVVIV   | 618  | 555  |
| >SRGAP3-L62VTLPRVVIVV  | 35   | >SRGAP3-L62VTIPRVVIVV  | 256  | 221  |
| >SRGAP3-L62VTLPRVVIVV  | 356  | >SRGAP3-L62VTIPRVVIVV  | 6536 | 6180 |
| >SRGAP3-L62VTLPRVVIV   | 39   | >SRGAP3-L62VTIPRVVIV   | 70   | 31   |
| >SRGAP3-L62VTLPRVVIVV  | 46   | >SRGAP3-L62VTIPRVVIVV  | 81   | 35   |
| >SRGAP3-L62VTLPRVVIVVI | 947  | >SRGAP3-L62VTIPRVVIVVI | 43   | 904  |
| >SRGAP3-L62VTLPRVVI    | 207  | >SRGAP3-L62VTIPRVVI    | 355  | 148  |
| >SRGAP3-L62VTLPRVVI    | 2641 | >SRGAP3-L62VTIPRVVI    | 216  | 2425 |
| >SRGAP3-L62VTLPRVVIV   | 1141 | >SRGAP3-L62VTIPRVVIV   | 134  | 1007 |
| >SRGAP3-L62VTLPRVVIVV  | 1646 | >SRGAP3-L62VTIPRVVIVV  | 251  | 1395 |
| >SRGAP3-L62VTLPRVVIVVI | 1694 | >SRGAP3-L62VTIPRVVIVVI | 276  | 1418 |
| >SRGAP3-L62VTLPRVVIVVI | 494  | >SRGAP3-L62VTIPRVVIVVI | 561  | 67   |
| >SRGAP3-L62VTLPRVVI    | 31   | >SRGAP3-L62VTIPRVVI    | 28   | 3    |
| >SRGAP3-L62VTLPRVVIV   | 113  | >SRGAP3-L62VTIPRVVIV   | 105  | 8    |
| >SRGAP3-L62VTLPRVVIVV  | 156  | >SRGAP3-L62VTIPRVVIVV  | 143  | 13   |
| >SRGAP3-L62VTLPRVVIVVI | 10   | >SRGAP3-L62VTIPRVVIVVI | 9    | 1    |
| >SRGAP3-L62VTLPRVVIVVI | 287  | >SRGAP3-L62VTIPRVVIVVI | 133  | 154  |
| >SRGAP3-L62VTLPRVVIVVI | 741  | >SRGAP3-L62VTIPRVVIVVI | 287  | 454  |
| >SRGAP3-L62VTLPRVVIVV  | 591  | >SRGAP3-L62VTIPRVVIVV  | 310  | 281  |
| >SRGAP3-L62VTLPRVVIVVI | 29   | >SRGAP3-L62VTIPRVVIVVI | 62   | 33   |
| >SRGAP3-L62VTLPRVVI    | 23   | >SRGAP3-L62VTIPRVVI    | 29   | 6    |
| >SRGAP3-L62LVTLPRVVIV  | 640  | >SRGAP3-L62LVTIPRVVIVV | 290  | 350  |
| >SRGAP3-L62LVTLPRVV    | 249  | >SRGAP3-L62LVTIPRVV    | 116  | 133  |

|                        |     |                        |     |     |
|------------------------|-----|------------------------|-----|-----|
| >SRGAP3-L62LVTLPRVVIV  | 39  | >SRGAP3-L62LVTIPRVVIV  | 23  | 16  |
| >SRGAP3-L62LVTLPRVVIV\ | 39  | >SRGAP3-L62LVTIPRVVIVV | 23  | 16  |
| >SRGAP3-L62LVTLPRVV    | 566 | >SRGAP3-L62LVTIPRVV    | 406 | 160 |
| >SRGAP3-L62LVTLPRVVI   | 363 | >SRGAP3-L62LVTIPRVVI   | 373 | 10  |
| >SRGAP3-L62LVTLPRVVIV  | 111 | >SRGAP3-L62LVTIPRVVIVV | 112 | 1   |
| >SRGAP3-L62LVTLPRVVI   | 486 | >SRGAP3-L62LVTIPRVVI   | 260 | 226 |
| >SRGAP3-L62ILVTLPRV    | 41  | >SRGAP3-L62ILVTIPRV    | 33  | 8   |
| >SRGAP3-L62ILVTLPRVVIV | 160 | >SRGAP3-L62ILVTIPRVVIV | 127 | 33  |
| >SRGAP3-L62ILVTLPRV    | 56  | >SRGAP3-L62ILVTIPRV    | 32  | 24  |
| >SRGAP3-L62ILVTLPRVV   | 762 | >SRGAP3-L62ILVTIPRVV   | 286 | 476 |
| >SRGAP3-L62ILVTLPRVVI  | 158 | >SRGAP3-L62ILVTIPRVVI  | 163 | 5   |
| >SRGAP3-L62ILVTLPRVVIV | 114 | >SRGAP3-L62ILVTIPRVVIV | 58  | 56  |
| >SRGAP3-L62ILVTLPRV    | 12  | >SRGAP3-L62ILVTIPRV    | 9   | 3   |
| >SRGAP3-L62ILVTLPRVV   | 34  | >SRGAP3-L62ILVTIPRVV   | 19  | 15  |
| >SRGAP3-L62ILVTLPRVVI  | 231 | >SRGAP3-L62ILVTIPRVVI  | 256 | 25  |
| >SRGAP3-L62ILVTLPRVVIV | 16  | >SRGAP3-L62ILVTIPRVVIV | 11  | 5   |
| >SRGAP3-L62ILVTLPRV    | 76  | >SRGAP3-L62ILVTIPRV    | 74  | 2   |
| >SRGAP3-L62ILVTLPRVVIV | 244 | >SRGAP3-L62ILVTIPRVVIV | 208 | 36  |
| >SRGAP3-L62ILVTLPRV    | 4   | >SRGAP3-L62ILVTIPRV    | 3   | 1   |
| >SRGAP3-L62ILVTLPRVV   | 9   | >SRGAP3-L62ILVTIPRVV   | 7   | 2   |
| >SRGAP3-L62ILVTLPRVVI  | 193 | >SRGAP3-L62ILVTIPRVVI  | 126 | 67  |
| >SRGAP3-L62ILVTLPRVVIV | 10  | >SRGAP3-L62ILVTIPRVVIV | 9   | 1   |
| >SRGAP3-L62ILVTLPRV    | 28  | >SRGAP3-L62ILVTIPRV    | 26  | 2   |
| >SRGAP3-L62ILVTLPRVV   | 104 | >SRGAP3-L62ILVTIPRVV   | 81  | 23  |
| >SRGAP3-L62ILVTLPRVVIV | 25  | >SRGAP3-L62ILVTIPRVVIV | 22  | 3   |
| >SRGAP3-L62ILVTLPRV    | 14  | >SRGAP3-L62ILVTIPRV    | 14  | 0   |
| >SRGAP3-L62ILVTLPRVV   | 157 | >SRGAP3-L62ILVTIPRVV   | 161 | 4   |
| >SRGAP3-L62ILVTLPRVVIV | 33  | >SRGAP3-L62ILVTIPRVVIV | 34  | 1   |
| >SRGAP3-L62ILVTLPRV    | 17  | >SRGAP3-L62ILVTIPRV    | 7   | 10  |
| >SRGAP3-L62ILVTLPRVV   | 436 | >SRGAP3-L62ILVTIPRVV   | 65  | 371 |
| >SRGAP3-L62ILVTLPRVVIV | 78  | >SRGAP3-L62ILVTIPRVVIV | 27  | 51  |
| >SRGAP3-L62ILVTLPRV    | 3   | >SRGAP3-L62ILVTIPRV    | 3   | 0   |
| >SRGAP3-L62ILVTLPRVV   | 19  | >SRGAP3-L62ILVTIPRVV   | 15  | 4   |
| >SRGAP3-L62ILVTLPRVVI  | 232 | >SRGAP3-L62ILVTIPRVVI  | 151 | 81  |
| >SRGAP3-L62ILVTLPRVVIV | 6   | >SRGAP3-L62ILVTIPRVVIV | 6   | 0   |
| >SRGAP3-L62ILVTLPRVVI  | 484 | >SRGAP3-L62ILVTIPRVVI  | 531 | 47  |
| >SRGAP3-L62QILVTLPRV   | 287 | >SRGAP3-L62QILVTIPRV   | 284 | 3   |
| >SRGAP3-L62QILVTLPRVV  | 228 | >SRGAP3-L62QILVTIPRVV  | 214 | 14  |
| >SRGAP3-L62QILVTLPRV   | 17  | >SRGAP3-L62QILVTIPRV   | 25  | 8   |
| >SRGAP3-L62QILVTLPRVV  | 248 | >SRGAP3-L62QILVTIPRVV  | 434 | 186 |
| >SRGAP3-L62QILVTLPRV   | 34  | >SRGAP3-L62QILVTIPRV   | 15  | 19  |
| >SRGAP3-L62QILVTLPRVV  | 169 | >SRGAP3-L62QILVTIPRVV  | 94  | 75  |
| >SRGAP3-L62QILVTLPRV   | 364 | >SRGAP3-L62QILVTIPRV   | 377 | 13  |

|                         |      |                         |      |      |
|-------------------------|------|-------------------------|------|------|
| >SRGAP3-L62 QILVTLPRV   | 42   | >SRGAP3-L62 QILVTIPRV   | 27   | 15   |
| >SRGAP3-L62 QILVTLPRV   | 24   | >SRGAP3-L62 QILVTIPRV   | 15   | 9    |
| >SRGAP3-L62 QILVTLPRVV  | 433  | >SRGAP3-L62 QILVTIPRVV  | 259  | 174  |
| >SRGAP3-L62 QILVTLPRV   | 17   | >SRGAP3-L62 QILVTIPRV   | 12   | 5    |
| >SRGAP3-L62 QILVTLPRVV  | 500  | >SRGAP3-L62 QILVTIPRVV  | 328  | 172  |
| >SRGAP3-L62 QILVTLPR    | 518  | >SRGAP3-L62 QILVTIPR    | 491  | 27   |
| >SRGAP3-L62 QILVTLPR    | 136  | >SRGAP3-L62 QILVTIPR    | 80   | 56   |
| >SRGAP3-L62 QILVTLPR    | 629  | >SRGAP3-L62 QILVTIPR    | 331  | 298  |
| >SRGAP3-L62 QILVTLPR    | 342  | >SRGAP3-L62 QILVTIPR    | 185  | 157  |
| >SRGAP3-L62 QILVTLPRV   | 12   | >SRGAP3-L62 QILVTIPRV   | 14   | 2    |
| >SRGAP3-L62 QILVTLPRVV  | 286  | >SRGAP3-L62 QILVTIPRVV  | 280  | 6    |
| >SRGAP3-L62 QILVTLPR    | 60   | >SRGAP3-L62 QILVTIPR    | 50   | 10   |
| >SRGAP3-L62 QQILVTLPRV  | 385  | >SRGAP3-L62 QQILVTIPRV  | 484  | 99   |
| >SRGAP3-L62 QQILVTLPRV  | 66   | >SRGAP3-L62 QQILVTIPRV  | 80   | 14   |
| >SRGAP3-L62 QQILVTLPRV' | 171  | >SRGAP3-L62 QQILVTIPRV\ | 153  | 18   |
| >SRGAP3-L62 QQILVTLPR   | 245  | >SRGAP3-L62 QQILVTIPR   | 342  | 97   |
| >SRGAP3-L62 QQILVTLPR   | 187  | >SRGAP3-L62 QQILVTIPR   | 81   | 106  |
| >SRGAP3-L62 QQILVTLPR   | 496  | >SRGAP3-L62 QQILVTIPR   | 297  | 199  |
| >SRGAP3-L62 QQILVTLPRV' | 380  | >SRGAP3-L62 QQILVTIPRV\ | 425  | 45   |
| >SRGAP3-L62 QQILVTLPR   | 51   | >SRGAP3-L62 QQILVTIPR   | 67   | 16   |
| >SRGAP3-L62 IQQILVTLPRV | 301  | >SRGAP3-L62 IQQILVTIPRV | 384  | 83   |
| >SRGAP3-L62 IQQILVTLPRV | 378  | >SRGAP3-L62 IQQILVTIPRV | 450  | 72   |
| >SRGAP3-L62 IQQILVTL    | 106  | >SRGAP3-L62 IQQILVTI    | 119  | 13   |
| >SRGAP3-L62 IQQILVTLPRV | 26   | >SRGAP3-L62 IQQILVTIPRV | 38   | 12   |
| >SRGAP3-L62 IQQILVTLPRV | 194  | >SRGAP3-L62 IQQILVTIPRV | 155  | 39   |
| >SRGAP3-L62 IQQILVTLPRV | 634  | >SRGAP3-L62 IQQILVTIPRV | 476  | 158  |
| >SRGAP3-L62 IQQILVTLPR  | 63   | >SRGAP3-L62 IQQILVTIPR  | 51   | 12   |
| >SRGAP3-L62 IQQILVTL    | 1167 | >SRGAP3-L62 IQQILVTI    | 393  | 774  |
| >SRGAP3-L62 IQQILVTLPR  | 137  | >SRGAP3-L62 IQQILVTIPR  | 132  | 5    |
| >SRGAP3-L62 IQQILVTLPR  | 754  | >SRGAP3-L62 IQQILVTIPR  | 451  | 303  |
| >SRGAP3-L62 IQQILVTL    | 447  | >SRGAP3-L62 IQQILVTI    | 1227 | 780  |
| >SRGAP3-L62 IQQILVTL    | 106  | >SRGAP3-L62 IQQILVTI    | 160  | 54   |
| >SRGAP3-L62 IQQILVTLPR  | 98   | >SRGAP3-L62 IQQILVTIPR  | 119  | 21   |
| >SRGAP3-L62 QIQQILVTL   | 488  | >SRGAP3-L62 QIQQILVTI   | 520  | 32   |
| >SRGAP3-L62 QIQQILVTL   | 343  | >SRGAP3-L62 QIQQILVTI   | 1716 | 1373 |
| >SRGAP3-L62 QIQQILVTLPF | 255  | >SRGAP3-L62 QIQQILVTIPR | 143  | 112  |
| >SRGAP3-L62 QIQQILVTL   | 26   | >SRGAP3-L62 QIQQILVTI   | 12   | 14   |
| >SRGAP3-L62 QIQQILVTLPF | 442  | >SRGAP3-L62 QIQQILVTIPR | 267  | 175  |
| >SRGAP3-L62 QIQQILVTLPF | 172  | >SRGAP3-L62 QIQQILVTIPR | 115  | 57   |
| >SRGAP3-L62 QIQQILVTLPF | 34   | >SRGAP3-L62 QIQQILVTIPR | 39   | 5    |
| >SRGAP3-L62 HQIQQILVTL  | 395  | >SRGAP3-L62 HQIQQILVTI  | 692  | 297  |
| >SRGAP3-L62 HQIQQILVTL  | 456  | >SRGAP3-L62 HQIQQILVTI  | 296  | 160  |
| >SRGAP3-L62 HQIQQILVTL  | 443  | >SRGAP3-L62 HQIQQILVTI  | 379  | 64   |

|                         |      |                         |       |       |
|-------------------------|------|-------------------------|-------|-------|
| >SRGAP3-L62 HQIQQILVTL  | 393  | >SRGAP3-L62 HQIQQILVTI  | 148   | 245   |
| >SRGAP3-L62 HQIQQILVTL  | 121  | >SRGAP3-L62 HQIQQILVTI  | 278   | 157   |
| >SRGAP3-L62 HQIQQILVTL  | 63   | >SRGAP3-L62 HQIQQILVTI  | 113   | 50    |
| >SRGAP3-L62 HQIQQILVTL  | 128  | >SRGAP3-L62 HQIQQILVTI  | 429   | 301   |
| >SRGAP3-L62 HQIQQILVTL  | 11   | >SRGAP3-L62 HQIQQILVTI  | 72    | 61    |
| >SRGAP3-L62 HQIQQILVTL  | 199  | >SRGAP3-L62 HQIQQILVTI  | 1157  | 958   |
| >SRGAP3-R4: RANQQETEM   | 100  | >SRGAP3-R4: KANQQETEM   | 52    | 48    |
| >SRGAP3-R4: RANQQETEM   | 47   | >SRGAP3-R4: KANQQETEM   | 63    | 16    |
| >SRGAP3-R4: RANQQETEM   | 306  | >SRGAP3-R4: KANQQETEM   | 958   | 652   |
| >SRGAP3-R4: RANQQETEM   | 497  | >SRGAP3-R4: KANQQETEM   | 1586  | 1089  |
| >SRGAP3-R4: RANQQETEM   | 70   | >SRGAP3-R4: KANQQETEM   | 104   | 34    |
| >SRGAP3-R4: RANQQETEM   | 247  | >SRGAP3-R4: KANQQETEM   | 343   | 96    |
| >SRGAP3-R4: RANQQETEM   | 30   | >SRGAP3-R4: KANQQETEM   | 73    | 43    |
| >SRGAP3-R4: RANQQETEM   | 16   | >SRGAP3-R4: KANQQETEM   | 39    | 23    |
| >SRGAP3-R4: RANQQETEM   | 15   | >SRGAP3-R4: KANQQETEM   | 32    | 17    |
| >SRGAP3-R4: RANQQETEM   | 131  | >SRGAP3-R4: KANQQETEM   | 303   | 172   |
| >SRGAP3-R4: RANQQETEM   | 444  | >SRGAP3-R4: KANQQETEM   | 828   | 384   |
| >SRGAP3-R4: RANQQETEM   | 197  | >SRGAP3-R4: KANQQETEM   | 177   | 20    |
| >SRGAP3-R4: RANQQETEM   | 142  | >SRGAP3-R4: KANQQETEM   | 126   | 16    |
| >SRGAP3-R4: RANQQETEM   | 169  | >SRGAP3-R4: KANQQETEM   | 99    | 70    |
| >SRGAP3-R4: RANQQETEM   | 29   | >SRGAP3-R4: KANQQETEM   | 25    | 4     |
| >SRGAP3-R4: RANQQETEM   | 33   | >SRGAP3-R4: KANQQETEM   | 27    | 6     |
| >SRGAP3-R4: RRANQQETE   | 67   | >SRGAP3-R4: RKANQQETE   | 12    | 55    |
| >SRGAP3-R4: RRANQQETE   | 12   | >SRGAP3-R4: RKANQQETE   | 3     | 9     |
| >SRGAP3-R4: RRANQQET    | 450  | >SRGAP3-R4: RKANQQET    | 13151 | 12701 |
| >SRGAP3-R4: RRANQQETE   | 30   | >SRGAP3-R4: RKANQQETE   | 2317  | 2287  |
| >SRGAP3-R4: RRANQQETE   | 57   | >SRGAP3-R4: RKANQQETE   | 2992  | 2935  |
| >SRGAP3-R4: RRANQQET    | 151  | >SRGAP3-R4: RKANQQET    | 6099  | 5948  |
| >SRGAP3-R4: RRANQQETE   | 103  | >SRGAP3-R4: RKANQQETE   | 1962  | 1859  |
| >SRGAP3-R4: RRANQQETE   | 135  | >SRGAP3-R4: RKANQQETE   | 2727  | 2592  |
| >SRGAP3-R4: RRANQQET    | 333  | >SRGAP3-R4: RKANQQET    | 5550  | 5217  |
| >SRGAP3-R4: RRANQQETE   | 91   | >SRGAP3-R4: RKANQQETE   | 3086  | 2995  |
| >SRGAP3-R4: RRANQQETE   | 168  | >SRGAP3-R4: RKANQQETE   | 5522  | 5354  |
| >SRGAP3-R4: RRANQQETE   | 119  | >SRGAP3-R4: RKANQQETE   | 1267  | 1148  |
| >SRGAP3-R4: YMSKINIAKRI | 2761 | >SRGAP3-R4: YMSKINIAKRI | 130   | 2631  |
| >SRGAP3-R4: YMSKINIAKRI | 5546 | >SRGAP3-R4: YMSKINIAKRI | 292   | 5254  |
| >SRGAP3-R4: YMSKINIAKRI | 157  | >SRGAP3-R4: YMSKINIAKRI | 3281  | 3124  |
| >SRGAP3-R4: YMSKINIAKRI | 26   | >SRGAP3-R4: YMSKINIAKRI | 109   | 83    |
| >SRGAP3-R4: YMSKINIAKRI | 56   | >SRGAP3-R4: YMSKINIAKRI | 1318  | 1262  |
| >SRGAP3-R4: KRRANQQET   | 34   | >SRGAP3-R4: KRKANQQET   | 85    | 51    |
| >SRGAP3-R4: KRRANQQET   | 338  | >SRGAP3-R4: KRKANQQET   | 366   | 28    |
| >SRGAP3-R4: KRRANQQE    | 317  | >SRGAP3-R4: KRKANQQE    | 1797  | 1480  |
| >SRGAP3-R4: KRRANQQET   | 373  | >SRGAP3-R4: KRKANQQET   | 998   | 625   |

|                       |       |                       |      |       |
|-----------------------|-------|-----------------------|------|-------|
| >SRGAP3-R4:KRRANQQET  | 365   | >SRGAP3-R4:KRKANQQET  | 1276 | 911   |
| >SRGAP3-R4:KRRANQQET  | 95    | >SRGAP3-R4:KRKANQQET  | 242  | 147   |
| >SRGAP3-R4:AKRRANQQE  | 478   | >SRGAP3-R4:AKRKANQQE  | 487  | 9     |
| >SRGAP3-R4:KINIAKRR   | 1964  | >SRGAP3-R4:KINIAKRR   | 110  | 1854  |
| >SRGAP3-R4:KINIAKRR   | 4707  | >SRGAP3-R4:KINIAKRR   | 238  | 4469  |
| >SRGAP3-R4:KINIAKRR   | 3661  | >SRGAP3-R4:KINIAKRR   | 56   | 3605  |
| >SRGAP3-R4:KINIAKRR   | 28    | >SRGAP3-R4:KINIAKRR   | 461  | 433   |
| >SRGAP3-R4:KINIAKRR   | 88    | >SRGAP3-R4:KINIAKRR   | 1552 | 1464  |
| >SRGAP3-R4:MSKINIAKRR | 430   | >SRGAP3-R4:MSKINIAKRR | 8    | 422   |
| >SRGAP3-R4:MSKINIAKRR | 46    | >SRGAP3-R4:MSKINIAKRR | 46   | 0     |
| >SRGAP3-R4:MSKINIAKRR | 17    | >SRGAP3-R4:MSKINIAKRR | 282  | 265   |
| >SRGAP3-R4:MSKINIAKRR | 85    | >SRGAP3-R4:MSKINIAKRR | 278  | 193   |
| >SRGAP3-S5:SFERGEDPLV | 1722  | >SRGAP3-S5:FFERGEDPLV | 250  | 1472  |
| >SRGAP3-S5:SFERGEDPLV | 215   | >SRGAP3-S5:FFERGEDPLV | 900  | 685   |
| >SRGAP3-S5:NSFERGEDPL | 227   | >SRGAP3-S5:NFFERGEDPL | 7168 | 6941  |
| >SRGAP3-S5:SQVEVNDIKN | 1418  | >SRGAP3-S5:SQVEVNDIKN | 226  | 1192  |
| >SRGAP3-S5:SQVEVNDIKN | 14669 | >SRGAP3-S5:SQVEVNDIKN | 213  | 14456 |
| >SRGAP3-S5:SQVEVNDIKN | 7961  | >SRGAP3-S5:SQVEVNDIKN | 11   | 7950  |
| >SRGAP3-S5:DIKNSFER   | 130   | >SRGAP3-S5:DIKNFFER   | 41   | 89    |
| >SRGAP3-S5:DIKNSFER   | 16    | >SRGAP3-S5:DIKNFFER   | 9    | 7     |
| >SRGAP3-S5:DIKNSFER   | 18    | >SRGAP3-S5:DIKNFFER   | 14   | 4     |
| >SRGAP3-S5:DIKNSFER   | 2059  | >SRGAP3-S5:DIKNFFER   | 257  | 1802  |
| >SRGAP3-S5:NDIKNSFER  | 163   | >SRGAP3-S5:NDIKNFFER  | 83   | 80    |
| >SRGAP3-S5:EVNDIKNSF  | 32    | >SRGAP3-S5:EVNDIKNFF  | 695  | 663   |
| >SRGAP3-S5:EVNDIKNS   | 15778 | >SRGAP3-S5:EVNDIKNF   | 206  | 15572 |
| >SRGAP3-S5:EVNDIKNSF  | 47    | >SRGAP3-S5:EVNDIKNFF  | 50   | 3     |
| >SRGAP3-S5:EVNDIKNS   | 13142 | >SRGAP3-S5:EVNDIKNF   | 50   | 13092 |
| >SRGAP3-S5:EVNDIKNSF  | 211   | >SRGAP3-S5:EVNDIKNFF  | 36   | 175   |
| >SRGAP3-S5:EVNDIKNSFE | 113   | >SRGAP3-S5:EVNDIKNFFE | 41   | 72    |
| >SRGAP3-S5:EVNDIKNSFE | 37    | >SRGAP3-S5:EVNDIKNFFE | 19   | 18    |
| >SRGAP3-S5:EVNDIKNSF  | 1090  | >SRGAP3-S5:EVNDIKNFF  | 155  | 935   |
| >SRGAP3-S5:EVNDIKNSFE | 3     | >SRGAP3-S5:EVNDIKNFFE | 2    | 1     |
| >SRGAP3-S5:EVNDIKNSF  | 706   | >SRGAP3-S5:EVNDIKNFF  | 206  | 500   |
| >SRGAP3-S5:EVNDIKNSFE | 615   | >SRGAP3-S5:EVNDIKNFFE | 247  | 368   |
| >SRGAP3-S5:VEVNDIKNSF | 1745  | >SRGAP3-S5:VEVNDIKNFF | 274  | 1471  |
| >SRGAP3-S5:VEVNDIKNS  | 17775 | >SRGAP3-S5:VEVNDIKNF  | 99   | 17676 |
| >SRGAP3-S5:VEVNDIKNSF | 92    | >SRGAP3-S5:VEVNDIKNFF | 339  | 247   |
| >SRGAP3-S5:VEVNDIKNS  | 14568 | >SRGAP3-S5:VEVNDIKNF  | 374  | 14194 |
| >SRGAP3-S5:VEVNDIKNS  | 5781  | >SRGAP3-S5:VEVNDIKNF  | 231  | 5550  |
| >SRGAP3-S5:VEVNDIKNS  | 3360  | >SRGAP3-S5:VEVNDIKNF  | 88   | 3272  |
| >SS18L1-G35 GAPSQYPGY | 5007  | >SS18L1-G35 EAPSQYPGY | 21   | 4986  |
| >SS18L1-G35 GAPSQYPGY | 7829  | >SS18L1-G35 EAPSQYPGY | 41   | 7788  |
| >SS18L1-G35 GAPSQYPGY | 423   | >SS18L1-G35 EAPSQYPGY | 1468 | 1045  |

|                        |       |                        |       |       |
|------------------------|-------|------------------------|-------|-------|
| >SS18L1-G35 GAPSQYPGY  | 3228  | >SS18L1-G35 EAPSQYPGY  | 311   | 2917  |
| >SS18L1-G35 QGAPSQYPGY | 2019  | >SS18L1-G35 QEAPSQYPGY | 418   | 1601  |
| >SS18L1-G35 QGAPSQYPGY | 227   | >SS18L1-G35 QEAPSQYPGY | 11456 | 11229 |
| >SS18L1-G35 QGAPSQYPGY | 27420 | >SS18L1-G35 QEAPSQYPGY | 304   | 27116 |
| >SS18L1-G35 QGAPSQYPGY | 38652 | >SS18L1-G35 QEAPSQYPGY | 294   | 38358 |
| >SS18L1-G35 AQGAPSQYPC | 285   | >SS18L1-G35 AQEAPSQYPC | 430   | 145   |
| >SS18L1-G35 AQGAPSQY   | 55    | >SS18L1-G35 AQEAPSQY   | 184   | 129   |
| >SS18L1-G35 AQGAPSQYPC | 415   | >SS18L1-G35 AQEAPSQYPC | 3000  | 2585  |
| >SS18L1-G35 AQGAPSQYPC | 50    | >SS18L1-G35 AQEAPSQYPC | 157   | 107   |
| >SS18L1-G35 AQGAPSQY   | 140   | >SS18L1-G35 AQEAPSQY   | 111   | 29    |
| >SS18L1-G35 AQGAPSQYPC | 248   | >SS18L1-G35 AQEAPSQYPC | 212   | 36    |
| >SS18L1-G35 AQGAPSQY   | 26    | >SS18L1-G35 AQEAPSQY   | 110   | 84    |
| >SS18L1-G35 AQGAPSQYPC | 35    | >SS18L1-G35 AQEAPSQYPC | 158   | 123   |
| >SS18L1-G35 SAQGAPSQY  | 459   | >SS18L1-G35 SAQEAPSQY  | 585   | 126   |
| >SS18L1-G35 SAQGAPSQY  | 487   | >SS18L1-G35 SAQEAPSQY  | 464   | 23    |
| >SS18L1-G35 SAQGAPSQY  | 409   | >SS18L1-G35 SAQEAPSQY  | 487   | 78    |
| >SS18L1-G35 SAQGAPSQY  | 60    | >SS18L1-G35 SAQEAPSQY  | 26    | 34    |
| >SS18L1-G35 SAQGAPSQY  | 317   | >SS18L1-G35 SAQEAPSQY  | 177   | 140   |
| >SS18L1-G35 SAQGAPSQY  | 28    | >SS18L1-G35 SAQEAPSQY  | 92    | 64    |
| >SS18L1-G35 GSAQGAPSQY | 250   | >SS18L1-G35 GSAQEAPSQY | 186   | 64    |
| >SS18L1-G35 GSAQGAPSQY | 573   | >SS18L1-G35 GSAQEAPSQY | 390   | 183   |
| >SS18L1-G35 GSAQGAPSQY | 106   | >SS18L1-G35 GSAQEAPSQY | 167   | 61    |
| >SS18L1-G35 GSAQGAPSQY | 215   | >SS18L1-G35 GSAQEAPSQY | 399   | 184   |
| >SS18L1-G35 GSAQGAPSQY | 8     | >SS18L1-G35 GSAQEAPSQY | 11    | 3     |
| >SS18L1-G35 GSAQGAPSQY | 385   | >SS18L1-G35 GSAQEAPSQY | 577   | 192   |
| >SS18L1-G35 GSAQGAPSQY | 43    | >SS18L1-G35 GSAQEAPSQY | 51    | 8     |
| >SS18L1-G35 YGSAQGAPSC | 170   | >SS18L1-G35 YGSAQEAPSC | 419   | 249   |
| >SS18L1-G35 YGSAQGAPSC | 200   | >SS18L1-G35 YGSAQEAPSC | 360   | 160   |
| >SS18L1-G35 YGSAQGAPSC | 108   | >SS18L1-G35 YGSAQEAPSC | 313   | 205   |
| >SS18L1-G35 YGSAQGAPSC | 64    | >SS18L1-G35 YGSAQEAPSC | 106   | 42    |
| >SS18L1-G35 YGSAQGAPSC | 52    | >SS18L1-G35 YGSAQEAPSC | 41    | 11    |
| >SS18L1-G35 YGSAQGAPSC | 77    | >SS18L1-G35 YGSAQEAPSC | 172   | 95    |
| >SS18L1-G35 QQQGYGSAC  | 476   | >SS18L1-G35 QQQGYGSAC  | 650   | 174   |
| >SS18L1-G36 GQQYGSYR   | 25    | >SS18L1-G36 DQQYGSYR   | 309   | 284   |
| >SS18L1-G36 GQQYGSYR   | 7216  | >SS18L1-G36 DQQYGSYR   | 137   | 7079  |
| >SS18L1-G36 GQQYGSYRA  | 498   | >SS18L1-G36 DQQYGSYRA  | 6706  | 6208  |
| >SS18L1-G36 QGQQYGSY   | 185   | >SS18L1-G36 QDQQYGSY   | 2217  | 2032  |
| >SS18L1-G36 QGQQYGSY   | 482   | >SS18L1-G36 QDQQYGSY   | 3991  | 3509  |
| >SS18L1-G36 QGQQYGSYR  | 316   | >SS18L1-G36 QDQQYGSYR  | 1648  | 1332  |
| >SS18L1-G36 GQGQQYGSY  | 131   | >SS18L1-G36 GQDQQYGSY  | 234   | 103   |
| >SS18L1-G36 GQGQQYGSY  | 47    | >SS18L1-G36 GQDQQYGSY  | 260   | 213   |
| >SS18L1-G36 QGQGQQYGSY | 85    | >SS18L1-G36 QGQDQQYGSY | 108   | 23    |
| >SS18L1-G36 QGQGQQYGSY | 547   | >SS18L1-G36 QGQDQQYGSY | 393   | 154   |

|                        |      |                        |       |       |
|------------------------|------|------------------------|-------|-------|
| >SS18L1-G36 QGQGQQYG'  | 265  | >SS18L1-G36 QGQDQQYG'  | 225   | 40    |
| >SS18L1-G36 QGQGQQYG'  | 226  | >SS18L1-G36 QGQDQQYG'  | 190   | 36    |
| >SS18L1-G36 QGQGQQQY'  | 103  | >SS18L1-G36 QGQDQQQY'  | 135   | 32    |
| >SS18L1-G36 QGQGQQQY   | 70   | >SS18L1-G36 QGQDQQQY   | 106   | 36    |
| >SS18L1-G36 QGQGQQQY'  | 49   | >SS18L1-G36 QGQDQQQY'  | 60    | 11    |
| >SS18L1-G36 QGQGQQQY   | 105  | >SS18L1-G36 QGQDQQQY   | 406   | 301   |
| >SS18L1-G36 QGQGQQQY'  | 116  | >SS18L1-G36 QGQDQQQY'  | 351   | 235   |
| >SS18L1-G36 QGQGQQQY   | 198  | >SS18L1-G36 QGQDQQQY   | 373   | 175   |
| >SS18L1-G36 QGQGQQQY'  | 266  | >SS18L1-G36 QGQDQQQY'  | 268   | 2     |
| >SS18L1-G36 YQQGQDQQ'  | 185  | >SS18L1-G36 YQQGQDQQ'  | 273   | 88    |
| >SS18L1-G36 YQQGQDQQ'  | 42   | >SS18L1-G36 YQQGQDQQ'  | 49    | 7     |
| >SS18L1-G36 YQQGQDQQ'  | 13   | >SS18L1-G36 YQQGQDQQ'  | 20    | 7     |
| >SS18L1-G36 YQQGQDQQ'  | 31   | >SS18L1-G36 YQQGQDQQ'  | 203   | 172   |
| >SS18L1-G36 YQQGQDQQ'  | 1852 | >SS18L1-G36 YQQGQDQQ'  | 411   | 1441  |
| >SS18L1-G36 GYQQGQDQ'  | 252  | >SS18L1-G36 GYQQGQDQ'  | 274   | 22    |
| >SS18L1-G36 GYQQGQDQ'  | 194  | >SS18L1-G36 GYQQGQDQ'  | 189   | 5     |
| >SS18L1-G36 GYQQGQDQ'  | 250  | >SS18L1-G36 GYQQGQDQ'  | 179   | 71    |
| >SS18L1-R29 RSFEESTQHY | 88   | >SS18L1-R29 WSFEESTQH) | 151   | 63    |
| >SS18L1-R29 RSFEESTQHY | 445  | >SS18L1-R29 WSFEESTQH) | 49    | 396   |
| >SS18L1-R29 RSFEESTQHY | 144  | >SS18L1-R29 WSFEESTQH) | 7094  | 6950  |
| >SS18L1-R29 RSFEESTQHY | 38   | >SS18L1-R29 WSFEESTQH) | 1838  | 1800  |
| >SS18L1-R29 RSFEESTQHY | 115  | >SS18L1-R29 WSFEESTQH) | 99    | 16    |
| >SS18L1-R29 RSFEESTQHY | 72   | >SS18L1-R29 WSFEESTQH) | 22    | 50    |
| >SS18L1-R29 RSFEESTQHY | 293  | >SS18L1-R29 WSFEESTQH) | 14351 | 14058 |
| >SS18L1-R29 RSFEESTQHY | 169  | >SS18L1-R29 WSFEESTQH) | 12710 | 12541 |
| >SS18L1-R29 RSFEESTQHY | 36   | >SS18L1-R29 WSFEESTQH) | 241   | 205   |
| >SS18L1-R29 RSFEESTQHY | 17   | >SS18L1-R29 WSFEESTQH) | 41    | 24    |
| >SS18L1-R29 RSFEESTQHY | 168  | >SS18L1-R29 WSFEESTQH) | 13951 | 13783 |
| >SS18L1-R29 RSFEESTQHY | 368  | >SS18L1-R29 WSFEESTQH) | 14708 | 14340 |
| >SS18L1-R29 RSFEESTQHY | 760  | >SS18L1-R29 WSFEESTQH) | 173   | 587   |
| >SS18L1-R29 RSFEESTQHY | 80   | >SS18L1-R29 WSFEESTQH) | 1809  | 1729  |
| >SS18L1-R29 RSFEESTQHY | 75   | >SS18L1-R29 WSFEESTQH) | 1479  | 1404  |
| >SS18L1-R29 RSFEESTQHY | 31   | >SS18L1-R29 WSFEESTQH) | 36    | 5     |
| >SS18L1-R29 RSFEESTQHY | 76   | >SS18L1-R29 WSFEESTQH) | 108   | 32    |
| >SS18L1-R29 RSFEESTQHY | 6    | >SS18L1-R29 WSFEESTQH) | 13    | 7     |
| >SS18L1-R29 RSFEESTQHY | 10   | >SS18L1-R29 WSFEESTQH) | 22    | 12    |
| >SS18L1-R29 RSFEESTQ   | 134  | >SS18L1-R29 WSFEESTQ   | 1501  | 1367  |
| >SS18L1-R29 RSFEESTQH  | 21   | >SS18L1-R29 WSFEESTQH  | 139   | 118   |
| >SS18L1-R29 RSFEESTQHY | 3    | >SS18L1-R29 WSFEESTQH) | 9     | 6     |
| >SS18L1-R29 RSFEESTQHY | 3    | >SS18L1-R29 WSFEESTQH) | 12    | 9     |
| >SS18L1-R29 RSFEESTQHY | 5992 | >SS18L1-R29 WSFEESTQH) | 343   | 5649  |
| >SS18L1-R29 RSFEESTQHY | 1518 | >SS18L1-R29 WSFEESTQH) | 61    | 1457  |
| >SS18L1-R29 RSFEESTQHY | 62   | >SS18L1-R29 WSFEESTQH) | 255   | 193   |



|                        |       |                        |       |       |
|------------------------|-------|------------------------|-------|-------|
| >SS18L1-R29 RSFEESTQHY | 52    | >SS18L1-R29 WSFEESTQH  | 149   | 97    |
| >SS18L1-R29 RSFEESTQHY | 16    | >SS18L1-R29 WSFEESTQH  | 184   | 168   |
| >SS18L1-R29 RSFEESTQHY | 11    | >SS18L1-R29 WSFEESTQH  | 45    | 34    |
| >SS18L1-R29 RSFEESTQH  | 157   | >SS18L1-R29 WSFEESTQH  | 105   | 52    |
| >SS18L1-R29 RSFEESTQHY | 103   | >SS18L1-R29 WSFEESTQH  | 73    | 30    |
| >SS18L1-R29 RSFEESTQHY | 18    | >SS18L1-R29 WSFEESTQH  | 17    | 1     |
| >SS18L1-R29 RSFEESTQHY | 251   | >SS18L1-R29 WSFEESTQH  | 95    | 156   |
| >SS18L1-R29 QSSYTEQSYD | 15052 | >SS18L1-R29 QSSYTEQSYD | 494   | 14558 |
| >SS18L1-R29 QSSYTEQSYD | 56    | >SS18L1-R29 QSSYTEQSYD | 26013 | 25957 |
| >SS18L1-R29 QSSYTEQSYD | 20599 | >SS18L1-R29 QSSYTEQSYD | 25    | 20574 |
| >SS18L1-R29 QSSYTEQSYD | 24589 | >SS18L1-R29 QSSYTEQSYD | 92    | 24497 |
| >SS18L1-R29 QSSYTEQSYD | 21627 | >SS18L1-R29 QSSYTEQSYD | 35    | 21592 |
| >SS18L1-R29 EQSYDRSF   | 108   | >SS18L1-R29 EQSYDWSF   | 124   | 16    |
| >SS18L1-R29 EQSYDRSF   | 15    | >SS18L1-R29 EQSYDWSF   | 17    | 2     |
| >SS18L1-R29 TEQSYDRSF  | 12048 | >SS18L1-R29 TEQSYDWSF  | 470   | 11578 |
| >SS18L1-R29 TEQSYDRSF  | 47    | >SS18L1-R29 TEQSYDWSF  | 9     | 38    |
| >SS18L1-R29 TEQSYDRSF  | 401   | >SS18L1-R29 TEQSYDWSF  | 83    | 318   |
| >SS18L1-R29 TEQSYDRSF  | 132   | >SS18L1-R29 TEQSYDWSF  | 111   | 21    |
| >SS18L1-R29 TEQSYDRSF  | 127   | >SS18L1-R29 TEQSYDWSF  | 33    | 94    |
| >SS18L1-R29 TEQSYDRS   | 1018  | >SS18L1-R29 TEQSYDWS   | 260   | 758   |
| >SS18L1-R29 YTEQSYDRSF | 1074  | >SS18L1-R29 YTEQSYDWSI | 86    | 988   |
| >SS18L1-R29 YTEQSYDRSF | 323   | >SS18L1-R29 YTEQSYDWSI | 571   | 248   |
| >SS18L1-R29 YTEQSYDRSF | 1097  | >SS18L1-R29 YTEQSYDWSI | 245   | 852   |
| >SS18L1-R29 YTEQSYDR   | 16    | >SS18L1-R29 YTEQSYDW   | 18448 | 18432 |
| >SS18L1-R29 YTEQSYDRSF | 499   | >SS18L1-R29 YTEQSYDWSI | 533   | 34    |
| >SS18L1-R29 YTEQSYDR   | 14825 | >SS18L1-R29 YTEQSYDW   | 9     | 14816 |
| >SS18L1-R29 YTEQSYDRSF | 6     | >SS18L1-R29 YTEQSYDWSI | 5     | 1     |
| >SS18L1-R29 YTEQSYDR   | 25647 | >SS18L1-R29 YTEQSYDW   | 191   | 25456 |
| >SS18L1-R29 YTEQSYDR   | 22442 | >SS18L1-R29 YTEQSYDW   | 463   | 21979 |
| >SS18L1-R29 YTEQSYDRSF | 228   | >SS18L1-R29 YTEQSYDWSI | 62    | 166   |
| >SS18L1-R29 YTEQSYDRSF | 127   | >SS18L1-R29 YTEQSYDWSI | 73    | 54    |
| >SS18L1-R29 YTEQSYDR   | 31290 | >SS18L1-R29 YTEQSYDW   | 181   | 31109 |
| >SS18L1-R29 SYTEQSYDRS | 1272  | >SS18L1-R29 SYTEQSYDW  | 201   | 1071  |
| >SS18L1-R29 SYTEQSYDRS | 772   | >SS18L1-R29 SYTEQSYDW  | 181   | 591   |
| >SS18L1-R29 SYTEQSYDR  | 2742  | >SS18L1-R29 SYTEQSYDW  | 22    | 2720  |
| >SS18L1-R29 SYTEQSYDRS | 10    | >SS18L1-R29 SYTEQSYDW  | 5     | 5     |
| >SS18L1-R29 SYTEQSYDR  | 250   | >SS18L1-R29 SYTEQSYDW  | 23287 | 23037 |
| >SS18L1-R29 SYTEQSYDR  | 264   | >SS18L1-R29 SYTEQSYDW  | 34108 | 33844 |
| >SS18L1-R29 SYTEQSYDR  | 23    | >SS18L1-R29 SYTEQSYDW  | 20864 | 20841 |
| >SS18L1-R29 SYTEQSYDRS | 1479  | >SS18L1-R29 SYTEQSYDW  | 393   | 1086  |
| >SS18L1-R29 SSYTEQSYDR | 62    | >SS18L1-R29 SSYTEQSYDW | 30144 | 30082 |
| >SS18L1-R29 SSYTEQSYDR | 155   | >SS18L1-R29 SSYTEQSYDW | 26395 | 26240 |
| >SS18L1-R29 SSYTEQSYDR | 11586 | >SS18L1-R29 SSYTEQSYDW | 495   | 11091 |

|                        |       |                        |       |       |
|------------------------|-------|------------------------|-------|-------|
| >SS18L1-R29 SSYTEQSYDR | 24    | >SS18L1-R29 SSYTEQSYDM | 27889 | 27865 |
| >SS18L1-R29 SSYTEQSYDR | 11530 | >SS18L1-R29 SSYTEQSYDM | 8     | 11522 |
| >SS18L1-R29 SSYTEQSYDR | 21963 | >SS18L1-R29 SSYTEQSYDM | 54    | 21909 |
| >SS18L1-R29 SSYTEQSYDR | 21336 | >SS18L1-R29 SSYTEQSYDM | 22    | 21314 |
| >SS18L1-R29 SSYTEQSYDR | 169   | >SS18L1-R29 SSYTEQSYDM | 4412  | 4243  |
| >SS18L1-R29 SSYTEQSYDR | 241   | >SS18L1-R29 SSYTEQSYDM | 33073 | 32832 |
| >SSX1-N82H- NDFDNDHNF  | 124   | >SSX1-N82H- HDFDNDHNF  | 123   | 1     |
| >SSX1-N82H- NDFDNDHNF  | 2019  | >SSX1-N82H- HDFDNDHNF  | 432   | 1587  |
| >SSX1-N82H- NDFDNDHNF  | 138   | >SSX1-N82H- HDFDNDHNF  | 43    | 95    |
| >SSX1-N82H- NDFDNDHNF  | 771   | >SSX1-N82H- HDFDNDHNF  | 148   | 623   |
| >SSX1-N82H- NDFDNDHNF  | 513   | >SSX1-N82H- HDFDNDHNF  | 199   | 314   |
| >SSX1-N82H- QGNDFDNDf  | 111   | >SSX1-N82H- QGHDFDNDf  | 59    | 52    |
| >SSX1-N82H- ATDFQGNDf  | 445   | >SSX1-N82H- ATDFQGHDF  | 177   | 268   |
| >SSX1-N82H- ATDFQGNDf  | 98    | >SSX1-N82H- ATDFQGHDF  | 21    | 77    |
| >SSX1-N82H- QATDFQGND  | 1350  | >SSX1-N82H- QATDFQGHDF | 366   | 984   |
| >SSX1-N82H- KQATDFQGN  | 108   | >SSX1-N82H- KQATDFQGH  | 106   | 2     |
| >SSX1-N82H- KQATDFQGN  | 2736  | >SSX1-N82H- KQATDFQGH  | 201   | 2535  |
| >SSX1-N82H- KQATDFQGN  | 3     | >SSX1-N82H- KQATDFQGH  | 3     | 0     |
| >SSX1-T77A- TDFQGNDf   | 1099  | >SSX1-T77A- ADFQGNDf   | 296   | 803   |
| >SSX1-T77A- TDFQGNDf   | 979   | >SSX1-T77A- ADFQGNDf   | 401   | 578   |
| >SSX1-T77A- ATDFQGNDf  | 445   | >SSX1-T77A- AADFQGNDf  | 11503 | 11058 |
| >SSX1-T77A- ATDFQGNDf  | 98    | >SSX1-T77A- AADFQGNDf  | 1263  | 1165  |
| >SSX1-T77A- LPPFMCNKQ  | 172   | >SSX1-T77A- LPPFMCNKQ  | 13    | 159   |
| >SSX1-T77A- QATDFQGND  | 697   | >SSX1-T77A- QAADFQGNf  | 342   | 355   |
| >SSX1-T77A- KQATDFQGN  | 792   | >SSX1-T77A- KQAADFQGN  | 395   | 397   |
| >SSX1-T77A- KQATDFQGN  | 108   | >SSX1-T77A- KQAADFQGN  | 65    | 43    |
| >SSX1-T77A- KQATDFQGN  | 3     | >SSX1-T77A- KQAADFQGN  | 3     | 0     |
| >SSX1-T77A- MCNKQATDF  | 156   | >SSX1-T77A- MCNKQAADF  | 361   | 205   |
| >SSX1-T77A- FMCNKQAT   | 1861  | >SSX1-T77A- FMCNKQAA   | 219   | 1642  |
| >SSX1-T77A- FMCNKQAT   | 713   | >SSX1-T77A- FMCNKQAA   | 72    | 641   |
| >SSX1-T77A- FMCNKQATD  | 138   | >SSX1-T77A- FMCNKQAAf  | 248   | 110   |
| >SSX1-T77A- FMCNKQAT   | 206   | >SSX1-T77A- FMCNKQAA   | 18    | 188   |
| >SSX1-T77A- FMCNKQAT   | 1421  | >SSX1-T77A- FMCNKQAA   | 158   | 1263  |
| >SSX1-T77A- FMCNKQAT   | 31    | >SSX1-T77A- FMCNKQAA   | 7     | 24    |
| >SSX1-T77A- FMCNKQATD  | 257   | >SSX1-T77A- FMCNKQAAf  | 362   | 105   |
| >SSX1-T77A- FMCNKQAT   | 1354  | >SSX1-T77A- FMCNKQAA   | 122   | 1232  |
| >SSX1-T77A- FMCNKQAT   | 2880  | >SSX1-T77A- FMCNKQAA   | 267   | 2613  |
| >SSX1-T77A- FMCNKQAT   | 37    | >SSX1-T77A- FMCNKQAA   | 7     | 30    |
| >SSX1-T77A- FMCNKQATD  | 109   | >SSX1-T77A- FMCNKQAAf  | 191   | 82    |
| >SSX1-T77A- FMCNKQATD  | 81    | >SSX1-T77A- FMCNKQAAf  | 69    | 12    |
| >SSX1-T77A- FMCNKQATD  | 204   | >SSX1-T77A- FMCNKQAAf  | 166   | 38    |
| >SSX1-T77A- FMCNKQATD  | 12    | >SSX1-T77A- FMCNKQAAf  | 16    | 4     |
| >SSX1-T77A- PFMCNKQAT  | 242   | >SSX1-T77A- PFMCNKQAA  | 170   | 72    |

|                         |      |                         |       |       |
|-------------------------|------|-------------------------|-------|-------|
| >SSX1-T77A- PFMCKNKQAT  | 213  | >SSX1-T77A- PFMCKNKQAA  | 156   | 57    |
| >STIL-D533N DIFEKLQTV   | 3929 | >STIL-D533N NIFEKLQTV   | 32    | 3897  |
| >STIL-D533N DIFEKLQTV   | 1513 | >STIL-D533N NIFEKLQTV   | 39    | 1474  |
| >STIL-D533N DIFEKLQTVS/ | 5026 | >STIL-D533N NIFEKLQTVS/ | 189   | 4837  |
| >STIL-D533N DIFEKLQTV   | 289  | >STIL-D533N NIFEKLQTV   | 7     | 282   |
| >STIL-D533N DIFEKLQTVS/ | 2351 | >STIL-D533N NIFEKLQTVS/ | 46    | 2305  |
| >STIL-D533N DIFEKLQTV   | 285  | >STIL-D533N NIFEKLQTV   | 9     | 276   |
| >STIL-D533N DIFEKLQTVS/ | 2693 | >STIL-D533N NIFEKLQTVS/ | 65    | 2628  |
| >STIL-D533N DIFEKLQTV   | 11   | >STIL-D533N NIFEKLQTV   | 4     | 7     |
| >STIL-D533N DIFEKLQTVS/ | 1657 | >STIL-D533N NIFEKLQTVS/ | 268   | 1389  |
| >STIL-D533N DIFEKLQTV   | 116  | >STIL-D533N NIFEKLQTV   | 8     | 108   |
| >STIL-D533N DIFEKLQTV   | 50   | >STIL-D533N NIFEKLQTV   | 22    | 28    |
| >STIL-D533N DIFEKLQTV   | 145  | >STIL-D533N NIFEKLQTV   | 32    | 113   |
| >STIL-D533N DIFEKLQTV   | 14   | >STIL-D533N NIFEKLQTV   | 5     | 9     |
| >STIL-D533N DIFEKLQTV   | 112  | >STIL-D533N NIFEKLQTV   | 52    | 60    |
| >STIL-D533N DIFEKLQTVS/ | 231  | >STIL-D533N NIFEKLQTVS/ | 111   | 120   |
| >STIL-D533N DIFEKLQTV   | 22   | >STIL-D533N NIFEKLQTV   | 19    | 3     |
| >STIL-D533N DIFEKLQTVS/ | 514  | >STIL-D533N NIFEKLQTVS/ | 466   | 48    |
| >STIL-D533N HDIFEKLQTV  | 283  | >STIL-D533N HNIFEKLQTV  | 11295 | 11012 |
| >STIL-D533N PSHDIFEK    | 312  | >STIL-D533N PSHNIFEK    | 265   | 47    |
| >STIL-D533N PSHDIFEK    | 384  | >STIL-D533N PSHNIFEK    | 191   | 193   |
| >STIL-D533N GPSHDIFEKL  | 387  | >STIL-D533N GPSHNIFEKL  | 476   | 89    |
| >STIL-D533N GPSHDIFEK   | 303  | >STIL-D533N GPSHNIFEK   | 237   | 66    |
| >STIL-D533N NGPSHDIF    | 80   | >STIL-D533N NGPSHNIF    | 74    | 6     |
| >STIL-D533N NGPSHDIFE   | 270  | >STIL-D533N NGPSHNIFE   | 322   | 52    |
| >STIL-D533N NGPSHDIFEK  | 237  | >STIL-D533N NGPSHNIFEK  | 267   | 30    |
| >STIL-D533N NGPSHDIFEK  | 625  | >STIL-D533N NGPSHNIFEK  | 322   | 303   |
| >STIL-D533N HNGPSHDIF   | 1131 | >STIL-D533N HNGPSHNIF   | 169   | 962   |
| >STIL-D533N SHNGPSHDIF  | 265  | >STIL-D533N SHNGPSHNIF  | 76    | 189   |
| >STIL-D533N SSHNGPSHDI  | 399  | >STIL-D533N SSHNGPSHNI  | 79    | 320   |
| >STIL-D533N SSHNGPSHDI  | 380  | >STIL-D533N SSHNGPSHNI  | 228   | 152   |
| >STIL-D533N SSHNGPSHDI  | 31   | >STIL-D533N SSHNGPSHNI  | 13    | 18    |
| >STIL-D533N SSHNGPSHDI  | 571  | >STIL-D533N SSHNGPSHNI  | 131   | 440   |
| >STIL-D533N SSHNGPSHDI  | 19   | >STIL-D533N SSHNGPSHNI  | 16    | 3     |
| >STIL-D533N SSHNGPSHDI  | 17   | >STIL-D533N SSHNGPSHNI  | 10    | 7     |
| >STIL-H978Y- HTKKKTHHSF | 4295 | >STIL-H978Y- YTKKKTHHSR | 452   | 3843  |
| >STIL-H978Y- HTKKKTHHS  | 32   | >STIL-H978Y- YTKKKTHHS  | 935   | 903   |
| >STIL-H978Y- HTKKKTHHSF | 10   | >STIL-H978Y- YTKKKTHHSR | 135   | 125   |
| >STIL-H978Y- HTKKKTHHSF | 16   | >STIL-H978Y- YTKKKTHHSR | 398   | 382   |
| >STIL-H978Y- HTKKKTHH   | 273  | >STIL-H978Y- YTKKKTHH   | 1531  | 1258  |
| >STIL-H978Y- HTKKKTHHSF | 25   | >STIL-H978Y- YTKKKTHHSR | 32    | 7     |
| >STIL-H978Y- HTKKKTHHSF | 102  | >STIL-H978Y- YTKKKTHHSR | 37    | 65    |
| >STIL-H978Y- HTKKKTHHSF | 15   | >STIL-H978Y- YTKKKTHHSR | 9     | 6     |

|                         |       |                         |     |       |
|-------------------------|-------|-------------------------|-----|-------|
| >STIL-H978Y- HTKKKTHHSF | 4309  | >STIL-H978Y- YTKKKTHHSR | 309 | 4000  |
| >STIL-H978Y- HTKKKTHHSF | 145   | >STIL-H978Y- YTKKKTHHSR | 26  | 119   |
| >STIL-H978Y- HTKKKTHHSF | 57    | >STIL-H978Y- YTKKKTHHSR | 187 | 130   |
| >STIL-H978Y- YHTKKKTHHS | 3739  | >STIL-H978Y- YYTKKKTHHS | 39  | 3700  |
| >STIL-H978Y- YHTKKKTHHS | 4734  | >STIL-H978Y- YYTKKKTHHS | 33  | 4701  |
| >STIL-H978Y- YHTKKKTHHS | 844   | >STIL-H978Y- YYTKKKTHHS | 128 | 716   |
| >STIL-H978Y- YHTKKKTHHS | 506   | >STIL-H978Y- YYTKKKTHHS | 21  | 485   |
| >STIL-H978Y- HECTRQNV`  | 4643  | >STIL-H978Y- HECTRQNV`  | 133 | 4510  |
| >STIL-H978Y- HECTRQNV`  | 3905  | >STIL-H978Y- HECTRQNV`  | 186 | 3719  |
| >STIL-H978Y- NVYHTKKK   | 174   | >STIL-H978Y- NVYYTKKK   | 325 | 151   |
| >STIL-H978Y- NVYHTKKK   | 344   | >STIL-H978Y- NVYYTKKK   | 271 | 73    |
| >STIL-H978Y- NVYHTKKK   | 73    | >STIL-H978Y- NVYYTKKK   | 28  | 45    |
| >STIL-H978Y- TQNVYHTKK  | 575   | >STIL-H978Y- TQNVYYTKK  | 425 | 150   |
| >STIL-H978Y- TQNVYHTK   | 31    | >STIL-H978Y- TQNVYYTK   | 20  | 11    |
| >STIL-H978Y- TQNVYHTKK  | 43    | >STIL-H978Y- TQNVYYTKK  | 27  | 16    |
| >STIL-H978Y- TQNVYHTKKI | 939   | >STIL-H978Y- TQNVYYTKKK | 369 | 570   |
| >STIL-H978Y- TQNVYHTK   | 62    | >STIL-H978Y- TQNVYYTK   | 38  | 24    |
| >STIL-H978Y- TQNVYHTKK  | 55    | >STIL-H978Y- TQNVYYTKK  | 60  | 5     |
| >STIL-H978Y- RTQNVYHTK  | 138   | >STIL-H978Y- RTQNVYYTK  | 145 | 7     |
| >STIL-H978Y- RTQNVYHTKI | 38    | >STIL-H978Y- RTQNVYYTKk | 30  | 8     |
| >STIL-H978Y- RTQNVYHTKI | 154   | >STIL-H978Y- RTQNVYYTKk | 196 | 42    |
| >STIL-H978Y- RTQNVYHTK  | 8     | >STIL-H978Y- RTQNVYYTK  | 7   | 1     |
| >STIL-H978Y- RTQNVYHTKI | 24    | >STIL-H978Y- RTQNVYYTKk | 16  | 8     |
| >STIL-H978Y- RTQNVYHTKI | 18    | >STIL-H978Y- RTQNVYYTKk | 14  | 4     |
| >STIL-H978Y- RTQNVYHTK  | 6     | >STIL-H978Y- RTQNVYYTK  | 7   | 1     |
| >STIL-H978Y- RTQNVYHTKI | 12    | >STIL-H978Y- RTQNVYYTKk | 15  | 3     |
| >STIL-H978Y- RTQNVYHTKI | 13    | >STIL-H978Y- RTQNVYYTKk | 13  | 0     |
| >STIL-H978Y- RTQNVYHTK  | 9     | >STIL-H978Y- RTQNVYYTK  | 7   | 2     |
| >STIL-H978Y- RTQNVYHTKI | 177   | >STIL-H978Y- RTQNVYYTKk | 187 | 10    |
| >STIL-H978Y- RTQNVYHTKI | 39    | >STIL-H978Y- RTQNVYYTKk | 32  | 7     |
| >STIL-H978Y- RTQNVYHTK  | 368   | >STIL-H978Y- RTQNVYYTK  | 94  | 274   |
| >STIL-H978Y- RTQNVYHTK  | 127   | >STIL-H978Y- RTQNVYYTK  | 135 | 8     |
| >STIL-H978Y- RTQNVYHTKI | 542   | >STIL-H978Y- RTQNVYYTKk | 348 | 194   |
| >STIL-H978Y- RTQNVYHTK  | 204   | >STIL-H978Y- RTQNVYYTK  | 260 | 56    |
| >STIL-H978Y- RTQNVYHTKI | 487   | >STIL-H978Y- RTQNVYYTKk | 471 | 16    |
| >STIL-H978Y- RTQNVYHTKI | 364   | >STIL-H978Y- RTQNVYYTKk | 466 | 102   |
| >STIL-H978Y- TRTQNVYHTI | 1612  | >STIL-H978Y- TRTQNVYYTK | 322 | 1290  |
| >STIL-H978Y- TRTQNVYHTI | 446   | >STIL-H978Y- TRTQNVYYTK | 402 | 44    |
| >STIL-H978Y- TRTQNVYHTI | 171   | >STIL-H978Y- TRTQNVYYTK | 124 | 47    |
| >STIL-H978Y- CTRTQNVYH  | 18098 | >STIL-H978Y- CTRTQNVYY  | 219 | 17879 |
| >STIL-H978Y- CTRTQNVYH` | 357   | >STIL-H978Y- CTRTQNVYYT | 398 | 41    |
| >STIL-H978Y- CTRTQNVYH` | 259   | >STIL-H978Y- CTRTQNVYYT | 174 | 85    |
| >STIL-H978Y- CTRTQNVYH  | 10436 | >STIL-H978Y- CTRTQNVYY  | 120 | 10316 |

|                           |       |                           |       |       |
|---------------------------|-------|---------------------------|-------|-------|
| >STIL-H978Y-CTRTRQNVYH    | 8221  | >STIL-H978Y-CTRTRQNVYY    | 219   | 8002  |
| >STIL-H978Y-CTRTRQNVYH    | 13376 | >STIL-H978Y-CTRTRQNVYY    | 137   | 13239 |
| >STIL-H978Y-CTRTRQNVYH    | 131   | >STIL-H978Y-CTRTRQNVYY    | 16    | 115   |
| >STIL-H978Y-CTRTRQNVYH    | 340   | >STIL-H978Y-CTRTRQNVYYT   | 164   | 176   |
| >STIL-H978Y-CTRTRQNVYH    | 4     | >STIL-H978Y-CTRTRQNVYYT   | 4     | 0     |
| >STIL-H978Y-CTRTRQNVYH    | 10448 | >STIL-H978Y-CTRTRQNVYY    | 112   | 10336 |
| >STIL-H978Y-CTRTRQNVYH    | 169   | >STIL-H978Y-CTRTRQNVYYT   | 107   | 62    |
| >STIL-H978Y-CTRTRQNVYH    | 176   | >STIL-H978Y-CTRTRQNVYYT   | 163   | 13    |
| >STIL-H978Y-CTRTRQNVYH    | 8434  | >STIL-H978Y-CTRTRQNVYY    | 353   | 8081  |
| >STIL-H978Y-CTRTRQNVYH    | 5512  | >STIL-H978Y-CTRTRQNVYY    | 14    | 5498  |
| >STIL-H978Y-CTRTRQNVYH    | 3687  | >STIL-H978Y-CTRTRQNVYY    | 187   | 3500  |
| >STIL-H978Y-ECTRTRQNVYH   | 7667  | >STIL-H978Y-ECTRTRQNVYY   | 102   | 7565  |
| >STIL-H978Y-ECTRTRQNVYH   | 23036 | >STIL-H978Y-ECTRTRQNVYY   | 478   | 22558 |
| >STIL-T836I-l TSLPGSASSLK | 91    | >STIL-T836I-r ISLPGSASSLK | 58    | 33    |
| >STIL-T836I-l TSLPGSASSLK | 14    | >STIL-T836I-r ISLPGSASSLK | 20    | 6     |
| >STIL-T836I-l TSLPGSASSLK | 30    | >STIL-T836I-r ISLPGSASSLK | 19    | 11    |
| >STIL-T836I-l TSLPGSASSLK | 114   | >STIL-T836I-r ISLPGSASSLK | 288   | 174   |
| >STIL-T836I-l TSLPGSASSL  | 482   | >STIL-T836I-r ISLPGSASSL  | 3609  | 3127  |
| >STIL-T836I-l TSLPGSASSL  | 520   | >STIL-T836I-r ISLPGSASSL  | 69    | 451   |
| >STIL-T836I-l TSLPGSAS    | 3136  | >STIL-T836I-r ISLPGSAS    | 389   | 2747  |
| >STIL-T836I-l TSLPGSASS   | 740   | >STIL-T836I-r ISLPGSASS   | 57    | 683   |
| >STIL-T836I-l TSLPGSASSL  | 4     | >STIL-T836I-r ISLPGSASSL  | 3     | 1     |
| >STIL-T836I-l TSLPGSASSL  | 143   | >STIL-T836I-r ISLPGSASSL  | 2092  | 1949  |
| >STIL-T836I-l TSLPGSASSL  | 2003  | >STIL-T836I-r ISLPGSASSL  | 157   | 1846  |
| >STIL-T836I-l TSLPGSASSLK | 800   | >STIL-T836I-r ISLPGSASSLK | 233   | 567   |
| >STIL-T836I-l TSLPGSASSL  | 246   | >STIL-T836I-r ISLPGSASSL  | 125   | 121   |
| >STIL-T836I-l VTSLPGSASSI | 6834  | >STIL-T836I-r VISLPGSASSL | 361   | 6473  |
| >STIL-T836I-l VTSLPGSASSI | 5     | >STIL-T836I-r VISLPGSASSL | 848   | 843   |
| >STIL-T836I-l VTSLPGSASSI | 60    | >STIL-T836I-r VISLPGSASSL | 9691  | 9631  |
| >STIL-T836I-l VTSLPGSAS   | 242   | >STIL-T836I-r VISLPGSAS   | 7639  | 7397  |
| >STIL-T836I-l VTSLPGSASSI | 7     | >STIL-T836I-r VISLPGSASSL | 189   | 182   |
| >STIL-T836I-l VTSLPGSASSI | 225   | >STIL-T836I-r VISLPGSASSL | 14388 | 14163 |
| >STIL-T836I-l EVTSLPGS    | 2075  | >STIL-T836I-r EVISLPGS    | 116   | 1959  |
| >STIL-T836I-l EVTSLPGSA   | 5320  | >STIL-T836I-r EVISLPGSA   | 300   | 5020  |
| >STIL-T836I-l EVTSLPGSAS  | 2656  | >STIL-T836I-r EVISLPGSAS  | 183   | 2473  |
| >STIL-T836I-l EVTSLPGSAS  | 5753  | >STIL-T836I-r EVISLPGSASS | 373   | 5380  |
| >STIL-T836I-l EVTSLPGSA   | 45    | >STIL-T836I-r EVISLPGSA   | 21    | 24    |
| >STIL-T836I-l EVTSLPGSAS  | 354   | >STIL-T836I-r EVISLPGSASS | 115   | 239   |
| >STIL-T836I-l EVTSLPGSA   | 794   | >STIL-T836I-r EVISLPGSA   | 170   | 624   |
| >STIL-T836I-l NEVTSLPGSA  | 354   | >STIL-T836I-r NEVISLPGSA  | 289   | 65    |
| >STIL-T836I-l VDINNEVT    | 28367 | >STIL-T836I-r VDINNEVI    | 233   | 28134 |
| >STIL-T836I-l VDINNEVT    | 4693  | >STIL-T836I-r VDINNEVI    | 64    | 4629  |
| >STIL-T836I-l SVDINNEVTS  | 624   | >STIL-T836I-r SVDINNEVISL | 330   | 294   |

|                             |       |                             |       |       |
|-----------------------------|-------|-----------------------------|-------|-------|
| >STIL-T836I-\ FSVDINNEVT    | 1545  | >STIL-T836I-r FSVDINNEVI    | 204   | 1341  |
| >STIL-T836I-\ FSVDINNEVT    | 31288 | >STIL-T836I-r FSVDINNEVI    | 299   | 30989 |
| >STIL-V626F- TVGSIQDV       | 89    | >STIL-V626F- TFGSIQDV       | 4076  | 3987  |
| >STIL-V626F- TVGSIQDV       | 166   | >STIL-V626F- TFGSIQDV       | 12661 | 12495 |
| >STIL-V626F- PLNSWQGAM      | 99    | >STIL-V626F- PLNSWQGAM      | 15569 | 15470 |
| >STIL-V626F- PLNSWQGAM      | 11    | >STIL-V626F- PLNSWQGAM      | 8020  | 8009  |
| >STIL-V626F- PLNSWQGAM      | 173   | >STIL-V626F- PLNSWQGAM      | 17984 | 17811 |
| >STIL-V626F- PLNSWQGAM      | 32    | >STIL-V626F- PLNSWQGAM      | 18753 | 18721 |
| >STIL-V626F- PLNSWQGAM      | 17    | >STIL-V626F- PLNSWQGAM      | 16380 | 16363 |
| >STIL-V626F- PLNSWQGAM      | 4     | >STIL-V626F- PLNSWQGAM      | 11937 | 11933 |
| >STIL-V626F- PLNSWQGAM      | 10474 | >STIL-V626F- PLNSWQGAM      | 493   | 9981  |
| >STIL-V626F- NTVGSIQDV      | 538   | >STIL-V626F- NTFGSIQDV      | 258   | 280   |
| >STIL-V626F- NTVGSIQDV      | 1364  | >STIL-V626F- NTFGSIQDV      | 112   | 1252  |
| >STIL-V626F- NTVGSIQDV      | 4008  | >STIL-V626F- NTFGSIQDV      | 403   | 3605  |
| >STIL-V626F- NTVGSIQDV      | 323   | >STIL-V626F- NTFGSIQDV      | 58    | 265   |
| >STIL-V626F- NTVGSIQDV      | 36    | >STIL-V626F- NTFGSIQDV      | 12    | 24    |
| >STIL-V626F- NTVGSIQDVC     | 1328  | >STIL-V626F- NTFGSIQDVC     | 330   | 998   |
| >STIL-V626F- NTVGSIQDV      | 207   | >STIL-V626F- NTFGSIQDV      | 87    | 120   |
| >STIL-V626F- GANTVGSIQ      | 526   | >STIL-V626F- GANTFGSIQ      | 494   | 32    |
| >STIL-V626F- GANTVGSIQ      | 292   | >STIL-V626F- GANTFGSIQ      | 163   | 129   |
| >STIL-V626F- QGANTVGSIQ     | 296   | >STIL-V626F- QGANTFGSIQ     | 161   | 135   |
| >STIL-V626F- WQGANTVGSIQ    | 522   | >STIL-V626F- WQGANTFGSIQ    | 407   | 115   |
| >STIL-V626F- WQGANTVGSIQ    | 254   | >STIL-V626F- WQGANTFGSIQ    | 159   | 95    |
| >STIL-V626F- WQGANTVGSIQ    | 481   | >STIL-V626F- WQGANTFGSIQ    | 2428  | 1947  |
| >STIL-V626F- WQGANTVGSIQ    | 240   | >STIL-V626F- WQGANTFGSIQ    | 267   | 27    |
| >STIL-V626F- WQGANTVGSIQ    | 370   | >STIL-V626F- WQGANTFGSIQ    | 493   | 123   |
| >STIL-V626F- SWQGANTVGSIQ   | 251   | >STIL-V626F- SWQGANTFGSIQ   | 4309  | 4058  |
| >STIL-V626F- SWQGANTVGSIQ   | 18    | >STIL-V626F- SWQGANTFGSIQ   | 15    | 3     |
| >STIL-V626F- SWQGANTVGSIQ   | 9062  | >STIL-V626F- SWQGANTFGSIQ   | 111   | 8951  |
| >STIL-V626F- SWQGANTVGSIQ   | 4219  | >STIL-V626F- SWQGANTFGSIQ   | 130   | 4089  |
| >STIL-V626F- SWQGANTVGSIQ   | 1607  | >STIL-V626F- SWQGANTFGSIQ   | 8     | 1599  |
| >STIL-V626F- SWQGANTVGSIQ   | 85    | >STIL-V626F- SWQGANTFGSIQ   | 47    | 38    |
| >STIL-V626F- SWQGANTVGSIQ   | 112   | >STIL-V626F- SWQGANTFGSIQ   | 119   | 7     |
| >STIL-V626F- SWQGANTVGSIQ   | 458   | >STIL-V626F- SWQGANTFGSIQ   | 60    | 398   |
| >STIL-V626F- SWQGANTVGSIQ   | 83    | >STIL-V626F- SWQGANTFGSIQ   | 61    | 22    |
| >STIL-V626F- NSWQGANTVGSIQ  | 2376  | >STIL-V626F- NSWQGANTFGSIQ  | 160   | 2216  |
| >STIL-V626F- NSWQGANTVGSIQ  | 41    | >STIL-V626F- NSWQGANTFGSIQ  | 8280  | 8239  |
| >STIL-V626F- NSWQGANTVGSIQ  | 3924  | >STIL-V626F- NSWQGANTFGSIQ  | 54    | 3870  |
| >STIL-V626F- NSWQGANTVGSIQ  | 2268  | >STIL-V626F- NSWQGANTFGSIQ  | 12    | 2256  |
| >STIL-V626F- NSWQGANTVGSIQ  | 3877  | >STIL-V626F- NSWQGANTFGSIQ  | 45    | 3832  |
| >STIL-V626F- NSWQGANTVGSIQ  | 1207  | >STIL-V626F- NSWQGANTFGSIQ  | 41    | 1166  |
| >STIL-V626F- LNSWQGANTVGSIQ | 10613 | >STIL-V626F- LNSWQGANTFGSIQ | 498   | 10115 |
| >STIL-V626F- LNSWQGANTVGSIQ | 4728  | >STIL-V626F- LNSWQGANTFGSIQ | 211   | 4517  |

|                         |      |                         |      |      |
|-------------------------|------|-------------------------|------|------|
| >STIL-V685L- VARPPSHM   | 362  | >STIL-V685L- LARPPSHM   | 121  | 241  |
| >STIL-V685L- VARPPSHMD  | 209  | >STIL-V685L- LARPPSHMD  | 78   | 131  |
| >STIL-V685L- VARPPSHM   | 411  | >STIL-V685L- LARPPSHM   | 375  | 36   |
| >STIL-V685L- VARPPSHM   | 593  | >STIL-V685L- LARPPSHM   | 181  | 412  |
| >STIL-V685L- VARPPSHM   | 180  | >STIL-V685L- LARPPSHM   | 106  | 74   |
| >STIL-V685L- VARPPSHMD  | 281  | >STIL-V685L- LARPPSHMD  | 165  | 116  |
| >STIL-V685L- VARPPSHM   | 7    | >STIL-V685L- LARPPSHM   | 7    | 0    |
| >STIL-V685L- VARPPSHMD  | 11   | >STIL-V685L- LARPPSHMD  | 12   | 1    |
| >STIL-V685L- PVARPPSHM  | 6758 | >STIL-V685L- PLARPPSHM  | 74   | 6684 |
| >STIL-V685L- PVARPPSHM  | 38   | >STIL-V685L- PLARPPSHM  | 1347 | 1309 |
| >STIL-V685L- SPHSNIEPSP | 288  | >STIL-V685L- SPHSNIEPSP | 77   | 211  |
| >STIL-V685L- SPHSNIEPSP | 52   | >STIL-V685L- SPHSNIEPSP | 20   | 32   |
| >STIL-V685L- SPHSNIEPSP | 1808 | >STIL-V685L- SPHSNIEPSP | 103  | 1705 |
| >STIL-V685L- SPVARPPSHM | 24   | >STIL-V685L- SPLARPPSHM | 15   | 9    |
| >STIL-V685L- SPVARPPSHM | 69   | >STIL-V685L- SPLARPPSHM | 91   | 22   |
| >STIL-V685L- PSPVARPPSH | 140  | >STIL-V685L- PSPLARPPSH | 116  | 24   |
| >STIL-V685L- EPSPVARPPS | 162  | >STIL-V685L- EPSPLARPPS | 146  | 16   |
| >STIL-V685L- NIEPSPVAR  | 180  | >STIL-V685L- NIEPSPLAR  | 431  | 251  |
| >STIL-V685L- NIEPSPVAR  | 334  | >STIL-V685L- NIEPSPLAR  | 315  | 19   |
| >STIL-V685L- SNIESPVP   | 2008 | >STIL-V685L- SNIEPSPL   | 384  | 1624 |
| >STIL-V685L- SNIESPVP   | 240  | >STIL-V685L- SNIEPSPL   | 1860 | 1620 |
| >STIL-V685L- SNIESPVP   | 352  | >STIL-V685L- SNIEPSPL   | 2896 | 2544 |
| >STIL-V685L- HSNIEPSPVA | 485  | >STIL-V685L- HSNIEPSPVA | 269  | 216  |
| >STIL-V685L- HSNIEPSPVA | 41   | >STIL-V685L- HSNIEPSPVA | 91   | 50   |
| >STIL-V685L- HSNIEPSPVA | 102  | >STIL-V685L- HSNIEPSPVA | 195  | 93   |
| >STIL-V685L- HSNIEPSPV  | 248  | >STIL-V685L- HSNIEPSPV  | 3166 | 2918 |
| >STIL-V685L- HSNIEPSPV  | 317  | >STIL-V685L- HSNIEPSPV  | 10   | 307  |
| >STK11-A205 FAADDTCRT   | 980  | >STK11-A205 FTADDTCRT   | 302  | 678  |
| >STK11-A205 FAADDTCRT   | 402  | >STK11-A205 FTADDTCRT   | 250  | 152  |
| >STK11-A205 FAADDTCRT   | 194  | >STK11-A205 FTADDTCRT   | 136  | 58   |
| >STK11-A205 FAADDTCR    | 8    | >STK11-A205 FTADDTCR    | 3    | 5    |
| >STK11-A205 FAADDTCRTS  | 1022 | >STK11-A205 FTADDTCRTS  | 188  | 834  |
| >STK11-A205 FAADDTCRT   | 1389 | >STK11-A205 FTADDTCRT   | 167  | 1222 |
| >STK11-A205 HPFAADDT    | 127  | >STK11-A205 HPFTADDT    | 402  | 275  |
| >STK11-A205 HPFAADDTC   | 406  | >STK11-A205 HPFTADDTC   | 657  | 251  |
| >STK11-A205 HPFAADDTCF  | 322  | >STK11-A205 HPFTADDTCF  | 525  | 203  |
| >STK11-A205 HPFAADDT    | 133  | >STK11-A205 HPFTADDT    | 212  | 79   |
| >STK11-A205 HPFAADDTC   | 31   | >STK11-A205 HPFTADDTC   | 43   | 12   |
| >STK11-A205 HPFAADDTCF  | 102  | >STK11-A205 HPFTADDTCF  | 139  | 37   |
| >STK11-A205 HPFAADDTCF  | 181  | >STK11-A205 HPFTADDTCF  | 178  | 3    |
| >STK11-A205 ALHPFAADD   | 194  | >STK11-A205 ALHPFTADD   | 183  | 11   |
| >STK11-A205 ALHPFAADD   | 278  | >STK11-A205 ALHPFTADD   | 195  | 83   |
| >STK11-A205 ALHPFAADD   | 45   | >STK11-A205 ALHPFTADD   | 42   | 3    |

|                         |       |                         |      |       |
|-------------------------|-------|-------------------------|------|-------|
| >STK11-A205 EALHPFAA    | 133   | >STK11-A205 EALHPFTA    | 238  | 105   |
| >STK11-A205 EALHPFAA    | 27    | >STK11-A205 EALHPFTA    | 34   | 7     |
| >STK11-A205 AEALHPFA    | 216   | >STK11-A205 AEALHPFT    | 259  | 43    |
| >STK11-A205 AEALHPFAA   | 157   | >STK11-A205 AEALHPFTA   | 416  | 259   |
| >STK11-A205 AEALHPFA    | 5     | >STK11-A205 AEALHPFT    | 12   | 7     |
| >STK11-A205 AEALHPFAA   | 4     | >STK11-A205 AEALHPFTA   | 5    | 1     |
| >STK11-A205 AEALHPFAAD  | 197   | >STK11-A205 AEALHPFTAD  | 185  | 12    |
| >STK11-A205 AEALHPFAA   | 117   | >STK11-A205 AEALHPFTA   | 95   | 22    |
| >STK11-A205 AEALHPFAAD  | 622   | >STK11-A205 AEALHPFTAD  | 336  | 286   |
| >STK11-A205 GVAEALHPFA  | 159   | >STK11-A205 GVAEALHPFT  | 153  | 6     |
| >STK11-A205 GVAEALHPFA  | 73    | >STK11-A205 GVAEALHPFT  | 109  | 36    |
| >STK11-A205 GVAEALHPFA  | 33    | >STK11-A205 GVAEALHPFT  | 39   | 6     |
| >STK11-A205 GVAEALHPFA  | 26    | >STK11-A205 GVAEALHPFT  | 34   | 8     |
| >STK11-A205 GVAEALHPFA  | 497   | >STK11-A205 GVAEALHPFT  | 3019 | 2522  |
| >STK11-A205 GVAEALHPFA  | 393   | >STK11-A205 GVAEALHPFT  | 291  | 102   |
| >STK11-A205 GVAEALHPFA  | 340   | >STK11-A205 GVAEALHPFT  | 200  | 140   |
| >STK11-A205 GVAEALHPFA  | 74    | >STK11-A205 GVAEALHPFT  | 966  | 892   |
| >STK11-A205 GVAEALHPFA  | 455   | >STK11-A205 GVAEALHPFT  | 181  | 274   |
| >STK11-A205 GVAEALHPFA  | 295   | >STK11-A205 GVAEALHPFT  | 2902 | 2607  |
| >STK11-A205 GVAEALHPFA  | 683   | >STK11-A205 GVAEALHPFT  | 249  | 434   |
| >STK11-A389 KAVCMNGTE   | 732   | >STK11-A389 KTVCMNGTE   | 474  | 258   |
| >STK11-A389 KAVCMNGTE   | 7659  | >STK11-A389 KTVCMNGTE   | 395  | 7264  |
| >STK11-A389 GLPKAVCM    | 330   | >STK11-A389 GLPKTVCM    | 258  | 72    |
| >STK11-A389 GLPKAVCM    | 509   | >STK11-A389 GLPKTVCM    | 415  | 94    |
| >STK11-A389 RGLPKAVCM   | 199   | >STK11-A389 RGLPKTVCM   | 665  | 466   |
| >STK11-A389 RRGLPKAVCM  | 65    | >STK11-A389 RRGLPKTVCM  | 54   | 11    |
| >STK11-A389 RRGLPKAV    | 1147  | >STK11-A389 RRGLPKTV    | 376  | 771   |
| >STK11-A389 RRGLPKAVC   | 698   | >STK11-A389 RRGLPKTVC   | 462  | 236   |
| >STK11-A389 RRGLPKAVCM  | 215   | >STK11-A389 RRGLPKTVCM  | 184  | 31    |
| >STK11-A389 RRGLPKAVCM  | 583   | >STK11-A389 RRGLPKTVCM  | 427  | 156   |
| >STK11-A389 RRGLPKAVCM  | 102   | >STK11-A389 RRGLPKTVCM  | 86   | 16    |
| >STK11-A389 QRRGLPKAVC  | 475   | >STK11-A389 QRRGLPKTVC  | 437  | 38    |
| >STK11-A389 QRRGLPKAVC  | 194   | >STK11-A389 QRRGLPKTVC  | 233  | 39    |
| >STK11-A389 GQRRGLPKA   | 165   | >STK11-A389 GQRRGLPKT   | 3898 | 3733  |
| >STK11-A389 GQRRGLPKA\  | 250   | >STK11-A389 GQRRGLPKT\  | 402  | 152   |
| >STK11-D17E DIKPGNLL    | 14062 | >STK11-D17E YIKPGNLL    | 159  | 13903 |
| >STK11-D17E DIKPGNLLL   | 16431 | >STK11-D17E YIKPGNLLL   | 246  | 16185 |
| >STK11-D17E DIKPGNLL    | 11424 | >STK11-D17E YIKPGNLL    | 67   | 11357 |
| >STK11-D17E DIKPGNLLL   | 11665 | >STK11-D17E YIKPGNLLL   | 67   | 11598 |
| >STK11-D17E DIKPGNLLLT  | 4537  | >STK11-D17E YIKPGNLLLT  | 168  | 4369  |
| >STK11-D17E DIKPGNLLLT\ | 13412 | >STK11-D17E YIKPGNLLLT\ | 301  | 13111 |
| >STK11-D17E DIKPGNLL    | 23265 | >STK11-D17E YIKPGNLL    | 444  | 22821 |
| >STK11-D17E DIKPGNLLL   | 20993 | >STK11-D17E YIKPGNLLL   | 136  | 20857 |



|                        |       |                         |     |       |
|------------------------|-------|-------------------------|-----|-------|
| >STK11-D17€ DIKPGNLL   | 8057  | >STK11-D17€ YIKPGNLL    | 34  | 8023  |
| >STK11-D17€ DIKPGNLLL  | 6143  | >STK11-D17€ YIKPGNLLL   | 13  | 6130  |
| >STK11-D17€ DIKPGNLLLT | 20568 | >STK11-D17€ YIKPGNLLLT  | 443 | 20125 |
| >STK11-D17€ DIKPGNLLL  | 15721 | >STK11-D17€ YIKPGNLLL   | 431 | 15290 |
| >STK11-D17€ KDIKPGNL   | 29098 | >STK11-D17€ KYIKPGNL    | 130 | 28968 |
| >STK11-D17€ KDIKPGNLLL | 31324 | >STK11-D17€ KYIKPGNLLL  | 408 | 30916 |
| >STK11-D17€ KDIKPGNL   | 25741 | >STK11-D17€ KYIKPGNL    | 332 | 25409 |
| >STK11-D17€ KDIKPGNLLL | 30177 | >STK11-D17€ KYIKPGNLLL  | 231 | 29946 |
| >STK11-D17€ KDIKPGNL   | 28595 | >STK11-D17€ KYIKPGNL    | 499 | 28096 |
| >STK11-D17€ KDIKPGNLL  | 23995 | >STK11-D17€ KYIKPGNLL   | 185 | 23810 |
| >STK11-D17€ KDIKPGNLLL | 30460 | >STK11-D17€ KYIKPGNLLL  | 273 | 30187 |
| >STK11-D17€ KDIKPGNL   | 24628 | >STK11-D17€ KYIKPGNL    | 19  | 24609 |
| >STK11-D17€ KDIKPGNLL  | 23809 | >STK11-D17€ KYIKPGNLL   | 15  | 23794 |
| >STK11-D17€ KDIKPGNLLL | 23740 | >STK11-D17€ KYIKPGNLLL  | 12  | 23728 |
| >STK11-D17€ KDIKPGNL   | 32511 | >STK11-D17€ KYIKPGNL    | 473 | 32038 |
| >STK11-D17€ KDIKPGNLL  | 28445 | >STK11-D17€ KYIKPGNLL   | 364 | 28081 |
| >STK11-D17€ KDIKPGNLLL | 24327 | >STK11-D17€ KYIKPGNLLL  | 108 | 24219 |
| >STK11-D17€ YLHSQGIVHK | 1164  | >STK11-D17€ YLHSQGIVHK  | 293 | 871   |
| >STK11-D17€ YLHSQGIVHK | 557   | >STK11-D17€ YLHSQGIVHK  | 60  | 497   |
| >STK11-D17€ YLHSQGIVHK | 33708 | >STK11-D17€ YLHSQGIVHK  | 326 | 33382 |
| >STK11-D17€ YLHSQGIVHK | 18530 | >STK11-D17€ YLHSQGIVHK  | 16  | 18514 |
| >STK11-D17€ YLHSQGIVHK | 21069 | >STK11-D17€ YLHSQGIVHK  | 88  | 20981 |
| >STK11-D17€ YLHSQGIVHK | 23623 | >STK11-D17€ YLHSQGIVHK  | 19  | 23604 |
| >STK11-D17€ YLHSQGIVHK | 18567 | >STK11-D17€ YLHSQGIVHK  | 106 | 18461 |
| >STK11-D17€ YLHSQGIVHK | 14515 | >STK11-D17€ YLHSQGIVHK  | 23  | 14492 |
| >STK11-D17€ YLHSQGIVHK | 19156 | >STK11-D17€ YLHSQGIVHK  | 59  | 19097 |
| >STK11-D17€ YLHSQGIVHK | 24773 | >STK11-D17€ YLHSQGIVHK  | 408 | 24365 |
| >STK11-D17€ YLHSQGIVHK | 24699 | >STK11-D17€ YLHSQGIVHK  | 484 | 24215 |
| >STK11-D17€ YLHSQGIVHK | 36616 | >STK11-D17€ YLHSQGIVHK  | 217 | 36399 |
| >STK11-D17€ HKDIKPGNLL | 7418  | >STK11-D17€ HKYIKPGNLL  | 150 | 7268  |
| >STK11-D17€ HKDIKPGNLL | 9967  | >STK11-D17€ HKYIKPGNLLI | 209 | 9758  |
| >STK11-D17€ HKDIKPGNLL | 4085  | >STK11-D17€ HKYIKPGNLL  | 347 | 3738  |
| >STK11-D17€ HKDIKPGNLL | 570   | >STK11-D17€ HKYIKPGNLLI | 425 | 145   |
| >STK11-D17€ HKDIKPGNLL | 4221  | >STK11-D17€ HKYIKPGNLLI | 287 | 3934  |
| >STK11-D17€ IVHKDIKPGN | 3767  | >STK11-D17€ IVHKYIKPGNI | 466 | 3301  |
| >STK11-D17€ GIVHKDIK   | 1046  | >STK11-D17€ GIVHKYIK    | 113 | 933   |
| >STK11-D17€ QGIVHKDIK  | 2282  | >STK11-D17€ QGIVHKYIK   | 449 | 1833  |
| >STK11-D17€ SQGIVHKDI  | 468   | >STK11-D17€ SQGIVHKYI   | 148 | 320   |
| >STK11-D17€ SQGIVHKDI  | 10754 | >STK11-D17€ SQGIVHKYI   | 439 | 10315 |
| >STK11-D17€ SQGIVHKDIK | 2894  | >STK11-D17€ SQGIVHKYIK  | 246 | 2648  |
| >STK11-D17€ SQGIVHKD   | 25119 | >STK11-D17€ SQGIVHKY    | 90  | 25029 |
| >STK11-D17€ SQGIVHKD   | 25313 | >STK11-D17€ SQGIVHKY    | 288 | 25025 |
| >STK11-D17€ SQGIVHKD   | 21443 | >STK11-D17€ SQGIVHKY    | 236 | 21207 |

|                        |       |                        |       |       |
|------------------------|-------|------------------------|-------|-------|
| >STK11-D17€HSQGIVHKD   | 21939 | >STK11-D17€HSQGIVHKY   | 273   | 21666 |
| >STK11-D17€HSQGIVHKDI  | 303   | >STK11-D17€HSQGIVHKYII | 75    | 228   |
| >STK11-D17€HSQGIVHKD   | 16817 | >STK11-D17€HSQGIVHKY   | 52    | 16765 |
| >STK11-D17€HSQGIVHKD   | 31608 | >STK11-D17€HSQGIVHKY   | 81    | 31527 |
| >STK11-D17€HSQGIVHKD   | 24759 | >STK11-D17€HSQGIVHKY   | 156   | 24603 |
| >STK11-D17€HSQGIVHKDI  | 763   | >STK11-D17€HSQGIVHKYII | 170   | 593   |
| >STK11-D17€HSQGIVHKD   | 12739 | >STK11-D17€HSQGIVHKY   | 17    | 12722 |
| >STK11-D17€HSQGIVHKDI  | 1750  | >STK11-D17€HSQGIVHKYII | 133   | 1617  |
| >STK11-D17€HSQGIVHKDI  | 368   | >STK11-D17€HSQGIVHKYI  | 756   | 388   |
| >STK11-D17€HSQGIVHKD   | 22326 | >STK11-D17€HSQGIVHKY   | 484   | 21842 |
| >STK11-D17€HSQGIVHKDI  | 264   | >STK11-D17€HSQGIVHKYII | 170   | 94    |
| >STK11-D17€HSQGIVHKD   | 16403 | >STK11-D17€HSQGIVHKY   | 9     | 16394 |
| >STK11-D17€HSQGIVHKDI  | 1184  | >STK11-D17€HSQGIVHKYI  | 407   | 777   |
| >STK11-D17€HSQGIVHKD   | 17278 | >STK11-D17€HSQGIVHKY   | 129   | 17149 |
| >STK11-D17€HSQGIVHKD   | 18052 | >STK11-D17€HSQGIVHKY   | 87    | 17965 |
| >STK11-D17€HSQGIVHKD   | 23450 | >STK11-D17€HSQGIVHKY   | 128   | 23322 |
| >STK11-D17€HSQGIVHKD   | 37536 | >STK11-D17€HSQGIVHKY   | 302   | 37234 |
| >STK11-D17€HSQGIVHKD   | 34816 | >STK11-D17€HSQGIVHKY   | 186   | 34630 |
| >STK11-D194DLGVAEAL    | 4516  | >STK11-D194HLGVAEAL    | 98    | 4418  |
| >STK11-D194DLGVAEAL    | 2587  | >STK11-D194HLGVAEAL    | 283   | 2304  |
| >STK11-D194DLGVAEAL    | 4248  | >STK11-D194HLGVAEAL    | 128   | 4120  |
| >STK11-D194DLGVAEAL    | 3255  | >STK11-D194HLGVAEAL    | 429   | 2826  |
| >STK11-D194DLGVAEAL    | 1218  | >STK11-D194HLGVAEAL    | 50    | 1168  |
| >STK11-D194DLGVAEALHF  | 3186  | >STK11-D194HLGVAEALHF  | 122   | 3064  |
| >STK11-D194DLGVAEALHF  | 1662  | >STK11-D194HLGVAEALHF  | 240   | 1422  |
| >STK11-D194SDLGVAEAL   | 12416 | >STK11-D194SHLGVAEAL   | 485   | 11931 |
| >STK11-D194SDLGVAEAL   | 1057  | >STK11-D194SHLGVAEAL   | 11    | 1046  |
| >STK11-D194SDLGVAEAL   | 281   | >STK11-D194SHLGVAEAL   | 24113 | 23832 |
| >STK11-D194LTTGGTLKISF | 9589  | >STK11-D194LTTGGTLKISF | 346   | 9243  |
| >STK11-D194ISDLGVAEA   | 16039 | >STK11-D194ISHLGVAEA   | 389   | 15650 |
| >STK11-D194ISDLGVAEAL  | 33    | >STK11-D194ISHLGVAEAL  | 13    | 20    |
| >STK11-D194ISDLGVAEALI | 1331  | >STK11-D194ISHLGVAEALI | 464   | 867   |
| >STK11-D194KISDLGVAEA  | 429   | >STK11-D194KISHLGVAEA  | 2094  | 1665  |
| >STK11-D194KISDLGVAEAI | 14    | >STK11-D194KISHLGVAEAI | 32    | 18    |
| >STK11-D194KISDLGVA    | 167   | >STK11-D194KISHLGVA    | 219   | 52    |
| >STK11-D194KISDLGVAEA  | 96    | >STK11-D194KISHLGVAEA  | 238   | 142   |
| >STK11-D194KISDLGVAEAI | 288   | >STK11-D194KISHLGVAEAI | 502   | 214   |
| >STK11-D194KISDLGVAEAI | 68    | >STK11-D194KISHLGVAEAI | 199   | 131   |
| >STK11-D194KISDLGVAEA  | 324   | >STK11-D194KISHLGVAEA  | 2041  | 1717  |
| >STK11-D194KISDLGVAEAI | 114   | >STK11-D194KISHLGVAEAI | 733   | 619   |
| >STK11-D194KISDLGVAEA  | 136   | >STK11-D194KISHLGVAEA  | 2268  | 2132  |
| >STK11-D194KISDLGVAEAI | 201   | >STK11-D194KISHLGVAEAI | 3348  | 3147  |
| >STK11-D194KISDLGVAEAI | 38    | >STK11-D194KISHLGVAEAI | 26    | 12    |

|                         |      |                         |       |       |
|-------------------------|------|-------------------------|-------|-------|
| >STK11-D194 LKISDLGV    | 189  | >STK11-D194 LKISHLGV    | 77    | 112   |
| >STK11-D194 LKISDLGVAE/ | 474  | >STK11-D194 LKISHLGVAE/ | 339   | 135   |
| >STK11-D194 TLKISDLGV   | 70   | >STK11-D194 TLKISHLGV   | 34    | 36    |
| >STK11-D194 TLKISDLGVA  | 134  | >STK11-D194 TLKISHLGVA  | 118   | 16    |
| >STK11-D194 TLKISDLGV   | 659  | >STK11-D194 TLKISHLGV   | 172   | 487   |
| >STK11-D194 TLKISDLGV   | 458  | >STK11-D194 TLKISHLGV   | 814   | 356   |
| >STK11-D194 TLKISDLGV   | 9    | >STK11-D194 TLKISHLGV   | 5     | 4     |
| >STK11-D194 GTLKISDLGV  | 274  | >STK11-D194 GTLKISHLGV  | 161   | 113   |
| >STK11-D194 GTLKISDLGV  | 152  | >STK11-D194 GTLKISHLGV  | 191   | 39    |
| >STK11-D194 GTLKISDLGV  | 186  | >STK11-D194 GTLKISHLGV  | 48    | 138   |
| >STK11-D194 GTLKISDLGV  | 275  | >STK11-D194 GTLKISHLGV  | 208   | 67    |
| >STK11-D194 GTLKISDLGV  | 38   | >STK11-D194 GTLKISHLGV  | 35    | 3     |
| >STK11-D194 GTLKISDLGV  | 1407 | >STK11-D194 GTLKISHLGV  | 328   | 1079  |
| >STK11-D194 GTLKISDLGV  | 789  | >STK11-D194 GTLKISHLGV  | 86    | 703   |
| >STK11-D194 GTLKISDL    | 262  | >STK11-D194 GTLKISHL    | 71    | 191   |
| >STK11-D194 GTLKISDLGV/ | 328  | >STK11-D194 GTLKISHLGV/ | 421   | 93    |
| >STK11-D194 TTGGTLKISDI | 670  | >STK11-D194 TTGGTLKISHL | 146   | 524   |
| >STK11-D194 TTGGTLKISDI | 654  | >STK11-D194 TTGGTLKISHL | 231   | 423   |
| >STK11-D194 DLGVAEAL    | 4516 | >STK11-D194 NLGVAEAL    | 168   | 4348  |
| >STK11-D194 DLGVAEAL    | 4248 | >STK11-D194 NLGVAEAL    | 326   | 3922  |
| >STK11-D194 DLGVAEAL    | 1362 | >STK11-D194 NLGVAEAL    | 379   | 983   |
| >STK11-D194 DLGVAEAL    | 1218 | >STK11-D194 NLGVAEAL    | 259   | 959   |
| >STK11-D194 DLGVAEALHF  | 3186 | >STK11-D194 NLGVAEALHF  | 313   | 2873  |
| >STK11-D194 DLGVAEALHF  | 1662 | >STK11-D194 NLGVAEALHF  | 402   | 1260  |
| >STK11-D194 SDLGVAEAL   | 1057 | >STK11-D194 SNLGVAEAL   | 311   | 746   |
| >STK11-D194 SDLGVAEAL   | 281  | >STK11-D194 SNLGVAEAL   | 12511 | 12230 |
| >STK11-D194 ISDLGVAEAL  | 33   | >STK11-D194 ISNLGVAEAL  | 21    | 12    |
| >STK11-D194 KISDLGVAEA  | 429  | >STK11-D194 KISNLGVAEA  | 530   | 101   |
| >STK11-D194 KISDLGVAEA  | 14   | >STK11-D194 KISNLGVAEA  | 40    | 26    |
| >STK11-D194 KISDLGVA    | 167  | >STK11-D194 KISNLGVA    | 320   | 153   |
| >STK11-D194 KISDLGVAEA  | 96   | >STK11-D194 KISNLGVAEA  | 100   | 4     |
| >STK11-D194 KISDLGVAEA  | 288  | >STK11-D194 KISNLGVAEA  | 596   | 308   |
| >STK11-D194 KISDLGVAEA  | 68   | >STK11-D194 KISNLGVAEA  | 174   | 106   |
| >STK11-D194 KISDLGVAEA  | 324  | >STK11-D194 KISNLGVAEA  | 825   | 501   |
| >STK11-D194 KISDLGVAEA  | 114  | >STK11-D194 KISNLGVAEA  | 281   | 167   |
| >STK11-D194 KISDLGVAEA  | 136  | >STK11-D194 KISNLGVAEA  | 993   | 857   |
| >STK11-D194 KISDLGVAEA  | 201  | >STK11-D194 KISNLGVAEA  | 1602  | 1401  |
| >STK11-D194 KISDLGVAEA  | 38   | >STK11-D194 KISNLGVAEA  | 20    | 18    |
| >STK11-D194 LKISDLGV    | 189  | >STK11-D194 LKISNLGV    | 89    | 100   |
| >STK11-D194 LKISDLGVAE/ | 474  | >STK11-D194 LKISNLGVAE/ | 344   | 130   |
| >STK11-D194 TLKISDLGV   | 1025 | >STK11-D194 TLKISNLGV   | 410   | 615   |
| >STK11-D194 TLKISDLGV   | 70   | >STK11-D194 TLKISNLGV   | 28    | 42    |
| >STK11-D194 TLKISDLGVA  | 134  | >STK11-D194 TLKISNLGVA  | 100   | 34    |

|                         |       |                         |       |       |
|-------------------------|-------|-------------------------|-------|-------|
| >STK11-D194 TLKISDLGV   | 659   | >STK11-D194 TLKISNLGV   | 359   | 300   |
| >STK11-D194 TLKISDLGV   | 458   | >STK11-D194 TLKISNLGV   | 722   | 264   |
| >STK11-D194 TLKISDLGV   | 9     | >STK11-D194 TLKISNLGV   | 6     | 3     |
| >STK11-D194 GTLKISDLGV  | 274   | >STK11-D194 GTLKISNLGV  | 170   | 104   |
| >STK11-D194 GTLKISDLGV  | 152   | >STK11-D194 GTLKISNLGV  | 143   | 9     |
| >STK11-D194 GTLKISDLGV  | 186   | >STK11-D194 GTLKISNLGV  | 152   | 34    |
| >STK11-D194 GTLKISDLGV  | 275   | >STK11-D194 GTLKISNLGV  | 260   | 15    |
| >STK11-D194 GTLKISDLGV  | 38    | >STK11-D194 GTLKISNLGV  | 55    | 17    |
| >STK11-D194 GTLKISDLGV  | 789   | >STK11-D194 GTLKISNLGV  | 163   | 626   |
| >STK11-D194 GTLKISDL    | 262   | >STK11-D194 GTLKISNL    | 71    | 191   |
| >STK11-D194 GTLKISDLG   | 765   | >STK11-D194 GTLKISNLG   | 422   | 343   |
| >STK11-D194 GTLKISDLGV/ | 328   | >STK11-D194 GTLKISNLGV/ | 310   | 18    |
| >STK11-D194 TTGGTLKISDI | 670   | >STK11-D194 TTGGTLKISNI | 225   | 445   |
| >STK11-D194 TTGGTLKISDI | 654   | >STK11-D194 TTGGTLKISNI | 151   | 503   |
| >STK11-D194 TTGGTLKISDI | 1068  | >STK11-D194 TTGGTLKISNI | 450   | 618   |
| >STK11-D194 DLGVAEAL    | 4516  | >STK11-D194 VLGVAEAL    | 116   | 4400  |
| >STK11-D194 DLGVAEAL    | 2587  | >STK11-D194 VLGVAEAL    | 50    | 2537  |
| >STK11-D194 DLGVAEAL    | 4248  | >STK11-D194 VLGVAEAL    | 93    | 4155  |
| >STK11-D194 DLGVAEAL    | 3255  | >STK11-D194 VLGVAEAL    | 113   | 3142  |
| >STK11-D194 DLGVAEAL    | 1362  | >STK11-D194 VLGVAEAL    | 73    | 1289  |
| >STK11-D194 DLGVAEAL    | 1218  | >STK11-D194 VLGVAEAL    | 17    | 1201  |
| >STK11-D194 DLGVAEALHF  | 3186  | >STK11-D194 VLGVAEALHF  | 135   | 3051  |
| >STK11-D194 DLGVAEALHF  | 4626  | >STK11-D194 VLGVAEALHF  | 497   | 4129  |
| >STK11-D194 SDLGVAEAL   | 7198  | >STK11-D194 SVLGVAEAL   | 419   | 6779  |
| >STK11-D194 SDLGVAEA    | 10618 | >STK11-D194 SVLGVAEA    | 79    | 10539 |
| >STK11-D194 SDLGVAEAL   | 5885  | >STK11-D194 SVLGVAEAL   | 29    | 5856  |
| >STK11-D194 SDLGVAEA    | 9966  | >STK11-D194 SVLGVAEA    | 71    | 9895  |
| >STK11-D194 SDLGVAEAL   | 6359  | >STK11-D194 SVLGVAEAL   | 24    | 6335  |
| >STK11-D194 SDLGVAEA    | 12967 | >STK11-D194 SVLGVAEA    | 116   | 12851 |
| >STK11-D194 SDLGVAEAL   | 14117 | >STK11-D194 SVLGVAEAL   | 147   | 13970 |
| >STK11-D194 SDLGVAEA    | 26384 | >STK11-D194 SVLGVAEA    | 203   | 26181 |
| >STK11-D194 SDLGVAEAL   | 28045 | >STK11-D194 SVLGVAEAL   | 431   | 27614 |
| >STK11-D194 SDLGVAEAL   | 4320  | >STK11-D194 SVLGVAEAL   | 30    | 4290  |
| >STK11-D194 SDLGVAEA    | 17171 | >STK11-D194 SVLGVAEA    | 224   | 16947 |
| >STK11-D194 SDLGVAEAL   | 15386 | >STK11-D194 SVLGVAEAL   | 123   | 15263 |
| >STK11-D194 SDLGVAEA    | 14002 | >STK11-D194 SVLGVAEA    | 337   | 13665 |
| >STK11-D194 SDLGVAEAL   | 10155 | >STK11-D194 SVLGVAEAL   | 115   | 10040 |
| >STK11-D194 SDLGVAEAL   | 1057  | >STK11-D194 SVLGVAEAL   | 415   | 642   |
| >STK11-D194 SDLGVAEAL   | 281   | >STK11-D194 SVLGVAEAL   | 27015 | 26734 |
| >STK11-D194 LTTGGTLKISD | 26572 | >STK11-D194 LTTGGTLKISV | 274   | 26298 |
| >STK11-D194 LTTGGTLKISD | 29075 | >STK11-D194 LTTGGTLKISV | 259   | 28816 |
| >STK11-D194 LTTGGTLKISD | 25819 | >STK11-D194 LTTGGTLKISV | 333   | 25486 |
| >STK11-D194 LTTGGTLKISD | 32483 | >STK11-D194 LTTGGTLKISV | 15    | 32468 |

|                        |       |                        |      |       |
|------------------------|-------|------------------------|------|-------|
| >STK11-D194LTTGGTLKISD | 17261 | >STK11-D194LTTGGTLKISV | 87   | 17174 |
| >STK11-D194LTTGGTLKISD | 20579 | >STK11-D194LTTGGTLKISV | 446  | 20133 |
| >STK11-D194LTTGGTLKISD | 16285 | >STK11-D194LTTGGTLKISV | 434  | 15851 |
| >STK11-D194LTTGGTLKISD | 9589  | >STK11-D194LTTGGTLKISV | 451  | 9138  |
| >STK11-D194ISDLGVAEA   | 1981  | >STK11-D194ISVLGVAEA   | 325  | 1656  |
| >STK11-D194ISDLGVAEAL  | 33    | >STK11-D194ISVLGVAEAL  | 8    | 25    |
| >STK11-D194ISDLGVAEALI | 1331  | >STK11-D194ISVLGVAEALI | 177  | 1154  |
| >STK11-D194KISDLGVAEA  | 429   | >STK11-D194KISVLGVAEA  | 1383 | 954   |
| >STK11-D194KISDLGVAEAI | 14    | >STK11-D194KISVLGVAEAI | 57   | 43    |
| >STK11-D194KISDLGV     | 167   | >STK11-D194KISVLGV     | 705  | 538   |
| >STK11-D194KISDLGVAEA  | 96    | >STK11-D194KISVLGVAEA  | 206  | 110   |
| >STK11-D194KISDLGVAEAI | 288   | >STK11-D194KISVLGVAEAI | 1479 | 1191  |
| >STK11-D194KISDLGVAEAI | 68    | >STK11-D194KISVLGVAEAI | 290  | 222   |
| >STK11-D194KISDLGVAEA  | 324   | >STK11-D194KISVLGVAEA  | 3027 | 2703  |
| >STK11-D194KISDLGVAEAI | 114   | >STK11-D194KISVLGVAEAI | 1150 | 1036  |
| >STK11-D194KISDLGVAEA  | 136   | >STK11-D194KISVLGVAEA  | 2426 | 2290  |
| >STK11-D194KISDLGVAEAI | 201   | >STK11-D194KISVLGVAEAI | 3512 | 3311  |
| >STK11-D194KISDLGVAEAI | 38    | >STK11-D194KISVLGVAEAI | 53   | 15    |
| >STK11-D194LKISDLGV    | 1138  | >STK11-D194LKISVLGV    | 495  | 643   |
| >STK11-D194LKISDLGV    | 189   | >STK11-D194LKISVLGV    | 118  | 71    |
| >STK11-D194LKISDLGVAEI | 474   | >STK11-D194LKISVLGVAEI | 577  | 103   |
| >STK11-D194TLKISDLGV   | 1025  | >STK11-D194TLKISVLGV   | 332  | 693   |
| >STK11-D194TLKISDLGV   | 70    | >STK11-D194TLKISVLGV   | 8    | 62    |
| >STK11-D194TLKISDLGVA  | 134   | >STK11-D194TLKISVLGVA  | 80   | 54    |
| >STK11-D194TLKISDLGV   | 659   | >STK11-D194TLKISVLGV   | 50   | 609   |
| >STK11-D194TLKISDLGV   | 682   | >STK11-D194TLKISVLGV   | 225  | 457   |
| >STK11-D194TLKISDLGV   | 458   | >STK11-D194TLKISVLGV   | 125  | 333   |
| >STK11-D194TLKISDLGV   | 9     | >STK11-D194TLKISVLGV   | 3    | 6     |
| >STK11-D194GTLKISDLGV  | 274   | >STK11-D194GTLKISVLGV  | 96   | 178   |
| >STK11-D194GTLKISDLGV  | 152   | >STK11-D194GTLKISVLGV  | 152  | 0     |
| >STK11-D194GTLKISDLGV  | 186   | >STK11-D194GTLKISVLGV  | 37   | 149   |
| >STK11-D194GTLKISDLGV  | 275   | >STK11-D194GTLKISVLGV  | 122  | 153   |
| >STK11-D194GTLKISDLGV  | 38    | >STK11-D194GTLKISVLGV  | 19   | 19    |
| >STK11-D194GTLKISDLGV  | 1407  | >STK11-D194GTLKISVLGV  | 380  | 1027  |
| >STK11-D194GTLKISDLGV  | 789   | >STK11-D194GTLKISVLGV  | 134  | 655   |
| >STK11-D194GTLKISDL    | 262   | >STK11-D194GTLKISVL    | 74   | 188   |
| >STK11-D194GTLKISDLGVI | 328   | >STK11-D194GTLKISVLGVI | 213  | 115   |
| >STK11-D194TTGGTLKISD  | 27804 | >STK11-D194TTGGTLKISV  | 387  | 27417 |
| >STK11-D194TTGGTLKISD  | 23505 | >STK11-D194TTGGTLKISV  | 256  | 23249 |
| >STK11-D194TTGGTLKISDI | 670   | >STK11-D194TTGGTLKISVI | 249  | 421   |
| >STK11-D194TTGGTLKISD  | 33122 | >STK11-D194TTGGTLKISV  | 498  | 32624 |
| >STK11-D194TTGGTLKISD  | 19403 | >STK11-D194TTGGTLKISV  | 162  | 19241 |
| >STK11-D194TTGGTLKISDI | 654   | >STK11-D194TTGGTLKISVI | 223  | 431   |

|                        |       |                        |       |       |
|------------------------|-------|------------------------|-------|-------|
| >STK11-D194TTGGTLKISDI | 1068  | >STK11-D194TTGGTLKISVL | 350   | 718   |
| >STK11-D194TTGGTLKISDI | 1269  | >STK11-D194TTGGTLKISVL | 164   | 1105  |
| >STK11-D194DLGVAEAL    | 17965 | >STK11-D194YLGVAEAL    | 155   | 17810 |
| >STK11-D194DLGVAEAL    | 4516  | >STK11-D194YLGVAEAL    | 11    | 4505  |
| >STK11-D194DLGVAEALHF  | 15133 | >STK11-D194YLGVAEALHP  | 172   | 14961 |
| >STK11-D194DLGVAEAL    | 14671 | >STK11-D194YLGVAEAL    | 156   | 14515 |
| >STK11-D194DLGVAEAL    | 17430 | >STK11-D194YLGVAEAL    | 190   | 17240 |
| >STK11-D194DLGVAEAL    | 2587  | >STK11-D194YLGVAEAL    | 8     | 2579  |
| >STK11-D194DLGVAEALHF  | 15109 | >STK11-D194YLGVAEALHP  | 340   | 14769 |
| >STK11-D194DLGVAEAL    | 4248  | >STK11-D194YLGVAEAL    | 9     | 4239  |
| >STK11-D194DLGVAEALHF  | 13157 | >STK11-D194YLGVAEALHP  | 423   | 12734 |
| >STK11-D194DLGVAEAL    | 3255  | >STK11-D194YLGVAEAL    | 16    | 3239  |
| >STK11-D194DLGVAEAL    | 1362  | >STK11-D194YLGVAEAL    | 10    | 1352  |
| >STK11-D194DLGVAEAL    | 1218  | >STK11-D194YLGVAEAL    | 4     | 1214  |
| >STK11-D194DLGVAEALHF  | 14536 | >STK11-D194YLGVAEALHP  | 158   | 14378 |
| >STK11-D194DLGVAEALHF  | 3186  | >STK11-D194YLGVAEALHP  | 57    | 3129  |
| >STK11-D194DLGVAEALHF  | 1662  | >STK11-D194YLGVAEALHP  | 108   | 1554  |
| >STK11-D194DLGVAEALHF  | 4626  | >STK11-D194YLGVAEALHP  | 119   | 4507  |
| >STK11-D194DLGVAEALHF  | 2051  | >STK11-D194YLGVAEALHP  | 329   | 1722  |
| >STK11-D194SDLGVAEAL   | 12416 | >STK11-D194SYLGVAEAL   | 4     | 12412 |
| >STK11-D194SDLGVAEA    | 22510 | >STK11-D194SYLGVAEA    | 182   | 22328 |
| >STK11-D194SDLGVAEAL   | 20505 | >STK11-D194SYLGVAEAL   | 5     | 20500 |
| >STK11-D194SDLGVAEAL   | 4320  | >STK11-D194SYLGVAEAL   | 134   | 4186  |
| >STK11-D194SDLGVAEAL   | 1057  | >STK11-D194SYLGVAEAL   | 312   | 745   |
| >STK11-D194SDLGVAEAL   | 16529 | >STK11-D194SYLGVAEAL   | 317   | 16212 |
| >STK11-D194SDLGVAEA    | 31751 | >STK11-D194SYLGVAEA    | 327   | 31424 |
| >STK11-D194SDLGVAEAL   | 25322 | >STK11-D194SYLGVAEAL   | 83    | 25239 |
| >STK11-D194SDLGVAEAL   | 281   | >STK11-D194SYLGVAEAL   | 26496 | 26215 |
| >STK11-D194LTTGGTLKISD | 21855 | >STK11-D194LTTGGTLKISY | 151   | 21704 |
| >STK11-D194LTTGGTLKISD | 34319 | >STK11-D194LTTGGTLKISY | 218   | 34101 |
| >STK11-D194LTTGGTLKISD | 30658 | >STK11-D194LTTGGTLKISY | 178   | 30480 |
| >STK11-D194LTTGGTLKISD | 20008 | >STK11-D194LTTGGTLKISY | 33    | 19975 |
| >STK11-D194LTTGGTLKISD | 30812 | >STK11-D194LTTGGTLKISY | 132   | 30680 |
| >STK11-D194LTTGGTLKISD | 24822 | >STK11-D194LTTGGTLKISY | 349   | 24473 |
| >STK11-D194LTTGGTLKISD | 12805 | >STK11-D194LTTGGTLKISY | 10    | 12795 |
| >STK11-D194LTTGGTLKISD | 22124 | >STK11-D194LTTGGTLKISY | 467   | 21657 |
| >STK11-D194LTTGGTLKISD | 19822 | >STK11-D194LTTGGTLKISY | 256   | 19566 |
| >STK11-D194LTTGGTLKISD | 9589  | >STK11-D194LTTGGTLKISY | 19    | 9570  |
| >STK11-D194LTTGGTLKISD | 37423 | >STK11-D194LTTGGTLKISY | 426   | 36997 |
| >STK11-D194ISDLGVAEAL  | 4004  | >STK11-D194ISYLGVAEAL  | 286   | 3718  |
| >STK11-D194ISDLGVAEAL  | 10647 | >STK11-D194ISYLGVAEAL  | 206   | 10441 |
| >STK11-D194ISDLGVAEA   | 1981  | >STK11-D194ISYLGVAEA   | 62    | 1919  |
| >STK11-D194ISDLGVAEAL  | 33    | >STK11-D194ISYLGVAEAL  | 5     | 28    |

|                        |       |                         |      |       |
|------------------------|-------|-------------------------|------|-------|
| >STK11-D194ISDLGVAEALF | 1331  | >STK11-D194ISYLGVAEALF  | 47   | 1284  |
| >STK11-D194ISDLGVAEAL  | 3467  | >STK11-D194ISYLGVAEAL   | 433  | 3034  |
| >STK11-D194ISDLGVAEALF | 2054  | >STK11-D194ISYLGVAEALF  | 249  | 1805  |
| >STK11-D194KISDLGVAEA  | 429   | >STK11-D194KISYLGVAEA   | 897  | 468   |
| >STK11-D194KISDLGVAEA  | 14    | >STK11-D194KISYLGVAEAL  | 27   | 13    |
| >STK11-D194KISDLGVA    | 167   | >STK11-D194KISYLGVA     | 328  | 161   |
| >STK11-D194KISDLGVAEA  | 96    | >STK11-D194KISYLGVAEA   | 142  | 46    |
| >STK11-D194KISDLGVAEA  | 288   | >STK11-D194KISYLGVAEAL  | 712  | 424   |
| >STK11-D194KISDLGVAEA  | 68    | >STK11-D194KISYLGVAEAL  | 242  | 174   |
| >STK11-D194KISDLGVAEA  | 324   | >STK11-D194KISYLGVAEA   | 3612 | 3288  |
| >STK11-D194KISDLGVAEA  | 114   | >STK11-D194KISYLGVAEAL  | 1431 | 1317  |
| >STK11-D194KISDLGVAEA  | 136   | >STK11-D194KISYLGVAEA   | 4369 | 4233  |
| >STK11-D194KISDLGVAEA  | 201   | >STK11-D194KISYLGVAEAL  | 5457 | 5256  |
| >STK11-D194KISDLGVAEA  | 38    | >STK11-D194KISYLGVAEAL  | 16   | 22    |
| >STK11-D194LKISDLGV    | 189   | >STK11-D194LKISYLGV     | 51   | 138   |
| >STK11-D194LKISDLGVAE/ | 474   | >STK11-D194LKISYLGVAE/  | 252  | 222   |
| >STK11-D194TLKISDLGV   | 1025  | >STK11-D194TLKISYLGV    | 394  | 631   |
| >STK11-D194TLKISDLGV   | 70    | >STK11-D194TLKISYLGV    | 15   | 55    |
| >STK11-D194TLKISDLGVA  | 134   | >STK11-D194TLKISYLGVA   | 80   | 54    |
| >STK11-D194TLKISDLGV   | 659   | >STK11-D194TLKISYLGV    | 170  | 489   |
| >STK11-D194TLKISDLGV   | 458   | >STK11-D194TLKISYLGV    | 319  | 139   |
| >STK11-D194TLKISDLGV   | 9     | >STK11-D194TLKISYLGV    | 4    | 5     |
| >STK11-D194GTLKISDL    | 3124  | >STK11-D194GTLKISYL     | 251  | 2873  |
| >STK11-D194GTLKISDLGV  | 274   | >STK11-D194GTLKISYLGV   | 122  | 152   |
| >STK11-D194GTLKISDL    | 5918  | >STK11-D194GTLKISYL     | 342  | 5576  |
| >STK11-D194GTLKISDLGV  | 152   | >STK11-D194GTLKISYLGV   | 143  | 9     |
| >STK11-D194GTLKISDL    | 4461  | >STK11-D194GTLKISYL     | 118  | 4343  |
| >STK11-D194GTLKISDLGV  | 186   | >STK11-D194GTLKISYLGV   | 47   | 139   |
| >STK11-D194GTLKISDL    | 5230  | >STK11-D194GTLKISYL     | 376  | 4854  |
| >STK11-D194GTLKISDLGV  | 275   | >STK11-D194GTLKISYLGV   | 109  | 166   |
| >STK11-D194GTLKISDL    | 2629  | >STK11-D194GTLKISYL     | 246  | 2383  |
| >STK11-D194GTLKISDLGV  | 38    | >STK11-D194GTLKISYLGV   | 26   | 12    |
| >STK11-D194GTLKISDLGV  | 789   | >STK11-D194GTLKISYLGV   | 90   | 699   |
| >STK11-D194GTLKISDL    | 262   | >STK11-D194GTLKISYL     | 70   | 192   |
| >STK11-D194GTLKISDLGV/ | 328   | >STK11-D194GTLKISYLGVA/ | 235  | 93    |
| >STK11-D194TTGGTLKISD  | 20642 | >STK11-D194TTGGTLKISY   | 223  | 20419 |
| >STK11-D194TTGGTLKISD  | 27377 | >STK11-D194TTGGTLKISY   | 72   | 27305 |
| >STK11-D194TTGGTLKISDI | 670   | >STK11-D194TTGGTLKISYL  | 144  | 526   |
| >STK11-D194TTGGTLKISD  | 26241 | >STK11-D194TTGGTLKISY   | 49   | 26192 |
| >STK11-D194TTGGTLKISD  | 32589 | >STK11-D194TTGGTLKISY   | 414  | 32175 |
| >STK11-D194TTGGTLKISD  | 27952 | >STK11-D194TTGGTLKISY   | 317  | 27635 |
| >STK11-D194TTGGTLKISDI | 5130  | >STK11-D194TTGGTLKISYL  | 352  | 4778  |
| >STK11-D194TTGGTLKISD  | 23929 | >STK11-D194TTGGTLKISY   | 115  | 23814 |

|                        |       |                        |     |       |
|------------------------|-------|------------------------|-----|-------|
| >STK11-D194TTGGTLKISDI | 654   | >STK11-D194TTGGTLKISYL | 192 | 462   |
| >STK11-D194TTGGTLKISDI | 1068  | >STK11-D194TTGGTLKISYL | 100 | 968   |
| >STK11-D194TTGGTLKISD  | 19537 | >STK11-D194TTGGTLKISY  | 64  | 19473 |
| >STK11-D194TTGGTLKISDI | 1269  | >STK11-D194TTGGTLKISYL | 252 | 1017  |
| >STK11-D208AEALHPFAAC  | 547   | >STK11-D208AEALHPFAAC  | 236 | 311   |
| >STK11-D208FAADDTCRT   | 402   | >STK11-D208FAADNTCRT   | 656 | 254   |
| >STK11-D208FAADDTCRT   | 194   | >STK11-D208FAADNTCRT   | 135 | 59    |
| >STK11-D208FAADDTCR    | 8     | >STK11-D208FAADNTCR    | 6   | 2     |
| >STK11-D208HPFAADDT    | 127   | >STK11-D208HPFAADNT    | 159 | 32    |
| >STK11-D208HPFAADDTC   | 406   | >STK11-D208HPFAADNTC   | 577 | 171   |
| >STK11-D208HPFAADDTCI  | 322   | >STK11-D208HPFAADNTCI  | 261 | 61    |
| >STK11-D208HPFAADDT    | 133   | >STK11-D208HPFAADNT    | 185 | 52    |
| >STK11-D208HPFAADDTC   | 31    | >STK11-D208HPFAADNTC   | 35  | 4     |
| >STK11-D208HPFAADDTCI  | 102   | >STK11-D208HPFAADNTCI  | 116 | 14    |
| >STK11-D208HPFAADDTCI  | 970   | >STK11-D208HPFAADNTCI  | 430 | 540   |
| >STK11-D208HPFAADDTCI  | 181   | >STK11-D208HPFAADNTCI  | 128 | 53    |
| >STK11-D208ALHPFAADDI  | 194   | >STK11-D208ALHPFAADNI  | 253 | 59    |
| >STK11-D208ALHPFAADDI  | 278   | >STK11-D208ALHPFAADNI  | 150 | 128   |
| >STK11-D208ALHPFAADDI  | 45    | >STK11-D208ALHPFAADNI  | 26  | 19    |
| >STK11-D208EALHPFAADCI | 1895  | >STK11-D208EALHPFAADNI | 411 | 1484  |
| >STK11-D237DIWSAGVTLY  | 1485  | >STK11-D237YIWSAGVTLY  | 400 | 1085  |
| >STK11-D237DIWSAGVTL   | 13790 | >STK11-D237YIWSAGVTL   | 20  | 13770 |
| >STK11-D237DIWSAGVTL   | 7230  | >STK11-D237YIWSAGVTL   | 125 | 7105  |
| >STK11-D237DIWSAGVTL   | 15308 | >STK11-D237YIWSAGVTL   | 294 | 15014 |
| >STK11-D237DIWSAGVTL   | 5053  | >STK11-D237YIWSAGVTL   | 42  | 5011  |
| >STK11-D237DIWSAGVT    | 18257 | >STK11-D237YIWSAGVT    | 319 | 17938 |
| >STK11-D237DIWSAGVTL   | 1472  | >STK11-D237YIWSAGVTL   | 4   | 1468  |
| >STK11-D237DIWSAGVTLY  | 16804 | >STK11-D237YIWSAGVTLY  | 267 | 16537 |
| >STK11-D237DIWSAGVTL   | 7799  | >STK11-D237YIWSAGVTL   | 16  | 7783  |
| >STK11-D237DIWSAGVTL   | 787   | >STK11-D237YIWSAGVTL   | 8   | 779   |
| >STK11-D237DIWSAGVTL   | 2022  | >STK11-D237YIWSAGVTL   | 10  | 2012  |
| >STK11-D237DIWSAGVTL   | 1732  | >STK11-D237YIWSAGVTL   | 5   | 1727  |
| >STK11-D237DIWSAGVTLY  | 353   | >STK11-D237YIWSAGVTLY  | 90  | 263   |
| >STK11-D237DIWSAGVTLY  | 183   | >STK11-D237YIWSAGVTLY  | 82  | 101   |
| >STK11-D237DIWSAGVTL   | 828   | >STK11-D237YIWSAGVTL   | 187 | 641   |
| >STK11-D237DIWSAGVTL   | 117   | >STK11-D237YIWSAGVTL   | 79  | 38    |
| >STK11-D237DIWSAGVTLY  | 3706  | >STK11-D237YIWSAGVTLY  | 59  | 3647  |
| >STK11-D237DIWSAGVTL   | 14623 | >STK11-D237YIWSAGVTL   | 478 | 14145 |
| >STK11-D237DIWSAGVTLY  | 5956  | >STK11-D237YIWSAGVTLY  | 95  | 5861  |
| >STK11-D237DIWSAGVTLY  | 584   | >STK11-D237YIWSAGVTLY  | 61  | 523   |
| >STK11-D237DIWSAGVTL   | 2053  | >STK11-D237YIWSAGVTL   | 34  | 2019  |
| >STK11-D237DIWSAGVTLY  | 1415  | >STK11-D237YIWSAGVTLY  | 34  | 1381  |
| >STK11-D237DIWSAGVTL   | 12620 | >STK11-D237YIWSAGVTL   | 191 | 12429 |



|                       |       |                       |       |       |
|-----------------------|-------|-----------------------|-------|-------|
| >STK11-D237DIWSAGVTLY | 7379  | >STK11-D237YIWSAGVTLY | 57    | 7322  |
| >STK11-D237DIWSAGVTL  | 836   | >STK11-D237YIWSAGVTL  | 103   | 733   |
| >STK11-D237DIWSAGVTL  | 9468  | >STK11-D237YIWSAGVTL  | 305   | 9163  |
| >STK11-D237DIWSAGVTL  | 4030  | >STK11-D237YIWSAGVTL  | 165   | 3865  |
| >STK11-D237DIWSAGVTLY | 4479  | >STK11-D237YIWSAGVTLY | 178   | 4301  |
| >STK11-D237VDIWSAGVTI | 21351 | >STK11-D237VYIWSAGVTL | 16    | 21335 |
| >STK11-D237VDIWSAGV   | 2401  | >STK11-D237VYIWSAGV   | 363   | 2038  |
| >STK11-D237VDIWSAGV   | 3466  | >STK11-D237VYIWSAGV   | 220   | 3246  |
| >STK11-D237VDIWSAGV   | 7416  | >STK11-D237VYIWSAGV   | 110   | 7306  |
| >STK11-D237VDIWSAGVTI | 29587 | >STK11-D237VYIWSAGVTL | 131   | 29456 |
| >STK11-D237VDIWSAGVTI | 29057 | >STK11-D237VYIWSAGVTL | 119   | 28938 |
| >STK11-D237VDIWSAGVTI | 24876 | >STK11-D237VYIWSAGVTL | 12    | 24864 |
| >STK11-D237VDIWSAGVTI | 304   | >STK11-D237VYIWSAGVTL | 15    | 289   |
| >STK11-D237VDIWSAGVTI | 1088  | >STK11-D237VYIWSAGVTL | 59    | 1029  |
| >STK11-D237VDIWSAGVTI | 3999  | >STK11-D237VYIWSAGVTL | 150   | 3849  |
| >STK11-D237VDIWSAGVTI | 391   | >STK11-D237VYIWSAGVTL | 572   | 181   |
| >STK11-D237VDIWSAGVTI | 3860  | >STK11-D237VYIWSAGVTL | 267   | 3593  |
| >STK11-D237VDIWSAGV   | 31916 | >STK11-D237VYIWSAGV   | 231   | 31685 |
| >STK11-D237VDIWSAGVTI | 30021 | >STK11-D237VYIWSAGVTL | 385   | 29636 |
| >STK11-D237VDIWSAGV   | 171   | >STK11-D237VYIWSAGV   | 19450 | 19279 |
| >STK11-D237VDIWSAGVTI | 421   | >STK11-D237VYIWSAGVTL | 25627 | 25206 |
| >STK11-D237GLDTFSGFKV | 30484 | >STK11-D237GLDTFSGFKV | 303   | 30181 |
| >STK11-D237GLDTFSGFKV | 34533 | >STK11-D237GLDTFSGFKV | 453   | 34080 |
| >STK11-D237KVDIWSAGV  | 5732  | >STK11-D237KVYIWSAGV  | 66    | 5666  |
| >STK11-D237KVDIWSAGV  | 4237  | >STK11-D237KVYIWSAGV  | 61    | 4176  |
| >STK11-D237KVDIWSAGV  | 42    | >STK11-D237KVYIWSAGV  | 19    | 23    |
| >STK11-D237KVDIWSAGV  | 563   | >STK11-D237KVYIWSAGV  | 190   | 373   |
| >STK11-D237KVDIWSAGV  | 473   | >STK11-D237KVYIWSAGV  | 54    | 419   |
| >STK11-D237KVDIWSAGV  | 1632  | >STK11-D237KVYIWSAGV  | 340   | 1292  |
| >STK11-D237KVDIWSAGV  | 212   | >STK11-D237KVYIWSAGV  | 8     | 204   |
| >STK11-D237KVDIWSAGV  | 5804  | >STK11-D237KVYIWSAGV  | 466   | 5338  |
| >STK11-D237KVDIWSAGV  | 3745  | >STK11-D237KVYIWSAGV  | 178   | 3567  |
| >STK11-D237KVDIWSAGV  | 12    | >STK11-D237KVYIWSAGV  | 8     | 4     |
| >STK11-D237KVDIWSAGV  | 142   | >STK11-D237KVYIWSAGV  | 76    | 66    |
| >STK11-D237KVDIWSAGV  | 5     | >STK11-D237KVYIWSAGV  | 3     | 2     |
| >STK11-D237KVDIWSAGV  | 88    | >STK11-D237KVYIWSAGV  | 19    | 69    |
| >STK11-D237KVDIWSAGV  | 16    | >STK11-D237KVYIWSAGV  | 10    | 6     |
| >STK11-D237KVDIWSAGV  | 307   | >STK11-D237KVYIWSAGV  | 152   | 155   |
| >STK11-D237KVDIWSAGV  | 12    | >STK11-D237KVYIWSAGV  | 7     | 5     |
| >STK11-D237KVDIWSAGV  | 153   | >STK11-D237KVYIWSAGV  | 53    | 100   |
| >STK11-D237KVDIWSAGV  | 11    | >STK11-D237KVYIWSAGV  | 17    | 6     |
| >STK11-D237KVDIWSAGV  | 10    | >STK11-D237KVYIWSAGV  | 5     | 5     |
| >STK11-D237KVDIWSAGV  | 471   | >STK11-D237KVYIWSAGV  | 56    | 415   |

|                        |       |                        |      |       |
|------------------------|-------|------------------------|------|-------|
| >STK11-D237KVDIWSAGV   | 8514  | >STK11-D237KVYIWSAGV   | 223  | 8291  |
| >STK11-D237KVDIWSAGV'  | 8922  | >STK11-D237KVYIWSAGV\  | 234  | 8688  |
| >STK11-D237KVDIWSAGV   | 3271  | >STK11-D237KVYIWSAGV   | 273  | 2998  |
| >STK11-D237KVDIWSAGV'  | 97    | >STK11-D237KVYIWSAGV\  | 11   | 86    |
| >STK11-D237KVDIWSAGV   | 3219  | >STK11-D237KVYIWSAGV   | 149  | 3070  |
| >STK11-D237KVDIWSAGV   | 14    | >STK11-D237KVYIWSAGV   | 7    | 7     |
| >STK11-D237KVDIWSAGV   | 2416  | >STK11-D237KVYIWSAGV   | 67   | 2349  |
| >STK11-D237KVDIWSAGV'  | 153   | >STK11-D237KVYIWSAGV\  | 7    | 146   |
| >STK11-D237KVDIWSAGV'  | 2937  | >STK11-D237KVYIWSAGV\  | 439  | 2498  |
| >STK11-D237KVDIWSAGV'  | 3468  | >STK11-D237KVYIWSAGV\  | 280  | 3188  |
| >STK11-D237FKVDIWSA    | 443   | >STK11-D237FKVYIWSA    | 656  | 213   |
| >STK11-D237FKVDIWSA    | 23    | >STK11-D237FKVYIWSA    | 68   | 45    |
| >STK11-D237FKVDIWSAG\  | 105   | >STK11-D237FKVYIWSAG\  | 173  | 68    |
| >STK11-D237FKVDIWSAG\  | 70    | >STK11-D237FKVYIWSAG\  | 730  | 660   |
| >STK11-D237FKVDIWSAG\  | 65    | >STK11-D237FKVYIWSAG\  | 1756 | 1691  |
| >STK11-D237FKVDIWSA    | 513   | >STK11-D237FKVYIWSA    | 137  | 376   |
| >STK11-D237FKVDIWSAG\  | 278   | >STK11-D237FKVYIWSAG\  | 85   | 193   |
| >STK11-D237FKVDIWSAG\  | 443   | >STK11-D237FKVYIWSAG\  | 811  | 368   |
| >STK11-D237SGFKVDIW    | 371   | >STK11-D237SGFKVYIW    | 139  | 232   |
| >STK11-D237SGFKVDIW    | 170   | >STK11-D237SGFKVYIW    | 84   | 86    |
| >STK11-D237FSGFKVDI    | 6594  | >STK11-D237FSGFKVYI    | 460  | 6134  |
| >STK11-D237FSGFKVDIWS  | 847   | >STK11-D237FSGFKVYIWS  | 277  | 570   |
| >STK11-D237FSGFKVDI    | 4873  | >STK11-D237FSGFKVYI    | 315  | 4558  |
| >STK11-D237FSGFKVDIW   | 133   | >STK11-D237FSGFKVYIW   | 31   | 102   |
| >STK11-D237FSGFKVDIW   | 1873  | >STK11-D237FSGFKVYIW   | 278  | 1595  |
| >STK11-D237FSGFKVDIW   | 1839  | >STK11-D237FSGFKVYIW   | 240  | 1599  |
| >STK11-D237FSGFKVDIW   | 30    | >STK11-D237FSGFKVYIW   | 16   | 14    |
| >STK11-D237FSGFKVDI    | 410   | >STK11-D237FSGFKVYI    | 156  | 254   |
| >STK11-D237TFSGFKVDIW  | 2735  | >STK11-D237TFSGFKVYIW  | 136  | 2599  |
| >STK11-D237TFSGFKVDIW  | 6793  | >STK11-D237TFSGFKVYIW  | 466  | 6327  |
| >STK11-D237TFSGFKVDI   | 1033  | >STK11-D237TFSGFKVYI   | 175  | 858   |
| >STK11-D237TFSGFKVD    | 23170 | >STK11-D237TFSGFKVY    | 53   | 23117 |
| >STK11-D237TFSGFKVD    | 35080 | >STK11-D237TFSGFKVY    | 464  | 34616 |
| >STK11-D237TFSGFKVDI   | 983   | >STK11-D237TFSGFKVYI   | 266  | 717   |
| >STK11-D237DTFSGFKVDI  | 5743  | >STK11-D237DTFSGFKVYI  | 393  | 5350  |
| >STK11-D237DTFSGFKVD   | 21920 | >STK11-D237DTFSGFKVY   | 212  | 21708 |
| >STK11-D237DTFSGFKVD   | 20561 | >STK11-D237DTFSGFKVY   | 29   | 20532 |
| >STK11-D237DTFSGFKVD   | 28126 | >STK11-D237DTFSGFKVY   | 37   | 28089 |
| >STK11-D237DTFSGFKVD   | 26278 | >STK11-D237DTFSGFKVY   | 32   | 26246 |
| >STK11-D237DTFSGFKVDI\ | 673   | >STK11-D237DTFSGFKVYI\ | 408  | 265   |
| >STK11-D237DTFSGFKVD   | 25344 | >STK11-D237DTFSGFKVY   | 104  | 25240 |
| >STK11-D237DTFSGFKVD   | 27570 | >STK11-D237DTFSGFKVY   | 152  | 27418 |
| >STK11-D237DTFSGFKVDI  | 385   | >STK11-D237DTFSGFKVYI  | 692  | 307   |

|                        |       |                        |     |       |
|------------------------|-------|------------------------|-----|-------|
| >STK11-D237DTFSGFKVDI  | 1638  | >STK11-D237DTFSGFKVYI  | 304 | 1334  |
| >STK11-D237DTFSGFKVD   | 11055 | >STK11-D237DTFSGFKVY   | 109 | 10946 |
| >STK11-D237DTFSGFKVDI  | 200   | >STK11-D237DTFSGFKVYI  | 21  | 179   |
| >STK11-D237DTFSGFKVDI  | 303   | >STK11-D237DTFSGFKVYI  | 27  | 276   |
| >STK11-D237DTFSGFKVD   | 21745 | >STK11-D237DTFSGFKVY   | 328 | 21417 |
| >STK11-D237DTFSGFKVD   | 22672 | >STK11-D237DTFSGFKVY   | 128 | 22544 |
| >STK11-D237DTFSGFKVDI  | 237   | >STK11-D237DTFSGFKVYI  | 86  | 151   |
| >STK11-D237DTFSGFKVD   | 11734 | >STK11-D237DTFSGFKVY   | 311 | 11423 |
| >STK11-D237DTFSGFKVDI  | 366   | >STK11-D237DTFSGFKVYI  | 130 | 236   |
| >STK11-D237DTFSGFKVD   | 6153  | >STK11-D237DTFSGFKVY   | 15  | 6138  |
| >STK11-D237DTFSGFKVDI  | 225   | >STK11-D237DTFSGFKVYI  | 224 | 1     |
| >STK11-D237LDTFSGFKVD  | 238   | >STK11-D237LDTFSGFKVYI | 232 | 6     |
| >STK11-D277DCGPPLSDL   | 13145 | >STK11-D277YCGPPLSDL   | 425 | 12720 |
| >STK11-D277GDCGPPLSDL  | 26811 | >STK11-D277GYCGPPLSDL  | 54  | 26757 |
| >STK11-D277GDCGPPLSDL  | 25646 | >STK11-D277GYCGPPLSDL  | 43  | 25603 |
| >STK11-D277IGKGSYAIPGI | 31361 | >STK11-D277IGKGSYAIPGI | 101 | 31260 |
| >STK11-D277IGKGSYAIPGI | 22565 | >STK11-D277IGKGSYAIPGI | 314 | 22251 |
| >STK11-D277IGKGSYAIPGI | 24003 | >STK11-D277IGKGSYAIPGI | 185 | 23818 |
| >STK11-D277IPGDCGPPL   | 490   | >STK11-D277IPGYCGPPL   | 161 | 329   |
| >STK11-D277IPGDCGPPL   | 21    | >STK11-D277IPGYCGPPL   | 21  | 0     |
| >STK11-D277IPGDCGPPL   | 97    | >STK11-D277IPGYCGPPL   | 152 | 55    |
| >STK11-D277AIPGDCGPPL  | 141   | >STK11-D277AIPGYCGPPL  | 153 | 12    |
| >STK11-D277AIPGDCGPPL  | 93    | >STK11-D277AIPGYCGPPL  | 117 | 24    |
| >STK11-D277AIPGDCGPPL  | 1245  | >STK11-D277AIPGYCGPPL  | 227 | 1018  |
| >STK11-D277YAIPGDCGPP  | 654   | >STK11-D277YAIPGYCGPP  | 194 | 460   |
| >STK11-D277YAIPGDCGPP  | 246   | >STK11-D277YAIPGYCGPP  | 185 | 61    |
| >STK11-D277YAIPGDCGPP  | 748   | >STK11-D277YAIPGYCGPP  | 485 | 263   |
| >STK11-D277YAIPGDCGPP  | 1073  | >STK11-D277YAIPGYCGPP  | 347 | 726   |
| >STK11-D277YAIPGDCGPP  | 17    | >STK11-D277YAIPGYCGPP  | 11  | 6     |
| >STK11-D277YAIPGDCGPP  | 428   | >STK11-D277YAIPGYCGPP  | 323 | 105   |
| >STK11-D277YAIPGDCGPP  | 71    | >STK11-D277YAIPGYCGPP  | 88  | 17    |
| >STK11-D277YAIPGDCGPP  | 547   | >STK11-D277YAIPGYCGPP  | 356 | 191   |
| >STK11-D277YAIPGDCGPP  | 240   | >STK11-D277YAIPGYCGPP  | 77  | 163   |
| >STK11-D277YAIPGDCGPP  | 500   | >STK11-D277YAIPGYCGPP  | 443 | 57    |
| >STK11-D277YAIPGDCGPP  | 195   | >STK11-D277YAIPGYCGPP  | 193 | 2     |
| >STK11-D277YAIPGDCGPP  | 339   | >STK11-D277YAIPGYCGPP  | 107 | 232   |
| >STK11-D277YAIPGDCGPP  | 7     | >STK11-D277YAIPGYCGPP  | 9   | 2     |
| >STK11-D277YAIPGDCGPP  | 34    | >STK11-D277YAIPGYCGPP  | 61  | 27    |
| >STK11-D277YAIPGDCGPP  | 239   | >STK11-D277YAIPGYCGPP  | 139 | 100   |
| >STK11-D277SYAIPGDC    | 1607  | >STK11-D277SYAIPGYC    | 487 | 1120  |
| >STK11-D277GSYAIPGD    | 19351 | >STK11-D277GSYAIPGY    | 382 | 18969 |
| >STK11-D277GSYAIPGD    | 23178 | >STK11-D277GSYAIPGY    | 250 | 22928 |
| >STK11-D277GSYAIPGD    | 23921 | >STK11-D277GSYAIPGY    | 62  | 23859 |

|                       |       |                       |       |       |
|-----------------------|-------|-----------------------|-------|-------|
| >STK11-D277GSYAIPGD   | 23517 | >STK11-D277GSYAIPGY   | 33    | 23484 |
| >STK11-D277GSYAIPGD   | 21435 | >STK11-D277GSYAIPGY   | 245   | 21190 |
| >STK11-D277GSYAIPGD   | 12764 | >STK11-D277GSYAIPGY   | 6     | 12758 |
| >STK11-D277KGSYAIPGD  | 18781 | >STK11-D277KGSYAIPGY  | 13    | 18768 |
| >STK11-D277KGSYAIPGD  | 22309 | >STK11-D277KGSYAIPGY  | 434   | 21875 |
| >STK11-D277KGSYAIPGD  | 25735 | >STK11-D277KGSYAIPGY  | 305   | 25430 |
| >STK11-D277GKGSYAIPGD | 21517 | >STK11-D277GKGSYAIPGY | 140   | 21377 |
| >STK11-E14KTEGELMSVGI | 290   | >STK11-E14KTKGELMSVGI | 15563 | 15273 |
| >STK11-E14KTEGELMSV   | 184   | >STK11-E14KTKGELMSV   | 27071 | 26887 |
| >STK11-E14KTEGELMSV   | 176   | >STK11-E14KTKGELMSV   | 30974 | 30798 |
| >STK11-E14KTEGELMSVGI | 52    | >STK11-E14KTKGELMSVGI | 18770 | 18718 |
| >STK11-E14KFTEGELMSV  | 234   | >STK11-E14KFTKGELMSV  | 349   | 115   |
| >STK11-E14KFTEGELMSV  | 33    | >STK11-E14KFTKGELMSV  | 44    | 11    |
| >STK11-E14KFTEGELMSV  | 64    | >STK11-E14KFTKGELMSV  | 5     | 59    |
| >STK11-E14KFTEGELMSV  | 11    | >STK11-E14KFTKGELMSV  | 16    | 5     |
| >STK11-E14KFTEGELMSV  | 65    | >STK11-E14KFTKGELMSV  | 141   | 76    |
| >STK11-E14KFTEGELMSV  | 5     | >STK11-E14KFTKGELMSV  | 5     | 0     |
| >STK11-E14KFTEGELMSV  | 6423  | >STK11-E14KFTKGELMSV  | 367   | 6056  |
| >STK11-E14KFTEGELMSVC | 375   | >STK11-E14KFTKGELMSVC | 30    | 345   |
| >STK11-E14KFTEGELMSVC | 1760  | >STK11-E14KFTKGELMSVC | 291   | 1469  |
| >STK11-E14KFTEGELMSV  | 149   | >STK11-E14KFTKGELMSV  | 100   | 49    |
| >STK11-E14KFTEGELMSV  | 127   | >STK11-E14KFTKGELMSV  | 234   | 107   |
| >STK11-E14KFTEGELMSVC | 42    | >STK11-E14KFTKGELMSVC | 22    | 20    |
| >STK11-E14KFTEGELMSVC | 408   | >STK11-E14KFTKGELMSVC | 856   | 448   |
| >STK11-E14KFTEGELMSVC | 216   | >STK11-E14KFTKGELMSVC | 132   | 84    |
| >STK11-E14KMFTEGELMS' | 326   | >STK11-E14KMFTKGELMS' | 904   | 578   |
| >STK11-E14KMFTEGELMS' | 17    | >STK11-E14KMFTKGELMS' | 106   | 89    |
| >STK11-E14KMFTEGELM   | 296   | >STK11-E14KMFTKGELM   | 391   | 95    |
| >STK11-E14KGMFTEGEL   | 185   | >STK11-E14KGMFTKGEL   | 340   | 155   |
| >STK11-E14KGMFTEGELM  | 16    | >STK11-E14KGMFTKGELM  | 17    | 1     |
| >STK11-E14KGMFTEGEL   | 23    | >STK11-E14KGMFTKGEL   | 42    | 19    |
| >STK11-E14KGMFTEGELM  | 64    | >STK11-E14KGMFTKGELM  | 137   | 73    |
| >STK11-E14KGMFTEGELM  | 6     | >STK11-E14KGMFTKGELM  | 7     | 1     |
| >STK11-E14KGMFTEGEL   | 119   | >STK11-E14KGMFTKGEL   | 87    | 32    |
| >STK11-E14KGMFTEGELM  | 5     | >STK11-E14KGMFTKGELM  | 4     | 1     |
| >STK11-E14KGMFTEGELM  | 22    | >STK11-E14KGMFTKGELM  | 33    | 11    |
| >STK11-E14KGMFTEGEL   | 13    | >STK11-E14KGMFTKGEL   | 13    | 0     |
| >STK11-E14KGMFTEGELM  | 124   | >STK11-E14KGMFTKGELM  | 108   | 16    |
| >STK11-E14KGMFTEGELM  | 2     | >STK11-E14KGMFTKGELM  | 2     | 0     |
| >STK11-E14KGMFTEGEL   | 40    | >STK11-E14KGMFTKGEL   | 55    | 15    |
| >STK11-E14KGMFTEGELM  | 476   | >STK11-E14KGMFTKGELM  | 600   | 124   |
| >STK11-E14KGMFTEGELM  | 4     | >STK11-E14KGMFTKGELM  | 4     | 0     |
| >STK11-E14KGMFTEGEL   | 28    | >STK11-E14KGMFTKGEL   | 41    | 13    |

|                         |       |                         |       |       |
|-------------------------|-------|-------------------------|-------|-------|
| >STK11-E14K GMFTEGELM   | 5     | >STK11-E14K GMFTKGELM   | 5     | 0     |
| >STK11-E14K GMFTEGELM   | 32    | >STK11-E14K GMFTKGELM   | 33    | 1     |
| >STK11-E14K GMFTEGEL    | 25    | >STK11-E14K GMFTKGEL    | 26    | 1     |
| >STK11-E14K GMFTEGELM   | 3     | >STK11-E14K GMFTKGELM   | 3     | 0     |
| >STK11-E14K GMFTEGELM   | 354   | >STK11-E14K GMFTKGELM   | 460   | 106   |
| >STK11-E14K GMFTEGEL    | 300   | >STK11-E14K GMFTKGEL    | 628   | 328   |
| >STK11-E14K GMFTEGELM   | 113   | >STK11-E14K GMFTKGELM   | 311   | 198   |
| >STK11-E14K GMFTEGELM   | 85    | >STK11-E14K GMFTKGELM   | 159   | 74    |
| >STK11-E14K GMFTEGELM   | 243   | >STK11-E14K GMFTKGELM   | 232   | 11    |
| >STK11-E14K LGMFTEGELM  | 105   | >STK11-E14K LGMFTKGELM  | 191   | 86    |
| >STK11-E14K QLGMFTEGEI  | 85    | >STK11-E14K QLGMFTKGE   | 287   | 202   |
| >STK11-E14K QLGMFTEGEI  | 393   | >STK11-E14K QLGMFTKGE   | 362   | 31    |
| >STK11-E14K QLGMFTEGEI  | 219   | >STK11-E14K QLGMFTKGE   | 422   | 203   |
| >STK11-E14K QLGMFTEGEI  | 72    | >STK11-E14K QLGMFTKGE   | 109   | 37    |
| >STK11-E14K QQLGMFTEG   | 138   | >STK11-E14K QQLGMFTKG   | 194   | 56    |
| >STK11-E14K QQLGMFTE    | 23421 | >STK11-E14K QQLGMFTK    | 57    | 23364 |
| >STK11-E14K QQLGMFTE    | 13518 | >STK11-E14K QQLGMFTK    | 466   | 13052 |
| >STK11-E14K QQLGMFTE    | 12332 | >STK11-E14K QQLGMFTK    | 359   | 11973 |
| >STK11-E199 EALHPFAA    | 3721  | >STK11-E199 KALHPFAA    | 64    | 3657  |
| >STK11-E199 EALHPFAA    | 16377 | >STK11-E199 KALHPFAA    | 186   | 16191 |
| >STK11-E199 EALHPFAA    | 133   | >STK11-E199 KALHPFAA    | 9977  | 9844  |
| >STK11-E199 EALHPFAA    | 27    | >STK11-E199 KALHPFAA    | 3107  | 3080  |
| >STK11-E199 AEALHPFA    | 216   | >STK11-E199 AKALHPFA    | 28289 | 28073 |
| >STK11-E199 AEALHPFAA   | 157   | >STK11-E199 AKALHPFAA   | 28005 | 27848 |
| >STK11-E199 AEALHPFA    | 5     | >STK11-E199 AKALHPFA    | 2033  | 2028  |
| >STK11-E199 AEALHPFAA   | 4     | >STK11-E199 AKALHPFAA   | 992   | 988   |
| >STK11-E199 AEALHPFAAC  | 197   | >STK11-E199 AKALHPFAAC  | 10818 | 10621 |
| >STK11-E199 AEALHPFAA   | 117   | >STK11-E199 AKALHPFAA   | 21903 | 21786 |
| >STK11-E199 TLKISDLGVAE | 20732 | >STK11-E199 TLKISDLGVAE | 372   | 20360 |
| >STK11-E199 TLKISDLGVAE | 14193 | >STK11-E199 TLKISDLGVAE | 162   | 14031 |
| >STK11-E199 VAEALHPFA   | 2984  | >STK11-E199 VAKALHPFA   | 12    | 2972  |
| >STK11-E199 VAEALHPFAA  | 9258  | >STK11-E199 VAKALHPFAA  | 167   | 9091  |
| >STK11-E199 VAEALHPF    | 1968  | >STK11-E199 VAKALHPF    | 94    | 1874  |
| >STK11-E199 VAEALHPF    | 1327  | >STK11-E199 VAKALHPF    | 63    | 1264  |
| >STK11-E199 VAEALHPF    | 38    | >STK11-E199 VAKALHPF    | 22    | 16    |
| >STK11-E199 VAEALHPF    | 127   | >STK11-E199 VAKALHPF    | 568   | 441   |
| >STK11-E199 VAEALHPF    | 4317  | >STK11-E199 VAKALHPF    | 378   | 3939  |
| >STK11-E199 GVAEALHPFA  | 159   | >STK11-E199 GVAKALHPFA  | 1214  | 1055  |
| >STK11-E199 GVAEALHPFA  | 73    | >STK11-E199 GVAKALHPFA  | 269   | 196   |
| >STK11-E199 GVAEALHPFA  | 33    | >STK11-E199 GVAKALHPFA  | 133   | 100   |
| >STK11-E199 GVAEALHPF   | 23    | >STK11-E199 GVAKALHPF   | 221   | 198   |
| >STK11-E199 GVAEALHPFA  | 26    | >STK11-E199 GVAKALHPFA  | 108   | 82    |
| >STK11-E199 GVAEALHPFA  | 497   | >STK11-E199 GVAKALHPFA  | 4024  | 3527  |

|                         |       |                         |       |       |
|-------------------------|-------|-------------------------|-------|-------|
| >STK11-E199 GVAEALHPFA  | 393   | >STK11-E199 GVAKALHPFA  | 3966  | 3573  |
| >STK11-E199 GVAEALHPFA  | 340   | >STK11-E199 GVAKALHPFA  | 3166  | 2826  |
| >STK11-E199 GVAEALHPFA  | 74    | >STK11-E199 GVAKALHPFA  | 362   | 288   |
| >STK11-E199 GVAEALHPFA  | 455   | >STK11-E199 GVAKALHPFA  | 2463  | 2008  |
| >STK11-E199 GVAEALHPFA  | 295   | >STK11-E199 GVAKALHPFA  | 1754  | 1459  |
| >STK11-E199 GVAEALHPF   | 19    | >STK11-E199 GVAKALHPF   | 44    | 25    |
| >STK11-E199 GVAEALHPFA  | 926   | >STK11-E199 GVAKALHPFA  | 492   | 434   |
| >STK11-E199 GVAEALHPF   | 95    | >STK11-E199 GVAKALHPF   | 82    | 13    |
| >STK11-E199 GVAEALHPF   | 227   | >STK11-E199 GVAKALHPF   | 748   | 521   |
| >STK11-E199 GVAEALHPF   | 256   | >STK11-E199 GVAKALHPF   | 1022  | 766   |
| >STK11-E199 GVAEALHPF   | 62    | >STK11-E199 GVAKALHPF   | 85    | 23    |
| >STK11-E199 LGVAEALHPF  | 141   | >STK11-E199 LGVAKALHPF  | 155   | 14    |
| >STK11-E199 LGVAEALHPF  | 315   | >STK11-E199 LGVAKALHPF  | 483   | 168   |
| >STK11-E199 LGVAEALHPF  | 89    | >STK11-E199 LGVAKALHPF  | 65    | 24    |
| >STK11-E199 SDLGVAEAL   | 281   | >STK11-E199 SDLGVAKAL   | 1077  | 796   |
| >STK11-E199 ISDLGVAE    | 26194 | >STK11-E199 ISDLGVAK    | 159   | 26035 |
| >STK11-E199 ISDLGVAEAL  | 33    | >STK11-E199 ISDLGVAKAL  | 15    | 18    |
| >STK11-E199 KISDLGVAEA  | 429   | >STK11-E199 KISDLGVAKA  | 611   | 182   |
| >STK11-E199 KISDLGVAEA  | 14    | >STK11-E199 KISDLGVAKA  | 77    | 63    |
| >STK11-E199 KISDLGVAEA  | 96    | >STK11-E199 KISDLGVAKA  | 157   | 61    |
| >STK11-E199 KISDLGVAEA  | 288   | >STK11-E199 KISDLGVAKA  | 416   | 128   |
| >STK11-E199 KISDLGVAEA  | 68    | >STK11-E199 KISDLGVAKA  | 394   | 326   |
| >STK11-E199 KISDLGVAEA  | 324   | >STK11-E199 KISDLGVAKA  | 694   | 370   |
| >STK11-E199 KISDLGVAEA  | 114   | >STK11-E199 KISDLGVAKA  | 361   | 247   |
| >STK11-E199 KISDLGVAEA  | 136   | >STK11-E199 KISDLGVAKA  | 331   | 195   |
| >STK11-E199 KISDLGVAEA  | 201   | >STK11-E199 KISDLGVAKA  | 502   | 301   |
| >STK11-E199 KISDLGVAE   | 18139 | >STK11-E199 KISDLGVAK   | 113   | 18026 |
| >STK11-E199 KISDLGVAE   | 18195 | >STK11-E199 KISDLGVAK   | 29    | 18166 |
| >STK11-E199 KISDLGVAE   | 13592 | >STK11-E199 KISDLGVAK   | 61    | 13531 |
| >STK11-E199 KISDLGVAE   | 14205 | >STK11-E199 KISDLGVAK   | 392   | 13813 |
| >STK11-E199 KISDLGVAEA  | 38    | >STK11-E199 KISDLGVAKA  | 70    | 32    |
| >STK11-E199 KISDLGVAE   | 18463 | >STK11-E199 KISDLGVAK   | 399   | 18064 |
| >STK11-E199 LKISDLGVAE  | 1331  | >STK11-E199 LKISDLGVAK  | 143   | 1188  |
| >STK11-E199 LKISDLGVAE/ | 474   | >STK11-E199 LKISDLGVAK/ | 1079  | 605   |
| >STK11-E199 EALHPFAA    | 3721  | >STK11-E199 QALHPFAA    | 381   | 3340  |
| >STK11-E199 EALHPFAA    | 133   | >STK11-E199 QALHPFAA    | 1011  | 878   |
| >STK11-E199 EALHPFAA    | 27    | >STK11-E199 QALHPFAA    | 208   | 181   |
| >STK11-E199 AEALHPFAA   | 10855 | >STK11-E199 AQALHPFAA   | 395   | 10460 |
| >STK11-E199 AEALHPFA    | 13191 | >STK11-E199 AQALHPFA    | 461   | 12730 |
| >STK11-E199 AEALHPFAA   | 10327 | >STK11-E199 AQALHPFAA   | 138   | 10189 |
| >STK11-E199 AEALHPFA    | 6904  | >STK11-E199 AQALHPFA    | 37    | 6867  |
| >STK11-E199 AEALHPFAA   | 6774  | >STK11-E199 AQALHPFAA   | 31    | 6743  |
| >STK11-E199 AEALHPFA    | 216   | >STK11-E199 AQALHPFA    | 13254 | 13038 |

|                        |      |                        |       |       |
|------------------------|------|------------------------|-------|-------|
| >STK11-E199 AEALHPFAA  | 157  | >STK11-E199 AQALHPFAA  | 13914 | 13757 |
| >STK11-E199 AEALHPFA   | 5    | >STK11-E199 AQALHPFA   | 183   | 178   |
| >STK11-E199 AEALHPFAA  | 4    | >STK11-E199 AQALHPFAA  | 77    | 73    |
| >STK11-E199 AEALHPFAAC | 197  | >STK11-E199 AQALHPFAAI | 7937  | 7740  |
| >STK11-E199 AEALHPFAA  | 117  | >STK11-E199 AQALHPFAA  | 14292 | 14175 |
| >STK11-E199 VAEALHPF   | 1968 | >STK11-E199 VAQALHPF   | 140   | 1828  |
| >STK11-E199 VAEALHPF   | 1327 | >STK11-E199 VAQALHPF   | 171   | 1156  |
| >STK11-E199 VAEALHPF   | 38   | >STK11-E199 VAQALHPF   | 28    | 10    |
| >STK11-E199 VAEALHPF   | 127  | >STK11-E199 VAQALHPF   | 160   | 33    |
| >STK11-E199 VAEALHPF   | 3272 | >STK11-E199 VAQALHPF   | 130   | 3142  |
| >STK11-E199 GVAEALHPFA | 159  | >STK11-E199 GVAQALHPF/ | 1296  | 1137  |
| >STK11-E199 GVAEALHPFA | 73   | >STK11-E199 GVAQALHPF/ | 242   | 169   |
| >STK11-E199 GVAEALHPFA | 33   | >STK11-E199 GVAQALHPF/ | 133   | 100   |
| >STK11-E199 GVAEALHPF  | 23   | >STK11-E199 GVAQALHPF  | 176   | 153   |
| >STK11-E199 GVAEALHPFA | 26   | >STK11-E199 GVAQALHPF/ | 91    | 65    |
| >STK11-E199 GVAEALHPFA | 497  | >STK11-E199 GVAQALHPF/ | 2659  | 2162  |
| >STK11-E199 GVAEALHPFA | 393  | >STK11-E199 GVAQALHPF/ | 2389  | 1996  |
| >STK11-E199 GVAEALHPFA | 340  | >STK11-E199 GVAQALHPF/ | 3103  | 2763  |
| >STK11-E199 GVAEALHPFA | 74   | >STK11-E199 GVAQALHPF/ | 275   | 201   |
| >STK11-E199 GVAEALHPFA | 455  | >STK11-E199 GVAQALHPF/ | 2009  | 1554  |
| >STK11-E199 GVAEALHPFA | 295  | >STK11-E199 GVAQALHPF/ | 747   | 452   |
| >STK11-E199 GVAEALHPF  | 19   | >STK11-E199 GVAQALHPF  | 22    | 3     |
| >STK11-E199 GVAEALHPF  | 95   | >STK11-E199 GVAQALHPF  | 62    | 33    |
| >STK11-E199 GVAEALHPF  | 227  | >STK11-E199 GVAQALHPF  | 239   | 12    |
| >STK11-E199 GVAEALHPF  | 256  | >STK11-E199 GVAQALHPF  | 341   | 85    |
| >STK11-E199 GVAEALHPF  | 62   | >STK11-E199 GVAQALHPF  | 112   | 50    |
| >STK11-E199 LGVAEALHPF | 141  | >STK11-E199 LGVAQALHPF | 111   | 30    |
| >STK11-E199 LGVAEALHPF | 315  | >STK11-E199 LGVAQALHPF | 306   | 9     |
| >STK11-E199 LGVAEALHPF | 89   | >STK11-E199 LGVAQALHPF | 64    | 25    |
| >STK11-E199 SDLGVAEAL  | 1057 | >STK11-E199 SDLGVAQAL  | 372   | 685   |
| >STK11-E199 SDLGVAEAL  | 281  | >STK11-E199 SDLGVAQAL  | 911   | 630   |
| >STK11-E199 ISDLGVAEAL | 33   | >STK11-E199 ISDLGVAQAL | 13    | 20    |
| >STK11-E199 KISDLGVAEA | 429  | >STK11-E199 KISDLGVAQA | 695   | 266   |
| >STK11-E199 KISDLGVAEA | 14   | >STK11-E199 KISDLGVAQA | 23    | 9     |
| >STK11-E199 KISDLGVAEA | 96   | >STK11-E199 KISDLGVAQA | 193   | 97    |
| >STK11-E199 KISDLGVAEA | 288  | >STK11-E199 KISDLGVAQA | 205   | 83    |
| >STK11-E199 KISDLGVAEA | 68   | >STK11-E199 KISDLGVAQA | 90    | 22    |
| >STK11-E199 KISDLGVAEA | 324  | >STK11-E199 KISDLGVAQA | 356   | 32    |
| >STK11-E199 KISDLGVAEA | 114  | >STK11-E199 KISDLGVAQA | 124   | 10    |
| >STK11-E199 KISDLGVAEA | 136  | >STK11-E199 KISDLGVAQA | 126   | 10    |
| >STK11-E199 KISDLGVAEA | 201  | >STK11-E199 KISDLGVAQA | 82    | 119   |
| >STK11-E199 KISDLGVAEA | 38   | >STK11-E199 KISDLGVAQA | 52    | 14    |
| >STK11-E199 LKISDLGVAE | 1331 | >STK11-E199 LKISDLGVAQ | 391   | 940   |

|                         |       |                         |      |       |
|-------------------------|-------|-------------------------|------|-------|
| >STK11-E199 LKISDLGVAE/ | 474   | >STK11-E199 LKISDLGVAQ, | 906  | 432   |
| >STK11-E223 EIANGLDTF   | 2566  | >STK11-E223 LIANGLDTF   | 185  | 2381  |
| >STK11-E223 EIANGLDTF   | 60    | >STK11-E223 LIANGLDTF   | 4765 | 4705  |
| >STK11-E223 EIANGLDTF   | 95    | >STK11-E223 LIANGLDTF   | 9227 | 9132  |
| >STK11-E223 EIANGLDTF   | 5     | >STK11-E223 LIANGLDTF   | 218  | 213   |
| >STK11-E223 EIANGLDTF   | 1522  | >STK11-E223 LIANGLDTF   | 95   | 1427  |
| >STK11-E223 EIANGLDTF   | 437   | >STK11-E223 LIANGLDTF   | 441  | 4     |
| >STK11-E223 EIANGLDTF   | 1809  | >STK11-E223 LIANGLDTF   | 142  | 1667  |
| >STK11-E223 SQGSPAFQPF  | 16096 | >STK11-E223 SQGSPAFQPF  | 82   | 16014 |
| >STK11-E223 SQGSPAFQPF  | 7263  | >STK11-E223 SQGSPAFQPF  | 390  | 6873  |
| >STK11-E223 SQGSPAFQPF  | 10103 | >STK11-E223 SQGSPAFQPF  | 139  | 9964  |
| >STK11-E223 SQGSPAFQPF  | 22911 | >STK11-E223 SQGSPAFQPF  | 277  | 22634 |
| >STK11-E223 PPEIANGLDT  | 563   | >STK11-E223 PPLIANGLDTI | 86   | 477   |
| >STK11-E223 PPEIANGLDT  | 493   | >STK11-E223 PPLIANGLDTI | 311  | 182   |
| >STK11-E223 PPEIANGLDT  | 711   | >STK11-E223 PPLIANGLDTI | 482  | 229   |
| >STK11-E223 QPPEIANGL   | 425   | >STK11-E223 QPPLIANGL   | 590  | 165   |
| >STK11-E223 FQPPEIANGL  | 200   | >STK11-E223 FQPPLIANGL  | 162  | 38    |
| >STK11-E223 FQPPEIAN    | 1485  | >STK11-E223 FQPPLIAN    | 356  | 1129  |
| >STK11-E223 FQPPEIANG   | 538   | >STK11-E223 FQPPLIANG   | 328  | 210   |
| >STK11-E223 FQPPEIANGL  | 121   | >STK11-E223 FQPPLIANGL  | 101  | 20    |
| >STK11-E223 FQPPEIANGL  | 286   | >STK11-E223 FQPPLIANGL  | 340  | 54    |
| >STK11-E223 FQPPEIANGL  | 424   | >STK11-E223 FQPPLIANGL  | 688  | 264   |
| >STK11-E223 FQPPEIANGL  | 511   | >STK11-E223 FQPPLIANGL  | 427  | 84    |
| >STK11-E223 FQPPEIANGL  | 244   | >STK11-E223 FQPPLIANGL  | 150  | 94    |
| >STK11-E223 AFQPPEIANG  | 197   | >STK11-E223 AFQPPLIANG  | 117  | 80    |
| >STK11-E223 PAFQPPEI    | 617   | >STK11-E223 PAFQPPLI    | 353  | 264   |
| >STK11-E223 SPAFQPPE    | 7731  | >STK11-E223 SPAFQPPL    | 43   | 7688  |
| >STK11-E223 SPAFQPPE    | 3076  | >STK11-E223 SPAFQPPL    | 198  | 2878  |
| >STK11-E223 SPAFQPPE    | 22341 | >STK11-E223 SPAFQPPL    | 303  | 22038 |
| >STK11-E223 SPAFQPPEI   | 612   | >STK11-E223 SPAFQPPLI   | 312  | 300   |
| >STK11-E223 SPAFQPPEIA  | 436   | >STK11-E223 SPAFQPPLIA  | 433  | 3     |
| >STK11-E223 GSPAFQPPE   | 16197 | >STK11-E223 GSPAFQPPL   | 164  | 16033 |
| >STK11-E223 GSPAFQPPE   | 552   | >STK11-E223 GSPAFQPPL   | 4    | 548   |
| >STK11-E223 GSPAFQPPEI  | 54    | >STK11-E223 GSPAFQPPLI  | 9    | 45    |
| >STK11-E223 GSPAFQPPEI/ | 428   | >STK11-E223 GSPAFQPPLI/ | 153  | 275   |
| >STK11-E223 GSPAFQPPEI  | 57    | >STK11-E223 GSPAFQPPLI  | 29   | 28    |
| >STK11-E223 QGSPAFQPPI  | 751   | >STK11-E223 QGSPAFQPPI  | 376  | 375   |
| >STK11-F231 FSGFKVDIW   | 133   | >STK11-F231 LSGFKVDIW   | 151  | 18    |
| >STK11-F231 FSGFKVDIW   | 1839  | >STK11-F231 LSGFKVDIW   | 326  | 1513  |
| >STK11-F231 FSGFKVDIW   | 30    | >STK11-F231 LSGFKVDIW   | 25   | 5     |
| >STK11-F231 FSGFKVDI    | 410   | >STK11-F231 LSGFKVDI    | 308  | 102   |
| >STK11-F231 TFSGFKVDI   | 12523 | >STK11-F231 TLSGFKVDI   | 263  | 12260 |
| >STK11-F231 TFSGFKVDI   | 21056 | >STK11-F231 TLSGFKVDI   | 21   | 21035 |



|                        |       |                        |      |       |
|------------------------|-------|------------------------|------|-------|
| >STK11-F231 TFSGFKVDI  | 6363  | >STK11-F231 TLSGFKVDI  | 448  | 5915  |
| >STK11-F231 PPEIANGLDI | 493   | >STK11-F231 PPEIANGLDI | 5061 | 4568  |
| >STK11-F231 DTFSGFKVDI | 385   | >STK11-F231 DTLSGFKVDI | 1623 | 1238  |
| >STK11-F231 DTFSGFKV   | 9     | >STK11-F231 DTLSGFKV   | 107  | 98    |
| >STK11-F231 DTFSGFKVDI | 200   | >STK11-F231 DTLSGFKVDI | 2418 | 2218  |
| >STK11-F231 DTFSGFKV   | 9     | >STK11-F231 DTLSGFKV   | 6    | 3     |
| >STK11-F231 DTFSGFKVDI | 303   | >STK11-F231 DTLSGFKVDI | 160  | 143   |
| >STK11-F231 DTFSGFKVDI | 237   | >STK11-F231 DTLSGFKVDI | 437  | 200   |
| >STK11-F231 DTFSGFKVDI | 366   | >STK11-F231 DTLSGFKVDI | 1221 | 855   |
| >STK11-F231 DTFSGFKVDI | 225   | >STK11-F231 DTLSGFKVDI | 219  | 6     |
| >STK11-F231 LDTFSGFKV  | 168   | >STK11-F231 LDTLGFKV   | 47   | 121   |
| >STK11-F231 LDTFSGFKVD | 238   | >STK11-F231 LDTLGFKVD  | 79   | 159   |
| >STK11-F231 GLDTFSGFKV | 105   | >STK11-F231 GLDTLGSFKV | 170  | 65    |
| >STK11-F231 GLDTFSGFKV | 36    | >STK11-F231 GLDTLGSFKV | 77   | 41    |
| >STK11-F231 GLDTFSGFKV | 272   | >STK11-F231 GLDTLGSFKV | 501  | 229   |
| >STK11-F231 GLDTFSGFKV | 321   | >STK11-F231 GLDTLGSFKV | 476  | 155   |
| >STK11-F231 GLDTFSGFKV | 4     | >STK11-F231 GLDTLGSFKV | 5    | 1     |
| >STK11-F231 GLDTFSGFKV | 5     | >STK11-F231 GLDTLGSFKV | 5    | 0     |
| >STK11-F231 GLDTFSGFKV | 5     | >STK11-F231 GLDTLGSFKV | 5    | 0     |
| >STK11-F231 GLDTFSGFKV | 16    | >STK11-F231 GLDTLGSFKV | 25   | 9     |
| >STK11-F231 GLDTFSGFKV | 4     | >STK11-F231 GLDTLGSFKV | 5    | 1     |
| >STK11-F231 GLDTFSGFK  | 52    | >STK11-F231 GLDTLGSFK  | 66   | 14    |
| >STK11-F231 GLDTFSGFK  | 31    | >STK11-F231 GLDTLGSFK  | 91   | 60    |
| >STK11-F231 NGLDTFSGFK | 498   | >STK11-F231 NGLDTLGSFK | 651  | 153   |
| >STK11-F231 NGLDTFSGFK | 133   | >STK11-F231 NGLDTLGSFK | 215  | 82    |
| >STK11-F231 NGLDTFSGF  | 293   | >STK11-F231 NGLDTLGSF  | 420  | 127   |
| >STK11-F231 IANGLDTFSG | 272   | >STK11-F231 IANGLDTLSG | 453  | 181   |
| >STK11-F231 IANGLDTFSG | 191   | >STK11-F231 IANGLDTLSG | 342  | 151   |
| >STK11-F231 IANGLDTF   | 30    | >STK11-F231 IANGLDTL   | 259  | 229   |
| >STK11-F231 IANGLDTFSG | 18    | >STK11-F231 IANGLDTLSG | 13   | 5     |
| >STK11-F231 IANGLDTF   | 43    | >STK11-F231 IANGLDTL   | 805  | 762   |
| >STK11-F231 IANGLDTFSG | 119   | >STK11-F231 IANGLDTLSG | 155  | 36    |
| >STK11-F231 IANGLDTF   | 271   | >STK11-F231 IANGLDTL   | 3263 | 2992  |
| >STK11-F231 IANGLDTF   | 38    | >STK11-F231 IANGLDTL   | 819  | 781   |
| >STK11-F231 IANGLDTFSG | 68    | >STK11-F231 IANGLDTLSG | 61   | 7     |
| >STK11-F231 IANGLDTFSG | 62    | >STK11-F231 IANGLDTLSG | 63   | 1     |
| >STK11-F231 EIANGLDTF  | 2566  | >STK11-F231 EIANGLDTL  | 466  | 2100  |
| >STK11-F231 EIANGLDTF  | 60    | >STK11-F231 EIANGLDTL  | 258  | 198   |
| >STK11-F231 EIANGLDTF  | 95    | >STK11-F231 EIANGLDTL  | 1277 | 1182  |
| >STK11-F231 EIANGLDTF  | 5     | >STK11-F231 EIANGLDTL  | 30   | 25    |
| >STK11-F231 EIANGLDTF  | 10335 | >STK11-F231 EIANGLDTL  | 69   | 10266 |
| >STK11-F231 EIANGLDTF  | 6884  | >STK11-F231 EIANGLDTL  | 131  | 6753  |
| >STK11-F231 EIANGLDTF  | 437   | >STK11-F231 EIANGLDTL  | 6228 | 5791  |

|                         |       |                         |      |       |
|-------------------------|-------|-------------------------|------|-------|
| >STK11-F231 PEIANGLDTF  | 1436  | >STK11-F231 PEIANGLDTL  | 391  | 1045  |
| >STK11-F298 FSIRQIRQHS\ | 6     | >STK11-F298 LSIRQIRQHS\ | 6    | 0     |
| >STK11-F298 FSIRQIRQHS\ | 200   | >STK11-F298 LSIRQIRQHS\ | 435  | 235   |
| >STK11-F298 FSIRQIRQHS\ | 34    | >STK11-F298 LSIRQIRQHS\ | 29   | 5     |
| >STK11-F298 FSIRQIRQHS\ | 11    | >STK11-F298 LSIRQIRQHS\ | 11   | 0     |
| >STK11-F298 FSIRQIRQHS\ | 38    | >STK11-F298 LSIRQIRQHS\ | 123  | 85    |
| >STK11-F298 RFSIRQIR    | 10516 | >STK11-F298 RLSIRQIR    | 435  | 10081 |
| >STK11-F298 RFSIRQIR    | 11    | >STK11-F298 RLSIRQIR    | 21   | 10    |
| >STK11-F298 RFSIRQIR    | 33    | >STK11-F298 RLSIRQIR    | 130  | 97    |
| >STK11-F298 GMLEYEPAKF  | 5588  | >STK11-F298 GMLEYEPAKF  | 104  | 5484  |
| >STK11-F298 GMLEYEPAKF  | 10837 | >STK11-F298 GMLEYEPAKF  | 310  | 10527 |
| >STK11-F298 GMLEYEPAKF  | 1676  | >STK11-F298 GMLEYEPAKF  | 430  | 1246  |
| >STK11-F298 GMLEYEPAKF  | 86    | >STK11-F298 GMLEYEPAKF  | 3    | 83    |
| >STK11-F298 GMLEYEPAKF  | 1832  | >STK11-F298 GMLEYEPAKF  | 12   | 1820  |
| >STK11-F298 GMLEYEPAKF  | 4340  | >STK11-F298 GMLEYEPAKF  | 15   | 4325  |
| >STK11-F298 GMLEYEPAKF  | 10068 | >STK11-F298 GMLEYEPAKF  | 46   | 10022 |
| >STK11-F298 GMLEYEPAKF  | 3252  | >STK11-F298 GMLEYEPAKF  | 8    | 3244  |
| >STK11-F298 GMLEYEPAKF  | 44    | >STK11-F298 GMLEYEPAKF  | 1286 | 1242  |
| >STK11-F298 GMLEYEPAKF  | 135   | >STK11-F298 GMLEYEPAKF  | 1483 | 1348  |
| >STK11-F298 KRFSIRQIR   | 325   | >STK11-F298 KRLSIRQIR   | 818  | 493   |
| >STK11-F298 KRFSIRQI    | 84    | >STK11-F298 KRLSIRQI    | 272  | 188   |
| >STK11-F298 KRFSIRQIR   | 138   | >STK11-F298 KRLSIRQIR   | 481  | 343   |
| >STK11-F298 KRFSIRQIRQ† | 354   | >STK11-F298 KRLSIRQIRQ† | 1189 | 835   |
| >STK11-F298 KRFSIRQI    | 20    | >STK11-F298 KRLSIRQI    | 36   | 16    |
| >STK11-F298 KRFSIRQIR   | 36    | >STK11-F298 KRLSIRQIR   | 80   | 44    |
| >STK11-F298 KRFSIRQIRQ  | 153   | >STK11-F298 KRLSIRQIRQ  | 300  | 147   |
| >STK11-F298 KRFSIRQIRQ† | 37    | >STK11-F298 KRLSIRQIRQ† | 74   | 37    |
| >STK11-F298 KRFSIRQI    | 26    | >STK11-F298 KRLSIRQI    | 37   | 11    |
| >STK11-F298 KRFSIRQIR   | 209   | >STK11-F298 KRLSIRQIR   | 288  | 79    |
| >STK11-F298 KRFSIRQIRQ† | 160   | >STK11-F298 KRLSIRQIRQ† | 201  | 41    |
| >STK11-F298 KRFSIRQI    | 259   | >STK11-F298 KRLSIRQI    | 244  | 15    |
| >STK11-F298 KRFSIRQIR   | 450   | >STK11-F298 KRLSIRQIR   | 980  | 530   |
| >STK11-F298 KRFSIRQIR   | 34    | >STK11-F298 KRLSIRQIR   | 64   | 30    |
| >STK11-F298 KRFSIRQI    | 307   | >STK11-F298 KRLSIRQI    | 1359 | 1052  |
| >STK11-F298 AKRFSIRQI   | 457   | >STK11-F298 AKRLSIRQI   | 1043 | 586   |
| >STK11-F298 AKRFSIRQIR  | 239   | >STK11-F298 AKRLSIRQIR  | 506  | 267   |
| >STK11-F298 AKRFSIRQI   | 39    | >STK11-F298 AKRLSIRQI   | 65   | 26    |
| >STK11-F298 AKRFSIRQIR  | 128   | >STK11-F298 AKRLSIRQIR  | 179  | 51    |
| >STK11-F298 PAKRFSIR    | 372   | >STK11-F298 PAKRLSIR    | 800  | 428   |
| >STK11-F298 PAKRFSIRQIR | 429   | >STK11-F298 PAKRLSIRQIR | 579  | 150   |
| >STK11-F298 EPAKRFSIR   | 68    | >STK11-F298 EPAKRLSIR   | 145  | 77    |
| >STK11-F298 EPAKRFSI    | 70    | >STK11-F298 EPAKRLSI    | 57   | 13    |
| >STK11-F298 EPAKRFSIRQI | 291   | >STK11-F298 EPAKRLSIRQI | 334  | 43    |

|                         |       |                         |      |       |
|-------------------------|-------|-------------------------|------|-------|
| >STK11-F298 EPAKRFSI    | 71    | >STK11-F298 EPAKRLSI    | 76   | 5     |
| >STK11-F298 EPAKRFSIRQI | 223   | >STK11-F298 EPAKRLSIRQI | 426  | 203   |
| >STK11-F298 EPAKRFSI    | 139   | >STK11-F298 EPAKRLSI    | 392  | 253   |
| >STK11-F298 YEPAKRFSI   | 20    | >STK11-F298 YEPAKRLSI   | 21   | 1     |
| >STK11-F298 YEPAKRFSI   | 225   | >STK11-F298 YEPAKRLSI   | 311  | 86    |
| >STK11-F298 YEPAKRFSI   | 11    | >STK11-F298 YEPAKRLSI   | 19   | 8     |
| >STK11-F298 EYEPAKRFSI  | 290   | >STK11-F298 EYEPAKRLSI  | 477  | 187   |
| >STK11-F298 EYEPAKRF    | 84    | >STK11-F298 EYEPAKRL    | 880  | 796   |
| >STK11-F298 EYEPAKRFSI  | 234   | >STK11-F298 EYEPAKRLSI  | 539  | 305   |
| >STK11-F298 EYEPAKRFSIR | 123   | >STK11-F298 EYEPAKRLSIR | 226  | 103   |
| >STK11-F298 EYEPAKRFSIR | 282   | >STK11-F298 EYEPAKRLSIR | 440  | 158   |
| >STK11-F298 EYEPAKRFSIR | 86    | >STK11-F298 EYEPAKRLSIR | 211  | 125   |
| >STK11-F298 LEYEPAKRF   | 218   | >STK11-F298 LEYEPAKRL   | 71   | 147   |
| >STK11-F298 LEYEPAKRFS  | 249   | >STK11-F298 LEYEPAKRLS  | 911  | 662   |
| >STK11-F298 LEYEPAKRFSI | 8     | >STK11-F298 LEYEPAKRLSI | 8    | 0     |
| >STK11-F298 LEYEPAKRF   | 48    | >STK11-F298 LEYEPAKRL   | 1199 | 1151  |
| >STK11-F298 LEYEPAKRFSI | 773   | >STK11-F298 LEYEPAKRLSI | 454  | 319   |
| >STK11-F298 LEYEPAKRF   | 48    | >STK11-F298 LEYEPAKRL   | 552  | 504   |
| >STK11-F298 LEYEPAKRFSI | 158   | >STK11-F298 LEYEPAKRLSI | 236  | 78    |
| >STK11-F298 LEYEPAKRF   | 1170  | >STK11-F298 LEYEPAKRL   | 151  | 1019  |
| >STK11-F298 LEYEPAKRFSI | 69    | >STK11-F298 LEYEPAKRLSI | 120  | 51    |
| >STK11-F298 LEYEPAKRFSI | 116   | >STK11-F298 LEYEPAKRLSI | 118  | 2     |
| >STK11-F298 LEYEPAKRF   | 328   | >STK11-F298 LEYEPAKRL   | 1820 | 1492  |
| >STK11-F298 LEYEPAKRF   | 126   | >STK11-F298 LEYEPAKRL   | 768  | 642   |
| >STK11-F298 LEYEPAKRF   | 149   | >STK11-F298 LEYEPAKRL   | 42   | 107   |
| >STK11-F298 LEYEPAKRFSI | 7     | >STK11-F298 LEYEPAKRLSI | 9    | 2     |
| >STK11-F298 LEYEPAKRFSI | 275   | >STK11-F298 LEYEPAKRLSI | 378  | 103   |
| >STK11-F298 MLEYEPAKRF  | 13786 | >STK11-F298 MLEYEPAKRL  | 45   | 13741 |
| >STK11-F354 FDIEDDIY    | 45    | >STK11-F354 LDIEDDIY    | 119  | 74    |
| >STK11-F354 FDIEDDII    | 120   | >STK11-F354 LDIEDDII    | 329  | 209   |
| >STK11-F354 FDIEDDII    | 43    | >STK11-F354 LDIEDDII    | 52   | 9     |
| >STK11-F354 LFDIEDDIY   | 138   | >STK11-F354 LLDIEDDIY   | 86   | 52    |
| >STK11-F354 LFDIEDDI    | 21461 | >STK11-F354 LLDIEDDI    | 301  | 21160 |
| >STK11-F354 LFDIEDDIYT  | 9351  | >STK11-F354 LLDIEDDIYT  | 94   | 9257  |
| >STK11-F354 LFDIEDDII   | 20768 | >STK11-F354 LLDIEDDII   | 307  | 20461 |
| >STK11-F354 LFDIEDDI    | 18240 | >STK11-F354 LLDIEDDI    | 157  | 18083 |
| >STK11-F354 LFDIEDDII   | 19843 | >STK11-F354 LLDIEDDII   | 263  | 19580 |
| >STK11-F354 LFDIEDDIYT  | 16760 | >STK11-F354 LLDIEDDIYT  | 231  | 16529 |
| >STK11-F354 LFDIEDDI    | 30670 | >STK11-F354 LLDIEDDI    | 238  | 30432 |
| >STK11-F354 LFDIEDDIYT  | 23225 | >STK11-F354 LLDIEDDIYT  | 139  | 23086 |
| >STK11-F354 LFDIEDDIY   | 227   | >STK11-F354 LLDIEDDIY   | 967  | 740   |
| >STK11-F354 LFDIEDDII   | 1166  | >STK11-F354 LLDIEDDII   | 245  | 921   |
| >STK11-F354 LHGADEDEDI  | 104   | >STK11-F354 LHGADEDEDI  | 920  | 816   |

|                                   |       |                                     |      |       |
|-----------------------------------|-------|-------------------------------------|------|-------|
| >STK11-F354 DLFDIEDDII            | 201   | >STK11-F354 DLLDIEDDII              | 633  | 432   |
| >STK11-F354 DLFDIEDDI             | 226   | >STK11-F354 DLLDIEDDI               | 220  | 6     |
| >STK11-F354 DLFDIEDDII            | 403   | >STK11-F354 DLLDIEDDII              | 390  | 13    |
| >STK11-F354 DLFDIEDDI             | 1739  | >STK11-F354 DLLDIEDDI               | 347  | 1392  |
| >STK11-F354 DLFDIEDDII            | 2110  | >STK11-F354 DLLDIEDDII              | 397  | 1713  |
| >STK11-F354 DLFDIEDDI             | 439   | >STK11-F354 DLLDIEDDI               | 1005 | 566   |
| >STK11-F354 DLFDIEDDIY            | 263   | >STK11-F354 DLLDIEDDIY              | 508  | 245   |
| >STK11-F354 DLFDIEDDIY            | 209   | >STK11-F354 DLLDIEDDIY              | 466  | 257   |
| >STK11-F354 EDLFDIEDDI            | 898   | >STK11-F354 EDLLDIEDDI              | 323  | 575   |
| >STK11-F354 EDLFDIEDDII           | 434   | >STK11-F354 EDLLDIEDDII             | 178  | 256   |
| >STK11-F354 EDLFDIEDDI            | 223   | >STK11-F354 EDLLDIEDDI              | 67   | 156   |
| >STK11-F354 EDLFDIEDDII           | 89    | >STK11-F354 EDLLDIEDDII             | 32   | 57    |
| >STK11-F354 DEDLFDIEDD            | 82    | >STK11-F354 DEDLLDIEDD              | 100  | 18    |
| >STK11-F354 DEDLFDIED             | 303   | >STK11-F354 DEDLLDIED               | 503  | 200   |
| >STK11-F354 EDEDLFDI              | 76    | >STK11-F354 EDEDLLDI                | 192  | 116   |
| >STK11-F354 DEDEDLFDI             | 75    | >STK11-F354 DEDEDLLDI               | 106  | 31    |
| >STK11-F354 DEDEDLFDI             | 448   | >STK11-F354 DEDEDLLDI               | 880  | 432   |
| >STK11-F354 DEDEDLFDIEI           | 375   | >STK11-F354 DEDEDLLDIEI             | 550  | 175   |
| >STK11-F354 DEDEDLFDI             | 182   | >STK11-F354 DEDEDLLDI               | 840  | 658   |
| >STK11-F354 ADEDEDLF              | 4282  | >STK11-F354 ADEDEDLL                | 150  | 4132  |
| >STK11-F354 ADEDEDLFDI            | 31    | >STK11-F354 ADEDEDLLDI              | 50   | 19    |
| >STK11-G13 <sup>5</sup> GMQEMLDS\ | 16    | >STK11-G13 <sup>5</sup> RMQEMLDS\   | 14   | 2     |
| >STK11-G13 <sup>5</sup> GMQEMLDS\ | 8     | >STK11-G13 <sup>5</sup> RMQEMLDS\   | 8    | 0     |
| >STK11-G13 <sup>5</sup> GMQEMLDS\ | 4     | >STK11-G13 <sup>5</sup> RMQEMLDS\   | 4    | 0     |
| >STK11-G13 <sup>5</sup> GMQEMLDS\ | 10    | >STK11-G13 <sup>5</sup> RMQEMLDS\   | 6    | 4     |
| >STK11-G13 <sup>5</sup> GMQEMLDS\ | 3     | >STK11-G13 <sup>5</sup> RMQEMLDS\   | 2    | 1     |
| >STK11-G13 <sup>5</sup> GMQEMLDS\ | 2     | >STK11-G13 <sup>5</sup> RMQEMLDS\   | 2    | 0     |
| >STK11-G13 <sup>5</sup> GMQEMLDS\ | 9     | >STK11-G13 <sup>5</sup> RMQEMLDS\   | 12   | 3     |
| >STK11-G13 <sup>5</sup> GMQEMLDS\ | 7     | >STK11-G13 <sup>5</sup> RMQEMLDS\   | 5    | 2     |
| >STK11-G13 <sup>5</sup> GMQEMLDS\ | 2     | >STK11-G13 <sup>5</sup> RMQEMLDS\   | 2    | 0     |
| >STK11-G13 <sup>5</sup> GMQEMLDS\ | 4792  | >STK11-G13 <sup>5</sup> RMQEMLDS\   | 190  | 4602  |
| >STK11-G13 <sup>5</sup> MYMVMEYC' | 10073 | >STK11-G13 <sup>5</sup> MYMVMEYC'   | 12   | 10061 |
| >STK11-G13 <sup>5</sup> MYMVMEYC' | 10901 | >STK11-G13 <sup>5</sup> MYMVMEYC'   | 13   | 10888 |
| >STK11-G13 <sup>5</sup> MYMVMEYC' | 24967 | >STK11-G13 <sup>5</sup> MYMVMEYC'   | 15   | 24952 |
| >STK11-G13 <sup>5</sup> MYMVMEYC' | 26020 | >STK11-G13 <sup>5</sup> MYMVMEYC'   | 54   | 25966 |
| >STK11-G13 <sup>5</sup> CVCGMQEM  | 95    | >STK11-G13 <sup>5</sup> CVC CRMQEM  | 163  | 68    |
| >STK11-G13 <sup>5</sup> YCVCGMQEN | 17    | >STK11-G13 <sup>5</sup> YCVC CRMQEN | 63   | 46    |
| >STK11-G13 <sup>5</sup> YCVCGMQEN | 316   | >STK11-G13 <sup>5</sup> YCVC CRMQEN | 1805 | 1489  |
| >STK11-G13 <sup>5</sup> YCVCGMQEN | 85    | >STK11-G13 <sup>5</sup> YCVC CRMQEN | 198  | 113   |
| >STK11-G13 <sup>5</sup> EYCVCGMQE | 67    | >STK11-G13 <sup>5</sup> EYCV CRMQE  | 73   | 6     |
| >STK11-G13 <sup>5</sup> EYCVCGMQE | 248   | >STK11-G13 <sup>5</sup> EYCV CRMQE  | 398  | 150   |
| >STK11-G13 <sup>5</sup> MEYCVCGM  | 120   | >STK11-G13 <sup>5</sup> MEYCV CRM   | 222  | 102   |
| >STK11-G13 <sup>5</sup> MEYCVCGMC | 424   | >STK11-G13 <sup>5</sup> MEYCV CRM C | 439  | 15    |

|                                   |       |                                   |      |       |
|-----------------------------------|-------|-----------------------------------|------|-------|
| >STK11-G13 <sup>5</sup> MEYCVCGMC | 33    | >STK11-G13 <sup>5</sup> MEYCVCRM  | 22   | 11    |
| >STK11-G13 <sup>5</sup> MEYCVCGM  | 292   | >STK11-G13 <sup>5</sup> MEYCVCRM  | 280  | 12    |
| >STK11-G13 <sup>5</sup> MEYCVCGMC | 162   | >STK11-G13 <sup>5</sup> MEYCVCRM  | 100  | 62    |
| >STK11-G13 <sup>5</sup> MEYCVCGM  | 108   | >STK11-G13 <sup>5</sup> MEYCVCRM  | 228  | 120   |
| >STK11-G13 <sup>5</sup> MEYCVCGMC | 49    | >STK11-G13 <sup>5</sup> MEYCVCRM  | 59   | 10    |
| >STK11-G13 <sup>5</sup> MEYCVCGMC | 419   | >STK11-G13 <sup>5</sup> MEYCVCRM  | 872  | 453   |
| >STK11-G13 <sup>5</sup> MEYCVCGM  | 92    | >STK11-G13 <sup>5</sup> MEYCVCRM  | 257  | 165   |
| >STK11-G13 <sup>5</sup> MEYCVCGMC | 62    | >STK11-G13 <sup>5</sup> MEYCVCRM  | 171  | 109   |
| >STK11-G13 <sup>5</sup> MEYCVCGM  | 291   | >STK11-G13 <sup>5</sup> MEYCVCRM  | 510  | 219   |
| >STK11-G13 <sup>5</sup> MEYCVCGMC | 217   | >STK11-G13 <sup>5</sup> MEYCVCRM  | 232  | 15    |
| >STK11-G13 <sup>5</sup> MEYCVCGMC | 281   | >STK11-G13 <sup>5</sup> MEYCVCRM  | 181  | 100   |
| >STK11-G13 <sup>5</sup> MEYCVCGM  | 201   | >STK11-G13 <sup>5</sup> MEYCVCRM  | 191  | 10    |
| >STK11-G13 <sup>5</sup> MEYCVCGMC | 1043  | >STK11-G13 <sup>5</sup> MEYCVCRM  | 446  | 597   |
| >STK11-G13 <sup>5</sup> MEYCVCGMC | 181   | >STK11-G13 <sup>5</sup> MEYCVCRM  | 145  | 36    |
| >STK11-G13 <sup>5</sup> MEYCVCGMC | 855   | >STK11-G13 <sup>5</sup> MEYCVCRM  | 412  | 443   |
| >STK11-G13 <sup>5</sup> MEYCVCGMC | 438   | >STK11-G13 <sup>5</sup> MEYCVCRM  | 420  | 18    |
| >STK11-G13 <sup>5</sup> MEYCVCGMC | 131   | >STK11-G13 <sup>5</sup> MEYCVCRM  | 149  | 18    |
| >STK11-G13 <sup>5</sup> MEYCVCGM  | 383   | >STK11-G13 <sup>5</sup> MEYCVCRM  | 1346 | 963   |
| >STK11-G13 <sup>5</sup> MEYCVCGMC | 21    | >STK11-G13 <sup>5</sup> MEYCVCRM  | 35   | 14    |
| >STK11-G13 <sup>5</sup> VMEYCVCGM | 392   | >STK11-G13 <sup>5</sup> VMEYCVCRM | 1707 | 1315  |
| >STK11-G13 <sup>5</sup> VMEYCVCGM | 361   | >STK11-G13 <sup>5</sup> VMEYCVCRM | 312  | 49    |
| >STK11-G13 <sup>5</sup> VMEYCVCG  | 19522 | >STK11-G13 <sup>5</sup> VMEYCVCR  | 71   | 19451 |
| >STK11-G13 <sup>5</sup> VMEYCVCG  | 35579 | >STK11-G13 <sup>5</sup> VMEYCVCR  | 348  | 35231 |
| >STK11-G13 <sup>5</sup> MVMEYCVCC | 118   | >STK11-G13 <sup>5</sup> MVMEYCVCF | 257  | 139   |
| >STK11-G13 <sup>5</sup> MVMEYCVCC | 165   | >STK11-G13 <sup>5</sup> MVMEYCVCF | 224  | 59    |
| >STK11-G13 <sup>5</sup> MVMEYCVCC | 182   | >STK11-G13 <sup>5</sup> MVMEYCVCF | 486  | 304   |
| >STK11-G13 <sup>5</sup> MVMEYCVCC | 92    | >STK11-G13 <sup>5</sup> MVMEYCVCF | 221  | 129   |
| >STK11-G13 <sup>5</sup> MVMEYCVCC | 191   | >STK11-G13 <sup>5</sup> MVMEYCVCF | 273  | 82    |
| >STK11-G13 <sup>5</sup> MVMEYCVCC | 52    | >STK11-G13 <sup>5</sup> MVMEYCVCF | 113  | 61    |
| >STK11-G13 <sup>5</sup> MVMEYCVCC | 452   | >STK11-G13 <sup>5</sup> MVMEYCVCF | 373  | 79    |
| >STK11-G13 <sup>5</sup> MVMEYCVCC | 12391 | >STK11-G13 <sup>5</sup> MVMEYCVCF | 71   | 12320 |
| >STK11-G13 <sup>5</sup> MVMEYCVCC | 234   | >STK11-G13 <sup>5</sup> MVMEYCVCF | 245  | 11    |
| >STK11-G13 <sup>5</sup> MVMEYCVCC | 9877  | >STK11-G13 <sup>5</sup> MVMEYCVCF | 29   | 9848  |
| >STK11-G13 <sup>5</sup> MVMEYCVCC | 14652 | >STK11-G13 <sup>5</sup> MVMEYCVCF | 19   | 14633 |
| >STK11-G13 <sup>5</sup> MVMEYCVCC | 6073  | >STK11-G13 <sup>5</sup> MVMEYCVCF | 3    | 6070  |
| >STK11-G13 <sup>5</sup> MVMEYCVCC | 98    | >STK11-G13 <sup>5</sup> MVMEYCVCF | 213  | 115   |
| >STK11-G13 <sup>5</sup> MVMEYCVCC | 191   | >STK11-G13 <sup>5</sup> MVMEYCVCF | 204  | 13    |
| >STK11-G13 <sup>5</sup> MVMEYCVCC | 28    | >STK11-G13 <sup>5</sup> MVMEYCVCF | 62   | 34    |
| >STK11-G13 <sup>5</sup> MVMEYCVCC | 166   | >STK11-G13 <sup>5</sup> MVMEYCVCF | 220  | 54    |
| >STK11-G13 <sup>5</sup> MVMEYCVCC | 127   | >STK11-G13 <sup>5</sup> MVMEYCVCF | 108  | 19    |
| >STK11-G13 <sup>5</sup> MVMEYCVCC | 431   | >STK11-G13 <sup>5</sup> MVMEYCVCF | 615  | 184   |
| >STK11-G13 <sup>5</sup> YMVMEYCV  | 339   | >STK11-G13 <sup>5</sup> YMVMEYCV  | 208  | 131   |
| >STK11-G13 <sup>5</sup> YMVMEYCV  | 89    | >STK11-G13 <sup>5</sup> YMVMEYCV  | 108  | 19    |

|                                                 |       |                                                 |      |       |
|-------------------------------------------------|-------|-------------------------------------------------|------|-------|
| >STK11-G13 <sup>E</sup> YMVMEYCVC               | 69    | >STK11-G13 <sup>E</sup> YMVMEYCVC               | 114  | 45    |
| >STK11-G13 <sup>E</sup> YMVMEYCVC               | 32    | >STK11-G13 <sup>E</sup> YMVMEYCVC               | 66   | 34    |
| >STK11-G13 <sup>E</sup> YMVMEYCVC               | 44    | >STK11-G13 <sup>E</sup> YMVMEYCVC               | 184  | 140   |
| >STK11-G13 <sup>E</sup> YMVMEYCVC               | 9     | >STK11-G13 <sup>E</sup> YMVMEYCVC               | 12   | 3     |
| >STK11-G13 <sup>E</sup> YMVMEYCVC               | 39    | >STK11-G13 <sup>E</sup> YMVMEYCVC               | 115  | 76    |
| >STK11-G13 <sup>E</sup> YMVMEYCVC               | 41    | >STK11-G13 <sup>E</sup> YMVMEYCVC               | 82   | 41    |
| >STK11-G13 <sup>E</sup> YMVMEYCVC               | 55    | >STK11-G13 <sup>E</sup> YMVMEYCVC               | 128  | 73    |
| >STK11-G13 <sup>E</sup> YMVMEYCVC               | 8     | >STK11-G13 <sup>E</sup> YMVMEYCVC               | 8    | 0     |
| >STK11-G13 <sup>E</sup> YMVMEYCVC               | 25957 | >STK11-G13 <sup>E</sup> YMVMEYCVC               | 85   | 25872 |
| >STK11-G13 <sup>E</sup> YMVMEYCVC               | 8535  | >STK11-G13 <sup>E</sup> YMVMEYCVC               | 44   | 8491  |
| >STK11-G13 <sup>E</sup> YMVMEYCVC               | 31251 | >STK11-G13 <sup>E</sup> YMVMEYCVC               | 42   | 31209 |
| >STK11-G13 <sup>E</sup> YMVMEYCVC               | 37    | >STK11-G13 <sup>E</sup> YMVMEYCVC               | 47   | 10    |
| >STK11-G13 <sup>E</sup> YMVMEYCVC               | 2051  | >STK11-G13 <sup>E</sup> YMVMEYCVC               | 180  | 1871  |
| >STK11-G13 <sup>E</sup> YMVMEYCVC               | 25    | >STK11-G13 <sup>E</sup> YMVMEYCVC               | 34   | 9     |
| >STK11-G13 <sup>E</sup> YMVMEYCVC               | 318   | >STK11-G13 <sup>E</sup> YMVMEYCVC               | 279  | 39    |
| >STK11-G13 <sup>E</sup> YMVMEYCVC               | 424   | >STK11-G13 <sup>E</sup> YMVMEYCVC               | 699  | 275   |
| >STK11-G13 <sup>E</sup> YMVMEYCVC               | 29658 | >STK11-G13 <sup>E</sup> YMVMEYCVC               | 263  | 29395 |
| >STK11-G13 <sup>E</sup> YMVMEYCVC               | 33308 | >STK11-G13 <sup>E</sup> YMVMEYCVC               | 111  | 33197 |
| >STK11-G16 <sup>E</sup> GLEYLHSQGI <sup>I</sup> | 410   | >STK11-G16 <sup>E</sup> CLEYLHSQGI <sup>I</sup> | 1024 | 614   |
| >STK11-G16 <sup>E</sup> GLEYLHSQGI <sup>I</sup> | 393   | >STK11-G16 <sup>E</sup> CLEYLHSQGI <sup>I</sup> | 1059 | 666   |
| >STK11-G16 <sup>E</sup> GLEYLHSQGI              | 248   | >STK11-G16 <sup>E</sup> CLEYLHSQGI              | 1486 | 1238  |
| >STK11-G16 <sup>E</sup> GLEYLHSQGI <sup>I</sup> | 252   | >STK11-G16 <sup>E</sup> CLEYLHSQGI <sup>I</sup> | 1552 | 1300  |
| >STK11-G16 <sup>E</sup> GLEYLHSQGI              | 439   | >STK11-G16 <sup>E</sup> CLEYLHSQGI              | 2458 | 2019  |
| >STK11-G16 <sup>E</sup> GLEYLHSQGI <sup>I</sup> | 39    | >STK11-G16 <sup>E</sup> CLEYLHSQGI <sup>I</sup> | 162  | 123   |
| >STK11-G16 <sup>E</sup> DGLEYLHSQGI             | 252   | >STK11-G16 <sup>E</sup> DCLEYLHSQGI             | 55   | 197   |
| >STK11-G16 <sup>E</sup> LIDGLEYL                | 149   | >STK11-G16 <sup>E</sup> LIDCLEYL                | 102  | 47    |
| >STK11-G16 <sup>E</sup> LIDGLEYL                | 42    | >STK11-G16 <sup>E</sup> LIDCLEYL                | 56   | 14    |
| >STK11-G16 <sup>E</sup> LIDGLEYL                | 86    | >STK11-G16 <sup>E</sup> LIDCLEYL                | 95   | 9     |
| >STK11-G16 <sup>E</sup> LIDGLEYL                | 20    | >STK11-G16 <sup>E</sup> LIDCLEYL                | 34   | 14    |
| >STK11-G16 <sup>E</sup> LIDGLEYL                | 626   | >STK11-G16 <sup>E</sup> LIDCLEYL                | 109  | 517   |
| >STK11-G16 <sup>E</sup> LIDGLEYL                | 100   | >STK11-G16 <sup>E</sup> LIDCLEYL                | 425  | 325   |
| >STK11-G16 <sup>E</sup> LIDGLEYL                | 118   | >STK11-G16 <sup>E</sup> LIDCLEYL                | 366  | 248   |
| >STK11-G16 <sup>E</sup> LIDGLEYL                | 28    | >STK11-G16 <sup>E</sup> LIDCLEYL                | 595  | 567   |
| >STK11-G16 <sup>E</sup> QLIDGLEYL               | 11    | >STK11-G16 <sup>E</sup> QLIDCLEYL               | 8    | 3     |
| >STK11-G16 <sup>E</sup> QLIDGLEYL               | 3     | >STK11-G16 <sup>E</sup> QLIDCLEYL               | 2    | 1     |
| >STK11-G16 <sup>E</sup> QLIDGLEYLH <sup>S</sup> | 1151  | >STK11-G16 <sup>E</sup> QLIDCLEYLH <sup>S</sup> | 425  | 726   |
| >STK11-G16 <sup>E</sup> QLIDGLEYL               | 7     | >STK11-G16 <sup>E</sup> QLIDCLEYL               | 10   | 3     |
| >STK11-G16 <sup>E</sup> QLIDGLEYL               | 4     | >STK11-G16 <sup>E</sup> QLIDCLEYL               | 5    | 1     |
| >STK11-G16 <sup>E</sup> QLIDGLEYLH <sup>S</sup> | 314   | >STK11-G16 <sup>E</sup> QLIDCLEYLH <sup>S</sup> | 393  | 79    |
| >STK11-G16 <sup>E</sup> QLIDGLEYL               | 3     | >STK11-G16 <sup>E</sup> QLIDCLEYL               | 8    | 5     |
| >STK11-G16 <sup>E</sup> QLIDGLEYL               | 5     | >STK11-G16 <sup>E</sup> QLIDCLEYL               | 5    | 0     |
| >STK11-G16 <sup>E</sup> QLIDGLEYL               | 38    | >STK11-G16 <sup>E</sup> QLIDCLEYL               | 96   | 58    |
| >STK11-G16 <sup>E</sup> QLIDGLEYL               | 8     | >STK11-G16 <sup>E</sup> QLIDCLEYL               | 8    | 0     |

|                        |      |                        |      |      |
|------------------------|------|------------------------|------|------|
| >STK11-G163QLIDGLEYL   | 2    | >STK11-G163QLIDCLEYL   | 3    | 1    |
| >STK11-G163QLIDGLEY    | 438  | >STK11-G163QLIDCLEY    | 1541 | 1103 |
| >STK11-G163QLIDGLEY    | 119  | >STK11-G163QLIDCLEY    | 184  | 65   |
| >STK11-G163QLIDGLEYL   | 96   | >STK11-G163QLIDCLEYL   | 135  | 39   |
| >STK11-G163QLIDGLEY    | 10   | >STK11-G163QLIDCLEY    | 12   | 2    |
| >STK11-G163QLIDGLEY    | 345  | >STK11-G163QLIDCLEY    | 226  | 119  |
| >STK11-G163QLIDGLEYL   | 113  | >STK11-G163QLIDCLEYL   | 67   | 46   |
| >STK11-G163QLIDGLEYL   | 245  | >STK11-G163QLIDCLEYL   | 1012 | 767  |
| >STK11-G163QLIDGLEY    | 36   | >STK11-G163QLIDCLEY    | 68   | 32   |
| >STK11-G163QLIDGLEY    | 80   | >STK11-G163QLIDCLEY    | 103  | 23   |
| >STK11-G163QLIDGLEY    | 94   | >STK11-G163QLIDCLEY    | 1109 | 1015 |
| >STK11-G163QLIDGLEY    | 681  | >STK11-G163QLIDCLEY    | 414  | 267  |
| >STK11-G163CQLIDGLEYL  | 447  | >STK11-G163CQLIDCLEYL  | 159  | 288  |
| >STK11-G163CQLIDGLEYL  | 139  | >STK11-G163CQLIDCLEYL  | 152  | 13   |
| >STK11-G163CQLIDGLEYL  | 115  | >STK11-G163CQLIDCLEYL  | 78   | 37   |
| >STK11-G163CQLIDGLEY   | 105  | >STK11-G163CQLIDCLEY   | 113  | 8    |
| >STK11-G163CQLIDGLEY   | 529  | >STK11-G163CQLIDCLEY   | 321  | 208  |
| >STK11-G163CQLIDGLEY   | 236  | >STK11-G163CQLIDCLEY   | 820  | 584  |
| >STK11-G163CQLIDGLEY   | 349  | >STK11-G163CQLIDCLEY   | 556  | 207  |
| >STK11-G163CQLIDGLEY   | 29   | >STK11-G163CQLIDCLEY   | 48   | 19   |
| >STK11-G163FCQLIDGLEY  | 490  | >STK11-G163FCQLIDCLEY  | 316  | 174  |
| >STK11-G163FCQLIDGLEYL | 203  | >STK11-G163FCQLIDCLEYL | 120  | 83   |
| >STK11-G163FCQLIDGLEY  | 259  | >STK11-G163FCQLIDCLEY  | 425  | 166  |
| >STK11-G163FCQLIDGLEY  | 933  | >STK11-G163FCQLIDCLEY  | 461  | 472  |
| >STK11-G163FCQLIDGLEY  | 263  | >STK11-G163FCQLIDCLEY  | 919  | 656  |
| >STK11-G163YFCQLIDGL   | 275  | >STK11-G163YFCQLIDCL   | 515  | 240  |
| >STK11-G163YFCQLIDGL   | 17   | >STK11-G163YFCQLIDCL   | 87   | 70   |
| >STK11-G163YFCQLIDGLE\ | 11   | >STK11-G163YFCQLIDCLEY | 11   | 0    |
| >STK11-G163YFCQLIDGLE\ | 32   | >STK11-G163YFCQLIDCLEY | 46   | 14   |
| >STK11-G163YFCQLIDGLE\ | 421  | >STK11-G163YFCQLIDCLEY | 587  | 166  |
| >STK11-G163YFCQLIDGLE\ | 410  | >STK11-G163YFCQLIDCLEY | 1231 | 821  |
| >STK11-G163YFCQLIDGLE\ | 188  | >STK11-G163YFCQLIDCLEY | 218  | 30   |
| >STK11-G163GYFCQLIDGL  | 12   | >STK11-G163GYFCQLIDCL  | 28   | 16   |
| >STK11-G163GYFCQLIDGL  | 243  | >STK11-G163GYFCQLIDCL  | 205  | 38   |
| >STK11-G163GLEYLHSQGI\ | 410  | >STK11-G163DLEYLHSQGI\ | 6870 | 6460 |
| >STK11-G163GLEYLHSQGI\ | 393  | >STK11-G163DLEYLHSQGI\ | 8346 | 7953 |
| >STK11-G163GLEYLHSQGI  | 248  | >STK11-G163DLEYLHSQGI  | 6697 | 6449 |
| >STK11-G163GLEYLHSQGI\ | 252  | >STK11-G163DLEYLHSQGI\ | 5423 | 5171 |
| >STK11-G163GLEYLHSQGI  | 439  | >STK11-G163DLEYLHSQGI  | 7120 | 6681 |
| >STK11-G163GLEYLHSQGI\ | 39   | >STK11-G163DLEYLHSQGI\ | 746  | 707  |
| >STK11-G163DGLEYLHSQC  | 2576 | >STK11-G163DDLEYLHSQC  | 183  | 2393 |
| >STK11-G163DGLEYLHSQC  | 252  | >STK11-G163DDLEYLHSQC  | 766  | 514  |
| >STK11-G163DGLEYLHSQ   | 4578 | >STK11-G163DDLEYLHSQ   | 157  | 4421 |

|                          |       |                          |     |       |
|--------------------------|-------|--------------------------|-----|-------|
| >STK11-G163 DGGLEYLHSQC  | 15234 | >STK11-G163 DDLEYLHSQC   | 161 | 15073 |
| >STK11-G163 LIDGLEYL     | 149   | >STK11-G163 LIDDLEYL     | 51  | 98    |
| >STK11-G163 LIDGLEYL     | 42    | >STK11-G163 LIDDLEYL     | 22  | 20    |
| >STK11-G163 LIDGLEYL     | 86    | >STK11-G163 LIDDLEYL     | 32  | 54    |
| >STK11-G163 LIDGLEYL     | 20    | >STK11-G163 LIDDLEYL     | 14  | 6     |
| >STK11-G163 LIDGLEYL     | 626   | >STK11-G163 LIDDLEYL     | 112 | 514   |
| >STK11-G163 LIDGLEYL     | 100   | >STK11-G163 LIDDLEYL     | 69  | 31    |
| >STK11-G163 LIDGLEYL     | 118   | >STK11-G163 LIDDLEYL     | 46  | 72    |
| >STK11-G163 LIDGLEYL     | 28    | >STK11-G163 LIDDLEYL     | 17  | 11    |
| >STK11-G163 LIDGLEYLHSC  | 574   | >STK11-G163 LIDDLEYLHSC  | 273 | 301   |
| >STK11-G163 QLIDGLEYL    | 11    | >STK11-G163 QLIDDLEYL    | 12  | 1     |
| >STK11-G163 QLIDGLEYL    | 3     | >STK11-G163 QLIDDLEYL    | 2   | 1     |
| >STK11-G163 QLIDGLEYL    | 7     | >STK11-G163 QLIDDLEYL    | 12  | 5     |
| >STK11-G163 QLIDGLEYL    | 4     | >STK11-G163 QLIDDLEYL    | 7   | 3     |
| >STK11-G163 QLIDGLEYLHSC | 314   | >STK11-G163 QLIDDLEYLHSC | 562 | 248   |
| >STK11-G163 QLIDGLEYL    | 3     | >STK11-G163 QLIDDLEYL    | 5   | 2     |
| >STK11-G163 QLIDGLEYL    | 5     | >STK11-G163 QLIDDLEYL    | 4   | 1     |
| >STK11-G163 QLIDGLEYL    | 38    | >STK11-G163 QLIDDLEYL    | 56  | 18    |
| >STK11-G163 QLIDGLEYL    | 8     | >STK11-G163 QLIDDLEYL    | 7   | 1     |
| >STK11-G163 QLIDGLEYL    | 2     | >STK11-G163 QLIDDLEYL    | 3   | 1     |
| >STK11-G163 QLIDGLEY     | 438   | >STK11-G163 QLIDDLEY     | 785 | 347   |
| >STK11-G163 QLIDGLEY     | 119   | >STK11-G163 QLIDDLEY     | 76  | 43    |
| >STK11-G163 QLIDGLEYL    | 96    | >STK11-G163 QLIDDLEYL    | 50  | 46    |
| >STK11-G163 QLIDGLEY     | 10    | >STK11-G163 QLIDDLEY     | 13  | 3     |
| >STK11-G163 QLIDGLEY     | 345   | >STK11-G163 QLIDDLEY     | 381 | 36    |
| >STK11-G163 QLIDGLEYL    | 113   | >STK11-G163 QLIDDLEYL    | 252 | 139   |
| >STK11-G163 QLIDGLEYL    | 245   | >STK11-G163 QLIDDLEYL    | 452 | 207   |
| >STK11-G163 QLIDGLEY     | 36    | >STK11-G163 QLIDDLEY     | 86  | 50    |
| >STK11-G163 QLIDGLEY     | 80    | >STK11-G163 QLIDDLEY     | 128 | 48    |
| >STK11-G163 QLIDGLEY     | 94    | >STK11-G163 QLIDDLEY     | 377 | 283   |
| >STK11-G163 QLIDGLEY     | 817   | >STK11-G163 QLIDDLEY     | 486 | 331   |
| >STK11-G163 CQLIDGLEYL   | 447   | >STK11-G163 CQLIDDLEYL   | 277 | 170   |
| >STK11-G163 CQLIDGLEYL   | 139   | >STK11-G163 CQLIDDLEYL   | 137 | 2     |
| >STK11-G163 CQLIDGLEYL   | 115   | >STK11-G163 CQLIDDLEYL   | 99  | 16    |
| >STK11-G163 CQLIDGLEY    | 105   | >STK11-G163 CQLIDDLEY    | 132 | 27    |
| >STK11-G163 CQLIDGLEY    | 529   | >STK11-G163 CQLIDDLEY    | 350 | 179   |
| >STK11-G163 CQLIDGLEY    | 236   | >STK11-G163 CQLIDDLEY    | 744 | 508   |
| >STK11-G163 CQLIDGLEY    | 349   | >STK11-G163 CQLIDDLEY    | 733 | 384   |
| >STK11-G163 CQLIDGLEY    | 29    | >STK11-G163 CQLIDDLEY    | 119 | 90    |
| >STK11-G163 FCQLIDGLEY   | 490   | >STK11-G163 FCQLIDDLEY   | 224 | 266   |
| >STK11-G163 FCQLIDGLEYL  | 203   | >STK11-G163 FCQLIDDLEYL  | 114 | 89    |
| >STK11-G163 FCQLIDGLEY   | 259   | >STK11-G163 FCQLIDDLEY   | 243 | 16    |
| >STK11-G163 FCQLIDGLEY   | 263   | >STK11-G163 FCQLIDDLEY   | 678 | 415   |



|                        |      |                        |      |      |
|------------------------|------|------------------------|------|------|
| >STK11-G16EYFCQLIDGL   | 275  | >STK11-G16EYFCQLIDDL   | 1739 | 1464 |
| >STK11-G16EYFCQLIDGL   | 17   | >STK11-G16EYFCQLIDDL   | 21   | 4    |
| >STK11-G16EYFCQLIDGLE\ | 11   | >STK11-G16EYFCQLIDDLE\ | 10   | 1    |
| >STK11-G16EYFCQLIDGLE\ | 32   | >STK11-G16EYFCQLIDDLE\ | 43   | 11   |
| >STK11-G16EYFCQLIDGLE\ | 421  | >STK11-G16EYFCQLIDDLE\ | 723  | 302  |
| >STK11-G16EYFCQLIDGLE\ | 410  | >STK11-G16EYFCQLIDDLE\ | 637  | 227  |
| >STK11-G16EYFCQLIDGLE\ | 188  | >STK11-G16EYFCQLIDDLE\ | 108  | 80   |
| >STK11-G16EGYFCQLIDGL  | 552  | >STK11-G16EGYFCQLIDDL  | 398  | 154  |
| >STK11-G16EGYFCQLIDGL  | 12   | >STK11-G16EGYFCQLIDDL  | 11   | 1    |
| >STK11-G16EGYFCQLIDGL  | 243  | >STK11-G16EGYFCQLIDDL  | 460  | 217  |
| >STK11-G17IGIVHKDIK    | 1046 | >STK11-G17ISIVHKDIK    | 261  | 785  |
| >STK11-G17IQGIVHKDIK   | 2282 | >STK11-G17IQSIVHKDIK   | 225  | 2057 |
| >STK11-G17IQGIVHKDI    | 5113 | >STK11-G17IQSIVHKDI    | 411  | 4702 |
| >STK11-G17ISQGIVHKDI   | 468  | >STK11-G17ISQSIVHKDI   | 320  | 148  |
| >STK11-G17ISQGIVHKDIK  | 2894 | >STK11-G17ISQSIVHKDIK  | 384  | 2510 |
| >STK11-G17IHSQGIVHK    | 670  | >STK11-G17IHSQSIVHK    | 447  | 223  |
| >STK11-G17IHSQGIVHK    | 104  | >STK11-G17IHSQSIVHK    | 60   | 44   |
| >STK11-G17IHSQGIVHKDI  | 303  | >STK11-G17IHSQSIVHKDII | 219  | 84   |
| >STK11-G17IHSQGIVHK    | 57   | >STK11-G17IHSQSIVHK    | 39   | 18   |
| >STK11-G17IHSQGIVHK    | 174  | >STK11-G17IHSQSIVHK    | 62   | 112  |
| >STK11-G17IHSQGIVHKDI  | 368  | >STK11-G17IHSQSIVHKDI  | 802  | 434  |
| >STK11-G17IHSQGIVHK    | 126  | >STK11-G17IHSQSIVHK    | 60   | 66   |
| >STK11-G17IHSQGIVHKDI  | 264  | >STK11-G17IHSQSIVHKDII | 149  | 115  |
| >STK11-G17IYLHSQGIV    | 106  | >STK11-G17IYLHSQSIV    | 31   | 75   |
| >STK11-G17IYLHSQGIV    | 26   | >STK11-G17IYLHSQSIV    | 8    | 18   |
| >STK11-G17IYLHSQGIV    | 4    | >STK11-G17IYLHSQSIV    | 3    | 1    |
| >STK11-G17IYLHSQGIV    | 354  | >STK11-G17IYLHSQSIV    | 101  | 253  |
| >STK11-G17IYLHSQGIV    | 3    | >STK11-G17IYLHSQSIV    | 2    | 1    |
| >STK11-G17IYLHSQGIV    | 7    | >STK11-G17IYLHSQSIV    | 4    | 3    |
| >STK11-G17IYLHSQGIV    | 10   | >STK11-G17IYLHSQSIV    | 6    | 4    |
| >STK11-G17IYLHSQGIV    | 57   | >STK11-G17IYLHSQSIV    | 8    | 49   |
| >STK11-G17IYLHSQGIV    | 2    | >STK11-G17IYLHSQSIV    | 2    | 0    |
| >STK11-G17IYLHSQGIVHK  | 75   | >STK11-G17IYLHSQSIVHK  | 70   | 5    |
| >STK11-G17IYLHSQGIVHK  | 97   | >STK11-G17IYLHSQSIVHK  | 71   | 26   |
| >STK11-G17IYLHSQGIVHK  | 622  | >STK11-G17IYLHSQSIVHK  | 273  | 349  |
| >STK11-G17IYLHSQGIVHK  | 118  | >STK11-G17IYLHSQSIVHK  | 44   | 74   |
| >STK11-G17IYLHSQGIVHK  | 1348 | >STK11-G17IYLHSQSIVHK  | 443  | 905  |
| >STK11-G17IYLHSQGIVH   | 579  | >STK11-G17IYLHSQSIVH   | 338  | 241  |
| >STK11-G17IYLHSQGIV    | 503  | >STK11-G17IYLHSQSIV    | 418  | 85   |
| >STK11-G17IYLHSQGIVH   | 345  | >STK11-G17IYLHSQSIVH   | 551  | 206  |
| >STK11-G17IYLHSQGIV    | 1026 | >STK11-G17IYLHSQSIV    | 168  | 858  |
| >STK11-G17IYLHSQGIVH   | 495  | >STK11-G17IYLHSQSIVH   | 547  | 52   |
| >STK11-G17IYLHSQGIVHK  | 269  | >STK11-G17IYLHSQSIVHK  | 180  | 89   |

|                        |       |                         |     |       |
|------------------------|-------|-------------------------|-----|-------|
| >STK11-G171EYLHSQGI    | 626   | >STK11-G171EYLHSQSI     | 62  | 564   |
| >STK11-G171EYLHSQGI    | 847   | >STK11-G171EYLHSQSI     | 288 | 559   |
| >STK11-G171EYLHSQGI    | 69    | >STK11-G171EYLHSQSI     | 38  | 31    |
| >STK11-G171EYLHSQGIVH  | 249   | >STK11-G171EYLHSQSIVHI  | 205 | 44    |
| >STK11-G171EYLHSQGIVH  | 528   | >STK11-G171EYLHSQSIVHI  | 255 | 273   |
| >STK11-G171EYLHSQGIVH  | 175   | >STK11-G171EYLHSQSIVHI  | 149 | 26    |
| >STK11-G171LEYLHSQGI   | 8     | >STK11-G171LEYLHSQSI    | 6   | 2     |
| >STK11-G171LEYLHSQGIV  | 14    | >STK11-G171LEYLHSQSIV   | 13  | 1     |
| >STK11-G171LEYLHSQGI   | 1297  | >STK11-G171LEYLHSQSI    | 280 | 1017  |
| >STK11-G171LEYLHSQGIV  | 2246  | >STK11-G171LEYLHSQSIV   | 333 | 1913  |
| >STK11-G171LEYLHSQGI   | 490   | >STK11-G171LEYLHSQSI    | 139 | 351   |
| >STK11-G171LEYLHSQGIVI | 208   | >STK11-G171LEYLHSQSIVH  | 201 | 7     |
| >STK11-G171LEYLHSQGI   | 123   | >STK11-G171LEYLHSQSI    | 111 | 12    |
| >STK11-G171LEYLHSQGI   | 188   | >STK11-G171LEYLHSQSI    | 56  | 132   |
| >STK11-G171LEYLHSQGIV  | 560   | >STK11-G171LEYLHSQSIV   | 413 | 147   |
| >STK11-G171LEYLHSQGI   | 379   | >STK11-G171LEYLHSQSI    | 375 | 4     |
| >STK11-G171LEYLHSQGI   | 5     | >STK11-G171LEYLHSQSI    | 6   | 1     |
| >STK11-G171LEYLHSQGIV  | 107   | >STK11-G171LEYLHSQSIV   | 81  | 26    |
| >STK11-G171LEYLHSQGI   | 1440  | >STK11-G171LEYLHSQSI    | 437 | 1003  |
| >STK11-G171GLEYLHSQGI\ | 410   | >STK11-G171GLEYLHSQSIV\ | 160 | 250   |
| >STK11-G171GLEYLHSQGI\ | 393   | >STK11-G171GLEYLHSQSIV\ | 205 | 188   |
| >STK11-G171GLEYLHSQGI  | 248   | >STK11-G171GLEYLHSQSI   | 308 | 60    |
| >STK11-G171GLEYLHSQGI\ | 252   | >STK11-G171GLEYLHSQSIV\ | 89  | 163   |
| >STK11-G171GLEYLHSQGI\ | 752   | >STK11-G171GLEYLHSQSIV\ | 364 | 388   |
| >STK11-G171GLEYLHSQGI  | 439   | >STK11-G171GLEYLHSQSI   | 322 | 117   |
| >STK11-G171GLEYLHSQGI\ | 39    | >STK11-G171GLEYLHSQSIV\ | 15  | 24    |
| >STK11-G171GLEYLHSQGI\ | 1669  | >STK11-G171GLEYLHSQSIV\ | 333 | 1336  |
| >STK11-G171DGLEYLHSQGI | 252   | >STK11-G171DGLEYLHSQSIV | 461 | 209   |
| >STK11-G18C KDIKPGNLL  | 2522  | >STK11-G18C KDIKPVNLL   | 226 | 2296  |
| >STK11-G18C HKDIKPGNLL | 1516  | >STK11-G18C HKDIKPVNLL  | 467 | 1049  |
| >STK11-G18C HKDIKPGNLL | 570   | >STK11-G18C HKDIKPVNLLI | 331 | 239   |
| >STK11-G18C IVHKDIKPG  | 19370 | >STK11-G18C IVHKDIKPV   | 66  | 19304 |
| >STK11-G18C IVHKDIKPG  | 23918 | >STK11-G18C IVHKDIKPV   | 402 | 23516 |
| >STK11-G18C IVHKDIKPG  | 25663 | >STK11-G18C IVHKDIKPV   | 142 | 25521 |
| >STK11-G18C IVHKDIKPG  | 33788 | >STK11-G18C IVHKDIKPV   | 80  | 33708 |
| >STK11-G18C GIVHKDIKPG | 25008 | >STK11-G18C GIVHKDIKPV  | 461 | 24547 |
| >STK11-G18C GIVHKDIKPG | 27642 | >STK11-G18C GIVHKDIKPV  | 404 | 27238 |
| >STK11-G18C GIVHKDIKPG | 21016 | >STK11-G18C GIVHKDIKPV  | 335 | 20681 |
| >STK11-G18C GIVHKDIKPG | 34952 | >STK11-G18C GIVHKDIKPV  | 187 | 34765 |
| >STK11-G19€ GVAEALHPFA | 159   | >STK11-G19€ VVAEALHPFA  | 131 | 28    |
| >STK11-G19€ GVAEALHPFA | 73    | >STK11-G19€ VVAEALHPFA  | 81  | 8     |
| >STK11-G19€ GVAEALHPFA | 33    | >STK11-G19€ VVAEALHPFA  | 29  | 4     |
| >STK11-G19€ GVAEALHPF  | 23    | >STK11-G19€ VVAEALHPF   | 17  | 6     |

|                        |       |                        |     |       |
|------------------------|-------|------------------------|-----|-------|
| >STK11-G19€GVAEALHPFA  | 26    | >STK11-G19€VVAEALHPFA  | 15  | 11    |
| >STK11-G19€GVAEALHPFA  | 497   | >STK11-G19€VVAEALHPFA  | 191 | 306   |
| >STK11-G19€GVAEALHPFA  | 393   | >STK11-G19€VVAEALHPFA  | 154 | 239   |
| >STK11-G19€GVAEALHPFA  | 340   | >STK11-G19€VVAEALHPFA  | 693 | 353   |
| >STK11-G19€GVAEALHPFA  | 74    | >STK11-G19€VVAEALHPFA  | 81  | 7     |
| >STK11-G19€GVAEALHPFA  | 455   | >STK11-G19€VVAEALHPFA  | 543 | 88    |
| >STK11-G19€GVAEALHPFA  | 1938  | >STK11-G19€VVAEALHPFA  | 342 | 1596  |
| >STK11-G19€GVAEALHPFA  | 2382  | >STK11-G19€VVAEALHPFA  | 353 | 2029  |
| >STK11-G19€GVAEALHPFA  | 295   | >STK11-G19€VVAEALHPFA  | 99  | 196   |
| >STK11-G19€GVAEALHPFA  | 683   | >STK11-G19€VVAEALHPFA  | 256 | 427   |
| >STK11-G19€GVAEALHPF   | 2546  | >STK11-G19€VVAEALHPF   | 471 | 2075  |
| >STK11-G19€GVAEALHPF   | 19    | >STK11-G19€VVAEALHPF   | 7   | 12    |
| >STK11-G19€GVAEALHPFA  | 661   | >STK11-G19€VVAEALHPFA  | 107 | 554   |
| >STK11-G19€GVAEALHPFA  | 709   | >STK11-G19€VVAEALHPFA  | 143 | 566   |
| >STK11-G19€GVAEALHPFA  | 911   | >STK11-G19€VVAEALHPFA  | 207 | 704   |
| >STK11-G19€GVAEALHPF   | 95    | >STK11-G19€VVAEALHPF   | 78  | 17    |
| >STK11-G19€GVAEALHPF   | 2179  | >STK11-G19€VVAEALHPF   | 471 | 1708  |
| >STK11-G19€GVAEALHPF   | 227   | >STK11-G19€VVAEALHPF   | 63  | 164   |
| >STK11-G19€GVAEALHPF   | 256   | >STK11-G19€VVAEALHPF   | 49  | 207   |
| >STK11-G19€GVAEALHPF   | 3354  | >STK11-G19€VVAEALHPF   | 285 | 3069  |
| >STK11-G19€GVAEALHPF   | 62    | >STK11-G19€VVAEALHPF   | 45  | 17    |
| >STK11-G19€LGVAEALHPF  | 3645  | >STK11-G19€LVVAEALHPF  | 40  | 3605  |
| >STK11-G19€LGVAEALHPF  | 11024 | >STK11-G19€LVVAEALHPF  | 31  | 10993 |
| >STK11-G19€LGVAEALHPF  | 141   | >STK11-G19€LVVAEALHPF  | 52  | 89    |
| >STK11-G19€LGVAEALHPF  | 315   | >STK11-G19€LVVAEALHPF  | 166 | 149   |
| >STK11-G19€LGVAEALHPF  | 89    | >STK11-G19€LVVAEALHPF  | 23  | 66    |
| >STK11-G19€LGVAEALHPF  | 529   | >STK11-G19€LVVAEALHPF  | 129 | 400   |
| >STK11-G19€LGVAEALHPF  | 1686  | >STK11-G19€LVVAEALHPF  | 418 | 1268  |
| >STK11-G19€DLGVAEALHF  | 2131  | >STK11-G19€DLVVAEALHF  | 104 | 2027  |
| >STK11-G19€DLGVAEALHF  | 2051  | >STK11-G19€DLVVAEALHF  | 352 | 1699  |
| >STK11-G19€SDLGVAEAL   | 281   | >STK11-G19€SDLVVAEAL   | 84  | 197   |
| >STK11-G19€ISDLGVAEAL  | 33    | >STK11-G19€ISDLVVAEAL  | 113 | 80    |
| >STK11-G19€KISDLGVA    | 3897  | >STK11-G19€KISDLVVA    | 414 | 3483  |
| >STK11-G19€KISDLGVAEAI | 562   | >STK11-G19€KISDLVVAEAI | 189 | 373   |
| >STK11-G19€KISDLGVA    | 813   | >STK11-G19€KISDLVVA    | 123 | 690   |
| >STK11-G19€KISDLGVAEA  | 429   | >STK11-G19€KISDLVVAEA  | 247 | 182   |
| >STK11-G19€KISDLGVAEAI | 14    | >STK11-G19€KISDLVVAEAI | 10  | 4     |
| >STK11-G19€KISDLGVA    | 167   | >STK11-G19€KISDLVVA    | 81  | 86    |
| >STK11-G19€KISDLGVAEA  | 96    | >STK11-G19€KISDLVVAEA  | 109 | 13    |
| >STK11-G19€KISDLGVAEAI | 288   | >STK11-G19€KISDLVVAEAI | 98  | 190   |
| >STK11-G19€KISDLGVA    | 678   | >STK11-G19€KISDLVVA    | 111 | 567   |
| >STK11-G19€KISDLGVAEA  | 569   | >STK11-G19€KISDLVVAEA  | 329 | 240   |
| >STK11-G19€KISDLGVAEAI | 68    | >STK11-G19€KISDLVVAEAI | 37  | 31    |

|                          |       |                         |      |       |
|--------------------------|-------|-------------------------|------|-------|
| >STK11-G19€ KISDLGVAAEA  | 324   | >STK11-G19€ KISDLVVAEA  | 100  | 224   |
| >STK11-G19€ KISDLGVAAEA/ | 114   | >STK11-G19€ KISDLVVAEAI | 77   | 37    |
| >STK11-G19€ KISDLGVAAEA/ | 956   | >STK11-G19€ KISDLVVAEAI | 493  | 463   |
| >STK11-G19€ KISDLGVAAEA  | 699   | >STK11-G19€ KISDLVVAEA  | 304  | 395   |
| >STK11-G19€ KISDLGVAAEA/ | 832   | >STK11-G19€ KISDLVVAEAI | 479  | 353   |
| >STK11-G19€ KISDLGVA     | 1975  | >STK11-G19€ KISDLVVA    | 322  | 1653  |
| >STK11-G19€ KISDLGVAAEA  | 136   | >STK11-G19€ KISDLVVAEA  | 104  | 32    |
| >STK11-G19€ KISDLGVAAEA/ | 201   | >STK11-G19€ KISDLVVAEAI | 152  | 49    |
| >STK11-G19€ KISDLGVAAEA/ | 38    | >STK11-G19€ KISDLVVAEAI | 26   | 12    |
| >STK11-G19€ LKISDLGV     | 189   | >STK11-G19€ LKISDLVV    | 32   | 157   |
| >STK11-G19€ LKISDLGVA    | 1637  | >STK11-G19€ LKISDLVVA   | 71   | 1566  |
| >STK11-G19€ LKISDLGVAAE/ | 474   | >STK11-G19€ LKISDLVVAE/ | 187  | 287   |
| >STK11-G19€ TLKISDLG     | 12901 | >STK11-G19€ TLKISDLV    | 109  | 12792 |
| >STK11-G19€ TLKISDLG     | 16507 | >STK11-G19€ TLKISDLV    | 37   | 16470 |
| >STK11-G19€ TLKISDLGV    | 70    | >STK11-G19€ TLKISDLVV   | 204  | 134   |
| >STK11-G19€ TLKISDLGVA   | 134   | >STK11-G19€ TLKISDLVVA  | 236  | 102   |
| >STK11-G19€ TLKISDLGV    | 458   | >STK11-G19€ TLKISDLVV   | 961  | 503   |
| >STK11-G19€ TLKISDLG     | 26493 | >STK11-G19€ TLKISDLV    | 16   | 26477 |
| >STK11-G19€ TLKISDLGV    | 9     | >STK11-G19€ TLKISDLVV   | 21   | 12    |
| >STK11-G19€ TLKISDLGVA   | 1877  | >STK11-G19€ TLKISDLVVA  | 470  | 1407  |
| >STK11-G19€ GTLKISDLG    | 17024 | >STK11-G19€ GTLKISDLV   | 105  | 16919 |
| >STK11-G19€ GTLKISDLGV   | 274   | >STK11-G19€ GTLKISDLVV  | 707  | 433   |
| >STK11-G19€ GTLKISDLG    | 25063 | >STK11-G19€ GTLKISDLV   | 190  | 24873 |
| >STK11-G19€ GTLKISDLGV   | 152   | >STK11-G19€ GTLKISDLVV  | 437  | 285   |
| >STK11-G19€ GTLKISDLG    | 26420 | >STK11-G19€ GTLKISDLV   | 229  | 26191 |
| >STK11-G19€ GTLKISDLGV   | 186   | >STK11-G19€ GTLKISDLVV  | 411  | 225   |
| >STK11-G19€ GTLKISDLG    | 23524 | >STK11-G19€ GTLKISDLV   | 428  | 23096 |
| >STK11-G19€ GTLKISDLGV   | 275   | >STK11-G19€ GTLKISDLVV  | 634  | 359   |
| >STK11-G19€ GTLKISDLG    | 22247 | >STK11-G19€ GTLKISDLV   | 51   | 22196 |
| >STK11-G19€ GTLKISDLGV   | 38    | >STK11-G19€ GTLKISDLVV  | 84   | 46    |
| >STK11-G19€ GTLKISDLG    | 19768 | >STK11-G19€ GTLKISDLV   | 449  | 19319 |
| >STK11-G19€ GTLKISDLG    | 765   | >STK11-G19€ GTLKISDLV   | 31   | 734   |
| >STK11-G19€ GTLKISDLGV/  | 328   | >STK11-G19€ GTLKISDLVV/ | 671  | 343   |
| >STK11-G21€ GSPAFQPPEI   | 54    | >STK11-G21€ DSPAFQPPEI  | 510  | 456   |
| >STK11-G21€ GSPAFQPPEI/  | 428   | >STK11-G21€ DSPAFQPPEI/ | 5457 | 5029  |
| >STK11-G21€ GSPAFQPPEI   | 57    | >STK11-G21€ DSPAFQPPEI  | 116  | 59    |
| >STK11-G21€ QGSPAFQPPI   | 16480 | >STK11-G21€ QDSPAFQPPI  | 196  | 16284 |
| >STK11-G21€ TSQGSPAF     | 232   | >STK11-G21€ TSQDSPAF    | 190  | 42    |
| >STK11-G21€ TSQGSPAF     | 235   | >STK11-G21€ TSQDSPAF    | 123  | 112   |
| >STK11-G21€ TSQGSPAF     | 9     | >STK11-G21€ TSQDSPAF    | 12   | 3     |
| >STK11-G21€ TSQGSPAF     | 543   | >STK11-G21€ TSQDSPAF    | 482  | 61    |
| >STK11-G21€ TSQGSPAF     | 132   | >STK11-G21€ TSQDSPAF    | 186  | 54    |
| >STK11-G21€ RTSQGSPAF    | 367   | >STK11-G21€ RTSQDSPAF   | 538  | 171   |

|                                     |       |                                     |     |       |
|-------------------------------------|-------|-------------------------------------|-----|-------|
| >STK11-G21 <sup>5</sup> RTSQGSPAF   | 665   | >STK11-G21 <sup>5</sup> RTSQDSPAF   | 376 | 289   |
| >STK11-G21 <sup>5</sup> RTSQGSPA    | 85    | >STK11-G21 <sup>5</sup> RTSQDSPA    | 426 | 341   |
| >STK11-G21 <sup>5</sup> RTSQGSPAFC  | 194   | >STK11-G21 <sup>5</sup> RTSQDSPAF   | 581 | 387   |
| >STK11-G21 <sup>5</sup> RTSQGSPAF   | 430   | >STK11-G21 <sup>5</sup> RTSQDSPAF   | 631 | 201   |
| >STK11-G21 <sup>5</sup> RTSQGSPAF   | 31    | >STK11-G21 <sup>5</sup> RTSQDSPAF   | 37  | 6     |
| >STK11-G21 <sup>5</sup> RTSQGSPAF   | 32    | >STK11-G21 <sup>5</sup> RTSQDSPAF   | 42  | 10    |
| >STK11-G21 <sup>5</sup> RTSQGSPAF   | 20    | >STK11-G21 <sup>5</sup> RTSQDSPAF   | 17  | 3     |
| >STK11-G21 <sup>5</sup> RTSQGSPA    | 150   | >STK11-G21 <sup>5</sup> RTSQDSPA    | 764 | 614   |
| >STK11-G21 <sup>5</sup> RTSQGSPAF   | 3     | >STK11-G21 <sup>5</sup> RTSQDSPAF   | 5   | 2     |
| >STK11-G21 <sup>5</sup> RTSQGSPAFC  | 152   | >STK11-G21 <sup>5</sup> RTSQDSPAF   | 564 | 412   |
| >STK11-G21 <sup>5</sup> RTSQGSPAF   | 251   | >STK11-G21 <sup>5</sup> RTSQDSPAF   | 283 | 32    |
| >STK11-G21 <sup>5</sup> RTSQGSPAF   | 26    | >STK11-G21 <sup>5</sup> RTSQDSPAF   | 35  | 9     |
| >STK11-G21 <sup>5</sup> RTSQGSPAF   | 17    | >STK11-G21 <sup>5</sup> RTSQDSPAF   | 52  | 35    |
| >STK11-G21 <sup>5</sup> RTSQGSPAFC  | 159   | >STK11-G21 <sup>5</sup> RTSQDSPAF   | 245 | 86    |
| >STK11-G21 <sup>5</sup> CRTSQGSPAF  | 19    | >STK11-G21 <sup>5</sup> CRTSQDSPA   | 47  | 28    |
| >STK11-G21 <sup>5</sup> CRTSQGSPAF  | 170   | >STK11-G21 <sup>5</sup> CRTSQDSPA   | 349 | 179   |
| >STK11-G21 <sup>5</sup> TCRTSQGSPA  | 172   | >STK11-G21 <sup>5</sup> TCRTSQDSPA  | 594 | 422   |
| >STK11-G21 <sup>5</sup> TCRTSQGSPA  | 163   | >STK11-G21 <sup>5</sup> TCRTSQDSPA  | 144 | 19    |
| >STK11-G24 <sup>2</sup> GVTLYNITTGI | 408   | >STK11-G24 <sup>2</sup> RVTLYNITTGI | 544 | 136   |
| >STK11-G24 <sup>2</sup> GVTLYNITTGI | 622   | >STK11-G24 <sup>2</sup> RVTLYNITTGI | 204 | 418   |
| >STK11-G24 <sup>2</sup> GVTLYNITTGI | 2888  | >STK11-G24 <sup>2</sup> RVTLYNITTGI | 135 | 2753  |
| >STK11-G24 <sup>2</sup> GVTLYNITTGI | 7444  | >STK11-G24 <sup>2</sup> RVTLYNITTGI | 301 | 7143  |
| >STK11-G24 <sup>2</sup> AGVTLYNI    | 23412 | >STK11-G24 <sup>2</sup> ARVTLYNI    | 125 | 23287 |
| >STK11-G24 <sup>2</sup> SGFKVDIWSA  | 19189 | >STK11-G24 <sup>2</sup> SGFKVDIWSA  | 114 | 19075 |
| >STK11-G24 <sup>2</sup> SGFKVDIWSA  | 34319 | >STK11-G24 <sup>2</sup> SGFKVDIWSA  | 73  | 34246 |
| >STK11-G24 <sup>2</sup> SGFKVDIWSA  | 33619 | >STK11-G24 <sup>2</sup> SGFKVDIWSA  | 231 | 33388 |
| >STK11-G24 <sup>2</sup> SAGVTLYN    | 13407 | >STK11-G24 <sup>2</sup> SARVTLYN    | 191 | 13216 |
| >STK11-G24 <sup>2</sup> SAGVTLYNI   | 7852  | >STK11-G24 <sup>2</sup> SARVTLYNI   | 15  | 7837  |
| >STK11-G24 <sup>2</sup> SAGVTLYNIT  | 15278 | >STK11-G24 <sup>2</sup> SARVTLYNIT  | 295 | 14983 |
| >STK11-G24 <sup>2</sup> SAGVTLYNITI | 13745 | >STK11-G24 <sup>2</sup> SARVTLYNITI | 139 | 13606 |
| >STK11-G24 <sup>2</sup> SAGVTLYNI   | 7373  | >STK11-G24 <sup>2</sup> SARVTLYNI   | 386 | 6987  |
| >STK11-G24 <sup>2</sup> SAGVTLYNI   | 441   | >STK11-G24 <sup>2</sup> SARVTLYNI   | 404 | 37    |
| >STK11-G24 <sup>2</sup> WSAGVTLYN   | 1184  | >STK11-G24 <sup>2</sup> WSARVTLYNI  | 359 | 825   |
| >STK11-G24 <sup>2</sup> WSAGVTLY    | 24    | >STK11-G24 <sup>2</sup> WSARVTLY    | 18  | 6     |
| >STK11-G24 <sup>2</sup> WSAGVTLYN   | 271   | >STK11-G24 <sup>2</sup> WSARVTLYNI  | 975 | 704   |
| >STK11-G24 <sup>2</sup> WSAGVTLY    | 385   | >STK11-G24 <sup>2</sup> WSARVTLY    | 968 | 583   |
| >STK11-G24 <sup>2</sup> WSAGVTLY    | 19    | >STK11-G24 <sup>2</sup> WSARVTLY    | 61  | 42    |
| >STK11-G24 <sup>2</sup> WSAGVTLY    | 242   | >STK11-G24 <sup>2</sup> WSARVTLY    | 483 | 241   |
| >STK11-G24 <sup>2</sup> WSAGVTLY    | 459   | >STK11-G24 <sup>2</sup> WSARVTLY    | 628 | 169   |
| >STK11-G24 <sup>2</sup> WSAGVTLYN   | 95    | >STK11-G24 <sup>2</sup> WSARVTLYNI  | 123 | 28    |
| >STK11-G24 <sup>2</sup> WSAGVTLYN   | 252   | >STK11-G24 <sup>2</sup> WSARVTLYNI  | 362 | 110   |
| >STK11-G24 <sup>2</sup> WSAGVTLY    | 620   | >STK11-G24 <sup>2</sup> WSARVTLY    | 311 | 309   |
| >STK11-G24 <sup>2</sup> WSAGVTLY    | 189   | >STK11-G24 <sup>2</sup> WSARVTLY    | 216 | 27    |

|                       |     |                       |      |     |
|-----------------------|-----|-----------------------|------|-----|
| >STK11-G242WSAGVTLY   | 831 | >STK11-G242WSARVTLY   | 216  | 615 |
| >STK11-G242WSAGVTLY   | 13  | >STK11-G242WSARVTLY   | 34   | 21  |
| >STK11-G242WSAGVTLYN  | 370 | >STK11-G242WSARVTLYNI | 1114 | 744 |
| >STK11-G242WSAGVTLY   | 100 | >STK11-G242WSARVTLY   | 272  | 172 |
| >STK11-G242WSAGVTLY   | 44  | >STK11-G242WSARVTLY   | 40   | 4   |
| >STK11-G242WSAGVTLYN  | 88  | >STK11-G242WSARVTLYNI | 52   | 36  |
| >STK11-G242WSAGVTLY   | 15  | >STK11-G242WSARVTLY   | 16   | 1   |
| >STK11-G242WSAGVTLYN  | 437 | >STK11-G242WSARVTLYNI | 304  | 133 |
| >STK11-G242WSAGVTLY   | 60  | >STK11-G242WSARVTLY   | 131  | 71  |
| >STK11-G242WSAGVTLYN  | 101 | >STK11-G242WSARVTLYNI | 284  | 183 |
| >STK11-G242IWSAGVTLYN | 467 | >STK11-G242IWSARVTLYN | 492  | 25  |
| >STK11-G242IWSAGVTLYN | 268 | >STK11-G242IWSARVTLYN | 349  | 81  |
| >STK11-G242IWSAGVTL   | 554 | >STK11-G242IWSARVTL   | 474  | 80  |
| >STK11-G242IWSAGVTLYN | 292 | >STK11-G242IWSARVTLYN | 176  | 116 |
| >STK11-G242IWSAGVTL   | 217 | >STK11-G242IWSARVTL   | 353  | 136 |
| >STK11-G242IWSAGVTLYN | 454 | >STK11-G242IWSARVTLYN | 759  | 305 |
| >STK11-G242IWSAGVTLY  | 25  | >STK11-G242IWSARVTLY  | 81   | 56  |
| >STK11-G242IWSAGVTLY  | 115 | >STK11-G242IWSARVTLY  | 405  | 290 |
| >STK11-G242IWSAGVTLY  | 478 | >STK11-G242IWSARVTLY  | 485  | 7   |
| >STK11-G242IWSAGVTLY  | 366 | >STK11-G242IWSARVTLY  | 758  | 392 |
| >STK11-G242IWSAGVTL   | 254 | >STK11-G242IWSARVTL   | 169  | 85  |
| >STK11-G242IWSAGVTLYN | 341 | >STK11-G242IWSARVTLYN | 304  | 37  |
| >STK11-G242DIWSAGVTLY | 353 | >STK11-G242DIWSARVTLY | 863  | 510 |
| >STK11-G242DIWSAGVTLY | 183 | >STK11-G242DIWSARVTLY | 203  | 20  |
| >STK11-G242DIWSAGVTL  | 828 | >STK11-G242DIWSARVTL  | 479  | 349 |
| >STK11-G242DIWSAGVTL  | 117 | >STK11-G242DIWSARVTL  | 148  | 31  |
| >STK11-G242VDIWSAGVTI | 304 | >STK11-G242VDIWSARVTI | 737  | 433 |
| >STK11-G242VDIWSAGVTI | 391 | >STK11-G242VDIWSARVTI | 749  | 358 |
| >STK11-G242VDIWSAGV   | 171 | >STK11-G242VDIWSARV   | 227  | 56  |
| >STK11-G242VDIWSAGVTI | 421 | >STK11-G242VDIWSARVTI | 990  | 569 |
| >STK11-G242KVDIWSAGV  | 42  | >STK11-G242KVDIWSARV  | 53   | 11  |
| >STK11-G242KVDIWSAGV  | 473 | >STK11-G242KVDIWSARV  | 697  | 224 |
| >STK11-G242KVDIWSAGV  | 212 | >STK11-G242KVDIWSARV  | 496  | 284 |
| >STK11-G242KVDIWSAGV  | 12  | >STK11-G242KVDIWSARV  | 43   | 31  |
| >STK11-G242KVDIWSAGV  | 142 | >STK11-G242KVDIWSARV  | 275  | 133 |
| >STK11-G242KVDIWSAGV  | 5   | >STK11-G242KVDIWSARV  | 7    | 2   |
| >STK11-G242KVDIWSAGV  | 88  | >STK11-G242KVDIWSARV  | 242  | 154 |
| >STK11-G242KVDIWSAGV  | 16  | >STK11-G242KVDIWSARV  | 86   | 70  |
| >STK11-G242KVDIWSAGV  | 307 | >STK11-G242KVDIWSARV  | 1010 | 703 |
| >STK11-G242KVDIWSAGV  | 12  | >STK11-G242KVDIWSARV  | 24   | 12  |
| >STK11-G242KVDIWSAGV  | 153 | >STK11-G242KVDIWSARV  | 485  | 332 |
| >STK11-G242KVDIWSAGV  | 11  | >STK11-G242KVDIWSARV  | 39   | 28  |
| >STK11-G242KVDIWSAGV  | 10  | >STK11-G242KVDIWSARV  | 10   | 0   |

|                        |       |                        |      |       |
|------------------------|-------|------------------------|------|-------|
| >STK11-G242KVDIWSAGV   | 471   | >STK11-G242KVDIWSARV   | 397  | 74    |
| >STK11-G242KVDIWSAG    | 17748 | >STK11-G242KVDIWSAR    | 33   | 17715 |
| >STK11-G242KVDIWSAGV   | 97    | >STK11-G242KVDIWSARV   | 87   | 10    |
| >STK11-G242KVDIWSAGV   | 14    | >STK11-G242KVDIWSARV   | 62   | 48    |
| >STK11-G242KVDIWSAGV   | 153   | >STK11-G242KVDIWSARV   | 359  | 206   |
| >STK11-G242KVDIWSAG    | 34927 | >STK11-G242KVDIWSAR    | 289  | 34638 |
| >STK11-G242FKVDIWSAG\  | 105   | >STK11-G242FKVDIWSAR\  | 277  | 172   |
| >STK11-G242FKVDIWSAG\  | 70    | >STK11-G242FKVDIWSAR\  | 101  | 31    |
| >STK11-G242FKVDIWSAG\  | 65    | >STK11-G242FKVDIWSAR\  | 54   | 11    |
| >STK11-G242FKVDIWSAG   | 34409 | >STK11-G242FKVDIWSAR   | 100  | 34309 |
| >STK11-G242FKVDIWSAG   | 2798  | >STK11-G242FKVDIWSAR   | 177  | 2621  |
| >STK11-G242FKVDIWSAG\  | 278   | >STK11-G242FKVDIWSAR\  | 375  | 97    |
| >STK11-G242FKVDIWSAG\  | 443   | >STK11-G242FKVDIWSAR\  | 548  | 105   |
| >STK11-G242GFKVDIWSA(  | 26385 | >STK11-G242GFKVDIWSAF  | 150  | 26235 |
| >STK11-G242GVTLYNITTGI | 408   | >STK11-G242VVTLYNITTGI | 524  | 116   |
| >STK11-G242GVTLYNITTGI | 622   | >STK11-G242VVTLYNITTGI | 314  | 308   |
| >STK11-G242GVTLYNITTGI | 1599  | >STK11-G242VVTLYNITTGI | 487  | 1112  |
| >STK11-G242AGVTLYNI    | 3726  | >STK11-G242AVVTLYNI    | 279  | 3447  |
| >STK11-G242AGVTLYNI    | 11624 | >STK11-G242AVVTLYNI    | 329  | 11295 |
| >STK11-G242AGVTLYNI    | 6500  | >STK11-G242AVVTLYNI    | 133  | 6367  |
| >STK11-G242AGVTLYNI    | 30461 | >STK11-G242AVVTLYNI    | 395  | 30066 |
| >STK11-G242AGVTLYNI    | 18323 | >STK11-G242AVVTLYNI    | 389  | 17934 |
| >STK11-G242AGVTLYNI    | 9085  | >STK11-G242AVVTLYNI    | 158  | 8927  |
| >STK11-G242SGFKVDIWSA  | 18653 | >STK11-G242SGFKVDIWSA  | 389  | 18264 |
| >STK11-G242SGFKVDIWSA  | 24336 | >STK11-G242SGFKVDIWSA  | 434  | 23902 |
| >STK11-G242SGFKVDIWSA  | 24672 | >STK11-G242SGFKVDIWSA  | 277  | 24395 |
| >STK11-G242SGFKVDIWSA  | 14503 | >STK11-G242SGFKVDIWSA  | 185  | 14318 |
| >STK11-G242SGFKVDIWSA  | 4900  | >STK11-G242SGFKVDIWSA  | 392  | 4508  |
| >STK11-G242SAGVTLYNI   | 2083  | >STK11-G242SAVVTLYNI   | 123  | 1960  |
| >STK11-G242SAGVTLYNI   | 4245  | >STK11-G242SAVVTLYNI   | 445  | 3800  |
| >STK11-G242SAGVTLYNI   | 3653  | >STK11-G242SAVVTLYNI   | 314  | 3339  |
| >STK11-G242SAGVTLYNI   | 1511  | >STK11-G242SAVVTLYNI   | 445  | 1066  |
| >STK11-G242SAGVTLYNI   | 441   | >STK11-G242SAVVTLYNI   | 504  | 63    |
| >STK11-G242WSAGVTLY    | 24    | >STK11-G242WSAVVTLY    | 17   | 7     |
| >STK11-G242WSAGVTLYN   | 271   | >STK11-G242WSAVVTLYNI  | 574  | 303   |
| >STK11-G242WSAGVTLY    | 385   | >STK11-G242WSAVVTLY    | 1210 | 825   |
| >STK11-G242WSAGVTLY    | 19    | >STK11-G242WSAVVTLY    | 42   | 23    |
| >STK11-G242WSAGVTLY    | 242   | >STK11-G242WSAVVTLY    | 261  | 19    |
| >STK11-G242WSAGVTLY    | 459   | >STK11-G242WSAVVTLY    | 508  | 49    |
| >STK11-G242WSAGVTLYN   | 95    | >STK11-G242WSAVVTLYNI  | 192  | 97    |
| >STK11-G242WSAGVTLYN   | 252   | >STK11-G242WSAVVTLYNI  | 339  | 87    |
| >STK11-G242WSAGVTLY    | 620   | >STK11-G242WSAVVTLY    | 479  | 141   |
| >STK11-G242WSAGVTLY    | 189   | >STK11-G242WSAVVTLY    | 260  | 71    |

|                       |       |                       |      |       |
|-----------------------|-------|-----------------------|------|-------|
| >STK11-G242WSAGVTLY   | 831   | >STK11-G242WSAVVTLY   | 333  | 498   |
| >STK11-G242WSAGVTLY   | 13    | >STK11-G242WSAVVTLY   | 19   | 6     |
| >STK11-G242WSAGVTLYN  | 370   | >STK11-G242WSAVVTLYN  | 399  | 29    |
| >STK11-G242WSAGVTLY   | 100   | >STK11-G242WSAVVTLY   | 145  | 45    |
| >STK11-G242WSAGVTLY   | 44    | >STK11-G242WSAVVTLY   | 30   | 14    |
| >STK11-G242WSAGVTLYN  | 88    | >STK11-G242WSAVVTLYN  | 74   | 14    |
| >STK11-G242WSAGVTLY   | 15    | >STK11-G242WSAVVTLY   | 10   | 5     |
| >STK11-G242WSAGVTLYN  | 437   | >STK11-G242WSAVVTLYN  | 278  | 159   |
| >STK11-G242WSAGVTLY   | 60    | >STK11-G242WSAVVTLY   | 79   | 19    |
| >STK11-G242WSAGVTLYN  | 101   | >STK11-G242WSAVVTLYN  | 99   | 2     |
| >STK11-G242IWSAGVTL   | 1384  | >STK11-G242IWSAVVTL   | 354  | 1030  |
| >STK11-G242IWSAGVTLYN | 467   | >STK11-G242IWSAVVTLYN | 180  | 287   |
| >STK11-G242IWSAGVTLYN | 268   | >STK11-G242IWSAVVTLYN | 177  | 91    |
| >STK11-G242IWSAGVTL   | 554   | >STK11-G242IWSAVVTL   | 250  | 304   |
| >STK11-G242IWSAGVTLYN | 292   | >STK11-G242IWSAVVTLYN | 169  | 123   |
| >STK11-G242IWSAGVTL   | 217   | >STK11-G242IWSAVVTL   | 131  | 86    |
| >STK11-G242IWSAGVTLYN | 454   | >STK11-G242IWSAVVTLYN | 362  | 92    |
| >STK11-G242IWSAGVTLY  | 25    | >STK11-G242IWSAVVTLY  | 60   | 35    |
| >STK11-G242IWSAGVTLY  | 115   | >STK11-G242IWSAVVTLY  | 194  | 79    |
| >STK11-G242IWSAGVTLY  | 478   | >STK11-G242IWSAVVTLY  | 328  | 150   |
| >STK11-G242IWSAGVTLY  | 366   | >STK11-G242IWSAVVTLY  | 203  | 163   |
| >STK11-G242IWSAGVTL   | 254   | >STK11-G242IWSAVVTL   | 181  | 73    |
| >STK11-G242IWSAGVTLY  | 512   | >STK11-G242IWSAVVTLY  | 499  | 13    |
| >STK11-G242IWSAGVTLYN | 341   | >STK11-G242IWSAVVTLYN | 291  | 50    |
| >STK11-G242DIWSAGVTL  | 1472  | >STK11-G242DIWSAVVTL  | 316  | 1156  |
| >STK11-G242DIWSAGVTL  | 787   | >STK11-G242DIWSAVVTL  | 217  | 570   |
| >STK11-G242DIWSAGVTL  | 2022  | >STK11-G242DIWSAVVTL  | 84   | 1938  |
| >STK11-G242DIWSAGVTLY | 710   | >STK11-G242DIWSAVVTLY | 458  | 252   |
| >STK11-G242DIWSAGVTLY | 523   | >STK11-G242DIWSAVVTLY | 216  | 307   |
| >STK11-G242DIWSAGVTLY | 353   | >STK11-G242DIWSAVVTLY | 490  | 137   |
| >STK11-G242DIWSAGVTLY | 183   | >STK11-G242DIWSAVVTLY | 144  | 39    |
| >STK11-G242DIWSAGVTL  | 828   | >STK11-G242DIWSAVVTL  | 138  | 690   |
| >STK11-G242DIWSAGVTLY | 1172  | >STK11-G242DIWSAVVTLY | 498  | 674   |
| >STK11-G242DIWSAGVTL  | 117   | >STK11-G242DIWSAVVTL  | 41   | 76    |
| >STK11-G242VDIWSAGVTI | 304   | >STK11-G242VDIWSAVVTI | 474  | 170   |
| >STK11-G242VDIWSAGVTI | 391   | >STK11-G242VDIWSAVVTI | 527  | 136   |
| >STK11-G242VDIWSAGV   | 171   | >STK11-G242VDIWSAVV   | 131  | 40    |
| >STK11-G242VDIWSAGVTI | 421   | >STK11-G242VDIWSAVVTI | 366  | 55    |
| >STK11-G242KVDIWSAG   | 21319 | >STK11-G242KVDIWSAV   | 137  | 21182 |
| >STK11-G242KVDIWSAGV  | 42    | >STK11-G242KVDIWSAVV  | 99   | 57    |
| >STK11-G242KVDIWSAGV  | 563   | >STK11-G242KVDIWSAVV  | 202  | 361   |
| >STK11-G242KVDIWSAGV  | 473   | >STK11-G242KVDIWSAVV  | 1251 | 778   |
| >STK11-G242KVDIWSAG   | 20282 | >STK11-G242KVDIWSAV   | 371  | 19911 |



|                       |       |                        |      |       |
|-----------------------|-------|------------------------|------|-------|
| >STK11-G242KVDIWSAGV  | 212   | >STK11-G242KVDIWSAVV   | 583  | 371   |
| >STK11-G242KVDIWSAG   | 7262  | >STK11-G242KVDIWSAV    | 11   | 7251  |
| >STK11-G242KVDIWSAGV  | 12    | >STK11-G242KVDIWSAVV   | 28   | 16    |
| >STK11-G242KVDIWSAGV  | 142   | >STK11-G242KVDIWSAVV   | 123  | 19    |
| >STK11-G242KVDIWSAG   | 11713 | >STK11-G242KVDIWSAV    | 12   | 11701 |
| >STK11-G242KVDIWSAGV  | 5     | >STK11-G242KVDIWSAVV   | 10   | 5     |
| >STK11-G242KVDIWSAGV  | 88    | >STK11-G242KVDIWSAVV   | 51   | 37    |
| >STK11-G242KVDIWSAG   | 17877 | >STK11-G242KVDIWSAV    | 110  | 17767 |
| >STK11-G242KVDIWSAGV  | 16    | >STK11-G242KVDIWSAVV   | 33   | 17    |
| >STK11-G242KVDIWSAGV  | 307   | >STK11-G242KVDIWSAVV   | 234  | 73    |
| >STK11-G242KVDIWSAG   | 19549 | >STK11-G242KVDIWSAV    | 31   | 19518 |
| >STK11-G242KVDIWSAGV  | 12    | >STK11-G242KVDIWSAVV   | 21   | 9     |
| >STK11-G242KVDIWSAGV  | 153   | >STK11-G242KVDIWSAVV   | 98   | 55    |
| >STK11-G242KVDIWSAG   | 26292 | >STK11-G242KVDIWSAV    | 344  | 25948 |
| >STK11-G242KVDIWSAGV  | 11    | >STK11-G242KVDIWSAVV   | 44   | 33    |
| >STK11-G242KVDIWSAG   | 33399 | >STK11-G242KVDIWSAV    | 52   | 33347 |
| >STK11-G242KVDIWSAGV  | 10    | >STK11-G242KVDIWSAVV   | 24   | 14    |
| >STK11-G242KVDIWSAGV  | 471   | >STK11-G242KVDIWSAVV   | 331  | 140   |
| >STK11-G242KVDIWSAGV  | 97    | >STK11-G242KVDIWSAVV   | 47   | 50    |
| >STK11-G242KVDIWSAG   | 19152 | >STK11-G242KVDIWSAV    | 222  | 18930 |
| >STK11-G242KVDIWSAGV  | 14    | >STK11-G242KVDIWSAVV   | 121  | 107   |
| >STK11-G242KVDIWSAGV  | 153   | >STK11-G242KVDIWSAVV   | 178  | 25    |
| >STK11-G242FKVDIWSAG  | 12377 | >STK11-G242FKVDIWSAV   | 107  | 12270 |
| >STK11-G242FKVDIWSAG  | 17105 | >STK11-G242FKVDIWSAV   | 170  | 16935 |
| >STK11-G242FKVDIWSAG  | 3066  | >STK11-G242FKVDIWSAV   | 12   | 3054  |
| >STK11-G242FKVDIWSAG\ | 105   | >STK11-G242FKVDIWSAV\  | 211  | 106   |
| >STK11-G242FKVDIWSAG  | 16549 | >STK11-G242FKVDIWSAV   | 134  | 16415 |
| >STK11-G242FKVDIWSAG\ | 70    | >STK11-G242FKVDIWSAV\  | 160  | 90    |
| >STK11-G242FKVDIWSAG  | 31458 | >STK11-G242FKVDIWSAV   | 226  | 31232 |
| >STK11-G242FKVDIWSAG\ | 65    | >STK11-G242FKVDIWSAV\  | 127  | 62    |
| >STK11-G242FKVDIWSAG  | 14323 | >STK11-G242FKVDIWSAV   | 177  | 14146 |
| >STK11-G242FKVDIWSAG  | 2798  | >STK11-G242FKVDIWSAV   | 55   | 2743  |
| >STK11-G242FKVDIWSAG\ | 278   | >STK11-G242FKVDIWSAV\  | 77   | 201   |
| >STK11-G242FKVDIWSAG  | 6654  | >STK11-G242FKVDIWSAV   | 79   | 6575  |
| >STK11-G242FKVDIWSAG\ | 443   | >STK11-G242FKVDIWSAV\  | 45   | 398   |
| >STK11-G242GFKVDIWSAG | 12937 | >STK11-G242GFKVDIWSAV  | 252  | 12685 |
| >STK11-G279GPPLSDLLKG | 3993  | >STK11-G279FPPLSDLLKGI | 143  | 3850  |
| >STK11-G279GPPLSDLL   | 6163  | >STK11-G279FPPLSDLL    | 352  | 5811  |
| >STK11-G279GPPLSDLL   | 141   | >STK11-G279FPPLSDLL    | 21   | 120   |
| >STK11-G279CGPPLSDL   | 92    | >STK11-G279CFPPLSDL    | 4849 | 4757  |
| >STK11-G279CGPPLSDLL  | 109   | >STK11-G279CFPPLSDLL   | 3067 | 2958  |
| >STK11-G279CGPPLSDLLK | 13762 | >STK11-G279CFPPLSDLLK  | 416  | 13346 |
| >STK11-G279CGPPLSDL   | 10752 | >STK11-G279CFPPLSDL    | 15   | 10737 |

|                        |       |                         |     |       |
|------------------------|-------|-------------------------|-----|-------|
| >STK11-G279 CGPPLSDLL  | 9045  | >STK11-G279 CFPPLSDLL   | 10  | 9035  |
| >STK11-G279 CGPPLSDLLK | 9204  | >STK11-G279 CFPPLSDLLK  | 193 | 9011  |
| >STK11-G279 CGPPLSDLL  | 17    | >STK11-G279 CFPPLSDLL   | 64  | 47    |
| >STK11-G279 CGPPLSDLLK | 12571 | >STK11-G279 CFPPLSDLLK  | 237 | 12334 |
| >STK11-G279 IPGDCGPPL  | 490   | >STK11-G279 IPGDCFPPL   | 104 | 386   |
| >STK11-G279 IPGDCGPPL  | 21    | >STK11-G279 IPGDCFPPL   | 37  | 16    |
| >STK11-G279 IPGDCGPPL  | 97    | >STK11-G279 IPGDCFPPL   | 72  | 25    |
| >STK11-G279 IPGDCGPPL  | 762   | >STK11-G279 IPGDCFPPL   | 161 | 601   |
| >STK11-G279 IPGDCGPP   | 1356  | >STK11-G279 IPGDCFP     | 283 | 1073  |
| >STK11-G279 IPGDCGPPL  | 725   | >STK11-G279 IPGDCFPPL   | 124 | 601   |
| >STK11-G279 AIPGDCGPPL | 2439  | >STK11-G279 AIPGDCFPPL  | 378 | 2061  |
| >STK11-G279 AIPGDCGPPL | 631   | >STK11-G279 AIPGDCFPPL  | 214 | 417   |
| >STK11-G279 AIPGDCGPPL | 141   | >STK11-G279 AIPGDCFPPL  | 51  | 90    |
| >STK11-G279 AIPGDCGPPL | 963   | >STK11-G279 AIPGDCFPPL  | 431 | 532   |
| >STK11-G279 AIPGDCGPPL | 816   | >STK11-G279 AIPGDCFPPL  | 323 | 493   |
| >STK11-G279 AIPGDCGPPL | 93    | >STK11-G279 AIPGDCFPPL  | 19  | 74    |
| >STK11-G279 AIPGDCGPPL | 1245  | >STK11-G279 AIPGDCFPPL  | 140 | 1105  |
| >STK11-G279 YAIPGDCGPP | 654   | >STK11-G279 YAIPGDCFPPI | 373 | 281   |
| >STK11-G279 YAIPGDCGPP | 246   | >STK11-G279 YAIPGDCFPPI | 91  | 155   |
| >STK11-G279 YAIPGDCGPP | 748   | >STK11-G279 YAIPGDCFPPI | 263 | 485   |
| >STK11-G279 YAIPGDCGPP | 17    | >STK11-G279 YAIPGDCFPPI | 8   | 9     |
| >STK11-G279 YAIPGDCGPP | 428   | >STK11-G279 YAIPGDCFPPI | 349 | 79    |
| >STK11-G279 YAIPGDCGPP | 615   | >STK11-G279 YAIPGDCFPPI | 462 | 153   |
| >STK11-G279 YAIPGDCGPP | 71    | >STK11-G279 YAIPGDCFPPI | 47  | 24    |
| >STK11-G279 YAIPGDCG   | 30603 | >STK11-G279 YAIPGDCF    | 307 | 30296 |
| >STK11-G279 YAIPGDCGPP | 547   | >STK11-G279 YAIPGDCFPPI | 138 | 409   |
| >STK11-G279 YAIPGDCGPP | 240   | >STK11-G279 YAIPGDCFPPI | 115 | 125   |
| >STK11-G279 YAIPGDCG   | 7285  | >STK11-G279 YAIPGDCF    | 119 | 7166  |
| >STK11-G279 YAIPGDCGPP | 195   | >STK11-G279 YAIPGDCFPPI | 187 | 8     |
| >STK11-G279 YAIPGDCG   | 20776 | >STK11-G279 YAIPGDCF    | 55  | 20721 |
| >STK11-G279 YAIPGDCGPP | 339   | >STK11-G279 YAIPGDCFPPI | 289 | 50    |
| >STK11-G279 YAIPGDCG   | 13341 | >STK11-G279 YAIPGDCF    | 15  | 13326 |
| >STK11-G279 YAIPGDCGPP | 7     | >STK11-G279 YAIPGDCFPPI | 12  | 5     |
| >STK11-G279 YAIPGDCG   | 2863  | >STK11-G279 YAIPGDCF    | 20  | 2843  |
| >STK11-G279 YAIPGDCGPP | 34    | >STK11-G279 YAIPGDCFPPI | 38  | 4     |
| >STK11-G279 YAIPGDCGPP | 239   | >STK11-G279 YAIPGDCFPPI | 200 | 39    |
| >STK11-G279 YAIPGDCG   | 17910 | >STK11-G279 YAIPGDCF    | 347 | 17563 |
| >STK11-G279 SYAIPGDCG  | 11926 | >STK11-G279 SYAIPGDCF   | 31  | 11895 |
| >STK11-G279 GSYAIPGDCG | 24113 | >STK11-G279 GSYAIPGDCF  | 214 | 23899 |
| >STK11-G279 GSYAIPGDCG | 19132 | >STK11-G279 GSYAIPGDCF  | 38  | 19094 |
| >STK11-G56\ GEGSYGKVK  | 208   | >STK11-G56\ VEGSYGKVK   | 112 | 96    |
| >STK11-G56\ GEGSYGKV   | 261   | >STK11-G56\ VEGSYGKV    | 886 | 625   |
| >STK11-G56\ GEGSYGKVK  | 208   | >STK11-G56\ VEGSYGKVK   | 765 | 557   |

|                         |       |                         |      |       |
|-------------------------|-------|-------------------------|------|-------|
| >STK11-G56\ GEGSYGKVK E | 102   | >STK11-G56\ VEGSYGKVK E | 581  | 479   |
| >STK11-G56\ LGEGSYGKV   | 12105 | >STK11-G56\ LVEGSYGKV   | 41   | 12064 |
| >STK11-G56\ LGEGSYGK    | 8784  | >STK11-G56\ LVEGSYGK    | 210  | 8574  |
| >STK11-G56\ LGEGSYGK    | 8557  | >STK11-G56\ LVEGSYGK    | 301  | 8256  |
| >STK11-G56\ LLGEGSYGKV  | 401   | >STK11-G56\ LLVEGSYGKV  | 323  | 78    |
| >STK11-G56\ LLGEGSYGKV  | 44    | >STK11-G56\ LLVEGSYGKV  | 43   | 1     |
| >STK11-G56\ LLGEGSYGKV  | 31    | >STK11-G56\ LLVEGSYGKV  | 20   | 11    |
| >STK11-G56\ LLGEGSYGKV  | 1545  | >STK11-G56\ LLVEGSYGKV  | 304  | 1241  |
| >STK11-G56\ LLGEGSYG    | 253   | >STK11-G56\ LLVEGSYG    | 282  | 29    |
| >STK11-G56\ LLGEGSYGK   | 449   | >STK11-G56\ LLVEGSYGK   | 493  | 44    |
| >STK11-G56\ LLGEGSYGKV  | 3     | >STK11-G56\ LLVEGSYGKV  | 3    | 0     |
| >STK11-G56\ LLGEGSYGKV  | 10    | >STK11-G56\ LLVEGSYGKV  | 10   | 0     |
| >STK11-G56\ LLGEGSYGKV  | 8     | >STK11-G56\ LLVEGSYGKV  | 9    | 1     |
| >STK11-G56\ LLGEGSYGKV  | 7     | >STK11-G56\ LLVEGSYGKV  | 17   | 10    |
| >STK11-G56\ LLGEGSYGK   | 146   | >STK11-G56\ LLVEGSYGK   | 138  | 8     |
| >STK11-G56\ LLGEGSYGKV  | 2     | >STK11-G56\ LLVEGSYGKV  | 2    | 0     |
| >STK11-G56\ LLGEGSYGK   | 207   | >STK11-G56\ LLVEGSYGK   | 237  | 30    |
| >STK11-G56\ LLGEGSYGK   | 477   | >STK11-G56\ LLVEGSYGK   | 382  | 95    |
| >STK11-G56\ LLGEGSYGKV  | 757   | >STK11-G56\ LLVEGSYGKV  | 260  | 497   |
| >STK11-G56\ DLLGEGSYGK  | 28    | >STK11-G56\ DLLVEGSYGK  | 133  | 105   |
| >STK11-G56\ DLLGEGSYGK  | 35    | >STK11-G56\ DLLVEGSYGK  | 75   | 40    |
| >STK11-G56\ DLLGEGSYGK  | 42    | >STK11-G56\ DLLVEGSYGK  | 138  | 96    |
| >STK11-G56\ DLLGEGSYGK  | 12    | >STK11-G56\ DLLVEGSYGK  | 50   | 38    |
| >STK11-G56\ DLLGEGSYGK  | 262   | >STK11-G56\ DLLVEGSYGK  | 549  | 287   |
| >STK11-G56\ DLLGEGSY    | 414   | >STK11-G56\ DLLVEGSY    | 2208 | 1794  |
| >STK11-G56\ DLLGEGSY    | 379   | >STK11-G56\ DLLVEGSY    | 951  | 572   |
| >STK11-G56\ DLLGEGSY    | 387   | >STK11-G56\ DLLVEGSY    | 339  | 48    |
| >STK11-G56\ DLLGEGSYGK  | 267   | >STK11-G56\ DLLVEGSYGK  | 315  | 48    |
| >STK11-G56\ DLLGEGSY    | 128   | >STK11-G56\ DLLVEGSY    | 270  | 142   |
| >STK11-G56\ MGDLLGEGS'  | 212   | >STK11-G56\ MGDLLVEGS'  | 146  | 66    |
| >STK11-G56\ MGDLLGEGS'  | 421   | >STK11-G56\ MGDLLVEGS'  | 508  | 87    |
| >STK11-G56\ LMGDLLGEG   | 1261  | >STK11-G56\ LMGDLLVEG   | 196  | 1065  |
| >STK11-G56\ LMGDLLGEG   | 878   | >STK11-G56\ LMGDLLVEG   | 260  | 618   |
| >STK11-G56\ LMGDLLGEG:  | 386   | >STK11-G56\ LMGDLLVEG:  | 126  | 260   |
| >STK11-G56\ LMGDLLGEG   | 3379  | >STK11-G56\ LMGDLLVEG   | 360  | 3019  |
| >STK11-G56\ LMGDLLGEG:  | 1138  | >STK11-G56\ LMGDLLVEG:  | 254  | 884   |
| >STK11-G56\ LMGDLLGEG:  | 21    | >STK11-G56\ LMGDLLVEG:  | 29   | 8     |
| >STK11-G56\ LMGDLLGEG:  | 14    | >STK11-G56\ LMGDLLVEG:  | 30   | 16    |
| >STK11-G56\ LMGDLLGEG:  | 223   | >STK11-G56\ LMGDLLVEG:  | 263  | 40    |
| >STK11-G56\ LMGDLLGEG:  | 45    | >STK11-G56\ LMGDLLVEG:  | 50   | 5     |
| >STK11-G56\ LMGDLLGEG:  | 491   | >STK11-G56\ LMGDLLVEG:  | 1171 | 680   |
| >STK11-G56\ YLMGDLLG    | 509   | >STK11-G56\ YLMGDLLV    | 6    | 503   |
| >STK11-G56\ YLMGDLLGEC  | 136   | >STK11-G56\ YLMGDLLVEC  | 57   | 79    |

|                       |       |                       |      |       |
|-----------------------|-------|-----------------------|------|-------|
| >STK11-G56\YLMGDLLGEC | 197   | >STK11-G56\YLMGDLLVEC | 60   | 137   |
| >STK11-G56\YLMGDLLG   | 70    | >STK11-G56\YLMGDLLV   | 2    | 68    |
| >STK11-G56\YLMGDLLGE  | 165   | >STK11-G56\YLMGDLLVE  | 327  | 162   |
| >STK11-G56\YLMGDLLGEC | 149   | >STK11-G56\YLMGDLLVEC | 89   | 60    |
| >STK11-G56\YLMGDLLGEC | 28    | >STK11-G56\YLMGDLLVEC | 15   | 13    |
| >STK11-G56\YLMGDLLG   | 408   | >STK11-G56\YLMGDLLV   | 3    | 405   |
| >STK11-G56\YLMGDLLGEC | 267   | >STK11-G56\YLMGDLLVEC | 389  | 122   |
| >STK11-G56\YLMGDLLGEC | 76    | >STK11-G56\YLMGDLLVEC | 32   | 44    |
| >STK11-G56\YLMGDLLG   | 596   | >STK11-G56\YLMGDLLV   | 3    | 593   |
| >STK11-G56\YLMGDLLGE  | 250   | >STK11-G56\YLMGDLLVE  | 1229 | 979   |
| >STK11-G56\YLMGDLLGEC | 261   | >STK11-G56\YLMGDLLVEC | 175  | 86    |
| >STK11-G56\YLMGDLLGEC | 72    | >STK11-G56\YLMGDLLVEC | 53   | 19    |
| >STK11-G56\YLMGDLLG   | 335   | >STK11-G56\YLMGDLLV   | 2    | 333   |
| >STK11-G56\YLMGDLLGEC | 84    | >STK11-G56\YLMGDLLVEC | 46   | 38    |
| >STK11-G56\YLMGDLLGEC | 38    | >STK11-G56\YLMGDLLVEC | 24   | 14    |
| >STK11-G56\YLMGDLLG   | 1390  | >STK11-G56\YLMGDLLV   | 3    | 1387  |
| >STK11-G56\YLMGDLLGEC | 625   | >STK11-G56\YLMGDLLVEC | 185  | 440   |
| >STK11-G56\YLMGDLLGEC | 201   | >STK11-G56\YLMGDLLVEC | 155  | 46    |
| >STK11-G56\YLMGDLLG   | 1443  | >STK11-G56\YLMGDLLV   | 4    | 1439  |
| >STK11-G56\YLMGDLLGEC | 787   | >STK11-G56\YLMGDLLVEC | 490  | 297   |
| >STK11-G56\YLMGDLLG   | 4358  | >STK11-G56\YLMGDLLV   | 2    | 4356  |
| >STK11-G56\YLMGDLLGEC | 156   | >STK11-G56\YLMGDLLVEC | 53   | 103   |
| >STK11-G56\YLMGDLLG   | 129   | >STK11-G56\YLMGDLLV   | 1    | 128   |
| >STK11-G56\YLMGDLLGE  | 54    | >STK11-G56\YLMGDLLVE  | 159  | 105   |
| >STK11-G56\YLMGDLLGEC | 106   | >STK11-G56\YLMGDLLVEC | 21   | 85    |
| >STK11-G56\YLMGDLLGEC | 33    | >STK11-G56\YLMGDLLVEC | 22   | 11    |
| >STK11-G56\YLMGDLLG   | 17199 | >STK11-G56\YLMGDLLV   | 421  | 16778 |
| >STK11-G56\YLMGDLLG   | 19160 | >STK11-G56\YLMGDLLV   | 135  | 19025 |
| >STK11-G56\KYLMDLLG   | 24060 | >STK11-G56\KYLMDLLV   | 357  | 23703 |
| >STK11-G56\KYLMDLLG   | 4074  | >STK11-G56\KYLMDLLV   | 267  | 3807  |
| >STK11-G56\KYLMDLLG   | 1888  | >STK11-G56\KYLMDLLV   | 249  | 1639  |
| >STK11-G56\KYLMDLLG   | 326   | >STK11-G56\KYLMDLLV   | 78   | 248   |
| >STK11-G56\KYLMDLLGE  | 405   | >STK11-G56\KYLMDLLVE  | 482  | 77    |
| >STK11-G56\GEGSYGKVK  | 208   | >STK11-G56\WEGSYGKVK  | 47   | 161   |
| >STK11-G56\GEGSYGKVK  | 602   | >STK11-G56\WEGSYGKVK  | 492  | 110   |
| >STK11-G56\GEGSYGKV   | 261   | >STK11-G56\WEGSYGKV   | 2293 | 2032  |
| >STK11-G56\GEGSYGKVK  | 208   | >STK11-G56\WEGSYGKVK  | 1874 | 1666  |
| >STK11-G56\GEGSYGKVK  | 102   | >STK11-G56\WEGSYGKVK  | 67   | 35    |
| >STK11-G56\LGEGSYGK   | 14671 | >STK11-G56\LWEGSYGK   | 286  | 14385 |
| >STK11-G56\LGEGSYGKV  | 28725 | >STK11-G56\LWEGSYGKV  | 297  | 28428 |
| >STK11-G56\IGKYLMGDLL | 25027 | >STK11-G56\IGKYLMGDLL | 244  | 24783 |
| >STK11-G56\IGKYLMGDLL | 22286 | >STK11-G56\IGKYLMGDLL | 459  | 21827 |
| >STK11-G56\LLGEGSYGKV | 401   | >STK11-G56\LLWEGSYGK  | 123  | 278   |

|                       |      |                       |     |      |
|-----------------------|------|-----------------------|-----|------|
| >STK11-G56\LLGEGSYGKV | 44   | >STK11-G56\LLWEGSYGK\ | 36  | 8    |
| >STK11-G56\LLGEGSYGKV | 31   | >STK11-G56\LLWEGSYGK\ | 18  | 13   |
| >STK11-G56\LLGEGSYGKV | 1545 | >STK11-G56\LLWEGSYGK\ | 286 | 1259 |
| >STK11-G56\LLGEGSYG   | 253  | >STK11-G56\LLWEGSYG   | 18  | 235  |
| >STK11-G56\LLGEGSYGK  | 449  | >STK11-G56\LLWEGSYGK  | 20  | 429  |
| >STK11-G56\LLGEGSYGKV | 3    | >STK11-G56\LLWEGSYGK\ | 1   | 2    |
| >STK11-G56\LLGEGSYGKV | 3581 | >STK11-G56\LLWEGSYGK\ | 295 | 3286 |
| >STK11-G56\LLGEGSYG   | 1909 | >STK11-G56\LLWEGSYG   | 440 | 1469 |
| >STK11-G56\LLGEGSYGK  | 1193 | >STK11-G56\LLWEGSYGK  | 229 | 964  |
| >STK11-G56\LLGEGSYGKV | 10   | >STK11-G56\LLWEGSYGK\ | 4   | 6    |
| >STK11-G56\LLGEGSYG   | 3174 | >STK11-G56\LLWEGSYG   | 301 | 2873 |
| >STK11-G56\LLGEGSYGK  | 3633 | >STK11-G56\LLWEGSYGK  | 272 | 3361 |
| >STK11-G56\LLGEGSYGKV | 8    | >STK11-G56\LLWEGSYGK\ | 4   | 4    |
| >STK11-G56\LLGEGSYGKV | 7    | >STK11-G56\LLWEGSYGK\ | 2   | 5    |
| >STK11-G56\LLGEGSYG   | 958  | >STK11-G56\LLWEGSYG   | 152 | 806  |
| >STK11-G56\LLGEGSYGK  | 146  | >STK11-G56\LLWEGSYGK  | 31  | 115  |
| >STK11-G56\LLGEGSYGKV | 2    | >STK11-G56\LLWEGSYGK\ | 2   | 0    |
| >STK11-G56\LLGEGSYGKV | 1852 | >STK11-G56\LLWEGSYGK\ | 318 | 1534 |
| >STK11-G56\LLGEGSYGK  | 207  | >STK11-G56\LLWEGSYGK  | 82  | 125  |
| >STK11-G56\LLGEGSYGKV | 663  | >STK11-G56\LLWEGSYGK\ | 205 | 458  |
| >STK11-G56\LLGEGSYGK  | 477  | >STK11-G56\LLWEGSYGK  | 173 | 304  |
| >STK11-G56\LLGEGSYGKV | 757  | >STK11-G56\LLWEGSYGK\ | 53  | 704  |
| >STK11-G56\DLLGEGSYGK | 28   | >STK11-G56\DLLWEGSYGI | 14  | 14   |
| >STK11-G56\DLLGEGSYGK | 35   | >STK11-G56\DLLWEGSYGI | 22  | 13   |
| >STK11-G56\DLLGEGSYGK | 42   | >STK11-G56\DLLWEGSYGI | 41  | 1    |
| >STK11-G56\DLLGEGSYGK | 12   | >STK11-G56\DLLWEGSYGI | 12  | 0    |
| >STK11-G56\DLLGEGSYGK | 262  | >STK11-G56\DLLWEGSYGI | 212 | 50   |
| >STK11-G56\DLLGEGSY   | 414  | >STK11-G56\DLLWEGSY   | 899 | 485  |
| >STK11-G56\DLLGEGSY   | 379  | >STK11-G56\DLLWEGSY   | 305 | 74   |
| >STK11-G56\DLLGEGSY   | 387  | >STK11-G56\DLLWEGSY   | 125 | 262  |
| >STK11-G56\DLLGEGSYGK | 267  | >STK11-G56\DLLWEGSYGI | 59  | 208  |
| >STK11-G56\DLLGEGSY   | 128  | >STK11-G56\DLLWEGSY   | 617 | 489  |
| >STK11-G56\MGDLLGEGS' | 212  | >STK11-G56\MGDLLWEGS' | 329 | 117  |
| >STK11-G56\MGDLLGEGS' | 421  | >STK11-G56\MGDLLWEGS' | 675 | 254  |
| >STK11-G56\LMGDLLGEG  | 1261 | >STK11-G56\LMGDLLWEG  | 63  | 1198 |
| >STK11-G56\LMGDLLGEG  | 878  | >STK11-G56\LMGDLLWEG  | 24  | 854  |
| >STK11-G56\LMGDLLGEG: | 386  | >STK11-G56\LMGDLLWEG  | 96  | 290  |
| >STK11-G56\LMGDLLGEG  | 7492 | >STK11-G56\LMGDLLWEG  | 159 | 7333 |
| >STK11-G56\LMGDLLGEG  | 9769 | >STK11-G56\LMGDLLWEG  | 354 | 9415 |
| >STK11-G56\LMGDLLGEG  | 3379 | >STK11-G56\LMGDLLWEG  | 30  | 3349 |
| >STK11-G56\LMGDLLGEG: | 1138 | >STK11-G56\LMGDLLWEG  | 263 | 875  |
| >STK11-G56\LMGDLLGEG: | 2120 | >STK11-G56\LMGDLLWEG  | 366 | 1754 |
| >STK11-G56\LMGDLLGEG: | 21   | >STK11-G56\LMGDLLWEG  | 14  | 7    |

|                        |       |                        |      |       |
|------------------------|-------|------------------------|------|-------|
| >STK11-G56\LMGDLLGEG:  | 14    | >STK11-G56\LMGDLLWEG   | 13   | 1     |
| >STK11-G56\LMGDLLGEG:  | 223   | >STK11-G56\LMGDLLWEG   | 99   | 124   |
| >STK11-G56\LMGDLLGEG:  | 45    | >STK11-G56\LMGDLLWEG   | 53   | 8     |
| >STK11-G56\LMGDLLGEG:  | 491   | >STK11-G56\LMGDLLWEG   | 1422 | 931   |
| >STK11-G56\YLMGDLLGEC  | 136   | >STK11-G56\YLMGDLLWE   | 24   | 112   |
| >STK11-G56\YLMGDLLGEC  | 197   | >STK11-G56\YLMGDLLWE   | 76   | 121   |
| >STK11-G56\YLMGDLLG    | 70    | >STK11-G56\YLMGDLLW    | 260  | 190   |
| >STK11-G56\YLMGDLLGE   | 165   | >STK11-G56\YLMGDLLWE   | 75   | 90    |
| >STK11-G56\YLMGDLLGEC  | 149   | >STK11-G56\YLMGDLLWE   | 51   | 98    |
| >STK11-G56\YLMGDLLGEC  | 28    | >STK11-G56\YLMGDLLWE   | 19   | 9     |
| >STK11-G56\YLMGDLLG    | 408   | >STK11-G56\YLMGDLLW    | 2368 | 1960  |
| >STK11-G56\YLMGDLLGEC  | 267   | >STK11-G56\YLMGDLLWE   | 332  | 65    |
| >STK11-G56\YLMGDLLGEC  | 76    | >STK11-G56\YLMGDLLWE   | 78   | 2     |
| >STK11-G56\YLMGDLLGE   | 250   | >STK11-G56\YLMGDLLWE   | 770  | 520   |
| >STK11-G56\YLMGDLLGEC  | 261   | >STK11-G56\YLMGDLLWE   | 57   | 204   |
| >STK11-G56\YLMGDLLGEC  | 72    | >STK11-G56\YLMGDLLWE   | 31   | 41    |
| >STK11-G56\YLMGDLLG    | 335   | >STK11-G56\YLMGDLLW    | 1712 | 1377  |
| >STK11-G56\YLMGDLLGEC  | 84    | >STK11-G56\YLMGDLLWE   | 15   | 69    |
| >STK11-G56\YLMGDLLGEC  | 38    | >STK11-G56\YLMGDLLWE   | 34   | 4     |
| >STK11-G56\YLMGDLLGEC  | 625   | >STK11-G56\YLMGDLLWE   | 56   | 569   |
| >STK11-G56\YLMGDLLGEC  | 201   | >STK11-G56\YLMGDLLWE   | 435  | 234   |
| >STK11-G56\YLMGDLLGEC  | 1618  | >STK11-G56\YLMGDLLWE   | 146  | 1472  |
| >STK11-G56\YLMGDLLGEC  | 2764  | >STK11-G56\YLMGDLLWE   | 160  | 2604  |
| >STK11-G56\YLMGDLLGEC  | 156   | >STK11-G56\YLMGDLLWE   | 120  | 36    |
| >STK11-G56\YLMGDLLG    | 129   | >STK11-G56\YLMGDLLW    | 306  | 177   |
| >STK11-G56\YLMGDLLGE   | 54    | >STK11-G56\YLMGDLLWE   | 30   | 24    |
| >STK11-G56\YLMGDLLGEC  | 106   | >STK11-G56\YLMGDLLWE   | 8    | 98    |
| >STK11-G56\YLMGDLLGEC  | 33    | >STK11-G56\YLMGDLLWE   | 34   | 1     |
| >STK11-G56\YLMGDLLG    | 6385  | >STK11-G56\YLMGDLLW    | 420  | 5965  |
| >STK11-G56\YLMGDLLG    | 22874 | >STK11-G56\YLMGDLLW    | 114  | 22760 |
| >STK11-G56\YLMGDLLG    | 20659 | >STK11-G56\YLMGDLLW    | 35   | 20624 |
| >STK11-G56\KYLMDLLG    | 17240 | >STK11-G56\KYLMDLLW    | 79   | 17161 |
| >STK11-G56\KYLMDLLG    | 11602 | >STK11-G56\KYLMDLLW    | 147  | 11455 |
| >STK11-G56\KYLMDLLG    | 4074  | >STK11-G56\KYLMDLLW    | 21   | 4053  |
| >STK11-G56\KYLMDLLGE   | 992   | >STK11-G56\KYLMDLLW    | 237  | 755   |
| >STK11-G56\KYLMDLLG    | 21599 | >STK11-G56\KYLMDLLW    | 60   | 21539 |
| >STK11-G56\KYLMDLLG    | 326   | >STK11-G56\KYLMDLLW    | 137  | 189   |
| >STK11-G56\KYLMDLLGE   | 405   | >STK11-G56\KYLMDLLW    | 133  | 272   |
| >STK11-G91L GEANVKKEI  | 6     | >STK11-G91L LEANVKKEI  | 5    | 1     |
| >STK11-G91L GEANVKKEIQ | 409   | >STK11-G91L LEANVKKEIQ | 100  | 309   |
| >STK11-G91L GEANVKKEI  | 206   | >STK11-G91L LEANVKKEI  | 388  | 182   |
| >STK11-G91L GEANVKKEIQ | 64    | >STK11-G91L LEANVKKEIQ | 118  | 54    |
| >STK11-G91L GEANVKKEIQ | 367   | >STK11-G91L LEANVKKEIQ | 944  | 577   |

|                         |       |                         |     |       |
|-------------------------|-------|-------------------------|-----|-------|
| >STK11-G91L GEANVKKEI   | 18    | >STK11-G91L LEANVKKEI   | 95  | 77    |
| >STK11-G91L GEANVKKEIQ  | 46    | >STK11-G91L LEANVKKEIQ  | 262 | 216   |
| >STK11-G91L KKKKLRRIPNL | 1441  | >STK11-G91L KKKKLRRIPNL | 371 | 1070  |
| >STK11-G91L KKKKLRRIPNL | 4591  | >STK11-G91L KKKKLRRIPNL | 57  | 4534  |
| >STK11-G91L KKKKLRRIPNL | 8228  | >STK11-G91L KKKKLRRIPNL | 370 | 7858  |
| >STK11-G91L IPNGEANV    | 471   | >STK11-G91L IPNLEANV    | 387 | 84    |
| >STK11-G91L RIPNGEANV   | 150   | >STK11-G91L RIPNLEANV   | 240 | 90    |
| >STK11-G91L RIPNGEANV   | 78    | >STK11-G91L RIPNLEANV   | 89  | 11    |
| >STK11-G91L RIPNGEANV   | 114   | >STK11-G91L RIPNLEANV   | 108 | 6     |
| >STK11-G91L RIPNGEANV   | 14    | >STK11-G91L RIPNLEANV   | 38  | 24    |
| >STK11-G91L RIPNGEANVK  | 245   | >STK11-G91L RIPNLEANVK  | 273 | 28    |
| >STK11-G91L RIPNGEANVK  | 285   | >STK11-G91L RIPNLEANVK  | 237 | 48    |
| >STK11-G91L RIPNGEANVK  | 364   | >STK11-G91L RIPNLEANVK  | 198 | 166   |
| >STK11-G91L RRIPNGEANV  | 239   | >STK11-G91L RRIPNLEANV  | 425 | 186   |
| >STK11-G91L RRIPNGEA    | 398   | >STK11-G91L RRIPNLEA    | 230 | 168   |
| >STK11-G91L RRIPNGEANV  | 65    | >STK11-G91L RRIPNLEANV  | 48  | 17    |
| >STK11-G91L RRIPNGEANV  | 76    | >STK11-G91L RRIPNLEANV  | 68  | 8     |
| >STK11-G91L RRIPNGEA    | 193   | >STK11-G91L RRIPNLEA    | 36  | 157   |
| >STK11-G91L RRIPNGEAN   | 626   | >STK11-G91L RRIPNLEAN   | 332 | 294   |
| >STK11-G91L RRIPNGEANV  | 124   | >STK11-G91L RRIPNLEANV  | 177 | 53    |
| >STK11-G91L RRIPNGEANV  | 580   | >STK11-G91L RRIPNLEANV  | 393 | 187   |
| >STK11-G91L RRIPNGEANV  | 86    | >STK11-G91L RRIPNLEANV  | 65  | 21    |
| >STK11-G91L RRIPNGEANV  | 202   | >STK11-G91L RRIPNLEANV  | 95  | 107   |
| >STK11-G91L KLRRIPNG    | 13431 | >STK11-G91L KLRRIPNL    | 170 | 13261 |
| >STK11-G91L KLRRIPNG    | 9951  | >STK11-G91L KLRRIPNL    | 68  | 9883  |
| >STK11-G91L KLRRIPNGEA  | 448   | >STK11-G91L KLRRIPNLEA  | 323 | 125   |
| >STK11-G91L KLRRIPNG    | 13287 | >STK11-G91L KLRRIPNL    | 131 | 13156 |
| >STK11-G91L KLRRIPNG    | 18136 | >STK11-G91L KLRRIPNL    | 368 | 17768 |
| >STK11-G91L KLRRIPNG    | 11736 | >STK11-G91L KLRRIPNL    | 21  | 11715 |
| >STK11-G91L KLRRIPNGEA  | 569   | >STK11-G91L KLRRIPNLEA  | 165 | 404   |
| >STK11-G91L KLRRIPNG    | 19    | >STK11-G91L KLRRIPNL    | 8   | 11    |
| >STK11-G91L KLRRIPNGE   | 614   | >STK11-G91L KLRRIPNLE   | 174 | 440   |
| >STK11-G91L KLRRIPNGEA  | 10    | >STK11-G91L KLRRIPNLEA  | 6   | 4     |
| >STK11-G91L KLRRIPNG    | 2713  | >STK11-G91L KLRRIPNL    | 312 | 2401  |
| >STK11-G91L KKLRRIPNG   | 2725  | >STK11-G91L KKLRRIPNL   | 28  | 2697  |
| >STK11-G91L KKLRRIPNGE  | 755   | >STK11-G91L KKLRRIPNLEA | 203 | 552   |
| >STK11-G91L KKLRRIPNG   | 9690  | >STK11-G91L KKLRRIPNL   | 426 | 9264  |
| >STK11-G91L KKLRRIPNG   | 8253  | >STK11-G91L KKLRRIPNL   | 184 | 8069  |
| >STK11-G91L KKKLRRIPNG  | 766   | >STK11-G91L KKKLRRIPNL  | 179 | 587   |
| >STK11-G91L KKKLRRIPNG  | 6527  | >STK11-G91L KKKLRRIPNL  | 107 | 6420  |
| >STK11-H107HKNVIQLV     | 758   | >STK11-H107RKNVIQLV     | 169 | 589   |
| >STK11-H107HKNVIQLVDV   | 612   | >STK11-H107RKNVIQLVDV   | 130 | 482   |
| >STK11-H107HKNVIQLVDV   | 347   | >STK11-H107RKNVIQLVDV   | 74  | 273   |

|                         |       |                         |      |       |
|-------------------------|-------|-------------------------|------|-------|
| >STK11-H107HKNVIQLVDV   | 78    | >STK11-H107RKNVIQLVDV   | 1127 | 1049  |
| >STK11-H107HKNVIQLVDV   | 3028  | >STK11-H107RKNVIQLVDV   | 335  | 2693  |
| >STK11-H107HKNVIQLVDV   | 6497  | >STK11-H107RKNVIQLVDV   | 280  | 6217  |
| >STK11-H107HKNVIQLVDV   | 2342  | >STK11-H107RKNVIQLVDV   | 231  | 2111  |
| >STK11-H107RHKNVIQL     | 397   | >STK11-H107RRKNVIQL     | 195  | 202   |
| >STK11-H107RHKNVIQLV    | 839   | >STK11-H107RRKNVIQLV    | 325  | 514   |
| >STK11-H107RHKNVIQLVE   | 821   | >STK11-H107RRKNVIQLVD   | 323  | 498   |
| >STK11-H107RHKNVIQL     | 6828  | >STK11-H107RRKNVIQL     | 31   | 6797  |
| >STK11-H107RHKNVIQLV    | 7333  | >STK11-H107RRKNVIQLV    | 44   | 7289  |
| >STK11-H107RHKNVIQLVE   | 9571  | >STK11-H107RRKNVIQLVD   | 154  | 9417  |
| >STK11-H107RHKNVIQLVE   | 13304 | >STK11-H107RRKNVIQLVD   | 165  | 13139 |
| >STK11-H107RHKNVIQL     | 2086  | >STK11-H107RRKNVIQL     | 20   | 2066  |
| >STK11-H107RHKNVIQLV    | 990   | >STK11-H107RRKNVIQLV    | 32   | 958   |
| >STK11-H107RHKNVIQLVE   | 9535  | >STK11-H107RRKNVIQLVD   | 76   | 9459  |
| >STK11-H107RHKNVIQLVE   | 2505  | >STK11-H107RRKNVIQLVD   | 68   | 2437  |
| >STK11-H107RHKNVIQL     | 2539  | >STK11-H107RRKNVIQL     | 61   | 2478  |
| >STK11-H107RHKNVIQLV    | 1099  | >STK11-H107RRKNVIQLV    | 32   | 1067  |
| >STK11-H107RHKNVIQLVE   | 16240 | >STK11-H107RRKNVIQLVD   | 161  | 16079 |
| >STK11-H107RHKNVIQLVE   | 7531  | >STK11-H107RRKNVIQLVD   | 163  | 7368  |
| >STK11-H107KEIQLLRRRLRF | 1832  | >STK11-H107KEIQLLRRRLRF | 488  | 1344  |
| >STK11-H107KEIQLLRRRLRF | 19506 | >STK11-H107KEIQLLRRRLRF | 53   | 19453 |
| >STK11-H107LRHKNVIQL    | 221   | >STK11-H107LRRKNVIQL    | 158  | 63    |
| >STK11-H107LRHKNVIQLV   | 478   | >STK11-H107LRRKNVIQLV   | 287  | 191   |
| >STK11-H107LRHKNVIQL    | 107   | >STK11-H107LRRKNVIQL    | 261  | 154   |
| >STK11-H107LRHKNVIQLV   | 794   | >STK11-H107LRRKNVIQLV   | 499  | 295   |
| >STK11-H107LRHKNVIQL    | 434   | >STK11-H107LRRKNVIQL    | 6349 | 5915  |
| >STK11-H107LRHKNVIQL    | 676   | >STK11-H107LRRKNVIQL    | 203  | 473   |
| >STK11-H107LRHKNVIQL    | 101   | >STK11-H107LRRKNVIQL    | 49   | 52    |
| >STK11-H107LRHKNVIQLV   | 458   | >STK11-H107LRRKNVIQLV   | 220  | 238   |
| >STK11-H107RLRHKNVIQL   | 197   | >STK11-H107RLRRKNVIQL'  | 388  | 191   |
| >STK11-H107RLRHKNVI     | 235   | >STK11-H107RLRRKNVI     | 763  | 528   |
| >STK11-H107RLRHKNVIQL   | 10    | >STK11-H107RLRRKNVIQL'  | 18   | 8     |
| >STK11-H107RLRHKNVIQL   | 254   | >STK11-H107RLRRKNVIQL   | 218  | 36    |
| >STK11-H107RLRHKNVIQL   | 26    | >STK11-H107RLRRKNVIQL'  | 23   | 3     |
| >STK11-H107RLRHKNVIQL   | 81    | >STK11-H107RLRRKNVIQL'  | 123  | 42    |
| >STK11-H107RLRHKNVIQL   | 112   | >STK11-H107RLRRKNVIQL'  | 130  | 18    |
| >STK11-H107RLRHKNVI     | 994   | >STK11-H107RLRRKNVI     | 463  | 531   |
| >STK11-H107RLRHKNVIQL   | 34    | >STK11-H107RLRRKNVIQL   | 22   | 12    |
| >STK11-H107RLRHKNVIQL   | 7     | >STK11-H107RLRRKNVIQL'  | 6    | 1     |
| >STK11-H107RLRHKNVI     | 12    | >STK11-H107RLRRKNVI     | 9    | 3     |
| >STK11-H107RLRHKNVIQ    | 44    | >STK11-H107RLRRKNVIQ    | 26   | 18    |
| >STK11-H107RLRHKNVIQL   | 11    | >STK11-H107RLRRKNVIQL   | 8    | 3     |
| >STK11-H107RLRHKNVIQL   | 9     | >STK11-H107RLRRKNVIQL'  | 7    | 2     |



|                       |      |                        |      |      |
|-----------------------|------|------------------------|------|------|
| >STK11-H107RLRHKNVIQL | 473  | >STK11-H107RLRRKNVIQL  | 461  | 12   |
| >STK11-H107RLRHKNVI   | 114  | >STK11-H107RLRRKNVI    | 47   | 67   |
| >STK11-H107RLRHKNVIQL | 1015 | >STK11-H107RLRRKNVIQL' | 410  | 605  |
| >STK11-H107RLRHKNVI   | 247  | >STK11-H107RLRRKNVI    | 503  | 256  |
| >STK11-H107RLRHKNVIQL | 207  | >STK11-H107RLRRKNVIQL  | 348  | 141  |
| >STK11-H107RLRHKNVIQL | 103  | >STK11-H107RLRRKNVIQL  | 480  | 377  |
| >STK11-H107RRLRHKNVI  | 746  | >STK11-H107RRLRRKNVI   | 217  | 529  |
| >STK11-H107RRLRHKNV   | 195  | >STK11-H107RRLRRKNV    | 318  | 123  |
| >STK11-H107RRLRHKNVI  | 185  | >STK11-H107RRLRRKNVI   | 306  | 121  |
| >STK11-H107RRLRHKNVIQ | 148  | >STK11-H107RRLRRKNVIQ  | 194  | 46   |
| >STK11-H107RRLRHKNV   | 52   | >STK11-H107RRLRRKNV    | 37   | 15   |
| >STK11-H107RRLRHKNVI  | 52   | >STK11-H107RRLRRKNVI   | 41   | 11   |
| >STK11-H107RRLRHKNVIQ | 129  | >STK11-H107RRLRRKNVIQ  | 84   | 45   |
| >STK11-H107RRLRHKNVIQ | 20   | >STK11-H107RRLRRKNVIQ  | 19   | 1    |
| >STK11-H107RRLRHKNV   | 52   | >STK11-H107RRLRRKNV    | 22   | 30   |
| >STK11-H107RRLRHKNVI  | 36   | >STK11-H107RRLRRKNVI   | 31   | 5    |
| >STK11-H107RRLRHKNVIQ | 92   | >STK11-H107RRLRRKNVIQ  | 48   | 44   |
| >STK11-H107RRLRHKNVIQ | 22   | >STK11-H107RRLRRKNVIQ  | 21   | 1    |
| >STK11-H107RRLRHKNV   | 290  | >STK11-H107RRLRRKNV    | 148  | 142  |
| >STK11-H107RRLRHKNVI  | 19   | >STK11-H107RRLRRKNVI   | 19   | 0    |
| >STK11-H107RRLRHKNVIQ | 539  | >STK11-H107RRLRRKNVIQ  | 185  | 354  |
| >STK11-H107RRLRHKNVIQ | 10   | >STK11-H107RRLRRKNVIQ  | 10   | 0    |
| >STK11-H107LRRLRHKNV  | 141  | >STK11-H107LRRLRRKNV   | 109  | 32   |
| >STK11-H107LRRLRHKNVI | 484  | >STK11-H107LRRLRRKNVI  | 383  | 101  |
| >STK11-H107LRRLRHKNVI | 477  | >STK11-H107LRRLRRKNVI  | 292  | 185  |
| >STK11-H107LLRRLRHKNV | 147  | >STK11-H107LLRRLRRKNV  | 224  | 77   |
| >STK11-H107LLRRLRHKNV | 281  | >STK11-H107LLRRLRRKNV  | 1807 | 1526 |
| >STK11-H107LLRRLRHKNV | 5    | >STK11-H107LLRRLRRKNV  | 9    | 4    |
| >STK11-H107LLRRLRHKNV | 79   | >STK11-H107LLRRLRRKNV  | 293  | 214  |
| >STK11-H107LLRRLRHK   | 83   | >STK11-H107LLRRLRRK    | 92   | 9    |
| >STK11-H107LLRRLRHK   | 7    | >STK11-H107LLRRLRRK    | 11   | 4    |
| >STK11-H107LLRRLRHKNV | 80   | >STK11-H107LLRRLRRKNV  | 101  | 21   |
| >STK11-H107LLRRLRHKNV | 93   | >STK11-H107LLRRLRRKNV  | 92   | 1    |
| >STK11-H107LLRRLRHK   | 271  | >STK11-H107LLRRLRRK    | 900  | 629  |
| >STK11-H107LLRRLRHKNV | 42   | >STK11-H107LLRRLRRKNV  | 44   | 2    |
| >STK11-H107QLLRRLRHKN | 399  | >STK11-H107QLLRRLRHKN  | 606  | 207  |
| >STK11-H107QLLRRLRHKN | 29   | >STK11-H107QLLRRLRHKN  | 106  | 77   |
| >STK11-H107QLLRRLRHKN | 240  | >STK11-H107QLLRRLRHKN  | 539  | 299  |
| >STK11-H107QLLRRLRHKN | 170  | >STK11-H107QLLRRLRHKN  | 434  | 264  |
| >STK11-H107QLLRRLRHKN | 329  | >STK11-H107QLLRRLRHKN  | 755  | 426  |
| >STK11-H107QLLRRLRHKN | 10   | >STK11-H107QLLRRLRHKN  | 12   | 2    |
| >STK11-H107QLLRRLRHK  | 89   | >STK11-H107QLLRRLRHK   | 95   | 6    |
| >STK11-H107QLLRRLRHK  | 195  | >STK11-H107QLLRRLRHK   | 750  | 555  |

|                        |       |                        |      |       |
|------------------------|-------|------------------------|------|-------|
| >STK11-H107QLLRRLRH    | 9789  | >STK11-H107QLLRRRLRR   | 106  | 9683  |
| >STK11-H107QLLRRLRHKN  | 90    | >STK11-H107QLLRRRLRRKN | 93   | 3     |
| >STK11-H107QLLRRLRH    | 25799 | >STK11-H107QLLRRRLRR   | 219  | 25580 |
| >STK11-H107IQLLRRLRHK  | 54    | >STK11-H107IQLLRRRLRRK | 75   | 21    |
| >STK11-H107IQLLRRLRHK  | 360   | >STK11-H107IQLLRRRLRRK | 649  | 289   |
| >STK11-H107IQLLRRLRHK  | 477   | >STK11-H107IQLLRRRLRRK | 1116 | 639   |
| >STK11-H107IQLLRRLRH   | 7477  | >STK11-H107IQLLRRRLRR  | 32   | 7445  |
| >STK11-H107IQLLRRLRHK  | 341   | >STK11-H107IQLLRRRLRRK | 400  | 59    |
| >STK11-H107IQLLRRLRH   | 31465 | >STK11-H107IQLLRRRLRR  | 479  | 30986 |
| >STK11-H107IQLLRRLRH   | 23156 | >STK11-H107IQLLRRRLRR  | 150  | 23006 |
| >STK11-H107EIQLLRRLRH  | 6435  | >STK11-H107EIQLLRRRLRR | 39   | 6396  |
| >STK11-H107EIQLLRRLRH  | 9428  | >STK11-H107EIQLLRRRLRR | 163  | 9265  |
| >STK11-H107EIQLLRRLRH  | 24991 | >STK11-H107EIQLLRRRLRR | 240  | 24751 |
| >STK11-H107EIQLLRRLRH  | 31721 | >STK11-H107EIQLLRRRLRR | 275  | 31446 |
| >STK11-H174HKDIKPGNLL  | 6176  | >STK11-H174RKDIKPGNLL  | 396  | 5780  |
| >STK11-H174HKDIKPGNLL  | 4221  | >STK11-H174RKDIKPGNLLI | 388  | 3833  |
| >STK11-H174VHKDIKPGNL  | 10296 | >STK11-H174VRKDIKPGNL  | 108  | 10188 |
| >STK11-H174VHKDIKPGNL  | 19320 | >STK11-H174VRKDIKPGNL  | 173  | 19147 |
| >STK11-H174VHKDIKPGNL  | 16196 | >STK11-H174VRKDIKPGNL  | 113  | 16083 |
| >STK11-H174LEYLHSQGIVH | 208   | >STK11-H174LEYLHSQGIVH | 563  | 355   |
| >STK11-H174IVHKDIKPGN  | 2474  | >STK11-H174IVRKDIKPGNI | 262  | 2212  |
| >STK11-H174SQGIVHKDI   | 468   | >STK11-H174SQGIVRKDI   | 113  | 355   |
| >STK11-H174HSQGIVHK    | 104   | >STK11-H174HSQGIVRK    | 129  | 25    |
| >STK11-H174HSQGIVHKDI  | 303   | >STK11-H174HSQGIVRKDI  | 754  | 451   |
| >STK11-H174HSQGIVHK    | 57    | >STK11-H174HSQGIVRK    | 171  | 114   |
| >STK11-H174HSQGIVHK    | 174   | >STK11-H174HSQGIVRK    | 666  | 492   |
| >STK11-H174HSQGIVHKDI  | 368   | >STK11-H174HSQGIVRKDI  | 653  | 285   |
| >STK11-H174HSQGIVHK    | 126   | >STK11-H174HSQGIVRK    | 201  | 75    |
| >STK11-H174HSQGIVHKDI  | 264   | >STK11-H174HSQGIVRKDI  | 514  | 250   |
| >STK11-H174YLHSQGIVHK  | 75    | >STK11-H174YLHSQGIVRK  | 50   | 25    |
| >STK11-H174YLHSQGIVHK  | 97    | >STK11-H174YLHSQGIVRK  | 137  | 40    |
| >STK11-H174YLHSQGIVHK  | 118   | >STK11-H174YLHSQGIVRK  | 342  | 224   |
| >STK11-H174YLHSQGIVH   | 16042 | >STK11-H174YLHSQGIVR   | 366  | 15676 |
| >STK11-H174YLHSQGIVH   | 23180 | >STK11-H174YLHSQGIVR   | 254  | 22926 |
| >STK11-H174YLHSQGIVH   | 345   | >STK11-H174YLHSQGIVR   | 3260 | 2915  |
| >STK11-H174YLHSQGIVH   | 495   | >STK11-H174YLHSQGIVR   | 622  | 127   |
| >STK11-H174YLHSQGIVHK  | 269   | >STK11-H174YLHSQGIVRK  | 1349 | 1080  |
| >STK11-H174YLHSQGIVH   | 30190 | >STK11-H174YLHSQGIVR   | 329  | 29861 |
| >STK11-H174EYLHSQGIVH  | 13835 | >STK11-H174EYLHSQGIVR  | 357  | 13478 |
| >STK11-H174EYLHSQGIVH  | 249   | >STK11-H174EYLHSQGIVR  | 669  | 420   |
| >STK11-H174EYLHSQGIVH  | 17954 | >STK11-H174EYLHSQGIVR  | 46   | 17908 |
| >STK11-H174EYLHSQGIVH  | 175   | >STK11-H174EYLHSQGIVR  | 387  | 212   |
| >STK11-K78E KILKKKKLRR | 425   | >STK11-K78E EILKKKKLRR | 6772 | 6347  |

|                         |       |                         |      |       |
|-------------------------|-------|-------------------------|------|-------|
| >STK11-K78E KILKKKKLR   | 15    | >STK11-K78E EILKKKKLR   | 1166 | 1151  |
| >STK11-K78E KILKKKKLRR  | 11    | >STK11-K78E EILKKKKLRR  | 155  | 144   |
| >STK11-K78E KILKKKKLR   | 8899  | >STK11-K78E EILKKKKLR   | 172  | 8727  |
| >STK11-K78E KILKKKKLR   | 9233  | >STK11-K78E EILKKKKLR   | 181  | 9052  |
| >STK11-K78E KILKKKKL    | 603   | >STK11-K78E EILKKKKL    | 203  | 400   |
| >STK11-K78E KILKKKKLRR  | 1086  | >STK11-K78E EILKKKKLRR  | 325  | 761   |
| >STK11-K78E KILKKKKLR   | 27    | >STK11-K78E EILKKKKLR   | 118  | 91    |
| >STK11-K78E KILKKKKLRR  | 17    | >STK11-K78E EILKKKKLRR  | 62   | 45    |
| >STK11-K78E VKILKKKKL   | 10371 | >STK11-K78E VEILKKKKL   | 170  | 10201 |
| >STK11-K78E VKILKKKKL   | 23934 | >STK11-K78E VEILKKKKL   | 471  | 23463 |
| >STK11-K78E AVKILKKK    | 495   | >STK11-K78E AVEILKKK    | 578  | 83    |
| >STK11-K78E AVKILKKK    | 13    | >STK11-K78E AVEILKKK    | 3161 | 3148  |
| >STK11-K78E AVKILKKK    | 22    | >STK11-K78E AVEILKKK    | 4607 | 4585  |
| >STK11-K78E AVKILKKK    | 392   | >STK11-K78E AVEILKKK    | 5499 | 5107  |
| >STK11-K78E AVKILKKK    | 390   | >STK11-K78E AVEILKKK    | 5522 | 5132  |
| >STK11-K78E AVKILKKKKLR | 17    | >STK11-K78E AVEILKKKKLR | 178  | 161   |
| >STK11-K78E RAVKILKK    | 274   | >STK11-K78E RAVEILKK    | 462  | 188   |
| >STK11-K78E RAVKILKK    | 121   | >STK11-K78E RAVEILKK    | 112  | 9     |
| >STK11-K78E RAVKILKK    | 88    | >STK11-K78E RAVEILKK    | 215  | 127   |
| >STK11-K78E RAVKILKKK   | 256   | >STK11-K78E RAVEILKKK   | 605  | 349   |
| >STK11-K78E RAVKILKKK   | 438   | >STK11-K78E RAVEILKKK   | 873  | 435   |
| >STK11-K78E RAVKILKKKKL | 35    | >STK11-K78E RAVEILKKKKL | 19   | 16    |
| >STK11-K78E RRAVKILK    | 24    | >STK11-K78E RRAVEILK    | 32   | 8     |
| >STK11-K78E RRAVKILKK   | 15    | >STK11-K78E RRAVEILKK   | 20   | 5     |
| >STK11-K78E RRAVKILKKK  | 25    | >STK11-K78E RRAVEILKKK  | 26   | 1     |
| >STK11-K78E RRAVKILKKK  | 19    | >STK11-K78E RRAVEILKKK  | 23   | 4     |
| >STK11-K78E RRAVKILK    | 14    | >STK11-K78E RRAVEILK    | 33   | 19    |
| >STK11-K78E RRAVKILKK   | 130   | >STK11-K78E RRAVEILKK   | 231  | 101   |
| >STK11-K78E RRAVKILKKK  | 223   | >STK11-K78E RRAVEILKKK  | 340  | 117   |
| >STK11-K78E RRAVKILKKK  | 294   | >STK11-K78E RRAVEILKKK  | 432  | 138   |
| >STK11-K78E RRAVKILK    | 249   | >STK11-K78E RRAVEILK    | 409  | 160   |
| >STK11-K78E RRAVKILKK   | 23    | >STK11-K78E RRAVEILKK   | 50   | 27    |
| >STK11-K78E RRAVKILKKK  | 125   | >STK11-K78E RRAVEILKKK  | 158  | 33    |
| >STK11-K78E RRAVKILKKK  | 77    | >STK11-K78E RRAVEILKKK  | 130  | 53    |
| >STK11-K78E CRRAVKILK   | 147   | >STK11-K78E CRRAVEILK   | 353  | 206   |
| >STK11-K78E CRRAVKILKK  | 305   | >STK11-K78E CRRAVEILKK  | 687  | 382   |
| >STK11-K78E CRRAVKILK   | 422   | >STK11-K78E CRRAVEILK   | 919  | 497   |
| >STK11-K78E CRRAVKILKK  | 87    | >STK11-K78E CRRAVEILKK  | 97   | 10    |
| >STK11-K78E CRRAVKILKK  | 374   | >STK11-K78E CRRAVEILKK  | 586  | 212   |
| >STK11-K78E CRRAVKILK   | 139   | >STK11-K78E CRRAVEILK   | 559  | 420   |
| >STK11-K78E CRRAVKILKK  | 438   | >STK11-K78E CRRAVEILKK  | 609  | 171   |
| >STK11-K78E LCRRAVKI    | 230   | >STK11-K78E LCRRAVEI    | 247  | 17    |
| >STK11-K78E LCRRAVKIL   | 428   | >STK11-K78E LCRRAVEIL   | 2462 | 2034  |

|                          |       |                          |       |       |
|--------------------------|-------|--------------------------|-------|-------|
| >STK11-K78E LCRRRAVKILK  | 6     | >STK11-K78E LCRRRAVEILK  | 12    | 6     |
| >STK11-K78E LCRRRAVKILKK | 9     | >STK11-K78E LCRRRAVEILKK | 19    | 10    |
| >STK11-K78E TLCRRRAVKI   | 698   | >STK11-K78E TLCRRRAVEI   | 260   | 438   |
| >STK11-K78E TLCRRRAVKI   | 142   | >STK11-K78E TLCRRRAVEI   | 63    | 79    |
| >STK11-K78E TLCRRRAVKIL  | 134   | >STK11-K78E TLCRRRAVEIL  | 57    | 77    |
| >STK11-K78E TLCRRRAVK    | 83    | >STK11-K78E TLCRRRAVE    | 18568 | 18485 |
| >STK11-K78E TLCRRRAVKILK | 44    | >STK11-K78E TLCRRRAVEILK | 55    | 11    |
| >STK11-K78E TLCRRRAVK    | 101   | >STK11-K78E TLCRRRAVE    | 25119 | 25018 |
| >STK11-K78E TLCRRRAVKILK | 28    | >STK11-K78E TLCRRRAVEILK | 28    | 0     |
| >STK11-K78E TLCRRRAVKI   | 520   | >STK11-K78E TLCRRRAVEI   | 467   | 53    |
| >STK11-K78E TLCRRRAVKILK | 262   | >STK11-K78E TLCRRRAVEILK | 186   | 76    |
| >STK11-K78E ETLCRRRAVKIL | 190   | >STK11-K78E ETLCRRRAVEIL | 107   | 83    |
| >STK11-K78E ETLCRRRAVKIL | 247   | >STK11-K78E ETLCRRRAVEIL | 242   | 5     |
| >STK11-K78E ETLCRRRAVKI  | 392   | >STK11-K78E ETLCRRRAVEI  | 369   | 23    |
| >STK11-K78E ETLCRRRAVK   | 60    | >STK11-K78E ETLCRRRAVE   | 2042  | 1982  |
| >STK11-K78E ETLCRRRAVK   | 15    | >STK11-K78E ETLCRRRAVE   | 3401  | 3386  |
| >STK11-K78E ETLCRRRAVKI  | 491   | >STK11-K78E ETLCRRRAVEI  | 200   | 291   |
| >STK11-K78E ETLCRRRAVKIL | 692   | >STK11-K78E ETLCRRRAVEIL | 83    | 609   |
| >STK11-K78E ETLCRRRAVKI  | 26    | >STK11-K78E ETLCRRRAVEI  | 18    | 8     |
| >STK11-K78E ETLCRRRAVKIL | 265   | >STK11-K78E ETLCRRRAVEIL | 99    | 166   |
| >STK11-K78E ETLCRRRAVKIL | 426   | >STK11-K78E ETLCRRRAVEIL | 859   | 433   |
| >STK11-K78E ETLCRRRAVKIL | 465   | >STK11-K78E ETLCRRRAVEIL | 992   | 527   |
| >STK11-K78E SETLCRRRAVK  | 11    | >STK11-K78E SETLCRRRAVEI | 8     | 3     |
| >STK11-K78E SETLCRRRAVKI | 379   | >STK11-K78E SETLCRRRAVEI | 304   | 75    |
| >STK11-K78E SETLCRRRAVK  | 808   | >STK11-K78E SETLCRRRAVEI | 249   | 559   |
| >STK11-K78E SETLCRRRAVKI | 21    | >STK11-K78E SETLCRRRAVEI | 33    | 12    |
| >STK11-L160 LIDGLEYL     | 149   | >STK11-L160 PIDGLEYL     | 8484  | 8335  |
| >STK11-L160 LIDGLEYL     | 42    | >STK11-L160 PIDGLEYL     | 1105  | 1063  |
| >STK11-L160 LIDGLEYL     | 86    | >STK11-L160 PIDGLEYL     | 5328  | 5242  |
| >STK11-L160 LIDGLEYL     | 20    | >STK11-L160 PIDGLEYL     | 437   | 417   |
| >STK11-L160 LIDGLEYL     | 100   | >STK11-L160 PIDGLEYL     | 1494  | 1394  |
| >STK11-L160 LIDGLEYL     | 118   | >STK11-L160 PIDGLEYL     | 1371  | 1253  |
| >STK11-L160 LIDGLEYL     | 28    | >STK11-L160 PIDGLEYL     | 2039  | 2011  |
| >STK11-L160 QLIDGLEYL    | 30269 | >STK11-L160 QPIDGLEYL    | 96    | 30173 |
| >STK11-L160 QLIDGLEYL    | 11    | >STK11-L160 QPIDGLEYL    | 19494 | 19483 |
| >STK11-L160 QLIDGLEYL    | 3     | >STK11-L160 QPIDGLEYL    | 8377  | 8374  |
| >STK11-L160 QLIDGLEYL    | 7     | >STK11-L160 QPIDGLEYL    | 15419 | 15412 |
| >STK11-L160 QLIDGLEYL    | 4     | >STK11-L160 QPIDGLEYL    | 923   | 919   |
| >STK11-L160 QLIDGLEYLH!  | 314   | >STK11-L160 QPIDGLEYLH!  | 18682 | 18368 |
| >STK11-L160 QLIDGLEYL    | 3     | >STK11-L160 QPIDGLEYL    | 13575 | 13572 |
| >STK11-L160 QLIDGLEYL    | 5     | >STK11-L160 QPIDGLEYL    | 18249 | 18244 |
| >STK11-L160 QLIDGLEYL    | 38    | >STK11-L160 QPIDGLEYL    | 19824 | 19786 |
| >STK11-L160 QLIDGLEYL    | 8     | >STK11-L160 QPIDGLEYL    | 19420 | 19412 |

|                         |       |                         |       |       |
|-------------------------|-------|-------------------------|-------|-------|
| >STK11-L160 QLIDGLEYL   | 2     | >STK11-L160 QPIDGLEYL   | 18837 | 18835 |
| >STK11-L160 QLIDGLEY    | 438   | >STK11-L160 QPIDGLEY    | 6215  | 5777  |
| >STK11-L160 QLIDGLEY    | 119   | >STK11-L160 QPIDGLEY    | 311   | 192   |
| >STK11-L160 QLIDGLEYL   | 96    | >STK11-L160 QPIDGLEYL   | 226   | 130   |
| >STK11-L160 QLIDGLEY    | 10    | >STK11-L160 QPIDGLEY    | 118   | 108   |
| >STK11-L160 QLIDGLEY    | 345   | >STK11-L160 QPIDGLEY    | 4324  | 3979  |
| >STK11-L160 QLIDGLEYL   | 113   | >STK11-L160 QPIDGLEYL   | 1922  | 1809  |
| >STK11-L160 QLIDGLEYL   | 245   | >STK11-L160 QPIDGLEYL   | 416   | 171   |
| >STK11-L160 QLIDGLEY    | 36    | >STK11-L160 QPIDGLEY    | 1675  | 1639  |
| >STK11-L160 QLIDGLEY    | 80    | >STK11-L160 QPIDGLEY    | 7916  | 7836  |
| >STK11-L160 QLIDGLEY    | 94    | >STK11-L160 QPIDGLEY    | 1513  | 1419  |
| >STK11-L160 QLIDGLEY    | 817   | >STK11-L160 QPIDGLEY    | 14    | 803   |
| >STK11-L160 QLIDGLEY    | 23666 | >STK11-L160 QPIDGLEY    | 84    | 23582 |
| >STK11-L160 QLIDGLEYL   | 24298 | >STK11-L160 QPIDGLEYL   | 451   | 23847 |
| >STK11-L160 QLIDGLEY    | 4945  | >STK11-L160 QPIDGLEY    | 72    | 4873  |
| >STK11-L160 QLIDGLEY    | 23961 | >STK11-L160 QPIDGLEY    | 248   | 23713 |
| >STK11-L160 CQLIDGLEYL  | 447   | >STK11-L160 CQPIDGLEYL  | 4802  | 4355  |
| >STK11-L160 CQLIDGLEYL  | 139   | >STK11-L160 CQPIDGLEYL  | 251   | 112   |
| >STK11-L160 CQLIDGLEYL  | 115   | >STK11-L160 CQPIDGLEYL  | 346   | 231   |
| >STK11-L160 CQLIDGLEY   | 105   | >STK11-L160 CQPIDGLEY   | 814   | 709   |
| >STK11-L160 CQLIDGLEY   | 236   | >STK11-L160 CQPIDGLEY   | 1889  | 1653  |
| >STK11-L160 CQLIDGLEY   | 349   | >STK11-L160 CQPIDGLEY   | 663   | 314   |
| >STK11-L160 CQLIDGLEY   | 29    | >STK11-L160 CQPIDGLEY   | 325   | 296   |
| >STK11-L160 FCQLIDGLEY  | 490   | >STK11-L160 FCQPIDGLEY  | 770   | 280   |
| >STK11-L160 FCQLIDGL    | 791   | >STK11-L160 FCQPIDGL    | 492   | 299   |
| >STK11-L160 FCQLIDGLEYL | 203   | >STK11-L160 FCQPIDGLEYL | 86    | 117   |
| >STK11-L160 FCQLIDGLEY  | 259   | >STK11-L160 FCQPIDGLEY  | 449   | 190   |
| >STK11-L160 FCQLIDGLEY  | 263   | >STK11-L160 FCQPIDGLEY  | 133   | 130   |
| >STK11-L160 YFCQLIDGL   | 275   | >STK11-L160 YFCQPIDGL   | 1625  | 1350  |
| >STK11-L160 YFCQLIDGL   | 1016  | >STK11-L160 YFCQPIDGL   | 491   | 525   |
| >STK11-L160 YFCQLIDGL   | 17    | >STK11-L160 YFCQPIDGL   | 35    | 18    |
| >STK11-L160 YFCQLIDGLE\ | 11    | >STK11-L160 YFCQPIDGLE\ | 12    | 1     |
| >STK11-L160 YFCQLIDGLE\ | 32    | >STK11-L160 YFCQPIDGLE\ | 91    | 59    |
| >STK11-L160 YFCQLIDGLE\ | 421   | >STK11-L160 YFCQPIDGLE\ | 490   | 69    |
| >STK11-L160 YFCQLIDGLE\ | 410   | >STK11-L160 YFCQPIDGLE\ | 124   | 286   |
| >STK11-L160 YFCQLIDGLE\ | 188   | >STK11-L160 YFCQPIDGLE\ | 236   | 48    |
| >STK11-L160 GYFCQLIDGL  | 12    | >STK11-L160 GYFCQPIDGL  | 22    | 10    |
| >STK11-L160 GYFCQLIDGL  | 243   | >STK11-L160 GYFCQPIDGL  | 369   | 126   |
| >STK11-L160 HGYFCQLI    | 230   | >STK11-L160 HGYFCQPI    | 255   | 25    |
| >STK11-L160 AHGYFCQLI   | 2308  | >STK11-L160 AHGYFCQPI   | 327   | 1981  |
| >STK11-L160 QAHGYFCQL   | 77    | >STK11-L160 QAHGYFCQP   | 2772  | 2695  |
| >STK11-L160 QAHGYFCQLI  | 1063  | >STK11-L160 QAHGYFCQP   | 497   | 566   |
| >STK11-L160 QAHGYFCQL   | 252   | >STK11-L160 QAHGYFCQP   | 11232 | 10980 |

|                        |      |                        |       |       |
|------------------------|------|------------------------|-------|-------|
| >STK11-L160 QAHGYFCQL  | 233  | >STK11-L160 QAHGYFCQP  | 23355 | 23122 |
| >STK11-L160 CQAHGYFCQ  | 326  | >STK11-L160 CQAHGYFCQ  | 1001  | 675   |
| >STK11-L160 CQAHGYFCQ  | 454  | >STK11-L160 CQAHGYFCQ  | 540   | 86    |
| >STK11-L160 CQAHGYFCQ  | 564  | >STK11-L160 CQAHGYFCQ  | 276   | 288   |
| >STK11-L160 CQAHGYFCQ  | 107  | >STK11-L160 CQAHGYFCQ  | 54    | 53    |
| >STK11-L160 CQAHGYFCQ  | 153  | >STK11-L160 CQAHGYFCQ  | 3447  | 3294  |
| >STK11-L160 CQAHGYFCQ  | 192  | >STK11-L160 CQAHGYFCQ  | 49    | 143   |
| >STK11-L160 CQAHGYFCQ  | 387  | >STK11-L160 CQAHGYFCQ  | 20673 | 20286 |
| >STK11-L160 CQAHGYFCQ  | 126  | >STK11-L160 CQAHGYFCQ  | 148   | 22    |
| >STK11-L285 LLKGMLEYEP | 57   | >STK11-L285 QLKGMLEYEF | 184   | 127   |
| >STK11-L285 LLKGMLEYEP | 15   | >STK11-L285 QLKGMLEYEF | 68    | 53    |
| >STK11-L285 LLKGMLEYEP | 17   | >STK11-L285 QLKGMLEYEF | 166   | 149   |
| >STK11-L285 LLKGMLEY   | 33   | >STK11-L285 QLKGMLEY   | 41    | 8     |
| >STK11-L285 LLKGMLEY   | 220  | >STK11-L285 QLKGMLEY   | 427   | 207   |
| >STK11-L285 LLKGMLEY   | 91   | >STK11-L285 QLKGMLEY   | 55    | 36    |
| >STK11-L285 LLKGMLEY   | 52   | >STK11-L285 QLKGMLEY   | 107   | 55    |
| >STK11-L285 LLKGMLEY   | 254  | >STK11-L285 QLKGMLEY   | 164   | 90    |
| >STK11-L285 DLLKGMLEY  | 462  | >STK11-L285 DQLKGMLEY  | 6284  | 5822  |
| >STK11-L285 DLLKGMLEY  | 118  | >STK11-L285 DQLKGMLEY  | 260   | 142   |
| >STK11-L285 DLLKGMLEY  | 30   | >STK11-L285 DQLKGMLEY  | 263   | 233   |
| >STK11-L285 DLLKGMLEY  | 10   | >STK11-L285 DQLKGMLEY  | 74    | 64    |
| >STK11-L285 DLLKGMLEY  | 170  | >STK11-L285 DQLKGMLEY  | 229   | 59    |
| >STK11-L285 DLLKGMLEY  | 3463 | >STK11-L285 DQLKGMLEY  | 222   | 3241  |
| >STK11-L285 DLLKGMLEY  | 1723 | >STK11-L285 DQLKGMLEY  | 36    | 1687  |
| >STK11-L285 SDLLKGML   | 185  | >STK11-L285 SDQLKGML   | 286   | 101   |
| >STK11-L285 SDLLKGML   | 228  | >STK11-L285 SDQLKGML   | 648   | 420   |
| >STK11-L285 SDLLKGML   | 1927 | >STK11-L285 SDQLKGML   | 485   | 1442  |
| >STK11-L285 SDLLKGML   | 269  | >STK11-L285 SDQLKGML   | 767   | 498   |
| >STK11-L285 LSDLLKGMLE | 6    | >STK11-L285 LSDQLKGML  | 6     | 0     |
| >STK11-L285 LSDLLKGMLE | 459  | >STK11-L285 LSDQLKGML  | 478   | 19    |
| >STK11-L285 LSDLLKGMLE | 570  | >STK11-L285 LSDQLKGML  | 278   | 292   |
| >STK11-L285 LSDLLKGMLE | 353  | >STK11-L285 LSDQLKGML  | 265   | 88    |
| >STK11-L285 LSDLLKGM   | 110  | >STK11-L285 LSDQLKGM   | 67    | 43    |
| >STK11-L285 LSDLLKGMLE | 24   | >STK11-L285 LSDQLKGML  | 18    | 6     |
| >STK11-L285 LSDLLKGMLE | 1185 | >STK11-L285 LSDQLKGML  | 438   | 747   |
| >STK11-L285 LSDLLKGMML | 292  | >STK11-L285 LSDQLKGML  | 120   | 172   |
| >STK11-L285 LSDLLKGMLE | 129  | >STK11-L285 LSDQLKGML  | 61    | 68    |
| >STK11-L285 PLSDLLKGML | 117  | >STK11-L285 PLSQLKGML  | 78    | 39    |
| >STK11-L285 GPPLSDLL   | 141  | >STK11-L285 GPPLSDQL   | 961   | 820   |
| >STK11-L285 CGPPLSDL   | 92   | >STK11-L285 CGPPLSDQ   | 750   | 658   |
| >STK11-L285 CGPPLSDLL  | 109  | >STK11-L285 CGPPLSDQL  | 112   | 3     |
| >STK11-L285 CGPPLSDLL  | 17   | >STK11-L285 CGPPLSDQL  | 216   | 199   |
| >STK11-M1T·MEVVPQQI    | 83   | >STK11-M1T·TEVVPQQI    | 271   | 188   |

|                       |       |                       |       |       |
|-----------------------|-------|-----------------------|-------|-------|
| >STK11-M1T·MEVVDPQQI  | 220   | >STK11-M1T·TEVVDPQQI  | 655   | 435   |
| >STK11-M1T·MEVVDPQQI  | 351   | >STK11-M1T·TEVVDPQQI  | 379   | 28    |
| >STK11-M1T·MEVVDPQQI  | 428   | >STK11-M1T·TEVVDPQQI  | 1648  | 1220  |
| >STK11-M1T·MEVVDPQQI  | 27    | >STK11-M1T·TEVVDPQQI  | 86    | 59    |
| >STK11-M1T·MEVVDPQQI  | 138   | >STK11-M1T·TEVVDPQQI  | 689   | 551   |
| >STK11-P179KPGNLLLT   | 29062 | >STK11-P179KLGNLLLT   | 359   | 28703 |
| >STK11-P179KPGNLLTT   | 26976 | >STK11-P179KLGNLLTT   | 102   | 26874 |
| >STK11-P179KPGNLLTT   | 23197 | >STK11-P179KLGNLLTT   | 338   | 22859 |
| >STK11-P179KPGNLLTT   | 25565 | >STK11-P179KLGNLLTT   | 183   | 25382 |
| >STK11-P179KPGNLLLT   | 36851 | >STK11-P179KLGNLLLT   | 370   | 36481 |
| >STK11-P179KPGNLLTT   | 36288 | >STK11-P179KLGNLLTT   | 192   | 36096 |
| >STK11-P179KPGNLLTT   | 20007 | >STK11-P179KLGNLLTT   | 404   | 19603 |
| >STK11-P179IKPGNLLL   | 1787  | >STK11-P179IKLGNLLL   | 146   | 1641  |
| >STK11-P179KDIKPGNL   | 3385  | >STK11-P179KDIKLGNL   | 469   | 2916  |
| >STK11-P179KDIKPGNLL  | 2907  | >STK11-P179KDIKLGNLL  | 204   | 2703  |
| >STK11-P281PLSDLLKGML | 12631 | >STK11-P281LLSDLLKGML | 464   | 12167 |
| >STK11-P281PLSDLLKG   | 8676  | >STK11-P281LLSDLLKG   | 354   | 8322  |
| >STK11-P281PLSDLLKGM  | 1198  | >STK11-P281LLSDLLKGM  | 42    | 1156  |
| >STK11-P281PLSDLLKGML | 1197  | >STK11-P281LLSDLLKGML | 35    | 1162  |
| >STK11-P281PLSDLLKGM  | 3261  | >STK11-P281LLSDLLKGM  | 41    | 3220  |
| >STK11-P281PLSDLLKGML | 2912  | >STK11-P281LLSDLLKGML | 99    | 2813  |
| >STK11-P281PLSDLLKGM  | 12438 | >STK11-P281LLSDLLKGM  | 385   | 12053 |
| >STK11-P281PLSDLLKGM  | 2250  | >STK11-P281LLSDLLKGM  | 64    | 2186  |
| >STK11-P281PLSDLLKGML | 773   | >STK11-P281LLSDLLKGML | 35    | 738   |
| >STK11-P281PLSDLLKGM  | 7467  | >STK11-P281LLSDLLKGM  | 225   | 7242  |
| >STK11-P281PLSDLLKGML | 6837  | >STK11-P281LLSDLLKGML | 307   | 6530  |
| >STK11-P281PLSDLLKGML | 1644  | >STK11-P281LLSDLLKGML | 147   | 1497  |
| >STK11-P281PLSDLLKGM  | 1598  | >STK11-P281LLSDLLKGM  | 91    | 1507  |
| >STK11-P281PLSDLLKGML | 2324  | >STK11-P281LLSDLLKGML | 261   | 2063  |
| >STK11-P281PLSDLLKGM  | 914   | >STK11-P281LLSDLLKGM  | 12    | 902   |
| >STK11-P281PLSDLLKGML | 117   | >STK11-P281LLSDLLKGML | 6     | 111   |
| >STK11-P281PPLSDLLKGM | 27922 | >STK11-P281PLSDLLKGM  | 279   | 27643 |
| >STK11-P281PPLSDLLKGM | 22518 | >STK11-P281PLSDLLKGM  | 471   | 22047 |
| >STK11-P281PPLSDLLKGM | 34649 | >STK11-P281PLSDLLKGM  | 292   | 34357 |
| >STK11-P281SYAIPGDCGP | 14522 | >STK11-P281SYAIPGDCGP | 52    | 14470 |
| >STK11-P281SYAIPGDCGP | 10377 | >STK11-P281SYAIPGDCGP | 137   | 10240 |
| >STK11-P281SYAIPGDCGP | 1476  | >STK11-P281SYAIPGDCGP | 308   | 1168  |
| >STK11-P281GPPLSDLL   | 141   | >STK11-P281GPLSDLL    | 19476 | 19335 |
| >STK11-P281CGPPLSDL   | 92    | >STK11-P281CGPLSDL    | 180   | 88    |
| >STK11-P281CGPPLSDLL  | 109   | >STK11-P281CGPLSDLL   | 288   | 179   |
| >STK11-P281CGPPLSDLL  | 17    | >STK11-P281CGPLSDLL   | 50    | 33    |
| >STK11-P281IPGDCGPPL  | 490   | >STK11-P281IPGDCGPLL  | 283   | 207   |
| >STK11-P281IPGDCGPP   | 12392 | >STK11-P281IPGDCGPL   | 26    | 12366 |

|                         |       |                         |       |       |
|-------------------------|-------|-------------------------|-------|-------|
| >STK11-P281 IPGDCGPPL   | 21    | >STK11-P281 IPGDCGPPL   | 143   | 122   |
| >STK11-P281 IPGDCGPP    | 8540  | >STK11-P281 IPGDCGPL    | 278   | 8262  |
| >STK11-P281 IPGDCGPPL   | 97    | >STK11-P281 IPGDCGPPL   | 1119  | 1022  |
| >STK11-P281 IPGDCGPPL   | 762   | >STK11-P281 IPGDCGPPL   | 206   | 556   |
| >STK11-P281 AIPGDCGPPL  | 141   | >STK11-P281 AIPGDCGPPL  | 219   | 78    |
| >STK11-P281 AIPGDCGPPL  | 93    | >STK11-P281 AIPGDCGPPL  | 83    | 10    |
| >STK11-P281 AIPGDCGPPL  | 1245  | >STK11-P281 AIPGDCGPPL  | 189   | 1056  |
| >STK11-P281 YAIPGDCGPP  | 246   | >STK11-P281 YAIPGDCGPL  | 328   | 82    |
| >STK11-P281 YAIPGDCGPP  | 24256 | >STK11-P281 YAIPGDCGPL  | 369   | 23887 |
| >STK11-P281 YAIPGDCGPP  | 18279 | >STK11-P281 YAIPGDCGPL  | 445   | 17834 |
| >STK11-P281 YAIPGDCGPP  | 11049 | >STK11-P281 YAIPGDCGPL  | 230   | 10819 |
| >STK11-P281 YAIPGDCGPP  | 17    | >STK11-P281 YAIPGDCGPL  | 27    | 10    |
| >STK11-P281 YAIPGDCGPP  | 428   | >STK11-P281 YAIPGDCGPL  | 780   | 352   |
| >STK11-P281 YAIPGDCGPP  | 29685 | >STK11-P281 YAIPGDCGPL  | 480   | 29205 |
| >STK11-P281 YAIPGDCGPP  | 71    | >STK11-P281 YAIPGDCGPL  | 59    | 12    |
| >STK11-P281 YAIPGDCGPP  | 28824 | >STK11-P281 YAIPGDCGPL  | 444   | 28380 |
| >STK11-P281 YAIPGDCGPP  | 240   | >STK11-P281 YAIPGDCGPL  | 1066  | 826   |
| >STK11-P281 YAIPGDCGPP  | 5422  | >STK11-P281 YAIPGDCGPL  | 362   | 5060  |
| >STK11-P281 YAIPGDCGPP  | 195   | >STK11-P281 YAIPGDCGPL  | 1640  | 1445  |
| >STK11-P281 YAIPGDCGPP  | 339   | >STK11-P281 YAIPGDCGPL  | 1312  | 973   |
| >STK11-P281 YAIPGDCGPP  | 13102 | >STK11-P281 YAIPGDCGPL  | 22    | 13080 |
| >STK11-P281 YAIPGDCGPP  | 7     | >STK11-P281 YAIPGDCGPL  | 13    | 6     |
| >STK11-P281 YAIPGDCGPP  | 34    | >STK11-P281 YAIPGDCGPL  | 278   | 244   |
| >STK11-P281 YAIPGDCGPP  | 239   | >STK11-P281 YAIPGDCGPL  | 923   | 684   |
| >STK11-P281 YAIPGDCGPP  | 1812  | >STK11-P281 YAIPGDCGPL  | 496   | 1316  |
| >STK11-P314 PPAEAPVPI   | 13778 | >STK11-P314 HPAEAPVPI   | 158   | 13620 |
| >STK11-P314 PPAEAPVPI   | 2258  | >STK11-P314 HPAEAPVPI   | 66    | 2192  |
| >STK11-P314 PPAEAPVPI   | 485   | >STK11-P314 HPAEAPVPI   | 22    | 463   |
| >STK11-P314 PPAEAPVPI   | 862   | >STK11-P314 HPAEAPVPI   | 35    | 827   |
| >STK11-P314 PPAEAPVPIPI | 4809  | >STK11-P314 HPAEAPVPIPI | 113   | 4696  |
| >STK11-P314 PPAEAPVPI   | 5881  | >STK11-P314 HPAEAPVPI   | 24    | 5857  |
| >STK11-P314 PPAEAPVPI   | 815   | >STK11-P314 HPAEAPVPI   | 308   | 507   |
| >STK11-P314 PPAEAPVPI   | 706   | >STK11-P314 HPAEAPVPI   | 150   | 556   |
| >STK11-P314 PPAEAPVPI   | 1638  | >STK11-P314 HPAEAPVPI   | 85    | 1553  |
| >STK11-P314 PPAEAPVPI   | 8903  | >STK11-P314 HPAEAPVPI   | 271   | 8632  |
| >STK11-P314 HPPAEAPVPI  | 416   | >STK11-P314 HHPAEAPVPI  | 34519 | 34103 |
| >STK11-P314 HPPAEAPV    | 450   | >STK11-P314 HHPAEAPV    | 26083 | 25633 |
| >STK11-P314 HPPAEAPVPI  | 511   | >STK11-P314 HHPAEAPVPI  | 88    | 423   |
| >STK11-P314 RQHSWFRKK   | 7755  | >STK11-P314 RQHSWFRKK   | 287   | 7468  |
| >STK11-P314 RQHSWFRKK   | 687   | >STK11-P314 RQHSWFRKK   | 144   | 543   |
| >STK11-P314 KHPPAEAPVF  | 11619 | >STK11-P314 KHHPAEAPVF  | 271   | 11348 |
| >STK11-P314 KHPPAEAPVF  | 1409  | >STK11-P314 KHHPAEAPVF  | 176   | 1233  |
| >STK11-P314 KKHPPAEA    | 257   | >STK11-P314 KKHHPAEA    | 178   | 79    |



|                         |       |                         |       |       |
|-------------------------|-------|-------------------------|-------|-------|
| >STK11-P314 KKHPPAEAP   | 417   | >STK11-P314 KKHHPAEAP   | 323   | 94    |
| >STK11-P314 KKHPPAEAPV  | 30    | >STK11-P314 KKHHPAEAPV  | 23    | 7     |
| >STK11-P314 KKHPPAEAPV  | 498   | >STK11-P314 KKHHPAEAPV  | 428   | 70    |
| >STK11-P314 RKKHPPAEA   | 491   | >STK11-P314 RKKHHPAEA   | 183   | 308   |
| >STK11-P314 RKKHPPAEAF  | 296   | >STK11-P314 RKKHHPAEAF  | 156   | 140   |
| >STK11-P314 RKKHPPAE    | 546   | >STK11-P314 RKKHHPAE    | 465   | 81    |
| >STK11-P314 RKKHPPAEA   | 69    | >STK11-P314 RKKHHPAEA   | 72    | 3     |
| >STK11-P314 RKKHPPAEAF  | 205   | >STK11-P314 RKKHHPAEAF  | 196   | 9     |
| >STK11-P314 RKKHPPAEAF  | 16    | >STK11-P314 RKKHHPAEAF  | 16    | 0     |
| >STK11-P314 FRKKHPPA    | 187   | >STK11-P314 FRKKHHPA    | 68    | 119   |
| >STK11-P314 WFRKKHPPA   | 102   | >STK11-P314 WFRKKHHPA   | 326   | 224   |
| >STK11-P314 WFRKKHPPA   | 169   | >STK11-P314 WFRKKHHPA   | 65    | 104   |
| >STK11-P314 SWFRKKHPP,  | 297   | >STK11-P314 SWFRKKHHP,  | 717   | 420   |
| >STK11-P314 SWFRKKHPP   | 379   | >STK11-P314 SWFRKKHH    | 571   | 192   |
| >STK11-P314 SWFRKKHPP   | 171   | >STK11-P314 SWFRKKHHP   | 327   | 156   |
| >STK11-P314 SWFRKKHPP,  | 37    | >STK11-P314 SWFRKKHHP,  | 68    | 31    |
| >STK11-P314 SWFRKKHPP,  | 144   | >STK11-P314 SWFRKKHHP,  | 163   | 19    |
| >STK11-P314 HSWFRKKHPP  | 120   | >STK11-P314 HSWFRKKHH   | 264   | 144   |
| >STK11-P314 HSWFRKKHPP  | 10867 | >STK11-P314 HSWFRKKHH   | 356   | 10511 |
| >STK11-P324 PSPDTKDRW   | 2634  | >STK11-P324 LSPDTKDRWI  | 241   | 2393  |
| >STK11-P324 PSPDTKDRW   | 5792  | >STK11-P324 LSPDTKDRW   | 235   | 5557  |
| >STK11-P324 PSPDTKDRW   | 6325  | >STK11-P324 LSPDTKDRW   | 387   | 5938  |
| >STK11-P324 PSPDTKDRW   | 12317 | >STK11-P324 LSPDTKDRW   | 306   | 12011 |
| >STK11-P324 PPSPDTKDRV  | 63    | >STK11-P324 PLSPDTKDRV  | 8957  | 8894  |
| >STK11-P324 PPAEAPVPIPI | 19706 | >STK11-P324 PPAEAPVPIPI | 166   | 19540 |
| >STK11-P324 PPAEAPVPIPI | 4809  | >STK11-P324 PPAEAPVPIPI | 229   | 4580  |
| >STK11-P324 IPPSPDTKDR\ | 55    | >STK11-P324 IPLSPDTKDR\ | 18    | 37    |
| >STK11-P324 IPPSPDTKDR\ | 47    | >STK11-P324 IPLSPDTKDR\ | 8     | 39    |
| >STK11-P324 EAPVPIPP    | 8650  | >STK11-P324 EAPVPIPL    | 47    | 8603  |
| >STK11-P324 EAPVPIPP    | 16886 | >STK11-P324 EAPVPIPL    | 322   | 16564 |
| >STK11-P324 EAPVPIPP    | 26220 | >STK11-P324 EAPVPIPL    | 207   | 26013 |
| >STK11-P324 EAPVPIPPS   | 2372  | >STK11-P324 EAPVPIPLS   | 243   | 2129  |
| >STK11-P324 AEAPVPIPP   | 19584 | >STK11-P324 AEAPVPIPL   | 63    | 19521 |
| >STK11-P324 AEAPVPIPP   | 1481  | >STK11-P324 AEAPVPIPL   | 12    | 1469  |
| >STK11-P324 AEAPVPIPP   | 5873  | >STK11-P324 AEAPVPIPL   | 116   | 5757  |
| >STK11-P324 AEAPVPIPP   | 6030  | >STK11-P324 AEAPVPIPL   | 235   | 5795  |
| >STK11-P324 AEAPVPIPP   | 792   | >STK11-P324 AEAPVPIPL   | 96    | 696   |
| >STK11-P324 AEAPVPIPPS  | 288   | >STK11-P324 AEAPVPIPLS  | 257   | 31    |
| >STK11-P324 AEAPVPIPP   | 2295  | >STK11-P324 AEAPVPIPL   | 23    | 2272  |
| >STK11-P6Q- DPQQQLGMF   | 279   | >STK11-P6Q- DQQQLGMF    | 10594 | 10315 |
| >STK11-P6Q- VVDPQQQLGM  | 284   | >STK11-P6Q- VVDQQQLGM   | 1284  | 1000  |
| >STK11-P6Q- VVDPQQQLGM  | 173   | >STK11-P6Q- VVDQQQLGM   | 809   | 636   |
| >STK11-P6Q- EVVDPQQQLG  | 181   | >STK11-P6Q- EVVDQQQLG   | 79    | 102   |

|                        |       |                        |       |       |
|------------------------|-------|------------------------|-------|-------|
| >STK11-P6Q- EVVDPQQQL  | 656   | >STK11-P6Q- EVVDQQQQL  | 153   | 503   |
| >STK11-P6Q- EVVDPQQQLG | 8     | >STK11-P6Q- EVVDQQQQLG | 6     | 2     |
| >STK11-P6Q- EVVDPQQQL  | 12    | >STK11-P6Q- EVVDQQQQL  | 13    | 1     |
| >STK11-P6Q- EVVDPQQQLG | 4     | >STK11-P6Q- EVVDQQQQLG | 4     | 0     |
| >STK11-P6Q- EVVDPQQQLG | 3     | >STK11-P6Q- EVVDQQQQLG | 3     | 0     |
| >STK11-P6Q- EVVDPQQQLG | 67    | >STK11-P6Q- EVVDQQQQLG | 118   | 51    |
| >STK11-P6Q- EVVDPQQQLG | 451   | >STK11-P6Q- EVVDQQQQLG | 1262  | 811   |
| >STK11-P6Q- EVVDPQQQL  | 32    | >STK11-P6Q- EVVDQQQQL  | 55    | 23    |
| >STK11-P6Q- EVVDPQQQL  | 24    | >STK11-P6Q- EVVDQQQQL  | 68    | 44    |
| >STK11-P6Q- EVVDPQQQLG | 24    | >STK11-P6Q- EVVDQQQQLG | 63    | 39    |
| >STK11-P6Q- MEVVDPQQQL | 562   | >STK11-P6Q- MEVVDQQQQL | 396   | 166   |
| >STK11-P6Q- MEVVDPQQQL | 83    | >STK11-P6Q- MEVVDQQQQL | 61    | 22    |
| >STK11-P6Q- MEVVDPQQQL | 220   | >STK11-P6Q- MEVVDQQQQL | 171   | 49    |
| >STK11-P6Q- MEVVDPQQQL | 916   | >STK11-P6Q- MEVVDQQQQL | 340   | 576   |
| >STK11-P6Q- MEVVDPQQQL | 700   | >STK11-P6Q- MEVVDQQQQL | 351   | 349   |
| >STK11-P6Q- MEVVDPQQQL | 351   | >STK11-P6Q- MEVVDQQQQL | 226   | 125   |
| >STK11-P6Q- MEVVDPQQQL | 622   | >STK11-P6Q- MEVVDQQQQL | 419   | 203   |
| >STK11-P6Q- MEVVDPQQQL | 428   | >STK11-P6Q- MEVVDQQQQL | 431   | 3     |
| >STK11-P6Q- MEVVDPQQQL | 27    | >STK11-P6Q- MEVVDQQQQL | 47    | 20    |
| >STK11-P6Q- MEVVDPQQQL | 138   | >STK11-P6Q- MEVVDQQQQL | 141   | 3     |
| >STK11-Q10(QLLRRLRHKN  | 399   | >STK11-Q10(ELLRRLRHKN' | 2413  | 2014  |
| >STK11-Q10(QLLRRLRHKN  | 29    | >STK11-Q10(ELLRRLRHKN' | 48    | 19    |
| >STK11-Q10(QLLRRLRHKN  | 240   | >STK11-Q10(ELLRRLRHKN' | 658   | 418   |
| >STK11-Q10(QLLRRLRHKN  | 170   | >STK11-Q10(ELLRRLRHKN' | 161   | 9     |
| >STK11-Q10(QLLRRLRHKN  | 329   | >STK11-Q10(ELLRRLRHKN' | 161   | 168   |
| >STK11-Q10(QLLRRLRHKN  | 10    | >STK11-Q10(ELLRRLRHKN' | 18    | 8     |
| >STK11-Q10(QLLRRLRHK   | 89    | >STK11-Q10(ELLRRLRHK   | 452   | 363   |
| >STK11-Q10(QLLRRLRHK   | 195   | >STK11-Q10(ELLRRLRHK   | 6152  | 5957  |
| >STK11-Q10(QLLRRLRHKN  | 3590  | >STK11-Q10(ELLRRLRHKN' | 367   | 3223  |
| >STK11-Q10(QLLRRLRHKN  | 90    | >STK11-Q10(ELLRRLRHKN' | 72    | 18    |
| >STK11-Q10(IQLLRRLR    | 21443 | >STK11-Q10(IELLRRLR    | 364   | 21079 |
| >STK11-Q10(IQLLRRLRHK  | 54    | >STK11-Q10(IELLRRLRHK  | 2992  | 2938  |
| >STK11-Q10(IQLLRRLRHK  | 360   | >STK11-Q10(IELLRRLRHK  | 17408 | 17048 |
| >STK11-Q10(IQLLRRLRHK  | 477   | >STK11-Q10(IELLRRLRHK  | 7403  | 6926  |
| >STK11-Q10(IQLLRRLR    | 25    | >STK11-Q10(IELLRRLR    | 1969  | 1944  |
| >STK11-Q10(IQLLRRLRHK  | 341   | >STK11-Q10(IELLRRLRHK  | 3622  | 3281  |
| >STK11-Q10(IQLLRRLR    | 375   | >STK11-Q10(IELLRRLR    | 1560  | 1185  |
| >STK11-Q10(IQLLRRLR    | 226   | >STK11-Q10(IELLRRLR    | 434   | 208   |
| >STK11-Q10(EIQLLRRLR   | 30    | >STK11-Q10(EIELLRRLR   | 80    | 50    |
| >STK11-Q10(EIQLLRRLR   | 47    | >STK11-Q10(EIELLRRLR   | 35    | 12    |
| >STK11-Q10(EIQLLRRLRHK | 539   | >STK11-Q10(EIELLRRLRHK | 398   | 141   |
| >STK11-Q10(KEIQLLRRLR  | 84    | >STK11-Q10(KEIELLRRLR  | 124   | 40    |
| >STK11-Q10(KEIQLLRRLR  | 66    | >STK11-Q10(KEIELLRRLR  | 42    | 24    |

|                         |       |                         |       |       |
|-------------------------|-------|-------------------------|-------|-------|
| >STK11-Q10C KEIQLLRRL   | 50    | >STK11-Q10C KEIELLRRL   | 41    | 9     |
| >STK11-Q10C KEIQLLRRL   | 144   | >STK11-Q10C KEIELLRRL   | 169   | 25    |
| >STK11-Q10C KEIQLLRRL   | 6     | >STK11-Q10C KEIELLRRL   | 5     | 1     |
| >STK11-Q10C KEIQLLRR    | 50    | >STK11-Q10C KEIELLRR    | 95    | 45    |
| >STK11-Q10C KEIQLLRRLR  | 95    | >STK11-Q10C KEIELLRRLR  | 208   | 113   |
| >STK11-Q10C KKEIQLLR    | 192   | >STK11-Q10C KKEIELLR    | 214   | 22    |
| >STK11-Q10C KKEIQLLRR   | 280   | >STK11-Q10C KKEIELLRR   | 318   | 38    |
| >STK11-Q10C KKEIQLLRRLR | 439   | >STK11-Q10C KKEIELLRRLR | 489   | 50    |
| >STK11-Q10C VKKEIQLL    | 268   | >STK11-Q10C VKKEIELL    | 605   | 337   |
| >STK11-Q10C NVKKEIQLLR  | 168   | >STK11-Q10C NVKKEIELLR  | 322   | 154   |
| >STK11-Q10C NVKKEIQLLRI | 495   | >STK11-Q10C NVKKEIELLRF | 1061  | 566   |
| >STK11-Q10C NVKKEIQLLR  | 479   | >STK11-Q10C NVKKEIELLR  | 528   | 49    |
| >STK11-Q10C NVKKEIQLLRI | 452   | >STK11-Q10C NVKKEIELLRF | 579   | 127   |
| >STK11-Q10C NVKKEIQLLR  | 32    | >STK11-Q10C NVKKEIELLR  | 31    | 1     |
| >STK11-Q10C NVKKEIQLLRI | 169   | >STK11-Q10C NVKKEIELLRF | 116   | 53    |
| >STK11-Q10C NVKKEIQLLR  | 358   | >STK11-Q10C NVKKEIELLR  | 436   | 78    |
| >STK11-Q10C NVKKEIQLLRI | 499   | >STK11-Q10C NVKKEIELLRF | 588   | 89    |
| >STK11-Q10C GEANVKKEIC  | 409   | >STK11-Q10C GEANVKKEIE  | 430   | 21    |
| >STK11-Q10C GEANVKKEIC  | 64    | >STK11-Q10C GEANVKKEIE  | 29    | 35    |
| >STK11-Q10C GEANVKKEIC  | 367   | >STK11-Q10C GEANVKKEIE  | 184   | 183   |
| >STK11-Q10C GEANVKKEIC  | 46    | >STK11-Q10C GEANVKKEIE  | 95    | 49    |
| >STK11-Q12E QKMYMVME    | 413   | >STK11-Q12E RKMVMVME    | 61    | 352   |
| >STK11-Q12E QKMYMVME    | 3     | >STK11-Q12E RKMVMVME    | 2     | 1     |
| >STK11-Q12E QKMYMVME    | 1381  | >STK11-Q12E RKMVMVME    | 356   | 1025  |
| >STK11-Q12E QKMYMVME    | 85    | >STK11-Q12E RKMVMVME    | 17    | 68    |
| >STK11-Q12E KQKMYMVM    | 307   | >STK11-Q12E KRKMYMVM    | 689   | 382   |
| >STK11-Q12E KQKMYMVM    | 72    | >STK11-Q12E KRKMYMVM    | 702   | 630   |
| >STK11-Q12E KQKMYMVM    | 134   | >STK11-Q12E KRKMYMVM    | 1449  | 1315  |
| >STK11-Q12E KQKMYMVM    | 214   | >STK11-Q12E KRKMYMVM    | 1234  | 1020  |
| >STK11-Q12E KQKMYMVM    | 145   | >STK11-Q12E KRKMYMVM    | 384   | 239   |
| >STK11-Q12E KQKMYMVM    | 35    | >STK11-Q12E KRKMYMVM    | 11593 | 11558 |
| >STK11-Q12E KQKMYMVM    | 39    | >STK11-Q12E KRKMYMVM    | 5681  | 5642  |
| >STK11-Q12E KQKMYMVM    | 7     | >STK11-Q12E KRKMYMVM    | 34    | 27    |
| >STK11-Q12E KQKMYMVM    | 4     | >STK11-Q12E KRKMYMVM    | 12    | 8     |
| >STK11-Q12E KQKMYMVM    | 2701  | >STK11-Q12E KRKMYMVM    | 140   | 2561  |
| >STK11-Q12E KQKMYMVM    | 3208  | >STK11-Q12E KRKMYMVM    | 33    | 3175  |
| >STK11-Q12E KQKMYMVM    | 7800  | >STK11-Q12E KRKMYMVM    | 402   | 7398  |
| >STK11-Q12E KQKMYMVM    | 6700  | >STK11-Q12E KRKMYMVM    | 450   | 6250  |
| >STK11-Q12E LVDVLYNEEK  | 19852 | >STK11-Q12E LVDVLYNEEK  | 357   | 19495 |
| >STK11-Q12E EKQKMYMVI   | 142   | >STK11-Q12E EKRKMYMVI   | 22    | 120   |
| >STK11-Q12E EKQKMYMVI   | 44    | >STK11-Q12E EKRKMYMVI   | 10    | 34    |
| >STK11-Q12E EEKQKMYM    | 298   | >STK11-Q12E EEKRKMYM    | 417   | 119   |
| >STK11-Q12E EEKQKMYMV   | 96    | >STK11-Q12E EEKRKMYMV   | 74    | 22    |

|                       |       |                        |      |       |
|-----------------------|-------|------------------------|------|-------|
| >STK11-Q12:EEKQKMYMV  | 290   | >STK11-Q12:EEKRKMVMV   | 489  | 199   |
| >STK11-Q12:EEKQKMYMV  | 189   | >STK11-Q12:EEKRKMVMV   | 283  | 94    |
| >STK11-Q12:EEKQKMYMV  | 29    | >STK11-Q12:EEKRKMVMV   | 42   | 13    |
| >STK11-Q12:EEKQKMYMV  | 236   | >STK11-Q12:EEKRKMVMV   | 552  | 316   |
| >STK11-Q12:NEEKQKMYM  | 107   | >STK11-Q12:NEEKRKMVM   | 70   | 37    |
| >STK11-Q12:NEEKQKMYM  | 31    | >STK11-Q12:NEEKRKMVM   | 26   | 5     |
| >STK11-Q12:NEEKQKMYM  | 288   | >STK11-Q12:NEEKRKMVM   | 206  | 82    |
| >STK11-Q12:NEEKQKMY   | 127   | >STK11-Q12:NEEKRKMVM   | 122  | 5     |
| >STK11-Q12:NEEKQKMYM  | 472   | >STK11-Q12:NEEKRKMVM   | 697  | 225   |
| >STK11-Q12:NEEKQKMYM  | 171   | >STK11-Q12:NEEKRKMVM   | 217  | 46    |
| >STK11-Q12:NEEKQKMYM  | 236   | >STK11-Q12:NEEKRKMVM   | 426  | 190   |
| >STK11-Q12:LYNEEKQKM  | 142   | >STK11-Q12:LYNEEKRKM   | 284  | 142   |
| >STK11-Q12:VLYNEEKQKM | 47    | >STK11-Q12:VLYNEEKRKM  | 104  | 57    |
| >STK11-Q12:VLYNEEKQKM | 233   | >STK11-Q12:VLYNEEKRKM  | 1506 | 1273  |
| >STK11-Q12:VLYNEEKQ   | 121   | >STK11-Q12:VLYNEEKR    | 6078 | 5957  |
| >STK11-Q12:VLYNEEKQKM | 34    | >STK11-Q12:VLYNEEKRKM  | 218  | 184   |
| >STK11-Q12:VLYNEEKQK  | 108   | >STK11-Q12:VLYNEEKRK   | 108  | 0     |
| >STK11-Q12:VLYNEEKQKM | 279   | >STK11-Q12:VLYNEEKRKM  | 443  | 164   |
| >STK11-Q12:VLYNEEKQKM | 209   | >STK11-Q12:VLYNEEKRKM  | 199  | 10    |
| >STK11-Q12:VLYNEEKQKM | 143   | >STK11-Q12:VLYNEEKRKM  | 171  | 28    |
| >STK11-Q12:VLYNEEKQKM | 471   | >STK11-Q12:VLYNEEKRKM  | 1039 | 568   |
| >STK11-Q12:VLYNEEKQKM | 103   | >STK11-Q12:VLYNEEKRKM  | 100  | 3     |
| >STK11-Q12:VLYNEEKQKM | 363   | >STK11-Q12:VLYNEEKRKM  | 555  | 192   |
| >STK11-Q12:DVLYNEEKQK | 222   | >STK11-Q12:DVLYNEEKRK  | 310  | 88    |
| >STK11-Q12:DVLYNEEKQ  | 24891 | >STK11-Q12:DVLYNEEKR   | 219  | 24672 |
| >STK11-Q12:DVLYNEEKQ  | 3482  | >STK11-Q12:DVLYNEEKR   | 16   | 3466  |
| >STK11-Q37LQPRRKRAK   | 452   | >STK11-Q37LPRRKRAK     | 80   | 372   |
| >STK11-Q37LQPRRKRAKL  | 13    | >STK11-Q37LPRRKRAKL    | 8    | 5     |
| >STK11-Q37LQPRRKRAKLI | 229   | >STK11-Q37LPRRKRAKLI   | 370  | 141   |
| >STK11-Q37LQPRRKRAKL  | 17    | >STK11-Q37LPRRKRAKL    | 15   | 2     |
| >STK11-Q37LQPRRKRAKLI | 481   | >STK11-Q37LPRRKRAKLI   | 317  | 164   |
| >STK11-Q37LQPRRKRAKL  | 327   | >STK11-Q37LPRRKRAKL    | 340  | 13    |
| >STK11-Q37LYQPRRKRAKL | 29    | >STK11-Q37LYLPRRKRAKLI | 538  | 509   |
| >STK11-Q37LYQPRRKRAKL | 4867  | >STK11-Q37LYLPRRKRAKL  | 417  | 4450  |
| >STK11-Q37LYQPRRKRA   | 5184  | >STK11-Q37LYLPRRKRA    | 351  | 4833  |
| >STK11-Q37LYQPRRKRAKL | 3946  | >STK11-Q37LYLPRRKRAKL  | 434  | 3512  |
| >STK11-Q37LYQPRRKRAKL | 2620  | >STK11-Q37LYLPRRKRAKLI | 132  | 2488  |
| >STK11-Q37LYQPRRKRA   | 11027 | >STK11-Q37LYLPRRKRA    | 336  | 10691 |
| >STK11-Q37LYQPRRKRAKL | 5811  | >STK11-Q37LYLPRRKRAKL  | 85   | 5726  |
| >STK11-Q37LYQPRRKRAKL | 6757  | >STK11-Q37LYLPRRKRAKLI | 92   | 6665  |
| >STK11-Q37LYQPRRKRAKL | 14259 | >STK11-Q37LYLPRRKRAKL  | 441  | 13818 |
| >STK11-Q37LYQPRRKRA   | 17673 | >STK11-Q37LYLPRRKRA    | 15   | 17658 |
| >STK11-Q37LYQPRRKRAKL | 6329  | >STK11-Q37LYLPRRKRAKL  | 6    | 6323  |

|                         |       |                         |     |       |
|-------------------------|-------|-------------------------|-----|-------|
| >STK11-Q37L YQPRRKRAKL  | 20822 | >STK11-Q37L YLPRRKRAKLI | 29  | 20793 |
| >STK11-Q37L YQPRRKRA    | 4341  | >STK11-Q37L YLPRRKRA    | 375 | 3966  |
| >STK11-Q37L YQPRRKRAKL  | 2405  | >STK11-Q37L YLPRRKRAKLI | 167 | 2238  |
| >STK11-Q37L HRIDSTEVIYC | 4868  | >STK11-Q37L HRIDSTEVIYL | 271 | 4597  |
| >STK11-Q37L HRIDSTEVIYC | 4602  | >STK11-Q37L HRIDSTEVIYL | 303 | 4299  |
| >STK11-Q37L HRIDSTEVIYC | 8645  | >STK11-Q37L HRIDSTEVIYL | 26  | 8619  |
| >STK11-Q37L HRIDSTEVIYC | 10058 | >STK11-Q37L HRIDSTEVIYL | 131 | 9927  |
| >STK11-Q37L IYQPRRKRAK  | 1133  | >STK11-Q37L IYLPRRKRAKL | 233 | 900   |
| >STK11-Q37L IYQPRRKRAK  | 101   | >STK11-Q37L IYLPRRKRAKL | 141 | 40    |
| >STK11-Q37L IYQPRRKRAK  | 185   | >STK11-Q37L IYLPRRKRAKL | 182 | 3     |
| >STK11-Q37L IYQPRRKRAK  | 478   | >STK11-Q37L IYLPRRKRAKL | 508 | 30    |
| >STK11-Q37L IYQPRRKRAK  | 24    | >STK11-Q37L IYLPRRKRAKL | 17  | 7     |
| >STK11-Q37L IYQPRRKRAK  | 189   | >STK11-Q37L IYLPRRKRAK  | 49  | 140   |
| >STK11-Q37L IYQPRRKR    | 35    | >STK11-Q37L IYLPRRKR    | 28  | 7     |
| >STK11-Q37L IYQPRRKR    | 85    | >STK11-Q37L IYLPRRKR    | 54  | 31    |
| >STK11-Q37L IYQPRRKR    | 77    | >STK11-Q37L IYLPRRKR    | 36  | 41    |
| >STK11-Q37L VIYQPRRK    | 44    | >STK11-Q37L VIYLPRRK    | 41  | 3     |
| >STK11-Q37L VIYQPRRKR   | 499   | >STK11-Q37L VIYLPRRKR   | 348 | 151   |
| >STK11-Q37L VIYQPRRKRA  | 46    | >STK11-Q37L VIYLPRRKRAK | 43  | 3     |
| >STK11-Q37L VIYQPRRK    | 99    | >STK11-Q37L VIYLPRRK    | 59  | 40    |
| >STK11-Q37L VIYQPRRKRA  | 181   | >STK11-Q37L VIYLPRRKRAK | 104 | 77    |
| >STK11-Q37L VIYQPRRKR   | 275   | >STK11-Q37L VIYLPRRKR   | 101 | 174   |
| >STK11-Q37L VIYQPRRKR   | 318   | >STK11-Q37L VIYLPRRKR   | 556 | 238   |
| >STK11-Q37L EVIYQPRR    | 268   | >STK11-Q37L EVIYLPRR    | 143 | 125   |
| >STK11-Q37L EVIYQPRRKR  | 454   | >STK11-Q37L EVIYLPRRKR  | 186 | 268   |
| >STK11-Q37L EVIYQPRR    | 160   | >STK11-Q37L EVIYLPRR    | 77  | 83    |
| >STK11-Q37L EVIYQPRR    | 5     | >STK11-Q37L EVIYLPRR    | 4   | 1     |
| >STK11-Q37L EVIYQPRRK   | 34    | >STK11-Q37L EVIYLPRRK   | 18  | 16    |
| >STK11-Q37L EVIYQPRRKR  | 33    | >STK11-Q37L EVIYLPRRKR  | 11  | 22    |
| >STK11-Q37L EVIYQPRRKR, | 175   | >STK11-Q37L EVIYLPRRKR  | 78  | 97    |
| >STK11-Q37L TEVIYQPR    | 736   | >STK11-Q37L TEVIYLPR    | 433 | 303   |
| >STK11-Q37L TEVIYQPR    | 372   | >STK11-Q37L TEVIYLPR    | 175 | 197   |
| >STK11-Q37L STEVIYQPR   | 503   | >STK11-Q37L STEVIYLPR   | 51  | 452   |
| >STK11-Q37L STEVIYQPRR  | 1104  | >STK11-Q37L STEVIYLPRR  | 428 | 676   |
| >STK11-Q37L STEVIYQPRRI | 122   | >STK11-Q37L STEVIYLPRRK | 73  | 49    |
| >STK11-Q37L STEVIYQPRRI | 349   | >STK11-Q37L STEVIYLPRRK | 378 | 29    |
| >STK11-Q37L STEVIYQPR   | 17    | >STK11-Q37L STEVIYLPR   | 21  | 4     |
| >STK11-Q37L STEVIYQPR   | 244   | >STK11-Q37L STEVIYLPR   | 339 | 95    |
| >STK11-Q37L STEVIYQPR   | 35    | >STK11-Q37L STEVIYLPR   | 32  | 3     |
| >STK11-Q37L STEVIYQPRR  | 276   | >STK11-Q37L STEVIYLPRR  | 161 | 115   |
| >STK11-Q37L STEVIYQPRRI | 526   | >STK11-Q37L STEVIYLPRRK | 397 | 129   |
| >STK11-Q37L STEVIYQPR   | 1342  | >STK11-Q37L STEVIYLPR   | 188 | 1154  |
| >STK11-Q37L STEVIYQPRR  | 354   | >STK11-Q37L STEVIYLPRR  | 178 | 176   |

|                         |       |                          |       |       |
|-------------------------|-------|--------------------------|-------|-------|
| >STK11-Q37L STEVIYQPRRI | 284   | >STK11-Q37L STEVIYLP RRK | 164   | 120   |
| >STK11-Q37L STEVIYQPR   | 1100  | >STK11-Q37L STEVIYLPR    | 169   | 931   |
| >STK11-Q37L DSTEVIYQ    | 5072  | >STK11-Q37L DSTEVIYL     | 436   | 4636  |
| >STK11-Q37L DSTEVIYQPR  | 441   | >STK11-Q37L DSTEVIYLPR   | 315   | 126   |
| >STK11-Q37L DSTEVIYQPR  | 48    | >STK11-Q37L DSTEVIYLPR   | 28    | 20    |
| >STK11-Q37L DSTEVIYQPR  | 42    | >STK11-Q37L DSTEVIYLPRF  | 33    | 9     |
| >STK11-Q37L DSTEVIYQPR  | 12    | >STK11-Q37L DSTEVIYLPR   | 10    | 2     |
| >STK11-Q37L DSTEVIYQPR  | 10    | >STK11-Q37L DSTEVIYLPRF  | 10    | 0     |
| >STK11-Q37L DSTEVIYQ    | 8983  | >STK11-Q37L DSTEVIYL     | 98    | 8885  |
| >STK11-Q37L IDSTEVIYQPR | 711   | >STK11-Q37L IDSTEVIYLPR  | 231   | 480   |
| >STK11-Q37L RIDSTEVIYQ  | 15711 | >STK11-Q37L RIDSTEVIYL   | 176   | 15535 |
| >STK11-Q37L RIDSTEVIYQ  | 14294 | >STK11-Q37L RIDSTEVIYL   | 83    | 14211 |
| >STK11-Q37L RIDSTEVIYQ  | 17077 | >STK11-Q37L RIDSTEVIYL   | 315   | 16762 |
| >STK11-Q37L RIDSTEVIYQ  | 16461 | >STK11-Q37L RIDSTEVIYL   | 230   | 16231 |
| >STK11-Q37L RIDSTEVIYQ  | 2925  | >STK11-Q37L RIDSTEVIYL   | 40    | 2885  |
| >STK11-Q37L RIDSTEVIYQ  | 18670 | >STK11-Q37L RIDSTEVIYL   | 406   | 18264 |
| >STK11-Q37L RIDSTEVIYQ  | 10180 | >STK11-Q37L RIDSTEVIYL   | 112   | 10068 |
| >STK11-R297 RFSIRQIR    | 11    | >STK11-R297 SFSIRQIR     | 32    | 21    |
| >STK11-R297 RFSIRQIR    | 1144  | >STK11-R297 SFSIRQIR     | 375   | 769   |
| >STK11-R297 RFSIRQIR    | 33    | >STK11-R297 SFSIRQIR     | 128   | 95    |
| >STK11-R297 KRFSIRQIR   | 23310 | >STK11-R297 KSFSIRQIR    | 207   | 23103 |
| >STK11-R297 KRFSIRQI    | 5049  | >STK11-R297 KSFSIRQI     | 61    | 4988  |
| >STK11-R297 KRFSIRQIR   | 6934  | >STK11-R297 KSFSIRQIR    | 108   | 6826  |
| >STK11-R297 KRFSIRQIRQ  | 8849  | >STK11-R297 KSFSIRQIRQ   | 361   | 8488  |
| >STK11-R297 KRFSIRQIR   | 325   | >STK11-R297 KSFSIRQIR    | 8     | 317   |
| >STK11-R297 KRFSIRQIRQ† | 12626 | >STK11-R297 KSFSIRQIRQ†  | 286   | 12340 |
| >STK11-R297 KRFSIRQI    | 642   | >STK11-R297 KSFSIRQI     | 13    | 629   |
| >STK11-R297 KRFSIRQIR   | 4137  | >STK11-R297 KSFSIRQIR    | 41    | 4096  |
| >STK11-R297 KRFSIRQI    | 84    | >STK11-R297 KSFSIRQI     | 229   | 145   |
| >STK11-R297 KRFSIRQIR   | 138   | >STK11-R297 KSFSIRQIR    | 306   | 168   |
| >STK11-R297 KRFSIRQIRQ† | 354   | >STK11-R297 KSFSIRQIRQ†  | 1092  | 738   |
| >STK11-R297 KRFSIRQI    | 21888 | >STK11-R297 KSFSIRQI     | 27    | 21861 |
| >STK11-R297 KRFSIRQIRQ† | 27530 | >STK11-R297 KSFSIRQIRQ†  | 342   | 27188 |
| >STK11-R297 KRFSIRQI    | 20    | >STK11-R297 KSFSIRQI     | 12525 | 12505 |
| >STK11-R297 KRFSIRQIR   | 36    | >STK11-R297 KSFSIRQIR    | 13989 | 13953 |
| >STK11-R297 KRFSIRQIRQ  | 153   | >STK11-R297 KSFSIRQIRQ   | 24580 | 24427 |
| >STK11-R297 KRFSIRQIRQ† | 37    | >STK11-R297 KSFSIRQIRQ†  | 14357 | 14320 |
| >STK11-R297 KRFSIRQI    | 21129 | >STK11-R297 KSFSIRQI     | 214   | 20915 |
| >STK11-R297 KRFSIRQI    | 19915 | >STK11-R297 KSFSIRQI     | 72    | 19843 |
| >STK11-R297 KRFSIRQIR   | 12207 | >STK11-R297 KSFSIRQIR    | 380   | 11827 |
| >STK11-R297 KRFSIRQIRQ† | 4270  | >STK11-R297 KSFSIRQIRQ†  | 83    | 4187  |
| >STK11-R297 KRFSIRQI    | 26    | >STK11-R297 KSFSIRQI     | 4249  | 4223  |
| >STK11-R297 KRFSIRQIR   | 209   | >STK11-R297 KSFSIRQIR    | 16148 | 15939 |

|                        |      |                        |       |       |
|------------------------|------|------------------------|-------|-------|
| >STK11-R297KRFSIRQIRQI | 160  | >STK11-R297KSFSIRQIRQI | 13352 | 13192 |
| >STK11-R297KRFSIRQI    | 259  | >STK11-R297KSFSIRQI    | 11689 | 11430 |
| >STK11-R297KRFSIRQIR   | 450  | >STK11-R297KSFSIRQIR   | 27459 | 27009 |
| >STK11-R297KRFSIRQIR   | 34   | >STK11-R297KSFSIRQIR   | 41    | 7     |
| >STK11-R297KRFSIRQI    | 307  | >STK11-R297KSFSIRQI    | 10    | 297   |
| >STK11-R297KGMLEYEPAI  | 254  | >STK11-R297KGMLEYEPAI  | 21900 | 21646 |
| >STK11-R297KGMLEYEPAI  | 59   | >STK11-R297KGMLEYEPAI  | 25476 | 25417 |
| >STK11-R297AKRFSIRQI   | 457  | >STK11-R297AKSFSIRQI   | 10707 | 10250 |
| >STK11-R297AKRFSIRQIR  | 239  | >STK11-R297AKSFSIRQIR  | 216   | 23    |
| >STK11-R297AKRFSIRQI   | 39   | >STK11-R297AKSFSIRQI   | 110   | 71    |
| >STK11-R297AKRFSIRQIR  | 128  | >STK11-R297AKSFSIRQIR  | 296   | 168   |
| >STK11-R297PAKRFSIR    | 372  | >STK11-R297PAKSFSIR    | 372   | 0     |
| >STK11-R297PAKRFSIRQIR | 429  | >STK11-R297PAKSFSIRQIR | 378   | 51    |
| >STK11-R297EPAKRFSIR   | 68   | >STK11-R297EPAKSFSIR   | 26    | 42    |
| >STK11-R297EPAKRFSI    | 877  | >STK11-R297EPAKSFSI    | 472   | 405   |
| >STK11-R297EPAKRFSI    | 522  | >STK11-R297EPAKSFSI    | 138   | 384   |
| >STK11-R297EPAKRFSIRQI | 912  | >STK11-R297EPAKSFSIRQI | 385   | 527   |
| >STK11-R297EPAKRFSI    | 70   | >STK11-R297EPAKSFSI    | 214   | 144   |
| >STK11-R297EPAKRFSIRQI | 291  | >STK11-R297EPAKSFSIRQI | 452   | 161   |
| >STK11-R297EPAKRFSI    | 71   | >STK11-R297EPAKSFSI    | 619   | 548   |
| >STK11-R297EPAKRFSIRQI | 223  | >STK11-R297EPAKSFSIRQI | 1667  | 1444  |
| >STK11-R297EPAKRFSI    | 631  | >STK11-R297EPAKSFSI    | 216   | 415   |
| >STK11-R297EPAKRFSIRQI | 566  | >STK11-R297EPAKSFSIRQI | 408   | 158   |
| >STK11-R297EPAKRFSI    | 139  | >STK11-R297EPAKSFSI    | 57    | 82    |
| >STK11-R297EPAKRFSIRQI | 1036 | >STK11-R297EPAKSFSIRQI | 460   | 576   |
| >STK11-R297YEPAKRFSI   | 20   | >STK11-R297YEPAKSFSI   | 19    | 1     |
| >STK11-R297YEPAKRFSI   | 2792 | >STK11-R297YEPAKSFSI   | 498   | 2294  |
| >STK11-R297YEPAKRFSI   | 225  | >STK11-R297YEPAKSFSI   | 289   | 64    |
| >STK11-R297YEPAKRFSI   | 11   | >STK11-R297YEPAKSFSI   | 9     | 2     |
| >STK11-R297EYEPAKRFSI  | 290  | >STK11-R297EYEPAKSFSI  | 226   | 64    |
| >STK11-R297EYEPAKRF    | 84   | >STK11-R297EYEPAKSF    | 45    | 39    |
| >STK11-R297EYEPAKRFSI  | 234  | >STK11-R297EYEPAKSFSI  | 143   | 91    |
| >STK11-R297EYEPAKRFSIR | 123  | >STK11-R297EYEPAKSFSIR | 146   | 23    |
| >STK11-R297EYEPAKRFSIR | 282  | >STK11-R297EYEPAKSFSIR | 117   | 165   |
| >STK11-R297EYEPAKRFSIR | 86   | >STK11-R297EYEPAKSFSIR | 90    | 4     |
| >STK11-R297LEYEPAKRF   | 218  | >STK11-R297LEYEPAKSF   | 43    | 175   |
| >STK11-R297LEYEPAKRFS  | 249  | >STK11-R297LEYEPAKSFS  | 188   | 61    |
| >STK11-R297LEYEPAKRFSI | 8    | >STK11-R297LEYEPAKSFSI | 7     | 1     |
| >STK11-R297LEYEPAKRF   | 1932 | >STK11-R297LEYEPAKSF   | 248   | 1684  |
| >STK11-R297LEYEPAKRF   | 923  | >STK11-R297LEYEPAKSF   | 297   | 626   |
| >STK11-R297LEYEPAKRF   | 48   | >STK11-R297LEYEPAKSF   | 9     | 39    |
| >STK11-R297LEYEPAKRFSI | 773  | >STK11-R297LEYEPAKSFSI | 418   | 355   |
| >STK11-R297LEYEPAKRF   | 48   | >STK11-R297LEYEPAKSF   | 9     | 39    |

|                         |      |                         |       |       |
|-------------------------|------|-------------------------|-------|-------|
| >STK11-R297 LEYEPAKRFSI | 158  | >STK11-R297 LEYEPAKSFSI | 141   | 17    |
| >STK11-R297 LEYEPAKRF   | 1170 | >STK11-R297 LEYEPAKSF   | 308   | 862   |
| >STK11-R297 LEYEPAKRFSI | 69   | >STK11-R297 LEYEPAKSFSI | 50    | 19    |
| >STK11-R297 LEYEPAKRFSI | 116  | >STK11-R297 LEYEPAKSFSI | 94    | 22    |
| >STK11-R297 LEYEPAKRF   | 328  | >STK11-R297 LEYEPAKSF   | 137   | 191   |
| >STK11-R297 LEYEPAKRF   | 126  | >STK11-R297 LEYEPAKSF   | 103   | 23    |
| >STK11-R297 LEYEPAKRF   | 149  | >STK11-R297 LEYEPAKSF   | 120   | 29    |
| >STK11-R297 LEYEPAKRFSI | 7    | >STK11-R297 LEYEPAKSFSI | 6     | 1     |
| >STK11-R297 LEYEPAKRFSI | 275  | >STK11-R297 LEYEPAKSFSI | 174   | 101   |
| >STK11-R297 MLEYEPAKR   | 78   | >STK11-R297 MLEYEPAKS   | 28189 | 28111 |
| >STK11-R297 MLEYEPAKRF  | 940  | >STK11-R297 MLEYEPAKSF  | 155   | 785   |
| >STK11-R297 MLEYEPAKR   | 485  | >STK11-R297 MLEYEPAKS   | 33836 | 33351 |
| >STK11-R297 GMLEYEPAKF  | 964  | >STK11-R297 GMLEYEPAKS  | 79    | 885   |
| >STK11-R297 GMLEYEPAKF  | 86   | >STK11-R297 GMLEYEPAKS  | 74    | 12    |
| >STK11-R297 GMLEYEPAKF  | 4421 | >STK11-R297 GMLEYEPAKS  | 364   | 4057  |
| >STK11-R297 GMLEYEPAKF  | 273  | >STK11-R297 GMLEYEPAKS  | 29817 | 29544 |
| >STK11-R297 GMLEYEPAKF  | 1106 | >STK11-R297 GMLEYEPAKS  | 255   | 851   |
| >STK11-R297 GMLEYEPAKF  | 764  | >STK11-R297 GMLEYEPAKS  | 334   | 430   |
| >STK11-R297 GMLEYEPAKF  | 44   | >STK11-R297 GMLEYEPAKS  | 11    | 33    |
| >STK11-R297 GMLEYEPAKF  | 135  | >STK11-R297 GMLEYEPAKS  | 160   | 25    |
| >STK11-R304 RQHSWFRK    | 91   | >STK11-R304 GQHSWFRK    | 365   | 274   |
| >STK11-R304 RQHSWFRKK   | 106  | >STK11-R304 GQHSWFRKK   | 491   | 385   |
| >STK11-R304 RQHSWFRK    | 30   | >STK11-R304 GQHSWFRK    | 38    | 8     |
| >STK11-R304 RQHSWFRKK   | 77   | >STK11-R304 GQHSWFRKK   | 126   | 49    |
| >STK11-R304 RQHSWFRK    | 11   | >STK11-R304 GQHSWFRK    | 441   | 430   |
| >STK11-R304 RQHSWFRKK   | 17   | >STK11-R304 GQHSWFRKK   | 1402  | 1385  |
| >STK11-R304 RQHSWFRK    | 14   | >STK11-R304 GQHSWFRK    | 102   | 88    |
| >STK11-R304 RQHSWFRKK   | 22   | >STK11-R304 GQHSWFRKK   | 402   | 380   |
| >STK11-R304 RQHSWFRK    | 366  | >STK11-R304 GQHSWFRK    | 4148  | 3782  |
| >STK11-R304 RQHSWFRKK   | 214  | >STK11-R304 GQHSWFRKK   | 2175  | 1961  |
| >STK11-R304 RQHSWFRKK   | 116  | >STK11-R304 GQHSWFRKK   | 1665  | 1549  |
| >STK11-R304 RQHSWFRK    | 57   | >STK11-R304 GQHSWFRK    | 604   | 547   |
| >STK11-R304 RQHSWFRKK   | 33   | >STK11-R304 GQHSWFRKK   | 266   | 233   |
| >STK11-R304 RQHSWFRKK   | 449  | >STK11-R304 GQHSWFRKK   | 2150  | 1701  |
| >STK11-R304 RQHSWFRK    | 609  | >STK11-R304 GQHSWFRK    | 236   | 373   |
| >STK11-R304 RQHSWFRK    | 344  | >STK11-R304 GQHSWFRK    | 6930  | 6586  |
| >STK11-R304 RQHSWFRKK   | 349  | >STK11-R304 GQHSWFRKK   | 6481  | 6132  |
| >STK11-R304 IRQHSWFRK   | 8115 | >STK11-R304 IGQHSWFRK   | 391   | 7724  |
| >STK11-R304 IRQHSWFR    | 1948 | >STK11-R304 IGQHSWFR    | 49    | 1899  |
| >STK11-R304 IRQHSWFR    | 344  | >STK11-R304 IGQHSWFR    | 22235 | 21891 |
| >STK11-R304 IRQHSWFRK   | 91   | >STK11-R304 IGQHSWFRK   | 21173 | 21082 |
| >STK11-R304 IRQHSWFRKK  | 71   | >STK11-R304 IGQHSWFRKI  | 25534 | 25463 |
| >STK11-R304 IRQHSWFRKK  | 447  | >STK11-R304 IGQHSWFRKI  | 24428 | 23981 |



|                        |      |                        |       |       |
|------------------------|------|------------------------|-------|-------|
| >STK11-R304IRQHSWFRK   | 440  | >STK11-R304IGQHSWFRK   | 36510 | 36070 |
| >STK11-R304IRQHSWFRKI  | 277  | >STK11-R304IGQHSWFRKI  | 27669 | 27392 |
| >STK11-R304IRQHSWFRK   | 403  | >STK11-R304IGQHSWFRK   | 138   | 265   |
| >STK11-R304IRQHSWFRKI  | 1853 | >STK11-R304IGQHSWFRKI  | 409   | 1444  |
| >STK11-R304IRQHSWFR    | 196  | >STK11-R304IGQHSWFR    | 150   | 46    |
| >STK11-R304PAKRFSIRQIR | 429  | >STK11-R304PAKRFSIRQIC | 22752 | 22323 |
| >STK11-R304QIRQHSWFR   | 194  | >STK11-R304QIGQHSWFR   | 319   | 125   |
| >STK11-R304QIRQHSWFR   | 180  | >STK11-R304QIGQHSWFR   | 482   | 302   |
| >STK11-R304QIRQHSWFR   | 134  | >STK11-R304QIGQHSWFR   | 95    | 39    |
| >STK11-R304QIRQHSWFR   | 2604 | >STK11-R304QIGQHSWFR   | 440   | 2164  |
| >STK11-R304QIRQHSWF    | 171  | >STK11-R304QIGQHSWF    | 262   | 91    |
| >STK11-R304QIRQHSWFR   | 147  | >STK11-R304QIGQHSWFR   | 14384 | 14237 |
| >STK11-R304QIRQHSWFR   | 8    | >STK11-R304QIGQHSWFR   | 3488  | 3480  |
| >STK11-R304QIRQHSWFR   | 15   | >STK11-R304QIGQHSWFR   | 7430  | 7415  |
| >STK11-R304QIRQHSWFR   | 25   | >STK11-R304QIGQHSWFR   | 148   | 123   |
| >STK11-R304QIRQHSWFR   | 143  | >STK11-R304QIGQHSWFR   | 655   | 512   |
| >STK11-R304QIRQHSWFR   | 35   | >STK11-R304QIGQHSWFR   | 308   | 273   |
| >STK11-R304QIRQHSWFR   | 135  | >STK11-R304QIGQHSWFR   | 99    | 36    |
| >STK11-R304QIRQHSWF    | 326  | >STK11-R304QIGQHSWF    | 1141  | 815   |
| >STK11-R304QIRQHSWF    | 447  | >STK11-R304QIGQHSWF    | 3695  | 3248  |
| >STK11-R304QIRQHSWF    | 132  | >STK11-R304QIGQHSWF    | 4621  | 4489  |
| >STK11-R304QIRQHSWFR   | 41   | >STK11-R304QIGQHSWFR   | 25    | 16    |
| >STK11-R304QIRQHSWFR   | 869  | >STK11-R304QIGQHSWFR   | 344   | 525   |
| >STK11-R304RQIRQHSWF   | 1276 | >STK11-R304RQIGQHSWF   | 369   | 907   |
| >STK11-R304RQIRQHSWF   | 587  | >STK11-R304RQIGQHSWF   | 317   | 270   |
| >STK11-R304RQIRQHSWF   | 142  | >STK11-R304RQIGQHSWF   | 179   | 37    |
| >STK11-R304RQIRQHSWF   | 565  | >STK11-R304RQIGQHSWF   | 351   | 214   |
| >STK11-R304RQIRQHSWF   | 34   | >STK11-R304RQIGQHSWF   | 36    | 2     |
| >STK11-R304RQIRQHSWF   | 458  | >STK11-R304RQIGQHSWF   | 788   | 330   |
| >STK11-R304RQIRQHSWF   | 534  | >STK11-R304RQIGQHSWF   | 419   | 115   |
| >STK11-R304RQIRQHSWF   | 393  | >STK11-R304RQIGQHSWF   | 167   | 226   |
| >STK11-R304RQIRQHSWF   | 25   | >STK11-R304RQIGQHSWF   | 64    | 39    |
| >STK11-R304RQIRQHSWF   | 10   | >STK11-R304RQIGQHSWF   | 9     | 1     |
| >STK11-R304RQIRQHSWF   | 21   | >STK11-R304RQIGQHSWF   | 37    | 16    |
| >STK11-R304RQIRQHSW    | 297  | >STK11-R304RQIGQHSW    | 142   | 155   |
| >STK11-R304RQIRQHSWF   | 731  | >STK11-R304RQIGQHSWF   | 135   | 596   |
| >STK11-R304RQIRQHSW    | 132  | >STK11-R304RQIGQHSW    | 111   | 21    |
| >STK11-R304RQIRQHSWF   | 58   | >STK11-R304RQIGQHSWF   | 53    | 5     |
| >STK11-R304RQIRQHSW    | 32   | >STK11-R304RQIGQHSW    | 118   | 86    |
| >STK11-R304RQIRQHSWF   | 3    | >STK11-R304RQIGQHSWF   | 6     | 3     |
| >STK11-R304RQIRQHSWF   | 170  | >STK11-R304RQIGQHSWF   | 674   | 504   |
| >STK11-R304RQIRQHSWF   | 374  | >STK11-R304RQIGQHSWF   | 1438  | 1064  |
| >STK11-R304RQIRQHSW    | 369  | >STK11-R304RQIGQHSW    | 183   | 186   |

|                         |      |                         |       |       |
|-------------------------|------|-------------------------|-------|-------|
| >STK11-R304 RQIRQHSWF   | 360  | >STK11-R304 RQIGQHSWF   | 110   | 250   |
| >STK11-R304 RQIRQHSWF   | 261  | >STK11-R304 RQIGQHSWF   | 294   | 33    |
| >STK11-R304 RQIRQHSWF   | 129  | >STK11-R304 RQIGQHSWF   | 104   | 25    |
| >STK11-R304 RQIRQHSW    | 123  | >STK11-R304 RQIGQHSW    | 133   | 10    |
| >STK11-R304 RQIRQHSW    | 23   | >STK11-R304 RQIGQHSW    | 27    | 4     |
| >STK11-R304 RQIRQHSWF   | 463  | >STK11-R304 RQIGQHSWF   | 407   | 56    |
| >STK11-R304 RQIRQHSW    | 338  | >STK11-R304 RQIGQHSW    | 2088  | 1750  |
| >STK11-R304 RQIRQHSWF   | 497  | >STK11-R304 RQIGQHSWF   | 1365  | 868   |
| >STK11-R304 RQIRQHSWF   | 413  | >STK11-R304 RQIGQHSWF   | 2335  | 1922  |
| >STK11-R304 RQIRQHSWF   | 197  | >STK11-R304 RQIGQHSWF   | 933   | 736   |
| >STK11-R304 RQIRQHSWF   | 444  | >STK11-R304 RQIGQHSWF   | 934   | 490   |
| >STK11-R304 RQIRQHSW    | 519  | >STK11-R304 RQIGQHSW    | 151   | 368   |
| >STK11-R304 RQIRQHSWF   | 43   | >STK11-R304 RQIGQHSWF   | 28    | 15    |
| >STK11-R304 IRQIRQHSWF  | 186  | >STK11-R304 IRQIGQHSWF  | 196   | 10    |
| >STK11-R304 IRQIRQHSWF  | 67   | >STK11-R304 IRQIGQHSWF  | 93    | 26    |
| >STK11-R304 IRQIRQHSWF  | 190  | >STK11-R304 IRQIGQHSWF  | 289   | 99    |
| >STK11-R304 IRQIRQHSWF  | 172  | >STK11-R304 IRQIGQHSWF  | 441   | 269   |
| >STK11-R304 IRQIRQHSWF  | 82   | >STK11-R304 IRQIGQHSWF  | 147   | 65    |
| >STK11-R304 IRQIRQHSW   | 2529 | >STK11-R304 IRQIGQHSW   | 445   | 2084  |
| >STK11-R304 IRQIRQHSWF  | 201  | >STK11-R304 IRQIGQHSWF  | 355   | 154   |
| >STK11-R304 SIRQIRQHSW  | 364  | >STK11-R304 SIRQIGQHSM  | 336   | 28    |
| >STK11-R304 SIRQIRQHS   | 242  | >STK11-R304 SIRQIGQHS   | 1229  | 987   |
| >STK11-R304 SIRQIRQHSW  | 350  | >STK11-R304 SIRQIGQHSM  | 219   | 131   |
| >STK11-R304 SIRQIRQHSW  | 1269 | >STK11-R304 SIRQIGQHSM  | 403   | 866   |
| >STK11-R304 SIRQIRQHSW  | 436  | >STK11-R304 SIRQIGQHSM  | 202   | 234   |
| >STK11-R304 SIRQIRQHSW  | 380  | >STK11-R304 SIRQIGQHSM  | 149   | 231   |
| >STK11-R304 SIRQIRQHSW  | 211  | >STK11-R304 SIRQIGQHSM  | 270   | 59    |
| >STK11-R304 SIRQIRQHSW  | 18   | >STK11-R304 SIRQIGQHSM  | 15    | 3     |
| >STK11-R304 FSIRQIRQH   | 1136 | >STK11-R304 FSIRQIGQH   | 298   | 838   |
| >STK11-R304 FSIRQIRQHS\ | 6    | >STK11-R304 FSIRQIGQHS\ | 6     | 0     |
| >STK11-R304 FSIRQIRQHS\ | 200  | >STK11-R304 FSIRQIGQHS\ | 147   | 53    |
| >STK11-R304 FSIRQIRQHS\ | 34   | >STK11-R304 FSIRQIGQHS\ | 44    | 10    |
| >STK11-R304 FSIRQIRQHS\ | 11   | >STK11-R304 FSIRQIGQHS\ | 10    | 1     |
| >STK11-R304 FSIRQIRQHS\ | 38   | >STK11-R304 FSIRQIGQHS\ | 39    | 1     |
| >STK11-R304 RFSIRQIR    | 11   | >STK11-R304 RFSIRQIG    | 11201 | 11190 |
| >STK11-R304 RFSIRQIR    | 33   | >STK11-R304 RFSIRQIG    | 30418 | 30385 |
| >STK11-R304 KRFSIRQIR   | 325  | >STK11-R304 KRFSIRQIG   | 18840 | 18515 |
| >STK11-R304 KRFSIRQIR   | 138  | >STK11-R304 KRFSIRQIG   | 1420  | 1282  |
| >STK11-R304 KRFSIRQIRQ† | 354  | >STK11-R304 KRFSIRQIGQ† | 707   | 353   |
| >STK11-R304 KRFSIRQIR   | 36   | >STK11-R304 KRFSIRQIG   | 596   | 560   |
| >STK11-R304 KRFSIRQIRQ  | 153  | >STK11-R304 KRFSIRQIGQ  | 258   | 105   |
| >STK11-R304 KRFSIRQIRQ† | 37   | >STK11-R304 KRFSIRQIGQ† | 42    | 5     |
| >STK11-R304 KRFSIRQIR   | 2840 | >STK11-R304 KRFSIRQIG   | 343   | 2497  |

|                        |       |                        |       |       |
|------------------------|-------|------------------------|-------|-------|
| >STK11-R304KRFSIRQIR   | 209   | >STK11-R304KRFSIRQIG   | 319   | 110   |
| >STK11-R304KRFSIRQIRQI | 160   | >STK11-R304KRFSIRQIGQI | 234   | 74    |
| >STK11-R304KRFSIRQIR   | 450   | >STK11-R304KRFSIRQIG   | 1419  | 969   |
| >STK11-R304KRFSIRQIR   | 34    | >STK11-R304KRFSIRQIG   | 26768 | 26734 |
| >STK11-R304AKRFSIRQIR  | 239   | >STK11-R304AKRFSIRQIG  | 27439 | 27200 |
| >STK11-R304AKRFSIRQIR  | 128   | >STK11-R304AKRFSIRQIG  | 1493  | 1365  |
| >STK11-R304RQHSWFRK    | 91    | >STK11-R304WQHSWFRK    | 3344  | 3253  |
| >STK11-R304RQHSWFRKK   | 106   | >STK11-R304WQHSWFRKI   | 4783  | 4677  |
| >STK11-R304RQHSWFRK    | 30    | >STK11-R304WQHSWFRK    | 754   | 724   |
| >STK11-R304RQHSWFRKK   | 77    | >STK11-R304WQHSWFRKI   | 3047  | 2970  |
| >STK11-R304RQHSWFRK    | 11    | >STK11-R304WQHSWFRK    | 4319  | 4308  |
| >STK11-R304RQHSWFRKK   | 17    | >STK11-R304WQHSWFRKI   | 8274  | 8257  |
| >STK11-R304RQHSWFRK    | 14    | >STK11-R304WQHSWFRK    | 843   | 829   |
| >STK11-R304RQHSWFRKK   | 22    | >STK11-R304WQHSWFRKI   | 2868  | 2846  |
| >STK11-R304RQHSWFRK    | 366   | >STK11-R304WQHSWFRK    | 946   | 580   |
| >STK11-R304RQHSWFRKK   | 214   | >STK11-R304WQHSWFRKI   | 462   | 248   |
| >STK11-R304RQHSWFRKK   | 116   | >STK11-R304WQHSWFRKI   | 258   | 142   |
| >STK11-R304RQHSWFRK    | 57    | >STK11-R304WQHSWFRK    | 413   | 356   |
| >STK11-R304RQHSWFRKK   | 33    | >STK11-R304WQHSWFRKI   | 259   | 226   |
| >STK11-R304RQHSWFRKK   | 449   | >STK11-R304WQHSWFRKI   | 3587  | 3138  |
| >STK11-R304RQHSWFRK    | 344   | >STK11-R304WQHSWFRK    | 1413  | 1069  |
| >STK11-R304RQHSWFRKK   | 349   | >STK11-R304WQHSWFRKI   | 1433  | 1084  |
| >STK11-R304IRQHSWFRK   | 8223  | >STK11-R304IWQHSWFRK   | 115   | 8108  |
| >STK11-R304IRQHSWFR    | 1948  | >STK11-R304IWQHSWFR    | 23    | 1925  |
| >STK11-R304IRQHSWFRK   | 10123 | >STK11-R304IWQHSWFRK   | 309   | 9814  |
| >STK11-R304IRQHSWFR    | 1567  | >STK11-R304IWQHSWFR    | 102   | 1465  |
| >STK11-R304IRQHSWFR    | 344   | >STK11-R304IWQHSWFR    | 15459 | 15115 |
| >STK11-R304IRQHSWFRK   | 91    | >STK11-R304IWQHSWFRK   | 12591 | 12500 |
| >STK11-R304IRQHSWFRKI  | 71    | >STK11-R304IWQHSWFRK   | 7866  | 7795  |
| >STK11-R304IRQHSWFRKI  | 447   | >STK11-R304IWQHSWFRK   | 18727 | 18280 |
| >STK11-R304IRQHSWFRK   | 440   | >STK11-R304IWQHSWFRK   | 34907 | 34467 |
| >STK11-R304IRQHSWFRKI  | 277   | >STK11-R304IWQHSWFRK   | 10625 | 10348 |
| >STK11-R304IRQHSWFRK   | 403   | >STK11-R304IWQHSWFRK   | 341   | 62    |
| >STK11-R304IRQHSWFR    | 196   | >STK11-R304IWQHSWFR    | 16    | 180   |
| >STK11-R304IRQHSWFRK   | 9642  | >STK11-R304IWQHSWFRK   | 97    | 9545  |
| >STK11-R304IRQHSWFRKI  | 8184  | >STK11-R304IWQHSWFRK   | 163   | 8021  |
| >STK11-R304IRQHSWFR    | 26817 | >STK11-R304IWQHSWFR    | 129   | 26688 |
| >STK11-R304PAKRFSIRQIR | 429   | >STK11-R304PAKRFSIRQIV | 21472 | 21043 |
| >STK11-R304PAKRFSIRQIR | 23779 | >STK11-R304PAKRFSIRQIV | 159   | 23620 |
| >STK11-R304QIRQHSWFRK  | 194   | >STK11-R304QIWQHSWFF   | 231   | 37    |
| >STK11-R304QIRQHSWFRK  | 180   | >STK11-R304QIWQHSWFF   | 159   | 21    |
| >STK11-R304QIRQHSWFR   | 6598  | >STK11-R304QIWQHSWFF   | 402   | 6196  |
| >STK11-R304QIRQHSWFR   | 134   | >STK11-R304QIWQHSWFF   | 58    | 76    |

|                       |      |                       |       |       |
|-----------------------|------|-----------------------|-------|-------|
| >STK11-R304 QIRQHSWFR | 2604 | >STK11-R304 QIWQHSWFF | 171   | 2433  |
| >STK11-R304 QIRQHSWF  | 171  | >STK11-R304 QIWQHSWF  | 229   | 58    |
| >STK11-R304 QIRQHSWFR | 147  | >STK11-R304 QIWQHSWFF | 12525 | 12378 |
| >STK11-R304 QIRQHSWFR | 8    | >STK11-R304 QIWQHSWFF | 1469  | 1461  |
| >STK11-R304 QIRQHSWFR | 15   | >STK11-R304 QIWQHSWFF | 4336  | 4321  |
| >STK11-R304 QIRQHSWFR | 25   | >STK11-R304 QIWQHSWFF | 16    | 9     |
| >STK11-R304 QIRQHSWFR | 143  | >STK11-R304 QIWQHSWFF | 190   | 47    |
| >STK11-R304 QIRQHSWF  | 7357 | >STK11-R304 QIWQHSWF  | 290   | 7067  |
| >STK11-R304 QIRQHSWFR | 35   | >STK11-R304 QIWQHSWFF | 25    | 10    |
| >STK11-R304 QIRQHSWFR | 135  | >STK11-R304 QIWQHSWFF | 46    | 89    |
| >STK11-R304 QIRQHSWFR | 593  | >STK11-R304 QIWQHSWFF | 410   | 183   |
| >STK11-R304 QIRQHSWF  | 326  | >STK11-R304 QIWQHSWF  | 1388  | 1062  |
| >STK11-R304 QIRQHSWF  | 447  | >STK11-R304 QIWQHSWF  | 308   | 139   |
| >STK11-R304 QIRQHSWF  | 132  | >STK11-R304 QIWQHSWF  | 129   | 3     |
| >STK11-R304 QIRQHSWF  | 6596 | >STK11-R304 QIWQHSWF  | 412   | 6184  |
| >STK11-R304 QIRQHSWFR | 945  | >STK11-R304 QIWQHSWFF | 278   | 667   |
| >STK11-R304 QIRQHSWFR | 620  | >STK11-R304 QIWQHSWFF | 401   | 219   |
| >STK11-R304 QIRQHSWFR | 41   | >STK11-R304 QIWQHSWFF | 14    | 27    |
| >STK11-R304 QIRQHSWFR | 869  | >STK11-R304 QIWQHSWFF | 94    | 775   |
| >STK11-R304 QIRQHSWFR | 1221 | >STK11-R304 QIWQHSWFF | 128   | 1093  |
| >STK11-R304 RQIRQHSWF | 1276 | >STK11-R304 RQIWQHSWF | 338   | 938   |
| >STK11-R304 RQIRQHSWF | 587  | >STK11-R304 RQIWQHSWF | 274   | 313   |
| >STK11-R304 RQIRQHSWF | 142  | >STK11-R304 RQIWQHSWF | 116   | 26    |
| >STK11-R304 RQIRQHSWF | 565  | >STK11-R304 RQIWQHSWF | 309   | 256   |
| >STK11-R304 RQIRQHSWF | 34   | >STK11-R304 RQIWQHSWF | 18    | 16    |
| >STK11-R304 RQIRQHSWF | 458  | >STK11-R304 RQIWQHSWF | 395   | 63    |
| >STK11-R304 RQIRQHSWF | 534  | >STK11-R304 RQIWQHSWF | 432   | 102   |
| >STK11-R304 RQIRQHSWF | 393  | >STK11-R304 RQIWQHSWF | 656   | 263   |
| >STK11-R304 RQIRQHSWF | 25   | >STK11-R304 RQIWQHSWF | 100   | 75    |
| >STK11-R304 RQIRQHSWF | 10   | >STK11-R304 RQIWQHSWF | 6     | 4     |
| >STK11-R304 RQIRQHSWF | 21   | >STK11-R304 RQIWQHSWF | 20    | 1     |
| >STK11-R304 RQIRQHSW  | 297  | >STK11-R304 RQIWQHSW  | 99    | 198   |
| >STK11-R304 RQIRQHSWF | 1567 | >STK11-R304 RQIWQHSWF | 440   | 1127  |
| >STK11-R304 RQIRQHSWF | 621  | >STK11-R304 RQIWQHSWF | 465   | 156   |
| >STK11-R304 RQIRQHSWF | 731  | >STK11-R304 RQIWQHSWF | 194   | 537   |
| >STK11-R304 RQIRQHSW  | 132  | >STK11-R304 RQIWQHSW  | 184   | 52    |
| >STK11-R304 RQIRQHSWF | 58   | >STK11-R304 RQIWQHSWF | 74    | 16    |
| >STK11-R304 RQIRQHSW  | 32   | >STK11-R304 RQIWQHSW  | 126   | 94    |
| >STK11-R304 RQIRQHSWF | 3    | >STK11-R304 RQIWQHSWF | 7     | 4     |
| >STK11-R304 RQIRQHSWF | 170  | >STK11-R304 RQIWQHSWF | 527   | 357   |
| >STK11-R304 RQIRQHSWF | 374  | >STK11-R304 RQIWQHSWF | 1200  | 826   |
| >STK11-R304 RQIRQHSW  | 369  | >STK11-R304 RQIWQHSW  | 209   | 160   |
| >STK11-R304 RQIRQHSWF | 360  | >STK11-R304 RQIWQHSWF | 107   | 253   |

|                         |       |                        |       |       |
|-------------------------|-------|------------------------|-------|-------|
| >STK11-R304 RQIRQHSWF   | 261   | >STK11-R304 RQIWQHSWF  | 123   | 138   |
| >STK11-R304 RQIRQHSWF   | 129   | >STK11-R304 RQIWQHSWF  | 121   | 8     |
| >STK11-R304 RQIRQHSW    | 123   | >STK11-R304 RQIWQHSW   | 278   | 155   |
| >STK11-R304 RQIRQHSW    | 23    | >STK11-R304 RQIWQHSW   | 20    | 3     |
| >STK11-R304 RQIRQHSWF   | 463   | >STK11-R304 RQIWQHSWF  | 422   | 41    |
| >STK11-R304 RQIRQHSW    | 338   | >STK11-R304 RQIWQHSW   | 648   | 310   |
| >STK11-R304 RQIRQHSWF   | 497   | >STK11-R304 RQIWQHSWF  | 533   | 36    |
| >STK11-R304 RQIRQHSWF   | 413   | >STK11-R304 RQIWQHSWF  | 350   | 63    |
| >STK11-R304 RQIRQHSWF   | 197   | >STK11-R304 RQIWQHSWF  | 152   | 45    |
| >STK11-R304 RQIRQHSWF   | 444   | >STK11-R304 RQIWQHSWF  | 271   | 173   |
| >STK11-R304 RQIRQHSW    | 519   | >STK11-R304 RQIWQHSW   | 129   | 390   |
| >STK11-R304 RQIRQHSWF   | 43    | >STK11-R304 RQIWQHSWF  | 23    | 20    |
| >STK11-R304 RQIRQHSWF   | 1626  | >STK11-R304 RQIWQHSWF  | 410   | 1216  |
| >STK11-R304 IRQIRQHSWF  | 186   | >STK11-R304 IRQIWQHSW  | 185   | 1     |
| >STK11-R304 IRQIRQHSWF  | 67    | >STK11-R304 IRQIWQHSW  | 43    | 24    |
| >STK11-R304 IRQIRQHSWF  | 190   | >STK11-R304 IRQIWQHSW  | 131   | 59    |
| >STK11-R304 IRQIRQHSWF  | 172   | >STK11-R304 IRQIWQHSW  | 582   | 410   |
| >STK11-R304 IRQIRQHSWF  | 82    | >STK11-R304 IRQIWQHSW  | 113   | 31    |
| >STK11-R304 IRQIRQHSW   | 2529  | >STK11-R304 IRQIWQHSW  | 206   | 2323  |
| >STK11-R304 IRQIRQHSWF  | 201   | >STK11-R304 IRQIWQHSW  | 118   | 83    |
| >STK11-R304 SIRQIRQHSW  | 364   | >STK11-R304 SIRQIWQHSV | 223   | 141   |
| >STK11-R304 SIRQIRQHS   | 242   | >STK11-R304 SIRQIWQHS  | 164   | 78    |
| >STK11-R304 SIRQIRQHSW  | 350   | >STK11-R304 SIRQIWQHSV | 320   | 30    |
| >STK11-R304 SIRQIRQHSW  | 436   | >STK11-R304 SIRQIWQHSV | 320   | 116   |
| >STK11-R304 SIRQIRQHSW  | 380   | >STK11-R304 SIRQIWQHSV | 190   | 190   |
| >STK11-R304 SIRQIRQHSW  | 211   | >STK11-R304 SIRQIWQHSV | 123   | 88    |
| >STK11-R304 SIRQIRQHSW  | 18    | >STK11-R304 SIRQIWQHSV | 17    | 1     |
| >STK11-R304 FSIRQIRQHS\ | 6     | >STK11-R304 FSIRQIWQHS | 6     | 0     |
| >STK11-R304 FSIRQIRQHS\ | 200   | >STK11-R304 FSIRQIWQHS | 59    | 141   |
| >STK11-R304 FSIRQIRQHS\ | 34    | >STK11-R304 FSIRQIWQHS | 30    | 4     |
| >STK11-R304 FSIRQIRQH   | 11185 | >STK11-R304 FSIRQIWQH  | 483   | 10702 |
| >STK11-R304 FSIRQIRQHS\ | 11    | >STK11-R304 FSIRQIWQHS | 9     | 2     |
| >STK11-R304 FSIRQIRQHS\ | 38    | >STK11-R304 FSIRQIWQHS | 20    | 18    |
| >STK11-R304 RFSIRQIR    | 7401  | >STK11-R304 RFSIRQIW   | 254   | 7147  |
| >STK11-R304 RFSIRQIR    | 11    | >STK11-R304 RFSIRQIW   | 8334  | 8323  |
| >STK11-R304 RFSIRQIRQH  | 1413  | >STK11-R304 RFSIRQIWQH | 424   | 989   |
| >STK11-R304 RFSIRQIR    | 22085 | >STK11-R304 RFSIRQIW   | 104   | 21981 |
| >STK11-R304 RFSIRQIR    | 33    | >STK11-R304 RFSIRQIW   | 22848 | 22815 |
| >STK11-R304 KRFSIRQIR   | 325   | >STK11-R304 KRFSIRQIW  | 16642 | 16317 |
| >STK11-R304 KRFSIRQIR   | 138   | >STK11-R304 KRFSIRQIW  | 68    | 70    |
| >STK11-R304 KRFSIRQIRQ\ | 354   | >STK11-R304 KRFSIRQIWQ | 355   | 1     |
| >STK11-R304 KRFSIRQIR   | 36    | >STK11-R304 KRFSIRQIW  | 236   | 200   |
| >STK11-R304 KRFSIRQIRQ  | 153   | >STK11-R304 KRFSIRQIWQ | 159   | 6     |

|                         |       |                         |       |       |
|-------------------------|-------|-------------------------|-------|-------|
| >STK11-R304 KRFSIRQIRQI | 37    | >STK11-R304 KRFSIRQIWQ  | 30    | 7     |
| >STK11-R304 KRFSIRQIR   | 209   | >STK11-R304 KRFSIRQIW   | 132   | 77    |
| >STK11-R304 KRFSIRQIRQI | 160   | >STK11-R304 KRFSIRQIWQ  | 181   | 21    |
| >STK11-R304 KRFSIRQIR   | 450   | >STK11-R304 KRFSIRQIW   | 1420  | 970   |
| >STK11-R304 KRFSIRQIR   | 23380 | >STK11-R304 KRFSIRQIW   | 30    | 23350 |
| >STK11-R304 KRFSIRQIR   | 34    | >STK11-R304 KRFSIRQIW   | 21556 | 21522 |
| >STK11-R304 AKRFSIRQIR  | 239   | >STK11-R304 AKRFSIRQIW  | 25365 | 25126 |
| >STK11-R304 AKRFSIRQIR  | 128   | >STK11-R304 AKRFSIRQIW  | 44    | 84    |
| >STK11-R409 GRAPNPARK   | 300   | >STK11-R409 GWAPNPARK   | 19341 | 19041 |
| >STK11-R409 GRAPNPARK   | 126   | >STK11-R409 GWAPNPARK   | 23392 | 23266 |
| >STK11-R409 GRAPNPAR    | 7566  | >STK11-R409 GWAPNPAR    | 70    | 7496  |
| >STK11-R409 GRAPNPARK   | 32822 | >STK11-R409 GWAPNPARK   | 317   | 32505 |
| >STK11-R409 EGRAPNPAR   | 3354  | >STK11-R409 EGWAPNPAR   | 152   | 3202  |
| >STK11-R409 AEGRAPNPA   | 250   | >STK11-R409 AEGWAPNPA   | 388   | 138   |
| >STK11-R409 AEGRAPNPA   | 12    | >STK11-R409 AEGWAPNPA   | 7     | 5     |
| >STK11-R409 RAEGRAPNPA  | 123   | >STK11-R409 RAEGWAPNPA  | 120   | 3     |
| >STK11-R409 RAEGRAPNPA  | 761   | >STK11-R409 RAEGWAPNPA  | 414   | 347   |
| >STK11-R409 KSRAEGRA    | 11    | >STK11-R409 KSRAEGWA    | 12    | 1     |
| >STK11-R409 KSRAEGRAP   | 123   | >STK11-R409 KSRAEGWAP   | 226   | 103   |
| >STK11-R409 KSRAEGRAPN  | 26    | >STK11-R409 KSRAEGWAP   | 30    | 4     |
| >STK11-R409 KSRAEGRAPN  | 43    | >STK11-R409 KSRAEGWAP   | 67    | 24    |
| >STK11-R409 STKSRAEGRA  | 264   | >STK11-R409 STKSRAEGWA  | 273   | 9     |
| >STK11-R409 STKSRAEGR   | 41    | >STK11-R409 STKSRAEGW   | 18586 | 18545 |
| >STK11-R409 STKSRAEGR   | 20    | >STK11-R409 STKSRAEGW   | 19140 | 19120 |
| >STK11-R409 STKSRAEGR   | 15438 | >STK11-R409 STKSRAEGW   | 9     | 15429 |
| >STK11-R409 STKSRAEGR   | 25234 | >STK11-R409 STKSRAEGW   | 80    | 25154 |
| >STK11-R409 STKSRAEGR   | 2216  | >STK11-R409 STKSRAEGW   | 223   | 1993  |
| >STK11-R409 STKSRAEGRA  | 1117  | >STK11-R409 STKSRAEGWA  | 188   | 929   |
| >STK11-R409 LSTKSRAEGR  | 190   | >STK11-R409 LSTKSRAEGM  | 30455 | 30265 |
| >STK11-R409 LSTKSRAEGR  | 249   | >STK11-R409 LSTKSRAEGM  | 36888 | 36639 |
| >STK11-R409 LSTKSRAEGR  | 12709 | >STK11-R409 LSTKSRAEGM  | 7     | 12702 |
| >STK11-R409 LSTKSRAEGR  | 22433 | >STK11-R409 LSTKSRAEGM  | 49    | 22384 |
| >STK11-R409 LSTKSRAEGR  | 20170 | >STK11-R409 LSTKSRAEGM  | 14    | 20156 |
| >STK11-R409 LSTKSRAEGR  | 27225 | >STK11-R409 LSTKSRAEGM  | 249   | 26976 |
| >STK11-R426 RLSACKQQ    | 1091  | >STK11-R426 WLSACKQQ    | 227   | 864   |
| >STK11-R426 RRLSACKQ    | 351   | >STK11-R426 RWLSACKQ    | 17274 | 16923 |
| >STK11-R426 RRLSACKQ    | 326   | >STK11-R426 RWLSACKQ    | 19333 | 19007 |
| >STK11-R426 RRLSACKQ    | 12633 | >STK11-R426 RWLSACKQ    | 136   | 12497 |
| >STK11-R426 RRLSACKQ    | 30482 | >STK11-R426 RWLSACKQ    | 158   | 30324 |
| >STK11-R426 RRLSACKQQ   | 28077 | >STK11-R426 RWLSACKQQ   | 112   | 27965 |
| >STK11-R426 KACSASSKIRV | 18    | >STK11-R426 KACSASSKIRV | 13430 | 13412 |
| >STK11-R426 KACSASSKIRV | 413   | >STK11-R426 KACSASSKIRV | 36437 | 36024 |
| >STK11-R426 KACSASSKIRV | 10410 | >STK11-R426 KACSASSKIRV | 11    | 10399 |

|                         |       |                         |       |       |
|-------------------------|-------|-------------------------|-------|-------|
| >STK11-R426 KACSASSKIRF | 20303 | >STK11-R426 KACSASSKIRV | 68    | 20235 |
| >STK11-R426 KACSASSKIRF | 20705 | >STK11-R426 KACSASSKIRV | 17    | 20688 |
| >STK11-R426 KACSASSKIRF | 154   | >STK11-R426 KACSASSKIRV | 31623 | 31469 |
| >STK11-R426 IRRLSACK    | 259   | >STK11-R426 IRWLSACK    | 10665 | 10406 |
| >STK11-R426 IRRLSACK    | 1005  | >STK11-R426 IRWLSACK    | 52    | 953   |
| >STK11-R426 KIRRLSACK   | 49    | >STK11-R426 KIRWLSACK   | 44    | 5     |
| >STK11-R426 KIRRLSACK   | 629   | >STK11-R426 KIRWLSACK   | 247   | 382   |
| >STK11-R426 KIRRLSAC    | 48    | >STK11-R426 KIRWLSAC    | 318   | 270   |
| >STK11-R426 KIRRLSACK   | 3     | >STK11-R426 KIRWLSACK   | 4     | 1     |
| >STK11-R426 KIRRLSACKQ  | 16    | >STK11-R426 KIRWLSACKC  | 60    | 44    |
| >STK11-R426 KIRRLSACKQ  | 33    | >STK11-R426 KIRWLSACKC  | 140   | 107   |
| >STK11-R426 KIRRLSACK   | 51    | >STK11-R426 KIRWLSACK   | 44    | 7     |
| >STK11-R426 SKIRRLSA    | 495   | >STK11-R426 SKIRWLSA    | 512   | 17    |
| >STK11-R426 SSKIRRLSACK | 89    | >STK11-R426 SSKIRWLSAC  | 78    | 11    |
| >STK11-R426 SSKIRRLS    | 303   | >STK11-R426 SSKIRWLS    | 388   | 85    |
| >STK11-R426 SSKIRRLSA   | 8     | >STK11-R426 SSKIRWLSA   | 7     | 1     |
| >STK11-R426 SSKIRRLSACK | 5     | >STK11-R426 SSKIRWLSAC  | 6     | 1     |
| >STK11-R426 SSKIRRLSACK | 143   | >STK11-R426 SSKIRWLSAC  | 144   | 1     |
| >STK11-R426 SSKIRRLSA   | 31    | >STK11-R426 SSKIRWLSA   | 107   | 76    |
| >STK11-R426 SSKIRRLSACK | 979   | >STK11-R426 SSKIRWLSAC  | 310   | 669   |
| >STK11-R426 ASSKIRRLSA  | 209   | >STK11-R426 ASSKIRWLSA  | 215   | 6     |
| >STK11-R426 ASSKIRRL    | 183   | >STK11-R426 ASSKIRWL    | 198   | 15    |
| >STK11-R426 ASSKIRRL    | 217   | >STK11-R426 ASSKIRWL    | 1153  | 936   |
| >STK11-R426 SASSKIRR    | 83    | >STK11-R426 SASSKIRW    | 20646 | 20563 |
| >STK11-R426 SASSKIRR    | 65    | >STK11-R426 SASSKIRW    | 26523 | 26458 |
| >STK11-R426 SASSKIRRLSA | 406   | >STK11-R426 SASSKIRWLSA | 876   | 470   |
| >STK11-R426 SASSKIRR    | 18272 | >STK11-R426 SASSKIRW    | 51    | 18221 |
| >STK11-R426 SASSKIRR    | 34853 | >STK11-R426 SASSKIRW    | 405   | 34448 |
| >STK11-R426 SASSKIRR    | 24531 | >STK11-R426 SASSKIRW    | 174   | 24357 |
| >STK11-R426 SASSKIRR    | 23131 | >STK11-R426 SASSKIRW    | 113   | 23018 |
| >STK11-R426 CSASSKIRR   | 120   | >STK11-R426 CSASSKIRW   | 20496 | 20376 |
| >STK11-R426 CSASSKIRR   | 28    | >STK11-R426 CSASSKIRW   | 19439 | 19411 |
| >STK11-R426 CSASSKIRR   | 18570 | >STK11-R426 CSASSKIRW   | 11    | 18559 |
| >STK11-R426 CSASSKIRRL  | 190   | >STK11-R426 CSASSKIRWL  | 278   | 88    |
| >STK11-R426 CSASSKIRR   | 23120 | >STK11-R426 CSASSKIRW   | 67    | 23053 |
| >STK11-R426 CSASSKIRR   | 20937 | >STK11-R426 CSASSKIRW   | 14    | 20923 |
| >STK11-R426 CSASSKIRRL  | 972   | >STK11-R426 CSASSKIRWL  | 164   | 808   |
| >STK11-R426 CSASSKIRRL  | 420   | >STK11-R426 CSASSKIRWL  | 1068  | 648   |
| >STK11-R426 ACSASSKIRR  | 146   | >STK11-R426 ACSASSKIRW  | 26445 | 26299 |
| >STK11-R426 ACSASSKIRR  | 24350 | >STK11-R426 ACSASSKIRW  | 339   | 24011 |
| >STK11-R86C RRIPNGEANV  | 239   | >STK11-R86C GRIPNGEANV  | 1682  | 1443  |
| >STK11-R86C RRIPNGEA    | 398   | >STK11-R86C GRIPNGEA    | 3701  | 3303  |
| >STK11-R86C RRIPNGEANV  | 65    | >STK11-R86C GRIPNGEANV  | 517   | 452   |

|                         |      |                         |       |       |
|-------------------------|------|-------------------------|-------|-------|
| >STK11-R86C RRIPNGEANV  | 76   | >STK11-R86C GRIPNGEANV  | 603   | 527   |
| >STK11-R86C RRIPNGEA    | 193  | >STK11-R86C GRIPNGEA    | 17100 | 16907 |
| >STK11-R86C RRIPNGEANV  | 124  | >STK11-R86C GRIPNGEANV  | 3753  | 3629  |
| >STK11-R86C RRIPNGEANV  | 86   | >STK11-R86C GRIPNGEANV  | 1353  | 1267  |
| >STK11-R86C RRIPNGEANV  | 202  | >STK11-R86C GRIPNGEANV  | 569   | 367   |
| >STK11-R86C AVKILKKKKLR | 17   | >STK11-R86C AVKILKKKKLC | 16646 | 16629 |
| >STK11-R86C KLRRIPNGEA  | 448  | >STK11-R86C KLGRIPNGEA  | 404   | 44    |
| >STK11-R86C KLRRIPNGEA  | 1143 | >STK11-R86C KLGRIPNGEA  | 116   | 1027  |
| >STK11-R86C KLRRIPNGEA  | 569  | >STK11-R86C KLGRIPNGEA  | 274   | 295   |
| >STK11-R86C KLRRIPNG    | 19   | >STK11-R86C KLGRIPNG    | 8293  | 8274  |
| >STK11-R86C KLRRIPNGEA  | 10   | >STK11-R86C KLGRIPNGEA  | 5858  | 5848  |
| >STK11-R86C LKKKKLRR    | 408  | >STK11-R86C LKKKKLGRI   | 1492  | 1084  |
| >STK11-R86C ILKKKKLRR   | 395  | >STK11-R86C ILKKKKLGRI  | 205   | 190   |
| >STK11-R86C ILKKKKLR    | 23   | >STK11-R86C ILKKKKLG    | 19194 | 19171 |
| >STK11-R86C ILKKKKLRR   | 32   | >STK11-R86C ILKKKKLGR   | 63    | 31    |
| >STK11-R86C ILKKKKLR    | 355  | >STK11-R86C ILKKKKLG    | 34374 | 34019 |
| >STK11-R86C ILKKKKLR    | 273  | >STK11-R86C ILKKKKLG    | 33070 | 32797 |
| >STK11-R86C ILKKKKLRR   | 178  | >STK11-R86C ILKKKKLGR   | 155   | 23    |
| >STK11-R86C KILKKKKLRR  | 425  | >STK11-R86C KILKKKKLGR  | 318   | 107   |
| >STK11-R86C KILKKKKLR   | 15   | >STK11-R86C KILKKKKLG   | 14154 | 14139 |
| >STK11-R86C KILKKKKLRR  | 11   | >STK11-R86C KILKKKKLGR  | 11    | 0     |
| >STK11-R86C KILKKKKLR   | 27   | >STK11-R86C KILKKKKLG   | 14616 | 14589 |
| >STK11-R86C KILKKKKLRR  | 17   | >STK11-R86C KILKKKKLGR  | 25    | 8     |
| >STK11-R87K RIPNGEANV   | 150  | >STK11-R87K KIPNGEANV   | 144   | 6     |
| >STK11-R87K RIPNGEANV   | 518  | >STK11-R87K KIPNGEANV   | 299   | 219   |
| >STK11-R87K RIPNGEANV   | 78   | >STK11-R87K KIPNGEANV   | 77    | 1     |
| >STK11-R87K RIPNGEANV   | 114  | >STK11-R87K KIPNGEANV   | 61    | 53    |
| >STK11-R87K RIPNGEANV   | 14   | >STK11-R87K KIPNGEANV   | 12    | 2     |
| >STK11-R87K RIPNGEANVK  | 245  | >STK11-R87K KIPNGEANVK  | 239   | 6     |
| >STK11-R87K RIPNGEANVK  | 285  | >STK11-R87K KIPNGEANVK  | 432   | 147   |
| >STK11-R87K RIPNGEANVK  | 364  | >STK11-R87K KIPNGEANVK  | 517   | 153   |
| >STK11-R87K RRIPNGEA    | 1910 | >STK11-R87K RKIPNGEA    | 376   | 1534  |
| >STK11-R87K RRIPNGEAN   | 2151 | >STK11-R87K RKIPNGEAN   | 427   | 1724  |
| >STK11-R87K RRIPNGEANV  | 239  | >STK11-R87K RKIPNGEANV  | 33    | 206   |
| >STK11-R87K RRIPNGEANV  | 617  | >STK11-R87K RKIPNGEANV  | 93    | 524   |
| >STK11-R87K RRIPNGEA    | 398  | >STK11-R87K RKIPNGEA    | 12955 | 12557 |
| >STK11-R87K RRIPNGEANV  | 65   | >STK11-R87K RKIPNGEANV  | 5092  | 5027  |
| >STK11-R87K RRIPNGEANV  | 76   | >STK11-R87K RKIPNGEANV  | 3967  | 3891  |
| >STK11-R87K RRIPNGEA    | 193  | >STK11-R87K RKIPNGEA    | 8319  | 8126  |
| >STK11-R87K RRIPNGEANV  | 124  | >STK11-R87K RKIPNGEANV  | 3434  | 3310  |
| >STK11-R87K RRIPNGEANV  | 86   | >STK11-R87K RKIPNGEANV  | 3245  | 3159  |
| >STK11-R87K RRIPNGEANV  | 202  | >STK11-R87K RKIPNGEANV  | 4350  | 4148  |
| >STK11-R87K KLRRIPNGEA  | 448  | >STK11-R87K KLRRIPNGEA  | 545   | 97    |



|                         |       |                         |       |       |
|-------------------------|-------|-------------------------|-------|-------|
| >STK11-R87K KLRRIPNG    | 19    | >STK11-R87K KLRKIPNG    | 36    | 17    |
| >STK11-R87K KLRRIPNGEA  | 10    | >STK11-R87K KLRKIPNGEA  | 14    | 4     |
| >STK11-R87K KKKKLRRI    | 571   | >STK11-R87K KKKKLRKI    | 357   | 214   |
| >STK11-R87K LKKKLRRI    | 408   | >STK11-R87K LKKKLRKI    | 523   | 115   |
| >STK11-R87K ILKKKLRRI   | 395   | >STK11-R87K ILKKKLRKI   | 302   | 93    |
| >STK11-R87K ILKKKLR     | 619   | >STK11-R87K ILKKKLRK    | 58    | 561   |
| >STK11-R87K ILKKKLR     | 4880  | >STK11-R87K ILKKKLRK    | 78    | 4802  |
| >STK11-R87K ILKKKLR     | 32    | >STK11-R87K ILKKKLRK    | 801   | 769   |
| >STK11-R87K ILKKKLR     | 178   | >STK11-R87K ILKKKLRK    | 2798  | 2620  |
| >STK11-R87K KILKKKLR    | 425   | >STK11-R87K KILKKKLRK   | 27    | 398   |
| >STK11-R87K KILKKKLR    | 3133  | >STK11-R87K KILKKKLRK   | 225   | 2908  |
| >STK11-R87K KILKKKLR    | 2325  | >STK11-R87K KILKKKLRK   | 27    | 2298  |
| >STK11-R87K KILKKKLR    | 11    | >STK11-R87K KILKKKLRK   | 129   | 118   |
| >STK11-R87K KILKKKLRRI  | 811   | >STK11-R87K KILKKKLRKI  | 495   | 316   |
| >STK11-R87K KILKKKLR    | 17    | >STK11-R87K KILKKKLRK   | 156   | 139   |
| >STK11-S216 SPAFQPPE    | 3076  | >STK11-S216 FPAFQPPE    | 187   | 2889  |
| >STK11-S216 SPAFQPPEI   | 2400  | >STK11-S216 FPAFQPPEI   | 138   | 2262  |
| >STK11-S216 SPAFQPPEIA  | 3164  | >STK11-S216 FPAFQPPEIA  | 132   | 3032  |
| >STK11-S216 SPAFQPPEIAI | 1288  | >STK11-S216 FPAFQPPEIAI | 83    | 1205  |
| >STK11-S216 SPAFQPPEI   | 732   | >STK11-S216 FPAFQPPEI   | 50    | 682   |
| >STK11-S216 SPAFQPPEI   | 612   | >STK11-S216 FPAFQPPEI   | 28    | 584   |
| >STK11-S216 SPAFQPPE    | 5367  | >STK11-S216 FPAFQPPE    | 89    | 5278  |
| >STK11-S216 SPAFQPPEI   | 7680  | >STK11-S216 FPAFQPPEI   | 54    | 7626  |
| >STK11-S216 SPAFQPPEIA  | 436   | >STK11-S216 FPAFQPPEIA  | 24    | 412   |
| >STK11-S216 SPAFQPPEIAI | 4712  | >STK11-S216 FPAFQPPEIAI | 63    | 4649  |
| >STK11-S216 GSPAFQPPEI  | 13624 | >STK11-S216 GFPAFQPPEI  | 192   | 13432 |
| >STK11-S216 GSPAFQPPEI  | 54    | >STK11-S216 GFPAFQPPEI  | 3960  | 3906  |
| >STK11-S216 GSPAFQPPEI  | 428   | >STK11-S216 GFPAFQPPEI  | 18248 | 17820 |
| >STK11-S216 GSPAFQPPEI  | 57    | >STK11-S216 GFPAFQPPEI  | 10095 | 10038 |
| >STK11-S216 QGSPAFQPPEI | 751   | >STK11-S216 QGFPAFQPPEI | 138   | 613   |
| >STK11-S216 TSQGSPAF    | 681   | >STK11-S216 TSQGFPF     | 412   | 269   |
| >STK11-S216 TSQGSPAF    | 853   | >STK11-S216 TSQGFPF     | 296   | 557   |
| >STK11-S216 TSQGSPAF    | 232   | >STK11-S216 TSQGFPF     | 427   | 195   |
| >STK11-S216 TSQGSPAF    | 235   | >STK11-S216 TSQGFPF     | 228   | 7     |
| >STK11-S216 TSQGSPAF    | 9     | >STK11-S216 TSQGFPF     | 39    | 30    |
| >STK11-S216 TSQGSPAF    | 132   | >STK11-S216 TSQGFPF     | 143   | 11    |
| >STK11-S216 RTSQGSPA    | 1843  | >STK11-S216 RTSQGFPA    | 132   | 1711  |
| >STK11-S216 RTSQGSPAF   | 2165  | >STK11-S216 RTSQGFPAF   | 255   | 1910  |
| >STK11-S216 RTSQGSPAF   | 367   | >STK11-S216 RTSQGFPAF   | 44    | 323   |
| >STK11-S216 RTSQGSPAF   | 665   | >STK11-S216 RTSQGFPAF   | 159   | 506   |
| >STK11-S216 RTSQGSPA    | 85    | >STK11-S216 RTSQGFPA    | 89    | 4     |
| >STK11-S216 RTSQGSPAFC  | 194   | >STK11-S216 RTSQGFPAFC  | 288   | 94    |
| >STK11-S216 RTSQGSPA    | 430   | >STK11-S216 RTSQGFPAF   | 387   | 43    |

|                        |       |                         |       |       |
|------------------------|-------|-------------------------|-------|-------|
| >STK11-S216 RTSQGSPAF  | 31    | >STK11-S216 RTSQGFPAPF  | 43    | 12    |
| >STK11-S216 RTSQGSPAF  | 32    | >STK11-S216 RTSQGFPAPF  | 33    | 1     |
| >STK11-S216 RTSQGSPAF  | 20    | >STK11-S216 RTSQGFPAPF  | 16    | 4     |
| >STK11-S216 RTSQGSPA   | 150   | >STK11-S216 RTSQGFPA    | 433   | 283   |
| >STK11-S216 RTSQGSPAF  | 3     | >STK11-S216 RTSQGFPAPF  | 4     | 1     |
| >STK11-S216 RTSQGSPAFC | 152   | >STK11-S216 RTSQGFPAPFC | 844   | 692   |
| >STK11-S216 RTSQGSPAF  | 251   | >STK11-S216 RTSQGFPAPF  | 640   | 389   |
| >STK11-S216 RTSQGSPAF  | 26    | >STK11-S216 RTSQGFPAPF  | 37    | 11    |
| >STK11-S216 RTSQGSPAF  | 547   | >STK11-S216 RTSQGFPAPF  | 127   | 420   |
| >STK11-S216 RTSQGSPAF  | 17    | >STK11-S216 RTSQGFPAPF  | 14    | 3     |
| >STK11-S216 RTSQGSPAFC | 159   | >STK11-S216 RTSQGFPAPFC | 224   | 65    |
| >STK11-S216 CRTSQGSPAF | 19    | >STK11-S216 CRTSQGFPAF  | 28    | 9     |
| >STK11-S216 CRTSQGSPAF | 170   | >STK11-S216 CRTSQGFPAF  | 74    | 96    |
| >STK11-S216 TCRTSQGSPA | 172   | >STK11-S216 TCRTSQGFPA  | 100   | 72    |
| >STK11-S216 TCRTSQGSPA | 163   | >STK11-S216 TCRTSQGFPA  | 167   | 4     |
| >STK11-S216 TCRTSQGSPA | 554   | >STK11-S216 TCRTSQGFPA  | 499   | 55    |
| >STK11-S216 DTCRTSQGS  | 11173 | >STK11-S216 DTCRTSQGF   | 78    | 11095 |
| >STK11-S216 DTCRTSQGS  | 11860 | >STK11-S216 DTCRTSQGF   | 128   | 11732 |
| >STK11-S216 DTCRTSQGS  | 19921 | >STK11-S216 DTCRTSQGF   | 69    | 19852 |
| >STK11-S216 SPAFQPPEIA | 436   | >STK11-S216 PPAFQPPEIA  | 13411 | 12975 |
| >STK11-S216 GSPAFQPPEI | 27845 | >STK11-S216 GPPAFQPPEI  | 161   | 27684 |
| >STK11-S216 GSPAFQPPEI | 54    | >STK11-S216 GPPAFQPPEI  | 2121  | 2067  |
| >STK11-S216 GSPAFQPPEI | 428   | >STK11-S216 GPPAFQPPEI  | 13283 | 12855 |
| >STK11-S216 GSPAFQPPEI | 57    | >STK11-S216 GPPAFQPPEI  | 7117  | 7060  |
| >STK11-S216 QGSPAFQPPI | 21178 | >STK11-S216 QGPPAFQPPI  | 407   | 20771 |
| >STK11-S216 QGSPAFQPPI | 13737 | >STK11-S216 QGPPAFQPPI  | 472   | 13265 |
| >STK11-S216 TSQGSPAF   | 681   | >STK11-S216 TSQGPPAF    | 293   | 388   |
| >STK11-S216 TSQGSPAF   | 232   | >STK11-S216 TSQGPPAF    | 890   | 658   |
| >STK11-S216 TSQGSPAF   | 235   | >STK11-S216 TSQGPPAF    | 509   | 274   |
| >STK11-S216 TSQGSPAF   | 9     | >STK11-S216 TSQGPPAF    | 22    | 13    |
| >STK11-S216 TSQGSPAF   | 132   | >STK11-S216 TSQGPPAF    | 190   | 58    |
| >STK11-S216 RTSQGSPAF  | 367   | >STK11-S216 RTSQGPPAF   | 901   | 534   |
| >STK11-S216 RTSQGSPAF  | 665   | >STK11-S216 RTSQGPPAF   | 389   | 276   |
| >STK11-S216 RTSQGSPA   | 85    | >STK11-S216 RTSQGPPA    | 50    | 35    |
| >STK11-S216 RTSQGSPAFC | 194   | >STK11-S216 RTSQGPPAFC  | 467   | 273   |
| >STK11-S216 RTSQGSPAF  | 430   | >STK11-S216 RTSQGPPAF   | 754   | 324   |
| >STK11-S216 RTSQGSPAF  | 31    | >STK11-S216 RTSQGPPAF   | 29    | 2     |
| >STK11-S216 RTSQGSPAF  | 32    | >STK11-S216 RTSQGPPAF   | 80    | 48    |
| >STK11-S216 RTSQGSPAF  | 20    | >STK11-S216 RTSQGPPAF   | 21    | 1     |
| >STK11-S216 RTSQGSPA   | 150   | >STK11-S216 RTSQGPPA    | 363   | 213   |
| >STK11-S216 RTSQGSPAF  | 3     | >STK11-S216 RTSQGPPAF   | 4     | 1     |
| >STK11-S216 RTSQGSPAFC | 152   | >STK11-S216 RTSQGPPAFC  | 434   | 282   |
| >STK11-S216 RTSQGSPAF  | 251   | >STK11-S216 RTSQGPPAF   | 711   | 460   |

|                        |       |                        |     |       |
|------------------------|-------|------------------------|-----|-------|
| >STK11-S216 RTSQGSPAF  | 26    | >STK11-S216 RTSQGPPAF  | 25  | 1     |
| >STK11-S216 RTSQGSPAF  | 17    | >STK11-S216 RTSQGPPAF  | 38  | 21    |
| >STK11-S216 RTSQGSPAFC | 159   | >STK11-S216 RTSQGPPAFC | 163 | 4     |
| >STK11-S216 CRTSQGSPAF | 19    | >STK11-S216 CRTSQGPPAF | 27  | 8     |
| >STK11-S216 CRTSQGSPAF | 170   | >STK11-S216 CRTSQGPPAF | 49  | 121   |
| >STK11-S216 TCRTSQGSPA | 172   | >STK11-S216 TCRTSQGPPA | 53  | 119   |
| >STK11-S216 TCRTSQGSPA | 163   | >STK11-S216 TCRTSQGPPA | 178 | 15    |
| >STK11-T367 TVPGQVPEEE | 2819  | >STK11-T367 MVPGQVPEE  | 272 | 2547  |
| >STK11-T367 TVPGQVPEEE | 118   | >STK11-T367 MVPGQVPEE  | 38  | 80    |
| >STK11-T367 FTVPGQVPE  | 3351  | >STK11-T367 FMVPGQVPE  | 437 | 2914  |
| >STK11-T367 FTVPGQVPE  | 23421 | >STK11-T367 FMVPGQVPE  | 272 | 23149 |
| >STK11-T367 FTVPGQVPEE | 17557 | >STK11-T367 FMVPGQVPE  | 82  | 17475 |
| >STK11-T367 QDFTVPGQV  | 554   | >STK11-T367 QDFMVPGQ\  | 416 | 138   |
| >STK11-T367 QDFTVPGQV  | 181   | >STK11-T367 QDFMVPGQ\  | 369 | 188   |
| >STK11-T367 QDFTVPGQV  | 284   | >STK11-T367 QDFMVPGQ\  | 229 | 55    |
| >STK11-T367 TQDFTVPGQ' | 151   | >STK11-T367 TQDFMVPGC  | 271 | 120   |
| >STK11-T367 TQDFTVPGQ' | 498   | >STK11-T367 TQDFMVPGC  | 711 | 213   |
| >STK11-T367 YTQDFTVPGC | 109   | >STK11-T367 YTQDFMVPG  | 112 | 3     |
| >STK11-T367 YTQDFTVPGC | 167   | >STK11-T367 YTQDFMVPG  | 201 | 34    |
| >STK11-T367 YTQDFTVPGC | 29    | >STK11-T367 YTQDFMVPG  | 26  | 3     |
| >STK11-T367 YTQDFTVPGC | 152   | >STK11-T367 YTQDFMVPG  | 126 | 26    |
| >STK11-T367 YTQDFTVPGC | 6     | >STK11-T367 YTQDFMVPG  | 6   | 0     |
| >STK11-T367 YTQDFTVPGC | 107   | >STK11-T367 YTQDFMVPG  | 160 | 53    |
| >STK11-T367 YTQDFTVPGC | 101   | >STK11-T367 YTQDFMVPG  | 126 | 25    |
| >STK11-T367 YTQDFTVPGC | 211   | >STK11-T367 YTQDFMVPG  | 715 | 504   |
| >STK11-T367 YTQDFTVPGC | 13    | >STK11-T367 YTQDFMVPG  | 13  | 0     |
| >STK11-T367 YTQDFTVPGC | 16    | >STK11-T367 YTQDFMVPG  | 18  | 2     |
| >STK11-T367 YTQDFTVPGC | 11    | >STK11-T367 YTQDFMVPG  | 12  | 1     |
| >STK11-T367 YTQDFTVPGC | 439   | >STK11-T367 YTQDFMVPG  | 231 | 208   |
| >STK11-T367 YTQDFTVPGC | 190   | >STK11-T367 YTQDFMVPG  | 105 | 85    |
| >STK11-T367 IYTQDFTV   | 156   | >STK11-T367 IYTQDFMV   | 372 | 216   |
| >STK11-T367 IYTQDFTV   | 490   | >STK11-T367 IYTQDFMV   | 757 | 267   |
| >STK11-T367 IYTQDFTV   | 241   | >STK11-T367 IYTQDFMV   | 132 | 109   |
| >STK11-T367 IITYQDFTV  | 28    | >STK11-T367 IITYQDFMV  | 32  | 4     |
| >STK11-T367 IITYQDFTV  | 68    | >STK11-T367 IITYQDFMV  | 55  | 13    |
| >STK11-T367 IITYQDFTV  | 39    | >STK11-T367 IITYQDFMV  | 67  | 28    |
| >STK11-T367 IITYQDFTV  | 11    | >STK11-T367 IITYQDFMV  | 17  | 6     |
| >STK11-T367 IITYQDFTV  | 7     | >STK11-T367 IITYQDFMV  | 8   | 1     |
| >STK11-T367 IITYQDFTV  | 13    | >STK11-T367 IITYQDFMV  | 81  | 68    |
| >STK11-T367 IITYQDFTV  | 9     | >STK11-T367 IITYQDFMV  | 10  | 1     |
| >STK11-T367 IITYQDFTV  | 89    | >STK11-T367 IITYQDFMV  | 210 | 121   |
| >STK11-T367 IITYQDFTV  | 6     | >STK11-T367 IITYQDFMV  | 10  | 4     |
| >STK11-T367 IITYQDFTV  | 442   | >STK11-T367 IITYQDFMV  | 408 | 34    |

|                         |       |                        |      |       |
|-------------------------|-------|------------------------|------|-------|
| >STK11-T367 DIIYTQDFTV  | 437   | >STK11-T367 DIIYTQDFMV | 645  | 208   |
| >STK11-T367 DIIYTQDFT   | 883   | >STK11-T367 DIIYTQDFM  | 4    | 879   |
| >STK11-T367 DIIYTQDFTV  | 136   | >STK11-T367 DIIYTQDFMV | 76   | 60    |
| >STK11-T367 DDIIYTQDFTV | 53    | >STK11-T367 DDIIYTQDFM | 60   | 7     |
| >STK11-V66M VLDSETLCRR, | 1608  | >STK11-V66M MLDSETLCRR | 347  | 1261  |
| >STK11-V66M VLDSETLCRR, | 2253  | >STK11-V66M MLDSETLCRR | 222  | 2031  |
| >STK11-V66M VLDSETLC    | 289   | >STK11-V66M MLDSETLC   | 137  | 152   |
| >STK11-V66M VLDSETLCRR, | 216   | >STK11-V66M MLDSETLCRR | 105  | 111   |
| >STK11-V66M VLDSETLC    | 94    | >STK11-V66M MLDSETLC   | 36   | 58    |
| >STK11-V66M VLDSETLCRR, | 122   | >STK11-V66M MLDSETLCRR | 51   | 71    |
| >STK11-V66M VLDSETLCRR  | 1198  | >STK11-V66M MLDSETLCRR | 275  | 923   |
| >STK11-V66M VLDSETLCR   | 3426  | >STK11-V66M MLDSETLCR  | 231  | 3195  |
| >STK11-V66M VLDSETLCRR  | 5461  | >STK11-V66M MLDSETLCRR | 406  | 5055  |
| >STK11-V66M VLDSETLCR   | 1353  | >STK11-V66M MLDSETLCR  | 358  | 995   |
| >STK11-V66M VLDSETLCRR  | 1444  | >STK11-V66M MLDSETLCRR | 389  | 1055  |
| >STK11-V66M EVLDSETL    | 4217  | >STK11-V66M EMLDSETL   | 454  | 3763  |
| >STK11-V66M EVLDSETL    | 1394  | >STK11-V66M EMLDSETL   | 12   | 1382  |
| >STK11-V66M EVLDSETL    | 4133  | >STK11-V66M EMLDSETL   | 23   | 4110  |
| >STK11-V66M EVLDSETL    | 3202  | >STK11-V66M EMLDSETL   | 26   | 3176  |
| >STK11-V66M EVLDSETL    | 631   | >STK11-V66M EMLDSETL   | 7    | 624   |
| >STK11-V66M EVLDSETL    | 971   | >STK11-V66M EMLDSETL   | 10   | 961   |
| >STK11-V66M EVLDSETLC   | 12363 | >STK11-V66M EMLDSETLC  | 217  | 12146 |
| >STK11-V66M EVLDSETL    | 195   | >STK11-V66M EMLDSETL   | 5173 | 4978  |
| >STK11-V66M EVLDSETLCR  | 521   | >STK11-V66M EMLDSETLCR | 271  | 250   |
| >STK11-V66M EVLDSETLCRI | 1555  | >STK11-V66M EMLDSETLCR | 467  | 1088  |
| >STK11-V66M EVLDSETLCR  | 70    | >STK11-V66M EMLDSETLCR | 50   | 20    |
| >STK11-V66M EVLDSETLCRI | 79    | >STK11-V66M EMLDSETLCR | 51   | 28    |
| >STK11-V66M EVLDSETLCR  | 42    | >STK11-V66M EMLDSETLCR | 156  | 114   |
| >STK11-V66M EVLDSETLCRI | 8     | >STK11-V66M EMLDSETLCR | 53   | 45    |
| >STK11-V66M EVLDSETL    | 176   | >STK11-V66M EMLDSETL   | 5159 | 4983  |
| >STK11-V66M EVLDSETL    | 27    | >STK11-V66M EMLDSETL   | 109  | 82    |
| >STK11-V66M EVLDSETL    | 10763 | >STK11-V66M EMLDSETL   | 470  | 10293 |
| >STK11-V66M EVLDSETLCR  | 411   | >STK11-V66M EMLDSETLCR | 115  | 296   |
| >STK11-V66M EVLDSETLCRI | 330   | >STK11-V66M EMLDSETLCR | 81   | 249   |
| >STK11-V66M GEGSYGKVKE  | 208   | >STK11-V66M GEGSYGKVKE | 666  | 458   |
| >STK11-V66M GEGSYGKVKE  | 602   | >STK11-V66M GEGSYGKVKE | 488  | 114   |
| >STK11-V66M GEGSYGKVKE  | 1020  | >STK11-V66M GEGSYGKVKE | 498  | 522   |
| >STK11-V66M GEGSYGKVKE  | 208   | >STK11-V66M GEGSYGKVKE | 2731 | 2523  |
| >STK11-V66M GEGSYGKVKE  | 102   | >STK11-V66M GEGSYGKVKE | 440  | 338   |
| >STK11-V66M KEVLDSETL   | 2465  | >STK11-V66M KEMLDSETL  | 243  | 2222  |
| >STK11-V66M KEVLDSETL   | 11    | >STK11-V66M KEMLDSETL  | 10   | 1     |
| >STK11-V66M KEVLDSET    | 333   | >STK11-V66M KEMLDSET   | 112  | 221   |
| >STK11-V66M KEVLDSETL   | 288   | >STK11-V66M KEMLDSETL  | 98   | 190   |

|                          |       |                          |       |       |
|--------------------------|-------|--------------------------|-------|-------|
| >STK11-V66M KEVLDSETL    | 1359  | >STK11-V66M KEMLDSETL    | 423   | 936   |
| >STK11-V66M KEVLDSET     | 1043  | >STK11-V66M KEMLDSET     | 192   | 851   |
| >STK11-V66M KEVLDSETL    | 25    | >STK11-V66M KEMLDSETL    | 9     | 16    |
| >STK11-V66M KEVLDSETLCF  | 208   | >STK11-V66M KEMLDSETLC   | 179   | 29    |
| >STK11-V66M KVKEVLDSETI  | 322   | >STK11-V66M KVKEMLDSETI  | 364   | 42    |
| >STK11-V66M KVKEVLDSETI  | 189   | >STK11-V66M KVKEMLDSETI  | 364   | 175   |
| >STK11-V66M KVKEVLDSETI  | 332   | >STK11-V66M KVKEMLDSETI  | 254   | 78    |
| >STK11-V66M KVKEVLDSETI  | 75    | >STK11-V66M KVKEMLDSETI  | 79    | 4     |
| >STK11-V66M SYGKVKVKEVL  | 26    | >STK11-V66M SYGKVKVKEML  | 40    | 14    |
| >STK11-V66M SYGKVKVKEV   | 138   | >STK11-V66M SYGKVKVKEML  | 58    | 80    |
| >STK11-V66M SYGKVKVKEVL  | 11    | >STK11-V66M SYGKVKVKEML  | 8     | 3     |
| >STK11-V66M GSYGKVKVKEV  | 349   | >STK11-V66M GSYGKVKVKEML | 11811 | 11462 |
| >STK11-V66M GSYGKVKVKEV  | 137   | >STK11-V66M GSYGKVKVKEML | 7     | 130   |
| >STK11-V66M GSYGKVKVKEVL | 85    | >STK11-V66M GSYGKVKVKEML | 58    | 27    |
| >STK11-V66M GSYGKVKVKEV  | 4188  | >STK11-V66M GSYGKVKVKEML | 228   | 3960  |
| >STK11-W30 WFRKKHPPA     | 102   | >STK11-W30 LFRKKHPPA     | 6     | 96    |
| >STK11-W30 WFRKKHPPA     | 893   | >STK11-W30 LFRKKHPPAE    | 25    | 868   |
| >STK11-W30 WFRKKHPPA     | 169   | >STK11-W30 LFRKKHPPA     | 155   | 14    |
| >STK11-W30 SWFRKKHPPA    | 22900 | >STK11-W30 SLFRKKHPPA    | 497   | 22403 |
| >STK11-W30 SWFRKKHPPA    | 15353 | >STK11-W30 SLFRKKHPPA    | 172   | 15181 |
| >STK11-W30 SWFRKKHPPA    | 14074 | >STK11-W30 SLFRKKHPPA    | 11    | 14063 |
| >STK11-W30 SWFRKKHPPA    | 19654 | >STK11-W30 SLFRKKHPPA    | 231   | 19423 |
| >STK11-W30 SWFRKKHPPA    | 17063 | >STK11-W30 SLFRKKHPPA    | 18    | 17045 |
| >STK11-W30 SWFRKKHPPA    | 24931 | >STK11-W30 SLFRKKHPPA    | 11    | 24920 |
| >STK11-W30 SWFRKKHPPA    | 297   | >STK11-W30 SLFRKKHPPA    | 169   | 128   |
| >STK11-W30 SWFRKKHPP     | 379   | >STK11-W30 SLFRKKHPP     | 29944 | 29565 |
| >STK11-W30 SWFRKKHPP     | 171   | >STK11-W30 SLFRKKHPP     | 24944 | 24773 |
| >STK11-W30 SWFRKKHPPA    | 37    | >STK11-W30 SLFRKKHPPA    | 8395  | 8358  |
| >STK11-W30 SWFRKKHPPA    | 144   | >STK11-W30 SLFRKKHPPA    | 27215 | 27071 |
| >STK11-W30 FSIRQIRQHSL   | 21757 | >STK11-W30 FSIRQIRQHSL   | 254   | 21503 |
| >STK11-W30 FSIRQIRQHSL   | 21344 | >STK11-W30 FSIRQIRQHSL   | 406   | 20938 |
| >STK11-W30 FSIRQIRQHSL   | 1173  | >STK11-W30 FSIRQIRQHSL   | 280   | 893   |
| >STK11-W30 FSIRQIRQHSL   | 6426  | >STK11-W30 FSIRQIRQHSL   | 236   | 6190  |
| >STK11-W30 FSIRQIRQHSL   | 1513  | >STK11-W30 FSIRQIRQHSL   | 369   | 1144  |
| >STK11-W30 FSIRQIRQHSL   | 6     | >STK11-W30 FSIRQIRQHSL   | 45    | 39    |
| >STK11-W30 FSIRQIRQHSL   | 200   | >STK11-W30 FSIRQIRQHSL   | 8264  | 8064  |
| >STK11-W30 FSIRQIRQHSL   | 34    | >STK11-W30 FSIRQIRQHSL   | 3649  | 3615  |
| >STK11-W30 FSIRQIRQHSL   | 11    | >STK11-W30 FSIRQIRQHSL   | 295   | 284   |
| >STK11-W30 FSIRQIRQHSL   | 38    | >STK11-W30 FSIRQIRQHSL   | 9839  | 9801  |
| >STK11-W30 HSWFRKKHPP    | 120   | >STK11-W30 HSLFRKKHPP    | 36    | 84    |
| >STK11-W30 RQHSLFRK      | 91    | >STK11-W30 RQHSLFRK      | 104   | 13    |
| >STK11-W30 RQHSLFRKK     | 106   | >STK11-W30 RQHSLFRKK     | 144   | 38    |
| >STK11-W30 RQHSLFRK      | 30    | >STK11-W30 RQHSLFRK      | 35    | 5     |

|                       |      |                        |      |      |
|-----------------------|------|------------------------|------|------|
| >STK11-W30 RQHSWFRKK  | 77   | >STK11-W30 RQHSLFRKK   | 114  | 37   |
| >STK11-W30 RQHSWFRK   | 11   | >STK11-W30 RQHSLFRK    | 13   | 2    |
| >STK11-W30 RQHSWFRKK  | 17   | >STK11-W30 RQHSLFRKK   | 14   | 3    |
| >STK11-W30 RQHSWFRK   | 14   | >STK11-W30 RQHSLFRK    | 18   | 4    |
| >STK11-W30 RQHSWFRKK  | 22   | >STK11-W30 RQHSLFRKK   | 31   | 9    |
| >STK11-W30 RQHSWFRK   | 366  | >STK11-W30 RQHSLFRK    | 476  | 110  |
| >STK11-W30 RQHSWFRKK  | 214  | >STK11-W30 RQHSLFRKK   | 264  | 50   |
| >STK11-W30 RQHSWFRKK  | 116  | >STK11-W30 RQHSLFRKKH  | 129  | 13   |
| >STK11-W30 RQHSWFRK   | 57   | >STK11-W30 RQHSLFRK    | 86   | 29   |
| >STK11-W30 RQHSWFRKK  | 33   | >STK11-W30 RQHSLFRKK   | 44   | 11   |
| >STK11-W30 RQHSWFRKK  | 449  | >STK11-W30 RQHSLFRKK   | 209  | 240  |
| >STK11-W30 RQHSWFRK   | 344  | >STK11-W30 RQHSLFRK    | 652  | 308  |
| >STK11-W30 RQHSWFRKK  | 349  | >STK11-W30 RQHSLFRKK   | 505  | 156  |
| >STK11-W30 IRQHSWFR   | 344  | >STK11-W30 IRQHSLFR    | 500  | 156  |
| >STK11-W30 IRQHSWFRK  | 91   | >STK11-W30 IRQHSLFRK   | 127  | 36   |
| >STK11-W30 IRQHSWFRKK | 71   | >STK11-W30 IRQHSLFRKK  | 124  | 53   |
| >STK11-W30 IRQHSWFRKK | 447  | >STK11-W30 IRQHSLFRKKI | 560  | 113  |
| >STK11-W30 IRQHSWFRK  | 440  | >STK11-W30 IRQHSLFRK   | 498  | 58   |
| >STK11-W30 IRQHSWFRKK | 277  | >STK11-W30 IRQHSLFRKK  | 317  | 40   |
| >STK11-W30 IRQHSWFRK  | 403  | >STK11-W30 IRQHSLFRK   | 2218 | 1815 |
| >STK11-W30 IRQHSWFR   | 196  | >STK11-W30 IRQHSLFR    | 408  | 212  |
| >STK11-W30 QIRQHSWFR  | 1277 | >STK11-W30 QIRQHSLFR   | 200  | 1077 |
| >STK11-W30 QIRQHSWFR  | 194  | >STK11-W30 QIRQHSLFRK  | 77   | 117  |
| >STK11-W30 QIRQHSWFR  | 180  | >STK11-W30 QIRQHSLFRK  | 159  | 21   |
| >STK11-W30 QIRQHSWFR  | 134  | >STK11-W30 QIRQHSLFRK  | 100  | 34   |
| >STK11-W30 QIRQHSWF   | 171  | >STK11-W30 QIRQHSLF    | 2238 | 2067 |
| >STK11-W30 QIRQHSWFR  | 147  | >STK11-W30 QIRQHSLFR   | 30   | 117  |
| >STK11-W30 QIRQHSWFR  | 8    | >STK11-W30 QIRQHSLFRK  | 9    | 1    |
| >STK11-W30 QIRQHSWFR  | 15   | >STK11-W30 QIRQHSLFRK  | 12   | 3    |
| >STK11-W30 QIRQHSWFR  | 25   | >STK11-W30 QIRQHSLFR   | 165  | 140  |
| >STK11-W30 QIRQHSWFR  | 143  | >STK11-W30 QIRQHSLFRK  | 165  | 22   |
| >STK11-W30 QIRQHSWFR  | 35   | >STK11-W30 QIRQHSLFR   | 305  | 270  |
| >STK11-W30 QIRQHSWFR  | 135  | >STK11-W30 QIRQHSLFR   | 378  | 243  |
| >STK11-W30 QIRQHSWFR  | 593  | >STK11-W30 QIRQHSLFRK  | 481  | 112  |
| >STK11-W30 QIRQHSWF   | 326  | >STK11-W30 QIRQHSLF    | 149  | 177  |
| >STK11-W30 QIRQHSWF   | 638  | >STK11-W30 QIRQHSLF    | 452  | 186  |
| >STK11-W30 QIRQHSWF   | 447  | >STK11-W30 QIRQHSLF    | 179  | 268  |
| >STK11-W30 QIRQHSWF   | 132  | >STK11-W30 QIRQHSLF    | 191  | 59   |
| >STK11-W30 QIRQHSWFR  | 41   | >STK11-W30 QIRQHSLFR   | 49   | 8    |
| >STK11-W30 RQIRQHSW   | 8673 | >STK11-W30 RQIRQHSL    | 45   | 8628 |
| >STK11-W30 RQIRQHSWF  | 587  | >STK11-W30 RQIRQHSLFR  | 247  | 340  |
| >STK11-W30 RQIRQHSWF  | 142  | >STK11-W30 RQIRQHSLFR  | 120  | 22   |
| >STK11-W30 RQIRQHSWF  | 565  | >STK11-W30 RQIRQHSLFR  | 322  | 243  |

|                       |       |                        |       |       |
|-----------------------|-------|------------------------|-------|-------|
| >STK11-W30 RQIRQHSWF  | 34    | >STK11-W30 RQIRQHSLFR  | 28    | 6     |
| >STK11-W30 RQIRQHSWF  | 458   | >STK11-W30 RQIRQHSLF   | 134   | 324   |
| >STK11-W30 RQIRQHSWF  | 393   | >STK11-W30 RQIRQHSLF   | 3565  | 3172  |
| >STK11-W30 RQIRQHSWF  | 874   | >STK11-W30 RQIRQHSLFR  | 259   | 615   |
| >STK11-W30 RQIRQHSWF  | 25    | >STK11-W30 RQIRQHSLFR  | 39    | 14    |
| >STK11-W30 RQIRQHSWF  | 10    | >STK11-W30 RQIRQHSLFR  | 23    | 13    |
| >STK11-W30 RQIRQHSWF  | 21    | >STK11-W30 RQIRQHSLFR  | 22    | 1     |
| >STK11-W30 RQIRQHSW   | 297   | >STK11-W30 RQIRQHSL    | 397   | 100   |
| >STK11-W30 RQIRQHSW   | 132   | >STK11-W30 RQIRQHSL    | 96    | 36    |
| >STK11-W30 RQIRQHSWF  | 58    | >STK11-W30 RQIRQHSLF   | 39    | 19    |
| >STK11-W30 RQIRQHSW   | 32    | >STK11-W30 RQIRQHSL    | 10    | 22    |
| >STK11-W30 RQIRQHSWF  | 3     | >STK11-W30 RQIRQHSLF   | 2     | 1     |
| >STK11-W30 RQIRQHSWF  | 170   | >STK11-W30 RQIRQHSLFR  | 94    | 76    |
| >STK11-W30 RQIRQHSWF  | 374   | >STK11-W30 RQIRQHSLFR  | 382   | 8     |
| >STK11-W30 RQIRQHSW   | 369   | >STK11-W30 RQIRQHSL    | 7130  | 6761  |
| >STK11-W30 RQIRQHSWF  | 360   | >STK11-W30 RQIRQHSLF   | 1123  | 763   |
| >STK11-W30 RQIRQHSW   | 2358  | >STK11-W30 RQIRQHSL    | 175   | 2183  |
| >STK11-W30 RQIRQHSWF  | 1794  | >STK11-W30 RQIRQHSLF   | 467   | 1327  |
| >STK11-W30 RQIRQHSWF  | 261   | >STK11-W30 RQIRQHSLFR  | 251   | 10    |
| >STK11-W30 RQIRQHSWF  | 129   | >STK11-W30 RQIRQHSLFR  | 128   | 1     |
| >STK11-W30 RQIRQHSW   | 13013 | >STK11-W30 RQIRQHSL    | 242   | 12771 |
| >STK11-W30 RQIRQHSW   | 5414  | >STK11-W30 RQIRQHSL    | 134   | 5280  |
| >STK11-W30 RQIRQHSW   | 123   | >STK11-W30 RQIRQHSL    | 15148 | 15025 |
| >STK11-W30 RQIRQHSW   | 23    | >STK11-W30 RQIRQHSL    | 4486  | 4463  |
| >STK11-W30 RQIRQHSWF  | 463   | >STK11-W30 RQIRQHSLF   | 309   | 154   |
| >STK11-W30 RQIRQHSW   | 338   | >STK11-W30 RQIRQHSL    | 25    | 313   |
| >STK11-W30 RQIRQHSWF  | 497   | >STK11-W30 RQIRQHSLF   | 293   | 204   |
| >STK11-W30 RQIRQHSWF  | 413   | >STK11-W30 RQIRQHSLFR  | 137   | 276   |
| >STK11-W30 RQIRQHSW   | 536   | >STK11-W30 RQIRQHSL    | 127   | 409   |
| >STK11-W30 RQIRQHSWF  | 197   | >STK11-W30 RQIRQHSLF   | 79    | 118   |
| >STK11-W30 RQIRQHSWF  | 444   | >STK11-W30 RQIRQHSLFR  | 301   | 143   |
| >STK11-W30 RQIRQHSWF  | 43    | >STK11-W30 RQIRQHSLFR  | 48    | 5     |
| >STK11-W30 IRQIRQHSW  | 8789  | >STK11-W30 IRQIRQHSL   | 201   | 8588  |
| >STK11-W30 IRQIRQHSWF | 186   | >STK11-W30 IRQIRQHSLF  | 92    | 94    |
| >STK11-W30 IRQIRQHSW  | 1307  | >STK11-W30 IRQIRQHSL   | 94    | 1213  |
| >STK11-W30 IRQIRQHSWF | 67    | >STK11-W30 IRQIRQHSLF  | 62    | 5     |
| >STK11-W30 IRQIRQHSWF | 190   | >STK11-W30 IRQIRQHSLFF | 252   | 62    |
| >STK11-W30 IRQIRQHSW  | 4224  | >STK11-W30 IRQIRQHSL   | 401   | 3823  |
| >STK11-W30 IRQIRQHSWF | 172   | >STK11-W30 IRQIRQHSLF  | 181   | 9     |
| >STK11-W30 IRQIRQHSW  | 2902  | >STK11-W30 IRQIRQHSL   | 12    | 2890  |
| >STK11-W30 IRQIRQHSWF | 82    | >STK11-W30 IRQIRQHSLF  | 95    | 13    |
| >STK11-W30 IRQIRQHSWF | 582   | >STK11-W30 IRQIRQHSLFF | 111   | 471   |
| >STK11-W30 IRQIRQHSWF | 201   | >STK11-W30 IRQIRQHSLFF | 274   | 73    |

|                          |       |                          |       |       |
|--------------------------|-------|--------------------------|-------|-------|
| >STK11-W30 SIRQIRQHSW    | 24592 | >STK11-W30 SIRQIRQHSL    | 54    | 24538 |
| >STK11-W30 SIRQIRQHSW    | 364   | >STK11-W30 SIRQIRQHSLF   | 3385  | 3021  |
| >STK11-W30 SIRQIRQHSW    | 2996  | >STK11-W30 SIRQIRQHSL    | 60    | 2936  |
| >STK11-W30 SIRQIRQHSW    | 350   | >STK11-W30 SIRQIRQHSLF   | 198   | 152   |
| >STK11-W30 SIRQIRQHSW    | 731   | >STK11-W30 SIRQIRQHSLF   | 377   | 354   |
| >STK11-W30 SIRQIRQHSW    | 436   | >STK11-W30 SIRQIRQHSL    | 4357  | 3921  |
| >STK11-W30 SIRQIRQHSW    | 380   | >STK11-W30 SIRQIRQHSLF   | 725   | 345   |
| >STK11-W30 SIRQIRQHSW    | 211   | >STK11-W30 SIRQIRQHSL    | 18227 | 18016 |
| >STK11-W30 SIRQIRQHSW    | 18    | >STK11-W30 SIRQIRQHSLF   | 16    | 2     |
| >STK11-Y49C YLMGDLLGEC   | 136   | >STK11-Y49C DLMGDLLGEC   | 4226  | 4090  |
| >STK11-Y49C YLMGDLLGEC   | 197   | >STK11-Y49C DLMGDLLGEC   | 20187 | 19990 |
| >STK11-Y49C YLMGDLLG     | 70    | >STK11-Y49C DLMGDLLG     | 11039 | 10969 |
| >STK11-Y49C YLMGDLLGE    | 165   | >STK11-Y49C DLMGDLLGE    | 15292 | 15127 |
| >STK11-Y49C YLMGDLLGEC   | 149   | >STK11-Y49C DLMGDLLGEC   | 5615  | 5466  |
| >STK11-Y49C YLMGDLLGEC   | 28    | >STK11-Y49C DLMGDLLGEC   | 7310  | 7282  |
| >STK11-Y49C YLMGDLLG     | 408   | >STK11-Y49C DLMGDLLG     | 18794 | 18386 |
| >STK11-Y49C YLMGDLLGEC   | 267   | >STK11-Y49C DLMGDLLGEC   | 4568  | 4301  |
| >STK11-Y49C YLMGDLLGEC   | 76    | >STK11-Y49C DLMGDLLGEC   | 10979 | 10903 |
| >STK11-Y49C YLMGDLLGE    | 250   | >STK11-Y49C DLMGDLLGE    | 18012 | 17762 |
| >STK11-Y49C YLMGDLLGEC   | 261   | >STK11-Y49C DLMGDLLGEC   | 11132 | 10871 |
| >STK11-Y49C YLMGDLLGEC   | 72    | >STK11-Y49C DLMGDLLGEC   | 12923 | 12851 |
| >STK11-Y49C YLMGDLLG     | 335   | >STK11-Y49C DLMGDLLG     | 17796 | 17461 |
| >STK11-Y49C YLMGDLLGEC   | 84    | >STK11-Y49C DLMGDLLGEC   | 12815 | 12731 |
| >STK11-Y49C YLMGDLLGEC   | 38    | >STK11-Y49C DLMGDLLGEC   | 9257  | 9219  |
| >STK11-Y49C YLMGDLLGEC   | 201   | >STK11-Y49C DLMGDLLGEC   | 15120 | 14919 |
| >STK11-Y49C YLMGDLLGEC   | 156   | >STK11-Y49C DLMGDLLGEC   | 4135  | 3979  |
| >STK11-Y49C YLMGDLLG     | 129   | >STK11-Y49C DLMGDLLG     | 17403 | 17274 |
| >STK11-Y49C YLMGDLLGE    | 54    | >STK11-Y49C DLMGDLLGE    | 14007 | 13953 |
| >STK11-Y49C YLMGDLLGEC   | 106   | >STK11-Y49C DLMGDLLGEC   | 16499 | 16393 |
| >STK11-Y49C YLMGDLLGEC   | 33    | >STK11-Y49C DLMGDLLGEC   | 11125 | 11092 |
| >STK11-Y49C KYLMGDLL     | 58    | >STK11-Y49C KDLMGDLL     | 29641 | 29583 |
| >STK11-Y49C KYLMGDLL     | 27500 | >STK11-Y49C KDLMGDLL     | 356   | 27144 |
| >STK11-Y49C KYLMGDLL     | 323   | >STK11-Y49C KDLMGDLL     | 26854 | 26531 |
| >STK11-Y49C KYLMGDLL     | 386   | >STK11-Y49C KDLMGDLL     | 28046 | 27660 |
| >STK11-Y49C KYLMGDLL     | 12    | >STK11-Y49C KDLMGDLL     | 23346 | 23334 |
| >STK11-Y49C KYLMGDLL     | 27766 | >STK11-Y49C KDLMGDLL     | 461   | 27305 |
| >STK11-Y49C KYLMGDLL     | 46    | >STK11-Y49C KDLMGDLL     | 18525 | 18479 |
| >STK11-Y49C KYLMGDLLG    | 326   | >STK11-Y49C KDLMGDLLG    | 27782 | 27456 |
| >STK11-Y49C KYLMGDLLGE   | 405   | >STK11-Y49C KDLMGDLLGE   | 30272 | 29867 |
| >STK11-Y49C KYLMGDLL     | 28547 | >STK11-Y49C KDLMGDLL     | 452   | 28095 |
| >STK11-Y49C RRRKRAKLIGK' | 214   | >STK11-Y49C RRRKRAKLIGKI | 17686 | 17472 |
| >STK11-Y49C RRRKRAKLIGK' | 43    | >STK11-Y49C RRRKRAKLIGKI | 816   | 773   |
| >STK11-Y49C RRRKRAKLIGK' | 165   | >STK11-Y49C RRRKRAKLIGKI | 383   | 218   |



|                          |     |                          |       |       |
|--------------------------|-----|--------------------------|-------|-------|
| >STK11-Y49C RKRKRAKLIGK' | 412 | >STK11-Y49C RKRKRAKLIGKI | 2087  | 1675  |
| >STK11-Y49C GKYLMDLL     | 124 | >STK11-Y49C GKDLMDLL     | 1404  | 1280  |
| >STK11-Y49C LIGKYLMDL    | 216 | >STK11-Y49C LIGKDLMDL    | 510   | 294   |
| >STK11-Y49C LIGKYLMDL    | 453 | >STK11-Y49C LIGKDLMDL    | 618   | 165   |
| >STK11-Y49C KLIGKYL      | 59  | >STK11-Y49C KLIGKDL      | 599   | 540   |
| >STK11-Y49C KLIGKYLMD    | 398 | >STK11-Y49C KLIGKDLMD    | 459   | 61    |
| >STK11-Y49C KLIGKYL      | 56  | >STK11-Y49C KLIGKDL      | 229   | 173   |
| >STK11-Y49C KLIGKYLMD    | 85  | >STK11-Y49C KLIGKDLMD    | 140   | 55    |
| >STK11-Y49C KLIGKYL      | 376 | >STK11-Y49C KLIGKDL      | 1747  | 1371  |
| >STK11-Y49C KLIGKYLMD    | 39  | >STK11-Y49C KLIGKDLMD    | 110   | 71    |
| >STK11-Y49C KLIGKYL      | 81  | >STK11-Y49C KLIGKDL      | 488   | 407   |
| >STK11-Y49C KLIGKYLMD    | 207 | >STK11-Y49C KLIGKDLMD    | 252   | 45    |
| >STK11-Y49C KLIGKYL      | 198 | >STK11-Y49C KLIGKDL      | 1033  | 835   |
| >STK11-Y49C KLIGKYLMD    | 479 | >STK11-Y49C KLIGKDLMD    | 323   | 156   |
| >STK11-Y49C KLIGKYLMD    | 442 | >STK11-Y49C KLIGKDLMD    | 334   | 108   |
| >STK11-Y49C KLIGKYL      | 83  | >STK11-Y49C KLIGKDL      | 344   | 261   |
| >STK11-Y49C KLIGKYLMD    | 48  | >STK11-Y49C KLIGKDLMD    | 38    | 10    |
| >STK11-Y49C AKLIGKYL     | 95  | >STK11-Y49C AKLIGKDL     | 208   | 113   |
| >STK11-Y49C AKLIGKYL     | 467 | >STK11-Y49C AKLIGKDL     | 1960  | 1493  |
| >STK11-Y49C RAKLIGKYL    | 59  | >STK11-Y49C RAKLIGKDL    | 1609  | 1550  |
| >STK11-Y49C RAKLIGKYL    | 107 | >STK11-Y49C RAKLIGKDL    | 917   | 810   |
| >STK11-Y49C RAKLIGKYL    | 203 | >STK11-Y49C RAKLIGKDL    | 1253  | 1050  |
| >STK11-Y49C RAKLIGKY     | 160 | >STK11-Y49C RAKLIGKD     | 27981 | 27821 |
| >STK11-Y49C RAKLIGKY     | 18  | >STK11-Y49C RAKLIGKD     | 17859 | 17841 |
| >STK11-Y49C RAKLIGKYL    | 58  | >STK11-Y49C RAKLIGKDL    | 238   | 180   |
| >STK11-Y49C RAKLIGKYL    | 118 | >STK11-Y49C RAKLIGKDL    | 398   | 280   |
| >STK11-Y49C RAKLIGKY     | 417 | >STK11-Y49C RAKLIGKD     | 27325 | 26908 |
| >STK11-Y49C RAKLIGKYL    | 305 | >STK11-Y49C RAKLIGKDL    | 1181  | 876   |
| >STK11-Y49C KRAKLIGKY    | 72  | >STK11-Y49C KRAKLIGKD    | 26292 | 26220 |
| >STK11-Y49C KRAKLIGKY    | 264 | >STK11-Y49C KRAKLIGKD    | 26628 | 26364 |
| >STK11-Y49C KRAKLIGKY    | 30  | >STK11-Y49C KRAKLIGKD    | 827   | 797   |
| >STK11-Y49C KRAKLIGKYL   | 18  | >STK11-Y49C KRAKLIGKDL   | 23    | 5     |
| >STK11-Y49C KRAKLIGKYL   | 25  | >STK11-Y49C KRAKLIGKDL   | 62    | 37    |
| >STK11-Y49C KRAKLIGKY    | 222 | >STK11-Y49C KRAKLIGKD    | 609   | 387   |
| >STK11-Y49C KRAKLIGKYL   | 79  | >STK11-Y49C KRAKLIGKDL   | 138   | 59    |
| >STK11-Y49C KRAKLIGKYL   | 73  | >STK11-Y49C KRAKLIGKDL   | 80    | 7     |
| >STK11-Y49C KRAKLIGKY    | 426 | >STK11-Y49C KRAKLIGKD    | 3566  | 3140  |
| >STK11-Y49C KRAKLIGKYL   | 44  | >STK11-Y49C KRAKLIGKDL   | 71    | 27    |
| >STK11-Y49C KRAKLIGKYL   | 76  | >STK11-Y49C KRAKLIGKDL   | 90    | 14    |
| >STK11-Y49C RKRKRAKLIGKY | 129 | >STK11-Y49C RKRKRAKLIGKD | 1473  | 1344  |
| >STK11-Y49C RKRKRAKLIGKY | 124 | >STK11-Y49C RKRKRAKLIGKD | 28572 | 28448 |
| >STK11-Y49C RKRKRAKLIGKY | 28  | >STK11-Y49C RKRKRAKLIGKD | 17857 | 17829 |
| >STK11-Y49C RKRKRAKLIGKY | 26  | >STK11-Y49C RKRKRAKLIGKD | 38    | 12    |

|                         |       |                        |       |       |
|-------------------------|-------|------------------------|-------|-------|
| >STK11-Y49C RKRAKLIGKY  | 121   | >STK11-Y49C RKRAKLIGKD | 9210  | 9089  |
| >STK11-Y49C RKRAKLIGKY  | 348   | >STK11-Y49C RKRAKLIGKD | 28929 | 28581 |
| >STK11-Y49C RKRAKLIGKYI | 283   | >STK11-Y49C RKRAKLIGKD | 311   | 28    |
| >STK11-Y49C RKRAKLIGKYI | 281   | >STK11-Y49C RKRAKLIGKD | 641   | 360   |
| >SUFU-P187I PVQTPFGV    | 10280 | >SUFU-P187I LVQTPFGV   | 435   | 9845  |
| >SUFU-P187I PVQTPFGV    | 6146  | >SUFU-P187I LVQTPFGV   | 390   | 5756  |
| >SUFU-P187I PVQTPFGV    | 5022  | >SUFU-P187I LVQTPFGV   | 54    | 4968  |
| >SUFU-P187I PVQTPFGV    | 1503  | >SUFU-P187I LVQTPFGV   | 62    | 1441  |
| >SUFU-P187I PVQTPFGV    | 4648  | >SUFU-P187I LVQTPFGV   | 171   | 4477  |
| >SUFU-P187I PVQTPFGV    | 1448  | >SUFU-P187I LVQTPFGV   | 204   | 1244  |
| >SUFU-P187I PVQTPFGV    | 899   | >SUFU-P187I LVQTPFGV   | 18    | 881   |
| >SUFU-P187I PVQTPFGVV   | 6302  | >SUFU-P187I LVQTPFGVV  | 361   | 5941  |
| >SUFU-P187I PVQTPFGVV   | 2106  | >SUFU-P187I LVQTPFGVV  | 217   | 1889  |
| >SUFU-P187I PVQTPFGVV   | 475   | >SUFU-P187I LVQTPFGVV  | 557   | 82    |
| >SUFU-P187I PVQTPFGVV   | 801   | >SUFU-P187I LVQTPFGVV  | 420   | 381   |
| >SUFU-P187I PVQTPFGV    | 2461  | >SUFU-P187I LVQTPFGV   | 120   | 2341  |
| >SUFU-P187I PVQTPFGVV   | 4628  | >SUFU-P187I LVQTPFGVV  | 244   | 4384  |
| >SUFU-P187I PVQTPFGV    | 1361  | >SUFU-P187I LVQTPFGV   | 132   | 1229  |
| >SUFU-P187I PVQTPFGVV   | 5089  | >SUFU-P187I LVQTPFGVV  | 69    | 5020  |
| >SUFU-P187I PVQTPFGVV   | 2637  | >SUFU-P187I LVQTPFGVV  | 213   | 2424  |
| >SUFU-P187I PVQTPFGVV   | 10687 | >SUFU-P187I LVQTPFGVV  | 347   | 10340 |
| >SUFU-P187I PVQTPFGVV   | 5222  | >SUFU-P187I LVQTPFGVV  | 95    | 5127  |
| >SUFU-P187I QPVQTPFGV   | 21736 | >SUFU-P187I QLVQTPFGV  | 69    | 21667 |
| >SUFU-P187I QPVQTPFGV\  | 24461 | >SUFU-P187I QLVQTPFGV\ | 434   | 24027 |
| >SUFU-P187I QPVQTPFGV   | 22976 | >SUFU-P187I QLVQTPFGV  | 83    | 22893 |
| >SUFU-P187I QPVQTPFGV\  | 20182 | >SUFU-P187I QLVQTPFGV\ | 257   | 19925 |
| >SUFU-P187I QPVQTPFGV   | 19559 | >SUFU-P187I QLVQTPFGV  | 25    | 19534 |
| >SUFU-P187I QPVQTPFGV\  | 12685 | >SUFU-P187I QLVQTPFGV\ | 28    | 12657 |
| >SUFU-P187I QPVQTPFGV   | 8447  | >SUFU-P187I QLVQTPFGV  | 24    | 8423  |
| >SUFU-P187I QPVQTPFGV\  | 11466 | >SUFU-P187I QLVQTPFGV\ | 314   | 11152 |
| >SUFU-P187I QPVQTPFGV   | 9957  | >SUFU-P187I QLVQTPFGV  | 3     | 9954  |
| >SUFU-P187I QPVQTPFGV\  | 18559 | >SUFU-P187I QLVQTPFGV\ | 15    | 18544 |
| >SUFU-P187I QPVQTPFGV   | 17039 | >SUFU-P187I QLVQTPFGV  | 7     | 17032 |
| >SUFU-P187I QPVQTPFGV\  | 22333 | >SUFU-P187I QLVQTPFGV\ | 108   | 22225 |
| >SUFU-P187I QPVQTPFGV   | 17707 | >SUFU-P187I QLVQTPFGV  | 9     | 17698 |
| >SUFU-P187I QPVQTPFGV\  | 23356 | >SUFU-P187I QLVQTPFGV\ | 149   | 23207 |
| >SUFU-P187I QPVQTPFGV   | 19008 | >SUFU-P187I QLVQTPFGV  | 4     | 19004 |
| >SUFU-P187I QPVQTPFGV\  | 23387 | >SUFU-P187I QLVQTPFGV\ | 248   | 23139 |
| >SUFU-P187I QPVQTPFGV   | 19439 | >SUFU-P187I QLVQTPFGV  | 3     | 19436 |
| >SUFU-P187I QPVQTPFGV\  | 25676 | >SUFU-P187I QLVQTPFGV\ | 12    | 25664 |
| >SUFU-P187I QPVQTPFGV   | 72    | >SUFU-P187I QLVQTPFGV  | 23    | 49    |
| >SUFU-P187I QPVQTPFGV\  | 404   | >SUFU-P187I QLVQTPFGV\ | 322   | 82    |
| >SUFU-P187I QPVQTPFGV\  | 349   | >SUFU-P187I QLVQTPFGV\ | 16431 | 16082 |

|                      |       |                      |     |       |
|----------------------|-------|----------------------|-----|-------|
| >SUFU-P187IMLLTEDPQM | 17490 | >SUFU-P187IMLLTEDPQM | 22  | 17468 |
| >SUFU-P187IMLLTEDPQM | 8254  | >SUFU-P187IMLLTEDPQM | 22  | 8232  |
| >SUFU-P187IMLLTEDPQM | 15699 | >SUFU-P187IMLLTEDPQM | 232 | 15467 |
| >SUFU-P187IMLLTEDPQM | 12887 | >SUFU-P187IMLLTEDPQM | 116 | 12771 |
| >SUFU-P187IMLLTEDPQM | 2698  | >SUFU-P187IMLLTEDPQM | 9   | 2689  |
| >SUFU-P187IMLLTEDPQM | 11932 | >SUFU-P187IMLLTEDPQM | 25  | 11907 |
| >SUFU-P187IMLLTEDPQM | 7065  | >SUFU-P187IMLLTEDPQM | 12  | 7053  |
| >SUFU-P187IMLLTEDPQM | 14875 | >SUFU-P187IMLLTEDPQM | 7   | 14868 |
| >SUFU-P187IMLLTEDPQM | 1858  | >SUFU-P187IMLLTEDPQM | 3   | 1855  |
| >SUFU-P187IMQPVQTPFG | 460   | >SUFU-P187IMQLVQTPFG | 39  | 421   |
| >SUFU-P187IMQPVQTPFG | 2391  | >SUFU-P187IMQLVQTPFG | 450 | 1941  |
| >SUFU-P187IMQPVQTPFG | 466   | >SUFU-P187IMQLVQTPFG | 191 | 275   |
| >SUFU-P187IMQPVQTPFG | 242   | >SUFU-P187IMQLVQTPFG | 99  | 143   |
| >SUFU-P187IMQPVQTPFG | 268   | >SUFU-P187IMQLVQTPFG | 442 | 174   |
| >SUFU-P187IMQPVQTPF  | 150   | >SUFU-P187IMQLVQTPF  | 32  | 118   |
| >SUFU-P187IMQPVQTPFG | 1457  | >SUFU-P187IMQLVQTPFG | 357 | 1100  |
| >SUFU-P187IMQPVQTPFG | 48    | >SUFU-P187IMQLVQTPFG | 26  | 22    |
| >SUFU-P187IMQPVQTPFG | 23    | >SUFU-P187IMQLVQTPFG | 8   | 15    |
| >SUFU-P187IMQPVQTPFG | 61    | >SUFU-P187IMQLVQTPFG | 11  | 50    |
| >SUFU-P187IMQPVQTPFG | 883   | >SUFU-P187IMQLVQTPFG | 114 | 769   |
| >SUFU-P187IMQPVQTPFG | 177   | >SUFU-P187IMQLVQTPFG | 12  | 165   |
| >SUFU-P187IMQPVQTPFG | 3476  | >SUFU-P187IMQLVQTPFG | 256 | 3220  |
| >SUFU-P187IMQPVQTPFG | 88    | >SUFU-P187IMQLVQTPFG | 13  | 75    |
| >SUFU-P187IMQPVQTPFG | 2034  | >SUFU-P187IMQLVQTPFG | 358 | 1676  |
| >SUFU-P187IMQPVQTPFG | 474   | >SUFU-P187IMQLVQTPFG | 13  | 461   |
| >SUFU-P187IMQPVQTPFG | 254   | >SUFU-P187IMQLVQTPFG | 111 | 143   |
| >SUFU-P187IMQPVQTPF  | 879   | >SUFU-P187IMQLVQTPF  | 278 | 601   |
| >SUFU-P187IMQPVQTPFG | 4589  | >SUFU-P187IMQLVQTPFG | 114 | 4475  |
| >SUFU-P187IMQPVQTPF  | 60    | >SUFU-P187IMQLVQTPF  | 45  | 15    |
| >SUFU-P187IMQPVQTPF  | 673   | >SUFU-P187IMQLVQTPF  | 233 | 440   |
| >SUFU-P187IMQPVQTPF  | 6     | >SUFU-P187IMQLVQTPF  | 2   | 4     |
| >SUFU-P187IMQPVQTPFG | 1425  | >SUFU-P187IMQLVQTPFG | 127 | 1298  |
| >SUFU-P187IMQPVQTPFG | 1088  | >SUFU-P187IMQLVQTPFG | 87  | 1001  |
| >SUFU-P187IMQPVQTPF  | 677   | >SUFU-P187IMQLVQTPF  | 119 | 558   |
| >SUFU-P187IQMQPVQTPF | 42    | >SUFU-P187IQMQLVQTPF | 82  | 40    |
| >SUFU-P187IQMQPVQTPF | 36    | >SUFU-P187IQMQLVQTPF | 117 | 81    |
| >SUFU-P187IQMQPVQTPF | 25    | >SUFU-P187IQMQLVQTPF | 86  | 61    |
| >SUFU-P187IQMQPVQTPF | 33    | >SUFU-P187IQMQLVQTPF | 129 | 96    |
| >SUFU-P187IQMQPVQTPF | 3     | >SUFU-P187IQMQLVQTPF | 7   | 4     |
| >SUFU-P187IQMQPVQTPF | 5     | >SUFU-P187IQMQLVQTPF | 9   | 4     |
| >SUFU-P187IQMQPVQTPF | 12    | >SUFU-P187IQMQLVQTPF | 25  | 13    |
| >SUFU-P187IQMQPVQTPF | 7     | >SUFU-P187IQMQLVQTPF | 10  | 3     |
| >SUFU-P187IQMQPVQTPF | 3     | >SUFU-P187IQMQLVQTPF | 7   | 4     |

|                       |       |                       |      |       |
|-----------------------|-------|-----------------------|------|-------|
| >SUFU-P187IQMQPVQTPF  | 67    | >SUFU-P187IQMQLVQTPF  | 55   | 12    |
| >SUFU-P187IQMQPVQTPF  | 229   | >SUFU-P187IQMQLVQTPF  | 517  | 288   |
| >SUFU-P187IQMQPVQTPF  | 35    | >SUFU-P187IQMQLVQTPF  | 58   | 23    |
| >SUFU-P187IQMQPVQTPF  | 110   | >SUFU-P187IQMQLVQTPF  | 273  | 163   |
| >SUFU-P187IQMQPVQTPF  | 14    | >SUFU-P187IQMQLVQTPF  | 33   | 19    |
| >SUFU-P187IQMQPVQTPF  | 409   | >SUFU-P187IQMQLVQTPF  | 965  | 556   |
| >SUFU-P187IQMQPVQTPF  | 456   | >SUFU-P187IQMQLVQTPF  | 3474 | 3018  |
| >SUFU-P187IPQMQLVQTF  | 919   | >SUFU-P187IPQMQLVQTF  | 396  | 523   |
| >SUFU-P187IPQMQLVQTF  | 99    | >SUFU-P187IPQMQLVQTF  | 91   | 8     |
| >SUFU-P187IPQMQLVQTF  | 356   | >SUFU-P187IPQMQLVQTF  | 1684 | 1328  |
| >SUFU-P187IPQMQLVQTF  | 5     | >SUFU-P187IPQMQLVQTF  | 8    | 3     |
| >SUFU-P187IDPQMQLVQ   | 37    | >SUFU-P187IDPQMQLVQ   | 40   | 3     |
| >SUFU-P187IDPQMQLVQ   | 1515  | >SUFU-P187IDPQMQLVQ   | 498  | 1017  |
| >SUFU-P187ITEDPQMQLV  | 144   | >SUFU-P187ITEDPQMQLV  | 38   | 106   |
| >SUFU-P187ITEDPQMQL   | 13871 | >SUFU-P187ITEDPQMQL   | 286  | 13585 |
| >SUFU-P187ILTEDPQMQL  | 339   | >SUFU-P187ILTEDPQMQL  | 563  | 224   |
| >SUFU-P187ILTEDPQMQL  | 29089 | >SUFU-P187ILTEDPQMQL  | 321  | 28768 |
| >SUFU-P187ILTEDPQMQL  | 29    | >SUFU-P187ILTEDPQMQL  | 31   | 2     |
| >SUFU-P187ILTEDPQMQL  | 208   | >SUFU-P187ILTEDPQMQL  | 372  | 164   |
| >SUFU-P187ILTEDPQMQL  | 69    | >SUFU-P187ILTEDPQMQL  | 312  | 243   |
| >SUFU-P187ILTEDPQMQL  | 15684 | >SUFU-P187ILTEDPQMQL  | 32   | 15652 |
| >SUFU-P187ILTEDPQMQL  | 282   | >SUFU-P187ILTEDPQMQL  | 755  | 473   |
| >SUFU-P187ILTEDPQMQL  | 20803 | >SUFU-P187ILTEDPQMQL  | 206  | 20597 |
| >SUFU-P187ILTEDPQMQL  | 1119  | >SUFU-P187ILTEDPQMQL  | 246  | 873   |
| >SUFU-P187ILTEDPQMQL  | 6160  | >SUFU-P187ILTEDPQMQL  | 68   | 6092  |
| >SUFU-P187ILLEDPQMQL  | 14569 | >SUFU-P187ILLEDPQMQL  | 398  | 14171 |
| >SUFU-P187ILLEDPQMQL  | 23    | >SUFU-P187ILLEDPQMQL  | 26   | 3     |
| >SUFU-P187ILLEDPQMQL  | 8587  | >SUFU-P187ILLEDPQMQL  | 25   | 8562  |
| >SUFU-P187ILLEDPQMQL  | 12    | >SUFU-P187ILLEDPQMQL  | 10   | 2     |
| >SUFU-P187ILLEDPQMQL  | 5     | >SUFU-P187ILLEDPQMQL  | 6    | 1     |
| >SUFU-P187ILLEDPQMQL  | 22    | >SUFU-P187ILLEDPQMQL  | 39   | 17    |
| >SUFU-P187ILLEDPQMQL  | 3395  | >SUFU-P187ILLEDPQMQL  | 7    | 3388  |
| >SUFU-P187ILLEDPQMQL  | 2     | >SUFU-P187ILLEDPQMQL  | 3    | 1     |
| >SUFU-P187ILLEDPQMQL  | 15152 | >SUFU-P187ILLEDPQMQL  | 22   | 15130 |
| >SUFU-P187ILLEDPQMQL  | 4     | >SUFU-P187ILLEDPQMQL  | 5    | 1     |
| >SUFU-P187ILLEDPQMQL  | 9197  | >SUFU-P187ILLEDPQMQL  | 15   | 9182  |
| >SUFU-P187ILLEDPQMQL  | 5     | >SUFU-P187ILLEDPQMQL  | 6    | 1     |
| >SUFU-P187ILLEDPQMQL  | 19401 | >SUFU-P187ILLEDPQMQL  | 13   | 19388 |
| >SUFU-P187ILLEDPQMQL  | 10    | >SUFU-P187ILLEDPQMQL  | 12   | 2     |
| >SUFU-P187ILLEDPQMQL  | 610   | >SUFU-P187ILLEDPQMQL  | 2    | 608   |
| >SUFU-P187ILLEDPQMQL  | 2     | >SUFU-P187ILLEDPQMQL  | 2    | 0     |
| >SUFU-P187ILLEDPQMQL  | 399   | >SUFU-P187ILLEDPQMQL  | 1570 | 1171  |
| >SUFU-R299(RLSGKDTEQI | 168   | >SUFU-R299(QLSGKDTEQI | 257  | 89    |

|                        |       |                        |       |       |
|------------------------|-------|------------------------|-------|-------|
| >SUFU-R299(RLSGKDTEQI  | 270   | >SUFU-R299(QLSGKDTEQI  | 500   | 230   |
| >SUFU-R299(RLSGKDTEQI  | 44    | >SUFU-R299(QLSGKDTEQI  | 405   | 361   |
| >SUFU-R299(RLSGKDTEQI  | 391   | >SUFU-R299(QLSGKDTEQI  | 2550  | 2159  |
| >SUFU-R299(RLSGKDTEQI  | 125   | >SUFU-R299(QLSGKDTEQI  | 1299  | 1174  |
| >SUFU-R299(RLSGKDTEQI  | 163   | >SUFU-R299(QLSGKDTEQI  | 306   | 143   |
| >SUFU-R299(RLSGKDTEQ   | 207   | >SUFU-R299(QLSGKDTEQ   | 769   | 562   |
| >SUFU-R299(RLSGKDTEQI  | 19    | >SUFU-R299(QLSGKDTEQI  | 35    | 16    |
| >SUFU-R299(RLSGKDTEQII | 151   | >SUFU-R299(QLSGKDTEQI  | 3932  | 3781  |
| >SUFU-R299(RLSGKDTEQI  | 55    | >SUFU-R299(QLSGKDTEQI  | 434   | 379   |
| >SUFU-R299(RLSGKDTEQII | 251   | >SUFU-R299(QLSGKDTEQI  | 968   | 717   |
| >SUFU-R299(RRLSGKDTEC  | 15830 | >SUFU-R299(RQLSGKDTEC  | 59    | 15771 |
| >SUFU-R299(RRLSGKDTEC  | 3459  | >SUFU-R299(RQLSGKDTEC  | 172   | 3287  |
| >SUFU-R299(RRLSGKDTEC  | 346   | >SUFU-R299(RQLSGKDTEC  | 68    | 278   |
| >SUFU-R299(RRLSGKDTEC  | 126   | >SUFU-R299(RQLSGKDTEC  | 10010 | 9884  |
| >SUFU-R299(RRLSGKDTEC  | 47    | >SUFU-R299(RQLSGKDTEC  | 866   | 819   |
| >SUFU-R299(RRLSGKDTEC  | 6562  | >SUFU-R299(RQLSGKDTEC  | 272   | 6290  |
| >SUFU-R299(RRLSGKDTEC  | 3234  | >SUFU-R299(RQLSGKDTEC  | 256   | 2978  |
| >SUFU-R299(RRLSGKDT    | 338   | >SUFU-R299(RQLSGKDT    | 5944  | 5606  |
| >SUFU-R299(RRLSGKDTE   | 377   | >SUFU-R299(RQLSGKDTE   | 7194  | 6817  |
| >SUFU-R299(RRLSGKDTEC  | 224   | >SUFU-R299(RQLSGKDTEC  | 7308  | 7084  |
| >SUFU-R299(RRLSGKDTEC  | 75    | >SUFU-R299(RQLSGKDTEC  | 1529  | 1454  |
| >SUFU-R299(RRLSGKDTEC  | 214   | >SUFU-R299(RQLSGKDTEC  | 3145  | 2931  |
| >SUFU-R299(RRLSGKDTEC  | 549   | >SUFU-R299(RQLSGKDTEC  | 344   | 205   |
| >SUFU-R299(RSICIGTQPRF | 19    | >SUFU-R299(RSICIGTQPRC | 5340  | 5321  |
| >SUFU-R299(RSICIGTQPRF | 179   | >SUFU-R299(RSICIGTQPRC | 14354 | 14175 |
| >SUFU-R299(RSICIGTQPRF | 470   | >SUFU-R299(RSICIGTQPRC | 27267 | 26797 |
| >SUFU-R299(GTQPRRLSGK  | 42    | >SUFU-R299(GTQPRQLSGI  | 63    | 21    |
| >SUFU-R299(GTQPRRLSGK  | 71    | >SUFU-R299(GTQPRQLSGI  | 89    | 18    |
| >SUFU-R299(GTQPRRLSGK  | 167   | >SUFU-R299(GTQPRQLSGI  | 277   | 110   |
| >SUFU-R299(GTQPRRLSGK  | 390   | >SUFU-R299(GTQPRQLSGI  | 244   | 146   |
| >SUFU-R299(CIGTQPRR    | 123   | >SUFU-R299(CIGTQPRQ    | 22335 | 22212 |
| >SUFU-R299(SICIGTQPRR  | 317   | >SUFU-R299(SICIGTQPRQ  | 30213 | 29896 |
| >SUFU-R299(SICIGTQPRR  | 111   | >SUFU-R299(SICIGTQPRQ  | 19532 | 19421 |
| >SUFU-R299(SICIGTQPRR  | 342   | >SUFU-R299(SICIGTQPRQ  | 33749 | 33407 |
| >SUFU-R299(SICIGTQPRR  | 477   | >SUFU-R299(SICIGTQPRQ  | 22638 | 22161 |
| >SUFU-R362(RTRQLESVHL  | 98    | >SUFU-R362(CTRQLESVHL  | 593   | 495   |
| >SUFU-R362(RTRQLESVHL  | 100   | >SUFU-R362(CTRQLESVHL  | 341   | 241   |
| >SUFU-R362(RTRQLESV    | 18    | >SUFU-R362(CTRQLESV    | 1143  | 1125  |
| >SUFU-R362(RTRQLESVHL  | 11    | >SUFU-R362(CTRQLESVHL  | 487   | 476   |
| >SUFU-R362(RTRQLESVHL  | 3     | >SUFU-R362(CTRQLESVHL  | 13    | 10    |
| >SUFU-R362(RTRQLESVHL  | 72    | >SUFU-R362(CTRQLESVHL  | 1237  | 1165  |
| >SUFU-R362(RTRQLESVHL  | 573   | >SUFU-R362(CTRQLESVHL  | 162   | 411   |
| >SUFU-R362(RTRQLESV    | 29    | >SUFU-R362(CTRQLESV    | 2687  | 2658  |

|                        |      |                        |       |       |
|------------------------|------|------------------------|-------|-------|
| >SUFU-R362(IRTRQLESVH  | 38   | >SUFU-R362(CTRQLESVH   | 4516  | 4478  |
| >SUFU-R362(IRTRQLESVHL | 4    | >SUFU-R362(CTRQLESVHL  | 64    | 60    |
| >SUFU-R362(IRTRQLESVH  | 3    | >SUFU-R362(CTRQLESVH   | 20    | 17    |
| >SUFU-R362(IRTRQLESVHL | 53   | >SUFU-R362(CTRQLESVHL  | 666   | 613   |
| >SUFU-R362(IRTRQLESVHL | 233  | >SUFU-R362(CTRQLESVHL  | 2396  | 2163  |
| >SUFU-R362(IRTRQLESVHI | 421  | >SUFU-R362(CTRQLESVHI  | 6734  | 6313  |
| >SUFU-R362(IRTRQLESVHI | 213  | >SUFU-R362(CTRQLESVHI  | 25272 | 25059 |
| >SUFU-R362(IRTRQLESVHI | 255  | >SUFU-R362(CTRQLESVHI  | 36515 | 36260 |
| >SUFU-R362(STAIIPHELIR | 100  | >SUFU-R362(STAIIPHELIC | 20393 | 20293 |
| >SUFU-R362(STAIIPHELIR | 167  | >SUFU-R362(STAIIPHELIC | 21118 | 20951 |
| >SUFU-R362(STAIIPHELIR | 11   | >SUFU-R362(STAIIPHELIC | 18996 | 18985 |
| >SUFU-R362(STAIIPHELIR | 79   | >SUFU-R362(STAIIPHELIC | 3984  | 3905  |
| >SUFU-R362(STAIIPHELIR | 491  | >SUFU-R362(STAIIPHELIC | 36619 | 36128 |
| >SUFU-R362(LIRTRQLESV  | 802  | >SUFU-R362(LICTRQLESV  | 276   | 526   |
| >SUFU-R362(LIRTRQLESV  | 144  | >SUFU-R362(LICTRQLESV  | 91    | 53    |
| >SUFU-R362(LIRTRQLESV  | 2036 | >SUFU-R362(LICTRQLESV  | 265   | 1771  |
| >SUFU-R362(LIRTRQLESV  | 962  | >SUFU-R362(LICTRQLESV  | 91    | 871   |
| >SUFU-R362(LIRTRQLESV  | 13   | >SUFU-R362(LICTRQLESV  | 10    | 3     |
| >SUFU-R362(LIRTRQLES   | 257  | >SUFU-R362(LICTRQLES   | 12339 | 12082 |
| >SUFU-R362(LIRTRQLESV  | 172  | >SUFU-R362(LICTRQLESV  | 9402  | 9230  |
| >SUFU-R362(ELIRTRQLESV | 388  | >SUFU-R362(ELICTRQLESV | 187   | 201   |
| >SUFU-R362(ELIRTRQLESV | 317  | >SUFU-R362(ELICTRQLESV | 123   | 194   |
| >SUFU-R362(ELIRTRQLESV | 556  | >SUFU-R362(ELICTRQLESV | 261   | 295   |
| >SUFU-R362(ELIRTRQLESV | 42   | >SUFU-R362(ELICTRQLESV | 24    | 18    |
| >SUFU-R362(ELIRTRQLESV | 118  | >SUFU-R362(ELICTRQLESV | 30    | 88    |
| >SUFU-R362(ELIRTRQLESV | 166  | >SUFU-R362(ELICTRQLESV | 193   | 27    |
| >SUFU-R362(ELIRTRQLESV | 319  | >SUFU-R362(ELICTRQLESV | 193   | 126   |
| >SUFU-R362(ELIRTRQL    | 94   | >SUFU-R362(ELICTRQL    | 345   | 251   |
| >SUFU-R362(ELIRTRQLESV | 7    | >SUFU-R362(ELICTRQLESV | 10    | 3     |
| >SUFU-R362(ELIRTRQLESV | 116  | >SUFU-R362(ELICTRQLESV | 43    | 73    |
| >SUFU-R362(ELIRTRQLESV | 82   | >SUFU-R362(ELICTRQLESV | 30    | 52    |
| >SUFU-R362(ELIRTRQL    | 478  | >SUFU-R362(ELICTRQL    | 1403  | 925   |
| >SUFU-R362(HELIRTRQL   | 10   | >SUFU-R362(HELICTRQL   | 21    | 11    |
| >SUFU-R362(HELIRTRQL   | 1618 | >SUFU-R362(HELICTRQL   | 267   | 1351  |
| >SUFU-R362(HELIRTRQL   | 967  | >SUFU-R362(HELICTRQL   | 201   | 766   |
| >SUFU-R362(HELIRTRQL   | 100  | >SUFU-R362(HELICTRQL   | 23    | 77    |
| >SUFU-R362(HELIRTRQLES | 536  | >SUFU-R362(HELICTRQLES | 160   | 376   |
| >SUFU-R362(HELIRTRQL   | 442  | >SUFU-R362(HELICTRQL   | 342   | 100   |
| >SUFU-R362(HELIRTRQL   | 14   | >SUFU-R362(HELICTRQL   | 10    | 4     |
| >SUFU-R362(IPHELIRTRQL | 724  | >SUFU-R362(IPHELICTRQL | 208   | 516   |
| >SUFU-R362(IPHELIRTRQL | 31   | >SUFU-R362(IPHELICTRQL | 57    | 26    |
| >SUFU-R362(IPHELIRTRQL | 385  | >SUFU-R362(IPHELICTRQL | 273   | 112   |
| >SUFU-R362(IPHELIRTR   | 894  | >SUFU-R362(IPHELICTR   | 188   | 706   |

|                        |      |                        |       |       |
|------------------------|------|------------------------|-------|-------|
| >SUFU-R362(IIPHELIR    | 165  | >SUFU-R362(IIPHELIC    | 34492 | 34327 |
| >SUFU-R362(IIPHELIRTR  | 295  | >SUFU-R362(IIPHELICTR  | 114   | 181   |
| >SUFU-R362(AIIPHELIR   | 395  | >SUFU-R362(AIIPHELIC   | 24118 | 23723 |
| >SUFU-R362(AIIPHELIRTR | 975  | >SUFU-R362(AIIPHELICTR | 319   | 656   |
| >SUFU-R362(AIIPHELIRTR | 201  | >SUFU-R362(AIIPHELICTR | 103   | 98    |
| >SUFU-R362(AIIPHELIRTR | 477  | >SUFU-R362(AIIPHELICTR | 182   | 295   |
| >SUFU-R362(AIIPHELIRTR | 1259 | >SUFU-R362(AIIPHELICTR | 425   | 834   |
| >SUFU-R362(TAIIPHELIR  | 16   | >SUFU-R362(TAIIPHELIC  | 31615 | 31599 |
| >SYK-D405N- DNPYIVRMI  | 745  | >SYK-D405N- NNPYIVRMI  | 189   | 556   |
| >SYK-D405N- DNPYIVRMIG | 997  | >SYK-D405N- NNPYIVRMIG | 498   | 499   |
| >SYK-D405N- LDNPYIVRM  | 7284 | >SYK-D405N- LNNPYIVRM  | 494   | 6790  |
| >SYK-D405N- LDNPYIVRMI | 89   | >SYK-D405N- LNNPYIVRMI | 383   | 294   |
| >SYK-D405N- LDNPYIVR   | 2405 | >SYK-D405N- LNNPYIVR   | 221   | 2184  |
| >SYK-D405N- LDNPYIVRMI | 90   | >SYK-D405N- LNNPYIVRMI | 3409  | 3319  |
| >SYK-D405N- QLDNPYIV   | 111  | >SYK-D405N- QLNNPYIV   | 239   | 128   |
| >SYK-D405N- QLDNPYIV   | 315  | >SYK-D405N- QLNNPYIV   | 81    | 234   |
| >SYK-D405N- QLDNPYIVRM | 429  | >SYK-D405N- QLNNPYIVRM | 389   | 40    |
| >SYK-D405N- QLDNPYIV   | 915  | >SYK-D405N- QLNNPYIV   | 24    | 891   |
| >SYK-D405N- QLDNPYIVRM | 2447 | >SYK-D405N- QLNNPYIVRM | 110   | 2337  |
| >SYK-D405N- QLDNPYIV   | 408  | >SYK-D405N- QLNNPYIV   | 1198  | 790   |
| >SYK-D405N- QLDNPYIV   | 5    | >SYK-D405N- QLNNPYIV   | 7     | 2     |
| >SYK-D405N- QLDNPYIVRM | 48   | >SYK-D405N- QLNNPYIVRM | 93    | 45    |
| >SYK-D405N- QLDNPYIVRM | 22   | >SYK-D405N- QLNNPYIVRM | 40    | 18    |
| >SYK-D405N- QLDNPYIV   | 8    | >SYK-D405N- QLNNPYIV   | 12    | 4     |
| >SYK-D405N- QLDNPYIV   | 15   | >SYK-D405N- QLNNPYIV   | 36    | 21    |
| >SYK-D405N- QLDNPYIV   | 13   | >SYK-D405N- QLNNPYIV   | 17    | 4     |
| >SYK-D405N- QLDNPYIV   | 10   | >SYK-D405N- QLNNPYIV   | 7     | 3     |
| >SYK-D405N- QLDNPYIVRM | 267  | >SYK-D405N- QLNNPYIVRM | 168   | 99    |
| >SYK-D405N- QLDNPYIVR  | 2699 | >SYK-D405N- QLNNPYIVR  | 75    | 2624  |
| >SYK-D405N- QLDNPYIVRM | 1206 | >SYK-D405N- QLNNPYIVRM | 272   | 934   |
| >SYK-D405N- QLDNPYIV   | 4244 | >SYK-D405N- QLNNPYIV   | 429   | 3815  |
| >SYK-D405N- QLDNPYIV   | 257  | >SYK-D405N- QLNNPYIV   | 552   | 295   |
| >SYK-D405N- QQLDNPYI   | 2543 | >SYK-D405N- QQLNNPYI   | 375   | 2168  |
| >SYK-D405N- QQLDNPYI   | 150  | >SYK-D405N- QQLNNPYI   | 623   | 473   |
| >SYK-D405N- QQLDNPYIV  | 75   | >SYK-D405N- QQLNNPYIV  | 358   | 283   |
| >SYK-D405N- QQLDNPYI   | 22   | >SYK-D405N- QQLNNPYI   | 35    | 13    |
| >SYK-D405N- QQLDNPYIV  | 59   | >SYK-D405N- QQLNNPYIV  | 107   | 48    |
| >SYK-D405N- QQLDNPYIVF | 190  | >SYK-D405N- QQLNNPYIVF | 512   | 322   |
| >SYK-D405N- QQLDNPYI   | 92   | >SYK-D405N- QQLNNPYI   | 184   | 92    |
| >SYK-D405N- QQLDNPYIV  | 39   | >SYK-D405N- QQLNNPYIV  | 96    | 57    |
| >SYK-D405N- QQLDNPYI   | 119  | >SYK-D405N- QQLNNPYI   | 196   | 77    |
| >SYK-D405N- QQLDNPYIV  | 7    | >SYK-D405N- QQLNNPYIV  | 12    | 5     |
| >SYK-D405N- QQLDNPYIV  | 435  | >SYK-D405N- QQLNNPYIV  | 897   | 462   |

|                        |     |                        |     |     |
|------------------------|-----|------------------------|-----|-----|
| >SYK-D405N- QQLDNPYI   | 241 | >SYK-D405N- QQLNNPYI   | 510 | 269 |
| >SYK-D405N- QQLDNPYIV  | 43  | >SYK-D405N- QQLNNPYIV  | 142 | 99  |
| >SYK-D405N- QQLDNPYI   | 178 | >SYK-D405N- QQLNNPYI   | 61  | 117 |
| >SYK-D405N- QQLDNPYIV  | 181 | >SYK-D405N- QQLNNPYIV  | 54  | 127 |
| >SYK-D405N- QQLDNPYIVF | 366 | >SYK-D405N- QQLNNPYIVF | 123 | 243 |
| >SYK-D405N- QQLDNPYIVF | 57  | >SYK-D405N- QQLNNPYIVF | 23  | 34  |
| >SYK-D405N- QQLDNPYIV  | 300 | >SYK-D405N- QQLNNPYIV  | 510 | 210 |
| >SYK-D405N- QQLDNPYIVF | 62  | >SYK-D405N- QQLNNPYIVF | 94  | 32  |
| >SYK-D405N- MQQLDNPYI  | 203 | >SYK-D405N- MQQLNNPYI  | 304 | 101 |
| >SYK-D405N- MQQLDNPYI' | 390 | >SYK-D405N- MQQLNNPYI' | 758 | 368 |
| >SYK-D405N- MQQLDNPYI  | 20  | >SYK-D405N- MQQLNNPYI  | 27  | 7   |
| >SYK-D405N- MQQLDNPYI' | 129 | >SYK-D405N- MQQLNNPYI' | 241 | 112 |
| >SYK-D405N- MQQLDNPYI' | 478 | >SYK-D405N- MQQLNNPYI' | 331 | 147 |
| >SYK-D405N- MQQLDNPYI  | 771 | >SYK-D405N- MQQLNNPYI  | 314 | 457 |
| >SYK-D405N- MQQLDNPYI' | 47  | >SYK-D405N- MQQLNNPYI' | 30  | 17  |
| >SYK-D405N- MQQLDNPY   | 154 | >SYK-D405N- MQQLNNPY   | 144 | 10  |
| >SYK-D405N- MQQLDNPYI' | 62  | >SYK-D405N- MQQLNNPYI' | 31  | 31  |
| >SYK-D405N- MQQLDNPY   | 46  | >SYK-D405N- MQQLNNPY   | 45  | 1   |
| >SYK-D405N- MQQLDNPY   | 148 | >SYK-D405N- MQQLNNPY   | 104 | 44  |
| >SYK-D405N- MQQLDNPY   | 31  | >SYK-D405N- MQQLNNPY   | 12  | 19  |
| >SYK-D405N- MQQLDNPYI  | 585 | >SYK-D405N- MQQLNNPYI  | 302 | 283 |
| >SYK-D405N- MQQLDNPYI' | 477 | >SYK-D405N- MQQLNNPYI' | 290 | 187 |
| >SYK-D405N- MQQLDNPY   | 110 | >SYK-D405N- MQQLNNPY   | 148 | 38  |
| >SYK-D405N- MQQLDNPYI' | 424 | >SYK-D405N- MQQLNNPYI' | 233 | 191 |
| >SYK-D405N- VMQQLDNP\  | 190 | >SYK-D405N- VMQQLNNP\  | 216 | 26  |
| >SYK-D405N- VMQQLDNP\  | 79  | >SYK-D405N- VMQQLNNP\  | 59  | 20  |
| >SYK-D405N- VMQQLDNP\  | 249 | >SYK-D405N- VMQQLNNP\  | 229 | 20  |
| >SYK-D405N- VMQQLDNP\  | 92  | >SYK-D405N- VMQQLNNP\  | 71  | 21  |
| >SYK-D405N- VMQQLDNP\  | 505 | >SYK-D405N- VMQQLNNP\  | 400 | 105 |
| >SYK-D405N- VMQQLDNP\  | 89  | >SYK-D405N- VMQQLNNP\  | 57  | 32  |
| >SYK-D405N- VMQQLDNP\  | 13  | >SYK-D405N- VMQQLNNP\  | 8   | 5   |
| >SYK-D405N- VMQQLDNP\  | 7   | >SYK-D405N- VMQQLNNP\  | 5   | 2   |
| >SYK-D405N- VMQQLDNP\  | 17  | >SYK-D405N- VMQQLNNP\  | 15  | 2   |
| >SYK-D405N- VMQQLDNP\  | 4   | >SYK-D405N- VMQQLNNP\  | 5   | 1   |
| >SYK-D405N- VMQQLDNP\  | 42  | >SYK-D405N- VMQQLNNP\  | 55  | 13  |
| >SYK-D405N- VMQQLDNP\  | 15  | >SYK-D405N- VMQQLNNP\  | 19  | 4   |
| >SYK-D405N- VMQQLDNP\  | 78  | >SYK-D405N- VMQQLNNP\  | 43  | 35  |
| >SYK-D405N- VMQQLDNP\  | 25  | >SYK-D405N- VMQQLNNP\  | 12  | 13  |
| >SYK-D405N- VMQQLDNP\  | 32  | >SYK-D405N- VMQQLNNP\  | 23  | 9   |
| >SYK-D405N- VMQQLDNP\  | 4   | >SYK-D405N- VMQQLNNP\  | 4   | 0   |
| >SYK-D405N- VMQQLDNP\  | 67  | >SYK-D405N- VMQQLNNP\  | 93  | 26  |
| >SYK-D405N- VMQQLDNP\  | 18  | >SYK-D405N- VMQQLNNP\  | 15  | 3   |
| >SYK-D405N- VMQQLDNP\  | 30  | >SYK-D405N- VMQQLNNP\  | 31  | 1   |



|                      |       |                      |     |       |
|----------------------|-------|----------------------|-----|-------|
| >SYK-D405N-VMQQLDNP\ | 39    | >SYK-D405N-VMQQLNNP\ | 34  | 5     |
| >SYK-D405N-VMQQLDNP\ | 197   | >SYK-D405N-VMQQLNNP\ | 48  | 149   |
| >SYK-D405N-VMQQLDNP\ | 79    | >SYK-D405N-VMQQLNNP\ | 231 | 152   |
| >SYK-D405N-NVMQQLDNI | 442   | >SYK-D405N-NVMQQLNNI | 459 | 17    |
| >SYK-D405N-NVMQQLDNI | 313   | >SYK-D405N-NVMQQLNNI | 285 | 28    |
| >SYK-D405N-NVMQQLDNI | 696   | >SYK-D405N-NVMQQLNNI | 472 | 224   |
| >SYK-D405N-NVMQQLDNI | 57    | >SYK-D405N-NVMQQLNNI | 63  | 6     |
| >SYK-D405N-NVMQQLDNI | 185   | >SYK-D405N-NVMQQLNNI | 195 | 10    |
| >SYK-D405N-NVMQQLDNI | 448   | >SYK-D405N-NVMQQLNNI | 262 | 186   |
| >SYK-D405N-NVMQQLDNI | 19    | >SYK-D405N-NVMQQLNNI | 21  | 2     |
| >SYK-D405N-NVMQQLDNI | 425   | >SYK-D405N-NVMQQLNNI | 478 | 53    |
| >SYK-D405N-NVMQQLDNI | 50    | >SYK-D405N-NVMQQLNNI | 16  | 34    |
| >SYK-D405N-NVMQQLDNI | 424   | >SYK-D405N-NVMQQLNNI | 408 | 16    |
| >SYK-D405N-NVMQQLDNI | 81    | >SYK-D405N-NVMQQLNNI | 53  | 28    |
| >SYK-D405N-NVMQQLDNI | 20    | >SYK-D405N-NVMQQLNNI | 14  | 6     |
| >SYK-D405N-NVMQQLDNI | 547   | >SYK-D405N-NVMQQLNNI | 371 | 176   |
| >SYK-D405N-NVMQQLDNI | 185   | >SYK-D405N-NVMQQLNNI | 151 | 34    |
| >SYK-D405N-NVMQQLDNI | 215   | >SYK-D405N-NVMQQLNNI | 185 | 30    |
| >SYK-D405N-NVMQQLDNI | 239   | >SYK-D405N-NVMQQLNNI | 146 | 93    |
| >SYK-D405N-ANVMQQLDI | 1058  | >SYK-D405N-ANVMQQLNI | 493 | 565   |
| >SYK-D580H-DLMNLCWT  | 9319  | >SYK-D580H-HLMNLCWT  | 128 | 9191  |
| >SYK-D580H-DLMNLCWTY | 162   | >SYK-D580H-HLMNLCWTY | 8   | 154   |
| >SYK-D580H-DLMNLCWT  | 3468  | >SYK-D580H-HLMNLCWT  | 69  | 3399  |
| >SYK-D580H-DLMNLCWTY | 189   | >SYK-D580H-HLMNLCWTY | 5   | 184   |
| >SYK-D580H-DLMNLCWT  | 5064  | >SYK-D580H-HLMNLCWT  | 127 | 4937  |
| >SYK-D580H-DLMNLCWTY | 370   | >SYK-D580H-HLMNLCWTY | 8   | 362   |
| >SYK-D580H-DLMNLCWT  | 7669  | >SYK-D580H-HLMNLCWT  | 258 | 7411  |
| >SYK-D580H-DLMNLCWTY | 570   | >SYK-D580H-HLMNLCWTY | 18  | 552   |
| >SYK-D580H-DLMNLCWT  | 2461  | >SYK-D580H-HLMNLCWT  | 236 | 2225  |
| >SYK-D580H-DLMNLCWTY | 23    | >SYK-D580H-HLMNLCWTY | 5   | 18    |
| >SYK-D580H-DLMNLCWT  | 7421  | >SYK-D580H-HLMNLCWT  | 434 | 6987  |
| >SYK-D580H-DLMNLCWTY | 14    | >SYK-D580H-HLMNLCWTY | 3   | 11    |
| >SYK-D580H-DLMNLCWTY | 23    | >SYK-D580H-HLMNLCWTY | 9   | 14    |
| >SYK-D580H-DLMNLCWT  | 740   | >SYK-D580H-HLMNLCWT  | 435 | 305   |
| >SYK-D580H-DLMNLCWTY | 4     | >SYK-D580H-HLMNLCWTY | 2   | 2     |
| >SYK-D580H-DLMNLCWT  | 778   | >SYK-D580H-HLMNLCWT  | 28  | 750   |
| >SYK-D580H-DLMNLCWTY | 6168  | >SYK-D580H-HLMNLCWTY | 442 | 5726  |
| >SYK-D580H-DLMNLCWTY | 6     | >SYK-D580H-HLMNLCWTY | 2   | 4     |
| >SYK-D580H-DLMNLCWTY | 13778 | >SYK-D580H-HLMNLCWTY | 315 | 13463 |
| >SYK-D580H-DLMNLCWTY | 410   | >SYK-D580H-HLMNLCWTY | 663 | 253   |
| >SYK-D580H-DLMNLCWTY | 63    | >SYK-D580H-HLMNLCWTY | 17  | 46    |
| >SYK-D580H-DLMNLCWTY | 68    | >SYK-D580H-HLMNLCWTY | 17  | 51    |
| >SYK-D580H-DLMNLCWTY | 623   | >SYK-D580H-HLMNLCWTY | 47  | 576   |

|                      |       |                      |       |       |
|----------------------|-------|----------------------|-------|-------|
| >SYK-D580H-DLMNLCWTY | 851   | >SYK-D580H-HLMNLCWTY | 116   | 735   |
| >SYK-D580H-DLMNLCWTY | 88    | >SYK-D580H-HLMNLCWTY | 53    | 35    |
| >SYK-D580H-DLMNLCWTY | 54    | >SYK-D580H-HLMNLCWTY | 55    | 1     |
| >SYK-D580H-DLMNLCWTY | 195   | >SYK-D580H-HLMNLCWTY | 9     | 186   |
| >SYK-D580H-DLMNLCWTY | 2176  | >SYK-D580H-HLMNLCWTY | 90    | 2086  |
| >SYK-D580H-DLMNLCWTY | 775   | >SYK-D580H-HLMNLCWTY | 139   | 636   |
| >SYK-D580H-DLMNLCWTY | 2074  | >SYK-D580H-HLMNLCWTY | 135   | 1939  |
| >SYK-D580H-DLMNLCWTY | 358   | >SYK-D580H-HLMNLCWTY | 2214  | 1856  |
| >SYK-D580H-DLMNLCWTY | 412   | >SYK-D580H-HLMNLCWTY | 110   | 302   |
| >SYK-D580H-DLMNLCWTY | 2903  | >SYK-D580H-HLMNLCWTY | 72    | 2831  |
| >SYK-D580H-DLMNLCWTY | 203   | >SYK-D580H-HLMNLCWTY | 64    | 139   |
| >SYK-D580H-YDLMNLCWT | 745   | >SYK-D580H-YHLMNLCWT | 398   | 347   |
| >SYK-D580H-YDLMNLCWT | 1307  | >SYK-D580H-YHLMNLCWT | 294   | 1013  |
| >SYK-D580H-YDLMNLCWT | 1066  | >SYK-D580H-YHLMNLCWT | 41    | 1025  |
| >SYK-D580H-YDLMNLCWT | 498   | >SYK-D580H-YHLMNLCWT | 6694  | 6196  |
| >SYK-D580H-YDLMNLCW  | 340   | >SYK-D580H-YHLMNLCW  | 228   | 112   |
| >SYK-D580H-YDLMNLCW  | 19106 | >SYK-D580H-YHLMNLCW  | 100   | 19006 |
| >SYK-D580H-MYDLMNLCV | 274   | >SYK-D580H-MYHLMNLCV | 14015 | 13741 |
| >SYK-D580H-MYDLMNLCV | 680   | >SYK-D580H-MYHLMNLCV | 179   | 501   |
| >SYK-D580H-MYDLMNLCV | 671   | >SYK-D580H-MYHLMNLCV | 202   | 469   |
| >SYK-D580H-MYDLMNLCV | 1329  | >SYK-D580H-MYHLMNLCV | 447   | 882   |
| >SYK-D580H-MYDLMNLCV | 1094  | >SYK-D580H-MYHLMNLCV | 154   | 940   |
| >SYK-D580H-MYDLMNLCV | 598   | >SYK-D580H-MYHLMNLCV | 126   | 472   |
| >SYK-D580H-MYDLMNLCV | 32    | >SYK-D580H-MYHLMNLCV | 11    | 21    |
| >SYK-D580H-MYDLMNLCV | 244   | >SYK-D580H-MYHLMNLCV | 107   | 137   |
| >SYK-D580H-MYDLMNLCV | 57    | >SYK-D580H-MYHLMNLCV | 33    | 24    |
| >SYK-D580H-MYDLMNLCV | 557   | >SYK-D580H-MYHLMNLCV | 491   | 66    |
| >SYK-D580H-MYDLMNLCV | 55    | >SYK-D580H-MYHLMNLCV | 342   | 287   |
| >SYK-D580H-MYDLMNLCV | 585   | >SYK-D580H-MYHLMNLCV | 425   | 160   |
| >SYK-D580H-MYDLMNLC  | 907   | >SYK-D580H-MYHLMNLC  | 432   | 475   |
| >SYK-D580H-MYDLMNLCV | 557   | >SYK-D580H-MYHLMNLCV | 297   | 260   |
| >SYK-D580H-EMYDLMNL  | 139   | >SYK-D580H-EMYHLMNL  | 659   | 520   |
| >SYK-D580H-EMYDLMNL  | 32    | >SYK-D580H-EMYHLMNL  | 83    | 51    |
| >SYK-D580H-EMYDLMNL  | 32    | >SYK-D580H-EMYHLMNL  | 46    | 14    |
| >SYK-D580H-EMYDLMNLC | 338   | >SYK-D580H-EMYHLMNLC | 630   | 292   |
| >SYK-D580H-EMYDLMNL  | 211   | >SYK-D580H-EMYHLMNL  | 844   | 633   |
| >SYK-D580H-EMYDLMNL  | 8     | >SYK-D580H-EMYHLMNL  | 28    | 20    |
| >SYK-D580H-EMYDLMNLC | 122   | >SYK-D580H-EMYHLMNLC | 1031  | 909   |
| >SYK-D580H-EMYDLMNLC | 46    | >SYK-D580H-EMYHLMNLC | 245   | 199   |
| >SYK-D580H-EMYDLMNL  | 32    | >SYK-D580H-EMYHLMNL  | 114   | 82    |
| >SYK-D580H-EMYDLMNL  | 19    | >SYK-D580H-EMYHLMNL  | 71    | 52    |
| >SYK-D580H-EMYDLMNLC | 325   | >SYK-D580H-EMYHLMNLC | 1344  | 1019  |
| >SYK-D580H-EMYDLMNL  | 37    | >SYK-D580H-EMYHLMNL  | 789   | 752   |

|                        |      |                        |      |      |
|------------------------|------|------------------------|------|------|
| >SYK-D580H- EMYDLMNL   | 5    | >SYK-D580H- EMYHLMNL   | 42   | 37   |
| >SYK-D580H- EMYDLMNLC  | 256  | >SYK-D580H- EMYHLMNLC  | 7110 | 6854 |
| >SYK-D580H- EMYDLMNLC  | 46   | >SYK-D580H- EMYHLMNLC  | 571  | 525  |
| >SYK-D580H- EMYDLMNL   | 264  | >SYK-D580H- EMYHLMNL   | 337  | 73   |
| >SYK-D580H- EMYDLMNL   | 207  | >SYK-D580H- EMYHLMNL   | 332  | 125  |
| >SYK-D580H- EMYDLMNL   | 14   | >SYK-D580H- EMYHLMNL   | 37   | 23   |
| >SYK-D580H- EMYDLMNLC  | 452  | >SYK-D580H- EMYHLMNLC  | 2505 | 2053 |
| >SYK-D580H- EMYDLMNL   | 340  | >SYK-D580H- EMYHLMNL   | 104  | 236  |
| >SYK-D580H- EMYDLMNLC  | 285  | >SYK-D580H- EMYHLMNLC  | 311  | 26   |
| >SYK-D580H- EMYDLMNLC  | 837  | >SYK-D580H- EMYHLMNLC  | 438  | 399  |
| >SYK-D580H- EMYDLMNLC  | 408  | >SYK-D580H- EMYHLMNLC  | 266  | 142  |
| >SYK-D580H- EMYDLMNLC  | 436  | >SYK-D580H- EMYHLMNLC  | 366  | 70   |
| >SYK-D580H- REMYDLMNL  | 157  | >SYK-D580H- REMYHLMNL  | 73   | 84   |
| >SYK-D580H- REMYDLMNL  | 6    | >SYK-D580H- REMYHLMNL  | 6    | 0    |
| >SYK-D580H- REMYDLMNL  | 37   | >SYK-D580H- REMYHLMNL  | 21   | 16   |
| >SYK-D580H- REMYDLMNL  | 331  | >SYK-D580H- REMYHLMNL  | 463  | 132  |
| >SYK-D580H- REMYDLMNL  | 294  | >SYK-D580H- REMYHLMNL  | 146  | 148  |
| >SYK-D580H- REMYDLMNL  | 58   | >SYK-D580H- REMYHLMNL  | 57   | 1    |
| >SYK-D580H- REMYDLMNL  | 594  | >SYK-D580H- REMYHLMNL  | 347  | 247  |
| >SYK-D580H- REMYDLMNL  | 29   | >SYK-D580H- REMYHLMNL  | 17   | 12   |
| >SYK-D580H- REMYDLMN   | 1051 | >SYK-D580H- REMYHLMN   | 317  | 734  |
| >SYK-D580H- REMYDLMNL  | 300  | >SYK-D580H- REMYHLMNL  | 221  | 79   |
| >SYK-D580H- REMYDLMNL  | 755  | >SYK-D580H- REMYHLMNL  | 257  | 498  |
| >SYK-D580H- REMYDLMNL  | 4    | >SYK-D580H- REMYHLMNL  | 3    | 1    |
| >SYK-D580H- REMYDLMNL  | 440  | >SYK-D580H- REMYHLMNL  | 163  | 277  |
| >SYK-D580H- REMYDLMNL  | 25   | >SYK-D580H- REMYHLMNL  | 15   | 10   |
| >SYK-D580H- CPREMYDL   | 78   | >SYK-D580H- CPREMYHL   | 57   | 21   |
| >SYK-D580H- CPREMYDLM  | 193  | >SYK-D580H- CPREMYHLM  | 49   | 144  |
| >SYK-D580H- CPREMYDLM  | 89   | >SYK-D580H- CPREMYHLM  | 34   | 55   |
| >SYK-D580H- CPREMYDLM  | 2386 | >SYK-D580H- CPREMYHLM  | 333  | 2053 |
| >SYK-D580H- CPREMYDLM  | 122  | >SYK-D580H- CPREMYHLM  | 133  | 11   |
| >SYK-D580H- CPREMYDLM  | 322  | >SYK-D580H- CPREMYHLM  | 170  | 152  |
| >SYK-D580H- CPREMYDLM  | 498  | >SYK-D580H- CPREMYHLM  | 552  | 54   |
| >SYK-D580H- CPREMYDLM  | 378  | >SYK-D580H- CPREMYHLM  | 188  | 190  |
| >SYK-D580H- GCPREMYDLI | 1200 | >SYK-D580H- GCPREMYHLI | 247  | 953  |
| >SYK-S293C-1 STVSFNPY  | 518  | >SYK-S293C-1 CTVSFNPY  | 120  | 398  |
| >SYK-S293C-1 STVSFNPY  | 43   | >SYK-S293C-1 CTVSFNPY  | 421  | 378  |
| >SYK-S293C-1 STVSFNPY  | 406  | >SYK-S293C-1 CTVSFNPY  | 1794 | 1388 |
| >SYK-S293C-1 STVSFNPY  | 33   | >SYK-S293C-1 CTVSFNPY  | 113  | 80   |
| >SYK-S293C-1 STVSFNPY  | 5    | >SYK-S293C-1 CTVSFNPY  | 9    | 4    |
| >SYK-S293C-1 STVSFNPY  | 29   | >SYK-S293C-1 CTVSFNPY  | 25   | 4    |
| >SYK-S293C-1 STVSFNPY  | 36   | >SYK-S293C-1 CTVSFNPY  | 61   | 25   |
| >SYK-S293C-1 STVSFNPY  | 42   | >SYK-S293C-1 CTVSFNPY  | 60   | 18   |

|                         |      |                        |       |       |
|-------------------------|------|------------------------|-------|-------|
| >SYK-S293C-1STVSFNPY    | 99   | >SYK-S293C-1CTVSFNPY   | 285   | 186   |
| >SYK-S293C-1STVSFNPY    | 200  | >SYK-S293C-1CTVSFNPY   | 777   | 577   |
| >SYK-S293C-1STVSFNPY    | 83   | >SYK-S293C-1CTVSFNPY   | 401   | 318   |
| >SYK-S293C-1STVSFNPY    | 98   | >SYK-S293C-1CTVSFNPY   | 111   | 13    |
| >SYK-S293C-1STVSFNPY    | 10   | >SYK-S293C-1CTVSFNPY   | 29    | 19    |
| >SYK-S293C-1STVSFNPY    | 321  | >SYK-S293C-1CTVSFNPY   | 210   | 111   |
| >SYK-S293C-1STVSFNPY    | 115  | >SYK-S293C-1CTVSFNPY   | 142   | 27    |
| >SYK-S293C-1STVSFNPY    | 262  | >SYK-S293C-1CTVSFNPY   | 744   | 482   |
| >SYK-S293C-1STVSFNPY    | 386  | >SYK-S293C-1CTVSFNPY   | 3496  | 3110  |
| >SYK-S293C-1ESTVSFNPY   | 134  | >SYK-S293C-1ECTVSFNPY  | 9703  | 9569  |
| >SYK-S293C-1ESTVSFNPY   | 309  | >SYK-S293C-1ECTVSFNPY  | 2462  | 2153  |
| >SYK-S293C-1ESTVSFNPY   | 19   | >SYK-S293C-1ECTVSFNPY  | 116   | 97    |
| >SYK-S293C-1ESTVSFNPY   | 16   | >SYK-S293C-1ECTVSFNPY  | 43    | 27    |
| >SYK-S293C-1ESTVSFNPY   | 198  | >SYK-S293C-1ECTVSFNPY  | 7175  | 6977  |
| >SYK-S293C-1ESTVSFNPY   | 146  | >SYK-S293C-1ECTVSFNPY  | 1555  | 1409  |
| >SYK-S293C-1ESTVSFNPY   | 80   | >SYK-S293C-1ECTVSFNPY  | 18081 | 18001 |
| >SYK-S293C-1ESTVSFNPY   | 103  | >SYK-S293C-1ECTVSFNPY  | 419   | 316   |
| >SYK-S293C-1QESTVSFNPY  | 411  | >SYK-S293C-1QECTVSFNPY | 413   | 2     |
| >SYK-S293C-1QESTVSFNPY  | 167  | >SYK-S293C-1QECTVSFNPY | 317   | 150   |
| >SYK-S293C-1QESTVSFNPY  | 95   | >SYK-S293C-1QECTVSFNPY | 103   | 8     |
| >SYK-S293C-1QESTVSFNPY  | 76   | >SYK-S293C-1QECTVSFNPY | 77    | 1     |
| >SYK-S293C-1RQUESTVSFNP | 103  | >SYK-S293C-1RQECTVSFNF | 663   | 560   |
| >SYK-S293C-1RQUESTVSF   | 107  | >SYK-S293C-1RQECTVSF   | 111   | 4     |
| >SYK-S293C-1RQUESTVSF   | 46   | >SYK-S293C-1RQECTVSF   | 51    | 5     |
| >SYK-S293C-1RQUESTVSFNP | 38   | >SYK-S293C-1RQECTVSFNF | 41    | 3     |
| >SYK-S293C-1RQUESTVSFNP | 401  | >SYK-S293C-1RQECTVSFNF | 571   | 170   |
| >SYK-S293C-1RQUESTVSF   | 3    | >SYK-S293C-1RQECTVSF   | 4     | 1     |
| >SYK-S293C-1RQUESTVSFNP | 4    | >SYK-S293C-1RQECTVSFNF | 5     | 1     |
| >SYK-S293C-1RQUESTVSF   | 395  | >SYK-S293C-1RQECTVSF   | 795   | 400   |
| >SYK-S293C-1RQUESTVSF   | 1014 | >SYK-S293C-1RQECTVSF   | 334   | 680   |
| >SYK-S293C-1NRQUESTVSF  | 19   | >SYK-S293C-1NRQECTVSF  | 71    | 52    |
| >SYK-S293C-1NRQUESTVSF  | 208  | >SYK-S293C-1NRQECTVSF  | 257   | 49    |
| >SYK-S293C-1NRQUESTVSF  | 280  | >SYK-S293C-1NRQECTVSF  | 81    | 199   |
| >SYK-S293C-1GNRQUESTVSF | 183  | >SYK-S293C-1GNRQECTVSI | 466   | 283   |
| >SYK-S293C-1GNRQUESTVSF | 67   | >SYK-S293C-1GNRQECTVSI | 146   | 79    |
| >SYK-S293C-1AQGNRQUESTV | 183  | >SYK-S293C-1AQGNRQECTV | 315   | 132   |
| >SYK-S293C-1AQGNRQUEST  | 406  | >SYK-S293C-1AQGNRQECT  | 233   | 173   |
| >SYK-S293C-1AQGNRQUEST  | 441  | >SYK-S293C-1AQGNRQECT  | 287   | 154   |
| >SYK-S293C-1AQGNRQUEST  | 593  | >SYK-S293C-1AQGNRQECT  | 172   | 421   |
| >SYK-S293C-1AQGNRQUEST  | 537  | >SYK-S293C-1AQGNRQECT  | 272   | 265   |
| >SYK-S293C-1AQGNRQUEST  | 481  | >SYK-S293C-1AQGNRQECT  | 962   | 481   |
| >SYK-S293C-1SPAQGNRQE   | 167  | >SYK-S293C-1SPAQGNRQE  | 1911  | 1744  |
| >SYK-Y246C-1YKADGLLRV   | 224  | >SYK-Y246C-1CKADGLLRV  | 2818  | 2594  |

|                         |       |                        |       |       |
|-------------------------|-------|------------------------|-------|-------|
| >SYK-Y246C-1YKADGLLRV   | 72    | >SYK-Y246C-1CKADGLLRV  | 2020  | 1948  |
| >SYK-Y246C-1YKADGLLRV   | 93    | >SYK-Y246C-1CKADGLLRV  | 6074  | 5981  |
| >SYK-Y246C-1YKADGLLRV   | 219   | >SYK-Y246C-1CKADGLLRV  | 11233 | 11014 |
| >SYK-Y246C-1YKADGLLRV   | 11    | >SYK-Y246C-1CKADGLLRV  | 1344  | 1333  |
| >SYK-Y246C-1YKADGLLRVL  | 113   | >SYK-Y246C-1CKADGLLRVL | 1170  | 1057  |
| >SYK-Y246C-1YKADGLLRVL  | 49    | >SYK-Y246C-1CKADGLLRVL | 1528  | 1479  |
| >SYK-Y246C-1SYKADGLL    | 102   | >SYK-Y246C-1SCKADGLL   | 20101 | 19999 |
| >SYK-Y246C-1SYKADGLLRV  | 60    | >SYK-Y246C-1SCKADGLLRV | 13750 | 13690 |
| >SYK-Y246C-1SYKADGLL    | 82    | >SYK-Y246C-1SCKADGLL   | 22914 | 22832 |
| >SYK-Y246C-1SYKADGLLRV  | 52    | >SYK-Y246C-1SCKADGLLRV | 22113 | 22061 |
| >SYK-Y246C-1SYKADGLLRV  | 284   | >SYK-Y246C-1SCKADGLLRV | 2657  | 2373  |
| >SYK-Y246C-1SYKADGLLR   | 91    | >SYK-Y246C-1SCKADGLLR  | 2757  | 2666  |
| >SYK-Y246C-1SYKADGLLR   | 54    | >SYK-Y246C-1SCKADGLLR  | 724   | 670   |
| >SYK-Y246C-1SYKADGLLRV  | 173   | >SYK-Y246C-1SCKADGLLRV | 14456 | 14283 |
| >SYK-Y246C-1TLWQLVEHY!  | 872   | >SYK-Y246C-1TLWQLVEHY! | 28    | 844   |
| >SYK-Y246C-1TLWQLVEHY!  | 4560  | >SYK-Y246C-1TLWQLVEHY! | 374   | 4186  |
| >SYK-Y246C-1TLWQLVEHY!  | 12139 | >SYK-Y246C-1TLWQLVEHY! | 434   | 11705 |
| >SYK-Y246C-1TLWQLVEHY!  | 1954  | >SYK-Y246C-1TLWQLVEHY! | 80    | 1874  |
| >SYK-Y246C-1TLWQLVEHY!  | 13    | >SYK-Y246C-1TLWQLVEHY! | 12843 | 12830 |
| >SYK-Y246C-1TLWQLVEHY!  | 48    | >SYK-Y246C-1TLWQLVEHY! | 18511 | 18463 |
| >SYK-Y246C-1TLWQLVEHY!  | 112   | >SYK-Y246C-1TLWQLVEHY! | 994   | 882   |
| >SYK-Y246C-1TLWQLVEHY!  | 52    | >SYK-Y246C-1TLWQLVEHY! | 25268 | 25216 |
| >SYK-Y246C-1TLWQLVEHY!  | 92    | >SYK-Y246C-1TLWQLVEHY! | 15668 | 15576 |
| >SYK-Y246C-1TLWQLVEHY!  | 250   | >SYK-Y246C-1TLWQLVEHY! | 25812 | 25562 |
| >SYK-Y246C-1TLWQLVEHY!  | 245   | >SYK-Y246C-1TLWQLVEHY! | 12995 | 12750 |
| >SYK-Y246C-1TLWQLVEHY!  | 218   | >SYK-Y246C-1TLWQLVEHY! | 15980 | 15762 |
| >SYK-Y246C-1YSYKADGLL   | 230   | >SYK-Y246C-1YSCKADGLL  | 12079 | 11849 |
| >SYK-Y246C-1YSYKADGLLR' | 377   | >SYK-Y246C-1YSCKADGLLR | 2396  | 2019  |
| >SYK-Y246C-1YSYKADGLLR' | 318   | >SYK-Y246C-1YSCKADGLLR | 3265  | 2947  |
| >SYK-Y246C-1YSYKADGLLR' | 126   | >SYK-Y246C-1YSCKADGLLR | 706   | 580   |
| >SYK-Y246C-1YSYKADGLLR' | 119   | >SYK-Y246C-1YSCKADGLLR | 1226  | 1107  |
| >SYK-Y246C-1YSYKADGLLR' | 229   | >SYK-Y246C-1YSCKADGLLR | 7151  | 6922  |
| >SYK-Y246C-1YSYKADGLLR' | 306   | >SYK-Y246C-1YSCKADGLLR | 2046  | 1740  |
| >SYK-Y246C-1YSYKADGLLR  | 169   | >SYK-Y246C-1YSCKADGLLR | 390   | 221   |
| >SYK-Y246C-1YSYKADGLLR  | 221   | >SYK-Y246C-1YSCKADGLLR | 306   | 85    |
| >SYK-Y246C-1YSYKADGLLR  | 6     | >SYK-Y246C-1YSCKADGLLR | 20    | 14    |
| >SYK-Y246C-1YSYKADGLLR' | 320   | >SYK-Y246C-1YSCKADGLLR | 2046  | 1726  |
| >SYK-Y246C-1YSYKADGLLR' | 238   | >SYK-Y246C-1YSCKADGLLR | 4230  | 3992  |
| >SYK-Y246C-1YSYKADGL    | 10    | >SYK-Y246C-1YSCKADGL   | 52    | 42    |
| >SYK-Y246C-1YSYKADGLL   | 27    | >SYK-Y246C-1YSCKADGLL  | 170   | 143   |
| >SYK-Y246C-1YSYKADGLLR' | 49    | >SYK-Y246C-1YSCKADGLLR | 361   | 312   |
| >SYK-Y246C-1YSYKADGLL   | 219   | >SYK-Y246C-1YSCKADGLL  | 931   | 712   |
| >SYK-Y246C-1YSYKADGLL   | 40    | >SYK-Y246C-1YSCKADGLL  | 184   | 144   |

|                         |      |                         |       |       |
|-------------------------|------|-------------------------|-------|-------|
| >SYK-Y246C-1 YSYKADGLLR | 124  | >SYK-Y246C-1 YSCKADGLLR | 603   | 479   |
| >SYK-Y246C-1 YSYKADGLLR | 313  | >SYK-Y246C-1 YSCKADGLLR | 1033  | 720   |
| >SYK-Y246C-1 YSYKADGL   | 200  | >SYK-Y246C-1 YSCKADGL   | 673   | 473   |
| >SYK-Y246C-1 YSYKADGLL  | 46   | >SYK-Y246C-1 YSCKADGLL  | 135   | 89    |
| >SYK-Y246C-1 YSYKADGLLR | 348  | >SYK-Y246C-1 YSCKADGLLR | 1096  | 748   |
| >SYK-Y246C-1 HYSYKADGLL | 463  | >SYK-Y246C-1 HYSCKADGLL | 955   | 492   |
| >SYK-Y246C-1 HYSYKADGL  | 37   | >SYK-Y246C-1 HYSCKADGL  | 40    | 3     |
| >SYK-Y246C-1 HYSYKADGLL | 30   | >SYK-Y246C-1 HYSCKADGLL | 32    | 2     |
| >SYK-Y246C-1 HYSYKADGLL | 177  | >SYK-Y246C-1 HYSCKADGLL | 307   | 130   |
| >SYK-Y246C-1 HYSYKADGLL | 95   | >SYK-Y246C-1 HYSCKADGLL | 144   | 49    |
| >SYK-Y246C-1 HYSYKADGLL | 192  | >SYK-Y246C-1 HYSCKADGLL | 445   | 253   |
| >SYK-Y246C-1 HYSYKADGLL | 22   | >SYK-Y246C-1 HYSCKADGLL | 15    | 7     |
| >SYK-Y246C-1 EHYSYKADGL | 127  | >SYK-Y246C-1 EHYSCKADGL | 312   | 185   |
| >SYK-Y246C-1 EHYSYKADGL | 226  | >SYK-Y246C-1 EHYSCKADGL | 442   | 216   |
| >SYK-Y246C-1 EHYSYKADGL | 125  | >SYK-Y246C-1 EHYSCKADGL | 223   | 98    |
| >SYK-Y246C-1 EHYSYKADGL | 159  | >SYK-Y246C-1 EHYSCKADGL | 268   | 109   |
| >SYK-Y246C-1 VEHSYKADG  | 169  | >SYK-Y246C-1 VEHSYCKADG | 150   | 19    |
| >SYK-Y246C-1 VEHSYKADG  | 18   | >SYK-Y246C-1 VEHSYCKADG | 37    | 19    |
| >SYK-Y246C-1 VEHSYKA    | 402  | >SYK-Y246C-1 VEHSYCKA   | 789   | 387   |
| >SYK-Y246C-1 VEHSYKADG  | 368  | >SYK-Y246C-1 VEHSYCKADG | 521   | 153   |
| >SYK-Y246C-1 VEHSYKA    | 19   | >SYK-Y246C-1 VEHSYCKA   | 93    | 74    |
| >SYK-Y246C-1 VEHSYKADG  | 177  | >SYK-Y246C-1 VEHSYCKADG | 150   | 27    |
| >SYK-Y246C-1 LVEHSYK    | 290  | >SYK-Y246C-1 LVEHSYCK   | 1695  | 1405  |
| >SYK-Y246C-1 LVEHSYK    | 59   | >SYK-Y246C-1 LVEHSYCK   | 492   | 433   |
| >SYK-Y246C-1 LVEHSYK    | 245  | >SYK-Y246C-1 LVEHSYCK   | 1608  | 1363  |
| >SYK-Y246C-1 LVEHSYK    | 335  | >SYK-Y246C-1 LVEHSYCK   | 2902  | 2567  |
| >SYK-Y246C-1 LVEHSYK    | 157  | >SYK-Y246C-1 LVEHSYCK   | 427   | 270   |
| >SYK-Y246C-1 QLVEHSYKA  | 133  | >SYK-Y246C-1 QLVEHSYCKA | 422   | 289   |
| >SYK-Y246C-1 QLVEHSYKA  | 644  | >SYK-Y246C-1 QLVEHSYCKA | 389   | 255   |
| >SYK-Y246C-1 QLVEHSY    | 5340 | >SYK-Y246C-1 QLVEHSYSC  | 185   | 5155  |
| >SYK-Y246C-1 QLVEHSYKA  | 47   | >SYK-Y246C-1 QLVEHSYCKA | 103   | 56    |
| >SYK-Y246C-1 QLVEHSYKA  | 102  | >SYK-Y246C-1 QLVEHSYCKA | 445   | 343   |
| >SYK-Y246C-1 QLVEHSY    | 5696 | >SYK-Y246C-1 QLVEHSYSC  | 216   | 5480  |
| >SYK-Y246C-1 QLVEHSYKA  | 51   | >SYK-Y246C-1 QLVEHSYCKA | 35    | 16    |
| >SYK-Y246C-1 QLVEHSYK   | 45   | >SYK-Y246C-1 QLVEHSYCK  | 179   | 134   |
| >SYK-Y246C-1 QLVEHSYK   | 68   | >SYK-Y246C-1 QLVEHSYCK  | 903   | 835   |
| >SYK-Y246C-1 QLVEHSY    | 430  | >SYK-Y246C-1 QLVEHSYSC  | 17821 | 17391 |
| >SYK-Y246C-1 QLVEHSY    | 56   | >SYK-Y246C-1 QLVEHSYSC  | 23026 | 22970 |
| >SYK-Y246C-1 QLVEHSY    | 23   | >SYK-Y246C-1 QLVEHSYSC  | 18276 | 18253 |
| >SYK-Y246C-1 QLVEHSY    | 406  | >SYK-Y246C-1 QLVEHSYSC  | 28854 | 28448 |
| >SYK-Y246C-1 QLVEHSYK   | 479  | >SYK-Y246C-1 QLVEHSYCK  | 3433  | 2954  |
| >SYK-Y246C-1 QLVEHSYK   | 137  | >SYK-Y246C-1 QLVEHSYCK  | 731   | 594   |
| >SYK-Y246C-1 QLVEHSY    | 94   | >SYK-Y246C-1 QLVEHSYSC  | 14744 | 14650 |

|                         |       |                         |       |       |
|-------------------------|-------|-------------------------|-------|-------|
| >SYK-Y246C-1 QLVEHYSY   | 152   | >SYK-Y246C-1 QLVEHYSY   | 22507 | 22355 |
| >SYK-Y246C-1 QLVEHYSY   | 132   | >SYK-Y246C-1 QLVEHYSY   | 11519 | 11387 |
| >SYK-Y246C-1 QLVEHYSY   | 293   | >SYK-Y246C-1 QLVEHYSY   | 19174 | 18881 |
| >SYK-Y246C-1 QLVEHYSY   | 377   | >SYK-Y246C-1 QLVEHYSY   | 33639 | 33262 |
| >SYK-Y246C-1 WQLVEHYSY  | 2323  | >SYK-Y246C-1 WQLVEHYSY  | 409   | 1914  |
| >SYK-Y246C-1 WQLVEHYSY  | 67    | >SYK-Y246C-1 WQLVEHYSY  | 93    | 26    |
| >SYK-Y246C-1 WQLVEHYSY  | 190   | >SYK-Y246C-1 WQLVEHYSY  | 875   | 685   |
| >SYK-Y246C-1 WQLVEHYSY  | 322   | >SYK-Y246C-1 WQLVEHYSY  | 1845  | 1523  |
| >SYK-Y246C-1 WQLVEHYSY  | 40    | >SYK-Y246C-1 WQLVEHYSY  | 22211 | 22171 |
| >SYK-Y246C-1 WQLVEHYSY  | 146   | >SYK-Y246C-1 WQLVEHYSY  | 30778 | 30632 |
| >SYK-Y246C-1 WQLVEHYSY  | 80    | >SYK-Y246C-1 WQLVEHYSY  | 11494 | 11414 |
| >SYK-Y246C-1 WQLVEHYSY  | 238   | >SYK-Y246C-1 WQLVEHYSY  | 21292 | 21054 |
| >SYK-Y246C-1 WQLVEHYSY  | 7     | >SYK-Y246C-1 WQLVEHYSY  | 747   | 740   |
| >SYK-Y246C-1 WQLVEHYSY  | 189   | >SYK-Y246C-1 WQLVEHYSY  | 204   | 15    |
| >SYK-Y246C-1 WQLVEHYSY  | 404   | >SYK-Y246C-1 WQLVEHYSY  | 359   | 45    |
| >SYK-Y246C-1 WQLVEHYSY  | 25    | >SYK-Y246C-1 WQLVEHYSY  | 5513  | 5488  |
| >SYK-Y246C-1 WQLVEHYSY  | 255   | >SYK-Y246C-1 WQLVEHYSY  | 18271 | 18016 |
| >SYK-Y246C-1 LWQLVEHYSY | 42    | >SYK-Y246C-1 LWQLVEHYSY | 19245 | 19203 |
| >SYK-Y246C-1 LWQLVEHYSY | 41    | >SYK-Y246C-1 LWQLVEHYSY | 17410 | 17369 |
| >SYK-Y246C-1 LWQLVEHYSY | 160   | >SYK-Y246C-1 LWQLVEHYSY | 1633  | 1473  |
| >SYK-Y246C-1 LWQLVEHYSY | 202   | >SYK-Y246C-1 LWQLVEHYSY | 547   | 345   |
| >TAF15-D278 DTGKPKGEAT  | 7389  | >TAF15-D278 DTGKPKGEAT  | 232   | 7157  |
| >TAF15-D278 DTGKPKGEAT  | 8270  | >TAF15-D278 DTGKPKGEAT  | 451   | 7819  |
| >TAF15-D278 DTGKPKGEAT  | 489   | >TAF15-D278 DTGKPKGEAT  | 3752  | 3263  |
| >TAF15-D278 DTGKPKGEAT  | 143   | >TAF15-D278 DTGKPKGEAT  | 2949  | 2806  |
| >TAF15-D278 KPMINLYTDK  | 21577 | >TAF15-D278 KPMINLYTDK  | 125   | 21452 |
| >TAF15-D278 KPMINLYTDK  | 4391  | >TAF15-D278 KPMINLYTDK  | 390   | 4001  |
| >TAF15-D278 YTDKDTGK    | 951   | >TAF15-D278 YTDKDTGK    | 168   | 783   |
| >TAF15-D278 YTDKDTGKPK  | 405   | >TAF15-D278 YTDKDTGKPK  | 335   | 70    |
| >TAF15-D278 YTDKDTGK    | 119   | >TAF15-D278 YTDKDTGK    | 44    | 75    |
| >TAF15-D278 YTDKDTGKPK  | 1753  | >TAF15-D278 YTDKDTGKPK  | 348   | 1405  |
| >TAF15-D278 NLYTDKDTGK  | 526   | >TAF15-D278 NLYTDKDTGK  | 88    | 438   |
| >TAF15-D278 MINLYTDKD   | 23922 | >TAF15-D278 MINLYTDKV   | 240   | 23682 |
| >TAF15-D278 MINLYTDKD   | 11269 | >TAF15-D278 MINLYTDKV   | 9     | 11260 |
| >TAF15-D278 MINLYTDKD   | 20320 | >TAF15-D278 MINLYTDKV   | 16    | 20304 |
| >TAF15-D278 MINLYTDKD   | 26996 | >TAF15-D278 MINLYTDKV   | 88    | 26908 |
| >TAF15-D278 MINLYTDKD   | 27712 | >TAF15-D278 MINLYTDKV   | 40    | 27672 |
| >TAF15-D278 MINLYTDKD   | 27643 | >TAF15-D278 MINLYTDKV   | 258   | 27385 |
| >TAF15-D278 MINLYTDKD   | 26206 | >TAF15-D278 MINLYTDKV   | 56    | 26150 |
| >TAF15-D278 MINLYTDKD   | 35181 | >TAF15-D278 MINLYTDKV   | 21    | 35160 |
| >TAF15-D278 MINLYTDKD   | 16250 | >TAF15-D278 MINLYTDKV   | 22    | 16228 |
| >TAF15-D278 MINLYTDKD   | 22231 | >TAF15-D278 MINLYTDKV   | 153   | 22078 |
| >TAF15-D278 PMINLYTDKC  | 21931 | >TAF15-D278 PMINLYTDKV  | 378   | 21553 |

|                         |       |                        |      |       |
|-------------------------|-------|------------------------|------|-------|
| >TAF15-D27ËPMINLYTDKC   | 23725 | >TAF15-D27ËPMINLYTDKV  | 362  | 23363 |
| >TAF15-D27ËPMINLYTDKC   | 25141 | >TAF15-D27ËPMINLYTDKV  | 33   | 25108 |
| >TAF15-D27ËPMINLYTDKC   | 23963 | >TAF15-D27ËPMINLYTDKV  | 228  | 23735 |
| >TAF15-D27ËPMINLYTDKC   | 23554 | >TAF15-D27ËPMINLYTDKV  | 50   | 23504 |
| >TAF15-D27ËPMINLYTDKC   | 26027 | >TAF15-D27ËPMINLYTDKV  | 286  | 25741 |
| >TAF15-D27ËPMINLYTDKC   | 33174 | >TAF15-D27ËPMINLYTDKV  | 23   | 33151 |
| >TAF15-I236'TIFVQGLGEG  | 253   | >TAF15-I236'TVFVQGLGEC | 554  | 301   |
| >TAF15-I236'TIFVQGLGEG  | 205   | >TAF15-I236'TVFVQGLGEC | 469  | 264   |
| >TAF15-I236'TIFVQGLGEG  | 113   | >TAF15-I236'TVFVQGLGEC | 95   | 18    |
| >TAF15-I236'TIFVQGLGEG  | 43    | >TAF15-I236'TVFVQGLGEC | 131  | 88    |
| >TAF15-I236'TIFVQGLGEG  | 74    | >TAF15-I236'TVFVQGLGEC | 223  | 149   |
| >TAF15-I236'TIFVQGLGEG  | 38    | >TAF15-I236'TVFVQGLGEC | 90   | 52    |
| >TAF15-I236'TIFVQGLGEG  | 55    | >TAF15-I236'TVFVQGLGEC | 17   | 38    |
| >TAF15-I236'TIFVQGLGEG  | 95    | >TAF15-I236'TVFVQGLGEC | 48   | 47    |
| >TAF15-I236'SESDNSDNN`  | 56    | >TAF15-I236'SESDNSDNN` | 481  | 425   |
| >TAF15-I236'SESDNSDNN`  | 67    | >TAF15-I236'SESDNSDNN` | 187  | 120   |
| >TAF15-I236'SESDNSDNN`  | 980   | >TAF15-I236'SESDNSDNN` | 219  | 761   |
| >TAF15-I236'SESDNSDNN`  | 57    | >TAF15-I236'SESDNSDNN` | 259  | 202   |
| >TAF15-I236'NTIFVQGL    | 99    | >TAF15-I236'NTVFVQGL   | 237  | 138   |
| >TAF15-I236'NTIFVQGL    | 12    | >TAF15-I236'NTVFVQGL   | 17   | 5     |
| >TAF15-I236'NTIFVQGLG   | 307   | >TAF15-I236'NTVFVQGLG  | 501  | 194   |
| >TAF15-I236'NTIFVQGL    | 85    | >TAF15-I236'NTVFVQGL   | 113  | 28    |
| >TAF15-I236'NTIFVQGL    | 489   | >TAF15-I236'NTVFVQGL   | 442  | 47    |
| >TAF15-I236'SDNNTIFV    | 68    | >TAF15-I236'SDNNTVFV   | 60   | 8     |
| >TAF15-I236'NSDNNTIFV   | 107   | >TAF15-I236'NSDNNTVFV  | 241  | 134   |
| >TAF15-I236'NSDNNTIFV   | 278   | >TAF15-I236'NSDNNTVFV  | 110  | 168   |
| >TAF15-I236'NSDNNTIFV   | 22    | >TAF15-I236'NSDNNTVFV  | 33   | 11    |
| >TAF15-I236'NSDNNTIF    | 643   | >TAF15-I236'NSDNNTVF   | 321  | 322   |
| >TAF15-I236'SDNSDNNTI   | 79    | >TAF15-I236'SDNSDNNTV  | 146  | 67    |
| >TAF15-I236'SDNSDNNTIF  | 107   | >TAF15-I236'SDNSDNNTV  | 93   | 14    |
| >TAF15-I236'ESDNSDNNTI  | 1279  | >TAF15-I236'ESDNSDNNTV | 326  | 953   |
| >TAF15-I236'ESDNSDNNTI  | 1685  | >TAF15-I236'ESDNSDNNTV | 220  | 1465  |
| >TAF15-I236'ESDNSDNNTI  | 213   | >TAF15-I236'ESDNSDNNTV | 113  | 100   |
| >TAL1-R315L RSLHPAML    | 518   | >TAL1-R315L LSLHPAML   | 454  | 64    |
| >TAL1-R315L RSLHPAML    | 267   | >TAL1-R315L LSLHPAML   | 5653 | 5386  |
| >TAL1-R315L RSLHPAMLPA/ | 16    | >TAL1-R315L LSLHPAMLPA | 343  | 327   |
| >TAL1-R315L RSLHPAMLPA/ | 25    | >TAL1-R315L LSLHPAMLPA | 834  | 809   |
| >TAL1-R315L RSLHPAML    | 190   | >TAL1-R315L LSLHPAML   | 7416 | 7226  |
| >TAL1-R315L RSLHPAML    | 110   | >TAL1-R315L LSLHPAML   | 267  | 157   |
| >TAL1-R315L RSLHPAML    | 3     | >TAL1-R315L LSLHPAML   | 8    | 5     |
| >TAL1-R315L RSLHPAMLPA/ | 45    | >TAL1-R315L LSLHPAMLPA | 344  | 299   |
| >TAL1-R315L RSLHPAMLPA/ | 279   | >TAL1-R315L LSLHPAMLPA | 2617 | 2338  |
| >TAL1-R315L RSLHPAML    | 146   | >TAL1-R315L LSLHPAML   | 851  | 705   |



|                        |       |                        |       |       |
|------------------------|-------|------------------------|-------|-------|
| >TAL1-R315L RSLHPAML   | 237   | >TAL1-R315L LSLHPAML   | 48    | 189   |
| >TAL1-R315L RSLHPAML   | 74    | >TAL1-R315L LSLHPAML   | 692   | 618   |
| >TAL1-R315L RSLHPAML   | 91    | >TAL1-R315L LSLHPAML   | 257   | 166   |
| >TAL1-R315L ARSLHPAML  | 23394 | >TAL1-R315L ALSLHPAML  | 169   | 23225 |
| >TAL1-R315L ARSLHPAMLF | 23129 | >TAL1-R315L ALSLHPAMLF | 154   | 22975 |
| >TAL1-R315L ARSLHPAM   | 25602 | >TAL1-R315L ALSLHPAM   | 140   | 25462 |
| >TAL1-R315L ARSLHPAML  | 13393 | >TAL1-R315L ALSLHPAML  | 10    | 13383 |
| >TAL1-R315L ARSLHPAMLF | 20120 | >TAL1-R315L ALSLHPAMLF | 35    | 20085 |
| >TAL1-R315L ARSLHPAM   | 21648 | >TAL1-R315L ALSLHPAM   | 276   | 21372 |
| >TAL1-R315L ARSLHPAML  | 17170 | >TAL1-R315L ALSLHPAML  | 11    | 17159 |
| >TAL1-R315L ARSLHPAMLF | 12097 | >TAL1-R315L ALSLHPAMLF | 8     | 12089 |
| >TAL1-R315L ARSLHPAM   | 27544 | >TAL1-R315L ALSLHPAM   | 376   | 27168 |
| >TAL1-R315L ARSLHPAML  | 24084 | >TAL1-R315L ALSLHPAML  | 39    | 24045 |
| >TAL1-R315L ARSLHPAMLF | 28104 | >TAL1-R315L ALSLHPAMLF | 360   | 27744 |
| >TAL1-R315L ARSLHPAML  | 25196 | >TAL1-R315L ALSLHPAML  | 250   | 24946 |
| >TAL1-R315L ARSLHPAML  | 24709 | >TAL1-R315L ALSLHPAML  | 462   | 24247 |
| >TAL1-R315L ARSLHPAML  | 24949 | >TAL1-R315L ALSLHPAML  | 295   | 24654 |
| >TAL1-R315L ARSLHPAM   | 35165 | >TAL1-R315L ALSLHPAM   | 182   | 34983 |
| >TAL1-R315L ARSLHPAML  | 29465 | >TAL1-R315L ALSLHPAML  | 18    | 29447 |
| >TAL1-R315L ARSLHPAMLF | 32969 | >TAL1-R315L ALSLHPAMLF | 49    | 32920 |
| >TAL1-R315L ARSLHPAM   | 16100 | >TAL1-R315L ALSLHPAM   | 347   | 15753 |
| >TAL1-R315L ARSLHPAM   | 310   | >TAL1-R315L ALSLHPAM   | 834   | 524   |
| >TAL1-R315L ARSLHPAM   | 330   | >TAL1-R315L ALSLHPAM   | 18114 | 17784 |
| >TAL1-R315L ARSLHPAML  | 325   | >TAL1-R315L ALSLHPAML  | 17221 | 16896 |
| >TAL1-R315L ARSLHPAM   | 339   | >TAL1-R315L ALSLHPAM   | 7645  | 7306  |
| >TAL1-R315L ARSLHPAML  | 328   | >TAL1-R315L ALSLHPAML  | 6154  | 5826  |
| >TAL1-R315L ARSLHPAML  | 14    | >TAL1-R315L ALSLHPAML  | 4653  | 4639  |
| >TAL1-R315L TEEPAPKHTA | 14992 | >TAL1-R315L TEEPAPKHTA | 73    | 14919 |
| >TAL1-R315L TARSLHPAM  | 666   | >TAL1-R315L TALSLHPAM  | 129   | 537   |
| >TAL1-R315L TARSLHPA   | 9162  | >TAL1-R315L TALSLHPA   | 460   | 8702  |
| >TAL1-R315L TARSLHPA   | 29    | >TAL1-R315L TALSLHPA   | 3291  | 3262  |
| >TAL1-R315L TARSLHPAM  | 32    | >TAL1-R315L TALSLHPAM  | 3577  | 3545  |
| >TAL1-R315L TARSLHPAMI | 159   | >TAL1-R315L TALSLHPAMI | 7188  | 7029  |
| >TAL1-R315L TARSLHPA   | 4390  | >TAL1-R315L TALSLHPA   | 54    | 4336  |
| >TAL1-R315L TARSLHPAM  | 4315  | >TAL1-R315L TALSLHPAM  | 45    | 4270  |
| >TAL1-R315L TARSLHPAMI | 4679  | >TAL1-R315L TALSLHPAMI | 56    | 4623  |
| >TAL1-R315L TARSLHPAM  | 317   | >TAL1-R315L TALSLHPAM  | 13503 | 13186 |
| >TAL1-R315L TARSLHPAM  | 367   | >TAL1-R315L TALSLHPAM  | 497   | 130   |
| >TAL1-R315L TARSLHPAM  | 208   | >TAL1-R315L TALSLHPAM  | 388   | 180   |
| >TAL1-R315L TARSLHPAMI | 145   | >TAL1-R315L TALSLHPAMI | 314   | 169   |
| >TAL1-R315L TARSLHPAM  | 73    | >TAL1-R315L TALSLHPAM  | 28    | 45    |
| >TAL1-R315L TARSLHPAM  | 120   | >TAL1-R315L TALSLHPAM  | 362   | 242   |
| >TAL1-R315L HTARSLHPA  | 394   | >TAL1-R315L HTALSLHPA  | 272   | 122   |

|                        |       |                        |       |       |
|------------------------|-------|------------------------|-------|-------|
| >TAL1-R315L HTARSLHPAN | 231   | >TAL1-R315L HTALSLHPAN | 222   | 9     |
| >TAL1-R315L HTARSLHPA  | 194   | >TAL1-R315L HTALSLHPA  | 244   | 50    |
| >TAL1-R315L HTARSLHPA  | 267   | >TAL1-R315L HTALSLHPA  | 267   | 0     |
| >TAL1-R315L HTARSLHPAN | 754   | >TAL1-R315L HTALSLHPAN | 482   | 272   |
| >TAL1-R315L HTARSLHPAN | 6     | >TAL1-R315L HTALSLHPAN | 11    | 5     |
| >TAL1-R315L HTARSLHPAN | 63    | >TAL1-R315L HTALSLHPAN | 185   | 122   |
| >TAL1-R315L HTARSLHPAN | 172   | >TAL1-R315L HTALSLHPAN | 336   | 164   |
| >TAL1-R315L HTARSLHPA  | 48    | >TAL1-R315L HTALSLHPA  | 194   | 146   |
| >TAL1-R315L HTARSLHPAN | 117   | >TAL1-R315L HTALSLHPAN | 387   | 270   |
| >TAL1-R315L HTARSLHPA  | 9     | >TAL1-R315L HTALSLHPA  | 7     | 2     |
| >TAL1-R315L HTARSLHPAN | 19    | >TAL1-R315L HTALSLHPAN | 18    | 1     |
| >TAL1-R315L HTARSLHPA  | 31    | >TAL1-R315L HTALSLHPA  | 40    | 9     |
| >TAL1-R315L HTARSLHPAN | 39    | >TAL1-R315L HTALSLHPAN | 48    | 9     |
| >TAL1-R315L HTARSLHPAN | 50    | >TAL1-R315L HTALSLHPAN | 60    | 10    |
| >TAL1-R315L HTARSLHPAN | 437   | >TAL1-R315L HTALSLHPAN | 864   | 427   |
| >TAL1-R315L HTARSLHPAN | 13    | >TAL1-R315L HTALSLHPAN | 8     | 5     |
| >TAL1-R315L HTARSLHPAN | 9     | >TAL1-R315L HTALSLHPAN | 6     | 3     |
| >TAL1-R315L HTARSLHPAN | 209   | >TAL1-R315L HTALSLHPAN | 1097  | 888   |
| >TAL1-R315L HTARSLHPAN | 229   | >TAL1-R315L HTALSLHPAN | 109   | 120   |
| >TAL1-R315L HTARSLHPAN | 130   | >TAL1-R315L HTALSLHPAN | 65    | 65    |
| >TAL1-R315L HTARSLHPAN | 129   | >TAL1-R315L HTALSLHPAN | 86    | 43    |
| >TAL1-R315L HTARSLHPAN | 372   | >TAL1-R315L HTALSLHPAN | 570   | 198   |
| >TAL1-R315L HTARSLHPAN | 431   | >TAL1-R315L HTALSLHPAN | 732   | 301   |
| >TAL1-R315L KHTARSLHPA | 269   | >TAL1-R315L KHTALSLHPA | 262   | 7     |
| >TAL1-R315L KHTARSLHPA | 531   | >TAL1-R315L KHTALSLHPA | 325   | 206   |
| >TAL1-R315L PKHTARSL   | 319   | >TAL1-R315L PKHTALSL   | 230   | 89    |
| >TAL1-R315L APKHTARSL  | 17    | >TAL1-R315L APKHTALSL  | 21    | 4     |
| >TAL1-R315L APKHTARSL  | 419   | >TAL1-R315L APKHTALSL  | 370   | 49    |
| >TAL1-R315L APKHTARSL  | 753   | >TAL1-R315L APKHTALSL  | 380   | 373   |
| >TAL1-R315L PAPKHTARSL | 157   | >TAL1-R315L PAPKHTALSL | 47    | 110   |
| >TAL1-R315L EPAPKHTAR  | 131   | >TAL1-R315L EPAPKHTAL  | 27008 | 26877 |
| >TAL1-R315L EPAPKHTAR  | 9983  | >TAL1-R315L EPAPKHTAL  | 10    | 9973  |
| >TAL1-R315L EPAPKHTARS | 16    | >TAL1-R315L EPAPKHTALS | 20    | 4     |
| >TAL1-R315L EPAPKHTAR  | 8909  | >TAL1-R315L EPAPKHTAL  | 65    | 8844  |
| >TAL1-R315L EPAPKHTARS | 306   | >TAL1-R315L EPAPKHTALS | 260   | 46    |
| >TAL1-R315L EPAPKHTAR  | 1880  | >TAL1-R315L EPAPKHTAL  | 79    | 1801  |
| >TAL1-R315L EPAPKHTARS | 421   | >TAL1-R315L EPAPKHTALS | 169   | 252   |
| >TAL1-R315L EPAPKHTAR  | 21634 | >TAL1-R315L EPAPKHTAL  | 415   | 21219 |
| >TAL1-R315L EPAPKHTARS | 711   | >TAL1-R315L EPAPKHTALS | 197   | 514   |
| >TAL1-R315L EPAPKHTAR  | 20950 | >TAL1-R315L EPAPKHTAL  | 485   | 20465 |
| >TAL1-R315L EEPAPKHTAR | 1985  | >TAL1-R315L EEPAPKHTAL | 189   | 1796  |
| >TCF12-R74C RGFTDSPHY  | 711   | >TCF12-R74C GGFTDSPHY  | 202   | 509   |
| >TCF12-R74C RGFTDSPHY  | 33    | >TCF12-R74C GGFTDSPHY  | 61    | 28    |

|                             |      |                              |       |       |
|-----------------------------|------|------------------------------|-------|-------|
| >TCF12-R74C RGFTDSPHY       | 73   | >TCF12-R74C GGFTDSPHY        | 209   | 136   |
| >TCF12-R74C RGFTDSPHY       | 97   | >TCF12-R74C GGFTDSPHY        | 1510  | 1413  |
| >TCF12-R74C RGFTDSPHY       | 100  | >TCF12-R74C GGFTDSPHY        | 3844  | 3744  |
| >TCF12-R74C SRGFTDSPHY      | 5281 | >TCF12-R74C SGGFTDSPHY       | 278   | 5003  |
| >TCF12-R74C SSRGFTDSPH      | 53   | >TCF12-R74C SSGGFTDSPH       | 101   | 48    |
| >TCF12-R74C SSRGFTDSPH      | 307  | >TCF12-R74C SSGGFTDSPH       | 171   | 136   |
| >TCF12-R74C SSRGFTDSPH      | 393  | >TCF12-R74C SSGGFTDSPH       | 14603 | 14210 |
| >TCF12-R74C SSRGFTDSPH      | 32   | >TCF12-R74C SSGGFTDSPH       | 6916  | 6884  |
| >TCF12-R74C SSRGFTDSPH      | 52   | >TCF12-R74C SSGGFTDSPH       | 50    | 2     |
| >TCF12-R74C SSRGFTDSPH      | 1360 | >TCF12-R74C SSGGFTDSPH       | 162   | 1198  |
| >TCF12-R74C SSRGFTDSPH      | 69   | >TCF12-R74C SSGGFTDSPH       | 134   | 65    |
| >TCF12-R74C SSRGFTDSPH      | 307  | >TCF12-R74C SSGGFTDSPH       | 2973  | 2666  |
| >TCF12-R74C SSRGFTDSPH      | 463  | >TCF12-R74C SSGGFTDSPH       | 5937  | 5474  |
| >TCF12-R74C SSRGFTDSPH      | 9    | >TCF12-R74C SSGGFTDSPH       | 168   | 159   |
| >TCF12-R74C SSRGFTDSPH      | 29   | >TCF12-R74C SSGGFTDSPH       | 460   | 431   |
| >TCF12-R74C SYDSSRGF        | 34   | >TCF12-R74C SYDSSGGF         | 23    | 11    |
| >TCF12-R74C SYDSSRGFT       | 222  | >TCF12-R74C SYDSSGGFT        | 556   | 334   |
| >TCF12-R74C PSYDSSRGF       | 140  | >TCF12-R74C PSYDSSGGF        | 446   | 306   |
| >TCF12-R74C PSYDSSRGF       | 7    | >TCF12-R74C PSYDSSGGF        | 8     | 1     |
| >TCF12-R74C SPSYDSSRGF      | 467  | >TCF12-R74C SPSYDSSGGF       | 597   | 130   |
| >TCF12-R74C SPSYDSSRGF      | 423  | >TCF12-R74C SPSYDSSGGF       | 288   | 135   |
| >TCF12-R74C SPSYDSSRGF      | 689  | >TCF12-R74C SPSYDSSGGF       | 234   | 455   |
| >TCF12-R74C PPSYDSSRG       | 472  | >TCF12-R74C PPSYDSSGG        | 483   | 11    |
| >TCF12-R74C PPSYDSSRG       | 158  | >TCF12-R74C PPSYDSSGG        | 282   | 124   |
| >TCF3-A8V- $\mu$ APVGTDKEL  | 142  | >TCF3-A8V- $\eta$ VPVGTDKEL  | 115   | 27    |
| >TCF3-A8V- $\mu$ APVGTDKEL  | 112  | >TCF3-A8V- $\eta$ VPVGTDKEL  | 280   | 168   |
| >TCF3-A8V- $\mu$ APVGTDKEL  | 703  | >TCF3-A8V- $\eta$ VPVGTDKEL  | 247   | 456   |
| >TCF3-A8V- $\mu$ MAPVGTDK   | 298  | >TCF3-A8V- $\eta$ MVPVGTDK   | 160   | 138   |
| >TCF3-A8V- $\mu$ MAPVGTDK   | 387  | >TCF3-A8V- $\eta$ MVPVGTDK   | 2531  | 2144  |
| >TCF3-A8V- $\mu$ RMAPVGTDK  | 32   | >TCF3-A8V- $\eta$ RMVPVGTDK  | 187   | 155   |
| >TCF3-A8V- $\mu$ RMAPVGTDK  | 59   | >TCF3-A8V- $\eta$ RMVPVGTDK  | 174   | 115   |
| >TCF3-A8V- $\mu$ RMAPVGTDK  | 513  | >TCF3-A8V- $\eta$ RMVPVGTDK  | 428   | 85    |
| >TCF3-A8V- $\mu$ RMAPVGTDK  | 22   | >TCF3-A8V- $\eta$ RMVPVGTDK  | 26    | 4     |
| >TCF3-A8V- $\mu$ RMAPVGTDK  | 250  | >TCF3-A8V- $\eta$ RMVPVGTDK  | 231   | 19    |
| >TCF3-A8V- $\mu$ RMAPVGTDK  | 30   | >TCF3-A8V- $\eta$ RMVPVGTDK  | 112   | 82    |
| >TCF3-A8V- $\mu$ RMAPVGTDK  | 15   | >TCF3-A8V- $\eta$ RMVPVGTDK  | 25    | 10    |
| >TCF3-A8V- $\mu$ RMAPVGTDK  | 36   | >TCF3-A8V- $\eta$ RMVPVGTDK  | 60    | 24    |
| >TCF3-A8V- $\mu$ RMAPVGTDK  | 65   | >TCF3-A8V- $\eta$ RMVPVGTDK  | 113   | 48    |
| >TCF3-A8V- $\mu$ RMAPVGTDK  | 377  | >TCF3-A8V- $\eta$ RMVPVGTDK  | 337   | 40    |
| >TCF3-A8V- $\mu$ RMAPVGTDK  | 320  | >TCF3-A8V- $\eta$ RMVPVGTDK  | 428   | 108   |
| >TCF3-A8V- $\mu$ RMAPVGTDK  | 110  | >TCF3-A8V- $\eta$ RMVPVGTDK  | 96    | 14    |
| >TCF3-A8V- $\mu$ RMAPVGTDK  | 200  | >TCF3-A8V- $\eta$ RMVPVGTDK  | 68    | 132   |
| >TCF3-A8V- $\mu$ QRMVPVGTCL | 156  | >TCF3-A8V- $\eta$ QRMVPVGTCL | 288   | 132   |

|                        |       |                        |     |       |
|------------------------|-------|------------------------|-----|-------|
| >TCF3-A8V-m QPQRMAPV   | 125   | >TCF3-A8V-n QPQRMAPV   | 181 | 56    |
| >TCF3-A8V-m NQPQRMAPV  | 47    | >TCF3-A8V-n NQPQRMAPV  | 179 | 132   |
| >TCF3-A8V-m NQPQRMAPV  | 18    | >TCF3-A8V-n NQPQRMAPV  | 21  | 3     |
| >TCF3-D218E ADGSLHPSAE | 17104 | >TCF3-D218E AEGSLHPSAE | 65  | 17039 |
| >TCF3-D218E ADGSLHPS   | 4562  | >TCF3-D218E AEGSLHPS   | 347 | 4215  |
| >TCF3-D218E ADGSLHPSA  | 488   | >TCF3-D218E AEGSLHPSA  | 45  | 443   |
| >TCF3-D218E ADGSLHPSAE | 1169  | >TCF3-D218E AEGSLHPSAE | 115 | 1054  |
| >TCF3-D218E ADGSLHPSAE | 10096 | >TCF3-D218E AEGSLHPSAE | 464 | 9632  |
| >TCF3-D218E ADGSLHPSAE | 16951 | >TCF3-D218E AEGSLHPSAE | 283 | 16668 |
| >TCF3-D218E ADGSLHPS   | 8230  | >TCF3-D218E AEGSLHPS   | 22  | 8208  |
| >TCF3-D218E ADGSLHPSA  | 434   | >TCF3-D218E AEGSLHPSA  | 4   | 430   |
| >TCF3-D218E ADGSLHPSAE | 7686  | >TCF3-D218E AEGSLHPSAE | 490 | 7196  |
| >TCF3-D218E ADGSLHPSAE | 16053 | >TCF3-D218E AEGSLHPSAE | 66  | 15987 |
| >TCF3-D218E ADGSLHPSAE | 4791  | >TCF3-D218E AEGSLHPSAE | 103 | 4688  |
| >TCF3-D218E STYPAPFYVA | 699   | >TCF3-D218E STYPAPFYVA | 356 | 343   |
| >TCF3-D218E YVADGSLHPS | 58    | >TCF3-D218E YVAEGSLHPS | 61  | 3     |
| >TCF3-D218E YVADGSLHPS | 114   | >TCF3-D218E YVAEGSLHPS | 135 | 21    |
| >TCF3-D218E YVADGSLHPS | 22    | >TCF3-D218E YVAEGSLHPS | 21  | 1     |
| >TCF3-D218E YVADGSLHPS | 8     | >TCF3-D218E YVAEGSLHPS | 8   | 0     |
| >TCF3-D218E YVADGSLHPS | 93    | >TCF3-D218E YVAEGSLHPS | 61  | 32    |
| >TCF3-D218E YVADGSLHPS | 47    | >TCF3-D218E YVAEGSLHPS | 38  | 9     |
| >TCF3-D218E YVADGSLHPS | 201   | >TCF3-D218E YVAEGSLHPS | 218 | 17    |
| >TCF3-D218E YVADGSLHPS | 325   | >TCF3-D218E YVAEGSLHPS | 724 | 399   |
| >TCF3-D218E YVADGSLHPS | 9     | >TCF3-D218E YVAEGSLHPS | 13  | 4     |
| >TCF3-D218E YVADGSLH   | 109   | >TCF3-D218E YVAEGSLH   | 289 | 180   |
| >TCF3-D218E YVADGSLHPS | 117   | >TCF3-D218E YVAEGSLHPS | 150 | 33    |
| >TCF3-D218E YVADGSLHPS | 528   | >TCF3-D218E YVAEGSLHPS | 310 | 218   |
| >TCF3-D218E YVADGSLHPS | 29    | >TCF3-D218E YVAEGSLHPS | 19  | 10    |
| >TCF3-D218E FYVADGSL   | 8     | >TCF3-D218E FYVAEGSL   | 12  | 4     |
| >TCF3-D218E FYVADGSL   | 478   | >TCF3-D218E FYVAEGSL   | 393 | 85    |
| >TCF3-D218E FYVADGSL   | 18    | >TCF3-D218E FYVAEGSL   | 12  | 6     |
| >TCF3-D218E APFYVADGSL | 11    | >TCF3-D218E APFYVAEGSL | 16  | 5     |
| >TCF3-D218E APFYVADGSL | 601   | >TCF3-D218E APFYVAEGSL | 214 | 387   |
| >TCF3-D218E APFYVADGSL | 458   | >TCF3-D218E APFYVAEGSL | 764 | 306   |
| >TCF3-D218E APFYVADGSL | 257   | >TCF3-D218E APFYVAEGSL | 262 | 5     |
| >TCF3-D218E YPAPFYVAD  | 59    | >TCF3-D218E YPAPFYVAE  | 27  | 32    |
| >TCF3-D218E YPAPFYVADG | 89    | >TCF3-D218E YPAPFYVAEG | 175 | 86    |
| >TCF3-D218E YPAPFYVAD  | 77    | >TCF3-D218E YPAPFYVAE  | 106 | 29    |
| >TCF3-D218E YPAPFYVADG | 66    | >TCF3-D218E YPAPFYVAEG | 36  | 30    |
| >TCF3-D218E YPAPFYVADG | 456   | >TCF3-D218E YPAPFYVAEG | 951 | 495   |
| >TCF3-D218E TYPAPFYVAD | 531   | >TCF3-D218E TYPAPFYVAE | 399 | 132   |
| >TCF3-D218E TYPAPFYVAD | 1413  | >TCF3-D218E TYPAPFYVAE | 418 | 995   |
| >TCF3-E545K EREKERRV   | 7000  | >TCF3-E545K KREKERRV   | 174 | 6826  |

|                        |       |                         |       |       |
|------------------------|-------|-------------------------|-------|-------|
| >TCF3-E545K AEREKERRV  | 265   | >TCF3-E545K AKREKERRV   | 30627 | 30362 |
| >TCF3-E545K AEREKERRVA | 236   | >TCF3-E545K AKREKERRVA  | 16295 | 16059 |
| >TCF3-E545K AEREKERRV  | 191   | >TCF3-E545K AKREKERRV   | 23262 | 23071 |
| >TCF3-E545K KAEREKERRV | 11686 | >TCF3-E545K KAKREKERRV  | 473   | 11213 |
| >TCF3-E545K KAEREKERRV | 6051  | >TCF3-E545K KAKREKERRV  | 71    | 5980  |
| >TCF3-E545K KAEREKER   | 396   | >TCF3-E545K KAKREKER    | 23    | 373   |
| >TCF3-E545K KAEREKERR  | 394   | >TCF3-E545K KAKREKERR   | 22    | 372   |
| >TCF3-E545K EQKAEREKER | 2244  | >TCF3-E545K EQKAKREKER  | 499   | 1745  |
| >TCF3-E545K DLLPPEQKAE | 59    | >TCF3-E545K DLLPPEQKAK  | 97    | 38    |
| >TCF3-P633L PQMVL SAP  | 12718 | >TCF3-P633L LQMVL SAP   | 440   | 12278 |
| >TCF3-P633L PQMVL SAPH | 1160  | >TCF3-P633L LQMVL SAPH  | 50    | 1110  |
| >TCF3-P633L PQMVL SAPH | 10308 | >TCF3-P633L LQMVL SAPHI | 444   | 9864  |
| >TCF3-P633L PQMVL SAPH | 5072  | >TCF3-P633L LQMVL SAPHI | 131   | 4941  |
| >TCF3-P633L PQMVL SAP  | 5219  | >TCF3-P633L LQMVL SAP   | 396   | 4823  |
| >TCF3-P633L PQMVL SAPH | 1432  | >TCF3-P633L LQMVL SAPH  | 72    | 1360  |
| >TCF3-P633L GDPQMVL SA | 815   | >TCF3-P633L GDLQMVL SA  | 47    | 768   |
| >TCF3-P633L VVGDPQMV   | 1116  | >TCF3-P633L VVGDLQMV    | 373   | 743   |
| >TCF3-P633L VVGDPQMV   | 1113  | >TCF3-P633L VVGDLQMV    | 180   | 933   |
| >TCF3-P633L VVGDPQMV   | 14    | >TCF3-P633L VVGDLQMV    | 21    | 7     |
| >TCF3-P633L VVGDPQMV   | 518   | >TCF3-P633L VVGDLQMV    | 326   | 192   |
| >TCF3-P633L VVGDPQMV   | 97    | >TCF3-P633L VVGDLQMV    | 48    | 49    |
| >TCF3-P633L VVGDPQMV   | 104   | >TCF3-P633L VVGDLQMV    | 71    | 33    |
| >TCF3-P633L VVGDPQMV   | 6     | >TCF3-P633L VVGDLQMV    | 4     | 2     |
| >TCF3-P633L VVGDPQMVL  | 66    | >TCF3-P633L VVGDLQMVL   | 61    | 5     |
| >TCF3-P633L VVGDPQMVL  | 193   | >TCF3-P633L VVGDLQMVL   | 225   | 32    |
| >TCF3-P633L GVVGDPQM\  | 1967  | >TCF3-P633L GVVGDLQM\   | 352   | 1615  |
| >TCF3-P633L GVVGDPQM\  | 393   | >TCF3-P633L GVVGDLQM\   | 381   | 12    |
| >TCF3-P633L GVVGDPQM\  | 253   | >TCF3-P633L GVVGDLQM\   | 82    | 171   |
| >TCF3-P633L GVVGDPQM\  | 1647  | >TCF3-P633L GVVGDLQM\   | 34    | 1613  |
| >TCF3-P633L GVVGDPQM\  | 50    | >TCF3-P633L GVVGDLQM\   | 51    | 1     |
| >TCF3-P633L GVVGDPQM\  | 1007  | >TCF3-P633L GVVGDLQM\   | 355   | 652   |
| >TCF3-P633L GVVGDPQM\  | 158   | >TCF3-P633L GVVGDLQM\   | 94    | 64    |
| >TCF3-P633L GVVGDPQM\  | 22    | >TCF3-P633L GVVGDLQM\   | 6     | 16    |
| >TCF3-P633L GVVGDPQM\  | 413   | >TCF3-P633L GVVGDLQM\   | 248   | 165   |
| >TCF3-P633L GVVGDPQM   | 104   | >TCF3-P633L GVVGDLQM    | 117   | 13    |
| >TCF3-P633L VSGVVGDPQ  | 216   | >TCF3-P633L VSGVVGDLQ   | 150   | 66    |
| >TCF3-P633L VSGVVGDPQ  | 449   | >TCF3-P633L VSGVVGDLQ   | 197   | 252   |
| >TCF3-P633L VSGVVGDPQ  | 628   | >TCF3-P633L VSGVVGDLQ   | 196   | 432   |
| >TCF3-P633L KVSGVVGDP  | 16063 | >TCF3-P633L KVSGVVGDL   | 406   | 15657 |
| >TCF3-P633L KVSGVVGDP  | 11673 | >TCF3-P633L KVSGVVGDL   | 432   | 11241 |
| >TCF3-P633L KVSGVVGDP( | 384   | >TCF3-P633L KVSGVVGDL(  | 228   | 156   |
| >TCF3-P633L KVSGVVGDP( | 96    | >TCF3-P633L KVSGVVGDL(  | 68    | 28    |
| >TCF3-P633L KVSGVVGDP( | 348   | >TCF3-P633L KVSGVVGDL(  | 247   | 101   |

|                        |       |                        |      |       |
|------------------------|-------|------------------------|------|-------|
| >TCF3-T491N TAAASEIK   | 115   | >TCF3-T491N MAAASEIK   | 89   | 26    |
| >TCF3-T491N TAAASEIKR  | 1397  | >TCF3-T491N MAAASEIKR  | 163  | 1234  |
| >TCF3-T491N TAAASEIK   | 20    | >TCF3-T491N MAAASEIK   | 8    | 12    |
| >TCF3-T491N TAAASEIKR  | 7     | >TCF3-T491N MAAASEIKR  | 4    | 3     |
| >TCF3-T491N ATAAASEI   | 3970  | >TCF3-T491N AMAAASEI   | 47   | 3923  |
| >TCF3-T491N ATAAASEI   | 98    | >TCF3-T491N AMAAASEI   | 6    | 92    |
| >TCF3-T491N ATAAASEI   | 292   | >TCF3-T491N AMAAASEI   | 7    | 285   |
| >TCF3-T491N ATAAASEI   | 328   | >TCF3-T491N AMAAASEI   | 54   | 274   |
| >TCF3-T491N ATAAASEI   | 2521  | >TCF3-T491N AMAAASEI   | 12   | 2509  |
| >TCF3-T491N ATAAASEI   | 11585 | >TCF3-T491N AMAAASEI   | 45   | 11540 |
| >TCF3-T491N ATAAASEI   | 3866  | >TCF3-T491N AMAAASEI   | 18   | 3848  |
| >TCF3-T491N ATAAASEI   | 13418 | >TCF3-T491N AMAAASEI   | 40   | 13378 |
| >TCF3-T491N ATAAASEI   | 6830  | >TCF3-T491N AMAAASEI   | 9    | 6821  |
| >TCF3-T491N ATAAASEIK  | 603   | >TCF3-T491N AMAAASEIK  | 129  | 474   |
| >TCF3-T491N ATAAASEIK  | 34    | >TCF3-T491N AMAAASEIK  | 48   | 14    |
| >TCF3-T491N ATAAASEIKR | 55    | >TCF3-T491N AMAAASEIKF | 205  | 150   |
| >TCF3-T491N ATAAASEIK  | 133   | >TCF3-T491N AMAAASEIK  | 904  | 771   |
| >TCF3-T491N ATAAASEIKR | 493   | >TCF3-T491N AMAAASEIKF | 223  | 270   |
| >TCF3-T491N ATAAASEI   | 470   | >TCF3-T491N AMAAASEI   | 751  | 281   |
| >TCF3-T491N ATAAASEIK  | 67    | >TCF3-T491N AMAAASEIK  | 1820 | 1753  |
| >TCF3-T491N ATAAASEIKR | 7     | >TCF3-T491N AMAAASEIKF | 35   | 28    |
| >TCF3-T491N ATAAASEI   | 26    | >TCF3-T491N AMAAASEI   | 2368 | 2342  |
| >TCF3-T491N ATAAASEI   | 4206  | >TCF3-T491N AMAAASEI   | 261  | 3945  |
| >TCF3-T491N ATAAASEI   | 2481  | >TCF3-T491N AMAAASEI   | 106  | 2375  |
| >TCF3-T491N ATAAASEI   | 26    | >TCF3-T491N AMAAASEI   | 3755 | 3729  |
| >TCF3-T491N ATAAASEIK  | 222   | >TCF3-T491N AMAAASEIK  | 3231 | 3009  |
| >TCF3-T491N ATAAASEIKR | 312   | >TCF3-T491N AMAAASEIKF | 4578 | 4266  |
| >TCF3-T491N ATAAASEI   | 24    | >TCF3-T491N AMAAASEI   | 1142 | 1118  |
| >TCF3-T491N SYSGLGRAGA | 840   | >TCF3-T491N SYSGLGRAGA | 32   | 808   |
| >TCF3-T491N SYSGLGRAGA | 3350  | >TCF3-T491N SYSGLGRAGA | 298  | 3052  |
| >TCF3-T491N SYSGLGRAGA | 660   | >TCF3-T491N SYSGLGRAGA | 178  | 482   |
| >TCF3-T491N GATAAASEI  | 4849  | >TCF3-T491N GAMAAASEI  | 467  | 4382  |
| >TCF3-T491N GATAAASEI  | 4756  | >TCF3-T491N GAMAAASEI  | 360  | 4396  |
| >TCF3-T491N GATAAASEIK | 1764  | >TCF3-T491N GAMAAASEIH | 142  | 1622  |
| >TCF3-T491N GATAAASEIK | 165   | >TCF3-T491N GAMAAASEIH | 31   | 134   |
| >TCF3-T491N GATAAASEIK | 5290  | >TCF3-T491N GAMAAASEIH | 331  | 4959  |
| >TCF3-T491N GATAAASEIK | 471   | >TCF3-T491N GAMAAASEIH | 112  | 359   |
| >TCF3-T491N GATAAASEIK | 132   | >TCF3-T491N GAMAAASEIH | 77   | 55    |
| >TCF3-T491N GATAAASEI  | 737   | >TCF3-T491N GAMAAASEI  | 169  | 568   |
| >TCF3-T491N GATAAASEI  | 430   | >TCF3-T491N GAMAAASEI  | 315  | 115   |
| >TCF3-T491N GATAAASEI  | 389   | >TCF3-T491N GAMAAASEI  | 153  | 236   |
| >TCF3-T491N RAGATAAASI | 52    | >TCF3-T491N RAGAMAAAS  | 79   | 27    |
| >TCF3-T491N RAGATAAASI | 231   | >TCF3-T491N RAGAMAAAS  | 419  | 188   |

|                         |       |                         |     |       |
|-------------------------|-------|-------------------------|-----|-------|
| >TCF3-T491N RAGATAAASI  | 51    | >TCF3-T491N RAGAMAAAS   | 68  | 17    |
| >TCF3-T491N LGRAGATA    | 421   | >TCF3-T491N LGRAGAMA    | 437 | 16    |
| >TCF3-T491N LGRAGATAA   | 1863  | >TCF3-T491N LGRAGAMAA   | 103 | 1760  |
| >TCF3-T491N LGRAGATAA/  | 238   | >TCF3-T491N LGRAGAMAA   | 119 | 119   |
| >TCF3-T491N GLGRAGATA/  | 482   | >TCF3-T491N GLGRAGAMA/  | 442 | 40    |
| >TCF3-T491N GLGRAGATA   | 277   | >TCF3-T491N GLGRAGAMA/  | 477 | 200   |
| >TCF3-T491N GLGRAGATA/  | 524   | >TCF3-T491N GLGRAGAMA/  | 352 | 172   |
| >TCF3-T491N GLGRAGATA/  | 99    | >TCF3-T491N GLGRAGAMA/  | 100 | 1     |
| >TCF3-T491N GLGRAGATA   | 148   | >TCF3-T491N GLGRAGAMA/  | 203 | 55    |
| >TCF3-T491N GLGRAGATA/  | 327   | >TCF3-T491N GLGRAGAMA/  | 251 | 76    |
| >TCF3-T491N GLGRAGATA/  | 142   | >TCF3-T491N GLGRAGAMA/  | 174 | 32    |
| >TCF3-T491N GLGRAGATA   | 51    | >TCF3-T491N GLGRAGAMA/  | 467 | 416   |
| >TCF3-T491N GLGRAGATA/  | 193   | >TCF3-T491N GLGRAGAMA/  | 142 | 51    |
| >TCF3-T491N GLGRAGATA/  | 45    | >TCF3-T491N GLGRAGAMA/  | 97  | 52    |
| >TCF3-T491N GLGRAGATA   | 118   | >TCF3-T491N GLGRAGAMA/  | 163 | 45    |
| >TCF3-T491N GLGRAGATA/  | 323   | >TCF3-T491N GLGRAGAMA/  | 259 | 64    |
| >TCF3-T491N GLGRAGATA/  | 214   | >TCF3-T491N GLGRAGAMA/  | 317 | 103   |
| >TCF3-T491N GLGRAGATA   | 27    | >TCF3-T491N GLGRAGAMA/  | 51  | 24    |
| >TCF3-T491N GLGRAGATA/  | 42    | >TCF3-T491N GLGRAGAMA/  | 36  | 6     |
| >TCF3-T491N GLGRAGATA/  | 29    | >TCF3-T491N GLGRAGAMA/  | 41  | 12    |
| >TCF3-T491N YSGLGRAGAT  | 11811 | >TCF3-T491N YSGLGRAGAT  | 49  | 11762 |
| >TCF3-T491N YSGLGRAGAT  | 7646  | >TCF3-T491N YSGLGRAGAT  | 40  | 7606  |
| >TCF3-V10L-I PVGTDKEL   | 15833 | >TCF3-V10L-I PLGTDKEL   | 442 | 15391 |
| >TCF3-V10L-I PVGTDKELSD | 13842 | >TCF3-V10L-I PLGTDKELSD | 385 | 13457 |
| >TCF3-V10L-I APVGTDKEL  | 142   | >TCF3-V10L-I APLGTDKEL  | 63  | 79    |
| >TCF3-V10L-I APVGTDKEL  | 112   | >TCF3-V10L-I APLGTDKEL  | 199 | 87    |
| >TCF3-V10L-I APVGTDKEL  | 731   | >TCF3-V10L-I APLGTDKEL  | 390 | 341   |
| >TCF3-V10L-I MAPVGTDK   | 298   | >TCF3-V10L-I MAPLGTDK   | 486 | 188   |
| >TCF3-V10L-I MAPVGTDK   | 387   | >TCF3-V10L-I MAPLGTDK   | 338 | 49    |
| >TCF3-V10L-I RMAPVGTDK  | 32    | >TCF3-V10L-I RMAPLGTDK  | 29  | 3     |
| >TCF3-V10L-I RMAPVGTDK  | 59    | >TCF3-V10L-I RMAPLGTDK  | 70  | 11    |
| >TCF3-V10L-I RMAPVGTDK  | 22    | >TCF3-V10L-I RMAPLGTDK  | 45  | 23    |
| >TCF3-V10L-I RMAPVGTDK  | 250   | >TCF3-V10L-I RMAPLGTDK  | 336 | 86    |
| >TCF3-V10L-I RMAPVGTDK  | 30    | >TCF3-V10L-I RMAPLGTDK  | 47  | 17    |
| >TCF3-V10L-I RMAPVGTDK  | 15    | >TCF3-V10L-I RMAPLGTDK  | 15  | 0     |
| >TCF3-V10L-I RMAPVGTDK  | 36    | >TCF3-V10L-I RMAPLGTDK  | 48  | 12    |
| >TCF3-V10L-I RMAPVGTDK  | 65    | >TCF3-V10L-I RMAPLGTDK  | 98  | 33    |
| >TCF3-V10L-I RMAPVGTDK  | 377   | >TCF3-V10L-I RMAPLGTDK  | 330 | 47    |
| >TCF3-V10L-I RMAPVGTDK  | 320   | >TCF3-V10L-I RMAPLGTDK  | 293 | 27    |
| >TCF3-V10L-I RMAPVGTDK  | 110   | >TCF3-V10L-I RMAPLGTDK  | 111 | 1     |
| >TCF3-V10L-I RMAPVGTDK  | 200   | >TCF3-V10L-I RMAPLGTDK  | 115 | 85    |
| >TCF3-V10L-I QRMAPVGT   | 156   | >TCF3-V10L-I QRMAPLGT   | 140 | 16    |
| >TCF3-V10L-I PQRMAPVGT  | 620   | >TCF3-V10L-I PQRMAPLGT  | 499 | 121   |

|                        |       |                         |      |       |
|------------------------|-------|-------------------------|------|-------|
| >TCF3-V10L-1QPQRMAPV   | 125   | >TCF3-V10L-1QPQRMAPL    | 46   | 79    |
| >TCF3-V10L-1QPQRMAPV   | 1636  | >TCF3-V10L-1QPQRMAPL    | 442  | 1194  |
| >TCF3-V10L-1NQPQRMAPV  | 47    | >TCF3-V10L-1NQPQRMAPL   | 539  | 492   |
| >TCF3-V10L-1NQPQRMAPV  | 18    | >TCF3-V10L-1NQPQRMAPL   | 70   | 52    |
| >TCF3-V10L-1NQPQRMAPV  | 3172  | >TCF3-V10L-1NQPQRMAPL   | 223  | 2949  |
| >TCL1A-G59E LGRPMTPTQI | 7071  | >TCL1A-G59E LERPMTPTQI  | 23   | 7048  |
| >TCL1A-G59E LGRPMTPTQ  | 490   | >TCL1A-G59E LERPMTPTQ   | 6133 | 5643  |
| >TCL1A-G59E LGRPMTPTQI | 366   | >TCL1A-G59E LERPMTPTQI  | 5894 | 5528  |
| >TCL1A-G59E LGRPMTPTQ  | 26010 | >TCL1A-G59E LERPMTPTQ   | 227  | 25783 |
| >TCL1A-G59E LGRPMTPT   | 36625 | >TCL1A-G59E LERPMTPT    | 135  | 36490 |
| >TCL1A-G59E LGRPMTPTQI | 36038 | >TCL1A-G59E LERPMTPTQI  | 354  | 35684 |
| >TCL1A-G59E LGRPMTPTQI | 20779 | >TCL1A-G59E LERPMTPTQI  | 13   | 20766 |
| >TCL1A-G59E VLGRPMTPTC | 122   | >TCL1A-G59E VLERPMTPTC  | 600  | 478   |
| >TCL1A-G59E VLGRPMTPTC | 13    | >TCL1A-G59E VLERPMTPTC  | 111  | 98    |
| >TCL1A-G59E VLGRPMTPTC | 396   | >TCL1A-G59E VLERPMTPTC  | 1738 | 1342  |
| >TCL1A-G59E VLGRPMTPTC | 138   | >TCL1A-G59E VLERPMTPTC  | 2493 | 2355  |
| >TCL1A-G59E VLGRPMTPTC | 456   | >TCL1A-G59E VLERPMTPTC  | 8551 | 8095  |
| >TCL1A-G59E VLGRPMTPT  | 292   | >TCL1A-G59E VLERPMTPT   | 720  | 428   |
| >TCL1A-G59E VLGRPMTPTC | 63    | >TCL1A-G59E VLERPMTPTC  | 124  | 61    |
| >TCL1A-G59E VLGRPMTPTC | 15    | >TCL1A-G59E VLERPMTPTC  | 34   | 19    |
| >TCL1A-G59E DVVLGRPM   | 26    | >TCL1A-G59E DVVLERPM    | 28   | 2     |
| >TCL1A-G59E DVVLGRPM   | 289   | >TCL1A-G59E DVVLERPM    | 1469 | 1180  |
| >TCL1A-G59E REDVVLGRPM | 163   | >TCL1A-G59E REDVVLERPM  | 163  | 0     |
| >TCL1A-G59E REDVVLGRPM | 384   | >TCL1A-G59E REDVVLERPM  | 478  | 94    |
| >TCL1A-G59E REDVVLGRPM | 171   | >TCL1A-G59E REDVVLERPM  | 229  | 58    |
| >TCL1A-G59E REDVVLGRPM | 186   | >TCL1A-G59E REDVVLERPM  | 215  | 29    |
| >TCL1A-G59E RREDVVLGR  | 320   | >TCL1A-G59E RREDVVLER   | 556  | 236   |
| >TCL1A-G59E RREDVVLGRF | 165   | >TCL1A-G59E RREDVVLERP  | 269  | 104   |
| >TCL1A-G59E RREDVVLG   | 78    | >TCL1A-G59E RREDVVLE    | 226  | 148   |
| >TCL1A-G59E RREDVVLGR  | 194   | >TCL1A-G59E RREDVVLER   | 118  | 76    |
| >TCL1A-G59E RREDVVLGRF | 100   | >TCL1A-G59E RREDVVLERP  | 113  | 13    |
| >TCL1A-G59E RREDVVLGR  | 68    | >TCL1A-G59E RREDVVLER   | 86   | 18    |
| >TCL1A-G59E RREDVVLGRF | 53    | >TCL1A-G59E RREDVVLERP  | 75   | 22    |
| >TCL1A-G59E RREDVVLGR  | 207   | >TCL1A-G59E RREDVVLER   | 395  | 188   |
| >TCL1A-G59E LRREDVVLGR | 145   | >TCL1A-G59E LRREDVVLER  | 174  | 29    |
| >TCL1A-G59E LRREDVVLGR | 174   | >TCL1A-G59E LRREDVVLER  | 338  | 164   |
| >TCL1A-G59E LLRREDVVLG | 867   | >TCL1A-G59E LLRREDVVLEI | 408  | 459   |
| >TCL1A-K23M KVVYLDEK   | 312   | >TCL1A-K23M NFVYLDEK    | 8501 | 8189  |
| >TCL1A-K23M KVVYLDEK   | 4988  | >TCL1A-K23M NFVYLDEK    | 229  | 4759  |
| >TCL1A-K23M KVVYLDEK   | 427   | >TCL1A-K23M NFVYLDEK    | 3231 | 2804  |
| >TCL1A-K23M KVVYLDEKQH | 467   | >TCL1A-K23M NFVYLDEKQH  | 3944 | 3477  |
| >TCL1A-K23M KVVYLDEK   | 242   | >TCL1A-K23M ENFVYLDEK   | 59   | 183   |
| >TCL1A-K23M WEKVVYLD   | 489   | >TCL1A-K23M WENFVYLD    | 222  | 267   |



|                       |      |                        |      |      |
|-----------------------|------|------------------------|------|------|
| >TCL1A-K23MWEKRVYLDEI | 940  | >TCL1A-K23M WENRVYLDEI | 457  | 483  |
| >TCL1A-K23MAWEKRVYL   | 135  | >TCL1A-K23MAWENRVYL    | 130  | 5    |
| >TCL1A-K23MAWEKRVYL   | 83   | >TCL1A-K23MAWENRVYL    | 71   | 12   |
| >TCL1A-K23MAWEKRVYLDI | 558  | >TCL1A-K23MAWENRVYLDI  | 487  | 71   |
| >TCL1A-K23MWAWKRVYL   | 1760 | >TCL1A-K23MWAWENRVYL   | 17   | 1743 |
| >TCL1A-K23MWAWKRVYL   | 190  | >TCL1A-K23MWAWENRVYL   | 326  | 136  |
| >TCL1A-K23MWAWKRVYL   | 35   | >TCL1A-K23MWAWENRVYL   | 34   | 1    |
| >TCL1A-K23MWAWKRVYL   | 239  | >TCL1A-K23MWAWENRVYL   | 256  | 17   |
| >TCL1A-K23MWAWKRVYL   | 10   | >TCL1A-K23MWAWENRVYL   | 7    | 3    |
| >TCL1A-K23MWAWKRVYL   | 13   | >TCL1A-K23MWAWENRVYL   | 7    | 6    |
| >TCL1A-K23MWAWKRVYL   | 447  | >TCL1A-K23MWAWENRVYL   | 63   | 384  |
| >TCL1A-K23MWAWKRVYL   | 112  | >TCL1A-K23MWAWENRVYL   | 77   | 35   |
| >TCL1A-K23MWAWKRVYL   | 78   | >TCL1A-K23MWAWENRVYL   | 23   | 55   |
| >TCL1A-K23MWAWKRVYL   | 159  | >TCL1A-K23MWAWENRVYL   | 58   | 101  |
| >TCL1A-K23MWAWKRVY    | 64   | >TCL1A-K23MWAWENRVY    | 36   | 28   |
| >TCL1A-K23MWAWKRVY    | 333  | >TCL1A-K23MWAWENRVY    | 173  | 160  |
| >TCL1A-K23MWAWKRVYL   | 48   | >TCL1A-K23MWAWENRVYL   | 23   | 25   |
| >TCL1A-K23MWAWKRVYL   | 24   | >TCL1A-K23MWAWENRVYL   | 10   | 14   |
| >TCL1A-K23MWAWKRVYL   | 387  | >TCL1A-K23MWAWENRVYL   | 5914 | 5527 |
| >TCL1A-K23MWAWKRVY    | 567  | >TCL1A-K23MWAWENRVY    | 271  | 296  |
| >TCL1A-K23MWAWKRVY    | 135  | >TCL1A-K23MWAWENRVY    | 51   | 84   |
| >TCL1A-K23MWAWKRVYL   | 361  | >TCL1A-K23MWAWENRVYL   | 104  | 257  |
| >TCL1A-K23MWAWKRVY    | 28   | >TCL1A-K23MWAWENRVY    | 25   | 3    |
| >TCL1A-K23MWAWKRVYL   | 207  | >TCL1A-K23MWAWENRVYL   | 285  | 78   |
| >TCL1A-K23MWAWKRVY    | 11   | >TCL1A-K23MWAWENRVY    | 8    | 3    |
| >TCL1A-K23MWAWKRVYL   | 354  | >TCL1A-K23MWAWENRVYL   | 95   | 259  |
| >TCL1A-K23MWAWKRVY    | 148  | >TCL1A-K23MWAWENRVY    | 100  | 48   |
| >TCL1A-K23MWAWKRVYL   | 707  | >TCL1A-K23MWAWENRVYL   | 301  | 406  |
| >TCL1A-K23MLWAWKRV    | 1298 | >TCL1A-K23MLWAWENRV    | 145  | 1153 |
| >TCL1A-K23MLWAWKRV    | 2189 | >TCL1A-K23MLWAWENRV    | 378  | 1811 |
| >TCL1A-K23MLWAWKRVY   | 792  | >TCL1A-K23MLWAWENRVY   | 334  | 458  |
| >TCL1A-K23MLWAWKRVY   | 38   | >TCL1A-K23MLWAWENRVY   | 23   | 15   |
| >TCL1A-K23MLWAWKRVY   | 64   | >TCL1A-K23MLWAWENRVY   | 33   | 31   |
| >TCL1A-K23MLWAWKRVY   | 30   | >TCL1A-K23MLWAWENRVY   | 19   | 11   |
| >TCL1A-K23MLWAWKRVY   | 776  | >TCL1A-K23MLWAWENRVY   | 253  | 523  |
| >TCL1A-K23MLWAWKRVY   | 94   | >TCL1A-K23MLWAWENRVY   | 221  | 127  |
| >TCL1A-K23MLWAWKRV    | 27   | >TCL1A-K23MLWAWENRV    | 23   | 4    |
| >TCL1A-K23MLWAWKRVY   | 165  | >TCL1A-K23MLWAWENRVY   | 137  | 28   |
| >TCL1A-K23MLWAWKRVY   | 63   | >TCL1A-K23MLWAWENRVY   | 35   | 28   |
| >TCL1A-K23MLWAWKRVY   | 219  | >TCL1A-K23MLWAWENRVY   | 188  | 31   |
| >TCL1A-K23MLWAWKRV    | 11   | >TCL1A-K23MLWAWENRV    | 8    | 3    |
| >TCL1A-K23MLWAWKRV    | 10   | >TCL1A-K23MLWAWENRV    | 8    | 2    |
| >TCL1A-K23MLWAWKRV    | 83   | >TCL1A-K23MLWAWENRV    | 8    | 75   |

|                       |      |                       |      |      |
|-----------------------|------|-----------------------|------|------|
| >TCL1A-K23MRLWAWKEKVV | 21   | >TCL1A-K23MRLWAWENFV  | 10   | 11   |
| >TCL1A-K23MRLWAWKEKVV | 78   | >TCL1A-K23MRLWAWENFV  | 24   | 54   |
| >TCL1A-K23MRLWAWKEKVV | 178  | >TCL1A-K23MRLWAWENFV  | 131  | 47   |
| >TCL1A-K23MRLWAWKEKVV | 84   | >TCL1A-K23MRLWAWENFV  | 15   | 69   |
| >TCL1A-K23MRLWAWKEKVV | 50   | >TCL1A-K23MRLWAWENFV  | 25   | 25   |
| >TCL1A-K23MRLWAWKEKF  | 63   | >TCL1A-K23MRLWAWENF   | 63   | 0    |
| >TCL1A-K23MRLWAWKEKVV | 1    | >TCL1A-K23MRLWAWENFV  | 1    | 0    |
| >TCL1A-K23MRLWAWKEKVV | 176  | >TCL1A-K23MRLWAWENFV  | 123  | 53   |
| >TCL1A-K23MRLWAWKEKVV | 2    | >TCL1A-K23MRLWAWENFV  | 2    | 0    |
| >TCL1A-K23MRLWAWKEKVV | 4    | >TCL1A-K23MRLWAWENFV  | 3    | 1    |
| >TCL1A-K23MRLWAWKEKVV | 6    | >TCL1A-K23MRLWAWENFV  | 4    | 2    |
| >TCL1A-K23MRLWAWKEKVV | 4    | >TCL1A-K23MRLWAWENFV  | 4    | 0    |
| >TCL1A-K23MRLWAWKEKVV | 6    | >TCL1A-K23MRLWAWENFV  | 5    | 1    |
| >TCL1A-K23MRLWAWKEKVV | 3    | >TCL1A-K23MRLWAWENFV  | 2    | 1    |
| >TCL1A-K23MRLWAWKEKVV | 4    | >TCL1A-K23MRLWAWENFV  | 3    | 1    |
| >TCL1A-K23MRLWAWKEKVV | 2    | >TCL1A-K23MRLWAWENFV  | 2    | 0    |
| >TCL1A-K23MRLWAWKEKVV | 3    | >TCL1A-K23MRLWAWENFV  | 3    | 0    |
| >TCL1A-K23MRLWAWKEKVV | 476  | >TCL1A-K23MRLWAWENFV  | 381  | 95   |
| >TCL1A-K23MRLWAWKEKF  | 150  | >TCL1A-K23MRLWAWENF   | 100  | 50   |
| >TCL1A-K23MRLWAWKEKVV | 533  | >TCL1A-K23MRLWAWENFV  | 427  | 106  |
| >TCL1A-K23MRLWAWKEKVV | 1816 | >TCL1A-K23MRLWAWENFV  | 417  | 1399 |
| >TCL1A-K23MRLWAWKEKVV | 55   | >TCL1A-K23MRLWAWENFV  | 31   | 24   |
| >TCL1A-K23MRLWAWKEKVV | 932  | >TCL1A-K23MRLWAWENFV  | 482  | 450  |
| >TCL1A-K23MRLWAWKEKVV | 122  | >TCL1A-K23MRLWAWENFV  | 126  | 4    |
| >TCL1A-K23MRLWAWKEKF  | 25   | >TCL1A-K23MRLWAWENF   | 18   | 7    |
| >TCL1A-K23MRLWAWKEKVV | 125  | >TCL1A-K23MRLWAWENFV  | 41   | 84   |
| >TCL1A-K23MRLWAWKEKVV | 76   | >TCL1A-K23MRLWAWENFV  | 52   | 24   |
| >TCL1A-K23MRLWAWKEKVV | 1688 | >TCL1A-K23MRLWAWENFV  | 314  | 1374 |
| >TCL1A-K23MRLWAWKEKVV | 26   | >TCL1A-K23MRLWAWENFV  | 14   | 12   |
| >TCL1A-K23MRLWAWKEKF  | 268  | >TCL1A-K23MRLWAWENF   | 128  | 140  |
| >TCL1A-K23MRLWAWKEKVV | 149  | >TCL1A-K23MRLWAWENFV  | 97   | 52   |
| >TCL1A-K23MRLWAWKEKF  | 20   | >TCL1A-K23MRLWAWENF   | 12   | 8    |
| >TCL1A-K23MRLWAWKEKVV | 74   | >TCL1A-K23MRLWAWENFV  | 45   | 29   |
| >TCL1A-K23MRLWAWKEKVV | 129  | >TCL1A-K23MRLWAWENFV  | 81   | 48   |
| >TCL1A-K23MRLWAWKEKF  | 66   | >TCL1A-K23MRLWAWENF   | 103  | 37   |
| >TCL1A-K23MRLWAWKEKVV | 158  | >TCL1A-K23MRLWAWENFV  | 184  | 26   |
| >TCL1A-K23MRLWAWKEKVV | 331  | >TCL1A-K23MRLWAWENFV  | 264  | 67   |
| >TCL1A-K23MRLWAWKEKF  | 460  | >TCL1A-K23MRLWAWENF   | 1231 | 771  |
| >TCL1A-K23MRLWAWKEKVV | 388  | >TCL1A-K23MRLWAWENFV  | 317  | 71   |
| >TCL1A-K23MRLWAWKEKVV | 396  | >TCL1A-K23MRLWAWENFV  | 227  | 169  |
| >TCL1A-K23MDRLWAWEK   | 289  | >TCL1A-K23MDRLWAWEN   | 6327 | 6038 |
| >TCL1A-K23MDRLWAWEKF  | 470  | >TCL1A-K23MDRLWAWENI  | 511  | 41   |
| >TCL1A-K23MPDRLWAWEK  | 141  | >TCL1A-K23MPDRLWAWENI | 96   | 45   |

|                        |      |                       |      |      |
|------------------------|------|-----------------------|------|------|
| >TCL1A-K23MHPDRLWAWI   | 799  | >TCL1A-K23MHPDRLWAWI  | 220  | 579  |
| >TCL1A-K23MHPDRLWAWI   | 73   | >TCL1A-K23MHPDRLWAWI  | 59   | 14   |
| >TCL1A-K23MHPDRLWAWI   | 277  | >TCL1A-K23MHPDRLWAWI  | 166  | 111  |
| >TCL1A-K23MHPDRLWAWI   | 39   | >TCL1A-K23MHPDRLWAWI  | 65   | 26   |
| >TCL1A-K23MHPDRLWAWI   | 449  | >TCL1A-K23MHPDRLWAWI  | 420  | 29   |
| >TET1-A2023ARRELHATTP  | 133  | >TET1-A2023TRRELHATTP | 493  | 360  |
| >TET1-A2023CARRELHA    | 131  | >TET1-A2023CTRRELHA   | 25   | 106  |
| >TET1-A2023CARRELHATT  | 1368 | >TET1-A2023CTRRELHATT | 250  | 1118 |
| >TET1-A2023IECARREL    | 419  | >TET1-A2023IECTRREL   | 505  | 86   |
| >TET1-A2023IECARREL    | 202  | >TET1-A2023IECTRREL   | 332  | 130  |
| >TET1-A2023VLIECARREL  | 128  | >TET1-A2023VLIETRREL  | 111  | 17   |
| >TET1-A2023VLIECARREL  | 382  | >TET1-A2023VLIETRREL  | 258  | 124  |
| >TET1-A2023VLIECARREL  | 43   | >TET1-A2023VLIETRREL  | 26   | 17   |
| >TET1-A2023VLIECARREL  | 84   | >TET1-A2023VLIETRREL  | 48   | 36   |
| >TET1-A2023VLIECARREL  | 507  | >TET1-A2023VLIETRREL  | 338  | 169  |
| >TET1-A2023VLIECARREL  | 10   | >TET1-A2023VLIETRREL  | 8    | 2    |
| >TET1-A2023VLIECARR    | 437  | >TET1-A2023VLIETR     | 514  | 77   |
| >TET1-A2023VLIECARR    | 558  | >TET1-A2023VLIETR     | 461  | 97   |
| >TET1-A2023SVLIECAR    | 495  | >TET1-A2023SVLIECTR   | 688  | 193  |
| >TET1-A2023SVLIECAR    | 143  | >TET1-A2023SVLIECTR   | 192  | 49   |
| >TET1-A2023SVLIECARR   | 249  | >TET1-A2023SVLIECTR   | 464  | 215  |
| >TET1-A2023SVLIECAR    | 102  | >TET1-A2023SVLIECTR   | 100  | 2    |
| >TET1-A2023SVLIECARR   | 153  | >TET1-A2023SVLIECTR   | 244  | 91   |
| >TET1-A2023SVLIECAR    | 277  | >TET1-A2023SVLIECTR   | 250  | 27   |
| >TET1-A2023GSVLIECAR   | 323  | >TET1-A2023GSVLIECTR  | 392  | 69   |
| >TET1-A2023GSVLIECARR  | 323  | >TET1-A2023GSVLIECTR  | 826  | 503  |
| >TET1-A2023GSVLIECAR   | 227  | >TET1-A2023GSVLIECTR  | 135  | 92   |
| >TET1-A2023GSVLIECARR  | 105  | >TET1-A2023GSVLIECTR  | 203  | 98   |
| >TET1-A2023HGSVLIECARI | 401  | >TET1-A2023HGSVLIECTR | 514  | 113  |
| >TET1-A2023HGSVLIECAR  | 302  | >TET1-A2023HGSVLIECTR | 255  | 47   |
| >TET1-D1715DTDEFGSK    | 2400 | >TET1-D1715NTDEFGSK   | 247  | 2153 |
| >TET1-D1715DTDEFGSKEG  | 196  | >TET1-D1715NTDEFGSKEG | 598  | 402  |
| >TET1-D1715DTDEFGSK    | 117  | >TET1-D1715NTDEFGSK   | 168  | 51   |
| >TET1-D1715DTDEFGSKEG  | 35   | >TET1-D1715NTDEFGSKEG | 33   | 2    |
| >TET1-D1715LSDTDEFGSK  | 604  | >TET1-D1715LSNTDEFGSK | 194  | 410  |
| >TET1-D1715KLSDTDEF    | 141  | >TET1-D1715KLSNTDEF   | 605  | 464  |
| >TET1-D1715KLSDTDEFG   | 269  | >TET1-D1715KLSNTDEFG  | 1619 | 1350 |
| >TET1-D1715KLSDTDEFGS  | 120  | >TET1-D1715KLSNTDEFGS | 70   | 50   |
| >TET1-D1715KLSDTDEFGS  | 138  | >TET1-D1715KLSNTDEFGS | 124  | 14   |
| >TET1-D1715KLSDTDEFGS  | 239  | >TET1-D1715KLSNTDEFGS | 177  | 62   |
| >TET1-D1715KLSDTDEF    | 85   | >TET1-D1715KLSNTDEF   | 37   | 48   |
| >TET1-D1715KLSDTDEF    | 212  | >TET1-D1715KLSNTDEF   | 176  | 36   |
| >TET1-D1715KLSDTDEF    | 152  | >TET1-D1715KLSNTDEF   | 66   | 86   |

|                        |       |                        |      |       |
|------------------------|-------|------------------------|------|-------|
| >TET1-D1715YKLSDTDEF   | 16230 | >TET1-D1715YKLSNTDEF   | 259  | 15971 |
| >TET1-D1715YKLSDTDEF   | 375   | >TET1-D1715YKLSNTDEF   | 182  | 193   |
| >TET1-D1715YKLSDTDEF   | 3     | >TET1-D1715YKLSNTDEF   | 3    | 0     |
| >TET1-D1715YKLSDTDEF   | 507   | >TET1-D1715YKLSNTDEF   | 442  | 65    |
| >TET1-D1715LYKLSDTDEF  | 218   | >TET1-D1715LYKLSNTDEF  | 91   | 127   |
| >TET1-D1715LYKLSDTDEF  | 219   | >TET1-D1715LYKLSNTDEF  | 98   | 121   |
| >TET1-D1715LYKLSDTDEF  | 13    | >TET1-D1715LYKLSNTDEF  | 11   | 2     |
| >TET1-D1715PLYKLSDTDEI | 524   | >TET1-D1715PLYKLSNTDEI | 365  | 159   |
| >TET1-D1715PLYKLSDTDEI | 295   | >TET1-D1715PLYKLSNTDEI | 171  | 124   |
| >TET1-D1715LPLYKLSDT   | 644   | >TET1-D1715LPLYKLSNT   | 251  | 393   |
| >TET1-F329V FLLAGSKQA  | 60    | >TET1-F329V VLLAGSKQA  | 1964 | 1904  |
| >TET1-F329V FLLAGSKQAT | 357   | >TET1-F329V VLLAGSKQAT | 5240 | 4883  |
| >TET1-F329V FLLAGSKQAT | 14    | >TET1-F329V VLLAGSKQAT | 85   | 71    |
| >TET1-F329V FLLAGSKQA  | 92    | >TET1-F329V VLLAGSKQA  | 3184 | 3092  |
| >TET1-F329V FLLAGSKQAT | 126   | >TET1-F329V VLLAGSKQAT | 2472 | 2346  |
| >TET1-F329V FLLAGSKQAT | 13    | >TET1-F329V VLLAGSKQAT | 191  | 178   |
| >TET1-F329V FLLAGSKQA  | 12    | >TET1-F329V VLLAGSKQA  | 220  | 208   |
| >TET1-F329V FLLAGSKQAT | 105   | >TET1-F329V VLLAGSKQAT | 1251 | 1146  |
| >TET1-F329V FLLAGSKQAT | 11    | >TET1-F329V VLLAGSKQAT | 129  | 118   |
| >TET1-F329V FLLAGSKQA  | 48    | >TET1-F329V VLLAGSKQA  | 983  | 935   |
| >TET1-F329V FLLAGSKQAT | 18    | >TET1-F329V VLLAGSKQAT | 297  | 279   |
| >TET1-F329V FLLAGSKQ   | 156   | >TET1-F329V VLLAGSKQ   | 1197 | 1041  |
| >TET1-F329V FLLAGSKQA  | 5     | >TET1-F329V VLLAGSKQA  | 22   | 17    |
| >TET1-F329V FLLAGSKQAT | 14    | >TET1-F329V VLLAGSKQAT | 89   | 75    |
| >TET1-F329V FLLAGSKQAT | 2     | >TET1-F329V VLLAGSKQAT | 4    | 2     |
| >TET1-F329V FLLAGSKQA  | 42    | >TET1-F329V VLLAGSKQA  | 716  | 674   |
| >TET1-F329V FLLAGSKQAT | 160   | >TET1-F329V VLLAGSKQAT | 2379 | 2219  |
| >TET1-F329V FLLAGSKQAT | 4     | >TET1-F329V VLLAGSKQAT | 11   | 7     |
| >TET1-F329V FLLAGSKQ   | 196   | >TET1-F329V VLLAGSKQ   | 1456 | 1260  |
| >TET1-F329V FLLAGSKQA  | 11    | >TET1-F329V VLLAGSKQA  | 39   | 28    |
| >TET1-F329V FLLAGSKQAT | 87    | >TET1-F329V VLLAGSKQAT | 756  | 669   |
| >TET1-F329V FLLAGSKQAT | 6     | >TET1-F329V VLLAGSKQAT | 11   | 5     |
| >TET1-F329V FLLAGSKQA  | 17    | >TET1-F329V VLLAGSKQA  | 73   | 56    |
| >TET1-F329V FLLAGSKQAT | 235   | >TET1-F329V VLLAGSKQAT | 986  | 751   |
| >TET1-F329V FLLAGSKQAT | 3     | >TET1-F329V VLLAGSKQAT | 4    | 1     |
| >TET1-F329V FLLAGSKQ   | 12    | >TET1-F329V VLLAGSKQ   | 99   | 87    |
| >TET1-F329V FLLAGSKQA  | 4     | >TET1-F329V VLLAGSKQA  | 12   | 8     |
| >TET1-F329V FLLAGSKQAT | 8     | >TET1-F329V VLLAGSKQAT | 47   | 39    |
| >TET1-F329V FLLAGSKQAT | 2     | >TET1-F329V VLLAGSKQAT | 3    | 1     |
| >TET1-F329V FLLAGSKQAT | 496   | >TET1-F329V VLLAGSKQAT | 6982 | 6486  |
| >TET1-F329V FLLAGSKQAT | 238   | >TET1-F329V VLLAGSKQAT | 1385 | 1147  |
| >TET1-F329V FLLAGSKQAT | 166   | >TET1-F329V VLLAGSKQAT | 950  | 784   |
| >TET1-F329V FLLAGSKQAT | 290   | >TET1-F329V VLLAGSKQAT | 994  | 704   |

|                         |       |                         |       |       |
|-------------------------|-------|-------------------------|-------|-------|
| >TET1-F329V FLLAGSKQAT  | 119   | >TET1-F329V VLLAGSKQAT  | 2628  | 2509  |
| >TET1-F329V KFLLAGSK    | 1641  | >TET1-F329V KVLLAGSK    | 93    | 1548  |
| >TET1-F329V KFLLAGSK    | 2318  | >TET1-F329V KVLLAGSK    | 55    | 2263  |
| >TET1-F329V KFLLAGSK    | 19    | >TET1-F329V KVLLAGSK    | 8     | 11    |
| >TET1-F329V KFLLAGSKQA  | 523   | >TET1-F329V KVLLAGSKQA  | 107   | 416   |
| >TET1-F329V KFLLAGSK    | 436   | >TET1-F329V KVLLAGSK    | 4508  | 4072  |
| >TET1-F329V GSTSPTSVIKF | 114   | >TET1-F329V GSTSPTSVIKV | 5469  | 5355  |
| >TET1-F329V GSTSPTSVIKF | 8     | >TET1-F329V GSTSPTSVIKV | 2138  | 2130  |
| >TET1-F329V GSTSPTSVIKF | 494   | >TET1-F329V GSTSPTSVIKV | 17514 | 17020 |
| >TET1-F329V GSTSPTSVIKF | 155   | >TET1-F329V GSTSPTSVIKV | 487   | 332   |
| >TET1-F329V GSTSPTSVIKF | 17    | >TET1-F329V GSTSPTSVIKV | 183   | 166   |
| >TET1-F329V IKFLLAGSKQ/ | 462   | >TET1-F329V IKVLLAGSKQ/ | 2378  | 1916  |
| >TET1-F329V VIKFLLAGSK  | 113   | >TET1-F329V VIKVLLAGSK  | 748   | 635   |
| >TET1-F329V VIKFLLAGSK  | 459   | >TET1-F329V VIKVLLAGSK  | 1539  | 1080  |
| >TET1-F329V VIKFLLAGSK  | 55    | >TET1-F329V VIKVLLAGSK  | 65    | 10    |
| >TET1-F329V SVIKFLLA    | 368   | >TET1-F329V SVIKVLLA    | 268   | 100   |
| >TET1-F329V SVIKFLLA    | 64    | >TET1-F329V SVIKVLLA    | 153   | 89    |
| >TET1-F329V SVIKFLLAGSK | 174   | >TET1-F329V SVIKVLLAGSK | 158   | 16    |
| >TET1-F329V SVIKFLLAGSK | 11    | >TET1-F329V SVIKVLLAGSK | 14    | 3     |
| >TET1-F329V SVIKFLLAGSK | 77    | >TET1-F329V SVIKVLLAGSK | 137   | 60    |
| >TET1-F329V SVIKFLLAGSK | 55    | >TET1-F329V SVIKVLLAGSK | 51    | 4     |
| >TET1-F329V SVIKFLLA    | 279   | >TET1-F329V SVIKVLLA    | 275   | 4     |
| >TET1-F329V TSVIKFLL    | 359   | >TET1-F329V TSVIKVLL    | 646   | 287   |
| >TET1-F329V TSVIKFLL    | 72    | >TET1-F329V TSVIKVLL    | 57    | 15    |
| >TET1-F329V TSVIKFLL    | 147   | >TET1-F329V TSVIKVLL    | 497   | 350   |
| >TET1-F329V SPTSVIKF    | 28    | >TET1-F329V SPTSVIKV    | 178   | 150   |
| >TET1-F329V SPTSVIKFL   | 12    | >TET1-F329V SPTSVIKVL   | 169   | 157   |
| >TET1-F329V SPTSVIKFLL  | 41    | >TET1-F329V SPTSVIKVLL  | 128   | 87    |
| >TET1-F329V SPTSVIKFL   | 1966  | >TET1-F329V SPTSVIKVL   | 180   | 1786  |
| >TET1-F329V SPTSVIKFLL  | 26    | >TET1-F329V SPTSVIKVLL  | 26    | 0     |
| >TET1-F329V SPTSVIKF    | 95    | >TET1-F329V SPTSVIKV    | 7484  | 7389  |
| >TET1-F329V SPTSVIKF    | 279   | >TET1-F329V SPTSVIKV    | 4029  | 3750  |
| >TET1-F329V SPTSVIKFLLA | 105   | >TET1-F329V SPTSVIKVLLA | 300   | 195   |
| >TET1-F329V SPTSVIKF    | 85    | >TET1-F329V SPTSVIKV    | 5713  | 5628  |
| >TET1-F329V SPTSVIKFL   | 940   | >TET1-F329V SPTSVIKVL   | 196   | 744   |
| >TET1-F329V SPTSVIKF    | 60    | >TET1-F329V SPTSVIKV    | 5525  | 5465  |
| >TET1-F329V TSPTSVIKF   | 319   | >TET1-F329V TSPTSVIKV   | 15290 | 14971 |
| >TET1-F329V TSPTSVIKF   | 16004 | >TET1-F329V TSPTSVIKV   | 62    | 15942 |
| >TET1-F329V TSPTSVIKFLL | 100   | >TET1-F329V TSPTSVIKVLL | 152   | 52    |
| >TET1-F329V TSPTSVIKF   | 374   | >TET1-F329V TSPTSVIKV   | 10250 | 9876  |
| >TET1-F329V TSPTSVIKF   | 51    | >TET1-F329V TSPTSVIKV   | 7881  | 7830  |
| >TET1-F329V TSPTSVIKF   | 3     | >TET1-F329V TSPTSVIKV   | 5     | 2     |
| >TET1-F329V TSPTSVIKFL  | 2     | >TET1-F329V TSPTSVIKVL  | 2     | 0     |

|                         |       |                         |       |       |
|-------------------------|-------|-------------------------|-------|-------|
| >TET1-F329V TSPTSVIKFLL | 2     | >TET1-F329V TSPTSVIKVLL | 2     | 0     |
| >TET1-F329V STSPTSVIKF  | 18290 | >TET1-F329V STSPTSVIKV  | 446   | 17844 |
| >TET1-F329V STSPTSVIKFL | 146   | >TET1-F329V STSPTSVIKVL | 1216  | 1070  |
| >TET1-F329V STSPTSVIKF  | 18936 | >TET1-F329V STSPTSVIKV  | 120   | 18816 |
| >TET1-F329V STSPTSVIKF  | 17808 | >TET1-F329V STSPTSVIKV  | 119   | 17689 |
| >TET1-F329V STSPTSVIKF  | 18407 | >TET1-F329V STSPTSVIKV  | 128   | 18279 |
| >TET1-F329V STSPTSVIKF  | 20738 | >TET1-F329V STSPTSVIKV  | 56    | 20682 |
| >TET1-F329V STSPTSVIKF  | 25914 | >TET1-F329V STSPTSVIKV  | 68    | 25846 |
| >TET1-F329V STSPTSVIKFL | 410   | >TET1-F329V STSPTSVIKVL | 2029  | 1619  |
| >TET1-F329V STSPTSVIKF  | 210   | >TET1-F329V STSPTSVIKV  | 2724  | 2514  |
| >TET1-F329V STSPTSVIKF  | 15207 | >TET1-F329V STSPTSVIKV  | 72    | 15135 |
| >TET1-F329V STSPTSVIKFL | 69    | >TET1-F329V STSPTSVIKVL | 396   | 327   |
| >TET1-F329V STSPTSVIKF  | 12540 | >TET1-F329V STSPTSVIKV  | 59    | 12481 |
| >TET1-F329V STSPTSVIKF  | 86    | >TET1-F329V STSPTSVIKV  | 3368  | 3282  |
| >TET1-F329V STSPTSVIKF  | 3     | >TET1-F329V STSPTSVIKV  | 116   | 113   |
| >TET1-F329V STSPTSVIKFL | 21    | >TET1-F329V STSPTSVIKVL | 23    | 2     |
| >TET1-F329V STSPTSVIKF  | 89    | >TET1-F329V STSPTSVIKV  | 12111 | 12022 |
| >TET1-F329V STSPTSVIKF  | 38    | >TET1-F329V STSPTSVIKV  | 102   | 64    |
| >TET1-F329V STSPTSVIKFL | 15    | >TET1-F329V STSPTSVIKVL | 41    | 26    |
| >TET1-F329V STSPTSVIKF  | 21    | >TET1-F329V STSPTSVIKV  | 62    | 41    |
| >TET1-F329V STSPTSVIKFL | 40    | >TET1-F329V STSPTSVIKVL | 29    | 11    |
| >TET1-F329V STSPTSVIKFL | 62    | >TET1-F329V STSPTSVIKVL | 65    | 3     |
| >TET1-G188€ GRLSGANA    | 4366  | >TET1-G188€ RRLSGANA    | 349   | 4017  |
| >TET1-G188€ GRLSGANAA   | 2682  | >TET1-G188€ RRLSGANAA   | 137   | 2545  |
| >TET1-G188€ GRLSGANAA/  | 2857  | >TET1-G188€ RRLSGANAA/  | 206   | 2651  |
| >TET1-G188€ GRLSGANAA/  | 2326  | >TET1-G188€ RRLSGANAA/  | 158   | 2168  |
| >TET1-G188€ GRLSGANA    | 906   | >TET1-G188€ RRLSGANA    | 106   | 800   |
| >TET1-G188€ GRLSGANAA   | 1703  | >TET1-G188€ RRLSGANAA   | 180   | 1523  |
| >TET1-G188€ GRLSGANAA/  | 1158  | >TET1-G188€ RRLSGANAA/  | 101   | 1057  |
| >TET1-G188€ GRLSGANAA/  | 833   | >TET1-G188€ RRLSGANAA/  | 96    | 737   |
| >TET1-G188€ GRLSGANA    | 15946 | >TET1-G188€ RRLSGANA    | 318   | 15628 |
| >TET1-G188€ GRLSGANAA   | 7454  | >TET1-G188€ RRLSGANAA   | 357   | 7097  |
| >TET1-G188€ GRLSGANAA/  | 9055  | >TET1-G188€ RRLSGANAA/  | 342   | 8713  |
| >TET1-G188€ GRLSGANAA/  | 8030  | >TET1-G188€ RRLSGANAA/  | 389   | 7641  |
| >TET1-G188€ GRLSGANAA/  | 6504  | >TET1-G188€ RRLSGANAA/  | 353   | 6151  |
| >TET1-G188€ SGRLSGANA   | 124   | >TET1-G188€ SRRLSGANA   | 897   | 773   |
| >TET1-G188€ SGRLSGANA/  | 202   | >TET1-G188€ SRRLSGANA/  | 1450  | 1248  |
| >TET1-G188€ SGRLSGANA/  | 67    | >TET1-G188€ SRRLSGANA/  | 506   | 439   |
| >TET1-G188€ SSTPHCTMPS  | 21764 | >TET1-G188€ SSTPHCTMPS  | 82    | 21682 |
| >TET1-G188€ SSTPHCTMPS  | 35142 | >TET1-G188€ SSTPHCTMPS  | 97    | 35045 |
| >TET1-G188€ SSTPHCTMPS  | 9002  | >TET1-G188€ SSTPHCTMPS  | 128   | 8874  |
| >TET1-G188€ PSGRLSGA    | 15311 | >TET1-G188€ PSRRLSGA    | 221   | 15090 |
| >TET1-G188€ PSGRLSGANA  | 12261 | >TET1-G188€ PSRRLSGANA  | 51    | 12210 |

|                        |       |                        |      |       |
|------------------------|-------|------------------------|------|-------|
| >TET1-G188€PSGRLSGANAF | 13021 | >TET1-G188€PSRRLSGANA  | 85   | 12936 |
| >TET1-G188€MPSGRLSGA   | 95    | >TET1-G188€MPSRRLSGA   | 103  | 8     |
| >TET1-G188€MPSGRLSGAI  | 101   | >TET1-G188€MPSRRLSGAI  | 103  | 2     |
| >TET1-G188€MPSGRLSG    | 1566  | >TET1-G188€MPSRRLSG    | 121  | 1445  |
| >TET1-G188€MPSGRLSGA   | 1017  | >TET1-G188€MPSRRLSGA   | 112  | 905   |
| >TET1-G188€MPSGRLSGAI  | 2375  | >TET1-G188€MPSRRLSGAI  | 498  | 1877  |
| >TET1-G188€MPSGRLSGA   | 18    | >TET1-G188€MPSRRLSGA   | 31   | 13    |
| >TET1-G188€MPSGRLSGAI  | 16    | >TET1-G188€MPSRRLSGAI  | 23   | 7     |
| >TET1-G188€TMPSGRLSGA/ | 2704  | >TET1-G188€TMPSRRLSGA/ | 213  | 2491  |
| >TET1-G188€TMPSGRLSGA/ | 145   | >TET1-G188€TMPSRRLSGA/ | 636  | 491   |
| >TET1-G188€TMPSGRLSGA/ | 49    | >TET1-G188€TMPSRRLSGA/ | 72   | 23    |
| >TET1-G188€TMPSGRLSGA/ | 39    | >TET1-G188€TMPSRRLSGA/ | 115  | 76    |
| >TET1-G188€CTMPSGRRLSC | 189   | >TET1-G188€CTMPSRRLSC  | 361  | 172   |
| >TET1-G188€CTMPSGRRL   | 110   | >TET1-G188€CTMPSRRL    | 148  | 38    |
| >TET1-G188€CTMPSGRRLSC | 167   | >TET1-G188€CTMPSRRLSC  | 83   | 84    |
| >TET1-G188€CTMPSGRRL   | 14    | >TET1-G188€CTMPSRRL    | 15   | 1     |
| >TET1-G188€CTMPSGRRL   | 286   | >TET1-G188€CTMPSRRL    | 57   | 229   |
| >TET1-G188€CTMPSGRRL   | 24    | >TET1-G188€CTMPSRRL    | 36   | 12    |
| >TET1-G188€HCTMPSGR    | 320   | >TET1-G188€HCTMPSRR    | 433  | 113   |
| >TET1-G188€TPHCTMPSRI  | 186   | >TET1-G188€TPHCTMPSRI  | 724  | 538   |
| >TET1-G188€TPHCTMPSRI  | 100   | >TET1-G188€TPHCTMPSRI  | 87   | 13    |
| >TET1-G188€TPHCTMPSRI  | 317   | >TET1-G188€TPHCTMPSRI  | 582  | 265   |
| >TET1-G188€STPHCTMPSC  | 30828 | >TET1-G188€STPHCTMPSF  | 59   | 30769 |
| >TET1-G188€STPHCTMPSC  | 28662 | >TET1-G188€STPHCTMPSF  | 159  | 28503 |
| >TET1-G188€STPHCTMPSC  | 550   | >TET1-G188€STPHCTMPSF  | 272  | 278   |
| >TET1-G188€STPHCTMPSC  | 33059 | >TET1-G188€STPHCTMPSF  | 52   | 33007 |
| >TET1-G188€STPHCTMPSC  | 52    | >TET1-G188€STPHCTMPSF  | 70   | 18    |
| >TET1-G188€STPHCTMPSC  | 358   | >TET1-G188€STPHCTMPSF  | 770  | 412   |
| >TET1-G188€STPHCTMPSC  | 11501 | >TET1-G188€STPHCTMPSF  | 239  | 11262 |
| >TET1-G188€STPHCTMPSC  | 751   | >TET1-G188€STPHCTMPSF  | 427  | 324   |
| >TET1-G188€STPHCTMPSC  | 32798 | >TET1-G188€STPHCTMPSF  | 267  | 32531 |
| >TET1-G188€STPHCTMPSC  | 282   | >TET1-G188€STPHCTMPSF  | 303  | 21    |
| >TET1-H170€HVLPLYKL    | 301   | >TET1-H170€QVLPLYKL    | 318  | 17    |
| >TET1-H170€HVLPLYKL    | 140   | >TET1-H170€QVLPLYKL    | 298  | 158   |
| >TET1-H170€HVLPLYKL    | 83    | >TET1-H170€QVLPLYKL    | 117  | 34    |
| >TET1-H170€HVLPLYKL    | 418   | >TET1-H170€QVLPLYKL    | 1266 | 848   |
| >TET1-H170€LHVLPLYKL   | 4469  | >TET1-H170€LQVLPLYKL   | 346  | 4123  |
| >TET1-H170€LHVLPLYKL   | 16922 | >TET1-H170€LQVLPLYKL   | 41   | 16881 |
| >TET1-H170€LHVLPLYK    | 7509  | >TET1-H170€LQVLPLYK    | 66   | 7443  |
| >TET1-H170€LHVLPLYKL   | 4178  | >TET1-H170€LQVLPLYKL   | 481  | 3697  |
| >TET1-H170€LHVLPLYKL   | 10865 | >TET1-H170€LQVLPLYKL   | 303  | 10562 |
| >TET1-H170€QLHVLPLYKL  | 49    | >TET1-H170€QLQVLPLYKL  | 82   | 33    |
| >TET1-H170€QLHVLPLYKL  | 382   | >TET1-H170€QLQVLPLYKL  | 706  | 324   |

|                       |     |                       |      |     |
|-----------------------|-----|-----------------------|------|-----|
| >TET1-H170€QLHVLPLYKL | 90  | >TET1-H170€QLQVLPLYKL | 260  | 170 |
| >TET1-H170€QLHVLPLYKL | 417 | >TET1-H170€QLQVLPLYKL | 144  | 273 |
| >TET1-H170€QLHVLPLYKL | 97  | >TET1-H170€QLQVLPLYKL | 126  | 29  |
| >TET1-H170€QLHVLPLYK  | 51  | >TET1-H170€QLQVLPLYK  | 107  | 56  |
| >TET1-H170€QLHVLPLYK  | 42  | >TET1-H170€QLQVLPLYK  | 27   | 15  |
| >TET1-H170€QLHVLPLY   | 21  | >TET1-H170€QLQVLPLY   | 29   | 8   |
| >TET1-H170€QLHVLPLYK  | 17  | >TET1-H170€QLQVLPLYK  | 732  | 715 |
| >TET1-H170€QLHVLPLY   | 219 | >TET1-H170€QLQVLPLY   | 165  | 54  |
| >TET1-H170€QLHVLPLY   | 25  | >TET1-H170€QLQVLPLY   | 48   | 23  |
| >TET1-H170€QLHVLPLYK  | 247 | >TET1-H170€QLQVLPLYK  | 716  | 469 |
| >TET1-H170€EQLHVLPL   | 50  | >TET1-H170€EQLQVLPL   | 74   | 24  |
| >TET1-H170€EQLHVLPLYK | 149 | >TET1-H170€EQLQVLPLYK | 189  | 40  |
| >TET1-H170€EQLHVLPLYK | 102 | >TET1-H170€EQLQVLPLYK | 223  | 121 |
| >TET1-H170€EQLHVLPLYK | 85  | >TET1-H170€EQLQVLPLYK | 81   | 4   |
| >TET1-H170€EQLHVLPLY  | 149 | >TET1-H170€EQLQVLPLY  | 62   | 87  |
| >TET1-H170€EQLHVLPLY  | 360 | >TET1-H170€EQLQVLPLY  | 644  | 284 |
| >TET1-H170€EQLHVLPLY  | 189 | >TET1-H170€EQLQVLPLY  | 279  | 90  |
| >TET1-H170€EQLHVLPL   | 100 | >TET1-H170€EQLQVLPL   | 309  | 209 |
| >TET1-H170€EQLHVLPLY  | 143 | >TET1-H170€EQLQVLPLY  | 476  | 333 |
| >TET1-H170€EQLHVLPL   | 67  | >TET1-H170€EQLQVLPL   | 48   | 19  |
| >TET1-H170€EQLHVLPL   | 400 | >TET1-H170€EQLQVLPL   | 589  | 189 |
| >TET1-H170€EQLHVLPLYK | 819 | >TET1-H170€EQLQVLPLYK | 490  | 329 |
| >TET1-H170€DEQLHVLP   | 446 | >TET1-H170€DEQLQVLP   | 564  | 118 |
| >TET1-H170€DEQLHVLPL  | 413 | >TET1-H170€DEQLQVLPL  | 182  | 231 |
| >TET1-H170€DEQLHVLPL  | 11  | >TET1-H170€DEQLQVLPL  | 17   | 6   |
| >TET1-H170€DEQLHVLPLY | 107 | >TET1-H170€DEQLQVLPLY | 71   | 36  |
| >TET1-H170€DEQLHVLPL  | 286 | >TET1-H170€DEQLQVLPL  | 283  | 3   |
| >TET1-H170€DEQLHVLPLY | 403 | >TET1-H170€DEQLQVLPLY | 325  | 78  |
| >TET1-H170€DEQLHVLPL  | 253 | >TET1-H170€DEQLQVLPL  | 1052 | 799 |
| >TET1-H170€PQDEQLHV   | 210 | >TET1-H170€PQDEQLQV   | 523  | 313 |
| >TET1-H170€PQDEQLHVLI | 340 | >TET1-H170€PQDEQLQVLI | 589  | 249 |
| >TET1-H170€PQDEQLHV   | 618 | >TET1-H170€PQDEQLQV   | 477  | 141 |
| >TET1-H170€PQDEQLHV   | 379 | >TET1-H170€PQDEQLQV   | 771  | 392 |
| >TET1-H170€IPQDEQLHVL | 407 | >TET1-H170€IPQDEQLQVL | 718  | 311 |
| >TET1-H170€VIPQDEQLHV | 168 | >TET1-H170€VIPQDEQLQV | 93   | 75  |
| >TET1-H170€VIPQDEQLHV | 66  | >TET1-H170€VIPQDEQLQV | 100  | 34  |
| >TET1-H170€VIPQDEQLHV | 10  | >TET1-H170€VIPQDEQLQV | 7    | 3   |
| >TET1-H170€VIPQDEQLHV | 46  | >TET1-H170€VIPQDEQLQV | 96   | 50  |
| >TET1-H170€GVIPQDEQLF | 585 | >TET1-H170€GVIPQDEQLC | 483  | 102 |
| >TET1-H170€GVIPQDEQLF | 82  | >TET1-H170€GVIPQDEQLC | 167  | 85  |
| >TET1-H170€GVIPQDEQLF | 715 | >TET1-H170€GVIPQDEQLC | 460  | 255 |
| >TET1-H170€GVIPQDEQLF | 277 | >TET1-H170€GVIPQDEQLC | 747  | 470 |
| >TET1-H170€GVIPQDEQLF | 141 | >TET1-H170€GVIPQDEQLC | 258  | 117 |



|                       |       |                       |       |       |
|-----------------------|-------|-----------------------|-------|-------|
| >TET1-H170€GVIPQDEQLH | 32    | >TET1-H170€GVIPQDEQLC | 20    | 12    |
| >TET1-P1846PGFWSWSPK  | 3214  | >TET1-P1846LGFSWSPK   | 140   | 3074  |
| >TET1-P1846PGFWSWSPK  | 1915  | >TET1-P1846LGFSWSPK   | 271   | 1644  |
| >TET1-P1846SPGFSWSPKT | 22413 | >TET1-P1846SLGFSWSPKT | 206   | 22207 |
| >TET1-P1846SPGFSWSPKT | 27747 | >TET1-P1846SLGFSWSPKT | 356   | 27391 |
| >TET1-P1846SPGFSWSPKT | 26148 | >TET1-P1846SLGFSWSPKT | 90    | 26058 |
| >TET1-P1846SPGFSWSPKT | 23556 | >TET1-P1846SLGFSWSPKT | 220   | 23336 |
| >TET1-P1846SPGFSWSPKT | 24844 | >TET1-P1846SLGFSWSPKT | 178   | 24666 |
| >TET1-P1846SPGFSWSPKT | 35762 | >TET1-P1846SLGFSWSPKT | 187   | 35575 |
| >TET1-P1846SPGFSWSPKT | 35649 | >TET1-P1846SLGFSWSPKT | 104   | 35545 |
| >TET1-P1846SPGFSWSPK  | 13195 | >TET1-P1846SLGFSWSPK  | 51    | 13144 |
| >TET1-P1846SPGFSWSPK  | 3145  | >TET1-P1846SLGFSWSPK  | 18    | 3127  |
| >TET1-P1846SPGFSWSPK  | 11566 | >TET1-P1846SLGFSWSPK  | 117   | 11449 |
| >TET1-P1846SAPHPVKEAS | 9353  | >TET1-P1846SAPHPVKEAS | 75    | 9278  |
| >TET1-P1846ASPGFSWSPK | 47    | >TET1-P1846ASLGFSWSPK | 17    | 30    |
| >TET1-P1846ASPGFSWSPK | 11    | >TET1-P1846ASLGFSWSPK | 9     | 2     |
| >TET1-P1846ASPGFSWSPK | 81    | >TET1-P1846ASLGFSWSPK | 9     | 72    |
| >TET1-P1846ASPGFSWSPK | 320   | >TET1-P1846ASLGFSWSPK | 91    | 229   |
| >TET1-P1846ASPGFSWSPK | 53    | >TET1-P1846ASLGFSWSPK | 110   | 57    |
| >TET1-P1846ASPGFSWSP  | 157   | >TET1-P1846ASLGFSWSP  | 17438 | 17281 |
| >TET1-P1846ASPGFSWSPK | 199   | >TET1-P1846ASLGFSWSPK | 19169 | 18970 |
| >TET1-P1846ASPGFSWSPK | 295   | >TET1-P1846ASLGFSWSPK | 59    | 236   |
| >TET1-P1846EASPGFSWSP | 345   | >TET1-P1846EASLGFSWSP | 581   | 236   |
| >TET1-P1846EASPGFSWSP | 604   | >TET1-P1846EASLGFSWSP | 493   | 111   |
| >TET1-P1846EASPGFSWSP | 14    | >TET1-P1846EASLGFSWSP | 14    | 0     |
| >TET1-P1846EASPGFSW   | 20    | >TET1-P1846EASLGFSW   | 178   | 158   |
| >TET1-P1846EASPGFSW   | 50    | >TET1-P1846EASLGFSW   | 45    | 5     |
| >TET1-P1846EASPGFSW   | 173   | >TET1-P1846EASLGFSW   | 912   | 739   |
| >TET1-P1846EASPGFSW   | 37    | >TET1-P1846EASLGFSW   | 117   | 80    |
| >TET1-P1846EASPGFSW   | 177   | >TET1-P1846EASLGFSW   | 237   | 60    |
| >TET1-P1846EASPGFSW   | 227   | >TET1-P1846EASLGFSW   | 989   | 762   |
| >TET1-P1846KEASPGFSW  | 1883  | >TET1-P1846KEASLGFSW  | 282   | 1601  |
| >TET1-P1846KEASPGFSW  | 3658  | >TET1-P1846KEASLGFSW  | 476   | 3182  |
| >TET1-P1846KEASPGFSW  | 60    | >TET1-P1846KEASLGFSW  | 66    | 6     |
| >TET1-P1846KEASPGFSW  | 55    | >TET1-P1846KEASLGFSW  | 15    | 40    |
| >TET1-P1846KEASPGFSW  | 130   | >TET1-P1846KEASLGFSW  | 64    | 66    |
| >TET1-P1846KEASPGFSW  | 191   | >TET1-P1846KEASLGFSW  | 73    | 118   |
| >TET1-P1846VKEASPGF   | 75    | >TET1-P1846VKEASLGF   | 92    | 17    |
| >TET1-P1846VKEASPGFSM | 839   | >TET1-P1846VKEASLGFSM | 464   | 375   |
| >TET1-P1846HPVKEASP   | 16449 | >TET1-P1846HPVKEASL   | 31    | 16418 |
| >TET1-P1846HPVKEASP   | 3411  | >TET1-P1846HPVKEASL   | 88    | 3323  |
| >TET1-P1846HPVKEASPG  | 100   | >TET1-P1846HPVKEASLG  | 1750  | 1650  |
| >TET1-P1846HPVKEASPGF | 170   | >TET1-P1846HPVKEASLGF | 101   | 69    |

|                        |       |                        |       |       |
|------------------------|-------|------------------------|-------|-------|
| >TET1-P1846 HPVKEASP   | 16569 | >TET1-P1846 HPVKEASL   | 51    | 16518 |
| >TET1-P1846 HPVKEASP   | 9449  | >TET1-P1846 HPVKEASL   | 198   | 9251  |
| >TET1-P1846 HPVKEASPGF | 965   | >TET1-P1846 HPVKEASLGF | 323   | 642   |
| >TET1-P1846 HPVKEASP   | 12565 | >TET1-P1846 HPVKEASL   | 189   | 12376 |
| >TET1-P1846 HPVKEASPGF | 178   | >TET1-P1846 HPVKEASLGF | 155   | 23    |
| >TET1-P1846 AHPVKEASP  | 37715 | >TET1-P1846 AHPVKEASL  | 80    | 37635 |
| >TET1-P1846 AHPVKEASP  | 7682  | >TET1-P1846 AHPVKEASL  | 85    | 7597  |
| >TET1-R1505 RTGHHCPA\  | 310   | >TET1-R1505 CTGHHCPA\  | 835   | 525   |
| >TET1-R1505 RTGHHCPA\  | 497   | >TET1-R1505 CTGHHCPA\  | 3936  | 3439  |
| >TET1-R1505 RTGHHCPA\  | 452   | >TET1-R1505 CTGHHCPA\  | 275   | 177   |
| >TET1-R1505 RTGHHCPA   | 249   | >TET1-R1505 CTGHHCPA   | 7078  | 6829  |
| >TET1-R1505 RTGHHCPA\  | 332   | >TET1-R1505 CTGHHCPA\  | 11515 | 11183 |
| >TET1-R1505 RTGHHCPA\  | 460   | >TET1-R1505 CTGHHCPA\  | 17750 | 17290 |
| >TET1-R1505 RTGHHCPA\  | 119   | >TET1-R1505 CTGHHCPA\  | 1664  | 1545  |
| >TET1-R1505 RTGHHCPA\  | 8     | >TET1-R1505 CTGHHCPA\  | 603   | 595   |
| >TET1-R1505 RTGHHCPA\  | 306   | >TET1-R1505 CTGHHCPA\  | 5186  | 4880  |
| >TET1-R1505 RTGHHCPA\  | 389   | >TET1-R1505 CTGHHCPA\  | 740   | 351   |
| >TET1-R1505 RTGHHCPA\  | 157   | >TET1-R1505 CTGHHCPA\  | 2480  | 2323  |
| >TET1-R1505 RTGHHCPA\  | 47    | >TET1-R1505 CTGHHCPA\  | 808   | 761   |
| >TET1-R1505 RTGHHCPA\  | 124   | >TET1-R1505 CTGHHCPA\  | 91    | 33    |
| >TET1-R1505 RQRTGHHCP' | 840   | >TET1-R1505 RQCTGHHCP' | 126   | 714   |
| >TET1-R1505 RQRTGHHCP  | 305   | >TET1-R1505 RQCTGHHCP  | 11184 | 10879 |
| >TET1-R1505 RQRTGHHCP  | 351   | >TET1-R1505 RQCTGHHCP  | 11814 | 11463 |
| >TET1-R1505 RQRTGHHCP' | 21    | >TET1-R1505 RQCTGHHCP' | 4340  | 4319  |
| >TET1-R1505 RQRTGHHCP' | 8     | >TET1-R1505 RQCTGHHCP' | 1148  | 1140  |
| >TET1-R1505 RQRTGHHCP' | 394   | >TET1-R1505 RQCTGHHCP' | 735   | 341   |
| >TET1-R1505 RQRTGHHCP' | 223   | >TET1-R1505 RQCTGHHCP' | 467   | 244   |
| >TET1-R1505 RQRTGHHCP' | 284   | >TET1-R1505 RQCTGHHCP' | 1079  | 795   |
| >TET1-R1505 RQRTGHHCP' | 75    | >TET1-R1505 RQCTGHHCP' | 447   | 372   |
| >TET1-R1505 RQRTGHHCP  | 221   | >TET1-R1505 RQCTGHHCP  | 658   | 437   |
| >TET1-R1505 VLCLVRQR   | 252   | >TET1-R1505 VLCLVRQC   | 19532 | 19280 |
| >TET1-R1505 VLCLVRQR   | 352   | >TET1-R1505 VLCLVRQC   | 36008 | 35656 |
| >TET1-R1505 KVLCLVRQR  | 30    | >TET1-R1505 KVLCLVRQC  | 13046 | 13016 |
| >TET1-R1505 KVLCLVRQR  | 45    | >TET1-R1505 KVLCLVRQC  | 33646 | 33601 |
| >TET1-V1257 VEPLDSL    | 364   | >TET1-V1257 FEPLDSL    | 127   | 237   |
| >TET1-V1257 VEPLDSL    | 449   | >TET1-V1257 FEPLDSL    | 123   | 326   |
| >TET1-V1257 VEPLDSL    | 1406  | >TET1-V1257 FEPLDSL    | 421   | 985   |
| >TET1-V1257 VEPLDSL    | 922   | >TET1-V1257 FEPLDSL    | 294   | 628   |
| >TET1-V1257 VEPLDSL    | 168   | >TET1-V1257 FEPLDSL    | 60    | 108   |
| >TET1-V1257 VEPLDSL    | 1933  | >TET1-V1257 FEPLDSL    | 420   | 1513  |
| >TET1-V1257 KVEPLDSL   | 2652  | >TET1-V1257 KFEPLDSL   | 84    | 2568  |
| >TET1-V1257 KVEPLDSL   | 6147  | >TET1-V1257 KFEPLDSL   | 450   | 5697  |
| >TET1-V1257 KVEPLDSL   | 14521 | >TET1-V1257 KFEPLDSL   | 458   | 14063 |

|                        |       |                        |       |       |
|------------------------|-------|------------------------|-------|-------|
| >TET1-V1257KVEPLDSLSLF | 6237  | >TET1-V1257KFEPLDSLSLF | 67    | 6170  |
| >TET1-V1257KVEPLDSLSL  | 494   | >TET1-V1257KFEPLDSLSL  | 5690  | 5196  |
| >TET1-V1257KVEPLDSLSL  | 212   | >TET1-V1257KFEPLDSLSL  | 18953 | 18741 |
| >TET1-V1257KVEPLDSLSLF | 24    | >TET1-V1257KFEPLDSLSLF | 11200 | 11176 |
| >TET1-V1257KVEPLDSLSLF | 8     | >TET1-V1257KFEPLDSLSLF | 50    | 42    |
| >TET1-V1257KVEPLDSL    | 12903 | >TET1-V1257KFEPLDSL    | 82    | 12821 |
| >TET1-V1257KVEPLDSLSL  | 16629 | >TET1-V1257KFEPLDSLSL  | 227   | 16402 |
| >TET1-V1257KVEPLDSLSLF | 22945 | >TET1-V1257KFEPLDSLSLF | 421   | 22524 |
| >TET1-V1257YPESAEEKVK' | 147   | >TET1-V1257YPESAEEKVK  | 44    | 103   |
| >TET1-V1257YPESAEEKVK' | 1614  | >TET1-V1257YPESAEEKVK  | 24    | 1590  |
| >TET1-V1257YPESAEEKVK' | 1063  | >TET1-V1257YPESAEEKVK  | 116   | 947   |
| >TET1-V1257YPESAEEKVK' | 8822  | >TET1-V1257YPESAEEKVK  | 113   | 8709  |
| >TET1-V1257YPESAEEKVK' | 3193  | >TET1-V1257YPESAEEKVK  | 48    | 3145  |
| >TET1-V1257VKVEPLDSL   | 218   | >TET1-V1257VKFEPLDSL   | 24    | 194   |
| >TET1-V1257VKVEPLDSLSI | 55    | >TET1-V1257VKFEPLDSLSL | 9     | 46    |
| >TET1-V1257KVKVEPLD    | 481   | >TET1-V1257KVKFEPLD    | 371   | 110   |
| >TET1-V1257KVKVEPLDS   | 390   | >TET1-V1257KVKFEPLDS   | 312   | 78    |
| >TET1-V1257KVKVEPLDSL  | 121   | >TET1-V1257KVKFEPLDSL  | 99    | 22    |
| >TET1-V1257KVKVEPLDSL' | 196   | >TET1-V1257KVKFEPLDSL' | 159   | 37    |
| >TET1-V1257KVKVEPLDSL  | 1400  | >TET1-V1257KVKFEPLDSL  | 365   | 1035  |
| >TET1-V1257EKVKVEPL    | 498   | >TET1-V1257EKVKFEPL    | 185   | 313   |
| >TET1-V1257EEKVKVEPL   | 626   | >TET1-V1257EEKVKFEPL   | 87    | 539   |
| >TET1-V1257EEKVKVEPL   | 1438  | >TET1-V1257EEKVKFEPL   | 357   | 1081  |
| >TET1-V1257EEKVKVEPL   | 214   | >TET1-V1257EEKVKFEPL   | 145   | 69    |
| >TET1-V1257EEKVKVEPL   | 1622  | >TET1-V1257EEKVKFEPL   | 305   | 1317  |
| >TET1-V1257EEKVKVEPL   | 266   | >TET1-V1257EEKVKFEPL   | 408   | 142   |
| >TET1-V1257AEEKVKVEPL  | 98    | >TET1-V1257AEEKVKFEPL  | 103   | 5     |
| >TET1-V1257AEEKVKVEPL  | 141   | >TET1-V1257AEEKVKFEPL  | 85    | 56    |
| >TET1-V1257AEEKVKVEPL  | 209   | >TET1-V1257AEEKVKFEPL  | 68    | 141   |
| >TET1-V1257AEEKVKVEPL  | 1554  | >TET1-V1257AEEKVKFEPL  | 482   | 1072  |
| >TET1-V1257AEEKVKVEPL  | 171   | >TET1-V1257AEEKVKFEPL  | 99    | 72    |
| >TET1-V1257AEEKVKVEPL  | 60    | >TET1-V1257AEEKVKFEPL  | 94    | 34    |
| >TET1-V1257SAEEKVKV    | 13507 | >TET1-V1257SAEEKVKF    | 143   | 13364 |
| >TET1-V1257ESAEEKVKV   | 12773 | >TET1-V1257ESAEEKVKF   | 340   | 12433 |
| >TET1-V1257ESAEEKVKV   | 35    | >TET1-V1257ESAEEKVKF   | 13125 | 13090 |
| >TET1-V1257ESAEEKVKV   | 48    | >TET1-V1257ESAEEKVKF   | 14380 | 14332 |
| >TET1-V1257ESAEEKVKV   | 13089 | >TET1-V1257ESAEEKVKF   | 98    | 12991 |
| >TET2-A1264ALNEERTCA   | 233   | >TET2-A1264PLNEERTCA   | 5663  | 5430  |
| >TET2-A1264ALNEERTCA   | 116   | >TET2-A1264PLNEERTCA   | 5437  | 5321  |
| >TET2-A1264ALNEERTC    | 253   | >TET2-A1264PLNEERTC    | 4231  | 3978  |
| >TET2-A1264ALNEERTCAC  | 94    | >TET2-A1264PLNEERTCAC  | 1427  | 1333  |
| >TET2-A1264ALNEERTCAC  | 469   | >TET2-A1264PLNEERTCAC  | 7647  | 7178  |
| >TET2-A1264ALNEERTCA   | 286   | >TET2-A1264PLNEERTCA   | 4383  | 4097  |

|                       |       |                       |       |       |
|-----------------------|-------|-----------------------|-------|-------|
| >TET2-A1264ALNEERTC   | 70    | >TET2-A1264PLNEERTC   | 3081  | 3011  |
| >TET2-A1264ALNEERTCA  | 25    | >TET2-A1264PLNEERTCA  | 390   | 365   |
| >TET2-A1264ALNEERTCAC | 15    | >TET2-A1264PLNEERTCAC | 604   | 589   |
| >TET2-A1264ALNEERTCAC | 169   | >TET2-A1264PLNEERTCAC | 3841  | 3672  |
| >TET2-A1264CALNEERTCA | 27924 | >TET2-A1264CPLNEERTCA | 273   | 27651 |
| >TET2-A1264RCALNEER   | 185   | >TET2-A1264RCPLNEER   | 162   | 23    |
| >TET2-A1264RRCALNEER  | 336   | >TET2-A1264RRCPLNEER  | 569   | 233   |
| >TET2-A1264RRCALNEERT | 107   | >TET2-A1264RRCPLNEERT | 239   | 132   |
| >TET2-A1264RRCALNEE   | 163   | >TET2-A1264RRCPLNEE   | 165   | 2     |
| >TET2-A1264RRCALNEER  | 348   | >TET2-A1264RRCPLNEER  | 421   | 73    |
| >TET2-A1264RRCALNEERT | 283   | >TET2-A1264RRCPLNEERT | 469   | 186   |
| >TET2-A1264RRCALNEERT | 291   | >TET2-A1264RRCPLNEERT | 346   | 55    |
| >TET2-A1264RRCALNEE   | 297   | >TET2-A1264RRCPLNEE   | 197   | 100   |
| >TET2-A1264RRCALNEER  | 405   | >TET2-A1264RRCPLNEER  | 279   | 126   |
| >TET2-A1264RRCALNEERT | 230   | >TET2-A1264RRCPLNEERT | 228   | 2     |
| >TET2-A1264RRCALNEERT | 495   | >TET2-A1264RRCPLNEERT | 309   | 186   |
| >TET2-A1264RRCALNEER  | 170   | >TET2-A1264RRCPLNEER  | 202   | 32    |
| >TET2-A1264LTNRRCAL   | 1141  | >TET2-A1264LTNRRCP    | 419   | 722   |
| >TET2-A1264LTNRRCAL   | 282   | >TET2-A1264LTNRRCP    | 390   | 108   |
| >TET2-A1264LTNRRCAL   | 106   | >TET2-A1264LTNRRCP    | 73    | 33    |
| >TET2-A1264TLNRRCAL   | 982   | >TET2-A1264TLNRRCP    | 458   | 524   |
| >TET2-A1264TLNRRCA    | 358   | >TET2-A1264TLNRRCP    | 22290 | 21932 |
| >TET2-A1264TLNRRCAL   | 8     | >TET2-A1264TLNRRCP    | 6     | 2     |
| >TET2-A1264TLNRRCAL   | 31    | >TET2-A1264TLNRRCP    | 36    | 5     |
| >TET2-A1264GTLNRRCAL  | 272   | >TET2-A1264GTLNRRCP   | 141   | 131   |
| >TET2-A1344AYNNQIEY   | 4259  | >TET2-A1344EYNNQIEY   | 349   | 3910  |
| >TET2-A1344AYNNQIEY   | 272   | >TET2-A1344EYNNQIEY   | 772   | 500   |
| >TET2-A1344AYNNQIEY   | 122   | >TET2-A1344EYNNQIEY   | 720   | 598   |
| >TET2-A1344AYNNQIEYEH | 17    | >TET2-A1344EYNNQIEYEH | 166   | 149   |
| >TET2-A1344AYNNQIEYEH | 644   | >TET2-A1344EYNNQIEYEH | 29    | 615   |
| >TET2-A1344AYNNQIEYEH | 3161  | >TET2-A1344EYNNQIEYEH | 80    | 3081  |
| >TET2-A1344AYNNQIEY   | 408   | >TET2-A1344EYNNQIEY   | 2928  | 2520  |
| >TET2-A1344AYNNQIEYEH | 158   | >TET2-A1344EYNNQIEYEH | 46    | 112   |
| >TET2-A1344DAYNNQIEY  | 297   | >TET2-A1344DEYNNQIEY  | 9352  | 9055  |
| >TET2-A1344DAYNNQIEY  | 179   | >TET2-A1344DEYNNQIEY  | 8907  | 8728  |
| >TET2-A1344DAYNNQIE   | 23037 | >TET2-A1344DEYNNQIE   | 322   | 22715 |
| >TET2-A1344DAYNNQIEY  | 1172  | >TET2-A1344DEYNNQIEY  | 4     | 1168  |
| >TET2-A1344DAYNNQIEYE | 13747 | >TET2-A1344DEYNNQIEYE | 29    | 13718 |
| >TET2-A1344DAYNNQIEY  | 25    | >TET2-A1344DEYNNQIEY  | 1375  | 1350  |
| >TET2-A1344DAYNNQIEYE | 374   | >TET2-A1344DEYNNQIEYE | 9707  | 9333  |
| >TET2-A1344DAYNNQIEY  | 16416 | >TET2-A1344DEYNNQIEY  | 315   | 16101 |
| >TET2-A1344DAYNNQIEY  | 30967 | >TET2-A1344DEYNNQIEY  | 183   | 30784 |
| >TET2-A1344PDAYNNQI   | 226   | >TET2-A1344PDEYNNQI   | 251   | 25    |

|                        |       |                        |       |       |
|------------------------|-------|------------------------|-------|-------|
| >TET2-A1344APDAYNNQI   | 276   | >TET2-A1344APDEYNNQI   | 535   | 259   |
| >TET2-A1344APDAYNNQIE  | 47    | >TET2-A1344APDEYNNQIE  | 40    | 7     |
| >TET2-A1344APDAYNNQIE  | 367   | >TET2-A1344APDEYNNQIE  | 269   | 98    |
| >TET2-A1344APDAYNNQIE  | 21    | >TET2-A1344APDEYNNQIE  | 15    | 6     |
| >TET2-A1344LAPDAYNNQ   | 365   | >TET2-A1344LAPDEYNNQ   | 1523  | 1158  |
| >TET2-A1344LAPDAYNNQ   | 9     | >TET2-A1344LAPDEYNNQI  | 17    | 8     |
| >TET2-A1344KLAPDAYNNC  | 36    | >TET2-A1344KLAPDEYNNC  | 36    | 0     |
| >TET2-A1344KLAPDAYNNC  | 7     | >TET2-A1344KLAPDEYNNC  | 7     | 0     |
| >TET2-A1344KLAPDAYNNC  | 15    | >TET2-A1344KLAPDEYNNC  | 30    | 15    |
| >TET2-A1344KLAPDAYNNC  | 76    | >TET2-A1344KLAPDEYNNC  | 132   | 56    |
| >TET2-A1344KLAPDAYNNC  | 22    | >TET2-A1344KLAPDEYNNC  | 23    | 1     |
| >TET2-A1344KLAPDAYNNC  | 27    | >TET2-A1344KLAPDEYNNC  | 26    | 1     |
| >TET2-A1344KLAPDAYNNC  | 34    | >TET2-A1344KLAPDEYNNC  | 26    | 8     |
| >TET2-A1344KLAPDAYNNC  | 43    | >TET2-A1344KLAPDEYNNC  | 46    | 3     |
| >TET2-A1344KLAPDAYNNC  | 207   | >TET2-A1344KLAPDEYNNC  | 269   | 62    |
| >TET2-A1344KLAPDAYNNC  | 11    | >TET2-A1344KLAPDEYNNC  | 10    | 1     |
| >TET2-A1344KLAPDAYNNC  | 120   | >TET2-A1344KLAPDEYNNC  | 242   | 122   |
| >TET2-A1344KKLAPDAY    | 6     | >TET2-A1344KKLAPDEY    | 10    | 4     |
| >TET2-A1344YKKLAPDAY   | 11    | >TET2-A1344YKKLAPDEY   | 24    | 13    |
| >TET2-A1344TYKKLAPDAY  | 170   | >TET2-A1344TYKKLAPDEY  | 310   | 140   |
| >TET2-A1344TYKKLAPDAY  | 574   | >TET2-A1344TYKKLAPDEY  | 498   | 76    |
| >TET2-A1344TYKKLAPDAY  | 1114  | >TET2-A1344TYKKLAPDEY  | 470   | 644   |
| >TET2-A1344PTYKKLAPDA  | 28    | >TET2-A1344PTYKKLAPDE' | 61    | 33    |
| >TET2-A1344PTYKKLAPDA  | 184   | >TET2-A1344PTYKKLAPDE' | 797   | 613   |
| >TET2-A1344PTYKKLAPDA  | 365   | >TET2-A1344PTYKKLAPDE' | 450   | 85    |
| >TET2-A1344PTYKKLAPDA  | 293   | >TET2-A1344PTYKKLAPDE' | 211   | 82    |
| >TET2-A1355APECRGL     | 42    | >TET2-A1355PPECRLGL    | 1033  | 991   |
| >TET2-A1355RAPECRLGL   | 30851 | >TET2-A1355RPPECRLGL   | 88    | 30763 |
| >TET2-A1355RAPECRLGLK  | 315   | >TET2-A1355RPPECRLGLK  | 5545  | 5230  |
| >TET2-A1355RAPECRLGLK  | 393   | >TET2-A1355RPPECRLGLK  | 15295 | 14902 |
| >TET2-A1355RAPECRLGL   | 828   | >TET2-A1355RPPECRLGL   | 19    | 809   |
| >TET2-A1355RAPECRLGL   | 53    | >TET2-A1355RPPECRLGL   | 1264  | 1211  |
| >TET2-A1355RAPECRLGL   | 474   | >TET2-A1355RPPECRLGL   | 622   | 148   |
| >TET2-A1355HRAPECRLGL  | 46    | >TET2-A1355HRPPECRLGL  | 186   | 140   |
| >TET2-A1355HRAPECRLGL  | 235   | >TET2-A1355HRPPECRLGL  | 1223  | 988   |
| >TET2-A1355HRAPECRLGL  | 187   | >TET2-A1355HRPPECRLGL  | 2951  | 2764  |
| >TET2-A1355HRAPECRLGL  | 156   | >TET2-A1355HRPPECRLGL  | 118   | 38    |
| >TET2-A1355HRAPECRLGL  | 272   | >TET2-A1355HRPPECRLGL  | 344   | 72    |
| >TET2-A1355HRAPECRLGL  | 359   | >TET2-A1355HRPPECRLGL  | 747   | 388   |
| >TET2-A1355EYEHRAPECR  | 281   | >TET2-A1355EYEHRPPECR  | 294   | 13    |
| >TET2-A1355IEYEHRAPE   | 58    | >TET2-A1355IEYEHRPPE   | 67    | 9     |
| >TET2-A1355IEYEHRAPE   | 361   | >TET2-A1355IEYEHRPPE   | 184   | 177   |
| >TET2-A1355IEYEHRAPECF | 452   | >TET2-A1355IEYEHRPPECF | 420   | 32    |

|                         |      |                         |       |       |
|-------------------------|------|-------------------------|-------|-------|
| >TET2-A1355 NQIEYEHRA   | 48   | >TET2-A1355 NQIEYEHRP   | 4198  | 4150  |
| >TET2-A1865 APTHGSILI   | 461  | >TET2-A1865 GPTHGSILI   | 4327  | 3866  |
| >TET2-A1865 APTHGSIL    | 25   | >TET2-A1865 GPTHGSIL    | 73    | 48    |
| >TET2-A1865 APTHGSILI   | 375  | >TET2-A1865 GPTHGSILI   | 3977  | 3602  |
| >TET2-A1865 APTHGSILI   | 174  | >TET2-A1865 GPTHGSILI   | 279   | 105   |
| >TET2-A1865 VAPTHGSI    | 5824 | >TET2-A1865 VGPTHGSI    | 231   | 5593  |
| >TET2-A1865 VAPTHGSIL   | 7988 | >TET2-A1865 VGPTHGSIL   | 320   | 7668  |
| >TET2-A1865 VAPTHGSILI  | 6374 | >TET2-A1865 VGPTHGSILI  | 255   | 6119  |
| >TET2-A1865 VAPTHGSIL   | 5    | >TET2-A1865 VGPTHGSIL   | 21    | 16    |
| >TET2-A1865 VAPTHGSILI  | 6    | >TET2-A1865 VGPTHGSILI  | 33    | 27    |
| >TET2-A1865 VAPTHGSILIE | 280  | >TET2-A1865 VGPTHGSILIE | 3551  | 3271  |
| >TET2-A1865 VAPTHGSI    | 249  | >TET2-A1865 VGPTHGSI    | 903   | 654   |
| >TET2-A1865 VAPTHGSILI  | 227  | >TET2-A1865 VGPTHGSILI  | 4523  | 4296  |
| >TET2-A1865 AVAPTHGSI   | 228  | >TET2-A1865 AVGPTHGSI   | 3731  | 3503  |
| >TET2-A1865 AVAPTHGSILI | 276  | >TET2-A1865 AVGPTHGSIL  | 3926  | 3650  |
| >TET2-A1865 AVAPTHGSILI | 142  | >TET2-A1865 AVGPTHGSIL  | 1519  | 1377  |
| >TET2-A1865 AVAPTHGSI   | 183  | >TET2-A1865 AVGPTHGSI   | 483   | 300   |
| >TET2-A1865 AVAPTHGSILI | 153  | >TET2-A1865 AVGPTHGSIL  | 382   | 229   |
| >TET2-A1865 AVAPTHGSI   | 438  | >TET2-A1865 AVGPTHGSI   | 11626 | 11188 |
| >TET2-A1865 AVAPTHGSILI | 196  | >TET2-A1865 AVGPTHGSIL  | 7587  | 7391  |
| >TET2-A1865 AVAPTHGSI   | 216  | >TET2-A1865 AVGPTHGSI   | 3423  | 3207  |
| >TET2-A1865 AVAPTHGSI   | 51   | >TET2-A1865 AVGPTHGSI   | 100   | 49    |
| >TET2-A1865 AVAPTHGSIL  | 294  | >TET2-A1865 AVGPTHGSIL  | 1244  | 950   |
| >TET2-A1865 AVAPTHGSILI | 84   | >TET2-A1865 AVGPTHGSIL  | 201   | 117   |
| >TET2-A1865 VAVAPTHGSI  | 98   | >TET2-A1865 VAVGPTHGSI  | 340   | 242   |
| >TET2-A1865 VAVAPTHGSI  | 128  | >TET2-A1865 VAVGPTHGSI  | 127   | 1     |
| >TET2-A1865 VAVAPTHGSI  | 73   | >TET2-A1865 VAVGPTHGSI  | 76    | 3     |
| >TET2-A1865 VAVAPTHGSI  | 263  | >TET2-A1865 VAVGPTHGSI  | 291   | 28    |
| >TET2-A1865 VAVAPTHGSI  | 550  | >TET2-A1865 VAVGPTHGSI  | 402   | 148   |
| >TET2-A1865 VAVAPTHGSI  | 136  | >TET2-A1865 VAVGPTHGSI  | 445   | 309   |
| >TET2-A1865 GVAVAPTHG   | 461  | >TET2-A1865 GVAVGPTHG   | 386   | 75    |
| >TET2-A1865 GVAVAPTHG   | 236  | >TET2-A1865 GVAVGPTHG   | 233   | 3     |
| >TET2-A1876 AKRELHATTP  | 13   | >TET2-A1876 GKRELHATTP  | 53    | 40    |
| >TET2-A1876 IIECAKREL   | 599  | >TET2-A1876 IIECGKREL   | 369   | 230   |
| >TET2-A1876 IIECAKREL   | 155  | >TET2-A1876 IIECGKREL   | 71    | 84    |
| >TET2-A1876 ILIECAKREL  | 79   | >TET2-A1876 ILIECGKREL  | 101   | 22    |
| >TET2-A1876 ILIECAKREL  | 183  | >TET2-A1876 ILIECGKREL  | 135   | 48    |
| >TET2-A1876 ILIECAKREL  | 29   | >TET2-A1876 ILIECGKREL  | 22    | 7     |
| >TET2-A1876 ILIECAKREL  | 61   | >TET2-A1876 ILIECGKREL  | 59    | 2     |
| >TET2-A1876 ILIECAKREL  | 13   | >TET2-A1876 ILIECGKREL  | 11    | 2     |
| >TET2-A1876 ILIECAKR    | 481  | >TET2-A1876 ILIECGKR    | 958   | 477   |
| >TET2-A1876 ILIECAKR    | 111  | >TET2-A1876 ILIECGKR    | 415   | 304   |
| >TET2-A1876 ILIECAKR    | 148  | >TET2-A1876 ILIECGKR    | 375   | 227   |

|                         |     |                         |      |      |
|-------------------------|-----|-------------------------|------|------|
| >TET2-A1876 SILIECAK    | 60  | >TET2-A1876 SILIECGK    | 91   | 31   |
| >TET2-A1876 SILIECAKR   | 346 | >TET2-A1876 SILIECGKR   | 1158 | 812  |
| >TET2-A1876 SILIECAKR   | 238 | >TET2-A1876 SILIECGKR   | 598  | 360  |
| >TET2-A1876 GSILIECAK   | 60  | >TET2-A1876 GSILIECGK   | 71   | 11   |
| >TET2-A1876 GSILIECAKR  | 163 | >TET2-A1876 GSILIECGKR  | 1011 | 848  |
| >TET2-A1876 GSILIECAK   | 416 | >TET2-A1876 GSILIECGK   | 339  | 77   |
| >TET2-A1876 GSILIECAKR  | 34  | >TET2-A1876 GSILIECGKR  | 393  | 359  |
| >TET2-A1876 HGSILIECAKR | 414 | >TET2-A1876 HGSILIECGKR | 917  | 503  |
| >TET2-A1876 HGSILIECAKR | 345 | >TET2-A1876 HGSILIECGKR | 600  | 255  |
| >TET2-A1876 AKRELHATTP  | 13  | >TET2-A1876 VKRELHATTP  | 19   | 6    |
| >TET2-A1876 CAKRELHA    | 956 | >TET2-A1876 CVKRELHA    | 245  | 711  |
| >TET2-A1876 IECAKREL    | 155 | >TET2-A1876 IECVKREL    | 322  | 167  |
| >TET2-A1876 ILIECAKREL  | 540 | >TET2-A1876 ILIECVKREL  | 406  | 134  |
| >TET2-A1876 ILIECAKREL  | 79  | >TET2-A1876 ILIECVKREL  | 65   | 14   |
| >TET2-A1876 ILIECAKREL  | 183 | >TET2-A1876 ILIECVKREL  | 143  | 40   |
| >TET2-A1876 ILIECAKREL  | 29  | >TET2-A1876 ILIECVKREL  | 9    | 20   |
| >TET2-A1876 ILIECAKREL  | 61  | >TET2-A1876 ILIECVKREL  | 41   | 20   |
| >TET2-A1876 ILIECAKREL  | 586 | >TET2-A1876 ILIECVKREL  | 216  | 370  |
| >TET2-A1876 ILIECAKREL  | 852 | >TET2-A1876 ILIECVKREL  | 415  | 437  |
| >TET2-A1876 ILIECAKREL  | 13  | >TET2-A1876 ILIECVKREL  | 11   | 2    |
| >TET2-A1876 ILIECAKR    | 526 | >TET2-A1876 ILIECVKR    | 424  | 102  |
| >TET2-A1876 ILIECAKR    | 481 | >TET2-A1876 ILIECVKR    | 490  | 9    |
| >TET2-A1876 ILIECAKR    | 111 | >TET2-A1876 ILIECVKR    | 121  | 10   |
| >TET2-A1876 ILIECAKR    | 148 | >TET2-A1876 ILIECVKR    | 89   | 59   |
| >TET2-A1876 SILIECAKREL | 827 | >TET2-A1876 SILIECVKREL | 491  | 336  |
| >TET2-A1876 SILIECAK    | 60  | >TET2-A1876 SILIECVK    | 69   | 9    |
| >TET2-A1876 SILIECAKR   | 346 | >TET2-A1876 SILIECVKR   | 348  | 2    |
| >TET2-A1876 SILIECAKR   | 238 | >TET2-A1876 SILIECVKR   | 79   | 159  |
| >TET2-A1876 GSILIECAK   | 60  | >TET2-A1876 GSILIECVK   | 85   | 25   |
| >TET2-A1876 GSILIECAKR  | 534 | >TET2-A1876 GSILIECVKR  | 205  | 329  |
| >TET2-A1876 GSILIECAKR  | 163 | >TET2-A1876 GSILIECVKR  | 279  | 116  |
| >TET2-A1876 GSILIECAK   | 416 | >TET2-A1876 GSILIECVK   | 523  | 107  |
| >TET2-A1876 GSILIECAKR  | 34  | >TET2-A1876 GSILIECVKR  | 44   | 10   |
| >TET2-A1876 HGSILIECAKR | 414 | >TET2-A1876 HGSILIECVKR | 439  | 25   |
| >TET2-A1876 HGSILIECAKR | 345 | >TET2-A1876 HGSILIECVKR | 164  | 181  |
| >TET2-A1882 ATTPLKNPNR  | 140 | >TET2-A1882 PTTPLKNPNR  | 5098 | 4958 |
| >TET2-A1882 ATTPLKNPNR  | 215 | >TET2-A1882 PTTPLKNPNR  | 3536 | 3321 |
| >TET2-A1882 ATTPLKNPNR  | 99  | >TET2-A1882 PTTPLKNPNR  | 2067 | 1968 |
| >TET2-A1882 ATTPLKNPNR  | 242 | >TET2-A1882 PTTPLKNPNR  | 9164 | 8922 |
| >TET2-A1882 HATTPLKNPN  | 206 | >TET2-A1882 HPTTPLKNPN  | 7786 | 7580 |
| >TET2-A1882 HATTPLKNPN  | 427 | >TET2-A1882 HPTTPLKNPN  | 3980 | 3553 |
| >TET2-A1882 HATTPLKNPN  | 81  | >TET2-A1882 HPTTPLKNPN  | 2121 | 2040 |
| >TET2-A1882 HATTPLKNPN  | 567 | >TET2-A1882 HPTTPLKNPN  | 456  | 111  |

|                         |      |                         |      |      |
|-------------------------|------|-------------------------|------|------|
| >TET2-A1882 ELHATTPL    | 161  | >TET2-A1882 ELHPTTPL    | 277  | 116  |
| >TET2-A1882 ELHATTPL    | 213  | >TET2-A1882 ELHPTTPL    | 310  | 97   |
| >TET2-A1882 ELHATTPL    | 124  | >TET2-A1882 ELHPTTPL    | 93   | 31   |
| >TET2-A1882 ELHATTPL    | 420  | >TET2-A1882 ELHPTTPL    | 309  | 111  |
| >TET2-A1882 ELHATTPL    | 23   | >TET2-A1882 ELHPTTPL    | 14   | 9    |
| >TET2-A1882 ELHATTPLK   | 118  | >TET2-A1882 ELHPTTPLK   | 174  | 56   |
| >TET2-A1882 ELHATTPLK   | 366  | >TET2-A1882 ELHPTTPLK   | 411  | 45   |
| >TET2-A1882 ELHATTPLK   | 169  | >TET2-A1882 ELHPTTPLK   | 165  | 4    |
| >TET2-A1882 ELHATTPLK   | 24   | >TET2-A1882 ELHPTTPLK   | 46   | 22   |
| >TET2-A1882 ELHATTPL    | 208  | >TET2-A1882 ELHPTTPL    | 193  | 15   |
| >TET2-A1882 ELHATTPL    | 209  | >TET2-A1882 ELHPTTPL    | 223  | 14   |
| >TET2-A1882 RELHATTPL   | 109  | >TET2-A1882 RELHPTTPL   | 1614 | 1505 |
| >TET2-A1882 RELHATTPLK  | 159  | >TET2-A1882 RELHPTTPLK  | 425  | 266  |
| >TET2-A1882 RELHATTPL   | 312  | >TET2-A1882 RELHPTTPL   | 219  | 93   |
| >TET2-A1882 RELHATTPL   | 48   | >TET2-A1882 RELHPTTPL   | 42   | 6    |
| >TET2-A1882 RELHATTPL   | 7    | >TET2-A1882 RELHPTTPL   | 10   | 3    |
| >TET2-A1882 RELHATTPL   | 12   | >TET2-A1882 RELHPTTPL   | 18   | 6    |
| >TET2-A1882 RELHATTPL   | 138  | >TET2-A1882 RELHPTTPL   | 95   | 43   |
| >TET2-A1882 RELHATTPL   | 6    | >TET2-A1882 RELHPTTPL   | 9    | 3    |
| >TET2-A1882 KRELHATTPL  | 108  | >TET2-A1882 KRELHPTTPL  | 88   | 20   |
| >TET2-A1882 KRELHATTPL  | 462  | >TET2-A1882 KRELHPTTPL  | 797  | 335  |
| >TET2-A1882 KRELHATT    | 453  | >TET2-A1882 KRELHPTT    | 346  | 107  |
| >TET2-A1882 KRELHATTPL  | 79   | >TET2-A1882 KRELHPTTPL  | 80   | 1    |
| >TET2-A1882 KRELHATTPLI | 335  | >TET2-A1882 KRELHPTTPLI | 384  | 49   |
| >TET2-A1882 KRELHATTPL  | 174  | >TET2-A1882 KRELHPTTPL  | 172  | 2    |
| >TET2-A1882 KRELHATTPLI | 65   | >TET2-A1882 KRELHPTTPLI | 52   | 13   |
| >TET2-A1882 AKRELHATTP  | 13   | >TET2-A1882 AKRELHPTTP  | 13   | 0    |
| >TET2-A308T AAMLNNTCSF  | 109  | >TET2-A308T TAMLNNTCSF  | 537  | 428  |
| >TET2-A308T AAMLNNTCSF( | 200  | >TET2-A308T TAMLNNTCSFC | 257  | 57   |
| >TET2-A308T AAMLNNTCSF( | 11   | >TET2-A308T TAMLNNTCSFC | 10   | 1    |
| >TET2-A308T AAMLNNTCSF( | 67   | >TET2-A308T TAMLNNTCSFC | 593  | 526  |
| >TET2-A308T AAMLNNTCSF  | 108  | >TET2-A308T TAMLNNTCSF  | 419  | 311  |
| >TET2-A308T AAMLNNTCSF( | 235  | >TET2-A308T TAMLNNTCSFC | 15   | 220  |
| >TET2-A308T AAMLNNTCSF  | 66   | >TET2-A308T TAMLNNTCSF  | 134  | 68   |
| >TET2-A308T AAMLNNTCSF  | 24   | >TET2-A308T TAMLNNTCSF  | 88   | 64   |
| >TET2-A308T AAMLNNTCSF  | 9    | >TET2-A308T TAMLNNTCSF  | 26   | 17   |
| >TET2-A308T AAMLNNTCSF  | 255  | >TET2-A308T TAMLNNTCSF  | 71   | 184  |
| >TET2-A308T AAMLNNTCSF  | 199  | >TET2-A308T TAMLNNTCSF  | 162  | 37   |
| >TET2-A308T AAMLNNTCSF( | 163  | >TET2-A308T TAMLNNTCSFC | 491  | 328  |
| >TET2-A308T LAAMLNNTCSF | 5056 | >TET2-A308T LTAMLNNTCSF | 200  | 4856 |
| >TET2-A308T LAAMLNNTCSF | 603  | >TET2-A308T LTAMLNNTCSF | 112  | 491  |
| >TET2-A308T LAAMLNNTCSF | 52   | >TET2-A308T LTAMLNNTCSF | 41   | 11   |
| >TET2-A308T LAAMLNNTCSF | 31   | >TET2-A308T LTAMLNNTCSF | 63   | 32   |



|                         |      |                         |      |      |
|-------------------------|------|-------------------------|------|------|
| >TET2-A308T LAAMLNTCSF  | 36   | >TET2-A308T LTAMLNTCSF  | 7    | 29   |
| >TET2-A308T LAAMLNTCSF  | 54   | >TET2-A308T LTAMLNTCSF  | 45   | 9    |
| >TET2-A308T LAAMLNTCSF  | 2995 | >TET2-A308T LTAMLNTCSF  | 195  | 2800 |
| >TET2-A308T LAAMLNTCSF  | 191  | >TET2-A308T LTAMLNTCSF  | 18   | 173  |
| >TET2-A308T LAAMLNTCSF  | 1075 | >TET2-A308T LTAMLNTCSF  | 49   | 1026 |
| >TET2-A308T KLAAMLNT    | 159  | >TET2-A308T KLTAMLNT    | 951  | 792  |
| >TET2-A308T KLAAMLNT    | 36   | >TET2-A308T KLTAMLNT    | 378  | 342  |
| >TET2-A308T KLAAMLNTC   | 192  | >TET2-A308T KLTAMLNTC   | 1477 | 1285 |
| >TET2-A308T KLAAMLNTC   | 95   | >TET2-A308T KLTAMLNTC   | 803  | 708  |
| >TET2-A308T KLAAMLNT    | 34   | >TET2-A308T KLTAMLNT    | 300  | 266  |
| >TET2-A308T KLAAMLNTC   | 116  | >TET2-A308T KLTAMLNTC   | 1200 | 1084 |
| >TET2-A308T KLAAMLNTC   | 432  | >TET2-A308T KLTAMLNTC   | 3278 | 2846 |
| >TET2-A308T KLAAMLNT    | 373  | >TET2-A308T KLTAMLNT    | 1158 | 785  |
| >TET2-A308T KLAAMLNTC   | 280  | >TET2-A308T KLTAMLNTC   | 915  | 635  |
| >TET2-A308T KLAAMLNTC   | 186  | >TET2-A308T KLTAMLNTC   | 535  | 349  |
| >TET2-A308T KLAAMLNTC   | 215  | >TET2-A308T KLTAMLNTC   | 542  | 327  |
| >TET2-A308T KLAAMLNTC   | 172  | >TET2-A308T KLTAMLNTC   | 309  | 137  |
| >TET2-A308T KLAAMLNT    | 172  | >TET2-A308T KLTAMLNT    | 220  | 48   |
| >TET2-A308T KLAAMLNTC   | 28   | >TET2-A308T KLTAMLNTC   | 32   | 4    |
| >TET2-A308T KLAAMLNTC   | 445  | >TET2-A308T KLTAMLNTC   | 906  | 461  |
| >TET2-A308T KLAAMLNTC   | 12   | >TET2-A308T KLTAMLNTC   | 16   | 4    |
| >TET2-A308T KLAAMLNTC   | 45   | >TET2-A308T KLTAMLNTC   | 204  | 159  |
| >TET2-A308T KLAAMLNTC   | 36   | >TET2-A308T KLTAMLNTC   | 75   | 39   |
| >TET2-A308T KLAAMLNTC   | 285  | >TET2-A308T KLTAMLNTC   | 440  | 155  |
| >TET2-A308T KLAAMLNTC   | 111  | >TET2-A308T KLTAMLNTC   | 230  | 119  |
| >TET2-A308T ASKLAAML    | 117  | >TET2-A308T ASKLTAML    | 76   | 41   |
| >TET2-A308T ASKLAAMLN   | 325  | >TET2-A308T ASKLTAMLN   | 326  | 1    |
| >TET2-A308T ASKLAAMLN   | 190  | >TET2-A308T ASKLTAMLN   | 208  | 18   |
| >TET2-A308T ASKLAAML    | 13   | >TET2-A308T ASKLTAML    | 16   | 3    |
| >TET2-A308T ASKLAAML    | 49   | >TET2-A308T ASKLTAML    | 69   | 20   |
| >TET2-A308T NASKLAAML   | 1468 | >TET2-A308T NASKLTAML   | 464  | 1004 |
| >TET2-A308T NASKLAAML   | 468  | >TET2-A308T NASKLTAML   | 120  | 348  |
| >TET2-A308T NASKLAAML   | 560  | >TET2-A308T NASKLTAML   | 301  | 259  |
| >TET2-A308T NASKLAAM    | 62   | >TET2-A308T NASKLTAM    | 47   | 15   |
| >TET2-A308T DNASKLAAM   | 286  | >TET2-A308T DNASKLTAM   | 1661 | 1375 |
| >TET2-A308T ADNASKLAAM  | 170  | >TET2-A308T ADNASKLTAM  | 193  | 23   |
| >TET2-A308T DADNASKLAAM | 283  | >TET2-A308T DADNASKLTAM | 269  | 14   |
| >TET2-C1193 CPIAKWVV    | 2182 | >TET2-C1193 FPIAKWVV    | 203  | 1979 |
| >TET2-C1193 CPIAKWVVRF  | 2092 | >TET2-C1193 FPIAKWVVRF  | 442  | 1650 |
| >TET2-C1193 CPIAKWVV    | 812  | >TET2-C1193 FPIAKWVV    | 108  | 704  |
| >TET2-C1193 CPIAKWVV    | 2358 | >TET2-C1193 FPIAKWVV    | 310  | 2048 |
| >TET2-C1193 CPIAKWVV    | 2808 | >TET2-C1193 FPIAKWVV    | 366  | 2442 |
| >TET2-C1193 CPIAKWVV    | 1966 | >TET2-C1193 FPIAKWVV    | 81   | 1885 |

|                        |       |                        |     |       |
|------------------------|-------|------------------------|-----|-------|
| >TET2-C1193 CPIAKWVV   | 945   | >TET2-C1193 FPIAKWVV   | 258 | 687   |
| >TET2-C1193 CPIAKWVV   | 540   | >TET2-C1193 FPIAKWVV   | 94  | 446   |
| >TET2-C1193 CPIAKWVV   | 25    | >TET2-C1193 FPIAKWVV   | 7   | 18    |
| >TET2-C1193 CPIAKWVVR  | 635   | >TET2-C1193 FPIAKWVVR  | 36  | 599   |
| >TET2-C1193 CPIAKWVVRF | 678   | >TET2-C1193 FPIAKWVVRF | 49  | 629   |
| >TET2-C1193 CPIAKWVV   | 4082  | >TET2-C1193 FPIAKWVV   | 498 | 3584  |
| >TET2-C1193 CPIAKWVVR  | 160   | >TET2-C1193 FPIAKWVVR  | 336 | 176   |
| >TET2-C1193 CPIAKWVVRF | 181   | >TET2-C1193 FPIAKWVVRF | 429 | 248   |
| >TET2-C1193 GCPIAKWVVI | 3131  | >TET2-C1193 GFPIAKWVVI | 386 | 2745  |
| >TET2-C1193 GCPIAKWVVI | 6535  | >TET2-C1193 GFPIAKWVVI | 224 | 6311  |
| >TET2-C1193 GCPIAKWVVI | 968   | >TET2-C1193 GFPIAKWVVI | 134 | 834   |
| >TET2-C1193 GCPIAKWVVI | 857   | >TET2-C1193 GFPIAKWVVI | 146 | 711   |
| >TET2-C1193 TGKEGKSSQC | 24063 | >TET2-C1193 TGKEGKSSQC | 464 | 23599 |
| >TET2-C1193 QGCPIAKWV' | 984   | >TET2-C1193 QGFPIAKWV' | 355 | 629   |
| >TET2-C1193 QGCPIAKWV' | 2347  | >TET2-C1193 QGFPIAKWV' | 242 | 2105  |
| >TET2-C1193 QGCPIAKW   | 124   | >TET2-C1193 QGFPIAKW   | 33  | 91    |
| >TET2-C1193 QGCPIAKW   | 2127  | >TET2-C1193 QGFPIAKW   | 101 | 2026  |
| >TET2-C1193 QGCPIAKW   | 1221  | >TET2-C1193 QGFPIAKW   | 151 | 1070  |
| >TET2-C1193 QGCPIAKWV' | 111   | >TET2-C1193 QGFPIAKWV' | 51  | 60    |
| >TET2-C1193 SQGCPIAKW\ | 36    | >TET2-C1193 SQGFPIAKW\ | 62  | 26    |
| >TET2-C1193 SQGCPIAKW\ | 103   | >TET2-C1193 SQGFPIAKW\ | 177 | 74    |
| >TET2-C1193 SQGCPIAKW\ | 28    | >TET2-C1193 SQGFPIAKW\ | 47  | 19    |
| >TET2-C1193 SQGCPIAKW\ | 33    | >TET2-C1193 SQGFPIAKW\ | 144 | 111   |
| >TET2-C1193 SQGCPIAKW\ | 105   | >TET2-C1193 SQGFPIAKW\ | 103 | 2     |
| >TET2-C1193 SQGCPIAK   | 85    | >TET2-C1193 SQGFPIAK   | 33  | 52    |
| >TET2-C1193 SSQGCPIAK  | 13    | >TET2-C1193 SSQGFPIAK  | 7   | 6     |
| >TET2-C1193 SSQGCPIAK  | 222   | >TET2-C1193 SSQGFPIAK  | 44  | 178   |
| >TET2-C1193 SSQGCPIAKM | 2113  | >TET2-C1193 SSQGFPIAKM | 405 | 1708  |
| >TET2-C1193 SSQGCPIAKM | 13    | >TET2-C1193 SSQGFPIAKM | 11  | 2     |
| >TET2-C1193 SSQGCPIAKM | 1149  | >TET2-C1193 SSQGFPIAKM | 434 | 715   |
| >TET2-C1193 SSQGCPIAKM | 60    | >TET2-C1193 SSQGFPIAKM | 43  | 17    |
| >TET2-C1193 SSQGCPIAKM | 29    | >TET2-C1193 SSQGFPIAKM | 24  | 5     |
| >TET2-C1193 SSQGCPIAKM | 1492  | >TET2-C1193 SSQGFPIAKM | 448 | 1044  |
| >TET2-C1193 SSQGCPIAKM | 472   | >TET2-C1193 SSQGFPIAKM | 500 | 28    |
| >TET2-C1193 SSQGCPIAK  | 149   | >TET2-C1193 SSQGFPIAK  | 74  | 75    |
| >TET2-C1193 KSSQGCPI   | 3574  | >TET2-C1193 KSSQGFPI   | 482 | 3092  |
| >TET2-C1193 KSSQGCPIAK | 116   | >TET2-C1193 KSSQGFPIAK | 92  | 24    |
| >TET2-C1193 KSSQGCPIAK | 19    | >TET2-C1193 KSSQGFPIAK | 12  | 7     |
| >TET2-C1193 KSSQGCPI   | 322   | >TET2-C1193 KSSQGFPI   | 239 | 83    |
| >TET2-C1193 KSSQGCPIA  | 1092  | >TET2-C1193 KSSQGFPIA  | 244 | 848   |
| >TET2-C1193 KSSQGCPIAK | 25    | >TET2-C1193 KSSQGFPIAK | 10  | 15    |
| >TET2-C1193 KSSQGCPIAK | 370   | >TET2-C1193 KSSQGFPIAK | 190 | 180   |
| >TET2-C1193 KSSQGCPI   | 262   | >TET2-C1193 KSSQGFPI   | 85  | 177   |

|                         |       |                         |     |       |
|-------------------------|-------|-------------------------|-----|-------|
| >TET2-C1193 KSSQGCPI    | 15    | >TET2-C1193 KSSQGFPI    | 16  | 1     |
| >TET2-C1193 KSSQGCPIAK' | 7     | >TET2-C1193 KSSQGFPIAK\ | 6   | 1     |
| >TET2-C1193 KSSQGCPIAK' | 45    | >TET2-C1193 KSSQGFPIAK\ | 40  | 5     |
| >TET2-C1193 KSSQGCPI    | 104   | >TET2-C1193 KSSQGFPI    | 43  | 61    |
| >TET2-C1193 KSSQGCPIAK' | 9     | >TET2-C1193 KSSQGFPIAK\ | 8   | 1     |
| >TET2-C1193 KSSQGCPIAK' | 307   | >TET2-C1193 KSSQGFPIAK\ | 313 | 6     |
| >TET2-C1193 KSSQGCPIAK' | 674   | >TET2-C1193 KSSQGFPIAK\ | 461 | 213   |
| >TET2-C1193 KSSQGCPIAK  | 353   | >TET2-C1193 KSSQGFPIAK  | 139 | 214   |
| >TET2-C1193 KSSQGCPI    | 50    | >TET2-C1193 KSSQGFPI    | 26  | 24    |
| >TET2-C1193 GKSSQGCPI   | 73    | >TET2-C1193 GKSSQGFPI   | 94  | 21    |
| >TET2-C1193 KEGKSSQGC   | 71    | >TET2-C1193 KEGKSSQGF   | 151 | 80    |
| >TET2-C1193 KEGKSSQGC   | 19090 | >TET2-C1193 KEGKSSQGF   | 332 | 18758 |
| >TET2-C1193 KEGKSSQGC   | 17044 | >TET2-C1193 KEGKSSQGF   | 74  | 16970 |
| >TET2-C1193 KEGKSSQGC   | 362   | >TET2-C1193 KEGKSSQGF   | 139 | 223   |
| >TET2-C1193 KEGKSSQGC   | 80    | >TET2-C1193 KEGKSSQGF   | 103 | 23    |
| >TET2-C1193 KEGKSSQGC   | 2609  | >TET2-C1193 KEGKSSQGF   | 141 | 2468  |
| >TET2-C1193 KEGKSSQGC   | 8792  | >TET2-C1193 KEGKSSQGF   | 205 | 8587  |
| >TET2-C1193 KEGKSSQGC   | 1577  | >TET2-C1193 KEGKSSQGF   | 265 | 1312  |
| >TET2-C1193 KEGKSSQGC   | 26    | >TET2-C1193 KEGKSSQGF   | 17  | 9     |
| >TET2-C1193 CPIAKWVV    | 812   | >TET2-C1193 WPIAKWVV    | 177 | 635   |
| >TET2-C1193 CPIAKWVV    | 2808  | >TET2-C1193 WPIAKWVV    | 416 | 2392  |
| >TET2-C1193 CPIAKWVV    | 1966  | >TET2-C1193 WPIAKWVV    | 118 | 1848  |
| >TET2-C1193 CPIAKWVV    | 540   | >TET2-C1193 WPIAKWVV    | 317 | 223   |
| >TET2-C1193 CPIAKWVV    | 25    | >TET2-C1193 WPIAKWVV    | 21  | 4     |
| >TET2-C1193 CPIAKWVVR   | 635   | >TET2-C1193 WPIAKWVVR   | 396 | 239   |
| >TET2-C1193 CPIAKWVVR   | 678   | >TET2-C1193 WPIAKWVVR   | 495 | 183   |
| >TET2-C1193 CPIAKWVV    | 4082  | >TET2-C1193 WPIAKWVV    | 276 | 3806  |
| >TET2-C1193 CPIAKWVVR   | 160   | >TET2-C1193 WPIAKWVVR   | 147 | 13    |
| >TET2-C1193 CPIAKWVVR   | 181   | >TET2-C1193 WPIAKWVVR   | 194 | 13    |
| >TET2-C1193 GCPIAKWVVI  | 968   | >TET2-C1193 GWPIAKWV\   | 27  | 941   |
| >TET2-C1193 GCPIAKWVVI  | 857   | >TET2-C1193 GWPIAKWV\   | 28  | 829   |
| >TET2-C1193 GCPIAKWVV   | 38815 | >TET2-C1193 GWPIAKWV\   | 488 | 38327 |
| >TET2-C1193 TGKEGKSSQC  | 27761 | >TET2-C1193 TGKEGKSSQC  | 383 | 27378 |
| >TET2-C1193 QGCPIAKWV'  | 984   | >TET2-C1193 QGWPIAKW\   | 238 | 746   |
| >TET2-C1193 QGCPIAKW    | 124   | >TET2-C1193 QGWPIAKW    | 40  | 84    |
| >TET2-C1193 QGCPIAKW    | 2127  | >TET2-C1193 QGWPIAKW    | 121 | 2006  |
| >TET2-C1193 QGCPIAKW    | 1221  | >TET2-C1193 QGWPIAKW    | 259 | 962   |
| >TET2-C1193 QGCPIAKWV'  | 111   | >TET2-C1193 QGWPIAKW\   | 32  | 79    |
| >TET2-C1193 SQGCPIAKW\  | 36    | >TET2-C1193 SQGWPIAKW   | 25  | 11    |
| >TET2-C1193 SQGCPIAKW\  | 103   | >TET2-C1193 SQGWPIAKW   | 37  | 66    |
| >TET2-C1193 SQGCPIAKW\  | 28    | >TET2-C1193 SQGWPIAKW   | 12  | 16    |
| >TET2-C1193 SQGCPIAKW\  | 33    | >TET2-C1193 SQGWPIAKW   | 122 | 89    |
| >TET2-C1193 SQGCPIAKW\  | 860   | >TET2-C1193 SQGWPIAKW   | 148 | 712   |

|                         |       |                         |     |       |
|-------------------------|-------|-------------------------|-----|-------|
| >TET2-C1193 SQGCPIAKW\  | 105   | >TET2-C1193 SQGWPIAKW   | 23  | 82    |
| >TET2-C1193 SQGCPIAKW\  | 2209  | >TET2-C1193 SQGWPIAKW   | 225 | 1984  |
| >TET2-C1193 SQGCPIAKW\  | 974   | >TET2-C1193 SQGWPIAKW   | 64  | 910   |
| >TET2-C1193 SQGCPIAK    | 85    | >TET2-C1193 SQGWPIAK    | 30  | 55    |
| >TET2-C1193 SSQGCPIAK   | 13    | >TET2-C1193 SSQGWPIAK   | 9   | 4     |
| >TET2-C1193 SSQGCPIAK   | 222   | >TET2-C1193 SSQGWPIAK   | 143 | 79    |
| >TET2-C1193 SSQGCPIAK\  | 13    | >TET2-C1193 SSQGWPIAK\  | 11  | 2     |
| >TET2-C1193 SSQGCPIAK\  | 60    | >TET2-C1193 SSQGWPIAK\  | 51  | 9     |
| >TET2-C1193 SSQGCPIAK\  | 29    | >TET2-C1193 SSQGWPIAK\  | 20  | 9     |
| >TET2-C1193 SSQGCPIAK\  | 472   | >TET2-C1193 SSQGWPIAK\  | 519 | 47    |
| >TET2-C1193 SSQGCPIAK   | 149   | >TET2-C1193 SSQGWPIAK   | 94  | 55    |
| >TET2-C1193 KSSQGCPIAK  | 116   | >TET2-C1193 KSSQGWPIAK  | 142 | 26    |
| >TET2-C1193 KSSQGCPIAK  | 19    | >TET2-C1193 KSSQGWPIAK  | 18  | 1     |
| >TET2-C1193 KSSQGCPI    | 322   | >TET2-C1193 KSSQGWPI    | 264 | 58    |
| >TET2-C1193 KSSQGCPIA   | 1092  | >TET2-C1193 KSSQGWPIA   | 62  | 1030  |
| >TET2-C1193 KSSQGCPIAK  | 25    | >TET2-C1193 KSSQGWPIAK  | 9   | 16    |
| >TET2-C1193 KSSQGCPIAK  | 370   | >TET2-C1193 KSSQGWPIAK  | 360 | 10    |
| >TET2-C1193 KSSQGCPI    | 262   | >TET2-C1193 KSSQGWPI    | 241 | 21    |
| >TET2-C1193 KSSQGCPI    | 15    | >TET2-C1193 KSSQGWPI    | 15  | 0     |
| >TET2-C1193 KSSQGCPIAK' | 7     | >TET2-C1193 KSSQGWPIAK' | 6   | 1     |
| >TET2-C1193 KSSQGCPIAK' | 45    | >TET2-C1193 KSSQGWPIAK' | 37  | 8     |
| >TET2-C1193 KSSQGCPI    | 104   | >TET2-C1193 KSSQGWPI    | 42  | 62    |
| >TET2-C1193 KSSQGCPIAK' | 9     | >TET2-C1193 KSSQGWPIAK' | 8   | 1     |
| >TET2-C1193 KSSQGCPIAK' | 307   | >TET2-C1193 KSSQGWPIAK' | 498 | 191   |
| >TET2-C1193 KSSQGCPIAK' | 674   | >TET2-C1193 KSSQGWPIAK' | 269 | 405   |
| >TET2-C1193 KSSQGCPIAK  | 353   | >TET2-C1193 KSSQGWPIAK  | 153 | 200   |
| >TET2-C1193 KSSQGCPI    | 50    | >TET2-C1193 KSSQGWPI    | 37  | 13    |
| >TET2-C1193 GKSSQGCPI   | 73    | >TET2-C1193 GKSSQGWPI   | 97  | 24    |
| >TET2-C1193 KEGKSSQGCF  | 71    | >TET2-C1193 KEGKSSQGW   | 204 | 133   |
| >TET2-C1193 KEGKSSQGCF  | 362   | >TET2-C1193 KEGKSSQGW   | 200 | 162   |
| >TET2-C1193 KEGKSSQGCF  | 80    | >TET2-C1193 KEGKSSQGW   | 99  | 19    |
| >TET2-C1193 KEGKSSQGC   | 2609  | >TET2-C1193 KEGKSSQGW   | 60  | 2549  |
| >TET2-C1193 KEGKSSQGC   | 8792  | >TET2-C1193 KEGKSSQGW   | 59  | 8733  |
| >TET2-C1193 KEGKSSQGCF  | 1577  | >TET2-C1193 KEGKSSQGW   | 285 | 1292  |
| >TET2-C1193 KEGKSSQGCF  | 26    | >TET2-C1193 KEGKSSQGW   | 27  | 1     |
| >TET2-C1211 CLVRERAGHT  | 4903  | >TET2-C1211 YLVRERAGHT  | 395 | 4508  |
| >TET2-C1211 CLVRERAGHT  | 3437  | >TET2-C1211 YLVRERAGHT  | 56  | 3381  |
| >TET2-C1211 CLVRERAGHT  | 2396  | >TET2-C1211 YLVRERAGHT  | 76  | 2320  |
| >TET2-C1211 CLVRERAGHT  | 5665  | >TET2-C1211 YLVRERAGHT  | 66  | 5599  |
| >TET2-C1211 CLVRERAGHT  | 356   | >TET2-C1211 YLVRERAGHT  | 5   | 351   |
| >TET2-C1211 RRSSEEKLLC  | 26044 | >TET2-C1211 RRSSEEKLLY  | 186 | 25858 |
| >TET2-C1211 RRSSEEKLLC  | 3249  | >TET2-C1211 RRSSEEKLLY  | 43  | 3206  |
| >TET2-C1211 RRSSEEKLLC  | 2713  | >TET2-C1211 RRSSEEKLLY  | 145 | 2568  |

|                         |       |                         |     |       |
|-------------------------|-------|-------------------------|-----|-------|
| >TET2-C1211 RRSSEEKLLC  | 329   | >TET2-C1211 RRSSEEKLLY  | 205 | 124   |
| >TET2-C1211 LLCLVRERA   | 1417  | >TET2-C1211 LLYLVRERA   | 397 | 1020  |
| >TET2-C1211 LLCLVRERA   | 2584  | >TET2-C1211 LLYLVRERA   | 212 | 2372  |
| >TET2-C1211 LLCLVRERA   | 797   | >TET2-C1211 LLYLVRERA   | 49  | 748   |
| >TET2-C1211 LLCLVRERA   | 8355  | >TET2-C1211 LLYLVRERA   | 419 | 7936  |
| >TET2-C1211 LLCLVRERA   | 166   | >TET2-C1211 LLYLVRERA   | 39  | 127   |
| >TET2-C1211 LLCLVRER    | 8430  | >TET2-C1211 LLYLVRER    | 413 | 8017  |
| >TET2-C1211 LLCLVRER    | 203   | >TET2-C1211 LLYLVRER    | 65  | 138   |
| >TET2-C1211 LLCLVRER    | 244   | >TET2-C1211 LLYLVRER    | 221 | 23    |
| >TET2-C1211 LLCLVRER    | 630   | >TET2-C1211 LLYLVRER    | 196 | 434   |
| >TET2-C1211 KLLCLVRERA  | 352   | >TET2-C1211 KLLYLVRERA  | 311 | 41    |
| >TET2-C1211 KLLCLVRERA  | 222   | >TET2-C1211 KLLYLVRERA  | 206 | 16    |
| >TET2-C1211 KLLCLVRERA  | 714   | >TET2-C1211 KLLYLVRERA  | 490 | 224   |
| >TET2-C1211 KLLCLVRERA  | 19    | >TET2-C1211 KLLYLVRERA  | 73  | 54    |
| >TET2-C1211 KLLCLVRERA  | 170   | >TET2-C1211 KLLYLVRERA  | 766 | 596   |
| >TET2-C1211 KLLCLVRERA  | 141   | >TET2-C1211 KLLYLVRERA  | 218 | 77    |
| >TET2-C1211 KLLCLVRERA  | 300   | >TET2-C1211 KLLYLVRERA  | 366 | 66    |
| >TET2-C1211 KLLCLVRER   | 41    | >TET2-C1211 KLLYLVRER   | 18  | 23    |
| >TET2-C1211 KLLCLVRER   | 38    | >TET2-C1211 KLLYLVRER   | 102 | 64    |
| >TET2-C1211 EKLLCLVR    | 236   | >TET2-C1211 EKLLYLVR    | 406 | 170   |
| >TET2-C1211 EEKLLCLV    | 15    | >TET2-C1211 EEKLLYLV    | 12  | 3     |
| >TET2-C1211 EEKLLCLV    | 292   | >TET2-C1211 EEKLLYLV    | 178 | 114   |
| >TET2-C1211 EEKLLCLV    | 210   | >TET2-C1211 EEKLLYLV    | 40  | 170   |
| >TET2-C1211 EEKLLCLV    | 878   | >TET2-C1211 EEKLLYLV    | 428 | 450   |
| >TET2-C1211 EEKLLCLVR   | 724   | >TET2-C1211 EEKLLYLVR   | 351 | 373   |
| >TET2-C1211 SEEKLLCL    | 49    | >TET2-C1211 SEEKLLYL    | 63  | 14    |
| >TET2-C1211 SEEKLLCLV   | 16    | >TET2-C1211 SEEKLLYLV   | 13  | 3     |
| >TET2-C1211 SEEKLLCL    | 144   | >TET2-C1211 SEEKLLYL    | 55  | 89    |
| >TET2-C1211 SEEKLLCLV   | 861   | >TET2-C1211 SEEKLLYLV   | 394 | 467   |
| >TET2-C1211 SEEKLLCL    | 216   | >TET2-C1211 SEEKLLYL    | 239 | 23    |
| >TET2-C1211 SEEKLLCLV   | 708   | >TET2-C1211 SEEKLLYLV   | 268 | 440   |
| >TET2-C1211 SEEKLLCLV   | 1218  | >TET2-C1211 SEEKLLYLV   | 70  | 1148  |
| >TET2-C1211 SEEKLLCLVR  | 557   | >TET2-C1211 SEEKLLYLVR  | 161 | 396   |
| >TET2-C1211 SEEKLLCLV   | 10    | >TET2-C1211 SEEKLLYLV   | 10  | 0     |
| >TET2-C1211 SEEKLLCLVR  | 617   | >TET2-C1211 SEEKLLYLVR  | 318 | 299   |
| >TET2-C1211 SSEEKLLC    | 11720 | >TET2-C1211 SSEEKLLY    | 10  | 11710 |
| >TET2-C1211 SSEEKLLCLV  | 1430  | >TET2-C1211 SSEEKLLYLV  | 367 | 1063  |
| >TET2-C1211 SSEEKLLC    | 25550 | >TET2-C1211 SSEEKLLY    | 276 | 25274 |
| >TET2-C1211 SSEEKLLC    | 28541 | >TET2-C1211 SSEEKLLY    | 492 | 28049 |
| >TET2-C1211 SSEEKLLCLVR | 1531  | >TET2-C1211 SSEEKLLYLVR | 417 | 1114  |
| >TET2-C1211 SSEEKLLC    | 24693 | >TET2-C1211 SSEEKLLY    | 204 | 24489 |
| >TET2-C1211 SSEEKLLC    | 17692 | >TET2-C1211 SSEEKLLY    | 28  | 17664 |
| >TET2-C1211 SSEEKLLCL   | 711   | >TET2-C1211 SSEEKLLYL   | 67  | 644   |

|                         |       |                         |      |       |
|-------------------------|-------|-------------------------|------|-------|
| >TET2-C1211 SSEEKLLCL   | 4468  | >TET2-C1211 SSEEKLLYL   | 431  | 4037  |
| >TET2-C1211 SSEEKLLC    | 39391 | >TET2-C1211 SSEEKLLY    | 436  | 38955 |
| >TET2-C1211 SSSEEKLLC   | 15224 | >TET2-C1211 SSSEEKLLY   | 17   | 15207 |
| >TET2-C1211 SSSEEKLLCL  | 2267  | >TET2-C1211 SSSEEKLLYL  | 203  | 2064  |
| >TET2-C1211 SSSEEKLLCLV | 706   | >TET2-C1211 SSSEEKLLYLV | 207  | 499   |
| >TET2-C1211 SSSEEKLLCLV | 595   | >TET2-C1211 SSSEEKLLYLV | 377  | 218   |
| >TET2-C1211 SSSEEKLLC   | 20498 | >TET2-C1211 SSSEEKLLY   | 193  | 20305 |
| >TET2-C1211 SSSEEKLLC   | 23182 | >TET2-C1211 SSSEEKLLY   | 47   | 23135 |
| >TET2-C1211 SSSEEKLLC   | 25468 | >TET2-C1211 SSSEEKLLY   | 143  | 25325 |
| >TET2-C1211 SSSEEKLLCLV | 845   | >TET2-C1211 SSSEEKLLYLV | 182  | 663   |
| >TET2-C1211 SSSEEKLLC   | 24880 | >TET2-C1211 SSSEEKLLY   | 55   | 24825 |
| >TET2-C1211 SSSEEKLLC   | 17512 | >TET2-C1211 SSSEEKLLY   | 32   | 17480 |
| >TET2-C1211 SSSEEKLLCL  | 595   | >TET2-C1211 SSSEEKLLYL  | 99   | 496   |
| >TET2-C1211 SSSEEKLLCL  | 3349  | >TET2-C1211 SSSEEKLLYL  | 361  | 2988  |
| >TET2-C1211 SSSEEKLLC   | 17118 | >TET2-C1211 SSSEEKLLY   | 136  | 16982 |
| >TET2-C1211 SSSEEKLLCL  | 514   | >TET2-C1211 SSSEEKLLYL  | 120  | 394   |
| >TET2-C1211 SSSEEKLLC   | 39435 | >TET2-C1211 SSSEEKLLY   | 451  | 38984 |
| >TET2-C1211 RSSSEEKLLC  | 29837 | >TET2-C1211 RSSSEEKLLY  | 152  | 29685 |
| >TET2-C1211 RSSSEEKLLC  | 32582 | >TET2-C1211 RSSSEEKLLY  | 159  | 32423 |
| >TET2-C1211 RSSSEEKLLC  | 29590 | >TET2-C1211 RSSSEEKLLY  | 172  | 29418 |
| >TET2-C1211 RSSSEEKLLC  | 22244 | >TET2-C1211 RSSSEEKLLY  | 109  | 22135 |
| >TET2-C1211 RSSSEEKLLC  | 25829 | >TET2-C1211 RSSSEEKLLY  | 80   | 25749 |
| >TET2-C1211 RSSSEEKLLC  | 14291 | >TET2-C1211 RSSSEEKLLY  | 280  | 14011 |
| >TET2-C1211 RSSSEEKLLC  | 8890  | >TET2-C1211 RSSSEEKLLY  | 6    | 8884  |
| >TET2-C1211 RSSSEEKLLCL | 52    | >TET2-C1211 RSSSEEKLLYL | 14   | 38    |
| >TET2-C1211 RSSSEEKLLC  | 16608 | >TET2-C1211 RSSSEEKLLY  | 204  | 16404 |
| >TET2-C1211 RSSSEEKLLC  | 5161  | >TET2-C1211 RSSSEEKLLY  | 48   | 5113  |
| >TET2-C1211 RSSSEEKLLCL | 885   | >TET2-C1211 RSSSEEKLLYL | 96   | 789   |
| >TET2-C1211 RSSSEEKLLCL | 3582  | >TET2-C1211 RSSSEEKLLYL | 455  | 3127  |
| >TET2-C1211 RSSSEEKLLC  | 3074  | >TET2-C1211 RSSSEEKLLY  | 25   | 3049  |
| >TET2-C1211 RSSSEEKLLCL | 1448  | >TET2-C1211 RSSSEEKLLYL | 390  | 1058  |
| >TET2-C1211 RSSSEEKLLCL | 649   | >TET2-C1211 RSSSEEKLLYL | 461  | 188   |
| >TET2-C1263 RCALNEER    | 185   | >TET2-C1263 RGALNEER    | 489  | 304   |
| >TET2-C1263 RRCALNEER   | 336   | >TET2-C1263 RRGALNEER   | 179  | 157   |
| >TET2-C1263 RRCALNEERT  | 107   | >TET2-C1263 RRGALNEERT  | 137  | 30    |
| >TET2-C1263 RRCALNEE    | 163   | >TET2-C1263 RRGALNEE    | 220  | 57    |
| >TET2-C1263 RRCALNEER   | 348   | >TET2-C1263 RRGALNEER   | 456  | 108   |
| >TET2-C1263 RRCALNEERT  | 283   | >TET2-C1263 RRGALNEERT  | 386  | 103   |
| >TET2-C1263 RRCALNEERT  | 291   | >TET2-C1263 RRGALNEERT  | 377  | 86    |
| >TET2-C1263 RRCALNEE    | 297   | >TET2-C1263 RRGALNEE    | 456  | 159   |
| >TET2-C1263 RRCALNEER   | 405   | >TET2-C1263 RRGALNEER   | 1096 | 691   |
| >TET2-C1263 RRCALNEERT  | 230   | >TET2-C1263 RRGALNEERT  | 282  | 52    |
| >TET2-C1263 RRCALNEERT  | 495   | >TET2-C1263 RRGALNEERT  | 1298 | 803   |

|                        |       |                        |      |       |
|------------------------|-------|------------------------|------|-------|
| >TET2-C1263 RRCALNEER  | 170   | >TET2-C1263 RRGALNEER  | 146  | 24    |
| >TET2-C1263 LTNRRCAL   | 282   | >TET2-C1263 LTNRRGAL   | 1352 | 1070  |
| >TET2-C1263 LTNRRCAL   | 106   | >TET2-C1263 LTNRRGAL   | 172  | 66    |
| >TET2-C1263 TLTNRRCA   | 358   | >TET2-C1263 TLTNRRGA   | 214  | 144   |
| >TET2-C1263 TLTNRRCAL  | 8     | >TET2-C1263 TLTNRRGAL  | 109  | 101   |
| >TET2-C1263 TLTNRRCAL  | 31    | >TET2-C1263 TLTNRRGAL  | 151  | 120   |
| >TET2-C1263 GTLTNRRCAL | 272   | >TET2-C1263 GTLTNRRGAL | 505  | 233   |
| >TET2-C1263 RCALNEER   | 23406 | >TET2-C1263 RRALNEER   | 105  | 23301 |
| >TET2-C1263 RCALNEERTC | 23660 | >TET2-C1263 RRALNEERTC | 366  | 23294 |
| >TET2-C1263 RCALNEER   | 17975 | >TET2-C1263 RRALNEER   | 128  | 17847 |
| >TET2-C1263 RCALNEER   | 185   | >TET2-C1263 RRALNEER   | 670  | 485   |
| >TET2-C1263 RKYGTLNRR  | 1327  | >TET2-C1263 RKYGTLNRR  | 261  | 1066  |
| >TET2-C1263 RKYGTLNRR  | 7637  | >TET2-C1263 RKYGTLNRR  | 417  | 7220  |
| >TET2-C1263 RKYGTLNRR  | 36144 | >TET2-C1263 RKYGTLNRR  | 169  | 35975 |
| >TET2-C1263 RRCALNEER  | 336   | >TET2-C1263 RRRALNEER  | 90   | 246   |
| >TET2-C1263 RRCALNEERT | 107   | >TET2-C1263 RRRALNEERT | 51   | 56    |
| >TET2-C1263 RRCALNEE   | 163   | >TET2-C1263 RRRALNEE   | 96   | 67    |
| >TET2-C1263 RRCALNEER  | 348   | >TET2-C1263 RRRALNEER  | 75   | 273   |
| >TET2-C1263 RRCALNEERT | 283   | >TET2-C1263 RRRALNEERT | 66   | 217   |
| >TET2-C1263 RRCALNEERT | 291   | >TET2-C1263 RRRALNEERT | 70   | 221   |
| >TET2-C1263 RRCALNEE   | 297   | >TET2-C1263 RRRALNEE   | 497  | 200   |
| >TET2-C1263 RRCALNEER  | 405   | >TET2-C1263 RRRALNEER  | 343  | 62    |
| >TET2-C1263 RRCALNEERT | 230   | >TET2-C1263 RRRALNEERT | 92   | 138   |
| >TET2-C1263 RRCALNEERT | 495   | >TET2-C1263 RRRALNEERT | 407  | 88    |
| >TET2-C1263 RRCALNEER  | 170   | >TET2-C1263 RRRALNEER  | 537  | 367   |
| >TET2-C1263 LTNRRCAL   | 282   | >TET2-C1263 LTNRRRAL   | 255  | 27    |
| >TET2-C1263 LTNRRCAL   | 106   | >TET2-C1263 LTNRRRAL   | 278  | 172   |
| >TET2-C1263 TLTNRRCA   | 358   | >TET2-C1263 TLTNRRRA   | 205  | 153   |
| >TET2-C1263 TLTNRRCAL  | 8     | >TET2-C1263 TLTNRRRAL  | 161  | 153   |
| >TET2-C1263 TLTNRRCAL  | 31    | >TET2-C1263 TLTNRRRAL  | 51   | 20    |
| >TET2-C1263 GTLTNRRC   | 20777 | >TET2-C1263 GTLTNRRR   | 141  | 20636 |
| >TET2-C1263 GTLTNRRCAL | 272   | >TET2-C1263 GTLTNRRRAL | 397  | 125   |
| >TET2-C1263 GTLTNRRC   | 18105 | >TET2-C1263 GTLTNRRR   | 337  | 17768 |
| >TET2-C1263 KYGTLNRRC  | 24028 | >TET2-C1263 KYGTLNRRR  | 63   | 23965 |
| >TET2-C1263 KYGTLNRRC  | 12905 | >TET2-C1263 KYGTLNRRR  | 11   | 12894 |
| >TET2-C1271 RRCALNEERT | 291   | >TET2-C1271 RRCALNEERT | 274  | 17    |
| >TET2-C1271 RRCALNEERT | 495   | >TET2-C1271 RRCALNEERT | 1210 | 715   |
| >TET2-C1271 RRCALNEERT | 30024 | >TET2-C1271 RRCALNEERT | 73   | 29951 |
| >TET2-C1271 RTCACQGL   | 8224  | >TET2-C1271 RTWACQGL   | 416  | 7808  |
| >TET2-C1271 RTCACQGL   | 4785  | >TET2-C1271 RTWACQGL   | 445  | 4340  |
| >TET2-C1271 RTCACQGL   | 920   | >TET2-C1271 RTWACQGL   | 107  | 813   |
| >TET2-C1271 RTCACQGL   | 7     | >TET2-C1271 RTWACQGL   | 4    | 3     |
| >TET2-C1271 RTCACQGL   | 7810  | >TET2-C1271 RTWACQGL   | 402  | 7408  |

|                         |       |                        |       |       |
|-------------------------|-------|------------------------|-------|-------|
| >TET2-C1271 RTCACQGL    | 253   | >TET2-C1271 RTWACQGL   | 230   | 23    |
| >TET2-C1271 RTCACQGL    | 116   | >TET2-C1271 RTWACQGL   | 39    | 77    |
| >TET2-C1271 EERTCACQGL  | 285   | >TET2-C1271 EERTWACQG  | 190   | 95    |
| >TET2-C1271 EERTCACQGL  | 97    | >TET2-C1271 EERTWACQG  | 63    | 34    |
| >TET2-C1271 NEERTCACQGL | 50    | >TET2-C1271 NEERTWACQ  | 55    | 5     |
| >TET2-C1271 NEERTCACQGL | 359   | >TET2-C1271 NEERTWACQ  | 163   | 196   |
| >TET2-C1271 NEERTCAC    | 2042  | >TET2-C1271 NEERTWAC   | 256   | 1786  |
| >TET2-C1271 ALNEERTCA   | 233   | >TET2-C1271 ALNEERTWA  | 53    | 180   |
| >TET2-C1271 ALNEERTCA   | 116   | >TET2-C1271 ALNEERTWA  | 17    | 99    |
| >TET2-C1271 ALNEERTC    | 253   | >TET2-C1271 ALNEERTW   | 11153 | 10900 |
| >TET2-C1271 ALNEERTCA   | 982   | >TET2-C1271 ALNEERTWA  | 233   | 749   |
| >TET2-C1271 ALNEERTCAC  | 94    | >TET2-C1271 ALNEERTWA  | 32    | 62    |
| >TET2-C1271 ALNEERTCAC  | 469   | >TET2-C1271 ALNEERTWA  | 129   | 340   |
| >TET2-C1271 ALNEERTCA   | 286   | >TET2-C1271 ALNEERTWA  | 254   | 32    |
| >TET2-C1271 ALNEERTC    | 70    | >TET2-C1271 ALNEERTW   | 7591  | 7521  |
| >TET2-C1271 ALNEERTCA   | 25    | >TET2-C1271 ALNEERTWA  | 7     | 18    |
| >TET2-C1271 ALNEERTCAC  | 15    | >TET2-C1271 ALNEERTWA  | 7     | 8     |
| >TET2-C1271 ALNEERTCAC  | 169   | >TET2-C1271 ALNEERTWA  | 130   | 39    |
| >TET2-C1271 CALNEERTC   | 26907 | >TET2-C1271 CALNEERTW  | 136   | 26771 |
| >TET2-C1271 CALNEERTC   | 27816 | >TET2-C1271 CALNEERTW  | 52    | 27764 |
| >TET2-C1271 CALNEERTC   | 21915 | >TET2-C1271 CALNEERTW  | 51    | 21864 |
| >TET2-C1271 CALNEERTC   | 21584 | >TET2-C1271 CALNEERTW  | 234   | 21350 |
| >TET2-C1271 CALNEERTC   | 25391 | >TET2-C1271 CALNEERTW  | 118   | 25273 |
| >TET2-C1271 CALNEERTC   | 28598 | >TET2-C1271 CALNEERTW  | 207   | 28391 |
| >TET2-C1273 CQGLDPETCC  | 4986  | >TET2-C1273 FQGLDPETCC | 80    | 4906  |
| >TET2-C1273 CALNEERTCA  | 12646 | >TET2-C1273 CALNEERTCA | 64    | 12582 |
| >TET2-C1273 CALNEERTCA  | 26079 | >TET2-C1273 CALNEERTCA | 311   | 25768 |
| >TET2-C1273 CALNEERTCA  | 10788 | >TET2-C1273 CALNEERTCA | 63    | 10725 |
| >TET2-C1273 RTCACQGL    | 12473 | >TET2-C1273 RTCAFQGL   | 460   | 12013 |
| >TET2-C1273 RTCACQGL    | 1510  | >TET2-C1273 RTCAFQGL   | 368   | 1142  |
| >TET2-C1273 RTCACQGL    | 920   | >TET2-C1273 RTCAFQGL   | 183   | 737   |
| >TET2-C1273 RTCACQGL    | 7     | >TET2-C1273 RTCAFQGL   | 8     | 1     |
| >TET2-C1273 RTCACQGL    | 253   | >TET2-C1273 RTCAFQGL   | 439   | 186   |
| >TET2-C1273 RTCACQGL    | 116   | >TET2-C1273 RTCAFQGL   | 81    | 35    |
| >TET2-C1273 EERTCACQGL  | 285   | >TET2-C1273 EERTCAFQGL | 590   | 305   |
| >TET2-C1273 EERTCACQGL  | 653   | >TET2-C1273 EERTCAFQGL | 264   | 389   |
| >TET2-C1273 EERTCACQGL  | 97    | >TET2-C1273 EERTCAFQGL | 142   | 45    |
| >TET2-C1273 NEERTCACQ   | 1259  | >TET2-C1273 NEERTCAFQ  | 157   | 1102  |
| >TET2-C1273 NEERTCACQ   | 50    | >TET2-C1273 NEERTCAFQ  | 67    | 17    |
| >TET2-C1273 NEERTCAC    | 7987  | >TET2-C1273 NEERTCAF   | 61    | 7926  |
| >TET2-C1273 NEERTCACQ   | 359   | >TET2-C1273 NEERTCAFQ  | 158   | 201   |
| >TET2-C1273 NEERTCAC    | 6752  | >TET2-C1273 NEERTCAF   | 436   | 6316  |
| >TET2-C1273 NEERTCAC    | 13994 | >TET2-C1273 NEERTCAF   | 492   | 13502 |



|                        |       |                        |      |       |
|------------------------|-------|------------------------|------|-------|
| >TET2-C1273 NEERTCACQC | 851   | >TET2-C1273 NEERTCAFQC | 242  | 609   |
| >TET2-C1273 ALNEERTCAC | 2356  | >TET2-C1273 ALNEERTCAF | 458  | 1898  |
| >TET2-C1273 ALNEERTCAC | 94    | >TET2-C1273 ALNEERTCAF | 738  | 644   |
| >TET2-C1273 ALNEERTCAC | 469   | >TET2-C1273 ALNEERTCAF | 3757 | 3288  |
| >TET2-C1273 ALNEERTCAC | 15    | >TET2-C1273 ALNEERTCAF | 553  | 538   |
| >TET2-C1273 ALNEERTCAC | 169   | >TET2-C1273 ALNEERTCAF | 64   | 105   |
| >TET2-C1273 ALNEERTCAC | 6211  | >TET2-C1273 ALNEERTCAF | 152  | 6059  |
| >TET2-C1273 ALNEERTCAC | 11031 | >TET2-C1273 ALNEERTCAF | 60   | 10971 |
| >TET2-C1273 ALNEERTCAC | 9686  | >TET2-C1273 ALNEERTCAF | 31   | 9655  |
| >TET2-C1273 RTCACQGL   | 1510  | >TET2-C1273 RTCASQGL   | 254  | 1256  |
| >TET2-C1273 RTCACQGL   | 920   | >TET2-C1273 RTCASQGL   | 451  | 469   |
| >TET2-C1273 RTCACQGL   | 7     | >TET2-C1273 RTCASQGL   | 4    | 3     |
| >TET2-C1273 RTCACQGL   | 253   | >TET2-C1273 RTCASQGL   | 344  | 91    |
| >TET2-C1273 RTCACQGL   | 116   | >TET2-C1273 RTCASQGL   | 106  | 10    |
| >TET2-C1273 EERTCACQGL | 285   | >TET2-C1273 EERTCASQGL | 524  | 239   |
| >TET2-C1273 EERTCACQGL | 653   | >TET2-C1273 EERTCASQGL | 418  | 235   |
| >TET2-C1273 EERTCACQGL | 97    | >TET2-C1273 EERTCASQGL | 291  | 194   |
| >TET2-C1273 NEERTCACQC | 50    | >TET2-C1273 NEERTCASQC | 67   | 17    |
| >TET2-C1273 NEERTCACQC | 359   | >TET2-C1273 NEERTCASQC | 249  | 110   |
| >TET2-C1273 NEERTCACQC | 851   | >TET2-C1273 NEERTCASQC | 262  | 589   |
| >TET2-C1273 ALNEERTCAC | 94    | >TET2-C1273 ALNEERTCAS | 915  | 821   |
| >TET2-C1273 ALNEERTCAC | 469   | >TET2-C1273 ALNEERTCAS | 4145 | 3676  |
| >TET2-C1273 ALNEERTCAC | 15    | >TET2-C1273 ALNEERTCAS | 253  | 238   |
| >TET2-C1273 ALNEERTCAC | 169   | >TET2-C1273 ALNEERTCAS | 43   | 126   |
| >TET2-C1289 CSWSMYYNG  | 70    | >TET2-C1289 FSWSMYYNG  | 119  | 49    |
| >TET2-C1289 CSWSMYYNG  | 150   | >TET2-C1289 FSWSMYYNG  | 387  | 237   |
| >TET2-C1289 CSWSMYYNG  | 313   | >TET2-C1289 FSWSMYYNG  | 75   | 238   |
| >TET2-C1289 GCSWSMYY   | 64    | >TET2-C1289 GFSWSMYY   | 8    | 56    |
| >TET2-C1289 GCSWSMYY   | 128   | >TET2-C1289 GFSWSMYY   | 46   | 82    |
| >TET2-C1289 GCSWSMYY   | 212   | >TET2-C1289 GFSWSMYY   | 35   | 177   |
| >TET2-C1289 GCSWSMYYN  | 26485 | >TET2-C1289 GFSWSMYYN  | 386  | 26099 |
| >TET2-C1289 ETCGASFSFG | 7148  | >TET2-C1289 ETCGASFSFG | 71   | 7077  |
| >TET2-C1289 ETCGASFSFG | 5700  | >TET2-C1289 ETCGASFSFG | 18   | 5682  |
| >TET2-C1289 ETCGASFSFG | 8509  | >TET2-C1289 ETCGASFSFG | 32   | 8477  |
| >TET2-C1289 ETCGASFSFG | 8542  | >TET2-C1289 ETCGASFSFG | 120  | 8422  |
| >TET2-C1289 ETCGASFSFG | 6753  | >TET2-C1289 ETCGASFSFG | 462  | 6291  |
| >TET2-C1289 ETCGASFSFG | 359   | >TET2-C1289 ETCGASFSFG | 1037 | 678   |
| >TET2-C1289 ETCGASFSFG | 10321 | >TET2-C1289 ETCGASFSFG | 8    | 10313 |
| >TET2-C1289 FGCSWSMYY  | 513   | >TET2-C1289 FGFSWSMYY  | 264  | 249   |
| >TET2-C1289 FGCSWSMY   | 48    | >TET2-C1289 FGFSWSMY   | 19   | 29    |
| >TET2-C1289 FGCSWSMYY  | 10    | >TET2-C1289 FGFSWSMYY  | 6    | 4     |
| >TET2-C1289 FGCSWSMY   | 186   | >TET2-C1289 FGFSWSMY   | 93   | 93    |
| >TET2-C1289 FGCSWSMYY  | 84    | >TET2-C1289 FGFSWSMYY  | 41   | 43    |

|                        |      |                        |     |      |
|------------------------|------|------------------------|-----|------|
| >TET2-C1289 FGCSWSMYY  | 3122 | >TET2-C1289 FGFSWSMYY  | 319 | 2803 |
| >TET2-C1289 FGCSWSMYY  | 158  | >TET2-C1289 FGFSWSMYY  | 143 | 15   |
| >TET2-C1289 FGCSWSMYY  | 210  | >TET2-C1289 FGFSWSMYY  | 98  | 112  |
| >TET2-C1289 FGCSWSMYY  | 136  | >TET2-C1289 FGFSWSMYY  | 65  | 71   |
| >TET2-C1289 FGCSWSMYY  | 372  | >TET2-C1289 FGFSWSMYY  | 54  | 318  |
| >TET2-C1289 FGCSWSMYY  | 1453 | >TET2-C1289 FGFSWSMYY  | 181 | 1272 |
| >TET2-C1289 FGCSWSMYY  | 730  | >TET2-C1289 FGFSWSMYY  | 28  | 702  |
| >TET2-C1289 FGCSWSMYY  | 538  | >TET2-C1289 FGFSWSMYY  | 20  | 518  |
| >TET2-C1289 FGCSWSMYY  | 1009 | >TET2-C1289 FGFSWSMYY  | 128 | 881  |
| >TET2-C1289 FGCSWSMYY  | 1271 | >TET2-C1289 FGFSWSMYY  | 221 | 1050 |
| >TET2-C1289 FGCSWSMYY  | 138  | >TET2-C1289 FGFSWSMYY  | 43  | 95   |
| >TET2-C1289 FGCSWSMYY  | 263  | >TET2-C1289 FGFSWSMYY  | 61  | 202  |
| >TET2-C1289 FGCSWSMYY  | 109  | >TET2-C1289 FGFSWSMYY  | 14  | 95   |
| >TET2-C1289 FGCSWSMYY  | 7670 | >TET2-C1289 FGFSWSMYY  | 455 | 7215 |
| >TET2-C1289 FGCSWSMYY  | 1141 | >TET2-C1289 FGFSWSMYY  | 309 | 832  |
| >TET2-C1289 SFGCSWSMYY | 533  | >TET2-C1289 SFGFSWSMYY | 489 | 44   |
| >TET2-C1289 SFGCSWSMYY | 744  | >TET2-C1289 SFGFSWSMYY | 384 | 360  |
| >TET2-C1289 SFGCSWSMYY | 641  | >TET2-C1289 SFGFSWSMYY | 312 | 329  |
| >TET2-C1289 SFGCSWSMYY | 18   | >TET2-C1289 SFGFSWSMYY | 12  | 6    |
| >TET2-C1289 SFGCSWSMYY | 15   | >TET2-C1289 SFGFSWSMYY | 12  | 3    |
| >TET2-C1289 SFGCSWSMYY | 841  | >TET2-C1289 SFGFSWSMYY | 180 | 661  |
| >TET2-C1289 SFGCSWSMYY | 190  | >TET2-C1289 SFGFSWSMYY | 151 | 39   |
| >TET2-C1289 SFGCSWSMYY | 91   | >TET2-C1289 SFGFSWSMYY | 59  | 32   |
| >TET2-C1289 SFGCSWSMYY | 81   | >TET2-C1289 SFGFSWSMYY | 105 | 24   |
| >TET2-C1289 SFGCSWSMYY | 416  | >TET2-C1289 SFGFSWSMYY | 535 | 119  |
| >TET2-C1289 SFGCSWSMYY | 55   | >TET2-C1289 SFGFSWSMYY | 55  | 0    |
| >TET2-C1289 SFGCSWSMYY | 2710 | >TET2-C1289 SFGFSWSMYY | 389 | 2321 |
| >TET2-C1289 SFGCSWSMYY | 197  | >TET2-C1289 SFGFSWSMYY | 134 | 63   |
| >TET2-C1289 SFGCSWSM   | 646  | >TET2-C1289 SFGFSWSM   | 292 | 354  |
| >TET2-C1289 FSFGCSWSM  | 1647 | >TET2-C1289 FSFGFSWSM  | 143 | 1504 |
| >TET2-C1289 FSFGCSWSM  | 74   | >TET2-C1289 FSFGFSWSM  | 82  | 8    |
| >TET2-C1289 FSFGCSWSM  | 43   | >TET2-C1289 FSFGFSWSM  | 25  | 18   |
| >TET2-C1289 FSFGCSWSM  | 40   | >TET2-C1289 FSFGFSWSM  | 42  | 2    |
| >TET2-C1289 FSFGCSWSM  | 20   | >TET2-C1289 FSFGFSWSM  | 12  | 8    |
| >TET2-C1289 FSFGCSWSM  | 13   | >TET2-C1289 FSFGFSWSM  | 17  | 4    |
| >TET2-C1289 FSFGCSWSM  | 469  | >TET2-C1289 FSFGFSWSM  | 60  | 409  |
| >TET2-C1289 FSFGCSWSM  | 327  | >TET2-C1289 FSFGFSWSM  | 201 | 126  |
| >TET2-C1289 FSFGCSWSM  | 318  | >TET2-C1289 FSFGFSWSM  | 271 | 47   |
| >TET2-C1289 FSFGCSWSM  | 507  | >TET2-C1289 FSFGFSWSM  | 224 | 283  |
| >TET2-C1289 FSFGCSWSM  | 42   | >TET2-C1289 FSFGFSWSM  | 23  | 19   |
| >TET2-C1289 FSFGCSWSM  | 557  | >TET2-C1289 FSFGFSWSM  | 422 | 135  |
| >TET2-C1289 FSFGCSWSM  | 1316 | >TET2-C1289 FSFGFSWSM  | 177 | 1139 |
| >TET2-C1289 FSFGCSWSM  | 112  | >TET2-C1289 FSFGFSWSM  | 132 | 20   |

|                        |      |                        |     |      |
|------------------------|------|------------------------|-----|------|
| >TET2-C1289 FSFGCSWSM  | 103  | >TET2-C1289 FSFGFSWSM' | 36  | 67   |
| >TET2-C1289 FSFGCSWSM  | 22   | >TET2-C1289 FSFGFSWSM' | 22  | 0    |
| >TET2-C1289 FSFGCSWSM  | 6    | >TET2-C1289 FSFGFSWSM' | 5   | 1    |
| >TET2-C1289 FSFGCSWSM  | 14   | >TET2-C1289 FSFGFSWSM' | 9   | 5    |
| >TET2-C1289 FSFGCSWSM  | 24   | >TET2-C1289 FSFGFSWSM' | 34  | 10   |
| >TET2-C1289 FSFGCSWSM  | 1174 | >TET2-C1289 FSFGFSWSM' | 134 | 1040 |
| >TET2-C1289 FSFGCSWSM  | 27   | >TET2-C1289 FSFGFSWSM' | 21  | 6    |
| >TET2-C1289 FSFGCSWSM  | 32   | >TET2-C1289 FSFGFSWSM' | 18  | 14   |
| >TET2-C1289 FSFGCSWSM  | 73   | >TET2-C1289 FSFGFSWSM' | 62  | 11   |
| >TET2-C1289 FSFGCSWSM  | 567  | >TET2-C1289 FSFGFSWSM' | 36  | 531  |
| >TET2-C1289 FSFGCSWSM  | 82   | >TET2-C1289 FSFGFSWSM' | 35  | 47   |
| >TET2-C1289 FSFGCSWSM  | 158  | >TET2-C1289 FSFGFSWSM' | 170 | 12   |
| >TET2-C1289 FSFGCSWSM  | 58   | >TET2-C1289 FSFGFSWSM' | 56  | 2    |
| >TET2-C1289 FSFGCSWSM  | 46   | >TET2-C1289 FSFGFSWSM' | 46  | 0    |
| >TET2-C1289 FSFGCSWSM  | 93   | >TET2-C1289 FSFGFSWSM' | 30  | 63   |
| >TET2-C1289 FSFGCSWSM  | 439  | >TET2-C1289 FSFGFSWSM' | 122 | 317  |
| >TET2-C1289 FSFGCSWSM  | 44   | >TET2-C1289 FSFGFSWSM' | 23  | 21   |
| >TET2-C1289 FSFGCSWSM  | 10   | >TET2-C1289 FSFGFSWSM' | 7   | 3    |
| >TET2-C1289 FSFGCSWSM  | 10   | >TET2-C1289 FSFGFSWSM' | 7   | 3    |
| >TET2-C1289 FSFGCSWSM  | 5    | >TET2-C1289 FSFGFSWSM' | 6   | 1    |
| >TET2-C1289 FSFGCSWSM  | 3    | >TET2-C1289 FSFGFSWSM' | 3   | 0    |
| >TET2-C1289 FSFGCSWSM  | 4    | >TET2-C1289 FSFGFSWSM' | 4   | 0    |
| >TET2-C1289 FSFGCSWSM  | 840  | >TET2-C1289 FSFGFSWSM' | 490 | 350  |
| >TET2-C1289 FSFGCSWSM  | 37   | >TET2-C1289 FSFGFSWSM' | 48  | 11   |
| >TET2-C1289 FSFGCSWSM  | 42   | >TET2-C1289 FSFGFSWSM' | 51  | 9    |
| >TET2-C1289 FSFGCSWSM  | 38   | >TET2-C1289 FSFGFSWSM' | 35  | 3    |
| >TET2-C1289 FSFGCSWSM  | 472  | >TET2-C1289 FSFGFSWSM' | 858 | 386  |
| >TET2-C1289 FSFGCSWSM  | 113  | >TET2-C1289 FSFGFSWSM' | 66  | 47   |
| >TET2-C1289 FSFGCSWSM  | 225  | >TET2-C1289 FSFGFSWSM' | 139 | 86   |
| >TET2-C1289 FSFGCSWSM  | 106  | >TET2-C1289 FSFGFSWSM' | 77  | 29   |
| >TET2-C1289 FSFGCSWSM  | 38   | >TET2-C1289 FSFGFSWSM' | 28  | 10   |
| >TET2-C1289 FSFGCSWSM  | 279  | >TET2-C1289 FSFGFSWSM' | 183 | 96   |
| >TET2-C1289 FSFGCSWSM  | 20   | >TET2-C1289 FSFGFSWSM' | 17  | 3    |
| >TET2-C1289 FSFGCSWSM  | 101  | >TET2-C1289 FSFGFSWSM' | 39  | 62   |
| >TET2-C1289 FSFGCSWSM  | 23   | >TET2-C1289 FSFGFSWSM' | 25  | 2    |
| >TET2-C1289 FSFGCSWSM  | 50   | >TET2-C1289 FSFGFSWSM' | 27  | 23   |
| >TET2-C1289 FSFGCSWSM  | 7    | >TET2-C1289 FSFGFSWSM' | 8   | 1    |
| >TET2-C1289 FSFGCSWSM  | 87   | >TET2-C1289 FSFGFSWSM' | 77  | 10   |
| >TET2-C1289 FSFGCSWSM  | 28   | >TET2-C1289 FSFGFSWSM' | 40  | 12   |
| >TET2-C1289 FSFGCSWSM  | 162  | >TET2-C1289 FSFGFSWSM' | 98  | 64   |
| >TET2-C1289 SFSFGCSW   | 902  | >TET2-C1289 SFSFGFSW   | 114 | 788  |
| >TET2-C1289 SFSFGCSWSM | 935  | >TET2-C1289 SFSFGFSWSM | 349 | 586  |
| >TET2-C1289 SFSFGCSWSM | 13   | >TET2-C1289 SFSFGFSWSM | 11  | 2    |

|                       |       |                        |     |       |
|-----------------------|-------|------------------------|-----|-------|
| >TET2-C1289SFSFGCSWSM | 58    | >TET2-C1289SFSFGFSWSM  | 47  | 11    |
| >TET2-C1289SFSFGCSWSM | 128   | >TET2-C1289SFSFGFSWSM  | 109 | 19    |
| >TET2-C1289SFSFGCSWSM | 93    | >TET2-C1289SFSFGFSWSM  | 138 | 45    |
| >TET2-C1289SFSFGCSWSM | 12    | >TET2-C1289SFSFGFSWSM  | 12  | 0     |
| >TET2-C1289SFSFGCSWSM | 112   | >TET2-C1289SFSFGFSWSM  | 181 | 69    |
| >TET2-C1289SFSFGCSWSM | 461   | >TET2-C1289SFSFGFSWSM  | 338 | 123   |
| >TET2-C1289SFSFGCSW   | 324   | >TET2-C1289SFSFGFSW    | 325 | 1     |
| >TET2-C1289ASFSFGCS   | 2068  | >TET2-C1289ASFSFGFS    | 453 | 1615  |
| >TET2-C1289ASFSFGCSWS | 204   | >TET2-C1289ASFSFGFSWS  | 99  | 105   |
| >TET2-C1289ASFSFGCSWS | 651   | >TET2-C1289ASFSFGFSWS  | 305 | 346   |
| >TET2-C1289ASFSFGCSWS | 709   | >TET2-C1289ASFSFGFSWS  | 342 | 367   |
| >TET2-C1289ASFSFGCSW  | 51    | >TET2-C1289ASFSFGFSW   | 18  | 33    |
| >TET2-C1289ASFSFGCSWS | 135   | >TET2-C1289ASFSFGFSWS  | 54  | 81    |
| >TET2-C1289ASFSFGCSW  | 256   | >TET2-C1289ASFSFGFSW   | 978 | 722   |
| >TET2-C1289ASFSFGCSWS | 125   | >TET2-C1289ASFSFGFSWS  | 165 | 40    |
| >TET2-C1289ASFSFGCSW  | 29    | >TET2-C1289ASFSFGFSW   | 28  | 1     |
| >TET2-C1289ASFSFGCSWS | 12    | >TET2-C1289ASFSFGFSWS  | 10  | 2     |
| >TET2-C1289ASFSFGCSW  | 4     | >TET2-C1289ASFSFGFSW   | 3   | 1     |
| >TET2-C1289ASFSFGCSWS | 6     | >TET2-C1289ASFSFGFSWS  | 6   | 0     |
| >TET2-C1289ASFSFGCSW  | 855   | >TET2-C1289ASFSFGFSW   | 299 | 556   |
| >TET2-C1289ASFSFGCSW  | 34    | >TET2-C1289ASFSFGFSW   | 32  | 2     |
| >TET2-C1289ASFSFGCSWS | 235   | >TET2-C1289ASFSFGFSWS  | 135 | 100   |
| >TET2-C1289ASFSFGCSW  | 14    | >TET2-C1289ASFSFGFSW   | 10  | 4     |
| >TET2-C1289ASFSFGCSWS | 298   | >TET2-C1289ASFSFGFSWS  | 153 | 145   |
| >TET2-C1289ASFSFGCSWS | 211   | >TET2-C1289ASFSFGFSWS  | 67  | 144   |
| >TET2-C1289ASFSFGCSW  | 84    | >TET2-C1289ASFSFGFSW   | 27  | 57    |
| >TET2-C1289ASFSFGCSWS | 16    | >TET2-C1289ASFSFGFSWS  | 12  | 4     |
| >TET2-C1289ASFSFGCSW  | 336   | >TET2-C1289ASFSFGFSW   | 130 | 206   |
| >TET2-C1289ASFSFGCSW  | 266   | >TET2-C1289ASFSFGFSW   | 177 | 89    |
| >TET2-C1289ASFSFGCS   | 562   | >TET2-C1289ASFSFGFS    | 229 | 333   |
| >TET2-C1289ASFSFGCSW  | 2370  | >TET2-C1289ASFSFGFSW   | 306 | 2064  |
| >TET2-C1289ASFSFGCSWS | 734   | >TET2-C1289ASFSFGFSWS  | 161 | 573   |
| >TET2-C1289ASFSFGCSWS | 505   | >TET2-C1289ASFSFGFSWS  | 225 | 280   |
| >TET2-C1289ASFSFGCSWS | 85    | >TET2-C1289ASFSFGFSWS  | 50  | 35    |
| >TET2-C1289GASFSFGC   | 16047 | >TET2-C1289GASFSFGF    | 36  | 16011 |
| >TET2-C1289GASFSFGCSM | 86    | >TET2-C1289GASFSFGFSM  | 49  | 37    |
| >TET2-C1289GASFSFGCSM | 234   | >TET2-C1289GASFSFGFSM  | 124 | 110   |
| >TET2-C1289GASFSFGCSM | 73    | >TET2-C1289GASFSFGFSM  | 34  | 39    |
| >TET2-C1289GASFSFGCSM | 651   | >TET2-C1289GASFSFGFSM  | 414 | 237   |
| >TET2-C1289CGASFSFGC  | 17903 | >TET2-C1289CGASFSFGF   | 368 | 17535 |
| >TET2-C1289CGASFSFGCS | 883   | >TET2-C1289CGASFSFGFS' | 483 | 400   |
| >TET2-C1289CGASFSFGCS | 347   | >TET2-C1289CGASFSFGFS' | 243 | 104   |
| >TET2-C1289CGASFSFGCS | 38    | >TET2-C1289CGASFSFGFS' | 23  | 15    |

|                       |       |                        |      |       |
|-----------------------|-------|------------------------|------|-------|
| >TET2-C1289CGASFSFGCS | 683   | >TET2-C1289CGASFSFGFS' | 338  | 345   |
| >TET2-C1289CGASFSFGCS | 205   | >TET2-C1289CGASFSFGFS' | 150  | 55    |
| >TET2-C1289TCGASFSFGC | 24890 | >TET2-C1289TCGASFSFGF  | 481  | 24409 |
| >TET2-C1289CSWSMYYNC  | 70    | >TET2-C1289YSWSMYYNC   | 66   | 4     |
| >TET2-C1289CSWSMYYNC  | 150   | >TET2-C1289YSWSMYYNC   | 155  | 5     |
| >TET2-C1289CSWSMYYNC  | 313   | >TET2-C1289YSWSMYYNC   | 73   | 240   |
| >TET2-C1289GCSWSMYY   | 25093 | >TET2-C1289GYSWSMYY    | 214  | 24879 |
| >TET2-C1289GCSWSMYY   | 64    | >TET2-C1289GYSWSMYY    | 12   | 52    |
| >TET2-C1289GCSWSMYY   | 128   | >TET2-C1289GYSWSMYY    | 23   | 105   |
| >TET2-C1289GCSWSMYY   | 212   | >TET2-C1289GYSWSMYY    | 28   | 184   |
| >TET2-C1289GCSWSMYYN  | 29841 | >TET2-C1289GYSWSMYYN   | 461  | 29380 |
| >TET2-C1289GCSWSMYYN  | 26485 | >TET2-C1289GYSWSMYYN   | 365  | 26120 |
| >TET2-C1289ETCGASFSFG | 16232 | >TET2-C1289ETCGASFSFG  | 280  | 15952 |
| >TET2-C1289ETCGASFSFG | 7148  | >TET2-C1289ETCGASFSFG  | 21   | 7127  |
| >TET2-C1289ETCGASFSFG | 5700  | >TET2-C1289ETCGASFSFG  | 10   | 5690  |
| >TET2-C1289ETCGASFSFG | 8509  | >TET2-C1289ETCGASFSFG  | 6    | 8503  |
| >TET2-C1289ETCGASFSFG | 21193 | >TET2-C1289ETCGASFSFG  | 98   | 21095 |
| >TET2-C1289ETCGASFSFG | 28545 | >TET2-C1289ETCGASFSFG  | 186  | 28359 |
| >TET2-C1289ETCGASFSFG | 6753  | >TET2-C1289ETCGASFSFG  | 25   | 6728  |
| >TET2-C1289ETCGASFSFG | 359   | >TET2-C1289ETCGASFSFG  | 3191 | 2832  |
| >TET2-C1289ETCGASFSFG | 10321 | >TET2-C1289ETCGASFSFG  | 9    | 10312 |
| >TET2-C1289ETCGASFSFG | 19421 | >TET2-C1289ETCGASFSFG  | 351  | 19070 |
| >TET2-C1289ETCGASFSFG | 35525 | >TET2-C1289ETCGASFSFG  | 216  | 35309 |
| >TET2-C1289FGCSWSMY   | 2770  | >TET2-C1289FGYSWSMY    | 418  | 2352  |
| >TET2-C1289FGCSWSMYY  | 513   | >TET2-C1289FGYSWSMYY   | 69   | 444   |
| >TET2-C1289FGCSWSMY   | 48    | >TET2-C1289FGYSWSMY    | 17   | 31    |
| >TET2-C1289FGCSWSMYY  | 10    | >TET2-C1289FGYSWSMYY   | 6    | 4     |
| >TET2-C1289FGCSWSMY   | 186   | >TET2-C1289FGYSWSMY    | 124  | 62    |
| >TET2-C1289FGCSWSMYY  | 84    | >TET2-C1289FGYSWSMYY   | 50   | 34    |
| >TET2-C1289FGCSWSMY   | 158   | >TET2-C1289FGYSWSMY    | 151  | 7     |
| >TET2-C1289FGCSWSMY   | 210   | >TET2-C1289FGYSWSMY    | 101  | 109   |
| >TET2-C1289FGCSWSMYY  | 136   | >TET2-C1289FGYSWSMYY   | 64   | 72    |
| >TET2-C1289FGCSWSMY   | 372   | >TET2-C1289FGYSWSMY    | 43   | 329   |
| >TET2-C1289FGCSWSMYY  | 1453  | >TET2-C1289FGYSWSMYY   | 138  | 1315  |
| >TET2-C1289FGCSWSMY   | 730   | >TET2-C1289FGYSWSMY    | 42   | 688   |
| >TET2-C1289FGCSWSMYY  | 538   | >TET2-C1289FGYSWSMYY   | 33   | 505   |
| >TET2-C1289FGCSWSMY   | 1009  | >TET2-C1289FGYSWSMY    | 60   | 949   |
| >TET2-C1289FGCSWSMYY  | 1271  | >TET2-C1289FGYSWSMYY   | 119  | 1152  |
| >TET2-C1289FGCSWSMY   | 138   | >TET2-C1289FGYSWSMY    | 34   | 104   |
| >TET2-C1289FGCSWSMYY  | 263   | >TET2-C1289FGYSWSMYY   | 49   | 214   |
| >TET2-C1289FGCSWSMY   | 5893  | >TET2-C1289FGYSWSMY    | 348  | 5545  |
| >TET2-C1289FGCSWSMYY  | 109   | >TET2-C1289FGYSWSMYY   | 27   | 82    |
| >TET2-C1289SFGCSWSMY  | 533   | >TET2-C1289SFGYSWSMY   | 389  | 144   |

|                       |      |                        |     |      |
|-----------------------|------|------------------------|-----|------|
| >TET2-C1289 SFGCSWSMY | 744  | >TET2-C1289 SFGYSWSMY  | 352 | 392  |
| >TET2-C1289 SFGCSWSMY | 641  | >TET2-C1289 SFGYSWSMY  | 348 | 293  |
| >TET2-C1289 SFGCSWSMY | 18   | >TET2-C1289 SFGYSWSMY  | 14  | 4    |
| >TET2-C1289 SFGCSWSMY | 15   | >TET2-C1289 SFGYSWSMY  | 14  | 1    |
| >TET2-C1289 SFGCSWSMY | 841  | >TET2-C1289 SFGYSWSMY  | 140 | 701  |
| >TET2-C1289 SFGCSWSMY | 190  | >TET2-C1289 SFGYSWSMY  | 146 | 44   |
| >TET2-C1289 SFGCSWSMY | 91   | >TET2-C1289 SFGYSWSMY  | 73  | 18   |
| >TET2-C1289 SFGCSWSMY | 81   | >TET2-C1289 SFGYSWSMY  | 69  | 12   |
| >TET2-C1289 SFGCSWSMY | 416  | >TET2-C1289 SFGYSWSMY  | 374 | 42   |
| >TET2-C1289 SFGCSWSMY | 55   | >TET2-C1289 SFGYSWSMY  | 51  | 4    |
| >TET2-C1289 SFGCSWSMY | 2710 | >TET2-C1289 SFGYSWSMY  | 318 | 2392 |
| >TET2-C1289 SFGCSWSMY | 197  | >TET2-C1289 SFGYSWSMY  | 306 | 109  |
| >TET2-C1289 SFGCSWSM  | 646  | >TET2-C1289 SFGYSWSM   | 321 | 325  |
| >TET2-C1289 FSFGCSWSM | 1647 | >TET2-C1289 FSFGYSWSM  | 297 | 1350 |
| >TET2-C1289 FSFGCSWSM | 74   | >TET2-C1289 FSFGYSWSM' | 72  | 2    |
| >TET2-C1289 FSFGCSWSM | 43   | >TET2-C1289 FSFGYSWSM' | 23  | 20   |
| >TET2-C1289 FSFGCSWSM | 40   | >TET2-C1289 FSFGYSWSM  | 26  | 14   |
| >TET2-C1289 FSFGCSWSM | 20   | >TET2-C1289 FSFGYSWSM  | 11  | 9    |
| >TET2-C1289 FSFGCSWSM | 13   | >TET2-C1289 FSFGYSWSM  | 11  | 2    |
| >TET2-C1289 FSFGCSWSM | 469  | >TET2-C1289 FSFGYSWSM  | 60  | 409  |
| >TET2-C1289 FSFGCSWSM | 327  | >TET2-C1289 FSFGYSWSM' | 289 | 38   |
| >TET2-C1289 FSFGCSWSM | 318  | >TET2-C1289 FSFGYSWSM' | 312 | 6    |
| >TET2-C1289 FSFGCSWSM | 507  | >TET2-C1289 FSFGYSWSM' | 295 | 212  |
| >TET2-C1289 FSFGCSWSM | 42   | >TET2-C1289 FSFGYSWSM' | 34  | 8    |
| >TET2-C1289 FSFGCSWSM | 557  | >TET2-C1289 FSFGYSWSM' | 397 | 160  |
| >TET2-C1289 FSFGCSWSM | 1316 | >TET2-C1289 FSFGYSWSM  | 169 | 1147 |
| >TET2-C1289 FSFGCSWSM | 112  | >TET2-C1289 FSFGYSWSM' | 118 | 6    |
| >TET2-C1289 FSFGCSWSM | 103  | >TET2-C1289 FSFGYSWSM' | 34  | 69   |
| >TET2-C1289 FSFGCSWSM | 22   | >TET2-C1289 FSFGYSWSM' | 15  | 7    |
| >TET2-C1289 FSFGCSWSM | 6    | >TET2-C1289 FSFGYSWSM' | 5   | 1    |
| >TET2-C1289 FSFGCSWSM | 14   | >TET2-C1289 FSFGYSWSM' | 9   | 5    |
| >TET2-C1289 FSFGCSWSM | 24   | >TET2-C1289 FSFGYSWSM' | 42  | 18   |
| >TET2-C1289 FSFGCSWSM | 27   | >TET2-C1289 FSFGYSWSM' | 28  | 1    |
| >TET2-C1289 FSFGCSWSM | 32   | >TET2-C1289 FSFGYSWSM' | 22  | 10   |
| >TET2-C1289 FSFGCSWSM | 73   | >TET2-C1289 FSFGYSWSM  | 122 | 49   |
| >TET2-C1289 FSFGCSWSM | 567  | >TET2-C1289 FSFGYSWSM  | 61  | 506  |
| >TET2-C1289 FSFGCSWSM | 82   | >TET2-C1289 FSFGYSWSM' | 50  | 32   |
| >TET2-C1289 FSFGCSWSM | 158  | >TET2-C1289 FSFGYSWSM  | 105 | 53   |
| >TET2-C1289 FSFGCSWSM | 58   | >TET2-C1289 FSFGYSWSM' | 48  | 10   |
| >TET2-C1289 FSFGCSWSM | 46   | >TET2-C1289 FSFGYSWSM' | 40  | 6    |
| >TET2-C1289 FSFGCSWSM | 93   | >TET2-C1289 FSFGYSWSM' | 50  | 43   |
| >TET2-C1289 FSFGCSWSM | 439  | >TET2-C1289 FSFGYSWSM' | 240 | 199  |
| >TET2-C1289 FSFGCSWSM | 44   | >TET2-C1289 FSFGYSWSM  | 24  | 20   |

|                        |      |                        |      |      |
|------------------------|------|------------------------|------|------|
| >TET2-C1289 FSFGCSWSM  | 10   | >TET2-C1289 FSFGYSWSM' | 7    | 3    |
| >TET2-C1289 FSFGCSWSM  | 10   | >TET2-C1289 FSFGYSWSM' | 7    | 3    |
| >TET2-C1289 FSFGCSWSM  | 5    | >TET2-C1289 FSFGYSWSM' | 4    | 1    |
| >TET2-C1289 FSFGCSWSM  | 3    | >TET2-C1289 FSFGYSWSM' | 3    | 0    |
| >TET2-C1289 FSFGCSWSM  | 4    | >TET2-C1289 FSFGYSWSM' | 4    | 0    |
| >TET2-C1289 FSFGCSWSM  | 37   | >TET2-C1289 FSFGYSWSM' | 39   | 2    |
| >TET2-C1289 FSFGCSWSM  | 42   | >TET2-C1289 FSFGYSWSM' | 47   | 5    |
| >TET2-C1289 FSFGCSWSM  | 38   | >TET2-C1289 FSFGYSWSM' | 20   | 18   |
| >TET2-C1289 FSFGCSWSM  | 472  | >TET2-C1289 FSFGYSWSM' | 1124 | 652  |
| >TET2-C1289 FSFGCSWSM  | 113  | >TET2-C1289 FSFGYSWSM' | 156  | 43   |
| >TET2-C1289 FSFGCSWSM  | 225  | >TET2-C1289 FSFGYSWSM' | 257  | 32   |
| >TET2-C1289 FSFGCSWSM  | 106  | >TET2-C1289 FSFGYSWSM' | 134  | 28   |
| >TET2-C1289 FSFGCSWSM  | 38   | >TET2-C1289 FSFGYSWSM' | 37   | 1    |
| >TET2-C1289 FSFGCSWSM  | 279  | >TET2-C1289 FSFGYSWSM' | 194  | 85   |
| >TET2-C1289 FSFGCSWSM  | 20   | >TET2-C1289 FSFGYSWSM' | 19   | 1    |
| >TET2-C1289 FSFGCSWSM  | 101  | >TET2-C1289 FSFGYSWSM' | 49   | 52   |
| >TET2-C1289 FSFGCSWSM  | 23   | >TET2-C1289 FSFGYSWSM' | 38   | 15   |
| >TET2-C1289 FSFGCSWSM  | 50   | >TET2-C1289 FSFGYSWSM' | 38   | 12   |
| >TET2-C1289 FSFGCSWSM  | 7    | >TET2-C1289 FSFGYSWSM' | 10   | 3    |
| >TET2-C1289 FSFGCSWSM  | 87   | >TET2-C1289 FSFGYSWSM' | 49   | 38   |
| >TET2-C1289 FSFGCSWSM  | 28   | >TET2-C1289 FSFGYSWSM' | 36   | 8    |
| >TET2-C1289 FSFGCSWSM  | 162  | >TET2-C1289 FSFGYSWSM' | 240  | 78   |
| >TET2-C1289 SFSFGCSW   | 902  | >TET2-C1289 SFSFGYSW   | 155  | 747  |
| >TET2-C1289 SFSFGCSWSM | 935  | >TET2-C1289 SFSFGYSWSM | 350  | 585  |
| >TET2-C1289 SFSFGCSWSM | 13   | >TET2-C1289 SFSFGYSWSM | 13   | 0    |
| >TET2-C1289 SFSFGCSWSM | 58   | >TET2-C1289 SFSFGYSWSM | 59   | 1    |
| >TET2-C1289 SFSFGCSWSM | 128  | >TET2-C1289 SFSFGYSWSM | 106  | 22   |
| >TET2-C1289 SFSFGCSWSM | 93   | >TET2-C1289 SFSFGYSWSM | 145  | 52   |
| >TET2-C1289 SFSFGCSWSM | 12   | >TET2-C1289 SFSFGYSWSM | 14   | 2    |
| >TET2-C1289 SFSFGCSWSM | 112  | >TET2-C1289 SFSFGYSWSM | 123  | 11   |
| >TET2-C1289 SFSFGCSWSM | 461  | >TET2-C1289 SFSFGYSWSM | 595  | 134  |
| >TET2-C1289 SFSFGCSW   | 324  | >TET2-C1289 SFSFGYSW   | 254  | 70   |
| >TET2-C1289 ASFSFGCS   | 2068 | >TET2-C1289 ASFSFGYS   | 224  | 1844 |
| >TET2-C1289 ASFSFGCSWS | 204  | >TET2-C1289 ASFSFGYSWS | 130  | 74   |
| >TET2-C1289 ASFSFGCSWS | 651  | >TET2-C1289 ASFSFGYSWS | 290  | 361  |
| >TET2-C1289 ASFSFGCSWS | 709  | >TET2-C1289 ASFSFGYSWS | 450  | 259  |
| >TET2-C1289 ASFSFGCSW  | 51   | >TET2-C1289 ASFSFGYSW  | 10   | 41   |
| >TET2-C1289 ASFSFGCSWS | 135  | >TET2-C1289 ASFSFGYSWS | 58   | 77   |
| >TET2-C1289 ASFSFGCSW  | 256  | >TET2-C1289 ASFSFGYSW  | 680  | 424  |
| >TET2-C1289 ASFSFGCSWS | 125  | >TET2-C1289 ASFSFGYSWS | 130  | 5    |
| >TET2-C1289 ASFSFGCSW  | 29   | >TET2-C1289 ASFSFGYSW  | 17   | 12   |
| >TET2-C1289 ASFSFGCSWS | 12   | >TET2-C1289 ASFSFGYSWS | 9    | 3    |
| >TET2-C1289 ASFSFGCSW  | 4    | >TET2-C1289 ASFSFGYSW  | 4    | 0    |

|                         |       |                         |     |       |
|-------------------------|-------|-------------------------|-----|-------|
| >TET2-C1289 ASFSFGCSWS  | 6     | >TET2-C1289 ASFSFGYSWS  | 6   | 0     |
| >TET2-C1289 ASFSFGCSW   | 855   | >TET2-C1289 ASFSFGYSW   | 398 | 457   |
| >TET2-C1289 ASFSFGCSW   | 34    | >TET2-C1289 ASFSFGYSW   | 31  | 3     |
| >TET2-C1289 ASFSFGCSWS  | 235   | >TET2-C1289 ASFSFGYSWS  | 179 | 56    |
| >TET2-C1289 ASFSFGCSW   | 14    | >TET2-C1289 ASFSFGYSW   | 14  | 0     |
| >TET2-C1289 ASFSFGCSWS  | 298   | >TET2-C1289 ASFSFGYSWS  | 289 | 9     |
| >TET2-C1289 ASFSFGCSWS  | 211   | >TET2-C1289 ASFSFGYSWS  | 74  | 137   |
| >TET2-C1289 ASFSFGCSW   | 84    | >TET2-C1289 ASFSFGYSW   | 34  | 50    |
| >TET2-C1289 ASFSFGCSWS  | 16    | >TET2-C1289 ASFSFGYSWS  | 16  | 0     |
| >TET2-C1289 ASFSFGCSW   | 336   | >TET2-C1289 ASFSFGYSW   | 257 | 79    |
| >TET2-C1289 ASFSFGCSW   | 266   | >TET2-C1289 ASFSFGYSW   | 319 | 53    |
| >TET2-C1289 ASFSFGCS    | 562   | >TET2-C1289 ASFSFGYS    | 209 | 353   |
| >TET2-C1289 ASFSFGCSW   | 2370  | >TET2-C1289 ASFSFGYSW   | 374 | 1996  |
| >TET2-C1289 ASFSFGCSWS  | 734   | >TET2-C1289 ASFSFGYSWS  | 345 | 389   |
| >TET2-C1289 ASFSFGCSWS  | 505   | >TET2-C1289 ASFSFGYSWS  | 279 | 226   |
| >TET2-C1289 ASFSFGCSWS  | 85    | >TET2-C1289 ASFSFGYSWS  | 82  | 3     |
| >TET2-C1289 GASFSFGC    | 22776 | >TET2-C1289 GASFSFGY    | 457 | 22319 |
| >TET2-C1289 GASFSFGC    | 23959 | >TET2-C1289 GASFSFGY    | 72  | 23887 |
| >TET2-C1289 GASFSFGC    | 27042 | >TET2-C1289 GASFSFGY    | 58  | 26984 |
| >TET2-C1289 GASFSFGC    | 20341 | >TET2-C1289 GASFSFGY    | 455 | 19886 |
| >TET2-C1289 GASFSFGC    | 16047 | >TET2-C1289 GASFSFGY    | 43  | 16004 |
| >TET2-C1289 GASFSFGCSW  | 86    | >TET2-C1289 GASFSFGYSW  | 72  | 14    |
| >TET2-C1289 GASFSFGC    | 22687 | >TET2-C1289 GASFSFGY    | 431 | 22256 |
| >TET2-C1289 GASFSFGCSW  | 234   | >TET2-C1289 GASFSFGYSW  | 95  | 139   |
| >TET2-C1289 GASFSFGCSW  | 73    | >TET2-C1289 GASFSFGYSW  | 45  | 28    |
| >TET2-C1289 CGASFSFGC   | 23637 | >TET2-C1289 CGASFSFGY   | 123 | 23514 |
| >TET2-C1289 CGASFSFGC   | 23166 | >TET2-C1289 CGASFSFGY   | 21  | 23145 |
| >TET2-C1289 CGASFSFGC   | 17903 | >TET2-C1289 CGASFSFGY   | 133 | 17770 |
| >TET2-C1289 CGASFSFGCS  | 347   | >TET2-C1289 CGASFSFGYS' | 191 | 156   |
| >TET2-C1289 CGASFSFGCS  | 38    | >TET2-C1289 CGASFSFGYS' | 41  | 3     |
| >TET2-C1289 CGASFSFGCS  | 205   | >TET2-C1289 CGASFSFGYS' | 230 | 25    |
| >TET2-C1289 CGASFSFGC   | 38284 | >TET2-C1289 CGASFSFGY   | 212 | 38072 |
| >TET2-C1289 TCGASFSFGC  | 32503 | >TET2-C1289 TCGASFSFGY  | 457 | 32046 |
| >TET2-C1289 TCGASFSFGC  | 24890 | >TET2-C1289 TCGASFSFGY  | 66  | 24824 |
| >TET2-C1289 TCGASFSFGC  | 23217 | >TET2-C1289 TCGASFSFGY  | 35  | 23182 |
| >TET2-C1298 CKFARSKIPR  | 196   | >TET2-C1298 WKFARSKIPR  | 557 | 361   |
| >TET2-C1298 CKFARSKI    | 59    | >TET2-C1298 WKFARSKI    | 16  | 43    |
| >TET2-C1298 CKFARSKIP   | 950   | >TET2-C1298 WKFARSKIP   | 322 | 628   |
| >TET2-C1298 CKFARSKIPR  | 125   | >TET2-C1298 WKFARSKIPR  | 39  | 86    |
| >TET2-C1298 CKFARSKIPRk | 1282  | >TET2-C1298 WKFARSKIPR  | 398 | 884   |
| >TET2-C1298 CKFARSKIPR  | 73    | >TET2-C1298 WKFARSKIPR  | 71  | 2     |
| >TET2-C1298 CKFARSKI    | 94    | >TET2-C1298 WKFARSKI    | 719 | 625   |
| >TET2-C1298 GCKFARSK    | 46    | >TET2-C1298 GWKFARSK    | 51  | 5     |



|                         |      |                        |      |      |
|-------------------------|------|------------------------|------|------|
| >TET2-C1298 GCKFARSKIPI | 107  | >TET2-C1298 GWKFARSKIP | 33   | 74   |
| >TET2-C1298 GCKFARSKI   | 261  | >TET2-C1298 GWKFARSKI  | 3071 | 2810 |
| >TET2-C1298 GCKFARSKIPI | 2121 | >TET2-C1298 GWKFARSKIP | 43   | 2078 |
| >TET2-C1298 YNGCKFAR    | 882  | >TET2-C1298 YNGWKFAR   | 492  | 390  |
| >TET2-C1298 YNGCKFAR    | 1223 | >TET2-C1298 YNGWKFAR   | 442  | 781  |
| >TET2-C1298 YNGCKFAR    | 182  | >TET2-C1298 YNGWKFAR   | 121  | 61   |
| >TET2-C1298 YYNGCKFAR   | 9    | >TET2-C1298 YYNGWKFAR  | 8    | 1    |
| >TET2-C1298 YYNGCKFAR   | 18   | >TET2-C1298 YYNGWKFAR  | 8    | 10   |
| >TET2-C1298 YYNGCKFAR   | 194  | >TET2-C1298 YYNGWKFAR  | 134  | 60   |
| >TET2-C1298 YYNGCKFAR   | 16   | >TET2-C1298 YYNGWKFAR  | 29   | 13   |
| >TET2-C1298 YYNGCKFARS  | 311  | >TET2-C1298 YYNGWKFAR  | 520  | 209  |
| >TET2-C1298 YYNGCKFA    | 523  | >TET2-C1298 YYNGWKFA   | 236  | 287  |
| >TET2-C1298 MYYNGCKF    | 28   | >TET2-C1298 MYYNGWKF   | 11   | 17   |
| >TET2-C1298 MYYNGCKF    | 297  | >TET2-C1298 MYYNGWKF   | 69   | 228  |
| >TET2-C1298 MYYNGCKF    | 5    | >TET2-C1298 MYYNGWKF   | 5    | 0    |
| >TET2-C1298 MYYNGCKF    | 333  | >TET2-C1298 MYYNGWKF   | 47   | 286  |
| >TET2-C1298 MYYNGCKFA   | 749  | >TET2-C1298 MYYNGWKF/  | 45   | 704  |
| >TET2-C1298 MYYNGCKFA   | 8    | >TET2-C1298 MYYNGWKF/  | 9    | 1    |
| >TET2-C1298 MYYNGCKFA   | 28   | >TET2-C1298 MYYNGWKF/  | 28   | 0    |
| >TET2-C1298 MYYNGCKFA   | 209  | >TET2-C1298 MYYNGWKF/  | 103  | 106  |
| >TET2-C1298 MYYNGCKF    | 488  | >TET2-C1298 MYYNGWKF   | 306  | 182  |
| >TET2-C1298 MYYNGCKF    | 38   | >TET2-C1298 MYYNGWKF   | 61   | 23   |
| >TET2-C1298 MYYNGCKFA   | 296  | >TET2-C1298 MYYNGWKF/  | 273  | 23   |
| >TET2-C1298 MYYNGCKFA   | 23   | >TET2-C1298 MYYNGWKF/  | 25   | 2    |
| >TET2-C1298 MYYNGCKF    | 392  | >TET2-C1298 MYYNGWKF   | 162  | 230  |
| >TET2-C1298 MYYNGCKFA   | 17   | >TET2-C1298 MYYNGWKF/  | 37   | 20   |
| >TET2-C1298 SMYYNGCKF   | 208  | >TET2-C1298 SMYYNGWKF  | 1178 | 970  |
| >TET2-C1298 SMYYNGCKF,  | 413  | >TET2-C1298 SMYYNGWKF  | 880  | 467  |
| >TET2-C1298 SMYYNGCKF,  | 273  | >TET2-C1298 SMYYNGWKF  | 255  | 18   |
| >TET2-C1298 SMYYNGCKF,  | 38   | >TET2-C1298 SMYYNGWKF  | 48   | 10   |
| >TET2-C1298 SMYYNGCKF   | 197  | >TET2-C1298 SMYYNGWKF  | 35   | 162  |
| >TET2-C1298 SMYYNGCKF,  | 18   | >TET2-C1298 SMYYNGWKF  | 7    | 11   |
| >TET2-C1298 SMYYNGCKF,  | 1780 | >TET2-C1298 SMYYNGWKF  | 349  | 1431 |
| >TET2-C1298 SMYYNGCKF   | 1889 | >TET2-C1298 SMYYNGWKF  | 198  | 1691 |
| >TET2-C1298 SMYYNGCKF,  | 122  | >TET2-C1298 SMYYNGWKF  | 63   | 59   |
| >TET2-C1298 SMYYNGCKF,  | 30   | >TET2-C1298 SMYYNGWKF  | 18   | 12   |
| >TET2-C1298 SMYYNGCKF,  | 53   | >TET2-C1298 SMYYNGWKF  | 44   | 9    |
| >TET2-C1298 SMYYNGCK    | 40   | >TET2-C1298 SMYYNGWK   | 34   | 6    |
| >TET2-C1298 SMYYNGCKF,  | 130  | >TET2-C1298 SMYYNGWKF  | 132  | 2    |
| >TET2-C1298 SMYYNGCK    | 17   | >TET2-C1298 SMYYNGWK   | 15   | 2    |
| >TET2-C1298 SMYYNGCKF,  | 62   | >TET2-C1298 SMYYNGWKF  | 31   | 31   |
| >TET2-C1298 SMYYNGCKF   | 1912 | >TET2-C1298 SMYYNGWKF  | 51   | 1861 |
| >TET2-C1298 SMYYNGCKF   | 5077 | >TET2-C1298 SMYYNGWKF  | 413  | 4664 |

|                        |       |                       |     |       |
|------------------------|-------|-----------------------|-----|-------|
| >TET2-C1298 SMYYNGCKF  | 1478  | >TET2-C1298 SMYYNGWKF | 61  | 1417  |
| >TET2-C1298 SMYYNGCKF  | 521   | >TET2-C1298 SMYYNGWKF | 28  | 493   |
| >TET2-C1298 SMYYNGCKF  | 4953  | >TET2-C1298 SMYYNGWKF | 297 | 4656  |
| >TET2-C1298 SMYYNGCK   | 364   | >TET2-C1298 SMYYNGWK  | 207 | 157   |
| >TET2-C1298 SMYYNGCKF, | 8     | >TET2-C1298 SMYYNGWKF | 7   | 1     |
| >TET2-C1298 SMYYNGCKF  | 66    | >TET2-C1298 SMYYNGWKF | 49  | 17    |
| >TET2-C1298 SMYYNGCKF, | 217   | >TET2-C1298 SMYYNGWKF | 106 | 111   |
| >TET2-C1298 SMYYNGCK   | 153   | >TET2-C1298 SMYYNGWK  | 107 | 46    |
| >TET2-C1298 SMYYNGCKF, | 35    | >TET2-C1298 SMYYNGWKF | 33  | 2     |
| >TET2-C1298 SMYYNGCKF  | 37    | >TET2-C1298 SMYYNGWKF | 97  | 60    |
| >TET2-C1298 SMYYNGCKF  | 23    | >TET2-C1298 SMYYNGWKF | 26  | 3     |
| >TET2-C1298 SMYYNGCKF  | 3     | >TET2-C1298 SMYYNGWKF | 4   | 1     |
| >TET2-C1298 SMYYNGCKF, | 335   | >TET2-C1298 SMYYNGWKF | 458 | 123   |
| >TET2-C1298 SMYYNGCKF, | 199   | >TET2-C1298 SMYYNGWKF | 307 | 108   |
| >TET2-C1298 SMYYNGCKF  | 33    | >TET2-C1298 SMYYNGWKF | 59  | 26    |
| >TET2-C1298 SMYYNGCKF, | 54    | >TET2-C1298 SMYYNGWKF | 62  | 8     |
| >TET2-C1298 WSMYYNGC   | 463   | >TET2-C1298 WSMYYNGW  | 475 | 12    |
| >TET2-C1298 WSMYYNGC   | 316   | >TET2-C1298 WSMYYNGW  | 75  | 241   |
| >TET2-C1298 WSMYYNGC   | 1643  | >TET2-C1298 WSMYYNGW  | 474 | 1169  |
| >TET2-C1298 WSMYYNGC   | 1846  | >TET2-C1298 WSMYYNGW  | 254 | 1592  |
| >TET2-C1298 WSMYYNGC   | 269   | >TET2-C1298 WSMYYNGW  | 62  | 207   |
| >TET2-C1298 WSMYYNGC   | 92    | >TET2-C1298 WSMYYNGW  | 33  | 59    |
| >TET2-C1298 WSMYYNGC   | 351   | >TET2-C1298 WSMYYNGW  | 195 | 156   |
| >TET2-C1298 WSMYYNGC   | 119   | >TET2-C1298 WSMYYNGW  | 491 | 372   |
| >TET2-C1298 WSMYYNGC   | 16    | >TET2-C1298 WSMYYNGW  | 23  | 7     |
| >TET2-C1298 WSMYYNGC   | 12286 | >TET2-C1298 WSMYYNGW  | 8   | 12278 |
| >TET2-C1298 WSMYYNGC   | 9     | >TET2-C1298 WSMYYNGW  | 6   | 3     |
| >TET2-C1298 WSMYYNGC   | 23140 | >TET2-C1298 WSMYYNGW  | 74  | 23066 |
| >TET2-C1298 WSMYYNGC   | 3228  | >TET2-C1298 WSMYYNGW  | 466 | 2762  |
| >TET2-C1298 WSMYYNGC   | 17920 | >TET2-C1298 WSMYYNGW  | 15  | 17905 |
| >TET2-C1298 WSMYYNGC   | 284   | >TET2-C1298 WSMYYNGW  | 119 | 165   |
| >TET2-C1298 WSMYYNGC   | 18    | >TET2-C1298 WSMYYNGW  | 17  | 1     |
| >TET2-C1298 WSMYYNGC   | 25541 | >TET2-C1298 WSMYYNGW  | 459 | 25082 |
| >TET2-C1298 SWSMYYNGC  | 1176  | >TET2-C1298 SWSMYYNGV | 444 | 732   |
| >TET2-C1298 SWSMYYNGC  | 673   | >TET2-C1298 SWSMYYNGV | 230 | 443   |
| >TET2-C1298 SWSMYYNGC  | 1599  | >TET2-C1298 SWSMYYNGV | 211 | 1388  |
| >TET2-C1298 SWSMYYNGC  | 421   | >TET2-C1298 SWSMYYNGV | 92  | 329   |
| >TET2-C1298 SWSMYYNGC  | 8994  | >TET2-C1298 SWSMYYNGV | 186 | 8808  |
| >TET2-C1298 SWSMYYNGC  | 27    | >TET2-C1298 SWSMYYNGV | 12  | 15    |
| >TET2-C1298 SWSMYYNGC  | 442   | >TET2-C1298 SWSMYYNGV | 195 | 247   |
| >TET2-C1298 SWSMYYNGC  | 59    | >TET2-C1298 SWSMYYNGV | 57  | 2     |
| >TET2-C1298 SWSMYYNGC  | 137   | >TET2-C1298 SWSMYYNGV | 54  | 83    |
| >TET2-C1298 CSWSMYYNC  | 70    | >TET2-C1298 CSWSMYYNC | 77  | 7     |

|                         |       |                         |      |       |
|-------------------------|-------|-------------------------|------|-------|
| >TET2-C1298 CSWSMYYNC   | 150   | >TET2-C1298 CSWSMYYNC   | 117  | 33    |
| >TET2-C1298 CSWSMYYNC   | 313   | >TET2-C1298 CSWSMYYNC   | 205  | 108   |
| >TET2-C1298 CSWSMYYNC   | 19897 | >TET2-C1298 CSWSMYYNC   | 20   | 19877 |
| >TET2-C1298 CSWSMYYNC   | 21490 | >TET2-C1298 CSWSMYYNC   | 64   | 21426 |
| >TET2-C1298 CSWSMYYNC   | 17667 | >TET2-C1298 CSWSMYYNC   | 19   | 17648 |
| >TET2-C1298 CSWSMYYNC   | 27498 | >TET2-C1298 CSWSMYYNC   | 296  | 27202 |
| >TET2-C1298 CSWSMYYNC   | 17197 | >TET2-C1298 CSWSMYYNC   | 68   | 17129 |
| >TET2-C1298 CKFARSKIPR  | 196   | >TET2-C1298 YKFARSKIPR  | 236  | 40    |
| >TET2-C1298 CKFARSKIPR  | 529   | >TET2-C1298 YKFARSKIPR  | 404  | 125   |
| >TET2-C1298 CKFARSKI    | 59    | >TET2-C1298 YKFARSKI    | 8    | 51    |
| >TET2-C1298 CKFARSKIP   | 950   | >TET2-C1298 YKFARSKIP   | 149  | 801   |
| >TET2-C1298 CKFARSKIPR  | 125   | >TET2-C1298 YKFARSKIPR  | 19   | 106   |
| >TET2-C1298 CKFARSKIPR  | 1282  | >TET2-C1298 YKFARSKIPR  | 156  | 1126  |
| >TET2-C1298 CKFARSKIPR  | 73    | >TET2-C1298 YKFARSKIPR  | 76   | 3     |
| >TET2-C1298 CKFARSKI    | 94    | >TET2-C1298 YKFARSKI    | 490  | 396   |
| >TET2-C1298 GCKFARSKI   | 24485 | >TET2-C1298 GYKFARSKI   | 25   | 24460 |
| >TET2-C1298 GCKFARSKI   | 21703 | >TET2-C1298 GYKFARSKI   | 352  | 21351 |
| >TET2-C1298 GCKFARSKI   | 22919 | >TET2-C1298 GYKFARSKI   | 84   | 22835 |
| >TET2-C1298 GCKFARSK    | 46    | >TET2-C1298 GYKFARSK    | 8    | 38    |
| >TET2-C1298 GCKFARSKI   | 1090  | >TET2-C1298 GYKFARSKI   | 72   | 1018  |
| >TET2-C1298 GCKFARSKIPI | 897   | >TET2-C1298 GYKFARSKIPI | 76   | 821   |
| >TET2-C1298 GCKFARSKIPI | 107   | >TET2-C1298 GYKFARSKIPI | 10   | 97    |
| >TET2-C1298 GCKFARSKIPI | 3332  | >TET2-C1298 GYKFARSKIPI | 121  | 3211  |
| >TET2-C1298 GCKFARSKI   | 261   | >TET2-C1298 GYKFARSKI   | 2309 | 2048  |
| >TET2-C1298 GCKFARSKIPI | 2121  | >TET2-C1298 GYKFARSKIPI | 114  | 2007  |
| >TET2-C1298 GCSWSMYYN   | 25807 | >TET2-C1298 GCSWSMYYN   | 496  | 25311 |
| >TET2-C1298 GCSWSMYYN   | 28652 | >TET2-C1298 GCSWSMYYN   | 128  | 28524 |
| >TET2-C1298 GCSWSMYYN   | 19570 | >TET2-C1298 GCSWSMYYN   | 301  | 19269 |
| >TET2-C1298 YNGCKFAR    | 182   | >TET2-C1298 YNGYKFAR    | 445  | 263   |
| >TET2-C1298 YYNGCKFAR   | 9     | >TET2-C1298 YYNGYKFAR   | 7    | 2     |
| >TET2-C1298 YYNGCKFAR   | 18    | >TET2-C1298 YYNGYKFAR   | 12   | 6     |
| >TET2-C1298 YYNGCKFAR   | 194   | >TET2-C1298 YYNGYKFAR   | 109  | 85    |
| >TET2-C1298 YYNGCKFAR   | 16    | >TET2-C1298 YYNGYKFAR   | 32   | 16    |
| >TET2-C1298 YYNGCKFARS  | 311   | >TET2-C1298 YYNGYKFARS  | 767  | 456   |
| >TET2-C1298 MYYNGCKF    | 28    | >TET2-C1298 MYYNGYKF    | 12   | 16    |
| >TET2-C1298 MYYNGCKF    | 297   | >TET2-C1298 MYYNGYKF    | 91   | 206   |
| >TET2-C1298 MYYNGCKF    | 5     | >TET2-C1298 MYYNGYKF    | 4    | 1     |
| >TET2-C1298 MYYNGCKFA   | 784   | >TET2-C1298 MYYNGYKFA   | 150  | 634   |
| >TET2-C1298 MYYNGCKFA   | 732   | >TET2-C1298 MYYNGYKFA   | 326  | 406   |
| >TET2-C1298 MYYNGCKF    | 333   | >TET2-C1298 MYYNGYKF    | 47   | 286   |
| >TET2-C1298 MYYNGCKFA   | 749   | >TET2-C1298 MYYNGYKFA   | 68   | 681   |
| >TET2-C1298 MYYNGCKFA   | 8     | >TET2-C1298 MYYNGYKFA   | 8    | 0     |
| >TET2-C1298 MYYNGCKF    | 1435  | >TET2-C1298 MYYNGYKF    | 423  | 1012  |

|                        |      |                        |     |      |
|------------------------|------|------------------------|-----|------|
| >TET2-C1298 MYYNGCKFA  | 28   | >TET2-C1298 MYYNGYKFA  | 24  | 4    |
| >TET2-C1298 MYYNGCKFA  | 209  | >TET2-C1298 MYYNGYKFA  | 65  | 144  |
| >TET2-C1298 MYYNGCKF   | 488  | >TET2-C1298 MYYNGYKF   | 478 | 10   |
| >TET2-C1298 MYYNGCKF   | 38   | >TET2-C1298 MYYNGYKF   | 39  | 1    |
| >TET2-C1298 MYYNGCKFA  | 296  | >TET2-C1298 MYYNGYKFA  | 909 | 613  |
| >TET2-C1298 MYYNGCKFA  | 23   | >TET2-C1298 MYYNGYKFA  | 26  | 3    |
| >TET2-C1298 MYYNGCKF   | 392  | >TET2-C1298 MYYNGYKF   | 355 | 37   |
| >TET2-C1298 MYYNGCKFA  | 17   | >TET2-C1298 MYYNGYKFA  | 31  | 14   |
| >TET2-C1298 SMYYNGCKF  | 208  | >TET2-C1298 SMYYNGYKF  | 251 | 43   |
| >TET2-C1298 SMYYNGCKF, | 413  | >TET2-C1298 SMYYNGYKF, | 564 | 151  |
| >TET2-C1298 SMYYNGCKF, | 273  | >TET2-C1298 SMYYNGYKF, | 140 | 133  |
| >TET2-C1298 SMYYNGCKF, | 38   | >TET2-C1298 SMYYNGYKF, | 36  | 2    |
| >TET2-C1298 SMYYNGCK   | 4130 | >TET2-C1298 SMYYNGYK   | 452 | 3678 |
| >TET2-C1298 SMYYNGCKF  | 197  | >TET2-C1298 SMYYNGYKF  | 137 | 60   |
| >TET2-C1298 SMYYNGCKF, | 18   | >TET2-C1298 SMYYNGYKF, | 9   | 9    |
| >TET2-C1298 SMYYNGCKF  | 1889 | >TET2-C1298 SMYYNGYKF  | 410 | 1479 |
| >TET2-C1298 SMYYNGCKF, | 122  | >TET2-C1298 SMYYNGYKF, | 43  | 79   |
| >TET2-C1298 SMYYNGCKF, | 30   | >TET2-C1298 SMYYNGYKF, | 25  | 5    |
| >TET2-C1298 SMYYNGCKF, | 53   | >TET2-C1298 SMYYNGYKF, | 49  | 4    |
| >TET2-C1298 SMYYNGCK   | 40   | >TET2-C1298 SMYYNGYK   | 28  | 12   |
| >TET2-C1298 SMYYNGCKF, | 130  | >TET2-C1298 SMYYNGYKF, | 127 | 3    |
| >TET2-C1298 SMYYNGCK   | 17   | >TET2-C1298 SMYYNGYK   | 7   | 10   |
| >TET2-C1298 SMYYNGCKF, | 62   | >TET2-C1298 SMYYNGYKF, | 33  | 29   |
| >TET2-C1298 SMYYNGCKF  | 1912 | >TET2-C1298 SMYYNGYKF  | 70  | 1842 |
| >TET2-C1298 SMYYNGCKF  | 1478 | >TET2-C1298 SMYYNGYKF  | 329 | 1149 |
| >TET2-C1298 SMYYNGCKF  | 521  | >TET2-C1298 SMYYNGYKF  | 21  | 500  |
| >TET2-C1298 SMYYNGCK   | 708  | >TET2-C1298 SMYYNGYK   | 94  | 614  |
| >TET2-C1298 SMYYNGCKF  | 4953 | >TET2-C1298 SMYYNGYKF  | 327 | 4626 |
| >TET2-C1298 SMYYNGCK   | 364  | >TET2-C1298 SMYYNGYK   | 41  | 323  |
| >TET2-C1298 SMYYNGCKF, | 8    | >TET2-C1298 SMYYNGYKF, | 6   | 2    |
| >TET2-C1298 SMYYNGCKF  | 66   | >TET2-C1298 SMYYNGYKF  | 16  | 50   |
| >TET2-C1298 SMYYNGCKF, | 217  | >TET2-C1298 SMYYNGYKF, | 136 | 81   |
| >TET2-C1298 SMYYNGCK   | 153  | >TET2-C1298 SMYYNGYK   | 53  | 100  |
| >TET2-C1298 SMYYNGCKF, | 35   | >TET2-C1298 SMYYNGYKF, | 22  | 13   |
| >TET2-C1298 SMYYNGCKF  | 37   | >TET2-C1298 SMYYNGYKF  | 54  | 17   |
| >TET2-C1298 SMYYNGCKF  | 23   | >TET2-C1298 SMYYNGYKF  | 23  | 0    |
| >TET2-C1298 SMYYNGCKF  | 3    | >TET2-C1298 SMYYNGYKF  | 3   | 0    |
| >TET2-C1298 SMYYNGCKF, | 335  | >TET2-C1298 SMYYNGYKF, | 218 | 117  |
| >TET2-C1298 SMYYNGCKF, | 199  | >TET2-C1298 SMYYNGYKF, | 205 | 6    |
| >TET2-C1298 SMYYNGCKF  | 33   | >TET2-C1298 SMYYNGYKF  | 53  | 20   |
| >TET2-C1298 SMYYNGCKF, | 939  | >TET2-C1298 SMYYNGYKF, | 463 | 476  |
| >TET2-C1298 SMYYNGCK   | 2995 | >TET2-C1298 SMYYNGYK   | 202 | 2793 |
| >TET2-C1298 SMYYNGCKF, | 54   | >TET2-C1298 SMYYNGYKF, | 58  | 4    |

|                       |       |                       |     |       |
|-----------------------|-------|-----------------------|-----|-------|
| >TET2-C1298 WSMYYNGC  | 18658 | >TET2-C1298 WSMYYNGY  | 75  | 18583 |
| >TET2-C1298 WSMYYNGCf | 463   | >TET2-C1298 WSMYYNGYf | 53  | 410   |
| >TET2-C1298 WSMYYNGCf | 316   | >TET2-C1298 WSMYYNGYf | 49  | 267   |
| >TET2-C1298 WSMYYNGCf | 1643  | >TET2-C1298 WSMYYNGYf | 335 | 1308  |
| >TET2-C1298 WSMYYNGC  | 15627 | >TET2-C1298 WSMYYNGY  | 225 | 15402 |
| >TET2-C1298 WSMYYNGC  | 32850 | >TET2-C1298 WSMYYNGY  | 224 | 32626 |
| >TET2-C1298 WSMYYNGC  | 29944 | >TET2-C1298 WSMYYNGY  | 345 | 29599 |
| >TET2-C1298 WSMYYNGC  | 20898 | >TET2-C1298 WSMYYNGY  | 129 | 20769 |
| >TET2-C1298 WSMYYNGCf | 269   | >TET2-C1298 WSMYYNGYf | 64  | 205   |
| >TET2-C1298 WSMYYNGC  | 26054 | >TET2-C1298 WSMYYNGY  | 70  | 25984 |
| >TET2-C1298 WSMYYNGCf | 798   | >TET2-C1298 WSMYYNGYf | 249 | 549   |
| >TET2-C1298 WSMYYNGCf | 92    | >TET2-C1298 WSMYYNGYf | 17  | 75    |
| >TET2-C1298 WSMYYNGCf | 351   | >TET2-C1298 WSMYYNGYf | 140 | 211   |
| >TET2-C1298 WSMYYNGC  | 15183 | >TET2-C1298 WSMYYNGY  | 96  | 15087 |
| >TET2-C1298 WSMYYNGCf | 119   | >TET2-C1298 WSMYYNGYf | 190 | 71    |
| >TET2-C1298 WSMYYNGC  | 4722  | >TET2-C1298 WSMYYNGY  | 40  | 4682  |
| >TET2-C1298 WSMYYNGCf | 16    | >TET2-C1298 WSMYYNGYf | 17  | 1     |
| >TET2-C1298 WSMYYNGC  | 12286 | >TET2-C1298 WSMYYNGY  | 10  | 12276 |
| >TET2-C1298 WSMYYNGCf | 9     | >TET2-C1298 WSMYYNGYf | 7   | 2     |
| >TET2-C1298 WSMYYNGC  | 12661 | >TET2-C1298 WSMYYNGY  | 94  | 12567 |
| >TET2-C1298 WSMYYNGCf | 284   | >TET2-C1298 WSMYYNGYf | 175 | 109   |
| >TET2-C1298 WSMYYNGC  | 12858 | >TET2-C1298 WSMYYNGY  | 193 | 12665 |
| >TET2-C1298 WSMYYNGCf | 18    | >TET2-C1298 WSMYYNGYf | 20  | 2     |
| >TET2-C1298 SWSMYYNGC | 1176  | >TET2-C1298 SWSMYYNGY | 213 | 963   |
| >TET2-C1298 SWSMYYNGC | 673   | >TET2-C1298 SWSMYYNGY | 107 | 566   |
| >TET2-C1298 SWSMYYNGC | 1599  | >TET2-C1298 SWSMYYNGY | 270 | 1329  |
| >TET2-C1298 SWSMYYNGC | 421   | >TET2-C1298 SWSMYYNGY | 155 | 266   |
| >TET2-C1298 SWSMYYNGC | 27    | >TET2-C1298 SWSMYYNGY | 17  | 10    |
| >TET2-C1298 SWSMYYNGC | 22047 | >TET2-C1298 SWSMYYNGY | 229 | 21818 |
| >TET2-C1298 SWSMYYNGC | 2658  | >TET2-C1298 SWSMYYNGY | 348 | 2310  |
| >TET2-C1298 SWSMYYNGC | 21987 | >TET2-C1298 SWSMYYNGY | 73  | 21914 |
| >TET2-C1298 SWSMYYNGC | 1162  | >TET2-C1298 SWSMYYNGY | 403 | 759   |
| >TET2-C1298 SWSMYYNGC | 442   | >TET2-C1298 SWSMYYNGY | 49  | 393   |
| >TET2-C1298 SWSMYYNGC | 59    | >TET2-C1298 SWSMYYNGY | 89  | 30    |
| >TET2-C1298 SWSMYYNGC | 137   | >TET2-C1298 SWSMYYNGY | 94  | 43    |
| >TET2-C1298 CSWSMYYNC | 28620 | >TET2-C1298 CSWSMYYNC | 78  | 28542 |
| >TET2-C1298 CSWSMYYNC | 1371  | >TET2-C1298 CSWSMYYNC | 212 | 1159  |
| >TET2-C1298 CSWSMYYNC | 70    | >TET2-C1298 CSWSMYYNC | 20  | 50    |
| >TET2-C1298 CSWSMYYNC | 29978 | >TET2-C1298 CSWSMYYNC | 434 | 29544 |
| >TET2-C1298 CSWSMYYNC | 2707  | >TET2-C1298 CSWSMYYNC | 407 | 2300  |
| >TET2-C1298 CSWSMYYNC | 22065 | >TET2-C1298 CSWSMYYNC | 39  | 22026 |
| >TET2-C1298 CSWSMYYNC | 150   | >TET2-C1298 CSWSMYYNC | 26  | 124   |
| >TET2-C1298 CSWSMYYNC | 313   | >TET2-C1298 CSWSMYYNC | 116 | 197   |

|                         |       |                         |      |       |
|-------------------------|-------|-------------------------|------|-------|
| >TET2-C1298 CSWSMYYNC   | 7847  | >TET2-C1298 CSWSMYYNC   | 107  | 7740  |
| >TET2-C1298 CSWSMYYNC   | 19897 | >TET2-C1298 CSWSMYYNC   | 45   | 19852 |
| >TET2-C1298 CSWSMYYNC   | 2653  | >TET2-C1298 CSWSMYYNC   | 437  | 2216  |
| >TET2-C1358 CRLGLKEGRP  | 174   | >TET2-C1358 GRLGLKEGRP  | 233  | 59    |
| >TET2-C1358 CRLGLKEGR   | 172   | >TET2-C1358 GRLGLKEGR   | 75   | 97    |
| >TET2-C1358 CRLGLKEGRP  | 158   | >TET2-C1358 GRLGLKEGRP  | 59   | 99    |
| >TET2-C1358 CRLGLKEGRP  | 1217  | >TET2-C1358 GRLGLKEGRP  | 340  | 877   |
| >TET2-C1358 CRLGLKEGR   | 285   | >TET2-C1358 GRLGLKEGR   | 2890 | 2605  |
| >TET2-C1358 APECRLGL    | 42    | >TET2-C1358 APEGRLGL    | 27   | 15    |
| >TET2-C1358 RAPECRLGLK  | 315   | >TET2-C1358 RAPEGRLGLK  | 375  | 60    |
| >TET2-C1358 RAPECRLGLK  | 522   | >TET2-C1358 RAPEGRLGLK  | 458  | 64    |
| >TET2-C1358 RAPECRLGLK  | 393   | >TET2-C1358 RAPEGRLGLK  | 222  | 171   |
| >TET2-C1358 RAPECRLGL   | 674   | >TET2-C1358 RAPEGRLGL   | 264  | 410   |
| >TET2-C1358 RAPECRLGL   | 53    | >TET2-C1358 RAPEGRLGL   | 88   | 35    |
| >TET2-C1358 RAPECRLGL   | 474   | >TET2-C1358 RAPEGRLGL   | 628  | 154   |
| >TET2-C1358 HRAPECRLGL  | 46    | >TET2-C1358 HRAPEGRLGL  | 37   | 9     |
| >TET2-C1358 HRAPECRLGL  | 235   | >TET2-C1358 HRAPEGRLGL  | 99   | 136   |
| >TET2-C1358 HRAPECRLGL  | 187   | >TET2-C1358 HRAPEGRLGL  | 103  | 84    |
| >TET2-C1358 HRAPECRLGL  | 156   | >TET2-C1358 HRAPEGRLGL  | 147  | 9     |
| >TET2-C1358 HRAPECRLGL  | 272   | >TET2-C1358 HRAPEGRLGL  | 190  | 82    |
| >TET2-C1358 HRAPECRLGL  | 359   | >TET2-C1358 HRAPEGRLGL  | 382  | 23    |
| >TET2-C1358 EYEHRAPECR  | 281   | >TET2-C1358 EYEHRAPEGR  | 137  | 144   |
| >TET2-C1358 IEYEHRAPECF | 452   | >TET2-C1358 IEYEHRAPEGI | 331  | 121   |
| >TET2-C1358 IEYEHRAPECF | 776   | >TET2-C1358 IEYEHRAPEGI | 394  | 382   |
| >TET2-C1396 CTLTREDNR   | 102   | >TET2-C1396 WTLTREDNR   | 139  | 37    |
| >TET2-C1396 CTLTREDNRE  | 766   | >TET2-C1396 WTLTREDNR   | 210  | 556   |
| >TET2-C1396 CTLTREDNRE  | 70    | >TET2-C1396 WTLTREDNR   | 13   | 57    |
| >TET2-C1396 CTLTREDNRE  | 1754  | >TET2-C1396 WTLTREDNR   | 71   | 1683  |
| >TET2-C1396 VCTLTREDNR  | 4327  | >TET2-C1396 VWTLTREDNR  | 82   | 4245  |
| >TET2-C1396 HNMQNGSTI   | 20101 | >TET2-C1396 HNMQNGSTI   | 111  | 19990 |
| >TET2-C1396 LVCTLTREDN  | 426   | >TET2-C1396 LVWTLTREDN  | 84   | 342   |
| >TET2-C1396 LVCTLTREDN  | 105   | >TET2-C1396 LVWTLTREDN  | 186  | 81    |
| >TET2-C1396 LVCTLTREDN  | 748   | >TET2-C1396 LVWTLTREDN  | 174  | 574   |
| >TET2-C1396 TLVCTLTR    | 442   | >TET2-C1396 TLVWTLTR    | 185  | 257   |
| >TET2-C1396 TLVCTLTR    | 845   | >TET2-C1396 TLVWTLTR    | 450  | 395   |
| >TET2-C1396 TLVCTLTR    | 66    | >TET2-C1396 TLVWTLTR    | 32   | 34    |
| >TET2-C1396 TLVCTLTR    | 101   | >TET2-C1396 TLVWTLTR    | 96   | 5     |
| >TET2-C1396 STLVCTLTR   | 37    | >TET2-C1396 STLVWTLTR   | 21   | 16    |
| >TET2-C1396 STLVCTLTR   | 42    | >TET2-C1396 STLVWTLTR   | 25   | 17    |
| >TET2-C1396 STLVCTLTR   | 1944  | >TET2-C1396 STLVWTLTR   | 462  | 1482  |
| >TET2-C1396 STLVCTLTR   | 424   | >TET2-C1396 STLVWTLTR   | 100  | 324   |
| >TET2-C1396 STLVCTLTR   | 65    | >TET2-C1396 STLVWTLTR   | 67   | 2     |
| >TET2-C1396 STLVCTLTR   | 62    | >TET2-C1396 STLVWTLTR   | 50   | 12    |

|                        |       |                        |      |       |
|------------------------|-------|------------------------|------|-------|
| >TET2-C1396STLVCTLTR   | 52    | >TET2-C1396STLVWTLTR   | 120  | 68    |
| >TET2-C1396GSTLVCTLTR  | 150   | >TET2-C1396GSTLVWTLTR  | 189  | 39    |
| >TET2-C1396GSTLVCTLTR  | 173   | >TET2-C1396GSTLVWTLTR  | 260  | 87    |
| >TET2-C1396GSTLVCTLTR  | 287   | >TET2-C1396GSTLVWTLTR  | 160  | 127   |
| >TET2-C1396GSTLVCTL    | 173   | >TET2-C1396GSTLVWTL    | 208  | 35    |
| >TET2-C1396GSTLVCTLT   | 242   | >TET2-C1396GSTLVWTLT   | 542  | 300   |
| >TET2-C1396GSTLVCTLTR  | 1004  | >TET2-C1396GSTLVWTLTR  | 381  | 623   |
| >TET2-C1396NGSTLVCTLTR | 385   | >TET2-C1396NGSTLVWTLTR | 360  | 25    |
| >TET2-C1396NGSTLVCTLTR | 113   | >TET2-C1396NGSTLVWTLTR | 121  | 8     |
| >TET2-C1396MQNGSTLVC   | 337   | >TET2-C1396MQNGSTLVV   | 63   | 274   |
| >TET2-C1396MQNGSTLVC   | 51    | >TET2-C1396MQNGSTLVV   | 21   | 30    |
| >TET2-C1396MQNGSTLVC   | 53    | >TET2-C1396MQNGSTLVV   | 39   | 14    |
| >TET2-C1396MQNGSTLVC   | 19    | >TET2-C1396MQNGSTLVV   | 8    | 11    |
| >TET2-C1396MQNGSTLVC   | 137   | >TET2-C1396MQNGSTLVV   | 52   | 85    |
| >TET2-C1396MQNGSTLVC   | 829   | >TET2-C1396MQNGSTLVV   | 136  | 693   |
| >TET2-C1396MQNGSTLVC   | 780   | >TET2-C1396MQNGSTLVV   | 339  | 441   |
| >TET2-C1396MQNGSTLVC   | 1253  | >TET2-C1396MQNGSTLVV   | 293  | 960   |
| >TET2-C1396MQNGSTLVC   | 436   | >TET2-C1396MQNGSTLVV   | 189  | 247   |
| >TET2-C1396MQNGSTLVC   | 8348  | >TET2-C1396MQNGSTLVV   | 379  | 7969  |
| >TET2-C1396MQNGSTLVC   | 252   | >TET2-C1396MQNGSTLVV   | 171  | 81    |
| >TET2-C1396MQNGSTLVC   | 1020  | >TET2-C1396MQNGSTLVV   | 57   | 963   |
| >TET2-C1396MQNGSTLVC   | 60    | >TET2-C1396MQNGSTLVV   | 169  | 109   |
| >TET2-C1396MQNGSTLVC   | 846   | >TET2-C1396MQNGSTLVV   | 55   | 791   |
| >TET2-C1396MQNGSTLVC   | 29    | >TET2-C1396MQNGSTLVV   | 31   | 2     |
| >TET2-C1396MQNGSTLVC   | 22517 | >TET2-C1396MQNGSTLVV   | 306  | 22211 |
| >TET2-C1396MQNGSTLVC   | 18    | >TET2-C1396MQNGSTLVV   | 9    | 9     |
| >TET2-C1396MQNGSTLVC   | 702   | >TET2-C1396MQNGSTLVV   | 322  | 380   |
| >TET2-C1396MQNGSTLVC   | 22270 | >TET2-C1396MQNGSTLVV   | 364  | 21906 |
| >TET2-C1396MQNGSTLVC   | 234   | >TET2-C1396MQNGSTLVV   | 74   | 160   |
| >TET2-C1396MQNGSTLVC   | 31652 | >TET2-C1396MQNGSTLVV   | 221  | 31431 |
| >TET2-C1396MQNGSTLVC   | 16288 | >TET2-C1396MQNGSTLVV   | 17   | 16271 |
| >TET2-C1396MQNGSTLVC   | 29282 | >TET2-C1396MQNGSTLVV   | 105  | 29177 |
| >TET2-C1396MQNGSTLVC   | 22597 | >TET2-C1396MQNGSTLVV   | 19   | 22578 |
| >TET2-C1396NMQNGSTLV   | 5093  | >TET2-C1396NMQNGSTLV   | 240  | 4853  |
| >TET2-C1396NMQNGSTLV   | 4856  | >TET2-C1396NMQNGSTLV   | 286  | 4570  |
| >TET2-C1396NMQNGSTLV   | 21568 | >TET2-C1396NMQNGSTLV   | 325  | 21243 |
| >TET2-C1875CAKRELHA    | 956   | >TET2-C1875RAKRELHA    | 13   | 943   |
| >TET2-C1875CAKRELHAT   | 9345  | >TET2-C1875RAKRELHAT   | 394  | 8951  |
| >TET2-C1875CAKRELHATT  | 5121  | >TET2-C1875RAKRELHATT  | 106  | 5015  |
| >TET2-C1875IECAKREL    | 155   | >TET2-C1875IERAKREL    | 1648 | 1493  |
| >TET2-C1875IECAKREL    | 1393  | >TET2-C1875IERAKREL    | 221  | 1172  |
| >TET2-C1875ILIECAKREL  | 79    | >TET2-C1875ILIERAKREL  | 345  | 266   |
| >TET2-C1875ILIECAKREL  | 183   | >TET2-C1875ILIERAKREL  | 318  | 135   |

|                         |       |                         |       |       |
|-------------------------|-------|-------------------------|-------|-------|
| >TET2-C1875 ILIECAKREL  | 29    | >TET2-C1875 ILIERAKREL  | 28    | 1     |
| >TET2-C1875 ILIECAKREL  | 61    | >TET2-C1875 ILIERAKREL  | 181   | 120   |
| >TET2-C1875 ILIECAKREL  | 13    | >TET2-C1875 ILIERAKREL  | 11    | 2     |
| >TET2-C1875 ILIECAKR    | 526   | >TET2-C1875 ILIERAKR    | 171   | 355   |
| >TET2-C1875 ILIECAKR    | 481   | >TET2-C1875 ILIERAKR    | 222   | 259   |
| >TET2-C1875 ILIECAKR    | 111   | >TET2-C1875 ILIERAKR    | 104   | 7     |
| >TET2-C1875 ILIECAKR    | 148   | >TET2-C1875 ILIERAKR    | 310   | 162   |
| >TET2-C1875 SILIECAK    | 60    | >TET2-C1875 SILIERAK    | 101   | 41    |
| >TET2-C1875 SILIECAK    | 696   | >TET2-C1875 SILIERAK    | 483   | 213   |
| >TET2-C1875 SILIECAKR   | 514   | >TET2-C1875 SILIERAKR   | 61    | 453   |
| >TET2-C1875 SILIECAKR   | 346   | >TET2-C1875 SILIERAKR   | 320   | 26    |
| >TET2-C1875 SILIECAKR   | 238   | >TET2-C1875 SILIERAKR   | 155   | 83    |
| >TET2-C1875 GSILIECAK   | 60    | >TET2-C1875 GSILIERAK   | 243   | 183   |
| >TET2-C1875 GSILIECAKR  | 163   | >TET2-C1875 GSILIERAKR  | 39    | 124   |
| >TET2-C1875 GSILIECAK   | 416   | >TET2-C1875 GSILIERAK   | 1981  | 1565  |
| >TET2-C1875 GSILIECAKR  | 34    | >TET2-C1875 GSILIERAKR  | 50    | 16    |
| >TET2-C1875 HGSILIEC    | 21928 | >TET2-C1875 HGSILIER    | 322   | 21606 |
| >TET2-C1875 HGSILIECAKR | 776   | >TET2-C1875 HGSILIERAKR | 301   | 475   |
| >TET2-C1875 HGSILIEC    | 41849 | >TET2-C1875 HGSILIER    | 324   | 41525 |
| >TET2-C1875 HGSILIECAKR | 414   | >TET2-C1875 HGSILIERAKR | 442   | 28    |
| >TET2-C1875 HGSILIEC    | 35659 | >TET2-C1875 HGSILIER    | 193   | 35466 |
| >TET2-C1875 HGSILIECAKR | 345   | >TET2-C1875 HGSILIERAKR | 215   | 130   |
| >TET2-C1875 PTHGSILIEC  | 36433 | >TET2-C1875 PTHGSILIER  | 138   | 36295 |
| >TET2-D1242 DKLYSELTETL | 361   | >TET2-D1242 VKLYSELTETL | 17    | 344   |
| >TET2-D1242 ADKLYSEL    | 3357  | >TET2-D1242 AVKLYSEL    | 342   | 3015  |
| >TET2-D1242 ADKLYSEL    | 12142 | >TET2-D1242 AVKLYSEL    | 173   | 11969 |
| >TET2-D1242 ADKLYSEL    | 186   | >TET2-D1242 AVKLYSEL    | 25796 | 25610 |
| >TET2-D1242 VWEGIPLSLA  | 534   | >TET2-D1242 VWEGIPLSLA  | 136   | 398   |
| >TET2-D1242 LADKLYSEL   | 982   | >TET2-D1242 LAVKLYSEL   | 93    | 889   |
| >TET2-D1242 LADKLYSEL   | 5594  | >TET2-D1242 LAVKLYSEL   | 355   | 5239  |
| >TET2-D1242 LADKLYSEL   | 1610  | >TET2-D1242 LAVKLYSEL   | 226   | 1384  |
| >TET2-D1242 LADKLYSEL   | 373   | >TET2-D1242 LAVKLYSEL   | 99    | 274   |
| >TET2-D1242 SLADKLYSEL  | 202   | >TET2-D1242 SLAVKLYSEL  | 618   | 416   |
| >TET2-D1242 SLADKLYSELT | 86    | >TET2-D1242 SLAVKLYSELT | 779   | 693   |
| >TET2-D1242 SLADKLYS    | 115   | >TET2-D1242 SLAVKLYS    | 571   | 456   |
| >TET2-D1242 SLADKLYSE   | 107   | >TET2-D1242 SLAVKLYSE   | 1263  | 1156  |
| >TET2-D1242 SLADKLYSEL  | 14    | >TET2-D1242 SLAVKLYSEL  | 39    | 25    |
| >TET2-D1242 SLADKLYSELT | 10    | >TET2-D1242 SLAVKLYSELT | 35    | 25    |
| >TET2-D1242 SLADKLYS    | 388   | >TET2-D1242 SLAVKLYS    | 2291  | 1903  |
| >TET2-D1242 SLADKLYSEL  | 33    | >TET2-D1242 SLAVKLYSEL  | 63    | 30    |
| >TET2-D1242 SLADKLYSELT | 34    | >TET2-D1242 SLAVKLYSELT | 263   | 229   |
| >TET2-D1242 SLADKLYSEL  | 289   | >TET2-D1242 SLAVKLYSEL  | 633   | 344   |
| >TET2-D1242 SLADKLYSELT | 291   | >TET2-D1242 SLAVKLYSELT | 2490  | 2199  |



|                        |       |                        |      |       |
|------------------------|-------|------------------------|------|-------|
| >TET2-D1242SLADKLYS    | 195   | >TET2-D1242SLAVKLYS    | 1453 | 1258  |
| >TET2-D1242SLADKLYSEL  | 5     | >TET2-D1242SLAVKLYSEL  | 26   | 21    |
| >TET2-D1242SLADKLYSEL  | 83    | >TET2-D1242SLAVKLYSEL  | 1049 | 966   |
| >TET2-D1242SLADKLYSEL  | 14    | >TET2-D1242SLAVKLYSEL  | 64   | 50    |
| >TET2-D1242SLADKLYSEL  | 7     | >TET2-D1242SLAVKLYSEL  | 16   | 9     |
| >TET2-D1242SLADKLYSEL  | 141   | >TET2-D1242SLAVKLYSEL  | 1051 | 910   |
| >TET2-D1242SLADKLYSEL  | 35    | >TET2-D1242SLAVKLYSEL  | 181  | 146   |
| >TET2-D1242SLADKLYS    | 81    | >TET2-D1242SLAVKLYS    | 1864 | 1783  |
| >TET2-D1242SLADKLYSE   | 324   | >TET2-D1242SLAVKLYSE   | 7439 | 7115  |
| >TET2-D1242SLADKLYSEL  | 2     | >TET2-D1242SLAVKLYSEL  | 4    | 2     |
| >TET2-D1242SLADKLYSEL  | 17    | >TET2-D1242SLAVKLYSEL  | 222  | 205   |
| >TET2-D1242LSLADKLY    | 109   | >TET2-D1242LSLAVKLY    | 130  | 21    |
| >TET2-D1242LSLADKLY    | 319   | >TET2-D1242LSLAVKLY    | 441  | 122   |
| >TET2-D1242LSLADKLY    | 521   | >TET2-D1242LSLAVKLY    | 293  | 228   |
| >TET2-D1242LSLADKLYSEL | 393   | >TET2-D1242LSLAVKLYSEL | 435  | 42    |
| >TET2-D1242LSLADKLY    | 9     | >TET2-D1242LSLAVKLY    | 9    | 0     |
| >TET2-D1242LSLADKLYSEL | 32    | >TET2-D1242LSLAVKLYSEL | 39   | 7     |
| >TET2-D1242LSLADKLY    | 341   | >TET2-D1242LSLAVKLY    | 236  | 105   |
| >TET2-D1242LSLADKLY    | 307   | >TET2-D1242LSLAVKLY    | 64   | 243   |
| >TET2-D1242LSLADKLYSEL | 679   | >TET2-D1242LSLAVKLYSEL | 160  | 519   |
| >TET2-D1242LSLADKLY    | 199   | >TET2-D1242LSLAVKLY    | 51   | 148   |
| >TET2-D1242LSLADKLYSEL | 132   | >TET2-D1242LSLAVKLYSEL | 51   | 81    |
| >TET2-D1242LSLADKLYSEL | 647   | >TET2-D1242LSLAVKLYSEL | 467  | 180   |
| >TET2-D1242PLSLADKL    | 1335  | >TET2-D1242PLSLAVKL    | 233  | 1102  |
| >TET2-D1242PLSLADKLY   | 304   | >TET2-D1242PLSLAVKLY   | 509  | 205   |
| >TET2-D1242IPLSLADKL   | 27    | >TET2-D1242IPLSLAVKL   | 13   | 14    |
| >TET2-D1242IPLSLADKL   | 898   | >TET2-D1242IPLSLAVKL   | 418  | 480   |
| >TET2-D1242IPLSLADKL   | 621   | >TET2-D1242IPLSLAVKL   | 470  | 151   |
| >TET2-D1242IPLSLADKLY  | 182   | >TET2-D1242IPLSLAVKLY  | 634  | 452   |
| >TET2-D1242IPLSLADKL   | 350   | >TET2-D1242IPLSLAVKL   | 181  | 169   |
| >TET2-D1242IPLSLADKLY  | 449   | >TET2-D1242IPLSLAVKLY  | 846  | 397   |
| >TET2-D1242IPLSLADKLY  | 745   | >TET2-D1242IPLSLAVKLY  | 202  | 543   |
| >TET2-D1242IPLSLADKL   | 206   | >TET2-D1242IPLSLAVKL   | 48   | 158   |
| >TET2-D1242IPLSLADKLY  | 64    | >TET2-D1242IPLSLAVKLY  | 34   | 30    |
| >TET2-D1242GIPLSLAD    | 21706 | >TET2-D1242GIPLSLAV    | 108  | 21598 |
| >TET2-D1242GIPLSLAD    | 25372 | >TET2-D1242GIPLSLAV    | 103  | 25269 |
| >TET2-D1242GIPLSLAD    | 29830 | >TET2-D1242GIPLSLAV    | 250  | 29580 |
| >TET2-D1242GIPLSLAD    | 25790 | >TET2-D1242GIPLSLAV    | 270  | 25520 |
| >TET2-D1242GIPLSLAD    | 35286 | >TET2-D1242GIPLSLAV    | 61   | 35225 |
| >TET2-D1242GIPLSLADK   | 938   | >TET2-D1242GIPLSLAVK   | 446  | 492   |
| >TET2-D1242GIPLSLADKL  | 563   | >TET2-D1242GIPLSLAVKL  | 196  | 367   |
| >TET2-D1242EGIPLSLAD   | 20838 | >TET2-D1242EGIPLSLAV   | 99   | 20739 |
| >TET2-D1242EGIPLSLAD   | 19419 | >TET2-D1242EGIPLSLAV   | 268  | 19151 |

|                       |       |                        |      |       |
|-----------------------|-------|------------------------|------|-------|
| >TET2-D1242WEGIPLSLAD | 18896 | >TET2-D1242WEGIPLSLAV  | 65   | 18831 |
| >TET2-D137€DFCAHAHR   | 146   | >TET2-D137€EFCAHAHR    | 82   | 64    |
| >TET2-D137€DFCAHAHR   | 10    | >TET2-D137€EFCAHAHR    | 17   | 7     |
| >TET2-D137€DFCAHAHR   | 115   | >TET2-D137€EFCAHAHR    | 28   | 87    |
| >TET2-D137€DFCAHAHR   | 74    | >TET2-D137€EFCAHAHR    | 28   | 46    |
| >TET2-D137€LDFCAHAHR  | 882   | >TET2-D137€LEFCAHAHR   | 341  | 541   |
| >TET2-D137€LDFCAHAHR  | 274   | >TET2-D137€LEFCAHAHR   | 259  | 15    |
| >TET2-D137€LDFCAHAHRI | 2165  | >TET2-D137€LEFCAHAHRE  | 258  | 1907  |
| >TET2-D137€LDFCAHAH   | 2498  | >TET2-D137€LEFCAHAH    | 18   | 2480  |
| >TET2-D137€LDFCAHAHR  | 17821 | >TET2-D137€LEFCAHAHR   | 271  | 17550 |
| >TET2-D137€LDFCAHAHRI | 9440  | >TET2-D137€LEFCAHAHRE  | 45   | 9395  |
| >TET2-D137€LDFCAHAHRI | 10096 | >TET2-D137€LEFCAHAHRE  | 17   | 10079 |
| >TET2-D137€LDFCAHAHRI | 2179  | >TET2-D137€LEFCAHAHRE  | 269  | 1910  |
| >TET2-D137€LDFCAHAHRI | 17640 | >TET2-D137€LEFCAHAHRE  | 315  | 17325 |
| >TET2-D137€LDFCAHAHRI | 5993  | >TET2-D137€LEFCAHAHRE  | 262  | 5731  |
| >TET2-D137€LDFCAHAHR  | 342   | >TET2-D137€LEFCAHAHR   | 128  | 214   |
| >TET2-D137€CLDFCAHA   | 469   | >TET2-D137€CLEFCAHA    | 815  | 346   |
| >TET2-D137€CLDFCAHAHF | 39    | >TET2-D137€CLEFCAHAHR  | 52   | 13    |
| >TET2-D137€CLDFCAHAHF | 203   | >TET2-D137€CLEFCAHAHR  | 211  | 8     |
| >TET2-D137€CLDFCAHAH  | 341   | >TET2-D137€CLEFCAHAH   | 342  | 1     |
| >TET2-D137€CLDFCAHAHF | 111   | >TET2-D137€CLEFCAHAHR  | 111  | 0     |
| >TET2-D137€CLDFCAHAHF | 146   | >TET2-D137€CLEFCAHAHR  | 71   | 75    |
| >TET2-D137€ACLDFCAHAH | 92    | >TET2-D137€ACLEFCAHAH  | 128  | 36    |
| >TET2-D137€ACLDFCAHAH | 97    | >TET2-D137€ACLEFCAHAH  | 168  | 71    |
| >TET2-D137€VTACLDFCA  | 69    | >TET2-D137€VTACLEFCA   | 277  | 208   |
| >TET2-D137€VTACLDFCAH | 31    | >TET2-D137€VTACLEFCAH  | 63   | 32    |
| >TET2-D137€SGVTACLDF  | 109   | >TET2-D137€SGVTACLEF   | 407  | 298   |
| >TET2-D137€SGVTACLDF  | 1038  | >TET2-D137€SGVTACLEF   | 497  | 541   |
| >TET2-D137€FSGVTACLDF | 485   | >TET2-D137€FSGVTACLEF  | 173  | 312   |
| >TET2-D137€FSGVTACLDF | 94    | >TET2-D137€FSGVTACLEF  | 58   | 36    |
| >TET2-D137€FSGVTACLDF | 27    | >TET2-D137€FSGVTACLEF  | 11   | 16    |
| >TET2-D137€FSGVTACLDF | 402   | >TET2-D137€FSGVTACLEF  | 75   | 327   |
| >TET2-D137€FSGVTACLDF | 354   | >TET2-D137€FSGVTACLEF  | 192  | 162   |
| >TET2-D137€PFSGVTACLD | 274   | >TET2-D137€PFSGVTACLEF | 155  | 119   |
| >TET2-D137€PFSGVTACLD | 206   | >TET2-D137€PFSGVTACLEF | 63   | 143   |
| >TET2-D137€PFSGVTACLD | 390   | >TET2-D137€PFSGVTACLEF | 408  | 18    |
| >TET2-D137€DFCAHAHR   | 146   | >TET2-D137€GFCAHAHR    | 24   | 122   |
| >TET2-D137€DFCAHAHR   | 10    | >TET2-D137€GFCAHAHR    | 257  | 247   |
| >TET2-D137€DFCAHAHR   | 115   | >TET2-D137€GFCAHAHR    | 2120 | 2005  |
| >TET2-D137€DFCAHAHR   | 74    | >TET2-D137€GFCAHAHR    | 92   | 18    |
| >TET2-D137€LDFCAHAHR  | 882   | >TET2-D137€LGFCAHAHR   | 53   | 829   |
| >TET2-D137€LDFCAHAHR  | 274   | >TET2-D137€LGFCAHAHR   | 85   | 189   |
| >TET2-D137€LDFCAHAHR  | 342   | >TET2-D137€LGFCAHAHR   | 95   | 247   |

|                        |     |                        |      |      |
|------------------------|-----|------------------------|------|------|
| >TET2-D137€CLDFCAHA    | 469 | >TET2-D137€CLGFCAHA    | 365  | 104  |
| >TET2-D137€CLDFCAHAHF  | 717 | >TET2-D137€CLGFCAHAHF  | 471  | 246  |
| >TET2-D137€CLDFCAHAHF  | 39  | >TET2-D137€CLGFCAHAHF  | 26   | 13   |
| >TET2-D137€CLDFCAHAHF  | 203 | >TET2-D137€CLGFCAHAHF  | 139  | 64   |
| >TET2-D137€CLDFCAHAH   | 341 | >TET2-D137€CLGFCAHAH   | 915  | 574  |
| >TET2-D137€CLDFCAHAHF  | 111 | >TET2-D137€CLGFCAHAHF  | 60   | 51   |
| >TET2-D137€CLDFCAHAHF  | 146 | >TET2-D137€CLGFCAHAHF  | 39   | 107  |
| >TET2-D137€ACLDFCAHAH  | 92  | >TET2-D137€ACLGFCAHAH  | 140  | 48   |
| >TET2-D137€ACLDFCAHAH  | 97  | >TET2-D137€ACLGFCAHAH  | 126  | 29   |
| >TET2-D137€VTACLDFCA   | 69  | >TET2-D137€VTACLGFCA   | 247  | 178  |
| >TET2-D137€VTACLDFCAH  | 31  | >TET2-D137€VTACLGFCAH  | 61   | 30   |
| >TET2-D137€SGVTACLDF   | 109 | >TET2-D137€SGVTACLGF   | 3877 | 3768 |
| >TET2-D137€FSGVTACLDF  | 485 | >TET2-D137€FSGVTACLGF  | 196  | 289  |
| >TET2-D137€FSGVTACLDF  | 94  | >TET2-D137€FSGVTACLGF  | 135  | 41   |
| >TET2-D137€FSGVTACLDF  | 27  | >TET2-D137€FSGVTACLGF  | 9    | 18   |
| >TET2-D137€FSGVTACLDF  | 402 | >TET2-D137€FSGVTACLGF  | 148  | 254  |
| >TET2-D137€FSGVTACLDF  | 354 | >TET2-D137€FSGVTACLGF  | 250  | 104  |
| >TET2-D137€PFSGVTACLDF | 274 | >TET2-D137€PFSGVTACLGF | 728  | 454  |
| >TET2-D137€PFSGVTACLDF | 206 | >TET2-D137€PFSGVTACLGF | 177  | 29   |
| >TET2-D137€PFSGVTACLDF | 390 | >TET2-D137€PFSGVTACLGF | 743  | 353  |
| >TET2-D137€DFCAHAHR    | 146 | >TET2-D137€NFCAHAHR    | 44   | 102  |
| >TET2-D137€DFCAHAHR    | 10  | >TET2-D137€NFCAHAHR    | 23   | 13   |
| >TET2-D137€DFCAHAHR    | 115 | >TET2-D137€NFCAHAHR    | 163  | 48   |
| >TET2-D137€DFCAHAHR    | 74  | >TET2-D137€NFCAHAHR    | 26   | 48   |
| >TET2-D137€LDFCAHAHR   | 882 | >TET2-D137€LNFCAHAHR   | 81   | 801  |
| >TET2-D137€LDFCAHAHR   | 274 | >TET2-D137€LNFCAHAHR   | 51   | 223  |
| >TET2-D137€LDFCAHAHR   | 342 | >TET2-D137€LNFCAHAHR   | 134  | 208  |
| >TET2-D137€CLDFCAHA    | 657 | >TET2-D137€CLNFCAHA    | 184  | 473  |
| >TET2-D137€CLDFCAHA    | 922 | >TET2-D137€CLNFCAHA    | 46   | 876  |
| >TET2-D137€CLDFCAHA    | 469 | >TET2-D137€CLNFCAHA    | 274  | 195  |
| >TET2-D137€CLDFCAHAHF  | 717 | >TET2-D137€CLNFCAHAHF  | 257  | 460  |
| >TET2-D137€CLDFCAHAHF  | 39  | >TET2-D137€CLNFCAHAHF  | 12   | 27   |
| >TET2-D137€CLDFCAHAHF  | 203 | >TET2-D137€CLNFCAHAHF  | 69   | 134  |
| >TET2-D137€CLDFCAHAHF  | 558 | >TET2-D137€CLNFCAHAHF  | 240  | 318  |
| >TET2-D137€CLDFCAHAH   | 341 | >TET2-D137€CLNFCAHAH   | 478  | 137  |
| >TET2-D137€CLDFCAHAHF  | 111 | >TET2-D137€CLNFCAHAHF  | 81   | 30   |
| >TET2-D137€CLDFCAHAHF  | 146 | >TET2-D137€CLNFCAHAHF  | 63   | 83   |
| >TET2-D137€ACLDFCAHAH  | 92  | >TET2-D137€ACLNFCAHAH  | 64   | 28   |
| >TET2-D137€ACLDFCAHAH  | 97  | >TET2-D137€ACLNFCAHAH  | 191  | 94   |
| >TET2-D137€VTACLDFCA   | 69  | >TET2-D137€VTACLNFCA   | 42   | 27   |
| >TET2-D137€VTACLDFCAH  | 31  | >TET2-D137€VTACLNFCAH  | 30   | 1    |
| >TET2-D137€SGVTACLDF   | 109 | >TET2-D137€SGVTACLNF   | 137  | 28   |
| >TET2-D137€FSGVTACLDF  | 485 | >TET2-D137€FSGVTACLNF  | 360  | 125  |

|                         |       |                         |     |       |
|-------------------------|-------|-------------------------|-----|-------|
| >TET2-D137€ FSGVTA CLDF | 94    | >TET2-D137€ FSGVTA CLNF | 53  | 41    |
| >TET2-D137€ FSGVTA CLDF | 27    | >TET2-D137€ FSGVTA CLNF | 10  | 17    |
| >TET2-D137€ FSGVTA CLDF | 402   | >TET2-D137€ FSGVTA CLNF | 112 | 290   |
| >TET2-D137€ FSGVTA CLDF | 354   | >TET2-D137€ FSGVTA CLNF | 218 | 136   |
| >TET2-D137€ PFSGVTA CLD | 274   | >TET2-D137€ PFSGVTA CLN | 139 | 135   |
| >TET2-D137€ PFSGVTA CLD | 206   | >TET2-D137€ PFSGVTA CLN | 131 | 75    |
| >TET2-D137€ PFSGVTA CLD | 390   | >TET2-D137€ PFSGVTA CLN | 575 | 185   |
| >TET2-D1384 DLHNMQNG!   | 5632  | >TET2-D1384 HLHNMQNG!   | 206 | 5426  |
| >TET2-D1384 DLHNMQNG!   | 5128  | >TET2-D1384 HLHNMQNG!   | 97  | 5031  |
| >TET2-D1384 DLHNMQNG!   | 859   | >TET2-D1384 HLHNMQNG!   | 66  | 793   |
| >TET2-D1384 DLHNMQNG!   | 1361  | >TET2-D1384 HLHNMQNG!   | 35  | 1326  |
| >TET2-D1384 DLHNMQNG!   | 2634  | >TET2-D1384 HLHNMQNG!   | 321 | 2313  |
| >TET2-D1384 DLHNMQNG!   | 89    | >TET2-D1384 HLHNMQNG!   | 5   | 84    |
| >TET2-D1384 DLHNMQNG!   | 2254  | >TET2-D1384 HLHNMQNG!   | 400 | 1854  |
| >TET2-D1384 CLDFCAHAHF  | 9446  | >TET2-D1384 CLDFCAHAHF  | 378 | 9068  |
| >TET2-D1384 HRDLHNMQ!   | 1391  | >TET2-D1384 HRHLHNMQ!   | 490 | 901   |
| >TET2-D1384 AHRDLHNM    | 665   | >TET2-D1384 AHRHLHNM    | 150 | 515   |
| >TET2-D1384 HAHRDLHNM   | 61    | >TET2-D1384 HAHRHLHNM   | 39  | 22    |
| >TET2-D1384 HAHRDLHN    | 4103  | >TET2-D1384 HAHRHLHN    | 411 | 3692  |
| >TET2-D1384 HAHRDLHNM   | 476   | >TET2-D1384 HAHRHLHNM   | 55  | 421   |
| >TET2-D1384 HAHRDLHNM   | 944   | >TET2-D1384 HAHRHLHNM   | 228 | 716   |
| >TET2-D1384 HAHRDLHNM   | 8598  | >TET2-D1384 HAHRHLHNM   | 299 | 8299  |
| >TET2-D1384 HAHRDLHNM   | 1163  | >TET2-D1384 HAHRHLHNM   | 293 | 870   |
| >TET2-D1384 AHAHRDLHN   | 1364  | >TET2-D1384 AHAHRHLHN   | 461 | 903   |
| >TET2-D1384 DLHNMQNG!   | 5632  | >TET2-D1384 VLHNMQNG!   | 305 | 5327  |
| >TET2-D1384 DLHNMQNG!   | 5128  | >TET2-D1384 VLHNMQNG!   | 54  | 5074  |
| >TET2-D1384 DLHNMQNG!   | 859   | >TET2-D1384 VLHNMQNG!   | 13  | 846   |
| >TET2-D1384 DLHNMQNG!   | 1361  | >TET2-D1384 VLHNMQNG!   | 24  | 1337  |
| >TET2-D1384 DLHNMQNG!   | 2634  | >TET2-D1384 VLHNMQNG!   | 86  | 2548  |
| >TET2-D1384 DLHNMQNG!   | 10410 | >TET2-D1384 VLHNMQNG!   | 277 | 10133 |
| >TET2-D1384 DLHNMQNG!   | 89    | >TET2-D1384 VLHNMQNG!   | 3   | 86    |
| >TET2-D1384 DLHNMQNG!   | 6089  | >TET2-D1384 VLHNMQNG!   | 496 | 5593  |
| >TET2-D1384 RDLHNMQNG!  | 15185 | >TET2-D1384 RVLHNMQNG!  | 447 | 14738 |
| >TET2-D1384 CLDFCAHAHF  | 23584 | >TET2-D1384 CLDFCAHAHF  | 65  | 23519 |
| >TET2-D1384 CLDFCAHAHF  | 17353 | >TET2-D1384 CLDFCAHAHF  | 58  | 17295 |
| >TET2-D1384 CLDFCAHAHF  | 23378 | >TET2-D1384 CLDFCAHAHF  | 215 | 23163 |
| >TET2-D1384 CLDFCAHAHF  | 29256 | >TET2-D1384 CLDFCAHAHF  | 354 | 28902 |
| >TET2-D1384 CLDFCAHAHF  | 20019 | >TET2-D1384 CLDFCAHAHF  | 11  | 20008 |
| >TET2-D1384 CLDFCAHAHF  | 16519 | >TET2-D1384 CLDFCAHAHF  | 12  | 16507 |
| >TET2-D1384 CLDFCAHAHF  | 23515 | >TET2-D1384 CLDFCAHAHF  | 52  | 23463 |
| >TET2-D1384 CLDFCAHAHF  | 23967 | >TET2-D1384 CLDFCAHAHF  | 4   | 23963 |
| >TET2-D1384 CLDFCAHAHF  | 22241 | >TET2-D1384 CLDFCAHAHF  | 7   | 22234 |
| >TET2-D1384 HRDLHNMQ!   | 1391  | >TET2-D1384 HRVLHNMQ!   | 323 | 1068  |

|                       |       |                       |     |       |
|-----------------------|-------|-----------------------|-----|-------|
| >TET2-D1384AHRDLHNM   | 665   | >TET2-D1384AHRVLHNM   | 468 | 197   |
| >TET2-D1384HAHRDLHNM  | 61    | >TET2-D1384HAHRVLHNM  | 259 | 198   |
| >TET2-D1384HAHRDLHNM  | 476   | >TET2-D1384HAHRVLHNM  | 102 | 374   |
| >TET2-D1384HAHRDLHNM  | 944   | >TET2-D1384HAHRVLHNM  | 354 | 590   |
| >TET2-D1384HAHRDLHNM  | 3294  | >TET2-D1384HAHRVLHNM  | 324 | 2970  |
| >TET2-D1384FCAHAHRD   | 20710 | >TET2-D1384FCAHAHRV   | 73  | 20637 |
| >TET2-D1384FCAHAHRD   | 29555 | >TET2-D1384FCAHAHRV   | 351 | 29204 |
| >TET2-D1384FCAHAHRD   | 35349 | >TET2-D1384FCAHAHRV   | 56  | 35293 |
| >TET2-D1384FCAHAHRD   | 17609 | >TET2-D1384FCAHAHRV   | 72  | 17537 |
| >TET2-D1384FCAHAHRD   | 19961 | >TET2-D1384FCAHAHRV   | 265 | 19696 |
| >TET2-D1384LDFCAHAHRD | 24155 | >TET2-D1384LDFCAHAHRV | 381 | 23774 |
| >TET2-D1427DEFGSVEA   | 21282 | >TET2-D1427YFGSVEA    | 390 | 20892 |
| >TET2-D1427DEFGSVEA   | 37    | >TET2-D1427YFGSVEA    | 125 | 88    |
| >TET2-D1427DEFGSVEAQ  | 13    | >TET2-D1427YFGSVEAQ   | 33  | 20    |
| >TET2-D1427DEFGSVEAQE | 78    | >TET2-D1427YFGSVEAQE  | 294 | 216   |
| >TET2-D1427DEFGSVEA   | 7950  | >TET2-D1427YFGSVEA    | 363 | 7587  |
| >TET2-D1427DEFGSVEAQ  | 8738  | >TET2-D1427YFGSVEAQ   | 440 | 8298  |
| >TET2-D1427DEFGSVEA   | 1264  | >TET2-D1427YFGSVEA    | 39  | 1225  |
| >TET2-D1427DEFGSVEAQ  | 6955  | >TET2-D1427YFGSVEAQ   | 499 | 6456  |
| >TET2-D1427DEFGSVEA   | 248   | >TET2-D1427YFGSVEA    | 70  | 178   |
| >TET2-D1427DVDEFGSV   | 16750 | >TET2-D1427DVYFGSV    | 65  | 16685 |
| >TET2-D1427DVDEFGSV   | 436   | >TET2-D1427DVYFGSV    | 79  | 357   |
| >TET2-D1427DVDEFGSV   | 1654  | >TET2-D1427DVYFGSV    | 470 | 1184  |
| >TET2-D1427DVDEFGSV   | 1600  | >TET2-D1427DVYFGSV    | 232 | 1368  |
| >TET2-D1427DVDEFGSVEA | 15450 | >TET2-D1427DVYFGSVEA  | 442 | 15008 |
| >TET2-D1427DVDEFGSVEA | 9669  | >TET2-D1427DVYFGSVEA  | 434 | 9235  |
| >TET2-D1427DVDEFGSV   | 358   | >TET2-D1427DVYFGSV    | 24  | 334   |
| >TET2-D1427DVDEFGSVEA | 3776  | >TET2-D1427DVYFGSVEA  | 259 | 3517  |
| >TET2-D1427DVDEFGSV   | 8     | >TET2-D1427DVYFGSV    | 5   | 3     |
| >TET2-D1427DVDEFGSVEA | 113   | >TET2-D1427DVYFGSVEA  | 38  | 75    |
| >TET2-D1427SDVDEFGSV  | 46    | >TET2-D1427SDVYFGSV   | 126 | 80    |
| >TET2-D1427KVSDVDEFGS | 272   | >TET2-D1427KVSDVYFGS  | 215 | 57    |
| >TET2-D1427KVSDVDEFGS | 36    | >TET2-D1427KVSDVYFGS  | 29  | 7     |
| >TET2-D1427KVSDVDEFGS | 34    | >TET2-D1427KVSDVYFGS  | 12  | 22    |
| >TET2-D1427KVSDVDEF   | 562   | >TET2-D1427KVSDVYEF   | 275 | 287   |
| >TET2-D1427KVSDVDEFGS | 18    | >TET2-D1427KVSDVYFGS  | 11  | 7     |
| >TET2-D1427KVSDVDEFGS | 59    | >TET2-D1427KVSDVYFGS  | 53  | 6     |
| >TET2-D1427KVSDVDEFGS | 466   | >TET2-D1427KVSDVYFGS  | 535 | 69    |
| >TET2-D1427KVSDVDEFGS | 129   | >TET2-D1427KVSDVYFGS  | 162 | 33    |
| >TET2-D1427KVSDVDEFGS | 24    | >TET2-D1427KVSDVYFGS  | 35  | 11    |
| >TET2-D1427KVSDVDEF   | 1640  | >TET2-D1427KVSDVYEF   | 360 | 1280  |
| >TET2-D1427KVSDVDEF   | 78    | >TET2-D1427KVSDVYEF   | 26  | 52    |
| >TET2-D1427KVSDVDEFGS | 107   | >TET2-D1427KVSDVYFGS  | 79  | 28    |

|                        |       |                        |       |       |
|------------------------|-------|------------------------|-------|-------|
| >TET2-D1427KVSDVDEF    | 708   | >TET2-D1427KVSDVYEF    | 391   | 317   |
| >TET2-D1427KVSDVDEF    | 1406  | >TET2-D1427KVSDVYEF    | 352   | 1054  |
| >TET2-D1427KVSDVDEF    | 540   | >TET2-D1427KVSDVYEF    | 286   | 254   |
| >TET2-D1427KVSDVDEF    | 58    | >TET2-D1427KVSDVYEF    | 32    | 26    |
| >TET2-D1427KVSDVDEF    | 1605  | >TET2-D1427KVSDVYEF    | 235   | 1370  |
| >TET2-D1427YKVSDVDEF   | 4828  | >TET2-D1427YKVSDVYEF   | 423   | 4405  |
| >TET2-D1427YKVSDVDEF   | 125   | >TET2-D1427YKVSDVYEF   | 175   | 50    |
| >TET2-D1427YKVSDVDEF   | 3     | >TET2-D1427YKVSDVYEF   | 2     | 1     |
| >TET2-D1427YKVSDVDEF   | 876   | >TET2-D1427YKVSDVYEF   | 464   | 412   |
| >TET2-D1427YKVSDVDEF   | 3151  | >TET2-D1427YKVSDVYEF   | 195   | 2956  |
| >TET2-D1427LYKVSDVDEF  | 454   | >TET2-D1427LYKVSDVYEF  | 22    | 432   |
| >TET2-D1427LYKVSDVDEF  | 357   | >TET2-D1427LYKVSDVYEF  | 44    | 313   |
| >TET2-D1427LYKVSDVDEF  | 8     | >TET2-D1427LYKVSDVYEF  | 8     | 0     |
| >TET2-D1427LYKVSDVDEF  | 3159  | >TET2-D1427LYKVSDVYEF  | 291   | 2868  |
| >TET2-D1427LYKVSDVD    | 31101 | >TET2-D1427LYKVSDVY    | 258   | 30843 |
| >TET2-D1427LYKVSDVDEF  | 496   | >TET2-D1427LYKVSDVYEF  | 221   | 275   |
| >TET2-D1427PLYKVSDVDE  | 1549  | >TET2-D1427PLYKVSDVYEF | 326   | 1223  |
| >TET2-D1427PLYKVSDVDE  | 1067  | >TET2-D1427PLYKVSDVYEF | 223   | 844   |
| >TET2-D1427PLYKVSDVD   | 22283 | >TET2-D1427PLYKVSDVY   | 395   | 21888 |
| >TET2-D1427PLYKVSDVD   | 31062 | >TET2-D1427PLYKVSDVY   | 225   | 30837 |
| >TET2-D1427PLYKVSDVDE  | 283   | >TET2-D1427PLYKVSDVYEF | 138   | 145   |
| >TET2-D1427LPLYKVSDVD  | 8282  | >TET2-D1427LPLYKVSDVY  | 34    | 8248  |
| >TET2-D1427LPLYKVSDVD  | 6102  | >TET2-D1427LPLYKVSDVY  | 164   | 5938  |
| >TET2-D1427LPLYKVSDVD  | 344   | >TET2-D1427LPLYKVSDVY  | 294   | 50    |
| >TET2-D1427LPLYKVSDVD  | 28953 | >TET2-D1427LPLYKVSDVY  | 66    | 28887 |
| >TET2-D1427LPLYKVSDVD  | 9882  | >TET2-D1427LPLYKVSDVY  | 25    | 9857  |
| >TET2-D1844DEVWSDSEQ   | 1272  | >TET2-D1844GEVWSDSEQ   | 378   | 894   |
| >TET2-D1844DEVWSDSE    | 271   | >TET2-D1844GEVWSDSE    | 14765 | 14494 |
| >TET2-D1844DEVWSDSEQ   | 55    | >TET2-D1844GEVWSDSEQ   | 8347  | 8292  |
| >TET2-D1844DEVWSDSEQ   | 5     | >TET2-D1844GEVWSDSEQ   | 297   | 292   |
| >TET2-D1844DEVWSDSEQ   | 920   | >TET2-D1844GEVWSDSEQ   | 24    | 896   |
| >TET2-D1844DEVWSDSEQ   | 5108  | >TET2-D1844GEVWSDSEQ   | 234   | 4874  |
| >TET2-D1844DEVWSDSEQ   | 439   | >TET2-D1844GEVWSDSEQ   | 205   | 234   |
| >TET2-D1844DEVWSDSEQ   | 106   | >TET2-D1844GEVWSDSEQ   | 58    | 48    |
| >TET2-D1844DEVWSDSEQ   | 10945 | >TET2-D1844GEVWSDSEQ   | 184   | 10761 |
| >TET2-D1844AEDNDEVW    | 237   | >TET2-D1844AEDNDEVW    | 304   | 67    |
| >TET2-D1844AEDNDEVW    | 152   | >TET2-D1844AEDNDEVW    | 125   | 27    |
| >TET2-D1844AEDNDEVWS   | 539   | >TET2-D1844AEDNDEVWS   | 288   | 251   |
| >TET2-D1844GAEDNDEVW   | 334   | >TET2-D1844GAEDNDEVW   | 207   | 127   |
| >TET2-D1844GAEDNDEVW   | 100   | >TET2-D1844GAEDNDEVW   | 301   | 201   |
| >TET2-D1844SGAEDNDEV   | 418   | >TET2-D1844SGAEDNDEV   | 593   | 175   |
| >TET2-D1844SGAEDNDEV'  | 292   | >TET2-D1844SGAEDNDEV'  | 794   | 502   |
| >TET2-D1844ASGAEDNDEV' | 69    | >TET2-D1844ASGAEDNDEV' | 43    | 26    |

|                        |      |                        |       |       |
|------------------------|------|------------------------|-------|-------|
| >TET2-D1844ASGAEDNDE'  | 166  | >TET2-D1844ASGAEDNGE'  | 178   | 12    |
| >TET2-D1844ASGAEDNDE'  | 29   | >TET2-D1844ASGAEDNGE'  | 31    | 2     |
| >TET2-D1844VASGAEDND   | 275  | >TET2-D1844VASGAEDNG   | 341   | 66    |
| >TET2-E1144EGPFYTHL    | 591  | >TET2-E1144KGPFFYTHL   | 44    | 547   |
| >TET2-E1144EGPFYTHL    | 466  | >TET2-E1144KGPFFYTHL   | 17117 | 16651 |
| >TET2-E1144DEGPFYTH    | 33   | >TET2-E1144DKGPFFYTH   | 10299 | 10266 |
| >TET2-E1144DEGPFYTHL   | 55   | >TET2-E1144DKGPFFYTHL  | 15564 | 15509 |
| >TET2-E1144DEGPFYTHLG  | 272  | >TET2-E1144DKGPFFYTHLG | 20665 | 20393 |
| >TET2-E1144DEGPFYTHLG  | 172  | >TET2-E1144DKGPFFYTHLG | 26736 | 26564 |
| >TET2-E1144IEKDEGPFY   | 253  | >TET2-E1144IEKDKGPFY   | 361   | 108   |
| >TET2-E1144IEKDEGPF    | 386  | >TET2-E1144IEKDKGPF    | 343   | 43    |
| >TET2-E1144IEKDEGPF    | 193  | >TET2-E1144IEKDKGPF    | 372   | 179   |
| >TET2-E1144IEKDEGPFY   | 470  | >TET2-E1144IEKDKGPFY   | 1020  | 550   |
| >TET2-E1144IEKDEGPF    | 126  | >TET2-E1144IEKDKGPF    | 110   | 16    |
| >TET2-E1144IEKDEGPFY   | 99   | >TET2-E1144IEKDKGPFY   | 221   | 122   |
| >TET2-E1144IEKDEGPFY   | 285  | >TET2-E1144IEKDKGPFY   | 418   | 133   |
| >TET2-E1144IIEKDEGPFY  | 363  | >TET2-E1144IIEKDKGPFY  | 226   | 137   |
| >TET2-E1144QIIEKDEGPFY | 101  | >TET2-E1144QIIEKDKGPFY | 107   | 6     |
| >TET2-E1144QIIEKDEGPF  | 30   | >TET2-E1144QIIEKDKGPF  | 65    | 35    |
| >TET2-E1144QIIEKDEGPFY | 7    | >TET2-E1144QIIEKDKGPFY | 11    | 4     |
| >TET2-E1144QIIEKDEGPFY | 128  | >TET2-E1144QIIEKDKGPFY | 79    | 49    |
| >TET2-E1144QIIEKDEGPFY | 51   | >TET2-E1144QIIEKDKGPFY | 80    | 29    |
| >TET2-E1144QIIEKDEGPFY | 211  | >TET2-E1144QIIEKDKGPFY | 276   | 65    |
| >TET2-E1144QIIEKDEGPFY | 425  | >TET2-E1144QIIEKDKGPFY | 598   | 173   |
| >TET2-E1144QIIEKDEGPF  | 429  | >TET2-E1144QIIEKDKGPF  | 520   | 91    |
| >TET2-E1144EQIIEKDEGPF | 257  | >TET2-E1144EQIIEKDKGPF | 438   | 181   |
| >TET2-E1144EQIIEKDEGPF | 306  | >TET2-E1144EQIIEKDKGPF | 321   | 15    |
| >TET2-E1144EQIIEKDEGPF | 214  | >TET2-E1144EQIIEKDKGPF | 282   | 68    |
| >TET2-E1222EAAVIVILI   | 2812 | >TET2-E1222GAAVIVILI   | 425   | 2387  |
| >TET2-E1222EAAVIVILILV | 1033 | >TET2-E1222GAAVIVILILV | 96    | 937   |
| >TET2-E1222EAAVIVILILV | 2764 | >TET2-E1222GAAVIVILILV | 467   | 2297  |
| >TET2-E1222EAAVIVILILV | 1527 | >TET2-E1222GAAVIVILILV | 226   | 1301  |
| >TET2-E1222EAAVIVILILV | 4724 | >TET2-E1222GAAVIVILILV | 372   | 4352  |
| >TET2-E1222EAAVIVILILV | 2989 | >TET2-E1222GAAVIVILILV | 450   | 2539  |
| >TET2-E1222EAAVIVIL    | 24   | >TET2-E1222GAAVIVIL    | 4081  | 4057  |
| >TET2-E1222EAAVIVILI   | 8    | >TET2-E1222GAAVIVILI   | 874   | 866   |
| >TET2-E1222EAAVIVILILV | 6    | >TET2-E1222GAAVIVILILV | 255   | 249   |
| >TET2-E1222EAAVIVIL    | 319  | >TET2-E1222GAAVIVIL    | 16048 | 15729 |
| >TET2-E1222EAAVIVILI   | 46   | >TET2-E1222GAAVIVILI   | 11113 | 11067 |
| >TET2-E1222EAAVIVILIL  | 299  | >TET2-E1222GAAVIVILIL  | 15522 | 15223 |
| >TET2-E1222EAAVIVILILV | 9    | >TET2-E1222GAAVIVILILV | 3316  | 3307  |
| >TET2-E1222EAAVIVILI   | 951  | >TET2-E1222GAAVIVILI   | 386   | 565   |
| >TET2-E1222CEAAVIVI    | 116  | >TET2-E1222CGAAVIVI    | 34694 | 34578 |

|                         |     |                         |       |       |
|-------------------------|-----|-------------------------|-------|-------|
| >TET2-E1222 CEAAVIVILI  | 20  | >TET2-E1222 CGAAVIVILI  | 6545  | 6525  |
| >TET2-E1222 CEAAVIVIL   | 292 | >TET2-E1222 CGAAVIVIL   | 22156 | 21864 |
| >TET2-E1222 CEAAVIVILIL | 259 | >TET2-E1222 CGAAVIVILIL | 21855 | 21596 |
| >TET2-E1222 CEAAVIVIL   | 244 | >TET2-E1222 CGAAVIVIL   | 3764  | 3520  |
| >TET2-E1222 CEAAVIVI    | 57  | >TET2-E1222 CGAAVIVI    | 23569 | 23512 |
| >TET2-E1222 CEAAVIVIL   | 12  | >TET2-E1222 CGAAVIVIL   | 20949 | 20937 |
| >TET2-E1222 CEAAVIVILIL | 18  | >TET2-E1222 CGAAVIVILIL | 20756 | 20738 |
| >TET2-E1222 CEAAVIVI    | 410 | >TET2-E1222 CGAAVIVI    | 37301 | 36891 |
| >TET2-E1222 CEAAVIVIL   | 309 | >TET2-E1222 CGAAVIVIL   | 36156 | 35847 |
| >TET2-E1222 CEAAVIVILI  | 457 | >TET2-E1222 CGAAVIVILI  | 35972 | 35515 |
| >TET2-E1222 CEAAVIVILIL | 203 | >TET2-E1222 CGAAVIVILIL | 35361 | 35158 |
| >TET2-E1222 CEAAVIVILIL | 416 | >TET2-E1222 CGAAVIVILIL | 40124 | 39708 |
| >TET2-E1222 CEAAVIVI    | 83  | >TET2-E1222 CGAAVIVI    | 34222 | 34139 |
| >TET2-E1222 CEAAVIVIL   | 313 | >TET2-E1222 CGAAVIVIL   | 37674 | 37361 |
| >TET2-E1222 CEAAVIVILI  | 276 | >TET2-E1222 CGAAVIVILI  | 27140 | 26864 |
| >TET2-E1222 CEAAVIVILIL | 452 | >TET2-E1222 CGAAVIVILIL | 37980 | 37528 |
| >TET2-E1222 CEAAVIVI    | 131 | >TET2-E1222 CGAAVIVI    | 13303 | 13172 |
| >TET2-E1222 CEAAVIVIL   | 20  | >TET2-E1222 CGAAVIVIL   | 21274 | 21254 |
| >TET2-E1222 CEAAVIVILI  | 219 | >TET2-E1222 CGAAVIVILI  | 33580 | 33361 |
| >TET2-E1222 CEAAVIVILIL | 26  | >TET2-E1222 CGAAVIVILIL | 23176 | 23150 |
| >TET2-E1222 CEAAVIVI    | 738 | >TET2-E1222 CGAAVIVI    | 76    | 662   |
| >TET2-E1222 HTCEAAVIV   | 442 | >TET2-E1222 HTCGAAVIV   | 1399  | 957   |
| >TET2-E1222 HTCEAAVIVI  | 250 | >TET2-E1222 HTCGAAVIVI  | 223   | 27    |
| >TET2-E1222 HTCEAAVI    | 431 | >TET2-E1222 HTCGAAVI    | 207   | 224   |
| >TET2-E1222 HTCEAAVIVI  | 223 | >TET2-E1222 HTCGAAVIVI  | 119   | 104   |
| >TET2-E1222 HTCEAAVIVIL | 370 | >TET2-E1222 HTCGAAVIVII | 166   | 204   |
| >TET2-E1222 HTCEAAVI    | 132 | >TET2-E1222 HTCGAAVI    | 109   | 23    |
| >TET2-E1222 HTCEAAVIV   | 38  | >TET2-E1222 HTCGAAVIV   | 43    | 5     |
| >TET2-E1222 HTCEAAVIVI  | 198 | >TET2-E1222 HTCGAAVIVI  | 356   | 158   |
| >TET2-E1222 HTCEAAVIVIL | 127 | >TET2-E1222 HTCGAAVIVII | 143   | 16    |
| >TET2-E1222 HTCEAAVI    | 450 | >TET2-E1222 HTCGAAVI    | 1919  | 1469  |
| >TET2-E1222 HTCEAAVIV   | 45  | >TET2-E1222 HTCGAAVIV   | 489   | 444   |
| >TET2-E1222 HTCEAAVIVI  | 375 | >TET2-E1222 HTCGAAVIVI  | 2228  | 1853  |
| >TET2-E1222 HTCEAAVI    | 48  | >TET2-E1222 HTCGAAVI    | 26    | 22    |
| >TET2-E1222 HTCEAAVIV   | 355 | >TET2-E1222 HTCGAAVIV   | 322   | 33    |
| >TET2-E1222 HTCEAAVIVI  | 78  | >TET2-E1222 HTCGAAVIVI  | 58    | 20    |
| >TET2-E1222 HTCEAAVIVIL | 56  | >TET2-E1222 HTCGAAVIVII | 47    | 9     |
| >TET2-E1222 HTCEAAVIVIL | 180 | >TET2-E1222 HTCGAAVIVII | 188   | 8     |
| >TET2-E1222 HTCEAAVIVIL | 485 | >TET2-E1222 HTCGAAVIVII | 424   | 61    |
| >TET2-E1222 HTCEAAVI    | 18  | >TET2-E1222 HTCGAAVI    | 22    | 4     |
| >TET2-E1222 HTCEAAVIVI  | 76  | >TET2-E1222 HTCGAAVIVI  | 75    | 1     |
| >TET2-E1222 HTCEAAVIVIL | 231 | >TET2-E1222 HTCGAAVIVII | 376   | 145   |
| >TET2-E1222 RAGHTCEAAV  | 509 | >TET2-E1222 RAGHTCGAAV  | 286   | 223   |



|                         |      |                        |       |       |
|-------------------------|------|------------------------|-------|-------|
| >TET2-E1222 RAGHTCEAA\  | 418  | >TET2-E1222 RAGHTCGAA\ | 585   | 167   |
| >TET2-E1222 RAGHTCEAA\  | 30   | >TET2-E1222 RAGHTCGAA\ | 25    | 5     |
| >TET2-E1222 ERAGHTCEA\  | 422  | >TET2-E1222 ERAGHTCGA\ | 404   | 18    |
| >TET2-E1222 ERAGHTCEA\  | 282  | >TET2-E1222 ERAGHTCGA\ | 261   | 21    |
| >TET2-E1222 RERAGHTCE\  | 274  | >TET2-E1222 RERAGHTCG\ | 459   | 185   |
| >TET2-E1222 RERAGHTCE\  | 46   | >TET2-E1222 RERAGHTCG\ | 68    | 22    |
| >TET2-E1222 RERAGHTCE\  | 14   | >TET2-E1222 RERAGHTCG\ | 18    | 4     |
| >TET2-E1222 RERAGHTCE\  | 379  | >TET2-E1222 RERAGHTCG\ | 588   | 209   |
| >TET2-E1234 WEGIPLSL    | 389  | >TET2-E1234 WGGIPLSL   | 37244 | 36855 |
| >TET2-E1234 WEGIPLSL    | 268  | >TET2-E1234 WGGIPLSL   | 24087 | 23819 |
| >TET2-E1234 WEGIPLSL    | 76   | >TET2-E1234 WGGIPLSL   | 22303 | 22227 |
| >TET2-E1234 WEGIPLSL    | 78   | >TET2-E1234 WGGIPLSL   | 34018 | 33940 |
| >TET2-E1234 WEGIPLSLA   | 74   | >TET2-E1234 WGGIPLSLA  | 34954 | 34880 |
| >TET2-E1234 VWEGIPLSL   | 1018 | >TET2-E1234 VWGGIPLSL  | 497   | 521   |
| >TET2-E1234 VWEGIPLSL   | 1084 | >TET2-E1234 VWGGIPLSL  | 364   | 720   |
| >TET2-E1234 VWEGIPLSL   | 1881 | >TET2-E1234 VWGGIPLSL  | 336   | 1545  |
| >TET2-E1234 VWEGIPLSL   | 139  | >TET2-E1234 VWGGIPLSL  | 205   | 66    |
| >TET2-E1234 VWEGIPLSLA  | 191  | >TET2-E1234 VWGGIPLSLA | 196   | 5     |
| >TET2-E1234 LVWEGIPL    | 25   | >TET2-E1234 LVWGGIPL   | 40    | 15    |
| >TET2-E1234 LVWEGIPLS   | 427  | >TET2-E1234 LVWGGIPLS  | 1887  | 1460  |
| >TET2-E1234 LVWEGIPLSL  | 220  | >TET2-E1234 LVWGGIPLSL | 289   | 69    |
| >TET2-E1234 LVWEGIPLSL\ | 55   | >TET2-E1234 LVWGGIPLSL | 134   | 79    |
| >TET2-E1234 LVWEGIPLSL  | 47   | >TET2-E1234 LVWGGIPLSL | 50    | 3     |
| >TET2-E1234 LVWEGIPLSL  | 76   | >TET2-E1234 LVWGGIPLSL | 70    | 6     |
| >TET2-E1234 LVWEGIPLSL\ | 186  | >TET2-E1234 LVWGGIPLSL | 439   | 253   |
| >TET2-E1234 LVWEGIPL    | 19   | >TET2-E1234 LVWGGIPL   | 40    | 21    |
| >TET2-E1234 LVWEGIPLS   | 153  | >TET2-E1234 LVWGGIPLS  | 934   | 781   |
| >TET2-E1234 LVWEGIPLSL  | 110  | >TET2-E1234 LVWGGIPLSL | 111   | 1     |
| >TET2-E1234 LVWEGIPLSL\ | 26   | >TET2-E1234 LVWGGIPLSL | 73    | 47    |
| >TET2-E1234 LVWEGIPL    | 11   | >TET2-E1234 LVWGGIPL   | 18    | 7     |
| >TET2-E1234 LVWEGIPLS   | 321  | >TET2-E1234 LVWGGIPLS  | 1097  | 776   |
| >TET2-E1234 LVWEGIPLSL  | 7    | >TET2-E1234 LVWGGIPLSL | 14    | 7     |
| >TET2-E1234 LVWEGIPLSL\ | 30   | >TET2-E1234 LVWGGIPLSL | 76    | 46    |
| >TET2-E1234 LVWEGIPL    | 75   | >TET2-E1234 LVWGGIPL   | 495   | 420   |
| >TET2-E1234 LVWEGIPLSL  | 172  | >TET2-E1234 LVWGGIPLSL | 1520  | 1348  |
| >TET2-E1234 LVWEGIPL    | 35   | >TET2-E1234 LVWGGIPL   | 49    | 14    |
| >TET2-E1234 LVWEGIPLSL  | 26   | >TET2-E1234 LVWGGIPLSL | 49    | 23    |
| >TET2-E1234 LVWEGIPLSL\ | 130  | >TET2-E1234 LVWGGIPLSL | 297   | 167   |
| >TET2-E1234 LVWEGIPL    | 116  | >TET2-E1234 LVWGGIPL   | 179   | 63    |
| >TET2-E1234 LVWEGIPLSL  | 20   | >TET2-E1234 LVWGGIPLSL | 40    | 20    |
| >TET2-E1234 LVWEGIPLSL\ | 359  | >TET2-E1234 LVWGGIPLSL | 645   | 286   |
| >TET2-E1234 LVWEGIPL    | 16   | >TET2-E1234 LVWGGIPL   | 11    | 5     |
| >TET2-E1234 LVWEGIPLSL  | 8    | >TET2-E1234 LVWGGIPLSL | 7     | 1     |

|                         |      |                         |      |      |
|-------------------------|------|-------------------------|------|------|
| >TET2-E1234 LVWEGIPLSL  | 29   | >TET2-E1234 LVWGGIPLSL  | 25   | 4    |
| >TET2-E1234 LVWEGIPLSL  | 360  | >TET2-E1234 LVWGGIPLSL  | 191  | 169  |
| >TET2-E1234 LVWEGIPL    | 46   | >TET2-E1234 LVWGGIPL    | 172  | 126  |
| >TET2-E1234 LVWEGIPLSL  | 69   | >TET2-E1234 LVWGGIPLSL  | 339  | 270  |
| >TET2-E1234 LVWEGIPLSL  | 172  | >TET2-E1234 LVWGGIPLSL  | 924  | 752  |
| >TET2-E1234 LVWEGIPL    | 958  | >TET2-E1234 LVWGGIPL    | 264  | 694  |
| >TET2-E1234 LVWEGIPL    | 198  | >TET2-E1234 LVWGGIPL    | 170  | 28   |
| >TET2-E1234 LVWEGIPLSL  | 142  | >TET2-E1234 LVWGGIPLSL  | 154  | 12   |
| >TET2-E1234 LVWEGIPL    | 96   | >TET2-E1234 LVWGGIPL    | 136  | 40   |
| >TET2-E1234 LVWEGIPLSL  | 191  | >TET2-E1234 LVWGGIPLSL  | 139  | 52   |
| >TET2-E1234 ILVWEGIPL   | 96   | >TET2-E1234 ILVWGGIPL   | 71   | 25   |
| >TET2-E1234 ILVWEGIPLSL | 80   | >TET2-E1234 ILVWGGIPLSI | 64   | 16   |
| >TET2-E1234 ILVWEGIPL   | 39   | >TET2-E1234 ILVWGGIPL   | 91   | 52   |
| >TET2-E1234 ILVWEGIPLSL | 53   | >TET2-E1234 ILVWGGIPLSI | 90   | 37   |
| >TET2-E1234 ILVWEGIPL   | 101  | >TET2-E1234 ILVWGGIPL   | 45   | 56   |
| >TET2-E1234 ILVWEGIPLSL | 72   | >TET2-E1234 ILVWGGIPLSI | 43   | 29   |
| >TET2-E1234 ILVWEGIPL   | 83   | >TET2-E1234 ILVWGGIPL   | 47   | 36   |
| >TET2-E1234 ILVWEGIPLSL | 281  | >TET2-E1234 ILVWGGIPLSI | 162  | 119  |
| >TET2-E1234 ILVWEGIPL   | 7    | >TET2-E1234 ILVWGGIPL   | 5    | 2    |
| >TET2-E1234 ILVWEGIPLS  | 320  | >TET2-E1234 ILVWGGIPLS  | 231  | 89   |
| >TET2-E1234 ILVWEGIPLSL | 7    | >TET2-E1234 ILVWGGIPLSI | 5    | 2    |
| >TET2-E1234 ILVWEGIPL   | 114  | >TET2-E1234 ILVWGGIPL   | 89   | 25   |
| >TET2-E1234 ILVWEGIPLSL | 220  | >TET2-E1234 ILVWGGIPLSI | 178  | 42   |
| >TET2-E1234 ILVWEGIPL   | 35   | >TET2-E1234 ILVWGGIPL   | 17   | 18   |
| >TET2-E1234 ILVWEGIPLSL | 54   | >TET2-E1234 ILVWGGIPLSI | 32   | 22   |
| >TET2-E1234 ILVWEGIPL   | 1105 | >TET2-E1234 ILVWGGIPL   | 207  | 898  |
| >TET2-E1234 ILVWEGIPLSL | 257  | >TET2-E1234 ILVWGGIPLSI | 98   | 159  |
| >TET2-E1234 ILVWEGIPL   | 6    | >TET2-E1234 ILVWGGIPL   | 3    | 3    |
| >TET2-E1234 ILVWEGIPLS  | 215  | >TET2-E1234 ILVWGGIPLS  | 91   | 124  |
| >TET2-E1234 ILVWEGIPLSL | 4    | >TET2-E1234 ILVWGGIPLSI | 3    | 1    |
| >TET2-E1234 ILVWEGIPLSL | 564  | >TET2-E1234 ILVWGGIPLSI | 488  | 76   |
| >TET2-E1234 LILVWEGIPL  | 137  | >TET2-E1234 LILVWGGIPL  | 207  | 70   |
| >TET2-E1234 LILVWEGIPL  | 111  | >TET2-E1234 LILVWGGIPL  | 128  | 17   |
| >TET2-E1234 LILVWEGIPL  | 395  | >TET2-E1234 LILVWGGIPL  | 253  | 142  |
| >TET2-E1234 LILVWEGI    | 105  | >TET2-E1234 LILVWGGI    | 190  | 85   |
| >TET2-E1234 LILVWEGIPL  | 47   | >TET2-E1234 LILVWGGIPL  | 56   | 9    |
| >TET2-E1234 LILVWEGI    | 37   | >TET2-E1234 LILVWGGI    | 55   | 18   |
| >TET2-E1234 LILVWEGIPL  | 91   | >TET2-E1234 LILVWGGIPL  | 48   | 43   |
| >TET2-E1234 LILVWEGIPL  | 702  | >TET2-E1234 LILVWGGIPL  | 495  | 207  |
| >TET2-E1234 LILVWEGI    | 258  | >TET2-E1234 LILVWGGI    | 462  | 204  |
| >TET2-E1234 LILVWEGIPL  | 281  | >TET2-E1234 LILVWGGIPL  | 177  | 104  |
| >TET2-E1234 LILVWEGI    | 375  | >TET2-E1234 LILVWGGI    | 2016 | 1641 |
| >TET2-E1234 LILVWEGI    | 481  | >TET2-E1234 LILVWGGI    | 1055 | 574  |

|                         |       |                         |       |       |
|-------------------------|-------|-------------------------|-------|-------|
| >TET2-E1234 LILVWEGIPL  | 123   | >TET2-E1234 LILVWGGIPL  | 88    | 35    |
| >TET2-E1234 LILVWEGI    | 601   | >TET2-E1234 LILVWGGI    | 339   | 262   |
| >TET2-E1234 LILVWEGIPL  | 627   | >TET2-E1234 LILVWGGIPL  | 211   | 416   |
| >TET2-E1234 ILILVWEGI   | 156   | >TET2-E1234 ILILVWGGI   | 672   | 516   |
| >TET2-E1234 ILILVWEGIPL | 66    | >TET2-E1234 ILILVWGGIPL | 92    | 26    |
| >TET2-E1234 ILILVWEGI   | 84    | >TET2-E1234 ILILVWGGI   | 532   | 448   |
| >TET2-E1234 ILILVWEGIPL | 50    | >TET2-E1234 ILILVWGGIPL | 116   | 66    |
| >TET2-E1234 ILILVWEGI   | 164   | >TET2-E1234 ILILVWGGI   | 73    | 91    |
| >TET2-E1234 ILILVWEGIPL | 149   | >TET2-E1234 ILILVWGGIPL | 89    | 60    |
| >TET2-E1234 ILILVWEGI   | 60    | >TET2-E1234 ILILVWGGI   | 193   | 133   |
| >TET2-E1234 ILILVWEGIPL | 72    | >TET2-E1234 ILILVWGGIPL | 90    | 18    |
| >TET2-E1234 ILILVWEGI   | 10    | >TET2-E1234 ILILVWGGI   | 23    | 13    |
| >TET2-E1234 ILILVWEGIPL | 14    | >TET2-E1234 ILILVWGGIPL | 15    | 1     |
| >TET2-E1234 ILILVWEGI   | 295   | >TET2-E1234 ILILVWGGI   | 1056  | 761   |
| >TET2-E1234 ILILVWEGIPL | 91    | >TET2-E1234 ILILVWGGIPL | 125   | 34    |
| >TET2-E1234 ILILVWEGI   | 100   | >TET2-E1234 ILILVWGGI   | 264   | 164   |
| >TET2-E1234 ILILVWEGIPL | 60    | >TET2-E1234 ILILVWGGIPL | 61    | 1     |
| >TET2-E1234 ILILVWEGI   | 402   | >TET2-E1234 ILILVWGGI   | 5412  | 5010  |
| >TET2-E1234 ILILVWEGI   | 206   | >TET2-E1234 ILILVWGGI   | 712   | 506   |
| >TET2-E1234 ILILVWEGIPL | 32    | >TET2-E1234 ILILVWGGIPL | 35    | 3     |
| >TET2-E1234 VILILVWEGI  | 411   | >TET2-E1234 VILILVWGGI  | 585   | 174   |
| >TET2-E1234 VILILVWEGI  | 12    | >TET2-E1234 VILILVWGGI  | 25    | 13    |
| >TET2-E1234 VILILVWEGI  | 60    | >TET2-E1234 VILILVWGGI  | 129   | 69    |
| >TET2-E1234 VILILVWEGI  | 252   | >TET2-E1234 VILILVWGGI  | 985   | 733   |
| >TET2-E1234 IVILILVWEGI | 492   | >TET2-E1234 IVILILVWGGI | 305   | 187   |
| >TET2-E1234 IVILILVWEGI | 50    | >TET2-E1234 IVILILVWGGI | 109   | 59    |
| >TET2-E1234 IVILILVWEGI | 32    | >TET2-E1234 IVILILVWGGI | 56    | 24    |
| >TET2-E1318 EEEKLESHL   | 788   | >TET2-E1318 GEEKLESHL   | 77    | 711   |
| >TET2-E1318 EEEKLESHL   | 3709  | >TET2-E1318 GEEKLESHL   | 142   | 3567  |
| >TET2-E1318 KEEKLESHL   | 373   | >TET2-E1318 KGEEKLESHL  | 35254 | 34881 |
| >TET2-E1318 KEEKLESHL   | 102   | >TET2-E1318 KGEEKLESHL  | 32859 | 32757 |
| >TET2-E1879 ELHATTPL    | 3732  | >TET2-E1879 ALHATTPL    | 45    | 3687  |
| >TET2-E1879 ELHATTPL    | 161   | >TET2-E1879 ALHATTPL    | 10    | 151   |
| >TET2-E1879 ELHATTPL    | 213   | >TET2-E1879 ALHATTPL    | 7     | 206   |
| >TET2-E1879 ELHATTPL    | 3812  | >TET2-E1879 ALHATTPL    | 226   | 3586  |
| >TET2-E1879 ELHATTPL    | 124   | >TET2-E1879 ALHATTPL    | 10    | 114   |
| >TET2-E1879 ELHATTPL    | 644   | >TET2-E1879 ALHATTPL    | 27    | 617   |
| >TET2-E1879 ELHATTPL    | 420   | >TET2-E1879 ALHATTPL    | 31    | 389   |
| >TET2-E1879 ELHATTPL    | 23    | >TET2-E1879 ALHATTPL    | 3     | 20    |
| >TET2-E1879 ELHATTPLK   | 6044  | >TET2-E1879 ALHATTPLK   | 345   | 5699  |
| >TET2-E1879 ELHATTPLK   | 118   | >TET2-E1879 ALHATTPLK   | 34    | 84    |
| >TET2-E1879 ELHATTPLK   | 366   | >TET2-E1879 ALHATTPLK   | 24    | 342   |
| >TET2-E1879 ELHATTPL    | 10732 | >TET2-E1879 ALHATTPL    | 180   | 10552 |

|                         |       |                        |       |       |
|-------------------------|-------|------------------------|-------|-------|
| >TET2-E1879 ELHATTPLK   | 169   | >TET2-E1879 ALHATTPLK  | 4     | 165   |
| >TET2-E1879 ELHATTPL    | 1319  | >TET2-E1879 ALHATTPL   | 151   | 1168  |
| >TET2-E1879 ELHATTPLK   | 24    | >TET2-E1879 ALHATTPLK  | 1626  | 1602  |
| >TET2-E1879 ELHATTPL    | 208   | >TET2-E1879 ALHATTPL   | 6136  | 5928  |
| >TET2-E1879 ELHATTPL    | 209   | >TET2-E1879 ALHATTPL   | 7331  | 7122  |
| >TET2-E1879 ELHATTPL    | 1283  | >TET2-E1879 ALHATTPL   | 180   | 1103  |
| >TET2-E1879 ELHATTPL    | 1289  | >TET2-E1879 ALHATTPL   | 152   | 1137  |
| >TET2-E1879 RELHATTPL   | 18421 | >TET2-E1879 RALHATTPL  | 240   | 18181 |
| >TET2-E1879 RELHATTPL   | 109   | >TET2-E1879 RALHATTPL  | 21102 | 20993 |
| >TET2-E1879 RELHATTPL   | 1038  | >TET2-E1879 RALHATTPL  | 69    | 969   |
| >TET2-E1879 RELHATTPLK  | 1263  | >TET2-E1879 RALHATTPLK | 31    | 1232  |
| >TET2-E1879 RELHATTPLK  | 5400  | >TET2-E1879 RALHATTPLK | 25    | 5375  |
| >TET2-E1879 RELHATTPL   | 8815  | >TET2-E1879 RALHATTPL  | 95    | 8720  |
| >TET2-E1879 RELHATTPLK  | 159   | >TET2-E1879 RALHATTPLK | 5     | 154   |
| >TET2-E1879 RELHATTPL   | 312   | >TET2-E1879 RALHATTPL  | 77    | 235   |
| >TET2-E1879 RELHATTPL   | 3546  | >TET2-E1879 RALHATTPL  | 34    | 3512  |
| >TET2-E1879 RELHATTPL   | 48    | >TET2-E1879 RALHATTPL  | 53    | 5     |
| >TET2-E1879 RELHATTPL   | 9786  | >TET2-E1879 RALHATTPL  | 6     | 9780  |
| >TET2-E1879 RELHATTPL   | 10563 | >TET2-E1879 RALHATTPL  | 247   | 10316 |
| >TET2-E1879 RELHATTPL   | 7     | >TET2-E1879 RALHATTPL  | 7985  | 7978  |
| >TET2-E1879 RELHATTPL   | 12    | >TET2-E1879 RALHATTPL  | 12335 | 12323 |
| >TET2-E1879 RELHATTPL   | 138   | >TET2-E1879 RALHATTPL  | 288   | 150   |
| >TET2-E1879 RELHATTPL   | 19481 | >TET2-E1879 RALHATTPL  | 352   | 19129 |
| >TET2-E1879 RELHATTPL   | 6     | >TET2-E1879 RALHATTPL  | 11108 | 11102 |
| >TET2-E1879 RELHATTPL   | 5381  | >TET2-E1879 RALHATTPL  | 237   | 5144  |
| >TET2-E1879 KRELHATTPL  | 1176  | >TET2-E1879 KRALHATTPL | 125   | 1051  |
| >TET2-E1879 KRELHATTPL  | 108   | >TET2-E1879 KRALHATTPL | 53    | 55    |
| >TET2-E1879 KRELHATTPLI | 1228  | >TET2-E1879 KRALHATTPL | 80    | 1148  |
| >TET2-E1879 KRELHATTPL  | 462   | >TET2-E1879 KRALHATTPL | 216   | 246   |
| >TET2-E1879 KRELHATT    | 453   | >TET2-E1879 KRALHATT   | 224   | 229   |
| >TET2-E1879 KRELHATTPL  | 79    | >TET2-E1879 KRALHATTPL | 86    | 7     |
| >TET2-E1879 KRELHATTPLI | 335   | >TET2-E1879 KRALHATTPL | 242   | 93    |
| >TET2-E1879 KRELHATTPL  | 174   | >TET2-E1879 KRALHATTPL | 173   | 1     |
| >TET2-E1879 KRELHATTPLI | 65    | >TET2-E1879 KRALHATTPL | 50    | 15    |
| >TET2-E1879 AKRELHATTP  | 775   | >TET2-E1879 AKRALHATTP | 303   | 472   |
| >TET2-E1879 AKRELHATTP  | 13    | >TET2-E1879 AKRALHATTP | 11    | 2     |
| >TET2-E1879 CAKRELHA    | 956   | >TET2-E1879 CAKRALHA   | 130   | 826   |
| >TET2-E1879 IECAKREL    | 599   | >TET2-E1879 IECAKRAL   | 192   | 407   |
| >TET2-E1879 IECAKREL    | 155   | >TET2-E1879 IECAKRAL   | 73    | 82    |
| >TET2-E1879 ILIECAKRE   | 21482 | >TET2-E1879 ILIECAKRA  | 392   | 21090 |
| >TET2-E1879 ILIECAKRE   | 11835 | >TET2-E1879 ILIECAKRA  | 380   | 11455 |
| >TET2-E1879 ILIECAKREL  | 79    | >TET2-E1879 ILIECAKRAL | 58    | 21    |
| >TET2-E1879 ILIECAKRE   | 17246 | >TET2-E1879 ILIECAKRA  | 40    | 17206 |

|                        |       |                        |      |       |
|------------------------|-------|------------------------|------|-------|
| >TET2-E1879 ILIECAKREL | 183   | >TET2-E1879 ILIECAKRAL | 137  | 46    |
| >TET2-E1879 ILIECAKRE  | 16417 | >TET2-E1879 ILIECAKRA  | 129  | 16288 |
| >TET2-E1879 ILIECAKREL | 29    | >TET2-E1879 ILIECAKRAL | 30   | 1     |
| >TET2-E1879 ILIECAKRE  | 19775 | >TET2-E1879 ILIECAKRA  | 321  | 19454 |
| >TET2-E1879 ILIECAKREL | 61    | >TET2-E1879 ILIECAKRAL | 38   | 23    |
| >TET2-E1879 ILIECAKRE  | 12419 | >TET2-E1879 ILIECAKRA  | 24   | 12395 |
| >TET2-E1879 ILIECAKREL | 13    | >TET2-E1879 ILIECAKRAL | 27   | 14    |
| >TET2-E350K EEFCSGSSNI | 322   | >TET2-E350K KEFCSGSSNI | 709  | 387   |
| >TET2-E350K EEFCSGSS   | 1390  | >TET2-E350K KEFCSGSS   | 181  | 1209  |
| >TET2-E350K EEFCSGSSNI | 119   | >TET2-E350K KEFCSGSSNI | 11   | 108   |
| >TET2-E350K EEFCSGSSNI | 44    | >TET2-E350K KEFCSGSSNI | 11   | 33    |
| >TET2-E350K EEFCSGSS   | 2345  | >TET2-E350K KEFCSGSS   | 466  | 1879  |
| >TET2-E350K EEFCSGSS   | 1438  | >TET2-E350K KEFCSGSS   | 264  | 1174  |
| >TET2-E350K EEFCSGSSNI | 182   | >TET2-E350K KEFCSGSSNI | 37   | 145   |
| >TET2-E350K EEFCSGSSNI | 443   | >TET2-E350K KEFCSGSSNI | 353  | 90    |
| >TET2-E350K EEFCSGSSNI | 74    | >TET2-E350K KEFCSGSSNI | 174  | 100   |
| >TET2-E350K EEFCSGSS   | 416   | >TET2-E350K KEFCSGSS   | 1321 | 905   |
| >TET2-E350K EEFCSGSSNI | 4106  | >TET2-E350K KEFCSGSSNI | 408  | 3698  |
| >TET2-E350K EEFCSGSSNI | 254   | >TET2-E350K KEFCSGSSNI | 14   | 240   |
| >TET2-E350K KLASGEEF   | 353   | >TET2-E350K KLASGKEF   | 2582 | 2229  |
| >TET2-E350K KLASGEEFC  | 104   | >TET2-E350K KLASGKEFC  | 123  | 19    |
| >TET2-E350K KLASGEEFC  | 197   | >TET2-E350K KLASGKEFC  | 489  | 292   |
| >TET2-E350K KLASGEEFC  | 376   | >TET2-E350K KLASGKEFC  | 920  | 544   |
| >TET2-E350K KLASGEEFC  | 77    | >TET2-E350K KLASGKEFC  | 82   | 5     |
| >TET2-E350K KLASGEEF   | 197   | >TET2-E350K KLASGKEF   | 615  | 418   |
| >TET2-E350K KLASGEEF   | 111   | >TET2-E350K KLASGKEF   | 153  | 42    |
| >TET2-E350K KLASGEEF   | 565   | >TET2-E350K KLASGKEF   | 379  | 186   |
| >TET2-E350K KLASGEEF   | 27    | >TET2-E350K KLASGKEF   | 23   | 4     |
| >TET2-E350K KLASGEEF   | 756   | >TET2-E350K KLASGKEF   | 462  | 294   |
| >TET2-E350K TKLASGEEF  | 4     | >TET2-E350K TKLASGKEF  | 3    | 1     |
| >TET2-E350K TTKLASGE   | 25164 | >TET2-E350K TTKLASGK   | 104  | 25060 |
| >TET2-E350K TTKLASGE   | 7338  | >TET2-E350K TTKLASGK   | 16   | 7322  |
| >TET2-E350K TTKLASGE   | 10117 | >TET2-E350K TTKLASGK   | 35   | 10082 |
| >TET2-E350K TTKLASGEEF | 266   | >TET2-E350K TTKLASGKEF | 737  | 471   |
| >TET2-E350K TTKLASGEEF | 12    | >TET2-E350K TTKLASGKEF | 8    | 4     |
| >TET2-E350K TTKLASGEEF | 60    | >TET2-E350K TTKLASGKEF | 62   | 2     |
| >TET2-E350K GTTKLASGE  | 21816 | >TET2-E350K GTTKLASGK  | 490  | 21326 |
| >TET2-E350K GTTKLASGE  | 26780 | >TET2-E350K GTTKLASGK  | 51   | 26729 |
| >TET2-E350K GTTKLASGE  | 19204 | >TET2-E350K GTTKLASGK  | 169  | 19035 |
| >TET2-E350K GTTKLASGEE | 15    | >TET2-E350K GTTKLASGKE | 8    | 7     |
| >TET2-E350K GTTKLASGE  | 250   | >TET2-E350K GTTKLASGK  | 209  | 41    |
| >TET2-E350K GTTKLASGEE | 6     | >TET2-E350K GTTKLASGKE | 8    | 2     |
| >TET2-F1287 FGCSWSMY   | 48    | >TET2-F1287 LGCSWSMY   | 183  | 135   |

|                        |       |                        |      |       |
|------------------------|-------|------------------------|------|-------|
| >TET2-F1287 FGCSWSMYY  | 10    | >TET2-F1287 LGCSWSMYY  | 20   | 10    |
| >TET2-F1287 FGCSWSMY   | 186   | >TET2-F1287 LGCSWSMY   | 81   | 105   |
| >TET2-F1287 FGCSWSMYY  | 84    | >TET2-F1287 LGCSWSMYY  | 35   | 49    |
| >TET2-F1287 FGCSWSMYY  | 158   | >TET2-F1287 LGCSWSMYY  | 342  | 184   |
| >TET2-F1287 FGCSWSMY   | 210   | >TET2-F1287 LGCSWSMY   | 179  | 31    |
| >TET2-F1287 FGCSWSMYY  | 136   | >TET2-F1287 LGCSWSMYY  | 118  | 18    |
| >TET2-F1287 FGCSWSMY   | 372   | >TET2-F1287 LGCSWSMY   | 2267 | 1895  |
| >TET2-F1287 FGCSWSMY   | 138   | >TET2-F1287 LGCSWSMY   | 470  | 332   |
| >TET2-F1287 FGCSWSMYY  | 263   | >TET2-F1287 LGCSWSMYY  | 901  | 638   |
| >TET2-F1287 FGCSWSMYY  | 109   | >TET2-F1287 LGCSWSMYY  | 78   | 31    |
| >TET2-F1287 SFGCSWSMY  | 533   | >TET2-F1287 SLGCSWSMY  | 279  | 254   |
| >TET2-F1287 SFGCSWSM   | 17624 | >TET2-F1287 SLGCSWSM   | 225  | 17399 |
| >TET2-F1287 SFGCSWSM   | 8923  | >TET2-F1287 SLGCSWSM   | 228  | 8695  |
| >TET2-F1287 SFGCSWSM   | 10610 | >TET2-F1287 SLGCSWSM   | 30   | 10580 |
| >TET2-F1287 SFGCSWSM   | 12668 | >TET2-F1287 SLGCSWSM   | 40   | 12628 |
| >TET2-F1287 SFGCSWSM   | 14316 | >TET2-F1287 SLGCSWSM   | 86   | 14230 |
| >TET2-F1287 SFGCSWSM   | 17093 | >TET2-F1287 SLGCSWSM   | 356  | 16737 |
| >TET2-F1287 SFGCSWSM   | 21936 | >TET2-F1287 SLGCSWSM   | 63   | 21873 |
| >TET2-F1287 SFGCSWSMY  | 744   | >TET2-F1287 SLGCSWSMY  | 96   | 648   |
| >TET2-F1287 SFGCSWSMY  | 641   | >TET2-F1287 SLGCSWSMY  | 126  | 515   |
| >TET2-F1287 SFGCSWSMY  | 18    | >TET2-F1287 SLGCSWSMY  | 59   | 41    |
| >TET2-F1287 SFGCSWSMY  | 15    | >TET2-F1287 SLGCSWSMY  | 54   | 39    |
| >TET2-F1287 SFGCSWSMY  | 841   | >TET2-F1287 SLGCSWSMY  | 390  | 451   |
| >TET2-F1287 SFGCSWSMY  | 190   | >TET2-F1287 SLGCSWSMY  | 187  | 3     |
| >TET2-F1287 SFGCSWSMY  | 91    | >TET2-F1287 SLGCSWSMY  | 30   | 61    |
| >TET2-F1287 SFGCSWSM   | 4973  | >TET2-F1287 SLGCSWSM   | 211  | 4762  |
| >TET2-F1287 SFGCSWSMY  | 812   | >TET2-F1287 SLGCSWSMY  | 61   | 751   |
| >TET2-F1287 SFGCSWSMY  | 618   | >TET2-F1287 SLGCSWSMY  | 54   | 564   |
| >TET2-F1287 SFGCSWSMY  | 81    | >TET2-F1287 SLGCSWSMY  | 28   | 53    |
| >TET2-F1287 SFGCSWSMY  | 416   | >TET2-F1287 SLGCSWSMY  | 117  | 299   |
| >TET2-F1287 SFGCSWSMY  | 3130  | >TET2-F1287 SLGCSWSMY  | 279  | 2851  |
| >TET2-F1287 SFGCSWSMY  | 3667  | >TET2-F1287 SLGCSWSMY  | 335  | 3332  |
| >TET2-F1287 SFGCSWSMY  | 55    | >TET2-F1287 SLGCSWSMY  | 34   | 21    |
| >TET2-F1287 SFGCSWSMY  | 2710  | >TET2-F1287 SLGCSWSMY  | 312  | 2398  |
| >TET2-F1287 SFGCSWSMY  | 197   | >TET2-F1287 SLGCSWSMY  | 258  | 61    |
| >TET2-F1287 DPETCGASFS | 259   | >TET2-F1287 DPETCGASFS | 304  | 45    |
| >TET2-F1287 DPETCGASFS | 413   | >TET2-F1287 DPETCGASFS | 3482 | 3069  |
| >TET2-F1287 DPETCGASFS | 42    | >TET2-F1287 DPETCGASFS | 345  | 303   |
| >TET2-F1287 DPETCGASFS | 8571  | >TET2-F1287 DPETCGASFS | 438  | 8133  |
| >TET2-F1287 DPETCGASFS | 258   | >TET2-F1287 DPETCGASFS | 648  | 390   |
| >TET2-F1287 DPETCGASFS | 143   | >TET2-F1287 DPETCGASFS | 1734 | 1591  |
| >TET2-F1287 FSGCSWSM   | 74    | >TET2-F1287 FSLGCSWSM  | 139  | 65    |
| >TET2-F1287 FSGCSWSM   | 43    | >TET2-F1287 FSLGCSWSM  | 171  | 128   |

|                      |     |                       |      |      |
|----------------------|-----|-----------------------|------|------|
| >TET2-F1287 FSGCSWSM | 40  | >TET2-F1287 FSLGCSWSM | 69   | 29   |
| >TET2-F1287 FSGCSWSM | 20  | >TET2-F1287 FSLGCSWSM | 194  | 174  |
| >TET2-F1287 FSGCSWSM | 13  | >TET2-F1287 FSLGCSWSM | 14   | 1    |
| >TET2-F1287 FSGCSWSM | 469 | >TET2-F1287 FSLGCSWSM | 777  | 308  |
| >TET2-F1287 FSGCSWSM | 327 | >TET2-F1287 FSLGCSWSM | 345  | 18   |
| >TET2-F1287 FSGCSWSM | 318 | >TET2-F1287 FSLGCSWSM | 1641 | 1323 |
| >TET2-F1287 FSGCSWSM | 42  | >TET2-F1287 FSLGCSWSM | 235  | 193  |
| >TET2-F1287 FSGCSWSM | 112 | >TET2-F1287 FSLGCSWSM | 218  | 106  |
| >TET2-F1287 FSGCSWSM | 103 | >TET2-F1287 FSLGCSWSM | 1143 | 1040 |
| >TET2-F1287 FSGCSWSM | 22  | >TET2-F1287 FSLGCSWSM | 62   | 40   |
| >TET2-F1287 FSGCSWSM | 6   | >TET2-F1287 FSLGCSWSM | 7    | 1    |
| >TET2-F1287 FSGCSWSM | 14  | >TET2-F1287 FSLGCSWSM | 31   | 17   |
| >TET2-F1287 FSGCSWSM | 24  | >TET2-F1287 FSLGCSWSM | 50   | 26   |
| >TET2-F1287 FSGCSWSM | 27  | >TET2-F1287 FSLGCSWSM | 177  | 150  |
| >TET2-F1287 FSGCSWSM | 32  | >TET2-F1287 FSLGCSWSM | 1261 | 1229 |
| >TET2-F1287 FSGCSWSM | 73  | >TET2-F1287 FSLGCSWSM | 1674 | 1601 |
| >TET2-F1287 FSGCSWSM | 567 | >TET2-F1287 FSLGCSWSM | 241  | 326  |
| >TET2-F1287 FSGCSWSM | 82  | >TET2-F1287 FSLGCSWSM | 78   | 4    |
| >TET2-F1287 FSGCSWSM | 158 | >TET2-F1287 FSLGCSWSM | 1371 | 1213 |
| >TET2-F1287 FSGCSWSM | 58  | >TET2-F1287 FSLGCSWSM | 191  | 133  |
| >TET2-F1287 FSGCSWSM | 46  | >TET2-F1287 FSLGCSWSM | 154  | 108  |
| >TET2-F1287 FSGCSWSM | 93  | >TET2-F1287 FSLGCSWSM | 220  | 127  |
| >TET2-F1287 FSGCSWSM | 439 | >TET2-F1287 FSLGCSWSM | 1189 | 750  |
| >TET2-F1287 FSGCSWSM | 44  | >TET2-F1287 FSLGCSWSM | 212  | 168  |
| >TET2-F1287 FSGCSWSM | 10  | >TET2-F1287 FSLGCSWSM | 35   | 25   |
| >TET2-F1287 FSGCSWSM | 10  | >TET2-F1287 FSLGCSWSM | 36   | 26   |
| >TET2-F1287 FSGCSWSM | 5   | >TET2-F1287 FSLGCSWSM | 7    | 2    |
| >TET2-F1287 FSGCSWSM | 3   | >TET2-F1287 FSLGCSWSM | 4    | 1    |
| >TET2-F1287 FSGCSWSM | 4   | >TET2-F1287 FSLGCSWSM | 5    | 1    |
| >TET2-F1287 FSGCSWSM | 37  | >TET2-F1287 FSLGCSWSM | 64   | 27   |
| >TET2-F1287 FSGCSWSM | 42  | >TET2-F1287 FSLGCSWSM | 73   | 31   |
| >TET2-F1287 FSGCSWSM | 38  | >TET2-F1287 FSLGCSWSM | 69   | 31   |
| >TET2-F1287 FSGCSWSM | 472 | >TET2-F1287 FSLGCSWSM | 407  | 65   |
| >TET2-F1287 FSGCSWSM | 113 | >TET2-F1287 FSLGCSWSM | 241  | 128  |
| >TET2-F1287 FSGCSWSM | 225 | >TET2-F1287 FSLGCSWSM | 544  | 319  |
| >TET2-F1287 FSGCSWSM | 106 | >TET2-F1287 FSLGCSWSM | 224  | 118  |
| >TET2-F1287 FSGCSWSM | 38  | >TET2-F1287 FSLGCSWSM | 49   | 11   |
| >TET2-F1287 FSGCSWSM | 279 | >TET2-F1287 FSLGCSWSM | 398  | 119  |
| >TET2-F1287 FSGCSWSM | 20  | >TET2-F1287 FSLGCSWSM | 24   | 4    |
| >TET2-F1287 FSGCSWSM | 101 | >TET2-F1287 FSLGCSWSM | 576  | 475  |
| >TET2-F1287 FSGCSWSM | 23  | >TET2-F1287 FSLGCSWSM | 80   | 57   |
| >TET2-F1287 FSGCSWSM | 50  | >TET2-F1287 FSLGCSWSM | 59   | 9    |
| >TET2-F1287 FSGCSWSM | 7   | >TET2-F1287 FSLGCSWSM | 18   | 11   |

|                        |      |                        |      |      |
|------------------------|------|------------------------|------|------|
| >TET2-F1287 FSFGCSWSM  | 87   | >TET2-F1287 FSLGCSWSM  | 1006 | 919  |
| >TET2-F1287 FSFGCSWSM  | 28   | >TET2-F1287 FSLGCSWSM  | 161  | 133  |
| >TET2-F1287 FSFGCSWSM  | 162  | >TET2-F1287 FSLGCSWSM  | 672  | 510  |
| >TET2-F1287 SFSFGCSWSM | 13   | >TET2-F1287 SFSLGCSWSM | 20   | 7    |
| >TET2-F1287 SFSFGCSWSM | 58   | >TET2-F1287 SFSLGCSWSM | 142  | 84   |
| >TET2-F1287 SFSFGCSWSM | 128  | >TET2-F1287 SFSLGCSWSM | 163  | 35   |
| >TET2-F1287 SFSFGCSWSM | 93   | >TET2-F1287 SFSLGCSWSM | 98   | 5    |
| >TET2-F1287 SFSFGCSWSM | 12   | >TET2-F1287 SFSLGCSWSM | 20   | 8    |
| >TET2-F1287 SFSFGCSWSM | 112  | >TET2-F1287 SFSLGCSWSM | 302  | 190  |
| >TET2-F1287 SFSFGCSWSM | 461  | >TET2-F1287 SFSLGCSWSM | 412  | 49   |
| >TET2-F1287 SFSFGCSW   | 324  | >TET2-F1287 SFSLGCSW   | 554  | 230  |
| >TET2-F1287 ASFSFGCSWS | 204  | >TET2-F1287 ASFSLGCSWS | 942  | 738  |
| >TET2-F1287 ASFSFGCSW  | 51   | >TET2-F1287 ASFSLGCSW  | 103  | 52   |
| >TET2-F1287 ASFSFGCSWS | 135  | >TET2-F1287 ASFSLGCSWS | 206  | 71   |
| >TET2-F1287 ASFSFGCSW  | 256  | >TET2-F1287 ASFSLGCSW  | 193  | 63   |
| >TET2-F1287 ASFSFGCSWS | 125  | >TET2-F1287 ASFSLGCSWS | 110  | 15   |
| >TET2-F1287 ASFSFGCSW  | 29   | >TET2-F1287 ASFSLGCSW  | 92   | 63   |
| >TET2-F1287 ASFSFGCSWS | 12   | >TET2-F1287 ASFSLGCSWS | 21   | 9    |
| >TET2-F1287 ASFSFGCSW  | 4    | >TET2-F1287 ASFSLGCSW  | 4    | 0    |
| >TET2-F1287 ASFSFGCSWS | 6    | >TET2-F1287 ASFSLGCSWS | 6    | 0    |
| >TET2-F1287 ASFSFGCSW  | 34   | >TET2-F1287 ASFSLGCSW  | 50   | 16   |
| >TET2-F1287 ASFSFGCSWS | 235  | >TET2-F1287 ASFSLGCSWS | 562  | 327  |
| >TET2-F1287 ASFSFGCSW  | 14   | >TET2-F1287 ASFSLGCSW  | 14   | 0    |
| >TET2-F1287 ASFSFGCSWS | 298  | >TET2-F1287 ASFSLGCSWS | 240  | 58   |
| >TET2-F1287 ASFSFGCSWS | 211  | >TET2-F1287 ASFSLGCSWS | 338  | 127  |
| >TET2-F1287 ASFSFGCSW  | 84   | >TET2-F1287 ASFSLGCSW  | 94   | 10   |
| >TET2-F1287 ASFSFGCSWS | 16   | >TET2-F1287 ASFSLGCSWS | 17   | 1    |
| >TET2-F1287 ASFSFGCSW  | 336  | >TET2-F1287 ASFSLGCSW  | 1078 | 742  |
| >TET2-F1287 ASFSFGCSW  | 266  | >TET2-F1287 ASFSLGCSW  | 597  | 331  |
| >TET2-F1287 ASFSFGCSWS | 85   | >TET2-F1287 ASFSLGCSWS | 169  | 84   |
| >TET2-F1287 GASFSFGCSM | 86   | >TET2-F1287 GASFSLGCSM | 66   | 20   |
| >TET2-F1287 GASFSFGCSM | 234  | >TET2-F1287 GASFSLGCSM | 303  | 69   |
| >TET2-F1287 GASFSFGCSM | 73   | >TET2-F1287 GASFSLGCSM | 67   | 6    |
| >TET2-F1287 CGASFSFGCS | 347  | >TET2-F1287 CGASFSLGCS | 681  | 334  |
| >TET2-F1287 CGASFSFGCS | 38   | >TET2-F1287 CGASFSLGCS | 42   | 4    |
| >TET2-F1287 CGASFSFGCS | 205  | >TET2-F1287 CGASFSLGCS | 432  | 227  |
| >TET2-F1287 ETCGASFSF  | 267  | >TET2-F1287 ETCGASFSL  | 1152 | 885  |
| >TET2-F1287 ETCGASFSF  | 127  | >TET2-F1287 ETCGASFSL  | 1008 | 881  |
| >TET2-F1287 ETCGASFSF  | 18   | >TET2-F1287 ETCGASFSL  | 85   | 67   |
| >TET2-F1287 ETCGASFSF  | 49   | >TET2-F1287 ETCGASFSL  | 116  | 67   |
| >TET2-F1287 ETCGASFSF  | 49   | >TET2-F1287 ETCGASFSL  | 266  | 217  |
| >TET2-F1287 ETCGASFSF  | 1518 | >TET2-F1287 ETCGASFSL  | 11   | 1507 |
| >TET2-F1287 ETCGASFSFG | 359  | >TET2-F1287 ETCGASFLG  | 1964 | 1605 |



|                        |       |                        |      |       |
|------------------------|-------|------------------------|------|-------|
| >TET2-F1287 ETCGASFSF  | 3991  | >TET2-F1287 ETCGASFSL  | 21   | 3970  |
| >TET2-F1287 ETCGASFSF  | 268   | >TET2-F1287 ETCGASFSL  | 6056 | 5788  |
| >TET2-F1287 ETCGASFSF  | 8     | >TET2-F1287 ETCGASFSL  | 35   | 27    |
| >TET2-F1287 ETCGASFSF  | 281   | >TET2-F1287 ETCGASFSL  | 4627 | 4346  |
| >TET2-F1287 PETCGASFSF | 1168  | >TET2-F1287 PETCGASFSL | 351  | 817   |
| >TET2-F1368 FSGVTACLDF | 485   | >TET2-F1368 LSGVTACLDF | 365  | 120   |
| >TET2-F1368 FSGVTACLDF | 94    | >TET2-F1368 LSGVTACLDF | 195  | 101   |
| >TET2-F1368 FSGVTACLDF | 27    | >TET2-F1368 LSGVTACLDF | 24   | 3     |
| >TET2-F1368 FSGVTACLDF | 402   | >TET2-F1368 LSGVTACLDF | 222  | 180   |
| >TET2-F1368 FSGVTACL   | 74    | >TET2-F1368 LSGVTACL   | 203  | 129   |
| >TET2-F1368 FSGVTACLDF | 354   | >TET2-F1368 LSGVTACLDF | 177  | 177   |
| >TET2-F1368 PFSGVTACL  | 3126  | >TET2-F1368 PLSGVTACL  | 32   | 3094  |
| >TET2-F1368 PFSGVTACL  | 21023 | >TET2-F1368 PLSGVTACL  | 289  | 20734 |
| >TET2-F1368 PFSGVTACL  | 18314 | >TET2-F1368 PLSGVTACL  | 113  | 18201 |
| >TET2-F1368 PFSGVTACL  | 15339 | >TET2-F1368 PLSGVTACL  | 21   | 15318 |
| >TET2-F1368 PFSGVTAC   | 31300 | >TET2-F1368 PLSGVTAC   | 488  | 30812 |
| >TET2-F1368 PFSGVTACL  | 20412 | >TET2-F1368 PLSGVTACL  | 29   | 20383 |
| >TET2-F1368 PFSGVTACLD | 274   | >TET2-F1368 PLSGVTACLD | 5056 | 4782  |
| >TET2-F1368 PFSGVTACLD | 206   | >TET2-F1368 PLSGVTACLD | 9213 | 9007  |
| >TET2-F1368 PFSGVTACLD | 390   | >TET2-F1368 PLSGVTACLD | 1434 | 1044  |
| >TET2-F1368 CRLGLKEGRP | 174   | >TET2-F1368 CRLGLKEGRP | 1768 | 1594  |
| >TET2-F1368 CRLGLKEGRP | 158   | >TET2-F1368 CRLGLKEGRP | 135  | 23    |
| >TET2-F1368 CRLGLKEGRP | 1217  | >TET2-F1368 CRLGLKEGRP | 352  | 865   |
| >TET2-F1368 RPFSGVTACL | 57    | >TET2-F1368 RPLSGVTACL | 192  | 135   |
| >TET2-F1368 RPFSGVTA   | 124   | >TET2-F1368 RPLSGVTA   | 95   | 29    |
| >TET2-F1368 RPFSGVTAC  | 138   | >TET2-F1368 RPLSGVTAC  | 110  | 28    |
| >TET2-F1368 RPFSGVTACL | 57    | >TET2-F1368 RPLSGVTACL | 50   | 7     |
| >TET2-F1368 RPFSGVTACL | 242   | >TET2-F1368 RPLSGVTACL | 1149 | 907   |
| >TET2-F1368 RPFSGVTACL | 35    | >TET2-F1368 RPLSGVTACL | 58   | 23    |
| >TET2-F1368 RPFSGVTA   | 181   | >TET2-F1368 RPLSGVTA   | 236  | 55    |
| >TET2-F1368 GRPFSGVTAC | 46    | >TET2-F1368 GRPLSGVTAC | 65   | 19    |
| >TET2-F1368 KEGRPFSGV  | 89    | >TET2-F1368 KEGRPLSGV  | 463  | 374   |
| >TET2-F1368 KEGRPFSGVT | 28    | >TET2-F1368 KEGRPLSGVT | 52   | 24    |
| >TET2-F1368 KEGRPFSGV  | 37    | >TET2-F1368 KEGRPLSGV  | 21   | 16    |
| >TET2-F1368 GLKEGRPFSG | 212   | >TET2-F1368 GLKEGRPLSG | 195  | 17    |
| >TET2-F1368 GLKEGRPF   | 5440  | >TET2-F1368 GLKEGRPL   | 51   | 5389  |
| >TET2-F1368 GLKEGRPFSG | 5     | >TET2-F1368 GLKEGRPLSG | 4    | 1     |
| >TET2-F1368 GLKEGRPFSG | 113   | >TET2-F1368 GLKEGRPLSG | 185  | 72    |
| >TET2-F1368 GLKEGRPFSG | 15    | >TET2-F1368 GLKEGRPLSG | 16   | 1     |
| >TET2-F1368 GLKEGRPF   | 13857 | >TET2-F1368 GLKEGRPL   | 347  | 13510 |
| >TET2-F1368 GLKEGRPFSG | 21    | >TET2-F1368 GLKEGRPLSG | 20   | 1     |
| >TET2-F1368 GLKEGRPFSG | 27    | >TET2-F1368 GLKEGRPLSG | 27   | 0     |
| >TET2-F1368 GLKEGRPF   | 8905  | >TET2-F1368 GLKEGRPL   | 41   | 8864  |

|                        |       |                        |      |       |
|------------------------|-------|------------------------|------|-------|
| >TET2-F1368 GLKEGRPFSG | 2     | >TET2-F1368 GLKEGRPLSG | 2    | 0     |
| >TET2-F1368 GLKEGRPF   | 63    | >TET2-F1368 GLKEGRPL   | 992  | 929   |
| >TET2-F1368 GLKEGRPF   | 132   | >TET2-F1368 GLKEGRPL   | 2004 | 1872  |
| >TET2-F1368 GLKEGRPF   | 235   | >TET2-F1368 GLKEGRPL   | 5954 | 5719  |
| >TET2-F1368 LGLKEGRPF  | 121   | >TET2-F1368 LGLKEGRPL  | 3402 | 3281  |
| >TET2-F1368 RLGLKEGRPF | 234   | >TET2-F1368 RLGLKEGRPL | 3263 | 3029  |
| >TET2-F1368 FSGVTACLDF | 485   | >TET2-F1368 YSGVTACLDF | 260  | 225   |
| >TET2-F1368 FSGVTACLDF | 94    | >TET2-F1368 YSGVTACLDF | 67   | 27    |
| >TET2-F1368 FSGVTACL   | 731   | >TET2-F1368 YSGVTACL   | 217  | 514   |
| >TET2-F1368 FSGVTACLDF | 27    | >TET2-F1368 YSGVTACLDF | 13   | 14    |
| >TET2-F1368 FSGVTACLDF | 402   | >TET2-F1368 YSGVTACLDF | 431  | 29    |
| >TET2-F1368 FSGVTACL   | 74    | >TET2-F1368 YSGVTACL   | 50   | 24    |
| >TET2-F1368 FSGVTACLDF | 354   | >TET2-F1368 YSGVTACLDF | 152  | 202   |
| >TET2-F1368 PFSGVTACLD | 274   | >TET2-F1368 PYSGVTACLD | 105  | 169   |
| >TET2-F1368 PFSGVTACLD | 1300  | >TET2-F1368 PYSGVTACLD | 238  | 1062  |
| >TET2-F1368 PFSGVTACL  | 2513  | >TET2-F1368 PYSGVTACL  | 231  | 2282  |
| >TET2-F1368 PFSGVTACLD | 206   | >TET2-F1368 PYSGVTACLD | 26   | 180   |
| >TET2-F1368 PFSGVTACLD | 390   | >TET2-F1368 PYSGVTACLD | 935  | 545   |
| >TET2-F1368 CRLGLKEGRP | 174   | >TET2-F1368 CRLGLKEGRP | 565  | 391   |
| >TET2-F1368 CRLGLKEGRP | 158   | >TET2-F1368 CRLGLKEGRP | 195  | 37    |
| >TET2-F1368 RPFSGVTACL | 57    | >TET2-F1368 RPYSGVTACL | 99   | 42    |
| >TET2-F1368 RPFSGVTA   | 124   | >TET2-F1368 RPYSGVTA   | 34   | 90    |
| >TET2-F1368 RPFSGVTAC  | 138   | >TET2-F1368 RPYSGVTAC  | 45   | 93    |
| >TET2-F1368 RPFSGVTACL | 57    | >TET2-F1368 RPYSGVTACL | 33   | 24    |
| >TET2-F1368 RPFSGVTACL | 242   | >TET2-F1368 RPYSGVTACL | 333  | 91    |
| >TET2-F1368 RPFSGVTAC  | 944   | >TET2-F1368 RPYSGVTAC  | 489  | 455   |
| >TET2-F1368 RPFSGVTACL | 35    | >TET2-F1368 RPYSGVTACL | 45   | 10    |
| >TET2-F1368 RPFSGVTA   | 181   | >TET2-F1368 RPYSGVTA   | 69   | 112   |
| >TET2-F1368 RPFSGVTACL | 640   | >TET2-F1368 RPYSGVTACL | 389  | 251   |
| >TET2-F1368 GRPFSGVTAC | 46    | >TET2-F1368 GRPYSGVTAC | 89   | 43    |
| >TET2-F1368 KEGRPFSGV  | 89    | >TET2-F1368 KEGRPYSGV  | 150  | 61    |
| >TET2-F1368 KEGRPFSGVT | 28    | >TET2-F1368 KEGRPYSGVT | 32   | 4     |
| >TET2-F1368 KEGRPFSGV  | 37    | >TET2-F1368 KEGRPYSGV  | 171  | 134   |
| >TET2-F1368 GLKEGRPFSG | 212   | >TET2-F1368 GLKEGRPYSG | 247  | 35    |
| >TET2-F1368 GLKEGRPFSG | 5     | >TET2-F1368 GLKEGRPYSG | 5    | 0     |
| >TET2-F1368 GLKEGRPFSG | 113   | >TET2-F1368 GLKEGRPYSG | 343  | 230   |
| >TET2-F1368 GLKEGRPFSG | 15    | >TET2-F1368 GLKEGRPYSG | 13   | 2     |
| >TET2-F1368 GLKEGRPFSG | 21    | >TET2-F1368 GLKEGRPYSG | 24   | 3     |
| >TET2-F1368 GLKEGRPFSG | 27    | >TET2-F1368 GLKEGRPYSG | 27   | 0     |
| >TET2-F1368 GLKEGRPFS  | 834   | >TET2-F1368 GLKEGRPYS  | 448  | 386   |
| >TET2-F1368 GLKEGRPFSG | 2     | >TET2-F1368 GLKEGRPYSG | 2    | 0     |
| >TET2-F1368 GLKEGRPF   | 14232 | >TET2-F1368 GLKEGRPY   | 411  | 13821 |
| >TET2-F1368 GLKEGRPF   | 63    | >TET2-F1368 GLKEGRPY   | 65   | 2     |

|                        |       |                        |      |       |
|------------------------|-------|------------------------|------|-------|
| >TET2-F1368 GLKEGRPF   | 132   | >TET2-F1368 GLKEGRPY   | 69   | 63    |
| >TET2-F1368 GLKEGRPF   | 235   | >TET2-F1368 GLKEGRPY   | 1466 | 1231  |
| >TET2-F1368 LGLKEGRPF  | 649   | >TET2-F1368 LGLKEGRPY  | 482  | 167   |
| >TET2-F1368 LGLKEGRPF  | 121   | >TET2-F1368 LGLKEGRPY  | 530  | 409   |
| >TET2-F1368 LGLKEGRPF  | 975   | >TET2-F1368 LGLKEGRPY  | 305  | 670   |
| >TET2-F1368 RLGLKEGRPF | 5769  | >TET2-F1368 RLGLKEGRPY | 375  | 5394  |
| >TET2-F1368 RLGLKEGRPF | 14018 | >TET2-F1368 RLGLKEGRPY | 127  | 13891 |
| >TET2-F1368 RLGLKEGRPF | 234   | >TET2-F1368 RLGLKEGRPY | 216  | 18    |
| >TET2-F868L FPNNVIPKQD | 42    | >TET2-F868L LPNNVIPKQD | 44   | 2     |
| >TET2-F868L FPNNVIPKQD | 341   | >TET2-F868L LPNNVIPKQD | 492  | 151   |
| >TET2-F868L FPNNVIPK   | 305   | >TET2-F868L LPNNVIPK   | 865  | 560   |
| >TET2-F868L FPNNVIPKQD | 398   | >TET2-F868L LPNNVIPKQD | 1011 | 613   |
| >TET2-F868L FPNNVIPKQD | 133   | >TET2-F868L LPNNVIPKQD | 291  | 158   |
| >TET2-F868L FPNNVIPK   | 34    | >TET2-F868L LPNNVIPK   | 211  | 177   |
| >TET2-F868L FPNNVIPKQ  | 90    | >TET2-F868L LPNNVIPKQ  | 700  | 610   |
| >TET2-F868L FPNNVIPKQD | 169   | >TET2-F868L LPNNVIPKQD | 1640 | 1471  |
| >TET2-F868L FPNNVIPKQD | 497   | >TET2-F868L LPNNVIPKQD | 1351 | 854   |
| >TET2-F868L YFPNNVIPK  | 16149 | >TET2-F868L YLPNNVIPK  | 146  | 16003 |
| >TET2-F868L YFPNNVIPKQ | 9401  | >TET2-F868L YLPNNVIPKQ | 47   | 9354  |
| >TET2-F868L YFPNNVIPKQ | 11824 | >TET2-F868L YLPNNVIPKQ | 67   | 11757 |
| >TET2-F868L YFPNNVIPK  | 25416 | >TET2-F868L YLPNNVIPK  | 72   | 25344 |
| >TET2-F868L YFPNNVIPKQ | 13113 | >TET2-F868L YLPNNVIPKQ | 6    | 13107 |
| >TET2-F868L YFPNNVIPK  | 10083 | >TET2-F868L YLPNNVIPK  | 283  | 9800  |
| >TET2-F868L YFPNNVIPK  | 3606  | >TET2-F868L YLPNNVIPK  | 400  | 3206  |
| >TET2-F868L YFPNNVIPK  | 225   | >TET2-F868L YLPNNVIPK  | 942  | 717   |
| >TET2-F868L KTQNLHHMC  | 10814 | >TET2-F868L KTQNLHHMC  | 355  | 10459 |
| >TET2-F868L KTQNLHHMC  | 183   | >TET2-F868L KTQNLHHMC  | 2542 | 2359  |
| >TET2-F868L KTQNLHHMC  | 249   | >TET2-F868L KTQNLHHMC  | 1477 | 1228  |
| >TET2-F868L KTQNLHHMC  | 1152  | >TET2-F868L KTQNLHHMC  | 79   | 1073  |
| >TET2-F868L KTQNLHHMC  | 233   | >TET2-F868L KTQNLHHMC  | 176  | 57    |
| >TET2-F868L KTQNLHHMC  | 41    | >TET2-F868L KTQNLHHMC  | 142  | 101   |
| >TET2-F868L KTQNLHHMC  | 235   | >TET2-F868L KTQNLHHMC  | 6444 | 6209  |
| >TET2-F868L KTQNLHHMC  | 116   | >TET2-F868L KTQNLHHMC  | 2523 | 2407  |
| >TET2-F868L KTQNLHHMC  | 5     | >TET2-F868L KTQNLHHMC  | 11   | 6     |
| >TET2-F868L KTQNLHHMC  | 106   | >TET2-F868L KTQNLHHMC  | 992  | 886   |
| >TET2-F868L KTQNLHHMC  | 34    | >TET2-F868L KTQNLHHMC  | 307  | 273   |
| >TET2-F868L KTQNLHHMC  | 170   | >TET2-F868L KTQNLHHMC  | 99   | 71    |
| >TET2-F868L KTQNLHHMC  | 12    | >TET2-F868L KTQNLHHMC  | 57   | 45    |
| >TET2-F868L QYFPNNVI   | 9     | >TET2-F868L QYLPNNVI   | 8    | 1     |
| >TET2-F868L QYFPNNVI   | 111   | >TET2-F868L QYLPNNVI   | 114  | 3     |
| >TET2-F868L QYFPNNVI   | 386   | >TET2-F868L QYLPNNVI   | 233  | 153   |
| >TET2-F868L QYFPNNVI   | 9     | >TET2-F868L QYLPNNVI   | 8    | 1     |
| >TET2-F868L QYFPNNVIPK | 13    | >TET2-F868L QYLPNNVIPK | 20   | 7     |

|                         |     |                         |      |      |
|-------------------------|-----|-------------------------|------|------|
| >TET2-F868L: QYFPNNVI   | 392 | >TET2-F868L: QYLPNNVI   | 2344 | 1952 |
| >TET2-F868L: QYFPNNVIPK | 212 | >TET2-F868L: QYLPNNVIPK | 530  | 318  |
| >TET2-F868L: QYFPNNVIPK | 28  | >TET2-F868L: QYLPNNVIPK | 37   | 9    |
| >TET2-F868L: QYFPNNVI   | 316 | >TET2-F868L: QYLPNNVI   | 428  | 112  |
| >TET2-F868L: MQYFPNNV   | 54  | >TET2-F868L: MQYLPNNV   | 119  | 65   |
| >TET2-F868L: MQYFPNNV   | 34  | >TET2-F868L: MQYLPNNV   | 72   | 38   |
| >TET2-F868L: MQYFPNNV   | 14  | >TET2-F868L: MQYLPNNV   | 27   | 13   |
| >TET2-F868L: MQYFPNNVI  | 352 | >TET2-F868L: MQYLPNNVI  | 1058 | 706  |
| >TET2-F868L: MQYFPNNV   | 14  | >TET2-F868L: MQYLPNNV   | 16   | 2    |
| >TET2-F868L: MQYFPNNVI  | 88  | >TET2-F868L: MQYLPNNVI  | 89   | 1    |
| >TET2-F868L: MQYFPNNV   | 19  | >TET2-F868L: MQYLPNNV   | 43   | 24   |
| >TET2-F868L: MQYFPNNV   | 204 | >TET2-F868L: MQYLPNNV   | 328  | 124  |
| >TET2-F868L: MQYFPNNV   | 265 | >TET2-F868L: MQYLPNNV   | 311  | 46   |
| >TET2-F868L: MQYFPNNVII | 41  | >TET2-F868L: MQYLPNNVII | 55   | 14   |
| >TET2-F868L: MQYFPNNVII | 10  | >TET2-F868L: MQYLPNNVII | 15   | 5    |
| >TET2-F868L: MQYFPNNVII | 49  | >TET2-F868L: MQYLPNNVII | 84   | 35   |
| >TET2-F868L: MQYFPNNVII | 117 | >TET2-F868L: MQYLPNNVII | 181  | 64   |
| >TET2-F868L: MQYFPNNVI  | 205 | >TET2-F868L: MQYLPNNVI  | 711  | 506  |
| >TET2-F868L: MQYFPNNVII | 138 | >TET2-F868L: MQYLPNNVII | 403  | 265  |
| >TET2-F868L: MQYFPNNV   | 87  | >TET2-F868L: MQYLPNNV   | 399  | 312  |
| >TET2-F868L: MQYFPNNV   | 451 | >TET2-F868L: MQYLPNNV   | 1301 | 850  |
| >TET2-F868L: MQYFPNNVI  | 139 | >TET2-F868L: MQYLPNNVI  | 355  | 216  |
| >TET2-F868L: MQYFPNNV   | 13  | >TET2-F868L: MQYLPNNV   | 21   | 8    |
| >TET2-F868L: MQYFPNNVI  | 9   | >TET2-F868L: MQYLPNNVI  | 11   | 2    |
| >TET2-F868L: MQYFPNNVII | 123 | >TET2-F868L: MQYLPNNVII | 192  | 69   |
| >TET2-F868L: MQYFPNNVII | 26  | >TET2-F868L: MQYLPNNVII | 37   | 11   |
| >TET2-F868L: MQYFPNNVI  | 221 | >TET2-F868L: MQYLPNNVI  | 139  | 82   |
| >TET2-F868L: MQYFPNNVI  | 270 | >TET2-F868L: MQYLPNNVI  | 426  | 156  |
| >TET2-F868L: MQYFPNNVI  | 224 | >TET2-F868L: MQYLPNNVI  | 301  | 77   |
| >TET2-F868L: HMQYFPNN\  | 66  | >TET2-F868L: HMQYLPNN\  | 164  | 98   |
| >TET2-F868L: HMQYFPNN\  | 23  | >TET2-F868L: HMQYLPNN\  | 45   | 22   |
| >TET2-F868L: HMQYFPNN\  | 226 | >TET2-F868L: HMQYLPNN\  | 537  | 311  |
| >TET2-F868L: HMQYFPNN\  | 17  | >TET2-F868L: HMQYLPNN\  | 27   | 10   |
| >TET2-F868L: HMQYFPNN\  | 20  | >TET2-F868L: HMQYLPNN\  | 54   | 34   |
| >TET2-F868L: HMQYFPNN\  | 7   | >TET2-F868L: HMQYLPNN\  | 9    | 2    |
| >TET2-F868L: HMQYFPNN\  | 79  | >TET2-F868L: HMQYLPNN\  | 112  | 33   |
| >TET2-F868L: HMQYFPNN\  | 176 | >TET2-F868L: HMQYLPNN\  | 121  | 55   |
| >TET2-F868L: HMQYFPNN\  | 162 | >TET2-F868L: HMQYLPNN\  | 272  | 110  |
| >TET2-F868L: HMQYFPNN\  | 21  | >TET2-F868L: HMQYLPNN\  | 43   | 22   |
| >TET2-F868L: HMQYFPNN\  | 58  | >TET2-F868L: HMQYLPNN\  | 103  | 45   |
| >TET2-F868L: HMQYFPNN\  | 151 | >TET2-F868L: HMQYLPNN\  | 673  | 522  |
| >TET2-F868L: HMQYFPNN\  | 123 | >TET2-F868L: HMQYLPNN\  | 342  | 219  |
| >TET2-F868L: HHMQYFPNN  | 383 | >TET2-F868L: HHMQYLPNN  | 1081 | 698  |

|                        |       |                        |      |       |
|------------------------|-------|------------------------|------|-------|
| >TET2-F868L HHMQYFPNN  | 345   | >TET2-F868L HHMQYLPNN  | 645  | 300   |
| >TET2-F868L HHMQYFPNN  | 321   | >TET2-F868L HHMQYLPNN  | 343  | 22    |
| >TET2-F868L HHMQYFPNN  | 145   | >TET2-F868L HHMQYLPNN  | 158  | 13    |
| >TET2-F868L HHMQYFPNN  | 52    | >TET2-F868L HHMQYLPNN  | 75   | 23    |
| >TET2-F868L HHMQYFPNN  | 16    | >TET2-F868L HHMQYLPNN  | 19   | 3     |
| >TET2-F868L HHMQYFPNN  | 537   | >TET2-F868L HHMQYLPNN  | 409  | 128   |
| >TET2-F868L NLHHMQYF   | 16293 | >TET2-F868L NLHHMQYL   | 324  | 15969 |
| >TET2-F868L NLHHMQYF   | 2223  | >TET2-F868L NLHHMQYL   | 21   | 2202  |
| >TET2-F868L NLHHMQYF   | 4630  | >TET2-F868L NLHHMQYL   | 62   | 4568  |
| >TET2-F868L NLHHMQYF   | 4366  | >TET2-F868L NLHHMQYL   | 50   | 4316  |
| >TET2-F868L NLHHMQYF   | 9274  | >TET2-F868L NLHHMQYL   | 76   | 9198  |
| >TET2-F868L NLHHMQYF   | 9279  | >TET2-F868L NLHHMQYL   | 26   | 9253  |
| >TET2-F868L NLHHMQYF   | 350   | >TET2-F868L NLHHMQYL   | 6964 | 6614  |
| >TET2-F868L NLHHMQYF   | 383   | >TET2-F868L NLHHMQYL   | 6105 | 5722  |
| >TET2-F868L NLHHMQYF   | 193   | >TET2-F868L NLHHMQYL   | 4959 | 4766  |
| >TET2-F868L QNLHHMQYF  | 368   | >TET2-F868L QNLHHMQYL  | 168  | 200   |
| >TET2-F868L QNLHHMQYF  | 290   | >TET2-F868L QNLHHMQYL  | 1732 | 1442  |
| >TET2-F868L QNLHHMQYF  | 47    | >TET2-F868L QNLHHMQYL  | 2045 | 1998  |
| >TET2-F868L TQNLHHMQY  | 73    | >TET2-F868L TQNLHHMQYL | 1316 | 1243  |
| >TET2-F868L TQNLHHMQY  | 16    | >TET2-F868L TQNLHHMQYL | 376  | 360   |
| >TET2-G125€GTLTNRRCAL  | 272   | >TET2-G125€DTLTNRRCAL  | 4125 | 3853  |
| >TET2-G125€YGTLTNRR    | 359   | >TET2-G125€YDTLTNRR    | 1075 | 716   |
| >TET2-G125€KYGTLTNR    | 16    | >TET2-G125€KYDTLTNR    | 38   | 22    |
| >TET2-G125€KYGTLTNRR   | 30    | >TET2-G125€KYDTLTNRR   | 106  | 76    |
| >TET2-G125€KYGTLTNR    | 10    | >TET2-G125€KYDTLTNR    | 16   | 6     |
| >TET2-G125€KYGTLTNRR   | 9     | >TET2-G125€KYDTLTNRR   | 13   | 4     |
| >TET2-G125€RKYGTLTNR   | 368   | >TET2-G125€RKYDTLTNR   | 250  | 118   |
| >TET2-G125€RKYGTLTNRR  | 79    | >TET2-G125€RKYDTLTNRR  | 139  | 60    |
| >TET2-G125€RKYGTLTN    | 911   | >TET2-G125€RKYDTLTN    | 480  | 431   |
| >TET2-G125€RKYGTLTNR   | 38    | >TET2-G125€RKYDTLTNR   | 19   | 19    |
| >TET2-G125€RKYGTLTNRR  | 190   | >TET2-G125€RKYDTLTNRR  | 99   | 91    |
| >TET2-G125€RKYGTLTNR   | 243   | >TET2-G125€RKYDTLTNR   | 701  | 458   |
| >TET2-G125€RKYGTLTNRR  | 345   | >TET2-G125€RKYDTLTNRR  | 381  | 36    |
| >TET2-G125€RKYGTLTNR   | 133   | >TET2-G125€RKYDTLTNR   | 101  | 32    |
| >TET2-G125€RKYGTLTNRR  | 87    | >TET2-G125€RKYDTLTNRR  | 74   | 13    |
| >TET2-G125€LRKYGTLTNR  | 198   | >TET2-G125€LRKYDTLTNR  | 184  | 14    |
| >TET2-G125€TLRKYGTL    | 1003  | >TET2-G125€TLRKYDTL    | 414  | 589   |
| >TET2-G125€TLRKYGTL    | 154   | >TET2-G125€TLRKYDTL    | 535  | 381   |
| >TET2-G125€TLRKYGTL    | 79    | >TET2-G125€TLRKYDTL    | 68   | 11    |
| >TET2-G125€TLRKYGTLTNI | 417   | >TET2-G125€TLRKYDTLTNI | 1149 | 732   |
| >TET2-G125€TLRKYGTLTNI | 26    | >TET2-G125€TLRKYDTLTNI | 27   | 1     |
| >TET2-G125€TLRKYGTLTNI | 148   | >TET2-G125€TLRKYDTLTNI | 130  | 18    |
| >TET2-G125€TLRKYGTLTNI | 581   | >TET2-G125€TLRKYDTLTNI | 305  | 276   |

|                        |       |                        |      |       |
|------------------------|-------|------------------------|------|-------|
| >TET2-G125€TLRKYGTL    | 137   | >TET2-G125€TLRKYDTL    | 155  | 18    |
| >TET2-G125€TLRKYGTLTN  | 814   | >TET2-G125€TLRKYDTLTN  | 460  | 354   |
| >TET2-G125€ETLRKYGTL   | 405   | >TET2-G125€ETLRKYDTL   | 869  | 464   |
| >TET2-G125€ETLRKYGTL   | 84    | >TET2-G125€ETLRKYDTL   | 80   | 4     |
| >TET2-G125€ETLRKYGTL   | 147   | >TET2-G125€ETLRKYDTL   | 298  | 151   |
| >TET2-G125€ETLRKYGTL   | 530   | >TET2-G125€ETLRKYDTL   | 384  | 146   |
| >TET2-G125€ETLRKYGT    | 416   | >TET2-G125€ETLRKYDT    | 3751 | 3335  |
| >TET2-G125€ETLRKYGTL   | 72    | >TET2-G125€ETLRKYDTL   | 114  | 42    |
| >TET2-G125€ETLRKYGTL   | 453   | >TET2-G125€ETLRKYDTL   | 950  | 497   |
| >TET2-G125€ETLRKYGTL   | 358   | >TET2-G125€ETLRKYDTL   | 1478 | 1120  |
| >TET2-G125€TETLRKYGTL  | 74    | >TET2-G125€TETLRKYDTL  | 76   | 2     |
| >TET2-G125€TETLRKYGTL  | 102   | >TET2-G125€TETLRKYDTL  | 127  | 25    |
| >TET2-G125€LTETLRKYGTL | 304   | >TET2-G125€LTETLRKYDTL | 709  | 405   |
| >TET2-G125€LTETLRKYGTL | 539   | >TET2-G125€LTETLRKYDTL | 408  | 131   |
| >TET2-G125€LTETLRKYGTL | 86    | >TET2-G125€LTETLRKYDTL | 139  | 53    |
| >TET2-G127€GLDPETCGA   | 219   | >TET2-G127€ELDPETCGA   | 2661 | 2442  |
| >TET2-G127€GLDPETCGA   | 432   | >TET2-G127€ELDPETCGA   | 5672 | 5240  |
| >TET2-G127€GLDPETCGA   | 206   | >TET2-G127€ELDPETCGA   | 2170 | 1964  |
| >TET2-G127€GLDPETCGA   | 20    | >TET2-G127€ELDPETCGA   | 125  | 105   |
| >TET2-G127€GLDPETCGA   | 14    | >TET2-G127€ELDPETCGA   | 353  | 339   |
| >TET2-G127€GLDPETCGA   | 12    | >TET2-G127€ELDPETCGA   | 101  | 89    |
| >TET2-G127€GLDPETCGA   | 103   | >TET2-G127€ELDPETCGA   | 44   | 59    |
| >TET2-G127€GLDPETCGA   | 8     | >TET2-G127€ELDPETCGA   | 26   | 18    |
| >TET2-G127€GLDPETCGA   | 10922 | >TET2-G127€ELDPETCGA   | 256  | 10666 |
| >TET2-G127€RTCACQGL    | 920   | >TET2-G127€RTCACQEL    | 443  | 477   |
| >TET2-G127€RTCACQGL    | 7     | >TET2-G127€RTCACQEL    | 9    | 2     |
| >TET2-G127€RTCACQGL    | 253   | >TET2-G127€RTCACQEL    | 118  | 135   |
| >TET2-G127€RTCACQGL    | 116   | >TET2-G127€RTCACQEL    | 154  | 38    |
| >TET2-G127€EERTCACQGL  | 285   | >TET2-G127€EERTCACQEL  | 175  | 110   |
| >TET2-G127€EERTCACQGL  | 653   | >TET2-G127€EERTCACQEL  | 391  | 262   |
| >TET2-G127€EERTCACQGL  | 97    | >TET2-G127€EERTCACQEL  | 217  | 120   |
| >TET2-G127€NEERTCACQGL | 50    | >TET2-G127€NEERTCACQEL | 34   | 16    |
| >TET2-G127€NEERTCACQGL | 359   | >TET2-G127€NEERTCACQEL | 422  | 63    |
| >TET2-G127€GLDPETCGA   | 568   | >TET2-G127€RLDPETCGA   | 434  | 134   |
| >TET2-G127€GLDPETCGA   | 219   | >TET2-G127€RLDPETCGA   | 279  | 60    |
| >TET2-G127€GLDPETCGA   | 432   | >TET2-G127€RLDPETCGA   | 273  | 159   |
| >TET2-G127€GLDPETCGA   | 206   | >TET2-G127€RLDPETCGA   | 70   | 136   |
| >TET2-G127€GLDPETCGA   | 20    | >TET2-G127€RLDPETCGA   | 12   | 8     |
| >TET2-G127€GLDPETCGA   | 14    | >TET2-G127€RLDPETCGA   | 20   | 6     |
| >TET2-G127€GLDPETCGA   | 12    | >TET2-G127€RLDPETCGA   | 20   | 8     |
| >TET2-G127€GLDPETCGA   | 103   | >TET2-G127€RLDPETCGA   | 42   | 61    |
| >TET2-G127€GLDPETCGA   | 8     | >TET2-G127€RLDPETCGA   | 9    | 1     |
| >TET2-G127€GLDPETCGAS  | 4643  | >TET2-G127€RLDPETCGAS  | 245  | 4398  |

|                        |       |                        |      |       |
|------------------------|-------|------------------------|------|-------|
| >TET2-G1275GLDPETCGAS  | 811   | >TET2-G1275RLDPETCGAS  | 190  | 621   |
| >TET2-G1275GLDPETCGAS  | 2081  | >TET2-G1275RLDPETCGAS  | 237  | 1844  |
| >TET2-G1275GLDPETCGAS  | 1425  | >TET2-G1275RLDPETCGAS  | 46   | 1379  |
| >TET2-G1275RTCACQGL    | 7     | >TET2-G1275RTCACQRL    | 6    | 1     |
| >TET2-G1275RTCACQGL    | 253   | >TET2-G1275RTCACQRL    | 122  | 131   |
| >TET2-G1275RTCACQGL    | 116   | >TET2-G1275RTCACQRL    | 131  | 15    |
| >TET2-G1275ERTCACQG    | 39554 | >TET2-G1275ERTCACQR    | 364  | 39190 |
| >TET2-G1275EERTCACQGL  | 285   | >TET2-G1275EERTCACQRL  | 744  | 459   |
| >TET2-G1275EERTCACQGL  | 97    | >TET2-G1275EERTCACQRL  | 227  | 130   |
| >TET2-G1275EERTCACQG   | 34040 | >TET2-G1275EERTCACQR   | 210  | 33830 |
| >TET2-G1275NEERTCACQGL | 50    | >TET2-G1275NEERTCACQRL | 131  | 81    |
| >TET2-G1275NEERTCACQG  | 359   | >TET2-G1275NEERTCACQR  | 840  | 481   |
| >TET2-G1282GASFSFGCSM  | 86    | >TET2-G1282DASFSFGCSM  | 1644 | 1558  |
| >TET2-G1282GASFSFGCSM  | 234   | >TET2-G1282DASFSFGCSM  | 918  | 684   |
| >TET2-G1282GASFSFGCSM  | 73    | >TET2-G1282DASFSFGCSM  | 1300 | 1227  |
| >TET2-G1282GASFSFGCSM  | 651   | >TET2-G1282DASFSFGCSM  | 405  | 246   |
| >TET2-G1282CGASFSFGCS  | 347   | >TET2-G1282CDASFSFGCS  | 6996 | 6649  |
| >TET2-G1282CGASFSFGCS  | 38    | >TET2-G1282CDASFSFGCS  | 3982 | 3944  |
| >TET2-G1282CGASFSFGCS  | 205   | >TET2-G1282CDASFSFGCS  | 1784 | 1579  |
| >TET2-G1282ETCGASFSF   | 267   | >TET2-G1282ETCDASFSF   | 139  | 128   |
| >TET2-G1282ETCGASFSF   | 127   | >TET2-G1282ETCDASFSF   | 51   | 76    |
| >TET2-G1282ETCGASFS    | 431   | >TET2-G1282ETCDASFS    | 643  | 212   |
| >TET2-G1282ETCGASFSF   | 18    | >TET2-G1282ETCDASFSF   | 31   | 13    |
| >TET2-G1282ETCGASFSF   | 49    | >TET2-G1282ETCDASFSF   | 225  | 176   |
| >TET2-G1282ETCGASFSF   | 49    | >TET2-G1282ETCDASFSF   | 169  | 120   |
| >TET2-G1282ETCGASFS    | 559   | >TET2-G1282ETCDASFS    | 443  | 116   |
| >TET2-G1282ETCGASFSF   | 590   | >TET2-G1282ETCDASFSF   | 425  | 165   |
| >TET2-G1282ETCGASFS    | 321   | >TET2-G1282ETCDASFS    | 239  | 82    |
| >TET2-G1282ETCGASFSFG  | 359   | >TET2-G1282ETCDASFSFG  | 240  | 119   |
| >TET2-G1282ETCGASFSFG  | 1284  | >TET2-G1282ETCDASFSFG  | 376  | 908   |
| >TET2-G1282ETCGASFSF   | 268   | >TET2-G1282ETCDASFSF   | 174  | 94    |
| >TET2-G1282ETCGASFSF   | 8     | >TET2-G1282ETCDASFSF   | 7    | 1     |
| >TET2-G1282ETCGASFSF   | 281   | >TET2-G1282ETCDASFSF   | 235  | 46    |
| >TET2-G1282PETCGASF    | 398   | >TET2-G1282PETCDASF    | 1178 | 780   |
| >TET2-G1282DPETCGASFS  | 259   | >TET2-G1282DPETCDASFS  | 265  | 6     |
| >TET2-G1282DPETCGASFS  | 413   | >TET2-G1282DPETCDASFS  | 520  | 107   |
| >TET2-G1282DPETCGASF   | 113   | >TET2-G1282DPETCDASF   | 36   | 77    |
| >TET2-G1282DPETCGASFS  | 42    | >TET2-G1282DPETCDASFS  | 23   | 19    |
| >TET2-G1282DPETCGASF   | 932   | >TET2-G1282DPETCDASF   | 241  | 691   |
| >TET2-G1282DPETCGASFS  | 258   | >TET2-G1282DPETCDASFS  | 141  | 117   |
| >TET2-G1282DPETCGASF   | 282   | >TET2-G1282DPETCDASF   | 82   | 200   |
| >TET2-G1282DPETCGASFS  | 143   | >TET2-G1282DPETCDASFS  | 72   | 71    |
| >TET2-G1282GLDPETCGA   | 219   | >TET2-G1282GLDPETCDA   | 1553 | 1334  |

|                       |       |                       |      |       |
|-----------------------|-------|-----------------------|------|-------|
| >TET2-G1282GLDPETCGA  | 432   | >TET2-G1282GLDPETCDA  | 2135 | 1703  |
| >TET2-G1282GLDPETCGA  | 206   | >TET2-G1282GLDPETCDA  | 2615 | 2409  |
| >TET2-G1282GLDPETCGA  | 20    | >TET2-G1282GLDPETCDA  | 296  | 276   |
| >TET2-G1282GLDPETCGA  | 14    | >TET2-G1282GLDPETCDA  | 96   | 82    |
| >TET2-G1282GLDPETCGA  | 12    | >TET2-G1282GLDPETCDA  | 29   | 17    |
| >TET2-G1282GLDPETCGA  | 103   | >TET2-G1282GLDPETCDA  | 2736 | 2633  |
| >TET2-G1282GLDPETCGA  | 8     | >TET2-G1282GLDPETCDA  | 17   | 9     |
| >TET2-G1282GCSWSMYY   | 64    | >TET2-G1282GCSWSMYY   | 71   | 7     |
| >TET2-G1282GCSWSMYY   | 128   | >TET2-G1282GCSWSMYY   | 73   | 55    |
| >TET2-G1282GCSWSMYY   | 2351  | >TET2-G1282GCSWSMYY   | 109  | 2242  |
| >TET2-G1282GCSWSMYY   | 212   | >TET2-G1282GCSWSMYY   | 308  | 96    |
| >TET2-G1282FGCSWSMYY  | 5364  | >TET2-G1282FGCSWSMYY  | 29   | 5335  |
| >TET2-G1282FGCSWSMYY  | 1672  | >TET2-G1282FGCSWSMYY  | 14   | 1658  |
| >TET2-G1282FGCSWSMYY  | 3261  | >TET2-G1282FGCSWSMYY  | 57   | 3204  |
| >TET2-G1282FGCSWSMYY  | 10194 | >TET2-G1282FGCSWSMYY  | 314  | 9880  |
| >TET2-G1282FGCSWSMYY  | 16153 | >TET2-G1282FGCSWSMYY  | 169  | 15984 |
| >TET2-G1282FGCSWSMYY  | 16633 | >TET2-G1282FGCSWSMYY  | 156  | 16477 |
| >TET2-G1282FGCSWSMYY  | 48    | >TET2-G1282FGCSWSMYY  | 17   | 31    |
| >TET2-G1282FGCSWSMYY  | 10    | >TET2-G1282FGCSWSMYY  | 7    | 3     |
| >TET2-G1282FGCSWSMYY  | 186   | >TET2-G1282FGCSWSMYY  | 59   | 127   |
| >TET2-G1282FGCSWSMYY  | 84    | >TET2-G1282FGCSWSMYY  | 32   | 52    |
| >TET2-G1282FGCSWSMYY  | 3122  | >TET2-G1282FGCSWSMYY  | 213  | 2909  |
| >TET2-G1282FGCSWSMYY  | 158   | >TET2-G1282FGCSWSMYY  | 34   | 124   |
| >TET2-G1282FGCSWSMYY  | 210   | >TET2-G1282FGCSWSMYY  | 64   | 146   |
| >TET2-G1282FGCSWSMYY  | 136   | >TET2-G1282FGCSWSMYY  | 49   | 87    |
| >TET2-G1282FGCSWSMYY  | 372   | >TET2-G1282FGCSWSMYY  | 680  | 308   |
| >TET2-G1282FGCSWSMYY  | 730   | >TET2-G1282FGCSWSMYY  | 43   | 687   |
| >TET2-G1282FGCSWSMYY  | 538   | >TET2-G1282FGCSWSMYY  | 28   | 510   |
| >TET2-G1282FGCSWSMYY  | 1009  | >TET2-G1282FGCSWSMYY  | 8    | 1001  |
| >TET2-G1282FGCSWSMYY  | 1271  | >TET2-G1282FGCSWSMYY  | 14   | 1257  |
| >TET2-G1282FGCSWSMYY  | 138   | >TET2-G1282FGCSWSMYY  | 118  | 20    |
| >TET2-G1282FGCSWSMYY  | 263   | >TET2-G1282FGCSWSMYY  | 224  | 39    |
| >TET2-G1282FGCSWSMYY  | 5893  | >TET2-G1282FGCSWSMYY  | 71   | 5822  |
| >TET2-G1282FGCSWSMYY  | 4920  | >TET2-G1282FGCSWSMYY  | 78   | 4842  |
| >TET2-G1282FGCSWSMYY  | 109   | >TET2-G1282FGCSWSMYY  | 14   | 95    |
| >TET2-G1282FGCSWSMYY  | 1141  | >TET2-G1282FGCSWSMYY  | 207  | 934   |
| >TET2-G1282SFGCSWSMYY | 2146  | >TET2-G1282SFGCSWSMYY | 445  | 1701  |
| >TET2-G1282SFGCSWSMYY | 533   | >TET2-G1282SFGCSWSMYY | 199  | 334   |
| >TET2-G1282SFGCSWSMYY | 744   | >TET2-G1282SFGCSWSMYY | 363  | 381   |
| >TET2-G1282SFGCSWSMYY | 641   | >TET2-G1282SFGCSWSMYY | 108  | 533   |
| >TET2-G1282SFGCSWSMYY | 18    | >TET2-G1282SFGCSWSMYY | 21   | 3     |
| >TET2-G1282SFGCSWSMYY | 15    | >TET2-G1282SFGCSWSMYY | 11   | 4     |
| >TET2-G1282SFGCSWSMYY | 841   | >TET2-G1282SFGCSWSMYY | 319  | 522   |



|                      |      |                      |     |      |
|----------------------|------|----------------------|-----|------|
| >TET2-G128ÆSFGCSWSMY | 190  | >TET2-G128ÆSFSCSWSMY | 119 | 71   |
| >TET2-G128ÆSFGCSWSMY | 1503 | >TET2-G128ÆSFSCSWSMY | 339 | 1164 |
| >TET2-G128ÆSFGCSWSMY | 91   | >TET2-G128ÆSFSCSWSMY | 207 | 116  |
| >TET2-G128ÆSFGCSWSMY | 812  | >TET2-G128ÆSFSCSWSMY | 467 | 345  |
| >TET2-G128ÆSFGCSWSMY | 618  | >TET2-G128ÆSFSCSWSMY | 374 | 244  |
| >TET2-G128ÆSFGCSWSMY | 81   | >TET2-G128ÆSFSCSWSMY | 53  | 28   |
| >TET2-G128ÆSFGCSWSMY | 416  | >TET2-G128ÆSFSCSWSMY | 255 | 161  |
| >TET2-G128ÆSFGCSWSMY | 55   | >TET2-G128ÆSFSCSWSMY | 16  | 39   |
| >TET2-G128ÆSFGCSWSMY | 2710 | >TET2-G128ÆSFSCSWSMY | 393 | 2317 |
| >TET2-G128ÆSFGCSWSMY | 197  | >TET2-G128ÆSFSCSWSMY | 85  | 112  |
| >TET2-G128ÆSFGCSWSM  | 646  | >TET2-G128ÆSFSCSWSM  | 138 | 508  |
| >TET2-G128ÆFSFGCSWSM | 74   | >TET2-G128ÆFSFSCSWSM | 46  | 28   |
| >TET2-G128ÆFSFGCSWSM | 43   | >TET2-G128ÆFSFSCSWSM | 21  | 22   |
| >TET2-G128ÆFSFGCSWSM | 40   | >TET2-G128ÆFSFSCSWSM | 35  | 5    |
| >TET2-G128ÆFSFGCSWSM | 20   | >TET2-G128ÆFSFSCSWSM | 18  | 2    |
| >TET2-G128ÆFSFGCSWSM | 13   | >TET2-G128ÆFSFSCSWSM | 17  | 4    |
| >TET2-G128ÆFSFGCSWSM | 469  | >TET2-G128ÆFSFSCSWSM | 997 | 528  |
| >TET2-G128ÆFSFGCSWSM | 327  | >TET2-G128ÆFSFSCSWSM | 376 | 49   |
| >TET2-G128ÆFSFGCSWSM | 318  | >TET2-G128ÆFSFSCSWSM | 254 | 64   |
| >TET2-G128ÆFSFGCSWSM | 507  | >TET2-G128ÆFSFSCSWSM | 355 | 152  |
| >TET2-G128ÆFSFGCSWSM | 42   | >TET2-G128ÆFSFSCSWSM | 29  | 13   |
| >TET2-G128ÆFSFGCSWSM | 112  | >TET2-G128ÆFSFSCSWSM | 176 | 64   |
| >TET2-G128ÆFSFGCSWSM | 103  | >TET2-G128ÆFSFSCSWSM | 252 | 149  |
| >TET2-G128ÆFSFGCSWSM | 22   | >TET2-G128ÆFSFSCSWSM | 25  | 3    |
| >TET2-G128ÆFSFGCSWSM | 6    | >TET2-G128ÆFSFSCSWSM | 6   | 0    |
| >TET2-G128ÆFSFGCSWSM | 14   | >TET2-G128ÆFSFSCSWSM | 15  | 1    |
| >TET2-G128ÆFSFGCSWSM | 24   | >TET2-G128ÆFSFSCSWSM | 13  | 11   |
| >TET2-G128ÆFSFGCSWSM | 27   | >TET2-G128ÆFSFSCSWSM | 29  | 2    |
| >TET2-G128ÆFSFGCSWSM | 32   | >TET2-G128ÆFSFSCSWSM | 24  | 8    |
| >TET2-G128ÆFSFGCSWSM | 73   | >TET2-G128ÆFSFSCSWSM | 96  | 23   |
| >TET2-G128ÆFSFGCSWSM | 567  | >TET2-G128ÆFSFSCSWSM | 338 | 229  |
| >TET2-G128ÆFSFGCSWSM | 82   | >TET2-G128ÆFSFSCSWSM | 38  | 44   |
| >TET2-G128ÆFSFGCSWSM | 158  | >TET2-G128ÆFSFSCSWSM | 95  | 63   |
| >TET2-G128ÆFSFGCSWSM | 58   | >TET2-G128ÆFSFSCSWSM | 44  | 14   |
| >TET2-G128ÆFSFGCSWSM | 46   | >TET2-G128ÆFSFSCSWSM | 37  | 9    |
| >TET2-G128ÆFSFGCSWSM | 93   | >TET2-G128ÆFSFSCSWSM | 124 | 31   |
| >TET2-G128ÆFSFGCSWSM | 439  | >TET2-G128ÆFSFSCSWSM | 600 | 161  |
| >TET2-G128ÆFSFGCSWSM | 44   | >TET2-G128ÆFSFSCSWSM | 6   | 38   |
| >TET2-G128ÆFSFGCSWSM | 10   | >TET2-G128ÆFSFSCSWSM | 3   | 7    |
| >TET2-G128ÆFSFGCSWSM | 10   | >TET2-G128ÆFSFSCSWSM | 3   | 7    |
| >TET2-G128ÆFSFGCSWSM | 5    | >TET2-G128ÆFSFSCSWSM | 7   | 2    |
| >TET2-G128ÆFSFGCSWSM | 3    | >TET2-G128ÆFSFSCSWSM | 3   | 0    |
| >TET2-G128ÆFSFGCSWSM | 4    | >TET2-G128ÆFSFSCSWSM | 4   | 0    |

|                       |     |                       |     |     |
|-----------------------|-----|-----------------------|-----|-----|
| >TET2-G128ÆFSFGCSWSM  | 37  | >TET2-G128ÆFSFSCSWSM  | 34  | 3   |
| >TET2-G128ÆFSFGCSWSM  | 42  | >TET2-G128ÆFSFSCSWSM  | 41  | 1   |
| >TET2-G128ÆFSFGCSWSM  | 38  | >TET2-G128ÆFSFSCSWSM  | 44  | 6   |
| >TET2-G128ÆFSFGCSWSM  | 472 | >TET2-G128ÆFSFSCSWSM  | 459 | 13  |
| >TET2-G128ÆFSFGCSWSM  | 113 | >TET2-G128ÆFSFSCSWSM  | 177 | 64  |
| >TET2-G128ÆFSFGCSWSM  | 225 | >TET2-G128ÆFSFSCSWSM  | 347 | 122 |
| >TET2-G128ÆFSFGCSWSM  | 106 | >TET2-G128ÆFSFSCSWSM  | 145 | 39  |
| >TET2-G128ÆFSFGCSWSM  | 38  | >TET2-G128ÆFSFSCSWSM  | 37  | 1   |
| >TET2-G128ÆFSFGCSWSM  | 279 | >TET2-G128ÆFSFSCSWSM  | 260 | 19  |
| >TET2-G128ÆFSFGCSWSM  | 20  | >TET2-G128ÆFSFSCSWSM  | 18  | 2   |
| >TET2-G128ÆFSFGCSWSM  | 101 | >TET2-G128ÆFSFSCSWSM  | 62  | 39  |
| >TET2-G128ÆFSFGCSWSM  | 23  | >TET2-G128ÆFSFSCSWSM  | 11  | 12  |
| >TET2-G128ÆFSFGCSWSM  | 50  | >TET2-G128ÆFSFSCSWSM  | 44  | 6   |
| >TET2-G128ÆFSFGCSWSM  | 7   | >TET2-G128ÆFSFSCSWSM  | 5   | 2   |
| >TET2-G128ÆFSFGCSWSM  | 87  | >TET2-G128ÆFSFSCSWSM  | 278 | 191 |
| >TET2-G128ÆFSFGCSWSM  | 28  | >TET2-G128ÆFSFSCSWSM  | 40  | 12  |
| >TET2-G128ÆFSFGCSWSM  | 162 | >TET2-G128ÆFSFSCSWSM  | 66  | 96  |
| >TET2-G128ÆSFSFGCSWSM | 13  | >TET2-G128ÆSFSFSCSWSM | 21  | 8   |
| >TET2-G128ÆSFSFGCSWSM | 58  | >TET2-G128ÆSFSFSCSWSM | 80  | 22  |
| >TET2-G128ÆSFSFGCSWSM | 128 | >TET2-G128ÆSFSFSCSWSM | 170 | 42  |
| >TET2-G128ÆSFSFGCSWSM | 93  | >TET2-G128ÆSFSFSCSWSM | 74  | 19  |
| >TET2-G128ÆSFSFGCSWSM | 12  | >TET2-G128ÆSFSFSCSWSM | 12  | 0   |
| >TET2-G128ÆSFSFGCSWSM | 112 | >TET2-G128ÆSFSFSCSWSM | 87  | 25  |
| >TET2-G128ÆSFSFGCSWSM | 461 | >TET2-G128ÆSFSFSCSWSM | 570 | 109 |
| >TET2-G128ÆSFSFGCSW   | 324 | >TET2-G128ÆSFSFSCSW   | 279 | 45  |
| >TET2-G128ÆASFSFGCSWS | 204 | >TET2-G128ÆASFSFSCSWS | 149 | 55  |
| >TET2-G128ÆASFSFGCSWS | 651 | >TET2-G128ÆASFSFSCSWS | 345 | 306 |
| >TET2-G128ÆASFSFGCSWS | 866 | >TET2-G128ÆASFSFSCSWS | 386 | 480 |
| >TET2-G128ÆASFSFGCSW  | 51  | >TET2-G128ÆASFSFSCSW  | 16  | 35  |
| >TET2-G128ÆASFSFGCSWS | 135 | >TET2-G128ÆASFSFSCSWS | 72  | 63  |
| >TET2-G128ÆASFSFGCSW  | 256 | >TET2-G128ÆASFSFSCSW  | 160 | 96  |
| >TET2-G128ÆASFSFGCSWS | 125 | >TET2-G128ÆASFSFSCSWS | 94  | 31  |
| >TET2-G128ÆASFSFGCSW  | 29  | >TET2-G128ÆASFSFSCSW  | 35  | 6   |
| >TET2-G128ÆASFSFGCSWS | 12  | >TET2-G128ÆASFSFSCSWS | 9   | 3   |
| >TET2-G128ÆASFSFGCSW  | 4   | >TET2-G128ÆASFSFSCSW  | 3   | 1   |
| >TET2-G128ÆASFSFGCSWS | 6   | >TET2-G128ÆASFSFSCSWS | 5   | 1   |
| >TET2-G128ÆASFSFGCSW  | 34  | >TET2-G128ÆASFSFSCSW  | 34  | 0   |
| >TET2-G128ÆASFSFGCSWS | 235 | >TET2-G128ÆASFSFSCSWS | 254 | 19  |
| >TET2-G128ÆASFSFGCSW  | 14  | >TET2-G128ÆASFSFSCSW  | 11  | 3   |
| >TET2-G128ÆASFSFGCSWS | 298 | >TET2-G128ÆASFSFSCSWS | 144 | 154 |
| >TET2-G128ÆASFSFGCSWS | 211 | >TET2-G128ÆASFSFSCSWS | 156 | 55  |
| >TET2-G128ÆASFSFGCSW  | 84  | >TET2-G128ÆASFSFSCSW  | 97  | 13  |
| >TET2-G128ÆASFSFGCSWS | 16  | >TET2-G128ÆASFSFSCSWS | 14  | 2   |

|                       |       |                        |     |       |
|-----------------------|-------|------------------------|-----|-------|
| >TET2-G128ÆASFSFGCSW  | 336   | >TET2-G128ÆASFSFSCSW   | 121 | 215   |
| >TET2-G128ÆASFSFGCSW  | 266   | >TET2-G128ÆASFSFSCSW   | 217 | 49    |
| >TET2-G128ÆASFSFGCSWS | 734   | >TET2-G128ÆASFSFSCSWS  | 402 | 332   |
| >TET2-G128ÆASFSFGCSWS | 505   | >TET2-G128ÆASFSFSCSWS  | 335 | 170   |
| >TET2-G128ÆASFSFGCSWS | 85    | >TET2-G128ÆASFSFSCSWS  | 64  | 21    |
| >TET2-G128ÆGASFSFGCSW | 86    | >TET2-G128ÆGASFSFSCSW  | 44  | 42    |
| >TET2-G128ÆGASFSFGCSW | 234   | >TET2-G128ÆGASFSFSCSW  | 186 | 48    |
| >TET2-G128ÆGASFSFGCSW | 73    | >TET2-G128ÆGASFSFSCSW  | 36  | 37    |
| >TET2-G128ÆGASFSFGCSW | 651   | >TET2-G128ÆGASFSFSCSW  | 340 | 311   |
| >TET2-G128ÆCGASFSFGCS | 347   | >TET2-G128ÆCGASFSFSCS\ | 304 | 43    |
| >TET2-G128ÆCGASFSFGCS | 38    | >TET2-G128ÆCGASFSFSCS\ | 22  | 16    |
| >TET2-G128ÆCGASFSFGCS | 683   | >TET2-G128ÆCGASFSFSCS\ | 317 | 366   |
| >TET2-G128ÆCGASFSFGCS | 205   | >TET2-G128ÆCGASFSFSCS\ | 185 | 20    |
| >TET2-G128ÆETCGASFSFG | 1406  | >TET2-G128ÆETCGASFSFS  | 304 | 1102  |
| >TET2-G128ÆETCGASFSFG | 359   | >TET2-G128ÆETCGASFSFS\ | 523 | 164   |
| >TET2-G128ÆGCSWSMYY   | 64    | >TET2-G128ÆVCSWSMYY    | 85  | 21    |
| >TET2-G128ÆGCSWSMYY   | 128   | >TET2-G128ÆVCSWSMYY    | 60  | 68    |
| >TET2-G128ÆGCSWSMYY   | 2351  | >TET2-G128ÆVCSWSMYY    | 133 | 2218  |
| >TET2-G128ÆGCSWSMYY   | 212   | >TET2-G128ÆVCSWSMYY    | 538 | 326   |
| >TET2-G128ÆFGCSWSMYY  | 5364  | >TET2-G128ÆFVCSWSMYY   | 435 | 4929  |
| >TET2-G128ÆFGCSWSMYY  | 1672  | >TET2-G128ÆFVCSWSMYY   | 96  | 1576  |
| >TET2-G128ÆFGCSWSMYY  | 10183 | >TET2-G128ÆFVCSWSMYY   | 330 | 9853  |
| >TET2-G128ÆFGCSWSMYY  | 3261  | >TET2-G128ÆFVCSWSMYY   | 34  | 3227  |
| >TET2-G128ÆFGCSWSMYY  | 14626 | >TET2-G128ÆFVCSWSMYY   | 119 | 14507 |
| >TET2-G128ÆFGCSWSMYY  | 10194 | >TET2-G128ÆFVCSWSMYY   | 34  | 10160 |
| >TET2-G128ÆFGCSWSMYY  | 16153 | >TET2-G128ÆFVCSWSMYY   | 35  | 16118 |
| >TET2-G128ÆFGCSWSMYY  | 16633 | >TET2-G128ÆFVCSWSMYY   | 33  | 16600 |
| >TET2-G128ÆFGCSWSMYY  | 48    | >TET2-G128ÆFVCSWSMYY   | 8   | 40    |
| >TET2-G128ÆFGCSWSMYY  | 10    | >TET2-G128ÆFVCSWSMYY   | 5   | 5     |
| >TET2-G128ÆFGCSWSMYY  | 186   | >TET2-G128ÆFVCSWSMYY   | 88  | 98    |
| >TET2-G128ÆFGCSWSMYY  | 84    | >TET2-G128ÆFVCSWSMYY   | 42  | 42    |
| >TET2-G128ÆFGCSWSMYY  | 7080  | >TET2-G128ÆFVCSWSMYY   | 361 | 6719  |
| >TET2-G128ÆFGCSWSMYY  | 3122  | >TET2-G128ÆFVCSWSMYY   | 137 | 2985  |
| >TET2-G128ÆFGCSWSMYY  | 3502  | >TET2-G128ÆFVCSWSMYY   | 154 | 3348  |
| >TET2-G128ÆFGCSWSMYY  | 158   | >TET2-G128ÆFVCSWSMYY   | 7   | 151   |
| >TET2-G128ÆFGCSWSMYY  | 210   | >TET2-G128ÆFVCSWSMYY   | 77  | 133   |
| >TET2-G128ÆFGCSWSMYY  | 136   | >TET2-G128ÆFVCSWSMYY   | 61  | 75    |
| >TET2-G128ÆFGCSWSMYY  | 372   | >TET2-G128ÆFVCSWSMYY   | 141 | 231   |
| >TET2-G128ÆFGCSWSMYY  | 730   | >TET2-G128ÆFVCSWSMYY   | 373 | 357   |
| >TET2-G128ÆFGCSWSMYY  | 538   | >TET2-G128ÆFVCSWSMYY   | 253 | 285   |
| >TET2-G128ÆFGCSWSMYY  | 1009  | >TET2-G128ÆFVCSWSMYY   | 167 | 842   |
| >TET2-G128ÆFGCSWSMYY  | 1271  | >TET2-G128ÆFVCSWSMYY   | 236 | 1035  |
| >TET2-G128ÆFGCSWSMYY  | 138   | >TET2-G128ÆFVCSWSMYY   | 60  | 78    |

|                       |       |                       |      |       |
|-----------------------|-------|-----------------------|------|-------|
| >TET2-G1288FGCSWSMYY  | 263   | >TET2-G1288FVCSWSMYY  | 98   | 165   |
| >TET2-G1288FGCSWSMYY  | 109   | >TET2-G1288FVCSWSMYY  | 39   | 70    |
| >TET2-G1288FGCSWSM    | 2649  | >TET2-G1288FVCSWSM    | 487  | 2162  |
| >TET2-G1288FGCSWSMYY  | 1141  | >TET2-G1288FVCSWSMYY  | 186  | 955   |
| >TET2-G1288PETCGASFSF | 18666 | >TET2-G1288PETCGASFSF | 124  | 18542 |
| >TET2-G1288SFGCSWSM   | 2146  | >TET2-G1288SFVCSWSM   | 298  | 1848  |
| >TET2-G1288SFGCSWSM   | 641   | >TET2-G1288SFVCSWSM   | 300  | 341   |
| >TET2-G1288SFGCSWSM   | 18    | >TET2-G1288SFVCSWSM   | 14   | 4     |
| >TET2-G1288SFGCSWSM   | 15    | >TET2-G1288SFVCSWSM   | 14   | 1     |
| >TET2-G1288SFGCSWSM   | 190   | >TET2-G1288SFVCSWSM   | 128  | 62    |
| >TET2-G1288SFGCSWSM   | 2126  | >TET2-G1288SFVCSWSM   | 482  | 1644  |
| >TET2-G1288SFGCSWSM   | 91    | >TET2-G1288SFVCSWSM   | 214  | 123   |
| >TET2-G1288SFGCSWSM   | 618   | >TET2-G1288SFVCSWSM   | 434  | 184   |
| >TET2-G1288SFGCSWSM   | 81    | >TET2-G1288SFVCSWSM   | 50   | 31    |
| >TET2-G1288SFGCSWSM   | 416   | >TET2-G1288SFVCSWSM   | 224  | 192   |
| >TET2-G1288SFGCSWSM   | 55    | >TET2-G1288SFVCSWSM   | 17   | 38    |
| >TET2-G1288SFGCSWSM   | 197   | >TET2-G1288SFVCSWSM   | 325  | 128   |
| >TET2-G1288SFGCSWSM   | 646   | >TET2-G1288SFVCSWSM   | 109  | 537   |
| >TET2-G1288FSFGCSWSM  | 74    | >TET2-G1288FSFVCSWSM  | 77   | 3     |
| >TET2-G1288FSFGCSWSM  | 43    | >TET2-G1288FSFVCSWSM  | 26   | 17    |
| >TET2-G1288FSFGCSWSM  | 40    | >TET2-G1288FSFVCSWSM  | 109  | 69    |
| >TET2-G1288FSFGCSWSM  | 20    | >TET2-G1288FSFVCSWSM  | 71   | 51    |
| >TET2-G1288FSFGCSWSM  | 13    | >TET2-G1288FSFVCSWSM  | 28   | 15    |
| >TET2-G1288FSFGCSWSM  | 469   | >TET2-G1288FSFVCSWSM  | 2991 | 2522  |
| >TET2-G1288FSFGCSWSM  | 327   | >TET2-G1288FSFVCSWSM  | 863  | 536   |
| >TET2-G1288FSFGCSWSM  | 318   | >TET2-G1288FSFVCSWSM  | 431  | 113   |
| >TET2-G1288FSFGCSWSM  | 42    | >TET2-G1288FSFVCSWSM  | 53   | 11    |
| >TET2-G1288FSFGCSWSM  | 112   | >TET2-G1288FSFVCSWSM  | 239  | 127   |
| >TET2-G1288FSFGCSWSM  | 103   | >TET2-G1288FSFVCSWSM  | 507  | 404   |
| >TET2-G1288FSFGCSWSM  | 22    | >TET2-G1288FSFVCSWSM  | 24   | 2     |
| >TET2-G1288FSFGCSWSM  | 6     | >TET2-G1288FSFVCSWSM  | 7    | 1     |
| >TET2-G1288FSFGCSWSM  | 14    | >TET2-G1288FSFVCSWSM  | 16   | 2     |
| >TET2-G1288FSFGCSWSM  | 24    | >TET2-G1288FSFVCSWSM  | 20   | 4     |
| >TET2-G1288FSFGCSWSM  | 27    | >TET2-G1288FSFVCSWSM  | 41   | 14    |
| >TET2-G1288FSFGCSWSM  | 32    | >TET2-G1288FSFVCSWSM  | 53   | 21    |
| >TET2-G1288FSFGCSWSM  | 73    | >TET2-G1288FSFVCSWSM  | 199  | 126   |
| >TET2-G1288FSFGCSWSM  | 82    | >TET2-G1288FSFVCSWSM  | 61   | 21    |
| >TET2-G1288FSFGCSWSM  | 158   | >TET2-G1288FSFVCSWSM  | 169  | 11    |
| >TET2-G1288FSFGCSWSM  | 58    | >TET2-G1288FSFVCSWSM  | 70   | 12    |
| >TET2-G1288FSFGCSWSM  | 46    | >TET2-G1288FSFVCSWSM  | 57   | 11    |
| >TET2-G1288FSFGCSWSM  | 93    | >TET2-G1288FSFVCSWSM  | 150  | 57    |
| >TET2-G1288FSFGCSWSM  | 439   | >TET2-G1288FSFVCSWSM  | 710  | 271   |
| >TET2-G1288FSFGCSWSM  | 44    | >TET2-G1288FSFVCSWSM  | 14   | 30    |

|                       |     |                       |     |     |
|-----------------------|-----|-----------------------|-----|-----|
| >TET2-G128ËFSFGCSWSM  | 10  | >TET2-G128ËFSFVCSWSM' | 5   | 5   |
| >TET2-G128ËFSFGCSWSM  | 10  | >TET2-G128ËFSFVCSWSM' | 5   | 5   |
| >TET2-G128ËFSFGCSWSM  | 5   | >TET2-G128ËFSFVCSWSM' | 6   | 1   |
| >TET2-G128ËFSFGCSWSM  | 3   | >TET2-G128ËFSFVCSWSM' | 3   | 0   |
| >TET2-G128ËFSFGCSWSM  | 4   | >TET2-G128ËFSFVCSWSM' | 4   | 0   |
| >TET2-G128ËFSFGCSWSM  | 37  | >TET2-G128ËFSFVCSWSM' | 49  | 12  |
| >TET2-G128ËFSFGCSWSM  | 42  | >TET2-G128ËFSFVCSWSM' | 57  | 15  |
| >TET2-G128ËFSFGCSWSM  | 38  | >TET2-G128ËFSFVCSWSM' | 104 | 66  |
| >TET2-G128ËFSFGCSWSM  | 472 | >TET2-G128ËFSFVCSWSM' | 477 | 5   |
| >TET2-G128ËFSFGCSWSM  | 113 | >TET2-G128ËFSFVCSWSM' | 167 | 54  |
| >TET2-G128ËFSFGCSWSM  | 225 | >TET2-G128ËFSFVCSWSM' | 320 | 95  |
| >TET2-G128ËFSFGCSWSM  | 106 | >TET2-G128ËFSFVCSWSM' | 137 | 31  |
| >TET2-G128ËFSFGCSWSM  | 38  | >TET2-G128ËFSFVCSWSM' | 36  | 2   |
| >TET2-G128ËFSFGCSWSM  | 279 | >TET2-G128ËFSFVCSWSM' | 223 | 56  |
| >TET2-G128ËFSFGCSWSM  | 20  | >TET2-G128ËFSFVCSWSM' | 18  | 2   |
| >TET2-G128ËFSFGCSWSM  | 101 | >TET2-G128ËFSFVCSWSM' | 166 | 65  |
| >TET2-G128ËFSFGCSWSM  | 23  | >TET2-G128ËFSFVCSWSM' | 39  | 16  |
| >TET2-G128ËFSFGCSWSM  | 50  | >TET2-G128ËFSFVCSWSM' | 41  | 9   |
| >TET2-G128ËFSFGCSWSM  | 7   | >TET2-G128ËFSFVCSWSM' | 10  | 3   |
| >TET2-G128ËFSFGCSWSM  | 87  | >TET2-G128ËFSFVCSWSM' | 218 | 131 |
| >TET2-G128ËFSFGCSWSM  | 28  | >TET2-G128ËFSFVCSWSM' | 38  | 10  |
| >TET2-G128ËFSFGCSWSM  | 162 | >TET2-G128ËFSFVCSWSM' | 128 | 34  |
| >TET2-G128ËSFSFGCSW   | 902 | >TET2-G128ËSFSFVCSW   | 444 | 458 |
| >TET2-G128ËSFSFGCSWSM | 13  | >TET2-G128ËSFSFVCSWSM | 18  | 5   |
| >TET2-G128ËSFSFGCSWSM | 58  | >TET2-G128ËSFSFVCSWSM | 70  | 12  |
| >TET2-G128ËSFSFGCSWSM | 128 | >TET2-G128ËSFSFVCSWSM | 370 | 242 |
| >TET2-G128ËSFSFGCSWSM | 93  | >TET2-G128ËSFSFVCSWSM | 81  | 12  |
| >TET2-G128ËSFSFGCSWSM | 12  | >TET2-G128ËSFSFVCSWSM | 9   | 3   |
| >TET2-G128ËSFSFGCSWSM | 112 | >TET2-G128ËSFSFVCSWSM | 77  | 35  |
| >TET2-G128ËSFSFGCSWSM | 461 | >TET2-G128ËSFSFVCSWSM | 365 | 96  |
| >TET2-G128ËSFSFGCSW   | 324 | >TET2-G128ËSFSFVCSW   | 266 | 58  |
| >TET2-G128ËASFSFGCSWS | 204 | >TET2-G128ËASFSFVCSWS | 151 | 53  |
| >TET2-G128ËASFSFGCSWS | 651 | >TET2-G128ËASFSFVCSWS | 373 | 278 |
| >TET2-G128ËASFSFGCSW  | 51  | >TET2-G128ËASFSFVCSW  | 17  | 34  |
| >TET2-G128ËASFSFGCSWS | 135 | >TET2-G128ËASFSFVCSWS | 86  | 49  |
| >TET2-G128ËASFSFGCSW  | 256 | >TET2-G128ËASFSFVCSW  | 258 | 2   |
| >TET2-G128ËASFSFGCSWS | 125 | >TET2-G128ËASFSFVCSWS | 124 | 1   |
| >TET2-G128ËASFSFGCSW  | 29  | >TET2-G128ËASFSFVCSW  | 37  | 8   |
| >TET2-G128ËASFSFGCSWS | 12  | >TET2-G128ËASFSFVCSWS | 10  | 2   |
| >TET2-G128ËASFSFGCSW  | 4   | >TET2-G128ËASFSFVCSW  | 4   | 0   |
| >TET2-G128ËASFSFGCSWS | 6   | >TET2-G128ËASFSFVCSWS | 5   | 1   |
| >TET2-G128ËASFSFGCSW  | 34  | >TET2-G128ËASFSFVCSW  | 29  | 5   |
| >TET2-G128ËASFSFGCSWS | 235 | >TET2-G128ËASFSFVCSWS | 234 | 1   |

|                       |       |                        |      |       |
|-----------------------|-------|------------------------|------|-------|
| >TET2-G128ÆASFSFGCSW  | 14    | >TET2-G128ÆASFSFVCSW   | 12   | 2     |
| >TET2-G128ÆASFSFGCSWS | 298   | >TET2-G128ÆASFSFVCSWS  | 106  | 192   |
| >TET2-G128ÆASFSFGCSWS | 211   | >TET2-G128ÆASFSFVCSWS  | 206  | 5     |
| >TET2-G128ÆASFSFGCSW  | 84    | >TET2-G128ÆASFSFVCSW   | 226  | 142   |
| >TET2-G128ÆASFSFGCSWS | 16    | >TET2-G128ÆASFSFVCSWS  | 25   | 9     |
| >TET2-G128ÆASFSFGCSW  | 336   | >TET2-G128ÆASFSFVCSW   | 48   | 288   |
| >TET2-G128ÆASFSFGCSW  | 266   | >TET2-G128ÆASFSFVCSW   | 621  | 355   |
| >TET2-G128ÆASFSFGCS   | 562   | >TET2-G128ÆASFSFVCS    | 223  | 339   |
| >TET2-G128ÆASFSFGCSWS | 734   | >TET2-G128ÆASFSFVCSWS  | 441  | 293   |
| >TET2-G128ÆASFSFGCSWS | 505   | >TET2-G128ÆASFSFVCSWS  | 275  | 230   |
| >TET2-G128ÆASFSFGCSWS | 85    | >TET2-G128ÆASFSFVCSWS  | 109  | 24    |
| >TET2-G128ÆGASFSFGCSW | 86    | >TET2-G128ÆGASFSFVCSW  | 57   | 29    |
| >TET2-G128ÆGASFSFGCSW | 234   | >TET2-G128ÆGASFSFVCSW  | 164  | 70    |
| >TET2-G128ÆGASFSFGCSW | 73    | >TET2-G128ÆGASFSFVCSW  | 35   | 38    |
| >TET2-G128ÆGASFSFGCSW | 651   | >TET2-G128ÆGASFSFVCSW  | 154  | 497   |
| >TET2-G128ÆCGASFSFG   | 14306 | >TET2-G128ÆCGASFSFV    | 186  | 14120 |
| >TET2-G128ÆCGASFSFG   | 15397 | >TET2-G128ÆCGASFSFV    | 96   | 15301 |
| >TET2-G128ÆCGASFSFGCS | 883   | >TET2-G128ÆCGASFSFVCS' | 490  | 393   |
| >TET2-G128ÆCGASFSFGCS | 347   | >TET2-G128ÆCGASFSFVCS' | 269  | 78    |
| >TET2-G128ÆCGASFSFGCS | 38    | >TET2-G128ÆCGASFSFVCS' | 19   | 19    |
| >TET2-G128ÆCGASFSFGCS | 683   | >TET2-G128ÆCGASFSFVCS' | 177  | 506   |
| >TET2-G128ÆCGASFSFGCS | 205   | >TET2-G128ÆCGASFSFVCS' | 296  | 91    |
| >TET2-G128ÆTCGASFSFG  | 17679 | >TET2-G128ÆTCGASFSFV   | 183  | 17496 |
| >TET2-G128ÆETCGASFSFG | 22862 | >TET2-G128ÆETCGASFSFV  | 213  | 22649 |
| >TET2-G128ÆETCGASFSFG | 19863 | >TET2-G128ÆETCGASFSFV  | 284  | 19579 |
| >TET2-G128ÆETCGASFSFG | 1406  | >TET2-G128ÆETCGASFSFV  | 53   | 1353  |
| >TET2-G128ÆETCGASFSFG | 3579  | >TET2-G128ÆETCGASFSFV  | 174  | 3405  |
| >TET2-G128ÆETCGASFSFG | 7494  | >TET2-G128ÆETCGASFSFV  | 10   | 7484  |
| >TET2-G128ÆETCGASFSFG | 359   | >TET2-G128ÆETCGASFSFV  | 1160 | 801   |
| >TET2-G128ÆETCGASFSFG | 9340  | >TET2-G128ÆETCGASFSFV  | 8    | 9332  |
| >TET2-G1361GLKEGRPFSG | 212   | >TET2-G1361DLKEGRPFSG  | 6369 | 6157  |
| >TET2-G1361GLKEGRPFSG | 5     | >TET2-G1361DLKEGRPFSG  | 327  | 322   |
| >TET2-G1361GLKEGRPFSG | 113   | >TET2-G1361DLKEGRPFSG  | 3957 | 3844  |
| >TET2-G1361GLKEGRPFSG | 15    | >TET2-G1361DLKEGRPFSG  | 357  | 342   |
| >TET2-G1361GLKEGRPFSG | 21    | >TET2-G1361DLKEGRPFSG  | 1116 | 1095  |
| >TET2-G1361GLKEGRPFSG | 27    | >TET2-G1361DLKEGRPFSG  | 588  | 561   |
| >TET2-G1361GLKEGRPFSG | 2     | >TET2-G1361DLKEGRPFSG  | 10   | 8     |
| >TET2-G1361GLKEGRPFSG | 5625  | >TET2-G1361DLKEGRPFSG  | 299  | 5326  |
| >TET2-G1361GLKEGRPF   | 63    | >TET2-G1361DLKEGRPF    | 945  | 882   |
| >TET2-G1361GLKEGRPF   | 132   | >TET2-G1361DLKEGRPF    | 180  | 48    |
| >TET2-G1361GLKEGRPF   | 235   | >TET2-G1361DLKEGRPF    | 1417 | 1182  |
| >TET2-G1361LGLKEGRPF  | 121   | >TET2-G1361LDLKEGRPF   | 230  | 109   |
| >TET2-G1361RLGLKEGR   | 194   | >TET2-G1361RLDLKEGR    | 950  | 756   |

|                       |      |                        |      |      |
|-----------------------|------|------------------------|------|------|
| >TET2-G1361RLGLKEGRPF | 234  | >TET2-G1361RLDLKEGRPF  | 2404 | 2170 |
| >TET2-G1361RLGLKEGR   | 143  | >TET2-G1361RLDLKEGR    | 784  | 641  |
| >TET2-G1361CRLGLKEGRP | 174  | >TET2-G1361CRLDLKEGRP  | 92   | 82   |
| >TET2-G1361CRLGLKEGR  | 172  | >TET2-G1361CRLDLKEGR   | 425  | 253  |
| >TET2-G1361CRLGLKEGRP | 158  | >TET2-G1361CRLDLKEGRP  | 314  | 156  |
| >TET2-G1361CRLGLKEGR  | 285  | >TET2-G1361CRLDLKEGR   | 222  | 63   |
| >TET2-G1361APECRLGL   | 1563 | >TET2-G1361APECRLDL    | 109  | 1454 |
| >TET2-G1361APECRLGL   | 42   | >TET2-G1361APECRLDL    | 69   | 27   |
| >TET2-G1361RAPECRLGLK | 315  | >TET2-G1361RAPECRLDLK  | 919  | 604  |
| >TET2-G1361RAPECRLGLK | 522  | >TET2-G1361RAPECRLDLK  | 381  | 141  |
| >TET2-G1361RAPECRLGLK | 393  | >TET2-G1361RAPECRLDLK  | 1407 | 1014 |
| >TET2-G1361RAPECRLGL  | 53   | >TET2-G1361RAPECRLDL   | 95   | 42   |
| >TET2-G1361RAPECRLGL  | 474  | >TET2-G1361RAPECRLDL   | 2911 | 2437 |
| >TET2-G1361HRAPECRLGL | 46   | >TET2-G1361HRAPECRLDL  | 53   | 7    |
| >TET2-G1361HRAPECRLGL | 235  | >TET2-G1361HRAPECRLDL  | 403  | 168  |
| >TET2-G1361HRAPECRLGL | 187  | >TET2-G1361HRAPECRLDL  | 308  | 121  |
| >TET2-G1361HRAPECRLGL | 156  | >TET2-G1361HRAPECRLDL  | 212  | 56   |
| >TET2-G1361HRAPECRLGL | 272  | >TET2-G1361HRAPECRLDL  | 427  | 155  |
| >TET2-G1361HRAPECRLGL | 359  | >TET2-G1361HRAPECRLDL  | 527  | 168  |
| >TET2-G1361GLKEGRPFSG | 790  | >TET2-G1361SLKEGRPFSG' | 354  | 436  |
| >TET2-G1361GLKEGRPFSG | 212  | >TET2-G1361SLKEGRPFSG' | 136  | 76   |
| >TET2-G1361GLKEGRPFSG | 5    | >TET2-G1361SLKEGRPFSG' | 4    | 1    |
| >TET2-G1361GLKEGRPFSG | 113  | >TET2-G1361SLKEGRPFSG' | 55   | 58   |
| >TET2-G1361GLKEGRPFSG | 15   | >TET2-G1361SLKEGRPFSG' | 9    | 6    |
| >TET2-G1361GLKEGRPFSG | 21   | >TET2-G1361SLKEGRPFSG' | 28   | 7    |
| >TET2-G1361GLKEGRPFSG | 27   | >TET2-G1361SLKEGRPFSG' | 17   | 10   |
| >TET2-G1361GLKEGRPFS  | 834  | >TET2-G1361SLKEGRPFS   | 382  | 452  |
| >TET2-G1361GLKEGRPFSG | 2    | >TET2-G1361SLKEGRPFSG' | 2    | 0    |
| >TET2-G1361GLKEGRPFS  | 940  | >TET2-G1361SLKEGRPFS   | 146  | 794  |
| >TET2-G1361GLKEGRPF   | 63   | >TET2-G1361SLKEGRPF    | 46   | 17   |
| >TET2-G1361GLKEGRPF   | 132  | >TET2-G1361SLKEGRPF    | 52   | 80   |
| >TET2-G1361GLKEGRPF   | 235  | >TET2-G1361SLKEGRPF    | 70   | 165  |
| >TET2-G1361LGLKEGRPF  | 649  | >TET2-G1361LSLKEGRPF   | 114  | 535  |
| >TET2-G1361LGLKEGRPF  | 121  | >TET2-G1361LSLKEGRPF   | 8    | 113  |
| >TET2-G1361LGLKEGRPF  | 1112 | >TET2-G1361LSLKEGRPF   | 8    | 1104 |
| >TET2-G1361LGLKEGRPF  | 5994 | >TET2-G1361LSLKEGRPF   | 218  | 5776 |
| >TET2-G1361RLGLKEGR   | 194  | >TET2-G1361RLSLKEGR    | 94   | 100  |
| >TET2-G1361RLGLKEGRPF | 234  | >TET2-G1361RLSLKEGRPF  | 168  | 66   |
| >TET2-G1361RLGLKEGRPF | 797  | >TET2-G1361RLSLKEGRPF  | 159  | 638  |
| >TET2-G1361RLGLKEGRPF | 1826 | >TET2-G1361RLSLKEGRPF  | 286  | 1540 |
| >TET2-G1361RLGLKEGRPF | 1302 | >TET2-G1361RLSLKEGRPF  | 216  | 1086 |
| >TET2-G1361RLGLKEGR   | 143  | >TET2-G1361RLSLKEGR    | 211  | 68   |
| >TET2-G1361CRLGLKEGRP | 174  | >TET2-G1361CRLSLKEGRPI | 34   | 140  |

|                        |       |                        |      |       |
|------------------------|-------|------------------------|------|-------|
| >TET2-G1361CRLGLKEGR   | 172   | >TET2-G1361CRLSLKEGR   | 221  | 49    |
| >TET2-G1361CRLGLKEGRP  | 158   | >TET2-G1361CRLSLKEGRPI | 203  | 45    |
| >TET2-G1361CRLGLKEGR   | 285   | >TET2-G1361CRLSLKEGR   | 347  | 62    |
| >TET2-G1361APECRLGL    | 1563  | >TET2-G1361APECRLSL    | 314  | 1249  |
| >TET2-G1361APECRLGL    | 42    | >TET2-G1361APECRLSL    | 18   | 24    |
| >TET2-G1361APECRLGL    | 2527  | >TET2-G1361APECRLSL    | 313  | 2214  |
| >TET2-G1361RAPECRLGLK  | 315   | >TET2-G1361RAPECRLSLK  | 142  | 173   |
| >TET2-G1361RAPECRLGLK  | 522   | >TET2-G1361RAPECRLSLK  | 130  | 392   |
| >TET2-G1361RAPECRLGLK  | 393   | >TET2-G1361RAPECRLSLK  | 243  | 150   |
| >TET2-G1361RAPECRLGLK  | 1613  | >TET2-G1361RAPECRLSLK  | 229  | 1384  |
| >TET2-G1361RAPECRLGL   | 828   | >TET2-G1361RAPECRLSL   | 40   | 788   |
| >TET2-G1361RAPECRLGL   | 53    | >TET2-G1361RAPECRLSL   | 30   | 23    |
| >TET2-G1361RAPECRLGL   | 474   | >TET2-G1361RAPECRLSL   | 1780 | 1306  |
| >TET2-G1361RAPECRLGL   | 1253  | >TET2-G1361RAPECRLSL   | 321  | 932   |
| >TET2-G1361HRAPECRLGL  | 46    | >TET2-G1361HRAPECRLSL  | 48   | 2     |
| >TET2-G1361HRAPECRLGL  | 235   | >TET2-G1361HRAPECRLSL  | 240  | 5     |
| >TET2-G1361HRAPECRLGL  | 187   | >TET2-G1361HRAPECRLSL  | 63   | 124   |
| >TET2-G1361HRAPECRLGL  | 156   | >TET2-G1361HRAPECRLSL  | 190  | 34    |
| >TET2-G1361HRAPECRLGL  | 272   | >TET2-G1361HRAPECRLSL  | 416  | 144   |
| >TET2-G1361HRAPECRLGL  | 359   | >TET2-G1361HRAPECRLSL  | 193  | 166   |
| >TET2-G137C GVTACLDF   | 6621  | >TET2-G137C EVTACLDF   | 78   | 6543  |
| >TET2-G137C GVTACLDFCA | 14626 | >TET2-G137C EVTACLDFCA | 223  | 14403 |
| >TET2-G137C GVTACLDFC  | 17410 | >TET2-G137C EVTACLDFC  | 232  | 17178 |
| >TET2-G137C GVTACLDFCA | 6313  | >TET2-G137C EVTACLDFCA | 263  | 6050  |
| >TET2-G137C SGVTACLDF  | 24948 | >TET2-G137C SEVTACLDF  | 336  | 24612 |
| >TET2-G137C SGVTACLDF  | 109   | >TET2-G137C SEVTACLDF  | 196  | 87    |
| >TET2-G137C SGVTACLDF  | 1038  | >TET2-G137C SEVTACLDF  | 167  | 871   |
| >TET2-G137C SGVTACLDF  | 21782 | >TET2-G137C SEVTACLDF  | 111  | 21671 |
| >TET2-G137C SGVTACLDF  | 24098 | >TET2-G137C SEVTACLDF  | 489  | 23609 |
| >TET2-G137C SGVTACLDF  | 18631 | >TET2-G137C SEVTACLDF  | 322  | 18309 |
| >TET2-G137C SGVTACLDF  | 27335 | >TET2-G137C SEVTACLDF  | 40   | 27295 |
| >TET2-G137C SGVTACLDFC | 23608 | >TET2-G137C SEVTACLDFC | 12   | 23596 |
| >TET2-G137C SGVTACLDF  | 34173 | >TET2-G137C SEVTACLDF  | 148  | 34025 |
| >TET2-G137C FSGVTACLDF | 1846  | >TET2-G137C FSEVTACLDF | 438  | 1408  |
| >TET2-G137C FSGVTACLDF | 485   | >TET2-G137C FSEVTACLDF | 4553 | 4068  |
| >TET2-G137C FSGVTACLDF | 94    | >TET2-G137C FSEVTACLDF | 324  | 230   |
| >TET2-G137C FSGVTACL   | 731   | >TET2-G137C FSEVTACL   | 391  | 340   |
| >TET2-G137C FSGVTACLDF | 27    | >TET2-G137C FSEVTACLDF | 17   | 10    |
| >TET2-G137C FSGVTACL   | 3569  | >TET2-G137C FSEVTACL   | 330  | 3239  |
| >TET2-G137C FSGVTACLDF | 402   | >TET2-G137C FSEVTACLDF | 3627 | 3225  |
| >TET2-G137C FSGVTACL   | 582   | >TET2-G137C FSEVTACL   | 320  | 262   |
| >TET2-G137C FSGVTACL   | 74    | >TET2-G137C FSEVTACL   | 62   | 12    |
| >TET2-G137C FSGVTACLDF | 354   | >TET2-G137C FSEVTACLDF | 379  | 25    |



|                        |       |                         |      |       |
|------------------------|-------|-------------------------|------|-------|
| >TET2-G137C PFSGVTACLD | 274   | >TET2-G137C PFSEVTACLD  | 353  | 79    |
| >TET2-G137C PFSGVTACLD | 206   | >TET2-G137C PFSEVTACLD  | 262  | 56    |
| >TET2-G137C PFSGVTACLD | 390   | >TET2-G137C PFSEVTACLD  | 883  | 493   |
| >TET2-G137C RPFSGVTACL | 57    | >TET2-G137C RPFSEVTACL  | 323  | 266   |
| >TET2-G137C RPFSGVTA   | 124   | >TET2-G137C RPFSEVTA    | 1664 | 1540  |
| >TET2-G137C RPFSGVTAC  | 138   | >TET2-G137C RPFSEVTAC   | 1988 | 1850  |
| >TET2-G137C RPFSGVTACL | 57    | >TET2-G137C RPFSEVTACL  | 207  | 150   |
| >TET2-G137C RPFSGVTACL | 242   | >TET2-G137C RPFSEVTACL  | 224  | 18    |
| >TET2-G137C RPFSGVTACL | 35    | >TET2-G137C RPFSEVTACL  | 57   | 22    |
| >TET2-G137C RPFSGVTA   | 181   | >TET2-G137C RPFSEVTA    | 565  | 384   |
| >TET2-G137C RPFSGVTACL | 1120  | >TET2-G137C RPFSEVTACL  | 462  | 658   |
| >TET2-G137C GRPFSGVTAC | 46    | >TET2-G137C GRPFSEVTAC  | 58   | 12    |
| >TET2-G137C KEGRPFSGV  | 1088  | >TET2-G137C KEGRPFSEV   | 278  | 810   |
| >TET2-G137C KEGRPFSGV  | 89    | >TET2-G137C KEGRPFSEV   | 56   | 33    |
| >TET2-G137C KEGRPFSGVT | 28    | >TET2-G137C KEGRPFSEVT  | 25   | 3     |
| >TET2-G137C KEGRPFSGV  | 37    | >TET2-G137C KEGRPFSEV   | 42   | 5     |
| >TET2-G137C GLKEGRPFSG | 790   | >TET2-G137C GLKEGRPFSE' | 435  | 355   |
| >TET2-G137C GLKEGRPFSG | 212   | >TET2-G137C GLKEGRPFSE' | 166  | 46    |
| >TET2-G137C GLKEGRPFSG | 5     | >TET2-G137C GLKEGRPFSE' | 6    | 1     |
| >TET2-G137C GLKEGRPFSG | 113   | >TET2-G137C GLKEGRPFSE' | 168  | 55    |
| >TET2-G137C GLKEGRPFSG | 15    | >TET2-G137C GLKEGRPFSE' | 16   | 1     |
| >TET2-G137C GLKEGRPFSG | 21    | >TET2-G137C GLKEGRPFSE' | 31   | 10    |
| >TET2-G137C GLKEGRPFSG | 27    | >TET2-G137C GLKEGRPFSE' | 27   | 0     |
| >TET2-G137C GLKEGRPFSG | 2     | >TET2-G137C GLKEGRPFSE' | 2    | 0     |
| >TET2-G137C GVTACLDFC  | 807   | >TET2-G137C VVTACLDFC   | 385  | 422   |
| >TET2-G137C SGVTACLDF  | 109   | >TET2-G137C SVVTACLDF   | 537  | 428   |
| >TET2-G137C SGVTACLDFC | 11480 | >TET2-G137C SVVTACLDFC  | 410  | 11070 |
| >TET2-G137C SGVTACLDF  | 28780 | >TET2-G137C SVVTACLDF   | 372  | 28408 |
| >TET2-G137C SGVTACLDF  | 5933  | >TET2-G137C SVVTACLDF   | 461  | 5472  |
| >TET2-G137C SGVTACLDFC | 9944  | >TET2-G137C SVVTACLDFC  | 341  | 9603  |
| >TET2-G137C FSGVTACLDF | 485   | >TET2-G137C FSVVTACLDF  | 335  | 150   |
| >TET2-G137C FSGVTACL   | 2444  | >TET2-G137C FSVVTACL    | 386  | 2058  |
| >TET2-G137C FSGVTACLDF | 94    | >TET2-G137C FSVVTACLDF  | 18   | 76    |
| >TET2-G137C FSGVTACL   | 731   | >TET2-G137C FSVVTACL    | 49   | 682   |
| >TET2-G137C FSGVTACLDF | 27    | >TET2-G137C FSVVTACLDF  | 5    | 22    |
| >TET2-G137C FSGVTACL   | 3569  | >TET2-G137C FSVVTACL    | 142  | 3427  |
| >TET2-G137C FSGVTACLDF | 402   | >TET2-G137C FSVVTACLDF  | 100  | 302   |
| >TET2-G137C FSGVTACL   | 582   | >TET2-G137C FSVVTACL    | 45   | 537   |
| >TET2-G137C FSGVTACL   | 74    | >TET2-G137C FSVVTACL    | 44   | 30    |
| >TET2-G137C FSGVTACLDF | 354   | >TET2-G137C FSVVTACLDF  | 273  | 81    |
| >TET2-G137C PFSGVTACLD | 274   | >TET2-G137C PFSVVTACLD  | 259  | 15    |
| >TET2-G137C PFSGVTACLD | 206   | >TET2-G137C PFSVVTACLD  | 363  | 157   |
| >TET2-G137C PFSGVTACLD | 390   | >TET2-G137C PFSVVTACLD  | 1010 | 620   |

|                         |       |                         |     |       |
|-------------------------|-------|-------------------------|-----|-------|
| >TET2-G137C RPFSGVTACL  | 57    | >TET2-G137C RPFSSVVTACL | 98  | 41    |
| >TET2-G137C RPFSGVTA    | 124   | >TET2-G137C RPFSSVTA    | 571 | 447   |
| >TET2-G137C RPFSGVTAC   | 138   | >TET2-G137C RPFSSVTAC   | 547 | 409   |
| >TET2-G137C RPFSGVTACL  | 57    | >TET2-G137C RPFSSVVTACL | 48  | 9     |
| >TET2-G137C RPFSGVTACL  | 242   | >TET2-G137C RPFSSVVTACL | 253 | 11    |
| >TET2-G137C RPFSGVTACL  | 35    | >TET2-G137C RPFSSVVTACL | 44  | 9     |
| >TET2-G137C RPFSGVTA    | 181   | >TET2-G137C RPFSSVTA    | 180 | 1     |
| >TET2-G137C RPFSGVTA    | 1119  | >TET2-G137C RPFSSVTA    | 251 | 868   |
| >TET2-G137C RPFSGVTACL  | 1120  | >TET2-G137C RPFSSVVTACL | 235 | 885   |
| >TET2-G137C RPFSGVTACL  | 640   | >TET2-G137C RPFSSVVTACL | 406 | 234   |
| >TET2-G137C GRPFSGVTAC  | 713   | >TET2-G137C GRPSSVVTAC  | 467 | 246   |
| >TET2-G137C GRPFSGVTAC  | 46    | >TET2-G137C GRPSSVVTAC  | 24  | 22    |
| >TET2-G137C KEGRPFSG    | 10961 | >TET2-G137C KEGRPFSV    | 375 | 10586 |
| >TET2-G137C KEGRPFSGV   | 1088  | >TET2-G137C KEGRPFSVV   | 314 | 774   |
| >TET2-G137C KEGRPFSG    | 1406  | >TET2-G137C KEGRPFSV    | 98  | 1308  |
| >TET2-G137C KEGRPFSGV   | 89    | >TET2-G137C KEGRPFSVV   | 72  | 17    |
| >TET2-G137C KEGRPFSGVT  | 28    | >TET2-G137C KEGRPFSVVT  | 24  | 4     |
| >TET2-G137C KEGRPFSGV   | 37    | >TET2-G137C KEGRPFSVV   | 47  | 10    |
| >TET2-G137C GLKEGRPFSG  | 14689 | >TET2-G137C GLKEGRPFSV  | 100 | 14589 |
| >TET2-G137C GLKEGRPFSG  | 6211  | >TET2-G137C GLKEGRPFSV  | 38  | 6173  |
| >TET2-G137C GLKEGRPFSG  | 212   | >TET2-G137C GLKEGRPFSV  | 649 | 437   |
| >TET2-G137C GLKEGRPFSG  | 12043 | >TET2-G137C GLKEGRPFSV  | 42  | 12001 |
| >TET2-G137C GLKEGRPFSG  | 5     | >TET2-G137C GLKEGRPFSV  | 7   | 2     |
| >TET2-G137C GLKEGRPFSG  | 113   | >TET2-G137C GLKEGRPFSV  | 437 | 324   |
| >TET2-G137C GLKEGRPFSG  | 8984  | >TET2-G137C GLKEGRPFSV  | 9   | 8975  |
| >TET2-G137C GLKEGRPFSG  | 15    | >TET2-G137C GLKEGRPFSV  | 32  | 17    |
| >TET2-G137C GLKEGRPFSG  | 8588  | >TET2-G137C GLKEGRPFSV  | 12  | 8576  |
| >TET2-G137C GLKEGRPFSG  | 21    | >TET2-G137C GLKEGRPFSV  | 31  | 10    |
| >TET2-G137C GLKEGRPFSG  | 14353 | >TET2-G137C GLKEGRPFSV  | 12  | 14341 |
| >TET2-G137C GLKEGRPFSG  | 27    | >TET2-G137C GLKEGRPFSV  | 53  | 26    |
| >TET2-G137C GLKEGRPFSG  | 22999 | >TET2-G137C GLKEGRPFSV  | 177 | 22822 |
| >TET2-G137C GLKEGRPFSG  | 4604  | >TET2-G137C GLKEGRPFSV  | 2   | 4602  |
| >TET2-G137C GLKEGRPFSG  | 2     | >TET2-G137C GLKEGRPFSV  | 4   | 2     |
| >TET2-G171C GKLPPTYPT   | 2468  | >TET2-G171C RKLPPYPT    | 182 | 2286  |
| >TET2-G171C GKLPPTYPTH  | 234   | >TET2-G171C RKLPPYPTH   | 23  | 211   |
| >TET2-G171C GKLPPTYPTHE | 4086  | >TET2-G171C RKLPPYPTHE  | 427 | 3659  |
| >TET2-G171C GKLPPTYPTHE | 47    | >TET2-G171C RKLPPYPTHE  | 8   | 39    |
| >TET2-G171C CTIRPNVHHV  | 25856 | >TET2-G171C CTIRPNVHHV  | 277 | 25579 |
| >TET2-G171C CTIRPNVHHV  | 16328 | >TET2-G171C CTIRPNVHHV  | 30  | 16298 |
| >TET2-G171C CTIRPNVHHV  | 28715 | >TET2-G171C CTIRPNVHHV  | 158 | 28557 |
| >TET2-G171C CTIRPNVHHV  | 15152 | >TET2-G171C CTIRPNVHHV  | 13  | 15139 |
| >TET2-G171C CTIRPNVHHV  | 37064 | >TET2-G171C CTIRPNVHHV  | 412 | 36652 |
| >TET2-G171C HVGKLPPTY   | 2550  | >TET2-G171C HVRKLPPTY   | 385 | 2165  |

|                       |       |                       |      |       |
|-----------------------|-------|-----------------------|------|-------|
| >TET2-G171ϵHVGKLPPY   | 97    | >TET2-G171ϵHVRKLPPY   | 57   | 40    |
| >TET2-G171ϵHVGKLPPY   | 356   | >TET2-G171ϵHVRKLPPY   | 162  | 194   |
| >TET2-G171ϵHVGKLPPY   | 141   | >TET2-G171ϵHVRKLPPY   | 267  | 126   |
| >TET2-G171ϵHVGKLPPY   | 2452  | >TET2-G171ϵHVRKLPPY   | 6    | 2446  |
| >TET2-G171ϵHVGKLPPYP  | 5585  | >TET2-G171ϵHVRKLPPYP  | 9    | 5576  |
| >TET2-G171ϵHVGKLPPYPT | 7386  | >TET2-G171ϵHVRKLPPYPT | 20   | 7366  |
| >TET2-G171ϵHVGKLPPYPT | 7296  | >TET2-G171ϵHVRKLPPYPT | 15   | 7281  |
| >TET2-G171ϵHVGKLPPY   | 374   | >TET2-G171ϵHVRKLPPY   | 440  | 66    |
| >TET2-G171ϵHVGKLPPY   | 19    | >TET2-G171ϵHVRKLPPY   | 122  | 103   |
| >TET2-G171ϵHVGKLPPY   | 251   | >TET2-G171ϵHVRKLPPY   | 110  | 141   |
| >TET2-G171ϵHVGKLPPY   | 2523  | >TET2-G171ϵHVRKLPPY   | 70   | 2453  |
| >TET2-G171ϵHVGKLPPY   | 283   | >TET2-G171ϵHVRKLPPY   | 192  | 91    |
| >TET2-G171ϵHHVGKLPPY  | 102   | >TET2-G171ϵHHVRKLPPY  | 225  | 123   |
| >TET2-G171ϵHHVGKLPPY  | 422   | >TET2-G171ϵHHVRKLPPY  | 2266 | 1844  |
| >TET2-G171ϵHHVGKLPPY  | 1664  | >TET2-G171ϵHHVRKLPPY  | 397  | 1267  |
| >TET2-G171ϵHHVGKLPPY  | 447   | >TET2-G171ϵHHVRKLPPY  | 1704 | 1257  |
| >TET2-G171ϵVHHVGKLPPY | 345   | >TET2-G171ϵVHHVRKLPPY | 287  | 58    |
| >TET2-G171ϵNVHHVGKLPI | 185   | >TET2-G171ϵNVHHVRKLPI | 257  | 72    |
| >TET2-G171ϵNVHHVGKLPI | 146   | >TET2-G171ϵNVHHVRKLPI | 139  | 7     |
| >TET2-G171ϵNVHHVGKLPI | 187   | >TET2-G171ϵNVHHVRKLPI | 351  | 164   |
| >TET2-G171ϵNVHHVGKLPI | 549   | >TET2-G171ϵNVHHVRKLPI | 419  | 130   |
| >TET2-G171ϵNVHHVGKL   | 243   | >TET2-G171ϵNVHHVRKL   | 322  | 79    |
| >TET2-G171ϵNVHHVGKLPI | 498   | >TET2-G171ϵNVHHVRKLPI | 775  | 277   |
| >TET2-G171ϵNVHHVGKLPI | 280   | >TET2-G171ϵNVHHVRKLPI | 420  | 140   |
| >TET2-G171ϵNVHHVGKLPI | 411   | >TET2-G171ϵNVHHVRKLPI | 673  | 262   |
| >TET2-G171ϵRPNVHHVG   | 18690 | >TET2-G171ϵRPNVHHVR   | 49   | 18641 |
| >TET2-G171ϵRPNVHHVGK  | 108   | >TET2-G171ϵRPNVHHVRK  | 92   | 16    |
| >TET2-G171ϵRPNVHHVG   | 35396 | >TET2-G171ϵRPNVHHVR   | 260  | 35136 |
| >TET2-G171ϵIRPNVHHVGK | 80    | >TET2-G171ϵIRPNVHHVRK | 48   | 32    |
| >TET2-G171ϵTIRPNVHHVC | 161   | >TET2-G171ϵTIRPNVHHVR | 117  | 44    |
| >TET2-G171ϵTIRPNVHHVC | 422   | >TET2-G171ϵTIRPNVHHVR | 282  | 140   |
| >TET2-G171ϵTIRPNVHHVC | 657   | >TET2-G171ϵTIRPNVHHVR | 214  | 443   |
| >TET2-G171ϵTIRPNVHHVC | 7     | >TET2-G171ϵTIRPNVHHVR | 7    | 0     |
| >TET2-G171ϵTIRPNVHHVC | 20767 | >TET2-G171ϵTIRPNVHHVR | 43   | 20724 |
| >TET2-G171ϵTIRPNVHHVC | 702   | >TET2-G171ϵTIRPNVHHVR | 367  | 335   |
| >TET2-G171ϵTIRPNVHHVC | 373   | >TET2-G171ϵTIRPNVHHVR | 390  | 17    |
| >TET2-G171ϵTIRPNVHHVC | 33238 | >TET2-G171ϵTIRPNVHHVR | 197  | 33041 |
| >TET2-G1861GVAVAPTHG  | 461   | >TET2-G1861RVAVAPTHG! | 324  | 137   |
| >TET2-G1861GVAVAPTHG  | 4264  | >TET2-G1861RVAVAPTHG! | 82   | 4182  |
| >TET2-G1861GVAVAPTHG  | 8700  | >TET2-G1861RVAVAPTHG! | 336  | 8364  |
| >TET2-G1861GVAVAPTHG  | 6674  | >TET2-G1861RVAVAPTHG! | 306  | 6368  |
| >TET2-G1861GVAVAPTHG  | 12577 | >TET2-G1861RVAVAPTHG! | 338  | 12239 |
| >TET2-G1861GVAVAPTHG  | 236   | >TET2-G1861RVAVAPTHG! | 34   | 202   |

|                        |       |                        |      |       |
|------------------------|-------|------------------------|------|-------|
| >TET2-G1861GGVAVAPTH   | 30360 | >TET2-G1861GRVAVAPTH   | 496  | 29864 |
| >TET2-G1861EQSFLDPDIGI | 36318 | >TET2-G1861EQSFLDPDIGI | 81   | 36237 |
| >TET2-G1861PDIGGVAV    | 581   | >TET2-G1861PDIGRVAV    | 449  | 132   |
| >TET2-G1861FLDPDIGGV   | 12    | >TET2-G1861FLDPDIGRV   | 12   | 0     |
| >TET2-G1861FLDPDIGGVA  | 189   | >TET2-G1861FLDPDIGRVA  | 331  | 142   |
| >TET2-G1861FLDPDIGGVA  | 11    | >TET2-G1861FLDPDIGRVA  | 12   | 1     |
| >TET2-G1861FLDPDIGGV   | 4     | >TET2-G1861FLDPDIGRV   | 6    | 2     |
| >TET2-G1861FLDPDIGGVA  | 189   | >TET2-G1861FLDPDIGRVA  | 271  | 82    |
| >TET2-G1861FLDPDIGGVA  | 5     | >TET2-G1861FLDPDIGRVA  | 6    | 1     |
| >TET2-G1861FLDPDIGGV   | 3     | >TET2-G1861FLDPDIGRV   | 4    | 1     |
| >TET2-G1861FLDPDIGGVA  | 173   | >TET2-G1861FLDPDIGRVA  | 332  | 159   |
| >TET2-G1861FLDPDIGGVA  | 6     | >TET2-G1861FLDPDIGRVA  | 10   | 4     |
| >TET2-G1861FLDPDIGGV   | 4     | >TET2-G1861FLDPDIGRV   | 7    | 3     |
| >TET2-G1861FLDPDIGGVA  | 215   | >TET2-G1861FLDPDIGRVA  | 290  | 75    |
| >TET2-G1861FLDPDIGGVA  | 4     | >TET2-G1861FLDPDIGRVA  | 6    | 2     |
| >TET2-G1861FLDPDIGG    | 159   | >TET2-G1861FLDPDIGR    | 1011 | 852   |
| >TET2-G1861FLDPDIGGV   | 1     | >TET2-G1861FLDPDIGRV   | 1    | 0     |
| >TET2-G1861FLDPDIGGVA  | 7     | >TET2-G1861FLDPDIGRVA  | 8    | 1     |
| >TET2-G1861FLDPDIGGVA  | 1     | >TET2-G1861FLDPDIGRVA  | 2    | 1     |
| >TET2-G1861FLDPDIGGV   | 2     | >TET2-G1861FLDPDIGRV   | 3    | 1     |
| >TET2-G1861FLDPDIGGVA  | 22    | >TET2-G1861FLDPDIGRVA  | 32   | 10    |
| >TET2-G1861FLDPDIGGVA  | 2     | >TET2-G1861FLDPDIGRVA  | 3    | 1     |
| >TET2-G1861FLDPDIGGV   | 4     | >TET2-G1861FLDPDIGRV   | 5    | 1     |
| >TET2-G1861FLDPDIGGVA  | 20    | >TET2-G1861FLDPDIGRVA  | 30   | 10    |
| >TET2-G1861FLDPDIGGVA  | 4     | >TET2-G1861FLDPDIGRVA  | 4    | 0     |
| >TET2-G1861FLDPDIGGV   | 3     | >TET2-G1861FLDPDIGRV   | 5    | 2     |
| >TET2-G1861FLDPDIGGVA  | 174   | >TET2-G1861FLDPDIGRVA  | 230  | 56    |
| >TET2-G1861FLDPDIGGVA  | 4     | >TET2-G1861FLDPDIGRVA  | 7    | 3     |
| >TET2-G1861FLDPDIGGV   | 1     | >TET2-G1861FLDPDIGRV   | 1    | 0     |
| >TET2-G1861FLDPDIGGVA  | 7     | >TET2-G1861FLDPDIGRVA  | 8    | 1     |
| >TET2-G1861FLDPDIGGVA  | 1     | >TET2-G1861FLDPDIGRVA  | 1    | 0     |
| >TET2-G1861FLDPDIGGV   | 64    | >TET2-G1861FLDPDIGRV   | 342  | 278   |
| >TET2-G1861FLDPDIGGVA  | 113   | >TET2-G1861FLDPDIGRVA  | 160  | 47    |
| >TET2-G1861SFLDPDIGGV  | 84    | >TET2-G1861SFLDPDIGRV  | 123  | 39    |
| >TET2-G1861SFLDPDIGGV  | 114   | >TET2-G1861SFLDPDIGRV  | 291  | 177   |
| >TET2-G1861SFLDPDIGGV  | 175   | >TET2-G1861SFLDPDIGRV  | 155  | 20    |
| >TET2-G1861SFLDPDIGG   | 23685 | >TET2-G1861SFLDPDIGR   | 283  | 23402 |
| >TET2-G1861SFLDPDIGG   | 36712 | >TET2-G1861SFLDPDIGR   | 436  | 36276 |
| >TET2-G1861SFLDPDIGG   | 28237 | >TET2-G1861SFLDPDIGR   | 34   | 28203 |
| >TET2-G1861QSFLDPDIGG  | 33732 | >TET2-G1861QSFLDPDIGR  | 37   | 33695 |
| >TET2-G1861QSFLDPDIGG  | 78    | >TET2-G1861QSFLDPDIGR  | 131  | 53    |
| >TET2-G1861QSFLDPDIGG  | 17948 | >TET2-G1861QSFLDPDIGR  | 483  | 17465 |
| >TET2-G1861QSFLDPDIGG  | 35867 | >TET2-G1861QSFLDPDIGR  | 366  | 35501 |

|                        |       |                        |       |       |
|------------------------|-------|------------------------|-------|-------|
| >TET2-G186ϵGSILIECAK   | 60    | >TET2-G186ϵWSILIECAK   | 2162  | 2102  |
| >TET2-G186ϵGSILIECAKR  | 163   | >TET2-G186ϵWSILIECAKR  | 185   | 22    |
| >TET2-G186ϵGSILIECAKR  | 1327  | >TET2-G186ϵWSILIECAKR  | 282   | 1045  |
| >TET2-G186ϵGSILIECAK   | 416   | >TET2-G186ϵWSILIECAK   | 102   | 314   |
| >TET2-G186ϵGSILIECAKR  | 34    | >TET2-G186ϵWSILIECAKR  | 10    | 24    |
| >TET2-G186ϵHGSILIECAKR | 776   | >TET2-G186ϵHWSILIECAK  | 253   | 523   |
| >TET2-G186ϵHGSILIECAKR | 414   | >TET2-G186ϵHWSILIECAK  | 1355  | 941   |
| >TET2-G186ϵHGSILIECAK  | 2717  | >TET2-G186ϵHWSILIECAK  | 40    | 2677  |
| >TET2-G186ϵHGSILIECAKR | 345   | >TET2-G186ϵHWSILIECAK  | 12    | 333   |
| >TET2-G186ϵHGSILIEC    | 34751 | >TET2-G186ϵHWSILIEC    | 303   | 34448 |
| >TET2-G186ϵHGSILIECA   | 32560 | >TET2-G186ϵHWSILIECA   | 181   | 32379 |
| >TET2-G186ϵIGGVAVAPTH  | 24386 | >TET2-G186ϵIGGVAVAPTH  | 134   | 24252 |
| >TET2-G186ϵIGGVAVAPTH  | 20975 | >TET2-G186ϵIGGVAVAPTH  | 50    | 20925 |
| >TET2-G186ϵPTHGSILI    | 309   | >TET2-G186ϵPTHWSILI    | 537   | 228   |
| >TET2-G186ϵPTHGSILI    | 554   | >TET2-G186ϵPTHWSILI    | 190   | 364   |
| >TET2-G186ϵAPTHGSILI   | 461   | >TET2-G186ϵAPTHWSILI   | 15407 | 14946 |
| >TET2-G186ϵAPTHGSIL    | 25    | >TET2-G186ϵAPTHWSIL    | 32    | 7     |
| >TET2-G186ϵAPTHGSILI   | 375   | >TET2-G186ϵAPTHWSILI   | 851   | 476   |
| >TET2-G186ϵAPTHGSIL    | 837   | >TET2-G186ϵAPTHWSIL    | 414   | 423   |
| >TET2-G186ϵAPTHGSIL    | 1816  | >TET2-G186ϵAPTHWSIL    | 448   | 1368  |
| >TET2-G186ϵAPTHGSILI   | 174   | >TET2-G186ϵAPTHWSILI   | 64    | 110   |
| >TET2-G186ϵAPTHGSILI   | 1749  | >TET2-G186ϵAPTHWSILI   | 492   | 1257  |
| >TET2-G186ϵVAPTHGSIL   | 828   | >TET2-G186ϵVAPTHWSIL   | 121   | 707   |
| >TET2-G186ϵVAPTHGSIL   | 5     | >TET2-G186ϵVAPTHWSIL   | 5     | 0     |
| >TET2-G186ϵVAPTHGSILI  | 6     | >TET2-G186ϵVAPTHWSILI  | 6     | 0     |
| >TET2-G186ϵVAPTHGSILIE | 280   | >TET2-G186ϵVAPTHWSILII | 331   | 51    |
| >TET2-G186ϵVAPTHGSI    | 249   | >TET2-G186ϵVAPTHWSI    | 302   | 53    |
| >TET2-G186ϵVAPTHGSILI  | 227   | >TET2-G186ϵVAPTHWSILI  | 73    | 154   |
| >TET2-G186ϵAVAPTHGSI   | 13657 | >TET2-G186ϵAVAPTHWSI   | 380   | 13277 |
| >TET2-G186ϵAVAPTHGSILI | 2073  | >TET2-G186ϵAVAPTHWSIL  | 321   | 1752  |
| >TET2-G186ϵAVAPTHGSI   | 1852  | >TET2-G186ϵAVAPTHWSI   | 80    | 1772  |
| >TET2-G186ϵAVAPTHGSILI | 509   | >TET2-G186ϵAVAPTHWSIL  | 135   | 374   |
| >TET2-G186ϵAVAPTHGSI   | 228   | >TET2-G186ϵAVAPTHWSI   | 216   | 12    |
| >TET2-G186ϵAVAPTHGSILI | 276   | >TET2-G186ϵAVAPTHWSIL  | 238   | 38    |
| >TET2-G186ϵAVAPTHGSI   | 878   | >TET2-G186ϵAVAPTHWSI   | 8     | 870   |
| >TET2-G186ϵAVAPTHGSILI | 142   | >TET2-G186ϵAVAPTHWSIL  | 26    | 116   |
| >TET2-G186ϵAVAPTHGSI   | 1661  | >TET2-G186ϵAVAPTHWSI   | 46    | 1615  |
| >TET2-G186ϵAVAPTHGSILI | 1485  | >TET2-G186ϵAVAPTHWSIL  | 214   | 1271  |
| >TET2-G186ϵAVAPTHGSI   | 9564  | >TET2-G186ϵAVAPTHWSI   | 138   | 9426  |
| >TET2-G186ϵAVAPTHGSILI | 2131  | >TET2-G186ϵAVAPTHWSIL  | 329   | 1802  |
| >TET2-G186ϵAVAPTHGSI   | 1348  | >TET2-G186ϵAVAPTHWSI   | 13    | 1335  |
| >TET2-G186ϵAVAPTHGSIL  | 514   | >TET2-G186ϵAVAPTHWSIL  | 104   | 410   |
| >TET2-G186ϵAVAPTHGSILI | 686   | >TET2-G186ϵAVAPTHWSIL  | 89    | 597   |

|                         |       |                        |      |       |
|-------------------------|-------|------------------------|------|-------|
| >TET2-G186ϵ AVAPTHGSI   | 183   | >TET2-G186ϵ AVAPTHWSI  | 251  | 68    |
| >TET2-G186ϵ AVAPTHGSILI | 153   | >TET2-G186ϵ AVAPTHWSIL | 205  | 52    |
| >TET2-G186ϵ AVAPTHGSI   | 2514  | >TET2-G186ϵ AVAPTHWSI  | 181  | 2333  |
| >TET2-G186ϵ AVAPTHGSI   | 438   | >TET2-G186ϵ AVAPTHWSI  | 97   | 341   |
| >TET2-G186ϵ AVAPTHGSILI | 196   | >TET2-G186ϵ AVAPTHWSIL | 90   | 106   |
| >TET2-G186ϵ AVAPTHGSI   | 1867  | >TET2-G186ϵ AVAPTHWSI  | 147  | 1720  |
| >TET2-G186ϵ AVAPTHGSILI | 1430  | >TET2-G186ϵ AVAPTHWSIL | 286  | 1144  |
| >TET2-G186ϵ AVAPTHGSI   | 216   | >TET2-G186ϵ AVAPTHWSI  | 1322 | 1106  |
| >TET2-G186ϵ AVAPTHGSI   | 9431  | >TET2-G186ϵ AVAPTHWSI  | 388  | 9043  |
| >TET2-G186ϵ AVAPTHGSIL  | 8441  | >TET2-G186ϵ AVAPTHWSIL | 434  | 8007  |
| >TET2-G186ϵ AVAPTHGSI   | 51    | >TET2-G186ϵ AVAPTHWSI  | 108  | 57    |
| >TET2-G186ϵ AVAPTHGSIL  | 294   | >TET2-G186ϵ AVAPTHWSIL | 231  | 63    |
| >TET2-G186ϵ AVAPTHGSILI | 84    | >TET2-G186ϵ AVAPTHWSIL | 104  | 20    |
| >TET2-G186ϵ VAVAPTHGSI  | 2855  | >TET2-G186ϵ VAVAPTHWS  | 332  | 2523  |
| >TET2-G186ϵ VAVAPTHGSI  | 98    | >TET2-G186ϵ VAVAPTHWS  | 72   | 26    |
| >TET2-G186ϵ VAVAPTHGSI  | 778   | >TET2-G186ϵ VAVAPTHWS  | 268  | 510   |
| >TET2-G186ϵ VAVAPTHG    | 12369 | >TET2-G186ϵ VAVAPTHW   | 7    | 12362 |
| >TET2-G186ϵ VAVAPTHGSI  | 128   | >TET2-G186ϵ VAVAPTHWS  | 88   | 40    |
| >TET2-G186ϵ VAVAPTHGSI  | 73    | >TET2-G186ϵ VAVAPTHWS  | 93   | 20    |
| >TET2-G186ϵ VAVAPTHG    | 33134 | >TET2-G186ϵ VAVAPTHW   | 213  | 32921 |
| >TET2-G186ϵ VAVAPTHG    | 20900 | >TET2-G186ϵ VAVAPTHW   | 41   | 20859 |
| >TET2-G186ϵ VAVAPTHG    | 13823 | >TET2-G186ϵ VAVAPTHW   | 9    | 13814 |
| >TET2-G186ϵ VAVAPTHGSI  | 747   | >TET2-G186ϵ VAVAPTHWS  | 79   | 668   |
| >TET2-G186ϵ VAVAPTHGSI  | 1102  | >TET2-G186ϵ VAVAPTHWS  | 162  | 940   |
| >TET2-G186ϵ VAVAPTHGSI  | 263   | >TET2-G186ϵ VAVAPTHWS  | 321  | 58    |
| >TET2-G186ϵ VAVAPTHGSI  | 136   | >TET2-G186ϵ VAVAPTHWS  | 2169 | 2033  |
| >TET2-G186ϵ GVAVAPTHG   | 2648  | >TET2-G186ϵ GVAVAPTHW  | 429  | 2219  |
| >TET2-G186ϵ GVAVAPTHG   | 461   | >TET2-G186ϵ GVAVAPTHW  | 430  | 31    |
| >TET2-G186ϵ GVAVAPTHG   | 3071  | >TET2-G186ϵ GVAVAPTHW  | 236  | 2835  |
| >TET2-G186ϵ GVAVAPTHG   | 25443 | >TET2-G186ϵ GVAVAPTHW  | 402  | 25041 |
| >TET2-G186ϵ GVAVAPTHG   | 24298 | >TET2-G186ϵ GVAVAPTHW  | 386  | 23912 |
| >TET2-G186ϵ GVAVAPTHG   | 20760 | >TET2-G186ϵ GVAVAPTHW  | 31   | 20729 |
| >TET2-G186ϵ GVAVAPTHG   | 236   | >TET2-G186ϵ GVAVAPTHW  | 452  | 216   |
| >TET2-G186ϵ GGVAVAPTH   | 28089 | >TET2-G186ϵ GGVAVAPTH  | 440  | 27649 |
| >TET2-G186ϵ GGVAVAPTH   | 24824 | >TET2-G186ϵ GGVAVAPTH  | 363  | 24461 |
| >TET2-G186ϵ GGVAVAPTH   | 20569 | >TET2-G186ϵ GGVAVAPTH  | 43   | 20526 |
| >TET2-G191ϵ GLALWEAKM   | 405   | >TET2-G191ϵ DLALWEAKM  | 9228 | 8823  |
| >TET2-G191ϵ GLALWEAKM   | 470   | >TET2-G191ϵ DLALWEAKM  | 3116 | 2646  |
| >TET2-G191ϵ GLALWEAKM   | 320   | >TET2-G191ϵ DLALWEAKM  | 5522 | 5202  |
| >TET2-G191ϵ GLALWEAKM   | 294   | >TET2-G191ϵ DLALWEAKM  | 5047 | 4753  |
| >TET2-G191ϵ GLALWEAKM   | 161   | >TET2-G191ϵ DLALWEAKM  | 3954 | 3793  |
| >TET2-G191ϵ GLALWEAKM   | 159   | >TET2-G191ϵ DLALWEAKM  | 2966 | 2807  |
| >TET2-G191ϵ GLALWEAKM   | 53    | >TET2-G191ϵ DLALWEAKM  | 2699 | 2646  |

|                       |       |                       |       |       |
|-----------------------|-------|-----------------------|-------|-------|
| >TET2-G1913GLALWEAKM  | 69    | >TET2-G1913DLALWEAKM  | 1999  | 1930  |
| >TET2-G1913GLALWEAK   | 499   | >TET2-G1913DLALWEAK   | 8630  | 8131  |
| >TET2-G1913GLALWEAK   | 345   | >TET2-G1913DLALWEAK   | 10360 | 10015 |
| >TET2-G1913GLALWEAK   | 16561 | >TET2-G1913DLALWEAK   | 382   | 16179 |
| >TET2-G1913GLALWEAK   | 3311  | >TET2-G1913DLALWEAK   | 242   | 3069  |
| >TET2-G1913HGLALWEA   | 18638 | >TET2-G1913HDLALWEA   | 71    | 18567 |
| >TET2-G1913HGLALWEAK  | 24700 | >TET2-G1913HDLALWEAK  | 454   | 24246 |
| >TET2-G1913EPKHGLAL   | 93    | >TET2-G1913EPKHDLAL   | 401   | 308   |
| >TET2-G1913EPKHGLAL   | 241   | >TET2-G1913EPKHDLAL   | 180   | 61    |
| >TET2-G1913EPKHGLAL   | 385   | >TET2-G1913EPKHDLAL   | 212   | 173   |
| >TET2-G1913EPKHGLALW  | 97    | >TET2-G1913EPKHDLALW  | 50    | 47    |
| >TET2-G1913EPKHGLALWI | 379   | >TET2-G1913EPKHDLALWI | 701   | 322   |
| >TET2-G1913EPKHGLALW  | 20    | >TET2-G1913EPKHDLALW  | 22    | 2     |
| >TET2-G1913NEPKHGLAL  | 228   | >TET2-G1913NEPKHDLAL  | 378   | 150   |
| >TET2-G1913NEPKHGLALV | 153   | >TET2-G1913NEPKHDLALV | 190   | 37    |
| >TET2-G1913NEPKHGLALV | 375   | >TET2-G1913NEPKHDLALV | 436   | 61    |
| >TET2-G1913MNEPKHGLA  | 621   | >TET2-G1913MNEPKHDLA  | 387   | 234   |
| >TET2-G1913MNEPKHGLA  | 28    | >TET2-G1913MNEPKHDLA  | 31    | 3     |
| >TET2-G1913SMNEPKHGL  | 213   | >TET2-G1913SMNEPKHDL  | 1536  | 1323  |
| >TET2-G1913SMNEPKHGL  | 161   | >TET2-G1913SMNEPKHDL  | 182   | 21    |
| >TET2-G1913SMNEPKHGL  | 61    | >TET2-G1913SMNEPKHDL  | 451   | 390   |
| >TET2-G1913SMNEPKHGL  | 61    | >TET2-G1913SMNEPKHDL  | 82    | 21    |
| >TET2-G1913SMNEPKHGL  | 76    | >TET2-G1913SMNEPKHDL  | 433   | 357   |
| >TET2-G1913SMNEPKHGL  | 331   | >TET2-G1913SMNEPKHDL  | 907   | 576   |
| >TET2-G1913SMNEPKHGL  | 37    | >TET2-G1913SMNEPKHDL  | 77    | 40    |
| >TET2-G1913SMNEPKHGL  | 418   | >TET2-G1913SMNEPKHDL  | 4623  | 4205  |
| >TET2-G1913SMNEPKHGL  | 301   | >TET2-G1913SMNEPKHDL  | 468   | 167   |
| >TET2-G1913SMNEPKHGL  | 2     | >TET2-G1913SMNEPKHDL  | 7     | 5     |
| >TET2-G1913SMNEPKHGL  | 16    | >TET2-G1913SMNEPKHDL  | 17    | 1     |
| >TET2-G1913SMNEPKHGL  | 4     | >TET2-G1913SMNEPKHDL  | 7     | 3     |
| >TET2-G1913SMNEPKHGL  | 9     | >TET2-G1913SMNEPKHDL  | 42    | 33    |
| >TET2-G1913SMNEPKHGL  | 612   | >TET2-G1913SMNEPKHDL  | 343   | 269   |
| >TET2-G1913SMNEPKHGL  | 19    | >TET2-G1913SMNEPKHDL  | 25    | 6     |
| >TET2-G1913SMNEPKHGL  | 9     | >TET2-G1913SMNEPKHDL  | 23    | 14    |
| >TET2-G1913SMNEPKHGL  | 119   | >TET2-G1913SMNEPKHDL  | 56    | 63    |
| >TET2-G1913SMNEPKHGL  | 20    | >TET2-G1913SMNEPKHDL  | 25    | 5     |
| >TET2-G1913SMNEPKHGL  | 20    | >TET2-G1913SMNEPKHDL  | 550   | 530   |
| >TET2-G1913SMNEPKHGL  | 375   | >TET2-G1913SMNEPKHDL  | 743   | 368   |
| >TET2-G1913SMNEPKHGL  | 2     | >TET2-G1913SMNEPKHDL  | 4     | 2     |
| >TET2-G1913SMNEPKHGL  | 39    | >TET2-G1913SMNEPKHDL  | 38    | 1     |
| >TET2-G1913SMNEPKHGL  | 8     | >TET2-G1913SMNEPKHDL  | 10    | 2     |
| >TET2-G1913SMNEPKHGL  | 47    | >TET2-G1913SMNEPKHDL  | 1078  | 1031  |
| >TET2-G1913SMNEPKHGL  | 436   | >TET2-G1913SMNEPKHDL  | 1347  | 911   |

|                       |       |                       |     |       |
|-----------------------|-------|-----------------------|-----|-------|
| >TET2-G1913SMNEPKHGL  | 315   | >TET2-G1913SMNEPKHDL  | 452 | 137   |
| >TET2-G1913SMNEPKHGL  | 422   | >TET2-G1913SMNEPKHDL  | 701 | 279   |
| >TET2-G1913SMNEPKHGL  | 172   | >TET2-G1913SMNEPKHDL  | 437 | 265   |
| >TET2-G1913SMNEPKHGL  | 210   | >TET2-G1913SMNEPKHDL  | 416 | 206   |
| >TET2-G1913KSMNEPKHG  | 158   | >TET2-G1913KSMNEPKHD  | 563 | 405   |
| >TET2-G1913KSMNEPKHG  | 159   | >TET2-G1913KSMNEPKHD  | 175 | 16    |
| >TET2-G1913KSMNEPKHG  | 525   | >TET2-G1913KSMNEPKHD  | 367 | 158   |
| >TET2-G1913KSMNEPKHG  | 11    | >TET2-G1913KSMNEPKHD  | 36  | 25    |
| >TET2-G1913KSMNEPKHG  | 204   | >TET2-G1913KSMNEPKHD  | 576 | 372   |
| >TET2-G1913HKSMNEPKH  | 465   | >TET2-G1913HKSMNEPKH  | 347 | 118   |
| >TET2-G1913GLALWEAKM  | 405   | >TET2-G1913VLALWEAKM  | 535 | 130   |
| >TET2-G1913GLALWEAKM  | 470   | >TET2-G1913VLALWEAKM  | 962 | 492   |
| >TET2-G1913GLALWEAKM  | 320   | >TET2-G1913VLALWEAKM  | 128 | 192   |
| >TET2-G1913GLALWEAKM  | 294   | >TET2-G1913VLALWEAKM  | 128 | 166   |
| >TET2-G1913GLALWEAKM  | 161   | >TET2-G1913VLALWEAKM  | 270 | 109   |
| >TET2-G1913GLALWEAKM  | 159   | >TET2-G1913VLALWEAKM  | 191 | 32    |
| >TET2-G1913GLALWEAKM  | 617   | >TET2-G1913VLALWEAKM  | 66  | 551   |
| >TET2-G1913GLALWEAKM  | 53    | >TET2-G1913VLALWEAKM  | 30  | 23    |
| >TET2-G1913GLALWEAKM  | 69    | >TET2-G1913VLALWEAKM  | 34  | 35    |
| >TET2-G1913GLALWEAK   | 499   | >TET2-G1913VLALWEAK   | 283 | 216   |
| >TET2-G1913GLALWEAK   | 345   | >TET2-G1913VLALWEAK   | 383 | 38    |
| >TET2-G1913HGLALWEA   | 11757 | >TET2-G1913HVLALWEA   | 236 | 11521 |
| >TET2-G1913HGLALWEA   | 1008  | >TET2-G1913HVLALWEA   | 17  | 991   |
| >TET2-G1913HGLALWEA   | 9081  | >TET2-G1913HVLALWEA   | 446 | 8635  |
| >TET2-G1913HGLALWEAK  | 10824 | >TET2-G1913HVLALWEAK  | 481 | 10343 |
| >TET2-G1913HGLALWEAK  | 6920  | >TET2-G1913HVLALWEAK  | 96  | 6824  |
| >TET2-G1913HGLALWEAK  | 28027 | >TET2-G1913HVLALWEAKI | 309 | 27718 |
| >TET2-G1913HGLALWEA   | 6135  | >TET2-G1913HVLALWEA   | 434 | 5701  |
| >TET2-G1913HGLALWEAK  | 681   | >TET2-G1913HVLALWEAK  | 22  | 659   |
| >TET2-G1913HGLALWEAK  | 1345  | >TET2-G1913HVLALWEAK  | 116 | 1229  |
| >TET2-G1913HGLALWEAK  | 8172  | >TET2-G1913HVLALWEAK  | 223 | 7949  |
| >TET2-G1913HGLALWEA   | 6994  | >TET2-G1913HVLALWEA   | 71  | 6923  |
| >TET2-G1913HGLALWEA   | 5508  | >TET2-G1913HVLALWEA   | 73  | 5435  |
| >TET2-G1913HGLALWEAK  | 8992  | >TET2-G1913HVLALWEAKI | 213 | 8779  |
| >TET2-G1913EPKHGLAL   | 93    | >TET2-G1913EPKHVLAL   | 293 | 200   |
| >TET2-G1913EPKHGLAL   | 241   | >TET2-G1913EPKHVLAL   | 111 | 130   |
| >TET2-G1913EPKHGLAL   | 385   | >TET2-G1913EPKHVLAL   | 303 | 82    |
| >TET2-G1913EPKHGLALW  | 97    | >TET2-G1913EPKHVLALW  | 101 | 4     |
| >TET2-G1913EPKHGLALWI | 379   | >TET2-G1913EPKHVLALWI | 242 | 137   |
| >TET2-G1913EPKHGLALW  | 20    | >TET2-G1913EPKHVLALW  | 19  | 1     |
| >TET2-G1913NEPKHGLALV | 1066  | >TET2-G1913NEPKHVLALV | 346 | 720   |
| >TET2-G1913NEPKHGLAL  | 228   | >TET2-G1913NEPKHVLAL  | 171 | 57    |
| >TET2-G1913NEPKHGLALV | 153   | >TET2-G1913NEPKHVLALV | 110 | 43    |



|                       |       |                       |      |       |
|-----------------------|-------|-----------------------|------|-------|
| >TET2-G1913NEPKHGLALV | 375   | >TET2-G1913NEPKHVLALV | 155  | 220   |
| >TET2-G1913NEPKHGLAL  | 583   | >TET2-G1913NEPKHVLAL  | 72   | 511   |
| >TET2-G1913MNPKHGLA   | 621   | >TET2-G1913MNPKHVLA   | 288  | 333   |
| >TET2-G1913MNPKHGLA   | 28    | >TET2-G1913MNPKHVLA   | 68   | 40    |
| >TET2-G1913SMNEPKHG   | 21993 | >TET2-G1913SMNEPKHV   | 203  | 21790 |
| >TET2-G1913SMNEPKHGL  | 213   | >TET2-G1913SMNEPKHVL  | 562  | 349   |
| >TET2-G1913SMNEPKHGL  | 161   | >TET2-G1913SMNEPKHVL  | 82   | 79    |
| >TET2-G1913SMNEPKHG   | 17465 | >TET2-G1913SMNEPKHV   | 119  | 17346 |
| >TET2-G1913SMNEPKHGL  | 61    | >TET2-G1913SMNEPKHVL  | 163  | 102   |
| >TET2-G1913SMNEPKHGL  | 61    | >TET2-G1913SMNEPKHVL  | 37   | 24    |
| >TET2-G1913SMNEPKHG   | 7308  | >TET2-G1913SMNEPKHV   | 11   | 7297  |
| >TET2-G1913SMNEPKHGL  | 76    | >TET2-G1913SMNEPKHVL  | 240  | 164   |
| >TET2-G1913SMNEPKHGL  | 331   | >TET2-G1913SMNEPKHVL  | 452  | 121   |
| >TET2-G1913SMNEPKHGL  | 37    | >TET2-G1913SMNEPKHVL  | 24   | 13    |
| >TET2-G1913SMNEPKHG   | 25320 | >TET2-G1913SMNEPKHV   | 379  | 24941 |
| >TET2-G1913SMNEPKHGL  | 418   | >TET2-G1913SMNEPKHVL  | 2649 | 2231  |
| >TET2-G1913SMNEPKHGL  | 301   | >TET2-G1913SMNEPKHVL  | 241  | 60    |
| >TET2-G1913SMNEPKHG   | 1025  | >TET2-G1913SMNEPKHV   | 2    | 1023  |
| >TET2-G1913SMNEPKHGL  | 2     | >TET2-G1913SMNEPKHVL  | 3    | 1     |
| >TET2-G1913SMNEPKHGL  | 16    | >TET2-G1913SMNEPKHVL  | 10   | 6     |
| >TET2-G1913SMNEPKHGL  | 4     | >TET2-G1913SMNEPKHVL  | 3    | 1     |
| >TET2-G1913SMNEPKHG   | 11580 | >TET2-G1913SMNEPKHV   | 9    | 11571 |
| >TET2-G1913SMNEPKHGL  | 9     | >TET2-G1913SMNEPKHVL  | 13   | 4     |
| >TET2-G1913SMNEPKHGL  | 612   | >TET2-G1913SMNEPKHVL  | 236  | 376   |
| >TET2-G1913SMNEPKHGL  | 19    | >TET2-G1913SMNEPKHVL  | 14   | 5     |
| >TET2-G1913SMNEPKHG   | 8184  | >TET2-G1913SMNEPKHV   | 7    | 8177  |
| >TET2-G1913SMNEPKHGL  | 9     | >TET2-G1913SMNEPKHVL  | 16   | 7     |
| >TET2-G1913SMNEPKHGL  | 119   | >TET2-G1913SMNEPKHVL  | 37   | 82    |
| >TET2-G1913SMNEPKHGL  | 20    | >TET2-G1913SMNEPKHVL  | 16   | 4     |
| >TET2-G1913SMNEPKHG   | 21463 | >TET2-G1913SMNEPKHV   | 40   | 21423 |
| >TET2-G1913SMNEPKHGL  | 20    | >TET2-G1913SMNEPKHVL  | 75   | 55    |
| >TET2-G1913SMNEPKHGL  | 375   | >TET2-G1913SMNEPKHVL  | 124  | 251   |
| >TET2-G1913SMNEPKHG   | 9072  | >TET2-G1913SMNEPKHV   | 3    | 9069  |
| >TET2-G1913SMNEPKHGL  | 2     | >TET2-G1913SMNEPKHVL  | 4    | 2     |
| >TET2-G1913SMNEPKHGL  | 39    | >TET2-G1913SMNEPKHVL  | 14   | 25    |
| >TET2-G1913SMNEPKHGL  | 8     | >TET2-G1913SMNEPKHVL  | 5    | 3     |
| >TET2-G1913SMNEPKHGL  | 1077  | >TET2-G1913SMNEPKHVL  | 424  | 653   |
| >TET2-G1913SMNEPKHG   | 18923 | >TET2-G1913SMNEPKHV   | 318  | 18605 |
| >TET2-G1913SMNEPKHGL  | 47    | >TET2-G1913SMNEPKHVL  | 623  | 576   |
| >TET2-G1913SMNEPKHGL  | 436   | >TET2-G1913SMNEPKHVL  | 418  | 18    |
| >TET2-G1913SMNEPKHGL  | 315   | >TET2-G1913SMNEPKHVL  | 248  | 67    |
| >TET2-G1913SMNEPKHGL  | 422   | >TET2-G1913SMNEPKHVL  | 1001 | 579   |
| >TET2-G1913SMNEPKHGL  | 172   | >TET2-G1913SMNEPKHVL  | 145  | 27    |

|                       |       |                       |     |       |
|-----------------------|-------|-----------------------|-----|-------|
| >TET2-G191E SMNEPKHGL | 1452  | >TET2-G191E SMNEPKHVL | 80  | 1372  |
| >TET2-G191E SMNEPKHGL | 210   | >TET2-G191E SMNEPKHVL | 85  | 125   |
| >TET2-G191E KSMNEPKHG | 158   | >TET2-G191E KSMNEPKHV | 106 | 52    |
| >TET2-G191E KSMNEPKHG | 159   | >TET2-G191E KSMNEPKHV | 112 | 47    |
| >TET2-G191E KSMNEPKHG | 11736 | >TET2-G191E KSMNEPKHV | 262 | 11474 |
| >TET2-G191E KSMNEPKHG | 525   | >TET2-G191E KSMNEPKHV | 149 | 376   |
| >TET2-G191E KSMNEPKHG | 9597  | >TET2-G191E KSMNEPKHV | 465 | 9132  |
| >TET2-G191E KSMNEPKHG | 11    | >TET2-G191E KSMNEPKHV | 17  | 6     |
| >TET2-G191E KSMNEPKHG | 599   | >TET2-G191E KSMNEPKHV | 353 | 246   |
| >TET2-G191E KSMNEPKHG | 204   | >TET2-G191E KSMNEPKHV | 59  | 145   |
| >TET2-G191E HKSMNEPKH | 8765  | >TET2-G191E HKSMNEPKH | 248 | 8517  |
| >TET2-G191E HKSMNEPKH | 465   | >TET2-G191E HKSMNEPKH | 121 | 344   |
| >TET2-G191E HKSMNEPKH | 532   | >TET2-G191E HKSMNEPKH | 56  | 476   |
| >TET2-G773\GSFFGQTK   | 193   | >TET2-G773\VSFFGQTK   | 121 | 72    |
| >TET2-G773\GSFFGQTK   | 19    | >TET2-G773\VSFFGQTK   | 21  | 2     |
| >TET2-G773\GSFFGQTK   | 148   | >TET2-G773\VSFFGQTK   | 177 | 29    |
| >TET2-G773\GSFFGQTK   | 264   | >TET2-G773\VSFFGQTK   | 147 | 117   |
| >TET2-G773\GSFFGQTKV  | 1303  | >TET2-G773\VSFFGQTKV  | 190 | 1113  |
| >TET2-G773\GSFFGQTKV  | 401   | >TET2-G773\VSFFGQTKV  | 102 | 299   |
| >TET2-G773\GSFFGQTKV  | 48    | >TET2-G773\VSFFGQTKV  | 70  | 22    |
| >TET2-G773\GSFFGQTK   | 154   | >TET2-G773\VSFFGQTK   | 427 | 273   |
| >TET2-G773\EGSFFGQTK  | 8770  | >TET2-G773\EVSFFGQTK  | 304 | 8466  |
| >TET2-G773\EGSFFGQTK  | 177   | >TET2-G773\EVSFFGQTK  | 8   | 169   |
| >TET2-G773\EGSFFGQT   | 10999 | >TET2-G773\EVSFFGQT   | 280 | 10719 |
| >TET2-G773\EGSFFGQTKV | 3639  | >TET2-G773\EVSFFGQTKV | 35  | 3604  |
| >TET2-G773\EGSFFGQTKV | 3719  | >TET2-G773\EVSFFGQTKV | 25  | 3694  |
| >TET2-G773\REGSFFGQ   | 2930  | >TET2-G773\REVSFFGQ   | 392 | 2538  |
| >TET2-G773\REGSFFGQTK | 190   | >TET2-G773\REVSFFGQTK | 29  | 161   |
| >TET2-G773\REGSFFGQT  | 337   | >TET2-G773\REVSFFGQT  | 156 | 181   |
| >TET2-G773\REGSFFGQTK | 327   | >TET2-G773\REVSFFGQTK | 170 | 157   |
| >TET2-G773\REGSFFGQ   | 202   | >TET2-G773\REVSFFGQ   | 238 | 36    |
| >TET2-G773\REGSFFGQT  | 106   | >TET2-G773\REVSFFGQT  | 101 | 5     |
| >TET2-G773\REGSFFGQTK | 79    | >TET2-G773\REVSFFGQTK | 86  | 7     |
| >TET2-G773\REGSFFGQT  | 61    | >TET2-G773\REVSFFGQT  | 15  | 46    |
| >TET2-G773\REGSFFGQTK | 13    | >TET2-G773\REVSFFGQTK | 6   | 7     |
| >TET2-G773\QREGSFFGQ  | 1213  | >TET2-G773\QREVSFFGQ  | 316 | 897   |
| >TET2-G773\QQREGSFF   | 43    | >TET2-G773\QQREVSFF   | 46  | 3     |
| >TET2-G773\QQREGSFF   | 55    | >TET2-G773\QQREVSFF   | 286 | 231   |
| >TET2-G773\QQREGSFF   | 4     | >TET2-G773\QQREVSFF   | 4   | 0     |
| >TET2-G773\DQQREGSFF  | 3054  | >TET2-G773\DQQREVSFF  | 201 | 2853  |
| >TET2-G773\DQQREGSF   | 385   | >TET2-G773\DQQREVSF   | 107 | 278   |
| >TET2-G773\DQQREGSFF  | 134   | >TET2-G773\DQQREVSFF  | 155 | 21    |
| >TET2-H121E HTCEAAVIV | 442   | >TET2-H121E QTCEAAVIV | 475 | 33    |

|                         |       |                         |      |       |
|-------------------------|-------|-------------------------|------|-------|
| >TET2-H1219 HTCEAAVIVI  | 250   | >TET2-H1219 QTCEAAVIVI  | 2748 | 2498  |
| >TET2-H1219 HTCEAAVI    | 431   | >TET2-H1219 QTCEAAVI    | 355  | 76    |
| >TET2-H1219 HTCEAAVIVI  | 223   | >TET2-H1219 QTCEAAVIVI  | 180  | 43    |
| >TET2-H1219 HTCEAAVIVIL | 370   | >TET2-H1219 QTCEAAVIVIL | 301  | 69    |
| >TET2-H1219 HTCEAAVI    | 132   | >TET2-H1219 QTCEAAVI    | 310  | 178   |
| >TET2-H1219 HTCEAAVIV   | 38    | >TET2-H1219 QTCEAAVIV   | 87   | 49    |
| >TET2-H1219 HTCEAAVIVI  | 198   | >TET2-H1219 QTCEAAVIVI  | 209  | 11    |
| >TET2-H1219 HTCEAAVIVIL | 127   | >TET2-H1219 QTCEAAVIVIL | 280  | 153   |
| >TET2-H1219 HTCEAAVI    | 450   | >TET2-H1219 QTCEAAVI    | 698  | 248   |
| >TET2-H1219 HTCEAAVIV   | 45    | >TET2-H1219 QTCEAAVIV   | 68   | 23    |
| >TET2-H1219 HTCEAAVIVI  | 375   | >TET2-H1219 QTCEAAVIVI  | 623  | 248   |
| >TET2-H1219 HTCEAAVI    | 48    | >TET2-H1219 QTCEAAVI    | 104  | 56    |
| >TET2-H1219 HTCEAAVIV   | 355   | >TET2-H1219 QTCEAAVIV   | 944  | 589   |
| >TET2-H1219 HTCEAAVIVI  | 78    | >TET2-H1219 QTCEAAVIVI  | 184  | 106   |
| >TET2-H1219 HTCEAAVIVIL | 56    | >TET2-H1219 QTCEAAVIVIL | 123  | 67    |
| >TET2-H1219 HTCEAAVIVIL | 180   | >TET2-H1219 QTCEAAVIVIL | 1981 | 1801  |
| >TET2-H1219 HTCEAAVIVIL | 485   | >TET2-H1219 QTCEAAVIVIL | 258  | 227   |
| >TET2-H1219 HTCEAAVI    | 18    | >TET2-H1219 QTCEAAVI    | 27   | 9     |
| >TET2-H1219 HTCEAAVIVI  | 76    | >TET2-H1219 QTCEAAVIVI  | 59   | 17    |
| >TET2-H1219 HTCEAAVIVIL | 231   | >TET2-H1219 QTCEAAVIVIL | 458  | 227   |
| >TET2-H1219 GHTCEAAV    | 16498 | >TET2-H1219 GQTCEAAV    | 398  | 16100 |
| >TET2-H1219 GHTCEAAV    | 15387 | >TET2-H1219 GQTCEAAV    | 37   | 15350 |
| >TET2-H1219 GHTCEAAV    | 11140 | >TET2-H1219 GQTCEAAV    | 58   | 11082 |
| >TET2-H1219 GHTCEAAVIV  | 13306 | >TET2-H1219 GQTCEAAVIV  | 104  | 13202 |
| >TET2-H1219 RAGHTCEAA\  | 509   | >TET2-H1219 RAGQTCEAA\  | 489  | 20    |
| >TET2-H1219 RAGHTCEAA\  | 418   | >TET2-H1219 RAGQTCEAA\  | 457  | 39    |
| >TET2-H1219 RAGHTCEAA\  | 30    | >TET2-H1219 RAGQTCEAA\  | 27   | 3     |
| >TET2-H1219 ERAGHTCEA/  | 422   | >TET2-H1219 ERAGQTCEA/  | 437  | 15    |
| >TET2-H1219 ERAGHTCEA/  | 282   | >TET2-H1219 ERAGQTCEA/  | 362  | 80    |
| >TET2-H1219 RERAGHTCE/  | 274   | >TET2-H1219 RERAGQTCE/  | 463  | 189   |
| >TET2-H1219 RERAGHTC    | 440   | >TET2-H1219 RERAGQTC    | 473  | 33    |
| >TET2-H1219 RERAGHTCE/  | 46    | >TET2-H1219 RERAGQTCE/  | 51   | 5     |
| >TET2-H1219 RERAGHTC    | 425   | >TET2-H1219 RERAGQTC    | 871  | 446   |
| >TET2-H1219 RERAGHTCE/  | 14    | >TET2-H1219 RERAGQTCE/  | 16   | 2     |
| >TET2-H1219 RERAGHTCE/  | 379   | >TET2-H1219 RERAGQTCE/  | 208  | 171   |
| >TET2-H1219 CLVRERAGHT  | 356   | >TET2-H1219 CLVRERAGQT  | 926  | 570   |
| >TET2-H1219 HTCEAAVIV   | 442   | >TET2-H1219 RTCEAAVIV   | 135  | 307   |
| >TET2-H1219 HTCEAAVIV   | 886   | >TET2-H1219 RTCEAAVIV   | 219  | 667   |
| >TET2-H1219 HTCEAAVI    | 947   | >TET2-H1219 RTCEAAVI    | 266  | 681   |
| >TET2-H1219 HTCEAAVIV   | 1062  | >TET2-H1219 RTCEAAVIV   | 318  | 744   |
| >TET2-H1219 HTCEAAVIVI  | 250   | >TET2-H1219 RTCEAAVIVI  | 69   | 181   |
| >TET2-H1219 HTCEAAVI    | 431   | >TET2-H1219 RTCEAAVI    | 36   | 395   |
| >TET2-H1219 HTCEAAVIV   | 2895  | >TET2-H1219 RTCEAAVIV   | 249  | 2646  |

|                        |       |                        |      |       |
|------------------------|-------|------------------------|------|-------|
| >TET2-H1219HTCEAAVIVI  | 223   | >TET2-H1219RTCEAAVIVI  | 23   | 200   |
| >TET2-H1219HTCEAAVIVIL | 370   | >TET2-H1219RTCEAAVIVIL | 32   | 338   |
| >TET2-H1219HTCEAAVI    | 132   | >TET2-H1219RTCEAAVI    | 4998 | 4866  |
| >TET2-H1219HTCEAAVIV   | 38    | >TET2-H1219RTCEAAVIV   | 1645 | 1607  |
| >TET2-H1219HTCEAAVIVI  | 198   | >TET2-H1219RTCEAAVIVI  | 157  | 41    |
| >TET2-H1219HTCEAAVIVIL | 127   | >TET2-H1219RTCEAAVIVIL | 3962 | 3835  |
| >TET2-H1219HTCEAAVI    | 450   | >TET2-H1219RTCEAAVI    | 5300 | 4850  |
| >TET2-H1219HTCEAAVIV   | 45    | >TET2-H1219RTCEAAVIV   | 1224 | 1179  |
| >TET2-H1219HTCEAAVIVI  | 375   | >TET2-H1219RTCEAAVIVI  | 5264 | 4889  |
| >TET2-H1219HTCEAAVI    | 48    | >TET2-H1219RTCEAAVI    | 11   | 37    |
| >TET2-H1219HTCEAAVIV   | 355   | >TET2-H1219RTCEAAVIV   | 86   | 269   |
| >TET2-H1219HTCEAAVIVI  | 78    | >TET2-H1219RTCEAAVIVI  | 16   | 62    |
| >TET2-H1219HTCEAAVIVIL | 56    | >TET2-H1219RTCEAAVIVIL | 14   | 42    |
| >TET2-H1219HTCEAAVIVIL | 180   | >TET2-H1219RTCEAAVIVIL | 2367 | 2187  |
| >TET2-H1219HTCEAAVIVI  | 4226  | >TET2-H1219RTCEAAVIVI  | 327  | 3899  |
| >TET2-H1219HTCEAAVIVI  | 1662  | >TET2-H1219RTCEAAVIVI  | 395  | 1267  |
| >TET2-H1219HTCEAAVIVIL | 485   | >TET2-H1219RTCEAAVIVIL | 114  | 371   |
| >TET2-H1219HTCEAAVIVI  | 2105  | >TET2-H1219RTCEAAVIVI  | 136  | 1969  |
| >TET2-H1219HTCEAAVI    | 18    | >TET2-H1219RTCEAAVI    | 9    | 9     |
| >TET2-H1219HTCEAAVIV   | 1178  | >TET2-H1219RTCEAAVIV   | 377  | 801   |
| >TET2-H1219HTCEAAVIVI  | 76    | >TET2-H1219RTCEAAVIVI  | 80   | 4     |
| >TET2-H1219HTCEAAVIVIL | 231   | >TET2-H1219RTCEAAVIVIL | 67   | 164   |
| >TET2-H1219GHTCEAAVIV  | 19563 | >TET2-H1219GRTCEAAVIV  | 314  | 19249 |
| >TET2-H1219LLCLVRERAG  | 8866  | >TET2-H1219LLCLVRERAG  | 140  | 8726  |
| >TET2-H1219LLCLVRERAG  | 19222 | >TET2-H1219LLCLVRERAG  | 105  | 19117 |
| >TET2-H1219LLCLVRERAG  | 20350 | >TET2-H1219LLCLVRERAG  | 223  | 20127 |
| >TET2-H1219RAGHTCEAA\  | 418   | >TET2-H1219RAGRTCEAA\  | 294  | 124   |
| >TET2-H1219RAGHTCEAA\  | 30    | >TET2-H1219RAGRTCEAA\  | 35   | 5     |
| >TET2-H1219ERAGHTCEAA/ | 422   | >TET2-H1219ERAGRTCEAA/ | 574  | 152   |
| >TET2-H1219ERAGHTCEAA/ | 282   | >TET2-H1219ERAGRTCEAA/ | 422  | 140   |
| >TET2-H1219RERAGHTC    | 537   | >TET2-H1219RERAGRTC    | 328  | 209   |
| >TET2-H1219RERAGHTCE/  | 274   | >TET2-H1219RERAGRTCE/  | 298  | 24    |
| >TET2-H1219RERAGHTC    | 440   | >TET2-H1219RERAGRTC    | 678  | 238   |
| >TET2-H1219RERAGHTCE/  | 46    | >TET2-H1219RERAGRTCE/  | 59   | 13    |
| >TET2-H1219RERAGHTC    | 425   | >TET2-H1219RERAGRTC    | 1675 | 1250  |
| >TET2-H1219RERAGHTCE/  | 14    | >TET2-H1219RERAGRTCE/  | 22   | 8     |
| >TET2-H1219RERAGHTCE/  | 379   | >TET2-H1219RERAGRTCE/  | 197  | 182   |
| >TET2-H1219LVRERAGH    | 2030  | >TET2-H1219LVRERAGR    | 215  | 1815  |
| >TET2-H1219LVRERAGH    | 9703  | >TET2-H1219LVRERAGR    | 83   | 9620  |
| >TET2-H1219LVRERAGH    | 18626 | >TET2-H1219LVRERAGR    | 119  | 18507 |
| >TET2-H1219LVRERAGH    | 21861 | >TET2-H1219LVRERAGR    | 283  | 21578 |
| >TET2-H1219CLVRERAGHT  | 356   | >TET2-H1219CLVRERAGRT  | 4061 | 3705  |
| >TET2-H1219CLVRERAGH   | 21108 | >TET2-H1219CLVRERAGR   | 281  | 20827 |

|                        |       |                        |      |       |
|------------------------|-------|------------------------|------|-------|
| >TET2-H1219CLVRERAGH   | 31237 | >TET2-H1219CLVRERAGR   | 392  | 30845 |
| >TET2-H1219LCLVRERAGH  | 10678 | >TET2-H1219LCLVRERAGR  | 148  | 10530 |
| >TET2-H1219HTCEAAVIV   | 5257  | >TET2-H1219YTCEAAVIV   | 402  | 4855  |
| >TET2-H1219HTCEAAVIVI  | 3349  | >TET2-H1219YTCEAAVIVI  | 303  | 3046  |
| >TET2-H1219HTCEAAVIVIL | 6847  | >TET2-H1219YTCEAAVIVIL | 478  | 6369  |
| >TET2-H1219HTCEAAVIVI  | 2668  | >TET2-H1219YTCEAAVIVI  | 451  | 2217  |
| >TET2-H1219HTCEAAVIVIL | 2077  | >TET2-H1219YTCEAAVIVIL | 347  | 1730  |
| >TET2-H1219HTCEAAVIV   | 2691  | >TET2-H1219YTCEAAVIV   | 177  | 2514  |
| >TET2-H1219HTCEAAVIVI  | 3435  | >TET2-H1219YTCEAAVIVI  | 412  | 3023  |
| >TET2-H1219HTCEAAVI    | 3068  | >TET2-H1219YTCEAAVI    | 111  | 2957  |
| >TET2-H1219HTCEAAVIV   | 442   | >TET2-H1219YTCEAAVIV   | 28   | 414   |
| >TET2-H1219HTCEAAVIVI  | 2535  | >TET2-H1219YTCEAAVIVI  | 141  | 2394  |
| >TET2-H1219HTCEAAVIVIL | 1634  | >TET2-H1219YTCEAAVIVIL | 72   | 1562  |
| >TET2-H1219HTCEAAVI    | 3463  | >TET2-H1219YTCEAAVI    | 80   | 3383  |
| >TET2-H1219HTCEAAVIV   | 886   | >TET2-H1219YTCEAAVIV   | 20   | 866   |
| >TET2-H1219HTCEAAVIVI  | 2094  | >TET2-H1219YTCEAAVIVI  | 51   | 2043  |
| >TET2-H1219HTCEAAVIVIL | 2834  | >TET2-H1219YTCEAAVIVIL | 91   | 2743  |
| >TET2-H1219HTCEAAVIV   | 3345  | >TET2-H1219YTCEAAVIV   | 250  | 3095  |
| >TET2-H1219HTCEAAVIV   | 2790  | >TET2-H1219YTCEAAVIV   | 56   | 2734  |
| >TET2-H1219HTCEAAVIV   | 812   | >TET2-H1219YTCEAAVIV   | 26   | 786   |
| >TET2-H1219HTCEAAVIVIL | 6918  | >TET2-H1219YTCEAAVIVIL | 441  | 6477  |
| >TET2-H1219HTCEAAVIVIL | 824   | >TET2-H1219YTCEAAVIVIL | 369  | 455   |
| >TET2-H1219HTCEAAVIVI  | 250   | >TET2-H1219YTCEAAVIVI  | 3323 | 3073  |
| >TET2-H1219HTCEAAVI    | 431   | >TET2-H1219YTCEAAVI    | 1379 | 948   |
| >TET2-H1219HTCEAAVIVI  | 223   | >TET2-H1219YTCEAAVIVI  | 612  | 389   |
| >TET2-H1219HTCEAAVIVIL | 370   | >TET2-H1219YTCEAAVIVIL | 1373 | 1003  |
| >TET2-H1219HTCEAAVI    | 132   | >TET2-H1219YTCEAAVI    | 246  | 114   |
| >TET2-H1219HTCEAAVIV   | 38    | >TET2-H1219YTCEAAVIV   | 71   | 33    |
| >TET2-H1219HTCEAAVIVI  | 198   | >TET2-H1219YTCEAAVIVI  | 53   | 145   |
| >TET2-H1219HTCEAAVIVIL | 127   | >TET2-H1219YTCEAAVIVIL | 228  | 101   |
| >TET2-H1219HTCEAAVI    | 450   | >TET2-H1219YTCEAAVI    | 185  | 265   |
| >TET2-H1219HTCEAAVIV   | 45    | >TET2-H1219YTCEAAVIV   | 21   | 24    |
| >TET2-H1219HTCEAAVIVI  | 375   | >TET2-H1219YTCEAAVIVI  | 155  | 220   |
| >TET2-H1219HTCEAAVIVIL | 889   | >TET2-H1219YTCEAAVIVIL | 409  | 480   |
| >TET2-H1219HTCEAAVI    | 48    | >TET2-H1219YTCEAAVI    | 31   | 17    |
| >TET2-H1219HTCEAAVIV   | 355   | >TET2-H1219YTCEAAVIV   | 212  | 143   |
| >TET2-H1219HTCEAAVIVI  | 78    | >TET2-H1219YTCEAAVIVI  | 49   | 29    |
| >TET2-H1219HTCEAAVIVIL | 56    | >TET2-H1219YTCEAAVIVIL | 36   | 20    |
| >TET2-H1219HTCEAAVIVIL | 180   | >TET2-H1219YTCEAAVIVIL | 129  | 51    |
| >TET2-H1219HTCEAAVIV   | 2526  | >TET2-H1219YTCEAAVIV   | 149  | 2377  |
| >TET2-H1219HTCEAAVIVI  | 1662  | >TET2-H1219YTCEAAVIVI  | 118  | 1544  |
| >TET2-H1219HTCEAAVIVIL | 485   | >TET2-H1219YTCEAAVIVIL | 34   | 451   |
| >TET2-H1219HTCEAAVIVI  | 2105  | >TET2-H1219YTCEAAVIVI  | 195  | 1910  |

|                         |       |                         |      |       |
|-------------------------|-------|-------------------------|------|-------|
| >TET2-H1219 HTCEAAVIVIL | 2048  | >TET2-H1219 YTCEAAVIVIL | 286  | 1762  |
| >TET2-H1219 HTCEAAVI    | 18    | >TET2-H1219 YTCEAAVI    | 18   | 0     |
| >TET2-H1219 HTCEAAVIVI  | 76    | >TET2-H1219 YTCEAAVIVI  | 54   | 22    |
| >TET2-H1219 HTCEAAVIVIL | 231   | >TET2-H1219 YTCEAAVIVIL | 227  | 4     |
| >TET2-H1219 GHTCEAAVI   | 17776 | >TET2-H1219 GYTCEAAVI   | 36   | 17740 |
| >TET2-H1219 GHTCEAAVIV  | 16065 | >TET2-H1219 GYTCEAAVIV  | 22   | 16043 |
| >TET2-H1219 LLCLVRERAG  | 18652 | >TET2-H1219 LLCLVRERAG  | 181  | 18471 |
| >TET2-H1219 LLCLVRERAG  | 8868  | >TET2-H1219 LLCLVRERAG  | 181  | 8687  |
| >TET2-H1219 RAGHTCEAA\  | 418   | >TET2-H1219 RAGYTCEAA\  | 763  | 345   |
| >TET2-H1219 RAGHTCEAA\  | 30    | >TET2-H1219 RAGYTCEAA\  | 29   | 1     |
| >TET2-H1219 ERAGHTCEAA/ | 422   | >TET2-H1219 ERAGYTCEAA/ | 240  | 182   |
| >TET2-H1219 ERAGHTCEAA/ | 282   | >TET2-H1219 ERAGYTCEAA/ | 160  | 122   |
| >TET2-H1219 RERAGHTCEA/ | 274   | >TET2-H1219 RERAGYTCEA/ | 355  | 81    |
| >TET2-H1219 RERAGHTC    | 440   | >TET2-H1219 RERAGYTC    | 257  | 183   |
| >TET2-H1219 RERAGHTCEA/ | 46    | >TET2-H1219 RERAGYTCEA/ | 50   | 4     |
| >TET2-H1219 RERAGHTC    | 425   | >TET2-H1219 RERAGYTC    | 394  | 31    |
| >TET2-H1219 RERAGHTCEA/ | 14    | >TET2-H1219 RERAGYTCEA/ | 11   | 3     |
| >TET2-H1219 RERAGHTCEA/ | 379   | >TET2-H1219 RERAGYTCEA/ | 180  | 199   |
| >TET2-H1219 LVRERAGH    | 5352  | >TET2-H1219 LVRERAGY    | 78   | 5274  |
| >TET2-H1219 LVRERAGH    | 19219 | >TET2-H1219 LVRERAGY    | 485  | 18734 |
| >TET2-H1219 LVRERAGH    | 2030  | >TET2-H1219 LVRERAGY    | 230  | 1800  |
| >TET2-H1219 LVRERAGHT   | 1020  | >TET2-H1219 LVRERAGYT   | 433  | 587   |
| >TET2-H1219 LVRERAGH    | 20833 | >TET2-H1219 LVRERAGY    | 285  | 20548 |
| >TET2-H1219 LVRERAGH    | 7487  | >TET2-H1219 LVRERAGY    | 111  | 7376  |
| >TET2-H1219 LVRERAGH    | 7331  | >TET2-H1219 LVRERAGY    | 18   | 7313  |
| >TET2-H1219 CLVRERAGHT  | 356   | >TET2-H1219 CLVRERAGYT  | 1300 | 944   |
| >TET2-H1219 CLVRERAGH   | 20288 | >TET2-H1219 CLVRERAGY   | 383  | 19905 |
| >TET2-H1219 CLVRERAGH   | 15874 | >TET2-H1219 CLVRERAGY   | 155  | 15719 |
| >TET2-H138C HAHRDLHNM   | 61    | >TET2-H138C PAHRDLHNM   | 265  | 204   |
| >TET2-H138C HAHRDLHNM   | 476   | >TET2-H138C PAHRDLHNM   | 8136 | 7660  |
| >TET2-H138C AHAHRDLHN   | 36248 | >TET2-H138C APAHRDLHN   | 189  | 36059 |
| >TET2-H138C AHAHRDLHN   | 31435 | >TET2-H138C APAHRDLHN   | 277  | 31158 |
| >TET2-H138C CAHAHRDL    | 24726 | >TET2-H138C CAPAHRDL    | 241  | 24485 |
| >TET2-H138C CAHAHRDLH   | 6987  | >TET2-H138C CAPAHRDLH   | 23   | 6964  |
| >TET2-H138C DFCAHAHR    | 146   | >TET2-H138C DFCAPAHR    | 469  | 323   |
| >TET2-H138C DFCAHAHR    | 10    | >TET2-H138C DFCAPAHR    | 13   | 3     |
| >TET2-H138C DFCAHAHR    | 115   | >TET2-H138C DFCAPAHR    | 278  | 163   |
| >TET2-H138C DFCAHAHR    | 74    | >TET2-H138C DFCAPAHR    | 159  | 85    |
| >TET2-H138C LDFCAHAHR   | 274   | >TET2-H138C LDFCAPAHR   | 697  | 423   |
| >TET2-H138C LDFCAHAHR   | 342   | >TET2-H138C LDFCAPAHR   | 464  | 122   |
| >TET2-H138C CLDFCAHA    | 713   | >TET2-H138C CLDFCAPA    | 237  | 476   |
| >TET2-H138C CLDFCAHA    | 922   | >TET2-H138C CLDFCAPA    | 452  | 470   |
| >TET2-H138C CLDFCAHA    | 541   | >TET2-H138C CLDFCAPA    | 485  | 56    |

|                        |       |                        |      |       |
|------------------------|-------|------------------------|------|-------|
| >TET2-H138C CLDFCAHA   | 469   | >TET2-H138C CLDFCAPA   | 686  | 217   |
| >TET2-H138C CLDFCAHAHF | 39    | >TET2-H138C CLDFCAPAHF | 92   | 53    |
| >TET2-H138C CLDFCAHAHF | 203   | >TET2-H138C CLDFCAPAHF | 1403 | 1200  |
| >TET2-H138C CLDFCAHAHF | 558   | >TET2-H138C CLDFCAPAHF | 488  | 70    |
| >TET2-H138C CLDFCAHAH  | 341   | >TET2-H138C CLDFCAPAH  | 1452 | 1111  |
| >TET2-H138C CLDFCAHAHF | 111   | >TET2-H138C CLDFCAPAHF | 101  | 10    |
| >TET2-H138C CLDFCAHAHF | 146   | >TET2-H138C CLDFCAPAHF | 314  | 168   |
| >TET2-H138C ACLDFCAHAH | 92    | >TET2-H138C ACLDFCAPAH | 247  | 155   |
| >TET2-H138C ACLDFCAHAH | 97    | >TET2-H138C ACLDFCAPAH | 111  | 14    |
| >TET2-H138C TACLDFCAHA | 1283  | >TET2-H138C TACLDFCAPA | 423  | 860   |
| >TET2-H138C VTACLDFCAH | 795   | >TET2-H138C VTACLDFCAP | 412  | 383   |
| >TET2-H138C VTACLDFCAH | 1213  | >TET2-H138C VTACLDFCAP | 447  | 766   |
| >TET2-H138C VTACLDFCAH | 549   | >TET2-H138C VTACLDFCAP | 274  | 275   |
| >TET2-H138C VTACLDFCAH | 31    | >TET2-H138C VTACLDFCAP | 15   | 16    |
| >TET2-H138C HAHRDLHNM  | 1406  | >TET2-H138C YAHRDLHNM  | 125  | 1281  |
| >TET2-H138C HAHRDLHNM  | 61    | >TET2-H138C YAHRDLHNM  | 27   | 34    |
| >TET2-H138C HAHRDLHNM  | 476   | >TET2-H138C YAHRDLHNM  | 6799 | 6323  |
| >TET2-H138C HAHRDLHNM  | 1163  | >TET2-H138C YAHRDLHNM  | 450  | 713   |
| >TET2-H138C AHAHRDLHN  | 22123 | >TET2-H138C AYHRDLHNI  | 178  | 21945 |
| >TET2-H138C AHAHRDLHN  | 10317 | >TET2-H138C AYHRDLHNI  | 476  | 9841  |
| >TET2-H138C GVTACLDFCA | 14626 | >TET2-H138C GVTACLDFCA | 329  | 14297 |
| >TET2-H138C GVTACLDFCA | 14724 | >TET2-H138C GVTACLDFCA | 139  | 14585 |
| >TET2-H138C GVTACLDFCA | 16325 | >TET2-H138C GVTACLDFCA | 151  | 16174 |
| >TET2-H138C GVTACLDFCA | 5573  | >TET2-H138C GVTACLDFCA | 438  | 5135  |
| >TET2-H138C CAHAHRDLH  | 2612  | >TET2-H138C CAYHRDLHI  | 177  | 2435  |
| >TET2-H138C CAHAHRDLH  | 1962  | >TET2-H138C CAYHRDLHI  | 383  | 1579  |
| >TET2-H138C CAHAHRDL   | 2274  | >TET2-H138C CAYHRDL    | 495  | 1779  |
| >TET2-H138C DFCAHAHR   | 146   | >TET2-H138C DFCAYHR    | 136  | 10    |
| >TET2-H138C DFCAHAHR   | 10    | >TET2-H138C DFCAYHR    | 8    | 2     |
| >TET2-H138C DFCAHAHR   | 115   | >TET2-H138C DFCAYHR    | 116  | 1     |
| >TET2-H138C DFCAHAHR   | 74    | >TET2-H138C DFCAYHR    | 72   | 2     |
| >TET2-H138C LDFCAHAHR  | 274   | >TET2-H138C LDFCAYHR   | 359  | 85    |
| >TET2-H138C LDFCAHAHR  | 342   | >TET2-H138C LDFCAYHR   | 457  | 115   |
| >TET2-H138C CLDFCAHA   | 713   | >TET2-H138C CLDFCAYA   | 105  | 608   |
| >TET2-H138C CLDFCAHA   | 657   | >TET2-H138C CLDFCAYA   | 157  | 500   |
| >TET2-H138C CLDFCAHA   | 1227  | >TET2-H138C CLDFCAYA   | 166  | 1061  |
| >TET2-H138C CLDFCAHA   | 541   | >TET2-H138C CLDFCAYA   | 175  | 366   |
| >TET2-H138C CLDFCAHA   | 845   | >TET2-H138C CLDFCAYA   | 94   | 751   |
| >TET2-H138C CLDFCAHA   | 469   | >TET2-H138C CLDFCAYA   | 331  | 138   |
| >TET2-H138C CLDFCAHAHF | 39    | >TET2-H138C CLDFCAYAHF | 47   | 8     |
| >TET2-H138C CLDFCAHAHF | 203   | >TET2-H138C CLDFCAYAHF | 247  | 44    |
| >TET2-H138C CLDFCAHAHF | 558   | >TET2-H138C CLDFCAYAHF | 310  | 248   |
| >TET2-H138C CLDFCAHAH  | 341   | >TET2-H138C CLDFCAYAH  | 101  | 240   |

|                        |       |                        |      |       |
|------------------------|-------|------------------------|------|-------|
| >TET2-H138C CLDFCAHAHF | 111   | >TET2-H138C CLDFCAYAHR | 78   | 33    |
| >TET2-H138C CLDFCAHAHF | 146   | >TET2-H138C CLDFCAYAHR | 118  | 28    |
| >TET2-H138C ACLDFCAHAH | 92    | >TET2-H138C ACLDFCAYAH | 82   | 10    |
| >TET2-H138C ACLDFCAH   | 6747  | >TET2-H138C ACLDFCAY   | 237  | 6510  |
| >TET2-H138C ACLDFCAHAH | 97    | >TET2-H138C ACLDFCAYAH | 86   | 11    |
| >TET2-H138C TACLDFCAHA | 1283  | >TET2-H138C TACLDFCAYA | 319  | 964   |
| >TET2-H138C TACLDFCAHA | 1174  | >TET2-H138C TACLDFCAYA | 389  | 785   |
| >TET2-H138C TACLDFCAH  | 10586 | >TET2-H138C TACLDFCAY  | 217  | 10369 |
| >TET2-H138C TACLDFCAH  | 1775  | >TET2-H138C TACLDFCAY  | 53   | 1722  |
| >TET2-H138C VTACLDFCAH | 15170 | >TET2-H138C VTACLDFCAY | 89   | 15081 |
| >TET2-H138C VTACLDFCAH | 795   | >TET2-H138C VTACLDFCAY | 155  | 640   |
| >TET2-H138C VTACLDFCAH | 549   | >TET2-H138C VTACLDFCAY | 214  | 335   |
| >TET2-H138C VTACLDFCAH | 9451  | >TET2-H138C VTACLDFCAY | 165  | 9286  |
| >TET2-H138C VTACLDFCAH | 17721 | >TET2-H138C VTACLDFCAY | 133  | 17588 |
| >TET2-H138C VTACLDFCAH | 15259 | >TET2-H138C VTACLDFCAY | 87   | 15172 |
| >TET2-H138C VTACLDFCAH | 31    | >TET2-H138C VTACLDFCAY | 18   | 13    |
| >TET2-H138C VTACLDFCAH | 14433 | >TET2-H138C VTACLDFCAY | 286  | 14147 |
| >TET2-H138C VTACLDFCAH | 5180  | >TET2-H138C VTACLDFCAY | 105  | 5075  |
| >TET2-H138C VTACLDFCAH | 9042  | >TET2-H138C VTACLDFCAY | 468  | 8574  |
| >TET2-H138C VTACLDFCAH | 5050  | >TET2-H138C VTACLDFCAY | 39   | 5011  |
| >TET2-H138C VTACLDFCAH | 16428 | >TET2-H138C VTACLDFCAY | 251  | 16177 |
| >TET2-H1382 AHRDLHNM   | 4471  | >TET2-H1382 AYRDLHNM   | 28   | 4443  |
| >TET2-H1382 AHRDLHNMC  | 6893  | >TET2-H1382 AYRDLHNMC  | 52   | 6841  |
| >TET2-H1382 AHRDLHNMC  | 8282  | >TET2-H1382 AYRDLHNMC  | 128  | 8154  |
| >TET2-H1382 AHRDLHNMC  | 6344  | >TET2-H1382 AYRDLHNMC  | 47   | 6297  |
| >TET2-H1382 AHRDLHNM   | 4320  | >TET2-H1382 AYRDLHNM   | 357  | 3963  |
| >TET2-H1382 TACLDFCAHA | 15582 | >TET2-H1382 TACLDFCAHA | 333  | 15249 |
| >TET2-H1382 TACLDFCAHA | 13499 | >TET2-H1382 TACLDFCAHA | 150  | 13349 |
| >TET2-H1382 TACLDFCAHA | 978   | >TET2-H1382 TACLDFCAHA | 39   | 939   |
| >TET2-H1382 HAHRDLHNM  | 61    | >TET2-H1382 HAYRDLHNM  | 33   | 28    |
| >TET2-H1382 HAHRDLHNM  | 476   | >TET2-H1382 HAYRDLHNM  | 4459 | 3983  |
| >TET2-H1382 HAHRDLHNM  | 4432  | >TET2-H1382 HAYRDLHNM  | 143  | 4289  |
| >TET2-H1382 HAHRDLHNM  | 1163  | >TET2-H1382 HAYRDLHNM  | 94   | 1069  |
| >TET2-H1382 HAHRDLHNM  | 1317  | >TET2-H1382 HAYRDLHNM  | 184  | 1133  |
| >TET2-H1382 HAHRDLHNM  | 3294  | >TET2-H1382 HAYRDLHNM  | 211  | 3083  |
| >TET2-H1382 DFCAHAHR   | 146   | >TET2-H1382 DFCAHAYR   | 47   | 99    |
| >TET2-H1382 DFCAHAHR   | 10    | >TET2-H1382 DFCAHAYR   | 8    | 2     |
| >TET2-H1382 DFCAHAHR   | 115   | >TET2-H1382 DFCAHAYR   | 38   | 77    |
| >TET2-H1382 DFCAHAHR   | 74    | >TET2-H1382 DFCAHAYR   | 25   | 49    |
| >TET2-H1382 LDFCAHAH   | 13638 | >TET2-H1382 LDFCAHAY   | 185  | 13453 |
| >TET2-H1382 LDFCAHAHR  | 882   | >TET2-H1382 LDFCAHAYR  | 182  | 700   |
| >TET2-H1382 LDFCAHAHR  | 274   | >TET2-H1382 LDFCAHAYR  | 63   | 211   |
| >TET2-H1382 LDFCAHAH   | 3880  | >TET2-H1382 LDFCAHAY   | 191  | 3689  |



|                        |       |                        |       |       |
|------------------------|-------|------------------------|-------|-------|
| >TET2-H1382LDFCAHAH    | 2498  | >TET2-H1382LDFCAHAY    | 49    | 2449  |
| >TET2-H1382LDFCAHAH    | 2443  | >TET2-H1382LDFCAHAY    | 107   | 2336  |
| >TET2-H1382LDFCAHAHR   | 342   | >TET2-H1382LDFCAHAYR   | 121   | 221   |
| >TET2-H1382CLDFCAHAH   | 6648  | >TET2-H1382CLDFCAHAY   | 11    | 6637  |
| >TET2-H1382CLDFCAHAHF  | 717   | >TET2-H1382CLDFCAHAYR  | 223   | 494   |
| >TET2-H1382CLDFCAHAH   | 6046  | >TET2-H1382CLDFCAHAY   | 102   | 5944  |
| >TET2-H1382CLDFCAHAH   | 3020  | >TET2-H1382CLDFCAHAY   | 21    | 2999  |
| >TET2-H1382CLDFCAHAHF  | 39    | >TET2-H1382CLDFCAHAYR  | 18    | 21    |
| >TET2-H1382CLDFCAHAHF  | 203   | >TET2-H1382CLDFCAHAYR  | 39    | 164   |
| >TET2-H1382CLDFCAHAHF  | 558   | >TET2-H1382CLDFCAHAYR  | 67    | 491   |
| >TET2-H1382CLDFCAHAH   | 15677 | >TET2-H1382CLDFCAHAY   | 142   | 15535 |
| >TET2-H1382CLDFCAHAH   | 6218  | >TET2-H1382CLDFCAHAY   | 319   | 5899  |
| >TET2-H1382CLDFCAHAH   | 341   | >TET2-H1382CLDFCAHAY   | 12    | 329   |
| >TET2-H1382CLDFCAHAHF  | 111   | >TET2-H1382CLDFCAHAYR  | 72    | 39    |
| >TET2-H1382CLDFCAHAHF  | 146   | >TET2-H1382CLDFCAHAYR  | 53    | 93    |
| >TET2-H1382ACLDFCAHAH  | 22088 | >TET2-H1382ACLDFCAHAY  | 194   | 21894 |
| >TET2-H1382ACLDFCAHAH  | 92    | >TET2-H1382ACLDFCAHAY  | 37    | 55    |
| >TET2-H1382ACLDFCAHAH  | 669   | >TET2-H1382ACLDFCAHAY  | 399   | 270   |
| >TET2-H1382ACLDFCAHAH  | 8415  | >TET2-H1382ACLDFCAHAY  | 350   | 8065  |
| >TET2-H1382ACLDFCAHAH  | 97    | >TET2-H1382ACLDFCAHAY  | 43    | 54    |
| >TET2-H1817HKLSDANGQ   | 221   | >TET2-H1817NKLSDANGQ   | 878   | 657   |
| >TET2-H1817GLHKLSDA    | 1302  | >TET2-H1817GLNKLSDA    | 371   | 931   |
| >TET2-H1817GLHKLSDA    | 98    | >TET2-H1817GLNKLSDA    | 47    | 51    |
| >TET2-H1817GLHKLSDA    | 734   | >TET2-H1817GLNKLSDA    | 304   | 430   |
| >TET2-H1817GLHKLSDA    | 177   | >TET2-H1817GLNKLSDA    | 196   | 19    |
| >TET2-H1817CVQGGLHKL   | 73    | >TET2-H1817CVQGGLNKL   | 1620  | 1547  |
| >TET2-H1817CVQGGLHK    | 79    | >TET2-H1817CVQGGLNK    | 57    | 22    |
| >TET2-H1817CVQGGLHKL   | 414   | >TET2-H1817CVQGGLNKL   | 641   | 227   |
| >TET2-H1817TACVQGGLH   | 424   | >TET2-H1817TACVQGGLN   | 547   | 123   |
| >TET2-H1817TACVQGGLH   | 72    | >TET2-H1817TACVQGGLN   | 85    | 13    |
| >TET2-H1817RTACVQGGLI  | 45    | >TET2-H1817RTACVQGGLI  | 41    | 4     |
| >TET2-H1817RTACVQGGLI  | 33    | >TET2-H1817RTACVQGGLI  | 23    | 10    |
| >TET2-H1817RTACVQGGLI  | 16    | >TET2-H1817RTACVQGGLI  | 20    | 4     |
| >TET2-H1817RTACVQGGLI  | 267   | >TET2-H1817RTACVQGGLI  | 454   | 187   |
| >TET2-H1817RTACVQGGLI  | 215   | >TET2-H1817RTACVQGGLI  | 185   | 30    |
| >TET2-H1817RTACVQGGLI  | 317   | >TET2-H1817RTACVQGGLI  | 276   | 41    |
| >TET2-H1868HGSILIECAKR | 414   | >TET2-H1868PGSILIECAKR | 9712  | 9298  |
| >TET2-H1868HGSILIECAKR | 345   | >TET2-H1868PGSILIECAKR | 2492  | 2147  |
| >TET2-H1868THGSILIECA  | 23851 | >TET2-H1868TPGSILIECA  | 161   | 23690 |
| >TET2-H1868PTHGSILI    | 309   | >TET2-H1868PTPGSILI    | 12047 | 11738 |
| >TET2-H1868PTHGSILI    | 5439  | >TET2-H1868PTPGSILI    | 12    | 5427  |
| >TET2-H1868PTHGSILIE   | 13752 | >TET2-H1868PTPGSILIE   | 74    | 13678 |
| >TET2-H1868PTHGSILIEC  | 13767 | >TET2-H1868PTPGSILIEC  | 73    | 13694 |

|                         |       |                         |      |       |
|-------------------------|-------|-------------------------|------|-------|
| >TET2-H186E APTHGSIL    | 1215  | >TET2-H186E APTPGSIL    | 430  | 785   |
| >TET2-H186E APTHGSILI   | 461   | >TET2-H186E APTPGSILI   | 176  | 285   |
| >TET2-H186E APTHGSIL    | 25    | >TET2-H186E APTPGSIL    | 33   | 8     |
| >TET2-H186E APTHGSILI   | 375   | >TET2-H186E APTPGSILI   | 495  | 120   |
| >TET2-H186E APTHGSILI   | 174   | >TET2-H186E APTPGSILI   | 249  | 75    |
| >TET2-H186E APTHGSILI   | 2039  | >TET2-H186E APTPGSILI   | 436  | 1603  |
| >TET2-H186E VAPTHGSI    | 744   | >TET2-H186E VAPTPGSI    | 210  | 534   |
| >TET2-H186E VAPTHGSIL   | 5     | >TET2-H186E VAPTPGSIL   | 4    | 1     |
| >TET2-H186E VAPTHGSILI  | 6     | >TET2-H186E VAPTPGSILI  | 4    | 2     |
| >TET2-H186E VAPTHGSILIE | 280   | >TET2-H186E VAPTPGSILIE | 205  | 75    |
| >TET2-H186E VAPTHGSIL   | 3650  | >TET2-H186E VAPTPGSIL   | 470  | 3180  |
| >TET2-H186E VAPTHGSI    | 249   | >TET2-H186E VAPTPGSI    | 175  | 74    |
| >TET2-H186E VAPTHGSILI  | 227   | >TET2-H186E VAPTPGSILI  | 328  | 101   |
| >TET2-H186E AVAPTHGSILI | 509   | >TET2-H186E AVAPTPGSILI | 433  | 76    |
| >TET2-H186E AVAPTHGSI   | 228   | >TET2-H186E AVAPTPGSI   | 60   | 168   |
| >TET2-H186E AVAPTHGSILI | 276   | >TET2-H186E AVAPTPGSILI | 141  | 135   |
| >TET2-H186E AVAPTHGSILI | 142   | >TET2-H186E AVAPTPGSILI | 164  | 22    |
| >TET2-H186E AVAPTHGSI   | 183   | >TET2-H186E AVAPTPGSI   | 861  | 678   |
| >TET2-H186E AVAPTHGSILI | 153   | >TET2-H186E AVAPTPGSILI | 315  | 162   |
| >TET2-H186E AVAPTHGSI   | 438   | >TET2-H186E AVAPTPGSI   | 555  | 117   |
| >TET2-H186E AVAPTHGSILI | 196   | >TET2-H186E AVAPTPGSILI | 211  | 15    |
| >TET2-H186E AVAPTHGSI   | 216   | >TET2-H186E AVAPTPGSI   | 614  | 398   |
| >TET2-H186E AVAPTHGSI   | 51    | >TET2-H186E AVAPTPGSI   | 32   | 19    |
| >TET2-H186E AVAPTHGSIL  | 294   | >TET2-H186E AVAPTPGSIL  | 224  | 70    |
| >TET2-H186E AVAPTHGSILI | 84    | >TET2-H186E AVAPTPGSILI | 55   | 29    |
| >TET2-H186E VAVAPTHGSI  | 98    | >TET2-H186E VAVAPTPGSI  | 1305 | 1207  |
| >TET2-H186E VAVAPTHGSI  | 128   | >TET2-H186E VAVAPTPGSI  | 169  | 41    |
| >TET2-H186E VAVAPTHGSI  | 73    | >TET2-H186E VAVAPTPGSI  | 57   | 16    |
| >TET2-H186E VAVAPTHGSI  | 263   | >TET2-H186E VAVAPTPGSI  | 300  | 37    |
| >TET2-H186E VAVAPTHGSI  | 550   | >TET2-H186E VAVAPTPGSI  | 297  | 253   |
| >TET2-H186E VAVAPTHGSI  | 136   | >TET2-H186E VAVAPTPGSI  | 78   | 58    |
| >TET2-H186E GVAVAPTHG   | 461   | >TET2-H186E GVAVAPTPG!  | 201  | 260   |
| >TET2-H186E GVAVAPTHG   | 236   | >TET2-H186E GVAVAPTPG!  | 192  | 44    |
| >TET2-H186E HGSILIECAKR | 776   | >TET2-H186E RGSILIECAKR | 190  | 586   |
| >TET2-H186E HGSILIECAKR | 414   | >TET2-H186E RGSILIECAKR | 4492 | 4078  |
| >TET2-H186E HGSILIECAKR | 345   | >TET2-H186E RGSILIECAKR | 278  | 67    |
| >TET2-H186E DIGGVAVAPT  | 23848 | >TET2-H186E DIGGVAVAPT  | 184  | 23664 |
| >TET2-H186E DIGGVAVAPT  | 9723  | >TET2-H186E DIGGVAVAPT  | 55   | 9668  |
| >TET2-H186E PTHGSILI    | 309   | >TET2-H186E PTRGSILI    | 29   | 280   |
| >TET2-H186E APTHGSIL    | 1215  | >TET2-H186E APTRGSIL    | 408  | 807   |
| >TET2-H186E APTHGSILI   | 461   | >TET2-H186E APTRGSILI   | 171  | 290   |
| >TET2-H186E APTHGSIL    | 25    | >TET2-H186E APTRGSIL    | 28   | 3     |
| >TET2-H186E APTHGSILI   | 375   | >TET2-H186E APTRGSILI   | 413  | 38    |

|                         |       |                         |      |       |
|-------------------------|-------|-------------------------|------|-------|
| >TET2-H186EAPTHGSILI    | 174   | >TET2-H186EAPTRGSILI    | 345  | 171   |
| >TET2-H186EVAPTHGSIL    | 7988  | >TET2-H186EVAPTRGSIL    | 255  | 7733  |
| >TET2-H186EVAPTHGSIL    | 828   | >TET2-H186EVAPTRGSIL    | 435  | 393   |
| >TET2-H186EVAPTHGSIL    | 5     | >TET2-H186EVAPTRGSIL    | 13   | 8     |
| >TET2-H186EVAPTHGSILI   | 6     | >TET2-H186EVAPTRGSILI   | 13   | 7     |
| >TET2-H186EVAPTHGSILIE  | 280   | >TET2-H186EVAPTRGSILIE  | 844  | 564   |
| >TET2-H186EVAPTHGSI     | 249   | >TET2-H186EVAPTRGSI     | 293  | 44    |
| >TET2-H186EVAPTHGSILI   | 227   | >TET2-H186EVAPTRGSILI   | 283  | 56    |
| >TET2-H186EAVAPTHGSI    | 1862  | >TET2-H186EAVAPTRGSI    | 341  | 1521  |
| >TET2-H186EAVAPTHGSI    | 228   | >TET2-H186EAVAPTRGSI    | 657  | 429   |
| >TET2-H186EAVAPTHGSILI  | 276   | >TET2-H186EAVAPTRGSILI  | 540  | 264   |
| >TET2-H186EAVAPTHGSILIE | 142   | >TET2-H186EAVAPTRGSILIE | 241  | 99    |
| >TET2-H186EAVAPTHGSI    | 183   | >TET2-H186EAVAPTRGSI    | 272  | 89    |
| >TET2-H186EAVAPTHGSILI  | 153   | >TET2-H186EAVAPTRGSILI  | 165  | 12    |
| >TET2-H186EAVAPTHGSI    | 438   | >TET2-H186EAVAPTRGSI    | 198  | 240   |
| >TET2-H186EAVAPTHGSILIE | 196   | >TET2-H186EAVAPTRGSILIE | 162  | 34    |
| >TET2-H186EAVAPTHGSI    | 216   | >TET2-H186EAVAPTRGSI    | 39   | 177   |
| >TET2-H186EAVAPTHGSI    | 51    | >TET2-H186EAVAPTRGSI    | 62   | 11    |
| >TET2-H186EAVAPTHGSIL   | 294   | >TET2-H186EAVAPTRGSIL   | 1143 | 849   |
| >TET2-H186EAVAPTHGSILIE | 84    | >TET2-H186EAVAPTRGSILIE | 95   | 11    |
| >TET2-H186EVAVAPTHGSI   | 98    | >TET2-H186EVAVAPTRGSI   | 157  | 59    |
| >TET2-H186EVAVAPTHGSI   | 128   | >TET2-H186EVAVAPTRGSI   | 384  | 256   |
| >TET2-H186EVAVAPTHGSI   | 73    | >TET2-H186EVAVAPTRGSI   | 77   | 4     |
| >TET2-H186EVAVAPTHGSI   | 263   | >TET2-H186EVAVAPTRGSI   | 770  | 507   |
| >TET2-H186EVAVAPTHGSI   | 550   | >TET2-H186EVAVAPTRGSI   | 420  | 130   |
| >TET2-H186EVAVAPTHGSI   | 136   | >TET2-H186EVAVAPTRGSI   | 153  | 17    |
| >TET2-H186EGVAVAPTHG    | 461   | >TET2-H186EGVAVAPTRG!   | 735  | 274   |
| >TET2-H186EGVAVAPTH     | 13213 | >TET2-H186EGVAVAPTR     | 97   | 13116 |
| >TET2-H186EGVAVAPTHG    | 236   | >TET2-H186EGVAVAPTRG!   | 255  | 19    |
| >TET2-H1881HATTPLKNPN   | 206   | >TET2-H1881QATTPLKNPN   | 1655 | 1449  |
| >TET2-H1881HATTPLKNPN   | 427   | >TET2-H1881QATTPLKNPN   | 4033 | 3606  |
| >TET2-H1881HATTPLKNPN   | 81    | >TET2-H1881QATTPLKNPN   | 209  | 128   |
| >TET2-H1881LHATTPLK     | 9498  | >TET2-H1881LQATTPLK     | 284  | 9214  |
| >TET2-H1881LHATTPLK     | 10679 | >TET2-H1881LQATTPLK     | 93   | 10586 |
| >TET2-H1881ILIECAKRELH  | 14973 | >TET2-H1881ILIECAKRELQ  | 257  | 14716 |
| >TET2-H1881ELHATTPL     | 161   | >TET2-H1881ELQATTPL     | 187  | 26    |
| >TET2-H1881ELHATTPL     | 213   | >TET2-H1881ELQATTPL     | 905  | 692   |
| >TET2-H1881ELHATTPL     | 124   | >TET2-H1881ELQATTPL     | 383  | 259   |
| >TET2-H1881ELHATTPL     | 644   | >TET2-H1881ELQATTPL     | 221  | 423   |
| >TET2-H1881ELHATTPL     | 420   | >TET2-H1881ELQATTPL     | 746  | 326   |
| >TET2-H1881ELHATTPL     | 928   | >TET2-H1881ELQATTPL     | 224  | 704   |
| >TET2-H1881ELHATTPL     | 23    | >TET2-H1881ELQATTPL     | 29   | 6     |
| >TET2-H1881ELHATTPLK    | 118   | >TET2-H1881ELQATTPLK    | 508  | 390   |

|                        |       |                        |      |       |
|------------------------|-------|------------------------|------|-------|
| >TET2-H1881ELHATTPLK   | 366   | >TET2-H1881ELQATTPLK   | 233  | 133   |
| >TET2-H1881ELHATTPLK   | 169   | >TET2-H1881ELQATTPLK   | 3963 | 3794  |
| >TET2-H1881ELHATTPLK   | 24    | >TET2-H1881ELQATTPLK   | 74   | 50    |
| >TET2-H1881ELHATTPL    | 208   | >TET2-H1881ELQATTPL    | 857  | 649   |
| >TET2-H1881ELHATTPL    | 209   | >TET2-H1881ELQATTPL    | 187  | 22    |
| >TET2-H1881RELHATTPL   | 109   | >TET2-H1881RELQATTPL   | 102  | 7     |
| >TET2-H1881RELHATTPLK  | 159   | >TET2-H1881RELQATTPLK  | 557  | 398   |
| >TET2-H1881RELHATTPL   | 312   | >TET2-H1881RELQATTPL   | 303  | 9     |
| >TET2-H1881RELHATTPL   | 48    | >TET2-H1881RELQATTPL   | 149  | 101   |
| >TET2-H1881RELHATTPL   | 637   | >TET2-H1881RELQATTPL   | 155  | 482   |
| >TET2-H1881RELHATTPL   | 740   | >TET2-H1881RELQATTPL   | 318  | 422   |
| >TET2-H1881RELHATTPL   | 7     | >TET2-H1881RELQATTPL   | 8    | 1     |
| >TET2-H1881RELHATTPL   | 12    | >TET2-H1881RELQATTPL   | 10   | 2     |
| >TET2-H1881RELHATTPL   | 530   | >TET2-H1881RELQATTPL   | 451  | 79    |
| >TET2-H1881RELHATTPL   | 138   | >TET2-H1881RELQATTPL   | 193  | 55    |
| >TET2-H1881RELHATTPL   | 6     | >TET2-H1881RELQATTPL   | 4    | 2     |
| >TET2-H1881RELHATTPLK  | 755   | >TET2-H1881RELQATTPLK  | 361  | 394   |
| >TET2-H1881RELHATTPLK  | 788   | >TET2-H1881RELQATTPLK  | 487  | 301   |
| >TET2-H1881KRELHATTPL  | 108   | >TET2-H1881KRELQATTPL  | 78   | 30    |
| >TET2-H1881KRELHATTPL  | 462   | >TET2-H1881KRELQATTPL  | 619  | 157   |
| >TET2-H1881KRELHATT    | 453   | >TET2-H1881KRELQATT    | 279  | 174   |
| >TET2-H1881KRELHATTPL  | 79    | >TET2-H1881KRELQATTPL  | 67   | 12    |
| >TET2-H1881KRELHATTPL  | 335   | >TET2-H1881KRELQATTPL  | 437  | 102   |
| >TET2-H1881KRELHATTPL  | 174   | >TET2-H1881KRELQATTPL  | 95   | 79    |
| >TET2-H1881KRELHATTPL  | 65    | >TET2-H1881KRELQATTPL  | 214  | 149   |
| >TET2-H1881AKRELHATTPL | 13    | >TET2-H1881AKRELQATTPL | 17   | 4     |
| >TET2-H1881HATTPLKNPN  | 206   | >TET2-H1881RATTPLKNPN  | 47   | 159   |
| >TET2-H1881HATTPLKNPN  | 427   | >TET2-H1881RATTPLKNPN  | 8904 | 8477  |
| >TET2-H1881HATTPLKNPN  | 81    | >TET2-H1881RATTPLKNPN  | 1170 | 1089  |
| >TET2-H1881HATTPLKNPN  | 567   | >TET2-H1881RATTPLKNPN  | 415  | 152   |
| >TET2-H1881LHATTPLK    | 19008 | >TET2-H1881LRATTPLK    | 159  | 18849 |
| >TET2-H1881ILIECAKRELH | 8931  | >TET2-H1881ILIECAKRELR | 228  | 8703  |
| >TET2-H1881ILIECAKRELH | 21501 | >TET2-H1881ILIECAKRELR | 325  | 21176 |
| >TET2-H1881ILIECAKRELH | 13302 | >TET2-H1881ILIECAKRELR | 92   | 13210 |
| >TET2-H1881ILIECAKRELH | 28438 | >TET2-H1881ILIECAKRELR | 155  | 28283 |
| >TET2-H1881ELHATTPL    | 161   | >TET2-H1881ELRATTPL    | 730  | 569   |
| >TET2-H1881ELHATTPL    | 213   | >TET2-H1881ELRATTPL    | 463  | 250   |
| >TET2-H1881ELHATTPL    | 124   | >TET2-H1881ELRATTPL    | 1801 | 1677  |
| >TET2-H1881ELHATTPL    | 420   | >TET2-H1881ELRATTPL    | 3243 | 2823  |
| >TET2-H1881ELHATTPL    | 23    | >TET2-H1881ELRATTPL    | 61   | 38    |
| >TET2-H1881ELHATTPLK   | 118   | >TET2-H1881ELRATTPLK   | 105  | 13    |
| >TET2-H1881ELHATTPLK   | 366   | >TET2-H1881ELRATTPLK   | 3610 | 3244  |
| >TET2-H1881ELHATTPLK   | 169   | >TET2-H1881ELRATTPLK   | 20   | 149   |

|                         |       |                        |      |       |
|-------------------------|-------|------------------------|------|-------|
| >TET2-H1881ELHATTPLK    | 24    | >TET2-H1881ELRATTPLK   | 137  | 113   |
| >TET2-H1881ELHATTPL     | 208   | >TET2-H1881ELRATTPL    | 3283 | 3075  |
| >TET2-H1881ELHATTPL     | 209   | >TET2-H1881ELRATTPL    | 863  | 654   |
| >TET2-H1881ELHATTPL     | 647   | >TET2-H1881ELRATTPL    | 178  | 469   |
| >TET2-H1881RELHATTPL    | 109   | >TET2-H1881RELRATTPL   | 95   | 14    |
| >TET2-H1881RELHATTPLK   | 159   | >TET2-H1881RELRATTPLK  | 92   | 67    |
| >TET2-H1881RELHATTPL    | 312   | >TET2-H1881RELRATTPL   | 228  | 84    |
| >TET2-H1881RELHATTPL    | 48    | >TET2-H1881RELRATTPL   | 71   | 23    |
| >TET2-H1881RELHATTPL    | 637   | >TET2-H1881RELRATTPL   | 341  | 296   |
| >TET2-H1881RELHATTPL    | 7     | >TET2-H1881RELRATTPL   | 10   | 3     |
| >TET2-H1881RELHATTPL    | 12    | >TET2-H1881RELRATTPL   | 13   | 1     |
| >TET2-H1881RELHATTPL    | 138   | >TET2-H1881RELRATTPL   | 288  | 150   |
| >TET2-H1881RELHATTPL    | 6     | >TET2-H1881RELRATTPL   | 5    | 1     |
| >TET2-H1881KRELHATTPL   | 108   | >TET2-H1881KRELRATTPL  | 69   | 39    |
| >TET2-H1881KRELHATTPL   | 462   | >TET2-H1881KRELRATTPL  | 885  | 423   |
| >TET2-H1881KRELHATT     | 453   | >TET2-H1881KRELRATT    | 124  | 329   |
| >TET2-H1881KRELHATTPL   | 79    | >TET2-H1881KRELRATTPL  | 42   | 37    |
| >TET2-H1881KRELHATTPLI  | 335   | >TET2-H1881KRELRATTPLI | 292  | 43    |
| >TET2-H1881KRELHATTPL   | 174   | >TET2-H1881KRELRATTPL  | 73   | 101   |
| >TET2-H1881KRELHATTPLI  | 65    | >TET2-H1881KRELRATTPLI | 68   | 3     |
| >TET2-H1881AKRELHATTPL  | 13    | >TET2-H1881AKRELRATTPL | 15   | 2     |
| >TET2-H1881ECAKRELH     | 16266 | >TET2-H1881ECAKRELR    | 135  | 16131 |
| >TET2-H1881LIECAKRELH   | 16678 | >TET2-H1881LIECAKRELR  | 241  | 16437 |
| >TET2-H1904HKSMNEPKH    | 465   | >TET2-H1904QKSMNEPKH   | 502  | 37    |
| >TET2-H1904QHKSMMNEPK   | 4812  | >TET2-H1904QQKSMNEPK   | 439  | 4373  |
| >TET2-H1904QHKSMMNEPK   | 5768  | >TET2-H1904QQKSMNEPK   | 378  | 5390  |
| >TET2-H1904YQHKSMMNEP   | 380   | >TET2-H1904YQQKSMNEP   | 4875 | 4495  |
| >TET2-H1904YQHKSMMNEP   | 236   | >TET2-H1904YQQKSMNEP   | 778  | 542   |
| >TET2-H1904YQHKSMMNEP   | 67    | >TET2-H1904YQQKSMNEP   | 184  | 117   |
| >TET2-H1904YQHKSMMNEP   | 150   | >TET2-H1904YQQKSMNEP   | 497  | 347   |
| >TET2-H1904FYQHKSMMNE   | 516   | >TET2-H1904FYQQKSMNE   | 363  | 153   |
| >TET2-H1904FYQHKSMMNE   | 424   | >TET2-H1904FYQQKSMNE   | 295  | 129   |
| >TET2-H1904VIFYQHKSMM   | 67    | >TET2-H1904VIFYQQKSM   | 369  | 302   |
| >TET2-H1904LVIFYQHKSMM  | 263   | >TET2-H1904LVIFYQQKSM  | 473  | 210   |
| >TET2-H1904LVIFYQHKSMM  | 131   | >TET2-H1904LVIFYQQKSM  | 272  | 141   |
| >TET2-H1904LVIFYQHKSMM  | 66    | >TET2-H1904LVIFYQQKSM  | 123  | 57    |
| >TET2-H1904LVIFYQHKSMM  | 148   | >TET2-H1904LVIFYQQKSM  | 359  | 211   |
| >TET2-H1904LVIFYQHKSMM  | 62    | >TET2-H1904LVIFYQQKSM  | 157  | 95    |
| >TET2-H1904SLVIFYQHKSMM | 380   | >TET2-H1904SLVIFYQQKSM | 604  | 224   |
| >TET2-H1904SLVIFYQHKSMM | 283   | >TET2-H1904SLVIFYQQKSM | 371  | 88    |
| >TET2-H1904SLVIFYQHK    | 160   | >TET2-H1904SLVIFYQQK   | 195  | 35    |
| >TET2-H1904SLVIFYQHK    | 76    | >TET2-H1904SLVIFYQQK   | 59   | 17    |
| >TET2-H1904SLVIFYQHK    | 382   | >TET2-H1904SLVIFYQQK   | 389  | 7     |

|                        |       |                        |      |       |
|------------------------|-------|------------------------|------|-------|
| >TET2-H1904SLVFYQHKS   | 458   | >TET2-H1904SLVFYQQKS   | 201  | 257   |
| >TET2-H1904ISLVFYQH    | 1129  | >TET2-H1904ISLVFYQQ    | 210  | 919   |
| >TET2-H1904ISLVFYQHK   | 225   | >TET2-H1904ISLVFYQQK   | 420  | 195   |
| >TET2-H1904ISLVFYQHKS  | 34    | >TET2-H1904ISLVFYQQKS  | 44   | 10    |
| >TET2-H1904ISLVFYQHK   | 451   | >TET2-H1904ISLVFYQQK   | 494  | 43    |
| >TET2-H1904ISLVFYQHK   | 42    | >TET2-H1904ISLVFYQQK   | 26   | 16    |
| >TET2-H1904ISLVFYQHK   | 15    | >TET2-H1904ISLVFYQQK   | 30   | 15    |
| >TET2-H1904ISLVFYQHK   | 93    | >TET2-H1904ISLVFYQQK   | 219  | 126   |
| >TET2-H1904ISLVFYQHK   | 474   | >TET2-H1904ISLVFYQQK   | 696  | 222   |
| >TET2-H1904ISLVFYQHKS  | 31    | >TET2-H1904ISLVFYQQKS  | 45   | 14    |
| >TET2-H1904ISLVFYQHKS  | 8     | >TET2-H1904ISLVFYQQKS  | 10   | 2     |
| >TET2-H1904ISLVFYQHKS  | 135   | >TET2-H1904ISLVFYQQKS  | 163  | 28    |
| >TET2-H1904ISLVFYQHKS  | 562   | >TET2-H1904ISLVFYQQKS  | 231  | 331   |
| >TET2-H1904ISLVFYQHKS  | 50    | >TET2-H1904ISLVFYQQKS  | 63   | 13    |
| >TET2-H1904ISLVFYQH    | 359   | >TET2-H1904ISLVFYQQ    | 660  | 301   |
| >TET2-H1904ISLVFYQHK   | 172   | >TET2-H1904ISLVFYQQK   | 209  | 37    |
| >TET2-H1904RISLVFYQHK  | 34    | >TET2-H1904RISLVFYQQK  | 43   | 9     |
| >TET2-H1904RISLVFYQH   | 222   | >TET2-H1904RISLVFYQQ   | 7217 | 6995  |
| >TET2-H1904RISLVFYQHK  | 13    | >TET2-H1904RISLVFYQQK  | 17   | 4     |
| >TET2-H1904RISLVFYQHK  | 19    | >TET2-H1904RISLVFYQQK  | 30   | 11    |
| >TET2-H1904RISLVFYQH   | 291   | >TET2-H1904RISLVFYQQ   | 1745 | 1454  |
| >TET2-H1904RISLVFYQHK  | 60    | >TET2-H1904RISLVFYQQK  | 101  | 41    |
| >TET2-H1904RISLVFYQHK  | 395   | >TET2-H1904RISLVFYQQK  | 360  | 35    |
| >TET2-H1904RISLVFYQHK  | 264   | >TET2-H1904RISLVFYQQK  | 1166 | 902   |
| >TET2-H1904RISLVFYQHK  | 187   | >TET2-H1904RISLVFYQQK  | 539  | 352   |
| >TET2-H1904TRISLVFYQH  | 107   | >TET2-H1904TRISLVFYQQ  | 114  | 7     |
| >TET2-H1904HKSMNEPK    | 898   | >TET2-H1904RKSMNEPK    | 213  | 685   |
| >TET2-H1904HKSMNEPKH   | 465   | >TET2-H1904RKSMNEPKH   | 86   | 379   |
| >TET2-H1904QHKSMNEPK   | 17974 | >TET2-H1904QRKSMNEPK   | 473  | 17501 |
| >TET2-H1904PTRISLVFYQF | 2939  | >TET2-H1904PTRISLVFYQF | 445  | 2494  |
| >TET2-H1904PTRISLVFYQF | 6985  | >TET2-H1904PTRISLVFYQF | 57   | 6928  |
| >TET2-H1904PTRISLVFYQF | 19305 | >TET2-H1904PTRISLVFYQF | 109  | 19196 |
| >TET2-H1904YQHKS       | 380   | >TET2-H1904YQRKSMNEP   | 50   | 330   |
| >TET2-H1904YQHKS       | 943   | >TET2-H1904YQRKSMNE    | 485  | 458   |
| >TET2-H1904YQHKS       | 236   | >TET2-H1904YQRKSMNEP   | 132  | 104   |
| >TET2-H1904YQHKS       | 67    | >TET2-H1904YQRKSMNEP   | 34   | 33    |
| >TET2-H1904YQHKS       | 150   | >TET2-H1904YQRKSMNEP   | 80   | 70    |
| >TET2-H1904FYQHKS      | 516   | >TET2-H1904FYQRKSMNE   | 420  | 96    |
| >TET2-H1904FYQHKS      | 424   | >TET2-H1904FYQRKSMNE   | 343  | 81    |
| >TET2-H1904VIFYQHKS    | 67    | >TET2-H1904VIFYQRKSM   | 837  | 770   |
| >TET2-H1904LVFYQHKS    | 263   | >TET2-H1904LVFYQRKSM   | 334  | 71    |
| >TET2-H1904LVFYQHKS    | 131   | >TET2-H1904LVFYQRKSM   | 272  | 141   |
| >TET2-H1904LVFYQHKS    | 66    | >TET2-H1904LVFYQRKSM   | 99   | 33    |

|                        |       |                        |      |       |
|------------------------|-------|------------------------|------|-------|
| >TET2-H1904LVFYQHKSM   | 148   | >TET2-H1904LVFYQRKSM   | 739  | 591   |
| >TET2-H1904LVFYQHKSM   | 62    | >TET2-H1904LVFYQRKSM   | 134  | 72    |
| >TET2-H1904SLVfyQHKSM  | 380   | >TET2-H1904SLVfyQRKSM  | 1791 | 1411  |
| >TET2-H1904SLVfyQHKSM  | 283   | >TET2-H1904SLVfyQRKSM  | 1503 | 1220  |
| >TET2-H1904SLVfyQHK    | 160   | >TET2-H1904SLVfyQRK    | 180  | 20    |
| >TET2-H1904SLVfyQHK    | 76    | >TET2-H1904SLVfyQRK    | 85   | 9     |
| >TET2-H1904SLVfyQHK    | 382   | >TET2-H1904SLVfyQRK    | 668  | 286   |
| >TET2-H1904SLVfyQHKSM  | 458   | >TET2-H1904SLVfyQRKSM  | 442  | 16    |
| >TET2-H1904ISLVfyQH    | 1129  | >TET2-H1904ISLVfyQR    | 90   | 1039  |
| >TET2-H1904ISLVfyQHK   | 225   | >TET2-H1904ISLVfyQRK   | 178  | 47    |
| >TET2-H1904ISLVfyQHKSM | 34    | >TET2-H1904ISLVfyQRKSM | 38   | 4     |
| >TET2-H1904ISLVfyQHK   | 451   | >TET2-H1904ISLVfyQRK   | 458  | 7     |
| >TET2-H1904ISLVfyQH    | 2892  | >TET2-H1904ISLVfyQR    | 137  | 2755  |
| >TET2-H1904ISLVfyQHK   | 42    | >TET2-H1904ISLVfyQRK   | 30   | 12    |
| >TET2-H1904ISLVfyQHK   | 15    | >TET2-H1904ISLVfyQRK   | 41   | 26    |
| >TET2-H1904ISLVfyQH    | 1132  | >TET2-H1904ISLVfyQR    | 10   | 1122  |
| >TET2-H1904ISLVfyQHK   | 93    | >TET2-H1904ISLVfyQRK   | 234  | 141   |
| >TET2-H1904ISLVfyQH    | 16768 | >TET2-H1904ISLVfyQR    | 61   | 16707 |
| >TET2-H1904ISLVfyQH    | 12202 | >TET2-H1904ISLVfyQR    | 55   | 12147 |
| >TET2-H1904ISLVfyQHK   | 474   | >TET2-H1904ISLVfyQRK   | 1220 | 746   |
| >TET2-H1904ISLVfyQHKSM | 31    | >TET2-H1904ISLVfyQRKSM | 44   | 13    |
| >TET2-H1904ISLVfyQHKSM | 8     | >TET2-H1904ISLVfyQRKSM | 11   | 3     |
| >TET2-H1904ISLVfyQHKSM | 135   | >TET2-H1904ISLVfyQRKSM | 168  | 33    |
| >TET2-H1904ISLVfyQHKSM | 50    | >TET2-H1904ISLVfyQRKSM | 55   | 5     |
| >TET2-H1904ISLVfyQH    | 359   | >TET2-H1904ISLVfyQR    | 119  | 240   |
| >TET2-H1904ISLVfyQHK   | 172   | >TET2-H1904ISLVfyQRK   | 185  | 13    |
| >TET2-H1904ISLVfyQH    | 26232 | >TET2-H1904ISLVfyQR    | 149  | 26083 |
| >TET2-H1904RISLVfyQH   | 758   | >TET2-H1904RISLVfyQR   | 276  | 482   |
| >TET2-H1904RISLVfyQHK  | 34    | >TET2-H1904RISLVfyQRK  | 44   | 10    |
| >TET2-H1904RISLVfyQH   | 222   | >TET2-H1904RISLVfyQR   | 25   | 197   |
| >TET2-H1904RISLVfyQHK  | 13    | >TET2-H1904RISLVfyQRK  | 17   | 4     |
| >TET2-H1904RISLVfyQHK  | 19    | >TET2-H1904RISLVfyQRK  | 41   | 22    |
| >TET2-H1904RISLVfyQH   | 291   | >TET2-H1904RISLVfyQR   | 6    | 285   |
| >TET2-H1904RISLVfyQHK  | 60    | >TET2-H1904RISLVfyQRK  | 63   | 3     |
| >TET2-H1904RISLVfyQH   | 21607 | >TET2-H1904RISLVfyQR   | 121  | 21486 |
| >TET2-H1904RISLVfyQH   | 10654 | >TET2-H1904RISLVfyQR   | 44   | 10610 |
| >TET2-H1904RISLVfyQHK  | 395   | >TET2-H1904RISLVfyQRK  | 425  | 30    |
| >TET2-H1904RISLVfyQHK  | 264   | >TET2-H1904RISLVfyQRK  | 1502 | 1238  |
| >TET2-H1904RISLVfyQH   | 8724  | >TET2-H1904RISLVfyQR   | 18   | 8706  |
| >TET2-H1904RISLVfyQHK  | 187   | >TET2-H1904RISLVfyQRK  | 394  | 207   |
| >TET2-H1904TRISLVfyQH  | 5389  | >TET2-H1904TRISLVfyQR  | 68   | 5321  |
| >TET2-H1904TRISLVfyQH  | 11384 | >TET2-H1904TRISLVfyQR  | 412  | 10972 |
| >TET2-H1904TRISLVfyQH  | 12967 | >TET2-H1904TRISLVfyQR  | 110  | 12857 |

|                          |       |                          |      |       |
|--------------------------|-------|--------------------------|------|-------|
| >TET2-H1904TRISLVFYQH    | 539   | >TET2-H1904TRISLVFYQR    | 90   | 449   |
| >TET2-H1904TRISLVFYQH    | 107   | >TET2-H1904TRISLVFYQRk   | 118  | 11    |
| >TET2-H1904TRISLVFYQH    | 25451 | >TET2-H1904TRISLVFYQR    | 149  | 25302 |
| >TET2-I1175\IRIERVIY     | 39    | >TET2-I1175\VRIERVIY     | 87   | 48    |
| >TET2-I1175\IRIERVIYTGK  | 86    | >TET2-I1175\VRIERVIYTGK  | 101  | 15    |
| >TET2-I1175\IRIERVIYTGK  | 117   | >TET2-I1175\VRIERVIYTGK  | 251  | 134   |
| >TET2-I1175\AIRIERVI     | 92    | >TET2-I1175\AVRIERVI     | 33   | 59    |
| >TET2-I1175\AIRIERVIY    | 126   | >TET2-I1175\AVRIERVIY    | 42   | 84    |
| >TET2-I1175\AIRIERVIYT   | 106   | >TET2-I1175\AVRIERVIYT   | 38   | 68    |
| >TET2-I1175\AIRIERVIYTG  | 321   | >TET2-I1175\AVRIERVIYTG  | 105  | 216   |
| >TET2-I1175\AIRIERVIY    | 323   | >TET2-I1175\AVRIERVIY    | 259  | 64    |
| >TET2-I1175\AIRIERVIY    | 444   | >TET2-I1175\AVRIERVIY    | 649  | 205   |
| >TET2-I1175\AIRIERVIY    | 1946  | >TET2-I1175\AVRIERVIY    | 405  | 1541  |
| >TET2-I1175\EERFGQKGK/   | 116   | >TET2-I1175\EERFGQKGK/   | 1287 | 1171  |
| >TET2-I1175\EERFGQKGK/   | 325   | >TET2-I1175\EERFGQKGK/   | 84   | 241   |
| >TET2-I1175\KAIRIERV     | 274   | >TET2-I1175\KAVRIERV     | 443  | 169   |
| >TET2-I1175\KAIRIERV     | 482   | >TET2-I1175\KAVRIERV     | 722  | 240   |
| >TET2-I1175\KAIRIERVIY   | 431   | >TET2-I1175\KAVRIERVIY   | 750  | 319   |
| >TET2-I1175\KAIRIERVIY   | 107   | >TET2-I1175\KAVRIERVIY   | 171  | 64    |
| >TET2-I1175\KAIRIERVIY   | 183   | >TET2-I1175\KAVRIERVIY   | 164  | 19    |
| >TET2-I1175\KAIRIERVIY   | 128   | >TET2-I1175\KAVRIERVIY   | 162  | 34    |
| >TET2-I1175\KAIRIERVI    | 154   | >TET2-I1175\KAVRIERVI    | 309  | 155   |
| >TET2-I1175\KAIRIERVIY   | 56    | >TET2-I1175\KAVRIERVIY   | 96   | 40    |
| >TET2-I1175\KAIRIERVIY   | 399   | >TET2-I1175\KAVRIERVIY   | 422  | 23    |
| >TET2-I1175\KAIRIERVI    | 257   | >TET2-I1175\KAVRIERVI    | 399  | 142   |
| >TET2-I1175\GKAIRIERVIY  | 121   | >TET2-I1175\GKAVRIERVIY  | 70   | 51    |
| >TET2-I1175\KGKAIRIER    | 52    | >TET2-I1175\KGKAVRIER    | 57   | 5     |
| >TET2-I1175\KGKAIRIERV   | 467   | >TET2-I1175\KGKAVRIERV   | 473  | 6     |
| >TET2-I1175\KGKAIRIERVI  | 121   | >TET2-I1175\KGKAVRIERV   | 127  | 6     |
| >TET2-I1175\KGKAIRIER    | 10    | >TET2-I1175\KGKAVRIER    | 11   | 1     |
| >TET2-I1175\KGKAIRIER    | 68    | >TET2-I1175\KGKAVRIER    | 148  | 80    |
| >TET2-I1175\GQK GKAIR    | 77    | >TET2-I1175\GQK GKAVR    | 60   | 17    |
| >TET2-I1175\GQK GKAIRIEI | 58    | >TET2-I1175\GQK GKAVRIE  | 49   | 9     |
| >TET2-I1175\RFGQK GKAI   | 311   | >TET2-I1175\RFGQK GKAV   | 6166 | 5855  |
| >TET2-I1175\RFGQK GKAIR  | 236   | >TET2-I1175\RFGQK GKAVI  | 150  | 86    |
| >TET2-I1175\RFGQK GKAIR  | 57    | >TET2-I1175\RFGQK GKAVI  | 55   | 2     |
| >TET2-I1175\RFGQK GKAIR  | 45    | >TET2-I1175\RFGQK GKAVI  | 37   | 8     |
| >TET2-I1175\ERFGQK GKAI  | 441   | >TET2-I1175\ERFGQK GKAI\ | 456  | 15    |
| >TET2-I1175\ERFGQK GKAI  | 306   | >TET2-I1175\ERFGQK GKAI\ | 1108 | 802   |
| >TET2-I1175\ERFGQK GKAI  | 534   | >TET2-I1175\ERFGQK GKAI\ | 383  | 151   |
| >TET2-I1175\ERFGQK GKAI  | 406   | >TET2-I1175\ERFGQK GKAI\ | 401  | 5     |
| >TET2-I1195\IAKWV VRR    | 16    | >TET2-I1195\IAKWV VRR    | 22   | 6     |
| >TET2-I1195\IAKWV VRR    | 92    | >TET2-I1195\IAKWV VRR    | 207  | 115   |



|                         |      |                         |      |      |
|-------------------------|------|-------------------------|------|------|
| >TET2-I1195\IAKWVRR     | 39   | >TET2-I1195\VAKWVRR     | 134  | 95   |
| >TET2-I1195\PIAKWVRR    | 145  | >TET2-I1195\PVAKWVRR    | 356  | 211  |
| >TET2-I1195\PIAKWVRR    | 111  | >TET2-I1195\PVAKWVRR    | 247  | 136  |
| >TET2-I1195\KEGKSSQGCF  | 71   | >TET2-I1195\KEGKSSQGCF  | 578  | 507  |
| >TET2-I1195\KEGKSSQGCF  | 362  | >TET2-I1195\KEGKSSQGCF  | 887  | 525  |
| >TET2-I1195\KEGKSSQGCF  | 80   | >TET2-I1195\KEGKSSQGCF  | 105  | 25   |
| >TET2-I1195\KEGKSSQGCF  | 1577 | >TET2-I1195\KEGKSSQGCF  | 468  | 1109 |
| >TET2-I1195\KEGKSSQGCF  | 26   | >TET2-I1195\KEGKSSQGCF  | 66   | 40   |
| >TET2-I1195\CPIAKWVV    | 25   | >TET2-I1195\CPVAKWVV    | 27   | 2    |
| >TET2-I1195\CPIAKWVVR   | 160  | >TET2-I1195\CPVAKWVVR   | 133  | 27   |
| >TET2-I1195\CPIAKWVRF   | 181  | >TET2-I1195\CPVAKWVVR   | 146  | 35   |
| >TET2-I1195\QGCPIAKW    | 124  | >TET2-I1195\QGCPIAKW    | 124  | 0    |
| >TET2-I1195\QGCPIAKW\   | 111  | >TET2-I1195\QGCPIAKW\   | 253  | 142  |
| >TET2-I1195\SQGCPVAKW   | 36   | >TET2-I1195\SQGCPVAKW   | 48   | 12   |
| >TET2-I1195\SQGCPVAKW   | 103  | >TET2-I1195\SQGCPVAKW   | 85   | 18   |
| >TET2-I1195\SQGCPVAKW   | 28   | >TET2-I1195\SQGCPVAKW   | 36   | 8    |
| >TET2-I1195\SQGCPVAKW   | 33   | >TET2-I1195\SQGCPVAKW   | 32   | 1    |
| >TET2-I1195\SQGCPVAKW   | 105  | >TET2-I1195\SQGCPVAKW   | 115  | 10   |
| >TET2-I1195\SQGCPVAK    | 85   | >TET2-I1195\SQGCPVAK    | 133  | 48   |
| >TET2-I1195\SSQGCPIAK   | 13   | >TET2-I1195\SSQGCPIAK   | 19   | 6    |
| >TET2-I1195\SSQGCPIAK   | 222  | >TET2-I1195\SSQGCPIAK   | 661  | 439  |
| >TET2-I1195\SSQGCPIAK\  | 13   | >TET2-I1195\SSQGCPIAK\  | 12   | 1    |
| >TET2-I1195\SSQGCPIAK\  | 60   | >TET2-I1195\SSQGCPIAK\  | 58   | 2    |
| >TET2-I1195\SSQGCPIAK\  | 29   | >TET2-I1195\SSQGCPIAK\  | 27   | 2    |
| >TET2-I1195\SSQGCPIAK\  | 472  | >TET2-I1195\SSQGCPIAK\  | 545  | 73   |
| >TET2-I1195\SSQGCPIAK   | 149  | >TET2-I1195\SSQGCPIAK   | 154  | 5    |
| >TET2-I1195\KSSQGCPIAK  | 116  | >TET2-I1195\KSSQGCPIAK  | 157  | 41   |
| >TET2-I1195\KSSQGCPIAK  | 19   | >TET2-I1195\KSSQGCPIAK  | 24   | 5    |
| >TET2-I1195\KSSQGCPI    | 322  | >TET2-I1195\KSSQGCPI    | 540  | 218  |
| >TET2-I1195\KSSQGCPIAK  | 25   | >TET2-I1195\KSSQGCPIAK  | 43   | 18   |
| >TET2-I1195\KSSQGCPIAK  | 370  | >TET2-I1195\KSSQGCPIAK  | 308  | 62   |
| >TET2-I1195\KSSQGCPI    | 262  | >TET2-I1195\KSSQGCPI    | 3401 | 3139 |
| >TET2-I1195\KSSQGCPI    | 15   | >TET2-I1195\KSSQGCPI    | 83   | 68   |
| >TET2-I1195\KSSQGCPIAK' | 7    | >TET2-I1195\KSSQGCPIAK' | 6    | 1    |
| >TET2-I1195\KSSQGCPIAK' | 45   | >TET2-I1195\KSSQGCPIAK' | 45   | 0    |
| >TET2-I1195\KSSQGCPI    | 104  | >TET2-I1195\KSSQGCPI    | 3922 | 3818 |
| >TET2-I1195\KSSQGCPIAK' | 9    | >TET2-I1195\KSSQGCPIAK' | 9    | 0    |
| >TET2-I1195\KSSQGCPIAK' | 307  | >TET2-I1195\KSSQGCPIAK' | 297  | 10   |
| >TET2-I1195\KSSQGCPIAK  | 353  | >TET2-I1195\KSSQGCPIAK  | 386  | 33   |
| >TET2-I1195\KSSQGCPI    | 50   | >TET2-I1195\KSSQGCPI    | 2903 | 2853 |
| >TET2-I1195\GKSSQGCPI   | 73   | >TET2-I1195\GKSSQGCPI   | 104  | 31   |
| >TET2-I1195\GKSSQGCPIA  | 619  | >TET2-I1195\GKSSQGCPIA  | 348  | 271  |
| >TET2-I1871\ILIECAKREL  | 79   | >TET2-I1871\SLIECAKREL  | 59   | 20   |

|                         |      |                         |       |       |
|-------------------------|------|-------------------------|-------|-------|
| >TET2-I1871!ILIECAKREL  | 183  | >TET2-I1871!SLIECAKREL  | 137   | 46    |
| >TET2-I1871!ILIECAKREL  | 29   | >TET2-I1871!SLIECAKREL  | 26    | 3     |
| >TET2-I1871!ILIECAKREL  | 61   | >TET2-I1871!SLIECAKREL  | 47    | 14    |
| >TET2-I1871!ILIECAKREL  | 586  | >TET2-I1871!SLIECAKREL  | 111   | 475   |
| >TET2-I1871!ILIECAKREL  | 13   | >TET2-I1871!SLIECAKREL  | 11    | 2     |
| >TET2-I1871!ILIECAKR    | 526  | >TET2-I1871!SLIECAKR    | 366   | 160   |
| >TET2-I1871!ILIECAKR    | 481  | >TET2-I1871!SLIECAKR    | 1638  | 1157  |
| >TET2-I1871!ILIECAKR    | 111  | >TET2-I1871!SLIECAKR    | 155   | 44    |
| >TET2-I1871!ILIECAKR    | 148  | >TET2-I1871!SLIECAKR    | 183   | 35    |
| >TET2-I1871!SILIECAK    | 60   | >TET2-I1871!SSLIECAK    | 39    | 21    |
| >TET2-I1871!SILIECAK    | 696  | >TET2-I1871!SSLIECAK    | 265   | 431   |
| >TET2-I1871!SILIECAKR   | 514  | >TET2-I1871!SSLIECAKR   | 231   | 283   |
| >TET2-I1871!SILIECAKR   | 346  | >TET2-I1871!SSLIECAKR   | 374   | 28    |
| >TET2-I1871!SILIECAKREL | 7094 | >TET2-I1871!SSLIECAKREL | 64    | 7030  |
| >TET2-I1871!SILIECAK    | 2158 | >TET2-I1871!SSLIECAK    | 209   | 1949  |
| >TET2-I1871!SILIECAKR   | 4587 | >TET2-I1871!SSLIECAKR   | 354   | 4233  |
| >TET2-I1871!SILIECAKR   | 238  | >TET2-I1871!SSLIECAKR   | 1464  | 1226  |
| >TET2-I1871!GVAVAPTHG   | 461  | >TET2-I1871!GVAVAPTHG   | 12079 | 11618 |
| >TET2-I1871!GVAVAPTHG   | 236  | >TET2-I1871!GVAVAPTHG   | 35071 | 34835 |
| >TET2-I1871!GSILIECAK   | 60   | >TET2-I1871!GSSLIECAK   | 60    | 0     |
| >TET2-I1871!GSILIECAKR  | 163  | >TET2-I1871!GSSLIECAKR  | 135   | 28    |
| >TET2-I1871!GSILIECAK   | 416  | >TET2-I1871!GSSLIECAK   | 676   | 260   |
| >TET2-I1871!GSILIECAKR  | 34   | >TET2-I1871!GSSLIECAKR  | 60    | 26    |
| >TET2-I1871!HGSILIECAKR | 414  | >TET2-I1871!HGSSLIECAK  | 218   | 196   |
| >TET2-I1871!HGSILIECAKR | 345  | >TET2-I1871!HGSSLIECAK  | 312   | 33    |
| >TET2-I1871!PTHGSILI    | 309  | >TET2-I1871!PTHGSSLI    | 458   | 149   |
| >TET2-I1871!PTHGSILI    | 554  | >TET2-I1871!PTHGSSLI    | 308   | 246   |
| >TET2-I1871!APTHGSIL    | 1215 | >TET2-I1871!APTHGSSL    | 490   | 725   |
| >TET2-I1871!APTHGSILI   | 461  | >TET2-I1871!APTHGSSLI   | 1138  | 677   |
| >TET2-I1871!APTHGSIL    | 25   | >TET2-I1871!APTHGSSL    | 14    | 11    |
| >TET2-I1871!APTHGSILI   | 375  | >TET2-I1871!APTHGSSLI   | 137   | 238   |
| >TET2-I1871!APTHGSILI   | 174  | >TET2-I1871!APTHGSSLI   | 415   | 241   |
| >TET2-I1871!VAPTHGSIL   | 5    | >TET2-I1871!VAPTHGSSL   | 11    | 6     |
| >TET2-I1871!VAPTHGSILI  | 6    | >TET2-I1871!VAPTHGSSLI  | 10    | 4     |
| >TET2-I1871!VAPTHGSILIE | 280  | >TET2-I1871!VAPTHGSSLI  | 855   | 575   |
| >TET2-I1871!VAPTHGSI    | 249  | >TET2-I1871!VAPTHGSS    | 33552 | 33303 |
| >TET2-I1871!VAPTHGSILI  | 227  | >TET2-I1871!VAPTHGSSLI  | 65    | 162   |
| >TET2-I1871!AVAPTHGSIL  | 1466 | >TET2-I1871!AVAPTHGSSL  | 437   | 1029  |
| >TET2-I1871!AVAPTHGSILI | 509  | >TET2-I1871!AVAPTHGSSL  | 333   | 176   |
| >TET2-I1871!AVAPTHGSI   | 228  | >TET2-I1871!AVAPTHGSS   | 10064 | 9836  |
| >TET2-I1871!AVAPTHGSILI | 276  | >TET2-I1871!AVAPTHGSSL  | 76    | 200   |
| >TET2-I1871!AVAPTHGSILI | 142  | >TET2-I1871!AVAPTHGSSL  | 254   | 112   |
| >TET2-I1871!AVAPTHGSIL  | 514  | >TET2-I1871!AVAPTHGSSL  | 130   | 384   |

|                         |      |                         |       |       |
|-------------------------|------|-------------------------|-------|-------|
| >TET2-I1871!AVAPTHGSI   | 183  | >TET2-I1871!AVAPTHGSS   | 2602  | 2419  |
| >TET2-I1871!AVAPTHGSILI | 153  | >TET2-I1871!AVAPTHGSSL  | 372   | 219   |
| >TET2-I1871!AVAPTHGSI   | 438  | >TET2-I1871!AVAPTHGSS   | 8985  | 8547  |
| >TET2-I1871!AVAPTHGSILI | 196  | >TET2-I1871!AVAPTHGSSL  | 159   | 37    |
| >TET2-I1871!AVAPTHGSI   | 216  | >TET2-I1871!AVAPTHGSS   | 9197  | 8981  |
| >TET2-I1871!AVAPTHGSIL  | 1998 | >TET2-I1871!AVAPTHGSSL  | 481   | 1517  |
| >TET2-I1871!AVAPTHGSIL  | 531  | >TET2-I1871!AVAPTHGSSL  | 143   | 388   |
| >TET2-I1871!AVAPTHGSILI | 1293 | >TET2-I1871!AVAPTHGSSL  | 111   | 1182  |
| >TET2-I1871!AVAPTHGSI   | 51   | >TET2-I1871!AVAPTHGSS   | 26441 | 26390 |
| >TET2-I1871!AVAPTHGSIL  | 294  | >TET2-I1871!AVAPTHGSSL  | 358   | 64    |
| >TET2-I1871!AVAPTHGSILI | 84   | >TET2-I1871!AVAPTHGSSL  | 47    | 37    |
| >TET2-I1871!VAVAPTHGSI  | 98   | >TET2-I1871!VAVAPTHGS   | 12451 | 12353 |
| >TET2-I1871!VAVAPTHGSI  | 1234 | >TET2-I1871!VAVAPTHGS   | 226   | 1008  |
| >TET2-I1871!VAVAPTHGSI  | 617  | >TET2-I1871!VAVAPTHGS   | 296   | 321   |
| >TET2-I1871!VAVAPTHGSI  | 128  | >TET2-I1871!VAVAPTHGS   | 7965  | 7837  |
| >TET2-I1871!VAVAPTHGSI  | 73   | >TET2-I1871!VAVAPTHGS   | 20    | 53    |
| >TET2-I1871!VAVAPTHGSI  | 263  | >TET2-I1871!VAVAPTHGS   | 325   | 62    |
| >TET2-I1871!VAVAPTHGSI  | 136  | >TET2-I1871!VAVAPTHGS   | 33716 | 33580 |
| >TET2-I1873!IECAKREL    | 599  | >TET2-I1873!IECAKREL    | 216   | 383   |
| >TET2-I1873!IECAKRELHA  | 1161 | >TET2-I1873!IECAKRELHA  | 474   | 687   |
| >TET2-I1873!IECAKREL    | 155  | >TET2-I1873!IECAKREL    | 1050  | 895   |
| >TET2-I1873!IECAKRELHA  | 1397 | >TET2-I1873!IECAKRELHA  | 261   | 1136  |
| >TET2-I1873!AVAPTHGSILI | 276  | >TET2-I1873!AVAPTHGSILI | 20214 | 19938 |
| >TET2-I1873!AVAPTHGSILI | 142  | >TET2-I1873!AVAPTHGSILI | 20660 | 20518 |
| >TET2-I1873!AVAPTHGSILI | 153  | >TET2-I1873!AVAPTHGSILI | 5098  | 4945  |
| >TET2-I1873!AVAPTHGSILI | 196  | >TET2-I1873!AVAPTHGSILI | 19061 | 18865 |
| >TET2-I1873!AVAPTHGSILI | 84   | >TET2-I1873!AVAPTHGSILI | 37828 | 37744 |
| >TET2-I1873!ILIECAKREL  | 79   | >TET2-I1873!ILNECAKREL  | 202   | 123   |
| >TET2-I1873!ILIECAKREL  | 183  | >TET2-I1873!ILNECAKREL  | 542   | 359   |
| >TET2-I1873!ILIECAKREL  | 29   | >TET2-I1873!ILNECAKREL  | 28    | 1     |
| >TET2-I1873!ILIECAKREL  | 61   | >TET2-I1873!ILNECAKREL  | 186   | 125   |
| >TET2-I1873!ILIECAKREL  | 586  | >TET2-I1873!ILNECAKREL  | 353   | 233   |
| >TET2-I1873!ILIECAKREL  | 852  | >TET2-I1873!ILNECAKREL  | 217   | 635   |
| >TET2-I1873!ILIECAKREL  | 13   | >TET2-I1873!ILNECAKREL  | 13    | 0     |
| >TET2-I1873!ILIECAKR    | 526  | >TET2-I1873!ILNECAKR    | 157   | 369   |
| >TET2-I1873!ILIECAKR    | 481  | >TET2-I1873!ILNECAKR    | 623   | 142   |
| >TET2-I1873!ILIECAKR    | 111  | >TET2-I1873!ILNECAKR    | 397   | 286   |
| >TET2-I1873!ILIECAKR    | 148  | >TET2-I1873!ILNECAKR    | 264   | 116   |
| >TET2-I1873!SILIECAK    | 60   | >TET2-I1873!SILNECAK    | 41    | 19    |
| >TET2-I1873!SILIECAK    | 696  | >TET2-I1873!SILNECAK    | 492   | 204   |
| >TET2-I1873!SILIECAKR   | 514  | >TET2-I1873!SILNECAKR   | 380   | 134   |
| >TET2-I1873!SILIECAKR   | 346  | >TET2-I1873!SILNECAKR   | 263   | 83    |
| >TET2-I1873!SILIECAKR   | 238  | >TET2-I1873!SILNECAKR   | 269   | 31    |

|                         |      |                         |       |       |
|-------------------------|------|-------------------------|-------|-------|
| >TET2-I1873IGSILIECAK   | 60   | >TET2-I1873IGSILNECAK   | 140   | 80    |
| >TET2-I1873IGSILIECAKR  | 534  | >TET2-I1873IGSILNECAKR  | 498   | 36    |
| >TET2-I1873IGSILIECAKR  | 163  | >TET2-I1873IGSILNECAKR  | 250   | 87    |
| >TET2-I1873IGSILIECAK   | 416  | >TET2-I1873IGSILNECAK   | 1357  | 941   |
| >TET2-I1873IGSILIECAKR  | 34   | >TET2-I1873IGSILNECAKR  | 99    | 65    |
| >TET2-I1873IHGSILIECAKR | 414  | >TET2-I1873IHGSILNECAK  | 422   | 8     |
| >TET2-I1873IHGSILIECAKR | 345  | >TET2-I1873IHGSILNECAK  | 386   | 41    |
| >TET2-I1873IPTHGSILI    | 309  | >TET2-I1873IPTHGSILN    | 6713  | 6404  |
| >TET2-I1873IAPTHGSILI   | 461  | >TET2-I1873IAPTHGSILN   | 39503 | 39042 |
| >TET2-I1873IAPTHGSILI   | 375  | >TET2-I1873IAPTHGSILN   | 22699 | 22324 |
| >TET2-I1873IAPTHGSILI   | 174  | >TET2-I1873IAPTHGSILN   | 16991 | 16817 |
| >TET2-I1873IVAPTHGSILI  | 6    | >TET2-I1873IVAPTHGSILN  | 863   | 857   |
| >TET2-I1873IVAPTHGSILIE | 280  | >TET2-I1873IVAPTHGSILN  | 1025  | 745   |
| >TET2-I1873IVAPTHGSILI  | 227  | >TET2-I1873IVAPTHGSILN  | 35783 | 35556 |
| >TET2-I1873`IECAKREL    | 155  | >TET2-I1873`TECAKREL    | 295   | 140   |
| >TET2-I1873`IECAKRELHA  | 1397 | >TET2-I1873`TECAKRELHA  | 230   | 1167  |
| >TET2-I1873`AVAPTHGSILI | 276  | >TET2-I1873`AVAPTHGSIL` | 4346  | 4070  |
| >TET2-I1873`AVAPTHGSILI | 142  | >TET2-I1873`AVAPTHGSIL` | 2170  | 2028  |
| >TET2-I1873`AVAPTHGSILI | 153  | >TET2-I1873`AVAPTHGSIL` | 3822  | 3669  |
| >TET2-I1873`AVAPTHGSILI | 196  | >TET2-I1873`AVAPTHGSIL` | 5272  | 5076  |
| >TET2-I1873`AVAPTHGSILI | 84   | >TET2-I1873`AVAPTHGSIL` | 33967 | 33883 |
| >TET2-I1873`ILIECAKREL  | 79   | >TET2-I1873`ILTECAKREL  | 169   | 90    |
| >TET2-I1873`ILIECAKREL  | 183  | >TET2-I1873`ILTECAKREL  | 574   | 391   |
| >TET2-I1873`ILIECAKREL  | 29   | >TET2-I1873`ILTECAKREL  | 93    | 64    |
| >TET2-I1873`ILIECAKREL  | 61   | >TET2-I1873`ILTECAKREL  | 311   | 250   |
| >TET2-I1873`ILIECAKREL  | 586  | >TET2-I1873`ILTECAKREL  | 337   | 249   |
| >TET2-I1873`ILIECAKREL  | 13   | >TET2-I1873`ILTECAKREL  | 9     | 4     |
| >TET2-I1873`ILIECAKR    | 481  | >TET2-I1873`ILTECAKR    | 673   | 192   |
| >TET2-I1873`ILIECAKR    | 111  | >TET2-I1873`ILTECAKR    | 233   | 122   |
| >TET2-I1873`ILIECAKR    | 148  | >TET2-I1873`ILTECAKR    | 214   | 66    |
| >TET2-I1873`SILIECAK    | 60   | >TET2-I1873`SILTECAK    | 44    | 16    |
| >TET2-I1873`SILIECAK    | 696  | >TET2-I1873`SILTECAK    | 403   | 293   |
| >TET2-I1873`SILIECAKR   | 346  | >TET2-I1873`SILTECAKR   | 263   | 83    |
| >TET2-I1873`SILIECAKR   | 238  | >TET2-I1873`SILTECAKR   | 135   | 103   |
| >TET2-I1873`GSILIECAK   | 60   | >TET2-I1873`GSILTECAK   | 83    | 23    |
| >TET2-I1873`GSILIECAKR  | 534  | >TET2-I1873`GSILTECAKR  | 449   | 85    |
| >TET2-I1873`GSILIECAKR  | 163  | >TET2-I1873`GSILTECAKR  | 332   | 169   |
| >TET2-I1873`GSILIECAK   | 416  | >TET2-I1873`GSILTECAK   | 1382  | 966   |
| >TET2-I1873`GSILIECAKR  | 34   | >TET2-I1873`GSILTECAKR  | 59    | 25    |
| >TET2-I1873`HGSILIECAKR | 414  | >TET2-I1873`HGSILTECAKf | 362   | 52    |
| >TET2-I1873`HGSILIECAKR | 345  | >TET2-I1873`HGSILTECAKf | 259   | 86    |
| >TET2-I1873`PTHGSILI    | 309  | >TET2-I1873`PTHGSILT    | 4542  | 4233  |
| >TET2-I1873`APTHGSILI   | 461  | >TET2-I1873`APTHGSILT   | 26506 | 26045 |

|                          |       |                          |       |       |
|--------------------------|-------|--------------------------|-------|-------|
| >TET2-I1873` APTHGSILI   | 375   | >TET2-I1873` APTHGSILT   | 4231  | 3856  |
| >TET2-I1873` APTHGSILI   | 174   | >TET2-I1873` APTHGSILT   | 6087  | 5913  |
| >TET2-I1873` VAPTHGSILI  | 6     | >TET2-I1873` VAPTHGSILT  | 348   | 342   |
| >TET2-I1873` VAPTHGSILIE | 280   | >TET2-I1873` VAPTHGSILIE | 707   | 427   |
| >TET2-I1873` VAPTHGSILI  | 227   | >TET2-I1873` VAPTHGSILT  | 29769 | 29542 |
| >TET2-K1197 KWVVRSS      | 89    | >TET2-K1197 RWVVRSS      | 181   | 92    |
| >TET2-K1197 KWVVRSSS     | 90    | >TET2-K1197 RWVVRSSS     | 185   | 95    |
| >TET2-K1197 KWVVRSSSI    | 210   | >TET2-K1197 RWVVRSSSI    | 413   | 203   |
| >TET2-K1197 AKWVVRSS:    | 455   | >TET2-K1197 ARWVVRSS:    | 1684  | 1229  |
| >TET2-K1197 AKWVVRSS     | 9299  | >TET2-K1197 ARWVVRSS     | 123   | 9176  |
| >TET2-K1197 AKWVVRSS     | 7485  | >TET2-K1197 ARWVVRSS     | 72    | 7413  |
| >TET2-K1197 AKWVVRSS     | 3883  | >TET2-K1197 ARWVVRSS     | 270   | 3613  |
| >TET2-K1197 AKWVVRSS     | 2300  | >TET2-K1197 ARWVVRSS     | 171   | 2129  |
| >TET2-K1197 AKWVVRSS:    | 2921  | >TET2-K1197 ARWVVRSS:    | 207   | 2714  |
| >TET2-K1197 AKWVVRSS:    | 3786  | >TET2-K1197 ARWVVRSS:    | 278   | 3508  |
| >TET2-K1197 AKWVVRSS     | 13009 | >TET2-K1197 ARWVVRSS     | 213   | 12796 |
| >TET2-K1197 IAKWVVR      | 16    | >TET2-K1197 IARWVVR      | 25    | 9     |
| >TET2-K1197 IAKWVVR      | 92    | >TET2-K1197 IARWVVR      | 78    | 14    |
| >TET2-K1197 IAKWVVR      | 39    | >TET2-K1197 IARWVVR      | 120   | 81    |
| >TET2-K1197 PIAKWVVR     | 145   | >TET2-K1197 PIARWVVR     | 297   | 152   |
| >TET2-K1197 PIAKWVVR     | 111   | >TET2-K1197 PIARWVVR     | 290   | 179   |
| >TET2-K1197 CPIAKWVV     | 812   | >TET2-K1197 CPIARWVV     | 233   | 579   |
| >TET2-K1197 CPIAKWVV     | 25    | >TET2-K1197 CPIARWVV     | 22    | 3     |
| >TET2-K1197 CPIAKWVVR    | 160   | >TET2-K1197 CPIARWVVR    | 139   | 21    |
| >TET2-K1197 CPIAKWVVR    | 181   | >TET2-K1197 CPIARWVVR    | 187   | 6     |
| >TET2-K1197 QGCPIAKW     | 124   | >TET2-K1197 QGCPIARW     | 107   | 17    |
| >TET2-K1197 QGCPIAKWV    | 111   | >TET2-K1197 QGCPIARWV    | 146   | 35    |
| >TET2-K1197 SQGCPIAKW    | 36    | >TET2-K1197 SQGCPIARW    | 31    | 5     |
| >TET2-K1197 SQGCPIAKW    | 103   | >TET2-K1197 SQGCPIARW    | 78    | 25    |
| >TET2-K1197 SQGCPIAKW    | 28    | >TET2-K1197 SQGCPIARW    | 47    | 19    |
| >TET2-K1197 SQGCPIAKW    | 33    | >TET2-K1197 SQGCPIARW    | 59    | 26    |
| >TET2-K1197 SQGCPIAKW    | 105   | >TET2-K1197 SQGCPIARW    | 184   | 79    |
| >TET2-K1197 SQGCPIAK     | 85    | >TET2-K1197 SQGCPIAR     | 2845  | 2760  |
| >TET2-K1197 SQGCPIAK     | 4542  | >TET2-K1197 SQGCPIAR     | 285   | 4257  |
| >TET2-K1197 SQGCPIAK     | 2463  | >TET2-K1197 SQGCPIAR     | 167   | 2296  |
| >TET2-K1197 SSQGCPIAK    | 13    | >TET2-K1197 SSQGCPIAR    | 194   | 181   |
| >TET2-K1197 SSQGCPIAK    | 222   | >TET2-K1197 SSQGCPIAR    | 8552  | 8330  |
| >TET2-K1197 SSQGCPIAK    | 2862  | >TET2-K1197 SSQGCPIAR    | 119   | 2743  |
| >TET2-K1197 SSQGCPIAKW   | 13    | >TET2-K1197 SSQGCPIARW   | 11    | 2     |
| >TET2-K1197 SSQGCPIAKW   | 60    | >TET2-K1197 SSQGCPIARW   | 59    | 1     |
| >TET2-K1197 SSQGCPIAKW   | 29    | >TET2-K1197 SSQGCPIARW   | 28    | 1     |
| >TET2-K1197 SSQGCPIAKW   | 472   | >TET2-K1197 SSQGCPIARW   | 480   | 8     |
| >TET2-K1197 SSQGCPIAK    | 149   | >TET2-K1197 SSQGCPIAR    | 238   | 89    |

|                        |       |                        |       |       |
|------------------------|-------|------------------------|-------|-------|
| >TET2-K1197SSQGCPIAK   | 7974  | >TET2-K1197SSQGCPIAR   | 280   | 7694  |
| >TET2-K1197KSSQGCPIAK  | 116   | >TET2-K1197KSSQGCPIAR  | 2269  | 2153  |
| >TET2-K1197KSSQGCPIAK  | 19    | >TET2-K1197KSSQGCPIAR  | 154   | 135   |
| >TET2-K1197KSSQGCPIAK  | 25    | >TET2-K1197KSSQGCPIAR  | 2689  | 2664  |
| >TET2-K1197KSSQGCPIAK  | 370   | >TET2-K1197KSSQGCPIAR  | 19    | 351   |
| >TET2-K1197KSSQGCPIAK' | 7     | >TET2-K1197KSSQGCPIAR' | 6     | 1     |
| >TET2-K1197KSSQGCPIAK' | 45    | >TET2-K1197KSSQGCPIAR' | 45    | 0     |
| >TET2-K1197KSSQGCPIAK' | 9     | >TET2-K1197KSSQGCPIAR' | 9     | 0     |
| >TET2-K1197KSSQGCPIAK' | 307   | >TET2-K1197KSSQGCPIAR' | 184   | 123   |
| >TET2-K1197KSSQGCPIAK  | 914   | >TET2-K1197KSSQGCPIAR  | 381   | 533   |
| >TET2-K1197KSSQGCPIAK  | 353   | >TET2-K1197KSSQGCPIAR  | 545   | 192   |
| >TET2-K1197KSSQGCPIAK  | 2892  | >TET2-K1197KSSQGCPIAR  | 179   | 2713  |
| >TET2-K1299KFARSKIPRKF | 163   | >TET2-K1299EFARSKIPRKF | 837   | 674   |
| >TET2-K1299KFARSKIPRKF | 231   | >TET2-K1299EFARSKIPRKF | 728   | 497   |
| >TET2-K1299KFARSKIPRKF | 103   | >TET2-K1299EFARSKIPRKF | 849   | 746   |
| >TET2-K1299KFARSKIPR   | 367   | >TET2-K1299EFARSKIPR   | 16529 | 16162 |
| >TET2-K1299KFARSKIPRK  | 19    | >TET2-K1299EFARSKIPRK  | 8934  | 8915  |
| >TET2-K1299KFARSKIPR   | 6     | >TET2-K1299EFARSKIPR   | 116   | 110   |
| >TET2-K1299KFARSKIPR   | 3076  | >TET2-K1299EFARSKIPR   | 59    | 3017  |
| >TET2-K1299KFARSKIPR   | 2129  | >TET2-K1299EFARSKIPR   | 26    | 2103  |
| >TET2-K1299KFARSKIPRK  | 226   | >TET2-K1299EFARSKIPRK  | 3967  | 3741  |
| >TET2-K1299KFARSKIPR   | 15    | >TET2-K1299EFARSKIPR   | 52    | 37    |
| >TET2-K1299KFARSKIPRK  | 383   | >TET2-K1299EFARSKIPRK  | 4023  | 3640  |
| >TET2-K1299CKFARSKIPR  | 196   | >TET2-K1299CEFARSKIPR  | 401   | 205   |
| >TET2-K1299CKFARSKI    | 59    | >TET2-K1299CEFARSKI    | 2454  | 2395  |
| >TET2-K1299CKFARSKIPR  | 125   | >TET2-K1299CEFARSKIPR  | 3794  | 3669  |
| >TET2-K1299CKFARSKI    | 26576 | >TET2-K1299CEFARSKI    | 277   | 26299 |
| >TET2-K1299CKFARSKIPR  | 73    | >TET2-K1299CEFARSKIPR  | 53    | 20    |
| >TET2-K1299CKFARSKI    | 94    | >TET2-K1299CEFARSKI    | 146   | 52    |
| >TET2-K1299CSWSMYYNC   | 70    | >TET2-K1299CSWSMYYNC   | 20482 | 20412 |
| >TET2-K1299CSWSMYYNC   | 150   | >TET2-K1299CSWSMYYNC   | 7894  | 7744  |
| >TET2-K1299CSWSMYYNC   | 313   | >TET2-K1299CSWSMYYNC   | 21683 | 21370 |
| >TET2-K1299GCKFARSK    | 46    | >TET2-K1299GCEFARSK    | 6615  | 6569  |
| >TET2-K1299GCKFARSKIPI | 107   | >TET2-K1299GCEFARSKIPI | 2348  | 2241  |
| >TET2-K1299GCKFARSKI   | 261   | >TET2-K1299GCEFARSKI   | 423   | 162   |
| >TET2-K1299YNGCKFAR    | 182   | >TET2-K1299YNGCEFAR    | 206   | 24    |
| >TET2-K1299YYNGCKFA    | 3222  | >TET2-K1299YYNGCEFA    | 485   | 2737  |
| >TET2-K1299YYNGCKFAR   | 9     | >TET2-K1299YYNGCEFAR   | 18    | 9     |
| >TET2-K1299YYNGCKFAR   | 18    | >TET2-K1299YYNGCEFAR   | 19    | 1     |
| >TET2-K1299YYNGCKFAR   | 194   | >TET2-K1299YYNGCEFAR   | 131   | 63    |
| >TET2-K1299YYNGCKFAR   | 16    | >TET2-K1299YYNGCEFAR   | 19    | 3     |
| >TET2-K1299YYNGCKFARS  | 311   | >TET2-K1299YYNGCEFARS  | 489   | 178   |
| >TET2-K1299MYYNGCKFA   | 3811  | >TET2-K1299MYYNGCEFA   | 360   | 3451  |

|                        |      |                        |       |       |
|------------------------|------|------------------------|-------|-------|
| >TET2-K1299 MYYNGCKF   | 28   | >TET2-K1299 MYYNGCEF   | 21    | 7     |
| >TET2-K1299 MYYNGCKF   | 297  | >TET2-K1299 MYYNGCEF   | 294   | 3     |
| >TET2-K1299 MYYNGCKF   | 5    | >TET2-K1299 MYYNGCEF   | 4     | 1     |
| >TET2-K1299 MYYNGCKFA  | 784  | >TET2-K1299 MYYNGCEFA  | 409   | 375   |
| >TET2-K1299 MYYNGCKFA  | 732  | >TET2-K1299 MYYNGCEFA  | 487   | 245   |
| >TET2-K1299 MYYNGCKF   | 333  | >TET2-K1299 MYYNGCEF   | 275   | 58    |
| >TET2-K1299 MYYNGCKFA  | 8    | >TET2-K1299 MYYNGCEFA  | 15    | 7     |
| >TET2-K1299 MYYNGCKFA  | 28   | >TET2-K1299 MYYNGCEFA  | 46    | 18    |
| >TET2-K1299 MYYNGCKFA  | 209  | >TET2-K1299 MYYNGCEFA  | 202   | 7     |
| >TET2-K1299 MYYNGCKF   | 488  | >TET2-K1299 MYYNGCEF   | 518   | 30    |
| >TET2-K1299 MYYNGCKF   | 38   | >TET2-K1299 MYYNGCEF   | 25    | 13    |
| >TET2-K1299 MYYNGCKFA  | 296  | >TET2-K1299 MYYNGCEFA  | 593   | 297   |
| >TET2-K1299 MYYNGCKFA  | 23   | >TET2-K1299 MYYNGCEFA  | 31    | 8     |
| >TET2-K1299 MYYNGCKF   | 392  | >TET2-K1299 MYYNGCEF   | 328   | 64    |
| >TET2-K1299 MYYNGCKFA  | 17   | >TET2-K1299 MYYNGCEFA  | 18    | 1     |
| >TET2-K1299 SMYYNGCKF  | 1844 | >TET2-K1299 SMYYNGCEF  | 397   | 1447  |
| >TET2-K1299 SMYYNGCKF  | 208  | >TET2-K1299 SMYYNGCEF  | 167   | 41    |
| >TET2-K1299 SMYYNGCKF, | 413  | >TET2-K1299 SMYYNGCEF, | 56    | 357   |
| >TET2-K1299 SMYYNGCKF, | 273  | >TET2-K1299 SMYYNGCEF, | 44    | 229   |
| >TET2-K1299 SMYYNGCKF, | 38   | >TET2-K1299 SMYYNGCEF, | 28    | 10    |
| >TET2-K1299 SMYYNGCKF, | 1536 | >TET2-K1299 SMYYNGCEF, | 293   | 1243  |
| >TET2-K1299 SMYYNGCKF  | 197  | >TET2-K1299 SMYYNGCEF  | 71    | 126   |
| >TET2-K1299 SMYYNGCKF, | 18   | >TET2-K1299 SMYYNGCEF, | 7     | 11    |
| >TET2-K1299 SMYYNGCKF, | 122  | >TET2-K1299 SMYYNGCEF, | 40    | 82    |
| >TET2-K1299 SMYYNGCKF, | 30   | >TET2-K1299 SMYYNGCEF, | 13    | 17    |
| >TET2-K1299 SMYYNGCKF, | 53   | >TET2-K1299 SMYYNGCEF, | 26    | 27    |
| >TET2-K1299 SMYYNGCK   | 40   | >TET2-K1299 SMYYNGCE   | 16655 | 16615 |
| >TET2-K1299 SMYYNGCKF, | 130  | >TET2-K1299 SMYYNGCEF, | 201   | 71    |
| >TET2-K1299 SMYYNGCK   | 17   | >TET2-K1299 SMYYNGCE   | 17544 | 17527 |
| >TET2-K1299 SMYYNGCKF, | 62   | >TET2-K1299 SMYYNGCEF, | 64    | 2     |
| >TET2-K1299 SMYYNGCKF  | 521  | >TET2-K1299 SMYYNGCEF  | 438   | 83    |
| >TET2-K1299 SMYYNGCK   | 364  | >TET2-K1299 SMYYNGCE   | 12821 | 12457 |
| >TET2-K1299 SMYYNGCKF, | 8    | >TET2-K1299 SMYYNGCEF, | 9     | 1     |
| >TET2-K1299 SMYYNGCKF  | 66   | >TET2-K1299 SMYYNGCEF  | 61    | 5     |
| >TET2-K1299 SMYYNGCKF, | 217  | >TET2-K1299 SMYYNGCEF, | 208   | 9     |
| >TET2-K1299 SMYYNGCK   | 153  | >TET2-K1299 SMYYNGCE   | 14915 | 14762 |
| >TET2-K1299 SMYYNGCKF, | 35   | >TET2-K1299 SMYYNGCEF, | 28    | 7     |
| >TET2-K1299 SMYYNGCKF  | 37   | >TET2-K1299 SMYYNGCEF  | 24    | 13    |
| >TET2-K1299 SMYYNGCKF, | 1179 | >TET2-K1299 SMYYNGCEF, | 453   | 726   |
| >TET2-K1299 SMYYNGCKF  | 23   | >TET2-K1299 SMYYNGCEF  | 22    | 1     |
| >TET2-K1299 SMYYNGCKF  | 3    | >TET2-K1299 SMYYNGCEF  | 3     | 0     |
| >TET2-K1299 SMYYNGCKF, | 335  | >TET2-K1299 SMYYNGCEF, | 417   | 82    |
| >TET2-K1299 SMYYNGCKF, | 199  | >TET2-K1299 SMYYNGCEF, | 152   | 47    |

|                         |      |                         |       |       |
|-------------------------|------|-------------------------|-------|-------|
| >TET2-K1299 SMYYNGCKF   | 33   | >TET2-K1299 SMYYNGCEF   | 34    | 1     |
| >TET2-K1299 SMYYNGCKF,  | 54   | >TET2-K1299 SMYYNGCEF,  | 66    | 12    |
| >TET2-K1299 WSMYYNGCI   | 463  | >TET2-K1299 WSMYYNGCI   | 25263 | 24800 |
| >TET2-K1299 WSMYYNGCI   | 316  | >TET2-K1299 WSMYYNGCI   | 271   | 45    |
| >TET2-K1299 WSMYYNGCI   | 269  | >TET2-K1299 WSMYYNGCI   | 381   | 112   |
| >TET2-K1299 WSMYYNGCI   | 92   | >TET2-K1299 WSMYYNGCI   | 12952 | 12860 |
| >TET2-K1299 WSMYYNGCI   | 351  | >TET2-K1299 WSMYYNGCI   | 48    | 303   |
| >TET2-K1299 WSMYYNGCI   | 119  | >TET2-K1299 WSMYYNGCI   | 53    | 66    |
| >TET2-K1299 WSMYYNGCI   | 16   | >TET2-K1299 WSMYYNGCI   | 12    | 4     |
| >TET2-K1299 WSMYYNGCI   | 9    | >TET2-K1299 WSMYYNGCI   | 8     | 1     |
| >TET2-K1299 WSMYYNGCI   | 284  | >TET2-K1299 WSMYYNGCI   | 246   | 38    |
| >TET2-K1299 WSMYYNGCI   | 18   | >TET2-K1299 WSMYYNGCI   | 20    | 2     |
| >TET2-K1299 WSMYYNGCI   | 645  | >TET2-K1299 WSMYYNGCI   | 487   | 158   |
| >TET2-K1299 SWSMYYNGC   | 421  | >TET2-K1299 SWSMYYNGC   | 478   | 57    |
| >TET2-K1299 SWSMYYNGC   | 27   | >TET2-K1299 SWSMYYNGC   | 16    | 11    |
| >TET2-K1299 SWSMYYNGC   | 727  | >TET2-K1299 SWSMYYNGC   | 348   | 379   |
| >TET2-K1299 SWSMYYNGC   | 442  | >TET2-K1299 SWSMYYNGC   | 18948 | 18506 |
| >TET2-K1299 SWSMYYNGC   | 137  | >TET2-K1299 SWSMYYNGC   | 119   | 18    |
| >TET2-K1299 KFARSKIPRKF | 163  | >TET2-K1299 NFARSKIPRKI | 273   | 110   |
| >TET2-K1299 KFARSKIPRKF | 231  | >TET2-K1299 NFARSKIPRKI | 753   | 522   |
| >TET2-K1299 KFARSKIPRKF | 103  | >TET2-K1299 NFARSKIPRKI | 268   | 165   |
| >TET2-K1299 KFARSKIPR   | 367  | >TET2-K1299 NFARSKIPR   | 13831 | 13464 |
| >TET2-K1299 KFARSKIPRK  | 19   | >TET2-K1299 NFARSKIPRK  | 4508  | 4489  |
| >TET2-K1299 KFARSKIPR   | 6    | >TET2-K1299 NFARSKIPR   | 35    | 29    |
| >TET2-K1299 KFARSKIPR   | 3076 | >TET2-K1299 NFARSKIPR   | 67    | 3009  |
| >TET2-K1299 KFARSKIPR   | 2129 | >TET2-K1299 NFARSKIPR   | 126   | 2003  |
| >TET2-K1299 KFARSKIPRK  | 226  | >TET2-K1299 NFARSKIPRK  | 4434  | 4208  |
| >TET2-K1299 KFARSKIPR   | 15   | >TET2-K1299 NFARSKIPR   | 49    | 34    |
| >TET2-K1299 KFARSKIPRK  | 383  | >TET2-K1299 NFARSKIPRK  | 4989  | 4606  |
| >TET2-K1299 CKFARSKIPR  | 196  | >TET2-K1299 CNFARSKIPR  | 286   | 90    |
| >TET2-K1299 CKFARSKIPR  | 529  | >TET2-K1299 CNFARSKIPR  | 221   | 308   |
| >TET2-K1299 CKFARSKI    | 59   | >TET2-K1299 CNFARSKI    | 3959  | 3900  |
| >TET2-K1299 CKFARSKIPR  | 125  | >TET2-K1299 CNFARSKIPR  | 5801  | 5676  |
| >TET2-K1299 CKFARSKIPR  | 73   | >TET2-K1299 CNFARSKIPR  | 56    | 17    |
| >TET2-K1299 CKFARSKI    | 94   | >TET2-K1299 CNFARSKI    | 33    | 61    |
| >TET2-K1299 CSWSMYYNC   | 70   | >TET2-K1299 CSWSMYYNC   | 19773 | 19703 |
| >TET2-K1299 CSWSMYYNC   | 150  | >TET2-K1299 CSWSMYYNC   | 9819  | 9669  |
| >TET2-K1299 CSWSMYYNC   | 313  | >TET2-K1299 CSWSMYYNC   | 24852 | 24539 |
| >TET2-K1299 GCKFARSK    | 46   | >TET2-K1299 GCNFARSK    | 1221  | 1175  |
| >TET2-K1299 GCKFARSKIPR | 107  | >TET2-K1299 GCNFARSKIPR | 166   | 59    |
| >TET2-K1299 GCKFARSKI   | 261  | >TET2-K1299 GCNFARSKI   | 441   | 180   |
| >TET2-K1299 YNGCKFAR    | 182  | >TET2-K1299 YNGCNFAR    | 133   | 49    |
| >TET2-K1299 YYNGCKFA    | 3222 | >TET2-K1299 YYNGCNFA    | 273   | 2949  |



|                        |      |                        |       |       |
|------------------------|------|------------------------|-------|-------|
| >TET2-K1299 YYNGCKFAR  | 9    | >TET2-K1299 YYNGCNFAR  | 11    | 2     |
| >TET2-K1299 YYNGCKFAR  | 18   | >TET2-K1299 YYNGCNFAR  | 12    | 6     |
| >TET2-K1299 YYNGCKFAR  | 194  | >TET2-K1299 YYNGCNFAR  | 93    | 101   |
| >TET2-K1299 YYNGCKFAR  | 16   | >TET2-K1299 YYNGCNFAR  | 13    | 3     |
| >TET2-K1299 YYNGCKFARS | 311  | >TET2-K1299 YYNGCNFARS | 328   | 17    |
| >TET2-K1299 YYNGCKFA   | 523  | >TET2-K1299 YYNGCNFA   | 384   | 139   |
| >TET2-K1299 MYYNGCKFA  | 3811 | >TET2-K1299 MYYNGCNFA  | 459   | 3352  |
| >TET2-K1299 MYYNGCKF   | 28   | >TET2-K1299 MYYNGCNF   | 21    | 7     |
| >TET2-K1299 MYYNGCKF   | 297  | >TET2-K1299 MYYNGCNF   | 285   | 12    |
| >TET2-K1299 MYYNGCKF   | 5    | >TET2-K1299 MYYNGCNF   | 5     | 0     |
| >TET2-K1299 MYYNGCKFA  | 784  | >TET2-K1299 MYYNGCNFA  | 373   | 411   |
| >TET2-K1299 MYYNGCKFA  | 732  | >TET2-K1299 MYYNGCNFA  | 469   | 263   |
| >TET2-K1299 MYYNGCKF   | 333  | >TET2-K1299 MYYNGCNF   | 384   | 51    |
| >TET2-K1299 MYYNGCKFA  | 749  | >TET2-K1299 MYYNGCNFA  | 272   | 477   |
| >TET2-K1299 MYYNGCKFA  | 8    | >TET2-K1299 MYYNGCNFA  | 9     | 1     |
| >TET2-K1299 MYYNGCKFA  | 28   | >TET2-K1299 MYYNGCNFA  | 34    | 6     |
| >TET2-K1299 MYYNGCKFA  | 209  | >TET2-K1299 MYYNGCNFA  | 83    | 126   |
| >TET2-K1299 MYYNGCKF   | 488  | >TET2-K1299 MYYNGCNF   | 490   | 2     |
| >TET2-K1299 MYYNGCKF   | 38   | >TET2-K1299 MYYNGCNF   | 23    | 15    |
| >TET2-K1299 MYYNGCKFA  | 296  | >TET2-K1299 MYYNGCNFA  | 256   | 40    |
| >TET2-K1299 MYYNGCKFA  | 23   | >TET2-K1299 MYYNGCNFA  | 23    | 0     |
| >TET2-K1299 MYYNGCKF   | 392  | >TET2-K1299 MYYNGCNF   | 426   | 34    |
| >TET2-K1299 MYYNGCKFA  | 17   | >TET2-K1299 MYYNGCNFA  | 16    | 1     |
| >TET2-K1299 SMYYNGCKF  | 208  | >TET2-K1299 SMYYNGCNF  | 120   | 88    |
| >TET2-K1299 SMYYNGCKF, | 413  | >TET2-K1299 SMYYNGCNF, | 87    | 326   |
| >TET2-K1299 SMYYNGCKF, | 273  | >TET2-K1299 SMYYNGCNF, | 68    | 205   |
| >TET2-K1299 SMYYNGCKF, | 38   | >TET2-K1299 SMYYNGCNF, | 25    | 13    |
| >TET2-K1299 SMYYNGCKF, | 1536 | >TET2-K1299 SMYYNGCNF, | 336   | 1200  |
| >TET2-K1299 SMYYNGCKF  | 197  | >TET2-K1299 SMYYNGCNF  | 200   | 3     |
| >TET2-K1299 SMYYNGCKF, | 18   | >TET2-K1299 SMYYNGCNF, | 14    | 4     |
| >TET2-K1299 SMYYNGCKF, | 122  | >TET2-K1299 SMYYNGCNF, | 35    | 87    |
| >TET2-K1299 SMYYNGCKF, | 30   | >TET2-K1299 SMYYNGCNF, | 15    | 15    |
| >TET2-K1299 SMYYNGCKF, | 53   | >TET2-K1299 SMYYNGCNF, | 31    | 22    |
| >TET2-K1299 SMYYNGCK   | 40   | >TET2-K1299 SMYYNGCN   | 15757 | 15717 |
| >TET2-K1299 SMYYNGCKF, | 130  | >TET2-K1299 SMYYNGCNF, | 123   | 7     |
| >TET2-K1299 SMYYNGCK   | 17   | >TET2-K1299 SMYYNGCN   | 15965 | 15948 |
| >TET2-K1299 SMYYNGCKF, | 62   | >TET2-K1299 SMYYNGCNF, | 45    | 17    |
| >TET2-K1299 SMYYNGCK   | 364  | >TET2-K1299 SMYYNGCN   | 13243 | 12879 |
| >TET2-K1299 SMYYNGCKF, | 8    | >TET2-K1299 SMYYNGCNF, | 8     | 0     |
| >TET2-K1299 SMYYNGCKF  | 66   | >TET2-K1299 SMYYNGCNF  | 54    | 12    |
| >TET2-K1299 SMYYNGCKF, | 217  | >TET2-K1299 SMYYNGCNF, | 146   | 71    |
| >TET2-K1299 SMYYNGCK   | 153  | >TET2-K1299 SMYYNGCN   | 17970 | 17817 |
| >TET2-K1299 SMYYNGCKF, | 35   | >TET2-K1299 SMYYNGCNF, | 24    | 11    |

|                        |       |                        |       |       |
|------------------------|-------|------------------------|-------|-------|
| >TET2-K1299 SMYYNGCKF  | 37    | >TET2-K1299 SMYYNGCNF  | 27    | 10    |
| >TET2-K1299 SMYYNGCKF  | 23    | >TET2-K1299 SMYYNGCNF  | 24    | 1     |
| >TET2-K1299 SMYYNGCKF  | 3     | >TET2-K1299 SMYYNGCNF  | 3     | 0     |
| >TET2-K1299 SMYYNGCKF, | 335   | >TET2-K1299 SMYYNGCNF  | 272   | 63    |
| >TET2-K1299 SMYYNGCKF, | 199   | >TET2-K1299 SMYYNGCNF  | 106   | 93    |
| >TET2-K1299 SMYYNGCKF  | 33    | >TET2-K1299 SMYYNGCNF  | 30    | 3     |
| >TET2-K1299 SMYYNGCKF, | 54    | >TET2-K1299 SMYYNGCNF  | 46    | 8     |
| >TET2-K1299 WSMYYNGCI  | 463   | >TET2-K1299 WSMYYNGCI  | 24360 | 23897 |
| >TET2-K1299 WSMYYNGCI  | 316   | >TET2-K1299 WSMYYNGCI  | 110   | 206   |
| >TET2-K1299 WSMYYNGCI  | 269   | >TET2-K1299 WSMYYNGCI  | 233   | 36    |
| >TET2-K1299 WSMYYNGCI  | 92    | >TET2-K1299 WSMYYNGCI  | 15281 | 15189 |
| >TET2-K1299 WSMYYNGCI  | 351   | >TET2-K1299 WSMYYNGCI  | 55    | 296   |
| >TET2-K1299 WSMYYNGCI  | 119   | >TET2-K1299 WSMYYNGCI  | 70    | 49    |
| >TET2-K1299 WSMYYNGCI  | 16    | >TET2-K1299 WSMYYNGCI  | 12    | 4     |
| >TET2-K1299 WSMYYNGCI  | 9     | >TET2-K1299 WSMYYNGCI  | 8     | 1     |
| >TET2-K1299 WSMYYNGCI  | 284   | >TET2-K1299 WSMYYNGCI  | 366   | 82    |
| >TET2-K1299 WSMYYNGCI  | 18    | >TET2-K1299 WSMYYNGCI  | 21    | 3     |
| >TET2-K1299 WSMYYNGCI  | 645   | >TET2-K1299 WSMYYNGCI  | 410   | 235   |
| >TET2-K1299 SWSMYYNGC  | 671   | >TET2-K1299 SWSMYYNGC  | 483   | 188   |
| >TET2-K1299 SWSMYYNGC  | 421   | >TET2-K1299 SWSMYYNGC  | 445   | 24    |
| >TET2-K1299 SWSMYYNGC  | 27    | >TET2-K1299 SWSMYYNGC  | 32    | 5     |
| >TET2-K1299 SWSMYYNGC  | 727   | >TET2-K1299 SWSMYYNGC  | 375   | 352   |
| >TET2-K1299 SWSMYYNGC  | 442   | >TET2-K1299 SWSMYYNGC  | 16977 | 16535 |
| >TET2-K1299 SWSMYYNGC  | 137   | >TET2-K1299 SWSMYYNGC  | 151   | 14    |
| >TET2-L1210 LLCLVRERA  | 166   | >TET2-L1210 LPCLVRERA  | 37482 | 37316 |
| >TET2-L1210 LLCLVRER   | 203   | >TET2-L1210 LPCLVRER   | 3602  | 3399  |
| >TET2-L1210 LLCLVRER   | 244   | >TET2-L1210 LPCLVRER   | 2164  | 1920  |
| >TET2-L1210 LLCLVRERA  | 26078 | >TET2-L1210 LPCLVRERA  | 122   | 25956 |
| >TET2-L1210 VRRSSSEKLI | 122   | >TET2-L1210 VRRSSSEKLI | 2964  | 2842  |
| >TET2-L1210 KLLCLVRERA | 352   | >TET2-L1210 KLPCLVRERA | 4721  | 4369  |
| >TET2-L1210 KLLCLVRERA | 222   | >TET2-L1210 KLPCLVRERA | 600   | 378   |
| >TET2-L1210 KLLCLVRERA | 19    | >TET2-L1210 KLPCLVRERA | 131   | 112   |
| >TET2-L1210 KLLCLVRERA | 170   | >TET2-L1210 KLPCLVRERA | 2062  | 1892  |
| >TET2-L1210 KLLCLVRERA | 141   | >TET2-L1210 KLPCLVRERA | 1468  | 1327  |
| >TET2-L1210 KLLCLVRERA | 300   | >TET2-L1210 KLPCLVRERA | 705   | 405   |
| >TET2-L1210 KLLCLVRER  | 41    | >TET2-L1210 KLPCLVRER  | 273   | 232   |
| >TET2-L1210 KLLCLVRER  | 38    | >TET2-L1210 KLPCLVRER  | 57    | 19    |
| >TET2-L1210 EKLLCLVR   | 236   | >TET2-L1210 EKLPCLVR   | 267   | 31    |
| >TET2-L1210 EEKLLCLV   | 15    | >TET2-L1210 EEKLPCLV   | 10    | 5     |
| >TET2-L1210 EEKLLCLV   | 292   | >TET2-L1210 EEKLPCLV   | 2183  | 1891  |
| >TET2-L1210 EEKLLCLV   | 210   | >TET2-L1210 EEKLPCLV   | 422   | 212   |
| >TET2-L1210 SEEKLLCL   | 49    | >TET2-L1210 SEEKLPCL   | 136   | 87    |
| >TET2-L1210 SEEKLLCLV  | 16    | >TET2-L1210 SEEKLPCLV  | 58    | 42    |

|                         |       |                         |       |       |
|-------------------------|-------|-------------------------|-------|-------|
| >TET2-L1210 SEEKLLCL    | 144   | >TET2-L1210 SEEKLPCL    | 247   | 103   |
| >TET2-L1210 SEEKLLCL    | 216   | >TET2-L1210 SEEKLPCL    | 391   | 175   |
| >TET2-L1210 SEEKLLCLV   | 10    | >TET2-L1210 SEEKLPCLV   | 34    | 24    |
| >TET2-L1210 SSEEKLLCLV  | 880   | >TET2-L1210 SSEEKLPCLV  | 285   | 595   |
| >TET2-L1210 RSSSEEKLL   | 47    | >TET2-L1210 RSSSEEKLP   | 16047 | 16000 |
| >TET2-L1210 RSSSEEKLLCL | 52    | >TET2-L1210 RSSSEEKLPCL | 71    | 19    |
| >TET2-L1210 RSSSEEKLL   | 282   | >TET2-L1210 RSSSEEKLP   | 11801 | 11519 |
| >TET2-L1210 RRSSEEKLL   | 165   | >TET2-L1210 RRSSEEKLP   | 3228  | 3063  |
| >TET2-L1210 RRSSEEKLL   | 33    | >TET2-L1210 RRSSEEKLP   | 4404  | 4371  |
| >TET2-L1210 RRSSEEKLL   | 93    | >TET2-L1210 RRSSEEKLP   | 4150  | 4057  |
| >TET2-L1210 RRSSEEKLLC  | 329   | >TET2-L1210 RRSSEEKLP   | 701   | 372   |
| >TET2-L1210 RRSSEEKLL   | 108   | >TET2-L1210 RRSSEEKLP   | 7266  | 7158  |
| >TET2-L1322 LESHQNLSTI  | 103   | >TET2-L1322 PESHQNLST   | 1570  | 1467  |
| >TET2-L1322 LESHQNLSTI  | 359   | >TET2-L1322 PESHQNLST   | 4295  | 3936  |
| >TET2-L1322 LESHQNL     | 54    | >TET2-L1322 PESHQNL     | 1070  | 1016  |
| >TET2-L1322 LESHQNLSTI  | 26    | >TET2-L1322 PESHQNLST   | 547   | 521   |
| >TET2-L1322 LESHQNL     | 110   | >TET2-L1322 PESHQNL     | 2694  | 2584  |
| >TET2-L1322 LESHQNLSTI  | 98    | >TET2-L1322 PESHQNLST   | 2211  | 2113  |
| >TET2-L1322 LESHQNLSTI  | 71    | >TET2-L1322 PESHQNLST   | 960   | 889   |
| >TET2-L1322 KLESHQNL    | 234   | >TET2-L1322 KPESHQNL    | 23898 | 23664 |
| >TET2-L1322 KLESHQNL    | 11    | >TET2-L1322 KPESHQNL    | 24096 | 24085 |
| >TET2-L1322 KLESHQNL    | 45    | >TET2-L1322 KPESHQNL    | 21836 | 21791 |
| >TET2-L1322 KLESHQNL    | 112   | >TET2-L1322 KPESHQNL    | 28022 | 27910 |
| >TET2-L1322 KLESHQNL    | 88    | >TET2-L1322 KPESHQNL    | 24097 | 24009 |
| >TET2-L1322 KLESHQNL    | 12    | >TET2-L1322 KPESHQNL    | 30306 | 30294 |
| >TET2-L1322 KLESHQNL    | 17655 | >TET2-L1322 KPESHQNL    | 54    | 17601 |
| >TET2-L1322 EKLESHQNL   | 77    | >TET2-L1322 EKPESHQNL   | 912   | 835   |
| >TET2-L1322 EEKLESHL    | 109   | >TET2-L1322 EEKPESHL    | 2954  | 2845  |
| >TET2-L1322 EEKLESHLQ   | 360   | >TET2-L1322 EEKPESHLQ   | 1149  | 789   |
| >TET2-L1322 KEEEEKLESHL | 373   | >TET2-L1322 KEEEEKPESHL | 382   | 9     |
| >TET2-L1322 KEEEEKLESHL | 102   | >TET2-L1322 KEEEEKPESHL | 98    | 4     |
| >TET2-L1340 LAPDAYNNQ   | 365   | >TET2-L1340 PAPDAYNNQ   | 5189  | 4824  |
| >TET2-L1340 LAPDAYNNQ   | 9     | >TET2-L1340 PAPDAYNNQ   | 124   | 115   |
| >TET2-L1340 KLAPDAYNNQ  | 36    | >TET2-L1340 KPAPDAYNNQ  | 21745 | 21709 |
| >TET2-L1340 KLAPDAYNNQ  | 7     | >TET2-L1340 KPAPDAYNNQ  | 10463 | 10456 |
| >TET2-L1340 KLAPDAYNNQ  | 15    | >TET2-L1340 KPAPDAYNNQ  | 17856 | 17841 |
| >TET2-L1340 KLAPDAYNNQ  | 76    | >TET2-L1340 KPAPDAYNNQ  | 9625  | 9549  |
| >TET2-L1340 KLAPDAYNNQ  | 22    | >TET2-L1340 KPAPDAYNNQ  | 21581 | 21559 |
| >TET2-L1340 KLAPDAYNNQ  | 27    | >TET2-L1340 KPAPDAYNNQ  | 21581 | 21554 |
| >TET2-L1340 KLAPDAYNNQ  | 34    | >TET2-L1340 KPAPDAYNNQ  | 21608 | 21574 |
| >TET2-L1340 KLAPDAYNNQ  | 43    | >TET2-L1340 KPAPDAYNNQ  | 22671 | 22628 |
| >TET2-L1340 KLAPDAYNNQ  | 207   | >TET2-L1340 KPAPDAYNNQ  | 36449 | 36242 |
| >TET2-L1340 KLAPDAYNNQ  | 11    | >TET2-L1340 KPAPDAYNNQ  | 32167 | 32156 |

|                        |       |                        |       |       |
|------------------------|-------|------------------------|-------|-------|
| >TET2-L1340 KLAPDAYNNI | 120   | >TET2-L1340 KPAPDAYNNI | 12823 | 12703 |
| >TET2-L1340 KLAPDAYNNI | 15400 | >TET2-L1340 KPAPDAYNNI | 80    | 15320 |
| >TET2-L1340 KLAPDAYNNI | 581   | >TET2-L1340 KPAPDAYNNI | 301   | 280   |
| >TET2-L1340 STLMAPTYKK | 11    | >TET2-L1340 STLMAPTYKK | 12746 | 12735 |
| >TET2-L1340 STLMAPTYKK | 108   | >TET2-L1340 STLMAPTYKK | 7781  | 7673  |
| >TET2-L1340 STLMAPTYKK | 111   | >TET2-L1340 STLMAPTYKK | 17364 | 17253 |
| >TET2-L1340 KKLAPDAY   | 6     | >TET2-L1340 KKPAPDAY   | 41    | 35    |
| >TET2-L1340 YKKLAPDAY  | 1289  | >TET2-L1340 YKKPAPDAY  | 447   | 842   |
| >TET2-L1340 YKKLAPDA   | 1560  | >TET2-L1340 YKKPAPDA   | 465   | 1095  |
| >TET2-L1340 YKKLAPDAY  | 11    | >TET2-L1340 YKKPAPDAY  | 5     | 6     |
| >TET2-L1340 TYKKLAPDAY | 170   | >TET2-L1340 TYKKPAPDAY | 191   | 21    |
| >TET2-L1340 TYKKLAPDAY | 574   | >TET2-L1340 TYKKPAPDAY | 269   | 305   |
| >TET2-L1340 PTYKKLAPDA | 28    | >TET2-L1340 PTYKKPAPDA | 100   | 72    |
| >TET2-L1340 PTYKKLAPDA | 184   | >TET2-L1340 PTYKKPAPDA | 176   | 8     |
| >TET2-L1340 PTYKKLAPDA | 365   | >TET2-L1340 PTYKKPAPDA | 241   | 124   |
| >TET2-L1340 PTYKKLAPDA | 293   | >TET2-L1340 PTYKKPAPDA | 234   | 59    |
| >TET2-L1340 APTYKKLA   | 2124  | >TET2-L1340 APTYKKPA   | 169   | 1955  |
| >TET2-L1340 APTYKKLA   | 797   | >TET2-L1340 APTYKKPA   | 245   | 552   |
| >TET2-L1340 MAPTYKKL   | 46    | >TET2-L1340 MAPTYKKP   | 16624 | 16578 |
| >TET2-L1340 MAPTYKKLA  | 857   | >TET2-L1340 MAPTYKKPA  | 370   | 487   |
| >TET2-L1340 LMAPTYKKL  | 52    | >TET2-L1340 LMAPTYKKP  | 6309  | 6257  |
| >TET2-L1340 LMAPTYKKL  | 33    | >TET2-L1340 LMAPTYKKP  | 9330  | 9297  |
| >TET2-L1340 LMAPTYKKLA | 501   | >TET2-L1340 LMAPTYKKPA | 382   | 119   |
| >TET2-L1340 LMAPTYKKL  | 37    | >TET2-L1340 LMAPTYKKP  | 11078 | 11041 |
| >TET2-L1340 LMAPTYKKLA | 197   | >TET2-L1340 LMAPTYKKPA | 109   | 88    |
| >TET2-L1340 LMAPTYKKL  | 88    | >TET2-L1340 LMAPTYKKP  | 18483 | 18395 |
| >TET2-L1340 LMAPTYKKLA | 672   | >TET2-L1340 LMAPTYKKPA | 487   | 185   |
| >TET2-L1340 LMAPTYKKL  | 169   | >TET2-L1340 LMAPTYKKP  | 23451 | 23282 |
| >TET2-L1340 LMAPTYKKL  | 5     | >TET2-L1340 LMAPTYKKP  | 11271 | 11266 |
| >TET2-L1340 LMAPTYKKLA | 18    | >TET2-L1340 LMAPTYKKPA | 20    | 2     |
| >TET2-L1340 LMAPTYKKL  | 61    | >TET2-L1340 LMAPTYKKP  | 2053  | 1992  |
| >TET2-L1340 LMAPTYKKLA | 1272  | >TET2-L1340 LMAPTYKKPA | 327   | 945   |
| >TET2-L1340 TLMAPTYKKL | 260   | >TET2-L1340 TLMAPTYKKF | 182   | 78    |
| >TET2-L1340 TLMAPTYKKL | 52    | >TET2-L1340 TLMAPTYKKF | 10973 | 10921 |
| >TET2-L1340 TLMAPTYKKL | 128   | >TET2-L1340 TLMAPTYKKF | 146   | 18    |
| >TET2-L1340 TLMAPTYKKL | 36    | >TET2-L1340 TLMAPTYKKF | 5537  | 5501  |
| >TET2-L1340 TLMAPTYKKL | 61    | >TET2-L1340 TLMAPTYKKF | 33    | 28    |
| >TET2-L1340 TLMAPTYKKL | 43    | >TET2-L1340 TLMAPTYKKF | 10487 | 10444 |
| >TET2-L1340 TLMAPTYKKL | 267   | >TET2-L1340 TLMAPTYKKF | 152   | 115   |
| >TET2-L1340 TLMAPTYKKL | 126   | >TET2-L1340 TLMAPTYKKF | 16841 | 16715 |
| >TET2-L1340 TLMAPTYKKL | 1023  | >TET2-L1340 TLMAPTYKKF | 360   | 663   |
| >TET2-L1340 TLMAPTYKKL | 359   | >TET2-L1340 TLMAPTYKKF | 19745 | 19386 |
| >TET2-L1340 TLMAPTYKKL | 37    | >TET2-L1340 TLMAPTYKKF | 19760 | 19723 |

|                        |       |                        |       |       |
|------------------------|-------|------------------------|-------|-------|
| >TET2-L1340 TLMAPTYKKL | 14    | >TET2-L1340 TLMAPTYKKF | 17271 | 17257 |
| >TET2-L1340 TLMAPTYKKL | 94    | >TET2-L1340 TLMAPTYKKF | 119   | 25    |
| >TET2-L1340 TLMAPTYKKL | 350   | >TET2-L1340 TLMAPTYKKF | 148   | 202   |
| >TET2-L1340 TLMAPTYKKL | 493   | >TET2-L1340 TLMAPTYKKF | 14977 | 14484 |
| >TET2-L1360 LGLKEGRPF  | 121   | >TET2-L1360 QGLKEGRPF  | 306   | 185   |
| >TET2-L1360 RLGLKEGR   | 194   | >TET2-L1360 RQGLKEGR   | 163   | 31    |
| >TET2-L1360 RLGLKEGRPF | 234   | >TET2-L1360 RQGLKEGRPF | 90    | 144   |
| >TET2-L1360 RLGLKEGRPF | 797   | >TET2-L1360 RQGLKEGRPF | 45    | 752   |
| >TET2-L1360 RLGLKEGR   | 143   | >TET2-L1360 RQGLKEGR   | 160   | 17    |
| >TET2-L1360 CRLGLKEGRP | 174   | >TET2-L1360 CRQGLKEGRF | 462   | 288   |
| >TET2-L1360 CRLGLKEGR  | 172   | >TET2-L1360 CRQGLKEGR  | 318   | 146   |
| >TET2-L1360 CRLGLKEGRP | 158   | >TET2-L1360 CRQGLKEGRF | 251   | 93    |
| >TET2-L1360 CRLGLKEGRP | 1217  | >TET2-L1360 CRQGLKEGRF | 339   | 878   |
| >TET2-L1360 CRLGLKEGR  | 285   | >TET2-L1360 CRQGLKEGR  | 1618  | 1333  |
| >TET2-L1360 APECRLGL   | 42    | >TET2-L1360 APECRQGL   | 63    | 21    |
| >TET2-L1360 RAPECRLGLK | 315   | >TET2-L1360 RAPECRQGLK | 1180  | 865   |
| >TET2-L1360 RAPECRLGLK | 393   | >TET2-L1360 RAPECRQGLK | 474   | 81    |
| >TET2-L1360 RAPECRLGL  | 53    | >TET2-L1360 RAPECRQGL  | 166   | 113   |
| >TET2-L1360 RAPECRLGL  | 474   | >TET2-L1360 RAPECRQGL  | 1986  | 1512  |
| >TET2-L1360 HRAPECRLGL | 46    | >TET2-L1360 HRAPECRQGL | 62    | 16    |
| >TET2-L1360 HRAPECRLGL | 235   | >TET2-L1360 HRAPECRQGL | 265   | 30    |
| >TET2-L1360 HRAPECRLGL | 187   | >TET2-L1360 HRAPECRQGL | 241   | 54    |
| >TET2-L1360 HRAPECRLGL | 156   | >TET2-L1360 HRAPECRQGL | 323   | 167   |
| >TET2-L1360 HRAPECRLGL | 272   | >TET2-L1360 HRAPECRQGL | 419   | 147   |
| >TET2-L1360 HRAPECRLGL | 359   | >TET2-L1360 HRAPECRQGL | 723   | 364   |
| >TET2-L1360 LGLKEGRPF  | 121   | >TET2-L1360 RGLKEGRPF  | 45    | 76    |
| >TET2-L1360 LGLKEGRPF  | 1112  | >TET2-L1360 RGLKEGRPF  | 96    | 1016  |
| >TET2-L1360 RLGLKEGR   | 194   | >TET2-L1360 RRGLKEGR   | 12185 | 11991 |
| >TET2-L1360 RLGLKEGRPF | 234   | >TET2-L1360 RRGLKEGRPF | 12630 | 12396 |
| >TET2-L1360 RLGLKEGRPF | 797   | >TET2-L1360 RRGLKEGRPF | 227   | 570   |
| >TET2-L1360 RLGLKEGR   | 16663 | >TET2-L1360 RRGLKEGR   | 330   | 16333 |
| >TET2-L1360 RLGLKEGRPF | 21363 | >TET2-L1360 RRGLKEGRPF | 51    | 21312 |
| >TET2-L1360 RLGLKEGR   | 21378 | >TET2-L1360 RRGLKEGR   | 437   | 20941 |
| >TET2-L1360 RLGLKEGRPF | 23915 | >TET2-L1360 RRGLKEGRPF | 250   | 23665 |
| >TET2-L1360 RLGLKEGRPF | 24689 | >TET2-L1360 RRGLKEGRPF | 267   | 24422 |
| >TET2-L1360 RLGLKEGR   | 143   | >TET2-L1360 RRGLKEGR   | 382   | 239   |
| >TET2-L1360 EYEHRAPECR | 19573 | >TET2-L1360 EYEHRAPECR | 98    | 19475 |
| >TET2-L1360 EYEHRAPECR | 35346 | >TET2-L1360 EYEHRAPECR | 349   | 34997 |
| >TET2-L1360 EYEHRAPECR | 28145 | >TET2-L1360 EYEHRAPECR | 64    | 28081 |
| >TET2-L1360 CRLGLKEGRP | 174   | >TET2-L1360 CRRGLKEGRP | 122   | 52    |
| >TET2-L1360 CRLGLKEGR  | 172   | >TET2-L1360 CRRGLKEGR  | 1113  | 941   |
| >TET2-L1360 CRLGLKEGRP | 158   | >TET2-L1360 CRRGLKEGRP | 759   | 601   |
| >TET2-L1360 CRLGLKEGR  | 285   | >TET2-L1360 CRRGLKEGR  | 1717  | 1432  |

|                        |       |                        |       |       |
|------------------------|-------|------------------------|-------|-------|
| >TET2-L1360 APECRLGL   | 42    | >TET2-L1360 APECRRGL   | 20    | 22    |
| >TET2-L1360 RAPECRLGLK | 315   | >TET2-L1360 RAPECRRGLK | 1064  | 749   |
| >TET2-L1360 RAPECRLGLK | 393   | >TET2-L1360 RAPECRRGLK | 306   | 87    |
| >TET2-L1360 RAPECRLGL  | 828   | >TET2-L1360 RAPECRRGL  | 404   | 424   |
| >TET2-L1360 RAPECRLGL  | 53    | >TET2-L1360 RAPECRRGL  | 129   | 76    |
| >TET2-L1360 RAPECRLGL  | 474   | >TET2-L1360 RAPECRRGL  | 1097  | 623   |
| >TET2-L1360 HRAPECRLGL | 46    | >TET2-L1360 HRAPECRRGL | 112   | 66    |
| >TET2-L1360 HRAPECRLGL | 235   | >TET2-L1360 HRAPECRRGL | 257   | 22    |
| >TET2-L1360 HRAPECRLGL | 187   | >TET2-L1360 HRAPECRRGL | 671   | 484   |
| >TET2-L1360 HRAPECRLGL | 156   | >TET2-L1360 HRAPECRRGL | 453   | 297   |
| >TET2-L1360 HRAPECRLGL | 272   | >TET2-L1360 HRAPECRRGL | 931   | 659   |
| >TET2-L1360 HRAPECRLGL | 359   | >TET2-L1360 HRAPECRRGL | 373   | 14    |
| >TET2-L1360 HRAPECRL   | 33297 | >TET2-L1360 HRAPECRR   | 307   | 32990 |
| >TET2-L1398 LTREDNREF  | 263   | >TET2-L1398 PTREDNREF  | 11149 | 10886 |
| >TET2-L1398 LTREDNREF  | 104   | >TET2-L1398 PTREDNREF  | 1777  | 1673  |
| >TET2-L1398 LTREDNREF  | 9     | >TET2-L1398 PTREDNREF  | 701   | 692   |
| >TET2-L1398 LTREDNREF  | 458   | >TET2-L1398 PTREDNREF  | 13639 | 13181 |
| >TET2-L1398 LTREDNREF  | 87    | >TET2-L1398 PTREDNREF  | 5171  | 5084  |
| >TET2-L1398 TLTREDNR   | 132   | >TET2-L1398 TPTREDNR   | 1054  | 922   |
| >TET2-L1398 TLTREDNREF | 9325  | >TET2-L1398 TPTREDNREF | 200   | 9125  |
| >TET2-L1398 TLTREDNREF | 19725 | >TET2-L1398 TPTREDNREF | 110   | 19615 |
| >TET2-L1398 MQNGSTLVC  | 337   | >TET2-L1398 MQNGSTLVC  | 21929 | 21592 |
| >TET2-L1398 MQNGSTLVC  | 51    | >TET2-L1398 MQNGSTLVC  | 8567  | 8516  |
| >TET2-L1398 MQNGSTLVC  | 53    | >TET2-L1398 MQNGSTLVC  | 9361  | 9308  |
| >TET2-L1398 MQNGSTLVC  | 19    | >TET2-L1398 MQNGSTLVC  | 3746  | 3727  |
| >TET2-L1398 MQNGSTLVC  | 137   | >TET2-L1398 MQNGSTLVC  | 13200 | 13063 |
| >TET2-L1398 MQNGSTLVC  | 436   | >TET2-L1398 MQNGSTLVC  | 30121 | 29685 |
| >TET2-L1398 MQNGSTLVC  | 252   | >TET2-L1398 MQNGSTLVC  | 7659  | 7407  |
| >TET2-L1398 MQNGSTLVC  | 60    | >TET2-L1398 MQNGSTLVC  | 785   | 725   |
| >TET2-L1398 MQNGSTLVC  | 29    | >TET2-L1398 MQNGSTLVC  | 1208  | 1179  |
| >TET2-L1398 MQNGSTLVC  | 18    | >TET2-L1398 MQNGSTLVC  | 11906 | 11888 |
| >TET2-L1398 MQNGSTLVC  | 234   | >TET2-L1398 MQNGSTLVC  | 13749 | 13515 |
| >TET2-L1398 CTLTREDNR  | 102   | >TET2-L1398 CPTREDNR   | 161   | 59    |
| >TET2-L1398 CTLTREDNRE | 70    | >TET2-L1398 CPTREDNRE  | 3350  | 3280  |
| >TET2-L1398 CTLTREDNRE | 20206 | >TET2-L1398 CPTREDNRE  | 229   | 19977 |
| >TET2-L1398 LVCTLTREDN | 426   | >TET2-L1398 LVCTPTREDN | 628   | 202   |
| >TET2-L1398 LVCTLTREDN | 105   | >TET2-L1398 LVCTPTREDN | 156   | 51    |
| >TET2-L1398 TLVCTLTR   | 442   | >TET2-L1398 TLVCTPTR   | 568   | 126   |
| >TET2-L1398 TLVCTLTR   | 66    | >TET2-L1398 TLVCTPTR   | 64    | 2     |
| >TET2-L1398 TLVCTLTR   | 101   | >TET2-L1398 TLVCTPTR   | 151   | 50    |
| >TET2-L1398 STLVCTLTR  | 37    | >TET2-L1398 STLVCTPTR  | 114   | 77    |
| >TET2-L1398 STLVCTLTR  | 42    | >TET2-L1398 STLVCTPTR  | 31    | 11    |
| >TET2-L1398 STLVCTLTR  | 424   | >TET2-L1398 STLVCTPTR  | 654   | 230   |

|                         |       |                         |       |       |
|-------------------------|-------|-------------------------|-------|-------|
| >TET2-L1398 STLVCTLTR   | 65    | >TET2-L1398 STLVCTPTR   | 60    | 5     |
| >TET2-L1398 STLVCTLTR   | 62    | >TET2-L1398 STLVCTPTR   | 78    | 16    |
| >TET2-L1398 STLVCTLTR   | 52    | >TET2-L1398 STLVCTPTR   | 189   | 137   |
| >TET2-L1398 GSTLVCTLTR  | 150   | >TET2-L1398 GSTLVCTPTR  | 513   | 363   |
| >TET2-L1398 GSTLVCTLTR  | 173   | >TET2-L1398 GSTLVCTPTR  | 428   | 255   |
| >TET2-L1398 GSTLVCTLTR  | 287   | >TET2-L1398 GSTLVCTPTR  | 491   | 204   |
| >TET2-L1398 GSTLVCTL    | 173   | >TET2-L1398 GSTLVCTP    | 22301 | 22128 |
| >TET2-L1398 GSTLVCTLT   | 242   | >TET2-L1398 GSTLVCTPT   | 3341  | 3099  |
| >TET2-L1398 NGSTLVCTLTR | 385   | >TET2-L1398 NGSTLVCTPT  | 321   | 64    |
| >TET2-L1398 NGSTLVCTLTR | 113   | >TET2-L1398 NGSTLVCTPT  | 278   | 165   |
| >TET2-L1398 LTREDNREF   | 5173  | >TET2-L1398 RTREDNREF   | 178   | 4995  |
| >TET2-L1398 LTREDNREFG  | 621   | >TET2-L1398 RTREDNREFC  | 25    | 596   |
| >TET2-L1398 LTREDNREFG  | 2729  | >TET2-L1398 RTREDNREFC  | 86    | 2643  |
| >TET2-L1398 LTREDNREF   | 8901  | >TET2-L1398 RTREDNREF   | 264   | 8637  |
| >TET2-L1398 LTREDNREF   | 263   | >TET2-L1398 RTREDNREF   | 264   | 1     |
| >TET2-L1398 LTREDNREF   | 104   | >TET2-L1398 RTREDNREF   | 37    | 67    |
| >TET2-L1398 LTREDNREF   | 9     | >TET2-L1398 RTREDNREF   | 5     | 4     |
| >TET2-L1398 LTREDNREF   | 458   | >TET2-L1398 RTREDNREF   | 135   | 323   |
| >TET2-L1398 LTREDNREF   | 87    | >TET2-L1398 RTREDNREF   | 53    | 34    |
| >TET2-L1398 TLTREDNR    | 132   | >TET2-L1398 TRTREDNR    | 3663  | 3531  |
| >TET2-L1398 TLTREDNREF  | 1503  | >TET2-L1398 TRTREDNREF  | 452   | 1051  |
| >TET2-L1398 MQNGSTLVC   | 337   | >TET2-L1398 MQNGSTLVC   | 22066 | 21729 |
| >TET2-L1398 MQNGSTLVC   | 51    | >TET2-L1398 MQNGSTLVC   | 15858 | 15807 |
| >TET2-L1398 MQNGSTLVC   | 53    | >TET2-L1398 MQNGSTLVC   | 14289 | 14236 |
| >TET2-L1398 MQNGSTLVC   | 19    | >TET2-L1398 MQNGSTLVC   | 12052 | 12033 |
| >TET2-L1398 MQNGSTLVC   | 137   | >TET2-L1398 MQNGSTLVC   | 16028 | 15891 |
| >TET2-L1398 MQNGSTLVC   | 436   | >TET2-L1398 MQNGSTLVC   | 28876 | 28440 |
| >TET2-L1398 MQNGSTLVC   | 9741  | >TET2-L1398 MQNGSTLVC   | 20    | 9721  |
| >TET2-L1398 MQNGSTLVC   | 252   | >TET2-L1398 MQNGSTLVC   | 5768  | 5516  |
| >TET2-L1398 MQNGSTLVC   | 29198 | >TET2-L1398 MQNGSTLVC   | 146   | 29052 |
| >TET2-L1398 MQNGSTLVC   | 60    | >TET2-L1398 MQNGSTLVC   | 2647  | 2587  |
| >TET2-L1398 MQNGSTLVC   | 29    | >TET2-L1398 MQNGSTLVC   | 241   | 212   |
| >TET2-L1398 MQNGSTLVC   | 18    | >TET2-L1398 MQNGSTLVC   | 8652  | 8634  |
| >TET2-L1398 MQNGSTLVC   | 234   | >TET2-L1398 MQNGSTLVC   | 15226 | 14992 |
| >TET2-L1398 MQNGSTLVC   | 29300 | >TET2-L1398 MQNGSTLVC   | 115   | 29185 |
| >TET2-L1398 CTLTREDNR   | 686   | >TET2-L1398 CTRTREDNR   | 433   | 253   |
| >TET2-L1398 CTLTREDNR   | 545   | >TET2-L1398 CTRTREDNR   | 251   | 294   |
| >TET2-L1398 CTLTREDNR   | 102   | >TET2-L1398 CTRTREDNR   | 232   | 130   |
| >TET2-L1398 CTLTREDNRE  | 70    | >TET2-L1398 CTRTREDNRE  | 41    | 29    |
| >TET2-L1398 LVCTLTREDN  | 426   | >TET2-L1398 LVCTRTRREDN | 300   | 126   |
| >TET2-L1398 LVCTLTREDN  | 105   | >TET2-L1398 LVCTRTRREDN | 120   | 15    |
| >TET2-L1398 TLVCTLTR    | 442   | >TET2-L1398 TLVCTRTR    | 319   | 123   |
| >TET2-L1398 TLVCTLTR    | 66    | >TET2-L1398 TLVCTRTR    | 83    | 17    |

|                        |       |                        |       |       |
|------------------------|-------|------------------------|-------|-------|
| >TET2-L1398 TLVCTLTR   | 101   | >TET2-L1398 TLVCTRTR   | 201   | 100   |
| >TET2-L1398 STLVCTLTR  | 37    | >TET2-L1398 STLVCTRTR  | 568   | 531   |
| >TET2-L1398 STLVCTLTR  | 42    | >TET2-L1398 STLVCTRTR  | 40    | 2     |
| >TET2-L1398 STLVCTLTR  | 424   | >TET2-L1398 STLVCTRTR  | 562   | 138   |
| >TET2-L1398 STLVCTLTR  | 65    | >TET2-L1398 STLVCTRTR  | 151   | 86    |
| >TET2-L1398 STLVCTLTR  | 62    | >TET2-L1398 STLVCTRTR  | 100   | 38    |
| >TET2-L1398 STLVCTLTR  | 52    | >TET2-L1398 STLVCTRTR  | 239   | 187   |
| >TET2-L1398 GSTLVCTLTR | 150   | >TET2-L1398 GSTLVCTRTR | 1516  | 1366  |
| >TET2-L1398 GSTLVCTL   | 15082 | >TET2-L1398 GSTLVCTR   | 230   | 14852 |
| >TET2-L1398 GSTLVCTLTR | 173   | >TET2-L1398 GSTLVCTRTR | 116   | 57    |
| >TET2-L1398 GSTLVCTL   | 32162 | >TET2-L1398 GSTLVCTR   | 161   | 32001 |
| >TET2-L1398 GSTLVCTLTR | 287   | >TET2-L1398 GSTLVCTRTR | 1313  | 1026  |
| >TET2-L1398 GSTLVCTL   | 173   | >TET2-L1398 GSTLVCTR   | 17633 | 17460 |
| >TET2-L1398 GSTLVCLT   | 242   | >TET2-L1398 GSTLVCTR   | 505   | 263   |
| >TET2-L1398 NGSTLVCTL  | 32298 | >TET2-L1398 NGSTLVCTR  | 241   | 32057 |
| >TET2-L1398 NGSTLVCLT  | 385   | >TET2-L1398 NGSTLVCTR  | 655   | 270   |
| >TET2-L1398 NGSTLVCTL  | 32383 | >TET2-L1398 NGSTLVCTR  | 190   | 32193 |
| >TET2-L1398 NGSTLVCLT  | 113   | >TET2-L1398 NGSTLVCTR  | 408   | 295   |
| >TET2-L1398 QNGSTLVCTL | 32930 | >TET2-L1398 QNGSTLVCTR | 318   | 32612 |
| >TET2-L1801 LPALNHDR   | 966   | >TET2-L1801 FPALNHDR   | 216   | 750   |
| >TET2-L1801 LPALNHDR   | 177   | >TET2-L1801 FPALNHDR   | 111   | 66    |
| >TET2-L1801 LPALNHDR   | 1659  | >TET2-L1801 FPALNHDR   | 198   | 1461  |
| >TET2-L1801 LPALNHDR   | 410   | >TET2-L1801 FPALNHDR   | 137   | 273   |
| >TET2-L1801 LPALNHDR   | 1781  | >TET2-L1801 FPALNHDR   | 475   | 1306  |
| >TET2-L1801 LPALNHDR   | 126   | >TET2-L1801 FPALNHDR   | 25    | 101   |
| >TET2-L1801 LPALNHDR   | 43    | >TET2-L1801 FPALNHDR   | 11    | 32    |
| >TET2-L1801 LPALNHDR   | 351   | >TET2-L1801 FPALNHDR   | 77    | 274   |
| >TET2-L1801 MLPALNHDR  | 227   | >TET2-L1801 MFPALNHDR  | 6686  | 6459  |
| >TET2-L1801 MLPALNHDR  | 53    | >TET2-L1801 MFPALNHDR  | 13247 | 13194 |
| >TET2-L1801 MLPALNHDR  | 114   | >TET2-L1801 MFPALNHDR  | 17938 | 17824 |
| >TET2-L1801 MLPALNHDR  | 126   | >TET2-L1801 MFPALNHDR  | 29921 | 29795 |
| >TET2-L1801 MLPALNHDR  | 32    | >TET2-L1801 MFPALNHDR  | 21839 | 21807 |
| >TET2-L1801 MLPALNHDR  | 418   | >TET2-L1801 MFPALNHDR  | 96    | 322   |
| >TET2-L1801 MLPALNHDR  | 1203  | >TET2-L1801 MFPALNHDR  | 244   | 959   |
| >TET2-L1801 MLPALNHDR  | 117   | >TET2-L1801 MFPALNHDR  | 200   | 83    |
| >TET2-L1801 MLPALNHDR  | 57    | >TET2-L1801 MFPALNHDR  | 18    | 39    |
| >TET2-L1801 SHTANGLSK  | 2608  | >TET2-L1801 SHTANGLSK  | 106   | 2502  |
| >TET2-L1801 SHTANGLSK  | 267   | >TET2-L1801 SHTANGLSK  | 5312  | 5045  |
| >TET2-L1801 KMLPALNHD  | 1659  | >TET2-L1801 KMFPALNHD  | 155   | 1504  |
| >TET2-L1801 KMLPALNHD  | 1891  | >TET2-L1801 KMFPALNHD  | 268   | 1623  |
| >TET2-L1801 KMLPALNHD  | 274   | >TET2-L1801 KMFPALNHD  | 232   | 42    |
| >TET2-L1801 KMLPALNHD  | 68    | >TET2-L1801 KMFPALNHD  | 42    | 26    |
| >TET2-L1801 KMLPALNHD  | 321   | >TET2-L1801 KMFPALNHD  | 314   | 7     |



|                        |      |                        |      |      |
|------------------------|------|------------------------|------|------|
| >TET2-L1801 KMLPALNHD  | 369  | >TET2-L1801 KMFALNHD   | 159  | 210  |
| >TET2-L1801 KMLPALNH   | 218  | >TET2-L1801 KMFALNH    | 66   | 152  |
| >TET2-L1801 KMLPALNHD  | 394  | >TET2-L1801 KMFALNHD   | 352  | 42   |
| >TET2-L1801 KMLPALNH   | 1219 | >TET2-L1801 KMFALNH    | 451  | 768  |
| >TET2-L1801 KMLPALNHD  | 21   | >TET2-L1801 KMFALNHD   | 18   | 3    |
| >TET2-L1801 KMLPALNH   | 366  | >TET2-L1801 KMFALNH    | 71   | 295  |
| >TET2-L1801 KMLPALNHD  | 915  | >TET2-L1801 KMFALNHD   | 225  | 690  |
| >TET2-L1801 KMLPALNHD  | 258  | >TET2-L1801 KMFALNHD   | 114  | 144  |
| >TET2-L1801 KMLPALNHD  | 20   | >TET2-L1801 KMFALNHD   | 15   | 5    |
| >TET2-L1801 SKMLPALNH  | 717  | >TET2-L1801 SKMFALNH   | 376  | 341  |
| >TET2-L1801 LSKMLPAL   | 2381 | >TET2-L1801 LSKMFAL    | 106  | 2275 |
| >TET2-L1801 LSKMLPAL   | 204  | >TET2-L1801 LSKMFAL    | 99   | 105  |
| >TET2-L1801 LSKMLPAL   | 551  | >TET2-L1801 LSKMFAL    | 173  | 378  |
| >TET2-L1801 LSKMLPAL   | 521  | >TET2-L1801 LSKMFAL    | 113  | 408  |
| >TET2-L1801 LSKMLPAL   | 30   | >TET2-L1801 LSKMFAL    | 42   | 12   |
| >TET2-L1801 GLSKMLPA   | 145  | >TET2-L1801 GLSKMFPA   | 63   | 82   |
| >TET2-L1801 GLSKMLPAL  | 36   | >TET2-L1801 GLSKMFAL   | 59   | 23   |
| >TET2-L1801 GLSKMLPA   | 54   | >TET2-L1801 GLSKMFPA   | 22   | 32   |
| >TET2-L1801 GLSKMLPAL  | 10   | >TET2-L1801 GLSKMFAL   | 14   | 4    |
| >TET2-L1801 GLSKMLPA   | 15   | >TET2-L1801 GLSKMFPA   | 17   | 2    |
| >TET2-L1801 GLSKMLPAL  | 19   | >TET2-L1801 GLSKMFAL   | 41   | 22   |
| >TET2-L1801 GLSKMLPA   | 418  | >TET2-L1801 GLSKMFPA   | 78   | 340  |
| >TET2-L1801 GLSKMLPAL  | 67   | >TET2-L1801 GLSKMFAL   | 40   | 27   |
| >TET2-L1801 GLSKMLPA   | 620  | >TET2-L1801 GLSKMFPA   | 265  | 355  |
| >TET2-L1801 GLSKMLPAL  | 70   | >TET2-L1801 GLSKMFAL   | 126  | 56   |
| >TET2-L1801 GLSKMLPA   | 357  | >TET2-L1801 GLSKMFPA   | 107  | 250  |
| >TET2-L1801 GLSKMLPAL  | 28   | >TET2-L1801 GLSKMFAL   | 59   | 31   |
| >TET2-L1801 GLSKMLPA   | 118  | >TET2-L1801 GLSKMFPA   | 49   | 69   |
| >TET2-L1801 GLSKMLPAL  | 22   | >TET2-L1801 GLSKMFAL   | 32   | 10   |
| >TET2-L1801 GLSKMLPAL  | 268  | >TET2-L1801 GLSKMFAL   | 874  | 606  |
| >TET2-L1801 GLSKMLPA   | 44   | >TET2-L1801 GLSKMFPA   | 23   | 21   |
| >TET2-L1801 GLSKMLPAL  | 7    | >TET2-L1801 GLSKMFAL   | 9    | 2    |
| >TET2-L1801 GLSKMLPAL  | 2912 | >TET2-L1801 GLSKMFAL   | 299  | 2613 |
| >TET2-L1801 GLSKMLPAL  | 967  | >TET2-L1801 GLSKMFAL   | 340  | 627  |
| >TET2-L1801 TANGLSKMLI | 484  | >TET2-L1801 TANGLSKMFI | 90   | 394  |
| >TET2-L1801 TANGLSKML  | 787  | >TET2-L1801 TANGLSKMF  | 97   | 690  |
| >TET2-L1801 TANGLSKML  | 6536 | >TET2-L1801 TANGLSKMF  | 499  | 6037 |
| >TET2-L1801 TANGLSKML  | 1877 | >TET2-L1801 TANGLSKMF  | 232  | 1645 |
| >TET2-L1801 HTANGLSKM  | 774  | >TET2-L1801 HTANGLSKM  | 144  | 630  |
| >TET2-L1801 HTANGLSKM  | 636  | >TET2-L1801 HTANGLSKM  | 95   | 541  |
| >TET2-L1801 HTANGLSKM  | 210  | >TET2-L1801 HTANGLSKM  | 4854 | 4644 |
| >TET2-L1801 HTANGLSKM  | 7844 | >TET2-L1801 HTANGLSKM  | 411  | 7433 |
| >TET2-L1801 HTANGLSKM  | 4239 | >TET2-L1801 HTANGLSKM  | 204  | 4035 |

|                         |       |                         |       |       |
|-------------------------|-------|-------------------------|-------|-------|
| >TET2-L1801 HTANGLSKM   | 10    | >TET2-L1801 HTANGLSKM   | 5     | 5     |
| >TET2-L1801 HTANGLSKM   | 249   | >TET2-L1801 HTANGLSKM   | 46    | 203   |
| >TET2-L1872 ILIECAKREL  | 24778 | >TET2-L1872 IPIECAKREL  | 29    | 24749 |
| >TET2-L1872 ILIECAKREL  | 79    | >TET2-L1872 IPIECAKREL  | 19735 | 19656 |
| >TET2-L1872 ILIECAKREL  | 183   | >TET2-L1872 IPIECAKREL  | 23093 | 22910 |
| >TET2-L1872 ILIECAKREL  | 29    | >TET2-L1872 IPIECAKREL  | 23286 | 23257 |
| >TET2-L1872 ILIECAKREL  | 61    | >TET2-L1872 IPIECAKREL  | 23256 | 23195 |
| >TET2-L1872 ILIECAKREL  | 13    | >TET2-L1872 IPIECAKREL  | 31304 | 31291 |
| >TET2-L1872 ILIECAKR    | 481   | >TET2-L1872 IPIECAKR    | 2908  | 2427  |
| >TET2-L1872 ILIECAKR    | 111   | >TET2-L1872 IPIECAKR    | 691   | 580   |
| >TET2-L1872 ILIECAKR    | 148   | >TET2-L1872 IPIECAKR    | 457   | 309   |
| >TET2-L1872 VAVAPTHGSI  | 73    | >TET2-L1872 VAVAPTHGSI  | 16811 | 16738 |
| >TET2-L1872 VAVAPTHGSI  | 263   | >TET2-L1872 VAVAPTHGSI  | 14944 | 14681 |
| >TET2-L1872 SILIECAK    | 60    | >TET2-L1872 SIPIECAK    | 548   | 488   |
| >TET2-L1872 SILIECAKR   | 346   | >TET2-L1872 SIPIECAKR   | 530   | 184   |
| >TET2-L1872 SILIECAKR   | 238   | >TET2-L1872 SIPIECAKR   | 487   | 249   |
| >TET2-L1872 GSILIECAK   | 60    | >TET2-L1872 GSIPIECAK   | 40    | 20    |
| >TET2-L1872 GSILIECAKR  | 163   | >TET2-L1872 GSIPIECAKR  | 261   | 98    |
| >TET2-L1872 GSILIECAK   | 416   | >TET2-L1872 GSIPIECAK   | 284   | 132   |
| >TET2-L1872 GSILIECAKR  | 34    | >TET2-L1872 GSIPIECAKR  | 24    | 10    |
| >TET2-L1872 HGSILIECAKR | 414   | >TET2-L1872 HGSIPIECAKR | 676   | 262   |
| >TET2-L1872 HGSILIECAKR | 345   | >TET2-L1872 HGSIPIECAKR | 642   | 297   |
| >TET2-L1872 PTHGSILI    | 309   | >TET2-L1872 PTHGSIPI    | 134   | 175   |
| >TET2-L1872 APTHGSILI   | 461   | >TET2-L1872 APTHGSIPI   | 1093  | 632   |
| >TET2-L1872 APTHGSIL    | 25    | >TET2-L1872 APTHGSIP    | 9647  | 9622  |
| >TET2-L1872 APTHGSILI   | 375   | >TET2-L1872 APTHGSIPI   | 17    | 358   |
| >TET2-L1872 APTHGSILI   | 3349  | >TET2-L1872 APTHGSIPI   | 265   | 3084  |
| >TET2-L1872 APTHGSILI   | 174   | >TET2-L1872 APTHGSIPI   | 631   | 457   |
| >TET2-L1872 VAPTHGSIL   | 5     | >TET2-L1872 VAPTHGSIP   | 1307  | 1302  |
| >TET2-L1872 VAPTHGSILI  | 6     | >TET2-L1872 VAPTHGSIPI  | 21    | 15    |
| >TET2-L1872 VAPTHGSILIE | 280   | >TET2-L1872 VAPTHGSIPIE | 287   | 7     |
| >TET2-L1872 VAPTHGSILI  | 227   | >TET2-L1872 VAPTHGSIPI  | 706   | 479   |
| >TET2-L1872 AVAPTHGSILI | 276   | >TET2-L1872 AVAPTHGSIP  | 136   | 140   |
| >TET2-L1872 AVAPTHGSILI | 142   | >TET2-L1872 AVAPTHGSIP  | 67    | 75    |
| >TET2-L1872 AVAPTHGSILI | 153   | >TET2-L1872 AVAPTHGSIP  | 71    | 82    |
| >TET2-L1872 AVAPTHGSILI | 2259  | >TET2-L1872 AVAPTHGSIP  | 406   | 1853  |
| >TET2-L1872 AVAPTHGSILI | 196   | >TET2-L1872 AVAPTHGSIP  | 65    | 131   |
| >TET2-L1872 AVAPTHGSILI | 1430  | >TET2-L1872 AVAPTHGSIP  | 316   | 1114  |
| >TET2-L1872 AVAPTHGSILI | 4717  | >TET2-L1872 AVAPTHGSIP  | 332   | 4385  |
| >TET2-L1872 AVAPTHGSIL  | 294   | >TET2-L1872 AVAPTHGSIP  | 32339 | 32045 |
| >TET2-L1872 AVAPTHGSILI | 84    | >TET2-L1872 AVAPTHGSIP  | 116   | 32    |
| >TET2-L1899 LVFYQHKSM   | 263   | >TET2-L1899 PVFYQHKSM   | 1488  | 1225  |
| >TET2-L1899 LVFYQHKSM   | 131   | >TET2-L1899 PVFYQHKSM   | 8431  | 8300  |

|                        |       |                        |       |       |
|------------------------|-------|------------------------|-------|-------|
| >TET2-L1899 LVFYQHKS   | 66    | >TET2-L1899 PVFYQHKS   | 1199  | 1133  |
| >TET2-L1899 LVFYQHKS   | 148   | >TET2-L1899 PVFYQHKS   | 11753 | 11605 |
| >TET2-L1899 LVFYQHKS   | 62    | >TET2-L1899 PVFYQHKS   | 5055  | 4993  |
| >TET2-L1899 SLVfyQHKS  | 34225 | >TET2-L1899 SPVfyQHKS  | 372   | 33853 |
| >TET2-L1899 SLVfyQHKS  | 380   | >TET2-L1899 SPVfyQHKS  | 28604 | 28224 |
| >TET2-L1899 SLVfyQHKS  | 283   | >TET2-L1899 SPVfyQHKS  | 36459 | 36176 |
| >TET2-L1899 SLVfyQHK   | 160   | >TET2-L1899 SPVfyQHK   | 17915 | 17755 |
| >TET2-L1899 SLVfyQHK   | 76    | >TET2-L1899 SPVfyQHK   | 6985  | 6909  |
| >TET2-L1899 SLVfyQHK   | 382   | >TET2-L1899 SPVfyQHK   | 2047  | 1665  |
| >TET2-L1899 SLVfyQHKS  | 25982 | >TET2-L1899 SPVfyQHKS  | 112   | 25870 |
| >TET2-L1899 SLVfyQHKS  | 458   | >TET2-L1899 SPVfyQHKS  | 5143  | 4685  |
| >TET2-L1899 ISLVfyQHK  | 225   | >TET2-L1899 ISPVfyQHK  | 482   | 257   |
| >TET2-L1899 ISLVfyQHKS | 34    | >TET2-L1899 ISPVfyQHKS | 37    | 3     |
| >TET2-L1899 ISLVfyQHK  | 451   | >TET2-L1899 ISPVfyQHK  | 3036  | 2585  |
| >TET2-L1899 ISLVfyQHK  | 42    | >TET2-L1899 ISPVfyQHK  | 504   | 462   |
| >TET2-L1899 ISLVfyQHK  | 15    | >TET2-L1899 ISPVfyQHK  | 343   | 328   |
| >TET2-L1899 ISLVfyQHK  | 93    | >TET2-L1899 ISPVfyQHK  | 989   | 896   |
| >TET2-L1899 ISLVfyQHK  | 474   | >TET2-L1899 ISPVfyQHK  | 2753  | 2279  |
| >TET2-L1899 ISLVfyQHKS | 31    | >TET2-L1899 ISPVfyQHKS | 273   | 242   |
| >TET2-L1899 ISLVfyQHKS | 8     | >TET2-L1899 ISPVfyQHKS | 267   | 259   |
| >TET2-L1899 ISLVfyQHKS | 135   | >TET2-L1899 ISPVfyQHKS | 1155  | 1020  |
| >TET2-L1899 ISLVfyQH   | 16771 | >TET2-L1899 ISPVfyQH   | 46    | 16725 |
| >TET2-L1899 ISLVfyQHS  | 20830 | >TET2-L1899 ISPVfyQHS  | 132   | 20698 |
| >TET2-L1899 ISLVfyQHKS | 3464  | >TET2-L1899 ISPVfyQHKS | 6     | 3458  |
| >TET2-L1899 ISLVfyQHKS | 50    | >TET2-L1899 ISPVfyQHKS | 1068  | 1018  |
| >TET2-L1899 ISLVfyQH   | 359   | >TET2-L1899 ISPVfyQH   | 2237  | 1878  |
| >TET2-L1899 ISLVfyQHK  | 172   | >TET2-L1899 ISPVfyQHK  | 783   | 611   |
| >TET2-L1899 RISLVfyQH  | 758   | >TET2-L1899 RISPfyQH   | 390   | 368   |
| >TET2-L1899 RISLVfyQHK | 34    | >TET2-L1899 RISPfyQHK  | 23    | 11    |
| >TET2-L1899 RISLVfyQH  | 222   | >TET2-L1899 RISPfyQH   | 162   | 60    |
| >TET2-L1899 RISLVfyQHK | 13    | >TET2-L1899 RISPfyQHK  | 14    | 1     |
| >TET2-L1899 RISLVfyQHK | 19    | >TET2-L1899 RISPfyQHK  | 11    | 8     |
| >TET2-L1899 RISLVfyQH  | 291   | >TET2-L1899 RISPfyQH   | 115   | 176   |
| >TET2-L1899 RISLVfyQHK | 60    | >TET2-L1899 RISPfyQHK  | 90    | 30    |
| >TET2-L1899 RISLVfyQHK | 395   | >TET2-L1899 RISPfyQHK  | 284   | 111   |
| >TET2-L1899 RISLVfyQHK | 264   | >TET2-L1899 RISPfyQHK  | 118   | 146   |
| >TET2-L1899 RISLVfyQHK | 187   | >TET2-L1899 RISPfyQHK  | 185   | 2     |
| >TET2-L1899 TRISLVfy   | 172   | >TET2-L1899 TRISPVfy   | 236   | 64    |
| >TET2-L1899 TRISLVfy   | 223   | >TET2-L1899 TRISPVfy   | 298   | 75    |
| >TET2-L1899 TRISLVfy   | 456   | >TET2-L1899 TRISPVfy   | 903   | 447   |
| >TET2-L1899 TRISLVfy   | 396   | >TET2-L1899 TRISPVfy   | 1418  | 1022  |
| >TET2-L1899 TRISLVfy   | 180   | >TET2-L1899 TRISPVfy   | 88    | 92    |
| >TET2-L1899 TRISLVfy   | 247   | >TET2-L1899 TRISPVfy   | 934   | 687   |

|                         |      |                         |       |       |
|-------------------------|------|-------------------------|-------|-------|
| >TET2-L1899 TRISLVFYQHI | 107  | >TET2-L1899 TRISPVFYQHI | 261   | 154   |
| >TET2-L1899 PTRISLVFY   | 57   | >TET2-L1899 PTRISPVFY   | 1114  | 1057  |
| >TET2-L1899 PTRISLVFY   | 380  | >TET2-L1899 PTRISPVFY   | 297   | 83    |
| >TET2-L1899 PTRISLVFY   | 393  | >TET2-L1899 PTRISPVFY   | 264   | 129   |
| >TET2-L1899 PTRISLVFY   | 40   | >TET2-L1899 PTRISPVFY   | 34    | 6     |
| >TET2-L1899 PTRISLVFYQ  | 224  | >TET2-L1899 PTRISPVFYQ  | 233   | 9     |
| >TET2-L1899 PTRISLVFY   | 332  | >TET2-L1899 PTRISPVFY   | 793   | 461   |
| >TET2-L1899 PTRISLVF    | 11   | >TET2-L1899 PTRISPVF    | 16    | 5     |
| >TET2-L1899 PTRISLVFY   | 17   | >TET2-L1899 PTRISPVFY   | 23    | 6     |
| >TET2-L1899 HPTRISLVF   | 1617 | >TET2-L1899 HPTRISPVF   | 285   | 1332  |
| >TET2-L1899 HPTRISLVFY  | 167  | >TET2-L1899 HPTRISPVFY  | 533   | 366   |
| >TET2-L1899 HPTRISLV    | 361  | >TET2-L1899 HPTRISPV    | 41    | 320   |
| >TET2-L1899 HPTRISLVF   | 51   | >TET2-L1899 HPTRISPVF   | 105   | 54    |
| >TET2-L1899 HPTRISLV    | 2399 | >TET2-L1899 HPTRISPV    | 350   | 2049  |
| >TET2-L1899 HPTRISLVF   | 12   | >TET2-L1899 HPTRISPVF   | 14    | 2     |
| >TET2-L1899 HPTRISLVFY  | 198  | >TET2-L1899 HPTRISPVFY  | 113   | 85    |
| >TET2-L1899 HPTRISLVF   | 164  | >TET2-L1899 HPTRISPVF   | 275   | 111   |
| >TET2-L1899 HPTRISLVFY  | 432  | >TET2-L1899 HPTRISPVFY  | 598   | 166   |
| >TET2-L1899 HPTRISLV    | 201  | >TET2-L1899 HPTRISPV    | 58    | 143   |
| >TET2-L1899 HPTRISLVF   | 11   | >TET2-L1899 HPTRISPVF   | 11    | 0     |
| >TET2-L1899 HPTRISLVFY  | 12   | >TET2-L1899 HPTRISPVFY  | 43    | 31    |
| >TET2-L1899 HPTRISLVF   | 62   | >TET2-L1899 HPTRISPVF   | 135   | 73    |
| >TET2-L1899 HPTRISLVFY  | 498  | >TET2-L1899 HPTRISPVFY  | 1480  | 982   |
| >TET2-L1899 NHPTRISLVF  | 428  | >TET2-L1899 NHPTRISPVF  | 462   | 34    |
| >TET2-L1899 NHPTRISL    | 187  | >TET2-L1899 NHPTRISP    | 19179 | 18992 |
| >TET2-L1899 RNHPTRISL   | 18   | >TET2-L1899 RNHPTRISP   | 172   | 154   |
| >TET2-L1899 RNHPTRISLV  | 55   | >TET2-L1899 RNHPTRISPV  | 29    | 26    |
| >TET2-L1899 RNHPTRISLVI | 573  | >TET2-L1899 RNHPTRISPV  | 405   | 168   |
| >TET2-L1899 RNHPTRISLVI | 129  | >TET2-L1899 RNHPTRISPV  | 184   | 55    |
| >TET2-L1899 RNHPTRISL   | 328  | >TET2-L1899 RNHPTRISP   | 6506  | 6178  |
| >TET2-L1899 RNHPTRISLVI | 16   | >TET2-L1899 RNHPTRISPV  | 19    | 3     |
| >TET2-L1899 RNHPTRISLVI | 430  | >TET2-L1899 RNHPTRISPV  | 661   | 231   |
| >TET2-L1899 RNHPTRISL   | 438  | >TET2-L1899 RNHPTRISP   | 23650 | 23212 |
| >TET2-L1899 NRNHPTRISL  | 423  | >TET2-L1899 NRNHPTRISP  | 5996  | 5573  |
| >TET2-L1899 NRNHPTRISL  | 420  | >TET2-L1899 NRNHPTRISP  | 17847 | 17427 |
| >TET2-L1899 NRNHPTRISL  | 91   | >TET2-L1899 NRNHPTRISP  | 16721 | 16630 |
| >TET2-L1971 LAERTMSV    | 1297 | >TET2-L1971 FAERTMSV    | 58    | 1239  |
| >TET2-L1971 LAERTMSV    | 226  | >TET2-L1971 FAERTMSV    | 34    | 192   |
| >TET2-L1971 LAERTMSV    | 3463 | >TET2-L1971 FAERTMSV    | 405   | 3058  |
| >TET2-L1971 SLAERTMSV   | 9    | >TET2-L1971 SFAERTMSV   | 2175  | 2166  |
| >TET2-L1971 SLAERTMSVT  | 185  | >TET2-L1971 SFAERTMSVT  | 19772 | 19587 |
| >TET2-L1971 SLAERTMSV   | 3    | >TET2-L1971 SFAERTMSV   | 133   | 130   |
| >TET2-L1971 SLAERTMSVT  | 306  | >TET2-L1971 SFAERTMSVT  | 19823 | 19517 |

|                         |      |                         |       |       |
|-------------------------|------|-------------------------|-------|-------|
| >TET2-L1971 SLAERTMSVT  | 99   | >TET2-L1971 SFAERTMSVT  | 8865  | 8766  |
| >TET2-L1971 SLAERTMS    | 361  | >TET2-L1971 SFAERTMS    | 20544 | 20183 |
| >TET2-L1971 SLAERTMSV   | 2    | >TET2-L1971 SFAERTMSV   | 680   | 678   |
| >TET2-L1971 SLAERTMSVT  | 122  | >TET2-L1971 SFAERTMSVT  | 14999 | 14877 |
| >TET2-L1971 SLAERTMSVT  | 31   | >TET2-L1971 SFAERTMSVT  | 13530 | 13499 |
| >TET2-L1971 SLAERTMSV   | 8    | >TET2-L1971 SFAERTMSV   | 510   | 502   |
| >TET2-L1971 SLAERTMSV   | 2    | >TET2-L1971 SFAERTMSV   | 565   | 563   |
| >TET2-L1971 SLAERTMSVT  | 212  | >TET2-L1971 SFAERTMSVT  | 18799 | 18587 |
| >TET2-L1971 SLAERTMSVT  | 84   | >TET2-L1971 SFAERTMSVT  | 15352 | 15268 |
| >TET2-L1971 SLAERTMSV   | 4    | >TET2-L1971 SFAERTMSV   | 2458  | 2454  |
| >TET2-L1971 SLAERTMSVT  | 278  | >TET2-L1971 SFAERTMSVT  | 20620 | 20342 |
| >TET2-L1971 SLAERTMSV   | 4    | >TET2-L1971 SFAERTMSV   | 185   | 181   |
| >TET2-L1971 SLAERTMSVT  | 174  | >TET2-L1971 SFAERTMSVT  | 19047 | 18873 |
| >TET2-L1971 SLAERTMSVT  | 38   | >TET2-L1971 SFAERTMSVT  | 14251 | 14213 |
| >TET2-L1971 SLAERTMSV   | 5    | >TET2-L1971 SFAERTMSV   | 4969  | 4964  |
| >TET2-L1971 SLAERTMS    | 377  | >TET2-L1971 SFAERTMS    | 31022 | 30645 |
| >TET2-L1971 SLAERTMSV   | 1    | >TET2-L1971 SFAERTMSV   | 41    | 40    |
| >TET2-L1971 SLAERTMSVT  | 30   | >TET2-L1971 SFAERTMSVT  | 21859 | 21829 |
| >TET2-L1971 SLAERTMSVT  | 9    | >TET2-L1971 SFAERTMSVT  | 17610 | 17601 |
| >TET2-L1971 SLAERTMSV   | 54   | >TET2-L1971 SFAERTMSV   | 962   | 908   |
| >TET2-L1971 SLAERTMSV   | 29   | >TET2-L1971 SFAERTMSV   | 988   | 959   |
| >TET2-L1971 SLAERTMSV   | 57   | >TET2-L1971 SFAERTMSV   | 698   | 641   |
| >TET2-L1971 EPTYLRFIKSL | 1000 | >TET2-L1971 EPTYLRFIKSF | 69    | 931   |
| >TET2-L1971 EPTYLRFIKSL | 369  | >TET2-L1971 EPTYLRFIKSF | 125   | 244   |
| >TET2-L1971 EPTYLRFIKSL | 2312 | >TET2-L1971 EPTYLRFIKSF | 213   | 2099  |
| >TET2-L1971 EPTYLRFIKSL | 1226 | >TET2-L1971 EPTYLRFIKSF | 113   | 1113  |
| >TET2-L1971 KSLAERTMSV  | 498  | >TET2-L1971 KSFAERTMSV  | 509   | 11    |
| >TET2-L1971 KSLAERTMSV  | 813  | >TET2-L1971 KSFAERTMSV  | 273   | 540   |
| >TET2-L1971 KSLAERTMSV  | 375  | >TET2-L1971 KSFAERTMSV  | 148   | 227   |
| >TET2-L1971 KSLAERTMSV  | 184  | >TET2-L1971 KSFAERTMSV  | 293   | 109   |
| >TET2-L1971 KSLAERTM    | 676  | >TET2-L1971 KSFAERTM    | 325   | 351   |
| >TET2-L1971 KSLAERTMSV  | 54   | >TET2-L1971 KSFAERTMSV  | 31    | 23    |
| >TET2-L1971 KSLAERTM    | 445  | >TET2-L1971 KSFAERTM    | 77    | 368   |
| >TET2-L1971 KSLAERTMSV  | 218  | >TET2-L1971 KSFAERTMSV  | 51    | 167   |
| >TET2-L1971 KSLAERTMSV  | 2312 | >TET2-L1971 KSFAERTMSV  | 194   | 2118  |
| >TET2-L1971 KSLAERTM    | 237  | >TET2-L1971 KSFAERTM    | 45    | 192   |
| >TET2-L1971 KSLAERTMSV  | 186  | >TET2-L1971 KSFAERTMSV  | 36    | 150   |
| >TET2-L1971 KSLAERTM    | 7    | >TET2-L1971 KSFAERTM    | 5     | 2     |
| >TET2-L1971 KSLAERTMSV  | 189  | >TET2-L1971 KSFAERTMSV  | 73    | 116   |
| >TET2-L1971 KSLAERTMSV  | 860  | >TET2-L1971 KSFAERTMSV  | 330   | 530   |
| >TET2-L1971 KSLAERTM    | 96   | >TET2-L1971 KSFAERTM    | 54    | 42    |
| >TET2-L1971 KSLAERTM    | 93   | >TET2-L1971 KSFAERTM    | 67    | 26    |
| >TET2-L1971 KSLAERTMSV  | 542  | >TET2-L1971 KSFAERTMSV  | 137   | 405   |

|                         |      |                         |       |       |
|-------------------------|------|-------------------------|-------|-------|
| >TET2-L1971 KSLAERTM    | 902  | >TET2-L1971 KSFAERTM    | 219   | 683   |
| >TET2-L1971 IKSLAERTM   | 125  | >TET2-L1971 IKSFAERTM   | 72    | 53    |
| >TET2-L1971 IKSLAERTMS' | 88   | >TET2-L1971 IKSFAERTMS' | 53    | 35    |
| >TET2-L1971 FIKSLAERTM  | 448  | >TET2-L1971 FIKSFAERTM  | 182   | 266   |
| >TET2-L1971 FIKSLAERTM  | 856  | >TET2-L1971 FIKSFAERTM  | 441   | 415   |
| >TET2-L1971 FIKSLAER    | 92   | >TET2-L1971 FIKSFAER    | 54    | 38    |
| >TET2-L1971 FIKSLAER    | 234  | >TET2-L1971 FIKSFAER    | 132   | 102   |
| >TET2-L1971 FIKSLAER    | 24   | >TET2-L1971 FIKSFAER    | 13    | 11    |
| >TET2-L1971 FIKSLAER    | 984  | >TET2-L1971 FIKSFAER    | 260   | 724   |
| >TET2-L1971 RFIKSLAERTM | 565  | >TET2-L1971 RFIKSAERTM  | 300   | 265   |
| >TET2-L1971 RFIKSLAER   | 6    | >TET2-L1971 RFIKSAER    | 6     | 0     |
| >TET2-L1971 RFIKSLAER   | 559  | >TET2-L1971 RFIKSAER    | 223   | 336   |
| >TET2-L1971 RFIKSLAER   | 631  | >TET2-L1971 RFIKSAER    | 301   | 330   |
| >TET2-L1971 RFIKSLAER   | 68   | >TET2-L1971 RFIKSAER    | 21    | 47    |
| >TET2-L1971 LRFIKSLAER  | 128  | >TET2-L1971 LRFIKSAER   | 63    | 65    |
| >TET2-L1971 LRFIKSLA    | 423  | >TET2-L1971 LRFIKSFA    | 557   | 134   |
| >TET2-L1971 LRFIKSLAER  | 194  | >TET2-L1971 LRFIKSAER   | 159   | 35    |
| >TET2-L1971 LRFIKSLA    | 398  | >TET2-L1971 LRFIKSFA    | 513   | 115   |
| >TET2-L1971 LRFIKSLAER  | 938  | >TET2-L1971 LRFIKSAER   | 492   | 446   |
| >TET2-L1971 YLRFIKSL    | 78   | >TET2-L1971 YLRFIKSF    | 2371  | 2293  |
| >TET2-L1971 YLRFIKSLA   | 133  | >TET2-L1971 YLRFIKSFA   | 53    | 80    |
| >TET2-L1971 YLRFIKSL    | 13   | >TET2-L1971 YLRFIKSF    | 1779  | 1766  |
| >TET2-L1971 YLRFIKSLA   | 13   | >TET2-L1971 YLRFIKSFA   | 11    | 2     |
| >TET2-L1971 YLRFIKSL    | 32   | >TET2-L1971 YLRFIKSF    | 2887  | 2855  |
| >TET2-L1971 YLRFIKSLA   | 487  | >TET2-L1971 YLRFIKSFA   | 128   | 359   |
| >TET2-L1971 YLRFIKSL    | 232  | >TET2-L1971 YLRFIKSF    | 14556 | 14324 |
| >TET2-L1971 YLRFIKSLA   | 2449 | >TET2-L1971 YLRFIKSFA   | 385   | 2064  |
| >TET2-L1971 YLRFIKSL    | 447  | >TET2-L1971 YLRFIKSF    | 19840 | 19393 |
| >TET2-L1971 YLRFIKSL    | 4    | >TET2-L1971 YLRFIKSF    | 1970  | 1966  |
| >TET2-L1971 YLRFIKSLA   | 12   | >TET2-L1971 YLRFIKSFA   | 9     | 3     |
| >TET2-L1971 YLRFIKSLA   | 795  | >TET2-L1971 YLRFIKSFA   | 188   | 607   |
| >TET2-L1971 YLRFIKSLAER | 22   | >TET2-L1971 YLRFIKSFAER | 15    | 7     |
| >TET2-L1971 YLRFIKSLAER | 29   | >TET2-L1971 YLRFIKSFAER | 20    | 9     |
| >TET2-L1971 YLRFIKSLAER | 55   | >TET2-L1971 YLRFIKSFAER | 34    | 21    |
| >TET2-L1971 YLRFIKSL    | 25   | >TET2-L1971 YLRFIKSF    | 74    | 49    |
| >TET2-L1971 YLRFIKSL    | 575  | >TET2-L1971 YLRFIKSF    | 47    | 528   |
| >TET2-L1971 YLRFIKSL    | 1251 | >TET2-L1971 YLRFIKSF    | 72    | 1179  |
| >TET2-L1971 YLRFIKSL    | 208  | >TET2-L1971 YLRFIKSF    | 11    | 197   |
| >TET2-L1971 YLRFIKSL    | 2566 | >TET2-L1971 YLRFIKSF    | 204   | 2362  |
| >TET2-L1971 YLRFIKSLA   | 105  | >TET2-L1971 YLRFIKSFA   | 218   | 113   |
| >TET2-L1971 TYLRFIKSL   | 219  | >TET2-L1971 TYLRFIKSF   | 415   | 196   |
| >TET2-L1971 TYLRFIKSL   | 162  | >TET2-L1971 TYLRFIKSF   | 6941  | 6779  |
| >TET2-L1971 TYLRFIKSL   | 381  | >TET2-L1971 TYLRFIKSF   | 29    | 352   |

|                         |      |                        |     |      |
|-------------------------|------|------------------------|-----|------|
| >TET2-L1971 TYLRFIKSL   | 428  | >TET2-L1971 TYLRFIKSF  | 82  | 346  |
| >TET2-L1971 TYLRFIKSL   | 6    | >TET2-L1971 TYLRFIKSF  | 5   | 1    |
| >TET2-L1971 TYLRFIKSL   | 2702 | >TET2-L1971 TYLRFIKSF  | 167 | 2535 |
| >TET2-L1971 TYLRFIKSL   | 427  | >TET2-L1971 TYLRFIKSF  | 770 | 343  |
| >TET2-L1971 TYLRFIKSL   | 243  | >TET2-L1971 TYLRFIKSF  | 815 | 572  |
| >TET2-L1971 TYLRFIKSLA  | 563  | >TET2-L1971 TYLRFIKSFA | 207 | 356  |
| >TET2-L1971 PTYLRFIKSL  | 1454 | >TET2-L1971 PTYLRFIKSF | 313 | 1141 |
| >TET2-L1971 PTYLRFIKSL  | 4354 | >TET2-L1971 PTYLRFIKSF | 304 | 4050 |
| >TET2-L1971 PTYLRFIKSL  | 714  | >TET2-L1971 PTYLRFIKSF | 57  | 657  |
| >TET2-L1971 PTYLRFIKSL  | 739  | >TET2-L1971 PTYLRFIKSF | 96  | 643  |
| >TET2-L699M LKQHLNQQA   | 677  | >TET2-L699M MKQHLNQQ   | 355 | 322  |
| >TET2-L699M VLKQHLNQQ   | 393  | >TET2-L699M VMKQHLNQQ  | 887 | 494  |
| >TET2-L699M VLKQHLNQQ   | 24   | >TET2-L699M VMKQHLNQQ  | 40  | 16   |
| >TET2-L699M SQTEKLMSPV  | 45   | >TET2-L699M SQTEKLMSPV | 184 | 139  |
| >TET2-L699M SQTEKLMSPV  | 1924 | >TET2-L699M SQTEKLMSPV | 397 | 1527 |
| >TET2-L699M SQTEKLMSPV  | 603  | >TET2-L699M SQTEKLMSPV | 356 | 247  |
| >TET2-L699M SQTEKLMSPV  | 212  | >TET2-L699M SQTEKLMSPV | 913 | 701  |
| >TET2-L699M SPVLKQHL    | 547  | >TET2-L699M SPVMKQHL   | 251 | 296  |
| >TET2-L699M SPVLKQHL    | 129  | >TET2-L699M SPVMKQHL   | 54  | 75   |
| >TET2-L699M SPVLKQHL    | 776  | >TET2-L699M SPVMKQHL   | 259 | 517  |
| >TET2-L699M MSPVLKQHL   | 167  | >TET2-L699M MSPVMKQHI  | 141 | 26   |
| >TET2-L699M MSPVLKQHL   | 46   | >TET2-L699M MSPVMKQHI  | 47  | 1    |
| >TET2-L699M LMSPVLKQHI  | 118  | >TET2-L699M LMSPVMKQHI | 125 | 7    |
| >TET2-L699M LMSPVLKQHI  | 471  | >TET2-L699M LMSPVMKQHI | 542 | 71   |
| >TET2-L699M LMSPVLKQHI  | 22   | >TET2-L699M LMSPVMKQHI | 39  | 17   |
| >TET2-L699M LMSPVLKQHI  | 93   | >TET2-L699M LMSPVMKQHI | 169 | 76   |
| >TET2-L699M LMSPVLKQHI  | 38   | >TET2-L699M LMSPVMKQHI | 60  | 22   |
| >TET2-L699M LMSPVLKQHI  | 214  | >TET2-L699M LMSPVMKQHI | 504 | 290  |
| >TET2-L699M LMSPVLKQ    | 84   | >TET2-L699M LMSPVMKQ   | 79  | 5    |
| >TET2-L699M LMSPVLKQHI  | 4    | >TET2-L699M LMSPVMKQHI | 5   | 1    |
| >TET2-L699M LMSPVLKQHI  | 215  | >TET2-L699M LMSPVMKQHI | 214 | 1    |
| >TET2-L699M LMSPVLKQHI  | 427  | >TET2-L699M LMSPVMKQHI | 443 | 16   |
| >TET2-L699M KLMSPVLKQHI | 38   | >TET2-L699M KLMSPVMKC  | 39  | 1    |
| >TET2-L699M KLMSPVLKQHI | 17   | >TET2-L699M KLMSPVMKC  | 18  | 1    |
| >TET2-L699M KLMSPVLKQHI | 49   | >TET2-L699M KLMSPVMKC  | 36  | 13   |
| >TET2-L699M KLMSPVLKQHI | 89   | >TET2-L699M KLMSPVMKC  | 99  | 10   |
| >TET2-L699M KLMSPVLKQ   | 471  | >TET2-L699M KLMSPVMKC  | 370 | 101  |
| >TET2-L699M KLMSPVLKQHI | 10   | >TET2-L699M KLMSPVMKC  | 13  | 3    |
| >TET2-L699M KLMSPVLKQHI | 18   | >TET2-L699M KLMSPVMKC  | 17  | 1    |
| >TET2-L699M KLMSPVLKQHI | 26   | >TET2-L699M KLMSPVMKC  | 30  | 4    |
| >TET2-L699M KLMSPVLKQHI | 31   | >TET2-L699M KLMSPVMKC  | 24  | 7    |
| >TET2-L699M KLMSPVLKQ   | 396  | >TET2-L699M KLMSPVMKC  | 166 | 230  |
| >TET2-L699M KLMSPVLKQHI | 7    | >TET2-L699M KLMSPVMKC  | 5   | 2    |

|                        |       |                        |      |       |
|------------------------|-------|------------------------|------|-------|
| >TET2-L699N KLMSPVLK   | 25    | >TET2-L699N KLMSPVMK   | 25   | 0     |
| >TET2-L699N KLMSPVLK   | 11    | >TET2-L699N KLMSPVMK   | 11   | 0     |
| >TET2-L699N KLMSPVLK   | 34    | >TET2-L699N KLMSPVMK   | 56   | 22    |
| >TET2-L699N KLMSPVLK   | 107   | >TET2-L699N KLMSPVMK   | 169  | 62    |
| >TET2-L699N KLMSPVLKQF | 244   | >TET2-L699N KLMSPVMKC  | 241  | 3     |
| >TET2-L699N KLMSPVLKQF | 160   | >TET2-L699N KLMSPVMKC  | 139  | 21    |
| >TET2-L699N KLMSPVLK   | 269   | >TET2-L699N KLMSPVMK   | 623  | 354   |
| >TET2-L699N EKLMSPVL   | 61    | >TET2-L699N EKLMSPVM   | 45   | 16    |
| >TET2-L699N EKLMSPVLK  | 552   | >TET2-L699N EKLMSPVMK  | 286  | 266   |
| >TET2-L699N EKLMSPVL   | 118   | >TET2-L699N EKLMSPVM   | 579  | 461   |
| >TET2-L699N TEKLMSPVL  | 137   | >TET2-L699N TEKLMSPVM  | 190  | 53    |
| >TET2-L699N TEKLMSPVL  | 692   | >TET2-L699N TEKLMSPVM  | 410  | 282   |
| >TET2-L699N TEKLMSPVL  | 337   | >TET2-L699N TEKLMSPVM  | 1770 | 1433  |
| >TET2-L699N TEKLMSPVL  | 26    | >TET2-L699N TEKLMSPVM  | 41   | 15    |
| >TET2-L699N TEKLMSPVL  | 18    | >TET2-L699N TEKLMSPVM  | 32   | 14    |
| >TET2-L699N QTEKLMSPVI | 60    | >TET2-L699N QTEKLMSPVI | 109  | 49    |
| >TET2-L699N QTEKLMSPVI | 81    | >TET2-L699N QTEKLMSPVI | 100  | 19    |
| >TET2-L699N QTEKLMSPVI | 82    | >TET2-L699N QTEKLMSPVI | 54   | 28    |
| >TET2-L699N QTEKLMSPVI | 244   | >TET2-L699N QTEKLMSPVI | 368  | 124   |
| >TET2-L699N QTEKLMSPVI | 478   | >TET2-L699N QTEKLMSPVI | 33   | 445   |
| >TET2-L699N QTEKLMSPVI | 187   | >TET2-L699N QTEKLMSPVI | 191  | 4     |
| >TET2-N1641NCSPYLGSY   | 662   | >TET2-N1641ICSPYLGSY   | 252  | 410   |
| >TET2-N1641NCSPYLGSY   | 147   | >TET2-N1641ICSPYLGSY   | 28   | 119   |
| >TET2-N1641NCSPYLGSY   | 620   | >TET2-N1641ICSPYLGSY   | 50   | 570   |
| >TET2-N1641DNCSPYLGSY  | 4354  | >TET2-N1641DICSPYLGSY  | 340  | 4014  |
| >TET2-N1641DNCSPYLGSY  | 476   | >TET2-N1641DICSPYLGSY  | 15   | 461   |
| >TET2-N1641DNCSPYLGSY  | 457   | >TET2-N1641DICSPYLGSY  | 91   | 366   |
| >TET2-N1641YQCNGNLSVI  | 10321 | >TET2-N1641YQCNGNLSVI  | 45   | 10276 |
| >TET2-N1641YQCNGNLSVI  | 4110  | >TET2-N1641YQCNGNLSVI  | 263  | 3847  |
| >TET2-N1641YQCNGNLSVI  | 3985  | >TET2-N1641YQCNGNLSVI  | 58   | 3927  |
| >TET2-N1641YQCNGNLSVI  | 14217 | >TET2-N1641YQCNGNLSVI  | 372  | 13845 |
| >TET2-N1641VDNCSPYLGS  | 1393  | >TET2-N1641VDICSPYLGSY | 354  | 1039  |
| >TET2-N1641SVDNCSPY    | 160   | >TET2-N1641SVDICSPY    | 178  | 18    |
| >TET2-N1641SVDNCSPYL   | 37    | >TET2-N1641SVDICSPYL   | 82   | 45    |
| >TET2-N1641SVDNCSPYL   | 301   | >TET2-N1641SVDICSPYL   | 348  | 47    |
| >TET2-N1641SVDNCSPYL   | 26    | >TET2-N1641SVDICSPYL   | 63   | 37    |
| >TET2-N1641SVDNCSPYL   | 83    | >TET2-N1641SVDICSPYL   | 213  | 130   |
| >TET2-N1641SVDNCSPYL   | 107   | >TET2-N1641SVDICSPYL   | 931  | 824   |
| >TET2-N1641SVDNCSPYL   | 21    | >TET2-N1641SVDICSPYL   | 52   | 31    |
| >TET2-N1641SVDNCSPYL   | 102   | >TET2-N1641SVDICSPYL   | 605  | 503   |
| >TET2-N1641SVDNCSPYL   | 201   | >TET2-N1641SVDICSPYL   | 340  | 139   |
| >TET2-N1641SVDNCSPY    | 256   | >TET2-N1641SVDICSPY    | 398  | 142   |
| >TET2-N1641SVDNCSPY    | 271   | >TET2-N1641SVDICSPY    | 265  | 6     |



|                         |      |                         |      |      |
|-------------------------|------|-------------------------|------|------|
| >TET2-N1641SVDNCSPY     | 76   | >TET2-N1641SVDICSPY     | 88   | 12   |
| >TET2-N1641SVDNCSPYL    | 88   | >TET2-N1641SVDICSPYL    | 142  | 54   |
| >TET2-N1641SVDNCSPY     | 357  | >TET2-N1641SVDICSPY     | 298  | 59   |
| >TET2-N1641SVDNCSPY     | 191  | >TET2-N1641SVDICSPY     | 238  | 47   |
| >TET2-N1641LSVDNCSPYL   | 60   | >TET2-N1641LSVDICSPYL   | 4014 | 3954 |
| >TET2-N1641LSVDNCSPYL   | 228  | >TET2-N1641LSVDICSPYL   | 115  | 113  |
| >TET2-N1641LSVDNCSPY    | 90   | >TET2-N1641LSVDICSPY    | 241  | 151  |
| >TET2-N1641LSVDNCSPY    | 71   | >TET2-N1641LSVDICSPY    | 41   | 30   |
| >TET2-N1641LSVDNCSPY    | 93   | >TET2-N1641LSVDICSPY    | 49   | 44   |
| >TET2-N1641LSVDNCSPYL   | 695  | >TET2-N1641LSVDICSPYL   | 283  | 412  |
| >TET2-N1641LSVDNCSPY    | 35   | >TET2-N1641LSVDICSPY    | 44   | 9    |
| >TET2-N1641LSVDNCSPY    | 32   | >TET2-N1641LSVDICSPY    | 54   | 22   |
| >TET2-N1641LSVDNCSPY    | 4    | >TET2-N1641LSVDICSPY    | 5    | 1    |
| >TET2-N1641LSVDNCSPYL   | 11   | >TET2-N1641LSVDICSPYL   | 13   | 2    |
| >TET2-N1641LSVDNCSPY    | 26   | >TET2-N1641LSVDICSPY    | 28   | 2    |
| >TET2-N1641LSVDNCSPYL   | 84   | >TET2-N1641LSVDICSPYL   | 46   | 38   |
| >TET2-N1641LSVDNCSPY    | 23   | >TET2-N1641LSVDICSPY    | 5    | 18   |
| >TET2-N1641LSVDNCSPYL   | 79   | >TET2-N1641LSVDICSPYL   | 102  | 23   |
| >TET2-N1641LSVDNCSPY    | 2849 | >TET2-N1641LSVDICSPY    | 448  | 2401 |
| >TET2-N1641NLSVDNCSPY   | 164  | >TET2-N1641NLSVDICSPYL  | 82   | 82   |
| >TET2-N1641NLSVDNCSPY   | 11   | >TET2-N1641NLSVDICSPYL  | 8    | 3    |
| >TET2-N1641NLSVDNCSPY   | 305  | >TET2-N1641NLSVDICSPYL  | 124  | 181  |
| >TET2-N1641NLSVDNCSPY   | 440  | >TET2-N1641NLSVDICSPYL  | 204  | 236  |
| >TET2-N1641NLSVDNCSPY   | 178  | >TET2-N1641NLSVDICSPYL  | 69   | 109  |
| >TET2-N1641NLSVDNCSPY   | 50   | >TET2-N1641NLSVDICSPYL  | 39   | 11   |
| >TET2-N1641NLSVDNCSPY   | 92   | >TET2-N1641NLSVDICSPYL  | 46   | 46   |
| >TET2-N1641NLSVDNCSPY   | 13   | >TET2-N1641NLSVDICSPYL  | 8    | 5    |
| >TET2-N1641NLSVDNCSPY   | 23   | >TET2-N1641NLSVDICSPYL  | 15   | 8    |
| >TET2-N1641NLSVDNCSPY   | 195  | >TET2-N1641NLSVDICSPY   | 124  | 71   |
| >TET2-N1641NLSVDNCSPY   | 85   | >TET2-N1641NLSVDICSPY   | 89   | 4    |
| >TET2-N1641NLSVDNCSPY   | 66   | >TET2-N1641NLSVDICSPY   | 133  | 67   |
| >TET2-N1641GNLSVDNCSF   | 412  | >TET2-N1641GNLSVDICSP'  | 300  | 112  |
| >TET2-N1641GNLSVDNCSF   | 98   | >TET2-N1641GNLSVDICSP'  | 77   | 21   |
| >TET2-P101F PSLSGLLQIK  | 1477 | >TET2-P101F HSLSGLLQIK  | 133  | 1344 |
| >TET2-P101F PSLSGLLQIKK | 3102 | >TET2-P101F HSLSGLLQIKK | 89   | 3013 |
| >TET2-P101F PSLSGLLQIK  | 228  | >TET2-P101F HSLSGLLQIK  | 46   | 182  |
| >TET2-P101F PSLSGLLQIKK | 741  | >TET2-P101F HSLSGLLQIKK | 46   | 695  |
| >TET2-P101F PSLSGLLQI   | 8331 | >TET2-P101F HSLSGLLQI   | 280  | 8051 |
| >TET2-P101F PSLSGLLQIK  | 1306 | >TET2-P101F HSLSGLLQIK  | 18   | 1288 |
| >TET2-P101F PSLSGLLQIKK | 1070 | >TET2-P101F HSLSGLLQIKK | 16   | 1054 |
| >TET2-P101F PSLSGLLQIK  | 8267 | >TET2-P101F HSLSGLLQIK  | 252  | 8015 |
| >TET2-P101F PSLSGLLQI   | 5177 | >TET2-P101F HSLSGLLQI   | 128  | 5049 |
| >TET2-P101F PSLSGLLQI   | 1784 | >TET2-P101F HSLSGLLQI   | 12   | 1772 |

|                         |       |                         |      |       |
|-------------------------|-------|-------------------------|------|-------|
| >TET2-P101F PSLSGLLQI   | 9766  | >TET2-P101F HSLSGLLQI   | 94   | 9672  |
| >TET2-P101F PSLSGLLQI   | 7147  | >TET2-P101F HSLSGLLQI   | 308  | 6839  |
| >TET2-P101F PSLSGLLQI   | 278   | >TET2-P101F HSLSGLLQI   | 23   | 255   |
| >TET2-P101F EPSLSGLL    | 236   | >TET2-P101F EHSLSGLL    | 5241 | 5005  |
| >TET2-P101F EPSLSGLL    | 1988  | >TET2-P101F EHSLSGLL    | 371  | 1617  |
| >TET2-P101F SEPSLSGL    | 2641  | >TET2-P101F SEHSLSGL    | 365  | 2276  |
| >TET2-P101F SEPSLSGLL   | 46    | >TET2-P101F SEHSLSGLL   | 34   | 12    |
| >TET2-P101F SEPSLSGLLQI | 16    | >TET2-P101F SEHSLSGLLQI | 13   | 3     |
| >TET2-P101F SEPSLSGL    | 1589  | >TET2-P101F SEHSLSGL    | 51   | 1538  |
| >TET2-P101F SEPSLSGLL   | 1491  | >TET2-P101F SEHSLSGLL   | 56   | 1435  |
| >TET2-P101F SEPSLSGLLQI | 3308  | >TET2-P101F SEHSLSGLLQI | 231  | 3077  |
| >TET2-P101F SEPSLSGL    | 1407  | >TET2-P101F SEHSLSGL    | 80   | 1327  |
| >TET2-P101F SEPSLSGLL   | 2749  | >TET2-P101F SEHSLSGLL   | 139  | 2610  |
| >TET2-P101F SEPSLSGLLQI | 1863  | >TET2-P101F SEHSLSGLLQI | 91   | 1772  |
| >TET2-P101F SEPSLSGL    | 4014  | >TET2-P101F SEHSLSGL    | 497  | 3517  |
| >TET2-P101F SEPSLSGLL   | 3984  | >TET2-P101F SEHSLSGLL   | 444  | 3540  |
| >TET2-P101F SEPSLSGLLQI | 18503 | >TET2-P101F SEHSLSGLLQI | 341  | 18162 |
| >TET2-P101F SEPSLSGLL   | 103   | >TET2-P101F SEHSLSGLL   | 29   | 74    |
| >TET2-P101F SEPSLSGLLQI | 9     | >TET2-P101F SEHSLSGLLQI | 4    | 5     |
| >TET2-P101F VSEPSLSGL   | 4     | >TET2-P101F VSEHSLSGL   | 6    | 2     |
| >TET2-P101F VSEPSLSGLL  | 24    | >TET2-P101F VSEHSLSGLL  | 44   | 20    |
| >TET2-P101F VSEPSLSGL   | 277   | >TET2-P101F VSEHSLSGL   | 1840 | 1563  |
| >TET2-P101F VSEPSLSGLL  | 71    | >TET2-P101F VSEHSLSGLL  | 337  | 266   |
| >TET2-P101F VSEPSLSGL   | 75    | >TET2-P101F VSEHSLSGL   | 101  | 26    |
| >TET2-P101F VSEPSLSGLL  | 268   | >TET2-P101F VSEHSLSGLL  | 450  | 182   |
| >TET2-P101F VSEPSLSGL   | 451   | >TET2-P101F VSEHSLSGL   | 2225 | 1774  |
| >TET2-P101F TVSEPSLSGL  | 186   | >TET2-P101F TVSEHSLSGL  | 163  | 23    |
| >TET2-P101F TVSEPSLSGLL | 421   | >TET2-P101F TVSEHSLSGLI | 108  | 313   |
| >TET2-P101F TVSEPSLSGL  | 69    | >TET2-P101F TVSEHSLSGL  | 68   | 1     |
| >TET2-P101F TVSEPSLSGLL | 976   | >TET2-P101F TVSEHSLSGLI | 185  | 791   |
| >TET2-P101F TVSEPSLSGL  | 407   | >TET2-P101F TVSEHSLSGL  | 573  | 166   |
| >TET2-P101F TVSEPSLSGL  | 373   | >TET2-P101F TVSEHSLSGL  | 513  | 140   |
| >TET2-P101F TVSEPSLSGL  | 106   | >TET2-P101F TVSEHSLSGL  | 290  | 184   |
| >TET2-P101F TVSEPSLSGLL | 21    | >TET2-P101F TVSEHSLSGLI | 55   | 34    |
| >TET2-P101F TVSEPSLSGL  | 48    | >TET2-P101F TVSEHSLSGL  | 100  | 52    |
| >TET2-P101F TVSEPSLSGLL | 100   | >TET2-P101F TVSEHSLSGLI | 199  | 99    |
| >TET2-P101F TVSEPSLSGL  | 389   | >TET2-P101F TVSEHSLSGL  | 825  | 436   |
| >TET2-P101F RTVSEPSLSGI | 255   | >TET2-P101F RTVSEHSLSGI | 422  | 167   |
| >TET2-P101F RTVSEPSL    | 350   | >TET2-P101F RTVSEHSL    | 245  | 105   |
| >TET2-P101F RTVSEPSLSGI | 70    | >TET2-P101F RTVSEHSLSGI | 48   | 22    |
| >TET2-P101F RTVSEPSL    | 225   | >TET2-P101F RTVSEHSL    | 145  | 80    |
| >TET2-P101F RTVSEPSL    | 316   | >TET2-P101F RTVSEHSL    | 366  | 50    |
| >TET2-P101F RTVSEPSLSGI | 521   | >TET2-P101F RTVSEHSLSGI | 390  | 131   |

|                         |       |                         |      |       |
|-------------------------|-------|-------------------------|------|-------|
| >TET2-P101F RTVSEPSL    | 4     | >TET2-P101F RTVSEHSL    | 4    | 0     |
| >TET2-P101F RTVSEPSLSG  | 578   | >TET2-P101F RTVSEHSLSG  | 493  | 85    |
| >TET2-P101F RTVSEPSLSGI | 3     | >TET2-P101F RTVSEHSLSGI | 3    | 0     |
| >TET2-P101F RTVSEPSL    | 220   | >TET2-P101F RTVSEHSL    | 155  | 65    |
| >TET2-P101F RTVSEPSLSGI | 275   | >TET2-P101F RTVSEHSLSGI | 135  | 140   |
| >TET2-P101F RTVSEPSLS   | 120   | >TET2-P101F RTVSEHSLS   | 42   | 78    |
| >TET2-P101F RTVSEPSLSGI | 15    | >TET2-P101F RTVSEHSLSGI | 10   | 5     |
| >TET2-P101F RTVSEPSL    | 167   | >TET2-P101F RTVSEHSL    | 301  | 134   |
| >TET2-P101F RTVSEPSLSGI | 128   | >TET2-P101F RTVSEHSLSGI | 157  | 29    |
| >TET2-P101F KRTVSEPSL   | 165   | >TET2-P101F KRTVSEHSL   | 210  | 45    |
| >TET2-P101F KRTVSEPSL   | 570   | >TET2-P101F KRTVSEHSL   | 162  | 408   |
| >TET2-P101F KRTVSEPSL   | 105   | >TET2-P101F KRTVSEHSL   | 142  | 37    |
| >TET2-P101F KRTVSEPSL   | 190   | >TET2-P101F KRTVSEHSL   | 201  | 11    |
| >TET2-P101F IKRTVSEP    | 286   | >TET2-P101F IKRTVSEH    | 62   | 224   |
| >TET2-P101F IKRTVSEPS   | 370   | >TET2-P101F IKRTVSEHS   | 1051 | 681   |
| >TET2-P101F IKRTVSEPSL  | 9     | >TET2-P101F IKRTVSEHSL  | 11   | 2     |
| >TET2-P101F GIKRTVSEPSL | 454   | >TET2-P101F GIKRTVSEHSL | 235  | 219   |
| >TET2-P101F GIKRTVSEPSL | 324   | >TET2-P101F GIKRTVSEHSL | 778  | 454   |
| >TET2-P1194 PIAKWVRR    | 13736 | >TET2-P1194 AIAKWVRR    | 420  | 13316 |
| >TET2-P1194 PIAKWVRR    | 2115  | >TET2-P1194 AIAKWVRR    | 66   | 2049  |
| >TET2-P1194 PIAKWVRR    | 2541  | >TET2-P1194 AIAKWVRR    | 56   | 2485  |
| >TET2-P1194 PIAKWVRR    | 1462  | >TET2-P1194 AIAKWVRR    | 251  | 1211  |
| >TET2-P1194 PIAKWVRR    | 964   | >TET2-P1194 AIAKWVRR    | 169  | 795   |
| >TET2-P1194 PIAKWVRR    | 6761  | >TET2-P1194 AIAKWVRR    | 412  | 6349  |
| >TET2-P1194 PIAKWVRR    | 145   | >TET2-P1194 AIAKWVRR    | 343  | 198   |
| >TET2-P1194 PIAKWVRR    | 111   | >TET2-P1194 AIAKWVRR    | 315  | 204   |
| >TET2-P1194 CIAKWVV     | 8624  | >TET2-P1194 CAIAKWVV    | 314  | 8310  |
| >TET2-P1194 CIAKWVVR    | 1803  | >TET2-P1194 CAIAKWVVR   | 53   | 1750  |
| >TET2-P1194 CIAKWVVR    | 1056  | >TET2-P1194 CAIAKWVVR   | 120  | 936   |
| >TET2-P1194 CIAKWVVR    | 2131  | >TET2-P1194 CAIAKWVVR   | 258  | 1873  |
| >TET2-P1194 CIAKWVVR    | 2307  | >TET2-P1194 CAIAKWVVR   | 78   | 2229  |
| >TET2-P1194 CIAKWVVR    | 2092  | >TET2-P1194 CAIAKWVVR   | 74   | 2018  |
| >TET2-P1194 CIAKWVV     | 5424  | >TET2-P1194 CAIAKWVV    | 107  | 5317  |
| >TET2-P1194 CIAKWVV     | 25    | >TET2-P1194 CAIAKWVV    | 4121 | 4096  |
| >TET2-P1194 CIAKWVVR    | 160   | >TET2-P1194 CAIAKWVVR   | 178  | 18    |
| >TET2-P1194 CIAKWVVR    | 181   | >TET2-P1194 CAIAKWVVR   | 205  | 24    |
| >TET2-P1194 QGCPIAKW    | 124   | >TET2-P1194 QGCAIAKW    | 764  | 640   |
| >TET2-P1194 QGCPIAKW    | 111   | >TET2-P1194 QGCAIAKW    | 84   | 27    |
| >TET2-P1194 SQGCPKAW    | 863   | >TET2-P1194 SQGCAIAKW   | 495  | 368   |
| >TET2-P1194 SQGCPKAW    | 36    | >TET2-P1194 SQGCAIAKW   | 23   | 13    |
| >TET2-P1194 SQGCPKAW    | 103   | >TET2-P1194 SQGCAIAKW   | 193  | 90    |
| >TET2-P1194 SQGCPKAW    | 28    | >TET2-P1194 SQGCAIAKW   | 49   | 21    |
| >TET2-P1194 SQGCPKAW    | 33    | >TET2-P1194 SQGCAIAKW   | 28   | 5     |

|                         |       |                        |       |       |
|-------------------------|-------|------------------------|-------|-------|
| >TET2-P1194 SQGCPIAKW'  | 105   | >TET2-P1194 SQGCAIAKW' | 59    | 46    |
| >TET2-P1194 SQGCPIAK    | 85    | >TET2-P1194 SQGCAIAK   | 91    | 6     |
| >TET2-P1194 SSQGCPIAK   | 13    | >TET2-P1194 SSQGCAIAK  | 15    | 2     |
| >TET2-P1194 SSQGCPIAK   | 222   | >TET2-P1194 SSQGCAIAK  | 397   | 175   |
| >TET2-P1194 SSQGCPIAKM  | 13    | >TET2-P1194 SSQGCAIAKM | 10    | 3     |
| >TET2-P1194 SSQGCPIAKM  | 60    | >TET2-P1194 SSQGCAIAKM | 55    | 5     |
| >TET2-P1194 SSQGCPIAKM  | 29    | >TET2-P1194 SSQGCAIAKM | 29    | 0     |
| >TET2-P1194 SSQGCPIAKM  | 472   | >TET2-P1194 SSQGCAIAKM | 291   | 181   |
| >TET2-P1194 SSQGCPIAK   | 149   | >TET2-P1194 SSQGCAIAK  | 350   | 201   |
| >TET2-P1194 KSSQGCPIAK  | 116   | >TET2-P1194 KSSQGCAIAK | 113   | 3     |
| >TET2-P1194 KSSQGCPIAK  | 19    | >TET2-P1194 KSSQGCAIAK | 27    | 8     |
| >TET2-P1194 KSSQGCPI    | 322   | >TET2-P1194 KSSQGCAI   | 888   | 566   |
| >TET2-P1194 KSSQGCPIAK  | 25    | >TET2-P1194 KSSQGCAIAK | 37    | 12    |
| >TET2-P1194 KSSQGCPIAK  | 370   | >TET2-P1194 KSSQGCAIAK | 307   | 63    |
| >TET2-P1194 KSSQGCPI    | 262   | >TET2-P1194 KSSQGCAI   | 197   | 65    |
| >TET2-P1194 KSSQGCPI    | 15    | >TET2-P1194 KSSQGCAI   | 22    | 7     |
| >TET2-P1194 KSSQGCPIAK' | 7     | >TET2-P1194 KSSQGCAIAK | 7     | 0     |
| >TET2-P1194 KSSQGCPIAK' | 45    | >TET2-P1194 KSSQGCAIAK | 40    | 5     |
| >TET2-P1194 KSSQGCPI    | 104   | >TET2-P1194 KSSQGCAI   | 123   | 19    |
| >TET2-P1194 KSSQGCPIAK' | 9     | >TET2-P1194 KSSQGCAIAK | 8     | 1     |
| >TET2-P1194 KSSQGCPIAK' | 307   | >TET2-P1194 KSSQGCAIAK | 326   | 19    |
| >TET2-P1194 KSSQGCPIAK' | 674   | >TET2-P1194 KSSQGCAIAK | 248   | 426   |
| >TET2-P1194 KSSQGCPIAK  | 353   | >TET2-P1194 KSSQGCAIAK | 692   | 339   |
| >TET2-P1194 KSSQGCPI    | 50    | >TET2-P1194 KSSQGCAI   | 40    | 10    |
| >TET2-P1194 GKSSQGCPI   | 73    | >TET2-P1194 GKSSQGCAI  | 63    | 10    |
| >TET2-P1194 KEGKSSQGC/  | 71    | >TET2-P1194 KEGKSSQGC/ | 98    | 27    |
| >TET2-P1194 KEGKSSQGC/  | 362   | >TET2-P1194 KEGKSSQGC/ | 330   | 32    |
| >TET2-P1194 KEGKSSQGC/  | 80    | >TET2-P1194 KEGKSSQGC/ | 120   | 40    |
| >TET2-P1194 KEGKSSQGC/  | 26    | >TET2-P1194 KEGKSSQGC/ | 30    | 4     |
| >TET2-P1367 PFSGVTACL   | 3126  | >TET2-P1367 SFSGVTACL  | 127   | 2999  |
| >TET2-P1367 PFSGVTACLD  | 274   | >TET2-P1367 SFSGVTACLD | 358   | 84    |
| >TET2-P1367 PFSGVTACLD  | 206   | >TET2-P1367 SFSGVTACLD | 30    | 176   |
| >TET2-P1367 PFSGVTACLD  | 390   | >TET2-P1367 SFSGVTACLD | 135   | 255   |
| >TET2-P1367 PFSGVTAC    | 4542  | >TET2-P1367 SFSGVTAC   | 481   | 4061  |
| >TET2-P1367 RPFSGVTACL  | 57    | >TET2-P1367 RSFSGVTACL | 10915 | 10858 |
| >TET2-P1367 RPFSGVTACL  | 4203  | >TET2-P1367 RSFSGVTACL | 413   | 3790  |
| >TET2-P1367 RPFSGVTA    | 14185 | >TET2-P1367 RSFSGVTA   | 72    | 14113 |
| >TET2-P1367 RPFSGVTACL  | 16415 | >TET2-P1367 RSFSGVTACL | 452   | 15963 |
| >TET2-P1367 RPFSGVTA    | 8253  | >TET2-P1367 RSFSGVTA   | 141   | 8112  |
| >TET2-P1367 RPFSGVTAC   | 8085  | >TET2-P1367 RSFSGVTAC  | 86    | 7999  |
| >TET2-P1367 RPFSGVTACL  | 2958  | >TET2-P1367 RSFSGVTACL | 41    | 2917  |
| >TET2-P1367 RPFSGVTACL  | 8836  | >TET2-P1367 RSFSGVTACL | 146   | 8690  |
| >TET2-P1367 RPFSGVTA    | 124   | >TET2-P1367 RSFSGVTA   | 20068 | 19944 |

|                        |       |                        |       |       |
|------------------------|-------|------------------------|-------|-------|
| >TET2-P1367 RPFSGVTAC  | 138   | >TET2-P1367 RSFSGVTAC  | 21631 | 21493 |
| >TET2-P1367 RPFSGVTACL | 57    | >TET2-P1367 RSFSGVTACL | 15850 | 15793 |
| >TET2-P1367 RPFSGVTACL | 11604 | >TET2-P1367 RSFSGVTACL | 329   | 11275 |
| >TET2-P1367 RPFSGVTA   | 1105  | >TET2-P1367 RSFSGVTA   | 80    | 1025  |
| >TET2-P1367 RPFSGVTAC  | 1575  | >TET2-P1367 RSFSGVTAC  | 182   | 1393  |
| >TET2-P1367 RPFSGVTACL | 242   | >TET2-P1367 RSFSGVTACL | 26    | 216   |
| >TET2-P1367 RPFSGVTA   | 19163 | >TET2-P1367 RSFSGVTA   | 57    | 19106 |
| >TET2-P1367 RPFSGVTAC  | 22153 | >TET2-P1367 RSFSGVTAC  | 200   | 21953 |
| >TET2-P1367 RPFSGVTACL | 9131  | >TET2-P1367 RSFSGVTACL | 6     | 9125  |
| >TET2-P1367 RPFSGVTACL | 35    | >TET2-P1367 RSFSGVTACL | 377   | 342   |
| >TET2-P1367 RPFSGVTA   | 181   | >TET2-P1367 RSFSGVTA   | 24503 | 24322 |
| >TET2-P1367 RPFSGVTACL | 20081 | >TET2-P1367 RSFSGVTACL | 94    | 19987 |
| >TET2-P1367 RPFSGVTACL | 21969 | >TET2-P1367 RSFSGVTACL | 380   | 21589 |
| >TET2-P1367 RPFSGVTA   | 13279 | >TET2-P1367 RSFSGVTA   | 393   | 12886 |
| >TET2-P1367 RPFSGVTACL | 22776 | >TET2-P1367 RSFSGVTACL | 304   | 22472 |
| >TET2-P1367 GRPFSGVTAC | 713   | >TET2-P1367 GRSFSGVTAC | 491   | 222   |
| >TET2-P1367 GRPFSGVTAC | 46    | >TET2-P1367 GRSFSGVTAC | 39    | 7     |
| >TET2-P1367 KEGRPFSGV  | 3932  | >TET2-P1367 KEGRSFSGV  | 263   | 3669  |
| >TET2-P1367 KEGRPFSGV  | 1088  | >TET2-P1367 KEGRSFSGV  | 374   | 714   |
| >TET2-P1367 KEGRPFSGVT | 1048  | >TET2-P1367 KEGRSFSGVT | 471   | 577   |
| >TET2-P1367 KEGRPFSGV  | 89    | >TET2-P1367 KEGRSFSGV  | 54    | 35    |
| >TET2-P1367 KEGRPFSGVT | 28    | >TET2-P1367 KEGRSFSGVT | 16    | 12    |
| >TET2-P1367 KEGRPFSGV  | 37    | >TET2-P1367 KEGRSFSGV  | 34    | 3     |
| >TET2-P1367 GLKEGRPFSG | 212   | >TET2-P1367 GLKEGRSFSG | 90    | 122   |
| >TET2-P1367 GLKEGRPFSG | 5     | >TET2-P1367 GLKEGRSFSG | 3     | 2     |
| >TET2-P1367 GLKEGRPFSG | 113   | >TET2-P1367 GLKEGRSFSG | 149   | 36    |
| >TET2-P1367 GLKEGRPFSG | 15    | >TET2-P1367 GLKEGRSFSG | 26    | 11    |
| >TET2-P1367 GLKEGRPFSG | 21    | >TET2-P1367 GLKEGRSFSG | 17    | 4     |
| >TET2-P1367 GLKEGRPFSG | 27    | >TET2-P1367 GLKEGRSFSG | 38    | 11    |
| >TET2-P1367 GLKEGRPFSG | 2     | >TET2-P1367 GLKEGRSFSG | 2     | 0     |
| >TET2-P1367 GLKEGRPF   | 63    | >TET2-P1367 GLKEGRSF   | 71    | 8     |
| >TET2-P1367 GLKEGRPF   | 132   | >TET2-P1367 GLKEGRSF   | 130   | 2     |
| >TET2-P1367 GLKEGRPF   | 235   | >TET2-P1367 GLKEGRSF   | 207   | 28    |
| >TET2-P1367 LGLKEGRPF  | 121   | >TET2-P1367 LGLKEGRSF  | 135   | 14    |
| >TET2-P1367 RLGLKEGRPF | 234   | >TET2-P1367 RLGLKEGRSF | 368   | 134   |
| >TET2-P1367 RLGLKEGRPF | 1302  | >TET2-P1367 RLGLKEGRSF | 449   | 853   |
| >TET2-P1367 CRLGLKEGRP | 174   | >TET2-P1367 CRLGLKEGRS | 200   | 26    |
| >TET2-P1367 CRLGLKEGRP | 158   | >TET2-P1367 CRLGLKEGRS | 204   | 46    |
| >TET2-P1419 PLYKVSDV   | 3729  | >TET2-P1419 RLYKVSDV   | 52    | 3677  |
| >TET2-P1419 PLYKVSDV   | 440   | >TET2-P1419 RLYKVSDV   | 32    | 408   |
| >TET2-P1419 PLYKVSDV   | 87    | >TET2-P1419 RLYKVSDV   | 4     | 83    |
| >TET2-P1419 PLYKVSDV   | 6400  | >TET2-P1419 RLYKVSDV   | 92    | 6308  |
| >TET2-P1419 PLYKVSDV   | 11    | >TET2-P1419 RLYKVSDV   | 2     | 9     |

|                        |       |                        |       |       |
|------------------------|-------|------------------------|-------|-------|
| >TET2-P1419 PLYKVSDVDE | 2085  | >TET2-P1419 RLYKVSDVDE | 84    | 2001  |
| >TET2-P1419 PLYKVSDV   | 544   | >TET2-P1419 RLYKVSDV   | 8     | 536   |
| >TET2-P1419 PLYKVSDV   | 13    | >TET2-P1419 RLYKVSDV   | 6     | 7     |
| >TET2-P1419 PLYKVSDV   | 364   | >TET2-P1419 RLYKVSDV   | 80    | 284   |
| >TET2-P1419 PLYKVSDV   | 11    | >TET2-P1419 RLYKVSDV   | 4     | 7     |
| >TET2-P1419 PLYKVSDVDE | 1549  | >TET2-P1419 RLYKVSDVDE | 449   | 1100  |
| >TET2-P1419 PLYKVSDVDE | 2437  | >TET2-P1419 RLYKVSDVDE | 73    | 2364  |
| >TET2-P1419 PLYKVSDV   | 7004  | >TET2-P1419 RLYKVSDV   | 313   | 6691  |
| >TET2-P1419 PLYKVSDVDE | 1067  | >TET2-P1419 RLYKVSDVDE | 12    | 1055  |
| >TET2-P1419 PLYKVSDVDE | 2174  | >TET2-P1419 RLYKVSDVDE | 45    | 2129  |
| >TET2-P1419 PLYKVSDV   | 4470  | >TET2-P1419 RLYKVSDV   | 261   | 4209  |
| >TET2-P1419 PLYKVSDVDE | 283   | >TET2-P1419 RLYKVSDVDE | 11    | 272   |
| >TET2-P1419 PLYKVSDVDE | 17470 | >TET2-P1419 RLYKVSDVDE | 212   | 17258 |
| >TET2-P1419 PLYKVSDVDE | 18639 | >TET2-P1419 RLYKVSDVDE | 277   | 18362 |
| >TET2-P1419 PLYKVSDVDE | 14679 | >TET2-P1419 RLYKVSDVDE | 344   | 14335 |
| >TET2-P1419 PLYKVSDVDE | 3619  | >TET2-P1419 RLYKVSDVDE | 402   | 3217  |
| >TET2-P1419 LPLYKVSDV  | 234   | >TET2-P1419 LRLYKVSDV  | 31942 | 31708 |
| >TET2-P1419 LPLYKVSDV  | 233   | >TET2-P1419 LRLYKVSDV  | 2146  | 1913  |
| >TET2-P1419 LPLYKVSDV  | 5489  | >TET2-P1419 LRLYKVSDV  | 420   | 5069  |
| >TET2-P1419 LPLYKVSDV  | 214   | >TET2-P1419 LRLYKVSDV  | 20359 | 20145 |
| >TET2-P1419 LPLYKVSDV  | 429   | >TET2-P1419 LRLYKVSDV  | 30758 | 30329 |
| >TET2-P1419 LPLYKVSDVD | 344   | >TET2-P1419 LRLYKVSDVD | 29626 | 29282 |
| >TET2-P1419 KPEDEQLHVL | 22218 | >TET2-P1419 KPEDEQLHVL | 59    | 22159 |
| >TET2-P1419 VLPLYKVSDV | 182   | >TET2-P1419 VLRLYKVSDV | 198   | 16    |
| >TET2-P1419 VLPLYKVSDV | 26    | >TET2-P1419 VLRLYKVSDV | 168   | 142   |
| >TET2-P1419 VLPLYKVSDV | 178   | >TET2-P1419 VLRLYKVSDV | 563   | 385   |
| >TET2-P1419 VLPLYKVSDV | 42    | >TET2-P1419 VLRLYKVSDV | 507   | 465   |
| >TET2-P1419 VLPLYKVSDV | 180   | >TET2-P1419 VLRLYKVSDV | 1973  | 1793  |
| >TET2-P1419 VLPLYKVSDV | 4     | >TET2-P1419 VLRLYKVSDV | 5     | 1     |
| >TET2-P1419 HVLPLYKV   | 261   | >TET2-P1419 HVLRLYKV   | 566   | 305   |
| >TET2-P1419 HVLPLYKV   | 345   | >TET2-P1419 HVLRLYKV   | 809   | 464   |
| >TET2-P1419 HVLPLYKVSD | 443   | >TET2-P1419 HVLRLYKVSD | 953   | 510   |
| >TET2-P1419 HVLPLYKV   | 48    | >TET2-P1419 HVLRLYKV   | 133   | 85    |
| >TET2-P1419 HVLPLYKV   | 41    | >TET2-P1419 HVLRLYKV   | 90    | 49    |
| >TET2-P1419 HVLPLYKV   | 112   | >TET2-P1419 HVLRLYKV   | 183   | 71    |
| >TET2-P1419 HVLPLYKV   | 69    | >TET2-P1419 HVLRLYKV   | 153   | 84    |
| >TET2-P1419 HVLPLYKVSD | 444   | >TET2-P1419 HVLRLYKVSD | 975   | 531   |
| >TET2-P1419 HVLPLYKV   | 192   | >TET2-P1419 HVLRLYKV   | 443   | 251   |
| >TET2-P1419 HVLPLYKV   | 20    | >TET2-P1419 HVLRLYKV   | 53    | 33    |
| >TET2-P1419 HVLPLYKVSD | 82    | >TET2-P1419 HVLRLYKVSD | 235   | 153   |
| >TET2-P1419 HVLPLYKV   | 943   | >TET2-P1419 HVLRLYKV   | 481   | 462   |
| >TET2-P1419 HVLPLYKV   | 21    | >TET2-P1419 HVLRLYKV   | 64    | 43    |
| >TET2-P1419 HVLPLYKVSD | 217   | >TET2-P1419 HVLRLYKVSD | 707   | 490   |

|                          |       |                          |      |       |
|--------------------------|-------|--------------------------|------|-------|
| >TET2-P1419 HVLPLYKV     | 12    | >TET2-P1419 HVLRLYKV     | 24   | 12    |
| >TET2-P1419 HVLPLYKVSD   | 188   | >TET2-P1419 HVLRLYKVSD   | 371  | 183   |
| >TET2-P1419 QLHVLPPLYKV  | 126   | >TET2-P1419 QLHVLRPLYKV  | 250  | 124   |
| >TET2-P1419 QLHVLPPLYKV  | 50    | >TET2-P1419 QLHVLRPLYKV  | 139  | 89    |
| >TET2-P1419 QLHVLPPLYKV  | 78    | >TET2-P1419 QLHVLRPLYKV  | 125  | 47    |
| >TET2-P1419 QLHVLPPLYKV  | 238   | >TET2-P1419 QLHVLRPLYKV  | 297  | 59    |
| >TET2-P1419 QLHVLPPLYKV  | 8     | >TET2-P1419 QLHVLRPLYKV  | 49   | 41    |
| >TET2-P1419 QLHVLPPLYKV  | 40    | >TET2-P1419 QLHVLRPLYKV  | 154  | 114   |
| >TET2-P1419 QLHVLPPLYKV  | 71    | >TET2-P1419 QLHVLRPLYKV  | 188  | 117   |
| >TET2-P1419 QLHVLPPLYKV  | 112   | >TET2-P1419 QLHVLRPLYKV  | 694  | 582   |
| >TET2-P1419 QLHVLPPLYKV  | 8     | >TET2-P1419 QLHVLRPLYKV  | 6    | 2     |
| >TET2-P1419 QLHVLPPLYK   | 51    | >TET2-P1419 QLHVLRPLYK   | 47   | 4     |
| >TET2-P1419 QLHVLPPLYK   | 42    | >TET2-P1419 QLHVLRPLYK   | 49   | 7     |
| >TET2-P1419 QLHVLPPLY    | 21    | >TET2-P1419 QLHVLRPLY    | 60   | 39    |
| >TET2-P1419 QLHVLPPLY    | 17    | >TET2-P1419 QLHVLRPLY    | 10   | 7     |
| >TET2-P1419 QLHVLPPLY    | 219   | >TET2-P1419 QLHVLRPLY    | 480  | 261   |
| >TET2-P1419 QLHVLPPLY    | 1731  | >TET2-P1419 QLHVLRPLY    | 220  | 1511  |
| >TET2-P1419 QLHVLPPLY    | 1490  | >TET2-P1419 QLHVLRPLY    | 487  | 1003  |
| >TET2-P1419 QLHVLPPLY    | 25    | >TET2-P1419 QLHVLRPLY    | 60   | 35    |
| >TET2-P1419 QLHVLPPLY    | 616   | >TET2-P1419 QLHVLRPLY    | 429  | 187   |
| >TET2-P1419 QLHVLPPLY    | 247   | >TET2-P1419 QLHVLRPLY    | 194  | 53    |
| >TET2-P1419 EQLHVLPPL    | 50    | >TET2-P1419 EQLHVLRPL    | 649  | 599   |
| >TET2-P1419 EQLHVLPPLYK' | 27    | >TET2-P1419 EQLHVLRPLYK' | 55   | 28    |
| >TET2-P1419 EQLHVLPPLYK' | 104   | >TET2-P1419 EQLHVLRPLYK' | 348  | 244   |
| >TET2-P1419 EQLHVLPPLYK' | 340   | >TET2-P1419 EQLHVLRPLYK' | 702  | 362   |
| >TET2-P1419 EQLHVLPPLYK' | 194   | >TET2-P1419 EQLHVLRPLYK' | 910  | 716   |
| >TET2-P1419 EQLHVLPPLYK' | 238   | >TET2-P1419 EQLHVLRPLYK' | 1026 | 788   |
| >TET2-P1419 EQLHVLPPLYK  | 102   | >TET2-P1419 EQLHVLRPLYK  | 119  | 17    |
| >TET2-P1419 EQLHVLPPLYK  | 85    | >TET2-P1419 EQLHVLRPLYK  | 177  | 92    |
| >TET2-P1419 EQLHVLPPLY   | 149   | >TET2-P1419 EQLHVLRPLY   | 685  | 536   |
| >TET2-P1419 EQLHVLPPLY   | 360   | >TET2-P1419 EQLHVLRPLY   | 1593 | 1233  |
| >TET2-P1419 EQLHVLPPLY   | 189   | >TET2-P1419 EQLHVLRPLY   | 1476 | 1287  |
| >TET2-P1419 EQLHVLPPLYK' | 117   | >TET2-P1419 EQLHVLRPLYK' | 792  | 675   |
| >TET2-P1419 EQLHVLPPL    | 100   | >TET2-P1419 EQLHVLRPL    | 722  | 622   |
| >TET2-P1419 EQLHVLPPLY   | 143   | >TET2-P1419 EQLHVLRPLY   | 233  | 90    |
| >TET2-P1419 EQLHVLPPL    | 67    | >TET2-P1419 EQLHVLRPL    | 827  | 760   |
| >TET2-P1419 EQLHVLPPL    | 400   | >TET2-P1419 EQLHVLRPL    | 4122 | 3722  |
| >TET2-P1419 DEQLHVLP     | 446   | >TET2-P1419 DEQLHVLR     | 463  | 17    |
| >TET2-P1419 DEQLHVLPPL   | 413   | >TET2-P1419 DEQLHVLRPL   | 1716 | 1303  |
| >TET2-P1419 DEQLHVLP     | 35725 | >TET2-P1419 DEQLHVLR     | 482  | 35243 |
| >TET2-P1419 DEQLHVLPPL   | 11    | >TET2-P1419 DEQLHVLRPL   | 107  | 96    |
| >TET2-P1419 DEQLHVLPPLY  | 107   | >TET2-P1419 DEQLHVLRPLY  | 158  | 51    |
| >TET2-P1419 DEQLHVLPPL   | 286   | >TET2-P1419 DEQLHVLRPL   | 3317 | 3031  |

|                         |       |                         |       |       |
|-------------------------|-------|-------------------------|-------|-------|
| >TET2-P1419 DEQLHVLPLY  | 890   | >TET2-P1419 DEQLHVLRLY  | 362   | 528   |
| >TET2-P1419 DEQLHVLPLY  | 403   | >TET2-P1419 DEQLHVLRLY  | 301   | 102   |
| >TET2-P1419 DEQLHVLPL   | 253   | >TET2-P1419 DEQLHVLRL   | 406   | 153   |
| >TET2-P1419 EDEQLHVLP   | 36197 | >TET2-P1419 EDEQLHVLR   | 247   | 35950 |
| >TET2-P1419 PEDEQLHVLP  | 383   | >TET2-P1419 PEDEQLHVLR  | 1758  | 1375  |
| >TET2-P1894 PTRISLVFY   | 8445  | >TET2-P1894 HTRISLVFY   | 273   | 8172  |
| >TET2-P1894 PTRISLVFY   | 6178  | >TET2-P1894 HTRISLVFY   | 394   | 5784  |
| >TET2-P1894 PTRISLVFY   | 6702  | >TET2-P1894 HTRISLVFY   | 148   | 6554  |
| >TET2-P1894 PTRISLVFY   | 57    | >TET2-P1894 HTRISLVFY   | 16    | 41    |
| >TET2-P1894 PTRISLVFY   | 380   | >TET2-P1894 HTRISLVFY   | 57    | 323   |
| >TET2-P1894 PTRISLVFY   | 393   | >TET2-P1894 HTRISLVFY   | 152   | 241   |
| >TET2-P1894 PTRISLVF    | 1970  | >TET2-P1894 HTRISLVF    | 28    | 1942  |
| >TET2-P1894 PTRISLVFY   | 40    | >TET2-P1894 HTRISLVFY   | 4     | 36    |
| >TET2-P1894 PTRISLVFYQ  | 224   | >TET2-P1894 HTRISLVFYQ  | 8     | 216   |
| >TET2-P1894 PTRISLVFYQ† | 2939  | >TET2-P1894 HTRISLVFYQ† | 59    | 2880  |
| >TET2-P1894 PTRISLVFY   | 332   | >TET2-P1894 HTRISLVFY   | 97    | 235   |
| >TET2-P1894 PTRISLVFYQ† | 6985  | >TET2-P1894 HTRISLVFYQ† | 209   | 6776  |
| >TET2-P1894 PTRISLVFY   | 14666 | >TET2-P1894 HTRISLVFY   | 462   | 14204 |
| >TET2-P1894 PTRISLVFY   | 2227  | >TET2-P1894 HTRISLVFY   | 225   | 2002  |
| >TET2-P1894 PTRISLVF    | 1934  | >TET2-P1894 HTRISLVF    | 76    | 1858  |
| >TET2-P1894 PTRISLVFY   | 6906  | >TET2-P1894 HTRISLVFY   | 368   | 6538  |
| >TET2-P1894 PTRISLVF    | 520   | >TET2-P1894 HTRISLVF    | 41    | 479   |
| >TET2-P1894 PTRISLVFY   | 1522  | >TET2-P1894 HTRISLVFY   | 177   | 1345  |
| >TET2-P1894 PTRISLVF    | 11    | >TET2-P1894 HTRISLVF    | 2     | 9     |
| >TET2-P1894 PTRISLVFY   | 17    | >TET2-P1894 HTRISLVFY   | 3     | 14    |
| >TET2-P1894 PTRISLVFYQ  | 7920  | >TET2-P1894 HTRISLVFYQ  | 173   | 7747  |
| >TET2-P1894 PTRISLVFYQ† | 4748  | >TET2-P1894 HTRISLVFYQ† | 67    | 4681  |
| >TET2-P1894 PTRISLVF    | 11410 | >TET2-P1894 HTRISLVF    | 238   | 11172 |
| >TET2-P1894 PTRISLVFY   | 10183 | >TET2-P1894 HTRISLVFY   | 273   | 9910  |
| >TET2-P1894 PTRISLVF    | 599   | >TET2-P1894 HTRISLVF    | 51    | 548   |
| >TET2-P1894 PTRISLVFY   | 797   | >TET2-P1894 HTRISLVFY   | 35    | 762   |
| >TET2-P1894 PTRISLVFYQ† | 6153  | >TET2-P1894 HTRISLVFYQ† | 352   | 5801  |
| >TET2-P1894 HPTRISLVFY  | 980   | >TET2-P1894 HHTRISLVFY  | 361   | 619   |
| >TET2-P1894 HPTRISLVFY  | 167   | >TET2-P1894 HHTRISLVFY  | 65    | 102   |
| >TET2-P1894 HPTRISLV    | 361   | >TET2-P1894 HHTRISLV    | 28497 | 28136 |
| >TET2-P1894 HPTRISLVF   | 51    | >TET2-P1894 HHTRISLVF   | 23531 | 23480 |
| >TET2-P1894 HPTRISLVF   | 706   | >TET2-P1894 HHTRISLVF   | 68    | 638   |
| >TET2-P1894 HPTRISLVFY  | 3121  | >TET2-P1894 HHTRISLVFY  | 408   | 2713  |
| >TET2-P1894 HPTRISLVF   | 12    | >TET2-P1894 HHTRISLVF   | 1913  | 1901  |
| >TET2-P1894 HPTRISLVFY  | 198   | >TET2-P1894 HHTRISLVFY  | 30584 | 30386 |
| >TET2-P1894 HPTRISLVF   | 2082  | >TET2-P1894 HHTRISLVF   | 325   | 1757  |
| >TET2-P1894 HPTRISLVF   | 164   | >TET2-P1894 HHTRISLVF   | 13404 | 13240 |
| >TET2-P1894 HPTRISLVFY  | 432   | >TET2-P1894 HHTRISLVFY  | 20851 | 20419 |



|                         |       |                        |       |       |
|-------------------------|-------|------------------------|-------|-------|
| >TET2-P1894 HPTRISLV    | 201   | >TET2-P1894 HHTRISLV   | 20689 | 20488 |
| >TET2-P1894 HPTRISLVF   | 11    | >TET2-P1894 HHTRISLVF  | 702   | 691   |
| >TET2-P1894 HPTRISLVFY  | 12    | >TET2-P1894 HHTRISLVFY | 696   | 684   |
| >TET2-P1894 HPTRISLVF   | 62    | >TET2-P1894 HHTRISLVF  | 17394 | 17332 |
| >TET2-P1894 HPTRISLVFY  | 498   | >TET2-P1894 HHTRISLVFY | 24413 | 23915 |
| >TET2-P1894 HPTRISLVF   | 2671  | >TET2-P1894 HHTRISLVF  | 100   | 2571  |
| >TET2-P1894 NHPTRISLVF  | 428   | >TET2-P1894 NHHTRISLVF | 4860  | 4432  |
| >TET2-P1894 NHPTRISLVF  | 985   | >TET2-P1894 NHHTRISLVF | 99    | 886   |
| >TET2-P1894 NHPTRISL    | 2575  | >TET2-P1894 NHHTRISL   | 379   | 2196  |
| >TET2-P1894 NHPTRISL    | 187   | >TET2-P1894 NHHTRISL   | 20    | 167   |
| >TET2-P1894 NHPTRISLVF  | 2678  | >TET2-P1894 NHHTRISLVF | 237   | 2441  |
| >TET2-P1894 RNHPTRISL   | 18    | >TET2-P1894 RNHHTRISL  | 20    | 2     |
| >TET2-P1894 RNHPTRISLV  | 55    | >TET2-P1894 RNHHTRISLV | 58    | 3     |
| >TET2-P1894 RNHPTRISLVI | 129   | >TET2-P1894 RNHHTRISLV | 119   | 10    |
| >TET2-P1894 RNHPTRISL   | 328   | >TET2-P1894 RNHHTRISL  | 107   | 221   |
| >TET2-P1894 RNHPTRISLVI | 16    | >TET2-P1894 RNHHTRISLV | 11    | 5     |
| >TET2-P1894 RNHPTRISLVI | 430   | >TET2-P1894 RNHHTRISLV | 1674  | 1244  |
| >TET2-P1894 RNHPTRISL   | 438   | >TET2-P1894 RNHHTRISL  | 1377  | 939   |
| >TET2-P1894 NRNHPTRISL  | 423   | >TET2-P1894 NRNHHTRISL | 438   | 15    |
| >TET2-P1894 NRNHPTRISL  | 420   | >TET2-P1894 NRNHHTRISL | 374   | 46    |
| >TET2-P1894 NRNHPTRISL  | 91    | >TET2-P1894 NRNHHTRISL | 73    | 18    |
| >TET2-P1894 NRNHPTRISL' | 869   | >TET2-P1894 NRNHHTRISL | 324   | 545   |
| >TET2-P1894 NPNRNHPTR   | 928   | >TET2-P1894 NPNRNHHTR  | 341   | 587   |
| >TET2-P1894 NPNRNHPT    | 482   | >TET2-P1894 NPNRNHHT   | 6739  | 6257  |
| >TET2-P1894 KNPNRNHPT   | 1257  | >TET2-P1894 KNPNRNHHT  | 328   | 929   |
| >TET2-P1894 KNPNRNHPT   | 120   | >TET2-P1894 KNPNRNHHT  | 59    | 61    |
| >TET2-P1894 LKNPNRNHP   | 2120  | >TET2-P1894 LKNPNRNHH  | 379   | 1741  |
| >TET2-P1894 LKNPNRNHP'  | 249   | >TET2-P1894 LKNPNRNHH' | 272   | 23    |
| >TET2-P1937 GPDYVPQK    | 10412 | >TET2-P1937 GSDYVPQK   | 52    | 10360 |
| >TET2-P1937 KYGPDYVPQK  | 439   | >TET2-P1937 KYGSDYVPQK | 700   | 261   |
| >TET2-P1937 KYGPDYVPQK  | 41    | >TET2-P1937 KYGSDYVPQK | 64    | 23    |
| >TET2-P1937 KYGPDYVPQ   | 122   | >TET2-P1937 KYGSDYVPQ  | 117   | 5     |
| >TET2-P1937 KYGPDYVPQK  | 75    | >TET2-P1937 KYGSDYVPQK | 83    | 8     |
| >TET2-P1937 EKYGPDYVPC  | 499   | >TET2-P1937 EKYGSDYVPC | 229   | 270   |
| >TET2-P1937 EKYGPDYV    | 167   | >TET2-P1937 EKYGSDYV   | 250   | 83    |
| >TET2-P1937 CEKYGPDYV   | 1829  | >TET2-P1937 CEKYGSDYV  | 366   | 1463  |
| >TET2-P1937 CEKYGPDYV   | 329   | >TET2-P1937 CEKYGSDYV  | 184   | 145   |
| >TET2-P1937 CEKYGPDYV   | 136   | >TET2-P1937 CEKYGSDYV  | 102   | 34    |
| >TET2-P1937 EECEKYGPDY  | 187   | >TET2-P1937 EECEKYGSDY | 71    | 116   |
| >TET2-P1937 EECEKYGPDY  | 413   | >TET2-P1937 EECEKYGSDY | 138   | 275   |
| >TET2-P1937 EECEKYGPDY  | 926   | >TET2-P1937 EECEKYGSDY | 460   | 466   |
| >TET2-P1937 EECEKYGPDY  | 268   | >TET2-P1937 EECEKYGSDY | 125   | 143   |
| >TET2-P1937 EECEKYGPDY  | 129   | >TET2-P1937 EECEKYGSDY | 110   | 19    |

|                         |       |                         |       |       |
|-------------------------|-------|-------------------------|-------|-------|
| >TET2-P1937 EEECEKYGPD  | 185   | >TET2-P1937 EEECEKYGSD  | 231   | 46    |
| >TET2-P1941 PQQSHGKKV   | 5617  | >TET2-P1941 SQKSHGKKV   | 216   | 5401  |
| >TET2-P1941 PQQSHGKK    | 1322  | >TET2-P1941 SQKSHGKK    | 66    | 1256  |
| >TET2-P1941 PQQSHGKKVI  | 3284  | >TET2-P1941 SQKSHGKKVI  | 186   | 3098  |
| >TET2-P1941 PQQSHGKK    | 7434  | >TET2-P1941 SQKSHGKK    | 444   | 6990  |
| >TET2-P1941 PQQSHGKKVI  | 434   | >TET2-P1941 SQKSHGKKVI  | 22    | 412   |
| >TET2-P1941 PQQSHGKKV   | 999   | >TET2-P1941 SQKSHGKKV   | 90    | 909   |
| >TET2-P1941 VPQKSHGK    | 12753 | >TET2-P1941 VSQKSHGK    | 40    | 12713 |
| >TET2-P1941 VPQKSHGKK   | 18334 | >TET2-P1941 VSQKSHGKK   | 116   | 18218 |
| >TET2-P1941 VPQKSHGKK   | 17128 | >TET2-P1941 VSQKSHGKK   | 426   | 16702 |
| >TET2-P1941 VPQKSHGKK\  | 118   | >TET2-P1941 VSQKSHGKK\  | 18960 | 18842 |
| >TET2-P1941 VPQKSHGKK\  | 142   | >TET2-P1941 VSQKSHGKK\  | 26273 | 26131 |
| >TET2-P1941 YVPQKSHGKI  | 1667  | >TET2-P1941 YVSQKSHGKI  | 311   | 1356  |
| >TET2-P1941 YVPQKSHGKI  | 124   | >TET2-P1941 YVSQKSHGKI  | 45    | 79    |
| >TET2-P1941 YVPQKSHGKI  | 71    | >TET2-P1941 YVSQKSHGKI  | 83    | 12    |
| >TET2-P1941 YVPQKSHGKI  | 343   | >TET2-P1941 YVSQKSHGKI  | 267   | 76    |
| >TET2-P1941 YVPQKSHGKI  | 1185  | >TET2-P1941 YVSQKSHGKI  | 367   | 818   |
| >TET2-P1941 YVPQKSHGKI  | 13    | >TET2-P1941 YVSQKSHGKI  | 8     | 5     |
| >TET2-P1941 YVPQKSHGKI  | 1215  | >TET2-P1941 YVSQKSHGKI  | 411   | 804   |
| >TET2-P1941 YVPQKSHGK   | 1372  | >TET2-P1941 YVSQKSHGK   | 111   | 1261  |
| >TET2-P1941 YVPQKSHGKI  | 1125  | >TET2-P1941 YVSQKSHGKI  | 336   | 789   |
| >TET2-P1941 YVPQKSHGK   | 154   | >TET2-P1941 YVSQKSHGK   | 31    | 123   |
| >TET2-P1941 YVPQKSHGKI  | 1243  | >TET2-P1941 YVSQKSHGKI  | 442   | 801   |
| >TET2-P1941 KYGPDYVPQ   | 825   | >TET2-P1941 KYGPDYVVSQ  | 344   | 481   |
| >TET2-P1941 KYGPDYVPQI  | 439   | >TET2-P1941 KYGPDYVVSQI | 338   | 101   |
| >TET2-P1941 KYGPDYVPQI  | 41    | >TET2-P1941 KYGPDYVVSQI | 111   | 70    |
| >TET2-P1941 KYGPDYVPQ   | 122   | >TET2-P1941 KYGPDYVVSQ  | 387   | 265   |
| >TET2-P1941 KYGPDYVPQI  | 75    | >TET2-P1941 KYGPDYVVSQI | 101   | 26    |
| >TET2-P1941 EKYGPDYVPC  | 499   | >TET2-P1941 EKYGPDYVSC  | 291   | 208   |
| >TET2-P1962 PTYLRFIKSLA | 1047  | >TET2-P1962 LTYLRFIKSLA | 253   | 794   |
| >TET2-P1962 PTYLRFIKSL  | 5155  | >TET2-P1962 LTYLRFIKSL  | 444   | 4711  |
| >TET2-P1962 PTYLRFIKSL  | 4114  | >TET2-P1962 LTYLRFIKSL  | 281   | 3833  |
| >TET2-P1962 PTYLRFIK    | 253   | >TET2-P1962 LTYLRFIK    | 39    | 214   |
| >TET2-P1962 PTYLRFIK    | 59    | >TET2-P1962 LTYLRFIK    | 11    | 48    |
| >TET2-P1962 PTYLRFIK    | 382   | >TET2-P1962 LTYLRFIK    | 44    | 338   |
| >TET2-P1962 PTYLRFIK    | 956   | >TET2-P1962 LTYLRFIK    | 34    | 922   |
| >TET2-P1962 PTYLRFIK    | 1952  | >TET2-P1962 LTYLRFIK    | 439   | 1513  |
| >TET2-P1962 PTYLRFIK    | 525   | >TET2-P1962 LTYLRFIK    | 21    | 504   |
| >TET2-P1962 PTYLRFIKSL  | 4354  | >TET2-P1962 LTYLRFIKSL  | 454   | 3900  |
| >TET2-P1962 PTYLRFIKSL  | 714   | >TET2-P1962 LTYLRFIKSL  | 10    | 704   |
| >TET2-P1962 PTYLRFIKSL  | 1626  | >TET2-P1962 LTYLRFIKSL  | 185   | 1441  |
| >TET2-P1962 PTYLRFIKSL  | 739   | >TET2-P1962 LTYLRFIKSL  | 43    | 696   |
| >TET2-P1962 PTYLRFIKSLA | 4906  | >TET2-P1962 LTYLRFIKSLA | 122   | 4784  |

|                         |       |                         |       |       |
|-------------------------|-------|-------------------------|-------|-------|
| >TET2-P1962 PTYLRFIK    | 522   | >TET2-P1962 LTYLRFIK    | 206   | 316   |
| >TET2-P1962 PTYLRFIKSL  | 9935  | >TET2-P1962 LTYLRFIKSL  | 401   | 9534  |
| >TET2-P1962 EPTYLRFIKSL | 36173 | >TET2-P1962 ELTYLRFIKSL | 193   | 35980 |
| >TET2-P1962 EPTYLRFIK   | 2993  | >TET2-P1962 ELTYLRFIK   | 278   | 2715  |
| >TET2-P1962 EPTYLRFIK   | 54    | >TET2-P1962 ELTYLRFIK   | 11    | 43    |
| >TET2-P1962 EPTYLRFI    | 1472  | >TET2-P1962 ELTYLRFI    | 141   | 1331  |
| >TET2-P1962 EPTYLRFI    | 330   | >TET2-P1962 ELTYLRFI    | 28927 | 28597 |
| >TET2-P1962 EPTYLRFIKSL | 369   | >TET2-P1962 ELTYLRFIKSL | 26611 | 26242 |
| >TET2-P1962 EPAEPHETSEI | 16707 | >TET2-P1962 EPAEPHETSEI | 325   | 16382 |
| >TET2-P1962 EPAEPHETSEI | 6486  | >TET2-P1962 EPAEPHETSEI | 94    | 6392  |
| >TET2-P1962 EPAEPHETSEI | 18988 | >TET2-P1962 EPAEPHETSEI | 119   | 18869 |
| >TET2-P1962 EPAEPHETSEI | 2239  | >TET2-P1962 EPAEPHETSEI | 68    | 2171  |
| >TET2-P1962 SEPTYLRF    | 4142  | >TET2-P1962 SELTYLRF    | 484   | 3658  |
| >TET2-P1962 SEPTYLRFI   | 4     | >TET2-P1962 SELTYLRFI   | 3     | 1     |
| >TET2-P1962 SEPTYLRF    | 1717  | >TET2-P1962 SELTYLRF    | 119   | 1598  |
| >TET2-P1962 SEPTYLRF    | 1840  | >TET2-P1962 SELTYLRF    | 79    | 1761  |
| >TET2-P1962 SEPTYLRF    | 3791  | >TET2-P1962 SELTYLRF    | 299   | 3492  |
| >TET2-P1962 SEPTYLRFI   | 2955  | >TET2-P1962 SELTYLRFI   | 212   | 2743  |
| >TET2-P1962 SEPTYLRF    | 2336  | >TET2-P1962 SELTYLRF    | 258   | 2078  |
| >TET2-P1962 SEPTYLRFI   | 3991  | >TET2-P1962 SELTYLRFI   | 424   | 3567  |
| >TET2-P1962 SEPTYLRF    | 589   | >TET2-P1962 SELTYLRF    | 36    | 553   |
| >TET2-P1962 SEPTYLRFI   | 2669  | >TET2-P1962 SELTYLRFI   | 159   | 2510  |
| >TET2-P1962 SEPTYLRFI   | 8654  | >TET2-P1962 SELTYLRFI   | 187   | 8467  |
| >TET2-P1962 SEPTYLRFIKS | 7033  | >TET2-P1962 SELTYLRFIKS | 205   | 6828  |
| >TET2-P1962 SEPTYLRFI   | 14    | >TET2-P1962 SELTYLRFI   | 6     | 8     |
| >TET2-P1962 SEPTYLRFIKS | 2116  | >TET2-P1962 SELTYLRFIKS | 392   | 1724  |
| >TET2-P1962 TSEPTYLRFI  | 176   | >TET2-P1962 TSELTYLRFI  | 121   | 55    |
| >TET2-P1962 TSEPTYLR    | 316   | >TET2-P1962 TSELTYLR    | 419   | 103   |
| >TET2-P1962 TSEPTYLRFIK | 29    | >TET2-P1962 TSELTYLRFIK | 31    | 2     |
| >TET2-P1962 TSEPTYLRF   | 374   | >TET2-P1962 TSELTYLRF   | 1664  | 1290  |
| >TET2-P1962 TSEPTYLR    | 53    | >TET2-P1962 TSELTYLR    | 64    | 11    |
| >TET2-P1962 TSEPTYLR    | 38    | >TET2-P1962 TSELTYLR    | 31    | 7     |
| >TET2-P1962 TSEPTYLRFIK | 277   | >TET2-P1962 TSELTYLRFIK | 265   | 12    |
| >TET2-P1962 TSEPTYLRF   | 4     | >TET2-P1962 TSELTYLRF   | 11    | 7     |
| >TET2-P1962 TSEPTYLRF   | 436   | >TET2-P1962 TSELTYLRF   | 3797  | 3361  |
| >TET2-P1962 TSEPTYLRF   | 278   | >TET2-P1962 TSELTYLRF   | 913   | 635   |
| >TET2-P1962 TSEPTYLRFI  | 175   | >TET2-P1962 TSELTYLRFI  | 464   | 289   |
| >TET2-P1962 TSEPTYLRF   | 110   | >TET2-P1962 TSELTYLRF   | 244   | 134   |
| >TET2-P1962 TSEPTYLR    | 498   | >TET2-P1962 TSELTYLR    | 858   | 360   |
| >TET2-P1962 TSEPTYLRFIK | 349   | >TET2-P1962 TSELTYLRFIK | 671   | 322   |
| >TET2-P1962 TSEPTYLR    | 454   | >TET2-P1962 TSELTYLR    | 469   | 15    |
| >TET2-P1962 TSEPTYLRFI  | 209   | >TET2-P1962 TSELTYLRFI  | 158   | 51    |
| >TET2-P1962 ETSEPTYLRFI | 705   | >TET2-P1962 ETSELTYLRFI | 86    | 619   |

|                          |       |                          |      |       |
|--------------------------|-------|--------------------------|------|-------|
| >TET2-P1962 ETSEPTYLRF   | 463   | >TET2-P1962 ETSELTYLRF   | 543  | 80    |
| >TET2-P1962 ETSEPTYL     | 1201  | >TET2-P1962 ETSELTYL     | 158  | 1043  |
| >TET2-P1962 ETSEPTYLR    | 359   | >TET2-P1962 ETSELTYLR    | 315  | 44    |
| >TET2-P1962 ETSEPTYLRF   | 1085  | >TET2-P1962 ETSELTYLRF   | 455  | 630   |
| >TET2-P1962 ETSEPTYL     | 873   | >TET2-P1962 ETSELTYL     | 183  | 690   |
| >TET2-P1962 ETSEPTYLRF   | 105   | >TET2-P1962 ETSELTYLRF   | 86   | 19    |
| >TET2-P1962 ETSEPTYL     | 75    | >TET2-P1962 ETSELTYL     | 51   | 24    |
| >TET2-P1962 ETSEPTYLRF   | 22    | >TET2-P1962 ETSELTYLRF   | 47   | 25    |
| >TET2-P1962 ETSEPTYLRFI  | 44    | >TET2-P1962 ETSELTYLRFI  | 114  | 70    |
| >TET2-P1962 ETSEPTYL     | 255   | >TET2-P1962 ETSELTYL     | 548  | 293   |
| >TET2-P1962 ETSEPTYLRF   | 210   | >TET2-P1962 ETSELTYLRF   | 457  | 247   |
| >TET2-P1962 ETSEPTYLRFI  | 274   | >TET2-P1962 ETSELTYLRFI  | 543  | 269   |
| >TET2-P1962 ETSEPTYLR    | 230   | >TET2-P1962 ETSELTYLR    | 99   | 131   |
| >TET2-P1962 ETSEPTYLR    | 15    | >TET2-P1962 ETSELTYLR    | 10   | 5     |
| >TET2-P1962 ETSEPTYLR    | 2     | >TET2-P1962 ETSELTYLR    | 1    | 1     |
| >TET2-P1962 ETSEPTYL     | 8     | >TET2-P1962 ETSELTYL     | 7    | 1     |
| >TET2-P1962 ETSEPTYLR    | 176   | >TET2-P1962 ETSELTYLR    | 322  | 146   |
| >TET2-P1962 ETSEPTYLRFI  | 8     | >TET2-P1962 ETSELTYLRFI  | 8    | 0     |
| >TET2-P1962 ETSEPTYL     | 10    | >TET2-P1962 ETSELTYL     | 10   | 0     |
| >TET2-P1962 ETSEPTYLRFI  | 12    | >TET2-P1962 ETSELTYLRFI  | 14   | 2     |
| >TET2-P1962 ETSEPTYL     | 217   | >TET2-P1962 ETSELTYL     | 325  | 108   |
| >TET2-P1962 ETSEPTYLRF   | 8     | >TET2-P1962 ETSELTYLRF   | 12   | 4     |
| >TET2-P1962 ETSEPTYLRFI  | 310   | >TET2-P1962 ETSELTYLRFI  | 501  | 191   |
| >TET2-P1962 ETSEPTYLRF   | 351   | >TET2-P1962 ETSELTYLRF   | 175  | 176   |
| >TET2-P1962 ETSEPTYLR    | 795   | >TET2-P1962 ETSELTYLR    | 397  | 398   |
| >TET2-P1962 ETSEPTYLR    | 126   | >TET2-P1962 ETSELTYLR    | 43   | 83    |
| >TET2-P1962 ETSEPTYLRFI  | 146   | >TET2-P1962 ETSELTYLRFI  | 273  | 127   |
| >TET2-P1962 HETSEPTYL    | 1951  | >TET2-P1962 HETSELTYL    | 314  | 1637  |
| >TET2-P1962 HETSEPTYLRFI | 239   | >TET2-P1962 HETSELTYLRFI | 384  | 145   |
| >TET2-P1962 HETSEPTY     | 182   | >TET2-P1962 HETSELTY     | 98   | 84    |
| >TET2-P1962 HETSEPTYLRFI | 604   | >TET2-P1962 HETSELTYLRFI | 278  | 326   |
| >TET2-P1962 HETSEPTYL    | 66    | >TET2-P1962 HETSELTYL    | 25   | 41    |
| >TET2-P1962 HETSEPTYLRFI | 518   | >TET2-P1962 HETSELTYLRFI | 298  | 220   |
| >TET2-P1962 HETSEPTYL    | 331   | >TET2-P1962 HETSELTYL    | 145  | 186   |
| >TET2-P1962 HETSEPTY     | 276   | >TET2-P1962 HETSELTY     | 200  | 76    |
| >TET2-P1962 HETSEPTYLRFI | 130   | >TET2-P1962 HETSELTYLRFI | 133  | 3     |
| >TET2-P1962 HETSEPTYL    | 95    | >TET2-P1962 HETSELTYL    | 20   | 75    |
| >TET2-P1962 HETSEPTYLRFI | 543   | >TET2-P1962 HETSELTYLRFI | 176  | 367   |
| >TET2-P1962 HETSEPTYLR   | 49    | >TET2-P1962 HETSELTYLR   | 54   | 5     |
| >TET2-P1962 PHETSEPTY    | 1440  | >TET2-P1962 PHETSELTY    | 468  | 972   |
| >TET2-P1962 EPHETSEPTYI  | 200   | >TET2-P1962 EPHETSELTYL  | 180  | 20    |
| >TET2-P1962 EPHETSEPTY   | 485   | >TET2-P1962 EPHETSELTY   | 1703 | 1218  |
| >TET2-P1962 EPHETSEP     | 25413 | >TET2-P1962 EPHETSEL     | 421  | 24992 |

|                         |       |                         |       |       |
|-------------------------|-------|-------------------------|-------|-------|
| >TET2-P1962 EPHETSEP    | 4436  | >TET2-P1962 EPHETSEL    | 133   | 4303  |
| >TET2-P1962 EPHETSEPT   | 222   | >TET2-P1962 EPHETSELT   | 3512  | 3290  |
| >TET2-P1962 EPHETSEP    | 17644 | >TET2-P1962 EPHETSEL    | 275   | 17369 |
| >TET2-P1962 EPHETSEPTYI | 460   | >TET2-P1962 EPHETSELTYL | 389   | 71    |
| >TET2-P1962 EPHETSEPTY  | 53    | >TET2-P1962 EPHETSELTY  | 55    | 2     |
| >TET2-P1962 EPHETSEPTY  | 676   | >TET2-P1962 EPHETSELTY  | 381   | 295   |
| >TET2-P1962 AEPHETSEP   | 18182 | >TET2-P1962 AEPHETSEL   | 408   | 17774 |
| >TET2-P1962 AEPHETSEP   | 8419  | >TET2-P1962 AEPHETSEL   | 325   | 8094  |
| >TET2-P1962 AEPHETSEPT  | 631   | >TET2-P1962 AEPHETSELT  | 482   | 149   |
| >TET2-P1962 AEPHETSEP   | 4316  | >TET2-P1962 AEPHETSEL   | 40    | 4276  |
| >TET2-P399L PPPSQLLL    | 399   | >TET2-P399L LPPSQLLL    | 653   | 254   |
| >TET2-P399L PPPSQLLL    | 104   | >TET2-P399L LPPSQLLL    | 31    | 73    |
| >TET2-P399L PPPSQLLL    | 2367  | >TET2-P399L LPPSQLLL    | 336   | 2031  |
| >TET2-P399L PPPSQLLLSPF | 6431  | >TET2-P399L LPPSQLLLSPF | 452   | 5979  |
| >TET2-P399L PPPSQLLL    | 1427  | >TET2-P399L LPPSQLLL    | 128   | 1299  |
| >TET2-P399L PPPPSQLL    | 329   | >TET2-P399L PLPPSQLL    | 33641 | 33312 |
| >TET2-P399L PPPPSQLL    | 58    | >TET2-P399L PLPPSQLL    | 29427 | 29369 |
| >TET2-P399L PPPPSQLL    | 30909 | >TET2-P399L PLPPSQLL    | 29    | 30880 |
| >TET2-P399L PPPPSQLL    | 30857 | >TET2-P399L PLPPSQLL    | 30    | 30827 |
| >TET2-P399L PPPPSQLL    | 27    | >TET2-P399L PLPPSQLL    | 420   | 393   |
| >TET2-P399L PPPPSQLL    | 99    | >TET2-P399L PLPPSQLL    | 46    | 53    |
| >TET2-P399L KDSFSATTTPI | 12591 | >TET2-P399L KDSFSATTTPI | 464   | 12127 |
| >TET2-P399L TPPPPSQLL   | 386   | >TET2-P399L TPLPPSQLL   | 26257 | 25871 |
| >TET2-P399L TPPPPSQLLL  | 370   | >TET2-P399L TPLPPSQLLL  | 26573 | 26203 |
| >TET2-P399L TPPPPSQL    | 128   | >TET2-P399L TPLPPSQL    | 100   | 28    |
| >TET2-P399L TPPPPSQLLL  | 210   | >TET2-P399L TPLPPSQLLL  | 224   | 14    |
| >TET2-P399L TPPPPSQLL   | 7713  | >TET2-P399L TPLPPSQLL   | 496   | 7217  |
| >TET2-P399L TPPPPSQL    | 566   | >TET2-P399L TPLPPSQL    | 208   | 358   |
| >TET2-P399L TPPPPSQLL   | 1022  | >TET2-P399L TPLPPSQLL   | 406   | 616   |
| >TET2-P399L TPPPPSQL    | 3607  | >TET2-P399L TPLPPSQL    | 200   | 3407  |
| >TET2-P399L TPPPPSQLL   | 3692  | >TET2-P399L TPLPPSQLL   | 194   | 3498  |
| >TET2-P399L TPPPPSQLLL  | 3082  | >TET2-P399L TPLPPSQLLL  | 155   | 2927  |
| >TET2-P399L TPPPPSQLL   | 1139  | >TET2-P399L TPLPPSQLL   | 466   | 673   |
| >TET2-P399L TPPPPSQL    | 49    | >TET2-P399L TPLPPSQL    | 12401 | 12352 |
| >TET2-P399L TPPPPSQLL   | 7     | >TET2-P399L TPLPPSQLL   | 5338  | 5331  |
| >TET2-P399L TPPPPSQLLL  | 7     | >TET2-P399L TPLPPSQLLL  | 5321  | 5314  |
| >TET2-P399L TTPPPSQLL   | 19    | >TET2-P399L TTPLPPSQL   | 47    | 28    |
| >TET2-P399L TTPPPSQLL   | 205   | >TET2-P399L TTPLPPSQLL  | 246   | 41    |
| >TET2-P399L TTPPPSQLLL  | 30    | >TET2-P399L TTPLPPSQLLL | 69    | 39    |
| >TET2-P399L TTPPPSQLL   | 49    | >TET2-P399L TTPLPPSQL   | 329   | 280   |
| >TET2-P399L TTPPPSQLL   | 227   | >TET2-P399L TTPLPPSQLL  | 908   | 681   |
| >TET2-P399L TTPPPSQLLL  | 157   | >TET2-P399L TTPLPPSQLLL | 674   | 517   |
| >TET2-P399L TTPPPSQLL   | 2     | >TET2-P399L TTPLPPSQL   | 4     | 2     |

|                         |       |                         |     |       |
|-------------------------|-------|-------------------------|-----|-------|
| >TET2-P399L TTPPPPSQLL  | 2     | >TET2-P399L TTPLPPSPLL  | 2   | 0     |
| >TET2-P399L TTPPPPSQLLI | 2     | >TET2-P399L TTPLPPSPLLI | 2   | 0     |
| >TET2-P399L TTPPPPSQL   | 147   | >TET2-P399L TTPLPPSQL   | 373 | 226   |
| >TET2-P399L TTPPPPSQLL  | 379   | >TET2-P399L TTPLPPSQLL  | 166 | 213   |
| >TET2-P399L TTPPPPSQL   | 60    | >TET2-P399L TTPLPPSQL   | 488 | 428   |
| >TET2-P399L TTPPPPSQLL  | 428   | >TET2-P399L TTPLPPSQLL  | 294 | 134   |
| >TET2-P399L TTPPPPSQLLI | 138   | >TET2-P399L TTPLPPSPLLI | 951 | 813   |
| >TET2-P399L TTTPPPPSPLI | 35    | >TET2-P399L TTTPLPPSPLI | 46  | 11    |
| >TET2-P399L TTTPPPPSQL  | 143   | >TET2-P399L TTTPLPPSQL  | 361 | 218   |
| >TET2-P399L TTTPPPPSPLI | 181   | >TET2-P399L TTTPLPPSPLI | 369 | 188   |
| >TET2-P399L TTTPPPPSQL  | 7     | >TET2-P399L TTTPLPPSQL  | 12  | 5     |
| >TET2-P399L TTTPPPPSPLI | 19    | >TET2-P399L TTTPLPPSPLI | 26  | 7     |
| >TET2-P399L TTTPPPPSQL  | 26    | >TET2-P399L TTTPLPPSQL  | 41  | 15    |
| >TET2-P399L TTTPPPPSPLI | 7     | >TET2-P399L TTTPLPPSPLI | 8   | 1     |
| >TET2-P399L TTTPPPPSQL  | 61    | >TET2-P399L TTTPLPPSQL  | 38  | 23    |
| >TET2-P399L TTTPPPPSPLI | 72    | >TET2-P399L TTTPLPPSPLI | 71  | 1     |
| >TET2-P399L TTTPPPPSQL  | 298   | >TET2-P399L TTTPLPPSQL  | 245 | 53    |
| >TET2-P399L TTTPPPPSPLI | 144   | >TET2-P399L TTTPLPPSPLI | 263 | 119   |
| >TET2-P399L ATTTPPPPSQ  | 257   | >TET2-P399L ATTTPLPPSQ  | 83  | 174   |
| >TET2-P399L ATTTPPPPSQ  | 9     | >TET2-P399L ATTTPLPPSQ  | 9   | 0     |
| >TET2-P399L ATTTPPPPSQ  | 67    | >TET2-P399L ATTTPLPPSQ  | 55  | 12    |
| >TET2-P399L ATTTPPPPSQ  | 45    | >TET2-P399L ATTTPLPPSQ  | 33  | 12    |
| >TET2-P399L ATTTPPPPSQ  | 303   | >TET2-P399L ATTTPLPPSQ  | 334 | 31    |
| >TET2-P399L FSATTTTP    | 22196 | >TET2-P399L FSATTTPL    | 284 | 21912 |
| >TET2-P399L FSATTTTP    | 5778  | >TET2-P399L FSATTTPL    | 21  | 5757  |
| >TET2-P399L FSATTTTP    | 13277 | >TET2-P399L FSATTTPL    | 452 | 12825 |
| >TET2-P399L FSATTTTP    | 9973  | >TET2-P399L FSATTTPL    | 98  | 9875  |
| >TET2-P399L FSATTTTP    | 6761  | >TET2-P399L FSATTTPL    | 38  | 6723  |
| >TET2-P399L FSATTTTP    | 13277 | >TET2-P399L FSATTTPL    | 196 | 13081 |
| >TET2-P399L FSATTTTP    | 2797  | >TET2-P399L FSATTTPL    | 56  | 2741  |
| >TET2-P399L FSATTTTP    | 18520 | >TET2-P399L FSATTTPL    | 25  | 18495 |
| >TET2-P399L FSATTTTP    | 11810 | >TET2-P399L FSATTTPL    | 368 | 11442 |
| >TET2-P399L FSATTTTP    | 15341 | >TET2-P399L FSATTTPL    | 55  | 15286 |
| >TET2-P399L FSATTTTP    | 20387 | >TET2-P399L FSATTTPL    | 63  | 20324 |
| >TET2-P399L FSATTTTP    | 7826  | >TET2-P399L FSATTTPL    | 120 | 7706  |
| >TET2-P399L FSATTTTP    | 22714 | >TET2-P399L FSATTTPL    | 176 | 22538 |
| >TET2-P399L SFSATTTTP   | 2464  | >TET2-P399L SFSATTTPL   | 5   | 2459  |
| >TET2-P399L SFSATTTTP   | 12704 | >TET2-P399L SFSATTTPL   | 67  | 12637 |
| >TET2-P399L SFSATTTTP   | 1340  | >TET2-P399L SFSATTTPL   | 258 | 1082  |
| >TET2-P399L DSFSATTTTP  | 10043 | >TET2-P399L DSFSATTTPL  | 189 | 9854  |
| >TET2-P399L DSFSATTTTP  | 21102 | >TET2-P399L DSFSATTTPL  | 136 | 20966 |
| >TET2-P399L DSFSATTTTP  | 10364 | >TET2-P399L DSFSATTTPL  | 115 | 10249 |
| >TET2-P399L DSFSATTTTP  | 6139  | >TET2-P399L DSFSATTTPL  | 240 | 5899  |

|                         |       |                        |       |       |
|-------------------------|-------|------------------------|-------|-------|
| >TET2-P399L DSFSATTTTPP | 23200 | >TET2-P399L DSFSATTTPL | 190   | 23010 |
| >TET2-Q134\xNQIEYEHRA   | 48    | >TET2-Q134\xNRIEYEHRA  | 15076 | 15028 |
| >TET2-Q134\xNQIEYEHR    | 263   | >TET2-Q134\xNRIEYEHR   | 675   | 412   |
| >TET2-Q134\xNQIEYEHR    | 398   | >TET2-Q134\xNRIEYEHR   | 938   | 540   |
| >TET2-Q134\xKKLAPDAYNN  | 881   | >TET2-Q134\xKKLAPDAYNN | 198   | 683   |
| >TET2-Q134\xKKLAPDAYNN  | 7169  | >TET2-Q134\xKKLAPDAYNN | 61    | 7108  |
| >TET2-Q134\xYNNQIEYEHR  | 440   | >TET2-Q134\xYNNRIEYEHR | 1353  | 913   |
| >TET2-Q134\xAYNNQIEY    | 272   | >TET2-Q134\xAYNNRIEY   | 509   | 237   |
| >TET2-Q134\xAYNNQIEY    | 122   | >TET2-Q134\xAYNNRIEY   | 174   | 52    |
| >TET2-Q134\xAYNNQIEYEH  | 17    | >TET2-Q134\xAYNNRIEYEH | 15    | 2     |
| >TET2-Q134\xAYNNQIEYEH  | 644   | >TET2-Q134\xAYNNRIEYEH | 224   | 420   |
| >TET2-Q134\xAYNNQIEY    | 408   | >TET2-Q134\xAYNNRIEY   | 845   | 437   |
| >TET2-Q134\xAYNNQIEYEH  | 158   | >TET2-Q134\xAYNNRIEYEH | 169   | 11    |
| >TET2-Q134\xDAYNNQIEY   | 297   | >TET2-Q134\xDAYNNRIEY  | 522   | 225   |
| >TET2-Q134\xDAYNNQIEY   | 179   | >TET2-Q134\xDAYNNRIEY  | 113   | 66    |
| >TET2-Q134\xDAYNNQIEY   | 25    | >TET2-Q134\xDAYNNRIEY  | 43    | 18    |
| >TET2-Q134\xDAYNNQIEYE  | 374   | >TET2-Q134\xDAYNNRIEYE | 605   | 231   |
| >TET2-Q134\xPDAYNNQI    | 226   | >TET2-Q134\xPDAYNNRI   | 281   | 55    |
| >TET2-Q134\xAPDAYNNQI   | 276   | >TET2-Q134\xAPDAYNNRI  | 574   | 298   |
| >TET2-Q134\xAPDAYNNQIE  | 47    | >TET2-Q134\xAPDAYNNRIE | 61    | 14    |
| >TET2-Q134\xAPDAYNNQIE  | 367   | >TET2-Q134\xAPDAYNNRIE | 474   | 107   |
| >TET2-Q134\xAPDAYNNQIE  | 21    | >TET2-Q134\xAPDAYNNRIE | 26    | 5     |
| >TET2-Q134\xLAPDAYNNQ   | 16467 | >TET2-Q134\xLAPDAYNNR  | 140   | 16327 |
| >TET2-Q134\xLAPDAYNNQ   | 365   | >TET2-Q134\xLAPDAYNNR  | 1263  | 898   |
| >TET2-Q134\xLAPDAYNNQ   | 9     | >TET2-Q134\xLAPDAYNNRI | 10    | 1     |
| >TET2-Q134\xKLAPDAYNNC  | 36    | >TET2-Q134\xKLAPDAYNNF | 37    | 1     |
| >TET2-Q134\xKLAPDAYNNC  | 7     | >TET2-Q134\xKLAPDAYNNF | 8     | 1     |
| >TET2-Q134\xKLAPDAYNNC  | 15    | >TET2-Q134\xKLAPDAYNNF | 19    | 4     |
| >TET2-Q134\xKLAPDAYNNC  | 76    | >TET2-Q134\xKLAPDAYNNF | 116   | 40    |
| >TET2-Q134\xKLAPDAYNNC  | 22    | >TET2-Q134\xKLAPDAYNNF | 27    | 5     |
| >TET2-Q134\xKLAPDAYNNC  | 27    | >TET2-Q134\xKLAPDAYNNF | 28    | 1     |
| >TET2-Q134\xKLAPDAYNNC  | 34    | >TET2-Q134\xKLAPDAYNNF | 63    | 29    |
| >TET2-Q134\xKLAPDAYNNC  | 43    | >TET2-Q134\xKLAPDAYNNF | 88    | 45    |
| >TET2-Q134\xKLAPDAYNNC  | 207   | >TET2-Q134\xKLAPDAYNNF | 7579  | 7372  |
| >TET2-Q134\xKLAPDAYNNC  | 11    | >TET2-Q134\xKLAPDAYNNF | 12    | 1     |
| >TET2-Q134\xKLAPDAYNNC  | 24143 | >TET2-Q134\xKLAPDAYNNF | 208   | 23935 |
| >TET2-Q134\xKLAPDAYNNC  | 120   | >TET2-Q134\xKLAPDAYNNF | 245   | 125   |
| >TET2-Q134\xKLAPDAYNNC  | 6961  | >TET2-Q134\xKLAPDAYNNF | 86    | 6875  |
| >TET2-Q134\xKLAPDAYNNC  | 7504  | >TET2-Q134\xKLAPDAYNNF | 35    | 7469  |
| >TET2-Q548L QTRDLVPP    | 652   | >TET2-Q548L LTRDLVPP   | 432   | 220   |
| >TET2-Q548L QTRDLVPPT   | 73    | >TET2-Q548L LTRDLVPPT  | 48    | 25    |
| >TET2-Q548L QTRDLVPPTC  | 78    | >TET2-Q548L LTRDLVPPTQ | 51    | 27    |
| >TET2-Q548L QTRDLVPPT   | 639   | >TET2-Q548L LTRDLVPPT  | 271   | 368   |

|                         |       |                         |       |       |
|-------------------------|-------|-------------------------|-------|-------|
| >TET2-Q548L QTRDLVPPTC  | 138   | >TET2-Q548L LTRDLVPPTQ  | 52    | 86    |
| >TET2-Q548L QTRDLVPPTC  | 96    | >TET2-Q548L LTRDLVPPTQ  | 38    | 58    |
| >TET2-Q548L EQTRDLVPPT  | 31717 | >TET2-Q548L ELTRDLVPPT  | 475   | 31242 |
| >TET2-Q548L QEILKGRDKEI | 12369 | >TET2-Q548L QEILKGRDKEI | 403   | 11966 |
| >TET2-Q548L KEQTRDLVPP  | 269   | >TET2-Q548L KELTRDLVPP  | 95    | 174   |
| >TET2-Q548L KEQTRDLVPP  | 272   | >TET2-Q548L KELTRDLVPP  | 340   | 68    |
| >TET2-Q548L KEQTRDLVPP  | 167   | >TET2-Q548L KELTRDLVPP  | 62    | 105   |
| >TET2-Q548L RDKEQTRDL   | 1817  | >TET2-Q548L RDKELTRDL   | 415   | 1402  |
| >TET2-Q548L RDKEQTRDLV  | 235   | >TET2-Q548L RDKELTRDLV  | 306   | 71    |
| >TET2-Q548L GRDKQTRDI   | 301   | >TET2-Q548L GRDKELTRDL  | 244   | 57    |
| >TET2-Q548L KGRDKQTR    | 505   | >TET2-Q548L KGRDKELTR   | 227   | 278   |
| >TET2-Q548L KGRDKQTR    | 250   | >TET2-Q548L KGRDKELTR   | 481   | 231   |
| >TET2-Q548L KGRDKQTR    | 388   | >TET2-Q548L KGRDKELTR   | 133   | 255   |
| >TET2-Q548L ILKGRDKEQ   | 2670  | >TET2-Q548L ILKGRDKEL   | 22    | 2648  |
| >TET2-Q548L ILKGRDKEQT  | 150   | >TET2-Q548L ILKGRDKELTF | 205   | 55    |
| >TET2-Q548L ILKGRDKEQT  | 248   | >TET2-Q548L ILKGRDKELTF | 261   | 13    |
| >TET2-Q548L ILKGRDKEQ   | 9323  | >TET2-Q548L ILKGRDKEL   | 118   | 9205  |
| >TET2-Q548L ILKGRDKEQT  | 785   | >TET2-Q548L ILKGRDKELTF | 317   | 468   |
| >TET2-R1167 RFGQK GKAI  | 311   | >TET2-R1167 TFGQK GKAI  | 2786  | 2475  |
| >TET2-R1167 RFGQK GKAIR | 236   | >TET2-R1167 TFGQK GKAIR | 2225  | 1989  |
| >TET2-R1167 RFGQK GKAIR | 57    | >TET2-R1167 TFGQK GKAIR | 398   | 341   |
| >TET2-R1167 RFGQK GKAIR | 45    | >TET2-R1167 TFGQK GKAIR | 160   | 115   |
| >TET2-R1167 ERFQK GKAI  | 12719 | >TET2-R1167 ETFQK GKAI  | 487   | 12232 |
| >TET2-R1167 ERFQK GKAI  | 17596 | >TET2-R1167 ETFQK GKAI  | 252   | 17344 |
| >TET2-R1167 ERFQK GKAI  | 19852 | >TET2-R1167 ETFQK GKAI  | 346   | 19506 |
| >TET2-R1167 ERFQK GKAI  | 3963  | >TET2-R1167 ETFQK GKAI  | 50    | 3913  |
| >TET2-R1167 ERFQK GK    | 2404  | >TET2-R1167 ETFQK GK    | 6     | 2398  |
| >TET2-R1167 ERFQK GKAI  | 441   | >TET2-R1167 ETFQK GKAI  | 3     | 438   |
| >TET2-R1167 ERFQK GK    | 15348 | >TET2-R1167 ETFQK GK    | 33    | 15315 |
| >TET2-R1167 ERFQK GKAI  | 22372 | >TET2-R1167 ETFQK GKAI  | 251   | 22121 |
| >TET2-R1167 ERFQK GKAI  | 19464 | >TET2-R1167 ETFQK GKAI  | 269   | 19195 |
| >TET2-R1167 ERFQK GKAI  | 27555 | >TET2-R1167 ETFQK GKAI  | 297   | 27258 |
| >TET2-R1167 ERFQK GK    | 175   | >TET2-R1167 ETFQK GK    | 21462 | 21287 |
| >TET2-R1167 ERFQK GKAI  | 306   | >TET2-R1167 ETFQK GKAI  | 29353 | 29047 |
| >TET2-R1167 ERFQK GK    | 296   | >TET2-R1167 ETFQK GK    | 15063 | 14767 |
| >TET2-R1167 ERFQK GKAI  | 406   | >TET2-R1167 ETFQK GKAI  | 358   | 48    |
| >TET2-R1167 VAAIREIMEEI | 376   | >TET2-R1167 VAAIREIMEEI | 22363 | 21987 |
| >TET2-R1167 VAAIREIMEEI | 60    | >TET2-R1167 VAAIREIMEEI | 21833 | 21773 |
| >TET2-R1167 EERFGQK GK/ | 116   | >TET2-R1167 EETFQK GK/  | 49    | 67    |
| >TET2-R1167 EERFGQK GK/ | 325   | >TET2-R1167 EETFQK GK/  | 315   | 10    |
| >TET2-R1167 MEERFGQK G  | 71    | >TET2-R1167 MEETFQK G   | 85    | 14    |
| >TET2-R1167 IMEERFGQ    | 411   | >TET2-R1167 IMEETFQQ    | 230   | 181   |
| >TET2-R1167 IMEERFGQK   | 85    | >TET2-R1167 IMEETFQQK   | 172   | 87    |



|                        |       |                        |       |       |
|------------------------|-------|------------------------|-------|-------|
| >TET2-R1167IMEERFGQKC  | 355   | >TET2-R1167IMEETFGQKC  | 669   | 314   |
| >TET2-R1167IMEERFGQK   | 492   | >TET2-R1167IMEETFGQK   | 389   | 103   |
| >TET2-R1167EIMEERFGQK  | 538   | >TET2-R1167EIMEETFGQK  | 360   | 178   |
| >TET2-R1167EIMEERFGQK  | 629   | >TET2-R1167EIMEETFGQK  | 281   | 348   |
| >TET2-R1167EIMEERFGQ   | 350   | >TET2-R1167EIMEETFGQ   | 284   | 66    |
| >TET2-R1167EIMEERFGQK  | 361   | >TET2-R1167EIMEETFGQK  | 214   | 147   |
| >TET2-R1167EIMEERFGQ   | 225   | >TET2-R1167EIMEETFGQ   | 30    | 195   |
| >TET2-R1167REIMEERF    | 221   | >TET2-R1167REIMEETF    | 35    | 186   |
| >TET2-R1167REIMEERF    | 3840  | >TET2-R1167REIMEETF    | 494   | 3346  |
| >TET2-R1167REIMEERF    | 148   | >TET2-R1167REIMEETF    | 31    | 117   |
| >TET2-R1167REIMEERF    | 490   | >TET2-R1167REIMEETF    | 262   | 228   |
| >TET2-R1167REIMEERFGC  | 618   | >TET2-R1167REIMEETFGC  | 474   | 144   |
| >TET2-R1167REIMEERF    | 301   | >TET2-R1167REIMEETF    | 243   | 58    |
| >TET2-R1167REIMEERFGC  | 780   | >TET2-R1167REIMEETFGC  | 462   | 318   |
| >TET2-R1167AIREIMEERF  | 367   | >TET2-R1167AIREIMEETF  | 404   | 37    |
| >TET2-R1167AIREIMEER   | 43    | >TET2-R1167AIREIMEET   | 18922 | 18879 |
| >TET2-R1167AIREIMEERF  | 1625  | >TET2-R1167AIREIMEETF  | 164   | 1461  |
| >TET2-R1167AIREIMEER   | 444   | >TET2-R1167AIREIMEET   | 35179 | 34735 |
| >TET2-R1167AIREIMEER   | 396   | >TET2-R1167AIREIMEET   | 36981 | 36585 |
| >TET2-R1167AIREIMEERF  | 725   | >TET2-R1167AIREIMEETF  | 279   | 446   |
| >TET2-R1167AIREIMEERF  | 1283  | >TET2-R1167AIREIMEETF  | 332   | 951   |
| >TET2-R1167AIREIMEERF  | 148   | >TET2-R1167AIREIMEETF  | 102   | 46    |
| >TET2-R1167AAIREIMEERI | 255   | >TET2-R1167AAIREIMEETI | 284   | 29    |
| >TET2-R1167AAIREIMEER  | 491   | >TET2-R1167AAIREIMEET  | 33554 | 33063 |
| >TET2-R1167AAIREIMEER  | 77    | >TET2-R1167AAIREIMEET  | 35164 | 35087 |
| >TET2-R1167AAIREIMEERI | 254   | >TET2-R1167AAIREIMEETI | 55    | 199   |
| >TET2-R1167AAIREIMEERI | 32    | >TET2-R1167AAIREIMEETI | 24    | 8     |
| >TET2-R1167AAIREIMEERI | 224   | >TET2-R1167AAIREIMEETI | 124   | 100   |
| >TET2-R1167AAIREIMEER  | 445   | >TET2-R1167AAIREIMEET  | 7829  | 7384  |
| >TET2-R1214RERAGHTC    | 537   | >TET2-R1214WERAGHTC    | 70    | 467   |
| >TET2-R1214RERAGHTCE/  | 274   | >TET2-R1214WERAGHTCE   | 13322 | 13048 |
| >TET2-R1214RERAGHTC    | 3586  | >TET2-R1214WERAGHTC    | 93    | 3493  |
| >TET2-R1214RERAGHTCE/  | 6340  | >TET2-R1214WERAGHTCE   | 171   | 6169  |
| >TET2-R1214RERAGHTC    | 440   | >TET2-R1214WERAGHTC    | 384   | 56    |
| >TET2-R1214RERAGHTCE/  | 46    | >TET2-R1214WERAGHTCE   | 56    | 10    |
| >TET2-R1214RERAGHTC    | 425   | >TET2-R1214WERAGHTC    | 5981  | 5556  |
| >TET2-R1214RERAGHTCE/  | 14    | >TET2-R1214WERAGHTCE   | 128   | 114   |
| >TET2-R1214RERAGHTCE/  | 379   | >TET2-R1214WERAGHTCE   | 261   | 118   |
| >TET2-R1214VRERAGHTC   | 36857 | >TET2-R1214VWERAGHTC   | 499   | 36358 |
| >TET2-R1214SSEEKLLCLVR | 16206 | >TET2-R1214SSEEKLLCLVV | 15    | 16191 |
| >TET2-R1214SSEEKLLCLVR | 22559 | >TET2-R1214SSEEKLLCLVV | 395   | 22164 |
| >TET2-R1214LVRERAGHTC  | 10369 | >TET2-R1214LVWERAGHT   | 221   | 10148 |
| >TET2-R1214LVRERAGHTC  | 3054  | >TET2-R1214LVWERAGHT   | 342   | 2712  |

|                       |       |                       |       |       |
|-----------------------|-------|-----------------------|-------|-------|
| >TET2-R1214CLVRERAGHT | 356   | >TET2-R1214CLVWERAGH  | 103   | 253   |
| >TET2-R1214LLCLVRERA  | 797   | >TET2-R1214LLCLVWERA  | 57    | 740   |
| >TET2-R1214LLCLVRERA  | 166   | >TET2-R1214LLCLVWERA  | 177   | 11    |
| >TET2-R1214LLCLVRER   | 203   | >TET2-R1214LLCLVWER   | 84    | 119   |
| >TET2-R1214LLCLVRER   | 244   | >TET2-R1214LLCLVWER   | 55    | 189   |
| >TET2-R1214LLCLVRER   | 630   | >TET2-R1214LLCLVWER   | 358   | 272   |
| >TET2-R1214LLCLVRER   | 1667  | >TET2-R1214LLCLVWER   | 426   | 1241  |
| >TET2-R1214KLLCLVRERA | 352   | >TET2-R1214KLLCLVWERA | 252   | 100   |
| >TET2-R1214KLLCLVRERA | 222   | >TET2-R1214KLLCLVWERA | 238   | 16    |
| >TET2-R1214KLLCLVRERA | 614   | >TET2-R1214KLLCLVWERA | 471   | 143   |
| >TET2-R1214KLLCLVRER  | 3373  | >TET2-R1214KLLCLVWER  | 73    | 3300  |
| >TET2-R1214KLLCLVRERA | 19    | >TET2-R1214KLLCLVWERA | 4     | 15    |
| >TET2-R1214KLLCLVRERA | 2154  | >TET2-R1214KLLCLVWERA | 276   | 1878  |
| >TET2-R1214KLLCLVRER  | 8893  | >TET2-R1214KLLCLVWER  | 482   | 8411  |
| >TET2-R1214KLLCLVRERA | 170   | >TET2-R1214KLLCLVWERA | 37    | 133   |
| >TET2-R1214KLLCLVRERA | 141   | >TET2-R1214KLLCLVWERA | 19    | 122   |
| >TET2-R1214KLLCLVRERA | 1594  | >TET2-R1214KLLCLVWERA | 102   | 1492  |
| >TET2-R1214KLLCLVRERA | 300   | >TET2-R1214KLLCLVWERA | 70    | 230   |
| >TET2-R1214KLLCLVRER  | 6580  | >TET2-R1214KLLCLVWER  | 457   | 6123  |
| >TET2-R1214KLLCLVRER  | 41    | >TET2-R1214KLLCLVWER  | 14    | 27    |
| >TET2-R1214KLLCLVRER  | 38    | >TET2-R1214KLLCLVWER  | 13    | 25    |
| >TET2-R1214KLLCLVRERA | 17749 | >TET2-R1214KLLCLVWERA | 473   | 17276 |
| >TET2-R1214EKLLCLVRER | 1362  | >TET2-R1214EKLLCLVWER | 478   | 884   |
| >TET2-R1214EKLLCLVR   | 236   | >TET2-R1214EKLLCLVW   | 31805 | 31569 |
| >TET2-R1214EKLLCLVRER | 792   | >TET2-R1214EKLLCLVWER | 161   | 631   |
| >TET2-R1214EEKLLCLVR  | 13198 | >TET2-R1214EEKLLCLVW  | 412   | 12786 |
| >TET2-R1214EEKLLCLVR  | 2696  | >TET2-R1214EEKLLCLVW  | 489   | 2207  |
| >TET2-R1214EEKLLCLVR  | 8756  | >TET2-R1214EEKLLCLVW  | 208   | 8548  |
| >TET2-R1214EEKLLCLVR  | 5395  | >TET2-R1214EEKLLCLVW  | 98    | 5297  |
| >TET2-R1214SEEKLLCLVR | 6850  | >TET2-R1214SEEKLLCLVW | 258   | 6592  |
| >TET2-R1214SEEKLLCLVR | 9887  | >TET2-R1214SEEKLLCLVW | 19    | 9868  |
| >TET2-R1214SEEKLLCLVR | 5530  | >TET2-R1214SEEKLLCLVW | 23    | 5507  |
| >TET2-R1214SEEKLLCLVR | 557   | >TET2-R1214SEEKLLCLVW | 344   | 213   |
| >TET2-R1216RAGHTCEAA\ | 418   | >TET2-R1216QAGHTCEAA\ | 8868  | 8450  |
| >TET2-R1216RAGHTCEAA\ | 30    | >TET2-R1216QAGHTCEAA\ | 256   | 226   |
| >TET2-R1216ERAGHTCEA/ | 12781 | >TET2-R1216EQAGHTCEA/ | 373   | 12408 |
| >TET2-R1216ERAGHTCEA/ | 23533 | >TET2-R1216EQAGHTCEA/ | 469   | 23064 |
| >TET2-R1216ERAGHTCEA/ | 14798 | >TET2-R1216EQAGHTCEA/ | 98    | 14700 |
| >TET2-R1216ERAGHTCEA/ | 422   | >TET2-R1216EQAGHTCEA/ | 133   | 289   |
| >TET2-R1216ERAGHTCEA/ | 282   | >TET2-R1216EQAGHTCEA/ | 239   | 43    |
| >TET2-R1216RERAGHTCE/ | 274   | >TET2-R1216REQAGHTCE/ | 11772 | 11498 |
| >TET2-R1216RERAGHTC   | 631   | >TET2-R1216REQAGHTC   | 161   | 470   |
| >TET2-R1216RERAGHTC   | 440   | >TET2-R1216REQAGHTC   | 1058  | 618   |

|                        |      |                        |       |       |
|------------------------|------|------------------------|-------|-------|
| >TET2-R1216 RERAGHTCE/ | 46   | >TET2-R1216 REQAGHTCE/ | 83    | 37    |
| >TET2-R1216 RERAGHTC   | 425  | >TET2-R1216 REQAGHTC   | 120   | 305   |
| >TET2-R1216 RERAGHTCE  | 994  | >TET2-R1216 REQAGHTCE  | 300   | 694   |
| >TET2-R1216 RERAGHTCE/ | 934  | >TET2-R1216 REQAGHTCE/ | 149   | 785   |
| >TET2-R1216 RERAGHTCE/ | 14   | >TET2-R1216 REQAGHTCE/ | 8     | 6     |
| >TET2-R1216 RERAGHTCE/ | 379  | >TET2-R1216 REQAGHTCE/ | 799   | 420   |
| >TET2-R1216 CLVRERAGHT | 356  | >TET2-R1216 CLVREQAGHT | 249   | 107   |
| >TET2-R1216 LLCLVRERA  | 166  | >TET2-R1216 LLCLVREQA  | 136   | 30    |
| >TET2-R1216 LLCLVRER   | 203  | >TET2-R1216 LLCLVREQ   | 13676 | 13473 |
| >TET2-R1216 LLCLVRER   | 244  | >TET2-R1216 LLCLVREQ   | 21788 | 21544 |
| >TET2-R1216 KLLCLVRERA | 352  | >TET2-R1216 KLLCLVREQA | 325   | 27    |
| >TET2-R1216 KLLCLVRERA | 222  | >TET2-R1216 KLLCLVREQA | 268   | 46    |
| >TET2-R1216 KLLCLVRERA | 614  | >TET2-R1216 KLLCLVREQA | 370   | 244   |
| >TET2-R1216 KLLCLVRER  | 3373 | >TET2-R1216 KLLCLVREQ  | 345   | 3028  |
| >TET2-R1216 KLLCLVRERA | 19   | >TET2-R1216 KLLCLVREQA | 16    | 3     |
| >TET2-R1216 KLLCLVRERA | 170  | >TET2-R1216 KLLCLVREQA | 159   | 11    |
| >TET2-R1216 KLLCLVRERA | 141  | >TET2-R1216 KLLCLVREQA | 74    | 67    |
| >TET2-R1216 KLLCLVRERA | 300  | >TET2-R1216 KLLCLVREQA | 230   | 70    |
| >TET2-R1216 KLLCLVRER  | 41   | >TET2-R1216 KLLCLVREQ  | 7842  | 7801  |
| >TET2-R1216 KLLCLVRER  | 38   | >TET2-R1216 KLLCLVREQ  | 9877  | 9839  |
| >TET2-R1261 RRCALNEER  | 336  | >TET2-R1261 CRCALNEER  | 5161  | 4825  |
| >TET2-R1261 RRCALNEERT | 107  | >TET2-R1261 CRCALNEERT | 2095  | 1988  |
| >TET2-R1261 RRCALNEE   | 163  | >TET2-R1261 CRCALNEE   | 8031  | 7868  |
| >TET2-R1261 RRCALNEER  | 348  | >TET2-R1261 CRCALNEER  | 16548 | 16200 |
| >TET2-R1261 RRCALNEERT | 283  | >TET2-R1261 CRCALNEERT | 7448  | 7165  |
| >TET2-R1261 RRCALNEERT | 291  | >TET2-R1261 CRCALNEERT | 15489 | 15198 |
| >TET2-R1261 RRCALNEE   | 297  | >TET2-R1261 CRCALNEE   | 988   | 691   |
| >TET2-R1261 RRCALNEER  | 405  | >TET2-R1261 CRCALNEER  | 4852  | 4447  |
| >TET2-R1261 RRCALNEERT | 230  | >TET2-R1261 CRCALNEERT | 3095  | 2865  |
| >TET2-R1261 RRCALNEERT | 495  | >TET2-R1261 CRCALNEERT | 8517  | 8022  |
| >TET2-R1261 RRCALNEER  | 170  | >TET2-R1261 CRCALNEER  | 1034  | 864   |
| >TET2-R1261 TLRKYGTLTN | 417  | >TET2-R1261 TLRKYGTLTN | 20513 | 20096 |
| >TET2-R1261 TLRKYGTLTN | 26   | >TET2-R1261 TLRKYGTLTN | 20252 | 20226 |
| >TET2-R1261 TLRKYGTLTN | 148  | >TET2-R1261 TLRKYGTLTN | 34098 | 33950 |
| >TET2-R1261 TNRRCALNEE | 1879 | >TET2-R1261 TNRCALNEE  | 386   | 1493  |
| >TET2-R1261 LTNRRCAL   | 282  | >TET2-R1261 LTNRCAL    | 860   | 578   |
| >TET2-R1261 LTNRRCAL   | 106  | >TET2-R1261 LTNRCAL    | 79    | 27    |
| >TET2-R1261 TLTNRRCAL  | 832  | >TET2-R1261 TLTNRCAL   | 193   | 639   |
| >TET2-R1261 TLTNRRCA   | 358  | >TET2-R1261 TLTNRCRA   | 346   | 12    |
| >TET2-R1261 TLTNRRCAL  | 8    | >TET2-R1261 TLTNRCAL   | 8     | 0     |
| >TET2-R1261 TLTNRRCAL  | 31   | >TET2-R1261 TLTNRCAL   | 1607  | 1576  |
| >TET2-R1261 GTLTNRRCAL | 272  | >TET2-R1261 GTLTNRCAL  | 281   | 9     |
| >TET2-R1261 YGTLTNRR   | 359  | >TET2-R1261 YGTLTNCR   | 238   | 121   |

|                        |      |                         |       |       |
|------------------------|------|-------------------------|-------|-------|
| >TET2-R1261 KYGTLTNR   | 16   | >TET2-R1261 KYGTLTNC    | 15982 | 15966 |
| >TET2-R1261 KYGTLNRR   | 30   | >TET2-R1261 KYGTLNCR    | 25    | 5     |
| >TET2-R1261 KYGTLTNR   | 10   | >TET2-R1261 KYGTLTNC    | 8165  | 8155  |
| >TET2-R1261 KYGTLNRR   | 9    | >TET2-R1261 KYGTLNCR    | 11    | 2     |
| >TET2-R1261 RKYGTLTNR  | 368  | >TET2-R1261 RKYGTLTNC   | 22420 | 22052 |
| >TET2-R1261 RKYGTLNRR  | 79   | >TET2-R1261 RKYGTLNCR   | 52    | 27    |
| >TET2-R1261 RKYGTLTNR  | 38   | >TET2-R1261 RKYGTLTNC   | 406   | 368   |
| >TET2-R1261 RKYGTLNRR  | 190  | >TET2-R1261 RKYGTLNCR   | 60    | 130   |
| >TET2-R1261 RKYGTLTNR  | 243  | >TET2-R1261 RKYGTLTNC   | 5816  | 5573  |
| >TET2-R1261 RKYGTLNRR  | 345  | >TET2-R1261 RKYGTLNCR   | 306   | 39    |
| >TET2-R1261 RKYGTLTNR  | 133  | >TET2-R1261 RKYGTLTNC   | 34638 | 34505 |
| >TET2-R1261 RKYGTLNRR  | 87   | >TET2-R1261 RKYGTLNCR   | 158   | 71    |
| >TET2-R1261 LRKYGTLTNR | 198  | >TET2-R1261 LRKYGTLTNC  | 3043  | 2845  |
| >TET2-R1261 RRCALNEER  | 336  | >TET2-R1261 GRCALNEER   | 2496  | 2160  |
| >TET2-R1261 RRCALNEERT | 107  | >TET2-R1261 GRCALNEERT  | 1075  | 968   |
| >TET2-R1261 RRCALNEE   | 163  | >TET2-R1261 GRCALNEE    | 13010 | 12847 |
| >TET2-R1261 RRCALNEER  | 348  | >TET2-R1261 GRCALNEER   | 5993  | 5645  |
| >TET2-R1261 RRCALNEERT | 283  | >TET2-R1261 GRCALNEERT  | 7842  | 7559  |
| >TET2-R1261 RRCALNEERT | 291  | >TET2-R1261 GRCALNEERT  | 5224  | 4933  |
| >TET2-R1261 RRCALNEE   | 297  | >TET2-R1261 GRCALNEE    | 6077  | 5780  |
| >TET2-R1261 RRCALNEER  | 405  | >TET2-R1261 GRCALNEER   | 1209  | 804   |
| >TET2-R1261 RRCALNEERT | 230  | >TET2-R1261 GRCALNEERT  | 3684  | 3454  |
| >TET2-R1261 RRCALNEERT | 495  | >TET2-R1261 GRCALNEERT  | 2333  | 1838  |
| >TET2-R1261 RRCALNEER  | 170  | >TET2-R1261 GRCALNEER   | 5680  | 5510  |
| >TET2-R1261 TLRKYGTLNR | 417  | >TET2-R1261 TLRKYGTLNCR | 19768 | 19351 |
| >TET2-R1261 TLRKYGTLNR | 26   | >TET2-R1261 TLRKYGTLNCR | 19384 | 19358 |
| >TET2-R1261 TLRKYGTLNR | 148  | >TET2-R1261 TLRKYGTLNCR | 32411 | 32263 |
| >TET2-R1261 LTNRRCAL   | 282  | >TET2-R1261 LTNGRCAL    | 3708  | 3426  |
| >TET2-R1261 LTNRRCAL   | 106  | >TET2-R1261 LTNGRCAL    | 33    | 73    |
| >TET2-R1261 TLTNRRCAL  | 1180 | >TET2-R1261 TLTNGRCAL   | 483   | 697   |
| >TET2-R1261 TLTNRRCAL  | 982  | >TET2-R1261 TLTNGRCAL   | 229   | 753   |
| >TET2-R1261 TLTNRRCAL  | 358  | >TET2-R1261 TLTNGRCA    | 232   | 126   |
| >TET2-R1261 TLTNRRCAL  | 8    | >TET2-R1261 TLTNGRCAL   | 4     | 4     |
| >TET2-R1261 TLTNRRCAL  | 31   | >TET2-R1261 TLTNGRCAL   | 3202  | 3171  |
| >TET2-R1261 GTLTNRRCAL | 272  | >TET2-R1261 GTLTNGRCAL  | 114   | 158   |
| >TET2-R1261 YGTLNRR    | 359  | >TET2-R1261 YGTLTNGR    | 306   | 53    |
| >TET2-R1261 KYGTLTNR   | 16   | >TET2-R1261 KYGTLTNG    | 15026 | 15010 |
| >TET2-R1261 KYGTLNRR   | 30   | >TET2-R1261 KYGTLTNGR   | 54    | 24    |
| >TET2-R1261 KYGTLTNR   | 10   | >TET2-R1261 KYGTLTNG    | 5160  | 5150  |
| >TET2-R1261 KYGTLNRR   | 9    | >TET2-R1261 KYGTLTNGR   | 10    | 1     |
| >TET2-R1261 RKYGTLTNR  | 368  | >TET2-R1261 RKYGTLTNG   | 22068 | 21700 |
| >TET2-R1261 RKYGTLNRR  | 79   | >TET2-R1261 RKYGTLTNGR  | 78    | 1     |
| >TET2-R1261 RKYGTLNR   | 38   | >TET2-R1261 RKYGTLTNG   | 1387  | 1349  |

|                        |       |                        |       |       |
|------------------------|-------|------------------------|-------|-------|
| >TET2-R1261 RKYGTLNRR  | 190   | >TET2-R1261 RKYGTLNNGF | 124   | 66    |
| >TET2-R1261 RKYGTLNRR  | 243   | >TET2-R1261 RKYGTLNNG  | 5757  | 5514  |
| >TET2-R1261 RKYGTLNRR  | 345   | >TET2-R1261 RKYGTLNNGF | 549   | 204   |
| >TET2-R1261 RKYGTLNRR  | 133   | >TET2-R1261 RKYGTLNNG  | 32826 | 32693 |
| >TET2-R1261 RKYGTLNRR  | 87    | >TET2-R1261 RKYGTLNNGF | 81    | 6     |
| >TET2-R1261 LRKYGTLNRR | 198   | >TET2-R1261 LRKYGTLNNG | 4383  | 4185  |
| >TET2-R1261 RRCALNEER  | 336   | >TET2-R1261 LRCALNEER  | 2430  | 2094  |
| >TET2-R1261 RRCALNEERT | 107   | >TET2-R1261 LRCALNEERT | 3186  | 3079  |
| >TET2-R1261 RRCALNEE   | 163   | >TET2-R1261 LRCALNEE   | 13316 | 13153 |
| >TET2-R1261 RRCALNEER  | 348   | >TET2-R1261 LRCALNEER  | 12045 | 11697 |
| >TET2-R1261 RRCALNEERT | 283   | >TET2-R1261 LRCALNEERT | 13029 | 12746 |
| >TET2-R1261 RRCALNEERT | 291   | >TET2-R1261 LRCALNEERT | 10964 | 10673 |
| >TET2-R1261 RRCALNEE   | 297   | >TET2-R1261 LRCALNEE   | 4098  | 3801  |
| >TET2-R1261 RRCALNEER  | 405   | >TET2-R1261 LRCALNEER  | 5514  | 5109  |
| >TET2-R1261 RRCALNEERT | 230   | >TET2-R1261 LRCALNEERT | 4523  | 4293  |
| >TET2-R1261 RRCALNEERT | 495   | >TET2-R1261 LRCALNEERT | 8972  | 8477  |
| >TET2-R1261 RRCALNEER  | 170   | >TET2-R1261 LRCALNEER  | 1912  | 1742  |
| >TET2-R1261 NRRCALNEEF | 5686  | >TET2-R1261 NLRCALNEER | 322   | 5364  |
| >TET2-R1261 TLRKYGTLNR | 18192 | >TET2-R1261 TLRKYGTLNR | 97    | 18095 |
| >TET2-R1261 TLRKYGTLNR | 14197 | >TET2-R1261 TLRKYGTLNR | 38    | 14159 |
| >TET2-R1261 TLRKYGTLNR | 16078 | >TET2-R1261 TLRKYGTLNR | 29    | 16049 |
| >TET2-R1261 TLRKYGTLNR | 417   | >TET2-R1261 TLRKYGTLNR | 15130 | 14713 |
| >TET2-R1261 TLRKYGTLNR | 26    | >TET2-R1261 TLRKYGTLNR | 12327 | 12301 |
| >TET2-R1261 TLRKYGTLNR | 148   | >TET2-R1261 TLRKYGTLNR | 21686 | 21538 |
| >TET2-R1261 LTNRRCAL   | 282   | >TET2-R1261 LTNLRCAL   | 1300  | 1018  |
| >TET2-R1261 LTNRRCAL   | 106   | >TET2-R1261 LTNLRCAL   | 52    | 54    |
| >TET2-R1261 TLNRRCAL   | 832   | >TET2-R1261 TLNLRCAL   | 229   | 603   |
| >TET2-R1261 TLNRRCAL   | 982   | >TET2-R1261 TLNLRCAL   | 284   | 698   |
| >TET2-R1261 TLNRRCA    | 358   | >TET2-R1261 TLNLRCA    | 277   | 81    |
| >TET2-R1261 TLNRRCAL   | 8     | >TET2-R1261 TLNLRCAL   | 7     | 1     |
| >TET2-R1261 TLNRRCAL   | 31    | >TET2-R1261 TLNLRCAL   | 727   | 696   |
| >TET2-R1261 GTLTNRRCAL | 272   | >TET2-R1261 GTLTNLRCAL | 177   | 95    |
| >TET2-R1261 YGTLNRR    | 359   | >TET2-R1261 YGTLNLR    | 142   | 217   |
| >TET2-R1261 YGTLNRR    | 993   | >TET2-R1261 YGTLNLR    | 387   | 606   |
| >TET2-R1261 KYGTLNRR   | 14428 | >TET2-R1261 KYGTLNL    | 15    | 14413 |
| >TET2-R1261 KYGTLNRR   | 8119  | >TET2-R1261 KYGTLNL    | 474   | 7645  |
| >TET2-R1261 KYGTLNRR   | 3297  | >TET2-R1261 KYGTLNL    | 19    | 3278  |
| >TET2-R1261 KYGTLNRR   | 16    | >TET2-R1261 KYGTLNL    | 6219  | 6203  |
| >TET2-R1261 KYGTLNRR   | 30    | >TET2-R1261 KYGTLNLR   | 18    | 12    |
| >TET2-R1261 KYGTLNRR   | 10    | >TET2-R1261 KYGTLNL    | 2310  | 2300  |
| >TET2-R1261 KYGTLNRR   | 9     | >TET2-R1261 KYGTLNLR   | 9     | 0     |
| >TET2-R1261 RKYGTLNRR  | 368   | >TET2-R1261 RKYGTLNL   | 18732 | 18364 |
| >TET2-R1261 RKYGTLNRR  | 79    | >TET2-R1261 RKYGTLNLR  | 58    | 21    |

|                        |       |                        |       |       |
|------------------------|-------|------------------------|-------|-------|
| >TET2-R1261 RKYGTLTNR  | 38    | >TET2-R1261 RKYGTLTNL  | 9     | 29    |
| >TET2-R1261 RKYGTLNRR  | 190   | >TET2-R1261 RKYGTLNLR  | 138   | 52    |
| >TET2-R1261 RKYGTLTNR  | 243   | >TET2-R1261 RKYGTLTNL  | 220   | 23    |
| >TET2-R1261 RKYGTLNRR  | 345   | >TET2-R1261 RKYGTLNLR  | 302   | 43    |
| >TET2-R1261 RKYGTLTNR  | 15352 | >TET2-R1261 RKYGTLTNL  | 138   | 15214 |
| >TET2-R1261 RKYGTLTNR  | 3907  | >TET2-R1261 RKYGTLTNL  | 223   | 3684  |
| >TET2-R1261 RKYGTLTNR  | 7276  | >TET2-R1261 RKYGTLTNL  | 401   | 6875  |
| >TET2-R1261 RKYGTLTNR  | 133   | >TET2-R1261 RKYGTLTNL  | 28954 | 28821 |
| >TET2-R1261 RKYGTLNRR  | 87    | >TET2-R1261 RKYGTLNLR  | 58    | 29    |
| >TET2-R1261 LRKYGTLTNR | 1293  | >TET2-R1261 LRKYGTLTNL | 147   | 1146  |
| >TET2-R1261 LRKYGTLTNR | 198   | >TET2-R1261 LRKYGTLTNL | 59    | 139   |
| >TET2-R1261 LRKYGTLTNR | 743   | >TET2-R1261 LRKYGTLTNL | 99    | 644   |
| >TET2-R1302 RSKIPRKF   | 138   | >TET2-R1302 GSKIPRKF   | 1149  | 1011  |
| >TET2-R1302 RSKIPRKF   | 170   | >TET2-R1302 GSKIPRKF   | 276   | 106   |
| >TET2-R1302 RSKIPRKF   | 3     | >TET2-R1302 GSKIPRKF   | 7     | 4     |
| >TET2-R1302 RSKIPRKF   | 27    | >TET2-R1302 GSKIPRKF   | 1887  | 1860  |
| >TET2-R1302 RSKIPRKF   | 16    | >TET2-R1302 GSKIPRKF   | 1093  | 1077  |
| >TET2-R1302 RSKIPRKF   | 23    | >TET2-R1302 GSKIPRKF   | 189   | 166   |
| >TET2-R1302 RSKIPRKF   | 44    | >TET2-R1302 GSKIPRKF   | 969   | 925   |
| >TET2-R1302 RSKIPRKF   | 3     | >TET2-R1302 GSKIPRKF   | 16    | 13    |
| >TET2-R1302 RSKIPRKF   | 6     | >TET2-R1302 GSKIPRKF   | 92    | 86    |
| >TET2-R1302 RSKIPRKF   | 12    | >TET2-R1302 GSKIPRKF   | 459   | 447   |
| >TET2-R1302 RSKIPRKF   | 96    | >TET2-R1302 GSKIPRKF   | 2212  | 2116  |
| >TET2-R1302 RSKIPRKF   | 451   | >TET2-R1302 GSKIPRKF   | 1327  | 876   |
| >TET2-R1302 RSKIPRKF   | 53    | >TET2-R1302 GSKIPRKF   | 1608  | 1555  |
| >TET2-R1302 RSKIPRKF   | 152   | >TET2-R1302 GSKIPRKF   | 1012  | 860   |
| >TET2-R1302 RSKIPRKF   | 166   | >TET2-R1302 GSKIPRKF   | 220   | 54    |
| >TET2-R1302 RSKIPRKF   | 469   | >TET2-R1302 GSKIPRKF   | 4092  | 3623  |
| >TET2-R1302 ARSKIPRKF  | 2320  | >TET2-R1302 AGSKIPRKF  | 460   | 1860  |
| >TET2-R1302 ARSKIPRKF  | 72    | >TET2-R1302 AGSKIPRKF  | 2436  | 2364  |
| >TET2-R1302 ARSKIPRKF  | 112   | >TET2-R1302 AGSKIPRKF  | 22018 | 21906 |
| >TET2-R1302 ARSKIPRKF  | 94    | >TET2-R1302 AGSKIPRKF  | 19863 | 19769 |
| >TET2-R1302 ARSKIPRKF  | 64    | >TET2-R1302 AGSKIPRKF  | 21228 | 21164 |
| >TET2-R1302 ARSKIPRKF  | 230   | >TET2-R1302 AGSKIPRKF  | 24670 | 24440 |
| >TET2-R1302 ARSKIPRKF  | 76    | >TET2-R1302 AGSKIPRKF  | 23705 | 23629 |
| >TET2-R1302 ARSKIPRKF  | 42    | >TET2-R1302 AGSKIPRKF  | 19994 | 19952 |
| >TET2-R1302 SMYYNGCKF, | 1780  | >TET2-R1302 SMYYNGCKF, | 356   | 1424  |
| >TET2-R1302 SMYYNGCKF, | 130   | >TET2-R1302 SMYYNGCKF, | 17204 | 17074 |
| >TET2-R1302 SMYYNGCKF, | 62    | >TET2-R1302 SMYYNGCKF, | 17048 | 16986 |
| >TET2-R1302 SMYYNGCKF, | 8     | >TET2-R1302 SMYYNGCKF, | 6218  | 6210  |
| >TET2-R1302 SMYYNGCKF, | 217   | >TET2-R1302 SMYYNGCKF, | 23275 | 23058 |
| >TET2-R1302 SMYYNGCKF, | 35    | >TET2-R1302 SMYYNGCKF, | 27802 | 27767 |
| >TET2-R1302 SMYYNGCKF, | 199   | >TET2-R1302 SMYYNGCKF, | 2200  | 2001  |

|                        |      |                        |       |       |
|------------------------|------|------------------------|-------|-------|
| >TET2-R1302SMYYNGCKF,  | 54   | >TET2-R1302SMYYNGCKF,  | 27141 | 27087 |
| >TET2-R1302FARSKIPRK   | 49   | >TET2-R1302FAGSKIPRK   | 10204 | 10155 |
| >TET2-R1302FARSKIPRKF  | 20   | >TET2-R1302FAGSKIPRKF  | 7149  | 7129  |
| >TET2-R1302FARSKIPR    | 67   | >TET2-R1302FAGSKIPR    | 439   | 372   |
| >TET2-R1302FARSKIPR    | 79   | >TET2-R1302FAGSKIPR    | 583   | 504   |
| >TET2-R1302FARSKIPR    | 163  | >TET2-R1302FAGSKIPR    | 125   | 38    |
| >TET2-R1302FARSKIPRK   | 680  | >TET2-R1302FAGSKIPRK   | 412   | 268   |
| >TET2-R1302FARSKIPRKF  | 324  | >TET2-R1302FAGSKIPRKF  | 206   | 118   |
| >TET2-R1302FARSKIPRKF  | 36   | >TET2-R1302FAGSKIPRKF  | 593   | 557   |
| >TET2-R1302FARSKIPRKF  | 13   | >TET2-R1302FAGSKIPRKF  | 238   | 225   |
| >TET2-R1302FARSKIPRKF  | 200  | >TET2-R1302FAGSKIPRKF  | 593   | 393   |
| >TET2-R1302FARSKIPR    | 1198 | >TET2-R1302FAGSKIPR    | 407   | 791   |
| >TET2-R1302KFARSKIPRKF | 163  | >TET2-R1302KFAGSKIPRKF | 217   | 54    |
| >TET2-R1302KFARSKIPRKF | 231  | >TET2-R1302KFAGSKIPRKF | 379   | 148   |
| >TET2-R1302KFARSKIPRKF | 103  | >TET2-R1302KFAGSKIPRKF | 106   | 3     |
| >TET2-R1302KFARSKIPR   | 367  | >TET2-R1302KFAGSKIPR   | 1668  | 1301  |
| >TET2-R1302KFARSKIPRK  | 19   | >TET2-R1302KFAGSKIPRK  | 47    | 28    |
| >TET2-R1302KFARSKIPR   | 6    | >TET2-R1302KFAGSKIPR   | 9     | 3     |
| >TET2-R1302KFARSKIPRK  | 226  | >TET2-R1302KFAGSKIPRK  | 187   | 39    |
| >TET2-R1302KFARSKIPR   | 15   | >TET2-R1302KFAGSKIPR   | 11    | 4     |
| >TET2-R1302KFARSKIPRK  | 383  | >TET2-R1302KFAGSKIPRK  | 243   | 140   |
| >TET2-R1302CKFARSKIPR  | 196  | >TET2-R1302CKFAGSKIPR  | 569   | 373   |
| >TET2-R1302CKFARSKI    | 59   | >TET2-R1302CKFAGSKI    | 33    | 26    |
| >TET2-R1302CKFARSKIPR  | 125  | >TET2-R1302CKFAGSKIPR  | 116   | 9     |
| >TET2-R1302CKFARSKIPR  | 73   | >TET2-R1302CKFAGSKIPR  | 104   | 31    |
| >TET2-R1302CKFARSKI    | 94   | >TET2-R1302CKFAGSKI    | 57    | 37    |
| >TET2-R1302GCKFARSK    | 46   | >TET2-R1302GCKFAGSK    | 106   | 60    |
| >TET2-R1302GCKFARSKIPI | 107  | >TET2-R1302GCKFAGSKIPI | 355   | 248   |
| >TET2-R1302GCKFARSKI   | 261  | >TET2-R1302GCKFAGSKI   | 133   | 128   |
| >TET2-R1302YNGCKFAR    | 182  | >TET2-R1302YNGCKFAG    | 34315 | 34133 |
| >TET2-R1302YYNGCKFAR   | 9    | >TET2-R1302YYNGCKFAG   | 11527 | 11518 |
| >TET2-R1302YYNGCKFAR   | 18   | >TET2-R1302YYNGCKFAG   | 12633 | 12615 |
| >TET2-R1302YYNGCKFAR   | 194  | >TET2-R1302YYNGCKFAG   | 36385 | 36191 |
| >TET2-R1302YYNGCKFAR   | 16   | >TET2-R1302YYNGCKFAG   | 17529 | 17513 |
| >TET2-R1302YYNGCKFARS  | 311  | >TET2-R1302YYNGCKFAGS  | 305   | 6     |
| >TET2-R1302MYYNGCKFA   | 8    | >TET2-R1302MYYNGCKFA   | 7099  | 7091  |
| >TET2-R1302MYYNGCKFA   | 28   | >TET2-R1302MYYNGCKFA   | 8359  | 8331  |
| >TET2-R1302MYYNGCKFA   | 209  | >TET2-R1302MYYNGCKFA   | 37134 | 36925 |
| >TET2-R1302MYYNGCKFA   | 296  | >TET2-R1302MYYNGCKFA   | 29165 | 28869 |
| >TET2-R1302MYYNGCKFA   | 23   | >TET2-R1302MYYNGCKFA   | 13073 | 13050 |
| >TET2-R1359RLGLKEGR    | 194  | >TET2-R1359CLGLKEGR    | 3758  | 3564  |
| >TET2-R1359RLGLKEGRPF  | 234  | >TET2-R1359CLGLKEGRPF  | 2200  | 1966  |
| >TET2-R1359RLGLKEGR    | 143  | >TET2-R1359CLGLKEGR    | 463   | 320   |

|                        |      |                        |       |       |
|------------------------|------|------------------------|-------|-------|
| >TET2-R1359CRLGLKEGRP  | 174  | >TET2-R1359CCLGLKEGRP  | 2009  | 1835  |
| >TET2-R1359CRLGLKEGR   | 172  | >TET2-R1359CCLGLKEGR   | 24039 | 23867 |
| >TET2-R1359CRLGLKEGRP  | 158  | >TET2-R1359CCLGLKEGRP  | 21000 | 20842 |
| >TET2-R1359CRLGLKEGR   | 285  | >TET2-R1359CCLGLKEGR   | 104   | 181   |
| >TET2-R1359IEYEHRAPECF | 452  | >TET2-R1359IEYEHRAPECC | 63    | 389   |
| >TET2-R1359APECRGLGL   | 42   | >TET2-R1359APECCLGL    | 126   | 84    |
| >TET2-R1359RAPECRLGL   | 1582 | >TET2-R1359RAPECCLGL   | 303   | 1279  |
| >TET2-R1359RAPECRLGLK  | 315  | >TET2-R1359RAPECCLGLK  | 348   | 33    |
| >TET2-R1359RAPECRLGLK  | 393  | >TET2-R1359RAPECCLGLK  | 1942  | 1549  |
| >TET2-R1359RAPECRLGL   | 674  | >TET2-R1359RAPECCLGL   | 386   | 288   |
| >TET2-R1359RAPECRLGL   | 53   | >TET2-R1359RAPECCLGL   | 21    | 32    |
| >TET2-R1359RAPECRLGL   | 474  | >TET2-R1359RAPECCLGL   | 981   | 507   |
| >TET2-R1359HRAPECRLGL  | 46   | >TET2-R1359HRAPECCLGL  | 48    | 2     |
| >TET2-R1359HRAPECRLGL  | 235  | >TET2-R1359HRAPECCLGL  | 414   | 179   |
| >TET2-R1359HRAPECRL    | 535  | >TET2-R1359HRAPECCL    | 127   | 408   |
| >TET2-R1359HRAPECRLGL  | 187  | >TET2-R1359HRAPECCLGL  | 266   | 79    |
| >TET2-R1359HRAPECRLGL  | 156  | >TET2-R1359HRAPECCLGL  | 185   | 29    |
| >TET2-R1359HRAPECRLGL  | 272  | >TET2-R1359HRAPECCLGL  | 232   | 40    |
| >TET2-R1359HRAPECRLGL  | 359  | >TET2-R1359HRAPECCLGL  | 520   | 161   |
| >TET2-R1359YEHRAPECRL  | 850  | >TET2-R1359YEHRAPECCL  | 271   | 579   |
| >TET2-R1359YEHRAPECR   | 2219 | >TET2-R1359YEHRAPECC   | 327   | 1892  |
| >TET2-R1359EYEHRAPECR  | 281  | >TET2-R1359EYEHRAPECC  | 35919 | 35638 |
| >TET2-R1359RLGLKEGR    | 194  | >TET2-R1359HLGLKEGR    | 885   | 691   |
| >TET2-R1359RLGLKEGRPF  | 234  | >TET2-R1359HLGLKEGRPF  | 620   | 386   |
| >TET2-R1359RLGLKEGR    | 143  | >TET2-R1359HLGLKEGR    | 146   | 3     |
| >TET2-R1359CRLGLKEGRP  | 174  | >TET2-R1359CHLGLKEGRP  | 338   | 164   |
| >TET2-R1359CRLGLKEGR   | 172  | >TET2-R1359CHLGLKEGR   | 18409 | 18237 |
| >TET2-R1359CRLGLKEGRP  | 158  | >TET2-R1359CHLGLKEGRP  | 15492 | 15334 |
| >TET2-R1359CRLGLKEGR   | 285  | >TET2-R1359CHLGLKEGR   | 279   | 6     |
| >TET2-R1359IEYEHRAPECF | 516  | >TET2-R1359IEYEHRAPECF | 195   | 321   |
| >TET2-R1359IEYEHRAPECF | 452  | >TET2-R1359IEYEHRAPECF | 1809  | 1357  |
| >TET2-R1359APECRGLGL   | 42   | >TET2-R1359APECHLGL    | 68    | 26    |
| >TET2-R1359RAPECRLGLK  | 315  | >TET2-R1359RAPECHLGLK  | 420   | 105   |
| >TET2-R1359RAPECRLGLK  | 393  | >TET2-R1359RAPECHLGLK  | 354   | 39    |
| >TET2-R1359RAPECRLGL   | 674  | >TET2-R1359RAPECHLGL   | 164   | 510   |
| >TET2-R1359RAPECRLGL   | 53   | >TET2-R1359RAPECHLGL   | 10    | 43    |
| >TET2-R1359RAPECRLGL   | 474  | >TET2-R1359RAPECHLGL   | 893   | 419   |
| >TET2-R1359HRAPECRLGL  | 46   | >TET2-R1359HRAPECHLGL  | 28    | 18    |
| >TET2-R1359HRAPECRLGL  | 235  | >TET2-R1359HRAPECHLGL  | 228   | 7     |
| >TET2-R1359HRAPECRL    | 535  | >TET2-R1359HRAPECHL    | 429   | 106   |
| >TET2-R1359HRAPECRLGL  | 187  | >TET2-R1359HRAPECHLGL  | 77    | 110   |
| >TET2-R1359HRAPECRLGL  | 156  | >TET2-R1359HRAPECHLGL  | 136   | 20    |
| >TET2-R1359HRAPECRLGL  | 272  | >TET2-R1359HRAPECHLGL  | 162   | 110   |



|                         |       |                         |       |       |
|-------------------------|-------|-------------------------|-------|-------|
| >TET2-R1359 HRAPECRLGL  | 359   | >TET2-R1359 HRAPECHLGL  | 361   | 2     |
| >TET2-R1359 EYEHRAPECR  | 281   | >TET2-R1359 EYEHRAPECH  | 29679 | 29398 |
| >TET2-R1359 RLGLKEGR    | 194   | >TET2-R1359 PLGLKEGR    | 11556 | 11362 |
| >TET2-R1359 RLGLKEGRPF  | 234   | >TET2-R1359 PLGLKEGRPF  | 7115  | 6881  |
| >TET2-R1359 RLGLKEGR    | 143   | >TET2-R1359 PLGLKEGR    | 1851  | 1708  |
| >TET2-R1359 CRLGLKEGRP  | 23683 | >TET2-R1359 CPLGLKEGRP  | 209   | 23474 |
| >TET2-R1359 CRLGLKEGRP  | 174   | >TET2-R1359 CPLGLKEGRP  | 2167  | 1993  |
| >TET2-R1359 CRLGLKEGR   | 172   | >TET2-R1359 CPLGLKEGR   | 23710 | 23538 |
| >TET2-R1359 CRLGLKEGRP  | 158   | >TET2-R1359 CPLGLKEGRP  | 20426 | 20268 |
| >TET2-R1359 CRLGLKEGRP  | 15710 | >TET2-R1359 CPLGLKEGRP  | 49    | 15661 |
| >TET2-R1359 CRLGLKEGRP  | 29168 | >TET2-R1359 CPLGLKEGRP  | 269   | 28899 |
| >TET2-R1359 CRLGLKEGRP  | 22917 | >TET2-R1359 CPLGLKEGRP  | 414   | 22503 |
| >TET2-R1359 CRLGLKEGR   | 285   | >TET2-R1359 CPLGLKEGR   | 310   | 25    |
| >TET2-R1359 IEYEHRAPECF | 452   | >TET2-R1359 IEYEHRAPECF | 555   | 103   |
| >TET2-R1359 APECRLGL    | 42    | >TET2-R1359 APECPLGL    | 161   | 119   |
| >TET2-R1359 RAPECRLGLK  | 315   | >TET2-R1359 RAPECPLGLK  | 298   | 17    |
| >TET2-R1359 RAPECRLGLK  | 522   | >TET2-R1359 RAPECPLGLK  | 333   | 189   |
| >TET2-R1359 RAPECRLGLK  | 393   | >TET2-R1359 RAPECPLGLK  | 974   | 581   |
| >TET2-R1359 RAPECRLGL   | 674   | >TET2-R1359 RAPECPLGL   | 266   | 408   |
| >TET2-R1359 RAPECRLGL   | 53    | >TET2-R1359 RAPECPLGL   | 67    | 14    |
| >TET2-R1359 RAPECRLGL   | 474   | >TET2-R1359 RAPECPLGL   | 651   | 177   |
| >TET2-R1359 HRAPECRLGL  | 46    | >TET2-R1359 HRAPECPLGL  | 22    | 24    |
| >TET2-R1359 HRAPECRLGL  | 235   | >TET2-R1359 HRAPECPLGL  | 373   | 138   |
| >TET2-R1359 HRAPECRL    | 535   | >TET2-R1359 HRAPECPL    | 54    | 481   |
| >TET2-R1359 HRAPECRLGL  | 187   | >TET2-R1359 HRAPECPLGL  | 100   | 87    |
| >TET2-R1359 HRAPECRL    | 1123  | >TET2-R1359 HRAPECPL    | 473   | 650   |
| >TET2-R1359 HRAPECRLGL  | 156   | >TET2-R1359 HRAPECPLGL  | 114   | 42    |
| >TET2-R1359 HRAPECRLGL  | 272   | >TET2-R1359 HRAPECPLGL  | 122   | 150   |
| >TET2-R1359 HRAPECRLGL  | 359   | >TET2-R1359 HRAPECPLGL  | 620   | 261   |
| >TET2-R1359 YEHRAPCRL   | 850   | >TET2-R1359 YEHRAPCPL   | 350   | 500   |
| >TET2-R1359 YEHRAPCRL   | 1454  | >TET2-R1359 YEHRAPCPL   | 256   | 1198  |
| >TET2-R1359 YEHRAPCRL   | 3675  | >TET2-R1359 YEHRAPCPL   | 400   | 3275  |
| >TET2-R1359 EYEHRAPECR  | 281   | >TET2-R1359 EYEHRAPECP  | 34402 | 34121 |
| >TET2-R1366 RPFSGVTACL  | 57    | >TET2-R1366 HPFSGVTACL  | 77    | 20    |
| >TET2-R1366 RPFSGVTA    | 124   | >TET2-R1366 HPFSGVTA    | 544   | 420   |
| >TET2-R1366 RPFSGVTAC   | 138   | >TET2-R1366 HPFSGVTAC   | 485   | 347   |
| >TET2-R1366 RPFSGVTACL  | 57    | >TET2-R1366 HPFSGVTACL  | 272   | 215   |
| >TET2-R1366 RPFSGVTACL  | 242   | >TET2-R1366 HPFSGVTACL  | 878   | 636   |
| >TET2-R1366 RPFSGVTA    | 1414  | >TET2-R1366 HPFSGVTA    | 83    | 1331  |
| >TET2-R1366 RPFSGVTAC   | 944   | >TET2-R1366 HPFSGVTAC   | 44    | 900   |
| >TET2-R1366 RPFSGVTACL  | 3907  | >TET2-R1366 HPFSGVTACL  | 400   | 3507  |
| >TET2-R1366 RPFSGVTACL  | 35    | >TET2-R1366 HPFSGVTACL  | 10    | 25    |
| >TET2-R1366 RPFSGVTA    | 181   | >TET2-R1366 HPFSGVTA    | 24    | 157   |

|                        |      |                        |       |       |
|------------------------|------|------------------------|-------|-------|
| >TET2-R1366 RPFSGVTA   | 1119 | >TET2-R1366 HPFSGVTA   | 438   | 681   |
| >TET2-R1366 RPFSGVTACL | 1120 | >TET2-R1366 HPFSGVTACL | 383   | 737   |
| >TET2-R1366 RPFSGVTACL | 640  | >TET2-R1366 HPFSGVTACL | 268   | 372   |
| >TET2-R1366 GRPFSGVTA  | 46   | >TET2-R1366 GHPFSGVTA  | 8844  | 8798  |
| >TET2-R1366 EGRPFSGV   | 1485 | >TET2-R1366 EGHPFSGV   | 49    | 1436  |
| >TET2-R1366 KEGRPFSGV  | 89   | >TET2-R1366 KEGHPFSGV  | 138   | 49    |
| >TET2-R1366 KEGRPFSGVT | 28   | >TET2-R1366 KEGHPFSGVT | 32    | 4     |
| >TET2-R1366 KEGRPFSGV  | 37   | >TET2-R1366 KEGHPFSGV  | 36    | 1     |
| >TET2-R1366 GLKEGRPFSG | 212  | >TET2-R1366 GLKEGHPFSG | 111   | 101   |
| >TET2-R1366 GLKEGRPFSG | 5    | >TET2-R1366 GLKEGHPFSG | 3     | 2     |
| >TET2-R1366 GLKEGRPFSG | 113  | >TET2-R1366 GLKEGHPFSG | 65    | 48    |
| >TET2-R1366 GLKEGRPFSG | 15   | >TET2-R1366 GLKEGHPFSG | 6     | 9     |
| >TET2-R1366 GLKEGRPFSG | 21   | >TET2-R1366 GLKEGHPFSG | 11    | 10    |
| >TET2-R1366 GLKEGRPFSG | 27   | >TET2-R1366 GLKEGHPFSG | 19    | 8     |
| >TET2-R1366 GLKEGRPFSG | 963  | >TET2-R1366 GLKEGHPFSG | 346   | 617   |
| >TET2-R1366 GLKEGRPFSG | 2    | >TET2-R1366 GLKEGHPFSG | 2     | 0     |
| >TET2-R1366 GLKEGRPF   | 63   | >TET2-R1366 GLKEGHPF   | 48    | 15    |
| >TET2-R1366 GLKEGRPF   | 132  | >TET2-R1366 GLKEGHPF   | 76    | 56    |
| >TET2-R1366 GLKEGRPF   | 235  | >TET2-R1366 GLKEGHPF   | 173   | 62    |
| >TET2-R1366 LGLKEGRPF  | 649  | >TET2-R1366 LGLKEGHPF  | 415   | 234   |
| >TET2-R1366 LGLKEGRPF  | 121  | >TET2-R1366 LGLKEGHPF  | 87    | 34    |
| >TET2-R1366 LGLKEGRPF  | 975  | >TET2-R1366 LGLKEGHPF  | 262   | 713   |
| >TET2-R1366 RLGLKEGR   | 194  | >TET2-R1366 RLGLKEGH   | 11191 | 10997 |
| >TET2-R1366 RLGLKEGRPF | 234  | >TET2-R1366 RLGLKEGHPF | 149   | 85    |
| >TET2-R1366 RLGLKEGR   | 143  | >TET2-R1366 RLGLKEGH   | 27041 | 26898 |
| >TET2-R1366 CRLGLKEGRP | 174  | >TET2-R1366 CRLGLKEGHP | 156   | 18    |
| >TET2-R1366 CRLGLKEGR  | 172  | >TET2-R1366 CRLGLKEGH  | 438   | 266   |
| >TET2-R1366 CRLGLKEGRP | 158  | >TET2-R1366 CRLGLKEGHP | 122   | 36    |
| >TET2-R1366 CRLGLKEGR  | 285  | >TET2-R1366 CRLGLKEGH  | 33060 | 32775 |
| >TET2-R1465 RQRKLEAKK  | 334  | >TET2-R1465 QQRKLEAKK  | 4063  | 3729  |
| >TET2-R1465 RQRKLEAK   | 8    | >TET2-R1465 QQRKLEAK   | 201   | 193   |
| >TET2-R1465 RQRKLEAKK  | 7    | >TET2-R1465 QQRKLEAKK  | 122   | 115   |
| >TET2-R1465 RQRKLEAKKA | 131  | >TET2-R1465 QQRKLEAKK/ | 4701  | 4570  |
| >TET2-R1465 RQRKLEAKKA | 36   | >TET2-R1465 QQRKLEAKK/ | 1822  | 1786  |
| >TET2-R1465 RQRKLEAK   | 117  | >TET2-R1465 QQRKLEAK   | 3652  | 3535  |
| >TET2-R1465 RQRKLEAKK  | 111  | >TET2-R1465 QQRKLEAKK  | 3459  | 3348  |
| >TET2-R1465 RQRKLEAK   | 168  | >TET2-R1465 QQRKLEAK   | 937   | 769   |
| >TET2-R1465 RQRKLEAKKA | 147  | >TET2-R1465 QQRKLEAKK/ | 687   | 540   |
| >TET2-R1465 RQRKLEAKK  | 223  | >TET2-R1465 QQRKLEAKK  | 4139  | 3916  |
| >TET2-R1465 CRQRKLEAK  | 329  | >TET2-R1465 CQQRKLEAK  | 7647  | 7318  |
| >TET2-R1465 CRQRKLEAK  | 247  | >TET2-R1465 CQQRKLEAK  | 14548 | 14301 |
| >TET2-R1465 CRQRKLEA   | 436  | >TET2-R1465 CQQRKLEA   | 6207  | 5771  |
| >TET2-R1465 CRQRKLEAKK | 488  | >TET2-R1465 CQQRKLEAK  | 12007 | 11519 |

|                        |       |                        |       |       |
|------------------------|-------|------------------------|-------|-------|
| >TET2-R1465 CRQRKLEAKK | 305   | >TET2-R1465 CQQRKLEAKK | 8711  | 8406  |
| >TET2-R1465 RMLAEPVKTC | 341   | >TET2-R1465 RMLAEPVKTC | 12758 | 12417 |
| >TET2-R1465 RMLAEPVKTC | 12    | >TET2-R1465 RMLAEPVKTC | 3940  | 3928  |
| >TET2-R1465 RMLAEPVKTC | 367   | >TET2-R1465 RMLAEPVKTC | 1550  | 1183  |
| >TET2-R1465 RMLAEPVKTC | 41    | >TET2-R1465 RMLAEPVKTC | 3222  | 3181  |
| >TET2-R1465 TCRQRKLEAK | 268   | >TET2-R1465 TCQQRKLEAK | 10851 | 10583 |
| >TET2-R1465 TCRQRKLEAK | 184   | >TET2-R1465 TCQQRKLEAK | 10877 | 10693 |
| >TET2-R1465 KTCRQRKLEA | 385   | >TET2-R1465 KTCQQRKLEA | 955   | 570   |
| >TET2-R1465 KTCRQRKLEA | 55    | >TET2-R1465 KTCQQRKLEA | 93    | 38    |
| >TET2-R1465 KTCRQRKRL  | 238   | >TET2-R1465 KTCQQRKRL  | 1325  | 1087  |
| >TET2-R1465 KTCRQRKLEA | 45    | >TET2-R1465 KTCQQRKLEA | 276   | 231   |
| >TET2-R1465 KTCRQRKLEA | 13    | >TET2-R1465 KTCQQRKLEA | 50    | 37    |
| >TET2-R1465 KTCRQRKLEA | 41    | >TET2-R1465 KTCQQRKLEA | 167   | 126   |
| >TET2-R1465 KTCRQRKRL  | 383   | >TET2-R1465 KTCQQRKRL  | 451   | 68    |
| >TET2-R1465 KTCRQRKRL  | 48    | >TET2-R1465 KTCQQRKRL  | 24    | 24    |
| >TET2-R1465 KTCRQRKRL  | 432   | >TET2-R1465 KTCQQRKRL  | 346   | 86    |
| >TET2-R1465 PVKTCRQRK  | 62    | >TET2-R1465 PVKTCQQRK  | 158   | 96    |
| >TET2-R1465 EPVKTCRQR  | 228   | >TET2-R1465 EPVKTCQQR  | 132   | 96    |
| >TET2-R1465 LAEPVKTCR  | 138   | >TET2-R1465 LAEPVKTCQ  | 18558 | 18420 |
| >TET2-R1465 LAEPVKTCRQ | 638   | >TET2-R1465 LAEPVKTCQC | 467   | 171   |
| >TET2-R1465 LAEPVKTCR  | 109   | >TET2-R1465 LAEPVKTCQ  | 13533 | 13424 |
| >TET2-R1465 LAEPVKTCRQ | 241   | >TET2-R1465 LAEPVKTCQC | 176   | 65    |
| >TET2-R1465 MLAEPVKTCF | 327   | >TET2-R1465 MLAEPVKTC  | 243   | 84    |
| >TET2-R1465 MLAEPVKTCF | 118   | >TET2-R1465 MLAEPVKTC  | 96    | 22    |
| >TET2-R1465 MLAEPVKTCF | 902   | >TET2-R1465 MLAEPVKTC  | 439   | 463   |
| >TET2-R1465 MLAEPVKTCF | 3580  | >TET2-R1465 MLAEPVKTC  | 45    | 3535  |
| >TET2-R1465 MLAEPVKTCF | 9     | >TET2-R1465 MLAEPVKTC  | 8     | 1     |
| >TET2-R1465 MLAEPVKTCF | 101   | >TET2-R1465 MLAEPVKTC  | 18205 | 18104 |
| >TET2-R1465 MLAEPVKTCF | 233   | >TET2-R1465 MLAEPVKTC  | 21454 | 21221 |
| >TET2-R1465 MLAEPVKTCF | 40    | >TET2-R1465 MLAEPVKTC  | 25914 | 25874 |
| >TET2-R1660 RYPSQDPL   | 389   | >TET2-R1660 GYPSQDPL   | 3018  | 2629  |
| >TET2-R1660 RYPSQDPLSK | 265   | >TET2-R1660 GYPSQDPLSK | 2471  | 2206  |
| >TET2-R1660 RYPSQDPL   | 7     | >TET2-R1660 GYPSQDPL   | 25    | 18    |
| >TET2-R1660 RYPSQDPLSK | 212   | >TET2-R1660 GYPSQDPLSK | 1680  | 1468  |
| >TET2-R1660 RYPSQDPLSK | 5     | >TET2-R1660 GYPSQDPLSK | 13    | 8     |
| >TET2-R1660 RYPSQDPLSK | 81    | >TET2-R1660 GYPSQDPLSK | 3664  | 3583  |
| >TET2-R1660 RYPSQDPLSK | 74    | >TET2-R1660 GYPSQDPLSK | 2787  | 2713  |
| >TET2-R1660 RYPSQDPLSK | 386   | >TET2-R1660 GYPSQDPLSK | 1103  | 717   |
| >TET2-R1660 YRYPQDPL   | 2288  | >TET2-R1660 YGYPSQDPL  | 230   | 2058  |
| >TET2-R1660 YRYPQDPL   | 18    | >TET2-R1660 YGYPSQDPL  | 379   | 361   |
| >TET2-R1660 YRYPQDPLS  | 91    | >TET2-R1660 YGYPSQDPLS | 1774  | 1683  |
| >TET2-R1660 YRYPQDPL   | 219   | >TET2-R1660 YGYPSQDPL  | 1877  | 1658  |
| >TET2-R1660 YRYPQDPL   | 11494 | >TET2-R1660 YGYPSQDPL  | 83    | 11411 |

|                        |      |                        |       |       |
|------------------------|------|------------------------|-------|-------|
| >TET2-R1660 YRYPSQDPL  | 84   | >TET2-R1660 YGYPSQDPL  | 21377 | 21293 |
| >TET2-R1660 YRYPSQDPLS | 42   | >TET2-R1660 YGYPSQDPLS | 19710 | 19668 |
| >TET2-R1660 YRYPSQDPL  | 4391 | >TET2-R1660 YGYPSQDPL  | 197   | 4194  |
| >TET2-R1660 YRYPSQDPL  | 19   | >TET2-R1660 YGYPSQDPL  | 1134  | 1115  |
| >TET2-R1660 YRYPSQDPL  | 140  | >TET2-R1660 YGYPSQDPL  | 29636 | 29496 |
| >TET2-R1660 YRYPSQDPLS | 338  | >TET2-R1660 YGYPSQDPLS | 33615 | 33277 |
| >TET2-R1660 YRYPSQDPL  | 476  | >TET2-R1660 YGYPSQDPL  | 6337  | 5861  |
| >TET2-R1660 SPQSQPMDL  | 185  | >TET2-R1660 SPQSQPMDL  | 31203 | 31018 |
| >TET2-R1660 LYRYPSQDPL | 184  | >TET2-R1660 LYGYPQDPL  | 40    | 144   |
| >TET2-R1660 LYRYPSQDPL | 107  | >TET2-R1660 LYGYPQDPL  | 13824 | 13717 |
| >TET2-R1660 LYRYPSQDPL | 197  | >TET2-R1660 LYGYPQDPL  | 15086 | 14889 |
| >TET2-R1660 LYRYPSQDPL | 260  | >TET2-R1660 LYGYPQDPL  | 220   | 40    |
| >TET2-R1660 DLYRYPSQDP | 670  | >TET2-R1660 DLYGYPSQDF | 204   | 466   |
| >TET2-R1660 DLYRYPSQDP | 48   | >TET2-R1660 DLYGYPSQDF | 23    | 25    |
| >TET2-R1660 DLYRYPSQDP | 244  | >TET2-R1660 DLYGYPSQDF | 86    | 158   |
| >TET2-R1660 DLYRYPSQDP | 1910 | >TET2-R1660 DLYGYPSQDF | 360   | 1550  |
| >TET2-R1660 DLYRYPSQ   | 865  | >TET2-R1660 DLYGYPSQ   | 254   | 611   |
| >TET2-R1660 DLYRYPSQDP | 74   | >TET2-R1660 DLYGYPSQDF | 32    | 42    |
| >TET2-R1660 DLYRYPSQDP | 463  | >TET2-R1660 DLYGYPSQDF | 336   | 127   |
| >TET2-R1660 QPMDLYRY   | 442  | >TET2-R1660 QPMDLYGY   | 504   | 62    |
| >TET2-R1660 QPMDLYRYP  | 240  | >TET2-R1660 QPMDLYGYP  | 335   | 95    |
| >TET2-R1660 QPMDLYRY   | 19   | >TET2-R1660 QPMDLYGY   | 16    | 3     |
| >TET2-R1660 QPMDLYRY   | 54   | >TET2-R1660 QPMDLYGY   | 104   | 50    |
| >TET2-R1660 QPMDLYRYP  | 359  | >TET2-R1660 QPMDLYGYP  | 132   | 227   |
| >TET2-R1660 QPMDLYRY   | 49   | >TET2-R1660 QPMDLYGY   | 618   | 569   |
| >TET2-R1660 QPMDLYRY   | 320  | >TET2-R1660 QPMDLYGY   | 982   | 662   |
| >TET2-R1660 SQPMDLYRY  | 414  | >TET2-R1660 SQPMDLYGY  | 428   | 14    |
| >TET2-R1660 SQPMDLYRY  | 61   | >TET2-R1660 SQPMDLYGY  | 60    | 1     |
| >TET2-R1660 SQPMDLYR   | 369  | >TET2-R1660 SQPMDLYG   | 22449 | 22080 |
| >TET2-R1660 SQPMDLYRY  | 269  | >TET2-R1660 SQPMDLYGY  | 169   | 100   |
| >TET2-R1660 SQPMDLYR   | 74   | >TET2-R1660 SQPMDLYG   | 28284 | 28210 |
| >TET2-R1660 QSQPMDLYR  | 175  | >TET2-R1660 QSQPMDLYG  | 124   | 51    |
| >TET2-R1660 QSQPMDLYR  | 177  | >TET2-R1660 QSQPMDLYG  | 22536 | 22359 |
| >TET2-R1660 QSQPMDLYR  | 466  | >TET2-R1660 QSQPMDLYG  | 509   | 43    |
| >TET2-R1660 QSQPMDLYR  | 634  | >TET2-R1660 QSQPMDLYG  | 499   | 135   |
| >TET2-R1660 QSQPMDLYR  | 35   | >TET2-R1660 QSQPMDLYG  | 51    | 16    |
| >TET2-R1660 QSQPMDLYR  | 65   | >TET2-R1660 QSQPMDLYG  | 20031 | 19966 |
| >TET2-R1660 QSQPMDLYR  | 134  | >TET2-R1660 QSQPMDLYG  | 36736 | 36602 |
| >TET2-R1660 QSQPMDLYR  | 667  | >TET2-R1660 QSQPMDLYG  | 441   | 226   |
| >TET2-R1660 QSQPMDLYR  | 10   | >TET2-R1660 QSQPMDLYG  | 11    | 1     |
| >TET2-R1660 QSQPMDLYR  | 485  | >TET2-R1660 QSQPMDLYG  | 971   | 486   |
| >TET2-R1660 QSQPMDLYR  | 157  | >TET2-R1660 QSQPMDLYG  | 133   | 24    |
| >TET2-R1660 QSQPMDLYR  | 283  | >TET2-R1660 QSQPMDLYG  | 18761 | 18478 |

|                         |      |                         |       |       |
|-------------------------|------|-------------------------|-------|-------|
| >TET2-R1660 QSQPMDLYR   | 90   | >TET2-R1660 QSQPMDLYG   | 31958 | 31868 |
| >TET2-R1660 PQSQPMDLY   | 200  | >TET2-R1660 PQSQPMDLY   | 206   | 6     |
| >TET2-R1660 PQSQPMDLY   | 161  | >TET2-R1660 PQSQPMDLY   | 31730 | 31569 |
| >TET2-R1878 RELHATTP    | 5350 | >TET2-R1878 HELHATTP    | 305   | 5045  |
| >TET2-R1878 RELHATTPL   | 109  | >TET2-R1878 HELHATTPL   | 35    | 74    |
| >TET2-R1878 RELHATTPLK  | 159  | >TET2-R1878 HELHATTPLK  | 561   | 402   |
| >TET2-R1878 RELHATTPL   | 312  | >TET2-R1878 HELHATTPL   | 3766  | 3454  |
| >TET2-R1878 RELHATTPL   | 48   | >TET2-R1878 HELHATTPL   | 171   | 123   |
| >TET2-R1878 RELHATTPL   | 637  | >TET2-R1878 HELHATTPL   | 70    | 567   |
| >TET2-R1878 RELHATTPL   | 740  | >TET2-R1878 HELHATTPL   | 51    | 689   |
| >TET2-R1878 RELHATTPL   | 7    | >TET2-R1878 HELHATTPL   | 8     | 1     |
| >TET2-R1878 RELHATTPL   | 12   | >TET2-R1878 HELHATTPL   | 12    | 0     |
| >TET2-R1878 RELHATTPL   | 530  | >TET2-R1878 HELHATTPL   | 481   | 49    |
| >TET2-R1878 RELHATTPL   | 138  | >TET2-R1878 HELHATTPL   | 1272  | 1134  |
| >TET2-R1878 RELHATTPL   | 6    | >TET2-R1878 HELHATTPL   | 9     | 3     |
| >TET2-R1878 KRELHATTPL  | 108  | >TET2-R1878 KHELHATTPL  | 9279  | 9171  |
| >TET2-R1878 KRELHATTPL  | 462  | >TET2-R1878 KHELHATTPL  | 156   | 306   |
| >TET2-R1878 KRELHATT    | 453  | >TET2-R1878 KHELHATT    | 19823 | 19370 |
| >TET2-R1878 KRELHATTPL  | 79   | >TET2-R1878 KHELHATTPL  | 10172 | 10093 |
| >TET2-R1878 KRELHATTPLI | 335  | >TET2-R1878 KHELHATTPL  | 14472 | 14137 |
| >TET2-R1878 KRELHATTPL  | 174  | >TET2-R1878 KHELHATTPL  | 20125 | 19951 |
| >TET2-R1878 KRELHATTPLI | 65   | >TET2-R1878 KHELHATTPL  | 11256 | 11191 |
| >TET2-R1878 HGSILIECAKR | 414  | >TET2-R1878 HGSILIECAKH | 24463 | 24049 |
| >TET2-R1878 HGSILIECAKR | 345  | >TET2-R1878 HGSILIECAKH | 28825 | 28480 |
| >TET2-R1878 AKRELHATTP  | 13   | >TET2-R1878 AKHELHATTP  | 19    | 6     |
| >TET2-R1878 AKRELHATTP  | 2019 | >TET2-R1878 AKHELHATTP  | 96    | 1923  |
| >TET2-R1878 IECAKREL    | 599  | >TET2-R1878 IECAKHEL    | 148   | 451   |
| >TET2-R1878 IECAKREL    | 155  | >TET2-R1878 IECAKHEL    | 30    | 125   |
| >TET2-R1878 LIECAKREL   | 8462 | >TET2-R1878 LIECAKHEL   | 213   | 8249  |
| >TET2-R1878 ILIECAKREL  | 540  | >TET2-R1878 ILIECAKHEL  | 177   | 363   |
| >TET2-R1878 ILIECAKREL  | 79   | >TET2-R1878 ILIECAKHEL  | 31    | 48    |
| >TET2-R1878 ILIECAKREL  | 183  | >TET2-R1878 ILIECAKHEL  | 134   | 49    |
| >TET2-R1878 ILIECAKREL  | 29   | >TET2-R1878 ILIECAKHEL  | 11    | 18    |
| >TET2-R1878 ILIECAKREL  | 61   | >TET2-R1878 ILIECAKHEL  | 8     | 53    |
| >TET2-R1878 ILIECAKREL  | 586  | >TET2-R1878 ILIECAKHEL  | 52    | 534   |
| >TET2-R1878 ILIECAKREL  | 852  | >TET2-R1878 ILIECAKHEL  | 54    | 798   |
| >TET2-R1878 ILIECAKREL  | 13   | >TET2-R1878 ILIECAKHEL  | 4     | 9     |
| >TET2-R1878 ILIECAKR    | 481  | >TET2-R1878 ILIECAKH    | 24890 | 24409 |
| >TET2-R1878 ILIECAKR    | 111  | >TET2-R1878 ILIECAKH    | 15129 | 15018 |
| >TET2-R1878 ILIECAKR    | 148  | >TET2-R1878 ILIECAKH    | 28488 | 28340 |
| >TET2-R1878 SILIECAKREL | 827  | >TET2-R1878 SILIECAKHEL | 207   | 620   |
| >TET2-R1878 SILIECAKREL | 1385 | >TET2-R1878 SILIECAKHEL | 168   | 1217  |
| >TET2-R1878 SILIECAKREL | 1171 | >TET2-R1878 SILIECAKHEL | 61    | 1110  |

|                        |       |                        |       |       |
|------------------------|-------|------------------------|-------|-------|
| >TET2-R1878 SILIECAKR  | 346   | >TET2-R1878 SILIECAKH  | 22094 | 21748 |
| >TET2-R1878 SILIECAKR  | 238   | >TET2-R1878 SILIECAKH  | 25665 | 25427 |
| >TET2-R1878 GSILIECAKR | 163   | >TET2-R1878 GSILIECAKH | 14039 | 13876 |
| >TET2-R1878 GSILIECAKR | 34    | >TET2-R1878 GSILIECAKH | 11368 | 11334 |
| >TET2-R1896 RISLVFYQ   | 1748  | >TET2-R1896 MISLVFYQ   | 203   | 1545  |
| >TET2-R1896 RISLVFYQHK | 34    | >TET2-R1896 MISLVFYQHK | 56    | 22    |
| >TET2-R1896 RISLVFYQH  | 222   | >TET2-R1896 MISLVFYQH  | 188   | 34    |
| >TET2-R1896 RISLVFYQHK | 13    | >TET2-R1896 MISLVFYQHK | 14    | 1     |
| >TET2-R1896 RISLVFYQHK | 19    | >TET2-R1896 MISLVFYQHK | 66    | 47    |
| >TET2-R1896 RISLVFYQH  | 291   | >TET2-R1896 MISLVFYQH  | 710   | 419   |
| >TET2-R1896 RISLVFYQHK | 60    | >TET2-R1896 MISLVFYQHK | 93    | 33    |
| >TET2-R1896 RISLVFYQ   | 5606  | >TET2-R1896 MISLVFYQ   | 122   | 5484  |
| >TET2-R1896 RISLVFYQH  | 10654 | >TET2-R1896 MISLVFYQH  | 341   | 10313 |
| >TET2-R1896 RISLVFYQHK | 395   | >TET2-R1896 MISLVFYQHK | 22    | 373   |
| >TET2-R1896 RISLVFYQHK | 10549 | >TET2-R1896 MISLVFYQHK | 330   | 10219 |
| >TET2-R1896 RISLVFYQHK | 264   | >TET2-R1896 MISLVFYQHK | 1667  | 1403  |
| >TET2-R1896 RISLVFYQHK | 187   | >TET2-R1896 MISLVFYQHK | 584   | 397   |
| >TET2-R1896 TRISLVFYQ  | 23368 | >TET2-R1896 TMISLVFYQ  | 238   | 23130 |
| >TET2-R1896 TRISLVFYQ  | 14564 | >TET2-R1896 TMISLVFYQ  | 63    | 14501 |
| >TET2-R1896 TRISLVFYQ  | 25503 | >TET2-R1896 TMISLVFYQ  | 77    | 25426 |
| >TET2-R1896 TRISLVFYQ  | 26773 | >TET2-R1896 TMISLVFYQ  | 266   | 26507 |
| >TET2-R1896 TRISLVFYQ  | 31044 | >TET2-R1896 TMISLVFYQ  | 183   | 30861 |
| >TET2-R1896 TRISLVFY   | 21093 | >TET2-R1896 TMISLVFY   | 277   | 20816 |
| >TET2-R1896 TRISLVFYQH | 18613 | >TET2-R1896 TMISLVFYQH | 104   | 18509 |
| >TET2-R1896 TRISLVFY   | 15045 | >TET2-R1896 TMISLVFY   | 48    | 14997 |
| >TET2-R1896 TRISLVFYQH | 4698  | >TET2-R1896 TMISLVFYQH | 17    | 4681  |
| >TET2-R1896 TRISLVFY   | 172   | >TET2-R1896 TMISLVFY   | 10    | 162   |
| >TET2-R1896 TRISLVFY   | 223   | >TET2-R1896 TMISLVFY   | 8     | 215   |
| >TET2-R1896 TRISLVFYQ  | 12039 | >TET2-R1896 TMISLVFYQ  | 279   | 11760 |
| >TET2-R1896 TRISLVFY   | 456   | >TET2-R1896 TMISLVFY   | 20    | 436   |
| >TET2-R1896 TRISLVFYQ  | 18528 | >TET2-R1896 TMISLVFYQ  | 334   | 18194 |
| >TET2-R1896 TRISLVFYQH | 11734 | >TET2-R1896 TMISLVFYQH | 40    | 11694 |
| >TET2-R1896 TRISLVFY   | 3327  | >TET2-R1896 TMISLVFY   | 127   | 3200  |
| >TET2-R1896 TRISLVFYQ  | 3886  | >TET2-R1896 TMISLVFYQ  | 183   | 3703  |
| >TET2-R1896 TRISLVFYQH | 929   | >TET2-R1896 TMISLVFYQH | 51    | 878   |
| >TET2-R1896 TRISLVFY   | 396   | >TET2-R1896 TMISLVFY   | 24    | 372   |
| >TET2-R1896 TRISLVFY   | 10839 | >TET2-R1896 TMISLVFY   | 58    | 10781 |
| >TET2-R1896 TRISLVFY   | 180   | >TET2-R1896 TMISLVFY   | 25    | 155   |
| >TET2-R1896 TRISLVFY   | 247   | >TET2-R1896 TMISLVFY   | 13463 | 13216 |
| >TET2-R1896 TRISLVFYQH | 107   | >TET2-R1896 TMISLVFYQH | 8798  | 8691  |
| >TET2-R1896 LKNPNRNHP  | 249   | >TET2-R1896 LKNPNRNHP  | 18    | 231   |
| >TET2-R1896 PTRISLVFY  | 3633  | >TET2-R1896 PTMISLVFY  | 232   | 3401  |
| >TET2-R1896 PTRISLVFY  | 57    | >TET2-R1896 PTMISLVFY  | 16    | 41    |

|                         |       |                        |       |       |
|-------------------------|-------|------------------------|-------|-------|
| >TET2-R1896 PTRISLVFY   | 380   | >TET2-R1896 PTMISLVFY  | 658   | 278   |
| >TET2-R1896 PTRISLVFY   | 393   | >TET2-R1896 PTMISLVFY  | 133   | 260   |
| >TET2-R1896 PTRISLVFY   | 40    | >TET2-R1896 PTMISLVFY  | 4621  | 4581  |
| >TET2-R1896 PTRISLVFYQ  | 224   | >TET2-R1896 PTMISLVFYQ | 9293  | 9069  |
| >TET2-R1896 PTRISLVFY   | 332   | >TET2-R1896 PTMISLVFY  | 160   | 172   |
| >TET2-R1896 PTRISLVF    | 520   | >TET2-R1896 PTMISLVF   | 468   | 52    |
| >TET2-R1896 PTRISLVF    | 11    | >TET2-R1896 PTMISLVF   | 15    | 4     |
| >TET2-R1896 PTRISLVFY   | 17    | >TET2-R1896 PTMISLVFY  | 18    | 1     |
| >TET2-R1896 HPTRISLVFY  | 167   | >TET2-R1896 HPTMISLVFY | 261   | 94    |
| >TET2-R1896 HPTRISLV    | 361   | >TET2-R1896 HPTMISLV   | 393   | 32    |
| >TET2-R1896 HPTRISLVF   | 51    | >TET2-R1896 HPTMISLVF  | 37    | 14    |
| >TET2-R1896 HPTRISLVF   | 12    | >TET2-R1896 HPTMISLVF  | 10    | 2     |
| >TET2-R1896 HPTRISLVFY  | 198   | >TET2-R1896 HPTMISLVFY | 55    | 143   |
| >TET2-R1896 HPTRISLVF   | 164   | >TET2-R1896 HPTMISLVF  | 125   | 39    |
| >TET2-R1896 HPTRISLVFY  | 432   | >TET2-R1896 HPTMISLVFY | 184   | 248   |
| >TET2-R1896 HPTRISLV    | 201   | >TET2-R1896 HPTMISLV   | 200   | 1     |
| >TET2-R1896 HPTRISLVF   | 11    | >TET2-R1896 HPTMISLVF  | 16    | 5     |
| >TET2-R1896 HPTRISLVFY  | 12    | >TET2-R1896 HPTMISLVFY | 16    | 4     |
| >TET2-R1896 HPTRISLVF   | 62    | >TET2-R1896 HPTMISLVF  | 42    | 20    |
| >TET2-R1896 HPTRISLVFY  | 498   | >TET2-R1896 HPTMISLVFY | 347   | 151   |
| >TET2-R1896 NHPTRISLVF  | 428   | >TET2-R1896 NHPTMISLVF | 410   | 18    |
| >TET2-R1896 NHPTRISL    | 187   | >TET2-R1896 NHPTMISL   | 119   | 68    |
| >TET2-R1896 RNHPTRISL   | 18    | >TET2-R1896 RNHPTMISL  | 36    | 18    |
| >TET2-R1896 RNHPTRISLV  | 55    | >TET2-R1896 RNHPTMISLV | 93    | 38    |
| >TET2-R1896 RNHPTRISLVI | 129   | >TET2-R1896 RNHPTMISLV | 95    | 34    |
| >TET2-R1896 RNHPTRISL   | 328   | >TET2-R1896 RNHPTMISL  | 431   | 103   |
| >TET2-R1896 RNHPTRISLVI | 16    | >TET2-R1896 RNHPTMISLV | 18    | 2     |
| >TET2-R1896 RNHPTRISLVI | 430   | >TET2-R1896 RNHPTMISLV | 97    | 333   |
| >TET2-R1896 RNHPTRISLVI | 515   | >TET2-R1896 RNHPTMISLV | 365   | 150   |
| >TET2-R1896 RNHPTRISL   | 438   | >TET2-R1896 RNHPTMISL  | 272   | 166   |
| >TET2-R1896 NRNHPTRISL  | 423   | >TET2-R1896 NRNHPTMISI | 275   | 148   |
| >TET2-R1896 NRNHPTRISL  | 420   | >TET2-R1896 NRNHPTMISI | 557   | 137   |
| >TET2-R1896 NRNHPTRISL  | 91    | >TET2-R1896 NRNHPTMISI | 47    | 44    |
| >TET2-R1896 NPNRNHPTR   | 33861 | >TET2-R1896 NPNRNHPTV  | 39    | 33822 |
| >TET2-R1896 NPNRNHPTR   | 21022 | >TET2-R1896 NPNRNHPTV  | 39    | 20983 |
| >TET2-R1896 NPNRNHPTR   | 5815  | >TET2-R1896 NPNRNHPTV  | 33    | 5782  |
| >TET2-R1896 KPNRNHPT    | 120   | >TET2-R1896 KPNRNHPT   | 23010 | 22890 |
| >TET2-R1896 RISLVFYQHK  | 34    | >TET2-R1896 SISLVFYQHK | 62    | 28    |
| >TET2-R1896 RISLVFYQH   | 222   | >TET2-R1896 SISLVFYQH  | 141   | 81    |
| >TET2-R1896 RISLVFYQHK  | 13    | >TET2-R1896 SISLVFYQHK | 9     | 4     |
| >TET2-R1896 RISLVFYQHK  | 19    | >TET2-R1896 SISLVFYQHK | 193   | 174   |
| >TET2-R1896 RISLVFYQH   | 291   | >TET2-R1896 SISLVFYQH  | 2459  | 2168  |
| >TET2-R1896 RISLVFYQHK  | 60    | >TET2-R1896 SISLVFYQHK | 198   | 138   |

|                        |       |                         |       |       |
|------------------------|-------|-------------------------|-------|-------|
| >TET2-R1896 RISLVFYQHK | 395   | >TET2-R1896 SISLVFYQHK  | 92    | 303   |
| >TET2-R1896 RISLVFYQHK | 264   | >TET2-R1896 SISLVFYQHK  | 559   | 295   |
| >TET2-R1896 RISLVFYQHK | 187   | >TET2-R1896 SISLVFYQHK  | 1348  | 1161  |
| >TET2-R1896 TRISLVFY   | 15045 | >TET2-R1896 TSISLVFY    | 33    | 15012 |
| >TET2-R1896 TRISLVFYQH | 4698  | >TET2-R1896 TSISLVFYQHK | 15    | 4683  |
| >TET2-R1896 TRISLVFY   | 172   | >TET2-R1896 TSISLVFY    | 4     | 168   |
| >TET2-R1896 TRISLVFY   | 3188  | >TET2-R1896 TSISLVFY    | 251   | 2937  |
| >TET2-R1896 TRISLVFY   | 223   | >TET2-R1896 TSISLVFY    | 32    | 191   |
| >TET2-R1896 TRISLVFYQH | 9580  | >TET2-R1896 TSISLVFYQHK | 298   | 9282  |
| >TET2-R1896 TRISLVFY   | 456   | >TET2-R1896 TSISLVFY    | 39    | 417   |
| >TET2-R1896 TRISLVFYQH | 11734 | >TET2-R1896 TSISLVFYQHK | 83    | 11651 |
| >TET2-R1896 TRISLVFY   | 3327  | >TET2-R1896 TSISLVFY    | 39    | 3288  |
| >TET2-R1896 TRISLVFYQ  | 3886  | >TET2-R1896 TSISLVFYQ   | 59    | 3827  |
| >TET2-R1896 TRISLVFYQH | 929   | >TET2-R1896 TSISLVFYQHK | 18    | 911   |
| >TET2-R1896 TRISLVFY   | 396   | >TET2-R1896 TSISLVFY    | 178   | 218   |
| >TET2-R1896 TRISLVFY   | 10839 | >TET2-R1896 TSISLVFY    | 269   | 10570 |
| >TET2-R1896 TRISLVFY   | 180   | >TET2-R1896 TSISLVFY    | 244   | 64    |
| >TET2-R1896 TRISLVFY   | 22588 | >TET2-R1896 TSISLVFY    | 10    | 22578 |
| >TET2-R1896 TRISLVFY   | 247   | >TET2-R1896 TSISLVFY    | 21046 | 20799 |
| >TET2-R1896 TRISLVFYQH | 107   | >TET2-R1896 TSISLVFYQHK | 19099 | 18992 |
| >TET2-R1896 TRISLVFY   | 20621 | >TET2-R1896 TSISLVFY    | 137   | 20484 |
| >TET2-R1896 TRISLVFY   | 9374  | >TET2-R1896 TSISLVFY    | 108   | 9266  |
| >TET2-R1896 TRISLVFYQH | 10910 | >TET2-R1896 TSISLVFYQH  | 332   | 10578 |
| >TET2-R1896 TRISLVFYQH | 3969  | >TET2-R1896 TSISLVFYQHK | 197   | 3772  |
| >TET2-R1896 LKNPNRNHP  | 249   | >TET2-R1896 LKNPNRNHP   | 1420  | 1171  |
| >TET2-R1896 PTRISLVFY  | 3633  | >TET2-R1896 PTSISLVFY   | 33    | 3600  |
| >TET2-R1896 PTRISLVFY  | 57    | >TET2-R1896 PTSISLVFY   | 113   | 56    |
| >TET2-R1896 PTRISLVFY  | 380   | >TET2-R1896 PTSISLVFY   | 6174  | 5794  |
| >TET2-R1896 PTRISLVFY  | 393   | >TET2-R1896 PTSISLVFY   | 121   | 272   |
| >TET2-R1896 PTRISLVFY  | 40    | >TET2-R1896 PTSISLVFY   | 6408  | 6368  |
| >TET2-R1896 PTRISLVFYQ | 224   | >TET2-R1896 PTSISLVFYQ  | 11203 | 10979 |
| >TET2-R1896 PTRISLVFY  | 332   | >TET2-R1896 PTSISLVFY   | 122   | 210   |
| >TET2-R1896 PTRISLVF   | 11    | >TET2-R1896 PTSISLVF    | 41    | 30    |
| >TET2-R1896 PTRISLVFY  | 17    | >TET2-R1896 PTSISLVFY   | 45    | 28    |
| >TET2-R1896 PTRISLVF   | 599   | >TET2-R1896 PTSISLVF    | 345   | 254   |
| >TET2-R1896 HPTRISLVF  | 1617  | >TET2-R1896 HPTSISLVF   | 314   | 1303  |
| >TET2-R1896 HPTRISLVFY | 167   | >TET2-R1896 HPTSISLVFY  | 174   | 7     |
| >TET2-R1896 HPTRISLV   | 361   | >TET2-R1896 HPTSISLV    | 491   | 130   |
| >TET2-R1896 HPTRISLVF  | 51    | >TET2-R1896 HPTSISLVF   | 57    | 6     |
| >TET2-R1896 HPTRISLVF  | 706   | >TET2-R1896 HPTSISLVF   | 397   | 309   |
| >TET2-R1896 HPTRISLVF  | 12    | >TET2-R1896 HPTSISLVF   | 9     | 3     |
| >TET2-R1896 HPTRISLVFY | 198   | >TET2-R1896 HPTSISLVFY  | 67    | 131   |
| >TET2-R1896 HPTRISLVF  | 2082  | >TET2-R1896 HPTSISLVF   | 406   | 1676  |



|                         |      |                         |       |       |
|-------------------------|------|-------------------------|-------|-------|
| >TET2-R1896 HPTRISLVF   | 164  | >TET2-R1896 HPTSISLVF   | 85    | 79    |
| >TET2-R1896 HPTRISLVFY  | 432  | >TET2-R1896 HPTSISLVFY  | 263   | 169   |
| >TET2-R1896 HPTRISLV    | 201  | >TET2-R1896 HPTSISLV    | 178   | 23    |
| >TET2-R1896 HPTRISLVF   | 1142 | >TET2-R1896 HPTSISLVF   | 455   | 687   |
| >TET2-R1896 HPTRISLVF   | 11   | >TET2-R1896 HPTSISLVF   | 10    | 1     |
| >TET2-R1896 HPTRISLVFY  | 12   | >TET2-R1896 HPTSISLVFY  | 11    | 1     |
| >TET2-R1896 HPTRISLVF   | 62   | >TET2-R1896 HPTSISLVF   | 43    | 19    |
| >TET2-R1896 HPTRISLVFY  | 498  | >TET2-R1896 HPTSISLVFY  | 330   | 168   |
| >TET2-R1896 NHPTRISLVF  | 428  | >TET2-R1896 NHPTSISLVF  | 324   | 104   |
| >TET2-R1896 NHPTRISLVF  | 985  | >TET2-R1896 NHPTSISLVF  | 317   | 668   |
| >TET2-R1896 NHPTRISL    | 187  | >TET2-R1896 NHPTSISL    | 73    | 114   |
| >TET2-R1896 RNHPTRISL   | 18   | >TET2-R1896 RNHPTSISL   | 19    | 1     |
| >TET2-R1896 RNHPTRISLV  | 55   | >TET2-R1896 RNHPTSISLV  | 52    | 3     |
| >TET2-R1896 RNHPTRISLVI | 129  | >TET2-R1896 RNHPTSISLVF | 63    | 66    |
| >TET2-R1896 RNHPTRISL   | 328  | >TET2-R1896 RNHPTSISL   | 169   | 159   |
| >TET2-R1896 RNHPTRISLVI | 16   | >TET2-R1896 RNHPTSISLVF | 12    | 4     |
| >TET2-R1896 RNHPTRISLVI | 430  | >TET2-R1896 RNHPTSISLVF | 135   | 295   |
| >TET2-R1896 RNHPTRISLVI | 515  | >TET2-R1896 RNHPTSISLVF | 347   | 168   |
| >TET2-R1896 RNHPTRISL   | 438  | >TET2-R1896 RNHPTSISL   | 183   | 255   |
| >TET2-R1896 NRNHPTRI    | 2454 | >TET2-R1896 NRNHPTSI    | 434   | 2020  |
| >TET2-R1896 NRNHPTRISL  | 423  | >TET2-R1896 NRNHPTSISL  | 191   | 232   |
| >TET2-R1896 NRNHPTRISL  | 420  | >TET2-R1896 NRNHPTSISL  | 462   | 42    |
| >TET2-R1896 NRNHPTRISL  | 91   | >TET2-R1896 NRNHPTSISL  | 39    | 52    |
| >TET2-R1896 KNPNRNHPT   | 1348 | >TET2-R1896 KNPNRNHPT:  | 288   | 1060  |
| >TET2-R1896 KNPNRNHPT   | 120  | >TET2-R1896 KNPNRNHPT:  | 24792 | 24672 |
| >TET2-R1896 KNPNRNHPT   | 949  | >TET2-R1896 KNPNRNHPT:  | 361   | 588   |
| >TET2-R2000 AFTRVTGPYN  | 7554 | >TET2-R2000 AFTRVTGPYN  | 485   | 7069  |
| >TET2-R2000 AFTRVTGPYN  | 8385 | >TET2-R2000 AFTRVTGPYN  | 226   | 8159  |
| >TET2-R2000 AFTRVTGPYN  | 16   | >TET2-R2000 AFTRVTGPYN  | 245   | 229   |
| >TET2-R2000 AFTRVTGPYN  | 284  | >TET2-R2000 AFTRVTGPYN  | 7026  | 6742  |
| >TET2-R2000 AFTRVTGPYN  | 242  | >TET2-R2000 AFTRVTGPYN  | 5296  | 5054  |
| >TET2-R2000 TGPYNRYI    | 56   | >TET2-R2000 TGPYNKYI    | 53    | 3     |
| >TET2-R2000 VTGPYNRY    | 337  | >TET2-R2000 VTGPYNKY    | 941   | 604   |
| >TET2-R2000 VTGPYNRYI   | 365  | >TET2-R2000 VTGPYNKYI   | 511   | 146   |
| >TET2-R2000 VTGPYNRY    | 74   | >TET2-R2000 VTGPYNKY    | 76    | 2     |
| >TET2-R2000 VTGPYNRY    | 63   | >TET2-R2000 VTGPYNKY    | 71    | 8     |
| >TET2-R2000 VTGPYNRY    | 189  | >TET2-R2000 VTGPYNKY    | 471   | 282   |
| >TET2-R2000 VTGPYNRY    | 11   | >TET2-R2000 VTGPYNKY    | 14    | 3     |
| >TET2-R2000 VTGPYNRYI   | 148  | >TET2-R2000 VTGPYNKYI   | 82    | 66    |
| >TET2-R2000 VTGPYNRYI   | 64   | >TET2-R2000 VTGPYNKYI   | 116   | 52    |
| >TET2-R2000 VTGPYNRYI   | 46   | >TET2-R2000 VTGPYNKYI   | 40    | 6     |
| >TET2-R2000 RVTGPYNR    | 1562 | >TET2-R2000 RVTGPYNK    | 101   | 1461  |
| >TET2-R2000 RVTGPYNR    | 203  | >TET2-R2000 RVTGPYNK    | 22    | 181   |

|                        |       |                        |       |       |
|------------------------|-------|------------------------|-------|-------|
| >TET2-R2000 RVTGPYNRY  | 67    | >TET2-R2000 RVTGPYNKY  | 111   | 44    |
| >TET2-R2000 RVTGPYNRY  | 233   | >TET2-R2000 RVTGPYNKY  | 216   | 17    |
| >TET2-R2000 RVTGPYNR   | 2737  | >TET2-R2000 RVTGPYNK   | 24    | 2713  |
| >TET2-R2000 RVTGPYNRYI | 134   | >TET2-R2000 RVTGPYNKYI | 202   | 68    |
| >TET2-R2000 RVTGPYNRY  | 215   | >TET2-R2000 RVTGPYNKY  | 205   | 10    |
| >TET2-R2000 RVTGPYNR   | 15    | >TET2-R2000 RVTGPYNK   | 126   | 111   |
| >TET2-R2000 RVTGPYNR   | 228   | >TET2-R2000 RVTGPYNK   | 902   | 674   |
| >TET2-R2000 RVTGPYNRYI | 376   | >TET2-R2000 RVTGPYNKYI | 500   | 124   |
| >TET2-R2000 RVTGPYNRY  | 271   | >TET2-R2000 RVTGPYNKY  | 472   | 201   |
| >TET2-R2000 RVTGPYNRY  | 17    | >TET2-R2000 RVTGPYNKY  | 26    | 9     |
| >TET2-R2000 RVTGPYNRY  | 107   | >TET2-R2000 RVTGPYNKY  | 176   | 69    |
| >TET2-R2000 RVTGPYNR   | 62    | >TET2-R2000 RVTGPYNK   | 1376  | 1314  |
| >TET2-R2000 TRVTGPYNRY | 553   | >TET2-R2000 TRVTGPYNKY | 363   | 190   |
| >TET2-R2000 TRVTGPYNR  | 744   | >TET2-R2000 TRVTGPYNK  | 385   | 359   |
| >TET2-R2000 TRVTGPYNRY | 213   | >TET2-R2000 TRVTGPYNKY | 175   | 38    |
| >TET2-R2000 TRVTGPYNR  | 176   | >TET2-R2000 TRVTGPYNK  | 4303  | 4127  |
| >TET2-R2000 FTRVTGPYNR | 4608  | >TET2-R2000 FTRVTGPYNK | 304   | 4304  |
| >TET2-R2000 FTRVTGPYNR | 1167  | >TET2-R2000 FTRVTGPYNK | 96    | 1071  |
| >TET2-R2000 FTRVTGPYNR | 1816  | >TET2-R2000 FTRVTGPYNK | 467   | 1349  |
| >TET2-R2000 FTRVTGPYNR | 178   | >TET2-R2000 FTRVTGPYNK | 216   | 38    |
| >TET2-R2000 FTRVTGPYNR | 188   | >TET2-R2000 FTRVTGPYNK | 359   | 171   |
| >TET2-R2000 FTRVTGPYNR | 223   | >TET2-R2000 FTRVTGPYNK | 365   | 142   |
| >TET2-R2000 FTRVTGPYNR | 42    | >TET2-R2000 FTRVTGPYNK | 43    | 1     |
| >TET2-R2000 FTRVTGPYNR | 430   | >TET2-R2000 FTRVTGPYNK | 11    | 419   |
| >TET2-R2000 FTRVTGPYNR | 346   | >TET2-R2000 FTRVTGPYNK | 353   | 7     |
| >TET2-R2000 FTRVTGPYNR | 116   | >TET2-R2000 FTRVTGPYNK | 1644  | 1528  |
| >TET2-R2000 FTRVTGPYNR | 43    | >TET2-R2000 FTRVTGPYNK | 131   | 88    |
| >TET2-R2000 FTRVTGPYNR | 183   | >TET2-R2000 FTRVTGPYNK | 451   | 268   |
| >TET2-R2000 FTRVTGPYNR | 241   | >TET2-R2000 FTRVTGPYNK | 179   | 62    |
| >TET2-R2000 FTRVTGPYNR | 104   | >TET2-R2000 FTRVTGPYNK | 63    | 41    |
| >TET2-R2000 FTRVTGPYNR | 4     | >TET2-R2000 FTRVTGPYNK | 5     | 1     |
| >TET2-R2000 FTRVTGPYNR | 5     | >TET2-R2000 FTRVTGPYNK | 6     | 1     |
| >TET2-R2000 FTRVTGPYNR | 248   | >TET2-R2000 FTRVTGPYNK | 378   | 130   |
| >TET2-R686S RADSQTEK   | 234   | >TET2-R686S SADSQTEK   | 140   | 94    |
| >TET2-R686S RADSQTEKL  | 241   | >TET2-R686S SADSQTEKL  | 4290  | 4049  |
| >TET2-R686S RADSQTEKLM | 156   | >TET2-R686S SADSQTEKLM | 3227  | 3071  |
| >TET2-R686S QRADSQTEK  | 19651 | >TET2-R686S QSADSQTEK  | 91    | 19560 |
| >TET2-R686S QRADSQTEK  | 3545  | >TET2-R686S QSADSQTEK  | 31    | 3514  |
| >TET2-R686S QRADSQTEKI | 477   | >TET2-R686S QSADSQTEKI | 1486  | 1009  |
| >TET2-R686S QRADSQTEKI | 25006 | >TET2-R686S QSADSQTEKI | 36    | 24970 |
| >TET2-R686S QRADSQTEKI | 24051 | >TET2-R686S QSADSQTEKI | 28    | 24023 |
| >TET2-R686S QRADSQTEK  | 427   | >TET2-R686S QSADSQTEK  | 22670 | 22243 |
| >TET2-R686S QRADSQTEKI | 225   | >TET2-R686S QSADSQTEKI | 26503 | 26278 |

|                        |       |                        |       |       |
|------------------------|-------|------------------------|-------|-------|
| >TET2-R686S QRADSQTEKI | 408   | >TET2-R686S QSADSQTEKL | 19598 | 19190 |
| >TET2-R686S QRADSQTEKI | 18094 | >TET2-R686S QSADSQTEKL | 394   | 17700 |
| >TET2-R686S QRADSQTEKI | 5877  | >TET2-R686S QSADSQTEKL | 88    | 5789  |
| >TET2-R686S QRADSQTEK  | 9501  | >TET2-R686S QSADSQTEK  | 165   | 9336  |
| >TET2-R686S LCGTRFHFQC | 480   | >TET2-R686S LCGTRFHFQC | 22777 | 22297 |
| >TET2-R686S LCGTRFHFQC | 150   | >TET2-R686S LCGTRFHFQC | 25841 | 25691 |
| >TET2-R686S QQRADSQTE  | 7160  | >TET2-R686S QQSADSQTEI | 321   | 6839  |
| >TET2-R686S QQRADSQTE  | 2084  | >TET2-R686S QQSADSQTEI | 211   | 1873  |
| >TET2-R686S QQRADSQTE  | 68    | >TET2-R686S QQSADSQTEI | 7875  | 7807  |
| >TET2-R686S QQRADSQTE  | 178   | >TET2-R686S QQSADSQTEI | 580   | 402   |
| >TET2-R686S QQRADSQTE  | 69    | >TET2-R686S QQSADSQTEI | 175   | 106   |
| >TET2-R686S FQQRADSQT  | 573   | >TET2-R686S FQQSADSQTI | 304   | 269   |
| >TET2-R686S RFHFQQRA   | 23    | >TET2-R686S RFHFQQSA   | 13    | 10    |
| >TET2-R686S RFHFQQRAD  | 283   | >TET2-R686S RFHFQQSAD  | 315   | 32    |
| >TET2-R686S TRFHFQQR   | 229   | >TET2-R686S TRFHFQQS   | 31731 | 31502 |
| >TET2-R686S TRFHFQQR   | 486   | >TET2-R686S TRFHFQQS   | 1601  | 1115  |
| >TET2-R686S TRFHFQQRA  | 857   | >TET2-R686S TRFHFQQSA  | 123   | 734   |
| >TET2-R686S TRFHFQQR   | 105   | >TET2-R686S TRFHFQQS   | 945   | 840   |
| >TET2-R686S TRFHFQQRA  | 459   | >TET2-R686S TRFHFQQSA  | 357   | 102   |
| >TET2-R686S TRFHFQQRA  | 316   | >TET2-R686S TRFHFQQSA  | 437   | 121   |
| >TET2-R686S TRFHFQQR   | 141   | >TET2-R686S TRFHFQQS   | 27504 | 27363 |
| >TET2-R686S GTRFHFQQR  | 60    | >TET2-R686S GTRFHFQQS  | 184   | 124   |
| >TET2-R686S GTRFHFQQR  | 20    | >TET2-R686S GTRFHFQQS  | 10    | 10    |
| >TET2-R686S GTRFHFQQR  | 12    | >TET2-R686S GTRFHFQQS  | 12387 | 12375 |
| >TET2-R686S GTRFHFQQR  | 302   | >TET2-R686S GTRFHFQQS  | 30833 | 30531 |
| >TET2-R686S GTRFHFQQR  | 108   | >TET2-R686S GTRFHFQQS  | 1385  | 1277  |
| >TET2-R686S CGTRFHFQQI | 231   | >TET2-R686S CGTRFHFQQI | 32704 | 32473 |
| >TET2-S1284 SFSFGCSW   | 902   | >TET2-S1284 FFSFGCSW   | 226   | 676   |
| >TET2-S1284 SFSFGCSWSM | 935   | >TET2-S1284 FFSFGCSWSM | 296   | 639   |
| >TET2-S1284 SFSFGCSWSM | 13    | >TET2-S1284 FFSFGCSWSM | 7     | 6     |
| >TET2-S1284 SFSFGCSWSM | 58    | >TET2-S1284 FFSFGCSWSM | 171   | 113   |
| >TET2-S1284 SFSFGCSWSM | 128   | >TET2-S1284 FFSFGCSWSM | 45    | 83    |
| >TET2-S1284 SFSFGCSWSM | 1797  | >TET2-S1284 FFSFGCSWSM | 181   | 1616  |
| >TET2-S1284 SFSFGCSWSM | 93    | >TET2-S1284 FFSFGCSWSM | 141   | 48    |
| >TET2-S1284 SFSFGCSWSM | 12    | >TET2-S1284 FFSFGCSWSM | 12    | 0     |
| >TET2-S1284 SFSFGCSWSM | 112   | >TET2-S1284 FFSFGCSWSM | 65    | 47    |
| >TET2-S1284 SFSFGCSWSM | 461   | >TET2-S1284 FFSFGCSWSM | 935   | 474   |
| >TET2-S1284 SFSFGCSW   | 324   | >TET2-S1284 FFSFGCSW   | 820   | 496   |
| >TET2-S1284 ASFSFGCSWS | 204   | >TET2-S1284 AFFSFGCSWS | 788   | 584   |
| >TET2-S1284 ASFSFGCSWS | 651   | >TET2-S1284 AFFSFGCSWS | 361   | 290   |
| >TET2-S1284 ASFSFGCSW  | 14341 | >TET2-S1284 AFFSFGCSW  | 271   | 14070 |
| >TET2-S1284 ASFSFGCSWS | 13600 | >TET2-S1284 AFFSFGCSWS | 367   | 13233 |
| >TET2-S1284 ASFSFGCSW  | 51    | >TET2-S1284 AFFSFGCSW  | 608   | 557   |

|                        |       |                        |       |       |
|------------------------|-------|------------------------|-------|-------|
| >TET2-S1284 ASFSFGCSWS | 135   | >TET2-S1284 AFFSFGCSWS | 1551  | 1416  |
| >TET2-S1284 ASFSFGCSW  | 256   | >TET2-S1284 AFFSFGCSW  | 2278  | 2022  |
| >TET2-S1284 ASFSFGCSWS | 125   | >TET2-S1284 AFFSFGCSWS | 998   | 873   |
| >TET2-S1284 ASFSFGCSW  | 29    | >TET2-S1284 AFFSFGCSW  | 604   | 575   |
| >TET2-S1284 ASFSFGCSWS | 12    | >TET2-S1284 AFFSFGCSWS | 188   | 176   |
| >TET2-S1284 ASFSFGCSW  | 4     | >TET2-S1284 AFFSFGCSW  | 4192  | 4188  |
| >TET2-S1284 ASFSFGCSWS | 6     | >TET2-S1284 AFFSFGCSWS | 18387 | 18381 |
| >TET2-S1284 ASFSFGCSW  | 34    | >TET2-S1284 AFFSFGCSW  | 6665  | 6631  |
| >TET2-S1284 ASFSFGCSWS | 235   | >TET2-S1284 AFFSFGCSWS | 21708 | 21473 |
| >TET2-S1284 ASFSFGCSW  | 14    | >TET2-S1284 AFFSFGCSW  | 1030  | 1016  |
| >TET2-S1284 ASFSFGCSWS | 298   | >TET2-S1284 AFFSFGCSWS | 15842 | 15544 |
| >TET2-S1284 ASFSFGCSWS | 211   | >TET2-S1284 AFFSFGCSWS | 9714  | 9503  |
| >TET2-S1284 ASFSFGCSW  | 84    | >TET2-S1284 AFFSFGCSW  | 2165  | 2081  |
| >TET2-S1284 ASFSFGCSWS | 16    | >TET2-S1284 AFFSFGCSWS | 465   | 449   |
| >TET2-S1284 ASFSFGCSW  | 336   | >TET2-S1284 AFFSFGCSW  | 2440  | 2104  |
| >TET2-S1284 ASFSFGCSW  | 266   | >TET2-S1284 AFFSFGCSW  | 5174  | 4908  |
| >TET2-S1284 ASFSFGCSWS | 9301  | >TET2-S1284 AFFSFGCSWS | 351   | 8950  |
| >TET2-S1284 ASFSFGCSWS | 23821 | >TET2-S1284 AFFSFGCSWS | 148   | 23673 |
| >TET2-S1284 ASFSFGCSWS | 85    | >TET2-S1284 AFFSFGCSWS | 11097 | 11012 |
| >TET2-S1284 GASFSFGCSM | 86    | >TET2-S1284 GAFFSFGCSM | 32    | 54    |
| >TET2-S1284 GASFSFGCSM | 234   | >TET2-S1284 GAFFSFGCSM | 81    | 153   |
| >TET2-S1284 GASFSFGCSM | 73    | >TET2-S1284 GAFFSFGCSM | 57    | 16    |
| >TET2-S1284 GASFSFGCSM | 1273  | >TET2-S1284 GAFFSFGCSM | 349   | 924   |
| >TET2-S1284 GASFSFGCSM | 651   | >TET2-S1284 GAFFSFGCSM | 315   | 336   |
| >TET2-S1284 CGASFSFGCS | 347   | >TET2-S1284 CGAFFSFGCS | 488   | 141   |
| >TET2-S1284 CGASFSFGCS | 38    | >TET2-S1284 CGAFFSFGCS | 57    | 19    |
| >TET2-S1284 CGASFSFGCS | 205   | >TET2-S1284 CGAFFSFGCS | 249   | 44    |
| >TET2-S1284 ETCGASFSF  | 2067  | >TET2-S1284 ETCGAFFSF  | 379   | 1688  |
| >TET2-S1284 ETCGASFSF  | 267   | >TET2-S1284 ETCGAFFSF  | 91    | 176   |
| >TET2-S1284 ETCGASFSF  | 127   | >TET2-S1284 ETCGAFFSF  | 146   | 19    |
| >TET2-S1284 ETCGASFS   | 431   | >TET2-S1284 ETCGAFFS   | 633   | 202   |
| >TET2-S1284 ETCGASFSF  | 18    | >TET2-S1284 ETCGAFFSF  | 6     | 12    |
| >TET2-S1284 ETCGASFSF  | 49    | >TET2-S1284 ETCGAFFSF  | 9     | 40    |
| >TET2-S1284 ETCGASFSF  | 49    | >TET2-S1284 ETCGAFFSF  | 107   | 58    |
| >TET2-S1284 ETCGASFS   | 559   | >TET2-S1284 ETCGAFFS   | 361   | 198   |
| >TET2-S1284 ETCGASFSF  | 590   | >TET2-S1284 ETCGAFFSF  | 417   | 173   |
| >TET2-S1284 ETCGASFS   | 321   | >TET2-S1284 ETCGAFFS   | 99    | 222   |
| >TET2-S1284 ETCGASFSFG | 359   | >TET2-S1284 ETCGAFFSFG | 213   | 146   |
| >TET2-S1284 ETCGASFSF  | 268   | >TET2-S1284 ETCGAFFSF  | 315   | 47    |
| >TET2-S1284 ETCGASFSF  | 8     | >TET2-S1284 ETCGAFFSF  | 30    | 22    |
| >TET2-S1284 ETCGASFSF  | 281   | >TET2-S1284 ETCGAFFSF  | 722   | 441   |
| >TET2-S1284 ETCGASFSF  | 1152  | >TET2-S1284 ETCGAFFSF  | 242   | 910   |
| >TET2-S1284 ETCGASFSF  | 530   | >TET2-S1284 ETCGAFFSF  | 478   | 52    |

|                        |       |                        |       |       |
|------------------------|-------|------------------------|-------|-------|
| >TET2-S1284 PETCGASF   | 1118  | >TET2-S1284 PETCGAFF   | 393   | 725   |
| >TET2-S1284 PETCGASF   | 398   | >TET2-S1284 PETCGAFF   | 786   | 388   |
| >TET2-S1284 PETCGASF   | 894   | >TET2-S1284 PETCGAFF   | 343   | 551   |
| >TET2-S1284 DPETCGASFS | 259   | >TET2-S1284 DPETCGAFFS | 130   | 129   |
| >TET2-S1284 DPETCGASFS | 413   | >TET2-S1284 DPETCGAFFS | 373   | 40    |
| >TET2-S1284 DPETCGAS   | 1927  | >TET2-S1284 DPETCGAF   | 53    | 1874  |
| >TET2-S1284 DPETCGASF  | 113   | >TET2-S1284 DPETCGAFF  | 304   | 191   |
| >TET2-S1284 DPETCGASFS | 42    | >TET2-S1284 DPETCGAFFS | 69    | 27    |
| >TET2-S1284 DPETCGASFS | 258   | >TET2-S1284 DPETCGAFFS | 195   | 63    |
| >TET2-S1284 DPETCGAS   | 23199 | >TET2-S1284 DPETCGAF   | 329   | 22870 |
| >TET2-S1284 DPETCGASF  | 282   | >TET2-S1284 DPETCGAFF  | 528   | 246   |
| >TET2-S1284 DPETCGASFS | 143   | >TET2-S1284 DPETCGAFFS | 96    | 47    |
| >TET2-S1286 SFGCSWSMY  | 18    | >TET2-S1286 PFGCSWSMY  | 42    | 24    |
| >TET2-S1286 SFGCSWSMY  | 15    | >TET2-S1286 PFGCSWSMY  | 24    | 9     |
| >TET2-S1286 SFGCSWSMY  | 190   | >TET2-S1286 PFGCSWSMY  | 650   | 460   |
| >TET2-S1286 SFGCSWSMY  | 91    | >TET2-S1286 PFGCSWSMY  | 1004  | 913   |
| >TET2-S1286 SFGCSWSMY  | 81    | >TET2-S1286 PFGCSWSMY  | 715   | 634   |
| >TET2-S1286 SFGCSWSMY  | 416   | >TET2-S1286 PFGCSWSMY  | 3311  | 2895  |
| >TET2-S1286 SFGCSWSMY  | 55    | >TET2-S1286 PFGCSWSMY  | 3795  | 3740  |
| >TET2-S1286 SFGCSWSMY  | 197   | >TET2-S1286 PFGCSWSMY  | 414   | 217   |
| >TET2-S1286 FSGCSWSM   | 2565  | >TET2-S1286 FPFGCSWSM  | 14    | 2551  |
| >TET2-S1286 FSGCSWSM   | 12591 | >TET2-S1286 FPFGCSWSM  | 241   | 12350 |
| >TET2-S1286 FSGCSWSM   | 74    | >TET2-S1286 FPFGCSWSM  | 10631 | 10557 |
| >TET2-S1286 FSGCSWSM   | 43    | >TET2-S1286 FPFGCSWSM  | 14196 | 14153 |
| >TET2-S1286 FSGCSWSM   | 40    | >TET2-S1286 FPFGCSWSM  | 3972  | 3932  |
| >TET2-S1286 FSGCSWSM   | 20    | >TET2-S1286 FPFGCSWSM  | 1704  | 1684  |
| >TET2-S1286 FSGCSWSM   | 13    | >TET2-S1286 FPFGCSWSM  | 316   | 303   |
| >TET2-S1286 FSGCSWSM   | 469   | >TET2-S1286 FPFGCSWSM  | 3639  | 3170  |
| >TET2-S1286 FSGCSWSM   | 327   | >TET2-S1286 FPFGCSWSM  | 8783  | 8456  |
| >TET2-S1286 FSGCSWSM   | 318   | >TET2-S1286 FPFGCSWSM  | 12950 | 12632 |
| >TET2-S1286 FSGCSWSM   | 42    | >TET2-S1286 FPFGCSWSM  | 9795  | 9753  |
| >TET2-S1286 FSGCSWSM   | 112   | >TET2-S1286 FPFGCSWSM  | 2073  | 1961  |
| >TET2-S1286 FSGCSWSM   | 103   | >TET2-S1286 FPFGCSWSM  | 2254  | 2151  |
| >TET2-S1286 FSGCSWSM   | 22    | >TET2-S1286 FPFGCSWSM  | 156   | 134   |
| >TET2-S1286 FSGCSWSM   | 6     | >TET2-S1286 FPFGCSWSM  | 12    | 6     |
| >TET2-S1286 FSGCSWSM   | 14    | >TET2-S1286 FPFGCSWSM  | 344   | 330   |
| >TET2-S1286 FSGCSWSM   | 24    | >TET2-S1286 FPFGCSWSM  | 458   | 434   |
| >TET2-S1286 FSGCSWSM   | 27    | >TET2-S1286 FPFGCSWSM  | 1135  | 1108  |
| >TET2-S1286 FSGCSWSM   | 32    | >TET2-S1286 FPFGCSWSM  | 951   | 919   |
| >TET2-S1286 FSGCSWSM   | 73    | >TET2-S1286 FPFGCSWSM  | 2397  | 2324  |
| >TET2-S1286 FSGCSWSM   | 82    | >TET2-S1286 FPFGCSWSM  | 556   | 474   |
| >TET2-S1286 FSGCSWSM   | 10928 | >TET2-S1286 FPFGCSWSM  | 16    | 10912 |
| >TET2-S1286 FSGCSWSM   | 158   | >TET2-S1286 FPFGCSWSM  | 10016 | 9858  |

|                       |       |                       |       |       |
|-----------------------|-------|-----------------------|-------|-------|
| >TET2-S1286 FSFGCSWSM | 58    | >TET2-S1286 FPFGCSWSM | 2369  | 2311  |
| >TET2-S1286 FSFGCSWSM | 46    | >TET2-S1286 FPFGCSWSM | 1623  | 1577  |
| >TET2-S1286 FSFGCSWSM | 93    | >TET2-S1286 FPFGCSWSM | 50    | 43    |
| >TET2-S1286 FSFGCSWSM | 439   | >TET2-S1286 FPFGCSWSM | 201   | 238   |
| >TET2-S1286 FSFGCSWSM | 44    | >TET2-S1286 FPFGCSWSM | 483   | 439   |
| >TET2-S1286 FSFGCSWSM | 10    | >TET2-S1286 FPFGCSWSM | 79    | 69    |
| >TET2-S1286 FSFGCSWSM | 10    | >TET2-S1286 FPFGCSWSM | 86    | 76    |
| >TET2-S1286 FSFGCSWSM | 5     | >TET2-S1286 FPFGCSWSM | 9822  | 9817  |
| >TET2-S1286 FSFGCSWSM | 3     | >TET2-S1286 FPFGCSWSM | 2813  | 2810  |
| >TET2-S1286 FSFGCSWSM | 4     | >TET2-S1286 FPFGCSWSM | 5499  | 5495  |
| >TET2-S1286 FSFGCSWSM | 1427  | >TET2-S1286 FPFGCSWSM | 234   | 1193  |
| >TET2-S1286 FSFGCSWSM | 840   | >TET2-S1286 FPFGCSWSM | 144   | 696   |
| >TET2-S1286 FSFGCSWS  | 11541 | >TET2-S1286 FPFGCSWS  | 226   | 11315 |
| >TET2-S1286 FSFGCSWSM | 37    | >TET2-S1286 FPFGCSWSM | 7     | 30    |
| >TET2-S1286 FSFGCSWSM | 7215  | >TET2-S1286 FPFGCSWSM | 20    | 7195  |
| >TET2-S1286 FSFGCSWSM | 42    | >TET2-S1286 FPFGCSWSM | 7     | 35    |
| >TET2-S1286 FSFGCSWSM | 38    | >TET2-S1286 FPFGCSWSM | 9     | 29    |
| >TET2-S1286 FSFGCSWSM | 716   | >TET2-S1286 FPFGCSWSM | 10    | 706   |
| >TET2-S1286 FSFGCSWSM | 9922  | >TET2-S1286 FPFGCSWSM | 131   | 9791  |
| >TET2-S1286 FSFGCSWSM | 472   | >TET2-S1286 FPFGCSWSM | 8     | 464   |
| >TET2-S1286 FSFGCSWS  | 8906  | >TET2-S1286 FPFGCSWS  | 48    | 8858  |
| >TET2-S1286 FSFGCSWSM | 15698 | >TET2-S1286 FPFGCSWSM | 21    | 15677 |
| >TET2-S1286 FSFGCSWSM | 19993 | >TET2-S1286 FPFGCSWSM | 436   | 19557 |
| >TET2-S1286 FSFGCSWSM | 20586 | >TET2-S1286 FPFGCSWSM | 74    | 20512 |
| >TET2-S1286 FSFGCSWSM | 113   | >TET2-S1286 FPFGCSWSM | 15772 | 15659 |
| >TET2-S1286 FSFGCSWSM | 225   | >TET2-S1286 FPFGCSWSM | 15635 | 15410 |
| >TET2-S1286 FSFGCSWSM | 106   | >TET2-S1286 FPFGCSWSM | 12829 | 12723 |
| >TET2-S1286 FSFGCSWSM | 38    | >TET2-S1286 FPFGCSWSM | 16954 | 16916 |
| >TET2-S1286 FSFGCSWSM | 279   | >TET2-S1286 FPFGCSWSM | 18546 | 18267 |
| >TET2-S1286 FSFGCSWSM | 20    | >TET2-S1286 FPFGCSWSM | 13386 | 13366 |
| >TET2-S1286 FSFGCSWSM | 101   | >TET2-S1286 FPFGCSWSM | 5166  | 5065  |
| >TET2-S1286 FSFGCSWSM | 23    | >TET2-S1286 FPFGCSWSM | 656   | 633   |
| >TET2-S1286 FSFGCSWSM | 50    | >TET2-S1286 FPFGCSWSM | 5926  | 5876  |
| >TET2-S1286 FSFGCSWSM | 7     | >TET2-S1286 FPFGCSWSM | 98    | 91    |
| >TET2-S1286 FSFGCSWSM | 5731  | >TET2-S1286 FPFGCSWSM | 42    | 5689  |
| >TET2-S1286 FSFGCSWSM | 8925  | >TET2-S1286 FPFGCSWSM | 97    | 8828  |
| >TET2-S1286 FSFGCSWSM | 9980  | >TET2-S1286 FPFGCSWSM | 54    | 9926  |
| >TET2-S1286 FSFGCSWSM | 3061  | >TET2-S1286 FPFGCSWSM | 12    | 3049  |
| >TET2-S1286 FSFGCSWSM | 2941  | >TET2-S1286 FPFGCSWSM | 10    | 2931  |
| >TET2-S1286 FSFGCSWSM | 87    | >TET2-S1286 FPFGCSWSM | 71    | 16    |
| >TET2-S1286 FSFGCSWSM | 28    | >TET2-S1286 FPFGCSWSM | 198   | 170   |
| >TET2-S1286 FSFGCSWSM | 162   | >TET2-S1286 FPFGCSWSM | 4934  | 4772  |
| >TET2-S1286 SFSFGCSW  | 902   | >TET2-S1286 SFPFGCSW  | 128   | 774   |

|                        |      |                        |      |      |
|------------------------|------|------------------------|------|------|
| >TET2-S1286 SFSFGCSWSM | 935  | >TET2-S1286 SFPFGCSWSM | 173  | 762  |
| >TET2-S1286 SFSFGCSWSM | 13   | >TET2-S1286 SFPFGCSWSM | 25   | 12   |
| >TET2-S1286 SFSFGCSWSM | 58   | >TET2-S1286 SFPFGCSWSM | 253  | 195  |
| >TET2-S1286 SFSFGCSWSM | 128  | >TET2-S1286 SFPFGCSWSM | 181  | 53   |
| >TET2-S1286 SFSFGCSWSM | 93   | >TET2-S1286 SFPFGCSWSM | 338  | 245  |
| >TET2-S1286 SFSFGCSWSM | 12   | >TET2-S1286 SFPFGCSWSM | 142  | 130  |
| >TET2-S1286 SFSFGCSWSM | 112  | >TET2-S1286 SFPFGCSWSM | 517  | 405  |
| >TET2-S1286 SFSFGCSWSM | 461  | >TET2-S1286 SFPFGCSWSM | 267  | 194  |
| >TET2-S1286 SFSFGCSW   | 324  | >TET2-S1286 SFPFGCSW   | 848  | 524  |
| >TET2-S1286 ASFSFGCSWS | 204  | >TET2-S1286 ASFPFGCSWS | 310  | 106  |
| >TET2-S1286 ASFSFGCSWS | 709  | >TET2-S1286 ASFPFGCSWS | 323  | 386  |
| >TET2-S1286 ASFSFGCSW  | 51   | >TET2-S1286 ASFPFGCSW  | 76   | 25   |
| >TET2-S1286 ASFSFGCSWS | 135  | >TET2-S1286 ASFPFGCSWS | 200  | 65   |
| >TET2-S1286 ASFSFGCSW  | 256  | >TET2-S1286 ASFPFGCSW  | 266  | 10   |
| >TET2-S1286 ASFSFGCSWS | 125  | >TET2-S1286 ASFPFGCSWS | 135  | 10   |
| >TET2-S1286 ASFSFGCSW  | 29   | >TET2-S1286 ASFPFGCSW  | 79   | 50   |
| >TET2-S1286 ASFSFGCSWS | 12   | >TET2-S1286 ASFPFGCSWS | 21   | 9    |
| >TET2-S1286 ASFSFGCSW  | 4    | >TET2-S1286 ASFPFGCSW  | 3    | 1    |
| >TET2-S1286 ASFSFGCSWS | 2114 | >TET2-S1286 ASFPFGCSWS | 421  | 1693 |
| >TET2-S1286 ASFSFGCSWS | 6    | >TET2-S1286 ASFPFGCSWS | 4    | 2    |
| >TET2-S1286 ASFSFGCSW  | 34   | >TET2-S1286 ASFPFGCSW  | 25   | 9    |
| >TET2-S1286 ASFSFGCSWS | 235  | >TET2-S1286 ASFPFGCSWS | 96   | 139  |
| >TET2-S1286 ASFSFGCSW  | 14   | >TET2-S1286 ASFPFGCSW  | 10   | 4    |
| >TET2-S1286 ASFSFGCSWS | 298  | >TET2-S1286 ASFPFGCSWS | 122  | 176  |
| >TET2-S1286 ASFSFGCSWS | 211  | >TET2-S1286 ASFPFGCSWS | 154  | 57   |
| >TET2-S1286 ASFSFGCSW  | 84   | >TET2-S1286 ASFPFGCSW  | 183  | 99   |
| >TET2-S1286 ASFSFGCSWS | 16   | >TET2-S1286 ASFPFGCSWS | 25   | 9    |
| >TET2-S1286 ASFSFGCSW  | 336  | >TET2-S1286 ASFPFGCSW  | 574  | 238  |
| >TET2-S1286 ASFSFGCSW  | 266  | >TET2-S1286 ASFPFGCSW  | 71   | 195  |
| >TET2-S1286 ASFSFGCSWS | 505  | >TET2-S1286 ASFPFGCSWS | 379  | 126  |
| >TET2-S1286 ASFSFGCSWS | 85   | >TET2-S1286 ASFPFGCSWS | 38   | 47   |
| >TET2-S1286 GASFSFGCSM | 86   | >TET2-S1286 GASFPFGCSM | 131  | 45   |
| >TET2-S1286 GASFSFGCSM | 234  | >TET2-S1286 GASFPFGCSM | 343  | 109  |
| >TET2-S1286 GASFSFGCSM | 73   | >TET2-S1286 GASFPFGCSM | 130  | 57   |
| >TET2-S1286 CGASFSFGCS | 347  | >TET2-S1286 CGASFPFGCS | 225  | 122  |
| >TET2-S1286 CGASFSFGCS | 38   | >TET2-S1286 CGASFPFGCS | 33   | 5    |
| >TET2-S1286 CGASFSFGCS | 205  | >TET2-S1286 CGASFPFGCS | 250  | 45   |
| >TET2-S1286 ETCGASFSF  | 267  | >TET2-S1286 ETCGASFPF  | 2225 | 1958 |
| >TET2-S1286 ETCGASFSF  | 127  | >TET2-S1286 ETCGASFPF  | 140  | 13   |
| >TET2-S1286 ETCGASFS   | 431  | >TET2-S1286 ETCGASFP   | 1498 | 1067 |
| >TET2-S1286 ETCGASFSF  | 18   | >TET2-S1286 ETCGASFPF  | 11   | 7    |
| >TET2-S1286 ETCGASFSF  | 49   | >TET2-S1286 ETCGASFPF  | 63   | 14   |
| >TET2-S1286 ETCGASFSF  | 49   | >TET2-S1286 ETCGASFPF  | 45   | 4    |

|                        |      |                        |      |      |
|------------------------|------|------------------------|------|------|
| >TET2-S1286 ETCGASFS   | 321  | >TET2-S1286 ETCGASFP   | 5747 | 5426 |
| >TET2-S1286 ETCGASFSF  | 1518 | >TET2-S1286 ETCGASFPF  | 331  | 1187 |
| >TET2-S1286 ETCGASFSFG | 359  | >TET2-S1286 ETCGASFPFG | 388  | 29   |
| >TET2-S1286 ETCGASFSF  | 268  | >TET2-S1286 ETCGASFPF  | 152  | 116  |
| >TET2-S1286 ETCGASFSF  | 8    | >TET2-S1286 ETCGASFPF  | 7    | 1    |
| >TET2-S1286 ETCGASFSF  | 281  | >TET2-S1286 ETCGASFPF  | 70   | 211  |
| >TET2-S1286 DPETCGASFS | 259  | >TET2-S1286 DPETCGASFP | 1097 | 838  |
| >TET2-S1286 DPETCGASFS | 413  | >TET2-S1286 DPETCGASFP | 325  | 88   |
| >TET2-S1286 DPETCGASFS | 42   | >TET2-S1286 DPETCGASFP | 23   | 19   |
| >TET2-S1286 DPETCGASFS | 258  | >TET2-S1286 DPETCGASFP | 541  | 283  |
| >TET2-S1286 DPETCGASFS | 143  | >TET2-S1286 DPETCGASFP | 169  | 26   |
| >TET2-S1292 SMYYNGCKF  | 208  | >TET2-S1292 RMYYNGCKF  | 814  | 606  |
| >TET2-S1292 SMYYNGCKF, | 413  | >TET2-S1292 RMYYNGCKF, | 522  | 109  |
| >TET2-S1292 SMYYNGCKF, | 273  | >TET2-S1292 RMYYNGCKF, | 450  | 177  |
| >TET2-S1292 SMYYNGCKF, | 38   | >TET2-S1292 RMYYNGCKF, | 56   | 18   |
| >TET2-S1292 SMYYNGCKF  | 197  | >TET2-S1292 RMYYNGCKF  | 224  | 27   |
| >TET2-S1292 SMYYNGCKF, | 18   | >TET2-S1292 RMYYNGCKF, | 20   | 2    |
| >TET2-S1292 SMYYNGCKF, | 122  | >TET2-S1292 RMYYNGCKF, | 123  | 1    |
| >TET2-S1292 SMYYNGCKF, | 30   | >TET2-S1292 RMYYNGCKF, | 98   | 68   |
| >TET2-S1292 SMYYNGCKF, | 53   | >TET2-S1292 RMYYNGCKF, | 147  | 94   |
| >TET2-S1292 SMYYNGCK   | 40   | >TET2-S1292 RMYYNGCK   | 28   | 12   |
| >TET2-S1292 SMYYNGCKF, | 130  | >TET2-S1292 RMYYNGCKF, | 48   | 82   |
| >TET2-S1292 SMYYNGCK   | 17   | >TET2-S1292 RMYYNGCK   | 26   | 9    |
| >TET2-S1292 SMYYNGCKF, | 62   | >TET2-S1292 RMYYNGCKF, | 109  | 47   |
| >TET2-S1292 SMYYNGCKF  | 1478 | >TET2-S1292 RMYYNGCKF  | 233  | 1245 |
| >TET2-S1292 SMYYNGCK   | 708  | >TET2-S1292 RMYYNGCK   | 48   | 660  |
| >TET2-S1292 SMYYNGCKF, | 2432 | >TET2-S1292 RMYYNGCKF, | 227  | 2205 |
| >TET2-S1292 SMYYNGCK   | 364  | >TET2-S1292 RMYYNGCK   | 48   | 316  |
| >TET2-S1292 SMYYNGCKF, | 8    | >TET2-S1292 RMYYNGCKF, | 5    | 3    |
| >TET2-S1292 SMYYNGCKF  | 66   | >TET2-S1292 RMYYNGCKF  | 11   | 55   |
| >TET2-S1292 SMYYNGCKF, | 4062 | >TET2-S1292 RMYYNGCKF, | 401  | 3661 |
| >TET2-S1292 SMYYNGCKF, | 217  | >TET2-S1292 RMYYNGCKF, | 508  | 291  |
| >TET2-S1292 SMYYNGCK   | 153  | >TET2-S1292 RMYYNGCK   | 1310 | 1157 |
| >TET2-S1292 SMYYNGCKF, | 35   | >TET2-S1292 RMYYNGCKF, | 215  | 180  |
| >TET2-S1292 SMYYNGCKF  | 37   | >TET2-S1292 RMYYNGCKF  | 32   | 5    |
| >TET2-S1292 SMYYNGCKF, | 1179 | >TET2-S1292 RMYYNGCKF, | 452  | 727  |
| >TET2-S1292 SMYYNGCKF  | 23   | >TET2-S1292 RMYYNGCKF  | 80   | 57   |
| >TET2-S1292 SMYYNGCK   | 604  | >TET2-S1292 RMYYNGCK   | 138  | 466  |
| >TET2-S1292 SMYYNGCKF  | 3    | >TET2-S1292 RMYYNGCKF  | 2    | 1    |
| >TET2-S1292 SMYYNGCKF, | 335  | >TET2-S1292 RMYYNGCKF, | 87   | 248  |
| >TET2-S1292 SMYYNGCKF, | 199  | >TET2-S1292 RMYYNGCKF, | 42   | 157  |
| >TET2-S1292 SMYYNGCKF  | 33   | >TET2-S1292 RMYYNGCKF  | 8    | 25   |
| >TET2-S1292 SMYYNGCKF  | 5524 | >TET2-S1292 RMYYNGCKF  | 97   | 5427 |



|                        |       |                        |       |       |
|------------------------|-------|------------------------|-------|-------|
| >TET2-S1292 SMYYNGCKF, | 54    | >TET2-S1292 RMYYNGCKF, | 26    | 28    |
| >TET2-S1292 WSMYYNGCI  | 463   | >TET2-S1292 WRMYYNGCI  | 19767 | 19304 |
| >TET2-S1292 WSMYYNGCI  | 316   | >TET2-S1292 WRMYYNGCI  | 475   | 159   |
| >TET2-S1292 WSMYYNGCI  | 269   | >TET2-S1292 WRMYYNGCI  | 1890  | 1621  |
| >TET2-S1292 WSMYYNGCI  | 92    | >TET2-S1292 WRMYYNGCI  | 5694  | 5602  |
| >TET2-S1292 WSMYYNGCI  | 351   | >TET2-S1292 WRMYYNGCI  | 11434 | 11083 |
| >TET2-S1292 WSMYYNGCI  | 119   | >TET2-S1292 WRMYYNGCI  | 6995  | 6876  |
| >TET2-S1292 WSMYYNGCI  | 16    | >TET2-S1292 WRMYYNGCI  | 12    | 4     |
| >TET2-S1292 WSMYYNGCI  | 9     | >TET2-S1292 WRMYYNGCI  | 18225 | 18216 |
| >TET2-S1292 WSMYYNGCI  | 10016 | >TET2-S1292 WRMYYNGCI  | 28    | 9988  |
| >TET2-S1292 WSMYYNGCI  | 6700  | >TET2-S1292 WRMYYNGCI  | 25    | 6675  |
| >TET2-S1292 WSMYYNGCI  | 284   | >TET2-S1292 WRMYYNGCI  | 19915 | 19631 |
| >TET2-S1292 WSMYYNGCI  | 18    | >TET2-S1292 WRMYYNGCI  | 319   | 301   |
| >TET2-S1292 WSMYYNGCI  | 18230 | >TET2-S1292 WRMYYNGCI  | 171   | 18059 |
| >TET2-S1292 WSMYYNGCI  | 32466 | >TET2-S1292 WRMYYNGCI  | 283   | 32183 |
| >TET2-S1292 WSMYYNGCI  | 15949 | >TET2-S1292 WRMYYNGCI  | 127   | 15822 |
| >TET2-S1292 GASFSFGCSM | 21412 | >TET2-S1292 GASFSFGCSM | 283   | 21129 |
| >TET2-S1292 GASFSFGCSM | 19948 | >TET2-S1292 GASFSFGCSM | 43    | 19905 |
| >TET2-S1292 GASFSFGCSM | 6695  | >TET2-S1292 GASFSFGCSM | 355   | 6340  |
| >TET2-S1292 SWSMYYNGC  | 672   | >TET2-S1292 SWRMYYNGC  | 344   | 328   |
| >TET2-S1292 SWSMYYNGC  | 671   | >TET2-S1292 SWRMYYNGC  | 378   | 293   |
| >TET2-S1292 SWSMYYNGC  | 421   | >TET2-S1292 SWRMYYNGC  | 803   | 382   |
| >TET2-S1292 SWSMYYNGC  | 27    | >TET2-S1292 SWRMYYNGC  | 99    | 72    |
| >TET2-S1292 SWSMYYNGC  | 2658  | >TET2-S1292 SWRMYYNGC  | 13    | 2645  |
| >TET2-S1292 SWSMYYNGC  | 727   | >TET2-S1292 SWRMYYNGC  | 303   | 424   |
| >TET2-S1292 SWSMYYNGC  | 442   | >TET2-S1292 SWRMYYNGC  | 829   | 387   |
| >TET2-S1292 SWSMYYNG   | 187   | >TET2-S1292 SWRMYYNG   | 244   | 57    |
| >TET2-S1292 SWSMYYNGC  | 59    | >TET2-S1292 SWRMYYNGC  | 67    | 8     |
| >TET2-S1292 SWSMYYNGC  | 137   | >TET2-S1292 SWRMYYNGC  | 173   | 36    |
| >TET2-S1292 CSWSMYYNC  | 70    | >TET2-S1292 CSWRMYYNC  | 78    | 8     |
| >TET2-S1292 CSWSMYYNC  | 150   | >TET2-S1292 CSWRMYYNC  | 167   | 17    |
| >TET2-S1292 CSWSMYYNC  | 313   | >TET2-S1292 CSWRMYYNC  | 644   | 331   |
| >TET2-S1292 GCSWSMYY   | 64    | >TET2-S1292 GCSWRMYY   | 92    | 28    |
| >TET2-S1292 GCSWSMYY   | 128   | >TET2-S1292 GCSWRMYY   | 162   | 34    |
| >TET2-S1292 GCSWSMYY   | 212   | >TET2-S1292 GCSWRMYY   | 176   | 36    |
| >TET2-S1292 FGCSWSMY   | 48    | >TET2-S1292 FGCSWRMY   | 107   | 59    |
| >TET2-S1292 FGCSWSMY   | 10    | >TET2-S1292 FGCSWRMY   | 14    | 4     |
| >TET2-S1292 FGCSWSMY   | 186   | >TET2-S1292 FGCSWRMY   | 388   | 202   |
| >TET2-S1292 FGCSWSMY   | 84    | >TET2-S1292 FGCSWRMY   | 56    | 28    |
| >TET2-S1292 FGCSWSMY   | 158   | >TET2-S1292 FGCSWRMY   | 1339  | 1181  |
| >TET2-S1292 FGCSWSMY   | 210   | >TET2-S1292 FGCSWRMY   | 764   | 554   |
| >TET2-S1292 FGCSWSMY   | 136   | >TET2-S1292 FGCSWRMY   | 454   | 318   |
| >TET2-S1292 FGCSWSMY   | 372   | >TET2-S1292 FGCSWRMY   | 1243  | 871   |

|                       |       |                       |      |       |
|-----------------------|-------|-----------------------|------|-------|
| >TET2-S1292 FGCSWSMY  | 138   | >TET2-S1292 FGCSWRMY  | 712  | 574   |
| >TET2-S1292 FGCSWSMY  | 263   | >TET2-S1292 FGCSWRMY  | 1750 | 1487  |
| >TET2-S1292 FGCSWSMY  | 109   | >TET2-S1292 FGCSWRMY  | 177  | 68    |
| >TET2-S1292 SFGCSWSMY | 18    | >TET2-S1292 SFGCSWRMY | 36   | 18    |
| >TET2-S1292 SFGCSWSMY | 15    | >TET2-S1292 SFGCSWRMY | 18   | 3     |
| >TET2-S1292 SFGCSWSMY | 190   | >TET2-S1292 SFGCSWRMY | 201  | 11    |
| >TET2-S1292 SFGCSWSMY | 1503  | >TET2-S1292 SFGCSWRMY | 390  | 1113  |
| >TET2-S1292 SFGCSWSMY | 91    | >TET2-S1292 SFGCSWRMY | 218  | 127   |
| >TET2-S1292 SFGCSWSMY | 81    | >TET2-S1292 SFGCSWRMY | 216  | 135   |
| >TET2-S1292 SFGCSWSMY | 416   | >TET2-S1292 SFGCSWRMY | 1038 | 622   |
| >TET2-S1292 SFGCSWSMY | 55    | >TET2-S1292 SFGCSWRMY | 1605 | 1550  |
| >TET2-S1292 SFGCSWSMY | 197   | >TET2-S1292 SFGCSWRMY | 1039 | 842   |
| >TET2-S1292 FSGCSWSM  | 74    | >TET2-S1292 FSGCSWRM  | 123  | 49    |
| >TET2-S1292 FSGCSWSM  | 43    | >TET2-S1292 FSGCSWRM  | 53   | 10    |
| >TET2-S1292 FSGCSWSM  | 40    | >TET2-S1292 FSGCSWRM  | 68   | 28    |
| >TET2-S1292 FSGCSWSM  | 20    | >TET2-S1292 FSGCSWRM  | 43   | 23    |
| >TET2-S1292 FSGCSWSM  | 13    | >TET2-S1292 FSGCSWRM  | 52   | 39    |
| >TET2-S1292 FSGCSWSM  | 469   | >TET2-S1292 FSGCSWRM  | 547  | 78    |
| >TET2-S1292 FSGCSWSM  | 327   | >TET2-S1292 FSGCSWRM  | 964  | 637   |
| >TET2-S1292 FSGCSWSM  | 318   | >TET2-S1292 FSGCSWRM  | 405  | 87    |
| >TET2-S1292 FSGCSWSM  | 42    | >TET2-S1292 FSGCSWRM  | 51   | 9     |
| >TET2-S1292 FSGCSWSM  | 112   | >TET2-S1292 FSGCSWRM  | 449  | 337   |
| >TET2-S1292 FSGCSWSM  | 103   | >TET2-S1292 FSGCSWRM  | 212  | 109   |
| >TET2-S1292 FSGCSWSM  | 22    | >TET2-S1292 FSGCSWRM  | 19   | 3     |
| >TET2-S1292 FSGCSWSM  | 6     | >TET2-S1292 FSGCSWRM  | 6    | 0     |
| >TET2-S1292 FSGCSWSM  | 14    | >TET2-S1292 FSGCSWRM  | 22   | 8     |
| >TET2-S1292 FSGCSWSM  | 24    | >TET2-S1292 FSGCSWRM  | 21   | 3     |
| >TET2-S1292 FSGCSWS   | 20140 | >TET2-S1292 FSGCSWR   | 170  | 19970 |
| >TET2-S1292 FSGCSWS   | 20424 | >TET2-S1292 FSGCSWR   | 54   | 20370 |
| >TET2-S1292 FSGCSWS   | 2828  | >TET2-S1292 FSGCSWR   | 3    | 2825  |
| >TET2-S1292 FSGCSWSM  | 27    | >TET2-S1292 FSGCSWRM  | 143  | 116   |
| >TET2-S1292 FSGCSWSM  | 32    | >TET2-S1292 FSGCSWRM  | 30   | 2     |
| >TET2-S1292 FSGCSWSM  | 73    | >TET2-S1292 FSGCSWRM  | 78   | 5     |
| >TET2-S1292 FSGCSWSM  | 82    | >TET2-S1292 FSGCSWRM  | 217  | 135   |
| >TET2-S1292 FSGCSWSM  | 158   | >TET2-S1292 FSGCSWRM  | 939  | 781   |
| >TET2-S1292 FSGCSWSM  | 58    | >TET2-S1292 FSGCSWRM  | 101  | 43    |
| >TET2-S1292 FSGCSWSM  | 46    | >TET2-S1292 FSGCSWRM  | 76   | 30    |
| >TET2-S1292 FSGCSWSM  | 93    | >TET2-S1292 FSGCSWRM  | 211  | 118   |
| >TET2-S1292 FSGCSWSM  | 439   | >TET2-S1292 FSGCSWRM  | 1025 | 586   |
| >TET2-S1292 FSGCSWSM  | 44    | >TET2-S1292 FSGCSWRM  | 384  | 340   |
| >TET2-S1292 FSGCSWSM  | 10    | >TET2-S1292 FSGCSWRM  | 30   | 20    |
| >TET2-S1292 FSGCSWSM  | 10    | >TET2-S1292 FSGCSWRM  | 16   | 6     |
| >TET2-S1292 FSGCSWSM  | 5     | >TET2-S1292 FSGCSWRM  | 5    | 0     |

|                        |       |                        |     |       |
|------------------------|-------|------------------------|-----|-------|
| >TET2-S1292 FSFGCSWSM  | 3     | >TET2-S1292 FSFGCSWRM  | 4   | 1     |
| >TET2-S1292 FSFGCSWSM  | 4     | >TET2-S1292 FSFGCSWRM  | 5   | 1     |
| >TET2-S1292 FSFGCSWSM  | 37    | >TET2-S1292 FSFGCSWRM  | 93  | 56    |
| >TET2-S1292 FSFGCSWSM  | 42    | >TET2-S1292 FSFGCSWRM  | 120 | 78    |
| >TET2-S1292 FSFGCSWSM  | 38    | >TET2-S1292 FSFGCSWRM  | 312 | 274   |
| >TET2-S1292 FSFGCSWSM  | 472   | >TET2-S1292 FSFGCSWRM  | 655 | 183   |
| >TET2-S1292 FSFGCSWSM  | 113   | >TET2-S1292 FSFGCSWRM  | 108 | 5     |
| >TET2-S1292 FSFGCSWSM  | 225   | >TET2-S1292 FSFGCSWRM  | 138 | 87    |
| >TET2-S1292 FSFGCSWSM  | 106   | >TET2-S1292 FSFGCSWRM  | 97  | 9     |
| >TET2-S1292 FSFGCSWSM  | 38    | >TET2-S1292 FSFGCSWRM  | 47  | 9     |
| >TET2-S1292 FSFGCSWSM  | 279   | >TET2-S1292 FSFGCSWRM  | 967 | 688   |
| >TET2-S1292 FSFGCSWSM  | 20    | >TET2-S1292 FSFGCSWRM  | 27  | 7     |
| >TET2-S1292 FSFGCSWSM  | 101   | >TET2-S1292 FSFGCSWRM  | 188 | 87    |
| >TET2-S1292 FSFGCSWSM  | 23    | >TET2-S1292 FSFGCSWRM  | 19  | 4     |
| >TET2-S1292 FSFGCSWSM  | 50    | >TET2-S1292 FSFGCSWRM  | 122 | 72    |
| >TET2-S1292 FSFGCSWSM  | 7     | >TET2-S1292 FSFGCSWRM  | 8   | 1     |
| >TET2-S1292 FSFGCSWSM  | 87    | >TET2-S1292 FSFGCSWRM  | 121 | 34    |
| >TET2-S1292 FSFGCSWSM  | 28    | >TET2-S1292 FSFGCSWRM  | 26  | 2     |
| >TET2-S1292 FSFGCSWS   | 23670 | >TET2-S1292 FSFGCSWR   | 261 | 23409 |
| >TET2-S1292 FSFGCSWSM  | 162   | >TET2-S1292 FSFGCSWRM  | 378 | 216   |
| >TET2-S1292 SFSFGCSWSM | 13    | >TET2-S1292 SFSFGCSWRM | 18  | 5     |
| >TET2-S1292 SFSFGCSWSM | 58    | >TET2-S1292 SFSFGCSWRM | 137 | 79    |
| >TET2-S1292 SFSFGCSWS  | 18969 | >TET2-S1292 SFSFGCSWR  | 81  | 18888 |
| >TET2-S1292 SFSFGCSWS  | 25803 | >TET2-S1292 SFSFGCSWR  | 134 | 25669 |
| >TET2-S1292 SFSFGCSWS  | 21260 | >TET2-S1292 SFSFGCSWR  | 85  | 21175 |
| >TET2-S1292 SFSFGCSWSM | 128   | >TET2-S1292 SFSFGCSWRM | 264 | 136   |
| >TET2-S1292 SFSFGCSWSM | 93    | >TET2-S1292 SFSFGCSWRM | 171 | 78    |
| >TET2-S1292 SFSFGCSWSM | 12    | >TET2-S1292 SFSFGCSWRM | 95  | 83    |
| >TET2-S1292 SFSFGCSWSM | 112   | >TET2-S1292 SFSFGCSWRM | 290 | 178   |
| >TET2-S1292 SFSFGCSWSM | 461   | >TET2-S1292 SFSFGCSWRM | 638 | 177   |
| >TET2-S1292 ASFSFGCSWS | 204   | >TET2-S1292 ASFSFGCSWF | 97  | 107   |
| >TET2-S1292 ASFSFGCSWS | 9014  | >TET2-S1292 ASFSFGCSWF | 106 | 8908  |
| >TET2-S1292 ASFSFGCSWS | 24177 | >TET2-S1292 ASFSFGCSWF | 31  | 24146 |
| >TET2-S1292 ASFSFGCSWS | 9539  | >TET2-S1292 ASFSFGCSWF | 14  | 9525  |
| >TET2-S1292 ASFSFGCSWS | 135   | >TET2-S1292 ASFSFGCSWF | 611 | 476   |
| >TET2-S1292 ASFSFGCSWS | 21114 | >TET2-S1292 ASFSFGCSWF | 182 | 20932 |
| >TET2-S1292 ASFSFGCSWS | 22686 | >TET2-S1292 ASFSFGCSWF | 8   | 22678 |
| >TET2-S1292 ASFSFGCSWS | 125   | >TET2-S1292 ASFSFGCSWF | 569 | 444   |
| >TET2-S1292 ASFSFGCSWS | 1711  | >TET2-S1292 ASFSFGCSWF | 449 | 1262  |
| >TET2-S1292 ASFSFGCSWS | 12    | >TET2-S1292 ASFSFGCSWF | 50  | 38    |
| >TET2-S1292 ASFSFGCSWS | 6     | >TET2-S1292 ASFSFGCSWF | 5   | 1     |
| >TET2-S1292 ASFSFGCSWS | 235   | >TET2-S1292 ASFSFGCSWF | 237 | 2     |
| >TET2-S1292 ASFSFGCSWS | 298   | >TET2-S1292 ASFSFGCSWF | 412 | 114   |

|                         |      |                         |       |       |
|-------------------------|------|-------------------------|-------|-------|
| >TET2-S1292 ASFSFGCSWS  | 211  | >TET2-S1292 ASFSFGCSWF  | 385   | 174   |
| >TET2-S1292 ASFSFGCSWS  | 16   | >TET2-S1292 ASFSFGCSWF  | 13    | 3     |
| >TET2-S1292 ASFSFGCSWS  | 734  | >TET2-S1292 ASFSFGCSWF  | 65    | 669   |
| >TET2-S1292 ASFSFGCSWS  | 505  | >TET2-S1292 ASFSFGCSWF  | 386   | 119   |
| >TET2-S1292 ASFSFGCSWS  | 85   | >TET2-S1292 ASFSFGCSWF  | 209   | 124   |
| >TET2-S1303 SKIPRKFLL   | 377  | >TET2-S1303 NKIPRKFLL   | 1253  | 876   |
| >TET2-S1303 RSKIPRKF    | 138  | >TET2-S1303 RNKIPRKF    | 7838  | 7700  |
| >TET2-S1303 RSKIPRKF    | 170  | >TET2-S1303 RNKIPRKF    | 7316  | 7146  |
| >TET2-S1303 RSKIPRKF    | 3    | >TET2-S1303 RNKIPRKF    | 7     | 4     |
| >TET2-S1303 RSKIPRKF    | 27   | >TET2-S1303 RNKIPRKF    | 1002  | 975   |
| >TET2-S1303 RSKIPRKFLL  | 16   | >TET2-S1303 RNKIPRKFLL  | 579   | 563   |
| >TET2-S1303 RSKIPRKF    | 23   | >TET2-S1303 RNKIPRKF    | 384   | 361   |
| >TET2-S1303 RSKIPRKF    | 44   | >TET2-S1303 RNKIPRKF    | 312   | 268   |
| >TET2-S1303 RSKIPRKF    | 3    | >TET2-S1303 RNKIPRKF    | 4591  | 4588  |
| >TET2-S1303 RSKIPRKF    | 6    | >TET2-S1303 RNKIPRKF    | 10643 | 10637 |
| >TET2-S1303 RSKIPRKFLL  | 12   | >TET2-S1303 RNKIPRKFLL  | 15600 | 15588 |
| >TET2-S1303 RSKIPRKF    | 96   | >TET2-S1303 RNKIPRKF    | 11864 | 11768 |
| >TET2-S1303 RSKIPRKFLL  | 451  | >TET2-S1303 RNKIPRKFLL  | 12796 | 12345 |
| >TET2-S1303 RSKIPRKF    | 53   | >TET2-S1303 RNKIPRKF    | 962   | 909   |
| >TET2-S1303 RSKIPRKF    | 152  | >TET2-S1303 RNKIPRKF    | 9507  | 9355  |
| >TET2-S1303 RSKIPRKFLL  | 166  | >TET2-S1303 RNKIPRKFLL  | 3286  | 3120  |
| >TET2-S1303 RSKIPRKFLL  | 469  | >TET2-S1303 RNKIPRKFLL  | 5443  | 4974  |
| >TET2-S1303 ARSKIPRKF   | 72   | >TET2-S1303 ARNKIPRKF   | 73    | 1     |
| >TET2-S1303 ARSKIPRKF   | 112  | >TET2-S1303 ARNKIPRKF   | 94    | 18    |
| >TET2-S1303 ARSKIPRKF   | 94   | >TET2-S1303 ARNKIPRKF   | 78    | 16    |
| >TET2-S1303 ARSKIPRKF   | 64   | >TET2-S1303 ARNKIPRKF   | 54    | 10    |
| >TET2-S1303 ARSKIPRKF   | 1879 | >TET2-S1303 ARNKIPRKF   | 480   | 1399  |
| >TET2-S1303 ARSKIPRKF   | 230  | >TET2-S1303 ARNKIPRKF   | 249   | 19    |
| >TET2-S1303 ARSKIPRKF   | 76   | >TET2-S1303 ARNKIPRKF   | 106   | 30    |
| >TET2-S1303 ARSKIPRKF   | 42   | >TET2-S1303 ARNKIPRKF   | 58    | 16    |
| >TET2-S1303 FARSKIPRKF  | 49   | >TET2-S1303 FARNKIPRKF  | 42    | 7     |
| >TET2-S1303 FARSKIPRKF  | 20   | >TET2-S1303 FARNKIPRKF  | 18    | 2     |
| >TET2-S1303 FARSKIPR    | 67   | >TET2-S1303 FARNKIPR    | 91    | 24    |
| >TET2-S1303 FARSKIPR    | 79   | >TET2-S1303 FARNKIPR    | 94    | 15    |
| >TET2-S1303 FARSKIPR    | 163  | >TET2-S1303 FARNKIPR    | 229   | 66    |
| >TET2-S1303 FARSKIPRKF  | 324  | >TET2-S1303 FARNKIPRKF  | 447   | 123   |
| >TET2-S1303 FARSKIPRKF  | 36   | >TET2-S1303 FARNKIPRKF  | 50    | 14    |
| >TET2-S1303 FARSKIPRKF  | 13   | >TET2-S1303 FARNKIPRKF  | 15    | 2     |
| >TET2-S1303 FARSKIPRKF  | 200  | >TET2-S1303 FARNKIPRKF  | 239   | 39    |
| >TET2-S1303 KFARSKIPRKF | 163  | >TET2-S1303 KFARNKIPRKF | 140   | 23    |
| >TET2-S1303 KFARSKIPRKF | 231  | >TET2-S1303 KFARNKIPRKF | 196   | 35    |
| >TET2-S1303 KFARSKIPRKF | 103  | >TET2-S1303 KFARNKIPRKF | 55    | 48    |
| >TET2-S1303 KFARSKIPR   | 367  | >TET2-S1303 KFARNKIPR   | 632   | 265   |

|                         |       |                         |      |       |
|-------------------------|-------|-------------------------|------|-------|
| >TET2-S1303 KFARSKIPRK  | 19    | >TET2-S1303 KFARNKIPRK  | 23   | 4     |
| >TET2-S1303 KFARSKIPR   | 6     | >TET2-S1303 KFARNKIPR   | 7    | 1     |
| >TET2-S1303 KFARSKIPRK  | 226   | >TET2-S1303 KFARNKIPRK  | 837  | 611   |
| >TET2-S1303 KFARSKIPR   | 15    | >TET2-S1303 KFARNKIPR   | 12   | 3     |
| >TET2-S1303 KFARSKIPRK  | 383   | >TET2-S1303 KFARNKIPRK  | 283  | 100   |
| >TET2-S1303 CKFARSKIPR  | 196   | >TET2-S1303 CKFARNKIPR  | 396  | 200   |
| >TET2-S1303 CKFARSKI    | 59    | >TET2-S1303 CKFARNKI    | 124  | 65    |
| >TET2-S1303 CKFARSKIPR  | 125   | >TET2-S1303 CKFARNKIPR  | 222  | 97    |
| >TET2-S1303 CKFARSKIPR  | 73    | >TET2-S1303 CKFARNKIPR  | 55   | 18    |
| >TET2-S1303 CKFARSKI    | 94    | >TET2-S1303 CKFARNKI    | 211  | 117   |
| >TET2-S1303 GCKFARSK    | 46    | >TET2-S1303 GCKFARNK    | 63   | 17    |
| >TET2-S1303 GCKFARSKIPR | 107   | >TET2-S1303 GCKFARNKIPR | 145  | 38    |
| >TET2-S1303 GCKFARSKI   | 261   | >TET2-S1303 GCKFARNKI   | 2734 | 2473  |
| >TET2-S1303 YYNGCKFARS  | 311   | >TET2-S1303 YYNGCKFARN  | 185  | 126   |
| >TET2-S145N DLSDKKESV   | 98    | >TET2-S145N DLNDKKESV   | 38   | 60    |
| >TET2-S145N DLSDKKESV   | 189   | >TET2-S145N DLNDKKESV   | 148  | 41    |
| >TET2-S145N DLSDKKESV   | 35    | >TET2-S145N DLNDKKESV   | 50   | 15    |
| >TET2-S145N DLSDKKESV   | 6     | >TET2-S145N DLNDKKESV   | 7    | 1     |
| >TET2-S145N SDLSDKKESV  | 172   | >TET2-S145N SDLNDKKESV  | 272  | 100   |
| >TET2-S145N VSDLSDKK    | 282   | >TET2-S145N VSDLNDKK    | 542  | 260   |
| >TET2-S145N NVSDLSDK    | 277   | >TET2-S145N NVSDLNDK    | 437  | 160   |
| >TET2-S145N NVSDLSDKK   | 121   | >TET2-S145N NVSDLNDKK   | 191  | 70    |
| >TET2-S145N NVSDLSDK    | 62    | >TET2-S145N NVSDLNDK    | 73   | 11    |
| >TET2-S145N NVSDLSDKK   | 30    | >TET2-S145N NVSDLNDKK   | 25   | 5     |
| >TET2-S1556 SVNSYSASGS  | 948   | >TET2-S1556 YVNSYSASGS  | 98   | 850   |
| >TET2-S1556 SVNSYSASG   | 1135  | >TET2-S1556 YVNSYSASG   | 330  | 805   |
| >TET2-S1556 ESVNSYSA    | 54    | >TET2-S1556 EYVNSYSA    | 2552 | 2498  |
| >TET2-S1556 QQQPHHPQ1   | 8841  | >TET2-S1556 QQQPHHPQ1   | 61   | 8780  |
| >TET2-S1556 QQQPHHPQ1   | 19492 | >TET2-S1556 QQQPHHPQ1   | 169  | 19323 |
| >TET2-S1556 QQQPHHPQ1   | 3840  | >TET2-S1556 QQQPHHPQ1   | 14   | 3826  |
| >TET2-S1556 TESVNSYSA   | 5247  | >TET2-S1556 TEYVNSYSA   | 304  | 4943  |
| >TET2-S1556 TESVNSYSA   | 825   | >TET2-S1556 TEYVNSYSA   | 159  | 666   |
| >TET2-S1556 TESVNSYSA   | 142   | >TET2-S1556 TEYVNSYSA   | 41   | 101   |
| >TET2-S1556 TESVNSYSAS  | 439   | >TET2-S1556 TEYVNSYSAS  | 256  | 183   |
| >TET2-S1556 TESVNSYSA   | 24    | >TET2-S1556 TEYVNSYSA   | 20   | 4     |
| >TET2-S1556 TESVNSYSAS  | 1046  | >TET2-S1556 TEYVNSYSAS  | 290  | 756   |
| >TET2-S1556 QTESVNSY    | 27    | >TET2-S1556 QTEYVNSY    | 33   | 6     |
| >TET2-S1556 QTESVNSY    | 146   | >TET2-S1556 QTEYVNSY    | 95   | 51    |
| >TET2-S1556 QTESVNSY    | 348   | >TET2-S1556 QTEYVNSY    | 382  | 34    |
| >TET2-S1556 QTESVNSY    | 75    | >TET2-S1556 QTEYVNSY    | 82   | 7     |
| >TET2-S1556 QTESVNSY    | 92    | >TET2-S1556 QTEYVNSY    | 109  | 17    |
| >TET2-S1556 QTESVNSY    | 97    | >TET2-S1556 QTEYVNSY    | 158  | 61    |
| >TET2-S1556 QTESVNSYS   | 131   | >TET2-S1556 QTEYVNSYS   | 195  | 64    |

|                         |       |                         |      |       |
|-------------------------|-------|-------------------------|------|-------|
| >TET2-S1556 QTESVNSYSA  | 399   | >TET2-S1556 QTEYVNSYSA  | 606  | 207   |
| >TET2-S1556 QTESVNSY    | 377   | >TET2-S1556 QTEYVNSY    | 364  | 13    |
| >TET2-S1556 PQTESVNSY   | 41    | >TET2-S1556 PQTEYVNSY   | 63   | 22    |
| >TET2-S1556 HPQTESVNSY  | 107   | >TET2-S1556 HPQTEYVNSY  | 110  | 3     |
| >TET2-S1556 HPQTESVNSY  | 10    | >TET2-S1556 HPQTEYVNSY  | 12   | 2     |
| >TET2-S1556 HPQTESVNSY  | 1288  | >TET2-S1556 HPQTEYVNSY  | 486  | 802   |
| >TET2-S1556 HHPQTESVN!  | 313   | >TET2-S1556 HHPQTEYVN!  | 557  | 244   |
| >TET2-S1556 QPHHPQTES'  | 446   | >TET2-S1556 QPHHPQTEY'  | 1491 | 1045  |
| >TET2-S1556 QPHHPQTES   | 18191 | >TET2-S1556 QPHHPQTEY   | 483  | 17708 |
| >TET2-S1556 QPHHPQTES   | 4849  | >TET2-S1556 QPHHPQTEY   | 35   | 4814  |
| >TET2-S1556 QPHHPQTES'  | 157   | >TET2-S1556 QPHHPQTEY'  | 150  | 7     |
| >TET2-S1556 QPHHPQTES   | 17529 | >TET2-S1556 QPHHPQTEY   | 67   | 17462 |
| >TET2-S1556 QQPHPHQTE   | 204   | >TET2-S1556 QQPHPHQTE   | 171  | 33    |
| >TET2-S1556 QQPHPHQTE   | 81    | >TET2-S1556 QQPHPHQTE   | 50   | 31    |
| >TET2-S1556 QQPHPHQTE   | 2117  | >TET2-S1556 QQPHPHQTE   | 440  | 1677  |
| >TET2-S1556 QQPHPHQTE   | 16949 | >TET2-S1556 QQPHPHQTE   | 221  | 16728 |
| >TET2-S1556 QQPHPHQTE   | 24295 | >TET2-S1556 QQPHPHQTE   | 419  | 23876 |
| >TET2-S1556 QQPHPHQTE   | 4678  | >TET2-S1556 QQPHPHQTE   | 18   | 4660  |
| >TET2-S1556 QQPHPHQTE   | 279   | >TET2-S1556 QQPHPHQTE   | 688  | 409   |
| >TET2-S1898 SLVFIYQHK   | 6499  | >TET2-S1898 FLVFIYQHK   | 491  | 6008  |
| >TET2-S1898 SLVFIYQHKS  | 557   | >TET2-S1898 FLVFIYQHKS  | 22   | 535   |
| >TET2-S1898 SLVFIYQHKS  | 1190  | >TET2-S1898 FLVFIYQHKS  | 247  | 943   |
| >TET2-S1898 SLVFIYQHKS  | 3495  | >TET2-S1898 FLVFIYQHKS  | 276  | 3219  |
| >TET2-S1898 SLVFIYQHKS  | 1441  | >TET2-S1898 FLVFIYQHKS  | 419  | 1022  |
| >TET2-S1898 SLVFIYQHKS  | 1683  | >TET2-S1898 FLVFIYQHKS  | 234  | 1449  |
| >TET2-S1898 SLVFIYQHKS  | 380   | >TET2-S1898 FLVFIYQHKS  | 58   | 322   |
| >TET2-S1898 SLVFIYQHKS  | 2050  | >TET2-S1898 FLVFIYQHKS  | 360  | 1690  |
| >TET2-S1898 SLVFIYQHK   | 2497  | >TET2-S1898 FLVFIYQHK   | 203  | 2294  |
| >TET2-S1898 SLVFIYQHK   | 590   | >TET2-S1898 FLVFIYQHK   | 48   | 542   |
| >TET2-S1898 SLVFIYQHKS  | 283   | >TET2-S1898 FLVFIYQHKS  | 31   | 252   |
| >TET2-S1898 SLVFIYQHK   | 160   | >TET2-S1898 FLVFIYQHK   | 630  | 470   |
| >TET2-S1898 SLVFIYQHK   | 76    | >TET2-S1898 FLVFIYQHK   | 1576 | 1500  |
| >TET2-S1898 SLVFIYQHK   | 382   | >TET2-S1898 FLVFIYQHK   | 111  | 271   |
| >TET2-S1898 SLVFIYQHKS  | 621   | >TET2-S1898 FLVFIYQHKS  | 370  | 251   |
| >TET2-S1898 SLVFIYQHKS  | 695   | >TET2-S1898 FLVFIYQHKS  | 123  | 572   |
| >TET2-S1898 SLVFIYQHKS  | 458   | >TET2-S1898 FLVFIYQHKS  | 735  | 277   |
| >TET2-S1898 ISLVFIYQHK  | 225   | >TET2-S1898 IFLVFIYQHK  | 1841 | 1616  |
| >TET2-S1898 ISLVFIYQHKS | 34    | >TET2-S1898 IFLVFIYQHKS | 103  | 69    |
| >TET2-S1898 ISLVFIYQHK  | 451   | >TET2-S1898 IFLVFIYQHK  | 4775 | 4324  |
| >TET2-S1898 ISLVFIYQHK  | 42    | >TET2-S1898 IFLVFIYQHK  | 2121 | 2079  |
| >TET2-S1898 ISLVFIYQHK  | 9319  | >TET2-S1898 IFLVFIYQHK  | 199  | 9120  |
| >TET2-S1898 ISLVFIYQH   | 4891  | >TET2-S1898 IFLVFIYQH   | 426  | 4465  |
| >TET2-S1898 ISLVFIYQHK  | 15    | >TET2-S1898 IFLVFIYQHK  | 39   | 24    |

|                        |       |                        |       |       |
|------------------------|-------|------------------------|-------|-------|
| >TET2-S1898 ISLVFYQHK  | 93    | >TET2-S1898 IFLVFYQHK  | 62    | 31    |
| >TET2-S1898 ISLVFYQHK  | 2085  | >TET2-S1898 IFLVFYQHK  | 209   | 1876  |
| >TET2-S1898 ISLVFYQHK  | 474   | >TET2-S1898 IFLVFYQHK  | 4721  | 4247  |
| >TET2-S1898 ISLVFYQHKS | 31    | >TET2-S1898 IFLVFYQHKS | 547   | 516   |
| >TET2-S1898 ISLVFYQHKS | 8     | >TET2-S1898 IFLVFYQHKS | 20786 | 20778 |
| >TET2-S1898 ISLVFYQHKS | 135   | >TET2-S1898 IFLVFYQHKS | 20710 | 20575 |
| >TET2-S1898 ISLVFYQHKS | 50    | >TET2-S1898 IFLVFYQHKS | 1911  | 1861  |
| >TET2-S1898 ISLVFYQH   | 359   | >TET2-S1898 IFLVFYQH   | 4288  | 3929  |
| >TET2-S1898 ISLVFYQHK  | 172   | >TET2-S1898 IFLVFYQHK  | 1305  | 1133  |
| >TET2-S1898 ISLVFYQHK  | 3500  | >TET2-S1898 IFLVFYQHK  | 164   | 3336  |
| >TET2-S1898 NPNRNHPTR  | 8059  | >TET2-S1898 NPNRNHPTR  | 60    | 7999  |
| >TET2-S1898 NPNRNHPTR  | 4413  | >TET2-S1898 NPNRNHPTR  | 84    | 4329  |
| >TET2-S1898 NPNRNHPTR  | 11258 | >TET2-S1898 NPNRNHPTR  | 136   | 11122 |
| >TET2-S1898 NPNRNHPTR  | 24706 | >TET2-S1898 NPNRNHPTR  | 279   | 24427 |
| >TET2-S1898 RISLVFYQH  | 758   | >TET2-S1898 RIFLVFYQH  | 177   | 581   |
| >TET2-S1898 RISLVFYQHK | 34    | >TET2-S1898 RIFLVFYQHK | 28    | 6     |
| >TET2-S1898 RISLVFYQH  | 222   | >TET2-S1898 RIFLVFYQH  | 61    | 161   |
| >TET2-S1898 RISLVFYQHK | 13    | >TET2-S1898 RIFLVFYQHK | 15    | 2     |
| >TET2-S1898 RISLVFYQHK | 19    | >TET2-S1898 RIFLVFYQHK | 7     | 12    |
| >TET2-S1898 RISLVFYQ   | 775   | >TET2-S1898 RIFLVFYQ   | 165   | 610   |
| >TET2-S1898 RISLVFYQH  | 291   | >TET2-S1898 RIFLVFYQH  | 71    | 220   |
| >TET2-S1898 RISLVFYQHK | 60    | >TET2-S1898 RIFLVFYQHK | 69    | 9     |
| >TET2-S1898 RISLVFYQH  | 1513  | >TET2-S1898 RIFLVFYQH  | 113   | 1400  |
| >TET2-S1898 RISLVFYQHK | 395   | >TET2-S1898 RIFLVFYQHK | 157   | 238   |
| >TET2-S1898 RISLVFYQHK | 264   | >TET2-S1898 RIFLVFYQHK | 181   | 83    |
| >TET2-S1898 RISLVFYQ   | 573   | >TET2-S1898 RIFLVFYQ   | 107   | 466   |
| >TET2-S1898 RISLVFYQHK | 187   | >TET2-S1898 RIFLVFYQHK | 48    | 139   |
| >TET2-S1898 TRISLVFY   | 172   | >TET2-S1898 TRIFLVFY   | 332   | 160   |
| >TET2-S1898 TRISLVFY   | 223   | >TET2-S1898 TRIFLVFY   | 125   | 98    |
| >TET2-S1898 TRISLVFY   | 456   | >TET2-S1898 TRIFLVFY   | 564   | 108   |
| >TET2-S1898 TRISLVFY   | 396   | >TET2-S1898 TRIFLVFY   | 235   | 161   |
| >TET2-S1898 TRISLVFY   | 180   | >TET2-S1898 TRIFLVFY   | 539   | 359   |
| >TET2-S1898 TRISLVFY   | 247   | >TET2-S1898 TRIFLVFY   | 445   | 198   |
| >TET2-S1898 TRISLVFYQH | 107   | >TET2-S1898 TRIFLVFYQH | 147   | 40    |
| >TET2-S1898 TRISLVFYQH | 908   | >TET2-S1898 TRIFLVFYQH | 291   | 617   |
| >TET2-S1898 PTRISLVFY  | 57    | >TET2-S1898 PTRIFLVFY  | 75    | 18    |
| >TET2-S1898 PTRISLVFY  | 380   | >TET2-S1898 PTRIFLVFY  | 621   | 241   |
| >TET2-S1898 PTRISLVFY  | 393   | >TET2-S1898 PTRIFLVFY  | 144   | 249   |
| >TET2-S1898 PTRISLVFY  | 40    | >TET2-S1898 PTRIFLVFY  | 47    | 7     |
| >TET2-S1898 PTRISLVFYQ | 224   | >TET2-S1898 PTRIFLVFYQ | 239   | 15    |
| >TET2-S1898 PTRISLVFY  | 332   | >TET2-S1898 PTRIFLVFY  | 226   | 106   |
| >TET2-S1898 PTRISLVF   | 520   | >TET2-S1898 PTRIFLVF   | 474   | 46    |
| >TET2-S1898 PTRISLVF   | 11    | >TET2-S1898 PTRIFLVF   | 60    | 49    |

|                         |       |                         |      |       |
|-------------------------|-------|-------------------------|------|-------|
| >TET2-S1898 PTRISLVFY   | 17    | >TET2-S1898 PTRIFLVFY   | 85   | 68    |
| >TET2-S1898 PTRISLVFY   | 797   | >TET2-S1898 PTRIFLVFY   | 430  | 367   |
| >TET2-S1898 HPTRISLVF   | 1617  | >TET2-S1898 HPTRIFLVF   | 480  | 1137  |
| >TET2-S1898 HPTRISLVFY  | 980   | >TET2-S1898 HPTRIFLVFY  | 377  | 603   |
| >TET2-S1898 HPTRISLV    | 1406  | >TET2-S1898 HPTRIFLV    | 444  | 962   |
| >TET2-S1898 HPTRISLVFY  | 167   | >TET2-S1898 HPTRIFLVFY  | 102  | 65    |
| >TET2-S1898 HPTRISLV    | 361   | >TET2-S1898 HPTRIFLV    | 989  | 628   |
| >TET2-S1898 HPTRISLVF   | 51    | >TET2-S1898 HPTRIFLVF   | 63   | 12    |
| >TET2-S1898 HPTRISLVF   | 706   | >TET2-S1898 HPTRIFLVF   | 459  | 247   |
| >TET2-S1898 HPTRISLVF   | 12    | >TET2-S1898 HPTRIFLVF   | 15   | 3     |
| >TET2-S1898 HPTRISLVFY  | 198   | >TET2-S1898 HPTRIFLVFY  | 247  | 49    |
| >TET2-S1898 HPTRISLV    | 1527  | >TET2-S1898 HPTRIFLV    | 342  | 1185  |
| >TET2-S1898 HPTRISLVF   | 164   | >TET2-S1898 HPTRIFLVF   | 51   | 113   |
| >TET2-S1898 HPTRISLVFY  | 432   | >TET2-S1898 HPTRIFLVFY  | 359  | 73    |
| >TET2-S1898 HPTRISLV    | 201   | >TET2-S1898 HPTRIFLV    | 30   | 171   |
| >TET2-S1898 HPTRISLVF   | 11    | >TET2-S1898 HPTRIFLVF   | 21   | 10    |
| >TET2-S1898 HPTRISLVFY  | 12    | >TET2-S1898 HPTRIFLVFY  | 14   | 2     |
| >TET2-S1898 HPTRISLVF   | 62    | >TET2-S1898 HPTRIFLVF   | 24   | 38    |
| >TET2-S1898 HPTRISLVFY  | 498   | >TET2-S1898 HPTRIFLVFY  | 166  | 332   |
| >TET2-S1898 NHPTRISLVF  | 428   | >TET2-S1898 NHPTRIFLVF  | 288  | 140   |
| >TET2-S1898 NHPTRISLVF  | 1319  | >TET2-S1898 NHPTRIFLVF  | 283  | 1036  |
| >TET2-S1898 NHPTRISL    | 187   | >TET2-S1898 NHPTRIFL    | 752  | 565   |
| >TET2-S1898 RNHPTRISL   | 18    | >TET2-S1898 RNHPTRIFL   | 9    | 9     |
| >TET2-S1898 RNHPTRISLV  | 55    | >TET2-S1898 RNHPTRIFLV  | 39   | 16    |
| >TET2-S1898 RNHPTRISLVI | 129   | >TET2-S1898 RNHPTRIFLVI | 174  | 45    |
| >TET2-S1898 RNHPTRIS    | 14001 | >TET2-S1898 RNHPTRIF    | 29   | 13972 |
| >TET2-S1898 RNHPTRISL   | 328   | >TET2-S1898 RNHPTRIFL   | 711  | 383   |
| >TET2-S1898 RNHPTRISLVI | 16    | >TET2-S1898 RNHPTRIFLVI | 18   | 2     |
| >TET2-S1898 RNHPTRISLVI | 430   | >TET2-S1898 RNHPTRIFLVI | 1089 | 659   |
| >TET2-S1898 RNHPTRIS    | 15089 | >TET2-S1898 RNHPTRIF    | 178  | 14911 |
| >TET2-S1898 RNHPTRISLVI | 515   | >TET2-S1898 RNHPTRIFLVI | 453  | 62    |
| >TET2-S1898 RNHPTRISL   | 731   | >TET2-S1898 RNHPTRIFL   | 264  | 467   |
| >TET2-S1898 RNHPTRISL   | 979   | >TET2-S1898 RNHPTRIFL   | 259  | 720   |
| >TET2-S1898 RNHPTRISL   | 438   | >TET2-S1898 RNHPTRIFL   | 682  | 244   |
| >TET2-S1898 NRNHPTRIS   | 9528  | >TET2-S1898 NRNHPTRIF   | 40   | 9488  |
| >TET2-S1898 NRNHPTRISL  | 423   | >TET2-S1898 NRNHPTRIFL  | 1104 | 681   |
| >TET2-S1898 NRNHPTRISL  | 420   | >TET2-S1898 NRNHPTRIFL  | 174  | 246   |
| >TET2-S1898 NRNHPTRISL  | 91    | >TET2-S1898 NRNHPTRIFL  | 357  | 266   |
| >TET2-S1898 NRNHPTRISL  | 962   | >TET2-S1898 NRNHPTRIFL  | 450  | 512   |
| >TET2-S1898 NRNHPTRISL  | 785   | >TET2-S1898 NRNHPTRIFL  | 335  | 450   |
| >TET2-S282F SELPPKPAAV  | 515   | >TET2-S282F FELPPKPAAV  | 395  | 120   |
| >TET2-S282F SELPPKPAAV  | 1878  | >TET2-S282F FELPPKPAAV  | 302  | 1576  |
| >TET2-S282F SELPPKPAAV  | 1633  | >TET2-S282F FELPPKPAAV  | 223  | 1410  |



|                        |       |                        |      |       |
|------------------------|-------|------------------------|------|-------|
| >TET2-S282F SELPPKPAAV | 528   | >TET2-S282F FELPPKPAAV | 79   | 449   |
| >TET2-S282F SELPPKPAAV | 1472  | >TET2-S282F FELPPKPAAV | 227  | 1245  |
| >TET2-S282F SELPPKPAAV | 732   | >TET2-S282F FELPPKPAAV | 298  | 434   |
| >TET2-S282F SELPPKPA   | 1134  | >TET2-S282F FELPPKPA   | 426  | 708   |
| >TET2-S282F SELPPKPA   | 923   | >TET2-S282F FELPPKPA   | 345  | 578   |
| >TET2-S282F SELPPKPAAV | 689   | >TET2-S282F FELPPKPAAV | 366  | 323   |
| >TET2-S282F SELPPKPAAV | 497   | >TET2-S282F FELPPKPAAV | 5980 | 5483  |
| >TET2-S282F SELPPKPA   | 53    | >TET2-S282F FELPPKPA   | 588  | 535   |
| >TET2-S282F SELPPKPA   | 23    | >TET2-S282F FELPPKPA   | 184  | 161   |
| >TET2-S282F SELPPKPAAV | 267   | >TET2-S282F FELPPKPAAV | 1727 | 1460  |
| >TET2-S282F SELPPKPAAV | 101   | >TET2-S282F FELPPKPAAV | 1173 | 1072  |
| >TET2-S282F SELPPKPA   | 16672 | >TET2-S282F FELPPKPA   | 324  | 16348 |
| >TET2-S282F SELPPKPAAV | 280   | >TET2-S282F FELPPKPAAV | 40   | 240   |
| >TET2-S282F SELPPKPAAV | 175   | >TET2-S282F FELPPKPAAV | 74   | 101   |
| >TET2-S282F NSELPPKPA  | 23835 | >TET2-S282F NFELPPKPA  | 425  | 23410 |
| >TET2-S282F GQINSAQTSN | 6279  | >TET2-S282F GQINSAQTSN | 38   | 6241  |
| >TET2-S282F GQINSAQTSN | 16121 | >TET2-S282F GQINSAQTSN | 218  | 15903 |
| >TET2-S282F GQINSAQTSN | 1295  | >TET2-S282F GQINSAQTSN | 3    | 1292  |
| >TET2-S282F SSELPPK    | 724   | >TET2-S282F SNFELPPK   | 107  | 617   |
| >TET2-S282F SSELPPK    | 2022  | >TET2-S282F SNFELPPK   | 378  | 1644  |
| >TET2-S282F SSELPPK    | 2025  | >TET2-S282F SNFELPPK   | 430  | 1595  |
| >TET2-S282F TSNSELPPK  | 16    | >TET2-S282F TSNFELPPK  | 11   | 5     |
| >TET2-S282F TSNSELPPK  | 88    | >TET2-S282F TSNFELPPK  | 58   | 30    |
| >TET2-S282F TSNSELPPK  | 257   | >TET2-S282F TSNFELPPK  | 147  | 110   |
| >TET2-S282F QTSNSELPPK | 280   | >TET2-S282F QTSNFELPPK | 85   | 195   |
| >TET2-S282F QTSNSELPPK | 12    | >TET2-S282F QTSNFELPPK | 8    | 4     |
| >TET2-S282F QTSNSELPPK | 41    | >TET2-S282F QTSNFELPPK | 42   | 1     |
| >TET2-S282F QTSNSELPPK | 39    | >TET2-S282F QTSNFELPPK | 19   | 20    |
| >TET2-S282F QTSNSELPPK | 145   | >TET2-S282F QTSNFELPPK | 115  | 30    |
| >TET2-S282F AQTSNSEL   | 498   | >TET2-S282F AQTSNFEL   | 173  | 325   |
| >TET2-S282F AQTSNSEL   | 202   | >TET2-S282F AQTSNFEL   | 17   | 185   |
| >TET2-S282F AQTSNSELPP | 122   | >TET2-S282F AQTSNFELPP | 66   | 56    |
| >TET2-S282F AQTSNSEL   | 28    | >TET2-S282F AQTSNFEL   | 53   | 25    |
| >TET2-S282F AQTSNSEL   | 1188  | >TET2-S282F AQTSNFEL   | 308  | 880   |
| >TET2-S282F SAQTSNSEL  | 314   | >TET2-S282F SAQTSNFEL  | 290  | 24    |
| >TET2-S282F SAQTSNSEL  | 211   | >TET2-S282F SAQTSNFEL  | 4951 | 4740  |
| >TET2-S282F NSAQTSNSEL | 694   | >TET2-S282F NSAQTSNFEL | 396  | 298   |
| >TET2-S282F NSAQTSNSEL | 1599  | >TET2-S282F NSAQTSNFEL | 295  | 1304  |
| >TET2-S282F NSAQTSNS   | 17686 | >TET2-S282F NSAQTSNF   | 126  | 17560 |
| >TET2-S282F NSAQTSNS   | 18342 | >TET2-S282F NSAQTSNF   | 23   | 18319 |
| >TET2-S282F NSAQTSNSEL | 296   | >TET2-S282F NSAQTSNFEL | 372  | 76    |
| >TET2-S282F NSAQTSNSEL | 433   | >TET2-S282F NSAQTSNFEL | 407  | 26    |
| >TET2-S282F NSAQTSNS   | 18397 | >TET2-S282F NSAQTSNF   | 213  | 18184 |

|                        |       |                        |      |       |
|------------------------|-------|------------------------|------|-------|
| >TET2-S282F NSAQTSNSEL | 88    | >TET2-S282F NSAQTSNFEL | 705  | 617   |
| >TET2-S282F INSAQTSNS  | 15758 | >TET2-S282F INSAQTSNF  | 48   | 15710 |
| >TET2-S282F QINSAQTSNS | 18244 | >TET2-S282F QINSAQTSNF | 291  | 17953 |
| >TET2-S282F QINSAQTSNS | 15090 | >TET2-S282F QINSAQTSNF | 88   | 15002 |
| >TET2-S460F SQSPNPSTHV | 2546  | >TET2-S460F FQSPNPSTHV | 319  | 2227  |
| >TET2-S460F SQSPNPSTHV | 316   | >TET2-S460F FQSPNPSTHV | 66   | 250   |
| >TET2-S460F SQSPNPSTHV | 141   | >TET2-S460F FQSPNPSTHV | 44   | 97    |
| >TET2-S460F SQSPNPST   | 881   | >TET2-S460F FQSPNPST   | 58   | 823   |
| >TET2-S460F SQSPNPSTHV | 363   | >TET2-S460F FQSPNPSTHV | 63   | 300   |
| >TET2-S460F SQSPNPSTHV | 2754  | >TET2-S460F FQSPNPSTHV | 190  | 2564  |
| >TET2-S460F SQSPNPSTHV | 161   | >TET2-S460F FQSPNPSTHV | 26   | 135   |
| >TET2-S460F SQSPNPSTHV | 162   | >TET2-S460F FQSPNPSTHV | 25   | 137   |
| >TET2-S460F SQSPNPSTHV | 99    | >TET2-S460F FQSPNPSTHV | 37   | 62    |
| >TET2-S460F SQSPNPSTHV | 4565  | >TET2-S460F FQSPNPSTHV | 401  | 4164  |
| >TET2-S460F SQSPNPSTHV | 251   | >TET2-S460F FQSPNPSTHV | 19   | 232   |
| >TET2-S460F SQSPNPSTHV | 345   | >TET2-S460F FQSPNPSTHV | 209  | 136   |
| >TET2-S460F SQSPNPSTH  | 138   | >TET2-S460F FQSPNPSTH  | 25   | 113   |
| >TET2-S460F SQSPNPSTHV | 62    | >TET2-S460F FQSPNPSTHV | 17   | 45    |
| >TET2-S460F SQSPNPSTHV | 1529  | >TET2-S460F FQSPNPSTHV | 342  | 1187  |
| >TET2-S460F SQSPNPSTHV | 2423  | >TET2-S460F FQSPNPSTHV | 337  | 2086  |
| >TET2-S460F KIEGKPEAPP | 10502 | >TET2-S460F KIEGKPEAPP | 59   | 10443 |
| >TET2-S460F KIEGKPEAPP | 23603 | >TET2-S460F KIEGKPEAPP | 411  | 23192 |
| >TET2-S460F EAPPSQSPNF | 399   | >TET2-S460F EAPPFQSPNF | 200  | 199   |
| >TET2-S460F GKPEAPPS   | 16080 | >TET2-S460F GKPEAPPF   | 49   | 16031 |
| >TET2-S460F IEGKPEAPPS | 21424 | >TET2-S460F IEGKPEAPPF | 160  | 21264 |
| >TET2-S817T SPYSQTMK   | 803   | >TET2-S817T TPYSQTMK   | 246  | 557   |
| >TET2-S817T SPYSQTMKSS | 68    | >TET2-S817T TPYSQTMKSS | 318  | 250   |
| >TET2-S817T SPYSQTMKSS | 112   | >TET2-S817T TPYSQTMKSS | 90   | 22    |
| >TET2-S817T NSPYSQTMK  | 77    | >TET2-S817T NTPYSQTMK  | 17   | 60    |
| >TET2-S817T NSPYSQTM   | 32    | >TET2-S817T NTPYSQTM   | 16   | 16    |
| >TET2-S817T EEVQNINRRN | 1081  | >TET2-S817T EEVQNINRRN | 253  | 828   |
| >TET2-S817T RNSPYSQTM  | 325   | >TET2-S817T RNTSYSQTM  | 614  | 289   |
| >TET2-S817T RNSPYSQTM  | 328   | >TET2-S817T RNTSYSQTM  | 3074 | 2746  |
| >TET2-S817T RNSPYSQTM  | 129   | >TET2-S817T RNTSYSQTM  | 331  | 202   |
| >TET2-S817T RNSPYSQTM  | 227   | >TET2-S817T RNTSYSQTM  | 328  | 101   |
| >TET2-S817T RNSPYSQTM  | 134   | >TET2-S817T RNTSYSQTM  | 137  | 3     |
| >TET2-S817T RRNSPYSQTM | 8     | >TET2-S817T RRNTSYSQTM | 12   | 4     |
| >TET2-S817T RRNSPYSQTM | 160   | >TET2-S817T RRNTSYSQTM | 308  | 148   |
| >TET2-S817T RRNSPYSQTM | 27    | >TET2-S817T RRNTSYSQTM | 28   | 1     |
| >TET2-S817T RRNSPYSQTM | 69    | >TET2-S817T RRNTSYSQTM | 70   | 1     |
| >TET2-S817T RRNSPYSQ   | 533   | >TET2-S817T RRNTSYSQ   | 161  | 372   |
| >TET2-S817T RRNSPYSQT  | 285   | >TET2-S817T RRNTSYSQT  | 189  | 96    |
| >TET2-S817T RRNSPYSQTM | 39    | >TET2-S817T RRNTSYSQTM | 29   | 10    |

|                         |       |                         |       |       |
|-------------------------|-------|-------------------------|-------|-------|
| >TET2-S817T RRNSPYSQTM  | 309   | >TET2-S817T RRNTPYSQTM  | 218   | 91    |
| >TET2-S817T RRNSPYSQTM  | 26    | >TET2-S817T RRNTPYSQTM  | 22    | 4     |
| >TET2-S817T RRNSPYSQTM  | 372   | >TET2-S817T RRNTPYSQTM  | 235   | 137   |
| >TET2-S817T NRRNSPYSQTM | 41    | >TET2-S817T NRRNTPYSQTM | 67    | 26    |
| >TET2-S817T INRRNSPY    | 397   | >TET2-S817T INRRNTPY    | 918   | 521   |
| >TET2-S817T INRRNSPYS   | 82    | >TET2-S817T INRRNTPYS   | 125   | 43    |
| >TET2-S817T INRRNSPY    | 177   | >TET2-S817T INRRNTPY    | 252   | 75    |
| >TET2-S817T INRRNSPY    | 325   | >TET2-S817T INRRNTPY    | 699   | 374   |
| >TET2-S817T INRRNSPY    | 45    | >TET2-S817T INRRNTPY    | 54    | 9     |
| >TET2-S817T NINRRNSPY   | 138   | >TET2-S817T NINRRNTPY   | 177   | 39    |
| >TET2-S817T NINRRNSPY   | 95    | >TET2-S817T NINRRNTPY   | 282   | 187   |
| >TET2-S817T NINRRNSPY   | 306   | >TET2-S817T NINRRNTPY   | 321   | 15    |
| >TET2-S817T QNINRRNSPY  | 206   | >TET2-S817T QNINRRNTPY  | 416   | 210   |
| >TET2-S817T QNINRRNSPY  | 383   | >TET2-S817T QNINRRNTPY  | 757   | 374   |
| >TET2-S817T QNINRRNSPY  | 358   | >TET2-S817T QNINRRNTPY  | 502   | 144   |
| >TET2-S817T QNINRRNSPY  | 464   | >TET2-S817T QNINRRNTPY  | 971   | 507   |
| >TET2-S817T QNINRRNSPY  | 240   | >TET2-S817T QNINRRNTPY  | 313   | 73    |
| >TET2-S817T VQNINRRNSP  | 57    | >TET2-S817T VQNINRRNTP  | 154   | 97    |
| >TET2-S817T VQNINRRNSP  | 65    | >TET2-S817T VQNINRRNTP  | 70    | 5     |
| >TET2-S817T VQNINRRNSP  | 174   | >TET2-S817T VQNINRRNTP  | 320   | 146   |
| >TET2-S817T VQNINRRNSP  | 9     | >TET2-S817T VQNINRRNTP  | 11    | 2     |
| >TET2-T1270 RTCACQGL    | 21483 | >TET2-T1270 RPCACQGL    | 39    | 21444 |
| >TET2-T1270 RTCACQGL    | 17081 | >TET2-T1270 RPCACQGL    | 197   | 16884 |
| >TET2-T1270 RTCACQGL    | 7     | >TET2-T1270 RPCACQGL    | 12292 | 12285 |
| >TET2-T1270 RTCACQGL    | 253   | >TET2-T1270 RPCACQGL    | 13216 | 12963 |
| >TET2-T1270 RTCACQGL    | 116   | >TET2-T1270 RPCACQGL    | 5935  | 5819  |
| >TET2-T1270 EERTCACQGL  | 285   | >TET2-T1270 EERPCACQGL  | 349   | 64    |
| >TET2-T1270 EERTCACQGL  | 653   | >TET2-T1270 EERPCACQGL  | 482   | 171   |
| >TET2-T1270 EERTCACQGL  | 97    | >TET2-T1270 EERPCACQGL  | 105   | 8     |
| >TET2-T1270 NEERTCACQGL | 50    | >TET2-T1270 NEERPCACQGL | 340   | 290   |
| >TET2-T1270 NEERTCACQGL | 359   | >TET2-T1270 NEERPCACQGL | 398   | 39    |
| >TET2-T1270 ALNEERTCA   | 233   | >TET2-T1270 ALNEERPCA   | 793   | 560   |
| >TET2-T1270 ALNEERTCA   | 116   | >TET2-T1270 ALNEERPCA   | 674   | 558   |
| >TET2-T1270 ALNEERTC    | 253   | >TET2-T1270 ALNEERPC    | 301   | 48    |
| >TET2-T1270 ALNEERTCA   | 982   | >TET2-T1270 ALNEERPCA   | 341   | 641   |
| >TET2-T1270 ALNEERTCAC  | 94    | >TET2-T1270 ALNEERPCAC  | 55    | 39    |
| >TET2-T1270 ALNEERTCAC  | 469   | >TET2-T1270 ALNEERPCAC  | 563   | 94    |
| >TET2-T1270 ALNEERTCA   | 286   | >TET2-T1270 ALNEERPCA   | 53    | 233   |
| >TET2-T1270 ALNEERTC    | 70    | >TET2-T1270 ALNEERPC    | 162   | 92    |
| >TET2-T1270 ALNEERTCA   | 25    | >TET2-T1270 ALNEERPCA   | 17    | 8     |
| >TET2-T1270 ALNEERTCAC  | 15    | >TET2-T1270 ALNEERPCAC  | 17    | 2     |
| >TET2-T1270 ALNEERTCAC  | 169   | >TET2-T1270 ALNEERPCAC  | 136   | 33    |
| >TET2-T1270 RRCALNEERT  | 107   | >TET2-T1270 RRCALNEERP  | 1014  | 907   |

|                         |       |                         |      |       |
|-------------------------|-------|-------------------------|------|-------|
| >TET2-T1270 RRCALNEERT  | 283   | >TET2-T1270 RRCALNEERP  | 1740 | 1457  |
| >TET2-T1270 RRCALNEERT  | 291   | >TET2-T1270 RRCALNEERP  | 613  | 322   |
| >TET2-T1270 RRCALNEERT  | 230   | >TET2-T1270 RRCALNEERP  | 1888 | 1658  |
| >TET2-T1270 RRCALNEERT  | 495   | >TET2-T1270 RRCALNEERP  | 1018 | 523   |
| >TET2-T1372 VTACLDFCA   | 1579  | >TET2-T1372 VIACLDFCA   | 409  | 1170  |
| >TET2-T1372 VTACLDFCAH  | 795   | >TET2-T1372 VIACLDFCAH  | 178  | 617   |
| >TET2-T1372 VTACLDFCAH  | 1213  | >TET2-T1372 VIACLDFCAH  | 207  | 1006  |
| >TET2-T1372 VTACLDFCA   | 1430  | >TET2-T1372 VIACLDFCA   | 436  | 994   |
| >TET2-T1372 VTACLDFCAH  | 549   | >TET2-T1372 VIACLDFCAH  | 167  | 382   |
| >TET2-T1372 VTACLDFCA   | 69    | >TET2-T1372 VIACLDFCA   | 489  | 420   |
| >TET2-T1372 VTACLDFCAH  | 31    | >TET2-T1372 VIACLDFCAH  | 277  | 246   |
| >TET2-T1372 GVTACLDFCA  | 1136  | >TET2-T1372 GVIACLDFCA  | 360  | 776   |
| >TET2-T1372 GVTACLDFC   | 807   | >TET2-T1372 GVIACLDFC   | 122  | 685   |
| >TET2-T1372 GVTACLDFCA  | 2585  | >TET2-T1372 GVIACLDFCA  | 432  | 2153  |
| >TET2-T1372 GVTACLDF    | 1147  | >TET2-T1372 GVIACLDF    | 375  | 772   |
| >TET2-T1372 GVTACLDF    | 5894  | >TET2-T1372 GVIACLDF    | 496  | 5398  |
| >TET2-T1372 SGVTACLDF   | 109   | >TET2-T1372 SGVIACLDF   | 2024 | 1915  |
| >TET2-T1372 FSGVTAACL   | 1130  | >TET2-T1372 FSGVIACL    | 404  | 726   |
| >TET2-T1372 FSGVTAACLDF | 485   | >TET2-T1372 FSGVIACLDF  | 930  | 445   |
| >TET2-T1372 FSGVTAACLDF | 94    | >TET2-T1372 FSGVIACLDF  | 280  | 186   |
| >TET2-T1372 FSGVTAACLDF | 27    | >TET2-T1372 FSGVIACLDF  | 43   | 16    |
| >TET2-T1372 FSGVTAACLDF | 402   | >TET2-T1372 FSGVIACLDF  | 726  | 324   |
| >TET2-T1372 FSGVTAACL   | 74    | >TET2-T1372 FSGVIACL    | 118  | 44    |
| >TET2-T1372 FSGVTAACLDF | 354   | >TET2-T1372 FSGVIACLDF  | 376  | 22    |
| >TET2-T1372 PFSGVTAACLD | 274   | >TET2-T1372 PFSGVIACLDI | 256  | 18    |
| >TET2-T1372 PFSGVTAACLD | 206   | >TET2-T1372 PFSGVIACLDI | 221  | 15    |
| >TET2-T1372 PFSGVTAACLD | 390   | >TET2-T1372 PFSGVIACLDI | 637  | 247   |
| >TET2-T1372 RPFSGVTAACL | 57    | >TET2-T1372 RPFSGVIACL  | 32   | 25    |
| >TET2-T1372 RPFSGVTA    | 124   | >TET2-T1372 RPFSGVIA    | 158  | 34    |
| >TET2-T1372 RPFSGVTAC   | 138   | >TET2-T1372 RPFSGVIAC   | 517  | 379   |
| >TET2-T1372 RPFSGVTAACL | 57    | >TET2-T1372 RPFSGVIACL  | 79   | 22    |
| >TET2-T1372 RPFSGVTAACL | 242   | >TET2-T1372 RPFSGVIACL  | 345  | 103   |
| >TET2-T1372 RPFSGVTAC   | 944   | >TET2-T1372 RPFSGVIAC   | 483  | 461   |
| >TET2-T1372 RPFSGVTAACL | 35    | >TET2-T1372 RPFSGVIACL  | 35   | 0     |
| >TET2-T1372 RPFSGVTA    | 181   | >TET2-T1372 RPFSGVIA    | 150  | 31    |
| >TET2-T1372 RPFSGVTAACL | 640   | >TET2-T1372 RPFSGVIACL  | 444  | 196   |
| >TET2-T1372 GRPFSGVTAAC | 46    | >TET2-T1372 GRPFSGVIAAC | 39   | 7     |
| >TET2-T1372 EGRPFSGVTA  | 34842 | >TET2-T1372 EGRPFSGVI   | 373  | 34469 |
| >TET2-T1372 KEGRPFSGVTA | 17794 | >TET2-T1372 KEGRPFSGVI  | 155  | 17639 |
| >TET2-T1372 KEGRPFSGVTA | 28    | >TET2-T1372 KEGRPFSGVI  | 31   | 3     |
| >TET2-T1372 KEGRPFSGVTA | 2549  | >TET2-T1372 KEGRPFSGVI  | 24   | 2525  |
| >TET2-T1393 TLVCTLTR    | 442   | >TET2-T1393 PLVCTLTR    | 6016 | 5574  |
| >TET2-T1393 TLVCTLTR    | 66    | >TET2-T1393 PLVCTLTR    | 5032 | 4966  |

|                        |      |                        |       |       |
|------------------------|------|------------------------|-------|-------|
| >TET2-T1393 TLVCTLTR   | 101  | >TET2-T1393 PLVCTLTR   | 173   | 72    |
| >TET2-T1393 STLVCTLTR  | 37   | >TET2-T1393 SPLVCTLTR  | 15759 | 15722 |
| >TET2-T1393 STLVCTLTR  | 42   | >TET2-T1393 SPLVCTLTR  | 3165  | 3123  |
| >TET2-T1393 STLVCTLTR  | 424  | >TET2-T1393 SPLVCTLTR  | 7713  | 7289  |
| >TET2-T1393 STLVCTLTR  | 65   | >TET2-T1393 SPLVCTLTR  | 4622  | 4557  |
| >TET2-T1393 STLVCTLTR  | 62   | >TET2-T1393 SPLVCTLTR  | 1142  | 1080  |
| >TET2-T1393 STLVCTLTR  | 52   | >TET2-T1393 SPLVCTLTR  | 79    | 27    |
| >TET2-T1393 GSTLVCTLTR | 150  | >TET2-T1393 GSPLVCTLTR | 213   | 63    |
| >TET2-T1393 GSTLVCTLTR | 173  | >TET2-T1393 GSPLVCTLTR | 359   | 186   |
| >TET2-T1393 GSTLVCTLTR | 287  | >TET2-T1393 GSPLVCTLTR | 259   | 28    |
| >TET2-T1393 GSTLVCTL   | 173  | >TET2-T1393 GSPLVCTL   | 2470  | 2297  |
| >TET2-T1393 GSTLVCTL   | 3611 | >TET2-T1393 GSPLVCTL   | 44    | 3567  |
| >TET2-T1393 GSTLVCTL   | 242  | >TET2-T1393 GSPLVCTL   | 3807  | 3565  |
| >TET2-T1393 NGSTLVCTL  | 385  | >TET2-T1393 NGSPLVCTL  | 397   | 12    |
| >TET2-T1393 NGSTLVCTL  | 113  | >TET2-T1393 NGSPLVCTL  | 138   | 25    |
| >TET2-T1393 MQNGSTLV   | 58   | >TET2-T1393 MQNGSPLV   | 44    | 14    |
| >TET2-T1393 MQNGSTLVC  | 337  | >TET2-T1393 MQNGSPLVC  | 420   | 83    |
| >TET2-T1393 MQNGSTLV   | 20   | >TET2-T1393 MQNGSPLV   | 75    | 55    |
| >TET2-T1393 MQNGSTLVC  | 51   | >TET2-T1393 MQNGSPLVC  | 108   | 57    |
| >TET2-T1393 MQNGSTLV   | 6    | >TET2-T1393 MQNGSPLV   | 12    | 6     |
| >TET2-T1393 MQNGSTLVC  | 53   | >TET2-T1393 MQNGSPLVC  | 62    | 9     |
| >TET2-T1393 MQNGSTLV   | 6    | >TET2-T1393 MQNGSPLV   | 10    | 4     |
| >TET2-T1393 MQNGSTLVC  | 19   | >TET2-T1393 MQNGSPLVC  | 48    | 29    |
| >TET2-T1393 MQNGSTLV   | 73   | >TET2-T1393 MQNGSPLV   | 34    | 39    |
| >TET2-T1393 MQNGSTLVC  | 137  | >TET2-T1393 MQNGSPLVC  | 87    | 50    |
| >TET2-T1393 MQNGSTLV   | 218  | >TET2-T1393 MQNGSPLV   | 91    | 127   |
| >TET2-T1393 MQNGSTLV   | 959  | >TET2-T1393 MQNGSPLV   | 422   | 537   |
| >TET2-T1393 MQNGSTLV   | 43   | >TET2-T1393 MQNGSPLV   | 57    | 14    |
| >TET2-T1393 MQNGSTLVC  | 436  | >TET2-T1393 MQNGSPLVC  | 565   | 129   |
| >TET2-T1393 MQNGSTLVC  | 252  | >TET2-T1393 MQNGSPLVC  | 433   | 181   |
| >TET2-T1393 MQNGSTLV   | 484  | >TET2-T1393 MQNGSPLV   | 2932  | 2448  |
| >TET2-T1393 MQNGSTLVC  | 60   | >TET2-T1393 MQNGSPLVC  | 84    | 24    |
| >TET2-T1393 MQNGSTLV   | 146  | >TET2-T1393 MQNGSPLV   | 228   | 82    |
| >TET2-T1393 MQNGSTLVC  | 29   | >TET2-T1393 MQNGSPLVC  | 28    | 1     |
| >TET2-T1393 MQNGSTLVC  | 18   | >TET2-T1393 MQNGSPLVC  | 19    | 1     |
| >TET2-T1393 MQNGSTLVC  | 234  | >TET2-T1393 MQNGSPLVC  | 226   | 8     |
| >TET2-T1393 NMQNGSTLV  | 68   | >TET2-T1393 NMQNGSPLV  | 29    | 39    |
| >TET2-T1393 NMQNGSTL   | 515  | >TET2-T1393 NMQNGSPL   | 292   | 223   |
| >TET2-T1393 NMQNGSTLV  | 61   | >TET2-T1393 NMQNGSPLV  | 263   | 202   |
| >TET2-T1393 NMQNGSTL   | 127  | >TET2-T1393 NMQNGSPL   | 97    | 30    |
| >TET2-T1393 NMQNGSTLV  | 6    | >TET2-T1393 NMQNGSPLV  | 20    | 14    |
| >TET2-T1393 NMQNGSTLV  | 79   | >TET2-T1393 NMQNGSPLV  | 52    | 27    |
| >TET2-T1393 NMQNGSTL   | 74   | >TET2-T1393 NMQNGSPL   | 78    | 4     |

|                        |      |                        |      |      |
|------------------------|------|------------------------|------|------|
| >TET2-T1393 NMQNGSTLV  | 16   | >TET2-T1393 NMQNGSPLV  | 10   | 6    |
| >TET2-T1393 NMQNGSTL   | 11   | >TET2-T1393 NMQNGSPL   | 13   | 2    |
| >TET2-T1393 NMQNGSTLV  | 8    | >TET2-T1393 NMQNGSPLV  | 6    | 2    |
| >TET2-T1393 NMQNGSTLV  | 22   | >TET2-T1393 NMQNGSPLV  | 9    | 13   |
| >TET2-T1393 NMQNGSTL   | 222  | >TET2-T1393 NMQNGSPL   | 292  | 70   |
| >TET2-T1393 NMQNGSTLV  | 19   | >TET2-T1393 NMQNGSPLV  | 7    | 12   |
| >TET2-T1393 NMQNGSTL   | 28   | >TET2-T1393 NMQNGSPL   | 58   | 30   |
| >TET2-T1393 NMQNGSTLV  | 4    | >TET2-T1393 NMQNGSPLV  | 5    | 1    |
| >TET2-T1393 NMQNGSTLV  | 1015 | >TET2-T1393 NMQNGSPLV  | 148  | 867  |
| >TET2-T1393 NMQNGSTL   | 327  | >TET2-T1393 NMQNGSPL   | 166  | 161  |
| >TET2-T1393 NMQNGSTL   | 127  | >TET2-T1393 NMQNGSPL   | 104  | 23   |
| >TET2-T1393 NMQNGSTL   | 498  | >TET2-T1393 NMQNGSPL   | 390  | 108  |
| >TET2-T1393 NMQNGSTL   | 370  | >TET2-T1393 NMQNGSPL   | 196  | 174  |
| >TET2-T1393 HNMQNGSTI  | 72   | >TET2-T1393 HNMQNGSPI  | 39   | 33   |
| >TET2-T1393 HNMQNGSTI  | 2037 | >TET2-T1393 HNMQNGSPI  | 235  | 1802 |
| >TET2-T1393 HNMQNGSTI  | 678  | >TET2-T1393 HNMQNGSPI  | 303  | 375  |
| >TET2-T1393 HNMQNGSTI  | 473  | >TET2-T1393 HNMQNGSPI  | 307  | 166  |
| >TET2-T1393 HNMQNGSTI  | 69   | >TET2-T1393 HNMQNGSPI  | 51   | 18   |
| >TET2-T1393 HNMQNGSTI  | 467  | >TET2-T1393 HNMQNGSPI  | 5002 | 4535 |
| >TET2-T1393 LHMNQNGST  | 465  | >TET2-T1393 LHMNQNGSF  | 330  | 135  |
| >TET2-T1393 LHMNQNGST  | 295  | >TET2-T1393 LHMNQNGSF  | 519  | 224  |
| >TET2-T1393 LHMNQNGST  | 654  | >TET2-T1393 LHMNQNGSF  | 415  | 239  |
| >TET2-T1393 DLHMNQNG:  | 89   | >TET2-T1393 DLHMNQNG:  | 203  | 114  |
| >TET2-T1884 TPLKNPNR   | 434  | >TET2-T1884 APLKNPNR   | 1792 | 1358 |
| >TET2-T1884 TTPLKNPNR  | 75   | >TET2-T1884 TAPLKNPNR  | 308  | 233  |
| >TET2-T1884 ATTPLKNPNR | 140  | >TET2-T1884 ATAPLKNPNF | 152  | 12   |
| >TET2-T1884 ATTPLKNPNR | 215  | >TET2-T1884 ATAPLKNPNF | 316  | 101  |
| >TET2-T1884 ATTPLKNPNR | 99   | >TET2-T1884 ATAPLKNPNF | 30   | 69   |
| >TET2-T1884 ATTPLKNPNR | 242  | >TET2-T1884 ATAPLKNPNF | 118  | 124  |
| >TET2-T1884 HATTPLKNPN | 206  | >TET2-T1884 HATAPLKNPN | 148  | 58   |
| >TET2-T1884 HATTPLKNPN | 427  | >TET2-T1884 HATAPLKNPN | 323  | 104  |
| >TET2-T1884 HATTPLKNPN | 81   | >TET2-T1884 HATAPLKNPN | 73   | 8    |
| >TET2-T1884 ELHATTPL   | 161  | >TET2-T1884 ELHATAPL   | 264  | 103  |
| >TET2-T1884 ELHATTPL   | 213  | >TET2-T1884 ELHATAPL   | 369  | 156  |
| >TET2-T1884 ELHATTPL   | 124  | >TET2-T1884 ELHATAPL   | 83   | 41   |
| >TET2-T1884 ELHATTPL   | 644  | >TET2-T1884 ELHATAPL   | 347  | 297  |
| >TET2-T1884 ELHATTPL   | 420  | >TET2-T1884 ELHATAPL   | 539  | 119  |
| >TET2-T1884 ELHATTPL   | 23   | >TET2-T1884 ELHATAPL   | 24   | 1    |
| >TET2-T1884 ELHATTPLK  | 118  | >TET2-T1884 ELHATAPLK  | 176  | 58   |
| >TET2-T1884 ELHATTPLK  | 366  | >TET2-T1884 ELHATAPLK  | 757  | 391  |
| >TET2-T1884 ELHATTPLK  | 169  | >TET2-T1884 ELHATAPLK  | 480  | 311  |
| >TET2-T1884 ELHATTPLK  | 24   | >TET2-T1884 ELHATAPLK  | 30   | 6    |
| >TET2-T1884 ELHATTPL   | 208  | >TET2-T1884 ELHATAPL   | 182  | 26   |

|                         |      |                        |      |      |
|-------------------------|------|------------------------|------|------|
| >TET2-T1884 ELHATTPL    | 209  | >TET2-T1884 ELHATAPL   | 131  | 78   |
| >TET2-T1884 ELHATTPL    | 566  | >TET2-T1884 ELHATAPL   | 239  | 327  |
| >TET2-T1884 RELHATTPL   | 109  | >TET2-T1884 RELHATAPL  | 72   | 37   |
| >TET2-T1884 RELHATTPLK  | 159  | >TET2-T1884 RELHATAPLK | 136  | 23   |
| >TET2-T1884 RELHATTPL   | 312  | >TET2-T1884 RELHATAPL  | 542  | 230  |
| >TET2-T1884 RELHATTPL   | 48   | >TET2-T1884 RELHATAPL  | 93   | 45   |
| >TET2-T1884 RELHATTPL   | 740  | >TET2-T1884 RELHATAPL  | 262  | 478  |
| >TET2-T1884 RELHATTP    | 559  | >TET2-T1884 RELHATAP   | 409  | 150  |
| >TET2-T1884 RELHATTPL   | 7    | >TET2-T1884 RELHATAPL  | 6    | 1    |
| >TET2-T1884 RELHATTPL   | 12   | >TET2-T1884 RELHATAPL  | 38   | 26   |
| >TET2-T1884 RELHATTPL   | 530  | >TET2-T1884 RELHATAPL  | 450  | 80   |
| >TET2-T1884 RELHATTPL   | 138  | >TET2-T1884 RELHATAPL  | 122  | 16   |
| >TET2-T1884 RELHATTPL   | 6    | >TET2-T1884 RELHATAPL  | 6    | 0    |
| >TET2-T1884 KRELHATTPL  | 108  | >TET2-T1884 KRELHATAPL | 148  | 40   |
| >TET2-T1884 KRELHATTPL  | 462  | >TET2-T1884 KRELHATAPL | 172  | 290  |
| >TET2-T1884 KRELHATT    | 453  | >TET2-T1884 KRELHATA   | 709  | 256  |
| >TET2-T1884 KRELHATTPL  | 79   | >TET2-T1884 KRELHATAPL | 141  | 62   |
| >TET2-T1884 KRELHATTPLI | 335  | >TET2-T1884 KRELHATAPL | 431  | 96   |
| >TET2-T1884 KRELHATTPL  | 174  | >TET2-T1884 KRELHATAPL | 227  | 53   |
| >TET2-T1884 KRELHATTPLI | 65   | >TET2-T1884 KRELHATAPL | 84   | 19   |
| >TET2-T1884 AKRELHATT   | 4179 | >TET2-T1884 AKRELHATA  | 193  | 3986 |
| >TET2-T1884 AKRELHATTP  | 775  | >TET2-T1884 AKRELHATAP | 212  | 563  |
| >TET2-T1884 AKRELHATT   | 1218 | >TET2-T1884 AKRELHATA  | 279  | 939  |
| >TET2-T1884 AKRELHATTP  | 724  | >TET2-T1884 AKRELHATAP | 489  | 235  |
| >TET2-T1884 AKRELHATTP  | 13   | >TET2-T1884 AKRELHATAP | 17   | 4    |
| >TET2-T1884 CAKRELHATT  | 5121 | >TET2-T1884 CAKRELHATA | 354  | 4767 |
| >TET2-T492S TAGTMTVPL   | 1607 | >TET2-T492S SAGTMTVPL  | 256  | 1351 |
| >TET2-T492S TAGTMTVPL   | 552  | >TET2-T492S SAGTMTVPL  | 492  | 60   |
| >TET2-T492S TAGTMTVPL   | 1030 | >TET2-T492S SAGTMTVPL  | 410  | 620  |
| >TET2-T492S TAGTMTVPL   | 130  | >TET2-T492S SAGTMTVPL  | 552  | 422  |
| >TET2-T492S QTAGTMTV    | 212  | >TET2-T492S QSAGTMTV   | 910  | 698  |
| >TET2-T492S QTAGTMTVP   | 232  | >TET2-T492S QSAGTMTVP  | 1963 | 1731 |
| >TET2-T492S QTAGTMTV    | 118  | >TET2-T492S QSAGTMTV   | 1493 | 1375 |
| >TET2-T492S QTAGTMTV    | 70   | >TET2-T492S QSAGTMTV   | 565  | 495  |
| >TET2-T492S QTAGTMTVP   | 475  | >TET2-T492S QSAGTMTVP  | 4368 | 3893 |
| >TET2-T492S QTAGTMTV    | 352  | >TET2-T492S QSAGTMTV   | 5160 | 4808 |
| >TET2-T492S QTAGTMTV    | 98   | >TET2-T492S QSAGTMTV   | 4495 | 4397 |
| >TET2-T492S QTAGTMTVP   | 55   | >TET2-T492S QSAGTMTVP  | 410  | 355  |
| >TET2-T492S QTAGTMTV    | 302  | >TET2-T492S QSAGTMTV   | 922  | 620  |
| >TET2-T492S QTAGTMTVP   | 35   | >TET2-T492S QSAGTMTVP  | 114  | 79   |
| >TET2-T492S QTAGTMTV    | 7    | >TET2-T492S QSAGTMTV   | 19   | 12   |
| >TET2-T492S QTAGTMTVP   | 200  | >TET2-T492S QSAGTMTVP  | 1389 | 1189 |
| >TET2-T492S QTAGTMTV    | 10   | >TET2-T492S QSAGTMTV   | 117  | 107  |

|                        |      |                        |     |      |
|------------------------|------|------------------------|-----|------|
| >TET2-T492S QTAGTMTVP  | 45   | >TET2-T492S QSAGTMTVP  | 530 | 485  |
| >TET2-T492S QTAGTMTV   | 188  | >TET2-T492S QSAGTMTV   | 333 | 145  |
| >TET2-T492S QTAGTMTVP  | 12   | >TET2-T492S QSAGTMTVP  | 17  | 5    |
| >TET2-T492S QTAGTMTVP  | 543  | >TET2-T492S QSAGTMTVP  | 248 | 295  |
| >TET2-T492S QTAGTMTVP  | 55   | >TET2-T492S QSAGTMTVP  | 195 | 140  |
| >TET2-T492S QTAGTMTVP  | 284  | >TET2-T492S QSAGTMTVP  | 887 | 603  |
| >TET2-T492S QTAGTMTVP  | 107  | >TET2-T492S QSAGTMTVP  | 299 | 192  |
| >TET2-T492S QTAGTMTVP  | 534  | >TET2-T492S QSAGTMTVP  | 342 | 192  |
| >TET2-T492S IQTAGTMTV  | 131  | >TET2-T492S IQSAGTMTV  | 68  | 63   |
| >TET2-T492S IQTAGTMTVI | 420  | >TET2-T492S IQSAGTMTVI | 194 | 226  |
| >TET2-T492S IQTAGTMTV  | 495  | >TET2-T492S IQSAGTMTV  | 88  | 407  |
| >TET2-T492S IQTAGTMTVI | 254  | >TET2-T492S IQSAGTMTVI | 46  | 208  |
| >TET2-T492S IQTAGTMTV  | 26   | >TET2-T492S IQSAGTMTV  | 8   | 18   |
| >TET2-T492S IQTAGTMTVI | 417  | >TET2-T492S IQSAGTMTVI | 82  | 335  |
| >TET2-T492S IQTAGTMTV  | 5    | >TET2-T492S IQSAGTMTV  | 5   | 0    |
| >TET2-T492S IQTAGTMTVI | 17   | >TET2-T492S IQSAGTMTVI | 17  | 0    |
| >TET2-T492S IQTAGTMTV  | 154  | >TET2-T492S IQSAGTMTV  | 100 | 54   |
| >TET2-T492S IQTAGTMTV  | 175  | >TET2-T492S IQSAGTMTV  | 145 | 30   |
| >TET2-T492S IQTAGTMTV  | 111  | >TET2-T492S IQSAGTMTV  | 147 | 36   |
| >TET2-T492S IQTAGTMTV  | 797  | >TET2-T492S IQSAGTMTV  | 229 | 568  |
| >TET2-T492S IQTAGTMTV  | 31   | >TET2-T492S IQSAGTMTV  | 39  | 8    |
| >TET2-T492S IQTAGTMTVI | 563  | >TET2-T492S IQSAGTMTVI | 346 | 217  |
| >TET2-T492S IQTAGTMTV  | 1781 | >TET2-T492S IQSAGTMTV  | 189 | 1592 |
| >TET2-T492S IQTAGTMTVI | 301  | >TET2-T492S IQSAGTMTVI | 70  | 231  |
| >TET2-T492S IQTAGTMTV  | 56   | >TET2-T492S IQSAGTMTV  | 22  | 34   |
| >TET2-T492S IQTAGTMTVI | 19   | >TET2-T492S IQSAGTMTVI | 9   | 10   |
| >TET2-T492S IQTAGTMTV  | 1147 | >TET2-T492S IQSAGTMTV  | 302 | 845  |
| >TET2-T492S IQTAGTMTVI | 60   | >TET2-T492S IQSAGTMTVI | 18  | 42   |
| >TET2-T492S IQTAGTMTVI | 245  | >TET2-T492S IQSAGTMTVI | 294 | 49   |
| >TET2-T492S IQTAGTMTVI | 161  | >TET2-T492S IQSAGTMTVI | 121 | 40   |
| >TET2-T492S DIQTAGTMTV | 314  | >TET2-T492S DIQSAGTMTV | 212 | 102  |
| >TET2-T492S DIQTAGTMTV | 336  | >TET2-T492S DIQSAGTMTV | 209 | 127  |
| >TET2-T492S DIQTAGTMTV | 226  | >TET2-T492S DIQSAGTMTV | 110 | 116  |
| >TET2-T492S NDIQTAGTM  | 206  | >TET2-T492S NDIQSAGTM  | 251 | 45   |
| >TET2-T492S NDIQTAGTM  | 63   | >TET2-T492S NDIQSAGTM  | 68  | 5    |
| >TET2-T492S RNDIQTAGTM | 508  | >TET2-T492S RNDIQSAGTM | 348 | 160  |
| >TET2-T492S NRNDIQTAG  | 472  | >TET2-T492S NRNDIQSAG  | 648 | 176  |
| >TET2-T492S NRNDIQTAG  | 324  | >TET2-T492S NRNDIQSAG  | 310 | 14   |
| >TET2-V1199VRRSSSEEK   | 642  | >TET2-V1199IVRRSSSEEK  | 278 | 364  |
| >TET2-V1199VRRSSSEEK   | 462  | >TET2-V1199IVRRSSSEEK  | 475 | 13   |
| >TET2-V1199VRRSSSE     | 727  | >TET2-V1199IVRRSSSE    | 275 | 452  |
| >TET2-V1199VRRSSSEE    | 768  | >TET2-V1199IVRRSSSEE   | 283 | 485  |
| >TET2-V1199VRRSSSEEK   | 6    | >TET2-V1199IVRRSSSEEK  | 5   | 1    |



|                        |       |                        |      |       |
|------------------------|-------|------------------------|------|-------|
| >TET2-V1199VRRSSSEEKI  | 451   | >TET2-V1199IVRRSSSEEKL | 228  | 223   |
| >TET2-V1199VRRSSSEEKI  | 323   | >TET2-V1199IVRRSSSEEKL | 192  | 131   |
| >TET2-V1199VRRSSSEEKI  | 273   | >TET2-V1199IVRRSSSEEKL | 149  | 124   |
| >TET2-V1199WVRRSSSEE   | 119   | >TET2-V1199WIVRRSSSEE  | 279  | 160   |
| >TET2-V1199SSQGCPIAKW  | 2232  | >TET2-V1199SSQGCPIAKW  | 449  | 1783  |
| >TET2-V1199SSQGCPIAKW  | 472   | >TET2-V1199SSQGCPIAKW  | 330  | 142   |
| >TET2-V1199SSQGCPIAKW  | 2005  | >TET2-V1199SSQGCPIAKW  | 35   | 1970  |
| >TET2-V1199KWVRRSS     | 89    | >TET2-V1199KWIVRRSS    | 155  | 66    |
| >TET2-V1199KWVRRSSS    | 90    | >TET2-V1199KWIVRRSSS   | 157  | 67    |
| >TET2-V1199KWVRRSSSE   | 210   | >TET2-V1199KWIVRRSSSE  | 363  | 153   |
| >TET2-V1199AKWVRRSS:   | 455   | >TET2-V1199AKWIVRRSSS  | 716  | 261   |
| >TET2-V1199IAKWVRR     | 16    | >TET2-V1199IAKWIVRR    | 12   | 4     |
| >TET2-V1199IAKWVRR     | 92    | >TET2-V1199IAKWIVRR    | 82   | 10    |
| >TET2-V1199IAKWVRR     | 39    | >TET2-V1199IAKWIVRR    | 33   | 6     |
| >TET2-V1199IAKWVRR     | 711   | >TET2-V1199IAKWIVRR    | 305  | 406   |
| >TET2-V1199PIAKWVVR    | 145   | >TET2-V1199PIAKWIVR    | 134  | 11    |
| >TET2-V1199PIAKWVRR    | 111   | >TET2-V1199PIAKWIVRR   | 79   | 32    |
| >TET2-V1199CPIAKWVV    | 540   | >TET2-V1199CPIAKWIV    | 455  | 85    |
| >TET2-V1199CPIAKWVV    | 25    | >TET2-V1199CPIAKWIV    | 24   | 1     |
| >TET2-V1199CPIAKWVVR   | 160   | >TET2-V1199CPIAKWIVR   | 190  | 30    |
| >TET2-V1199CPIAKWVVR   | 181   | >TET2-V1199CPIAKWIVRR  | 154  | 27    |
| >TET2-V1199QGCPIAKWV   | 3113  | >TET2-V1199QGCPIAKWI   | 450  | 2663  |
| >TET2-V1199QGCPIAKWV   | 111   | >TET2-V1199QGCPIAKWIV  | 121  | 10    |
| >TET2-V1199QGCPIAKWV   | 5776  | >TET2-V1199QGCPIAKWI   | 165  | 5611  |
| >TET2-V1199SQGCPIAKWV  | 36    | >TET2-V1199SQGCPIAKWI  | 41   | 5     |
| >TET2-V1199SQGCPIAKWV  | 103   | >TET2-V1199SQGCPIAKWI  | 969  | 866   |
| >TET2-V1199SQGCPIAKWV  | 28    | >TET2-V1199SQGCPIAKWI  | 63   | 35    |
| >TET2-V1199SQGCPIAKWV  | 33    | >TET2-V1199SQGCPIAKWI  | 39   | 6     |
| >TET2-V1199SQGCPIAKWV  | 105   | >TET2-V1199SQGCPIAKWI  | 128  | 23    |
| >TET2-V1227VILILVWEGI  | 411   | >TET2-V1227EILILVWEGI  | 792  | 381   |
| >TET2-V1227VILILVWEGI  | 12    | >TET2-V1227EILILVWEGI  | 154  | 142   |
| >TET2-V1227VILILVWEGI  | 60    | >TET2-V1227EILILVWEGI  | 727  | 667   |
| >TET2-V1227VILILVWEGI  | 252   | >TET2-V1227EILILVWEGI  | 744  | 492   |
| >TET2-V1227VILILVWEGI  | 1122  | >TET2-V1227EILILVWEGI  | 13   | 1109  |
| >TET2-V1227IVILILVW    | 39287 | >TET2-V1227IEILILVW    | 210  | 39077 |
| >TET2-V1227IVILILVWEGI | 3555  | >TET2-V1227IEILILVWEGI | 9    | 3546  |
| >TET2-V1227IVILILVWEGI | 492   | >TET2-V1227IEILILVWEGI | 7194 | 6702  |
| >TET2-V1227IVILILVWEGI | 50    | >TET2-V1227IEILILVWEGI | 917  | 867   |
| >TET2-V1227IVILILVWEGI | 32    | >TET2-V1227IEILILVWEGI | 9271 | 9239  |
| >TET2-V1227IVILILVW    | 35    | >TET2-V1227IEILILVW    | 3577 | 3542  |
| >TET2-V1227IVILILVW    | 12983 | >TET2-V1227IEILILVW    | 41   | 12942 |
| >TET2-V1227IVILILVWEGI | 20796 | >TET2-V1227IEILILVWEGI | 20   | 20776 |
| >TET2-V1227IVILILVWEGI | 37441 | >TET2-V1227IEILILVWEGI | 433  | 37008 |

|                        |       |                        |      |       |
|------------------------|-------|------------------------|------|-------|
| >TET2-V1227IVILILVW    | 17518 | >TET2-V1227IEILILVW    | 99   | 17419 |
| >TET2-V1227IVILILVW    | 19494 | >TET2-V1227IEILILVW    | 38   | 19456 |
| >TET2-V1227IVILILVWEG  | 29213 | >TET2-V1227IEILILVWEG  | 452  | 28761 |
| >TET2-V1227IVILILVW    | 287   | >TET2-V1227IEILILVW    | 1936 | 1649  |
| >TET2-V1227IVILILVW    | 178   | >TET2-V1227IEILILVW    | 5575 | 5397  |
| >TET2-V1227IVILILVW    | 15    | >TET2-V1227IEILILVW    | 783  | 768   |
| >TET2-V1227IVILILVW    | 27042 | >TET2-V1227IEILILVW    | 225  | 26817 |
| >TET2-V1227IVILILVWEGI | 4537  | >TET2-V1227IEILILVWEGI | 3    | 4534  |
| >TET2-V1227IVILILVW    | 217   | >TET2-V1227IEILILVW    | 113  | 104   |
| >TET2-V1227VIVILILV    | 223   | >TET2-V1227VIEILILV    | 1473 | 1250  |
| >TET2-V1227VIVILILV    | 346   | >TET2-V1227VIEILILV    | 919  | 573   |
| >TET2-V1227VIVILILV    | 131   | >TET2-V1227VIEILILV    | 1166 | 1035  |
| >TET2-V1227VIVILILV    | 39    | >TET2-V1227VIEILILV    | 406  | 367   |
| >TET2-V1227VIVILILV    | 20    | >TET2-V1227VIEILILV    | 146  | 126   |
| >TET2-V1227VIVILILV    | 51    | >TET2-V1227VIEILILV    | 607  | 556   |
| >TET2-V1227VIVILILV    | 8     | >TET2-V1227VIEILILV    | 17   | 9     |
| >TET2-V1227VIVILILVW   | 48    | >TET2-V1227VIEILILVW   | 532  | 484   |
| >TET2-V1227VIVILILVW   | 15    | >TET2-V1227VIEILILVW   | 279  | 264   |
| >TET2-V1227AVIVILIL    | 797   | >TET2-V1227AVIEILIL    | 142  | 655   |
| >TET2-V1227AVIVILILV   | 53    | >TET2-V1227AVIEILILV   | 14   | 39    |
| >TET2-V1227AVIVILIL    | 712   | >TET2-V1227AVIEILIL    | 181  | 531   |
| >TET2-V1227AVIVILILV   | 84    | >TET2-V1227AVIEILILV   | 14   | 70    |
| >TET2-V1227AVIVILIL    | 931   | >TET2-V1227AVIEILIL    | 168  | 763   |
| >TET2-V1227AVIVILILV   | 77    | >TET2-V1227AVIEILILV   | 9    | 68    |
| >TET2-V1227AVIVILIL    | 134   | >TET2-V1227AVIEILIL    | 22   | 112   |
| >TET2-V1227AVIVILILV   | 11    | >TET2-V1227AVIEILILV   | 3    | 8     |
| >TET2-V1227AVIVILILV   | 136   | >TET2-V1227AVIEILILV   | 7    | 129   |
| >TET2-V1227AVIVILILV   | 372   | >TET2-V1227AVIEILILV   | 21   | 351   |
| >TET2-V1227AVIVILILV   | 185   | >TET2-V1227AVIEILILV   | 22   | 163   |
| >TET2-V1227AVIVILILV   | 2351  | >TET2-V1227AVIEILILV   | 166  | 2185  |
| >TET2-V1227AVIVILIL    | 907   | >TET2-V1227AVIEILIL    | 162  | 745   |
| >TET2-V1227AVIVILILV   | 35    | >TET2-V1227AVIEILILV   | 6    | 29    |
| >TET2-V1227AVIVILIL    | 200   | >TET2-V1227AVIEILIL    | 45   | 155   |
| >TET2-V1227AVIVILILV   | 1944  | >TET2-V1227AVIEILILV   | 372  | 1572  |
| >TET2-V1227AVIVILILVW  | 727   | >TET2-V1227AVIEILILVW  | 267  | 460   |
| >TET2-V1227AVIVILILVWE | 1020  | >TET2-V1227AVIEILILVWE | 312  | 708   |
| >TET2-V1227AVIVILILVW  | 481   | >TET2-V1227AVIEILILVW  | 237  | 244   |
| >TET2-V1227AVIVILILV   | 41    | >TET2-V1227AVIEILILV   | 16   | 25    |
| >TET2-V1227AVIVILILV   | 294   | >TET2-V1227AVIEILILV   | 19   | 275   |
| >TET2-V1227AVIVILILVW  | 43    | >TET2-V1227AVIEILILVW  | 29   | 14    |
| >TET2-V1227AVIVILILVW  | 21    | >TET2-V1227AVIEILILVW  | 24   | 3     |
| >TET2-V1227AVIVILILVW  | 273   | >TET2-V1227AVIEILILVW  | 265  | 8     |
| >TET2-V1227AAVIVILILV  | 418   | >TET2-V1227AAVIEILILV  | 224  | 194   |

|                        |     |                        |       |       |
|------------------------|-----|------------------------|-------|-------|
| >TET2-V1227AAVIVILILV  | 441 | >TET2-V1227AAVIEILILV  | 420   | 21    |
| >TET2-V1227AAVIVILILV  | 365 | >TET2-V1227AAVIEILILV  | 289   | 76    |
| >TET2-V1227AAVIVILILV  | 130 | >TET2-V1227AAVIEILILV  | 100   | 30    |
| >TET2-V1227AAVIVILILV  | 237 | >TET2-V1227AAVIEILILV  | 505   | 268   |
| >TET2-V1227AAVIVILILV  | 317 | >TET2-V1227AAVIEILILV  | 204   | 113   |
| >TET2-V1227AAVIVILILV  | 203 | >TET2-V1227AAVIEILILV  | 365   | 162   |
| >TET2-V1227AAVIVILIL   | 142 | >TET2-V1227AAVIEILIL   | 72    | 70    |
| >TET2-V1227AAVIVILILVW | 7   | >TET2-V1227AAVIEILILVW | 6     | 1     |
| >TET2-V1227AAVIVILILVW | 102 | >TET2-V1227AAVIEILILVW | 64    | 38    |
| >TET2-V1227AAVIVILILVW | 116 | >TET2-V1227AAVIEILILVW | 137   | 21    |
| >TET2-V1227AAVIVILILVW | 10  | >TET2-V1227AAVIEILILVW | 14    | 4     |
| >TET2-V1227AAVIVILILVW | 71  | >TET2-V1227AAVIEILILVW | 96    | 25    |
| >TET2-V1227EAAVIVIL    | 24  | >TET2-V1227EAAVIEIL    | 41    | 17    |
| >TET2-V1227EAAVIVILI   | 8   | >TET2-V1227EAAVIEILI   | 19    | 11    |
| >TET2-V1227EAAVIVILILV | 6   | >TET2-V1227EAAVIEILILV | 7     | 1     |
| >TET2-V1227EAAVIVIL    | 319 | >TET2-V1227EAAVIEIL    | 1183  | 864   |
| >TET2-V1227EAAVIVILI   | 46  | >TET2-V1227EAAVIEILI   | 816   | 770   |
| >TET2-V1227EAAVIVILIL  | 299 | >TET2-V1227EAAVIEILIL  | 1665  | 1366  |
| >TET2-V1227EAAVIVILILV | 9   | >TET2-V1227EAAVIEILILV | 23    | 14    |
| >TET2-V1227CEAAVIVI    | 116 | >TET2-V1227CEAAVIEI    | 1241  | 1125  |
| >TET2-V1227CEAAVIVILI  | 20  | >TET2-V1227CEAAVIEILI  | 29    | 9     |
| >TET2-V1227CEAAVIVIL   | 292 | >TET2-V1227CEAAVIEIL   | 565   | 273   |
| >TET2-V1227CEAAVIVILIL | 259 | >TET2-V1227CEAAVIEILIL | 502   | 243   |
| >TET2-V1227CEAAVIVIL   | 244 | >TET2-V1227CEAAVIEIL   | 1994  | 1750  |
| >TET2-V1227CEAAVIVI    | 57  | >TET2-V1227CEAAVIEI    | 91    | 34    |
| >TET2-V1227CEAAVIVIL   | 12  | >TET2-V1227CEAAVIEIL   | 14    | 2     |
| >TET2-V1227CEAAVIVILIL | 18  | >TET2-V1227CEAAVIEILIL | 38    | 20    |
| >TET2-V1227CEAAVIVI    | 410 | >TET2-V1227CEAAVIEI    | 397   | 13    |
| >TET2-V1227CEAAVIVIL   | 309 | >TET2-V1227CEAAVIEIL   | 450   | 141   |
| >TET2-V1227CEAAVIVILI  | 457 | >TET2-V1227CEAAVIEILI  | 750   | 293   |
| >TET2-V1227CEAAVIVILIL | 203 | >TET2-V1227CEAAVIEILIL | 269   | 66    |
| >TET2-V1227CEAAVIVI    | 965 | >TET2-V1227CEAAVIEI    | 345   | 620   |
| >TET2-V1227CEAAVIVILIL | 416 | >TET2-V1227CEAAVIEILIL | 664   | 248   |
| >TET2-V1227CEAAVIVI    | 83  | >TET2-V1227CEAAVIEI    | 111   | 28    |
| >TET2-V1227CEAAVIVIL   | 313 | >TET2-V1227CEAAVIEIL   | 617   | 304   |
| >TET2-V1227CEAAVIVILI  | 276 | >TET2-V1227CEAAVIEILI  | 349   | 73    |
| >TET2-V1227CEAAVIVILIL | 452 | >TET2-V1227CEAAVIEILIL | 738   | 286   |
| >TET2-V1227CEAAVIVI    | 131 | >TET2-V1227CEAAVIEI    | 172   | 41    |
| >TET2-V1227CEAAVIVIL   | 20  | >TET2-V1227CEAAVIEIL   | 24    | 4     |
| >TET2-V1227CEAAVIVILI  | 219 | >TET2-V1227CEAAVIEILI  | 619   | 400   |
| >TET2-V1227CEAAVIVILIL | 26  | >TET2-V1227CEAAVIEILIL | 36    | 10    |
| >TET2-V1227HTCEAAVIV   | 442 | >TET2-V1227HTCEAAVIE   | 28098 | 27656 |
| >TET2-V1227HTCEAAVIVIL | 824 | >TET2-V1227HTCEAAVIEIL | 427   | 397   |

|                        |       |                         |       |       |
|------------------------|-------|-------------------------|-------|-------|
| >TET2-V1227HTCEAAVIVI  | 250   | >TET2-V1227HTCEAAVIEI   | 257   | 7     |
| >TET2-V1227HTCEAAVIVI  | 223   | >TET2-V1227HTCEAAVIEI   | 279   | 56    |
| >TET2-V1227HTCEAAVIVIL | 370   | >TET2-V1227HTCEAAVIEIL  | 813   | 443   |
| >TET2-V1227HTCEAAVIV   | 38    | >TET2-V1227HTCEAAVIE    | 20657 | 20619 |
| >TET2-V1227HTCEAAVIVI  | 198   | >TET2-V1227HTCEAAVIEI   | 107   | 91    |
| >TET2-V1227HTCEAAVIVIL | 127   | >TET2-V1227HTCEAAVIEIL  | 121   | 6     |
| >TET2-V1227HTCEAAVIV   | 45    | >TET2-V1227HTCEAAVIE    | 18656 | 18611 |
| >TET2-V1227HTCEAAVIVI  | 375   | >TET2-V1227HTCEAAVIEI   | 101   | 274   |
| >TET2-V1227HTCEAAVIV   | 355   | >TET2-V1227HTCEAAVIE    | 8610  | 8255  |
| >TET2-V1227HTCEAAVIVI  | 78    | >TET2-V1227HTCEAAVIEI   | 56    | 22    |
| >TET2-V1227HTCEAAVIVIL | 56    | >TET2-V1227HTCEAAVIEIL  | 96    | 40    |
| >TET2-V1227HTCEAAVIVIL | 180   | >TET2-V1227HTCEAAVIEIL  | 770   | 590   |
| >TET2-V1227HTCEAAVIVIL | 485   | >TET2-V1227HTCEAAVIEIL  | 794   | 309   |
| >TET2-V1227HTCEAAVIVI  | 76    | >TET2-V1227HTCEAAVIEI   | 128   | 52    |
| >TET2-V1227HTCEAAVIVIL | 231   | >TET2-V1227HTCEAAVIEIL  | 271   | 40    |
| >TET2-V1417VLPLYKVSVDV | 1658  | >TET2-V1417FLPLYKVSVDV  | 95    | 1563  |
| >TET2-V1417VLPLYKVSVDV | 916   | >TET2-V1417FLPLYKVSVDV  | 61    | 855   |
| >TET2-V1417VLPLYKVSVDV | 182   | >TET2-V1417FLPLYKVSVDV  | 22    | 160   |
| >TET2-V1417VLPLYKVSVDV | 2472  | >TET2-V1417FLPLYKVSVDV  | 115   | 2357  |
| >TET2-V1417VLPLYKVSVDV | 26    | >TET2-V1417FLPLYKVSVDV  | 6     | 20    |
| >TET2-V1417VLPLYKVSVDV | 178   | >TET2-V1417FLPLYKVSVDV  | 19    | 159   |
| >TET2-V1417VLPLYKVSVDV | 42    | >TET2-V1417FLPLYKVSVDV  | 12    | 30    |
| >TET2-V1417VLPLYKVSVDV | 180   | >TET2-V1417FLPLYKVSVDV  | 33    | 147   |
| >TET2-V1417VLPLYKVSVDV | 4     | >TET2-V1417FLPLYKVSVDV  | 2     | 2     |
| >TET2-V1417HVLPLYKV    | 261   | >TET2-V1417HFLPLYKV     | 6478  | 6217  |
| >TET2-V1417HVLPLYKV    | 345   | >TET2-V1417HFLPLYKV     | 1054  | 709   |
| >TET2-V1417HVLPLYKVSVD | 443   | >TET2-V1417HFLPLYKVSVD' | 10261 | 9818  |
| >TET2-V1417HVLPLYKV    | 48    | >TET2-V1417HFLPLYKV     | 3801  | 3753  |
| >TET2-V1417HVLPLYKV    | 41    | >TET2-V1417HFLPLYKV     | 979   | 938   |
| >TET2-V1417HVLPLYKV    | 112   | >TET2-V1417HFLPLYKV     | 3261  | 3149  |
| >TET2-V1417HVLPLYKV    | 69    | >TET2-V1417HFLPLYKV     | 1106  | 1037  |
| >TET2-V1417HVLPLYKVSVD | 444   | >TET2-V1417HFLPLYKVSVD' | 4116  | 3672  |
| >TET2-V1417HVLPLYKV    | 192   | >TET2-V1417HFLPLYKV     | 7134  | 6942  |
| >TET2-V1417HVLPLYKV    | 20    | >TET2-V1417HFLPLYKV     | 1348  | 1328  |
| >TET2-V1417HVLPLYKVSVD | 82    | >TET2-V1417HFLPLYKVSVD' | 2841  | 2759  |
| >TET2-V1417HVLPLYKV    | 9219  | >TET2-V1417HFLPLYKV     | 181   | 9038  |
| >TET2-V1417HVLPLYKVSVD | 13168 | >TET2-V1417HFLPLYKVSVD' | 493   | 12675 |
| >TET2-V1417HVLPLYKV    | 21    | >TET2-V1417HFLPLYKV     | 5726  | 5705  |
| >TET2-V1417HVLPLYKVSVD | 217   | >TET2-V1417HFLPLYKVSVD' | 15354 | 15137 |
| >TET2-V1417HVLPLYKV    | 12    | >TET2-V1417HFLPLYKV     | 1560  | 1548  |
| >TET2-V1417HVLPLYKVSVD | 188   | >TET2-V1417HFLPLYKVSVD' | 11460 | 11272 |
| >TET2-V1417HVLPLYKV    | 22749 | >TET2-V1417HFLPLYKV     | 331   | 22418 |
| >TET2-V1417HVLPLYKVSVD | 23603 | >TET2-V1417HFLPLYKVSVD' | 475   | 23128 |

|                        |      |                        |     |      |
|------------------------|------|------------------------|-----|------|
| >TET2-V1417QLHVLPLYKV  | 126  | >TET2-V1417QLHFLPLYKV  | 83  | 43   |
| >TET2-V1417QLHVLPLYKV  | 50   | >TET2-V1417QLHFLPLYKV  | 44  | 6    |
| >TET2-V1417QLHVLPLYKV  | 78   | >TET2-V1417QLHFLPLYKV  | 106 | 28   |
| >TET2-V1417QLHVLPLYKV  | 238  | >TET2-V1417QLHFLPLYKV  | 270 | 32   |
| >TET2-V1417QLHVLPLYKV  | 8    | >TET2-V1417QLHFLPLYKV  | 6   | 2    |
| >TET2-V1417QLHVLPLYKV  | 40   | >TET2-V1417QLHFLPLYKV  | 39  | 1    |
| >TET2-V1417QLHVLPLYKV  | 71   | >TET2-V1417QLHFLPLYKV  | 68  | 3    |
| >TET2-V1417QLHVLPLYKV  | 112  | >TET2-V1417QLHFLPLYKV  | 58  | 54   |
| >TET2-V1417QLHVLPLYKV  | 8    | >TET2-V1417QLHFLPLYKV  | 8   | 0    |
| >TET2-V1417QLHVLPLYK   | 51   | >TET2-V1417QLHFLPLYK   | 37  | 14   |
| >TET2-V1417QLHVLPLYK   | 42   | >TET2-V1417QLHFLPLYK   | 25  | 17   |
| >TET2-V1417QLHVLPLY    | 21   | >TET2-V1417QLHFLPLY    | 12  | 9    |
| >TET2-V1417QLHVLPLYK   | 17   | >TET2-V1417QLHFLPLYK   | 15  | 2    |
| >TET2-V1417QLHVLPLY    | 219  | >TET2-V1417QLHFLPLY    | 144 | 75   |
| >TET2-V1417QLHVLPLYK   | 1490 | >TET2-V1417QLHFLPLYK   | 438 | 1052 |
| >TET2-V1417QLHVLPLY    | 25   | >TET2-V1417QLHFLPLY    | 15  | 10   |
| >TET2-V1417QLHVLPLYK   | 247  | >TET2-V1417QLHFLPLYK   | 80  | 167  |
| >TET2-V1417EQLHVLPL    | 50   | >TET2-V1417EQLHFLPL    | 27  | 23   |
| >TET2-V1417EQLHVLPLYK' | 27   | >TET2-V1417EQLHFLPLYK\ | 27  | 0    |
| >TET2-V1417EQLHVLPLYK' | 104  | >TET2-V1417EQLHFLPLYK\ | 124 | 20   |
| >TET2-V1417EQLHVLPLYK' | 340  | >TET2-V1417EQLHFLPLYK\ | 344 | 4    |
| >TET2-V1417EQLHVLPLYK' | 194  | >TET2-V1417EQLHFLPLYK\ | 463 | 269  |
| >TET2-V1417EQLHVLPLYK' | 238  | >TET2-V1417EQLHFLPLYK\ | 249 | 11   |
| >TET2-V1417EQLHVLPLYK  | 102  | >TET2-V1417EQLHFLPLYK  | 67  | 35   |
| >TET2-V1417EQLHVLPLYK  | 85   | >TET2-V1417EQLHFLPLYK  | 50  | 35   |
| >TET2-V1417EQLHVLPLY   | 149  | >TET2-V1417EQLHFLPLY   | 92  | 57   |
| >TET2-V1417EQLHVLPLY   | 360  | >TET2-V1417EQLHFLPLY   | 187 | 173  |
| >TET2-V1417EQLHVLPLY   | 189  | >TET2-V1417EQLHFLPLY   | 175 | 14   |
| >TET2-V1417EQLHVLPL    | 837  | >TET2-V1417EQLHFLPL    | 301 | 536  |
| >TET2-V1417EQLHVLPLYK' | 117  | >TET2-V1417EQLHFLPLYK\ | 45  | 72   |
| >TET2-V1417EQLHVLPL    | 100  | >TET2-V1417EQLHFLPL    | 35  | 65   |
| >TET2-V1417EQLHVLPLY   | 143  | >TET2-V1417EQLHFLPLY   | 25  | 118  |
| >TET2-V1417EQLHVLPL    | 67   | >TET2-V1417EQLHFLPL    | 85  | 18   |
| >TET2-V1417EQLHVLPL    | 400  | >TET2-V1417EQLHFLPL    | 293 | 107  |
| >TET2-V1417EQLHVLPLYK  | 819  | >TET2-V1417EQLHFLPLYK  | 153 | 666  |
| >TET2-V1417DEQLHVLP    | 446  | >TET2-V1417DEQLHFLP    | 218 | 228  |
| >TET2-V1417DEQLHVLPL   | 413  | >TET2-V1417DEQLHFLPL   | 402 | 11   |
| >TET2-V1417DEQLHVLPL   | 4262 | >TET2-V1417DEQLHFLPL   | 469 | 3793 |
| >TET2-V1417DEQLHVLPL   | 11   | >TET2-V1417DEQLHFLPL   | 9   | 2    |
| >TET2-V1417DEQLHVLPLY  | 107  | >TET2-V1417DEQLHFLPLY  | 132 | 25   |
| >TET2-V1417DEQLHVLPL   | 286  | >TET2-V1417DEQLHFLPL   | 184 | 102  |
| >TET2-V1417DEQLHVLPLY  | 403  | >TET2-V1417DEQLHFLPLY  | 246 | 157  |
| >TET2-V1417DEQLHVLPL   | 253  | >TET2-V1417DEQLHFLPL   | 406 | 153  |

|                         |       |                        |      |       |
|-------------------------|-------|------------------------|------|-------|
| >TET2-V1417PEDEQLHVL    | 2387  | >TET2-V1417PEDEQLHFL   | 73   | 2314  |
| >TET2-V1417PEDEQLHVL    | 390   | >TET2-V1417PEDEQLHFL   | 533  | 143   |
| >TET2-V1417PEDEQLHVLP   | 383   | >TET2-V1417PEDEQLHFLP  | 237  | 146   |
| >TET2-V1417KPEDEQLHV    | 3086  | >TET2-V1417KPEDEQLHF   | 162  | 2924  |
| >TET2-V1417KPEDEQLHV    | 10016 | >TET2-V1417KPEDEQLHF   | 297  | 9719  |
| >TET2-V1417GKPEDEQLHV   | 7442  | >TET2-V1417GKPEDEQLHF  | 267  | 7175  |
| >TET2-V1718HVGKLPPTYPT  | 5588  | >TET2-V1718HLGKLPPTYPT | 461  | 5127  |
| >TET2-V1718HVGKLPPTYPT  | 12214 | >TET2-V1718HLGKLPPTYPT | 478  | 11736 |
| >TET2-V1718HVGKLPPTY    | 97    | >TET2-V1718HLGKLPPTY   | 1592 | 1495  |
| >TET2-V1718HVGKLPPTY    | 356   | >TET2-V1718HLGKLPPTY   | 2108 | 1752  |
| >TET2-V1718HVGKLPPTY    | 141   | >TET2-V1718HLGKLPPTY   | 169  | 28    |
| >TET2-V1718HVGKLPPTY    | 374   | >TET2-V1718HLGKLPPTY   | 367  | 7     |
| >TET2-V1718HVGKLPPTY    | 19    | >TET2-V1718HLGKLPPTY   | 20   | 1     |
| >TET2-V1718HVGKLPPTY    | 251   | >TET2-V1718HLGKLPPTY   | 110  | 141   |
| >TET2-V1718HVGKLPPTY    | 2592  | >TET2-V1718HLGKLPPTY   | 470  | 2122  |
| >TET2-V1718HVGKLPPTY    | 283   | >TET2-V1718HLGKLPPTY   | 1417 | 1134  |
| >TET2-V1718SCTIRPNVHH   | 360   | >TET2-V1718SCTIRPNVHH  | 5158 | 4798  |
| >TET2-V1718HHVGKLPPTY   | 102   | >TET2-V1718HHLGKLPPTY  | 1263 | 1161  |
| >TET2-V1718HHVGKLPPTY   | 422   | >TET2-V1718HHLGKLPPTY  | 290  | 132   |
| >TET2-V1718HHVGKLPPTY   | 447   | >TET2-V1718HHLGKLPPTY  | 617  | 170   |
| >TET2-V1718VHHVGKLPPTY  | 345   | >TET2-V1718VHHLGKLPPTY | 687  | 342   |
| >TET2-V1718NVHHVGKLPPTY | 185   | >TET2-V1718NVHHLGKLPFY | 357  | 172   |
| >TET2-V1718NVHHVGKLPPTY | 146   | >TET2-V1718NVHHLGKLPFY | 124  | 22    |
| >TET2-V1718NVHHVGKLPPTY | 187   | >TET2-V1718NVHHLGKLPFY | 134  | 53    |
| >TET2-V1718NVHHVGKLP    | 243   | >TET2-V1718NVHHLGKLP   | 583  | 340   |
| >TET2-V1718NVHHVGKLP    | 498   | >TET2-V1718NVHHLGKLPFY | 339  | 159   |
| >TET2-V1718NVHHVGKLP    | 280   | >TET2-V1718NVHHLGKLPFY | 263  | 17    |
| >TET2-V1718NVHHVGKLP    | 411   | >TET2-V1718NVHHLGKLPFY | 377  | 34    |
| >TET2-V1718RPNVHHVGK    | 108   | >TET2-V1718RPNVHHLGKI  | 55   | 53    |
| >TET2-V1718IRPNVHHVGK   | 80    | >TET2-V1718IRPNVHHLGK  | 68   | 12    |
| >TET2-V1718TIRPNVHHV    | 22    | >TET2-V1718TIRPNVHHL   | 385  | 363   |
| >TET2-V1718TIRPNVHHV    | 400   | >TET2-V1718TIRPNVHHL   | 3397 | 2997  |
| >TET2-V1718TIRPNVHHV    | 95    | >TET2-V1718TIRPNVHHL   | 1810 | 1715  |
| >TET2-V1718TIRPNVHHV    | 336   | >TET2-V1718TIRPNVHHL   | 3838 | 3502  |
| >TET2-V1718TIRPNVHHV    | 412   | >TET2-V1718TIRPNVHHL   | 6538 | 6126  |
| >TET2-V1718TIRPNVHHV    | 3     | >TET2-V1718TIRPNVHHL   | 22   | 19    |
| >TET2-V1718TIRPNVHHVC   | 161   | >TET2-V1718TIRPNVHHLG  | 114  | 47    |
| >TET2-V1718TIRPNVHHVC   | 422   | >TET2-V1718TIRPNVHHLG  | 256  | 166   |
| >TET2-V1718TIRPNVHHV    | 4236  | >TET2-V1718TIRPNVHHL   | 474  | 3762  |
| >TET2-V1718TIRPNVHHV    | 67    | >TET2-V1718TIRPNVHHL   | 104  | 37    |
| >TET2-V1718TIRPNVHHVC   | 657   | >TET2-V1718TIRPNVHHLG  | 378  | 279   |
| >TET2-V1718TIRPNVHHVC   | 7     | >TET2-V1718TIRPNVHHLG  | 6    | 1     |
| >TET2-V1718TIRPNVHHVC   | 373   | >TET2-V1718TIRPNVHHLG  | 832  | 459   |

|                       |       |                       |       |       |
|-----------------------|-------|-----------------------|-------|-------|
| >TET2-V1718TIRPNVHHV  | 128   | >TET2-V1718TIRPNVHHL  | 1980  | 1852  |
| >TET2-V1718TIRPNVHHV  | 295   | >TET2-V1718TIRPNVHHL  | 3035  | 2740  |
| >TET2-V1718CTIRPNVHHV | 418   | >TET2-V1718CTIRPNVHHL | 4595  | 4177  |
| >TET2-V1718CTIRPNVHHV | 459   | >TET2-V1718CTIRPNVHHL | 5732  | 5273  |
| >TET2-V1718CTIRPNVHHV | 113   | >TET2-V1718CTIRPNVHHL | 15    | 98    |
| >TET2-V1718CTIRPNVHHV | 22    | >TET2-V1718CTIRPNVHHL | 77    | 55    |
| >TET2-V1718CTIRPNVHHV | 70    | >TET2-V1718CTIRPNVHHL | 1026  | 956   |
| >TET2-V1718CTIRPNVHHV | 3612  | >TET2-V1718CTIRPNVHHL | 162   | 3450  |
| >TET2-V1718CTIRPNVHHV | 2337  | >TET2-V1718CTIRPNVHHL | 256   | 2081  |
| >TET2-W129 WSMYYNGCI  | 6738  | >TET2-W129 RSMYYNGCK  | 111   | 6627  |
| >TET2-W129 WSMYYNGCI  | 463   | >TET2-W129 RSMYYNGCK  | 16    | 447   |
| >TET2-W129 WSMYYNGCI  | 316   | >TET2-W129 RSMYYNGCK  | 158   | 158   |
| >TET2-W129 WSMYYNGCI  | 269   | >TET2-W129 RSMYYNGCK  | 315   | 46    |
| >TET2-W129 WSMYYNGCI  | 7223  | >TET2-W129 RSMYYNGCK  | 16    | 7207  |
| >TET2-W129 WSMYYNGCI  | 11270 | >TET2-W129 RSMYYNGCK  | 78    | 11192 |
| >TET2-W129 WSMYYNGCI  | 798   | >TET2-W129 RSMYYNGCK  | 78    | 720   |
| >TET2-W129 WSMYYNGCI  | 7285  | >TET2-W129 RSMYYNGCK  | 95    | 7190  |
| >TET2-W129 WSMYYNGCI  | 4377  | >TET2-W129 RSMYYNGCK  | 33    | 4344  |
| >TET2-W129 WSMYYNGCI  | 92    | >TET2-W129 RSMYYNGCK  | 364   | 272   |
| >TET2-W129 WSMYYNGCI  | 351   | >TET2-W129 RSMYYNGCK  | 6774  | 6423  |
| >TET2-W129 WSMYYNGCI  | 119   | >TET2-W129 RSMYYNGCK  | 80    | 39    |
| >TET2-W129 WSMYYNGCI  | 16    | >TET2-W129 RSMYYNGCK  | 8     | 8     |
| >TET2-W129 WSMYYNGCI  | 9     | >TET2-W129 RSMYYNGCK  | 5     | 4     |
| >TET2-W129 WSMYYNGCI  | 3228  | >TET2-W129 RSMYYNGCK  | 267   | 2961  |
| >TET2-W129 WSMYYNGCI  | 284   | >TET2-W129 RSMYYNGCK  | 23    | 261   |
| >TET2-W129 WSMYYNGCI  | 18    | >TET2-W129 RSMYYNGCK  | 20    | 2     |
| >TET2-W129 SWSMYYNGC  | 421   | >TET2-W129 SRSMYYNGCI | 14248 | 13827 |
| >TET2-W129 SWSMYYNGC  | 27    | >TET2-W129 SRSMYYNGCI | 12879 | 12852 |
| >TET2-W129 SWSMYYNGC  | 727   | >TET2-W129 SRSMYYNGCI | 29    | 698   |
| >TET2-W129 SWSMYYNGC  | 15009 | >TET2-W129 SRSMYYNGCI | 236   | 14773 |
| >TET2-W129 SWSMYYNGC  | 27983 | >TET2-W129 SRSMYYNGCI | 469   | 27514 |
| >TET2-W129 SWSMYYNGC  | 442   | >TET2-W129 SRSMYYNGCI | 18060 | 17618 |
| >TET2-W129 SWSMYYNG   | 187   | >TET2-W129 SRSMYYNG   | 26764 | 26577 |
| >TET2-W129 SWSMYYNGC  | 59    | >TET2-W129 SRSMYYNGC  | 17166 | 17107 |
| >TET2-W129 SWSMYYNGC  | 137   | >TET2-W129 SRSMYYNGCI | 26001 | 25864 |
| >TET2-W129 CGASFSFGCS | 26395 | >TET2-W129 CGASFSFGCS | 98    | 26297 |
| >TET2-W129 CGASFSFGCS | 347   | >TET2-W129 CGASFSFGCS | 24341 | 23994 |
| >TET2-W129 CGASFSFGCS | 38    | >TET2-W129 CGASFSFGCS | 21964 | 21926 |
| >TET2-W129 CGASFSFGCS | 205   | >TET2-W129 CGASFSFGCS | 30633 | 30428 |
| >TET2-W129 CGASFSFGCS | 21644 | >TET2-W129 CGASFSFGCS | 121   | 21523 |
| >TET2-W129 CSWSMYYNG  | 70    | >TET2-W129 CSRSMYYNGI | 813   | 743   |
| >TET2-W129 CSWSMYYNG  | 13400 | >TET2-W129 CSRSMYYNG  | 453   | 12947 |
| >TET2-W129 CSWSMYYNG  | 2707  | >TET2-W129 CSRSMYYNGI | 10    | 2697  |

|                       |     |                       |      |      |
|-----------------------|-----|-----------------------|------|------|
| >TET2-W129 CSWSMYYNCG | 150 | >TET2-W129 CSRSMYYNGI | 437  | 287  |
| >TET2-W129 CSWSMYYNCG | 313 | >TET2-W129 CSRSMYYNGI | 856  | 543  |
| >TET2-W129 GCSWSMYYY  | 64  | >TET2-W129 GCSRSMYY   | 335  | 271  |
| >TET2-W129 GCSWSMYYY  | 128 | >TET2-W129 GCSRSMYY   | 584  | 456  |
| >TET2-W129 GCSWSMYYY  | 212 | >TET2-W129 GCSRSMYY   | 1022 | 810  |
| >TET2-W129 FGCSWSMY   | 48  | >TET2-W129 FGCSRSMY   | 350  | 302  |
| >TET2-W129 FGCSWSMY   | 10  | >TET2-W129 FGCSRSMYY  | 52   | 42   |
| >TET2-W129 FGCSWSMY   | 186 | >TET2-W129 FGCSRSMY   | 430  | 244  |
| >TET2-W129 FGCSWSMY   | 84  | >TET2-W129 FGCSRSMYY  | 662  | 578  |
| >TET2-W129 FGCSWSMY   | 158 | >TET2-W129 FGCSRSMYY  | 270  | 112  |
| >TET2-W129 FGCSWSMY   | 210 | >TET2-W129 FGCSRSMY   | 344  | 134  |
| >TET2-W129 FGCSWSMY   | 136 | >TET2-W129 FGCSRSMYY  | 216  | 80   |
| >TET2-W129 FGCSWSMY   | 372 | >TET2-W129 FGCSRSMY   | 544  | 172  |
| >TET2-W129 FGCSWSMY   | 138 | >TET2-W129 FGCSRSMY   | 813  | 675  |
| >TET2-W129 FGCSWSMY   | 263 | >TET2-W129 FGCSRSMYY  | 1743 | 1480 |
| >TET2-W129 FGCSWSMY   | 109 | >TET2-W129 FGCSRSMYY  | 300  | 191  |
| >TET2-W129 SFGCSWSMY  | 744 | >TET2-W129 SFGCSRSMYY | 391  | 353  |
| >TET2-W129 SFGCSWSMY  | 18  | >TET2-W129 SFGCSRSMY  | 61   | 43   |
| >TET2-W129 SFGCSWSMY  | 15  | >TET2-W129 SFGCSRSMYY | 27   | 12   |
| >TET2-W129 SFGCSWSMY  | 841 | >TET2-W129 SFGCSRSMY  | 449  | 392  |
| >TET2-W129 SFGCSWSMY  | 190 | >TET2-W129 SFGCSRSMYY | 178  | 12   |
| >TET2-W129 SFGCSWSMY  | 91  | >TET2-W129 SFGCSRSMYY | 92   | 1    |
| >TET2-W129 SFGCSWSMY  | 81  | >TET2-W129 SFGCSRSMY  | 387  | 306  |
| >TET2-W129 SFGCSWSMY  | 416 | >TET2-W129 SFGCSRSMYY | 819  | 403  |
| >TET2-W129 SFGCSWSMY  | 55  | >TET2-W129 SFGCSRSMY  | 61   | 6    |
| >TET2-W129 SFGCSWSMY  | 197 | >TET2-W129 SFGCSRSMY  | 395  | 198  |
| >TET2-W129 FSFGCSWSM  | 74  | >TET2-W129 FSFGCSRSMY | 171  | 97   |
| >TET2-W129 FSFGCSWSM  | 43  | >TET2-W129 FSFGCSRSMY | 218  | 175  |
| >TET2-W129 FSFGCSWSM  | 40  | >TET2-W129 FSFGCSRSM  | 5797 | 5757 |
| >TET2-W129 FSFGCSWSM  | 20  | >TET2-W129 FSFGCSRSM  | 672  | 652  |
| >TET2-W129 FSFGCSWSM  | 13  | >TET2-W129 FSFGCSRSM  | 2108 | 2095 |
| >TET2-W129 FSFGCSWSM  | 469 | >TET2-W129 FSFGCSRSM  | 8924 | 8455 |
| >TET2-W129 FSFGCSWSM  | 327 | >TET2-W129 FSFGCSRSMY | 340  | 13   |
| >TET2-W129 FSFGCSWSM  | 318 | >TET2-W129 FSFGCSRSMY | 295  | 23   |
| >TET2-W129 FSFGCSWSM  | 42  | >TET2-W129 FSFGCSRSMY | 118  | 76   |
| >TET2-W129 FSFGCSWSM  | 557 | >TET2-W129 FSFGCSRSMY | 399  | 158  |
| >TET2-W129 FSFGCSWSM  | 112 | >TET2-W129 FSFGCSRSMY | 744  | 632  |
| >TET2-W129 FSFGCSWSM  | 103 | >TET2-W129 FSFGCSRSMY | 303  | 200  |
| >TET2-W129 FSFGCSWSM  | 22  | >TET2-W129 FSFGCSRSMY | 33   | 11   |
| >TET2-W129 FSFGCSWSM  | 6   | >TET2-W129 FSFGCSRSMY | 9    | 3    |
| >TET2-W129 FSFGCSWSM  | 14  | >TET2-W129 FSFGCSRSMY | 41   | 27   |
| >TET2-W129 FSFGCSWSM  | 24  | >TET2-W129 FSFGCSRSMY | 74   | 50   |
| >TET2-W129 FSFGCSWSM  | 27  | >TET2-W129 FSFGCSRSMY | 35   | 8    |



|                       |       |                       |      |       |
|-----------------------|-------|-----------------------|------|-------|
| >TET2-W129 FSFGCSWSM  | 32    | >TET2-W129 FSFGCSRSMY | 51   | 19    |
| >TET2-W129 FSFGCSWSM  | 73    | >TET2-W129 FSFGCSRSM  | 1804 | 1731  |
| >TET2-W129 FSFGCSWSM  | 82    | >TET2-W129 FSFGCSRSMY | 379  | 297   |
| >TET2-W129 FSFGCSWSM  | 158   | >TET2-W129 FSFGCSRSM  | 91   | 67    |
| >TET2-W129 FSFGCSWSM  | 58    | >TET2-W129 FSFGCSRSMY | 54   | 4     |
| >TET2-W129 FSFGCSWSM  | 46    | >TET2-W129 FSFGCSRSMY | 43   | 3     |
| >TET2-W129 FSFGCSWSM  | 93    | >TET2-W129 FSFGCSRSMY | 164  | 71    |
| >TET2-W129 FSFGCSWSM  | 439   | >TET2-W129 FSFGCSRSMY | 299  | 140   |
| >TET2-W129 FSFGCSWSM  | 44    | >TET2-W129 FSFGCSRSM  | 46   | 2     |
| >TET2-W129 FSFGCSWSM  | 10    | >TET2-W129 FSFGCSRSMY | 10   | 0     |
| >TET2-W129 FSFGCSWSM  | 10    | >TET2-W129 FSFGCSRSMY | 12   | 2     |
| >TET2-W129 FSFGCSWSM  | 5     | >TET2-W129 FSFGCSRSM  | 7    | 2     |
| >TET2-W129 FSFGCSWSM  | 3     | >TET2-W129 FSFGCSRSMY | 4    | 1     |
| >TET2-W129 FSFGCSWSM  | 4     | >TET2-W129 FSFGCSRSMY | 4    | 0     |
| >TET2-W129 FSFGCSWSM  | 37    | >TET2-W129 FSFGCSRSM  | 96   | 59    |
| >TET2-W129 FSFGCSWSM  | 42    | >TET2-W129 FSFGCSRSMY | 109  | 67    |
| >TET2-W129 FSFGCSWSM  | 38    | >TET2-W129 FSFGCSRSM  | 1073 | 1035  |
| >TET2-W129 FSFGCSWSM  | 472   | >TET2-W129 FSFGCSRSMY | 2070 | 1598  |
| >TET2-W129 FSFGCSWSM  | 113   | >TET2-W129 FSFGCSRSM  | 413  | 300   |
| >TET2-W129 FSFGCSWSM  | 225   | >TET2-W129 FSFGCSRSMY | 453  | 228   |
| >TET2-W129 FSFGCSWSM  | 106   | >TET2-W129 FSFGCSRSMY | 179  | 73    |
| >TET2-W129 FSFGCSWSM  | 38    | >TET2-W129 FSFGCSRSM  | 3910 | 3872  |
| >TET2-W129 FSFGCSWSM  | 279   | >TET2-W129 FSFGCSRSMY | 1602 | 1323  |
| >TET2-W129 FSFGCSWSM  | 20    | >TET2-W129 FSFGCSRSMY | 111  | 91    |
| >TET2-W129 FSFGCSWSM  | 101   | >TET2-W129 FSFGCSRSM  | 518  | 417   |
| >TET2-W129 FSFGCSWSM  | 23    | >TET2-W129 FSFGCSRSM  | 8    | 15    |
| >TET2-W129 FSFGCSWSM  | 50    | >TET2-W129 FSFGCSRSMY | 56   | 6     |
| >TET2-W129 FSFGCSWSM  | 7     | >TET2-W129 FSFGCSRSMY | 6    | 1     |
| >TET2-W129 FSFGCSWSM  | 87    | >TET2-W129 FSFGCSRSMY | 619  | 532   |
| >TET2-W129 FSFGCSWSM  | 28    | >TET2-W129 FSFGCSRSMY | 77   | 49    |
| >TET2-W129 FSFGCSWSM  | 162   | >TET2-W129 FSFGCSRSM  | 123  | 39    |
| >TET2-W129 SFSFGCSWSM | 13    | >TET2-W129 SFSFGCSRSM | 19   | 6     |
| >TET2-W129 SFSFGCSWSM | 58    | >TET2-W129 SFSFGCSRSM | 37   | 21    |
| >TET2-W129 SFSFGCSW   | 19877 | >TET2-W129 SFSFGCSR   | 70   | 19807 |
| >TET2-W129 SFSFGCSW   | 31208 | >TET2-W129 SFSFGCSR   | 180  | 31028 |
| >TET2-W129 SFSFGCSW   | 29326 | >TET2-W129 SFSFGCSR   | 233  | 29093 |
| >TET2-W129 SFSFGCSWSM | 128   | >TET2-W129 SFSFGCSRSM | 273  | 145   |
| >TET2-W129 SFSFGCSWSM | 93    | >TET2-W129 SFSFGCSRSM | 151  | 58    |
| >TET2-W129 SFSFGCSWSM | 12    | >TET2-W129 SFSFGCSRSM | 13   | 1     |
| >TET2-W129 SFSFGCSWSM | 112   | >TET2-W129 SFSFGCSRSM | 141  | 29    |
| >TET2-W129 SFSFGCSW   | 30913 | >TET2-W129 SFSFGCSR   | 236  | 30677 |
| >TET2-W129 SFSFGCSWSM | 461   | >TET2-W129 SFSFGCSRSM | 3653 | 3192  |
| >TET2-W129 SFSFGCSW   | 324   | >TET2-W129 SFSFGCSR   | 726  | 402   |

|                         |       |                         |       |       |
|-------------------------|-------|-------------------------|-------|-------|
| >TET2-W129 ASFSFGCSWS   | 204   | >TET2-W129 ASFSFGCSRSI  | 82    | 122   |
| >TET2-W129 ASFSFGCSW    | 15207 | >TET2-W129 ASFSFGCSR    | 23    | 15184 |
| >TET2-W129 ASFSFGCSW    | 13529 | >TET2-W129 ASFSFGCSR    | 16    | 13513 |
| >TET2-W129 ASFSFGCSW    | 51    | >TET2-W129 ASFSFGCSR    | 3374  | 3323  |
| >TET2-W129 ASFSFGCSWS   | 135   | >TET2-W129 ASFSFGCSRSI  | 225   | 90    |
| >TET2-W129 ASFSFGCSW    | 20444 | >TET2-W129 ASFSFGCSR    | 22    | 20422 |
| >TET2-W129 ASFSFGCSW    | 256   | >TET2-W129 ASFSFGCSR    | 8433  | 8177  |
| >TET2-W129 ASFSFGCSWS   | 125   | >TET2-W129 ASFSFGCSRSI  | 83    | 42    |
| >TET2-W129 ASFSFGCSW    | 29    | >TET2-W129 ASFSFGCSR    | 59    | 30    |
| >TET2-W129 ASFSFGCSWS   | 12    | >TET2-W129 ASFSFGCSRSI  | 11    | 1     |
| >TET2-W129 ASFSFGCSW    | 4     | >TET2-W129 ASFSFGCSR    | 4256  | 4252  |
| >TET2-W129 ASFSFGCSWS   | 6     | >TET2-W129 ASFSFGCSRSI  | 7     | 1     |
| >TET2-W129 ASFSFGCSW    | 34    | >TET2-W129 ASFSFGCSR    | 18312 | 18278 |
| >TET2-W129 ASFSFGCSWS   | 235   | >TET2-W129 ASFSFGCSRSI  | 661   | 426   |
| >TET2-W129 ASFSFGCSW    | 14    | >TET2-W129 ASFSFGCSR    | 21295 | 21281 |
| >TET2-W129 ASFSFGCSWS   | 298   | >TET2-W129 ASFSFGCSRSI  | 5069  | 4771  |
| >TET2-W129 ASFSFGCSWS   | 211   | >TET2-W129 ASFSFGCSRSI  | 645   | 434   |
| >TET2-W129 ASFSFGCSW    | 84    | >TET2-W129 ASFSFGCSR    | 1628  | 1544  |
| >TET2-W129 ASFSFGCSWS   | 16    | >TET2-W129 ASFSFGCSRSI  | 8     | 8     |
| >TET2-W129 ASFSFGCSW    | 336   | >TET2-W129 ASFSFGCSR    | 32659 | 32323 |
| >TET2-W129 ASFSFGCSW    | 266   | >TET2-W129 ASFSFGCSR    | 32110 | 31844 |
| >TET2-W129 ASFSFGCSW    | 2370  | >TET2-W129 ASFSFGCSR    | 85    | 2285  |
| >TET2-W129 ASFSFGCSWS   | 85    | >TET2-W129 ASFSFGCSRSI  | 71    | 14    |
| >TET2-W129 GASFSFGCSM   | 28667 | >TET2-W129 GASFSFGCSR   | 237   | 28430 |
| >TET2-W129 GASFSFGCSM   | 15950 | >TET2-W129 GASFSFGCSR   | 67    | 15883 |
| >TET2-W129 GASFSFGCSM   | 28680 | >TET2-W129 GASFSFGCSR   | 37    | 28643 |
| >TET2-W129 GASFSFGCSM   | 86    | >TET2-W129 GASFSFGCSR   | 18758 | 18672 |
| >TET2-W129 GASFSFGCSM   | 234   | >TET2-W129 GASFSFGCSR   | 24108 | 23874 |
| >TET2-W129 GASFSFGCSM   | 73    | >TET2-W129 GASFSFGCSR   | 22841 | 22768 |
| >TET2-Y1579 YPNSSHTSDI  | 41    | >TET2-Y1579 SPNSSHTSDI  | 33    | 8     |
| >TET2-Y1579 YPNSSHTSDI  | 161   | >TET2-Y1579 SPNSSHTSDI  | 38    | 123   |
| >TET2-Y1579 YPNSSHTSDI\ | 172   | >TET2-Y1579 SPNSSHTSDI\ | 709   | 537   |
| >TET2-Y1579 YPNSSHTSDI  | 463   | >TET2-Y1579 SPNSSHTSDI  | 2475  | 2012  |
| >TET2-Y1579 YPNSSHTSDI\ | 93    | >TET2-Y1579 SPNSSHTSDI\ | 552   | 459   |
| >TET2-Y1579 YPNSSHTS    | 52    | >TET2-Y1579 SPNSSHTS    | 1113  | 1061  |
| >TET2-Y1579 YPNSSHTSDI\ | 7     | >TET2-Y1579 SPNSSHTSDI\ | 19    | 12    |
| >TET2-Y1579 YPNSSHTSDI\ | 64    | >TET2-Y1579 SPNSSHTSDI\ | 314   | 250   |
| >TET2-Y1579 YPNSSHTSDI  | 474   | >TET2-Y1579 SPNSSHTSDI  | 2640  | 2166  |
| >TET2-Y1579 YPNSSHTSDI\ | 86    | >TET2-Y1579 SPNSSHTSDI\ | 183   | 97    |
| >TET2-Y1579 YPNSSHTS    | 345   | >TET2-Y1579 SPNSSHTS    | 1264  | 919   |
| >TET2-Y1579 YPNSSHTSDI\ | 12    | >TET2-Y1579 SPNSSHTSDI\ | 31    | 19    |
| >TET2-Y1579 YPNSSHTSDI\ | 120   | >TET2-Y1579 SPNSSHTSDI\ | 801   | 681   |
| >TET2-Y1579 PYPNSSHTSD  | 344   | >TET2-Y1579 PSPNSSHTSD  | 15941 | 15597 |

|                        |       |                        |       |       |
|------------------------|-------|------------------------|-------|-------|
| >TET2-Y1579 PYPNSSHTSD | 218   | >TET2-Y1579 PSPNSSHTSD | 8461  | 8243  |
| >TET2-Y1579 PYPNSSHTSD | 56    | >TET2-Y1579 PSPNSSHTSD | 16015 | 15959 |
| >TET2-Y1579 PYPNSSHTSD | 14987 | >TET2-Y1579 PSPNSSHTSD | 243   | 14744 |
| >TET2-Y1579 YMRRPNPVS  | 2394  | >TET2-Y1579 YMRRPNPVS  | 471   | 1923  |
| >TET2-Y1579 YMRRPNPVS  | 90    | >TET2-Y1579 YMRRPNPVS  | 20970 | 20880 |
| >TET2-Y1579 YMRRPNPVS  | 36    | >TET2-Y1579 YMRRPNPVS  | 18890 | 18854 |
| >TET2-Y1579 YMRRPNPVS  | 235   | >TET2-Y1579 YMRRPNPVS  | 599   | 364   |
| >TET2-Y1579 YMRRPNPVS  | 389   | >TET2-Y1579 YMRRPNPVS  | 18865 | 18476 |
| >TET2-Y1579 YMRRPNPVS  | 24    | >TET2-Y1579 YMRRPNPVS  | 360   | 336   |
| >TET2-Y1579 YMRRPNPVS  | 8     | >TET2-Y1579 YMRRPNPVS  | 468   | 460   |
| >TET2-Y1579 YMRRPNPVS  | 3     | >TET2-Y1579 YMRRPNPVS  | 114   | 111   |
| >TET2-Y1579 YMRRPNPVS  | 32    | >TET2-Y1579 YMRRPNPVS  | 15916 | 15884 |
| >TET2-Y1579 YMRRPNPVS  | 147   | >TET2-Y1579 YMRRPNPVS  | 14413 | 14266 |
| >TET2-Y1579 YMRRPNPVS  | 439   | >TET2-Y1579 YMRRPNPVS  | 7356  | 6917  |
| >TET2-Y1579 YMRRPNPVS  | 42    | >TET2-Y1579 YMRRPNPVS  | 5950  | 5908  |
| >TET2-Y1579 SPYPNSSH   | 477   | >TET2-Y1579 SPSPNSSH   | 823   | 346   |
| >TET2-Y1579 SPYPNSSH   | 135   | >TET2-Y1579 SPSPNSSH   | 224   | 89    |
| >TET2-Y1579 VSPYPNSSH  | 962   | >TET2-Y1579 VSPSPNSSH  | 453   | 509   |
| >TET2-Y1579 VSPYPNSSHT | 805   | >TET2-Y1579 VSPSPNSSHT | 405   | 400   |
| >TET2-Y1579 VSPYPNSSHT | 160   | >TET2-Y1579 VSPSPNSSHT | 87    | 73    |
| >TET2-Y1579 VSPYPNSSH  | 179   | >TET2-Y1579 VSPSPNSSH  | 107   | 72    |
| >TET2-Y1579 NPVSPYPNSS | 252   | >TET2-Y1579 NPVSPSPNSS | 149   | 103   |
| >TET2-Y1579 RPNPVSPY   | 288   | >TET2-Y1579 RPNPVSPS   | 623   | 335   |
| >TET2-Y1579 RPNPVSPY   | 180   | >TET2-Y1579 RPNPVSPS   | 11018 | 10838 |
| >TET2-Y1579 RPNPVSPY   | 13    | >TET2-Y1579 RPNPVSPS   | 1032  | 1019  |
| >TET2-Y1579 RPNPVSPY   | 10    | >TET2-Y1579 RPNPVSPS   | 2136  | 2126  |
| >TET2-Y1579 RRPNPVSPY  | 9     | >TET2-Y1579 RRPNPVSPS  | 1720  | 1711  |
| >TET2-Y1579 RRPNPVSPY  | 310   | >TET2-Y1579 RRPNPVSPS  | 821   | 511   |
| >TET2-Y1579 RRPNPVSPY  | 480   | >TET2-Y1579 RRPNPVSPS  | 1707  | 1227  |
| >TET2-Y1579 MRRPNPVSP  | 440   | >TET2-Y1579 MRRPNPVSP  | 24697 | 24257 |
| >TET2-Y1579 MRRPNPVSP  | 4     | >TET2-Y1579 MRRPNPVSP  | 261   | 257   |
| >TET2-Y1579 MRRPNPVSP  | 107   | >TET2-Y1579 MRRPNPVSP  | 4380  | 4273  |
| >TFE3-A125T QAQEQERRE  | 954   | >TFE3-A125T QTQEQERREI | 426   | 528   |
| >TFE3-A125T QAQEQERR   | 562   | >TFE3-A125T QTQEQERR   | 127   | 435   |
| >TFE3-A125T QAQEQERRE  | 569   | >TFE3-A125T QTQEQERREI | 139   | 430   |
| >TFE3-A125T LLRQQLMRAI | 78    | >TFE3-A125T LLRQQLMRAI | 872   | 794   |
| >TFE3-A125T LLRQQLMRAI | 9     | >TFE3-A125T LLRQQLMRAI | 41    | 32    |
| >TFE3-A125T LLRQQLMRAI | 129   | >TFE3-A125T LLRQQLMRAI | 3297  | 3168  |
| >TFE3-A125T LLRQQLMRAI | 415   | >TFE3-A125T LLRQQLMRAI | 3591  | 3176  |
| >TFE3-A125T RAQAQEQER  | 54    | >TFE3-A125T RAQTQEQER  | 77    | 23    |
| >TFE3-A125T RAQAQEQER  | 502   | >TFE3-A125T RAQTQEQER  | 416   | 86    |
| >TFE3-A125T MRAQAQEQI  | 399   | >TFE3-A125T MRAQTQEQE  | 351   | 48    |
| >TFE3-A125T MRAQAQEQI  | 98    | >TFE3-A125T MRAQTQEQE  | 127   | 29    |

|                        |      |                        |      |      |
|------------------------|------|------------------------|------|------|
| >TFE3-A125T MRAQAQEQI  | 321  | >TFE3-A125T MRAQTQEQE  | 372  | 51   |
| >TFE3-A125T LMRAQAQEC  | 163  | >TFE3-A125T LMRAQTQEC  | 83   | 80   |
| >TFE3-A125T LMRAQAQEC  | 939  | >TFE3-A125T LMRAQTQEC  | 330  | 609  |
| >TFE3-A125T LMRAQAQEC  | 568  | >TFE3-A125T LMRAQTQEC  | 355  | 213  |
| >TFE3-A125T LMRAQAQEC  | 49   | >TFE3-A125T LMRAQTQEC  | 36   | 13   |
| >TFE3-A125T LMRAQAQEC  | 873  | >TFE3-A125T LMRAQTQEC  | 439  | 434  |
| >TFE3-A125T LMRAQAQEC  | 355  | >TFE3-A125T LMRAQTQEC  | 289  | 66   |
| >TFE3-A125T QLMRAQAQ   | 1271 | >TFE3-A125T QLMRAQTQ   | 479  | 792  |
| >TFE3-A125T QLMRAQAQ   | 308  | >TFE3-A125T QLMRAQTQ   | 250  | 58   |
| >TFE3-A125T QQLMRAQA   | 449  | >TFE3-A125T QQLMRAQT   | 3300 | 2851 |
| >TFE3-A125T LRQQLMRAC  | 476  | >TFE3-A125T LRQQLMRAC  | 448  | 28   |
| >TFG-A149S- SASDSSGK   | 1178 | >TFG-A149S- SSSDSSGK   | 380  | 798  |
| >TFG-A149S- SASDSSGK   | 57   | >TFG-A149S- SSSDSSGK   | 19   | 38   |
| >TFG-A149S- SASDSSGK   | 712  | >TFG-A149S- SSSDSSGK   | 246  | 466  |
| >TFG-A149S- SASDSSGK   | 123  | >TFG-A149S- SSSDSSGK   | 143  | 20   |
| >TFG-A149S- SASDSSGK   | 1234 | >TFG-A149S- SSSDSSGK   | 275  | 959  |
| >TFG-A149S- KSASDSSGK  | 84   | >TFG-A149S- KSSSDSSGK  | 92   | 8    |
| >TFG-A149S- KSASDSSGK  | 67   | >TFG-A149S- KSSSDSSGK  | 56   | 11   |
| >TFG-A149S- KSASDSSGK  | 215  | >TFG-A149S- KSSSDSSGK  | 81   | 134  |
| >TFG-A149S- EEKSASDSS  | 882  | >TFG-A149S- EEKSSSDSS  | 449  | 433  |
| >TFG-A149S- REEKASDSS  | 463  | >TFG-A149S- REEKSSSDSS | 652  | 189  |
| >TFG-N384K- NRPPFGQGY  | 689  | >TFG-N384K- KRPPFGQGY  | 142  | 547  |
| >TFG-N384K- RNRPPFGQG  | 267  | >TFG-N384K- RKRPPFGQG  | 956  | 689  |
| >TFG-N384K- RNRPPFGQG  | 367  | >TFG-N384K- RKRPPFGQG  | 1201 | 834  |
| >TFG-N384K- RNRPPFGQG  | 153  | >TFG-N384K- RKRPPFGQG  | 827  | 674  |
| >TFG-N384K- RNRPPFGQG  | 475  | >TFG-N384K- RKRPPFGQG  | 956  | 481  |
| >TFG-N384K- RNRPPFGQG  | 129  | >TFG-N384K- RKRPPFGQG  | 4    | 125  |
| >TFG-N384K- RNRPPFGQG  | 59   | >TFG-N384K- RKRPPFGQG  | 209  | 150  |
| >TFG-N384K- ARNRPPFGQ  | 65   | >TFG-N384K- ARKRPPFGQ  | 55   | 10   |
| >TFG-N384K- ARNRPPFGQ  | 338  | >TFG-N384K- ARKRPPFGQ  | 577  | 239  |
| >TFG-N384K- YARNRPPF   | 517  | >TFG-N384K- YARKRPPF   | 493  | 24   |
| >TFG-N384K- YARNRPPFG  | 56   | >TFG-N384K- YARKRPPFG  | 48   | 8    |
| >TFG-N384K- YARNRPPF   | 104  | >TFG-N384K- YARKRPPF   | 62   | 42   |
| >TFG-N384K- YARNRPPF   | 105  | >TFG-N384K- YARKRPPF   | 37   | 68   |
| >TFG-N384K- YARNRPPF   | 71   | >TFG-N384K- YARKRPPF   | 87   | 16   |
| >TFG-N384K- YARNRPPF   | 8    | >TFG-N384K- YARKRPPF   | 10   | 2    |
| >TFG-N384K- YARNRPPF   | 7    | >TFG-N384K- YARKRPPF   | 7    | 0    |
| >TFG-N384K- YARNRPPF   | 91   | >TFG-N384K- YARKRPPF   | 164  | 73   |
| >TFG-N384K- YARNRPPF   | 159  | >TFG-N384K- YARKRPPF   | 392  | 233  |
| >TFG-N384K- PYARNRPPF  | 92   | >TFG-N384K- PYARKRPPF  | 253  | 161  |
| >TFG-N384K- PYARNRPPF  | 358  | >TFG-N384K- PYARKRPPF  | 470  | 112  |
| >TFG-N384K- PYARNRPPF  | 48   | >TFG-N384K- PYARKRPPF  | 140  | 92   |
| >TFG-N384K- NPYARNRPPF | 165  | >TFG-N384K- NPYARKRPPF | 260  | 95   |

|                         |       |                         |       |       |
|-------------------------|-------|-------------------------|-------|-------|
| >TFG-N384K-NPYARNRPPF   | 76    | >TFG-N384K-NPYARKRPPF   | 96    | 20    |
| >TFG-N384K-NPYARNRPPF   | 260   | >TFG-N384K-NPYARKRPPF   | 709   | 449   |
| >TFG-N384K-NPYARNRPPF   | 198   | >TFG-N384K-NPYARKRPPF   | 616   | 418   |
| >TFG-N384K-NPYARNRPPF   | 74    | >TFG-N384K-NPYARKRPPF   | 54    | 20    |
| >TFG-N384K-NPYARNRPPF   | 400   | >TFG-N384K-NPYARKRPPF   | 1088  | 688   |
| >TFRC-F297L SFFGHAHL    | 54    | >TFRC-F297L SLFGHAHL    | 57    | 3     |
| >TFRC-F297L SFFGHAHL    | 11640 | >TFRC-F297L SLFGHAHL    | 29    | 11611 |
| >TFRC-F297L SFFGHAHLGT  | 17429 | >TFRC-F297L SLFGHAHLGT  | 143   | 17286 |
| >TFRC-F297L SFFGHAHL    | 258   | >TFRC-F297L SLFGHAHL    | 6     | 252   |
| >TFRC-F297L SFFGHAHLG   | 8786  | >TFRC-F297L SLFGHAHLG   | 147   | 8639  |
| >TFRC-F297L SFFGHAHLGT  | 12145 | >TFRC-F297L SLFGHAHLGT  | 108   | 12037 |
| >TFRC-F297L SFFGHAHL    | 10435 | >TFRC-F297L SLFGHAHL    | 18    | 10417 |
| >TFRC-F297L SFFGHAHLGT  | 7735  | >TFRC-F297L SLFGHAHLGT  | 48    | 7687  |
| >TFRC-F297L SFFGHAHL    | 4039  | >TFRC-F297L SLFGHAHL    | 88    | 3951  |
| >TFRC-F297L SFFGHAHL    | 1655  | >TFRC-F297L SLFGHAHL    | 3     | 1652  |
| >TFRC-F297L SFFGHAHLG   | 21182 | >TFRC-F297L SLFGHAHLG   | 207   | 20975 |
| >TFRC-F297L SFFGHAHLGT  | 10677 | >TFRC-F297L SLFGHAHLGT  | 19    | 10658 |
| >TFRC-F297L SFFGHAHLGT  | 21058 | >TFRC-F297L SLFGHAHLGT  | 207   | 20851 |
| >TFRC-F297L SFFGHAHL    | 12781 | >TFRC-F297L SLFGHAHL    | 18    | 12763 |
| >TFRC-F297L SFFGHAHL    | 3073  | >TFRC-F297L SLFGHAHL    | 7     | 3066  |
| >TFRC-F297L SFFGHAHLGT  | 12496 | >TFRC-F297L SLFGHAHLGT  | 115   | 12381 |
| >TFRC-F297L SFFGHAHL    | 19594 | >TFRC-F297L SLFGHAHL    | 263   | 19331 |
| >TFRC-F297L SFFGHAHL    | 1586  | >TFRC-F297L SLFGHAHL    | 2     | 1584  |
| >TFRC-F297L SFFGHAHLG   | 29852 | >TFRC-F297L SLFGHAHLG   | 149   | 29703 |
| >TFRC-F297L SFFGHAHLGT  | 18454 | >TFRC-F297L SLFGHAHLGT  | 12    | 18442 |
| >TFRC-F297L SFFGHAHL    | 87    | >TFRC-F297L SLFGHAHL    | 10852 | 10765 |
| >TFRC-F297L SFFGHAHL    | 4184  | >TFRC-F297L SLFGHAHL    | 234   | 3950  |
| >TFRC-F297L SFFGHAHL    | 4412  | >TFRC-F297L SLFGHAHL    | 242   | 4170  |
| >TFRC-F297L SFFGHAHL    | 391   | >TFRC-F297L SLFGHAHL    | 2156  | 1765  |
| >TFRC-F297L SFFGHAHL    | 280   | >TFRC-F297L SLFGHAHL    | 15404 | 15124 |
| >TFRC-F297L SFFGHAHLG   | 462   | >TFRC-F297L SLFGHAHLG   | 19168 | 18706 |
| >TFRC-F297L KFPIVNAELSF | 301   | >TFRC-F297L KFPIVNAELSL | 4189  | 3888  |
| >TFRC-F297L KFPIVNAELSF | 151   | >TFRC-F297L KFPIVNAELSL | 1143  | 992   |
| >TFRC-F297L KFPIVNAELSF | 8     | >TFRC-F297L KFPIVNAELSL | 40    | 32    |
| >TFRC-F297L KFPIVNAELSF | 1671  | >TFRC-F297L KFPIVNAELSL | 415   | 1256  |
| >TFRC-F297L LSFFGHAHL   | 86    | >TFRC-F297L LSLFGHAHL   | 410   | 324   |
| >TFRC-F297L LSFFGHAHL   | 296   | >TFRC-F297L LSLFGHAHL   | 611   | 315   |
| >TFRC-F297L LSFFGHAHL   | 175   | >TFRC-F297L LSLFGHAHL   | 6430  | 6255  |
| >TFRC-F297L LSFFGHAHL   | 110   | >TFRC-F297L LSLFGHAHL   | 744   | 634   |
| >TFRC-F297L LSFFGHAH    | 490   | >TFRC-F297L LSLFGHAH    | 2379  | 1889  |
| >TFRC-F297L LSFFGHAHL   | 209   | >TFRC-F297L LSLFGHAHL   | 1538  | 1329  |
| >TFRC-F297L LSFFGHAH    | 257   | >TFRC-F297L LSLFGHAH    | 875   | 618   |
| >TFRC-F297L LSFFGHAHL   | 4     | >TFRC-F297L LSLFGHAHL   | 5     | 1     |

|                        |       |                        |      |       |
|------------------------|-------|------------------------|------|-------|
| >TFRC-F297L LSFFGHAHLG | 232   | >TFRC-F297L LSLFGHAHLG | 668  | 436   |
| >TFRC-F297L LSFFGHAHL  | 366   | >TFRC-F297L LSLFGHAHL  | 486  | 120   |
| >TFRC-F297L LSFFGHAHL  | 58    | >TFRC-F297L LSLFGHAHL  | 248  | 190   |
| >TFRC-F297L LSFFGHAHL  | 38    | >TFRC-F297L LSLFGHAHL  | 172  | 134   |
| >TFRC-F297L ELSFFGHAHL | 158   | >TFRC-F297L ELSLFGHAHL | 127  | 31    |
| >TFRC-F297L ELSFFGHAHL | 400   | >TFRC-F297L ELSLFGHAHL | 285  | 115   |
| >TFRC-F297L ELSFFGHAHL | 303   | >TFRC-F297L ELSLFGHAHL | 723  | 420   |
| >TFRC-F297L ELSFFGHAHL | 288   | >TFRC-F297L ELSLFGHAHL | 503  | 215   |
| >TFRC-F297L ELSFFGHAHL | 35    | >TFRC-F297L ELSLFGHAHL | 47   | 12    |
| >TFRC-F297L ELSFFGHA   | 184   | >TFRC-F297L ELSLFGHA   | 815  | 631   |
| >TFRC-F297L ELSFFGHAHL | 106   | >TFRC-F297L ELSLFGHAHL | 717  | 611   |
| >TFRC-F297L ELSFFGHAHL | 246   | >TFRC-F297L ELSLFGHAHL | 565  | 319   |
| >TFRC-F297L AELSFFGHAH | 12    | >TFRC-F297L AELSFGHAH  | 13   | 1     |
| >TFRC-F297L AELSFFGHA  | 194   | >TFRC-F297L AELSFGHA   | 259  | 65    |
| >TFRC-F297L AELSFFGHAH | 95    | >TFRC-F297L AELSFGHAH  | 104  | 9     |
| >TFRC-F297L AELSFFGH   | 142   | >TFRC-F297L AELSFGH    | 195  | 53    |
| >TFRC-F297L AELSFFGHA  | 426   | >TFRC-F297L AELSFGHA   | 450  | 24    |
| >TFRC-F297L AELSFFGHAH | 152   | >TFRC-F297L AELSFGHAH  | 155  | 3     |
| >TFRC-F297L AELSFFGH   | 72    | >TFRC-F297L AELSFGH    | 262  | 190   |
| >TFRC-F297L AELSFFGHA  | 6     | >TFRC-F297L AELSFGHA   | 11   | 5     |
| >TFRC-F297L AELSFFGHAH | 59    | >TFRC-F297L AELSFGHAH  | 135  | 76    |
| >TFRC-F297L AELSFFGHA  | 31    | >TFRC-F297L AELSFGHA   | 36   | 5     |
| >TFRC-F297L AELSFFGHAH | 13    | >TFRC-F297L AELSFGHAH  | 14   | 1     |
| >TFRC-F297L IVNAELSF   | 9158  | >TFRC-F297L IVNAELSL   | 204  | 8954  |
| >TFRC-F297L IVNAELSF   | 11467 | >TFRC-F297L IVNAELSL   | 354  | 11113 |
| >TFRC-F297L IVNAELSF   | 2431  | >TFRC-F297L IVNAELSL   | 346  | 2085  |
| >TFRC-F297L IVNAELSFF  | 467   | >TFRC-F297L IVNAELSLF  | 1763 | 1296  |
| >TFRC-F297L IVNAELSFF  | 44    | >TFRC-F297L IVNAELSLF  | 736  | 692   |
| >TFRC-F297L IVNAELSF   | 122   | >TFRC-F297L IVNAELSL   | 3079 | 2957  |
| >TFRC-F297L IVNAELSFF  | 299   | >TFRC-F297L IVNAELSLF  | 478  | 179   |
| >TFRC-F297L IVNAELSF   | 155   | >TFRC-F297L IVNAELSL   | 2546 | 2391  |
| >TFRC-F297L IVNAELSFF  | 251   | >TFRC-F297L IVNAELSLF  | 391  | 140   |
| >TFRC-F297L IVNAELSF   | 108   | >TFRC-F297L IVNAELSL   | 1902 | 1794  |
| >TFRC-F297L IVNAELSFF  | 174   | >TFRC-F297L IVNAELSLF  | 244  | 70    |
| >TFRC-F297L IVNAELSF   | 495   | >TFRC-F297L IVNAELSL   | 7209 | 6714  |
| >TFRC-F297L IVNAELSF   | 116   | >TFRC-F297L IVNAELSL   | 3076 | 2960  |
| >TFRC-F297L IVNAELSFF  | 287   | >TFRC-F297L IVNAELSLF  | 211  | 76    |
| >TFRC-F297L IVNAELSFF  | 32    | >TFRC-F297L IVNAELSLF  | 16   | 16    |
| >TFRC-F297L PIVNAELSFF | 90    | >TFRC-F297L PIVNAELSLF | 670  | 580   |
| >TFRC-F297L PIVNAELSF  | 19    | >TFRC-F297L PIVNAELSL  | 23   | 4     |
| >TFRC-F297L PIVNAELSFF | 17    | >TFRC-F297L PIVNAELSLF | 211  | 194   |
| >TFRC-F297L PIVNAELSFF | 288   | >TFRC-F297L PIVNAELSLF | 2507 | 2219  |
| >TFRC-F297L PIVNAELSF  | 342   | >TFRC-F297L PIVNAELSL  | 187  | 155   |

|                        |       |                         |       |       |
|------------------------|-------|-------------------------|-------|-------|
| >TFRC-F297L FPIVNAELSF | 90    | >TFRC-F297L FPIVNAELSL  | 2142  | 2052  |
| >TFRC-F297L FPIVNAELSF | 188   | >TFRC-F297L FPIVNAELSLF | 273   | 85    |
| >TFRC-F297L FPIVNAELSF | 11    | >TFRC-F297L FPIVNAELSL  | 24    | 13    |
| >TFRC-F297L FPIVNAELSF | 19    | >TFRC-F297L FPIVNAELSLF | 19    | 0     |
| >TFRC-F297L FPIVNAELSF | 1195  | >TFRC-F297L FPIVNAELSL  | 29    | 1166  |
| >TFRC-F297L FPIVNAELSF | 37    | >TFRC-F297L FPIVNAELSL  | 80    | 43    |
| >TFRC-F297L FPIVNAELSF | 21    | >TFRC-F297L FPIVNAELSLF | 15    | 6     |
| >TFRC-F297L FPIVNAELSF | 912   | >TFRC-F297L FPIVNAELSLF | 255   | 657   |
| >TFRC-F297L FPIVNAELSF | 10    | >TFRC-F297L FPIVNAELSL  | 55    | 45    |
| >TFRC-F297L FPIVNAELSF | 13    | >TFRC-F297L FPIVNAELSLF | 11    | 2     |
| >TFRC-R155F REAGSQKDEI | 11    | >TFRC-R155F HEAGSQKDEI  | 18    | 7     |
| >TFRC-R155F REAGSQKDEI | 311   | >TFRC-R155F HEAGSQKDEI  | 353   | 42    |
| >TFRC-R155F REAGSQKDEI | 229   | >TFRC-R155F HEAGSQKDEI  | 482   | 253   |
| >TFRC-R155F KLLNENSYVP | 232   | >TFRC-R155F KLLNENSYVP  | 618   | 386   |
| >TFRC-R155F KLLNENSYVP | 363   | >TFRC-R155F KLLNENSYVP  | 4023  | 3660  |
| >TFRC-R155F KLLNENSYVP | 13    | >TFRC-R155F KLLNENSYVP  | 1210  | 1197  |
| >TFRC-R155F KLLNENSYVP | 313   | >TFRC-R155F KLLNENSYVP  | 286   | 27    |
| >TFRC-R155F KLLNENSYVP | 18    | >TFRC-R155F KLLNENSYVP  | 4189  | 4171  |
| >TFRC-R155F VPREAGSQ   | 99    | >TFRC-R155F VPHEAGSQ    | 1640  | 1541  |
| >TFRC-R155F YVPREAGSQ  | 696   | >TFRC-R155F YVPHEAGSQ   | 476   | 220   |
| >TFRC-R155F YVPREAGSQ  | 238   | >TFRC-R155F YVPHEAGSQ   | 146   | 92    |
| >TFRC-R155F SYVPREAGSC | 460   | >TFRC-R155F SYVPHEAGSC  | 542   | 82    |
| >TFRC-R155F NSYVPREA   | 976   | >TFRC-R155F NSYVPHEA    | 198   | 778   |
| >TFRC-R155F ENSYVPREA  | 1943  | >TFRC-R155F ENSYVPHEA   | 66    | 1877  |
| >TFRC-R155F NENSYVPR   | 445   | >TFRC-R155F NENSYVPH    | 177   | 268   |
| >TFRC-R155F NENSYVPREA | 215   | >TFRC-R155F NENSYVPHEA  | 185   | 30    |
| >TFRC-R155F NENSYVPR   | 362   | >TFRC-R155F NENSYVPH    | 31605 | 31243 |
| >TFRC-R155F LNENSYVPR  | 414   | >TFRC-R155F LNENSYVPH   | 16344 | 15930 |
| >TFRC-R155F LLNENSYVPR | 57    | >TFRC-R155F LLNENSYVPH  | 7016  | 6959  |
| >TFRC-R155F LLNENSYVPR | 77    | >TFRC-R155F LLNENSYVPH  | 5971  | 5894  |
| >TFRC-R155F LLNENSYVPR | 483   | >TFRC-R155F LLNENSYVPH  | 23013 | 22530 |
| >TFRC-R155F LLNENSYVPR | 7273  | >TFRC-R155F LLNENSYVPH  | 358   | 6915  |
| >TFRC-R155F LLNENSYVPR | 164   | >TFRC-R155F LLNENSYVPH  | 24801 | 24637 |
| >TFRC-T658R TDFGNAEK   | 476   | >TFRC-T658R RDFGNAEK    | 6668  | 6192  |
| >TFRC-T658R TDFGNAEKTI | 1947  | >TFRC-T658R RDFGNAEKTI  | 282   | 1665  |
| >TFRC-T658R TTDFGNAEK  | 41    | >TFRC-T658R TRDFGNAEK   | 12630 | 12589 |
| >TFRC-T658R TTDFGNAEK  | 25    | >TFRC-T658R TRDFGNAEK   | 7479  | 7454  |
| >TFRC-T658R DFFRATSRLT | 20270 | >TFRC-T658R DFFRATSRLTI | 212   | 20058 |
| >TFRC-T658R DFFRATSRLT | 5418  | >TFRC-T658R DFFRATSRLTI | 12    | 5406  |
| >TFRC-T658R DFFRATSRLT | 17393 | >TFRC-T658R DFFRATSRLTI | 26    | 17367 |
| >TFRC-T658R DFFRATSRLT | 28203 | >TFRC-T658R DFFRATSRLTI | 92    | 28111 |
| >TFRC-T658R LTTDFGNAEK | 178   | >TFRC-T658R LTRDFGNAEK  | 119   | 59    |
| >TFRC-T658R LTTDFGNAEK | 43    | >TFRC-T658R LTRDFGNAEK  | 225   | 182   |

|                        |       |                        |      |       |
|------------------------|-------|------------------------|------|-------|
| >TFRC-T658RLTTDFGNA    | 7751  | >TFRC-T658RLTRDFGNA    | 26   | 7725  |
| >TFRC-T658RLTTDFGNAEK  | 240   | >TFRC-T658RLTRDFGNAEK  | 4    | 236   |
| >TFRC-T658RLTTDFGNAEK  | 23    | >TFRC-T658RLTRDFGNAEK  | 111  | 88    |
| >TFRC-T658RLTTDFGNA    | 333   | >TFRC-T658RLTRDFGNA    | 6288 | 5955  |
| >TFRC-T658RLTTDFGNAEK  | 1505  | >TFRC-T658RLTRDFGNAEK  | 410  | 1095  |
| >TFRC-T658RRLTTDFGNA   | 68    | >TFRC-T658RRLTRDFGNA   | 128  | 60    |
| >TFRC-T658RRLTTDFGNA   | 348   | >TFRC-T658RRLTRDFGNA   | 200  | 148   |
| >TFRC-T658RRLTTDFGNAE  | 77    | >TFRC-T658RRLTRDFGNAE  | 74   | 3     |
| >TFRC-T658RRLTTDFGNAE  | 231   | >TFRC-T658RRLTRDFGNAE  | 240  | 9     |
| >TFRC-T658RRLTTDFGNAE  | 342   | >TFRC-T658RRLTRDFGNAE  | 149  | 193   |
| >TFRC-T658RTSRLTTDFG   | 498   | >TFRC-T658RTSRLTRDFG   | 272  | 226   |
| >TFRC-T658RTSRLTTDFGN  | 102   | >TFRC-T658RTSRLTRDFGN  | 66   | 36    |
| >TFRC-T658RTSRLTTDF    | 139   | >TFRC-T658RTSRLTRDF    | 320  | 181   |
| >TFRC-T658RTSRLTTDF    | 12    | >TFRC-T658RTSRLTRDF    | 26   | 14    |
| >TFRC-T658RTSRLTTDF    | 99    | >TFRC-T658RTSRLTRDF    | 93   | 6     |
| >TFRC-T658RATSRLTTDF   | 27    | >TFRC-T658RATSRLTRDF   | 60   | 33    |
| >TFRC-T658RATSRLTTDF   | 164   | >TFRC-T658RATSRLTRDF   | 382  | 218   |
| >TFRC-T658RATSRLTTDF   | 27    | >TFRC-T658RATSRLTRDF   | 57   | 30    |
| >TFRC-T658RATSRLTTDF   | 459   | >TFRC-T658RATSRLTRDF   | 4904 | 4445  |
| >TFRC-T658RATSRLTTDF   | 39    | >TFRC-T658RATSRLTRDF   | 285  | 246   |
| >TFRC-T658RATSRLTT     | 14154 | >TFRC-T658RATSRLTR     | 14   | 14140 |
| >TFRC-T658RATSRLTT     | 35204 | >TFRC-T658RATSRLTR     | 243  | 34961 |
| >TFRC-T658RATSRLTTDF   | 44    | >TFRC-T658RATSRLTRDF   | 108  | 64    |
| >TFRC-T658RATSRLTTDF   | 21    | >TFRC-T658RATSRLTRDF   | 37   | 16    |
| >TFRC-T658RATSRLTTDF   | 141   | >TFRC-T658RATSRLTRDF   | 672  | 531   |
| >TFRC-T658RATSRLTTDF   | 105   | >TFRC-T658RATSRLTRDF   | 277  | 172   |
| >TFRC-T658RATSRLTT     | 33912 | >TFRC-T658RATSRLTR     | 334  | 33578 |
| >TFRC-T658RFRATSRLTT   | 899   | >TFRC-T658RFRATSRLTR   | 181  | 718   |
| >TFRC-T658RFRATSRLTTDI | 8     | >TFRC-T658RFRATSRLTRDI | 12   | 4     |
| >TFRC-T658RFRATSRLTT   | 937   | >TFRC-T658RFRATSRLTR   | 68   | 869   |
| >TFRC-T658RFRATSRLTTDI | 277   | >TFRC-T658RFRATSRLTRDI | 280  | 3     |
| >TFRC-T658RFRATSRLTT   | 478   | >TFRC-T658RFRATSRLTR   | 677  | 199   |
| >TFRC-T658RFRATSRLTTDI | 307   | >TFRC-T658RFRATSRLTRDI | 319  | 12    |
| >TFRC-T658RFRATSRLTTDI | 573   | >TFRC-T658RFRATSRLTRDI | 380  | 193   |
| >TFRC-T658RFFRATSRLTT  | 2107  | >TFRC-T658RFFRATSRLTR  | 479  | 1628  |
| >TFRC-T658RFFRATSRLTT  | 9855  | >TFRC-T658RFFRATSRLTR  | 20   | 9835  |
| >TFRC-T658RFFRATSRLTT  | 11263 | >TFRC-T658RFFRATSRLTR  | 37   | 11226 |
| >TFRC-T658RFFRATSRLTT  | 30177 | >TFRC-T658RFFRATSRLTR  | 119  | 30058 |
| >TFRC-T658RFFRATSRLTT  | 26464 | >TFRC-T658RFFRATSRLTR  | 311  | 26153 |
| >TFRC-T658RFFRATSRLTT  | 30894 | >TFRC-T658RFFRATSRLTR  | 154  | 30740 |
| >TFRC-Y563CYPYLGTTM    | 227   | >TFRC-Y563CYPYLGTTM    | 3067 | 2840  |
| >TFRC-Y563CYPYLGTTM    | 73    | >TFRC-Y563CYPYLGTTM    | 327  | 254   |
| >TFRC-Y563CYPYLGTTMDI  | 494   | >TFRC-Y563CYPYLGTTMDI  | 2080 | 1586  |



|                        |     |                        |       |       |
|------------------------|-----|------------------------|-------|-------|
| >TFRC-Y563CYPYLGTTMD1  | 135 | >TFRC-Y563C CPYLGTTMD1 | 1611  | 1476  |
| >TFRC-Y563CYPYLGTTM    | 9   | >TFRC-Y563C CPYLGTTM   | 35    | 26    |
| >TFRC-Y563CYPYLGTTM    | 344 | >TFRC-Y563C CPYLGTTM   | 8471  | 8127  |
| >TFRC-Y563CYPYLGTTMD1  | 75  | >TFRC-Y563C CPYLGTTMD1 | 1325  | 1250  |
| >TFRC-Y563CYPYLGTTM    | 359 | >TFRC-Y563C CPYLGTTM   | 2363  | 2004  |
| >TFRC-Y563CYPYLGTTMD1  | 397 | >TFRC-Y563C CPYLGTTMD1 | 2358  | 1961  |
| >TFRC-Y563CYPYLGTTMD1  | 446 | >TFRC-Y563C CPYLGTTMD1 | 6603  | 6157  |
| >TFRC-Y563CYPYLGTTMD1  | 335 | >TFRC-Y563C CPYLGTTMD1 | 1559  | 1224  |
| >TFRC-Y563CYPYLGTTM    | 7   | >TFRC-Y563C CPYLGTTM   | 12    | 5     |
| >TFRC-Y563CYPYLGTTMD1  | 6   | >TFRC-Y563C CPYLGTTMD1 | 9     | 3     |
| >TFRC-Y563CYPYLGTTM    | 142 | >TFRC-Y563C CPYLGTTM   | 3644  | 3502  |
| >TFRC-Y563CYPYLGTTM    | 414 | >TFRC-Y563C CPYLGTTM   | 754   | 340   |
| >TFRC-Y563CYPYLGTTM    | 80  | >TFRC-Y563C CPYLGTTM   | 112   | 32    |
| >TFRC-Y563CYPYLGTTMD1  | 31  | >TFRC-Y563C CPYLGTTMD1 | 52    | 21    |
| >TFRC-Y563CYPYLGTTMD   | 350 | >TFRC-Y563C CPYLGTTMD  | 377   | 27    |
| >TFRC-Y563CYPYLGTTMD1  | 82  | >TFRC-Y563C CPYLGTTMD1 | 1742  | 1660  |
| >TFRC-Y563CYPYLGTTM    | 195 | >TFRC-Y563C CPYLGTTM   | 1909  | 1714  |
| >TFRC-Y563CYPYLGTTMD1  | 11  | >TFRC-Y563C CPYLGTTMD1 | 145   | 134   |
| >TFRC-Y563CYPYLGTTM    | 486 | >TFRC-Y563C CPYLGTTM   | 1551  | 1065  |
| >TFRC-Y563CYPYLGTTMD1  | 36  | >TFRC-Y563C CPYLGTTMD1 | 104   | 68    |
| >TFRC-Y563C VSFCFCEDTD | 100 | >TFRC-Y563C VSFCFCEDTD | 23281 | 23181 |
| >TFRC-Y563C VSFCFCEDTD | 256 | >TFRC-Y563C VSFCFCEDTD | 27660 | 27404 |
| >TFRC-Y563C VSFCFCEDTD | 281 | >TFRC-Y563C VSFCFCEDTD | 19945 | 19664 |
| >TFRC-Y563C VSFCFCEDTD | 26  | >TFRC-Y563C VSFCFCEDTD | 3783  | 3757  |
| >TFRC-Y563C VSFCFCEDTD | 21  | >TFRC-Y563C VSFCFCEDTD | 13585 | 13564 |
| >TFRC-Y563C VSFCFCEDTD | 415 | >TFRC-Y563C VSFCFCEDTD | 20998 | 20583 |
| >TFRC-Y563C VSFCFCEDTD | 24  | >TFRC-Y563C VSFCFCEDTD | 6269  | 6245  |
| >TFRC-Y563C TDYPYLGTT  | 392 | >TFRC-Y563C TDCPYLGTT  | 879   | 487   |
| >TFRC-Y563C TDYPYLGTTM | 478 | >TFRC-Y563C TDCPYLGTTM | 1010  | 532   |
| >TFRC-Y563C DTDYPYLGTT | 946 | >TFRC-Y563C DTDCPYLGTT | 248   | 698   |
| >TFRC-Y563C DTDYPYLGTT | 366 | >TFRC-Y563C DTDCPYLGTT | 105   | 261   |
| >TFRC-Y563C DTDYPYLGTT | 898 | >TFRC-Y563C DTDCPYLGTT | 341   | 557   |
| >TFRC-Y563C DTDYPYLGTT | 173 | >TFRC-Y563C DTDCPYLGTT | 71    | 102   |
| >TFRC-Y563C DTDYPYLGTT | 142 | >TFRC-Y563C DTDCPYLGTT | 152   | 10    |
| >TFRC-Y563C CEDTDYPY   | 66  | >TFRC-Y563C CEDTDCPY   | 386   | 320   |
| >TFRC-Y563C CEDTDYPY   | 33  | >TFRC-Y563C CEDTDCPY   | 134   | 101   |
| >TFRC-Y563C CEDTDYPY   | 348 | >TFRC-Y563C CEDTDCPY   | 1836  | 1488  |
| >TFRC-Y563C FCEDTDYPY  | 286 | >TFRC-Y563C FCEDTDCPY  | 764   | 478   |
| >TFRC-Y563C FCEDTDYPY  | 141 | >TFRC-Y563C FCEDTDCPY  | 3537  | 3396  |
| >TFRC-Y563C FCEDTDYPY  | 24  | >TFRC-Y563C FCEDTDCPY  | 55    | 31    |
| >TFRC-Y563C CFCEDTDYPY | 20  | >TFRC-Y563C CFCEDTDCPY | 98    | 78    |
| >TFRC-Y563C CFCEDTDY   | 126 | >TFRC-Y563C CFCEDTDC   | 22374 | 22248 |
| >TFRC-Y563C CFCEDTDYPY | 112 | >TFRC-Y563C CFCEDTDCPY | 397   | 285   |

|                        |     |                        |       |       |
|------------------------|-----|------------------------|-------|-------|
| >TFRC-Y563C FCFCEDTDY  | 195 | >TFRC-Y563C FCFCEDTDC  | 23838 | 23643 |
| >TFRC-Y563C FCFCEDTDYP | 32  | >TFRC-Y563C FCFCEDTDCP | 283   | 251   |
| >TFRC-Y563C FCFCEDTDY  | 182 | >TFRC-Y563C FCFCEDTDC  | 12912 | 12730 |
| >TFRC-Y563C FCFCEDTDYP | 73  | >TFRC-Y563C FCFCEDTDCP | 67    | 6     |
| >TFRC-Y563C FCFCEDTDY  | 98  | >TFRC-Y563C FCFCEDTDC  | 11587 | 11489 |
| >TFRC-Y563C FCFCEDTDYP | 21  | >TFRC-Y563C FCFCEDTDCP | 26    | 5     |
| >TFRC-Y563C FCFCEDTDYP | 436 | >TFRC-Y563C FCFCEDTDCP | 2719  | 2283  |
| >TFRC-Y563C SFCFCEDTDY | 136 | >TFRC-Y563C SFCFCEDTDC | 26948 | 26812 |
| >THRAP3-F4: FEKKMADF   | 308 | >THRAP3-F4: LEKKMADF   | 2104  | 1796  |
| >THRAP3-F4: FEKKMADF   | 165 | >THRAP3-F4: LEKKMADF   | 358   | 193   |
| >THRAP3-F4: FEKKMADF   | 271 | >THRAP3-F4: LEKKMADF   | 225   | 46    |
| >THRAP3-F4: FEKKMADFHI | 363 | >THRAP3-F4: LEKKMADFHI | 837   | 474   |
| >THRAP3-F4: DFEKKMADF  | 155 | >THRAP3-F4: DLEKKMADF  | 804   | 649   |
| >THRAP3-F4: SPKRYKLRDD | 157 | >THRAP3-F4: SPKRYKLRDD | 182   | 25    |
| >THRAP3-F4: SPKRYKLRDD | 384 | >THRAP3-F4: SPKRYKLRDD | 86    | 298   |
| >THRAP3-F4: SPKRYKLRDD | 398 | >THRAP3-F4: SPKRYKLRDD | 105   | 293   |
| >THRAP3-F4: KLRDDFEKKM | 290 | >THRAP3-F4: KLRDDLEKKM | 220   | 70    |
| >THRAP3-F4: KLRDDFEKKM | 279 | >THRAP3-F4: KLRDDLEKKM | 290   | 11    |
| >THRAP3-F4: KLRDDFEKKM | 100 | >THRAP3-F4: KLRDDLEKKM | 84    | 16    |
| >THRAP3-F4: KLRDDFEK   | 136 | >THRAP3-F4: KLRDDLEK   | 163   | 27    |
| >THRAP3-F4: KLRDDFEK   | 178 | >THRAP3-F4: KLRDDLEK   | 368   | 190   |
| >THRAP3-F4: KLRDDFEK   | 10  | >THRAP3-F4: KLRDDLEK   | 9     | 1     |
| >THRAP3-F4: KLRDDFEK   | 43  | >THRAP3-F4: KLRDDLEK   | 57    | 14    |
| >THRAP3-F4: KLRDDFEKKM | 345 | >THRAP3-F4: KLRDDLEKKM | 456   | 111   |
| >THRAP3-F4: KLRDDFEK   | 156 | >THRAP3-F4: KLRDDLEK   | 1867  | 1711  |
| >THRAP3-F4: YKLRDDFEK  | 951 | >THRAP3-F4: YKLRDDLEK  | 479   | 472   |
| >THRAP3-F4: YKLRDDFEK  | 33  | >THRAP3-F4: YKLRDDLEK  | 37    | 4     |
| >THRAP3-F4: RYKLRDDF   | 376 | >THRAP3-F4: RYKLRDDL   | 5087  | 4711  |
| >THRAP3-F4: RYKLRDDF   | 418 | >THRAP3-F4: RYKLRDDL   | 1626  | 1208  |
| >THRAP3-F4: RYKLRDDF   | 10  | >THRAP3-F4: RYKLRDDL   | 34    | 24    |
| >THRAP3-F4: RYKLRDDFEK | 8   | >THRAP3-F4: RYKLRDDLEK | 8     | 0     |
| >THRAP3-F4: RYKLRDDFEK | 18  | >THRAP3-F4: RYKLRDDLEK | 23    | 5     |
| >THRAP3-F4: RYKLRDDFEK | 73  | >THRAP3-F4: RYKLRDDLEK | 150   | 77    |
| >THRAP3-F4: RYKLRDDFEK | 290 | >THRAP3-F4: RYKLRDDLEK | 402   | 112   |
| >THRAP3-F4: RYKLRDDFEK | 209 | >THRAP3-F4: RYKLRDDLEK | 593   | 384   |
| >THRAP3-F4: KRYKLRDDF  | 39  | >THRAP3-F4: KRYKLRDDL  | 458   | 419   |
| >THRAP3-F4: KRYKLRDDF  | 164 | >THRAP3-F4: KRYKLRDDL  | 108   | 56    |
| >THRAP3-F4: KRYKLRDDFE | 50  | >THRAP3-F4: KRYKLRDDLE | 54    | 4     |
| >THRAP3-F4: KRYKLRDDF  | 39  | >THRAP3-F4: KRYKLRDDL  | 19    | 20    |
| >THRAP3-F4: KRYKLRDDFE | 447 | >THRAP3-F4: KRYKLRDDLE | 537   | 90    |
| >THRAP3-F4: KRYKLRDDFE | 115 | >THRAP3-F4: KRYKLRDDLE | 74    | 41    |
| >THRAP3-F4: KRYKLRDDF  | 62  | >THRAP3-F4: KRYKLRDDL  | 22    | 40    |
| >THRAP3-F4: KRYKLRDDFE | 194 | >THRAP3-F4: KRYKLRDDLE | 85    | 109   |

|                        |       |                        |      |       |
|------------------------|-------|------------------------|------|-------|
| >THRAP3-F4: PKRYKLRDDF | 153   | >THRAP3-F4: PKRYKLRDDL | 2740 | 2587  |
| >THRAP3-H6 HFGSSGRTL   | 29    | >THRAP3-H6 QFGSSGRTL   | 66   | 37    |
| >THRAP3-H6 HHFGSSGMT   | 4425  | >THRAP3-H6 HQFGSSGMT   | 59   | 4366  |
| >THRAP3-H6 HHFGSSGMT   | 10650 | >THRAP3-H6 HQFGSSGMT   | 272  | 10378 |
| >THRAP3-H6 HHFGSSGM    | 21372 | >THRAP3-H6 HQFGSSGM    | 174  | 21198 |
| >THRAP3-H6 HHFGSSGMT   | 11387 | >THRAP3-H6 HQFGSSGMT   | 229  | 11158 |
| >THRAP3-H6 HHFGSSGM    | 1678  | >THRAP3-H6 HQFGSSGM    | 404  | 1274  |
| >THRAP3-H6 HHFGSSGMT   | 4680  | >THRAP3-H6 HQFGSSGMT   | 367  | 4313  |
| >THRAP3-H6 HHFGSSGM    | 11912 | >THRAP3-H6 HQFGSSGM    | 40   | 11872 |
| >THRAP3-H6 HHFGSSGMT   | 15776 | >THRAP3-H6 HQFGSSGMT   | 70   | 15706 |
| >THRAP3-H6 HHFGSSGM    | 507   | >THRAP3-H6 HQFGSSGM    | 26   | 481   |
| >THRAP3-H6 HHFGSSGMT   | 2238  | >THRAP3-H6 HQFGSSGMT   | 82   | 2156  |
| >THRAP3-H6 HHFGSSGMT   | 7214  | >THRAP3-H6 HQFGSSGMT   | 268  | 6946  |
| >THRAP3-H6 HHFGSSGM    | 238   | >THRAP3-H6 HQFGSSGM    | 15   | 223   |
| >THRAP3-H6 HHFGSSGMT   | 64    | >THRAP3-H6 HQFGSSGMT   | 9    | 55    |
| >THRAP3-H6 HHFGSSGMT   | 3483  | >THRAP3-H6 HQFGSSGMT   | 363  | 3120  |
| >THRAP3-H6 HHFGSSGM    | 204   | >THRAP3-H6 HQFGSSGM    | 4677 | 4473  |
| >THRAP3-H6 HHFGSSGMT   | 45    | >THRAP3-H6 HQFGSSGMT   | 1181 | 1136  |
| >THRAP3-H6 HHFGSSGM    | 7486  | >THRAP3-H6 HQFGSSGM    | 298  | 7188  |
| >THRAP3-H6 HHFGSSGMT   | 352   | >THRAP3-H6 HQFGSSGMT   | 356  | 4     |
| >THRAP3-H6 HHFGSSGM    | 29    | >THRAP3-H6 HQFGSSGM    | 48   | 19    |
| >THRAP3-H6 HHFGSSGMT   | 8     | >THRAP3-H6 HQFGSSGMT   | 11   | 3     |
| >THRAP3-H6 HHFGSSGMT   | 4339  | >THRAP3-H6 HQFGSSGMT   | 84   | 4255  |
| >THRAP3-H6 HHFGSSGM    | 190   | >THRAP3-H6 HQFGSSGM    | 4155 | 3965  |
| >THRAP3-H6 HHFGSSGMT   | 320   | >THRAP3-H6 HQFGSSGMT   | 6686 | 6366  |
| >THRAP3-H6 EHHFGSSGM   | 92    | >THRAP3-H6 EHQFGSSGM   | 253  | 161   |
| >THRAP3-H6 EHHFGSSGM   | 53    | >THRAP3-H6 EHQFGSSGM   | 101  | 48    |
| >THRAP3-H6 KEHHFGSSGM  | 97    | >THRAP3-H6 KEHQFGSSGM  | 278  | 181   |
| >THRAP3-H6 KEHHFGSS    | 136   | >THRAP3-H6 KEHQFGSS    | 112  | 24    |
| >THRAP3-H6 KEHHFGSSG   | 412   | >THRAP3-H6 KEHQFGSSG   | 335  | 77    |
| >THRAP3-H6 KEHHFGSSGM  | 437   | >THRAP3-H6 KEHQFGSSGM  | 432  | 5     |
| >THRAP3-H6 KEHHFGSSGM  | 75    | >THRAP3-H6 KEHQFGSSGM  | 63   | 12    |
| >THRAP3-H6 KEHHFGSSGM  | 487   | >THRAP3-H6 KEHQFGSSGM  | 690  | 203   |
| >THRAP3-H6 KEHHFGSS    | 312   | >THRAP3-H6 KEHQFGSS    | 182  | 130   |
| >THRAP3-H6 KEHHFGSSG   | 1230  | >THRAP3-H6 KEHQFGSSG   | 493  | 737   |
| >THRAP3-H6 KEHHFGSSGM  | 127   | >THRAP3-H6 KEHQFGSSGM  | 65   | 62    |
| >THRAP3-H6 KEHHFGSSGM  | 329   | >THRAP3-H6 KEHQFGSSGM  | 263  | 66    |
| >THRAP3-H6 KEHHFGSSGM  | 513   | >THRAP3-H6 KEHQFGSSGM  | 288  | 225   |
| >THRAP3-H6 HVKEHHFG    | 24    | >THRAP3-H6 HVKEHQFG    | 39   | 15    |
| >THRAP3-H6 HVKEHHFGS   | 90    | >THRAP3-H6 HVKEHQFGS   | 432  | 342   |
| >THRAP3-H6 HVKEHHFGS   | 71    | >THRAP3-H6 HVKEHQFGS   | 133  | 62    |
| >THRAP3-H6 HVKEHHFGS   | 80    | >THRAP3-H6 HVKEHQFGS   | 215  | 135   |
| >THRAP3-H6 HHVKEHHF    | 220   | >THRAP3-H6 HHVKEHQF    | 459  | 239   |

|                        |       |                        |      |       |
|------------------------|-------|------------------------|------|-------|
| >THRAP3-H6 HHVKEHHF    | 107   | >THRAP3-H6 HHVKEHQF    | 136  | 29    |
| >THRAP3-H6 VHHVKEHHF   | 474   | >THRAP3-H6 VHHVKEHQF   | 668  | 194   |
| >THRAP3-H6 IVHHVKEHHF  | 399   | >THRAP3-H6 IVHHVKEHQF  | 1314 | 915   |
| >THRAP3-H6 IVHHVKEHHF  | 491   | >THRAP3-H6 IVHHVKEHQF  | 718  | 227   |
| >THRAP3-H6 IVHHVKEHHF  | 828   | >THRAP3-H6 IVHHVKEHQF  | 261  | 567   |
| >THRAP3-H6 IVHHVKEHHF  | 383   | >THRAP3-H6 IVHHVKEHQF  | 426  | 43    |
| >THRAP3-H6 TIVHHVKEHH  | 21    | >THRAP3-H6 TIVHHVKEHC  | 37   | 16    |
| >THRAP3-H6 TIVHHVKEHH  | 1158  | >THRAP3-H6 TIVHHVKEHC  | 322  | 836   |
| >THRAP3-P2·PALKSPLQSV  | 2459  | >THRAP3-P2·AALKSPLQSV  | 116  | 2343  |
| >THRAP3-P2·PALKSPLQSV  | 1735  | >THRAP3-P2·AALKSPLQSV  | 75   | 1660  |
| >THRAP3-P2·PALKSPLQSV' | 5352  | >THRAP3-P2·AALKSPLQSV  | 381  | 4971  |
| >THRAP3-P2·PALKSPLQSV  | 5816  | >THRAP3-P2·AALKSPLQSV  | 357  | 5459  |
| >THRAP3-P2·PALKSPLQSV  | 2769  | >THRAP3-P2·AALKSPLQSV  | 87   | 2682  |
| >THRAP3-P2·PALKSPLQSV' | 5720  | >THRAP3-P2·AALKSPLQSV  | 325  | 5395  |
| >THRAP3-P2·PALKSPLQSV  | 1320  | >THRAP3-P2·AALKSPLQSV  | 331  | 989   |
| >THRAP3-P2·PALKSPLQSV  | 3101  | >THRAP3-P2·AALKSPLQSV  | 212  | 2889  |
| >THRAP3-P2·PALKSPLQSV' | 3863  | >THRAP3-P2·AALKSPLQSV  | 365  | 3498  |
| >THRAP3-P2·SPALKSPLQS\ | 13777 | >THRAP3-P2·SAALKSPLQS\ | 368  | 13409 |
| >THRAP3-P2·SPALKSPLQS\ | 9656  | >THRAP3-P2·SAALKSPLQS\ | 176  | 9480  |
| >THRAP3-P2·SPALKSPLQS\ | 13333 | >THRAP3-P2·SAALKSPLQS\ | 178  | 13155 |
| >THRAP3-P2·SPALKSPL    | 9530  | >THRAP3-P2·SAALKSPL    | 402  | 9128  |
| >THRAP3-P2·SPALKSPLQS\ | 5397  | >THRAP3-P2·SAALKSPLQS\ | 202  | 5195  |
| >THRAP3-P2·SPALKSPLQS\ | 959   | >THRAP3-P2·SAALKSPLQS\ | 209  | 750   |
| >THRAP3-P2·SPALKSPL    | 12    | >THRAP3-P2·SAALKSPL    | 316  | 304   |
| >THRAP3-P2·SPALKSPLQS\ | 40    | >THRAP3-P2·SAALKSPLQS\ | 3555 | 3515  |
| >THRAP3-P2·SPALKSPL    | 149   | >THRAP3-P2·SAALKSPL    | 496  | 347   |
| >THRAP3-P2·SPALKSPL    | 17869 | >THRAP3-P2·SAALKSPL    | 316  | 17553 |
| >THRAP3-P2·SPALKSPL    | 489   | >THRAP3-P2·SAALKSPL    | 3118 | 2629  |
| >THRAP3-P2·SPALKSPL    | 378   | >THRAP3-P2·SAALKSPL    | 4015 | 3637  |
| >THRAP3-P2·RSPALKSPL   | 393   | >THRAP3-P2·RSAALKSPL   | 5530 | 5137  |
| >THRAP3-P2·RSPALKSPL   | 3867  | >THRAP3-P2·RSAALKSPL   | 237  | 3630  |
| >THRAP3-P2·RSPALKSPL   | 2828  | >THRAP3-P2·RSAALKSPL   | 345  | 2483  |
| >THRAP3-P2·RSPALKSPL   | 1764  | >THRAP3-P2·RSAALKSPL   | 332  | 1432  |
| >THRAP3-P2·RSPALKSPL   | 129   | >THRAP3-P2·RSAALKSPL   | 7    | 122   |
| >THRAP3-P2·RSPALKSPL   | 371   | >THRAP3-P2·RSAALKSPL   | 300  | 71    |
| >THRAP3-P2·RSPALKSPL   | 13482 | >THRAP3-P2·RSAALKSPL   | 166  | 13316 |
| >THRAP3-P2·RSPALKSPL   | 9     | >THRAP3-P2·RSAALKSPL   | 1140 | 1131  |
| >THRAP3-P2·RSPALKSPLQ  | 174   | >THRAP3-P2·RSAALKSPLQ  | 8372 | 8198  |
| >THRAP3-P2·RSPALKSPL   | 1021  | >THRAP3-P2·RSAALKSPL   | 36   | 985   |
| >THRAP3-P2·RSPALKSPL   | 471   | >THRAP3-P2·RSAALKSPL   | 164  | 307   |
| >THRAP3-P2·ERSPALKSPL  | 1100  | >THRAP3-P2·ERSAALKSPL  | 421  | 679   |
| >THRAP3-P2·ERSPALKSPL  | 165   | >THRAP3-P2·ERSAALKSPL  | 81   | 84    |
| >THRAP3-P2·RERSPALK    | 25    | >THRAP3-P2·RERSAALK    | 14   | 11    |

|                        |       |                         |     |       |
|------------------------|-------|-------------------------|-----|-------|
| >THRAP3-P2·RERSPALKSPI | 367   | >THRAP3-P2·RERSAALKSPI  | 486 | 119   |
| >THRAP3-P2·RERSPALKSPI | 93    | >THRAP3-P2·RERSAALKSPI  | 123 | 30    |
| >THRAP3-P2·RERSPALKSPI | 51    | >THRAP3-P2·RERSAALKSPI  | 32  | 19    |
| >THRAP3-P2·RERSPALKSPI | 55    | >THRAP3-P2·RERSAALKSPI  | 27  | 28    |
| >THRAP3-P2·RERSPALKSPI | 327   | >THRAP3-P2·RERSAALKSPI  | 465 | 138   |
| >THRAP3-P2·RERSPALKSPI | 26    | >THRAP3-P2·RERSAALKSPI  | 17  | 9     |
| >THRAP3-P2·RERSPALKSPI | 351   | >THRAP3-P2·RERSAALKSPI  | 443 | 92    |
| >THRAP3-P2·SPRERSPALK  | 354   | >THRAP3-P2·SPRERSAALK   | 597 | 243   |
| >THRAP3-P2·SPRERSPA    | 10    | >THRAP3-P2·SPRERSAA     | 8   | 2     |
| >THRAP3-P2·SPRERSPAL   | 7     | >THRAP3-P2·SPRERSAAL    | 6   | 1     |
| >THRAP3-P2·SPRERSPA    | 93    | >THRAP3-P2·SPRERSAA     | 73  | 20    |
| >THRAP3-P2·SPRERSPAL   | 16    | >THRAP3-P2·SPRERSAAL    | 13  | 3     |
| >THRAP3-P2·SPRERSPAL   | 383   | >THRAP3-P2·SPRERSAAL    | 337 | 46    |
| >THRAP3-P2·SPRERSPAL   | 460   | >THRAP3-P2·SPRERSAAL    | 248 | 212   |
| >THRAP3-P2·SPRERSPA    | 236   | >THRAP3-P2·SPRERSAA     | 283 | 47    |
| >THRAP3-P2·SPRERSPAL   | 1605  | >THRAP3-P2·SPRERSAAL    | 366 | 1239  |
| >THRAP3-P2·LSPRERSPAL  | 463   | >THRAP3-P2·LSPRERSAAL   | 646 | 183   |
| >THRAP3-P2·LSPRERSPAL  | 17    | >THRAP3-P2·LSPRERSAAL   | 10  | 7     |
| >THRAP3-P2·LSPRERSPAL  | 1171  | >THRAP3-P2·LSPRERSAAL   | 492 | 679   |
| >THRAP3-P2·ELSPRERSPAL | 442   | >THRAP3-P2·ELSPRERSAAL  | 141 | 301   |
| >THRAP3-P2·ELSPRERSPA  | 386   | >THRAP3-P2·ELSPRERSAA   | 455 | 69    |
| >THRAP3-P2·ELSPRERSPAL | 43    | >THRAP3-P2·ELSPRERSAAL  | 43  | 0     |
| >THRAP3-P2·ELSPRERSPAL | 169   | >THRAP3-P2·ELSPRERSAAL  | 117 | 52    |
| >THRAP3-P2·SELSPRERSPA | 438   | >THRAP3-P2·SELSPRERSAAL | 600 | 162   |
| >THRAP3-P2·SELSPRERSP  | 881   | >THRAP3-P2·SELSPRERSAA  | 73  | 808   |
| >THRAP3-P2·SELSPRERSPA | 48    | >THRAP3-P2·SELSPRERSAAL | 34  | 14    |
| >THRAP3-P4·APPGKEKQRF  | 13766 | >THRAP3-P4·ATPGKEKQRF   | 122 | 13644 |
| >THRAP3-P4·YAPPGKEK    | 1343  | >THRAP3-P4·YATPGKEK     | 275 | 1068  |
| >THRAP3-P4·YAPPGKEKQF  | 1414  | >THRAP3-P4·YATPGKEKQF   | 286 | 1128  |
| >THRAP3-P4·VYAPPGKEKC  | 267   | >THRAP3-P4·VYATPGKEKC   | 224 | 43    |
| >THRAP3-P4·LVYAPPGK    | 39    | >THRAP3-P4·LVYATPGK     | 41  | 2     |
| >THRAP3-P4·LVYAPPGKEK  | 50    | >THRAP3-P4·LVYATPGKEK   | 51  | 1     |
| >THRAP3-P4·LVYAPPGK    | 24    | >THRAP3-P4·LVYATPGK     | 27  | 3     |
| >THRAP3-P4·LVYAPPGKEK  | 71    | >THRAP3-P4·LVYATPGKEK   | 67  | 4     |
| >THRAP3-P4·LVYAPPGK    | 95    | >THRAP3-P4·LVYATPGK     | 31  | 64    |
| >THRAP3-P4·LVYAPPGKEK  | 484   | >THRAP3-P4·LVYATPGKEK   | 157 | 327   |
| >THRAP3-P4·LVYAPPGK    | 135   | >THRAP3-P4·LVYATPGK     | 51  | 84    |
| >THRAP3-P4·LVYAPPGKEK  | 61    | >THRAP3-P4·LVYATPGKEK   | 101 | 40    |
| >THRAP3-P4·GLVYAPPGK   | 392   | >THRAP3-P4·GLVYATPGK    | 258 | 134   |
| >THRAP3-P4·GLVYAPPGK   | 512   | >THRAP3-P4·GLVYATPGK    | 268 | 244   |
| >THRAP3-P4·WEGLVYAP    | 652   | >THRAP3-P4·WEGLVYAT     | 179 | 473   |
| >THRAP3-P4·WEGLVYAP    | 1198  | >THRAP3-P4·WEGLVYAT     | 121 | 1077  |
| >THRAP3-P4·WEGLVYAP    | 7001  | >THRAP3-P4·WEGLVYAT     | 350 | 6651  |

|                         |       |                         |       |       |
|-------------------------|-------|-------------------------|-------|-------|
| >THRAP3-P4: WEGLVYAP    | 2288  | >THRAP3-P4: WEGLVYAT    | 357   | 1931  |
| >THRAP3-P4: KWEGLVYAP   | 1985  | >THRAP3-P4: KWEGLVYAT   | 455   | 1530  |
| >THRAP3-P4: KWEGLVYAP   | 44    | >THRAP3-P4: KWEGLVYAT   | 44    | 0     |
| >THRAP3-P4: KWEGLVYAPI  | 158   | >THRAP3-P4: KWEGLVYATI  | 148   | 10    |
| >TIF1-D673H DSTHKVPV    | 84    | >TIF1-D673H HSTHKVPV    | 42    | 42    |
| >TIF1-D673H DSTHKVPVV   | 12402 | >TIF1-D673H HSTHKVPVV   | 499   | 11903 |
| >TIF1-D673H DSTHKVPVVI  | 2586  | >TIF1-D673H HSTHKVPVVI  | 35    | 2551  |
| >TIF1-D673H DSTHKVPVVI  | 1111  | >TIF1-D673H HSTHKVPVVI  | 13    | 1098  |
| >TIF1-D673H DSTHKVPVVI  | 12062 | >TIF1-D673H HSTHKVPVVI  | 291   | 11771 |
| >TIF1-D673H DSTHKVPVVI  | 55    | >TIF1-D673H HSTHKVPVVI  | 33    | 22    |
| >TIF1-D673H ADSTHKVPV\  | 3584  | >TIF1-D673H AHSTHKVPV\  | 174   | 3410  |
| >TIF1-D673H ADSTHKVPV   | 12901 | >TIF1-D673H AHSTHKVPV   | 165   | 12736 |
| >TIF1-D673H ADSTHKVPV\  | 15007 | >TIF1-D673H AHSTHKVPV\  | 380   | 14627 |
| >TIF1-D673H ADSTHKVPV\  | 5685  | >TIF1-D673H AHSTHKVPV\  | 29    | 5656  |
| >TIF1-D673H ADSTHKVPV   | 276   | >TIF1-D673H AHSTHKVPV   | 6879  | 6603  |
| >TIF1-D673H ADSTHKVPV   | 212   | >TIF1-D673H AHSTHKVPV   | 21954 | 21742 |
| >TIF1-D673H ADSTHKVPV\  | 180   | >TIF1-D673H AHSTHKVPV\  | 19644 | 19464 |
| >TIF1-D673H GADSTHKV    | 333   | >TIF1-D673H GAHSTHKV    | 646   | 313   |
| >TIF1-D673H GADSTHKVP\  | 374   | >TIF1-D673H GAHSTHKVP\  | 728   | 354   |
| >TIF1-D673H GADSTHKV    | 437   | >TIF1-D673H GAHSTHKV    | 247   | 190   |
| >TIF1-D673H GADSTHKVP\  | 15830 | >TIF1-D673H GAHSTHKVP\  | 447   | 15383 |
| >TIF1-D673H AGADSTHKV   | 248   | >TIF1-D673H AGAHSTHKV   | 900   | 652   |
| >TIF1-D673H AGADSTHKV   | 25    | >TIF1-D673H AGAHSTHKV   | 1165  | 1140  |
| >TIF1-D673H AGADSTHKVI  | 258   | >TIF1-D673H AGAHSTHKVI  | 3904  | 3646  |
| >TIF1-D673H AGADSTHK    | 477   | >TIF1-D673H AGAHSTHK    | 259   | 218   |
| >TIF1-D673H KPAGADSTHI  | 506   | >TIF1-D673H KPAGAHSTHI  | 459   | 47    |
| >TIF1-D673H KPAGADST    | 125   | >TIF1-D673H KPAGAHST    | 32    | 93    |
| >TIF1-D673H KPAGADSTH   | 742   | >TIF1-D673H KPAGAHSTH   | 88    | 654   |
| >TIF1-D673H KPAGADSTHI  | 36    | >TIF1-D673H KPAGAHSTHI  | 18    | 18    |
| >TIF1-D673H KPAGADSTH   | 38    | >TIF1-D673H KPAGAHSTH   | 123   | 85    |
| >TIF1-D673H KPAGADSTH   | 1668  | >TIF1-D673H KPAGAHSTH   | 352   | 1316  |
| >TIF1-D673H SSKPAGADS   | 902   | >TIF1-D673H SSKPAGAHS   | 89    | 813   |
| >TIF1-D673H SSKPAGADST  | 2210  | >TIF1-D673H SSKPAGAHST  | 411   | 1799  |
| >TIF1-D673H SSKPAGADST  | 1843  | >TIF1-D673H SSKPAGAHST  | 312   | 1531  |
| >TIF1-D673H SSKPAGADST  | 257   | >TIF1-D673H SSKPAGAHST  | 150   | 107   |
| >TIF1-D673H SSKPAGADST  | 70    | >TIF1-D673H SSKPAGAHST  | 35    | 35    |
| >TIF1-D673H SSSKPAGAD   | 6778  | >TIF1-D673H SSSKPAGAH   | 203   | 6575  |
| >TIF1-E740Q EETVLRSDA   | 65    | >TIF1-E740Q QETVLRSDA   | 133   | 68    |
| >TIF1-E740Q SEETVLRSDA  | 45    | >TIF1-E740Q SQETVLRSDA  | 2883  | 2838  |
| >TIF1-E740Q LLNSSQSSTSE | 3144  | >TIF1-E740Q LLNSSQSSTSC | 33    | 3111  |
| >TIF1-E740Q TSEETVLR    | 1627  | >TIF1-E740Q TSQETVLR    | 151   | 1476  |
| >TIF1-E740Q TSEETVLR    | 577   | >TIF1-E740Q TSQETVLR    | 101   | 476   |
| >TIF1-E740Q TSEETVLR    | 29    | >TIF1-E740Q TSQETVLR    | 29    | 0     |

|                          |      |                          |       |       |
|--------------------------|------|--------------------------|-------|-------|
| >TIF1-E740Q STSEETVL     | 347  | >TIF1-E740Q STSQETVL     | 1081  | 734   |
| >TIF1-E740Q STSEETVLR    | 45   | >TIF1-E740Q STSQETVLR    | 71    | 26    |
| >TIF1-E740Q STSEETVLR    | 190  | >TIF1-E740Q STSQETVLR    | 388   | 198   |
| >TIF1-E740Q STSEETVLR    | 6    | >TIF1-E740Q STSQETVLR    | 8     | 2     |
| >TIF1-E740Q STSEETVL     | 129  | >TIF1-E740Q STSQETVL     | 80    | 49    |
| >TIF1-E740Q STSEETVLR    | 122  | >TIF1-E740Q STSQETVLR    | 112   | 10    |
| >TIF1-E740Q STSEETVLR    | 240  | >TIF1-E740Q STSQETVLR    | 112   | 128   |
| >TIF1-E740Q STSEETVL     | 475  | >TIF1-E740Q STSQETVL     | 404   | 71    |
| >TIF1-E740Q SSTSEETVLR   | 87   | >TIF1-E740Q SSTSQETVLR   | 73    | 14    |
| >TIF1-E740Q SSTSEETVLR   | 410  | >TIF1-E740Q SSTSQETVLR   | 165   | 245   |
| >TIF1-E740Q SSTSEETVLR   | 13   | >TIF1-E740Q SSTSQETVLR   | 14    | 1     |
| >TIF1-E740Q SSTSEETVL    | 90   | >TIF1-E740Q SSTSQETVL    | 79    | 11    |
| >TIF1-E740Q QSSTSEETVLF  | 16   | >TIF1-E740Q QSSTSQETVL   | 16    | 0     |
| >TIF1-E740Q QSSTSEETV    | 419  | >TIF1-E740Q QSSTSQETV    | 83    | 336   |
| >TIF1-E740Q QSSTSEETVL   | 499  | >TIF1-E740Q QSSTSQETVL   | 463   | 36    |
| >TIF1-E740Q QSSTSEETVL   | 206  | >TIF1-E740Q QSSTSQETVL   | 133   | 73    |
| >TIF1-E740Q QSSTSEETVLF  | 587  | >TIF1-E740Q QSSTSQETVL   | 350   | 237   |
| >TIF1-E740Q QSSTSEETVL   | 239  | >TIF1-E740Q QSSTSQETVL   | 139   | 100   |
| >TIF1-E740Q SQSSTSEETV   | 48   | >TIF1-E740Q SQSSTSQETV   | 92    | 44    |
| >TIF1-E740Q SQSSTSEETVI  | 332  | >TIF1-E740Q SQSSTSQETV   | 484   | 152   |
| >TIF1-E740Q SQSSTSEETV   | 155  | >TIF1-E740Q SQSSTSQETV   | 188   | 33    |
| >TIF1-E740Q SQSSTSEETV   | 401  | >TIF1-E740Q SQSSTSQETV   | 574   | 173   |
| >TIF1-E740Q SQSSTSEETV   | 182  | >TIF1-E740Q SQSSTSQETV   | 149   | 33    |
| >TIF1-E740Q SQSSTSEETV   | 297  | >TIF1-E740Q SQSSTSQETV   | 191   | 106   |
| >TIF1-E740Q SQSSTSEETV   | 109  | >TIF1-E740Q SQSSTSQETV   | 85    | 24    |
| >TIF1-E740Q SQSSTSEETV   | 827  | >TIF1-E740Q SQSSTSQETV   | 327   | 500   |
| >TIF1-E740Q SQSSTSEETV   | 669  | >TIF1-E740Q SQSSTSQETV   | 398   | 271   |
| >TIF1-E740Q SQSSTSEETVI  | 188  | >TIF1-E740Q SQSSTSQETV   | 155   | 33    |
| >TIF1-E740Q SQSSTSEET    | 1060 | >TIF1-E740Q SQSSTSQET    | 328   | 732   |
| >TIF1-E740Q SQSSTSEETV   | 50   | >TIF1-E740Q SQSSTSQETV   | 33    | 17    |
| >TIF1-E740Q SQSSTSEETVI  | 18   | >TIF1-E740Q SQSSTSQETV   | 14    | 4     |
| >TIF1-E740Q SQSSTSEETVI  | 35   | >TIF1-E740Q SQSSTSQETV   | 29    | 6     |
| >TIF1-E740Q SSQSSTSEET\  | 168  | >TIF1-E740Q SSQSSTSQET'  | 119   | 49    |
| >TIF1-E740Q SSQSSTSEET\  | 931  | >TIF1-E740Q SSQSSTSQET'  | 415   | 516   |
| >TIF1-F976C- RFPKPEFR    | 25   | >TIF1-F976C- RCPKPEFR    | 969   | 944   |
| >TIF1-F976C- RFPKPEFR    | 28   | >TIF1-F976C- RCPKPEFR    | 68    | 40    |
| >TIF1-F976C- LLKNLYPEKRF | 161  | >TIF1-F976C- LLKNLYPEKRC | 17064 | 16903 |
| >TIF1-F976C- LLKNLYPEKRF | 79   | >TIF1-F976C- LLKNLYPEKRC | 14204 | 14125 |
| >TIF1-F976C- KRFPKPEFR   | 392  | >TIF1-F976C- KRCPKPEFR   | 1309  | 917   |
| >TIF1-F976C- KRFPKPEF    | 7    | >TIF1-F976C- KRCPKPEF    | 92    | 85    |
| >TIF1-F976C- KRFPKPEF    | 150  | >TIF1-F976C- KRCPKPEF    | 4233  | 4083  |
| >TIF1-F976C- KRFPKPEFR   | 90   | >TIF1-F976C- KRCPKPEFR   | 3758  | 3668  |
| >TIF1-F976C- KRFPKPEF    | 43   | >TIF1-F976C- KRCPKPEF    | 66    | 23    |

|                         |     |                         |       |       |
|-------------------------|-----|-------------------------|-------|-------|
| >TIF1-F976C-KRFPKPEF    | 297 | >TIF1-F976C-KRCPKPEF    | 187   | 110   |
| >TIF1-F976C-KRFPKPEFR   | 21  | >TIF1-F976C-KRCPKPEFR   | 42    | 21    |
| >TIF1-F976C-EKRFKPEF    | 21  | >TIF1-F976C-EKRCPKPEF   | 9     | 12    |
| >TIF1-F976C-YPEKRFKPEI  | 39  | >TIF1-F976C-YPEKRCPKPEI | 44    | 5     |
| >TIF1-F976C-YPEKRFKPEI  | 109 | >TIF1-F976C-YPEKRCPKPEI | 155   | 46    |
| >TIF1-F976C-YPEKRFKPEI  | 453 | >TIF1-F976C-YPEKRCPKPEI | 1206  | 753   |
| >TIF1-F976C-YPEKRFKPEI  | 49  | >TIF1-F976C-YPEKRCPKPEI | 50    | 1     |
| >TIF1-F976C-YPEKRFKPEI  | 196 | >TIF1-F976C-YPEKRCPKPEI | 726   | 530   |
| >TIF1-F976C-YPEKRFKPEI  | 147 | >TIF1-F976C-YPEKRCPKPEI | 170   | 23    |
| >TIF1-F976C-YPEKRFKPEI  | 97  | >TIF1-F976C-YPEKRCPKPEI | 257   | 160   |
| >TIF1-F976C-LYPEKRFKPK  | 527 | >TIF1-F976C-LYPEKRCPK   | 335   | 192   |
| >TIF1-F976C-LYPEKRFKPK  | 129 | >TIF1-F976C-LYPEKRCPK   | 1401  | 1272  |
| >TIF1-F976C-LYPEKRFKPK  | 282 | >TIF1-F976C-LYPEKRCPK   | 922   | 640   |
| >TIF1-F976C-LYPEKRFKPK  | 131 | >TIF1-F976C-LYPEKRCPK   | 114   | 17    |
| >TIF1-F976C-NLYPEKRFKPK | 43  | >TIF1-F976C-NLYPEKRCPK  | 56    | 13    |
| >TIF1-F976C-NLYPEKRFKPK | 162 | >TIF1-F976C-NLYPEKRCPK  | 777   | 615   |
| >TIF1-F976C-NLYPEKRFKPK | 225 | >TIF1-F976C-NLYPEKRCPK  | 439   | 214   |
| >TIF1-F976C-NLYPEKRF    | 241 | >TIF1-F976C-NLYPEKRC    | 18837 | 18596 |
| >TIF1-F976C-NLYPEKRF    | 313 | >TIF1-F976C-NLYPEKRC    | 21072 | 20759 |
| >TIF1-F976C-KNLYPEKRFPI | 143 | >TIF1-F976C-KNLYPEKRCPI | 111   | 32    |
| >TIF1-F976C-KNLYPEKRFPI | 420 | >TIF1-F976C-KNLYPEKRCPI | 1636  | 1216  |
| >TIF1-F976C-KNLYPEKRF   | 179 | >TIF1-F976C-KNLYPEKRC   | 22824 | 22645 |
| >TIF1-F976C-LKNLYPEKRF  | 14  | >TIF1-F976C-LKNLYPEKRC  | 7634  | 7620  |
| >TIF1-I270V-IDTLITKLM   | 67  | >TIF1-I270V-IVDTLITKLM  | 123   | 56    |
| >TIF1-I270V-IIDTLITKL   | 225 | >TIF1-I270V-IVDTLITKL   | 487   | 262   |
| >TIF1-I270V-IIDTLITKL   | 553 | >TIF1-I270V-IVDTLITKL   | 486   | 67    |
| >TIF1-I270V-IIDTLITKL   | 289 | >TIF1-I270V-IVDTLITKL   | 989   | 700   |
| >TIF1-I270V-IIDTLITKL   | 287 | >TIF1-I270V-IVDTLITKL   | 1174  | 887   |
| >TIF1-I270V-IIDTLITK    | 247 | >TIF1-I270V-IVDTLITK    | 280   | 33    |
| >TIF1-I270V-IIDTLITK    | 64  | >TIF1-I270V-IVDTLITK    | 40    | 24    |
| >TIF1-I270V-EEAFQNQKVI  | 44  | >TIF1-I270V-EEAFQNQKVI  | 409   | 365   |
| >TIF1-I270V-EEAFQNQKVI  | 322 | >TIF1-I270V-EEAFQNQKVI  | 824   | 502   |
| >TIF1-I270V-EEAFQNQKVI  | 601 | >TIF1-I270V-EEAFQNQKVI  | 140   | 461   |
| >TIF1-I270V-EEAFQNQKVI  | 367 | >TIF1-I270V-EEAFQNQKVI  | 1710  | 1343  |
| >TIF1-I270V-VIIDLITKLM  | 360 | >TIF1-I270V-VIVDTLITKLM | 483   | 123   |
| >TIF1-I270V-VIIDLITKL   | 260 | >TIF1-I270V-VIVDTLITKL  | 432   | 172   |
| >TIF1-I270V-VIIDLITKL   | 225 | >TIF1-I270V-VIVDTLITKL  | 379   | 154   |
| >TIF1-I270V-VIIDLITKL   | 158 | >TIF1-I270V-VIVDTLITKL  | 217   | 59    |
| >TIF1-I270V-VIIDLITKLM  | 378 | >TIF1-I270V-VIVDTLITKLM | 560   | 182   |
| >TIF1-I270V-VIIDLITKL   | 48  | >TIF1-I270V-VIVDTLITKL  | 74    | 26    |
| >TIF1-I270V-VIIDLITKL   | 325 | >TIF1-I270V-VIVDTLITKL  | 850   | 525   |
| >TIF1-I270V-VIIDLITKL   | 353 | >TIF1-I270V-VIVDTLITKL  | 474   | 121   |
| >TIF1-I270V-VIIDLITKL   | 9   | >TIF1-I270V-VIVDTLITKL  | 12    | 3     |



|                         |      |                         |      |      |
|-------------------------|------|-------------------------|------|------|
| >TIF1-I270V-VIIDTLITK   | 430  | >TIF1-I270V-VIVDTLITK   | 539  | 109  |
| >TIF1-I270V-VIIDTLITK   | 14   | >TIF1-I270V-VIVDTLITK   | 30   | 16   |
| >TIF1-I270V-VIIDTLITKLM | 235  | >TIF1-I270V-VIVDTLITKLM | 511  | 276  |
| >TIF1-I270V-VIIDTLITK   | 485  | >TIF1-I270V-VIVDTLITK   | 782  | 297  |
| >TIF1-I270V-VIIDTLITK   | 197  | >TIF1-I270V-VIVDTLITK   | 364  | 167  |
| >TIF1-I270V-VIIDTLITKLM | 754  | >TIF1-I270V-VIVDTLITKLM | 468  | 286  |
| >TIF1-I270V-KVIIDTLI    | 82   | >TIF1-I270V-KVIVDTLI    | 69   | 13   |
| >TIF1-I270V-KVIIDTLITKL | 147  | >TIF1-I270V-KVIVDTLITKL | 123  | 24   |
| >TIF1-I270V-KVIIDTLITK  | 45   | >TIF1-I270V-KVIVDTLITK  | 56   | 11   |
| >TIF1-I270V-KVIIDTLITK  | 12   | >TIF1-I270V-KVIVDTLITK  | 14   | 2    |
| >TIF1-I270V-KVIIDTLITK  | 15   | >TIF1-I270V-KVIVDTLITK  | 12   | 3    |
| >TIF1-I270V-KVIIDTLI    | 144  | >TIF1-I270V-KVIVDTLI    | 118  | 26   |
| >TIF1-I270V-KVIIDTLITKL | 176  | >TIF1-I270V-KVIVDTLITKL | 143  | 33   |
| >TIF1-I270V-KVIIDTLITK  | 213  | >TIF1-I270V-KVIVDTLITK  | 276  | 63   |
| >TIF1-I270V-KVIIDTLITKL | 207  | >TIF1-I270V-KVIVDTLITKL | 421  | 214  |
| >TIF1-I270V-KVIIDTLI    | 346  | >TIF1-I270V-KVIVDTLI    | 144  | 202  |
| >TIF1-I270V-KVIIDTLI    | 201  | >TIF1-I270V-KVIVDTLI    | 234  | 33   |
| >TIF1-I270V-NQKVIIDTLI  | 429  | >TIF1-I270V-NQKVIVDTLI  | 334  | 95   |
| >TIF1-I270V-NQKVIIDTL   | 484  | >TIF1-I270V-NQKVIVDTL   | 1091 | 607  |
| >TIF1-I270V-FQNQKVII    | 1658 | >TIF1-I270V-FQNQKVIV    | 272  | 1386 |
| >TIF1-I270V-FQNQKVIIDT  | 289  | >TIF1-I270V-FQNQKVIVD1  | 322  | 33   |
| >TIF1-I270V-FQNQKVII    | 671  | >TIF1-I270V-FQNQKVIV    | 177  | 494  |
| >TIF1-I270V-FQNQKVIIDT  | 24   | >TIF1-I270V-FQNQKVIVD1  | 25   | 1    |
| >TIF1-I270V-FQNQKVII    | 170  | >TIF1-I270V-FQNQKVIV    | 27   | 143  |
| >TIF1-I270V-FQNQKVIIDT  | 38   | >TIF1-I270V-FQNQKVIVD1  | 35   | 3    |
| >TIF1-I270V-FQNQKVII    | 86   | >TIF1-I270V-FQNQKVIV    | 19   | 67   |
| >TIF1-I270V-FQNQKVIIDT  | 14   | >TIF1-I270V-FQNQKVIVD1  | 16   | 2    |
| >TIF1-I270V-FQNQKVII    | 846  | >TIF1-I270V-FQNQKVIV    | 76   | 770  |
| >TIF1-I270V-FQNQKVIIDT  | 105  | >TIF1-I270V-FQNQKVIVD1  | 103  | 2    |
| >TIF1-I270V-FQNQKVII    | 1961 | >TIF1-I270V-FQNQKVIV    | 193  | 1768 |
| >TIF1-I270V-FQNQKVIIDT  | 268  | >TIF1-I270V-FQNQKVIVD1  | 280  | 12   |
| >TIF1-I270V-FQNQKVII    | 4014 | >TIF1-I270V-FQNQKVIV    | 137  | 3877 |
| >TIF1-I270V-FQNQKVII    | 9870 | >TIF1-I270V-FQNQKVIV    | 135  | 9735 |
| >TIF1-I270V-FQNQKVIIDT  | 419  | >TIF1-I270V-FQNQKVIVD1  | 261  | 158  |
| >TIF1-I270V-FQNQKVII    | 115  | >TIF1-I270V-FQNQKVIV    | 156  | 41   |
| >TIF1-I270V-FQNQKVIIDT  | 155  | >TIF1-I270V-FQNQKVIVD1  | 129  | 26   |
| >TIF1-I270V-FQNQKVIIDT  | 66   | >TIF1-I270V-FQNQKVIVD1  | 46   | 20   |
| >TIF1-I270V-AFQNQKVII   | 451  | >TIF1-I270V-AFQNQKVIV   | 7178 | 6727 |
| >TIF1-I270V-EAFQNQKVII  | 1291 | >TIF1-I270V-EAFQNQKVIV  | 181  | 1110 |
| >TIF1-I320T-EINKKGGKAL  | 2263 | >TIF1-I320T-ETNKKGGKAL  | 171  | 2092 |
| >TIF1-I320T-EINKKGGKAL  | 300  | >TIF1-I320T-ETNKKGGKAL  | 2012 | 1712 |
| >TIF1-I320T-KVAIFTLMVE  | 163  | >TIF1-I320T-KVAIFTLMVE  | 3631 | 3468 |
| >TIF1-I320T-KVAIFTLMVE  | 48   | >TIF1-I320T-KVAIFTLMVE  | 934  | 886  |

|                           |     |                           |       |       |
|---------------------------|-----|---------------------------|-------|-------|
| >TIF1-I320T-V KVAIFTLMVE  | 194 | >TIF1-I320T-I KVAIFTLMVE  | 2458  | 2264  |
| >TIF1-I320T-V KVAIFTLMVE  | 106 | >TIF1-I320T-I KVAIFTLMVE  | 1253  | 1147  |
| >TIF1-I320T-V KVAIFTLMVE  | 409 | >TIF1-I320T-I KVAIFTLMVE  | 5629  | 5220  |
| >TIF1-I320T-V KVAIFTLMVE  | 18  | >TIF1-I320T-I KVAIFTLMVE  | 2189  | 2171  |
| >TIF1-I320T-V KVAIFTLMVE  | 175 | >TIF1-I320T-I KVAIFTLMVE  | 4358  | 4183  |
| >TIF1-I320T-V KVAIFTLMVE  | 441 | >TIF1-I320T-I KVAIFTLMVE  | 16994 | 16553 |
| >TIF1-I320T-V KVAIFTLMVE  | 158 | >TIF1-I320T-I KVAIFTLMVE  | 36864 | 36706 |
| >TIF1-I320T-V VEINKKGGKAL | 449 | >TIF1-I320T-I VETNKKGGKAL | 233   | 216   |
| >TIF1-I320T-V VEINKKGGKAL | 341 | >TIF1-I320T-I VETNKKGGKAL | 1111  | 770   |
| >TIF1-I320T-V VEINKKGGKAL | 66  | >TIF1-I320T-I VETNKKGGKAL | 126   | 60    |
| >TIF1-I320T-V VEINKKGGKAL | 166 | >TIF1-I320T-I VETNKKGGKAL | 2898  | 2732  |
| >TIF1-I320T-V VEINKKGGKAL | 104 | >TIF1-I320T-I VETNKKGGKAL | 732   | 628   |
| >TIF1-I320T-V MVEINKKGGK  | 252 | >TIF1-I320T-I MVETNKKGGK  | 231   | 21    |
| >TIF1-I320T-V LMVEINKKGGK | 91  | >TIF1-I320T-I LMVETNKKGGK | 158   | 67    |
| >TIF1-I320T-V LMVEINKKGGK | 96  | >TIF1-I320T-I LMVETNKKGGK | 98    | 2     |
| >TIF1-I320T-V LMVEINKKGGK | 77  | >TIF1-I320T-I LMVETNKKGGK | 82    | 5     |
| >TIF1-I320T-V LMVEINKK    | 362 | >TIF1-I320T-I LMVETNKK    | 429   | 67    |
| >TIF1-I320T-V LMVEINKK    | 272 | >TIF1-I320T-I LMVETNKK    | 559   | 287   |
| >TIF1-I320T-V TLMVEINK    | 66  | >TIF1-I320T-I TLMVETNK    | 68    | 2     |
| >TIF1-I320T-V TLMVEINKK   | 98  | >TIF1-I320T-I TLMVETNKK   | 87    | 11    |
| >TIF1-I320T-V TLMVEINKKG  | 290 | >TIF1-I320T-I TLMVETNKKK  | 236   | 54    |
| >TIF1-I320T-V TLMVEINK    | 20  | >TIF1-I320T-I TLMVETNK    | 30    | 10    |
| >TIF1-I320T-V TLMVEINKK   | 37  | >TIF1-I320T-I TLMVETNKK   | 33    | 4     |
| >TIF1-I320T-V TLMVEINKKG  | 211 | >TIF1-I320T-I TLMVETNKKK  | 181   | 30    |
| >TIF1-I320T-V TLMVEINK    | 188 | >TIF1-I320T-I TLMVETNK    | 168   | 20    |
| >TIF1-I320T-V TLMVEINKK   | 371 | >TIF1-I320T-I TLMVETNKK   | 350   | 21    |
| >TIF1-I320T-V FTLMVEINKK  | 430 | >TIF1-I320T-I FTLMVETNKK  | 274   | 156   |
| >TIF1-I320T-V FTLMVEINK   | 33  | >TIF1-I320T-I FTLMVETNK   | 65    | 32    |
| >TIF1-I320T-V FTLMVEINKK  | 38  | >TIF1-I320T-I FTLMVETNKK  | 27    | 11    |
| >TIF1-I320T-V FTLMVEINK   | 14  | >TIF1-I320T-I FTLMVETNK   | 12    | 2     |
| >TIF1-I320T-V FTLMVEINKK  | 29  | >TIF1-I320T-I FTLMVETNKK  | 18    | 11    |
| >TIF1-I320T-V IFTLMVEINK  | 263 | >TIF1-I320T-I IFTLMVETNK  | 476   | 213   |
| >TIF1-I320T-V IFTLMVEI    | 443 | >TIF1-I320T-I IFTLMVET    | 14650 | 14207 |
| >TIF1-I320T-V AIFTLMVEI   | 36  | >TIF1-I320T-I AIFTLMVET   | 826   | 790   |
| >TIF1-I320T-V AIFTLMVEI   | 32  | >TIF1-I320T-I AIFTLMVET   | 556   | 524   |
| >TIF1-I320T-V AIFTLMVEI   | 63  | >TIF1-I320T-I AIFTLMVET   | 989   | 926   |
| >TIF1-I320T-V AIFTLMVEI   | 102 | >TIF1-I320T-I AIFTLMVET   | 623   | 521   |
| >TIF1-I320T-V AIFTLMVEI   | 75  | >TIF1-I320T-I AIFTLMVET   | 2547  | 2472  |
| >TIF1-I320T-V AIFTLMVEI   | 220 | >TIF1-I320T-I AIFTLMVET   | 5834  | 5614  |
| >TIF1-I320T-V AIFTLMVEI   | 230 | >TIF1-I320T-I AIFTLMVET   | 3695  | 3465  |
| >TIF1-I320T-V AIFTLMVEINI | 40  | >TIF1-I320T-I AIFTLMVETN  | 42    | 2     |
| >TIF1-I320T-V AIFTLMVEINI | 9   | >TIF1-I320T-I AIFTLMVETN  | 12    | 3     |
| >TIF1-I320T-V AIFTLMVEINI | 51  | >TIF1-I320T-I AIFTLMVETN  | 239   | 188   |

|                           |      |                          |       |       |
|---------------------------|------|--------------------------|-------|-------|
| >TIF1-I320T-V AIFTLMVEINI | 424  | >TIF1-I320T-I AIFTLMVEIN | 314   | 110   |
| >TIF1-I320T-V AIFTLMVEI   | 19   | >TIF1-I320T-I AIFTLMVEI  | 1645  | 1626  |
| >TIF1-I320T-V AIFTLMVEINI | 102  | >TIF1-I320T-I AIFTLMVEIN | 89    | 13    |
| >TIF1-I320T-V AIFTLMVEI   | 61   | >TIF1-I320T-I AIFTLMVEI  | 2774  | 2713  |
| >TIF1-I320T-V AIFTLMVEINI | 361  | >TIF1-I320T-I AIFTLMVEIN | 509   | 148   |
| >TIF1-I320T-V AIFTLMVEI   | 253  | >TIF1-I320T-I AIFTLMVEI  | 7432  | 7179  |
| >TIF1-K968N KNLYPEKRFPI   | 143  | >TIF1-K968N NNLYPEKRF    | 9161  | 9018  |
| >TIF1-K968N KNLYPEKRFPI   | 420  | >TIF1-K968N NNLYPEKRF    | 5255  | 4835  |
| >TIF1-K968N KNLYPEKRF     | 179  | >TIF1-K968N NNLYPEKRF    | 2079  | 1900  |
| >TIF1-K968N KNLYPEKR      | 174  | >TIF1-K968N NNLYPEKR     | 2249  | 2075  |
| >TIF1-K968N LKNLYPEKRF    | 14   | >TIF1-K968N LNLYPEKRF    | 1172  | 1158  |
| >TIF1-K968N KLENYFEELLK   | 111  | >TIF1-K968N KLENYFEELLN  | 17652 | 17541 |
| >TIF1-K968N KLENYFEELLK   | 87   | >TIF1-K968N KLENYFEELLN  | 20325 | 20238 |
| >TIF1-K968N LLKNLYPEK     | 1766 | >TIF1-K968N LLNLYPEK     | 402   | 1364  |
| >TIF1-K968N LLKNLYPEK     | 178  | >TIF1-K968N LLNLYPEK     | 77    | 101   |
| >TIF1-K968N LLKNLYPEK     | 615  | >TIF1-K968N LLNLYPEK     | 60    | 555   |
| >TIF1-K968N LLKNLYPEK     | 12   | >TIF1-K968N LLNLYPEK     | 247   | 235   |
| >TIF1-K968N LLKNLYPEK     | 174  | >TIF1-K968N LLNLYPEK     | 348   | 174   |
| >TIF1-K968N LLKNLYPEKR    | 145  | >TIF1-K968N LLNLYPEKR    | 206   | 61    |
| >TIF1-K968N LLKNLYPEKRF   | 161  | >TIF1-K968N LLNLYPEKR    | 260   | 99    |
| >TIF1-K968N LLKNLYPEKRF   | 79   | >TIF1-K968N LLNLYPEKR    | 98    | 19    |
| >TIF1-K968N ELLKNLYPEK    | 520  | >TIF1-K968N ELLNLYPEK    | 205   | 315   |
| >TIF1-K968N ELLKNLYPEK    | 338  | >TIF1-K968N ELLNLYPEK    | 164   | 174   |
| >TIF1-K968N ELLKNLYPEKF   | 318  | >TIF1-K968N ELLNLYPEKI   | 242   | 76    |
| >TIF1-K968N ELLKNLYPEKF   | 98   | >TIF1-K968N ELLNLYPEKI   | 85    | 13    |
| >TIF1-K968N ELLKNLYPEKF   | 113  | >TIF1-K968N ELLNLYPEKI   | 209   | 96    |
| >TIF1-K968N EELLKNLY      | 42   | >TIF1-K968N EELLNLY      | 13    | 29    |
| >TIF1-K968N EELLKNLY      | 306  | >TIF1-K968N EELLNLY      | 152   | 154   |
| >TIF1-K968N EELLKNLY      | 131  | >TIF1-K968N EELLNLY      | 73    | 58    |
| >TIF1-K968N FEELLKNL      | 16   | >TIF1-K968N FEELLN       | 35    | 19    |
| >TIF1-K968N FEELLKNLY     | 30   | >TIF1-K968N FEELLNLY     | 135   | 105   |
| >TIF1-K968N FEELLKNLY     | 137  | >TIF1-K968N FEELLNLY     | 208   | 71    |
| >TIF1-K968N FEELLKNL      | 84   | >TIF1-K968N FEELLN       | 43    | 41    |
| >TIF1-K968N FEELLKNL      | 324  | >TIF1-K968N FEELLN       | 133   | 191   |
| >TIF1-K968N YFEELLKNLY    | 708  | >TIF1-K968N YFEELLNLY    | 402   | 306   |
| >TIF1-K968N YFEELLKNL     | 1758 | >TIF1-K968N YFEELLN      | 112   | 1646  |
| >TIF1-K968N YFEELLKNL     | 247  | >TIF1-K968N YFEELLN      | 87    | 160   |
| >TIF1-K968N YFEELLKNLY    | 151  | >TIF1-K968N YFEELLNLY    | 131   | 20    |
| >TIF1-K968N YFEELLKNLY    | 1105 | >TIF1-K968N YFEELLNLY    | 493   | 612   |
| >TIF1-K968N YFEELLKNLY    | 539  | >TIF1-K968N YFEELLNLY    | 204   | 335   |
| >TIF1-K968N NYFEELLKNL    | 1931 | >TIF1-K968N NYFEELLN     | 488   | 1443  |
| >TIF1-K968N NYFEELLKNL    | 11   | >TIF1-K968N NYFEELLN     | 9     | 2     |
| >TIF1-K968N NYFEELLKNLY   | 30   | >TIF1-K968N NYFEELLNLY   | 22    | 8     |

|                         |       |                          |       |       |
|-------------------------|-------|--------------------------|-------|-------|
| >TIF1-K968N NYFEELLKNL\ | 482   | >TIF1-K968N NYFEELLNNL'  | 400   | 82    |
| >TIF1-K968N NYFEELLK    | 486   | >TIF1-K968N NYFEELLN     | 13008 | 12522 |
| >TIF1-K968N NYFEELLK    | 191   | >TIF1-K968N NYFEELLN     | 19778 | 19587 |
| >TIF1-K968N NYFEELLKNL\ | 196   | >TIF1-K968N NYFEELLNNL'  | 94    | 102   |
| >TIF1-K968N NYFEELLKNL\ | 227   | >TIF1-K968N NYFEELLNNL'  | 309   | 82    |
| >TIF1-K968N NYFEELLK    | 64    | >TIF1-K968N NYFEELLN     | 6724  | 6660  |
| >TIF1-K968N NYFEELLKNL  | 1202  | >TIF1-K968N NYFEELLNNL   | 204   | 998   |
| >TIF1-K968N NYFEELLKNL  | 1248  | >TIF1-K968N NYFEELLNNL   | 184   | 1064  |
| >TIF1-K968N ENYFEELLK   | 71    | >TIF1-K968N ENYFEELLN    | 12605 | 12534 |
| >TIF1-P499S- PPHPQQLRY  | 21169 | >TIF1-P499S- PSHPQQLRY   | 274   | 20895 |
| >TIF1-P499S- PPHPQQLRY  | 626   | >TIF1-P499S- PSHPQQLRY   | 67    | 559   |
| >TIF1-P499S- PPHPQQLRY  | 19273 | >TIF1-P499S- PSHPQQLRY   | 30    | 19243 |
| >TIF1-P499S- PPHPQQLRY  | 469   | >TIF1-P499S- PSHPQQLRY   | 15281 | 14812 |
| >TIF1-P499S- LPPHPQQL   | 259   | >TIF1-P499S- LPSHPQQL    | 1920  | 1661  |
| >TIF1-P499S- LPPHPQQL   | 317   | >TIF1-P499S- LPSHPQQL    | 76    | 241   |
| >TIF1-P499S- LPPHPQQL   | 3140  | >TIF1-P499S- LPSHPQQL    | 360   | 2780  |
| >TIF1-P499S- LPPHPQQLRY | 216   | >TIF1-P499S- LPSHPQQLRY  | 73    | 143   |
| >TIF1-P499S- LPPHPQQL   | 638   | >TIF1-P499S- LPSHPQQL    | 391   | 247   |
| >TIF1-P499S- LPPHPQQLRY | 293   | >TIF1-P499S- LPSHPQQLRY  | 210   | 83    |
| >TIF1-P499S- LPPHPQQL   | 107   | >TIF1-P499S- LPSHPQQL    | 12126 | 12019 |
| >TIF1-P499S- LPPHPQQLRY | 2453  | >TIF1-P499S- LPSHPQQLRY  | 67    | 2386  |
| >TIF1-P499S- LPPHPQQLRY | 2759  | >TIF1-P499S- LPSHPQQLRY  | 375   | 2384  |
| >TIF1-P499S- VLPPHPQQL  | 75    | >TIF1-P499S- VLPSHPQQL   | 73    | 2     |
| >TIF1-P499S- VLPPHPQQL  | 25    | >TIF1-P499S- VLPSHPQQL   | 25    | 0     |
| >TIF1-P499S- VLPPHPQQL  | 7     | >TIF1-P499S- VLPSHPQQL   | 7     | 0     |
| >TIF1-P499S- VLPPHPQQL  | 480   | >TIF1-P499S- VLPSHPQQL   | 679   | 199   |
| >TIF1-P499S- VLPPHPQQL  | 113   | >TIF1-P499S- VLPSHPQQL   | 151   | 38    |
| >TIF1-P499S- VLPPHPQQL  | 137   | >TIF1-P499S- VLPSHPQQL   | 166   | 29    |
| >TIF1-P499S- VLPPHPQQ   | 39    | >TIF1-P499S- VLPSHPQQ    | 76    | 37    |
| >TIF1-P499S- VLPPHPQQL  | 5     | >TIF1-P499S- VLPSHPQQL   | 7     | 2     |
| >TIF1-P499S- VLPPHPQQLF | 42    | >TIF1-P499S- VLPSHPQQLF  | 48    | 6     |
| >TIF1-P499S- VLPPHPQQLF | 136   | >TIF1-P499S- VLPSHPQQLF  | 95    | 41    |
| >TIF1-P499S- VLPPHPQQL  | 104   | >TIF1-P499S- VLPSHPQQL   | 136   | 32    |
| >TIF1-P499S- VLPPHPQQLF | 154   | >TIF1-P499S- VLPSHPQQLF  | 192   | 38    |
| >TIF1-P499S- GPVLPPHPQC | 285   | >TIF1-P499S- GPVLPSPHPQC | 158   | 127   |
| >TIF1-R975S- RFPKPEFR   | 25    | >TIF1-R975S- SFPKPEFR    | 172   | 147   |
| >TIF1-R975S- RFPKPEFR   | 28    | >TIF1-R975S- SFPKPEFR    | 60    | 32    |
| >TIF1-R975S- KRFPKPEFR  | 19378 | >TIF1-R975S- KSFPKPEFR   | 412   | 18966 |
| >TIF1-R975S- KRFPKPEFR  | 16879 | >TIF1-R975S- KSFPKPEFR   | 43    | 16836 |
| >TIF1-R975S- KRFPKPEFR  | 9910  | >TIF1-R975S- KSFPKPEFR   | 333   | 9577  |
| >TIF1-R975S- KRFPKPEFR  | 392   | >TIF1-R975S- KSFPKPEFR   | 8     | 384   |
| >TIF1-R975S- KRFPKPEF   | 2584  | >TIF1-R975S- KSFPKPEF    | 36    | 2548  |
| >TIF1-R975S- KRFPKPEFR  | 7568  | >TIF1-R975S- KSFPKPEFR   | 91    | 7477  |

|                          |       |                          |       |       |
|--------------------------|-------|--------------------------|-------|-------|
| >TIF1-R975S- KRFPKPEF    | 14306 | >TIF1-R975S- KSFPKPEF    | 465   | 13841 |
| >TIF1-R975S- KRFPKPEF    | 7     | >TIF1-R975S- KSFPKPEF    | 10    | 3     |
| >TIF1-R975S- KRFPKPEF    | 5284  | >TIF1-R975S- KSFPKPEF    | 3     | 5281  |
| >TIF1-R975S- KRFPKPEFRN  | 25306 | >TIF1-R975S- KSFPKPEFRN  | 466   | 24840 |
| >TIF1-R975S- KRFPKPEF    | 150   | >TIF1-R975S- KSFPKPEF    | 18177 | 18027 |
| >TIF1-R975S- KRFPKPEFR   | 90    | >TIF1-R975S- KSFPKPEFR   | 20798 | 20708 |
| >TIF1-R975S- KRFPKPEF    | 17292 | >TIF1-R975S- KSFPKPEF    | 63    | 17229 |
| >TIF1-R975S- KRFPKPEF    | 12129 | >TIF1-R975S- KSFPKPEF    | 15    | 12114 |
| >TIF1-R975S- KRFPKPEF    | 43    | >TIF1-R975S- KSFPKPEF    | 9619  | 9576  |
| >TIF1-R975S- KRFPKPEF    | 297   | >TIF1-R975S- KSFPKPEF    | 14794 | 14497 |
| >TIF1-R975S- KRFPKPEFR   | 8129  | >TIF1-R975S- KSFPKPEFR   | 135   | 7994  |
| >TIF1-R975S- KRFPKPEFR   | 21    | >TIF1-R975S- KSFPKPEFR   | 30    | 9     |
| >TIF1-R975S- ELLKNLYPEKF | 318   | >TIF1-R975S- ELLKNLYPEKS | 31441 | 31123 |
| >TIF1-R975S- ELLKNLYPEKF | 98    | >TIF1-R975S- ELLKNLYPEKS | 29446 | 29348 |
| >TIF1-R975S- ELLKNLYPEKF | 113   | >TIF1-R975S- ELLKNLYPEKS | 26417 | 26304 |
| >TIF1-R975S- EKRFKPEFR   | 3089  | >TIF1-R975S- EKSFKPEFR   | 427   | 2662  |
| >TIF1-R975S- EKRFKPEF    | 21    | >TIF1-R975S- EKSFKPEF    | 60    | 39    |
| >TIF1-R975S- PEKRFKPEF   | 648   | >TIF1-R975S- PEKSFKPEF   | 343   | 305   |
| >TIF1-R975S- YPEKRFKPEI  | 39    | >TIF1-R975S- YPEKSFKPEI  | 22    | 17    |
| >TIF1-R975S- YPEKRFKPEI  | 109   | >TIF1-R975S- YPEKSFKPEI  | 165   | 56    |
| >TIF1-R975S- YPEKRFKPEI  | 453   | >TIF1-R975S- YPEKSFKPEI  | 4524  | 4071  |
| >TIF1-R975S- YPEKRFKPEI  | 49    | >TIF1-R975S- YPEKSFKPEI  | 28    | 21    |
| >TIF1-R975S- YPEKRFKPEI  | 196   | >TIF1-R975S- YPEKSFKPEI  | 99    | 97    |
| >TIF1-R975S- YPEKRFKPEI  | 147   | >TIF1-R975S- YPEKSFKPEI  | 56    | 91    |
| >TIF1-R975S- YPEKRFKPEI  | 97    | >TIF1-R975S- YPEKSFKPEI  | 74    | 23    |
| >TIF1-R975S- LYPEKRFK    | 129   | >TIF1-R975S- LYPEKSFK    | 790   | 661   |
| >TIF1-R975S- LYPEKRFK    | 282   | >TIF1-R975S- LYPEKSFK    | 1481  | 1199  |
| >TIF1-R975S- LYPEKRFK    | 131   | >TIF1-R975S- LYPEKSFK    | 198   | 67    |
| >TIF1-R975S- NLYPEKRFK   | 43    | >TIF1-R975S- NLYPEKSFK   | 24    | 19    |
| >TIF1-R975S- NLYPEKRFK   | 162   | >TIF1-R975S- NLYPEKSFK   | 57    | 105   |
| >TIF1-R975S- NLYPEKRFK   | 225   | >TIF1-R975S- NLYPEKSFK   | 96    | 129   |
| >TIF1-R975S- NLYPEKRF    | 1966  | >TIF1-R975S- NLYPEKSF    | 333   | 1633  |
| >TIF1-R975S- NLYPEKRF    | 241   | >TIF1-R975S- NLYPEKSF    | 84    | 157   |
| >TIF1-R975S- NLYPEKRF    | 313   | >TIF1-R975S- NLYPEKSF    | 37    | 276   |
| >TIF1-R975S- KNLYPEKRFPI | 143   | >TIF1-R975S- KNLYPEKSFPI | 131   | 12    |
| >TIF1-R975S- KNLYPEKRFPI | 420   | >TIF1-R975S- KNLYPEKSFPI | 801   | 381   |
| >TIF1-R975S- KNLYPEKRF   | 179   | >TIF1-R975S- KNLYPEKSF   | 22    | 157   |
| >TIF1-R975S- KNLYPEKR    | 174   | >TIF1-R975S- KNLYPEKS    | 27824 | 27650 |
| >TIF1-R975S- LKNLYPEKRF  | 14    | >TIF1-R975S- LKNLYPEKSF  | 5     | 9     |
| >TIF1-R975S- LLKNLYPEKR  | 145   | >TIF1-R975S- LLKNLYPEKS  | 24191 | 24046 |
| >TIF1-R975S- LLKNLYPEKRF | 161   | >TIF1-R975S- LLKNLYPEKSF | 53    | 108   |
| >TIF1-R975S- LLKNLYPEKRF | 79    | >TIF1-R975S- LLKNLYPEKSF | 16    | 63    |
| >TIF1-T403N- TIQFHCDPSF  | 208   | >TIF1-T403N- NIQFHCDPSF  | 347   | 139   |

|                        |       |                        |       |       |
|------------------------|-------|------------------------|-------|-------|
| >TIF1-T403N·NTIQFHCDPS | 369   | >TIF1-T403N·NNIQFHCDPS | 16559 | 16190 |
| >TIF1-T403N·NTIQFHCDPS | 22    | >TIF1-T403N·NNIQFHCDPS | 6383  | 6361  |
| >TIF1-T403N·NTIQFHCDPS | 433   | >TIF1-T403N·NNIQFHCDPS | 9375  | 8942  |
| >TIF1-T403N·NTIQFHCDPS | 228   | >TIF1-T403N·NNIQFHCDPS | 1377  | 1149  |
| >TIF1-T403N·NTIQFHCDPS | 337   | >TIF1-T403N·NNIQFHCDPS | 532   | 195   |
| >TIF1-T403N·NTIQFHCDPS | 15    | >TIF1-T403N·NNIQFHCDPS | 16138 | 16123 |
| >TIF1-T403N·NTIQFHCDPS | 465   | >TIF1-T403N·NNIQFHCDPS | 10176 | 9711  |
| >TIF1-T403N·VTNNTIQF   | 103   | >TIF1-T403N·VTNNTIQF   | 166   | 63    |
| >TIF1-T403N·VTNNTIQF   | 389   | >TIF1-T403N·VTNNTIQF   | 630   | 241   |
| >TIF1-T403N·VTNNTIQF   | 140   | >TIF1-T403N·VTNNTIQF   | 194   | 54    |
| >TIF1-T403N·VTNNTIQF   | 6     | >TIF1-T403N·VTNNTIQF   | 6     | 0     |
| >TIF1-T403N·VTNNTIQF   | 43    | >TIF1-T403N·VTNNTIQF   | 101   | 58    |
| >TIF1-T403N·VTNNTIQFH  | 276   | >TIF1-T403N·VTNNTIQFH  | 2048  | 1772  |
| >TIF1-T403N·SPVTNNTI   | 212   | >TIF1-T403N·SPVTNNTI   | 1615  | 1403  |
| >TIF1-T403N·SPVTNNTI   | 138   | >TIF1-T403N·SPVTNNTI   | 47    | 91    |
| >TIF1-T403N·SPVTNNTIQF | 9     | >TIF1-T403N·SPVTNNTIQF | 11    | 2     |
| >TIF1-T403N·SPVTNNTI   | 228   | >TIF1-T403N·SPVTNNTI   | 567   | 339   |
| >TIF1-T403N·SPVTNNTIQF | 463   | >TIF1-T403N·SPVTNNTIQF | 424   | 39    |
| >TIF1-T403N·SPVTNNTIQF | 202   | >TIF1-T403N·SPVTNNTIQF | 288   | 86    |
| >TIF1-T403N·SPVTNNTI   | 318   | >TIF1-T403N·SPVTNNTI   | 468   | 150   |
| >TIF1-T403N·SPVTNNTIQF | 184   | >TIF1-T403N·SPVTNNTIQF | 230   | 46    |
| >TIF1-T403N·SPVTNNTIQF | 402   | >TIF1-T403N·SPVTNNTIQF | 545   | 143   |
| >TIF1-T403N·SPVTNNTIQF | 93    | >TIF1-T403N·SPVTNNTIQF | 151   | 58    |
| >TIF1-T403N·ASPVNTNTI  | 269   | >TIF1-T403N·ASPVNTNTI  | 2321  | 2052  |
| >TIF1-T403N·ASPVNTNTIQ | 321   | >TIF1-T403N·ASPVNTNTIQ | 727   | 406   |
| >TIF1-T403N·ASPVNTNTIQ | 184   | >TIF1-T403N·ASPVNTNTIQ | 208   | 24    |
| >TIF1-T403N·ASPVNTNTIQ | 39    | >TIF1-T403N·ASPVNTNTIQ | 50    | 11    |
| >TIF1-T403N·ASPVNTNTI  | 13    | >TIF1-T403N·ASPVNTNTI  | 13    | 0     |
| >TIF1-T403N·ASPVNTNTIQ | 803   | >TIF1-T403N·ASPVNTNTIQ | 462   | 341   |
| >TIF1-T403N·ASPVNTNTIQ | 9     | >TIF1-T403N·ASPVNTNTIQ | 12    | 3     |
| >TIF1-T403N·ASPVNTNTI  | 67    | >TIF1-T403N·ASPVNTNTI  | 217   | 150   |
| >TIF1-T403N·CDASPVNTNN | 219   | >TIF1-T403N·CDASPVNTNN | 579   | 360   |
| >TIF1-T403N·CDASPVNTNN | 39    | >TIF1-T403N·CDASPVNTNN | 58    | 19    |
| >TLX3-T206R·TDAQVKTWF  | 326   | >TLX3-T206R·TDAQVKTWF  | 81    | 245   |
| >TLX3-T206R·MTDAQVKTV  | 484   | >TLX3-T206R·MTDAQVKTV  | 23517 | 23033 |
| >TLX3-T206R·MTDAQVKTV  | 332   | >TLX3-T206R·MTDAQVKTV  | 20808 | 20476 |
| >TLX3-T206R·MTDAQVKTV  | 4     | >TLX3-T206R·MTDAQVKTV  | 5650  | 5646  |
| >TLX3-T206R·MTDAQVKTV  | 9     | >TLX3-T206R·MTDAQVKTV  | 20818 | 20809 |
| >TLX3-T206R·MTDAQVKTV  | 24655 | >TLX3-T206R·MTDAQVKTV  | 112   | 24543 |
| >TLX3-T206R·MTDAQVKTV  | 322   | >TLX3-T206R·MTDAQVKTV  | 1537  | 1215  |
| >TLX3-T206R·MTDAQVKTV  | 38    | >TLX3-T206R·MTDAQVKTV  | 9641  | 9603  |
| >TLX3-T206R·MTDAQVKTV  | 14    | >TLX3-T206R·MTDAQVKTV  | 9380  | 9366  |
| >TLX3-T206R·MTDAQVKTV  | 283   | >TLX3-T206R·MTDAQVKTV  | 20363 | 20080 |

|                        |       |                        |      |       |
|------------------------|-------|------------------------|------|-------|
| >TLX3-T206R MTDAQVKT   | 31    | >TLX3-T206R MRDAQVKT   | 6066 | 6035  |
| >TLX3-T206R MTDAQVKT   | 139   | >TLX3-T206R MRDAQVKT   | 750  | 611   |
| >TLX3-T206R MTDAQVKT   | 27168 | >TLX3-T206R MRDAQVKT   | 441  | 26727 |
| >TLX3-T206R MTDAQVKT   | 10636 | >TLX3-T206R MRDAQVKT   | 247  | 10389 |
| >TLX3-T206R RAALAKSLKN | 19699 | >TLX3-T206R RAALAKSLKN | 75   | 19624 |
| >TLX3-T206R RAALAKSLKN | 33913 | >TLX3-T206R RAALAKSLKN | 263  | 33650 |
| >TLX3-T206R KMTDAQVKT  | 450   | >TLX3-T206R KMRDAQVKT  | 1757 | 1307  |
| >TLX3-T206R KMTDAQVKT  | 206   | >TLX3-T206R KMRDAQVKT  | 3292 | 3086  |
| >TLX3-T206R KMTDAQVKT  | 31    | >TLX3-T206R KMRDAQVKT  | 129  | 98    |
| >TLX3-T206R KMTDAQVK   | 149   | >TLX3-T206R KMRDAQVK   | 66   | 83    |
| >TLX3-T206R KMTDAQVK   | 269   | >TLX3-T206R KMRDAQVK   | 2313 | 2044  |
| >TLX3-T206R KMTDAQVK   | 122   | >TLX3-T206R KMRDAQVK   | 4    | 118   |
| >TLX3-T206R KMTDAQVKT  | 10640 | >TLX3-T206R KMRDAQVKT  | 63   | 10577 |
| >TLX3-T206R KMTDAQVKT  | 13824 | >TLX3-T206R KMRDAQVKT  | 414  | 13410 |
| >TLX3-T206R KMTDAQVK   | 575   | >TLX3-T206R KMRDAQVK   | 153  | 422   |
| >TLX3-T206R KMTDAQVKT  | 70    | >TLX3-T206R KMRDAQVKT  | 110  | 40    |
| >TLX3-T206R KMTDAQVKT  | 340   | >TLX3-T206R KMRDAQVKT  | 659  | 319   |
| >TLX3-T206R KMTDAQVKT  | 5564  | >TLX3-T206R KMRDAQVKT  | 441  | 5123  |
| >TLX3-T206R KMTDAQVKT  | 1542  | >TLX3-T206R KMRDAQVKT  | 109  | 1433  |
| >TLX3-T206R KMTDAQVK   | 2405  | >TLX3-T206R KMRDAQVK   | 357  | 2048  |
| >TLX3-T206R KMTDAQVKT  | 773   | >TLX3-T206R KMRDAQVKT  | 115  | 658   |
| >TLX3-T206R KMTDAQVKT  | 73    | >TLX3-T206R KMRDAQVKT  | 16   | 57    |
| >TLX3-T206R KMTDAQVKT  | 56    | >TLX3-T206R KMRDAQVKT  | 22   | 34    |
| >TLX3-T206R KMTDAQVKT  | 302   | >TLX3-T206R KMRDAQVKT  | 61   | 241   |
| >TLX3-T206R KMTDAQVKT  | 72    | >TLX3-T206R KMRDAQVKT  | 46   | 26    |
| >TLX3-T206R KMTDAQVKT  | 15    | >TLX3-T206R KMRDAQVKT  | 48   | 33    |
| >TLX3-T206R KMTDAQVKT  | 173   | >TLX3-T206R KMRDAQVKT  | 3380 | 3207  |
| >TLX3-T206R KMTDAQVKT  | 742   | >TLX3-T206R KMRDAQVKT  | 231  | 511   |
| >TLX3-T206R LKMTDAQV   | 86    | >TLX3-T206R LKMRDAQV   | 122  | 36    |
| >TLX3-T206R LKMTDAQVK  | 84    | >TLX3-T206R LKMRDAQVK  | 91   | 7     |
| >TLX3-T206R LKMTDAQVK  | 28    | >TLX3-T206R LKMRDAQVK  | 30   | 2     |
| >TLX3-T206R LKMTDAQVK  | 954   | >TLX3-T206R LKMRDAQVK  | 412  | 542   |
| >TLX3-T206R LKMTDAQVK  | 106   | >TLX3-T206R LKMRDAQVK  | 78   | 28    |
| >TLX3-T206R SLKMTDAQV  | 299   | >TLX3-T206R SLKMRDAQV  | 325  | 26    |
| >TLX3-T206R SLKMTDAQV  | 22    | >TLX3-T206R SLKMRDAQV  | 18   | 4     |
| >TLX3-T206R SLKMTDAQV  | 47    | >TLX3-T206R SLKMRDAQV  | 159  | 112   |
| >TLX3-T206R SLKMTDAQV  | 85    | >TLX3-T206R SLKMRDAQV  | 372  | 287   |
| >TLX3-T206R SLKMTDAQV  | 38    | >TLX3-T206R SLKMRDAQV  | 140  | 102   |
| >TLX3-T206R SLKMTDAQV  | 3     | >TLX3-T206R SLKMRDAQV  | 4    | 1     |
| >TLX3-T206R SLKMTDAQV  | 399   | >TLX3-T206R SLKMRDAQV  | 463  | 64    |
| >TLX3-T206R SLKMTDAQV  | 229   | >TLX3-T206R SLKMRDAQV  | 317  | 88    |
| >TLX3-T206R SLKMTDAQV  | 42    | >TLX3-T206R SLKMRDAQV  | 47   | 5     |
| >TLX3-T206R SLKMTDAQV  | 487   | >TLX3-T206R SLKMRDAQV  | 23   | 464   |

|                        |       |                        |       |       |
|------------------------|-------|------------------------|-------|-------|
| >TLX3-T206R KSLKMTDAQ' | 354   | >TLX3-T206R KSLKMRDAQ' | 445   | 91    |
| >TLX3-T206R KSLKMTDAQ' | 75    | >TLX3-T206R KSLKMRDAQ' | 95    | 20    |
| >TLX3-T206R KSLKMTDAQ' | 351   | >TLX3-T206R KSLKMRDAQ' | 334   | 17    |
| >TLX3-T206R KSLKMTDAQ' | 19    | >TLX3-T206R KSLKMRDAQ' | 15    | 4     |
| >TLX3-T206R KSLKMTDAQ' | 863   | >TLX3-T206R KSLKMRDAQ' | 463   | 400   |
| >TLX3-T206R KSLKMTDAQ' | 379   | >TLX3-T206R KSLKMRDAQ' | 2631  | 2252  |
| >TLX3-T206R KSLKMTDAQ' | 99    | >TLX3-T206R KSLKMRDAQ' | 188   | 89    |
| >TLX3-T206R LAKSLKMT   | 18849 | >TLX3-T206R LAKSLKMR   | 37    | 18812 |
| >TLX3-T206R LAKSLKMT   | 32393 | >TLX3-T206R LAKSLKMR   | 273   | 32120 |
| >TLX3-T206R ALAKSLKMTC | 136   | >TLX3-T206R ALAKSLKMRE | 829   | 693   |
| >TLX3-T206R ALAKSLKMT  | 202   | >TLX3-T206R ALAKSLKMR  | 14123 | 13921 |
| >TLX3-T206R ALAKSLKMTC | 15    | >TLX3-T206R ALAKSLKMRE | 47    | 32    |
| >TLX3-T206R ALAKSLKMT  | 454   | >TLX3-T206R ALAKSLKMR  | 13361 | 12907 |
| >TLX3-T206R ALAKSLKMTC | 38    | >TLX3-T206R ALAKSLKMRE | 245   | 207   |
| >TLX3-T206R AALAKSLKMT | 22146 | >TLX3-T206R AALAKSLKMF | 107   | 22039 |
| >TMPRSS2-P·PVPQYAPRV   | 5720  | >TMPRSS2-P·LVPQYAPRV   | 73    | 5647  |
| >TMPRSS2-P·PVPQYAPRV   | 1309  | >TMPRSS2-P·LVPQYAPRV   | 39    | 1270  |
| >TMPRSS2-P·PVPQYAPRV   | 3221  | >TMPRSS2-P·LVPQYAPRV   | 314   | 2907  |
| >TMPRSS2-P·PVPQYAPRV   | 101   | >TMPRSS2-P·LVPQYAPRV   | 7     | 94    |
| >TMPRSS2-P·PVPQYAPR    | 5024  | >TMPRSS2-P·LVPQYAPR    | 303   | 4721  |
| >TMPRSS2-P·PVPQYAPR    | 3717  | >TMPRSS2-P·LVPQYAPR    | 263   | 3454  |
| >TMPRSS2-P·PVPQYAPRV   | 1957  | >TMPRSS2-P·LVPQYAPRV   | 326   | 1631  |
| >TMPRSS2-P·PVPQYAPRV   | 2512  | >TMPRSS2-P·LVPQYAPRV   | 175   | 2337  |
| >TMPRSS2-P·PVPQYAPRVL  | 792   | >TMPRSS2-P·LVPQYAPRVL  | 39    | 753   |
| >TMPRSS2-P·PVPQYAPR    | 279   | >TMPRSS2-P·LVPQYAPR    | 189   | 90    |
| >TMPRSS2-P·SPVPQYAPRV  | 27160 | >TMPRSS2-P·SLVPQYAPRV  | 228   | 26932 |
| >TMPRSS2-P·SPVPQYAPRV  | 22673 | >TMPRSS2-P·SLVPQYAPRV  | 156   | 22517 |
| >TMPRSS2-P·SPVPQYAPRV  | 28699 | >TMPRSS2-P·SLVPQYAPRV  | 151   | 28548 |
| >TMPRSS2-P·SPVPQYAPRV  | 19538 | >TMPRSS2-P·SLVPQYAPRV  | 161   | 19377 |
| >TMPRSS2-P·SPVPQYAPRV  | 22782 | >TMPRSS2-P·SLVPQYAPRV  | 87    | 22695 |
| >TMPRSS2-P·SPVPQYAPRV  | 8182  | >TMPRSS2-P·SLVPQYAPRV  | 273   | 7909  |
| >TMPRSS2-P·SPVPQYAPRV  | 8462  | >TMPRSS2-P·SLVPQYAPRV  | 3     | 8459  |
| >TMPRSS2-P·SPVPQYAPRV  | 25199 | >TMPRSS2-P·SLVPQYAPRV  | 56    | 25143 |
| >TMPRSS2-P·SPVPQYAPRV  | 20510 | >TMPRSS2-P·SLVPQYAPRV  | 15    | 20495 |
| >TMPRSS2-P·SPVPQYAPRV  | 23938 | >TMPRSS2-P·SLVPQYAPRV  | 184   | 23754 |
| >TMPRSS2-P·SPVPQYAPRV  | 12334 | >TMPRSS2-P·SLVPQYAPRV  | 5     | 12329 |
| >TMPRSS2-P·SPVPQYAPRV  | 24837 | >TMPRSS2-P·SLVPQYAPRV  | 207   | 24630 |
| >TMPRSS2-P·SPVPQYAPRV  | 23358 | >TMPRSS2-P·SLVPQYAPRV  | 45    | 23313 |
| >TMPRSS2-P·SPVPQYAPRV  | 6036  | >TMPRSS2-P·SLVPQYAPRV  | 2     | 6034  |
| >TMPRSS2-P·SPVPQYAPRV  | 28775 | >TMPRSS2-P·SLVPQYAPRV  | 24    | 28751 |
| >TMPRSS2-P·SPVPQYAPR   | 18242 | >TMPRSS2-P·SLVPQYAPR   | 453   | 17789 |
| >TMPRSS2-P·SPVPQYAPR   | 554   | >TMPRSS2-P·SLVPQYAPR   | 15    | 539   |
| >TMPRSS2-P·SPVPQYAPR   | 3851  | >TMPRSS2-P·SLVPQYAPR   | 445   | 3406  |



|                       |       |                       |       |       |
|-----------------------|-------|-----------------------|-------|-------|
| >TMPRSS2-P·SPVPQYAPR  | 1722  | >TMPRSS2-P·SLVPQYAPR  | 394   | 1328  |
| >TMPRSS2-P·SPVPQYAPRV | 307   | >TMPRSS2-P·SLVPQYAPRV | 88    | 219   |
| >TMPRSS2-P·SPVPQYAPRV | 27    | >TMPRSS2-P·SLVPQYAPRV | 11284 | 11257 |
| >TMPRSS2-P·SPVPQYAPRV | 407   | >TMPRSS2-P·SLVPQYAPRV | 10489 | 10082 |
| >TMPRSS2-P·SPVPQYAPRV | 138   | >TMPRSS2-P·SLVPQYAPRV | 1869  | 1731  |
| >TMPRSS2-P·SPVPQYAPRV | 203   | >TMPRSS2-P·SLVPQYAPRV | 29409 | 29206 |
| >TMPRSS2-P·SPVPQYAPR  | 116   | >TMPRSS2-P·SLVPQYAPR  | 57    | 59    |
| >TMPRSS2-P·EVHPAQYYPS | 12687 | >TMPRSS2-P·EVHPAQYYPS | 86    | 12601 |
| >TMPRSS2-P·EVHPAQYYPS | 4764  | >TMPRSS2-P·EVHPAQYYPS | 49    | 4715  |
| >TMPRSS2-P·EVHPAQYYPS | 7664  | >TMPRSS2-P·EVHPAQYYPS | 53    | 7611  |
| >TMPRSS2-P·PSPVPQYAPR | 2083  | >TMPRSS2-P·PSLVPQYAPR | 421   | 1662  |
| >TMPRSS2-P·PSPVPQYAPR | 119   | >TMPRSS2-P·PSLVPQYAPR | 18292 | 18173 |
| >TMPRSS2-P·YPSVPQY    | 259   | >TMPRSS2-P·YPSLVPQY   | 348   | 89    |
| >TMPRSS2-P·YPSVPQYAP  | 607   | >TMPRSS2-P·YPSLVPQYAP | 439   | 168   |
| >TMPRSS2-P·YPSVPQYAP  | 300   | >TMPRSS2-P·YPSLVPQYAP | 343   | 43    |
| >TMPRSS2-P·YPSVPQY    | 10    | >TMPRSS2-P·YPSLVPQY   | 9     | 1     |
| >TMPRSS2-P·YPSVPQYAP  | 180   | >TMPRSS2-P·YPSLVPQYAP | 309   | 129   |
| >TMPRSS2-P·YPSVPQY    | 70    | >TMPRSS2-P·YPSLVPQY   | 49    | 21    |
| >TMPRSS2-P·YPSVPQYA   | 463   | >TMPRSS2-P·YPSLVPQYA  | 182   | 281   |
| >TMPRSS2-P·YPSVPQYAP  | 318   | >TMPRSS2-P·YPSLVPQYAP | 221   | 97    |
| >TMPRSS2-P·YPSVPQY    | 17    | >TMPRSS2-P·YPSLVPQY   | 33    | 16    |
| >TMPRSS2-P·YPSVPQY    | 346   | >TMPRSS2-P·YPSLVPQY   | 467   | 121   |
| >TMPRSS2-P·YPSVPQYAP  | 360   | >TMPRSS2-P·YPSLVPQYAP | 432   | 72    |
| >TMPRSS2-P·YYPSVPQYA  | 363   | >TMPRSS2-P·YYPSLVPQYA | 774   | 411   |
| >TMPRSS2-P·YYPSVPQY   | 942   | >TMPRSS2-P·YYPSLVPQY  | 311   | 631   |
| >TMPRSS2-P·YYPSVPQ    | 485   | >TMPRSS2-P·YYPSLVPQ   | 203   | 282   |
| >TMPRSS2-P·YYPSVPQY   | 12    | >TMPRSS2-P·YYPSLVPQY  | 7     | 5     |
| >TMPRSS2-P·YYPSVPQYA  | 46    | >TMPRSS2-P·YYPSLVPQYA | 31    | 15    |
| >TMPRSS2-P·YYPSVPQYA  | 325   | >TMPRSS2-P·YYPSLVPQYA | 189   | 136   |
| >TMPRSS2-P·YYPSVPQY   | 1203  | >TMPRSS2-P·YYPSLVPQY  | 239   | 964   |
| >TMPRSS2-P·YYPSVPQY   | 24    | >TMPRSS2-P·YYPSLVPQY  | 80    | 56    |
| >TMPRSS2-P·YYPSVPQY   | 32    | >TMPRSS2-P·YYPSLVPQY  | 27    | 5     |
| >TMPRSS2-P·YYPSVPQY   | 498   | >TMPRSS2-P·YYPSLVPQY  | 731   | 233   |
| >TMPRSS2-P·YYPSVPQYA  | 225   | >TMPRSS2-P·YYPSLVPQYA | 422   | 197   |
| >TMPRSS2-P·QYYPSVPQY  | 412   | >TMPRSS2-P·QYYPSLVPQY | 129   | 283   |
| >TMPRSS2-P·QYYPSVPQY  | 386   | >TMPRSS2-P·QYYPSLVPQY | 154   | 232   |
| >TMPRSS2-P·QYYPSVPQY  | 48    | >TMPRSS2-P·QYYPSLVPQY | 80    | 32    |
| >TMPRSS2-P·QYYPSVPQY  | 499   | >TMPRSS2-P·QYYPSLVPQY | 621   | 122   |
| >TMPRSS2-P·QYYPSVPQY  | 87    | >TMPRSS2-P·QYYPSLVPQY | 64    | 23    |
| >TMPRSS2-P·QYYPSVPQY  | 157   | >TMPRSS2-P·QYYPSLVPQY | 243   | 86    |
| >TMPRSS2-P·QYYPSVPQY  | 514   | >TMPRSS2-P·QYYPSLVPQY | 490   | 24    |
| >TMPRSS2-P·QYYPSVPQ   | 311   | >TMPRSS2-P·QYYPSLVPQ  | 423   | 112   |
| >TMPRSS2-P·QYYPSVPQY  | 122   | >TMPRSS2-P·QYYPSLVPQY | 159   | 37    |

|                        |      |                        |      |      |
|------------------------|------|------------------------|------|------|
| >TMPRSS2-P.AQYYPSPV    | 49   | >TMPRSS2-P.AQYYPSLV    | 70   | 21   |
| >TMPRSS2-P.AQYYPSPV    | 202  | >TMPRSS2-P.AQYYPSLV    | 169  | 33   |
| >TMPRSS2-P.AQYYPSPV    | 15   | >TMPRSS2-P.AQYYPSLV    | 20   | 5    |
| >TMPRSS2-P.AQYYPSPV    | 7    | >TMPRSS2-P.AQYYPSLV    | 11   | 4    |
| >TMPRSS2-P.AQYYPSPV    | 21   | >TMPRSS2-P.AQYYPSLV    | 37   | 16   |
| >TMPRSS2-P.AQYYPSPV    | 74   | >TMPRSS2-P.AQYYPSLV    | 279  | 205  |
| >TMPRSS2-P.AQYYPSPV    | 113  | >TMPRSS2-P.AQYYPSLV    | 187  | 74   |
| >TMPRSS2-P.AQYYPSPVPC  | 388  | >TMPRSS2-P.AQYYPSLVPC  | 322  | 66   |
| >TMPRSS2-P.AQYYPSPVPC  | 555  | >TMPRSS2-P.AQYYPSLVPC  | 290  | 265  |
| >TMPRSS2-P.AQYYPSPVPC  | 314  | >TMPRSS2-P.AQYYPSLVPC  | 836  | 522  |
| >TMPRSS2-P.AQYYPSPVPC  | 167  | >TMPRSS2-P.AQYYPSLVPC  | 79   | 88   |
| >TMPRSS2-P.AQYYPSPVPC  | 89   | >TMPRSS2-P.AQYYPSLVPC  | 131  | 42   |
| >TMPRSS2-P.AQYYPSPV    | 93   | >TMPRSS2-P.AQYYPSLV    | 601  | 508  |
| >TMPRSS2-P.AQYYPSVP    | 362  | >TMPRSS2-P.AQYYPSLVP   | 218  | 144  |
| >TMPRSS2-P.AQYYPSVPC   | 181  | >TMPRSS2-P.AQYYPSLVPC  | 109  | 72   |
| >TMPRSS2-P.AQYYPSVPC   | 34   | >TMPRSS2-P.AQYYPSLVPC  | 31   | 3    |
| >TMPRSS2-P.AQYYPSVPC   | 72   | >TMPRSS2-P.AQYYPSLVPC  | 115  | 43   |
| >TMPRSS2-P.AQYYPSPV    | 5    | >TMPRSS2-P.AQYYPSLV    | 12   | 7    |
| >TMPRSS2-P.AQYYPSVP    | 83   | >TMPRSS2-P.AQYYPSLVP   | 59   | 24   |
| >TMPRSS2-P.AQYYPSVPC   | 34   | >TMPRSS2-P.AQYYPSLVPC  | 36   | 2    |
| >TMPRSS2-P.AQYYPSVPC   | 3    | >TMPRSS2-P.AQYYPSLVPC  | 3    | 0    |
| >TMPRSS2-P.AQYYPSVPC   | 107  | >TMPRSS2-P.AQYYPSLVPC  | 118  | 11   |
| >TMPRSS2-P.AQYYPSPV    | 272  | >TMPRSS2-P.AQYYPSLV    | 563  | 291  |
| >TMPRSS2-P.HPAQYYPSP   | 7506 | >TMPRSS2-P.HPAQYYPSL   | 172  | 7334 |
| >TMPRSS2-P.HPAQYYPSPV  | 51   | >TMPRSS2-P.HPAQYYPSLV  | 135  | 84   |
| >TMPRSS2-P.HPAQYYPSP   | 4677 | >TMPRSS2-P.HPAQYYPSL   | 13   | 4664 |
| >TMPRSS2-P.HPAQYYPSPV  | 193  | >TMPRSS2-P.HPAQYYPSLV  | 1101 | 908  |
| >TMPRSS2-P.HPAQYYPSP   | 7720 | >TMPRSS2-P.HPAQYYPSL   | 139  | 7581 |
| >TMPRSS2-P.HPAQYYPSP   | 1047 | >TMPRSS2-P.HPAQYYPSL   | 46   | 1001 |
| >TMPRSS2-P.HPAQYYPSPV  | 430  | >TMPRSS2-P.HPAQYYPSLV  | 1146 | 716  |
| >TMPRSS2-P.HPAQYYPSP   | 8676 | >TMPRSS2-P.HPAQYYPSL   | 14   | 8662 |
| >TMPRSS2-P.HPAQYYPSPV  | 63   | >TMPRSS2-P.HPAQYYPSLV  | 271  | 208  |
| >TMPRSS2-P.HPAQYYPSP   | 8685 | >TMPRSS2-P.HPAQYYPSL   | 276  | 8409 |
| >TMPRSS2-P.HPAQYYPSPV  | 20   | >TMPRSS2-P.HPAQYYPSLV  | 24   | 4    |
| >TMPRSS2-P.HPAQYYPSPV  | 493  | >TMPRSS2-P.HPAQYYPSLV  | 1200 | 707  |
| >TMPRSS2-P.HPAQYYPSP   | 7850 | >TMPRSS2-P.HPAQYYPSL   | 59   | 7791 |
| >TMPRSS2-Y.YVYDNLITPAI | 59   | >TMPRSS2-Y.FVYDNLITPAI | 55   | 4    |
| >TMPRSS2-Y.YVYDNLIT    | 418  | >TMPRSS2-Y.FVYDNLIT    | 323  | 95   |
| >TMPRSS2-Y.YVYDNLITPA  | 59   | >TMPRSS2-Y.FVYDNLITPA  | 66   | 7    |
| >TMPRSS2-Y.YVYDNLITPAI | 28   | >TMPRSS2-Y.FVYDNLITPAI | 29   | 1    |
| >TMPRSS2-Y.YVYDNLITPA  | 31   | >TMPRSS2-Y.FVYDNLITPA  | 24   | 7    |
| >TMPRSS2-Y.YVYDNLITPAI | 133  | >TMPRSS2-Y.FVYDNLITPAI | 45   | 88   |
| >TMPRSS2-Y.YVYDNLIT    | 229  | >TMPRSS2-Y.FVYDNLIT    | 127  | 102  |

|                        |     |                        |       |       |
|------------------------|-----|------------------------|-------|-------|
| >TMPRSS2-Y·YVYDNLITPA  | 18  | >TMPRSS2-Y·FVYDNLITPA  | 17    | 1     |
| >TMPRSS2-Y·YVYDNLITPAI | 47  | >TMPRSS2-Y·FVYDNLITPAI | 28    | 19    |
| >TMPRSS2-Y·YVYDNLIT    | 69  | >TMPRSS2-Y·FVYDNLIT    | 37    | 32    |
| >TMPRSS2-Y·YVYDNLITP   | 122 | >TMPRSS2-Y·FVYDNLITP   | 89    | 33    |
| >TMPRSS2-Y·YVYDNLITPA  | 22  | >TMPRSS2-Y·FVYDNLITPA  | 20    | 2     |
| >TMPRSS2-Y·YVYDNLITPAI | 7   | >TMPRSS2-Y·FVYDNLITPAI | 6     | 1     |
| >TMPRSS2-Y·YVYDNLIT    | 249 | >TMPRSS2-Y·FVYDNLIT    | 317   | 68    |
| >TMPRSS2-Y·YVYDNLITP   | 266 | >TMPRSS2-Y·FVYDNLITP   | 364   | 98    |
| >TMPRSS2-Y·YVYDNLITPA  | 5   | >TMPRSS2-Y·FVYDNLITPA  | 5     | 0     |
| >TMPRSS2-Y·YVYDNLITPAI | 10  | >TMPRSS2-Y·FVYDNLITPAI | 12    | 2     |
| >TMPRSS2-Y·YVYDNLITPA  | 16  | >TMPRSS2-Y·FVYDNLITPA  | 21    | 5     |
| >TMPRSS2-Y·YVYDNLITPAI | 30  | >TMPRSS2-Y·FVYDNLITPAI | 40    | 10    |
| >TMPRSS2-Y·YVYDNLITPA  | 21  | >TMPRSS2-Y·FVYDNLITPA  | 25    | 4     |
| >TMPRSS2-Y·YVYDNLITPAI | 111 | >TMPRSS2-Y·FVYDNLITPAI | 152   | 41    |
| >TMPRSS2-Y·YVYDNLITPA  | 270 | >TMPRSS2-Y·FVYDNLITPA  | 606   | 336   |
| >TMPRSS2-Y·YVYDNLITPAI | 46  | >TMPRSS2-Y·FVYDNLITPAI | 89    | 43    |
| >TMPRSS2-Y·YVYDNLIT    | 106 | >TMPRSS2-Y·FVYDNLIT    | 124   | 18    |
| >TMPRSS2-Y·YVYDNLITPA  | 5   | >TMPRSS2-Y·FVYDNLITPA  | 5     | 0     |
| >TMPRSS2-Y·YVYDNLITPAI | 16  | >TMPRSS2-Y·FVYDNLITPAI | 19    | 3     |
| >TMPRSS2-Y·YVYDNLITPAI | 299 | >TMPRSS2-Y·FVYDNLITPAI | 634   | 335   |
| >TMPRSS2-Y·YVYDNLITPAI | 14  | >TMPRSS2-Y·FVYDNLITPAI | 12    | 2     |
| >TMPRSS2-Y·YVYDNLITPAI | 7   | >TMPRSS2-Y·FVYDNLITPAI | 16    | 9     |
| >TMPRSS2-Y·YVYDNLITPAI | 192 | >TMPRSS2-Y·FVYDNLITPAI | 241   | 49    |
| >TMPRSS2-Y·YVYDNLITPA  | 141 | >TMPRSS2-Y·FVYDNLITPA  | 196   | 55    |
| >TMPRSS2-Y·YVYDNLITPA  | 16  | >TMPRSS2-Y·FVYDNLITPA  | 18    | 2     |
| >TMPRSS2-Y·YVYDNLITPAI | 8   | >TMPRSS2-Y·FVYDNLITPAI | 8     | 0     |
| >TMPRSS2-Y·YVYDNLITPAI | 220 | >TMPRSS2-Y·FVYDNLITPAI | 579   | 359   |
| >TMPRSS2-Y·YVYDNLITPAI | 96  | >TMPRSS2-Y·FVYDNLITPAI | 153   | 57    |
| >TMPRSS2-Y·YVYDNLITPAI | 297 | >TMPRSS2-Y·FVYDNLITPAI | 380   | 83    |
| >TMPRSS2-Y·YVYDNLITPAI | 32  | >TMPRSS2-Y·FVYDNLITPAI | 121   | 89    |
| >TMPRSS2-Y·YVYDNLITPAI | 13  | >TMPRSS2-Y·FVYDNLITPAI | 16    | 3     |
| >TMPRSS2-Y·YVYDNLITPAI | 497 | >TMPRSS2-Y·FVYDNLITPAI | 544   | 47    |
| >TMPRSS2-Y·YVYDNLITPAI | 235 | >TMPRSS2-Y·FVYDNLITPAI | 198   | 37    |
| >TMPRSS2-Y·YVYDNLITPAI | 264 | >TMPRSS2-Y·FVYDNLITPAI | 792   | 528   |
| >TMPRSS2-Y·RYVYDNL     | 53  | >TMPRSS2-Y·RFVYDNL     | 163   | 110   |
| >TMPRSS2-Y·RYVYDNL     | 90  | >TMPRSS2-Y·RFVYDNL     | 476   | 386   |
| >TMPRSS2-Y·RYVYDNL     | 18  | >TMPRSS2-Y·RFVYDNL     | 384   | 366   |
| >TMPRSS2-Y·RYVYDNL     | 420 | >TMPRSS2-Y·RFVYDNL     | 513   | 93    |
| >TMPRSS2-Y·LIETQRCNSR' | 489 | >TMPRSS2-Y·LIETQRCNSRI | 15231 | 14742 |
| >TMPRSS2-Y·LIETQRCNSR' | 247 | >TMPRSS2-Y·LIETQRCNSRI | 12936 | 12689 |
| >TMPRSS2-Y·LIETQRCNSR' | 196 | >TMPRSS2-Y·LIETQRCNSRI | 267   | 71    |
| >TMPRSS2-Y·LIETQRCNSR' | 343 | >TMPRSS2-Y·LIETQRCNSRI | 11374 | 11031 |
| >TMPRSS2-Y·SRVYDNL     | 62  | >TMPRSS2-Y·SRFVYDNL    | 218   | 156   |

|                       |     |                       |       |       |
|-----------------------|-----|-----------------------|-------|-------|
| >TMPRSS2-Y·SRYVYDNL   | 220 | >TMPRSS2-Y·SRFVYDNL   | 515   | 295   |
| >TMPRSS2-Y·SRYVYDNL   | 120 | >TMPRSS2-Y·SRFVYDNL   | 261   | 141   |
| >TMPRSS2-Y·SRYVYDNL   | 324 | >TMPRSS2-Y·SRFVYDNL   | 280   | 44    |
| >TMPRSS2-Y·SRYVYDNL   | 176 | >TMPRSS2-Y·SRFVYDNL   | 106   | 70    |
| >TMPRSS2-Y·SRYVYDNL   | 192 | >TMPRSS2-Y·SRFVYDNL   | 116   | 76    |
| >TMPRSS2-Y·SRYVYDNLIT | 281 | >TMPRSS2-Y·SRFVYDNLIT | 311   | 30    |
| >TMPRSS2-Y·SRYVYDNL   | 158 | >TMPRSS2-Y·SRFVYDNL   | 462   | 304   |
| >TMPRSS2-Y·SRYVYDNL   | 28  | >TMPRSS2-Y·SRFVYDNL   | 46    | 18    |
| >TMPRSS2-Y·CNSRYVYDNL | 593 | >TMPRSS2-Y·CNSRFVYDNL | 324   | 269   |
| >TMPRSS2-Y·CNSRYVYDNL | 400 | >TMPRSS2-Y·CNSRFVYDNL | 765   | 365   |
| >TMPRSS2-Y·RCNSRYVY   | 126 | >TMPRSS2-Y·RCNSRFVY   | 135   | 9     |
| >TMPRSS2-Y·RCNSRYVY   | 318 | >TMPRSS2-Y·RCNSRFVY   | 110   | 208   |
| >TMPRSS2-Y·RCNSRYVY   | 218 | >TMPRSS2-Y·RCNSRFVY   | 311   | 93    |
| >TMPRSS2-Y·RCNSRYVY   | 383 | >TMPRSS2-Y·RCNSRFVY   | 593   | 210   |
| >TMPRSS2-Y·QRCNSRYVY  | 211 | >TMPRSS2-Y·QRCNSRFVY  | 385   | 174   |
| >TMPRSS2-Y·QRCNSRYVY  | 40  | >TMPRSS2-Y·QRCNSRFVY  | 57    | 17    |
| >TMPRSS2-Y·TQRCNSRYV  | 308 | >TMPRSS2-Y·TQRCNSRFV  | 357   | 49    |
| >TMPRSS2-Y·TQRCNSRYV  | 125 | >TMPRSS2-Y·TQRCNSRFV  | 76    | 49    |
| >TMPRSS2-Y·TQRCNSRYVY | 397 | >TMPRSS2-Y·TQRCNSRFVY | 1009  | 612   |
| >TMPRSS2-Y·TQRCNSRY   | 57  | >TMPRSS2-Y·TQRCNSRF   | 52    | 5     |
| >TMPRSS2-Y·TQRCNSRYVY | 42  | >TMPRSS2-Y·TQRCNSRFVY | 43    | 1     |
| >TMPRSS2-Y·TQRCNSRY   | 91  | >TMPRSS2-Y·TQRCNSRF   | 199   | 108   |
| >TMPRSS2-Y·TQRCNSRYVY | 112 | >TMPRSS2-Y·TQRCNSRFVY | 116   | 4     |
| >TMPRSS2-Y·TQRCNSRY   | 18  | >TMPRSS2-Y·TQRCNSRF   | 6     | 12    |
| >TMPRSS2-Y·TQRCNSRYV  | 132 | >TMPRSS2-Y·TQRCNSRFV  | 198   | 66    |
| >TMPRSS2-Y·TQRCNSRYVY | 7   | >TMPRSS2-Y·TQRCNSRFVY | 8     | 1     |
| >TMPRSS2-Y·ETQRCNSRY  | 174 | >TMPRSS2-Y·ETQRCNSRF  | 14925 | 14751 |
| >TMPRSS2-Y·ETQRCNSRYV | 319 | >TMPRSS2-Y·ETQRCNSRFV | 233   | 86    |
| >TMPRSS2-Y·ETQRCNSRY  | 352 | >TMPRSS2-Y·ETQRCNSRF  | 2484  | 2132  |
| >TMPRSS2-Y·ETQRCNSRY  | 95  | >TMPRSS2-Y·ETQRCNSRF  | 980   | 885   |
| >TMPRSS2-Y·ETQRCNSRYV | 238 | >TMPRSS2-Y·ETQRCNSRFV | 287   | 49    |
| >TMPRSS2-Y·ETQRCNSRY  | 11  | >TMPRSS2-Y·ETQRCNSRF  | 21    | 10    |
| >TMPRSS2-Y·ETQRCNSRYV | 19  | >TMPRSS2-Y·ETQRCNSRFV | 34    | 15    |
| >TMPRSS2-Y·ETQRCNSRYV | 481 | >TMPRSS2-Y·ETQRCNSRFV | 690   | 209   |
| >TMPRSS2-Y·ETQRCNSRY  | 79  | >TMPRSS2-Y·ETQRCNSRF  | 6455  | 6376  |
| >TMPRSS2-Y·ETQRCNSRYV | 51  | >TMPRSS2-Y·ETQRCNSRFV | 73    | 22    |
| >TMPRSS2-Y·ETQRCNSRY  | 273 | >TMPRSS2-Y·ETQRCNSRF  | 5566  | 5293  |
| >TMPRSS2-Y·ETQRCNSRYV | 170 | >TMPRSS2-Y·ETQRCNSRFV | 127   | 43    |
| >TMPRSS2-Y·ETQRCNSRYV | 129 | >TMPRSS2-Y·ETQRCNSRFV | 273   | 144   |
| >TMPRSS2-Y·ETQRCNSRYV | 72  | >TMPRSS2-Y·ETQRCNSRFV | 108   | 36    |
| >TMPRSS2-Y·ETQRCNSRY  | 132 | >TMPRSS2-Y·ETQRCNSRF  | 79    | 53    |
| >TMPRSS2-Y·ETQRCNSRYV | 335 | >TMPRSS2-Y·ETQRCNSRFV | 173   | 162   |
| >TMPRSS2-Y·ETQRCNSRY  | 5   | >TMPRSS2-Y·ETQRCNSRF  | 6     | 1     |

|                        |      |                        |       |       |
|------------------------|------|------------------------|-------|-------|
| >TMPRSS2-Y·ETQRCNSRYV  | 46   | >TMPRSS2-Y·ETQRCNSRFV  | 37    | 9     |
| >TMPRSS2-Y·IETQRCNSRY' | 20   | >TMPRSS2-Y·IETQRCNSRF' | 10    | 10    |
| >TMPRSS2-Y·IETQRCNSRY  | 1499 | >TMPRSS2-Y·IETQRCNSRF  | 338   | 1161  |
| >TMPRSS2-Y·IETQRCNSRY  | 601  | >TMPRSS2-Y·IETQRCNSRF  | 299   | 302   |
| >TMPRSS2-Y·IETQRCNSRY  | 366  | >TMPRSS2-Y·IETQRCNSRF  | 516   | 150   |
| >TMPRSS2-Y·IETQRCNSRY' | 119  | >TMPRSS2-Y·IETQRCNSRF' | 101   | 18    |
| >TNFAIP3-A1 KAVKIRER   | 24   | >TNFAIP3-A1 KPVKIRER   | 1366  | 1342  |
| >TNFAIP3-A1 KAVKIRER   | 307  | >TNFAIP3-A1 KPVKIRER   | 6083  | 5776  |
| >TNFAIP3-A1 KAVKIRER   | 157  | >TNFAIP3-A1 KPVKIRER   | 144   | 13    |
| >TNFAIP3-A1 MRKAVKIREF | 192  | >TNFAIP3-A1 MRKPVKIRER | 196   | 4     |
| >TNFAIP3-A1 MRKAVKIREF | 350  | >TNFAIP3-A1 MRKPVKIRER | 1031  | 681   |
| >TNFAIP3-A1 NMRKAVKI   | 349  | >TNFAIP3-A1 NMRKPVKI   | 522   | 173   |
| >TNFAIP3-A1 NMRKAVKIRI | 168  | >TNFAIP3-A1 NMRKPVKIRE | 150   | 18    |
| >TNFAIP3-A1 NMRKAVKIRI | 218  | >TNFAIP3-A1 NMRKPVKIRE | 175   | 43    |
| >TNFAIP3-A1 NMRKAVKIR  | 407  | >TNFAIP3-A1 NMRKPVKIR  | 543   | 136   |
| >TNFAIP3-A1 LSNMRKAVK  | 304  | >TNFAIP3-A1 LSNMRKPVK  | 378   | 74    |
| >TNFAIP3-A1 LSNMRKAVK  | 199  | >TNFAIP3-A1 LSNMRKPVK  | 152   | 47    |
| >TNFAIP3-A1 LSNMRKAVK  | 126  | >TNFAIP3-A1 LSNMRKPVK  | 60    | 66    |
| >TNFAIP3-A1 LSNMRKAVK  | 72   | >TNFAIP3-A1 LSNMRKPVK  | 244   | 172   |
| >TNFAIP3-A1 LSNMRKAVKI | 52   | >TNFAIP3-A1 LSNMRKPVKI | 58    | 6     |
| >TNFAIP3-A1 LSNMRKAVKI | 136  | >TNFAIP3-A1 LSNMRKPVKI | 365   | 229   |
| >TNFAIP3-A1 LSNMRKAVKI | 1656 | >TNFAIP3-A1 LSNMRKPVKI | 415   | 1241  |
| >TNFAIP3-A1 LSNMRKAVKI | 398  | >TNFAIP3-A1 LSNMRKPVKI | 229   | 169   |
| >TNFAIP3-A1 YLSNMRKAV  | 263  | >TNFAIP3-A1 YLSNMRKPV  | 125   | 138   |
| >TNFAIP3-A1 YLSNMRKAVI | 238  | >TNFAIP3-A1 YLSNMRKPV  | 141   | 97    |
| >TNFAIP3-A1 YLSNMRKA   | 83   | >TNFAIP3-A1 YLSNMRKP   | 4403  | 4320  |
| >TNFAIP3-A1 YLSNMRKAV  | 31   | >TNFAIP3-A1 YLSNMRKPV  | 26    | 5     |
| >TNFAIP3-A1 YLSNMRKAVI | 45   | >TNFAIP3-A1 YLSNMRKPV  | 40    | 5     |
| >TNFAIP3-A1 YLSNMRKA   | 15   | >TNFAIP3-A1 YLSNMRKP   | 6292  | 6277  |
| >TNFAIP3-A1 YLSNMRKAV  | 7    | >TNFAIP3-A1 YLSNMRKPV  | 5     | 2     |
| >TNFAIP3-A1 YLSNMRKAVI | 23   | >TNFAIP3-A1 YLSNMRKPV  | 16    | 7     |
| >TNFAIP3-A1 YLSNMRKAV  | 402  | >TNFAIP3-A1 YLSNMRKPV  | 231   | 171   |
| >TNFAIP3-A1 YLSNMRKA   | 118  | >TNFAIP3-A1 YLSNMRKP   | 10301 | 10183 |
| >TNFAIP3-A1 YLSNMRKAV  | 11   | >TNFAIP3-A1 YLSNMRKPV  | 11    | 0     |
| >TNFAIP3-A1 YLSNMRKAVI | 36   | >TNFAIP3-A1 YLSNMRKPV  | 26    | 10    |
| >TNFAIP3-A1 YLSNMRKA   | 499  | >TNFAIP3-A1 YLSNMRKP   | 17097 | 16598 |
| >TNFAIP3-A1 YLSNMRKAV  | 40   | >TNFAIP3-A1 YLSNMRKPV  | 33    | 7     |
| >TNFAIP3-A1 YLSNMRKAVI | 63   | >TNFAIP3-A1 YLSNMRKPV  | 62    | 1     |
| >TNFAIP3-A1 YLSNMRKA   | 200  | >TNFAIP3-A1 YLSNMRKP   | 16749 | 16549 |
| >TNFAIP3-A1 YLSNMRKAV  | 28   | >TNFAIP3-A1 YLSNMRKPV  | 17    | 11    |
| >TNFAIP3-A1 YLSNMRKAVI | 57   | >TNFAIP3-A1 YLSNMRKPV  | 45    | 12    |
| >TNFAIP3-A1 YLSNMRKAV  | 53   | >TNFAIP3-A1 YLSNMRKPV  | 50    | 3     |
| >TNFAIP3-A1 YLSNMRKAVI | 105  | >TNFAIP3-A1 YLSNMRKPV  | 100   | 5     |

|                        |      |                        |       |       |
|------------------------|------|------------------------|-------|-------|
| >TNFAIP3-A1 YLSNMRKA   | 8    | >TNFAIP3-A1 YLSNMRKP   | 4862  | 4854  |
| >TNFAIP3-A1 YLSNMRKAV  | 2    | >TNFAIP3-A1 YLSNMRKPV  | 2     | 0     |
| >TNFAIP3-A1 YLSNMRKAVI | 440  | >TNFAIP3-A1 YLSNMRKPV  | 320   | 120   |
| >TNFAIP3-A1 YLSNMRKAVI | 4    | >TNFAIP3-A1 YLSNMRKPV  | 5     | 1     |
| >TNFAIP3-A1 YLSNMRKAVI | 70   | >TNFAIP3-A1 YLSNMRKPV  | 138   | 68    |
| >TNFAIP3-A1 YLSNMRKAVI | 286  | >TNFAIP3-A1 YLSNMRKPV  | 162   | 124   |
| >TNFAIP3-A1 YLSNMRKAVI | 243  | >TNFAIP3-A1 YLSNMRKPV  | 1220  | 977   |
| >TNFAIP3-A1 YLSNMRKAV  | 184  | >TNFAIP3-A1 YLSNMRKPV  | 223   | 39    |
| >TNFAIP3-A1 YLSNMRKAV  | 421  | >TNFAIP3-A1 YLSNMRKPV  | 498   | 77    |
| >TNFAIP3-A1 LYLSNMRKA\ | 104  | >TNFAIP3-A1 LYLSNMRKP  | 94    | 10    |
| >TNFAIP3-A1 LYLSNMRKA  | 469  | >TNFAIP3-A1 LYLSNMRKP  | 1199  | 730   |
| >TNFAIP3-A1 LYLSNMRKA\ | 96   | >TNFAIP3-A1 LYLSNMRKP  | 241   | 145   |
| >TNFAIP3-A1 LYLSNMRKA\ | 134  | >TNFAIP3-A1 LYLSNMRKP  | 82    | 52    |
| >TNFAIP3-A1 LYLSNMRKA\ | 350  | >TNFAIP3-A1 LYLSNMRKP  | 762   | 412   |
| >TNFAIP3-A1 LYLSNMRKA\ | 426  | >TNFAIP3-A1 LYLSNMRKP  | 316   | 110   |
| >TNFAIP3-A1 ALYLSNMRK\ | 282  | >TNFAIP3-A1 ALYLSNMRKF | 141   | 141   |
| >TNFAIP3-A1 ALYLSNMRK\ | 247  | >TNFAIP3-A1 ALYLSNMRKF | 8663  | 8416  |
| >TNFAIP3-A1 ALYLSNMRK\ | 94   | >TNFAIP3-A1 ALYLSNMRKF | 75    | 19    |
| >TNFAIP3-A1 ALYLSNMRK\ | 85   | >TNFAIP3-A1 ALYLSNMRKF | 7309  | 7224  |
| >TNFAIP3-A1 ALYLSNMRK\ | 11   | >TNFAIP3-A1 ALYLSNMRKF | 8     | 3     |
| >TNFAIP3-A1 ALYLSNMRK\ | 464  | >TNFAIP3-A1 ALYLSNMRKF | 303   | 161   |
| >TNFAIP3-A1 ALYLSNMRK\ | 107  | >TNFAIP3-A1 ALYLSNMRKF | 9612  | 9505  |
| >TNFAIP3-A1 ALYLSNMRK\ | 8    | >TNFAIP3-A1 ALYLSNMRKF | 8     | 0     |
| >TNFAIP3-A1 ALYLSNMRK\ | 59   | >TNFAIP3-A1 ALYLSNMRKF | 53    | 6     |
| >TNFAIP3-A1 ALYLSNMRK\ | 480  | >TNFAIP3-A1 ALYLSNMRKF | 17766 | 17286 |
| >TNFAIP3-A1 ALYLSNMRK\ | 25   | >TNFAIP3-A1 ALYLSNMRKF | 15    | 10    |
| >TNFAIP3-A1 ALYLSNMRK\ | 244  | >TNFAIP3-A1 ALYLSNMRKF | 275   | 31    |
| >TNFAIP3-A1 ALYLSNMRK\ | 41   | >TNFAIP3-A1 ALYLSNMRKF | 14619 | 14578 |
| >TNFAIP3-A1 ALYLSNMRK\ | 4    | >TNFAIP3-A1 ALYLSNMRKF | 4     | 0     |
| >TNFAIP3-A1 ALYLSNMRK\ | 167  | >TNFAIP3-A1 ALYLSNMRKF | 173   | 6     |
| >TNFAIP3-A5 APAGCLSQA\ | 3030 | >TNFAIP3-A5 TPAGCLSQA\ | 187   | 2843  |
| >TNFAIP3-A5 APAGCLSQ   | 205  | >TNFAIP3-A5 TPAGCLSQ   | 1542  | 1337  |
| >TNFAIP3-A5 APAGCLSQA  | 48   | >TNFAIP3-A5 TPAGCLSQA  | 210   | 162   |
| >TNFAIP3-A5 APAGCLSQA  | 20   | >TNFAIP3-A5 TPAGCLSQA  | 13    | 7     |
| >TNFAIP3-A5 APAGCLSQA\ | 979  | >TNFAIP3-A5 TPAGCLSQA\ | 123   | 856   |
| >TNFAIP3-A5 DAPAGCLSQ\ | 1001 | >TNFAIP3-A5 DTPAGCLSQ\ | 88    | 913   |
| >TNFAIP3-A5 DAPAGCLSQ\ | 1924 | >TNFAIP3-A5 DTPAGCLSQ\ | 229   | 1695  |
| >TNFAIP3-A5 SCHRAGNDA  | 231  | >TNFAIP3-A5 SCHRAGNDT  | 696   | 465   |
| >TNFAIP3-A7 EPAPEDPPK  | 163  | >TNFAIP3-A7 EPTPEDPPK  | 298   | 135   |
| >TNFAIP3-A7 RGEPAPEDPF | 477  | >TNFAIP3-A7 RGEPTPEDPP | 486   | 9     |
| >TNFAIP3-C1 CLMHATSQY  | 205  | >TNFAIP3-C1 GLMHATSQY  | 84    | 121   |
| >TNFAIP3-C1 CLMHATSQ   | 945  | >TNFAIP3-C1 GLMHATSQ   | 347   | 598   |
| >TNFAIP3-C1 CLMHATSQY  | 102  | >TNFAIP3-C1 GLMHATSQY  | 52    | 50    |

|                        |      |                        |      |      |
|------------------------|------|------------------------|------|------|
| >TNFAIP3-C1 CLMHATSQYI | 251  | >TNFAIP3-C1 GLMHATSQY  | 144  | 107  |
| >TNFAIP3-C1 CLMHATSQYI | 171  | >TNFAIP3-C1 GLMHATSQY  | 36   | 135  |
| >TNFAIP3-C1 CLMHATSQYI | 63   | >TNFAIP3-C1 GLMHATSQY  | 9    | 54   |
| >TNFAIP3-C1 CLMHATSQYI | 2278 | >TNFAIP3-C1 GLMHATSQY  | 96   | 2182 |
| >TNFAIP3-C1 CLMHATSQYI | 15   | >TNFAIP3-C1 GLMHATSQY  | 21   | 6    |
| >TNFAIP3-C1 CLMHATSQ   | 2201 | >TNFAIP3-C1 GLMHATSQ   | 313  | 1888 |
| >TNFAIP3-C1 CLMHATSQYI | 342  | >TNFAIP3-C1 GLMHATSQY  | 42   | 300  |
| >TNFAIP3-C1 CLMHATSQY  | 116  | >TNFAIP3-C1 GLMHATSQY  | 101  | 15   |
| >TNFAIP3-C1 CLMHATSQY  | 86   | >TNFAIP3-C1 GLMHATSQY  | 42   | 44   |
| >TNFAIP3-C1 CLMHATSQY  | 104  | >TNFAIP3-C1 GLMHATSQY  | 139  | 35   |
| >TNFAIP3-C1 CLMHATSQY  | 111  | >TNFAIP3-C1 GLMHATSQY  | 807  | 696  |
| >TNFAIP3-C1 CLMHATSQY  | 65   | >TNFAIP3-C1 GLMHATSQY  | 43   | 22   |
| >TNFAIP3-C1 CLMHATSQYI | 215  | >TNFAIP3-C1 GLMHATSQY  | 89   | 126  |
| >TNFAIP3-C1 CLMHATSQY  | 74   | >TNFAIP3-C1 GLMHATSQY  | 38   | 36   |
| >TNFAIP3-C1 CLMHATSQYI | 1014 | >TNFAIP3-C1 GLMHATSQY  | 371  | 643  |
| >TNFAIP3-C1 CLMHATSQY  | 69   | >TNFAIP3-C1 GLMHATSQY  | 123  | 54   |
| >TNFAIP3-C1 CLMHATSQYI | 174  | >TNFAIP3-C1 GLMHATSQY  | 227  | 53   |
| >TNFAIP3-C1 CLMHATSQY  | 429  | >TNFAIP3-C1 GLMHATSQY  | 207  | 222  |
| >TNFAIP3-C1 CLMHATSQYI | 534  | >TNFAIP3-C1 GLMHATSQY  | 408  | 126  |
| >TNFAIP3-C1 CLMHATSQY  | 361  | >TNFAIP3-C1 GLMHATSQY  | 3336 | 2975 |
| >TNFAIP3-C1 CLMHATSQYI | 44   | >TNFAIP3-C1 GLMHATSQY  | 142  | 98   |
| >TNFAIP3-C1 CLMHATSQY  | 491  | >TNFAIP3-C1 GLMHATSQY  | 42   | 449  |
| >TNFAIP3-C1 CLMHATSQYI | 608  | >TNFAIP3-C1 GLMHATSQY  | 372  | 236  |
| >TNFAIP3-C1 CLMHATSQY  | 181  | >TNFAIP3-C1 GLMHATSQY  | 468  | 287  |
| >TNFAIP3-C1 NCLMHATSQ  | 301  | >TNFAIP3-C1 NGLMHATSC  | 577  | 276  |
| >TNFAIP3-C1 GNCLMHATS  | 406  | >TNFAIP3-C1 GNGLMHATS  | 374  | 32   |
| >TNFAIP3-C1 GNCLMHATS  | 138  | >TNFAIP3-C1 GNGLMHATS  | 220  | 82   |
| >TNFAIP3-C1 KTNGDGNCL  | 1757 | >TNFAIP3-C1 KTNGDGNGL  | 379  | 1378 |
| >TNFAIP3-C1 KTNGDGNCL  | 1055 | >TNFAIP3-C1 KTNGDGNGL  | 262  | 793  |
| >TNFAIP3-C1 KTNGDGNCL  | 1113 | >TNFAIP3-C1 KTNGDGNGL  | 46   | 1067 |
| >TNFAIP3-C1 KTNGDGNCLI | 36   | >TNFAIP3-C1 KTNGDGNGL  | 33   | 3    |
| >TNFAIP3-C1 KTNGDGNCLI | 130  | >TNFAIP3-C1 KTNGDGNGL  | 418  | 288  |
| >TNFAIP3-C1 KTNGDGNCLI | 81   | >TNFAIP3-C1 KTNGDGNGL  | 46   | 35   |
| >TNFAIP3-C1 KTNGDGNCLI | 339  | >TNFAIP3-C1 KTNGDGNGL  | 336  | 3    |
| >TNFAIP3-C1 LKTNGDGNCI | 412  | >TNFAIP3-C1 LKTNGDGNG  | 601  | 189  |
| >TNFAIP3-C1 LKTNGDGNCI | 464  | >TNFAIP3-C1 LKTNGDGNG  | 2256 | 1792 |
| >TNFAIP3-C1 ALKTNGDGN  | 225  | >TNFAIP3-C1 ALKTNGDGN  | 117  | 108  |
| >TNFAIP3-C1 ALKTNGDGN  | 746  | >TNFAIP3-C1 ALKTNGDGN  | 95   | 651  |
| >TNFAIP3-C1 ALKTNGDGN  | 560  | >TNFAIP3-C1 ALKTNGDGN  | 257  | 303  |
| >TNFAIP3-C1 ALKTNGDGN  | 84   | >TNFAIP3-C1 ALKTNGDGN  | 26   | 58   |
| >TNFAIP3-D1 DTDLVLRKAL | 1222 | >TNFAIP3-D1 VTDLVLRKAL | 394  | 828  |
| >TNFAIP3-D1 DTDLVLRK   | 1341 | >TNFAIP3-D1 VTDLVLRK   | 31   | 1310 |
| >TNFAIP3-D1 DTDLVLRK   | 244  | >TNFAIP3-D1 VTDLVLRK   | 2401 | 2157 |

|                        |       |                        |      |       |
|------------------------|-------|------------------------|------|-------|
| >TNFAIP3-D1 DTDLVLRKAL | 11292 | >TNFAIP3-D1 VTDLVLRKAL | 407  | 10885 |
| >TNFAIP3-D1 DTDLVLRKAL | 2678  | >TNFAIP3-D1 VTDLVLRKAL | 27   | 2651  |
| >TNFAIP3-D1 DTDLVLRKAL | 6828  | >TNFAIP3-D1 VTDLVLRKAL | 337  | 6491  |
| >TNFAIP3-D1 DTDLVLRKAL | 997   | >TNFAIP3-D1 VTDLVLRKAL | 45   | 952   |
| >TNFAIP3-D1 QDQDLVLRK  | 12685 | >TNFAIP3-D1 QVTDLVLRK  | 27   | 12658 |
| >TNFAIP3-D1 QDQDLVLR   | 12062 | >TNFAIP3-D1 QVTDLVLR   | 268  | 11794 |
| >TNFAIP3-D1 QDQDLVLR   | 1521  | >TNFAIP3-D1 QVTDLVLR   | 18   | 1503  |
| >TNFAIP3-D1 QDQDLVLRK  | 8362  | >TNFAIP3-D1 QVTDLVLRK  | 146  | 8216  |
| >TNFAIP3-D1 QDQDLVLRKA | 19810 | >TNFAIP3-D1 QVTDLVLRKA | 452  | 19358 |
| >TNFAIP3-D1 QDQDLVLR   | 1015  | >TNFAIP3-D1 QVTDLVLR   | 214  | 801   |
| >TNFAIP3-D1 ATSQYMWG\  | 23580 | >TNFAIP3-D1 ATSQYMWG\  | 388  | 23192 |
| >TNFAIP3-D1 ATSQYMWG\  | 19514 | >TNFAIP3-D1 ATSQYMWG\  | 137  | 19377 |
| >TNFAIP3-D1 ATSQYMWG\  | 23317 | >TNFAIP3-D1 ATSQYMWG\  | 151  | 23166 |
| >TNFAIP3-D1 ATSQYMWG\  | 23344 | >TNFAIP3-D1 ATSQYMWG\  | 97   | 23247 |
| >TNFAIP3-D1 ATSQYMWG\  | 22812 | >TNFAIP3-D1 ATSQYMWG\  | 22   | 22790 |
| >TNFAIP3-D1 ATSQYMWG\  | 23889 | >TNFAIP3-D1 ATSQYMWG\  | 114  | 23775 |
| >TNFAIP3-D1 ATSQYMWG\  | 31819 | >TNFAIP3-D1 ATSQYMWG\  | 11   | 31808 |
| >TNFAIP3-D1 ATSQYMWG\  | 21447 | >TNFAIP3-D1 ATSQYMWG\  | 152  | 21295 |
| >TNFAIP3-D1 ATSQYMWG\  | 18593 | >TNFAIP3-D1 ATSQYMWG\  | 62   | 18531 |
| >TNFAIP3-D1 ATSQYMWG\  | 6514  | >TNFAIP3-D1 ATSQYMWG\  | 73   | 6441  |
| >TNFAIP3-D1 ATSQYMWG\  | 15913 | >TNFAIP3-D1 ATSQYMWG\  | 484  | 15429 |
| >TNFAIP3-D1 ATSQYMWG\  | 1204  | >TNFAIP3-D1 ATSQYMWG\  | 418  | 786   |
| >TNFAIP3-D1 VQDQDLVLR  | 186   | >TNFAIP3-D1 VQVTDLVLR  | 81   | 105   |
| >TNFAIP3-D1 VQDQDLVLRK | 443   | >TNFAIP3-D1 VQVTDLVLRK | 183  | 260   |
| >TNFAIP3-D1 VQDQDLVLRK | 402   | >TNFAIP3-D1 VQVTDLVLRK | 200  | 202   |
| >TNFAIP3-D1 VQDQDLVLR  | 2063  | >TNFAIP3-D1 VQVTDLVLR  | 285  | 1778  |
| >TNFAIP3-D1 VQDQDLVLR  | 1792  | >TNFAIP3-D1 VQVTDLVLR  | 85   | 1707  |
| >TNFAIP3-D1 VQDQDLVLR  | 192   | >TNFAIP3-D1 VQVTDLVLR  | 175  | 17    |
| >TNFAIP3-D1 GVQDQDLV   | 325   | >TNFAIP3-D1 GVQVTDLV   | 994  | 669   |
| >TNFAIP3-D1 GVQDQDLV   | 415   | >TNFAIP3-D1 GVQVTDLV   | 1966 | 1551  |
| >TNFAIP3-D1 GVQDQDLV   | 99    | >TNFAIP3-D1 GVQVTDLV   | 676  | 577   |
| >TNFAIP3-D1 GVQDQDLV   | 250   | >TNFAIP3-D1 GVQVTDLV   | 879  | 629   |
| >TNFAIP3-D1 GVQDQDLV   | 33    | >TNFAIP3-D1 GVQVTDLV   | 407  | 374   |
| >TNFAIP3-D1 GVQDQDLVLF | 19    | >TNFAIP3-D1 GVQVTDLVLF | 28   | 9     |
| >TNFAIP3-D1 GVQDQDLVLF | 124   | >TNFAIP3-D1 GVQVTDLVLF | 211  | 87    |
| >TNFAIP3-D1 WGVQDQDLV  | 1068  | >TNFAIP3-D1 WGVQVTDLV  | 319  | 749   |
| >TNFAIP3-D1 WGVQDQDLV  | 2177  | >TNFAIP3-D1 WGVQVTDLV  | 185  | 1992  |
| >TNFAIP3-D1 WGVQDQDLV  | 274   | >TNFAIP3-D1 WGVQVTDLV  | 239  | 35    |
| >TNFAIP3-D1 MWGVQDQD   | 1065  | >TNFAIP3-D1 MWGVQVTD   | 282  | 783   |
| >TNFAIP3-D1 MWGVQDQD   | 232   | >TNFAIP3-D1 MWGVQVTD   | 121  | 111   |
| >TNFAIP3-D1 MWGVQDQD   | 532   | >TNFAIP3-D1 MWGVQVTD   | 370  | 162   |
| >TNFAIP3-D1 MWGVQDQD   | 281   | >TNFAIP3-D1 MWGVQVTD   | 230  | 51    |
| >TNFAIP3-D1 YMWGVQDQ   | 38    | >TNFAIP3-D1 YMWGVQVT   | 22   | 16    |



|                     |       |                     |     |       |
|---------------------|-------|---------------------|-----|-------|
| >TNFAIP3-D1YMWGVQDT | 56    | >TNFAIP3-D1YMWGVQVT | 48  | 8     |
| >TNFAIP3-D1YMWGVQDT | 7     | >TNFAIP3-D1YMWGVQVT | 6   | 1     |
| >TNFAIP3-D1YMWGVQDT | 782   | >TNFAIP3-D1YMWGVQVT | 429 | 353   |
| >TNFAIP3-D1YMWGVQDT | 26    | >TNFAIP3-D1YMWGVQVT | 31  | 5     |
| >TNFAIP3-D1YMWGVQDT | 4     | >TNFAIP3-D1YMWGVQVT | 4   | 0     |
| >TNFAIP3-D1YMWGVQDT | 582   | >TNFAIP3-D1YMWGVQVT | 332 | 250   |
| >TNFAIP3-D1YMWGVQDT | 123   | >TNFAIP3-D1YMWGVQVT | 40  | 83    |
| >TNFAIP3-D1YMWGVQDT | 7     | >TNFAIP3-D1YMWGVQVT | 7   | 0     |
| >TNFAIP3-D1YMWGVQDT | 604   | >TNFAIP3-D1YMWGVQVT | 318 | 286   |
| >TNFAIP3-D1YMWGVQDT | 326   | >TNFAIP3-D1YMWGVQVT | 232 | 94    |
| >TNFAIP3-D1YMWGVQDT | 8     | >TNFAIP3-D1YMWGVQVT | 8   | 0     |
| >TNFAIP3-D1YMWGVQDT | 4     | >TNFAIP3-D1YMWGVQVT | 2   | 2     |
| >TNFAIP3-D1YMWGVQDT | 23    | >TNFAIP3-D1YMWGVQVT | 12  | 11    |
| >TNFAIP3-D1YMWGVQDT | 4     | >TNFAIP3-D1YMWGVQVT | 2   | 2     |
| >TNFAIP3-D1YMWGVQDT | 1     | >TNFAIP3-D1YMWGVQVT | 1   | 0     |
| >TNFAIP3-D1YMWGVQDT | 97    | >TNFAIP3-D1YMWGVQVT | 39  | 58    |
| >TNFAIP3-D1YMWGVQDT | 10    | >TNFAIP3-D1YMWGVQVT | 7   | 3     |
| >TNFAIP3-D1YMWGVQDT | 2     | >TNFAIP3-D1YMWGVQVT | 2   | 0     |
| >TNFAIP3-D1YMWGVQDT | 9     | >TNFAIP3-D1YMWGVQVT | 8   | 1     |
| >TNFAIP3-D1YMWGVQDT | 216   | >TNFAIP3-D1YMWGVQVT | 124 | 92    |
| >TNFAIP3-D1YMWGVQDT | 5     | >TNFAIP3-D1YMWGVQVT | 4   | 1     |
| >TNFAIP3-D1YMWGVQDT | 3     | >TNFAIP3-D1YMWGVQVT | 3   | 0     |
| >TNFAIP3-D1YMWGVQDT | 30    | >TNFAIP3-D1YMWGVQVT | 11  | 19    |
| >TNFAIP3-D1YMWGVQDT | 9     | >TNFAIP3-D1YMWGVQVT | 3   | 6     |
| >TNFAIP3-D1YMWGVQDT | 2     | >TNFAIP3-D1YMWGVQVT | 1   | 1     |
| >TNFAIP3-D1YMWGVQDT | 6     | >TNFAIP3-D1YMWGVQVT | 4   | 2     |
| >TNFAIP3-D1YMWGVQDT | 648   | >TNFAIP3-D1YMWGVQVT | 85  | 563   |
| >TNFAIP3-D1YMWGVQDT | 3     | >TNFAIP3-D1YMWGVQVT | 2   | 1     |
| >TNFAIP3-D1YMWGVQDT | 2     | >TNFAIP3-D1YMWGVQVT | 2   | 0     |
| >TNFAIP3-D1YMWGVQDT | 418   | >TNFAIP3-D1YMWGVQVT | 303 | 115   |
| >TNFAIP3-D1YMWGVQDT | 2665  | >TNFAIP3-D1YMWGVQVT | 423 | 2242  |
| >TNFAIP3-D1YMWGVQDT | 285   | >TNFAIP3-D1YMWGVQVT | 95  | 190   |
| >TNFAIP3-D1YMWGVQDT | 992   | >TNFAIP3-D1YMWGVQVT | 412 | 580   |
| >TNFAIP3-D1YMWGVQDT | 349   | >TNFAIP3-D1YMWGVQVT | 171 | 178   |
| >TNFAIP3-D1YMWGVQDT | 51    | >TNFAIP3-D1YMWGVQVT | 30  | 21    |
| >TNFAIP3-D1YMWGVQDT | 447   | >TNFAIP3-D1YMWGVQVT | 616 | 169   |
| >TNFAIP3-D1YMWGVQDT | 154   | >TNFAIP3-D1YMWGVQVT | 34  | 120   |
| >TNFAIP3-D1YMWGVQDT | 163   | >TNFAIP3-D1YMWGVQVT | 148 | 15    |
| >TNFAIP3-D1QYMWGVQD | 33    | >TNFAIP3-D1QYMWGVQV | 20  | 13    |
| >TNFAIP3-D1QYMWGVQC | 29783 | >TNFAIP3-D1QYMWGVQV | 486 | 29297 |
| >TNFAIP3-D1QYMWGVQC | 36823 | >TNFAIP3-D1QYMWGVQV | 183 | 36640 |
| >TNFAIP3-D1QYMWGVQC | 847   | >TNFAIP3-D1QYMWGVQV | 384 | 463   |
| >TNFAIP3-D1QYMWGVQC | 919   | >TNFAIP3-D1QYMWGVQV | 30  | 889   |

|                        |       |                        |       |       |
|------------------------|-------|------------------------|-------|-------|
| >TNFAIP3-D1QYMWGVQC    | 492   | >TNFAIP3-D1QYMWGVQV    | 227   | 265   |
| >TNFAIP3-D1QYMWGVQC    | 16    | >TNFAIP3-D1QYMWGVQV    | 9     | 7     |
| >TNFAIP3-D1QYMWGVQC    | 10822 | >TNFAIP3-D1QYMWGVQV    | 267   | 10555 |
| >TNFAIP3-D1QYMWGVQC    | 564   | >TNFAIP3-D1QYMWGVQV    | 291   | 273   |
| >TNFAIP3-D1QYMWGVQC    | 866   | >TNFAIP3-D1QYMWGVQV    | 137   | 729   |
| >TNFAIP3-D1QYMWGVQC    | 350   | >TNFAIP3-D1QYMWGVQV    | 285   | 65    |
| >TNFAIP3-D1QYMWGVQC    | 253   | >TNFAIP3-D1QYMWGVQV    | 195   | 58    |
| >TNFAIP3-D1SQYMWGVQ    | 15981 | >TNFAIP3-D1SQYMWGVQ    | 265   | 15716 |
| >TNFAIP3-D1SQYMWGVQ    | 20828 | >TNFAIP3-D1SQYMWGVQ    | 58    | 20770 |
| >TNFAIP3-D1SQYMWGVQ    | 18566 | >TNFAIP3-D1SQYMWGVQ    | 38    | 18528 |
| >TNFAIP3-D1SQYMWGVQ    | 573   | >TNFAIP3-D1SQYMWGVQ    | 364   | 209   |
| >TNFAIP3-D1SQYMWGVQ    | 8508  | >TNFAIP3-D1SQYMWGVQ    | 17    | 8491  |
| >TNFAIP3-D1SQYMWGVQ    | 9651  | >TNFAIP3-D1SQYMWGVQ    | 4     | 9647  |
| >TNFAIP3-D1SQYMWGVQ    | 19953 | >TNFAIP3-D1SQYMWGVQ    | 99    | 19854 |
| >TNFAIP3-D1SQYMWGVQ    | 15603 | >TNFAIP3-D1SQYMWGVQ    | 12    | 15591 |
| >TNFAIP3-D1SQYMWGVQ    | 34808 | >TNFAIP3-D1SQYMWGVQ    | 17    | 34791 |
| >TNFAIP3-D1SQYMWGVQ    | 5255  | >TNFAIP3-D1SQYMWGVQ    | 152   | 5103  |
| >TNFAIP3-D1SQYMWGVQ    | 4194  | >TNFAIP3-D1SQYMWGVQ    | 18    | 4176  |
| >TNFAIP3-D1SQYMWGVQ    | 817   | >TNFAIP3-D1SQYMWGVQ    | 332   | 485   |
| >TNFAIP3-D1SQYMWGVQ    | 1910  | >TNFAIP3-D1SQYMWGVQ    | 361   | 1549  |
| >TNFAIP3-D1TSQYMWGVQ   | 10832 | >TNFAIP3-D1TSQYMWGVQ   | 172   | 10660 |
| >TNFAIP3-E7 EPAPEDPPK  | 163   | >TNFAIP3-E7 KPAPEDPPK  | 1353  | 1190  |
| >TNFAIP3-E7 EPAPEDPPKC | 2560  | >TNFAIP3-E7 KPAPEDPPKC | 186   | 2374  |
| >TNFAIP3-E7 QRMGPGAHI  | 2748  | >TNFAIP3-E7 QRMGPGAHI  | 51    | 2697  |
| >TNFAIP3-E7 RGEPAPEDPF | 477   | >TNFAIP3-E7 RGKPAPEDPF | 8     | 469   |
| >TNFAIP3-E7 RMGPGAHRG  | 16395 | >TNFAIP3-E7 RMGPGAHRG  | 34    | 16361 |
| >TNFAIP3-E7 RMGPGAHRG  | 14085 | >TNFAIP3-E7 RMGPGAHRG  | 157   | 13928 |
| >TNFAIP3-E7 RMGPGAHRG  | 5700  | >TNFAIP3-E7 RMGPGAHRG  | 79    | 5621  |
| >TNFAIP3-E7 ECFQFKQMY  | 116   | >TNFAIP3-E7 DCFQFKQMY  | 288   | 172   |
| >TNFAIP3-E7 NECFQFKQM  | 67    | >TNFAIP3-E7 NDCFQFKQM  | 4110  | 4043  |
| >TNFAIP3-E7 NECFQFKQ   | 385   | >TNFAIP3-E7 NDCFQFKQ   | 18205 | 17820 |
| >TNFAIP3-E7 NECFQFKQM  | 98    | >TNFAIP3-E7 NDCFQFKQM  | 12116 | 12018 |
| >TNFAIP3-E7 NECFQFKQM  | 366   | >TNFAIP3-E7 NDCFQFKQM  | 13025 | 12659 |
| >TNFAIP3-E7 NECFQFKQM  | 142   | >TNFAIP3-E7 NDCFQFKQM  | 8902  | 8760  |
| >TNFAIP3-E7 CNECFQFKQ  | 200   | >TNFAIP3-E7 CNDCFQFKQ  | 155   | 45    |
| >TNFAIP3-E7 YCNECFQF   | 242   | >TNFAIP3-E7 YCNDCFQF   | 293   | 51    |
| >TNFAIP3-E7 YCNECFQF   | 461   | >TNFAIP3-E7 YCNDCFQF   | 582   | 121   |
| >TNFAIP3-E7 YCNECFQFKC | 317   | >TNFAIP3-E7 YCNDCFQFKC | 131   | 186   |
| >TNFAIP3-E7 YCNECFQFK  | 588   | >TNFAIP3-E7 YCNDCFQFK  | 259   | 329   |
| >TNFAIP3-E7 GYCNECFQF  | 17    | >TNFAIP3-E7 GYCNDCFQF  | 25    | 8     |
| >TNFAIP3-E7 GYCNECFQF  | 165   | >TNFAIP3-E7 GYCNDCFQF  | 293   | 128   |
| >TNFAIP3-E7 GYCNECFQF  | 5     | >TNFAIP3-E7 GYCNDCFQF  | 7     | 2     |
| >TNFAIP3-E7 GYCNECFQF  | 580   | >TNFAIP3-E7 GYCNDCFQF  | 413   | 167   |

|                         |      |                         |       |       |
|-------------------------|------|-------------------------|-------|-------|
| >TNFAIP3-E7 NGYCNECFQI  | 293  | >TNFAIP3-E7 NGYCNDCFQ   | 279   | 14    |
| >TNFAIP3-E7 NGYCNECF    | 741  | >TNFAIP3-E7 NGYCNDCF    | 246   | 495   |
| >TNFAIP3-E7 NGYCNECFQI  | 416  | >TNFAIP3-E7 NGYCNDCFQ   | 282   | 134   |
| >TNFAIP3-E7 KCNGYCNECF  | 439  | >TNFAIP3-E7 KCNGYCNDCF  | 1114  | 675   |
| >TNFAIP3-E7 AKCNGYCNECF | 10   | >TNFAIP3-E7 AKCNGYCNDCF | 15    | 5     |
| >TNFAIP3-K2 KIRERTPE    | 156  | >TNFAIP3-K2 QIRERTPE    | 3685  | 3529  |
| >TNFAIP3-K2 KIRERTPED   | 119  | >TNFAIP3-K2 QIRERTPED   | 1766  | 1647  |
| >TNFAIP3-K2 KIRERTPEDI  | 32   | >TNFAIP3-K2 QIRERTPEDI  | 697   | 665   |
| >TNFAIP3-K2 KIRERTPEDI  | 206  | >TNFAIP3-K2 QIRERTPEDI  | 2703  | 2497  |
| >TNFAIP3-K2 KIRERTPEDIF | 250  | >TNFAIP3-K2 QIRERTPEDIF | 653   | 403   |
| >TNFAIP3-K2 KIRERTPEDIF | 449  | >TNFAIP3-K2 QIRERTPEDIF | 2096  | 1647  |
| >TNFAIP3-K2 VKIRERTPEDI | 119  | >TNFAIP3-K2 VQIRERTPED  | 126   | 7     |
| >TNFAIP3-K2 LYLSNMRKAVI | 134  | >TNFAIP3-K2 LYLSNMRKAVI | 9157  | 9023  |
| >TNFAIP3-K2 LYLSNMRKAVI | 350  | >TNFAIP3-K2 LYLSNMRKAVI | 7929  | 7579  |
| >TNFAIP3-K2 KAVKIRER    | 24   | >TNFAIP3-K2 KAVQIRER    | 48    | 24    |
| >TNFAIP3-K2 KAVKIRER    | 307  | >TNFAIP3-K2 KAVQIRER    | 276   | 31    |
| >TNFAIP3-K2 KAVKIRER    | 157  | >TNFAIP3-K2 KAVQIRER    | 118   | 39    |
| >TNFAIP3-K2 RKAVKIRER   | 1032 | >TNFAIP3-K2 RKAVQIRER   | 485   | 547   |
| >TNFAIP3-K2 MRKAVKIREF  | 192  | >TNFAIP3-K2 MRKAVQIREF  | 411   | 219   |
| >TNFAIP3-K2 MRKAVKIREF  | 350  | >TNFAIP3-K2 MRKAVQIREF  | 168   | 182   |
| >TNFAIP3-K2 NMRKAVKI    | 349  | >TNFAIP3-K2 NMRKAVQI    | 174   | 175   |
| >TNFAIP3-K2 NMRKAVKIR   | 778  | >TNFAIP3-K2 NMRKAVQIR   | 333   | 445   |
| >TNFAIP3-K2 NMRKAVKIRI  | 168  | >TNFAIP3-K2 NMRKAVQIR   | 142   | 26    |
| >TNFAIP3-K2 NMRKAVKIRI  | 218  | >TNFAIP3-K2 NMRKAVQIR   | 189   | 29    |
| >TNFAIP3-K2 NMRKAVKIR   | 407  | >TNFAIP3-K2 NMRKAVQIR   | 563   | 156   |
| >TNFAIP3-K2 SNMRKAVKI   | 545  | >TNFAIP3-K2 SNMRKAVQI   | 314   | 231   |
| >TNFAIP3-K2 SNMRKAVKI   | 676  | >TNFAIP3-K2 SNMRKAVQI   | 491   | 185   |
| >TNFAIP3-K2 LSNMRKAVK   | 304  | >TNFAIP3-K2 LSNMRKAVQ   | 20838 | 20534 |
| >TNFAIP3-K2 LSNMRKAVK   | 199  | >TNFAIP3-K2 LSNMRKAVQ   | 25010 | 24811 |
| >TNFAIP3-K2 LSNMRKAVK   | 126  | >TNFAIP3-K2 LSNMRKAVQ   | 8358  | 8232  |
| >TNFAIP3-K2 LSNMRKAVK   | 72   | >TNFAIP3-K2 LSNMRKAVQ   | 5208  | 5136  |
| >TNFAIP3-K2 LSNMRKAVKI  | 52   | >TNFAIP3-K2 LSNMRKAVQ   | 32    | 20    |
| >TNFAIP3-K2 LSNMRKAVKI  | 703  | >TNFAIP3-K2 LSNMRKAVQ   | 479   | 224   |
| >TNFAIP3-K2 LSNMRKAVKI  | 136  | >TNFAIP3-K2 LSNMRKAVQ   | 83    | 53    |
| >TNFAIP3-K2 LSNMRKAVKI  | 398  | >TNFAIP3-K2 LSNMRKAVQ   | 682   | 284   |
| >TNFAIP3-K2 YLSNMRKAVI  | 238  | >TNFAIP3-K2 YLSNMRKAVI  | 166   | 72    |
| >TNFAIP3-K2 YLSNMRKAVI  | 45   | >TNFAIP3-K2 YLSNMRKAVI  | 33    | 12    |
| >TNFAIP3-K2 YLSNMRKAVI  | 23   | >TNFAIP3-K2 YLSNMRKAVI  | 19    | 4     |
| >TNFAIP3-K2 YLSNMRKAVI  | 36   | >TNFAIP3-K2 YLSNMRKAVI  | 22    | 14    |
| >TNFAIP3-K2 YLSNMRKAVI  | 63   | >TNFAIP3-K2 YLSNMRKAVI  | 63    | 0     |
| >TNFAIP3-K2 YLSNMRKAVI  | 57   | >TNFAIP3-K2 YLSNMRKAVI  | 46    | 11    |
| >TNFAIP3-K2 YLSNMRKAVI  | 105  | >TNFAIP3-K2 YLSNMRKAVI  | 59    | 46    |
| >TNFAIP3-K2 YLSNMRKAVI  | 440  | >TNFAIP3-K2 YLSNMRKAVI  | 34    | 406   |

|                         |     |                         |       |       |
|-------------------------|-----|-------------------------|-------|-------|
| >TNFAIP3-K2 YLSNMRKAVI  | 4   | >TNFAIP3-K2 YLSNMRKAVI  | 4     | 0     |
| >TNFAIP3-K2 YLSNMRKAVI  | 70  | >TNFAIP3-K2 YLSNMRKAVI  | 22633 | 22563 |
| >TNFAIP3-K2 YLSNMRKAVI  | 286 | >TNFAIP3-K2 YLSNMRKAVI  | 34405 | 34119 |
| >TNFAIP3-K2 YLSNMRKAVI  | 243 | >TNFAIP3-K2 YLSNMRKAVI  | 28391 | 28148 |
| >TNFAIP3-K2 YLSNMRKAVI  | 691 | >TNFAIP3-K2 YLSNMRKAVI  | 474   | 217   |
| >TNFAIP3-L3 LLKEYLMV    | 41  | >TNFAIP3-L3 PLKEYLMV    | 1754  | 1713  |
| >TNFAIP3-L3 LLKEYLMVI   | 46  | >TNFAIP3-L3 PLKEYLMVI   | 4570  | 4524  |
| >TNFAIP3-L3 LLKEYLMVIEI | 43  | >TNFAIP3-L3 PLKEYLMVIEI | 2272  | 2229  |
| >TNFAIP3-L3 LLKEYLMV    | 26  | >TNFAIP3-L3 PLKEYLMV    | 766   | 740   |
| >TNFAIP3-L3 LLKEYLMVI   | 57  | >TNFAIP3-L3 PLKEYLMVI   | 1435  | 1378  |
| >TNFAIP3-L3 LLKEYLMVIEI | 42  | >TNFAIP3-L3 PLKEYLMVIEI | 987   | 945   |
| >TNFAIP3-L3 LLKEYLMV    | 4   | >TNFAIP3-L3 PLKEYLMV    | 83    | 79    |
| >TNFAIP3-L3 LLKEYLMVI   | 4   | >TNFAIP3-L3 PLKEYLMVI   | 78    | 74    |
| >TNFAIP3-L3 LLKEYLMVIEI | 7   | >TNFAIP3-L3 PLKEYLMVIEI | 171   | 164   |
| >TNFAIP3-L3 LLKEYLMV    | 52  | >TNFAIP3-L3 PLKEYLMV    | 3534  | 3482  |
| >TNFAIP3-L3 LLKEYLMVI   | 105 | >TNFAIP3-L3 PLKEYLMVI   | 7728  | 7623  |
| >TNFAIP3-L3 LLKEYLMVIEI | 192 | >TNFAIP3-L3 PLKEYLMVIEI | 6903  | 6711  |
| >TNFAIP3-L3 LLKEYLMV    | 5   | >TNFAIP3-L3 PLKEYLMV    | 49    | 44    |
| >TNFAIP3-L3 LLKEYLMVI   | 13  | >TNFAIP3-L3 PLKEYLMVI   | 361   | 348   |
| >TNFAIP3-L3 LLKEYLMVIEI | 15  | >TNFAIP3-L3 PLKEYLMVIEI | 274   | 259   |
| >TNFAIP3-L3 LLKEYLMV    | 22  | >TNFAIP3-L3 PLKEYLMV    | 849   | 827   |
| >TNFAIP3-L3 LLKEYLMVI   | 15  | >TNFAIP3-L3 PLKEYLMVI   | 1043  | 1028  |
| >TNFAIP3-L3 LLKEYLMVIEI | 32  | >TNFAIP3-L3 PLKEYLMVIEI | 1520  | 1488  |
| >TNFAIP3-L3 LLKEYLMV    | 30  | >TNFAIP3-L3 PLKEYLMV    | 348   | 318   |
| >TNFAIP3-L3 LLKEYLMVIEI | 370 | >TNFAIP3-L3 PLKEYLMVIEI | 4229  | 3859  |
| >TNFAIP3-L3 LLKEYLMV    | 88  | >TNFAIP3-L3 PLKEYLMV    | 1420  | 1332  |
| >TNFAIP3-L3 LLKEYLMV    | 2   | >TNFAIP3-L3 PLKEYLMV    | 8     | 6     |
| >TNFAIP3-L3 LLKEYLMVI   | 4   | >TNFAIP3-L3 PLKEYLMVI   | 132   | 128   |
| >TNFAIP3-L3 LLKEYLMVIEI | 4   | >TNFAIP3-L3 PLKEYLMVIEI | 103   | 99    |
| >TNFAIP3-L3 LLKEYLMVI   | 128 | >TNFAIP3-L3 PLKEYLMVI   | 1305  | 1177  |
| >TNFAIP3-L3 LLKEYLMVI   | 321 | >TNFAIP3-L3 PLKEYLMVI   | 11141 | 10820 |
| >TNFAIP3-L3 LLKEYLMVI   | 311 | >TNFAIP3-L3 PLKEYLMVI   | 3486  | 3175  |
| >TNFAIP3-L3 KLLKEYLM    | 59  | >TNFAIP3-L3 KPLKEYLM    | 22408 | 22349 |
| >TNFAIP3-L3 KLLKEYLMV   | 14  | >TNFAIP3-L3 KPLKEYLMV   | 19105 | 19091 |
| >TNFAIP3-L3 KLLKEYLMVI  | 32  | >TNFAIP3-L3 KPLKEYLMVI  | 9623  | 9591  |
| >TNFAIP3-L3 KLLKEYLM    | 281 | >TNFAIP3-L3 KPLKEYLM    | 31338 | 31057 |
| >TNFAIP3-L3 KLLKEYLMV   | 73  | >TNFAIP3-L3 KPLKEYLMV   | 29571 | 29498 |
| >TNFAIP3-L3 KLLKEYLMVI  | 42  | >TNFAIP3-L3 KPLKEYLMVI  | 9950  | 9908  |
| >TNFAIP3-L3 KLLKEYLMV   | 72  | >TNFAIP3-L3 KPLKEYLMV   | 18173 | 18101 |
| >TNFAIP3-L3 KLLKEYLMVI  | 40  | >TNFAIP3-L3 KPLKEYLMVI  | 11732 | 11692 |
| >TNFAIP3-L3 KLLKEYLMV   | 14  | >TNFAIP3-L3 KPLKEYLMV   | 8408  | 8394  |
| >TNFAIP3-L3 KLLKEYLMVI  | 90  | >TNFAIP3-L3 KPLKEYLMVI  | 4811  | 4721  |
| >TNFAIP3-L3 KLLKEYLM    | 70  | >TNFAIP3-L3 KPLKEYLM    | 25646 | 25576 |

|                         |       |                        |       |       |
|-------------------------|-------|------------------------|-------|-------|
| >TNFAIP3-L3 KLLKEYLMV   | 3     | >TNFAIP3-L3 KPLKEYLMV  | 8463  | 8460  |
| >TNFAIP3-L3 KLLKEYLMVI  | 9     | >TNFAIP3-L3 KPLKEYLMVI | 14358 | 14349 |
| >TNFAIP3-L3 KLLKEYLM    | 104   | >TNFAIP3-L3 KPLKEYLM   | 22748 | 22644 |
| >TNFAIP3-L3 KLLKEYLMV   | 11    | >TNFAIP3-L3 KPLKEYLMV  | 20219 | 20208 |
| >TNFAIP3-L3 KLLKEYLMVI  | 15    | >TNFAIP3-L3 KPLKEYLMVI | 17956 | 17941 |
| >TNFAIP3-L3 KLLKEYLM    | 96    | >TNFAIP3-L3 KPLKEYLM   | 25223 | 25127 |
| >TNFAIP3-L3 KLLKEYLMV   | 5     | >TNFAIP3-L3 KPLKEYLMV  | 7623  | 7618  |
| >TNFAIP3-L3 KLLKEYLMVI  | 19    | >TNFAIP3-L3 KPLKEYLMVI | 19342 | 19323 |
| >TNFAIP3-L3 KLLKEYLMV   | 22    | >TNFAIP3-L3 KPLKEYLMV  | 21227 | 21205 |
| >TNFAIP3-L3 KLLKEYLMVI  | 177   | >TNFAIP3-L3 KPLKEYLMVI | 19720 | 19543 |
| >TNFAIP3-L3 KLLKEYLM    | 381   | >TNFAIP3-L3 KPLKEYLM   | 37307 | 36926 |
| >TNFAIP3-L3 KLLKEYLMV   | 6     | >TNFAIP3-L3 KPLKEYLMV  | 23287 | 23281 |
| >TNFAIP3-L3 KLLKEYLMVI  | 44    | >TNFAIP3-L3 KPLKEYLMVI | 32858 | 32814 |
| >TNFAIP3-L3 KLLKEYLMVI  | 387   | >TNFAIP3-L3 KPLKEYLMVI | 14246 | 13859 |
| >TNFAIP3-L3 KLLKEYLMVI  | 113   | >TNFAIP3-L3 KPLKEYLMVI | 10162 | 10049 |
| >TNFAIP3-L3 KLLKEYLMVI  | 28186 | >TNFAIP3-L3 KPLKEYLMVI | 306   | 27880 |
| >TNFAIP3-L3 KLLKEYLMVI  | 232   | >TNFAIP3-L3 KPLKEYLMVI | 1531  | 1299  |
| >TNFAIP3-L3 KLLKEYLM    | 30169 | >TNFAIP3-L3 KPLKEYLM   | 285   | 29884 |
| >TNFAIP3-L3 KEKLLKEYL   | 117   | >TNFAIP3-L3 KEKPLKEYL  | 222   | 105   |
| >TNFAIP3-L3 KEKLLKEYLM  | 291   | >TNFAIP3-L3 KEKPLKEYLM | 566   | 275   |
| >TNFAIP3-L3 KEKLLKEYLM' | 153   | >TNFAIP3-L3 KEKPLKEYLM | 312   | 159   |
| >TNFAIP3-L3 KEKLLKEY    | 1422  | >TNFAIP3-L3 KEKPLKEY   | 420   | 1002  |
| >TNFAIP3-L3 KEKLLKEY    | 374   | >TNFAIP3-L3 KEKPLKEY   | 684   | 310   |
| >TNFAIP3-L3 KEKLLKEYL   | 113   | >TNFAIP3-L3 KEKPLKEYL  | 106   | 7     |
| >TNFAIP3-L3 KEKLLKEYL   | 83    | >TNFAIP3-L3 KEKPLKEYL  | 160   | 77    |
| >TNFAIP3-L3 KEKLLKEYLM  | 186   | >TNFAIP3-L3 KEKPLKEYLM | 323   | 137   |
| >TNFAIP3-L3 KEKLLKEYLM' | 76    | >TNFAIP3-L3 KEKPLKEYLM | 131   | 55    |
| >TNFAIP3-L3 KEKLLKEY    | 319   | >TNFAIP3-L3 KEKPLKEY   | 492   | 173   |
| >TNFAIP3-L3 KEKLLKEYLM  | 397   | >TNFAIP3-L3 KEKPLKEYLM | 576   | 179   |
| >TNFAIP3-L3 KEKLLKEYLM' | 408   | >TNFAIP3-L3 KEKPLKEYLM | 441   | 33    |
| >TNFAIP3-L3 KEKLLKEYL   | 83    | >TNFAIP3-L3 KEKPLKEYL  | 420   | 337   |
| >TNFAIP3-L3 KEKLLKEYLM  | 227   | >TNFAIP3-L3 KEKPLKEYLM | 329   | 102   |
| >TNFAIP3-L3 KEKLLKEYLM' | 33    | >TNFAIP3-L3 KEKPLKEYLM | 88    | 55    |
| >TNFAIP3-L3 MKEKLLKEY   | 114   | >TNFAIP3-L3 MKEKPLKEY  | 55    | 59    |
| >TNFAIP3-L3 EMKEKLLKEY  | 258   | >TNFAIP3-L3 EMKEKPLKEY | 192   | 66    |
| >TNFAIP3-L3 EMKEKLLKEY  | 193   | >TNFAIP3-L3 EMKEKPLKEY | 229   | 36    |
| >TNFAIP3-L3 EMKEKLLKEY  | 164   | >TNFAIP3-L3 EMKEKPLKEY | 1044  | 880   |
| >TNFAIP3-L3 EMKEKLLKEY  | 93    | >TNFAIP3-L3 EMKEKPLKEY | 276   | 183   |
| >TNFAIP3-L3 EMKEKLLK    | 463   | >TNFAIP3-L3 EMKEKPLK   | 455   | 8     |
| >TNFAIP3-L3 EMKEKLLKEY  | 233   | >TNFAIP3-L3 EMKEKPLKEY | 322   | 89    |
| >TNFAIP3-L3 EMKEKLLKEY  | 274   | >TNFAIP3-L3 EMKEKPLKEY | 503   | 229   |
| >TNFAIP3-L3 EMKEKLLKEY  | 785   | >TNFAIP3-L3 EMKEKPLKEY | 392   | 393   |
| >TNFAIP3-L3 EMKEKLLKEY  | 621   | >TNFAIP3-L3 EMKEKPLKEY | 306   | 315   |

|                        |      |                        |      |      |
|------------------------|------|------------------------|------|------|
| >TNFAIP3-L3 NEMKEKLL   | 20   | >TNFAIP3-L3 NEMKEKPL   | 163  | 143  |
| >TNFAIP3-L3 NEMKEKLLKE | 152  | >TNFAIP3-L3 NEMKEKPLKE | 476  | 324  |
| >TNFAIP3-L3 NEMKEKLL   | 710  | >TNFAIP3-L3 NEMKEKPL   | 134  | 576  |
| >TNFAIP3-L3 NEMKEKLLKE | 15   | >TNFAIP3-L3 NEMKEKPLKE | 23   | 8    |
| >TNFAIP3-L3 NEMKEKLL   | 1351 | >TNFAIP3-L3 NEMKEKPL   | 380  | 971  |
| >TNFAIP3-L3 NEMKEKLLKE | 120  | >TNFAIP3-L3 NEMKEKPLKE | 108  | 12   |
| >TNFAIP3-L3 NEMKEKLL   | 441  | >TNFAIP3-L3 NEMKEKPL   | 920  | 479  |
| >TNFAIP3-L3 NEMKEKLLKE | 57   | >TNFAIP3-L3 NEMKEKPLKE | 96   | 39   |
| >TNFAIP3-L3 PENEMKEKLL | 261  | >TNFAIP3-L3 PENEMKEKPI | 745  | 484  |
| >TNFAIP3-L4 KLNSKPGPEG | 266  | >TNFAIP3-L4 KVNSKPGPEC | 4949 | 4683 |
| >TNFAIP3-L4 KLNSKPGPEG | 23   | >TNFAIP3-L4 KVNSKPGPEC | 943  | 920  |
| >TNFAIP3-L4 KLNSKPGPEG | 11   | >TNFAIP3-L4 KVNSKPGPEC | 259  | 248  |
| >TNFAIP3-L4 KLNSKPGPEG | 9    | >TNFAIP3-L4 KVNSKPGPEC | 627  | 618  |
| >TNFAIP3-L4 KLNSKPGPEG | 39   | >TNFAIP3-L4 KVNSKPGPEC | 5361 | 5322 |
| >TNFAIP3-L4 KLNSKPGPEG | 69   | >TNFAIP3-L4 KVNSKPGPEC | 4518 | 4449 |
| >TNFAIP3-L4 KLNSKPGPEG | 88   | >TNFAIP3-L4 KVNSKPGPEC | 4504 | 4416 |
| >TNFAIP3-L4 KLNSKPGPEG | 34   | >TNFAIP3-L4 KVNSKPGPEC | 3682 | 3648 |
| >TNFAIP3-L4 KLNSKPGPEG | 284  | >TNFAIP3-L4 KVNSKPGPEC | 268  | 16   |
| >TNFAIP3-L4 RQKNQNKLP  | 2345 | >TNFAIP3-L4 RQKNQNKLP  | 258  | 2087 |
| >TNFAIP3-L4 RQKNQNKLP  | 1595 | >TNFAIP3-L4 RQKNQNKLP  | 336  | 1259 |
| >TNFAIP3-L4 RQKNQNKLP  | 106  | >TNFAIP3-L4 RQKNQNKLP  | 63   | 43   |
| >TNFAIP3-L4 RQKNQNKLP  | 53   | >TNFAIP3-L4 RQKNQNKLP  | 132  | 79   |
| >TNFAIP3-L4 RQKNQNKLP  | 280  | >TNFAIP3-L4 RQKNQNKLP  | 5420 | 5140 |
| >TNFAIP3-L4 RQKNQNKLP  | 397  | >TNFAIP3-L4 RQKNQNKLP  | 2926 | 2529 |
| >TNFAIP3-L4 LPKLNSKPG  | 245  | >TNFAIP3-L4 LPKVNSKPG  | 308  | 63   |
| >TNFAIP3-L4 KLPKLNSK   | 101  | >TNFAIP3-L4 KLPKVNSK   | 73   | 28   |
| >TNFAIP3-L4 NQNKLPKL   | 3520 | >TNFAIP3-L4 NQNKLPKV   | 384  | 3136 |
| >TNFAIP3-L4 NQNKLPKL   | 1882 | >TNFAIP3-L4 NQNKLPKV   | 420  | 1462 |
| >TNFAIP3-M MKCRSPGCPI  | 3    | >TNFAIP3-M IKCRSPGCPF  | 4    | 1    |
| >TNFAIP3-M AMKCRSPG    | 289  | >TNFAIP3-M AIKCRSPG    | 198  | 91   |
| >TNFAIP3-M AMKCRSPGC   | 706  | >TNFAIP3-M AIKCRSPGCPI | 491  | 215  |
| >TNFAIP3-M AMKCRSPG    | 391  | >TNFAIP3-M AIKCRSPG    | 886  | 495  |
| >TNFAIP3-M AMKCRSPGC   | 194  | >TNFAIP3-M AIKCRSPGCPI | 325  | 131  |
| >TNFAIP3-M AMKCRSPG    | 254  | >TNFAIP3-M AIKCRSPG    | 2075 | 1821 |
| >TNFAIP3-M AMKCRSPGC   | 19   | >TNFAIP3-M AIKCRSPGCPI | 29   | 10   |
| >TNFAIP3-M AMKCRSPGC   | 100  | >TNFAIP3-M AIKCRSPGCPI | 735  | 635  |
| >TNFAIP3-M AMKCRSPGC   | 5    | >TNFAIP3-M AIKCRSPGCPI | 44   | 39   |
| >TNFAIP3-M AMKCRSPGC   | 183  | >TNFAIP3-M AIKCRSPGCPI | 400  | 217  |
| >TNFAIP3-M SPFLFSETTAN | 214  | >TNFAIP3-M SPFLFSETTAI | 1173 | 959  |
| >TNFAIP3-M SPFLFSETTAN | 39   | >TNFAIP3-M SPFLFSETTAI | 171  | 132  |
| >TNFAIP3-M SPFLFSETTAN | 11   | >TNFAIP3-M SPFLFSETTAI | 161  | 150  |
| >TNFAIP3-M SPFLFSETTAN | 196  | >TNFAIP3-M SPFLFSETTAI | 574  | 378  |
| >TNFAIP3-M SPFLFSETTAN | 261  | >TNFAIP3-M SPFLFSETTAI | 3137 | 2876 |

|                        |      |                        |      |      |
|------------------------|------|------------------------|------|------|
| >TNFAIP3-M·SPFLFSETTAN | 140  | >TNFAIP3-M·SPFLFSETTAI | 479  | 339  |
| >TNFAIP3-M·SPFLFSETTAN | 4067 | >TNFAIP3-M·SPFLFSETTAI | 165  | 3902 |
| >TNFAIP3-M·ETTAMKCR    | 90   | >TNFAIP3-M·ETTAIKCR    | 61   | 29   |
| >TNFAIP3-M·ETTAMKCR    | 4    | >TNFAIP3-M·ETTAIKCR    | 3    | 1    |
| >TNFAIP3-M·ETTAMKCRS   | 1199 | >TNFAIP3-M·ETTAIKCRS   | 100  | 1099 |
| >TNFAIP3-M·ETTAMKCRSF  | 723  | >TNFAIP3-M·ETTAIKCRSPC | 208  | 515  |
| >TNFAIP3-M·FSETTAMK    | 69   | >TNFAIP3-M·FSETTAIK    | 173  | 104  |
| >TNFAIP3-M·LFSETTAM    | 1169 | >TNFAIP3-M·LFSETTAI    | 265  | 904  |
| >TNFAIP3-M·LFSETTAM    | 3741 | >TNFAIP3-M·LFSETTAI    | 302  | 3439 |
| >TNFAIP3-M·LFSETTAMK   | 406  | >TNFAIP3-M·LFSETTAIK   | 297  | 109  |
| >TNFAIP3-M·LFSETTAMKC  | 144  | >TNFAIP3-M·LFSETTAIKCR | 172  | 28   |
| >TNFAIP3-M·LFSETTAMKC  | 400  | >TNFAIP3-M·LFSETTAIKCR | 460  | 60   |
| >TNFAIP3-M·LFSETTAMK   | 231  | >TNFAIP3-M·LFSETTAIK   | 569  | 338  |
| >TNFAIP3-M·LFSETTAMKC  | 487  | >TNFAIP3-M·LFSETTAIKCR | 492  | 5    |
| >TNFAIP3-M·LFSETTAM    | 100  | >TNFAIP3-M·LFSETTAI    | 5229 | 5129 |
| >TNFAIP3-M·LFSETTAMKC  | 463  | >TNFAIP3-M·LFSETTAIKCR | 362  | 101  |
| >TNFAIP3-M·FLFSETTAM   | 13   | >TNFAIP3-M·FLFSETTAI   | 9    | 4    |
| >TNFAIP3-M·FLFSETTAMK  | 556  | >TNFAIP3-M·FLFSETTAIKC | 471  | 85   |
| >TNFAIP3-M·FLFSETTAM   | 2    | >TNFAIP3-M·FLFSETTAI   | 2    | 0    |
| >TNFAIP3-M·FLFSETTAMK  | 174  | >TNFAIP3-M·FLFSETTAIK  | 293  | 119  |
| >TNFAIP3-M·FLFSETTAMK  | 109  | >TNFAIP3-M·FLFSETTAIKC | 121  | 12   |
| >TNFAIP3-M·FLFSETTAM   | 5    | >TNFAIP3-M·FLFSETTAI   | 2    | 3    |
| >TNFAIP3-M·FLFSETTAMK  | 482  | >TNFAIP3-M·FLFSETTAIK  | 545  | 63   |
| >TNFAIP3-M·FLFSETTAMK  | 78   | >TNFAIP3-M·FLFSETTAIKC | 192  | 114  |
| >TNFAIP3-M·FLFSETTAM   | 24   | >TNFAIP3-M·FLFSETTAI   | 8    | 16   |
| >TNFAIP3-M·FLFSETTAMK  | 352  | >TNFAIP3-M·FLFSETTAIKC | 329  | 23   |
| >TNFAIP3-M·FLFSETTAM   | 6    | >TNFAIP3-M·FLFSETTAI   | 2    | 4    |
| >TNFAIP3-M·FLFSETTAMK  | 97   | >TNFAIP3-M·FLFSETTAIK  | 529  | 432  |
| >TNFAIP3-M·FLFSETTAMK  | 10   | >TNFAIP3-M·FLFSETTAIKC | 8    | 2    |
| >TNFAIP3-M·FLFSETTAM   | 15   | >TNFAIP3-M·FLFSETTAI   | 4    | 11   |
| >TNFAIP3-M·FLFSETTAMK  | 67   | >TNFAIP3-M·FLFSETTAIKC | 68   | 1    |
| >TNFAIP3-M·FLFSETTAM   | 26   | >TNFAIP3-M·FLFSETTAI   | 7    | 19   |
| >TNFAIP3-M·FLFSETTAMK  | 74   | >TNFAIP3-M·FLFSETTAIKC | 67   | 7    |
| >TNFAIP3-M·FLFSETTAM   | 45   | >TNFAIP3-M·FLFSETTAI   | 13   | 32   |
| >TNFAIP3-M·FLFSETTAMK  | 328  | >TNFAIP3-M·FLFSETTAIKC | 344  | 16   |
| >TNFAIP3-M·FLFSETTAM   | 5    | >TNFAIP3-M·FLFSETTAI   | 3    | 2    |
| >TNFAIP3-M·FLFSETTAMK  | 33   | >TNFAIP3-M·FLFSETTAIK  | 58   | 25   |
| >TNFAIP3-M·FLFSETTAMK  | 5    | >TNFAIP3-M·FLFSETTAIKC | 6    | 1    |
| >TNFAIP3-M·FLFSETTAMK  | 29   | >TNFAIP3-M·FLFSETTAIK  | 52   | 23   |
| >TNFAIP3-M·FLFSETTAMK  | 108  | >TNFAIP3-M·FLFSETTAIK  | 194  | 86   |
| >TNFAIP3-M·FLFSETTAM   | 631  | >TNFAIP3-M·FLFSETTAI   | 38   | 593  |
| >TNFAIP3-M·FLFSETTAMK  | 24   | >TNFAIP3-M·FLFSETTAIK  | 61   | 37   |
| >TNFAIP3-M·FLFSETTAM   | 768  | >TNFAIP3-M·FLFSETTAI   | 258  | 510  |

|                       |       |                         |      |       |
|-----------------------|-------|-------------------------|------|-------|
| >TNFAIP3-M·FLFSETTAM  | 33    | >TNFAIP3-M·FLFSETTAM    | 243  | 210   |
| >TNFAIP3-M·FLFSETTAM  | 49    | >TNFAIP3-M·FLFSETTAM    | 458  | 409   |
| >TNFAIP3-M·FLFSETTAM  | 5     | >TNFAIP3-M·FLFSETTAM    | 12   | 7     |
| >TNFAIP3-M·FLFSETTAMK | 281   | >TNFAIP3-M·FLFSETTAMK   | 186  | 95    |
| >TNFAIP3-M·FLFSETTAM  | 33    | >TNFAIP3-M·FLFSETTAM    | 1312 | 1279  |
| >TNFAIP3-M·FLFSETTAM  | 145   | >TNFAIP3-M·FLFSETTAM    | 467  | 322   |
| >TNFAIP3-M·FLFSETTAM  | 177   | >TNFAIP3-M·FLFSETTAM    | 1191 | 1014  |
| >TNFAIP3-M·FLFSETTAM  | 310   | >TNFAIP3-M·FLFSETTAM    | 2853 | 2543  |
| >TNFAIP3-M·FLFSETTAM  | 6690  | >TNFAIP3-M·FLFSETTAM    | 267  | 6423  |
| >TNFAIP3-N1NCLMHATSQ  | 301   | >TNFAIP3-N1SCLMHATSQ`   | 136  | 165   |
| >TNFAIP3-N1NCLMHATSQ  | 2323  | >TNFAIP3-N1SCLMHATSQ`   | 247  | 2076  |
| >TNFAIP3-N1GNCLMHATS  | 406   | >TNFAIP3-N1GSCLMHATSQ`  | 173  | 233   |
| >TNFAIP3-N1GNCLMHATS  | 2953  | >TNFAIP3-N1GSCLMHATSQ`  | 317  | 2636  |
| >TNFAIP3-N1GNCLMHATS  | 2469  | >TNFAIP3-N1GSCLMHATSQ`  | 351  | 2118  |
| >TNFAIP3-N1GNCLMHATS  | 7946  | >TNFAIP3-N1GSCLMHATSQ`  | 10   | 7936  |
| >TNFAIP3-N1GNCLMHATS  | 138   | >TNFAIP3-N1GSCLMHATSQ`  | 11   | 127   |
| >TNFAIP3-N1KTNGDGNCL  | 579   | >TNFAIP3-N1KTNGDGSLM`   | 445  | 134   |
| >TNFAIP3-N1KTNGDGNCL  | 1113  | >TNFAIP3-N1KTNGDGSLM`   | 72   | 1041  |
| >TNFAIP3-N1KTNGDGNCL  | 36    | >TNFAIP3-N1KTNGDGSLM`   | 12   | 24    |
| >TNFAIP3-N1KTNGDGNCL  | 1460  | >TNFAIP3-N1KTNGDGSLM`   | 478  | 982   |
| >TNFAIP3-N1KTNGDGNCL  | 130   | >TNFAIP3-N1KTNGDGSLM`   | 92   | 38    |
| >TNFAIP3-N1KTNGDGNCL  | 946   | >TNFAIP3-N1KTNGDGSLM`   | 85   | 861   |
| >TNFAIP3-N1KTNGDGNCL  | 81    | >TNFAIP3-N1KTNGDGSLM`   | 47   | 34    |
| >TNFAIP3-N1KTNGDGNCL  | 339   | >TNFAIP3-N1KTNGDGSLM`   | 103  | 236   |
| >TNFAIP3-N1LKTNGDGNCI | 412   | >TNFAIP3-N1LKTNGDGSLM`  | 225  | 187   |
| >TNFAIP3-N1LKTNGDGNCI | 464   | >TNFAIP3-N1LKTNGDGSLM`  | 328  | 136   |
| >TNFAIP3-N1ALKTNGDGN  | 225   | >TNFAIP3-N1ALKTNGDGSLM` | 326  | 101   |
| >TNFAIP3-N1ALKTNGDGN  | 746   | >TNFAIP3-N1ALKTNGDGSLM` | 350  | 396   |
| >TNFAIP3-N1ALKTNGDGN  | 84    | >TNFAIP3-N1ALKTNGDGSLM` | 49   | 35    |
| >TNFAIP3-N7GNAKCNGY   | 220   | >TNFAIP3-N7GKAKCNGY`    | 225  | 5     |
| >TNFAIP3-N7GNAKCNGY   | 7216  | >TNFAIP3-N7GKAKCNGY`    | 177  | 7039  |
| >TNFAIP3-N7FGNAKCNGY  | 354   | >TNFAIP3-N7FGKAKCNGY`   | 637  | 283   |
| >TNFAIP3-N7HFGNAKCNG  | 174   | >TNFAIP3-N7HFGKAKCNGY`  | 173  | 1     |
| >TNFAIP3-N7DHFGNAKCN  | 705   | >TNFAIP3-N7DHFGKAKCNGY` | 412  | 293   |
| >TNFAIP3-N7APACDHFGN  | 190   | >TNFAIP3-N7APACDHFGK`   | 145  | 45    |
| >TNFAIP3-N7APACDHFGN  | 10201 | >TNFAIP3-N7APACDHFGK`   | 484  | 9717  |
| >TNFAIP3-N7RAPACDHFGI | 32823 | >TNFAIP3-N7RAPACDHFGI`  | 193  | 32630 |
| >TNFAIP3-N7RAPACDHFGI | 32919 | >TNFAIP3-N7RAPACDHFGI`  | 246  | 32673 |
| >TNFAIP3-N7RAPACDHFGI | 14495 | >TNFAIP3-N7RAPACDHFGI`  | 451  | 14044 |
| >TNFAIP3-N7NGYCNECFQI | 1633  | >TNFAIP3-N7SGYCNECFQF`  | 69   | 1564  |
| >TNFAIP3-N7NGYCNECFQI | 6841  | >TNFAIP3-N7SGYCNECFQF`  | 427  | 6414  |
| >TNFAIP3-N7NGYCNECFQI | 293   | >TNFAIP3-N7SGYCNECFQF`  | 745  | 452   |
| >TNFAIP3-N7NGYCNECF   | 675   | >TNFAIP3-N7SGYCNECF`    | 170  | 505   |



|                        |       |                        |       |       |
|------------------------|-------|------------------------|-------|-------|
| >TNFAIP3-N7NGYCNECFQI  | 1182  | >TNFAIP3-N7SGYCNECFQF  | 369   | 813   |
| >TNFAIP3-N7NGYCNECFQI  | 3289  | >TNFAIP3-N7SGYCNECFQF  | 350   | 2939  |
| >TNFAIP3-N7NGYCNECFQI  | 416   | >TNFAIP3-N7SGYCNECFQF  | 304   | 112   |
| >TNFAIP3-N7CNGYCNECF   | 1358  | >TNFAIP3-N7CSGYCNECF   | 444   | 914   |
| >TNFAIP3-N7CNGYCNECF   | 1045  | >TNFAIP3-N7CSGYCNECF   | 468   | 577   |
| >TNFAIP3-N7CNGYCNECF   | 16164 | >TNFAIP3-N7CSGYCNECF   | 445   | 15719 |
| >TNFAIP3-N7KNGYCNECF   | 439   | >TNFAIP3-N7KCSGYCNECF  | 452   | 13    |
| >TNFAIP3-N7AKCNGYCNECF | 10    | >TNFAIP3-N7AKCSGYCNECF | 7     | 3     |
| >TNFAIP3-N7GNAKCSGY    | 220   | >TNFAIP3-N7GNAKCSGY    | 246   | 26    |
| >TNFAIP3-N7FGNAKCSGY   | 354   | >TNFAIP3-N7FGNAKCSGY   | 332   | 22    |
| >TNFAIP3-N7FGNAKCSGY   | 979   | >TNFAIP3-N7FGNAKCSGY   | 381   | 598   |
| >TNFAIP3-N7FGNAKCSGY   | 1397  | >TNFAIP3-N7FGNAKCSGY   | 439   | 958   |
| >TNFAIP3-N7FGNAKCSGY   | 3111  | >TNFAIP3-N7FGNAKCSGY   | 365   | 2746  |
| >TNFAIP3-N7HFGNAKCSGY  | 774   | >TNFAIP3-N7HFGNAKCSGY  | 443   | 331   |
| >TNFAIP3-N7HFGNAKCSGY  | 174   | >TNFAIP3-N7HFGNAKCSGY  | 111   | 63    |
| >TNFAIP3-N7HFGNAKCSGY  | 842   | >TNFAIP3-N7HFGNAKCSGY  | 409   | 433   |
| >TNFAIP3-P2PLHWPAQEC   | 355   | >TNFAIP3-P2TLHWPAQEC   | 68    | 287   |
| >TNFAIP3-P2PLHWPAQEC   | 286   | >TNFAIP3-P2TLHWPAQEC   | 35    | 251   |
| >TNFAIP3-P2PLHWPAQEC   | 1110  | >TNFAIP3-P2TLHWPAQEC   | 386   | 724   |
| >TNFAIP3-P2PLHWPAQEC   | 1483  | >TNFAIP3-P2TLHWPAQEC   | 57    | 1426  |
| >TNFAIP3-P2PLHWPAQEC   | 2714  | >TNFAIP3-P2TLHWPAQEC   | 295   | 2419  |
| >TNFAIP3-P2PLHWPAQEC   | 2277  | >TNFAIP3-P2TLHWPAQEC   | 38    | 2239  |
| >TNFAIP3-P2PLHWPAQEC   | 1641  | >TNFAIP3-P2TLHWPAQEC   | 250   | 1391  |
| >TNFAIP3-P2PLHWPAQEC   | 74    | >TNFAIP3-P2TLHWPAQEC   | 45    | 29    |
| >TNFAIP3-P2LPLHWPAQEC  | 13802 | >TNFAIP3-P2LTLHWPAQEC  | 398   | 13404 |
| >TNFAIP3-P2LPLHWPAQEC  | 9427  | >TNFAIP3-P2LTLHWPAQEC  | 114   | 9313  |
| >TNFAIP3-P2LPLHWPAQEC  | 441   | >TNFAIP3-P2LTLHWPAQEC  | 20    | 421   |
| >TNFAIP3-P2LPLHWPAQEC  | 3155  | >TNFAIP3-P2LTLHWPAQEC  | 133   | 3022  |
| >TNFAIP3-P2LPLHWPAQEC  | 4951  | >TNFAIP3-P2LTLHWPAQEC  | 297   | 4654  |
| >TNFAIP3-P2LPLHWPAQEC  | 9805  | >TNFAIP3-P2LTLHWPAQEC  | 411   | 9394  |
| >TNFAIP3-P2LPLHWPAQEC  | 754   | >TNFAIP3-P2LTLHWPAQEC  | 261   | 493   |
| >TNFAIP3-P2LPLHWPAQEC  | 13332 | >TNFAIP3-P2LTLHWPAQEC  | 14    | 13318 |
| >TNFAIP3-P2LPLHWPAQ    | 108   | >TNFAIP3-P2LTLHWPAQ    | 10595 | 10487 |
| >TNFAIP3-P2LPLHWPAQEC  | 16    | >TNFAIP3-P2LTLHWPAQEC  | 1064  | 1048  |
| >TNFAIP3-P2LPLHWPAQEC  | 27    | >TNFAIP3-P2LTLHWPAQEC  | 7640  | 7613  |
| >TNFAIP3-P2LPLHWPAQ    | 78    | >TNFAIP3-P2LTLHWPAQ    | 21356 | 21278 |
| >TNFAIP3-P2LPLHWPAQEC  | 325   | >TNFAIP3-P2LTLHWPAQEC  | 26738 | 26413 |
| >TNFAIP3-P2LPLHWPAQEC  | 318   | >TNFAIP3-P2LTLHWPAQEC  | 23169 | 22851 |
| >TNFAIP3-P2LPLHWPAQEC  | 18623 | >TNFAIP3-P2LTLHWPAQEC  | 102   | 18521 |
| >TNFAIP3-P2LPLHWPAQEC  | 2653  | >TNFAIP3-P2LTLHWPAQEC  | 37    | 2616  |
| >TNFAIP3-P2LPLHWPAQEC  | 44    | >TNFAIP3-P2LTLHWPAQEC  | 8522  | 8478  |
| >TNFAIP3-P2YLPLHWPA    | 25    | >TNFAIP3-P2YLTLHWPA    | 20    | 5     |
| >TNFAIP3-P2YLPLHWPA    | 31    | >TNFAIP3-P2YLTLHWPA    | 19    | 12    |

|                         |     |                         |     |     |
|-------------------------|-----|-------------------------|-----|-----|
| >TNFAIP3-P2 YLPLHWPA    | 11  | >TNFAIP3-P2 YLTLHWPA    | 13  | 2   |
| >TNFAIP3-P2 YLPLHWPA    | 13  | >TNFAIP3-P2 YLTLHWPA    | 15  | 2   |
| >TNFAIP3-P2 YLPLHWPAQ   | 421 | >TNFAIP3-P2 YLTLHWPAQ   | 635 | 214 |
| >TNFAIP3-P2 YLPLHWPA    | 8   | >TNFAIP3-P2 YLTLHWPA    | 12  | 4   |
| >TNFAIP3-P2 YLPLHWPAQ   | 36  | >TNFAIP3-P2 YLTLHWPAQ   | 66  | 30  |
| >TNFAIP3-P2 YLPLHWPA    | 52  | >TNFAIP3-P2 YLTLHWPA    | 33  | 19  |
| >TNFAIP3-P2 YLPLHWPA    | 17  | >TNFAIP3-P2 YLTLHWPA    | 14  | 3   |
| >TNFAIP3-P2 YLPLHWPA    | 333 | >TNFAIP3-P2 YLTLHWPA    | 241 | 92  |
| >TNFAIP3-P2 YLPLHWPA    | 7   | >TNFAIP3-P2 YLTLHWPA    | 5   | 2   |
| >TNFAIP3-P2 YLPLHWPAQ   | 125 | >TNFAIP3-P2 YLTLHWPAQ   | 76  | 49  |
| >TNFAIP3-P2 YLPLHWPAQ   | 17  | >TNFAIP3-P2 YLTLHWPAQ   | 10  | 7   |
| >TNFAIP3-P2 IYPLHWPA    | 265 | >TNFAIP3-P2 IYTLHWPA    | 985 | 720 |
| >TNFAIP3-P2 IYPLHWPA    | 374 | >TNFAIP3-P2 IYTLHWPA    | 479 | 105 |
| >TNFAIP3-P2 IYPLHWPA    | 192 | >TNFAIP3-P2 IYTLHWPA    | 691 | 499 |
| >TNFAIP3-P2 IYPLHWPA    | 390 | >TNFAIP3-P2 IYTLHWPA    | 649 | 259 |
| >TNFAIP3-P2 IYPLHWPA    | 372 | >TNFAIP3-P2 IYTLHWPA    | 267 | 105 |
| >TNFAIP3-P2 IYPLHWPAQ   | 622 | >TNFAIP3-P2 IYTLHWPAQ   | 446 | 176 |
| >TNFAIP3-P2 IYPLHWPA    | 56  | >TNFAIP3-P2 IYTLHWPA    | 123 | 67  |
| >TNFAIP3-P2 GIYPLHWPA   | 356 | >TNFAIP3-P2 GIYTLHWPA   | 154 | 202 |
| >TNFAIP3-P2 GIYPLHWPA   | 192 | >TNFAIP3-P2 GIYTLHWPA   | 126 | 66  |
| >TNFAIP3-P2 GIYPLHWPA   | 419 | >TNFAIP3-P2 GIYTLHWPA   | 344 | 75  |
| >TNFAIP3-P2 GIYPLHWPA   | 104 | >TNFAIP3-P2 GIYTLHWPA   | 79  | 25  |
| >TNFAIP3-P2 GIYPLHWPA   | 37  | >TNFAIP3-P2 GIYTLHWPA   | 55  | 18  |
| >TNFAIP3-P2 GIYPLHWPA   | 417 | >TNFAIP3-P2 GIYTLHWPA   | 231 | 186 |
| >TNFAIP3-P2 GIYPLHWPA   | 180 | >TNFAIP3-P2 GIYTLHWPA   | 97  | 83  |
| >TNFAIP3-P2 GIYPLHWPA   | 112 | >TNFAIP3-P2 GIYTLHWPA   | 111 | 1   |
| >TNFAIP3-P2 GIYPLHW     | 56  | >TNFAIP3-P2 GIYTLHW     | 45  | 11  |
| >TNFAIP3-P2 GIYPLHW     | 92  | >TNFAIP3-P2 GIYTLHW     | 45  | 47  |
| >TNFAIP3-P2 GGIYPLHW    | 46  | >TNFAIP3-P2 GGIYTLHW    | 40  | 6   |
| >TNFAIP3-P2 VGGIYLPL    | 55  | >TNFAIP3-P2 VGGIYLTL    | 175 | 120 |
| >TNFAIP3-P2 VGGIYLPLHW  | 80  | >TNFAIP3-P2 VGGIYLTLHW  | 85  | 5   |
| >TNFAIP3-P2 KVGGIYLPL   | 432 | >TNFAIP3-P2 KVGGIYLTL   | 906 | 474 |
| >TNFAIP3-P2 KVGGIYLPL   | 158 | >TNFAIP3-P2 KVGGIYLTL   | 395 | 237 |
| >TNFAIP3-P2 KVGGIYLPL   | 248 | >TNFAIP3-P2 KVGGIYLTL   | 624 | 376 |
| >TNFAIP3-P2 KVGGIYLPL   | 612 | >TNFAIP3-P2 KVGGIYLTL   | 374 | 238 |
| >TNFAIP3-P2 KVGGIYLPL   | 562 | >TNFAIP3-P2 KVGGIYLTL   | 201 | 361 |
| >TNFAIP3-P2 KVGGIYLPL   | 312 | >TNFAIP3-P2 KVGGIYLTL   | 875 | 563 |
| >TNFAIP3-P2 KVGGIYLPL   | 28  | >TNFAIP3-P2 KVGGIYLTL   | 13  | 15  |
| >TNFAIP3-P2 KVGGIYLPLH\ | 72  | >TNFAIP3-P2 KVGGIYLTLH\ | 44  | 28  |
| >TNFAIP3-P2 KVGGIYLPLH\ | 112 | >TNFAIP3-P2 KVGGIYLTLH\ | 119 | 7   |
| >TNFAIP3-P2 KVGGIYLPLH\ | 14  | >TNFAIP3-P2 KVGGIYLTLH\ | 13  | 1   |
| >TNFAIP3-P2 LKVGGIYLPL  | 86  | >TNFAIP3-P2 LKVGGIYLTL  | 133 | 47  |
| >TNFAIP3-P2 LKVGGIYLPL  | 81  | >TNFAIP3-P2 LKVGGIYLTL  | 133 | 52  |

|                         |       |                         |       |       |
|-------------------------|-------|-------------------------|-------|-------|
| >TNFAIP3-P2 LKVGGIYLPL  | 287   | >TNFAIP3-P2 LKVGGIYLT   | 643   | 356   |
| >TNFAIP3-P2 PLKVGGIYLPL | 454   | >TNFAIP3-P2 PLKVGGIYLT  | 192   | 262   |
| >TNFAIP3-P4 PGMALGASR   | 4849  | >TNFAIP3-P4 LGMALGASR   | 251   | 4598  |
| >TNFAIP3-P4 LPGMALGA    | 19370 | >TNFAIP3-P4 LLGMALGA    | 152   | 19218 |
| >TNFAIP3-P4 LPGMALGA    | 27757 | >TNFAIP3-P4 LLGMALGA    | 130   | 27627 |
| >TNFAIP3-P4 LPGMALGA    | 25204 | >TNFAIP3-P4 LLGMALGA    | 179   | 25025 |
| >TNFAIP3-P4 LPGMALGA    | 34430 | >TNFAIP3-P4 LLGMALGA    | 12    | 34418 |
| >TNFAIP3-P4 LPGMALGAS   | 3204  | >TNFAIP3-P4 LLGMALGAS   | 243   | 2961  |
| >TNFAIP3-P4 LPGMALGA    | 287   | >TNFAIP3-P4 LLGMALGA    | 29013 | 28726 |
| >TNFAIP3-P4 LPGMALGAS   | 424   | >TNFAIP3-P4 LLGMALGAS   | 29639 | 29215 |
| >TNFAIP3-P4 GLPGMALGA   | 2522  | >TNFAIP3-P4 GLLGMALGA   | 254   | 2268  |
| >TNFAIP3-P4 GLPGMALGA   | 119   | >TNFAIP3-P4 GLLGMALGA   | 243   | 124   |
| >TNFAIP3-P4 GLPGMALGA   | 1061  | >TNFAIP3-P4 GLLGMALGA   | 185   | 876   |
| >TNFAIP3-P4 GLPGMALGA   | 271   | >TNFAIP3-P4 GLLGMALGA   | 29    | 242   |
| >TNFAIP3-P4 GLPGMALGA   | 1679  | >TNFAIP3-P4 GLLGMALGA   | 74    | 1605  |
| >TNFAIP3-P4 GLPGMALGA   | 104   | >TNFAIP3-P4 GLLGMALGA   | 16    | 88    |
| >TNFAIP3-P4 GLPGMALGA   | 6132  | >TNFAIP3-P4 GLLGMALGA   | 225   | 5907  |
| >TNFAIP3-P4 GLPGMALGA   | 12    | >TNFAIP3-P4 GLLGMALGA   | 7     | 5     |
| >TNFAIP3-P4 GLPGMALGA   | 4198  | >TNFAIP3-P4 GLLGMALGA   | 480   | 3718  |
| >TNFAIP3-P4 GPEGLPGMA   | 214   | >TNFAIP3-P4 GPEGLLGMA   | 233   | 19    |
| >TNFAIP3-P4 KPGPEGLP    | 23877 | >TNFAIP3-P4 KPGPEGLL    | 255   | 23622 |
| >TNFAIP3-P5 PSPHSCHR    | 6816  | >TNFAIP3-P5 LSPHSCHR    | 415   | 6401  |
| >TNFAIP3-P5 PSPHSCHR    | 6863  | >TNFAIP3-P5 LSPHSCHR    | 419   | 6444  |
| >TNFAIP3-P5 PSPHSCHR    | 4171  | >TNFAIP3-P5 LSPHSCHR    | 295   | 3876  |
| >TNFAIP3-P5 PSPHSCHRA   | 5546  | >TNFAIP3-P5 LSPHSCHRA   | 266   | 5280  |
| >TNFAIP3-P5 SPSPHSCHRA  | 25364 | >TNFAIP3-P5 SLSPHSCHRA  | 298   | 25066 |
| >TNFAIP3-P5 SPSPHSCHRA  | 20000 | >TNFAIP3-P5 SLSPHSCHRA  | 193   | 19807 |
| >TNFAIP3-P5 SPSPHSCHRA  | 25126 | >TNFAIP3-P5 SLSPHSCHRA  | 87    | 25039 |
| >TNFAIP3-P5 SPSPHSCHRA  | 25456 | >TNFAIP3-P5 SLSPHSCHRA  | 383   | 25073 |
| >TNFAIP3-P5 SPSPHSCHRA  | 23416 | >TNFAIP3-P5 SLSPHSCHRA  | 73    | 23343 |
| >TNFAIP3-P5 SPSPHSCHRA  | 24756 | >TNFAIP3-P5 SLSPHSCHRA  | 4     | 24752 |
| >TNFAIP3-P5 SPSPHSCHR   | 18888 | >TNFAIP3-P5 SLSPHSCHR   | 216   | 18672 |
| >TNFAIP3-P5 SPSPHSCHR   | 2542  | >TNFAIP3-P5 SLSPHSCHR   | 29    | 2513  |
| >TNFAIP3-P5 SPSPHSCH    | 290   | >TNFAIP3-P5 SLSPHSCH    | 12768 | 12478 |
| >TNFAIP3-P5 SPSPHSCHR   | 197   | >TNFAIP3-P5 SLSPHSCHR   | 59    | 138   |
| >TNFAIP3-P5 KSDPSRLVRSI | 7614  | >TNFAIP3-P5 KSDPSRLVRSI | 8     | 7606  |
| >TNFAIP3-P5 KSDPSRLVRSI | 14044 | >TNFAIP3-P5 KSDPSRLVRSI | 162   | 13882 |
| >TNFAIP3-P5 KSDPSRLVRSI | 23033 | >TNFAIP3-P5 KSDPSRLVRSI | 270   | 22763 |
| >TNFAIP3-P5 RSPSPHSCHR  | 2114  | >TNFAIP3-P5 RSLSPHSCHR  | 314   | 1800  |
| >TNFAIP3-P5 RSPSPHSCHR  | 654   | >TNFAIP3-P5 RSLSPHSCHR  | 204   | 450   |
| >TNFAIP3-P5 RSPSPHSCHR  | 2268  | >TNFAIP3-P5 RSLSPHSCHR  | 90    | 2178  |
| >TNFAIP3-P5 RSPSPHSCHR  | 4136  | >TNFAIP3-P5 RSLSPHSCHR  | 215   | 3921  |
| >TNFAIP3-P5 RSPSPHSCHR  | 36    | >TNFAIP3-P5 RSLSPHSCHR  | 10    | 26    |

|                         |       |                         |       |       |
|-------------------------|-------|-------------------------|-------|-------|
| >TNFAIP3-P5 RSPSPHSCHR  | 127   | >TNFAIP3-P5 RSLSPHSCHR  | 200   | 73    |
| >TNFAIP3-P5 RSPSPHSCH   | 1420  | >TNFAIP3-P5 RSLSPHSCH   | 216   | 1204  |
| >TNFAIP3-P5 RSPSPHSCHR  | 2932  | >TNFAIP3-P5 RSLSPHSCHR  | 434   | 2498  |
| >TNFAIP3-P5 RSPSPHSCH   | 4932  | >TNFAIP3-P5 RSLSPHSCH   | 400   | 4532  |
| >TNFAIP3-P5 RSPSPHSCHR  | 6440  | >TNFAIP3-P5 RSLSPHSCHR  | 414   | 6026  |
| >TNFAIP3-P5 RSPSPHSC    | 66    | >TNFAIP3-P5 RSLSPHSC    | 16950 | 16884 |
| >TNFAIP3-P5 RSPSPHSCH   | 280   | >TNFAIP3-P5 RSLSPHSCH   | 23698 | 23418 |
| >TNFAIP3-P5 RSPSPHSCHR  | 69    | >TNFAIP3-P5 RSLSPHSCHR  | 17394 | 17325 |
| >TNFAIP3-P5 RSPSPHSCH   | 215   | >TNFAIP3-P5 RSLSPHSCH   | 14    | 201   |
| >TNFAIP3-P5 RSPSPHSCHR  | 3914  | >TNFAIP3-P5 RSLSPHSCHR  | 293   | 3621  |
| >TNFAIP3-P5 RSPSPHSCHR  | 210   | >TNFAIP3-P5 RSLSPHSCHR  | 107   | 103   |
| >TNFAIP3-P5 LVRSPSPH    | 327   | >TNFAIP3-P5 LVRSLSPH    | 299   | 28    |
| >TNFAIP3-P5 LVRSPSPHS   | 28    | >TNFAIP3-P5 LVRSLSPHS   | 25    | 3     |
| >TNFAIP3-P5 LVRSPSPHSC  | 342   | >TNFAIP3-P5 LVRSLSPHSC  | 344   | 2     |
| >TNFAIP3-P5 LVRSPSPH    | 924   | >TNFAIP3-P5 LVRSLSPH    | 499   | 425   |
| >TNFAIP3-P5 LVRSPSPHSCI | 74    | >TNFAIP3-P5 LVRSLSPHSCI | 70    | 4     |
| >TNFAIP3-P5 RLVRSPSPHS  | 99    | >TNFAIP3-P5 RLVRSLSPHS  | 133   | 34    |
| >TNFAIP3-P5 RLVRSPSPHS  | 513   | >TNFAIP3-P5 RLVRSLSPHS  | 433   | 80    |
| >TNFAIP3-P5 RLVRSPSPHS  | 75    | >TNFAIP3-P5 RLVRSLSPHS  | 57    | 18    |
| >TNFAIP3-P5 RLVRSPSPH   | 311   | >TNFAIP3-P5 RLVRSLSPH   | 393   | 82    |
| >TNFAIP3-P5 RLVRSPSPH   | 798   | >TNFAIP3-P5 RLVRSLSPH   | 282   | 516   |
| >TNFAIP3-P5 RLVRSPSPH   | 133   | >TNFAIP3-P5 RLVRSLSPH   | 276   | 143   |
| >TNFAIP3-P5 SRLVRSPSPH  | 323   | >TNFAIP3-P5 SRLVRSLSPH  | 883   | 560   |
| >TNFAIP3-P5 DPSRLVRSP   | 25585 | >TNFAIP3-P5 DPSRLVRSL   | 462   | 25123 |
| >TNFAIP3-P5 DPSRLVRSP   | 15324 | >TNFAIP3-P5 DPSRLVRSL   | 209   | 15115 |
| >TNFAIP3-P6 IPCLGRECGTI | 378   | >TNFAIP3-P6 ILCLGRECGTI | 33702 | 33324 |
| >TNFAIP3-P6 IPCLGRECGT  | 37808 | >TNFAIP3-P6 ILCLGRECGT  | 358   | 37450 |
| >TNFAIP3-P6 IPCLGRECGTI | 35481 | >TNFAIP3-P6 ILCLGRECGTI | 61    | 35420 |
| >TNFAIP3-P6 NTIPCLGR    | 153   | >TNFAIP3-P6 NTILCLGR    | 81    | 72    |
| >TNFAIP3-P6 NTIPCLGR    | 11    | >TNFAIP3-P6 NTILCLGR    | 13    | 2     |
| >TNFAIP3-P6 NTIPCLGR    | 387   | >TNFAIP3-P6 NTILCLGR    | 309   | 78    |
| >TNFAIP3-P6 QNTIPCLGR   | 1283  | >TNFAIP3-P6 QNTILCLGR   | 320   | 963   |
| >TNFAIP3-P6 FQNTIPCL    | 69    | >TNFAIP3-P6 FQNTILCL    | 66    | 3     |
| >TNFAIP3-P6 FQNTIPCL    | 28    | >TNFAIP3-P6 FQNTILCL    | 16    | 12    |
| >TNFAIP3-P6 FQNTIPCLG   | 2009  | >TNFAIP3-P6 FQNTILCLG   | 378   | 1631  |
| >TNFAIP3-P6 FQNTIPCL    | 167   | >TNFAIP3-P6 FQNTILCL    | 90    | 77    |
| >TNFAIP3-P6 FQNTIPCL    | 22    | >TNFAIP3-P6 FQNTILCL    | 12    | 10    |
| >TNFAIP3-P6 FQNTIPCLG   | 5369  | >TNFAIP3-P6 FQNTILCLG   | 317   | 5052  |
| >TNFAIP3-P6 FQNTIPCL    | 337   | >TNFAIP3-P6 FQNTILCL    | 493   | 156   |
| >TNFAIP3-P6 FQNTIPCL    | 464   | >TNFAIP3-P6 FQNTILCL    | 492   | 28    |
| >TNFAIP3-P6 FQNTIPCL    | 314   | >TNFAIP3-P6 FQNTILCL    | 617   | 303   |
| >TNFAIP3-P6 FQNTIPCLGR  | 767   | >TNFAIP3-P6 FQNTILCLGR  | 209   | 558   |
| >TNFAIP3-P6 FQNTIPCLGR  | 920   | >TNFAIP3-P6 FQNTILCLGR  | 353   | 567   |

|                        |       |                         |      |       |
|------------------------|-------|-------------------------|------|-------|
| >TNFAIP3-P6 FQNTIPCLGR | 396   | >TNFAIP3-P6 FQNTILCLGR  | 491  | 95    |
| >TNFAIP3-P6 FQNTIPCL   | 42    | >TNFAIP3-P6 FQNTILCL    | 49   | 7     |
| >TNFAIP3-P6 FQNTIPCL   | 26    | >TNFAIP3-P6 FQNTILCL    | 41   | 15    |
| >TNFAIP3-P6 FQNTIPCLGR | 259   | >TNFAIP3-P6 FQNTILCLGR  | 246  | 13    |
| >TNFAIP3-P6 RFQNTIPCL  | 146   | >TNFAIP3-P6 RFQNTILCL   | 127  | 19    |
| >TNFAIP3-P6 RFQNTIPCL  | 124   | >TNFAIP3-P6 RFQNTILCL   | 67   | 57    |
| >TNFAIP3-P6 RFQNTIPCLG | 23    | >TNFAIP3-P6 RFQNTILCLGI | 19   | 4     |
| >TNFAIP3-P6 RFQNTIPCL  | 789   | >TNFAIP3-P6 RFQNTILCL   | 402  | 387   |
| >TNFAIP3-P6 RFQNTIPCLG | 59    | >TNFAIP3-P6 RFQNTILCLGI | 37   | 22    |
| >TNFAIP3-P6 RFQNTIPCL  | 924   | >TNFAIP3-P6 RFQNTILCL   | 299  | 625   |
| >TNFAIP3-P6 RFQNTIPCL  | 514   | >TNFAIP3-P6 RFQNTILCL   | 344  | 170   |
| >TNFAIP3-P6 SRFQNTIP   | 2385  | >TNFAIP3-P6 SRFQNTIL    | 89   | 2296  |
| >TNFAIP3-P6 SRFQNTIPCL | 85    | >TNFAIP3-P6 SRFQNTILCL  | 93   | 8     |
| >TNFAIP3-P6 SRFQNTIP   | 2279  | >TNFAIP3-P6 SRFQNTIL    | 91   | 2188  |
| >TNFAIP3-P6 SRFQNTIPCL | 16    | >TNFAIP3-P6 SRFQNTILCL  | 13   | 3     |
| >TNFAIP3-P6 SRFQNTIP   | 16506 | >TNFAIP3-P6 SRFQNTIL    | 38   | 16468 |
| >TNFAIP3-P6 SRFQNTIPCL | 27    | >TNFAIP3-P6 SRFQNTILCL  | 26   | 1     |
| >TNFAIP3-P6 SRFQNTIPC  | 335   | >TNFAIP3-P6 SRFQNTILC   | 485  | 150   |
| >TNFAIP3-P6 SRFQNTIP   | 3143  | >TNFAIP3-P6 SRFQNTIL    | 176  | 2967  |
| >TNFAIP3-P6 SRFQNTIPCL | 359   | >TNFAIP3-P6 SRFQNTILCL  | 99   | 260   |
| >TNFAIP3-P6 SRFQNTIPC  | 579   | >TNFAIP3-P6 SRFQNTILC   | 127  | 452   |
| >TNFAIP3-P6 SRFQNTIPCL | 140   | >TNFAIP3-P6 SRFQNTILCL  | 52   | 88    |
| >TNFAIP3-P6 ASRFQNTIP  | 364   | >TNFAIP3-P6 ASRFQNTIL   | 26   | 338   |
| >TNFAIP3-P6 ASRFQNTIPC | 59    | >TNFAIP3-P6 ASRFQNTILC  | 109  | 50    |
| >TNFAIP3-P6 ASRFQNTIPC | 16    | >TNFAIP3-P6 ASRFQNTILCI | 20   | 4     |
| >TNFAIP3-P6 ASRFQNTIP  | 7475  | >TNFAIP3-P6 ASRFQNTIL   | 392  | 7083  |
| >TNFAIP3-P6 ASRFQNTIPC | 525   | >TNFAIP3-P6 ASRFQNTILCI | 383  | 142   |
| >TNFAIP3-P6 ASRFQNTIP  | 14358 | >TNFAIP3-P6 ASRFQNTIL   | 20   | 14338 |
| >TNFAIP3-P6 ASRFQNTIPC | 48    | >TNFAIP3-P6 ASRFQNTILCI | 37   | 11    |
| >TNFAIP3-P6 ASRFQNTIP  | 5318  | >TNFAIP3-P6 ASRFQNTIL   | 55   | 5263  |
| >TNFAIP3-P7 PKQRCRAPA  | 3883  | >TNFAIP3-P7 RKQRCRAPA   | 250  | 3633  |
| >TNFAIP3-P7 DPPKQRCR   | 3478  | >TNFAIP3-P7 DPRKQRCR    | 295  | 3183  |
| >TNFAIP3-P7 DPPKQRCRAI | 4646  | >TNFAIP3-P7 DPRKQRCRAI  | 59   | 4587  |
| >TNFAIP3-P7 DPPKQRCRA  | 6796  | >TNFAIP3-P7 DPRKQRCRA   | 438  | 6358  |
| >TNFAIP3-P7 DPPKQRCRAI | 5936  | >TNFAIP3-P7 DPRKQRCRAI  | 270  | 5666  |
| >TNFAIP3-P7 DPPKQRCRAI | 442   | >TNFAIP3-P7 DPRKQRCRAI  | 177  | 265   |
| >TNFAIP3-P7 EPAPEDPP   | 35598 | >TNFAIP3-P7 EPAPEDPR    | 261  | 35337 |
| >TNFAIP3-P7 EPAPEDPPKC | 547   | >TNFAIP3-P7 EPAPEDPRKC  | 374  | 173   |
| >TNFAIP3-P7 EPAPEDPPK  | 163   | >TNFAIP3-P7 EPAPEDPRK   | 2106 | 1943  |
| >TNFAIP3-P7 RGEPAPEDPF | 477   | >TNFAIP3-P7 RGEPAPEDPF  | 1921 | 1444  |
| >TNFAIP3-Q7CQHNPQRM    | 139   | >TNFAIP3-Q7CKHPNPQRM    | 131  | 8     |
| >TNFAIP3-Q7MECQHNPQF   | 39    | >TNFAIP3-Q7MECKHPNPQF   | 53   | 14    |
| >TNFAIP3-Q7MECQHNPQF   | 385   | >TNFAIP3-Q7MECKHPNPQF   | 479  | 94    |

|                       |      |                       |       |       |
|-----------------------|------|-----------------------|-------|-------|
| >TNFAIP3-Q7CMECQHPNC  | 160  | >TNFAIP3-Q7CMECKHPNC  | 232   | 72    |
| >TNFAIP3-Q7LCMECQHPN  | 205  | >TNFAIP3-Q7LCMECKHPN  | 190   | 15    |
| >TNFAIP3-R3RREGHAQNP  | 181  | >TNFAIP3-R3GREGHAQNP  | 1507  | 1326  |
| >TNFAIP3-R3RREGHAQNP  | 475  | >TNFAIP3-R3GREGHAQNP  | 906   | 431   |
| >TNFAIP3-R3GRREGHAQN  | 284  | >TNFAIP3-R3GGREGHAQN  | 8153  | 7869  |
| >TNFAIP3-R3GRREGHAQN  | 489  | >TNFAIP3-R3GGREGHAQN  | 18619 | 18130 |
| >TNFAIP3-R3GRREGHAQN  | 388  | >TNFAIP3-R3GGREGHAQN  | 27014 | 26626 |
| >TNFAIP3-R3KKWQENSEC  | 162  | >TNFAIP3-R3KKWQENSEC  | 2304  | 2142  |
| >TNFAIP3-R3KKWQENSEC  | 52   | >TNFAIP3-R3KKWQENSEC  | 27661 | 27609 |
| >TNFAIP3-R3SEQGRREGH  | 100  | >TNFAIP3-R3SEQGGREGH  | 78    | 22    |
| >TNFAIP3-R3SEQGRREGH  | 477  | >TNFAIP3-R3SEQGGREGH  | 252   | 225   |
| >TNFAIP3-R3ENSEQGRR   | 302  | >TNFAIP3-R3ENSEQGRR   | 244   | 58    |
| >TNFAIP3-R3KWQENSEQC  | 382  | >TNFAIP3-R3KWQENSEQC  | 733   | 351   |
| >TNFAIP3-R3KWQENSEQC  | 17   | >TNFAIP3-R3KWQENSEQC  | 16771 | 16754 |
| >TNFAIP3-R3KWQENSEQC  | 16   | >TNFAIP3-R3KWQENSEQC  | 17    | 1     |
| >TNFAIP3-R3KWQENSEQC  | 547  | >TNFAIP3-R3KWQENSEQC  | 380   | 167   |
| >TNFAIP3-T4ETTAMKCR   | 1419 | >TNFAIP3-T4ETNAMKCR   | 339   | 1080  |
| >TNFAIP3-T4ETTAMKCR   | 90   | >TNFAIP3-T4ETNAMKCR   | 99    | 9     |
| >TNFAIP3-T4ETTAMKCR   | 4    | >TNFAIP3-T4ETNAMKCR   | 5     | 1     |
| >TNFAIP3-T4FSETTAMK   | 69   | >TNFAIP3-T4FSETNAMK   | 78    | 9     |
| >TNFAIP3-T4LFSETTAMK  | 406  | >TNFAIP3-T4LFSETNAMK  | 503   | 97    |
| >TNFAIP3-T4LFSETTAMKC | 144  | >TNFAIP3-T4LFSETNAMKC | 151   | 7     |
| >TNFAIP3-T4LFSETTAMKC | 400  | >TNFAIP3-T4LFSETNAMKC | 291   | 109   |
| >TNFAIP3-T4LFSETTAMK  | 231  | >TNFAIP3-T4LFSETNAMK  | 274   | 43    |
| >TNFAIP3-T4LFSETTAMKC | 487  | >TNFAIP3-T4LFSETNAMKC | 550   | 63    |
| >TNFAIP3-T4LFSETTAM   | 100  | >TNFAIP3-T4LFSETNAM   | 123   | 23    |
| >TNFAIP3-T4LFSETTAMKC | 463  | >TNFAIP3-T4LFSETNAMKC | 672   | 209   |
| >TNFAIP3-T4FLFSETTA   | 14   | >TNFAIP3-T4FLFSETNA   | 12    | 2     |
| >TNFAIP3-T4FLFSETTAM  | 13   | >TNFAIP3-T4FLFSETNAM  | 17    | 4     |
| >TNFAIP3-T4FLFSETTA   | 4    | >TNFAIP3-T4FLFSETNA   | 3     | 1     |
| >TNFAIP3-T4FLFSETTAM  | 2    | >TNFAIP3-T4FLFSETNAM  | 2     | 0     |
| >TNFAIP3-T4FLFSETTAMK | 174  | >TNFAIP3-T4FLFSETNAMK | 222   | 48    |
| >TNFAIP3-T4FLFSETTAMK | 109  | >TNFAIP3-T4FLFSETNAMK | 103   | 6     |
| >TNFAIP3-T4FLFSETTA   | 4    | >TNFAIP3-T4FLFSETNA   | 3     | 1     |
| >TNFAIP3-T4FLFSETTAM  | 5    | >TNFAIP3-T4FLFSETNAM  | 7     | 2     |
| >TNFAIP3-T4FLFSETTAMK | 482  | >TNFAIP3-T4FLFSETNAMK | 1120  | 638   |
| >TNFAIP3-T4FLFSETTAMK | 78   | >TNFAIP3-T4FLFSETNAMK | 108   | 30    |
| >TNFAIP3-T4FLFSETTA   | 41   | >TNFAIP3-T4FLFSETNA   | 34    | 7     |
| >TNFAIP3-T4FLFSETTAM  | 24   | >TNFAIP3-T4FLFSETNAM  | 40    | 16    |
| >TNFAIP3-T4FLFSETTAMK | 352  | >TNFAIP3-T4FLFSETNAMK | 385   | 33    |
| >TNFAIP3-T4FLFSETTA   | 3    | >TNFAIP3-T4FLFSETNA   | 6     | 3     |
| >TNFAIP3-T4FLFSETTAM  | 6    | >TNFAIP3-T4FLFSETNAM  | 8     | 2     |
| >TNFAIP3-T4FLFSETTAMK | 97   | >TNFAIP3-T4FLFSETNAMK | 158   | 61    |

|                         |      |                         |     |      |
|-------------------------|------|-------------------------|-----|------|
| >TNFAIP3-T4 FLFSETTAMK  | 10   | >TNFAIP3-T4 FLFSETNAMK  | 10  | 0    |
| >TNFAIP3-T4 FLFSETTA    | 13   | >TNFAIP3-T4 FLFSETNA    | 26  | 13   |
| >TNFAIP3-T4 FLFSETTAM   | 15   | >TNFAIP3-T4 FLFSETNAM   | 10  | 5    |
| >TNFAIP3-T4 FLFSETTAMK  | 67   | >TNFAIP3-T4 FLFSETNAMK  | 42  | 25   |
| >TNFAIP3-T4 FLFSETTA    | 7    | >TNFAIP3-T4 FLFSETNA    | 8   | 1    |
| >TNFAIP3-T4 FLFSETTAM   | 26   | >TNFAIP3-T4 FLFSETNAM   | 44  | 18   |
| >TNFAIP3-T4 FLFSETTAMK  | 74   | >TNFAIP3-T4 FLFSETNAMK  | 122 | 48   |
| >TNFAIP3-T4 FLFSETTA    | 95   | >TNFAIP3-T4 FLFSETNA    | 134 | 39   |
| >TNFAIP3-T4 FLFSETTAM   | 45   | >TNFAIP3-T4 FLFSETNAM   | 48  | 3    |
| >TNFAIP3-T4 FLFSETTAMK  | 328  | >TNFAIP3-T4 FLFSETNAMK  | 287 | 41   |
| >TNFAIP3-T4 FLFSETTA    | 3    | >TNFAIP3-T4 FLFSETNA    | 3   | 0    |
| >TNFAIP3-T4 FLFSETTAM   | 5    | >TNFAIP3-T4 FLFSETNAM   | 10  | 5    |
| >TNFAIP3-T4 FLFSETTAMK  | 33   | >TNFAIP3-T4 FLFSETNAMK  | 75  | 42   |
| >TNFAIP3-T4 FLFSETTAMK  | 5    | >TNFAIP3-T4 FLFSETNAMK  | 6   | 1    |
| >TNFAIP3-T4 FLFSETTAMK  | 29   | >TNFAIP3-T4 FLFSETNAMK  | 44  | 15   |
| >TNFAIP3-T4 FLFSETTAMK  | 108  | >TNFAIP3-T4 FLFSETNAMK  | 125 | 17   |
| >TNFAIP3-T4 FLFSETTAMK  | 24   | >TNFAIP3-T4 FLFSETNAMK  | 29  | 5    |
| >TNFAIP3-T4 FLFSETTAM   | 33   | >TNFAIP3-T4 FLFSETNAM   | 45  | 12   |
| >TNFAIP3-T4 FLFSETTAM   | 49   | >TNFAIP3-T4 FLFSETNAM   | 50  | 1    |
| >TNFAIP3-T4 FLFSETTA    | 203  | >TNFAIP3-T4 FLFSETNA    | 319 | 116  |
| >TNFAIP3-T4 FLFSETTAM   | 5    | >TNFAIP3-T4 FLFSETNAM   | 7   | 2    |
| >TNFAIP3-T4 FLFSETTAMK  | 281  | >TNFAIP3-T4 FLFSETNAMK  | 357 | 76   |
| >TNFAIP3-T4 FLFSETTAM   | 33   | >TNFAIP3-T4 FLFSETNAM   | 32  | 1    |
| >TNFAIP3-T4 FLFSETTAM   | 145  | >TNFAIP3-T4 FLFSETNAM   | 69  | 76   |
| >TNFAIP3-T4 FLFSETTAM   | 177  | >TNFAIP3-T4 FLFSETNAM   | 273 | 96   |
| >TNFAIP3-T4 FLFSETTAM   | 310  | >TNFAIP3-T4 FLFSETNAM   | 660 | 350  |
| >TNFAIP3-T4 SPFLFSETTAM | 214  | >TNFAIP3-T4 SPFLFSETNAM | 465 | 251  |
| >TNFAIP3-T4 SPFLFSETTAM | 39   | >TNFAIP3-T4 SPFLFSETNAM | 46  | 7    |
| >TNFAIP3-T4 SPFLFSETTAM | 11   | >TNFAIP3-T4 SPFLFSETNAM | 12  | 1    |
| >TNFAIP3-T4 SPFLFSETTAM | 196  | >TNFAIP3-T4 SPFLFSETNAM | 115 | 81   |
| >TNFAIP3-T4 SPFLFSETTA  | 28   | >TNFAIP3-T4 SPFLFSETNA  | 28  | 0    |
| >TNFAIP3-T4 SPFLFSETTAM | 261  | >TNFAIP3-T4 SPFLFSETNAM | 432 | 171  |
| >TNFAIP3-T4 SPFLFSETTAM | 140  | >TNFAIP3-T4 SPFLFSETNAM | 94  | 46   |
| >TNFAIP3-V3 VPQLSLMDV   | 463  | >TNFAIP3-V3 MPQLSLMDV   | 351 | 112  |
| >TNFAIP3-V3 VPQLSLMDV   | 1516 | >TNFAIP3-V3 MPQLSLMDV   | 326 | 1190 |
| >TNFAIP3-V3 VPQLSLMDVI  | 3137 | >TNFAIP3-V3 MPQLSLMDV   | 272 | 2865 |
| >TNFAIP3-V3 VPQLSLMDV   | 6446 | >TNFAIP3-V3 MPQLSLMDV   | 191 | 6255 |
| >TNFAIP3-V3 VPQLSLMDVI  | 2985 | >TNFAIP3-V3 MPQLSLMDV   | 427 | 2558 |
| >TNFAIP3-V3 SVPQLSLMD\  | 915  | >TNFAIP3-V3 SMPQLSLMD   | 50  | 865  |
| >TNFAIP3-V3 SVPQLSLM    | 5063 | >TNFAIP3-V3 SMPQLSLM    | 331 | 4732 |
| >TNFAIP3-V3 SVPQLSLMD\  | 570  | >TNFAIP3-V3 SMPQLSLMD   | 49  | 521  |
| >TNFAIP3-V3 SVPQLSLM    | 4871 | >TNFAIP3-V3 SMPQLSLM    | 351 | 4520 |
| >TNFAIP3-V3 SVPQLSLMD\  | 88   | >TNFAIP3-V3 SMPQLSLMD   | 16  | 72   |

|                        |       |                       |       |       |
|------------------------|-------|-----------------------|-------|-------|
| >TNFAIP3-V3 SVPQLSLMD\ | 99    | >TNFAIP3-V3 SMPQLSLMD | 67    | 32    |
| >TNFAIP3-V3 SVPQLSLM   | 8508  | >TNFAIP3-V3 SMPQLSLM  | 155   | 8353  |
| >TNFAIP3-V3 SVPQLSLMD\ | 794   | >TNFAIP3-V3 SMPQLSLMD | 9     | 785   |
| >TNFAIP3-V3 SVPQLSLMD\ | 5301  | >TNFAIP3-V3 SMPQLSLMD | 46    | 5255  |
| >TNFAIP3-V3 SVPQLSLM   | 10943 | >TNFAIP3-V3 SMPQLSLM  | 225   | 10718 |
| >TNFAIP3-V3 SVPQLSLMD\ | 174   | >TNFAIP3-V3 SMPQLSLMD | 7     | 167   |
| >TNFAIP3-V3 SVPQLSLMD\ | 9320  | >TNFAIP3-V3 SMPQLSLMD | 305   | 9015  |
| >TNFAIP3-V3 SVPQLSLM   | 7010  | >TNFAIP3-V3 SMPQLSLM  | 210   | 6800  |
| >TNFAIP3-V3 SVPQLSLMD\ | 54    | >TNFAIP3-V3 SMPQLSLMD | 3     | 51    |
| >TNFAIP3-V3 SVPQLSLMD\ | 83    | >TNFAIP3-V3 SMPQLSLMD | 151   | 68    |
| >TNFAIP3-V3 SVPQLSLM   | 329   | >TNFAIP3-V3 SMPQLSLM  | 5781  | 5452  |
| >TNFAIP3-V3 SVPQLSLMD\ | 212   | >TNFAIP3-V3 SMPQLSLMD | 716   | 504   |
| >TNFAIP3-V3 SVPQLSLM   | 144   | >TNFAIP3-V3 SMPQLSLM  | 3527  | 3383  |
| >TNFAIP3-V3 PSVPQLSLM  | 100   | >TNFAIP3-V3 PSMPQLSLM | 370   | 270   |
| >TNFAIP3-V3 PSVPQLSL   | 274   | >TNFAIP3-V3 PSMPQLSL  | 340   | 66    |
| >TNFAIP3-V3 PSVPQLSLM  | 246   | >TNFAIP3-V3 PSMPQLSLM | 306   | 60    |
| >TNFAIP3-V3 PSVPQLSLM  | 209   | >TNFAIP3-V3 PSMPQLSLM | 132   | 77    |
| >TNFAIP3-V3 EPSVPQLSL  | 235   | >TNFAIP3-V3 EPSMPQLSL | 76    | 159   |
| >TNFAIP3-V3 EPSVPQLSL  | 505   | >TNFAIP3-V3 EPSMPQLSL | 276   | 229   |
| >TNFAIP3-V3 EPSVPQLSL  | 255   | >TNFAIP3-V3 EPSMPQLSL | 305   | 50    |
| >TNFAIP3-V3 MEPSVPQLSL | 126   | >TNFAIP3-V3 MEPSMPQLS | 137   | 11    |
| >TNFAIP3-V3 MEPSVPQLSL | 424   | >TNFAIP3-V3 MEPSMPQLS | 276   | 148   |
| >TNFAIP3-V3 MEPSVPQLSL | 176   | >TNFAIP3-V3 MEPSMPQLS | 125   | 51    |
| >TNFAIP3-V3 MEPSVPQLSL | 388   | >TNFAIP3-V3 MEPSMPQLS | 207   | 181   |
| >TNFAIP3-V3 MEPSVPQLSL | 35    | >TNFAIP3-V3 MEPSMPQLS | 27    | 8     |
| >TNFAIP3-V3 PMEPSVPQL  | 400   | >TNFAIP3-V3 PMEPSMPQL | 1673  | 1273  |
| >TNFAIP3-V3 PMEPSVPQL  | 19    | >TNFAIP3-V3 PMEPSMPQL | 32    | 13    |
| >TNFAIP3-V3 PMEPSVPQLS | 65    | >TNFAIP3-V3 PMEPSMPQL | 80    | 15    |
| >TNFAIP3-V3 NPMEPSVPQ  | 370   | >TNFAIP3-V3 NPMEPSMPC | 796   | 426   |
| >TNFAIP3-V3 NPMEPSVPQ  | 726   | >TNFAIP3-V3 NPMEPSMPC | 461   | 265   |
| >TNFAIP3-V3 NPMEPSVPQ  | 40    | >TNFAIP3-V3 NPMEPSMPC | 30    | 10    |
| >TNFAIP3-V3 NPMEPSVPQ  | 193   | >TNFAIP3-V3 NPMEPSMPC | 193   | 0     |
| >TNFAIP3-V3 NPMEPSVPQ  | 840   | >TNFAIP3-V3 NPMEPSMPC | 282   | 558   |
| >TNFAIP3-V3 NPMEPSVPQ  | 110   | >TNFAIP3-V3 NPMEPSMPC | 176   | 66    |
| >TNFAIP3-V3 NPMEPSVPQ  | 19    | >TNFAIP3-V3 NPMEPSMPC | 23    | 4     |
| >TNFAIP3-V3 NPMEPSVPQ  | 444   | >TNFAIP3-V3 NPMEPSMPC | 1054  | 610   |
| >TNFAIP3-V3 AQNPMEPSV  | 499   | >TNFAIP3-V3 AQNPMEPSN | 8712  | 8213  |
| >TNFAIP3-V3 AQNPMEPSV  | 229   | >TNFAIP3-V3 AQNPMEPSN | 9636  | 9407  |
| >TNFAIP3-V3 AQNPMEPSV  | 28    | >TNFAIP3-V3 AQNPMEPSN | 501   | 473   |
| >TNFAIP3-V3 AQNPMEPSV  | 279   | >TNFAIP3-V3 AQNPMEPSN | 9822  | 9543  |
| >TNFAIP3-V3 AQNPMEPSV  | 82    | >TNFAIP3-V3 AQNPMEPSN | 10691 | 10609 |
| >TNFAIP3-V3 AQNPMEPSV  | 56    | >TNFAIP3-V3 AQNPMEPSN | 13025 | 12969 |
| >TNFAIP3-V3 AQNPMEPSV  | 1351  | >TNFAIP3-V3 AQNPMEPSN | 106   | 1245  |



|                         |      |                         |       |       |
|-------------------------|------|-------------------------|-------|-------|
| >TNFAIP3-V3 AQNPMEPSV   | 263  | >TNFAIP3-V3 AQNPMEPSM   | 51    | 212   |
| >TNFAIP3-V3 HAQNPMEPS   | 231  | >TNFAIP3-V3 HAQNPMEPS   | 2098  | 1867  |
| >TNFAIP3-V3 HAQNPMEPS   | 6004 | >TNFAIP3-V3 HAQNPMEPS   | 166   | 5838  |
| >TNFAIP3-V5 VRSPSPHSCH  | 701  | >TNFAIP3-V5 IRSPSPHSCH  | 317   | 384   |
| >TNFAIP3-V5 VRSPSPHSCH  | 673  | >TNFAIP3-V5 IRSPSPHSCHF | 220   | 453   |
| >TNFAIP3-V5 LVRSPSPH    | 327  | >TNFAIP3-V5 LIRSPSPH    | 1106  | 779   |
| >TNFAIP3-V5 LVRSPSPHS   | 28   | >TNFAIP3-V5 LIRSPSPHS   | 89    | 61    |
| >TNFAIP3-V5 LVRSPSPHSC  | 342  | >TNFAIP3-V5 LIRSPSPHSC  | 1110  | 768   |
| >TNFAIP3-V5 LVRSPSPHSCI | 74   | >TNFAIP3-V5 LIRSPSPHSCF | 255   | 181   |
| >TNFAIP3-V5 RLVRSPSPHS  | 99   | >TNFAIP3-V5 RLIRSPSPHSC | 64    | 35    |
| >TNFAIP3-V5 RLVRSPSPHS  | 513  | >TNFAIP3-V5 RLIRSPSPHSC | 180   | 333   |
| >TNFAIP3-V5 RLVRSPSPHS  | 75   | >TNFAIP3-V5 RLIRSPSPHSC | 61    | 14    |
| >TNFAIP3-V5 RLVRSPSPH   | 311  | >TNFAIP3-V5 RLIRSPSPH   | 260   | 51    |
| >TNFAIP3-V5 RLVRSPSPH   | 798  | >TNFAIP3-V5 RLIRSPSPH   | 343   | 455   |
| >TNFAIP3-V5 RLVRSPSPH   | 133  | >TNFAIP3-V5 RLIRSPSPH   | 86    | 47    |
| >TNFAIP3-V5 SRLVRSPSPH  | 323  | >TNFAIP3-V5 SRLIRSPSPH  | 245   | 78    |
| >TNFAIP3-V5 KSDPSRLVR   | 336  | >TNFAIP3-V5 KSDPSRLIR   | 363   | 27    |
| >TNFAIP3-V5 KSDPSRLVR   | 129  | >TNFAIP3-V5 KSDPSRLIR   | 157   | 28    |
| >TNFAIP3-V5 KSDPSRLV    | 159  | >TNFAIP3-V5 KSDPSRLI    | 24    | 135   |
| >TNFAIP3-V5 KSDPSRLV    | 4776 | >TNFAIP3-V5 KSDPSRLI    | 163   | 4613  |
| >TNFAIP3-V5 KSDPSRLVR   | 456  | >TNFAIP3-V5 KSDPSRLIR   | 491   | 35    |
| >TNFAIP3-V5 KSDPSRLV    | 1503 | >TNFAIP3-V5 KSDPSRLI    | 22    | 1481  |
| >TNFAIP3-V5 SKSDPSRLVR  | 386  | >TNFAIP3-V5 SKSDPSRLIR  | 353   | 33    |
| >TNFAIP3-V5 RSKSDPSRLV  | 27   | >TNFAIP3-V5 RSKSDPSRLI  | 17    | 10    |
| >TNFAIP3-V5 RSKSDPSRLV  | 46   | >TNFAIP3-V5 RSKSDPSRLIR | 40    | 6     |
| >TNFAIP3-V5 RSKSDPSRLV  | 17   | >TNFAIP3-V5 RSKSDPSRLIR | 19    | 2     |
| >TNFAIP3-V5 RSKSDPSRLV  | 598  | >TNFAIP3-V5 RSKSDPSRLI  | 79    | 519   |
| >TNFAIP3-V5 RSKSDPSRLV  | 291  | >TNFAIP3-V5 RSKSDPSRLI  | 358   | 67    |
| >TNFAIP3-V5 RSKSDPSRLV  | 6506 | >TNFAIP3-V5 RSKSDPSRLI  | 170   | 6336  |
| >TNFAIP3-Y6 YFGTPENKGF  | 27   | >TNFAIP3-Y6 CFGTPENKGF  | 49    | 22    |
| >TNFAIP3-Y6 VYFGTPENK   | 87   | >TNFAIP3-Y6 VCFGTPENK   | 13781 | 13694 |
| >TNFAIP3-Y6 VYFGTPENKC  | 40   | >TNFAIP3-Y6 VCFGTPENKC  | 4094  | 4054  |
| >TNFAIP3-Y6 VYFGTPENKC  | 380  | >TNFAIP3-Y6 VCFGTPENKC  | 14215 | 13835 |
| >TNFAIP3-Y6 VYFGTPENKC  | 8    | >TNFAIP3-Y6 VCFGTPENKC  | 12349 | 12341 |
| >TNFAIP3-Y6 VYFGTPENKC  | 304  | >TNFAIP3-Y6 VCFGTPENKC  | 225   | 79    |
| >TNFAIP3-Y6 VYFGTPENKC  | 3215 | >TNFAIP3-Y6 VCFGTPENKC  | 487   | 2728  |
| >TNFAIP3-Y6 VYFGTPENK   | 313  | >TNFAIP3-Y6 VCFGTPENK   | 5050  | 4737  |
| >TNFAIP3-Y6 TSKCRKAGCV  | 85   | >TNFAIP3-Y6 TSKCRKAGCV  | 13900 | 13815 |
| >TNFAIP3-Y6 TSKCRKAGCV  | 387  | >TNFAIP3-Y6 TSKCRKAGCV  | 13398 | 13011 |
| >TNFAIP3-Y6 TSKCRKAGCV  | 40   | >TNFAIP3-Y6 TSKCRKAGCV  | 18555 | 18515 |
| >TNFAIP3-Y6 TSKCRKAGCV  | 146  | >TNFAIP3-Y6 TSKCRKAGCV  | 15698 | 15552 |
| >TNFAIP3-Y6 CVYFGTPENK  | 23   | >TNFAIP3-Y6 CVCFGTPENK  | 89    | 66    |
| >TNFAIP3-Y6 CVYFGTPENK  | 19   | >TNFAIP3-Y6 CVCFGTPENK  | 37    | 18    |

|                        |     |                        |       |       |
|------------------------|-----|------------------------|-------|-------|
| >TNFAIP3-Y6 CVYFGTPENK | 454 | >TNFAIP3-Y6 CVCFGTPENK | 923   | 469   |
| >TNFAIP3-Y6 CVYFGTPENK | 28  | >TNFAIP3-Y6 CVCFGTPENK | 188   | 160   |
| >TNFAIP3-Y6 RKAGCVYF   | 5   | >TNFAIP3-Y6 RKAGCVCF   | 5     | 0     |
| >TNFAIP3-Y6 CRKAGCVY   | 133 | >TNFAIP3-Y6 CRKAGCVC   | 6972  | 6839  |
| >TNFAIP3-Y6 CRKAGCVYF  | 37  | >TNFAIP3-Y6 CRKAGCVCF  | 48    | 11    |
| >TNFAIP3-Y6 CRKAGCVYF  | 490 | >TNFAIP3-Y6 CRKAGCVCF  | 730   | 240   |
| >TNFAIP3-Y6 KCRKAGCVY  | 21  | >TNFAIP3-Y6 KCRKAGCVC  | 273   | 252   |
| >TNFAIP3-Y6 KCRKAGCVYF | 98  | >TNFAIP3-Y6 KCRKAGCVCF | 871   | 773   |
| >TNFAIP3-Y6 KCRKAGCVYF | 32  | >TNFAIP3-Y6 KCRKAGCVCF | 19    | 13    |
| >TNFAIP3-Y6 KCRKAGCVY  | 479 | >TNFAIP3-Y6 KCRKAGCVC  | 18298 | 17819 |
| >TNFAIP3-Y6 KCRKAGCVY  | 133 | >TNFAIP3-Y6 KCRKAGCVC  | 6922  | 6789  |
| >TNFAIP3-Y6 KCRKAGCVYF | 47  | >TNFAIP3-Y6 KCRKAGCVCF | 39    | 8     |
| >TNFAIP3-Y6 KCRKAGCVY  | 85  | >TNFAIP3-Y6 KCRKAGCVC  | 11673 | 11588 |
| >TNFAIP3-Y6 SKCRKAGCVY | 109 | >TNFAIP3-Y6 SKCRKAGCVC | 7101  | 6992  |
| >TNFAIP3-Y6 SKCRKAGCVY | 34  | >TNFAIP3-Y6 SKCRKAGCVC | 38    | 4     |
| >TNFRSF14-F DVVKVIVSVQ | 32  | >TNFRSF14-F DVVKVIVSVQ | 10549 | 10517 |
| >TNFRSF14-F DVVKVIVSVQ | 5   | >TNFRSF14-F DVVKVIVSVQ | 480   | 475   |
| >TNFRSF14-F IVSVQRKR   | 158 | >TNFRSF14-F IVSVQQKR   | 200   | 42    |
| >TNFRSF14-F IVSVQRKR   | 119 | >TNFRSF14-F IVSVQQKR   | 98    | 21    |
| >TNFRSF14-F VIVSVQRK   | 261 | >TNFRSF14-F VIVSVQQK   | 290   | 29    |
| >TNFRSF14-F VIVSVQRK   | 187 | >TNFRSF14-F VIVSVQQK   | 125   | 62    |
| >TNFRSF14-F VIVSVQRKR  | 453 | >TNFRSF14-F VIVSVQQKR  | 287   | 166   |
| >TNFRSF14-F VIVSVQRK   | 503 | >TNFRSF14-F VIVSVQQK   | 321   | 182   |
| >TNFRSF14-F VIVSVQRKR  | 205 | >TNFRSF14-F VIVSVQQKR  | 124   | 81    |
| >TNFRSF14-F KVIVSVQRK  | 114 | >TNFRSF14-F KVIVSVQQK  | 134   | 20    |
| >TNFRSF14-F KVIVSVQR   | 151 | >TNFRSF14-F KVIVSVQQ   | 16565 | 16414 |
| >TNFRSF14-F KVIVSVQRK  | 38  | >TNFRSF14-F KVIVSVQQK  | 32    | 6     |
| >TNFRSF14-F KVIVSVQRK  | 12  | >TNFRSF14-F KVIVSVQQK  | 10    | 2     |
| >TNFRSF14-F KVIVSVQR   | 14  | >TNFRSF14-F KVIVSVQQ   | 6167  | 6153  |
| >TNFRSF14-F KVIVSVQRK  | 371 | >TNFRSF14-F KVIVSVQQK  | 366   | 5     |
| >TNFRSF14-F KVIVSVQRKR | 29  | >TNFRSF14-F KVIVSVQQKR | 57    | 28    |
| >TNFRSF14-F KVIVSVQR   | 91  | >TNFRSF14-F KVIVSVQQ   | 8864  | 8773  |
| >TNFRSF14-F KVIVSVQRKR | 560 | >TNFRSF14-F KVIVSVQQKR | 162   | 398   |
| >TNFRSF14-F KVIVSVQR   | 166 | >TNFRSF14-F KVIVSVQQ   | 18578 | 18412 |
| >TNFRSF14-F KVIVSVQRKR | 592 | >TNFRSF14-F KVIVSVQQKR | 429   | 163   |
| >TNFRSF14-F VVKVIVSVQR | 345 | >TNFRSF14-F VVKVIVSVQC | 378   | 33    |
| >TNFRSF14-F VVKVIVSVQR | 236 | >TNFRSF14-F VVKVIVSVQC | 184   | 52    |
| >TNFRSF14-F VVKVIVSVQR | 24  | >TNFRSF14-F VVKVIVSVQC | 19    | 5     |
| >TNFRSF14-F VVKVIVSVQR | 96  | >TNFRSF14-F VVKVIVSVQC | 14321 | 14225 |
| >TNFRSF14-F VVKVIVSVQR | 459 | >TNFRSF14-F VVKVIVSVQC | 426   | 33    |
| >TNFRSF14-F VVKVIVSVQR | 73  | >TNFRSF14-F VVKVIVSVQC | 27924 | 27851 |
| >TOP1-A96S- ASGDAKIK   | 377 | >TOP1-A96S- SSGDAKIK   | 221   | 156   |
| >TOP1-A96S- ASGDAKIKK  | 59  | >TOP1-A96S- SSGDAKIKK  | 36    | 23    |

|                         |       |                         |      |       |
|-------------------------|-------|-------------------------|------|-------|
| >TOP1-A96S- ASGDAKIKKE  | 274   | >TOP1-A96S- SSGDAKIKKEI | 157  | 117   |
| >TOP1-A96S- ASGDAKIKK   | 362   | >TOP1-A96S- SSGDAKIKK   | 606  | 244   |
| >TOP1-A96S- RASGDAKIKK  | 513   | >TOP1-A96S- RSSGDAKIKK  | 256  | 257   |
| >TOP1-A96S- RASGDAKIKK  | 99    | >TOP1-A96S- RSSGDAKIKK  | 31   | 68    |
| >TOP1-A96S- RASGDAKIK   | 1247  | >TOP1-A96S- RSSGDAKIK   | 440  | 807   |
| >TOP1-A96S- RASGDAKIKK  | 243   | >TOP1-A96S- RSSGDAKIKK  | 95   | 148   |
| >TOP1-A96S- RASGDAKI    | 2348  | >TOP1-A96S- RSSGDAKI    | 282  | 2066  |
| >TOP1-A96S- RASGDAKI    | 63    | >TOP1-A96S- RSSGDAKI    | 12   | 51    |
| >TOP1-A96S- RASGDAKI    | 307   | >TOP1-A96S- RSSGDAKI    | 109  | 198   |
| >TOP1-A96S- RASGDAKI    | 64    | >TOP1-A96S- RSSGDAKI    | 20   | 44    |
| >TOP1-A96S- KEKRKEEKVR  | 299   | >TOP1-A96S- KEKRKEEKVR  | 6646 | 6347  |
| >TOP1-A96S- VRASGDAKIK  | 340   | >TOP1-A96S- VRSSGDAKIK  | 637  | 297   |
| >TOP1-A96S- KVRASGDAK   | 127   | >TOP1-A96S- KVRSSGDAK   | 173  | 46    |
| >TOP1-A96S- KVRASGDAKI  | 172   | >TOP1-A96S- KVRSSGDAKI  | 214  | 42    |
| >TOP1-A96S- KVRASGDAK   | 376   | >TOP1-A96S- KVRSSGDAK   | 534  | 158   |
| >TOP1-A96S- KVRASGDA    | 6     | >TOP1-A96S- KVRSSGDA    | 8    | 2     |
| >TOP1-A96S- KVRASGDAK   | 3     | >TOP1-A96S- KVRSSGDAK   | 4    | 1     |
| >TOP1-A96S- KVRASGDAKI  | 7     | >TOP1-A96S- KVRSSGDAKI  | 8    | 1     |
| >TOP1-A96S- KVRASGDAKI  | 4     | >TOP1-A96S- KVRSSGDAKI  | 4    | 0     |
| >TOP1-A96S- KVRASGDAK   | 662   | >TOP1-A96S- KVRSSGDAK   | 451  | 211   |
| >TOP1-A96S- KVRASGDAKI  | 79    | >TOP1-A96S- KVRSSGDAKI  | 117  | 38    |
| >TOP1-A96S- EEKVRASGDA  | 464   | >TOP1-A96S- EEKVRSSGDA  | 679  | 215   |
| >TOP1-A96S- KEEKVRASGD  | 386   | >TOP1-A96S- KEEKVRSSGD  | 380  | 6     |
| >TOP1-K326f KIKEENEKL   | 497   | >TOP1-K326f RIKEENEKL   | 1025 | 528   |
| >TOP1-K326f KIKEENEKLLK | 200   | >TOP1-K326f RIKEENEKLLK | 203  | 3     |
| >TOP1-K326f KIKEENEKLLK | 256   | >TOP1-K326f RIKEENEKLLK | 197  | 59    |
| >TOP1-K326f KIKEENEK    | 13    | >TOP1-K326f RIKEENEK    | 13   | 0     |
| >TOP1-K326f KIKEENEKLLK | 11    | >TOP1-K326f RIKEENEKLLK | 10   | 1     |
| >TOP1-K326f LKIKEENEKL  | 110   | >TOP1-K326f LRIKEENEKL  | 734  | 624   |
| >TOP1-K326f LKIKEENEKLL | 102   | >TOP1-K326f LRIKEENEKLL | 743  | 641   |
| >TOP1-K326f LKIKEENEKL  | 16986 | >TOP1-K326f LRIKEENEKL  | 278  | 16708 |
| >TOP1-K326f KLKIKEENEKL | 202   | >TOP1-K326f KLRIKEENEKL | 443  | 241   |
| >TOP1-K326f KLKIKEENEKL | 159   | >TOP1-K326f KLRIKEENEKL | 109  | 50    |
| >TOP1-K326f KLKIKEENEK  | 43    | >TOP1-K326f KLRIKEENEK  | 12   | 31    |
| >TOP1-K326f MSKEEKLR    | 469   | >TOP1-K326f MSKEEKLR    | 8351 | 7882  |
| >TOP1-K326f MSKEEKLR    | 14    | >TOP1-K326f MSKEEKLR    | 1557 | 1543  |
| >TOP1-K326f MSKEEKLKI   | 309   | >TOP1-K326f MSKEEKLRI   | 309  | 0     |
| >TOP1-K326f MSKEEKLKIK  | 13    | >TOP1-K326f MSKEEKLRIK  | 10   | 3     |
| >TOP1-K326f MSKEEKLR    | 1084  | >TOP1-K326f MSKEEKLR    | 61   | 1023  |
| >TOP1-K326f MSKEEKLR    | 7085  | >TOP1-K326f MSKEEKLR    | 340  | 6745  |
| >TOP1-K326f MSKEEKLR    | 268   | >TOP1-K326f MSKEEKLR    | 58   | 210   |
| >TOP1-K326f MSKEEKLKI   | 240   | >TOP1-K326f MSKEEKLRI   | 134  | 106   |
| >TOP1-K326f MSKEEKLKI   | 259   | >TOP1-K326f MSKEEKLRI   | 352  | 93    |

|                       |       |                       |      |       |
|-----------------------|-------|-----------------------|------|-------|
| >TOP1-K326!QMSKEEKLK  | 3291  | >TOP1-K326!QMSKEEKLK  | 139  | 3152  |
| >TOP1-K326!KQMSKEEKLK | 173   | >TOP1-K326!KQMSKEEKLK | 144  | 29    |
| >TOP1-K326!KQMSKEEKLK | 346   | >TOP1-K326!KQMSKEEKLK | 6316 | 5970  |
| >TOP1-K326!KQMSKEEKLK | 270   | >TOP1-K326!KQMSKEEKLK | 3492 | 3222  |
| >TOP1-K326!KQMSKEEKLK | 1670  | >TOP1-K326!KQMSKEEKLK | 92   | 1578  |
| >TOP1-K326!KQMSKEEKLK | 215   | >TOP1-K326!KQMSKEEKLK | 336  | 121   |
| >TOP1-K326!KQMSKEEKLK | 123   | >TOP1-K326!KQMSKEEKLK | 193  | 70    |
| >TOP1-K326!KQMSKEEKLK | 1640  | >TOP1-K326!KQMSKEEKLK | 69   | 1571  |
| >TOP1-N623!ANRAVAIL   | 507   | >TOP1-N623!ASRAVAIL   | 14   | 493   |
| >TOP1-N623!ANRAVAILC  | 3389  | >TOP1-N623!ASRAVAILC  | 143  | 3246  |
| >TOP1-N623!ANRAVAILCN | 4504  | >TOP1-N623!ASRAVAILCN | 281  | 4223  |
| >TOP1-N623!ANRAVAILCN | 3133  | >TOP1-N623!ASRAVAILCN | 111  | 3022  |
| >TOP1-N623!ANRAVAIL   | 2179  | >TOP1-N623!ASRAVAIL   | 430  | 1749  |
| >TOP1-N623!ANRAVAIL   | 13561 | >TOP1-N623!ASRAVAIL   | 11   | 13550 |
| >TOP1-N623!RANRAVAI   | 83    | >TOP1-N623!RASRAVAI   | 161  | 78    |
| >TOP1-N623!RANRAVAIL  | 87    | >TOP1-N623!RASRAVAIL  | 178  | 91    |
| >TOP1-N623!RANRAVAI   | 117   | >TOP1-N623!RASRAVAI   | 228  | 111   |
| >TOP1-N623!RANRAVAI   | 353   | >TOP1-N623!RASRAVAI   | 303  | 50    |
| >TOP1-N623!RANRAVAIL  | 379   | >TOP1-N623!RASRAVAIL  | 355  | 24    |
| >TOP1-N623!RANRAVAI   | 260   | >TOP1-N623!RASRAVAI   | 163  | 97    |
| >TOP1-N623!RANRAVAIL  | 97    | >TOP1-N623!RASRAVAIL  | 62   | 35    |
| >TOP1-N623!RANRAVAI   | 194   | >TOP1-N623!RASRAVAI   | 254  | 60    |
| >TOP1-N623!RANRAVAIL  | 40    | >TOP1-N623!RASRAVAIL  | 44   | 4     |
| >TOP1-N623!RANRAVAIL  | 787   | >TOP1-N623!RASRAVAIL  | 366  | 421   |
| >TOP1-N623!RANRAVAI   | 106   | >TOP1-N623!RASRAVAI   | 68   | 38    |
| >TOP1-N623!NRANRAVAI  | 280   | >TOP1-N623!NRASRAVAI  | 365  | 85    |
| >TOP1-N623!NRANRAVAIL | 272   | >TOP1-N623!NRASRAVAIL | 307  | 35    |
| >TOP1-N623!NRANRAVAI  | 39    | >TOP1-N623!NRASRAVAI  | 24   | 15    |
| >TOP1-N623!NRANRAVAIL | 17    | >TOP1-N623!NRASRAVAIL | 13   | 4     |
| >TOP1-N623!NRANRAVAIL | 432   | >TOP1-N623!NRASRAVAIL | 798  | 366   |
| >TOP1-N623!NRANRAVAI  | 310   | >TOP1-N623!NRASRAVAI  | 524  | 214   |
| >TOP1-N623!NRANRAVAIL | 299   | >TOP1-N623!NRASRAVAIL | 486  | 187   |
| >TOP1-N623!YNRANRAVA  | 362   | >TOP1-N623!YNRASRAVA  | 210  | 152   |
| >TOP1-N623!YNRANRAVA  | 471   | >TOP1-N623!YNRASRAVAI | 507  | 36    |
| >TOP1-N623!YNRANRAV   | 908   | >TOP1-N623!YNRASRAV   | 416  | 492   |
| >TOP1-N623!YNRANRAVA  | 216   | >TOP1-N623!YNRASRAVAI | 102  | 114   |
| >TOP1-N623!YNRANRAVA  | 359   | >TOP1-N623!YNRASRAVAI | 161  | 198   |
| >TOP1-N623!SYNRANRAV  | 15    | >TOP1-N623!SYNRASRAV  | 42   | 27    |
| >TOP1-N623!SYNRANRAV/ | 5     | >TOP1-N623!SYNRASRAVA | 6    | 1     |
| >TOP1-N623!SYNRANRAV/ | 50    | >TOP1-N623!SYNRASRAVA | 36   | 14    |
| >TOP1-N623!SYNRANRAV  | 327   | >TOP1-N623!SYNRASRAV  | 160  | 167   |
| >TOP1-N623!SYNRANRAV/ | 133   | >TOP1-N623!SYNRASRAVA | 81   | 52    |
| >TOP1-N623!SYNRANRAV/ | 314   | >TOP1-N623!SYNRASRAVA | 228  | 86    |

|                        |       |                          |     |       |
|------------------------|-------|--------------------------|-----|-------|
| >TOP1-N623:SYNRANRAV\  | 401   | >TOP1-N623:SYNRASRAVA\   | 403 | 2     |
| >TOP1-N623:LSYNRANRA   | 151   | >TOP1-N623:LSYNRASRA     | 159 | 8     |
| >TOP1-N623:LSYNRANR    | 342   | >TOP1-N623:LSYNRASR      | 338 | 4     |
| >TOP1-N623:LSYNRANR    | 14    | >TOP1-N623:LSYNRASR      | 16  | 2     |
| >TOP1-N623:LSYNRANR    | 194   | >TOP1-N623:LSYNRASR      | 159 | 35    |
| >TOP1-N623:LSYNRANR    | 18    | >TOP1-N623:LSYNRASR      | 19  | 1     |
| >TOP1-N623:LSYNRANRA\  | 162   | >TOP1-N623:LSYNRASRAV    | 111 | 51    |
| >TOP1-N623:LSYNRANRA   | 2887  | >TOP1-N623:LSYNRASRA     | 147 | 2740  |
| >TOP1-N623:LSYNRANRA\  | 324   | >TOP1-N623:LSYNRASRAV    | 88  | 236   |
| >TOP1-N623:LSYNRANRA   | 1003  | >TOP1-N623:LSYNRASRA     | 62  | 941   |
| >TOP1-N623:LSYNRANRA\  | 576   | >TOP1-N623:LSYNRASRAV    | 215 | 361   |
| >TOP1-N623:LSYNRANRA\  | 1655  | >TOP1-N623:LSYNRASRAV    | 449 | 1206  |
| >TOP1-N623:ILSYNRANRA\ | 19    | >TOP1-N623:ILSYNRASRA\   | 17  | 2     |
| >TOP1-N623:ILSYNRANRA  | 716   | >TOP1-N623:ILSYNRASRA    | 283 | 433   |
| >TOP1-N623:ILSYNRANRA\ | 19    | >TOP1-N623:ILSYNRASRA\   | 13  | 6     |
| >TOP1-N623:ILSYNRANRA\ | 47    | >TOP1-N623:ILSYNRASRA\   | 32  | 15    |
| >TOP1-N623:ILSYNRANRA\ | 61    | >TOP1-N623:ILSYNRASRA\   | 33  | 28    |
| >TOP1-N623:ILSYNRANRA\ | 574   | >TOP1-N623:ILSYNRASRA\   | 340 | 234   |
| >TOP1-N623:ILSYNRANRA\ | 111   | >TOP1-N623:ILSYNRASRA\   | 56  | 55    |
| >TOP1-N623:ILSYNRANRA  | 73    | >TOP1-N623:ILSYNRASRA    | 34  | 39    |
| >TOP1-N623:ILSYNRANRA\ | 8     | >TOP1-N623:ILSYNRASRA\   | 7   | 1     |
| >TOP1-N623:ILSYNRANR   | 438   | >TOP1-N623:ILSYNRASR     | 605 | 167   |
| >TOP1-N623:ILSYNRANR   | 20    | >TOP1-N623:ILSYNRASR     | 40  | 20    |
| >TOP1-N623:ILSYNRANR   | 117   | >TOP1-N623:ILSYNRASR     | 105 | 12    |
| >TOP1-N623:ILSYNRANR   | 29    | >TOP1-N623:ILSYNRASR     | 28  | 1     |
| >TOP1-N623:ILSYNRANRA\ | 506   | >TOP1-N623:ILSYNRASRA\   | 383 | 123   |
| >TOP1-N623:ILSYNRANR   | 306   | >TOP1-N623:ILSYNRASR     | 635 | 329   |
| >TOP1-N623:KILSYNRANR\ | 865   | >TOP1-N623:KILSYNRASRA\  | 487 | 378   |
| >TOP1-N623:KILSYNRANR  | 255   | >TOP1-N623:KILSYNRASR    | 203 | 52    |
| >TOP1-N623:KILSYNRANR  | 308   | >TOP1-N623:KILSYNRASR    | 203 | 105   |
| >TOP1-N623:KILSYNRANR\ | 373   | >TOP1-N623:KILSYNRASRA\  | 462 | 89    |
| >TOP1-N623:KILSYNRANR  | 5     | >TOP1-N623:KILSYNRASR    | 5   | 0     |
| >TOP1-N623:KILSYNRANR  | 389   | >TOP1-N623:KILSYNRASR    | 558 | 169   |
| >TOP1-N623:KILSYNRANR  | 28    | >TOP1-N623:KILSYNRASR    | 31  | 3     |
| >TOP1-N623:AKILSYNRAN\ | 242   | >TOP1-N623:AKILSYNRASFA\ | 136 | 106   |
| >TOP1-P560I PEDDLFDRL  | 372   | >TOP1-P560I LEDDLFDRL    | 24  | 348   |
| >TOP1-P560I PEDDLFDRL  | 6183  | >TOP1-P560I LEDDLFDRL    | 484 | 5699  |
| >TOP1-P560I PEDDLFDRL  | 1812  | >TOP1-P560I LEDDLFDRL    | 134 | 1678  |
| >TOP1-P560I QPEDDLFDRL | 20635 | >TOP1-P560I QLEDDLFDRL   | 127 | 20508 |
| >TOP1-P560I QPEDDLFDRL | 28071 | >TOP1-P560I QLEDDLFDRL   | 439 | 27632 |
| >TOP1-P560I QPEDDLFDRL | 24204 | >TOP1-P560I QLEDDLFDRL   | 271 | 23933 |
| >TOP1-P560I QPEDDLFDRL | 27251 | >TOP1-P560I QLEDDLFDRL   | 11  | 27240 |
| >TOP1-P560I NLQLFMENK\ | 15546 | >TOP1-P560I NLQLFMENK\   | 424 | 15122 |

|                        |       |                         |       |       |
|------------------------|-------|-------------------------|-------|-------|
| >TOP1-P560I KQPEDDLFDF | 1499  | >TOP1-P560I KQLEDDLDFDR | 126   | 1373  |
| >TOP1-P560I KQPEDDLF   | 248   | >TOP1-P560I KQLEDDLDF   | 54    | 194   |
| >TOP1-P560I KQPEDDLFDF | 32    | >TOP1-P560I KQLEDDLDFDR | 12    | 20    |
| >TOP1-P560I KQPEDDLFDF | 1599  | >TOP1-P560I KQLEDDLDFDR | 234   | 1365  |
| >TOP1-P560I KQPEDDLFDF | 2704  | >TOP1-P560I KQLEDDLDFDR | 127   | 2577  |
| >TOP1-P560I KQPEDDLFDF | 2984  | >TOP1-P560I KQLEDDLDFDR | 342   | 2642  |
| >TOP1-P560I KQPEDDLF   | 1479  | >TOP1-P560I KQLEDDLDF   | 458   | 1021  |
| >TOP1-P560I KQPEDDLF   | 228   | >TOP1-P560I KQLEDDLDF   | 21    | 207   |
| >TOP1-P560I KQPEDDLFDF | 3236  | >TOP1-P560I KQLEDDLDFDR | 451   | 2785  |
| >TOP1-P560I KQPEDDLFDF | 93    | >TOP1-P560I KQLEDDLDFDR | 66    | 27    |
| >TOP1-P560I MENKQPEDC  | 1882  | >TOP1-P560I MENKQLEDD   | 199   | 1683  |
| >TOP1-P560I MENKQPEDC  | 1260  | >TOP1-P560I MENKQLEDD   | 400   | 860   |
| >TOP1-P560I MENKQPEDC  | 753   | >TOP1-P560I MENKQLEDD   | 316   | 437   |
| >TOP1-P560I MENKQPEDC  | 473   | >TOP1-P560I MENKQLEDD   | 408   | 65    |
| >TOP1-P560I MENKQPEDC  | 90    | >TOP1-P560I MENKQLEDD   | 100   | 10    |
| >TOP1-P560I MENKQPEDC  | 518   | >TOP1-P560I MENKQLEDD   | 178   | 340   |
| >TOP1-P560I FMENKQPED  | 107   | >TOP1-P560I FMENKQLED   | 60    | 47    |
| >TOP1-P560I FMENKQPED  | 158   | >TOP1-P560I FMENKQLED   | 264   | 106   |
| >TOP1-P560I FMENKQPED  | 102   | >TOP1-P560I FMENKQLED   | 104   | 2     |
| >TOP1-P560I FMENKQPED  | 285   | >TOP1-P560I FMENKQLED   | 305   | 20    |
| >TOP1-P560I FMENKQPED  | 18    | >TOP1-P560I FMENKQLED   | 19    | 1     |
| >TOP1-P560I LFMENKQP   | 11229 | >TOP1-P560I LFMENKQL    | 48    | 11181 |
| >TOP1-P560I QLFMENKQP  | 14544 | >TOP1-P560I QLFMENKQL   | 131   | 14413 |
| >TOP1-P560I QLFMENKQP  | 18948 | >TOP1-P560I QLFMENKQL   | 299   | 18649 |
| >TOP1-P560I QLFMENKQP  | 25587 | >TOP1-P560I QLFMENKQL   | 60    | 25527 |
| >TOP1-P560I LQLFMENKQ  | 6811  | >TOP1-P560I LQLFMENKQ   | 189   | 6622  |
| >TOP1-R449\RLKKCVDKI   | 167   | >TOP1-R449\WLKKCVDKI    | 102   | 65    |
| >TOP1-R449\RLKKCVDKI   | 36    | >TOP1-R449\WLKKCVDKI    | 31    | 5     |
| >TOP1-R449\RLKKCVDKI   | 1218  | >TOP1-R449\WLKKCVDKI    | 275   | 943   |
| >TOP1-R449\RLKKCVDK    | 83    | >TOP1-R449\WLKKCVDK     | 4183  | 4100  |
| >TOP1-R449\RLKKCVDK    | 32    | >TOP1-R449\WLKKCVDK     | 8447  | 8415  |
| >TOP1-R449\RLKKCVDK    | 374   | >TOP1-R449\WLKKCVDK     | 10488 | 10114 |
| >TOP1-R449\RLKKCVDKIR  | 37    | >TOP1-R449\WLKKCVDKIR   | 866   | 829   |
| >TOP1-R449\RLKKCVDKIR  | 886   | >TOP1-R449\WLKKCVDKIR   | 360   | 526   |
| >TOP1-R449\RLKKCVDKIR  | 83    | >TOP1-R449\WLKKCVDKIR   | 237   | 154   |
| >TOP1-R449\RRLKKCVDKI  | 11436 | >TOP1-R449\RWLKKCVDKI   | 18    | 11418 |
| >TOP1-R449\RRLKKCVDKII | 6737  | >TOP1-R449\RWLKKCVDKI   | 162   | 6575  |
| >TOP1-R449\RRLKKCVDK   | 151   | >TOP1-R449\RWLKKCVDK    | 9152  | 9001  |
| >TOP1-R449\RRLKKCVDKI  | 39    | >TOP1-R449\RWLKKCVDKI   | 3879  | 3840  |
| >TOP1-R449\RRLKKCVDKII | 125   | >TOP1-R449\RWLKKCVDKI   | 8704  | 8579  |
| >TOP1-R449\RRLKKCVD    | 367   | >TOP1-R449\RWLKKCVD     | 19776 | 19409 |
| >TOP1-R449\RRLKKCVDK   | 336   | >TOP1-R449\RWLKKCVDK    | 18671 | 18335 |
| >TOP1-R449\RRLKKCVDKI  | 99    | >TOP1-R449\RWLKKCVDKI   | 3802  | 3703  |

|                        |       |                       |       |       |
|------------------------|-------|-----------------------|-------|-------|
| >TOP1-R449\RRLKCCVDKI  | 184   | >TOP1-R449\RWLKCCVDKI | 8149  | 7965  |
| >TOP1-R449\RRLKCCVDK   | 2674  | >TOP1-R449\RWLKCCVDK  | 30    | 2644  |
| >TOP1-R449\RRLKCCVDKII | 112   | >TOP1-R449\RWLKCCVDKI | 11    | 101   |
| >TOP1-R449\RRLKCCVDK   | 33429 | >TOP1-R449\RWLKCCVDK  | 302   | 33127 |
| >TOP1-R449\RRLKCCVDKI  | 27482 | >TOP1-R449\RWLKCCVDKI | 262   | 27220 |
| >TOP1-R449\RRLKCCVDKII | 32993 | >TOP1-R449\RWLKCCVDKI | 398   | 32595 |
| >TOP1-R449\KDWQKYETA   | 36    | >TOP1-R449\KDWQKYETA  | 19912 | 19876 |
| >TOP1-R449\ARRLKKCV    | 2466  | >TOP1-R449\ARWLKCCV   | 77    | 2389  |
| >TOP1-R449\ARRLKKCVDK  | 1171  | >TOP1-R449\ARWLKCCVD  | 330   | 841   |
| >TOP1-R449\ARRLKKCVDK  | 1819  | >TOP1-R449\ARWLKCCVD  | 96    | 1723  |
| >TOP1-R449\ARRLKKCVDK  | 711   | >TOP1-R449\ARWLKCCVD  | 106   | 605   |
| >TOP1-R449\TARRLKKCV   | 49    | >TOP1-R449\TARWLKCCVI | 298   | 249   |
| >TOP1-R449\ETARRLKK    | 302   | >TOP1-R449\ETARWLKK   | 186   | 116   |
| >TOP1-R449\ETARRLKKCV  | 854   | >TOP1-R449\ETARWLKCC\ | 290   | 564   |
| >TOP1-R449\ETARRLKK    | 8     | >TOP1-R449\ETARWLKK   | 10    | 2     |
| >TOP1-R449\ETARRLKKCV  | 259   | >TOP1-R449\ETARWLKCC\ | 74    | 185   |
| >TOP1-R449\ETARRLKKCV  | 637   | >TOP1-R449\ETARWLKCC\ | 36    | 601   |
| >TOP1-R449\ETARRLKK    | 756   | >TOP1-R449\ETARWLKK   | 256   | 500   |
| >TOP1-R449\YETARRLKKC' | 18    | >TOP1-R449\YETARWLKCC | 18    | 0     |
| >TOP1-R449\YETARRLKKC' | 584   | >TOP1-R449\YETARWLKCC | 353   | 231   |
| >TOP1-R449\YETARRLKKC' | 62    | >TOP1-R449\YETARWLKCC | 34    | 28    |
| >TOP1-R449\KYETARRL    | 44    | >TOP1-R449\KYETARWL   | 37    | 7     |
| >TOP1-R449\KYETARRL    | 320   | >TOP1-R449\KYETARWL   | 70    | 250   |
| >TOP1-R449\KYETARRLK   | 10    | >TOP1-R449\KYETARWLK  | 13    | 3     |
| >TOP1-R449\KYETARRLKK  | 12    | >TOP1-R449\KYETARWLKk | 12    | 0     |
| >TOP1-R449\KYETARRLK   | 517   | >TOP1-R449\KYETARWLK  | 84    | 433   |
| >TOP1-R449\KYETARRLK   | 316   | >TOP1-R449\KYETARWLK  | 23    | 293   |
| >TOP1-R449\KYETARRLKK  | 114   | >TOP1-R449\KYETARWLKk | 35    | 79    |
| >TOP1-R449\KYETARRL    | 460   | >TOP1-R449\KYETARWL   | 207   | 253   |
| >TOP1-R449\KYETARRLK   | 1065  | >TOP1-R449\KYETARWLK  | 214   | 851   |
| >TOP1-R449\KYETARRLKKI | 1308  | >TOP1-R449\KYETARWLKk | 349   | 959   |
| >TOP1-R449\QKYETARRL   | 1216  | >TOP1-R449\QKYETARWL  | 278   | 938   |
| >TOP1-R449\QKYETARR    | 722   | >TOP1-R449\QKYETARW   | 191   | 531   |
| >TOP1-R449\QKYETARRL   | 61    | >TOP1-R449\QKYETARWL  | 109   | 48    |
| >TOP1-R449\QKYETARR    | 32834 | >TOP1-R449\QKYETARW   | 383   | 32451 |
| >TOP1-R449\QKYETARR    | 394   | >TOP1-R449\QKYETARW   | 33304 | 32910 |
| >TOP1-R449\WQKYETARR   | 8680  | >TOP1-R449\WQKYETARW  | 262   | 8418  |
| >TOP1-R449\WQKYETARR   | 458   | >TOP1-R449\WQKYETARW  | 1058  | 600   |
| >TOP1-R449\WQKYETARR   | 128   | >TOP1-R449\WQKYETARW  | 176   | 48    |
| >TOP1-R449\WQKYETARR   | 32294 | >TOP1-R449\WQKYETARW  | 224   | 32070 |
| >TOP1-R449\WQKYETARR   | 473   | >TOP1-R449\WQKYETARW  | 33363 | 32890 |
| >TOP1-R449\DWQKYETAR   | 30343 | >TOP1-R449\DWQKYETAR  | 235   | 30108 |
| >TOP1-R449\DWQKYETAR   | 46    | >TOP1-R449\DWQKYETAR  | 25231 | 25185 |

|                         |       |                         |       |       |
|-------------------------|-------|-------------------------|-------|-------|
| >TP53-A129[ ALNKMFCQL   | 238   | >TP53-A129[ DLNKMFCQL   | 15615 | 15377 |
| >TP53-A129[ ALNKMFCQL   | 17    | >TP53-A129[ DLNKMFCQL   | 2833  | 2816  |
| >TP53-A129[ ALNKMFCQL   | 30    | >TP53-A129[ DLNKMFCQL   | 4598  | 4568  |
| >TP53-A129[ ALNKMFCQL   | 442   | >TP53-A129[ DLNKMFCQL   | 3489  | 3047  |
| >TP53-A129[ ALNKMFCQL   | 297   | >TP53-A129[ DLNKMFCQL   | 12155 | 11858 |
| >TP53-A129[ ALNKMFCQL   | 22    | >TP53-A129[ DLNKMFCQL   | 1162  | 1140  |
| >TP53-A129[ ALNKMFCQL   | 255   | >TP53-A129[ DLNKMFCQL   | 6294  | 6039  |
| >TP53-A129[ ALNKMFCQL   | 198   | >TP53-A129[ DLNKMFCQL   | 5372  | 5174  |
| >TP53-A129[ ALNKMFCQL   | 21    | >TP53-A129[ DLNKMFCQL   | 501   | 480   |
| >TP53-A129[ ALNKMFCQL   | 256   | >TP53-A129[ DLNKMFCQL   | 4687  | 4431  |
| >TP53-A129[ ALNKMFCQL   | 66    | >TP53-A129[ DLNKMFCQL   | 647   | 581   |
| >TP53-A129[ ALNKMFCQ    | 245   | >TP53-A129[ DLNKMFCQ    | 8154  | 7909  |
| >TP53-A129[ ALNKMFCQL   | 3     | >TP53-A129[ DLNKMFCQL   | 37    | 34    |
| >TP53-A129[ ALNKMFCQL   | 11    | >TP53-A129[ DLNKMFCQL   | 549   | 538   |
| >TP53-A129[ ALNKMFCQL   | 37    | >TP53-A129[ DLNKMFCQL   | 504   | 467   |
| >TP53-A129[ ALNKMFCQL   | 25    | >TP53-A129[ DLNKMFCQL   | 2094  | 2069  |
| >TP53-A129[ ALNKMFCQL   | 113   | >TP53-A129[ DLNKMFCQL   | 10025 | 9912  |
| >TP53-A129[ ALNKMFCQL   | 431   | >TP53-A129[ DLNKMFCQL   | 5489  | 5058  |
| >TP53-A129[ ALNKMFCQL   | 5777  | >TP53-A129[ DLNKMFCQL   | 491   | 5286  |
| >TP53-A129[ ALNKMFCQL   | 288   | >TP53-A129[ DLNKMFCQL   | 339   | 51    |
| >TP53-A129[ ALNKMFCQL   | 416   | >TP53-A129[ DLNKMFCQL   | 10447 | 10031 |
| >TP53-A129[ PALNKMFCQ   | 33057 | >TP53-A129[ PDLNKMFCQ   | 301   | 32756 |
| >TP53-A129[ AKSVTCTYSP  | 56    | >TP53-A129[ AKSVTCTYSP  | 1294  | 1238  |
| >TP53-A129[ SPALNKMFC   | 432   | >TP53-A129[ SPDLNKMFC   | 304   | 128   |
| >TP53-A129[ SPALNKMFC   | 100   | >TP53-A129[ SPDLNKMFC   | 1202  | 1102  |
| >TP53-A129[ SPALNKMFC   | 41    | >TP53-A129[ SPDLNKMFC   | 222   | 181   |
| >TP53-A129[ SPALNKMFC   | 372   | >TP53-A129[ SPDLNKMFC   | 2896  | 2524  |
| >TP53-A129[ SPALNKMFC   | 326   | >TP53-A129[ SPDLNKMFC   | 1325  | 999   |
| >TP53-A129[ SPALNKMFC   | 450   | >TP53-A129[ SPDLNKMFC   | 3965  | 3515  |
| >TP53-A129[ YSPALNKMFC  | 384   | >TP53-A129[ YSPDLNKMFC  | 944   | 560   |
| >TP53-A129[ YSPALNKMFC  | 717   | >TP53-A129[ YSPDLNKMFC  | 475   | 242   |
| >TP53-A129[ YSPALNKMFC  | 104   | >TP53-A129[ YSPDLNKMFC  | 240   | 136   |
| >TP53-A129[ YSPALNKMFC  | 43    | >TP53-A129[ YSPDLNKMFC  | 31    | 12    |
| >TP53-A129[ YSPALNKMFC  | 40    | >TP53-A129[ YSPDLNKMFC  | 79    | 39    |
| >TP53-A129[ YSPALNKMFC  | 3     | >TP53-A129[ YSPDLNKMFC  | 3     | 0     |
| >TP53-A129[ YSPALNKMFC  | 22    | >TP53-A129[ YSPDLNKMFC  | 36    | 14    |
| >TP53-A129[ YSPALNKMFC  | 124   | >TP53-A129[ YSPDLNKMFC  | 196   | 72    |
| >TP53-A129[ YSPALNKMFC  | 67    | >TP53-A129[ YSPDLNKMFC  | 127   | 60    |
| >TP53-A129[ YSPALNKMFC  | 103   | >TP53-A129[ YSPDLNKMFC  | 63    | 40    |
| >TP53-A129[ TYSPALNKMFC | 136   | >TP53-A129[ TYSPDLNKMFC | 513   | 377   |
| >TP53-A129[ TYSPALNKMFC | 220   | >TP53-A129[ TYSPDLNKMFC | 556   | 336   |
| >TP53-A129[ TYSPALNKMFC | 179   | >TP53-A129[ TYSPDLNKMFC | 298   | 119   |
| >TP53-A129[ TYSPALNKMFC | 64    | >TP53-A129[ TYSPDLNKMFC | 93    | 29    |



|                        |     |                        |       |       |
|------------------------|-----|------------------------|-------|-------|
| >TP53-A129[ TYSPALNKM  | 27  | >TP53-A129[ TYSPDLNKM  | 60    | 33    |
| >TP53-A129[ TYSPALNKMf | 5   | >TP53-A129[ TYSPDLNKMf | 6     | 1     |
| >TP53-A129[ TYSPALNK   | 222 | >TP53-A129[ TYSPDLNK   | 2192  | 1970  |
| >TP53-A129[ TYSPALNKMf | 439 | >TP53-A129[ TYSPDLNKMf | 607   | 168   |
| >TP53-A129[ CTYSPALNK  | 30  | >TP53-A129[ CTYSPDLNK  | 50    | 20    |
| >TP53-A129[ CTYSPALNK  | 11  | >TP53-A129[ CTYSPDLNK  | 18    | 7     |
| >TP53-A129[ CTYSPALNKM | 343 | >TP53-A129[ CTYSPDLNKM | 586   | 243   |
| >TP53-A129[ CTYSPALNKM | 63  | >TP53-A129[ CTYSPDLNKM | 52    | 11    |
| >TP53-A129[ CTYSPALNKM | 380 | >TP53-A129[ CTYSPDLNKM | 406   | 26    |
| >TP53-A129[ CTYSPALNKM | 246 | >TP53-A129[ CTYSPDLNKM | 267   | 21    |
| >TP53-A129[ CTYSPALNK  | 215 | >TP53-A129[ CTYSPDLNK  | 661   | 446   |
| >TP53-A129[ CTYSPALNK  | 30  | >TP53-A129[ CTYSPDLNK  | 34    | 4     |
| >TP53-A129[ CTYSPALNKM | 488 | >TP53-A129[ CTYSPDLNKM | 2492  | 2004  |
| >TP53-A129[ CTYSPALNKM | 23  | >TP53-A129[ CTYSPDLNKM | 49    | 26    |
| >TP53-A129[ CTYSPALNKM | 24  | >TP53-A129[ CTYSPDLNKM | 49    | 25    |
| >TP53-A129[ CTYSPALNKM | 5   | >TP53-A129[ CTYSPDLNKM | 5     | 0     |
| >TP53-A129[ CTYSPALNKM | 76  | >TP53-A129[ CTYSPDLNKM | 499   | 423   |
| >TP53-A129[ CTYSPALNKM | 146 | >TP53-A129[ CTYSPDLNKM | 412   | 266   |
| >TP53-A129[ CTYSPALNKM | 30  | >TP53-A129[ CTYSPDLNKM | 46    | 16    |
| >TP53-A129[ CTYSPALNKM | 13  | >TP53-A129[ CTYSPDLNKM | 23    | 10    |
| >TP53-A129[ CTYSPALNKM | 358 | >TP53-A129[ CTYSPDLNKM | 435   | 77    |
| >TP53-A129[ TCTYSPALNK | 453 | >TP53-A129[ TCTYSPDLNK | 679   | 226   |
| >TP53-A129[ VTCTYSPA   | 415 | >TP53-A129[ VTCTYSPD   | 6741  | 6326  |
| >TP53-A129[ VTCTYSPAL  | 397 | >TP53-A129[ VTCTYSPDL  | 5358  | 4961  |
| >TP53-A129[ VTCTYSPALN | 80  | >TP53-A129[ VTCTYSPDLN | 209   | 129   |
| >TP53-A129[ VTCTYSPALN | 14  | >TP53-A129[ VTCTYSPDLN | 20    | 6     |
| >TP53-A129[ VTCTYSPALN | 146 | >TP53-A129[ VTCTYSPDLN | 324   | 178   |
| >TP53-A129[ VTCTYSPALN | 490 | >TP53-A129[ VTCTYSPDLN | 504   | 14    |
| >TP53-A129[ VTCTYSPAL  | 12  | >TP53-A129[ VTCTYSPDL  | 27    | 15    |
| >TP53-A129[ VTCTYSPAL  | 66  | >TP53-A129[ VTCTYSPDL  | 200   | 134   |
| >TP53-A129[ SVTCTYSPA  | 118 | >TP53-A129[ SVTCTYSPD  | 19330 | 19212 |
| >TP53-A129[ SVTCTYSPA  | 468 | >TP53-A129[ SVTCTYSPD  | 17571 | 17103 |
| >TP53-A129[ SVTCTYSPAL | 268 | >TP53-A129[ SVTCTYSPDL | 1363  | 1095  |
| >TP53-A129[ SVTCTYSPA  | 241 | >TP53-A129[ SVTCTYSPD  | 7472  | 7231  |
| >TP53-A129[ SVTCTYSPA  | 45  | >TP53-A129[ SVTCTYSPD  | 7803  | 7758  |
| >TP53-A129[ SVTCTYSPAL | 149 | >TP53-A129[ SVTCTYSPDL | 1065  | 916   |
| >TP53-A129[ KSVTCTYSPA | 396 | >TP53-A129[ KSVTCTYSPD | 2225  | 1829  |
| >TP53-A129[ KSVTCTYSPA | 149 | >TP53-A129[ KSVTCTYSPD | 4519  | 4370  |
| >TP53-A129[ KSVTCTYSPA | 488 | >TP53-A129[ KSVTCTYSPD | 2045  | 1557  |
| >TP53-A129[ KSVTCTYSPA | 107 | >TP53-A129[ KSVTCTYSPD | 445   | 338   |
| >TP53-A129[ KSVTCTYSPA | 349 | >TP53-A129[ KSVTCTYSPD | 7417  | 7068  |
| >TP53-A129[ KSVTCTYSPA | 89  | >TP53-A129[ KSVTCTYSPD | 276   | 187   |
| >TP53-A129[ KSVTCTYSPA | 6   | >TP53-A129[ KSVTCTYSPD | 11    | 5     |

|                         |     |                         |      |      |
|-------------------------|-----|-------------------------|------|------|
| >TP53-A129[KSVTCTYSPA   | 113 | >TP53-A129[KSVTCTYSPD   | 284  | 171  |
| >TP53-A129[KSVTCTYSPA   | 198 | >TP53-A129[KSVTCTYSPD   | 495  | 297  |
| >TP53-A129C ALNKMFCQL   | 238 | >TP53-A129C GLNKMFCQL   | 459  | 221  |
| >TP53-A129C ALNKMFCQL   | 17  | >TP53-A129C GLNKMFCQL   | 28   | 11   |
| >TP53-A129C ALNKMFCQL   | 30  | >TP53-A129C GLNKMFCQL   | 49   | 19   |
| >TP53-A129C ALNKMFCQL   | 442 | >TP53-A129C GLNKMFCQL   | 834  | 392  |
| >TP53-A129C ALNKMFCQL   | 297 | >TP53-A129C GLNKMFCQL   | 841  | 544  |
| >TP53-A129C ALNKMFCQL   | 22  | >TP53-A129C GLNKMFCQL   | 38   | 16   |
| >TP53-A129C ALNKMFCQL   | 255 | >TP53-A129C GLNKMFCQL   | 456  | 201  |
| >TP53-A129C ALNKMFCQL   | 198 | >TP53-A129C GLNKMFCQL   | 100  | 98   |
| >TP53-A129C ALNKMFCQL   | 21  | >TP53-A129C GLNKMFCQL   | 20   | 1    |
| >TP53-A129C ALNKMFCQL   | 256 | >TP53-A129C GLNKMFCQL   | 228  | 28   |
| >TP53-A129C ALNKMFCQL   | 66  | >TP53-A129C GLNKMFCQL   | 312  | 246  |
| >TP53-A129C ALNKMFCQ    | 245 | >TP53-A129C GLNKMFCQ    | 656  | 411  |
| >TP53-A129C ALNKMFCQL   | 3   | >TP53-A129C GLNKMFCQL   | 4    | 1    |
| >TP53-A129C ALNKMFCQL   | 11  | >TP53-A129C GLNKMFCQL   | 27   | 16   |
| >TP53-A129C ALNKMFCQL   | 37  | >TP53-A129C GLNKMFCQL   | 42   | 5    |
| >TP53-A129C ALNKMFCQL   | 25  | >TP53-A129C GLNKMFCQL   | 39   | 14   |
| >TP53-A129C ALNKMFCQL   | 113 | >TP53-A129C GLNKMFCQL   | 1217 | 1104 |
| >TP53-A129C ALNKMFCQL   | 431 | >TP53-A129C GLNKMFCQL   | 805  | 374  |
| >TP53-A129C ALNKMFCQL   | 288 | >TP53-A129C GLNKMFCQL   | 695  | 407  |
| >TP53-A129C ALNKMFCQL   | 416 | >TP53-A129C GLNKMFCQL   | 991  | 575  |
| >TP53-A129C AKSVTCTYSP  | 56  | >TP53-A129C AKSVTCTYSP  | 505  | 449  |
| >TP53-A129C SPALNKMFC   | 432 | >TP53-A129C SPGLNKMFC   | 297  | 135  |
| >TP53-A129C SPALNKMFC   | 100 | >TP53-A129C SPGLNKMFC   | 1148 | 1048 |
| >TP53-A129C SPALNKMFC   | 41  | >TP53-A129C SPGLNKMFC   | 167  | 126  |
| >TP53-A129C SPALNKMFC   | 372 | >TP53-A129C SPGLNKMFC   | 699  | 327  |
| >TP53-A129C SPALNKMFC   | 326 | >TP53-A129C SPGLNKMFC   | 2046 | 1720 |
| >TP53-A129C SPALNKMFC   | 450 | >TP53-A129C SPGLNKMFC   | 8234 | 7784 |
| >TP53-A129C YSPALNKMFC  | 384 | >TP53-A129C YSPGLNKMFC  | 224  | 160  |
| >TP53-A129C YSPALNKMFC  | 717 | >TP53-A129C YSPGLNKMFC  | 318  | 399  |
| >TP53-A129C YSPALNKMFC  | 104 | >TP53-A129C YSPGLNKMFC  | 650  | 546  |
| >TP53-A129C YSPALNKMFC  | 43  | >TP53-A129C YSPGLNKMFC  | 49   | 6    |
| >TP53-A129C YSPALNKMFC  | 40  | >TP53-A129C YSPGLNKMFC  | 99   | 59   |
| >TP53-A129C YSPALNKMFC  | 3   | >TP53-A129C YSPGLNKMFC  | 3    | 0    |
| >TP53-A129C YSPALNKMFC  | 22  | >TP53-A129C YSPGLNKMFC  | 35   | 13   |
| >TP53-A129C YSPALNKMFC  | 124 | >TP53-A129C YSPGLNKMFC  | 181  | 57   |
| >TP53-A129C YSPALNKMFC  | 67  | >TP53-A129C YSPGLNKMFC  | 100  | 33   |
| >TP53-A129C YSPALNKMFC  | 103 | >TP53-A129C YSPGLNKMFC  | 54   | 49   |
| >TP53-A129C TYSPALNKMFC | 136 | >TP53-A129C TYSPGLNKMFC | 83   | 53   |
| >TP53-A129C TYSPALNKMFC | 220 | >TP53-A129C TYSPGLNKMFC | 284  | 64   |
| >TP53-A129C TYSPALNKMFC | 179 | >TP53-A129C TYSPGLNKMFC | 390  | 211  |
| >TP53-A129C TYSPALNKMFC | 64  | >TP53-A129C TYSPGLNKMFC | 98   | 34   |

|                         |     |                         |       |       |
|-------------------------|-----|-------------------------|-------|-------|
| >TP53-A129C TYSPALNKM   | 27  | >TP53-A129C TYSPGLNKM   | 36    | 9     |
| >TP53-A129C TYSPALNKMFI | 5   | >TP53-A129C TYSPGLNKMFI | 5     | 0     |
| >TP53-A129C TYSPALNK    | 222 | >TP53-A129C TYSPGLNK    | 498   | 276   |
| >TP53-A129C TYSPALNKMFI | 439 | >TP53-A129C TYSPGLNKMFI | 343   | 96    |
| >TP53-A129C CTYSPALNK   | 30  | >TP53-A129C CTYSPGLNK   | 32    | 2     |
| >TP53-A129C CTYSPALNK   | 11  | >TP53-A129C CTYSPGLNK   | 11    | 0     |
| >TP53-A129C CTYSPALNKM  | 343 | >TP53-A129C CTYSPGLNKM  | 409   | 66    |
| >TP53-A129C CTYSPALNKM  | 63  | >TP53-A129C CTYSPGLNKM  | 68    | 5     |
| >TP53-A129C CTYSPALNKM  | 380 | >TP53-A129C CTYSPGLNKM  | 412   | 32    |
| >TP53-A129C CTYSPALNKM  | 246 | >TP53-A129C CTYSPGLNKM  | 115   | 131   |
| >TP53-A129C CTYSPALNK   | 215 | >TP53-A129C CTYSPGLNK   | 227   | 12    |
| >TP53-A129C CTYSPALNK   | 30  | >TP53-A129C CTYSPGLNK   | 86    | 56    |
| >TP53-A129C CTYSPALNKM  | 488 | >TP53-A129C CTYSPGLNKM  | 975   | 487   |
| >TP53-A129C CTYSPALNKM  | 610 | >TP53-A129C CTYSPGLNKM  | 456   | 154   |
| >TP53-A129C CTYSPALNKM  | 23  | >TP53-A129C CTYSPGLNKM  | 23    | 0     |
| >TP53-A129C CTYSPALNKM  | 24  | >TP53-A129C CTYSPGLNKM  | 29    | 5     |
| >TP53-A129C CTYSPALNKM  | 5   | >TP53-A129C CTYSPGLNKM  | 5     | 0     |
| >TP53-A129C CTYSPALNKM  | 76  | >TP53-A129C CTYSPGLNKM  | 168   | 92    |
| >TP53-A129C CTYSPALNKM  | 146 | >TP53-A129C CTYSPGLNKM  | 188   | 42    |
| >TP53-A129C CTYSPALNKM  | 30  | >TP53-A129C CTYSPGLNKM  | 33    | 3     |
| >TP53-A129C CTYSPALNKM  | 13  | >TP53-A129C CTYSPGLNKM  | 11    | 2     |
| >TP53-A129C CTYSPALNKM  | 358 | >TP53-A129C CTYSPGLNKM  | 376   | 18    |
| >TP53-A129C TCTYSPALNK  | 453 | >TP53-A129C TCTYSPGLNK  | 361   | 92    |
| >TP53-A129C VTCTYSPA    | 415 | >TP53-A129C VTCTYSPG    | 3513  | 3098  |
| >TP53-A129C VTCTYSPAL   | 397 | >TP53-A129C VTCTYSPGL   | 524   | 127   |
| >TP53-A129C VTCTYSPALN  | 80  | >TP53-A129C VTCTYSPGLN  | 95    | 15    |
| >TP53-A129C VTCTYSPALN  | 14  | >TP53-A129C VTCTYSPGLN  | 14    | 0     |
| >TP53-A129C VTCTYSPALN  | 146 | >TP53-A129C VTCTYSPGLN  | 179   | 33    |
| >TP53-A129C VTCTYSPALN  | 490 | >TP53-A129C VTCTYSPGLN  | 801   | 311   |
| >TP53-A129C VTCTYSPAL   | 12  | >TP53-A129C VTCTYSPGL   | 8     | 4     |
| >TP53-A129C VTCTYSPAL   | 66  | >TP53-A129C VTCTYSPGL   | 102   | 36    |
| >TP53-A129C SVTCTYSPA   | 118 | >TP53-A129C SVTCTYSPG   | 10909 | 10791 |
| >TP53-A129C SVTCTYSPA   | 468 | >TP53-A129C SVTCTYSPG   | 8905  | 8437  |
| >TP53-A129C SVTCTYSPAL  | 268 | >TP53-A129C SVTCTYSPGL  | 289   | 21    |
| >TP53-A129C SVTCTYSPA   | 241 | >TP53-A129C SVTCTYSPG   | 2915  | 2674  |
| >TP53-A129C SVTCTYSPA   | 45  | >TP53-A129C SVTCTYSPG   | 2896  | 2851  |
| >TP53-A129C SVTCTYSPAL  | 149 | >TP53-A129C SVTCTYSPGL  | 98    | 51    |
| >TP53-A129C KSVTCTYSPA  | 396 | >TP53-A129C KSVTCTYSPG  | 490   | 94    |
| >TP53-A129C KSVTCTYSPA  | 149 | >TP53-A129C KSVTCTYSPG  | 1731  | 1582  |
| >TP53-A129C KSVTCTYSPA  | 488 | >TP53-A129C KSVTCTYSPG  | 1134  | 646   |
| >TP53-A129C KSVTCTYSPA  | 107 | >TP53-A129C KSVTCTYSPG  | 444   | 337   |
| >TP53-A129C KSVTCTYSPA  | 349 | >TP53-A129C KSVTCTYSPG  | 3577  | 3228  |
| >TP53-A129C KSVTCTYSPA  | 89  | >TP53-A129C KSVTCTYSPG  | 381   | 292   |

|                         |      |                        |      |      |
|-------------------------|------|------------------------|------|------|
| >TP53-A129C KSVTCTYSPA  | 6    | >TP53-A129C KSVTCTYSPG | 5    | 1    |
| >TP53-A129C KSVTCTYSPA  | 113  | >TP53-A129C KSVTCTYSPG | 90   | 23   |
| >TP53-A129C KSVTCTYSPA  | 198  | >TP53-A129C KSVTCTYSPG | 273  | 75   |
| >TP53-A129T ALNKMFCQL   | 238  | >TP53-A129T TLNKMFCQL  | 629  | 391  |
| >TP53-A129T ALNKMFCQL   | 17   | >TP53-A129T TLNKMFCQL  | 37   | 20   |
| >TP53-A129T ALNKMFCQL   | 30   | >TP53-A129T TLNKMFCQL  | 64   | 34   |
| >TP53-A129T ALNKMFCQL   | 442  | >TP53-A129T TLNKMFCQL  | 406  | 36   |
| >TP53-A129T ALNKMFCQL   | 297  | >TP53-A129T TLNKMFCQL  | 715  | 418  |
| >TP53-A129T ALNKMFCQL   | 22   | >TP53-A129T TLNKMFCQL  | 86   | 64   |
| >TP53-A129T ALNKMFCQL   | 255  | >TP53-A129T TLNKMFCQL  | 1048 | 793  |
| >TP53-A129T ALNKMFCQL   | 198  | >TP53-A129T TLNKMFCQL  | 656  | 458  |
| >TP53-A129T ALNKMFCQL   | 21   | >TP53-A129T TLNKMFCQL  | 59   | 38   |
| >TP53-A129T ALNKMFCQL   | 256  | >TP53-A129T TLNKMFCQL  | 935  | 679  |
| >TP53-A129T ALNKMFCQL   | 66   | >TP53-A129T TLNKMFCQL  | 137  | 71   |
| >TP53-A129T ALNKMFCQ    | 245  | >TP53-A129T TLNKMFCQ   | 1313 | 1068 |
| >TP53-A129T ALNKMFCQL   | 3    | >TP53-A129T TLNKMFCQL  | 5    | 2    |
| >TP53-A129T ALNKMFCQL   | 11   | >TP53-A129T TLNKMFCQL  | 37   | 26   |
| >TP53-A129T ALNKMFCQL   | 37   | >TP53-A129T TLNKMFCQL  | 40   | 3    |
| >TP53-A129T ALNKMFCQL   | 25   | >TP53-A129T TLNKMFCQL  | 25   | 0    |
| >TP53-A129T ALNKMFCQL   | 113  | >TP53-A129T TLNKMFCQL  | 1063 | 950  |
| >TP53-A129T ALNKMFCQL   | 431  | >TP53-A129T TLNKMFCQL  | 549  | 118  |
| >TP53-A129T ALNKMFCQL   | 5777 | >TP53-A129T TLNKMFCQL  | 438  | 5339 |
| >TP53-A129T ALNKMFCQL   | 288  | >TP53-A129T TLNKMFCQL  | 210  | 78   |
| >TP53-A129T ALNKMFCQL   | 416  | >TP53-A129T TLNKMFCQL  | 1267 | 851  |
| >TP53-A129T AKSVTCTYSP  | 56   | >TP53-A129T AKSVTCTYSP | 166  | 110  |
| >TP53-A129T SPALNKMFC   | 432  | >TP53-A129T SPTLNKMFC  | 164  | 268  |
| >TP53-A129T SPALNKMFC   | 100  | >TP53-A129T SPTLNKMF   | 746  | 646  |
| >TP53-A129T SPALNKMFC   | 41   | >TP53-A129T SPTLNKMFC  | 125  | 84   |
| >TP53-A129T SPALNKMFC   | 372  | >TP53-A129T SPTLNKMFC  | 776  | 404  |
| >TP53-A129T SPALNKMFC   | 326  | >TP53-A129T SPTLNKMF   | 719  | 393  |
| >TP53-A129T SPALNKMFC   | 450  | >TP53-A129T SPTLNKMF   | 1768 | 1318 |
| >TP53-A129T YSPALNKMFC  | 384  | >TP53-A129T YSPTLNKMF  | 797  | 413  |
| >TP53-A129T YSPALNKMFC  | 717  | >TP53-A129T YSPTLNKM   | 461  | 256  |
| >TP53-A129T YSPALNKMFC  | 104  | >TP53-A129T YSPTLNKMF  | 82   | 22   |
| >TP53-A129T YSPALNKMFC  | 43   | >TP53-A129T YSPTLNKMF  | 97   | 54   |
| >TP53-A129T YSPALNKMFC  | 40   | >TP53-A129T YSPTLNKM   | 36   | 4    |
| >TP53-A129T YSPALNKMFC  | 3    | >TP53-A129T YSPTLNKMF  | 3    | 0    |
| >TP53-A129T YSPALNKMFC  | 22   | >TP53-A129T YSPTLNKMFC | 33   | 11   |
| >TP53-A129T YSPALNKMFC  | 124  | >TP53-A129T YSPTLNKMFC | 194  | 70   |
| >TP53-A129T YSPALNKMFC  | 67   | >TP53-A129T YSPTLNKM   | 145  | 78   |
| >TP53-A129T YSPALNKMFC  | 103  | >TP53-A129T YSPTLNKMF  | 70   | 33   |
| >TP53-A129T TYSPALNKMFC | 136  | >TP53-A129T TYSPTLNKM  | 44   | 92   |
| >TP53-A129T TYSPALNKMFC | 220  | >TP53-A129T TYSPTLNK   | 141  | 79   |

|                       |     |                        |      |      |
|-----------------------|-----|------------------------|------|------|
| >TP53-A1291TYSPALNKMF | 179 | >TP53-A1291TYSPTLNKMF  | 117  | 62   |
| >TP53-A1291TYSPALNKMF | 64  | >TP53-A1291TYSPTLNKMF  | 49   | 15   |
| >TP53-A1291TYSPALNKM  | 27  | >TP53-A1291TYSPTLNKM   | 40   | 13   |
| >TP53-A1291TYSPALNKMF | 5   | >TP53-A1291TYSPTLNKMF  | 5    | 0    |
| >TP53-A1291TYSPALNKMF | 586 | >TP53-A1291TYSPTLNKMF  | 404  | 182  |
| >TP53-A1291TYSPALNK   | 222 | >TP53-A1291TYSPTLNK    | 145  | 77   |
| >TP53-A1291TYSPALNK   | 674 | >TP53-A1291TYSPTLNK    | 364  | 310  |
| >TP53-A1291TYSPALNKM  | 866 | >TP53-A1291TYSPTLNKM   | 469  | 397  |
| >TP53-A1291TYSPALNKMF | 439 | >TP53-A1291TYSPTLNKMF  | 248  | 191  |
| >TP53-A1291CTYSPALNK  | 30  | >TP53-A1291CTYSPTLNK   | 28   | 2    |
| >TP53-A1291CTYSPALNK  | 11  | >TP53-A1291CTYSPTLNK   | 8    | 3    |
| >TP53-A1291CTYSPALNKM | 343 | >TP53-A1291CTYSPTLNKM  | 242  | 101  |
| >TP53-A1291CTYSPALNKM | 63  | >TP53-A1291CTYSPTLNKM  | 41   | 22   |
| >TP53-A1291CTYSPALNKM | 380 | >TP53-A1291CTYSPTLNKM  | 196  | 184  |
| >TP53-A1291CTYSPALNKM | 246 | >TP53-A1291CTYSPTLNKM  | 78   | 168  |
| >TP53-A1291CTYSPALNK  | 215 | >TP53-A1291CTYSPTLNK   | 83   | 132  |
| >TP53-A1291CTYSPALNKM | 767 | >TP53-A1291CTYSPTLNKM  | 442  | 325  |
| >TP53-A1291CTYSPALNK  | 30  | >TP53-A1291CTYSPTLNK   | 27   | 3    |
| >TP53-A1291CTYSPALNKM | 488 | >TP53-A1291CTYSPTLNKM  | 427  | 61   |
| >TP53-A1291CTYSPALNKM | 610 | >TP53-A1291CTYSPTLNKM  | 473  | 137  |
| >TP53-A1291CTYSPALNKM | 23  | >TP53-A1291CTYSPTLNKM  | 20   | 3    |
| >TP53-A1291CTYSPALNKM | 24  | >TP53-A1291CTYSPTLNKM  | 30   | 6    |
| >TP53-A1291CTYSPALNKM | 5   | >TP53-A1291CTYSPTLNKM  | 5    | 0    |
| >TP53-A1291CTYSPALNKM | 76  | >TP53-A1291CTYSPTLNKM  | 80   | 4    |
| >TP53-A1291CTYSPALNKM | 146 | >TP53-A1291CTYSPTLNKM  | 152  | 6    |
| >TP53-A1291CTYSPALNKM | 30  | >TP53-A1291CTYSPTLNKM  | 36   | 6    |
| >TP53-A1291CTYSPALNKM | 13  | >TP53-A1291CTYSPTLNKM  | 18   | 5    |
| >TP53-A1291CTYSPALNK  | 572 | >TP53-A1291CTYSPTLNK   | 257  | 315  |
| >TP53-A1291CTYSPALNKM | 358 | >TP53-A1291CTYSPTLNKM  | 331  | 27   |
| >TP53-A1291TCTYSPALNK | 807 | >TP53-A1291TCTYSPTLNK  | 425  | 382  |
| >TP53-A1291TCTYSPALNK | 453 | >TP53-A1291TCTYSPTLNKI | 246  | 207  |
| >TP53-A1291VTCTYSPA   | 415 | >TP53-A1291VTCTYSPT    | 755  | 340  |
| >TP53-A1291VTCTYSPAL  | 397 | >TP53-A1291VTCTYSPTL   | 588  | 191  |
| >TP53-A1291VTCTYSPAL  | 766 | >TP53-A1291VTCTYSPTL   | 483  | 283  |
| >TP53-A1291VTCTYSPALN | 80  | >TP53-A1291VTCTYSPTLNI | 72   | 8    |
| >TP53-A1291VTCTYSPALN | 14  | >TP53-A1291VTCTYSPTLNI | 11   | 3    |
| >TP53-A1291VTCTYSPALN | 146 | >TP53-A1291VTCTYSPTLNI | 92   | 54   |
| >TP53-A1291VTCTYSPALN | 490 | >TP53-A1291VTCTYSPTLNI | 406  | 84   |
| >TP53-A1291VTCTYSPAL  | 12  | >TP53-A1291VTCTYSPTL   | 6    | 6    |
| >TP53-A1291VTCTYSPAL  | 66  | >TP53-A1291VTCTYSPTL   | 39   | 27   |
| >TP53-A1291VTCTYSPAL  | 951 | >TP53-A1291VTCTYSPTL   | 146  | 805  |
| >TP53-A1291VTCTYSPAL  | 862 | >TP53-A1291VTCTYSPTL   | 263  | 599  |
| >TP53-A1291SVTCTYSPA  | 118 | >TP53-A1291SVTCTYSPT   | 1705 | 1587 |

|                        |      |                        |      |      |
|------------------------|------|------------------------|------|------|
| >TP53-A129\SVTCTYSPA   | 468  | >TP53-A129\SVTCTYSPT   | 2260 | 1792 |
| >TP53-A129\SVTCTYSPAL  | 268  | >TP53-A129\SVTCTYSPTL  | 330  | 62   |
| >TP53-A129\SVTCTYSPAL  | 1003 | >TP53-A129\SVTCTYSPTL  | 406  | 597  |
| >TP53-A129\SVTCTYSPA   | 241  | >TP53-A129\SVTCTYSPT   | 4494 | 4253 |
| >TP53-A129\SVTCTYSPA   | 45   | >TP53-A129\SVTCTYSPT   | 539  | 494  |
| >TP53-A129\SVTCTYSPAL  | 149  | >TP53-A129\SVTCTYSPTL  | 199  | 50   |
| >TP53-A129\KSVTCTYSPA  | 396  | >TP53-A129\KSVTCTYSPTL | 509  | 113  |
| >TP53-A129\KSVTCTYSPA  | 149  | >TP53-A129\KSVTCTYSPT  | 2757 | 2608 |
| >TP53-A129\KSVTCTYSPA  | 488  | >TP53-A129\KSVTCTYSPTL | 469  | 19   |
| >TP53-A129\KSVTCTYSPA  | 107  | >TP53-A129\KSVTCTYSPTL | 53   | 54   |
| >TP53-A129\KSVTCTYSPA  | 349  | >TP53-A129\KSVTCTYSPT  | 1586 | 1237 |
| >TP53-A129\KSVTCTYSPA  | 89   | >TP53-A129\KSVTCTYSPTL | 161  | 72   |
| >TP53-A129\KSVTCTYSPA  | 6    | >TP53-A129\KSVTCTYSPTL | 4    | 2    |
| >TP53-A129\KSVTCTYSPA  | 113  | >TP53-A129\KSVTCTYSPTL | 34   | 79   |
| >TP53-A129\KSVTCTYSPA  | 198  | >TP53-A129\KSVTCTYSPTL | 127  | 71   |
| >TP53-A129\KSVTCTYSPA  | 882  | >TP53-A129\KSVTCTYSPTL | 186  | 696  |
| >TP53-A129\KSVTCTYSPA  | 766  | >TP53-A129\KSVTCTYSPTL | 339  | 427  |
| >TP53-A129\ALNKMFCQL   | 238  | >TP53-A129\VLNKMFCQL   | 359  | 121  |
| >TP53-A129\ALNKMFCQL   | 17   | >TP53-A129\VLNKMFCQL   | 35   | 18   |
| >TP53-A129\ALNKMFCQL   | 30   | >TP53-A129\VLNKMFCQL   | 50   | 20   |
| >TP53-A129\ALNKMFCQL   | 442  | >TP53-A129\VLNKMFCQL   | 895  | 453  |
| >TP53-A129\ALNKMFCQL   | 297  | >TP53-A129\VLNKMFCQL   | 420  | 123  |
| >TP53-A129\ALNKMFCQL   | 22   | >TP53-A129\VLNKMFCQL   | 17   | 5    |
| >TP53-A129\ALNKMFCQL   | 255  | >TP53-A129\VLNKMFCQL   | 190  | 65   |
| >TP53-A129\ALNKMFCQL   | 198  | >TP53-A129\VLNKMFCQL   | 178  | 20   |
| >TP53-A129\ALNKMFCQL   | 21   | >TP53-A129\VLNKMFCQL   | 22   | 1    |
| >TP53-A129\ALNKMFCQL   | 256  | >TP53-A129\VLNKMFCQL   | 250  | 6    |
| >TP53-A129\ALNKMFCQL   | 66   | >TP53-A129\VLNKMFCQL   | 22   | 44   |
| >TP53-A129\ALNKMFCQ    | 245  | >TP53-A129\VLNKMFCQ    | 276  | 31   |
| >TP53-A129\ALNKMFCQL   | 3    | >TP53-A129\VLNKMFCQL   | 3    | 0    |
| >TP53-A129\ALNKMFCQL   | 11   | >TP53-A129\VLNKMFCQL   | 12   | 1    |
| >TP53-A129\ALNKMFCQL   | 37   | >TP53-A129\VLNKMFCQL   | 35   | 2    |
| >TP53-A129\ALNKMFCQL   | 25   | >TP53-A129\VLNKMFCQL   | 42   | 17   |
| >TP53-A129\ALNKMFCQL   | 113  | >TP53-A129\VLNKMFCQL   | 1327 | 1214 |
| >TP53-A129\ALNKMFCQL   | 431  | >TP53-A129\VLNKMFCQL   | 710  | 279  |
| >TP53-A129\ALNKMFCQL   | 288  | >TP53-A129\VLNKMFCQL   | 241  | 47   |
| >TP53-A129\ALNKMFCQL   | 416  | >TP53-A129\VLNKMFCQL   | 678  | 262  |
| >TP53-A129\AKSVTCTYSPA | 56   | >TP53-A129\AKSVTCTYSPT | 15   | 41   |
| >TP53-A129\SPALNKMFCQ  | 432  | >TP53-A129\SPVLNKMFCQ  | 84   | 348  |
| >TP53-A129\SPALNKMFCQ  | 100  | >TP53-A129\SPVLNKMFCQ  | 491  | 391  |
| >TP53-A129\SPALNKMFCQ  | 41   | >TP53-A129\SPVLNKMFCQ  | 93   | 52   |
| >TP53-A129\SPALNKMFCQ  | 372  | >TP53-A129\SPVLNKMFCQ  | 845  | 473  |
| >TP53-A129\SPALNKMFCQ  | 326  | >TP53-A129\SPVLNKMFCQ  | 308  | 18   |

|                        |      |                        |     |      |
|------------------------|------|------------------------|-----|------|
| >TP53-A129\ SPALNKMF   | 450  | >TP53-A129\ SPVLNKMF   | 710 | 260  |
| >TP53-A129\ YSPALNKMF  | 384  | >TP53-A129\ YSPVLNKMF  | 488 | 104  |
| >TP53-A129\ YSPALNKMF  | 104  | >TP53-A129\ YSPVLNKMF  | 140 | 36   |
| >TP53-A129\ YSPALNKMF  | 43   | >TP53-A129\ YSPVLNKMF  | 39  | 4    |
| >TP53-A129\ YSPALNKM   | 40   | >TP53-A129\ YSPVLNKM   | 22  | 18   |
| >TP53-A129\ YSPALNKMF  | 3    | >TP53-A129\ YSPVLNKMF  | 4   | 1    |
| >TP53-A129\ YSPALNKMFC | 22   | >TP53-A129\ YSPVLNKMFC | 45  | 23   |
| >TP53-A129\ YSPALNKMFC | 124  | >TP53-A129\ YSPVLNKMFC | 261 | 137  |
| >TP53-A129\ YSPALNKM   | 67   | >TP53-A129\ YSPVLNKM   | 82  | 15   |
| >TP53-A129\ YSPALNKMF  | 103  | >TP53-A129\ YSPVLNKMF  | 110 | 7    |
| >TP53-A129\ TYSPALNKM  | 136  | >TP53-A129\ TYSPVLNKM  | 50  | 86   |
| >TP53-A129\ TYSPALNK   | 220  | >TP53-A129\ TYSPVLNK   | 105 | 115  |
| >TP53-A129\ TYSPALNKMF | 179  | >TP53-A129\ TYSPVLNKMF | 116 | 63   |
| >TP53-A129\ TYSPALNKMF | 64   | >TP53-A129\ TYSPVLNKMF | 72  | 8    |
| >TP53-A129\ TYSPALNKM  | 27   | >TP53-A129\ TYSPVLNKM  | 22  | 5    |
| >TP53-A129\ TYSPALNKMF | 5    | >TP53-A129\ TYSPVLNKMF | 5   | 0    |
| >TP53-A129\ TYSPALNKMF | 551  | >TP53-A129\ TYSPVLNKMF | 478 | 73   |
| >TP53-A129\ TYSPALNKMF | 586  | >TP53-A129\ TYSPVLNKMF | 298 | 288  |
| >TP53-A129\ TYSPALNK   | 222  | >TP53-A129\ TYSPVLNK   | 473 | 251  |
| >TP53-A129\ TYSPALNKMF | 439  | >TP53-A129\ TYSPVLNKMF | 348 | 91   |
| >TP53-A129\ CTYSPALNK  | 30   | >TP53-A129\ CTYSPVLNK  | 29  | 1    |
| >TP53-A129\ CTYSPALNK  | 11   | >TP53-A129\ CTYSPVLNK  | 8   | 3    |
| >TP53-A129\ CTYSPALNKM | 343  | >TP53-A129\ CTYSPVLNKM | 274 | 69   |
| >TP53-A129\ CTYSPALNKM | 63   | >TP53-A129\ CTYSPVLNKM | 29  | 34   |
| >TP53-A129\ CTYSPALNKM | 380  | >TP53-A129\ CTYSPVLNKM | 148 | 232  |
| >TP53-A129\ CTYSPALNKM | 246  | >TP53-A129\ CTYSPVLNKM | 162 | 84   |
| >TP53-A129\ CTYSPALNK  | 215  | >TP53-A129\ CTYSPVLNK  | 146 | 69   |
| >TP53-A129\ CTYSPALNK  | 30   | >TP53-A129\ CTYSPVLNK  | 31  | 1    |
| >TP53-A129\ CTYSPALNKM | 488  | >TP53-A129\ CTYSPVLNKM | 562 | 74   |
| >TP53-A129\ CTYSPALNKM | 23   | >TP53-A129\ CTYSPVLNKM | 20  | 3    |
| >TP53-A129\ CTYSPALNKM | 24   | >TP53-A129\ CTYSPVLNKM | 40  | 16   |
| >TP53-A129\ CTYSPALNKM | 5    | >TP53-A129\ CTYSPVLNKM | 5   | 0    |
| >TP53-A129\ CTYSPALNKM | 627  | >TP53-A129\ CTYSPVLNKM | 482 | 145  |
| >TP53-A129\ CTYSPALNKM | 76   | >TP53-A129\ CTYSPVLNKM | 90  | 14   |
| >TP53-A129\ CTYSPALNKM | 146  | >TP53-A129\ CTYSPVLNKM | 167 | 21   |
| >TP53-A129\ CTYSPALNKM | 30   | >TP53-A129\ CTYSPVLNKM | 34  | 4    |
| >TP53-A129\ CTYSPALNKM | 13   | >TP53-A129\ CTYSPVLNKM | 19  | 6    |
| >TP53-A129\ CTYSPALNK  | 572  | >TP53-A129\ CTYSPVLNK  | 271 | 301  |
| >TP53-A129\ CTYSPALNKM | 358  | >TP53-A129\ CTYSPVLNKM | 462 | 104  |
| >TP53-A129\ TCTYSPALNK | 453  | >TP53-A129\ TCTYSPVLNK | 463 | 10   |
| >TP53-A129\ VTCTYSPA   | 415  | >TP53-A129\ VTCTYSPV   | 27  | 388  |
| >TP53-A129\ VTCTYSPA   | 1658 | >TP53-A129\ VTCTYSPV   | 213 | 1445 |
| >TP53-A129\ VTCTYSPA   | 1839 | >TP53-A129\ VTCTYSPV   | 167 | 1672 |

|                        |       |                        |       |       |
|------------------------|-------|------------------------|-------|-------|
| >TP53-A129\VTCTYSPAL   | 397   | >TP53-A129\VTCTYSPVL   | 2554  | 2157  |
| >TP53-A129\VTCTYSPA    | 4507  | >TP53-A129\VTCTYSPV    | 85    | 4422  |
| >TP53-A129\VTCTYSPA    | 17631 | >TP53-A129\VTCTYSPV    | 370   | 17261 |
| >TP53-A129\VTCTYSPALN  | 80    | >TP53-A129\VTCTYSPVLN  | 82    | 2     |
| >TP53-A129\VTCTYSPALN  | 14    | >TP53-A129\VTCTYSPVLN  | 12    | 2     |
| >TP53-A129\VTCTYSPALN  | 146   | >TP53-A129\VTCTYSPVLN  | 132   | 14    |
| >TP53-A129\VTCTYSPALN  | 490   | >TP53-A129\VTCTYSPVLN  | 518   | 28    |
| >TP53-A129\VTCTYSPA    | 2180  | >TP53-A129\VTCTYSPV    | 193   | 1987  |
| >TP53-A129\VTCTYSPA    | 4146  | >TP53-A129\VTCTYSPV    | 289   | 3857  |
| >TP53-A129\VTCTYSPAL   | 12    | >TP53-A129\VTCTYSPVL   | 12    | 0     |
| >TP53-A129\VTCTYSPAL   | 66    | >TP53-A129\VTCTYSPVL   | 52    | 14    |
| >TP53-A129\VTCTYSPAL   | 951   | >TP53-A129\VTCTYSPVL   | 200   | 751   |
| >TP53-A129\SVTCTYSPA   | 4731  | >TP53-A129\SVTCTYSPV   | 465   | 4266  |
| >TP53-A129\SVTCTYSPA   | 118   | >TP53-A129\SVTCTYSPV   | 15    | 103   |
| >TP53-A129\SVTCTYSPA   | 468   | >TP53-A129\SVTCTYSPV   | 40    | 428   |
| >TP53-A129\SVTCTYSPAL  | 268   | >TP53-A129\SVTCTYSPVL  | 699   | 431   |
| >TP53-A129\SVTCTYSPA   | 4503  | >TP53-A129\SVTCTYSPV   | 104   | 4399  |
| >TP53-A129\SVTCTYSPA   | 3002  | >TP53-A129\SVTCTYSPV   | 75    | 2927  |
| >TP53-A129\SVTCTYSPA   | 5667  | >TP53-A129\SVTCTYSPV   | 106   | 5561  |
| >TP53-A129\SVTCTYSPA   | 5164  | >TP53-A129\SVTCTYSPV   | 75    | 5089  |
| >TP53-A129\SVTCTYSPA   | 241   | >TP53-A129\SVTCTYSPV   | 473   | 232   |
| >TP53-A129\SVTCTYSPA   | 45    | >TP53-A129\SVTCTYSPV   | 11    | 34    |
| >TP53-A129\SVTCTYSPA   | 583   | >TP53-A129\SVTCTYSPV   | 21    | 562   |
| >TP53-A129\SVTCTYSPAL  | 149   | >TP53-A129\SVTCTYSPVL  | 605   | 456   |
| >TP53-A129\SVTCTYSPA   | 2869  | >TP53-A129\SVTCTYSPV   | 364   | 2505  |
| >TP53-A129\KSVTCTYSPA  | 1687  | >TP53-A129\KSVTCTYSPV  | 285   | 1402  |
| >TP53-A129\KSVTCTYSPA  | 396   | >TP53-A129\KSVTCTYSPVI | 1396  | 1000  |
| >TP53-A129\KSVTCTYSPA  | 149   | >TP53-A129\KSVTCTYSPV  | 273   | 124   |
| >TP53-A129\KSVTCTYSPA  | 488   | >TP53-A129\KSVTCTYSPVI | 764   | 276   |
| >TP53-A129\KSVTCTYSPA  | 107   | >TP53-A129\KSVTCTYSPVI | 291   | 184   |
| >TP53-A129\KSVTCTYSPA  | 3435  | >TP53-A129\KSVTCTYSPV  | 321   | 3114  |
| >TP53-A129\KSVTCTYSPA  | 349   | >TP53-A129\KSVTCTYSPV  | 77    | 272   |
| >TP53-A129\KSVTCTYSPA  | 89    | >TP53-A129\KSVTCTYSPVI | 140   | 51    |
| >TP53-A129\KSVTCTYSPA  | 1612  | >TP53-A129\KSVTCTYSPV  | 76    | 1536  |
| >TP53-A129\KSVTCTYSPA  | 6     | >TP53-A129\KSVTCTYSPVI | 7     | 1     |
| >TP53-A129\KSVTCTYSPA  | 113   | >TP53-A129\KSVTCTYSPVI | 32    | 81    |
| >TP53-A129\KSVTCTYSPA  | 198   | >TP53-A129\KSVTCTYSPVI | 136   | 62    |
| >TP53-A129\KSVTCTYSPA  | 882   | >TP53-A129\KSVTCTYSPVI | 244   | 638   |
| >TP53-A138F AKTCPVQL   | 41    | >TP53-A138F PKTCPVQL   | 1018  | 977   |
| >TP53-A138F AKTCPVQLW  | 192   | >TP53-A138F PKTCPVQLW  | 3368  | 3176  |
| >TP53-A138F LAKTCPVQL  | 11635 | >TP53-A138F LPKTCPVQL  | 15    | 11620 |
| >TP53-A138F LAKTCPVQLV | 29437 | >TP53-A138F LPKTCPVQLV | 159   | 29278 |
| >TP53-A138F LAKTCPVQLW | 482   | >TP53-A138F LPKTCPVQLW | 15202 | 14720 |



|                       |       |                       |       |       |
|-----------------------|-------|-----------------------|-------|-------|
| >TP53-A138FLAKTCPVQL  | 11331 | >TP53-A138FLPKTCPVQL  | 223   | 11108 |
| >TP53-A138FLAKTCPVQL  | 417   | >TP53-A138FLPKTCPVQL  | 1742  | 1325  |
| >TP53-A138FLAKTCPVQL  | 405   | >TP53-A138FLPKTCPVQL  | 20436 | 20031 |
| >TP53-A138FLAKTCPVQLV | 45    | >TP53-A138FLPKTCPVQLV | 4879  | 4834  |
| >TP53-A138FLAKTCPVQL  | 5347  | >TP53-A138FLPKTCPVQL  | 238   | 5109  |
| >TP53-A138FLAKTCPVQLV | 14685 | >TP53-A138FLPKTCPVQLV | 359   | 14326 |
| >TP53-A138FLAKTCPVQLV | 11442 | >TP53-A138FLPKTCPVQLV | 289   | 11153 |
| >TP53-A138FLAKTCPVQLV | 42    | >TP53-A138FLPKTCPVQLV | 2407  | 2365  |
| >TP53-A138FLAKTCPVQLV | 42    | >TP53-A138FLPKTCPVQLV | 11435 | 11393 |
| >TP53-A138FLAKTCPVQLV | 689   | >TP53-A138FLPKTCPVQLV | 19    | 670   |
| >TP53-A138FQLAKTCPV   | 58    | >TP53-A138FQLPKTCPV   | 418   | 360   |
| >TP53-A138FQLAKTCPV   | 13    | >TP53-A138FQLPKTCPV   | 178   | 165   |
| >TP53-A138FQLAKTCPVQL | 315   | >TP53-A138FQLPKTCPVQL | 1046  | 731   |
| >TP53-A138FQLAKTCPV   | 10    | >TP53-A138FQLPKTCPV   | 44    | 34    |
| >TP53-A138FQLAKTCPVQL | 383   | >TP53-A138FQLPKTCPVQL | 993   | 610   |
| >TP53-A138FQLAKTCPV   | 37    | >TP53-A138FQLPKTCPV   | 113   | 76    |
| >TP53-A138FQLAKTCPV   | 14    | >TP53-A138FQLPKTCPV   | 20    | 6     |
| >TP53-A138FQLAKTCPVQL | 323   | >TP53-A138FQLPKTCPVQL | 511   | 188   |
| >TP53-A138FQLAKTCPV   | 30    | >TP53-A138FQLPKTCPV   | 92    | 62    |
| >TP53-A138FQLAKTCPV   | 10    | >TP53-A138FQLPKTCPV   | 21    | 11    |
| >TP53-A138FQLAKTCPVQL | 177   | >TP53-A138FQLPKTCPVQL | 684   | 507   |
| >TP53-A138FQLAKTCPV   | 10    | >TP53-A138FQLPKTCPV   | 106   | 96    |
| >TP53-A138FQLAKTCPVQL | 117   | >TP53-A138FQLPKTCPVQL | 1494  | 1377  |
| >TP53-A138FQLAKTCPV   | 3     | >TP53-A138FQLPKTCPV   | 5     | 2     |
| >TP53-A138FQLAKTCPVQL | 20    | >TP53-A138FQLPKTCPVQL | 36    | 16    |
| >TP53-A138FQLAKTCPV   | 217   | >TP53-A138FQLPKTCPV   | 629   | 412   |
| >TP53-A138FQLAKTCPV   | 60    | >TP53-A138FQLPKTCPV   | 1178  | 1118  |
| >TP53-A138FQLAKTCPVQL | 343   | >TP53-A138FQLPKTCPVQL | 9263  | 8920  |
| >TP53-A138FQLAKTCPVQL | 13944 | >TP53-A138FQLPKTCPVQL | 439   | 13505 |
| >TP53-A138FCQLAKTCPV  | 121   | >TP53-A138FCQLPKTCPV  | 196   | 75    |
| >TP53-A138FCQLAKTCPV  | 173   | >TP53-A138FCQLPKTCPV  | 220   | 47    |
| >TP53-A138FCQLAKTCPV  | 22    | >TP53-A138FCQLPKTCPV  | 26    | 4     |
| >TP53-A138FCQLAKTCPVC | 463   | >TP53-A138FCQLPKTCPVC | 371   | 92    |
| >TP53-A138FCQLAKTCPV  | 136   | >TP53-A138FCQLPKTCPV  | 124   | 12    |
| >TP53-A138FCQLAKTCPV  | 77    | >TP53-A138FCQLPKTCPV  | 52    | 25    |
| >TP53-A138FCQLAKTCPV  | 457   | >TP53-A138FCQLPKTCPV  | 320   | 137   |
| >TP53-A138FCQLAKTCPV  | 268   | >TP53-A138FCQLPKTCPV  | 314   | 46    |
| >TP53-A138FCQLAKTCPVC | 155   | >TP53-A138FCQLPKTCPVC | 139   | 16    |
| >TP53-A138FCQLAKTCPVC | 231   | >TP53-A138FCQLPKTCPVC | 532   | 301   |
| >TP53-A138FCQLAKTCPV  | 443   | >TP53-A138FCQLPKTCPV  | 437   | 6     |
| >TP53-A138FMFCQLAKTC  | 450   | >TP53-A138FMFCQLPKTC  | 342   | 108   |
| >TP53-A138FMFCQLAKT   | 89    | >TP53-A138FMFCQLPKT   | 51    | 38    |
| >TP53-A138FMFCQLAKT   | 102   | >TP53-A138FMFCQLPKT   | 609   | 507   |

|                        |     |                        |       |       |
|------------------------|-----|------------------------|-------|-------|
| >TP53-A138F KMFCQLAKT  | 19  | >TP53-A138F KMFCQLPKT  | 82    | 63    |
| >TP53-A138F KMFCQLAKT  | 199 | >TP53-A138F KMFCQLPKT  | 104   | 95    |
| >TP53-A138F KMFCQLAKT  | 19  | >TP53-A138F KMFCQLPKT  | 16    | 3     |
| >TP53-A138F KMFCQLAKT  | 23  | >TP53-A138F KMFCQLPKT  | 14    | 9     |
| >TP53-A138F KMFCQLAKT  | 55  | >TP53-A138F KMFCQLPKT  | 93    | 38    |
| >TP53-A138F KMFCQLAKT  | 61  | >TP53-A138F KMFCQLPKT  | 71    | 10    |
| >TP53-A138F KMFCQLAKT  | 673 | >TP53-A138F KMFCQLPKT  | 125   | 548   |
| >TP53-A138F KMFCQLAKT  | 518 | >TP53-A138F KMFCQLPKT  | 322   | 196   |
| >TP53-A138F KMFCQLAK   | 26  | >TP53-A138F KMFCQLPK   | 26    | 0     |
| >TP53-A138F KMFCQLAK   | 12  | >TP53-A138F KMFCQLPK   | 9     | 3     |
| >TP53-A138F KMFCQLAK   | 8   | >TP53-A138F KMFCQLPK   | 6     | 2     |
| >TP53-A138F KMFCQLAK   | 35  | >TP53-A138F KMFCQLPK   | 29    | 6     |
| >TP53-A138F KMFCQLAK   | 371 | >TP53-A138F KMFCQLPK   | 331   | 40    |
| >TP53-A138F KMFCQLAKT  | 81  | >TP53-A138F KMFCQLPKT  | 81    | 0     |
| >TP53-A138F KMFCQLAK   | 58  | >TP53-A138F KMFCQLPK   | 58    | 0     |
| >TP53-A138F KMFCQLAKT  | 491 | >TP53-A138F KMFCQLPKT  | 427   | 64    |
| >TP53-A138F KMFCQLAK   | 39  | >TP53-A138F KMFCQLPK   | 28    | 11    |
| >TP53-A138F LNKMFQQLAI | 161 | >TP53-A138F LNKMFQQLPI | 67    | 94    |
| >TP53-A138F ALNKMFCQLI | 442 | >TP53-A138F ALNKMFCQLI | 16388 | 15946 |
| >TP53-A138F ALNKMFCQLI | 255 | >TP53-A138F ALNKMFCQLI | 13435 | 13180 |
| >TP53-A138F ALNKMFCQLI | 256 | >TP53-A138F ALNKMFCQLI | 16405 | 16149 |
| >TP53-A138F ALNKMFCQLI | 11  | >TP53-A138F ALNKMFCQLI | 5499  | 5488  |
| >TP53-A138F ALNKMFCQLI | 37  | >TP53-A138F ALNKMFCQLI | 35    | 2     |
| >TP53-A138F ALNKMFCQLI | 25  | >TP53-A138F ALNKMFCQLI | 17    | 8     |
| >TP53-A138F ALNKMFCQLI | 113 | >TP53-A138F ALNKMFCQLI | 47    | 66    |
| >TP53-A138F ALNKMFCQLI | 431 | >TP53-A138F ALNKMFCQLI | 220   | 211   |
| >TP53-A138S AKTCPVQL   | 41  | >TP53-A138S SKTCPVQL   | 78    | 37    |
| >TP53-A138S AKTCPVQLW  | 192 | >TP53-A138S SKTCPVQLW  | 413   | 221   |
| >TP53-A138S LAKTCPVQLV | 482 | >TP53-A138S LSKTCPVQLV | 7705  | 7223  |
| >TP53-A138S LAKTCPVQL  | 417 | >TP53-A138S LSKTCPVQL  | 225   | 192   |
| >TP53-A138S LAKTCPVQL  | 405 | >TP53-A138S LSKTCPVQL  | 39    | 366   |
| >TP53-A138S LAKTCPVQLV | 45  | >TP53-A138S LSKTCPVQLV | 8     | 37    |
| >TP53-A138S LAKTCPVQLV | 42  | >TP53-A138S LSKTCPVQLV | 37    | 5     |
| >TP53-A138S LAKTCPVQLV | 42  | >TP53-A138S LSKTCPVQLV | 25    | 17    |
| >TP53-A138S QLAKTCPV   | 58  | >TP53-A138S QLSKTCPV   | 159   | 101   |
| >TP53-A138S QLAKTCPV   | 13  | >TP53-A138S QLSKTCPV   | 22    | 9     |
| >TP53-A138S QLAKTCPVQL | 315 | >TP53-A138S QLSKTCPVQL | 297   | 18    |
| >TP53-A138S QLAKTCPV   | 10  | >TP53-A138S QLSKTCPV   | 17    | 7     |
| >TP53-A138S QLAKTCPVQL | 383 | >TP53-A138S QLSKTCPVQL | 336   | 47    |
| >TP53-A138S QLAKTCPV   | 37  | >TP53-A138S QLSKTCPV   | 111   | 74    |
| >TP53-A138S QLAKTCPV   | 14  | >TP53-A138S QLSKTCPV   | 22    | 8     |
| >TP53-A138S QLAKTCPVQL | 323 | >TP53-A138S QLSKTCPVQL | 602   | 279   |
| >TP53-A138S QLAKTCPV   | 30  | >TP53-A138S QLSKTCPV   | 33    | 3     |

|                        |     |                        |       |      |
|------------------------|-----|------------------------|-------|------|
| >TP53-A138S QLAKTCPV   | 10  | >TP53-A138S QLSKTCPV   | 18    | 8    |
| >TP53-A138S QLAKTCPVQL | 177 | >TP53-A138S QLSKTCPVQL | 535   | 358  |
| >TP53-A138S QLAKTCPV   | 10  | >TP53-A138S QLSKTCPV   | 17    | 7    |
| >TP53-A138S QLAKTCPVQL | 117 | >TP53-A138S QLSKTCPVQL | 261   | 144  |
| >TP53-A138S QLAKTCPV   | 3   | >TP53-A138S QLSKTCPV   | 4     | 1    |
| >TP53-A138S QLAKTCPVQL | 20  | >TP53-A138S QLSKTCPVQL | 27    | 7    |
| >TP53-A138S QLAKTCPV   | 217 | >TP53-A138S QLSKTCPV   | 676   | 459  |
| >TP53-A138S QLAKTCPV   | 60  | >TP53-A138S QLSKTCPV   | 276   | 216  |
| >TP53-A138S QLAKTCPVQL | 343 | >TP53-A138S QLSKTCPVQL | 547   | 204  |
| >TP53-A138S CQLAKTCPV  | 121 | >TP53-A138S CQLSKTCPV  | 137   | 16   |
| >TP53-A138S CQLAKTCPV  | 173 | >TP53-A138S CQLSKTCPV  | 208   | 35   |
| >TP53-A138S CQLAKTCPV  | 22  | >TP53-A138S CQLSKTCPV  | 35    | 13   |
| >TP53-A138S CQLAKTCPVC | 463 | >TP53-A138S CQLSKTCPVC | 834   | 371  |
| >TP53-A138S CQLAKTCPV  | 136 | >TP53-A138S CQLSKTCPV  | 160   | 24   |
| >TP53-A138S CQLAKTCPV  | 77  | >TP53-A138S CQLSKTCPV  | 97    | 20   |
| >TP53-A138S CQLAKTCPV  | 457 | >TP53-A138S CQLSKTCPV  | 446   | 11   |
| >TP53-A138S CQLAKTCPV  | 268 | >TP53-A138S CQLSKTCPV  | 118   | 150  |
| >TP53-A138S CQLAKTCPVC | 155 | >TP53-A138S CQLSKTCPVC | 72    | 83   |
| >TP53-A138S CQLAKTCPVC | 231 | >TP53-A138S CQLSKTCPVC | 338   | 107  |
| >TP53-A138S FCQLAKTCPV | 443 | >TP53-A138S FCQLSKTCPV | 384   | 59   |
| >TP53-A138S MFCQLAKTC  | 450 | >TP53-A138S MFCQLSKTC  | 591   | 141  |
| >TP53-A138S KMFCQLAKT  | 89  | >TP53-A138S KMFCQLSKT  | 243   | 154  |
| >TP53-A138S KMFCQLAKT  | 102 | >TP53-A138S KMFCQLSKT  | 227   | 125  |
| >TP53-A138S KMFCQLAKT  | 19  | >TP53-A138S KMFCQLSKT  | 19    | 0    |
| >TP53-A138S KMFCQLAKT  | 199 | >TP53-A138S KMFCQLSKT  | 330   | 131  |
| >TP53-A138S KMFCQLAKT  | 19  | >TP53-A138S KMFCQLSKT  | 31    | 12   |
| >TP53-A138S KMFCQLAKT  | 23  | >TP53-A138S KMFCQLSKT  | 20    | 3    |
| >TP53-A138S KMFCQLAKT  | 55  | >TP53-A138S KMFCQLSKT  | 116   | 61   |
| >TP53-A138S KMFCQLAKT  | 61  | >TP53-A138S KMFCQLSKT  | 52    | 9    |
| >TP53-A138S KMFCQLAK   | 26  | >TP53-A138S KMFCQLSK   | 25    | 1    |
| >TP53-A138S KMFCQLAK   | 12  | >TP53-A138S KMFCQLSK   | 9     | 3    |
| >TP53-A138S KMFCQLAK   | 8   | >TP53-A138S KMFCQLSK   | 8     | 0    |
| >TP53-A138S KMFCQLAK   | 35  | >TP53-A138S KMFCQLSK   | 53    | 18   |
| >TP53-A138S KMFCQLAK   | 371 | >TP53-A138S KMFCQLSK   | 409   | 38   |
| >TP53-A138S KMFCQLAKT  | 81  | >TP53-A138S KMFCQLSKT  | 94    | 13   |
| >TP53-A138S KMFCQLAK   | 58  | >TP53-A138S KMFCQLSK   | 53    | 5    |
| >TP53-A138S KMFCQLAKT  | 491 | >TP53-A138S KMFCQLSKT  | 286   | 205  |
| >TP53-A138S KMFCQLAKT  | 802 | >TP53-A138S KMFCQLSKT  | 419   | 383  |
| >TP53-A138S KMFCQLAK   | 39  | >TP53-A138S KMFCQLSK   | 50    | 11   |
| >TP53-A138S LNKMFQQLAI | 161 | >TP53-A138S LNKMFQQLS  | 119   | 42   |
| >TP53-A138S ALNKMFCQL  | 442 | >TP53-A138S ALNKMFCQL  | 9564  | 9122 |
| >TP53-A138S ALNKMFCQL  | 255 | >TP53-A138S ALNKMFCQL  | 6096  | 5841 |
| >TP53-A138S ALNKMFCQL  | 256 | >TP53-A138S ALNKMFCQL  | 10231 | 9975 |

|                       |      |                       |      |      |
|-----------------------|------|-----------------------|------|------|
| >TP53-A138SALNKMFCQL  | 11   | >TP53-A138SALNKMFCQL  | 831  | 820  |
| >TP53-A138SALNKMFCQL  | 37   | >TP53-A138SALNKMFCQL  | 34   | 3    |
| >TP53-A138SALNKMFCQL  | 25   | >TP53-A138SALNKMFCQL  | 20   | 5    |
| >TP53-A138SALNKMFCQL  | 113  | >TP53-A138SALNKMFCQL  | 83   | 30   |
| >TP53-A138SALNKMFCQL  | 431  | >TP53-A138SALNKMFCQL  | 717  | 286  |
| >TP53-A138TAKTCPVQL   | 41   | >TP53-A138TAKTCPVQL   | 217  | 176  |
| >TP53-A138TAKTCPVQLW  | 192  | >TP53-A138TAKTCPVQLW  | 973  | 781  |
| >TP53-A138TLAKTCPVQLV | 830  | >TP53-A138TLAKTCPVQLV | 297  | 533  |
| >TP53-A138TLAKTCPVQLV | 482  | >TP53-A138TLAKTCPVQLV | 372  | 110  |
| >TP53-A138TLAKTCPVQLV | 1694 | >TP53-A138TLAKTCPVQLV | 289  | 1405 |
| >TP53-A138TLAKTCPVQL  | 417  | >TP53-A138TLAKTCPVQL  | 755  | 338  |
| >TP53-A138TLAKTCPVQL  | 405  | >TP53-A138TLAKTCPVQL  | 26   | 379  |
| >TP53-A138TLAKTCPVQLV | 45   | >TP53-A138TLAKTCPVQLV | 8    | 37   |
| >TP53-A138TLAKTCPVQLV | 42   | >TP53-A138TLAKTCPVQLV | 39   | 3    |
| >TP53-A138TLAKTCPVQLV | 42   | >TP53-A138TLAKTCPVQLV | 36   | 6    |
| >TP53-A138TLAKTCPVQL  | 2930 | >TP53-A138TLAKTCPVQL  | 192  | 2738 |
| >TP53-A138TLAKTCPVQLV | 3119 | >TP53-A138TLAKTCPVQLV | 179  | 2940 |
| >TP53-A138TQLAKTCPV   | 58   | >TP53-A138TQLAKTCPV   | 290  | 232  |
| >TP53-A138TQLAKTCPV   | 13   | >TP53-A138TQLAKTCPV   | 92   | 79   |
| >TP53-A138TQLAKTCPVQL | 315  | >TP53-A138TQLAKTCPVQL | 994  | 679  |
| >TP53-A138TQLAKTCPV   | 10   | >TP53-A138TQLAKTCPV   | 61   | 51   |
| >TP53-A138TQLAKTCPVQL | 383  | >TP53-A138TQLAKTCPVQL | 746  | 363  |
| >TP53-A138TQLAKTCPV   | 37   | >TP53-A138TQLAKTCPV   | 113  | 76   |
| >TP53-A138TQLAKTCPV   | 14   | >TP53-A138TQLAKTCPV   | 31   | 17   |
| >TP53-A138TQLAKTCPVQL | 323  | >TP53-A138TQLAKTCPVQL | 815  | 492  |
| >TP53-A138TQLAKTCPV   | 30   | >TP53-A138TQLAKTCPV   | 42   | 12   |
| >TP53-A138TQLAKTCPV   | 10   | >TP53-A138TQLAKTCPV   | 16   | 6    |
| >TP53-A138TQLAKTCPVQL | 177  | >TP53-A138TQLAKTCPVQL | 411  | 234  |
| >TP53-A138TQLAKTCPV   | 10   | >TP53-A138TQLAKTCPV   | 71   | 61   |
| >TP53-A138TQLAKTCPVQL | 117  | >TP53-A138TQLAKTCPVQL | 1128 | 1011 |
| >TP53-A138TQLAKTCPV   | 3    | >TP53-A138TQLAKTCPV   | 4    | 1    |
| >TP53-A138TQLAKTCPVQL | 20   | >TP53-A138TQLAKTCPVQL | 23   | 3    |
| >TP53-A138TQLAKTCPV   | 217  | >TP53-A138TQLAKTCPV   | 899  | 682  |
| >TP53-A138TQLAKTCPV   | 60   | >TP53-A138TQLAKTCPV   | 366  | 306  |
| >TP53-A138TQLAKTCPVQL | 343  | >TP53-A138TQLAKTCPVQL | 671  | 328  |
| >TP53-A138TQQLAKTCPV  | 121  | >TP53-A138TQQLAKTCPV  | 254  | 133  |
| >TP53-A138TQQLAKTCPV  | 173  | >TP53-A138TQQLAKTCPV  | 340  | 167  |
| >TP53-A138TQQLAKTCPV  | 22   | >TP53-A138TQQLAKTCPV  | 42   | 20   |
| >TP53-A138TQQLAKTCPVC | 463  | >TP53-A138TQQLAKTCPVC | 991  | 528  |
| >TP53-A138TQQLAKTCPV  | 136  | >TP53-A138TQQLAKTCPV  | 405  | 269  |
| >TP53-A138TQQLAKTCPV  | 77   | >TP53-A138TQQLAKTCPV  | 104  | 27   |
| >TP53-A138TQQLAKTCPV  | 457  | >TP53-A138TQQLAKTCPV  | 907  | 450  |
| >TP53-A138TQQLAKTCPV  | 268  | >TP53-A138TQQLAKTCPV  | 232  | 36   |

|                       |     |                       |      |      |
|-----------------------|-----|-----------------------|------|------|
| >TP53-A138TCQLAKTCPVC | 155 | >TP53-A138TCQLTKTCPVC | 130  | 25   |
| >TP53-A138TCQLAKTCPVC | 231 | >TP53-A138TCQLTKTCPVC | 399  | 168  |
| >TP53-A138TFCQLAKTCPV | 443 | >TP53-A138TFCQLTKTCPV | 487  | 44   |
| >TP53-A138TMFCQLAKTC  | 450 | >TP53-A138TMFCQLTKTC  | 747  | 297  |
| >TP53-A138TKMFCQLAKT  | 89  | >TP53-A138TKMFCQLTKT  | 113  | 24   |
| >TP53-A138TKMFCQLAKT  | 102 | >TP53-A138TKMFCQLTKT  | 116  | 14   |
| >TP53-A138TKMFCQLAKT  | 19  | >TP53-A138TKMFCQLTKT  | 17   | 2    |
| >TP53-A138TKMFCQLAKT  | 199 | >TP53-A138TKMFCQLTKT  | 182  | 17   |
| >TP53-A138TKMFCQLAKT  | 19  | >TP53-A138TKMFCQLTKT  | 42   | 23   |
| >TP53-A138TKMFCQLAKT( | 23  | >TP53-A138TKMFCQLTKT( | 22   | 1    |
| >TP53-A138TKMFCQLAKT  | 55  | >TP53-A138TKMFCQLTKT  | 225  | 170  |
| >TP53-A138TKMFCQLAKT( | 61  | >TP53-A138TKMFCQLTKT( | 62   | 1    |
| >TP53-A138TKMFCQLAK   | 26  | >TP53-A138TKMFCQLTK   | 26   | 0    |
| >TP53-A138TKMFCQLAK   | 12  | >TP53-A138TKMFCQLTK   | 12   | 0    |
| >TP53-A138TKMFCQLAK   | 8   | >TP53-A138TKMFCQLTK   | 10   | 2    |
| >TP53-A138TKMFCQLAK   | 35  | >TP53-A138TKMFCQLTK   | 42   | 7    |
| >TP53-A138TKMFCQLAK   | 371 | >TP53-A138TKMFCQLTK   | 188  | 183  |
| >TP53-A138TKMFCQLAKT( | 81  | >TP53-A138TKMFCQLTKT( | 43   | 38   |
| >TP53-A138TKMFCQLAK   | 58  | >TP53-A138TKMFCQLTK   | 70   | 12   |
| >TP53-A138TKMFCQLAKT( | 491 | >TP53-A138TKMFCQLTKT( | 350  | 141  |
| >TP53-A138TKMFCQLAK   | 39  | >TP53-A138TKMFCQLTK   | 36   | 3    |
| >TP53-A138TLNKMFCQLAI | 161 | >TP53-A138TLNKMFCQLTI | 152  | 9    |
| >TP53-A138TALNKMFCQL  | 442 | >TP53-A138TALNKMFCQL' | 1135 | 693  |
| >TP53-A138TALNKMFCQL  | 255 | >TP53-A138TALNKMFCQL' | 1666 | 1411 |
| >TP53-A138TALNKMFCQL  | 256 | >TP53-A138TALNKMFCQL' | 2626 | 2370 |
| >TP53-A138TALNKMFCQL  | 11  | >TP53-A138TALNKMFCQL' | 66   | 55   |
| >TP53-A138TALNKMFCQL  | 37  | >TP53-A138TALNKMFCQL' | 38   | 1    |
| >TP53-A138TALNKMFCQL  | 25  | >TP53-A138TALNKMFCQL' | 23   | 2    |
| >TP53-A138TALNKMFCQL  | 113 | >TP53-A138TALNKMFCQL' | 107  | 6    |
| >TP53-A138TALNKMFCQL  | 431 | >TP53-A138TALNKMFCQL' | 508  | 77   |
| >TP53-A138\AKTCPVQL   | 41  | >TP53-A138\VKTCPVQL   | 64   | 23   |
| >TP53-A138\AKTCPVQLW  | 192 | >TP53-A138\VKTCPVQLW  | 295  | 103  |
| >TP53-A138\LAKTCPVQLV | 830 | >TP53-A138\LVKTCPVQLV | 98   | 732  |
| >TP53-A138\LAKTCPVQLV | 482 | >TP53-A138\LVKTCPVQLV | 34   | 448  |
| >TP53-A138\LAKTCPVQL  | 417 | >TP53-A138\LVKTCPVQL  | 1529 | 1112 |
| >TP53-A138\LAKTCPVQL  | 405 | >TP53-A138\LVKTCPVQL  | 4154 | 3749 |
| >TP53-A138\LAKTCPVQLV | 45  | >TP53-A138\LVKTCPVQLV | 268  | 223  |
| >TP53-A138\LAKTCPVQLV | 42  | >TP53-A138\LVKTCPVQLV | 144  | 102  |
| >TP53-A138\LAKTCPVQLV | 42  | >TP53-A138\LVKTCPVQLV | 203  | 161  |
| >TP53-A138\QLAKTCPV   | 58  | >TP53-A138\QLVKTCPV   | 249  | 191  |
| >TP53-A138\QLAKTCPV   | 13  | >TP53-A138\QLVKTCPV   | 66   | 53   |
| >TP53-A138\QLAKTCPVQL | 315 | >TP53-A138\QLVKTCPVQL | 718  | 403  |
| >TP53-A138\QLAKTCPV   | 10  | >TP53-A138\QLVKTCPV   | 26   | 16   |

|                       |      |                       |      |      |
|-----------------------|------|-----------------------|------|------|
| >TP53-A138\QLAKTCPVQL | 383  | >TP53-A138\QLVKTCPVQL | 426  | 43   |
| >TP53-A138\QLAKTCPV   | 37   | >TP53-A138\QLVKTCPV   | 38   | 1    |
| >TP53-A138\QLAKTCPV   | 14   | >TP53-A138\QLVKTCPV   | 18   | 4    |
| >TP53-A138\QLAKTCPVQL | 323  | >TP53-A138\QLVKTCPVQL | 418  | 95   |
| >TP53-A138\QLAKTCPV   | 30   | >TP53-A138\QLVKTCPV   | 31   | 1    |
| >TP53-A138\QLAKTCPV   | 10   | >TP53-A138\QLVKTCPV   | 24   | 14   |
| >TP53-A138\QLAKTCPVQL | 177  | >TP53-A138\QLVKTCPVQL | 820  | 643  |
| >TP53-A138\QLAKTCPV   | 10   | >TP53-A138\QLVKTCPV   | 86   | 76   |
| >TP53-A138\QLAKTCPVQL | 117  | >TP53-A138\QLVKTCPVQL | 1280 | 1163 |
| >TP53-A138\QLAKTCPV   | 3    | >TP53-A138\QLVKTCPV   | 5    | 2    |
| >TP53-A138\QLAKTCPVQL | 20   | >TP53-A138\QLVKTCPVQL | 36   | 16   |
| >TP53-A138\QLAKTCPV   | 217  | >TP53-A138\QLVKTCPV   | 649  | 432  |
| >TP53-A138\QLAKTCPV   | 60   | >TP53-A138\QLVKTCPV   | 117  | 57   |
| >TP53-A138\QLAKTCPVQL | 967  | >TP53-A138\QLVKTCPVQL | 389  | 578  |
| >TP53-A138\QLAKTCPVQL | 343  | >TP53-A138\QLVKTCPVQL | 572  | 229  |
| >TP53-A138\CQLAKTCPV  | 121  | >TP53-A138\CQLVKTCPV  | 689  | 568  |
| >TP53-A138\CQLAKTCPV  | 173  | >TP53-A138\CQLVKTCPV  | 818  | 645  |
| >TP53-A138\CQLAKTCPV  | 22   | >TP53-A138\CQLVKTCPV  | 33   | 11   |
| >TP53-A138\CQLAKTCPVC | 463  | >TP53-A138\CQLVKTCPVC | 910  | 447  |
| >TP53-A138\CQLAKTCPV  | 136  | >TP53-A138\CQLVKTCPV  | 671  | 535  |
| >TP53-A138\CQLAKTCPV  | 77   | >TP53-A138\CQLVKTCPV  | 133  | 56   |
| >TP53-A138\CQLAKTCPV  | 457  | >TP53-A138\CQLVKTCPV  | 954  | 497  |
| >TP53-A138\CQLAKTCPV  | 268  | >TP53-A138\CQLVKTCPV  | 356  | 88   |
| >TP53-A138\CQLAKTCPVC | 155  | >TP53-A138\CQLVKTCPVC | 198  | 43   |
| >TP53-A138\CQLAKTCPVC | 231  | >TP53-A138\CQLVKTCPVC | 716  | 485  |
| >TP53-A138\FCQLAKTCPV | 443  | >TP53-A138\FCQLVKTCPV | 733  | 290  |
| >TP53-A138\MFCQLAKTC  | 450  | >TP53-A138\MFCQLVKT   | 384  | 66   |
| >TP53-A138\KMFCQLAKT  | 89   | >TP53-A138\KMFCQLVKT  | 77   | 12   |
| >TP53-A138\KMFCQLAKT  | 102  | >TP53-A138\KMFCQLVKT  | 159  | 57   |
| >TP53-A138\KMFCQLAKT  | 19   | >TP53-A138\KMFCQLVKT  | 82   | 63   |
| >TP53-A138\KMFCQLAKT  | 199  | >TP53-A138\KMFCQLVKT  | 231  | 32   |
| >TP53-A138\KMFCQLAKT  | 19   | >TP53-A138\KMFCQLVKT  | 24   | 5    |
| >TP53-A138\KMFCQLAKT  | 23   | >TP53-A138\KMFCQLVKT  | 13   | 10   |
| >TP53-A138\KMFCQLAKT  | 55   | >TP53-A138\KMFCQLVKT  | 102  | 47   |
| >TP53-A138\KMFCQLAKT  | 61   | >TP53-A138\KMFCQLVKT  | 57   | 4    |
| >TP53-A138\KMFCQLAKT  | 673  | >TP53-A138\KMFCQLVKT  | 416  | 257  |
| >TP53-A138\KMFCQLAK   | 26   | >TP53-A138\KMFCQLVK   | 26   | 0    |
| >TP53-A138\KMFCQLAK   | 12   | >TP53-A138\KMFCQLVK   | 14   | 2    |
| >TP53-A138\KMFCQLAK   | 8    | >TP53-A138\KMFCQLVK   | 10   | 2    |
| >TP53-A138\KMFCQLAK   | 35   | >TP53-A138\KMFCQLVK   | 52   | 17   |
| >TP53-A138\KMFCQLAK   | 371  | >TP53-A138\KMFCQLVK   | 585  | 214  |
| >TP53-A138\KMFCQLAKT  | 1105 | >TP53-A138\KMFCQLVKT  | 217  | 888  |
| >TP53-A138\KMFCQLAKT  | 81   | >TP53-A138\KMFCQLVKT  | 46   | 35   |

|                        |      |                        |       |       |
|------------------------|------|------------------------|-------|-------|
| >TP53-A138\KMFCQLAK    | 58   | >TP53-A138\KMFCQLVK    | 70    | 12    |
| >TP53-A138\KMFCQLAKT   | 491  | >TP53-A138\KMFCQLVKT   | 288   | 203   |
| >TP53-A138\KMFCQLAK    | 39   | >TP53-A138\KMFCQLVK    | 29    | 10    |
| >TP53-A138\LNKMFCQLAI  | 161  | >TP53-A138\LNKMFCQLVI  | 248   | 87    |
| >TP53-A138\ALNKMFCQL   | 3416 | >TP53-A138\ALNKMFCQL'  | 472   | 2944  |
| >TP53-A138\ALNKMFCQL   | 1394 | >TP53-A138\ALNKMFCQL'  | 377   | 1017  |
| >TP53-A138\ALNKMFCQL   | 442  | >TP53-A138\ALNKMFCQL'  | 75    | 367   |
| >TP53-A138\ALNKMFCQL   | 255  | >TP53-A138\ALNKMFCQL'  | 8     | 247   |
| >TP53-A138\ALNKMFCQL   | 3615 | >TP53-A138\ALNKMFCQL'  | 45    | 3570  |
| >TP53-A138\ALNKMFCQL   | 256  | >TP53-A138\ALNKMFCQL'  | 10    | 246   |
| >TP53-A138\ALNKMFCQL   | 4922 | >TP53-A138\ALNKMFCQL'  | 24    | 4898  |
| >TP53-A138\ALNKMFCQL   | 11   | >TP53-A138\ALNKMFCQL'  | 2     | 9     |
| >TP53-A138\ALNKMFCQL   | 37   | >TP53-A138\ALNKMFCQL'  | 38    | 1     |
| >TP53-A138\ALNKMFCQL   | 25   | >TP53-A138\ALNKMFCQL'  | 27    | 2     |
| >TP53-A138\ALNKMFCQL   | 113  | >TP53-A138\ALNKMFCQL'  | 170   | 57    |
| >TP53-A138\ALNKMFCQL   | 431  | >TP53-A138\ALNKMFCQL'  | 688   | 257   |
| >TP53-A159[AMAIYKQSQI  | 221  | >TP53-A159[DMAIYKQSQI  | 2414  | 2193  |
| >TP53-A159[AMAIYKQSQI  | 161  | >TP53-A159[DMAIYKQSQI  | 8633  | 8472  |
| >TP53-A159[AMAIYKQSQI  | 199  | >TP53-A159[DMAIYKQSQI  | 3464  | 3265  |
| >TP53-A159[AMAIYKQSQI  | 283  | >TP53-A159[DMAIYKQSQI  | 4631  | 4348  |
| >TP53-A159[AMAIYKQSQ   | 69   | >TP53-A159[DMAIYKQSQ   | 8189  | 8120  |
| >TP53-A159[AMAIYKQSQI  | 49   | >TP53-A159[DMAIYKQSQI  | 5657  | 5608  |
| >TP53-A159[AMAIYKQSQI  | 55   | >TP53-A159[DMAIYKQSQI  | 1768  | 1713  |
| >TP53-A159[AMAIYKQSQI  | 69   | >TP53-A159[DMAIYKQSQI  | 1879  | 1810  |
| >TP53-A159[RAMAIYKQSC  | 354  | >TP53-A159[RDMAIYKQSC  | 20635 | 20281 |
| >TP53-A159[RAMAIYKQSC  | 375  | >TP53-A159[RDMAIYKQSC  | 1780  | 1405  |
| >TP53-A159[STPPPGTRVR  | 82   | >TP53-A159[STPPPGTRVR  | 10920 | 10838 |
| >TP53-A159[STPPPGTRVR  | 54   | >TP53-A159[STPPPGTRVR  | 417   | 363   |
| >TP53-A159[VRAMAIYK    | 159  | >TP53-A159[V RDMAIYK   | 1444  | 1285  |
| >TP53-A159[RV RAMAIY   | 205  | >TP53-A159[RV RDMAIY   | 779   | 574   |
| >TP53-A159[RV RAMAIYK  | 28   | >TP53-A159[RV RDMAIYK  | 37    | 9     |
| >TP53-A159[RV RAMAIYK  | 20   | >TP53-A159[RV RDMAIYK  | 21    | 1     |
| >TP53-A159[RV RAMAIY   | 241  | >TP53-A159[RV RDMAIY   | 200   | 41    |
| >TP53-A159[RV RAMAIY   | 398  | >TP53-A159[RV RDMAIY   | 256   | 142   |
| >TP53-A159[RV RAMAIY   | 5    | >TP53-A159[RV RDMAIY   | 9     | 4     |
| >TP53-A159[RV RAMAIYK  | 3    | >TP53-A159[RV RDMAIYK  | 3     | 0     |
| >TP53-A159[RV RAMAIYKC | 10   | >TP53-A159[RV RDMAIYKC | 15    | 5     |
| >TP53-A159[RV RAMAIYKC | 9    | >TP53-A159[RV RDMAIYKC | 13    | 4     |
| >TP53-A159[RV RAMAIY   | 107  | >TP53-A159[RV RDMAIY   | 88    | 19    |
| >TP53-A159[RV RAMAIYK  | 18   | >TP53-A159[RV RDMAIYK  | 26    | 8     |
| >TP53-A159[RV RAMAIY   | 26   | >TP53-A159[RV RDMAIY   | 73    | 47    |
| >TP53-A159[RV RAMAIY   | 85   | >TP53-A159[RV RDMAIY   | 105   | 20    |
| >TP53-A159[RV RAMAIY   | 311  | >TP53-A159[RV RDMAIY   | 738   | 427   |

|                        |       |                        |       |       |
|------------------------|-------|------------------------|-------|-------|
| >TP53-A159[ RVRAMAIY   | 7     | >TP53-A159[ RVRDMAIY   | 9     | 2     |
| >TP53-A159[ RVRAMAIY   | 211   | >TP53-A159[ RVRDMAIY   | 451   | 240   |
| >TP53-A159[ RVRAMAIYK  | 156   | >TP53-A159[ RVRDMAIYK  | 161   | 5     |
| >TP53-A159[ TRVRAMAIY  | 62    | >TP53-A159[ TRVRDMAIY  | 26    | 36    |
| >TP53-A159[ TRVRAMAIY  | 278   | >TP53-A159[ TRVRDMAIY  | 382   | 104   |
| >TP53-A159[ TRVRAMAI   | 215   | >TP53-A159[ TRVRDMAI   | 691   | 476   |
| >TP53-A159[ GTRVRAMAI\ | 269   | >TP53-A159[ GTRVRDMAI\ | 236   | 33    |
| >TP53-A159[ GTRVRAMAI\ | 50    | >TP53-A159[ GTRVRDMAI\ | 102   | 52    |
| >TP53-A159[ GTRVRAMAI\ | 39    | >TP53-A159[ GTRVRDMAI\ | 63    | 24    |
| >TP53-A159[ GTRVRAMA   | 18    | >TP53-A159[ GTRVRDMA   | 153   | 135   |
| >TP53-A159[ GTRVRAMAI  | 9     | >TP53-A159[ GTRVRDMAI  | 16    | 7     |
| >TP53-A159[ GTRVRAMAI\ | 30    | >TP53-A159[ GTRVRDMAI\ | 125   | 95    |
| >TP53-A159[ GTRVRAMAI\ | 3     | >TP53-A159[ GTRVRDMAI\ | 4     | 1     |
| >TP53-A159[ GTRVRAMAI\ | 130   | >TP53-A159[ GTRVRDMAI\ | 187   | 57    |
| >TP53-A159[ GTRVRAMAI\ | 115   | >TP53-A159[ GTRVRDMAI\ | 125   | 10    |
| >TP53-A159[ GTRVRAMAI\ | 405   | >TP53-A159[ GTRVRDMAI\ | 510   | 105   |
| >TP53-A159[ GTRVRAMAI  | 40    | >TP53-A159[ GTRVRDMAI  | 120   | 80    |
| >TP53-A159[ GTRVRAMAI\ | 4     | >TP53-A159[ GTRVRDMAI\ | 7     | 3     |
| >TP53-A159[ GTRVRAMAI  | 122   | >TP53-A159[ GTRVRDMAI  | 662   | 540   |
| >TP53-A159[ GTRVRAMAI\ | 21    | >TP53-A159[ GTRVRDMAI\ | 26    | 5     |
| >TP53-A159[ GTRVRAMAI\ | 269   | >TP53-A159[ GTRVRDMAI\ | 347   | 78    |
| >TP53-A159[ GTRVRAMAI  | 387   | >TP53-A159[ GTRVRDMAI  | 690   | 303   |
| >TP53-A159[ PPGTRVRAM  | 68    | >TP53-A159[ PPGTRVRDM  | 3029  | 2961  |
| >TP53-A159[ PPPGTRVRAM | 370   | >TP53-A159[ PPPGTRVRDM | 862   | 492   |
| >TP53-A159[ PPPGTRVRAM | 450   | >TP53-A159[ PPPGTRVRDM | 73    | 377   |
| >TP53-A159[ TPPPGRVRA  | 482   | >TP53-A159[ TPPPGRVRC  | 83    | 399   |
| >TP53-A159[ TPPPGRVRA  | 32    | >TP53-A159[ TPPPGRVRC  | 364   | 332   |
| >TP53-A159[ TPPPGRVRA  | 139   | >TP53-A159[ TPPPGRVRC  | 1302  | 1163  |
| >TP53-A159F AMAIYKQSQI | 221   | >TP53-A159F PMAIYKQSQI | 1280  | 1059  |
| >TP53-A159F AMAIYKQSQI | 161   | >TP53-A159F PMAIYKQSQI | 4542  | 4381  |
| >TP53-A159F AMAIYKQSQI | 199   | >TP53-A159F PMAIYKQSQI | 2305  | 2106  |
| >TP53-A159F AMAIYKQSQI | 283   | >TP53-A159F PMAIYKQSQI | 4076  | 3793  |
| >TP53-A159F AMAIYKQSQ  | 69    | >TP53-A159F PMAIYKQSQ  | 4644  | 4575  |
| >TP53-A159F AMAIYKQSQI | 49    | >TP53-A159F PMAIYKQSQI | 2853  | 2804  |
| >TP53-A159F AMAIYKQSQI | 55    | >TP53-A159F PMAIYKQSQI | 1707  | 1652  |
| >TP53-A159F AMAIYKQSQI | 69    | >TP53-A159F PMAIYKQSQI | 1009  | 940   |
| >TP53-A159F RAMAIYKQSC | 14619 | >TP53-A159F RPMAIYKQSC | 100   | 14519 |
| >TP53-A159F RAMAIYKQSC | 354   | >TP53-A159F RPMAIYKQSC | 17754 | 17400 |
| >TP53-A159F RAMAIYKQSC | 375   | >TP53-A159F RPMAIYKQSC | 1389  | 1014  |
| >TP53-A159F STPPPGRVVR | 82    | >TP53-A159F STPPPGRVVR | 11014 | 10932 |
| >TP53-A159F STPPPGRVVR | 54    | >TP53-A159F STPPPGRVVR | 161   | 107   |
| >TP53-A159F VRAMAIYK   | 159   | >TP53-A159F VRPMAIYK   | 1352  | 1193  |
| >TP53-A159F RVRAMAIY   | 205   | >TP53-A159F RVRPMAIY   | 265   | 60    |



|                        |     |                        |      |     |
|------------------------|-----|------------------------|------|-----|
| >TP53-A159F RVRAMAIYK  | 28  | >TP53-A159F RVRPMAIYK  | 30   | 2   |
| >TP53-A159F RVRAMAIYK  | 20  | >TP53-A159F RVRPMAIYK  | 21   | 1   |
| >TP53-A159F RVRAMAIY   | 241 | >TP53-A159F RVRPMAIY   | 280  | 39  |
| >TP53-A159F RVRAMAIY   | 398 | >TP53-A159F RVRPMAIY   | 212  | 186 |
| >TP53-A159F RVRAMAIY   | 5   | >TP53-A159F RVRPMAIY   | 6    | 1   |
| >TP53-A159F RVRAMAIYK  | 3   | >TP53-A159F RVRPMAIYK  | 3    | 0   |
| >TP53-A159F RVRAMAIYKC | 10  | >TP53-A159F RVRPMAIYKC | 10   | 0   |
| >TP53-A159F RVRAMAIYKC | 9   | >TP53-A159F RVRPMAIYKC | 9    | 0   |
| >TP53-A159F RVRAMAIY   | 107 | >TP53-A159F RVRPMAIY   | 82   | 25  |
| >TP53-A159F RVRAMAIYK  | 18  | >TP53-A159F RVRPMAIYK  | 19   | 1   |
| >TP53-A159F RVRAMAIY   | 26  | >TP53-A159F RVRPMAIY   | 59   | 33  |
| >TP53-A159F RVRAMAIY   | 85  | >TP53-A159F RVRPMAIY   | 92   | 7   |
| >TP53-A159F RVRAMAIY   | 311 | >TP53-A159F RVRPMAIY   | 311  | 0   |
| >TP53-A159F RVRAMAIY   | 7   | >TP53-A159F RVRPMAIY   | 4    | 3   |
| >TP53-A159F RVRAMAIY   | 211 | >TP53-A159F RVRPMAIY   | 956  | 745 |
| >TP53-A159F RVRAMAIYK  | 156 | >TP53-A159F RVRPMAIYK  | 260  | 104 |
| >TP53-A159F TRVRAMAIY  | 62  | >TP53-A159F TRVRPMAIY  | 29   | 33  |
| >TP53-A159F TRVRAMAIY  | 278 | >TP53-A159F TRVRPMAIY  | 189  | 89  |
| >TP53-A159F TRVRAMAI   | 215 | >TP53-A159F TRVRPMAI   | 386  | 171 |
| >TP53-A159F GTRVRAMAI\ | 269 | >TP53-A159F GTRVRPMAI\ | 616  | 347 |
| >TP53-A159F GTRVRAMAI\ | 50  | >TP53-A159F GTRVRPMAI\ | 52   | 2   |
| >TP53-A159F GTRVRAMAI\ | 39  | >TP53-A159F GTRVRPMAI\ | 36   | 3   |
| >TP53-A159F GTRVRAMA   | 18  | >TP53-A159F GTRVRPMA   | 12   | 6   |
| >TP53-A159F GTRVRAMAI  | 9   | >TP53-A159F GTRVRPMAI  | 7    | 2   |
| >TP53-A159F GTRVRAMAI\ | 30  | >TP53-A159F GTRVRPMAI\ | 38   | 8   |
| >TP53-A159F GTRVRAMAI\ | 3   | >TP53-A159F GTRVRPMAI\ | 3    | 0   |
| >TP53-A159F GTRVRAMAI\ | 130 | >TP53-A159F GTRVRPMAI\ | 261  | 131 |
| >TP53-A159F GTRVRAMAI\ | 115 | >TP53-A159F GTRVRPMAI\ | 96   | 19  |
| >TP53-A159F GTRVRAMAI\ | 405 | >TP53-A159F GTRVRPMAI\ | 756  | 351 |
| >TP53-A159F GTRVRAMAI  | 40  | >TP53-A159F GTRVRPMAI  | 119  | 79  |
| >TP53-A159F GTRVRAMAI\ | 4   | >TP53-A159F GTRVRPMAI\ | 5    | 1   |
| >TP53-A159F GTRVRAMAI  | 122 | >TP53-A159F GTRVRPMAI  | 450  | 328 |
| >TP53-A159F GTRVRAMAI\ | 21  | >TP53-A159F GTRVRPMAI\ | 22   | 1   |
| >TP53-A159F GTRVRAMAI\ | 269 | >TP53-A159F GTRVRPMAI\ | 170  | 99  |
| >TP53-A159F GTRVRAMAI  | 387 | >TP53-A159F GTRVRPMAI  | 663  | 276 |
| >TP53-A159F PPGTRVRAM  | 68  | >TP53-A159F PPGTRVRPM  | 67   | 1   |
| >TP53-A159F PPPGTRVRAM | 370 | >TP53-A159F PPPGTRVRPM | 798  | 428 |
| >TP53-A159F PPPGTRVRAM | 450 | >TP53-A159F PPPGTRVRPM | 1125 | 675 |
| >TP53-A159F TPPPGTRVRA | 482 | >TP53-A159F TPPPGTRVRP | 1391 | 909 |
| >TP53-A159F TPPPGTRVRA | 32  | >TP53-A159F TPPPGTRVRP | 35   | 3   |
| >TP53-A159F TPPPGTRVRA | 139 | >TP53-A159F TPPPGTRVRP | 191  | 52  |
| >TP53-A159F TPPPGTRVRA | 727 | >TP53-A159F TPPPGTRVRP | 490  | 237 |
| >TP53-A159S AMAIYKQSQT | 221 | >TP53-A159S SMAIYKQSQT | 153  | 68  |

|                        |      |                        |      |      |
|------------------------|------|------------------------|------|------|
| >TP53-A159S AMAIYKQSQI | 161  | >TP53-A159S SMAIYKQSQI | 188  | 27   |
| >TP53-A159S AMAIYKQSQI | 199  | >TP53-A159S SMAIYKQSQI | 152  | 47   |
| >TP53-A159S AMAIYKQSQI | 283  | >TP53-A159S SMAIYKQSQI | 97   | 186  |
| >TP53-A159S AMAIYKQSQ  | 69   | >TP53-A159S SMAIYKQSQ  | 110  | 41   |
| >TP53-A159S AMAIYKQSQI | 49   | >TP53-A159S SMAIYKQSQI | 78   | 29   |
| >TP53-A159S AMAIYKQSQI | 55   | >TP53-A159S SMAIYKQSQI | 61   | 6    |
| >TP53-A159S AMAIYKQSQI | 69   | >TP53-A159S SMAIYKQSQI | 153  | 84   |
| >TP53-A159S RAMAIYKQSC | 809  | >TP53-A159S RSMAIYKQSC | 378  | 431  |
| >TP53-A159S RAMAIYKQSC | 354  | >TP53-A159S RSMAIYKQSC | 51   | 303  |
| >TP53-A159S RAMAIYKQSC | 1142 | >TP53-A159S RSMAIYKQSC | 379  | 763  |
| >TP53-A159S RAMAIYKQSC | 375  | >TP53-A159S RSMAIYKQSC | 54   | 321  |
| >TP53-A159S STPPPGTRVR | 82   | >TP53-A159S STPPPGTRVR | 1426 | 1344 |
| >TP53-A159S STPPPGTRVR | 54   | >TP53-A159S STPPPGTRVR | 82   | 28   |
| >TP53-A159S VRAMAIYK   | 159  | >TP53-A159S VRSMAIYK   | 277  | 118  |
| >TP53-A159S RVRAMAIY   | 205  | >TP53-A159S RVRSMAIY   | 222  | 17   |
| >TP53-A159S RVRAMAIYK  | 28   | >TP53-A159S RVRSMAIYK  | 29   | 1    |
| >TP53-A159S RVRAMAIYK  | 20   | >TP53-A159S RVRSMAIYK  | 26   | 6    |
| >TP53-A159S RVRAMAIY   | 241  | >TP53-A159S RVRSMAIY   | 151  | 90   |
| >TP53-A159S RVRAMAIY   | 398  | >TP53-A159S RVRSMAIY   | 306  | 92   |
| >TP53-A159S RVRAMAIY   | 5    | >TP53-A159S RVRSMAIY   | 7    | 2    |
| >TP53-A159S RVRAMAIYK  | 3    | >TP53-A159S RVRSMAIYK  | 3    | 0    |
| >TP53-A159S RVRAMAIYKC | 10   | >TP53-A159S RVRSMAIYKC | 14   | 4    |
| >TP53-A159S RVRAMAIYKC | 9    | >TP53-A159S RVRSMAIYKC | 12   | 3    |
| >TP53-A159S RVRAMAIY   | 107  | >TP53-A159S RVRSMAIY   | 53   | 54   |
| >TP53-A159S RVRAMAIYK  | 18   | >TP53-A159S RVRSMAIYK  | 16   | 2    |
| >TP53-A159S RVRAMAIYK  | 588  | >TP53-A159S RVRSMAIYK  | 385  | 203  |
| >TP53-A159S RVRAMAIY   | 26   | >TP53-A159S RVRSMAIY   | 47   | 21   |
| >TP53-A159S RVRAMAIY   | 85   | >TP53-A159S RVRSMAIY   | 87   | 2    |
| >TP53-A159S RVRAMAIY   | 311  | >TP53-A159S RVRSMAIY   | 139  | 172  |
| >TP53-A159S RVRAMAIY   | 7    | >TP53-A159S RVRSMAIY   | 7    | 0    |
| >TP53-A159S RVRAMAIY   | 211  | >TP53-A159S RVRSMAIY   | 214  | 3    |
| >TP53-A159S RVRAMAIYK  | 156  | >TP53-A159S RVRSMAIYK  | 281  | 125  |
| >TP53-A159S TRVRAMAIY  | 62   | >TP53-A159S TRVRSMAIY  | 68   | 6    |
| >TP53-A159S TRVRAMAI   | 746  | >TP53-A159S TRVRSMAI   | 332  | 414  |
| >TP53-A159S TRVRAMAIY  | 278  | >TP53-A159S TRVRSMAIY  | 96   | 182  |
| >TP53-A159S TRVRAMAI   | 215  | >TP53-A159S TRVRSMAI   | 200  | 15   |
| >TP53-A159S GTRVRAMAI  | 269  | >TP53-A159S GTRVRSMAIY | 259  | 10   |
| >TP53-A159S GTRVRAMAI  | 50   | >TP53-A159S GTRVRSMAIY | 47   | 3    |
| >TP53-A159S GTRVRAMAI  | 39   | >TP53-A159S GTRVRSMAIY | 35   | 4    |
| >TP53-A159S GTRVRAMA   | 18   | >TP53-A159S GTRVRSMAI  | 18   | 0    |
| >TP53-A159S GTRVRAMAI  | 9    | >TP53-A159S GTRVRSMAI  | 5    | 4    |
| >TP53-A159S GTRVRAMAI  | 30   | >TP53-A159S GTRVRSMAIY | 19   | 11   |
| >TP53-A159S GTRVRAMAI  | 3    | >TP53-A159S GTRVRSMAIY | 3    | 0    |

|                        |      |                        |      |      |
|------------------------|------|------------------------|------|------|
| >TP53-A159S GTRVRAMAI  | 130  | >TP53-A159S GTRVRSMAI  | 144  | 14   |
| >TP53-A159S GTRVRAMAI  | 115  | >TP53-A159S GTRVRSMAI  | 77   | 38   |
| >TP53-A159S GTRVRAMAI  | 687  | >TP53-A159S GTRVRSMAI  | 301  | 386  |
| >TP53-A159S GTRVRAMAI  | 405  | >TP53-A159S GTRVRSMAI  | 199  | 206  |
| >TP53-A159S GTRVRAMAI  | 40   | >TP53-A159S GTRVRSMAI  | 51   | 11   |
| >TP53-A159S GTRVRAMAI  | 4    | >TP53-A159S GTRVRSMAI  | 4    | 0    |
| >TP53-A159S GTRVRAMAI  | 122  | >TP53-A159S GTRVRSMAI  | 156  | 34   |
| >TP53-A159S GTRVRAMAI  | 21   | >TP53-A159S GTRVRSMAI  | 21   | 0    |
| >TP53-A159S GTRVRAMAI  | 269  | >TP53-A159S GTRVRSMAI  | 238  | 31   |
| >TP53-A159S GTRVRAMAI  | 387  | >TP53-A159S GTRVRSMAI  | 368  | 19   |
| >TP53-A159S PPGTRVRAM  | 68   | >TP53-A159S PPGTRVRSM  | 153  | 85   |
| >TP53-A159S PPPGTRVRAM | 370  | >TP53-A159S PPPGTRVRS  | 678  | 308  |
| >TP53-A159S PPPGTRVRAM | 450  | >TP53-A159S PPPGTRVRS  | 238  | 212  |
| >TP53-A159S TPPPGRVRA  | 482  | >TP53-A159S TPPPGRVRS  | 241  | 241  |
| >TP53-A159S TPPPGRVRA  | 32   | >TP53-A159S TPPPGRVRS  | 45   | 13   |
| >TP53-A159S TPPPGRVRA  | 139  | >TP53-A159S TPPPGRVRS  | 598  | 459  |
| >TP53-A159T AMAIYKQSQI | 221  | >TP53-A159T TMAIYKQSQI | 165  | 56   |
| >TP53-A159T AMAIYKQSQI | 161  | >TP53-A159T TMAIYKQSQI | 410  | 249  |
| >TP53-A159T AMAIYKQSQI | 199  | >TP53-A159T TMAIYKQSQI | 643  | 444  |
| >TP53-A159T AMAIYKQSQI | 283  | >TP53-A159T TMAIYKQSQI | 1063 | 780  |
| >TP53-A159T AMAIYKQSQ  | 69   | >TP53-A159T TMAIYKQSQ  | 661  | 592  |
| >TP53-A159T AMAIYKQSQI | 49   | >TP53-A159T TMAIYKQSQI | 371  | 322  |
| >TP53-A159T AMAIYKQSQI | 55   | >TP53-A159T TMAIYKQSQI | 119  | 64   |
| >TP53-A159T AMAIYKQSQI | 69   | >TP53-A159T TMAIYKQSQI | 343  | 274  |
| >TP53-A159T RAMAIYKQSC | 2356 | >TP53-A159T RTMAIYKQSC | 415  | 1941 |
| >TP53-A159T RAMAIYKQSC | 3448 | >TP53-A159T RTMAIYKQSC | 340  | 3108 |
| >TP53-A159T RAMAIYKQSC | 1651 | >TP53-A159T RTMAIYKQSC | 341  | 1310 |
| >TP53-A159T RAMAIYKQ   | 1487 | >TP53-A159T RTMAIYKQ   | 350  | 1137 |
| >TP53-A159T RAMAIYKQSC | 809  | >TP53-A159T RTMAIYKQSC | 167  | 642  |
| >TP53-A159T RAMAIYKQ   | 4444 | >TP53-A159T RTMAIYKQ   | 289  | 4155 |
| >TP53-A159T RAMAIYKQSC | 354  | >TP53-A159T RTMAIYKQSC | 34   | 320  |
| >TP53-A159T RAMAIYKQSC | 375  | >TP53-A159T RTMAIYKQSC | 22   | 353  |
| >TP53-A159T STPPPGRVVR | 82   | >TP53-A159T STPPPGRVVR | 1445 | 1363 |
| >TP53-A159T STPPPGRVVR | 54   | >TP53-A159T STPPPGRVVR | 117  | 63   |
| >TP53-A159T VRAMAIYK   | 159  | >TP53-A159T VRTMAIYK   | 158  | 1    |
| >TP53-A159T RVRAMAIY   | 205  | >TP53-A159T RVRTMAIY   | 275  | 70   |
| >TP53-A159T RVRAMAIYK  | 28   | >TP53-A159T RVRTMAIYK  | 29   | 1    |
| >TP53-A159T RVRAMAIYK  | 20   | >TP53-A159T RVRTMAIYK  | 26   | 6    |
| >TP53-A159T RVRAMAIY   | 241  | >TP53-A159T RVRTMAIY   | 167  | 74   |
| >TP53-A159T RVRAMAIY   | 398  | >TP53-A159T RVRTMAIY   | 444  | 46   |
| >TP53-A159T RVRAMAIY   | 5    | >TP53-A159T RVRTMAIY   | 6    | 1    |
| >TP53-A159T RVRAMAIYK  | 3    | >TP53-A159T RVRTMAIYK  | 3    | 0    |
| >TP53-A159T RVRAMAIYKC | 10   | >TP53-A159T RVRTMAIYKC | 13   | 3    |

|                       |     |                       |     |     |
|-----------------------|-----|-----------------------|-----|-----|
| >TP53-A159TRVRAMAIYKC | 9   | >TP53-A159TRVRTMAIYKC | 11  | 2   |
| >TP53-A159TRVRAMAIY   | 107 | >TP53-A159TRVRTMAIY   | 88  | 19  |
| >TP53-A159TRVRAMAIYK  | 18  | >TP53-A159TRVRTMAIYK  | 20  | 2   |
| >TP53-A159TRVRAMAIY   | 26  | >TP53-A159TRVRTMAIY   | 52  | 26  |
| >TP53-A159TRVRAMAIY   | 85  | >TP53-A159TRVRTMAIY   | 154 | 69  |
| >TP53-A159TRVRAMAIY   | 311 | >TP53-A159TRVRTMAIY   | 245 | 66  |
| >TP53-A159TRVRAMAIY   | 7   | >TP53-A159TRVRTMAIY   | 10  | 3   |
| >TP53-A159TRVRAMAIY   | 211 | >TP53-A159TRVRTMAIY   | 552 | 341 |
| >TP53-A159TRVRAMAIYK  | 156 | >TP53-A159TRVRTMAIYK  | 167 | 11  |
| >TP53-A159TRVRAMAIY   | 62  | >TP53-A159TRVRTMAIY   | 102 | 40  |
| >TP53-A159TRVRAMAIY   | 278 | >TP53-A159TRVRTMAIY   | 150 | 128 |
| >TP53-A159TRVRAMAI    | 215 | >TP53-A159TRVRTMAI    | 164 | 51  |
| >TP53-A159TGTRVRAMAI\ | 269 | >TP53-A159TGTRVRTMAI\ | 260 | 9   |
| >TP53-A159TGTRVRAMAI\ | 50  | >TP53-A159TGTRVRTMAI\ | 47  | 3   |
| >TP53-A159TGTRVRAMAI\ | 39  | >TP53-A159TGTRVRTMAI\ | 29  | 10  |
| >TP53-A159TGTRVRAMA   | 18  | >TP53-A159TGTRVRTMA   | 37  | 19  |
| >TP53-A159TGTRVRAMAI  | 9   | >TP53-A159TGTRVRTMAI  | 6   | 3   |
| >TP53-A159TGTRVRAMAI\ | 30  | >TP53-A159TGTRVRTMAI\ | 20  | 10  |
| >TP53-A159TGTRVRAMAI\ | 3   | >TP53-A159TGTRVRTMAI\ | 3   | 0   |
| >TP53-A159TGTRVRAMAI\ | 130 | >TP53-A159TGTRVRTMAI\ | 102 | 28  |
| >TP53-A159TGTRVRAMAI\ | 115 | >TP53-A159TGTRVRTMAI\ | 74  | 41  |
| >TP53-A159TGTRVRAMAI  | 687 | >TP53-A159TGTRVRTMAI  | 328 | 359 |
| >TP53-A159TGTRVRAMAI\ | 405 | >TP53-A159TGTRVRTMAI\ | 289 | 116 |
| >TP53-A159TGTRVRAMAI  | 40  | >TP53-A159TGTRVRTMAI  | 105 | 65  |
| >TP53-A159TGTRVRAMAI\ | 4   | >TP53-A159TGTRVRTMAI\ | 5   | 1   |
| >TP53-A159TGTRVRAMAI  | 122 | >TP53-A159TGTRVRTMAI  | 372 | 250 |
| >TP53-A159TGTRVRAMAI\ | 21  | >TP53-A159TGTRVRTMAI\ | 23  | 2   |
| >TP53-A159TGTRVRAMAI\ | 269 | >TP53-A159TGTRVRTMAI\ | 215 | 54  |
| >TP53-A159TGTRVRAMAI  | 387 | >TP53-A159TGTRVRTMAI  | 312 | 75  |
| >TP53-A159TPPGTRVRAM  | 68  | >TP53-A159TPPGTRVRTM  | 908 | 840 |
| >TP53-A159TPPGTRVRAM  | 370 | >TP53-A159TPPGTRVRTM  | 374 | 4   |
| >TP53-A159TPPGTRVRAM  | 450 | >TP53-A159TPPGTRVRTM  | 276 | 174 |
| >TP53-A159TPPPGTRVRA  | 482 | >TP53-A159TPPPGTRVRT  | 294 | 188 |
| >TP53-A159TPPPGTRVRA  | 32  | >TP53-A159TPPPGTRVRT  | 131 | 99  |
| >TP53-A159TPPPGTRVRA  | 139 | >TP53-A159TPPPGTRVRT  | 346 | 207 |
| >TP53-A159TPPPGTRVRA  | 727 | >TP53-A159TPPPGTRVRT  | 498 | 229 |
| >TP53-A159\AMAIYKQSQI | 221 | >TP53-A159\VMAIYKQSQI | 64  | 157 |
| >TP53-A159\AMAIYKQSQI | 161 | >TP53-A159\VMAIYKQSQI | 340 | 179 |
| >TP53-A159\AMAIYKQSQI | 199 | >TP53-A159\VMAIYKQSQI | 145 | 54  |
| >TP53-A159\AMAIYKQSQI | 283 | >TP53-A159\VMAIYKQSQI | 295 | 12  |
| >TP53-A159\AMAIYKQSQ  | 69  | >TP53-A159\VMAIYKQSQ  | 86  | 17  |
| >TP53-A159\AMAIYKQSQI | 49  | >TP53-A159\VMAIYKQSQI | 59  | 10  |
| >TP53-A159\AMAIYKQSQI | 55  | >TP53-A159\VMAIYKQSQI | 79  | 24  |

|                       |      |                       |      |      |
|-----------------------|------|-----------------------|------|------|
| >TP53-A159\AMAIYKQSQI | 69   | >TP53-A159\VMAIYKQSQI | 106  | 37   |
| >TP53-A159\RAMAIYKQSC | 2356 | >TP53-A159\RVMAIYKQSC | 272  | 2084 |
| >TP53-A159\RAMAIYKQSC | 809  | >TP53-A159\RVMAIYKQSC | 316  | 493  |
| >TP53-A159\RAMAIYKQSC | 354  | >TP53-A159\RVMAIYKQSC | 2399 | 2045 |
| >TP53-A159\RAMAIYKQSC | 375  | >TP53-A159\RVMAIYKQSC | 197  | 178  |
| >TP53-A159\STPPPGTRVR | 6671 | >TP53-A159\STPPPGTRVR | 250  | 6421 |
| >TP53-A159\STPPPGTRVR | 5691 | >TP53-A159\STPPPGTRVR | 93   | 5598 |
| >TP53-A159\STPPPGTRVR | 82   | >TP53-A159\STPPPGTRVR | 12   | 70   |
| >TP53-A159\STPPPGTRVR | 54   | >TP53-A159\STPPPGTRVR | 5    | 49   |
| >TP53-A159\VRAMAIYK   | 159  | >TP53-A159\VRVMAIYK   | 209  | 50   |
| >TP53-A159\RVRAMAIY   | 205  | >TP53-A159\RVRVMAIY   | 393  | 188  |
| >TP53-A159\RVRAMAIYK  | 28   | >TP53-A159\RVRVMAIYK  | 34   | 6    |
| >TP53-A159\RVRAMAIYK  | 20   | >TP53-A159\RVRVMAIYK  | 30   | 10   |
| >TP53-A159\RVRAMAIY   | 241  | >TP53-A159\RVRVMAIY   | 513  | 272  |
| >TP53-A159\RVRAMAIY   | 398  | >TP53-A159\RVRVMAIY   | 581  | 183  |
| >TP53-A159\RVRAMAIY   | 5    | >TP53-A159\RVRVMAIY   | 6    | 1    |
| >TP53-A159\RVRAMAIYK  | 3    | >TP53-A159\RVRVMAIYK  | 3    | 0    |
| >TP53-A159\RVRAMAIYKC | 10   | >TP53-A159\RVRVMAIYKC | 13   | 3    |
| >TP53-A159\RVRAMAIYKC | 9    | >TP53-A159\RVRVMAIYKC | 10   | 1    |
| >TP53-A159\RVRAMAIY   | 107  | >TP53-A159\RVRVMAIY   | 94   | 13   |
| >TP53-A159\RVRAMAIYK  | 18   | >TP53-A159\RVRVMAIYK  | 16   | 2    |
| >TP53-A159\RVRAMAIY   | 26   | >TP53-A159\RVRVMAIY   | 55   | 29   |
| >TP53-A159\RVRAMAIY   | 85   | >TP53-A159\RVRVMAIY   | 140  | 55   |
| >TP53-A159\RVRAMAIY   | 311  | >TP53-A159\RVRVMAIY   | 476  | 165  |
| >TP53-A159\RVRAMAIY   | 7    | >TP53-A159\RVRVMAIY   | 9    | 2    |
| >TP53-A159\RVRAMAIY   | 211  | >TP53-A159\RVRVMAIY   | 249  | 38   |
| >TP53-A159\RVRAMAIYK  | 156  | >TP53-A159\RVRVMAIYK  | 698  | 542  |
| >TP53-A159\TRVRAMAIY  | 62   | >TP53-A159\TRVRVMAIY  | 139  | 77   |
| >TP53-A159\TRVRAMAIYK | 765  | >TP53-A159\TRVRVMAIYK | 431  | 334  |
| >TP53-A159\TRVRAMAIY  | 278  | >TP53-A159\TRVRVMAIY  | 367  | 89   |
| >TP53-A159\TRVRAMAI   | 215  | >TP53-A159\TRVRVMAI   | 250  | 35   |
| >TP53-A159\GTRVRAMAI\ | 269  | >TP53-A159\GTRVRVMAI\ | 406  | 137  |
| >TP53-A159\GTRVRAMAI\ | 50   | >TP53-A159\GTRVRVMAI\ | 53   | 3    |
| >TP53-A159\GTRVRAMAI\ | 39   | >TP53-A159\GTRVRVMAI\ | 33   | 6    |
| >TP53-A159\GTRVRAMAI\ | 715  | >TP53-A159\GTRVRVMAI\ | 484  | 231  |
| >TP53-A159\GTRVRAMA   | 18   | >TP53-A159\GTRVRVMA   | 19   | 1    |
| >TP53-A159\GTRVRAMAI  | 9    | >TP53-A159\GTRVRVMAI  | 7    | 2    |
| >TP53-A159\GTRVRAMAI\ | 30   | >TP53-A159\GTRVRVMAI\ | 37   | 7    |
| >TP53-A159\GTRVRAMAI\ | 3    | >TP53-A159\GTRVRVMAI\ | 3    | 0    |
| >TP53-A159\GTRVRAMAI\ | 130  | >TP53-A159\GTRVRVMAI\ | 109  | 21   |
| >TP53-A159\GTRVRAMAI\ | 115  | >TP53-A159\GTRVRVMAI\ | 71   | 44   |
| >TP53-A159\GTRVRAMAI  | 687  | >TP53-A159\GTRVRVMAI  | 345  | 342  |
| >TP53-A159\GTRVRAMAI\ | 405  | >TP53-A159\GTRVRVMAI\ | 310  | 95   |

|                       |       |                       |       |       |
|-----------------------|-------|-----------------------|-------|-------|
| >TP53-A159\GTRVRAMAI  | 40    | >TP53-A159\GTRVRVMAI  | 52    | 12    |
| >TP53-A159\GTRVRAMAI\ | 4     | >TP53-A159\GTRVRVMAI\ | 5     | 1     |
| >TP53-A159\GTRVRAMAI  | 122   | >TP53-A159\GTRVRVMAI  | 349   | 227   |
| >TP53-A159\GTRVRAMAI\ | 21    | >TP53-A159\GTRVRVMAI\ | 24    | 3     |
| >TP53-A159\GTRVRAMAI\ | 269   | >TP53-A159\GTRVRVMAI\ | 185   | 84    |
| >TP53-A159\GTRVRAMAI  | 387   | >TP53-A159\GTRVRVMAI  | 925   | 538   |
| >TP53-A159\PPGTRVRAM  | 68    | >TP53-A159\PPGTRVRVM  | 301   | 233   |
| >TP53-A159\PPPGTRVRAM | 370   | >TP53-A159\PPPGTRVRVM | 361   | 9     |
| >TP53-A159\PPPGTRVRA  | 12728 | >TP53-A159\PPPGTRVRV  | 266   | 12462 |
| >TP53-A159\PPPGTRVRAM | 450   | >TP53-A159\PPPGTRVRVM | 477   | 27    |
| >TP53-A159\TPPPGTRVRA | 583   | >TP53-A159\TPPPGTRVRV | 493   | 90    |
| >TP53-A159\TPPPGTRVRA | 10112 | >TP53-A159\TPPPGTRVRV | 300   | 9812  |
| >TP53-A159\TPPPGTRVRA | 482   | >TP53-A159\TPPPGTRVRV | 484   | 2     |
| >TP53-A159\TPPPGTRVRA | 2932  | >TP53-A159\TPPPGTRVRV | 420   | 2512  |
| >TP53-A159\TPPPGTRVRA | 32    | >TP53-A159\TPPPGTRVRV | 75    | 43    |
| >TP53-A159\TPPPGTRVRA | 139   | >TP53-A159\TPPPGTRVRV | 511   | 372   |
| >TP53-A159\TPPPGTRVRA | 727   | >TP53-A159\TPPPGTRVRV | 354   | 373   |
| >TP53-A161[AIYKQSQHM  | 91    | >TP53-A161[DIYKQSQHM  | 935   | 844   |
| >TP53-A161[AIYKQSQH   | 349   | >TP53-A161[DIYKQSQH   | 11736 | 11387 |
| >TP53-A161[AIYKQSQHM  | 7861  | >TP53-A161[DIYKQSQHM  | 340   | 7521  |
| >TP53-A161[AIYKQSQHM  | 804   | >TP53-A161[DIYKQSQHM  | 261   | 543   |
| >TP53-A161[AIYKQSQHM  | 62    | >TP53-A161[DIYKQSQHM  | 2696  | 2634  |
| >TP53-A161[AIYKQSQHM  | 198   | >TP53-A161[DIYKQSQHM  | 2249  | 2051  |
| >TP53-A161[MAIYKQSQH  | 226   | >TP53-A161[MDIYKQSQH  | 3962  | 3736  |
| >TP53-A161[MAIYKQSQH  | 205   | >TP53-A161[MDIYKQSQH  | 2568  | 2363  |
| >TP53-A161[MAIYKQSQH  | 20    | >TP53-A161[MDIYKQSQH  | 17170 | 17150 |
| >TP53-A161[MAIYKQSQH  | 151   | >TP53-A161[MDIYKQSQH  | 19877 | 19726 |
| >TP53-A161[AMAIYKQSQ  | 221   | >TP53-A161[AMDIYKQSQ  | 679   | 458   |
| >TP53-A161[AMAIYKQSQ  | 161   | >TP53-A161[AMDIYKQSQ  | 2328  | 2167  |
| >TP53-A161[AMAIYKQSQ  | 199   | >TP53-A161[AMDIYKQSQ  | 88    | 111   |
| >TP53-A161[AMAIYKQSQ  | 283   | >TP53-A161[AMDIYKQSQ  | 214   | 69    |
| >TP53-A161[AMAIYKQSQ  | 69    | >TP53-A161[AMDIYKQSQ  | 317   | 248   |
| >TP53-A161[AMAIYKQSQ  | 49    | >TP53-A161[AMDIYKQSQ  | 200   | 151   |
| >TP53-A161[AMAIYKQSQ  | 55    | >TP53-A161[AMDIYKQSQ  | 1069  | 1014  |
| >TP53-A161[AMAIYKQSQ  | 69    | >TP53-A161[AMDIYKQSQ  | 1916  | 1847  |
| >TP53-A161[RAMAIYKQSC | 354   | >TP53-A161[RAMDIYKQSC | 323   | 31    |
| >TP53-A161[RAMAIYKQSC | 375   | >TP53-A161[RAMDIYKQSC | 281   | 94    |
| >TP53-A161[VRAMAIYK   | 159   | >TP53-A161[VRAMDIYK   | 402   | 243   |
| >TP53-A161[RVRAMAIY   | 205   | >TP53-A161[RVRAMDIY   | 2108  | 1903  |
| >TP53-A161[RVRAMAIYK  | 28    | >TP53-A161[RVRAMDIYK  | 41    | 13    |
| >TP53-A161[RVRAMAIYK  | 20    | >TP53-A161[RVRAMDIYK  | 31    | 11    |
| >TP53-A161[RVRAMAIY   | 241   | >TP53-A161[RVRAMDIY   | 310   | 69    |
| >TP53-A161[RVRAMAIY   | 398   | >TP53-A161[RVRAMDIY   | 1062  | 664   |

|                        |      |                        |      |      |
|------------------------|------|------------------------|------|------|
| >TP53-A161[ RVRAMAIY   | 5    | >TP53-A161[ RVRAMDIY   | 17   | 12   |
| >TP53-A161[ RVRAMAIYK  | 3    | >TP53-A161[ RVRAMDIYK  | 3    | 0    |
| >TP53-A161[ RVRAMAIYKC | 10   | >TP53-A161[ RVRAMDIYKC | 29   | 19   |
| >TP53-A161[ RVRAMAIYKC | 9    | >TP53-A161[ RVRAMDIYKC | 13   | 4    |
| >TP53-A161[ RVRAMAIY   | 107  | >TP53-A161[ RVRAMDIY   | 227  | 120  |
| >TP53-A161[ RVRAMAIYK  | 18   | >TP53-A161[ RVRAMDIYK  | 15   | 3    |
| >TP53-A161[ RVRAMAIY   | 26   | >TP53-A161[ RVRAMDIY   | 52   | 26   |
| >TP53-A161[ RVRAMAIY   | 85   | >TP53-A161[ RVRAMDIY   | 133  | 48   |
| >TP53-A161[ RVRAMAIY   | 311  | >TP53-A161[ RVRAMDIY   | 1090 | 779  |
| >TP53-A161[ RVRAMAIY   | 7    | >TP53-A161[ RVRAMDIY   | 34   | 27   |
| >TP53-A161[ RVRAMAIY   | 211  | >TP53-A161[ RVRAMDIY   | 372  | 161  |
| >TP53-A161[ RVRAMAIYK  | 156  | >TP53-A161[ RVRAMDIYK  | 159  | 3    |
| >TP53-A161[ TRVRAMAIY  | 62   | >TP53-A161[ TRVRAMDIY  | 106  | 44   |
| >TP53-A161[ TRVRAMAIY  | 278  | >TP53-A161[ TRVRAMDIY  | 725  | 447  |
| >TP53-A161[ TRVRAMAI   | 215  | >TP53-A161[ TRVRAMDI   | 3982 | 3767 |
| >TP53-A161[ GTRVRAMAI\ | 269  | >TP53-A161[ GTRVRAMDI\ | 363  | 94   |
| >TP53-A161[ GTRVRAMAI\ | 50   | >TP53-A161[ GTRVRAMDI\ | 102  | 52   |
| >TP53-A161[ GTRVRAMAI\ | 39   | >TP53-A161[ GTRVRAMDI\ | 69   | 30   |
| >TP53-A161[ GTRVRAMA   | 18   | >TP53-A161[ GTRVRAMD   | 1281 | 1263 |
| >TP53-A161[ GTRVRAMAI  | 9    | >TP53-A161[ GTRVRAMDI  | 35   | 26   |
| >TP53-A161[ GTRVRAMAI\ | 30   | >TP53-A161[ GTRVRAMDI\ | 318  | 288  |
| >TP53-A161[ GTRVRAMAI\ | 3    | >TP53-A161[ GTRVRAMDI\ | 4    | 1    |
| >TP53-A161[ GTRVRAMAI\ | 130  | >TP53-A161[ GTRVRAMDI\ | 566  | 436  |
| >TP53-A161[ GTRVRAMAI\ | 115  | >TP53-A161[ GTRVRAMDI\ | 163  | 48   |
| >TP53-A161[ GTRVRAMAI\ | 405  | >TP53-A161[ GTRVRAMDI\ | 1761 | 1356 |
| >TP53-A161[ GTRVRAMAI  | 40   | >TP53-A161[ GTRVRAMDI  | 127  | 87   |
| >TP53-A161[ GTRVRAMAI\ | 4    | >TP53-A161[ GTRVRAMDI\ | 11   | 7    |
| >TP53-A161[ GTRVRAMAI  | 122  | >TP53-A161[ GTRVRAMDI  | 387  | 265  |
| >TP53-A161[ GTRVRAMAI\ | 21   | >TP53-A161[ GTRVRAMDI\ | 45   | 24   |
| >TP53-A161[ GTRVRAMAI\ | 269  | >TP53-A161[ GTRVRAMDI\ | 352  | 83   |
| >TP53-A161[ GTRVRAMAI  | 387  | >TP53-A161[ GTRVRAMDI  | 1553 | 1166 |
| >TP53-A161F AIYKQSQHM  | 91   | >TP53-A161F FIYKQSQHM  | 81   | 10   |
| >TP53-A161F AIYKQSQHM  | 3877 | >TP53-A161F FIYKQSQHM  | 192  | 3685 |
| >TP53-A161F AIYKQSQHM  | 2067 | >TP53-A161F FIYKQSQHM  | 181  | 1886 |
| >TP53-A161F AIYKQSQHM  | 3214 | >TP53-A161F FIYKQSQHM  | 155  | 3059 |
| >TP53-A161F AIYKQSQHM  | 1225 | >TP53-A161F FIYKQSQHM  | 166  | 1059 |
| >TP53-A161F AIYKQSQHM\ | 1331 | >TP53-A161F FIYKQSQHM\ | 145  | 1186 |
| >TP53-A161F AIYKQSQHM  | 1358 | >TP53-A161F FIYKQSQHM  | 155  | 1203 |
| >TP53-A161F AIYKQSQHM\ | 3687 | >TP53-A161F FIYKQSQHM\ | 392  | 3295 |
| >TP53-A161F AIYKQSQHM  | 1683 | >TP53-A161F FIYKQSQHM  | 188  | 1495 |
| >TP53-A161F AIYKQSQHM\ | 662  | >TP53-A161F FIYKQSQHM\ | 91   | 571  |
| >TP53-A161F AIYKQSQH   | 349  | >TP53-A161F FIYKQSQH   | 1695 | 1346 |
| >TP53-A161F AIYKQSQHM  | 7861 | >TP53-A161F FIYKQSQHM  | 378  | 7483 |

|                       |       |                       |       |       |
|-----------------------|-------|-----------------------|-------|-------|
| >TP53-A161FAIYKQSQHM  | 3022  | >TP53-A161FFIYKQSQHM  | 280   | 2742  |
| >TP53-A161FAIYKQSQHM  | 62    | >TP53-A161FFIYKQSQHM  | 48    | 14    |
| >TP53-A161FAIYKQSQHM  | 2859  | >TP53-A161FFIYKQSQHM  | 312   | 2547  |
| >TP53-A161FAIYKQSQHM  | 198   | >TP53-A161FFIYKQSQHM  | 94    | 104   |
| >TP53-A161FMAIYKQSQH  | 7601  | >TP53-A161FMFIYKQSQH  | 465   | 7136  |
| >TP53-A161FMAIYKQSQHI | 226   | >TP53-A161FMFIYKQSQHI | 1045  | 819   |
| >TP53-A161FMAIYKQSQHI | 205   | >TP53-A161FMFIYKQSQHI | 2579  | 2374  |
| >TP53-A161FMAIYKQSQHI | 20    | >TP53-A161FMFIYKQSQHI | 20030 | 20010 |
| >TP53-A161FMAIYKQSQHI | 151   | >TP53-A161FMFIYKQSQHI | 9579  | 9428  |
| >TP53-A161FPPPGTRVRAM | 2346  | >TP53-A161FPPPGTRVRAM | 385   | 1961  |
| >TP53-A161FPPPGTRVRAM | 23681 | >TP53-A161FPPPGTRVRAM | 110   | 23571 |
| >TP53-A161FAMAIYKQSQI | 221   | >TP53-A161FAMFIYKQSQI | 19    | 202   |
| >TP53-A161FAMAIYKQSQI | 161   | >TP53-A161FAMFIYKQSQI | 184   | 23    |
| >TP53-A161FAMAIYKQS   | 2603  | >TP53-A161FAMFIYKQS   | 345   | 2258  |
| >TP53-A161FAMAIYKQSQ  | 1796  | >TP53-A161FAMFIYKQSQ  | 278   | 1518  |
| >TP53-A161FAMAIYKQSQI | 199   | >TP53-A161FAMFIYKQSQI | 25    | 174   |
| >TP53-A161FAMAIYKQSQI | 1607  | >TP53-A161FAMFIYKQSQI | 397   | 1210  |
| >TP53-A161FAMAIYKQSQI | 283   | >TP53-A161FAMFIYKQSQI | 111   | 172   |
| >TP53-A161FAMAIYKQSQ  | 69    | >TP53-A161FAMFIYKQSQ  | 43    | 26    |
| >TP53-A161FAMAIYKQSQI | 49    | >TP53-A161FAMFIYKQSQI | 32    | 17    |
| >TP53-A161FAMAIYKQSQI | 55    | >TP53-A161FAMFIYKQSQI | 34    | 21    |
| >TP53-A161FAMAIYKQSQ  | 2989  | >TP53-A161FAMFIYKQSQ  | 387   | 2602  |
| >TP53-A161FAMAIYKQSQI | 2139  | >TP53-A161FAMFIYKQSQI | 230   | 1909  |
| >TP53-A161FAMAIYKQSQI | 69    | >TP53-A161FAMFIYKQSQI | 11    | 58    |
| >TP53-A161FAMAIYKQSQI | 1491  | >TP53-A161FAMFIYKQSQI | 289   | 1202  |
| >TP53-A161FRAMAIYKQSC | 354   | >TP53-A161FRAMFIYKQSC | 465   | 111   |
| >TP53-A161FRAMAIYKQSC | 375   | >TP53-A161FRAMFIYKQSC | 210   | 165   |
| >TP53-A161FVRAMAIYK   | 159   | >TP53-A161FVRAMFIYK   | 104   | 55    |
| >TP53-A161FRVRAMAIY   | 205   | >TP53-A161FRVRAMFIY   | 121   | 84    |
| >TP53-A161FRVRAMAIYK  | 28    | >TP53-A161FRVRAMFIYK  | 26    | 2     |
| >TP53-A161FRVRAMAIY   | 3205  | >TP53-A161FRVRAMFIY   | 484   | 2721  |
| >TP53-A161FRVRAMAIYK  | 20    | >TP53-A161FRVRAMFIYK  | 11    | 9     |
| >TP53-A161FRVRAMAIY   | 241   | >TP53-A161FRVRAMFIY   | 410   | 169   |
| >TP53-A161FRVRAMAIY   | 398   | >TP53-A161FRVRAMFIY   | 101   | 297   |
| >TP53-A161FRVRAMAIY   | 5     | >TP53-A161FRVRAMFIY   | 5     | 0     |
| >TP53-A161FRVRAMAIYK  | 3     | >TP53-A161FRVRAMFIYK  | 3     | 0     |
| >TP53-A161FRVRAMAIYKC | 10    | >TP53-A161FRVRAMFIYKC | 9     | 1     |
| >TP53-A161FRVRAMAIYKC | 9     | >TP53-A161FRVRAMFIYKC | 8     | 1     |
| >TP53-A161FRVRAMAIY   | 107   | >TP53-A161FRVRAMFIY   | 98    | 9     |
| >TP53-A161FRVRAMAIY   | 2353  | >TP53-A161FRVRAMFIY   | 427   | 1926  |
| >TP53-A161FRVRAMAIYK  | 18    | >TP53-A161FRVRAMFIYK  | 6     | 12    |
| >TP53-A161FRVRAMAIY   | 26    | >TP53-A161FRVRAMFIY   | 9     | 17    |
| >TP53-A161FRVRAMAIY   | 85    | >TP53-A161FRVRAMFIY   | 89    | 4     |



|                       |      |                       |      |      |
|-----------------------|------|-----------------------|------|------|
| >TP53-A161FRVRAMAIY   | 311  | >TP53-A161FRVRAMFIY   | 317  | 6    |
| >TP53-A161FRVRAMAIY   | 7    | >TP53-A161FRVRAMFIY   | 17   | 10   |
| >TP53-A161FRVRAMAIY   | 211  | >TP53-A161FRVRAMFIY   | 158  | 53   |
| >TP53-A161FRVRAMAIYK  | 156  | >TP53-A161FRVRAMFIYK  | 55   | 101  |
| >TP53-A161FTRVRAMAIYK | 1127 | >TP53-A161FTRVRAMFIYK | 434  | 693  |
| >TP53-A161FTRVRAMAIY  | 62   | >TP53-A161FTRVRAMFIY  | 334  | 272  |
| >TP53-A161FTRVRAMAIY  | 278  | >TP53-A161FTRVRAMFIY  | 429  | 151  |
| >TP53-A161FTRVRAMAI   | 542  | >TP53-A161FTRVRAMFI   | 375  | 167  |
| >TP53-A161FTRVRAMAIYK | 733  | >TP53-A161FTRVRAMFIYK | 426  | 307  |
| >TP53-A161FTRVRAMAI   | 215  | >TP53-A161FTRVRAMFI   | 1935 | 1720 |
| >TP53-A161FTRVRAMAIYK | 1215 | >TP53-A161FTRVRAMFIYK | 480  | 735  |
| >TP53-A161FGTRVRAMAIY | 269  | >TP53-A161FGTRVRAMFIY | 792  | 523  |
| >TP53-A161FGTRVRAMAIY | 50   | >TP53-A161FGTRVRAMFIY | 41   | 9    |
| >TP53-A161FGTRVRAMAIY | 39   | >TP53-A161FGTRVRAMFIY | 21   | 18   |
| >TP53-A161FGTRVRAMA   | 18   | >TP53-A161FGTRVRAMF   | 575  | 557  |
| >TP53-A161FGTRVRAMAI  | 9    | >TP53-A161FGTRVRAMFI  | 5    | 4    |
| >TP53-A161FGTRVRAMAIY | 30   | >TP53-A161FGTRVRAMFIY | 31   | 1    |
| >TP53-A161FGTRVRAMAIY | 3    | >TP53-A161FGTRVRAMFIY | 3    | 0    |
| >TP53-A161FGTRVRAMAIY | 130  | >TP53-A161FGTRVRAMFIY | 253  | 123  |
| >TP53-A161FGTRVRAMAIY | 115  | >TP53-A161FGTRVRAMFIY | 31   | 84   |
| >TP53-A161FGTRVRAMAIY | 671  | >TP53-A161FGTRVRAMFIY | 478  | 193  |
| >TP53-A161FGTRVRAMAIY | 405  | >TP53-A161FGTRVRAMFIY | 1103 | 698  |
| >TP53-A161FGTRVRAMA   | 5234 | >TP53-A161FGTRVRAMF   | 5    | 5229 |
| >TP53-A161FGTRVRAMAI  | 40   | >TP53-A161FGTRVRAMFI  | 42   | 2    |
| >TP53-A161FGTRVRAMAIY | 4    | >TP53-A161FGTRVRAMFIY | 5    | 1    |
| >TP53-A161FGTRVRAMAI  | 122  | >TP53-A161FGTRVRAMFI  | 41   | 81   |
| >TP53-A161FGTRVRAMAIY | 21   | >TP53-A161FGTRVRAMFIY | 22   | 1    |
| >TP53-A161FGTRVRAMAIY | 269  | >TP53-A161FGTRVRAMFIY | 128  | 141  |
| >TP53-A161FGTRVRAMAI  | 387  | >TP53-A161FGTRVRAMFI  | 159  | 228  |
| >TP53-A161CAIYKQSQHM  | 91   | >TP53-A161CGIYKQSQHM  | 588  | 497  |
| >TP53-A161CAIYKQSQH   | 349  | >TP53-A161CGIYKQSQH   | 628  | 279  |
| >TP53-A161CAIYKQSQHM  | 62   | >TP53-A161CGIYKQSQHM  | 104  | 42   |
| >TP53-A161CAIYKQSQHM  | 198  | >TP53-A161CGIYKQSQHM  | 1403 | 1205 |
| >TP53-A161CMAIYKQSQH  | 226  | >TP53-A161CMGIYKQSQH  | 584  | 358  |
| >TP53-A161CMAIYKQSQH  | 205  | >TP53-A161CMGIYKQSQH  | 1765 | 1560 |
| >TP53-A161CMAIYKQSQH  | 20   | >TP53-A161CMGIYKQSQH  | 1203 | 1183 |
| >TP53-A161CMAIYKQSQH  | 151  | >TP53-A161CMGIYKQSQH  | 3230 | 3079 |
| >TP53-A161CMAIYKQSQH  | 583  | >TP53-A161CMGIYKQSQH  | 396  | 187  |
| >TP53-A161CAMAIYKQSQ  | 221  | >TP53-A161CAMGIYKQSQ  | 192  | 29   |
| >TP53-A161CAMAIYKQSQ  | 161  | >TP53-A161CAMGIYKQSQ  | 2297 | 2136 |
| >TP53-A161CAMAIYKQSQ  | 199  | >TP53-A161CAMGIYKQSQ  | 218  | 19   |
| >TP53-A161CAMAIYKQSQ  | 283  | >TP53-A161CAMGIYKQSQ  | 664  | 381  |
| >TP53-A161CAMAIYKQSQ  | 69   | >TP53-A161CAMGIYKQSQ  | 205  | 136  |

|                        |     |                        |      |      |
|------------------------|-----|------------------------|------|------|
| >TP53-A161C(AMAIYKQSQI | 49  | >TP53-A161C(AMGIYKQSQI | 130  | 81   |
| >TP53-A161C(AMAIYKQSQI | 55  | >TP53-A161C(AMGIYKQSQI | 81   | 26   |
| >TP53-A161C(AMAIYKQSQI | 69  | >TP53-A161C(AMGIYKQSQI | 378  | 309  |
| >TP53-A161C(RAMAIYKQSC | 354 | >TP53-A161C(RAMGIYKQSC | 367  | 13   |
| >TP53-A161C(RAMAIYKQSC | 375 | >TP53-A161C(RAMGIYKQSC | 240  | 135  |
| >TP53-A161C(VRAMAIYK   | 159 | >TP53-A161C(VRAMGIYK   | 264  | 105  |
| >TP53-A161C(RVRAMAIY   | 205 | >TP53-A161C(RVRAMGIY   | 277  | 72   |
| >TP53-A161C(RVRAMAIYK  | 28  | >TP53-A161C(RVRAMGIYK  | 29   | 1    |
| >TP53-A161C(RVRAMAIYK  | 20  | >TP53-A161C(RVRAMGIYK  | 22   | 2    |
| >TP53-A161C(RVRAMAIY   | 241 | >TP53-A161C(RVRAMGIY   | 316  | 75   |
| >TP53-A161C(RVRAMAIY   | 398 | >TP53-A161C(RVRAMGIY   | 482  | 84   |
| >TP53-A161C(RVRAMAIY   | 5   | >TP53-A161C(RVRAMGIY   | 7    | 2    |
| >TP53-A161C(RVRAMAIYK  | 3   | >TP53-A161C(RVRAMGIYK  | 3    | 0    |
| >TP53-A161C(RVRAMAIYKC | 10  | >TP53-A161C(RVRAMGIYKC | 13   | 3    |
| >TP53-A161C(RVRAMAIYKC | 9   | >TP53-A161C(RVRAMGIYKC | 10   | 1    |
| >TP53-A161C(RVRAMAIY   | 107 | >TP53-A161C(RVRAMGIY   | 91   | 16   |
| >TP53-A161C(RVRAMAIYK  | 18  | >TP53-A161C(RVRAMGIYK  | 15   | 3    |
| >TP53-A161C(RVRAMAIY   | 26  | >TP53-A161C(RVRAMGIY   | 18   | 8    |
| >TP53-A161C(RVRAMAIY   | 85  | >TP53-A161C(RVRAMGIY   | 90   | 5    |
| >TP53-A161C(RVRAMAIY   | 311 | >TP53-A161C(RVRAMGIY   | 831  | 520  |
| >TP53-A161C(RVRAMAIY   | 7   | >TP53-A161C(RVRAMGIY   | 17   | 10   |
| >TP53-A161C(RVRAMAIY   | 211 | >TP53-A161C(RVRAMGIY   | 130  | 81   |
| >TP53-A161C(RVRAMAIYK  | 156 | >TP53-A161C(RVRAMGIYK  | 452  | 296  |
| >TP53-A161C(TRVRAMAIY  | 62  | >TP53-A161C(TRVRAMGIY  | 88   | 26   |
| >TP53-A161C(TRVRAMAIY  | 278 | >TP53-A161C(TRVRAMGIY  | 1088 | 810  |
| >TP53-A161C(TRVRAMAI   | 542 | >TP53-A161C(TRVRAMGI   | 351  | 191  |
| >TP53-A161C(TRVRAMAI   | 215 | >TP53-A161C(TRVRAMGI   | 2739 | 2524 |
| >TP53-A161C(GTRVRAMAI' | 269 | >TP53-A161C(GTRVRAMGI' | 335  | 66   |
| >TP53-A161C(GTRVRAMAI' | 50  | >TP53-A161C(GTRVRAMGI' | 57   | 7    |
| >TP53-A161C(GTRVRAMAI' | 39  | >TP53-A161C(GTRVRAMGI' | 44   | 5    |
| >TP53-A161C(GTRVRAMA   | 18  | >TP53-A161C(GTRVRAMG   | 193  | 175  |
| >TP53-A161C(GTRVRAMAI  | 9   | >TP53-A161C(GTRVRAMGI  | 17   | 8    |
| >TP53-A161C(GTRVRAMAI' | 30  | >TP53-A161C(GTRVRAMGI' | 72   | 42   |
| >TP53-A161C(GTRVRAMAI' | 3   | >TP53-A161C(GTRVRAMGI' | 4    | 1    |
| >TP53-A161C(GTRVRAMAI' | 130 | >TP53-A161C(GTRVRAMGI' | 75   | 55   |
| >TP53-A161C(GTRVRAMAI' | 115 | >TP53-A161C(GTRVRAMGI' | 115  | 0    |
| >TP53-A161C(GTRVRAMAI' | 405 | >TP53-A161C(GTRVRAMGI' | 915  | 510  |
| >TP53-A161C(GTRVRAMAI  | 40  | >TP53-A161C(GTRVRAMGI  | 24   | 16   |
| >TP53-A161C(GTRVRAMAI' | 4   | >TP53-A161C(GTRVRAMGI' | 7    | 3    |
| >TP53-A161C(GTRVRAMAI  | 122 | >TP53-A161C(GTRVRAMGI  | 212  | 90   |
| >TP53-A161C(GTRVRAMAI' | 21  | >TP53-A161C(GTRVRAMGI' | 19   | 2    |
| >TP53-A161C(GTRVRAMAI' | 269 | >TP53-A161C(GTRVRAMGI' | 321  | 52   |
| >TP53-A161C(GTRVRAMAI  | 387 | >TP53-A161C(GTRVRAMGI  | 653  | 266  |

|                        |       |                        |       |       |
|------------------------|-------|------------------------|-------|-------|
| >TP53-A161C PGTRVRAMA  | 619   | >TP53-A161C PGTRVRAMG  | 466   | 153   |
| >TP53-A161F AIYKQSQHM  | 91    | >TP53-A161F PIYKQSQHM  | 602   | 511   |
| >TP53-A161F AIYKQSQH   | 349   | >TP53-A161F PIYKQSQH   | 7558  | 7209  |
| >TP53-A161F AIYKQSQHM  | 62    | >TP53-A161F PIYKQSQHM  | 2540  | 2478  |
| >TP53-A161F AIYKQSQHM  | 198   | >TP53-A161F PIYKQSQHM  | 1440  | 1242  |
| >TP53-A161F MAIYKQSQHI | 16894 | >TP53-A161F MPIYKQSQHI | 19    | 16875 |
| >TP53-A161F MAIYKQSQHI | 25573 | >TP53-A161F MPIYKQSQHI | 328   | 25245 |
| >TP53-A161F MAIYKQSQHI | 226   | >TP53-A161F MPIYKQSQHI | 7091  | 6865  |
| >TP53-A161F MAIYKQSQHI | 205   | >TP53-A161F MPIYKQSQHI | 1290  | 1085  |
| >TP53-A161F MAIYKQSQHI | 20    | >TP53-A161F MPIYKQSQHI | 12142 | 12122 |
| >TP53-A161F MAIYKQSQH  | 1726  | >TP53-A161F MPIYKQSQH  | 128   | 1598  |
| >TP53-A161F MAIYKQSQHI | 17306 | >TP53-A161F MPIYKQSQHI | 30    | 17276 |
| >TP53-A161F MAIYKQSQHI | 3942  | >TP53-A161F MPIYKQSQHI | 456   | 3486  |
| >TP53-A161F MAIYKQSQHI | 7710  | >TP53-A161F MPIYKQSQHI | 67    | 7643  |
| >TP53-A161F MAIYKQSQ   | 15647 | >TP53-A161F MPIYKQSQ   | 409   | 15238 |
| >TP53-A161F MAIYKQSQHI | 19431 | >TP53-A161F MPIYKQSQHI | 93    | 19338 |
| >TP53-A161F MAIYKQSQHI | 3519  | >TP53-A161F MPIYKQSQHI | 35    | 3484  |
| >TP53-A161F MAIYKQSQHI | 151   | >TP53-A161F MPIYKQSQHI | 18776 | 18625 |
| >TP53-A161F AMAIYKQSQI | 221   | >TP53-A161F AMPIYKQSQI | 124   | 97    |
| >TP53-A161F AMAIYKQSQI | 161   | >TP53-A161F AMPIYKQSQI | 2448  | 2287  |
| >TP53-A161F AMAIYKQSQI | 199   | >TP53-A161F AMPIYKQSQI | 277   | 78    |
| >TP53-A161F AMAIYKQSQI | 283   | >TP53-A161F AMPIYKQSQI | 984   | 701   |
| >TP53-A161F AMAIYKQSQ  | 69    | >TP53-A161F AMPIYKQSQ  | 217   | 148   |
| >TP53-A161F AMAIYKQSQI | 49    | >TP53-A161F AMPIYKQSQI | 145   | 96    |
| >TP53-A161F AMAIYKQSQI | 55    | >TP53-A161F AMPIYKQSQI | 279   | 224   |
| >TP53-A161F AMAIYKQSQI | 69    | >TP53-A161F AMPIYKQSQI | 461   | 392   |
| >TP53-A161F RAMAIYKQSC | 354   | >TP53-A161F RAMPIYKQSC | 120   | 234   |
| >TP53-A161F RAMAIYKQSC | 375   | >TP53-A161F RAMPIYKQSC | 232   | 143   |
| >TP53-A161F VRAMAIYK   | 159   | >TP53-A161F VRAMPIYK   | 384   | 225   |
| >TP53-A161F RVRAMAIY   | 205   | >TP53-A161F RVRAMPIY   | 228   | 23    |
| >TP53-A161F RVRAMAIYK  | 28    | >TP53-A161F RVRAMPIYK  | 29    | 1     |
| >TP53-A161F RVRAMAIYK  | 20    | >TP53-A161F RVRAMPIYK  | 20    | 0     |
| >TP53-A161F RVRAMAIY   | 241   | >TP53-A161F RVRAMPIY   | 236   | 5     |
| >TP53-A161F RVRAMAIY   | 398   | >TP53-A161F RVRAMPIY   | 354   | 44    |
| >TP53-A161F RVRAMAIY   | 5     | >TP53-A161F RVRAMPIY   | 5     | 0     |
| >TP53-A161F RVRAMAIYK  | 3     | >TP53-A161F RVRAMPIYK  | 3     | 0     |
| >TP53-A161F RVRAMAIYKC | 10    | >TP53-A161F RVRAMPIYKC | 12    | 2     |
| >TP53-A161F RVRAMAIYKC | 9     | >TP53-A161F RVRAMPIYKC | 8     | 1     |
| >TP53-A161F RVRAMAIY   | 107   | >TP53-A161F RVRAMPIY   | 116   | 9     |
| >TP53-A161F RVRAMAIYK  | 18    | >TP53-A161F RVRAMPIYK  | 13    | 5     |
| >TP53-A161F RVRAMAIY   | 26    | >TP53-A161F RVRAMPIY   | 26    | 0     |
| >TP53-A161F RVRAMAIY   | 85    | >TP53-A161F RVRAMPIY   | 119   | 34    |
| >TP53-A161F RVRAMAIY   | 311   | >TP53-A161F RVRAMPIY   | 308   | 3     |

|                        |      |                        |     |     |
|------------------------|------|------------------------|-----|-----|
| >TP53-A161FRVRAMAIY    | 7    | >TP53-A161FRVRAMPIY    | 14  | 7   |
| >TP53-A161FRVRAMAIY    | 211  | >TP53-A161FRVRAMPIY    | 409 | 198 |
| >TP53-A161FRVRAMAIYK   | 156  | >TP53-A161FRVRAMPIYK   | 131 | 25  |
| >TP53-A161FTRVRAMAIY   | 62   | >TP53-A161FTRVRAMPIY   | 68  | 6   |
| >TP53-A161FTRVRAMAIY   | 278  | >TP53-A161FTRVRAMPIY   | 288 | 10  |
| >TP53-A161FTRVRAMAI    | 542  | >TP53-A161FTRVRAMPI    | 301 | 241 |
| >TP53-A161FTRVRAMAIYK  | 733  | >TP53-A161FTRVRAMPIYK  | 234 | 499 |
| >TP53-A161FTRVRAMAI    | 215  | >TP53-A161FTRVRAMPI    | 336 | 121 |
| >TP53-A161FGTRVRAMAI\  | 269  | >TP53-A161FGTRVRAMPI\  | 328 | 59  |
| >TP53-A161FGTRVRAMAI\  | 50   | >TP53-A161FGTRVRAMPI\  | 49  | 1   |
| >TP53-A161FGTRVRAMAI\  | 39   | >TP53-A161FGTRVRAMPI\  | 32  | 7   |
| >TP53-A161FGTRVRAMA    | 18   | >TP53-A161FGTRVRAMP    | 619 | 601 |
| >TP53-A161FGTRVRAMAI   | 9    | >TP53-A161FGTRVRAMPI   | 6   | 3   |
| >TP53-A161FGTRVRAMAI\  | 30   | >TP53-A161FGTRVRAMPI\  | 19  | 11  |
| >TP53-A161FGTRVRAMAI\  | 3    | >TP53-A161FGTRVRAMPI\  | 3   | 0   |
| >TP53-A161FGTRVRAMAI\  | 130  | >TP53-A161FGTRVRAMPI\  | 323 | 193 |
| >TP53-A161FGTRVRAMAI\  | 115  | >TP53-A161FGTRVRAMPI\  | 84  | 31  |
| >TP53-A161FGTRVRAMAI\  | 405  | >TP53-A161FGTRVRAMPI\  | 552 | 147 |
| >TP53-A161FGTRVRAMAI   | 40   | >TP53-A161FGTRVRAMPI   | 21  | 19  |
| >TP53-A161FGTRVRAMAI\  | 4    | >TP53-A161FGTRVRAMPI\  | 5   | 1   |
| >TP53-A161FGTRVRAMAI   | 122  | >TP53-A161FGTRVRAMPI   | 297 | 175 |
| >TP53-A161FGTRVRAMAI\  | 21   | >TP53-A161FGTRVRAMPI\  | 27  | 6   |
| >TP53-A161FGTRVRAMAI\  | 269  | >TP53-A161FGTRVRAMPI\  | 192 | 77  |
| >TP53-A161FGTRVRAMAI   | 387  | >TP53-A161FGTRVRAMPI   | 443 | 56  |
| >TP53-A161S AIYKQSQHM  | 91   | >TP53-A161S SIYKQSQHM  | 61  | 30  |
| >TP53-A161S AIYKQSQHM  | 1358 | >TP53-A161S SIYKQSQHM  | 438 | 920 |
| >TP53-A161S AIYKQSQH   | 349  | >TP53-A161S SIYKQSQH   | 452 | 103 |
| >TP53-A161S AIYKQSQHM  | 62   | >TP53-A161S SIYKQSQHM  | 70  | 8   |
| >TP53-A161S AIYKQSQHM  | 198  | >TP53-A161S SIYKQSQHM  | 478 | 280 |
| >TP53-A161S MAIYKQSQHI | 633  | >TP53-A161S MSIYKQSQHI | 70  | 563 |
| >TP53-A161S MAIYKQSQHI | 226  | >TP53-A161S MSIYKQSQHI | 145 | 81  |
| >TP53-A161S MAIYKQSQHI | 205  | >TP53-A161S MSIYKQSQHI | 116 | 89  |
| >TP53-A161S MAIYKQSQH  | 911  | >TP53-A161S MSIYKQSQH  | 106 | 805 |
| >TP53-A161S MAIYKQSQHI | 20   | >TP53-A161S MSIYKQSQHI | 8   | 12  |
| >TP53-A161S MAIYKQSQHI | 151  | >TP53-A161S MSIYKQSQHI | 67  | 84  |
| >TP53-A161S MAIYKQSQH  | 894  | >TP53-A161S MSIYKQSQH  | 130 | 764 |
| >TP53-A161S MAIYKQSQHI | 583  | >TP53-A161S MSIYKQSQHI | 46  | 537 |
| >TP53-A161S AMAIYKQSQI | 221  | >TP53-A161S AMSIYKQSQI | 437 | 216 |
| >TP53-A161S AMAIYKQSQI | 161  | >TP53-A161S AMSIYKQSQI | 301 | 140 |
| >TP53-A161S AMAIYKQSQI | 199  | >TP53-A161S AMSIYKQSQI | 332 | 133 |
| >TP53-A161S AMAIYKQSQI | 283  | >TP53-A161S AMSIYKQSQI | 856 | 573 |
| >TP53-A161S AMAIYKQSQ  | 69   | >TP53-A161S AMSIYKQSQ  | 119 | 50  |
| >TP53-A161S AMAIYKQSQI | 49   | >TP53-A161S AMSIYKQSQI | 80  | 31  |

|                        |      |                        |     |      |
|------------------------|------|------------------------|-----|------|
| >TP53-A161\$AMAIYKQSQI | 55   | >TP53-A161\$AMSIYKQSQI | 64  | 9    |
| >TP53-A161\$AMAIYKQSQI | 69   | >TP53-A161\$AMSIYKQSQI | 71  | 2    |
| >TP53-A161\$RAMAIYKQSC | 354  | >TP53-A161\$RAMSIYKQSC | 634 | 280  |
| >TP53-A161\$RAMAIYKQSC | 375  | >TP53-A161\$RAMSIYKQSC | 120 | 255  |
| >TP53-A161\$VRAMAIYK   | 159  | >TP53-A161\$VRAMSIYK   | 285 | 126  |
| >TP53-A161\$RVRAMAIY   | 205  | >TP53-A161\$RVRAMSIY   | 141 | 64   |
| >TP53-A161\$RVRAMAIYK  | 28   | >TP53-A161\$RVRAMSIYK  | 27  | 1    |
| >TP53-A161\$RVRAMAIYK  | 20   | >TP53-A161\$RVRAMSIYK  | 17  | 3    |
| >TP53-A161\$RVRAMAIY   | 241  | >TP53-A161\$RVRAMSIY   | 312 | 71   |
| >TP53-A161\$RVRAMAIY   | 398  | >TP53-A161\$RVRAMSIY   | 560 | 162  |
| >TP53-A161\$RVRAMAIY   | 5    | >TP53-A161\$RVRAMSIY   | 5   | 0    |
| >TP53-A161\$RVRAMAIYK  | 3    | >TP53-A161\$RVRAMSIYK  | 3   | 0    |
| >TP53-A161\$RVRAMAIYKC | 10   | >TP53-A161\$RVRAMSIYKC | 8   | 2    |
| >TP53-A161\$RVRAMAIYKC | 9    | >TP53-A161\$RVRAMSIYKC | 7   | 2    |
| >TP53-A161\$RVRAMAIY   | 107  | >TP53-A161\$RVRAMSIY   | 107 | 0    |
| >TP53-A161\$RVRAMAIYK  | 18   | >TP53-A161\$RVRAMSIYK  | 12  | 6    |
| >TP53-A161\$RVRAMAIY   | 26   | >TP53-A161\$RVRAMSIY   | 20  | 6    |
| >TP53-A161\$RVRAMAIY   | 85   | >TP53-A161\$RVRAMSIY   | 67  | 18   |
| >TP53-A161\$RVRAMAIY   | 311  | >TP53-A161\$RVRAMSIY   | 159 | 152  |
| >TP53-A161\$RVRAMAIY   | 7    | >TP53-A161\$RVRAMSIY   | 9   | 2    |
| >TP53-A161\$RVRAMAIY   | 211  | >TP53-A161\$RVRAMSIY   | 165 | 46   |
| >TP53-A161\$RVRAMAIYK  | 156  | >TP53-A161\$RVRAMSIYK  | 180 | 24   |
| >TP53-A161\$TRVRAMAIY  | 62   | >TP53-A161\$TRVRAMSIY  | 79  | 17   |
| >TP53-A161\$TRVRAMAIYK | 765  | >TP53-A161\$TRVRAMSIYK | 453 | 312  |
| >TP53-A161\$TRVRAMAIY  | 278  | >TP53-A161\$TRVRAMSIY  | 131 | 147  |
| >TP53-A161\$TRVRAMAI   | 542  | >TP53-A161\$TRVRAMSI   | 408 | 134  |
| >TP53-A161\$TRVRAMAI   | 215  | >TP53-A161\$TRVRAMSI   | 587 | 372  |
| >TP53-A161\$TRVRAMAIY  | 2598 | >TP53-A161\$TRVRAMSIY  | 150 | 2448 |
| >TP53-A161\$GTRVRAMAI  | 269  | >TP53-A161\$GTRVRAMSIY | 237 | 32   |
| >TP53-A161\$GTRVRAMAI  | 50   | >TP53-A161\$GTRVRAMSIY | 44  | 6    |
| >TP53-A161\$GTRVRAMAI  | 39   | >TP53-A161\$GTRVRAMSIY | 34  | 5    |
| >TP53-A161\$GTRVRAMA   | 18   | >TP53-A161\$GTRVRAMS   | 188 | 170  |
| >TP53-A161\$GTRVRAMAI  | 9    | >TP53-A161\$GTRVRAMSI  | 8   | 1    |
| >TP53-A161\$GTRVRAMAI  | 30   | >TP53-A161\$GTRVRAMSIY | 47  | 17   |
| >TP53-A161\$GTRVRAMAI  | 3    | >TP53-A161\$GTRVRAMSIY | 3   | 0    |
| >TP53-A161\$GTRVRAMAI  | 130  | >TP53-A161\$GTRVRAMSIY | 156 | 26   |
| >TP53-A161\$GTRVRAMAI  | 115  | >TP53-A161\$GTRVRAMSIY | 93  | 22   |
| >TP53-A161\$GTRVRAMAI  | 405  | >TP53-A161\$GTRVRAMSIY | 439 | 34   |
| >TP53-A161\$GTRVRAMAI  | 40   | >TP53-A161\$GTRVRAMSI  | 28  | 12   |
| >TP53-A161\$GTRVRAMAI  | 4    | >TP53-A161\$GTRVRAMSIY | 5   | 1    |
| >TP53-A161\$GTRVRAMAI  | 122  | >TP53-A161\$GTRVRAMSI  | 50  | 72   |
| >TP53-A161\$GTRVRAMAI  | 21   | >TP53-A161\$GTRVRAMSIY | 20  | 1    |
| >TP53-A161\$GTRVRAMAI  | 269  | >TP53-A161\$GTRVRAMSIY | 266 | 3    |

|                        |      |                        |      |      |
|------------------------|------|------------------------|------|------|
| >TP53-A161SGTRVRAMAI   | 387  | >TP53-A161SGTRVRAMSI   | 127  | 260  |
| >TP53-A161T AIYKQSQHM  | 91   | >TP53-A161T TIYKQSQHM  | 69   | 22   |
| >TP53-A161T AIYKQSQH   | 349  | >TP53-A161T TIYKQSQH   | 442  | 93   |
| >TP53-A161T AIYKQSQHM  | 62   | >TP53-A161T TIYKQSQHM  | 132  | 70   |
| >TP53-A161T AIYKQSQHM  | 198  | >TP53-A161T TIYKQSQHM  | 729  | 531  |
| >TP53-A161T MAIYKQSQHI | 633  | >TP53-A161T MTIYKQSQHI | 11   | 622  |
| >TP53-A161T MAIYKQSQ   | 841  | >TP53-A161T MTIYKQSQ   | 135  | 706  |
| >TP53-A161T MAIYKQSQH  | 526  | >TP53-A161T MTIYKQSQH  | 96   | 430  |
| >TP53-A161T MAIYKQSQHI | 1599 | >TP53-A161T MTIYKQSQHI | 296  | 1303 |
| >TP53-A161T MAIYKQSQHI | 3250 | >TP53-A161T MTIYKQSQHI | 481  | 2769 |
| >TP53-A161T MAIYKQSQHI | 672  | >TP53-A161T MTIYKQSQHI | 60   | 612  |
| >TP53-A161T MAIYKQSQHI | 226  | >TP53-A161T MTIYKQSQHI | 187  | 39   |
| >TP53-A161T MAIYKQSQHI | 205  | >TP53-A161T MTIYKQSQHI | 436  | 231  |
| >TP53-A161T MAIYKQSQH  | 911  | >TP53-A161T MTIYKQSQH  | 70   | 841  |
| >TP53-A161T MAIYKQSQHI | 20   | >TP53-A161T MTIYKQSQHI | 7    | 13   |
| >TP53-A161T MAIYKQSQHI | 151  | >TP53-A161T MTIYKQSQHI | 124  | 27   |
| >TP53-A161T MAIYKQSQH  | 894  | >TP53-A161T MTIYKQSQH  | 46   | 848  |
| >TP53-A161T MAIYKQSQHI | 583  | >TP53-A161T MTIYKQSQHI | 26   | 557  |
| >TP53-A161T AMAIYKQSQI | 221  | >TP53-A161T AMTIYKQSQI | 264  | 43   |
| >TP53-A161T AMAIYKQSQI | 161  | >TP53-A161T AMTIYKQSQI | 1359 | 1198 |
| >TP53-A161T AMAIYKQSQI | 199  | >TP53-A161T AMTIYKQSQI | 423  | 224  |
| >TP53-A161T AMAIYKQSQI | 283  | >TP53-A161T AMTIYKQSQI | 681  | 398  |
| >TP53-A161T AMAIYKQSQ  | 69   | >TP53-A161T AMTIYKQSQ  | 85   | 16   |
| >TP53-A161T AMAIYKQSQI | 49   | >TP53-A161T AMTIYKQSQI | 59   | 10   |
| >TP53-A161T AMAIYKQSQI | 55   | >TP53-A161T AMTIYKQSQI | 379  | 324  |
| >TP53-A161T AMAIYKQSQI | 69   | >TP53-A161T AMTIYKQSQI | 162  | 93   |
| >TP53-A161T RAMAIYKQSC | 354  | >TP53-A161T RAMTIYKQSC | 701  | 347  |
| >TP53-A161T RAMAIYKQSC | 375  | >TP53-A161T RAMTIYKQSC | 286  | 89   |
| >TP53-A161T VRAMAIYK   | 159  | >TP53-A161T VRAMTIYK   | 230  | 71   |
| >TP53-A161T RVRAMAIY   | 205  | >TP53-A161T RVRAMTIY   | 157  | 48   |
| >TP53-A161T RVRAMAIYK  | 28   | >TP53-A161T RVRAMTIYK  | 27   | 1    |
| >TP53-A161T RVRAMAIYK  | 20   | >TP53-A161T RVRAMTIYK  | 13   | 7    |
| >TP53-A161T RVRAMAIY   | 241  | >TP53-A161T RVRAMTIY   | 434  | 193  |
| >TP53-A161T RVRAMAIY   | 398  | >TP53-A161T RVRAMTIY   | 564  | 166  |
| >TP53-A161T RVRAMAIY   | 5    | >TP53-A161T RVRAMTIY   | 7    | 2    |
| >TP53-A161T RVRAMAIYK  | 3    | >TP53-A161T RVRAMTIYK  | 3    | 0    |
| >TP53-A161T RVRAMAIYKC | 10   | >TP53-A161T RVRAMTIYKC | 8    | 2    |
| >TP53-A161T RVRAMAIYKC | 9    | >TP53-A161T RVRAMTIYKC | 7    | 2    |
| >TP53-A161T RVRAMAIY   | 107  | >TP53-A161T RVRAMTIY   | 282  | 175  |
| >TP53-A161T RVRAMAIYK  | 18   | >TP53-A161T RVRAMTIYK  | 9    | 9    |
| >TP53-A161T RVRAMAIYK  | 588  | >TP53-A161T RVRAMTIYK  | 452  | 136  |
| >TP53-A161T RVRAMAIY   | 26   | >TP53-A161T RVRAMTIY   | 19   | 7    |
| >TP53-A161T RVRAMAIY   | 85   | >TP53-A161T RVRAMTIY   | 80   | 5    |

|                       |     |                       |      |     |
|-----------------------|-----|-----------------------|------|-----|
| >TP53-A161TRVRAMAIY   | 311 | >TP53-A161TRVRAMTIY   | 188  | 123 |
| >TP53-A161TRVRAMAIY   | 7   | >TP53-A161TRVRAMTIY   | 12   | 5   |
| >TP53-A161TRVRAMAIY   | 211 | >TP53-A161TRVRAMTIY   | 100  | 111 |
| >TP53-A161TRVRAMAIYK  | 156 | >TP53-A161TRVRAMTIYK  | 64   | 92  |
| >TP53-A161TRVRAMAIY   | 62  | >TP53-A161TRVRAMTIY   | 382  | 320 |
| >TP53-A161TRVRAMAIY   | 278 | >TP53-A161TRVRAMTIY   | 157  | 121 |
| >TP53-A161TRVRAMAI    | 542 | >TP53-A161TRVRAMTI    | 491  | 51  |
| >TP53-A161TRVRAMAI    | 215 | >TP53-A161TRVRAMTI    | 576  | 361 |
| >TP53-A161TGTRVRAMAI\ | 269 | >TP53-A161TGTRVRAMTI\ | 413  | 144 |
| >TP53-A161TGTRVRAMAI\ | 50  | >TP53-A161TGTRVRAMTI\ | 46   | 4   |
| >TP53-A161TGTRVRAMAI\ | 39  | >TP53-A161TGTRVRAMTI\ | 31   | 8   |
| >TP53-A161TGTRVRAMA   | 18  | >TP53-A161TGTRVRAMT   | 403  | 385 |
| >TP53-A161TGTRVRAMAI  | 9   | >TP53-A161TGTRVRAMTI  | 9    | 0   |
| >TP53-A161TGTRVRAMAI\ | 30  | >TP53-A161TGTRVRAMTI\ | 101  | 71  |
| >TP53-A161TGTRVRAMAI\ | 3   | >TP53-A161TGTRVRAMTI\ | 3    | 0   |
| >TP53-A161TGTRVRAMAI\ | 130 | >TP53-A161TGTRVRAMTI\ | 345  | 215 |
| >TP53-A161TGTRVRAMAI\ | 115 | >TP53-A161TGTRVRAMTI\ | 77   | 38  |
| >TP53-A161TGTRVRAMAI\ | 405 | >TP53-A161TGTRVRAMTI\ | 585  | 180 |
| >TP53-A161TGTRVRAMAI  | 40  | >TP53-A161TGTRVRAMTI  | 14   | 26  |
| >TP53-A161TGTRVRAMAI\ | 4   | >TP53-A161TGTRVRAMTI\ | 5    | 1   |
| >TP53-A161TGTRVRAMAI  | 122 | >TP53-A161TGTRVRAMTI  | 25   | 97  |
| >TP53-A161TGTRVRAMAI\ | 21  | >TP53-A161TGTRVRAMTI\ | 21   | 0   |
| >TP53-A161TGTRVRAMAI\ | 269 | >TP53-A161TGTRVRAMTI\ | 213  | 56  |
| >TP53-A161TGTRVRAMAI  | 387 | >TP53-A161TGTRVRAMTI  | 122  | 265 |
| >TP53-A161\AIYKQSQHM  | 91  | >TP53-A161\VIYKQSQHM  | 27   | 64  |
| >TP53-A161\AIYKQSQH   | 349 | >TP53-A161\VIYKQSQH   | 378  | 29  |
| >TP53-A161\AIYKQSQHM  | 62  | >TP53-A161\VIYKQSQHM  | 85   | 23  |
| >TP53-A161\AIYKQSQHM  | 198 | >TP53-A161\VIYKQSQHM  | 260  | 62  |
| >TP53-A161\AIYKQSQHM  | 514 | >TP53-A161\VIYKQSQHM  | 437  | 77  |
| >TP53-A161\MAIYKQSQH\ | 633 | >TP53-A161\MVIYKQSQH\ | 15   | 618 |
| >TP53-A161\MAIYKQSQ   | 841 | >TP53-A161\MVIYKQSQ   | 378  | 463 |
| >TP53-A161\MAIYKQSQH  | 526 | >TP53-A161\MVIYKQSQH  | 223  | 303 |
| >TP53-A161\MAIYKQSQH\ | 672 | >TP53-A161\MVIYKQSQH\ | 111  | 561 |
| >TP53-A161\MAIYKQSQH\ | 226 | >TP53-A161\MVIYKQSQH\ | 152  | 74  |
| >TP53-A161\MAIYKQSQH\ | 205 | >TP53-A161\MVIYKQSQH\ | 1155 | 950 |
| >TP53-A161\MAIYKQSQH\ | 20  | >TP53-A161\MVIYKQSQH\ | 184  | 164 |
| >TP53-A161\MAIYKQSQH\ | 151 | >TP53-A161\MVIYKQSQH\ | 967  | 816 |
| >TP53-A161\MAIYKQSQH\ | 583 | >TP53-A161\MVIYKQSQH\ | 328  | 255 |
| >TP53-A161\AMAIYKQSQ\ | 221 | >TP53-A161\AMVIYKQSQ\ | 70   | 151 |
| >TP53-A161\AMAIYKQSQ\ | 161 | >TP53-A161\AMVIYKQSQ\ | 865  | 704 |
| >TP53-A161\AMAIYKQSQ\ | 199 | >TP53-A161\AMVIYKQSQ\ | 231  | 32  |
| >TP53-A161\AMAIYKQSQ\ | 283 | >TP53-A161\AMVIYKQSQ\ | 1281 | 998 |
| >TP53-A161\AMAIYKQSQ  | 69  | >TP53-A161\AMVIYKQSQ  | 196  | 127 |

|                       |      |                       |     |      |
|-----------------------|------|-----------------------|-----|------|
| >TP53-A161\AMAIYKQSQI | 49   | >TP53-A161\AMVIYKQSQI | 119 | 70   |
| >TP53-A161\AMAIYKQSQI | 55   | >TP53-A161\AMVIYKQSQI | 73  | 18   |
| >TP53-A161\AMAIYKQSQI | 69   | >TP53-A161\AMVIYKQSQI | 55  | 14   |
| >TP53-A161\RAMAIYKQSC | 354  | >TP53-A161\RAMVIYKQSC | 458 | 104  |
| >TP53-A161\RAMAIYKQSC | 375  | >TP53-A161\RAMVIYKQSC | 398 | 23   |
| >TP53-A161\VRAMAIYK   | 159  | >TP53-A161\VRAMVIYK   | 166 | 7    |
| >TP53-A161\RVRAMAIY   | 205  | >TP53-A161\RVRAMVIY   | 207 | 2    |
| >TP53-A161\RVRAMAIYK  | 28   | >TP53-A161\RVRAMVIYK  | 27  | 1    |
| >TP53-A161\RVRAMAIYK  | 20   | >TP53-A161\RVRAMVIYK  | 15  | 5    |
| >TP53-A161\RVRAMAIY   | 241  | >TP53-A161\RVRAMVIY   | 239 | 2    |
| >TP53-A161\RVRAMAIY   | 398  | >TP53-A161\RVRAMVIY   | 733 | 335  |
| >TP53-A161\RVRAMAIY   | 5    | >TP53-A161\RVRAMVIY   | 6   | 1    |
| >TP53-A161\RVRAMAIYK  | 3    | >TP53-A161\RVRAMVIYK  | 3   | 0    |
| >TP53-A161\RVRAMAIYKC | 10   | >TP53-A161\RVRAMVIYKC | 12  | 2    |
| >TP53-A161\RVRAMAIYKC | 9    | >TP53-A161\RVRAMVIYKC | 8   | 1    |
| >TP53-A161\RVRAMAIY   | 107  | >TP53-A161\RVRAMVIY   | 336 | 229  |
| >TP53-A161\RVRAMAIYK  | 18   | >TP53-A161\RVRAMVIYK  | 11  | 7    |
| >TP53-A161\RVRAMAIY   | 26   | >TP53-A161\RVRAMVIY   | 31  | 5    |
| >TP53-A161\RVRAMAIY   | 85   | >TP53-A161\RVRAMVIY   | 86  | 1    |
| >TP53-A161\RVRAMAIY   | 311  | >TP53-A161\RVRAMVIY   | 156 | 155  |
| >TP53-A161\RVRAMAIY   | 7    | >TP53-A161\RVRAMVIY   | 12  | 5    |
| >TP53-A161\RVRAMAIY   | 211  | >TP53-A161\RVRAMVIY   | 116 | 95   |
| >TP53-A161\RVRAMAIYK  | 156  | >TP53-A161\RVRAMVIYK  | 160 | 4    |
| >TP53-A161\TRVRAMAIY  | 62   | >TP53-A161\TRVRAMVIY  | 344 | 282  |
| >TP53-A161\TRVRAMAIY  | 278  | >TP53-A161\TRVRAMVIY  | 146 | 132  |
| >TP53-A161\TRVRAMAI   | 215  | >TP53-A161\TRVRAMVI   | 254 | 39   |
| >TP53-A161\GTRVRAMAI\ | 269  | >TP53-A161\GTRVRAMVI\ | 386 | 117  |
| >TP53-A161\GTRVRAMAI\ | 50   | >TP53-A161\GTRVRAMVI\ | 51  | 1    |
| >TP53-A161\GTRVRAMAI\ | 39   | >TP53-A161\GTRVRAMVI\ | 34  | 5    |
| >TP53-A161\GTRVRAMA   | 18   | >TP53-A161\GTRVRAMV   | 29  | 11   |
| >TP53-A161\GTRVRAMAI  | 9    | >TP53-A161\GTRVRAMVI  | 11  | 2    |
| >TP53-A161\GTRVRAMAI\ | 30   | >TP53-A161\GTRVRAMVI\ | 43  | 13   |
| >TP53-A161\GTRVRAMAI\ | 3    | >TP53-A161\GTRVRAMVI\ | 3   | 0    |
| >TP53-A161\GTRVRAMAI\ | 130  | >TP53-A161\GTRVRAMVI\ | 445 | 315  |
| >TP53-A161\GTRVRAMAI\ | 115  | >TP53-A161\GTRVRAMVI\ | 84  | 31   |
| >TP53-A161\GTRVRAMAI\ | 405  | >TP53-A161\GTRVRAMVI\ | 630 | 225  |
| >TP53-A161\GTRVRAMA   | 5234 | >TP53-A161\GTRVRAMV   | 425 | 4809 |
| >TP53-A161\GTRVRAMAI  | 40   | >TP53-A161\GTRVRAMVI  | 41  | 1    |
| >TP53-A161\GTRVRAMAI\ | 4    | >TP53-A161\GTRVRAMVI\ | 5   | 1    |
| >TP53-A161\GTRVRAMAI  | 122  | >TP53-A161\GTRVRAMVI  | 31  | 91   |
| >TP53-A161\GTRVRAMAI\ | 21   | >TP53-A161\GTRVRAMVI\ | 20  | 1    |
| >TP53-A161\GTRVRAMAI\ | 269  | >TP53-A161\GTRVRAMVI\ | 210 | 59   |
| >TP53-A161\GTRVRAMAI  | 387  | >TP53-A161\GTRVRAMVI  | 239 | 148  |



|                        |       |                        |       |       |
|------------------------|-------|------------------------|-------|-------|
| >TP53-A189[ LAPPQHLIRV | 395   | >TP53-A189[ LDPPQHLIRV | 10614 | 10219 |
| >TP53-A189[ LAPPQHLIRV | 52    | >TP53-A189[ LDPPQHLIRV | 7947  | 7895  |
| >TP53-A189[ LAPPQHLI   | 5     | >TP53-A189[ LDPPQHLI   | 226   | 221   |
| >TP53-A189[ LAPPQHLIRV | 28    | >TP53-A189[ LDPPQHLIRV | 9207  | 9179  |
| >TP53-A189[ LAPPQHLI   | 70    | >TP53-A189[ LDPPQHLI   | 1542  | 1472  |
| >TP53-A189[ LAPPQHLI   | 28792 | >TP53-A189[ LDPPQHLI   | 152   | 28640 |
| >TP53-A189[ GLAPPQHL   | 285   | >TP53-A189[ GLDPPQHL   | 437   | 152   |
| >TP53-A189[ GLAPPQHLI  | 65    | >TP53-A189[ GLDPPQHLI  | 86    | 21    |
| >TP53-A189[ GLAPPQHLIR | 20    | >TP53-A189[ GLDPPQHLIR | 25    | 5     |
| >TP53-A189[ GLAPPQHL   | 22    | >TP53-A189[ GLDPPQHL   | 277   | 255   |
| >TP53-A189[ GLAPPQHLI  | 15    | >TP53-A189[ GLDPPQHLI  | 164   | 149   |
| >TP53-A189[ GLAPPQHLIR | 9     | >TP53-A189[ GLDPPQHLIR | 76    | 67    |
| >TP53-A189[ GLAPPQHL   | 61    | >TP53-A189[ GLDPPQHL   | 2913  | 2852  |
| >TP53-A189[ GLAPPQHLI  | 31    | >TP53-A189[ GLDPPQHLI  | 1741  | 1710  |
| >TP53-A189[ GLAPPQHLIR | 7     | >TP53-A189[ GLDPPQHLIR | 168   | 161   |
| >TP53-A189[ GLAPPQHLIR | 44    | >TP53-A189[ GLDPPQHLIR | 73    | 29    |
| >TP53-A189[ GLAPPQHL   | 16    | >TP53-A189[ GLDPPQHL   | 9     | 7     |
| >TP53-A189[ GLAPPQHLI  | 13    | >TP53-A189[ GLDPPQHLI  | 8     | 5     |
| >TP53-A189[ GLAPPQHLIR | 3     | >TP53-A189[ GLDPPQHLIR | 2     | 1     |
| >TP53-A189[ GLAPPQHL   | 26    | >TP53-A189[ GLDPPQHL   | 13    | 13    |
| >TP53-A189[ GLAPPQHLI  | 22    | >TP53-A189[ GLDPPQHLI  | 11    | 11    |
| >TP53-A189[ GLAPPQHLIR | 7     | >TP53-A189[ GLDPPQHLIR | 5     | 2     |
| >TP53-A189[ GLAPPQHL   | 11    | >TP53-A189[ GLDPPQHL   | 11    | 0     |
| >TP53-A189[ GLAPPQHLI  | 13    | >TP53-A189[ GLDPPQHLI  | 12    | 1     |
| >TP53-A189[ GLAPPQHLIR | 5     | >TP53-A189[ GLDPPQHLIR | 5     | 0     |
| >TP53-A189[ GLAPPQHL   | 175   | >TP53-A189[ GLDPPQHL   | 311   | 136   |
| >TP53-A189[ GLAPPQHLI  | 76    | >TP53-A189[ GLDPPQHLI  | 142   | 66    |
| >TP53-A189[ GLAPPQHLIR | 9     | >TP53-A189[ GLDPPQHLIR | 11    | 2     |
| >TP53-A189[ GLAPPQHL   | 5     | >TP53-A189[ GLDPPQHL   | 10    | 5     |
| >TP53-A189[ GLAPPQHLI  | 5     | >TP53-A189[ GLDPPQHLI  | 11    | 6     |
| >TP53-A189[ GLAPPQHLIR | 2     | >TP53-A189[ GLDPPQHLIR | 3     | 1     |
| >TP53-A189[ GLAPPQHLIR | 282   | >TP53-A189[ GLDPPQHLIR | 486   | 204   |
| >TP53-A189[ SDGLAPPQHI | 104   | >TP53-A189[ SDGLDPPQHI | 120   | 16    |
| >TP53-A189[ CSDSDGLA   | 178   | >TP53-A189[ CSDSDGLD   | 4585  | 4407  |
| >TP53-A189[ LAPPQHLI   | 9930  | >TP53-A189[ LGPPQHLI   | 402   | 9528  |
| >TP53-A189[ LAPPQHLIRV | 395   | >TP53-A189[ LGPPQHLIRV | 7414  | 7019  |
| >TP53-A189[ LAPPQHLIRV | 52    | >TP53-A189[ LGPPQHLIRV | 1485  | 1433  |
| >TP53-A189[ LAPPQHLI   | 5     | >TP53-A189[ LGPPQHLI   | 33    | 28    |
| >TP53-A189[ LAPPQHLIRV | 28    | >TP53-A189[ LGPPQHLIRV | 263   | 235   |
| >TP53-A189[ LAPPQHLIR  | 504   | >TP53-A189[ LGPPQHLIR  | 284   | 220   |
| >TP53-A189[ LAPPQHLI   | 70    | >TP53-A189[ LGPPQHLI   | 286   | 216   |
| >TP53-A189[ GLAPPQHL   | 285   | >TP53-A189[ GLGPPQHL   | 1895  | 1610  |
| >TP53-A189[ GLAPPQHLI  | 65    | >TP53-A189[ GLGPPQHLI  | 480   | 415   |

|                         |       |                         |      |       |
|-------------------------|-------|-------------------------|------|-------|
| >TP53-A189C GLAPPQHLIR' | 20    | >TP53-A189C GLGPPQHLIR  | 87   | 67    |
| >TP53-A189C GLAPPQHL    | 22    | >TP53-A189C GLGPPQHL    | 253  | 231   |
| >TP53-A189C GLAPPQHLI   | 15    | >TP53-A189C GLGPPQHLI   | 137  | 122   |
| >TP53-A189C GLAPPQHLIR' | 9     | >TP53-A189C GLGPPQHLIR  | 74   | 65    |
| >TP53-A189C GLAPPQHL    | 61    | >TP53-A189C GLGPPQHL    | 1335 | 1274  |
| >TP53-A189C GLAPPQHLI   | 31    | >TP53-A189C GLGPPQHLI   | 662  | 631   |
| >TP53-A189C GLAPPQHLIR' | 7     | >TP53-A189C GLGPPQHLIR  | 60   | 53    |
| >TP53-A189C GLAPPQHLIR' | 44    | >TP53-A189C GLGPPQHLIR  | 420  | 376   |
| >TP53-A189C GLAPPQHL    | 16    | >TP53-A189C GLGPPQHL    | 19   | 3     |
| >TP53-A189C GLAPPQHLI   | 13    | >TP53-A189C GLGPPQHLI   | 15   | 2     |
| >TP53-A189C GLAPPQHLIR' | 3     | >TP53-A189C GLGPPQHLIR  | 3    | 0     |
| >TP53-A189C GLAPPQHL    | 26    | >TP53-A189C GLGPPQHL    | 26   | 0     |
| >TP53-A189C GLAPPQHLI   | 22    | >TP53-A189C GLGPPQHLI   | 22   | 0     |
| >TP53-A189C GLAPPQHLIR' | 7     | >TP53-A189C GLGPPQHLIR  | 7    | 0     |
| >TP53-A189C GLAPPQHL    | 11    | >TP53-A189C GLGPPQHL    | 21   | 10    |
| >TP53-A189C GLAPPQHLI   | 13    | >TP53-A189C GLGPPQHLI   | 24   | 11    |
| >TP53-A189C GLAPPQHLIR' | 5     | >TP53-A189C GLGPPQHLIR  | 7    | 2     |
| >TP53-A189C GLAPPQHL    | 175   | >TP53-A189C GLGPPQHL    | 459  | 284   |
| >TP53-A189C GLAPPQHLI   | 76    | >TP53-A189C GLGPPQHLI   | 269  | 193   |
| >TP53-A189C GLAPPQHLIR' | 9     | >TP53-A189C GLGPPQHLIR  | 15   | 6     |
| >TP53-A189C GLAPPQHL    | 5     | >TP53-A189C GLGPPQHL    | 8    | 3     |
| >TP53-A189C GLAPPQHLI   | 5     | >TP53-A189C GLGPPQHLI   | 8    | 3     |
| >TP53-A189C GLAPPQHLIR' | 2     | >TP53-A189C GLGPPQHLIR  | 2    | 0     |
| >TP53-A189C GLAPPQHLIR  | 282   | >TP53-A189C GLGPPQHLIR  | 198  | 84    |
| >TP53-A189C SDGLAPPQHI  | 104   | >TP53-A189C SDGLGPPQHI  | 203  | 99    |
| >TP53-A189C CSDSDGLA    | 178   | >TP53-A189C CSDSDGLG    | 5451 | 5273  |
| >TP53-A189F LAPPQHLI    | 31219 | >TP53-A189F LPPPQHLI    | 122  | 31097 |
| >TP53-A189F LAPPQHHLIRV | 395   | >TP53-A189F LPPPQHHLIRV | 7683 | 7288  |
| >TP53-A189F LAPPQHHLIRV | 52    | >TP53-A189F LPPPQHHLIRV | 7469 | 7417  |
| >TP53-A189F LAPPQHLI    | 1132  | >TP53-A189F LPPPQHLI    | 76   | 1056  |
| >TP53-A189F LAPPQHLI    | 5210  | >TP53-A189F LPPPQHLI    | 408  | 4802  |
| >TP53-A189F LAPPQHLI    | 17932 | >TP53-A189F LPPPQHLI    | 486  | 17446 |
| >TP53-A189F LAPPQHHLIRV | 24823 | >TP53-A189F LPPPQHHLIRV | 169  | 24654 |
| >TP53-A189F LAPPQHLI    | 5     | >TP53-A189F LPPPQHLI    | 11   | 6     |
| >TP53-A189F LAPPQHHLIRV | 28    | >TP53-A189F LPPPQHHLIRV | 456  | 428   |
| >TP53-A189F LAPPQHHLIR  | 504   | >TP53-A189F LPPPQHHLIR  | 375  | 129   |
| >TP53-A189F LAPPQHLI    | 70    | >TP53-A189F LPPPQHLI    | 897  | 827   |
| >TP53-A189F GLAPPQHL    | 285   | >TP53-A189F GLPPPQHL    | 1897 | 1612  |
| >TP53-A189F GLAPPQHLI   | 65    | >TP53-A189F GLPPPQHLI   | 436  | 371   |
| >TP53-A189F GLAPPQHLIR' | 20    | >TP53-A189F GLPPPQHLIR' | 75   | 55    |
| >TP53-A189F GLAPPQHL    | 22    | >TP53-A189F GLPPPQHL    | 268  | 246   |
| >TP53-A189F GLAPPQHLI   | 15    | >TP53-A189F GLPPPQHLI   | 173  | 158   |
| >TP53-A189F GLAPPQHLIR' | 9     | >TP53-A189F GLPPPQHLIR' | 78   | 69    |

|                         |       |                         |      |       |
|-------------------------|-------|-------------------------|------|-------|
| >TP53-A189F GLAPPQHL    | 61    | >TP53-A189F GLPPPQHL    | 451  | 390   |
| >TP53-A189F GLAPPQHLI   | 31    | >TP53-A189F GLPPPQHLI   | 215  | 184   |
| >TP53-A189F GLAPPQHLIR' | 7     | >TP53-A189F GLPPPQHLIR' | 24   | 17    |
| >TP53-A189F GLAPPQHLIR  | 44    | >TP53-A189F GLPPPQHLIR' | 119  | 75    |
| >TP53-A189F GLAPPQHL    | 16    | >TP53-A189F GLPPPQHL    | 23   | 7     |
| >TP53-A189F GLAPPQHLI   | 13    | >TP53-A189F GLPPPQHLI   | 18   | 5     |
| >TP53-A189F GLAPPQHLIR' | 3     | >TP53-A189F GLPPPQHLIR' | 3    | 0     |
| >TP53-A189F GLAPPQHL    | 26    | >TP53-A189F GLPPPQHL    | 86   | 60    |
| >TP53-A189F GLAPPQHLI   | 22    | >TP53-A189F GLPPPQHLI   | 72   | 50    |
| >TP53-A189F GLAPPQHLIR' | 7     | >TP53-A189F GLPPPQHLIR' | 15   | 8     |
| >TP53-A189F GLAPPQHL    | 11    | >TP53-A189F GLPPPQHL    | 30   | 19    |
| >TP53-A189F GLAPPQHLI   | 13    | >TP53-A189F GLPPPQHLI   | 39   | 26    |
| >TP53-A189F GLAPPQHLIR' | 5     | >TP53-A189F GLPPPQHLIR' | 8    | 3     |
| >TP53-A189F GLAPPQHL    | 175   | >TP53-A189F GLPPPQHL    | 2154 | 1979  |
| >TP53-A189F GLAPPQHLI   | 76    | >TP53-A189F GLPPPQHLI   | 1636 | 1560  |
| >TP53-A189F GLAPPQHLIR' | 9     | >TP53-A189F GLPPPQHLIR' | 77   | 68    |
| >TP53-A189F GLAPPQHL    | 5     | >TP53-A189F GLPPPQHL    | 9    | 4     |
| >TP53-A189F GLAPPQHLI   | 5     | >TP53-A189F GLPPPQHLI   | 10   | 5     |
| >TP53-A189F GLAPPQHLIR' | 2     | >TP53-A189F GLPPPQHLIR' | 3    | 1     |
| >TP53-A189F GLAPPQHLI   | 2635  | >TP53-A189F GLPPPQHLI   | 18   | 2617  |
| >TP53-A189F GLAPPQHLIR' | 12320 | >TP53-A189F GLPPPQHLIR' | 323  | 11997 |
| >TP53-A189F GLAPPQHLIR  | 282   | >TP53-A189F GLPPPQHLIR  | 274  | 8     |
| >TP53-A189F SDGLAPPQHL  | 104   | >TP53-A189F SDGLPPPQHL  | 204  | 100   |
| >TP53-A189F CSDSDGLA    | 178   | >TP53-A189F CSDSDGLP    | 3926 | 3748  |
| >TP53-A189S APPQHLIR    | 1502  | >TP53-A189S SPPQHLIR    | 354  | 1148  |
| >TP53-A189S LAPPQHILIRV | 395   | >TP53-A189S LSPPQHILIRV | 1555 | 1160  |
| >TP53-A189S LAPPQHILIRV | 52    | >TP53-A189S LSPPQHILIRV | 1945 | 1893  |
| >TP53-A189S LAPPQHILI   | 5     | >TP53-A189S LSPPQHILI   | 2    | 3     |
| >TP53-A189S LAPPQHILIR  | 959   | >TP53-A189S LSPPQHILIR  | 157  | 802   |
| >TP53-A189S LAPPQHILIRV | 28    | >TP53-A189S LSPPQHILIRV | 7    | 21    |
| >TP53-A189S LAPPQHILIRV | 865   | >TP53-A189S LSPPQHILIRV | 190  | 675   |
| >TP53-A189S LAPPQHILIRV | 8032  | >TP53-A189S LSPPQHILIRV | 415  | 7617  |
| >TP53-A189S LAPPQHILI   | 70    | >TP53-A189S LSPPQHILI   | 27   | 43    |
| >TP53-A189S GLAPPQHL    | 285   | >TP53-A189S GLSPPQHL    | 732  | 447   |
| >TP53-A189S GLAPPQHLI   | 65    | >TP53-A189S GLSPPQHLI   | 147  | 82    |
| >TP53-A189S GLAPPQHLIR' | 20    | >TP53-A189S GLSPPQHLIR' | 36   | 16    |
| >TP53-A189S GLAPPQHL    | 22    | >TP53-A189S GLSPPQHL    | 35   | 13    |
| >TP53-A189S GLAPPQHLI   | 15    | >TP53-A189S GLSPPQHLI   | 24   | 9     |
| >TP53-A189S GLAPPQHLIR' | 9     | >TP53-A189S GLSPPQHLIR' | 15   | 6     |
| >TP53-A189S GLAPPQHL    | 61    | >TP53-A189S GLSPPQHL    | 124  | 63    |
| >TP53-A189S GLAPPQHLI   | 31    | >TP53-A189S GLSPPQHLI   | 60   | 29    |
| >TP53-A189S GLAPPQHLIR' | 7     | >TP53-A189S GLSPPQHLIR' | 10   | 3     |
| >TP53-A189S GLAPPQHLIR' | 44    | >TP53-A189S GLSPPQHLIR' | 125  | 81    |

|                         |      |                         |      |      |
|-------------------------|------|-------------------------|------|------|
| >TP53-A189S GLAPPQHL    | 16   | >TP53-A189S GLSPPQHL    | 26   | 10   |
| >TP53-A189S GLAPPQHLI   | 13   | >TP53-A189S GLSPPQHLI   | 21   | 8    |
| >TP53-A189S GLAPPQHLIR  | 3    | >TP53-A189S GLSPPQHLIR  | 4    | 1    |
| >TP53-A189S GLAPPQHL    | 26   | >TP53-A189S GLSPPQHL    | 29   | 3    |
| >TP53-A189S GLAPPQHLI   | 22   | >TP53-A189S GLSPPQHLI   | 23   | 1    |
| >TP53-A189S GLAPPQHLIR  | 7    | >TP53-A189S GLSPPQHLIR  | 8    | 1    |
| >TP53-A189S GLAPPQHL    | 11   | >TP53-A189S GLSPPQHL    | 23   | 12   |
| >TP53-A189S GLAPPQHLI   | 13   | >TP53-A189S GLSPPQHLI   | 27   | 14   |
| >TP53-A189S GLAPPQHLIR  | 5    | >TP53-A189S GLSPPQHLIR  | 7    | 2    |
| >TP53-A189S GLAPPQHL    | 175  | >TP53-A189S GLSPPQHL    | 412  | 237  |
| >TP53-A189S GLAPPQHLI   | 76   | >TP53-A189S GLSPPQHLI   | 188  | 112  |
| >TP53-A189S GLAPPQHLIR  | 9    | >TP53-A189S GLSPPQHLIR  | 14   | 5    |
| >TP53-A189S GLAPPQHL    | 5    | >TP53-A189S GLSPPQHL    | 6    | 1    |
| >TP53-A189S GLAPPQHLI   | 5    | >TP53-A189S GLSPPQHLI   | 6    | 1    |
| >TP53-A189S GLAPPQHLIR  | 2    | >TP53-A189S GLSPPQHLIR  | 2    | 0    |
| >TP53-A189S GLAPPQHLIR  | 282  | >TP53-A189S GLSPPQHLIR  | 220  | 62   |
| >TP53-A189S SDGLAPPQHL  | 104  | >TP53-A189S SDGLSPPQHL  | 75   | 29   |
| >TP53-A189S CSDSDGLA    | 178  | >TP53-A189S CSDSDGLS    | 769  | 591  |
| >TP53-A189T APPQHLIR    | 1502 | >TP53-A189T TPPQHLIR    | 375  | 1127 |
| >TP53-A189T LAPPQHILIRV | 395  | >TP53-A189T LTPPQHILIRV | 157  | 238  |
| >TP53-A189T LAPPQHILIRV | 577  | >TP53-A189T LTPPQHILIRV | 163  | 414  |
| >TP53-A189T LAPPQHILIRV | 52   | >TP53-A189T LTPPQHILIRV | 41   | 11   |
| >TP53-A189T LAPPQHILIR  | 1307 | >TP53-A189T LTPPQHILIR  | 430  | 877  |
| >TP53-A189T LAPPQHILIR  | 1385 | >TP53-A189T LTPPQHILIR  | 461  | 924  |
| >TP53-A189T LAPPQHILI   | 898  | >TP53-A189T LTPPQHILI   | 105  | 793  |
| >TP53-A189T LAPPQHILIRV | 3800 | >TP53-A189T LTPPQHILIRV | 370  | 3430 |
| >TP53-A189T LAPPQHILI   | 5    | >TP53-A189T LTPPQHILI   | 2    | 3    |
| >TP53-A189T LAPPQHILIR  | 959  | >TP53-A189T LTPPQHILIR  | 45   | 914  |
| >TP53-A189T LAPPQHILIRV | 28   | >TP53-A189T LTPPQHILIRV | 4    | 24   |
| >TP53-A189T LAPPQHILIRV | 865  | >TP53-A189T LTPPQHILIRV | 48   | 817  |
| >TP53-A189T LAPPQHILIRV | 8032 | >TP53-A189T LTPPQHILIRV | 147  | 7885 |
| >TP53-A189T LAPPQHILIR  | 504  | >TP53-A189T LTPPQHILIR  | 371  | 133  |
| >TP53-A189T LAPPQHILI   | 70   | >TP53-A189T LTPPQHILI   | 24   | 46   |
| >TP53-A189T GLAPPQHL    | 285  | >TP53-A189T GLTPPQHL    | 1460 | 1175 |
| >TP53-A189T GLAPPQHLI   | 65   | >TP53-A189T GLTPPQHLI   | 335  | 270  |
| >TP53-A189T GLAPPQHLIR  | 20   | >TP53-A189T GLTPPQHLIR  | 60   | 40   |
| >TP53-A189T GLAPPQHL    | 22   | >TP53-A189T GLTPPQHL    | 143  | 121  |
| >TP53-A189T GLAPPQHLI   | 15   | >TP53-A189T GLTPPQHLI   | 95   | 80   |
| >TP53-A189T GLAPPQHLIR  | 9    | >TP53-A189T GLTPPQHLIR  | 45   | 36   |
| >TP53-A189T GLAPPQHL    | 61   | >TP53-A189T GLTPPQHL    | 634  | 573  |
| >TP53-A189T GLAPPQHLI   | 31   | >TP53-A189T GLTPPQHLI   | 320  | 289  |
| >TP53-A189T GLAPPQHLIR  | 7    | >TP53-A189T GLTPPQHLIR  | 32   | 25   |
| >TP53-A189T GLAPPQHLIR  | 44   | >TP53-A189T GLTPPQHLIR  | 119  | 75   |

|                        |      |                        |      |      |
|------------------------|------|------------------------|------|------|
| >TP53-A189TGLAPPQHL    | 16   | >TP53-A189TGLTPPQHL    | 37   | 21   |
| >TP53-A189TGLAPPQHLI   | 13   | >TP53-A189TGLTPPQHLI   | 29   | 16   |
| >TP53-A189TGLAPPQHLIR' | 3    | >TP53-A189TGLTPPQHLIR' | 4    | 1    |
| >TP53-A189TGLAPPQHL    | 26   | >TP53-A189TGLTPPQHL    | 37   | 11   |
| >TP53-A189TGLAPPQHLI   | 22   | >TP53-A189TGLTPPQHLI   | 30   | 8    |
| >TP53-A189TGLAPPQHLIR' | 7    | >TP53-A189TGLTPPQHLIR' | 8    | 1    |
| >TP53-A189TGLAPPQHL    | 11   | >TP53-A189TGLTPPQHL    | 19   | 8    |
| >TP53-A189TGLAPPQHLI   | 13   | >TP53-A189TGLTPPQHLI   | 23   | 10   |
| >TP53-A189TGLAPPQHLIR' | 5    | >TP53-A189TGLTPPQHLIR' | 6    | 1    |
| >TP53-A189TGLAPPQHL    | 175  | >TP53-A189TGLTPPQHL    | 1741 | 1566 |
| >TP53-A189TGLAPPQHLI   | 76   | >TP53-A189TGLTPPQHLI   | 1066 | 990  |
| >TP53-A189TGLAPPQHLIR' | 9    | >TP53-A189TGLTPPQHLIR' | 52   | 43   |
| >TP53-A189TGLAPPQHL    | 5    | >TP53-A189TGLTPPQHL    | 6    | 1    |
| >TP53-A189TGLAPPQHLI   | 5    | >TP53-A189TGLTPPQHLI   | 6    | 1    |
| >TP53-A189TGLAPPQHLIR' | 2    | >TP53-A189TGLTPPQHLIR' | 2    | 0    |
| >TP53-A189TGLAPPQHLIR  | 282  | >TP53-A189TGLTPPQHLIR  | 296  | 14   |
| >TP53-A189TSDGLAPPQHI  | 507  | >TP53-A189TSDGLTPPQHL  | 463  | 44   |
| >TP53-A189TSDGLAPPQHI  | 104  | >TP53-A189TSDGLTPPQHL  | 67   | 37   |
| >TP53-A189TCSDSGLA     | 178  | >TP53-A189TCSDSGLT     | 697  | 519  |
| >TP53-A189\APPQHLIRV   | 1104 | >TP53-A189\VPPQHLIRV   | 473  | 631  |
| >TP53-A189\LAPPQHLIRV  | 395  | >TP53-A189\LVPPQHLIRV  | 157  | 238  |
| >TP53-A189\LAPPQHLIRV  | 577  | >TP53-A189\LVPPQHLIRV  | 127  | 450  |
| >TP53-A189\LAPPQHLI    | 3219 | >TP53-A189\LVPPQHLI    | 254  | 2965 |
| >TP53-A189\LAPPQHLIRV  | 52   | >TP53-A189\LVPPQHLIRV  | 8    | 44   |
| >TP53-A189\LAPPQHLI    | 898  | >TP53-A189\LVPPQHLI    | 176  | 722  |
| >TP53-A189\LAPPQHLI    | 5    | >TP53-A189\LVPPQHLI    | 4    | 1    |
| >TP53-A189\LAPPQHLIRV  | 28   | >TP53-A189\LVPPQHLIRV  | 160  | 132  |
| >TP53-A189\LAPPQHLIR   | 504  | >TP53-A189\LVPPQHLIR   | 307  | 197  |
| >TP53-A189\LAPPQHLI    | 70   | >TP53-A189\LVPPQHLI    | 342  | 272  |
| >TP53-A189\HERCSDSDGL  | 1489 | >TP53-A189\HERCSDSDGL  | 42   | 1447 |
| >TP53-A189\GLAPPQHL    | 285  | >TP53-A189\GLVPPQHL    | 1068 | 783  |
| >TP53-A189\GLAPPQHLI   | 65   | >TP53-A189\GLVPPQHLI   | 222  | 157  |
| >TP53-A189\GLAPPQHLIR' | 20   | >TP53-A189\GLVPPQHLIR' | 49   | 29   |
| >TP53-A189\GLAPPQHL    | 22   | >TP53-A189\GLVPPQHL    | 95   | 73   |
| >TP53-A189\GLAPPQHLI   | 15   | >TP53-A189\GLVPPQHLI   | 55   | 40   |
| >TP53-A189\GLAPPQHLIR' | 9    | >TP53-A189\GLVPPQHLIR' | 31   | 22   |
| >TP53-A189\GLAPPQHL    | 61   | >TP53-A189\GLVPPQHL    | 220  | 159  |
| >TP53-A189\GLAPPQHLI   | 31   | >TP53-A189\GLVPPQHLI   | 100  | 69   |
| >TP53-A189\GLAPPQHLIR' | 7    | >TP53-A189\GLVPPQHLIR' | 16   | 9    |
| >TP53-A189\GLAPPQHLIR' | 44   | >TP53-A189\GLVPPQHLIR' | 45   | 1    |
| >TP53-A189\GLAPPQHL    | 16   | >TP53-A189\GLVPPQHL    | 21   | 5    |
| >TP53-A189\GLAPPQHLI   | 13   | >TP53-A189\GLVPPQHLI   | 16   | 3    |
| >TP53-A189\GLAPPQHLIR' | 3    | >TP53-A189\GLVPPQHLIR' | 3    | 0    |

|                         |     |                         |      |      |
|-------------------------|-----|-------------------------|------|------|
| >TP53-A189\ GLAPPQHL    | 26  | >TP53-A189\ GLVPPQHL    | 25   | 1    |
| >TP53-A189\ GLAPPQHLI   | 22  | >TP53-A189\ GLVPPQHLI   | 19   | 3    |
| >TP53-A189\ GLAPPQHLIR' | 7   | >TP53-A189\ GLVPPQHLIR' | 7    | 0    |
| >TP53-A189\ GLAPPQHL    | 11  | >TP53-A189\ GLVPPQHL    | 33   | 22   |
| >TP53-A189\ GLAPPQHLI   | 13  | >TP53-A189\ GLVPPQHLI   | 40   | 27   |
| >TP53-A189\ GLAPPQHLIR' | 5   | >TP53-A189\ GLVPPQHLIR' | 8    | 3    |
| >TP53-A189\ GLAPPQHL    | 175 | >TP53-A189\ GLVPPQHL    | 2343 | 2168 |
| >TP53-A189\ GLAPPQHLI   | 76  | >TP53-A189\ GLVPPQHLI   | 1291 | 1215 |
| >TP53-A189\ GLAPPQHLIR' | 9   | >TP53-A189\ GLVPPQHLIR' | 71   | 62   |
| >TP53-A189\ GLAPPQHL    | 5   | >TP53-A189\ GLVPPQHL    | 8    | 3    |
| >TP53-A189\ GLAPPQHLI   | 5   | >TP53-A189\ GLVPPQHLI   | 8    | 3    |
| >TP53-A189\ GLAPPQHLIR' | 2   | >TP53-A189\ GLVPPQHLIR' | 2    | 0    |
| >TP53-A189\ GLAPPQHLIR  | 282 | >TP53-A189\ GLVPPQHLIR  | 341  | 59   |
| >TP53-A189\ SDGLAPPQHI  | 507 | >TP53-A189\ SDGLVPPQHI  | 323  | 184  |
| >TP53-A189\ SDGLAPPQHI  | 104 | >TP53-A189\ SDGLVPPQHI  | 143  | 39   |
| >TP53-A189\ CSDSDGLA    | 178 | >TP53-A189\ CSDSDGLV    | 68   | 110  |
| >TP53-A276[ CACPGRDRR   | 132 | >TP53-A276[ CDCPGRDRR   | 5029 | 4897 |
| >TP53-A276[ RVCACPGR    | 367 | >TP53-A276[ RVCDCPGR    | 489  | 122  |
| >TP53-A276[ RVCACPGRDI  | 435 | >TP53-A276[ RVCDCPGRDI  | 499  | 64   |
| >TP53-A276[ RVCACPGR    | 40  | >TP53-A276[ RVCDCPGR    | 61   | 21   |
| >TP53-A276[ RVCACPGRDI  | 37  | >TP53-A276[ RVCDCPGRDI  | 37   | 0    |
| >TP53-A276[ RVCACPGRDI  | 33  | >TP53-A276[ RVCDCPGRDI  | 43   | 10   |
| >TP53-A276[ RVCACPGR    | 481 | >TP53-A276[ RVCDCPGR    | 602  | 121  |
| >TP53-A276[ RVCACPGRDI  | 297 | >TP53-A276[ RVCDCPGRDI  | 599  | 302  |
| >TP53-A276[ RVCACPGR    | 66  | >TP53-A276[ RVCDCPGR    | 75   | 9    |
| >TP53-A276[ RVCACPGRDI  | 255 | >TP53-A276[ RVCDCPGRDI  | 275  | 20   |
| >TP53-A276[ RVCACPGRDI  | 109 | >TP53-A276[ RVCDCPGRDI  | 110  | 1    |
| >TP53-A276[ EVRVCACPGF  | 329 | >TP53-A276[ EVRVCDCPGF  | 1520 | 1191 |
| >TP53-A276[ EVRVCACPGF  | 70  | >TP53-A276[ EVRVCDCPGF  | 64   | 6    |
| >TP53-A276[ FEVRVCACPC  | 370 | >TP53-A276[ FEVRVCDCPC  | 646  | 276  |
| >TP53-A276[ NSFVCA      | 21  | >TP53-A276[ NSFVCD      | 6437 | 6416 |
| >TP53-A276( CACPGRDRR   | 132 | >TP53-A276( CGCPGRDRR   | 2758 | 2626 |
| >TP53-A276( RVCACPGR    | 367 | >TP53-A276( RVCGCPGR    | 707  | 340  |
| >TP53-A276( RVCACPGRDI  | 435 | >TP53-A276( RVCGCPGRDI  | 861  | 426  |
| >TP53-A276( RVCACPGR    | 40  | >TP53-A276( RVCGCPGR    | 64   | 24   |
| >TP53-A276( RVCACPGRDI  | 37  | >TP53-A276( RVCGCPGRDI  | 24   | 13   |
| >TP53-A276( RVCACPGRDI  | 33  | >TP53-A276( RVCGCPGRDI  | 55   | 22   |
| >TP53-A276( RVCACPGR    | 481 | >TP53-A276( RVCGCPGR    | 703  | 222  |
| >TP53-A276( RVCACPGRDI  | 297 | >TP53-A276( RVCGCPGRDI  | 337  | 40   |
| >TP53-A276( RVCACPGR    | 66  | >TP53-A276( RVCGCPGR    | 85   | 19   |
| >TP53-A276( RVCACPGRDI  | 255 | >TP53-A276( RVCGCPGRDI  | 315  | 60   |
| >TP53-A276( RVCACPGRDI  | 109 | >TP53-A276( RVCGCPGRDI  | 134  | 25   |
| >TP53-A276( EVRVCACPGF  | 329 | >TP53-A276( EVRVCGCPGF  | 786  | 457  |

|                        |     |                         |      |      |
|------------------------|-----|-------------------------|------|------|
| >TP53-A276C EVRVCACPGF | 70  | >TP53-A276C EVRVCGCPGF  | 126  | 56   |
| >TP53-A276C FEVRVCACPC | 370 | >TP53-A276C FEVRVCGCPC  | 663  | 293  |
| >TP53-A276C NSFVVRVCA  | 21  | >TP53-A276C NSFVVRVCG   | 2073 | 2052 |
| >TP53-A276F CACPGRDRR  | 132 | >TP53-A276F CPCPGRDRR   | 2848 | 2716 |
| >TP53-A276F RVCACPGR   | 367 | >TP53-A276F RVCPCPGR    | 309  | 58   |
| >TP53-A276F RVCACPGRDI | 435 | >TP53-A276F RVCPCPGRDI  | 442  | 7    |
| >TP53-A276F RVCACPGR   | 40  | >TP53-A276F RVCPCPGR    | 36   | 4    |
| >TP53-A276F RVCACPGRDI | 37  | >TP53-A276F RVCPCPGRDI  | 42   | 5    |
| >TP53-A276F RVCACPGRDI | 33  | >TP53-A276F RVCPCPGRDI  | 29   | 4    |
| >TP53-A276F RVCACPGR   | 481 | >TP53-A276F RVCPCPGR    | 932  | 451  |
| >TP53-A276F RVCACPGRDI | 297 | >TP53-A276F RVCPCPGRDI  | 346  | 49   |
| >TP53-A276F RVCACPGR   | 66  | >TP53-A276F RVCPCPGR    | 90   | 24   |
| >TP53-A276F RVCACPGRDI | 255 | >TP53-A276F RVCPCPGRDI  | 331  | 76   |
| >TP53-A276F RVCACPGRDI | 109 | >TP53-A276F RVCPCPGRDI  | 131  | 22   |
| >TP53-A276F EVRVCACPGF | 329 | >TP53-A276F EVRVCPCPGF  | 1575 | 1246 |
| >TP53-A276F EVRVCACPGF | 70  | >TP53-A276F EVRVCPCPGF  | 72   | 2    |
| >TP53-A276F FEVRVCACPC | 370 | >TP53-A276F FEVRVCPCPG  | 575  | 205  |
| >TP53-A276F NSFVVRVCA  | 21  | >TP53-A276F NSFVVRVCP   | 6857 | 6836 |
| >TP53-A276S CACPGRDRR  | 132 | >TP53-A276S CSCPGRDRR   | 182  | 50   |
| >TP53-A276S RVCACPGR   | 367 | >TP53-A276S RVCSCPGR    | 381  | 14   |
| >TP53-A276S RVCACPGRDI | 435 | >TP53-A276S RVCSCPGRDI  | 575  | 140  |
| >TP53-A276S RVCACPGR   | 40  | >TP53-A276S RVCSCPGR    | 30   | 10   |
| >TP53-A276S RVCACPGRDI | 37  | >TP53-A276S RVCSCPGRDI  | 34   | 3    |
| >TP53-A276S RVCACPGRDI | 33  | >TP53-A276S RVCSCPGRDI  | 26   | 7    |
| >TP53-A276S RVCACPGR   | 481 | >TP53-A276S RVCSCPGR    | 350  | 131  |
| >TP53-A276S RVCACPGRDI | 584 | >TP53-A276S RVCSCPGRDI  | 441  | 143  |
| >TP53-A276S RVCACPGRDI | 297 | >TP53-A276S RVCSCPGRDI  | 454  | 157  |
| >TP53-A276S RVCACPGR   | 66  | >TP53-A276S RVCSCPGR    | 92   | 26   |
| >TP53-A276S RVCACPGRDI | 255 | >TP53-A276S RVCSCPGRDI  | 390  | 135  |
| >TP53-A276S RVCACPGRDI | 109 | >TP53-A276S RVCSCPGRDI  | 162  | 53   |
| >TP53-A276S EVRVCACPGF | 673 | >TP53-A276S EVRVCSCPGR  | 307  | 366  |
| >TP53-A276S EVRVCACPGF | 329 | >TP53-A276S EVRVCSCPGR  | 398  | 69   |
| >TP53-A276S EVRVCACPGF | 70  | >TP53-A276S EVRVCSCPGR  | 39   | 31   |
| >TP53-A276S FEVRVCACPC | 370 | >TP53-A276S FEVRVCSCPGR | 336  | 34   |
| >TP53-A276S NSFVVRVCA  | 21  | >TP53-A276S NSFVVRVCS   | 301  | 280  |
| >TP53-A276T CACPGRDRR  | 921 | >TP53-A276T CTCPGRDRR   | 306  | 615  |
| >TP53-A276T CACPGRDRR  | 545 | >TP53-A276T CTCPGRDRR   | 292  | 253  |
| >TP53-A276T CACPGRDR   | 824 | >TP53-A276T CTCPGRDR    | 311  | 513  |
| >TP53-A276T CACPGRDRR  | 132 | >TP53-A276T CTCPGRDRR   | 51   | 81   |
| >TP53-A276T RVCACPGR   | 367 | >TP53-A276T RVCTCPGR    | 499  | 132  |
| >TP53-A276T RVCACPGRDI | 435 | >TP53-A276T RVCTCPGRDI  | 624  | 189  |
| >TP53-A276T RVCACPGR   | 40  | >TP53-A276T RVCTCPGR    | 42   | 2    |
| >TP53-A276T RVCACPGRDI | 37  | >TP53-A276T RVCTCPGRDI  | 29   | 8    |

|                        |      |                        |      |      |
|------------------------|------|------------------------|------|------|
| >TP53-A276\ RVCACPGRDI | 33   | >TP53-A276\ RVCTCPGRDF | 40   | 7    |
| >TP53-A276\ RVCACPGR   | 481  | >TP53-A276\ RVCTCPGR   | 496  | 15   |
| >TP53-A276\ RVCACPGRDI | 297  | >TP53-A276\ RVCTCPGRDF | 708  | 411  |
| >TP53-A276\ RVCACPGR   | 66   | >TP53-A276\ RVCTCPGR   | 61   | 5    |
| >TP53-A276\ RVCACPGRDI | 255  | >TP53-A276\ RVCTCPGRDF | 256  | 1    |
| >TP53-A276\ RVCACPGRDI | 109  | >TP53-A276\ RVCTCPGRDF | 104  | 5    |
| >TP53-A276\ EVRVCACPGF | 673  | >TP53-A276\ EVRVCTCPGF | 413  | 260  |
| >TP53-A276\ EVRVCACPGF | 329  | >TP53-A276\ EVRVCTCPGF | 616  | 287  |
| >TP53-A276\ EVRVCACPGF | 70   | >TP53-A276\ EVRVCTCPGF | 60   | 10   |
| >TP53-A276\ EVRVCACPGF | 744  | >TP53-A276\ EVRVCTCPGF | 499  | 245  |
| >TP53-A276\ FEVRVCACPC | 370  | >TP53-A276\ FEVRVCTCPG | 428  | 58   |
| >TP53-A276\ NSFVVRVCA  | 21   | >TP53-A276\ NSFVVRVCT  | 302  | 281  |
| >TP53-A276\ CACPGRDRR  | 921  | >TP53-A276\ CVCPGRDRR  | 499  | 422  |
| >TP53-A276\ CACPGRDRR  | 132  | >TP53-A276\ CVCPGRDRR  | 132  | 0    |
| >TP53-A276\ GRNSFEVRVC | 1232 | >TP53-A276\ GRNSFEVRVC | 440  | 792  |
| >TP53-A276\ RVCACPGR   | 367  | >TP53-A276\ RVCVCPGR   | 582  | 215  |
| >TP53-A276\ RVCACPGRDI | 435  | >TP53-A276\ RVCVCPGRDI | 893  | 458  |
| >TP53-A276\ RVCACPGR   | 40   | >TP53-A276\ RVCVCPGR   | 36   | 4    |
| >TP53-A276\ RVCACPGRDI | 37   | >TP53-A276\ RVCVCPGRDI | 47   | 10   |
| >TP53-A276\ RVCACPGRDI | 33   | >TP53-A276\ RVCVCPGRDI | 35   | 2    |
| >TP53-A276\ RVCACPGR   | 481  | >TP53-A276\ RVCVCPGR   | 509  | 28   |
| >TP53-A276\ RVCACPGRDI | 297  | >TP53-A276\ RVCVCPGRDI | 727  | 430  |
| >TP53-A276\ RVCACPGR   | 66   | >TP53-A276\ RVCVCPGR   | 158  | 92   |
| >TP53-A276\ RVCACPGRDI | 255  | >TP53-A276\ RVCVCPGRDI | 651  | 396  |
| >TP53-A276\ RVCACPGRDI | 109  | >TP53-A276\ RVCVCPGRDI | 277  | 168  |
| >TP53-A276\ EVRVCACPGF | 673  | >TP53-A276\ EVRVVCPGF  | 316  | 357  |
| >TP53-A276\ EVRVCACPGF | 329  | >TP53-A276\ EVRVVCPGF  | 279  | 50   |
| >TP53-A276\ EVRVCACPGF | 70   | >TP53-A276\ EVRVVCPGF  | 39   | 31   |
| >TP53-A276\ FEVRVCAC   | 822  | >TP53-A276\ FEVRVCVC   | 464  | 358  |
| >TP53-A276\ FEVRVCACPC | 370  | >TP53-A276\ FEVRVCVCPG | 271  | 99   |
| >TP53-A276\ NSFVVRVCA  | 21   | >TP53-A276\ NSFVVRVCV  | 7    | 14   |
| >TP53-A276\ NSFVVRVCA  | 5395 | >TP53-A276\ NSFVVRVCV  | 406  | 4989 |
| >TP53-A307\ ALPNNTSSS  | 301  | >TP53-A307\ SLPNNTSSS  | 446  | 145  |
| >TP53-A307\ ALPNNTSSSP | 111  | >TP53-A307\ SLPNNTSSSP | 175  | 64   |
| >TP53-A307\ RALPNNTSSS | 1092 | >TP53-A307\ RSLPNNTSSS | 389  | 703  |
| >TP53-A307\ RALPNNTSS  | 1481 | >TP53-A307\ RSLPNNTSS  | 275  | 1206 |
| >TP53-A307\ RALPNNTSSS | 1169 | >TP53-A307\ RSLPNNTSSS | 179  | 990  |
| >TP53-A307\ HELPPGSTKR | 250  | >TP53-A307\ HELPPGSTKR | 5412 | 5162 |
| >TP53-A307\ STKRALPN   | 100  | >TP53-A307\ STKRSLPN   | 66   | 34   |
| >TP53-A307\ STKRALPNN  | 60   | >TP53-A307\ STKRSLPNN  | 72   | 12   |
| >TP53-A307\ STKRALPNNT | 89   | >TP53-A307\ STKRSLPNNT | 113  | 24   |
| >TP53-A307\ STKRALPNNT | 46   | >TP53-A307\ STKRSLPNNT | 51   | 5    |
| >TP53-A307\ PPGSTKRAL  | 44   | >TP53-A307\ PPGSTKRSL  | 108  | 64   |



|                        |      |                          |      |      |
|------------------------|------|--------------------------|------|------|
| >TP53-A307S LPPGSTKRAL | 296  | >TP53-A307S LPPGSTKRSL   | 170  | 126  |
| >TP53-A307S LPPGSTKRAL | 75   | >TP53-A307S LPPGSTKRSL   | 73   | 2    |
| >TP53-A307S LPPGSTKRA  | 99   | >TP53-A307S LPPGSTKRS    | 2819 | 2720 |
| >TP53-A307S ELPPGSTKRA | 98   | >TP53-A307S ELPPGSTKRS   | 8239 | 8141 |
| >TP53-A307S ELPPGSTKRA | 151  | >TP53-A307S ELPPGSTKRSI  | 71   | 80   |
| >TP53-A307I ALPNNTSSS  | 301  | >TP53-A307I TLPNNTSSS    | 2029 | 1728 |
| >TP53-A307I ALPNNTSSSP | 111  | >TP53-A307I TLPNNTSSSP   | 697  | 586  |
| >TP53-A307I RALPNNTS   | 1957 | >TP53-A307I RTLPNNTS     | 342  | 1615 |
| >TP53-A307I RALPNNTSS  | 2264 | >TP53-A307I RTLPNNTSS    | 398  | 1866 |
| >TP53-A307I RALPNNTSSS | 1092 | >TP53-A307I RTLPNNTSSS   | 177  | 915  |
| >TP53-A307I RALPNNTSSS | 1877 | >TP53-A307I RTLPNNTSSSI  | 364  | 1513 |
| >TP53-A307I RALPNNTS   | 2391 | >TP53-A307I RTLPNNTS     | 392  | 1999 |
| >TP53-A307I RALPNNTSS  | 1481 | >TP53-A307I RTLPNNTSS    | 150  | 1331 |
| >TP53-A307I RALPNNTSSS | 1169 | >TP53-A307I RTLPNNTSSS   | 98   | 1071 |
| >TP53-A307I HELPPGSTKR | 250  | >TP53-A307I HELPPGSTKR   | 1794 | 1544 |
| >TP53-A307I STKRALPN   | 100  | >TP53-A307I STKRTPLN     | 67   | 33   |
| >TP53-A307I STKRALPNN  | 60   | >TP53-A307I STKRTPLNN    | 60   | 0    |
| >TP53-A307I STKRALPNNT | 89   | >TP53-A307I STKRTPLNNT   | 96   | 7    |
| >TP53-A307I STKRALPNNT | 46   | >TP53-A307I STKRTPLNNT   | 45   | 1    |
| >TP53-A307I PPGSTKRAL  | 44   | >TP53-A307I PPGSTKRRL    | 490  | 446  |
| >TP53-A307I LPPGSTKRAL | 296  | >TP53-A307I LPPGSTKRRL   | 205  | 91   |
| >TP53-A307I LPPGSTKRAL | 75   | >TP53-A307I LPPGSTKRRL   | 105  | 30   |
| >TP53-A307I LPPGSTKRA  | 99   | >TP53-A307I LPPGSTKRRT   | 2193 | 2094 |
| >TP53-A307I LPPGSTKRAL | 592  | >TP53-A307I LPPGSTKRRL   | 418  | 174  |
| >TP53-A307I ELPPGSTKRA | 98   | >TP53-A307I ELPPGSTKRRT  | 1233 | 1135 |
| >TP53-A307I ELPPGSTKRA | 151  | >TP53-A307I ELPPGSTKRRTI | 62   | 89   |
| >TP53-A307\ ALPNNTSSS  | 301  | >TP53-A307\ VLPNNTSSS    | 320  | 19   |
| >TP53-A307\ ALPNNTSSSP | 111  | >TP53-A307\ VLPNNTSSSP   | 112  | 1    |
| >TP53-A307\ RALPNNTSSS | 1092 | >TP53-A307\ RVLNNTSSS    | 306  | 786  |
| >TP53-A307\ HELPPGSTKR | 5021 | >TP53-A307\ HELPPGSTKR   | 299  | 4722 |
| >TP53-A307\ HELPPGSTKR | 250  | >TP53-A307\ HELPPGSTKR   | 1058 | 808  |
| >TP53-A307\ HELPPGSTKR | 1683 | >TP53-A307\ HELPPGSTKR   | 62   | 1621 |
| >TP53-A307\ STKRALPN   | 100  | >TP53-A307\ STKRVLPN     | 184  | 84   |
| >TP53-A307\ STKRALPNN  | 60   | >TP53-A307\ STKRVLPNN    | 215  | 155  |
| >TP53-A307\ STKRALPNNT | 89   | >TP53-A307\ STKRVLPNNT   | 236  | 147  |
| >TP53-A307\ STKRALPNNT | 46   | >TP53-A307\ STKRVLPNNT   | 100  | 54   |
| >TP53-A307\ PPGSTKRAL  | 44   | >TP53-A307\ PPGSTKRVL    | 184  | 140  |
| >TP53-A307\ LPPGSTKRAL | 296  | >TP53-A307\ LPPGSTKRVL   | 305  | 9    |
| >TP53-A307\ LPPGSTKRAL | 75   | >TP53-A307\ LPPGSTKRVL   | 67   | 8    |
| >TP53-A307\ LPPGSTKRA  | 99   | >TP53-A307\ LPPGSTKRIV   | 598  | 499  |
| >TP53-A307\ LPPGSTKRAL | 592  | >TP53-A307\ LPPGSTKRVL   | 265  | 327  |
| >TP53-A307\ ELPPGSTKRA | 3168 | >TP53-A307\ ELPPGSTKRIV  | 56   | 3112 |
| >TP53-A307\ ELPPGSTKRA | 3906 | >TP53-A307\ ELPPGSTKRIV  | 100  | 3806 |

|                         |      |                         |       |       |
|-------------------------|------|-------------------------|-------|-------|
| >TP53-A307\ ELPPGSTKRA  | 6420 | >TP53-A307\ ELPPGSTKRV  | 80    | 6340  |
| >TP53-A307\ ELPPGSTKRA  | 98   | >TP53-A307\ ELPPGSTKRV  | 5     | 93    |
| >TP53-A307\ ELPPGSTKRA  | 151  | >TP53-A307\ ELPPGSTKRV  | 162   | 11    |
| >TP53-A347C ALELKDAQA   | 144  | >TP53-A347C GLELKDAQA   | 360   | 216   |
| >TP53-A347C EALELKDAQA  | 161  | >TP53-A347C EGLELKDAQA  | 4630  | 4469  |
| >TP53-A347C NEALELKDA   | 240  | >TP53-A347C NEGLELKDA   | 1132  | 892   |
| >TP53-A347C NEALELKDA   | 288  | >TP53-A347C NEGLELKDA   | 414   | 126   |
| >TP53-A347C NEALELKDAC  | 461  | >TP53-A347C NEGLELKDAC  | 655   | 194   |
| >TP53-A347C ELNEALEL    | 71   | >TP53-A347C ELNEGLEL    | 141   | 70    |
| >TP53-A347C ELNEALEL    | 410  | >TP53-A347C ELNEGLEL    | 362   | 48    |
| >TP53-A347C ELNEALEL    | 41   | >TP53-A347C ELNEGLEL    | 27    | 14    |
| >TP53-A347C ELNEALEL    | 264  | >TP53-A347C ELNEGLEL    | 208   | 56    |
| >TP53-A347C ELNEALEL    | 85   | >TP53-A347C ELNEGLEL    | 69    | 16    |
| >TP53-A347C ELNEALEL    | 44   | >TP53-A347C ELNEGLEL    | 72    | 28    |
| >TP53-A347C ELNEALEL    | 13   | >TP53-A347C ELNEGLEL    | 11    | 2     |
| >TP53-A347C ELNEALELKD, | 603  | >TP53-A347C ELNEGLELKD, | 324   | 279   |
| >TP53-A347C ELNEALELK   | 33   | >TP53-A347C ELNEGLELK   | 77    | 44    |
| >TP53-A347C ELNEALEL    | 94   | >TP53-A347C ELNEGLEL    | 182   | 88    |
| >TP53-A347C RELNEALEL   | 390  | >TP53-A347C RELNEGLEL   | 201   | 189   |
| >TP53-A347C RELNEALEL   | 14   | >TP53-A347C RELNEGLEL   | 15    | 1     |
| >TP53-A347C RELNEALEL   | 18   | >TP53-A347C RELNEGLEL   | 12    | 6     |
| >TP53-A347C RELNEALEL   | 222  | >TP53-A347C RELNEGLEL   | 352   | 130   |
| >TP53-A347C RELNEALEL   | 19   | >TP53-A347C RELNEGLEL   | 31    | 12    |
| >TP53-A347C FRELNEALEL  | 379  | >TP53-A347C FRELNEGLEL  | 300   | 79    |
| >TP53-A347C FRELNEAL    | 31   | >TP53-A347C FRELNEGL    | 486   | 455   |
| >TP53-A347C FRELNEALEL  | 65   | >TP53-A347C FRELNEGLEL  | 256   | 191   |
| >TP53-A347C FRELNEALEL  | 471  | >TP53-A347C FRELNEGLEL  | 427   | 44    |
| >TP53-A347C MFRELNEALE  | 200  | >TP53-A347C MFRELNEGLE  | 284   | 84    |
| >TP53-A347C MFRELNEA    | 62   | >TP53-A347C MFRELNEG    | 919   | 857   |
| >TP53-A347C MFRELNEALE  | 217  | >TP53-A347C MFRELNEGLE  | 263   | 46    |
| >TP53-A347C MFRELNEAL   | 152  | >TP53-A347C MFRELNEGL   | 254   | 102   |
| >TP53-A347C MFRELNEALE  | 467  | >TP53-A347C MFRELNEGLE  | 580   | 113   |
| >TP53-A347C EMFRELNEA   | 133  | >TP53-A347C EMFRELNEG   | 4673  | 4540  |
| >TP53-A347C EMFRELNEAL  | 89   | >TP53-A347C EMFRELNEGI  | 98    | 9     |
| >TP53-A347C EMFRELNEA   | 401  | >TP53-A347C EMFRELNEG   | 15841 | 15440 |
| >TP53-A347C EMFRELNEAL  | 360  | >TP53-A347C EMFRELNEGI  | 319   | 41    |
| >TP53-A347C EMFRELNEA   | 161  | >TP53-A347C EMFRELNEG   | 8460  | 8299  |
| >TP53-A347C EMFRELNEAL  | 24   | >TP53-A347C EMFRELNEGI  | 22    | 2     |
| >TP53-A347C EMFRELNEAL  | 169  | >TP53-A347C EMFRELNEGI  | 174   | 5     |
| >TP53-A347C EMFRELNEAL  | 431  | >TP53-A347C EMFRELNEGI  | 191   | 240   |
| >TP53-A347C EMFRELNEAL  | 431  | >TP53-A347C EMFRELNEGI  | 151   | 280   |
| >TP53-A347C EMFRELNEA   | 119  | >TP53-A347C EMFRELNEG   | 19952 | 19833 |
| >TP53-A347C EMFRELNEAL  | 72   | >TP53-A347C EMFRELNEGI  | 41    | 31    |

|                        |      |                        |      |      |
|------------------------|------|------------------------|------|------|
| >TP53-A347C EMFRELNEAL | 272  | >TP53-A347C EMFRELNEGI | 812  | 540  |
| >TP53-A347C EMFRELNEAL | 291  | >TP53-A347C EMFRELNEGI | 166  | 125  |
| >TP53-A347C EMFRELNEAL | 98   | >TP53-A347C EMFRELNEGI | 570  | 472  |
| >TP53-A347C EMFRELNEAL | 495  | >TP53-A347C EMFRELNEGI | 4824 | 4329 |
| >TP53-A347C FEMFRELNEA | 301  | >TP53-A347C FEMFRELNEC | 311  | 10   |
| >TP53-A347C FEMFRELNEA | 394  | >TP53-A347C FEMFRELNEC | 533  | 139  |
| >TP53-A347C FEMFRELNEA | 253  | >TP53-A347C FEMFRELNEC | 1169 | 916  |
| >TP53-A347C FEMFRELNEA | 94   | >TP53-A347C FEMFRELNEC | 1058 | 964  |
| >TP53-A347C FEMFRELNEA | 18   | >TP53-A347C FEMFRELNEC | 26   | 8    |
| >TP53-A347C FEMFRELNEA | 47   | >TP53-A347C FEMFRELNEC | 119  | 72   |
| >TP53-A347C FEMFRELNEA | 29   | >TP53-A347C FEMFRELNEC | 26   | 3    |
| >TP53-A347I ALELKDAQA  | 144  | >TP53-A347I TLELKDAQA  | 682  | 538  |
| >TP53-A347I EALELKDAQA | 3912 | >TP53-A347I ETLELKDAQA | 375  | 3537 |
| >TP53-A347I EALELKDA   | 851  | >TP53-A347I ETLELKDA   | 169  | 682  |
| >TP53-A347I EALELKDAQ  | 2358 | >TP53-A347I ETLELKDAQ  | 366  | 1992 |
| >TP53-A347I EALELKDAQA | 161  | >TP53-A347I ETLELKDAQA | 40   | 121  |
| >TP53-A347I NEALELKDA  | 240  | >TP53-A347I NETLELKDA  | 534  | 294  |
| >TP53-A347I NEALELKDA  | 288  | >TP53-A347I NETLELKDA  | 675  | 387  |
| >TP53-A347I NEALELKDAC | 461  | >TP53-A347I NETLELKDAQ | 1056 | 595  |
| >TP53-A347I ELNEALEL   | 71   | >TP53-A347I ELNETLEL   | 69   | 2    |
| >TP53-A347I ELNEALEL   | 410  | >TP53-A347I ELNETLEL   | 310  | 100  |
| >TP53-A347I ELNEALEL   | 41   | >TP53-A347I ELNETLEL   | 23   | 18   |
| >TP53-A347I ELNEALEL   | 264  | >TP53-A347I ELNETLEL   | 112  | 152  |
| >TP53-A347I ELNEALEL   | 85   | >TP53-A347I ELNETLEL   | 69   | 16   |
| >TP53-A347I ELNEALEL   | 44   | >TP53-A347I ELNETLEL   | 26   | 18   |
| >TP53-A347I ELNEALEL   | 13   | >TP53-A347I ELNETLEL   | 10   | 3    |
| >TP53-A347I ELNEALELK  | 33   | >TP53-A347I ELNETLELK  | 31   | 2    |
| >TP53-A347I ELNEALEL   | 94   | >TP53-A347I ELNETLEL   | 90   | 4    |
| >TP53-A347I RELNEALEL  | 390  | >TP53-A347I RELNETLEL  | 275  | 115  |
| >TP53-A347I RELNEALEL  | 14   | >TP53-A347I RELNETLEL  | 23   | 9    |
| >TP53-A347I RELNEALEL  | 18   | >TP53-A347I RELNETLEL  | 13   | 5    |
| >TP53-A347I RELNEALEL  | 222  | >TP53-A347I RELNETLEL  | 333  | 111  |
| >TP53-A347I RELNEALEL  | 19   | >TP53-A347I RELNETLEL  | 7    | 12   |
| >TP53-A347I FRELNEALEL | 379  | >TP53-A347I FRELNETLEL | 302  | 77   |
| >TP53-A347I FRELNEAL   | 31   | >TP53-A347I FRELNETL   | 81   | 50   |
| >TP53-A347I FRELNEALEL | 65   | >TP53-A347I FRELNETLEL | 105  | 40   |
| >TP53-A347I FRELNEALEL | 471  | >TP53-A347I FRELNETLEL | 444  | 27   |
| >TP53-A347I MFRELNEAL  | 851  | >TP53-A347I MFRELNETL  | 350  | 501  |
| >TP53-A347I MFRELNEALE | 200  | >TP53-A347I MFRELNETLE | 103  | 97   |
| >TP53-A347I MFRELNEA   | 62   | >TP53-A347I MFRELNET   | 1642 | 1580 |
| >TP53-A347I MFRELNEALE | 217  | >TP53-A347I MFRELNETLE | 133  | 84   |
| >TP53-A347I MFRELNEAL  | 152  | >TP53-A347I MFRELNETL  | 169  | 17   |
| >TP53-A347I MFRELNEALE | 467  | >TP53-A347I MFRELNETLE | 574  | 107  |

|                       |     |                       |      |      |
|-----------------------|-----|-----------------------|------|------|
| >TP53-A3471EMFRELNEA  | 133 | >TP53-A3471EMFRELNET  | 1281 | 1148 |
| >TP53-A3471EMFRELNEAL | 89  | >TP53-A3471EMFRELNETL | 66   | 23   |
| >TP53-A3471EMFRELNEA  | 401 | >TP53-A3471EMFRELNET  | 4085 | 3684 |
| >TP53-A3471EMFRELNEAL | 360 | >TP53-A3471EMFRELNETL | 284  | 76   |
| >TP53-A3471EMFRELNEA  | 161 | >TP53-A3471EMFRELNET  | 1188 | 1027 |
| >TP53-A3471EMFRELNEAL | 24  | >TP53-A3471EMFRELNETL | 19   | 5    |
| >TP53-A3471EMFRELNEAL | 169 | >TP53-A3471EMFRELNETL | 96   | 73   |
| >TP53-A3471EMFRELNEAL | 431 | >TP53-A3471EMFRELNETL | 142  | 289  |
| >TP53-A3471EMFRELNEAL | 431 | >TP53-A3471EMFRELNETL | 201  | 230  |
| >TP53-A3471EMFRELNEA  | 119 | >TP53-A3471EMFRELNET  | 1617 | 1498 |
| >TP53-A3471EMFRELNEAL | 72  | >TP53-A3471EMFRELNETL | 32   | 40   |
| >TP53-A3471EMFRELNEAL | 272 | >TP53-A3471EMFRELNETL | 142  | 130  |
| >TP53-A3471EMFRELNEAL | 291 | >TP53-A3471EMFRELNETL | 374  | 83   |
| >TP53-A3471EMFRELNEAL | 98  | >TP53-A3471EMFRELNETL | 155  | 57   |
| >TP53-A3471EMFRELNEAL | 495 | >TP53-A3471EMFRELNETL | 1337 | 842  |
| >TP53-A3471FEMFRELNEA | 301 | >TP53-A3471FEMFRELNET | 228  | 73   |
| >TP53-A3471FEMFRELNEA | 394 | >TP53-A3471FEMFRELNET | 572  | 178  |
| >TP53-A3471FEMFRELNEA | 253 | >TP53-A3471FEMFRELNET | 329  | 76   |
| >TP53-A3471FEMFRELNEA | 94  | >TP53-A3471FEMFRELNET | 222  | 128  |
| >TP53-A3471FEMFRELNEA | 18  | >TP53-A3471FEMFRELNET | 19   | 1    |
| >TP53-A3471FEMFRELNEA | 47  | >TP53-A3471FEMFRELNET | 102  | 55   |
| >TP53-A3471FEMFRELNEA | 29  | >TP53-A3471FEMFRELNET | 30   | 1    |
| >TP53-A3531ELKDAQAGK  | 136 | >TP53-A3531ELKDTQAGK  | 117  | 19   |
| >TP53-A3531ALELKDAQA  | 144 | >TP53-A3531ALELKDTQA  | 194  | 50   |
| >TP53-A3531EALELKDAQA | 161 | >TP53-A3531EALELKDTQA | 290  | 129  |
| >TP53-A3531NEALELKDA  | 240 | >TP53-A3531NEALELKDT  | 269  | 29   |
| >TP53-A3531NEALELKDA  | 288 | >TP53-A3531NEALELKDT  | 2532 | 2244 |
| >TP53-A3531NEALELKDAC | 461 | >TP53-A3531NEALELKDTQ | 578  | 117  |
| >TP53-A3641RAHSSHLK   | 80  | >TP53-A3641RTHSSHLK   | 44   | 36   |
| >TP53-A3641RAHSSHLKSK | 307 | >TP53-A3641RTHSSHLKSK | 75   | 232  |
| >TP53-A3641RAHSSHLKSK | 101 | >TP53-A3641RTHSSHLKSK | 50   | 51   |
| >TP53-A3641RAHSSHLK   | 27  | >TP53-A3641RTHSSHLK   | 14   | 13   |
| >TP53-A3641RAHSSHLKSK | 777 | >TP53-A3641RTHSSHLKSK | 113  | 664  |
| >TP53-A3641RAHSSHLKSK | 92  | >TP53-A3641RTHSSHLKSK | 24   | 68   |
| >TP53-A3641RAHSSHLK   | 4   | >TP53-A3641RTHSSHLK   | 3    | 1    |
| >TP53-A3641RAHSSHLKS  | 31  | >TP53-A3641RTHSSHLKS  | 10   | 21   |
| >TP53-A3641RAHSSHLKSK | 4   | >TP53-A3641RTHSSHLKSK | 3    | 1    |
| >TP53-A3641RAHSSHLKSK | 6   | >TP53-A3641RTHSSHLKSK | 4    | 2    |
| >TP53-A3641RAHSSHLK   | 50  | >TP53-A3641RTHSSHLK   | 17   | 33   |
| >TP53-A3641RAHSSHLKSK | 72  | >TP53-A3641RTHSSHLKSK | 22   | 50   |
| >TP53-A3641RAHSSHLK   | 249 | >TP53-A3641RTHSSHLK   | 52   | 197  |
| >TP53-A3641RAHSSHLKSK | 764 | >TP53-A3641RTHSSHLKSK | 164  | 600  |
| >TP53-A3641RAHSSHLKS  | 917 | >TP53-A3641RTHSSHLKS  | 96   | 821  |

|                        |      |                        |      |      |
|------------------------|------|------------------------|------|------|
| >TP53-A364TRAHSSHLKSK  | 6121 | >TP53-A364TRTHSSHLKSK  | 340  | 5781 |
| >TP53-A364TRAHSSHLK    | 1501 | >TP53-A364TRTHSSHLK    | 267  | 1234 |
| >TP53-A364TRAHSSHLKSK  | 2887 | >TP53-A364TRTHSSHLKSK  | 425  | 2462 |
| >TP53-A364TRAHSSHL     | 60   | >TP53-A364TRTHSSHL     | 131  | 71   |
| >TP53-A364TRAHSSHLK    | 168  | >TP53-A364TRTHSSHLK    | 184  | 16   |
| >TP53-A364TRAHSSHLKSK  | 221  | >TP53-A364TRTHSSHLKSI  | 234  | 13   |
| >TP53-A364TRAHSSHL     | 220  | >TP53-A364TRTHSSHL     | 1199 | 979  |
| >TP53-A364GSRAHSSHLK   | 61   | >TP53-A364GSRTHSSHLK   | 71   | 10   |
| >TP53-A364GSRAHSSHLK   | 90   | >TP53-A364GSRTHSSHLK   | 117  | 27   |
| >TP53-A364GSRAHSSH     | 401  | >TP53-A364GSRTHSSH     | 613  | 212  |
| >TP53-A364GSRAHSSHL    | 23   | >TP53-A364GSRTHSSHL    | 32   | 9    |
| >TP53-A364GSRAHSSHLK   | 4    | >TP53-A364GSRTHSSHLK   | 4    | 0    |
| >TP53-A364GSRAHSSHLK   | 96   | >TP53-A364GSRTHSSHLK   | 143  | 47   |
| >TP53-A364GSRAHSSHL    | 141  | >TP53-A364GSRTHSSHL    | 454  | 313  |
| >TP53-A364GSRAHSSHL    | 471  | >TP53-A364GSRTHSSHL    | 413  | 58   |
| >TP53-A364GSRAHSSH     | 441  | >TP53-A364GSRTHSSH     | 805  | 364  |
| >TP53-A364GSRAHSSHL    | 8    | >TP53-A364GSRTHSSHL    | 13   | 5    |
| >TP53-A364GSRAHSSHL    | 78   | >TP53-A364GSRTHSSHL    | 60   | 18   |
| >TP53-A364GSRAHSSHLK   | 281  | >TP53-A364GSRTHSSHLK   | 280  | 1    |
| >TP53-A364GGSRAHSSHI   | 286  | >TP53-A364GGSRTHSSHL   | 245  | 41   |
| >TP53-A364GGSRAHSSH    | 291  | >TP53-A364GGSRTHSSH    | 114  | 177  |
| >TP53-A364EPGGSRAH     | 254  | >TP53-A364EPGGSRTH     | 630  | 376  |
| >TP53-A63T- APRMPEAA   | 25   | >TP53-A63T- TPRMPEAA   | 82   | 57   |
| >TP53-A63T- APRMPEAAP  | 261  | >TP53-A63T- TPRMPEAAP  | 2072 | 1811 |
| >TP53-A63T- APRMPEAAP  | 674  | >TP53-A63T- TPRMPEAAPI | 471  | 203  |
| >TP53-A63T- APRMPEAAP  | 38   | >TP53-A63T- TPRMPEAAPI | 98   | 60   |
| >TP53-A63T- APRMPEAA   | 771  | >TP53-A63T- TPRMPEAA   | 276  | 495  |
| >TP53-A63T- EAPRMPEAA  | 1076 | >TP53-A63T- ETPRMPEAAI | 342  | 734  |
| >TP53-A63T- EAPRMPEAA  | 30   | >TP53-A63T- ETPRMPEAAI | 10   | 20   |
| >TP53-A63T- EAPRMPEA   | 802  | >TP53-A63T- ETPRMPEA   | 68   | 734  |
| >TP53-A63T- EAPRMPEAA  | 215  | >TP53-A63T- ETPRMPEAA  | 23   | 192  |
| >TP53-A63T- DEAPRMPE   | 449  | >TP53-A63T- DETPRMPE   | 755  | 306  |
| >TP53-A63T- DEAPRMPEA  | 493  | >TP53-A63T- DETPRMPEA  | 942  | 449  |
| >TP53-A69G- EAAPRVAPA  | 8    | >TP53-A69G- EGAPRVAPA  | 54   | 46   |
| >TP53-A69G- EAAPRVAPAF | 9    | >TP53-A69G- EGAPRVAPAF | 69   | 60   |
| >TP53-A69G- EAAPRVAPA  | 130  | >TP53-A69G- EGAPRVAPA  | 5926 | 5796 |
| >TP53-A69G- EAAPRVAPAF | 96   | >TP53-A69G- EGAPRVAPAF | 4583 | 4487 |
| >TP53-A69G- MPEAAPRV   | 23   | >TP53-A69G- MPEGAPRV   | 78   | 55   |
| >TP53-A69G- MPEAAPRV   | 487  | >TP53-A69G- MPEGAPRV   | 462  | 25   |
| >TP53-A69G- MPEAAPRVA  | 177  | >TP53-A69G- MPEGAPRVA  | 242  | 65   |
| >TP53-A69G- MPEAAPRVA  | 65   | >TP53-A69G- MPEGAPRVA  | 70   | 5    |
| >TP53-A69G- MPEAAPRVA  | 258  | >TP53-A69G- MPEGAPRVA  | 278  | 20   |
| >TP53-A69G- MPEAAPRVA  | 76   | >TP53-A69G- MPEGAPRVA  | 81   | 5    |

|                       |      |                       |       |       |
|-----------------------|------|-----------------------|-------|-------|
| >TP53-A69G-MPEAAPRV   | 496  | >TP53-A69G-MPEGAPRV   | 1196  | 700   |
| >TP53-A69G-MPEAAPRV   | 83   | >TP53-A69G-MPEGAPRV   | 89    | 6     |
| >TP53-A69G-MPEAAPRVA  | 15   | >TP53-A69G-MPEGAPRVA  | 15    | 0     |
| >TP53-A69G-MPEAAPRVA  | 10   | >TP53-A69G-MPEGAPRVA  | 10    | 0     |
| >TP53-A69G-RMPEAAPRV  | 35   | >TP53-A69G-RMPEGAPRV  | 39    | 4     |
| >TP53-A69G-RMPEAAPRV  | 224  | >TP53-A69G-RMPEGAPRV  | 592   | 368   |
| >TP53-A69G-RMPEAAPRV  | 15   | >TP53-A69G-RMPEGAPRV  | 12    | 3     |
| >TP53-A69G-RMPEAAPRV  | 480  | >TP53-A69G-RMPEGAPRV  | 519   | 39    |
| >TP53-A69G-RMPEAAPRV  | 12   | >TP53-A69G-RMPEGAPRV  | 14    | 2     |
| >TP53-A69G-RMPEAAPRV  | 2    | >TP53-A69G-RMPEGAPRV  | 2     | 0     |
| >TP53-A69G-RMPEAAPRV  | 39   | >TP53-A69G-RMPEGAPRV  | 26    | 13    |
| >TP53-A69G-RMPEAAPRV  | 17   | >TP53-A69G-RMPEGAPRV  | 13    | 4     |
| >TP53-A69G-RMPEAAPRV  | 5    | >TP53-A69G-RMPEGAPRV  | 4     | 1     |
| >TP53-A69G-RMPEAAPRV  | 356  | >TP53-A69G-RMPEGAPRV  | 298   | 58    |
| >TP53-A69G-RMPEAAPRV  | 6    | >TP53-A69G-RMPEGAPRV  | 5     | 1     |
| >TP53-A69G-RMPEAAPRV  | 4    | >TP53-A69G-RMPEGAPRV  | 2     | 2     |
| >TP53-A69G-RMPEAAPRV  | 318  | >TP53-A69G-RMPEGAPRV  | 178   | 140   |
| >TP53-A69G-RMPEAAPR   | 53   | >TP53-A69G-RMPEGAPR   | 43    | 10    |
| >TP53-A69G-RMPEAAPRV  | 229  | >TP53-A69G-RMPEGAPRV  | 1423  | 1194  |
| >TP53-A69G-RMPEAAPR   | 26   | >TP53-A69G-RMPEGAPR   | 47    | 21    |
| >TP53-A69G-APRMPEAA   | 25   | >TP53-A69G-APRMPEGA   | 135   | 110   |
| >TP53-A69G-APRMPEAAP  | 261  | >TP53-A69G-APRMPEGAP  | 184   | 77    |
| >TP53-A69G-APRMPEAAP  | 674  | >TP53-A69G-APRMPEGAP  | 352   | 322   |
| >TP53-A69G-APRMPEAAP  | 38   | >TP53-A69G-APRMPEGAP  | 33    | 5     |
| >TP53-A69G-EAPRMPEAA  | 30   | >TP53-A69G-EAPRMPEGA  | 51    | 21    |
| >TP53-A69G-EAPRMPEAA  | 215  | >TP53-A69G-EAPRMPEGA  | 145   | 70    |
| >TP53-A69G-DEAPRMPEA  | 493  | >TP53-A69G-DEAPRMPEG  | 16520 | 16027 |
| >TP53-A69V-EAAPRVAPA  | 1849 | >TP53-A69V-EVAPRVAPA  | 184   | 1665  |
| >TP53-A69V-EAAPRVAPA  | 8    | >TP53-A69V-EVAPRVAPA  | 5     | 3     |
| >TP53-A69V-EAAPRVAPAF | 9    | >TP53-A69V-EVAPRVAPAF | 5     | 4     |
| >TP53-A69V-EAAPRVAPA  | 130  | >TP53-A69V-EVAPRVAPA  | 36    | 94    |
| >TP53-A69V-EAAPRVAPAF | 96   | >TP53-A69V-EVAPRVAPAF | 29    | 67    |
| >TP53-A69V-MPEAAPRV   | 23   | >TP53-A69V-MPEVAPRV   | 445   | 422   |
| >TP53-A69V-MPEAAPRV   | 487  | >TP53-A69V-MPEVAPRV   | 1284  | 797   |
| >TP53-A69V-MPEAAPRVA  | 177  | >TP53-A69V-MPEVAPRVA  | 754   | 577   |
| >TP53-A69V-MPEAAPRVA  | 65   | >TP53-A69V-MPEVAPRVA  | 154   | 89    |
| >TP53-A69V-MPEAAPRVA  | 258  | >TP53-A69V-MPEVAPRVA  | 644   | 386   |
| >TP53-A69V-MPEAAPRVA  | 76   | >TP53-A69V-MPEVAPRVA  | 143   | 67    |
| >TP53-A69V-MPEAAPRV   | 496  | >TP53-A69V-MPEVAPRV   | 344   | 152   |
| >TP53-A69V-MPEAAPRV   | 83   | >TP53-A69V-MPEVAPRV   | 88    | 5     |
| >TP53-A69V-MPEAAPRVA  | 15   | >TP53-A69V-MPEVAPRVA  | 16    | 1     |
| >TP53-A69V-MPEAAPRVA  | 10   | >TP53-A69V-MPEVAPRVA  | 10    | 0     |
| >TP53-A69V-RMPEAAPRV  | 35   | >TP53-A69V-RMPEVAPRV  | 23    | 12    |

|                         |      |                         |      |      |
|-------------------------|------|-------------------------|------|------|
| >TP53-A69V- RMPEAAPRV   | 224  | >TP53-A69V- RMPEVAPRV   | 108  | 116  |
| >TP53-A69V- RMPEAAPRV   | 15   | >TP53-A69V- RMPEVAPRV   | 12   | 3    |
| >TP53-A69V- RMPEAAPRV   | 480  | >TP53-A69V- RMPEVAPRV   | 473  | 7    |
| >TP53-A69V- RMPEAAPRV   | 12   | >TP53-A69V- RMPEVAPRV   | 11   | 1    |
| >TP53-A69V- RMPEAAPRV   | 2    | >TP53-A69V- RMPEVAPRV   | 2    | 0    |
| >TP53-A69V- RMPEAAPRV   | 39   | >TP53-A69V- RMPEVAPRV   | 24   | 15   |
| >TP53-A69V- RMPEAAPRV   | 17   | >TP53-A69V- RMPEVAPRV   | 12   | 5    |
| >TP53-A69V- RMPEAAPRV   | 5    | >TP53-A69V- RMPEVAPRV   | 4    | 1    |
| >TP53-A69V- RMPEAAPRV   | 356  | >TP53-A69V- RMPEVAPRV   | 230  | 126  |
| >TP53-A69V- RMPEAAPRV   | 6    | >TP53-A69V- RMPEVAPRV   | 6    | 0    |
| >TP53-A69V- RMPEAAPRV   | 4    | >TP53-A69V- RMPEVAPRV   | 3    | 1    |
| >TP53-A69V- RMPEAAPRV   | 318  | >TP53-A69V- RMPEVAPRV   | 464  | 146  |
| >TP53-A69V- RMPEAAPR    | 53   | >TP53-A69V- RMPEVAPR    | 27   | 26   |
| >TP53-A69V- RMPEAAPRV   | 229  | >TP53-A69V- RMPEVAPRV   | 386  | 157  |
| >TP53-A69V- RMPEAAPR    | 26   | >TP53-A69V- RMPEVAPR    | 35   | 9    |
| >TP53-A69V- APRMPEAA    | 25   | >TP53-A69V- APRMPEVA    | 48   | 23   |
| >TP53-A69V- APRMPEAAP   | 261  | >TP53-A69V- APRMPEVAP   | 286  | 25   |
| >TP53-A69V- APRMPEAAP   | 38   | >TP53-A69V- APRMPEVAP   | 46   | 8    |
| >TP53-A69V- EAPRMPEAA   | 30   | >TP53-A69V- EAPRMPEVA   | 30   | 0    |
| >TP53-A69V- EAPRMPEA    | 802  | >TP53-A69V- EAPRMPEV    | 49   | 753  |
| >TP53-A69V- EAPRMPEAA   | 215  | >TP53-A69V- EAPRMPEVA   | 716  | 501  |
| >TP53-A69V- EAPRMPEA    | 4763 | >TP53-A69V- EAPRMPEV    | 208  | 4555 |
| >TP53-A69V- DEAPRMPEA   | 1535 | >TP53-A69V- DEAPRMPEV   | 36   | 1499 |
| >TP53-A69V- DEAPRMPEA   | 876  | >TP53-A69V- DEAPRMPEV   | 345  | 531  |
| >TP53-A69V- DEAPRMPEA   | 493  | >TP53-A69V- DEAPRMPEV   | 2346 | 1853 |
| >TP53-A70T- APRVAPAPA   | 22   | >TP53-A70T- TPRVAPAPA   | 67   | 45   |
| >TP53-A70T- APRVAPAPA/  | 334  | >TP53-A70T- TPRVAPAPA/  | 250  | 84   |
| >TP53-A70T- APRVAPAPA   | 61   | >TP53-A70T- TPRVAPAPA   | 34   | 27   |
| >TP53-A70T- APRVAPAPA/  | 432  | >TP53-A70T- TPRVAPAPA/  | 80   | 352  |
| >TP53-A70T- AAPRVAPA    | 2376 | >TP53-A70T- ATPRVAPA    | 265  | 2111 |
| >TP53-A70T- AAPRVAPAPA/ | 4207 | >TP53-A70T- ATPRVAPAPA/ | 261  | 3946 |
| >TP53-A70T- AAPRVAPAPA/ | 3673 | >TP53-A70T- ATPRVAPAPA/ | 259  | 3414 |
| >TP53-A70T- EAAPRVAPA   | 8    | >TP53-A70T- EATPRVAPA   | 19   | 11   |
| >TP53-A70T- EAAPRVAPAF  | 9    | >TP53-A70T- EATPRVAPAF  | 23   | 14   |
| >TP53-A70T- EAAPRVAPA   | 130  | >TP53-A70T- EATPRVAPA   | 1016 | 886  |
| >TP53-A70T- EAAPRVAPAF  | 96   | >TP53-A70T- EATPRVAPAF  | 627  | 531  |
| >TP53-A70T- MPEAAPRV    | 23   | >TP53-A70T- MPEATPRV    | 285  | 262  |
| >TP53-A70T- MPEAAPRV    | 487  | >TP53-A70T- MPEATPRV    | 395  | 92   |
| >TP53-A70T- MPEAAPRVA   | 177  | >TP53-A70T- MPEATPRVA   | 253  | 76   |
| >TP53-A70T- MPEAAPRVA   | 65   | >TP53-A70T- MPEATPRVA   | 76   | 11   |
| >TP53-A70T- MPEAAPRVA   | 258  | >TP53-A70T- MPEATPRVA   | 574  | 316  |
| >TP53-A70T- MPEAAPRVA   | 76   | >TP53-A70T- MPEATPRVA   | 117  | 41   |
| >TP53-A70T- MPEAAPRV    | 496  | >TP53-A70T- MPEATPRV    | 537  | 41   |

|                        |      |                        |      |      |
|------------------------|------|------------------------|------|------|
| >TP53-A70T- MPEAAPRV   | 677  | >TP53-A70T- MPEATPRV   | 439  | 238  |
| >TP53-A70T- MPEAAPRV   | 83   | >TP53-A70T- MPEATPRV   | 76   | 7    |
| >TP53-A70T- MPEAAPRVA  | 15   | >TP53-A70T- MPEATPRVA  | 16   | 1    |
| >TP53-A70T- MPEAAPRVA  | 10   | >TP53-A70T- MPEATPRVA  | 10   | 0    |
| >TP53-A70T- RMPEAAPRV  | 35   | >TP53-A70T- RMPEATPRV  | 14   | 21   |
| >TP53-A70T- RMPEAAPRV  | 224  | >TP53-A70T- RMPEATPRV  | 57   | 167  |
| >TP53-A70T- RMPEAAPRV  | 15   | >TP53-A70T- RMPEATPRV  | 6    | 9    |
| >TP53-A70T- RMPEAAPRV  | 480  | >TP53-A70T- RMPEATPRV  | 287  | 193  |
| >TP53-A70T- RMPEAAPRV  | 12   | >TP53-A70T- RMPEATPRV  | 9    | 3    |
| >TP53-A70T- RMPEAAPRV  | 2    | >TP53-A70T- RMPEATPRV  | 2    | 0    |
| >TP53-A70T- RMPEAAPRV  | 39   | >TP53-A70T- RMPEATPRV  | 24   | 15   |
| >TP53-A70T- RMPEAAPRV  | 17   | >TP53-A70T- RMPEATPRV  | 9    | 8    |
| >TP53-A70T- RMPEAAPRV  | 5    | >TP53-A70T- RMPEATPRV  | 4    | 1    |
| >TP53-A70T- RMPEAAPRV  | 356  | >TP53-A70T- RMPEATPRV  | 264  | 92   |
| >TP53-A70T- RMPEAAPRV  | 6    | >TP53-A70T- RMPEATPRV  | 3    | 3    |
| >TP53-A70T- RMPEAAPRV  | 4    | >TP53-A70T- RMPEATPRV  | 2    | 2    |
| >TP53-A70T- RMPEAAPRV  | 318  | >TP53-A70T- RMPEATPRV  | 248  | 70   |
| >TP53-A70T- RMPEAAPR   | 53   | >TP53-A70T- RMPEATPR   | 44   | 9    |
| >TP53-A70T- RMPEAAPRV  | 229  | >TP53-A70T- RMPEATPRV  | 240  | 11   |
| >TP53-A70T- RMPEAAPR   | 26   | >TP53-A70T- RMPEATPR   | 23   | 3    |
| >TP53-A70T- APRMPEAA   | 25   | >TP53-A70T- APRMPEAT   | 55   | 30   |
| >TP53-A70T- APRMPEAAP  | 261  | >TP53-A70T- APRMPEATP  | 2361 | 2100 |
| >TP53-A70T- APRMPEAAP  | 38   | >TP53-A70T- APRMPEATPI | 34   | 4    |
| >TP53-A70T- EAPRMPEAA  | 30   | >TP53-A70T- EAPRMPEATI | 39   | 9    |
| >TP53-A70T- EAPRMPEAA  | 215  | >TP53-A70T- EAPRMPEAT  | 3818 | 3603 |
| >TP53-A74V- APAPAAPT   | 45   | >TP53-A74V- VPAPAAPT   | 84   | 39   |
| >TP53-A74V- APAPAAPTPA | 238  | >TP53-A74V- VPAPAAPTPA | 438  | 200  |
| >TP53-A74V- APAPAAPTPA | 27   | >TP53-A74V- VPAPAAPTPA | 40   | 13   |
| >TP53-A74V- APAPAAPT   | 458  | >TP53-A74V- VPAPAAPT   | 144  | 314  |
| >TP53-A74V- APAPAAPTPA | 203  | >TP53-A74V- VPAPAAPTPA | 69   | 134  |
| >TP53-A74V- APAPAAPT   | 2299 | >TP53-A74V- VPAPAAPT   | 427  | 1872 |
| >TP53-A74V- APAPAAPTPA | 376  | >TP53-A74V- VPAPAAPTPA | 40   | 336  |
| >TP53-A74V- APAPAAPTPA | 46   | >TP53-A74V- VPAPAAPTPA | 13   | 33   |
| >TP53-A74V- VAPAPAAPTF | 3077 | >TP53-A74V- VVPAPAAPTF | 399  | 2678 |
| >TP53-A74V- VAPAPAAPTF | 735  | >TP53-A74V- VVPAPAAPTF | 108  | 627  |
| >TP53-A74V- VAPAPAAPT  | 125  | >TP53-A74V- VVPAPAAPT  | 1165 | 1040 |
| >TP53-A74V- VAPAPAAPTF | 412  | >TP53-A74V- VVPAPAAPTF | 2727 | 2315 |
| >TP53-A74V- VAPAPAAPTF | 498  | >TP53-A74V- VVPAPAAPTF | 3039 | 2541 |
| >TP53-A74V- RVAPAPAA   | 259  | >TP53-A74V- RVVPAPAA   | 834  | 575  |
| >TP53-A74V- RVAPAPAA   | 79   | >TP53-A74V- RVVPAPAA   | 67   | 12   |
| >TP53-A74V- RVAPAPAA   | 77   | >TP53-A74V- RVVPAPAA   | 72   | 5    |
| >TP53-A74V- RVAPAPAA   | 432  | >TP53-A74V- RVVPAPAA   | 2949 | 2517 |
| >TP53-A74V- APRVAPAPA  | 22   | >TP53-A74V- APRVVPAPA  | 32   | 10   |



|                        |       |                         |     |       |
|------------------------|-------|-------------------------|-----|-------|
| >TP53-A74V- APRVAPAPA/ | 334   | >TP53-A74V- APRVVPAPA/  | 420 | 86    |
| >TP53-A74V- APRVAPAPA  | 61    | >TP53-A74V- APRVVPAPA   | 56  | 5     |
| >TP53-A74V- APRVAPAPA/ | 432   | >TP53-A74V- APRVVPAPA/  | 239 | 193   |
| >TP53-A74V- EAAPRVAPA  | 8     | >TP53-A74V- EAAPRVVPA   | 8   | 0     |
| >TP53-A74V- EAAPRVAPAF | 9     | >TP53-A74V- EAAPRVVPAF  | 8   | 1     |
| >TP53-A74V- EAAPRVAPA  | 130   | >TP53-A74V- EAAPRVVPA   | 279 | 149   |
| >TP53-A74V- EAAPRVAPAF | 96    | >TP53-A74V- EAAPRVVPAF  | 141 | 45    |
| >TP53-A74V- PEAAPRVAP/ | 591   | >TP53-A74V- PEAAPRVVPA/ | 461 | 130   |
| >TP53-A74V- MPEAAPRVA  | 22710 | >TP53-A74V- MPEAAPRVV   | 225 | 22485 |
| >TP53-A74V- MPEAAPRVA  | 177   | >TP53-A74V- MPEAAPRVV   | 71  | 106   |
| >TP53-A74V- MPEAAPRVA  | 65    | >TP53-A74V- MPEAAPRVV   | 71  | 6     |
| >TP53-A74V- MPEAAPRVA  | 258   | >TP53-A74V- MPEAAPRVV   | 419 | 161   |
| >TP53-A74V- MPEAAPRVA  | 76    | >TP53-A74V- MPEAAPRVV   | 71  | 5     |
| >TP53-A74V- MPEAAPRVA  | 15    | >TP53-A74V- MPEAAPRVV   | 59  | 44    |
| >TP53-A74V- MPEAAPRVA  | 10    | >TP53-A74V- MPEAAPRVV   | 9   | 1     |
| >TP53-A74V- RMPEAAPRV  | 1904  | >TP53-A74V- RMPEAAPRV   | 268 | 1636  |
| >TP53-A74V- RMPEAAPRV  | 480   | >TP53-A74V- RMPEAAPRV   | 72  | 408   |
| >TP53-A74V- RMPEAAPRV  | 39    | >TP53-A74V- RMPEAAPRV   | 3   | 36    |
| >TP53-A74V- RMPEAAPRV  | 1124  | >TP53-A74V- RMPEAAPRV   | 23  | 1101  |
| >TP53-A74V- RMPEAAPRV  | 356   | >TP53-A74V- RMPEAAPRV   | 13  | 343   |
| >TP53-A74V- RMPEAAPRV  | 2536  | >TP53-A74V- RMPEAAPRV   | 36  | 2500  |
| >TP53-A74V- RMPEAAPRV  | 318   | >TP53-A74V- RMPEAAPRV   | 11  | 307   |
| >TP53-A74V- RMPEAAPRV  | 8777  | >TP53-A74V- RMPEAAPRV   | 467 | 8310  |
| >TP53-A76V- APAAPTPA   | 26    | >TP53-A76V- VPAAPTPA    | 41  | 15    |
| >TP53-A76V- APAAPTPAA  | 28    | >TP53-A76V- VPAAPTPAA   | 36  | 8     |
| >TP53-A76V- APAAPTPAAF | 18    | >TP53-A76V- VPAAPTPAAF  | 24  | 6     |
| >TP53-A76V- APAAPTPA   | 925   | >TP53-A76V- VPAAPTPA    | 293 | 632   |
| >TP53-A76V- APAAPTPAA  | 276   | >TP53-A76V- VPAAPTPAA   | 94  | 182   |
| >TP53-A76V- APAAPTPAAF | 576   | >TP53-A76V- VPAAPTPAAF  | 183 | 393   |
| >TP53-A76V- APAAPTPA   | 66    | >TP53-A76V- VPAAPTPA    | 14  | 52    |
| >TP53-A76V- APAAPTPAA  | 25    | >TP53-A76V- VPAAPTPAA   | 9   | 16    |
| >TP53-A76V- APAAPTPAAF | 33    | >TP53-A76V- VPAAPTPAAF  | 10  | 23    |
| >TP53-A76V- MPEAAPRVA  | 65    | >TP53-A76V- MPEAAPRVA   | 32  | 33    |
| >TP53-A76V- MPEAAPRVA  | 76    | >TP53-A76V- MPEAAPRVA   | 112 | 36    |
| >TP53-A76V- MPEAAPRVA  | 6256  | >TP53-A76V- MPEAAPRVA   | 263 | 5993  |
| >TP53-A76V- MPEAAPRVA  | 10    | >TP53-A76V- MPEAAPRVA   | 23  | 13    |
| >TP53-A76V- APAPAAPT   | 45    | >TP53-A76V- APVPAAPT    | 168 | 123   |
| >TP53-A76V- APAPAAPTP/ | 238   | >TP53-A76V- APVPAAPT/   | 461 | 223   |
| >TP53-A76V- APAPAAPTP/ | 27    | >TP53-A76V- APVPAAPT/   | 67  | 40    |
| >TP53-A76V- APAPAAPT   | 458   | >TP53-A76V- APVPAAPT    | 449 | 9     |
| >TP53-A76V- APAPAAPTP/ | 203   | >TP53-A76V- APVPAAPT/   | 172 | 31    |
| >TP53-A76V- APAPAAPTP/ | 376   | >TP53-A76V- APVPAAPT/   | 165 | 211   |
| >TP53-A76V- APAPAAPTP/ | 46    | >TP53-A76V- APVPAAPT/   | 30  | 16    |

|                        |       |                        |      |       |
|------------------------|-------|------------------------|------|-------|
| >TP53-A76V- VAPAPAAPT  | 125   | >TP53-A76V- VAPVPAAPT  | 372  | 247   |
| >TP53-A76V- VAPAPAAPTF | 412   | >TP53-A76V- VAPVPAAPTf | 987  | 575   |
| >TP53-A76V- VAPAPAAPTF | 498   | >TP53-A76V- VAPVPAAPTf | 1058 | 560   |
| >TP53-A76V- RVAPAPAA   | 259   | >TP53-A76V- RVAPVPAA   | 97   | 162   |
| >TP53-A76V- RVAPAPAA   | 79    | >TP53-A76V- RVAPVPAA   | 57   | 22    |
| >TP53-A76V- RVAPAPAA   | 2346  | >TP53-A76V- RVAPVPAA   | 430  | 1916  |
| >TP53-A76V- RVAPAPAA   | 77    | >TP53-A76V- RVAPVPAA   | 155  | 78    |
| >TP53-A76V- RVAPAPAA   | 432   | >TP53-A76V- RVAPVPAA   | 965  | 533   |
| >TP53-A76V- APRVAPAPA  | 22    | >TP53-A76V- APRVAPVPA  | 23   | 1     |
| >TP53-A76V- APRVAPAPA/ | 334   | >TP53-A76V- APRVAPVPA/ | 753  | 419   |
| >TP53-A76V- APRVAPAPA  | 61    | >TP53-A76V- APRVAPVPA  | 41   | 20    |
| >TP53-A76V- APRVAPAPA/ | 432   | >TP53-A76V- APRVAPVPA/ | 285  | 147   |
| >TP53-A76V- AAPRVAPA   | 2638  | >TP53-A76V- AAPRVAPV   | 412  | 2226  |
| >TP53-A76V- AAPRVAPA   | 1931  | >TP53-A76V- AAPRVAPV   | 140  | 1791  |
| >TP53-A76V- AAPRVAPA   | 8708  | >TP53-A76V- AAPRVAPV   | 283  | 8425  |
| >TP53-A76V- AAPRVAPA   | 12904 | >TP53-A76V- AAPRVAPV   | 239  | 12665 |
| >TP53-A76V- AAPRVAPA   | 2376  | >TP53-A76V- AAPRVAPV   | 201  | 2175  |
| >TP53-A76V- EAAPRVAPA  | 1849  | >TP53-A76V- EAAPRVAPV  | 228  | 1621  |
| >TP53-A76V- EAAPRVAPA  | 3492  | >TP53-A76V- EAAPRVAPV  | 343  | 3149  |
| >TP53-A76V- EAAPRVAPA  | 8     | >TP53-A76V- EAAPRVAPV  | 4    | 4     |
| >TP53-A76V- EAAPRVAPAF | 9     | >TP53-A76V- EAAPRVAPVF | 9    | 0     |
| >TP53-A76V- EAAPRVAPA  | 130   | >TP53-A76V- EAAPRVAPV  | 7    | 123   |
| >TP53-A76V- EAAPRVAPAF | 96    | >TP53-A76V- EAAPRVAPVF | 147  | 51    |
| >TP53-A76V- PEAAPRVAP/ | 1052  | >TP53-A76V- PEAAPRVAPV | 463  | 589   |
| >TP53-A78V- AAPTAAAPA  | 298   | >TP53-A78V- VAPTPAAPA  | 115  | 183   |
| >TP53-A78V- AAPTAAAPAF | 692   | >TP53-A78V- VAPTPAAPAF | 283  | 409   |
| >TP53-A78V- EAAPRVAPAF | 9     | >TP53-A78V- EAAPRVAPAF | 4    | 5     |
| >TP53-A78V- EAAPRVAPAF | 96    | >TP53-A78V- EAAPRVAPAF | 6    | 90    |
| >TP53-A78V- APAAPTPA   | 26    | >TP53-A78V- APVAPTPA   | 58   | 32    |
| >TP53-A78V- APAAPTPAA  | 28    | >TP53-A78V- APVAPTPAA  | 45   | 17    |
| >TP53-A78V- APAAPTPAAF | 18    | >TP53-A78V- APVAPTPAAF | 28   | 10    |
| >TP53-A78V- APAAPTPAA  | 276   | >TP53-A78V- APVAPTPAA  | 218  | 58    |
| >TP53-A78V- APAAPTPAAF | 576   | >TP53-A78V- APVAPTPAAF | 448  | 128   |
| >TP53-A78V- APAAPTPA   | 66    | >TP53-A78V- APVAPTPA   | 35   | 31    |
| >TP53-A78V- APAAPTPAA  | 25    | >TP53-A78V- APVAPTPAA  | 17   | 8     |
| >TP53-A78V- APAAPTPAAF | 33    | >TP53-A78V- APVAPTPAAF | 21   | 12    |
| >TP53-A78V- APAPAAPT   | 45    | >TP53-A78V- APAPVAPT   | 85   | 40    |
| >TP53-A78V- APAPAAPTP/ | 238   | >TP53-A78V- APAPVAPTP/ | 284  | 46    |
| >TP53-A78V- APAPAAPTP/ | 27    | >TP53-A78V- APAPVAPTP/ | 38   | 11    |
| >TP53-A78V- APAPAAPT   | 458   | >TP53-A78V- APAPVAPT   | 651  | 193   |
| >TP53-A78V- APAPAAPTP/ | 203   | >TP53-A78V- APAPVAPTP/ | 278  | 75    |
| >TP53-A78V- APAPAAPTP/ | 376   | >TP53-A78V- APAPVAPTP/ | 202  | 174   |
| >TP53-A78V- APAPAAPTP/ | 46    | >TP53-A78V- APAPVAPTP/ | 43   | 3     |

|                        |       |                        |      |       |
|------------------------|-------|------------------------|------|-------|
| >TP53-A78V- VAPAPAAPT  | 125   | >TP53-A78V- VAPAPVAPT  | 62   | 63    |
| >TP53-A78V- VAPAPAAPTF | 412   | >TP53-A78V- VAPAPVAPTF | 343  | 69    |
| >TP53-A78V- VAPAPAAPTF | 498   | >TP53-A78V- VAPAPVAPTF | 408  | 90    |
| >TP53-A78V- RVAPAPAA   | 259   | >TP53-A78V- RVAPAPVA   | 959  | 700   |
| >TP53-A78V- RVAPAPAA   | 79    | >TP53-A78V- RVAPAPVA   | 374  | 295   |
| >TP53-A78V- RVAPAPAA   | 77    | >TP53-A78V- RVAPAPVA   | 134  | 57    |
| >TP53-A78V- RVAPAPAA   | 432   | >TP53-A78V- RVAPAPVA   | 1415 | 983   |
| >TP53-A78V- APRVAPAPA  | 22    | >TP53-A78V- APRVAPAPV  | 16   | 6     |
| >TP53-A78V- APRVAPAPA/ | 334   | >TP53-A78V- APRVAPAPV/ | 290  | 44    |
| >TP53-A78V- APRVAPAPA  | 61    | >TP53-A78V- APRVAPAPV  | 304  | 243   |
| >TP53-A78V- APRVAPAPA/ | 432   | >TP53-A78V- APRVAPAPV/ | 625  | 193   |
| >TP53-A78V- AAPRVAPAP/ | 2245  | >TP53-A78V- AAPRVAPAP\ | 345  | 1900  |
| >TP53-A78V- AAPRVAPAP/ | 9128  | >TP53-A78V- AAPRVAPAP\ | 332  | 8796  |
| >TP53-A78V- AAPRVAPAP/ | 15912 | >TP53-A78V- AAPRVAPAP\ | 488  | 15424 |
| >TP53-A78V- AAPRVAPAP/ | 4207  | >TP53-A78V- AAPRVAPAP\ | 171  | 4036  |
| >TP53-A79V- APTPAAPA   | 74    | >TP53-A79V- VPTPAAPA   | 158  | 84    |
| >TP53-A79V- APTPAAPAPA | 433   | >TP53-A79V- VPTPAAPAPA | 705  | 272   |
| >TP53-A79V- APTPAAPA   | 1144  | >TP53-A79V- VPTPAAPA   | 366  | 778   |
| >TP53-A79V- APTPAAPA   | 122   | >TP53-A79V- VPTPAAPA   | 23   | 99    |
| >TP53-A79V- APTPAAPAPA | 157   | >TP53-A79V- VPTPAAPAPA | 22   | 135   |
| >TP53-A79V- AAPTPAAPA  | 557   | >TP53-A79V- AVPTPAAPA  | 80   | 477   |
| >TP53-A79V- AAPTPAAPAF | 687   | >TP53-A79V- AVPTPAAPAF | 98   | 589   |
| >TP53-A79V- AAPTPAAPA  | 298   | >TP53-A79V- AVPTPAAPA  | 2413 | 2115  |
| >TP53-A79V- AAPRVAPAP/ | 1867  | >TP53-A79V- AAPRVAPAP/ | 156  | 1711  |
| >TP53-A79V- AAPRVAPAP/ | 7753  | >TP53-A79V- AAPRVAPAP/ | 276  | 7477  |
| >TP53-A79V- AAPRVAPAP/ | 13461 | >TP53-A79V- AAPRVAPAP/ | 326  | 13135 |
| >TP53-A79V- AAPRVAPAP/ | 3673  | >TP53-A79V- AAPRVAPAP/ | 134  | 3539  |
| >TP53-A79V- APAAPTPA   | 26    | >TP53-A79V- APAVPTPA   | 36   | 10    |
| >TP53-A79V- APAAPTPAA  | 28    | >TP53-A79V- APAVPTPAA  | 30   | 2     |
| >TP53-A79V- APAAPTPAAF | 18    | >TP53-A79V- APAVPTPAAF | 19   | 1     |
| >TP53-A79V- APAAPTPAA  | 276   | >TP53-A79V- APAVPTPAA  | 667  | 391   |
| >TP53-A79V- APAAPTPA   | 66    | >TP53-A79V- APAVPTPA   | 63   | 3     |
| >TP53-A79V- APAAPTPAA  | 25    | >TP53-A79V- APAVPTPAA  | 25   | 0     |
| >TP53-A79V- APAAPTPAAF | 33    | >TP53-A79V- APAVPTPAAF | 33   | 0     |
| >TP53-A79V- APAPAAPT   | 45    | >TP53-A79V- APAPAVPT   | 68   | 23    |
| >TP53-A79V- APAPAAPTP/ | 238   | >TP53-A79V- APAPAVPTP/ | 212  | 26    |
| >TP53-A79V- APAPAAPTP/ | 27    | >TP53-A79V- APAPAVPTP/ | 35   | 8     |
| >TP53-A79V- APAPAAPT   | 458   | >TP53-A79V- APAPAVPT   | 459  | 1     |
| >TP53-A79V- APAPAAPTP/ | 203   | >TP53-A79V- APAPAVPTP/ | 268  | 65    |
| >TP53-A79V- APAPAAPTP/ | 376   | >TP53-A79V- APAPAVPTP/ | 146  | 230   |
| >TP53-A79V- APAPAAPTP/ | 46    | >TP53-A79V- APAPAVPTP/ | 45   | 1     |
| >TP53-A79V- APAPAAPTP/ | 705   | >TP53-A79V- APAPAVPTP/ | 387  | 318   |
| >TP53-A79V- VAPAPAAPT  | 125   | >TP53-A79V- VAPAPAVPT  | 419  | 294   |

|                        |       |                        |       |       |
|------------------------|-------|------------------------|-------|-------|
| >TP53-A79V- VAPAPAAPTF | 412   | >TP53-A79V- VAPAPAVPTF | 430   | 18    |
| >TP53-A79V- VAPAPAAPTF | 498   | >TP53-A79V- VAPAPAVPTF | 826   | 328   |
| >TP53-A79V- RVAPAPAA   | 4587  | >TP53-A79V- RVAPAPAV   | 260   | 4327  |
| >TP53-A79V- RVAPAPAA   | 2204  | >TP53-A79V- RVAPAPAV   | 227   | 1977  |
| >TP53-A79V- RVAPAPAA   | 259   | >TP53-A79V- RVAPAPAV   | 32    | 227   |
| >TP53-A79V- RVAPAPAA   | 79    | >TP53-A79V- RVAPAPAV   | 14    | 65    |
| >TP53-A79V- RVAPAPAA   | 2346  | >TP53-A79V- RVAPAPAV   | 38    | 2308  |
| >TP53-A79V- RVAPAPAA   | 4427  | >TP53-A79V- RVAPAPAV   | 61    | 4366  |
| >TP53-A79V- RVAPAPAA   | 9048  | >TP53-A79V- RVAPAPAV   | 158   | 8890  |
| >TP53-A79V- RVAPAPAA   | 2422  | >TP53-A79V- RVAPAPAV   | 20    | 2402  |
| >TP53-A79V- RVAPAPAA   | 77    | >TP53-A79V- RVAPAPAV   | 145   | 68    |
| >TP53-A79V- RVAPAPAA   | 1765  | >TP53-A79V- RVAPAPAV   | 153   | 1612  |
| >TP53-A79V- RVAPAPAA   | 2554  | >TP53-A79V- RVAPAPAV   | 66    | 2488  |
| >TP53-A79V- RVAPAPAA   | 432   | >TP53-A79V- RVAPAPAV   | 135   | 297   |
| >TP53-A79V- APRVAPAPAA | 334   | >TP53-A79V- APRVAPAPAA | 52    | 282   |
| >TP53-A79V- APRVAPAPAA | 432   | >TP53-A79V- APRVAPAPAA | 1055  | 623   |
| >TP53-A83E- AAPAPAPSW  | 136   | >TP53-A83E- EAPAPAPSW  | 2701  | 2565  |
| >TP53-A83E- AAPAPAPS   | 10069 | >TP53-A83E- EAPAPAPS   | 307   | 9762  |
| >TP53-A83E- AAPAPAPSW  | 380   | >TP53-A83E- EAPAPAPSW  | 18    | 362   |
| >TP53-A83E- AAPAPAPSW  | 1180  | >TP53-A83E- EAPAPAPSW  | 14    | 1166  |
| >TP53-A83E- AAPAPAPSW  | 62    | >TP53-A83E- EAPAPAPSW  | 856   | 794   |
| >TP53-A83E- AAPAPAPSW  | 124   | >TP53-A83E- EAPAPAPSW  | 724   | 600   |
| >TP53-A83E- AAPAPAPSW  | 4     | >TP53-A83E- EAPAPAPSW  | 11    | 7     |
| >TP53-A83E- PAAPAPAPSV | 123   | >TP53-A83E- PEAPAPAPSV | 10733 | 10610 |
| >TP53-A83E- PAAPAPAPSV | 188   | >TP53-A83E- PEAPAPAPSV | 12562 | 12374 |
| >TP53-A83E- PAAPAPAPSV | 256   | >TP53-A83E- PEAPAPAPSV | 10450 | 10194 |
| >TP53-A83E- VAPAPAAPTF | 498   | >TP53-A83E- VAPAPAAPTF | 1331  | 833   |
| >TP53-A83E- TPAAPAPA   | 460   | >TP53-A83E- TPEAPAPA   | 5867  | 5407  |
| >TP53-A83E- TPAAPAPA   | 121   | >TP53-A83E- TPEAPAPA   | 946   | 825   |
| >TP53-A83E- TPAAPAPAPS | 296   | >TP53-A83E- TPEAPAPAPS | 2803  | 2507  |
| >TP53-A83E- TPAAPAPA   | 352   | >TP53-A83E- TPEAPAPA   | 1094  | 742   |
| >TP53-A83E- TPAAPAPAPS | 437   | >TP53-A83E- TPEAPAPAPS | 1142  | 705   |
| >TP53-A83E- TPAAPAPAPS | 33    | >TP53-A83E- TPEAPAPAPS | 40    | 7     |
| >TP53-A83E- TPAAPAPA   | 25    | >TP53-A83E- TPEAPAPA   | 181   | 156   |
| >TP53-A83E- TPAAPAPAPS | 16    | >TP53-A83E- TPEAPAPAPS | 14    | 2     |
| >TP53-A83E- PTPAAPAPA  | 441   | >TP53-A83E- PTPEAPAPA  | 917   | 476   |
| >TP53-A83E- APTPAAPA   | 74    | >TP53-A83E- APTPEAPA   | 405   | 331   |
| >TP53-A83E- APTPAAPAPA | 433   | >TP53-A83E- APTPEAPAPA | 2893  | 2460  |
| >TP53-A83E- APTPAAPA   | 122   | >TP53-A83E- APTPEAPA   | 461   | 339   |
| >TP53-A83E- APTPAAPAPA | 157   | >TP53-A83E- APTPEAPAPA | 513   | 356   |
| >TP53-A83E- AAPTPAAPA  | 298   | >TP53-A83E- AAPTEAPA   | 4807  | 4509  |
| >TP53-A83E- APAAPTPA   | 26    | >TP53-A83E- APAAPTEPE  | 355   | 329   |
| >TP53-A83E- APAAPTPAA  | 28    | >TP53-A83E- APAAPTEPEA | 63    | 35    |

|                        |     |                         |       |       |
|------------------------|-----|-------------------------|-------|-------|
| >TP53-A83E- APAAPTAAAF | 18  | >TP53-A83E- APAAPTPEAF  | 25    | 7     |
| >TP53-A83E- APAAPTAA   | 276 | >TP53-A83E- APAAPTPEA   | 1600  | 1324  |
| >TP53-A83E- APAAPTPA   | 66  | >TP53-A83E- APAAPTPE    | 5064  | 4998  |
| >TP53-A83E- APAAPTAA   | 25  | >TP53-A83E- APAAPTPEA   | 160   | 135   |
| >TP53-A83E- APAAPTAAAF | 33  | >TP53-A83E- APAAPTPEAF  | 47    | 14    |
| >TP53-A83E- APAPAAPTPA | 238 | >TP53-A83E- APAPAAPTPE  | 2249  | 2011  |
| >TP53-A83E- APAPAAPTPA | 27  | >TP53-A83E- APAPAAPTPE  | 62    | 35    |
| >TP53-A83E- APAPAAPTPA | 203 | >TP53-A83E- APAPAAPTPE  | 862   | 659   |
| >TP53-A83E- APAPAAPTPA | 376 | >TP53-A83E- APAPAAPTPE  | 13273 | 12897 |
| >TP53-A83E- APAPAAPTPA | 46  | >TP53-A83E- APAPAAPTPE  | 270   | 224   |
| >TP53-A84G- APAPAPSW   | 91  | >TP53-A84G- GPAPAPSW    | 736   | 645   |
| >TP53-A84G- APAPAPSWP  | 73  | >TP53-A84G- GPAPAPSWP   | 704   | 631   |
| >TP53-A84G- APAPAPSWP  | 41  | >TP53-A84G- GPAPAPSWP   | 130   | 89    |
| >TP53-A84G- APAPAPSW   | 51  | >TP53-A84G- GPAPAPSW    | 109   | 58    |
| >TP53-A84G- APAPAPSWP  | 390 | >TP53-A84G- GPAPAPSWP   | 1093  | 703   |
| >TP53-A84G- APAPAPSW   | 20  | >TP53-A84G- GPAPAPSW    | 39    | 19    |
| >TP53-A84G- AAPAPAPSW  | 136 | >TP53-A84G- AGPAPAPSW   | 1795  | 1659  |
| >TP53-A84G- AAPAPAPSW  | 380 | >TP53-A84G- AGPAPAPSW   | 5728  | 5348  |
| >TP53-A84G- AAPAPAPSW  | 62  | >TP53-A84G- AGPAPAPSW   | 1731  | 1669  |
| >TP53-A84G- AAPAPAPSW  | 124 | >TP53-A84G- AGPAPAPSW   | 1322  | 1198  |
| >TP53-A84G- AAPAPAPSW  | 4   | >TP53-A84G- AGPAPAPSW   | 14    | 10    |
| >TP53-A84G- APAPAAPTPA | 27  | >TP53-A84G- APAPAAPTPA  | 896   | 869   |
| >TP53-A84G- APAPAAPTPA | 203 | >TP53-A84G- APAPAAPTPA  | 427   | 224   |
| >TP53-A84G- APAPAAPTPA | 46  | >TP53-A84G- APAPAAPTPA  | 2068  | 2022  |
| >TP53-A84G- PAAPAPAPSV | 123 | >TP53-A84G- PAGPAPAPSV  | 684   | 561   |
| >TP53-A84G- PAAPAPAPSV | 188 | >TP53-A84G- PAGPAPAPSV  | 493   | 305   |
| >TP53-A84G- PAAPAPAPSV | 256 | >TP53-A84G- PAGPAPAPSV  | 1286  | 1030  |
| >TP53-A84G- TPAAPAPA   | 460 | >TP53-A84G- TPAGPAPA    | 692   | 232   |
| >TP53-A84G- TPAAPAPA   | 121 | >TP53-A84G- TPAGPAPA    | 97    | 24    |
| >TP53-A84G- TPAAPAPAPS | 296 | >TP53-A84G- TPAGPAPAPS  | 203   | 93    |
| >TP53-A84G- TPAAPAPA   | 352 | >TP53-A84G- TPAGPAPA    | 434   | 82    |
| >TP53-A84G- TPAAPAPAPS | 437 | >TP53-A84G- TPAGPAPAPS  | 538   | 101   |
| >TP53-A84G- TPAAPAPAPS | 33  | >TP53-A84G- TPAGPAPAPS  | 38    | 5     |
| >TP53-A84G- TPAAPAPA   | 25  | >TP53-A84G- TPAGPAPA    | 26    | 1     |
| >TP53-A84G- TPAAPAPAPS | 16  | >TP53-A84G- TPAGPAPAPS  | 17    | 1     |
| >TP53-A84G- PTPAAPAPA  | 441 | >TP53-A84G- PTPAGPAPA   | 3088  | 2647  |
| >TP53-A84G- APTPAAPA   | 74  | >TP53-A84G- APTPAGPA    | 45    | 29    |
| >TP53-A84G- APTPAAPAPA | 433 | >TP53-A84G- APTPAGPAPA  | 236   | 197   |
| >TP53-A84G- APTPAAPA   | 122 | >TP53-A84G- APTPAGPA    | 122   | 0     |
| >TP53-A84G- APTPAAPAPA | 157 | >TP53-A84G- APTPAGPAPA  | 145   | 12    |
| >TP53-A84G- AAPTAAAPA  | 298 | >TP53-A84G- AAPTAAAGPA  | 3625  | 3327  |
| >TP53-A84G- APAAPTAA   | 28  | >TP53-A84G- APAAPTAAAG  | 413   | 385   |
| >TP53-A84G- APAAPTAAAF | 18  | >TP53-A84G- APAAPTAAAGF | 14    | 4     |

|                        |      |                        |     |      |
|------------------------|------|------------------------|-----|------|
| >TP53-A84G- APAAPTPAA  | 276  | >TP53-A84G- APAAPTPAG  | 632 | 356  |
| >TP53-A84G- APAAPTPAA  | 25   | >TP53-A84G- APAAPTPAG  | 845 | 820  |
| >TP53-A84G- APAAPTPAAF | 33   | >TP53-A84G- APAAPTPAGF | 47  | 14   |
| >TP53-A84V- APAPAPSW   | 91   | >TP53-A84V- VPAPAPSW   | 189 | 98   |
| >TP53-A84V- APAPAPSWP  | 73   | >TP53-A84V- VPAPAPSWP  | 119 | 46   |
| >TP53-A84V- APAPAPSW   | 1044 | >TP53-A84V- VPAPAPSW   | 406 | 638  |
| >TP53-A84V- APAPAPSWP  | 41   | >TP53-A84V- VPAPAPSWP  | 91  | 50   |
| >TP53-A84V- APAPAPSW   | 51   | >TP53-A84V- VPAPAPSW   | 35  | 16   |
| >TP53-A84V- APAPAPSWP  | 390  | >TP53-A84V- VPAPAPSWP  | 985 | 595  |
| >TP53-A84V- APAPAPSW   | 20   | >TP53-A84V- VPAPAPSW   | 16  | 4    |
| >TP53-A84V- APAPAPSW   | 2595 | >TP53-A84V- VPAPAPSW   | 357 | 2238 |
| >TP53-A84V- AAPAPAPSW  | 136  | >TP53-A84V- AVPAPAPSW  | 28  | 108  |
| >TP53-A84V- AAPAPAPSW  | 859  | >TP53-A84V- AVPAPAPSW  | 157 | 702  |
| >TP53-A84V- AAPAPAPSW  | 1428 | >TP53-A84V- AVPAPAPSW  | 90  | 1338 |
| >TP53-A84V- AAPAPAPSW  | 380  | >TP53-A84V- AVPAPAPSW  | 97  | 283  |
| >TP53-A84V- AAPAPAPSW  | 1180 | >TP53-A84V- AVPAPAPSW  | 432 | 748  |
| >TP53-A84V- AAPAPAPSW  | 62   | >TP53-A84V- AVPAPAPSW  | 420 | 358  |
| >TP53-A84V- AAPAPAPSW  | 124  | >TP53-A84V- AVPAPAPSW  | 740 | 616  |
| >TP53-A84V- AAPAPAPSW  | 4    | >TP53-A84V- AVPAPAPSW  | 10  | 6    |
| >TP53-A84V- APAPAAPTPA | 5404 | >TP53-A84V- APAPAAPTPA | 75  | 5329 |
| >TP53-A84V- APAPAAPTPA | 3197 | >TP53-A84V- APAPAAPTPA | 218 | 2979 |
| >TP53-A84V- APAPAAPTPA | 27   | >TP53-A84V- APAPAAPTPA | 24  | 3    |
| >TP53-A84V- APAPAAPTPA | 203  | >TP53-A84V- APAPAAPTPA | 470 | 267  |
| >TP53-A84V- APAPAAPTPA | 46   | >TP53-A84V- APAPAAPTPA | 230 | 184  |
| >TP53-A84V- PAAPAPAPSV | 123  | >TP53-A84V- PAVPAPAPSV | 34  | 89   |
| >TP53-A84V- PAAPAPAPSV | 188  | >TP53-A84V- PAVPAPAPSV | 191 | 3    |
| >TP53-A84V- PAAPAPAPSV | 256  | >TP53-A84V- PAVPAPAPSV | 344 | 88   |
| >TP53-A84V- TPAAPAPA   | 460  | >TP53-A84V- TPAVPAPA   | 892 | 432  |
| >TP53-A84V- TPAAPAPA   | 121  | >TP53-A84V- TPAVPAPA   | 270 | 149  |
| >TP53-A84V- TPAAPAPAPS | 296  | >TP53-A84V- TPAVPAPAPS | 463 | 167  |
| >TP53-A84V- TPAAPAPA   | 352  | >TP53-A84V- TPAVPAPA   | 719 | 367  |
| >TP53-A84V- TPAAPAPAPS | 437  | >TP53-A84V- TPAVPAPAPS | 794 | 357  |
| >TP53-A84V- TPAAPAPAPS | 33   | >TP53-A84V- TPAVPAPAPS | 37  | 4    |
| >TP53-A84V- TPAAPAPA   | 25   | >TP53-A84V- TPAVPAPA   | 25  | 0    |
| >TP53-A84V- TPAAPAPAPS | 16   | >TP53-A84V- TPAVPAPAPS | 15  | 1    |
| >TP53-A84V- PTPAAPAPA  | 786  | >TP53-A84V- PTPAVPAPA  | 206 | 580  |
| >TP53-A84V- PTPAAPAPA  | 441  | >TP53-A84V- PTPAVPAPA  | 746 | 305  |
| >TP53-A84V- APTPAAPA   | 74   | >TP53-A84V- APTPAVPA   | 114 | 40   |
| >TP53-A84V- APTPAAPAPA | 433  | >TP53-A84V- APTPAVPAPA | 379 | 54   |
| >TP53-A84V- APTPAAPA   | 122  | >TP53-A84V- APTPAVPA   | 93  | 29   |
| >TP53-A84V- APTPAAPAPA | 157  | >TP53-A84V- APTPAVPAPA | 66  | 91   |
| >TP53-A84V- AAPTPAAPAF | 687  | >TP53-A84V- AAPTPAVPAF | 493 | 194  |
| >TP53-A84V- AAPTPAAPA  | 298  | >TP53-A84V- AAPTPAVPA  | 898 | 600  |

|                        |      |                        |     |      |
|------------------------|------|------------------------|-----|------|
| >TP53-A84V- APAAPTPAA  | 1180 | >TP53-A84V- APAAPTPAV  | 87  | 1093 |
| >TP53-A84V- APAAPTPAA  | 28   | >TP53-A84V- APAAPTPAV  | 26  | 2    |
| >TP53-A84V- APAAPTPAAF | 18   | >TP53-A84V- APAAPTPAVF | 19  | 1    |
| >TP53-A84V- APAAPTPAA  | 276  | >TP53-A84V- APAAPTPAV  | 550 | 274  |
| >TP53-A84V- APAAPTPAA  | 7585 | >TP53-A84V- APAAPTPAV  | 367 | 7218 |
| >TP53-A84V- APAAPTPAA  | 25   | >TP53-A84V- APAAPTPAV  | 92  | 67   |
| >TP53-A84V- APAAPTPAAF | 33   | >TP53-A84V- APAAPTPAVF | 26  | 7    |
| >TP53-A84V- APAAPTPAA  | 518  | >TP53-A84V- APAAPTPAV  | 484 | 34   |
| >TP53-A84V- PAPAAPTPAA | 7699 | >TP53-A84V- PAPAAPTPAV | 430 | 7269 |
| >TP53-A86V- APAPSWPL   | 12   | >TP53-A86V- VPAPSWPL   | 14  | 2    |
| >TP53-A86V- APAPSWPLSS | 292  | >TP53-A86V- VPAPSWPLSS | 705 | 413  |
| >TP53-A86V- APAPSWPL   | 196  | >TP53-A86V- VPAPSWPL   | 80  | 116  |
| >TP53-A86V- APAPSWPL   | 49   | >TP53-A86V- VPAPSWPL   | 129 | 80   |
| >TP53-A86V- APAPSWPLS  | 2575 | >TP53-A86V- VPAPSWPLS  | 479 | 2096 |
| >TP53-A86V- APAPSWPL   | 87   | >TP53-A86V- VPAPSWPL   | 281 | 194  |
| >TP53-A86V- PAPAPSWPL  | 1185 | >TP53-A86V- PVPAPSWPL  | 172 | 1013 |
| >TP53-A86V- PAPAPSWPL  | 9    | >TP53-A86V- PVPAPSWPL  | 39  | 30   |
| >TP53-A86V- APAAPTPAAF | 967  | >TP53-A86V- APAAPTPAAF | 75  | 892  |
| >TP53-A86V- APAAPTPAAF | 18   | >TP53-A86V- APAAPTPAAF | 17  | 1    |
| >TP53-A86V- APAAPTPAAF | 6812 | >TP53-A86V- APAAPTPAAF | 350 | 6462 |
| >TP53-A86V- APAAPTPAAF | 33   | >TP53-A86V- APAAPTPAAF | 144 | 111  |
| >TP53-A86V- APAPAPSWP  | 576  | >TP53-A86V- APVPAPSWP  | 213 | 363  |
| >TP53-A86V- APAPAPSW   | 91   | >TP53-A86V- APVPAPSW   | 382 | 291  |
| >TP53-A86V- APAPAPSWP  | 73   | >TP53-A86V- APVPAPSWP  | 126 | 53   |
| >TP53-A86V- APAPAPSW   | 745  | >TP53-A86V- APVPAPSW   | 178 | 567  |
| >TP53-A86V- APAPAPSWP  | 41   | >TP53-A86V- APVPAPSWP  | 43  | 2    |
| >TP53-A86V- APAPAPSW   | 51   | >TP53-A86V- APVPAPSW   | 34  | 17   |
| >TP53-A86V- APAPAPSWP  | 390  | >TP53-A86V- APVPAPSWP  | 583 | 193  |
| >TP53-A86V- APAPAPSW   | 20   | >TP53-A86V- APVPAPSW   | 17  | 3    |
| >TP53-A86V- AAPAPAPSW  | 136  | >TP53-A86V- AAPVPAPSW  | 303 | 167  |
| >TP53-A86V- AAPAPAPSW  | 380  | >TP53-A86V- AAPVPAPSW  | 986 | 606  |
| >TP53-A86V- AAPAPAPSW  | 62   | >TP53-A86V- AAPVPAPSW  | 68  | 6    |
| >TP53-A86V- AAPAPAPSW  | 124  | >TP53-A86V- AAPVPAPSW  | 339 | 215  |
| >TP53-A86V- AAPAPAPSW  | 4    | >TP53-A86V- AAPVPAPSW  | 6   | 2    |
| >TP53-A86V- PAAPAPAPSV | 123  | >TP53-A86V- PAAPVPAPSV | 320 | 197  |
| >TP53-A86V- PAAPAPAPSV | 188  | >TP53-A86V- PAAPVPAPSV | 220 | 32   |
| >TP53-A86V- PAAPAPAPSV | 256  | >TP53-A86V- PAAPVPAPSV | 144 | 112  |
| >TP53-A86V- TPAAPAPA   | 537  | >TP53-A86V- TPAAPVPA   | 469 | 68   |
| >TP53-A86V- TPAAPAPA   | 460  | >TP53-A86V- TPAAPVPA   | 678 | 218  |
| >TP53-A86V- TPAAPAPA   | 121  | >TP53-A86V- TPAAPVPA   | 183 | 62   |
| >TP53-A86V- TPAAPAPAPS | 296  | >TP53-A86V- TPAAPVPAPS | 465 | 169  |
| >TP53-A86V- TPAAPAPA   | 352  | >TP53-A86V- TPAAPVPA   | 351 | 1    |
| >TP53-A86V- TPAAPAPAPS | 437  | >TP53-A86V- TPAAPVPAPS | 552 | 115  |

|                        |       |                        |      |       |
|------------------------|-------|------------------------|------|-------|
| >TP53-A86V- TPAAPAPAPS | 33    | >TP53-A86V- TPAAPVPAPS | 29   | 4     |
| >TP53-A86V- TPAAPAPA   | 25    | >TP53-A86V- TPAAPVPA   | 21   | 4     |
| >TP53-A86V- TPAAPAPAPS | 16    | >TP53-A86V- TPAAPVPAPS | 11   | 5     |
| >TP53-A86V- PTPAAPAPA  | 441   | >TP53-A86V- PTPAAPVPA  | 1208 | 767   |
| >TP53-A86V- APTPAAPA   | 74    | >TP53-A86V- APTPAAPV   | 41   | 33    |
| >TP53-A86V- APTPAAPAPA | 433   | >TP53-A86V- APTPAAPVPA | 714  | 281   |
| >TP53-A86V- APTPAAPA   | 122   | >TP53-A86V- APTPAAPV   | 716  | 594   |
| >TP53-A86V- APTPAAPAPA | 157   | >TP53-A86V- APTPAAPVPA | 359  | 202   |
| >TP53-A86V- APTPAAPA   | 21422 | >TP53-A86V- APTPAAPV   | 486  | 20936 |
| >TP53-A86V- AAPTAAAPA  | 3041  | >TP53-A86V- AAPTAAAPV  | 426  | 2615  |
| >TP53-A86V- AAPTAAAPA  | 3411  | >TP53-A86V- AAPTAAAPV  | 313  | 3098  |
| >TP53-A86V- AAPTAAAPA  | 557   | >TP53-A86V- AAPTAAAPV  | 35   | 522   |
| >TP53-A86V- AAPTAAAPA  | 298   | >TP53-A86V- AAPTAAAPV  | 12   | 286   |
| >TP53-A86V- PAAPTPAAPA | 5277  | >TP53-A86V- PAAPTPAAPV | 240  | 5037  |
| >TP53-C124CCTYSPALNK   | 30    | >TP53-C124CCTYSPALNK   | 28   | 2     |
| >TP53-C124CCTYSPALNK   | 11    | >TP53-C124CCTYSPALNK   | 7    | 4     |
| >TP53-C124CCTYSPALNKM  | 343   | >TP53-C124CCTYSPALNKM  | 2888 | 2545  |
| >TP53-C124CCTYSPALNKM  | 63    | >TP53-C124CCTYSPALNKM  | 276  | 213   |
| >TP53-C124CCTYSPALNKM  | 380   | >TP53-C124CCTYSPALNKM  | 2343 | 1963  |
| >TP53-C124CCTYSPALNKM  | 246   | >TP53-C124CCTYSPALNKM  | 2122 | 1876  |
| >TP53-C124CCTYSPALNK   | 215   | >TP53-C124CCTYSPALNK   | 192  | 23    |
| >TP53-C124CCTYSPALNKM  | 767   | >TP53-C124CCTYSPALNKM  | 174  | 593   |
| >TP53-C124CCTYSPALNK   | 30    | >TP53-C124CCTYSPALNK   | 136  | 106   |
| >TP53-C124CCTYSPALNKM  | 488   | >TP53-C124CCTYSPALNKM  | 1960 | 1472  |
| >TP53-C124CCTYSPALNKM  | 23    | >TP53-C124CCTYSPALNKM  | 45   | 22    |
| >TP53-C124CCTYSPALNKM  | 24    | >TP53-C124CCTYSPALNKM  | 14   | 10    |
| >TP53-C124CCTYSPALNKM  | 5     | >TP53-C124CCTYSPALNKM  | 3    | 2     |
| >TP53-C124CCTYSPALNKM  | 76    | >TP53-C124CCTYSPALNKM  | 173  | 97    |
| >TP53-C124CCTYSPALNKM  | 146   | >TP53-C124CCTYSPALNKM  | 310  | 164   |
| >TP53-C124CCTYSPALNKM  | 30    | >TP53-C124CCTYSPALNKM  | 27   | 3     |
| >TP53-C124CCTYSPALNKM  | 13    | >TP53-C124CCTYSPALNKM  | 3    | 10    |
| >TP53-C124CCTYSPALNK   | 572   | >TP53-C124CCTYSPALNK   | 112  | 460   |
| >TP53-C124CCTYSPALNKM  | 358   | >TP53-C124CCTYSPALNKM  | 3846 | 3488  |
| >TP53-C124CTCTYSPALNK  | 453   | >TP53-C124CTGTYSPALNK  | 1081 | 628   |
| >TP53-C124CTCTYSPA     | 415   | >TP53-C124CTGTYSPA     | 1133 | 718   |
| >TP53-C124CTCTYSPAL    | 981   | >TP53-C124CTGTYSPAL    | 135  | 846   |
| >TP53-C124CTCTYSPAL    | 397   | >TP53-C124CTGTYSPAL    | 1202 | 805   |
| >TP53-C124CTCTYSPALN   | 80    | >TP53-C124CTGTYSPALN   | 85   | 5     |
| >TP53-C124CTCTYSPALN   | 14    | >TP53-C124CTGTYSPALN   | 22   | 8     |
| >TP53-C124CTCTYSPALN   | 146   | >TP53-C124CTGTYSPALN   | 530  | 384   |
| >TP53-C124CTCTYSPALN   | 490   | >TP53-C124CTGTYSPALN   | 1373 | 883   |
| >TP53-C124CTCTYSPAL    | 12    | >TP53-C124CTGTYSPAL    | 44   | 32    |
| >TP53-C124CTCTYSPAL    | 66    | >TP53-C124CTGTYSPAL    | 61   | 5     |



|                         |      |                        |      |      |
|-------------------------|------|------------------------|------|------|
| >TP53-C124C SVTCTYSPA   | 118  | >TP53-C124C SVTGTYSPA  | 198  | 80   |
| >TP53-C124C SVTCTYSPA   | 468  | >TP53-C124C SVTGTYSPA  | 390  | 78   |
| >TP53-C124C SVTCTYSPAL  | 268  | >TP53-C124C SVTGTYSPAL | 209  | 59   |
| >TP53-C124C SVTCTYSPA   | 5164 | >TP53-C124C SVTGTYSPA  | 421  | 4743 |
| >TP53-C124C SVTCTYSPAL  | 1003 | >TP53-C124C SVTGTYSPAL | 71   | 932  |
| >TP53-C124C SVTCTYSPAL  | 1465 | >TP53-C124C SVTGTYSPAL | 413  | 1052 |
| >TP53-C124C SVTCTYSPA   | 241  | >TP53-C124C SVTGTYSPA  | 389  | 148  |
| >TP53-C124C SVTCTYSPA   | 45   | >TP53-C124C SVTGTYSPA  | 79   | 34   |
| >TP53-C124C SVTCTYSPAL  | 149  | >TP53-C124C SVTGTYSPAL | 349  | 200  |
| >TP53-C124C KSVTCTYSPA  | 396  | >TP53-C124C KSVTGTYSPA | 308  | 88   |
| >TP53-C124C KSVTCTYSPA  | 149  | >TP53-C124C KSVTGTYSPA | 82   | 67   |
| >TP53-C124C KSVTCTYSPA  | 488  | >TP53-C124C KSVTGTYSPA | 257  | 231  |
| >TP53-C124C KSVTCTYSPA  | 107  | >TP53-C124C KSVTGTYSPA | 77   | 30   |
| >TP53-C124C KSVTCTYSPA  | 349  | >TP53-C124C KSVTGTYSPA | 937  | 588  |
| >TP53-C124C KSVTCTYSPA  | 89   | >TP53-C124C KSVTGTYSPA | 114  | 25   |
| >TP53-C124C KSVTCTYSPA  | 6    | >TP53-C124C KSVTGTYSPA | 5    | 1    |
| >TP53-C124C KSVTCTYSPA  | 669  | >TP53-C124C KSVTGTYSPA | 490  | 179  |
| >TP53-C124C KSVTCTYSPA  | 113  | >TP53-C124C KSVTGTYSPA | 105  | 8    |
| >TP53-C124C KSVTCTYSPA  | 198  | >TP53-C124C KSVTGTYSPA | 392  | 194  |
| >TP53-C124C AKSVTCTY    | 888  | >TP53-C124C AKSVTGTY   | 210  | 678  |
| >TP53-C124C AKSVTCTY    | 8    | >TP53-C124C AKSVTGTY   | 15   | 7    |
| >TP53-C124C AKSVTCTYS   | 640  | >TP53-C124C AKSVTGTYS  | 379  | 261  |
| >TP53-C124C AKSVTCTYSP  | 483  | >TP53-C124C AKSVTGTYSP | 442  | 41   |
| >TP53-C124C AKSVTCTYSP, | 56   | >TP53-C124C AKSVTGTYSP | 47   | 9    |
| >TP53-C124C TAKSVTCTY   | 312  | >TP53-C124C TAKSVTGTY  | 29   | 283  |
| >TP53-C124C TAKSVTCTY   | 247  | >TP53-C124C TAKSVTGTY  | 413  | 166  |
| >TP53-C124C TAKSVTCTY   | 78   | >TP53-C124C TAKSVTGTY  | 163  | 85   |
| >TP53-C124C TAKSVTCTY   | 430  | >TP53-C124C TAKSVTGTY  | 3243 | 2813 |
| >TP53-C124C TAKSVTCTY   | 265  | >TP53-C124C TAKSVTGTY  | 667  | 402  |
| >TP53-C124C TAKSVTCTY   | 100  | >TP53-C124C TAKSVTGTY  | 105  | 5    |
| >TP53-C124C TAKSVTCTY   | 336  | >TP53-C124C TAKSVTGTY  | 55   | 281  |
| >TP53-C124C GTAKSVTCTY  | 682  | >TP53-C124C GTAKSVTGTY | 293  | 389  |
| >TP53-C124C GTAKSVTCTY  | 466  | >TP53-C124C GTAKSVTGTY | 1400 | 934  |
| >TP53-C124C GTAKSVTCTY  | 518  | >TP53-C124C GTAKSVTGTY | 365  | 153  |
| >TP53-C124C GTAKSVTCTY  | 521  | >TP53-C124C GTAKSVTGTY | 169  | 352  |
| >TP53-C124C GTAKSVTCTY  | 122  | >TP53-C124C GTAKSVTGTY | 171  | 49   |
| >TP53-C124C GTAKSVTCTY  | 69   | >TP53-C124C GTAKSVTGTY | 28   | 41   |
| >TP53-C124C GTAKSVTCTY  | 71   | >TP53-C124C GTAKSVTGTY | 108  | 37   |
| >TP53-C124C GTAKSVTCTY  | 461  | >TP53-C124C GTAKSVTGTY | 1711 | 1250 |
| >TP53-C124C GTAKSVTCTY  | 8    | >TP53-C124C GTAKSVTGTY | 10   | 2    |
| >TP53-C124C GTAKSVTCTY  | 296  | >TP53-C124C GTAKSVTGTY | 1268 | 972  |
| >TP53-C124C GTAKSVTCTY  | 39   | >TP53-C124C GTAKSVTGTY | 28   | 11   |
| >TP53-C124C GTAKSVTCTY  | 143  | >TP53-C124C GTAKSVTGTY | 150  | 7    |

|                        |       |                        |      |       |
|------------------------|-------|------------------------|------|-------|
| >TP53-C124C SGTAKSVTCT | 624   | >TP53-C124C SGTAKSVTGT | 127  | 497   |
| >TP53-C124C SGTAKSVTCT | 917   | >TP53-C124C SGTAKSVTGT | 313  | 604   |
| >TP53-C124C SGTAKSVTCT | 374   | >TP53-C124C SGTAKSVTGT | 230  | 144   |
| >TP53-C124F CTYSPALNK  | 30    | >TP53-C124F RTYSPALNK  | 24   | 6     |
| >TP53-C124F CTYSPALNK  | 11    | >TP53-C124F RTYSPALNK  | 8    | 3     |
| >TP53-C124F CTYSPALNKN | 343   | >TP53-C124F RTYSPALNKN | 236  | 107   |
| >TP53-C124F CTYSPALNKN | 63    | >TP53-C124F RTYSPALNKN | 101  | 38    |
| >TP53-C124F CTYSPALNKN | 380   | >TP53-C124F RTYSPALNKN | 696  | 316   |
| >TP53-C124F CTYSPALNKN | 246   | >TP53-C124F RTYSPALNKN | 404  | 158   |
| >TP53-C124F CTYSPALNK  | 215   | >TP53-C124F RTYSPALNK  | 7    | 208   |
| >TP53-C124F CTYSPALNKN | 7650  | >TP53-C124F RTYSPALNKN | 233  | 7417  |
| >TP53-C124F CTYSPALNK  | 2398  | >TP53-C124F RTYSPALNK  | 118  | 2280  |
| >TP53-C124F CTYSPALNKN | 9946  | >TP53-C124F RTYSPALNKN | 144  | 9802  |
| >TP53-C124F CTYSPALNKN | 767   | >TP53-C124F RTYSPALNKN | 11   | 756   |
| >TP53-C124F CTYSPALNK  | 30    | >TP53-C124F RTYSPALNK  | 145  | 115   |
| >TP53-C124F CTYSPALNKN | 488   | >TP53-C124F RTYSPALNKN | 563  | 75    |
| >TP53-C124F CTYSPALNKN | 2170  | >TP53-C124F RTYSPALNKN | 134  | 2036  |
| >TP53-C124F CTYSPALNKN | 610   | >TP53-C124F RTYSPALNKN | 92   | 518   |
| >TP53-C124F CTYSPALNKN | 23    | >TP53-C124F RTYSPALNKN | 5    | 18    |
| >TP53-C124F CTYSPALN   | 6176  | >TP53-C124F RTYSPALN   | 218  | 5958  |
| >TP53-C124F CTYSPALNK  | 6036  | >TP53-C124F RTYSPALNK  | 88   | 5948  |
| >TP53-C124F CTYSPALNKN | 24    | >TP53-C124F RTYSPALNKN | 4    | 20    |
| >TP53-C124F CTYSPALNKN | 5     | >TP53-C124F RTYSPALNKN | 2    | 3     |
| >TP53-C124F CTYSPALNKN | 5234  | >TP53-C124F RTYSPALNKN | 254  | 4980  |
| >TP53-C124F CTYSPALNKN | 1345  | >TP53-C124F RTYSPALNKN | 97   | 1248  |
| >TP53-C124F CTYSPALNKN | 1669  | >TP53-C124F RTYSPALNKN | 71   | 1598  |
| >TP53-C124F CTYSPALNKN | 627   | >TP53-C124F RTYSPALNKN | 48   | 579   |
| >TP53-C124F CTYSPALNKN | 76    | >TP53-C124F RTYSPALNKN | 57   | 19    |
| >TP53-C124F CTYSPALNKN | 146   | >TP53-C124F RTYSPALNKN | 102  | 44    |
| >TP53-C124F CTYSPALNKN | 30    | >TP53-C124F RTYSPALNKN | 16   | 14    |
| >TP53-C124F CTYSPALNKN | 13    | >TP53-C124F RTYSPALNKN | 3    | 10    |
| >TP53-C124F CTYSPALNK  | 572   | >TP53-C124F RTYSPALNK  | 404  | 168   |
| >TP53-C124F CTYSPALNKN | 358   | >TP53-C124F RTYSPALNKN | 465  | 107   |
| >TP53-C124F TCTYSPAL   | 7184  | >TP53-C124F TRTYSPAL   | 374  | 6810  |
| >TP53-C124F TCTYSPALNK | 32368 | >TP53-C124F TRTYSPALNK | 403  | 31965 |
| >TP53-C124F TCTYSPAL   | 4667  | >TP53-C124F TRTYSPAL   | 56   | 4611  |
| >TP53-C124F TCTYSPALNK | 453   | >TP53-C124F TRTYSPALNK | 4972 | 4519  |
| >TP53-C124F VTCTYSPA   | 415   | >TP53-C124F VTRTYSPA   | 241  | 174   |
| >TP53-C124F VTCTYSPAL  | 981   | >TP53-C124F VTRTYSPAL  | 213  | 768   |
| >TP53-C124F VTCTYSPAL  | 397   | >TP53-C124F VTRTYSPAL  | 2580 | 2183  |
| >TP53-C124F VTCTYSPALN | 80    | >TP53-C124F VTRTYSPALN | 48   | 32    |
| >TP53-C124F VTCTYSPALN | 14    | >TP53-C124F VTRTYSPALN | 88   | 74    |
| >TP53-C124F VTCTYSPA   | 1512  | >TP53-C124F VTRTYSPA   | 9    | 1503  |

|                        |      |                        |      |      |
|------------------------|------|------------------------|------|------|
| >TP53-C124FVTCTYSPAL   | 2229 | >TP53-C124FVTRTYSPAL   | 11   | 2218 |
| >TP53-C124FVTCTYSPALN  | 9480 | >TP53-C124FVTRTYSPALN  | 205  | 9275 |
| >TP53-C124FVTCTYSPALN  | 146  | >TP53-C124FVTRTYSPALN  | 4    | 142  |
| >TP53-C124FVTCTYSPALN  | 490  | >TP53-C124FVTRTYSPALN  | 2044 | 1554 |
| >TP53-C124FVTCTYSPAL   | 1053 | >TP53-C124FVTRTYSPAL   | 219  | 834  |
| >TP53-C124FVTCTYSPAL   | 12   | >TP53-C124FVTRTYSPAL   | 4    | 8    |
| >TP53-C124FVTCTYSPAL   | 66   | >TP53-C124FVTRTYSPAL   | 109  | 43   |
| >TP53-C124FVTCTYSPAL   | 951  | >TP53-C124FVTRTYSPAL   | 101  | 850  |
| >TP53-C124FSVTCTYSPA   | 118  | >TP53-C124FSVTRTYSPA   | 420  | 302  |
| >TP53-C124FSVTCTYSPA   | 468  | >TP53-C124FSVTRTYSPA   | 973  | 505  |
| >TP53-C124FSVTCTYSPAL  | 268  | >TP53-C124FSVTRTYSPAL  | 581  | 313  |
| >TP53-C124FSVTCTYSPAL  | 1003 | >TP53-C124FSVTRTYSPAL  | 305  | 698  |
| >TP53-C124FSVTCTYSPA   | 241  | >TP53-C124FSVTRTYSPA   | 72   | 169  |
| >TP53-C124FSVTCTYSPAL  | 1005 | >TP53-C124FSVTRTYSPAL  | 385  | 620  |
| >TP53-C124FSVTCTYSPA   | 45   | >TP53-C124FSVTRTYSPA   | 232  | 187  |
| >TP53-C124FSVTCTYSPAL  | 149  | >TP53-C124FSVTRTYSPAL  | 485  | 336  |
| >TP53-C124FKSVTCTYSPA  | 710  | >TP53-C124FKSVTRTYSPA  | 281  | 429  |
| >TP53-C124FKSVTCTYSPA  | 396  | >TP53-C124FKSVTRTYSPA  | 515  | 119  |
| >TP53-C124FKSVTCTYSPA  | 149  | >TP53-C124FKSVTRTYSPA  | 46   | 103  |
| >TP53-C124FKSVTCTYSPA  | 488  | >TP53-C124FKSVTRTYSPA  | 171  | 317  |
| >TP53-C124FKSVTCTYSPA  | 107  | >TP53-C124FKSVTRTYSPA  | 70   | 37   |
| >TP53-C124FKSVTCTYSPA  | 349  | >TP53-C124FKSVTRTYSPA  | 651  | 302  |
| >TP53-C124FKSVTCTYSPA  | 89   | >TP53-C124FKSVTRTYSPA  | 122  | 33   |
| >TP53-C124FKSVTCTYSPA  | 6    | >TP53-C124FKSVTRTYSPA  | 6    | 0    |
| >TP53-C124FKSVTCTYSPA  | 113  | >TP53-C124FKSVTRTYSPA  | 247  | 134  |
| >TP53-C124FKSVTCTYSPA  | 198  | >TP53-C124FKSVTRTYSPA  | 419  | 221  |
| >TP53-C124FAKSVTCTY    | 8    | >TP53-C124FAKSVTRTY    | 7    | 1    |
| >TP53-C124FAKSVTCTYSP  | 483  | >TP53-C124FAKSVTRTYSP  | 592  | 109  |
| >TP53-C124FAKSVTCTYSP, | 56   | >TP53-C124FAKSVTRTYSP, | 52   | 4    |
| >TP53-C124FTAKSVTCTY   | 312  | >TP53-C124FTAKSVTRTY   | 236  | 76   |
| >TP53-C124FTAKSVTCTY   | 247  | >TP53-C124FTAKSVTRTY   | 1085 | 838  |
| >TP53-C124FTAKSVTCTY   | 78   | >TP53-C124FTAKSVTRTY   | 256  | 178  |
| >TP53-C124FTAKSVTCTY   | 430  | >TP53-C124FTAKSVTRTY   | 851  | 421  |
| >TP53-C124FTAKSVTCTY   | 265  | >TP53-C124FTAKSVTRTY   | 523  | 258  |
| >TP53-C124FTAKSVTCTY   | 100  | >TP53-C124FTAKSVTRTY   | 165  | 65   |
| >TP53-C124FTAKSVTCTY   | 746  | >TP53-C124FTAKSVTRTY   | 342  | 404  |
| >TP53-C124FTAKSVTCTY   | 336  | >TP53-C124FTAKSVTRTY   | 146  | 190  |
| >TP53-C124FTAKSVTCTY   | 1427 | >TP53-C124FTAKSVTRTY   | 227  | 1200 |
| >TP53-C124FGTAKSVTCTY  | 682  | >TP53-C124FGTAKSVTRTY  | 384  | 298  |
| >TP53-C124FGTAKSVTCTY  | 466  | >TP53-C124FGTAKSVTRTY  | 1294 | 828  |
| >TP53-C124FGTAKSVTCTY  | 521  | >TP53-C124FGTAKSVTRTY  | 366  | 155  |
| >TP53-C124FGTAKSVTCTY  | 122  | >TP53-C124FGTAKSVTRTY  | 136  | 14   |
| >TP53-C124FGTAKSVTCTY  | 69   | >TP53-C124FGTAKSVTRTY  | 171  | 102  |

|                        |       |                        |      |       |
|------------------------|-------|------------------------|------|-------|
| >TP53-C124F GTAKSVTC   | 22167 | >TP53-C124F GTAKSVTR   | 95   | 22072 |
| >TP53-C124F GTAKSVTC   | 28923 | >TP53-C124F GTAKSVTR   | 29   | 28894 |
| >TP53-C124F GTAKSVTCTY | 71    | >TP53-C124F GTAKSVTRTY | 154  | 83    |
| >TP53-C124F GTAKSVTCTY | 461   | >TP53-C124F GTAKSVTRTY | 885  | 424   |
| >TP53-C124F GTAKSVTCTY | 8     | >TP53-C124F GTAKSVTRTY | 9    | 1     |
| >TP53-C124F GTAKSVTCTY | 296   | >TP53-C124F GTAKSVTRTY | 2061 | 1765  |
| >TP53-C124F GTAKSVTCT  | 3065  | >TP53-C124F GTAKSVTRT  | 474  | 2591  |
| >TP53-C124F GTAKSVTCTY | 39    | >TP53-C124F GTAKSVTRTY | 61   | 22    |
| >TP53-C124F GTAKSVTCTY | 143   | >TP53-C124F GTAKSVTRTY | 61   | 82    |
| >TP53-C124F GTAKSVTC   | 11243 | >TP53-C124F GTAKSVTR   | 134  | 11109 |
| >TP53-C124F SGTAKSVTCT | 374   | >TP53-C124F SGTAKSVTRT | 118  | 256   |
| >TP53-C124F HSGTAKSVTC | 32934 | >TP53-C124F HSGTAKSVTR | 221  | 32713 |
| >TP53-C124F HSGTAKSVTC | 35366 | >TP53-C124F HSGTAKSVTR | 75   | 35291 |
| >TP53-C124F HSGTAKSVTC | 35815 | >TP53-C124F HSGTAKSVTR | 201  | 35614 |
| >TP53-C124S CTYSPALNKM | 1199  | >TP53-C124S STYSPALNKM | 353  | 846   |
| >TP53-C124S CTYSPALNK  | 30    | >TP53-C124S STYSPALNK  | 27   | 3     |
| >TP53-C124S CTYSPALNK  | 11    | >TP53-C124S STYSPALNK  | 6    | 5     |
| >TP53-C124S CTYSPALNKM | 343   | >TP53-C124S STYSPALNKM | 1558 | 1215  |
| >TP53-C124S CTYSPALNKM | 63    | >TP53-C124S STYSPALNKM | 21   | 42    |
| >TP53-C124S CTYSPALNKM | 380   | >TP53-C124S STYSPALNKM | 104  | 276   |
| >TP53-C124S CTYSPALNKM | 246   | >TP53-C124S STYSPALNKM | 271  | 25    |
| >TP53-C124S CTYSPALNK  | 215   | >TP53-C124S STYSPALNK  | 35   | 180   |
| >TP53-C124S CTYSPALNKM | 767   | >TP53-C124S STYSPALNKM | 59   | 708   |
| >TP53-C124S CTYSPALNK  | 30    | >TP53-C124S STYSPALNK  | 23   | 7     |
| >TP53-C124S CTYSPALNKM | 488   | >TP53-C124S STYSPALNKM | 46   | 442   |
| >TP53-C124S CTYSPALNKM | 2170  | >TP53-C124S STYSPALNKM | 320  | 1850  |
| >TP53-C124S CTYSPALNKM | 2628  | >TP53-C124S STYSPALNKM | 390  | 2238  |
| >TP53-C124S CTYSPALNKM | 23    | >TP53-C124S STYSPALNKM | 16   | 7     |
| >TP53-C124S CTYSPALNKM | 24    | >TP53-C124S STYSPALNKM | 8    | 16    |
| >TP53-C124S CTYSPALNKM | 5     | >TP53-C124S STYSPALNKM | 3    | 2     |
| >TP53-C124S CTYSPALNKM | 76    | >TP53-C124S STYSPALNKM | 49   | 27    |
| >TP53-C124S CTYSPALNKM | 146   | >TP53-C124S STYSPALNKM | 87   | 59    |
| >TP53-C124S CTYSPALNKM | 30    | >TP53-C124S STYSPALNKM | 18   | 12    |
| >TP53-C124S CTYSPALNKM | 13    | >TP53-C124S STYSPALNKM | 3    | 10    |
| >TP53-C124S CTYSPALNK  | 572   | >TP53-C124S STYSPALNK  | 85   | 487   |
| >TP53-C124S CTYSPALNKM | 358   | >TP53-C124S STYSPALNKM | 955  | 597   |
| >TP53-C124S TCTYSPALNK | 1144  | >TP53-C124S STYSPALNK  | 86   | 1058  |
| >TP53-C124S TCTYSPALNK | 807   | >TP53-C124S STYSPALNK  | 12   | 795   |
| >TP53-C124S TCTYSPALNK | 2112  | >TP53-C124S STYSPALNKI | 381  | 1731  |
| >TP53-C124S TCTYSPALNK | 3671  | >TP53-C124S STYSPALNK  | 411  | 3260  |
| >TP53-C124S TCTYSPALNK | 4775  | >TP53-C124S STYSPALNK  | 65   | 4710  |
| >TP53-C124S TCTYSPAL   | 17520 | >TP53-C124S STYSPAL    | 43   | 17477 |
| >TP53-C124S TCTYSPALNK | 16467 | >TP53-C124S STYSPALNKI | 71   | 16396 |

|                         |       |                         |     |       |
|-------------------------|-------|-------------------------|-----|-------|
| >TP53-C124S TCTYSPALNK  | 8681  | >TP53-C124S TSTYSPALNKI | 102 | 8579  |
| >TP53-C124S TCTYSPAL    | 10878 | >TP53-C124S TSTYSPAL    | 143 | 10735 |
| >TP53-C124S TCTYSPALNK  | 453   | >TP53-C124S TSTYSPALNKI | 59  | 394   |
| >TP53-C124S TCTYSPALNK  | 6825  | >TP53-C124S TSTYSPALNK  | 382 | 6443  |
| >TP53-C124S VTCTYSPA    | 415   | >TP53-C124S VTSTYSPA    | 462 | 47    |
| >TP53-C124S VTCTYSPAL   | 981   | >TP53-C124S VTSTYSPAL   | 364 | 617   |
| >TP53-C124S VTCTYSPAL   | 2627  | >TP53-C124S VTSTYSPAL   | 272 | 2355  |
| >TP53-C124S VTCTYSPA    | 1658  | >TP53-C124S VTSTYSPA    | 360 | 1298  |
| >TP53-C124S VTCTYSPAL   | 397   | >TP53-C124S VTSTYSPAL   | 289 | 108   |
| >TP53-C124S VTCTYSPALN  | 80    | >TP53-C124S VTSTYSPALN  | 48  | 32    |
| >TP53-C124S VTCTYSPALN  | 14    | >TP53-C124S VTSTYSPALN  | 11  | 3     |
| >TP53-C124S VTCTYSPALN  | 146   | >TP53-C124S VTSTYSPALN  | 112 | 34    |
| >TP53-C124S VTCTYSPALN  | 490   | >TP53-C124S VTSTYSPALN  | 237 | 253   |
| >TP53-C124S VTCTYSPA    | 2180  | >TP53-C124S VTSTYSPA    | 381 | 1799  |
| >TP53-C124S VTCTYSPAL   | 1053  | >TP53-C124S VTSTYSPAL   | 490 | 563   |
| >TP53-C124S VTCTYSPAL   | 12    | >TP53-C124S VTSTYSPAL   | 9   | 3     |
| >TP53-C124S VTCTYSPAL   | 66    | >TP53-C124S VTSTYSPAL   | 22  | 44    |
| >TP53-C124S VTCTYSPAL   | 951   | >TP53-C124S VTSTYSPAL   | 374 | 577   |
| >TP53-C124S VTCTYSPALN  | 859   | >TP53-C124S VTSTYSPALN  | 392 | 467   |
| >TP53-C124S SVTCTYSPAL  | 874   | >TP53-C124S SVTSTYSPAL  | 301 | 573   |
| >TP53-C124S SVTCTYSPA   | 118   | >TP53-C124S SVTSTYSPA   | 136 | 18    |
| >TP53-C124S SVTCTYSPA   | 468   | >TP53-C124S SVTSTYSPA   | 517 | 49    |
| >TP53-C124S SVTCTYSPAL  | 268   | >TP53-C124S SVTSTYSPAL  | 306 | 38    |
| >TP53-C124S SVTCTYSPAL  | 1003  | >TP53-C124S SVTSTYSPAL  | 265 | 738   |
| >TP53-C124S SVTCTYSPA   | 241   | >TP53-C124S SVTSTYSPA   | 263 | 22    |
| >TP53-C124S SVTCTYSPA   | 45    | >TP53-C124S SVTSTYSPA   | 103 | 58    |
| >TP53-C124S SVTCTYSPAL  | 149   | >TP53-C124S SVTSTYSPAL  | 196 | 47    |
| >TP53-C124S KSVTCTYSPAI | 396   | >TP53-C124S KSVTSTYSPAI | 526 | 130   |
| >TP53-C124S KSVTCTYSPA  | 149   | >TP53-C124S KSVTSTYSPA  | 44  | 105   |
| >TP53-C124S KSVTCTYSPAI | 488   | >TP53-C124S KSVTSTYSPAI | 145 | 343   |
| >TP53-C124S KSVTCTYSPAI | 107   | >TP53-C124S KSVTSTYSPAI | 103 | 4     |
| >TP53-C124S KSVTCTYSPA  | 349   | >TP53-C124S KSVTSTYSPA  | 190 | 159   |
| >TP53-C124S KSVTCTYSPAI | 89    | >TP53-C124S KSVTSTYSPAI | 40  | 49    |
| >TP53-C124S KSVTCTYSPA  | 1612  | >TP53-C124S KSVTSTYSPA  | 393 | 1219  |
| >TP53-C124S KSVTCTYSPAI | 6     | >TP53-C124S KSVTSTYSPAI | 4   | 2     |
| >TP53-C124S KSVTCTYSPAI | 113   | >TP53-C124S KSVTSTYSPAI | 69  | 44    |
| >TP53-C124S KSVTCTYSPAI | 198   | >TP53-C124S KSVTSTYSPAI | 126 | 72    |
| >TP53-C124S AKSVTCTY    | 888   | >TP53-C124S AKSVTSTY    | 274 | 614   |
| >TP53-C124S AKSVTCTY    | 8     | >TP53-C124S AKSVTSTY    | 4   | 4     |
| >TP53-C124S AKSVTCTYS   | 640   | >TP53-C124S AKSVTSTYS   | 423 | 217   |
| >TP53-C124S AKSVTCTYSP  | 483   | >TP53-C124S AKSVTSTYSP  | 248 | 235   |
| >TP53-C124S AKSVTCTYSP, | 56    | >TP53-C124S AKSVTSTYSP/ | 37  | 19    |
| >TP53-C124S AKSVTCTY    | 1329  | >TP53-C124S AKSVTSTY    | 460 | 869   |

|                       |      |                       |     |      |
|-----------------------|------|-----------------------|-----|------|
| >TP53-C124STAKSVTCTY  | 312  | >TP53-C124STAKSVTSTY  | 49  | 263  |
| >TP53-C124STAKSVTCTY  | 247  | >TP53-C124STAKSVTSTY  | 128 | 119  |
| >TP53-C124STAKSVTCTY  | 78   | >TP53-C124STAKSVTSTY  | 97  | 19   |
| >TP53-C124STAKSVTCTY  | 2049 | >TP53-C124STAKSVTSTY  | 448 | 1601 |
| >TP53-C124STAKSVTCTY  | 430  | >TP53-C124STAKSVTSTY  | 158 | 272  |
| >TP53-C124STAKSVTCTY  | 265  | >TP53-C124STAKSVTSTY  | 132 | 133  |
| >TP53-C124STAKSVTCTY  | 100  | >TP53-C124STAKSVTSTY  | 47  | 53   |
| >TP53-C124STAKSVTCTY  | 336  | >TP53-C124STAKSVTSTY  | 6   | 330  |
| >TP53-C124STAKSVTCTY  | 1427 | >TP53-C124STAKSVTSTY  | 418 | 1009 |
| >TP53-C124SGTAKSVTCTY | 682  | >TP53-C124SGTAKSVTSTY | 194 | 488  |
| >TP53-C124SGTAKSVTCTY | 466  | >TP53-C124SGTAKSVTSTY | 441 | 25   |
| >TP53-C124SGTAKSVTCTY | 518  | >TP53-C124SGTAKSVTSTY | 162 | 356  |
| >TP53-C124SGTAKSVTCTY | 775  | >TP53-C124SGTAKSVTSTY | 361 | 414  |
| >TP53-C124SGTAKSVTCTY | 521  | >TP53-C124SGTAKSVTSTY | 147 | 374  |
| >TP53-C124SGTAKSVTCTY | 122  | >TP53-C124SGTAKSVTSTY | 152 | 30   |
| >TP53-C124SGTAKSVTCTY | 69   | >TP53-C124SGTAKSVTSTY | 54  | 15   |
| >TP53-C124SGTAKSVTCTY | 71   | >TP53-C124SGTAKSVTSTY | 60  | 11   |
| >TP53-C124SGTAKSVTCTY | 461  | >TP53-C124SGTAKSVTSTY | 208 | 253  |
| >TP53-C124SGTAKSVTCTY | 8    | >TP53-C124SGTAKSVTSTY | 5   | 3    |
| >TP53-C124SGTAKSVTCTY | 296  | >TP53-C124SGTAKSVTSTY | 534 | 238  |
| >TP53-C124SGTAKSVTCTY | 39   | >TP53-C124SGTAKSVTSTY | 31  | 8    |
| >TP53-C124SGTAKSVTCTY | 143  | >TP53-C124SGTAKSVTSTY | 53  | 90   |
| >TP53-C124SGTAKSVTCT  | 624  | >TP53-C124SGTAKSVTST  | 181 | 443  |
| >TP53-C124SGTAKSVTCT  | 585  | >TP53-C124SGTAKSVTST  | 322 | 263  |
| >TP53-C124SGTAKSVTCT  | 917  | >TP53-C124SGTAKSVTST  | 63  | 854  |
| >TP53-C124SGTAKSVTCT  | 374  | >TP53-C124SGTAKSVTST  | 153 | 221  |
| >TP53-C124YCTYSPALNKM | 1199 | >TP53-C124YTYSPALNKM  | 104 | 1095 |
| >TP53-C124YCTYSPALNKM | 2550 | >TP53-C124YTYSPALNKM  | 216 | 2334 |
| >TP53-C124YCTYSPALNKM | 4341 | >TP53-C124YTYSPALNKM  | 205 | 4136 |
| >TP53-C124YCTYSPALNKM | 9862 | >TP53-C124YTYSPALNKM  | 231 | 9631 |
| >TP53-C124YCTYSPALNK  | 30   | >TP53-C124YTYSPALNK   | 31  | 1    |
| >TP53-C124YCTYSPALNK  | 11   | >TP53-C124YTYSPALNK   | 11  | 0    |
| >TP53-C124YCTYSPALNKM | 343  | >TP53-C124YTYSPALNKM  | 209 | 134  |
| >TP53-C124YCTYSPALNKM | 63   | >TP53-C124YTYSPALNKM  | 11  | 52   |
| >TP53-C124YCTYSPALNKM | 380  | >TP53-C124YTYSPALNKM  | 52  | 328  |
| >TP53-C124YCTYSPALNKM | 246  | >TP53-C124YTYSPALNKM  | 163 | 83   |
| >TP53-C124YCTYSPALNKM | 1390 | >TP53-C124YTYSPALNKM  | 175 | 1215 |
| >TP53-C124YCTYSPALNK  | 215  | >TP53-C124YTYSPALNK   | 256 | 41   |
| >TP53-C124YCTYSPALNKM | 767  | >TP53-C124YTYSPALNKM  | 177 | 590  |
| >TP53-C124YCTYSPALN   | 2355 | >TP53-C124YTYSPALN    | 470 | 1885 |
| >TP53-C124YCTYSPALNK  | 30   | >TP53-C124YTYSPALNK   | 8   | 22   |
| >TP53-C124YCTYSPALNKM | 1364 | >TP53-C124YTYSPALNKM  | 351 | 1013 |
| >TP53-C124YCTYSPALNKM | 488  | >TP53-C124YTYSPALNKM  | 18  | 470  |

|                       |       |                       |      |       |
|-----------------------|-------|-----------------------|------|-------|
| >TP53-C124YCTYSPALNKM | 2170  | >TP53-C124YTYTYPALNKM | 100  | 2070  |
| >TP53-C124YCTYSPALNKM | 2628  | >TP53-C124YTYTYPALNKM | 97   | 2531  |
| >TP53-C124YCTYSPALNKM | 610   | >TP53-C124YTYTYPALNKM | 70   | 540   |
| >TP53-C124YCTYSPALNKM | 23    | >TP53-C124YTYTYPALNKM | 6    | 17    |
| >TP53-C124YCTYSPALNK  | 6036  | >TP53-C124YTYTYPALNK  | 429  | 5607  |
| >TP53-C124YCTYSPALNKM | 24    | >TP53-C124YTYTYPALNKM | 6    | 18    |
| >TP53-C124YCTYSPALNKM | 5     | >TP53-C124YTYTYPALNKM | 3    | 2     |
| >TP53-C124YCTYSPALNKM | 627   | >TP53-C124YTYTYPALNKM | 347  | 280   |
| >TP53-C124YCTYSPALNKM | 76    | >TP53-C124YTYTYPALNKM | 18   | 58    |
| >TP53-C124YCTYSPALNKM | 146   | >TP53-C124YTYTYPALNKM | 27   | 119   |
| >TP53-C124YCTYSPALNK  | 5088  | >TP53-C124YTYTYPALNK  | 305  | 4783  |
| >TP53-C124YCTYSPALNKM | 30    | >TP53-C124YTYTYPALNKM | 16   | 14    |
| >TP53-C124YCTYSPALNKM | 13    | >TP53-C124YTYTYPALNKM | 2    | 11    |
| >TP53-C124YCTYSPALNK  | 572   | >TP53-C124YTYTYPALNK  | 397  | 175   |
| >TP53-C124YCTYSPALNKM | 358   | >TP53-C124YTYTYPALNKM | 1529 | 1171  |
| >TP53-C124YTCTYSPAL   | 24677 | >TP53-C124YTYTYPAL    | 82   | 24595 |
| >TP53-C124YTCTYSPALNK | 25410 | >TP53-C124YTYTYPALNKI | 474  | 24936 |
| >TP53-C124YTCTYSPALNK | 3671  | >TP53-C124YTYTYPALNK  | 424  | 3247  |
| >TP53-C124YTCTYSPALNK | 453   | >TP53-C124YTYTYPALNKI | 3880 | 3427  |
| >TP53-C124YTCTYSPAL   | 32243 | >TP53-C124YTYTYPAL    | 479  | 31764 |
| >TP53-C124YLHSGTAKSVT | 9968  | >TP53-C124YLHSGTAKSVT | 110  | 9858  |
| >TP53-C124YLHSGTAKSVT | 15082 | >TP53-C124YLHSGTAKSVT | 139  | 14943 |
| >TP53-C124YVTCTYSPA   | 415   | >TP53-C124YVTYTYSPA   | 4    | 411   |
| >TP53-C124YVTCTYSPAL  | 981   | >TP53-C124YVTYTYSPAL  | 10   | 971   |
| >TP53-C124YVTCTYSPAL  | 2470  | >TP53-C124YVTYTYSPAL  | 128  | 2342  |
| >TP53-C124YVTCTYSPAL  | 2627  | >TP53-C124YVTYTYSPAL  | 269  | 2358  |
| >TP53-C124YVTCTYSPA   | 1658  | >TP53-C124YVTYTYSPA   | 85   | 1573  |
| >TP53-C124YVTCTYSPA   | 1839  | >TP53-C124YVTYTYSPA   | 250  | 1589  |
| >TP53-C124YVTCTYSPAL  | 397   | >TP53-C124YVTYTYSPAL  | 43   | 354   |
| >TP53-C124YVTCTYSPA   | 4507  | >TP53-C124YVTYTYSPA   | 357  | 4150  |
| >TP53-C124YVTCTYSPAL  | 766   | >TP53-C124YVTYTYSPAL  | 39   | 727   |
| >TP53-C124YVTCTYSPALN | 80    | >TP53-C124YVTYTYSPALN | 27   | 53    |
| >TP53-C124YVTCTYSPALN | 14    | >TP53-C124YVTYTYSPALN | 8    | 6     |
| >TP53-C124YVTCTYSPALN | 146   | >TP53-C124YVTYTYSPALN | 54   | 92    |
| >TP53-C124YVTCTYSPAL  | 1995  | >TP53-C124YVTYTYSPAL  | 250  | 1745  |
| >TP53-C124YVTCTYSPALN | 490   | >TP53-C124YVTYTYSPALN | 69   | 421   |
| >TP53-C124YVTCTYSPA   | 2180  | >TP53-C124YVTYTYSPA   | 411  | 1769  |
| >TP53-C124YVTCTYSPAL  | 3501  | >TP53-C124YVTYTYSPAL  | 84   | 3417  |
| >TP53-C124YVTCTYSPAL  | 1053  | >TP53-C124YVTYTYSPAL  | 87   | 966   |
| >TP53-C124YVTCTYSPA   | 4146  | >TP53-C124YVTYTYSPA   | 410  | 3736  |
| >TP53-C124YVTCTYSPAL  | 12    | >TP53-C124YVTYTYSPAL  | 4    | 8     |
| >TP53-C124YVTCTYSPAL  | 1334  | >TP53-C124YVTYTYSPAL  | 470  | 864   |
| >TP53-C124YVTCTYSPAL  | 66    | >TP53-C124YVTYTYSPAL  | 24   | 42    |

|                        |       |                        |     |       |
|------------------------|-------|------------------------|-----|-------|
| >TP53-C124YVTCTYSPAL   | 951   | >TP53-C124YVTYTYSPAL   | 177 | 774   |
| >TP53-C124YVTCTYSPALN  | 859   | >TP53-C124YVTYTYSPALN  | 345 | 514   |
| >TP53-C124YVTCTYSPAL   | 862   | >TP53-C124YVTYTYSPAL   | 183 | 679   |
| >TP53-C124YSVTCTYSPA   | 118   | >TP53-C124YSVTYTYSPA   | 228 | 110   |
| >TP53-C124YSVTCTYSPA   | 468   | >TP53-C124YSVTYTYSPA   | 816 | 348   |
| >TP53-C124YSVTCTYSPAL  | 268   | >TP53-C124YSVTYTYSPAL  | 265 | 3     |
| >TP53-C124YSVTCTYSPA   | 241   | >TP53-C124YSVTYTYSPA   | 198 | 43    |
| >TP53-C124YSVTCTYSPA   | 45    | >TP53-C124YSVTYTYSPA   | 50  | 5     |
| >TP53-C124YSVTCTYSPAL  | 149   | >TP53-C124YSVTYTYSPAL  | 361 | 212   |
| >TP53-C124YKSVTCTYSPAI | 710   | >TP53-C124YKSVTYTYSPAI | 212 | 498   |
| >TP53-C124YKSVTCTYSPAI | 396   | >TP53-C124YKSVTYTYSPAI | 248 | 148   |
| >TP53-C124YKSVTCTYSPA  | 149   | >TP53-C124YKSVTYTYSPA  | 61  | 88    |
| >TP53-C124YKSVTCTYSPAI | 488   | >TP53-C124YKSVTYTYSPAI | 207 | 281   |
| >TP53-C124YKSVTCTYSPAI | 107   | >TP53-C124YKSVTYTYSPAI | 72  | 35    |
| >TP53-C124YKSVTCTYSPA  | 349   | >TP53-C124YKSVTYTYSPA  | 231 | 118   |
| >TP53-C124YKSVTCTYSPAI | 89    | >TP53-C124YKSVTYTYSPAI | 64  | 25    |
| >TP53-C124YKSVTCTYSPAI | 6     | >TP53-C124YKSVTYTYSPAI | 5   | 1     |
| >TP53-C124YKSVTCTYSPAI | 669   | >TP53-C124YKSVTYTYSPAI | 389 | 280   |
| >TP53-C124YKSVTCTYSPAI | 113   | >TP53-C124YKSVTYTYSPAI | 96  | 17    |
| >TP53-C124YKSVTCTYSPAI | 198   | >TP53-C124YKSVTYTYSPAI | 103 | 95    |
| >TP53-C124YAKSVTCTY    | 888   | >TP53-C124YAKSVTYTY    | 209 | 679   |
| >TP53-C124YAKSVTCTY    | 8     | >TP53-C124YAKSVTYTY    | 6   | 2     |
| >TP53-C124YAKSVTCTYS   | 640   | >TP53-C124YAKSVTYTYS   | 361 | 279   |
| >TP53-C124YAKSVTCTYSP  | 483   | >TP53-C124YAKSVTYTYSP  | 269 | 214   |
| >TP53-C124YAKSVTCTYSP, | 56    | >TP53-C124YAKSVTYTYSP, | 35  | 21    |
| >TP53-C124YAKSVTCTY    | 1329  | >TP53-C124YAKSVTYTY    | 324 | 1005  |
| >TP53-C124YAKSVTCTY    | 5625  | >TP53-C124YAKSVTYTY    | 144 | 5481  |
| >TP53-C124YAKSVTCTY    | 312   | >TP53-C124YAKSVTYTY    | 26  | 286   |
| >TP53-C124YAKSVTCTY    | 247   | >TP53-C124YAKSVTYTY    | 104 | 143   |
| >TP53-C124YAKSVTCTY    | 4000  | >TP53-C124YAKSVTYTY    | 316 | 3684  |
| >TP53-C124YAKSVTCTY    | 78    | >TP53-C124YAKSVTYTY    | 152 | 74    |
| >TP53-C124YAKSVTCTY    | 430   | >TP53-C124YAKSVTYTY    | 511 | 81    |
| >TP53-C124YAKSVTCTY    | 265   | >TP53-C124YAKSVTYTY    | 364 | 99    |
| >TP53-C124YAKSVTCTY    | 100   | >TP53-C124YAKSVTYTY    | 31  | 69    |
| >TP53-C124YAKSVTCTY    | 746   | >TP53-C124YAKSVTYTY    | 187 | 559   |
| >TP53-C124YAKSVTCTY    | 336   | >TP53-C124YAKSVTYTY    | 162 | 174   |
| >TP53-C124YAKSVTCTY    | 1427  | >TP53-C124YAKSVTYTY    | 102 | 1325  |
| >TP53-C124YGTAKSVTCTY  | 682   | >TP53-C124YGTAKSVTYTY  | 264 | 418   |
| >TP53-C124YGTAKSVTCTY  | 466   | >TP53-C124YGTAKSVTYTY  | 141 | 325   |
| >TP53-C124YGTAKSVTCTY  | 775   | >TP53-C124YGTAKSVTYTY  | 479 | 296   |
| >TP53-C124YGTAKSVTCTY  | 521   | >TP53-C124YGTAKSVTYTY  | 198 | 323   |
| >TP53-C124YGTAKSVTC    | 25188 | >TP53-C124YGTAKSVTY    | 172 | 25016 |
| >TP53-C124YGTAKSVTCTY  | 122   | >TP53-C124YGTAKSVTYTY  | 40  | 82    |



|                        |       |                        |     |       |
|------------------------|-------|------------------------|-----|-------|
| >TP53-C124YGTAKSVTC    | 29950 | >TP53-C124YGTAKSVTY    | 160 | 29790 |
| >TP53-C124YGTAKSVTCTY  | 69    | >TP53-C124YGTAKSVTYTY  | 33  | 36    |
| >TP53-C124YGTAKSVTCTY  | 1215  | >TP53-C124YGTAKSVTYTY  | 299 | 916   |
| >TP53-C124YGTAKSVTCTY  | 1713  | >TP53-C124YGTAKSVTYTY  | 356 | 1357  |
| >TP53-C124YGTAKSVTC    | 15688 | >TP53-C124YGTAKSVTY    | 116 | 15572 |
| >TP53-C124YGTAKSVTCTY  | 71    | >TP53-C124YGTAKSVTYTY  | 107 | 36    |
| >TP53-C124YGTAKSVTCTY  | 461   | >TP53-C124YGTAKSVTYTY  | 505 | 44    |
| >TP53-C124YGTAKSVTC    | 7191  | >TP53-C124YGTAKSVTY    | 5   | 7186  |
| >TP53-C124YGTAKSVTCTY  | 8     | >TP53-C124YGTAKSVTYTY  | 8   | 0     |
| >TP53-C124YGTAKSVTCTY  | 296   | >TP53-C124YGTAKSVTYTY  | 195 | 101   |
| >TP53-C124YGTAKSVTC    | 13775 | >TP53-C124YGTAKSVTY    | 86  | 13689 |
| >TP53-C124YGTAKSVTCTY  | 39    | >TP53-C124YGTAKSVTYTY  | 58  | 19    |
| >TP53-C124YGTAKSVTC    | 32581 | >TP53-C124YGTAKSVTY    | 67  | 32514 |
| >TP53-C124YGTAKSVTCTY  | 143   | >TP53-C124YGTAKSVTYTY  | 43  | 100   |
| >TP53-C124YGTAKSVTC    | 39672 | >TP53-C124YGTAKSVTY    | 465 | 39207 |
| >TP53-C124YGTAKSVTCTY  | 1136  | >TP53-C124YGTAKSVTYTY  | 328 | 808   |
| >TP53-C124YSGTAKSVTCT  | 624   | >TP53-C124YSGTAKSVTYT  | 115 | 509   |
| >TP53-C124YSGTAKSVTC   | 22542 | >TP53-C124YSGTAKSVTY   | 497 | 22045 |
| >TP53-C124YSGTAKSVTC   | 22828 | >TP53-C124YSGTAKSVTY   | 481 | 22347 |
| >TP53-C124YSGTAKSVTCT  | 585   | >TP53-C124YSGTAKSVTYT  | 217 | 368   |
| >TP53-C124YSGTAKSVTC   | 25956 | >TP53-C124YSGTAKSVTY   | 120 | 25836 |
| >TP53-C124YSGTAKSVTCT  | 374   | >TP53-C124YSGTAKSVTYT  | 69  | 305   |
| >TP53-C124YHSGTAKSVTC  | 35277 | >TP53-C124YHSGTAKSVTY  | 351 | 34926 |
| >TP53-C124YHSGTAKSVTC  | 29687 | >TP53-C124YHSGTAKSVTY  | 331 | 29356 |
| >TP53-C124YHSGTAKSVTC  | 18239 | >TP53-C124YHSGTAKSVTY  | 253 | 17986 |
| >TP53-C124YHSGTAKSVTC  | 13766 | >TP53-C124YHSGTAKSVTY  | 21  | 13745 |
| >TP53-C124YHSGTAKSVTC  | 20271 | >TP53-C124YHSGTAKSVTY  | 185 | 20086 |
| >TP53-C135F CQLAKTCPV  | 121   | >TP53-C135F FQLAKTCPV  | 8   | 113   |
| >TP53-C135F CQLAKTCPVC | 1090  | >TP53-C135F FQLAKTCPVC | 23  | 1067  |
| >TP53-C135F CQLAKTCPV  | 565   | >TP53-C135F FQLAKTCPV  | 16  | 549   |
| >TP53-C135F CQLAKTCPVC | 1773  | >TP53-C135F FQLAKTCPVC | 42  | 1731  |
| >TP53-C135F CQLAKTCPV  | 173   | >TP53-C135F FQLAKTCPV  | 7   | 166   |
| >TP53-C135F CQLAKTCPVC | 3649  | >TP53-C135F FQLAKTCPVC | 215 | 3434  |
| >TP53-C135F CQLAKTCPV  | 22    | >TP53-C135F FQLAKTCPV  | 3   | 19    |
| >TP53-C135F CQLAKTCPVC | 463   | >TP53-C135F FQLAKTCPVC | 9   | 454   |
| >TP53-C135F CQLAKTCPV  | 136   | >TP53-C135F FQLAKTCPV  | 5   | 131   |
| >TP53-C135F CQLAKTCPVC | 3238  | >TP53-C135F FQLAKTCPVC | 42  | 3196  |
| >TP53-C135F CQLAKTCPV  | 77    | >TP53-C135F FQLAKTCPV  | 5   | 72    |
| >TP53-C135F CQLAKTCPVC | 3566  | >TP53-C135F FQLAKTCPVC | 81  | 3485  |
| >TP53-C135F CQLAKTCPV  | 457   | >TP53-C135F FQLAKTCPV  | 10  | 447   |
| >TP53-C135F CQLAKTCPVC | 8446  | >TP53-C135F FQLAKTCPVC | 172 | 8274  |
| >TP53-C135F CQLAKTCPV  | 720   | >TP53-C135F FQLAKTCPV  | 18  | 702   |
| >TP53-C135F CQLAKTCPVC | 5023  | >TP53-C135F FQLAKTCPVC | 186 | 4837  |

|                        |       |                        |      |       |
|------------------------|-------|------------------------|------|-------|
| >TP53-C135F CQLAKTCPV  | 2497  | >TP53-C135F FQLAKTCPV  | 15   | 2482  |
| >TP53-C135F CQLAKTCPV  | 6874  | >TP53-C135F FQLAKTCPV  | 218  | 6656  |
| >TP53-C135F CQLAKTCPV  | 2033  | >TP53-C135F FQLAKTCPV  | 202  | 1831  |
| >TP53-C135F CQLAKTCPV  | 1648  | >TP53-C135F FQLAKTCPV  | 180  | 1468  |
| >TP53-C135F CQLAKTCPV  | 268   | >TP53-C135F FQLAKTCPV  | 53   | 215   |
| >TP53-C135F CQLAKTCPVC | 155   | >TP53-C135F FQLAKTCPVC | 23   | 132   |
| >TP53-C135F CQLAKTCPV  | 2778  | >TP53-C135F FQLAKTCPV  | 97   | 2681  |
| >TP53-C135F CQLAKTCPVC | 231   | >TP53-C135F FQLAKTCPVC | 14   | 217   |
| >TP53-C135F CQLAKTCPVC | 762   | >TP53-C135F FQLAKTCPVC | 149  | 613   |
| >TP53-C135F FCQLAKTCPV | 443   | >TP53-C135F FFQLAKTCPV | 319  | 124   |
| >TP53-C135F TYSPALNKMF | 16514 | >TP53-C135F TYSPALNKMF | 31   | 16483 |
| >TP53-C135F TYSPALNKMF | 5850  | >TP53-C135F TYSPALNKMF | 50   | 5800  |
| >TP53-C135F TYSPALNKMF | 551   | >TP53-C135F TYSPALNKMF | 4    | 547   |
| >TP53-C135F TYSPALNKMF | 439   | >TP53-C135F TYSPALNKMF | 490  | 51    |
| >TP53-C135F MFCQLAKTCI | 1152  | >TP53-C135F MFFQLAKTCI | 85   | 1067  |
| >TP53-C135F MFCQLAKTCI | 924   | >TP53-C135F MFFQLAKTCI | 104  | 820   |
| >TP53-C135F MFCQLAKTCI | 5011  | >TP53-C135F MFFQLAKTCI | 319  | 4692  |
| >TP53-C135F MFCQLAKTCI | 679   | >TP53-C135F MFFQLAKTCI | 97   | 582   |
| >TP53-C135F MFCQLAKTCI | 4646  | >TP53-C135F MFFQLAKTCI | 312  | 4334  |
| >TP53-C135F MFCQLAKTC  | 450   | >TP53-C135F MFFQLAKTC  | 100  | 350   |
| >TP53-C135F MFCQLAKTCI | 721   | >TP53-C135F MFFQLAKTCI | 180  | 541   |
| >TP53-C135F KMFCQLAKT  | 89    | >TP53-C135F KMFFQLAKT  | 163  | 74    |
| >TP53-C135F KMFCQLAKT  | 102   | >TP53-C135F KMFFQLAKT  | 88   | 14    |
| >TP53-C135F KMFCQLAKT  | 19    | >TP53-C135F KMFFQLAKT  | 24   | 5     |
| >TP53-C135F KMFCQLAKT  | 199   | >TP53-C135F KMFFQLAKT  | 495  | 296   |
| >TP53-C135F KMFCQLAKT  | 19    | >TP53-C135F KMFFQLAKT  | 39   | 20    |
| >TP53-C135F KMFCQLAKTC | 23    | >TP53-C135F KMFFQLAKTC | 35   | 12    |
| >TP53-C135F KMFCQLAKT  | 55    | >TP53-C135F KMFFQLAKT  | 327  | 272   |
| >TP53-C135F KMFCQLAKTC | 61    | >TP53-C135F KMFFQLAKTC | 202  | 141   |
| >TP53-C135F KMFCQLAKT  | 518   | >TP53-C135F KMFFQLAKT  | 242  | 276   |
| >TP53-C135F KMFCQLAKTC | 805   | >TP53-C135F KMFFQLAKTC | 471  | 334   |
| >TP53-C135F KMFCQLAK   | 26    | >TP53-C135F KMFFQLAK   | 24   | 2     |
| >TP53-C135F KMFCQLAK   | 12    | >TP53-C135F KMFFQLAK   | 9    | 3     |
| >TP53-C135F KMFCQLAK   | 8     | >TP53-C135F KMFFQLAK   | 6    | 2     |
| >TP53-C135F KMFCQLAK   | 35    | >TP53-C135F KMFFQLAK   | 23   | 12    |
| >TP53-C135F KMFCQLAK   | 371   | >TP53-C135F KMFFQLAK   | 134  | 237   |
| >TP53-C135F KMFCQLAKT  | 1105  | >TP53-C135F KMFFQLAKT  | 497  | 608   |
| >TP53-C135F KMFCQLAKTC | 81    | >TP53-C135F KMFFQLAKTC | 44   | 37    |
| >TP53-C135F KMFCQLAK   | 58    | >TP53-C135F KMFFQLAK   | 134  | 76    |
| >TP53-C135F KMFCQLAKTC | 491   | >TP53-C135F KMFFQLAKTC | 1255 | 764   |
| >TP53-C135F KMFCQLAK   | 39    | >TP53-C135F KMFFQLAK   | 63   | 24    |
| >TP53-C135F NKMFCQLAK  | 646   | >TP53-C135F NKMFFQLAK  | 294  | 352   |
| >TP53-C135F LNKMFQQL   | 100   | >TP53-C135F LNKMFFQL   | 179  | 79    |

|                        |       |                        |      |       |
|------------------------|-------|------------------------|------|-------|
| >TP53-C135F LNKMFQQLAI | 161   | >TP53-C135F LNKMFFQLAI | 44   | 117   |
| >TP53-C135F LNKMFQQL   | 153   | >TP53-C135F LNKMFFQL   | 137  | 16    |
| >TP53-C135F ALNKMFQQL  | 238   | >TP53-C135F ALNKMFFQL  | 29   | 209   |
| >TP53-C135F ALNKMFQQL  | 1744  | >TP53-C135F ALNKMFFQL  | 200  | 1544  |
| >TP53-C135F ALNKMFQQL  | 17    | >TP53-C135F ALNKMFFQL  | 6    | 11    |
| >TP53-C135F ALNKMFQQL  | 30    | >TP53-C135F ALNKMFFQL  | 26   | 4     |
| >TP53-C135F ALNKMFQQL  | 442   | >TP53-C135F ALNKMFFQL  | 246  | 196   |
| >TP53-C135F ALNKMFQQL  | 297   | >TP53-C135F ALNKMFFQL  | 49   | 248   |
| >TP53-C135F ALNKMFQQL  | 22    | >TP53-C135F ALNKMFFQL  | 15   | 7     |
| >TP53-C135F ALNKMFQQL  | 255   | >TP53-C135F ALNKMFFQL  | 103  | 152   |
| >TP53-C135F ALNKMFQQL  | 198   | >TP53-C135F ALNKMFFQL  | 50   | 148   |
| >TP53-C135F ALNKMFQQL  | 21    | >TP53-C135F ALNKMFFQL  | 17   | 4     |
| >TP53-C135F ALNKMFQQL  | 256   | >TP53-C135F ALNKMFFQL  | 162  | 94    |
| >TP53-C135F ALNKMFQQL  | 66    | >TP53-C135F ALNKMFFQL  | 20   | 46    |
| >TP53-C135F ALNKMFQQL  | 245   | >TP53-C135F ALNKMFFQL  | 106  | 139   |
| >TP53-C135F ALNKMFQQL  | 3     | >TP53-C135F ALNKMFFQL  | 2    | 1     |
| >TP53-C135F ALNKMFQQL  | 11    | >TP53-C135F ALNKMFFQL  | 9    | 2     |
| >TP53-C135F ALNKMFQQL  | 37    | >TP53-C135F ALNKMFFQL  | 32   | 5     |
| >TP53-C135F ALNKMFQQL  | 25    | >TP53-C135F ALNKMFFQL  | 14   | 11    |
| >TP53-C135F ALNKMFQQL  | 113   | >TP53-C135F ALNKMFFQL  | 75   | 38    |
| >TP53-C135F ALNKMFQQL  | 431   | >TP53-C135F ALNKMFFQL  | 213  | 218   |
| >TP53-C135F ALNKMFQQL  | 860   | >TP53-C135F ALNKMFFQL  | 291  | 569   |
| >TP53-C135F ALNKMFQQL  | 288   | >TP53-C135F ALNKMFFQL  | 1320 | 1032  |
| >TP53-C135F ALNKMFQQL  | 416   | >TP53-C135F ALNKMFFQL  | 1743 | 1327  |
| >TP53-C135F ALNKMFQQL  | 1052  | >TP53-C135F ALNKMFFQL  | 451  | 601   |
| >TP53-C135F ALNKMFQQL  | 981   | >TP53-C135F ALNKMFFQL  | 284  | 697   |
| >TP53-C135F SPALNKMFC  | 31593 | >TP53-C135F SPALNKMFF  | 72   | 31521 |
| >TP53-C135F SPALNKMFC  | 432   | >TP53-C135F SPALNKMFF  | 39   | 393   |
| >TP53-C135F SPALNKMFC  | 2294  | >TP53-C135F SPALNKMFF  | 70   | 2224  |
| >TP53-C135F SPALNKMFC  | 41    | >TP53-C135F SPALNKMFF  | 35   | 6     |
| >TP53-C135F SPALNKMFC  | 372   | >TP53-C135F SPALNKMFF  | 866  | 494   |
| >TP53-C135F YSPALNKMFC | 39718 | >TP53-C135F YSPALNKMFF | 461  | 39257 |
| >TP53-C135F YSPALNKMFC | 33060 | >TP53-C135F YSPALNKMFF | 378  | 32682 |
| >TP53-C135F YSPALNKMFC | 14735 | >TP53-C135F YSPALNKMFF | 114  | 14621 |
| >TP53-C135F YSPALNKMFC | 20649 | >TP53-C135F YSPALNKMFF | 235  | 20414 |
| >TP53-C135F YSPALNKMFC | 21487 | >TP53-C135F YSPALNKMFF | 150  | 21337 |
| >TP53-C135F YSPALNKMFC | 21545 | >TP53-C135F YSPALNKMFF | 82   | 21463 |
| >TP53-C135F YSPALNKMFC | 22    | >TP53-C135F YSPALNKMFF | 3    | 19    |
| >TP53-C135F YSPALNKMFC | 124   | >TP53-C135F YSPALNKMFF | 14   | 110   |
| >TP53-C135F YSPALNKMFC | 6448  | >TP53-C135F YSPALNKMFF | 28   | 6420  |
| >TP53-C135C CQLAKTCPV  | 121   | >TP53-C135C CQLAKTCPV  | 49   | 72    |
| >TP53-C135C CQLAKTCPVC | 1090  | >TP53-C135C CQLAKTCPVC | 485  | 605   |
| >TP53-C135C CQLAKTCPV  | 565   | >TP53-C135C CQLAKTCPV  | 431  | 134   |

|                       |      |                       |      |      |
|-----------------------|------|-----------------------|------|------|
| >TP53-C135CQQLAKTCPV  | 173  | >TP53-C135CGQLAKTCPV  | 81   | 92   |
| >TP53-C135CQQLAKTCPV  | 22   | >TP53-C135CGQLAKTCPV  | 14   | 8    |
| >TP53-C135CQQLAKTCPVC | 463  | >TP53-C135CGQLAKTCPVC | 205  | 258  |
| >TP53-C135CQQLAKTCPV  | 136  | >TP53-C135CGQLAKTCPV  | 33   | 103  |
| >TP53-C135CQQLAKTCPV  | 77   | >TP53-C135CGQLAKTCPV  | 11   | 66   |
| >TP53-C135CQQLAKTCPVC | 3566 | >TP53-C135CGQLAKTCPVC | 466  | 3100 |
| >TP53-C135CQQLAKTCPV  | 457  | >TP53-C135CGQLAKTCPV  | 24   | 433  |
| >TP53-C135CQQLAKTCPV  | 2497 | >TP53-C135CGQLAKTCPV  | 351  | 2146 |
| >TP53-C135CQQLAKTCPV  | 268  | >TP53-C135CGQLAKTCPV  | 419  | 151  |
| >TP53-C135CQQLAKTCPVC | 155  | >TP53-C135CGQLAKTCPVC | 236  | 81   |
| >TP53-C135CQQLAKTCPVC | 231  | >TP53-C135CGQLAKTCPVC | 319  | 88   |
| >TP53-C135CQQLAKTCPVC | 762  | >TP53-C135CGQLAKTCPVC | 125  | 637  |
| >TP53-C135CFQQLAKTCPV | 443  | >TP53-C135CFGQLAKTCPV | 2555 | 2112 |
| >TP53-C135CTYSPALNKMF | 439  | >TP53-C135CTYSPALNKMF | 914  | 475  |
| >TP53-C135CMFCQLAKTCI | 679  | >TP53-C135CMFGQLAKTC  | 404  | 275  |
| >TP53-C135CMFCQLAKTC  | 450  | >TP53-C135CMFGQLAKTC  | 1066 | 616  |
| >TP53-C135CKMFCQLAKT  | 89   | >TP53-C135CKMFGQLAKT  | 93   | 4    |
| >TP53-C135CKMFCQLAKT  | 102  | >TP53-C135CKMFGQLAKT  | 49   | 53   |
| >TP53-C135CKMFCQLAKT  | 19   | >TP53-C135CKMFGQLAKT  | 25   | 6    |
| >TP53-C135CKMFCQLAKT  | 199  | >TP53-C135CKMFGQLAKT  | 156  | 43   |
| >TP53-C135CKMFCQLAKT  | 19   | >TP53-C135CKMFGQLAKT  | 12   | 7    |
| >TP53-C135CKMFCQLAKTC | 23   | >TP53-C135CKMFGQLAKTC | 15   | 8    |
| >TP53-C135CKMFCQLAKT  | 55   | >TP53-C135CKMFGQLAKT  | 297  | 242  |
| >TP53-C135CKMFCQLAKTC | 61   | >TP53-C135CKMFGQLAKTC | 211  | 150  |
| >TP53-C135CKMFCQLAKT  | 673  | >TP53-C135CKMFGQLAKT  | 159  | 514  |
| >TP53-C135CKMFCQLAKT  | 518  | >TP53-C135CKMFGQLAKT  | 17   | 501  |
| >TP53-C135CKMFCQLAKTC | 805  | >TP53-C135CKMFGQLAKTC | 55   | 750  |
| >TP53-C135CKMFCQLAK   | 26   | >TP53-C135CKMFGQLAK   | 25   | 1    |
| >TP53-C135CKMFCQLAK   | 12   | >TP53-C135CKMFGQLAK   | 11   | 1    |
| >TP53-C135CKMFCQLAK   | 8    | >TP53-C135CKMFGQLAK   | 8    | 0    |
| >TP53-C135CKMFCQLAK   | 35   | >TP53-C135CKMFGQLAK   | 35   | 0    |
| >TP53-C135CKMFCQLAK   | 371  | >TP53-C135CKMFGQLAK   | 173  | 198  |
| >TP53-C135CKMFCQLAKT  | 1105 | >TP53-C135CKMFGQLAKT  | 407  | 698  |
| >TP53-C135CKMFCQLAKTC | 81   | >TP53-C135CKMFGQLAKTC | 43   | 38   |
| >TP53-C135CKMFCQLAK   | 58   | >TP53-C135CKMFGQLAK   | 276  | 218  |
| >TP53-C135CKMFCQLAKTC | 491  | >TP53-C135CKMFGQLAKTC | 2061 | 1570 |
| >TP53-C135CKMFCQLAK   | 39   | >TP53-C135CKMFGQLAK   | 64   | 25   |
| >TP53-C135CLNKMFCQL   | 100  | >TP53-C135CLNKMFGQL   | 155  | 55   |
| >TP53-C135CLNKMFCQLAI | 161  | >TP53-C135CLNKMFGQLAI | 78   | 83   |
| >TP53-C135CLNKMFCQL   | 153  | >TP53-C135CLNKMFGQL   | 727  | 574  |
| >TP53-C135CALNKMFCQL  | 238  | >TP53-C135CALNKMFGQL  | 1882 | 1644 |
| >TP53-C135CALNKMFCQL  | 17   | >TP53-C135CALNKMFGQL  | 42   | 25   |
| >TP53-C135CALNKMFCQL  | 30   | >TP53-C135CALNKMFGQL  | 20   | 10   |

|                         |       |                         |      |       |
|-------------------------|-------|-------------------------|------|-------|
| >TP53-C135C ALNKMFCQL   | 442   | >TP53-C135C ALNKMFGQL   | 1019 | 577   |
| >TP53-C135C ALNKMFCQL   | 297   | >TP53-C135C ALNKMFGQL   | 1985 | 1688  |
| >TP53-C135C ALNKMFCQL   | 22    | >TP53-C135C ALNKMFGQL   | 141  | 119   |
| >TP53-C135C ALNKMFCQL   | 255   | >TP53-C135C ALNKMFGQL   | 257  | 2     |
| >TP53-C135C ALNKMFCQL   | 198   | >TP53-C135C ALNKMFGQL   | 2453 | 2255  |
| >TP53-C135C ALNKMFCQL   | 21    | >TP53-C135C ALNKMFGQL   | 259  | 238   |
| >TP53-C135C ALNKMFCQL   | 256   | >TP53-C135C ALNKMFGQL   | 455  | 199   |
| >TP53-C135C ALNKMFCQL   | 66    | >TP53-C135C ALNKMFGQL   | 2932 | 2866  |
| >TP53-C135C ALNKMFCQ    | 245   | >TP53-C135C ALNKMFGQ    | 166  | 79    |
| >TP53-C135C ALNKMFCQL   | 3     | >TP53-C135C ALNKMFGQL   | 9    | 6     |
| >TP53-C135C ALNKMFCQL   | 11    | >TP53-C135C ALNKMFGQL   | 25   | 14    |
| >TP53-C135C ALNKMFCQL   | 37    | >TP53-C135C ALNKMFGQL   | 35   | 2     |
| >TP53-C135C ALNKMFCQL   | 25    | >TP53-C135C ALNKMFGQL   | 31   | 6     |
| >TP53-C135C ALNKMFCQL   | 113   | >TP53-C135C ALNKMFGQL   | 127  | 14    |
| >TP53-C135C ALNKMFCQL   | 431   | >TP53-C135C ALNKMFGQL   | 996  | 565   |
| >TP53-C135C ALNKMFCQL   | 288   | >TP53-C135C ALNKMFGQL   | 2200 | 1912  |
| >TP53-C135C ALNKMFCQL   | 416   | >TP53-C135C ALNKMFGQL   | 1513 | 1097  |
| >TP53-C135C SPALNKMFCQ  | 432   | >TP53-C135C SPALNKMFGQ  | 183  | 249   |
| >TP53-C135C SPALNKMFCQ  | 41    | >TP53-C135C SPALNKMFGQ  | 27   | 14    |
| >TP53-C135C SPALNKMFCQ  | 372   | >TP53-C135C SPALNKMFGQ  | 1251 | 879   |
| >TP53-C135C YSPALNKMFCQ | 22    | >TP53-C135C YSPALNKMFGQ | 113  | 91    |
| >TP53-C135C YSPALNKMFCQ | 124   | >TP53-C135C YSPALNKMFGQ | 94   | 30    |
| >TP53-C135F CQLAKTCPV   | 121   | >TP53-C135F RQLAKTCPV   | 36   | 85    |
| >TP53-C135F CQLAKTCPVC  | 1090  | >TP53-C135F RQLAKTCPVC  | 314  | 776   |
| >TP53-C135F CQLAKTCPV   | 173   | >TP53-C135F RQLAKTCPV   | 52   | 121   |
| >TP53-C135F CQLAKTCPV   | 22    | >TP53-C135F RQLAKTCPV   | 8    | 14    |
| >TP53-C135F CQLAKTCPVC  | 463   | >TP53-C135F RQLAKTCPVC  | 60   | 403   |
| >TP53-C135F CQLAKTCPV   | 136   | >TP53-C135F RQLAKTCPV   | 20   | 116   |
| >TP53-C135F CQLAKTCPVC  | 3238  | >TP53-C135F RQLAKTCPVC  | 337  | 2901  |
| >TP53-C135F CQLAKTCPV   | 77    | >TP53-C135F RQLAKTCPV   | 17   | 60    |
| >TP53-C135F CQLAKTCPV   | 457   | >TP53-C135F RQLAKTCPV   | 42   | 415   |
| >TP53-C135F CQLAKTCPV   | 720   | >TP53-C135F RQLAKTCPV   | 411  | 309   |
| >TP53-C135F CQLAKTCPV   | 6166  | >TP53-C135F RQLAKTCPV   | 120  | 6046  |
| >TP53-C135F CQLAKTCPV   | 16218 | >TP53-C135F RQLAKTCPV   | 216  | 16002 |
| >TP53-C135F CQLAKTCPVC  | 6922  | >TP53-C135F RQLAKTCPVC  | 71   | 6851  |
| >TP53-C135F CQLAKTCPV   | 1648  | >TP53-C135F RQLAKTCPV   | 129  | 1519  |
| >TP53-C135F CQLAKTCPV   | 268   | >TP53-C135F RQLAKTCPV   | 32   | 236   |
| >TP53-C135F CQLAKTCPVC  | 3628  | >TP53-C135F RQLAKTCPVC  | 434  | 3194  |
| >TP53-C135F CQLAKTCPVC  | 155   | >TP53-C135F RQLAKTCPVC  | 20   | 135   |
| >TP53-C135F CQLAKTCPVC  | 6226  | >TP53-C135F RQLAKTCPVC  | 387  | 5839  |
| >TP53-C135F CQLAKTCPVC  | 231   | >TP53-C135F RQLAKTCPVC  | 157  | 74    |
| >TP53-C135F CQLAKTCPVC  | 762   | >TP53-C135F RQLAKTCPVC  | 54   | 708   |
| >TP53-C135F CQLAKTCPVC  | 16644 | >TP53-C135F RQLAKTCPVC  | 260  | 16384 |

|                       |       |                       |      |       |
|-----------------------|-------|-----------------------|------|-------|
| >TP53-C135FCQLAKTCPVC | 7434  | >TP53-C135FRQLAKTCPVC | 272  | 7162  |
| >TP53-C135FCQLAKTCPV  | 443   | >TP53-C135FRQLAKTCPV  | 4135 | 3692  |
| >TP53-C135FTYSPALNKMF | 20008 | >TP53-C135FTYSPALNKMF | 29   | 19979 |
| >TP53-C135FTYSPALNKMF | 28516 | >TP53-C135FTYSPALNKMF | 46   | 28470 |
| >TP53-C135FTYSPALNKMF | 33701 | >TP53-C135FTYSPALNKMF | 42   | 33659 |
| >TP53-C135FTYSPALNKMF | 26286 | >TP53-C135FTYSPALNKMF | 31   | 26255 |
| >TP53-C135FTYSPALNKMF | 439   | >TP53-C135FTYSPALNKMF | 941  | 502   |
| >TP53-C135FMFCQLAKTCI | 3609  | >TP53-C135FMFRQLAKTCI | 28   | 3581  |
| >TP53-C135FMFCQLAKTCI | 4742  | >TP53-C135FMFRQLAKTCI | 306  | 4436  |
| >TP53-C135FMFCQLAKTC  | 450   | >TP53-C135FMFRQLAKTC  | 380  | 70    |
| >TP53-C135FMFCQLAKT   | 89    | >TP53-C135FMFRQLAKT   | 301  | 212   |
| >TP53-C135FMFCQLAKT   | 102   | >TP53-C135FMFRQLAKT   | 238  | 136   |
| >TP53-C135FMFCQLAKT   | 19    | >TP53-C135FMFRQLAKT   | 56   | 37    |
| >TP53-C135FMFCQLAKT   | 199   | >TP53-C135FMFRQLAKT   | 424  | 225   |
| >TP53-C135FMFCQLAKT   | 19    | >TP53-C135FMFRQLAKT   | 35   | 16    |
| >TP53-C135FMFCQLAKT(  | 23    | >TP53-C135FMFRQLAKT(  | 31   | 8     |
| >TP53-C135FMFCQLAKT   | 55    | >TP53-C135FMFRQLAKT   | 313  | 258   |
| >TP53-C135FMFCQLAKT(  | 61    | >TP53-C135FMFRQLAKT(  | 222  | 161   |
| >TP53-C135FMFCQLAKT   | 518   | >TP53-C135FMFRQLAKT   | 72   | 446   |
| >TP53-C135FMFCQLAKT(  | 805   | >TP53-C135FMFRQLAKT(  | 183  | 622   |
| >TP53-C135FMFCQLAK    | 26    | >TP53-C135FMFRQLAK    | 24   | 2     |
| >TP53-C135FMFCQLAK    | 12    | >TP53-C135FMFRQLAK    | 12   | 0     |
| >TP53-C135FMFCQLAK    | 8     | >TP53-C135FMFRQLAK    | 5    | 3     |
| >TP53-C135FMFCQLAK    | 35    | >TP53-C135FMFRQLAK    | 18   | 17    |
| >TP53-C135FMFCQLAK    | 371   | >TP53-C135FMFRQLAK    | 331  | 40    |
| >TP53-C135FMFCQLAKT(  | 81    | >TP53-C135FMFRQLAKT(  | 83   | 2     |
| >TP53-C135FMFCQLAK    | 58    | >TP53-C135FMFRQLAK    | 79   | 21    |
| >TP53-C135FMFCQLAKT(  | 491   | >TP53-C135FMFRQLAKT(  | 716  | 225   |
| >TP53-C135FMFCQLAK    | 39    | >TP53-C135FMFRQLAK    | 95   | 56    |
| >TP53-C135FLNKMFCQL   | 100   | >TP53-C135FLNKMFRQL   | 201  | 101   |
| >TP53-C135FLNKMFCQLA  | 161   | >TP53-C135FLNKMFRQLA  | 35   | 126   |
| >TP53-C135FLNKMFCQL   | 153   | >TP53-C135FLNKMFRQL   | 127  | 26    |
| >TP53-C135FALNKMFCQL  | 238   | >TP53-C135FALNKMFRQL  | 2607 | 2369  |
| >TP53-C135FALNKMFCQL  | 17    | >TP53-C135FALNKMFRQL  | 86   | 69    |
| >TP53-C135FALNKMFCQL  | 30    | >TP53-C135FALNKMFRQL  | 57   | 27    |
| >TP53-C135FALNKMFCQL, | 442   | >TP53-C135FALNKMFRQL, | 1074 | 632   |
| >TP53-C135FALNKMFCQL  | 297   | >TP53-C135FALNKMFRQL  | 3929 | 3632  |
| >TP53-C135FALNKMFCQL  | 22    | >TP53-C135FALNKMFRQL  | 147  | 125   |
| >TP53-C135FALNKMFCQL, | 255   | >TP53-C135FALNKMFRQL, | 733  | 478   |
| >TP53-C135FALNKMFCQL  | 198   | >TP53-C135FALNKMFRQL  | 2965 | 2767  |
| >TP53-C135FALNKMFCQL  | 21    | >TP53-C135FALNKMFRQL  | 569  | 548   |
| >TP53-C135FALNKMFCQL, | 256   | >TP53-C135FALNKMFRQL, | 1527 | 1271  |
| >TP53-C135FALNKMFCQL  | 66    | >TP53-C135FALNKMFRQL  | 3249 | 3183  |

|                       |       |                       |      |       |
|-----------------------|-------|-----------------------|------|-------|
| >TP53-C135FALNKMFCQ   | 245   | >TP53-C135FALNKMFRQ   | 161  | 84    |
| >TP53-C135FALNKMFCQL  | 3     | >TP53-C135FALNKMFRQL  | 11   | 8     |
| >TP53-C135FALNKMFCQL  | 11    | >TP53-C135FALNKMFRQL  | 28   | 17    |
| >TP53-C135FALNKMFCQL  | 37    | >TP53-C135FALNKMFRQL  | 36   | 1     |
| >TP53-C135FALNKMFCQL  | 25    | >TP53-C135FALNKMFRQL  | 35   | 10    |
| >TP53-C135FALNKMFCQL  | 113   | >TP53-C135FALNKMFRQL  | 92   | 21    |
| >TP53-C135FALNKMFCQL  | 431   | >TP53-C135FALNKMFRQL  | 580  | 149   |
| >TP53-C135FALNKMFCQL  | 288   | >TP53-C135FALNKMFRQL  | 657  | 369   |
| >TP53-C135FALNKMFCQL  | 416   | >TP53-C135FALNKMFRQL  | 2184 | 1768  |
| >TP53-C135FPALNKMFC   | 22860 | >TP53-C135FPALNKMFR   | 173  | 22687 |
| >TP53-C135FPALNKMFC   | 35966 | >TP53-C135FPALNKMFR   | 358  | 35608 |
| >TP53-C135FSPALNKMFC  | 432   | >TP53-C135FSPALNKMFR  | 955  | 523   |
| >TP53-C135FSPALNKMFC  | 38645 | >TP53-C135FSPALNKMFR  | 128  | 38517 |
| >TP53-C135FSPALNKMFC  | 41    | >TP53-C135FSPALNKMFR  | 26   | 15    |
| >TP53-C135FSPALNKMFC  | 372   | >TP53-C135FSPALNKMFR  | 621  | 249   |
| >TP53-C135FSPALNKMFC  | 35012 | >TP53-C135FSPALNKMFR  | 194  | 34818 |
| >TP53-C135FYSPALNKMFC | 33441 | >TP53-C135FYSPALNKMFF | 168  | 33273 |
| >TP53-C135FYSPALNKMFC | 19929 | >TP53-C135FYSPALNKMFF | 74   | 19855 |
| >TP53-C135FYSPALNKMFC | 26376 | >TP53-C135FYSPALNKMFF | 196  | 26180 |
| >TP53-C135FYSPALNKMFC | 21505 | >TP53-C135FYSPALNKMFF | 5    | 21500 |
| >TP53-C135FYSPALNKMFC | 22    | >TP53-C135FYSPALNKMFF | 220  | 198   |
| >TP53-C135FYSPALNKMFC | 124   | >TP53-C135FYSPALNKMFF | 66   | 58    |
| >TP53-C135FYSPALNKMFC | 35300 | >TP53-C135FYSPALNKMFF | 158  | 35142 |
| >TP53-C135SQLAKTCPV   | 121   | >TP53-C135SSQLAKTCPV  | 25   | 96    |
| >TP53-C135SQLAKTCPVC  | 1090  | >TP53-C135SSQLAKTCPVC | 218  | 872   |
| >TP53-C135SQLAKTCPV   | 565   | >TP53-C135SSQLAKTCPV  | 261  | 304   |
| >TP53-C135SQLAKTCPV   | 173   | >TP53-C135SSQLAKTCPV  | 50   | 123   |
| >TP53-C135SQLAKTCPV   | 22    | >TP53-C135SSQLAKTCPV  | 7    | 15    |
| >TP53-C135SQLAKTCPVC  | 463   | >TP53-C135SSQLAKTCPVC | 64   | 399   |
| >TP53-C135SQLAKTCPV   | 136   | >TP53-C135SSQLAKTCPV  | 16   | 120   |
| >TP53-C135SQLAKTCPVC  | 3238  | >TP53-C135SSQLAKTCPVC | 304  | 2934  |
| >TP53-C135SQLAKTCPV   | 77    | >TP53-C135SSQLAKTCPV  | 15   | 62    |
| >TP53-C135SQLAKTCPV   | 457   | >TP53-C135SSQLAKTCPV  | 17   | 440   |
| >TP53-C135SQLAKTCPVC  | 8446  | >TP53-C135SSQLAKTCPVC | 474  | 7972  |
| >TP53-C135SQLAKTCPV   | 2497  | >TP53-C135SSQLAKTCPV  | 135  | 2362  |
| >TP53-C135SQLAKTCPV   | 1648  | >TP53-C135SSQLAKTCPV  | 276  | 1372  |
| >TP53-C135SQLAKTCPV   | 268   | >TP53-C135SSQLAKTCPV  | 166  | 102   |
| >TP53-C135SQLAKTCPVC  | 155   | >TP53-C135SSQLAKTCPVC | 78   | 77    |
| >TP53-C135SQLAKTCPVC  | 231   | >TP53-C135SSQLAKTCPVC | 58   | 173   |
| >TP53-C135SQLAKTCPVC  | 762   | >TP53-C135SSQLAKTCPVC | 268  | 494   |
| >TP53-C135FCQLAKTCPV  | 1178  | >TP53-C135FSQLAKTCPV  | 409  | 769   |
| >TP53-C135FCQLAKTCPV  | 443   | >TP53-C135FSQLAKTCPV  | 2902 | 2459  |
| >TP53-C135TYPALNKMFI  | 439   | >TP53-C135TYPALNKMFI  | 1178 | 739   |

|                        |      |                        |     |     |
|------------------------|------|------------------------|-----|-----|
| >TP53-C135S MFCQLAKTCI | 1152 | >TP53-C135S MFSQLAKTCI | 182 | 970 |
| >TP53-C135S MFCQLAKTCI | 679  | >TP53-C135S MFSQLAKTCI | 268 | 411 |
| >TP53-C135S MFCQLAKTC  | 450  | >TP53-C135S MFSQLAKTC  | 181 | 269 |
| >TP53-C135S MFCQLAKTCI | 721  | >TP53-C135S MFSQLAKTCI | 257 | 464 |
| >TP53-C135S KMFCQLAKT  | 89   | >TP53-C135S KMFSQLAKT  | 82  | 7   |
| >TP53-C135S KMFCQLAKT  | 102  | >TP53-C135S KMFSQLAKT  | 48  | 54  |
| >TP53-C135S KMFCQLAKT  | 19   | >TP53-C135S KMFSQLAKT  | 20  | 1   |
| >TP53-C135S KMFCQLAKT  | 199  | >TP53-C135S KMFSQLAKT  | 211 | 12  |
| >TP53-C135S KMFCQLAKT  | 19   | >TP53-C135S KMFSQLAKT  | 19  | 0   |
| >TP53-C135S KMFCQLAKT  | 23   | >TP53-C135S KMFSQLAKT  | 21  | 2   |
| >TP53-C135S KMFCQLAKT  | 55   | >TP53-C135S KMFSQLAKT  | 247 | 192 |
| >TP53-C135S KMFCQLAKT  | 61   | >TP53-C135S KMFSQLAKT  | 175 | 114 |
| >TP53-C135S KMFCQLAKT  | 673  | >TP53-C135S KMFSQLAKT  | 247 | 426 |
| >TP53-C135S KMFCQLAKT  | 518  | >TP53-C135S KMFSQLAKT  | 61  | 457 |
| >TP53-C135S KMFCQLAKT  | 805  | >TP53-C135S KMFSQLAKT  | 159 | 646 |
| >TP53-C135S KMFCQLAK   | 26   | >TP53-C135S KMFSQLAK   | 25  | 1   |
| >TP53-C135S KMFCQLAK   | 12   | >TP53-C135S KMFSQLAK   | 10  | 2   |
| >TP53-C135S KMFCQLAK   | 8    | >TP53-C135S KMFSQLAK   | 7   | 1   |
| >TP53-C135S KMFCQLAK   | 35   | >TP53-C135S KMFSQLAK   | 20  | 15  |
| >TP53-C135S KMFCQLAK   | 371  | >TP53-C135S KMFSQLAK   | 350 | 21  |
| >TP53-C135S KMFCQLAKT  | 81   | >TP53-C135S KMFSQLAKT  | 80  | 1   |
| >TP53-C135S KMFCQLAK   | 58   | >TP53-C135S KMFSQLAK   | 43  | 15  |
| >TP53-C135S KMFCQLAKT  | 491  | >TP53-C135S KMFSQLAKT  | 456 | 35  |
| >TP53-C135S KMFCQLAK   | 39   | >TP53-C135S KMFSQLAK   | 62  | 23  |
| >TP53-C135S NKMFCQLAK  | 646  | >TP53-C135S NKMFSQLAK  | 278 | 368 |
| >TP53-C135S LNKMFQQL   | 100  | >TP53-C135S LNKMFSQL   | 75  | 25  |
| >TP53-C135S LNKMFQQLAI | 161  | >TP53-C135S LNKMFSQLAI | 35  | 126 |
| >TP53-C135S LNKMFQQL   | 153  | >TP53-C135S LNKMFSQL   | 159 | 6   |
| >TP53-C135S ALNKMFQQL  | 238  | >TP53-C135S ALNKMFSQL  | 467 | 229 |
| >TP53-C135S ALNKMFQQL  | 17   | >TP53-C135S ALNKMFSQL  | 11  | 6   |
| >TP53-C135S ALNKMFQQL  | 30   | >TP53-C135S ALNKMFSQL  | 9   | 21  |
| >TP53-C135S ALNKMFQQL  | 442  | >TP53-C135S ALNKMFSQL  | 441 | 1   |
| >TP53-C135S ALNKMFQQL  | 297  | >TP53-C135S ALNKMFSQL  | 580 | 283 |
| >TP53-C135S ALNKMFQQL  | 22   | >TP53-C135S ALNKMFSQL  | 63  | 41  |
| >TP53-C135S ALNKMFQQL  | 255  | >TP53-C135S ALNKMFSQL  | 185 | 70  |
| >TP53-C135S ALNKMFQQL  | 198  | >TP53-C135S ALNKMFSQL  | 445 | 247 |
| >TP53-C135S ALNKMFQQL  | 21   | >TP53-C135S ALNKMFSQL  | 78  | 57  |
| >TP53-C135S ALNKMFQQL  | 256  | >TP53-C135S ALNKMFSQL  | 237 | 19  |
| >TP53-C135S ALNKMFQQL  | 66   | >TP53-C135S ALNKMFSQL  | 297 | 231 |
| >TP53-C135S ALNKMFQQL  | 245  | >TP53-C135S ALNKMFSQL  | 82  | 163 |
| >TP53-C135S ALNKMFQQL  | 3    | >TP53-C135S ALNKMFSQL  | 3   | 0   |
| >TP53-C135S ALNKMFQQL  | 11   | >TP53-C135S ALNKMFSQL  | 11  | 0   |
| >TP53-C135S ALNKMFQQL  | 37   | >TP53-C135S ALNKMFSQL  | 32  | 5   |



|                         |       |                         |     |       |
|-------------------------|-------|-------------------------|-----|-------|
| >TP53-C135S ALNKMFCQL   | 25    | >TP53-C135S ALNKMFSQL   | 19  | 6     |
| >TP53-C135S ALNKMFCQL   | 113   | >TP53-C135S ALNKMFSQL   | 85  | 28    |
| >TP53-C135S ALNKMFCQL   | 431   | >TP53-C135S ALNKMFSQL   | 603 | 172   |
| >TP53-C135S ALNKMFCQL   | 288   | >TP53-C135S ALNKMFSQL   | 417 | 129   |
| >TP53-C135S ALNKMFCQL   | 416   | >TP53-C135S ALNKMFSQL   | 576 | 160   |
| >TP53-C135S ALNKMFCQL   | 10543 | >TP53-C135S ALNKMFSQL   | 304 | 10239 |
| >TP53-C135S SPALNKMFCQ  | 432   | >TP53-C135S SPALNKMFSQ  | 132 | 300   |
| >TP53-C135S SPALNKMFCQ  | 41    | >TP53-C135S SPALNKMFSQ  | 28  | 13    |
| >TP53-C135S SPALNKMFCQ  | 372   | >TP53-C135S SPALNKMFSQ  | 465 | 93    |
| >TP53-C135S YSPALNKMFC  | 22    | >TP53-C135S YSPALNKMFS  | 78  | 56    |
| >TP53-C135S YSPALNKMFC  | 124   | >TP53-C135S YSPALNKMFS  | 63  | 61    |
| >TP53-C135T CQLAKTCPV   | 121   | >TP53-C135T TQLAKTCPV   | 67  | 54    |
| >TP53-C135T CQLAKTCPV   | 173   | >TP53-C135T TQLAKTCPV   | 90  | 83    |
| >TP53-C135T CQLAKTCPV   | 22    | >TP53-C135T TQLAKTCPV   | 12  | 10    |
| >TP53-C135T CQLAKTCPVC  | 463   | >TP53-C135T TQLAKTCPVC  | 169 | 294   |
| >TP53-C135T CQLAKTCPV   | 136   | >TP53-C135T TQLAKTCPV   | 63  | 73    |
| >TP53-C135T CQLAKTCPV   | 77    | >TP53-C135T TQLAKTCPV   | 45  | 32    |
| >TP53-C135T CQLAKTCPV   | 457   | >TP53-C135T TQLAKTCPV   | 85  | 372   |
| >TP53-C135T CQLAKTCPV   | 6874  | >TP53-C135T TQLAKTCPV   | 498 | 6376  |
| >TP53-C135T CQLAKTCPV   | 268   | >TP53-C135T TQLAKTCPV   | 344 | 76    |
| >TP53-C135T CQLAKTCPVC  | 155   | >TP53-C135T TQLAKTCPVC  | 197 | 42    |
| >TP53-C135T CQLAKTCPV   | 2778  | >TP53-C135T TQLAKTCPV   | 330 | 2448  |
| >TP53-C135T CQLAKTCPVC  | 231   | >TP53-C135T TQLAKTCPVC  | 29  | 202   |
| >TP53-C135T CQLAKTCPVC  | 762   | >TP53-C135T TQLAKTCPVC  | 392 | 370   |
| >TP53-C135T FCQLAKTCPV  | 1648  | >TP53-C135T FTQLAKTCPV  | 293 | 1355  |
| >TP53-C135T FCQLAKTCPV  | 1385  | >TP53-C135T FTQLAKTCPV  | 117 | 1268  |
| >TP53-C135T FCQLAKTCPV  | 1178  | >TP53-C135T FTQLAKTCPV  | 81  | 1097  |
| >TP53-C135T FCQLAKTCPV  | 1921  | >TP53-C135T FTQLAKTCPV  | 200 | 1721  |
| >TP53-C135T FCQLAKTCPV  | 1652  | >TP53-C135T FTQLAKTCPV  | 195 | 1457  |
| >TP53-C135T FCQLAKTCPV  | 2662  | >TP53-C135T FTQLAKTCPV  | 356 | 2306  |
| >TP53-C135T FCQLAKTCPV  | 443   | >TP53-C135T FTQLAKTCPV  | 60  | 383   |
| >TP53-C135T FCQLAKTCPV  | 9092  | >TP53-C135T FTQLAKTCPV  | 160 | 8932  |
| >TP53-C135T FCQLAKTCPV  | 1688  | >TP53-C135T FTQLAKTCPV  | 67  | 1621  |
| >TP53-C135T FCQLAKTCPV  | 18842 | >TP53-C135T FTQLAKTCPV  | 227 | 18615 |
| >TP53-C135T TYSPALNKMFC | 439   | >TP53-C135T TYSPALNKMFS | 836 | 397   |
| >TP53-C135T MFCQLAKTCI  | 679   | >TP53-C135T MFTQLAKTCI  | 198 | 481   |
| >TP53-C135T MFCQLAKTC   | 450   | >TP53-C135T MFTQLAKTC   | 216 | 234   |
| >TP53-C135T MFCQLAKTCI  | 721   | >TP53-C135T MFTQLAKTCI  | 320 | 401   |
| >TP53-C135T KMFCQLAKT   | 89    | >TP53-C135T KMFTQLAKT   | 120 | 31    |
| >TP53-C135T KMFCQLAKT   | 102   | >TP53-C135T KMFTQLAKT   | 98  | 4     |
| >TP53-C135T KMFCQLAKT   | 19    | >TP53-C135T KMFTQLAKT   | 30  | 11    |
| >TP53-C135T KMFCQLAKT   | 199   | >TP53-C135T KMFTQLAKT   | 291 | 92    |
| >TP53-C135T KMFCQLAKT   | 19    | >TP53-C135T KMFTQLAKT   | 50  | 31    |

|                       |     |                       |     |     |
|-----------------------|-----|-----------------------|-----|-----|
| >TP53-C135TKMFCQLAKT( | 23  | >TP53-C135TKMFTQLAKT( | 44  | 21  |
| >TP53-C135TKMFCQLAKT  | 55  | >TP53-C135TKMFTQLAKT  | 304 | 249 |
| >TP53-C135TKMFCQLAKT( | 61  | >TP53-C135TKMFTQLAKT( | 200 | 139 |
| >TP53-C135TKMFCQLAKT  | 518 | >TP53-C135TKMFTQLAKT  | 120 | 398 |
| >TP53-C135TKMFCQLAKT( | 805 | >TP53-C135TKMFTQLAKT( | 275 | 530 |
| >TP53-C135TKMFCQLAK   | 26  | >TP53-C135TKMFTQLAK   | 25  | 1   |
| >TP53-C135TKMFCQLAK   | 12  | >TP53-C135TKMFTQLAK   | 11  | 1   |
| >TP53-C135TKMFCQLAK   | 8   | >TP53-C135TKMFTQLAK   | 6   | 2   |
| >TP53-C135TKMFCQLAK   | 35  | >TP53-C135TKMFTQLAK   | 26  | 9   |
| >TP53-C135TKMFCQLAK   | 371 | >TP53-C135TKMFTQLAK   | 349 | 22  |
| >TP53-C135TKMFCQLAKT( | 81  | >TP53-C135TKMFTQLAKT( | 92  | 11  |
| >TP53-C135TKMFCQLAK   | 58  | >TP53-C135TKMFTQLAK   | 62  | 4   |
| >TP53-C135TKMFCQLAKT( | 491 | >TP53-C135TKMFTQLAKT( | 694 | 203 |
| >TP53-C135TKMFCQLAK   | 39  | >TP53-C135TKMFTQLAK   | 46  | 7   |
| >TP53-C135TKMFCQLAK   | 646 | >TP53-C135TKMFTQLAK   | 424 | 222 |
| >TP53-C135TKMFCQLAK   | 100 | >TP53-C135TKMFTQLAK   | 154 | 54  |
| >TP53-C135TKMFCQLAK   | 161 | >TP53-C135TKMFTQLAK   | 35  | 126 |
| >TP53-C135TKMFCQLAK   | 153 | >TP53-C135TKMFTQLAK   | 193 | 40  |
| >TP53-C135TKMFCQLAK   | 238 | >TP53-C135TKMFTQLAK   | 207 | 31  |
| >TP53-C135TKMFCQLAK   | 17  | >TP53-C135TKMFTQLAK   | 8   | 9   |
| >TP53-C135TKMFCQLAK   | 30  | >TP53-C135TKMFTQLAK   | 9   | 21  |
| >TP53-C135TKMFCQLAK   | 442 | >TP53-C135TKMFTQLAK   | 245 | 197 |
| >TP53-C135TKMFCQLAK   | 297 | >TP53-C135TKMFTQLAK   | 296 | 1   |
| >TP53-C135TKMFCQLAK   | 22  | >TP53-C135TKMFTQLAK   | 91  | 69  |
| >TP53-C135TKMFCQLAK   | 255 | >TP53-C135TKMFTQLAK   | 192 | 63  |
| >TP53-C135TKMFCQLAK   | 198 | >TP53-C135TKMFTQLAK   | 955 | 757 |
| >TP53-C135TKMFCQLAK   | 21  | >TP53-C135TKMFTQLAK   | 67  | 46  |
| >TP53-C135TKMFCQLAK   | 256 | >TP53-C135TKMFTQLAK   | 225 | 31  |
| >TP53-C135TKMFCQLAK   | 66  | >TP53-C135TKMFTQLAK   | 473 | 407 |
| >TP53-C135TKMFCQLAK   | 245 | >TP53-C135TKMFTQLAK   | 72  | 173 |
| >TP53-C135TKMFCQLAK   | 3   | >TP53-C135TKMFTQLAK   | 3   | 0   |
| >TP53-C135TKMFCQLAK   | 11  | >TP53-C135TKMFTQLAK   | 10  | 1   |
| >TP53-C135TKMFCQLAK   | 37  | >TP53-C135TKMFTQLAK   | 34  | 3   |
| >TP53-C135TKMFCQLAK   | 25  | >TP53-C135TKMFTQLAK   | 26  | 1   |
| >TP53-C135TKMFCQLAK   | 113 | >TP53-C135TKMFTQLAK   | 119 | 6   |
| >TP53-C135TKMFCQLAK   | 431 | >TP53-C135TKMFTQLAK   | 508 | 77  |
| >TP53-C135TKMFCQLAK   | 860 | >TP53-C135TKMFTQLAK   | 430 | 430 |
| >TP53-C135TKMFCQLAK   | 288 | >TP53-C135TKMFTQLAK   | 611 | 323 |
| >TP53-C135TKMFCQLAK   | 416 | >TP53-C135TKMFTQLAK   | 862 | 446 |
| >TP53-C135TKMFCQLAK   | 432 | >TP53-C135TKMFTQLAK   | 108 | 324 |
| >TP53-C135TKMFCQLAK   | 41  | >TP53-C135TKMFTQLAK   | 30  | 11  |
| >TP53-C135TKMFCQLAK   | 372 | >TP53-C135TKMFTQLAK   | 567 | 195 |
| >TP53-C135TKMFCQLAK   | 22  | >TP53-C135TKMFTQLAK   | 111 | 89  |

|                       |       |                       |      |       |
|-----------------------|-------|-----------------------|------|-------|
| >TP53-C135TYSPALNKMFC | 124   | >TP53-C135TYSPALNKMFT | 44   | 80    |
| >TP53-C135VCQLAKTCPV  | 121   | >TP53-C135VWQLAKTCPV  | 35   | 86    |
| >TP53-C135VCQLAKTCPVC | 1090  | >TP53-C135VWQLAKTCPV  | 206  | 884   |
| >TP53-C135VCQLAKTCPV  | 565   | >TP53-C135VWQLAKTCPV  | 211  | 354   |
| >TP53-C135VCQLAKTCPV  | 173   | >TP53-C135VWQLAKTCPV  | 41   | 132   |
| >TP53-C135VCQLAKTCPV  | 22    | >TP53-C135VWQLAKTCPV  | 10   | 12    |
| >TP53-C135VCQLAKTCPVC | 463   | >TP53-C135VWQLAKTCPV  | 46   | 417   |
| >TP53-C135VCQLAKTCPV  | 136   | >TP53-C135VWQLAKTCPV  | 18   | 118   |
| >TP53-C135VCQLAKTCPVC | 3238  | >TP53-C135VWQLAKTCPV  | 291  | 2947  |
| >TP53-C135VCQLAKTCPV  | 77    | >TP53-C135VWQLAKTCPV  | 21   | 56    |
| >TP53-C135VCQLAKTCPV  | 457   | >TP53-C135VWQLAKTCPV  | 27   | 430   |
| >TP53-C135VCQLAKTCPV  | 720   | >TP53-C135VWQLAKTCPV  | 39   | 681   |
| >TP53-C135VCQLAKTCPV  | 2497  | >TP53-C135VWQLAKTCPV  | 120  | 2377  |
| >TP53-C135VCQLAKTCPV  | 1648  | >TP53-C135VWQLAKTCPV  | 217  | 1431  |
| >TP53-C135VCQLAKTCPV  | 268   | >TP53-C135VWQLAKTCPV  | 95   | 173   |
| >TP53-C135VCQLAKTCPVC | 155   | >TP53-C135VWQLAKTCPV  | 42   | 113   |
| >TP53-C135VCQLAKTCPV  | 2778  | >TP53-C135VWQLAKTCPV  | 185  | 2593  |
| >TP53-C135VCQLAKTCPVC | 231   | >TP53-C135VWQLAKTCPV  | 19   | 212   |
| >TP53-C135VCQLAKTCPVC | 762   | >TP53-C135VWQLAKTCPV  | 65   | 697   |
| >TP53-C135VFCQLAKTCPV | 443   | >TP53-C135VFWQLAKTCPV | 2916 | 2473  |
| >TP53-C135VFCQLAKTC   | 38735 | >TP53-C135VFWQLAKTC   | 473  | 38262 |
| >TP53-C135VTYSPALNKMF | 16514 | >TP53-C135TYSPALNKMF  | 133  | 16381 |
| >TP53-C135VTYSPALNKMF | 5850  | >TP53-C135TYSPALNKMF  | 121  | 5729  |
| >TP53-C135VTYSPALNKMF | 551   | >TP53-C135TYSPALNKMF  | 8    | 543   |
| >TP53-C135VTYSPALNKMF | 439   | >TP53-C135TYSPALNKMF  | 450  | 11    |
| >TP53-C135VMFCQLAKTCI | 1152  | >TP53-C135VMFWQLAKTC  | 467  | 685   |
| >TP53-C135VMFCQLAKTCI | 924   | >TP53-C135VMFWQLAKTC  | 67   | 857   |
| >TP53-C135VMFCQLAKTCI | 5011  | >TP53-C135VMFWQLAKTC  | 133  | 4878  |
| >TP53-C135VMFCQLAKTCI | 679   | >TP53-C135VMFWQLAKTC  | 82   | 597   |
| >TP53-C135VMFCQLAKTCI | 7918  | >TP53-C135VMFWQLAKTC  | 402  | 7516  |
| >TP53-C135VMFCQLAKTC  | 450   | >TP53-C135VMFWQLAKTC  | 99   | 351   |
| >TP53-C135VMFCQLAKTCI | 721   | >TP53-C135VMFWQLAKTC  | 174  | 547   |
| >TP53-C135VKMFCQLAKT  | 89    | >TP53-C135VKMFWQLAKT  | 62   | 27    |
| >TP53-C135VKMFCQLAKT  | 102   | >TP53-C135VKMFWQLAKT  | 111  | 9     |
| >TP53-C135VKMFCQLAKT  | 19    | >TP53-C135VKMFWQLAKT  | 23   | 4     |
| >TP53-C135VKMFCQLAKT  | 199   | >TP53-C135VKMFWQLAKT  | 165  | 34    |
| >TP53-C135VKMFCQLAK   | 1003  | >TP53-C135VKMFWQLAK   | 137  | 866   |
| >TP53-C135VKMFCQLAKT  | 19    | >TP53-C135VKMFWQLAKT  | 7    | 12    |
| >TP53-C135VKMFCQLAKTC | 23    | >TP53-C135VKMFWQLAKT  | 10   | 13    |
| >TP53-C135VKMFCQLAKT  | 55    | >TP53-C135VKMFWQLAKT  | 274  | 219   |
| >TP53-C135VKMFCQLAKTC | 61    | >TP53-C135VKMFWQLAKT  | 196  | 135   |
| >TP53-C135VKMFCQLAKT  | 673   | >TP53-C135VKMFWQLAKT  | 67   | 606   |
| >TP53-C135VKMFCQLAKTC | 1831  | >TP53-C135VKMFWQLAKT  | 302  | 1529  |

|                      |       |                      |      |       |
|----------------------|-------|----------------------|------|-------|
| >TP53-C135VKMFCQLAKT | 518   | >TP53-C135VKMFWQLAKT | 18   | 500   |
| >TP53-C135VKMFCQLAKT | 805   | >TP53-C135VKMFWQLAKT | 63   | 742   |
| >TP53-C135VKMFCQLAK  | 26    | >TP53-C135VKMFWQLAK  | 24   | 2     |
| >TP53-C135VKMFCQLAK  | 12    | >TP53-C135VKMFWQLAK  | 8    | 4     |
| >TP53-C135VKMFCQLAK  | 8     | >TP53-C135VKMFWQLAK  | 11   | 3     |
| >TP53-C135VKMFCQLAK  | 35    | >TP53-C135VKMFWQLAK  | 20   | 15    |
| >TP53-C135VKMFCQLAK  | 371   | >TP53-C135VKMFWQLAK  | 108  | 263   |
| >TP53-C135VKMFCQLAKT | 1105  | >TP53-C135VKMFWQLAKT | 287  | 818   |
| >TP53-C135VKMFCQLAKT | 81    | >TP53-C135VKMFWQLAKT | 35   | 46    |
| >TP53-C135VKMFCQLAK  | 58    | >TP53-C135VKMFWQLAK  | 278  | 220   |
| >TP53-C135VKMFCQLAKT | 491   | >TP53-C135VKMFWQLAKT | 1761 | 1270  |
| >TP53-C135VKMFCQLAK  | 39    | >TP53-C135VKMFWQLAK  | 35   | 4     |
| >TP53-C135VLNKMFCQL  | 100   | >TP53-C135VLNKMFWQL  | 489  | 389   |
| >TP53-C135VLNKMFCQLA | 3711  | >TP53-C135VLNKMFWQLA | 470  | 3241  |
| >TP53-C135VLNKMFCQLA | 161   | >TP53-C135VLNKMFWQLA | 42   | 119   |
| >TP53-C135VLNKMFCQL  | 153   | >TP53-C135VLNKMFWQL  | 163  | 10    |
| >TP53-C135VALNKMFCQL | 238   | >TP53-C135VALNKMFWQL | 24   | 214   |
| >TP53-C135VALNKMFCQ  | 1744  | >TP53-C135VALNKMFWQ  | 393  | 1351  |
| >TP53-C135VALNKMFCQL | 17    | >TP53-C135VALNKMFWQI | 5    | 12    |
| >TP53-C135VALNKMFCQL | 30    | >TP53-C135VALNKMFWQI | 21   | 9     |
| >TP53-C135VALNKMFCQL | 442   | >TP53-C135VALNKMFWQI | 621  | 179   |
| >TP53-C135VALNKMFCQL | 297   | >TP53-C135VALNKMFWQI | 30   | 267   |
| >TP53-C135VALNKMFCQL | 22    | >TP53-C135VALNKMFWQI | 7    | 15    |
| >TP53-C135VALNKMFCQL | 255   | >TP53-C135VALNKMFWQI | 65   | 190   |
| >TP53-C135VALNKMFCQL | 198   | >TP53-C135VALNKMFWQI | 16   | 182   |
| >TP53-C135VALNKMFCQL | 21    | >TP53-C135VALNKMFWQI | 12   | 9     |
| >TP53-C135VALNKMFCQL | 256   | >TP53-C135VALNKMFWQI | 96   | 160   |
| >TP53-C135VALNKMFCQL | 66    | >TP53-C135VALNKMFWQI | 16   | 50    |
| >TP53-C135VALNKMFCQ  | 245   | >TP53-C135VALNKMFWQ  | 45   | 200   |
| >TP53-C135VALNKMFCQL | 3     | >TP53-C135VALNKMFWQI | 2    | 1     |
| >TP53-C135VALNKMFCQL | 11    | >TP53-C135VALNKMFWQI | 12   | 1     |
| >TP53-C135VALNKMFCQL | 37    | >TP53-C135VALNKMFWQI | 37   | 0     |
| >TP53-C135VALNKMFCQL | 25    | >TP53-C135VALNKMFWQI | 17   | 8     |
| >TP53-C135VALNKMFCQL | 113   | >TP53-C135VALNKMFWQI | 162  | 49    |
| >TP53-C135VALNKMFCQL | 431   | >TP53-C135VALNKMFWQI | 289  | 142   |
| >TP53-C135VALNKMFCQL | 288   | >TP53-C135VALNKMFWQI | 211  | 77    |
| >TP53-C135VALNKMFCQL | 416   | >TP53-C135VALNKMFWQI | 3852 | 3436  |
| >TP53-C135VALNKMFCQL | 981   | >TP53-C135VALNKMFWQI | 391  | 590   |
| >TP53-C135VALNKMFCQL | 6766  | >TP53-C135VALNKMFWQI | 410  | 6356  |
| >TP53-C135VPALNKMFC  | 33688 | >TP53-C135VPALNKMFW  | 474  | 33214 |
| >TP53-C135VSPALNKMFC | 432   | >TP53-C135VSPALNKMFW | 464  | 32    |
| >TP53-C135VSPALNKMFC | 41    | >TP53-C135VSPALNKMFW | 43   | 2     |
| >TP53-C135VSPALNKMFC | 372   | >TP53-C135VSPALNKMFW | 349  | 23    |

|                         |       |                         |      |       |
|-------------------------|-------|-------------------------|------|-------|
| >TP53-C135V SPALNKMFC   | 1632  | >TP53-C135V SPALNKMFW   | 464  | 1168  |
| >TP53-C135V SPALNKMFC   | 25078 | >TP53-C135V SPALNKMFW   | 101  | 24977 |
| >TP53-C135V SPALNKMFC   | 26965 | >TP53-C135V SPALNKMFW   | 69   | 26896 |
| >TP53-C135V YSPALNKMFC  | 21545 | >TP53-C135V YSPALNKMFL  | 73   | 21472 |
| >TP53-C135V YSPALNKMFC  | 24245 | >TP53-C135V YSPALNKMFL  | 112  | 24133 |
| >TP53-C135V YSPALNKMFC  | 20561 | >TP53-C135V YSPALNKMFL  | 295  | 20266 |
| >TP53-C135V YSPALNKMFC  | 22    | >TP53-C135V YSPALNKMFL  | 13   | 9     |
| >TP53-C135V YSPALNKMFC  | 124   | >TP53-C135V YSPALNKMFL  | 16   | 108   |
| >TP53-C135V YSPALNKMFC  | 29633 | >TP53-C135V YSPALNKMFL  | 257  | 29376 |
| >TP53-C135Y CQLAKTCPV   | 121   | >TP53-C135Y YQLAKTCPV   | 9    | 112   |
| >TP53-C135Y CQLAKTCPVC  | 1090  | >TP53-C135Y YQLAKTCPVC  | 23   | 1067  |
| >TP53-C135Y CQLAKTCPV   | 565   | >TP53-C135Y YQLAKTCPV   | 52   | 513   |
| >TP53-C135Y CQLAKTCPVC  | 1773  | >TP53-C135Y YQLAKTCPVC  | 141  | 1632  |
| >TP53-C135Y CQLAKTCPV   | 173   | >TP53-C135Y YQLAKTCPV   | 11   | 162   |
| >TP53-C135Y CQLAKTCPVC  | 3649  | >TP53-C135Y YQLAKTCPVC  | 396  | 3253  |
| >TP53-C135Y CQLAKTCPV   | 22    | >TP53-C135Y YQLAKTCPV   | 4    | 18    |
| >TP53-C135Y CQLAKTCPVC  | 463   | >TP53-C135Y YQLAKTCPVC  | 13   | 450   |
| >TP53-C135Y CQLAKTCPV   | 136   | >TP53-C135Y YQLAKTCPV   | 5    | 131   |
| >TP53-C135Y CQLAKTCPVC  | 3238  | >TP53-C135Y YQLAKTCPVC  | 35   | 3203  |
| >TP53-C135Y CQLAKTCPV   | 77    | >TP53-C135Y YQLAKTCPV   | 5    | 72    |
| >TP53-C135Y CQLAKTCPVC  | 3566  | >TP53-C135Y YQLAKTCPVC  | 60   | 3506  |
| >TP53-C135Y CQLAKTCPV   | 457   | >TP53-C135Y YQLAKTCPV   | 10   | 447   |
| >TP53-C135Y CQLAKTCPVC  | 8446  | >TP53-C135Y YQLAKTCPVC  | 122  | 8324  |
| >TP53-C135Y CQLAKTCPV   | 720   | >TP53-C135Y YQLAKTCPV   | 11   | 709   |
| >TP53-C135Y CQLAKTCPVC  | 5023  | >TP53-C135Y YQLAKTCPVC  | 88   | 4935  |
| >TP53-C135Y CQLAKTCPV   | 2497  | >TP53-C135Y YQLAKTCPV   | 13   | 2484  |
| >TP53-C135Y CQLAKTCPVC  | 17444 | >TP53-C135Y YQLAKTCPVC  | 487  | 16957 |
| >TP53-C135Y CQLAKTCPV   | 6874  | >TP53-C135Y YQLAKTCPV   | 182  | 6692  |
| >TP53-C135Y CQLAKTCPV   | 2033  | >TP53-C135Y YQLAKTCPV   | 262  | 1771  |
| >TP53-C135Y CQLAKTCPV   | 1648  | >TP53-C135Y YQLAKTCPV   | 113  | 1535  |
| >TP53-C135Y CQLAKTCPV   | 268   | >TP53-C135Y YQLAKTCPV   | 44   | 224   |
| >TP53-C135Y CQLAKTCPVC  | 155   | >TP53-C135Y YQLAKTCPVC  | 20   | 135   |
| >TP53-C135Y CQLAKTCPV   | 2778  | >TP53-C135Y YQLAKTCPV   | 116  | 2662  |
| >TP53-C135Y CQLAKTCPVC  | 231   | >TP53-C135Y YQLAKTCPVC  | 16   | 215   |
| >TP53-C135Y CQLAKTCPVC  | 762   | >TP53-C135Y YQLAKTCPVC  | 121  | 641   |
| >TP53-C135Y FCQLAKTCPV  | 25826 | >TP53-C135Y FYQLAKTCPV  | 50   | 25776 |
| >TP53-C135Y FCQLAKTCPV  | 443   | >TP53-C135Y FYQLAKTCPV  | 243  | 200   |
| >TP53-C135Y TYSPALNKMFL | 551   | >TP53-C135Y TYSPALNKMFL | 100  | 451   |
| >TP53-C135Y TYSPALNKMFL | 17241 | >TP53-C135Y TYSPALNKMFL | 34   | 17207 |
| >TP53-C135Y TYSPALNKMFL | 21237 | >TP53-C135Y TYSPALNKMFL | 55   | 21182 |
| >TP53-C135Y TYSPALNKMFL | 26630 | >TP53-C135Y TYSPALNKMFL | 153  | 26477 |
| >TP53-C135Y TYSPALNKMFL | 35847 | >TP53-C135Y TYSPALNKMFL | 143  | 35704 |
| >TP53-C135Y TYSPALNKMFL | 439   | >TP53-C135Y TYSPALNKMFL | 1125 | 686   |

|                       |      |                       |     |      |
|-----------------------|------|-----------------------|-----|------|
| >TP53-C135YMFCQLAKTCI | 1152 | >TP53-C135YMFYQLAKTCI | 145 | 1007 |
| >TP53-C135YMFCQLAKTCI | 924  | >TP53-C135YMFYQLAKTCI | 72  | 852  |
| >TP53-C135YMFCQLAKTCI | 5011 | >TP53-C135YMFYQLAKTCI | 206 | 4805 |
| >TP53-C135YMFCQLAKTCI | 679  | >TP53-C135YMFYQLAKTCI | 71  | 608  |
| >TP53-C135YMFCQLAKTC  | 450  | >TP53-C135YMFYQLAKTC  | 129 | 321  |
| >TP53-C135YMFCQLAKTCI | 721  | >TP53-C135YMFYQLAKTCI | 216 | 505  |
| >TP53-C135YKMFCQLAKT  | 89   | >TP53-C135YKMFYQLAKT  | 119 | 30   |
| >TP53-C135YKMFCQLAKT  | 102  | >TP53-C135YKMFYQLAKT  | 100 | 2    |
| >TP53-C135YKMFCQLAKT  | 19   | >TP53-C135YKMFYQLAKT  | 44  | 25   |
| >TP53-C135YKMFCQLAKT  | 199  | >TP53-C135YKMFYQLAKT  | 473 | 274  |
| >TP53-C135YKMFCQLAKT  | 19   | >TP53-C135YKMFYQLAKT  | 129 | 110  |
| >TP53-C135YKMFCQLAKT  | 23   | >TP53-C135YKMFYQLAKT  | 78  | 55   |
| >TP53-C135YKMFCQLAKT  | 55   | >TP53-C135YKMFYQLAKT  | 327 | 272  |
| >TP53-C135YKMFCQLAKT  | 61   | >TP53-C135YKMFYQLAKT  | 209 | 148  |
| >TP53-C135YKMFCQLAK   | 26   | >TP53-C135YKMFYQLAK   | 25  | 1    |
| >TP53-C135YKMFCQLAK   | 12   | >TP53-C135YKMFYQLAK   | 11  | 1    |
| >TP53-C135YKMFCQLAK   | 8    | >TP53-C135YKMFYQLAK   | 7   | 1    |
| >TP53-C135YKMFCQLAK   | 35   | >TP53-C135YKMFYQLAK   | 19  | 16   |
| >TP53-C135YKMFCQLAK   | 371  | >TP53-C135YKMFYQLAK   | 126 | 245  |
| >TP53-C135YKMFCQLAKT  | 1105 | >TP53-C135YKMFYQLAKT  | 292 | 813  |
| >TP53-C135YKMFCQLAKT  | 81   | >TP53-C135YKMFYQLAKT  | 31  | 50   |
| >TP53-C135YKMFCQLAK   | 58   | >TP53-C135YKMFYQLAK   | 58  | 0    |
| >TP53-C135YKMFCQLAKT  | 491  | >TP53-C135YKMFYQLAKT  | 516 | 25   |
| >TP53-C135YKMFCQLAK   | 39   | >TP53-C135YKMFYQLAK   | 79  | 40   |
| >TP53-C135YNKMFCQLAK  | 646  | >TP53-C135YNKMFYQLAK  | 457 | 189  |
| >TP53-C135YLNKMFCQL   | 100  | >TP53-C135YLNKMFYQL   | 82  | 18   |
| >TP53-C135YLNKMFCQLA  | 2286 | >TP53-C135YLNKMFYQLA  | 376 | 1910 |
| >TP53-C135YLNKMFCQLAI | 161  | >TP53-C135YLNKMFYQLAI | 38  | 123  |
| >TP53-C135YLNKMFCQL   | 153  | >TP53-C135YLNKMFYQL   | 111 | 42   |
| >TP53-C135YALNKMFCQL  | 238  | >TP53-C135YALNKMFYQL  | 38  | 200  |
| >TP53-C135YALNKMFCQ   | 1744 | >TP53-C135YALNKMFYQ   | 184 | 1560 |
| >TP53-C135YALNKMFCQL  | 17   | >TP53-C135YALNKMFYQL  | 5   | 12   |
| >TP53-C135YALNKMFCQL  | 30   | >TP53-C135YALNKMFYQL  | 27  | 3    |
| >TP53-C135YALNKMFCQL  | 442  | >TP53-C135YALNKMFYQL  | 404 | 38   |
| >TP53-C135YALNKMFCQL  | 297  | >TP53-C135YALNKMFYQL  | 278 | 19   |
| >TP53-C135YALNKMFCQL  | 22   | >TP53-C135YALNKMFYQL  | 18  | 4    |
| >TP53-C135YALNKMFCQL  | 255  | >TP53-C135YALNKMFYQL  | 104 | 151  |
| >TP53-C135YALNKMFCQL  | 198  | >TP53-C135YALNKMFYQL  | 28  | 170  |
| >TP53-C135YALNKMFCQL  | 21   | >TP53-C135YALNKMFYQL  | 40  | 19   |
| >TP53-C135YALNKMFCQL  | 256  | >TP53-C135YALNKMFYQL  | 223 | 33   |
| >TP53-C135YALNKMFCQL  | 66   | >TP53-C135YALNKMFYQL  | 29  | 37   |
| >TP53-C135YALNKMFCQ   | 245  | >TP53-C135YALNKMFYQ   | 75  | 170  |
| >TP53-C135YALNKMFCQL  | 3    | >TP53-C135YALNKMFYQL  | 3   | 0    |

|                       |       |                       |      |       |
|-----------------------|-------|-----------------------|------|-------|
| >TP53-C135YALNKMFCQL  | 11    | >TP53-C135YALNKMFCQL  | 10   | 1     |
| >TP53-C135YALNKMFCQL  | 37    | >TP53-C135YALNKMFCQL  | 36   | 1     |
| >TP53-C135YALNKMFCQL  | 25    | >TP53-C135YALNKMFCQL  | 17   | 8     |
| >TP53-C135YALNKMFCQL  | 113   | >TP53-C135YALNKMFCQL  | 101  | 12    |
| >TP53-C135YALNKMFCQL  | 431   | >TP53-C135YALNKMFCQL  | 210  | 221   |
| >TP53-C135YALNKMFCQL  | 860   | >TP53-C135YALNKMFCQL  | 98   | 762   |
| >TP53-C135YALNKMFCQL  | 288   | >TP53-C135YALNKMFCQL  | 324  | 36    |
| >TP53-C135YALNKMFCQL  | 416   | >TP53-C135YALNKMFCQL  | 1199 | 783   |
| >TP53-C135YALNKMFCQL  | 981   | >TP53-C135YALNKMFCQL  | 287  | 694   |
| >TP53-C135YPALNKMFC   | 24682 | >TP53-C135YPALNKMFC   | 387  | 24295 |
| >TP53-C135YSPALNKMFC  | 432   | >TP53-C135YSPALNKMFC  | 92   | 340   |
| >TP53-C135YSPALNKMFC  | 41    | >TP53-C135YSPALNKMFC  | 35   | 6     |
| >TP53-C135YSPALNKMFC  | 372   | >TP53-C135YSPALNKMFC  | 405  | 33    |
| >TP53-C135YSPALNKMFC  | 15127 | >TP53-C135YSPALNKMFC  | 396  | 14731 |
| >TP53-C135YSPALNKMFC  | 34760 | >TP53-C135YSPALNKMFC  | 371  | 34389 |
| >TP53-C135YSPALNKMFC  | 30196 | >TP53-C135YSPALNKMFC  | 159  | 30037 |
| >TP53-C135YSPALNKMFC  | 33441 | >TP53-C135YSPALNKMFC  | 304  | 33137 |
| >TP53-C135YSPALNKMFC  | 20649 | >TP53-C135YSPALNKMFC  | 35   | 20614 |
| >TP53-C135YSPALNKMFC  | 24965 | >TP53-C135YSPALNKMFC  | 297  | 24668 |
| >TP53-C135YSPALNKMFC  | 21505 | >TP53-C135YSPALNKMFC  | 90   | 21415 |
| >TP53-C135YSPALNKMFC  | 24661 | >TP53-C135YSPALNKMFC  | 247  | 24414 |
| >TP53-C135YSPALNKMFC  | 21545 | >TP53-C135YSPALNKMFC  | 119  | 21426 |
| >TP53-C135YSPALNKMFC  | 22    | >TP53-C135YSPALNKMFC  | 33   | 11    |
| >TP53-C135YSPALNKMFC  | 124   | >TP53-C135YSPALNKMFC  | 12   | 112   |
| >TP53-C135YSPALNKMFC  | 6448  | >TP53-C135YSPALNKMFC  | 27   | 6421  |
| >TP53-C141A TCPVQLWV  | 1807  | >TP53-C141A TCPVQLWV  | 234  | 1573  |
| >TP53-C141A KTCPVQLWV | 575   | >TP53-C141A KTCPVQLWV | 91   | 484   |
| >TP53-C141A KTCPVQLWV | 923   | >TP53-C141A KTCPVQLWV | 44   | 879   |
| >TP53-C141A KTCPVQLWV | 1227  | >TP53-C141A KTCPVQLWV | 140  | 1087  |
| >TP53-C141A KTCPVQLWV | 125   | >TP53-C141A KTCPVQLWV | 35   | 90    |
| >TP53-C141A KTCPVQLWV | 53    | >TP53-C141A KTCPVQLWV | 41   | 12    |
| >TP53-C141A KTCPVQLWV | 338   | >TP53-C141A KTCPVQLWV | 25   | 313   |
| >TP53-C141A KTCPVQLWV | 202   | >TP53-C141A KTCPVQLWV | 68   | 134   |
| >TP53-C141A KTCPVQLWV | 224   | >TP53-C141A KTCPVQLWV | 442  | 218   |
| >TP53-C141A KTCPVQLW  | 165   | >TP53-C141A KTCPVQLW  | 130  | 35    |
| >TP53-C141A KTCPVQLWV | 1487  | >TP53-C141A KTCPVQLWV | 64   | 1423  |
| >TP53-C141A KTCPVQLW  | 4     | >TP53-C141A KTCPVQLW  | 4    | 0     |
| >TP53-C141A KTCPVQLWV | 118   | >TP53-C141A KTCPVQLWV | 94   | 24    |
| >TP53-C141A KTCPVQLW  | 34    | >TP53-C141A KTCPVQLW  | 29   | 5     |
| >TP53-C141A KTCPVQLW  | 10    | >TP53-C141A KTCPVQLW  | 8    | 2     |
| >TP53-C141A KTCPVQLWV | 554   | >TP53-C141A KTCPVQLWV | 54   | 500   |
| >TP53-C141A KTCPVQLWV | 1070  | >TP53-C141A KTCPVQLWV | 97   | 973   |
| >TP53-C141A KTCPVQLWV | 254   | >TP53-C141A KTCPVQLWV | 102  | 152   |

|                        |      |                        |      |      |
|------------------------|------|------------------------|------|------|
| >TP53-C141A KTCPVQLWV  | 272  | >TP53-C141A KTAPVQLWV  | 255  | 17   |
| >TP53-C141A AKTCPVQL   | 41   | >TP53-C141A AKTAPVQL   | 69   | 28   |
| >TP53-C141A AKTCPVQLW  | 192  | >TP53-C141A AKTAPVQLW  | 308  | 116  |
| >TP53-C141A LAKTCPVQLV | 482  | >TP53-C141A LAKTAPVQLV | 478  | 4    |
| >TP53-C141A LAKTCPVQL  | 1694 | >TP53-C141A LAKTAPVQL  | 427  | 1267 |
| >TP53-C141A LAKTCPVQL  | 417  | >TP53-C141A LAKTAPVQL  | 626  | 209  |
| >TP53-C141A LAKTCPVQL  | 405  | >TP53-C141A LAKTAPVQL  | 245  | 160  |
| >TP53-C141A LAKTCPVQLV | 45   | >TP53-C141A LAKTAPVQLV | 29   | 16   |
| >TP53-C141A LAKTCPVQLV | 42   | >TP53-C141A LAKTAPVQLV | 37   | 5    |
| >TP53-C141A LAKTCPVQLV | 42   | >TP53-C141A LAKTAPVQLV | 30   | 12   |
| >TP53-C141A QLAKTCPV   | 58   | >TP53-C141A QLAKTAPV   | 56   | 2    |
| >TP53-C141A QLAKTCPV   | 13   | >TP53-C141A QLAKTAPV   | 11   | 2    |
| >TP53-C141A QLAKTCPVQL | 315  | >TP53-C141A QLAKTAPVQL | 221  | 94   |
| >TP53-C141A QLAKTCPV   | 10   | >TP53-C141A QLAKTAPV   | 9    | 1    |
| >TP53-C141A QLAKTCPVQL | 383  | >TP53-C141A QLAKTAPVQL | 432  | 49   |
| >TP53-C141A QLAKTCPV   | 37   | >TP53-C141A QLAKTAPV   | 29   | 8    |
| >TP53-C141A QLAKTCPV   | 14   | >TP53-C141A QLAKTAPV   | 11   | 3    |
| >TP53-C141A QLAKTCPVQL | 323  | >TP53-C141A QLAKTAPVQL | 155  | 168  |
| >TP53-C141A QLAKTCPV   | 30   | >TP53-C141A QLAKTAPV   | 15   | 15   |
| >TP53-C141A QLAKTCPV   | 10   | >TP53-C141A QLAKTAPV   | 12   | 2    |
| >TP53-C141A QLAKTCPVQL | 177  | >TP53-C141A QLAKTAPVQL | 90   | 87   |
| >TP53-C141A QLAKTCPV   | 10   | >TP53-C141A QLAKTAPV   | 8    | 2    |
| >TP53-C141A QLAKTCPVQL | 117  | >TP53-C141A QLAKTAPVQL | 103  | 14   |
| >TP53-C141A QLAKTCPV   | 3    | >TP53-C141A QLAKTAPV   | 4    | 1    |
| >TP53-C141A QLAKTCPVQL | 20   | >TP53-C141A QLAKTAPVQL | 19   | 1    |
| >TP53-C141A QLAKTCPV   | 217  | >TP53-C141A QLAKTAPV   | 99   | 118  |
| >TP53-C141A QLAKTCPV   | 60   | >TP53-C141A QLAKTAPV   | 24   | 36   |
| >TP53-C141A QLAKTCPVQL | 967  | >TP53-C141A QLAKTAPVQL | 446  | 521  |
| >TP53-C141A QLAKTCPVQL | 343  | >TP53-C141A QLAKTAPVQL | 143  | 200  |
| >TP53-C141A CQLAKTCPV  | 121  | >TP53-C141A CQLAKTAPV  | 45   | 76   |
| >TP53-C141A CQLAKTCPV  | 565  | >TP53-C141A CQLAKTAPV  | 188  | 377  |
| >TP53-C141A CQLAKTCPV  | 173  | >TP53-C141A CQLAKTAPV  | 44   | 129  |
| >TP53-C141A CQLAKTCPV  | 22   | >TP53-C141A CQLAKTAPV  | 12   | 10   |
| >TP53-C141A CQLAKTCPVC | 463  | >TP53-C141A CQLAKTAPVC | 359  | 104  |
| >TP53-C141A CQLAKTCPV  | 136  | >TP53-C141A CQLAKTAPV  | 216  | 80   |
| >TP53-C141A CQLAKTCPV  | 77   | >TP53-C141A CQLAKTAPV  | 59   | 18   |
| >TP53-C141A CQLAKTCPV  | 457  | >TP53-C141A CQLAKTAPV  | 2040 | 1583 |
| >TP53-C141A CQLAKTCPV  | 268  | >TP53-C141A CQLAKTAPV  | 292  | 24   |
| >TP53-C141A CQLAKTCPVC | 155  | >TP53-C141A CQLAKTAPVC | 157  | 2    |
| >TP53-C141A CQLAKTCPVC | 231  | >TP53-C141A CQLAKTAPVC | 146  | 85   |
| >TP53-C141A CQLAKTCPVC | 762  | >TP53-C141A CQLAKTAPVC | 454  | 308  |
| >TP53-C141A FCQLAKTCPV | 443  | >TP53-C141A FCQLAKTAPV | 747  | 304  |
| >TP53-C141A MFCQLAKTC  | 450  | >TP53-C141A MFCQLAKTA  | 276  | 174  |



|                        |      |                        |     |      |
|------------------------|------|------------------------|-----|------|
| >TP53-C141A KMFCQLAKT( | 6161 | >TP53-C141A KMFCQLAKT/ | 463 | 5698 |
| >TP53-C141A KMFCQLAKT( | 4754 | >TP53-C141A KMFCQLAKT/ | 177 | 4577 |
| >TP53-C141A KMFCQLAKT( | 23   | >TP53-C141A KMFCQLAKT/ | 9   | 14   |
| >TP53-C141A KMFCQLAKT( | 61   | >TP53-C141A KMFCQLAKT/ | 19  | 42   |
| >TP53-C141A KMFCQLAKT( | 1831 | >TP53-C141A KMFCQLAKT/ | 81  | 1750 |
| >TP53-C141A KMFCQLAKT( | 805  | >TP53-C141A KMFCQLAKT/ | 124 | 681  |
| >TP53-C141A KMFCQLAKT( | 7124 | >TP53-C141A KMFCQLAKT/ | 281 | 6843 |
| >TP53-C141A KMFCQLAKT( | 81   | >TP53-C141A KMFCQLAKT/ | 131 | 50   |
| >TP53-C141A KMFCQLAKT( | 491  | >TP53-C141A KMFCQLAKT/ | 130 | 361  |
| >TP53-C141A KMFCQLAKT( | 802  | >TP53-C141A KMFCQLAKT/ | 294 | 508  |
| >TP53-C141F CPVQLWVDS  | 841  | >TP53-C141F FPVQLWVDS  | 96  | 745  |
| >TP53-C141F CPVQLWVDS  | 681  | >TP53-C141F FPVQLWVDS  | 83  | 598  |
| >TP53-C141F CPVQLWVD   | 706  | >TP53-C141F FPVQLWVD   | 88  | 618  |
| >TP53-C141F CPVQLWVDS  | 675  | >TP53-C141F FPVQLWVDS  | 86  | 589  |
| >TP53-C141F CPVQLWVDS  | 1843 | >TP53-C141F FPVQLWVDS  | 92  | 1751 |
| >TP53-C141F CPVQLWVDS  | 635  | >TP53-C141F FPVQLWVDS  | 72  | 563  |
| >TP53-C141F NKMFCQLAK  | 4154 | >TP53-C141F NKMFCQLAK  | 7   | 4147 |
| >TP53-C141F KTCPVQLWV  | 575  | >TP53-C141F KTFPVQLWV  | 30  | 545  |
| >TP53-C141F KTCPVQLWV  | 923  | >TP53-C141F KTFPVQLWV  | 62  | 861  |
| >TP53-C141F KTCPVQLWV  | 1227 | >TP53-C141F KTFPVQLWV  | 150 | 1077 |
| >TP53-C141F KTCPVQLWV  | 125  | >TP53-C141F KTFPVQLWV  | 15  | 110  |
| >TP53-C141F KTCPVQLWV  | 53   | >TP53-C141F KTFPVQLWV  | 7   | 46   |
| >TP53-C141F KTCPVQLWV  | 338  | >TP53-C141F KTFPVQLWV  | 13  | 325  |
| >TP53-C141F KTCPVQLWV  | 202  | >TP53-C141F KTFPVQLWV  | 34  | 168  |
| >TP53-C141F KTCPVQLWV  | 224  | >TP53-C141F KTFPVQLWV  | 29  | 195  |
| >TP53-C141F KTCPVQLW   | 165  | >TP53-C141F KTFPVQLW   | 12  | 153  |
| >TP53-C141F KTCPVQLWV  | 1821 | >TP53-C141F KTFPVQLWV  | 107 | 1714 |
| >TP53-C141F KTCPVQLWV  | 1487 | >TP53-C141F KTFPVQLWV  | 44  | 1443 |
| >TP53-C141F KTCPVQLW   | 4    | >TP53-C141F KTFPVQLW   | 3   | 1    |
| >TP53-C141F KTCPVQLWV  | 118  | >TP53-C141F KTFPVQLWV  | 41  | 77   |
| >TP53-C141F KTCPVQLW   | 34   | >TP53-C141F KTFPVQLW   | 29  | 5    |
| >TP53-C141F KTCPVQLWV  | 4438 | >TP53-C141F KTFPVQLWV  | 218 | 4220 |
| >TP53-C141F KTCPVQLW   | 10   | >TP53-C141F KTFPVQLW   | 8   | 2    |
| >TP53-C141F KTCPVQLWV  | 554  | >TP53-C141F KTFPVQLWV  | 60  | 494  |
| >TP53-C141F KTCPVQLWV  | 1070 | >TP53-C141F KTFPVQLWV  | 366 | 704  |
| >TP53-C141F KTCPVQLWV  | 254  | >TP53-C141F KTFPVQLWV  | 23  | 231  |
| >TP53-C141F KTCPVQLW   | 5386 | >TP53-C141F KTFPVQLW   | 465 | 4921 |
| >TP53-C141F KTCPVQLWV  | 272  | >TP53-C141F KTFPVQLWV  | 111 | 161  |
| >TP53-C141F AKTCPVQL   | 41   | >TP53-C141F AKTFPVQL   | 99  | 58   |
| >TP53-C141F AKTCPVQLW  | 192  | >TP53-C141F AKTFPVQLW  | 733 | 541  |
| >TP53-C141F LAKTCPVQL  | 482  | >TP53-C141F LAKTFPVQLW | 462 | 20   |
| >TP53-C141F LAKTCPVQL  | 417  | >TP53-C141F LAKTFPVQL  | 207 | 210  |
| >TP53-C141F LAKTCPVQL  | 405  | >TP53-C141F LAKTFPVQL  | 360 | 45   |

|                        |       |                        |     |       |
|------------------------|-------|------------------------|-----|-------|
| >TP53-C141F LAKTCPVQLV | 45    | >TP53-C141F LAKTFPVQLW | 32  | 13    |
| >TP53-C141F LAKTCPVQLV | 42    | >TP53-C141F LAKTFPVQLW | 34  | 8     |
| >TP53-C141F LAKTCPVQLV | 42    | >TP53-C141F LAKTFPVQLW | 32  | 10    |
| >TP53-C141F LAKTCPVQLV | 689   | >TP53-C141F LAKTFPVQLW | 373 | 316   |
| >TP53-C141F QLAKTCPV   | 58    | >TP53-C141F QLAKTFPV   | 17  | 41    |
| >TP53-C141F QLAKTCPV   | 13    | >TP53-C141F QLAKTFPV   | 6   | 7     |
| >TP53-C141F QLAKTCPVQL | 315   | >TP53-C141F QLAKTFPVQL | 147 | 168   |
| >TP53-C141F QLAKTCPV   | 10    | >TP53-C141F QLAKTFPV   | 7   | 3     |
| >TP53-C141F QLAKTCPVQL | 383   | >TP53-C141F QLAKTFPVQL | 292 | 91    |
| >TP53-C141F QLAKTCPV   | 37    | >TP53-C141F QLAKTFPV   | 7   | 30    |
| >TP53-C141F QLAKTCPV   | 14    | >TP53-C141F QLAKTFPV   | 6   | 8     |
| >TP53-C141F QLAKTCPVQL | 323   | >TP53-C141F QLAKTFPVQL | 74  | 249   |
| >TP53-C141F QLAKTCPV   | 30    | >TP53-C141F QLAKTFPV   | 9   | 21    |
| >TP53-C141F QLAKTCPV   | 10    | >TP53-C141F QLAKTFPV   | 8   | 2     |
| >TP53-C141F QLAKTCPVQL | 177   | >TP53-C141F QLAKTFPVQL | 102 | 75    |
| >TP53-C141F QLAKTCPV   | 10    | >TP53-C141F QLAKTFPV   | 6   | 4     |
| >TP53-C141F QLAKTCPVQL | 117   | >TP53-C141F QLAKTFPVQL | 119 | 2     |
| >TP53-C141F QLAKTCPV   | 3     | >TP53-C141F QLAKTFPV   | 3   | 0     |
| >TP53-C141F QLAKTCPVQL | 20    | >TP53-C141F QLAKTFPVQL | 14  | 6     |
| >TP53-C141F QLAKTCPV   | 217   | >TP53-C141F QLAKTFPV   | 62  | 155   |
| >TP53-C141F QLAKTCPV   | 60    | >TP53-C141F QLAKTFPV   | 13  | 47    |
| >TP53-C141F QLAKTCPVQL | 343   | >TP53-C141F QLAKTFPVQL | 209 | 134   |
| >TP53-C141F CQLAKTCPV  | 121   | >TP53-C141F CQLAKTFPV  | 16  | 105   |
| >TP53-C141F CQLAKTCPVC | 1090  | >TP53-C141F CQLAKTFPVC | 428 | 662   |
| >TP53-C141F CQLAKTCPV  | 565   | >TP53-C141F CQLAKTFPV  | 96  | 469   |
| >TP53-C141F CQLAKTCPV  | 173   | >TP53-C141F CQLAKTFPV  | 156 | 17    |
| >TP53-C141F CQLAKTCPV  | 22    | >TP53-C141F CQLAKTFPV  | 6   | 16    |
| >TP53-C141F CQLAKTCPVC | 463   | >TP53-C141F CQLAKTFPVC | 192 | 271   |
| >TP53-C141F CQLAKTCPV  | 136   | >TP53-C141F CQLAKTFPV  | 80  | 56    |
| >TP53-C141F CQLAKTCPV  | 77    | >TP53-C141F CQLAKTFPV  | 20  | 57    |
| >TP53-C141F CQLAKTCPV  | 457   | >TP53-C141F CQLAKTFPV  | 219 | 238   |
| >TP53-C141F CQLAKTCPV  | 720   | >TP53-C141F CQLAKTFPV  | 96  | 624   |
| >TP53-C141F CQLAKTCPV  | 268   | >TP53-C141F CQLAKTFPV  | 564 | 296   |
| >TP53-C141F CQLAKTCPVC | 155   | >TP53-C141F CQLAKTFPVC | 153 | 2     |
| >TP53-C141F CQLAKTCPVC | 231   | >TP53-C141F CQLAKTFPVC | 147 | 84    |
| >TP53-C141F CQLAKTCPVC | 762   | >TP53-C141F CQLAKTFPVC | 425 | 337   |
| >TP53-C141F FCQLAKTCPV | 1178  | >TP53-C141F FCQLAKTFPV | 371 | 807   |
| >TP53-C141F FCQLAKTCPV | 443   | >TP53-C141F FCQLAKTFPV | 441 | 2     |
| >TP53-C141F FCQLAKTCPV | 1688  | >TP53-C141F FCQLAKTFPV | 497 | 1191  |
| >TP53-C141F MFCQLAKTCI | 1152  | >TP53-C141F MFCQLAKTFI | 354 | 798   |
| >TP53-C141F MFCQLAKTC  | 27768 | >TP53-C141F MFCQLAKTF  | 210 | 27558 |
| >TP53-C141F MFCQLAKTC  | 8082  | >TP53-C141F MFCQLAKTF  | 9   | 8073  |
| >TP53-C141F MFCQLAKTC  | 18074 | >TP53-C141F MFCQLAKTF  | 350 | 17724 |

|                        |       |                        |      |       |
|------------------------|-------|------------------------|------|-------|
| >TP53-C141FMFCQLAKTC   | 450   | >TP53-C141FMFCQLAKTF   | 709  | 259   |
| >TP53-C141FKMFCQLAKTC  | 23    | >TP53-C141FKMFCQLAKTI  | 186  | 163   |
| >TP53-C141FKMFCQLAKTC  | 61    | >TP53-C141FKMFCQLAKTI  | 834  | 773   |
| >TP53-C141FKMFCQLAKTC  | 18838 | >TP53-C141FKMFCQLAKTI  | 224  | 18614 |
| >TP53-C141FKMFCQLAKTC  | 81    | >TP53-C141FKMFCQLAKTI  | 7    | 74    |
| >TP53-C141FKMFCQLAKTC  | 8111  | >TP53-C141FKMFCQLAKTI  | 44   | 8067  |
| >TP53-C141FKMFCQLAKTC  | 491   | >TP53-C141FKMFCQLAKTI  | 2    | 489   |
| >TP53-C141FKMFCQLAKTC  | 9704  | >TP53-C141FKMFCQLAKTI  | 15   | 9689  |
| >TP53-C141FKMFCQLAKTC  | 18318 | >TP53-C141FKMFCQLAKTI  | 435  | 17883 |
| >TP53-C141FKMFCQLAKTC  | 17329 | >TP53-C141FKMFCQLAKTI  | 284  | 17045 |
| >TP53-C141CKTCPVQLWV   | 125   | >TP53-C141CKTGPVQLWV   | 412  | 287   |
| >TP53-C141CKTCPVQLWV   | 53    | >TP53-C141CKTGPVQLWV   | 49   | 4     |
| >TP53-C141CKTCPVQLWV   | 338   | >TP53-C141CKTGPVQLWV   | 53   | 285   |
| >TP53-C141CKTCPVQLWV   | 202   | >TP53-C141CKTGPVQLWV   | 152  | 50    |
| >TP53-C141CKTCPVQLWV   | 224   | >TP53-C141CKTGPVQLWV   | 980  | 756   |
| >TP53-C141CKTCPVQLW    | 165   | >TP53-C141CKTGPVQLW    | 205  | 40    |
| >TP53-C141CKTCPVQLW    | 4     | >TP53-C141CKTGPVQLW    | 6    | 2     |
| >TP53-C141CKTCPVQLWV   | 118   | >TP53-C141CKTGPVQLWV   | 455  | 337   |
| >TP53-C141CKTCPVQLW    | 34    | >TP53-C141CKTGPVQLW    | 30   | 4     |
| >TP53-C141CKTCPVQLW    | 10    | >TP53-C141CKTGPVQLW    | 9    | 1     |
| >TP53-C141CKTCPVQLWV   | 554   | >TP53-C141CKTGPVQLWV   | 350  | 204   |
| >TP53-C141CKTCPVQLWV   | 254   | >TP53-C141CKTGPVQLWV   | 521  | 267   |
| >TP53-C141CKTCPVQLWV   | 272   | >TP53-C141CKTGPVQLWV   | 775  | 503   |
| >TP53-C141CAKTCPVQLW   | 4125  | >TP53-C141CAKTGPVQLW   | 473  | 3652  |
| >TP53-C141CAKTCPVQL    | 41    | >TP53-C141CAKTGPVQL    | 300  | 259   |
| >TP53-C141CAKTCPVQLW   | 192   | >TP53-C141CAKTGPVQLW   | 1367 | 1175  |
| >TP53-C141CALAKTCPVQLW | 482   | >TP53-C141CALAKTGPVQLV | 280  | 202   |
| >TP53-C141CALAKTCPVQL  | 417   | >TP53-C141CALAKTGPVQL  | 1343 | 926   |
| >TP53-C141CALAKTCPVQL  | 405   | >TP53-C141CALAKTGPVQL  | 144  | 261   |
| >TP53-C141CALAKTCPVQLV | 45    | >TP53-C141CALAKTGPVQLV | 22   | 23    |
| >TP53-C141CALAKTCPVQLV | 42    | >TP53-C141CALAKTGPVQLV | 51   | 9     |
| >TP53-C141CALAKTCPVQLV | 42    | >TP53-C141CALAKTGPVQLV | 35   | 7     |
| >TP53-C141CQLAKTCPV    | 58    | >TP53-C141CQLAKTGPV    | 434  | 376   |
| >TP53-C141CQLAKTCPV    | 13    | >TP53-C141CQLAKTGPV    | 28   | 15    |
| >TP53-C141CQLAKTCPVQL  | 315   | >TP53-C141CQLAKTGPVQL  | 322  | 7     |
| >TP53-C141CQLAKTCPV    | 10    | >TP53-C141CQLAKTGPV    | 11   | 1     |
| >TP53-C141CQLAKTCPVQL  | 383   | >TP53-C141CQLAKTGPVQL  | 309  | 74    |
| >TP53-C141CQLAKTCPV    | 37    | >TP53-C141CQLAKTGPV    | 150  | 113   |
| >TP53-C141CQLAKTCPV    | 14    | >TP53-C141CQLAKTGPV    | 20   | 6     |
| >TP53-C141CQLAKTCPVQL  | 323   | >TP53-C141CQLAKTGPVQL  | 108  | 215   |
| >TP53-C141CQLAKTCPV    | 30    | >TP53-C141CQLAKTGPV    | 60   | 30    |
| >TP53-C141CQLAKTCPV    | 10    | >TP53-C141CQLAKTGPV    | 24   | 14    |
| >TP53-C141CQLAKTCPVQL  | 177   | >TP53-C141CQLAKTGPVQL  | 81   | 96    |

|                       |       |                       |      |       |
|-----------------------|-------|-----------------------|------|-------|
| >TP53-C141CQLAKTCPV   | 10    | >TP53-C141CQLAKTGPV   | 89   | 79    |
| >TP53-C141CQLAKTCPVQL | 117   | >TP53-C141CQLAKTGPVQI | 201  | 84    |
| >TP53-C141CQLAKTCPV   | 3     | >TP53-C141CQLAKTGPV   | 7    | 4     |
| >TP53-C141CQLAKTCPVQL | 20    | >TP53-C141CQLAKTGPVQI | 17   | 3     |
| >TP53-C141CQLAKTCPV   | 217   | >TP53-C141CQLAKTGPV   | 217  | 0     |
| >TP53-C141CQLAKTCPV   | 60    | >TP53-C141CQLAKTGPV   | 91   | 31    |
| >TP53-C141CQLAKTCPVQL | 343   | >TP53-C141CQLAKTGPVQI | 270  | 73    |
| >TP53-C141CCQLAKTCPV  | 121   | >TP53-C141CCQLAKTGPV  | 1020 | 899   |
| >TP53-C141CCQLAKTCPV  | 173   | >TP53-C141CCQLAKTGPV  | 114  | 59    |
| >TP53-C141CCQLAKTCPV  | 22    | >TP53-C141CCQLAKTGPV  | 60   | 38    |
| >TP53-C141CCQLAKTCPVC | 463   | >TP53-C141CCQLAKTGPVC | 704  | 241   |
| >TP53-C141CCQLAKTCPV  | 136   | >TP53-C141CCQLAKTGPV  | 1081 | 945   |
| >TP53-C141CCQLAKTCPV  | 77    | >TP53-C141CCQLAKTGPV  | 1032 | 955   |
| >TP53-C141CCQLAKTCPV  | 457   | >TP53-C141CCQLAKTGPV  | 6134 | 5677  |
| >TP53-C141CCQLAKTCPV  | 268   | >TP53-C141CCQLAKTGPV  | 2811 | 2543  |
| >TP53-C141CCQLAKTCPVC | 155   | >TP53-C141CCQLAKTGPVC | 355  | 200   |
| >TP53-C141CCQLAKTCPVC | 231   | >TP53-C141CCQLAKTGPVC | 231  | 0     |
| >TP53-C141CFCQLAKTCPV | 443   | >TP53-C141CFCQLAKTGPV | 3491 | 3048  |
| >TP53-C141CMFCQLAKTC  | 450   | >TP53-C141CMFCQLAKTG  | 908  | 458   |
| >TP53-C141CKMFCQLAKTC | 23    | >TP53-C141CKMFCQLAKTC | 551  | 528   |
| >TP53-C141CKMFCQLAKTC | 61    | >TP53-C141CKMFCQLAKTC | 1224 | 1163  |
| >TP53-C141CKMFCQLAKTC | 81    | >TP53-C141CKMFCQLAKTC | 228  | 147   |
| >TP53-C141CKMFCQLAKTC | 491   | >TP53-C141CKMFCQLAKTC | 1569 | 1078  |
| >TP53-C141FNKMFCQLAK  | 35885 | >TP53-C141FNKMFCQLAK  | 446  | 35439 |
| >TP53-C141FKTCPVQLWV  | 125   | >TP53-C141FKTRPVQLWV  | 993  | 868   |
| >TP53-C141FKTCPVQLWV  | 53    | >TP53-C141FKTRPVQLWV  | 382  | 329   |
| >TP53-C141FKTCPVQLWV  | 338   | >TP53-C141FKTRPVQLWV  | 1277 | 939   |
| >TP53-C141FKTCPVQLWV  | 202   | >TP53-C141FKTRPVQLWV  | 301  | 99    |
| >TP53-C141FKTCPVQLW   | 5258  | >TP53-C141FKTRPVQLW   | 53   | 5205  |
| >TP53-C141FKTCPVQLWV  | 224   | >TP53-C141FKTRPVQLWV  | 4    | 220   |
| >TP53-C141FKTCPVQLWV  | 4368  | >TP53-C141FKTRPVQLWV  | 116  | 4252  |
| >TP53-C141FKTCPVQLWV  | 2627  | >TP53-C141FKTRPVQLWV  | 13   | 2614  |
| >TP53-C141FKTCPVQLW   | 165   | >TP53-C141FKTRPVQLW   | 601  | 436   |
| >TP53-C141FKTCPVQLW   | 4     | >TP53-C141FKTRPVQLW   | 3    | 1     |
| >TP53-C141FKTCPVQLWV  | 118   | >TP53-C141FKTRPVQLWV  | 27   | 91    |
| >TP53-C141FKTCPVQLW   | 34    | >TP53-C141FKTRPVQLW   | 27   | 7     |
| >TP53-C141FKTCPVQLW   | 10    | >TP53-C141FKTRPVQLW   | 11   | 1     |
| >TP53-C141FKTCPVQLWV  | 254   | >TP53-C141FKTRPVQLWV  | 32   | 222   |
| >TP53-C141FKTCPVQLWV  | 272   | >TP53-C141FKTRPVQLWV  | 1118 | 846   |
| >TP53-C141FAKTCPVQL   | 41    | >TP53-C141FAKTRPVQL   | 70   | 29    |
| >TP53-C141FAKTCPVQLW  | 192   | >TP53-C141FAKTRPVQLW  | 254  | 62    |
| >TP53-C141FLAKTCPVQLV | 482   | >TP53-C141FLAKTRPVQLV | 547  | 65    |
| >TP53-C141FLAKTCPVQL  | 3437  | >TP53-C141FLAKTRPVQL  | 41   | 3396  |

|                       |       |                       |      |       |
|-----------------------|-------|-----------------------|------|-------|
| >TP53-C141FLAKTCPVQL  | 417   | >TP53-C141FLAKTRPVQL  | 1405 | 988   |
| >TP53-C141FLAKTCPVQL  | 405   | >TP53-C141FLAKTRPVQL  | 231  | 174   |
| >TP53-C141FLAKTCPVQLV | 45    | >TP53-C141FLAKTRPVQLV | 30   | 15    |
| >TP53-C141FLAKTCPVQLV | 42    | >TP53-C141FLAKTRPVQLV | 43   | 1     |
| >TP53-C141FLAKTCPVQLV | 42    | >TP53-C141FLAKTRPVQLV | 57   | 15    |
| >TP53-C141FQLAKTCPV   | 58    | >TP53-C141FQLAKTRPV   | 677  | 619   |
| >TP53-C141FQLAKTCPV   | 13    | >TP53-C141FQLAKTRPV   | 49   | 36    |
| >TP53-C141FQLAKTCPVQL | 315   | >TP53-C141FQLAKTRPVQL | 499  | 184   |
| >TP53-C141FQLAKTCPV   | 10    | >TP53-C141FQLAKTRPV   | 22   | 12    |
| >TP53-C141FQLAKTCPVQL | 383   | >TP53-C141FQLAKTRPVQL | 586  | 203   |
| >TP53-C141FQLAKTCPV   | 37    | >TP53-C141FQLAKTRPV   | 389  | 352   |
| >TP53-C141FQLAKTCPV   | 14    | >TP53-C141FQLAKTRPV   | 48   | 34    |
| >TP53-C141FQLAKTCPVQL | 323   | >TP53-C141FQLAKTRPVQL | 447  | 124   |
| >TP53-C141FQLAKTCPV   | 30    | >TP53-C141FQLAKTRPV   | 195  | 165   |
| >TP53-C141FQLAKTCPV   | 10    | >TP53-C141FQLAKTRPV   | 53   | 43    |
| >TP53-C141FQLAKTCPVQL | 177   | >TP53-C141FQLAKTRPVQL | 362  | 185   |
| >TP53-C141FQLAKTCPV   | 10    | >TP53-C141FQLAKTRPV   | 214  | 204   |
| >TP53-C141FQLAKTCPVQL | 117   | >TP53-C141FQLAKTRPVQL | 1088 | 971   |
| >TP53-C141FQLAKTCPV   | 3     | >TP53-C141FQLAKTRPV   | 8    | 5     |
| >TP53-C141FQLAKTCPVQL | 20    | >TP53-C141FQLAKTRPVQL | 22   | 2     |
| >TP53-C141FQLAKTCPV   | 217   | >TP53-C141FQLAKTRPV   | 301  | 84    |
| >TP53-C141FQLAKTCPV   | 60    | >TP53-C141FQLAKTRPV   | 280  | 220   |
| >TP53-C141FQLAKTCPVQL | 343   | >TP53-C141FQLAKTRPVQL | 210  | 133   |
| >TP53-C141FCQLAKTCPV  | 121   | >TP53-C141FCQLAKTRPV  | 1172 | 1051  |
| >TP53-C141FCQLAKTCPV  | 173   | >TP53-C141FCQLAKTRPV  | 262  | 89    |
| >TP53-C141FCQLAKTCPV  | 22    | >TP53-C141FCQLAKTRPV  | 102  | 80    |
| >TP53-C141FCQLAKTCPVC | 463   | >TP53-C141FCQLAKTRPVC | 1118 | 655   |
| >TP53-C141FCQLAKTCPV  | 136   | >TP53-C141FCQLAKTRPV  | 1184 | 1048  |
| >TP53-C141FCQLAKTCPV  | 77    | >TP53-C141FCQLAKTRPV  | 1558 | 1481  |
| >TP53-C141FCQLAKTCPV  | 457   | >TP53-C141FCQLAKTRPV  | 8869 | 8412  |
| >TP53-C141FCQLAKTCPV  | 268   | >TP53-C141FCQLAKTRPV  | 527  | 259   |
| >TP53-C141FCQLAKTCPVC | 155   | >TP53-C141FCQLAKTRPVC | 231  | 76    |
| >TP53-C141FCQLAKTCPVC | 231   | >TP53-C141FCQLAKTRPVC | 389  | 158   |
| >TP53-C141FCQLAKTCPV  | 443   | >TP53-C141FCQLAKTRPV  | 3773 | 3330  |
| >TP53-C141FMFCQLAKTC  | 23164 | >TP53-C141FMFCQLAKTR  | 140  | 23024 |
| >TP53-C141FMFCQLAKTC  | 35469 | >TP53-C141FMFCQLAKTR  | 154  | 35315 |
| >TP53-C141FMFCQLAKTC  | 39424 | >TP53-C141FMFCQLAKTR  | 279  | 39145 |
| >TP53-C141FMFCQLAKTC  | 28327 | >TP53-C141FMFCQLAKTR  | 27   | 28300 |
| >TP53-C141FMFCQLAKTC  | 450   | >TP53-C141FMFCQLAKTR  | 988  | 538   |
| >TP53-C141FKMFCQLAKTC | 23    | >TP53-C141FKMFCQLAKTI | 3235 | 3212  |
| >TP53-C141FKMFCQLAKTC | 61    | >TP53-C141FKMFCQLAKTI | 4923 | 4862  |
| >TP53-C141FKMFCQLAKTC | 21924 | >TP53-C141FKMFCQLAKTI | 475  | 21449 |
| >TP53-C141FKMFCQLAKTC | 15020 | >TP53-C141FKMFCQLAKTI | 19   | 15001 |

|                       |       |                       |     |       |
|-----------------------|-------|-----------------------|-----|-------|
| >TP53-C141FKMFCQLAKT( | 81    | >TP53-C141FKMFCQLAKTI | 209 | 128   |
| >TP53-C141FKMFCQLAKT( | 491   | >TP53-C141FKMFCQLAKTI | 85  | 406   |
| >TP53-C141FKMFCQLAKT( | 29674 | >TP53-C141FKMFCQLAKTI | 76  | 29598 |
| >TP53-C141FKMFCQLAKT( | 14097 | >TP53-C141FKMFCQLAKTI | 14  | 14083 |
| >TP53-C141STCPVQLWV   | 1807  | >TP53-C141STSPVQLWV   | 301 | 1506  |
| >TP53-C141STCPVQLWV   | 16547 | >TP53-C141STSPVQLWV   | 66  | 16481 |
| >TP53-C141SKTCPVQLWV  | 575   | >TP53-C141SKTSPVQLWV  | 238 | 337   |
| >TP53-C141SKTCPVQLWV  | 923   | >TP53-C141SKTSPVQLWV  | 103 | 820   |
| >TP53-C141SKTCPVQLWV  | 1227  | >TP53-C141SKTSPVQLWV  | 256 | 971   |
| >TP53-C141SKTCPVQLWV  | 125   | >TP53-C141SKTSPVQLWV  | 89  | 36    |
| >TP53-C141SKTCPVQLWV  | 53    | >TP53-C141SKTSPVQLWV  | 69  | 16    |
| >TP53-C141SKTCPVQLWV  | 338   | >TP53-C141SKTSPVQLWV  | 60  | 278   |
| >TP53-C141SKTCPVQLWV  | 202   | >TP53-C141SKTSPVQLWV  | 104 | 98    |
| >TP53-C141SKTCPVQLWV  | 224   | >TP53-C141SKTSPVQLWV  | 164 | 60    |
| >TP53-C141SKTCPVQLW   | 165   | >TP53-C141SKTSPVQLW   | 135 | 30    |
| >TP53-C141SKTCPVQLWV  | 1487  | >TP53-C141SKTSPVQLWV  | 274 | 1213  |
| >TP53-C141SKTCPVQLW   | 4     | >TP53-C141SKTSPVQLW   | 4   | 0     |
| >TP53-C141SKTCPVQLWV  | 118   | >TP53-C141SKTSPVQLWV  | 96  | 22    |
| >TP53-C141SKTCPVQLW   | 34    | >TP53-C141SKTSPVQLW   | 28  | 6     |
| >TP53-C141SKTCPVQLW   | 10    | >TP53-C141SKTSPVQLW   | 8   | 2     |
| >TP53-C141SKTCPVQLWV  | 554   | >TP53-C141SKTSPVQLWV  | 72  | 482   |
| >TP53-C141SKTCPVQLWV  | 1070  | >TP53-C141SKTSPVQLWV  | 231 | 839   |
| >TP53-C141SKTCPVQLWV  | 254   | >TP53-C141SKTSPVQLWV  | 98  | 156   |
| >TP53-C141SKTCPVQLWV  | 272   | >TP53-C141SKTSPVQLWV  | 553 | 281   |
| >TP53-C141SAKTCPVQL   | 41    | >TP53-C141SAKTSPVQL   | 28  | 13    |
| >TP53-C141SAKTCPVQLW  | 192   | >TP53-C141SAKTSPVQLW  | 122 | 70    |
| >TP53-C141SAKTCPVQLW  | 503   | >TP53-C141SAKTSPVQLW' | 376 | 127   |
| >TP53-C141SLAKTCPVQLW | 482   | >TP53-C141SLAKTSPVQLW | 411 | 71    |
| >TP53-C141SLAKTCPVQL  | 417   | >TP53-C141SLAKTSPVQL  | 155 | 262   |
| >TP53-C141SLAKTCPVQL  | 405   | >TP53-C141SLAKTSPVQL  | 53  | 352   |
| >TP53-C141SLAKTCPVQLW | 45    | >TP53-C141SLAKTSPVQLW | 13  | 32    |
| >TP53-C141SLAKTCPVQLW | 42    | >TP53-C141SLAKTSPVQLW | 38  | 4     |
| >TP53-C141SLAKTCPVQLW | 42    | >TP53-C141SLAKTSPVQLW | 27  | 15    |
| >TP53-C141SQLAKTCPV   | 58    | >TP53-C141SQLAKTSPV   | 75  | 17    |
| >TP53-C141SQLAKTCPV   | 13    | >TP53-C141SQLAKTSPV   | 10  | 3     |
| >TP53-C141SQLAKTCPVQL | 315   | >TP53-C141SQLAKTSPVQL | 201 | 114   |
| >TP53-C141SQLAKTCPV   | 10    | >TP53-C141SQLAKTSPV   | 6   | 4     |
| >TP53-C141SQLAKTCPVQL | 383   | >TP53-C141SQLAKTSPVQL | 284 | 99    |
| >TP53-C141SQLAKTCPV   | 37    | >TP53-C141SQLAKTSPV   | 46  | 9     |
| >TP53-C141SQLAKTCPV   | 14    | >TP53-C141SQLAKTSPV   | 12  | 2     |
| >TP53-C141SQLAKTCPVQL | 323   | >TP53-C141SQLAKTSPVQL | 125 | 198   |
| >TP53-C141SQLAKTCPV   | 30    | >TP53-C141SQLAKTSPV   | 16  | 14    |
| >TP53-C141SQLAKTCPV   | 10    | >TP53-C141SQLAKTSPV   | 13  | 3     |

|                        |       |                        |      |       |
|------------------------|-------|------------------------|------|-------|
| >TP53-C141S QLAKTCPVQL | 177   | >TP53-C141S QLAKTSPVQL | 89   | 88    |
| >TP53-C141S QLAKTCPV   | 10    | >TP53-C141S QLAKTSPV   | 11   | 1     |
| >TP53-C141S QLAKTCPVQL | 117   | >TP53-C141S QLAKTSPVQL | 78   | 39    |
| >TP53-C141S QLAKTCPV   | 3     | >TP53-C141S QLAKTSPV   | 4    | 1     |
| >TP53-C141S QLAKTCPVQL | 20    | >TP53-C141S QLAKTSPVQL | 17   | 3     |
| >TP53-C141S QLAKTCPV   | 217   | >TP53-C141S QLAKTSPV   | 123  | 94    |
| >TP53-C141S QLAKTCPV   | 60    | >TP53-C141S QLAKTSPV   | 45   | 15    |
| >TP53-C141S QLAKTCPVQL | 967   | >TP53-C141S QLAKTSPVQL | 484  | 483   |
| >TP53-C141S QLAKTCPVQL | 343   | >TP53-C141S QLAKTSPVQL | 140  | 203   |
| >TP53-C141S CQLAKTCPV  | 121   | >TP53-C141S CQLAKTSPV  | 207  | 86    |
| >TP53-C141S CQLAKTCPV  | 565   | >TP53-C141S CQLAKTSPV  | 388  | 177   |
| >TP53-C141S CQLAKTCPV  | 173   | >TP53-C141S CQLAKTSPV  | 37   | 136   |
| >TP53-C141S CQLAKTCPV  | 22    | >TP53-C141S CQLAKTSPV  | 25   | 3     |
| >TP53-C141S CQLAKTCPVC | 463   | >TP53-C141S CQLAKTSPVC | 587  | 124   |
| >TP53-C141S CQLAKTCPV  | 136   | >TP53-C141S CQLAKTSPV  | 447  | 311   |
| >TP53-C141S CQLAKTCPV  | 77    | >TP53-C141S CQLAKTSPV  | 181  | 104   |
| >TP53-C141S CQLAKTCPV  | 457   | >TP53-C141S CQLAKTSPV  | 2497 | 2040  |
| >TP53-C141S CQLAKTCPV  | 268   | >TP53-C141S CQLAKTSPV  | 106  | 162   |
| >TP53-C141S CQLAKTCPVC | 155   | >TP53-C141S CQLAKTSPVC | 73   | 82    |
| >TP53-C141S CQLAKTCPVC | 231   | >TP53-C141S CQLAKTSPVC | 151  | 80    |
| >TP53-C141S FCQLAKTCPV | 443   | >TP53-C141S FCQLAKTSPV | 913  | 470   |
| >TP53-C141S MFCQLAKTC  | 450   | >TP53-C141S MFCQLAKTS  | 1460 | 1010  |
| >TP53-C141S KMFCQLAKTC | 23    | >TP53-C141S KMFCQLAKTS | 230  | 207   |
| >TP53-C141S KMFCQLAKTC | 61    | >TP53-C141S KMFCQLAKTS | 690  | 629   |
| >TP53-C141S KMFCQLAKTC | 81    | >TP53-C141S KMFCQLAKTS | 262  | 181   |
| >TP53-C141S KMFCQLAKTC | 491   | >TP53-C141S KMFCQLAKTS | 499  | 8     |
| >TP53-C141S KMFCQLAKTC | 802   | >TP53-C141S KMFCQLAKTS | 300  | 502   |
| >TP53-C141V CPVQLWVDS  | 841   | >TP53-C141V WPVQLWVD   | 106  | 735   |
| >TP53-C141V CPVQLWVDS  | 681   | >TP53-C141V WPVQLWVD   | 82   | 599   |
| >TP53-C141V CPVQLWVD   | 706   | >TP53-C141V WPVQLWVD   | 441  | 265   |
| >TP53-C141V CPVQLWVDS  | 675   | >TP53-C141V WPVQLWVD   | 439  | 236   |
| >TP53-C141V CPVQLWVDS  | 635   | >TP53-C141V WPVQLWVD   | 453  | 182   |
| >TP53-C141V TCPVQLWVD  | 38151 | >TP53-C141V TWPVQLWVI  | 241  | 37910 |
| >TP53-C141V NKMFCQLAK  | 4154  | >TP53-C141V NKMFCQLAK  | 473  | 3681  |
| >TP53-C141V KTCPVQLWV  | 575   | >TP53-C141V KTWPVQLWV  | 20   | 555   |
| >TP53-C141V KTCPVQLWV  | 923   | >TP53-C141V KTWPVQLWV  | 299  | 624   |
| >TP53-C141V KTCPVQLWV  | 125   | >TP53-C141V KTWPVQLWV  | 30   | 95    |
| >TP53-C141V KTCPVQLWV  | 53    | >TP53-C141V KTWPVQLWV  | 5    | 48    |
| >TP53-C141V KTCPVQLWV  | 338   | >TP53-C141V KTWPVQLWV  | 9    | 329   |
| >TP53-C141V KTCPVQLWV  | 202   | >TP53-C141V KTWPVQLWV  | 22   | 180   |
| >TP53-C141V KTCPVQLWV  | 224   | >TP53-C141V KTWPVQLWV  | 314  | 90    |
| >TP53-C141V KTCPVQLWV  | 2535  | >TP53-C141V KTWPVQLWV  | 445  | 2090  |
| >TP53-C141V KTCPVQLW   | 165   | >TP53-C141V KTWPVQLW   | 26   | 139   |

|                       |      |                       |      |      |
|-----------------------|------|-----------------------|------|------|
| >TP53-C141VKTCPVQLWV  | 1821 | >TP53-C141VKTWPVQLW\  | 217  | 1604 |
| >TP53-C141VKTCPVQLWV  | 1487 | >TP53-C141VKTWPVQLW\  | 398  | 1089 |
| >TP53-C141VKTCPVQLWV  | 7602 | >TP53-C141VKTWPVQLW\  | 230  | 7372 |
| >TP53-C141VKTCPVQLW   | 4    | >TP53-C141VKTWPVQLW   | 3    | 1    |
| >TP53-C141VKTCPVQLWV  | 118  | >TP53-C141VKTWPVQLW\  | 33   | 85   |
| >TP53-C141VKTCPVQLW   | 34   | >TP53-C141VKTWPVQLW   | 29   | 5    |
| >TP53-C141VKTCPVQLWV  | 4438 | >TP53-C141VKTWPVQLW\  | 245  | 4193 |
| >TP53-C141VKTCPVQLW   | 10   | >TP53-C141VKTWPVQLW   | 8    | 2    |
| >TP53-C141VKTCPVQLWV  | 554  | >TP53-C141VKTWPVQLW\  | 90   | 464  |
| >TP53-C141VKTCPVQLWV  | 1070 | >TP53-C141VKTWPVQLW\  | 368  | 702  |
| >TP53-C141VKTCPVQLWV  | 254  | >TP53-C141VKTWPVQLW\  | 143  | 111  |
| >TP53-C141VKTCPVQLWV  | 272  | >TP53-C141VKTWPVQLW\  | 104  | 168  |
| >TP53-C141VAKTCPVQLW  | 4125 | >TP53-C141VAKTWPVQLW  | 490  | 3635 |
| >TP53-C141VAKTCPVQL   | 41   | >TP53-C141VAKTWPVQL   | 275  | 234  |
| >TP53-C141VAKTCPVQLW  | 192  | >TP53-C141VAKTWPVQLW  | 1203 | 1011 |
| >TP53-C141VLAKTCPVQLW | 482  | >TP53-C141VLAKTWPVQL\ | 131  | 351  |
| >TP53-C141VLAKTCPVQL  | 417  | >TP53-C141VLAKTWPVQL  | 881  | 464  |
| >TP53-C141VLAKTCPVQL  | 405  | >TP53-C141VLAKTWPVQL  | 321  | 84   |
| >TP53-C141VLAKTCPVQLW | 45   | >TP53-C141VLAKTWPVQL\ | 34   | 11   |
| >TP53-C141VLAKTCPVQLW | 42   | >TP53-C141VLAKTWPVQL\ | 38   | 4    |
| >TP53-C141VLAKTCPVQLW | 42   | >TP53-C141VLAKTWPVQL\ | 27   | 15   |
| >TP53-C141VLAKTCPVQLW | 689  | >TP53-C141VLAKTWPVQL\ | 396  | 293  |
| >TP53-C141VQLAKTCPV   | 58   | >TP53-C141VQLAKTWPV   | 19   | 39   |
| >TP53-C141VQLAKTCPV   | 13   | >TP53-C141VQLAKTWPV   | 10   | 3    |
| >TP53-C141VQLAKTCPVQL | 315  | >TP53-C141VQLAKTWPVQ  | 295  | 20   |
| >TP53-C141VQLAKTCPV   | 10   | >TP53-C141VQLAKTWPV   | 10   | 0    |
| >TP53-C141VQLAKTCPVQL | 383  | >TP53-C141VQLAKTWPVQ  | 613  | 230  |
| >TP53-C141VQLAKTCPV   | 37   | >TP53-C141VQLAKTWPV   | 7    | 30   |
| >TP53-C141VQLAKTCPV   | 14   | >TP53-C141VQLAKTWPV   | 5    | 9    |
| >TP53-C141VQLAKTCPVQL | 323  | >TP53-C141VQLAKTWPVQ  | 47   | 276  |
| >TP53-C141VQLAKTCPV   | 30   | >TP53-C141VQLAKTWPV   | 14   | 16   |
| >TP53-C141VQLAKTCPV   | 10   | >TP53-C141VQLAKTWPV   | 6    | 4    |
| >TP53-C141VQLAKTCPVQL | 177  | >TP53-C141VQLAKTWPVQ  | 44   | 133  |
| >TP53-C141VQLAKTCPV   | 10   | >TP53-C141VQLAKTWPV   | 6    | 4    |
| >TP53-C141VQLAKTCPVQL | 117  | >TP53-C141VQLAKTWPVQ  | 74   | 43   |
| >TP53-C141VQLAKTCPV   | 3    | >TP53-C141VQLAKTWPV   | 3    | 0    |
| >TP53-C141VQLAKTCPVQL | 20   | >TP53-C141VQLAKTWPVQ  | 14   | 6    |
| >TP53-C141VQLAKTCPV   | 217  | >TP53-C141VQLAKTWPV   | 84   | 133  |
| >TP53-C141VQLAKTCPV   | 60   | >TP53-C141VQLAKTWPV   | 24   | 36   |
| >TP53-C141VQLAKTCPVQL | 343  | >TP53-C141VQLAKTWPVQ  | 174  | 169  |
| >TP53-C141VCQLAKTCPV  | 121  | >TP53-C141VCQLAKTWPV  | 13   | 108  |
| >TP53-C141VCQLAKTCPVC | 1090 | >TP53-C141VCQLAKTWPV  | 269  | 821  |
| >TP53-C141VCQLAKTCPV  | 565  | >TP53-C141VCQLAKTWPV  | 112  | 453  |



|                        |       |                        |      |       |
|------------------------|-------|------------------------|------|-------|
| >TP53-C141V CQLAKTCPV  | 173   | >TP53-C141V CQLAKTWPV  | 110  | 63    |
| >TP53-C141V CQLAKTCPV  | 22    | >TP53-C141V CQLAKTWPV  | 5    | 17    |
| >TP53-C141V CQLAKTCPVC | 463   | >TP53-C141V CQLAKTWPV  | 143  | 320   |
| >TP53-C141V CQLAKTCPV  | 136   | >TP53-C141V CQLAKTWPV  | 25   | 111   |
| >TP53-C141V CQLAKTCPV  | 77    | >TP53-C141V CQLAKTWPV  | 7    | 70    |
| >TP53-C141V CQLAKTCPV  | 457   | >TP53-C141V CQLAKTWPV  | 82   | 375   |
| >TP53-C141V CQLAKTCPV  | 720   | >TP53-C141V CQLAKTWPV  | 43   | 677   |
| >TP53-C141V CQLAKTCPV  | 268   | >TP53-C141V CQLAKTWPV  | 498  | 230   |
| >TP53-C141V CQLAKTCPVC | 155   | >TP53-C141V CQLAKTWPV  | 198  | 43    |
| >TP53-C141V CQLAKTCPV  | 2778  | >TP53-C141V CQLAKTWPV  | 433  | 2345  |
| >TP53-C141V CQLAKTCPVC | 231   | >TP53-C141V CQLAKTWPV  | 79   | 152   |
| >TP53-C141V CQLAKTCPVC | 762   | >TP53-C141V CQLAKTWPV  | 387  | 375   |
| >TP53-C141V FCQLAKTCPV | 1178  | >TP53-C141V FCQLAKTWPV | 269  | 909   |
| >TP53-C141V FCQLAKTCPV | 1652  | >TP53-C141V FCQLAKTWPV | 312  | 1340  |
| >TP53-C141V FCQLAKTCPV | 443   | >TP53-C141V FCQLAKTWPV | 118  | 325   |
| >TP53-C141V MFCQLAKTCI | 1152  | >TP53-C141V MFCQLAKTW  | 365  | 787   |
| >TP53-C141V MFCQLAKTCI | 924   | >TP53-C141V MFCQLAKTW  | 315  | 609   |
| >TP53-C141V MFCQLAKTCI | 679   | >TP53-C141V MFCQLAKTW  | 242  | 437   |
| >TP53-C141V MFCQLAKTC  | 8082  | >TP53-C141V MFCQLAKTW  | 60   | 8022  |
| >TP53-C141V MFCQLAKTC  | 450   | >TP53-C141V MFCQLAKTW  | 564  | 114   |
| >TP53-C141V MFCQLAKTCI | 721   | >TP53-C141V MFCQLAKTW  | 162  | 559   |
| >TP53-C141V KMFCQLAKTC | 23    | >TP53-C141V KMFCQLAKTW | 2685 | 2662  |
| >TP53-C141V KMFCQLAKTC | 61    | >TP53-C141V KMFCQLAKTW | 3616 | 3555  |
| >TP53-C141V KMFCQLAKTC | 81    | >TP53-C141V KMFCQLAKTW | 10   | 71    |
| >TP53-C141V KMFCQLAKTC | 8111  | >TP53-C141V KMFCQLAKTW | 495  | 7616  |
| >TP53-C141V KMFCQLAKTC | 491   | >TP53-C141V KMFCQLAKTW | 41   | 450   |
| >TP53-C141V KMFCQLAKTC | 9704  | >TP53-C141V KMFCQLAKTW | 21   | 9683  |
| >TP53-C141V KMFCQLAKTC | 18318 | >TP53-C141V KMFCQLAKTW | 45   | 18273 |
| >TP53-C141V KMFCQLAKTC | 17329 | >TP53-C141V KMFCQLAKTW | 20   | 17309 |
| >TP53-C141V KMFCQLAKTC | 28275 | >TP53-C141V KMFCQLAKTW | 218  | 28057 |
| >TP53-C141Y CPVQLWVD   | 3557  | >TP53-C141Y YPVQLWVD   | 433  | 3124  |
| >TP53-C141Y CPVQLWVDS  | 841   | >TP53-C141Y YPVQLWVDS  | 74   | 767   |
| >TP53-C141Y CPVQLWVDS  | 681   | >TP53-C141Y YPVQLWVDS  | 72   | 609   |
| >TP53-C141Y CPVQLWVDS  | 1843  | >TP53-C141Y YPVQLWVDS  | 347  | 1496  |
| >TP53-C141Y TCPVQLWV   | 20830 | >TP53-C141Y TYPVQLWV   | 42   | 20788 |
| >TP53-C141Y TCPVQLWVD  | 21021 | >TP53-C141Y TYPVQLWVD  | 242  | 20779 |
| >TP53-C141Y TCPVQLWVD  | 22070 | >TP53-C141Y TYPVQLWVD  | 148  | 21922 |
| >TP53-C141Y NKMFCQLAK  | 4154  | >TP53-C141Y NKMFCQLAK  | 16   | 4138  |
| >TP53-C141Y KTCPVQLWV  | 575   | >TP53-C141Y KTYPVQLWV  | 39   | 536   |
| >TP53-C141Y KTCPVQLWV  | 923   | >TP53-C141Y KTYPVQLWV  | 107  | 816   |
| >TP53-C141Y KTCPVQLWV  | 1227  | >TP53-C141Y KTYPVQLWV  | 61   | 1166  |
| >TP53-C141Y KTCPVQLWV  | 125   | >TP53-C141Y KTYPVQLWV  | 15   | 110   |
| >TP53-C141Y KTCPVQLWV  | 53    | >TP53-C141Y KTYPVQLWV  | 6    | 47    |

|                       |      |                       |     |      |
|-----------------------|------|-----------------------|-----|------|
| >TP53-C141YKTCPVQLWV  | 338  | >TP53-C141YKTYPVQLWV  | 11  | 327  |
| >TP53-C141YKTCPVQLWV  | 202  | >TP53-C141YKTYPVQLWV  | 25  | 177  |
| >TP53-C141YKTCPVQLWV  | 224  | >TP53-C141YKTYPVQLWV  | 68  | 156  |
| >TP53-C141YKTCPVQLW   | 165  | >TP53-C141YKTYPVQLW   | 24  | 141  |
| >TP53-C141YKTCPVQLWV  | 1821 | >TP53-C141YKTYPVQLWV  | 249 | 1572 |
| >TP53-C141YKTCPVQLWV  | 1487 | >TP53-C141YKTYPVQLWV  | 212 | 1275 |
| >TP53-C141YKTCPVQLWV  | 7602 | >TP53-C141YKTYPVQLWV  | 300 | 7302 |
| >TP53-C141YKTCPVQLW   | 4    | >TP53-C141YKTYPVQLW   | 3   | 1    |
| >TP53-C141YKTCPVQLWV  | 118  | >TP53-C141YKTYPVQLWV  | 24  | 94   |
| >TP53-C141YKTCPVQLW   | 34   | >TP53-C141YKTYPVQLW   | 29  | 5    |
| >TP53-C141YKTCPVQLWV  | 4438 | >TP53-C141YKTYPVQLWV  | 374 | 4064 |
| >TP53-C141YKTCPVQLW   | 10   | >TP53-C141YKTYPVQLW   | 8   | 2    |
| >TP53-C141YKTCPVQLWV  | 554  | >TP53-C141YKTYPVQLWV  | 45  | 509  |
| >TP53-C141YKTCPVQLWV  | 5045 | >TP53-C141YKTYPVQLWV  | 499 | 4546 |
| >TP53-C141YKTCPVQLWV  | 1070 | >TP53-C141YKTYPVQLWV  | 227 | 843  |
| >TP53-C141YKTCPVQLWV  | 254  | >TP53-C141YKTYPVQLWV  | 51  | 203  |
| >TP53-C141YKTCPVQLWV  | 272  | >TP53-C141YKTYPVQLWV  | 118 | 154  |
| >TP53-C141YAKTCPVQL   | 41   | >TP53-C141YAKTYPVQL   | 37  | 4    |
| >TP53-C141YAKTCPVQLW  | 192  | >TP53-C141YAKTYPVQLW  | 191 | 1    |
| >TP53-C141YLAKTCPVQLW | 482  | >TP53-C141YLAKTYPVQLW | 344 | 138  |
| >TP53-C141YLAKTCPVQL  | 3437 | >TP53-C141YLAKTYPVQL  | 339 | 3098 |
| >TP53-C141YLAKTCPVQL  | 417  | >TP53-C141YLAKTYPVQL  | 223 | 194  |
| >TP53-C141YLAKTCPVQL  | 405  | >TP53-C141YLAKTYPVQL  | 172 | 233  |
| >TP53-C141YLAKTCPVQLW | 45   | >TP53-C141YLAKTYPVQLW | 26  | 19   |
| >TP53-C141YLAKTCPVQLW | 42   | >TP53-C141YLAKTYPVQLW | 40  | 2    |
| >TP53-C141YLAKTCPVQLW | 42   | >TP53-C141YLAKTYPVQLW | 34  | 8    |
| >TP53-C141YQLAKTCPV   | 58   | >TP53-C141YQLAKTYPV   | 24  | 34   |
| >TP53-C141YQLAKTCPV   | 13   | >TP53-C141YQLAKTYPV   | 6   | 7    |
| >TP53-C141YQLAKTCPVQL | 315  | >TP53-C141YQLAKTYPVQL | 111 | 204  |
| >TP53-C141YQLAKTCPV   | 10   | >TP53-C141YQLAKTYPV   | 8   | 2    |
| >TP53-C141YQLAKTCPVQL | 383  | >TP53-C141YQLAKTYPVQL | 345 | 38   |
| >TP53-C141YQLAKTCPV   | 37   | >TP53-C141YQLAKTYPV   | 20  | 17   |
| >TP53-C141YQLAKTCPV   | 14   | >TP53-C141YQLAKTYPV   | 7   | 7    |
| >TP53-C141YQLAKTCPVQL | 323  | >TP53-C141YQLAKTYPVQL | 71  | 252  |
| >TP53-C141YQLAKTCPV   | 30   | >TP53-C141YQLAKTYPV   | 10  | 20   |
| >TP53-C141YQLAKTCPV   | 10   | >TP53-C141YQLAKTYPV   | 10  | 0    |
| >TP53-C141YQLAKTCPVQL | 177  | >TP53-C141YQLAKTYPVQL | 109 | 68   |
| >TP53-C141YQLAKTCPV   | 10   | >TP53-C141YQLAKTYPV   | 7   | 3    |
| >TP53-C141YQLAKTCPVQL | 117  | >TP53-C141YQLAKTYPVQL | 131 | 14   |
| >TP53-C141YQLAKTCPV   | 3    | >TP53-C141YQLAKTYPV   | 3   | 0    |
| >TP53-C141YQLAKTCPVQL | 20   | >TP53-C141YQLAKTYPVQL | 14  | 6    |
| >TP53-C141YQLAKTCPV   | 217  | >TP53-C141YQLAKTYPV   | 56  | 161  |
| >TP53-C141YQLAKTCPV   | 60   | >TP53-C141YQLAKTYPV   | 27  | 33   |

|                        |       |                        |      |       |
|------------------------|-------|------------------------|------|-------|
| >TP53-C141YQLAKTCPVQL  | 343   | >TP53-C141YQLAKTYPVQL  | 148  | 195   |
| >TP53-C141Y CQLAKTCPV  | 121   | >TP53-C141Y CQLAKTYPV  | 19   | 102   |
| >TP53-C141Y CQLAKTCPVC | 1090  | >TP53-C141Y CQLAKTYPVC | 372  | 718   |
| >TP53-C141Y CQLAKTCPV  | 565   | >TP53-C141Y CQLAKTYPV  | 76   | 489   |
| >TP53-C141Y CQLAKTCPV  | 173   | >TP53-C141Y CQLAKTYPV  | 151  | 22    |
| >TP53-C141Y CQLAKTCPV  | 22    | >TP53-C141Y CQLAKTYPV  | 12   | 10    |
| >TP53-C141Y CQLAKTCPVC | 463   | >TP53-C141Y CQLAKTYPVC | 284  | 179   |
| >TP53-C141Y CQLAKTCPV  | 136   | >TP53-C141Y CQLAKTYPV  | 104  | 32    |
| >TP53-C141Y CQLAKTCPV  | 77    | >TP53-C141Y CQLAKTYPV  | 15   | 62    |
| >TP53-C141Y CQLAKTCPV  | 457   | >TP53-C141Y CQLAKTYPV  | 872  | 415   |
| >TP53-C141Y CQLAKTCPV  | 720   | >TP53-C141Y CQLAKTYPV  | 176  | 544   |
| >TP53-C141Y CQLAKTCPV  | 268   | >TP53-C141Y CQLAKTYPV  | 320  | 52    |
| >TP53-C141Y CQLAKTCPVC | 155   | >TP53-C141Y CQLAKTYPVC | 128  | 27    |
| >TP53-C141Y CQLAKTCPVC | 231   | >TP53-C141Y CQLAKTYPVC | 109  | 122   |
| >TP53-C141Y CQLAKTCPVC | 762   | >TP53-C141Y CQLAKTYPVC | 414  | 348   |
| >TP53-C141Y FCQLAKTCPV | 1178  | >TP53-C141Y FCQLAKTYPV | 298  | 880   |
| >TP53-C141Y FCQLAKTCPV | 1652  | >TP53-C141Y FCQLAKTYPV | 494  | 1158  |
| >TP53-C141Y FCQLAKTCPV | 443   | >TP53-C141Y FCQLAKTYPV | 843  | 400   |
| >TP53-C141Y MFCQLAKTCI | 1152  | >TP53-C141Y MFCQLAKTYI | 291  | 861   |
| >TP53-C141Y MFCQLAKTC  | 17781 | >TP53-C141Y MFCQLAKTY  | 34   | 17747 |
| >TP53-C141Y MFCQLAKTC  | 18074 | >TP53-C141Y MFCQLAKTY  | 141  | 17933 |
| >TP53-C141Y MFCQLAKTC  | 22380 | >TP53-C141Y MFCQLAKTY  | 390  | 21990 |
| >TP53-C141Y MFCQLAKTC  | 450   | >TP53-C141Y MFCQLAKTY  | 1880 | 1430  |
| >TP53-C141Y MFCQLAKTCI | 721   | >TP53-C141Y MFCQLAKTYI | 419  | 302   |
| >TP53-C141Y KMFCQLAKTC | 23    | >TP53-C141Y KMFCQLAKTY | 834  | 811   |
| >TP53-C141Y KMFCQLAKTC | 61    | >TP53-C141Y KMFCQLAKTY | 1710 | 1649  |
| >TP53-C141Y KMFCQLAKTC | 21924 | >TP53-C141Y KMFCQLAKTY | 254  | 21670 |
| >TP53-C141Y KMFCQLAKTC | 31414 | >TP53-C141Y KMFCQLAKTY | 254  | 31160 |
| >TP53-C141Y KMFCQLAKTC | 31472 | >TP53-C141Y KMFCQLAKTY | 168  | 31304 |
| >TP53-C141Y KMFCQLAKTC | 81    | >TP53-C141Y KMFCQLAKTY | 20   | 61    |
| >TP53-C141Y KMFCQLAKTC | 25783 | >TP53-C141Y KMFCQLAKTY | 98   | 25685 |
| >TP53-C141Y KMFCQLAKTC | 8111  | >TP53-C141Y KMFCQLAKTY | 52   | 8059  |
| >TP53-C141Y KMFCQLAKTC | 20956 | >TP53-C141Y KMFCQLAKTY | 212  | 20744 |
| >TP53-C141Y KMFCQLAKTC | 491   | >TP53-C141Y KMFCQLAKTY | 4    | 487   |
| >TP53-C141Y KMFCQLAKTC | 9704  | >TP53-C141Y KMFCQLAKTY | 15   | 9689  |
| >TP53-C176F CPHHERCSDS | 7280  | >TP53-C176F FPHHERCSDS | 289  | 6991  |
| >TP53-C176F CPHHERCSDS | 3038  | >TP53-C176F FPHHERCSDS | 314  | 2724  |
| >TP53-C176F SQHMTEVVR  | 11984 | >TP53-C176F SQHMTEVVR  | 67   | 11917 |
| >TP53-C176F SQHMTEVVR  | 5395  | >TP53-C176F SQHMTEVVR  | 8    | 5387  |
| >TP53-C176F RRCPPHER   | 405   | >TP53-C176F RRFPPHER   | 127  | 278   |
| >TP53-C176F RRCPPHER   | 1819  | >TP53-C176F RRFPPHER   | 142  | 1677  |
| >TP53-C176F RRCPPHER   | 729   | >TP53-C176F RRFPPHER   | 24   | 705   |
| >TP53-C176F RRCPPHERCS | 1695  | >TP53-C176F RRFPPHERCS | 252  | 1443  |

|                        |       |                        |      |       |
|------------------------|-------|------------------------|------|-------|
| >TP53-C176F RRCPPHER   | 102   | >TP53-C176F RRFPPHER   | 53   | 49    |
| >TP53-C176F RRCPPHERC  | 689   | >TP53-C176F RRFPPHERC  | 243  | 446   |
| >TP53-C176F RRCPPHERCS | 720   | >TP53-C176F RRFPPHERCS | 401  | 319   |
| >TP53-C176F RRCPPHER   | 312   | >TP53-C176F RRFPPHER   | 385  | 73    |
| >TP53-C176F RRCPPHERC  | 320   | >TP53-C176F RRFPPHERC  | 98   | 222   |
| >TP53-C176F RRCPPHER   | 87    | >TP53-C176F RRFPPHER   | 42   | 45    |
| >TP53-C176F VVRRCPHH   | 1099  | >TP53-C176F VVRRFPHH   | 224  | 875   |
| >TP53-C176F VVRRCPHHEF | 145   | >TP53-C176F VVRRFPHHEF | 47   | 98    |
| >TP53-C176F VVRRCPHHEF | 63    | >TP53-C176F VVRRFPHHEF | 37   | 26    |
| >TP53-C176F VVRRCPHHEF | 534   | >TP53-C176F VVRRFPHHEF | 417  | 117   |
| >TP53-C176F EVVRRCPH   | 400   | >TP53-C176F EVVRRFPH   | 127  | 273   |
| >TP53-C176F EVVRRCPHH  | 98    | >TP53-C176F EVVRRFPHH  | 13   | 85    |
| >TP53-C176F EVVRRCPHHE | 428   | >TP53-C176F EVVRRFPHHE | 161  | 267   |
| >TP53-C176F EVVRRCPHHE | 912   | >TP53-C176F EVVRRFPHHE | 438  | 474   |
| >TP53-C176F EVVRRCPHHE | 371   | >TP53-C176F EVVRRFPHHE | 118  | 253   |
| >TP53-C176F EVVRRCPHHE | 53    | >TP53-C176F EVVRRFPHHE | 32   | 21    |
| >TP53-C176F EVVRRCPHHE | 5     | >TP53-C176F EVVRRFPHHE | 5    | 0     |
| >TP53-C176F EVVRRCPHHE | 1019  | >TP53-C176F EVVRRFPHHE | 408  | 611   |
| >TP53-C176F TEVRRCPH   | 2407  | >TP53-C176F TEVRRFPH   | 326  | 2081  |
| >TP53-C176F MTEVRRRC   | 15372 | >TP53-C176F MTEVRRRF   | 13   | 15359 |
| >TP53-C176F MTEVRRRC   | 13322 | >TP53-C176F MTEVRRRF   | 157  | 13165 |
| >TP53-C176F HMTEVRRRC  | 38    | >TP53-C176F HMTEVRRRF  | 442  | 404   |
| >TP53-C176F HMTEVRRRC  | 1361  | >TP53-C176F HMTEVRRRF  | 341  | 1020  |
| >TP53-C176F HMTEVRRRC  | 23100 | >TP53-C176F HMTEVRRRF  | 404  | 22696 |
| >TP53-C176F HMTEVRRRC  | 15750 | >TP53-C176F HMTEVRRRF  | 153  | 15597 |
| >TP53-C176F QHMTEVRRR  | 15146 | >TP53-C176F QHMTEVRRR  | 76   | 15070 |
| >TP53-C176C RRCPPHER   | 405   | >TP53-C176C RRGPPHER   | 1207 | 802   |
| >TP53-C176C RRCPPHER   | 729   | >TP53-C176C RRGPPHER   | 436  | 293   |
| >TP53-C176C RRCPPHER   | 102   | >TP53-C176C RRGPPHER   | 136  | 34    |
| >TP53-C176C RRCPPHER   | 312   | >TP53-C176C RRGPPHER   | 474  | 162   |
| >TP53-C176C RRCPPHERC  | 320   | >TP53-C176C RRGPPHERC  | 834  | 514   |
| >TP53-C176C RRCPPHER   | 87    | >TP53-C176C RRGPPHER   | 84   | 3     |
| >TP53-C176C VVRRCPHH   | 1099  | >TP53-C176C VVRRGPHH   | 480  | 619   |
| >TP53-C176C VVRRCPHHEF | 145   | >TP53-C176C VVRRGPHHEF | 82   | 63    |
| >TP53-C176C VVRRCPHHEF | 63    | >TP53-C176C VVRRGPHHEF | 251  | 188   |
| >TP53-C176C EVVRRCPH   | 1432  | >TP53-C176C EVVRRGPH   | 448  | 984   |
| >TP53-C176C EVVRRCPH   | 400   | >TP53-C176C EVVRRGPH   | 120  | 280   |
| >TP53-C176C EVVRRCPHH  | 98    | >TP53-C176C EVVRRGPHH  | 64   | 34    |
| >TP53-C176C EVVRRCPHHE | 428   | >TP53-C176C EVVRRGPHHE | 260  | 168   |
| >TP53-C176C EVVRRCPHHE | 371   | >TP53-C176C EVVRRGPHHE | 402  | 31    |
| >TP53-C176C EVVRRCPHHE | 53    | >TP53-C176C EVVRRGPHHE | 100  | 47    |
| >TP53-C176C EVVRRCPHHE | 5     | >TP53-C176C EVVRRGPHHE | 8    | 3     |
| >TP53-C176C HMTEVRRRC  | 38    | >TP53-C176C HMTEVRRRG  | 1224 | 1186  |

|                       |       |                       |      |       |
|-----------------------|-------|-----------------------|------|-------|
| >TP53-C176FSQHMTEVVR  | 22412 | >TP53-C176FSQHMTEVVR  | 136  | 22276 |
| >TP53-C176FRRCPPHER   | 12026 | >TP53-C176FRRRPHER    | 237  | 11789 |
| >TP53-C176FRRCPPHER   | 405   | >TP53-C176FRRRPHER    | 198  | 207   |
| >TP53-C176FRRCPPHER   | 1819  | >TP53-C176FRRRPHER    | 456  | 1363  |
| >TP53-C176FRRCPPHER   | 729   | >TP53-C176FRRRPHER    | 203  | 526   |
| >TP53-C176FRRCPPHER   | 102   | >TP53-C176FRRRPHER    | 52   | 50    |
| >TP53-C176FRRCPPHERC  | 689   | >TP53-C176FRRRPHERC   | 123  | 566   |
| >TP53-C176FRRCPPHERCS | 720   | >TP53-C176FRRRPHERCS  | 145  | 575   |
| >TP53-C176FRRCPPHERCS | 2302  | >TP53-C176FRRRPHERCS  | 496  | 1806  |
| >TP53-C176FRRCPPHER   | 312   | >TP53-C176FRRRPHER    | 517  | 205   |
| >TP53-C176FRRCPPHERC  | 320   | >TP53-C176FRRRPHERC   | 266  | 54    |
| >TP53-C176FRRCPPHERCS | 717   | >TP53-C176FRRRPHERCS  | 242  | 475   |
| >TP53-C176FRRCPPHER   | 87    | >TP53-C176FRRRPHER    | 296  | 209   |
| >TP53-C176FVRRCPHH    | 1099  | >TP53-C176FVRRRRPHH   | 173  | 926   |
| >TP53-C176FVRRCPHHEF  | 145   | >TP53-C176FVRRRRPHHEF | 44   | 101   |
| >TP53-C176FVRRCPHHEF  | 63    | >TP53-C176FVRRRRPHHEF | 78   | 15    |
| >TP53-C176FEVRRCPH    | 400   | >TP53-C176FEVRRRRPH   | 205  | 195   |
| >TP53-C176FEVRRCPHH   | 98    | >TP53-C176FEVRRRRPHH  | 63   | 35    |
| >TP53-C176FEVRRCPHHE  | 428   | >TP53-C176FEVRRRRPHHE | 438  | 10    |
| >TP53-C176FEVRRCPHHE  | 371   | >TP53-C176FEVRRRRPHHE | 133  | 238   |
| >TP53-C176FEVRRCPHHE  | 53    | >TP53-C176FEVRRRRPHHE | 39   | 14    |
| >TP53-C176FEVRRCPHHE  | 5     | >TP53-C176FEVRRRRPHHE | 5    | 0     |
| >TP53-C176FMTEVVRR    | 20132 | >TP53-C176FMTEVVRRR   | 37   | 20095 |
| >TP53-C176FMTEVVRR    | 34449 | >TP53-C176FMTEVVRRR   | 215  | 34234 |
| >TP53-C176FMTEVVRR    | 26713 | >TP53-C176FMTEVVRRR   | 10   | 26703 |
| >TP53-C176FHMTEVVRR   | 38    | >TP53-C176FHMTEVVRRR  | 5644 | 5606  |
| >TP53-C176FHMTEVVRR   | 17090 | >TP53-C176FHMTEVVRRR  | 62   | 17028 |
| >TP53-C176FHMTEVVRR   | 32954 | >TP53-C176FHMTEVVRRR  | 68   | 32886 |
| >TP53-C176FHMTEVVRR   | 37888 | >TP53-C176FHMTEVVRRR  | 60   | 37828 |
| >TP53-C176FHMTEVVRR   | 37134 | >TP53-C176FHMTEVVRRR  | 320  | 36814 |
| >TP53-C176SRRCPHER    | 405   | >TP53-C176SRRSPHER    | 768  | 363   |
| >TP53-C176SRRCPHER    | 729   | >TP53-C176SRRSPHER    | 165  | 564   |
| >TP53-C176SRRCPHER    | 102   | >TP53-C176SRRSPHER    | 282  | 180   |
| >TP53-C176SRRCPHERC   | 689   | >TP53-C176SRRSPHERC   | 494  | 195   |
| >TP53-C176SRRCPHER    | 312   | >TP53-C176SRRSPHER    | 1086 | 774   |
| >TP53-C176SRRCPHERC   | 320   | >TP53-C176SRRSPHERC   | 338  | 18    |
| >TP53-C176SRRCPHER    | 87    | >TP53-C176SRRSPHER    | 154  | 67    |
| >TP53-C176SVRRCPHH    | 1099  | >TP53-C176SVRRRSPHH   | 159  | 940   |
| >TP53-C176SVRRCPHHEF  | 145   | >TP53-C176SVRRRSPHHEF | 46   | 99    |
| >TP53-C176SVRRCPHHEF  | 63    | >TP53-C176SVRRRSPHHEF | 162  | 99    |
| >TP53-C176SEVRRCPH    | 1432  | >TP53-C176SEVRRRSPH   | 430  | 1002  |
| >TP53-C176SEVRRCPH    | 400   | >TP53-C176SEVRRRSPH   | 99   | 301   |
| >TP53-C176SEVRRCPHH   | 98    | >TP53-C176SEVRRRSPHH  | 67   | 31    |

|                        |       |                        |      |       |
|------------------------|-------|------------------------|------|-------|
| >TP53-C176S EVVRRCPHHE | 428   | >TP53-C176S EVVRRSPHHE | 327  | 101   |
| >TP53-C176S EVVRRCPHHE | 371   | >TP53-C176S EVVRRSPHHE | 296  | 75    |
| >TP53-C176S EVVRRCPHHE | 53    | >TP53-C176S EVVRRSPHHE | 73   | 20    |
| >TP53-C176S EVVRRCPHHE | 5     | >TP53-C176S EVVRRSPHHE | 5    | 0     |
| >TP53-C176S HMTEVVRRC  | 38    | >TP53-C176S HMTEVVRRS  | 535  | 497   |
| >TP53-C176V RRCPPHER   | 405   | >TP53-C176V RRWPHHER   | 68   | 337   |
| >TP53-C176V RRCPPHER   | 1819  | >TP53-C176V RRWPHHER   | 246  | 1573  |
| >TP53-C176V RRCPPHER   | 729   | >TP53-C176V RRWPHHER   | 16   | 713   |
| >TP53-C176V RRCPPHERC  | 10365 | >TP53-C176V RRWPHHERC  | 298  | 10067 |
| >TP53-C176V RRCPPHERCS | 1695  | >TP53-C176V RRWPHHERC  | 235  | 1460  |
| >TP53-C176V RRCPPHERCS | 10165 | >TP53-C176V RRWPHHERC  | 369  | 9796  |
| >TP53-C176V RRCPPHER   | 102   | >TP53-C176V RRWPHHER   | 17   | 85    |
| >TP53-C176V RRCPPHERC  | 689   | >TP53-C176V RRWPHHERC  | 72   | 617   |
| >TP53-C176V RRCPPHERCS | 720   | >TP53-C176V RRWPHHERC  | 125  | 595   |
| >TP53-C176V RRCPPHERCS | 2302  | >TP53-C176V RRWPHHERC  | 243  | 2059  |
| >TP53-C176V RRCPPHER   | 312   | >TP53-C176V RRWPHHER   | 215  | 97    |
| >TP53-C176V RRCPPHERC  | 320   | >TP53-C176V RRWPHHERC  | 39   | 281   |
| >TP53-C176V RRCPPHERCS | 717   | >TP53-C176V RRWPHHERC  | 232  | 485   |
| >TP53-C176V RRCPPHERCS | 3791  | >TP53-C176V RRWPHHERC  | 492  | 3299  |
| >TP53-C176V RRCPPHER   | 87    | >TP53-C176V RRWPHHER   | 27   | 60    |
| >TP53-C176V VVRRCPHH   | 1099  | >TP53-C176V VVRRWPHH   | 277  | 822   |
| >TP53-C176V VVRRCPHHE  | 145   | >TP53-C176V VVRRWPHHE  | 132  | 13    |
| >TP53-C176V VVRRCPHHE  | 63    | >TP53-C176V VVRRWPHHE  | 53   | 10    |
| >TP53-C176V EVVRRCPH   | 1432  | >TP53-C176V EVVRRWPH   | 475  | 957   |
| >TP53-C176V EVVRRCPH   | 400   | >TP53-C176V EVVRRWPH   | 106  | 294   |
| >TP53-C176V EVVRRCPHH  | 98    | >TP53-C176V EVVRRWPHH  | 23   | 75    |
| >TP53-C176V EVVRRCPHHE | 428   | >TP53-C176V EVVRRWPHH  | 149  | 279   |
| >TP53-C176V EVVRRCPHHE | 371   | >TP53-C176V EVVRRWPHH  | 145  | 226   |
| >TP53-C176V EVVRRCPHHE | 53    | >TP53-C176V EVVRRWPHH  | 36   | 17    |
| >TP53-C176V EVVRRCPHHE | 5     | >TP53-C176V EVVRRWPHH  | 6    | 1     |
| >TP53-C176V EVVRRCPHHE | 1019  | >TP53-C176V EVVRRWPHH  | 466  | 553   |
| >TP53-C176V TEVVRRCPH  | 2407  | >TP53-C176V TEVVRRWPH  | 73   | 2334  |
| >TP53-C176V MTEVVRRC   | 15372 | >TP53-C176V MTEVVRRW   | 11   | 15361 |
| >TP53-C176V MTEVVRRC   | 22097 | >TP53-C176V MTEVVRRW   | 55   | 22042 |
| >TP53-C176V MTEVVRRC   | 21828 | >TP53-C176V MTEVVRRW   | 104  | 21724 |
| >TP53-C176V MTEVVRRC   | 29902 | >TP53-C176V MTEVVRRW   | 258  | 29644 |
| >TP53-C176V HMTEVVRRC  | 38    | >TP53-C176V HMTEVVRRW  | 4890 | 4852  |
| >TP53-C176V HMTEVVRRC  | 25498 | >TP53-C176V HMTEVVRRW  | 371  | 25127 |
| >TP53-C176V HMTEVVRRC  | 23218 | >TP53-C176V HMTEVVRRW  | 98   | 23120 |
| >TP53-C176V HMTEVVRRC  | 21388 | >TP53-C176V HMTEVVRRW  | 35   | 21353 |
| >TP53-C176Y RCPHHERC   | 20089 | >TP53-C176Y RYPHHERC   | 288  | 19801 |
| >TP53-C176YSQHMTEVVRR  | 32798 | >TP53-C176YSQHMTEVVRR  | 431  | 32367 |
| >TP53-C176YSQHMTEVVRR  | 11984 | >TP53-C176YSQHMTEVVRR  | 71   | 11913 |

|                       |       |                       |      |       |
|-----------------------|-------|-----------------------|------|-------|
| >TP53-C176YSQHMTEVVR  | 26341 | >TP53-C176YSQHMTEVVR  | 435  | 25906 |
| >TP53-C176YSQHMTEVVR  | 5395  | >TP53-C176YSQHMTEVVR  | 25   | 5370  |
| >TP53-C176YRRCPPHER   | 405   | >TP53-C176YRRCPPHER   | 155  | 250   |
| >TP53-C176YRRCPPHER   | 1819  | >TP53-C176YRRCPPHER   | 181  | 1638  |
| >TP53-C176YRRCPPHER   | 729   | >TP53-C176YRRCPPHER   | 34   | 695   |
| >TP53-C176YRRCPPHERCS | 1695  | >TP53-C176YRRCPPHERCS | 228  | 1467  |
| >TP53-C176YRRCPPHER   | 102   | >TP53-C176YRRCPPHER   | 38   | 64    |
| >TP53-C176YRRCPPHERC  | 689   | >TP53-C176YRRCPPHERC  | 96   | 593   |
| >TP53-C176YRRCPPHERCS | 720   | >TP53-C176YRRCPPHERCS | 165  | 555   |
| >TP53-C176YRRCPPHERCS | 2302  | >TP53-C176YRRCPPHERCS | 326  | 1976  |
| >TP53-C176YRRCPPHER   | 312   | >TP53-C176YRRCPPHER   | 286  | 26    |
| >TP53-C176YRRCPPHERC  | 320   | >TP53-C176YRRCPPHERC  | 63   | 257   |
| >TP53-C176YRRCPPHERCS | 717   | >TP53-C176YRRCPPHERCS | 237  | 480   |
| >TP53-C176YRRCPPHER   | 87    | >TP53-C176YRRCPPHER   | 48   | 39    |
| >TP53-C176YVRRCPHH    | 1099  | >TP53-C176YVRRCPHH    | 220  | 879   |
| >TP53-C176YVRRCPHHEF  | 145   | >TP53-C176YVRRCPHHEF  | 62   | 83    |
| >TP53-C176YVRRCPHHEF  | 63    | >TP53-C176YVRRCPHHEF  | 68   | 5     |
| >TP53-C176YEVVRRCPHH  | 2653  | >TP53-C176YEVVRRCPHH  | 342  | 2311  |
| >TP53-C176YEVVRRCPH   | 400   | >TP53-C176YEVVRRCPH   | 94   | 306   |
| >TP53-C176YEVVRRCPHH  | 98    | >TP53-C176YEVVRRCPHH  | 25   | 73    |
| >TP53-C176YEVVRRCPHHE | 428   | >TP53-C176YEVVRRCPHHE | 203  | 225   |
| >TP53-C176YEVVRRCPHHE | 371   | >TP53-C176YEVVRRCPHHE | 132  | 239   |
| >TP53-C176YEVVRRCPHHE | 53    | >TP53-C176YEVVRRCPHHE | 40   | 13    |
| >TP53-C176YEVVRRCPHHE | 5     | >TP53-C176YEVVRRCPHHE | 5    | 0     |
| >TP53-C176YTEVRRCPH   | 2407  | >TP53-C176YTEVRRCPH   | 165  | 2242  |
| >TP53-C176YMTEVRRRC   | 19699 | >TP53-C176YMTEVRRRC   | 35   | 19664 |
| >TP53-C176YMTEVRRRC   | 30410 | >TP53-C176YMTEVRRRC   | 294  | 30116 |
| >TP53-C176YMTEVRRRC   | 15372 | >TP53-C176YMTEVRRRC   | 17   | 15355 |
| >TP53-C176YMTEVRRRC   | 13322 | >TP53-C176YMTEVRRRC   | 171  | 13151 |
| >TP53-C176YMTEVRRRC   | 39388 | >TP53-C176YMTEVRRRC   | 483  | 38905 |
| >TP53-C176YHMTEVRRRC  | 38    | >TP53-C176YHMTEVRRRC  | 1913 | 1875  |
| >TP53-C176YHMTEVRRRC  | 25820 | >TP53-C176YHMTEVRRRC  | 368  | 25452 |
| >TP53-C176YHMTEVRRRC  | 28841 | >TP53-C176YHMTEVRRRC  | 240  | 28601 |
| >TP53-C176YHMTEVRRRC  | 1361  | >TP53-C176YHMTEVRRRC  | 378  | 983   |
| >TP53-C176YHMTEVRRRC  | 27307 | >TP53-C176YHMTEVRRRC  | 252  | 27055 |
| >TP53-C176YHMTEVRRRC  | 23100 | >TP53-C176YHMTEVRRRC  | 151  | 22949 |
| >TP53-C176YHMTEVRRRC  | 34033 | >TP53-C176YHMTEVRRRC  | 91   | 33942 |
| >TP53-C176YQHMTEVRRR  | 15146 | >TP53-C176YQHMTEVRRR  | 300  | 14846 |
| >TP53-C182FCSDSDGLA   | 178   | >TP53-C182FCSDSDGLA   | 1384 | 1206  |
| >TP53-C182FRCSDSGL    | 23290 | >TP53-C182FRCSDSGL    | 262  | 23028 |
| >TP53-C182FVRRCPHHEF  | 19969 | >TP53-C182FVRRCPHHEF  | 27   | 19942 |
| >TP53-C182FVRRCPHHEF  | 35733 | >TP53-C182FVRRCPHHEF  | 466  | 35267 |
| >TP53-C182FHERRSDSGL  | 422   | >TP53-C182FHERRSDSGL  | 501  | 79    |

|                        |       |                         |      |       |
|------------------------|-------|-------------------------|------|-------|
| >TP53-C182F HHERCSDSDC | 833   | >TP53-C182F HHERRSDSDC  | 365  | 468   |
| >TP53-C182F HHERCSDSDC | 126   | >TP53-C182F HHERRSDSDC  | 230  | 104   |
| >TP53-C182F RCPHHERC   | 34343 | >TP53-C182F RCPHHERR    | 135  | 34208 |
| >TP53-C182F RRCPPHERC  | 320   | >TP53-C182F RRCPPHHERR  | 289  | 31    |
| >TP53-C182F RRCPPHERC  | 35730 | >TP53-C182F RRCPPHHERR  | 141  | 35589 |
| >TP53-C182S CSDDSDGLA  | 178   | >TP53-C182S SSDSDGLA    | 648  | 470   |
| >TP53-C182S RCSDDSDGL  | 3743  | >TP53-C182S RSSDDSDGL   | 7    | 3736  |
| >TP53-C182S RCSDDSDGL  | 12085 | >TP53-C182S RSSDDSDGL   | 270  | 11815 |
| >TP53-C182S RCSDDSDGL  | 5424  | >TP53-C182S RSSDDSDGL   | 329  | 5095  |
| >TP53-C182S HERCSDSDGL | 422   | >TP53-C182S HERSDDSDGL  | 510  | 88    |
| >TP53-C182S HHERCSDSDC | 833   | >TP53-C182S HHERSSDDSDC | 429  | 404   |
| >TP53-C182S HHERCSDSDC | 126   | >TP53-C182S HHERSSDDSDC | 118  | 8     |
| >TP53-C182S RRCPPHERC  | 320   | >TP53-C182S RRCPPHERS   | 1147 | 827   |
| >TP53-C182Y CSDDSDGLA  | 178   | >TP53-C182Y YSDSDGLA    | 136  | 42    |
| >TP53-C182Y RCSDDSDGL  | 19062 | >TP53-C182Y RYSDSDGL    | 24   | 19038 |
| >TP53-C182Y RCSDDSDGL  | 28072 | >TP53-C182Y RYSDSDGL    | 279  | 27793 |
| >TP53-C182Y RCSDDSDGLA | 30051 | >TP53-C182Y RYSDSDGLA   | 492  | 29559 |
| >TP53-C182Y VVRRCPHHEF | 28150 | >TP53-C182Y VVRRCPHHEF  | 198  | 27952 |
| >TP53-C182Y VVRRCPHHEF | 24288 | >TP53-C182Y VVRRCPHHEF  | 153  | 24135 |
| >TP53-C182Y VVRRCPHHEF | 23456 | >TP53-C182Y VVRRCPHHEF  | 230  | 23226 |
| >TP53-C182Y VVRRCPHHEF | 24782 | >TP53-C182Y VVRRCPHHEF  | 213  | 24569 |
| >TP53-C182Y VVRRCPHHEF | 20097 | >TP53-C182Y VVRRCPHHEF  | 400  | 19697 |
| >TP53-C182Y VVRRCPHHEF | 18295 | >TP53-C182Y VVRRCPHHEF  | 174  | 18121 |
| >TP53-C182Y VVRRCPHHEF | 12055 | >TP53-C182Y VVRRCPHHEF  | 56   | 11999 |
| >TP53-C182Y HERCSDSDGL | 1468  | >TP53-C182Y HERYSDSDGL  | 260  | 1208  |
| >TP53-C182Y HERCSDSDGL | 422   | >TP53-C182Y HERYSDSDGL  | 255  | 167   |
| >TP53-C182Y HHERCSDSDC | 833   | >TP53-C182Y HHERYSDSDC  | 447  | 386   |
| >TP53-C182Y HHERCSDSDC | 126   | >TP53-C182Y HHERYSDSDC  | 78   | 48    |
| >TP53-C182Y RRCPPHERC  | 6899  | >TP53-C182Y RRCPPHERY   | 225  | 6674  |
| >TP53-C182Y RRCPPHERC  | 689   | >TP53-C182Y RRCPPHERY   | 399  | 290   |
| >TP53-C182Y RRCPPHERCS | 720   | >TP53-C182Y RRCPPHERYS  | 376  | 344   |
| >TP53-C182Y RRCPPHERC  | 320   | >TP53-C182Y RRCPPHERY   | 172  | 148   |
| >TP53-C182Y RRCPPHERCS | 717   | >TP53-C182Y RRCPPHERYS  | 454  | 263   |
| >TP53-C182Y VRRCPHHERC | 3426  | >TP53-C182Y VRRCPHHERY  | 71   | 3355  |
| >TP53-C229C CTTIHYNM   | 116   | >TP53-C229C GTTIHYNM    | 993  | 877   |
| >TP53-C229C CTTIHYNM   | 117   | >TP53-C229C GTTIHYNM    | 2106 | 1989  |
| >TP53-C229C CTTIHYNM   | 1373  | >TP53-C229C GTTIHYNM    | 480  | 893   |
| >TP53-C229C CTTIHYNM   | 161   | >TP53-C229C GTTIHYNM    | 1026 | 865   |
| >TP53-C229C CTTIHYNM   | 207   | >TP53-C229C GTTIHYNM    | 918  | 711   |
| >TP53-C229C CTTIHYNM   | 35    | >TP53-C229C GTTIHYNM    | 21   | 14    |
| >TP53-C229C CTTIHYNM   | 130   | >TP53-C229C GTTIHYNM    | 140  | 10    |
| >TP53-C229C CTTIHYNM   | 355   | >TP53-C229C GTTIHYNM    | 1374 | 1019  |
| >TP53-C229C CTTIHYNM   | 50    | >TP53-C229C GTTIHYNM    | 22   | 28    |



|                        |      |                       |      |      |
|------------------------|------|-----------------------|------|------|
| >TP53-C229CCTTIHYNM    | 1487 | >TP53-C229CGTTIHYNM   | 491  | 996  |
| >TP53-C229CCTTIHYNM    | 11   | >TP53-C229CGTTIHYNM   | 22   | 11   |
| >TP53-C229CCTTIHYNMC   | 184  | >TP53-C229CGTTIHYNMC  | 365  | 181  |
| >TP53-C229CCTTIHYNM    | 999  | >TP53-C229CGTTIHYNM   | 59   | 940  |
| >TP53-C229CCTTIHYN     | 68   | >TP53-C229CGTTIHYN    | 228  | 160  |
| >TP53-C229CCTTIHYN     | 1459 | >TP53-C229CGTTIHYN    | 375  | 1084 |
| >TP53-C229CCTTIHYNM    | 405  | >TP53-C229CGTTIHYNM   | 3083 | 2678 |
| >TP53-C229CDCTTIHYN    | 287  | >TP53-C229CDGTTIHYN   | 331  | 44   |
| >TP53-C229CDCTTIHYN    | 1323 | >TP53-C229CDGTTIHYN   | 311  | 1012 |
| >TP53-C229CSDCTTIHYN   | 400  | >TP53-C229CSDGTTIHYN  | 286  | 114  |
| >TP53-C229CGSDCTTIH    | 18   | >TP53-C229CGSDGTTIH   | 18   | 0    |
| >TP53-C229CGSDCTTIHYN  | 34   | >TP53-C229CGSDGTTIHYN | 32   | 2    |
| >TP53-C229CGSDCTTIH    | 659  | >TP53-C229CGSDGTTIH   | 359  | 300  |
| >TP53-C229CGSDCTTIHYN  | 174  | >TP53-C229CGSDGTTIHYN | 116  | 58   |
| >TP53-C229CGSDCTTIHYN  | 582  | >TP53-C229CGSDGTTIHYN | 276  | 306  |
| >TP53-C229CGSDCTTIH    | 68   | >TP53-C229CGSDGTTIH   | 28   | 40   |
| >TP53-C229CGSDCTTIHYN  | 99   | >TP53-C229CGSDGTTIHYN | 50   | 49   |
| >TP53-C229CGSDCTTIHYN  | 247  | >TP53-C229CGSDGTTIHYN | 241  | 6    |
| >TP53-C229CGSDCTTIH    | 242  | >TP53-C229CGSDGTTIH   | 182  | 60   |
| >TP53-C229CGSDCTTIHYN  | 97   | >TP53-C229CGSDGTTIHYN | 81   | 16   |
| >TP53-C229CVGSDCTTIH   | 353  | >TP53-C229CVGSDGTTIH  | 355  | 2    |
| >TP53-C229CVGSDCTTIH   | 184  | >TP53-C229CVGSDGTTIH  | 713  | 529  |
| >TP53-C229CVGSDCTTIH   | 642  | >TP53-C229CVGSDGTTIH  | 350  | 292  |
| >TP53-C229CVGSDCTTIH   | 377  | >TP53-C229CVGSDGTTIH  | 260  | 117  |
| >TP53-C229CVGSDCTTIH   | 449  | >TP53-C229CVGSDGTTIH  | 302  | 147  |
| >TP53-C229CEVGSDCTTIH' | 11   | >TP53-C229CEVGSDGTTIH | 8    | 3    |
| >TP53-C229CEVGSDCTTIH' | 75   | >TP53-C229CEVGSDGTTIH | 36   | 39   |
| >TP53-C229CEVGSDCTTIH' | 387  | >TP53-C229CEVGSDGTTIH | 370  | 17   |
| >TP53-C229CEVGSDCTTIH' | 326  | >TP53-C229CEVGSDGTTIH | 220  | 106  |
| >TP53-C229CEVGSDCTTI   | 342  | >TP53-C229CEVGSDGTTI  | 776  | 434  |
| >TP53-C229FCTTIHYNM    | 116  | >TP53-C229FRTTIHYNM   | 368  | 252  |
| >TP53-C229FCTTIHYN     | 117  | >TP53-C229FRTTIHYN    | 1632 | 1515 |
| >TP53-C229FCTTIHYN     | 1373 | >TP53-C229FRTTIHYN    | 206  | 1167 |
| >TP53-C229FCTTIHYN     | 161  | >TP53-C229FRTTIHYN    | 319  | 158  |
| >TP53-C229FCTTIHYNM    | 207  | >TP53-C229FRTTIHYNM   | 381  | 174  |
| >TP53-C229FCTTIHYN     | 35   | >TP53-C229FRTTIHYN    | 48   | 13   |
| >TP53-C229FCTTIHYNM    | 3610 | >TP53-C229FRTTIHYNM   | 50   | 3560 |
| >TP53-C229FCTTIHYN     | 130  | >TP53-C229FRTTIHYN    | 69   | 61   |
| >TP53-C229FCTTIHYN     | 5291 | >TP53-C229FRTTIHYN    | 342  | 4949 |
| >TP53-C229FCTTIHYN     | 355  | >TP53-C229FRTTIHYN    | 57   | 298  |
| >TP53-C229FCTTIHYN     | 50   | >TP53-C229FRTTIHYN    | 4    | 46   |
| >TP53-C229FCTTIHYNM    | 1487 | >TP53-C229FRTTIHYNM   | 10   | 1477 |
| >TP53-C229FCTTIHYN     | 3595 | >TP53-C229FRTTIHYN    | 147  | 3448 |

|                        |      |                     |      |      |
|------------------------|------|---------------------|------|------|
| >TP53-C229FCTTIHYNM    | 3499 | >TP53-C229FRTTIHYNM | 164  | 3335 |
| >TP53-C229FCTTIHYNM    | 11   | >TP53-C229FRTTIHYNM | 10   | 1    |
| >TP53-C229FCTTIHYNM    | 184  | >TP53-C229FRTTIHYNM | 125  | 59   |
| >TP53-C229FCTTIHYNM    | 4345 | >TP53-C229FRTTIHYNM | 219  | 4126 |
| >TP53-C229FCTTIHYNM    | 999  | >TP53-C229FRTTIHYNM | 40   | 959  |
| >TP53-C229FCTTIHYNM    | 68   | >TP53-C229FRTTIHYNM | 191  | 123  |
| >TP53-C229FCTTIHYNM    | 405  | >TP53-C229FRTTIHYNM | 435  | 30   |
| >TP53-C229FDCTTIHYNM   | 287  | >TP53-C229FRTTIHYNM | 576  | 289  |
| >TP53-C229FSDCTTIHYNM  | 400  | >TP53-C229FRTTIHYNM | 612  | 212  |
| >TP53-C229FGSDCTTIHY   | 18   | >TP53-C229FRTTIHYNM | 12   | 6    |
| >TP53-C229FGSDCTTIHYN  | 34   | >TP53-C229FRTTIHYNM | 19   | 15   |
| >TP53-C229FGSDCTTIHYN  | 174  | >TP53-C229FRTTIHYNM | 325  | 151  |
| >TP53-C229FGSDCTTIHYN  | 582  | >TP53-C229FRTTIHYNM | 331  | 251  |
| >TP53-C229FGSDCTTIHY   | 68   | >TP53-C229FRTTIHYNM | 88   | 20   |
| >TP53-C229FGSDCTTIHYN  | 99   | >TP53-C229FRTTIHYNM | 124  | 25   |
| >TP53-C229FGSDCTTIHY   | 2361 | >TP53-C229FRTTIHYNM | 263  | 2098 |
| >TP53-C229FGSDCTTIHYN  | 247  | >TP53-C229FRTTIHYNM | 284  | 37   |
| >TP53-C229FGSDCTTIHY   | 242  | >TP53-C229FRTTIHYNM | 564  | 322  |
| >TP53-C229FGSDCTTIHYN  | 97   | >TP53-C229FRTTIHYNM | 195  | 98   |
| >TP53-C229FVGSDCTTIHY  | 353  | >TP53-C229FRTTIHYNM | 255  | 98   |
| >TP53-C229FVGSDCTTIHY  | 184  | >TP53-C229FRTTIHYNM | 722  | 538  |
| >TP53-C229FVGSDCTTIHY  | 642  | >TP53-C229FRTTIHYNM | 499  | 143  |
| >TP53-C229FVGSDCTTIHY  | 377  | >TP53-C229FRTTIHYNM | 440  | 63   |
| >TP53-C229FVGSDCTTIHY  | 449  | >TP53-C229FRTTIHYNM | 163  | 286  |
| >TP53-C229FVGSDCCTTIH' | 11   | >TP53-C229FRTTIHYNM | 8    | 3    |
| >TP53-C229FVGSDCCTTIH' | 75   | >TP53-C229FRTTIHYNM | 64   | 11   |
| >TP53-C229FVGSDCCTTIH' | 387  | >TP53-C229FRTTIHYNM | 673  | 286  |
| >TP53-C229FVGSDCCTTI   | 1082 | >TP53-C229FRTTIHYNM | 406  | 676  |
| >TP53-C229FVGSDCCTTIH' | 326  | >TP53-C229FRTTIHYNM | 347  | 21   |
| >TP53-C229FPEVGSDCCTTI | 342  | >TP53-C229FRTTIHYNM | 1390 | 1048 |
| >TP53-C229FPPEVGSDCCTT | 657  | >TP53-C229FRTTIHYNM | 424  | 233  |
| >TP53-C229SCTTIHYNM    | 116  | >TP53-C229FRTTIHYNM | 135  | 19   |
| >TP53-C229SCTTIHYNM    | 117  | >TP53-C229FRTTIHYNM | 589  | 472  |
| >TP53-C229SCTTIHYNM    | 1373 | >TP53-C229FRTTIHYNM | 123  | 1250 |
| >TP53-C229SCTTIHYNM    | 754  | >TP53-C229FRTTIHYNM | 178  | 576  |
| >TP53-C229SCTTIHYNM    | 161  | >TP53-C229FRTTIHYNM | 51   | 110  |
| >TP53-C229SCTTIHYNM    | 207  | >TP53-C229FRTTIHYNM | 64   | 143  |
| >TP53-C229SCTTIHYNM    | 35   | >TP53-C229FRTTIHYNM | 22   | 13   |
| >TP53-C229SCTTIHYNM    | 130  | >TP53-C229FRTTIHYNM | 74   | 56   |
| >TP53-C229SCTTIHYNM    | 767  | >TP53-C229FRTTIHYNM | 345  | 422  |
| >TP53-C229SCTTIHYNM    | 355  | >TP53-C229FRTTIHYNM | 121  | 234  |
| >TP53-C229SCTTIHYNM    | 50   | >TP53-C229FRTTIHYNM | 16   | 34   |
| >TP53-C229SCTTIHYNM    | 1487 | >TP53-C229FRTTIHYNM | 200  | 1287 |

|                         |      |                         |      |      |
|-------------------------|------|-------------------------|------|------|
| >TP53-C229S CTTIHYNM    | 11   | >TP53-C229S STTIHYNM    | 8    | 3    |
| >TP53-C229S CTTIHYNMC   | 184  | >TP53-C229S STTIHYNMC   | 98   | 86   |
| >TP53-C229S CTTIHYNM    | 999  | >TP53-C229S STTIHYNM    | 60   | 939  |
| >TP53-C229S CTTIHNY     | 68   | >TP53-C229S STTIHNY     | 281  | 213  |
| >TP53-C229S CTTIHNY     | 1459 | >TP53-C229S STTIHNY     | 242  | 1217 |
| >TP53-C229S CTTIHYNM    | 405  | >TP53-C229S STTIHYNM    | 776  | 371  |
| >TP53-C229S DCTTIHNY    | 521  | >TP53-C229S DSTTIHNY    | 56   | 465  |
| >TP53-C229S DCTTIHYNM   | 585  | >TP53-C229S DSTTIHYNM   | 87   | 498  |
| >TP53-C229S DCTTIHNY    | 287  | >TP53-C229S DSTTIHNY    | 57   | 230  |
| >TP53-C229S DCTTIHNY    | 1323 | >TP53-C229S DSTTIHNY    | 101  | 1222 |
| >TP53-C229S DCTTIHNY    | 6791 | >TP53-C229S DSTTIHNY    | 126  | 6665 |
| >TP53-C229S DCTTIHYNM   | 4356 | >TP53-C229S DSTTIHYNM   | 146  | 4210 |
| >TP53-C229S DCTTIHNY    | 787  | >TP53-C229S DSTTIHNY    | 359  | 428  |
| >TP53-C229S SDCTTIHNY   | 400  | >TP53-C229S SDSTTIHNY   | 139  | 261  |
| >TP53-C229S SDCTTIHNY   | 1521 | >TP53-C229S SDSTTIHNY   | 273  | 1248 |
| >TP53-C229S GSDCTTIHY   | 18   | >TP53-C229S GSDSTTIHY   | 10   | 8    |
| >TP53-C229S GSDCTTIHYN  | 34   | >TP53-C229S GSDSTTIHYN' | 16   | 18   |
| >TP53-C229S GSDCTTIHY   | 659  | >TP53-C229S GSDSTTIHY   | 412  | 247  |
| >TP53-C229S GSDCTTIHYN  | 174  | >TP53-C229S GSDSTTIHYN' | 131  | 43   |
| >TP53-C229S GSDCTTIHY   | 1997 | >TP53-C229S GSDSTTIHY   | 327  | 1670 |
| >TP53-C229S GSDCTTIHYN  | 582  | >TP53-C229S GSDSTTIHYN' | 121  | 461  |
| >TP53-C229S GSDCTTIHY   | 68   | >TP53-C229S GSDSTTIHY   | 42   | 26   |
| >TP53-C229S GSDCTTIHYN  | 99   | >TP53-C229S GSDSTTIHYN' | 65   | 34   |
| >TP53-C229S GSDCTTIHY   | 535  | >TP53-C229S GSDSTTIHY   | 207  | 328  |
| >TP53-C229S GSDCTTIHYN  | 247  | >TP53-C229S GSDSTTIHYN' | 114  | 133  |
| >TP53-C229S GSDCTTIHY   | 242  | >TP53-C229S GSDSTTIHY   | 299  | 57   |
| >TP53-C229S GSDCTTIHYN  | 97   | >TP53-C229S GSDSTTIHYN' | 119  | 22   |
| >TP53-C229S VGSDCTTIHY  | 353  | >TP53-C229S VGSDSTTIHY  | 182  | 171  |
| >TP53-C229S VGSDCTTIHY  | 184  | >TP53-C229S VGSDSTTIHY  | 280  | 96   |
| >TP53-C229S VGSDCTTIHY  | 642  | >TP53-C229S VGSDSTTIHY  | 329  | 313  |
| >TP53-C229S VGSDCTTIHY  | 377  | >TP53-C229S VGSDSTTIHY  | 214  | 163  |
| >TP53-C229S VGSDCTTIHY  | 1948 | >TP53-C229S VGSDSTTIHY  | 409  | 1539 |
| >TP53-C229S VGSDCTTIHY  | 449  | >TP53-C229S VGSDSTTIHY  | 212  | 237  |
| >TP53-C229S EVGSDCTTIH' | 11   | >TP53-C229S EVGSDSTTIH' | 8    | 3    |
| >TP53-C229S EVGSDCTTIH' | 75   | >TP53-C229S EVGSDSTTIH' | 68   | 7    |
| >TP53-C229S EVGSDCTTIH' | 387  | >TP53-C229S EVGSDSTTIH' | 378  | 9    |
| >TP53-C229S EVGSDCTTI   | 1082 | >TP53-C229S EVGSDSTTI   | 445  | 637  |
| >TP53-C229S EVGSDCTTI   | 504  | >TP53-C229S EVGSDSTTI   | 124  | 380  |
| >TP53-C229S EVGSDCTTIH' | 326  | >TP53-C229S EVGSDSTTIH' | 147  | 179  |
| >TP53-C229S EVGSDCTTIH' | 819  | >TP53-C229S EVGSDSTTIH' | 452  | 367  |
| >TP53-C229S PEVGSDCTTI  | 342  | >TP53-C229S PEVGSDSTTI  | 1455 | 1113 |
| >TP53-C229S PPEVGSDCTT  | 657  | >TP53-C229S PPEVGSDSTT  | 335  | 322  |
| >TP53-C229Y CTTIHYNM    | 116  | >TP53-C229Y YTTIHYNM    | 193  | 77   |

|                       |       |                       |      |       |
|-----------------------|-------|-----------------------|------|-------|
| >TP53-C229YCTTIHYN    | 117   | >TP53-C229Y YTTIHYN   | 83   | 34    |
| >TP53-C229YCTTIHYNM   | 5332  | >TP53-C229Y YTTIHYNM  | 321  | 5011  |
| >TP53-C229YCTTIHYN    | 3621  | >TP53-C229Y YTTIHYN   | 85   | 3536  |
| >TP53-C229YCTTIHYNM   | 8276  | >TP53-C229Y YTTIHYNM  | 209  | 8067  |
| >TP53-C229YCTTIHYN    | 2641  | >TP53-C229Y YTTIHYN   | 212  | 2429  |
| >TP53-C229YCTTIHYNM   | 754   | >TP53-C229Y YTTIHYNM  | 35   | 719   |
| >TP53-C229YCTTIHYN    | 161   | >TP53-C229Y YTTIHYN   | 26   | 135   |
| >TP53-C229YCTTIHYNM   | 207   | >TP53-C229Y YTTIHYNM  | 32   | 175   |
| >TP53-C229YCTTIHYN    | 35    | >TP53-C229Y YTTIHYN   | 9    | 26    |
| >TP53-C229YCTTIHYN    | 130   | >TP53-C229Y YTTIHYN   | 232  | 102   |
| >TP53-C229YCTTIHYN    | 767   | >TP53-C229Y YTTIHYN   | 123  | 644   |
| >TP53-C229YCTTIHYNM   | 1337  | >TP53-C229Y YTTIHYNM  | 334  | 1003  |
| >TP53-C229YCTTIHYNM   | 4582  | >TP53-C229Y YTTIHYNM  | 183  | 4399  |
| >TP53-C229YCTTIHYN    | 355   | >TP53-C229Y YTTIHYN   | 67   | 288   |
| >TP53-C229YCTTIHYN    | 50    | >TP53-C229Y YTTIHYN   | 5    | 45    |
| >TP53-C229YCTTIHYNM   | 1487  | >TP53-C229Y YTTIHYNM  | 28   | 1459  |
| >TP53-C229YCTTIHYN    | 3855  | >TP53-C229Y YTTIHYN   | 373  | 3482  |
| >TP53-C229YCTTIHYNM   | 11    | >TP53-C229Y YTTIHYNM  | 4    | 7     |
| >TP53-C229YCTTIHYNM   | 184   | >TP53-C229Y YTTIHYNM  | 29   | 155   |
| >TP53-C229YCTTIHYN    | 4345  | >TP53-C229Y YTTIHYN   | 426  | 3919  |
| >TP53-C229YCTTIHYNM   | 999   | >TP53-C229Y YTTIHYNM  | 24   | 975   |
| >TP53-C229YCTTIHYN    | 68    | >TP53-C229Y YTTIHYN   | 148  | 80    |
| >TP53-C229YCTTIHYNM   | 405   | >TP53-C229Y YTTIHYNM  | 1604 | 1199  |
| >TP53-C229YDCTTIHYN   | 521   | >TP53-C229Y DYTTIHYN  | 416  | 105   |
| >TP53-C229YDCTTIHYN   | 287   | >TP53-C229Y DYTTIHYN  | 18   | 269   |
| >TP53-C229YDCTTIHYN   | 1323  | >TP53-C229Y DYTTIHYN  | 184  | 1139  |
| >TP53-C229YDCTTIHYN   | 8573  | >TP53-C229Y DYTTIHYN  | 470  | 8103  |
| >TP53-C229YDCTTIHYN   | 902   | >TP53-C229Y DYTTIHYN  | 356  | 546   |
| >TP53-C229YDCTTIHYN   | 787   | >TP53-C229Y DYTTIHYN  | 88   | 699   |
| >TP53-C229YPYEPPEVGSD | 37328 | >TP53-C229YPYEPPEVGSD | 253  | 37075 |
| >TP53-C229YSDCTTIHYN  | 3428  | >TP53-C229YSDYTTIHYN  | 180  | 3248  |
| >TP53-C229YSDCTTIH    | 1951  | >TP53-C229YSDYTTIH    | 400  | 1551  |
| >TP53-C229YSDCTTIHYN  | 400   | >TP53-C229YSDYTTIHYN  | 103  | 297   |
| >TP53-C229YSDCTTIHYN  | 1521  | >TP53-C229YSDYTTIHYN  | 119  | 1402  |
| >TP53-C229YGSDCTTIH   | 18    | >TP53-C229YGSDYTTIH   | 15   | 3     |
| >TP53-C229YGSDCTTIHYN | 34    | >TP53-C229YGSDYTTIHYN | 23   | 11    |
| >TP53-C229YGSDCTTIH   | 659   | >TP53-C229YGSDYTTIH   | 357  | 302   |
| >TP53-C229YGSDCTTIHYN | 174   | >TP53-C229YGSDYTTIHYN | 119  | 55    |
| >TP53-C229YGSDCTTIH   | 1997  | >TP53-C229YGSDYTTIH   | 459  | 1538  |
| >TP53-C229YGSDCTTIHYN | 582   | >TP53-C229YGSDYTTIHYN | 156  | 426   |
| >TP53-C229YGSDCTTIH   | 68    | >TP53-C229YGSDYTTIH   | 41   | 27    |
| >TP53-C229YGSDCTTIHYN | 99    | >TP53-C229YGSDYTTIHYN | 71   | 28    |
| >TP53-C229YGSDCTTIH   | 535   | >TP53-C229YGSDYTTIH   | 430  | 105   |

|                        |       |                        |     |       |
|------------------------|-------|------------------------|-----|-------|
| >TP53-C229YGSDCTTIHYN  | 247   | >TP53-C229YGSDYTTIHYN' | 210 | 37    |
| >TP53-C229YGSDCTTIHY   | 242   | >TP53-C229YGSDYTTIH Y  | 324 | 82    |
| >TP53-C229YGSDCTTIHYN  | 97    | >TP53-C229YGSDYTTIHYN' | 116 | 19    |
| >TP53-C229YVGSDCTTIHY  | 353   | >TP53-C229YVGSDYTTIH Y | 362 | 9     |
| >TP53-C229YVGSDCTTIHY  | 184   | >TP53-C229YVGSDYTTIH Y | 115 | 69    |
| >TP53-C229YVGSDCTTIHY  | 642   | >TP53-C229YVGSDYTTIH Y | 219 | 423   |
| >TP53-C229YVGSDCTTIHY  | 377   | >TP53-C229YVGSDYTTIH Y | 273 | 104   |
| >TP53-C229YVGSDCTTIHY  | 449   | >TP53-C229YVGSDYTTIH Y | 276 | 173   |
| >TP53-C229YEVGSDCTTIH' | 11    | >TP53-C229YEVGSDYTTIH' | 6   | 5     |
| >TP53-C229YEVGSDCTTIH' | 75    | >TP53-C229YEVGSDYTTIH' | 84  | 9     |
| >TP53-C229YEVGSDCTTIH' | 387   | >TP53-C229YEVGSDYTTIH' | 313 | 74    |
| >TP53-C229YEVGSDCTTI   | 1082  | >TP53-C229YEVGSDYTTI   | 335 | 747   |
| >TP53-C229YEVGSDCTTI   | 504   | >TP53-C229YEVGSDYTTI   | 114 | 390   |
| >TP53-C229YEVGSDCTTIH' | 326   | >TP53-C229YEVGSDYTTIH' | 280 | 46    |
| >TP53-C229YPEVGSDCTTI  | 1090  | >TP53-C229YPEVGSDYTTI  | 393 | 697   |
| >TP53-C229YPEVGSDCTTI  | 342   | >TP53-C229YPEVGSDYTTI  | 872 | 530   |
| >TP53-C229YPPEVGSDCTT  | 657   | >TP53-C229YPPEVGSDYTT  | 292 | 365   |
| >TP53-C229YEPPEVGSDC   | 8215  | >TP53-C229YEPPEVGSDY   | 70  | 8145  |
| >TP53-C238FCNSSCMGGN   | 876   | >TP53-C238FCNSSCMGGN   | 209 | 667   |
| >TP53-C238FCNSSCMGGN   | 2175  | >TP53-C238FCNSSCMGGN   | 245 | 1930  |
| >TP53-C238FCNSSCMGC    | 26751 | >TP53-C238FCNSSCMGC    | 331 | 26420 |
| >TP53-C238FYMCNSSCM    | 1744  | >TP53-C238FYMFNSSCM    | 298 | 1446  |
| >TP53-C238FYMCNSSCMC   | 5190  | >TP53-C238FYMFNSSCMC   | 113 | 5077  |
| >TP53-C238FYMCNSSCM    | 262   | >TP53-C238FYMFNSSCM    | 21  | 241   |
| >TP53-C238FYMCNSSCMC   | 988   | >TP53-C238FYMFNSSCMC   | 307 | 681   |
| >TP53-C238FYMCNSSCMC   | 252   | >TP53-C238FYMFNSSCMC   | 21  | 231   |
| >TP53-C238FYMCNSSCM    | 205   | >TP53-C238FYMFNSSCM    | 23  | 182   |
| >TP53-C238FYMCNSSCMC   | 4010  | >TP53-C238FYMFNSSCMC   | 368 | 3642  |
| >TP53-C238FYMCNSSCMC   | 2002  | >TP53-C238FYMFNSSCMC   | 273 | 1729  |
| >TP53-C238FYMCNSSCMC   | 167   | >TP53-C238FYMFNSSCMC   | 20  | 147   |
| >TP53-C238FYMCNSSCM    | 283   | >TP53-C238FYMFNSSCM    | 36  | 247   |
| >TP53-C238FYMCNSSCMC   | 3523  | >TP53-C238FYMFNSSCMC   | 473 | 3050  |
| >TP53-C238FYMCNSSCMC   | 1968  | >TP53-C238FYMFNSSCMC   | 394 | 1574  |
| >TP53-C238FYMCNSSCMC   | 41    | >TP53-C238FYMFNSSCMC   | 10  | 31    |
| >TP53-C238FYMCNSSCM    | 676   | >TP53-C238FYMFNSSCM    | 111 | 565   |
| >TP53-C238FYMCNSSCMC   | 143   | >TP53-C238FYMFNSSCMC   | 32  | 111   |
| >TP53-C238FYMCNSSCM    | 24    | >TP53-C238FYMFNSSCM    | 5   | 19    |
| >TP53-C238FYMCNSSCMC   | 92    | >TP53-C238FYMFNSSCMC   | 12  | 80    |
| >TP53-C238FYMCNSSCMC   | 399   | >TP53-C238FYMFNSSCMC   | 37  | 362   |
| >TP53-C238FYMCNSSCMC   | 16    | >TP53-C238FYMFNSSCMC   | 4   | 12    |
| >TP53-C238FYMCNSSCM    | 92    | >TP53-C238FYMFNSSCM    | 7   | 85    |
| >TP53-C238FYMCNSSCMC   | 5683  | >TP53-C238FYMFNSSCMC   | 262 | 5421  |
| >TP53-C238FYMCNSSCMC   | 5487  | >TP53-C238FYMFNSSCMC   | 341 | 5146  |

|                       |       |                        |     |       |
|-----------------------|-------|------------------------|-----|-------|
| >TP53-C238FYMCNSSCMC  | 197   | >TP53-C238FYMFNSSCMG   | 12  | 185   |
| >TP53-C238FYMCNSSCM   | 150   | >TP53-C238FYMFNSSCM    | 12  | 138   |
| >TP53-C238FYMCNSSCMC  | 1738  | >TP53-C238FYMFNSSCMG   | 88  | 1650  |
| >TP53-C238FYMCNSSCMC  | 4958  | >TP53-C238FYMFNSSCMG   | 299 | 4659  |
| >TP53-C238FYMCNSSCMC  | 421   | >TP53-C238FYMFNSSCMG   | 19  | 402   |
| >TP53-C238FYMCNSSCM   | 67    | >TP53-C238FYMFNSSCM    | 12  | 55    |
| >TP53-C238FYMCNSSCMC  | 332   | >TP53-C238FYMFNSSCMG   | 38  | 294   |
| >TP53-C238FYMCNSSCM   | 33    | >TP53-C238FYMFNSSCM    | 8   | 25    |
| >TP53-C238FYMCNSSCMC  | 903   | >TP53-C238FYMFNSSCMG   | 107 | 796   |
| >TP53-C238FYMCNSSCMC  | 1350  | >TP53-C238FYMFNSSCMG   | 135 | 1215  |
| >TP53-C238FYMCNSSCMC  | 53    | >TP53-C238FYMFNSSCMG   | 10  | 43    |
| >TP53-C238FYMCNSSCMC  | 2458  | >TP53-C238FYMFNSSCMG   | 444 | 2014  |
| >TP53-C238FYMCNSSCMC  | 4973  | >TP53-C238FYMFNSSCMG   | 316 | 4657  |
| >TP53-C238FYMCNSSCM   | 33    | >TP53-C238FYMFNSSCM    | 22  | 11    |
| >TP53-C238FYMCNSSCMC  | 127   | >TP53-C238FYMFNSSCMG   | 67  | 60    |
| >TP53-C238FYMCNSSCMC  | 292   | >TP53-C238FYMFNSSCMG   | 120 | 172   |
| >TP53-C238FYMCNSSCMC  | 44    | >TP53-C238FYMFNSSCMG   | 28  | 16    |
| >TP53-C238FYMCNSSCM   | 98    | >TP53-C238FYMFNSSCM    | 20  | 78    |
| >TP53-C238FYMCNSSCMC  | 145   | >TP53-C238FYMFNSSCMG   | 27  | 118   |
| >TP53-C238FYMCNSSCM   | 20    | >TP53-C238FYMFNSSCM    | 3   | 17    |
| >TP53-C238FYMCNSSCMC  | 1624  | >TP53-C238FYMFNSSCMG   | 121 | 1503  |
| >TP53-C238FYMCNSSCMC  | 2531  | >TP53-C238FYMFNSSCMG   | 176 | 2355  |
| >TP53-C238FYMCNSSCMC  | 160   | >TP53-C238FYMFNSSCMG   | 10  | 150   |
| >TP53-C238FYMCNSSCM   | 1533  | >TP53-C238FYMFNSSCM    | 391 | 1142  |
| >TP53-C238FYMCNSSCMC  | 294   | >TP53-C238FYMFNSSCMG   | 62  | 232   |
| >TP53-C238FYMCNSSCM   | 310   | >TP53-C238FYMFNSSCM    | 66  | 244   |
| >TP53-C238FYMCNSSCMC  | 958   | >TP53-C238FYMFNSSCMG   | 250 | 708   |
| >TP53-C238FYMCNSSCM   | 346   | >TP53-C238FYMFNSSCM    | 96  | 250   |
| >TP53-C238FYMCNSSCM   | 3357  | >TP53-C238FYMFNSSCM    | 280 | 3077  |
| >TP53-C238FYMCNSSCMC  | 1073  | >TP53-C238FYMFNSSCMG   | 88  | 985   |
| >TP53-C238FYNYMCNSSCM | 53    | >TP53-C238FYNYMFNSSCM  | 265 | 212   |
| >TP53-C238FYNYMCNSSCI | 429   | >TP53-C238FYNYMFNSSCI  | 473 | 44    |
| >TP53-C238FYNYMCNSSCI | 893   | >TP53-C238FYNYMFNSSCI  | 222 | 671   |
| >TP53-C238FYNYMCNSSCI | 31    | >TP53-C238FYNYMFNSSCI  | 27  | 4     |
| >TP53-C238FYNYMCNSSCI | 911   | >TP53-C238FYNYMFNSSCI  | 218 | 693   |
| >TP53-C238FYHNYMCNSS  | 70    | >TP53-C238FYHNYMFNSSCI | 128 | 58    |
| >TP53-C238FTIHNYNMF   | 11200 | >TP53-C238FTIHNYNMF    | 371 | 10829 |
| >TP53-C238FTIHNYNMF   | 23015 | >TP53-C238FTIHNYNMF    | 236 | 22779 |
| >TP53-C238FTTIHNYNMF  | 23875 | >TP53-C238FTTIHNYNMF   | 77  | 23798 |
| >TP53-C238FTTIHNYNMF  | 24674 | >TP53-C238FTTIHNYNMF   | 470 | 24204 |
| >TP53-C238FTTIHNYNMF  | 8451  | >TP53-C238FTTIHNYNMF   | 9   | 8442  |
| >TP53-C238FTTIHNYNMF  | 8516  | >TP53-C238FTTIHNYNMF   | 56  | 8460  |
| >TP53-C238FTTIHNYNMF  | 3928  | >TP53-C238FTTIHNYNMF   | 57  | 3871  |

|                       |       |                       |     |       |
|-----------------------|-------|-----------------------|-----|-------|
| >TP53-C238FTTIHYNMYC  | 6014  | >TP53-C238FTTIHYNMYMF | 259 | 5755  |
| >TP53-C238FTTIHYNMYC  | 120   | >TP53-C238FTTIHYNMYMF | 307 | 187   |
| >TP53-C238FTTIHYNMYCM | 102   | >TP53-C238FTTIHYNMYMF | 27  | 75    |
| >TP53-C238FTTIHYNMYC  | 17742 | >TP53-C238FTTIHYNMYMF | 390 | 17352 |
| >TP53-C238FTTIHYNMYC  | 10937 | >TP53-C238FTTIHYNMYMF | 86  | 10851 |
| >TP53-C238FTTIHYNMYC  | 9061  | >TP53-C238FTTIHYNMYMF | 7   | 9054  |
| >TP53-C238FTTIHYNMYC  | 16534 | >TP53-C238FTTIHYNMYMF | 220 | 16314 |
| >TP53-C238FTTIHYNMYC  | 1474  | >TP53-C238FTTIHYNMYMF | 145 | 1329  |
| >TP53-C238FTTIHYNMYC  | 7731  | >TP53-C238FTTIHYNMYMF | 33  | 7698  |
| >TP53-C238FTTIHYNMYC  | 16246 | >TP53-C238FTTIHYNMYMF | 174 | 16072 |
| >TP53-C238FTTIHYNMYC  | 19494 | >TP53-C238FTTIHYNMYMF | 39  | 19455 |
| >TP53-C238FTTIHYNMYC  | 184   | >TP53-C238FTTIHYNMYMF | 16  | 168   |
| >TP53-C238FTTIHYNMYC  | 9749  | >TP53-C238FTTIHYNMYMF | 47  | 9702  |
| >TP53-C238CNCSSCMGGN  | 2175  | >TP53-C238CNCSSCMGGN  | 157 | 2018  |
| >TP53-C238CMCNSSCMG   | 944   | >TP53-C238CMGNSSCMG   | 184 | 760   |
| >TP53-C238CYMCNSSCM   | 262   | >TP53-C238CYMGNSSCM   | 344 | 82    |
| >TP53-C238CYMCNSSCM   | 252   | >TP53-C238CYMGNSSCM   | 314 | 62    |
| >TP53-C238CYMCNSSCM   | 205   | >TP53-C238CYMGNSSCM   | 208 | 3     |
| >TP53-C238CYMCNSSCM   | 167   | >TP53-C238CYMGNSSCM   | 163 | 4     |
| >TP53-C238CYMCNSSCM   | 283   | >TP53-C238CYMGNSSCM   | 466 | 183   |
| >TP53-C238CYMCNSSCM   | 41    | >TP53-C238CYMGNSSCM   | 69  | 28    |
| >TP53-C238CYMCNSSCM   | 143   | >TP53-C238CYMGNSSCM   | 384 | 241   |
| >TP53-C238CYMCNSSCM   | 24    | >TP53-C238CYMGNSSCM   | 26  | 2     |
| >TP53-C238CYMCNSSCM   | 92    | >TP53-C238CYMGNSSCM   | 88  | 4     |
| >TP53-C238CYMCNSSCM   | 399   | >TP53-C238CYMGNSSCM   | 419 | 20    |
| >TP53-C238CYMCNSSCM   | 16    | >TP53-C238CYMGNSSCM   | 15  | 1     |
| >TP53-C238CYMCNSSCM   | 92    | >TP53-C238CYMGNSSCM   | 8   | 84    |
| >TP53-C238CYMCNSSCM   | 197   | >TP53-C238CYMGNSSCM   | 19  | 178   |
| >TP53-C238CYMCNSSCM   | 150   | >TP53-C238CYMGNSSCM   | 37  | 113   |
| >TP53-C238CYMCNSSCM   | 1738  | >TP53-C238CYMGNSSCM   | 385 | 1353  |
| >TP53-C238CYMCNSSCM   | 421   | >TP53-C238CYMGNSSCM   | 85  | 336   |
| >TP53-C238CYMCNSSCM   | 67    | >TP53-C238CYMGNSSCM   | 16  | 51    |
| >TP53-C238CYMCNSSCM   | 332   | >TP53-C238CYMGNSSCM   | 53  | 279   |
| >TP53-C238CYMCNSSCM   | 33    | >TP53-C238CYMGNSSCM   | 21  | 12    |
| >TP53-C238CYMCNSSCM   | 53    | >TP53-C238CYMGNSSCM   | 39  | 14    |
| >TP53-C238CYMCNSSCM   | 33    | >TP53-C238CYMGNSSCM   | 36  | 3     |
| >TP53-C238CYMCNSSCM   | 127   | >TP53-C238CYMGNSSCM   | 162 | 35    |
| >TP53-C238CYMCNSSCM   | 292   | >TP53-C238CYMGNSSCM   | 420 | 128   |
| >TP53-C238CYMCNSSCM   | 44    | >TP53-C238CYMGNSSCM   | 53  | 9     |
| >TP53-C238CYMCNSSCM   | 98    | >TP53-C238CYMGNSSCM   | 108 | 10    |
| >TP53-C238CYMCNSSCM   | 145   | >TP53-C238CYMGNSSCM   | 163 | 18    |
| >TP53-C238CYMCNSSCM   | 20    | >TP53-C238CYMGNSSCM   | 29  | 9     |
| >TP53-C238CYMCNSSCM   | 160   | >TP53-C238CYMGNSSCM   | 281 | 121   |

|                        |       |                       |      |       |
|------------------------|-------|-----------------------|------|-------|
| >TP53-C238CYMCNSSCMC   | 294   | >TP53-C238CYMGNSSCMC  | 1444 | 1150  |
| >TP53-C238CYMCNSSCM    | 310   | >TP53-C238CYMGNSSCM   | 770  | 460   |
| >TP53-C238CYMCNSSCM    | 346   | >TP53-C238CYMGNSSCM   | 3173 | 2827  |
| >TP53-C238CNYMCNSSCM   | 53    | >TP53-C238CNYMGNSSCM  | 53   | 0     |
| >TP53-C238CNYMCNSSCM   | 650   | >TP53-C238CNYMGNSSCM  | 371  | 279   |
| >TP53-C238CNYMCNSSCM   | 1703  | >TP53-C238CNYMGNSSCM  | 363  | 1340  |
| >TP53-C238CNYNYMCNSSCI | 429   | >TP53-C238CNYNYMGNSSC | 317  | 112   |
| >TP53-C238CNYNYMCNSSCI | 893   | >TP53-C238CNYNYMGNSSC | 119  | 774   |
| >TP53-C238CNYNYMCNSSCI | 31    | >TP53-C238CNYNYMGNSSC | 62   | 31    |
| >TP53-C238CHYNYMCNSS   | 70    | >TP53-C238CHYNYMGNSS  | 173  | 103   |
| >TP53-C238CTTIHNYMCM   | 1485  | >TP53-C238CTTIHNYMCM  | 482  | 1003  |
| >TP53-C238CTTIHNYMCM   | 120   | >TP53-C238CTTIHNYMCM  | 288  | 168   |
| >TP53-C238CTTIHNYMCM   | 102   | >TP53-C238CTTIHNYMCM  | 74   | 28    |
| >TP53-C238CTTIHNYMCM   | 184   | >TP53-C238CTTIHNYMCM  | 837  | 653   |
| >TP53-C238FCNSSCMGGM   | 3359  | >TP53-C238FCNSSCMGGM  | 257  | 3102  |
| >TP53-C238FCNSSCMGGM   | 2175  | >TP53-C238FCNSSCMGGM  | 138  | 2037  |
| >TP53-C238FCNSSCMGGM   | 639   | >TP53-C238FCNSSCMGGM  | 178  | 461   |
| >TP53-C238FCNSSCMGGC   | 2844  | >TP53-C238FCNSSCMGGC  | 186  | 2658  |
| >TP53-C238FDCTTIHNYNY  | 26449 | >TP53-C238FDCTTIHNYNY | 33   | 26416 |
| >TP53-C238FDCTTIHNYNY  | 37889 | >TP53-C238FDCTTIHNYNY | 96   | 37793 |
| >TP53-C238FDCTTIHNYNY  | 32127 | >TP53-C238FDCTTIHNYNY | 235  | 31892 |
| >TP53-C238FYMCNSSCM    | 262   | >TP53-C238FYMRNSSCM   | 3662 | 3400  |
| >TP53-C238FYMCNSSCMC   | 252   | >TP53-C238FYMRNSSCMC  | 2767 | 2515  |
| >TP53-C238FYMCNSSCM    | 205   | >TP53-C238FYMRNSSCM   | 841  | 636   |
| >TP53-C238FYMCNSSCMC   | 167   | >TP53-C238FYMRNSSCMC  | 715  | 548   |
| >TP53-C238FYMCNSSCM    | 283   | >TP53-C238FYMRNSSCM   | 160  | 123   |
| >TP53-C238FYMCNSSCMC   | 41    | >TP53-C238FYMRNSSCMC  | 26   | 15    |
| >TP53-C238FYMCNSSCMC   | 143   | >TP53-C238FYMRNSSCMC  | 1196 | 1053  |
| >TP53-C238FYMCNSSCM    | 24    | >TP53-C238FYMRNSSCM   | 169  | 145   |
| >TP53-C238FYMCNSSCMC   | 92    | >TP53-C238FYMRNSSCMC  | 876  | 784   |
| >TP53-C238FYMCNSSCMC   | 399   | >TP53-C238FYMRNSSCMC  | 2887 | 2488  |
| >TP53-C238FYMCNSSCMC   | 16    | >TP53-C238FYMRNSSCMC  | 104  | 88    |
| >TP53-C238FYMCNSSCM    | 92    | >TP53-C238FYMRNSSCM   | 86   | 6     |
| >TP53-C238FYMCNSSCMC   | 197   | >TP53-C238FYMRNSSCMC  | 221  | 24    |
| >TP53-C238FYMCNSSCM    | 150   | >TP53-C238FYMRNSSCM   | 531  | 381   |
| >TP53-C238FYMCNSSCMC   | 421   | >TP53-C238FYMRNSSCMC  | 1228 | 807   |
| >TP53-C238FYMCNSSCM    | 67    | >TP53-C238FYMRNSSCM   | 392  | 325   |
| >TP53-C238FYMCNSSCMC   | 332   | >TP53-C238FYMRNSSCMC  | 1411 | 1079  |
| >TP53-C238FYMCNSSCM    | 33    | >TP53-C238FYMRNSSCM   | 46   | 13    |
| >TP53-C238FYMCNSSCMC   | 53    | >TP53-C238FYMRNSSCMC  | 70   | 17    |
| >TP53-C238FYMCNSSCM    | 3169  | >TP53-C238FYMRNSSCM   | 89   | 3080  |
| >TP53-C238FYMCNSSCM    | 33    | >TP53-C238FYMRNSSCM   | 25   | 8     |
| >TP53-C238FYMCNSSCMC   | 127   | >TP53-C238FYMRNSSCMC  | 82   | 45    |



|                      |       |                      |      |       |
|----------------------|-------|----------------------|------|-------|
| >TP53-C238FYMCNSSCMC | 292   | >TP53-C238FYMRNSSCMC | 157  | 135   |
| >TP53-C238FYMCNSSCMC | 44    | >TP53-C238FYMRNSSCMC | 33   | 11    |
| >TP53-C238FYMCNSSCM  | 98    | >TP53-C238FYMRNSSCM  | 31   | 67    |
| >TP53-C238FYMCNSSCMC | 145   | >TP53-C238FYMRNSSCMC | 44   | 101   |
| >TP53-C238FYMCNSSCM  | 20    | >TP53-C238FYMRNSSCM  | 6    | 14    |
| >TP53-C238FYMCNSSCMC | 1624  | >TP53-C238FYMRNSSCMC | 316  | 1308  |
| >TP53-C238FYMCNSSCMC | 2531  | >TP53-C238FYMRNSSCMC | 478  | 2053  |
| >TP53-C238FYMCNSSCMC | 160   | >TP53-C238FYMRNSSCMC | 29   | 131   |
| >TP53-C238FYMCNSSCM  | 1533  | >TP53-C238FYMRNSSCM  | 429  | 1104  |
| >TP53-C238FYMCNSSCMC | 294   | >TP53-C238FYMRNSSCMC | 50   | 244   |
| >TP53-C238FYMCNSSCM  | 310   | >TP53-C238FYMRNSSCM  | 641  | 331   |
| >TP53-C238FYMCNSSCM  | 346   | >TP53-C238FYMRNSSCM  | 3981 | 3635  |
| >TP53-C238FYMCNSSCMC | 1073  | >TP53-C238FYMRNSSCMC | 133  | 940   |
| >TP53-C238FNYMCNSSCM | 53    | >TP53-C238FNYMRNSSCM | 53   | 0     |
| >TP53-C238FNYMCNSSCM | 942   | >TP53-C238FNYMRNSSCM | 468  | 474   |
| >TP53-C238FNYMCNSSCM | 650   | >TP53-C238FNYMRNSSCM | 424  | 226   |
| >TP53-C238FNYMCNSSCI | 429   | >TP53-C238FNYMRNSSCI | 519  | 90    |
| >TP53-C238FNYMCNSSCI | 893   | >TP53-C238FNYMRNSSCI | 351  | 542   |
| >TP53-C238FNYMCNSSCI | 31    | >TP53-C238FNYMRNSSCI | 56   | 25    |
| >TP53-C238FNYMCNSSCI | 911   | >TP53-C238FNYMRNSSCI | 271  | 640   |
| >TP53-C238FHNYMCNSS  | 70    | >TP53-C238FHNYMRNSS  | 69   | 1     |
| >TP53-C238FTIHNYMC   | 22488 | >TP53-C238FTIHNYMR   | 229  | 22259 |
| >TP53-C238FTIHNYMC   | 19887 | >TP53-C238FTIHNYMR   | 26   | 19861 |
| >TP53-C238FTIHNYMC   | 34361 | >TP53-C238FTIHNYMR   | 163  | 34198 |
| >TP53-C238FTIHNYMC   | 23099 | >TP53-C238FTIHNYMR   | 7    | 23092 |
| >TP53-C238FTIHNYMC   | 34643 | >TP53-C238FTIHNYMR   | 114  | 34529 |
| >TP53-C238FTTIHNYMC  | 16447 | >TP53-C238FTTIHNYMR  | 28   | 16419 |
| >TP53-C238FTTIHNYMC  | 15061 | >TP53-C238FTTIHNYMR  | 12   | 15049 |
| >TP53-C238FTTIHNYMC  | 22637 | >TP53-C238FTTIHNYMR  | 25   | 22612 |
| >TP53-C238FTTIHNYMC  | 6014  | >TP53-C238FTTIHNYMR  | 2    | 6012  |
| >TP53-C238FTTIHNYMC  | 120   | >TP53-C238FTTIHNYMR  | 1941 | 1821  |
| >TP53-C238FTTIHNYMCM | 102   | >TP53-C238FTTIHNYMRM | 259  | 157   |
| >TP53-C238FTTIHNYMC  | 8391  | >TP53-C238FTTIHNYMR  | 210  | 8181  |
| >TP53-C238FTTIHNYMC  | 36366 | >TP53-C238FTTIHNYMR  | 213  | 36153 |
| >TP53-C238FCTTIHNYMC | 31020 | >TP53-C238FCTTIHNYMF | 136  | 30884 |
| >TP53-C238FCTTIHNYMC | 17525 | >TP53-C238FCTTIHNYMF | 28   | 17497 |
| >TP53-C238FCTTIHNYMC | 26318 | >TP53-C238FCTTIHNYMF | 449  | 25869 |
| >TP53-C238FCTTIHNYMC | 20079 | >TP53-C238FCTTIHNYMF | 9    | 20070 |
| >TP53-C238FCTTIHNYMC | 184   | >TP53-C238FCTTIHNYMF | 1905 | 1721  |
| >TP53-C238FCTTIHNYMC | 18250 | >TP53-C238FCTTIHNYMF | 422  | 17828 |
| >TP53-C238FCTTIHNYMC | 36800 | >TP53-C238FCTTIHNYMF | 169  | 36631 |
| >TP53-C238SCNSSCMGGN | 2175  | >TP53-C238SCNSSCMGGN | 171  | 2004  |
| >TP53-C238SMCNSSCMGC | 2844  | >TP53-C238MSNSSCMGC  | 379  | 2465  |

|                       |       |                       |     |       |
|-----------------------|-------|-----------------------|-----|-------|
| >TP53-C238SMCNSSCMGC  | 5576  | >TP53-C238SMSNSSCMGC  | 9   | 5567  |
| >TP53-C238SMCNSSCMGC  | 17590 | >TP53-C238SMSNSSCMGC  | 425 | 17165 |
| >TP53-C238SMCNSSCMGC  | 944   | >TP53-C238SMSNSSCMGC  | 35  | 909   |
| >TP53-C238SYMCNSSCM   | 262   | >TP53-C238SYMSNSSCM   | 120 | 142   |
| >TP53-C238SYMCNSSCMC  | 252   | >TP53-C238SYMSNSSCMC  | 119 | 133   |
| >TP53-C238SYMCNSSCM   | 205   | >TP53-C238SYMSNSSCM   | 28  | 177   |
| >TP53-C238SYMCNSSCMC  | 167   | >TP53-C238SYMSNSSCMC  | 21  | 146   |
| >TP53-C238SYMCNSSCM   | 283   | >TP53-C238SYMSNSSCM   | 53  | 230   |
| >TP53-C238SYMCNSSCMC  | 41    | >TP53-C238SYMSNSSCMC  | 13  | 28    |
| >TP53-C238SYMCNSSCM   | 676   | >TP53-C238SYMSNSSCM   | 436 | 240   |
| >TP53-C238SYMCNSSCMC  | 143   | >TP53-C238SYMSNSSCMC  | 96  | 47    |
| >TP53-C238SYMCNSSCM   | 24    | >TP53-C238SYMSNSSCM   | 42  | 18    |
| >TP53-C238SYMCNSSCMC  | 92    | >TP53-C238SYMSNSSCMC  | 148 | 56    |
| >TP53-C238SYMCNSSCMC  | 399   | >TP53-C238SYMSNSSCMC  | 652 | 253   |
| >TP53-C238SYMCNSSCMC  | 16    | >TP53-C238SYMSNSSCMC  | 23  | 7     |
| >TP53-C238SYMCNSSCM   | 92    | >TP53-C238SYMSNSSCM   | 12  | 80    |
| >TP53-C238SYMCNSSCMC  | 197   | >TP53-C238SYMSNSSCMC  | 24  | 173   |
| >TP53-C238SYMCNSSCM   | 150   | >TP53-C238SYMSNSSCM   | 45  | 105   |
| >TP53-C238SYMCNSSCMC  | 1738  | >TP53-C238SYMSNSSCMC  | 429 | 1309  |
| >TP53-C238SYMCNSSCMC  | 421   | >TP53-C238SYMSNSSCMC  | 104 | 317   |
| >TP53-C238SYMCNSSCM   | 67    | >TP53-C238SYMSNSSCM   | 15  | 52    |
| >TP53-C238SYMCNSSCMC  | 332   | >TP53-C238SYMSNSSCMC  | 48  | 284   |
| >TP53-C238SYMCNSSCM   | 33    | >TP53-C238SYMSNSSCM   | 15  | 18    |
| >TP53-C238SYMCNSSCMC  | 903   | >TP53-C238SYMSNSSCMC  | 329 | 574   |
| >TP53-C238SYMCNSSCMC  | 53    | >TP53-C238SYMSNSSCMC  | 28  | 25    |
| >TP53-C238SYMCNSSCM   | 33    | >TP53-C238SYMSNSSCM   | 33  | 0     |
| >TP53-C238SYMCNSSCMC  | 127   | >TP53-C238SYMSNSSCMC  | 125 | 2     |
| >TP53-C238SYMCNSSCMC  | 292   | >TP53-C238SYMSNSSCMC  | 282 | 10    |
| >TP53-C238SYMCNSSCMC  | 44    | >TP53-C238SYMSNSSCMC  | 45  | 1     |
| >TP53-C238SYMCNSSCM   | 98    | >TP53-C238SYMSNSSCM   | 79  | 19    |
| >TP53-C238SYMCNSSCMC  | 145   | >TP53-C238SYMSNSSCMC  | 120 | 25    |
| >TP53-C238SYMCNSSCM   | 20    | >TP53-C238SYMSNSSCM   | 9   | 11    |
| >TP53-C238SYMCNSSCMC  | 160   | >TP53-C238SYMSNSSCMC  | 65  | 95    |
| >TP53-C238SYMCNSSCMC  | 294   | >TP53-C238SYMSNSSCMC  | 275 | 19    |
| >TP53-C238SYMCNSSCM   | 310   | >TP53-C238SYMSNSSCM   | 97  | 213   |
| >TP53-C238SYMCNSSCMC  | 958   | >TP53-C238SYMSNSSCMC  | 373 | 585   |
| >TP53-C238SYMCNSSCM   | 346   | >TP53-C238SYMSNSSCM   | 221 | 125   |
| >TP53-C238SYMCNSSCMC  | 1073  | >TP53-C238SYMSNSSCMC  | 447 | 626   |
| >TP53-C238SYNYMCNSSCM | 53    | >TP53-C238SYNYMSNSSCM | 32  | 21    |
| >TP53-C238SYNYMCNSSCM | 650   | >TP53-C238SYNYMSNSSCM | 404 | 246   |
| >TP53-C238SYNYMCNSSCM | 1703  | >TP53-C238SYNYMSNSSCM | 360 | 1343  |
| >TP53-C238SYNYMCNSSCI | 429   | >TP53-C238SYNYMSNSSCI | 256 | 173   |
| >TP53-C238SYNYMCNSSCI | 893   | >TP53-C238SYNYMSNSSCI | 173 | 720   |

|                        |       |                        |     |       |
|------------------------|-------|------------------------|-----|-------|
| >TP53-C238S YNYMCNSSCI | 31    | >TP53-C238S YNYMSNSSCI | 22  | 9     |
| >TP53-C238S YNYMCNSSCI | 911   | >TP53-C238S YNYMSNSSCI | 424 | 487   |
| >TP53-C238S HNYMCNSS   | 70    | >TP53-C238S HNYMSNSS   | 107 | 37    |
| >TP53-C238S IHNYMCNSS  | 575   | >TP53-C238S IHNYMSNSS  | 283 | 292   |
| >TP53-C238S TTIHNYMCM  | 1485  | >TP53-C238S TTIHNYMSN  | 369 | 1116  |
| >TP53-C238S TTIHNYMC   | 120   | >TP53-C238S TTIHNYMS   | 31  | 89    |
| >TP53-C238S TTIHNYMCM  | 102   | >TP53-C238S TTIHNYMSN  | 61  | 41    |
| >TP53-C238S CTTIHNYMC  | 184   | >TP53-C238S CTTIHNYMS  | 681 | 497   |
| >TP53-C238V CNSSCMGGM  | 2175  | >TP53-C238V WNSSCMGGI  | 75  | 2100  |
| >TP53-C238V MCNSSCMG   | 31155 | >TP53-C238V MWNSSCMG   | 251 | 30904 |
| >TP53-C238V MCNSSCMG   | 26751 | >TP53-C238V MWNSSCMG   | 131 | 26620 |
| >TP53-C238V MCNSSCMG   | 30272 | >TP53-C238V MWNSSCMG   | 284 | 29988 |
| >TP53-C238V YMCNSSCM   | 1744  | >TP53-C238V YMWNSSCM   | 231 | 1513  |
| >TP53-C238V YMCNSSCM   | 262   | >TP53-C238V YMWNSSCM   | 15  | 247   |
| >TP53-C238V YMCNSSCM   | 252   | >TP53-C238V YMWNSSCM   | 15  | 237   |
| >TP53-C238V YMCNSSCM   | 205   | >TP53-C238V YMWNSSCM   | 231 | 26    |
| >TP53-C238V YMCNSSCM   | 167   | >TP53-C238V YMWNSSCM   | 178 | 11    |
| >TP53-C238V YMCNSSCM   | 283   | >TP53-C238V YMWNSSCM   | 334 | 51    |
| >TP53-C238V YMCNSSCM   | 41    | >TP53-C238V YMWNSSCM   | 54  | 13    |
| >TP53-C238V YMCNSSCM   | 676   | >TP53-C238V YMWNSSCM   | 209 | 467   |
| >TP53-C238V YMCNSSCM   | 143   | >TP53-C238V YMWNSSCM   | 59  | 84    |
| >TP53-C238V YMCNSSCM   | 24    | >TP53-C238V YMWNSSCM   | 4   | 20    |
| >TP53-C238V YMCNSSCM   | 92    | >TP53-C238V YMWNSSCM   | 9   | 83    |
| >TP53-C238V YMCNSSCM   | 399   | >TP53-C238V YMWNSSCM   | 24  | 375   |
| >TP53-C238V YMCNSSCM   | 16    | >TP53-C238V YMWNSSCM   | 3   | 13    |
| >TP53-C238V YMCNSSCM   | 92    | >TP53-C238V YMWNSSCM   | 6   | 86    |
| >TP53-C238V YMCNSSCM   | 5683  | >TP53-C238V YMWNSSCM   | 155 | 5528  |
| >TP53-C238V YMCNSSCM   | 5487  | >TP53-C238V YMWNSSCM   | 225 | 5262  |
| >TP53-C238V YMCNSSCM   | 197   | >TP53-C238V YMWNSSCM   | 9   | 188   |
| >TP53-C238V YMCNSSCM   | 150   | >TP53-C238V YMWNSSCM   | 8   | 142   |
| >TP53-C238V YMCNSSCM   | 1738  | >TP53-C238V YMWNSSCM   | 42  | 1696  |
| >TP53-C238V YMCNSSCM   | 4958  | >TP53-C238V YMWNSSCM   | 115 | 4843  |
| >TP53-C238V YMCNSSCM   | 421   | >TP53-C238V YMWNSSCM   | 12  | 409   |
| >TP53-C238V YMCNSSCM   | 67    | >TP53-C238V YMWNSSCM   | 4   | 63    |
| >TP53-C238V YMCNSSCM   | 332   | >TP53-C238V YMWNSSCM   | 9   | 323   |
| >TP53-C238V YMCNSSCM   | 33    | >TP53-C238V YMWNSSCM   | 8   | 25    |
| >TP53-C238V YMCNSSCM   | 903   | >TP53-C238V YMWNSSCM   | 93  | 810   |
| >TP53-C238V YMCNSSCM   | 1350  | >TP53-C238V YMWNSSCM   | 99  | 1251  |
| >TP53-C238V YMCNSSCM   | 53    | >TP53-C238V YMWNSSCM   | 10  | 43    |
| >TP53-C238V YMCNSSCM   | 3526  | >TP53-C238V YMWNSSCM   | 454 | 3072  |
| >TP53-C238V YMCNSSCM   | 2559  | >TP53-C238V YMWNSSCM   | 292 | 2267  |
| >TP53-C238V YMCNSSCM   | 4973  | >TP53-C238V YMWNSSCM   | 125 | 4848  |
| >TP53-C238V YMCNSSCM   | 33    | >TP53-C238V YMWNSSCM   | 40  | 7     |

|                        |       |                        |      |       |
|------------------------|-------|------------------------|------|-------|
| >TP53-C238V YMCNSSCMC  | 127   | >TP53-C238V YMWNSSCM   | 192  | 65    |
| >TP53-C238V YMCNSSCMC  | 292   | >TP53-C238V YMWNSSCM   | 488  | 196   |
| >TP53-C238V YMCNSSCMC  | 44    | >TP53-C238V YMWNSSCM   | 59   | 15    |
| >TP53-C238V YMCNSSCM   | 98    | >TP53-C238V YMWNSSCM   | 32   | 66    |
| >TP53-C238V YMCNSSCMC  | 145   | >TP53-C238V YMWNSSCM   | 46   | 99    |
| >TP53-C238V YMCNSSCM   | 20    | >TP53-C238V YMWNSSCM   | 5    | 15    |
| >TP53-C238V YMCNSSCMC  | 1624  | >TP53-C238V YMWNSSCM   | 178  | 1446  |
| >TP53-C238V YMCNSSCMC  | 2531  | >TP53-C238V YMWNSSCM   | 287  | 2244  |
| >TP53-C238V YMCNSSCMC  | 160   | >TP53-C238V YMWNSSCM   | 19   | 141   |
| >TP53-C238V YMCNSSCM   | 1533  | >TP53-C238V YMWNSSCM   | 499  | 1034  |
| >TP53-C238V YMCNSSCMC  | 294   | >TP53-C238V YMWNSSCM   | 60   | 234   |
| >TP53-C238V YMCNSSCM   | 310   | >TP53-C238V YMWNSSCM   | 28   | 282   |
| >TP53-C238V YMCNSSCMC  | 958   | >TP53-C238V YMWNSSCM   | 77   | 881   |
| >TP53-C238V YMCNSSCM   | 346   | >TP53-C238V YMWNSSCM   | 535  | 189   |
| >TP53-C238V NYMCNSSCM  | 53    | >TP53-C238V NYMWNSSCM  | 147  | 94    |
| >TP53-C238V NYMCNSSCM  | 942   | >TP53-C238V NYMWNSSCM  | 426  | 516   |
| >TP53-C238V NYMCNSSCM  | 650   | >TP53-C238V NYMWNSSCM  | 368  | 282   |
| >TP53-C238V NYMCNSSCM  | 1703  | >TP53-C238V NYMWNSSCM  | 394  | 1309  |
| >TP53-C238V NYMCNSSC   | 3435  | >TP53-C238V NYMWNSSC   | 253  | 3182  |
| >TP53-C238V NYMCNSSCM  | 5004  | >TP53-C238V NYMWNSSCM  | 293  | 4711  |
| >TP53-C238V NYMCNSSCM  | 3405  | >TP53-C238V NYMWNSSCM  | 454  | 2951  |
| >TP53-C238V YNYMCNSSCM | 429   | >TP53-C238V YNYMWNSSC  | 343  | 86    |
| >TP53-C238V YNYMCNSSCM | 31    | >TP53-C238V YNYMWNSSC  | 62   | 31    |
| >TP53-C238V YNYMCNSSCM | 1238  | >TP53-C238V YNYMWNSSC  | 408  | 830   |
| >TP53-C238V YNYMCNSSCM | 911   | >TP53-C238V YNYMWNSSC  | 442  | 469   |
| >TP53-C238V HNYMCNSSC  | 70    | >TP53-C238V HNYMWNSC   | 96   | 26    |
| >TP53-C238V TTIHYNMCM  | 23875 | >TP53-C238V TTIHYNMCM  | 420  | 23455 |
| >TP53-C238V TTIHYNMCM  | 8451  | >TP53-C238V TTIHYNMCM  | 416  | 8035  |
| >TP53-C238V TTIHYNMCM  | 3928  | >TP53-C238V TTIHYNMCM  | 177  | 3751  |
| >TP53-C238V TTIHYNMCM  | 120   | >TP53-C238V TTIHYNMCM  | 6925 | 6805  |
| >TP53-C238V TTIHYNMCM  | 102   | >TP53-C238V TTIHYNMCM  | 31   | 71    |
| >TP53-C238V TTIHYNMCM  | 9061  | >TP53-C238V TTIHYNMCM  | 11   | 9050  |
| >TP53-C238V TTIHYNMCM  | 18800 | >TP53-C238V TTIHYNMCM  | 53   | 18747 |
| >TP53-C238V TTIHYNMCM  | 16534 | >TP53-C238V TTIHYNMCM  | 19   | 16515 |
| >TP53-C238V TTIHYNMCM  | 7731  | >TP53-C238V TTIHYNMCM  | 437  | 7294  |
| >TP53-C238V TTIHYNMCM  | 21951 | >TP53-C238V TTIHYNMCM  | 80   | 21871 |
| >TP53-C238V CTTIHYNMCM | 19494 | >TP53-C238V CTTIHYNMCM | 42   | 19452 |
| >TP53-C238V CTTIHYNMCM | 22817 | >TP53-C238V CTTIHYNMCM | 167  | 22650 |
| >TP53-C238V CTTIHYNMCM | 19141 | >TP53-C238V CTTIHYNMCM | 26   | 19115 |
| >TP53-C238V CTTIHYNMCM | 184   | >TP53-C238V CTTIHYNMCM | 92   | 92    |
| >TP53-C238V CTTIHYNMCM | 27462 | >TP53-C238V CTTIHYNMCM | 227  | 27235 |
| >TP53-C238V CTTIHYNMCM | 31694 | >TP53-C238V CTTIHYNMCM | 388  | 31306 |
| >TP53-C238V CNSSCMGGN  | 876   | >TP53-C238V YNSSCMGGN  | 189  | 687   |

|                       |       |                        |     |       |
|-----------------------|-------|------------------------|-----|-------|
| >TP53-C238YCNSSCMGGN  | 2175  | >TP53-C238Y YNSSCMGGN  | 75  | 2100  |
| >TP53-C238YMCNSSCMGC  | 24751 | >TP53-C238Y MYNSSCMGC  | 295 | 24456 |
| >TP53-C238YMCNSSCMGC  | 26751 | >TP53-C238Y MYNSSCMGC  | 319 | 26432 |
| >TP53-C238YDCTTIHYNYN | 23370 | >TP53-C238Y DCTTIHYNYN | 228 | 23142 |
| >TP53-C238Y YMCNSSCM  | 1744  | >TP53-C238Y YMYNSSCM   | 276 | 1468  |
| >TP53-C238Y YMCNSSCMC | 5190  | >TP53-C238Y YMYNSSCMC  | 49  | 5141  |
| >TP53-C238Y YMCNSSCM  | 262   | >TP53-C238Y YMYNSSCM   | 28  | 234   |
| >TP53-C238Y YMCNSSCMC | 988   | >TP53-C238Y YMYNSSCMC  | 397 | 591   |
| >TP53-C238Y YMCNSSCMC | 252   | >TP53-C238Y YMYNSSCMC  | 28  | 224   |
| >TP53-C238Y YMCNSSCM  | 205   | >TP53-C238Y YMYNSSCM   | 48  | 157   |
| >TP53-C238Y YMCNSSCMC | 2002  | >TP53-C238Y YMYNSSCMC  | 269 | 1733  |
| >TP53-C238Y YMCNSSCMC | 167   | >TP53-C238Y YMYNSSCMC  | 40  | 127   |
| >TP53-C238Y YMCNSSCM  | 283   | >TP53-C238Y YMYNSSCM   | 20  | 263   |
| >TP53-C238Y YMCNSSCMC | 3523  | >TP53-C238Y YMYNSSCMC  | 233 | 3290  |
| >TP53-C238Y YMCNSSCMC | 1968  | >TP53-C238Y YMYNSSCMC  | 313 | 1655  |
| >TP53-C238Y YMCNSSCMC | 41    | >TP53-C238Y YMYNSSCMC  | 7   | 34    |
| >TP53-C238Y YMCNSSCM  | 676   | >TP53-C238Y YMYNSSCM   | 122 | 554   |
| >TP53-C238Y YMCNSSCMC | 143   | >TP53-C238Y YMYNSSCMC  | 33  | 110   |
| >TP53-C238Y YMCNSSCM  | 24    | >TP53-C238Y YMYNSSCM   | 4   | 20    |
| >TP53-C238Y YMCNSSCMC | 92    | >TP53-C238Y YMYNSSCMC  | 9   | 83    |
| >TP53-C238Y YMCNSSCMC | 399   | >TP53-C238Y YMYNSSCMC  | 26  | 373   |
| >TP53-C238Y YMCNSSCMC | 16    | >TP53-C238Y YMYNSSCMC  | 3   | 13    |
| >TP53-C238Y YMCNSSCM  | 92    | >TP53-C238Y YMYNSSCM   | 5   | 87    |
| >TP53-C238Y YMCNSSCMC | 5683  | >TP53-C238Y YMYNSSCMC  | 189 | 5494  |
| >TP53-C238Y YMCNSSCMC | 5487  | >TP53-C238Y YMYNSSCMC  | 258 | 5229  |
| >TP53-C238Y YMCNSSCMC | 197   | >TP53-C238Y YMYNSSCMC  | 8   | 189   |
| >TP53-C238Y YMCNSSCM  | 150   | >TP53-C238Y YMYNSSCM   | 10  | 140   |
| >TP53-C238Y YMCNSSCMC | 1738  | >TP53-C238Y YMYNSSCMC  | 66  | 1672  |
| >TP53-C238Y YMCNSSCMC | 4958  | >TP53-C238Y YMYNSSCMC  | 194 | 4764  |
| >TP53-C238Y YMCNSSCMC | 421   | >TP53-C238Y YMYNSSCMC  | 16  | 405   |
| >TP53-C238Y YMCNSSCM  | 67    | >TP53-C238Y YMYNSSCM   | 12  | 55    |
| >TP53-C238Y YMCNSSCMC | 332   | >TP53-C238Y YMYNSSCMC  | 41  | 291   |
| >TP53-C238Y YMCNSSCM  | 33    | >TP53-C238Y YMYNSSCM   | 7   | 26    |
| >TP53-C238Y YMCNSSCMC | 903   | >TP53-C238Y YMYNSSCMC  | 75  | 828   |
| >TP53-C238Y YMCNSSCMC | 1350  | >TP53-C238Y YMYNSSCMC  | 88  | 1262  |
| >TP53-C238Y YMCNSSCMC | 53    | >TP53-C238Y YMYNSSCMC  | 8   | 45    |
| >TP53-C238Y YMCNSSCMC | 2458  | >TP53-C238Y YMYNSSCMC  | 357 | 2101  |
| >TP53-C238Y YMCNSSCMC | 4973  | >TP53-C238Y YMYNSSCMC  | 174 | 4799  |
| >TP53-C238Y YMCNSSCM  | 3169  | >TP53-C238Y YMYNSSCM   | 492 | 2677  |
| >TP53-C238Y YMCNSSCM  | 33    | >TP53-C238Y YMYNSSCM   | 24  | 9     |
| >TP53-C238Y YMCNSSCMC | 127   | >TP53-C238Y YMYNSSCMC  | 73  | 54    |
| >TP53-C238Y YMCNSSCMC | 292   | >TP53-C238Y YMYNSSCMC  | 138 | 154   |
| >TP53-C238Y YMCNSSCMC | 44    | >TP53-C238Y YMYNSSCMC  | 30  | 14    |

|                        |       |                       |      |       |
|------------------------|-------|-----------------------|------|-------|
| >TP53-C238Y YMCNSSCM   | 98    | >TP53-C238Y YMYNSSCM  | 16   | 82    |
| >TP53-C238Y YMCNSSCMC  | 145   | >TP53-C238Y YMYNSSCMC | 23   | 122   |
| >TP53-C238Y YMCNSSCM   | 20    | >TP53-C238Y YMYNSSCM  | 4    | 16    |
| >TP53-C238Y YMCNSSCMC  | 1624  | >TP53-C238Y YMYNSSCMC | 130  | 1494  |
| >TP53-C238Y YMCNSSCMC  | 2531  | >TP53-C238Y YMYNSSCMC | 206  | 2325  |
| >TP53-C238Y YMCNSSCMC  | 160   | >TP53-C238Y YMYNSSCMC | 13   | 147   |
| >TP53-C238Y YMCNSSCM   | 1533  | >TP53-C238Y YMYNSSCM  | 174  | 1359  |
| >TP53-C238Y YMCNSSCMC  | 294   | >TP53-C238Y YMYNSSCMC | 26   | 268   |
| >TP53-C238Y YMCNSSCM   | 310   | >TP53-C238Y YMYNSSCM  | 61   | 249   |
| >TP53-C238Y YMCNSSCMC  | 958   | >TP53-C238Y YMYNSSCMC | 230  | 728   |
| >TP53-C238Y YMCNSSCM   | 346   | >TP53-C238Y YMYNSSCM  | 132  | 214   |
| >TP53-C238Y YMCNSSCM   | 3357  | >TP53-C238Y YMYNSSCM  | 461  | 2896  |
| >TP53-C238Y YMCNSSCMC  | 1073  | >TP53-C238Y YMYNSSCMC | 223  | 850   |
| >TP53-C238Y NYMCNSSCM  | 53    | >TP53-C238Y NYMYNSSCM | 159  | 106   |
| >TP53-C238Y NYMCNSSCM  | 429   | >TP53-C238Y NYMYNSSCM | 296  | 133   |
| >TP53-C238Y NYMCNSSCM  | 893   | >TP53-C238Y NYMYNSSCM | 435  | 458   |
| >TP53-C238Y NYMCNSSCM  | 31    | >TP53-C238Y NYMYNSSCM | 27   | 4     |
| >TP53-C238Y HNYMCNSS   | 70    | >TP53-C238Y HNYMYNSS  | 166  | 96    |
| >TP53-C238Y IHNYMCNSS  | 575   | >TP53-C238Y IHNYMYNSS | 452  | 123   |
| >TP53-C238Y TIHNYMYC   | 22488 | >TP53-C238Y TIHNYMY   | 299  | 22189 |
| >TP53-C238Y TIHNYMYC   | 32233 | >TP53-C238Y TIHNYMY   | 241  | 31992 |
| >TP53-C238Y TIHNYMYC   | 17288 | >TP53-C238Y TIHNYMY   | 18   | 17270 |
| >TP53-C238Y TIHNYMYC   | 23737 | >TP53-C238Y TIHNYMY   | 64   | 23673 |
| >TP53-C238Y TIHNYMYC   | 23099 | >TP53-C238Y TIHNYMY   | 246  | 22853 |
| >TP53-C238Y TIHNYMYC   | 26835 | >TP53-C238Y TIHNYMY   | 306  | 26529 |
| >TP53-C238Y TTIHNYMYC  | 21379 | >TP53-C238Y TTIHNYMY  | 146  | 21233 |
| >TP53-C238Y TTIHNYMYC  | 16447 | >TP53-C238Y TTIHNYMY  | 35   | 16412 |
| >TP53-C238Y TTIHNYMYC  | 17733 | >TP53-C238Y TTIHNYMY  | 333  | 17400 |
| >TP53-C238Y TTIHNYMYC  | 15549 | >TP53-C238Y TTIHNYMY  | 66   | 15483 |
| >TP53-C238Y TTIHNYMYC  | 8451  | >TP53-C238Y TTIHNYMY  | 6    | 8445  |
| >TP53-C238Y TTIHNYMYC  | 22509 | >TP53-C238Y TTIHNYMY  | 113  | 22396 |
| >TP53-C238Y TTIHNYMYC  | 8516  | >TP53-C238Y TTIHNYMY  | 6    | 8510  |
| >TP53-C238Y TTIHNYMYC  | 12564 | >TP53-C238Y TTIHNYMY  | 15   | 12549 |
| >TP53-C238Y TTIHNYMYC  | 6014  | >TP53-C238Y TTIHNYMY  | 13   | 6001  |
| >TP53-C238Y TTIHNYMYC  | 120   | >TP53-C238Y TTIHNYMY  | 1180 | 1060  |
| >TP53-C238Y TTIHNYMYCM | 102   | >TP53-C238Y TTIHNYMYM | 20   | 82    |
| >TP53-C238Y TTIHNYMYC  | 25001 | >TP53-C238Y TTIHNYMY  | 63   | 24938 |
| >TP53-C238Y TTIHNYMYC  | 17742 | >TP53-C238Y TTIHNYMY  | 302  | 17440 |
| >TP53-C238Y TTIHNYMYC  | 10937 | >TP53-C238Y TTIHNYMY  | 347  | 10590 |
| >TP53-C238Y TTIHNYMYC  | 9061  | >TP53-C238Y TTIHNYMY  | 10   | 9051  |
| >TP53-C238Y TTIHNYMYC  | 7731  | >TP53-C238Y TTIHNYMY  | 23   | 7708  |
| >TP53-C238Y TTIHNYMYC  | 37836 | >TP53-C238Y TTIHNYMY  | 337  | 37499 |
| >TP53-C238Y CTTIHNYMYC | 25831 | >TP53-C238Y CTTIHNYMY | 126  | 25705 |

|                       |       |                      |      |       |
|-----------------------|-------|----------------------|------|-------|
| >TP53-C238YCTTIHYNMYC | 31020 | >TP53-C238YCTTIHYNMY | 224  | 30796 |
| >TP53-C238YCTTIHYNMYC | 32029 | >TP53-C238YCTTIHYNMY | 282  | 31747 |
| >TP53-C238YCTTIHYNMYC | 27892 | >TP53-C238YCTTIHYNMY | 223  | 27669 |
| >TP53-C238YCTTIHYNMYC | 25775 | >TP53-C238YCTTIHYNMY | 118  | 25657 |
| >TP53-C238YCTTIHYNMYC | 20079 | >TP53-C238YCTTIHYNMY | 221  | 19858 |
| >TP53-C238YCTTIHYNMYC | 19494 | >TP53-C238YCTTIHYNMY | 70   | 19424 |
| >TP53-C238YCTTIHYNMYC | 184   | >TP53-C238YCTTIHYNMY | 435  | 251   |
| >TP53-C238YCTTIHYNMYC | 9749  | >TP53-C238YCTTIHYNMY | 44   | 9705  |
| >TP53-C242FCMGGMNRR   | 7745  | >TP53-C242FCMGGMNRR  | 261  | 7484  |
| >TP53-C242FCMGGMNRR   | 4468  | >TP53-C242FCMGGMNRR  | 147  | 4321  |
| >TP53-C242FCMGGMNRR   | 1556  | >TP53-C242FCMGGMNRR  | 55   | 1501  |
| >TP53-C242FCMGGMNRR   | 2664  | >TP53-C242FCMGGMNRR  | 42   | 2622  |
| >TP53-C242FCMGGMNRR   | 1329  | >TP53-C242FCMGGMNRR  | 55   | 1274  |
| >TP53-C242FCMGGMNRR   | 5487  | >TP53-C242FCMGGMNRR  | 169  | 5318  |
| >TP53-C242FCMGGMNRR   | 9656  | >TP53-C242FCMGGMNRR  | 437  | 9219  |
| >TP53-C242FCMGGMNRR   | 984   | >TP53-C242FCMGGMNRR  | 13   | 971   |
| >TP53-C242FCMGGMNRR   | 2150  | >TP53-C242FCMGGMNRR  | 31   | 2119  |
| >TP53-C242FCMGGMNRR   | 3061  | >TP53-C242FCMGGMNRR  | 72   | 2989  |
| >TP53-C242FCMGGMNRR   | 3411  | >TP53-C242FCMGGMNRR  | 105  | 3306  |
| >TP53-C242FCMGGMNRR   | 10682 | >TP53-C242FCMGGMNRR  | 272  | 10410 |
| >TP53-C242FCMGGMNRR   | 3560  | >TP53-C242FCMGGMNRR  | 39   | 3521  |
| >TP53-C242FCMGGMNRR   | 2155  | >TP53-C242FCMGGMNRR  | 108  | 2047  |
| >TP53-C242FCMGGMNRR   | 1849  | >TP53-C242FCMGGMNRR  | 13   | 1836  |
| >TP53-C242FCMGGMNRR   | 88    | >TP53-C242FCMGGMNRR  | 3    | 85    |
| >TP53-C242FCMGGMNRR   | 314   | >TP53-C242FCMGGMNRR  | 1059 | 745   |
| >TP53-C242FCMGGMNRR   | 1022  | >TP53-C242FCMGGMNRR  | 273  | 749   |
| >TP53-C242FCMGGMNRR   | 117   | >TP53-C242FCMGGMNRR  | 268  | 151   |
| >TP53-C242FSCMGGMNR   | 4361  | >TP53-C242FSCMGGMNR  | 15   | 4346  |
| >TP53-C242FSCMGGMNR   | 17379 | >TP53-C242FSCMGGMNR  | 409  | 16970 |
| >TP53-C242FSCMGGMNR   | 1170  | >TP53-C242FSCMGGMNR  | 39   | 1131  |
| >TP53-C242FSCMGGMNR   | 1568  | >TP53-C242FSCMGGMNR  | 40   | 1528  |
| >TP53-C242FSCMGGMNR   | 2439  | >TP53-C242FSCMGGMNR  | 122  | 2317  |
| >TP53-C242FSCMGGMNR   | 3639  | >TP53-C242FSCMGGMNR  | 158  | 3481  |
| >TP53-C242FSCMGGMNR   | 2443  | >TP53-C242FSCMGGMNR  | 494  | 1949  |
| >TP53-C242FSCMGGMNR   | 464   | >TP53-C242FSCMGGMNR  | 91   | 373   |
| >TP53-C242FSCMGGMNR   | 1578  | >TP53-C242FSCMGGMNR  | 272  | 1306  |
| >TP53-C242FSCMGGMNR   | 23544 | >TP53-C242FSCMGGMNR  | 180  | 23364 |
| >TP53-C242FIHYNMYCNS  | 1151  | >TP53-C242FIHYNMYCNS | 96   | 1055  |
| >TP53-C242FIHYNMYCNS  | 28620 | >TP53-C242FIHYNMYCNS | 420  | 28200 |
| >TP53-C242FIHYNMYCNS  | 575   | >TP53-C242FIHYNMYCNS | 3    | 572   |
| >TP53-C242FIHYNMYCNS  | 9070  | >TP53-C242FIHYNMYCNS | 110  | 8960  |
| >TP53-C242FIHYNMYCNS  | 10247 | >TP53-C242FIHYNMYCNS | 45   | 10202 |
| >TP53-C242FSSCMGGMNI  | 58    | >TP53-C242FSSCMGGMNI | 16   | 42    |

|                       |      |                        |     |      |
|-----------------------|------|------------------------|-----|------|
| >TP53-C242F SSCMGGMNI | 192  | >TP53-C242F SSFMGGMNI  | 101 | 91   |
| >TP53-C242F SSCMGGMNI | 110  | >TP53-C242F SSFMGGMNI  | 45  | 65   |
| >TP53-C242F SSCMGGMNI | 56   | >TP53-C242F SSFMGGMNI  | 82  | 26   |
| >TP53-C242F SSCMGGMNI | 220  | >TP53-C242F SSFMGGMNI  | 30  | 190  |
| >TP53-C242F SSCMGGMNI | 361  | >TP53-C242F SSFMGGMNI  | 36  | 325  |
| >TP53-C242F SSCMGGMNI | 398  | >TP53-C242F SSFMGGMNI  | 107 | 291  |
| >TP53-C242F SSCMGGMNI | 460  | >TP53-C242F SSFMGGMNI  | 107 | 353  |
| >TP53-C242F NSSCMGGMI | 1185 | >TP53-C242F NSSFMGGMI  | 452 | 733  |
| >TP53-C242F NSSCMGGMI | 111  | >TP53-C242F NSSFMGGMI  | 50  | 61   |
| >TP53-C242F NSSCMGGMI | 55   | >TP53-C242F NSSFMGGMI  | 24  | 31   |
| >TP53-C242F NSSCMGGMI | 365  | >TP53-C242F NSSFMGGMI  | 254 | 111  |
| >TP53-C242F NSSCMGGMI | 12   | >TP53-C242F NSSFMGGMI  | 7   | 5    |
| >TP53-C242F NSSCMGGMI | 39   | >TP53-C242F NSSFMGGMI  | 20  | 19   |
| >TP53-C242F CNSSCMGGN | 4713 | >TP53-C242F CNSSFMMGGN | 386 | 4327 |
| >TP53-C242F CNSSCMGGN | 876  | >TP53-C242F CNSSFMMGGN | 275 | 601  |
| >TP53-C242F YMCNSSCM  | 1744 | >TP53-C242F YMCNSSFM   | 450 | 1294 |
| >TP53-C242F YMCNSSCM  | 262  | >TP53-C242F YMCNSSFM   | 43  | 219  |
| >TP53-C242F YMCNSSCMC | 988  | >TP53-C242F YMCNSSFMG  | 450 | 538  |
| >TP53-C242F YMCNSSCMC | 252  | >TP53-C242F YMCNSSFMG  | 131 | 121  |
| >TP53-C242F YMCNSSCM  | 205  | >TP53-C242F YMCNSSFM   | 19  | 186  |
| >TP53-C242F YMCNSSCMC | 167  | >TP53-C242F YMCNSSFMG  | 79  | 88   |
| >TP53-C242F YMCNSSCM  | 283  | >TP53-C242F YMCNSSFM   | 37  | 246  |
| >TP53-C242F YMCNSSCMC | 41   | >TP53-C242F YMCNSSFMG  | 35  | 6    |
| >TP53-C242F YMCNSSCM  | 676  | >TP53-C242F YMCNSSFM   | 68  | 608  |
| >TP53-C242F YMCNSSCMC | 143  | >TP53-C242F YMCNSSFMG  | 88  | 55   |
| >TP53-C242F YMCNSSCM  | 24   | >TP53-C242F YMCNSSFM   | 6   | 18   |
| >TP53-C242F YMCNSSCMC | 92   | >TP53-C242F YMCNSSFMG  | 55  | 37   |
| >TP53-C242F YMCNSSCMC | 399  | >TP53-C242F YMCNSSFMG  | 149 | 250  |
| >TP53-C242F YMCNSSCMC | 16   | >TP53-C242F YMCNSSFMG  | 8   | 8    |
| >TP53-C242F YMCNSSCM  | 92   | >TP53-C242F YMCNSSFM   | 37  | 55   |
| >TP53-C242F YMCNSSCMC | 197  | >TP53-C242F YMCNSSFMG  | 147 | 50   |
| >TP53-C242F YMCNSSCM  | 150  | >TP53-C242F YMCNSSFM   | 46  | 104  |
| >TP53-C242F YMCNSSCMC | 421  | >TP53-C242F YMCNSSFMG  | 274 | 147  |
| >TP53-C242F YMCNSSCM  | 67   | >TP53-C242F YMCNSSFM   | 26  | 41   |
| >TP53-C242F YMCNSSCMC | 332  | >TP53-C242F YMCNSSFMG  | 283 | 49   |
| >TP53-C242F YMCNSSCM  | 33   | >TP53-C242F YMCNSSFM   | 10  | 23   |
| >TP53-C242F YMCNSSCMC | 53   | >TP53-C242F YMCNSSFMG  | 49  | 4    |
| >TP53-C242F YMCNSSCM  | 33   | >TP53-C242F YMCNSSFM   | 37  | 4    |
| >TP53-C242F YMCNSSCMC | 127  | >TP53-C242F YMCNSSFMG  | 331 | 204  |
| >TP53-C242F YMCNSSCMC | 292  | >TP53-C242F YMCNSSFMG  | 269 | 23   |
| >TP53-C242F YMCNSSCMC | 44   | >TP53-C242F YMCNSSFMG  | 48  | 4    |
| >TP53-C242F YMCNSSCM  | 98   | >TP53-C242F YMCNSSFM   | 98  | 0    |
| >TP53-C242F YMCNSSCMC | 145  | >TP53-C242F YMCNSSFMG  | 68  | 77   |



|                      |       |                       |      |       |
|----------------------|-------|-----------------------|------|-------|
| >TP53-C242FYMCNSSCM  | 20    | >TP53-C242FYMCNSSFM   | 20   | 0     |
| >TP53-C242FYMCNSSCMC | 160   | >TP53-C242FYMCNSSFMG  | 132  | 28    |
| >TP53-C242FYMCNSSCM  | 1533  | >TP53-C242FYMCNSSFM   | 373  | 1160  |
| >TP53-C242FYMCNSSCMC | 294   | >TP53-C242FYMCNSSFMG  | 256  | 38    |
| >TP53-C242FYMCNSSCM  | 310   | >TP53-C242FYMCNSSFM   | 497  | 187   |
| >TP53-C242FYMCNSSCM  | 346   | >TP53-C242FYMCNSSFM   | 962  | 616   |
| >TP53-C242FYMCNSSCM  | 726   | >TP53-C242FYMCNSSFM   | 153  | 573   |
| >TP53-C242FYMCNSSC   | 2346  | >TP53-C242FYMCNSSF    | 104  | 2242  |
| >TP53-C242FYMCNSSCM  | 53    | >TP53-C242FYMCNSSFM   | 11   | 42    |
| >TP53-C242FYMCNSSC   | 12720 | >TP53-C242FYMCNSSF    | 26   | 12694 |
| >TP53-C242FYMCNSSC   | 8293  | >TP53-C242FYMCNSSF    | 88   | 8205  |
| >TP53-C242FYMCNSSCM  | 942   | >TP53-C242FYMCNSSFM   | 466  | 476   |
| >TP53-C242FYMCNSSC   | 1997  | >TP53-C242FYMCNSSF    | 7    | 1990  |
| >TP53-C242FYMCNSSCM  | 650   | >TP53-C242FYMCNSSFM   | 42   | 608   |
| >TP53-C242FYMCNSSC   | 18158 | >TP53-C242FYMCNSSF    | 157  | 18001 |
| >TP53-C242FYNYMCNSSC | 6059  | >TP53-C242FYNYMCNSSF  | 377  | 5682  |
| >TP53-C242FYNYMCNSSC | 1308  | >TP53-C242FYNYMCNSSFI | 337  | 971   |
| >TP53-C242FYNYMCNSSC | 1351  | >TP53-C242FYNYMCNSSFI | 311  | 1040  |
| >TP53-C242FYNYMCNSSC | 10307 | >TP53-C242FYNYMCNSSF  | 60   | 10247 |
| >TP53-C242FYNYMCNSSC | 429   | >TP53-C242FYNYMCNSSFI | 437  | 8     |
| >TP53-C242FYNYMCNSSC | 17145 | >TP53-C242FYNYMCNSSF  | 161  | 16984 |
| >TP53-C242FYNYMCNSSC | 1155  | >TP53-C242FYNYMCNSSF  | 4    | 1151  |
| >TP53-C242FYNYMCNSSC | 31    | >TP53-C242FYNYMCNSSFI | 40   | 9     |
| >TP53-C242FYNYMCNSSC | 21515 | >TP53-C242FYNYMCNSSF  | 277  | 21238 |
| >TP53-C242FYNYMCNSSC | 15949 | >TP53-C242FYNYMCNSSF  | 168  | 15781 |
| >TP53-C242FYNYMCNSSC | 1209  | >TP53-C242FYNYMCNSSF  | 6    | 1203  |
| >TP53-C242FYNYMCNSSC | 911   | >TP53-C242FYNYMCNSSFI | 141  | 770   |
| >TP53-C242FYNYMCNSS  | 1526  | >TP53-C242FYNYMCNSS   | 74   | 1452  |
| >TP53-C242FYNYMCNSS  | 70    | >TP53-C242FYNYMCNSS   | 18   | 52    |
| >TP53-C242FYNYMCNSS  | 31910 | >TP53-C242FYNYMCNSS   | 183  | 31727 |
| >TP53-C242FYNYMCNSS  | 20305 | >TP53-C242FYNYMCNSS   | 45   | 20260 |
| >TP53-C242FYNYMCNSS  | 9571  | >TP53-C242FYNYMCNSS   | 15   | 9556  |
| >TP53-C242FYNYMCNSS  | 2755  | >TP53-C242FYNYMCNSS   | 314  | 2441  |
| >TP53-C242FYNYMCNSS  | 2187  | >TP53-C242FYNYMCNSS   | 246  | 1941  |
| >TP53-C242FYNYMCNSS  | 18915 | >TP53-C242FYNYMCNSS   | 132  | 18783 |
| >TP53-C242FYNYMCNSS  | 1452  | >TP53-C242FYNYMCNSS   | 259  | 1193  |
| >TP53-C242C CMGGMNRR | 984   | >TP53-C242C GMGGMNRR  | 183  | 801   |
| >TP53-C242C CMGGMNRR | 3560  | >TP53-C242C GMGGMNRR  | 190  | 3370  |
| >TP53-C242C CMGGMNRR | 1849  | >TP53-C242C GMGGMNRR  | 289  | 1560  |
| >TP53-C242C CMGGMNRR | 88    | >TP53-C242C GMGGMNRR  | 24   | 64    |
| >TP53-C242C CMGGMNRR | 314   | >TP53-C242C GMGGMNRR  | 243  | 71    |
| >TP53-C242C CMGGMNRR | 117   | >TP53-C242C GMGGMNRR  | 1067 | 950   |
| >TP53-C242C SCMGGMNR | 464   | >TP53-C242C SGMGGMNR  | 859  | 395   |

|                       |     |                      |      |     |
|-----------------------|-----|----------------------|------|-----|
| >TP53-C242C(SSCMGGMNI | 58  | >TP53-C242C(SSGMGGMN | 220  | 162 |
| >TP53-C242C(SSCMGGMNI | 192 | >TP53-C242C(SSGMGGMN | 1070 | 878 |
| >TP53-C242C(SSCMGGMNI | 110 | >TP53-C242C(SSGMGGMN | 462  | 352 |
| >TP53-C242C(SSCMGGMNI | 56  | >TP53-C242C(SSGMGGMN | 354  | 298 |
| >TP53-C242C(SSCMGGMNI | 220 | >TP53-C242C(SSGMGGMN | 1074 | 854 |
| >TP53-C242C(SSCMGGMNI | 361 | >TP53-C242C(SSGMGGMN | 1045 | 684 |
| >TP53-C242C(SSCMGGMNI | 398 | >TP53-C242C(SSGMGGMN | 641  | 243 |
| >TP53-C242C(SSCMGGMNI | 460 | >TP53-C242C(SSGMGGMN | 753  | 293 |
| >TP53-C242C(NSSCMGGMI | 111 | >TP53-C242C(NSSGMGGM | 142  | 31  |
| >TP53-C242C(NSSCMGGMI | 55  | >TP53-C242C(NSSGMGGM | 49   | 6   |
| >TP53-C242C(NSSCMGGMI | 365 | >TP53-C242C(NSSGMGGM | 331  | 34  |
| >TP53-C242C(NSSCMGGMI | 12  | >TP53-C242C(NSSGMGGM | 9    | 3   |
| >TP53-C242C(NSSCMGGMI | 39  | >TP53-C242C(NSSGMGGM | 35   | 4   |
| >TP53-C242C(NSSCMGGM  | 848 | >TP53-C242C(NSSGMGGM | 416  | 432 |
| >TP53-C242C(YMCNSSCM  | 262 | >TP53-C242C(YMCNSSGM | 289  | 27  |
| >TP53-C242C(YMCNSSCMC | 252 | >TP53-C242C(YMCNSSGM | 815  | 563 |
| >TP53-C242C(YMCNSSCM  | 205 | >TP53-C242C(YMCNSSGM | 129  | 76  |
| >TP53-C242C(YMCNSSCMC | 167 | >TP53-C242C(YMCNSSGM | 421  | 254 |
| >TP53-C242C(YMCNSSCM  | 283 | >TP53-C242C(YMCNSSGM | 38   | 245 |
| >TP53-C242C(YMCNSSCMC | 41  | >TP53-C242C(YMCNSSGM | 33   | 8   |
| >TP53-C242C(YMCNSSCM  | 676 | >TP53-C242C(YMCNSSGM | 187  | 489 |
| >TP53-C242C(YMCNSSCMC | 143 | >TP53-C242C(YMCNSSGM | 262  | 119 |
| >TP53-C242C(YMCNSSCM  | 24  | >TP53-C242C(YMCNSSGM | 9    | 15  |
| >TP53-C242C(YMCNSSCMC | 92  | >TP53-C242C(YMCNSSGM | 660  | 568 |
| >TP53-C242C(YMCNSSCMC | 399 | >TP53-C242C(YMCNSSGM | 369  | 30  |
| >TP53-C242C(YMCNSSCMC | 16  | >TP53-C242C(YMCNSSGM | 14   | 2   |
| >TP53-C242C(YMCNSSCM  | 92  | >TP53-C242C(YMCNSSGM | 76   | 16  |
| >TP53-C242C(YMCNSSCMC | 197 | >TP53-C242C(YMCNSSGM | 411  | 214 |
| >TP53-C242C(YMCNSSCM  | 150 | >TP53-C242C(YMCNSSGM | 222  | 72  |
| >TP53-C242C(YMCNSSCMC | 421 | >TP53-C242C(YMCNSSGM | 647  | 226 |
| >TP53-C242C(YMCNSSCM  | 67  | >TP53-C242C(YMCNSSGM | 85   | 18  |
| >TP53-C242C(YMCNSSCMC | 332 | >TP53-C242C(YMCNSSGM | 1001 | 669 |
| >TP53-C242C(YMCNSSCM  | 33  | >TP53-C242C(YMCNSSGM | 20   | 13  |
| >TP53-C242C(YMCNSSCMC | 53  | >TP53-C242C(YMCNSSGM | 99   | 46  |
| >TP53-C242C(YMCNSSCMC | 591 | >TP53-C242C(YMCNSSGM | 373  | 218 |
| >TP53-C242C(YMCNSSCM  | 33  | >TP53-C242C(YMCNSSGM | 34   | 1   |
| >TP53-C242C(YMCNSSCMC | 127 | >TP53-C242C(YMCNSSGM | 293  | 166 |
| >TP53-C242C(YMCNSSCMC | 292 | >TP53-C242C(YMCNSSGM | 293  | 1   |
| >TP53-C242C(YMCNSSCMC | 44  | >TP53-C242C(YMCNSSGM | 43   | 1   |
| >TP53-C242C(YMCNSSCM  | 98  | >TP53-C242C(YMCNSSGM | 40   | 58  |
| >TP53-C242C(YMCNSSCMC | 145 | >TP53-C242C(YMCNSSGM | 43   | 102 |
| >TP53-C242C(YMCNSSCM  | 20  | >TP53-C242C(YMCNSSGM | 31   | 11  |
| >TP53-C242C(YMCNSSCMC | 160 | >TP53-C242C(YMCNSSGM | 301  | 141 |

|                        |       |                        |      |       |
|------------------------|-------|------------------------|------|-------|
| >TP53-C242CYMCNSSCM    | 1533  | >TP53-C242CYMCNSSGM    | 238  | 1295  |
| >TP53-C242CYMCNSSCMC   | 294   | >TP53-C242CYMCNSSGMC   | 279  | 15    |
| >TP53-C242CYMCNSSCM    | 310   | >TP53-C242CYMCNSSGM    | 373  | 63    |
| >TP53-C242CYMCNSSCM    | 346   | >TP53-C242CYMCNSSGM    | 1467 | 1121  |
| >TP53-C242CNYMCNSSCM   | 53    | >TP53-C242CNYMCNSSGM   | 22   | 31    |
| >TP53-C242CNYMCNSSCM   | 650   | >TP53-C242CNYMCNSSGM   | 183  | 467   |
| >TP53-C242CNYNYMCNSSCI | 429   | >TP53-C242CNYNYMCNSSG  | 329  | 100   |
| >TP53-C242CNYNYMCNSSCI | 893   | >TP53-C242CNYNYMCNSSG  | 394  | 499   |
| >TP53-C242CNYNYMCNSSCI | 31    | >TP53-C242CNYNYMCNSSG  | 63   | 32    |
| >TP53-C242CNYNYMCNSSCI | 911   | >TP53-C242CNYNYMCNSSG  | 396  | 515   |
| >TP53-C242CHYNYMCNSS   | 70    | >TP53-C242CHYNYMCNSS   | 34   | 36    |
| >TP53-C242FCMGGMNRR    | 1329  | >TP53-C242FRMGGMNRR    | 423  | 906   |
| >TP53-C242FCMGGMNRR    | 984   | >TP53-C242FRMGGMNRR    | 90   | 894   |
| >TP53-C242FCMGGMNRR    | 2150  | >TP53-C242FRMGGMNRR    | 260  | 1890  |
| >TP53-C242FCMGGMNRR    | 3560  | >TP53-C242FRMGGMNRR    | 380  | 3180  |
| >TP53-C242FCMGGMNRR    | 1849  | >TP53-C242FRMGGMNRR    | 393  | 1456  |
| >TP53-C242FCMGGMNRR    | 88    | >TP53-C242FRMGGMNRR    | 29   | 59    |
| >TP53-C242FCMGGMNRR    | 314   | >TP53-C242FRMGGMNRR    | 20   | 294   |
| >TP53-C242FCMGGMNRR    | 2379  | >TP53-C242FRMGGMNRR    | 23   | 2356  |
| >TP53-C242FCMGGMNRR    | 12646 | >TP53-C242FRMGGMNRR    | 188  | 12458 |
| >TP53-C242FCMGGMNRR    | 14463 | >TP53-C242FRMGGMNRR    | 489  | 13974 |
| >TP53-C242FCMGGMNRR    | 117   | >TP53-C242FRMGGMNRR    | 43   | 74    |
| >TP53-C242FSCMGGMNR    | 22965 | >TP53-C242FSRMGGMNR    | 122  | 22843 |
| >TP53-C242FSCMGGMNR    | 24367 | >TP53-C242FSRMGGMNR    | 205  | 24162 |
| >TP53-C242FSCMGGMNR    | 21187 | >TP53-C242FSRMGGMNR    | 53   | 21134 |
| >TP53-C242FSCMGGMNR    | 9713  | >TP53-C242FSRMGGMNR    | 182  | 9531  |
| >TP53-C242FSCMGGMNR    | 36626 | >TP53-C242FSRMGGMNR    | 370  | 36256 |
| >TP53-C242FSCMGGMNR    | 464   | >TP53-C242FSRMGGMNR    | 1179 | 715   |
| >TP53-C242FIHNYNYMCNSC | 575   | >TP53-C242FIHNYNYMCNSC | 142  | 433   |
| >TP53-C242FIHNYNYMCNSC | 35239 | >TP53-C242FIHNYNYMCNSC | 381  | 34858 |
| >TP53-C242FSSCMGGMNI   | 58    | >TP53-C242FSSRMGGMNI   | 1644 | 1586  |
| >TP53-C242FSSCMGGMNI   | 192   | >TP53-C242FSSRMGGMNI   | 1381 | 1189  |
| >TP53-C242FSSCMGGMNI   | 3944  | >TP53-C242FSSRMGGMNI   | 16   | 3928  |
| >TP53-C242FSSCMGGMNI   | 7496  | >TP53-C242FSSRMGGMNI   | 58   | 7438  |
| >TP53-C242FSSCMGGMNI   | 110   | >TP53-C242FSSRMGGMNI   | 74   | 36    |
| >TP53-C242FSSCMGGMNI   | 56    | >TP53-C242FSSRMGGMNI   | 78   | 22    |
| >TP53-C242FSSCMGGMNI   | 220   | >TP53-C242FSSRMGGMNI   | 1149 | 929   |
| >TP53-C242FSSCMGGMNI   | 361   | >TP53-C242FSSRMGGMNI   | 1032 | 671   |
| >TP53-C242FSSCMGGMNI   | 398   | >TP53-C242FSSRMGGMNI   | 835  | 437   |
| >TP53-C242FSSCMGGMNI   | 460   | >TP53-C242FSSRMGGMNI   | 1020 | 560   |
| >TP53-C242FNSSCMGGMI   | 111   | >TP53-C242FNSSRMGGMI   | 282  | 171   |
| >TP53-C242FNSSCMGGMI   | 55    | >TP53-C242FNSSRMGGMI   | 64   | 9     |
| >TP53-C242FNSSCMGGMI   | 365   | >TP53-C242FNSSRMGGMI   | 322  | 43    |

|                      |       |                      |      |       |
|----------------------|-------|----------------------|------|-------|
| >TP53-C242FNSSCMGGMI | 12    | >TP53-C242FNSSRMGGMI | 27   | 15    |
| >TP53-C242FNSSCMGGMI | 39    | >TP53-C242FNSSRMGGMI | 43   | 4     |
| >TP53-C242FYMCNSSCM  | 262   | >TP53-C242FYMCNSSRM  | 395  | 133   |
| >TP53-C242FYMCNSSCMC | 252   | >TP53-C242FYMCNSSRMC | 1047 | 795   |
| >TP53-C242FYMCNSSCM  | 205   | >TP53-C242FYMCNSSRM  | 230  | 25    |
| >TP53-C242FYMCNSSCMC | 167   | >TP53-C242FYMCNSSRMC | 500  | 333   |
| >TP53-C242FYMCNSSCM  | 283   | >TP53-C242FYMCNSSRM  | 101  | 182   |
| >TP53-C242FYMCNSSCMC | 41    | >TP53-C242FYMCNSSRMC | 53   | 12    |
| >TP53-C242FYMCNSSCMC | 143   | >TP53-C242FYMCNSSRMC | 502  | 359   |
| >TP53-C242FYMCNSSCM  | 24    | >TP53-C242FYMCNSSRM  | 12   | 12    |
| >TP53-C242FYMCNSSCMC | 92    | >TP53-C242FYMCNSSRMC | 727  | 635   |
| >TP53-C242FYMCNSSCMC | 399   | >TP53-C242FYMCNSSRMC | 1118 | 719   |
| >TP53-C242FYMCNSSCMC | 16    | >TP53-C242FYMCNSSRMC | 20   | 4     |
| >TP53-C242FYMCNSSCM  | 92    | >TP53-C242FYMCNSSRM  | 243  | 151   |
| >TP53-C242FYMCNSSCMC | 197   | >TP53-C242FYMCNSSRMC | 577  | 380   |
| >TP53-C242FYMCNSSCM  | 150   | >TP53-C242FYMCNSSRM  | 673  | 523   |
| >TP53-C242FYMCNSSCMC | 421   | >TP53-C242FYMCNSSRMC | 1362 | 941   |
| >TP53-C242FYMCNSSCM  | 67    | >TP53-C242FYMCNSSRM  | 222  | 155   |
| >TP53-C242FYMCNSSCMC | 332   | >TP53-C242FYMCNSSRMC | 1608 | 1276  |
| >TP53-C242FYMCNSSCM  | 33    | >TP53-C242FYMCNSSRM  | 18   | 15    |
| >TP53-C242FYMCNSSCMC | 53    | >TP53-C242FYMCNSSRMC | 152  | 99    |
| >TP53-C242FYMCNSSCM  | 33    | >TP53-C242FYMCNSSRM  | 39   | 6     |
| >TP53-C242FYMCNSSCMC | 127   | >TP53-C242FYMCNSSRMC | 395  | 268   |
| >TP53-C242FYMCNSSCMC | 292   | >TP53-C242FYMCNSSRMC | 530  | 238   |
| >TP53-C242FYMCNSSCMC | 44    | >TP53-C242FYMCNSSRMC | 51   | 7     |
| >TP53-C242FYMCNSSCM  | 98    | >TP53-C242FYMCNSSRM  | 86   | 12    |
| >TP53-C242FYMCNSSCMC | 145   | >TP53-C242FYMCNSSRMC | 75   | 70    |
| >TP53-C242FYMCNSSCM  | 20    | >TP53-C242FYMCNSSRM  | 38   | 18    |
| >TP53-C242FYMCNSSCMC | 160   | >TP53-C242FYMCNSSRMC | 214  | 54    |
| >TP53-C242FYMCNSSCM  | 1533  | >TP53-C242FYMCNSSRM  | 201  | 1332  |
| >TP53-C242FYMCNSSCMC | 294   | >TP53-C242FYMCNSSRMC | 310  | 16    |
| >TP53-C242FYMCNSSCM  | 310   | >TP53-C242FYMCNSSRM  | 735  | 425   |
| >TP53-C242FYMCNSSCM  | 346   | >TP53-C242FYMCNSSRM  | 1988 | 1642  |
| >TP53-C242FNYMCNSSCN | 53    | >TP53-C242FNYMCNSSRN | 13   | 40    |
| >TP53-C242FNYMCNSSCN | 650   | >TP53-C242FNYMCNSSRN | 138  | 512   |
| >TP53-C242FNYMCNSSC  | 25481 | >TP53-C242FNYMCNSSR  | 34   | 25447 |
| >TP53-C242FNYMCNSSC  | 36154 | >TP53-C242FNYMCNSSR  | 119  | 36035 |
| >TP53-C242FNYMCNSSC  | 31751 | >TP53-C242FNYMCNSSR  | 32   | 31719 |
| >TP53-C242FNYMCNSSC  | 31615 | >TP53-C242FNYMCNSSR  | 47   | 31568 |
| >TP53-C242FNYMCNSSC  | 429   | >TP53-C242FNYMCNSSR  | 471  | 42    |
| >TP53-C242FNYMCNSSC  | 1155  | >TP53-C242FNYMCNSSR  | 340  | 815   |
| >TP53-C242FNYMCNSSC  | 31    | >TP53-C242FNYMCNSSR  | 85   | 54    |
| >TP53-C242FNYMCNSSC  | 36229 | >TP53-C242FNYMCNSSR  | 170  | 36059 |

|                       |       |                       |      |       |
|-----------------------|-------|-----------------------|------|-------|
| >TP53-C242F HYNYMCNSS | 70    | >TP53-C242F HYNYMCNSS | 20   | 50    |
| >TP53-C242F HYNYMCNSS | 22748 | >TP53-C242F HYNYMCNSS | 61   | 22687 |
| >TP53-C242F HYNYMCNSS | 21211 | >TP53-C242F HYNYMCNSS | 163  | 21048 |
| >TP53-C242F HYNYMCNSS | 32843 | >TP53-C242F HYNYMCNSS | 38   | 32805 |
| >TP53-C242S CMGGMNRR  | 1556  | >TP53-C242S SMGGMNRR  | 355  | 1201  |
| >TP53-C242S CMGGMNRR  | 1329  | >TP53-C242S SMGGMNRR  | 240  | 1089  |
| >TP53-C242S CMGGMNRR  | 984   | >TP53-C242S SMGGMNRR  | 73   | 911   |
| >TP53-C242S CMGGMNRR  | 2150  | >TP53-C242S SMGGMNRR  | 211  | 1939  |
| >TP53-C242S CMGGMNRR  | 3560  | >TP53-C242S SMGGMNRR  | 92   | 3468  |
| >TP53-C242S CMGGMNRR  | 1849  | >TP53-C242S SMGGMNRR  | 128  | 1721  |
| >TP53-C242S CMGGMNRR  | 88    | >TP53-C242S SMGGMNRR  | 13   | 75    |
| >TP53-C242S CMGGMNRR  | 314   | >TP53-C242S SMGGMNRR  | 111  | 203   |
| >TP53-C242S CMGGMNRR  | 2379  | >TP53-C242S SMGGMNRR  | 154  | 2225  |
| >TP53-C242S CMGGMNRR  | 117   | >TP53-C242S SMGGMNRR  | 174  | 57    |
| >TP53-C242S SCMGGMNR  | 2430  | >TP53-C242S SSMGGMNR  | 192  | 2238  |
| >TP53-C242S SCMGGMNR  | 8330  | >TP53-C242S SSMGGMNR  | 23   | 8307  |
| >TP53-C242S SCMGGMNR  | 14085 | >TP53-C242S SSMGGMNR  | 60   | 14025 |
| >TP53-C242S SCMGGMNR  | 1170  | >TP53-C242S SSMGGMNR  | 90   | 1080  |
| >TP53-C242S SCMGGMNR  | 1568  | >TP53-C242S SSMGGMNR  | 90   | 1478  |
| >TP53-C242S SCMGGMNR  | 994   | >TP53-C242S SSMGGMNR  | 173  | 821   |
| >TP53-C242S SCMGGMNR  | 2443  | >TP53-C242S SSMGGMNR  | 50   | 2393  |
| >TP53-C242S SCMGGMNR  | 2764  | >TP53-C242S SSMGGMNR  | 56   | 2708  |
| >TP53-C242S SCMGGMNR  | 1031  | >TP53-C242S SSMGGMNR  | 119  | 912   |
| >TP53-C242S SCMGGMNR  | 14194 | >TP53-C242S SSMGGMNR  | 86   | 14108 |
| >TP53-C242S SCMGGMNR  | 2133  | >TP53-C242S SSMGGMNR  | 118  | 2015  |
| >TP53-C242S SCMGGMNR  | 2449  | >TP53-C242S SSMGGMNR  | 115  | 2334  |
| >TP53-C242S SCMGGMNR  | 464   | >TP53-C242S SSMGGMNR  | 1850 | 1386  |
| >TP53-C242S SCMGGMNR  | 1231  | >TP53-C242S SSMGGMNR  | 56   | 1175  |
| >TP53-C242S SSMGGMNI  | 58    | >TP53-C242S SSMGGMNI  | 66   | 8     |
| >TP53-C242S SSMGGMNI  | 192   | >TP53-C242S SSMGGMNI  | 93   | 99    |
| >TP53-C242S SSMGGMNI  | 110   | >TP53-C242S SSMGGMNI  | 228  | 118   |
| >TP53-C242S SSMGGMNI  | 56    | >TP53-C242S SSMGGMNI  | 83   | 27    |
| >TP53-C242S SSMGGMNI  | 220   | >TP53-C242S SSMGGMNI  | 131  | 89    |
| >TP53-C242S SSMGGMNI  | 361   | >TP53-C242S SSMGGMNI  | 81   | 280   |
| >TP53-C242S SSMGGMNI  | 398   | >TP53-C242S SSMGGMNI  | 265  | 133   |
| >TP53-C242S SSMGGMNI  | 460   | >TP53-C242S SSMGGMNI  | 296  | 164   |
| >TP53-C242S NSMGGMI   | 111   | >TP53-C242S NSMGGMI   | 81   | 30    |
| >TP53-C242S NSMGGMI   | 55    | >TP53-C242S NSMGGMI   | 70   | 15    |
| >TP53-C242S NSMGGMI   | 365   | >TP53-C242S NSMGGMI   | 379  | 14    |
| >TP53-C242S NSMGGMI   | 12    | >TP53-C242S NSMGGMI   | 9    | 3     |
| >TP53-C242S NSMGGMI   | 39    | >TP53-C242S NSMGGMI   | 22   | 17    |
| >TP53-C242S YMCNSSCM  | 262   | >TP53-C242S YMCNSSCM  | 150  | 112   |
| >TP53-C242S YMCNSSCM  | 252   | >TP53-C242S YMCNSSCM  | 515  | 263   |

|                       |      |                       |     |      |
|-----------------------|------|-----------------------|-----|------|
| >TP53-C242SYMCNSSCM   | 205  | >TP53-C242SYMCNSSSM   | 71  | 134  |
| >TP53-C242SYMCNSSCMC  | 167  | >TP53-C242SYMCNSSSMG  | 193 | 26   |
| >TP53-C242SYMCNSSCM   | 283  | >TP53-C242SYMCNSSSM   | 26  | 257  |
| >TP53-C242SYMCNSSCMC  | 41   | >TP53-C242SYMCNSSSMG  | 25  | 16   |
| >TP53-C242SYMCNSSCM   | 676  | >TP53-C242SYMCNSSSM   | 217 | 459  |
| >TP53-C242SYMCNSSCMC  | 143  | >TP53-C242SYMCNSSSMG  | 210 | 67   |
| >TP53-C242SYMCNSSCM   | 24   | >TP53-C242SYMCNSSSM   | 8   | 16   |
| >TP53-C242SYMCNSSCMC  | 92   | >TP53-C242SYMCNSSSMG  | 277 | 185  |
| >TP53-C242SYMCNSSCMC  | 399  | >TP53-C242SYMCNSSSMG  | 260 | 139  |
| >TP53-C242SYMCNSSCMC  | 16   | >TP53-C242SYMCNSSSMG  | 14  | 2    |
| >TP53-C242SYMCNSSCM   | 92   | >TP53-C242SYMCNSSSM   | 63  | 29   |
| >TP53-C242SYMCNSSCMC  | 197  | >TP53-C242SYMCNSSSMG  | 255 | 58   |
| >TP53-C242SYMCNSSCM   | 150  | >TP53-C242SYMCNSSSM   | 239 | 89   |
| >TP53-C242SYMCNSSCMC  | 421  | >TP53-C242SYMCNSSSMG  | 590 | 169  |
| >TP53-C242SYMCNSSCM   | 67   | >TP53-C242SYMCNSSSM   | 78  | 11   |
| >TP53-C242SYMCNSSCMC  | 332  | >TP53-C242SYMCNSSSMG  | 570 | 238  |
| >TP53-C242SYMCNSSCM   | 33   | >TP53-C242SYMCNSSSM   | 10  | 23   |
| >TP53-C242SYMCNSSCMC  | 53   | >TP53-C242SYMCNSSSMG  | 61  | 8    |
| >TP53-C242SYMCNSSCMC  | 591  | >TP53-C242SYMCNSSSMG  | 356 | 235  |
| >TP53-C242SYMCNSSCM   | 33   | >TP53-C242SYMCNSSSM   | 22  | 11   |
| >TP53-C242SYMCNSSCMC  | 127  | >TP53-C242SYMCNSSSMG  | 155 | 28   |
| >TP53-C242SYMCNSSCMC  | 292  | >TP53-C242SYMCNSSSMG  | 200 | 92   |
| >TP53-C242SYMCNSSCMC  | 44   | >TP53-C242SYMCNSSSMG  | 37  | 7    |
| >TP53-C242SYMCNSSCM   | 98   | >TP53-C242SYMCNSSSM   | 36  | 62   |
| >TP53-C242SYMCNSSCMC  | 145  | >TP53-C242SYMCNSSSMG  | 43  | 102  |
| >TP53-C242SYMCNSSCM   | 20   | >TP53-C242SYMCNSSSM   | 9   | 11   |
| >TP53-C242SYMCNSSCMC  | 160  | >TP53-C242SYMCNSSSMG  | 86  | 74   |
| >TP53-C242SYMCNSSCM   | 1533 | >TP53-C242SYMCNSSSM   | 190 | 1343 |
| >TP53-C242SYMCNSSCMC  | 294  | >TP53-C242SYMCNSSSMG  | 141 | 153  |
| >TP53-C242SYMCNSSCM   | 310  | >TP53-C242SYMCNSSSM   | 152 | 158  |
| >TP53-C242SYMCNSSCM   | 346  | >TP53-C242SYMCNSSSM   | 207 | 139  |
| >TP53-C242SYMCNSSCMC  | 1073 | >TP53-C242SYMCNSSSMG  | 364 | 709  |
| >TP53-C242SYNYMCNSSCN | 53   | >TP53-C242SYNYMCNSSSM | 5   | 48   |
| >TP53-C242SYNYMCNSSCN | 650  | >TP53-C242SYNYMCNSSSM | 68  | 582  |
| >TP53-C242SYNYMCNSSCI | 1351 | >TP53-C242SYNYMCNSSSI | 431 | 920  |
| >TP53-C242SYNYMCNSSCI | 429  | >TP53-C242SYNYMCNSSSI | 122 | 307  |
| >TP53-C242SYNYMCNSSCI | 893  | >TP53-C242SYNYMCNSSSI | 371 | 522  |
| >TP53-C242SYNYMCNSSCI | 31   | >TP53-C242SYNYMCNSSSI | 16  | 15   |
| >TP53-C242SYNYMCNSSCI | 911  | >TP53-C242SYNYMCNSSSI | 187 | 724  |
| >TP53-C242SYNYNYMCNSS | 70   | >TP53-C242SYNYNYMCNSS | 7   | 63   |
| >TP53-C242SYNYNYMCNSS | 2755 | >TP53-C242SYNYNYMCNSS | 489 | 2266 |
| >TP53-C242VCMGGMNRR   | 1556 | >TP53-C242VWMGGMNRI   | 480 | 1076 |
| >TP53-C242VCMGGMNRR   | 1329 | >TP53-C242VWMGGMNRI   | 360 | 969  |

|                       |       |                       |      |       |
|-----------------------|-------|-----------------------|------|-------|
| >TP53-C242V CMGGMNRR  | 984   | >TP53-C242V WMGGMNRI  | 77   | 907   |
| >TP53-C242V CMGGMNRR  | 2150  | >TP53-C242V WMGGMNRI  | 209  | 1941  |
| >TP53-C242V CMGGMNRR  | 3560  | >TP53-C242V WMGGMNRI  | 189  | 3371  |
| >TP53-C242V CMGGMNRR  | 2155  | >TP53-C242V WMGGMNRI  | 211  | 1944  |
| >TP53-C242V CMGGMNRR  | 1849  | >TP53-C242V WMGGMNRI  | 92   | 1757  |
| >TP53-C242V CMGGMNRR  | 88    | >TP53-C242V WMGGMNRI  | 9    | 79    |
| >TP53-C242V CMGGMNRR  | 314   | >TP53-C242V WMGGMNRI  | 2176 | 1862  |
| >TP53-C242V CMGGMNRR  | 14463 | >TP53-C242V WMGGMNRI  | 452  | 14011 |
| >TP53-C242V CMGGMNRR  | 117   | >TP53-C242V WMGGMNRI  | 155  | 38    |
| >TP53-C242V SCMGGMNR  | 4361  | >TP53-C242V SWMGGMNF  | 66   | 4295  |
| >TP53-C242V SCMGGMNR  | 17379 | >TP53-C242V SWMGGMNF  | 289  | 17090 |
| >TP53-C242V SCMGGMNR  | 1170  | >TP53-C242V SWMGGMNF  | 193  | 977   |
| >TP53-C242V SCMGGMNR  | 1568  | >TP53-C242V SWMGGMNF  | 259  | 1309  |
| >TP53-C242V SCMGGMNR  | 464   | >TP53-C242V SWMGGMNF  | 22   | 442   |
| >TP53-C242V SCMGGMNR  | 1578  | >TP53-C242V SWMGGMNF  | 27   | 1551  |
| >TP53-C242V SCMGGMNR  | 35102 | >TP53-C242V SWMGGMNF  | 301  | 34801 |
| >TP53-C242V SCMGGMNR  | 34642 | >TP53-C242V SWMGGMNF  | 236  | 34406 |
| >TP53-C242V SCMGGMNR  | 23544 | >TP53-C242V SWMGGMNF  | 61   | 23483 |
| >TP53-C242V IHYNYMCNS | 575   | >TP53-C242V IHYNYMCNS | 50   | 525   |
| >TP53-C242V IHYNYMCNS | 28614 | >TP53-C242V IHYNYMCNS | 267  | 28347 |
| >TP53-C242V IHYNYMCNS | 10247 | >TP53-C242V IHYNYMCNS | 7    | 10240 |
| >TP53-C242V SSCMGGMNI | 58    | >TP53-C242V SSWMGGMN  | 81   | 23    |
| >TP53-C242V SSCMGGMNI | 192   | >TP53-C242V SSWMGGMN  | 508  | 316   |
| >TP53-C242V SSCMGGMNI | 110   | >TP53-C242V SSWMGGMN  | 32   | 78    |
| >TP53-C242V SSCMGGMNI | 56    | >TP53-C242V SSWMGGMN  | 106  | 50    |
| >TP53-C242V SSCMGGMNI | 1403  | >TP53-C242V SSWMGGMN  | 493  | 910   |
| >TP53-C242V SSCMGGMNI | 220   | >TP53-C242V SSWMGGMN  | 464  | 244   |
| >TP53-C242V SSCMGGMNI | 361   | >TP53-C242V SSWMGGMN  | 629  | 268   |
| >TP53-C242V SSCMGGMNI | 398   | >TP53-C242V SSWMGGMN  | 397  | 1     |
| >TP53-C242V SSCMGGMNI | 460   | >TP53-C242V SSWMGGMN  | 469  | 9     |
| >TP53-C242V SSCMGGMNI | 3470  | >TP53-C242V SSWMGGMN  | 456  | 3014  |
| >TP53-C242V NSSCMGGMI | 111   | >TP53-C242V NSSWMGGV  | 127  | 16    |
| >TP53-C242V NSSCMGGMI | 55    | >TP53-C242V NSSWMGGV  | 30   | 25    |
| >TP53-C242V NSSCMGGMI | 365   | >TP53-C242V NSSWMGGV  | 254  | 111   |
| >TP53-C242V NSSCMGGMI | 12    | >TP53-C242V NSSWMGGV  | 13   | 1     |
| >TP53-C242V NSSCMGGMI | 39    | >TP53-C242V NSSWMGGV  | 19   | 20    |
| >TP53-C242V NSSCMGGM  | 848   | >TP53-C242V NSSWMGGV  | 417  | 431   |
| >TP53-C242V NSSCMGGM  | 851   | >TP53-C242V NSSWMGGV  | 69   | 782   |
| >TP53-C242V YMCNSSCM  | 262   | >TP53-C242V YMCNSSWM  | 73   | 189   |
| >TP53-C242V YMCNSSCM  | 252   | >TP53-C242V YMCNSSWM  | 94   | 158   |
| >TP53-C242V YMCNSSCM  | 205   | >TP53-C242V YMCNSSWM  | 44   | 161   |
| >TP53-C242V YMCNSSCM  | 167   | >TP53-C242V YMCNSSWM  | 122  | 45    |
| >TP53-C242V YMCNSSCM  | 283   | >TP53-C242V YMCNSSWM  | 40   | 243   |

|                       |       |                       |      |       |
|-----------------------|-------|-----------------------|------|-------|
| >TP53-C242V YMCNSSCMC | 41    | >TP53-C242V YMCNSSWM  | 30   | 11    |
| >TP53-C242V YMCNSSCM  | 676   | >TP53-C242V YMCNSSWM  | 167  | 509   |
| >TP53-C242V YMCNSSCMC | 143   | >TP53-C242V YMCNSSWM  | 68   | 75    |
| >TP53-C242V YMCNSSCM  | 24    | >TP53-C242V YMCNSSWM  | 7    | 17    |
| >TP53-C242V YMCNSSCMC | 92    | >TP53-C242V YMCNSSWM  | 20   | 72    |
| >TP53-C242V YMCNSSCMC | 399   | >TP53-C242V YMCNSSWM  | 96   | 303   |
| >TP53-C242V YMCNSSCMC | 16    | >TP53-C242V YMCNSSWM  | 5    | 11    |
| >TP53-C242V YMCNSSCM  | 92    | >TP53-C242V YMCNSSWM  | 118  | 26    |
| >TP53-C242V YMCNSSCMC | 197   | >TP53-C242V YMCNSSWM  | 69   | 128   |
| >TP53-C242V YMCNSSCM  | 150   | >TP53-C242V YMCNSSWM  | 116  | 34    |
| >TP53-C242V YMCNSSCMC | 421   | >TP53-C242V YMCNSSWM  | 128  | 293   |
| >TP53-C242V YMCNSSCM  | 67    | >TP53-C242V YMCNSSWM  | 103  | 36    |
| >TP53-C242V YMCNSSCMC | 332   | >TP53-C242V YMCNSSWM  | 135  | 197   |
| >TP53-C242V YMCNSSCM  | 33    | >TP53-C242V YMCNSSWM  | 7    | 26    |
| >TP53-C242V YMCNSSCMC | 903   | >TP53-C242V YMCNSSWM  | 189  | 714   |
| >TP53-C242V YMCNSSCMC | 53    | >TP53-C242V YMCNSSWM  | 23   | 30    |
| >TP53-C242V YMCNSSCMC | 591   | >TP53-C242V YMCNSSWM  | 361  | 230   |
| >TP53-C242V YMCNSSCM  | 33    | >TP53-C242V YMCNSSWM  | 67   | 34    |
| >TP53-C242V YMCNSSCMC | 127   | >TP53-C242V YMCNSSWM  | 767  | 640   |
| >TP53-C242V YMCNSSCMC | 292   | >TP53-C242V YMCNSSWM  | 524  | 232   |
| >TP53-C242V YMCNSSCMC | 44    | >TP53-C242V YMCNSSWM  | 49   | 5     |
| >TP53-C242V YMCNSSCM  | 98    | >TP53-C242V YMCNSSWM  | 102  | 4     |
| >TP53-C242V YMCNSSCMC | 145   | >TP53-C242V YMCNSSWM  | 117  | 28    |
| >TP53-C242V YMCNSSCM  | 20    | >TP53-C242V YMCNSSWM  | 42   | 22    |
| >TP53-C242V YMCNSSCMC | 160   | >TP53-C242V YMCNSSWM  | 192  | 32    |
| >TP53-C242V YMCNSSCM  | 1533  | >TP53-C242V YMCNSSWM  | 313  | 1220  |
| >TP53-C242V YMCNSSCMC | 294   | >TP53-C242V YMCNSSWM  | 311  | 17    |
| >TP53-C242V YMCNSSCM  | 310   | >TP53-C242V YMCNSSWM  | 578  | 268   |
| >TP53-C242V YMCNSSCM  | 346   | >TP53-C242V YMCNSSWM  | 1662 | 1316  |
| >TP53-C242V NYMCNSSCN | 726   | >TP53-C242V NYMCNSSW  | 252  | 474   |
| >TP53-C242V NYMCNSSCN | 53    | >TP53-C242V NYMCNSSW  | 14   | 39    |
| >TP53-C242V NYMCNSSC  | 12720 | >TP53-C242V NYMCNSSW  | 81   | 12639 |
| >TP53-C242V NYMCNSSC  | 8293  | >TP53-C242V NYMCNSSW  | 198  | 8095  |
| >TP53-C242V NYMCNSSC  | 1997  | >TP53-C242V NYMCNSSW  | 21   | 1976  |
| >TP53-C242V NYMCNSSCN | 650   | >TP53-C242V NYMCNSSW  | 56   | 594   |
| >TP53-C242V NYMCNSSCN | 2980  | >TP53-C242V NYMCNSSW  | 429  | 2551  |
| >TP53-C242V YNYMCNSSC | 429   | >TP53-C242V YNYMCNSSW | 1108 | 679   |
| >TP53-C242V YNYMCNSSC | 1155  | >TP53-C242V YNYMCNSSW | 88   | 1067  |
| >TP53-C242V YNYMCNSSC | 31    | >TP53-C242V YNYMCNSSW | 121  | 90    |
| >TP53-C242V YNYMCNSSC | 21515 | >TP53-C242V YNYMCNSSW | 152  | 21363 |
| >TP53-C242V YNYMCNSSC | 1209  | >TP53-C242V YNYMCNSSW | 34   | 1175  |
| >TP53-C242V YNYMCNSSC | 911   | >TP53-C242V YNYMCNSSW | 100  | 811   |
| >TP53-C242V YNYMCNSSC | 25530 | >TP53-C242V YNYMCNSSW | 76   | 25454 |



|                        |       |                        |     |       |
|------------------------|-------|------------------------|-----|-------|
| >TP53-C242V HYNYMCNSS  | 70    | >TP53-C242V HYNYMCNSS  | 22  | 48    |
| >TP53-C242V HYNYMCNSS  | 20305 | >TP53-C242V HYNYMCNSS  | 147 | 20158 |
| >TP53-C242V HYNYMCNSS  | 9571  | >TP53-C242V HYNYMCNSS  | 100 | 9471  |
| >TP53-C242V HYNYMCNSS  | 2755  | >TP53-C242V HYNYMCNSS  | 412 | 2343  |
| >TP53-C242V HYNYMCNSS  | 2416  | >TP53-C242V HYNYMCNSS  | 400 | 2016  |
| >TP53-C242V HYNYMCNSS  | 21212 | >TP53-C242V HYNYMCNSS  | 78  | 21134 |
| >TP53-C242Y CMGGMNRR   | 7745  | >TP53-C242Y YMGGMNRR   | 296 | 7449  |
| >TP53-C242Y CMGGMNRR   | 4468  | >TP53-C242Y YMGGMNRR   | 220 | 4248  |
| >TP53-C242Y CMGGMNRR   | 1556  | >TP53-C242Y YMGGMNRR   | 83  | 1473  |
| >TP53-C242Y CMGGMNRR   | 2664  | >TP53-C242Y YMGGMNRR   | 115 | 2549  |
| >TP53-C242Y CMGGMNRR   | 1329  | >TP53-C242Y YMGGMNRR   | 64  | 1265  |
| >TP53-C242Y CMGGMNRR   | 5487  | >TP53-C242Y YMGGMNRR   | 315 | 5172  |
| >TP53-C242Y CMGGMNRR   | 984   | >TP53-C242Y YMGGMNRR   | 11  | 973   |
| >TP53-C242Y CMGGMNRR   | 2150  | >TP53-C242Y YMGGMNRR   | 25  | 2125  |
| >TP53-C242Y CMGGMNRR   | 3061  | >TP53-C242Y YMGGMNRR   | 50  | 3011  |
| >TP53-C242Y CMGGMNRR   | 3411  | >TP53-C242Y YMGGMNRR   | 77  | 3334  |
| >TP53-C242Y CMGGMNRR   | 10682 | >TP53-C242Y YMGGMNRR   | 195 | 10487 |
| >TP53-C242Y CMGGMNRR   | 3560  | >TP53-C242Y YMGGMNRR   | 32  | 3528  |
| >TP53-C242Y CMGGMNRR   | 6204  | >TP53-C242Y YMGGMNRR   | 296 | 5908  |
| >TP53-C242Y CMGGMNRR   | 2155  | >TP53-C242Y YMGGMNRR   | 57  | 2098  |
| >TP53-C242Y CMGGMNRR   | 1849  | >TP53-C242Y YMGGMNRR   | 11  | 1838  |
| >TP53-C242Y CMGGMNRR   | 88    | >TP53-C242Y YMGGMNRR   | 3   | 85    |
| >TP53-C242Y CMGGMNRR   | 314   | >TP53-C242Y YMGGMNRR   | 305 | 9     |
| >TP53-C242Y CMGGMNRR   | 1022  | >TP53-C242Y YMGGMNRR   | 274 | 748   |
| >TP53-C242Y CMGGMNRR   | 117   | >TP53-C242Y YMGGMNRR   | 156 | 39    |
| >TP53-C242Y SCMGGMNR   | 4361  | >TP53-C242Y SYMGGMNR   | 2   | 4359  |
| >TP53-C242Y SCMGGMNR   | 20551 | >TP53-C242Y SYMGGMNR   | 441 | 20110 |
| >TP53-C242Y SCMGGMNR   | 22806 | >TP53-C242Y SYMGGMNR   | 330 | 22476 |
| >TP53-C242Y SCMGGMNR   | 17379 | >TP53-C242Y SYMGGMNR   | 18  | 17361 |
| >TP53-C242Y SCMGGMNR   | 1170  | >TP53-C242Y SYMGGMNR   | 52  | 1118  |
| >TP53-C242Y SCMGGMNR   | 1568  | >TP53-C242Y SYMGGMNR   | 56  | 1512  |
| >TP53-C242Y SCMGGMNR   | 2439  | >TP53-C242Y SYMGGMNR   | 110 | 2329  |
| >TP53-C242Y SCMGGMNR   | 3639  | >TP53-C242Y SYMGGMNR   | 135 | 3504  |
| >TP53-C242Y SCMGGMNR   | 464   | >TP53-C242Y SYMGGMNR   | 43  | 421   |
| >TP53-C242Y SCMGGMNR   | 1578  | >TP53-C242Y SYMGGMNR   | 113 | 1465  |
| >TP53-C242Y SCMGGMNR   | 23544 | >TP53-C242Y SYMGGMNR   | 162 | 23382 |
| >TP53-C242Y IHYNYMCNSS | 25127 | >TP53-C242Y IHYNYMCNSS | 305 | 24822 |
| >TP53-C242Y IHYNYMCNSS | 22655 | >TP53-C242Y IHYNYMCNSS | 75  | 22580 |
| >TP53-C242Y IHYNYMCNSS | 575   | >TP53-C242Y IHYNYMCNSS | 5   | 570   |
| >TP53-C242Y IHYNYMCNSS | 9070  | >TP53-C242Y IHYNYMCNSS | 80  | 8990  |
| >TP53-C242Y IHYNYMCNSS | 10247 | >TP53-C242Y IHYNYMCNSS | 52  | 10195 |
| >TP53-C242Y SSCMGGMNI  | 6027  | >TP53-C242Y SSYMGGMNI  | 200 | 5827  |
| >TP53-C242Y SSCMGGMNI  | 58    | >TP53-C242Y SSYMGGMNI  | 19  | 39    |

|                      |      |                      |     |      |
|----------------------|------|----------------------|-----|------|
| >TP53-C242YSSCMGGMNI | 192  | >TP53-C242YSSYMGGMNI | 74  | 118  |
| >TP53-C242YSSCMGGMNI | 110  | >TP53-C242YSSYMGGMNI | 52  | 58   |
| >TP53-C242YSSCMGGMNI | 56   | >TP53-C242YSSYMGGMNI | 47  | 9    |
| >TP53-C242YSSCMGGMNI | 220  | >TP53-C242YSSYMGGMNI | 61  | 159  |
| >TP53-C242YSSCMGGMNI | 361  | >TP53-C242YSSYMGGMNI | 35  | 326  |
| >TP53-C242YSSCMGGMNI | 398  | >TP53-C242YSSYMGGMNI | 174 | 224  |
| >TP53-C242YSSCMGGMNI | 460  | >TP53-C242YSSYMGGMNI | 187 | 273  |
| >TP53-C242YNSSCMGGMI | 1185 | >TP53-C242YNSSYMGGMI | 434 | 751  |
| >TP53-C242YNSSCMGGMI | 111  | >TP53-C242YNSSYMGGMI | 64  | 47   |
| >TP53-C242YNSSCMGGMI | 55   | >TP53-C242YNSSYMGGMI | 48  | 7    |
| >TP53-C242YNSSCMGGMI | 365  | >TP53-C242YNSSYMGGMI | 292 | 73   |
| >TP53-C242YNSSCMGGMI | 12   | >TP53-C242YNSSYMGGMI | 9   | 3    |
| >TP53-C242YNSSCMGGMI | 39   | >TP53-C242YNSSYMGGMI | 17  | 22   |
| >TP53-C242YCNSSCMGGN | 876  | >TP53-C242YCNSSYMGGN | 481 | 395  |
| >TP53-C242YCMCNSSCM  | 1744 | >TP53-C242YCMCNSSYM  | 289 | 1455 |
| >TP53-C242YCMCNSSCM  | 262  | >TP53-C242YCMCNSSYM  | 34  | 228  |
| >TP53-C242YCMCNSSCMC | 252  | >TP53-C242YCMCNSSYMC | 117 | 135  |
| >TP53-C242YCMCNSSCM  | 205  | >TP53-C242YCMCNSSYM  | 17  | 188  |
| >TP53-C242YCMCNSSCMC | 167  | >TP53-C242YCMCNSSYMC | 70  | 97   |
| >TP53-C242YCMCNSSCM  | 283  | >TP53-C242YCMCNSSYM  | 31  | 252  |
| >TP53-C242YCMCNSSCMC | 41   | >TP53-C242YCMCNSSYMC | 32  | 9    |
| >TP53-C242YCMCNSSCM  | 676  | >TP53-C242YCMCNSSYM  | 88  | 588  |
| >TP53-C242YCMCNSSCMC | 143  | >TP53-C242YCMCNSSYMC | 114 | 29   |
| >TP53-C242YCMCNSSCM  | 24   | >TP53-C242YCMCNSSYM  | 4   | 20   |
| >TP53-C242YCMCNSSCMC | 92   | >TP53-C242YCMCNSSYMC | 72  | 20   |
| >TP53-C242YCMCNSSCMC | 399  | >TP53-C242YCMCNSSYMC | 162 | 237  |
| >TP53-C242YCMCNSSCMC | 16   | >TP53-C242YCMCNSSYMC | 8   | 8    |
| >TP53-C242YCMCNSSCM  | 92   | >TP53-C242YCMCNSSYM  | 22  | 70   |
| >TP53-C242YCMCNSSCMC | 197  | >TP53-C242YCMCNSSYMC | 109 | 88   |
| >TP53-C242YCMCNSSCM  | 150  | >TP53-C242YCMCNSSYM  | 52  | 98   |
| >TP53-C242YCMCNSSCMC | 421  | >TP53-C242YCMCNSSYMC | 388 | 33   |
| >TP53-C242YCMCNSSCM  | 67   | >TP53-C242YCMCNSSYM  | 19  | 48   |
| >TP53-C242YCMCNSSCMC | 332  | >TP53-C242YCMCNSSYMC | 320 | 12   |
| >TP53-C242YCMCNSSCM  | 33   | >TP53-C242YCMCNSSYM  | 8   | 25   |
| >TP53-C242YCMCNSSCMC | 53   | >TP53-C242YCMCNSSYMC | 56  | 3    |
| >TP53-C242YCMCNSSCMC | 591  | >TP53-C242YCMCNSSYMC | 379 | 212  |
| >TP53-C242YCMCNSSCM  | 3526 | >TP53-C242YCMCNSSYM  | 328 | 3198 |
| >TP53-C242YCMCNSSCM  | 33   | >TP53-C242YCMCNSSYM  | 31  | 2    |
| >TP53-C242YCMCNSSCMC | 127  | >TP53-C242YCMCNSSYMC | 257 | 130  |
| >TP53-C242YCMCNSSCMC | 292  | >TP53-C242YCMCNSSYMC | 402 | 110  |
| >TP53-C242YCMCNSSCMC | 44   | >TP53-C242YCMCNSSYMC | 43  | 1    |
| >TP53-C242YCMCNSSCM  | 98   | >TP53-C242YCMCNSSYM  | 74  | 24   |
| >TP53-C242YCMCNSSCMC | 145  | >TP53-C242YCMCNSSYMC | 102 | 43   |

|                        |       |                        |      |       |
|------------------------|-------|------------------------|------|-------|
| >TP53-C242Y YMCNSSCM   | 20    | >TP53-C242Y YMCNSSYM   | 15   | 5     |
| >TP53-C242Y YMCNSSCMC  | 160   | >TP53-C242Y YMCNSSYMC  | 126  | 34    |
| >TP53-C242Y YMCNSSCM   | 1533  | >TP53-C242Y YMCNSSYM   | 377  | 1156  |
| >TP53-C242Y YMCNSSCMC  | 294   | >TP53-C242Y YMCNSSYMC  | 278  | 16    |
| >TP53-C242Y YMCNSSCM   | 310   | >TP53-C242Y YMCNSSYM   | 514  | 204   |
| >TP53-C242Y YMCNSSCM   | 346   | >TP53-C242Y YMCNSSYM   | 1364 | 1018  |
| >TP53-C242Y NYMCNSSCM  | 726   | >TP53-C242Y NYMCNSSYM  | 106  | 620   |
| >TP53-C242Y NYMCNSSCM  | 53    | >TP53-C242Y NYMCNSSYM  | 9    | 44    |
| >TP53-C242Y NYMCNSSCM  | 650   | >TP53-C242Y NYMCNSSYM  | 34   | 616   |
| >TP53-C242Y NYMCNSSC   | 21980 | >TP53-C242Y NYMCNSSY   | 149  | 21831 |
| >TP53-C242Y NYMCNSSC   | 26665 | >TP53-C242Y NYMCNSSY   | 295  | 26370 |
| >TP53-C242Y NYMCNSSC   | 24072 | >TP53-C242Y NYMCNSSY   | 220  | 23852 |
| >TP53-C242Y YNYMCNSSCI | 1351  | >TP53-C242Y YNYMCNSSYI | 160  | 1191  |
| >TP53-C242Y YNYMCNSSC  | 24055 | >TP53-C242Y YNYMCNSSY  | 94   | 23961 |
| >TP53-C242Y YNYMCNSSC  | 25496 | >TP53-C242Y YNYMCNSSY  | 91   | 25405 |
| >TP53-C242Y YNYMCNSSC  | 10307 | >TP53-C242Y YNYMCNSSY  | 66   | 10241 |
| >TP53-C242Y YNYMCNSSCI | 429   | >TP53-C242Y YNYMCNSSYI | 288  | 141   |
| >TP53-C242Y YNYMCNSSC  | 17145 | >TP53-C242Y YNYMCNSSY  | 60   | 17085 |
| >TP53-C242Y YNYMCNSSC  | 1155  | >TP53-C242Y YNYMCNSSY  | 7    | 1148  |
| >TP53-C242Y YNYMCNSSCI | 31    | >TP53-C242Y YNYMCNSSYI | 32   | 1     |
| >TP53-C242Y YNYMCNSSC  | 21515 | >TP53-C242Y YNYMCNSSY  | 364  | 21151 |
| >TP53-C242Y YNYMCNSSC  | 15949 | >TP53-C242Y YNYMCNSSY  | 60   | 15889 |
| >TP53-C242Y YNYMCNSSC  | 1209  | >TP53-C242Y YNYMCNSSY  | 4    | 1205  |
| >TP53-C242Y YNYMCNSSCI | 911   | >TP53-C242Y YNYMCNSSYI | 160  | 751   |
| >TP53-C242Y HNYMCNSS   | 70    | >TP53-C242Y HNYMCNSS   | 15   | 55    |
| >TP53-C242Y HNYMCNSS   | 2755  | >TP53-C242Y HNYMCNSS   | 248  | 2507  |
| >TP53-C242Y HNYMCNSS   | 18927 | >TP53-C242Y HNYMCNSS   | 85   | 18842 |
| >TP53-C242Y HNYMCNSS   | 21790 | >TP53-C242Y HNYMCNSS   | 86   | 21704 |
| >TP53-C242Y HNYMCNSS   | 2187  | >TP53-C242Y HNYMCNSS   | 364  | 1823  |
| >TP53-C242Y HNYMCNSS   | 13968 | >TP53-C242Y HNYMCNSS   | 69   | 13899 |
| >TP53-C242Y HNYMCNSS   | 1452  | >TP53-C242Y HNYMCNSS   | 458  | 994   |
| >TP53-C275F CACPGRDRR  | 545   | >TP53-C275F FACPGRDRR  | 347  | 198   |
| >TP53-C275F CACPGRDR   | 824   | >TP53-C275F FACPGRDR   | 233  | 591   |
| >TP53-C275F CACPGRDRR  | 132   | >TP53-C275F FACPGRDRR  | 35   | 97    |
| >TP53-C275F VCACPGRDRI | 4064  | >TP53-C275F VFACPGRDRF | 385  | 3679  |
| >TP53-C275F LGRNSFEVRV | 12391 | >TP53-C275F LGRNSFEVRV | 66   | 12325 |
| >TP53-C275F LGRNSFEVRV | 11563 | >TP53-C275F LGRNSFEVRV | 36   | 11527 |
| >TP53-C275F LGRNSFEVRV | 11794 | >TP53-C275F LGRNSFEVRV | 154  | 11640 |
| >TP53-C275F RVCACPGR   | 1309  | >TP53-C275F RVFACPGR   | 125  | 1184  |
| >TP53-C275F RVCACPGRDI | 1179  | >TP53-C275F RVFACPGRDF | 486  | 693   |
| >TP53-C275F RVCACPGRDI | 2312  | >TP53-C275F RVFACPGRDF | 258  | 2054  |
| >TP53-C275F RVCACPGR   | 367   | >TP53-C275F RVFACPGR   | 87   | 280   |
| >TP53-C275F RVCACPGRDI | 435   | >TP53-C275F RVFACPGRDF | 99   | 336   |

|                        |       |                        |      |       |
|------------------------|-------|------------------------|------|-------|
| >TP53-C275F RVCACPGR   | 1754  | >TP53-C275F RVFACPGR   | 338  | 1416  |
| >TP53-C275F RVCACPGR   | 40    | >TP53-C275F RVFACPGR   | 18   | 22    |
| >TP53-C275F RVCACPGRDI | 37    | >TP53-C275F RVFACPGRDI | 44   | 7     |
| >TP53-C275F RVCACPGRDI | 33    | >TP53-C275F RVFACPGRDI | 15   | 18    |
| >TP53-C275F RVCACPGR   | 481   | >TP53-C275F RVFACPGR   | 64   | 417   |
| >TP53-C275F RVCACPGRDI | 1118  | >TP53-C275F RVFACPGRDI | 134  | 984   |
| >TP53-C275F RVCACPGRDI | 584   | >TP53-C275F RVFACPGRDI | 105  | 479   |
| >TP53-C275F RVCACPGRDI | 297   | >TP53-C275F RVFACPGRDI | 248  | 49    |
| >TP53-C275F RVCACPGR   | 66    | >TP53-C275F RVFACPGR   | 35   | 31    |
| >TP53-C275F RVCACPGRDI | 255   | >TP53-C275F RVFACPGRDI | 81   | 174   |
| >TP53-C275F RVCACPGRDI | 109   | >TP53-C275F RVFACPGRDI | 47   | 62    |
| >TP53-C275F EVRVACPGF  | 329   | >TP53-C275F EVRVFACPGF | 334  | 5     |
| >TP53-C275F EVRVACPGF  | 70    | >TP53-C275F EVRVFACPGF | 57   | 13    |
| >TP53-C275F FEVRVCAC   | 822   | >TP53-C275F FEVRVFAC   | 156  | 666   |
| >TP53-C275F FEVRVCACPC | 370   | >TP53-C275F FEVRVFACPC | 299  | 71    |
| >TP53-C275F FEVRVCAC   | 1153  | >TP53-C275F FEVRVFAC   | 344  | 809   |
| >TP53-C275F SFEVRVCA   | 2430  | >TP53-C275F SFEVRVFA   | 375  | 2055  |
| >TP53-C275F NSFVVRVC   | 12357 | >TP53-C275F NSFVVRVF   | 414  | 11943 |
| >TP53-C275F NSFVVRVCA  | 2588  | >TP53-C275F NSFVVRVFA  | 356  | 2232  |
| >TP53-C275F NSFVVRVCA  | 21    | >TP53-C275F NSFVVRVFA  | 7    | 14    |
| >TP53-C275F NSFVVRVC   | 18692 | >TP53-C275F NSFVVRVF   | 305  | 18387 |
| >TP53-C275F NSFVVRVC   | 13511 | >TP53-C275F NSFVVRVF   | 48   | 13463 |
| >TP53-C275F NSFVVRVC   | 21401 | >TP53-C275F NSFVVRVF   | 76   | 21325 |
| >TP53-C275F RNSFVVRVC  | 19896 | >TP53-C275F RNSFVVRVF  | 123  | 19773 |
| >TP53-C275F GRNSFVVRVC | 7228  | >TP53-C275F GRNSFVVRVF | 59   | 7169  |
| >TP53-C275F GRNSFVVRVC | 3082  | >TP53-C275F GRNSFVVRVF | 103  | 2979  |
| >TP53-C275C CACPGRDRR  | 132   | >TP53-C275C GACPGRDRR  | 617  | 485   |
| >TP53-C275C RVCACPGR   | 367   | >TP53-C275C RVGACPGR   | 1163 | 796   |
| >TP53-C275C RVCACPGRDI | 435   | >TP53-C275C RVGACPGRDI | 1454 | 1019  |
| >TP53-C275C RVCACPGR   | 40    | >TP53-C275C RVGACPGR   | 93   | 53    |
| >TP53-C275C RVCACPGRDI | 37    | >TP53-C275C RVGACPGRDI | 221  | 184   |
| >TP53-C275C RVCACPGRDI | 33    | >TP53-C275C RVGACPGRDI | 70   | 37    |
| >TP53-C275C RVCACPGR   | 481   | >TP53-C275C RVGACPGR   | 1964 | 1483  |
| >TP53-C275C RVCACPGRDI | 297   | >TP53-C275C RVGACPGRDI | 365  | 68    |
| >TP53-C275C RVCACPGR   | 66    | >TP53-C275C RVGACPGR   | 64   | 2     |
| >TP53-C275C RVCACPGRDI | 255   | >TP53-C275C RVGACPGRDI | 258  | 3     |
| >TP53-C275C RVCACPGRDI | 109   | >TP53-C275C RVGACPGRDI | 101  | 8     |
| >TP53-C275C EVRVACPGF  | 329   | >TP53-C275C EVRVGACPGI | 2168 | 1839  |
| >TP53-C275C EVRVACPGF  | 70    | >TP53-C275C EVRVGACPGI | 179  | 109   |
| >TP53-C275C FEVRVCAC   | 822   | >TP53-C275C FEVRVGAC   | 91   | 731   |
| >TP53-C275C FEVRVCACPC | 370   | >TP53-C275C FEVRVGACPC | 630  | 260   |
| >TP53-C275C NSFVVRVCA  | 21    | >TP53-C275C NSFVVRVGA  | 9    | 12    |
| >TP53-C275F CACPGRDR   | 2429  | >TP53-C275F RACPGRDR   | 137  | 2292  |

|                        |       |                        |      |       |
|------------------------|-------|------------------------|------|-------|
| >TP53-C275F CACPGRDRR  | 921   | >TP53-C275F RACPGRDRR  | 32   | 889   |
| >TP53-C275F CACPGRDRR  | 132   | >TP53-C275F RACPGRDRR  | 801  | 669   |
| >TP53-C275F RVCACPGR   | 1309  | >TP53-C275F RVRACPGR   | 466  | 843   |
| >TP53-C275F RVCACPGR   | 367   | >TP53-C275F RVRACPGR   | 6123 | 5756  |
| >TP53-C275F RVCACPGRDI | 435   | >TP53-C275F RVRACPGRDI | 6993 | 6558  |
| >TP53-C275F RVCACPGR   | 1754  | >TP53-C275F RVRACPGR   | 9    | 1745  |
| >TP53-C275F RVCACPGRD  | 8735  | >TP53-C275F RVRACPGRD  | 334  | 8401  |
| >TP53-C275F RVCACPGRDI | 5762  | >TP53-C275F RVRACPGRDI | 30   | 5732  |
| >TP53-C275F RVCACPGRDI | 4857  | >TP53-C275F RVRACPGRDI | 25   | 4832  |
| >TP53-C275F RVCACPGR   | 40    | >TP53-C275F RVRACPGR   | 21   | 19    |
| >TP53-C275F RVCACPGRDI | 37    | >TP53-C275F RVRACPGRDI | 50   | 13    |
| >TP53-C275F RVCACPGRDI | 33    | >TP53-C275F RVRACPGRDI | 17   | 16    |
| >TP53-C275F RVCACPGR   | 481   | >TP53-C275F RVRACPGR   | 2369 | 1888  |
| >TP53-C275F RVCACPGRDI | 297   | >TP53-C275F RVRACPGRDI | 494  | 197   |
| >TP53-C275F RVCACPGR   | 66    | >TP53-C275F RVRACPGR   | 122  | 56    |
| >TP53-C275F RVCACPGRDI | 255   | >TP53-C275F RVRACPGRDI | 563  | 308   |
| >TP53-C275F RVCACPGRDI | 109   | >TP53-C275F RVRACPGRDI | 217  | 108   |
| >TP53-C275F EVRVCACPGF | 329   | >TP53-C275F EVRVRACPGF | 460  | 131   |
| >TP53-C275F EVRVCACPGF | 70    | >TP53-C275F EVRVRACPGF | 281  | 211   |
| >TP53-C275F FEVRVCAC   | 822   | >TP53-C275F FEVRVRAC   | 100  | 722   |
| >TP53-C275F FEVRVCACPC | 370   | >TP53-C275F FEVRVRACPC | 372  | 2     |
| >TP53-C275F NSFEBRVC   | 18664 | >TP53-C275F NSFEBRVR   | 256  | 18408 |
| >TP53-C275F NSFEBRVC   | 26972 | >TP53-C275F NSFEBRVR   | 92   | 26880 |
| >TP53-C275F NSFEBRVC   | 18452 | >TP53-C275F NSFEBRVR   | 11   | 18441 |
| >TP53-C275F NSFEBRVCA  | 21    | >TP53-C275F NSFEBRVRA  | 12   | 9     |
| >TP53-C275F GRNSFEBRVC | 3082  | >TP53-C275F GRNSFEBRVF | 178  | 2904  |
| >TP53-C275S CACPGRDRR  | 921   | >TP53-C275S SACPGRDRR  | 284  | 637   |
| >TP53-C275S CACPGRDRR  | 132   | >TP53-C275S SACPGRDRR  | 130  | 2     |
| >TP53-C275S VCACPGRDRI | 16189 | >TP53-C275S VSACPGRDRI | 351  | 15838 |
| >TP53-C275S RVCACPGR   | 1309  | >TP53-C275S RVSACPGR   | 498  | 811   |
| >TP53-C275S RVCACPGR   | 367   | >TP53-C275S RVSACPGR   | 291  | 76    |
| >TP53-C275S RVCACPGRDI | 435   | >TP53-C275S RVSACPGRDI | 353  | 82    |
| >TP53-C275S RVCACPGR   | 40    | >TP53-C275S RVSACPGR   | 49   | 9     |
| >TP53-C275S RVCACPGRDI | 37    | >TP53-C275S RVSACPGRDI | 54   | 17    |
| >TP53-C275S RVCACPGRDI | 33    | >TP53-C275S RVSACPGRDI | 42   | 9     |
| >TP53-C275S RVCACPGR   | 481   | >TP53-C275S RVSACPGR   | 290  | 191   |
| >TP53-C275S RVCACPGRDI | 1118  | >TP53-C275S RVSACPGRDI | 279  | 839   |
| >TP53-C275S RVCACPGRDI | 584   | >TP53-C275S RVSACPGRDI | 339  | 245   |
| >TP53-C275S RVCACPGRDI | 297   | >TP53-C275S RVSACPGRDI | 394  | 97    |
| >TP53-C275S RVCACPGR   | 66    | >TP53-C275S RVSACPGR   | 78   | 12    |
| >TP53-C275S RVCACPGRDI | 255   | >TP53-C275S RVSACPGRDI | 377  | 122   |
| >TP53-C275S RVCACPGRDI | 109   | >TP53-C275S RVSACPGRDI | 156  | 47    |
| >TP53-C275S EVRVCACPGF | 329   | >TP53-C275S EVRVSACPGF | 1200 | 871   |

|                        |       |                         |     |       |
|------------------------|-------|-------------------------|-----|-------|
| >TP53-C275S EVRVCACPGF | 70    | >TP53-C275S EVRVSACPGF  | 147 | 77    |
| >TP53-C275S FEVRVCAC   | 822   | >TP53-C275S FEVRVSAC    | 416 | 406   |
| >TP53-C275S FEVRVCACPG | 370   | >TP53-C275S FEVRVSACPG  | 384 | 14    |
| >TP53-C275S NSFVVRVCA  | 21    | >TP53-C275S NSFVVRVSA   | 11  | 10    |
| >TP53-C275V CACPGRDRR  | 132   | >TP53-C275V WACPGRDRR   | 156 | 24    |
| >TP53-C275V VCACPGRDR  | 13824 | >TP53-C275V VWACPGRDR   | 301 | 13523 |
| >TP53-C275V VCACPGRDRI | 7200  | >TP53-C275V VWACPGRDF   | 128 | 7072  |
| >TP53-C275V LGRNSFEVRV | 24084 | >TP53-C275V LGRNSFEVRV  | 252 | 23832 |
| >TP53-C275V LGRNSFEVRV | 24360 | >TP53-C275V LGRNSFEVRV  | 131 | 24229 |
| >TP53-C275V RVCACPGR   | 1309  | >TP53-C275V RVWACPGR    | 436 | 873   |
| >TP53-C275V RVCACPGR   | 367   | >TP53-C275V RVWACPGR    | 362 | 5     |
| >TP53-C275V RVCACPGRDI | 435   | >TP53-C275V RVWACPGR    | 508 | 73    |
| >TP53-C275V RVCACPGR   | 40    | >TP53-C275V RVWACPGR    | 16  | 24    |
| >TP53-C275V RVCACPGRDI | 37    | >TP53-C275V RVWACPGR    | 78  | 41    |
| >TP53-C275V RVCACPGRDI | 33    | >TP53-C275V RVWACPGR    | 15  | 18    |
| >TP53-C275V RVCACPGR   | 481   | >TP53-C275V RVWACPGR    | 975 | 494   |
| >TP53-C275V RVCACPGRDI | 297   | >TP53-C275V RVWACPGR    | 149 | 148   |
| >TP53-C275V RVCACPGR   | 66    | >TP53-C275V RVWACPGR    | 29  | 37    |
| >TP53-C275V RVCACPGRDI | 255   | >TP53-C275V RVWACPGR    | 74  | 181   |
| >TP53-C275V RVCACPGRDI | 109   | >TP53-C275V RVWACPGR    | 37  | 72    |
| >TP53-C275V EVRVCACPGF | 329   | >TP53-C275V EVRVWACPGR  | 563 | 234   |
| >TP53-C275V EVRVCACPGF | 70    | >TP53-C275V EVRVWACPGR  | 145 | 75    |
| >TP53-C275V FEVRVCAC   | 822   | >TP53-C275V FEVRVWAC    | 481 | 341   |
| >TP53-C275V FEVRVCACPG | 370   | >TP53-C275V FEVRVWACPGR | 379 | 9     |
| >TP53-C275V FEVRVCAC   | 1153  | >TP53-C275V FEVRVWAC    | 485 | 668   |
| >TP53-C275V SFVVRVCAC  | 3529  | >TP53-C275V SFVVRVWAC   | 363 | 3166  |
| >TP53-C275V NSFVVRVCA  | 21    | >TP53-C275V NSFVVRVWA   | 15  | 6     |
| >TP53-C275V NSFVVRVC   | 21401 | >TP53-C275V NSFVVRVW    | 41  | 21360 |
| >TP53-C275V NSFVVRVC   | 20752 | >TP53-C275V NSFVVRVW    | 55  | 20697 |
| >TP53-C275V NSFVVRVC   | 20751 | >TP53-C275V NSFVVRVW    | 45  | 20706 |
| >TP53-C275V NSFVVRVC   | 30710 | >TP53-C275V NSFVVRVW    | 409 | 30301 |
| >TP53-C275Y CACPGRDRR  | 545   | >TP53-C275Y YACPGRDRR   | 294 | 251   |
| >TP53-C275Y CACPGRDR   | 824   | >TP53-C275Y YACPGRDR    | 220 | 604   |
| >TP53-C275Y CACPGRDRR  | 132   | >TP53-C275Y YACPGRDRR   | 32  | 100   |
| >TP53-C275Y VCACPGRDRI | 7200  | >TP53-C275Y VYACPGRDRI  | 414 | 6786  |
| >TP53-C275Y LGRNSFEVRV | 12391 | >TP53-C275Y LGRNSFEVRV  | 71  | 12320 |
| >TP53-C275Y LGRNSFEVRV | 11563 | >TP53-C275Y LGRNSFEVRV  | 140 | 11423 |
| >TP53-C275Y LGRNSFEVRV | 11794 | >TP53-C275Y LGRNSFEVRV  | 108 | 11686 |
| >TP53-C275Y RVCACPGR   | 1309  | >TP53-C275Y RVYACPGR    | 67  | 1242  |
| >TP53-C275Y RVCACPGRDI | 1179  | >TP53-C275Y RVYACPGRDI  | 202 | 977   |
| >TP53-C275Y RVCACPGRDI | 2312  | >TP53-C275Y RVYACPGRDI  | 125 | 2187  |
| >TP53-C275Y RVCACPGR   | 367   | >TP53-C275Y RVYACPGR    | 107 | 260   |
| >TP53-C275Y RVCACPGRDI | 435   | >TP53-C275Y RVYACPGRDI  | 129 | 306   |

|                        |       |                        |     |       |
|------------------------|-------|------------------------|-----|-------|
| >TP53-C275Y RVCACPGR   | 40    | >TP53-C275Y RVYACPGR   | 20  | 20    |
| >TP53-C275Y RVCACPGRDI | 37    | >TP53-C275Y RVYACPGRDI | 29  | 8     |
| >TP53-C275Y RVCACPGRDI | 33    | >TP53-C275Y RVYACPGRDI | 16  | 17    |
| >TP53-C275Y RVCACPGR   | 481   | >TP53-C275Y RVYACPGR   | 142 | 339   |
| >TP53-C275Y RVCACPGRDI | 1118  | >TP53-C275Y RVYACPGRDI | 124 | 994   |
| >TP53-C275Y RVCACPGRDI | 584   | >TP53-C275Y RVYACPGRDI | 224 | 360   |
| >TP53-C275Y RVCACPGRDI | 297   | >TP53-C275Y RVYACPGRDI | 266 | 31    |
| >TP53-C275Y RVCACPGR   | 66    | >TP53-C275Y RVYACPGR   | 40  | 26    |
| >TP53-C275Y RVCACPGRDI | 255   | >TP53-C275Y RVYACPGRDI | 101 | 154   |
| >TP53-C275Y RVCACPGRDI | 109   | >TP53-C275Y RVYACPGRDI | 55  | 54    |
| >TP53-C275Y EVRVCACPGF | 329   | >TP53-C275Y EVRVYACPGF | 697 | 368   |
| >TP53-C275Y EVRVCACPGF | 70    | >TP53-C275Y EVRVYACPGF | 86  | 16    |
| >TP53-C275Y FEVRVCAC   | 822   | >TP53-C275Y FEVRVYAC   | 413 | 409   |
| >TP53-C275Y FEVRVCACPG | 370   | >TP53-C275Y FEVRVYACPG | 343 | 27    |
| >TP53-C275Y NSFVVRVC   | 31829 | >TP53-C275Y NSFVVRVY   | 343 | 31486 |
| >TP53-C275Y NSFVVRVC   | 18452 | >TP53-C275Y NSFVVRVY   | 256 | 18196 |
| >TP53-C275Y NSFVVRVCA  | 21    | >TP53-C275Y NSFVVRVYA  | 7   | 14    |
| >TP53-C275Y NSFVVRVCA  | 5395  | >TP53-C275Y NSFVVRVYA  | 426 | 4969  |
| >TP53-C275Y NSFVVRVC   | 18692 | >TP53-C275Y NSFVVRVY   | 249 | 18443 |
| >TP53-C275Y NSFVVRVC   | 13511 | >TP53-C275Y NSFVVRVY   | 209 | 13302 |
| >TP53-C275Y NSFVVRVC   | 21401 | >TP53-C275Y NSFVVRVY   | 135 | 21266 |
| >TP53-C275Y NSFVVRVC   | 16298 | >TP53-C275Y NSFVVRVY   | 376 | 15922 |
| >TP53-C275Y NSFVVRVC   | 20966 | >TP53-C275Y NSFVVRVY   | 487 | 20479 |
| >TP53-C275Y NSFVVRVC   | 33230 | >TP53-C275Y NSFVVRVY   | 132 | 33098 |
| >TP53-C275Y RNSFVVRVC  | 19004 | >TP53-C275Y RNSFVVRVY  | 448 | 18556 |
| >TP53-C275Y GRNSFVVRVC | 7228  | >TP53-C275Y GRNSFVVRVY | 173 | 7055  |
| >TP53-C275Y GRNSFVVRVC | 3082  | >TP53-C275Y GRNSFVVRVY | 58  | 3024  |
| >TP53-C277F RNSFVVRVCA | 16250 | >TP53-C277F RNSFVVRVCA | 208 | 16042 |
| >TP53-C277F RNSFVVRVCA | 12870 | >TP53-C277F RNSFVVRVCA | 48  | 12822 |
| >TP53-C277F CACPGRDRR  | 921   | >TP53-C277F CAFPGDRR   | 185 | 736   |
| >TP53-C277F CACPGRDRR  | 545   | >TP53-C277F CAFPGDRR   | 286 | 259   |
| >TP53-C277F CACPGRDR   | 824   | >TP53-C277F CAFPGDR    | 111 | 713   |
| >TP53-C277F CACPGRDRR  | 132   | >TP53-C277F CAFPGDRR   | 24  | 108   |
| >TP53-C277F RVCACPGR   | 367   | >TP53-C277F RVCAFPGR   | 77  | 290   |
| >TP53-C277F RVCACPGRDI | 435   | >TP53-C277F RVCAFPGRDI | 167 | 268   |
| >TP53-C277F RVCACPGR   | 1754  | >TP53-C277F RVCAFPGR   | 442 | 1312  |
| >TP53-C277F RVCACPGR   | 40    | >TP53-C277F RVCAFPGR   | 17  | 23    |
| >TP53-C277F RVCACPGRDI | 37    | >TP53-C277F RVCAFPGRDI | 30  | 7     |
| >TP53-C277F RVCACPGRDI | 33    | >TP53-C277F RVCAFPGRDI | 23  | 10    |
| >TP53-C277F RVCACPGR   | 481   | >TP53-C277F RVCAFPGR   | 198 | 283   |
| >TP53-C277F RVCACPGRDI | 584   | >TP53-C277F RVCAFPGRDI | 232 | 352   |
| >TP53-C277F RVCACPGRDI | 297   | >TP53-C277F RVCAFPGRDI | 174 | 123   |
| >TP53-C277F RVCACPGR   | 66    | >TP53-C277F RVCAFPGR   | 40  | 26    |

|                        |       |                        |      |       |
|------------------------|-------|------------------------|------|-------|
| >TP53-C277F RVCACPGRDI | 255   | >TP53-C277F RVCAFPGRDI | 274  | 19    |
| >TP53-C277F RVCACPGRDI | 109   | >TP53-C277F RVCAFPGRDI | 102  | 7     |
| >TP53-C277F VRVCACPGR  | 2911  | >TP53-C277F VRVCAFPGR  | 291  | 2620  |
| >TP53-C277F VRVCACPGR  | 2940  | >TP53-C277F VRVCAFPGR  | 485  | 2455  |
| >TP53-C277F EVRVCACPGF | 673   | >TP53-C277F EVRVCAFPGF | 193  | 480   |
| >TP53-C277F EVRVCACPGF | 329   | >TP53-C277F EVRVCAFPGF | 196  | 133   |
| >TP53-C277F EVRVCACPGF | 70    | >TP53-C277F EVRVCAFPGF | 59   | 11    |
| >TP53-C277F EVRVCACPGF | 744   | >TP53-C277F EVRVCAFPGF | 408  | 336   |
| >TP53-C277F FEVRVCAC   | 822   | >TP53-C277F FEVRVCAF   | 373  | 449   |
| >TP53-C277F FEVRVCACP  | 1437  | >TP53-C277F FEVRVCAFP  | 204  | 1233  |
| >TP53-C277F FEVRVCACPC | 370   | >TP53-C277F FEVRVCAFPG | 246  | 124   |
| >TP53-C277F FEVRVCAC   | 17115 | >TP53-C277F FEVRVCAF   | 170  | 16945 |
| >TP53-C277F FEVRVCAC   | 6972  | >TP53-C277F FEVRVCAF   | 25   | 6947  |
| >TP53-C277F FEVRVCAC   | 4455  | >TP53-C277F FEVRVCAF   | 29   | 4426  |
| >TP53-C277F FEVRVCAC   | 1153  | >TP53-C277F FEVRVCAF   | 148  | 1005  |
| >TP53-C277F FEVRVCACPC | 1958  | >TP53-C277F FEVRVCAFPG | 360  | 1598  |
| >TP53-C277F FEVRVCAC   | 1213  | >TP53-C277F FEVRVCAF   | 267  | 946   |
| >TP53-C277F FEVRVCACPC | 3346  | >TP53-C277F FEVRVCAFPG | 294  | 3052  |
| >TP53-C277F FEVRVCAC   | 6554  | >TP53-C277F FEVRVCAF   | 454  | 6100  |
| >TP53-C277F FEVRVCAC   | 6593  | >TP53-C277F FEVRVCAF   | 166  | 6427  |
| >TP53-C277F SFEVRVCAC  | 21113 | >TP53-C277F SFEVRVCAF  | 246  | 20867 |
| >TP53-C277F NSFVVRVCAC | 8736  | >TP53-C277F NSFVVRVCAF | 151  | 8585  |
| >TP53-C277F NSFVVRVCAC | 15895 | >TP53-C277F NSFVVRVCAF | 161  | 15734 |
| >TP53-C277F NSFVVRVCAC | 8140  | >TP53-C277F NSFVVRVCAF | 22   | 8118  |
| >TP53-C277F NSFVVRVCAC | 18693 | >TP53-C277F NSFVVRVCAF | 76   | 18617 |
| >TP53-C277C ACPGRDRRT  | 17822 | >TP53-C277C AGPGRDRRT  | 284  | 17538 |
| >TP53-C277C ACPGRDRRTI | 13383 | >TP53-C277C AGPGRDRRTI | 411  | 12972 |
| >TP53-C277C ACPGRDRRTI | 18029 | >TP53-C277C AGPGRDRRTI | 354  | 17675 |
| >TP53-C277C CACPGRDRR  | 132   | >TP53-C277C CAGPGRDRR  | 490  | 358   |
| >TP53-C277C RVCACPGR   | 367   | >TP53-C277C RVCAGPGR   | 434  | 67    |
| >TP53-C277C RVCACPGRDI | 435   | >TP53-C277C RVCAGPGRD  | 601  | 166   |
| >TP53-C277C RVCACPGR   | 40    | >TP53-C277C RVCAGPGR   | 46   | 6     |
| >TP53-C277C RVCACPGRDI | 37    | >TP53-C277C RVCAGPGRD  | 137  | 100   |
| >TP53-C277C RVCACPGRDI | 33    | >TP53-C277C RVCAGPGRD  | 42   | 9     |
| >TP53-C277C RVCACPGR   | 481   | >TP53-C277C RVCAGPGR   | 839  | 358   |
| >TP53-C277C RVCACPGRDI | 297   | >TP53-C277C RVCAGPGRD  | 564  | 267   |
| >TP53-C277C RVCACPGR   | 66    | >TP53-C277C RVCAGPGR   | 220  | 154   |
| >TP53-C277C RVCACPGRDI | 255   | >TP53-C277C RVCAGPGRD  | 1268 | 1013  |
| >TP53-C277C RVCACPGRDI | 109   | >TP53-C277C RVCAGPGRD  | 432  | 323   |
| >TP53-C277C EVRVCACPGF | 329   | >TP53-C277C EVRVACPGI  | 570  | 241   |
| >TP53-C277C EVRVCACPGF | 70    | >TP53-C277C EVRVACPGI  | 67   | 3     |
| >TP53-C277C FEVRVCACPC | 370   | >TP53-C277C FEVRVACPGC | 593  | 223   |
| >TP53-C277F RNSFEVRVCA | 36122 | >TP53-C277F RNSFEVRVCA | 397  | 35725 |



|                        |       |                        |     |       |
|------------------------|-------|------------------------|-----|-------|
| >TP53-C277F CACPGRDRR  | 921   | >TP53-C277F CARPGRDRR  | 486 | 435   |
| >TP53-C277F CACPGRDRR  | 545   | >TP53-C277F CARPGRDRR  | 454 | 91    |
| >TP53-C277F CACPGRDRR  | 132   | >TP53-C277F CARPGRDRR  | 653 | 521   |
| >TP53-C277F RVCACPGR   | 367   | >TP53-C277F RVCARPGR   | 284 | 83    |
| >TP53-C277F RVCACPGRDI | 435   | >TP53-C277F RVCARPGRDI | 453 | 18    |
| >TP53-C277F RVCACPGR   | 1754  | >TP53-C277F RVCARPGR   | 329 | 1425  |
| >TP53-C277F RVCACPGR   | 40    | >TP53-C277F RVCARPGR   | 17  | 23    |
| >TP53-C277F RVCACPGRDI | 37    | >TP53-C277F RVCARPGRDI | 44  | 7     |
| >TP53-C277F RVCACPGRDI | 33    | >TP53-C277F RVCARPGRDI | 22  | 11    |
| >TP53-C277F RVCACPGR   | 481   | >TP53-C277F RVCARPGR   | 463 | 18    |
| >TP53-C277F RVCACPGRDI | 297   | >TP53-C277F RVCARPGRDI | 453 | 156   |
| >TP53-C277F RVCACPGR   | 66    | >TP53-C277F RVCARPGR   | 97  | 31    |
| >TP53-C277F RVCACPGRDI | 255   | >TP53-C277F RVCARPGRDI | 771 | 516   |
| >TP53-C277F RVCACPGRDI | 109   | >TP53-C277F RVCARPGRDI | 228 | 119   |
| >TP53-C277F VRVCACPGR  | 2911  | >TP53-C277F VRVCARPGR  | 336 | 2575  |
| >TP53-C277F EVRVCACPGF | 673   | >TP53-C277F EVRVCARPGF | 170 | 503   |
| >TP53-C277F EVRVCACPGF | 329   | >TP53-C277F EVRVCARPGF | 465 | 136   |
| >TP53-C277F EVRVCACPGF | 70    | >TP53-C277F EVRVCARPGF | 111 | 41    |
| >TP53-C277F FEVRVCACPC | 370   | >TP53-C277F FEVRVCARPC | 340 | 30    |
| >TP53-C277F SFEVRVCAC  | 21166 | >TP53-C277F SFEVRVCAR  | 37  | 21129 |
| >TP53-C277F SFEVRVCAC  | 36216 | >TP53-C277F SFEVRVCAR  | 105 | 36111 |
| >TP53-C277F SFEVRVCAC  | 36632 | >TP53-C277F SFEVRVCAR  | 196 | 36436 |
| >TP53-C277F NSFVRVCAC  | 22433 | >TP53-C277F NSFVRVCAR  | 49  | 22384 |
| >TP53-C277F NSFVRVCAC  | 20343 | >TP53-C277F NSFVRVCAR  | 106 | 20237 |
| >TP53-C277F NSFVRVCAC  | 30085 | >TP53-C277F NSFVRVCAR  | 8   | 30077 |
| >TP53-C277S CACPGRDR   | 824   | >TP53-C277S CASPGRDR   | 415 | 409   |
| >TP53-C277S CACPGRDRR  | 132   | >TP53-C277S CASPGRDRR  | 75  | 57    |
| >TP53-C277S RVCACPGR   | 367   | >TP53-C277S RVCASPGR   | 170 | 197   |
| >TP53-C277S RVCACPGRDI | 435   | >TP53-C277S RVCASPGRDI | 289 | 146   |
| >TP53-C277S RVCACPGR   | 1754  | >TP53-C277S RVCASPGR   | 308 | 1446  |
| >TP53-C277S RVCACPGR   | 40    | >TP53-C277S RVCASPGR   | 35  | 5     |
| >TP53-C277S RVCACPGRDI | 37    | >TP53-C277S RVCASPGRDI | 84  | 47    |
| >TP53-C277S RVCACPGRDI | 33    | >TP53-C277S RVCASPGRDI | 33  | 0     |
| >TP53-C277S RVCACPGR   | 481   | >TP53-C277S RVCASPGR   | 303 | 178   |
| >TP53-C277S RVCACPGRDI | 584   | >TP53-C277S RVCASPGRDI | 356 | 228   |
| >TP53-C277S RVCACPGRDI | 297   | >TP53-C277S RVCASPGRDI | 279 | 18    |
| >TP53-C277S RVCACPGR   | 66    | >TP53-C277S RVCASPGR   | 121 | 55    |
| >TP53-C277S RVCACPGRDI | 255   | >TP53-C277S RVCASPGRDI | 956 | 701   |
| >TP53-C277S RVCACPGRDI | 109   | >TP53-C277S RVCASPGRDI | 311 | 202   |
| >TP53-C277S EVRVCACPGF | 329   | >TP53-C277S EVRVCASPGF | 638 | 309   |
| >TP53-C277S EVRVCACPGF | 70    | >TP53-C277S EVRVCASPGF | 43  | 27    |
| >TP53-C277S FEVRVCACPC | 370   | >TP53-C277S FEVRVCASPG | 400 | 30    |
| >TP53-C277S FEVRVCACPC | 1958  | >TP53-C277S FEVRVCASPG | 369 | 1589  |

|                        |       |                         |     |       |
|------------------------|-------|-------------------------|-----|-------|
| >TP53-C277VACPGRDRR    | 5852  | >TP53-C277V AWPGRDRR    | 83  | 5769  |
| >TP53-C277V RNSFEVRVCA | 22509 | >TP53-C277V RNSFEVRVCA  | 284 | 22225 |
| >TP53-C277V CACPGRDRR  | 921   | >TP53-C277V CAWPGRDRR   | 145 | 776   |
| >TP53-C277V CACPGRDRR  | 545   | >TP53-C277V CAWPGRDRR   | 329 | 216   |
| >TP53-C277V CACPGRDRR  | 132   | >TP53-C277V CAWPGRDRR   | 256 | 124   |
| >TP53-C277V RVCACPGR   | 367   | >TP53-C277V RVC AWPGR   | 179 | 188   |
| >TP53-C277V RVCACPGRDI | 435   | >TP53-C277V RVC AWPGR   | 243 | 192   |
| >TP53-C277V RVCACPGR   | 40    | >TP53-C277V RVC AWPGR   | 20  | 20    |
| >TP53-C277V RVCACPGRDI | 37    | >TP53-C277V RVC AWPGR   | 34  | 3     |
| >TP53-C277V RVCACPGRDI | 33    | >TP53-C277V RVC AWPGR   | 22  | 11    |
| >TP53-C277V RVCACPGR   | 481   | >TP53-C277V RVC AWPGR   | 601 | 120   |
| >TP53-C277V RVCACPGRDI | 297   | >TP53-C277V RVC AWPGR   | 191 | 106   |
| >TP53-C277V RVCACPGR   | 66    | >TP53-C277V RVC AWPGR   | 73  | 7     |
| >TP53-C277V RVCACPGRDI | 255   | >TP53-C277V RVC AWPGR   | 430 | 175   |
| >TP53-C277V RVCACPGRDI | 109   | >TP53-C277V RVC AWPGR   | 161 | 52    |
| >TP53-C277V VRVCACPGR  | 2911  | >TP53-C277V VRVCAWPGR   | 285 | 2626  |
| >TP53-C277V EVRVCACPGF | 673   | >TP53-C277V EVRVC AWPGR | 332 | 341   |
| >TP53-C277V EVRVCACPGF | 329   | >TP53-C277V EVRVC AWPGR | 884 | 555   |
| >TP53-C277V EVRVCACPGF | 70    | >TP53-C277V EVRVC AWPGR | 72  | 2     |
| >TP53-C277V EVRVCACPGF | 744   | >TP53-C277V EVRVC AWPGR | 403 | 341   |
| >TP53-C277V FEVRVCACPC | 370   | >TP53-C277V FEVRVCAWP   | 373 | 3     |
| >TP53-C277V FEVRVCAC   | 4455  | >TP53-C277V FEVRVCAW    | 162 | 4293  |
| >TP53-C277V FEVRVCACPC | 1958  | >TP53-C277V FEVRVCAWP   | 286 | 1672  |
| >TP53-C277V FEVRVCACPC | 3346  | >TP53-C277V FEVRVCAWP   | 419 | 2927  |
| >TP53-C277V FEVRVCAC   | 6554  | >TP53-C277V FEVRVCAW    | 97  | 6457  |
| >TP53-C277V FEVRVCAC   | 6593  | >TP53-C277V FEVRVCAW    | 56  | 6537  |
| >TP53-C277V FEVRVCAC   | 18613 | >TP53-C277V FEVRVCAW    | 33  | 18580 |
| >TP53-C277V NSFEVRVCAC | 8736  | >TP53-C277V NSFEVRVCAV  | 466 | 8270  |
| >TP53-C277V NSFEVRVCAC | 18693 | >TP53-C277V NSFEVRVCAV  | 64  | 18629 |
| >TP53-C277V NSFEVRVCAC | 23445 | >TP53-C277V NSFEVRVCAV  | 148 | 23297 |
| >TP53-C277V NSFEVRVCAC | 20734 | >TP53-C277V NSFEVRVCAV  | 45  | 20689 |
| >TP53-C277V NSFEVRVCAC | 28813 | >TP53-C277V NSFEVRVCAV  | 271 | 28542 |
| >TP53-C277YACPGRDRR    | 5852  | >TP53-C277Y AYPGRDRR    | 248 | 5604  |
| >TP53-C277Y RNSFEVRVCA | 16250 | >TP53-C277Y RNSFEVRVCA  | 190 | 16060 |
| >TP53-C277Y RNSFEVRVCA | 12870 | >TP53-C277Y RNSFEVRVCA  | 229 | 12641 |
| >TP53-C277Y CACPGRDRR  | 921   | >TP53-C277Y CAYPGRDRR   | 262 | 659   |
| >TP53-C277Y CACPGRDRR  | 545   | >TP53-C277Y CAYPGRDRR   | 449 | 96    |
| >TP53-C277Y CACPGRDR   | 824   | >TP53-C277Y CAYPGRDR    | 182 | 642   |
| >TP53-C277Y CACPGRDRR  | 132   | >TP53-C277Y CAYPGRDRR   | 39  | 93    |
| >TP53-C277Y RVCACPGR   | 367   | >TP53-C277Y RVCAYPGR    | 170 | 197   |
| >TP53-C277Y RVCACPGRDI | 435   | >TP53-C277Y RVCAYPGRDI  | 299 | 136   |
| >TP53-C277Y RVCACPGR   | 1754  | >TP53-C277Y RVCAYPGR    | 423 | 1331  |
| >TP53-C277Y RVCACPGR   | 40    | >TP53-C277Y RVCAYPGR    | 18  | 22    |

|                        |       |                        |      |       |
|------------------------|-------|------------------------|------|-------|
| >TP53-C277Y RVCACPGRDI | 37    | >TP53-C277Y RVCAYPGRDI | 46   | 9     |
| >TP53-C277Y RVCACPGRDI | 33    | >TP53-C277Y RVCAYPGRDI | 22   | 11    |
| >TP53-C277Y RVCACPGR   | 481   | >TP53-C277Y RVCAYPGR   | 374  | 107   |
| >TP53-C277Y RVCACPGRDI | 584   | >TP53-C277Y RVCAYPGRDI | 379  | 205   |
| >TP53-C277Y RVCACPGRDI | 297   | >TP53-C277Y RVCAYPGRDI | 288  | 9     |
| >TP53-C277Y RVCACPGR   | 66    | >TP53-C277Y RVCAYPGR   | 91   | 25    |
| >TP53-C277Y RVCACPGRDI | 255   | >TP53-C277Y RVCAYPGRDI | 614  | 359   |
| >TP53-C277Y RVCACPGRDI | 109   | >TP53-C277Y RVCAYPGRDI | 193  | 84    |
| >TP53-C277Y VRVCACPGR  | 2911  | >TP53-C277Y VRVCAYPGR  | 493  | 2418  |
| >TP53-C277Y EVRVCACPGF | 673   | >TP53-C277Y EVRVCAYPGF | 294  | 379   |
| >TP53-C277Y EVRVCACPGF | 329   | >TP53-C277Y EVRVCAYPGF | 274  | 55    |
| >TP53-C277Y EVRVCACPGF | 70    | >TP53-C277Y EVRVCAYPGF | 63   | 7     |
| >TP53-C277Y EVRVCACPGF | 744   | >TP53-C277Y EVRVCAYPGF | 388  | 356   |
| >TP53-C277Y FEVRVCACPG | 370   | >TP53-C277Y FEVRVCAYPG | 291  | 79    |
| >TP53-C277Y FEVRVCAC   | 17115 | >TP53-C277Y FEVRVCAY   | 144  | 16971 |
| >TP53-C277Y FEVRVCAC   | 6972  | >TP53-C277Y FEVRVCAY   | 79   | 6893  |
| >TP53-C277Y FEVRVCAC   | 4455  | >TP53-C277Y FEVRVCAY   | 30   | 4425  |
| >TP53-C277Y FEVRVCACPG | 1958  | >TP53-C277Y FEVRVCAYPG | 445  | 1513  |
| >TP53-C277Y FEVRVCACPG | 3346  | >TP53-C277Y FEVRVCAYPG | 439  | 2907  |
| >TP53-C277Y FEVRVCAC   | 6554  | >TP53-C277Y FEVRVCAY   | 461  | 6093  |
| >TP53-C277Y FEVRVCAC   | 6593  | >TP53-C277Y FEVRVCAY   | 200  | 6393  |
| >TP53-C277Y SFEVRVCAC  | 39358 | >TP53-C277Y SFEVRVCAY  | 309  | 39049 |
| >TP53-C277Y NSFVRVCAC  | 26277 | >TP53-C277Y NSFVRVCAY  | 107  | 26170 |
| >TP53-C277Y NSFVRVCAC  | 24086 | >TP53-C277Y NSFVRVCAY  | 54   | 24032 |
| >TP53-C277Y NSFVRVCAC  | 30085 | >TP53-C277Y NSFVRVCAY  | 233  | 29852 |
| >TP53-C277Y NSFVRVCAC  | 15895 | >TP53-C277Y NSFVRVCAY  | 139  | 15756 |
| >TP53-C277Y NSFVRVCAC  | 8140  | >TP53-C277Y NSFVRVCAY  | 70   | 8070  |
| >TP53-C277Y NSFVRVCAC  | 18693 | >TP53-C277Y NSFVRVCAY  | 108  | 18585 |
| >TP53-C277Y NSFVRVCAC  | 31595 | >TP53-C277Y NSFVRVCAY  | 162  | 31433 |
| >TP53-D148E DSTPPPGTR  | 203   | >TP53-D148E ESTPPPGTR  | 626  | 423   |
| >TP53-D148E DSTPPPGTRV | 372   | >TP53-D148E ESTPPPGTRV | 1111 | 739   |
| >TP53-D148E DSTPPPGTR  | 161   | >TP53-D148E ESTPPPGTR  | 41   | 120   |
| >TP53-D148E DSTPPPGTRV | 208   | >TP53-D148E ESTPPPGTRV | 51   | 157   |
| >TP53-D148E DSTPPPGTRV | 866   | >TP53-D148E ESTPPPGTRV | 177  | 689   |
| >TP53-D148E DSTPPPGTRV | 1466  | >TP53-D148E ESTPPPGTRV | 234  | 1232  |
| >TP53-D148E VDSTPPPGT  | 17500 | >TP53-D148E VESTPPPGT  | 448  | 17052 |
| >TP53-D148E VDSTPPPGTR | 5396  | >TP53-D148E VESTPPPGTR | 73   | 5323  |
| >TP53-D148E WVDSTPPPG  | 489   | >TP53-D148E WVESTPPPG  | 4065 | 3576  |
| >TP53-D148E LWVDSTPP   | 386   | >TP53-D148E LWVESTPP   | 369  | 17    |
| >TP53-D148E LWVDSTPPP  | 467   | >TP53-D148E LWVESTPPP  | 469  | 2     |
| >TP53-D148E LWVDSTPPPC | 485   | >TP53-D148E LWVESTPPPC | 503  | 18    |
| >TP53-D148E VQLWVDST   | 120   | >TP53-D148E VQLWVEST   | 130  | 10    |
| >TP53-D148E VQLWVDST   | 835   | >TP53-D148E VQLWVEST   | 441  | 394   |

|                        |       |                        |      |       |
|------------------------|-------|------------------------|------|-------|
| >TP53-D148E CPVQLWVDS  | 841   | >TP53-D148E CPVQLWVES  | 150  | 691   |
| >TP53-D148E CPVQLWVDS  | 675   | >TP53-D148E CPVQLWVES  | 234  | 441   |
| >TP53-D148E CPVQLWVDS  | 635   | >TP53-D148E CPVQLWVES  | 443  | 192   |
| >TP53-D148F DSTPPPGTR  | 203   | >TP53-D148F NSTPPPGTR  | 1197 | 994   |
| >TP53-D148F DSTPPPGTRV | 372   | >TP53-D148F NSTPPPGTRV | 1918 | 1546  |
| >TP53-D148F DSTPPPGTR  | 161   | >TP53-D148F NSTPPPGTR  | 196  | 35    |
| >TP53-D148F DSTPPPGTRV | 208   | >TP53-D148F NSTPPPGTRV | 254  | 46    |
| >TP53-D148F DSTPPPGTRV | 866   | >TP53-D148F NSTPPPGTRV | 446  | 420   |
| >TP53-D148F WVDSTPPPG  | 1217  | >TP53-D148F WVNSTPPPG  | 220  | 997   |
| >TP53-D148F WVDSTPPPG  | 489   | >TP53-D148F WVNSTPPPG  | 964  | 475   |
| >TP53-D148F LWVDSTPP   | 386   | >TP53-D148F LWVNSTPP   | 392  | 6     |
| >TP53-D148F LWVDSTPPP  | 467   | >TP53-D148F LWVNSTPPP  | 541  | 74    |
| >TP53-D148F LWVDSTPPPC | 485   | >TP53-D148F LWVNSTPPPC | 559  | 74    |
| >TP53-D148F VQLWVDST   | 120   | >TP53-D148F VQLWVNST   | 93   | 27    |
| >TP53-D148F CPVQLWVDS  | 675   | >TP53-D148F CPVQLWVNS  | 353  | 322   |
| >TP53-D148F CPVQLWVDS  | 635   | >TP53-D148F CPVQLWVNS  | 477  | 158   |
| >TP53-D148\ DSTPPPGTR  | 203   | >TP53-D148\ VSTPPPGTR  | 4200 | 3997  |
| >TP53-D148\ DSTPPPGTRV | 372   | >TP53-D148\ VSTPPPGTRV | 6020 | 5648  |
| >TP53-D148\ DSTPPPGTR  | 161   | >TP53-D148\ VSTPPPGTR  | 1068 | 907   |
| >TP53-D148\ DSTPPPGTRV | 208   | >TP53-D148\ VSTPPPGTRV | 1392 | 1184  |
| >TP53-D148\ DSTPPPGTRV | 6868  | >TP53-D148\ VSTPPPGTRV | 101  | 6767  |
| >TP53-D148\ DSTPPPGTRV | 14425 | >TP53-D148\ VSTPPPGTRV | 483  | 13942 |
| >TP53-D148\ VDSTPPPGTR | 17836 | >TP53-D148\ VVSTPPPGTR | 275  | 17561 |
| >TP53-D148\ VDSTPPPGTR | 13045 | >TP53-D148\ VVSTPPPGTR | 116  | 12929 |
| >TP53-D148\ VDSTPPPGTR | 16035 | >TP53-D148\ VVSTPPPGTR | 23   | 16012 |
| >TP53-D148\ VDSTPPPGTR | 23226 | >TP53-D148\ VVSTPPPGTR | 340  | 22886 |
| >TP53-D148\ VDSTPPPGTR | 18375 | >TP53-D148\ VVSTPPPGTR | 282  | 18093 |
| >TP53-D148\ AKTCPVQLW  | 8292  | >TP53-D148\ AKTCPVQLW  | 125  | 8167  |
| >TP53-D148\ WVDSTPPPG  | 1217  | >TP53-D148\ WVVSTPPPG  | 119  | 1098  |
| >TP53-D148\ WVDSTPPPG  | 489   | >TP53-D148\ WVVSTPPPG  | 647  | 158   |
| >TP53-D148\ LWVDSTPP   | 386   | >TP53-D148\ LWVVSTPP   | 372  | 14    |
| >TP53-D148\ LWVDSTPPP  | 467   | >TP53-D148\ LWVVSTPPP  | 538  | 71    |
| >TP53-D148\ LWVDSTPPPC | 485   | >TP53-D148\ LWVVSTPPPC | 584  | 99    |
| >TP53-D148\ VQLWVDST   | 120   | >TP53-D148\ VQLWVVST   | 66   | 54    |
| >TP53-D148\ VQLWVDST   | 835   | >TP53-D148\ VQLWVVST   | 189  | 646   |
| >TP53-D148\ CPVQLWVDS  | 841   | >TP53-D148\ CPVQLWVVS  | 159  | 682   |
| >TP53-D148\ CPVQLWVD   | 17939 | >TP53-D148\ CPVQLWVV   | 470  | 17469 |
| >TP53-D148\ CPVQLWVD   | 7060  | >TP53-D148\ CPVQLWVV   | 261  | 6799  |
| >TP53-D148\ CPVQLWVD   | 706   | >TP53-D148\ CPVQLWVV   | 29   | 677   |
| >TP53-D148\ CPVQLWVDS  | 675   | >TP53-D148\ CPVQLWVVS  | 123  | 552   |
| >TP53-D148\ CPVQLWVDS  | 635   | >TP53-D148\ CPVQLWVVS  | 346  | 289   |
| >TP53-D148\ KTCPVQLWV  | 23665 | >TP53-D148\ KTCPVQLWV  | 191  | 23474 |
| >TP53-D148\ KTCPVQLWV  | 15215 | >TP53-D148\ KTCPVQLWV  | 58   | 15157 |

|                       |       |                       |      |       |
|-----------------------|-------|-----------------------|------|-------|
| >TP53-D148\KTCPVQLWV  | 21264 | >TP53-D148\KTCPVQLWV  | 23   | 21241 |
| >TP53-D148\KTCPVQLWV  | 24836 | >TP53-D148\KTCPVQLWV  | 162  | 24674 |
| >TP53-D148\KTCPVQLWV  | 34972 | >TP53-D148\KTCPVQLWV  | 120  | 34852 |
| >TP53-D148\KTCPVQLWV  | 4368  | >TP53-D148\KTCPVQLWV  | 384  | 3984  |
| >TP53-D148\KTCPVQLWV  | 7844  | >TP53-D148\KTCPVQLWV  | 182  | 7662  |
| >TP53-D148\KTCPVQLWV  | 5045  | >TP53-D148\KTCPVQLWV  | 318  | 4727  |
| >TP53-D148\DSTPPPGTRV | 18500 | >TP53-D148\YSTPPPGTRV | 430  | 18070 |
| >TP53-D148\DSTPPPGTRV | 17587 | >TP53-D148\YSTPPPGTRV | 421  | 17166 |
| >TP53-D148\DSTPPPGTR  | 203   | >TP53-D148\YSTPPPGTR  | 1594 | 1391  |
| >TP53-D148\DSTPPPGTRV | 372   | >TP53-D148\YSTPPPGTRV | 2525 | 2153  |
| >TP53-D148\DSTPPPGTR  | 161   | >TP53-D148\YSTPPPGTR  | 96   | 65    |
| >TP53-D148\DSTPPPGTRV | 208   | >TP53-D148\YSTPPPGTRV | 129  | 79    |
| >TP53-D148\DSTPPPGTRV | 866   | >TP53-D148\YSTPPPGTRV | 306  | 560   |
| >TP53-D148\DSTPPPGTRV | 6868  | >TP53-D148\YSTPPPGTRV | 54   | 6814  |
| >TP53-D148\DSTPPPGTRV | 14425 | >TP53-D148\YSTPPPGTRV | 157  | 14268 |
| >TP53-D148\DSTPPPGTRV | 3923  | >TP53-D148\YSTPPPGTRV | 269  | 3654  |
| >TP53-D148\DSTPPPGTRV | 4239  | >TP53-D148\YSTPPPGTRV | 322  | 3917  |
| >TP53-D148\VDSTPPPGTR | 14919 | >TP53-D148\VYSTPPPGTR | 168  | 14751 |
| >TP53-D148\AKTCPVQLW  | 8292  | >TP53-D148\AKTCPVQLW  | 13   | 8279  |
| >TP53-D148\WVDSTPPPG  | 3163  | >TP53-D148\WVYSTPPPG  | 241  | 2922  |
| >TP53-D148\WVDSTPPPG  | 1880  | >TP53-D148\WVYSTPPPG  | 324  | 1556  |
| >TP53-D148\WVDSTPPPG  | 1217  | >TP53-D148\WVYSTPPPG  | 59   | 1158  |
| >TP53-D148\WVDSTPPPG  | 489   | >TP53-D148\WVYSTPPPG  | 141  | 348   |
| >TP53-D148\WVDSTPPPG  | 4740  | >TP53-D148\WVYSTPPPG  | 358  | 4382  |
| >TP53-D148\LWVDSTPP   | 386   | >TP53-D148\LWVYSTPP   | 287  | 99    |
| >TP53-D148\LWVDSTPPP  | 467   | >TP53-D148\LWVYSTPPP  | 436  | 31    |
| >TP53-D148\LWVDSTPPPC | 485   | >TP53-D148\LWVYSTPPPC | 482  | 3     |
| >TP53-D148\VQLWVDST   | 120   | >TP53-D148\VQLWVYST   | 55   | 65    |
| >TP53-D148\VQLWVDST   | 835   | >TP53-D148\VQLWVYST   | 172  | 663   |
| >TP53-D148\CPVQLWVD   | 3557  | >TP53-D148\CPVQLWVY   | 10   | 3547  |
| >TP53-D148\CPVQLWVD   | 7060  | >TP53-D148\CPVQLWVY   | 34   | 7026  |
| >TP53-D148\CPVQLWVDS  | 675   | >TP53-D148\CPVQLWVYS  | 236  | 439   |
| >TP53-D148\CPVQLWVDS  | 1843  | >TP53-D148\CPVQLWVYS  | 495  | 1348  |
| >TP53-D148\CPVQLWVDS  | 635   | >TP53-D148\CPVQLWVYS  | 258  | 377   |
| >TP53-D148\CPVQLWVD   | 17106 | >TP53-D148\CPVQLWVY   | 16   | 17090 |
| >TP53-D148\CPVQLWVD   | 17983 | >TP53-D148\CPVQLWVY   | 161  | 17822 |
| >TP53-D148\TCPVQLWVD  | 25469 | >TP53-D148\TCPVQLWVY  | 252  | 25217 |
| >TP53-D148\KTCPVQLWV  | 20199 | >TP53-D148\KTCPVQLWV  | 296  | 19903 |
| >TP53-D148\KTCPVQLWV  | 30988 | >TP53-D148\KTCPVQLWV  | 458  | 30530 |
| >TP53-D148\KTCPVQLWV  | 29654 | >TP53-D148\KTCPVQLWV  | 240  | 29414 |
| >TP53-D148\KTCPVQLWV  | 31410 | >TP53-D148\KTCPVQLWV  | 387  | 31023 |
| >TP53-D148\KTCPVQLWV  | 2627  | >TP53-D148\KTCPVQLWV  | 277  | 2350  |
| >TP53-D148\KTCPVQLWV  | 27957 | >TP53-D148\KTCPVQLWV  | 254  | 27703 |

|                        |       |                        |       |       |
|------------------------|-------|------------------------|-------|-------|
| >TP53-D148\KTCPVQLWV   | 7297  | >TP53-D148\KTCPVQLWV   | 473   | 6824  |
| >TP53-D148\KTCPVQLWV   | 18203 | >TP53-D148\KTCPVQLWV   | 6     | 18197 |
| >TP53-D148\KTCPVQLWV   | 20869 | >TP53-D148\KTCPVQLWV   | 399   | 20470 |
| >TP53-D148\KTCPVQLWV   | 7844  | >TP53-D148\KTCPVQLWV   | 6     | 7838  |
| >TP53-D148\KTCPVQLWV   | 9218  | >TP53-D148\KTCPVQLWV   | 96    | 9122  |
| >TP53-D148\KTCPVQLWV   | 5045  | >TP53-D148\KTCPVQLWV   | 17    | 5028  |
| >TP53-D148\KTCPVQLWV   | 19588 | >TP53-D148\KTCPVQLWV   | 114   | 19474 |
| >TP53-D184† DSDGLAPPQI | 2681  | >TP53-D184† HSDGLAPPQI | 39    | 2642  |
| >TP53-D184† CSDSDGLA   | 178   | >TP53-D184† CSHSDGLA   | 14178 | 14000 |
| >TP53-D184† HERCSDSDGL | 602   | >TP53-D184† HERCSHSDGL | 224   | 378   |
| >TP53-D184† HERCSDSDGL | 422   | >TP53-D184† HERCSHSDGL | 248   | 174   |
| >TP53-D184† HHERCSDSDC | 126   | >TP53-D184† HHERCSHSDC | 62    | 64    |
| >TP53-D184† CSDSDGLA   | 178   | >TP53-D184† CNSDSDGLA  | 5851  | 5673  |
| >TP53-D184† HERCSDSDGL | 602   | >TP53-D184† HERCSNSDGL | 355   | 247   |
| >TP53-D184† HERCSDSDGL | 422   | >TP53-D184† HERCSNSDGL | 121   | 301   |
| >TP53-D184† HHERCSDSDC | 126   | >TP53-D184† HHERCSNSDC | 76    | 50    |
| >TP53-D184\ DSDGLAPPQI | 2681  | >TP53-D184\ YSDGLAPPQI | 18    | 2663  |
| >TP53-D184\ DSDGLAPPQI | 17678 | >TP53-D184\ YSDGLAPPQI | 426   | 17252 |
| >TP53-D184\ RRCPHHERCS | 8906  | >TP53-D184\ RRCPHHERCS | 59    | 8847  |
| >TP53-D184\ RRCPHHERCS | 3791  | >TP53-D184\ RRCPHHERCS | 230   | 3561  |
| >TP53-D184\ CSDSDGLA   | 178   | >TP53-D184\ CSYSDGLA   | 13378 | 13200 |
| >TP53-D184\ CSDSDGLA   | 6107  | >TP53-D184\ CSYSDGLA   | 456   | 5651  |
| >TP53-D184\ ERCSYSDGL  | 1614  | >TP53-D184\ ERCSYSDGL  | 365   | 1249  |
| >TP53-D184\ HERCSDSDGL | 602   | >TP53-D184\ HERCSYSDGL | 185   | 417   |
| >TP53-D184\ HERCSDSDGL | 422   | >TP53-D184\ HERCSYSDGL | 81    | 341   |
| >TP53-D184\ HHERCSDSDC | 126   | >TP53-D184\ HHERCSYSDC | 49    | 77    |
| >TP53-D184\ CPHHERCSD  | 12255 | >TP53-D184\ CPHHERCSY  | 44    | 12211 |
| >TP53-D184\ CPHHERCSD  | 14427 | >TP53-D184\ CPHHERCSY  | 76    | 14351 |
| >TP53-D186‡ DGLAPPQHII | 1466  | >TP53-D186‡ EGLAPPQHII | 228   | 1238  |
| >TP53-D186‡ DGLAPPQHII | 968   | >TP53-D186‡ EGLAPPQHII | 220   | 748   |
| >TP53-D186‡ SDGLAPPQHI | 507   | >TP53-D186‡ SEGLAPPQHL | 17    | 490   |
| >TP53-D186‡ SDGLAPPQHI | 5430  | >TP53-D186‡ SEGLAPPQHL | 80    | 5350  |
| >TP53-D186‡ SDGLAPPQHI | 1651  | >TP53-D186‡ SEGLAPPQHL | 35    | 1616  |
| >TP53-D186‡ SDGLAPPQHI | 104   | >TP53-D186‡ SEGLAPPQHL | 5018  | 4914  |
| >TP53-D186‡ CSDSDGLA   | 178   | >TP53-D186‡ CSDSEGLA   | 187   | 9     |
| >TP53-D186‡ HERCSDSDGL | 602   | >TP53-D186‡ HERCSDSEGL | 349   | 253   |
| >TP53-D186‡ HERCSDSDGL | 422   | >TP53-D186‡ HERCSDSEGL | 236   | 186   |
| >TP53-D186‡ HHERCSDSDC | 126   | >TP53-D186‡ HHERCSDSEC | 134   | 8     |
| >TP53-D186‡ SDGLAPPQHI | 104   | >TP53-D186‡ SGGLAPPQHI | 11966 | 11862 |
| >TP53-D186‡ CSDSDGLA   | 178   | >TP53-D186‡ CSDSGGLA   | 142   | 36    |
| >TP53-D186‡ HERCSDSDGL | 602   | >TP53-D186‡ HERCSDSGGL | 368   | 234   |
| >TP53-D186‡ HERCSDSDGL | 422   | >TP53-D186‡ HERCSDSGGL | 336   | 86    |
| >TP53-D186‡ HHERCSDSDC | 126   | >TP53-D186‡ HHERCSDSGC | 165   | 39    |

|                        |       |                        |       |       |
|------------------------|-------|------------------------|-------|-------|
| >TP53-D186† DGLAPPQHLI | 968   | >TP53-D186† HGLAPPQHLI | 55    | 913   |
| >TP53-D186† SDGLAPPQHI | 104   | >TP53-D186† SHGLAPPQHI | 15222 | 15118 |
| >TP53-D186† CPHHERCSDS | 8475  | >TP53-D186† CPHHERCSDS | 391   | 8084  |
| >TP53-D186† CSDSDGLA   | 178   | >TP53-D186† CSDSHGLA   | 135   | 43    |
| >TP53-D186† ERCSDSDGL  | 1614  | >TP53-D186† ERCSDSHGL  | 108   | 1506  |
| >TP53-D186† HERCSDSDGL | 1468  | >TP53-D186† HERCSDSHGL | 374   | 1094  |
| >TP53-D186† HERCSDSDGL | 602   | >TP53-D186† HERCSDSHGL | 217   | 385   |
| >TP53-D186† HERCSDSDGL | 422   | >TP53-D186† HERCSDSHGL | 297   | 125   |
| >TP53-D186† HHERCSDSDC | 126   | >TP53-D186† HHERCSDSHC | 32    | 94    |
| >TP53-D186† DGLAPPQHLI | 968   | >TP53-D186† NGLAPPQHLI | 253   | 715   |
| >TP53-D186† SDGLAPPQHI | 104   | >TP53-D186† SGLAPPQHI  | 4928  | 4824  |
| >TP53-D186† CSDSDGLA   | 178   | >TP53-D186† CSDSNGLA   | 98    | 80    |
| >TP53-D186† ERCSDSDGL  | 1614  | >TP53-D186† ERCSDSNGL  | 320   | 1294  |
| >TP53-D186† HERCSDSDGL | 602   | >TP53-D186† HERCSDSNGL | 370   | 232   |
| >TP53-D186† HERCSDSDGL | 422   | >TP53-D186† HERCSDSNGL | 378   | 44    |
| >TP53-D186† HHERCSDSDC | 126   | >TP53-D186† HHERCSDSNC | 51    | 75    |
| >TP53-D186\ DGLAPPQHLI | 968   | >TP53-D186\ VGLAPPQHLI | 391   | 577   |
| >TP53-D186\ SDGLAPPQHI | 104   | >TP53-D186\ SVGLAPPQHI | 18901 | 18797 |
| >TP53-D186\ CPHHERCSDS | 21354 | >TP53-D186\ CPHHERCSDS | 202   | 21152 |
| >TP53-D186\ CPHHERCSDS | 3038  | >TP53-D186\ CPHHERCSDS | 138   | 2900  |
| >TP53-D186\ DSDGLAPPQI | 17635 | >TP53-D186\ DSVGLAPPQI | 92    | 17543 |
| >TP53-D186\ CSDSDGLA   | 178   | >TP53-D186\ CSDSVGLA   | 133   | 45    |
| >TP53-D186\ ERCSDSDGL  | 1614  | >TP53-D186\ ERCSDSVGL  | 173   | 1441  |
| >TP53-D186\ HERCSDSD   | 4473  | >TP53-D186\ HERCSDSV   | 89    | 4384  |
| >TP53-D186\ HERCSDSD   | 3245  | >TP53-D186\ HERCSDSV   | 142   | 3103  |
| >TP53-D186\ HERCSDSDGL | 602   | >TP53-D186\ HERCSDSVGL | 238   | 364   |
| >TP53-D186\ HERCSDSDGL | 422   | >TP53-D186\ HERCSDSVGL | 317   | 105   |
| >TP53-D186\ HERCSDSDGL | 1489  | >TP53-D186\ HERCSDSVGL | 409   | 1080  |
| >TP53-D186\ HHERCSDSD  | 16209 | >TP53-D186\ HHERCSDSV  | 492   | 15717 |
| >TP53-D186\ HHERCSDSDC | 126   | >TP53-D186\ HHERCSDSVC | 38    | 88    |
| >TP53-D207/ DDRNTFRHS\ | 3254  | >TP53-D207/ ADRNTFRHS\ | 375   | 2879  |
| >TP53-D207/ DDRNTFRHS\ | 2836  | >TP53-D207/ ADRNTFRHS\ | 352   | 2484  |
| >TP53-D207/ LDDRNTFRHS | 9652  | >TP53-D207/ LADRNTFRHS | 317   | 9335  |
| >TP53-D207/ LDDRNTFRHS | 6054  | >TP53-D207/ LADRNTFRHS | 139   | 5915  |
| >TP53-D207/ LDDRNTFRHS | 5755  | >TP53-D207/ LADRNTFRHS | 24    | 5731  |
| >TP53-D207/ LDDRNTFR   | 7912  | >TP53-D207/ LADRNTFR   | 200   | 7712  |
| >TP53-D207/ LDDRNTFR   | 4530  | >TP53-D207/ LADRNTFR   | 90    | 4440  |
| >TP53-D207/ LDDRNTFRHS | 8196  | >TP53-D207/ LADRNTFRHS | 92    | 8104  |
| >TP53-D207/ LDDRNTFRHS | 482   | >TP53-D207/ LADRNTFRHS | 31318 | 30836 |
| >TP53-D207/ VEGNLRVEYL | 11817 | >TP53-D207/ VEGNLRVEYL | 95    | 11722 |
| >TP53-D207/ YLDDRNTF   | 708   | >TP53-D207/ YLADRNTF   | 48    | 660   |
| >TP53-D207/ YLDDRNTFR  | 789   | >TP53-D207/ YLADRNTFR  | 49    | 740   |
| >TP53-D207/ YLDDRNTFR† | 1276  | >TP53-D207/ YLADRNTFR† | 120   | 1156  |

|                        |       |                        |       |       |
|------------------------|-------|------------------------|-------|-------|
| >TP53-D207/YLDDRNTF    | 4668  | >TP53-D207/YLADRNTF    | 199   | 4469  |
| >TP53-D207/YLDDRNTFRH  | 3101  | >TP53-D207/YLADRNTFRH  | 84    | 3017  |
| >TP53-D207/YLDDRNTF    | 187   | >TP53-D207/YLADRNTF    | 109   | 78    |
| >TP53-D207/YLDDRNTFRH  | 333   | >TP53-D207/YLADRNTFRH  | 202   | 131   |
| >TP53-D207/YLDDRNTF    | 149   | >TP53-D207/YLADRNTF    | 381   | 232   |
| >TP53-D207/YLDDRNTFRH  | 155   | >TP53-D207/YLADRNTFRH  | 388   | 233   |
| >TP53-D207/YLDDRNTF    | 367   | >TP53-D207/YLADRNTF    | 986   | 619   |
| >TP53-D207/YLDDRNTF    | 87    | >TP53-D207/YLADRNTF    | 27    | 60    |
| >TP53-D207/YLDDRNTFR   | 189   | >TP53-D207/YLADRNTFR   | 48    | 141   |
| >TP53-D207/YLDDRNTFRH  | 187   | >TP53-D207/YLADRNTFRH  | 60    | 127   |
| >TP53-D207/YLDDRNTFRH  | 171   | >TP53-D207/YLADRNTFRH  | 51    | 120   |
| >TP53-D207/YLDDRNTFR   | 282   | >TP53-D207/YLADRNTFR   | 43    | 239   |
| >TP53-D207/YLDDRNTFR   | 55    | >TP53-D207/YLADRNTFR   | 30    | 25    |
| >TP53-D207/YLDDRNTFR   | 68    | >TP53-D207/YLADRNTFR   | 6     | 62    |
| >TP53-D207/YLDDRNTF    | 847   | >TP53-D207/YLADRNTF    | 48    | 799   |
| >TP53-D207/YLDDRNTF    | 255   | >TP53-D207/YLADRNTF    | 45    | 210   |
| >TP53-D207/YLDDRNTF    | 1092  | >TP53-D207/YLADRNTF    | 26    | 1066  |
| >TP53-D207/YLDDRNTF    | 1013  | >TP53-D207/YLADRNTF    | 254   | 759   |
| >TP53-D207/YLDDRNTF    | 2716  | >TP53-D207/YLADRNTF    | 262   | 2454  |
| >TP53-D207/YLDDRNTFR   | 336   | >TP53-D207/YLADRNTFR   | 113   | 223   |
| >TP53-D207/EYLDDRNTF   | 10690 | >TP53-D207/EYLADRNTF   | 273   | 10417 |
| >TP53-D207/EYLDDRNTF   | 103   | >TP53-D207/EYLADRNTF   | 84    | 19    |
| >TP53-D207/EYLDDRNTF   | 667   | >TP53-D207/EYLADRNTF   | 465   | 202   |
| >TP53-D207/EYLDDRNTF   | 18    | >TP53-D207/EYLADRNTF   | 11    | 7     |
| >TP53-D207/EYLDDRNTF   | 381   | >TP53-D207/EYLADRNTF   | 1868  | 1487  |
| >TP53-D207/EYLDDRNTF   | 301   | >TP53-D207/EYLADRNTF   | 386   | 85    |
| >TP53-D207/EYLDDRNTFR  | 328   | >TP53-D207/EYLADRNTFR  | 318   | 10    |
| >TP53-D207/EYLDDRNTFR  | 88    | >TP53-D207/EYLADRNTFR  | 119   | 31    |
| >TP53-D207/EYLDDRNTFR  | 508   | >TP53-D207/EYLADRNTFR  | 323   | 185   |
| >TP53-D207/EYLDDRNTFR  | 19    | >TP53-D207/EYLADRNTFR  | 18    | 1     |
| >TP53-D207/VEYLDDRNTF  | 622   | >TP53-D207/VEYLADRNTF  | 211   | 411   |
| >TP53-D207/VEYLDDRNTF  | 124   | >TP53-D207/VEYLADRNTF  | 90    | 34    |
| >TP53-D207/VEYLDDRNTF  | 870   | >TP53-D207/VEYLADRNTF  | 438   | 432   |
| >TP53-D207/VEYLDDRNTF  | 524   | >TP53-D207/VEYLADRNTF  | 367   | 157   |
| >TP53-D207/RVEYLDDR    | 433   | >TP53-D207/RVEYLADR    | 81    | 352   |
| >TP53-D207/RVEYLDDRNT  | 40    | >TP53-D207/RVEYLADRNT  | 28    | 12    |
| >TP53-D207/RVEYLDDR    | 652   | >TP53-D207/RVEYLADR    | 450   | 202   |
| >TP53-D207/RVEYLDDRNT  | 78    | >TP53-D207/RVEYLADRNT  | 39    | 39    |
| >TP53-D207E LDDRNTFRHS | 2267  | >TP53-D207E LEDRNTFRHS | 39    | 2228  |
| >TP53-D207E LDDRNTFRHS | 20574 | >TP53-D207E LEDRNTFRHS | 229   | 20345 |
| >TP53-D207E LDDRNTFRHS | 5264  | >TP53-D207E LEDRNTFRHS | 164   | 5100  |
| >TP53-D207E LDDRNTFRHS | 482   | >TP53-D207E LEDRNTFRHS | 10751 | 10269 |
| >TP53-D207EYLDDRNTF    | 187   | >TP53-D207EYLEDRNTF    | 1561  | 1374  |



|                        |      |                         |       |       |
|------------------------|------|-------------------------|-------|-------|
| >TP53-D207EYLDDRNTFRH  | 333  | >TP53-D207EYLEDNRNTRH   | 2759  | 2426  |
| >TP53-D207EYLDDRNTF    | 149  | >TP53-D207EYLEDNRNTF    | 3318  | 3169  |
| >TP53-D207EYLDDRNTFRH  | 155  | >TP53-D207EYLEDNRNTRH   | 2700  | 2545  |
| >TP53-D207EYLDDRNTF    | 367  | >TP53-D207EYLEDNRNTF    | 2950  | 2583  |
| >TP53-D207EYLDDRNTF    | 87   | >TP53-D207EYLEDNRNTF    | 159   | 72    |
| >TP53-D207EYLDDRNTFR   | 189  | >TP53-D207EYLEDNRNTR    | 365   | 176   |
| >TP53-D207EYLDDRNTFRH  | 187  | >TP53-D207EYLEDNRNTRH   | 359   | 172   |
| >TP53-D207EYLDDRNTFRH  | 171  | >TP53-D207EYLEDNRNTRH   | 296   | 125   |
| >TP53-D207EYLDDRNTFR   | 282  | >TP53-D207EYLEDNRNTR    | 87    | 195   |
| >TP53-D207EYLDDRNTFR   | 55   | >TP53-D207EYLEDNRNTR    | 41    | 14    |
| >TP53-D207EYLDDRNTFR   | 68   | >TP53-D207EYLEDNRNTR    | 33    | 35    |
| >TP53-D207EYLDDRNTF    | 847  | >TP53-D207EYLEDNRNTF    | 492   | 355   |
| >TP53-D207EYLDDRNTF    | 255  | >TP53-D207EYLEDNRNTF    | 120   | 135   |
| >TP53-D207EYLDDRNTFR   | 336  | >TP53-D207EYLEDNRNTR    | 162   | 174   |
| >TP53-D207EYLLDDRNTF   | 103  | >TP53-D207EYLEDNRNTF    | 115   | 12    |
| >TP53-D207EYLLDDRNTF   | 18   | >TP53-D207EYLEDNRNTF    | 11    | 7     |
| >TP53-D207EYLLDDRNTF   | 381  | >TP53-D207EYLEDNRNTF    | 350   | 31    |
| >TP53-D207EYLLDDRNTF   | 301  | >TP53-D207EYLEDNRNTF    | 205   | 96    |
| >TP53-D207EYLLDDRNTF   | 1315 | >TP53-D207EYLEDNRNTF    | 248   | 1067  |
| >TP53-D207EYLLDDRNTFR  | 328  | >TP53-D207EYLEDNRNTR    | 640   | 312   |
| >TP53-D207EYLLDDRNTFR  | 88   | >TP53-D207EYLEDNRNTR    | 139   | 51    |
| >TP53-D207EYLLDDRNTFR  | 19   | >TP53-D207EYLEDNRNTR    | 24    | 5     |
| >TP53-D207EVEYLDDRNTF  | 622  | >TP53-D207EVEYLEDNRNTF  | 461   | 161   |
| >TP53-D207EVEYLDDRNTF  | 124  | >TP53-D207EVEYLEDNRNTF  | 116   | 8     |
| >TP53-D207EVEYLDDRNTF  | 555  | >TP53-D207EVEYLEDNRNTF  | 318   | 237   |
| >TP53-D207EVEYLDDRNTF  | 524  | >TP53-D207EVEYLEDNRNTF  | 303   | 221   |
| >TP53-D207E RVEYLDDR   | 433  | >TP53-D207E RVEYLEDNR   | 240   | 193   |
| >TP53-D207E RVEYLDDRNT | 40   | >TP53-D207E RVEYLEDNRNT | 42    | 2     |
| >TP53-D207E RVEYLDDRNT | 78   | >TP53-D207E RVEYLEDNRNT | 91    | 13    |
| >TP53-D207(DDRNTFRHS\  | 5611 | >TP53-D207(GDRNTFRHS\   | 264   | 5347  |
| >TP53-D207(LDDRNTFRHS  | 482  | >TP53-D207(LGDRNTFRHS   | 19100 | 18618 |
| >TP53-D207(YLDDRNTF    | 187  | >TP53-D207(YLGDRNTF     | 1089  | 902   |
| >TP53-D207(YLDDRNTFRH  | 333  | >TP53-D207(YLGDRNTFRH   | 1982  | 1649  |
| >TP53-D207(YLDDRNTF    | 149  | >TP53-D207(YLGDRNTF     | 462   | 313   |
| >TP53-D207(YLDDRNTFRH  | 155  | >TP53-D207(YLGDRNTFRH   | 454   | 299   |
| >TP53-D207(YLDDRNTF    | 367  | >TP53-D207(YLGDRNTF     | 861   | 494   |
| >TP53-D207(YLDDRNTF    | 87   | >TP53-D207(YLGDRNTF     | 64    | 23    |
| >TP53-D207(YLDDRNTFR   | 189  | >TP53-D207(YLGDRNTFR    | 130   | 59    |
| >TP53-D207(YLDDRNTFRH  | 187  | >TP53-D207(YLGDRNTFRH   | 141   | 46    |
| >TP53-D207(YLDDRNTFRH  | 171  | >TP53-D207(YLGDRNTFRH   | 117   | 54    |
| >TP53-D207(YLDDRNTFR   | 282  | >TP53-D207(YLGDRNTFR    | 74    | 208   |
| >TP53-D207(YLDDRNTFR   | 55   | >TP53-D207(YLGDRNTFR    | 37    | 18    |
| >TP53-D207(YLDDRNTFR   | 68   | >TP53-D207(YLGDRNTFR    | 45    | 23    |

|                       |       |                       |       |       |
|-----------------------|-------|-----------------------|-------|-------|
| >TP53-D207(YLDDRNTF   | 847   | >TP53-D207(YLGDRNTF   | 65    | 782   |
| >TP53-D207(YLDDRNTF   | 255   | >TP53-D207(YLGDRNTF   | 137   | 118   |
| >TP53-D207(YLDDRNTF   | 1092  | >TP53-D207(YLGDRNTF   | 159   | 933   |
| >TP53-D207(YLDDRNTFR  | 336   | >TP53-D207(YLGDRNTFR  | 93    | 243   |
| >TP53-D207(EYLDDRNTF  | 103   | >TP53-D207(EYLGDRNTF  | 107   | 4     |
| >TP53-D207(EYLDDRNTF  | 667   | >TP53-D207(EYLGDRNTF  | 420   | 247   |
| >TP53-D207(EYLDDRNTF  | 18    | >TP53-D207(EYLGDRNTF  | 10    | 8     |
| >TP53-D207(EYLDDRNTF  | 381   | >TP53-D207(EYLGDRNTF  | 927   | 546   |
| >TP53-D207(EYLDDRNTF  | 301   | >TP53-D207(EYLGDRNTF  | 119   | 182   |
| >TP53-D207(EYLDDRNTF  | 1315  | >TP53-D207(EYLGDRNTF  | 315   | 1000  |
| >TP53-D207(EYLDDRNTFR | 328   | >TP53-D207(EYLGDRNTFR | 208   | 120   |
| >TP53-D207(EYLDDRNTFR | 88    | >TP53-D207(EYLGDRNTFR | 107   | 19    |
| >TP53-D207(EYLDDRNTFR | 508   | >TP53-D207(EYLGDRNTFR | 393   | 115   |
| >TP53-D207(EYLDDRNTFR | 19    | >TP53-D207(EYLGDRNTFR | 21    | 2     |
| >TP53-D207(VEYLDDRNTF | 124   | >TP53-D207(VEYLGDRNTF | 125   | 1     |
| >TP53-D207(RVEYLDDR   | 433   | >TP53-D207(RVEYLGDR   | 215   | 218   |
| >TP53-D207(RVEYLDDRNT | 40    | >TP53-D207(RVEYLGDRNT | 40    | 0     |
| >TP53-D207(RVEYLDDRNT | 78    | >TP53-D207(RVEYLGDRNT | 37    | 41    |
| >TP53-D207\DDRNTFRHS\ | 5611  | >TP53-D207\YDRNTFRHSV | 138   | 5473  |
| >TP53-D207\LDDRNTFRHS | 5755  | >TP53-D207\LYDRNTFRHS | 57    | 5698  |
| >TP53-D207\LDDRNTFRHS | 26053 | >TP53-D207\LYDRNTFRHS | 250   | 25803 |
| >TP53-D207\LDDRNTFR   | 7912  | >TP53-D207\LYDRNTFR   | 91    | 7821  |
| >TP53-D207\LDDRNTFR   | 17204 | >TP53-D207\LYDRNTFR   | 163   | 17041 |
| >TP53-D207\LDDRNTFR   | 8279  | >TP53-D207\LYDRNTFR   | 76    | 8203  |
| >TP53-D207\LDDRNTFRHS | 482   | >TP53-D207\LYDRNTFRHS | 24984 | 24502 |
| >TP53-D207\VEGNLRVEYL | 24961 | >TP53-D207\VEGNLRVEYL | 187   | 24774 |
| >TP53-D207\VEGNLRVEYL | 12144 | >TP53-D207\VEGNLRVEYL | 157   | 11987 |
| >TP53-D207\VEGNLRVEYL | 6547  | >TP53-D207\VEGNLRVEYL | 231   | 6316  |
| >TP53-D207\YLDDRNTF   | 708   | >TP53-D207\YLYDRNTF   | 160   | 548   |
| >TP53-D207\YLDDRNTFR  | 789   | >TP53-D207\YLYDRNTFR  | 112   | 677   |
| >TP53-D207\YLDDRNTFR+ | 1276  | >TP53-D207\YLYDRNTFRH | 248   | 1028  |
| >TP53-D207\YLDDRNTF   | 4668  | >TP53-D207\YLYDRNTF   | 102   | 4566  |
| >TP53-D207\YLDDRNTFR  | 9299  | >TP53-D207\YLYDRNTFR  | 309   | 8990  |
| >TP53-D207\YLDDRNTFR+ | 3101  | >TP53-D207\YLYDRNTFRH | 47    | 3054  |
| >TP53-D207\YLDDRNTF   | 187   | >TP53-D207\YLYDRNTF   | 102   | 85    |
| >TP53-D207\YLDDRNTFR+ | 333   | >TP53-D207\YLYDRNTFRH | 115   | 218   |
| >TP53-D207\YLDDRNTF   | 149   | >TP53-D207\YLYDRNTF   | 26    | 123   |
| >TP53-D207\YLDDRNTFR  | 1191  | >TP53-D207\YLYDRNTFR  | 196   | 995   |
| >TP53-D207\YLDDRNTFR+ | 800   | >TP53-D207\YLYDRNTFRH | 136   | 664   |
| >TP53-D207\YLDDRNTFR+ | 155   | >TP53-D207\YLYDRNTFRH | 31    | 124   |
| >TP53-D207\YLDDRNTF   | 367   | >TP53-D207\YLYDRNTF   | 197   | 170   |
| >TP53-D207\YLDDRNTFR+ | 1022  | >TP53-D207\YLYDRNTFRH | 496   | 526   |
| >TP53-D207\YLDDRNTFR+ | 648   | >TP53-D207\YLYDRNTFRH | 253   | 395   |

|                       |       |                       |      |       |
|-----------------------|-------|-----------------------|------|-------|
| >TP53-D207\YLDDRNTF   | 87    | >TP53-D207\YLYDRNTF   | 11   | 76    |
| >TP53-D207\YLDDRNTFR  | 189   | >TP53-D207\YLYDRNTFR  | 18   | 171   |
| >TP53-D207\YLDDRNTFRH | 187   | >TP53-D207\YLYDRNTFRH | 20   | 167   |
| >TP53-D207\YLDDRNTFRH | 171   | >TP53-D207\YLYDRNTFRH | 22   | 149   |
| >TP53-D207\YLDDRNTFR  | 4049  | >TP53-D207\YLYDRNTFR  | 70   | 3979  |
| >TP53-D207\YLDDRNTFR  | 5350  | >TP53-D207\YLYDRNTFR  | 441  | 4909  |
| >TP53-D207\YLDDRNTF   | 5543  | >TP53-D207\YLYDRNTF   | 308  | 5235  |
| >TP53-D207\YLDDRNTF   | 4578  | >TP53-D207\YLYDRNTF   | 407  | 4171  |
| >TP53-D207\YLDDRNTFR  | 282   | >TP53-D207\YLYDRNTFR  | 14   | 268   |
| >TP53-D207\YLDDRNTF   | 2286  | >TP53-D207\YLYDRNTF   | 112  | 2174  |
| >TP53-D207\YLDDRNTFR  | 55    | >TP53-D207\YLYDRNTFR  | 14   | 41    |
| >TP53-D207\YLDDRNTFR  | 68    | >TP53-D207\YLYDRNTFR  | 5    | 63    |
| >TP53-D207\YLDDRNTF   | 847   | >TP53-D207\YLYDRNTF   | 35   | 812   |
| >TP53-D207\YLDDRNTF   | 255   | >TP53-D207\YLYDRNTF   | 21   | 234   |
| >TP53-D207\YLDDRNTF   | 1092  | >TP53-D207\YLYDRNTF   | 7    | 1085  |
| >TP53-D207\YLDDRNTF   | 1811  | >TP53-D207\YLYDRNTF   | 48   | 1763  |
| >TP53-D207\YLDDRNTF   | 1013  | >TP53-D207\YLYDRNTF   | 210  | 803   |
| >TP53-D207\YLDDRNTF   | 2716  | >TP53-D207\YLYDRNTF   | 405  | 2311  |
| >TP53-D207\YLDDRNTFR  | 336   | >TP53-D207\YLYDRNTFR  | 41   | 295   |
| >TP53-D207\EYLDDRNTF  | 103   | >TP53-D207\EYLYDRNTF  | 58   | 45    |
| >TP53-D207\EYLDDRNTF  | 667   | >TP53-D207\EYLYDRNTF  | 313  | 354   |
| >TP53-D207\EYLDDRNTF  | 18    | >TP53-D207\EYLYDRNTF  | 16   | 2     |
| >TP53-D207\EYLDDRNTF  | 381   | >TP53-D207\EYLYDRNTF  | 1511 | 1130  |
| >TP53-D207\EYLDDRNTF  | 301   | >TP53-D207\EYLYDRNTF  | 237  | 64    |
| >TP53-D207\EYLDDRNTFR | 328   | >TP53-D207\EYLYDRNTFR | 231  | 97    |
| >TP53-D207\EYLDDRNTFR | 88    | >TP53-D207\EYLYDRNTFR | 53   | 35    |
| >TP53-D207\EYLDDRNTFR | 508   | >TP53-D207\EYLYDRNTFR | 276  | 232   |
| >TP53-D207\EYLDDRNTFR | 19    | >TP53-D207\EYLYDRNTFR | 30   | 11    |
| >TP53-D207\VEYLDDRNTF | 622   | >TP53-D207\VEYLYDRNTF | 123  | 499   |
| >TP53-D207\VEYLDDRNTF | 124   | >TP53-D207\VEYLYDRNTF | 62   | 62    |
| >TP53-D207\VEYLDDRNT  | 2368  | >TP53-D207\VEYLYDRNT  | 340  | 2028  |
| >TP53-D207\VEYLDDRNTF | 870   | >TP53-D207\VEYLYDRNTF | 395  | 475   |
| >TP53-D207\VEYLDDRNTF | 524   | >TP53-D207\VEYLYDRNTF | 246  | 278   |
| >TP53-D207\RVEYLDDR   | 433   | >TP53-D207\RVEYLYDR   | 24   | 409   |
| >TP53-D207\RVEYLDDRNT | 40    | >TP53-D207\RVEYLYDRNT | 33   | 7     |
| >TP53-D207\RVEYLDDR   | 652   | >TP53-D207\RVEYLYDR   | 452  | 200   |
| >TP53-D207\RVEYLDDRNT | 78    | >TP53-D207\RVEYLYDRNT | 48   | 30    |
| >TP53-D207\RVEYLDDR   | 1045  | >TP53-D207\RVEYLYDR   | 245  | 800   |
| >TP53-D207\LRVEYLDDR  | 1926  | >TP53-D207\LRVEYLYDR  | 358  | 1568  |
| >TP53-D207\NLRVEYLD   | 24593 | >TP53-D207\NLRVEYLY   | 61   | 24532 |
| >TP53-D207\NLRVEYLDDR | 3664  | >TP53-D207\NLRVEYLYDR | 385  | 3279  |
| >TP53-D207\NLRVEYLD   | 26059 | >TP53-D207\NLRVEYLY   | 205  | 25854 |
| >TP53-D207\NLRVEYLD   | 34863 | >TP53-D207\NLRVEYLY   | 433  | 34430 |

|                       |       |                       |     |       |
|-----------------------|-------|-----------------------|-----|-------|
| >TP53-D207\NLRVEYLD   | 35055 | >TP53-D207\NLRVEYLY   | 228 | 34827 |
| >TP53-D207\GNLRVEYLD  | 24466 | >TP53-D207\GNLRVEYLY  | 100 | 24366 |
| >TP53-D207\GNLRVEYLD  | 27879 | >TP53-D207\GNLRVEYLY  | 307 | 27572 |
| >TP53-D207\GNLRVEYLD  | 37942 | >TP53-D207\GNLRVEYLY  | 462 | 37480 |
| >TP53-D207\EGNLRVEYLD | 32898 | >TP53-D207\EGNLRVEYLY | 337 | 32561 |
| >TP53-D208\DRNTFRHSV  | 2182  | >TP53-D208\ERNTFRHSV  | 231 | 1951  |
| >TP53-D208\DRNTFRHSV\ | 1923  | >TP53-D208\ERNTFRHSV\ | 353 | 1570  |
| >TP53-D208\DDRNTFRHS\ | 5165  | >TP53-D208\DERNTFRHS\ | 123 | 5042  |
| >TP53-D208\DDRNTFRH   | 15680 | >TP53-D208\DERNTFRH   | 312 | 15368 |
| >TP53-D208\DDRNTFRHS\ | 9668  | >TP53-D208\DERNTFRHS\ | 115 | 9553  |
| >TP53-D208\LDDRNTFRHS | 482   | >TP53-D208\LDERNTFRHS | 356 | 126   |
| >TP53-D208\YLDDRNTF   | 187   | >TP53-D208\YLDERNTF   | 220 | 33    |
| >TP53-D208\YLDDRNTFR\ | 333   | >TP53-D208\YLDERNTFR\ | 335 | 2     |
| >TP53-D208\YLDDRNTF   | 149   | >TP53-D208\YLDERNTF   | 100 | 49    |
| >TP53-D208\YLDDRNTFR\ | 155   | >TP53-D208\YLDERNTFR\ | 99  | 56    |
| >TP53-D208\YLDDRNTF   | 367   | >TP53-D208\YLDERNTF   | 325 | 42    |
| >TP53-D208\YLDDRNTFR\ | 648   | >TP53-D208\YLDERNTFR\ | 494 | 154   |
| >TP53-D208\YLDDRNTF   | 87    | >TP53-D208\YLDERNTF   | 221 | 134   |
| >TP53-D208\YLDDRNTFR  | 189   | >TP53-D208\YLDERNTFR  | 647 | 458   |
| >TP53-D208\YLDDRNTFR\ | 187   | >TP53-D208\YLDERNTFR\ | 469 | 282   |
| >TP53-D208\YLDDRNTFR\ | 171   | >TP53-D208\YLDERNTFR\ | 478 | 307   |
| >TP53-D208\YLDDRNTFR  | 282   | >TP53-D208\YLDERNTFR  | 404 | 122   |
| >TP53-D208\YLDDRNTFR  | 55    | >TP53-D208\YLDERNTFR  | 42  | 13    |
| >TP53-D208\YLDDRNTFR  | 68    | >TP53-D208\YLDERNTFR  | 61  | 7     |
| >TP53-D208\YLDDRNTF   | 255   | >TP53-D208\YLDERNTF   | 175 | 80    |
| >TP53-D208\YLDDRNTFR  | 336   | >TP53-D208\YLDERNTFR  | 737 | 401   |
| >TP53-D208\EYLDDRNTF  | 103   | >TP53-D208\EYLDERNTF  | 54  | 49    |
| >TP53-D208\EYLDDRNTF  | 667   | >TP53-D208\EYLDERNTF  | 343 | 324   |
| >TP53-D208\EYLDDRNTF  | 18    | >TP53-D208\EYLDERNTF  | 12  | 6     |
| >TP53-D208\EYLDDRNTF  | 381   | >TP53-D208\EYLDERNTF  | 543 | 162   |
| >TP53-D208\EYLDDRNTF  | 301   | >TP53-D208\EYLDERNTF  | 684 | 383   |
| >TP53-D208\EYLDDRNTFR | 328   | >TP53-D208\EYLDERNTFR | 359 | 31    |
| >TP53-D208\EYLDDRNTFR | 88    | >TP53-D208\EYLDERNTFR | 127 | 39    |
| >TP53-D208\EYLDDRNTFR | 19    | >TP53-D208\EYLDERNTFR | 16  | 3     |
| >TP53-D208\VEYLDDRNTF | 622   | >TP53-D208\VEYLDERNTF | 362 | 260   |
| >TP53-D208\VEYLDDRNTF | 124   | >TP53-D208\VEYLDERNTF | 93  | 31    |
| >TP53-D208\VEYLDDRNTF | 555   | >TP53-D208\VEYLDERNTF | 282 | 273   |
| >TP53-D208\RVEYLDDR   | 433   | >TP53-D208\RVEYLDER   | 61  | 372   |
| >TP53-D208\RVEYLDDRNT | 40    | >TP53-D208\RVEYLDERNT | 35  | 5     |
| >TP53-D208\RVEYLDDR   | 652   | >TP53-D208\RVEYLDER   | 219 | 433   |
| >TP53-D208\RVEYLDDRNT | 78    | >TP53-D208\RVEYLDERNT | 80  | 2     |
| >TP53-D208\DRNTFRHSV  | 1236  | >TP53-D208\GRNTFRHSV  | 90  | 1146  |
| >TP53-D208\DRNTFRHSV\ | 3881  | >TP53-D208\GRNTFRHSV\ | 209 | 3672  |

|                        |      |                        |      |      |
|------------------------|------|------------------------|------|------|
| >TP53-D208C DRNTFRHSV\ | 3275 | >TP53-D208C GRNTFRHSV\ | 298  | 2977 |
| >TP53-D208C DRNTFRHSV  | 4488 | >TP53-D208C GRNTFRHSV  | 128  | 4360 |
| >TP53-D208C DRNTFRHSV\ | 5415 | >TP53-D208C GRNTFRHSV\ | 208  | 5207 |
| >TP53-D208C LDDRNTFRHS | 482  | >TP53-D208C LDGRNTFRHS | 1091 | 609  |
| >TP53-D208C YLDDRNTF   | 187  | >TP53-D208C YLDGRNTF   | 801  | 614  |
| >TP53-D208C YLDDRNTFR† | 333  | >TP53-D208C YLDGRNTFR† | 1336 | 1003 |
| >TP53-D208C YLDDRNTF   | 149  | >TP53-D208C YLDGRNTF   | 256  | 107  |
| >TP53-D208C YLDDRNTFR† | 155  | >TP53-D208C YLDGRNTFR† | 280  | 125  |
| >TP53-D208C YLDDRNTF   | 367  | >TP53-D208C YLDGRNTF   | 1924 | 1557 |
| >TP53-D208C YLDDRNTF   | 87   | >TP53-D208C YLDGRNTF   | 153  | 66   |
| >TP53-D208C YLDDRNTFR  | 189  | >TP53-D208C YLDGRNTFR  | 514  | 325  |
| >TP53-D208C YLDDRNTFR† | 187  | >TP53-D208C YLDGRNTFR† | 400  | 213  |
| >TP53-D208C YLDDRNTFR† | 171  | >TP53-D208C YLDGRNTFR† | 391  | 220  |
| >TP53-D208C YLDDRNTFR  | 282  | >TP53-D208C YLDGRNTFR  | 443  | 161  |
| >TP53-D208C YLDDRNTFR  | 55   | >TP53-D208C YLDGRNTFR  | 58   | 3    |
| >TP53-D208C YLDDRNTFR  | 68   | >TP53-D208C YLDGRNTFR  | 87   | 19   |
| >TP53-D208C YLDDRNTF   | 255  | >TP53-D208C YLDGRNTF   | 95   | 160  |
| >TP53-D208C YLDDRNTFR  | 336  | >TP53-D208C YLDGRNTFR  | 475  | 139  |
| >TP53-D208C EYLDDRNTF  | 103  | >TP53-D208C EYLDGRNTF  | 72   | 31   |
| >TP53-D208C EYLDDRNTF  | 667  | >TP53-D208C EYLDGRNTF  | 483  | 184  |
| >TP53-D208C EYLDDRNTF  | 18   | >TP53-D208C EYLDGRNTF  | 11   | 7    |
| >TP53-D208C EYLDDRNTF  | 381  | >TP53-D208C EYLDGRNTF  | 173  | 208  |
| >TP53-D208C EYLDDRNTF  | 301  | >TP53-D208C EYLDGRNTF  | 501  | 200  |
| >TP53-D208C EYLDDRNTFR | 328  | >TP53-D208C EYLDGRNTFR | 174  | 154  |
| >TP53-D208C EYLDDRNTFR | 88   | >TP53-D208C EYLDGRNTFR | 88   | 0    |
| >TP53-D208C EYLDDRNTFR | 508  | >TP53-D208C EYLDGRNTFR | 292  | 216  |
| >TP53-D208C EYLDDRNTFR | 19   | >TP53-D208C EYLDGRNTFR | 22   | 3    |
| >TP53-D208C VEYLDDRNTF | 622  | >TP53-D208C VEYLDGRNTF | 410  | 212  |
| >TP53-D208C VEYLDDRNTF | 124  | >TP53-D208C VEYLDGRNTF | 49   | 75   |
| >TP53-D208C RVEYLDDR   | 433  | >TP53-D208C RVEYLDGR   | 129  | 304  |
| >TP53-D208C RVEYLDDRNT | 40   | >TP53-D208C RVEYLDGRNT | 64   | 24   |
| >TP53-D208C RVEYLDDR   | 652  | >TP53-D208C RVEYLDGR   | 385  | 267  |
| >TP53-D208C RVEYLDDRNT | 1271 | >TP53-D208C RVEYLDGRNT | 417  | 854  |
| >TP53-D208C RVEYLDDRNT | 78   | >TP53-D208C RVEYLDGRNT | 42   | 36   |
| >TP53-D208C LRVEYLDDR  | 1926 | >TP53-D208C LRVEYLDGR  | 302  | 1624 |
| >TP53-D208† DRNTFRHSV  | 2455 | >TP53-D208† HRNTFRHSV  | 491  | 1964 |
| >TP53-D208† DRNTFRHSV\ | 2444 | >TP53-D208† HRNTFRHSV\ | 381  | 2063 |
| >TP53-D208† DRNTFRHSV\ | 1973 | >TP53-D208† HRNTFRHSV\ | 294  | 1679 |
| >TP53-D208† DRNTFRHSV  | 1236 | >TP53-D208† HRNTFRHSV  | 54   | 1182 |
| >TP53-D208† DRNTFRHSV\ | 3881 | >TP53-D208† HRNTFRHSV\ | 58   | 3823 |
| >TP53-D208† DRNTFRHSV\ | 3275 | >TP53-D208† HRNTFRHSV\ | 140  | 3135 |
| >TP53-D208† DRNTFRHSV  | 2649 | >TP53-D208† HRNTFRHSV  | 83   | 2566 |
| >TP53-D208† DRNTFRHSV\ | 3714 | >TP53-D208† HRNTFRHSV\ | 143  | 3571 |

|                        |      |                        |      |      |
|------------------------|------|------------------------|------|------|
| >TP53-D208f DRNTFRHSV\ | 1923 | >TP53-D208f HRNTFRHSV\ | 57   | 1866 |
| >TP53-D208f DRNTFRHSV  | 4488 | >TP53-D208f HRNTFRHSV  | 283  | 4205 |
| >TP53-D208f DRNTFRHSV\ | 5415 | >TP53-D208f HRNTFRHSV\ | 489  | 4926 |
| >TP53-D208f LDDRNTFRHS | 482  | >TP53-D208f LDHRNTFRHS | 587  | 105  |
| >TP53-D208f YLDDRNTF   | 187  | >TP53-D208f YLDHRNTF   | 873  | 686  |
| >TP53-D208f YLDDRNTFRf | 333  | >TP53-D208f YLDHRNTFRf | 1505 | 1172 |
| >TP53-D208f YLDDRNTF   | 149  | >TP53-D208f YLDHRNTF   | 1009 | 860  |
| >TP53-D208f YLDDRNTFRf | 155  | >TP53-D208f YLDHRNTFRf | 934  | 779  |
| >TP53-D208f YLDDRNTF   | 367  | >TP53-D208f YLDHRNTF   | 1427 | 1060 |
| >TP53-D208f YLDDRNTF   | 87   | >TP53-D208f YLDHRNTF   | 1488 | 1401 |
| >TP53-D208f YLDDRNTFR  | 189  | >TP53-D208f YLDHRNTFR  | 4892 | 4703 |
| >TP53-D208f YLDDRNTFRf | 187  | >TP53-D208f YLDHRNTFRf | 2647 | 2460 |
| >TP53-D208f YLDDRNTFRf | 171  | >TP53-D208f YLDHRNTFRf | 2809 | 2638 |
| >TP53-D208f YLDDRNTFR  | 282  | >TP53-D208f YLDHRNTFR  | 215  | 67   |
| >TP53-D208f YLDDRNTFR  | 55   | >TP53-D208f YLDHRNTFR  | 46   | 9    |
| >TP53-D208f YLDDRNTFR  | 68   | >TP53-D208f YLDHRNTFR  | 83   | 15   |
| >TP53-D208f YLDDRNTF   | 255  | >TP53-D208f YLDHRNTF   | 183  | 72   |
| >TP53-D208f YLDDRNTF   | 1092 | >TP53-D208f YLDHRNTF   | 275  | 817  |
| >TP53-D208f YLDDRNTFR  | 336  | >TP53-D208f YLDHRNTFR  | 571  | 235  |
| >TP53-D208f EYLDDRNTF  | 103  | >TP53-D208f EYLDHRNTF  | 76   | 27   |
| >TP53-D208f EYLDDRNTF  | 667  | >TP53-D208f EYLDHRNTF  | 285  | 382  |
| >TP53-D208f EYLDDRNTF  | 18   | >TP53-D208f EYLDHRNTF  | 13   | 5    |
| >TP53-D208f EYLDDRNTF  | 381  | >TP53-D208f EYLDHRNTF  | 98   | 283  |
| >TP53-D208f EYLDDRNTF  | 301  | >TP53-D208f EYLDHRNTF  | 174  | 127  |
| >TP53-D208f EYLDDRNTFR | 328  | >TP53-D208f EYLDHRNTFR | 68   | 260  |
| >TP53-D208f EYLDDRNTFR | 88   | >TP53-D208f EYLDHRNTFR | 93   | 5    |
| >TP53-D208f EYLDDRNTFR | 508  | >TP53-D208f EYLDHRNTFR | 188  | 320  |
| >TP53-D208f EYLDDRNTFR | 19   | >TP53-D208f EYLDHRNTFR | 17   | 2    |
| >TP53-D208f VEYLDDRNTF | 622  | >TP53-D208f VEYLDHRNTF | 431  | 191  |
| >TP53-D208f VEYLDDRNTF | 124  | >TP53-D208f VEYLDHRNTF | 56   | 68   |
| >TP53-D208f VEYLDDRNTF | 594  | >TP53-D208f VEYLDHRNTF | 456  | 138  |
| >TP53-D208f VEYLDDRNTF | 870  | >TP53-D208f VEYLDHRNTF | 364  | 506  |
| >TP53-D208f VEYLDDRNTF | 524  | >TP53-D208f VEYLDHRNTF | 475  | 49   |
| >TP53-D208f RVEYLDDR   | 433  | >TP53-D208f RVEYLDHR   | 26   | 407  |
| >TP53-D208f RVEYLDDRNT | 40   | >TP53-D208f RVEYLDHRNT | 30   | 10   |
| >TP53-D208f RVEYLDDR   | 652  | >TP53-D208f RVEYLDHR   | 269  | 383  |
| >TP53-D208f RVEYLDDRNT | 1271 | >TP53-D208f RVEYLDHRNT | 353  | 918  |
| >TP53-D208f RVEYLDDRNT | 78   | >TP53-D208f RVEYLDHRNT | 103  | 25   |
| >TP53-D208f RVEYLDDR   | 1045 | >TP53-D208f RVEYLDHR   | 175  | 870  |
| >TP53-D208f LRVEYLDDR  | 1926 | >TP53-D208f LRVEYLDHR  | 330  | 1596 |
| >TP53-D208f DRNTFRHSV  | 2455 | >TP53-D208f IRNTFRHSV  | 176  | 2279 |
| >TP53-D208f DRNTFRHSV\ | 2444 | >TP53-D208f IRNTFRHSV\ | 146  | 2298 |
| >TP53-D208f DRNTFRHSV\ | 1973 | >TP53-D208f IRNTFRHSV\ | 107  | 1866 |

|                         |       |                         |      |       |
|-------------------------|-------|-------------------------|------|-------|
| >TP53-D208I DRNTFRHSV   | 1236  | >TP53-D208I IRNTFRHSV   | 178  | 1058  |
| >TP53-D208I DRNTFRHSV\  | 3881  | >TP53-D208I IRNTFRHSV\  | 426  | 3455  |
| >TP53-D208I DRNTFRHSV   | 4488  | >TP53-D208I IRNTFRHSV   | 417  | 4071  |
| >TP53-D208I DDRNTFRHS\  | 28653 | >TP53-D208I DIRNTFRHSV  | 395  | 28258 |
| >TP53-D208I DDRNTFRHS\  | 4765  | >TP53-D208I DIRNTFRHSV  | 424  | 4341  |
| >TP53-D208I LDDRNTFR    | 4530  | >TP53-D208I LDIRNTFR    | 349  | 4181  |
| >TP53-D208I LDDRNTFRHS\ | 482   | >TP53-D208I LDIRNTFRHS\ | 245  | 237   |
| >TP53-D208I YLDDRNTF    | 187   | >TP53-D208I YLDIRNTF    | 2039 | 1852  |
| >TP53-D208I YLDDRNTFR\  | 333   | >TP53-D208I YLDIRNTFRH\ | 2596 | 2263  |
| >TP53-D208I YLDDRNTF    | 149   | >TP53-D208I YLDIRNTF    | 686  | 537   |
| >TP53-D208I YLDDRNTFR\  | 155   | >TP53-D208I YLDIRNTFRH\ | 776  | 621   |
| >TP53-D208I YLDDRNTF    | 367   | >TP53-D208I YLDIRNTF    | 4028 | 3661  |
| >TP53-D208I YLDDRNTF    | 87    | >TP53-D208I YLDIRNTF    | 941  | 854   |
| >TP53-D208I YLDDRNTFR   | 189   | >TP53-D208I YLDIRNTFR   | 3570 | 3381  |
| >TP53-D208I YLDDRNTFR\  | 187   | >TP53-D208I YLDIRNTFRH\ | 2049 | 1862  |
| >TP53-D208I YLDDRNTFR\  | 171   | >TP53-D208I YLDIRNTFRH\ | 2273 | 2102  |
| >TP53-D208I YLDDRNTFR   | 282   | >TP53-D208I YLDIRNTFR   | 214  | 68    |
| >TP53-D208I YLDDRNTFR   | 55    | >TP53-D208I YLDIRNTFR   | 55   | 0     |
| >TP53-D208I YLDDRNTFR   | 68    | >TP53-D208I YLDIRNTFR   | 63   | 5     |
| >TP53-D208I YLDDRNTF    | 255   | >TP53-D208I YLDIRNTF    | 365  | 110   |
| >TP53-D208I YLDDRNTFR   | 336   | >TP53-D208I YLDIRNTFR   | 503  | 167   |
| >TP53-D208I EYLDDRNTF   | 103   | >TP53-D208I EYLDIRNTF   | 28   | 75    |
| >TP53-D208I EYLDDRNTF   | 667   | >TP53-D208I EYLDIRNTF   | 150  | 517   |
| >TP53-D208I EYLDDRNTF   | 18    | >TP53-D208I EYLDIRNTF   | 10   | 8     |
| >TP53-D208I EYLDDRNTF   | 381   | >TP53-D208I EYLDIRNTF   | 231  | 150   |
| >TP53-D208I EYLDDRNTF   | 301   | >TP53-D208I EYLDIRNTF   | 950  | 649   |
| >TP53-D208I EYLDDRNTFR  | 328   | >TP53-D208I EYLDIRNTFR  | 59   | 269   |
| >TP53-D208I EYLDDRNTFR  | 88    | >TP53-D208I EYLDIRNTFR  | 30   | 58    |
| >TP53-D208I EYLDDRNTFR  | 508   | >TP53-D208I EYLDIRNTFR  | 153  | 355   |
| >TP53-D208I EYLDDRNTFR  | 19    | >TP53-D208I EYLDIRNTFR  | 13   | 6     |
| >TP53-D208I VEYLDDRNTF  | 622   | >TP53-D208I VEYLDIRNTF  | 127  | 495   |
| >TP53-D208I VEYLDDRNTF  | 124   | >TP53-D208I VEYLDIRNTF  | 86   | 38    |
| >TP53-D208I VEYLDDRNTF  | 1478  | >TP53-D208I VEYLDIRNTF  | 488  | 990   |
| >TP53-D208I VEYLDDRNTF  | 594   | >TP53-D208I VEYLDIRNTF  | 313  | 281   |
| >TP53-D208I VEYLDDRNTF  | 1119  | >TP53-D208I VEYLDIRNTF  | 468  | 651   |
| >TP53-D208I VEYLDDRNTF  | 870   | >TP53-D208I VEYLDIRNTF  | 253  | 617   |
| >TP53-D208I VEYLDDRNTF  | 2225  | >TP53-D208I VEYLDIRNTF  | 448  | 1777  |
| >TP53-D208I VEYLDDRNTF  | 524   | >TP53-D208I VEYLDIRNTFF | 471  | 53    |
| >TP53-D208I RVEYLDDR    | 433   | >TP53-D208I RVEYLDIR    | 85   | 348   |
| >TP53-D208I RVEYLDDRNT  | 40    | >TP53-D208I RVEYLDIRNTI | 20   | 20    |
| >TP53-D208I RVEYLDDR    | 652   | >TP53-D208I RVEYLDIR    | 437  | 215   |
| >TP53-D208I RVEYLDDRNT  | 1271  | >TP53-D208I RVEYLDIRNTI | 471  | 800   |
| >TP53-D208I RVEYLDDRNT  | 78    | >TP53-D208I RVEYLDIRNTI | 55   | 23    |

|                       |       |                       |      |       |
|-----------------------|-------|-----------------------|------|-------|
| >TP53-D208†DRNTFRHSV  | 1236  | >TP53-D208†NRNTFRHSV  | 374  | 862   |
| >TP53-D208†DRNTFRHSV  | 2649  | >TP53-D208†NRNTFRHSV  | 160  | 2489  |
| >TP53-D208†DRNTFRHSV\ | 3714  | >TP53-D208†NRNTFRHSV\ | 299  | 3415  |
| >TP53-D208†DRNTFRHSV\ | 1923  | >TP53-D208†NRNTFRHSV\ | 109  | 1814  |
| >TP53-D208†LDDRNTFRHS | 482   | >TP53-D208†LDNRNTFRHS | 392  | 90    |
| >TP53-D208†YLDDRNTF   | 187   | >TP53-D208†YLDNRNTF   | 804  | 617   |
| >TP53-D208†YLDDRNTFR† | 333   | >TP53-D208†YLDNRNTFR† | 1124 | 791   |
| >TP53-D208†YLDDRNTF   | 149   | >TP53-D208†YLDNRNTF   | 331  | 182   |
| >TP53-D208†YLDDRNTFR† | 155   | >TP53-D208†YLDNRNTFR† | 403  | 248   |
| >TP53-D208†YLDDRNTF   | 367   | >TP53-D208†YLDNRNTF   | 648  | 281   |
| >TP53-D208†YLDDRNTF   | 87    | >TP53-D208†YLDNRNTF   | 499  | 412   |
| >TP53-D208†YLDDRNTFR  | 189   | >TP53-D208†YLDNRNTFR  | 2073 | 1884  |
| >TP53-D208†YLDDRNTFR† | 187   | >TP53-D208†YLDNRNTFR† | 1189 | 1002  |
| >TP53-D208†YLDDRNTFR† | 171   | >TP53-D208†YLDNRNTFR† | 1255 | 1084  |
| >TP53-D208†YLDDRNTFR  | 282   | >TP53-D208†YLDNRNTFR  | 171  | 111   |
| >TP53-D208†YLDDRNTFR  | 55    | >TP53-D208†YLDNRNTFR  | 56   | 1     |
| >TP53-D208†YLDDRNTFR  | 68    | >TP53-D208†YLDNRNTFR  | 68   | 0     |
| >TP53-D208†YLDDRNTF   | 255   | >TP53-D208†YLDNRNTF   | 135  | 120   |
| >TP53-D208†YLDDRNTF   | 1092  | >TP53-D208†YLDNRNTF   | 396  | 696   |
| >TP53-D208†YLDDRNTFR  | 336   | >TP53-D208†YLDNRNTFR  | 821  | 485   |
| >TP53-D208†EYLDDRNTF  | 103   | >TP53-D208†EYLDNRNTF  | 37   | 66    |
| >TP53-D208†EYLDDRNTF  | 667   | >TP53-D208†EYLDNRNTF  | 281  | 386   |
| >TP53-D208†EYLDDRNTF  | 18    | >TP53-D208†EYLDNRNTF  | 10   | 8     |
| >TP53-D208†EYLDDRNTF  | 381   | >TP53-D208†EYLDNRNTF  | 168  | 213   |
| >TP53-D208†EYLDDRNTF  | 301   | >TP53-D208†EYLDNRNTF  | 645  | 344   |
| >TP53-D208†EYLDDRNTFR | 328   | >TP53-D208†EYLDNRNTFR | 113  | 215   |
| >TP53-D208†EYLDDRNTFR | 88    | >TP53-D208†EYLDNRNTFR | 59   | 29    |
| >TP53-D208†EYLDDRNTFR | 508   | >TP53-D208†EYLDNRNTFR | 374  | 134   |
| >TP53-D208†EYLDDRNTFR | 19    | >TP53-D208†EYLDNRNTFR | 16   | 3     |
| >TP53-D208†VEYLDDRNTF | 622   | >TP53-D208†VEYLDNRNTF | 313  | 309   |
| >TP53-D208†VEYLDDRNTF | 124   | >TP53-D208†VEYLDNRNTF | 59   | 65    |
| >TP53-D208†VEYLDDRNTF | 594   | >TP53-D208†VEYLDNRNTF | 420  | 174   |
| >TP53-D208†RVEYLDDR   | 433   | >TP53-D208†RVEYLDNR   | 48   | 385   |
| >TP53-D208†RVEYLDDRNT | 40    | >TP53-D208†RVEYLDNRNT | 33   | 7     |
| >TP53-D208†RVEYLDDR   | 652   | >TP53-D208†RVEYLDNR   | 296  | 356   |
| >TP53-D208†RVEYLDDRNT | 78    | >TP53-D208†RVEYLDNRNT | 70   | 8     |
| >TP53-D208†RVEYLDDR   | 1045  | >TP53-D208†RVEYLDNR   | 345  | 700   |
| >TP53-D208†LRVEYLDDR  | 1926  | >TP53-D208†LRVEYLDNR  | 415  | 1511  |
| >TP53-D208\DRNTFRHSV  | 2455  | >TP53-D208\VRNTFRHSV  | 413  | 2042  |
| >TP53-D208\DRNTFRHSV\ | 2444  | >TP53-D208\VRNTFRHSV\ | 325  | 2119  |
| >TP53-D208\DRNTFRHSV\ | 1973  | >TP53-D208\VRNTFRHSV\ | 241  | 1732  |
| >TP53-D208\DRNTFRHSV  | 1236  | >TP53-D208\VRNTFRHSV  | 236  | 1000  |
| >TP53-D208\DDRNTFRHS\ | 19720 | >TP53-D208\VRNTFRHS\  | 255  | 19465 |



|                       |       |                       |      |       |
|-----------------------|-------|-----------------------|------|-------|
| >TP53-D208\DDRNTFRHS\ | 15102 | >TP53-D208\DVRNTFRHS\ | 399  | 14703 |
| >TP53-D208\LDDRNTFRHS | 482   | >TP53-D208\LDVRNTFRHS | 371  | 111   |
| >TP53-D208\YLDDRNTF   | 187   | >TP53-D208\YLDVRNTF   | 1657 | 1470  |
| >TP53-D208\YLDDRNTFRH | 333   | >TP53-D208\YLDVRNTFRH | 2187 | 1854  |
| >TP53-D208\YLDDRNTF   | 149   | >TP53-D208\YLDVRNTF   | 1214 | 1065  |
| >TP53-D208\YLDDRNTFRH | 155   | >TP53-D208\YLDVRNTFRH | 1452 | 1297  |
| >TP53-D208\YLDDRNTF   | 367   | >TP53-D208\YLDVRNTF   | 2946 | 2579  |
| >TP53-D208\YLDDRNTF   | 87    | >TP53-D208\YLDVRNTF   | 1423 | 1336  |
| >TP53-D208\YLDDRNTFR  | 189   | >TP53-D208\YLDVRNTFR  | 4765 | 4576  |
| >TP53-D208\YLDDRNTFRH | 187   | >TP53-D208\YLDVRNTFRH | 2642 | 2455  |
| >TP53-D208\YLDDRNTFRH | 171   | >TP53-D208\YLDVRNTFRH | 3000 | 2829  |
| >TP53-D208\YLDDRNTFR  | 282   | >TP53-D208\YLDVRNTFR  | 163  | 119   |
| >TP53-D208\YLDDRNTFR  | 55    | >TP53-D208\YLDVRNTFR  | 41   | 14    |
| >TP53-D208\YLDDRNTFR  | 68    | >TP53-D208\YLDVRNTFR  | 70   | 2     |
| >TP53-D208\YLDDRNTF   | 255   | >TP53-D208\YLDVRNTF   | 218  | 37    |
| >TP53-D208\YLDDRNTFR  | 336   | >TP53-D208\YLDVRNTFR  | 1080 | 744   |
| >TP53-D208\EYLDDRNTF  | 103   | >TP53-D208\EYLDVRNTF  | 31   | 72    |
| >TP53-D208\EYLDDRNTF  | 667   | >TP53-D208\EYLDVRNTF  | 170  | 497   |
| >TP53-D208\EYLDDRNTF  | 18    | >TP53-D208\EYLDVRNTF  | 8    | 10    |
| >TP53-D208\EYLDDRNTF  | 381   | >TP53-D208\EYLDVRNTF  | 221  | 160   |
| >TP53-D208\EYLDDRNTF  | 301   | >TP53-D208\EYLDVRNTF  | 1141 | 840   |
| >TP53-D208\EYLDDRNTFR | 328   | >TP53-D208\EYLDVRNTFR | 85   | 243   |
| >TP53-D208\EYLDDRNTFR | 88    | >TP53-D208\EYLDVRNTFR | 26   | 62    |
| >TP53-D208\EYLDDRNTFR | 508   | >TP53-D208\EYLDVRNTFR | 96   | 412   |
| >TP53-D208\EYLDDRNTFR | 19    | >TP53-D208\EYLDVRNTFR | 20   | 1     |
| >TP53-D208\VEYLDDRNTF | 622   | >TP53-D208\VEYLDVRNTF | 96   | 526   |
| >TP53-D208\VEYLDDRNTF | 124   | >TP53-D208\VEYLDVRNTF | 63   | 61    |
| >TP53-D208\VEYLDDRNTF | 594   | >TP53-D208\VEYLDVRNTF | 265  | 329   |
| >TP53-D208\VEYLDDRNTF | 870   | >TP53-D208\VEYLDVRNTF | 318  | 552   |
| >TP53-D208\RVEYLDDR   | 433   | >TP53-D208\RVEYLDVR   | 66   | 367   |
| >TP53-D208\RVEYLDDRNT | 40    | >TP53-D208\RVEYLDVRNT | 19   | 21    |
| >TP53-D208\RVEYLDDR   | 652   | >TP53-D208\RVEYLDVR   | 365  | 287   |
| >TP53-D208\RVEYLDDRNT | 78    | >TP53-D208\RVEYLDVRNT | 60   | 18    |
| >TP53-D208\RVEYLDDR   | 1045  | >TP53-D208\RVEYLDVR   | 430  | 615   |
| >TP53-D208\NLRVEYLDD  | 24926 | >TP53-D208\NLRVEYLDV  | 417  | 24509 |
| >TP53-D208\NLRVEYLDD  | 33837 | >TP53-D208\NLRVEYLDV  | 44   | 33793 |
| >TP53-D208\DRNTFRHSV  | 20496 | >TP53-D208\YRNTFRHSV  | 200  | 20296 |
| >TP53-D208\DRNTFRHSV  | 2455  | >TP53-D208\YRNTFRHSV  | 118  | 2337  |
| >TP53-D208\DRNTFRHSV\ | 2444  | >TP53-D208\YRNTFRHSV\ | 88   | 2356  |
| >TP53-D208\DRNTFRHSV\ | 1973  | >TP53-D208\YRNTFRHSV\ | 68   | 1905  |
| >TP53-D208\DRNTFRHS   | 8536  | >TP53-D208\YRNTFRHS   | 425  | 8111  |
| >TP53-D208\DRNTFRHSV  | 1236  | >TP53-D208\YRNTFRHSV  | 52   | 1184  |
| >TP53-D208\DRNTFRHSV\ | 3881  | >TP53-D208\YRNTFRHSV\ | 406  | 3475  |

|                       |      |                       |      |      |
|-----------------------|------|-----------------------|------|------|
| >TP53-D208\DRNTFRHSV\ | 3275 | >TP53-D208\YRNTFRHSV\ | 114  | 3161 |
| >TP53-D208\DRNTFRHSV  | 2649 | >TP53-D208\YRNTFRHSV  | 65   | 2584 |
| >TP53-D208\DRNTFRHSV\ | 3714 | >TP53-D208\YRNTFRHSV\ | 115  | 3599 |
| >TP53-D208\DRNTFRHSV\ | 1923 | >TP53-D208\YRNTFRHSV\ | 48   | 1875 |
| >TP53-D208\LDDRNTFRHS | 2267 | >TP53-D208\LDYRNTFRHS | 100  | 2167 |
| >TP53-D208\LDDRNTFR   | 4530 | >TP53-D208\LDYRNTFR   | 247  | 4283 |
| >TP53-D208\LDDRNTFRHS | 5264 | >TP53-D208\LDYRNTFRHS | 251  | 5013 |
| >TP53-D208\LDDRNTFRHS | 482  | >TP53-D208\LDYRNTFRHS | 249  | 233  |
| >TP53-D208\YLDDRNTF   | 187  | >TP53-D208\YLDYRNTF   | 1245 | 1058 |
| >TP53-D208\YLDDRNTFRH | 333  | >TP53-D208\YLDYRNTFRH | 1848 | 1515 |
| >TP53-D208\YLDDRNTF   | 149  | >TP53-D208\YLDYRNTF   | 1508 | 1359 |
| >TP53-D208\YLDDRNTFRH | 155  | >TP53-D208\YLDYRNTFRH | 1806 | 1651 |
| >TP53-D208\YLDDRNTF   | 367  | >TP53-D208\YLDYRNTF   | 1755 | 1388 |
| >TP53-D208\YLDDRNTF   | 87   | >TP53-D208\YLDYRNTF   | 2389 | 2302 |
| >TP53-D208\YLDDRNTFR  | 189  | >TP53-D208\YLDYRNTFR  | 8773 | 8584 |
| >TP53-D208\YLDDRNTFRH | 187  | >TP53-D208\YLDYRNTFRH | 4549 | 4362 |
| >TP53-D208\YLDDRNTFRH | 171  | >TP53-D208\YLDYRNTFRH | 5117 | 4946 |
| >TP53-D208\YLDDRNTFR  | 282  | >TP53-D208\YLDYRNTFR  | 136  | 146  |
| >TP53-D208\YLDDRNTFR  | 55   | >TP53-D208\YLDYRNTFR  | 29   | 26   |
| >TP53-D208\YLDDRNTFR  | 68   | >TP53-D208\YLDYRNTFR  | 28   | 40   |
| >TP53-D208\YLDDRNTF   | 255  | >TP53-D208\YLDYRNTF   | 218  | 37   |
| >TP53-D208\YLDDRNTF   | 1092 | >TP53-D208\YLDYRNTF   | 326  | 766  |
| >TP53-D208\YLDDRNTFR  | 336  | >TP53-D208\YLDYRNTFR  | 756  | 420  |
| >TP53-D208\EYLDDRNTF  | 103  | >TP53-D208\EYLDYRNTF  | 42   | 61   |
| >TP53-D208\EYLDDRNTF  | 667  | >TP53-D208\EYLDYRNTF  | 225  | 442  |
| >TP53-D208\EYLDDRNTF  | 18   | >TP53-D208\EYLDYRNTF  | 11   | 7    |
| >TP53-D208\EYLDDRNTF  | 381  | >TP53-D208\EYLDYRNTF  | 179  | 202  |
| >TP53-D208\EYLDDRNTF  | 301  | >TP53-D208\EYLDYRNTF  | 501  | 200  |
| >TP53-D208\EYLDDRNTFR | 328  | >TP53-D208\EYLDYRNTFR | 52   | 276  |
| >TP53-D208\EYLDDRNTFR | 88   | >TP53-D208\EYLDYRNTFR | 36   | 52   |
| >TP53-D208\EYLDDRNTFR | 508  | >TP53-D208\EYLDYRNTFR | 177  | 331  |
| >TP53-D208\EYLDDRNTFR | 19   | >TP53-D208\EYLDYRNTFR | 17   | 2    |
| >TP53-D208\EYLDDRNTF  | 1389 | >TP53-D208\EYLDYRNTF  | 477  | 912  |
| >TP53-D208\VEYLDDRNTF | 622  | >TP53-D208\VEYLDYRNTF | 122  | 500  |
| >TP53-D208\VEYLDDRNTF | 124  | >TP53-D208\VEYLDYRNTF | 42   | 82   |
| >TP53-D208\VEYLDDRNTF | 594  | >TP53-D208\VEYLDYRNTF | 253  | 341  |
| >TP53-D208\VEYLDDRNTF | 1119 | >TP53-D208\VEYLDYRNTF | 466  | 653  |
| >TP53-D208\VEYLDDRNTF | 870  | >TP53-D208\VEYLDYRNTF | 195  | 675  |
| >TP53-D208\VEYLDDRNTF | 2225 | >TP53-D208\VEYLDYRNTF | 460  | 1765 |
| >TP53-D208\RVEYLDDR   | 433  | >TP53-D208\RVEYLDYR   | 14   | 419  |
| >TP53-D208\RVEYLDDRNT | 40   | >TP53-D208\RVEYLDYRNT | 22   | 18   |
| >TP53-D208\RVEYLDDR   | 652  | >TP53-D208\RVEYLDYR   | 81   | 571  |
| >TP53-D208\RVEYLDDRNT | 1271 | >TP53-D208\RVEYLDYRNT | 392  | 879  |

|                        |       |                       |      |       |
|------------------------|-------|-----------------------|------|-------|
| >TP53-D208\RVEYLDDRNT  | 78    | >TP53-D208\RVEYLDYRNT | 66   | 12    |
| >TP53-D208\RVEYLDDR    | 1045  | >TP53-D208\RVEYLDYR   | 62   | 983   |
| >TP53-D208\LRVEYLDD    | 26933 | >TP53-D208\LRVEYLDY   | 431  | 26502 |
| >TP53-D208\LRVEYLDD    | 15200 | >TP53-D208\LRVEYLDY   | 122  | 15078 |
| >TP53-D208\NLRVEYLDD   | 25911 | >TP53-D208\NLRVEYLDY  | 82   | 25829 |
| >TP53-D208\NLRVEYLDDR  | 3664  | >TP53-D208\NLRVEYLDYR | 487  | 3177  |
| >TP53-D208\NLRVEYLDDR  | 5169  | >TP53-D208\NLRVEYLDYR | 285  | 4884  |
| >TP53-D208\NLRVEYLDDR  | 3077  | >TP53-D208\NLRVEYLDYR | 282  | 2795  |
| >TP53-D208\NLRVEYLDD   | 24604 | >TP53-D208\NLRVEYLDY  | 123  | 24481 |
| >TP53-D208\NLRVEYLDD   | 35166 | >TP53-D208\NLRVEYLDY  | 451  | 34715 |
| >TP53-D208\GNLRVEYLDCE | 4900  | >TP53-D208\GNLRVEYLDY | 362  | 4538  |
| >TP53-D228/DCTTIHYN    | 287   | >TP53-D228/ACTTIHYN   | 91   | 196   |
| >TP53-D228/DCTTIHYN    | 1323  | >TP53-D228/ACTTIHYN   | 187  | 1136  |
| >TP53-D228/DCTTIHYN    | 902   | >TP53-D228/ACTTIHYN   | 45   | 857   |
| >TP53-D228/SDCTTIHYN   | 16474 | >TP53-D228/SACTTIHYN  | 140  | 16334 |
| >TP53-D228/SDCTTIHY    | 5619  | >TP53-D228/SACTTIHY   | 224  | 5395  |
| >TP53-D228/SDCTTIHYN   | 4671  | >TP53-D228/SACTTIHYN  | 224  | 4447  |
| >TP53-D228/SDCTTIHYN   | 7435  | >TP53-D228/SACTTIHYN  | 252  | 7183  |
| >TP53-D228/SDCTTIHY    | 1951  | >TP53-D228/SACTTIHY   | 483  | 1468  |
| >TP53-D228/SDCTTIHYN   | 400   | >TP53-D228/SACTTIHYN  | 118  | 282   |
| >TP53-D228/SDCTTIHY    | 2787  | >TP53-D228/SACTTIHY   | 211  | 2576  |
| >TP53-D228/SDCTTIHYN   | 1521  | >TP53-D228/SACTTIHYN  | 322  | 1199  |
| >TP53-D228/SDCTTIHY    | 1995  | >TP53-D228/SACTTIHY   | 217  | 1778  |
| >TP53-D228/SDCTTIHYN   | 1285  | >TP53-D228/SACTTIHYN  | 110  | 1175  |
| >TP53-D228/SDCTTIHY    | 4932  | >TP53-D228/SACTTIHY   | 257  | 4675  |
| >TP53-D228/SDCTTIHY    | 20162 | >TP53-D228/SACTTIHY   | 78   | 20084 |
| >TP53-D228/SDCTTIHYN   | 18094 | >TP53-D228/SACTTIHYN  | 90   | 18004 |
| >TP53-D228/VPYEPPEVGS  | 3513  | >TP53-D228/VPYEPPEVGS | 85   | 3428  |
| >TP53-D228/GSDCTTIHY   | 18    | >TP53-D228/GSACTTIHY  | 431  | 413   |
| >TP53-D228/GSDCTTIHYN  | 34    | >TP53-D228/GSACTTIHYN | 1142 | 1108  |
| >TP53-D228/GSDCTTIHYN  | 1028  | >TP53-D228/GSACTTIHYN | 289  | 739   |
| >TP53-D228/GSDCTTIHY   | 659   | >TP53-D228/GSACTTIHY  | 60   | 599   |
| >TP53-D228/GSDCTTIHYN  | 174   | >TP53-D228/GSACTTIHYN | 24   | 150   |
| >TP53-D228/GSDCTTIHYN  | 582   | >TP53-D228/GSACTTIHYN | 128  | 454   |
| >TP53-D228/GSDCTTIHY   | 1834  | >TP53-D228/GSACTTIHY  | 70   | 1764  |
| >TP53-D228/GSDCTTIHYN  | 6674  | >TP53-D228/GSACTTIHYN | 426  | 6248  |
| >TP53-D228/GSDCTTIHY   | 4202  | >TP53-D228/GSACTTIHY  | 208  | 3994  |
| >TP53-D228/GSDCTTIHYN  | 4427  | >TP53-D228/GSACTTIHYN | 317  | 4110  |
| >TP53-D228/GSDCTTIHY   | 68    | >TP53-D228/GSACTTIHY  | 21   | 47    |
| >TP53-D228/GSDCTTIHYN  | 99    | >TP53-D228/GSACTTIHYN | 26   | 73    |
| >TP53-D228/GSDCTTIHY   | 2361  | >TP53-D228/GSACTTIHY  | 350  | 2011  |
| >TP53-D228/GSDCTTIHY   | 535   | >TP53-D228/GSACTTIHY  | 125  | 410   |
| >TP53-D228/GSDCTTIHYN  | 247   | >TP53-D228/GSACTTIHYN | 61   | 186   |

|                         |       |                          |     |       |
|-------------------------|-------|--------------------------|-----|-------|
| >TP53-D228/GSDCTTIHY    | 242   | >TP53-D228/GSACTTIHY     | 341 | 99    |
| >TP53-D228/GSDCTTIHYN   | 97    | >TP53-D228/GSACTTIHYN'   | 139 | 42    |
| >TP53-D228/GSDCTTIHYN   | 2014  | >TP53-D228/GSACTTIHYN'   | 492 | 1522  |
| >TP53-D228/VGSDCTTIHY   | 353   | >TP53-D228/VGSACTTIHY    | 961 | 608   |
| >TP53-D228/VGSDCTTIHY   | 184   | >TP53-D228/VGSACTTIHY    | 157 | 27    |
| >TP53-D228/VGSDCTTIHY   | 1444  | >TP53-D228/VGSACTTIHY    | 410 | 1034  |
| >TP53-D228/VGSDCTTIHY   | 377   | >TP53-D228/VGSACTTIHY    | 295 | 82    |
| >TP53-D228/VGSDCTTIHY   | 449   | >TP53-D228/VGSACTTIHY    | 566 | 117   |
| >TP53-D228/EVGSDCCTIH'  | 11    | >TP53-D228/EVGSACTTIH'   | 15  | 4     |
| >TP53-D228/EVGSDCCTIH'  | 75    | >TP53-D228/EVGSACTTIH'   | 77  | 2     |
| >TP53-D228/EVGSDCCTIH'  | 387   | >TP53-D228/EVGSACTTIH'   | 396 | 9     |
| >TP53-D228/EVGSDCCTIH'  | 612   | >TP53-D228/EVGSACTTIH'   | 382 | 230   |
| >TP53-D228/EVGSDCCTI    | 1082  | >TP53-D228/EVGSACTTI     | 234 | 848   |
| >TP53-D228/EVGSDCCTI    | 504   | >TP53-D228/EVGSACTTI     | 172 | 332   |
| >TP53-D228/EVGSDCCTIH'  | 326   | >TP53-D228/EVGSACTTIH'   | 323 | 3     |
| >TP53-D228/EVGSDCCTIH'  | 819   | >TP53-D228/EVGSACTTIH'   | 400 | 419   |
| >TP53-D228/PEVGSDCCTI   | 1029  | >TP53-D228/PEVGSACTTI    | 205 | 824   |
| >TP53-D228/PEVGSDCCTI   | 342   | >TP53-D228/PEVGSACTTI    | 107 | 235   |
| >TP53-D228/E DCTTIHYN   | 521   | >TP53-D228/E CTTIHYN     | 75  | 446   |
| >TP53-D228/E DCTTIHYNM  | 585   | >TP53-D228/E CTTIHYNM    | 119 | 466   |
| >TP53-D228/E DCTTIHYN   | 287   | >TP53-D228/E CTTIHYN     | 383 | 96    |
| >TP53-D228/E DCTTIHYN   | 902   | >TP53-D228/E CTTIHYN     | 328 | 574   |
| >TP53-D228/E SDCTTIHYN  | 3428  | >TP53-D228/E SECTTIHYN   | 48  | 3380  |
| >TP53-D228/E SDCTTIHYN  | 400   | >TP53-D228/E SECTTIHYN   | 310 | 90    |
| >TP53-D228/E SDCTTIHY   | 1995  | >TP53-D228/E SECTTIHY    | 443 | 1552  |
| >TP53-D228/E SDCTTIHYN  | 1285  | >TP53-D228/E SECTTIHYN   | 267 | 1018  |
| >TP53-D228/E SDCTTIHY   | 6164  | >TP53-D228/E SECTTIHY    | 84  | 6080  |
| >TP53-D228/E SDCTTIHYN  | 14718 | >TP53-D228/E SECTTIHYN   | 436 | 14282 |
| >TP53-D228/E SDCTTIHYN  | 20077 | >TP53-D228/E SECTTIHYN   | 358 | 19719 |
| >TP53-D228/E SDCTTIHY   | 7491  | >TP53-D228/E SECTTIHY    | 224 | 7267  |
| >TP53-D228/E SDCTTIHYN  | 5196  | >TP53-D228/E SECTTIHYN   | 152 | 5044  |
| >TP53-D228/E SDCTTIHY   | 7709  | >TP53-D228/E SECTTIHY    | 83  | 7626  |
| >TP53-D228/E SDCTTIHYN  | 4791  | >TP53-D228/E SECTTIHYN   | 70  | 4721  |
| >TP53-D228/E SDCTTIHYN  | 18287 | >TP53-D228/E SECTTIHYN   | 467 | 17820 |
| >TP53-D228/E SDCTTIHYN  | 28700 | >TP53-D228/E SECTTIHYN   | 468 | 28232 |
| >TP53-D228/E SDCTTIHYN  | 11007 | >TP53-D228/E SECTTIHYN   | 299 | 10708 |
| >TP53-D228/E GSDCTTIHY  | 18    | >TP53-D228/E GSECTTIHY   | 78  | 60    |
| >TP53-D228/E GSDCTTIHYN | 34    | >TP53-D228/E GSECTTIHYN' | 272 | 238   |
| >TP53-D228/E GSDCTTIHYN | 174   | >TP53-D228/E GSECTTIHYN' | 160 | 14    |
| >TP53-D228/E GSDCTTIHYN | 582   | >TP53-D228/E GSECTTIHYN' | 492 | 90    |
| >TP53-D228/E GSDCTTIHY  | 68    | >TP53-D228/E GSECTTIHY   | 73  | 5     |
| >TP53-D228/E GSDCTTIHYN | 99    | >TP53-D228/E GSECTTIHYN' | 78  | 21    |
| >TP53-D228/E GSDCTTIHY  | 535   | >TP53-D228/E GSECTTIHY   | 212 | 323   |

|                        |      |                        |      |      |
|------------------------|------|------------------------|------|------|
| >TP53-D228EGSDCTTIHYN  | 247  | >TP53-D228EGSECTTIHYN' | 99   | 148  |
| >TP53-D228EGSDCTTIHY   | 242  | >TP53-D228EGSECTTIHY   | 307  | 65   |
| >TP53-D228EGSDCTTIHYN  | 97   | >TP53-D228EGSECTTIHYN' | 129  | 32   |
| >TP53-D228EVGSDCTTIHY  | 353  | >TP53-D228EVGSECTTIHY  | 796  | 443  |
| >TP53-D228EVGSDCTTIHY  | 184  | >TP53-D228EVGSECTTIHY  | 192  | 8    |
| >TP53-D228EVGSDCTTIHY  | 377  | >TP53-D228EVGSECTTIHY  | 513  | 136  |
| >TP53-D228EVGSDCTTIHY  | 449  | >TP53-D228EVGSECTTIHY  | 681  | 232  |
| >TP53-D228EVGSDCTTIH'  | 11   | >TP53-D228EVGSECTTIH)  | 15   | 4    |
| >TP53-D228EVGSDCTTIH'  | 75   | >TP53-D228EVGSECTTIH)  | 120  | 45   |
| >TP53-D228EVGSDCTTIH'  | 387  | >TP53-D228EVGSECTTIH)  | 462  | 75   |
| >TP53-D228EVGSDCTTIH'  | 326  | >TP53-D228EVGSECTTIH)  | 245  | 81   |
| >TP53-D228PEVGSDCTTI   | 342  | >TP53-D228PEVGSECTTI   | 102  | 240  |
| >TP53-D228(DCTTIHYN    | 287  | >TP53-D228(GCTTIHYN    | 41   | 246  |
| >TP53-D228(DCTTIHYN    | 1323 | >TP53-D228(GCTTIHYN    | 295  | 1028 |
| >TP53-D228(DCTTIHYN    | 902  | >TP53-D228(GCTTIHYN    | 384  | 518  |
| >TP53-D228(DCTTIHYN    | 6665 | >TP53-D228(GCTTIHYN    | 275  | 6390 |
| >TP53-D228(DCTTIHYN    | 787  | >TP53-D228(GCTTIHYN    | 339  | 448  |
| >TP53-D228(SDCTTIHYN   | 400  | >TP53-D228(SGCTTIHYN   | 172  | 228  |
| >TP53-D228(SDCTTIHY    | 2787 | >TP53-D228(SGCTTIHY    | 239  | 2548 |
| >TP53-D228(GSDCTTIHY   | 18   | >TP53-D228(GSGCTTIHY   | 1848 | 1830 |
| >TP53-D228(GSDCTTIHYN  | 34   | >TP53-D228(GSGCTTIHYN  | 3671 | 3637 |
| >TP53-D228(GSDCTTIHY   | 659  | >TP53-D228(GSGCTTIHY   | 170  | 489  |
| >TP53-D228(GSDCTTIHYN  | 174  | >TP53-D228(GSGCTTIHYN  | 53   | 121  |
| >TP53-D228(GSDCTTIHYN  | 582  | >TP53-D228(GSGCTTIHYN  | 411  | 171  |
| >TP53-D228(GSDCTTIHY   | 1834 | >TP53-D228(GSGCTTIHY   | 103  | 1731 |
| >TP53-D228(GSDCTTIHY   | 68   | >TP53-D228(GSGCTTIHY   | 149  | 81   |
| >TP53-D228(GSDCTTIHYN  | 99   | >TP53-D228(GSGCTTIHYN  | 187  | 88   |
| >TP53-D228(GSDCTTIHYN  | 247  | >TP53-D228(GSGCTTIHYN  | 270  | 23   |
| >TP53-D228(GSDCTTIHY   | 242  | >TP53-D228(GSGCTTIHY   | 1096 | 854  |
| >TP53-D228(GSDCTTIHYN  | 97   | >TP53-D228(GSGCTTIHYN  | 364  | 267  |
| >TP53-D228(VGSDCTTIHY  | 353  | >TP53-D228(VGSGCTTIHY  | 1406 | 1053 |
| >TP53-D228(VGSDCTTIHY  | 184  | >TP53-D228(VGSGCTTIHY  | 130  | 54   |
| >TP53-D228(VGSDCTTIHY  | 642  | >TP53-D228(VGSGCTTIHY  | 398  | 244  |
| >TP53-D228(VGSDCTTIHY  | 377  | >TP53-D228(VGSGCTTIHY  | 496  | 119  |
| >TP53-D228(VGSDCTTIHY  | 449  | >TP53-D228(VGSGCTTIHY  | 620  | 171  |
| >TP53-D228(EVGSDCTTIH' | 11   | >TP53-D228(EVGSGCTTIH' | 14   | 3    |
| >TP53-D228(EVGSDCTTIH' | 75   | >TP53-D228(EVGSGCTTIH' | 52   | 23   |
| >TP53-D228(EVGSDCTTIH' | 387  | >TP53-D228(EVGSGCTTIH' | 202  | 185  |
| >TP53-D228(EVGSDCTTI   | 504  | >TP53-D228(EVGSGCTTI   | 282  | 222  |
| >TP53-D228(EVGSDCTTIH' | 326  | >TP53-D228(EVGSGCTTIH' | 208  | 118  |
| >TP53-D228(EVGSDCTTIH' | 819  | >TP53-D228(EVGSGCTTIH' | 425  | 394  |
| >TP53-D228(PEVGSDCTTI  | 342  | >TP53-D228(PEVGSGCTTI  | 141  | 201  |
| >TP53-D228(DCTTIHYN    | 287  | >TP53-D228(HCTTIHYN    | 66   | 221  |

|                         |       |                         |      |       |
|-------------------------|-------|-------------------------|------|-------|
| >TP53-D228† DCTTIHYN    | 1323  | >TP53-D228† HCTTIHYN    | 317  | 1006  |
| >TP53-D228† DCTTIHYN    | 902   | >TP53-D228† HCTTIHYN    | 17   | 885   |
| >TP53-D228† DCTTIHYN    | 787   | >TP53-D228† HCTTIHYN    | 159  | 628   |
| >TP53-D228† SDCTTIHYN   | 400   | >TP53-D228† SHCTTIHYN   | 200  | 200   |
| >TP53-D228† SDCTTIH     | 1995  | >TP53-D228† SHCTTIH     | 311  | 1684  |
| >TP53-D228† SDCTTIHYN   | 1285  | >TP53-D228† SHCTTIHYN   | 167  | 1118  |
| >TP53-D228† SDCTTIH     | 5977  | >TP53-D228† SHCTTIH     | 373  | 5604  |
| >TP53-D228† SDCTTIHYN   | 5410  | >TP53-D228† SHCTTIHYN   | 338  | 5072  |
| >TP53-D228† SDCTTIHNYI  | 14988 | >TP53-D228† SHCTTIHNYI  | 498  | 14490 |
| >TP53-D228† VPYEPPEVGS  | 9431  | >TP53-D228† VPYEPPEVGS  | 354  | 9077  |
| >TP53-D228† GSDCTTIH    | 18    | >TP53-D228† GSHCTTIH    | 3788 | 3770  |
| >TP53-D228† GSDCTTIHYN  | 34    | >TP53-D228† GSHCTTIHYN  | 6336 | 6302  |
| >TP53-D228† GSDCTTIHYN  | 1028  | >TP53-D228† GSHCTTIHYN  | 443  | 585   |
| >TP53-D228† GSDCTTIH    | 659   | >TP53-D228† GSHCTTIH    | 140  | 519   |
| >TP53-D228† GSDCTTIHYN  | 174   | >TP53-D228† GSHCTTIHYN  | 48   | 126   |
| >TP53-D228† GSDCTTIH    | 14101 | >TP53-D228† GSHCTTIH    | 121  | 13980 |
| >TP53-D228† GSDCTTIHYN  | 15519 | >TP53-D228† GSHCTTIHYN  | 388  | 15131 |
| >TP53-D228† GSDCTTIHYN  | 582   | >TP53-D228† GSHCTTIHYN  | 246  | 336   |
| >TP53-D228† GSDCTTIH    | 1834  | >TP53-D228† GSHCTTIH    | 69   | 1765  |
| >TP53-D228† GSDCTTIHYN  | 6674  | >TP53-D228† GSHCTTIHYN  | 428  | 6246  |
| >TP53-D228† GSDCTTIH    | 4202  | >TP53-D228† GSHCTTIH    | 128  | 4074  |
| >TP53-D228† GSDCTTIHYN  | 4427  | >TP53-D228† GSHCTTIHYN  | 210  | 4217  |
| >TP53-D228† GSDCTTIH    | 68    | >TP53-D228† GSHCTTIH    | 18   | 50    |
| >TP53-D228† GSDCTTIHYN  | 99    | >TP53-D228† GSHCTTIHYN  | 21   | 78    |
| >TP53-D228† GSDCTTIH    | 535   | >TP53-D228† GSHCTTIH    | 306  | 229   |
| >TP53-D228† GSDCTTIHYN  | 247   | >TP53-D228† GSHCTTIHYN  | 145  | 102   |
| >TP53-D228† GSDCTTIH    | 242   | >TP53-D228† GSHCTTIH    | 1657 | 1415  |
| >TP53-D228† GSDCTTIHYN  | 97    | >TP53-D228† GSHCTTIHYN  | 571  | 474   |
| >TP53-D228† VGSDCTTIH   | 353   | >TP53-D228† VGSHTTIH    | 1319 | 966   |
| >TP53-D228† VGSDCTTIH   | 184   | >TP53-D228† VGSHTTIH    | 178  | 6     |
| >TP53-D228† VGSDCTTIH   | 377   | >TP53-D228† VGSHTTIH    | 362  | 15    |
| >TP53-D228† VGSDCTTIH   | 449   | >TP53-D228† VGSHTTIH    | 970  | 521   |
| >TP53-D228† EVGSDCTTIH' | 11    | >TP53-D228† EVGSHCTTIH' | 7    | 4     |
| >TP53-D228† EVGSDCTTIH' | 75    | >TP53-D228† EVGSHCTTIH' | 152  | 77    |
| >TP53-D228† EVGSDCTTIH' | 387   | >TP53-D228† EVGSHCTTIH' | 210  | 177   |
| >TP53-D228† EVGSDCTTI   | 504   | >TP53-D228† EVGSHCTTI   | 242  | 262   |
| >TP53-D228† EVGSDCTTIH' | 326   | >TP53-D228† EVGSHCTTIH' | 392  | 66    |
| >TP53-D228† EVGSDCTTIH' | 819   | >TP53-D228† EVGSHCTTIH' | 388  | 431   |
| >TP53-D228† PEVGSCTTI   | 342   | >TP53-D228† PEVGSCTTI   | 216  | 126   |
| >TP53-D228† DCTTIHYN    | 287   | >TP53-D228† NCTTIHYN    | 119  | 168   |
| >TP53-D228† DCTTIHYN    | 902   | >TP53-D228† NCTTIHYN    | 62   | 840   |
| >TP53-D228† SDCTTIHYN   | 400   | >TP53-D228† SNCTTIHYN   | 183  | 217   |
| >TP53-D228† SDCTTIHYN   | 1285  | >TP53-D228† SNCTTIHYN   | 462  | 823   |

|                         |       |                         |      |       |
|-------------------------|-------|-------------------------|------|-------|
| >TP53-D228†GSDCTTIHY    | 18    | >TP53-D228†GSNCTTIHY    | 503  | 485   |
| >TP53-D228†GSDCTTIHYN   | 34    | >TP53-D228†GSNCTTIHYN   | 1410 | 1376  |
| >TP53-D228†GSDCTTIHY    | 2475  | >TP53-D228†GSNCTTIHY    | 467  | 2008  |
| >TP53-D228†GSDCTTIHYN   | 1028  | >TP53-D228†GSNCTTIHYN   | 187  | 841   |
| >TP53-D228†GSDCTTIHY    | 659   | >TP53-D228†GSNCTTIHY    | 161  | 498   |
| >TP53-D228†GSDCTTIHYN   | 174   | >TP53-D228†GSNCTTIHYN   | 49   | 125   |
| >TP53-D228†GSDCTTIHYN   | 582   | >TP53-D228†GSNCTTIHYN   | 127  | 455   |
| >TP53-D228†GSDCTTIHY    | 1834  | >TP53-D228†GSNCTTIHY    | 69   | 1765  |
| >TP53-D228†GSDCTTIHYN   | 6674  | >TP53-D228†GSNCTTIHYN   | 418  | 6256  |
| >TP53-D228†GSDCTTIHY    | 4202  | >TP53-D228†GSNCTTIHY    | 209  | 3993  |
| >TP53-D228†GSDCTTIHYN   | 4427  | >TP53-D228†GSNCTTIHYN   | 323  | 4104  |
| >TP53-D228†GSDCTTIHY    | 68    | >TP53-D228†GSNCTTIHY    | 33   | 35    |
| >TP53-D228†GSDCTTIHYN   | 99    | >TP53-D228†GSNCTTIHYN   | 40   | 59    |
| >TP53-D228†GSDCTTIHY    | 2361  | >TP53-D228†GSNCTTIHY    | 429  | 1932  |
| >TP53-D228†GSDCTTIHY    | 535   | >TP53-D228†GSNCTTIHY    | 244  | 291   |
| >TP53-D228†GSDCTTIHYN   | 247   | >TP53-D228†GSNCTTIHYN   | 118  | 129   |
| >TP53-D228†GSDCTTIHY    | 242   | >TP53-D228†GSNCTTIHY    | 487  | 245   |
| >TP53-D228†GSDCTTIHYN   | 97    | >TP53-D228†GSNCTTIHYN   | 188  | 91    |
| >TP53-D228†VGS DCTTIHY  | 353   | >TP53-D228†VGS NCTTIHY  | 1196 | 843   |
| >TP53-D228†VGS DCTTIHY  | 184   | >TP53-D228†VGS NCTTIHY  | 222  | 38    |
| >TP53-D228†VGS DCTTIHY  | 377   | >TP53-D228†VGS NCTTIHY  | 375  | 2     |
| >TP53-D228†VGS DCTTIHY  | 449   | >TP53-D228†VGS NCTTIHY  | 562  | 113   |
| >TP53-D228†EVGS DCTTIH' | 11    | >TP53-D228†EVGS NCTTIH' | 13   | 2     |
| >TP53-D228†EVGS DCTTIH' | 75    | >TP53-D228†EVGS NCTTIH' | 72   | 3     |
| >TP53-D228†EVGS DCTTIH' | 387   | >TP53-D228†EVGS NCTTIH' | 276  | 111   |
| >TP53-D228†EVGS DCTTIH' | 612   | >TP53-D228†EVGS NCTTIH' | 409  | 203   |
| >TP53-D228†EVGS DCTTI   | 1082  | >TP53-D228†EVGS NCTTI   | 468  | 614   |
| >TP53-D228†EVGS DCTTI   | 504   | >TP53-D228†EVGS NCTTI   | 308  | 196   |
| >TP53-D228†EVGS DCTTIH' | 326   | >TP53-D228†EVGS NCTTIH' | 314  | 12    |
| >TP53-D228†PEVGS DCTTI  | 342   | >TP53-D228†PEVGS NCTTI  | 108  | 234   |
| >TP53-D228\DCTTIHYN     | 287   | >TP53-D228\VCTTIHYN     | 55   | 232   |
| >TP53-D228\DCTTIHYN     | 1323  | >TP53-D228\VCTTIHYN     | 121  | 1202  |
| >TP53-D228\DCTTIHYN     | 902   | >TP53-D228\VCTTIHYN     | 17   | 885   |
| >TP53-D228\DCTTIHYN     | 6665  | >TP53-D228\VCTTIHYN     | 454  | 6211  |
| >TP53-D228\SDCTTIHYN    | 16571 | >TP53-D228\SVCTTIHYN    | 390  | 16181 |
| >TP53-D228\SDCTTIHY     | 17860 | >TP53-D228\SVCTTIHY     | 89   | 17771 |
| >TP53-D228\SDCTTIHYN    | 16474 | >TP53-D228\SVCTTIHYN    | 62   | 16412 |
| >TP53-D228\SDCTTIHY     | 5619  | >TP53-D228\SVCTTIHY     | 12   | 5607  |
| >TP53-D228\SDCTTIHYN    | 4671  | >TP53-D228\SVCTTIHYN    | 13   | 4658  |
| >TP53-D228\SDCTTIHYN    | 7435  | >TP53-D228\SVCTTIHYN    | 11   | 7424  |
| >TP53-D228\SDCTTIHYN    | 6720  | >TP53-D228\SVCTTIHYN    | 415  | 6305  |
| >TP53-D228\SDCTTIHY     | 1951  | >TP53-D228\SVCTTIHY     | 73   | 1878  |
| >TP53-D228\SDCTTIHYN    | 400   | >TP53-D228\SVCTTIHYN    | 85   | 315   |

|                        |       |                        |      |       |
|------------------------|-------|------------------------|------|-------|
| >TP53-D228\SDCTTIHY    | 2787  | >TP53-D228\SVCTTIHY    | 111  | 2676  |
| >TP53-D228\SDCTTIHYN   | 1521  | >TP53-D228\SVCTTIHYN   | 299  | 1222  |
| >TP53-D228\SDCTTIHY    | 1995  | >TP53-D228\SVCTTIHY    | 22   | 1973  |
| >TP53-D228\SDCTTIHYN   | 1285  | >TP53-D228\SVCTTIHYN   | 11   | 1274  |
| >TP53-D228\SDCTTIHY    | 4932  | >TP53-D228\SVCTTIHY    | 175  | 4757  |
| >TP53-D228\SDCTTIHYN   | 4273  | >TP53-D228\SVCTTIHYN   | 496  | 3777  |
| >TP53-D228\VPYEPPEVGS  | 26886 | >TP53-D228\VPYEPPEVGS  | 312  | 26574 |
| >TP53-D228\VPYEPPEVGS  | 17850 | >TP53-D228\VPYEPPEVGS  | 499  | 17351 |
| >TP53-D228\VPYEPPEVGS  | 19817 | >TP53-D228\VPYEPPEVGS  | 197  | 19620 |
| >TP53-D228\VPYEPPEVGS  | 6142  | >TP53-D228\VPYEPPEVGS  | 63   | 6079  |
| >TP53-D228\VPYEPPEVGS  | 3513  | >TP53-D228\VPYEPPEVGS  | 428  | 3085  |
| >TP53-D228\GSDCTTIHY   | 18    | >TP53-D228\GSVCTTIHY   | 5988 | 5970  |
| >TP53-D228\GSDCTTIHYN  | 34    | >TP53-D228\GSVCTTIHYN  | 8808 | 8774  |
| >TP53-D228\GSDCTTIHY   | 21436 | >TP53-D228\GSVCTTIHY   | 342  | 21094 |
| >TP53-D228\GSDCTTIHY   | 659   | >TP53-D228\GSVCTTIHY   | 104  | 555   |
| >TP53-D228\GSDCTTIHYN  | 174   | >TP53-D228\GSVCTTIHYN  | 35   | 139   |
| >TP53-D228\GSDCTTIHYN  | 582   | >TP53-D228\GSVCTTIHYN  | 395  | 187   |
| >TP53-D228\GSDCTTIHY   | 1834  | >TP53-D228\GSVCTTIHY   | 89   | 1745  |
| >TP53-D228\GSDCTTIHY   | 4202  | >TP53-D228\GSVCTTIHY   | 153  | 4049  |
| >TP53-D228\GSDCTTIHYN  | 4427  | >TP53-D228\GSVCTTIHYN  | 241  | 4186  |
| >TP53-D228\GSDCTTIHY   | 68    | >TP53-D228\GSVCTTIHY   | 10   | 58    |
| >TP53-D228\GSDCTTIHYN  | 99    | >TP53-D228\GSVCTTIHYN  | 12   | 87    |
| >TP53-D228\GSDCTTIHY   | 535   | >TP53-D228\GSVCTTIHY   | 147  | 388   |
| >TP53-D228\GSDCTTIHYN  | 247   | >TP53-D228\GSVCTTIHYN  | 73   | 174   |
| >TP53-D228\GSDCTTIHY   | 242   | >TP53-D228\GSVCTTIHY   | 1932 | 1690  |
| >TP53-D228\GSDCTTIHYN  | 97    | >TP53-D228\GSVCTTIHYN  | 571  | 474   |
| >TP53-D228\VGSDCTTIHY  | 353   | >TP53-D228\VGSVCTTIHY  | 1354 | 1001  |
| >TP53-D228\VGSDCTTIHY  | 184   | >TP53-D228\VGSVCTTIHY  | 154  | 30    |
| >TP53-D228\VGSDCTTIHY  | 377   | >TP53-D228\VGSVCTTIHY  | 695  | 318   |
| >TP53-D228\VGSDCTTIHY  | 449   | >TP53-D228\VGSVCTTIHY  | 401  | 48    |
| >TP53-D228\EVGSDCTTIH' | 11    | >TP53-D228\EVGSVCTTIH' | 27   | 16    |
| >TP53-D228\EVGSDCTTIH' | 75    | >TP53-D228\EVGSVCTTIH' | 104  | 29    |
| >TP53-D228\EVGSDCTTIH' | 387   | >TP53-D228\EVGSVCTTIH' | 379  | 8     |
| >TP53-D228\EVGSDCTTIH' | 612   | >TP53-D228\EVGSVCTTIH' | 212  | 400   |
| >TP53-D228\EVGSDCTTI   | 1082  | >TP53-D228\EVGSVCTTI   | 75   | 1007  |
| >TP53-D228\EVGSDCTTI   | 504   | >TP53-D228\EVGSVCTTI   | 269  | 235   |
| >TP53-D228\EVGSDCTTIH' | 326   | >TP53-D228\EVGSVCTTIH' | 168  | 158   |
| >TP53-D228\PEVGSVCTTI  | 1029  | >TP53-D228\PEVGSVCTTI  | 246  | 783   |
| >TP53-D228\PEVGSVCTTI  | 1090  | >TP53-D228\PEVGSVCTTI  | 409  | 681   |
| >TP53-D228\PEVGSVCTTI  | 342   | >TP53-D228\PEVGSVCTTI  | 113  | 229   |
| >TP53-D228\EPPEVGSV    | 23581 | >TP53-D228\EPPEVGSV    | 463  | 23118 |
| >TP53-D228\EPPEVGSV    | 19395 | >TP53-D228\EPPEVGSV    | 486  | 18909 |
| >TP53-D228\YEPPEVGSV   | 18883 | >TP53-D228\YEPPEVGSV   | 51   | 18832 |



|                       |       |                       |      |       |
|-----------------------|-------|-----------------------|------|-------|
| >TP53-D228\YEPPEVGSD  | 5258  | >TP53-D228\YEPPEVGSV  | 41   | 5217  |
| >TP53-D228\DCCTTIHYN  | 287   | >TP53-D228\YCTTIHYN   | 13   | 274   |
| >TP53-D228\DCCTTIHYN  | 902   | >TP53-D228\YCTTIHYN   | 10   | 892   |
| >TP53-D228\DCCTTIHYN  | 3280  | >TP53-D228\YCTTIHYN   | 431  | 2849  |
| >TP53-D228\DCCTTIHYNM | 18121 | >TP53-D228\YCTTIHYNM  | 410  | 17711 |
| >TP53-D228\DCCTTIHYN  | 6665  | >TP53-D228\YCTTIHYN   | 162  | 6503  |
| >TP53-D228\DCCTTIHYNM | 4356  | >TP53-D228\YCTTIHYNM  | 366  | 3990  |
| >TP53-D228\DCCTTIHYN  | 787   | >TP53-D228\YCTTIHYN   | 275  | 512   |
| >TP53-D228\SDCTTIHYN  | 18757 | >TP53-D228\SYCTTIHYN  | 19   | 18738 |
| >TP53-D228\SDCTTIHYN  | 27771 | >TP53-D228\SYCTTIHYN  | 111  | 27660 |
| >TP53-D228\SDCTTIHYN  | 28490 | >TP53-D228\SYCTTIHYN  | 164  | 28326 |
| >TP53-D228\SDCTTIHYN  | 26252 | >TP53-D228\SYCTTIHYN  | 423  | 25829 |
| >TP53-D228\SDCTTIHYN  | 24292 | >TP53-D228\SYCTTIHYN  | 23   | 24269 |
| >TP53-D228\SDCTTIH    | 5619  | >TP53-D228\SYCTTIH    | 244  | 5375  |
| >TP53-D228\SDCTTIHYN  | 4671  | >TP53-D228\SYCTTIHYN  | 201  | 4470  |
| >TP53-D228\SDCTTIHYN  | 7435  | >TP53-D228\SYCTTIHYN  | 221  | 7214  |
| >TP53-D228\SDCTTIH    | 1951  | >TP53-D228\SYCTTIH    | 76   | 1875  |
| >TP53-D228\SDCTTIHYN  | 400   | >TP53-D228\SYCTTIHYN  | 16   | 384   |
| >TP53-D228\SDCTTIH    | 2787  | >TP53-D228\SYCTTIH    | 128  | 2659  |
| >TP53-D228\SDCTTIHYN  | 1521  | >TP53-D228\SYCTTIHYN  | 107  | 1414  |
| >TP53-D228\SDCTTIH    | 1995  | >TP53-D228\SYCTTIH    | 45   | 1950  |
| >TP53-D228\SDCTTIHYN  | 1285  | >TP53-D228\SYCTTIHYN  | 22   | 1263  |
| >TP53-D228\SDCTTIH    | 8812  | >TP53-D228\SYCTTIH    | 359  | 8453  |
| >TP53-D228\SDCTTIHYN  | 14650 | >TP53-D228\SYCTTIHYN  | 223  | 14427 |
| >TP53-D228\SDCTTIH    | 27299 | >TP53-D228\SYCTTIH    | 388  | 26911 |
| >TP53-D228\SDCTTIHYN  | 25994 | >TP53-D228\SYCTTIHYN  | 139  | 25855 |
| >TP53-D228\VPYEPPEVGS | 29016 | >TP53-D228\VPYEPPEVGS | 212  | 28804 |
| >TP53-D228\VPYEPPEVGS | 9431  | >TP53-D228\VPYEPPEVGS | 22   | 9409  |
| >TP53-D228\VPYEPPEVGS | 6142  | >TP53-D228\VPYEPPEVGS | 467  | 5675  |
| >TP53-D228\VPYEPPEVGS | 17659 | >TP53-D228\VPYEPPEVGS | 100  | 17559 |
| >TP53-D228\VPYEPPEVGS | 27979 | >TP53-D228\VPYEPPEVGS | 119  | 27860 |
| >TP53-D228\GSDCTTIH   | 18    | >TP53-D228\GSYCTTIH   | 3409 | 3391  |
| >TP53-D228\GSDCTTIHYN | 34    | >TP53-D228\GSYCTTIHYN | 5995 | 5961  |
| >TP53-D228\GSDCTTIH   | 10053 | >TP53-D228\GSYCTTIH   | 203  | 9850  |
| >TP53-D228\GSDCTTIH   | 2475  | >TP53-D228\GSYCTTIH   | 109  | 2366  |
| >TP53-D228\GSDCTTIHYN | 1028  | >TP53-D228\GSYCTTIHYN | 47   | 981   |
| >TP53-D228\GSDCTTIH   | 659   | >TP53-D228\GSYCTTIH   | 37   | 622   |
| >TP53-D228\GSDCTTIHYN | 174   | >TP53-D228\GSYCTTIHYN | 17   | 157   |
| >TP53-D228\GSDCTTIHYN | 582   | >TP53-D228\GSYCTTIHYN | 166  | 416   |
| >TP53-D228\GSDCTTIHYN | 6875  | >TP53-D228\GSYCTTIHYN | 469  | 6406  |
| >TP53-D228\GSDCTTIH   | 1834  | >TP53-D228\GSYCTTIH   | 44   | 1790  |
| >TP53-D228\GSDCTTIHYN | 6674  | >TP53-D228\GSYCTTIHYN | 180  | 6494  |
| >TP53-D228\GSDCTTIH   | 4202  | >TP53-D228\GSYCTTIH   | 29   | 4173  |

|                        |       |                        |      |       |
|------------------------|-------|------------------------|------|-------|
| >TP53-D228\GSDCTTIHYN  | 4427  | >TP53-D228\GSYCTTIHYN' | 47   | 4380  |
| >TP53-D228\GSDCTTIHY   | 68    | >TP53-D228\GSYCTTIHY   | 6    | 62    |
| >TP53-D228\GSDCTTIHYN  | 99    | >TP53-D228\GSYCTTIHYN' | 6    | 93    |
| >TP53-D228\GSDCTTIHY   | 2361  | >TP53-D228\GSYCTTIHY   | 307  | 2054  |
| >TP53-D228\GSDCTTIHY   | 535   | >TP53-D228\GSYCTTIHY   | 62   | 473   |
| >TP53-D228\GSDCTTIHYN  | 247   | >TP53-D228\GSYCTTIHYN' | 32   | 215   |
| >TP53-D228\GSDCTTIHY   | 242   | >TP53-D228\GSYCTTIHY   | 1077 | 835   |
| >TP53-D228\GSDCTTIHYN  | 97    | >TP53-D228\GSYCTTIHYN' | 381  | 284   |
| >TP53-D228\GSDCTTIHYN  | 2014  | >TP53-D228\GSYCTTIHYN' | 491  | 1523  |
| >TP53-D228\VGSDCTTIHY  | 353   | >TP53-D228\VGSYCTTIHY  | 1004 | 651   |
| >TP53-D228\VGSDCTTIHY  | 184   | >TP53-D228\VGSYCTTIHY  | 114  | 70    |
| >TP53-D228\VGSDCTTIHY  | 642   | >TP53-D228\VGSYCTTIHY  | 323  | 319   |
| >TP53-D228\VGSDCTTIHY  | 377   | >TP53-D228\VGSYCTTIHY  | 357  | 20    |
| >TP53-D228\VGSDCTTIHY  | 449   | >TP53-D228\VGSYCTTIHY  | 184  | 265   |
| >TP53-D228\EVGSDCTTIH' | 11    | >TP53-D228\EVGSYCTTIH\ | 13   | 2     |
| >TP53-D228\EVGSDCTTIH' | 75    | >TP53-D228\EVGSYCTTIH\ | 71   | 4     |
| >TP53-D228\EVGSDCTTIH' | 387   | >TP53-D228\EVGSYCTTIH\ | 213  | 174   |
| >TP53-D228\EVGSDCTTIH' | 612   | >TP53-D228\EVGSYCTTIH\ | 346  | 266   |
| >TP53-D228\EVGSDCTTI   | 1082  | >TP53-D228\EVGSYCTTI   | 367  | 715   |
| >TP53-D228\EVGSDCTTI   | 504   | >TP53-D228\EVGSYCTTI   | 111  | 393   |
| >TP53-D228\EVGSDCTTIH' | 326   | >TP53-D228\EVGSYCTTIH\ | 172  | 154   |
| >TP53-D228\EVGSDCTTIH' | 819   | >TP53-D228\EVGSYCTTIH\ | 492  | 327   |
| >TP53-D228\PEVGSDCTTI  | 1029  | >TP53-D228\PEVGSYCTTI  | 243  | 786   |
| >TP53-D228\PEVGSDCTTI  | 1090  | >TP53-D228\PEVGSYCTTI  | 386  | 704   |
| >TP53-D228\PEVGSDCTTI  | 342   | >TP53-D228\PEVGSYCTTI  | 66   | 276   |
| >TP53-D228\PPEVGSDCTT  | 657   | >TP53-D228\PPEVGSYCTT  | 497  | 160   |
| >TP53-D228\EPPEVGSD    | 32792 | >TP53-D228\EPPEVGSY    | 352  | 32440 |
| >TP53-D228\EPPEVGSD    | 12616 | >TP53-D228\EPPEVGSY    | 52   | 12564 |
| >TP53-D228\EPPEVGSD    | 34095 | >TP53-D228\EPPEVGSY    | 396  | 33699 |
| >TP53-D228\YEPPEVGSD   | 22495 | >TP53-D228\YEPPEVGSY   | 348  | 22147 |
| >TP53-D228\YEPPEVGSD   | 12680 | >TP53-D228\YEPPEVGSY   | 168  | 12512 |
| >TP53-D228\PYEPPEVGSD  | 25670 | >TP53-D228\PYEPPEVGSY  | 162  | 25508 |
| >TP53-D259\EDSSGNLLGR  | 68    | >TP53-D259\EEDSSGNLLGR | 18   | 50    |
| >TP53-D259\EDSSGNLL    | 273   | >TP53-D259\EESSGNLL    | 6    | 267   |
| >TP53-D259\EDSSGNLL    | 15127 | >TP53-D259\EESSGNLL    | 44   | 15083 |
| >TP53-D259\LEDSSGNLL   | 745   | >TP53-D259\LEESSGNLL   | 249  | 496   |
| >TP53-D259\LEDSSGNL    | 33    | >TP53-D259\LEESSGNL    | 31   | 2     |
| >TP53-D259\LEDSSGNLL   | 20    | >TP53-D259\LEESSGNLL   | 18   | 2     |
| >TP53-D259\LEDSSGNLL   | 816   | >TP53-D259\LEESSGNLL   | 450  | 366   |
| >TP53-D259\TLEDSSGNL   | 62    | >TP53-D259\TLEESSGNL   | 111  | 49    |
| >TP53-D259\TLEDSSGNLL  | 133   | >TP53-D259\TLEESSGNLL  | 188  | 55    |
| >TP53-D259\TLEDSSGNL   | 24    | >TP53-D259\TLEESSGNL   | 73   | 49    |
| >TP53-D259\TLEDSSGNLL  | 23    | >TP53-D259\TLEESSGNLL  | 49   | 26    |

|                        |       |                        |       |       |
|------------------------|-------|------------------------|-------|-------|
| >TP53-D259EITLEDSSGNL  | 495   | >TP53-D259EITLEESSGNL  | 686   | 191   |
| >TP53-D259EITLEDSSGNLL | 536   | >TP53-D259EITLEESSGNLL | 408   | 128   |
| >TP53-D259EITLEDSSGNL  | 471   | >TP53-D259EITLEESSGNL  | 491   | 20    |
| >TP53-D259EITLEDSSGNL  | 371   | >TP53-D259EITLEESSGNL  | 523   | 152   |
| >TP53-D259EITLEDSSGNLL | 270   | >TP53-D259EITLEESSGNLL | 320   | 50    |
| >TP53-D259EITLEDSSGNL  | 302   | >TP53-D259EITLEESSGNL  | 337   | 35    |
| >TP53-D259EITLEDSSGNLL | 339   | >TP53-D259EITLEESSGNLL | 416   | 77    |
| >TP53-D259EITLEDSSGNL  | 137   | >TP53-D259EITLEESSGNL  | 166   | 29    |
| >TP53-D259EITLEDSSGNLL | 354   | >TP53-D259EITLEESSGNLL | 487   | 133   |
| >TP53-D259EITLEDSSGNL  | 6     | >TP53-D259EITLEESSGNL  | 6     | 0     |
| >TP53-D259EITLEDSSGNLL | 18    | >TP53-D259EITLEESSGNLL | 16    | 2     |
| >TP53-D259EITLEDSSGNLL | 259   | >TP53-D259EITLEESSGNLL | 117   | 142   |
| >TP53-D259EITLEDSSGNL  | 341   | >TP53-D259EITLEESSGNL  | 277   | 64    |
| >TP53-D259EITLEDSSGNLL | 30    | >TP53-D259EITLEESSGNLL | 39    | 9     |
| >TP53-D259C DSSGNLLGR  | 68    | >TP53-D259C GSSGNLLGR  | 1364  | 1296  |
| >TP53-D259C DSSGNLLGR  | 1653  | >TP53-D259C GSSGNLLGR  | 286   | 1367  |
| >TP53-D259C EDSSGNLL   | 273   | >TP53-D259C EGSSGNLL   | 25854 | 25581 |
| >TP53-D259C LEDSSGNL   | 33    | >TP53-D259C LEGSSGNL   | 177   | 144   |
| >TP53-D259C LEDSSGNLL  | 20    | >TP53-D259C LEGSSGNLL  | 90    | 70    |
| >TP53-D259C TLEDSSGNL  | 62    | >TP53-D259C TLEGSSGNL  | 147   | 85    |
| >TP53-D259C TLEDSSGNLL | 133   | >TP53-D259C TLEGSSGNLL | 204   | 71    |
| >TP53-D259C TLEDSSGNL  | 24    | >TP53-D259C TLEGSSGNL  | 64    | 40    |
| >TP53-D259C TLEDSSGNLL | 23    | >TP53-D259C TLEGSSGNLL | 45    | 22    |
| >TP53-D259CITLEDSSGNL  | 495   | >TP53-D259CITLEGSSGNL  | 436   | 59    |
| >TP53-D259CITLEDSSGNL  | 471   | >TP53-D259CITLEGSSGNL  | 411   | 60    |
| >TP53-D259CITLEDSSGNL  | 371   | >TP53-D259CITLEGSSGNL  | 681   | 310   |
| >TP53-D259CITLEDSSGNLL | 270   | >TP53-D259CITLEGSSGNLL | 156   | 114   |
| >TP53-D259CITLEDSSGNL  | 302   | >TP53-D259CITLEGSSGNL  | 230   | 72    |
| >TP53-D259CITLEDSSGNLL | 339   | >TP53-D259CITLEGSSGNLL | 231   | 108   |
| >TP53-D259CITLEDSSGNL  | 137   | >TP53-D259CITLEGSSGNL  | 128   | 9     |
| >TP53-D259CITLEDSSGNLL | 354   | >TP53-D259CITLEGSSGNLL | 237   | 117   |
| >TP53-D259CITLEDSSGN   | 2207  | >TP53-D259CITLEGSSGN   | 399   | 1808  |
| >TP53-D259CITLEDSSGNL  | 6     | >TP53-D259CITLEGSSGNL  | 4     | 2     |
| >TP53-D259CITLEDSSGNLL | 18    | >TP53-D259CITLEGSSGNLL | 9     | 9     |
| >TP53-D259CITLEDSSGNLL | 259   | >TP53-D259CITLEGSSGNLL | 188   | 71    |
| >TP53-D259CITLEDSSGNL  | 341   | >TP53-D259CITLEGSSGNL  | 268   | 73    |
| >TP53-D259CITLEDSSGNLL | 30    | >TP53-D259CITLEGSSGNLL | 18    | 12    |
| >TP53-D259CITLEDSSGNLL | 604   | >TP53-D259CITLEGSSGNLL | 484   | 120   |
| >TP53-D259H DSSGNLLGR  | 68    | >TP53-D259H HSSGNLLGR  | 80    | 12    |
| >TP53-D259H DSSGNLLGR  | 4109  | >TP53-D259H HSSGNLLGR  | 158   | 3951  |
| >TP53-D259H EDSSGNLL   | 273   | >TP53-D259H EHSSGNLL   | 13728 | 13455 |
| >TP53-D259H EDSSGNLL   | 11701 | >TP53-D259H EHSSGNLL   | 194   | 11507 |
| >TP53-D259H EDSSGNLL   | 5812  | >TP53-D259H EHSSGNLL   | 47    | 5765  |

|                         |       |                         |       |       |
|-------------------------|-------|-------------------------|-------|-------|
| >TP53-D259† RPILTIITLED | 7691  | >TP53-D259† RPILTIITLEH | 260   | 7431  |
| >TP53-D259† LEDSSGNLL   | 745   | >TP53-D259† LEHSSGNLL   | 201   | 544   |
| >TP53-D259† LEDSSGNLL   | 5589  | >TP53-D259† LEHSSGNLL   | 239   | 5350  |
| >TP53-D259† LEDSSGNL    | 33    | >TP53-D259† LEHSSGNL    | 36    | 3     |
| >TP53-D259† LEDSSGNLL   | 20    | >TP53-D259† LEHSSGNLL   | 22    | 2     |
| >TP53-D259† LEDSSGNL    | 2586  | >TP53-D259† LEHSSGNL    | 226   | 2360  |
| >TP53-D259† LEDSSGNLL   | 1775  | >TP53-D259† LEHSSGNLL   | 135   | 1640  |
| >TP53-D259† LEDSSGNLL   | 816   | >TP53-D259† LEHSSGNLL   | 88    | 728   |
| >TP53-D259† TLEDSSGNL   | 62    | >TP53-D259† TLEHSSGNL   | 315   | 253   |
| >TP53-D259† TLEDSSGNLL  | 133   | >TP53-D259† TLEHSSGNLL  | 864   | 731   |
| >TP53-D259† TLEDSSGNL   | 24    | >TP53-D259† TLEHSSGNL   | 683   | 659   |
| >TP53-D259† TLEDSSGNLL  | 23    | >TP53-D259† TLEHSSGNLL  | 284   | 261   |
| >TP53-D259† ITLEDSSGNLL | 1858  | >TP53-D259† ITLEHSSGNLL | 257   | 1601  |
| >TP53-D259† ITLEDSSGNL  | 495   | >TP53-D259† ITLEHSSGNL  | 850   | 355   |
| >TP53-D259† ITLEDSSGNLL | 536   | >TP53-D259† ITLEHSSGNLL | 297   | 239   |
| >TP53-D259† ITLEDSSGNL  | 471   | >TP53-D259† ITLEHSSGNL  | 436   | 35    |
| >TP53-D259† ITLEDSSGNL  | 371   | >TP53-D259† ITLEHSSGNL  | 809   | 438   |
| >TP53-D259† ITLEDSSGNLL | 270   | >TP53-D259† ITLEHSSGNLL | 221   | 49    |
| >TP53-D259† ITLEDSSGNL  | 302   | >TP53-D259† ITLEHSSGNL  | 322   | 20    |
| >TP53-D259† ITLEDSSGNLL | 339   | >TP53-D259† ITLEHSSGNLL | 269   | 70    |
| >TP53-D259† ITLEDSSGNL  | 137   | >TP53-D259† ITLEHSSGNL  | 114   | 23    |
| >TP53-D259† ITLEDSSGNLL | 354   | >TP53-D259† ITLEHSSGNLL | 229   | 125   |
| >TP53-D259† ITLEDSSGNL  | 6     | >TP53-D259† ITLEHSSGNL  | 5     | 1     |
| >TP53-D259† ITLEDSSGNLL | 18    | >TP53-D259† ITLEHSSGNLL | 11    | 7     |
| >TP53-D259† ITLEDSSGNLL | 259   | >TP53-D259† ITLEHSSGNLL | 66    | 193   |
| >TP53-D259† ITLEDSSGNL  | 341   | >TP53-D259† ITLEHSSGNL  | 238   | 103   |
| >TP53-D259† ITLEDSSGNLL | 30    | >TP53-D259† ITLEHSSGNLL | 49    | 19    |
| >TP53-D259† ITLEDSSGNL  | 1970  | >TP53-D259† ITLEHSSGNL  | 402   | 1568  |
| >TP53-D259† LTIITLED    | 7321  | >TP53-D259† LTIITLEH    | 214   | 7107  |
| >TP53-D259† ILTIITLEDSS | 4003  | >TP53-D259† ILTIITLEHSS | 394   | 3609  |
| >TP53-D259† ILTIITLED   | 13153 | >TP53-D259† ILTIITLEH   | 320   | 12833 |
| >TP53-D259† DSSGNLLGR   | 68    | >TP53-D259† NSSGNLLGR   | 86    | 18    |
| >TP53-D259† EDSSGNLL    | 273   | >TP53-D259† ENSSGNLL    | 10027 | 9754  |
| >TP53-D259† LEDSSGNLL   | 745   | >TP53-D259† LENSSGNLL   | 222   | 523   |
| >TP53-D259† LEDSSGNLL   | 5589  | >TP53-D259† LENSSGNLL   | 315   | 5274  |
| >TP53-D259† LEDSSGNL    | 33    | >TP53-D259† LENSSGNL    | 58    | 25    |
| >TP53-D259† LEDSSGNLL   | 20    | >TP53-D259† LENSSGNLL   | 32    | 12    |
| >TP53-D259† LEDSSGNL    | 2586  | >TP53-D259† LENSSGNL    | 444   | 2142  |
| >TP53-D259† LEDSSGNLL   | 1775  | >TP53-D259† LENSSGNLL   | 270   | 1505  |
| >TP53-D259† LEDSSGNLL   | 816   | >TP53-D259† LENSSGNLL   | 406   | 410   |
| >TP53-D259† TLEDSSGNL   | 62    | >TP53-D259† TLENSSGNL   | 403   | 341   |
| >TP53-D259† TLEDSSGNLL  | 133   | >TP53-D259† TLENSSGNLL  | 168   | 35    |
| >TP53-D259† TLEDSSGNL   | 24    | >TP53-D259† TLENSSGNL   | 235   | 211   |

|                         |       |                         |      |       |
|-------------------------|-------|-------------------------|------|-------|
| >TP53-D259M TLEDSSGNLL  | 23    | >TP53-D259M TLENSSGNLL  | 129  | 106   |
| >TP53-D259M ITLEDSSGNLL | 1858  | >TP53-D259M ITLENSSGNLL | 491  | 1367  |
| >TP53-D259M ITLEDSSGNL  | 495   | >TP53-D259M ITLENSSGNL  | 793  | 298   |
| >TP53-D259M ITLEDSSGNL  | 471   | >TP53-D259M ITLENSSGNL  | 391  | 80    |
| >TP53-D259M ITLEDSSGNL  | 371   | >TP53-D259M ITLENSSGNL  | 785  | 414   |
| >TP53-D259M ITLEDSSGNLL | 270   | >TP53-D259M ITLENSSGNLL | 353  | 83    |
| >TP53-D259M ITLEDSSGNL  | 302   | >TP53-D259M ITLENSSGNL  | 208  | 94    |
| >TP53-D259M ITLEDSSGNLL | 339   | >TP53-D259M ITLENSSGNLL | 195  | 144   |
| >TP53-D259M ITLEDSSGNL  | 137   | >TP53-D259M ITLENSSGNL  | 124  | 13    |
| >TP53-D259M ITLEDSSGNLL | 354   | >TP53-D259M ITLENSSGNLL | 253  | 101   |
| >TP53-D259M ITLEDSSGNL  | 6     | >TP53-D259M ITLENSSGNL  | 5    | 1     |
| >TP53-D259M ITLEDSSGNLL | 18    | >TP53-D259M ITLENSSGNLL | 11   | 7     |
| >TP53-D259M ITLEDSSGNLL | 259   | >TP53-D259M ITLENSSGNLL | 125  | 134   |
| >TP53-D259M ITLEDSSGNL  | 341   | >TP53-D259M ITLENSSGNL  | 159  | 182   |
| >TP53-D259M ITLEDSSGNLL | 30    | >TP53-D259M ITLENSSGNLL | 42   | 12    |
| >TP53-D259S DSSGNLLGR   | 14438 | >TP53-D259S SSSGNLLGR   | 230  | 14208 |
| >TP53-D259S DSSGNLLGR   | 68    | >TP53-D259S SSSGNLLGR   | 180  | 112   |
| >TP53-D259S DSSGNLLGR   | 1653  | >TP53-D259S SSSGNLLGR   | 197  | 1456  |
| >TP53-D259S EDSSGNLL    | 273   | >TP53-D259S ESSSGNLL    | 9653 | 9380  |
| >TP53-D259S EDSSGNLLGR  | 24901 | >TP53-D259S ESSSGNLLGR  | 324  | 24577 |
| >TP53-D259S EDSSGNLLGR  | 5087  | >TP53-D259S ESSSGNLLGR  | 12   | 5075  |
| >TP53-D259S EDSSGNLL    | 10265 | >TP53-D259S ESSSGNLL    | 244  | 10021 |
| >TP53-D259S EDSSGNLL    | 5546  | >TP53-D259S ESSSGNLL    | 98   | 5448  |
| >TP53-D259S LEDSSGNLL   | 745   | >TP53-D259S LESSSGNLL   | 347  | 398   |
| >TP53-D259S LEDSSGNLL   | 5589  | >TP53-D259S LESSSGNLL   | 337  | 5252  |
| >TP53-D259S LEDSSGNL    | 33    | >TP53-D259S LESSSGNL    | 27   | 6     |
| >TP53-D259S LEDSSGNLL   | 20    | >TP53-D259S LESSSGNLL   | 16   | 4     |
| >TP53-D259S LEDSSGNLL   | 816   | >TP53-D259S LESSSGNLL   | 191  | 625   |
| >TP53-D259S TLEDSSGNL   | 62    | >TP53-D259S TLESSSGNL   | 172  | 110   |
| >TP53-D259S TLEDSSGNLL  | 133   | >TP53-D259S TLESSSGNLL  | 117  | 16    |
| >TP53-D259S TLEDSSGNL   | 24    | >TP53-D259S TLESSSGNL   | 274  | 250   |
| >TP53-D259S TLEDSSGNLL  | 23    | >TP53-D259S TLESSSGNLL  | 135  | 112   |
| >TP53-D259S ITLEDSSGNL  | 495   | >TP53-D259S ITLESSSGNL  | 553  | 58    |
| >TP53-D259S ITLEDSSGNLL | 536   | >TP53-D259S ITLESSSGNLL | 466  | 70    |
| >TP53-D259S ITLEDSSGNL  | 471   | >TP53-D259S ITLESSSGNL  | 345  | 126   |
| >TP53-D259S ITLEDSSGNL  | 371   | >TP53-D259S ITLESSSGNL  | 508  | 137   |
| >TP53-D259S ITLEDSSGNLL | 270   | >TP53-D259S ITLESSSGNLL | 273  | 3     |
| >TP53-D259S ITLEDSSGNL  | 302   | >TP53-D259S ITLESSSGNL  | 369  | 67    |
| >TP53-D259S ITLEDSSGNLL | 339   | >TP53-D259S ITLESSSGNLL | 334  | 5     |
| >TP53-D259S ITLEDSSGNL  | 137   | >TP53-D259S ITLESSSGNL  | 118  | 19    |
| >TP53-D259S ITLEDSSGNLL | 354   | >TP53-D259S ITLESSSGNLL | 263  | 91    |
| >TP53-D259S ITLEDSSGNLL | 1117  | >TP53-D259S ITLESSSGNLL | 470  | 647   |
| >TP53-D259S ITLEDSSGN   | 2207  | >TP53-D259S ITLESSSGN   | 144  | 2063  |

|                        |       |                        |       |       |
|------------------------|-------|------------------------|-------|-------|
| >TP53-D259\ITLEDSSGNL  | 6     | >TP53-D259\ITLESSGNL   | 3     | 3     |
| >TP53-D259\ITLEDSSGNLL | 18    | >TP53-D259\ITLESSGNLL  | 7     | 11    |
| >TP53-D259\ITLEDSSGNLL | 259   | >TP53-D259\ITLESSGNLL  | 54    | 205   |
| >TP53-D259\ITLEDSSGNL  | 341   | >TP53-D259\ITLESSGNL   | 169   | 172   |
| >TP53-D259\ITLEDSSGNLL | 30    | >TP53-D259\ITLESSGNLL  | 18    | 12    |
| >TP53-D259\DSSGNLLGR   | 68    | >TP53-D259\VSSGNLLGR   | 712   | 644   |
| >TP53-D259\EDSSGNLL    | 273   | >TP53-D259\EVSSGNLL    | 28295 | 28022 |
| >TP53-D259\EDSSGNLLGR  | 24901 | >TP53-D259\EVSSGNLLGR  | 424   | 24477 |
| >TP53-D259\EDSSGNLLGR  | 5087  | >TP53-D259\EVSSGNLLGR  | 9     | 5078  |
| >TP53-D259\EDSSGNLL    | 10265 | >TP53-D259\EVSSGNLL    | 39    | 10226 |
| >TP53-D259\EDSSGNLL    | 13840 | >TP53-D259\EVSSGNLL    | 290   | 13550 |
| >TP53-D259\RPILTIITLED | 13455 | >TP53-D259\RPILTIITLEV | 69    | 13386 |
| >TP53-D259\LEDSSGNL    | 727   | >TP53-D259\LEVSSGNL    | 455   | 272   |
| >TP53-D259\LEDSSGNLL   | 745   | >TP53-D259\LEVSSGNLL   | 434   | 311   |
| >TP53-D259\LEDSSGNLL   | 5589  | >TP53-D259\LEVSSGNLL   | 229   | 5360  |
| >TP53-D259\LEDSSGNL    | 33    | >TP53-D259\LEVSSGNL    | 23    | 10    |
| >TP53-D259\LEDSSGNLL   | 20    | >TP53-D259\LEVSSGNLL   | 14    | 6     |
| >TP53-D259\LEDSSGNLL   | 1775  | >TP53-D259\LEVSSGNLL   | 477   | 1298  |
| >TP53-D259\LEDSSGNLL   | 816   | >TP53-D259\LEVSSGNLL   | 87    | 729   |
| >TP53-D259\TLEDSSGNL   | 62    | >TP53-D259\TLEVSSGNL   | 575   | 513   |
| >TP53-D259\TLEDSSGNLL  | 133   | >TP53-D259\TLEVSSGNLL  | 525   | 392   |
| >TP53-D259\TLEDSSGNL   | 24    | >TP53-D259\TLEVSSGNL   | 715   | 691   |
| >TP53-D259\TLEDSSGNLL  | 23    | >TP53-D259\TLEVSSGNLL  | 283   | 260   |
| >TP53-D259\ITLEDSSGNL  | 495   | >TP53-D259\ITLEVSSGNL  | 722   | 227   |
| >TP53-D259\ITLEDSSGNLL | 536   | >TP53-D259\ITLEVSSGNLL | 332   | 204   |
| >TP53-D259\ITLEDSSGNL  | 471   | >TP53-D259\ITLEVSSGNL  | 446   | 25    |
| >TP53-D259\ITLEDSSGNL  | 371   | >TP53-D259\ITLEVSSGNL  | 514   | 143   |
| >TP53-D259\ITLEDSSGNLL | 270   | >TP53-D259\ITLEVSSGNLL | 146   | 124   |
| >TP53-D259\ITLEDSSGNL  | 302   | >TP53-D259\ITLEVSSGNL  | 135   | 167   |
| >TP53-D259\ITLEDSSGNLL | 339   | >TP53-D259\ITLEVSSGNLL | 102   | 237   |
| >TP53-D259\ITLEDSSGNL  | 137   | >TP53-D259\ITLEVSSGNL  | 137   | 0     |
| >TP53-D259\ITLEDSSGNLL | 354   | >TP53-D259\ITLEVSSGNLL | 246   | 108   |
| >TP53-D259\ITLEDSSGNL  | 6     | >TP53-D259\ITLEVSSGNL  | 7     | 1     |
| >TP53-D259\ITLEDSSGNLL | 18    | >TP53-D259\ITLEVSSGNLL | 21    | 3     |
| >TP53-D259\ITLEDSSGNLL | 259   | >TP53-D259\ITLEVSSGNLL | 79    | 180   |
| >TP53-D259\ITLEDSSGNL  | 341   | >TP53-D259\ITLEVSSGNL  | 286   | 55    |
| >TP53-D259\ITLEDSSGNLL | 30    | >TP53-D259\ITLEVSSGNLL | 13    | 17    |
| >TP53-D259\LTIITLED    | 23058 | >TP53-D259\LTIITLEV    | 279   | 22779 |
| >TP53-D259\LTIITLED    | 16662 | >TP53-D259\LTIITLEV    | 288   | 16374 |
| >TP53-D259\LTIITLED    | 19208 | >TP53-D259\LTIITLEV    | 178   | 19030 |
| >TP53-D259\LTIITLED    | 19182 | >TP53-D259\LTIITLEV    | 28    | 19154 |
| >TP53-D259\LTIITLED    | 26628 | >TP53-D259\LTIITLEV    | 68    | 26560 |
| >TP53-D259\LTIITLED    | 26356 | >TP53-D259\LTIITLEV    | 473   | 25883 |

|                         |       |                         |       |       |
|-------------------------|-------|-------------------------|-------|-------|
| >TP53-D259\ LTIITLED    | 35451 | >TP53-D259\ LTIITLEV    | 69    | 35382 |
| >TP53-D259\ LTIITLED    | 12524 | >TP53-D259\ LTIITLEV    | 56    | 12468 |
| >TP53-D259\ LTIITLED    | 18009 | >TP53-D259\ LTIITLEV    | 69    | 17940 |
| >TP53-D259\ LTIITLED    | 7321  | >TP53-D259\ LTIITLEV    | 106   | 7215  |
| >TP53-D259\ ILTIITLED   | 19360 | >TP53-D259\ ILTIITLEV   | 31    | 19329 |
| >TP53-D259\ ILTIITLED   | 4430  | >TP53-D259\ ILTIITLEV   | 13    | 4417  |
| >TP53-D259\ ILTIITLED   | 12988 | >TP53-D259\ ILTIITLEV   | 27    | 12961 |
| >TP53-D259\ ILTIITLED   | 20625 | >TP53-D259\ ILTIITLEV   | 127   | 20498 |
| >TP53-D259\ ILTIITLED   | 14884 | >TP53-D259\ ILTIITLEV   | 5     | 14879 |
| >TP53-D259\ ILTIITLED   | 22855 | >TP53-D259\ ILTIITLEV   | 40    | 22815 |
| >TP53-D259\ ILTIITLED   | 16845 | >TP53-D259\ ILTIITLEV   | 7     | 16838 |
| >TP53-D259\ ILTIITLED   | 25445 | >TP53-D259\ ILTIITLEV   | 10    | 25435 |
| >TP53-D259\ ILTIITLED   | 12046 | >TP53-D259\ ILTIITLEV   | 2     | 12044 |
| >TP53-D259\ PILTIITLED  | 23143 | >TP53-D259\ PILTIITLEV  | 405   | 22738 |
| >TP53-D259\ PILTIITLED  | 27965 | >TP53-D259\ PILTIITLEV  | 98    | 27867 |
| >TP53-D259\ PILTIITLED  | 24155 | >TP53-D259\ PILTIITLEV  | 89    | 24066 |
| >TP53-D259\ PILTIITLED  | 25743 | >TP53-D259\ PILTIITLEV  | 82    | 25661 |
| >TP53-D259\ PILTIITLED  | 34487 | >TP53-D259\ PILTIITLEV  | 57    | 34430 |
| >TP53-D259\ DSSGNLLGR   | 68    | >TP53-D259\ YSSGNLLGR   | 47    | 21    |
| >TP53-D259\ EDSSGNLL    | 273   | >TP53-D259\ EYSSGNLL    | 26324 | 26051 |
| >TP53-D259\ EDSSGNLL    | 26001 | >TP53-D259\ EYSSGNLL    | 137   | 25864 |
| >TP53-D259\ EDSSGNLLGR  | 5087  | >TP53-D259\ EYSSGNLLGR  | 254   | 4833  |
| >TP53-D259\ EDSSGNLLGR  | 3878  | >TP53-D259\ EYSSGNLLGR  | 41    | 3837  |
| >TP53-D259\ EDSSGNLL    | 18547 | >TP53-D259\ EYSSGNLL    | 482   | 18065 |
| >TP53-D259\ RPILTIITLED | 23444 | >TP53-D259\ RPILTIITLEY | 128   | 23316 |
| >TP53-D259\ RPILTIITLED | 7691  | >TP53-D259\ RPILTIITLEY | 16    | 7675  |
| >TP53-D259\ RPILTIITLED | 19668 | >TP53-D259\ RPILTIITLEY | 208   | 19460 |
| >TP53-D259\ RPILTIITLED | 12288 | >TP53-D259\ RPILTIITLEY | 14    | 12274 |
| >TP53-D259\ RPILTIITLED | 20318 | >TP53-D259\ RPILTIITLEY | 234   | 20084 |
| >TP53-D259\ LEDSSGNL    | 727   | >TP53-D259\ LEYSSGNL    | 259   | 468   |
| >TP53-D259\ LEDSSGNLL   | 745   | >TP53-D259\ LEYSSGNLL   | 28    | 717   |
| >TP53-D259\ LEDSSGNL    | 7906  | >TP53-D259\ LEYSSGNL    | 162   | 7744  |
| >TP53-D259\ LEDSSGNLL   | 5589  | >TP53-D259\ LEYSSGNLL   | 52    | 5537  |
| >TP53-D259\ LEDSSGNL    | 33    | >TP53-D259\ LEYSSGNL    | 24    | 9     |
| >TP53-D259\ LEDSSGNLL   | 20    | >TP53-D259\ LEYSSGNLL   | 14    | 6     |
| >TP53-D259\ LEDSSGNL    | 2586  | >TP53-D259\ LEYSSGNL    | 213   | 2373  |
| >TP53-D259\ LEDSSGNLL   | 1775  | >TP53-D259\ LEYSSGNLL   | 127   | 1648  |
| >TP53-D259\ LEDSSGNLL   | 816   | >TP53-D259\ LEYSSGNLL   | 21    | 795   |
| >TP53-D259\ TLEDSSGNL   | 62    | >TP53-D259\ TLEYSSGNL   | 288   | 226   |
| >TP53-D259\ TLEDSSGNLL  | 133   | >TP53-D259\ TLEYSSGNLL  | 287   | 154   |
| >TP53-D259\ TLEDSSGNL   | 24    | >TP53-D259\ TLEYSSGNL   | 1720  | 1696  |
| >TP53-D259\ TLEDSSGNLL  | 23    | >TP53-D259\ TLEYSSGNLL  | 602   | 579   |
| >TP53-D259\ ITLEDSSGNLL | 1858  | >TP53-D259\ ITLEYSSGNLL | 139   | 1719  |

|                        |       |                        |     |       |
|------------------------|-------|------------------------|-----|-------|
| >TP53-D259\ITLEDSSGNLL | 1773  | >TP53-D259\ITLEYSSGNLL | 393 | 1380  |
| >TP53-D259\ITLEDSSGNL  | 495   | >TP53-D259\ITLEYSSGNL  | 474 | 21    |
| >TP53-D259\ITLEDSSGNLL | 536   | >TP53-D259\ITLEYSSGNLL | 170 | 366   |
| >TP53-D259\ITLEDSSGNL  | 471   | >TP53-D259\ITLEYSSGNL  | 291 | 180   |
| >TP53-D259\ITLEDSSGNL  | 371   | >TP53-D259\ITLEYSSGNL  | 428 | 57    |
| >TP53-D259\ITLEDSSGNLL | 270   | >TP53-D259\ITLEYSSGNLL | 125 | 145   |
| >TP53-D259\ITLEDSSGNL  | 302   | >TP53-D259\ITLEYSSGNL  | 157 | 145   |
| >TP53-D259\ITLEDSSGNLL | 339   | >TP53-D259\ITLEYSSGNLL | 120 | 219   |
| >TP53-D259\ITLEDSSGNL  | 137   | >TP53-D259\ITLEYSSGNL  | 76  | 61    |
| >TP53-D259\ITLEDSSGNLL | 354   | >TP53-D259\ITLEYSSGNLL | 158 | 196   |
| >TP53-D259\ITLEDSSGN   | 2207  | >TP53-D259\ITLEYSSGN   | 434 | 1773  |
| >TP53-D259\ITLEDSSGNL  | 6     | >TP53-D259\ITLEYSSGNL  | 4   | 2     |
| >TP53-D259\ITLEDSSGNLL | 18    | >TP53-D259\ITLEYSSGNLL | 9   | 9     |
| >TP53-D259\ITLEDSSGNLL | 259   | >TP53-D259\ITLEYSSGNLL | 58  | 201   |
| >TP53-D259\ITLEDSSGNL  | 341   | >TP53-D259\ITLEYSSGNL  | 221 | 120   |
| >TP53-D259\ITLEDSSGNLL | 30    | >TP53-D259\ITLEYSSGNLL | 17  | 13    |
| >TP53-D259\LTIIITLED   | 22632 | >TP53-D259\LTIIITLEY   | 156 | 22476 |
| >TP53-D259\LTIIITLED   | 21643 | >TP53-D259\LTIIITLEY   | 329 | 21314 |
| >TP53-D259\LTIIITLED   | 24273 | >TP53-D259\LTIIITLEY   | 47  | 24226 |
| >TP53-D259\LTIIITLED   | 36541 | >TP53-D259\LTIIITLEY   | 429 | 36112 |
| >TP53-D259\LTIIITLED   | 14817 | >TP53-D259\LTIIITLEY   | 11  | 14806 |
| >TP53-D259\LTIIITLED   | 26209 | >TP53-D259\LTIIITLEY   | 120 | 26089 |
| >TP53-D259\LTIIITLED   | 18714 | >TP53-D259\LTIIITLEY   | 486 | 18228 |
| >TP53-D259\LTIIITLED   | 20637 | >TP53-D259\LTIIITLEY   | 43  | 20594 |
| >TP53-D259\LTIIITLED   | 18926 | >TP53-D259\LTIIITLEY   | 102 | 18824 |
| >TP53-D259\LTIIITLED   | 25625 | >TP53-D259\LTIIITLEY   | 469 | 25156 |
| >TP53-D259\LTIIITLED   | 7321  | >TP53-D259\LTIIITLEY   | 4   | 7317  |
| >TP53-D259\LTIIITLED   | 14810 | >TP53-D259\LTIIITLEY   | 56  | 14754 |
| >TP53-D259\LTIIITLED   | 17887 | >TP53-D259\LTIIITLEY   | 146 | 17741 |
| >TP53-D259\ILTIITLED   | 18954 | >TP53-D259\ILTIITLEY   | 475 | 18479 |
| >TP53-D259\ILTIITLED   | 13988 | >TP53-D259\ILTIITLEY   | 8   | 13980 |
| >TP53-D259\ILTIITLED   | 25516 | >TP53-D259\ILTIITLEY   | 68  | 25448 |
| >TP53-D259\ILTIITLED   | 13153 | >TP53-D259\ILTIITLEY   | 3   | 13150 |
| >TP53-D259\PILTIITLED  | 30211 | >TP53-D259\PILTIITLEY  | 117 | 30094 |
| >TP53-D259\PILTIITLED  | 23398 | >TP53-D259\PILTIITLEY  | 59  | 23339 |
| >TP53-D281/DRRTEENLR   | 9942  | >TP53-D281/ARRTEENLR   | 419 | 9523  |
| >TP53-D281/DRRTEENL    | 4154  | >TP53-D281/ARRTEENL    | 396 | 3758  |
| >TP53-D281/RDRRTEENL   | 6883  | >TP53-D281/RARRTEENL   | 133 | 6750  |
| >TP53-D281/RDRRTEENL   | 3973  | >TP53-D281/RARRTEENL   | 35  | 3938  |
| >TP53-D281/RDRRTEENL   | 4647  | >TP53-D281/RARRTEENL   | 38  | 4609  |
| >TP53-D281/RDRRTEENL   | 3530  | >TP53-D281/RARRTEENL   | 465 | 3065  |
| >TP53-D281/RDRRTEENL   | 18985 | >TP53-D281/RARRTEENL   | 69  | 18916 |
| >TP53-D281/GRDRRTEEN   | 3548  | >TP53-D281/GRARRTEEN   | 422 | 3126  |



|                       |       |                        |     |       |
|-----------------------|-------|------------------------|-----|-------|
| >TP53-D281/GRDRRTEEN  | 446   | >TP53-D281/GRARRTEEN   | 139 | 307   |
| >TP53-D281/CACPGRDR   | 2429  | >TP53-D281/CACPGRAR    | 271 | 2158  |
| >TP53-D281/CACPGRDRR  | 921   | >TP53-D281/CACPGRARR   | 58  | 863   |
| >TP53-D281/CACPGRDR   | 1363  | >TP53-D281/CACPGRAR    | 326 | 1037  |
| >TP53-D281/CACPGRDRR  | 545   | >TP53-D281/CACPGRARR   | 86  | 459   |
| >TP53-D281/CACPGRDRR  | 132   | >TP53-D281/CACPGRARR   | 103 | 29    |
| >TP53-D281/RVCACPGRDI | 1179  | >TP53-D281/RVCACPGRAI  | 446 | 733   |
| >TP53-D281/RVCACPGRDI | 2312  | >TP53-D281/RVCACPGRAI  | 495 | 1817  |
| >TP53-D281/RVCACPGRDI | 435   | >TP53-D281/RVCACPGRAI  | 313 | 122   |
| >TP53-D281/RVCACPGRDI | 37    | >TP53-D281/RVCACPGRAI  | 16  | 21    |
| >TP53-D281/RVCACPGRDI | 33    | >TP53-D281/RVCACPGRAI  | 14  | 19    |
| >TP53-D281/RVCACPGRDI | 1118  | >TP53-D281/RVCACPGRAI  | 459 | 659   |
| >TP53-D281/RVCACPGRDI | 584   | >TP53-D281/RVCACPGRAI  | 445 | 139   |
| >TP53-D281/RVCACPGRDI | 297   | >TP53-D281/RVCACPGRAI  | 57  | 240   |
| >TP53-D281/RVCACPGRDI | 255   | >TP53-D281/RVCACPGRAI  | 142 | 113   |
| >TP53-D281/RVCACPGRDI | 109   | >TP53-D281/RVCACPGRAI  | 72  | 37    |
| >TP53-D281ERDRRTEENL  | 25377 | >TP53-D281ERERRTEENL   | 482 | 24895 |
| >TP53-D281ERDRRTEENL  | 955   | >TP53-D281ERERRTEENL   | 25  | 930   |
| >TP53-D281ERGRDRRTEEN | 446   | >TP53-D281ERGRERRTEEN  | 142 | 304   |
| >TP53-D281ERCACPGRDR  | 2429  | >TP53-D281ERCACPRGRER  | 481 | 1948  |
| >TP53-D281ERCACPGRDRR | 921   | >TP53-D281ERCACPRGRERR | 316 | 605   |
| >TP53-D281ERCACPGRDRR | 545   | >TP53-D281ERCACPRGRERR | 305 | 240   |
| >TP53-D281ERCACPGRDR  | 824   | >TP53-D281ERCACPRGRER  | 409 | 415   |
| >TP53-D281ERCACPGRDRR | 132   | >TP53-D281ERCACPRGRERR | 127 | 5     |
| >TP53-D281ERVCACPGRDI | 435   | >TP53-D281ERVCACPGREF  | 492 | 57    |
| >TP53-D281ERVCACPGRDI | 37    | >TP53-D281ERVCACPGREF  | 21  | 16    |
| >TP53-D281ERVCACPGRDI | 33    | >TP53-D281ERVCACPGREF  | 23  | 10    |
| >TP53-D281ERVCACPGRDI | 1118  | >TP53-D281ERVCACPGREF  | 447 | 671   |
| >TP53-D281ERVCACPGRDI | 297   | >TP53-D281ERVCACPGREF  | 147 | 150   |
| >TP53-D281ERVCACPGRDI | 255   | >TP53-D281ERVCACPGREF  | 217 | 38    |
| >TP53-D281ERVCACPGRDI | 109   | >TP53-D281ERVCACPGREF  | 99  | 10    |
| >TP53-D281(DRRTEENLR  | 5580  | >TP53-D281(GRRTEENLR   | 338 | 5242  |
| >TP53-D281(RDRRTEENL  | 3973  | >TP53-D281(RGRRTEENL   | 227 | 3746  |
| >TP53-D281(RDRRTEENL  | 4647  | >TP53-D281(RGRRTEENL   | 301 | 4346  |
| >TP53-D281(GRDRRTEEN  | 446   | >TP53-D281(GRGRRTEEN   | 408 | 38    |
| >TP53-D281(CACPGRDRR  | 921   | >TP53-D281(CACPGRGRR   | 379 | 542   |
| >TP53-D281(CACPGRDRR  | 545   | >TP53-D281(CACPGRGRR   | 288 | 257   |
| >TP53-D281(CACPGRDRR  | 132   | >TP53-D281(CACPGRGRR   | 313 | 181   |
| >TP53-D281(RVCACPGRDI | 1179  | >TP53-D281(RVCACPGRGI  | 382 | 797   |
| >TP53-D281(RVCACPGRDI | 435   | >TP53-D281(RVCACPGRGI  | 571 | 136   |
| >TP53-D281(RVCACPGRDI | 37    | >TP53-D281(RVCACPGRGI  | 17  | 20    |
| >TP53-D281(RVCACPGRDI | 33    | >TP53-D281(RVCACPGRGI  | 24  | 9     |
| >TP53-D281(RVCACPGRDI | 297   | >TP53-D281(RVCACPGRGI  | 147 | 150   |

|                        |       |                        |     |       |
|------------------------|-------|------------------------|-----|-------|
| >TP53-D281C RVCACPGRDI | 255   | >TP53-D281C RVCACPGRGI | 130 | 125   |
| >TP53-D281C RVCACPGRDI | 109   | >TP53-D281C RVCACPGRGI | 112 | 3     |
| >TP53-D281F DRRTEENLR  | 9942  | >TP53-D281F HRRTEENLR  | 211 | 9731  |
| >TP53-D281F DRRTEENLR  | 5580  | >TP53-D281F HRRTEENLR  | 79  | 5501  |
| >TP53-D281F RDRRTEENL  | 3530  | >TP53-D281F RHRRTEENL  | 205 | 3325  |
| >TP53-D281F GRDRRTEEN  | 3548  | >TP53-D281F GRHRRTEEN  | 460 | 3088  |
| >TP53-D281F GRDRRTEEN  | 446   | >TP53-D281F GRHRRTEEN  | 243 | 203   |
| >TP53-D281F CACPGRDR   | 2429  | >TP53-D281F CACPGRHR   | 176 | 2253  |
| >TP53-D281F CACPGRDRR  | 921   | >TP53-D281F CACPGRHRR  | 43  | 878   |
| >TP53-D281F CACPGRDR   | 1363  | >TP53-D281F CACPGRHR   | 312 | 1051  |
| >TP53-D281F CACPGRDRR  | 545   | >TP53-D281F CACPGRHRR  | 108 | 437   |
| >TP53-D281F CACPGRDRR  | 132   | >TP53-D281F CACPGRHRR  | 83  | 49    |
| >TP53-D281F RVCACPGRDI | 1179  | >TP53-D281F RVCACPGRHI | 322 | 857   |
| >TP53-D281F RVCACPGRDI | 435   | >TP53-D281F RVCACPGRHI | 206 | 229   |
| >TP53-D281F RVCACPGRDI | 37    | >TP53-D281F RVCACPGRHI | 16  | 21    |
| >TP53-D281F RVCACPGRDI | 33    | >TP53-D281F RVCACPGRHI | 14  | 19    |
| >TP53-D281F RVCACPGRDI | 584   | >TP53-D281F RVCACPGRHI | 422 | 162   |
| >TP53-D281F RVCACPGRDI | 297   | >TP53-D281F RVCACPGRHI | 41  | 256   |
| >TP53-D281F RVCACPGRDI | 255   | >TP53-D281F RVCACPGRHI | 85  | 170   |
| >TP53-D281F RVCACPGRDI | 109   | >TP53-D281F RVCACPGRHI | 44  | 65    |
| >TP53-D281M RDRRTEENL  | 3973  | >TP53-D281M RNRRTTEENL | 413 | 3560  |
| >TP53-D281M GRDRRTEEN  | 446   | >TP53-D281M GRNRRTTEEN | 319 | 127   |
| >TP53-D281M CACPGRDR   | 2429  | >TP53-D281M CACPGRNR   | 369 | 2060  |
| >TP53-D281M CACPGRDRR  | 921   | >TP53-D281M CACPGRNRR  | 200 | 721   |
| >TP53-D281M CACPGRDR   | 1363  | >TP53-D281M CACPGRNR   | 486 | 877   |
| >TP53-D281M CACPGRDRR  | 545   | >TP53-D281M CACPGRNRR  | 191 | 354   |
| >TP53-D281M CACPGRDR   | 824   | >TP53-D281M CACPGRNR   | 474 | 350   |
| >TP53-D281M CACPGRDRR  | 132   | >TP53-D281M CACPGRNRR  | 133 | 1     |
| >TP53-D281M RVCACPGRDI | 1179  | >TP53-D281M RVCACPGRNI | 422 | 757   |
| >TP53-D281M RVCACPGRDI | 435   | >TP53-D281M RVCACPGRNI | 388 | 47    |
| >TP53-D281M RVCACPGRDI | 37    | >TP53-D281M RVCACPGRNI | 17  | 20    |
| >TP53-D281M RVCACPGRDI | 33    | >TP53-D281M RVCACPGRNI | 18  | 15    |
| >TP53-D281M RVCACPGRDI | 297   | >TP53-D281M RVCACPGRNI | 86  | 211   |
| >TP53-D281M RVCACPGRDI | 255   | >TP53-D281M RVCACPGRNI | 99  | 156   |
| >TP53-D281M RVCACPGRDI | 109   | >TP53-D281M RVCACPGRNI | 78  | 31    |
| >TP53-D281F DRRTEENLR  | 9942  | >TP53-D281F RRRTEENLR  | 77  | 9865  |
| >TP53-D281F DRRTEENL   | 4154  | >TP53-D281F RRRTEENL   | 170 | 3984  |
| >TP53-D281F DRRTEENL   | 17411 | >TP53-D281F RRRTEENL   | 393 | 17018 |
| >TP53-D281F DRRTEENLR  | 5580  | >TP53-D281F RRRTEENLR  | 40  | 5540  |
| >TP53-D281F DRRTEENLR  | 8617  | >TP53-D281F RRRTEENLR  | 146 | 8471  |
| >TP53-D281F DRRTEENL   | 6826  | >TP53-D281F RRRTEENL   | 63  | 6763  |
| >TP53-D281F DRRTEENLR  | 8294  | >TP53-D281F RRRTEENLR  | 74  | 8220  |
| >TP53-D281F DRRTEENLR  | 13818 | >TP53-D281F RRRTEENLR  | 251 | 13567 |

|                       |       |                        |     |       |
|-----------------------|-------|------------------------|-----|-------|
| >TP53-D281FDRRTEEENL  | 15675 | >TP53-D281FRRRTEEENL   | 356 | 15319 |
| >TP53-D281FDRRTEEENLR | 10480 | >TP53-D281FRRRTEEENLR  | 144 | 10336 |
| >TP53-D281FRDRRTEEENL | 3530  | >TP53-D281FRRRTEEENL   | 115 | 3415  |
| >TP53-D281FRDRRTEEENL | 17448 | >TP53-D281FRRRTEEENL   | 27  | 17421 |
| >TP53-D281FRDRRTEEENL | 19192 | >TP53-D281FRRRTEEENL   | 282 | 18910 |
| >TP53-D281FRDRRTEEE   | 17872 | >TP53-D281FRRRTEEE     | 125 | 17747 |
| >TP53-D281FRDRRTEEEN  | 14164 | >TP53-D281FRRRTEEEN    | 100 | 14064 |
| >TP53-D281FRDRRTEEENL | 2785  | >TP53-D281FRRRTEEENL   | 21  | 2764  |
| >TP53-D281FRDRRTEEENL | 14404 | >TP53-D281FRRRTEEENL   | 155 | 14249 |
| >TP53-D281FRDRRTEEENL | 11521 | >TP53-D281FRRRTEEENL   | 36  | 11485 |
| >TP53-D281FEVRCACPGF  | 26861 | >TP53-D281FEVRCACPGF   | 84  | 26777 |
| >TP53-D281FEVRCACPGF  | 34566 | >TP53-D281FEVRCACPGF   | 64  | 34502 |
| >TP53-D281FGRDRRTEEEN | 1630  | >TP53-D281FGRRRTEEEN   | 248 | 1382  |
| >TP53-D281FGRDRRTEEEN | 446   | >TP53-D281FGRRRTEEEN   | 128 | 318   |
| >TP53-D281FCACPGRDRR  | 921   | >TP53-D281FCACPGRRRR   | 342 | 579   |
| >TP53-D281FCACPGRDRR  | 545   | >TP53-D281FCACPGRRRR   | 366 | 179   |
| >TP53-D281FCACPGRDRR  | 132   | >TP53-D281FCACPGRRRR   | 621 | 489   |
| >TP53-D281FVCACPGRD   | 25870 | >TP53-D281FVCACPGRR    | 468 | 25402 |
| >TP53-D281FVCACPGRDI  | 435   | >TP53-D281FVCACPGRRF   | 841 | 406   |
| >TP53-D281FVCACPGRD   | 14824 | >TP53-D281FVCACPGRR    | 35  | 14789 |
| >TP53-D281FVCACPGRDI  | 37    | >TP53-D281FVCACPGRRF   | 16  | 21    |
| >TP53-D281FVCACPGRDI  | 33    | >TP53-D281FVCACPGRRF   | 23  | 10    |
| >TP53-D281FVCACPGRDI  | 297   | >TP53-D281FVCACPGRRF   | 149 | 148   |
| >TP53-D281FVCACPGRD   | 31043 | >TP53-D281FVCACPGRR    | 58  | 30985 |
| >TP53-D281FVCACPGRDI  | 255   | >TP53-D281FVCACPGRRF   | 139 | 116   |
| >TP53-D281FVCACPGRDI  | 109   | >TP53-D281FVCACPGRRF   | 115 | 6     |
| >TP53-D281FVRVCACPGRI | 9260  | >TP53-D281FVRVCACPGRI  | 279 | 8981  |
| >TP53-D281\RDRRTEEE   | 10956 | >TP53-D281\RVRRTTEE    | 311 | 10645 |
| >TP53-D281\RDRRTEEEN  | 11458 | >TP53-D281\RVRRTTEEN   | 410 | 11048 |
| >TP53-D281\RDRRTEEENL | 6883  | >TP53-D281\RVRRTTEEENL | 43  | 6840  |
| >TP53-D281\RDRRTEEENL | 3973  | >TP53-D281\RVRRTTEEENL | 14  | 3959  |
| >TP53-D281\RDRRTEEENL | 4647  | >TP53-D281\RVRRTTEEENL | 22  | 4625  |
| >TP53-D281\EVRCACPGF  | 22977 | >TP53-D281\EVRCACPGF   | 183 | 22794 |
| >TP53-D281\GRDRRTEEEN | 3548  | >TP53-D281\GRVRRTEEEN  | 424 | 3124  |
| >TP53-D281\GRDRRTEEEN | 446   | >TP53-D281\GRVRRTEEEN  | 269 | 177   |
| >TP53-D281\CACPGRDR   | 2429  | >TP53-D281\CACPGRVR    | 447 | 1982  |
| >TP53-D281\CACPGRDRR  | 921   | >TP53-D281\CACPGRVRR   | 75  | 846   |
| >TP53-D281\CACPGRDRR  | 545   | >TP53-D281\CACPGRVRR   | 148 | 397   |
| >TP53-D281\CACPGRDRR  | 132   | >TP53-D281\CACPGRVRR   | 150 | 18    |
| >TP53-D281\RVCACPGRD  | 25249 | >TP53-D281\RVCACPGRV   | 250 | 24999 |
| >TP53-D281\RVCACPGRD  | 30901 | >TP53-D281\RVCACPGRV   | 384 | 30517 |
| >TP53-D281\RVCACPGRDI | 2312  | >TP53-D281\RVCACPGRVF  | 498 | 1814  |
| >TP53-D281\RVCACPGRDI | 435   | >TP53-D281\RVCACPGRVF  | 259 | 176   |

|                       |       |                       |     |       |
|-----------------------|-------|-----------------------|-----|-------|
| >TP53-D281\RVCACPGRDI | 37    | >TP53-D281\RVCACPGRVI | 28  | 9     |
| >TP53-D281\RVCACPGRDI | 33    | >TP53-D281\RVCACPGRVI | 15  | 18    |
| >TP53-D281\RVCACPGRDI | 297   | >TP53-D281\RVCACPGRVI | 110 | 187   |
| >TP53-D281\RVCACPGRDI | 255   | >TP53-D281\RVCACPGRVI | 137 | 118   |
| >TP53-D281\RVCACPGRDI | 109   | >TP53-D281\RVCACPGRVI | 48  | 61    |
| >TP53-D281\DRRTEENL   | 4154  | >TP53-D281\YRRTEENL   | 189 | 3965  |
| >TP53-D281\RDRRTEENL  | 24517 | >TP53-D281\RYRRTEENL  | 16  | 24501 |
| >TP53-D281\RDRRTEEE   | 10956 | >TP53-D281\RYRRTEEE   | 398 | 10558 |
| >TP53-D281\RDRRTEENL  | 6883  | >TP53-D281\RYRRTEENL  | 53  | 6830  |
| >TP53-D281\RDRRTEENL  | 3973  | >TP53-D281\RYRRTEENL  | 17  | 3956  |
| >TP53-D281\RDRRTEENL  | 4647  | >TP53-D281\RYRRTEENL  | 18  | 4629  |
| >TP53-D281\RDRRTEENL  | 4800  | >TP53-D281\RYRRTEENL  | 65  | 4735  |
| >TP53-D281\EVRVCACPGF | 23102 | >TP53-D281\EVRVCACPGF | 54  | 23048 |
| >TP53-D281\EVRVCACPGF | 33584 | >TP53-D281\EVRVCACPGF | 437 | 33147 |
| >TP53-D281\EVRVCACPGF | 25897 | >TP53-D281\EVRVCACPGF | 389 | 25508 |
| >TP53-D281\GRDRRTEEN  | 3548  | >TP53-D281\GRYRRTEEN  | 132 | 3416  |
| >TP53-D281\GRDRRTEE   | 5114  | >TP53-D281\GRYRRTEE   | 457 | 4657  |
| >TP53-D281\GRDRRTEEN  | 1630  | >TP53-D281\GRYRRTEEN  | 199 | 1431  |
| >TP53-D281\GRDRRTEEN  | 446   | >TP53-D281\GRYRRTEEN  | 68  | 378   |
| >TP53-D281\CACPGRDR   | 2429  | >TP53-D281\CACPGRYR   | 52  | 2377  |
| >TP53-D281\CACPGRDRR  | 921   | >TP53-D281\CACPGRYRR  | 24  | 897   |
| >TP53-D281\CACPGRDR   | 1363  | >TP53-D281\CACPGRYR   | 167 | 1196  |
| >TP53-D281\CACPGRDRR  | 545   | >TP53-D281\CACPGRYRR  | 45  | 500   |
| >TP53-D281\CACPGRDR   | 824   | >TP53-D281\CACPGRYR   | 167 | 657   |
| >TP53-D281\CACPGRDRR  | 132   | >TP53-D281\CACPGRYRR  | 79  | 53    |
| >TP53-D281\CACPGRDR   | 5897  | >TP53-D281\CACPGRYR   | 322 | 5575  |
| >TP53-D281\CACPGRDRR  | 5044  | >TP53-D281\CACPGRYRR  | 251 | 4793  |
| >TP53-D281\VCACPGRDRI | 4064  | >TP53-D281\VCACPGRYRF | 277 | 3787  |
| >TP53-D281\RVCACPGRD  | 18070 | >TP53-D281\RVCACPGRY  | 311 | 17759 |
| >TP53-D281\RVCACPGRDI | 1179  | >TP53-D281\RVCACPGRYF | 105 | 1074  |
| >TP53-D281\RVCACPGRDI | 2818  | >TP53-D281\RVCACPGRYF | 295 | 2523  |
| >TP53-D281\RVCACPGRDI | 435   | >TP53-D281\RVCACPGRYF | 131 | 304   |
| >TP53-D281\RVCACPGRD  | 32803 | >TP53-D281\RVCACPGRY  | 386 | 32417 |
| >TP53-D281\RVCACPGRD  | 24686 | >TP53-D281\RVCACPGRY  | 132 | 24554 |
| >TP53-D281\RVCACPGRD  | 18314 | >TP53-D281\RVCACPGRY  | 20  | 18294 |
| >TP53-D281\RVCACPGRDI | 37    | >TP53-D281\RVCACPGRYF | 9   | 28    |
| >TP53-D281\RVCACPGRDI | 33    | >TP53-D281\RVCACPGRYF | 13  | 20    |
| >TP53-D281\RVCACPGRDI | 1118  | >TP53-D281\RVCACPGRYF | 88  | 1030  |
| >TP53-D281\RVCACPGRDI | 584   | >TP53-D281\RVCACPGRYF | 379 | 205   |
| >TP53-D281\RVCACPGRD  | 22471 | >TP53-D281\RVCACPGRY  | 10  | 22461 |
| >TP53-D281\RVCACPGRD  | 21784 | >TP53-D281\RVCACPGRY  | 424 | 21360 |
| >TP53-D281\RVCACPGRD  | 19024 | >TP53-D281\RVCACPGRY  | 74  | 18950 |
| >TP53-D281\RVCACPGRD  | 23167 | >TP53-D281\RVCACPGRY  | 90  | 23077 |

|                       |       |                        |       |       |
|-----------------------|-------|------------------------|-------|-------|
| >TP53-D281\RVCACPGRD  | 32865 | >TP53-D281\RVCACPGRY   | 263   | 32602 |
| >TP53-D281\RVCACPGRDI | 297   | >TP53-D281\RVCACPGRYF  | 32    | 265   |
| >TP53-D281\RVCACPGRDI | 255   | >TP53-D281\RVCACPGRYF  | 39    | 216   |
| >TP53-D281\RVCACPGRDI | 109   | >TP53-D281\RVCACPGRYF  | 31    | 78    |
| >TP53-D281\VRVCACPGRI | 31775 | >TP53-D281\VRVCACPGRI  | 283   | 31492 |
| >TP53-D281\VRVCACPGRI | 9260  | >TP53-D281\VRVCACPGRI  | 91    | 9169  |
| >TP53-D324£LDGEYFTL   | 16628 | >TP53-D324£LEGEYFTL    | 476   | 16152 |
| >TP53-D324£LDGEYFTLQI | 87    | >TP53-D324£LEGEYFTLQI  | 7     | 80    |
| >TP53-D324£LDGEYFTL   | 8429  | >TP53-D324£LEGEYFTL    | 48    | 8381  |
| >TP53-D324£LDGEYFTL   | 15138 | >TP53-D324£LEGEYFTL    | 26    | 15112 |
| >TP53-D324£LDGEYFTL   | 1176  | >TP53-D324£LEGEYFTL    | 116   | 1060  |
| >TP53-D324£LDGEYFTL   | 20652 | >TP53-D324£LEGEYFTL    | 499   | 20153 |
| >TP53-D324£LDGEYFTLQI | 3164  | >TP53-D324£LEGEYFTLQI  | 45    | 3119  |
| >TP53-D324£LDGEYFTL   | 344   | >TP53-D324£LEGEYFTL    | 11181 | 10837 |
| >TP53-D324£LDGEYFTLQI | 94    | >TP53-D324£LEGEYFTLQI  | 4534  | 4440  |
| >TP53-D324£PLDGEYFTL  | 249   | >TP53-D324£PLEGEYFTL   | 416   | 167   |
| >TP53-D324£PLDGEYFTL  | 22    | >TP53-D324£PLEGEYFTL   | 640   | 618   |
| >TP53-D324£PLDGEYFTLQ | 68    | >TP53-D324£PLEGEYFTLQI | 1532  | 1464  |
| >TP53-D324£PLDGEYFTL  | 224   | >TP53-D324£PLEGEYFTL   | 1966  | 1742  |
| >TP53-D324£PLDGEYFTL  | 22    | >TP53-D324£PLEGEYFTL   | 1947  | 1925  |
| >TP53-D324£PLDGEYFTLQ | 140   | >TP53-D324£PLEGEYFTLQI | 5264  | 5124  |
| >TP53-D324£PLDGEYFTL  | 23    | >TP53-D324£PLEGEYFTL   | 2420  | 2397  |
| >TP53-D324£PLDGEYFTLQ | 158   | >TP53-D324£PLEGEYFTLQI | 6391  | 6233  |
| >TP53-D324£PLDGEYFTL  | 11    | >TP53-D324£PLEGEYFTL   | 16    | 5     |
| >TP53-D324£PLDGEYFTLQ | 111   | >TP53-D324£PLEGEYFTLQI | 177   | 66    |
| >TP53-D324£KPLDGEYF   | 296   | >TP53-D324£KPLEGEYF    | 122   | 174   |
| >TP53-D324£KPLDGEYFTL | 212   | >TP53-D324£KPLEGEYFTL  | 99    | 113   |
| >TP53-D324£KPLDGEYF   | 516   | >TP53-D324£KPLEGEYF    | 404   | 112   |
| >TP53-D324£KPLDGEYF   | 541   | >TP53-D324£KPLEGEYF    | 466   | 75    |
| >TP53-D324£KPLDGEYFTL | 321   | >TP53-D324£KPLEGEYFTL  | 212   | 109   |
| >TP53-D324£KPLDGEYF   | 287   | >TP53-D324£KPLEGEYF    | 264   | 23    |
| >TP53-D324£KPLDGEYF   | 195   | >TP53-D324£KPLEGEYF    | 211   | 16    |
| >TP53-D324£KPLDGEYFTL | 306   | >TP53-D324£KPLEGEYFTL  | 299   | 7     |
| >TP53-D324£KKPLDGEY   | 504   | >TP53-D324£KKPLEGEY    | 397   | 107   |
| >TP53-D324£KKPLDGEYF  | 31    | >TP53-D324£KKPLEGEYF   | 30    | 1     |
| >TP53-D324£KKKPLDGEY  | 83    | >TP53-D324£KKKPLEGEY   | 103   | 20    |
| >TP53-D324£KKKPLDGEY  | 138   | >TP53-D324£KKKPLEGEY   | 99    | 39    |
| >TP53-D324£KKKPLDGEYF | 14    | >TP53-D324£KKKPLEGEYF  | 12    | 2     |
| >TP53-D324£PKKKPLDGEY | 315   | >TP53-D324£PKKKPLEGEY  | 725   | 410   |
| >TP53-D324£PKKKPLDGEY | 78    | >TP53-D324£PKKKPLEGEY  | 58    | 20    |
| >TP53-D324£QPKKKPLDGE | 303   | >TP53-D324£QPKKKPLEGE  | 345   | 42    |
| >TP53-D324£DGEYFTLQI  | 3772  | >TP53-D324£SGEYFTLQI   | 145   | 3627  |
| >TP53-D324£LDGEYFTLQI | 87    | >TP53-D324£LSGEYFTLQI  | 1475  | 1388  |

|                         |       |                         |       |       |
|-------------------------|-------|-------------------------|-------|-------|
| >TP53-D324S LDGEYFTLQIF | 9687  | >TP53-D324S LSGEYFTLQIR | 144   | 9543  |
| >TP53-D324S LDGEYFTL    | 24046 | >TP53-D324S LSGEYFTL    | 105   | 23941 |
| >TP53-D324S LDGEYFTLQI  | 26398 | >TP53-D324S LSGEYFTLQI  | 382   | 26016 |
| >TP53-D324S LDGEYFTLQI  | 20722 | >TP53-D324S LSGEYFTLQI  | 224   | 20498 |
| >TP53-D324S LDGEYFTLQI  | 30061 | >TP53-D324S LSGEYFTLQI  | 368   | 29693 |
| >TP53-D324S LDGEYFTL    | 12466 | >TP53-D324S LSGEYFTL    | 194   | 12272 |
| >TP53-D324S LDGEYFTLQI  | 20509 | >TP53-D324S LSGEYFTLQI  | 128   | 20381 |
| >TP53-D324S LDGEYFTL    | 344   | >TP53-D324S LSGEYFTL    | 24365 | 24021 |
| >TP53-D324S LDGEYFTLQI  | 94    | >TP53-D324S LSGEYFTLQI  | 16501 | 16407 |
| >TP53-D324S PLDGEYFTL   | 249   | >TP53-D324S PLSGEYFTL   | 31    | 218   |
| >TP53-D324S PLDGEYFTLQ  | 1235  | >TP53-D324S PLSGEYFTLQI | 163   | 1072  |
| >TP53-D324S PLDGEYFTL   | 22    | >TP53-D324S PLSGEYFTL   | 93    | 71    |
| >TP53-D324S PLDGEYFTLQ  | 68    | >TP53-D324S PLSGEYFTLQI | 302   | 234   |
| >TP53-D324S PLDGEYFTL   | 224   | >TP53-D324S PLSGEYFTL   | 688   | 464   |
| >TP53-D324S PLDGEYFTL   | 22    | >TP53-D324S PLSGEYFTL   | 78    | 56    |
| >TP53-D324S PLDGEYFTLQ  | 140   | >TP53-D324S PLSGEYFTLQI | 537   | 397   |
| >TP53-D324S PLDGEYFTL   | 23    | >TP53-D324S PLSGEYFTL   | 37    | 14    |
| >TP53-D324S PLDGEYFTLQ  | 158   | >TP53-D324S PLSGEYFTLQI | 218   | 60    |
| >TP53-D324S PLDGEYFTL   | 11    | >TP53-D324S PLSGEYFTL   | 6     | 5     |
| >TP53-D324S PLDGEYFTLQ  | 111   | >TP53-D324S PLSGEYFTLQI | 51    | 60    |
| >TP53-D324S KPLDGEYF    | 296   | >TP53-D324S KPLSGEYF    | 20    | 276   |
| >TP53-D324S KPLDGEYFTL  | 212   | >TP53-D324S KPLSGEYFTL  | 29    | 183   |
| >TP53-D324S KPLDGEYFTL  | 526   | >TP53-D324S KPLSGEYFTL  | 239   | 287   |
| >TP53-D324S KPLDGEYF    | 516   | >TP53-D324S KPLSGEYF    | 114   | 402   |
| >TP53-D324S KPLDGEYFTL  | 321   | >TP53-D324S KPLSGEYFTL  | 224   | 97    |
| >TP53-D324S KPLDGEYF    | 287   | >TP53-D324S KPLSGEYF    | 350   | 63    |
| >TP53-D324S KPLDGEYF    | 195   | >TP53-D324S KPLSGEYF    | 198   | 3     |
| >TP53-D324S KPLDGEYFTL  | 306   | >TP53-D324S KPLSGEYFTL  | 270   | 36    |
| >TP53-D324S KKPLDGEY    | 504   | >TP53-D324S KKPLSGEY    | 113   | 391   |
| >TP53-D324S KKPLDGEYF   | 31    | >TP53-D324S KKPLSGEYF   | 11    | 20    |
| >TP53-D324S KKPLDGEYFT  | 611   | >TP53-D324S KKPLSGEYFTL | 179   | 432   |
| >TP53-D324S KKKPLDGEY   | 83    | >TP53-D324S KKKPLSGEY   | 82    | 1     |
| >TP53-D324S KKKPLDGEY   | 138   | >TP53-D324S KKKPLSGEY   | 37    | 101   |
| >TP53-D324S KKKPLDGEYF  | 14    | >TP53-D324S KKKPLSGEYF  | 7     | 7     |
| >TP53-D324S PKKKPLDGEY  | 315   | >TP53-D324S PKKKPLSGEY  | 532   | 217   |
| >TP53-D324S PKKKPLDGEY  | 994   | >TP53-D324S PKKKPLSGEY  | 269   | 725   |
| >TP53-D324S PKKKPLDGEY  | 78    | >TP53-D324S PKKKPLSGEYI | 23    | 55    |
| >TP53-D324S QPKKKPLDG   | 913   | >TP53-D324S QPKKKPLSG   | 105   | 808   |
| >TP53-D324S QPKKKPLDGE  | 303   | >TP53-D324S QPKKKPLSGE  | 281   | 22    |
| >TP53-D324S QPKKKPLDGE  | 812   | >TP53-D324S QPKKKPLSGE  | 293   | 519   |
| >TP53-D42Y- DLMLSPDDI   | 15480 | >TP53-D42Y- YLMLSPDDI   | 55    | 15425 |
| >TP53-D42Y- DLMLSPDDI   | 5239  | >TP53-D42Y- YLMLSPDDI   | 26    | 5213  |
| >TP53-D42Y- DLMLSPDDIE  | 18156 | >TP53-D42Y- YLMLSPDDIE  | 233   | 17923 |

|                        |       |                         |       |       |
|------------------------|-------|-------------------------|-------|-------|
| >TP53-D42Y- DLMLSPDDI  | 6588  | >TP53-D42Y- YLMLSPDDI   | 10    | 6578  |
| >TP53-D42Y- DLMLSPDDI  | 20436 | >TP53-D42Y- YLMLSPDDI   | 401   | 20035 |
| >TP53-D42Y- DLMLSPDDI  | 6532  | >TP53-D42Y- YLMLSPDDI   | 29    | 6503  |
| >TP53-D42Y- DLMLSPDDI  | 5163  | >TP53-D42Y- YLMLSPDDI   | 16    | 5147  |
| >TP53-D42Y- DLMLSPDDI  | 8296  | >TP53-D42Y- YLMLSPDDI   | 52    | 8244  |
| >TP53-D42Y- DLMLSPDDI  | 1415  | >TP53-D42Y- YLMLSPDDI   | 14    | 1401  |
| >TP53-D42Y- DLMLSPDDI  | 9506  | >TP53-D42Y- YLMLSPDDI   | 57    | 9449  |
| >TP53-D42Y- DLMLSPDDIE | 10150 | >TP53-D42Y- YLMLSPDDIE  | 56    | 10094 |
| >TP53-D42Y- DDLMLSPDDI | 32654 | >TP53-D42Y- DYMLMLSPDDI | 315   | 32339 |
| >TP53-D42Y- DDLMLSPDDI | 436   | >TP53-D42Y- DYMLMLSPDDI | 1701  | 1265  |
| >TP53-D42Y- DDLMLSPDDI | 237   | >TP53-D42Y- DYMLMLSPDDI | 20733 | 20496 |
| >TP53-D42Y- LSPLPSQAME | 23887 | >TP53-D42Y- LSPLPSQAME  | 118   | 23769 |
| >TP53-D42Y- MDDLMLSPD  | 520   | >TP53-D42Y- MDYLMLSPD   | 39    | 481   |
| >TP53-D42Y- MDDLMLSPD  | 277   | >TP53-D42Y- MDYLMLSPD   | 19    | 258   |
| >TP53-D42Y- MDDLMLSPD  | 762   | >TP53-D42Y- MDYLMLSPD   | 236   | 526   |
| >TP53-D42Y- MDDLMLSPD  | 107   | >TP53-D42Y- MDYLMLSPD   | 62    | 45    |
| >TP53-D42Y- AMDDLMLS   | 255   | >TP53-D42Y- AMDYLMLS    | 2153  | 1898  |
| >TP53-D42Y- AMDDLMLS   | 463   | >TP53-D42Y- AMDYLMLS    | 6053  | 5590  |
| >TP53-D42Y- QAMDDLML   | 2007  | >TP53-D42Y- QAMDYLML    | 406   | 1601  |
| >TP53-D42Y- QAMDDLML   | 826   | >TP53-D42Y- QAMDYLML    | 243   | 583   |
| >TP53-D42Y- QAMDDLML   | 318   | >TP53-D42Y- QAMDYLML    | 111   | 207   |
| >TP53-D42Y- QAMDDLML   | 897   | >TP53-D42Y- QAMDYLML    | 348   | 549   |
| >TP53-D42Y- QAMDDLML   | 386   | >TP53-D42Y- QAMDYLML    | 55    | 331   |
| >TP53-D42Y- QAMDDLML   | 307   | >TP53-D42Y- QAMDYLML    | 120   | 187   |
| >TP53-D42Y- SQAMDDLMI  | 593   | >TP53-D42Y- SQAMDYLM    | 220   | 373   |
| >TP53-D42Y- SQAMDDLMI  | 155   | >TP53-D42Y- SQAMDYLM    | 58    | 97    |
| >TP53-D42Y- SQAMDDLMI  | 463   | >TP53-D42Y- SQAMDYLM    | 239   | 224   |
| >TP53-D42Y- SQAMDDLMI  | 1071  | >TP53-D42Y- SQAMDYLM    | 240   | 831   |
| >TP53-D42Y- SQAMDDLMI  | 473   | >TP53-D42Y- SQAMDYLM    | 55    | 418   |
| >TP53-D42Y- SQAMDDLMI  | 1528  | >TP53-D42Y- SQAMDYLM    | 292   | 1236  |
| >TP53-D42Y- LPSQAMDDL  | 8     | >TP53-D42Y- LPSQAMDYL   | 5     | 3     |
| >TP53-D42Y- LPSQAMDDL  | 42    | >TP53-D42Y- LPSQAMDYLI  | 23    | 19    |
| >TP53-D42Y- LPSQAMDDL  | 173   | >TP53-D42Y- LPSQAMDYLI  | 140   | 33    |
| >TP53-D42Y- LPSQAMDDL  | 95    | >TP53-D42Y- LPSQAMDYL   | 98    | 3     |
| >TP53-D42Y- LPSQAMDDL  | 86    | >TP53-D42Y- LPSQAMDYLI  | 70    | 16    |
| >TP53-D42Y- LPSQAMDD   | 5037  | >TP53-D42Y- LPSQAMDY    | 10    | 5027  |
| >TP53-D42Y- LPSQAMDDL  | 114   | >TP53-D42Y- LPSQAMDYL   | 192   | 78    |
| >TP53-D42Y- LPSQAMDDL  | 125   | >TP53-D42Y- LPSQAMDYLI  | 44    | 81    |
| >TP53-D42Y- LPSQAMDDL  | 57    | >TP53-D42Y- LPSQAMDYLI  | 101   | 44    |
| >TP53-D42Y- LPSQAMDD   | 15528 | >TP53-D42Y- LPSQAMDY    | 65    | 15463 |
| >TP53-D42Y- LPSQAMDDL  | 874   | >TP53-D42Y- LPSQAMDYL   | 330   | 544   |
| >TP53-D42Y- LPSQAMDDL  | 838   | >TP53-D42Y- LPSQAMDYLI  | 368   | 470   |
| >TP53-D42Y- LPSQAMDDL  | 90    | >TP53-D42Y- LPSQAMDYLI  | 108   | 18    |

|                        |       |                        |     |       |
|------------------------|-------|------------------------|-----|-------|
| >TP53-D42Y- LPSQAMDD   | 31267 | >TP53-D42Y- LPSQAMDY   | 72  | 31195 |
| >TP53-D42Y- LPSQAMDD   | 20526 | >TP53-D42Y- LPSQAMDY   | 198 | 20328 |
| >TP53-D42Y- LPSQAMDDL  | 273   | >TP53-D42Y- LPSQAMDYLI | 169 | 104   |
| >TP53-D42Y- PLPSQAMDD  | 5062  | >TP53-D42Y- PLPSQAMDYI | 471 | 4591  |
| >TP53-D42Y- PLPSQAMDD  | 630   | >TP53-D42Y- PLPSQAMDYI | 140 | 490   |
| >TP53-D42Y- PLPSQAMDD  | 26394 | >TP53-D42Y- PLPSQAMDY  | 196 | 26198 |
| >TP53-D42Y- PLPSQAMDD  | 4697  | >TP53-D42Y- PLPSQAMDYI | 377 | 4320  |
| >TP53-D42Y- SPLPSQAMDI | 7     | >TP53-D42Y- SPLPSQAMD' | 6   | 1     |
| >TP53-D42Y- SPLPSQAMDI | 189   | >TP53-D42Y- SPLPSQAMD' | 208 | 19    |
| >TP53-D42Y- SPLPSQAMDI | 16634 | >TP53-D42Y- SPLPSQAMD' | 165 | 16469 |
| >TP53-D42Y- SPLPSQAMDI | 11531 | >TP53-D42Y- SPLPSQAMD' | 488 | 11043 |
| >TP53-D42Y- SPLPSQAMDI | 36177 | >TP53-D42Y- SPLPSQAMD' | 301 | 35876 |
| >TP53-D49H- PDDIEQWFT  | 240   | >TP53-D49H- PDHIEQWFT  | 299 | 59    |
| >TP53-D49H- SPDDIEQWF  | 339   | >TP53-D49H- SPDHIEQWF  | 370 | 31    |
| >TP53-D49H- SPDDIEQW   | 46    | >TP53-D49H- SPDHIEQW   | 63  | 17    |
| >TP53-D49H- SPDDIEQW   | 12    | >TP53-D49H- SPDHIEQW   | 10  | 2     |
| >TP53-D49H- LSPDDIEQW  | 195   | >TP53-D49H- LSPDHIEQW  | 67  | 128   |
| >TP53-D49H- LSPDDIEQWF | 180   | >TP53-D49H- LSPDHIEQWF | 76  | 104   |
| >TP53-D49H- LSPDDIEQW  | 126   | >TP53-D49H- LSPDHIEQW  | 197 | 71    |
| >TP53-D49H- LSPDDIEQW  | 149   | >TP53-D49H- LSPDHIEQW  | 111 | 38    |
| >TP53-D49H- LSPDDIEQW  | 181   | >TP53-D49H- LSPDHIEQW  | 19  | 162   |
| >TP53-D49H- LSPDDIEQWF | 10    | >TP53-D49H- LSPDHIEQWF | 6   | 4     |
| >TP53-D49H- LSPDDIEQWF | 190   | >TP53-D49H- LSPDHIEQWF | 45  | 145   |
| >TP53-D49H- LSPDDIEQWF | 84    | >TP53-D49H- LSPDHIEQWF | 57  | 27    |
| >TP53-D49H- LSPDDIEQW  | 218   | >TP53-D49H- LSPDHIEQW  | 149 | 69    |
| >TP53-D49H- MLSPDDIEQ  | 405   | >TP53-D49H- MLSPDHIEQ  | 245 | 160   |
| >TP53-D49H- MLSPDDIEQ\ | 107   | >TP53-D49H- MLSPDHIEQ\ | 105 | 2     |
| >TP53-D49H- MLSPDDIEQ  | 21    | >TP53-D49H- MLSPDHIEQ  | 9   | 12    |
| >TP53-D49H- MLSPDDIEQ\ | 129   | >TP53-D49H- MLSPDHIEQ\ | 142 | 13    |
| >TP53-D49H- MLSPDDIEQ\ | 213   | >TP53-D49H- MLSPDHIEQ\ | 88  | 125   |
| >TP53-D49H- MLSPDDIEQ\ | 93    | >TP53-D49H- MLSPDHIEQ\ | 51  | 42    |
| >TP53-D49H- MLSPDDIEQ\ | 427   | >TP53-D49H- MLSPDHIEQ\ | 342 | 85    |
| >TP53-D49H- MLSPDDIEQ\ | 131   | >TP53-D49H- MLSPDHIEQ\ | 262 | 131   |
| >TP53-D49H- MLSPDDIEQ\ | 204   | >TP53-D49H- MLSPDHIEQ\ | 182 | 22    |
| >TP53-D49H- MLSPDDIEQ\ | 20    | >TP53-D49H- MLSPDHIEQ\ | 21  | 1     |
| >TP53-D49H- MLSPDDIEQ\ | 292   | >TP53-D49H- MLSPDHIEQ\ | 426 | 134   |
| >TP53-D49H- MLSPDDIEQ\ | 80    | >TP53-D49H- MLSPDHIEQ\ | 91  | 11    |
| >TP53-D49H- MLSPDDIEQ\ | 445   | >TP53-D49H- MLSPDHIEQ\ | 546 | 101   |
| >TP53-D49H- LMLSPDDI   | 584   | >TP53-D49H- LMLSPDHI   | 100 | 484   |
| >TP53-D49H- LMLSPDDI   | 1250  | >TP53-D49H- LMLSPDHI   | 307 | 943   |
| >TP53-D49H- LMLSPDDI   | 971   | >TP53-D49H- LMLSPDHI   | 302 | 669   |
| >TP53-D49H- LMLSPDDI   | 1501  | >TP53-D49H- LMLSPDHI   | 132 | 1369  |
| >TP53-D49H- LMLSPDDI   | 14    | >TP53-D49H- LMLSPDHI   | 5   | 9     |



|                       |       |                       |     |       |
|-----------------------|-------|-----------------------|-----|-------|
| >TP53-D49H-LMLSPDDIEQ | 797   | >TP53-D49H-LMLSPDHIEQ | 260 | 537   |
| >TP53-D49H-LMLSPDDI   | 35    | >TP53-D49H-LMLSPDHI   | 9   | 26    |
| >TP53-D49H-LMLSPDDI   | 41    | >TP53-D49H-LMLSPDHI   | 13  | 28    |
| >TP53-D49H-LMLSPDDI   | 149   | >TP53-D49H-LMLSPDHI   | 30  | 119   |
| >TP53-D49H-LMLSPDDI   | 113   | >TP53-D49H-LMLSPDHI   | 35  | 78    |
| >TP53-D49H-LMLSPDDIEQ | 315   | >TP53-D49H-LMLSPDHIEQ | 65  | 250   |
| >TP53-D49H-LMLSPDDI   | 314   | >TP53-D49H-LMLSPDHI   | 170 | 144   |
| >TP53-D49H-LMLSPDDIEQ | 847   | >TP53-D49H-LMLSPDHIEQ | 463 | 384   |
| >TP53-D49H-LMLSPDDIEQ | 130   | >TP53-D49H-LMLSPDHIEQ | 43  | 87    |
| >TP53-D49H-LMLSPDDIEQ | 212   | >TP53-D49H-LMLSPDHIEQ | 150 | 62    |
| >TP53-D49H-LMLSPDDIEQ | 17    | >TP53-D49H-LMLSPDHIEQ | 15  | 2     |
| >TP53-D49H-LMLSPDDIEQ | 79    | >TP53-D49H-LMLSPDHIEQ | 64  | 15    |
| >TP53-D49H-LMLSPDDIEQ | 174   | >TP53-D49H-LMLSPDHIEQ | 435 | 261   |
| >TP53-D49H-DLMLSPDDI  | 1415  | >TP53-D49H-DLMLSPDHI  | 371 | 1044  |
| >TP53-D49H-DDLMLSPDDI | 436   | >TP53-D49H-DDLMLSPDHI | 433 | 3     |
| >TP53-D49H-DDLMLSPDDI | 237   | >TP53-D49H-DDLMLSPDHI | 291 | 54    |
| >TP53-D49H-MDDLMLSPD  | 277   | >TP53-D49H-MDDLMLSPD  | 245 | 32    |
| >TP53-D49H-MDDLMLSPD  | 107   | >TP53-D49H-MDDLMLSPD  | 128 | 21    |
| >TP53-D49Y-DDIEQWFTE  | 24256 | >TP53-D49Y-DYIEQWFTE  | 412 | 23844 |
| >TP53-D49Y-AMDDLMLSP  | 19336 | >TP53-D49Y-AMDDLMLSP  | 45  | 19291 |
| >TP53-D49Y-AMDDLMLSP  | 16616 | >TP53-D49Y-AMDDLMLSP  | 55  | 16561 |
| >TP53-D49Y-AMDDLMLSP  | 23080 | >TP53-D49Y-AMDDLMLSP  | 51  | 23029 |
| >TP53-D49Y-AMDDLMLSP  | 22053 | >TP53-D49Y-AMDDLMLSP  | 91  | 21962 |
| >TP53-D49Y-AMDDLMLSP  | 22067 | >TP53-D49Y-AMDDLMLSP  | 366 | 21701 |
| >TP53-D49Y-PDDIEQWFT  | 240   | >TP53-D49Y-PDYIEQWFT  | 139 | 101   |
| >TP53-D49Y-SPDDIEQWF  | 339   | >TP53-D49Y-SPDYIEQWF  | 544 | 205   |
| >TP53-D49Y-SPDDIEQW   | 46    | >TP53-D49Y-SPDYIEQW   | 55  | 9     |
| >TP53-D49Y-SPDDIEQW   | 12    | >TP53-D49Y-SPDYIEQW   | 13  | 1     |
| >TP53-D49Y-LSPDDIEQW  | 195   | >TP53-D49Y-LSPDYIEQW  | 37  | 158   |
| >TP53-D49Y-LSPDDIEQWF | 180   | >TP53-D49Y-LSPDYIEQWF | 63  | 117   |
| >TP53-D49Y-LSPDDIEQW  | 126   | >TP53-D49Y-LSPDYIEQW  | 102 | 24    |
| >TP53-D49Y-LSPDDIEQW  | 149   | >TP53-D49Y-LSPDYIEQW  | 60  | 89    |
| >TP53-D49Y-LSPDDIEQW  | 181   | >TP53-D49Y-LSPDYIEQW  | 15  | 166   |
| >TP53-D49Y-LSPDDIEQWF | 10    | >TP53-D49Y-LSPDYIEQWF | 5   | 5     |
| >TP53-D49Y-LSPDDIEQWF | 190   | >TP53-D49Y-LSPDYIEQWF | 38  | 152   |
| >TP53-D49Y-LSPDDIEQWF | 84    | >TP53-D49Y-LSPDYIEQWF | 50  | 34    |
| >TP53-D49Y-LSPDDIEQW  | 218   | >TP53-D49Y-LSPDYIEQW  | 184 | 34    |
| >TP53-D49Y-LSPDDIEQW  | 596   | >TP53-D49Y-LSPDYIEQW  | 161 | 435   |
| >TP53-D49Y-MLSPDDIEQ  | 405   | >TP53-D49Y-MLSPDYIEQ  | 80  | 325   |
| >TP53-D49Y-MLSPDDIEQV | 107   | >TP53-D49Y-MLSPDYIEQV | 60  | 47    |
| >TP53-D49Y-MLSPDDIEQ  | 21    | >TP53-D49Y-MLSPDYIEQ  | 8   | 13    |
| >TP53-D49Y-MLSPDDIEQV | 909   | >TP53-D49Y-MLSPDYIEQV | 476 | 433   |
| >TP53-D49Y-MLSPDDIEQV | 129   | >TP53-D49Y-MLSPDYIEQV | 155 | 26    |

|                        |       |                        |       |       |
|------------------------|-------|------------------------|-------|-------|
| >TP53-D49Y- MLSPDDIEQV | 951   | >TP53-D49Y- MLSPDYIEQV | 191   | 760   |
| >TP53-D49Y- MLSPDDIEQV | 213   | >TP53-D49Y- MLSPDYIEQV | 78    | 135   |
| >TP53-D49Y- MLSPDDIEQV | 93    | >TP53-D49Y- MLSPDYIEQV | 72    | 21    |
| >TP53-D49Y- MLSPDDIEQV | 427   | >TP53-D49Y- MLSPDYIEQV | 729   | 302   |
| >TP53-D49Y- MLSPDDIEQV | 131   | >TP53-D49Y- MLSPDYIEQV | 270   | 139   |
| >TP53-D49Y- MLSPDDIEQV | 204   | >TP53-D49Y- MLSPDYIEQV | 190   | 14    |
| >TP53-D49Y- MLSPDDIEQV | 20    | >TP53-D49Y- MLSPDYIEQV | 18    | 2     |
| >TP53-D49Y- MLSPDDIEQV | 292   | >TP53-D49Y- MLSPDYIEQV | 141   | 151   |
| >TP53-D49Y- MLSPDDIEQV | 80    | >TP53-D49Y- MLSPDYIEQV | 61    | 19    |
| >TP53-D49Y- MLSPDDIEQV | 445   | >TP53-D49Y- MLSPDYIEQV | 720   | 275   |
| >TP53-D49Y- LMLSPDDI   | 584   | >TP53-D49Y- LMLSPDYI   | 23    | 561   |
| >TP53-D49Y- LMLSPDDI   | 1250  | >TP53-D49Y- LMLSPDYI   | 71    | 1179  |
| >TP53-D49Y- LMLSPDDI   | 971   | >TP53-D49Y- LMLSPDYI   | 159   | 812   |
| >TP53-D49Y- LMLSPDDI   | 1501  | >TP53-D49Y- LMLSPDYI   | 70    | 1431  |
| >TP53-D49Y- LMLSPDDI   | 14    | >TP53-D49Y- LMLSPDYI   | 2     | 12    |
| >TP53-D49Y- LMLSPDDIEQ | 797   | >TP53-D49Y- LMLSPDYIEQ | 249   | 548   |
| >TP53-D49Y- LMLSPDDI   | 35    | >TP53-D49Y- LMLSPDYI   | 5     | 30    |
| >TP53-D49Y- LMLSPDDI   | 41    | >TP53-D49Y- LMLSPDYI   | 11    | 30    |
| >TP53-D49Y- LMLSPDDI   | 149   | >TP53-D49Y- LMLSPDYI   | 6     | 143   |
| >TP53-D49Y- LMLSPDDI   | 113   | >TP53-D49Y- LMLSPDYI   | 24    | 89    |
| >TP53-D49Y- LMLSPDDIEQ | 315   | >TP53-D49Y- LMLSPDYIEQ | 114   | 201   |
| >TP53-D49Y- LMLSPDDI   | 314   | >TP53-D49Y- LMLSPDYI   | 159   | 155   |
| >TP53-D49Y- LMLSPDDIEQ | 847   | >TP53-D49Y- LMLSPDYIEQ | 359   | 488   |
| >TP53-D49Y- LMLSPDDIEQ | 130   | >TP53-D49Y- LMLSPDYIEQ | 48    | 82    |
| >TP53-D49Y- LMLSPDDIEQ | 212   | >TP53-D49Y- LMLSPDYIEQ | 133   | 79    |
| >TP53-D49Y- LMLSPDDIEQ | 17    | >TP53-D49Y- LMLSPDYIEQ | 14    | 3     |
| >TP53-D49Y- LMLSPDDIEQ | 79    | >TP53-D49Y- LMLSPDYIEQ | 73    | 6     |
| >TP53-D49Y- LMLSPDDIEQ | 174   | >TP53-D49Y- LMLSPDYIEQ | 170   | 4     |
| >TP53-D49Y- DLMLSPDDI  | 6532  | >TP53-D49Y- DLMLSPDYI  | 238   | 6294  |
| >TP53-D49Y- DLMLSPDDI  | 5163  | >TP53-D49Y- DLMLSPDYI  | 339   | 4824  |
| >TP53-D49Y- DLMLSPDDI  | 1415  | >TP53-D49Y- DLMLSPDYI  | 37    | 1378  |
| >TP53-D49Y- DLMLSPDD   | 25855 | >TP53-D49Y- DLMLSPDY   | 453   | 25402 |
| >TP53-D49Y- DDLMLSPDD  | 436   | >TP53-D49Y- DDLMLSPDYI | 170   | 266   |
| >TP53-D49Y- DDLMLSPDD  | 17965 | >TP53-D49Y- DDLMLSPDY  | 495   | 17470 |
| >TP53-D49Y- DDLMLSPDD  | 237   | >TP53-D49Y- DDLMLSPDYI | 208   | 29    |
| >TP53-D49Y- MDDLMLSPD  | 520   | >TP53-D49Y- MDDLMLSPD  | 232   | 288   |
| >TP53-D49Y- MDDLMLSPD  | 277   | >TP53-D49Y- MDDLMLSPD  | 305   | 28    |
| >TP53-D49Y- MDDLMLSPD  | 107   | >TP53-D49Y- MDDLMLSPD  | 96    | 11    |
| >TP53-D61G- DEAPRMPE   | 449   | >TP53-D61G- GEAPRMPE   | 17951 | 17502 |
| >TP53-D61G- DEAPRMPEA  | 493   | >TP53-D61G- GEAPRMPEA  | 42    | 451   |
| >TP53-D61G- DEAPRMPEA  | 13559 | >TP53-D61G- GEAPRMPEA  | 237   | 13322 |
| >TP53-D61G- DPGPGEAPR  | 1293  | >TP53-D61G- DPGPGEAPR  | 445   | 848   |
| >TP53-D61N- DEAPRMPE   | 449   | >TP53-D61N- NEAPRMPE   | 1625  | 1176  |

|                         |       |                        |      |       |
|-------------------------|-------|------------------------|------|-------|
| >TP53-D61N·DEAPRMPEA    | 493   | >TP53-D61N·NEAPRMPEA   | 47   | 446   |
| >TP53-D61N·GPDEAPRM     | 590   | >TP53-D61N·GPNEAPRM    | 375  | 215   |
| >TP53-D61N·GPDEAPRM     | 1067  | >TP53-D61N·GPNEAPRM    | 410  | 657   |
| >TP53-D7H-v DPSVEPPL    | 6833  | >TP53-D7H-n HPSVEPPL   | 95   | 6738  |
| >TP53-D7H-v DPSVEPPL    | 266   | >TP53-D7H-n HPSVEPPL   | 46   | 220   |
| >TP53-D7H-v DPSVEPPL    | 2074  | >TP53-D7H-n HPSVEPPL   | 51   | 2023  |
| >TP53-D7H-v DPSVEPPL    | 2437  | >TP53-D7H-n HPSVEPPL   | 245  | 2192  |
| >TP53-D7H-v SDPSVEPPL   | 12757 | >TP53-D7H-n SHPSVEPPL  | 281  | 12476 |
| >TP53-D7H-v QSDPSVEPPL  | 15217 | >TP53-D7H-n QSHPSVEPPL | 342  | 14875 |
| >TP53-D7H-v QSDPSVEPPL  | 4107  | >TP53-D7H-n QSHPSVEPPL | 281  | 3826  |
| >TP53-D7H-v QSDPSVEPPL  | 39    | >TP53-D7H-n QSHPSVEPPL | 19   | 20    |
| >TP53-D7H-v PQSDPSVEPP  | 610   | >TP53-D7H-n PQSHPSVEPP | 162  | 448   |
| >TP53-D7H-v EPQSDPSV    | 1159  | >TP53-D7H-n EPQSHPSV   | 241  | 918   |
| >TP53-D7H-v EEPQSDPSV   | 1602  | >TP53-D7H-n EEPQSHPSV  | 253  | 1349  |
| >TP53-D7H-v MEEPQSDPS'  | 108   | >TP53-D7H-n MEEPQSHPS' | 92   | 16    |
| >TP53-D7H-v MEEPQSDPS'  | 477   | >TP53-D7H-n MEEPQSHPS' | 446  | 31    |
| >TP53-D7H-v MEEPQSDPS'  | 610   | >TP53-D7H-n MEEPQSHPS' | 404  | 206   |
| >TP53-D7H-v MEEPQSDPS   | 1325  | >TP53-D7H-n MEEPQSHPS  | 335  | 990   |
| >TP53-D7H-v MEEPQSDPS'  | 195   | >TP53-D7H-n MEEPQSHPS' | 205  | 10    |
| >TP53-D7H-v MEEPQSDPS'  | 82    | >TP53-D7H-n MEEPQSHPS' | 248  | 166   |
| >TP53-E11Q- EPPLSQETF   | 229   | >TP53-E11Q- QPPLSQETF  | 386  | 157   |
| >TP53-E11Q- VEPPLSQETF  | 2234  | >TP53-E11Q- VQPPLSQETF | 258  | 1976  |
| >TP53-E11Q- VEPPLSQETF  | 2977  | >TP53-E11Q- VQPPLSQETF | 97   | 2880  |
| >TP53-E11Q- VEPPLSQETF  | 617   | >TP53-E11Q- VQPPLSQETF | 18   | 599   |
| >TP53-E11Q- SVEPPLSQETI | 3521  | >TP53-E11Q- SVQPPLSQET | 356  | 3165  |
| >TP53-E11Q- SVEPPLSQETI | 936   | >TP53-E11Q- SVQPPLSQET | 143  | 793   |
| >TP53-E11Q- SVEPPLSQETI | 2892  | >TP53-E11Q- SVQPPLSQET | 184  | 2708  |
| >TP53-E11Q- SVEPPLSQETI | 1525  | >TP53-E11Q- SVQPPLSQET | 496  | 1029  |
| >TP53-E11Q- SVEPPLSQETI | 68    | >TP53-E11Q- SVQPPLSQET | 43   | 25    |
| >TP53-E11Q- SVEPPLSQETI | 35    | >TP53-E11Q- SVQPPLSQET | 32   | 3     |
| >TP53-E11Q- DPSVEPPL    | 266   | >TP53-E11Q- DPSVQPPL   | 297  | 31    |
| >TP53-E11Q- QSDPSVEPPL  | 1075  | >TP53-E11Q- QSDPSVQPPL | 490  | 585   |
| >TP53-E11Q- QSDPSVEPPL  | 39    | >TP53-E11Q- QSDPSVQPPL | 27   | 12    |
| >TP53-E171A EVVRRCPHHE  | 6752  | >TP53-E171A AVVRRCPHHI | 428  | 6324  |
| >TP53-E171A EVVRRCPH    | 400   | >TP53-E171A AVVRRCPH   | 4472 | 4072  |
| >TP53-E171A EVVRRCPHH   | 98    | >TP53-E171A AVVRRCPHH  | 1643 | 1545  |
| >TP53-E171A EVVRRCPHHE  | 428   | >TP53-E171A AVVRRCPHHI | 5119 | 4691  |
| >TP53-E171A EVVRRCPHHE  | 371   | >TP53-E171A AVVRRCPHHI | 32   | 339   |
| >TP53-E171A EVVRRCPHHE  | 53    | >TP53-E171A AVVRRCPHHI | 1381 | 1328  |
| >TP53-E171A EVVRRCPHHE  | 5     | >TP53-E171A AVVRRCPHHI | 109  | 104   |
| >TP53-E171A EVVRRCPHHE  | 3205  | >TP53-E171A AVVRRCPHHI | 434  | 2771  |
| >TP53-E171A AIYKQSQHM'  | 18048 | >TP53-E171A AIYKQSQHM' | 101  | 17947 |
| >TP53-E171A AIYKQSQHM'  | 18065 | >TP53-E171A AIYKQSQHM' | 269  | 17796 |

|                        |       |                        |     |       |
|------------------------|-------|------------------------|-----|-------|
| >TP53-E171A AIYKQSQHM' | 20227 | >TP53-E171A AIYKQSQHM' | 89  | 20138 |
| >TP53-E171A AIYKQSQHM' | 6246  | >TP53-E171A AIYKQSQHM' | 97  | 6149  |
| >TP53-E171A MTEVVRRCPI | 7649  | >TP53-E171A MTAVVRRCPI | 330 | 7319  |
| >TP53-E171A MTEVVRRCPI | 2918  | >TP53-E171A MTAVVRRCPI | 238 | 2680  |
| >TP53-E171A MTEVVRRC   | 11240 | >TP53-E171A MTAVVRRC   | 443 | 10797 |
| >TP53-E171A HMTEVVRRC  | 38    | >TP53-E171A HMTAVVRRC  | 251 | 213   |
| >TP53-E171A HMTEVVRRC  | 38    | >TP53-E171A HMTAVVRRC  | 21  | 17    |
| >TP53-E171A HMTEVVRRC  | 65    | >TP53-E171A HMTAVVRRC  | 90  | 25    |
| >TP53-E171A HMTEVVRRC  | 35    | >TP53-E171A HMTAVVRRC  | 30  | 5     |
| >TP53-E171A HMTEVVRRC  | 64    | >TP53-E171A HMTAVVRRC  | 40  | 24    |
| >TP53-E171A QHMTEVVR   | 269   | >TP53-E171A QHMTAVVR   | 230 | 39    |
| >TP53-E171A QHMTEVVR   | 195   | >TP53-E171A QHMTAVVRF  | 230 | 35    |
| >TP53-E171A SQHMTEVV   | 670   | >TP53-E171A SQHMTAVV   | 118 | 552   |
| >TP53-E171A SQHMTEVV   | 115   | >TP53-E171A SQHMTAVV   | 47  | 68    |
| >TP53-E171A SQHMTEVV   | 256   | >TP53-E171A SQHMTAVV   | 174 | 82    |
| >TP53-E171A SQHMTEVVR  | 115   | >TP53-E171A SQHMTAVVR  | 90  | 25    |
| >TP53-E171A SQHMTEVVR  | 504   | >TP53-E171A SQHMTAVVR  | 229 | 275   |
| >TP53-E171A SQHMTEVV   | 504   | >TP53-E171A SQHMTAVV   | 237 | 267   |
| >TP53-E171A SQHMTEVV   | 88    | >TP53-E171A SQHMTAVV   | 60  | 28    |
| >TP53-E171A SQHMTEVVR  | 162   | >TP53-E171A SQHMTAVVR  | 93  | 69    |
| >TP53-E171A SQHMTEVVR  | 572   | >TP53-E171A SQHMTAVVR  | 404 | 168   |
| >TP53-E171A SQHMTEVV   | 1657  | >TP53-E171A SQHMTAVV   | 286 | 1371  |
| >TP53-E171A SQHMTEVVR  | 434   | >TP53-E171A SQHMTAVVR  | 245 | 189   |
| >TP53-E171A SQHMTEVVR  | 363   | >TP53-E171A SQHMTAVVR  | 280 | 83    |
| >TP53-E171A QSQHMTEVV  | 230   | >TP53-E171A QSQHMTAV\  | 95  | 135   |
| >TP53-E171A QSQHMTEVV  | 321   | >TP53-E171A QSQHMTAV\  | 119 | 202   |
| >TP53-E171A QSQHMTEVV  | 185   | >TP53-E171A QSQHMTAV\  | 125 | 60    |
| >TP53-E171A QSQHMTEV   | 206   | >TP53-E171A QSQHMTAV   | 291 | 85    |
| >TP53-E171A QSQHMTEVV  | 303   | >TP53-E171A QSQHMTAV\  | 238 | 65    |
| >TP53-E171A QSQHMTEVV  | 306   | >TP53-E171A QSQHMTAV\  | 385 | 79    |
| >TP53-E171A KQSQHMTEV  | 82    | >TP53-E171A KQSQHMTAV  | 166 | 84    |
| >TP53-E171A KQSQHMTEV  | 51    | >TP53-E171A KQSQHMTAV  | 62  | 11    |
| >TP53-E171A KQSQHMTEV  | 298   | >TP53-E171A KQSQHMTAV  | 310 | 12    |
| >TP53-E171A KQSQHMTE   | 17807 | >TP53-E171A KQSQHMTA   | 235 | 17572 |
| >TP53-E171A KQSQHMTEV  | 9     | >TP53-E171A KQSQHMTAV  | 7   | 2     |
| >TP53-E171A KQSQHMTEV  | 273   | >TP53-E171A KQSQHMTAV  | 98  | 175   |
| >TP53-E171A KQSQHMTE   | 10832 | >TP53-E171A KQSQHMTA   | 80  | 10752 |
| >TP53-E171A KQSQHMTEV  | 10    | >TP53-E171A KQSQHMTAV  | 10  | 0     |
| >TP53-E171A KQSQHMTEV  | 426   | >TP53-E171A KQSQHMTAV  | 414 | 12    |
| >TP53-E171A KQSQHMTEV  | 35    | >TP53-E171A KQSQHMTAV  | 31  | 4     |
| >TP53-E171A KQSQHMTEV  | 541   | >TP53-E171A KQSQHMTAV  | 157 | 384   |
| >TP53-E171A KQSQHMTEV  | 222   | >TP53-E171A KQSQHMTAV  | 127 | 95    |
| >TP53-E171A KQSQHMTE   | 3366  | >TP53-E171A KQSQHMTA   | 299 | 3067  |

|                       |      |                       |      |      |
|-----------------------|------|-----------------------|------|------|
| >TP53-E171AKQSQHMTEV  | 86   | >TP53-E171AKQSQHMTAV  | 34   | 52   |
| >TP53-E171AKQSQHMTEV  | 110  | >TP53-E171AKQSQHMTAV  | 73   | 37   |
| >TP53-E171AKQSQHMTEV  | 185  | >TP53-E171AKQSQHMTAV  | 112  | 73   |
| >TP53-E171AKQSQHMTEV  | 60   | >TP53-E171AKQSQHMTAV  | 50   | 10   |
| >TP53-E171AYKQSQHMTE  | 467  | >TP53-E171AYKQSQHMTA  | 1206 | 739  |
| >TP53-E171AYKQSQHMTE  | 1075 | >TP53-E171AYKQSQHMTA  | 71   | 1004 |
| >TP53-E171AYKQSQHMTE  | 30   | >TP53-E171AYKQSQHMTA  | 17   | 13   |
| >TP53-E171AYKQSQHMTE  | 42   | >TP53-E171AYKQSQHMTA  | 34   | 8    |
| >TP53-E171AYKQSQHMTE  | 945  | >TP53-E171AYKQSQHMTA  | 268  | 677  |
| >TP53-E171AIYKQSQHMTI | 402  | >TP53-E171AIYKQSQHMTA | 287  | 115  |
| >TP53-E171AIYKQSQHMTI | 2804 | >TP53-E171AIYKQSQHMTA | 43   | 2761 |
| >TP53-E171CEVVRRCPH   | 400  | >TP53-E171CEVVRRCPH   | 1997 | 1597 |
| >TP53-E171CEVVRRCPHH  | 98   | >TP53-E171CEVVRRCPHH  | 657  | 559  |
| >TP53-E171CEVVRRCPHHE | 428  | >TP53-E171CEVVRRCPHHE | 2276 | 1848 |
| >TP53-E171CEVVRRCPHHE | 371  | >TP53-E171CEVVRRCPHHE | 650  | 279  |
| >TP53-E171CEVVRRCPHHE | 53   | >TP53-E171CEVVRRCPHHE | 30   | 23   |
| >TP53-E171CEVVRRCPHHE | 5    | >TP53-E171CEVVRRCPHHE | 14   | 9    |
| >TP53-E171CEVVRRCPHHE | 38   | >TP53-E171CEVVRRCPHHE | 70   | 32   |
| >TP53-E171CEVVRRCPHHE | 579  | >TP53-E171CEVVRRCPHHE | 191  | 388  |
| >TP53-E171CEVVRRCPHHE | 38   | >TP53-E171CEVVRRCPHHE | 29   | 9    |
| >TP53-E171CEVVRRCPHHE | 65   | >TP53-E171CEVVRRCPHHE | 81   | 16   |
| >TP53-E171CEVVRRCPHHE | 35   | >TP53-E171CEVVRRCPHHE | 33   | 2    |
| >TP53-E171CEVVRRCPHHE | 64   | >TP53-E171CEVVRRCPHHE | 43   | 21   |
| >TP53-E171CEVVRRCPHHE | 269  | >TP53-E171CEVVRRCPHHE | 307  | 38   |
| >TP53-E171CEVVRRCPHHE | 195  | >TP53-E171CEVVRRCPHHE | 413  | 218  |
| >TP53-E171CEVVRRCPHHE | 115  | >TP53-E171CEVVRRCPHHE | 104  | 11   |
| >TP53-E171CEVVRRCPHHE | 256  | >TP53-E171CEVVRRCPHHE | 502  | 246  |
| >TP53-E171CEVVRRCPHHE | 543  | >TP53-E171CEVVRRCPHHE | 470  | 73   |
| >TP53-E171CEVVRRCPHHE | 115  | >TP53-E171CEVVRRCPHHE | 84   | 31   |
| >TP53-E171CEVVRRCPHHE | 88   | >TP53-E171CEVVRRCPHHE | 270  | 182  |
| >TP53-E171CEVVRRCPHHE | 162  | >TP53-E171CEVVRRCPHHE | 302  | 140  |
| >TP53-E171CEVVRRCPHHE | 434  | >TP53-E171CEVVRRCPHHE | 232  | 202  |
| >TP53-E171CEVVRRCPHHE | 363  | >TP53-E171CEVVRRCPHHE | 316  | 47   |
| >TP53-E171CEVVRRCPHHE | 230  | >TP53-E171CEVVRRCPHHE | 250  | 20   |
| >TP53-E171CEVVRRCPHHE | 321  | >TP53-E171CEVVRRCPHHE | 433  | 112  |
| >TP53-E171CEVVRRCPHHE | 185  | >TP53-E171CEVVRRCPHHE | 204  | 19   |
| >TP53-E171CEVVRRCPHHE | 206  | >TP53-E171CEVVRRCPHHE | 1790 | 1584 |
| >TP53-E171CEVVRRCPHHE | 303  | >TP53-E171CEVVRRCPHHE | 672  | 369  |
| >TP53-E171CEVVRRCPHHE | 306  | >TP53-E171CEVVRRCPHHE | 312  | 6    |
| >TP53-E171CEVVRRCPHHE | 82   | >TP53-E171CEVVRRCPHHE | 1489 | 1407 |
| >TP53-E171CEVVRRCPHHE | 51   | >TP53-E171CEVVRRCPHHE | 582  | 531  |
| >TP53-E171CEVVRRCPHHE | 298  | >TP53-E171CEVVRRCPHHE | 503  | 205  |
| >TP53-E171CEVVRRCPHHE | 9    | >TP53-E171CEVVRRCPHHE | 26   | 17   |

|                        |     |                        |       |       |
|------------------------|-----|------------------------|-------|-------|
| >TP53-E171C KQSQHMTEV  | 273 | >TP53-E171C KQSQHMTDV  | 434   | 161   |
| >TP53-E171C KQSQHMTEV  | 10  | >TP53-E171C KQSQHMTDV  | 61    | 51    |
| >TP53-E171C KQSQHMTEV  | 426 | >TP53-E171C KQSQHMTDV  | 4645  | 4219  |
| >TP53-E171C KQSQHMTEV  | 35  | >TP53-E171C KQSQHMTDV  | 41    | 6     |
| >TP53-E171C KQSQHMTEV  | 222 | >TP53-E171C KQSQHMTDV  | 527   | 305   |
| >TP53-E171C KQSQHMTEV  | 86  | >TP53-E171C KQSQHMTDV  | 181   | 95    |
| >TP53-E171C KQSQHMTEV  | 110 | >TP53-E171C KQSQHMTDV  | 231   | 121   |
| >TP53-E171C KQSQHMTEV  | 185 | >TP53-E171C KQSQHMTDV  | 308   | 123   |
| >TP53-E171C KQSQHMTEV  | 60  | >TP53-E171C KQSQHMTDV  | 49    | 11    |
| >TP53-E171C YKQSQHMTE  | 467 | >TP53-E171C YKQSQHMTE  | 1767  | 1300  |
| >TP53-E171C YKQSQHMTE  | 30  | >TP53-E171C YKQSQHMTE  | 50    | 20    |
| >TP53-E171C YKQSQHMTE  | 42  | >TP53-E171C YKQSQHMTE  | 84    | 42    |
| >TP53-E171C IYKQSQHMTI | 402 | >TP53-E171C IYKQSQHMTI | 541   | 139   |
| >TP53-E171C EVVRRCPH   | 400 | >TP53-E171C GVVRRCPH   | 19202 | 18802 |
| >TP53-E171C EVVRRCPHH  | 98  | >TP53-E171C GVVRRCPHH  | 12222 | 12124 |
| >TP53-E171C EVVRRCPHHE | 428 | >TP53-E171C GVVRRCPHH  | 19948 | 19520 |
| >TP53-E171C EVVRRCPHHE | 371 | >TP53-E171C GVVRRCPHH  | 53    | 318   |
| >TP53-E171C EVVRRCPHHE | 53  | >TP53-E171C GVVRRCPHH  | 2119  | 2066  |
| >TP53-E171C EVVRRCPHHE | 5   | >TP53-E171C GVVRRCPHH  | 155   | 150   |
| >TP53-E171C HMTEVVRR   | 38  | >TP53-E171C HMTGVVRR   | 139   | 101   |
| >TP53-E171C HMTEVVRR   | 38  | >TP53-E171C HMTGVVRR   | 30    | 8     |
| >TP53-E171C HMTEVVRR   | 65  | >TP53-E171C HMTGVVRR   | 69    | 4     |
| >TP53-E171C HMTEVVRR   | 35  | >TP53-E171C HMTGVVRR   | 47    | 12    |
| >TP53-E171C HMTEVVRR   | 64  | >TP53-E171C HMTGVVRR   | 55    | 9     |
| >TP53-E171C QHMTEVVR   | 269 | >TP53-E171C QHMTGVVR   | 474   | 205   |
| >TP53-E171C QHMTEVVR   | 195 | >TP53-E171C QHMTGVVRF  | 437   | 242   |
| >TP53-E171C SQHMTEVV   | 670 | >TP53-E171C SQHMTGVV   | 230   | 440   |
| >TP53-E171C SQHMTEVV   | 115 | >TP53-E171C SQHMTGVV   | 241   | 126   |
| >TP53-E171C SQHMTEVV   | 256 | >TP53-E171C SQHMTGVV   | 425   | 169   |
| >TP53-E171C SQHMTEVVR  | 115 | >TP53-E171C SQHMTGVVF  | 60    | 55    |
| >TP53-E171C SQHMTEVVR  | 504 | >TP53-E171C SQHMTGVVF  | 301   | 203   |
| >TP53-E171C SQHMTEVV   | 504 | >TP53-E171C SQHMTGVV   | 279   | 225   |
| >TP53-E171C SQHMTEVV   | 88  | >TP53-E171C SQHMTGVV   | 184   | 96    |
| >TP53-E171C SQHMTEVVR  | 162 | >TP53-E171C SQHMTGVVF  | 50    | 112   |
| >TP53-E171C SQHMTEVVR  | 572 | >TP53-E171C SQHMTGVVF  | 339   | 233   |
| >TP53-E171C SQHMTEVVR  | 434 | >TP53-E171C SQHMTGVVF  | 495   | 61    |
| >TP53-E171C SQHMTEVVR  | 363 | >TP53-E171C SQHMTGVVF  | 502   | 139   |
| >TP53-E171C QSQHMTEVV  | 230 | >TP53-E171C QSQHMTGV   | 103   | 127   |
| >TP53-E171C QSQHMTEVV  | 321 | >TP53-E171C QSQHMTGV   | 226   | 95    |
| >TP53-E171C QSQHMTEVV  | 973 | >TP53-E171C QSQHMTGV   | 461   | 512   |
| >TP53-E171C QSQHMTEVV  | 185 | >TP53-E171C QSQHMTGV   | 261   | 76    |
| >TP53-E171C QSQHMTEV   | 206 | >TP53-E171C QSQHMTGV   | 267   | 61    |
| >TP53-E171C QSQHMTEVV  | 303 | >TP53-E171C QSQHMTGV   | 879   | 576   |

|                        |       |                        |       |       |
|------------------------|-------|------------------------|-------|-------|
| >TP53-E171C QSQHMTEVV  | 306   | >TP53-E171C QSQHMTGV\  | 322   | 16    |
| >TP53-E171C KQSQHMTEV  | 82    | >TP53-E171C KQSQHMTG\  | 196   | 114   |
| >TP53-E171C KQSQHMTEV  | 51    | >TP53-E171C KQSQHMTG\  | 81    | 30    |
| >TP53-E171C KQSQHMTEV  | 298   | >TP53-E171C KQSQHMTG\  | 841   | 543   |
| >TP53-E171C KQSQHMTEV  | 9     | >TP53-E171C KQSQHMTG\  | 7     | 2     |
| >TP53-E171C KQSQHMTEV  | 273   | >TP53-E171C KQSQHMTG\  | 156   | 117   |
| >TP53-E171C KQSQHMTEV  | 10    | >TP53-E171C KQSQHMTG\  | 11    | 1     |
| >TP53-E171C KQSQHMTEV  | 426   | >TP53-E171C KQSQHMTG\  | 381   | 45    |
| >TP53-E171C KQSQHMTEV  | 35    | >TP53-E171C KQSQHMTG\  | 29    | 6     |
| >TP53-E171C KQSQHMTEV  | 222   | >TP53-E171C KQSQHMTG\  | 278   | 56    |
| >TP53-E171C KQSQHMTEV  | 86    | >TP53-E171C KQSQHMTG\  | 263   | 177   |
| >TP53-E171C KQSQHMTEV  | 110   | >TP53-E171C KQSQHMTG\  | 348   | 238   |
| >TP53-E171C KQSQHMTEV  | 185   | >TP53-E171C KQSQHMTG\  | 125   | 60    |
| >TP53-E171C KQSQHMTEV  | 60    | >TP53-E171C KQSQHMTG\  | 57    | 3     |
| >TP53-E171C YKQSQHMTE  | 467   | >TP53-E171C YKQSQHMTG  | 705   | 238   |
| >TP53-E171C YKQSQHMTE  | 30    | >TP53-E171C YKQSQHMTG  | 66    | 36    |
| >TP53-E171C YKQSQHMTE  | 42    | >TP53-E171C YKQSQHMTG  | 124   | 82    |
| >TP53-E171C IYKQSQHMTI | 402   | >TP53-E171C IYKQSQHMTG | 802   | 400   |
| >TP53-E171C IYKQSQHMTI | 2804  | >TP53-E171C IYKQSQHMTG | 459   | 2345  |
| >TP53-E171K EVVRRCPHHI | 6752  | >TP53-E171K KVVRRCPHHI | 495   | 6257  |
| >TP53-E171K EVVRRCPH   | 400   | >TP53-E171K KVVRRCPH   | 13509 | 13109 |
| >TP53-E171K EVVRRCPHH  | 98    | >TP53-E171K KVVRRCPHH  | 6433  | 6335  |
| >TP53-E171K EVVRRCPHHI | 428   | >TP53-E171K KVVRRCPHHI | 14332 | 13904 |
| >TP53-E171K EVVRRCPHHI | 371   | >TP53-E171K KVVRRCPHHI | 14    | 357   |
| >TP53-E171K EVVRRCPHHI | 53    | >TP53-E171K KVVRRCPHHI | 2877  | 2824  |
| >TP53-E171K EVVRRCPHHI | 5     | >TP53-E171K KVVRRCPHHI | 281   | 276   |
| >TP53-E171K EVVRRCPHHI | 1019  | >TP53-E171K KVVRRCPHHI | 98    | 921   |
| >TP53-E171K AIYKQSQHM  | 11392 | >TP53-E171K AIYKQSQHM  | 31    | 11361 |
| >TP53-E171K AIYKQSQHM  | 16401 | >TP53-E171K AIYKQSQHM  | 16    | 16385 |
| >TP53-E171K AIYKQSQHM  | 6246  | >TP53-E171K AIYKQSQHM  | 9     | 6237  |
| >TP53-E171K MTEVRRCPH  | 6587  | >TP53-E171K MTKVRRCPH  | 48    | 6539  |
| >TP53-E171K MTEVRRCPH  | 8926  | >TP53-E171K MTKVRRCPH  | 145   | 8781  |
| >TP53-E171K MTEVRRCPH  | 3109  | >TP53-E171K MTKVRRCPH  | 289   | 2820  |
| >TP53-E171K MTEVRRCPH  | 2700  | >TP53-E171K MTKVRRCPH  | 252   | 2448  |
| >TP53-E171K HMTEVRRRC  | 38    | >TP53-E171K HMTKVRRRC  | 600   | 562   |
| >TP53-E171K HMTEVRRR   | 38    | >TP53-E171K HMTKVRRR   | 20    | 18    |
| >TP53-E171K HMTEVRRR   | 65    | >TP53-E171K HMTKVRRR   | 86    | 21    |
| >TP53-E171K HMTEVRRR   | 35    | >TP53-E171K HMTKVRRR   | 51    | 16    |
| >TP53-E171K HMTEVRRR   | 64    | >TP53-E171K HMTKVRRR   | 42    | 22    |
| >TP53-E171K QHMTEVVR   | 269   | >TP53-E171K QHMTKVVR   | 240   | 29    |
| >TP53-E171K QHMTEVVR   | 195   | >TP53-E171K QHMTKVVR   | 243   | 48    |
| >TP53-E171K SQHMTEVV   | 2781  | >TP53-E171K SQHMTKVV   | 385   | 2396  |
| >TP53-E171K SQHMTEVV   | 115   | >TP53-E171K SQHMTKVV   | 644   | 529   |

|                       |       |                       |      |       |
|-----------------------|-------|-----------------------|------|-------|
| >TP53-E171KSQHMTEVV   | 256   | >TP53-E171KSQHMTKVV   | 756  | 500   |
| >TP53-E171KSQHMTEVVR  | 115   | >TP53-E171KSQHMTKVVR  | 23   | 92    |
| >TP53-E171KSQHMTEVVR  | 504   | >TP53-E171KSQHMTKVVR  | 160  | 344   |
| >TP53-E171KSQHMTEVV   | 88    | >TP53-E171KSQHMTKVV   | 70   | 18    |
| >TP53-E171KSQHMTEVVR  | 162   | >TP53-E171KSQHMTKVVR  | 187  | 25    |
| >TP53-E171KSQHMTEVVR  | 434   | >TP53-E171KSQHMTKVVR  | 274  | 160   |
| >TP53-E171KSQHMTEVVR  | 363   | >TP53-E171KSQHMTKVVR  | 300  | 63    |
| >TP53-E171KQSQHMTEVV  | 230   | >TP53-E171KQSQHMTKVV  | 72   | 158   |
| >TP53-E171KQSQHMTEVV  | 321   | >TP53-E171KQSQHMTKVV  | 172  | 149   |
| >TP53-E171KQSQHMTEVV  | 185   | >TP53-E171KQSQHMTKVV  | 375  | 190   |
| >TP53-E171KQSQHMTEV   | 206   | >TP53-E171KQSQHMTKV   | 1081 | 875   |
| >TP53-E171KQSQHMTEVV  | 303   | >TP53-E171KQSQHMTKVV  | 5377 | 5074  |
| >TP53-E171KQSQHMTEVV  | 306   | >TP53-E171KQSQHMTKVV  | 339  | 33    |
| >TP53-E171KKQSQHMTEV  | 82    | >TP53-E171KKQSQHMTKV  | 481  | 399   |
| >TP53-E171KKQSQHMTEV  | 51    | >TP53-E171KKQSQHMTKV  | 164  | 113   |
| >TP53-E171KKQSQHMTEV  | 298   | >TP53-E171KKQSQHMTKV  | 1642 | 1344  |
| >TP53-E171KKQSQHMTEV  | 9     | >TP53-E171KKQSQHMTKV  | 14   | 5     |
| >TP53-E171KKQSQHMTEV  | 273   | >TP53-E171KKQSQHMTKV  | 417  | 144   |
| >TP53-E171KKQSQHMTEV  | 10    | >TP53-E171KKQSQHMTKV  | 30   | 20    |
| >TP53-E171KKQSQHMTEV  | 426   | >TP53-E171KKQSQHMTKV  | 1081 | 655   |
| >TP53-E171KKQSQHMTE   | 19571 | >TP53-E171KKQSQHMTK   | 99   | 19472 |
| >TP53-E171KKQSQHMTE   | 23156 | >TP53-E171KKQSQHMTK   | 52   | 23104 |
| >TP53-E171KKQSQHMTE   | 11939 | >TP53-E171KKQSQHMTK   | 109  | 11830 |
| >TP53-E171KKQSQHMTE   | 14657 | >TP53-E171KKQSQHMTK   | 299  | 14358 |
| >TP53-E171KKQSQHMTEV  | 35    | >TP53-E171KKQSQHMTKV  | 17   | 18    |
| >TP53-E171KKQSQHMTEV  | 222   | >TP53-E171KKQSQHMTKV  | 547  | 325   |
| >TP53-E171KKQSQHMTE   | 3366  | >TP53-E171KKQSQHMTK   | 283  | 3083  |
| >TP53-E171KKQSQHMTEV  | 86    | >TP53-E171KKQSQHMTKV  | 254  | 168   |
| >TP53-E171KKQSQHMTEV  | 110   | >TP53-E171KKQSQHMTKV  | 84   | 26    |
| >TP53-E171KKQSQHMTEV  | 185   | >TP53-E171KKQSQHMTKV  | 270  | 85    |
| >TP53-E171KKQSQHMTE   | 15815 | >TP53-E171KKQSQHMTK   | 488  | 15327 |
| >TP53-E171KKQSQHMTEV  | 60    | >TP53-E171KKQSQHMTKV  | 51   | 9     |
| >TP53-E171KYKQSQHMTE  | 467   | >TP53-E171KYKQSQHMTK  | 1028 | 561   |
| >TP53-E171KYKQSQHMTE  | 1075  | >TP53-E171KYKQSQHMTK  | 83   | 992   |
| >TP53-E171KYKQSQHMTE  | 30    | >TP53-E171KYKQSQHMTK  | 61   | 31    |
| >TP53-E171KYKQSQHMTE  | 42    | >TP53-E171KYKQSQHMTK  | 29   | 13    |
| >TP53-E171KIYKQSQHMTI | 402   | >TP53-E171KIYKQSQHMTI | 883  | 481   |
| >TP53-E171KIYKQSQHMTI | 2804  | >TP53-E171KIYKQSQHMTI | 7    | 2797  |
| >TP53-E171KIYKQSQHMTI | 12278 | >TP53-E171KIYKQSQHMTI | 314  | 11964 |
| >TP53-E171CEVVRRCPH   | 400   | >TP53-E171CQVVRRCPH   | 5088 | 4688  |
| >TP53-E171CEVVRRCPHH  | 98    | >TP53-E171CQVVRRCPHH  | 1744 | 1646  |
| >TP53-E171CEVVRRCPHHE | 428   | >TP53-E171CQVVRRCPHH  | 5378 | 4950  |
| >TP53-E171CEVVRRCPHHE | 371   | >TP53-E171CQVVRRCPHH  | 77   | 294   |



|                          |      |                           |      |      |
|--------------------------|------|---------------------------|------|------|
| >TP53-E171CEVVRRCPHHE    | 53   | >TP53-E171CQVVRRCPHH      | 512  | 459  |
| >TP53-E171CEVVRRCPHHE    | 5    | >TP53-E171CQVVRRCPHH      | 32   | 27   |
| >TP53-E171CMTQVVRRCPI    | 3109 | >TP53-E171CMTQVVRRCPI     | 450  | 2659 |
| >TP53-E171CHMTEVVRRRC    | 38   | >TP53-E171CHMTQVVRRC      | 278  | 240  |
| >TP53-E171CHMTEVVRR      | 38   | >TP53-E171CHMTQVVRRC      | 42   | 4    |
| >TP53-E171CHMTEVVRR      | 65   | >TP53-E171CHMTQVVRRC      | 105  | 40   |
| >TP53-E171CHMTEVVRR      | 35   | >TP53-E171CHMTQVVRRC      | 48   | 13   |
| >TP53-E171CHMTEVVRR      | 64   | >TP53-E171CHMTQVVRRC      | 37   | 27   |
| >TP53-E171CQHMTEVVRR     | 269  | >TP53-E171CQHMTQVVRRC     | 230  | 39   |
| >TP53-E171CQHMTEVVRR     | 195  | >TP53-E171CQHMTQVVRRC     | 179  | 16   |
| >TP53-E171CSQHMTEVVRR    | 670  | >TP53-E171CSQHMTQVVRRC    | 297  | 373  |
| >TP53-E171CSQHMTEVVRR    | 115  | >TP53-E171CSQHMTQVVRRC    | 125  | 10   |
| >TP53-E171CSQHMTEVVRR    | 256  | >TP53-E171CSQHMTQVVRRC    | 217  | 39   |
| >TP53-E171CSQHMTEVVRR    | 543  | >TP53-E171CSQHMTQVVRRC    | 419  | 124  |
| >TP53-E171CSQHMTEVVRR    | 115  | >TP53-E171CSQHMTQVVRRC    | 37   | 78   |
| >TP53-E171CSQHMTEVVRR    | 504  | >TP53-E171CSQHMTQVVRRC    | 404  | 100  |
| >TP53-E171CSQHMTEVVRR    | 504  | >TP53-E171CSQHMTQVVRRC    | 318  | 186  |
| >TP53-E171CSQHMTEVVRR    | 88   | >TP53-E171CSQHMTQVVRRC    | 41   | 47   |
| >TP53-E171CSQHMTEVVRR    | 162  | >TP53-E171CSQHMTQVVRRC    | 96   | 66   |
| >TP53-E171CSQHMTEVVRR    | 572  | >TP53-E171CSQHMTQVVRRC    | 460  | 112  |
| >TP53-E171CSQHMTEVVRR    | 434  | >TP53-E171CSQHMTQVVRRC    | 384  | 50   |
| >TP53-E171CSQHMTEVVRR    | 363  | >TP53-E171CSQHMTQVVRRC    | 337  | 26   |
| >TP53-E171CQSQHMTEVVRR   | 230  | >TP53-E171CQSQHMTQVVRRC   | 109  | 121  |
| >TP53-E171CQSQHMTEVVRR   | 321  | >TP53-E171CQSQHMTQVVRRC   | 153  | 168  |
| >TP53-E171CQSQHMTEVVRR   | 185  | >TP53-E171CQSQHMTQVVRRC   | 277  | 92   |
| >TP53-E171CQSQHMTEVVRR   | 206  | >TP53-E171CQSQHMTQVVRRC   | 646  | 440  |
| >TP53-E171CQSQHMTEVVRR   | 303  | >TP53-E171CQSQHMTQVVRRC   | 1496 | 1193 |
| >TP53-E171CQSQHMTEVVRR   | 306  | >TP53-E171CQSQHMTQVVRRC   | 388  | 82   |
| >TP53-E171CKQSQHMTEVVRR  | 82   | >TP53-E171CKQSQHMTQVVRRC  | 257  | 175  |
| >TP53-E171CKQSQHMTEVVRR  | 51   | >TP53-E171CKQSQHMTQVVRRC  | 93   | 42   |
| >TP53-E171CKQSQHMTEVVRR  | 298  | >TP53-E171CKQSQHMTQVVRRC  | 768  | 470  |
| >TP53-E171CKQSQHMTEVVRR  | 9    | >TP53-E171CKQSQHMTQVVRRC  | 10   | 1    |
| >TP53-E171CKQSQHMTEVVRR  | 273  | >TP53-E171CKQSQHMTQVVRRC  | 364  | 91   |
| >TP53-E171CKQSQHMTEVVRR  | 10   | >TP53-E171CKQSQHMTQVVRRC  | 16   | 6    |
| >TP53-E171CKQSQHMTEVVRR  | 426  | >TP53-E171CKQSQHMTQVVRRC  | 482  | 56   |
| >TP53-E171CKQSQHMTEVVRR  | 35   | >TP53-E171CKQSQHMTQVVRRC  | 21   | 14   |
| >TP53-E171CKQSQHMTEVVRR  | 222  | >TP53-E171CKQSQHMTQVVRRC  | 208  | 14   |
| >TP53-E171CKQSQHMTEVVRR  | 86   | >TP53-E171CKQSQHMTQVVRRC  | 214  | 128  |
| >TP53-E171CKQSQHMTEVVRR  | 110  | >TP53-E171CKQSQHMTQVVRRC  | 60   | 50   |
| >TP53-E171CKQSQHMTEVVRR  | 185  | >TP53-E171CKQSQHMTQVVRRC  | 172  | 13   |
| >TP53-E171CKQSQHMTEVVRR  | 863  | >TP53-E171CKQSQHMTQVVRRC  | 417  | 446  |
| >TP53-E171CKQSQHMTEVVRR  | 60   | >TP53-E171CKQSQHMTQVVRRC  | 59   | 1    |
| >TP53-E171CYKQSQHMTEVVRR | 467  | >TP53-E171CYKQSQHMTQVVRRC | 427  | 40   |

|                       |       |                       |       |       |
|-----------------------|-------|-----------------------|-------|-------|
| >TP53-E171CYKQSQHMTE  | 1075  | >TP53-E171CYKQSQHMTC  | 270   | 805   |
| >TP53-E171CYKQSQHMTE  | 30    | >TP53-E171CYKQSQHMTC  | 53    | 23    |
| >TP53-E171CYKQSQHMTE  | 42    | >TP53-E171CYKQSQHMTC  | 20    | 22    |
| >TP53-E171CYKQSQHMTE  | 945   | >TP53-E171CYKQSQHMTC  | 464   | 481   |
| >TP53-E171CIYKQSQHMTI | 402   | >TP53-E171CIYKQSQHMTI | 341   | 61    |
| >TP53-E171CIYKQSQHMTI | 2804  | >TP53-E171CIYKQSQHMTI | 426   | 2378  |
| >TP53-E171VEVRRCPH    | 400   | >TP53-E171VEVRRCPH    | 9995  | 9595  |
| >TP53-E171VEVRRCPHH   | 98    | >TP53-E171VEVRRCPHH   | 4885  | 4787  |
| >TP53-E171VEVRRCPHHE  | 428   | >TP53-E171VEVRRCPHHE  | 11636 | 11208 |
| >TP53-E171VEVRRCPHHE  | 371   | >TP53-E171VEVRRCPHHE  | 45    | 326   |
| >TP53-E171VEVRRCPHHE  | 53    | >TP53-E171VEVRRCPHHE  | 437   | 384   |
| >TP53-E171VEVRRCPHHE  | 5     | >TP53-E171VEVRRCPHHE  | 88    | 83    |
| >TP53-E171VAIYKQSQHM' | 11595 | >TP53-E171VAIYKQSQHM' | 433   | 11162 |
| >TP53-E171VAIYKQSQHM' | 24222 | >TP53-E171VAIYKQSQHM' | 346   | 23876 |
| >TP53-E171VAIYKQSQHM' | 25942 | >TP53-E171VAIYKQSQHM' | 203   | 25739 |
| >TP53-E171VAIYKQSQHM' | 18048 | >TP53-E171VAIYKQSQHM' | 14    | 18034 |
| >TP53-E171VAIYKQSQHM' | 22029 | >TP53-E171VAIYKQSQHM' | 64    | 21965 |
| >TP53-E171VAIYKQSQHM' | 18065 | >TP53-E171VAIYKQSQHM' | 8     | 18057 |
| >TP53-E171VAIYKQSQHM' | 24292 | >TP53-E171VAIYKQSQHM' | 63    | 24229 |
| >TP53-E171VAIYKQSQHM' | 21695 | >TP53-E171VAIYKQSQHM' | 13    | 21682 |
| >TP53-E171VAIYKQSQHM' | 20227 | >TP53-E171VAIYKQSQHM' | 4     | 20223 |
| >TP53-E171VAIYKQSQHM' | 6246  | >TP53-E171VAIYKQSQHM' | 183   | 6063  |
| >TP53-E171VAIYKQSQHM' | 5129  | >TP53-E171VAIYKQSQHM' | 465   | 4664  |
| >TP53-E171VAIYKQSQHM' | 22921 | >TP53-E171VAIYKQSQHM' | 376   | 22545 |
| >TP53-E171VAIYKQSQHM' | 10438 | >TP53-E171VAIYKQSQHM' | 331   | 10107 |
| >TP53-E171VHMTEVVRR   | 38    | >TP53-E171VHMTEVVRR   | 1008  | 970   |
| >TP53-E171VHMTEVVRR   | 38    | >TP53-E171VHMTEVVRR   | 18    | 20    |
| >TP53-E171VHMTEVVRR   | 65    | >TP53-E171VHMTEVVRR   | 52    | 13    |
| >TP53-E171VHMTEVVRR   | 35    | >TP53-E171VHMTEVVRR   | 34    | 1     |
| >TP53-E171VHMTEVVRR   | 64    | >TP53-E171VHMTEVVRR   | 107   | 43    |
| >TP53-E171VQHMTEVVRR  | 2161  | >TP53-E171VQHMTEVVRR  | 456   | 1705  |
| >TP53-E171VQHMTEVVRR  | 269   | >TP53-E171VQHMTEVVRR  | 339   | 70    |
| >TP53-E171VQHMTEVVRR  | 195   | >TP53-E171VQHMTEVVRR  | 354   | 159   |
| >TP53-E171VSQHMTVVV   | 670   | >TP53-E171VSQHMTVVV   | 124   | 546   |
| >TP53-E171VSQHMTVVV   | 115   | >TP53-E171VSQHMTVVV   | 47    | 68    |
| >TP53-E171VSQHMTVVV   | 256   | >TP53-E171VSQHMTVVV   | 101   | 155   |
| >TP53-E171VSQHMTVVV   | 543   | >TP53-E171VSQHMTVVV   | 202   | 341   |
| >TP53-E171VSQHMTVVVR  | 115   | >TP53-E171VSQHMTVVVR  | 39    | 76    |
| >TP53-E171VSQHMTVVVR  | 504   | >TP53-E171VSQHMTVVVR  | 105   | 399   |
| >TP53-E171VSQHMTVVV   | 504   | >TP53-E171VSQHMTVVV   | 199   | 305   |
| >TP53-E171VSQHMTVVV   | 88    | >TP53-E171VSQHMTVVV   | 29    | 59    |
| >TP53-E171VSQHMTVVVR  | 162   | >TP53-E171VSQHMTVVVR  | 59    | 103   |
| >TP53-E171VSQHMTVVVR  | 572   | >TP53-E171VSQHMTVVVR  | 392   | 180   |

|                        |       |                        |       |       |
|------------------------|-------|------------------------|-------|-------|
| >TP53-E171V SQHMTEVV   | 1657  | >TP53-E171V SQHMTVVV   | 295   | 1362  |
| >TP53-E171V SQHMTEVVR  | 434   | >TP53-E171V SQHMTVVVR  | 281   | 153   |
| >TP53-E171V SQHMTEVV   | 363   | >TP53-E171V SQHMTVVVR  | 342   | 21    |
| >TP53-E171V QSQHMTEVV  | 230   | >TP53-E171V QSQHMTVV\  | 70    | 160   |
| >TP53-E171V QSQHMTEVV  | 321   | >TP53-E171V QSQHMTVV\  | 89    | 232   |
| >TP53-E171V QSQHMTEVV  | 1104  | >TP53-E171V QSQHMTVV\  | 411   | 693   |
| >TP53-E171V QSQHMTEVV  | 185   | >TP53-E171V QSQHMTVV\  | 106   | 79    |
| >TP53-E171V QSQHMTEV   | 206   | >TP53-E171V QSQHMTVV   | 745   | 539   |
| >TP53-E171V QSQHMTEVV  | 303   | >TP53-E171V QSQHMTVV\  | 346   | 43    |
| >TP53-E171V QSQHMTEVV  | 1149  | >TP53-E171V QSQHMTVV\  | 448   | 701   |
| >TP53-E171V QSQHMTEVV  | 306   | >TP53-E171V QSQHMTVV\  | 276   | 30    |
| >TP53-E171V KQSQHMT    | 23563 | >TP53-E171V KQSQHMTV   | 351   | 23212 |
| >TP53-E171V KQSQHMT    | 82    | >TP53-E171V KQSQHMTV\  | 582   | 500   |
| >TP53-E171V KQSQHMT    | 24551 | >TP53-E171V KQSQHMTV   | 301   | 24250 |
| >TP53-E171V KQSQHMT    | 51    | >TP53-E171V KQSQHMTV\  | 210   | 159   |
| >TP53-E171V KQSQHMT    | 298   | >TP53-E171V KQSQHMTV\  | 473   | 175   |
| >TP53-E171V KQSQHMT    | 17807 | >TP53-E171V KQSQHMTV   | 26    | 17781 |
| >TP53-E171V KQSQHMT    | 9     | >TP53-E171V KQSQHMTV\  | 14    | 5     |
| >TP53-E171V KQSQHMT    | 273   | >TP53-E171V KQSQHMTV\  | 205   | 68    |
| >TP53-E171V KQSQHMT    | 10832 | >TP53-E171V KQSQHMTV   | 13    | 10819 |
| >TP53-E171V KQSQHMT    | 10    | >TP53-E171V KQSQHMTV\  | 27    | 17    |
| >TP53-E171V KQSQHMT    | 29632 | >TP53-E171V KQSQHMTV   | 198   | 29434 |
| >TP53-E171V KQSQHMT    | 426   | >TP53-E171V KQSQHMTV\  | 990   | 564   |
| >TP53-E171V KQSQHMT    | 22263 | >TP53-E171V KQSQHMTV   | 446   | 21817 |
| >TP53-E171V KQSQHMT    | 35    | >TP53-E171V KQSQHMTV\  | 23    | 12    |
| >TP53-E171V KQSQHMT    | 541   | >TP53-E171V KQSQHMTV\  | 151   | 390   |
| >TP53-E171V KQSQHMT    | 222   | >TP53-E171V KQSQHMTV\  | 155   | 67    |
| >TP53-E171V KQSQHMT    | 3366  | >TP53-E171V KQSQHMTV   | 60    | 3306  |
| >TP53-E171V KQSQHMT    | 86    | >TP53-E171V KQSQHMTV\  | 62    | 24    |
| >TP53-E171V KQSQHMT    | 110   | >TP53-E171V KQSQHMTV\  | 44    | 66    |
| >TP53-E171V KQSQHMT    | 185   | >TP53-E171V KQSQHMTV\  | 107   | 78    |
| >TP53-E171V KQSQHMT    | 60    | >TP53-E171V KQSQHMTV\  | 55    | 5     |
| >TP53-E171V YKQSQHMT   | 34354 | >TP53-E171V YKQSQHMTV  | 260   | 34094 |
| >TP53-E171V YKQSQHMT   | 467   | >TP53-E171V YKQSQHMTV  | 1404  | 937   |
| >TP53-E171V YKQSQHMT   | 1075  | >TP53-E171V YKQSQHMTV  | 16    | 1059  |
| >TP53-E171V YKQSQHMT   | 30    | >TP53-E171V YKQSQHMTV  | 24    | 6     |
| >TP53-E171V YKQSQHMT   | 42    | >TP53-E171V YKQSQHMTV  | 20    | 22    |
| >TP53-E171V YKQSQHMT   | 945   | >TP53-E171V YKQSQHMTV  | 221   | 724   |
| >TP53-E171V IYKQSQHMT  | 19560 | >TP53-E171V IYKQSQHMT  | 358   | 19202 |
| >TP53-E171V IYKQSQHMT  | 402   | >TP53-E171V IYKQSQHMT  | 431   | 29    |
| >TP53-E171V IYKQSQHMT  | 4508  | >TP53-E171V IYKQSQHMT  | 263   | 4245  |
| >TP53-E171V IYKQSQHMT  | 2804  | >TP53-E171V IYKQSQHMT  | 71    | 2733  |
| >TP53-E180C HERCSDSDGI | 422   | >TP53-E180C HDRCSDSDGI | 11307 | 10885 |

|                        |       |                        |       |       |
|------------------------|-------|------------------------|-------|-------|
| >TP53-E180C HHERCSDSDC | 833   | >TP53-E180C HHDRCSDDC  | 397   | 436   |
| >TP53-E180C HHERCSDSDC | 126   | >TP53-E180C HHDRCSDDC  | 66    | 60    |
| >TP53-E180C RRCPPHER   | 405   | >TP53-E180C RRCPPHDR   | 2434  | 2029  |
| >TP53-E180C RRCPPHER   | 102   | >TP53-E180C RRCPPHDR   | 73    | 29    |
| >TP53-E180C RRCPPHER   | 312   | >TP53-E180C RRCPPHDR   | 520   | 208   |
| >TP53-E180C RRCPPHERC  | 320   | >TP53-E180C RRCPPHDRC  | 305   | 15    |
| >TP53-E180C RRCPPHER   | 87    | >TP53-E180C RRCPPHDR   | 113   | 26    |
| >TP53-E180C VVRRCPHHEF | 145   | >TP53-E180C VVRRCPHHD  | 488   | 343   |
| >TP53-E180C VVRRCPHHEF | 63    | >TP53-E180C VVRRCPHHD  | 113   | 50    |
| >TP53-E180C EVVRRCPHHE | 428   | >TP53-E180C EVVRRCPHHI | 4271  | 3843  |
| >TP53-E180C EVVRRCPHHE | 371   | >TP53-E180C EVVRRCPHHI | 1857  | 1486  |
| >TP53-E180C EVVRRCPHHE | 53    | >TP53-E180C EVVRRCPHHI | 102   | 49    |
| >TP53-E180C EVVRRCPHHE | 5     | >TP53-E180C EVVRRCPHHI | 8     | 3     |
| >TP53-E180K ERCSDSDG   | 13500 | >TP53-E180K KRCSDSDG   | 366   | 13134 |
| >TP53-E180K ERCSDSDGL  | 5991  | >TP53-E180K KRCSDSDGL  | 365   | 5626  |
| >TP53-E180K HERCSDSDGL | 2612  | >TP53-E180K HKRCSDSDGL | 56    | 2556  |
| >TP53-E180K HERCSDSDGL | 422   | >TP53-E180K HKRCSDSDGL | 28395 | 27973 |
| >TP53-E180K HHERCSDSDC | 126   | >TP53-E180K HHKRCSDSDC | 3401  | 3275  |
| >TP53-E180K RRCPPHER   | 405   | >TP53-E180K RRCPPHHR   | 510   | 105   |
| >TP53-E180K RRCPPHER   | 729   | >TP53-E180K RRCPPHHR   | 345   | 384   |
| >TP53-E180K RRCPPHER   | 102   | >TP53-E180K RRCPPHHR   | 108   | 6     |
| >TP53-E180K RRCPPHER   | 312   | >TP53-E180K RRCPPHHR   | 188   | 124   |
| >TP53-E180K RRCPPHERC  | 320   | >TP53-E180K RRCPPHHRC  | 303   | 17    |
| >TP53-E180K RRCPPHER   | 87    | >TP53-E180K RRCPPHHR   | 54    | 33    |
| >TP53-E180K VVRRCPHHE  | 14787 | >TP53-E180K VVRRCPHHK  | 315   | 14472 |
| >TP53-E180K VVRRCPHHE  | 18529 | >TP53-E180K VVRRCPHHK  | 105   | 18424 |
| >TP53-E180K VVRRCPHHE  | 28723 | >TP53-E180K VVRRCPHHK  | 322   | 28401 |
| >TP53-E180K VVRRCPHHE  | 2903  | >TP53-E180K VVRRCPHHK  | 5     | 2898  |
| >TP53-E180K VVRRCPHHEF | 145   | >TP53-E180K VVRRCPHHKI | 204   | 59    |
| >TP53-E180K VVRRCPHHE  | 12830 | >TP53-E180K VVRRCPHHK  | 133   | 12697 |
| >TP53-E180K VVRRCPHHEF | 63    | >TP53-E180K VVRRCPHHKI | 64    | 1     |
| >TP53-E180K VVRRCPHHEF | 713   | >TP53-E180K VVRRCPHHKI | 399   | 314   |
| >TP53-E180K EVVRRCPHHE | 428   | >TP53-E180K EVVRRCPHHI | 838   | 410   |
| >TP53-E180K EVVRRCPHHE | 371   | >TP53-E180K EVVRRCPHHI | 439   | 68    |
| >TP53-E180K EVVRRCPHHE | 53    | >TP53-E180K EVVRRCPHHI | 86    | 33    |
| >TP53-E180K EVVRRCPHHE | 5     | >TP53-E180K EVVRRCPHHI | 7     | 2     |
| >TP53-E180C HERCSDSDGL | 5036  | >TP53-E180C HQRCSDSDG  | 123   | 4913  |
| >TP53-E180C HERCSDSDGL | 9118  | >TP53-E180C HQRCSDSDG  | 287   | 8831  |
| >TP53-E180C HERCSDSDGL | 2612  | >TP53-E180C HQRCSDSDG  | 64    | 2548  |
| >TP53-E180C HERCSDSDGL | 422   | >TP53-E180C HQRCSDSDG  | 20992 | 20570 |
| >TP53-E180C HHERCSDSDC | 126   | >TP53-E180C HHQRCSDSDC | 244   | 118   |
| >TP53-E180C RRCPPHER   | 405   | >TP53-E180C RRCPPHQR   | 387   | 18    |
| >TP53-E180C RRCPPHER   | 729   | >TP53-E180C RRCPPHQR   | 473   | 256   |

|                         |      |                         |       |       |
|-------------------------|------|-------------------------|-------|-------|
| >TP53-E180C RRCPPHER    | 102  | >TP53-E180C RRCPPHQR    | 71    | 31    |
| >TP53-E180C RRCPPHER    | 312  | >TP53-E180C RRCPPHQR    | 190   | 122   |
| >TP53-E180C RRCPPHERC   | 320  | >TP53-E180C RRCPPHQRC   | 191   | 129   |
| >TP53-E180C RRCPPHER    | 87   | >TP53-E180C RRCPPHQR    | 74    | 13    |
| >TP53-E180C VVRRCPHHE   | 2903 | >TP53-E180C VVRRCPHHQ   | 396   | 2507  |
| >TP53-E180C VVRRCPHHEI  | 145  | >TP53-E180C VVRRCPHHQ   | 148   | 3     |
| >TP53-E180C VVRRCPHHEI  | 63   | >TP53-E180C VVRRCPHHQ   | 74    | 11    |
| >TP53-E180C EVVRRCPHHE  | 428  | >TP53-E180C EVVRRCPHHQ  | 103   | 325   |
| >TP53-E180C EVVRRCPHHE  | 371  | >TP53-E180C EVVRRCPHHQ  | 393   | 22    |
| >TP53-E180C EVVRRCPHHE  | 53   | >TP53-E180C EVVRRCPHHQ  | 65    | 12    |
| >TP53-E180C EVVRRCPHHE  | 5    | >TP53-E180C EVVRRCPHHQ  | 5     | 0     |
| >TP53-E198C VEGNLRVEYL  | 312  | >TP53-E198C VGGNLRVEYL  | 27761 | 27449 |
| >TP53-E198C VEGNLRVEY   | 2056 | >TP53-E198C VGGNLRVEY   | 256   | 1800  |
| >TP53-E198C VEGNLRVEY   | 67   | >TP53-E198C VGGNLRVEY   | 18000 | 17933 |
| >TP53-E198C VEGNLRVEYL  | 472  | >TP53-E198C VGGNLRVEYL  | 35884 | 35412 |
| >TP53-E198C VEGNLRVEY   | 338  | >TP53-E198C VGGNLRVEY   | 37811 | 37473 |
| >TP53-E198C VEGNLRVEYL  | 278  | >TP53-E198C VGGNLRVEYL  | 34868 | 34590 |
| >TP53-E198C RVEGNLRV    | 604  | >TP53-E198C RVGGNLRV    | 62    | 542   |
| >TP53-E198C RVEGNLRVEY  | 974  | >TP53-E198C RVGGNLRVEY  | 125   | 849   |
| >TP53-E198C RVEGNLRV    | 54   | >TP53-E198C RVGGNLRV    | 19    | 35    |
| >TP53-E198C RVEGNLRVEY  | 1642 | >TP53-E198C RVGGNLRVEY  | 445   | 1197  |
| >TP53-E198C RVEGNLRVEY  | 224  | >TP53-E198C RVGGNLRVEY  | 224   | 0     |
| >TP53-E198C RVEGNLRVEY  | 810  | >TP53-E198C RVGGNLRVEY  | 296   | 514   |
| >TP53-E198C RVEGNLRVEY  | 1157 | >TP53-E198C RVGGNLRVEY  | 77    | 1080  |
| >TP53-E198C RVEGNLRVEY  | 2230 | >TP53-E198C RVGGNLRVEY  | 251   | 1979  |
| >TP53-E198C RVEGNLRVEY  | 301  | >TP53-E198C RVGGNLRVEY  | 814   | 513   |
| >TP53-E198C RVEGNLRVEY  | 400  | >TP53-E198C RVGGNLRVEY  | 393   | 7     |
| >TP53-E198C IRVEGNLRVEY | 53   | >TP53-E198C IRVGGNLRVEY | 146   | 93    |
| >TP53-E198C IRVEGNLRVEY | 668  | >TP53-E198C IRVGGNLRVEY | 410   | 258   |
| >TP53-E198C LIRVEGNLRV  | 35   | >TP53-E198C LIRVGGNLRV  | 16    | 19    |
| >TP53-E198C LIRVEGNLR   | 1087 | >TP53-E198C LIRVGGNLR   | 341   | 746   |
| >TP53-E198C LIRVEGNLRV  | 296  | >TP53-E198C LIRVGGNLRV  | 137   | 159   |
| >TP53-E198C LIRVEGNLR   | 570  | >TP53-E198C LIRVGGNLR   | 132   | 438   |
| >TP53-E198C LIRVEGNLR   | 1131 | >TP53-E198C LIRVGGNLR   | 344   | 787   |
| >TP53-E198C HLIRVEGNLR  | 156  | >TP53-E198C HLIRVGGNLR  | 212   | 56    |
| >TP53-E198C HLIRVEGNL   | 226  | >TP53-E198C HLIRVGGNL   | 215   | 11    |
| >TP53-E198C HLIRVEGNLR  | 111  | >TP53-E198C HLIRVGGNLR  | 113   | 2     |
| >TP53-E198C HLIRVEGNL   | 690  | >TP53-E198C HLIRVGGNL   | 134   | 556   |
| >TP53-E198C HLIRVEGNLR  | 41   | >TP53-E198C HLIRVGGNLR  | 23    | 18    |
| >TP53-E198C HLIRVEGNLR  | 322  | >TP53-E198C HLIRVGGNLR  | 285   | 37    |
| >TP53-E198C HLIRVEGNL   | 327  | >TP53-E198C HLIRVGGNL   | 143   | 184   |
| >TP53-E198C HLIRVEGNLR  | 9    | >TP53-E198C HLIRVGGNLR  | 8     | 1     |
| >TP53-E198C HLIRVEGNL   | 806  | >TP53-E198C HLIRVGGNL   | 446   | 360   |

|                         |      |                         |       |       |
|-------------------------|------|-------------------------|-------|-------|
| >TP53-E198C HLIRVEGNLR' | 27   | >TP53-E198C HLIRVGGNLR  | 24    | 3     |
| >TP53-E198C HLIRVEGNLR' | 27   | >TP53-E198C HLIRVGGNLR  | 29    | 2     |
| >TP53-E198C HLIRVEGNL   | 153  | >TP53-E198C HLIRVGGNL   | 175   | 22    |
| >TP53-E198C HLIRVEGNLR' | 4    | >TP53-E198C HLIRVGGNLR  | 4     | 0     |
| >TP53-E198C HLIRVEGNLR  | 241  | >TP53-E198C HLIRVGGNLR  | 241   | 0     |
| >TP53-E198C HLIRVEGNLR  | 381  | >TP53-E198C HLIRVGGNLR  | 442   | 61    |
| >TP53-E198C HLIRVEGNLR  | 24   | >TP53-E198C HLIRVGGNLR  | 46    | 22    |
| >TP53-E198C HLIRVEGNLR' | 398  | >TP53-E198C HLIRVGGNLR  | 391   | 7     |
| >TP53-E198C HLIRVEGNLR  | 478  | >TP53-E198C HLIRVGGNLR  | 815   | 337   |
| >TP53-E198K EGNLRVEY    | 4184 | >TP53-E198K KGNLRVEY    | 363   | 3821  |
| >TP53-E198K VEGNLRVEYL  | 312  | >TP53-E198K VKGNLRVEYL  | 11583 | 11271 |
| >TP53-E198K VEGNLRVEY   | 1192 | >TP53-E198K VKGNLRVEY   | 36    | 1156  |
| >TP53-E198K VEGNLRVEY   | 67   | >TP53-E198K VKGNLRVEY   | 13382 | 13315 |
| >TP53-E198K VEGNLRVEYL  | 472  | >TP53-E198K VKGNLRVEYL  | 28954 | 28482 |
| >TP53-E198K VEGNLRVEY   | 338  | >TP53-E198K VKGNLRVEY   | 24364 | 24026 |
| >TP53-E198K VEGNLRVEYL  | 278  | >TP53-E198K VKGNLRVEYL  | 23632 | 23354 |
| >TP53-E198K RVEGNLRV    | 3341 | >TP53-E198K RVKGNLRV    | 186   | 3155  |
| >TP53-E198K RVEGNLRVEY  | 5750 | >TP53-E198K RVKGNLRVEY  | 413   | 5337  |
| >TP53-E198K RVEGNLRV    | 54   | >TP53-E198K RVKGNLRV    | 55    | 1     |
| >TP53-E198K RVEGNLRVEY  | 1642 | >TP53-E198K RVKGNLRVEY  | 377   | 1265  |
| >TP53-E198K RVEGNLRV    | 2749 | >TP53-E198K RVKGNLRV    | 13    | 2736  |
| >TP53-E198K RVEGNLRVEY  | 4593 | >TP53-E198K RVKGNLRVEY  | 21    | 4572  |
| >TP53-E198K RVEGNLRVEY  | 4812 | >TP53-E198K RVKGNLRVEY  | 28    | 4784  |
| >TP53-E198K RVEGNLRVEY  | 224  | >TP53-E198K RVKGNLRVEY  | 312   | 88    |
| >TP53-E198K RVEGNLRVEY  | 4028 | >TP53-E198K RVKGNLRVEY  | 424   | 3604  |
| >TP53-E198K RVEGNLRVEY  | 2230 | >TP53-E198K RVKGNLRVEY  | 117   | 2113  |
| >TP53-E198K RVEGNLRVEY  | 301  | >TP53-E198K RVKGNLRVEY  | 117   | 184   |
| >TP53-E198K RVEGNLRVEY  | 400  | >TP53-E198K RVKGNLRVEY  | 285   | 115   |
| >TP53-E198K IRVEGNLRVE' | 53   | >TP53-E198K IRVKGNLRVE' | 40    | 13    |
| >TP53-E198K IRVEGNLRVE' | 668  | >TP53-E198K IRVKGNLRVE' | 480   | 188   |
| >TP53-E198K LIRVEGNLRV  | 35   | >TP53-E198K LIRVKGNLRV  | 45    | 10    |
| >TP53-E198K LIRVEGNLR   | 1087 | >TP53-E198K LIRVKGNLR   | 335   | 752   |
| >TP53-E198K LIRVEGNLRV  | 296  | >TP53-E198K LIRVKGNLRV  | 121   | 175   |
| >TP53-E198K LIRVEGNLR   | 570  | >TP53-E198K LIRVKGNLR   | 50    | 520   |
| >TP53-E198K LIRVEGNLR   | 1131 | >TP53-E198K LIRVKGNLR   | 299   | 832   |
| >TP53-E198K HLIRVEGNLR' | 156  | >TP53-E198K HLIRVKGNLR' | 316   | 160   |
| >TP53-E198K HLIRVEGNL   | 226  | >TP53-E198K HLIRVKGNL   | 436   | 210   |
| >TP53-E198K HLIRVEGNLR' | 111  | >TP53-E198K HLIRVKGNLR' | 186   | 75    |
| >TP53-E198K HLIRVEGNLR' | 41   | >TP53-E198K HLIRVKGNLR' | 51    | 10    |
| >TP53-E198K HLIRVEGNLR' | 322  | >TP53-E198K HLIRVKGNLR' | 516   | 194   |
| >TP53-E198K HLIRVEGNL   | 327  | >TP53-E198K HLIRVKGNL   | 400   | 73    |
| >TP53-E198K HLIRVEGNLR' | 9    | >TP53-E198K HLIRVKGNLR' | 13    | 4     |
| >TP53-E198K HLIRVEGNLR' | 27   | >TP53-E198K HLIRVKGNLR' | 55    | 28    |

|                         |      |                         |       |       |
|-------------------------|------|-------------------------|-------|-------|
| >TP53-E198KHLIRVEGNLR'  | 27   | >TP53-E198KHLIRVKGNLR'  | 43    | 16    |
| >TP53-E198KHLIRVEGNL    | 153  | >TP53-E198KHLIRVKGNL    | 165   | 12    |
| >TP53-E198KHLIRVEGNLR'  | 4    | >TP53-E198KHLIRVKGNLR'  | 4     | 0     |
| >TP53-E198KHLIRVEGNLR   | 241  | >TP53-E198KHLIRVKGNLR   | 84    | 157   |
| >TP53-E198KHLIRVEGNLR   | 381  | >TP53-E198KHLIRVKGNLR   | 363   | 18    |
| >TP53-E198KHLIRVEGNLR   | 24   | >TP53-E198KHLIRVKGNLR   | 60    | 36    |
| >TP53-E198KHLIRVEGNLR'  | 398  | >TP53-E198KHLIRVKGNLR'  | 339   | 59    |
| >TP53-E198KHLIRVEGNLR   | 478  | >TP53-E198KHLIRVKGNLR   | 408   | 70    |
| >TP53-E198C VEGNLRVEYL  | 312  | >TP53-E198C VQGNLRVEYL  | 7335  | 7023  |
| >TP53-E198C VEGNLRVEYL  | 7062 | >TP53-E198C VQGNLRVEYL  | 291   | 6771  |
| >TP53-E198C VEGNLRVEY   | 2056 | >TP53-E198C VQGNLRVEY   | 177   | 1879  |
| >TP53-E198C VEGNLRVEY   | 2344 | >TP53-E198C VQGNLRVEY   | 70    | 2274  |
| >TP53-E198C VEGNLRVEY   | 1192 | >TP53-E198C VQGNLRVEY   | 34    | 1158  |
| >TP53-E198C VEGNLRVEY   | 67   | >TP53-E198C VQGNLRVEY   | 4923  | 4856  |
| >TP53-E198C VEGNLRVEYL  | 472  | >TP53-E198C VQGNLRVEYL  | 26662 | 26190 |
| >TP53-E198C VEGNLRVEY   | 338  | >TP53-E198C VQGNLRVEY   | 13486 | 13148 |
| >TP53-E198C VEGNLRVEYL  | 278  | >TP53-E198C VQGNLRVEYL  | 19649 | 19371 |
| >TP53-E198C LAPPQHLIRV' | 865  | >TP53-E198C LAPPQHLIRV' | 438   | 427   |
| >TP53-E198C RVEGNLRV    | 732  | >TP53-E198C RVQGNLRV    | 380   | 352   |
| >TP53-E198C RVEGNLRVEY  | 946  | >TP53-E198C RVQGNLRVE'  | 474   | 472   |
| >TP53-E198C RVEGNLRV    | 604  | >TP53-E198C RVQGNLRV    | 108   | 496   |
| >TP53-E198C RVEGNLRVEY  | 974  | >TP53-E198C RVQGNLRVE'  | 209   | 765   |
| >TP53-E198C RVEGNLRV    | 54   | >TP53-E198C RVQGNLRV    | 19    | 35    |
| >TP53-E198C RVEGNLRVEY  | 1642 | >TP53-E198C RVQGNLRVE'  | 389   | 1253  |
| >TP53-E198C RVEGNLRVEY  | 224  | >TP53-E198C RVQGNLRVE'  | 110   | 114   |
| >TP53-E198C RVEGNLRVEY  | 810  | >TP53-E198C RVQGNLRVE'  | 184   | 626   |
| >TP53-E198C RVEGNLRVEY  | 1375 | >TP53-E198C RVQGNLRVE'  | 362   | 1013  |
| >TP53-E198C RVEGNLRVEY  | 1157 | >TP53-E198C RVQGNLRVE'  | 497   | 660   |
| >TP53-E198C RVEGNLRVEY  | 2230 | >TP53-E198C RVQGNLRVE'  | 174   | 2056  |
| >TP53-E198C RVEGNLRVEY  | 301  | >TP53-E198C RVQGNLRVE'  | 193   | 108   |
| >TP53-E198C RVEGNLRVEY  | 400  | >TP53-E198C RVQGNLRVE'  | 88    | 312   |
| >TP53-E198C RVEGNLRVEY  | 933  | >TP53-E198C RVQGNLRVE'  | 331   | 602   |
| >TP53-E198C IRVEGNLRVE' | 53   | >TP53-E198C IRVQGNLRVE  | 64    | 11    |
| >TP53-E198C LIRVEGNLRV  | 35   | >TP53-E198C LIRVQGNLRV  | 32    | 3     |
| >TP53-E198C LIRVEGNL    | 1610 | >TP53-E198C LIRVQGNL    | 269   | 1341  |
| >TP53-E198C LIRVEGNLR   | 1087 | >TP53-E198C LIRVQGNLR   | 160   | 927   |
| >TP53-E198C LIRVEGNLRV  | 296  | >TP53-E198C LIRVQGNLRV  | 99    | 197   |
| >TP53-E198C LIRVEGNLR   | 570  | >TP53-E198C LIRVQGNLR   | 89    | 481   |
| >TP53-E198C HLIRVEGNLR' | 156  | >TP53-E198C HLIRVQGNLR  | 139   | 17    |
| >TP53-E198C HLIRVEGNL   | 226  | >TP53-E198C HLIRVQGNL   | 75    | 151   |
| >TP53-E198C HLIRVEGNLR' | 111  | >TP53-E198C HLIRVQGNLR  | 76    | 35    |
| >TP53-E198C HLIRVEGNL   | 690  | >TP53-E198C HLIRVQGNL   | 163   | 527   |
| >TP53-E198C HLIRVEGNLR' | 41   | >TP53-E198C HLIRVQGNLR  | 27    | 14    |

|                         |       |                        |      |       |
|-------------------------|-------|------------------------|------|-------|
| >TP53-E198C HLIRVEGNLR' | 322   | >TP53-E198C HLIRVQGNLR | 330  | 8     |
| >TP53-E198C HLIRVEGNL   | 327   | >TP53-E198C HLIRVQGNL  | 193  | 134   |
| >TP53-E198C HLIRVEGNLR' | 9     | >TP53-E198C HLIRVQGNLR | 9    | 0     |
| >TP53-E198C HLIRVEGNL   | 806   | >TP53-E198C HLIRVQGNL  | 437  | 369   |
| >TP53-E198C HLIRVEGNLR' | 27    | >TP53-E198C HLIRVQGNLR | 26   | 1     |
| >TP53-E198C HLIRVEGNLR' | 27    | >TP53-E198C HLIRVQGNLR | 30   | 3     |
| >TP53-E198C HLIRVEGNL   | 153   | >TP53-E198C HLIRVQGNL  | 70   | 83    |
| >TP53-E198C HLIRVEGNLR' | 4     | >TP53-E198C HLIRVQGNLR | 4    | 0     |
| >TP53-E198C HLIRVEGNLR  | 241   | >TP53-E198C HLIRVQGNLR | 192  | 49    |
| >TP53-E198C HLIRVEGNLR  | 381   | >TP53-E198C HLIRVQGNLR | 300  | 81    |
| >TP53-E198C HLIRVEGNLR  | 24    | >TP53-E198C HLIRVQGNLR | 35   | 11    |
| >TP53-E198C HLIRVEGNLR' | 398   | >TP53-E198C HLIRVQGNLR | 223  | 175   |
| >TP53-E198C HLIRVEGNLR  | 478   | >TP53-E198C HLIRVQGNLR | 408  | 70    |
| >TP53-E204A EYLDDRNTF   | 103   | >TP53-E204A AYLDDRNTF  | 57   | 46    |
| >TP53-E204A EYLDDRNTF   | 18    | >TP53-E204A AYLDDRNTF  | 6    | 12    |
| >TP53-E204A EYLDDRNTF   | 381   | >TP53-E204A AYLDDRNTF  | 9577 | 9196  |
| >TP53-E204A EYLDDRNTF   | 301   | >TP53-E204A AYLDDRNTF  | 5079 | 4778  |
| >TP53-E204A EYLDDRNTFR  | 328   | >TP53-E204A AYLDDRNTFR | 50   | 278   |
| >TP53-E204A EYLDDRNTFR  | 88    | >TP53-E204A AYLDDRNTFR | 205  | 117   |
| >TP53-E204A EYLDDRNTF   | 1873  | >TP53-E204A AYLDDRNTF  | 301  | 1572  |
| >TP53-E204A EYLDDRNTFR  | 19    | >TP53-E204A AYLDDRNTFR | 43   | 24    |
| >TP53-E204A VEYLDDRNTF  | 2651  | >TP53-E204A VAYLDDRNTF | 89   | 2562  |
| >TP53-E204A VEYLDDRNTF  | 1728  | >TP53-E204A VAYLDDRNTF | 104  | 1624  |
| >TP53-E204A VEYLDDRNTF  | 2593  | >TP53-E204A VAYLDDRNTF | 50   | 2543  |
| >TP53-E204A VEYLDDRNTF  | 124   | >TP53-E204A VAYLDDRNTF | 78   | 46    |
| >TP53-E204A VEYLDDRNTF  | 15641 | >TP53-E204A VAYLDDRNTF | 19   | 15622 |
| >TP53-E204A LIRVEGNLRVI | 7444  | >TP53-E204A LIRVEGNLRV | 237  | 7207  |
| >TP53-E204A RVEYLDDR    | 433   | >TP53-E204A RVAYLDDR   | 143  | 290   |
| >TP53-E204A RVEYLDDRNT  | 40    | >TP53-E204A RVAYLDDRNT | 21   | 19    |
| >TP53-E204A RVEYLDDR    | 652   | >TP53-E204A RVAYLDDR   | 72   | 580   |
| >TP53-E204A RVEYLDDRNT  | 2758  | >TP53-E204A RVAYLDDRNT | 167  | 2591  |
| >TP53-E204A RVEYLDDRNT  | 2406  | >TP53-E204A RVAYLDDRNT | 234  | 2172  |
| >TP53-E204A RVEYLDDRNT  | 1271  | >TP53-E204A RVAYLDDRNT | 417  | 854   |
| >TP53-E204A RVEYLDDRNT  | 1584  | >TP53-E204A RVAYLDDRNT | 477  | 1107  |
| >TP53-E204A RVEYLDDRNT  | 9648  | >TP53-E204A RVAYLDDRNT | 151  | 9497  |
| >TP53-E204A RVEYLDDRNT  | 78    | >TP53-E204A RVAYLDDRNT | 51   | 27    |
| >TP53-E204A RVEYLDDRNT  | 2208  | >TP53-E204A RVAYLDDRNT | 288  | 1920  |
| >TP53-E204A GNLRVEYL    | 5657  | >TP53-E204A GNLRVAYL   | 444  | 5213  |
| >TP53-E204A EGNLRVEY    | 1669  | >TP53-E204A EGNLRVAY   | 459  | 1210  |
| >TP53-E204A VEGNLRVEYL  | 312   | >TP53-E204A VEGNLRVAYL | 337  | 25    |
| >TP53-E204A VEGNLRVEY   | 67    | >TP53-E204A VEGNLRVAY  | 28   | 39    |
| >TP53-E204A VEGNLRVEYL  | 472   | >TP53-E204A VEGNLRVAYL | 451  | 21    |
| >TP53-E204A VEGNLRVEY   | 338   | >TP53-E204A VEGNLRVAY  | 356  | 18    |



|                         |       |                        |       |       |
|-------------------------|-------|------------------------|-------|-------|
| >TP53-E204A VEGNLRVE    | 10735 | >TP53-E204A VEGNLRVA   | 103   | 10632 |
| >TP53-E204A VEGNLRVEYL  | 278   | >TP53-E204A VEGNLRVAYL | 855   | 577   |
| >TP53-E204A RVEGNLRVEY  | 224   | >TP53-E204A RVEGNLRVA\ | 383   | 159   |
| >TP53-E204A RVEGNLRVEY  | 810   | >TP53-E204A RVEGNLRVA\ | 258   | 552   |
| >TP53-E204A RVEGNLRVEY  | 301   | >TP53-E204A RVEGNLRVA\ | 564   | 263   |
| >TP53-E204A RVEGNLRVEY  | 1887  | >TP53-E204A RVEGNLRVA\ | 404   | 1483  |
| >TP53-E204A RVEGNLRVEY  | 400   | >TP53-E204A RVEGNLRVA\ | 882   | 482   |
| >TP53-E204A RVEGNLRVEY  | 933   | >TP53-E204A RVEGNLRVA\ | 378   | 555   |
| >TP53-E204A IRVEGNLRVE' | 53    | >TP53-E204A IRVEGNLRVA | 29    | 24    |
| >TP53-E204C EYLDDRNTF   | 103   | >TP53-E204C DYLDDRNTF  | 177   | 74    |
| >TP53-E204C EYLDDRNTF   | 18    | >TP53-E204C DYLDDRNTF  | 55    | 37    |
| >TP53-E204C EYLDDRNTF   | 381   | >TP53-E204C DYLDDRNTF  | 1452  | 1071  |
| >TP53-E204C EYLDDRNTF   | 301   | >TP53-E204C DYLDDRNTF  | 1869  | 1568  |
| >TP53-E204C EYLDDRNTFR  | 328   | >TP53-E204C DYLDDRNTFF | 342   | 14    |
| >TP53-E204C EYLDDRNTFR  | 88    | >TP53-E204C DYLDDRNTFF | 38    | 50    |
| >TP53-E204C EYLDDRNTFR  | 19    | >TP53-E204C DYLDDRNTFF | 35    | 16    |
| >TP53-E204C VEYLDDRNTF  | 124   | >TP53-E204C VDYLDDRNTF | 973   | 849   |
| >TP53-E204C VEYLDDRNTF  | 555   | >TP53-E204C VDYLDDRNTF | 40    | 515   |
| >TP53-E204C RVEYLDDR    | 433   | >TP53-E204C RVDYLDDR   | 1485  | 1052  |
| >TP53-E204C RVEYLDDRNT  | 40    | >TP53-E204C RVDYLDDRNT | 43    | 3     |
| >TP53-E204C RVEYLDDRNT  | 78    | >TP53-E204C RVDYLDDRNT | 181   | 103   |
| >TP53-E204C VEGNLRVEYL  | 312   | >TP53-E204C VEGNLRVDYL | 253   | 59    |
| >TP53-E204C VEGNLRVEY   | 67    | >TP53-E204C VEGNLRVDY  | 284   | 217   |
| >TP53-E204C VEGNLRVEYL  | 472   | >TP53-E204C VEGNLRVDYL | 568   | 96    |
| >TP53-E204C VEGNLRVEY   | 338   | >TP53-E204C VEGNLRVDY  | 327   | 11    |
| >TP53-E204C VEGNLRVEYL  | 278   | >TP53-E204C VEGNLRVDYL | 653   | 375   |
| >TP53-E204C RVEGNLRVEY  | 224   | >TP53-E204C RVEGNLRVD\ | 331   | 107   |
| >TP53-E204C RVEGNLRVEY  | 301   | >TP53-E204C RVEGNLRVD\ | 1263  | 962   |
| >TP53-E204C RVEGNLRVEY  | 400   | >TP53-E204C RVEGNLRVD\ | 734   | 334   |
| >TP53-E204C IRVEGNLRVE' | 53    | >TP53-E204C IRVEGNLRVD | 97    | 44    |
| >TP53-E204C EYLDDRNTF   | 103   | >TP53-E204C GYLDDRNTF  | 53    | 50    |
| >TP53-E204C EYLDDRNTF   | 18    | >TP53-E204C GYLDDRNTF  | 9     | 9     |
| >TP53-E204C EYLDDRNTF   | 381   | >TP53-E204C GYLDDRNTF  | 14995 | 14614 |
| >TP53-E204C EYLDDRNTF   | 301   | >TP53-E204C GYLDDRNTF  | 18320 | 18019 |
| >TP53-E204C EYLDDRNTFR  | 328   | >TP53-E204C GYLDDRNTFF | 194   | 134   |
| >TP53-E204C EYLDDRNTFR  | 88    | >TP53-E204C GYLDDRNTFF | 600   | 512   |
| >TP53-E204C EYLDDRNTFR  | 19    | >TP53-E204C GYLDDRNTFF | 54    | 35    |
| >TP53-E204C VEYLDDRNTF  | 124   | >TP53-E204C VGYLDDRNTF | 579   | 455   |
| >TP53-E204C VEYLDDRNTF  | 524   | >TP53-E204C VGYLDDRNTF | 370   | 154   |
| >TP53-E204C RVEYLDDR    | 433   | >TP53-E204C RVGYLDDR   | 282   | 151   |
| >TP53-E204C RVEYLDDRNT  | 40    | >TP53-E204C RVGYLDDRNT | 26    | 14    |
| >TP53-E204C RVEYLDDRNT  | 2758  | >TP53-E204C RVGYLDDRNT | 272   | 2486  |
| >TP53-E204C RVEYLDDRNT  | 78    | >TP53-E204C RVGYLDDRNT | 213   | 135   |

|                          |       |                          |       |       |
|--------------------------|-------|--------------------------|-------|-------|
| >TP53-E204C RVEYLDDR     | 1045  | >TP53-E204C RVGYLDDR     | 421   | 624   |
| >TP53-E204C VEGNLRVEYL   | 312   | >TP53-E204C VEGNLRVGYL   | 240   | 72    |
| >TP53-E204C VEGNLRVEY    | 67    | >TP53-E204C VEGNLRVGY    | 128   | 61    |
| >TP53-E204C VEGNLRVEYL   | 472   | >TP53-E204C VEGNLRVGYL   | 486   | 14    |
| >TP53-E204C VEGNLRVEY    | 338   | >TP53-E204C VEGNLRVGY    | 375   | 37    |
| >TP53-E204C VEGNLRVEYL   | 278   | >TP53-E204C VEGNLRVGYL   | 539   | 261   |
| >TP53-E204C RVEGNLRVEY   | 224   | >TP53-E204C RVEGNLRVG\`  | 539   | 315   |
| >TP53-E204C RVEGNLRVEY   | 301   | >TP53-E204C RVEGNLRVG\`  | 221   | 80    |
| >TP53-E204C RVEGNLRVEY   | 400   | >TP53-E204C RVEGNLRVG\`  | 483   | 83    |
| >TP53-E204C IRVEGNLRVE\` | 53    | >TP53-E204C IRVEGNLRVG   | 141   | 88    |
| >TP53-E204C IRVEGNLRVE\` | 668   | >TP53-E204C IRVEGNLRVG   | 338   | 330   |
| >TP53-E204K EYLDDRNTF    | 10690 | >TP53-E204K KYLDDRNTF    | 450   | 10240 |
| >TP53-E204K EYLDDRNTF    | 103   | >TP53-E204K KYLDDRNTF    | 28    | 75    |
| >TP53-E204K EYLDDRNTF    | 667   | >TP53-E204K KYLDDRNTF    | 199   | 468   |
| >TP53-E204K EYLDDRNTF    | 18    | >TP53-E204K KYLDDRNTF    | 6     | 12    |
| >TP53-E204K EYLDDRNTF    | 381   | >TP53-E204K KYLDDRNTF    | 10579 | 10198 |
| >TP53-E204K EYLDDRNTF    | 301   | >TP53-E204K KYLDDRNTF    | 12937 | 12636 |
| >TP53-E204K EYLDDRNTFR   | 17443 | >TP53-E204K KYLDDRNTFR   | 470   | 16973 |
| >TP53-E204K EYLDDRNTFR   | 328   | >TP53-E204K KYLDDRNTFR   | 17    | 311   |
| >TP53-E204K EYLDDRNTF    | 4692  | >TP53-E204K KYLDDRNTF    | 111   | 4581  |
| >TP53-E204K EYLDDRNTFR   | 88    | >TP53-E204K KYLDDRNTFR   | 405   | 317   |
| >TP53-E204K EYLDDRNTF    | 1873  | >TP53-E204K KYLDDRNTF    | 203   | 1670  |
| >TP53-E204K EYLDDRNTFR   | 19    | >TP53-E204K KYLDDRNTFR   | 10    | 9     |
| >TP53-E204K EYLDDRNTF    | 2742  | >TP53-E204K KYLDDRNTF    | 350   | 2392  |
| >TP53-E204K VEYLDDRNTF   | 124   | >TP53-E204K VKYLDDRNTF   | 6     | 118   |
| >TP53-E204K LIRVEGNLRVI  | 7444  | >TP53-E204K LIRVEGNLRVI  | 14    | 7430  |
| >TP53-E204K RVEYLDDR     | 433   | >TP53-E204K RVKYLDDR     | 27    | 406   |
| >TP53-E204K RVEYLDDRNT   | 40    | >TP53-E204K RVKYLDDRNT   | 48    | 8     |
| >TP53-E204K RVEYLDDRNT   | 2758  | >TP53-E204K RVKYLDDRNT   | 110   | 2648  |
| >TP53-E204K RVEYLDDRNT   | 2406  | >TP53-E204K RVKYLDDRNT   | 188   | 2218  |
| >TP53-E204K RVEYLDDRNT   | 78    | >TP53-E204K RVKYLDDRNT   | 54    | 24    |
| >TP53-E204K VEGNLRVEYL   | 312   | >TP53-E204K VEGNLRVKYL   | 117   | 195   |
| >TP53-E204K VEGNLRVEY    | 67    | >TP53-E204K VEGNLRVKY    | 127   | 60    |
| >TP53-E204K VEGNLRVEYL   | 472   | >TP53-E204K VEGNLRVKYL   | 807   | 335   |
| >TP53-E204K VEGNLRVEY    | 338   | >TP53-E204K VEGNLRVKY    | 520   | 182   |
| >TP53-E204K VEGNLRVEYL   | 278   | >TP53-E204K VEGNLRVKYL   | 511   | 233   |
| >TP53-E204K RVEGNLRVE    | 13453 | >TP53-E204K RVEGNLRVK    | 92    | 13361 |
| >TP53-E204K RVEGNLRVEY   | 224   | >TP53-E204K RVEGNLRVKY   | 209   | 15    |
| >TP53-E204K RVEGNLRVEY   | 301   | >TP53-E204K RVEGNLRVKY   | 303   | 2     |
| >TP53-E204K RVEGNLRVEY   | 400   | >TP53-E204K RVEGNLRVKY   | 234   | 166   |
| >TP53-E204K IRVEGNLRVE\` | 53    | >TP53-E204K IRVEGNLRVK\` | 110   | 57    |
| >TP53-E204K IRVEGNLRVE   | 4705  | >TP53-E204K IRVEGNLRVK   | 258   | 4447  |
| >TP53-E204K IRVEGNLRVE\` | 668   | >TP53-E204K IRVEGNLRVK\` | 328   | 340   |

|                        |       |                        |       |       |
|------------------------|-------|------------------------|-------|-------|
| >TP53-E204C EYLDDRNTF  | 103   | >TP53-E204C QYLDDRNTF  | 59    | 44    |
| >TP53-E204C EYLDDRNTF  | 18    | >TP53-E204C QYLDDRNTF  | 7     | 11    |
| >TP53-E204C EYLDDRNTF  | 381   | >TP53-E204C QYLDDRNTF  | 3244  | 2863  |
| >TP53-E204C EYLDDRNTF  | 301   | >TP53-E204C QYLDDRNTF  | 4571  | 4270  |
| >TP53-E204C EYLDDRNTFR | 328   | >TP53-E204C QYLDDRNTFF | 92    | 236   |
| >TP53-E204C EYLDDRNTFR | 88    | >TP53-E204C QYLDDRNTFF | 125   | 37    |
| >TP53-E204C EYLDDRNTFR | 19    | >TP53-E204C QYLDDRNTFF | 17    | 2     |
| >TP53-E204C VEYLDDRNTF | 2651  | >TP53-E204C VQYLDDRNTI | 69    | 2582  |
| >TP53-E204C VEYLDDRNTF | 3233  | >TP53-E204C VQYLDDRNTI | 93    | 3140  |
| >TP53-E204C VEYLDDRNTF | 5253  | >TP53-E204C VQYLDDRNTI | 475   | 4778  |
| >TP53-E204C VEYLDDRNTF | 124   | >TP53-E204C VQYLDDRNTI | 7     | 117   |
| >TP53-E204C VEYLDDRNTF | 524   | >TP53-E204C VQYLDDRNTI | 227   | 297   |
| >TP53-E204C RVEYLDDRNT | 2893  | >TP53-E204C RVQYLDDRNT | 346   | 2547  |
| >TP53-E204C RVEYLDDR   | 433   | >TP53-E204C RVQYLDDR   | 79    | 354   |
| >TP53-E204C RVEYLDDRNT | 40    | >TP53-E204C RVQYLDDRNT | 20    | 20    |
| >TP53-E204C RVEYLDDRNT | 2758  | >TP53-E204C RVQYLDDRNT | 186   | 2572  |
| >TP53-E204C RVEYLDDRNT | 2406  | >TP53-E204C RVQYLDDRNT | 475   | 1931  |
| >TP53-E204C RVEYLDDRNT | 78    | >TP53-E204C RVQYLDDRNT | 71    | 7     |
| >TP53-E204C VEGNLRVEYL | 312   | >TP53-E204C VEGNLRVQYI | 361   | 49    |
| >TP53-E204C VEGNLRVEY  | 67    | >TP53-E204C VEGNLRVQY  | 109   | 42    |
| >TP53-E204C VEGNLRVEYL | 472   | >TP53-E204C VEGNLRVQYI | 554   | 82    |
| >TP53-E204C VEGNLRVEY  | 338   | >TP53-E204C VEGNLRVQY  | 528   | 190   |
| >TP53-E204C VEGNLRVEYL | 278   | >TP53-E204C VEGNLRVQYI | 135   | 143   |
| >TP53-E204C RVEGNLRVEY | 224   | >TP53-E204C RVEGNLRVQ  | 210   | 14    |
| >TP53-E204C RVEGNLRVEY | 301   | >TP53-E204C RVEGNLRVQ  | 152   | 149   |
| >TP53-E204C RVEGNLRVEY | 400   | >TP53-E204C RVEGNLRVQ  | 416   | 16    |
| >TP53-E204C IRVEGNLRVE | 53    | >TP53-E204C IRVEGNLRVQ | 99    | 46    |
| >TP53-E204C IRVEGNLRVE | 668   | >TP53-E204C IRVEGNLRVQ | 419   | 249   |
| >TP53-E204V EYLDDRNTF  | 103   | >TP53-E204V VYLDDRNTF  | 25    | 78    |
| >TP53-E204V EYLDDRNTF  | 667   | >TP53-E204V VYLDDRNTF  | 269   | 398   |
| >TP53-E204V EYLDDRNTF  | 18    | >TP53-E204V VYLDDRNTF  | 9     | 9     |
| >TP53-E204V EYLDDRNTF  | 381   | >TP53-E204V VYLDDRNTF  | 12845 | 12464 |
| >TP53-E204V EYLDDRNTF  | 301   | >TP53-E204V VYLDDRNTF  | 10923 | 10622 |
| >TP53-E204V EYLDDRNTFR | 328   | >TP53-E204V VYLDDRNTFR | 98    | 230   |
| >TP53-E204V EYLDDRNTFR | 88    | >TP53-E204V VYLDDRNTFR | 115   | 27    |
| >TP53-E204V EYLDDRNTF  | 1873  | >TP53-E204V VYLDDRNTF  | 396   | 1477  |
| >TP53-E204V EYLDDRNTFR | 19    | >TP53-E204V VYLDDRNTFR | 27    | 8     |
| >TP53-E204V VEYLDDRNTF | 20800 | >TP53-E204V VVYLDDRNTF | 281   | 20519 |
| >TP53-E204V VEYLDDRNTF | 2651  | >TP53-E204V VVYLDDRNTF | 65    | 2586  |
| >TP53-E204V VEYLDDRNTF | 10212 | >TP53-E204V VVYLDDRNTF | 375   | 9837  |
| >TP53-E204V VEYLDDRNTF | 1728  | >TP53-E204V VVYLDDRNTF | 121   | 1607  |
| >TP53-E204V VEYLDDRNTF | 2593  | >TP53-E204V VVYLDDRNTF | 32    | 2561  |
| >TP53-E204V VEYLDDRNTF | 124   | >TP53-E204V VVYLDDRNTF | 338   | 214   |

|                         |       |                        |     |       |
|-------------------------|-------|------------------------|-----|-------|
| >TP53-E204V VEYLDDRNTF  | 15641 | >TP53-E204V VVYLDDRNTF | 112 | 15529 |
| >TP53-E204V VEYLDDRNTF  | 524   | >TP53-E204V VVYLDDRNTF | 295 | 229   |
| >TP53-E204V LIRVEGNLRVI | 34210 | >TP53-E204V LIRVEGNLRV | 161 | 34049 |
| >TP53-E204V LIRVEGNLRVI | 7444  | >TP53-E204V LIRVEGNLRV | 451 | 6993  |
| >TP53-E204V RVEYLDDRNT  | 12808 | >TP53-E204V RVVYLDDRNT | 122 | 12686 |
| >TP53-E204V RVEYLDDR    | 433   | >TP53-E204V RVVYLDDR   | 144 | 289   |
| >TP53-E204V RVEYLDDRNT  | 40    | >TP53-E204V RVVYLDDRNT | 19  | 21    |
| >TP53-E204V RVEYLDDR    | 652   | >TP53-E204V RVVYLDDR   | 138 | 514   |
| >TP53-E204V RVEYLDDRNT  | 2758  | >TP53-E204V RVVYLDDRNT | 219 | 2539  |
| >TP53-E204V RVEYLDDRNT  | 2406  | >TP53-E204V RVVYLDDRNT | 210 | 2196  |
| >TP53-E204V RVEYLDDRNT  | 1271  | >TP53-E204V RVVYLDDRNT | 88  | 1183  |
| >TP53-E204V RVEYLDDRNT  | 9648  | >TP53-E204V RVVYLDDRNT | 275 | 9373  |
| >TP53-E204V RVEYLDDRNT  | 78    | >TP53-E204V RVVYLDDRNT | 60  | 18    |
| >TP53-E204V RVEYLDDR    | 1045  | >TP53-E204V RVVYLDDR   | 405 | 640   |
| >TP53-E204V VEGNLRVEYL  | 312   | >TP53-E204V VEGNLRVVYL | 478 | 166   |
| >TP53-E204V VEGNLRVEY   | 67    | >TP53-E204V VEGNLRVVY  | 70  | 3     |
| >TP53-E204V VEGNLRVEYL  | 799   | >TP53-E204V VEGNLRVVYL | 499 | 300   |
| >TP53-E204V VEGNLRVE    | 8208  | >TP53-E204V VEGNLRVV   | 466 | 7742  |
| >TP53-E204V VEGNLRVEYL  | 472   | >TP53-E204V VEGNLRVVYL | 287 | 185   |
| >TP53-E204V VEGNLRVEY   | 338   | >TP53-E204V VEGNLRVVY  | 579 | 241   |
| >TP53-E204V VEGNLRVEYL  | 278   | >TP53-E204V VEGNLRVVYL | 574 | 296   |
| >TP53-E204V RVEGNLRVE   | 34894 | >TP53-E204V RVEGNLRVV  | 360 | 34534 |
| >TP53-E204V RVEGNLRVEY  | 224   | >TP53-E204V RVEGNLRVV  | 473 | 249   |
| >TP53-E204V RVEGNLRVEY  | 301   | >TP53-E204V RVEGNLRVV  | 491 | 190   |
| >TP53-E204V RVEGNLRVEY  | 400   | >TP53-E204V RVEGNLRVV  | 328 | 72    |
| >TP53-E204V IRVEGNLRVE  | 53    | >TP53-E204V IRVEGNLRVV | 44  | 9     |
| >TP53-E204V IRVEGNLRVE  | 3498  | >TP53-E204V IRVEGNLRVV | 424 | 3074  |
| >TP53-E221C VPYEPPEV    | 184   | >TP53-E221C VPYDPPEV   | 396 | 212   |
| >TP53-E221C VPYEPPEV    | 139   | >TP53-E221C VPYDPPEV   | 219 | 80    |
| >TP53-E221C VPYEPPEV    | 266   | >TP53-E221C VPYDPPEV   | 451 | 185   |
| >TP53-E221C VPYEPPEV    | 48    | >TP53-E221C VPYDPPEV   | 59  | 11    |
| >TP53-E221C VPYEPPEV    | 205   | >TP53-E221C VPYDPPEV   | 149 | 56    |
| >TP53-E221C VVPYEPPEV   | 507   | >TP53-E221C VVPYDPPEV  | 344 | 163   |
| >TP53-E221C VVPYEPPEV   | 214   | >TP53-E221C VVPYDPPEV  | 157 | 57    |
| >TP53-E221C VVPYEPPEV   | 329   | >TP53-E221C VVPYDPPEV  | 232 | 97    |
| >TP53-E221C VVPYEPPEV   | 56    | >TP53-E221C VVPYDPPEV  | 44  | 12    |
| >TP53-E221C VVVPYEPPEV  | 390   | >TP53-E221C VVVPYDPPEV | 489 | 99    |
| >TP53-E221C VVVPYEPPEV  | 136   | >TP53-E221C VVVPYDPPEV | 164 | 28    |
| >TP53-E221C VVVPYEPPEV  | 28    | >TP53-E221C VVVPYDPPEV | 34  | 6     |
| >TP53-E221C VVVPYEPPEV  | 72    | >TP53-E221C VVVPYDPPEV | 60  | 12    |
| >TP53-E221C VVVPYEPPEV  | 9     | >TP53-E221C VVVPYDPPEV | 10  | 1     |
| >TP53-E221C VVVPYEPPEV  | 353   | >TP53-E221C VVVPYDPPEV | 318 | 35    |
| >TP53-E221C SVVVPYEPPE  | 75    | >TP53-E221C SVVVPYDPPE | 70  | 5     |

|                        |       |                        |      |       |
|------------------------|-------|------------------------|------|-------|
| >TP53-E221C SVVVPYEPPE | 92    | >TP53-E221C SVVVPYDPPE | 112  | 20    |
| >TP53-E221C SVVVPYEPPE | 129   | >TP53-E221C SVVVPYDPPE | 104  | 25    |
| >TP53-E221C SVVVPYEPPE | 57    | >TP53-E221C SVVVPYDPPE | 74   | 17    |
| >TP53-E221C SVVVPYEPPE | 81    | >TP53-E221C SVVVPYDPPE | 70   | 11    |
| >TP53-E221C SVVVPYEPPE | 26    | >TP53-E221C SVVVPYDPPE | 25   | 1     |
| >TP53-E221C TFRHSVVVPY | 1278  | >TP53-E221C TFRHSVVVPY | 151  | 1127  |
| >TP53-E221C VPYEPPEV   | 184   | >TP53-E221C VPYGPPEV   | 73   | 111   |
| >TP53-E221C VPYEPPEV   | 139   | >TP53-E221C VPYGPPEV   | 304  | 165   |
| >TP53-E221C VPYEPPEV   | 266   | >TP53-E221C VPYGPPEV   | 946  | 680   |
| >TP53-E221C VPYEPPEV   | 48    | >TP53-E221C VPYGPPEV   | 122  | 74    |
| >TP53-E221C VPYEPPEV   | 205   | >TP53-E221C VPYGPPEV   | 88   | 117   |
| >TP53-E221C VVPYEPPEV  | 662   | >TP53-E221C VVPYGPPEV  | 277  | 385   |
| >TP53-E221C VVPYEPPEV  | 507   | >TP53-E221C VVPYGPPEV  | 159  | 348   |
| >TP53-E221C VVPYEPPEV  | 214   | >TP53-E221C VVPYGPPEV  | 99   | 115   |
| >TP53-E221C VVPYEPPEV  | 329   | >TP53-E221C VVPYGPPEV  | 101  | 228   |
| >TP53-E221C VVPYEPPEV  | 56    | >TP53-E221C VVPYGPPEV  | 29   | 27    |
| >TP53-E221C VVVPYEPPEV | 390   | >TP53-E221C VVVPYGPPEV | 236  | 154   |
| >TP53-E221C VVVPYEPPEV | 136   | >TP53-E221C VVVPYGPPEV | 183  | 47    |
| >TP53-E221C VVVPYEPPEV | 28    | >TP53-E221C VVVPYGPPEV | 16   | 12    |
| >TP53-E221C VVVPYEPPEV | 72    | >TP53-E221C VVVPYGPPEV | 49   | 23    |
| >TP53-E221C VVVPYEPPEV | 9     | >TP53-E221C VVVPYGPPEV | 7    | 2     |
| >TP53-E221C VVVPYEPPEV | 353   | >TP53-E221C VVVPYGPPEV | 109  | 244   |
| >TP53-E221C SVVVPYEPPE | 515   | >TP53-E221C SVVVPYGPPE | 286  | 229   |
| >TP53-E221C SVVVPYEPPE | 75    | >TP53-E221C SVVVPYGPPE | 86   | 11    |
| >TP53-E221C SVVVPYEPPE | 92    | >TP53-E221C SVVVPYGPPE | 113  | 21    |
| >TP53-E221C SVVVPYEPPE | 129   | >TP53-E221C SVVVPYGPPE | 130  | 1     |
| >TP53-E221C SVVVPYEPPE | 57    | >TP53-E221C SVVVPYGPPE | 67   | 10    |
| >TP53-E221C SVVVPYEPPE | 81    | >TP53-E221C SVVVPYGPPE | 58   | 23    |
| >TP53-E221C SVVVPYEPPE | 26    | >TP53-E221C SVVVPYGPPE | 18   | 8     |
| >TP53-E221K TFRHSVVVPY | 21514 | >TP53-E221K TFRHSVVVPY | 498  | 21016 |
| >TP53-E221K TFRHSVVVPY | 1278  | >TP53-E221K TFRHSVVVPY | 5    | 1273  |
| >TP53-E221K TFRHSVVVPY | 9801  | >TP53-E221K TFRHSVVVPY | 71   | 9730  |
| >TP53-E221K VPYEPPEV   | 184   | >TP53-E221K VPYKPPEV   | 70   | 114   |
| >TP53-E221K VPYEPPEV   | 139   | >TP53-E221K VPYKPPEV   | 1278 | 1139  |
| >TP53-E221K VPYEPPEV   | 266   | >TP53-E221K VPYKPPEV   | 1352 | 1086  |
| >TP53-E221K VPYEPPEV   | 48    | >TP53-E221K VPYKPPEV   | 69   | 21    |
| >TP53-E221K VPYEPPEV   | 205   | >TP53-E221K VPYKPPEV   | 170  | 35    |
| >TP53-E221K VVPYEPPEV  | 662   | >TP53-E221K VVPYKPPEV  | 412  | 250   |
| >TP53-E221K VVPYEPPEV  | 214   | >TP53-E221K VVPYKPPEV  | 198  | 16    |
| >TP53-E221K VVPYEPPEV  | 329   | >TP53-E221K VVPYKPPEV  | 421  | 92    |
| >TP53-E221K VVPYEPPEV  | 56    | >TP53-E221K VVPYKPPEV  | 60   | 4     |
| >TP53-E221K VVVPYEPPEV | 390   | >TP53-E221K VVVPYKPPEV | 577  | 187   |
| >TP53-E221K VVVPYEPPEV | 136   | >TP53-E221K VVVPYKPPEV | 252  | 116   |

|                         |       |                        |       |       |
|-------------------------|-------|------------------------|-------|-------|
| >TP53-E221KVVVPYEPPEV   | 28    | >TP53-E221KVVVPYKPPEV  | 29    | 1     |
| >TP53-E221KVVVPYEPPEV   | 72    | >TP53-E221KVVVPYKPPEV  | 124   | 52    |
| >TP53-E221KVVVPYEPPEV   | 9     | >TP53-E221KVVVPYKPPEV  | 9     | 0     |
| >TP53-E221KVVVPYEPPEV   | 353   | >TP53-E221KVVVPYKPPEV  | 221   | 132   |
| >TP53-E221KSVVVPYEPPE   | 75    | >TP53-E221KSVVVPYKPPE  | 197   | 122   |
| >TP53-E221KSVVVPYEPPE   | 92    | >TP53-E221KSVVVPYKPPE  | 162   | 70    |
| >TP53-E221KSVVVPYEPPE   | 129   | >TP53-E221KSVVVPYKPPE  | 248   | 119   |
| >TP53-E221KSVVVPYEPPE   | 57    | >TP53-E221KSVVVPYKPPE  | 87    | 30    |
| >TP53-E221KSVVVPYEPPE   | 81    | >TP53-E221KSVVVPYKPPE  | 104   | 23    |
| >TP53-E221KSVVVPYEPPE   | 26    | >TP53-E221KSVVVPYKPPE  | 53    | 27    |
| >TP53-E221KHSVVVPYE     | 19865 | >TP53-E221KHSVVVPYK    | 215   | 19650 |
| >TP53-E221KHSVVVPYE     | 25537 | >TP53-E221KHSVVVPYK    | 31    | 25506 |
| >TP53-E221KHSVVVPYE     | 8571  | >TP53-E221KHSVVVPYK    | 24    | 8547  |
| >TP53-E221KHSVVVPYE     | 9782  | >TP53-E221KHSVVVPYK    | 127   | 9655  |
| >TP53-E221KHSVVVPYE     | 4274  | >TP53-E221KHSVVVPYK    | 14    | 4260  |
| >TP53-E221KRHSVVVPYE    | 14528 | >TP53-E221KRHSVVVPYK   | 233   | 14295 |
| >TP53-E221KFRHSVVVPYE   | 3392  | >TP53-E221KFRHSVVVPYK  | 193   | 3199  |
| >TP53-E224C EVGSDCTTIH' | 11    | >TP53-E224C DVGSDCTTIH | 41    | 30    |
| >TP53-E224C EVGSDCTTIH' | 75    | >TP53-E224C DVGSDCTTIH | 216   | 141   |
| >TP53-E224C EVGSDCTTIH' | 387   | >TP53-E224C DVGSDCTTIH | 325   | 62    |
| >TP53-E224C EVGSDCTTIH' | 326   | >TP53-E224C DVGSDCTTIH | 691   | 365   |
| >TP53-E224C PEVGSDCTTI  | 342   | >TP53-E224C PDVGSDCTTI | 11926 | 11584 |
| >TP53-E224C PEVGSDCTTI  | 2986  | >TP53-E224C PDVGSDCTTI | 84    | 2902  |
| >TP53-E224C VPYEPPEV    | 184   | >TP53-E224C VPYEPPEV   | 78    | 106   |
| >TP53-E224C VPYEPPEV    | 139   | >TP53-E224C VPYEPPEV   | 1219  | 1080  |
| >TP53-E224C VPYEPPEV    | 266   | >TP53-E224C VPYEPPEV   | 1114  | 848   |
| >TP53-E224C VPYEPPEV    | 48    | >TP53-E224C VPYEPPEV   | 70    | 22    |
| >TP53-E224C VPYEPPEV    | 205   | >TP53-E224C VPYEPPEV   | 392   | 187   |
| >TP53-E224C VPYEPPEV    | 1696  | >TP53-E224C VPYEPPEV   | 371   | 1325  |
| >TP53-E224C VVPYEPPEV   | 214   | >TP53-E224C VVPYEPPEV  | 2719  | 2505  |
| >TP53-E224C VVPYEPPEV   | 329   | >TP53-E224C VVPYEPPEV  | 1217  | 888   |
| >TP53-E224C VVPYEPPEV   | 56    | >TP53-E224C VVPYEPPEV  | 253   | 197   |
| >TP53-E224C VVVPYEPPEV  | 390   | >TP53-E224C VVVPYEPPEV | 1009  | 619   |
| >TP53-E224C VVVPYEPPEV  | 136   | >TP53-E224C VVVPYEPPEV | 411   | 275   |
| >TP53-E224C VVVPYEPPEV  | 28    | >TP53-E224C VVVPYEPPEV | 243   | 215   |
| >TP53-E224C VVVPYEPPEV  | 72    | >TP53-E224C VVVPYEPPEV | 296   | 224   |
| >TP53-E224C VVVPYEPPEV  | 9     | >TP53-E224C VVVPYEPPEV | 20    | 11    |
| >TP53-E224C VVVPYEPPEV  | 353   | >TP53-E224C VVVPYEPPEV | 1754  | 1401  |
| >TP53-E224C SVVVPYEPPE  | 75    | >TP53-E224C SVVVPYEPPE | 446   | 371   |
| >TP53-E224C SVVVPYEPPE  | 92    | >TP53-E224C SVVVPYEPPE | 807   | 715   |
| >TP53-E224C SVVVPYEPPE  | 129   | >TP53-E224C SVVVPYEPPE | 502   | 373   |
| >TP53-E224C SVVVPYEPPE  | 57    | >TP53-E224C SVVVPYEPPE | 165   | 108   |
| >TP53-E224C SVVVPYEPPE  | 81    | >TP53-E224C SVVVPYEPPE | 378   | 297   |

|                          |       |                          |       |       |
|--------------------------|-------|--------------------------|-------|-------|
| >TP53-E224C SVVVPYEPPE'  | 26    | >TP53-E224C SVVVPYEPPE'  | 127   | 101   |
| >TP53-E224C EVGSDCTTIH'  | 11    | >TP53-E224C GVGSDCTTIH'  | 1607  | 1596  |
| >TP53-E224C EVGSDCTTIH'  | 75    | >TP53-E224C GVGSDCTTIH'  | 4822  | 4747  |
| >TP53-E224C EVGSDCTTIH'  | 387   | >TP53-E224C GVGSDCTTIH'  | 57    | 330   |
| >TP53-E224C EVGSDCTTIH'  | 1152  | >TP53-E224C GVGSDCTTIH'  | 325   | 827   |
| >TP53-E224C EVGSDCTTIH'  | 326   | >TP53-E224C GVGSDCTTIH'  | 353   | 27    |
| >TP53-E224C EVGSDCTTIH'  | 819   | >TP53-E224C GVGSDCTTIH'  | 239   | 580   |
| >TP53-E224C EVGSDCTTI    | 5853  | >TP53-E224C GVGSDCTTI    | 486   | 5367  |
| >TP53-E224C PEVGSDCTTI   | 342   | >TP53-E224C PGVGSDCTTI   | 34909 | 34567 |
| >TP53-E224C VPYEPPEV     | 184   | >TP53-E224C VPYEPPEV     | 1217  | 1033  |
| >TP53-E224C VPYEPPEV     | 139   | >TP53-E224C VPYEPPEV     | 177   | 38    |
| >TP53-E224C VPYEPPEV     | 266   | >TP53-E224C VPYEPPEV     | 160   | 106   |
| >TP53-E224C VPYEPPEV     | 48    | >TP53-E224C VPYEPPEV     | 101   | 53    |
| >TP53-E224C VPYEPPEV     | 205   | >TP53-E224C VPYEPPEV     | 258   | 53    |
| >TP53-E224C VVPYEPPEV    | 662   | >TP53-E224C VVPYEPPEV    | 489   | 173   |
| >TP53-E224C VVPYEPPEV    | 507   | >TP53-E224C VVPYEPPEV    | 364   | 143   |
| >TP53-E224C VVPYEPPEV    | 214   | >TP53-E224C VVPYEPPEV    | 226   | 12    |
| >TP53-E224C VVPYEPPEV    | 329   | >TP53-E224C VVPYEPPEV    | 304   | 25    |
| >TP53-E224C VVPYEPPEV    | 56    | >TP53-E224C VVPYEPPEV    | 82    | 26    |
| >TP53-E224C VVVPYEPPEV   | 390   | >TP53-E224C VVVPYEPPEV   | 263   | 127   |
| >TP53-E224C VVVPYEPPEV   | 136   | >TP53-E224C VVVPYEPPEV   | 120   | 16    |
| >TP53-E224C VVVPYEPPEV   | 28    | >TP53-E224C VVVPYEPPEV   | 27    | 1     |
| >TP53-E224C VVVPYEPPEV   | 72    | >TP53-E224C VVVPYEPPEV   | 80    | 8     |
| >TP53-E224C VVVPYEPPEV   | 955   | >TP53-E224C VVVPYEPPEV   | 408   | 547   |
| >TP53-E224C VVVPYEPPEV   | 9     | >TP53-E224C VVVPYEPPEV   | 10    | 1     |
| >TP53-E224C VVVPYEPPEV   | 353   | >TP53-E224C VVVPYEPPEV   | 175   | 178   |
| >TP53-E224C SVVVPYEPPE'  | 515   | >TP53-E224C SVVVPYEPPE'  | 397   | 118   |
| >TP53-E224C SVVVPYEPPE'  | 75    | >TP53-E224C SVVVPYEPPE'  | 51    | 24    |
| >TP53-E224C SVVVPYEPPE'  | 92    | >TP53-E224C SVVVPYEPPE'  | 90    | 2     |
| >TP53-E224C SVVVPYEPPE'  | 129   | >TP53-E224C SVVVPYEPPE'  | 135   | 6     |
| >TP53-E224C SVVVPYEPPE'  | 57    | >TP53-E224C SVVVPYEPPE'  | 73    | 16    |
| >TP53-E224C SVVVPYEPPE'  | 81    | >TP53-E224C SVVVPYEPPE'  | 86    | 5     |
| >TP53-E224C SVVVPYEPPE'  | 26    | >TP53-E224C SVVVPYEPPE'  | 15    | 11    |
| >TP53-E224K EVGSDCTTIH'  | 11    | >TP53-E224K KVGSDCTTIH'  | 608   | 597   |
| >TP53-E224K EVGSDCTTIH'  | 75    | >TP53-E224K KVGSDCTTIH'  | 2345  | 2270  |
| >TP53-E224K EVGSDCTTIH'  | 387   | >TP53-E224K KVGSDCTTIH'  | 144   | 243   |
| >TP53-E224K EVGSDCTTIH'  | 1152  | >TP53-E224K KVGSDCTTIH'  | 78    | 1074  |
| >TP53-E224K EVGSDCTTI    | 3328  | >TP53-E224K KVGSDCTTI    | 48    | 3280  |
| >TP53-E224K EVGSDCTTIH'  | 326   | >TP53-E224K KVGSDCTTIH'  | 25    | 301   |
| >TP53-E224K EVGSDCTTIH'  | 819   | >TP53-E224K KVGSDCTTIH'  | 154   | 665   |
| >TP53-E224K EVGSDCTTI    | 2492  | >TP53-E224K KVGSDCTTI    | 176   | 2316  |
| >TP53-E224K PEVGSDCTTI   | 342   | >TP53-E224K PKVGSDCTTI   | 24114 | 23772 |
| >TP53-E224K HSVVVPYEPPE' | 26940 | >TP53-E224K HSVVVPYEPPE' | 69    | 26871 |

|                        |       |                        |       |       |
|------------------------|-------|------------------------|-------|-------|
| >TP53-E224KHSVVVPYEPP  | 9329  | >TP53-E224KHSVVVPYEPP  | 32    | 9297  |
| >TP53-E224KHSVVVPYEPP  | 13437 | >TP53-E224KHSVVVPYEPP  | 363   | 13074 |
| >TP53-E224KHSVVVPYEPP  | 10605 | >TP53-E224KHSVVVPYEPP  | 63    | 10542 |
| >TP53-E224KVPYEPEEV    | 184   | >TP53-E224KVPYEPPKV    | 577   | 393   |
| >TP53-E224KVPYEPEEV    | 139   | >TP53-E224KVPYEPPKV    | 439   | 300   |
| >TP53-E224KVPYEPEEV    | 266   | >TP53-E224KVPYEPPKV    | 494   | 228   |
| >TP53-E224KVPYEPEEV    | 48    | >TP53-E224KVPYEPPKV    | 61    | 13    |
| >TP53-E224KVPYEPEEV    | 205   | >TP53-E224KVPYEPPKV    | 239   | 34    |
| >TP53-E224KVVPEPEEV    | 214   | >TP53-E224KVVPEPPKV    | 602   | 388   |
| >TP53-E224KVVPEPEEV    | 329   | >TP53-E224KVVPEPPKV    | 560   | 231   |
| >TP53-E224KVVPEPEEV    | 56    | >TP53-E224KVVPEPPKV    | 125   | 69    |
| >TP53-E224KVVPEPEE     | 27427 | >TP53-E224KVVPEPPK     | 208   | 27219 |
| >TP53-E224KVVVPYEPEEV  | 390   | >TP53-E224KVVVPYEPPKV  | 725   | 335   |
| >TP53-E224KVVVPYEPEEV  | 136   | >TP53-E224KVVVPYEPPKV  | 288   | 152   |
| >TP53-E224KVVVPYEPEEV  | 28    | >TP53-E224KVVVPYEPPKV  | 58    | 30    |
| >TP53-E224KVVVPYEPEEV  | 72    | >TP53-E224KVVVPYEPPKV  | 141   | 69    |
| >TP53-E224KVVVPYEPEEV  | 9     | >TP53-E224KVVVPYEPPKV  | 13    | 4     |
| >TP53-E224KVVVPYEPEE   | 23490 | >TP53-E224KVVVPYEPPK   | 39    | 23451 |
| >TP53-E224KVVVPYEPEE   | 14804 | >TP53-E224KVVVPYEPPK   | 252   | 14552 |
| >TP53-E224KVVVPYEPEE   | 22309 | >TP53-E224KVVVPYEPPK   | 430   | 21879 |
| >TP53-E224KVVVPYEPEEV  | 353   | >TP53-E224KVVVPYEPPKV  | 565   | 212   |
| >TP53-E224KSVVVPYEPEE  | 75    | >TP53-E224KSVVVPYEPPK  | 239   | 164   |
| >TP53-E224KSVVVPYEPEE  | 92    | >TP53-E224KSVVVPYEPPK  | 212   | 120   |
| >TP53-E224KSVVVPYEPEE  | 129   | >TP53-E224KSVVVPYEPPK  | 241   | 112   |
| >TP53-E224KSVVVPYEPEE  | 57    | >TP53-E224KSVVVPYEPPK  | 101   | 44    |
| >TP53-E224KSVVVPYEPEE  | 31346 | >TP53-E224KSVVVPYEPPK  | 31    | 31315 |
| >TP53-E224KSVVVPYEPEE  | 11775 | >TP53-E224KSVVVPYEPPK  | 110   | 11665 |
| >TP53-E224KSVVVPYEPEE  | 26503 | >TP53-E224KSVVVPYEPPK  | 48    | 26455 |
| >TP53-E224KSVVVPYEPEE  | 81    | >TP53-E224KSVVVPYEPPK  | 166   | 85    |
| >TP53-E224KSVVVPYEPEE  | 26    | >TP53-E224KSVVVPYEPPK  | 36    | 10    |
| >TP53-E258AEDSSGNLL    | 273   | >TP53-E258ADSSGNLL     | 1572  | 1299  |
| >TP53-E258ALEDSSGNL    | 23048 | >TP53-E258ALADSSGNL    | 336   | 22712 |
| >TP53-E258ALEDSSGNL    | 33    | >TP53-E258ALADSSGNL    | 19984 | 19951 |
| >TP53-E258ALEDSSGNLL   | 20    | >TP53-E258ALADSSGNLL   | 18697 | 18677 |
| >TP53-E258ALEDSSGNLL   | 15565 | >TP53-E258ALADSSGNLL   | 125   | 15440 |
| >TP53-E258ALEDSSGNLL   | 4734  | >TP53-E258ALADSSGNLL   | 497   | 4237  |
| >TP53-E258ARRPILTIITLE | 2464  | >TP53-E258ARRPILTIITLA | 357   | 2107  |
| >TP53-E258ARRPILTIITLE | 129   | >TP53-E258ARRPILTIITLA | 86    | 43    |
| >TP53-E258ARRPILTIITLE | 467   | >TP53-E258ARRPILTIITLA | 86    | 381   |
| >TP53-E258ATLEDSSGNL   | 5705  | >TP53-E258ATLADSSGNL   | 416   | 5289  |
| >TP53-E258ATLEDSSGNL   | 62    | >TP53-E258ATLADSSGNL   | 7     | 55    |
| >TP53-E258ATLEDSSGNLL  | 133   | >TP53-E258ATLADSSGNLL  | 19    | 114   |
| >TP53-E258ATLEDSSGNL   | 513   | >TP53-E258ATLADSSGNL   | 9     | 504   |



|                         |       |                         |       |       |
|-------------------------|-------|-------------------------|-------|-------|
| >TP53-E258A TLEDSSGNLL  | 977   | >TP53-E258A TLADSSGNLL  | 149   | 828   |
| >TP53-E258A TLEDSSGNL   | 1522  | >TP53-E258A TLADSSGNL   | 151   | 1371  |
| >TP53-E258A TLEDSSGNLL  | 1674  | >TP53-E258A TLADSSGNLL  | 181   | 1493  |
| >TP53-E258A TLEDSSGNL   | 947   | >TP53-E258A TLADSSGNL   | 164   | 783   |
| >TP53-E258A TLEDSSGNLL  | 736   | >TP53-E258A TLADSSGNLL  | 148   | 588   |
| >TP53-E258A TLEDSSGNL   | 3341  | >TP53-E258A TLADSSGNL   | 89    | 3252  |
| >TP53-E258A TLEDSSGNLL  | 3638  | >TP53-E258A TLADSSGNLL  | 79    | 3559  |
| >TP53-E258A TLEDSSGNL   | 4640  | >TP53-E258A TLADSSGNL   | 98    | 4542  |
| >TP53-E258A TLEDSSGNLL  | 7561  | >TP53-E258A TLADSSGNLL  | 227   | 7334  |
| >TP53-E258A TLEDSSGNL   | 24    | >TP53-E258A TLADSSGNL   | 7     | 17    |
| >TP53-E258A TLEDSSGNLL  | 23    | >TP53-E258A TLADSSGNLL  | 6     | 17    |
| >TP53-E258A TLEDSSGNL   | 10382 | >TP53-E258A TLADSSGNL   | 154   | 10228 |
| >TP53-E258A TLEDSSGNL   | 5016  | >TP53-E258A TLADSSGNL   | 489   | 4527  |
| >TP53-E258A ITLEDSSGNL  | 495   | >TP53-E258A ITLADSSGNL  | 486   | 9     |
| >TP53-E258A ITLEDSSGNL  | 471   | >TP53-E258A ITLADSSGNL  | 318   | 153   |
| >TP53-E258A ITLEDSSGNL  | 371   | >TP53-E258A ITLADSSGNL  | 577   | 206   |
| >TP53-E258A ITLEDSSGNLL | 270   | >TP53-E258A ITLADSSGNLL | 661   | 391   |
| >TP53-E258A ITLEDSSGNL  | 302   | >TP53-E258A ITLADSSGNL  | 1299  | 997   |
| >TP53-E258A ITLEDSSGNLL | 339   | >TP53-E258A ITLADSSGNLL | 1553  | 1214  |
| >TP53-E258A ITLEDSSGNL  | 137   | >TP53-E258A ITLADSSGNL  | 452   | 315   |
| >TP53-E258A ITLEDSSGNLL | 354   | >TP53-E258A ITLADSSGNLL | 1143  | 789   |
| >TP53-E258A ITLEDSSGNL  | 6     | >TP53-E258A ITLADSSGNL  | 5     | 1     |
| >TP53-E258A ITLEDSSGNLL | 18    | >TP53-E258A ITLADSSGNLL | 16    | 2     |
| >TP53-E258A ITLEDSSGNLL | 259   | >TP53-E258A ITLADSSGNLL | 203   | 56    |
| >TP53-E258A ITLEDSSGNL  | 341   | >TP53-E258A ITLADSSGNL  | 300   | 41    |
| >TP53-E258A ITLEDSSGNLL | 30    | >TP53-E258A ITLADSSGNLL | 16    | 14    |
| >TP53-E258A ILTIITLE    | 19914 | >TP53-E258A ILTIITLA    | 365   | 19549 |
| >TP53-E258A ILTIITLE    | 2676  | >TP53-E258A ILTIITLA    | 27    | 2649  |
| >TP53-E258A ILTIITLE    | 11278 | >TP53-E258A ILTIITLA    | 40    | 11238 |
| >TP53-E258A ILTIITLE    | 16513 | >TP53-E258A ILTIITLA    | 200   | 16313 |
| >TP53-E258A ILTIITLE    | 18140 | >TP53-E258A ILTIITLA    | 178   | 17962 |
| >TP53-E258A ILTIITLE    | 6248  | >TP53-E258A ILTIITLA    | 10    | 6238  |
| >TP53-E258A RPILTIITLE  | 2802  | >TP53-E258A RPILTIITLA  | 310   | 2492  |
| >TP53-E258A RPILTIITLE  | 1945  | >TP53-E258A RPILTIITLA  | 42    | 1903  |
| >TP53-E258C EDSSGNLL    | 273   | >TP53-E258C DDSSGNLL    | 1102  | 829   |
| >TP53-E258C LEDSSGNL    | 33    | >TP53-E258C LDDSSGNL    | 16441 | 16408 |
| >TP53-E258C LEDSSGNLL   | 20    | >TP53-E258C LDDSSGNLL   | 14171 | 14151 |
| >TP53-E258C RRPILTIITLE | 129   | >TP53-E258C RRPILTIITLD | 156   | 27    |
| >TP53-E258C RRPILTIITLE | 467   | >TP53-E258C RRPILTIITLD | 501   | 34    |
| >TP53-E258C TLEDSSGNL   | 62    | >TP53-E258C TLDDSSGNL   | 49    | 13    |
| >TP53-E258C TLEDSSGNLL  | 133   | >TP53-E258C TLDDSSGNLL  | 59    | 74    |
| >TP53-E258C TLEDSSGNL   | 513   | >TP53-E258C TLDDSSGNL   | 301   | 212   |
| >TP53-E258C TLEDSSGNL   | 1522  | >TP53-E258C TLDDSSGNL   | 59    | 1463  |

|                         |      |                         |       |       |
|-------------------------|------|-------------------------|-------|-------|
| >TP53-E258C TLEDSSGNLL  | 1674 | >TP53-E258C TLDDSSGNLL  | 72    | 1602  |
| >TP53-E258C TLEDSSGNL   | 947  | >TP53-E258C TLDDSSGNL   | 60    | 887   |
| >TP53-E258C TLEDSSGNLL  | 736  | >TP53-E258C TLDDSSGNLL  | 58    | 678   |
| >TP53-E258C TLEDSSGNL   | 3341 | >TP53-E258C TLDDSSGNL   | 83    | 3258  |
| >TP53-E258C TLEDSSGNLL  | 3638 | >TP53-E258C TLDDSSGNLL  | 67    | 3571  |
| >TP53-E258C TLEDSSGNL   | 4640 | >TP53-E258C TLDDSSGNL   | 136   | 4504  |
| >TP53-E258C TLEDSSGNLL  | 7561 | >TP53-E258C TLDDSSGNLL  | 366   | 7195  |
| >TP53-E258C TLEDSSGNL   | 24   | >TP53-E258C TLDDSSGNL   | 16    | 8     |
| >TP53-E258C TLEDSSGNLL  | 23   | >TP53-E258C TLDDSSGNLL  | 16    | 7     |
| >TP53-E258C ITLEDSSGNL  | 495  | >TP53-E258C ITLDDSSGNL  | 383   | 112   |
| >TP53-E258C ITLEDSSGNLL | 536  | >TP53-E258C ITLDDSSGNLL | 398   | 138   |
| >TP53-E258C ITLEDSSGNL  | 471  | >TP53-E258C ITLDDSSGNL  | 415   | 56    |
| >TP53-E258C ITLEDSSGNL  | 371  | >TP53-E258C ITLDDSSGNL  | 302   | 69    |
| >TP53-E258C ITLEDSSGNLL | 270  | >TP53-E258C ITLDDSSGNLL | 288   | 18    |
| >TP53-E258C ITLEDSSGNL  | 302  | >TP53-E258C ITLDDSSGNL  | 479   | 177   |
| >TP53-E258C ITLEDSSGNLL | 339  | >TP53-E258C ITLDDSSGNLL | 547   | 208   |
| >TP53-E258C ITLEDSSGNL  | 137  | >TP53-E258C ITLDDSSGNL  | 253   | 116   |
| >TP53-E258C ITLEDSSGNLL | 354  | >TP53-E258C ITLDDSSGNLL | 691   | 337   |
| >TP53-E258C ITLEDSSGNL  | 6    | >TP53-E258C ITLDDSSGNL  | 5     | 1     |
| >TP53-E258C ITLEDSSGNLL | 18   | >TP53-E258C ITLDDSSGNLL | 14    | 4     |
| >TP53-E258C ITLEDSSGNLL | 259  | >TP53-E258C ITLDDSSGNLL | 236   | 23    |
| >TP53-E258C ITLEDSSGNL  | 341  | >TP53-E258C ITLDDSSGNL  | 239   | 102   |
| >TP53-E258C ITLEDSSGNLL | 30   | >TP53-E258C ITLDDSSGNLL | 14    | 16    |
| >TP53-E258C EDSSGNLL    | 273  | >TP53-E258C GDSSGNLL    | 2769  | 2496  |
| >TP53-E258C LEDSSGNL    | 33   | >TP53-E258C LGDSSGNL    | 22071 | 22038 |
| >TP53-E258C LEDSSGNLL   | 20   | >TP53-E258C LGDSSGNLL   | 21375 | 21355 |
| >TP53-E258C RRPILTIITLE | 129  | >TP53-E258C RRPILTIITLG | 145   | 16    |
| >TP53-E258C RRPILTIITLE | 467  | >TP53-E258C RRPILTIITLG | 199   | 268   |
| >TP53-E258C TLEDSSGNL   | 62   | >TP53-E258C TLGDSSGNL   | 39    | 23    |
| >TP53-E258C TLEDSSGNLL  | 133  | >TP53-E258C TLGDSSGNLL  | 46    | 87    |
| >TP53-E258C TLEDSSGNL   | 513  | >TP53-E258C TLGDSSGNL   | 98    | 415   |
| >TP53-E258C TLEDSSGNLL  | 977  | >TP53-E258C TLGDSSGNLL  | 344   | 633   |
| >TP53-E258C TLEDSSGNL   | 1522 | >TP53-E258C TLGDSSGNL   | 167   | 1355  |
| >TP53-E258C TLEDSSGNLL  | 1674 | >TP53-E258C TLGDSSGNLL  | 207   | 1467  |
| >TP53-E258C TLEDSSGNL   | 947  | >TP53-E258C TLGDSSGNL   | 142   | 805   |
| >TP53-E258C TLEDSSGNLL  | 736  | >TP53-E258C TLGDSSGNLL  | 126   | 610   |
| >TP53-E258C TLEDSSGNL   | 3341 | >TP53-E258C TLGDSSGNL   | 253   | 3088  |
| >TP53-E258C TLEDSSGNLL  | 3638 | >TP53-E258C TLGDSSGNLL  | 219   | 3419  |
| >TP53-E258C TLEDSSGNL   | 4640 | >TP53-E258C TLGDSSGNL   | 215   | 4425  |
| >TP53-E258C TLEDSSGNL   | 24   | >TP53-E258C TLGDSSGNL   | 12    | 12    |
| >TP53-E258C TLEDSSGNLL  | 23   | >TP53-E258C TLGDSSGNLL  | 11    | 12    |
| >TP53-E258C ITLEDSSGNL  | 495  | >TP53-E258C ITLGDSSGNL  | 527   | 32    |
| >TP53-E258C ITLEDSSGNL  | 471  | >TP53-E258C ITLGDSSGNL  | 384   | 87    |

|                        |       |                        |       |       |
|------------------------|-------|------------------------|-------|-------|
| >TP53-E258CITLEDSSGNL  | 371   | >TP53-E258CITLGDSSGNL  | 360   | 11    |
| >TP53-E258CITLEDSSGNLL | 270   | >TP53-E258CITLGDSSGNLI | 830   | 560   |
| >TP53-E258CITLEDSSGNL  | 302   | >TP53-E258CITLGDSSGNL  | 808   | 506   |
| >TP53-E258CITLEDSSGNLL | 339   | >TP53-E258CITLGDSSGNLI | 968   | 629   |
| >TP53-E258CITLEDSSGNL  | 137   | >TP53-E258CITLGDSSGNL  | 885   | 748   |
| >TP53-E258CITLEDSSGNLL | 354   | >TP53-E258CITLGDSSGNLI | 2123  | 1769  |
| >TP53-E258CITLEDSSGNL  | 6     | >TP53-E258CITLGDSSGNL  | 5     | 1     |
| >TP53-E258CITLEDSSGNLL | 18    | >TP53-E258CITLGDSSGNLI | 16    | 2     |
| >TP53-E258CITLEDSSGNLL | 259   | >TP53-E258CITLGDSSGNLI | 247   | 12    |
| >TP53-E258CITLEDSSGNL  | 341   | >TP53-E258CITLGDSSGNL  | 327   | 14    |
| >TP53-E258CITLEDSSGNLL | 30    | >TP53-E258CITLGDSSGNLI | 14    | 16    |
| >TP53-E258KEDSSGNLL    | 273   | >TP53-E258KEDSSGNLL    | 715   | 442   |
| >TP53-E258KEDSSGNLLGR  | 3878  | >TP53-E258KEDSSGNLLGR  | 379   | 3499  |
| >TP53-E258KLEDSSGNLL   | 5589  | >TP53-E258KLEDSSGNLL   | 324   | 5265  |
| >TP53-E258KLEDSSGNL    | 33    | >TP53-E258KLEDSSGNL    | 17844 | 17811 |
| >TP53-E258KLEDSSGNLL   | 20    | >TP53-E258KLEDSSGNLL   | 16381 | 16361 |
| >TP53-E258KRRPILTIITLE | 2464  | >TP53-E258KRRPILTIITLK | 55    | 2409  |
| >TP53-E258KRRPILTIITLE | 129   | >TP53-E258KRRPILTIITLK | 82    | 47    |
| >TP53-E258KRRPILTIITLE | 467   | >TP53-E258KRRPILTIITLK | 19    | 448   |
| >TP53-E258KTLEDSSGNL   | 62    | >TP53-E258KTLKDSSGNL   | 73    | 11    |
| >TP53-E258KTLEDSSGNLL  | 133   | >TP53-E258KTLKDSSGNLL  | 72    | 61    |
| >TP53-E258KTLEDSSGNL   | 513   | >TP53-E258KTLKDSSGNL   | 17    | 496   |
| >TP53-E258KTLEDSSGNLL  | 977   | >TP53-E258KTLKDSSGNLL  | 226   | 751   |
| >TP53-E258KTLEDSSGNL   | 24    | >TP53-E258KTLKDSSGNL   | 29    | 5     |
| >TP53-E258KTLEDSSGNLL  | 23    | >TP53-E258KTLKDSSGNLL  | 25    | 2     |
| >TP53-E258KITLEDSSGNL  | 495   | >TP53-E258KITLKDSSGNL  | 1295  | 800   |
| >TP53-E258KITLEDSSGNL  | 471   | >TP53-E258KITLKDSSGNL  | 701   | 230   |
| >TP53-E258KITLEDSSGNL  | 371   | >TP53-E258KITLKDSSGNL  | 1412  | 1041  |
| >TP53-E258KITLEDSSGNLL | 270   | >TP53-E258KITLKDSSGNLL | 1609  | 1339  |
| >TP53-E258KITLEDSSGNL  | 302   | >TP53-E258KITLKDSSGNL  | 2486  | 2184  |
| >TP53-E258KITLEDSSGNLL | 339   | >TP53-E258KITLKDSSGNLL | 2971  | 2632  |
| >TP53-E258KITLEDSSGNL  | 137   | >TP53-E258KITLKDSSGNL  | 894   | 757   |
| >TP53-E258KITLEDSSGNLL | 354   | >TP53-E258KITLKDSSGNLL | 2154  | 1800  |
| >TP53-E258KITLEDSSGNL  | 6     | >TP53-E258KITLKDSSGNL  | 8     | 2     |
| >TP53-E258KITLEDSSGNLL | 18    | >TP53-E258KITLKDSSGNLL | 30    | 12    |
| >TP53-E258KITLEDSSGNLL | 259   | >TP53-E258KITLKDSSGNLL | 365   | 106   |
| >TP53-E258KITLEDSSGNL  | 341   | >TP53-E258KITLKDSSGNL  | 627   | 286   |
| >TP53-E258KITLEDSSGNLL | 30    | >TP53-E258KITLKDSSGNLL | 12    | 18    |
| >TP53-E258KILTIITLE    | 15560 | >TP53-E258KILTIITLK    | 60    | 15500 |
| >TP53-E258KILTIITLE    | 25789 | >TP53-E258KILTIITLK    | 87    | 25702 |
| >TP53-E258KILTIITLE    | 12205 | >TP53-E258KILTIITLK    | 109   | 12096 |
| >TP53-E258KILTIITLE    | 29377 | >TP53-E258KILTIITLK    | 275   | 29102 |
| >TP53-E258LEDSSGNLL    | 273   | >TP53-E258LEDSSGNLL    | 1275  | 1002  |

|                         |       |                         |       |       |
|-------------------------|-------|-------------------------|-------|-------|
| >TP53-E258L LEDSSGNLL   | 23161 | >TP53-E258L LLDSSGNLL   | 362   | 22799 |
| >TP53-E258L LEDSSGNL    | 17597 | >TP53-E258L LLDSSGNL    | 50    | 17547 |
| >TP53-E258L LEDSSGNLL   | 8628  | >TP53-E258L LLDSSGNLL   | 16    | 8612  |
| >TP53-E258L LEDSSGNL    | 22011 | >TP53-E258L LLDSSGNL    | 454   | 21557 |
| >TP53-E258L LEDSSGNL    | 20214 | >TP53-E258L LLDSSGNL    | 33    | 20181 |
| >TP53-E258L LEDSSGNLL   | 20493 | >TP53-E258L LLDSSGNLL   | 47    | 20446 |
| >TP53-E258L LEDSSGNL    | 21934 | >TP53-E258L LLDSSGNL    | 70    | 21864 |
| >TP53-E258L LEDSSGNLL   | 20882 | >TP53-E258L LLDSSGNLL   | 60    | 20822 |
| >TP53-E258L LEDSSGNL    | 21455 | >TP53-E258L LLDSSGNL    | 66    | 21389 |
| >TP53-E258L LEDSSGNLL   | 21283 | >TP53-E258L LLDSSGNLL   | 63    | 21220 |
| >TP53-E258L LEDSSGNL    | 24229 | >TP53-E258L LLDSSGNL    | 258   | 23971 |
| >TP53-E258L LEDSSGNL    | 28835 | >TP53-E258L LLDSSGNL    | 14    | 28821 |
| >TP53-E258L LEDSSGNLL   | 27002 | >TP53-E258L LLDSSGNLL   | 13    | 26989 |
| >TP53-E258L LEDSSGNL    | 33    | >TP53-E258L LLDSSGNL    | 22025 | 21992 |
| >TP53-E258L LEDSSGNLL   | 20    | >TP53-E258L LLDSSGNLL   | 21252 | 21232 |
| >TP53-E258L RRPILTIITL  | 2464  | >TP53-E258L RRPILTIITLL | 57    | 2407  |
| >TP53-E258L RRPILTIITL  | 17185 | >TP53-E258L RRPILTIITLL | 148   | 17037 |
| >TP53-E258L RRPILTIITL  | 129   | >TP53-E258L RRPILTIITLL | 17    | 112   |
| >TP53-E258L RRPILTIITL  | 467   | >TP53-E258L RRPILTIITLL | 5     | 462   |
| >TP53-E258L TLEDSSGNL   | 5705  | >TP53-E258L TLLDSSGNL   | 203   | 5502  |
| >TP53-E258L TLEDSSGNLL  | 2983  | >TP53-E258L TLLDSSGNLL  | 129   | 2854  |
| >TP53-E258L TLEDSSGNL   | 62    | >TP53-E258L TLLDSSGNL   | 51    | 11    |
| >TP53-E258L TLEDSSGNLL  | 133   | >TP53-E258L TLLDSSGNLL  | 29    | 104   |
| >TP53-E258L TLEDSSGNL   | 513   | >TP53-E258L TLLDSSGNL   | 59    | 454   |
| >TP53-E258L TLEDSSGNLL  | 977   | >TP53-E258L TLLDSSGNLL  | 114   | 863   |
| >TP53-E258L TLEDSSGNLL  | 5185  | >TP53-E258L TLLDSSGNLL  | 291   | 4894  |
| >TP53-E258L TLEDSSGNL   | 1522  | >TP53-E258L TLLDSSGNL   | 25    | 1497  |
| >TP53-E258L TLEDSSGNLL  | 1674  | >TP53-E258L TLLDSSGNLL  | 31    | 1643  |
| >TP53-E258L TLEDSSGNL   | 947   | >TP53-E258L TLLDSSGNL   | 22    | 925   |
| >TP53-E258L TLEDSSGNLL  | 736   | >TP53-E258L TLLDSSGNLL  | 23    | 713   |
| >TP53-E258L TLEDSSGNL   | 3341  | >TP53-E258L TLLDSSGNL   | 36    | 3305  |
| >TP53-E258L TLEDSSGNLL  | 3638  | >TP53-E258L TLLDSSGNLL  | 29    | 3609  |
| >TP53-E258L TLEDSSGNL   | 4640  | >TP53-E258L TLLDSSGNL   | 22    | 4618  |
| >TP53-E258L TLEDSSGNLL  | 7561  | >TP53-E258L TLLDSSGNLL  | 64    | 7497  |
| >TP53-E258L TLEDSSGNL   | 24    | >TP53-E258L TLLDSSGNL   | 8     | 16    |
| >TP53-E258L TLEDSSGNLL  | 23    | >TP53-E258L TLLDSSGNLL  | 7     | 16    |
| >TP53-E258L TLEDSSGNL   | 5016  | >TP53-E258L TLLDSSGNL   | 158   | 4858  |
| >TP53-E258L ITLEDSSGNL  | 495   | >TP53-E258L ITLLDSSGNL  | 775   | 280   |
| >TP53-E258L ITLEDSSGNL  | 471   | >TP53-E258L ITLLDSSGNL  | 733   | 262   |
| >TP53-E258L ITLEDSSGNL  | 371   | >TP53-E258L ITLLDSSGNL  | 465   | 94    |
| >TP53-E258L ITLEDSSGNLL | 270   | >TP53-E258L ITLLDSSGNLL | 1509  | 1239  |
| >TP53-E258L ITLEDSSGNL  | 302   | >TP53-E258L ITLLDSSGNL  | 4176  | 3874  |
| >TP53-E258L ITLEDSSGNLL | 339   | >TP53-E258L ITLLDSSGNLL | 4993  | 4654  |

|                         |       |                         |      |       |
|-------------------------|-------|-------------------------|------|-------|
| >TP53-E258L ITLEDSSGNL  | 137   | >TP53-E258L ITLLDSSGNL  | 1375 | 1238  |
| >TP53-E258L ITLEDSSGNLL | 354   | >TP53-E258L ITLLDSSGNLL | 3115 | 2761  |
| >TP53-E258L ITLEDSSGNL  | 6     | >TP53-E258L ITLLDSSGNL  | 6    | 0     |
| >TP53-E258L ITLEDSSGNLL | 18    | >TP53-E258L ITLLDSSGNLL | 19   | 1     |
| >TP53-E258L ITLEDSSGNLL | 259   | >TP53-E258L ITLLDSSGNLL | 351  | 92    |
| >TP53-E258L ITLEDSSGNL  | 341   | >TP53-E258L ITLLDSSGNL  | 133  | 208   |
| >TP53-E258L ITLEDSSGNLL | 30    | >TP53-E258L ITLLDSSGNLL | 17   | 13    |
| >TP53-E258L ILTIITL     | 19914 | >TP53-E258L ILTIITLL    | 121  | 19793 |
| >TP53-E258L ILTIITL     | 2676  | >TP53-E258L ILTIITLL    | 11   | 2665  |
| >TP53-E258L ILTIITL     | 11278 | >TP53-E258L ILTIITLL    | 70   | 11208 |
| >TP53-E258L ILTIITL     | 17884 | >TP53-E258L ILTIITLL    | 444  | 17440 |
| >TP53-E258L ILTIITL     | 16513 | >TP53-E258L ILTIITLL    | 55   | 16458 |
| >TP53-E258L ILTIITL     | 18140 | >TP53-E258L ILTIITLL    | 45   | 18095 |
| >TP53-E258L ILTIITL     | 25289 | >TP53-E258L ILTIITLL    | 374  | 24915 |
| >TP53-E258L ILTIITL     | 6248  | >TP53-E258L ILTIITLL    | 4    | 6244  |
| >TP53-E258L RPILTIITL   | 38346 | >TP53-E258L RPILTIITLL  | 355  | 37991 |
| >TP53-E258L RPILTIITL   | 2802  | >TP53-E258L RPILTIITLL  | 43   | 2759  |
| >TP53-E258L RPILTIITL   | 18401 | >TP53-E258L RPILTIITLL  | 412  | 17989 |
| >TP53-E258C EDSSGNLL    | 273   | >TP53-E258C QDSSGNLL    | 196  | 77    |
| >TP53-E258C LEDSSGNLL   | 8628  | >TP53-E258C LQDSSGNLL   | 293  | 8335  |
| >TP53-E258C LEDSSGNLL   | 15146 | >TP53-E258C LQDSSGNLL   | 232  | 14914 |
| >TP53-E258C LEDSSGNLL   | 5589  | >TP53-E258C LQDSSGNLL   | 344  | 5245  |
| >TP53-E258C LEDSSGNLL   | 2402  | >TP53-E258C LQDSSGNLL   | 188  | 2214  |
| >TP53-E258C LEDSSGNL    | 33    | >TP53-E258C LQDSSGNL    | 4047 | 4014  |
| >TP53-E258C LEDSSGNLL   | 20    | >TP53-E258C LQDSSGNLL   | 2133 | 2113  |
| >TP53-E258C RRPILTIITL  | 129   | >TP53-E258C RRPILTIITLQ | 115  | 14    |
| >TP53-E258C RRPILTIITL  | 467   | >TP53-E258C RRPILTIITLQ | 152  | 315   |
| >TP53-E258C TLEDSSGNL   | 62    | >TP53-E258C TLQDSSGNL   | 39   | 23    |
| >TP53-E258C TLEDSSGNLL  | 133   | >TP53-E258C TLQDSSGNLL  | 82   | 51    |
| >TP53-E258C TLEDSSGNL   | 513   | >TP53-E258C TLQDSSGNL   | 64   | 449   |
| >TP53-E258C TLEDSSGNLL  | 977   | >TP53-E258C TLQDSSGNLL  | 482  | 495   |
| >TP53-E258C TLEDSSGNL   | 1522  | >TP53-E258C TLQDSSGNL   | 301  | 1221  |
| >TP53-E258C TLEDSSGNLL  | 1674  | >TP53-E258C TLQDSSGNLL  | 361  | 1313  |
| >TP53-E258C TLEDSSGNL   | 947   | >TP53-E258C TLQDSSGNL   | 88   | 859   |
| >TP53-E258C TLEDSSGNLL  | 736   | >TP53-E258C TLQDSSGNLL  | 82   | 654   |
| >TP53-E258C TLEDSSGNL   | 24    | >TP53-E258C TLQDSSGNL   | 11   | 13    |
| >TP53-E258C TLEDSSGNLL  | 23    | >TP53-E258C TLQDSSGNLL  | 11   | 12    |
| >TP53-E258C ITLEDSSGNL  | 495   | >TP53-E258C ITLQDSSGNL  | 832  | 337   |
| >TP53-E258C ITLEDSSGNL  | 471   | >TP53-E258C ITLQDSSGNL  | 539  | 68    |
| >TP53-E258C ITLEDSSGNL  | 371   | >TP53-E258C ITLQDSSGNL  | 804  | 433   |
| >TP53-E258C ITLEDSSGNLL | 270   | >TP53-E258C ITLQDSSGNLI | 1521 | 1251  |
| >TP53-E258C ITLEDSSGNL  | 302   | >TP53-E258C ITLQDSSGNL  | 1621 | 1319  |
| >TP53-E258C ITLEDSSGNLL | 339   | >TP53-E258C ITLQDSSGNLI | 1889 | 1550  |

|                         |      |                        |       |       |
|-------------------------|------|------------------------|-------|-------|
| >TP53-E258CITLEDSSGNL   | 137  | >TP53-E258CITLQDSSGNL  | 682   | 545   |
| >TP53-E258CITLEDSSGNLL  | 354  | >TP53-E258CITLQDSSGNLI | 1699  | 1345  |
| >TP53-E258CITLEDSSGNL   | 6    | >TP53-E258CITLQDSSGNL  | 5     | 1     |
| >TP53-E258CITLEDSSGNLL  | 18   | >TP53-E258CITLQDSSGNLI | 16    | 2     |
| >TP53-E258CITLEDSSGNLL  | 259  | >TP53-E258CITLQDSSGNLI | 308   | 49    |
| >TP53-E258CITLEDSSGNL   | 341  | >TP53-E258CITLQDSSGNL  | 674   | 333   |
| >TP53-E258CITLEDSSGNLL  | 30   | >TP53-E258CITLQDSSGNLI | 11    | 19    |
| >TP53-E258CITLEDSSGNLL  | 604  | >TP53-E258CITLQDSSGNLI | 454   | 150   |
| >TP53-E258CILTIITILE    | 2676 | >TP53-E258CILTIITLQ    | 397   | 2279  |
| >TP53-E258CILTIITILE    | 6248 | >TP53-E258CILTIITLQ    | 97    | 6151  |
| >TP53-E258VEDSSGNLL     | 273  | >TP53-E258VVDSSGNLL    | 1463  | 1190  |
| >TP53-E258VLEDSSGNLL    | 8628 | >TP53-E258VLVDSSGNLL   | 250   | 8378  |
| >TP53-E258VLEDSSGNL     | 33   | >TP53-E258VLVDSSGNL    | 21858 | 21825 |
| >TP53-E258VLEDSSGNLL    | 20   | >TP53-E258VLVDSSGNLL   | 21140 | 21120 |
| >TP53-E258VLEDSSGNLL    | 4734 | >TP53-E258VLVDSSGNLL   | 256   | 4478  |
| >TP53-E258VRRPILTIITILE | 2464 | >TP53-E258VRRPILTIITLV | 138   | 2326  |
| >TP53-E258VRRPILTIITILE | 129  | >TP53-E258VRRPILTIITLV | 33    | 96    |
| >TP53-E258VRRPILTIITILE | 467  | >TP53-E258VRRPILTIITLV | 18    | 449   |
| >TP53-E258VTLEDSSGNL    | 62   | >TP53-E258VTLVDSSGNL   | 23    | 39    |
| >TP53-E258VTLEDSSGNLL   | 133  | >TP53-E258VTLVDSSGNLL  | 38    | 95    |
| >TP53-E258VTLEDSSGNL    | 513  | >TP53-E258VTLVDSSGNL   | 18    | 495   |
| >TP53-E258VTLEDSSGNLL   | 977  | >TP53-E258VTLVDSSGNLL  | 157   | 820   |
| >TP53-E258VTLEDSSGNL    | 1522 | >TP53-E258VTLVDSSGNL   | 192   | 1330  |
| >TP53-E258VTLEDSSGNLL   | 1674 | >TP53-E258VTLVDSSGNLL  | 233   | 1441  |
| >TP53-E258VTLEDSSGNL    | 947  | >TP53-E258VTLVDSSGNL   | 146   | 801   |
| >TP53-E258VTLEDSSGNLL   | 736  | >TP53-E258VTLVDSSGNLL  | 136   | 600   |
| >TP53-E258VTLEDSSGNL    | 3341 | >TP53-E258VTLVDSSGNL   | 483   | 2858  |
| >TP53-E258VTLEDSSGNLL   | 3638 | >TP53-E258VTLVDSSGNLL  | 413   | 3225  |
| >TP53-E258VTLEDSSGNL    | 24   | >TP53-E258VTLVDSSGNL   | 12    | 12    |
| >TP53-E258VTLEDSSGNLL   | 23   | >TP53-E258VTLVDSSGNLL  | 11    | 12    |
| >TP53-E258VITLEDSSGNL   | 495  | >TP53-E258VITLVDSSGNL  | 1070  | 575   |
| >TP53-E258VITLEDSSGNL   | 471  | >TP53-E258VITLVDSSGNL  | 755   | 284   |
| >TP53-E258VITLEDSSGNL   | 371  | >TP53-E258VITLVDSSGNL  | 605   | 234   |
| >TP53-E258VITLEDSSGNLL  | 270  | >TP53-E258VITLVDSSGNLL | 1471  | 1201  |
| >TP53-E258VITLEDSSGNL   | 302  | >TP53-E258VITLVDSSGNL  | 3486  | 3184  |
| >TP53-E258VITLEDSSGNLL  | 339  | >TP53-E258VITLVDSSGNLL | 4146  | 3807  |
| >TP53-E258VITLEDSSGNL   | 137  | >TP53-E258VITLVDSSGNL  | 1096  | 959   |
| >TP53-E258VITLEDSSGNLL  | 354  | >TP53-E258VITLVDSSGNLL | 2573  | 2219  |
| >TP53-E258VITLEDSSGNL   | 6    | >TP53-E258VITLVDSSGNL  | 6     | 0     |
| >TP53-E258VITLEDSSGNLL  | 18   | >TP53-E258VITLVDSSGNLL | 18    | 0     |
| >TP53-E258VITLEDSSGNLL  | 259  | >TP53-E258VITLVDSSGNLL | 423   | 164   |
| >TP53-E258VITLEDSSGNL   | 341  | >TP53-E258VITLVDSSGNL  | 217   | 124   |
| >TP53-E258VITLEDSSGNLL  | 30   | >TP53-E258VITLVDSSGNLL | 15    | 15    |

|                        |       |                        |      |       |
|------------------------|-------|------------------------|------|-------|
| >TP53-E258VILTIITILE   | 19914 | >TP53-E258VILTIITLV    | 37   | 19877 |
| >TP53-E258VILTIITILE   | 2676  | >TP53-E258VILTIITLV    | 8    | 2668  |
| >TP53-E258VILTIITILE   | 11278 | >TP53-E258VILTIITLV    | 12   | 11266 |
| >TP53-E258VILTIITILE   | 17884 | >TP53-E258VILTIITLV    | 66   | 17818 |
| >TP53-E258VILTIITILE   | 16513 | >TP53-E258VILTIITLV    | 6    | 16507 |
| >TP53-E258VILTIITILE   | 24495 | >TP53-E258VILTIITLV    | 49   | 24446 |
| >TP53-E258VILTIITILE   | 18140 | >TP53-E258VILTIITLV    | 8    | 18132 |
| >TP53-E258VILTIITILE   | 25289 | >TP53-E258VILTIITLV    | 18   | 25271 |
| >TP53-E258VILTIITILE   | 6248  | >TP53-E258VILTIITLV    | 2    | 6246  |
| >TP53-E258VILTIITILE   | 23163 | >TP53-E258VILTIITLV    | 417  | 22746 |
| >TP53-E258VILTIITILE   | 29925 | >TP53-E258VILTIITLV    | 321  | 29604 |
| >TP53-E258VILTIITILE   | 28595 | >TP53-E258VILTIITLV    | 120  | 28475 |
| >TP53-E258VILTIITILE   | 24428 | >TP53-E258VILTIITLV    | 126  | 24302 |
| >TP53-E258VILTIITILE   | 25358 | >TP53-E258VILTIITLV    | 120  | 25238 |
| >TP53-E258VILTIITILE   | 31834 | >TP53-E258VILTIITLV    | 57   | 31777 |
| >TP53-E258VILTIITILE   | 2802  | >TP53-E258VILTIITLV    | 54   | 2748  |
| >TP53-E258VILTIITILE   | 1945  | >TP53-E258VILTIITLV    | 131  | 1814  |
| >TP53-E271CEVRVCACPGI  | 329   | >TP53-E271CEVRVCACPGI  | 111  | 218   |
| >TP53-E271CEVRVCACPGI  | 70    | >TP53-E271CEVRVCACPGI  | 126  | 56    |
| >TP53-E271CFEVRVCACPGI | 370   | >TP53-E271CFEVRVCACPGI | 408  | 38    |
| >TP53-E271CNSFEVRVCA   | 21    | >TP53-E271CNSFEVRVCA   | 18   | 3     |
| >TP53-E271CGRNSFEVR    | 405   | >TP53-E271CGRNSFEVR    | 579  | 174   |
| >TP53-E271CLGRNSFEVR   | 286   | >TP53-E271CLGRNSFEVR   | 822  | 536   |
| >TP53-E271CLLGRNSFEV   | 26    | >TP53-E271CLLGRNSFEV   | 313  | 287   |
| >TP53-E271CLLGRNSFEVR  | 137   | >TP53-E271CLLGRNSFEVR  | 207  | 70    |
| >TP53-E271CLLGRNSFEV   | 16    | >TP53-E271CLLGRNSFEV   | 145  | 129   |
| >TP53-E271CLLGRNSFEVR  | 62    | >TP53-E271CLLGRNSFEVR  | 83   | 21    |
| >TP53-E271CLLGRNSFEV   | 47    | >TP53-E271CLLGRNSFEV   | 183  | 136   |
| >TP53-E271CLLGRNSFEVR  | 214   | >TP53-E271CLLGRNSFEVR  | 218  | 4     |
| >TP53-E271CLLGRNSFEV   | 39    | >TP53-E271CLLGRNSFEV   | 404  | 365   |
| >TP53-E271CLLGRNSFEV   | 2     | >TP53-E271CLLGRNSFEV   | 5    | 3     |
| >TP53-E271CLLGRNSFEVR  | 3     | >TP53-E271CLLGRNSFEVR  | 4    | 1     |
| >TP53-E271CLLGRNSFEV   | 2     | >TP53-E271CLLGRNSFEV   | 3    | 1     |
| >TP53-E271CLLGRNSFEVR  | 7     | >TP53-E271CLLGRNSFEVR  | 6    | 1     |
| >TP53-E271CLLGRNSFEV   | 5     | >TP53-E271CLLGRNSFEV   | 8    | 3     |
| >TP53-E271CLLGRNSFEVR  | 9     | >TP53-E271CLLGRNSFEVR  | 10   | 1     |
| >TP53-E271CLLGRNSFEV   | 2     | >TP53-E271CLLGRNSFEV   | 4    | 2     |
| >TP53-E271CLLGRNSFEVR  | 6     | >TP53-E271CLLGRNSFEVR  | 8    | 2     |
| >TP53-E271CLLGRNSFEV   | 2     | >TP53-E271CLLGRNSFEV   | 2    | 0     |
| >TP53-E271CLLGRNSFEVR  | 2     | >TP53-E271CLLGRNSFEVR  | 2    | 0     |
| >TP53-E271CLLGRNSFEVR  | 429   | >TP53-E271CLLGRNSFEVR  | 1172 | 743   |
| >TP53-E271CLLGRNSFEV   | 425   | >TP53-E271CLLGRNSFEV   | 2058 | 1633  |
| >TP53-E271CNLLGRNSFEV  | 29    | >TP53-E271CNLLGRNSFEV  | 87   | 58    |

|                        |      |                        |      |      |
|------------------------|------|------------------------|------|------|
| >TP53-E271C NLLGRNSFEV | 89   | >TP53-E271C NLLGRNSFDV | 210  | 121  |
| >TP53-E271C NLLGRNSFEV | 94   | >TP53-E271C NLLGRNSFDV | 195  | 101  |
| >TP53-E271C NLLGRNSFEV | 137  | >TP53-E271C NLLGRNSFDV | 410  | 273  |
| >TP53-E271C NLLGRNSFEV | 3    | >TP53-E271C NLLGRNSFDV | 9    | 6    |
| >TP53-E271C NLLGRNSFEV | 5    | >TP53-E271C NLLGRNSFDV | 11   | 6    |
| >TP53-E271C NLLGRNSFEV | 7    | >TP53-E271C NLLGRNSFDV | 10   | 3    |
| >TP53-E271C NLLGRNSFEV | 3    | >TP53-E271C NLLGRNSFDV | 6    | 3    |
| >TP53-E271C NLLGRNSFEV | 3    | >TP53-E271C NLLGRNSFDV | 4    | 1    |
| >TP53-E271C NLLGRNSFEV | 109  | >TP53-E271C NLLGRNSFDV | 159  | 50   |
| >TP53-E271C NLLGRNSFEV | 309  | >TP53-E271C NLLGRNSFDV | 347  | 38   |
| >TP53-E271C NLLGRNSFEV | 52   | >TP53-E271C NLLGRNSFDV | 217  | 165  |
| >TP53-E271C NLLGRNSFEV | 195  | >TP53-E271C NLLGRNSFDV | 202  | 7    |
| >TP53-E271C EVRVCACPG  | 6806 | >TP53-E271C GVRVCACPG  | 384  | 6422 |
| >TP53-E271C EVRVCACPGF | 5897 | >TP53-E271C GVRVCACPGI | 371  | 5526 |
| >TP53-E271C EVRVCACPGF | 329  | >TP53-E271C GVRVCACPGI | 2849 | 2520 |
| >TP53-E271C EVRVCACPGF | 70   | >TP53-E271C GVRVCACPGI | 1473 | 1403 |
| >TP53-E271C FEVRVCACPC | 370  | >TP53-E271C FGVRVCACPC | 113  | 257  |
| >TP53-E271C NSFVVRVCA  | 21   | >TP53-E271C NSFVVRVCA  | 23   | 2    |
| >TP53-E271C GRNSFEVR   | 405  | >TP53-E271C GRNSFGVR   | 225  | 180  |
| >TP53-E271C GRNSFEVRV  | 631  | >TP53-E271C GRNSFGVRV  | 273  | 358  |
| >TP53-E271C LGRNSFEVR  | 286  | >TP53-E271C LGRNSFGVR  | 369  | 83   |
| >TP53-E271C LLGRNSFEV  | 26   | >TP53-E271C LLGRNSFGV  | 52   | 26   |
| >TP53-E271C LLGRNSFEVR | 137  | >TP53-E271C LLGRNSFGVR | 187  | 50   |
| >TP53-E271C LLGRNSFEV  | 16   | >TP53-E271C LLGRNSFGV  | 24   | 8    |
| >TP53-E271C LLGRNSFEVR | 62   | >TP53-E271C LLGRNSFGVR | 68   | 6    |
| >TP53-E271C LLGRNSFEV  | 47   | >TP53-E271C LLGRNSFGV  | 39   | 8    |
| >TP53-E271C LLGRNSFEVR | 214  | >TP53-E271C LLGRNSFGVR | 98   | 116  |
| >TP53-E271C LLGRNSFEV  | 39   | >TP53-E271C LLGRNSFGV  | 25   | 14   |
| >TP53-E271C LLGRNSFEVR | 582  | >TP53-E271C LLGRNSFGVR | 426  | 156  |
| >TP53-E271C LLGRNSFEV  | 2    | >TP53-E271C LLGRNSFGV  | 2    | 0    |
| >TP53-E271C LLGRNSFEVR | 3    | >TP53-E271C LLGRNSFGVR | 3    | 0    |
| >TP53-E271C LLGRNSFEV  | 2    | >TP53-E271C LLGRNSFGV  | 2    | 0    |
| >TP53-E271C LLGRNSFEVR | 7    | >TP53-E271C LLGRNSFGVR | 6    | 1    |
| >TP53-E271C LLGRNSFEV  | 5    | >TP53-E271C LLGRNSFGV  | 5    | 0    |
| >TP53-E271C LLGRNSFEVR | 9    | >TP53-E271C LLGRNSFGVR | 9    | 0    |
| >TP53-E271C LLGRNSFEV  | 2    | >TP53-E271C LLGRNSFGV  | 2    | 0    |
| >TP53-E271C LLGRNSFEVR | 6    | >TP53-E271C LLGRNSFGVR | 6    | 0    |
| >TP53-E271C LLGRNSFEV  | 2    | >TP53-E271C LLGRNSFGV  | 2    | 0    |
| >TP53-E271C LLGRNSFEVR | 2    | >TP53-E271C LLGRNSFGVR | 2    | 0    |
| >TP53-E271C LLGRNSFEVR | 429  | >TP53-E271C LLGRNSFGVR | 659  | 230  |
| >TP53-E271C LLGRNSFEV  | 425  | >TP53-E271C LLGRNSFGV  | 250  | 175  |
| >TP53-E271C NLLGRNSFEV | 29   | >TP53-E271C NLLGRNSFGV | 28   | 1    |
| >TP53-E271C NLLGRNSFEV | 89   | >TP53-E271C NLLGRNSFGV | 77   | 12   |



|                        |       |                        |      |       |
|------------------------|-------|------------------------|------|-------|
| >TP53-E271C NLLGRNSFEV | 94    | >TP53-E271C NLLGRNSFGV | 65   | 29    |
| >TP53-E271C NLLGRNSFEV | 137   | >TP53-E271C NLLGRNSFGV | 116  | 21    |
| >TP53-E271C NLLGRNSFEV | 3     | >TP53-E271C NLLGRNSFGV | 3    | 0     |
| >TP53-E271C NLLGRNSFEV | 5     | >TP53-E271C NLLGRNSFGV | 5    | 0     |
| >TP53-E271C NLLGRNSFEV | 7     | >TP53-E271C NLLGRNSFGV | 6    | 1     |
| >TP53-E271C NLLGRNSFEV | 3     | >TP53-E271C NLLGRNSFGV | 3    | 0     |
| >TP53-E271C NLLGRNSFEV | 3     | >TP53-E271C NLLGRNSFGV | 3    | 0     |
| >TP53-E271C NLLGRNSFEV | 109   | >TP53-E271C NLLGRNSFGV | 107  | 2     |
| >TP53-E271C NLLGRNSFEV | 309   | >TP53-E271C NLLGRNSFGV | 470  | 161   |
| >TP53-E271C NLLGRNSFEV | 52    | >TP53-E271C NLLGRNSFGV | 29   | 23    |
| >TP53-E271C NLLGRNSFEV | 195   | >TP53-E271C NLLGRNSFGV | 217  | 22    |
| >TP53-E271K EVRVCACP   | 14014 | >TP53-E271K KVRVCACP   | 181  | 13833 |
| >TP53-E271K EVRVCACPG  | 6806  | >TP53-E271K KVRVCACPG  | 8    | 6798  |
| >TP53-E271K EVRVCACPGF | 5897  | >TP53-E271K KVRVCACPGF | 10   | 5887  |
| >TP53-E271K EVRVCACPGF | 13623 | >TP53-E271K KVRVCACPGF | 355  | 13268 |
| >TP53-E271K EVRVCACPGF | 673   | >TP53-E271K KVRVCACPGF | 29   | 644   |
| >TP53-E271K EVRVCACPGF | 329   | >TP53-E271K KVRVCACPGF | 2467 | 2138  |
| >TP53-E271K EVRVCACPGF | 70    | >TP53-E271K KVRVCACPGF | 2095 | 2025  |
| >TP53-E271K EVRVCACPGF | 2254  | >TP53-E271K KVRVCACPGF | 121  | 2133  |
| >TP53-E271K EVRVCACPGF | 744   | >TP53-E271K KVRVCACPGF | 104  | 640   |
| >TP53-E271K FEVRVCACPC | 370   | >TP53-E271K FKVRVCACPC | 304  | 66    |
| >TP53-E271K SGNLLGRNSF | 24081 | >TP53-E271K SGNLLGRNSF | 151  | 23930 |
| >TP53-E271K SFEVRVCA   | 12293 | >TP53-E271K SFKVRVCA   | 314  | 11979 |
| >TP53-E271K SFEVRVCAC  | 7576  | >TP53-E271K SFKVRVCAC  | 424  | 7152  |
| >TP53-E271K NSFVRVCA   | 21    | >TP53-E271K NSFKVRVCA  | 61   | 40    |
| >TP53-E271K GRNSFEVR   | 405   | >TP53-E271K GRNSFKVR   | 264  | 141   |
| >TP53-E271K GRNSFEVRV  | 631   | >TP53-E271K GRNSFKVRV  | 292  | 339   |
| >TP53-E271K GRNSFEVRV  | 1117  | >TP53-E271K GRNSFKVRV  | 383  | 734   |
| >TP53-E271K LGRNSFEVR  | 286   | >TP53-E271K LGRNSFKVR  | 408  | 122   |
| >TP53-E271K LLGRNSFEV  | 26    | >TP53-E271K LLGRNSFKV  | 76   | 50    |
| >TP53-E271K LLGRNSFEVR | 137   | >TP53-E271K LLGRNSFKVR | 275  | 138   |
| >TP53-E271K LLGRNSFEV  | 16    | >TP53-E271K LLGRNSFKV  | 37   | 21    |
| >TP53-E271K LLGRNSFEVR | 62    | >TP53-E271K LLGRNSFKVR | 105  | 43    |
| >TP53-E271K LLGRNSFEV  | 47    | >TP53-E271K LLGRNSFKV  | 84   | 37    |
| >TP53-E271K LLGRNSFEVR | 214   | >TP53-E271K LLGRNSFKVR | 238  | 24    |
| >TP53-E271K LLGRNSFEV  | 39    | >TP53-E271K LLGRNSFKV  | 138  | 99    |
| >TP53-E271K LLGRNSFEV  | 2     | >TP53-E271K LLGRNSFKV  | 3    | 1     |
| >TP53-E271K LLGRNSFEVR | 3     | >TP53-E271K LLGRNSFKVR | 3    | 0     |
| >TP53-E271K LLGRNSFEV  | 2     | >TP53-E271K LLGRNSFKV  | 3    | 1     |
| >TP53-E271K LLGRNSFEVR | 7     | >TP53-E271K LLGRNSFKVR | 12   | 5     |
| >TP53-E271K LLGRNSFEV  | 5     | >TP53-E271K LLGRNSFKV  | 6    | 1     |
| >TP53-E271K LLGRNSFEVR | 9     | >TP53-E271K LLGRNSFKVR | 12   | 3     |
| >TP53-E271K LLGRNSFEV  | 2     | >TP53-E271K LLGRNSFKV  | 2    | 0     |

|                       |       |                        |      |       |
|-----------------------|-------|------------------------|------|-------|
| >TP53-E271KLLGRNSFEVR | 6     | >TP53-E271KLLGRNSFKVR  | 9    | 3     |
| >TP53-E271KLLGRNSFEV  | 2     | >TP53-E271KLLGRNSFKV   | 2    | 0     |
| >TP53-E271KLLGRNSFEVR | 2     | >TP53-E271KLLGRNSFKVR  | 2    | 0     |
| >TP53-E271KLLGRNSFE   | 17277 | >TP53-E271KLLGRNSFK    | 47   | 17230 |
| >TP53-E271KLLGRNSFE   | 27320 | >TP53-E271KLLGRNSFK    | 146  | 27174 |
| >TP53-E271KLLGRNSFEVR | 429   | >TP53-E271KLLGRNSFKVR  | 425  | 4     |
| >TP53-E271KLLGRNSFEV  | 425   | >TP53-E271KLLGRNSFKV   | 719  | 294   |
| >TP53-E271KNLLGRNSFEV | 29    | >TP53-E271KNLLGRNSFKV  | 67   | 38    |
| >TP53-E271KNLLGRNSFEV | 89    | >TP53-E271KNLLGRNSFKV  | 111  | 22    |
| >TP53-E271KNLLGRNSFEV | 94    | >TP53-E271KNLLGRNSFKV  | 144  | 50    |
| >TP53-E271KNLLGRNSFEV | 137   | >TP53-E271KNLLGRNSFKV  | 282  | 145   |
| >TP53-E271KNLLGRNSFEV | 3     | >TP53-E271KNLLGRNSFKV  | 4    | 1     |
| >TP53-E271KNLLGRNSFEV | 5     | >TP53-E271KNLLGRNSFKV  | 7    | 2     |
| >TP53-E271KNLLGRNSFEV | 7     | >TP53-E271KNLLGRNSFKV  | 7    | 0     |
| >TP53-E271KNLLGRNSFEV | 3     | >TP53-E271KNLLGRNSFKV  | 3    | 0     |
| >TP53-E271KNLLGRNSFEV | 3     | >TP53-E271KNLLGRNSFKV  | 3    | 0     |
| >TP53-E271KNLLGRNSFE  | 18307 | >TP53-E271KNLLGRNSFK   | 64   | 18243 |
| >TP53-E271KNLLGRNSFE  | 27992 | >TP53-E271KNLLGRNSFK   | 227  | 27765 |
| >TP53-E271KNLLGRNSFE  | 6442  | >TP53-E271KNLLGRNSFK   | 188  | 6254  |
| >TP53-E271KNLLGRNSFEV | 109   | >TP53-E271KNLLGRNSFKV  | 161  | 52    |
| >TP53-E271KNLLGRNSFE  | 17739 | >TP53-E271KNLLGRNSFK   | 209  | 17530 |
| >TP53-E271KNLLGRNSFEV | 309   | >TP53-E271KNLLGRNSFKV  | 833  | 524   |
| >TP53-E271KNLLGRNSFEV | 52    | >TP53-E271KNLLGRNSFKV  | 69   | 17    |
| >TP53-E271KNLLGRNSFEV | 195   | >TP53-E271KNLLGRNSFKV  | 137  | 58    |
| >TP53-E271PEVRVCACPGF | 329   | >TP53-E271P PVRVCACPGF | 3804 | 3475  |
| >TP53-E271PEVRVCACPGF | 70    | >TP53-E271P PVRVCACPGF | 5925 | 5855  |
| >TP53-E271PFEVRVCACPC | 370   | >TP53-E271P FPVRVCACPC | 143  | 227   |
| >TP53-E271PFEVRVCAC   | 21898 | >TP53-E271P FPVRVCAC   | 272  | 21626 |
| >TP53-E271PFEVRVCAC   | 13514 | >TP53-E271P FPVRVCAC   | 56   | 13458 |
| >TP53-E271PFEVRVCACP  | 16006 | >TP53-E271P FPVRVCACP  | 184  | 15822 |
| >TP53-E271PFEVRVCACPC | 25018 | >TP53-E271P FPVRVCACPC | 499  | 24519 |
| >TP53-E271PNSFEVRVCA  | 21    | >TP53-E271P NSFPVRVCA  | 19   | 2     |
| >TP53-E271PGRNSFEVR   | 405   | >TP53-E271P GRNSFPVR   | 295  | 110   |
| >TP53-E271PGRNSFEVRV  | 631   | >TP53-E271P GRNSFPVRV  | 270  | 361   |
| >TP53-E271PGRNSFEVRV  | 1117  | >TP53-E271P GRNSFPVRV  | 259  | 858   |
| >TP53-E271PLGRNSFEV   | 820   | >TP53-E271P LGRNSFPV   | 104  | 716   |
| >TP53-E271PLGRNSFEVR  | 6129  | >TP53-E271P LGRNSFPVR  | 342  | 5787  |
| >TP53-E271PLGRNSFEVRV | 2669  | >TP53-E271P LGRNSFPVRV | 480  | 2189  |
| >TP53-E271PLGRNSFEVR  | 286   | >TP53-E271P LGRNSFPVR  | 189  | 97    |
| >TP53-E271PLLGRNSFEV  | 26    | >TP53-E271P LLGRNSFPV  | 23   | 3     |
| >TP53-E271PLLGRNSFEVR | 137   | >TP53-E271P LLGRNSFPVR | 83   | 54    |
| >TP53-E271PLLGRNSFEV  | 16    | >TP53-E271P LLGRNSFPV  | 18   | 2     |
| >TP53-E271PLLGRNSFEVR | 62    | >TP53-E271P LLGRNSFPVR | 66   | 4     |

|                        |      |                        |     |      |
|------------------------|------|------------------------|-----|------|
| >TP53-E271P LLGRNSFEV  | 47   | >TP53-E271P LLGRNSFPV  | 20  | 27   |
| >TP53-E271P LLGRNSFEVR | 214  | >TP53-E271P LLGRNSFPVR | 60  | 154  |
| >TP53-E271P LLGRNSFEV  | 39   | >TP53-E271P LLGRNSFPV  | 17  | 22   |
| >TP53-E271P LLGRNSFEV  | 2    | >TP53-E271P LLGRNSFPV  | 2   | 0    |
| >TP53-E271P LLGRNSFEVR | 3    | >TP53-E271P LLGRNSFPVR | 2   | 1    |
| >TP53-E271P LLGRNSFEV  | 2    | >TP53-E271P LLGRNSFPV  | 2   | 0    |
| >TP53-E271P LLGRNSFEVR | 7    | >TP53-E271P LLGRNSFPVR | 5   | 2    |
| >TP53-E271P LLGRNSFEV  | 5    | >TP53-E271P LLGRNSFPV  | 5   | 0    |
| >TP53-E271P LLGRNSFEVR | 9    | >TP53-E271P LLGRNSFPVR | 9   | 0    |
| >TP53-E271P LLGRNSFEV  | 2    | >TP53-E271P LLGRNSFPV  | 2   | 0    |
| >TP53-E271P LLGRNSFEVR | 6    | >TP53-E271P LLGRNSFPVR | 4   | 2    |
| >TP53-E271P LLGRNSFEV  | 2    | >TP53-E271P LLGRNSFPV  | 2   | 0    |
| >TP53-E271P LLGRNSFEVR | 2    | >TP53-E271P LLGRNSFPVR | 2   | 0    |
| >TP53-E271P LLGRNSFEVR | 429  | >TP53-E271P LLGRNSFPVR | 515 | 86   |
| >TP53-E271P LLGRNSFEV  | 425  | >TP53-E271P LLGRNSFPV  | 155 | 270  |
| >TP53-E271P LLGRNSFEVR | 773  | >TP53-E271P LLGRNSFPVR | 462 | 311  |
| >TP53-E271P NLLGRNSFEV | 29   | >TP53-E271P NLLGRNSFPV | 20  | 9    |
| >TP53-E271P NLLGRNSFEV | 89   | >TP53-E271P NLLGRNSFPV | 43  | 46   |
| >TP53-E271P NLLGRNSFEV | 94   | >TP53-E271P NLLGRNSFPV | 67  | 27   |
| >TP53-E271P NLLGRNSFEV | 137  | >TP53-E271P NLLGRNSFPV | 88  | 49   |
| >TP53-E271P NLLGRNSFEV | 3    | >TP53-E271P NLLGRNSFPV | 3   | 0    |
| >TP53-E271P NLLGRNSFEV | 5    | >TP53-E271P NLLGRNSFPV | 5   | 0    |
| >TP53-E271P NLLGRNSFEV | 7    | >TP53-E271P NLLGRNSFPV | 7   | 0    |
| >TP53-E271P NLLGRNSFEV | 3    | >TP53-E271P NLLGRNSFPV | 4   | 1    |
| >TP53-E271P NLLGRNSFEV | 3    | >TP53-E271P NLLGRNSFPV | 3   | 0    |
| >TP53-E271P NLLGRNSFEV | 502  | >TP53-E271P NLLGRNSFPV | 386 | 116  |
| >TP53-E271P NLLGRNSFEV | 109  | >TP53-E271P NLLGRNSFPV | 124 | 15   |
| >TP53-E271P NLLGRNSFEV | 309  | >TP53-E271P NLLGRNSFPV | 373 | 64   |
| >TP53-E271P NLLGRNSFEV | 52   | >TP53-E271P NLLGRNSFPV | 22  | 30   |
| >TP53-E271P NLLGRNSFEV | 195  | >TP53-E271P NLLGRNSFPV | 144 | 51   |
| >TP53-E271C EVRVCACPG  | 6806 | >TP53-E271C QVRVCACPG  | 243 | 6563 |
| >TP53-E271C EVRVCACPGF | 5897 | >TP53-E271C QVRVCACPG  | 252 | 5645 |
| >TP53-E271C EVRVCACPGF | 673  | >TP53-E271C QVRVCACPG  | 179 | 494  |
| >TP53-E271C EVRVCACPGF | 329  | >TP53-E271C QVRVCACPG  | 586 | 257  |
| >TP53-E271C EVRVCACPGF | 70   | >TP53-E271C QVRVCACPG  | 230 | 160  |
| >TP53-E271C FEVRVCAC   | 5124 | >TP53-E271C FQVRVCAC   | 21  | 5103 |
| >TP53-E271C FEVRVCACPC | 370  | >TP53-E271C FQVRVCACPC | 183 | 187  |
| >TP53-E271C FEVRVCACPC | 8965 | >TP53-E271C FQVRVCACPC | 366 | 8599 |
| >TP53-E271C NSFQVRVCA  | 21   | >TP53-E271C NSFQVRVCA  | 75  | 54   |
| >TP53-E271C GRNSFEVR   | 405  | >TP53-E271C GRNSFQVR   | 239 | 166  |
| >TP53-E271C GRNSFEVRV  | 631  | >TP53-E271C GRNSFQVRV  | 147 | 484  |
| >TP53-E271C GRNSFEVRV  | 1117 | >TP53-E271C GRNSFQVRV  | 422 | 695  |
| >TP53-E271C LGRNSFEVR  | 286  | >TP53-E271C LGRNSFQVR  | 187 | 99   |

|                        |      |                        |      |      |
|------------------------|------|------------------------|------|------|
| >TP53-E271C LLGRNSFEV  | 26   | >TP53-E271C LLGRNSFQV  | 52   | 26   |
| >TP53-E271C LLGRNSFEVR | 137  | >TP53-E271C LLGRNSFQVR | 112  | 25   |
| >TP53-E271C LLGRNSFEV  | 16   | >TP53-E271C LLGRNSFQV  | 24   | 8    |
| >TP53-E271C LLGRNSFEVR | 62   | >TP53-E271C LLGRNSFQVR | 44   | 18   |
| >TP53-E271C LLGRNSFEV  | 47   | >TP53-E271C LLGRNSFQV  | 49   | 2    |
| >TP53-E271C LLGRNSFEVR | 214  | >TP53-E271C LLGRNSFQVR | 115  | 99   |
| >TP53-E271C LLGRNSFEV  | 39   | >TP53-E271C LLGRNSFQV  | 83   | 44   |
| >TP53-E271C LLGRNSFEV  | 2    | >TP53-E271C LLGRNSFQV  | 2    | 0    |
| >TP53-E271C LLGRNSFEVR | 3    | >TP53-E271C LLGRNSFQVR | 3    | 0    |
| >TP53-E271C LLGRNSFEV  | 2    | >TP53-E271C LLGRNSFQV  | 3    | 1    |
| >TP53-E271C LLGRNSFEVR | 7    | >TP53-E271C LLGRNSFQVR | 7    | 0    |
| >TP53-E271C LLGRNSFEV  | 5    | >TP53-E271C LLGRNSFQV  | 6    | 1    |
| >TP53-E271C LLGRNSFEVR | 9    | >TP53-E271C LLGRNSFQVR | 9    | 0    |
| >TP53-E271C LLGRNSFEV  | 2    | >TP53-E271C LLGRNSFQV  | 2    | 0    |
| >TP53-E271C LLGRNSFEVR | 6    | >TP53-E271C LLGRNSFQVR | 4    | 2    |
| >TP53-E271C LLGRNSFE   | 5716 | >TP53-E271C LLGRNSFQ   | 81   | 5635 |
| >TP53-E271C LLGRNSFEV  | 2    | >TP53-E271C LLGRNSFQV  | 2    | 0    |
| >TP53-E271C LLGRNSFEVR | 2    | >TP53-E271C LLGRNSFQVR | 2    | 0    |
| >TP53-E271C LLGRNSFEVR | 429  | >TP53-E271C LLGRNSFQVR | 352  | 77   |
| >TP53-E271C LLGRNSFEV  | 425  | >TP53-E271C LLGRNSFQV  | 324  | 101  |
| >TP53-E271C NLLGRNSFEV | 29   | >TP53-E271C NLLGRNSFQV | 59   | 30   |
| >TP53-E271C NLLGRNSFEV | 89   | >TP53-E271C NLLGRNSFQV | 135  | 46   |
| >TP53-E271C NLLGRNSFEV | 94   | >TP53-E271C NLLGRNSFQV | 171  | 77   |
| >TP53-E271C NLLGRNSFEV | 137  | >TP53-E271C NLLGRNSFQV | 198  | 61   |
| >TP53-E271C NLLGRNSFEV | 3    | >TP53-E271C NLLGRNSFQV | 3    | 0    |
| >TP53-E271C NLLGRNSFEV | 5    | >TP53-E271C NLLGRNSFQV | 7    | 2    |
| >TP53-E271C NLLGRNSFEV | 7    | >TP53-E271C NLLGRNSFQV | 7    | 0    |
| >TP53-E271C NLLGRNSFEV | 3    | >TP53-E271C NLLGRNSFQV | 3    | 0    |
| >TP53-E271C NLLGRNSFEV | 3    | >TP53-E271C NLLGRNSFQV | 3    | 0    |
| >TP53-E271C NLLGRNSFEV | 502  | >TP53-E271C NLLGRNSFQV | 382  | 120  |
| >TP53-E271C NLLGRNSFEV | 109  | >TP53-E271C NLLGRNSFQV | 92   | 17   |
| >TP53-E271C NLLGRNSFEV | 309  | >TP53-E271C NLLGRNSFQV | 578  | 269  |
| >TP53-E271C NLLGRNSFEV | 52   | >TP53-E271C NLLGRNSFQV | 39   | 13   |
| >TP53-E271C NLLGRNSFEV | 195  | >TP53-E271C NLLGRNSFQV | 173  | 22   |
| >TP53-E271V EVRVCACPG  | 6806 | >TP53-E271V VVRVCACPG  | 463  | 6343 |
| >TP53-E271V EVRVCACPGF | 5897 | >TP53-E271V VVRVCACPGI | 460  | 5437 |
| >TP53-E271V EVRVCACPGF | 673  | >TP53-E271V VVRVCACPGI | 207  | 466  |
| >TP53-E271V EVRVCACPGF | 329  | >TP53-E271V VVRVCACPGI | 672  | 343  |
| >TP53-E271V EVRVCACPGF | 70   | >TP53-E271V VVRVCACPGI | 1040 | 970  |
| >TP53-E271V FEVRVCAC   | 5124 | >TP53-E271V FVVRVCAC   | 138  | 4986 |
| >TP53-E271V FEVRVCACPC | 370  | >TP53-E271V FVVRVCACPC | 7    | 363  |
| >TP53-E271V NSFVVRVCA  | 21   | >TP53-E271V NSFVVRVCA  | 60   | 39   |
| >TP53-E271V GRNSFEVR   | 405  | >TP53-E271V GRNSFVVR   | 144  | 261  |

|                       |       |                       |      |       |
|-----------------------|-------|-----------------------|------|-------|
| >TP53-E271VGRNSFEVRV  | 631   | >TP53-E271VGRNSFVVRV  | 154  | 477   |
| >TP53-E271VGRNSFEVRV  | 1117  | >TP53-E271VGRNSFVVRV  | 183  | 934   |
| >TP53-E271VLLGRNSFEVR | 286   | >TP53-E271VLLGRNSFVVR | 80   | 206   |
| >TP53-E271VLLGRNSFE   | 23319 | >TP53-E271VLLGRNSFV   | 117  | 23202 |
| >TP53-E271VLLGRNSFEV  | 26    | >TP53-E271VLLGRNSFVV  | 115  | 89    |
| >TP53-E271VLLGRNSFEVR | 137   | >TP53-E271VLLGRNSFVVR | 76   | 61    |
| >TP53-E271VLLGRNSFE   | 10604 | >TP53-E271VLLGRNSFV   | 19   | 10585 |
| >TP53-E271VLLGRNSFEV  | 16    | >TP53-E271VLLGRNSFVV  | 61   | 45    |
| >TP53-E271VLLGRNSFEVR | 62    | >TP53-E271VLLGRNSFVVR | 49   | 13    |
| >TP53-E271VLLGRNSFE   | 21155 | >TP53-E271VLLGRNSFV   | 22   | 21133 |
| >TP53-E271VLLGRNSFEV  | 47    | >TP53-E271VLLGRNSFVV  | 108  | 61    |
| >TP53-E271VLLGRNSFEVR | 214   | >TP53-E271VLLGRNSFVVR | 51   | 163   |
| >TP53-E271VLLGRNSFE   | 26266 | >TP53-E271VLLGRNSFV   | 130  | 26136 |
| >TP53-E271VLLGRNSFEV  | 39    | >TP53-E271VLLGRNSFVV  | 102  | 63    |
| >TP53-E271VLLGRNSFEVR | 582   | >TP53-E271VLLGRNSFVVR | 385  | 197   |
| >TP53-E271VLLGRNSFE   | 11511 | >TP53-E271VLLGRNSFV   | 3    | 11508 |
| >TP53-E271VLLGRNSFEV  | 2     | >TP53-E271VLLGRNSFVV  | 2    | 0     |
| >TP53-E271VLLGRNSFEVR | 3     | >TP53-E271VLLGRNSFVVR | 2    | 1     |
| >TP53-E271VLLGRNSFE   | 13333 | >TP53-E271VLLGRNSFV   | 4    | 13329 |
| >TP53-E271VLLGRNSFEV  | 2     | >TP53-E271VLLGRNSFVV  | 2    | 0     |
| >TP53-E271VLLGRNSFEVR | 7     | >TP53-E271VLLGRNSFVVR | 4    | 3     |
| >TP53-E271VLLGRNSFE   | 17971 | >TP53-E271VLLGRNSFV   | 7    | 17964 |
| >TP53-E271VLLGRNSFEV  | 5     | >TP53-E271VLLGRNSFVV  | 7    | 2     |
| >TP53-E271VLLGRNSFEVR | 9     | >TP53-E271VLLGRNSFVVR | 8    | 1     |
| >TP53-E271VLLGRNSFE   | 22094 | >TP53-E271VLLGRNSFV   | 3    | 22091 |
| >TP53-E271VLLGRNSFEV  | 2     | >TP53-E271VLLGRNSFVV  | 2    | 0     |
| >TP53-E271VLLGRNSFEVR | 6     | >TP53-E271VLLGRNSFVVR | 3    | 3     |
| >TP53-E271VLLGRNSFE   | 5716  | >TP53-E271VLLGRNSFV   | 2    | 5714  |
| >TP53-E271VLLGRNSFEV  | 2     | >TP53-E271VLLGRNSFVV  | 2    | 0     |
| >TP53-E271VLLGRNSFEVR | 2     | >TP53-E271VLLGRNSFVVR | 2    | 0     |
| >TP53-E271VLLGRNSFEVR | 429   | >TP53-E271VLLGRNSFVVR | 139  | 290   |
| >TP53-E271VLLGRNSFEV  | 425   | >TP53-E271VLLGRNSFVV  | 1779 | 1354  |
| >TP53-E271VLLGRNSFEVR | 773   | >TP53-E271VLLGRNSFVVR | 314  | 459   |
| >TP53-E271VLLGRNSFE   | 22396 | >TP53-E271VLLGRNSFV   | 40   | 22356 |
| >TP53-E271VLLGRNSFEV  | 29    | >TP53-E271VLLGRNSFVV  | 42   | 13    |
| >TP53-E271VLLGRNSFE   | 9648  | >TP53-E271VLLGRNSFV   | 14   | 9634  |
| >TP53-E271VLLGRNSFEV  | 89    | >TP53-E271VLLGRNSFVV  | 110  | 21    |
| >TP53-E271VLLGRNSFE   | 18690 | >TP53-E271VLLGRNSFV   | 23   | 18667 |
| >TP53-E271VLLGRNSFEV  | 94    | >TP53-E271VLLGRNSFVV  | 134  | 40    |
| >TP53-E271VLLGRNSFE   | 19920 | >TP53-E271VLLGRNSFV   | 43   | 19877 |
| >TP53-E271VLLGRNSFEV  | 137   | >TP53-E271VLLGRNSFVV  | 220  | 83    |
| >TP53-E271VLLGRNSFE   | 13653 | >TP53-E271VLLGRNSFV   | 4    | 13649 |
| >TP53-E271VLLGRNSFEV  | 3     | >TP53-E271VLLGRNSFVV  | 4    | 1     |

|                        |       |                        |     |       |
|------------------------|-------|------------------------|-----|-------|
| >TP53-E271VNULLGRNSFE  | 16746 | >TP53-E271VNULLGRNSFV  | 10  | 16736 |
| >TP53-E271VNULLGRNSFEV | 5     | >TP53-E271VNULLGRNSFVV | 6   | 1     |
| >TP53-E271VNULLGRNSFE  | 17612 | >TP53-E271VNULLGRNSFV  | 8   | 17604 |
| >TP53-E271VNULLGRNSFEV | 7     | >TP53-E271VNULLGRNSFVV | 9   | 2     |
| >TP53-E271VNULLGRNSFE  | 18591 | >TP53-E271VNULLGRNSFV  | 5   | 18586 |
| >TP53-E271VNULLGRNSFEV | 3     | >TP53-E271VNULLGRNSFVV | 4   | 1     |
| >TP53-E271VNULLGRNSFE  | 13161 | >TP53-E271VNULLGRNSFV  | 4   | 13157 |
| >TP53-E271VNULLGRNSFEV | 3     | >TP53-E271VNULLGRNSFVV | 4   | 1     |
| >TP53-E271VNULLGRNSFEV | 502   | >TP53-E271VNULLGRNSFVV | 197 | 305   |
| >TP53-E271VNULLGRNSFEV | 109   | >TP53-E271VNULLGRNSFVV | 57  | 52    |
| >TP53-E271VNULLGRNSFEV | 309   | >TP53-E271VNULLGRNSFVV | 243 | 66    |
| >TP53-E271VNULLGRNSFE  | 18956 | >TP53-E271VNULLGRNSFV  | 181 | 18775 |
| >TP53-E271VNULLGRNSFEV | 52    | >TP53-E271VNULLGRNSFVV | 128 | 76    |
| >TP53-E271VNULLGRNSFEV | 195   | >TP53-E271VNULLGRNSFVV | 90  | 105   |
| >TP53-E285ARTEEENLRK   | 882   | >TP53-E285ARTAEENLRK   | 80  | 802   |
| >TP53-E285ARTEEENLRKK  | 1962  | >TP53-E285ARTAEENLRKK  | 355 | 1607  |
| >TP53-E285ARTEEENLR    | 2668  | >TP53-E285ARTAEENLR    | 317 | 2351  |
| >TP53-E285ARTEEENLRK   | 88    | >TP53-E285ARTAEENLRK   | 20  | 68    |
| >TP53-E285ARTEEENLRKK  | 674   | >TP53-E285ARTAEENLRKK  | 118 | 556   |
| >TP53-E285ARTEEENLRK   | 126   | >TP53-E285ARTAEENLRK   | 45  | 81    |
| >TP53-E285ARTEEENLRKK  | 174   | >TP53-E285ARTAEENLRKK  | 64  | 110   |
| >TP53-E285ARTEEENLR    | 242   | >TP53-E285ARTAEENLR    | 93  | 149   |
| >TP53-E285ARTEEENLR    | 188   | >TP53-E285ARTAEENLR    | 22  | 166   |
| >TP53-E285ARTEEENLRK   | 3325  | >TP53-E285ARTAEENLRK   | 371 | 2954  |
| >TP53-E285ARTEEENLR    | 456   | >TP53-E285ARTAEENLR    | 224 | 232   |
| >TP53-E285ARRTEEEENL   | 171   | >TP53-E285ARRTAEEENL   | 123 | 48    |
| >TP53-E285ARRTEEEENLR  | 424   | >TP53-E285ARRTAEEENLR  | 352 | 72    |
| >TP53-E285ARRTEEEENLRK | 34    | >TP53-E285ARRTAEEENLRK | 31  | 3     |
| >TP53-E285ARRTEEEENLRK | 71    | >TP53-E285ARRTAEEENLRK | 60  | 11    |
| >TP53-E285ARRTEEEENL   | 66    | >TP53-E285ARRTAEEENL   | 64  | 2     |
| >TP53-E285ARRTEEEENLRK | 383   | >TP53-E285ARRTAEEENLRK | 273 | 110   |
| >TP53-E285ARRTEEEENL   | 94    | >TP53-E285ARRTAEEENL   | 82  | 12    |
| >TP53-E285ARRTEEEENLRK | 163   | >TP53-E285ARRTAEEENLRK | 208 | 45    |
| >TP53-E285ARRTEEEENLRK | 634   | >TP53-E285ARRTAEEENLRK | 441 | 193   |
| >TP53-E285ARRTEEEENLR  | 993   | >TP53-E285ARRTAEEENLR  | 419 | 574   |
| >TP53-E285AGRDRRTEEEEN | 446   | >TP53-E285AGRDRRRTAEEN | 227 | 219   |
| >TP53-E285CRTEEEENLRK  | 882   | >TP53-E285CRTGEENLRK   | 180 | 702   |
| >TP53-E285CRTEEEENLRK  | 88    | >TP53-E285CRTGEENLRK   | 39  | 49    |
| >TP53-E285CRTEEEENLRK  | 126   | >TP53-E285CRTGEENLRK   | 108 | 18    |
| >TP53-E285CRTEEEENLRKK | 174   | >TP53-E285CRTGEENLRKK  | 144 | 30    |
| >TP53-E285CRTEEEENLR   | 242   | >TP53-E285CRTGEENLR    | 173 | 69    |
| >TP53-E285CRTEEEENLR   | 188   | >TP53-E285CRTGEENLR    | 329 | 141   |
| >TP53-E285CRTEEEENLR   | 456   | >TP53-E285CRTGEENLR    | 159 | 297   |

|                       |       |                         |     |       |
|-----------------------|-------|-------------------------|-----|-------|
| >TP53-E285C RRTEENL   | 171   | >TP53-E285C RRTGEENL    | 118 | 53    |
| >TP53-E285C RRTEENLR  | 424   | >TP53-E285C RRTGEENLR   | 250 | 174   |
| >TP53-E285C RRTEENLRK | 34    | >TP53-E285C RRTGEENLRK  | 40  | 6     |
| >TP53-E285C RRTEENLRK | 71    | >TP53-E285C RRTGEENLRK  | 53  | 18    |
| >TP53-E285C RRTEENL   | 66    | >TP53-E285C RRTGEENL    | 127 | 61    |
| >TP53-E285C RRTEENLRK | 383   | >TP53-E285C RRTGEENLRK  | 700 | 317   |
| >TP53-E285C RRTEENL   | 94    | >TP53-E285C RRTGEENL    | 109 | 15    |
| >TP53-E285C RRTEENLRK | 163   | >TP53-E285C RRTGEENLRK  | 317 | 154   |
| >TP53-E285C GRDRRTEEN | 446   | >TP53-E285C GRDRRTGEEI  | 226 | 220   |
| >TP53-E285K RTEENLRK  | 882   | >TP53-E285K RTKEENLRK   | 166 | 716   |
| >TP53-E285K RTEENLRK  | 88    | >TP53-E285K RTKEENLRK   | 80  | 8     |
| >TP53-E285K RTEENLRKK | 674   | >TP53-E285K RTKEENLRKK  | 460 | 214   |
| >TP53-E285K RTEENLR   | 7486  | >TP53-E285K RTKEENLR    | 46  | 7440  |
| >TP53-E285K RTEENLRK  | 126   | >TP53-E285K RTKEENLRK   | 4   | 122   |
| >TP53-E285K RTEENLRKK | 174   | >TP53-E285K RTKEENLRKK  | 4   | 170   |
| >TP53-E285K RTEENLRKK | 10026 | >TP53-E285K RTKEENLRKK  | 156 | 9870  |
| >TP53-E285K RTEENLR   | 242   | >TP53-E285K RTKEENLR    | 21  | 221   |
| >TP53-E285K RTEENLR   | 188   | >TP53-E285K RTKEENLR    | 151 | 37    |
| >TP53-E285K RTEENLR   | 456   | >TP53-E285K RTKEENLR    | 324 | 132   |
| >TP53-E285K RRTEENL   | 171   | >TP53-E285K RRTKEENL    | 140 | 31    |
| >TP53-E285K RRTEENLR  | 424   | >TP53-E285K RRTKEENLR   | 338 | 86    |
| >TP53-E285K RRTEENLRK | 34    | >TP53-E285K RRTKEENLRK  | 46  | 12    |
| >TP53-E285K RRTEENLRK | 71    | >TP53-E285K RRTKEENLRK  | 62  | 9     |
| >TP53-E285K RRTEENL   | 66    | >TP53-E285K RRTKEENL    | 40  | 26    |
| >TP53-E285K RRTEENLRK | 383   | >TP53-E285K RRTKEENLRK  | 303 | 80    |
| >TP53-E285K RRTEENL   | 94    | >TP53-E285K RRTKEENL    | 74  | 20    |
| >TP53-E285K RRTEENLRK | 163   | >TP53-E285K RRTKEENLRK  | 248 | 85    |
| >TP53-E285K RRTEENLR  | 993   | >TP53-E285K RRTKEENLR   | 395 | 598   |
| >TP53-E285K GRDRRTEEN | 446   | >TP53-E285K GRDRRTKEEN  | 328 | 118   |
| >TP53-E285K PGRDRRTE  | 15047 | >TP53-E285K PGRDRRTK    | 150 | 14897 |
| >TP53-E285C RTEENLRK  | 882   | >TP53-E285C RTQEEENLRK  | 340 | 542   |
| >TP53-E285C RTEENLR   | 2668  | >TP53-E285C RTQEEENLR   | 310 | 2358  |
| >TP53-E285C RTEENLRK  | 88    | >TP53-E285C RTQEEENLRK  | 19  | 69    |
| >TP53-E285C RTEENLRKK | 674   | >TP53-E285C RTQEEENLRKK | 203 | 471   |
| >TP53-E285C RTEENLRK  | 126   | >TP53-E285C RTQEEENLRK  | 29  | 97    |
| >TP53-E285C RTEENLRKK | 174   | >TP53-E285C RTQEEENLRKK | 37  | 137   |
| >TP53-E285C RTEENLR   | 242   | >TP53-E285C RTQEEENLR   | 57  | 185   |
| >TP53-E285C RTEENLR   | 188   | >TP53-E285C RTQEEENLR   | 234 | 46    |
| >TP53-E285C RTEENLR   | 456   | >TP53-E285C RTQEEENLR   | 445 | 11    |
| >TP53-E285C RRTEENL   | 171   | >TP53-E285C RRTQEEENL   | 156 | 15    |
| >TP53-E285C RRTEENLR  | 424   | >TP53-E285C RRTQEEENLR  | 451 | 27    |
| >TP53-E285C RRTEENLRK | 34    | >TP53-E285C RRTQEEENLRK | 31  | 3     |
| >TP53-E285C RRTEENLRK | 71    | >TP53-E285C RRTQEEENLRK | 77  | 6     |

|                       |       |                        |     |       |
|-----------------------|-------|------------------------|-----|-------|
| >TP53-E285C RRTEENL   | 66    | >TP53-E285C RRTQEENL   | 38  | 28    |
| >TP53-E285C RRTEENLRK | 383   | >TP53-E285C RRTQEENLRK | 147 | 236   |
| >TP53-E285C RRTEENL   | 94    | >TP53-E285C RRTQEENL   | 110 | 16    |
| >TP53-E285C RRTEENLRK | 163   | >TP53-E285C RRTQEENLRK | 115 | 48    |
| >TP53-E285C RRTEENLRK | 634   | >TP53-E285C RRTQEENLRK | 443 | 191   |
| >TP53-E285C RRTEENLR  | 993   | >TP53-E285C RRTQEENLR  | 371 | 622   |
| >TP53-E285C GRDRRTEEN | 446   | >TP53-E285C GRDRRTQEEI | 304 | 142   |
| >TP53-E285V TEEENLRK  | 18156 | >TP53-E285V TVEENLRK   | 118 | 18038 |
| >TP53-E285V TEEENLRK  | 14336 | >TP53-E285V TVEENLRK   | 250 | 14086 |
| >TP53-E285V TEEENLRKK | 19136 | >TP53-E285V TVEENLRKK  | 495 | 18641 |
| >TP53-E285V CACPGRDRR | 29359 | >TP53-E285V CACPGRDRR  | 407 | 28952 |
| >TP53-E285V RTEENLRK  | 882   | >TP53-E285V RTVEENLRK  | 197 | 685   |
| >TP53-E285V RTEENLRKK | 1962  | >TP53-E285V RTVEENLRKK | 371 | 1591  |
| >TP53-E285V RTEENLRK  | 88    | >TP53-E285V RTVEENLRK  | 34  | 54    |
| >TP53-E285V RTEENLRKK | 674   | >TP53-E285V RTVEENLRKK | 118 | 556   |
| >TP53-E285V RTEENLRK  | 126   | >TP53-E285V RTVEENLRK  | 44  | 82    |
| >TP53-E285V RTEENLRKK | 174   | >TP53-E285V RTVEENLRKK | 60  | 114   |
| >TP53-E285V RTEENLR   | 242   | >TP53-E285V RTVEENLR   | 89  | 153   |
| >TP53-E285V RTEENLR   | 188   | >TP53-E285V RTVEENLR   | 42  | 146   |
| >TP53-E285V RTEENLR   | 456   | >TP53-E285V RTVEENLR   | 150 | 306   |
| >TP53-E285V RRTEENL   | 171   | >TP53-E285V RRTVEENL   | 119 | 52    |
| >TP53-E285V RRTEENLR  | 424   | >TP53-E285V RRTVEENLR  | 333 | 91    |
| >TP53-E285V RRTEENLRK | 34    | >TP53-E285V RRTVEENLRK | 47  | 13    |
| >TP53-E285V RRTEENLRK | 71    | >TP53-E285V RRTVEENLRK | 56  | 15    |
| >TP53-E285V RRTEENL   | 66    | >TP53-E285V RRTVEENL   | 37  | 29    |
| >TP53-E285V RRTEENLRK | 383   | >TP53-E285V RRTVEENLRK | 273 | 110   |
| >TP53-E285V RRTEENL   | 94    | >TP53-E285V RRTVEENL   | 59  | 35    |
| >TP53-E285V RRTEENLRK | 163   | >TP53-E285V RRTVEENLRK | 235 | 72    |
| >TP53-E285V RRTEENLRK | 634   | >TP53-E285V RRTVEENLRK | 313 | 321   |
| >TP53-E285V GRDRRTEEN | 446   | >TP53-E285V GRDRRTVEEN | 170 | 276   |
| >TP53-E285V CPGRDRRTE | 17298 | >TP53-E285V CPGRDRRTV  | 257 | 17041 |
| >TP53-E286A EEENLRKK  | 9014  | >TP53-E286A EAENLRKK   | 176 | 8838  |
| >TP53-E286A RTEENLRK  | 882   | >TP53-E286A RTEAENLRK  | 389 | 493   |
| >TP53-E286A RTEENLRKK | 1962  | >TP53-E286A RTEAENLRKK | 464 | 1498  |
| >TP53-E286A RTEENLRK  | 88    | >TP53-E286A RTEAENLRK  | 50  | 38    |
| >TP53-E286A RTEENLRKK | 674   | >TP53-E286A RTEAENLRKK | 308 | 366   |
| >TP53-E286A RTEENLRK  | 126   | >TP53-E286A RTEAENLRK  | 43  | 83    |
| >TP53-E286A RTEENLRKK | 174   | >TP53-E286A RTEAENLRKK | 68  | 106   |
| >TP53-E286A RTEENLR   | 242   | >TP53-E286A RTEAENLR   | 92  | 150   |
| >TP53-E286A RTEENLR   | 188   | >TP53-E286A RTEAENLR   | 154 | 34    |
| >TP53-E286A RTEENLR   | 456   | >TP53-E286A RTEAENLR   | 255 | 201   |
| >TP53-E286A RRTEENL   | 171   | >TP53-E286A RRTEAENL   | 64  | 107   |
| >TP53-E286A RRTEENLR  | 424   | >TP53-E286A RRTEAENLR  | 156 | 268   |



|                        |      |                        |     |      |
|------------------------|------|------------------------|-----|------|
| >TP53-E286A RRTEENLRK  | 34   | >TP53-E286A RRTEAENLRK | 29  | 5    |
| >TP53-E286A RRTEENLRK  | 71   | >TP53-E286A RRTEAENLRK | 43  | 28   |
| >TP53-E286A RRTEENL    | 66   | >TP53-E286A RRTEAENL   | 38  | 28   |
| >TP53-E286A RRTEENLRK  | 383  | >TP53-E286A RRTEAENLRK | 329 | 54   |
| >TP53-E286A RRTEENL    | 94   | >TP53-E286A RRTEAENL   | 80  | 14   |
| >TP53-E286A RRTEENLRK  | 163  | >TP53-E286A RRTEAENLRK | 148 | 15   |
| >TP53-E286A RRTEENLRK  | 634  | >TP53-E286A RRTEAENLRK | 274 | 360  |
| >TP53-E286A RDRRTEENL  | 955  | >TP53-E286A RDRRTEAENL | 393 | 562  |
| >TP53-E286A GRDRRTEEN  | 446  | >TP53-E286A GRDRRTEAEN | 294 | 152  |
| >TP53-E286C EENLRKKGEP | 7673 | >TP53-E286C DENLRKKGEF | 343 | 7330 |
| >TP53-E286C RTEENLRK   | 88   | >TP53-E286C RTEDENLRK  | 69  | 19   |
| >TP53-E286C RTEENLRKK  | 674  | >TP53-E286C RTEDENLRKK | 358 | 316  |
| >TP53-E286C RTEENLRK   | 126  | >TP53-E286C RTEDENLRK  | 97  | 29   |
| >TP53-E286C RTEENLRKK  | 174  | >TP53-E286C RTEDENLRKK | 141 | 33   |
| >TP53-E286C RTEENLR    | 242  | >TP53-E286C RTEDENLR   | 177 | 65   |
| >TP53-E286C RTEENLR    | 188  | >TP53-E286C RTEDENLR   | 210 | 22   |
| >TP53-E286C RTEENLR    | 456  | >TP53-E286C RTEDENLR   | 301 | 155  |
| >TP53-E286C RRTEENL    | 171  | >TP53-E286C RRTEDENL   | 145 | 26   |
| >TP53-E286C RRTEENLR   | 424  | >TP53-E286C RRTEDENLR  | 332 | 92   |
| >TP53-E286C RRTEENLRK  | 34   | >TP53-E286C RRTEDENLRK | 33  | 1    |
| >TP53-E286C RRTEENLRK  | 71   | >TP53-E286C RRTEDENLRK | 65  | 6    |
| >TP53-E286C RRTEENL    | 66   | >TP53-E286C RRTEDENL   | 35  | 31   |
| >TP53-E286C RRTEENLRK  | 383  | >TP53-E286C RRTEDENLRK | 360 | 23   |
| >TP53-E286C RRTEENL    | 94   | >TP53-E286C RRTEDENL   | 126 | 32   |
| >TP53-E286C RRTEENLRK  | 163  | >TP53-E286C RRTEDENLRK | 142 | 21   |
| >TP53-E286C RRTEENLRK  | 634  | >TP53-E286C RRTEDENLRK | 356 | 278  |
| >TP53-E286C GRDRRTEEN  | 446  | >TP53-E286C GRDRRTEDEN | 602 | 156  |
| >TP53-E286C RTEENLRK   | 88   | >TP53-E286C RTEGENLRK  | 93  | 5    |
| >TP53-E286C RTEENLRKK  | 674  | >TP53-E286C RTEGENLRKK | 400 | 274  |
| >TP53-E286C RTEENLRK   | 126  | >TP53-E286C RTEGENLRK  | 116 | 10   |
| >TP53-E286C RTEENLRKK  | 174  | >TP53-E286C RTEGENLRKK | 159 | 15   |
| >TP53-E286C RTEENLR    | 242  | >TP53-E286C RTEGENLR   | 187 | 55   |
| >TP53-E286C RTEENLR    | 188  | >TP53-E286C RTEGENLR   | 253 | 65   |
| >TP53-E286C RTEENLR    | 456  | >TP53-E286C RTEGENLR   | 337 | 119  |
| >TP53-E286C RRTEENL    | 171  | >TP53-E286C RRTEGENL   | 104 | 67   |
| >TP53-E286C RRTEENLR   | 424  | >TP53-E286C RRTEGENLR  | 306 | 118  |
| >TP53-E286C RRTEENLRK  | 34   | >TP53-E286C RRTEGENLRK | 35  | 1    |
| >TP53-E286C RRTEENLRK  | 71   | >TP53-E286C RRTEGENLRK | 61  | 10   |
| >TP53-E286C RRTEENL    | 66   | >TP53-E286C RRTEGENL   | 55  | 11   |
| >TP53-E286C RRTEENLRK  | 383  | >TP53-E286C RRTEGENLRK | 417 | 34   |
| >TP53-E286C RRTEENL    | 94   | >TP53-E286C RRTEGENL   | 217 | 123  |
| >TP53-E286C RRTEENLRK  | 163  | >TP53-E286C RRTEGENLRK | 168 | 5    |
| >TP53-E286C RRTEENLRK  | 634  | >TP53-E286C RRTEGENLRK | 224 | 410  |

|                         |       |                        |     |       |
|-------------------------|-------|------------------------|-----|-------|
| >TP53-E286C GRDRRTEEEEN | 446   | >TP53-E286C GRDRRTEGEI | 317 | 129   |
| >TP53-E286K RTEEEENLRK  | 88    | >TP53-E286K RTEKENLRK  | 99  | 11    |
| >TP53-E286K RTEEEENLRK  | 126   | >TP53-E286K RTEKENLRK  | 59  | 67    |
| >TP53-E286K RTEEEENLRKK | 174   | >TP53-E286K RTEKENLRKK | 90  | 84    |
| >TP53-E286K RTEEEENLR   | 242   | >TP53-E286K RTEKENLR   | 97  | 145   |
| >TP53-E286K RTEEEENLR   | 188   | >TP53-E286K RTEKENLR   | 238 | 50    |
| >TP53-E286K RTEEEENLR   | 456   | >TP53-E286K RTEKENLR   | 258 | 198   |
| >TP53-E286K RRTEEEENL   | 171   | >TP53-E286K RRTEKENL   | 108 | 63    |
| >TP53-E286K RRTEEEENLR  | 424   | >TP53-E286K RRTEKENLR  | 264 | 160   |
| >TP53-E286K RRTEEEENLRK | 34    | >TP53-E286K RRTEKENLRK | 31  | 3     |
| >TP53-E286K RRTEEEENLRK | 71    | >TP53-E286K RRTEKENLRK | 54  | 17    |
| >TP53-E286K RRTEEEENL   | 66    | >TP53-E286K RRTEKENL   | 23  | 43    |
| >TP53-E286K RRTEEEENLRK | 383   | >TP53-E286K RRTEKENLRK | 254 | 129   |
| >TP53-E286K RRTEEEENL   | 94    | >TP53-E286K RRTEKENL   | 68  | 26    |
| >TP53-E286K RRTEEEENLRK | 163   | >TP53-E286K RRTEKENLRK | 130 | 33    |
| >TP53-E286K RRTEEEENLRK | 634   | >TP53-E286K RRTEKENLRK | 393 | 241   |
| >TP53-E286K GRDRRTEEEEN | 446   | >TP53-E286K GRDRRTEKEN | 321 | 125   |
| >TP53-E286K PGRDRRTEE   | 16214 | >TP53-E286K PGRDRRTEK  | 244 | 15970 |
| >TP53-E286C RTEEEENLRK  | 88    | >TP53-E286C RTEQENLRK  | 143 | 55    |
| >TP53-E286C RTEEEENLRK  | 126   | >TP53-E286C RTEQENLRK  | 248 | 122   |
| >TP53-E286C RTEEEENLRKK | 174   | >TP53-E286C RTEQENLRKK | 301 | 127   |
| >TP53-E286C RTEEEENLR   | 242   | >TP53-E286C RTEQENLR   | 279 | 37    |
| >TP53-E286C RTEEEENLR   | 188   | >TP53-E286C RTEQENLR   | 228 | 40    |
| >TP53-E286C RTEEEENLR   | 456   | >TP53-E286C RTEQENLR   | 218 | 238   |
| >TP53-E286C RRTEEEENL   | 171   | >TP53-E286C RRTEQENL   | 76  | 95    |
| >TP53-E286C RRTEEEENLR  | 424   | >TP53-E286C RRTEQENLR  | 194 | 230   |
| >TP53-E286C RRTEEEENLRK | 34    | >TP53-E286C RRTEQENLRK | 26  | 8     |
| >TP53-E286C RRTEEEENLRK | 71    | >TP53-E286C RRTEQENLRK | 49  | 22    |
| >TP53-E286C RRTEEEENL   | 66    | >TP53-E286C RRTEQENL   | 36  | 30    |
| >TP53-E286C RRTEEEENLRK | 383   | >TP53-E286C RRTEQENLRK | 264 | 119   |
| >TP53-E286C RRTEEEENL   | 94    | >TP53-E286C RRTEQENL   | 55  | 39    |
| >TP53-E286C RRTEEEENLRK | 163   | >TP53-E286C RRTEQENLRK | 110 | 53    |
| >TP53-E286C RRTEEEENLRK | 634   | >TP53-E286C RRTEQENLRK | 409 | 225   |
| >TP53-E286C GRDRRTEEEEN | 446   | >TP53-E286C GRDRRTEQEI | 342 | 104   |
| >TP53-E286V EEENLRKK    | 9014  | >TP53-E286V EVENLRKK   | 81  | 8933  |
| >TP53-E286V RTEEEENLRK  | 88    | >TP53-E286V RTEVENLRK  | 83  | 5     |
| >TP53-E286V RTEEEENLRK  | 126   | >TP53-E286V RTEVENLRK  | 68  | 58    |
| >TP53-E286V RTEEEENLRKK | 174   | >TP53-E286V RTEVENLRKK | 101 | 73    |
| >TP53-E286V RTEEEENLR   | 242   | >TP53-E286V RTEVENLR   | 74  | 168   |
| >TP53-E286V RTEEEENLR   | 188   | >TP53-E286V RTEVENLR   | 162 | 26    |
| >TP53-E286V RTEEEENLR   | 456   | >TP53-E286V RTEVENLR   | 718 | 262   |
| >TP53-E286V RRTEEEENL   | 171   | >TP53-E286V RRTEVENL   | 66  | 105   |
| >TP53-E286V RRTEEEENLR  | 424   | >TP53-E286V RRTEVENLR  | 173 | 251   |

|                         |      |                        |     |      |
|-------------------------|------|------------------------|-----|------|
| >TP53-E286V RRTEEEENLRK | 34   | >TP53-E286V RRTEVENLRK | 27  | 7    |
| >TP53-E286V RRTEEEENLRK | 71   | >TP53-E286V RRTEVENLRK | 45  | 26   |
| >TP53-E286V RRTEEEENL   | 66   | >TP53-E286V RRTEVENL   | 26  | 40   |
| >TP53-E286V RRTEEEENLR  | 1692 | >TP53-E286V RRTEVENLR  | 283 | 1409 |
| >TP53-E286V RRTEEEENLRK | 383  | >TP53-E286V RRTEVENLRK | 350 | 33   |
| >TP53-E286V RRTEEEENLRK | 1381 | >TP53-E286V RRTEVENLRK | 429 | 952  |
| >TP53-E286V RRTEEEENL   | 94   | >TP53-E286V RRTEVENL   | 82  | 12   |
| >TP53-E286V RRTEEEENLRK | 163  | >TP53-E286V RRTEVENLRK | 167 | 4    |
| >TP53-E286V RRTEEEENLRK | 634  | >TP53-E286V RRTEVENLRK | 199 | 435  |
| >TP53-E286V RDRRTEEEENL | 955  | >TP53-E286V RDRRTEVENL | 420 | 535  |
| >TP53-E286V GRDRRTEEEEN | 446  | >TP53-E286V GRDRRTEVEN | 216 | 230  |
| >TP53-E286V CPGRDRRTEEE | 8861 | >TP53-E286V CPGRDRRTEV | 258 | 8603 |
| >TP53-E287A RTEEEENLRK  | 882  | >TP53-E287A RTEEANLRK  | 317 | 565  |
| >TP53-E287A RTEEEENLRKK | 1962 | >TP53-E287A RTEEANLRKK | 454 | 1508 |
| >TP53-E287A RTEEEENLRK  | 88   | >TP53-E287A RTEEANLRK  | 59  | 29   |
| >TP53-E287A RTEEEENLRKK | 674  | >TP53-E287A RTEEANLRKK | 228 | 446  |
| >TP53-E287A RTEEEENLRK  | 126  | >TP53-E287A RTEEANLRK  | 15  | 111  |
| >TP53-E287A RTEEEENLRKK | 174  | >TP53-E287A RTEEANLRKK | 31  | 143  |
| >TP53-E287A RTEEEENLR   | 242  | >TP53-E287A RTEEANLR   | 116 | 126  |
| >TP53-E287A RTEEEENLR   | 188  | >TP53-E287A RTEEANLR   | 91  | 97   |
| >TP53-E287A RTEEEENLR   | 456  | >TP53-E287A RTEEANLR   | 439 | 17   |
| >TP53-E287A RRTEEEENL   | 171  | >TP53-E287A RRTEEANL   | 91  | 80   |
| >TP53-E287A RRTEEEENLR  | 424  | >TP53-E287A RRTEEANLR  | 139 | 285  |
| >TP53-E287A RRTEEEENLRK | 34   | >TP53-E287A RRTEEANLRK | 30  | 4    |
| >TP53-E287A RRTEEEENLRK | 71   | >TP53-E287A RRTEEANLRK | 45  | 26   |
| >TP53-E287A RRTEEEENL   | 66   | >TP53-E287A RRTEEANL   | 30  | 36   |
| >TP53-E287A RRTEEEENLRK | 383  | >TP53-E287A RRTEEANLRK | 197 | 186  |
| >TP53-E287A RRTEEEENL   | 94   | >TP53-E287A RRTEEANL   | 55  | 39   |
| >TP53-E287A RRTEEEENLRK | 163  | >TP53-E287A RRTEEANLRK | 93  | 70   |
| >TP53-E287A RRTEEEENLRK | 634  | >TP53-E287A RRTEEANLRK | 359 | 275  |
| >TP53-E287A RRTEEEENLR  | 993  | >TP53-E287A RRTEEANLR  | 400 | 593  |
| >TP53-E287A GRDRRTEEEEN | 446  | >TP53-E287A GRDRRTEEAN | 249 | 197  |
| >TP53-E287C RTEEEENLRK  | 88   | >TP53-E287C RTEEDNLRK  | 117 | 29   |
| >TP53-E287C RTEEEENLRKK | 674  | >TP53-E287C RTEEDNLRKK | 448 | 226  |
| >TP53-E287C RTEEEENLRK  | 126  | >TP53-E287C RTEEDNLRK  | 238 | 112  |
| >TP53-E287C RTEEEENLRKK | 174  | >TP53-E287C RTEEDNLRKK | 262 | 88   |
| >TP53-E287C RTEEEENLR   | 242  | >TP53-E287C RTEEDNLR   | 189 | 53   |
| >TP53-E287C RTEEEENLR   | 188  | >TP53-E287C RTEEDNLR   | 181 | 7    |
| >TP53-E287C RTEEEENLR   | 456  | >TP53-E287C RTEEDNLR   | 558 | 102  |
| >TP53-E287C RRTEEEENL   | 171  | >TP53-E287C RRTEEDNL   | 236 | 65   |
| >TP53-E287C RRTEEEENLR  | 424  | >TP53-E287C RRTEEDNLR  | 421 | 3    |
| >TP53-E287C RRTEEEENLRK | 34   | >TP53-E287C RRTEEDNLRK | 39  | 5    |
| >TP53-E287C RRTEEEENLRK | 71   | >TP53-E287C RRTEEDNLRK | 73  | 2    |

|                       |       |                        |      |       |
|-----------------------|-------|------------------------|------|-------|
| >TP53-E287C RRTEENL   | 66    | >TP53-E287C RRTEEDNL   | 105  | 39    |
| >TP53-E287C RRTEENLRK | 383   | >TP53-E287C RRTEEDNLRK | 317  | 66    |
| >TP53-E287C RRTEENL   | 94    | >TP53-E287C RRTEEDNL   | 205  | 111   |
| >TP53-E287C RRTEENLRK | 163   | >TP53-E287C RRTEEDNLRK | 195  | 32    |
| >TP53-E287C RRTEENLR  | 993   | >TP53-E287C RRTEEDNLR  | 445  | 548   |
| >TP53-E287C GRDRRTEEN | 446   | >TP53-E287C GRDRRTEEDN | 412  | 34    |
| >TP53-E287C RTEENLRK  | 882   | >TP53-E287C RTEEGNLRK  | 267  | 615   |
| >TP53-E287C RTEENLRK  | 88    | >TP53-E287C RTEEGNLRK  | 79   | 9     |
| >TP53-E287C RTEENLRKK | 674   | >TP53-E287C RTEEGNLRKK | 346  | 328   |
| >TP53-E287C RTEENLRK  | 126   | >TP53-E287C RTEEGNLRK  | 37   | 89    |
| >TP53-E287C RTEENLRKK | 174   | >TP53-E287C RTEEGNLRKK | 74   | 100   |
| >TP53-E287C RTEENLR   | 242   | >TP53-E287C RTEEGNLR   | 91   | 151   |
| >TP53-E287C RTEENLR   | 188   | >TP53-E287C RTEEGNLR   | 239  | 51    |
| >TP53-E287C RTEENLR   | 456   | >TP53-E287C RTEEGNLR   | 1038 | 582   |
| >TP53-E287C RRTEENL   | 171   | >TP53-E287C RRTEEGNL   | 112  | 59    |
| >TP53-E287C RRTEENLR  | 424   | >TP53-E287C RRTEEGNLR  | 188  | 236   |
| >TP53-E287C RRTEENLRK | 34    | >TP53-E287C RRTEEGNLRK | 25   | 9     |
| >TP53-E287C RRTEENLRK | 71    | >TP53-E287C RRTEEGNLRK | 47   | 24    |
| >TP53-E287C RRTEENL   | 66    | >TP53-E287C RRTEEGNL   | 137  | 71    |
| >TP53-E287C RRTEENLRK | 383   | >TP53-E287C RRTEEGNLRK | 149  | 234   |
| >TP53-E287C RRTEENL   | 94    | >TP53-E287C RRTEEGNL   | 118  | 24    |
| >TP53-E287C RRTEENLRK | 163   | >TP53-E287C RRTEEGNLRK | 85   | 78    |
| >TP53-E287C RRTEENLRK | 634   | >TP53-E287C RRTEEGNLRK | 488  | 146   |
| >TP53-E287C GRDRRTEEN | 446   | >TP53-E287C GRDRRTEEGN | 298  | 148   |
| >TP53-E287K RTEENLRK  | 882   | >TP53-E287K RTEEKNLRK  | 316  | 566   |
| >TP53-E287K RTEENLRK  | 88    | >TP53-E287K RTEEKNLRK  | 90   | 2     |
| >TP53-E287K RTEENLRK  | 126   | >TP53-E287K RTEEKNLRK  | 37   | 89    |
| >TP53-E287K RTEENLRKK | 174   | >TP53-E287K RTEEKNLRKK | 67   | 107   |
| >TP53-E287K RTEENLR   | 242   | >TP53-E287K RTEEKNLR   | 40   | 202   |
| >TP53-E287K RTEENLR   | 188   | >TP53-E287K RTEEKNLR   | 263  | 75    |
| >TP53-E287K RTEENLR   | 456   | >TP53-E287K RTEEKNLR   | 421  | 35    |
| >TP53-E287K RRTEENL   | 171   | >TP53-E287K RRTEEKNL   | 131  | 40    |
| >TP53-E287K RRTEENLR  | 424   | >TP53-E287K RRTEEKNLR  | 281  | 143   |
| >TP53-E287K RRTEENLRK | 34    | >TP53-E287K RRTEEKNLRK | 31   | 3     |
| >TP53-E287K RRTEENLRK | 71    | >TP53-E287K RRTEEKNLRK | 58   | 13    |
| >TP53-E287K RRTEENL   | 66    | >TP53-E287K RRTEEKNL   | 58   | 8     |
| >TP53-E287K RRTEENLRK | 383   | >TP53-E287K RRTEEKNLRK | 281  | 102   |
| >TP53-E287K RRTEENL   | 94    | >TP53-E287K RRTEEKNL   | 80   | 14    |
| >TP53-E287K RRTEENLRK | 163   | >TP53-E287K RRTEEKNLRK | 120  | 43    |
| >TP53-E287K RRTEENLRK | 634   | >TP53-E287K RRTEEKNLRK | 401  | 233   |
| >TP53-E287K RRTEENLR  | 993   | >TP53-E287K RRTEEKNLR  | 453  | 540   |
| >TP53-E287K RDRRTEEE  | 10956 | >TP53-E287K RDRRTEEK   | 144  | 10812 |
| >TP53-E287K GRDRRTEEN | 446   | >TP53-E287K GRDRRTEEK  | 377  | 69    |

|                         |       |                         |     |       |
|-------------------------|-------|-------------------------|-----|-------|
| >TP53-E287V RTEEENLRK   | 882   | >TP53-E287V RTEEENLRK   | 155 | 727   |
| >TP53-E287V RTEEENLRK   | 88    | >TP53-E287V RTEEENLRK   | 34  | 54    |
| >TP53-E287V RTEEENLRKK  | 674   | >TP53-E287V RTEEENLRKK  | 337 | 337   |
| >TP53-E287V RTEEENLRK   | 126   | >TP53-E287V RTEEENLRK   | 44  | 82    |
| >TP53-E287V RTEEENLRKK  | 174   | >TP53-E287V RTEEENLRKK  | 77  | 97    |
| >TP53-E287V RTEEENLR    | 242   | >TP53-E287V RTEEENLR    | 47  | 195   |
| >TP53-E287V RTEEENLR    | 188   | >TP53-E287V RTEEENLR    | 51  | 137   |
| >TP53-E287V RTEEENLR    | 456   | >TP53-E287V RTEEENLR    | 523 | 67    |
| >TP53-E287V RRTEEENL    | 791   | >TP53-E287V RRTEEENL    | 297 | 494   |
| >TP53-E287V RRTEEENL    | 171   | >TP53-E287V RRTEEENL    | 75  | 96    |
| >TP53-E287V RRTEEENLR   | 424   | >TP53-E287V RRTEEENLR   | 112 | 312   |
| >TP53-E287V RRTEEENLRK  | 34    | >TP53-E287V RRTEEENLRK  | 21  | 13    |
| >TP53-E287V RRTEEENLRK  | 71    | >TP53-E287V RRTEEENLRK  | 40  | 31    |
| >TP53-E287V RRTEEENL    | 66    | >TP53-E287V RRTEEENL    | 28  | 38    |
| >TP53-E287V RRTEEENLRK  | 383   | >TP53-E287V RRTEEENLRK  | 133 | 250   |
| >TP53-E287V RRTEEENL    | 94    | >TP53-E287V RRTEEENL    | 46  | 48    |
| >TP53-E287V RRTEEENLRK  | 163   | >TP53-E287V RRTEEENLRK  | 66  | 97    |
| >TP53-E287V RRTEEENLRK  | 634   | >TP53-E287V RRTEEENLRK  | 256 | 378   |
| >TP53-E287V RRTEEENLR   | 993   | >TP53-E287V RRTEEENLR   | 392 | 601   |
| >TP53-E287V RDRRTEEE    | 24530 | >TP53-E287V RDRRTEEE    | 206 | 24324 |
| >TP53-E287V GRDRRTEEE   | 446   | >TP53-E287V GRDRRTEEE   | 204 | 242   |
| >TP53-E294C KKGEPHHEL   | 167   | >TP53-E294C KKGDPHHEL   | 230 | 63    |
| >TP53-E294C RKKGEPHHEL  | 62    | >TP53-E294C RKKGDPHHEI  | 67  | 5     |
| >TP53-E294C LRKKGEPHHE  | 405   | >TP53-E294C LRKKGDPHHEI | 497 | 92    |
| >TP53-E294C LRKKGEPHHE  | 321   | >TP53-E294C LRKKGDPHHEI | 402 | 81    |
| >TP53-E294C KKGEPHHEL   | 167   | >TP53-E294C KKGGPHHEL   | 439 | 272   |
| >TP53-E294C RKKGEPHHEL  | 62    | >TP53-E294C RKKGGPHHEI  | 73  | 11    |
| >TP53-E294C LRKKGEPHHE  | 405   | >TP53-E294C LRKKGGPHHEI | 288 | 117   |
| >TP53-E294C LRKKGEPHHE  | 321   | >TP53-E294C LRKKGGPHHEI | 256 | 65    |
| >TP53-E294K KKGEPHHEL   | 10824 | >TP53-E294K KGKPHHEL    | 158 | 10666 |
| >TP53-E294K KKGEPHHELPP | 9619  | >TP53-E294K KGKPHHELPP  | 176 | 9443  |
| >TP53-E294K KKGEPHHEL   | 167   | >TP53-E294K KKGKPHHEL   | 107 | 60    |
| >TP53-E294K RKKGEPHHEL  | 62    | >TP53-E294K RKKGKPHHEL  | 109 | 47    |
| >TP53-E294K RKKGEPHHEL  | 682   | >TP53-E294K RKKGKPHHEL  | 444 | 238   |
| >TP53-E294K LRKKGEPHHE  | 405   | >TP53-E294K LRKKGKPHHE  | 442 | 37    |
| >TP53-E294K LRKKGEPHHE  | 824   | >TP53-E294K LRKKGKPHHE  | 487 | 337   |
| >TP53-E294K LRKKGEPHHE  | 321   | >TP53-E294K LRKKGKPHHE  | 167 | 154   |
| >TP53-E294C KKGEPHHEL   | 167   | >TP53-E294C KKGQPHHEL   | 172 | 5     |
| >TP53-E294C RKKGEPHHEL  | 62    | >TP53-E294C RKKGQPHHEI  | 66  | 4     |
| >TP53-E294C RKKGEPHHEL  | 740   | >TP53-E294C RKKGQPHHEI  | 429 | 311   |
| >TP53-E294C RKKGEPHHEL  | 682   | >TP53-E294C RKKGQPHHEI  | 454 | 228   |
| >TP53-E294C LRKKGEPHHE  | 405   | >TP53-E294C LRKKGQPHHEI | 338 | 67    |
| >TP53-E294C LRKKGEPHHE  | 321   | >TP53-E294C LRKKGQPHHEI | 165 | 156   |

|                        |       |                         |       |       |
|------------------------|-------|-------------------------|-------|-------|
| >TP53-E294V EPHHELPPGS | 3407  | >TP53-E294V VPHHELPPGS  | 407   | 3000  |
| >TP53-E294V TEEENLRKKG | 7926  | >TP53-E294V TEEENLRKKG  | 20    | 7906  |
| >TP53-E294V TEEENLRKKG | 16053 | >TP53-E294V TEEENLRKKG  | 459   | 15594 |
| >TP53-E294V KGEPPHEL   | 3378  | >TP53-E294V KGVPPHEL    | 269   | 3109  |
| >TP53-E294V KKGEPHHEL  | 167   | >TP53-E294V KKGVPHHEL   | 154   | 13    |
| >TP53-E294V RKKGEPHHEL | 62    | >TP53-E294V RKKGVPHHEI  | 83    | 21    |
| >TP53-E294V LRKKGEPHHE | 405   | >TP53-E294V LRKKGVPHHE  | 255   | 150   |
| >TP53-E294V LRKKGEPHHE | 824   | >TP53-E294V LRKKGVPHHE  | 436   | 388   |
| >TP53-E294V LRKKGEPHHE | 321   | >TP53-E294V LRKKGVPHHE  | 110   | 211   |
| >TP53-E294V EENLRKKGE  | 3749  | >TP53-E294V EENLRKKGV   | 11    | 3738  |
| >TP53-E294V EEENLRKKGE | 7987  | >TP53-E294V EEENLRKKGV  | 26    | 7961  |
| >TP53-E298A ELPPGSTKRA | 2891  | >TP53-E298A ALPPGSTKRA  | 303   | 2588  |
| >TP53-E298A ELPPGSTKRA | 3455  | >TP53-E298A ALPPGSTKRA  | 160   | 3295  |
| >TP53-E298A ELPPGSTKRA | 3168  | >TP53-E298A ALPPGSTKRA  | 276   | 2892  |
| >TP53-E298A ELPPGSTKRA | 893   | >TP53-E298A ALPPGSTKRA  | 64    | 829   |
| >TP53-E298A ELPPGSTKRA | 3906  | >TP53-E298A ALPPGSTKRA  | 415   | 3491  |
| >TP53-E298A ELPPGSTKRA | 2349  | >TP53-E298A ALPPGSTKRA  | 330   | 2019  |
| >TP53-E298A ELPPGSTK   | 5840  | >TP53-E298A ALPPGSTK    | 320   | 5520  |
| >TP53-E298A ELPPGSTKRA | 98    | >TP53-E298A ALPPGSTKRA  | 8     | 90    |
| >TP53-E298A ELPPGSTKRA | 151   | >TP53-E298A ALPPGSTKRA  | 11    | 140   |
| >TP53-E298A ELPPGSTK   | 3265  | >TP53-E298A ALPPGSTK    | 184   | 3081  |
| >TP53-E298A ELPPGSTKR  | 321   | >TP53-E298A ALPPGSTKR   | 6543  | 6222  |
| >TP53-E298A ELPPGSTKRA | 3586  | >TP53-E298A ALPPGSTKRA  | 442   | 3144  |
| >TP53-E298A HELPPGSTK  | 9779  | >TP53-E298A HALPPGSTK   | 407   | 9372  |
| >TP53-E298A HELPPGSTK  | 15559 | >TP53-E298A HALPPGSTK   | 418   | 15141 |
| >TP53-E298A HELPPGSTK  | 7610  | >TP53-E298A HALPPGSTK   | 55    | 7555  |
| >TP53-E298A HELPPGSTKR | 6359  | >TP53-E298A HALPPGSTKR  | 39    | 6320  |
| >TP53-E298A HELPPGSTKR | 250   | >TP53-E298A HALPPGSTKR  | 34386 | 34136 |
| >TP53-E298A HELPPGSTKR | 437   | >TP53-E298A HALPPGSTKR  | 500   | 63    |
| >TP53-E298A NLRKKGEPHF | 3536  | >TP53-E298A NLRKKGEPHF  | 405   | 3131  |
| >TP53-E298A HHELPPGSTK | 1147  | >TP53-E298A HHALPPGSTK  | 309   | 838   |
| >TP53-E298A EPHHELPPG  | 2969  | >TP53-E298A EPHHALPPG   | 385   | 2584  |
| >TP53-E298A KKGEPHHEL  | 167   | >TP53-E298A KKGEPHHAL   | 66    | 101   |
| >TP53-E298A RKKGEPHHEL | 62    | >TP53-E298A RKKGEPHHAI  | 32    | 30    |
| >TP53-E298A RKKGEPHHEL | 682   | >TP53-E298A RKKGEPHHAI  | 403   | 279   |
| >TP53-E298A LRKKGEPHHE | 405   | >TP53-E298A LRKKGEPHHAI | 218   | 187   |
| >TP53-E298A LRKKGEPHHE | 321   | >TP53-E298A LRKKGEPHHAI | 349   | 28    |
| >TP53-E298K ELPPGSTKRA | 2891  | >TP53-E298K KLPPGSTKRA  | 321   | 2570  |
| >TP53-E298K ELPPGSTKRA | 3455  | >TP53-E298K KLPPGSTKRA  | 171   | 3284  |
| >TP53-E298K ELPPGSTKRA | 3168  | >TP53-E298K KLPPGSTKRA  | 219   | 2949  |
| >TP53-E298K ELPPGSTKRA | 893   | >TP53-E298K KLPPGSTKRA  | 55    | 838   |
| >TP53-E298K ELPPGSTKRA | 5689  | >TP53-E298K KLPPGSTKRA  | 305   | 5384  |
| >TP53-E298K ELPPGSTKRA | 3906  | >TP53-E298K KLPPGSTKRA  | 317   | 3589  |

|                        |       |                        |       |       |
|------------------------|-------|------------------------|-------|-------|
| >TP53-E298K ELPPGSTKRA | 2349  | >TP53-E298K KLPPGSTKRA | 251   | 2098  |
| >TP53-E298K ELPPGSTKRA | 98    | >TP53-E298K KLPPGSTKRA | 19    | 79    |
| >TP53-E298K ELPPGSTKRA | 151   | >TP53-E298K KLPPGSTKRA | 29    | 122   |
| >TP53-E298K ELPPGSTK   | 3265  | >TP53-E298K KLPPGSTK   | 64    | 3201  |
| >TP53-E298K ELPPGSTKR  | 12972 | >TP53-E298K KLPPGSTKR  | 359   | 12613 |
| >TP53-E298K ELPPGSTKR  | 9393  | >TP53-E298K KLPPGSTKR  | 157   | 9236  |
| >TP53-E298K ELPPGSTKRA | 12960 | >TP53-E298K KLPPGSTKRA | 417   | 12543 |
| >TP53-E298K ELPPGSTKR  | 321   | >TP53-E298K KLPPGSTKR  | 8571  | 8250  |
| >TP53-E298K ELPPGSTKRA | 3586  | >TP53-E298K KLPPGSTKRA | 411   | 3175  |
| >TP53-E298K ELPPGSTKR  | 1696  | >TP53-E298K KLPPGSTKR  | 115   | 1581  |
| >TP53-E298K HELPPGSTK  | 2156  | >TP53-E298K HKLPPGSTK  | 61    | 2095  |
| >TP53-E298K HELPPGSTKR | 6383  | >TP53-E298K HKLPPGSTKR | 171   | 6212  |
| >TP53-E298K HELPPGSTKR | 250   | >TP53-E298K HKLPPGSTKR | 30269 | 30019 |
| >TP53-E298K HELPPGSTKR | 437   | >TP53-E298K HKLPPGSTKR | 632   | 195   |
| >TP53-E298K NLRKKGEPHF | 14188 | >TP53-E298K NLRKKGEPHF | 267   | 13921 |
| >TP53-E298K KKGEPHHEL  | 167   | >TP53-E298K KKGEPHHL   | 361   | 194   |
| >TP53-E298K RKKGEPHHE  | 12462 | >TP53-E298K RKKGEPHHL  | 57    | 12405 |
| >TP53-E298K RKKGEPHHEL | 62    | >TP53-E298K RKKGEPHHL  | 112   | 50    |
| >TP53-E298K RKKGEPHHEL | 740   | >TP53-E298K RKKGEPHHL  | 368   | 372   |
| >TP53-E298K LRKKGEPHHE | 405   | >TP53-E298K LRKKGEPHHL | 725   | 320   |
| >TP53-E298K LRKKGEPHHE | 321   | >TP53-E298K LRKKGEPHHL | 514   | 193   |
| >TP53-E298C ELPPGSTKRA | 98    | >TP53-E298C QLPPGSTKRA | 45    | 53    |
| >TP53-E298C ELPPGSTKRA | 151   | >TP53-E298C QLPPGSTKRA | 77    | 74    |
| >TP53-E298C ELPPGSTKR  | 321   | >TP53-E298C QLPPGSTKR  | 2371  | 2050  |
| >TP53-E298C HELPPGSTK  | 9779  | >TP53-E298C HQLPPGSTK  | 298   | 9481  |
| >TP53-E298C HELPPGSTK  | 7610  | >TP53-E298C HQLPPGSTK  | 310   | 7300  |
| >TP53-E298C HELPPGSTK  | 2156  | >TP53-E298C HQLPPGSTK  | 54    | 2102  |
| >TP53-E298C HELPPGSTKR | 6383  | >TP53-E298C HQLPPGSTKR | 184   | 6199  |
| >TP53-E298C HELPPGSTKR | 250   | >TP53-E298C HQLPPGSTKR | 17309 | 17059 |
| >TP53-E298C HELPPGSTKR | 437   | >TP53-E298C HQLPPGSTKR | 177   | 260   |
| >TP53-E298C KKGEPHHEL  | 167   | >TP53-E298C KKGEPHHQL  | 304   | 137   |
| >TP53-E298C RKKGEPHHEL | 62    | >TP53-E298C RKKGEPHHQL | 102   | 40    |
| >TP53-E298C LRKKGEPHHE | 405   | >TP53-E298C LRKKGEPHHC | 681   | 276   |
| >TP53-E298C LRKKGEPHHE | 321   | >TP53-E298C LRKKGEPHHC | 561   | 240   |
| >TP53-E298V ELPPGSTKRA | 3455  | >TP53-E298V VLPPGSTKRA | 220   | 3235  |
| >TP53-E298V ELPPGSTKRA | 3168  | >TP53-E298V VLPPGSTKRA | 197   | 2971  |
| >TP53-E298V ELPPGSTKRA | 893   | >TP53-E298V VLPPGSTKRA | 46    | 847   |
| >TP53-E298V ELPPGSTKRA | 3906  | >TP53-E298V VLPPGSTKRA | 474   | 3432  |
| >TP53-E298V ELPPGSTKRA | 2349  | >TP53-E298V VLPPGSTKRA | 388   | 1961  |
| >TP53-E298V ELPPGSTK   | 5840  | >TP53-E298V VLPPGSTK   | 410   | 5430  |
| >TP53-E298V ELPPGSTKRA | 98    | >TP53-E298V VLPPGSTKRA | 10    | 88    |
| >TP53-E298V ELPPGSTKRA | 151   | >TP53-E298V VLPPGSTKRA | 14    | 137   |
| >TP53-E298V ELPPGSTK   | 3265  | >TP53-E298V VLPPGSTK   | 176   | 3089  |

|                        |       |                        |       |       |
|------------------------|-------|------------------------|-------|-------|
| >TP53-E298V ELPPGSTKR  | 321   | >TP53-E298V VLPPGSTKR  | 3945  | 3624  |
| >TP53-E298V ELPPGSTKRA | 3586  | >TP53-E298V VLPPGSTKRA | 166   | 3420  |
| >TP53-E298V HELPPGSTK  | 9779  | >TP53-E298V HVLPPGSTK  | 87    | 9692  |
| >TP53-E298V HELPPGSTK  | 15559 | >TP53-E298V HVLPPGSTK  | 74    | 15485 |
| >TP53-E298V HELPPGSTK  | 7610  | >TP53-E298V HVLPPGSTK  | 19    | 7591  |
| >TP53-E298V HELPPGSTKR | 4555  | >TP53-E298V HVLPPGSTKR | 367   | 4188  |
| >TP53-E298V HELPPGSTKR | 6359  | >TP53-E298V HVLPPGSTKR | 27    | 6332  |
| >TP53-E298V HELPPGSTKR | 250   | >TP53-E298V HVLPPGSTKR | 38658 | 38408 |
| >TP53-E298V HELPPGSTKR | 437   | >TP53-E298V HVLPPGSTKR | 274   | 163   |
| >TP53-E298V NLRKKGEPHF | 22297 | >TP53-E298V NLRKKGEPHF | 63    | 22234 |
| >TP53-E298V NLRKKGEPHF | 28413 | >TP53-E298V NLRKKGEPHF | 120   | 28293 |
| >TP53-E298V NLRKKGEPHF | 25688 | >TP53-E298V NLRKKGEPHF | 162   | 25526 |
| >TP53-E298V NLRKKGEPHF | 24801 | >TP53-E298V NLRKKGEPHF | 269   | 24532 |
| >TP53-E298V NLRKKGEPHF | 23900 | >TP53-E298V NLRKKGEPHF | 17    | 23883 |
| >TP53-E298V NLRKKGEPHF | 3536  | >TP53-E298V NLRKKGEPHF | 219   | 3317  |
| >TP53-E298V EPHHELPPG  | 2969  | >TP53-E298V EPHHVLPPG  | 363   | 2606  |
| >TP53-E298V KKGEPHHEL  | 167   | >TP53-E298V KKGEPHHVL  | 96    | 71    |
| >TP53-E298V RKKGEPHHE  | 11492 | >TP53-E298V RKKGEPHHV  | 249   | 11243 |
| >TP53-E298V RKKGEPHHEL | 62    | >TP53-E298V RKKGEPHHVI | 43    | 19    |
| >TP53-E298V RKKGEPHHEL | 740   | >TP53-E298V RKKGEPHHVI | 453   | 287   |
| >TP53-E298V RKKGEPHHEL | 682   | >TP53-E298V RKKGEPHHVI | 352   | 330   |
| >TP53-E298V LRKKGEPHHE | 405   | >TP53-E298V LRKKGEPHHV | 320   | 85    |
| >TP53-E298V LRKKGEPHHE | 321   | >TP53-E298V LRKKGEPHHV | 391   | 70    |
| >TP53-E339K EMFRELNEA  | 3933  | >TP53-E339K KMFRELNEA  | 26    | 3907  |
| >TP53-E339K EMFRELNEAL | 806   | >TP53-E339K KMFRELNEAL | 63    | 743   |
| >TP53-E339K EMFRELNEA  | 133   | >TP53-E339K KMFRELNEA  | 9     | 124   |
| >TP53-E339K EMFRELNEAL | 89    | >TP53-E339K KMFRELNEAL | 18    | 71    |
| >TP53-E339K EMFRELNEA  | 401   | >TP53-E339K KMFRELNEA  | 12    | 389   |
| >TP53-E339K EMFRELNEAL | 360   | >TP53-E339K KMFRELNEAL | 68    | 292   |
| >TP53-E339K EMFRELNEA  | 878   | >TP53-E339K KMFRELNEA  | 24    | 854   |
| >TP53-E339K EMFRELNEAL | 1298  | >TP53-E339K KMFRELNEAL | 180   | 1118  |
| >TP53-E339K EMFRELNEA  | 161   | >TP53-E339K KMFRELNEA  | 11    | 150   |
| >TP53-E339K EMFRELNEAL | 24    | >TP53-E339K KMFRELNEAL | 4     | 20    |
| >TP53-E339K EMFRELNEA  | 809   | >TP53-E339K KMFRELNEA  | 29    | 780   |
| >TP53-E339K EMFRELNEAL | 169   | >TP53-E339K KMFRELNEAL | 8     | 161   |
| >TP53-E339K EMFRELNEA  | 812   | >TP53-E339K KMFRELNEA  | 41    | 771   |
| >TP53-E339K EMFRELNEAL | 431   | >TP53-E339K KMFRELNEAL | 27    | 404   |
| >TP53-E339K EMFRELNEAL | 431   | >TP53-E339K KMFRELNEAL | 209   | 222   |
| >TP53-E339K EMFRELNEA  | 119   | >TP53-E339K KMFRELNEA  | 25    | 94    |
| >TP53-E339K EMFRELNEAL | 72    | >TP53-E339K KMFRELNEAL | 16    | 56    |
| >TP53-E339K EMFRELNEA  | 16602 | >TP53-E339K KMFRELNEA  | 288   | 16314 |
| >TP53-E339K EMFRELNEAL | 272   | >TP53-E339K KMFRELNEAL | 13    | 259   |
| >TP53-E339K EMFRELNEAL | 291   | >TP53-E339K KMFRELNEAL | 11285 | 10994 |



|                         |       |                         |       |       |
|-------------------------|-------|-------------------------|-------|-------|
| >TP53-E339K EMFRELNEAL  | 1014  | >TP53-E339K KMFRELNEAL  | 194   | 820   |
| >TP53-E339K EMFRELNEA   | 2504  | >TP53-E339K KMFRELNEA   | 128   | 2376  |
| >TP53-E339K EMFRELNEAL  | 98    | >TP53-E339K KMFRELNEAL  | 11    | 87    |
| >TP53-E339K EMFRELNEAL  | 495   | >TP53-E339K KMFRELNEAL  | 1524  | 1029  |
| >TP53-E339K FEMFRELNEA  | 301   | >TP53-E339K FKMFRELNEA  | 7960  | 7659  |
| >TP53-E339K FEMFRELNEA  | 394   | >TP53-E339K FKMFRELNEA  | 249   | 145   |
| >TP53-E339K FEMFRELNEA  | 558   | >TP53-E339K FKMFRELNEA  | 395   | 163   |
| >TP53-E339K FEMFRELNEA  | 9020  | >TP53-E339K FKMFRELNEA  | 436   | 8584  |
| >TP53-E339K FEMFRELNEA  | 724   | >TP53-E339K FKMFRELNEA  | 21    | 703   |
| >TP53-E339K FEMFRELNEA  | 253   | >TP53-E339K FKMFRELNEA  | 19339 | 19086 |
| >TP53-E339K FEMFRELNEA  | 94    | >TP53-E339K FKMFRELNEA  | 40    | 54    |
| >TP53-E339K FEMFRELNEA  | 18    | >TP53-E339K FKMFRELNEA  | 11443 | 11425 |
| >TP53-E339K FEMFRELNEA  | 47    | >TP53-E339K FKMFRELNEA  | 12645 | 12598 |
| >TP53-E339K FEMFRELNEA  | 29    | >TP53-E339K FKMFRELNEA  | 10389 | 10360 |
| >TP53-E339K TLQIRGRERFI | 21213 | >TP53-E339K TLQIRGRERFI | 308   | 20905 |
| >TP53-E339K TLQIRGRERFI | 25652 | >TP53-E339K TLQIRGRERFI | 234   | 25418 |
| >TP53-E339K RFEMFREL    | 253   | >TP53-E339K RFKMFREL    | 147   | 106   |
| >TP53-E339K RFEMFREL    | 7034  | >TP53-E339K RFKMFREL    | 49    | 6985  |
| >TP53-E339K RFEMFRELNE  | 3959  | >TP53-E339K RFKMFRELNE  | 22    | 3937  |
| >TP53-E339K RFEMFREL    | 308   | >TP53-E339K RFKMFREL    | 539   | 231   |
| >TP53-E339K ERFEMFREL   | 666   | >TP53-E339K ERFKMFREL   | 452   | 214   |
| >TP53-E339K ERFEMFREL   | 185   | >TP53-E339K ERFKMFREL   | 140   | 45    |
| >TP53-E339K ERFEMFREL   | 421   | >TP53-E339K ERFKMFREL   | 1295  | 874   |
| >TP53-E339K ERFEMFREL   | 172   | >TP53-E339K ERFKMFREL   | 80    | 92    |
| >TP53-E339K ERFEMFREL   | 10    | >TP53-E339K ERFKMFREL   | 9     | 1     |
| >TP53-E339K RERFEMFR    | 806   | >TP53-E339K RERFKMFR    | 324   | 482   |
| >TP53-E339K RERFEMFR    | 166   | >TP53-E339K RERFKMFR    | 36    | 130   |
| >TP53-E339K RERFEMFREL  | 48    | >TP53-E339K RERFKMFREL  | 48    | 0     |
| >TP53-E339K RERFEMFREL  | 142   | >TP53-E339K RERFKMFREL  | 147   | 5     |
| >TP53-E339K RERFEMFREL  | 29    | >TP53-E339K RERFKMFREL  | 34    | 5     |
| >TP53-E339K RERFEMFR    | 144   | >TP53-E339K RERFKMFR    | 127   | 17    |
| >TP53-E339K GRERFEMFRI  | 71    | >TP53-E339K GRERFKMFRI  | 51    | 20    |
| >TP53-E339K GRERFEMFR   | 521   | >TP53-E339K GRERFKMFR   | 205   | 316   |
| >TP53-E339K GRERFEMFRI  | 11    | >TP53-E339K GRERFKMFRI  | 7     | 4     |
| >TP53-E339K RGRERFEM    | 90    | >TP53-E339K RGRERFKM    | 83    | 7     |
| >TP53-E339K RGRERFEMFI  | 35    | >TP53-E339K RGRERFKMFI  | 16    | 19    |
| >TP53-E339K RGRERFEMFI  | 39    | >TP53-E339K RGRERFKMFI  | 19    | 20    |
| >TP53-E339K RGRERFEMF   | 658   | >TP53-E339K RGRERFKMF   | 143   | 515   |
| >TP53-E339K RGRERFEMF   | 226   | >TP53-E339K RGRERFKMF   | 692   | 466   |
| >TP53-E339K RGRERFEMF   | 118   | >TP53-E339K RGRERFKMF   | 62    | 56    |
| >TP53-E339K RGRERFEM    | 226   | >TP53-E339K RGRERFKM    | 166   | 60    |
| >TP53-E339K RGRERFEMF   | 85    | >TP53-E339K RGRERFKMF   | 25    | 60    |
| >TP53-E339K RGRERFEMF   | 108   | >TP53-E339K RGRERFKMF   | 183   | 75    |

|                         |       |                         |      |       |
|-------------------------|-------|-------------------------|------|-------|
| >TP53-E339K RGRERFEMFI  | 95    | >TP53-E339K RGRERFKMFI  | 65   | 30    |
| >TP53-E339K IRGRERFEMF  | 126   | >TP53-E339K IRGRERFKMF  | 102  | 24    |
| >TP53-E339K IRGRERFEM   | 585   | >TP53-E339K IRGRERFKM   | 252  | 333   |
| >TP53-E339K IRGRERFEMF  | 187   | >TP53-E339K IRGRERFKMF  | 128  | 59    |
| >TP53-E339K QIRGRERFE   | 21419 | >TP53-E339K QIRGRERFK   | 230  | 21189 |
| >TP53-E339K QIRGRERFE   | 4745  | >TP53-E339K QIRGRERFK   | 7    | 4738  |
| >TP53-E339K QIRGRERFEM  | 435   | >TP53-E339K QIRGRERFKM  | 583  | 148   |
| >TP53-E339K QIRGRERFEM  | 743   | >TP53-E339K QIRGRERFKM  | 300  | 443   |
| >TP53-E339K QIRGRERFEM  | 524   | >TP53-E339K QIRGRERFKM  | 356  | 168   |
| >TP53-E339K LQIRGRERFEI | 192   | >TP53-E339K LQIRGRERFKI | 833  | 641   |
| >TP53-E339K LQIRGRERFEI | 105   | >TP53-E339K LQIRGRERFKI | 299  | 194   |
| >TP53-E339K LQIRGRERFEI | 34    | >TP53-E339K LQIRGRERFKI | 73   | 39    |
| >TP53-E339C EMFRELNEA   | 3933  | >TP53-E339C QMFRELNEA   | 250  | 3683  |
| >TP53-E339C EMFRELNEAL  | 806   | >TP53-E339C QMFRELNEA   | 186  | 620   |
| >TP53-E339C EMFRELNEA   | 133   | >TP53-E339C QMFRELNEA   | 17   | 116   |
| >TP53-E339C EMFRELNEAL  | 89    | >TP53-E339C QMFRELNEA   | 32   | 57    |
| >TP53-E339C EMFRELNEA   | 401   | >TP53-E339C QMFRELNEA   | 38   | 363   |
| >TP53-E339C EMFRELNEAL  | 360   | >TP53-E339C QMFRELNEA   | 132  | 228   |
| >TP53-E339C EMFRELNEA   | 878   | >TP53-E339C QMFRELNEA   | 88   | 790   |
| >TP53-E339C EMFRELNEAL  | 1298  | >TP53-E339C QMFRELNEA   | 473  | 825   |
| >TP53-E339C EMFRELNEA   | 161   | >TP53-E339C QMFRELNEA   | 86   | 75    |
| >TP53-E339C EMFRELNEAL  | 24    | >TP53-E339C QMFRELNEA   | 14   | 10    |
| >TP53-E339C EMFRELNEA   | 809   | >TP53-E339C QMFRELNEA   | 261  | 548   |
| >TP53-E339C EMFRELNEAL  | 169   | >TP53-E339C QMFRELNEA   | 52   | 117   |
| >TP53-E339C EMFRELNEAL  | 431   | >TP53-E339C QMFRELNEA   | 436  | 5     |
| >TP53-E339C EMFRELNEAL  | 431   | >TP53-E339C QMFRELNEA   | 869  | 438   |
| >TP53-E339C EMFRELNEA   | 119   | >TP53-E339C QMFRELNEA   | 57   | 62    |
| >TP53-E339C EMFRELNEAL  | 72    | >TP53-E339C QMFRELNEA   | 38   | 34    |
| >TP53-E339C EMFRELNEAL  | 272   | >TP53-E339C QMFRELNEA   | 65   | 207   |
| >TP53-E339C EMFRELNEAL  | 291   | >TP53-E339C QMFRELNEA   | 2667 | 2376  |
| >TP53-E339C EMFRELNEAL  | 1014  | >TP53-E339C QMFRELNEA   | 359  | 655   |
| >TP53-E339C EMFRELNEAL  | 98    | >TP53-E339C QMFRELNEA   | 23   | 75    |
| >TP53-E339C EMFRELNEAL  | 495   | >TP53-E339C QMFRELNEA   | 636  | 141   |
| >TP53-E339C FEMFRELNEA  | 301   | >TP53-E339C FQMFRELNEA  | 4837 | 4536  |
| >TP53-E339C FEMFRELNEA  | 9650  | >TP53-E339C FQMFRELNEA  | 357  | 9293  |
| >TP53-E339C FEMFRELNEA  | 11411 | >TP53-E339C FQMFRELNEA  | 33   | 11378 |
| >TP53-E339C FEMFRELNEA  | 4485  | >TP53-E339C FQMFRELNEA  | 141  | 4344  |
| >TP53-E339C FEMFRELNEA  | 394   | >TP53-E339C FQMFRELNEA  | 10   | 384   |
| >TP53-E339C FEMFRELNEA  | 4536  | >TP53-E339C FQMFRELNEA  | 114  | 4422  |
| >TP53-E339C FEMFRELNEA  | 8404  | >TP53-E339C FQMFRELNEA  | 79   | 8325  |
| >TP53-E339C FEMFRELNEA  | 949   | >TP53-E339C FQMFRELNEA  | 47   | 902   |
| >TP53-E339C FEMFRELNEA  | 525   | >TP53-E339C FQMFRELNEA  | 6    | 519   |
| >TP53-E339C FEMFRELNEA  | 9767  | >TP53-E339C FQMFRELNEA  | 223  | 9544  |

|                        |      |                        |      |      |
|------------------------|------|------------------------|------|------|
| >TP53-E339C FEMFRELNEA | 558  | >TP53-E339C FQMFRELNE/ | 348  | 210  |
| >TP53-E339C FEMFRELNEA | 4384 | >TP53-E339C FQMFRELNE/ | 151  | 4233 |
| >TP53-E339C FEMFRELNEA | 9020 | >TP53-E339C FQMFRELNE/ | 476  | 8544 |
| >TP53-E339C FEMFRELNEA | 724  | >TP53-E339C FQMFRELNE/ | 22   | 702  |
| >TP53-E339C FEMFRELNEA | 253  | >TP53-E339C FQMFRELNE/ | 9810 | 9557 |
| >TP53-E339C FEMFRELNEA | 94   | >TP53-E339C FQMFRELNE/ | 17   | 77   |
| >TP53-E339C FEMFRELNEA | 18   | >TP53-E339C FQMFRELNE/ | 820  | 802  |
| >TP53-E339C FEMFRELNEA | 47   | >TP53-E339C FQMFRELNE/ | 1944 | 1897 |
| >TP53-E339C FEMFRELNEA | 1885 | >TP53-E339C FQMFRELNE/ | 126  | 1759 |
| >TP53-E339C FEMFRELNEA | 29   | >TP53-E339C FQMFRELNE/ | 4400 | 4371 |
| >TP53-E339C RFEMFREL   | 253  | >TP53-E339C RFQMFREL   | 29   | 224  |
| >TP53-E339C RFEMFREL   | 1195 | >TP53-E339C RFQMFREL   | 438  | 757  |
| >TP53-E339C RFEMFREL   | 308  | >TP53-E339C RFQMFREL   | 173  | 135  |
| >TP53-E339C RFEMFRELNE | 517  | >TP53-E339C RFQMFRELNI | 299  | 218  |
| >TP53-E339C ERFEMFREL  | 185  | >TP53-E339C ERFQMFREL  | 157  | 28   |
| >TP53-E339C ERFEMFREL  | 421  | >TP53-E339C ERFQMFREL  | 626  | 205  |
| >TP53-E339C ERFEMFREL  | 172  | >TP53-E339C ERFQMFREL  | 86   | 86   |
| >TP53-E339C ERFEMFREL  | 10   | >TP53-E339C ERFQMFREL  | 7    | 3    |
| >TP53-E339C RERFEMFR   | 806  | >TP53-E339C RERFQMFR   | 154  | 652  |
| >TP53-E339C RERFEMFR   | 166  | >TP53-E339C RERFQMFR   | 48   | 118  |
| >TP53-E339C RERFEMFREL | 48   | >TP53-E339C RERFQMFREI | 49   | 1    |
| >TP53-E339C RERFEMFREL | 142  | >TP53-E339C RERFQMFREI | 139  | 3    |
| >TP53-E339C RERFEMFREL | 29   | >TP53-E339C RERFQMFREI | 32   | 3    |
| >TP53-E339C RERFEMFR   | 144  | >TP53-E339C RERFQMFR   | 118  | 26   |
| >TP53-E339C GRERFEMF   | 846  | >TP53-E339C GRERFQMF   | 492  | 354  |
| >TP53-E339C GRERFEMFRI | 71   | >TP53-E339C GRERFQMFR  | 52   | 19   |
| >TP53-E339C GRERFEMFR  | 521  | >TP53-E339C GRERFQMFR  | 226  | 295  |
| >TP53-E339C GRERFEMFRI | 11   | >TP53-E339C GRERFQMFR  | 7    | 4    |
| >TP53-E339C RGRERFEM   | 90   | >TP53-E339C RGRERFQM   | 50   | 40   |
| >TP53-E339C RGRERFEMFI | 35   | >TP53-E339C RGRERFQMF  | 10   | 25   |
| >TP53-E339C RGRERFEMFI | 39   | >TP53-E339C RGRERFQMF  | 24   | 15   |
| >TP53-E339C RGRERFEMF  | 658  | >TP53-E339C RGRERFQMF  | 166  | 492  |
| >TP53-E339C RGRERFEMF  | 226  | >TP53-E339C RGRERFQMF  | 208  | 18   |
| >TP53-E339C RGRERFEMF  | 118  | >TP53-E339C RGRERFQMF  | 39   | 79   |
| >TP53-E339C RGRERFEM   | 226  | >TP53-E339C RGRERFQM   | 83   | 143  |
| >TP53-E339C RGRERFEMF  | 85   | >TP53-E339C RGRERFQMF  | 19   | 66   |
| >TP53-E339C RGRERFEMF  | 108  | >TP53-E339C RGRERFQMF  | 143  | 35   |
| >TP53-E339C RGRERFEMFI | 95   | >TP53-E339C RGRERFQMF  | 80   | 15   |
| >TP53-E339C IRGRERFEMF | 126  | >TP53-E339C IRGRERFQMF | 74   | 52   |
| >TP53-E339C IRGRERFEM  | 585  | >TP53-E339C IRGRERFQM  | 354  | 231  |
| >TP53-E339C IRGRERFEMF | 721  | >TP53-E339C IRGRERFQMF | 243  | 478  |
| >TP53-E339C IRGRERFEMF | 658  | >TP53-E339C IRGRERFQMF | 183  | 475  |
| >TP53-E339C IRGRERFEMF | 187  | >TP53-E339C IRGRERFQMF | 156  | 31   |

|                         |      |                         |       |       |
|-------------------------|------|-------------------------|-------|-------|
| >TP53-E339C QIRGRERFEM  | 435  | >TP53-E339C QIRGRERFQM  | 436   | 1     |
| >TP53-E339C QIRGRERFEM  | 743  | >TP53-E339C QIRGRERFQM  | 309   | 434   |
| >TP53-E339C LQIRGRERFEI | 192  | >TP53-E339C LQIRGRERFQ  | 461   | 269   |
| >TP53-E339C LQIRGRERFEI | 105  | >TP53-E339C LQIRGRERFQ  | 111   | 6     |
| >TP53-E339C LQIRGRERFEI | 34   | >TP53-E339C LQIRGRERFQ  | 65    | 31    |
| >TP53-E346A EALELKDAQA  | 161  | >TP53-E346A AALELKDAQA  | 6142  | 5981  |
| >TP53-E346A NEALELKDA   | 240  | >TP53-E346A NAALELKDA   | 31365 | 31125 |
| >TP53-E346A NEALELKDA   | 288  | >TP53-E346A NAALELKDA   | 37032 | 36744 |
| >TP53-E346A NEALELKDAC  | 461  | >TP53-E346A NAALELKDAC  | 37338 | 36877 |
| >TP53-E346A ERFEMFRELN  | 1371 | >TP53-E346A ERFEMFRELN  | 471   | 900   |
| >TP53-E346A ELNEALEL    | 71   | >TP53-E346A ELNAALEL    | 83    | 12    |
| >TP53-E346A ELNEALEL    | 410  | >TP53-E346A ELNAALEL    | 601   | 191   |
| >TP53-E346A ELNEALEL    | 41   | >TP53-E346A ELNAALEL    | 168   | 127   |
| >TP53-E346A ELNEALEL    | 264  | >TP53-E346A ELNAALEL    | 1383  | 1119  |
| >TP53-E346A ELNEALEL    | 85   | >TP53-E346A ELNAALEL    | 251   | 166   |
| >TP53-E346A ELNEALEL    | 44   | >TP53-E346A ELNAALEL    | 140   | 96    |
| >TP53-E346A ELNEALEL    | 13   | >TP53-E346A ELNAALEL    | 25    | 12    |
| >TP53-E346A ELNEALELK   | 33   | >TP53-E346A ELNAALELK   | 37    | 4     |
| >TP53-E346A ELNEALEL    | 836  | >TP53-E346A ELNAALEL    | 496   | 340   |
| >TP53-E346A ELNEALEL    | 94   | >TP53-E346A ELNAALEL    | 229   | 135   |
| >TP53-E346A RELNEALEL   | 906  | >TP53-E346A RELNAALEL   | 195   | 711   |
| >TP53-E346A RELNEALEL   | 390  | >TP53-E346A RELNAALEL   | 264   | 126   |
| >TP53-E346A RELNEALEL   | 2758 | >TP53-E346A RELNAALEL   | 461   | 2297  |
| >TP53-E346A RELNEALEL   | 14   | >TP53-E346A RELNAALEL   | 5     | 9     |
| >TP53-E346A RELNEALEL   | 18   | >TP53-E346A RELNAALEL   | 12    | 6     |
| >TP53-E346A RELNEALEL   | 222  | >TP53-E346A RELNAALEL   | 107   | 115   |
| >TP53-E346A RELNEALEL   | 19   | >TP53-E346A RELNAALEL   | 11    | 8     |
| >TP53-E346A FRELNEALEL  | 379  | >TP53-E346A FRELNAALEL  | 292   | 87    |
| >TP53-E346A FRELNEAL    | 31   | >TP53-E346A FRELNAAL    | 11    | 20    |
| >TP53-E346A FRELNEALEL  | 65   | >TP53-E346A FRELNAALEL  | 27    | 38    |
| >TP53-E346A FRELNEALEL  | 471  | >TP53-E346A FRELNAALEL  | 237   | 234   |
| >TP53-E346A MFRELNEALE  | 200  | >TP53-E346A MFRELNAALEL | 202   | 2     |
| >TP53-E346A MFRELNEA    | 62   | >TP53-E346A MFRELNAA    | 23    | 39    |
| >TP53-E346A MFRELNEAL   | 932  | >TP53-E346A MFRELNAAL   | 31    | 901   |
| >TP53-E346A MFRELNEALE  | 217  | >TP53-E346A MFRELNAALEL | 34    | 183   |
| >TP53-E346A MFRELNEA    | 514  | >TP53-E346A MFRELNAA    | 285   | 229   |
| >TP53-E346A MFRELNEAL   | 152  | >TP53-E346A MFRELNAAL   | 230   | 78    |
| >TP53-E346A MFRELNEALE  | 467  | >TP53-E346A MFRELNAALEL | 479   | 12    |
| >TP53-E346A EMFRELNEA   | 133  | >TP53-E346A EMFRELNAA   | 202   | 69    |
| >TP53-E346A EMFRELNEAL  | 89   | >TP53-E346A EMFRELNAAI  | 84    | 5     |
| >TP53-E346A EMFRELNEA   | 401  | >TP53-E346A EMFRELNAA   | 249   | 152   |
| >TP53-E346A EMFRELNEAL  | 360  | >TP53-E346A EMFRELNAAI  | 127   | 233   |
| >TP53-E346A EMFRELNEA   | 878  | >TP53-E346A EMFRELNAA   | 472   | 406   |

|                        |       |                         |     |       |
|------------------------|-------|-------------------------|-----|-------|
| >TP53-E346A EMFRELNE   | 20438 | >TP53-E346A EMFRELNA    | 374 | 20064 |
| >TP53-E346A EMFRELNEA  | 161   | >TP53-E346A EMFRELNAA   | 180 | 19    |
| >TP53-E346A EMFRELNEAL | 24    | >TP53-E346A EMFRELNAAI  | 22  | 2     |
| >TP53-E346A EMFRELNEA  | 809   | >TP53-E346A EMFRELNAA   | 454 | 355   |
| >TP53-E346A EMFRELNEAL | 169   | >TP53-E346A EMFRELNAAI  | 66  | 103   |
| >TP53-E346A EMFRELNEAL | 431   | >TP53-E346A EMFRELNAAI  | 428 | 3     |
| >TP53-E346A EMFRELNEAL | 431   | >TP53-E346A EMFRELNAAI  | 288 | 143   |
| >TP53-E346A EMFRELNE   | 23030 | >TP53-E346A EMFRELNA    | 249 | 22781 |
| >TP53-E346A EMFRELNEA  | 119   | >TP53-E346A EMFRELNAA   | 434 | 315   |
| >TP53-E346A EMFRELNEAL | 72    | >TP53-E346A EMFRELNAAI  | 43  | 29    |
| >TP53-E346A EMFRELNEAL | 272   | >TP53-E346A EMFRELNAAI  | 285 | 13    |
| >TP53-E346A EMFRELNEAL | 769   | >TP53-E346A EMFRELNAAI  | 316 | 453   |
| >TP53-E346A EMFRELNEAL | 291   | >TP53-E346A EMFRELNAAI  | 137 | 154   |
| >TP53-E346A EMFRELNEAL | 98    | >TP53-E346A EMFRELNAAI  | 63  | 35    |
| >TP53-E346A EMFRELNEAL | 495   | >TP53-E346A EMFRELNAAI  | 112 | 383   |
| >TP53-E346A FEMFRELNEA | 301   | >TP53-E346A FEMFRELNA/  | 304 | 3     |
| >TP53-E346A FEMFRELNEA | 394   | >TP53-E346A FEMFRELNA/  | 374 | 20    |
| >TP53-E346A FEMFRELNEA | 525   | >TP53-E346A FEMFRELNA/  | 383 | 142   |
| >TP53-E346A FEMFRELNEA | 558   | >TP53-E346A FEMFRELNA/  | 255 | 303   |
| >TP53-E346A FEMFRELNEA | 253   | >TP53-E346A FEMFRELNA/  | 172 | 81    |
| >TP53-E346A FEMFRELNEA | 94    | >TP53-E346A FEMFRELNA/  | 43  | 51    |
| >TP53-E346A FEMFRELNEA | 18    | >TP53-E346A FEMFRELNA/  | 23  | 5     |
| >TP53-E346A FEMFRELNE  | 4061  | >TP53-E346A FEMFRELNA   | 308 | 3753  |
| >TP53-E346A FEMFRELNEA | 47    | >TP53-E346A FEMFRELNA/  | 64  | 17    |
| >TP53-E346A FEMFRELNE  | 14569 | >TP53-E346A FEMFRELNA   | 330 | 14239 |
| >TP53-E346A FEMFRELNEA | 671   | >TP53-E346A FEMFRELNA/  | 335 | 336   |
| >TP53-E346A FEMFRELNEA | 29    | >TP53-E346A FEMFRELNA/  | 29  | 0     |
| >TP53-E346A RFEMFRELNE | 517   | >TP53-E346A RFEMFRELNA/ | 275 | 242   |
| >TP53-E358V EPGGSRAH   | 254   | >TP53-E358V VPGGSRAH    | 517 | 263   |
| >TP53-E358V LELKDAQAGk | 18657 | >TP53-E358V LELKDAQAGk  | 75  | 18582 |
| >TP53-E358V LELKDAQAGk | 9813  | >TP53-E358V LELKDAQAGk  | 60  | 9753  |
| >TP53-E358V KDAQAGKE   | 22612 | >TP53-E358V KDAQAGKV    | 198 | 22414 |
| >TP53-E358V ELKDAQAGKI | 22116 | >TP53-E358V ELKDAQAGK\  | 9   | 22107 |
| >TP53-E358V ELKDAQAGKI | 20255 | >TP53-E358V ELKDAQAGK\  | 424 | 19831 |
| >TP53-E56K- FTEDPGPDEA | 1669  | >TP53-E56K- FTKDPPGPDEA | 479 | 1190  |
| >TP53-E56K- QWFTEDPG   | 275   | >TP53-E56K- QWFTKDPG    | 231 | 44    |
| >TP53-E56K- DIEQWLTE   | 8863  | >TP53-E56K- DIEQWFTK    | 215 | 8648  |
| >TP53-E56K- DIEQWLTE   | 17700 | >TP53-E56K- DIEQWFTK    | 225 | 17475 |
| >TP53-E56V- TEDPGPDEAF | 9932  | >TP53-E56V- TVDPPGPDEAF | 246 | 9686  |
| >TP53-E56V- SPDDIEQWF1 | 19366 | >TP53-E56V- SPDDIEQWF1  | 337 | 19029 |
| >TP53-E56V- FTEDPGPDEA | 1669  | >TP53-E56V- FTVDPPGPDEA | 331 | 1338  |
| >TP53-E56V- FTEDPGPDEA | 736   | >TP53-E56V- FTVDPPGPDEA | 106 | 630   |
| >TP53-E56V- FTEDPGPDEA | 1606  | >TP53-E56V- FTVDPPGPDEA | 186 | 1420  |

|                        |       |                        |       |       |
|------------------------|-------|------------------------|-------|-------|
| >TP53-E56V- FTEDPGPDEA | 1652  | >TP53-E56V- FTVDPGPDEA | 160   | 1492  |
| >TP53-E56V- QWFTEDPG   | 275   | >TP53-E56V- QWFTVDPG   | 148   | 127   |
| >TP53-E56V- QWFTEDPGP  | 657   | >TP53-E56V- QWFTVDPGP  | 343   | 314   |
| >TP53-E56V- DIEQWFTE   | 32386 | >TP53-E56V- DIEQWFTV   | 108   | 32278 |
| >TP53-E56V- DIEQWFTE   | 17872 | >TP53-E56V- DIEQWFTV   | 72    | 17800 |
| >TP53-E56V- DDIEQWFTE  | 13359 | >TP53-E56V- DDIEQWFTV  | 54    | 13305 |
| >TP53-E56V- PDDIEQWFTE | 6170  | >TP53-E56V- PDDIEQWFTV | 23    | 6147  |
| >TP53-E62D- EAPRMPEAA  | 1076  | >TP53-E62D- DAPRMPEAA  | 365   | 711   |
| >TP53-E62D- EAPRMPEAA  | 30    | >TP53-E62D- DAPRMPEAA  | 97    | 67    |
| >TP53-E62D- EAPRMPEAA  | 215   | >TP53-E62D- DAPRMPEAA  | 2231  | 2016  |
| >TP53-E62D- DEAPRMPE   | 449   | >TP53-E62D- DDAPRMPE   | 17162 | 16713 |
| >TP53-E62D- DEAPRMPEA  | 493   | >TP53-E62D- DDAPRMPEA  | 28676 | 28183 |
| >TP53-E68G- EAAPRVAPA  | 1849  | >TP53-E68G- GAAPRVAPA  | 71    | 1778  |
| >TP53-E68G- EAAPRVAPAF | 3464  | >TP53-E68G- GAAPRVAPAI | 191   | 3273  |
| >TP53-E68G- EAAPRVAPA  | 3492  | >TP53-E68G- GAAPRVAPA  | 437   | 3055  |
| >TP53-E68G- EAAPRVAPA  | 8     | >TP53-E68G- GAAPRVAPA  | 1781  | 1773  |
| >TP53-E68G- EAAPRVAPAF | 9     | >TP53-E68G- GAAPRVAPAI | 2133  | 2124  |
| >TP53-E68G- EAAPRVAPA  | 130   | >TP53-E68G- GAAPRVAPA  | 14393 | 14263 |
| >TP53-E68G- EAAPRVAPAF | 96    | >TP53-E68G- GAAPRVAPAI | 12633 | 12537 |
| >TP53-E68G- MPEAAPRV   | 23    | >TP53-E68G- MPGAAPRV   | 24    | 1     |
| >TP53-E68G- MPEAAPRV   | 487   | >TP53-E68G- MPGAAPRV   | 459   | 28    |
| >TP53-E68G- MPEAAPRVA  | 177   | >TP53-E68G- MPGAAPRVA  | 186   | 9     |
| >TP53-E68G- MPEAAPRVA  | 65    | >TP53-E68G- MPGAAPRVA  | 74    | 9     |
| >TP53-E68G- MPEAAPRVA  | 258   | >TP53-E68G- MPGAAPRVA  | 675   | 417   |
| >TP53-E68G- MPEAAPRVA  | 76    | >TP53-E68G- MPGAAPRVA  | 168   | 92    |
| >TP53-E68G- MPEAAPRV   | 496   | >TP53-E68G- MPGAAPRV   | 501   | 5     |
| >TP53-E68G- MPEAAPRV   | 83    | >TP53-E68G- MPGAAPRV   | 101   | 18    |
| >TP53-E68G- MPEAAPRVA  | 15    | >TP53-E68G- MPGAAPRVA  | 16    | 1     |
| >TP53-E68G- MPEAAPRVA  | 10    | >TP53-E68G- MPGAAPRVA  | 10    | 0     |
| >TP53-E68G- RMPEAAPRV  | 35    | >TP53-E68G- RMPGAAPRV  | 109   | 74    |
| >TP53-E68G- RMPEAAPRV  | 224   | >TP53-E68G- RMPGAAPRV  | 353   | 129   |
| >TP53-E68G- RMPEAAPRV  | 15    | >TP53-E68G- RMPGAAPRV  | 34    | 19    |
| >TP53-E68G- RMPEAAPRV  | 480   | >TP53-E68G- RMPGAAPRV  | 416   | 64    |
| >TP53-E68G- RMPEAAPRV  | 12    | >TP53-E68G- RMPGAAPRV  | 32    | 20    |
| >TP53-E68G- RMPEAAPRV  | 2     | >TP53-E68G- RMPGAAPRV  | 3     | 1     |
| >TP53-E68G- RMPEAAPRV  | 39    | >TP53-E68G- RMPGAAPRV  | 100   | 61    |
| >TP53-E68G- RMPEAAPRV  | 17    | >TP53-E68G- RMPGAAPRV  | 111   | 94    |
| >TP53-E68G- RMPEAAPRV  | 5     | >TP53-E68G- RMPGAAPRV  | 6     | 1     |
| >TP53-E68G- RMPEAAPRV  | 356   | >TP53-E68G- RMPGAAPRV  | 853   | 497   |
| >TP53-E68G- RMPEAAPRV  | 6     | >TP53-E68G- RMPGAAPRV  | 9     | 3     |
| >TP53-E68G- RMPEAAPRV  | 4     | >TP53-E68G- RMPGAAPRV  | 3     | 1     |
| >TP53-E68G- RMPEAAPRV  | 318   | >TP53-E68G- RMPGAAPRV  | 310   | 8     |
| >TP53-E68G- RMPEAAPR   | 53    | >TP53-E68G- RMPGAAPR   | 48    | 5     |

|                        |      |                       |      |      |
|------------------------|------|-----------------------|------|------|
| >TP53-E68G- RMPEAAPRV  | 229  | >TP53-E68G- RMPGAAPRV | 231  | 2    |
| >TP53-E68G- RMPEAAPR   | 26   | >TP53-E68G- RMPGAAPR  | 23   | 3    |
| >TP53-E68G- APRMPEAA   | 25   | >TP53-E68G- APRMPGAA  | 11   | 14   |
| >TP53-E68G- APRMPEAAP  | 261  | >TP53-E68G- APRMPGAAP | 29   | 232  |
| >TP53-E68G- APRMPEAAP  | 674  | >TP53-E68G- APRMPGAAP | 142  | 532  |
| >TP53-E68G- APRMPEAAP  | 38   | >TP53-E68G- APRMPGAAP | 26   | 12   |
| >TP53-E68G- APRMPEAA   | 771  | >TP53-E68G- APRMPGAA  | 209  | 562  |
| >TP53-E68G- EAPRMPEAA  | 30   | >TP53-E68G- EAPRMPGAA | 37   | 7    |
| >TP53-E68G- EAPRMPEAA  | 215  | >TP53-E68G- EAPRMPGAA | 753  | 538  |
| >TP53-E68G- DEAPRMPE   | 449  | >TP53-E68G- DEAPRM PG | 2371 | 1922 |
| >TP53-E68G- DEAPRMPEA  | 493  | >TP53-E68G- DEAPRMPGA | 646  | 153  |
| >TP53-E68Q- EAAPRVAPA  | 1849 | >TP53-E68Q- QAAPRVAPA | 187  | 1662 |
| >TP53-E68Q- EAAPRVAPAF | 3464 | >TP53-E68Q- QAAPRVAPA | 490  | 2974 |
| >TP53-E68Q- EAAPRVAPA  | 3492 | >TP53-E68Q- QAAPRVAPA | 407  | 3085 |
| >TP53-E68Q- EAAPRVAPA  | 8    | >TP53-E68Q- QAAPRVAPA | 23   | 15   |
| >TP53-E68Q- EAAPRVAPAF | 9    | >TP53-E68Q- QAAPRVAPA | 28   | 19   |
| >TP53-E68Q- EAAPRVAPA  | 130  | >TP53-E68Q- QAAPRVAPA | 1764 | 1634 |
| >TP53-E68Q- EAAPRVAPAF | 96   | >TP53-E68Q- QAAPRVAPA | 1135 | 1039 |
| >TP53-E68Q- MPEAAPRV   | 23   | >TP53-E68Q- MPQAAPRV  | 13   | 10   |
| >TP53-E68Q- MPEAAPRV   | 487  | >TP53-E68Q- MPQAAPRV  | 297  | 190  |
| >TP53-E68Q- MPEAAPRVA  | 177  | >TP53-E68Q- MPQAAPRVA | 88   | 89   |
| >TP53-E68Q- MPEAAPRVA  | 65   | >TP53-E68Q- MPQAAPRVA | 40   | 25   |
| >TP53-E68Q- MPEAAPRVA  | 258  | >TP53-E68Q- MPQAAPRVA | 319  | 61   |
| >TP53-E68Q- MPEAAPRVA  | 76   | >TP53-E68Q- MPQAAPRVA | 90   | 14   |
| >TP53-E68Q- MPEAAPRV   | 496  | >TP53-E68Q- MPQAAPRV  | 456  | 40   |
| >TP53-E68Q- MPEAAPRV   | 83   | >TP53-E68Q- MPQAAPRV  | 62   | 21   |
| >TP53-E68Q- MPEAAPRVA  | 15   | >TP53-E68Q- MPQAAPRVA | 13   | 2    |
| >TP53-E68Q- MPEAAPRVA  | 10   | >TP53-E68Q- MPQAAPRVA | 9    | 1    |
| >TP53-E68Q- RMPEAAPRV  | 35   | >TP53-E68Q- RMPQAAPRV | 201  | 166  |
| >TP53-E68Q- RMPEAAPRV  | 224  | >TP53-E68Q- RMPQAAPRV | 1080 | 856  |
| >TP53-E68Q- RMPEAAPRV  | 15   | >TP53-E68Q- RMPQAAPRV | 60   | 45   |
| >TP53-E68Q- RMPEAAPRV  | 480  | >TP53-E68Q- RMPQAAPRV | 614  | 134  |
| >TP53-E68Q- RMPEAAPRV  | 12   | >TP53-E68Q- RMPQAAPRV | 49   | 37   |
| >TP53-E68Q- RMPEAAPRV  | 2    | >TP53-E68Q- RMPQAAPRV | 4    | 2    |
| >TP53-E68Q- RMPEAAPRV  | 39   | >TP53-E68Q- RMPQAAPRV | 199  | 160  |
| >TP53-E68Q- RMPEAAPRV  | 17   | >TP53-E68Q- RMPQAAPRV | 136  | 119  |
| >TP53-E68Q- RMPEAAPRV  | 5    | >TP53-E68Q- RMPQAAPRV | 6    | 1    |
| >TP53-E68Q- RMPEAAPRV  | 356  | >TP53-E68Q- RMPQAAPRV | 1270 | 914  |
| >TP53-E68Q- RMPEAAPRV  | 6    | >TP53-E68Q- RMPQAAPRV | 17   | 11   |
| >TP53-E68Q- RMPEAAPRV  | 4    | >TP53-E68Q- RMPQAAPRV | 5    | 1    |
| >TP53-E68Q- RMPEAAPRV  | 318  | >TP53-E68Q- RMPQAAPRV | 618  | 300  |
| >TP53-E68Q- RMPEAAPR   | 53   | >TP53-E68Q- RMPQAAPR  | 61   | 8    |
| >TP53-E68Q- RMPEAAPRV  | 229  | >TP53-E68Q- RMPQAAPRV | 313  | 84   |

|                         |      |                         |       |       |
|-------------------------|------|-------------------------|-------|-------|
| >TP53-E68Q- RMPEAAPR    | 26   | >TP53-E68Q- RMPQAAPR    | 18    | 8     |
| >TP53-E68Q- APRMPEAA    | 25   | >TP53-E68Q- APRMPQAA    | 17    | 8     |
| >TP53-E68Q- APRMPEAAP   | 261  | >TP53-E68Q- APRMPQAAF   | 185   | 76    |
| >TP53-E68Q- APRMPEAAP   | 38   | >TP53-E68Q- APRMPQAAF   | 35    | 3     |
| >TP53-E68Q- EAPRMPEAA   | 30   | >TP53-E68Q- EAPRMPQAA   | 41    | 11    |
| >TP53-E68Q- EAPRMPEAA   | 215  | >TP53-E68Q- EAPRMPQAA   | 1386  | 1171  |
| >TP53-E68Q- DEAPRMPE    | 449  | >TP53-E68Q- DEAPRMPQ    | 116   | 333   |
| >TP53-E68Q- DEAPRMPEA   | 493  | >TP53-E68Q- DEAPRMPQA   | 2117  | 1624  |
| >TP53-F109S FRLGFLHS    | 142  | >TP53-F109S SRLGFLHS    | 344   | 202   |
| >TP53-F109S FRLGFLHSG   | 306  | >TP53-F109S SRLGFLHSG   | 771   | 465   |
| >TP53-F109S FRLGFLHSGT  | 412  | >TP53-F109S SRLGFLHSGT  | 329   | 83    |
| >TP53-F109S FRLGFLHSGT, | 174  | >TP53-F109S SRLGFLHSGT, | 394   | 220   |
| >TP53-F109S GFRLGFLHS   | 921  | >TP53-F109S GSRLGFLHS   | 277   | 644   |
| >TP53-F109S GFRLGFLHSG  | 1432 | >TP53-F109S GSRLGFLHSG  | 412   | 1020  |
| >TP53-F109S GFRLGFLHSG  | 6277 | >TP53-F109S GSRLGFLHSG  | 487   | 5790  |
| >TP53-F109S SQKTYQGSYC  | 36   | >TP53-F109S SQKTYQGSYC  | 4658  | 4622  |
| >TP53-F109S SQKTYQGSYC  | 268  | >TP53-F109S SQKTYQGSYC  | 17837 | 17569 |
| >TP53-F109S SQKTYQGSYC  | 9    | >TP53-F109S SQKTYQGSYC  | 7407  | 7398  |
| >TP53-F109S YGFRLGFL    | 116  | >TP53-F109S YGSRLGFL    | 4637  | 4521  |
| >TP53-F109S YGFRLGFL    | 486  | >TP53-F109S YGSRLGFL    | 583   | 97    |
| >TP53-F109S YGFRLGFL    | 443  | >TP53-F109S YGSRLGFL    | 2577  | 2134  |
| >TP53-F109S YGFRLGFLH   | 89   | >TP53-F109S YGSRLGFLH   | 447   | 358   |
| >TP53-F109S SYGFRLGFL   | 95   | >TP53-F109S SYGSRLGFL   | 21    | 74    |
| >TP53-F109S SYGFRLGF    | 356  | >TP53-F109S SYGSRLGF    | 405   | 49    |
| >TP53-F109S SYGFRLGF    | 232  | >TP53-F109S SYGSRLGF    | 301   | 69    |
| >TP53-F109S SYGFRLGFL   | 319  | >TP53-F109S SYGSRLGFL   | 396   | 77    |
| >TP53-F109S SYGFRLGF    | 7    | >TP53-F109S SYGSRLGF    | 6     | 1     |
| >TP53-F109S SYGFRLGFL   | 12   | >TP53-F109S SYGSRLGFL   | 9     | 3     |
| >TP53-F109S SYGFRLGF    | 338  | >TP53-F109S SYGSRLGF    | 357   | 19    |
| >TP53-F109S SYGFRLGFL   | 139  | >TP53-F109S SYGSRLGFL   | 121   | 18    |
| >TP53-F109S SYGFRLGFL   | 222  | >TP53-F109S SYGSRLGFL   | 202   | 20    |
| >TP53-F109S GSYGFRLGF   | 78   | >TP53-F109S GSYGSRLGF   | 1943  | 1865  |
| >TP53-F109S GSYGFRLGFL  | 227  | >TP53-F109S GSYGSRLGFL  | 498   | 271   |
| >TP53-F109S GSYGFRLGFL  | 237  | >TP53-F109S GSYGSRLGFL  | 578   | 341   |
| >TP53-F109S GSYGFRLGFL  | 491  | >TP53-F109S GSYGSRLGFL  | 440   | 51    |
| >TP53-F109S GSYGFRLGFL  | 98   | >TP53-F109S GSYGSRLGFL  | 170   | 72    |
| >TP53-F109S GSYGFRLGF   | 61   | >TP53-F109S GSYGSRLGF   | 640   | 579   |
| >TP53-F109S GSYGFRLGF   | 365  | >TP53-F109S GSYGSRLGF   | 166   | 199   |
| >TP53-F109S GSYGFRLGF   | 111  | >TP53-F109S GSYGSRLGF   | 70    | 41    |
| >TP53-F109S GSYGFRLGF   | 4    | >TP53-F109S GSYGSRLGF   | 3     | 1     |
| >TP53-F109S GSYGFRLGFL  | 31   | >TP53-F109S GSYGSRLGFL  | 15    | 16    |
| >TP53-F109S GSYGFRLGF   | 222  | >TP53-F109S GSYGSRLGF   | 577   | 355   |
| >TP53-F109S GSYGFRLGF   | 264  | >TP53-F109S GSYGSRLGF   | 201   | 63    |



|                         |      |                         |       |       |
|-------------------------|------|-------------------------|-------|-------|
| >TP53-F109S GSYGFRLGF   | 44   | >TP53-F109S GSYGSRLGF   | 88    | 44    |
| >TP53-F109S GSYGFRLGFL  | 70   | >TP53-F109S GSYGSRLGFL  | 126   | 56    |
| >TP53-F109S GSYGFRLGFL  | 63   | >TP53-F109S GSYGSRLGFL  | 102   | 39    |
| >TP53-F109S QGSYGFRLGF  | 278  | >TP53-F109S QGSYGSRLGF  | 228   | 50    |
| >TP53-F109S YQGSYGFRL   | 30   | >TP53-F109S YQGSYGSRL   | 751   | 721   |
| >TP53-F109S YQGSYGFRL   | 36   | >TP53-F109S YQGSYGSRL   | 139   | 103   |
| >TP53-F109S YQGSYGFRL   | 1457 | >TP53-F109S YQGSYGSRL   | 380   | 1077  |
| >TP53-F109S YQGSYGFRL   | 15   | >TP53-F109S YQGSYGSRL   | 199   | 184   |
| >TP53-F109S YQGSYGFRLC  | 189  | >TP53-F109S YQGSYGSRLC  | 433   | 244   |
| >TP53-F109S YQGSYGFRL   | 32   | >TP53-F109S YQGSYGSRL   | 146   | 114   |
| >TP53-F109S YQGSYGFRL   | 167  | >TP53-F109S YQGSYGSRL   | 1394  | 1227  |
| >TP53-F109S YQGSYGFRL   | 54   | >TP53-F109S YQGSYGSRL   | 462   | 408   |
| >TP53-F109S YQGSYGFRL   | 476  | >TP53-F109S YQGSYGSRL   | 2125  | 1649  |
| >TP53-F109S YQGSYGFRL   | 211  | >TP53-F109S YQGSYGSRL   | 96    | 115   |
| >TP53-F109S YQGSYGFRLC  | 32   | >TP53-F109S YQGSYGSRLC  | 27    | 5     |
| >TP53-F109S YQGSYGFRLC  | 158  | >TP53-F109S YQGSYGSRLC  | 98    | 60    |
| >TP53-F109S YQGSYGFRL   | 1093 | >TP53-F109S YQGSYGSRL   | 349   | 744   |
| >TP53-F109S YQGSYGFRL   | 77   | >TP53-F109S YQGSYGSRL   | 20    | 57    |
| >TP53-F109S YQGSYGFRLC  | 6    | >TP53-F109S YQGSYGSRLC  | 4     | 2     |
| >TP53-F109S YQGSYGFRL   | 145  | >TP53-F109S YQGSYGSRL   | 297   | 152   |
| >TP53-F109S YQGSYGFRL   | 223  | >TP53-F109S YQGSYGSRL   | 1093  | 870   |
| >TP53-F109S TYQGSYGFRL  | 141  | >TP53-F109S TYQGSYGSRL  | 13    | 128   |
| >TP53-F109S TYQGSYGF    | 28   | >TP53-F109S TYQGSYGS    | 12444 | 12416 |
| >TP53-F109S TYQGSYGFRL  | 316  | >TP53-F109S TYQGSYGSRL  | 964   | 648   |
| >TP53-F109S TYQGSYGF    | 93   | >TP53-F109S TYQGSYGS    | 12757 | 12664 |
| >TP53-F109S TYQGSYGFRL  | 163  | >TP53-F109S TYQGSYGSRL  | 311   | 148   |
| >TP53-F109S TYQGSYGF    | 5    | >TP53-F109S TYQGSYGS    | 2119  | 2114  |
| >TP53-F109S TYQGSYGFRL  | 255  | >TP53-F109S TYQGSYGSRL  | 377   | 122   |
| >TP53-F109S TYQGSYGFRL  | 7    | >TP53-F109S TYQGSYGSRL  | 13    | 6     |
| >TP53-F109S TYQGSYGFRL  | 19   | >TP53-F109S TYQGSYGSRL  | 157   | 138   |
| >TP53-F109S TYQGSYGFRL  | 25   | >TP53-F109S TYQGSYGSRL  | 115   | 90    |
| >TP53-F109S TYQGSYGFRL  | 154  | >TP53-F109S TYQGSYGSRL  | 878   | 724   |
| >TP53-F109S TYQGSYGFRL  | 53   | >TP53-F109S TYQGSYGSRL  | 227   | 174   |
| >TP53-F109S KTYQGSYGFRL | 220  | >TP53-F109S KTYQGSYGSRL | 171   | 49    |
| >TP53-F109S KTYQGSYGFRL | 169  | >TP53-F109S KTYQGSYGSRL | 1411  | 1242  |
| >TP53-F109S KTYQGSYGFRL | 260  | >TP53-F109S KTYQGSYGSRL | 549   | 289   |
| >TP53-F109S KTYQGSYGF   | 391  | >TP53-F109S KTYQGSYGS   | 2977  | 2586  |
| >TP53-F109S KTYQGSYGFRL | 77   | >TP53-F109S KTYQGSYGSRL | 682   | 605   |
| >TP53-F109S KTYQGSYGFRL | 23   | >TP53-F109S KTYQGSYGSRL | 67    | 44    |
| >TP53-F109S KTYQGSYGFRL | 175  | >TP53-F109S KTYQGSYGSRL | 766   | 591   |
| >TP53-F109S KTYQGSYGFRL | 50   | >TP53-F109S KTYQGSYGSRL | 161   | 111   |
| >TP53-F109S KTYQGSYGFRL | 57   | >TP53-F109S KTYQGSYGSRL | 148   | 91    |
| >TP53-F109S KTYQGSYGF   | 481  | >TP53-F109S KTYQGSYGS   | 25200 | 24719 |

|                         |       |                         |       |       |
|-------------------------|-------|-------------------------|-------|-------|
| >TP53-F109S KTYQGSYGF   | 192   | >TP53-F109S KTYQGSYGS   | 14882 | 14690 |
| >TP53-F109S KTYQGSYGF   | 294   | >TP53-F109S KTYQGSYGS   | 10805 | 10511 |
| >TP53-F109S KTYQGSYGFR  | 96    | >TP53-F109S KTYQGSYGSR  | 283   | 187   |
| >TP53-F109S KTYQGSYGF   | 325   | >TP53-F109S KTYQGSYGS   | 2826  | 2501  |
| >TP53-F109S KTYQGSYGFR  | 10    | >TP53-F109S KTYQGSYGSR  | 32    | 22    |
| >TP53-F109S KTYQGSYGF   | 4     | >TP53-F109S KTYQGSYGS   | 288   | 284   |
| >TP53-F109S KTYQGSYGFR  | 21    | >TP53-F109S KTYQGSYGSR  | 76    | 55    |
| >TP53-F109S KTYQGSYGFR  | 407   | >TP53-F109S KTYQGSYGSR  | 2596  | 2189  |
| >TP53-F109S KTYQGSYGFR  | 57    | >TP53-F109S KTYQGSYGSR  | 402   | 345   |
| >TP53-F109S KTYQGSYGFR  | 402   | >TP53-F109S KTYQGSYGSR  | 1706  | 1304  |
| >TP53-F109S KTYQGSYGF   | 55    | >TP53-F109S KTYQGSYGS   | 10575 | 10520 |
| >TP53-F109S KTYQGSYGF   | 36    | >TP53-F109S KTYQGSYGS   | 13419 | 13383 |
| >TP53-F109S KTYQGSYGF   | 2     | >TP53-F109S KTYQGSYGS   | 49    | 47    |
| >TP53-F109S KTYQGSYGFR  | 465   | >TP53-F109S KTYQGSYGSR  | 265   | 200   |
| >TP53-F109S KTYQGSYGFR  | 3     | >TP53-F109S KTYQGSYGSR  | 3     | 0     |
| >TP53-F109S KTYQGSYGF   | 101   | >TP53-F109S KTYQGSYGS   | 11986 | 11885 |
| >TP53-F109S KTYQGSYGFR  | 439   | >TP53-F109S KTYQGSYGSR  | 948   | 509   |
| >TP53-F109S KTYQGSYGF   | 15    | >TP53-F109S KTYQGSYGS   | 10043 | 10028 |
| >TP53-F109S KTYQGSYGFR  | 35    | >TP53-F109S KTYQGSYGSR  | 139   | 104   |
| >TP53-F109S KTYQGSYGFR  | 151   | >TP53-F109S KTYQGSYGSR  | 369   | 218   |
| >TP53-F109S KTYQGSYGF   | 25    | >TP53-F109S KTYQGSYGS   | 3861  | 3836  |
| >TP53-F109S KTYQGSYGFR  | 28    | >TP53-F109S KTYQGSYGSR  | 10    | 18    |
| >TP53-F109S KTYQGSYGFR  | 345   | >TP53-F109S KTYQGSYGSR  | 1475  | 1130  |
| >TP53-F109S KTYQGSYGFR  | 370   | >TP53-F109S KTYQGSYGSR  | 459   | 89    |
| >TP53-F109S KTYQGSYGFR  | 25    | >TP53-F109S KTYQGSYGSR  | 60    | 35    |
| >TP53-F109S KTYQGSYGFR  | 43    | >TP53-F109S KTYQGSYGSR  | 33    | 10    |
| >TP53-F109S QKTYQGSYGI  | 10    | >TP53-F109S QKTYQGSYGI  | 5991  | 5981  |
| >TP53-F109V FRLGFLHS    | 142   | >TP53-F109V VRLGFLHS    | 651   | 509   |
| >TP53-F109V FRLGFLHSG   | 306   | >TP53-F109V VRLGFLHSG   | 1379  | 1073  |
| >TP53-F109V FRLGFLHSGT  | 412   | >TP53-F109V VRLGFLHSGT  | 737   | 325   |
| >TP53-F109V FRLGFLHSGT  | 174   | >TP53-F109V VRLGFLHSGT  | 726   | 552   |
| >TP53-F109V GFRLGFLHS   | 921   | >TP53-F109V GVRLGFLHS   | 210   | 711   |
| >TP53-F109V GFRLGFLHSG  | 1432  | >TP53-F109V GVRLGFLHSG  | 319   | 1113  |
| >TP53-F109V SQKTYQGSYCI | 12555 | >TP53-F109V SQKTYQGSYCI | 54    | 12501 |
| >TP53-F109V SQKTYQGSYCI | 2503  | >TP53-F109V SQKTYQGSYCI | 80    | 2423  |
| >TP53-F109V SQKTYQGSYCI | 36    | >TP53-F109V SQKTYQGSYCI | 711   | 675   |
| >TP53-F109V SQKTYQGSYCI | 268   | >TP53-F109V SQKTYQGSYCI | 5131  | 4863  |
| >TP53-F109V SQKTYQGSYCI | 9     | >TP53-F109V SQKTYQGSYCI | 494   | 485   |
| >TP53-F109V YGFRLGFL    | 116   | >TP53-F109V YGVRLGFL    | 699   | 583   |
| >TP53-F109V YGFRLGFL    | 486   | >TP53-F109V YGVRLGFL    | 1574  | 1088  |
| >TP53-F109V YGFRLGFL    | 443   | >TP53-F109V YGVRLGFL    | 746   | 303   |
| >TP53-F109V YGFRLGFLH   | 89    | >TP53-F109V YGVRLGFLH   | 577   | 488   |
| >TP53-F109V SYGFRLGFL   | 95    | >TP53-F109V SYGVRLGFL   | 29    | 66    |

|                        |      |                        |      |      |
|------------------------|------|------------------------|------|------|
| >TP53-F109V SYGFRLGF   | 356  | >TP53-F109V SYGVRLGF   | 499  | 143  |
| >TP53-F109V SYGFRLGF   | 232  | >TP53-F109V SYGVRLGF   | 321  | 89   |
| >TP53-F109V SYGFRLGFL  | 319  | >TP53-F109V SYGVRLGFL  | 524  | 205  |
| >TP53-F109V SYGFRLGF   | 7    | >TP53-F109V SYGVRLGF   | 8    | 1    |
| >TP53-F109V SYGFRLGFL  | 12   | >TP53-F109V SYGVRLGFL  | 13   | 1    |
| >TP53-F109V SYGFRLGF   | 338  | >TP53-F109V SYGVRLGF   | 617  | 279  |
| >TP53-F109V SYGFRLGFL  | 139  | >TP53-F109V SYGVRLGFL  | 225  | 86   |
| >TP53-F109V SYGFRLGFL  | 222  | >TP53-F109V SYGVRLGFL  | 417  | 195  |
| >TP53-F109V GSYGFRLGF  | 78   | >TP53-F109V GSYGVRLGF  | 2758 | 2680 |
| >TP53-F109V GSYGFRLGFL | 227  | >TP53-F109V GSYGVRLGFL | 1119 | 892  |
| >TP53-F109V GSYGFRLGFL | 237  | >TP53-F109V GSYGVRLGFL | 695  | 458  |
| >TP53-F109V GSYGFRLGFL | 491  | >TP53-F109V GSYGVRLGFL | 407  | 84   |
| >TP53-F109V GSYGFRLGFL | 98   | >TP53-F109V GSYGVRLGFL | 146  | 48   |
| >TP53-F109V GSYGFRLGF  | 61   | >TP53-F109V GSYGVRLGF  | 102  | 41   |
| >TP53-F109V GSYGFRLGF  | 365  | >TP53-F109V GSYGVRLGF  | 320  | 45   |
| >TP53-F109V GSYGFRLGF  | 111  | >TP53-F109V GSYGVRLGF  | 467  | 356  |
| >TP53-F109V GSYGFRLGF  | 4    | >TP53-F109V GSYGVRLGF  | 6    | 2    |
| >TP53-F109V GSYGFRLGFL | 31   | >TP53-F109V GSYGVRLGFL | 70   | 39   |
| >TP53-F109V GSYGFRLGF  | 222  | >TP53-F109V GSYGVRLGF  | 676  | 454  |
| >TP53-F109V GSYGFRLGF  | 264  | >TP53-F109V GSYGVRLGF  | 82   | 182  |
| >TP53-F109V GSYGFRLGF  | 44   | >TP53-F109V GSYGVRLGF  | 43   | 1    |
| >TP53-F109V GSYGFRLGFL | 70   | >TP53-F109V GSYGVRLGFL | 185  | 115  |
| >TP53-F109V GSYGFRLGFL | 63   | >TP53-F109V GSYGVRLGFL | 61   | 2    |
| >TP53-F109V QGSYGFRLGF | 278  | >TP53-F109V QGSYGVRLGF | 296  | 18   |
| >TP53-F109V YQGSYGFRL  | 30   | >TP53-F109V YQGSYGVRL  | 194  | 164  |
| >TP53-F109V YQGSYGFRL  | 36   | >TP53-F109V YQGSYGVRL  | 154  | 118  |
| >TP53-F109V YQGSYGFRL  | 15   | >TP53-F109V YQGSYGVRL  | 99   | 84   |
| >TP53-F109V YQGSYGFRLC | 189  | >TP53-F109V YQGSYGVRLC | 332  | 143  |
| >TP53-F109V YQGSYGFRL  | 32   | >TP53-F109V YQGSYGVRL  | 108  | 76   |
| >TP53-F109V YQGSYGFRL  | 167  | >TP53-F109V YQGSYGVRL  | 956  | 789  |
| >TP53-F109V YQGSYGFRL  | 54   | >TP53-F109V YQGSYGVRL  | 376  | 322  |
| >TP53-F109V YQGSYGFRL  | 476  | >TP53-F109V YQGSYGVRL  | 2794 | 2318 |
| >TP53-F109V YQGSYGFRL  | 211  | >TP53-F109V YQGSYGVRL  | 130  | 81   |
| >TP53-F109V YQGSYGFRLC | 32   | >TP53-F109V YQGSYGVRLC | 31   | 1    |
| >TP53-F109V YQGSYGFRLC | 158  | >TP53-F109V YQGSYGVRLC | 234  | 76   |
| >TP53-F109V YQGSYGFRL  | 1093 | >TP53-F109V YQGSYGVRL  | 480  | 613  |
| >TP53-F109V YQGSYGFRL  | 77   | >TP53-F109V YQGSYGVRL  | 22   | 55   |
| >TP53-F109V YQGSYGFRLC | 6    | >TP53-F109V YQGSYGVRLC | 7    | 1    |
| >TP53-F109V YQGSYGFRL  | 145  | >TP53-F109V YQGSYGVRL  | 148  | 3    |
| >TP53-F109V YQGSYGFRL  | 223  | >TP53-F109V YQGSYGVRL  | 537  | 314  |
| >TP53-F109V TYQGSYGF   | 3570 | >TP53-F109V TYQGSYGV   | 384  | 3186 |
| >TP53-F109V TYQGSYGFRL | 141  | >TP53-F109V TYQGSYGVRL | 69   | 72   |
| >TP53-F109V TYQGSYGF   | 28   | >TP53-F109V TYQGSYGV   | 1646 | 1618 |

|                        |       |                        |       |       |
|------------------------|-------|------------------------|-------|-------|
| >TP53-F109V TYQGSYGFR  | 316   | >TP53-F109V TYQGSYGVRL | 1407  | 1091  |
| >TP53-F109V TYQGSYGF   | 93    | >TP53-F109V TYQGSYGV   | 1751  | 1658  |
| >TP53-F109V TYQGSYGFR  | 163   | >TP53-F109V TYQGSYGVRL | 433   | 270   |
| >TP53-F109V TYQGSYGF   | 5     | >TP53-F109V TYQGSYGV   | 129   | 124   |
| >TP53-F109V TYQGSYGFR  | 255   | >TP53-F109V TYQGSYGV   | 316   | 61    |
| >TP53-F109V TYQGSYGFR  | 7     | >TP53-F109V TYQGSYGVRL | 9     | 2     |
| >TP53-F109V TYQGSYGF   | 19    | >TP53-F109V TYQGSYGV   | 136   | 117   |
| >TP53-F109V TYQGSYGF   | 25    | >TP53-F109V TYQGSYGV   | 308   | 283   |
| >TP53-F109V TYQGSYGF   | 154   | >TP53-F109V TYQGSYGV   | 1184  | 1030  |
| >TP53-F109V TYQGSYGF   | 53    | >TP53-F109V TYQGSYGV   | 147   | 94    |
| >TP53-F109V KTYQGSYGFR | 220   | >TP53-F109V KTYQGSYGV  | 181   | 39    |
| >TP53-F109V KTYQGSYGF  | 14231 | >TP53-F109V KTYQGSYGV  | 36    | 14195 |
| >TP53-F109V KTYQGSYGF  | 169   | >TP53-F109V KTYQGSYGV  | 706   | 537   |
| >TP53-F109V KTYQGSYGF  | 7440  | >TP53-F109V KTYQGSYGV  | 117   | 7323  |
| >TP53-F109V KTYQGSYGF  | 260   | >TP53-F109V KTYQGSYGV  | 512   | 252   |
| >TP53-F109V KTYQGSYGF  | 12837 | >TP53-F109V KTYQGSYGV  | 36    | 12801 |
| >TP53-F109V KTYQGSYGF  | 391   | >TP53-F109V KTYQGSYGV  | 11    | 380   |
| >TP53-F109V KTYQGSYGF  | 77    | >TP53-F109V KTYQGSYGV  | 350   | 273   |
| >TP53-F109V KTYQGSYGF  | 2729  | >TP53-F109V KTYQGSYGV  | 4     | 2725  |
| >TP53-F109V KTYQGSYGF  | 23    | >TP53-F109V KTYQGSYGV  | 51    | 28    |
| >TP53-F109V KTYQGSYGF  | 10583 | >TP53-F109V KTYQGSYGV  | 11    | 10572 |
| >TP53-F109V KTYQGSYGF  | 13584 | >TP53-F109V KTYQGSYGV  | 9     | 13575 |
| >TP53-F109V KTYQGSYGF  | 175   | >TP53-F109V KTYQGSYGV  | 467   | 292   |
| >TP53-F109V KTYQGSYGF  | 16134 | >TP53-F109V KTYQGSYGV  | 218   | 15916 |
| >TP53-F109V KTYQGSYGF  | 29052 | >TP53-F109V KTYQGSYGV  | 22    | 29030 |
| >TP53-F109V KTYQGSYGF  | 50    | >TP53-F109V KTYQGSYGV  | 273   | 223   |
| >TP53-F109V KTYQGSYGF  | 57    | >TP53-F109V KTYQGSYGV  | 261   | 204   |
| >TP53-F109V KTYQGSYGF  | 481   | >TP53-F109V KTYQGSYGV  | 14794 | 14313 |
| >TP53-F109V KTYQGSYGF  | 192   | >TP53-F109V KTYQGSYGV  | 2738  | 2546  |
| >TP53-F109V KTYQGSYGF  | 294   | >TP53-F109V KTYQGSYGV  | 6705  | 6411  |
| >TP53-F109V KTYQGSYGF  | 5597  | >TP53-F109V KTYQGSYGV  | 497   | 5100  |
| >TP53-F109V KTYQGSYGF  | 96    | >TP53-F109V KTYQGSYGV  | 655   | 559   |
| >TP53-F109V KTYQGSYGF  | 325   | >TP53-F109V KTYQGSYGV  | 736   | 411   |
| >TP53-F109V KTYQGSYGF  | 10    | >TP53-F109V KTYQGSYGV  | 50    | 40    |
| >TP53-F109V KTYQGSYGF  | 4     | >TP53-F109V KTYQGSYGV  | 31    | 27    |
| >TP53-F109V KTYQGSYGF  | 21    | >TP53-F109V KTYQGSYGV  | 16    | 5     |
| >TP53-F109V KTYQGSYGF  | 407   | >TP53-F109V KTYQGSYGV  | 5756  | 5349  |
| >TP53-F109V KTYQGSYGF  | 57    | >TP53-F109V KTYQGSYGV  | 544   | 487   |
| >TP53-F109V KTYQGSYGF  | 18363 | >TP53-F109V KTYQGSYGV  | 69    | 18294 |
| >TP53-F109V KTYQGSYGF  | 6412  | >TP53-F109V KTYQGSYGV  | 17    | 6395  |
| >TP53-F109V KTYQGSYGF  | 402   | >TP53-F109V KTYQGSYGV  | 1307  | 905   |
| >TP53-F109V KTYQGSYGF  | 55    | >TP53-F109V KTYQGSYGV  | 2295  | 2240  |
| >TP53-F109V KTYQGSYGF  | 36    | >TP53-F109V KTYQGSYGV  | 2201  | 2165  |

|                        |      |                        |       |       |
|------------------------|------|------------------------|-------|-------|
| >TP53-F109V KTYQGSYGF  | 2    | >TP53-F109V KTYQGSYGV  | 8     | 6     |
| >TP53-F109V KTYQGSYGFR | 465  | >TP53-F109V KTYQGSYGVF | 526   | 61    |
| >TP53-F109V KTYQGSYGF  | 3    | >TP53-F109V KTYQGSYGVF | 3     | 0     |
| >TP53-F109V KTYQGSYGF  | 101  | >TP53-F109V KTYQGSYGV  | 5047  | 4946  |
| >TP53-F109V KTYQGSYGFR | 439  | >TP53-F109V KTYQGSYGVF | 891   | 452   |
| >TP53-F109V KTYQGSYGF  | 15   | >TP53-F109V KTYQGSYGV  | 1533  | 1518  |
| >TP53-F109V KTYQGSYGFR | 35   | >TP53-F109V KTYQGSYGVF | 150   | 115   |
| >TP53-F109V KTYQGSYGF  | 151  | >TP53-F109V KTYQGSYGVF | 298   | 147   |
| >TP53-F109V KTYQGSYGF  | 25   | >TP53-F109V KTYQGSYGV  | 564   | 539   |
| >TP53-F109V KTYQGSYGFR | 28   | >TP53-F109V KTYQGSYGVF | 38    | 10    |
| >TP53-F109V KTYQGSYGFR | 345  | >TP53-F109V KTYQGSYGVF | 1582  | 1237  |
| >TP53-F109V KTYQGSYGF  | 370  | >TP53-F109V KTYQGSYGVF | 683   | 313   |
| >TP53-F109V KTYQGSYGF  | 25   | >TP53-F109V KTYQGSYGVF | 47    | 22    |
| >TP53-F109V KTYQGSYGF  | 1452 | >TP53-F109V KTYQGSYGV  | 272   | 1180  |
| >TP53-F109V KTYQGSYGFR | 43   | >TP53-F109V KTYQGSYGVF | 51    | 8     |
| >TP53-F109V QKTYQGSYGI | 10   | >TP53-F109V QKTYQGSYGI | 609   | 599   |
| >TP53-F113C FLHSGTAKSV | 122  | >TP53-F113C CLHSGTAKSV | 4136  | 4014  |
| >TP53-F113C FLHSGTAKS  | 179  | >TP53-F113C CLHSGTAKS  | 7684  | 7505  |
| >TP53-F113C FLHSGTAKSV | 13   | >TP53-F113C CLHSGTAKSV | 170   | 157   |
| >TP53-F113C FLHSGTAKSV | 413  | >TP53-F113C CLHSGTAKSV | 9503  | 9090  |
| >TP53-F113C FLHSGTAKS  | 26   | >TP53-F113C CLHSGTAKS  | 1727  | 1701  |
| >TP53-F113C FLHSGTAKSV | 11   | >TP53-F113C CLHSGTAKSV | 110   | 99    |
| >TP53-F113C FLHSGTAKSV | 27   | >TP53-F113C CLHSGTAKSV | 1043  | 1016  |
| >TP53-F113C FLHSGTAKS  | 188  | >TP53-F113C CLHSGTAKS  | 8265  | 8077  |
| >TP53-F113C FLHSGTAKSV | 2    | >TP53-F113C CLHSGTAKSV | 14    | 12    |
| >TP53-F113C FLHSGTAKSV | 116  | >TP53-F113C CLHSGTAKSV | 5370  | 5254  |
| >TP53-F113C FLHSGTAKSV | 5    | >TP53-F113C CLHSGTAKSV | 93    | 88    |
| >TP53-F113C FLHSGTAKSV | 7    | >TP53-F113C CLHSGTAKSV | 219   | 212   |
| >TP53-F113C FLHSGTAKSV | 7    | >TP53-F113C CLHSGTAKSV | 101   | 94    |
| >TP53-F113C FLHSGTAK   | 124  | >TP53-F113C CLHSGTAK   | 8962  | 8838  |
| >TP53-F113C FLHSGTAKS  | 31   | >TP53-F113C CLHSGTAKS  | 3561  | 3530  |
| >TP53-F113C FLHSGTAKSV | 2    | >TP53-F113C CLHSGTAKSV | 4     | 2     |
| >TP53-F113C FLHSGTAKSV | 13   | >TP53-F113C CLHSGTAKSV | 1339  | 1326  |
| >TP53-F113C FLHSGTAK   | 114  | >TP53-F113C CLHSGTAK   | 78    | 36    |
| >TP53-F113C FLHSGTAK   | 2726 | >TP53-F113C CLHSGTAK   | 360   | 2366  |
| >TP53-F113C FLHSGTAK   | 256  | >TP53-F113C CLHSGTAK   | 1113  | 857   |
| >TP53-F113C FLHSGTAKSV | 283  | >TP53-F113C CLHSGTAKSV | 4352  | 4069  |
| >TP53-F113C FLHSGTAKSV | 261  | >TP53-F113C CLHSGTAKSV | 2088  | 1827  |
| >TP53-F113C YQGSYGFRLC | 189  | >TP53-F113C YQGSYGFRLC | 513   | 324   |
| >TP53-F113C YQGSYGFRLC | 32   | >TP53-F113C YQGSYGFRLC | 6154  | 6122  |
| >TP53-F113C YQGSYGFRLC | 158  | >TP53-F113C YQGSYGFRLC | 16893 | 16735 |
| >TP53-F113C YQGSYGFRLC | 6    | >TP53-F113C YQGSYGFRLC | 2964  | 2958  |
| >TP53-F113C RLGFLHSGTA | 326  | >TP53-F113C RLGCLHSGTA | 289   | 37    |

|                         |     |                        |       |       |
|-------------------------|-----|------------------------|-------|-------|
| >TP53-F113C RLGFLHSGT   | 719 | >TP53-F113C RLGCLHSGT  | 278   | 441   |
| >TP53-F113C RLGFLHSGTA  | 162 | >TP53-F113C RLGCLHSGTA | 80    | 82    |
| >TP53-F113C RLGFLHSGTA  | 866 | >TP53-F113C RLGCLHSGTA | 163   | 703   |
| >TP53-F113C RLGFLHSGTA  | 43  | >TP53-F113C RLGCLHSGTA | 56    | 13    |
| >TP53-F113C RLGFLHSGTA  | 125 | >TP53-F113C RLGCLHSGTA | 266   | 141   |
| >TP53-F113C RLGFLHSGTA  | 384 | >TP53-F113C RLGCLHSGTA | 549   | 165   |
| >TP53-F113C RLGFLHSGTA  | 262 | >TP53-F113C RLGCLHSGTA | 360   | 98    |
| >TP53-F113C FRLGFLHS    | 142 | >TP53-F113C FRLGCLHS   | 757   | 615   |
| >TP53-F113C FRLGFLHSG   | 306 | >TP53-F113C FRLGCLHSG  | 1045  | 739   |
| >TP53-F113C FRLGFLHSGT  | 412 | >TP53-F113C FRLGCLHSGT | 245   | 167   |
| >TP53-F113C FRLGFLHSGT, | 174 | >TP53-F113C FRLGCLHSGT | 415   | 241   |
| >TP53-F113C YGFRLGFL    | 116 | >TP53-F113C YGFRLGCL   | 463   | 347   |
| >TP53-F113C YGFRLGFL    | 486 | >TP53-F113C YGFRLGCL   | 2784  | 2298  |
| >TP53-F113C YGFRLGFL    | 443 | >TP53-F113C YGFRLGCL   | 5711  | 5268  |
| >TP53-F113C YGFRLGFLH   | 89  | >TP53-F113C YGFRLGCLH  | 300   | 211   |
| >TP53-F113C SYGFRLGFL   | 95  | >TP53-F113C SYGFRLGCL  | 666   | 571   |
| >TP53-F113C SYGFRLGF    | 356 | >TP53-F113C SYGFRLGC   | 29441 | 29085 |
| >TP53-F113C SYGFRLGF    | 232 | >TP53-F113C SYGFRLGC   | 17835 | 17603 |
| >TP53-F113C SYGFRLGFL   | 319 | >TP53-F113C SYGFRLGCL  | 721   | 402   |
| >TP53-F113C SYGFRLGF    | 7   | >TP53-F113C SYGFRLGC   | 4337  | 4330  |
| >TP53-F113C SYGFRLGFL   | 12  | >TP53-F113C SYGFRLGCL  | 107   | 95    |
| >TP53-F113C SYGFRLGF    | 338 | >TP53-F113C SYGFRLGC   | 2569  | 2231  |
| >TP53-F113C SYGFRLGFL   | 139 | >TP53-F113C SYGFRLGCL  | 193   | 54    |
| >TP53-F113C SYGFRLGFL   | 222 | >TP53-F113C SYGFRLGCL  | 2042  | 1820  |
| >TP53-F113C GSYGFRLGF   | 78  | >TP53-F113C GSYGFRLGC  | 1272  | 1194  |
| >TP53-F113C GSYGFRLGFL  | 227 | >TP53-F113C GSYGFRLGCL | 392   | 165   |
| >TP53-F113C GSYGFRLGFL  | 237 | >TP53-F113C GSYGFRLGCL | 1141  | 904   |
| >TP53-F113C GSYGFRLGFL  | 491 | >TP53-F113C GSYGFRLGCL | 1021  | 530   |
| >TP53-F113C GSYGFRLGFL  | 98  | >TP53-F113C GSYGFRLGCL | 506   | 408   |
| >TP53-F113C GSYGFRLGF   | 61  | >TP53-F113C GSYGFRLGC  | 7320  | 7259  |
| >TP53-F113C GSYGFRLGF   | 365 | >TP53-F113C GSYGFRLGC  | 18961 | 18596 |
| >TP53-F113C GSYGFRLGF   | 111 | >TP53-F113C GSYGFRLGC  | 14218 | 14107 |
| >TP53-F113C GSYGFRLGF   | 4   | >TP53-F113C GSYGFRLGC  | 7556  | 7552  |
| >TP53-F113C GSYGFRLGFL  | 31  | >TP53-F113C GSYGFRLGCL | 190   | 159   |
| >TP53-F113C GSYGFRLGF   | 222 | >TP53-F113C GSYGFRLGC  | 17904 | 17682 |
| >TP53-F113C GSYGFRLGF   | 264 | >TP53-F113C GSYGFRLGC  | 18264 | 18000 |
| >TP53-F113C GSYGFRLGF   | 44  | >TP53-F113C GSYGFRLGC  | 7799  | 7755  |
| >TP53-F113C GSYGFRLGFL  | 70  | >TP53-F113C GSYGFRLGCL | 412   | 342   |
| >TP53-F113C GSYGFRLGFL  | 63  | >TP53-F113C GSYGFRLGCL | 140   | 77    |
| >TP53-F113C QGSYGFRLGF  | 278 | >TP53-F113C QGSYGFRLGC | 22916 | 22638 |
| >TP53-F113L FLHSGTAKSV  | 122 | >TP53-F113L LLHSGTAKSV | 1276  | 1154  |
| >TP53-F113L FLHSGTAKS   | 179 | >TP53-F113L LLHSGTAKS  | 2470  | 2291  |
| >TP53-F113L FLHSGTAKSV  | 13  | >TP53-F113L LLHSGTAKSV | 43    | 30    |

|                        |       |                        |      |       |
|------------------------|-------|------------------------|------|-------|
| >TP53-F113L FLHSGTAKSV | 413   | >TP53-F113L LLHSGTAKSV | 3958 | 3545  |
| >TP53-F113L FLHSGTAKS  | 26    | >TP53-F113L LLHSGTAKS  | 376  | 350   |
| >TP53-F113L FLHSGTAKSV | 11    | >TP53-F113L LLHSGTAKSV | 29   | 18    |
| >TP53-F113L FLHSGTAKSV | 27    | >TP53-F113L LLHSGTAKSV | 267  | 240   |
| >TP53-F113L FLHSGTAKS  | 188   | >TP53-F113L LLHSGTAKS  | 1778 | 1590  |
| >TP53-F113L FLHSGTAKSV | 2     | >TP53-F113L LLHSGTAKSV | 4    | 2     |
| >TP53-F113L FLHSGTAKSV | 116   | >TP53-F113L LLHSGTAKSV | 1022 | 906   |
| >TP53-F113L FLHSGTAKSV | 5     | >TP53-F113L LLHSGTAKSV | 18   | 13    |
| >TP53-F113L FLHSGTAKSV | 7     | >TP53-F113L LLHSGTAKSV | 22   | 15    |
| >TP53-F113L FLHSGTAKSV | 7     | >TP53-F113L LLHSGTAKSV | 24   | 17    |
| >TP53-F113L FLHSGTAK   | 124   | >TP53-F113L LLHSGTAK   | 861  | 737   |
| >TP53-F113L FLHSGTAKS  | 31    | >TP53-F113L LLHSGTAKS  | 157  | 126   |
| >TP53-F113L FLHSGTAKSV | 2     | >TP53-F113L LLHSGTAKSV | 2    | 0     |
| >TP53-F113L FLHSGTAKSV | 13    | >TP53-F113L LLHSGTAKSV | 54   | 41    |
| >TP53-F113L FLHSGTAK   | 114   | >TP53-F113L LLHSGTAK   | 59   | 55    |
| >TP53-F113L FLHSGTAK   | 2726  | >TP53-F113L LLHSGTAK   | 146  | 2580  |
| >TP53-F113L FLHSGTAK   | 256   | >TP53-F113L LLHSGTAK   | 1154 | 898   |
| >TP53-F113L FLHSGTAKSV | 283   | >TP53-F113L LLHSGTAKSV | 1612 | 1329  |
| >TP53-F113L FLHSGTAKSV | 261   | >TP53-F113L LLHSGTAKSV | 579  | 318   |
| >TP53-F113L GFLHSGTAKS | 17414 | >TP53-F113L GLLHSGTAKS | 357  | 17057 |
| >TP53-F113L GFLHSGTAKS | 7887  | >TP53-F113L GLLHSGTAKS | 308  | 7579  |
| >TP53-F113L GFLHSGTA   | 12891 | >TP53-F113L GLLHSGTA   | 87   | 12804 |
| >TP53-F113L GFLHSGTAKS | 9762  | >TP53-F113L GLLHSGTAKS | 27   | 9735  |
| >TP53-F113L GFLHSGTAKS | 8203  | >TP53-F113L GLLHSGTAKS | 208  | 7995  |
| >TP53-F113L GFLHSGTA   | 15827 | >TP53-F113L GLLHSGTA   | 61   | 15766 |
| >TP53-F113L GFLHSGTAKS | 3691  | >TP53-F113L GLLHSGTAKS | 5    | 3686  |
| >TP53-F113L GFLHSGTA   | 13924 | >TP53-F113L GLLHSGTA   | 39   | 13885 |
| >TP53-F113L GFLHSGTAKS | 4833  | >TP53-F113L GLLHSGTAKS | 6    | 4827  |
| >TP53-F113L GFLHSGTA   | 14815 | >TP53-F113L GLLHSGTA   | 61   | 14754 |
| >TP53-F113L GFLHSGTAKS | 3521  | >TP53-F113L GLLHSGTAKS | 8    | 3513  |
| >TP53-F113L GFLHSGTAKS | 17912 | >TP53-F113L GLLHSGTAKS | 52   | 17860 |
| >TP53-F113L GFLHSGTA   | 27606 | >TP53-F113L GLLHSGTA   | 78   | 27528 |
| >TP53-F113L GFLHSGTAKS | 4962  | >TP53-F113L GLLHSGTAKS | 4    | 4958  |
| >TP53-F113L GFLHSGTAK  | 3200  | >TP53-F113L GLLHSGTAK  | 58   | 3142  |
| >TP53-F113L GFLHSGTAK  | 2813  | >TP53-F113L GLLHSGTAK  | 167  | 2646  |
| >TP53-F113L GFLHSGTAKS | 6308  | >TP53-F113L GLLHSGTAKS | 447  | 5861  |
| >TP53-F113L YQGSYGFRLC | 10848 | >TP53-F113L YQGSYGFRLC | 138  | 10710 |
| >TP53-F113L YQGSYGFRLC | 8716  | >TP53-F113L YQGSYGFRLC | 175  | 8541  |
| >TP53-F113L YQGSYGFRLC | 189   | >TP53-F113L YQGSYGFRLC | 29   | 160   |
| >TP53-F113L YQGSYGFRLC | 6206  | >TP53-F113L YQGSYGFRLC | 153  | 6053  |
| >TP53-F113L YQGSYGFRLC | 32    | >TP53-F113L YQGSYGFRLC | 189  | 157   |
| >TP53-F113L YQGSYGFRLC | 158   | >TP53-F113L YQGSYGFRLC | 2472 | 2314  |
| >TP53-F113L YQGSYGFRLC | 6     | >TP53-F113L YQGSYGFRLC | 70   | 64    |

|                         |      |                         |      |      |
|-------------------------|------|-------------------------|------|------|
| >TP53-F113L YQGSYGFRLC  | 4801 | >TP53-F113L YQGSYGFRLC  | 164  | 4637 |
| >TP53-F113L RLGFLHSGTA  | 326  | >TP53-F113L RLGLLHSGTA  | 200  | 126  |
| >TP53-F113L RLGFLHSGTA  | 162  | >TP53-F113L RLGLLHSGTA  | 453  | 291  |
| >TP53-F113L RLGFLHSGTA  | 43   | >TP53-F113L RLGLLHSGTA  | 63   | 20   |
| >TP53-F113L RLGFLHSGTA  | 125  | >TP53-F113L RLGLLHSGTA  | 238  | 113  |
| >TP53-F113L RLGFLHSGTA  | 384  | >TP53-F113L RLGLLHSGTA  | 761  | 377  |
| >TP53-F113L RLGFLHSGTA  | 262  | >TP53-F113L RLGLLHSGTA  | 430  | 168  |
| >TP53-F113L FRLGFLHS    | 142  | >TP53-F113L FRLGLLHS    | 143  | 1    |
| >TP53-F113L FRLGFLHSG   | 306  | >TP53-F113L FRLGLLHSG   | 269  | 37   |
| >TP53-F113L FRLGFLHSGT  | 412  | >TP53-F113L FRLGLLHSGT  | 364  | 48   |
| >TP53-F113L FRLGFLHSGT, | 174  | >TP53-F113L FRLGLLHSGT, | 157  | 17   |
| >TP53-F113L YGFRLGFL    | 116  | >TP53-F113L YGFRLGLL    | 135  | 19   |
| >TP53-F113L YGFRLGFL    | 486  | >TP53-F113L YGFRLGLL    | 1317 | 831  |
| >TP53-F113L YGFRLGFL    | 443  | >TP53-F113L YGFRLGLL    | 2066 | 1623 |
| >TP53-F113L YGFRLGFLH   | 89   | >TP53-F113L YGFRLGLLH   | 82   | 7    |
| >TP53-F113L SYGFRLGFL   | 95   | >TP53-F113L SYGFRLGLL   | 406  | 311  |
| >TP53-F113L SYGFRLGF    | 356  | >TP53-F113L SYGFRLGL    | 6401 | 6045 |
| >TP53-F113L SYGFRLGF    | 232  | >TP53-F113L SYGFRLGL    | 1571 | 1339 |
| >TP53-F113L SYGFRLGFL   | 319  | >TP53-F113L SYGFRLGLL   | 234  | 85   |
| >TP53-F113L SYGFRLGF    | 7    | >TP53-F113L SYGFRLGL    | 23   | 16   |
| >TP53-F113L SYGFRLGFL   | 12   | >TP53-F113L SYGFRLGLL   | 20   | 8    |
| >TP53-F113L SYGFRLGF    | 338  | >TP53-F113L SYGFRLGL    | 215  | 123  |
| >TP53-F113L SYGFRLGFL   | 139  | >TP53-F113L SYGFRLGLL   | 138  | 1    |
| >TP53-F113L SYGFRLGFL   | 222  | >TP53-F113L SYGFRLGLL   | 1038 | 816  |
| >TP53-F113L GSYGFRLGF   | 78   | >TP53-F113L GSYGFRLGL   | 34   | 44   |
| >TP53-F113L GSYGFRLGFL  | 227  | >TP53-F113L GSYGFRLGLL  | 413  | 186  |
| >TP53-F113L GSYGFRLGFL  | 237  | >TP53-F113L GSYGFRLGLL  | 374  | 137  |
| >TP53-F113L GSYGFRLGFL  | 491  | >TP53-F113L GSYGFRLGLL  | 358  | 133  |
| >TP53-F113L GSYGFRLGFL  | 98   | >TP53-F113L GSYGFRLGLL  | 179  | 81   |
| >TP53-F113L GSYGFRLGF   | 61   | >TP53-F113L GSYGFRLGL   | 387  | 326  |
| >TP53-F113L GSYGFRLGF   | 365  | >TP53-F113L GSYGFRLGL   | 7801 | 7436 |
| >TP53-F113L GSYGFRLGF   | 111  | >TP53-F113L GSYGFRLGL   | 2453 | 2342 |
| >TP53-F113L GSYGFRLGF   | 4    | >TP53-F113L GSYGFRLGL   | 11   | 7    |
| >TP53-F113L GSYGFRLGFL  | 31   | >TP53-F113L GSYGFRLGLL  | 43   | 12   |
| >TP53-F113L GSYGFRLGF   | 222  | >TP53-F113L GSYGFRLGL   | 3516 | 3294 |
| >TP53-F113L GSYGFRLGF   | 264  | >TP53-F113L GSYGFRLGL   | 6577 | 6313 |
| >TP53-F113L GSYGFRLGF   | 44   | >TP53-F113L GSYGFRLGL   | 283  | 239  |
| >TP53-F113L GSYGFRLGFL  | 70   | >TP53-F113L GSYGFRLGLL  | 91   | 21   |
| >TP53-F113L GSYGFRLGFL  | 63   | >TP53-F113L GSYGFRLGLL  | 65   | 2    |
| >TP53-F113L QGSYGFRLGF  | 278  | >TP53-F113L QGSYGFRLGL  | 2981 | 2703 |
| >TP53-F113S FLHSGTAKSV  | 122  | >TP53-F113S SLHSGTAKSV  | 1158 | 1036 |
| >TP53-F113S FLHSGTAKS   | 179  | >TP53-F113S SLHSGTAKS   | 3645 | 3466 |
| >TP53-F113S FLHSGTAKSV  | 13   | >TP53-F113S SLHSGTAKSV  | 43   | 30   |



|                        |       |                        |       |       |
|------------------------|-------|------------------------|-------|-------|
| >TP53-F113S FLHSGTAKSV | 413   | >TP53-F113S SLHSGTAKSV | 5648  | 5235  |
| >TP53-F113S FLHSGTAKS  | 26    | >TP53-F113S SLHSGTAKS  | 476   | 450   |
| >TP53-F113S FLHSGTAKSV | 11    | >TP53-F113S SLHSGTAKSV | 27    | 16    |
| >TP53-F113S FLHSGTAKSV | 27    | >TP53-F113S SLHSGTAKSV | 340   | 313   |
| >TP53-F113S FLHSGTAKS  | 188   | >TP53-F113S SLHSGTAKS  | 1670  | 1482  |
| >TP53-F113S FLHSGTAKSV | 2     | >TP53-F113S SLHSGTAKSV | 3     | 1     |
| >TP53-F113S FLHSGTAKSV | 116   | >TP53-F113S SLHSGTAKSV | 881   | 765   |
| >TP53-F113S FLHSGTAKSV | 5     | >TP53-F113S SLHSGTAKSV | 21    | 16    |
| >TP53-F113S FLHSGTAKSV | 7     | >TP53-F113S SLHSGTAKSV | 11    | 4     |
| >TP53-F113S FLHSGTAKSV | 7     | >TP53-F113S SLHSGTAKSV | 96    | 89    |
| >TP53-F113S FLHSGTAK   | 124   | >TP53-F113S SLHSGTAK   | 1683  | 1559  |
| >TP53-F113S FLHSGTAKS  | 31    | >TP53-F113S SLHSGTAKS  | 304   | 273   |
| >TP53-F113S FLHSGTAKSV | 2     | >TP53-F113S SLHSGTAKSV | 2     | 0     |
| >TP53-F113S FLHSGTAKSV | 13    | >TP53-F113S SLHSGTAKSV | 102   | 89    |
| >TP53-F113S FLHSGTAK   | 114   | >TP53-F113S SLHSGTAK   | 56    | 58    |
| >TP53-F113S FLHSGTAK   | 1030  | >TP53-F113S SLHSGTAK   | 84    | 946   |
| >TP53-F113S FLHSGTAK   | 2726  | >TP53-F113S SLHSGTAK   | 57    | 2669  |
| >TP53-F113S FLHSGTAK   | 256   | >TP53-F113S SLHSGTAK   | 964   | 708   |
| >TP53-F113S FLHSGTAKSV | 283   | >TP53-F113S SLHSGTAKSV | 920   | 637   |
| >TP53-F113S FLHSGTAKSV | 261   | >TP53-F113S SLHSGTAKSV | 1426  | 1165  |
| >TP53-F113S GFLHSGTAK  | 3200  | >TP53-F113S GSLHSGTAK  | 243   | 2957  |
| >TP53-F113S GFLHSGTAK  | 2813  | >TP53-F113S GSLHSGTAK  | 42    | 2771  |
| >TP53-F113S GFLHSGTAK  | 1580  | >TP53-F113S GSLHSGTAK  | 477   | 1103  |
| >TP53-F113S GFLHSGTAKS | 6308  | >TP53-F113S GSLHSGTAKS | 336   | 5972  |
| >TP53-F113S GFLHSGTAKS | 26259 | >TP53-F113S GSLHSGTAKS | 137   | 26122 |
| >TP53-F113S GFLHSGTAKS | 7670  | >TP53-F113S GSLHSGTAKS | 317   | 7353  |
| >TP53-F113S GFLHSGTAK  | 3173  | >TP53-F113S GSLHSGTAK  | 175   | 2998  |
| >TP53-F113S YQGSYGFRLC | 189   | >TP53-F113S YQGSYGFRLC | 1111  | 922   |
| >TP53-F113S YQGSYGFRLC | 32    | >TP53-F113S YQGSYGFRLC | 4374  | 4342  |
| >TP53-F113S YQGSYGFRLC | 158   | >TP53-F113S YQGSYGFRLC | 16039 | 15881 |
| >TP53-F113S YQGSYGFRLC | 6     | >TP53-F113S YQGSYGFRLC | 3730  | 3724  |
| >TP53-F113S RLGFLHSGTA | 993   | >TP53-F113S RLGSLHSGTA | 325   | 668   |
| >TP53-F113S RLGFLHSGTA | 326   | >TP53-F113S RLGSLHSGTA | 127   | 199   |
| >TP53-F113S RLGFLHSGT  | 719   | >TP53-F113S RLGSLHSGT  | 329   | 390   |
| >TP53-F113S RLGFLHSGTA | 162   | >TP53-F113S RLGSLHSGTA | 89    | 73    |
| >TP53-F113S RLGFLHSGTA | 554   | >TP53-F113S RLGSLHSGTA | 173   | 381   |
| >TP53-F113S RLGFLHSGTA | 43    | >TP53-F113S RLGSLHSGTA | 43    | 0     |
| >TP53-F113S RLGFLHSGTA | 125   | >TP53-F113S RLGSLHSGTA | 186   | 61    |
| >TP53-F113S RLGFLHSGTA | 384   | >TP53-F113S RLGSLHSGTA | 560   | 176   |
| >TP53-F113S RLGFLHSGTA | 262   | >TP53-F113S RLGSLHSGTA | 198   | 64    |
| >TP53-F113S FRLGFLHS   | 142   | >TP53-F113S FRLGSLHS   | 345   | 203   |
| >TP53-F113S FRLGFLHSG  | 306   | >TP53-F113S FRLGSLHSG  | 1029  | 723   |
| >TP53-F113S FRLGFLHSGT | 412   | >TP53-F113S FRLGSLHSGT | 739   | 327   |

|                         |     |                         |       |       |
|-------------------------|-----|-------------------------|-------|-------|
| >TP53-F113S FRLGFLHSGT, | 174 | >TP53-F113S FRLGSLHSGT, | 329   | 155   |
| >TP53-F113S GFRLGFLHS   | 921 | >TP53-F113S GFRLGSLHS   | 475   | 446   |
| >TP53-F113S YGFRLGFL    | 116 | >TP53-F113S YGFRLGSL    | 103   | 13    |
| >TP53-F113S YGFRLGFL    | 486 | >TP53-F113S YGFRLGSL    | 1377  | 891   |
| >TP53-F113S YGFRLGFL    | 443 | >TP53-F113S YGFRLGSL    | 1766  | 1323  |
| >TP53-F113S YGFRLGFLH   | 89  | >TP53-F113S YGFRLGSLH   | 7     | 82    |
| >TP53-F113S SYGFRLGFL   | 95  | >TP53-F113S SYGFRLGSL   | 23    | 72    |
| >TP53-F113S SYGFRLGF    | 356 | >TP53-F113S SYGFRLGS    | 28695 | 28339 |
| >TP53-F113S SYGFRLGF    | 232 | >TP53-F113S SYGFRLGS    | 19241 | 19009 |
| >TP53-F113S SYGFRLGFL   | 319 | >TP53-F113S SYGFRLGSL   | 909   | 590   |
| >TP53-F113S SYGFRLGF    | 7   | >TP53-F113S SYGFRLGS    | 4669  | 4662  |
| >TP53-F113S SYGFRLGFL   | 12  | >TP53-F113S SYGFRLGSL   | 15    | 3     |
| >TP53-F113S SYGFRLGF    | 338 | >TP53-F113S SYGFRLGS    | 7474  | 7136  |
| >TP53-F113S SYGFRLGFL   | 139 | >TP53-F113S SYGFRLGSL   | 110   | 29    |
| >TP53-F113S SYGFRLGFL   | 222 | >TP53-F113S SYGFRLGSL   | 843   | 621   |
| >TP53-F113S GSYGFRLGF   | 78  | >TP53-F113S GSYGFRLGS   | 2931  | 2853  |
| >TP53-F113S GSYGFRLGFL  | 227 | >TP53-F113S GSYGFRLGSL  | 343   | 116   |
| >TP53-F113S GSYGFRLGFL  | 237 | >TP53-F113S GSYGFRLGSL  | 327   | 90    |
| >TP53-F113S GSYGFRLGFL  | 549 | >TP53-F113S GSYGFRLGSL  | 374   | 175   |
| >TP53-F113S GSYGFRLGFL  | 491 | >TP53-F113S GSYGFRLGSL  | 590   | 99    |
| >TP53-F113S GSYGFRLGFL  | 98  | >TP53-F113S GSYGFRLGSL  | 486   | 388   |
| >TP53-F113S GSYGFRLGF   | 61  | >TP53-F113S GSYGFRLGS   | 15566 | 15505 |
| >TP53-F113S GSYGFRLGF   | 365 | >TP53-F113S GSYGFRLGS   | 18336 | 17971 |
| >TP53-F113S GSYGFRLGF   | 111 | >TP53-F113S GSYGFRLGS   | 16256 | 16145 |
| >TP53-F113S GSYGFRLGF   | 4   | >TP53-F113S GSYGFRLGS   | 7410  | 7406  |
| >TP53-F113S GSYGFRLGFL  | 31  | >TP53-F113S GSYGFRLGSL  | 21    | 10    |
| >TP53-F113S GSYGFRLGF   | 222 | >TP53-F113S GSYGFRLGS   | 18054 | 17832 |
| >TP53-F113S GSYGFRLGF   | 264 | >TP53-F113S GSYGFRLGS   | 20572 | 20308 |
| >TP53-F113S GSYGFRLGF   | 44  | >TP53-F113S GSYGFRLGS   | 5658  | 5614  |
| >TP53-F113S GSYGFRLGFL  | 70  | >TP53-F113S GSYGFRLGSL  | 103   | 33    |
| >TP53-F113S GSYGFRLGFL  | 63  | >TP53-F113S GSYGFRLGSL  | 18    | 45    |
| >TP53-F113S QGSYGFRLGF  | 278 | >TP53-F113S QGSYGFRLGS  | 22199 | 21921 |
| >TP53-F113V FLHSGTAKSV  | 122 | >TP53-F113V VLHSGTAKSV  | 2102  | 1980  |
| >TP53-F113V FLHSGTAKS   | 179 | >TP53-F113V VLHSGTAKS   | 5876  | 5697  |
| >TP53-F113V FLHSGTAKSV  | 13  | >TP53-F113V VLHSGTAKSV  | 144   | 131   |
| >TP53-F113V FLHSGTAKSV  | 413 | >TP53-F113V VLHSGTAKSV  | 7864  | 7451  |
| >TP53-F113V FLHSGTAKS   | 26  | >TP53-F113V VLHSGTAKS   | 681   | 655   |
| >TP53-F113V FLHSGTAKSV  | 11  | >TP53-F113V VLHSGTAKSV  | 70    | 59    |
| >TP53-F113V FLHSGTAKSV  | 27  | >TP53-F113V VLHSGTAKSV  | 435   | 408   |
| >TP53-F113V FLHSGTAKS   | 188 | >TP53-F113V VLHSGTAKS   | 1538  | 1350  |
| >TP53-F113V FLHSGTAKSV  | 2   | >TP53-F113V VLHSGTAKSV  | 3     | 1     |
| >TP53-F113V FLHSGTAKSV  | 116 | >TP53-F113V VLHSGTAKSV  | 893   | 777   |
| >TP53-F113V FLHSGTAKSV  | 5   | >TP53-F113V VLHSGTAKSV  | 19    | 14    |

|                        |       |                        |      |       |
|------------------------|-------|------------------------|------|-------|
| >TP53-F113V FLHSGTAKSV | 7     | >TP53-F113V VLHSGTAKSV | 17   | 10    |
| >TP53-F113V FLHSGTAKSV | 7     | >TP53-F113V VLHSGTAKSV | 20   | 13    |
| >TP53-F113V FLHSGTAK   | 124   | >TP53-F113V VLHSGTAK   | 1295 | 1171  |
| >TP53-F113V FLHSGTAKS  | 31    | >TP53-F113V VLHSGTAKS  | 251  | 220   |
| >TP53-F113V FLHSGTAKSV | 2     | >TP53-F113V VLHSGTAKSV | 2    | 0     |
| >TP53-F113V FLHSGTAKSV | 13    | >TP53-F113V VLHSGTAKSV | 85   | 72    |
| >TP53-F113V FLHSGTAK   | 114   | >TP53-F113V VLHSGTAK   | 48   | 66    |
| >TP53-F113V FLHSGTAK   | 1030  | >TP53-F113V VLHSGTAK   | 211  | 819   |
| >TP53-F113V FLHSGTAK   | 2726  | >TP53-F113V VLHSGTAK   | 378  | 2348  |
| >TP53-F113V FLHSGTAK   | 256   | >TP53-F113V VLHSGTAK   | 2670 | 2414  |
| >TP53-F113V FLHSGTAKSV | 283   | >TP53-F113V VLHSGTAKSV | 1706 | 1423  |
| >TP53-F113V FLHSGTAKSV | 261   | >TP53-F113V VLHSGTAKSV | 912  | 651   |
| >TP53-F113V GFLHSGTAKS | 9762  | >TP53-F113V GVLHSGTAKS | 436  | 9326  |
| >TP53-F113V GFLHSGTAKS | 8203  | >TP53-F113V GVLHSGTAKS | 244  | 7959  |
| >TP53-F113V GFLHSGTAKS | 3691  | >TP53-F113V GVLHSGTAKS | 227  | 3464  |
| >TP53-F113V GFLHSGTAKS | 4833  | >TP53-F113V GVLHSGTAKS | 289  | 4544  |
| >TP53-F113V GFLHSGTAKS | 3521  | >TP53-F113V GVLHSGTAKS | 223  | 3298  |
| >TP53-F113V GFLHSGTAKS | 4962  | >TP53-F113V GVLHSGTAKS | 121  | 4841  |
| >TP53-F113V GFLHSGTAK  | 3200  | >TP53-F113V GVLHSGTAK  | 123  | 3077  |
| >TP53-F113V GFLHSGTAK  | 2813  | >TP53-F113V GVLHSGTAK  | 27   | 2786  |
| >TP53-F113V GFLHSGTAK  | 1580  | >TP53-F113V GVLHSGTAK  | 361  | 1219  |
| >TP53-F113V YQGSYGFRLC | 10848 | >TP53-F113V YQGSYGFRLC | 42   | 10806 |
| >TP53-F113V YQGSYGFRLC | 8716  | >TP53-F113V YQGSYGFRLC | 153  | 8563  |
| >TP53-F113V YQGSYGFRLC | 12671 | >TP53-F113V YQGSYGFRLC | 82   | 12589 |
| >TP53-F113V YQGSYGFRLC | 189   | >TP53-F113V YQGSYGFRLC | 9    | 180   |
| >TP53-F113V YQGSYGFRLC | 6206  | >TP53-F113V YQGSYGFRLC | 15   | 6191  |
| >TP53-F113V YQGSYGFRLC | 12418 | >TP53-F113V YQGSYGFRLC | 73   | 12345 |
| >TP53-F113V YQGSYGFRLC | 16778 | >TP53-F113V YQGSYGFRLC | 57   | 16721 |
| >TP53-F113V YQGSYGFRLC | 16722 | >TP53-F113V YQGSYGFRLC | 439  | 16283 |
| >TP53-F113V YQGSYGFRLC | 27495 | >TP53-F113V YQGSYGFRLC | 30   | 27465 |
| >TP53-F113V YQGSYGFRLC | 32    | >TP53-F113V YQGSYGFRLC | 556  | 524   |
| >TP53-F113V YQGSYGFRLC | 158   | >TP53-F113V YQGSYGFRLC | 3878 | 3720  |
| >TP53-F113V YQGSYGFRLC | 6     | >TP53-F113V YQGSYGFRLC | 155  | 149   |
| >TP53-F113V RLGFLHSGTA | 326   | >TP53-F113V RLGVLHSGTA | 231  | 95    |
| >TP53-F113V RLGFLHSGTA | 162   | >TP53-F113V RLGVLHSGTA | 341  | 179   |
| >TP53-F113V RLGFLHSGTA | 554   | >TP53-F113V RLGVLHSGTA | 484  | 70    |
| >TP53-F113V RLGFLHSGTA | 43    | >TP53-F113V RLGVLHSGTA | 61   | 18    |
| >TP53-F113V RLGFLHSGTA | 125   | >TP53-F113V RLGVLHSGTA | 263  | 138   |
| >TP53-F113V RLGFLHSGTA | 384   | >TP53-F113V RLGVLHSGTA | 487  | 103   |
| >TP53-F113V RLGFLHSGTA | 262   | >TP53-F113V RLGVLHSGTA | 240  | 22    |
| >TP53-F113V FRLGFLHS   | 142   | >TP53-F113V FRLGVLHS   | 194  | 52    |
| >TP53-F113V FRLGFLHSG  | 306   | >TP53-F113V FRLGVLHSG  | 528  | 222   |
| >TP53-F113V FRLGFLHSGT | 412   | >TP53-F113V FRLGVLHSGT | 745  | 333   |

|                         |     |                        |       |       |
|-------------------------|-----|------------------------|-------|-------|
| >TP53-F113V FRLGFLHSGT, | 174 | >TP53-F113V FRLGVLHSGT | 210   | 36    |
| >TP53-F113V YGFRLGFL    | 116 | >TP53-F113V YGFRLGVL   | 394   | 278   |
| >TP53-F113V YGFRLGFL    | 486 | >TP53-F113V YGFRLGVL   | 3369  | 2883  |
| >TP53-F113V YGFRLGFL    | 443 | >TP53-F113V YGFRLGVL   | 4497  | 4054  |
| >TP53-F113V YGFRLGFLH   | 89  | >TP53-F113V YGFRLGVLH  | 162   | 73    |
| >TP53-F113V SYGFRLGFL   | 95  | >TP53-F113V SYGFRLGVL  | 91    | 4     |
| >TP53-F113V SYGFRLGF    | 356 | >TP53-F113V SYGFRLGV   | 17043 | 16687 |
| >TP53-F113V SYGFRLGF    | 232 | >TP53-F113V SYGFRLGV   | 5987  | 5755  |
| >TP53-F113V SYGFRLGFL   | 319 | >TP53-F113V SYGFRLGVL  | 520   | 201   |
| >TP53-F113V SYGFRLGF    | 7   | >TP53-F113V SYGFRLGV   | 728   | 721   |
| >TP53-F113V SYGFRLGFL   | 12  | >TP53-F113V SYGFRLGVL  | 14    | 2     |
| >TP53-F113V SYGFRLGF    | 338 | >TP53-F113V SYGFRLGV   | 254   | 84    |
| >TP53-F113V SYGFRLGFL   | 139 | >TP53-F113V SYGFRLGVL  | 198   | 59    |
| >TP53-F113V SYGFRLGFL   | 222 | >TP53-F113V SYGFRLGVL  | 1900  | 1678  |
| >TP53-F113V GSYGFRLGF   | 78  | >TP53-F113V GSYGFRLGV  | 109   | 31    |
| >TP53-F113V GSYGFRLGFL  | 227 | >TP53-F113V GSYGFRLGVL | 580   | 353   |
| >TP53-F113V GSYGFRLGFL  | 237 | >TP53-F113V GSYGFRLGVL | 988   | 751   |
| >TP53-F113V GSYGFRLGFL  | 491 | >TP53-F113V GSYGFRLGVL | 725   | 234   |
| >TP53-F113V GSYGFRLGFL  | 98  | >TP53-F113V GSYGFRLGVL | 366   | 268   |
| >TP53-F113V GSYGFRLGF   | 61  | >TP53-F113V GSYGFRLGV  | 1956  | 1895  |
| >TP53-F113V GSYGFRLGF   | 365 | >TP53-F113V GSYGFRLGV  | 12692 | 12327 |
| >TP53-F113V GSYGFRLGF   | 111 | >TP53-F113V GSYGFRLGV  | 4519  | 4408  |
| >TP53-F113V GSYGFRLGF   | 4   | >TP53-F113V GSYGFRLGV  | 405   | 401   |
| >TP53-F113V GSYGFRLGFL  | 31  | >TP53-F113V GSYGFRLGVL | 34    | 3     |
| >TP53-F113V GSYGFRLGF   | 222 | >TP53-F113V GSYGFRLGV  | 13140 | 12918 |
| >TP53-F113V GSYGFRLGF   | 264 | >TP53-F113V GSYGFRLGV  | 15709 | 15445 |
| >TP53-F113V GSYGFRLGF   | 44  | >TP53-F113V GSYGFRLGV  | 889   | 845   |
| >TP53-F113V GSYGFRLGFL  | 70  | >TP53-F113V GSYGFRLGVL | 135   | 65    |
| >TP53-F113V GSYGFRLGFL  | 63  | >TP53-F113V GSYGFRLGVL | 93    | 30    |
| >TP53-F113V QGSYGFRLGF  | 278 | >TP53-F113V QGSYGFRLGV | 5073  | 4795  |
| >TP53-F134C FCQLAKTCPV  | 443 | >TP53-F134C CCQLAKTCPV | 15034 | 14591 |
| >TP53-F134C MFCQLAKTC   | 450 | >TP53-F134C MCCQLAKTC  | 29623 | 29173 |
| >TP53-F134C CTYSPALNKN  | 343 | >TP53-F134C CTYSPALNKN | 19257 | 18914 |
| >TP53-F134C CTYSPALNKN  | 380 | >TP53-F134C CTYSPALNKN | 28966 | 28586 |
| >TP53-F134C CTYSPALNKN  | 23  | >TP53-F134C CTYSPALNKN | 11145 | 11122 |
| >TP53-F134C CTYSPALNKN  | 5   | >TP53-F134C CTYSPALNKN | 5044  | 5039  |
| >TP53-F134C CTYSPALNKN  | 146 | >TP53-F134C CTYSPALNKN | 1758  | 1612  |
| >TP53-F134C CTYSPALNKN  | 13  | >TP53-F134C CTYSPALNKN | 2452  | 2439  |
| >TP53-F134C CTYSPALNKN  | 358 | >TP53-F134C CTYSPALNKN | 7750  | 7392  |
| >TP53-F134C KMFCQLAKT   | 89  | >TP53-F134C KMCCQLAKT  | 1624  | 1535  |
| >TP53-F134C KMFCQLAKT   | 102 | >TP53-F134C KMCCQLAKT  | 1522  | 1420  |
| >TP53-F134C KMFCQLAKT   | 19  | >TP53-F134C KMCCQLAKT  | 132   | 113   |
| >TP53-F134C KMFCQLAKT   | 199 | >TP53-F134C KMCCQLAKT  | 1834  | 1635  |

|                       |     |                       |       |       |
|-----------------------|-----|-----------------------|-------|-------|
| >TP53-F134C KMFCQLAKT | 19  | >TP53-F134C KMCCQLAKT | 196   | 177   |
| >TP53-F134C KMFCQLAKT | 23  | >TP53-F134C KMCCQLAKT | 198   | 175   |
| >TP53-F134C KMFCQLAKT | 55  | >TP53-F134C KMCCQLAKT | 1354  | 1299  |
| >TP53-F134C KMFCQLAKT | 61  | >TP53-F134C KMCCQLAKT | 1193  | 1132  |
| >TP53-F134C KMFCQLAK  | 26  | >TP53-F134C KMCCQLAK  | 46    | 20    |
| >TP53-F134C KMFCQLAK  | 12  | >TP53-F134C KMCCQLAK  | 29    | 17    |
| >TP53-F134C KMFCQLAK  | 8   | >TP53-F134C KMCCQLAK  | 24    | 16    |
| >TP53-F134C KMFCQLAK  | 35  | >TP53-F134C KMCCQLAK  | 82    | 47    |
| >TP53-F134C KMFCQLAK  | 371 | >TP53-F134C KMCCQLAK  | 2826  | 2455  |
| >TP53-F134C KMFCQLAKT | 81  | >TP53-F134C KMCCQLAKT | 1059  | 978   |
| >TP53-F134C KMFCQLAK  | 58  | >TP53-F134C KMCCQLAK  | 1114  | 1056  |
| >TP53-F134C KMFCQLAKT | 491 | >TP53-F134C KMCCQLAKT | 3499  | 3008  |
| >TP53-F134C KMFCQLAK  | 39  | >TP53-F134C KMCCQLAK  | 117   | 78    |
| >TP53-F134C NKMFCQLAK | 646 | >TP53-F134C NKMCCQLAK | 192   | 454   |
| >TP53-F134C LNKMFCQL  | 100 | >TP53-F134C LNKMCCQL  | 5646  | 5546  |
| >TP53-F134C LNKMFCQLA | 161 | >TP53-F134C LNKMCCQLA | 510   | 349   |
| >TP53-F134C LNKMFCQL  | 153 | >TP53-F134C LNKMCCQL  | 860   | 707   |
| >TP53-F134C ALNKMFCQL | 238 | >TP53-F134C ALNKMCCQL | 463   | 225   |
| >TP53-F134C ALNKMFCQL | 17  | >TP53-F134C ALNKMCCQL | 28    | 11    |
| >TP53-F134C ALNKMFCQL | 30  | >TP53-F134C ALNKMCCQL | 62    | 32    |
| >TP53-F134C ALNKMFCQL | 442 | >TP53-F134C ALNKMCCQL | 599   | 157   |
| >TP53-F134C ALNKMFCQL | 297 | >TP53-F134C ALNKMCCQL | 4875  | 4578  |
| >TP53-F134C ALNKMFCQL | 22  | >TP53-F134C ALNKMCCQL | 96    | 74    |
| >TP53-F134C ALNKMFCQL | 255 | >TP53-F134C ALNKMCCQL | 1143  | 888   |
| >TP53-F134C ALNKMFCQL | 198 | >TP53-F134C ALNKMCCQL | 1343  | 1145  |
| >TP53-F134C ALNKMFCQL | 21  | >TP53-F134C ALNKMCCQL | 33    | 12    |
| >TP53-F134C ALNKMFCQL | 256 | >TP53-F134C ALNKMCCQL | 463   | 207   |
| >TP53-F134C ALNKMFCQL | 66  | >TP53-F134C ALNKMCCQL | 88    | 22    |
| >TP53-F134C ALNKMFCQ  | 245 | >TP53-F134C ALNKMCCQ  | 241   | 4     |
| >TP53-F134C ALNKMFCQL | 3   | >TP53-F134C ALNKMCCQL | 4     | 1     |
| >TP53-F134C ALNKMFCQL | 11  | >TP53-F134C ALNKMCCQL | 18    | 7     |
| >TP53-F134C ALNKMFCQL | 37  | >TP53-F134C ALNKMCCQL | 44    | 7     |
| >TP53-F134C ALNKMFCQL | 25  | >TP53-F134C ALNKMCCQL | 51    | 26    |
| >TP53-F134C ALNKMFCQL | 113 | >TP53-F134C ALNKMCCQL | 265   | 152   |
| >TP53-F134C ALNKMFCQL | 431 | >TP53-F134C ALNKMCCQL | 1201  | 770   |
| >TP53-F134C ALNKMFCQL | 288 | >TP53-F134C ALNKMCCQL | 3222  | 2934  |
| >TP53-F134C ALNKMFCQL | 416 | >TP53-F134C ALNKMCCQL | 1067  | 651   |
| >TP53-F134C SPALNKMFC | 432 | >TP53-F134C SPALNKMCC | 1385  | 953   |
| >TP53-F134C SPALNKMF  | 100 | >TP53-F134C SPALNKMC  | 4165  | 4065  |
| >TP53-F134C SPALNKMFC | 41  | >TP53-F134C SPALNKMCC | 46    | 5     |
| >TP53-F134C SPALNKMFC | 372 | >TP53-F134C SPALNKMCC | 802   | 430   |
| >TP53-F134C SPALNKMF  | 326 | >TP53-F134C SPALNKMC  | 13439 | 13113 |
| >TP53-F134C SPALNKMF  | 450 | >TP53-F134C SPALNKMC  | 31434 | 30984 |

|                        |       |                        |       |       |
|------------------------|-------|------------------------|-------|-------|
| >TP53-F134C YSPALNKMF  | 384   | >TP53-F134C YSPALNKMC  | 16373 | 15989 |
| >TP53-F134C YSPALNKMF  | 104   | >TP53-F134C YSPALNKMC  | 20781 | 20677 |
| >TP53-F134C YSPALNKMF  | 43    | >TP53-F134C YSPALNKMC  | 18579 | 18536 |
| >TP53-F134C YSPALNKMF  | 3     | >TP53-F134C YSPALNKMC  | 17    | 14    |
| >TP53-F134C YSPALNKMFC | 22    | >TP53-F134C YSPALNKMC  | 209   | 187   |
| >TP53-F134C YSPALNKMFC | 124   | >TP53-F134C YSPALNKMC  | 581   | 457   |
| >TP53-F134C YSPALNKMF  | 103   | >TP53-F134C YSPALNKMC  | 13567 | 13464 |
| >TP53-F134C TYSPALNKMF | 179   | >TP53-F134C TYSPALNKMC | 31964 | 31785 |
| >TP53-F134C TYSPALNKMF | 64    | >TP53-F134C TYSPALNKMC | 22207 | 22143 |
| >TP53-F134C TYSPALNKMF | 5     | >TP53-F134C TYSPALNKMC | 1280  | 1275  |
| >TP53-F134C TYSPALNKMF | 439   | >TP53-F134C TYSPALNKMC | 2438  | 1999  |
| >TP53-F134L FCQLAKTCPV | 443   | >TP53-F134L LCQLAKTCPV | 2420  | 1977  |
| >TP53-F134L MFCQLAKTCI | 8584  | >TP53-F134L MLCQLAKTCI | 70    | 8514  |
| >TP53-F134L MFCQLAKTCI | 1152  | >TP53-F134L MLCQLAKTCI | 20    | 1132  |
| >TP53-F134L MFCQLAKTCI | 5378  | >TP53-F134L MLCQLAKTCI | 10    | 5368  |
| >TP53-F134L MFCQLAKTCI | 4206  | >TP53-F134L MLCQLAKTCI | 46    | 4160  |
| >TP53-F134L MFCQLAKT   | 23963 | >TP53-F134L MLCQLAKT   | 307   | 23656 |
| >TP53-F134L MFCQLAKTC  | 22511 | >TP53-F134L MLCQLAKTC  | 305   | 22206 |
| >TP53-F134L MFCQLAKTCI | 924   | >TP53-F134L MLCQLAKTCI | 3     | 921   |
| >TP53-F134L MFCQLAKTCI | 13056 | >TP53-F134L MLCQLAKTCI | 44    | 13012 |
| >TP53-F134L MFCQLAKTCI | 5011  | >TP53-F134L MLCQLAKTCI | 16    | 4995  |
| >TP53-F134L MFCQLAKTCI | 15655 | >TP53-F134L MLCQLAKTCI | 29    | 15626 |
| >TP53-F134L MFCQLAKT   | 28093 | >TP53-F134L MLCQLAKT   | 88    | 28005 |
| >TP53-F134L MFCQLAKTC  | 30396 | >TP53-F134L MLCQLAKTC  | 267   | 30129 |
| >TP53-F134L MFCQLAKTCI | 679   | >TP53-F134L MLCQLAKTCI | 2     | 677   |
| >TP53-F134L MFCQLAKTC  | 450   | >TP53-F134L MLCQLAKTC  | 18947 | 18497 |
| >TP53-F134L CTYSPALNKM | 343   | >TP53-F134L CTYSPALNKM | 4520  | 4177  |
| >TP53-F134L CTYSPALNKM | 380   | >TP53-F134L CTYSPALNKM | 3157  | 2777  |
| >TP53-F134L CTYSPALNKM | 8329  | >TP53-F134L CTYSPALNKM | 481   | 7848  |
| >TP53-F134L CTYSPALNKM | 23    | >TP53-F134L CTYSPALNKM | 741   | 718   |
| >TP53-F134L CTYSPALNKM | 5     | >TP53-F134L CTYSPALNKM | 23    | 18    |
| >TP53-F134L CTYSPALNKM | 146   | >TP53-F134L CTYSPALNKM | 72    | 74    |
| >TP53-F134L CTYSPALNKM | 13    | >TP53-F134L CTYSPALNKM | 57    | 44    |
| >TP53-F134L CTYSPALNKM | 358   | >TP53-F134L CTYSPALNKM | 23    | 335   |
| >TP53-F134L KMFCQLAKT  | 89    | >TP53-F134L KMLCQLAKT  | 175   | 86    |
| >TP53-F134L KMFCQLAKT  | 102   | >TP53-F134L KMLCQLAKT  | 1548  | 1446  |
| >TP53-F134L KMFCQLAKT  | 19    | >TP53-F134L KMLCQLAKT  | 159   | 140   |
| >TP53-F134L KMFCQLAKT  | 199   | >TP53-F134L KMLCQLAKT  | 183   | 16    |
| >TP53-F134L KMFCQLAKT  | 19    | >TP53-F134L KMLCQLAKT  | 30    | 11    |
| >TP53-F134L KMFCQLAKTC | 23    | >TP53-F134L KMLCQLAKTC | 32    | 9     |
| >TP53-F134L KMFCQLAKT  | 55    | >TP53-F134L KMLCQLAKT  | 36    | 19    |
| >TP53-F134L KMFCQLAKTC | 61    | >TP53-F134L KMLCQLAKTC | 44    | 17    |
| >TP53-F134L KMFCQLAK   | 26    | >TP53-F134L KMLCQLAK   | 36    | 10    |

|                         |      |                         |      |      |
|-------------------------|------|-------------------------|------|------|
| >TP53-F134L KMFCQLAK    | 12   | >TP53-F134L KMLCQLAK    | 27   | 15   |
| >TP53-F134L KMFCQLAK    | 8    | >TP53-F134L KMLCQLAK    | 10   | 2    |
| >TP53-F134L KMFCQLAK    | 35   | >TP53-F134L KMLCQLAK    | 65   | 30   |
| >TP53-F134L KMFCQLAK    | 371  | >TP53-F134L KMLCQLAK    | 1403 | 1032 |
| >TP53-F134L KMFCQLAKT(  | 81   | >TP53-F134L KMLCQLAKT(  | 350  | 269  |
| >TP53-F134L KMFCQLAK    | 58   | >TP53-F134L KMLCQLAK    | 239  | 181  |
| >TP53-F134L KMFCQLAKT(  | 491  | >TP53-F134L KMLCQLAKT(  | 1778 | 1287 |
| >TP53-F134L KMFCQLAK    | 39   | >TP53-F134L KMLCQLAK    | 66   | 27   |
| >TP53-F134L LNKMFQQL    | 100  | >TP53-F134L LNKMLCQL    | 2765 | 2665 |
| >TP53-F134L LNKMFQQLAI  | 161  | >TP53-F134L LNKMLCQLAI  | 348  | 187  |
| >TP53-F134L LNKMFQQL    | 153  | >TP53-F134L LNKMLCQL    | 504  | 351  |
| >TP53-F134L ALNKMFCQL   | 238  | >TP53-F134L ALNKMLCQL   | 130  | 108  |
| >TP53-F134L ALNKMFCQL   | 17   | >TP53-F134L ALNKMLCQL   | 12   | 5    |
| >TP53-F134L ALNKMFCQL   | 30   | >TP53-F134L ALNKMLCQL   | 14   | 16   |
| >TP53-F134L ALNKMFCQL   | 442  | >TP53-F134L ALNKMLCQL   | 425  | 17   |
| >TP53-F134L ALNKMFCQL   | 297  | >TP53-F134L ALNKMLCQL   | 529  | 232  |
| >TP53-F134L ALNKMFCQL   | 22   | >TP53-F134L ALNKMLCQL   | 12   | 10   |
| >TP53-F134L ALNKMFCQL   | 255  | >TP53-F134L ALNKMLCQL   | 284  | 29   |
| >TP53-F134L ALNKMFCQL   | 198  | >TP53-F134L ALNKMLCQL   | 79   | 119  |
| >TP53-F134L ALNKMFCQL   | 21   | >TP53-F134L ALNKMLCQL   | 17   | 4    |
| >TP53-F134L ALNKMFCQL   | 256  | >TP53-F134L ALNKMLCQL   | 189  | 67   |
| >TP53-F134L ALNKMFCQL   | 66   | >TP53-F134L ALNKMLCQL   | 26   | 40   |
| >TP53-F134L ALNKMFCQ    | 245  | >TP53-F134L ALNKMLCQ    | 452  | 207  |
| >TP53-F134L ALNKMFCQL   | 3    | >TP53-F134L ALNKMLCQL   | 2    | 1    |
| >TP53-F134L ALNKMFCQL   | 11   | >TP53-F134L ALNKMLCQL   | 12   | 1    |
| >TP53-F134L ALNKMFCQL   | 37   | >TP53-F134L ALNKMLCQL   | 44   | 7    |
| >TP53-F134L ALNKMFCQL   | 25   | >TP53-F134L ALNKMLCQL   | 38   | 13   |
| >TP53-F134L ALNKMFCQL   | 113  | >TP53-F134L ALNKMLCQL   | 152  | 39   |
| >TP53-F134L ALNKMFCQL   | 431  | >TP53-F134L ALNKMLCQL   | 848  | 417  |
| >TP53-F134L ALNKMFCQL   | 288  | >TP53-F134L ALNKMLCQL   | 3135 | 2847 |
| >TP53-F134L ALNKMFCQL   | 416  | >TP53-F134L ALNKMLCQL   | 1284 | 868  |
| >TP53-F134L SPALNKMF    | 1125 | >TP53-F134L SPALNKML    | 253  | 872  |
| >TP53-F134L SPALNKMFCC  | 432  | >TP53-F134L SPALNKMLCC  | 1715 | 1283 |
| >TP53-F134L SPALNKMF    | 100  | >TP53-F134L SPALNKML    | 46   | 54   |
| >TP53-F134L SPALNKMFCC  | 41   | >TP53-F134L SPALNKMLCC  | 44   | 3    |
| >TP53-F134L SPALNKMFCC  | 372  | >TP53-F134L SPALNKMLCC  | 1060 | 688  |
| >TP53-F134L SPALNKMF    | 326  | >TP53-F134L SPALNKML    | 4211 | 3885 |
| >TP53-F134L SPALNKMF    | 450  | >TP53-F134L SPALNKML    | 5174 | 4724 |
| >TP53-F134L YSPALNKMF   | 384  | >TP53-F134L YSPALNKML   | 6028 | 5644 |
| >TP53-F134L YSPALNKMF   | 104  | >TP53-F134L YSPALNKML   | 4064 | 3960 |
| >TP53-F134L YSPALNKMF   | 43   | >TP53-F134L YSPALNKML   | 477  | 434  |
| >TP53-F134L YSPALNKMF   | 3    | >TP53-F134L YSPALNKML   | 2    | 1    |
| >TP53-F134L YSPALNKMFCC | 22   | >TP53-F134L YSPALNKMLCC | 14   | 8    |

|                        |       |                        |       |       |
|------------------------|-------|------------------------|-------|-------|
| >TP53-F134L YSPALNKMFC | 124   | >TP53-F134L YSPALNKMLC | 215   | 91    |
| >TP53-F134L YSPALNKMF  | 103   | >TP53-F134L YSPALNKML  | 738   | 635   |
| >TP53-F134L TYSPALNKMF | 2357  | >TP53-F134L TYSPALNKML | 53    | 2304  |
| >TP53-F134L TYSPALNKMF | 179   | >TP53-F134L TYSPALNKML | 2646  | 2467  |
| >TP53-F134L TYSPALNKMF | 64    | >TP53-F134L TYSPALNKML | 851   | 787   |
| >TP53-F134L TYSPALNKMF | 5     | >TP53-F134L TYSPALNKML | 9     | 4     |
| >TP53-F134L TYSPALNKMF | 439   | >TP53-F134L TYSPALNKML | 1494  | 1055  |
| >TP53-F134S FCQLAKTCPV | 443   | >TP53-F134S SCQLAKTCPV | 4054  | 3611  |
| >TP53-F134S MFCQLAKTCI | 4646  | >TP53-F134S MSCQLAKTCI | 92    | 4554  |
| >TP53-F134S MFCQLAKTCI | 26789 | >TP53-F134S MSCQLAKTCI | 118   | 26671 |
| >TP53-F134S MFCQLAKTC  | 450   | >TP53-F134S MSCQLAKTC  | 27639 | 27189 |
| >TP53-F134S CTYSPALNKM | 343   | >TP53-F134S CTYSPALNKM | 21357 | 21014 |
| >TP53-F134S CTYSPALNKM | 380   | >TP53-F134S CTYSPALNKM | 24538 | 24158 |
| >TP53-F134S CTYSPALNKM | 23    | >TP53-F134S CTYSPALNKM | 11078 | 11055 |
| >TP53-F134S CTYSPALNKM | 5     | >TP53-F134S CTYSPALNKM | 5027  | 5022  |
| >TP53-F134S CTYSPALNKM | 146   | >TP53-F134S CTYSPALNKM | 6196  | 6050  |
| >TP53-F134S CTYSPALNKM | 13    | >TP53-F134S CTYSPALNKM | 1541  | 1528  |
| >TP53-F134S CTYSPALNKM | 358   | >TP53-F134S CTYSPALNKM | 4349  | 3991  |
| >TP53-F134S KMFCQLAKT  | 89    | >TP53-F134S KMSCQLAKT  | 679   | 590   |
| >TP53-F134S KMFCQLAKT  | 102   | >TP53-F134S KMSCQLAKT  | 195   | 93    |
| >TP53-F134S KMFCQLAKT  | 19    | >TP53-F134S KMSCQLAKT  | 26    | 7     |
| >TP53-F134S KMFCQLAKT  | 199   | >TP53-F134S KMSCQLAKT  | 1124  | 925   |
| >TP53-F134S KMFCQLAKT  | 19    | >TP53-F134S KMSCQLAKT  | 352   | 333   |
| >TP53-F134S KMFCQLAKT  | 23    | >TP53-F134S KMSCQLAKT  | 285   | 262   |
| >TP53-F134S KMFCQLAKT  | 55    | >TP53-F134S KMSCQLAKT  | 204   | 149   |
| >TP53-F134S KMFCQLAKT  | 61    | >TP53-F134S KMSCQLAKT  | 211   | 150   |
| >TP53-F134S KMFCQLAK   | 26    | >TP53-F134S KMSCQLAK   | 34    | 8     |
| >TP53-F134S KMFCQLAK   | 12    | >TP53-F134S KMSCQLAK   | 27    | 15    |
| >TP53-F134S KMFCQLAK   | 8     | >TP53-F134S KMSCQLAK   | 22    | 14    |
| >TP53-F134S KMFCQLAK   | 35    | >TP53-F134S KMSCQLAK   | 109   | 74    |
| >TP53-F134S KMFCQLAK   | 371   | >TP53-F134S KMSCQLAK   | 3251  | 2880  |
| >TP53-F134S KMFCQLAKT  | 81    | >TP53-F134S KMSCQLAKT  | 1165  | 1084  |
| >TP53-F134S KMFCQLAK   | 58    | >TP53-F134S KMSCQLAK   | 440   | 382   |
| >TP53-F134S KMFCQLAKT  | 491   | >TP53-F134S KMSCQLAKT  | 2456  | 1965  |
| >TP53-F134S KMFCQLAK   | 39    | >TP53-F134S KMSCQLAK   | 203   | 164   |
| >TP53-F134S NKMFCQLAK  | 646   | >TP53-F134S NKMSCQLAK  | 163   | 483   |
| >TP53-F134S LNKMFQQL   | 100   | >TP53-F134S LNKMSCQL   | 9053  | 8953  |
| >TP53-F134S LNKMFQQLA  | 161   | >TP53-F134S LNKMSCQLA  | 173   | 12    |
| >TP53-F134S LNKMFQQL   | 153   | >TP53-F134S LNKMSCQL   | 522   | 369   |
| >TP53-F134S ALNKMFQQL  | 238   | >TP53-F134S ALNKMSCQL  | 448   | 210   |
| >TP53-F134S ALNKMFQQL  | 17    | >TP53-F134S ALNKMSCQL  | 21    | 4     |
| >TP53-F134S ALNKMFQQL  | 30    | >TP53-F134S ALNKMSCQL  | 43    | 13    |
| >TP53-F134S ALNKMFQQL  | 442   | >TP53-F134S ALNKMSCQL  | 465   | 23    |



|                        |      |                        |       |       |
|------------------------|------|------------------------|-------|-------|
| >TP53-F134S ALNKMFCQL  | 297  | >TP53-F134S ALNKMSCQL  | 3825  | 3528  |
| >TP53-F134S ALNKMFCQL  | 22   | >TP53-F134S ALNKMSCQL  | 23    | 1     |
| >TP53-F134S ALNKMFCQL  | 255  | >TP53-F134S ALNKMSCQL  | 447   | 192   |
| >TP53-F134S ALNKMFCQL  | 198  | >TP53-F134S ALNKMSCQL  | 125   | 73    |
| >TP53-F134S ALNKMFCQL  | 21   | >TP53-F134S ALNKMSCQL  | 18    | 3     |
| >TP53-F134S ALNKMFCQL  | 256  | >TP53-F134S ALNKMSCQL  | 239   | 17    |
| >TP53-F134S ALNKMFCQL  | 66   | >TP53-F134S ALNKMSCQL  | 33    | 33    |
| >TP53-F134S ALNKMFCQ   | 245  | >TP53-F134S ALNKMSCQ   | 484   | 239   |
| >TP53-F134S ALNKMFCQL  | 3    | >TP53-F134S ALNKMSCQL  | 3     | 0     |
| >TP53-F134S ALNKMFCQL  | 11   | >TP53-F134S ALNKMSCQL  | 14    | 3     |
| >TP53-F134S ALNKMFCQL  | 37   | >TP53-F134S ALNKMSCQL  | 38    | 1     |
| >TP53-F134S ALNKMFCQL  | 25   | >TP53-F134S ALNKMSCQL  | 37    | 12    |
| >TP53-F134S ALNKMFCQL  | 113  | >TP53-F134S ALNKMSCQL  | 89    | 24    |
| >TP53-F134S ALNKMFCQL  | 431  | >TP53-F134S ALNKMSCQL  | 1082  | 651   |
| >TP53-F134S ALNKMFCQL  | 860  | >TP53-F134S ALNKMSCQL  | 476   | 384   |
| >TP53-F134S ALNKMFCQL  | 288  | >TP53-F134S ALNKMSCQL  | 2296  | 2008  |
| >TP53-F134S ALNKMFCQL  | 416  | >TP53-F134S ALNKMSCQL  | 384   | 32    |
| >TP53-F134S SPALNKMFCQ | 432  | >TP53-F134S SPALNKMSCQ | 1236  | 804   |
| >TP53-F134S SPALNKMF   | 100  | >TP53-F134S SPALNKMS   | 10391 | 10291 |
| >TP53-F134S SPALNKMFC  | 2294 | >TP53-F134S SPALNKMSC  | 174   | 2120  |
| >TP53-F134S SPALNKMFCQ | 41   | >TP53-F134S SPALNKMSCQ | 29    | 12    |
| >TP53-F134S SPALNKMFCQ | 372  | >TP53-F134S SPALNKMSCQ | 632   | 260   |
| >TP53-F134S SPALNKMF   | 326  | >TP53-F134S SPALNKMS   | 10909 | 10583 |
| >TP53-F134S SPALNKMF   | 450  | >TP53-F134S SPALNKMS   | 24078 | 23628 |
| >TP53-F134S YSPALNKMF  | 384  | >TP53-F134S YSPALNKMS  | 19455 | 19071 |
| >TP53-F134S YSPALNKMF  | 104  | >TP53-F134S YSPALNKMS  | 20573 | 20469 |
| >TP53-F134S YSPALNKMF  | 43   | >TP53-F134S YSPALNKMS  | 15734 | 15691 |
| >TP53-F134S YSPALNKMF  | 3    | >TP53-F134S YSPALNKMS  | 66    | 63    |
| >TP53-F134S YSPALNKMFC | 22   | >TP53-F134S YSPALNKMSC | 101   | 79    |
| >TP53-F134S YSPALNKMFC | 124  | >TP53-F134S YSPALNKMSC | 316   | 192   |
| >TP53-F134S YSPALNKMF  | 103  | >TP53-F134S YSPALNKMS  | 10351 | 10248 |
| >TP53-F134S TYSPALNKMF | 179  | >TP53-F134S TYSPALNKMS | 33353 | 33174 |
| >TP53-F134S TYSPALNKMF | 64   | >TP53-F134S TYSPALNKMS | 22562 | 22498 |
| >TP53-F134S TYSPALNKMF | 5    | >TP53-F134S TYSPALNKMS | 2187  | 2182  |
| >TP53-F134S TYSPALNKMF | 439  | >TP53-F134S TYSPALNKMS | 1183  | 744   |
| >TP53-F134V FCQLAKTCPV | 443  | >TP53-F134V VCQLAKTCPV | 3513  | 3070  |
| >TP53-F134V MFCQLAKTCI | 1152 | >TP53-F134V MVCQLAKTC  | 332   | 820   |
| >TP53-F134V MFCQLAKTCI | 5378 | >TP53-F134V MVCQLAKTC  | 121   | 5257  |
| >TP53-F134V MFCQLAKTCI | 4206 | >TP53-F134V MVCQLAKTC  | 63    | 4143  |
| >TP53-F134V MFCQLAKTCI | 924  | >TP53-F134V MVCQLAKTC  | 50    | 874   |
| >TP53-F134V MFCQLAKTCI | 679  | >TP53-F134V MVCQLAKTC  | 16    | 663   |
| >TP53-F134V MFCQLAKTCI | 4646 | >TP53-F134V MVCQLAKTC  | 25    | 4621  |
| >TP53-F134V MFCQLAKTCI | 7918 | >TP53-F134V MVCQLAKTC  | 110   | 7808  |

|                       |       |                       |       |       |
|-----------------------|-------|-----------------------|-------|-------|
| >TP53-F134VMFCQLAKTC  | 450   | >TP53-F134VMVCQLAKTC  | 25168 | 24718 |
| >TP53-F134VCTYSPALNKN | 20051 | >TP53-F134VCTYSPALNKN | 210   | 19841 |
| >TP53-F134VCTYSPALNKN | 343   | >TP53-F134VCTYSPALNKN | 16004 | 15661 |
| >TP53-F134VCTYSPALNKN | 380   | >TP53-F134VCTYSPALNKN | 14378 | 13998 |
| >TP53-F134VCTYSPALNKN | 17060 | >TP53-F134VCTYSPALNKN | 69    | 16991 |
| >TP53-F134VCTYSPALNKN | 8329  | >TP53-F134VCTYSPALNKN | 55    | 8274  |
| >TP53-F134VCTYSPALNKN | 23    | >TP53-F134VCTYSPALNKN | 1442  | 1419  |
| >TP53-F134VCTYSPALNKN | 5     | >TP53-F134VCTYSPALNKN | 446   | 441   |
| >TP53-F134VCTYSPALNKN | 146   | >TP53-F134VCTYSPALNKN | 371   | 225   |
| >TP53-F134VCTYSPALNKN | 13    | >TP53-F134VCTYSPALNKN | 176   | 163   |
| >TP53-F134VCTYSPALNKN | 358   | >TP53-F134VCTYSPALNKN | 124   | 234   |
| >TP53-F134VKMFCQLAKT  | 89    | >TP53-F134VKMVCQLAKT  | 1007  | 918   |
| >TP53-F134VKMFCQLAKT  | 102   | >TP53-F134VKMVCQLAKT  | 586   | 484   |
| >TP53-F134VKMFCQLAKT  | 19    | >TP53-F134VKMVCQLAKT  | 40    | 21    |
| >TP53-F134VKMFCQLAKT  | 199   | >TP53-F134VKMVCQLAKT  | 300   | 101   |
| >TP53-F134VKMFCQLAKT  | 19    | >TP53-F134VKMVCQLAKT  | 225   | 206   |
| >TP53-F134VKMFCQLAKT  | 23    | >TP53-F134VKMVCQLAKT  | 189   | 166   |
| >TP53-F134VKMFCQLAKT  | 55    | >TP53-F134VKMVCQLAKT  | 196   | 141   |
| >TP53-F134VKMFCQLAKT  | 61    | >TP53-F134VKMVCQLAKT  | 183   | 122   |
| >TP53-F134VKMFCQLAK   | 26    | >TP53-F134VKMVCQLAK   | 50    | 24    |
| >TP53-F134VKMFCQLAK   | 12    | >TP53-F134VKMVCQLAK   | 52    | 40    |
| >TP53-F134VKMFCQLAK   | 8     | >TP53-F134VKMVCQLAK   | 38    | 30    |
| >TP53-F134VKMFCQLAK   | 35    | >TP53-F134VKMVCQLAK   | 133   | 98    |
| >TP53-F134VKMFCQLAK   | 371   | >TP53-F134VKMVCQLAK   | 4210  | 3839  |
| >TP53-F134VKMFCQLAKT  | 81    | >TP53-F134VKMVCQLAKT  | 1236  | 1155  |
| >TP53-F134VKMFCQLAK   | 58    | >TP53-F134VKMVCQLAK   | 409   | 351   |
| >TP53-F134VKMFCQLAKT  | 491   | >TP53-F134VKMVCQLAKT  | 2308  | 1817  |
| >TP53-F134VKMFCQLAK   | 39    | >TP53-F134VKMVCQLAK   | 114   | 75    |
| >TP53-F134V NKMFCQLAK | 646   | >TP53-F134V NKMVCQLAK | 404   | 242   |
| >TP53-F134V LNKMFQQL  | 100   | >TP53-F134V LNKMVCQL  | 4918  | 4818  |
| >TP53-F134V LNKMFQQLA | 161   | >TP53-F134V LNKMVCQLA | 316   | 155   |
| >TP53-F134V LNKMFQQL  | 153   | >TP53-F134V LNKMVCQL  | 789   | 636   |
| >TP53-F134V ALNKMFCQL | 238   | >TP53-F134V ALNKMVCQL | 154   | 84    |
| >TP53-F134V ALNKMFCQL | 17    | >TP53-F134V ALNKMVCQL | 15    | 2     |
| >TP53-F134V ALNKMFCQL | 30    | >TP53-F134V ALNKMVCQL | 13    | 17    |
| >TP53-F134V ALNKMFCQL | 442   | >TP53-F134V ALNKMVCQL | 419   | 23    |
| >TP53-F134V ALNKMFCQL | 297   | >TP53-F134V ALNKMVCQL | 2369  | 2072  |
| >TP53-F134V ALNKMFCQL | 22    | >TP53-F134V ALNKMVCQL | 8     | 14    |
| >TP53-F134V ALNKMFCQL | 255   | >TP53-F134V ALNKMVCQL | 133   | 122   |
| >TP53-F134V ALNKMFCQL | 198   | >TP53-F134V ALNKMVCQL | 107   | 91    |
| >TP53-F134V ALNKMFCQL | 21    | >TP53-F134V ALNKMVCQL | 13    | 8     |
| >TP53-F134V ALNKMFCQL | 256   | >TP53-F134V ALNKMVCQL | 106   | 150   |
| >TP53-F134V ALNKMFCQL | 66    | >TP53-F134V ALNKMVCQL | 17    | 49    |

|                        |       |                        |       |       |
|------------------------|-------|------------------------|-------|-------|
| >TP53-F134VALNKMFCQ    | 245   | >TP53-F134VALNKMVCQ    | 304   | 59    |
| >TP53-F134VALNKMFCQL   | 3     | >TP53-F134VALNKMVCQL   | 2     | 1     |
| >TP53-F134VALNKMFCQL   | 11    | >TP53-F134VALNKMVCQL   | 12    | 1     |
| >TP53-F134VALNKMFCQL   | 37    | >TP53-F134VALNKMVCQL   | 43    | 6     |
| >TP53-F134VALNKMFCQL   | 25    | >TP53-F134VALNKMVCQL   | 36    | 11    |
| >TP53-F134VALNKMFCQL   | 113   | >TP53-F134VALNKMVCQL   | 143   | 30    |
| >TP53-F134VALNKMFCQL   | 431   | >TP53-F134VALNKMVCQL   | 992   | 561   |
| >TP53-F134VALNKMFCQL   | 288   | >TP53-F134VALNKMVCQL   | 2774  | 2486  |
| >TP53-F134VALNKMFCQL   | 416   | >TP53-F134VALNKMVCQL   | 592   | 176   |
| >TP53-F134VSPALNKMFC   | 1125  | >TP53-F134VSPALNKMVC   | 232   | 893   |
| >TP53-F134VSPALNKMFC   | 432   | >TP53-F134VSPALNKMVC   | 1259  | 827   |
| >TP53-F134VSPALNKMFC   | 100   | >TP53-F134VSPALNKMVC   | 143   | 43    |
| >TP53-F134VSPALNKMFC   | 2294  | >TP53-F134VSPALNKMVC   | 320   | 1974  |
| >TP53-F134VSPALNKMFC   | 41    | >TP53-F134VSPALNKMVC   | 40    | 1     |
| >TP53-F134VSPALNKMFC   | 372   | >TP53-F134VSPALNKMVC   | 775   | 403   |
| >TP53-F134VSPALNKMFC   | 326   | >TP53-F134VSPALNKMVC   | 10286 | 9960  |
| >TP53-F134VSPALNKMFC   | 450   | >TP53-F134VSPALNKMVC   | 15109 | 14659 |
| >TP53-F134VYSPALNKMFC  | 384   | >TP53-F134VYSPALNKMVC  | 16248 | 15864 |
| >TP53-F134VYSPALNKMFC  | 21854 | >TP53-F134VYSPALNKMVC  | 309   | 21545 |
| >TP53-F134VYSPALNKMFC  | 104   | >TP53-F134VYSPALNKMVC  | 6829  | 6725  |
| >TP53-F134VYSPALNKMFC  | 43    | >TP53-F134VYSPALNKMVC  | 8453  | 8410  |
| >TP53-F134VYSPALNKMFC  | 3     | >TP53-F134VYSPALNKMVC  | 4     | 1     |
| >TP53-F134VYSPALNKMFC  | 22    | >TP53-F134VYSPALNKMVC  | 52    | 30    |
| >TP53-F134VYSPALNKMFC  | 124   | >TP53-F134VYSPALNKMVC  | 253   | 129   |
| >TP53-F134VYSPALNKMFC  | 103   | >TP53-F134VYSPALNKMVC  | 2292  | 2189  |
| >TP53-F134VTYSPALNKMFC | 2357  | >TP53-F134VTYSPALNKMVC | 182   | 2175  |
| >TP53-F134VTYSPALNKMFC | 179   | >TP53-F134VTYSPALNKMVC | 13481 | 13302 |
| >TP53-F134VTYSPALNKMFC | 64    | >TP53-F134VTYSPALNKMVC | 6751  | 6687  |
| >TP53-F134VTYSPALNKMFC | 5     | >TP53-F134VTYSPALNKMVC | 133   | 128   |
| >TP53-F134VTYSPALNKMFC | 439   | >TP53-F134VTYSPALNKMVC | 2088  | 1649  |
| >TP53-F212I-FRHSVVVPY  | 4     | >TP53-F212I-IRHSVVVPY  | 5     | 1     |
| >TP53-F212I-FRHSVVVPY  | 33    | >TP53-F212I-IRHSVVVPY  | 129   | 96    |
| >TP53-F212I-TFRHSVVV   | 8834  | >TP53-F212I-TIRHSVVV   | 85    | 8749  |
| >TP53-F212I-TFRHSVVV   | 7945  | >TP53-F212I-TIRHSVVV   | 129   | 7816  |
| >TP53-F212I-TFRHSVVVPY | 2572  | >TP53-F212I-TIRHSVVVPY | 102   | 2470  |
| >TP53-F212I-TFRHSVVVPY | 185   | >TP53-F212I-TIRHSVVVPY | 1353  | 1168  |
| >TP53-F212I-TFRHSVVV   | 139   | >TP53-F212I-TIRHSVVV   | 100   | 39    |
| >TP53-F212I-TFRHSVVVPY | 162   | >TP53-F212I-TIRHSVVVPY | 117   | 45    |
| >TP53-F212I-TFRHSVVVPY | 140   | >TP53-F212I-TIRHSVVVPY | 47    | 93    |
| >TP53-F212I-TFRHSVVVPY | 225   | >TP53-F212I-TIRHSVVVPY | 283   | 58    |
| >TP53-F212I-TFRHSVVVPY | 271   | >TP53-F212I-TIRHSVVVPY | 54    | 217   |
| >TP53-F212I-TFRHSVVVPY | 11035 | >TP53-F212I-TIRHSVVVPY | 162   | 10873 |
| >TP53-F212I-TFRHSVVVPY | 3154  | >TP53-F212I-TIRHSVVVPY | 445   | 2709  |

|                         |       |                         |      |       |
|-------------------------|-------|-------------------------|------|-------|
| >TP53-F212I- RVEYLDDRNT | 40    | >TP53-F212I- RVEYLDDRNT | 47   | 7     |
| >TP53-F212I- RVEYLDDRNT | 78    | >TP53-F212I- RVEYLDDRNT | 1021 | 943   |
| >TP53-F212I- RVEYLDDRNT | 24066 | >TP53-F212I- RVEYLDDRNT | 433  | 23633 |
| >TP53-F212I- NTFRHSVV   | 382   | >TP53-F212I- NTIRHSVV   | 378  | 4     |
| >TP53-F212I- NTFRHSVV   | 309   | >TP53-F212I- NTIRHSVV   | 1974 | 1665  |
| >TP53-F212I- NTFRHSVVV  | 265   | >TP53-F212I- NTIRHSVVV  | 1723 | 1458  |
| >TP53-F212I- NTFRHSVVVF | 128   | >TP53-F212I- NTIRHSVVVP | 440  | 312   |
| >TP53-F212I- NTFRHSVVVF | 845   | >TP53-F212I- NTIRHSVVVP | 328  | 517   |
| >TP53-F212I- NTFRHSVVVF | 97    | >TP53-F212I- NTIRHSVVVP | 22   | 75    |
| >TP53-F212I- NTFRHSVVVF | 123   | >TP53-F212I- NTIRHSVVVP | 4    | 119   |
| >TP53-F212I- NTFRHSVVVF | 678   | >TP53-F212I- NTIRHSVVVP | 124  | 554   |
| >TP53-F212I- NTFRHSVVVF | 82    | >TP53-F212I- NTIRHSVVVP | 171  | 89    |
| >TP53-F212I- NTFRHSVVV  | 412   | >TP53-F212I- NTIRHSVVV  | 2992 | 2580  |
| >TP53-F212I- NTFRHSVVVF | 61    | >TP53-F212I- NTIRHSVVVP | 572  | 511   |
| >TP53-F212I- NTFRHSVVVF | 34    | >TP53-F212I- NTIRHSVVVP | 106  | 72    |
| >TP53-F212I- NTFRHSVV   | 11    | >TP53-F212I- NTIRHSVV   | 20   | 9     |
| >TP53-F212I- NTFRHSVVV  | 8     | >TP53-F212I- NTIRHSVVV  | 12   | 4     |
| >TP53-F212I- NTFRHSVV   | 50    | >TP53-F212I- NTIRHSVV   | 86   | 36    |
| >TP53-F212I- NTFRHSVVV  | 25    | >TP53-F212I- NTIRHSVVV  | 41   | 16    |
| >TP53-F212I- NTFRHSVVVF | 65    | >TP53-F212I- NTIRHSVVVP | 77   | 12    |
| >TP53-F212I- NTFRHSVVVF | 492   | >TP53-F212I- NTIRHSVVVP | 1827 | 1335  |
| >TP53-F212I- NTFRHSVVVF | 33    | >TP53-F212I- NTIRHSVVVP | 202  | 169   |
| >TP53-F212I- NTFRHSVVVF | 23    | >TP53-F212I- NTIRHSVVVP | 39   | 16    |
| >TP53-F212I- NTFRHSVVVF | 105   | >TP53-F212I- NTIRHSVVVP | 133  | 28    |
| >TP53-F212I- NTFRHSVVVF | 289   | >TP53-F212I- NTIRHSVVVP | 2524 | 2235  |
| >TP53-F212I- NTFRHSVVVF | 23    | >TP53-F212I- NTIRHSVVVP | 30   | 7     |
| >TP53-F212I- RNTFRHSVV  | 224   | >TP53-F212I- RNTIRHSVV  | 711  | 487   |
| >TP53-F212I- LDDRNTFRHS | 482   | >TP53-F212I- LDDRNTIRHS | 1066 | 584   |
| >TP53-F212I- YLDDRNTF   | 2206  | >TP53-F212I- YLDDRNTI   | 20   | 2186  |
| >TP53-F212I- YLDDRNTF   | 708   | >TP53-F212I- YLDDRNTI   | 24   | 684   |
| >TP53-F212I- YLDDRNTF   | 4668  | >TP53-F212I- YLDDRNTI   | 39   | 4629  |
| >TP53-F212I- YLDDRNTF   | 187   | >TP53-F212I- YLDDRNTI   | 27   | 160   |
| >TP53-F212I- YLDDRNTFR+ | 333   | >TP53-F212I- YLDDRNTIRH | 934  | 601   |
| >TP53-F212I- YLDDRNTF   | 149   | >TP53-F212I- YLDDRNTI   | 4    | 145   |
| >TP53-F212I- YLDDRNTFR+ | 155   | >TP53-F212I- YLDDRNTIRH | 118  | 37    |
| >TP53-F212I- YLDDRNTF   | 367   | >TP53-F212I- YLDDRNTI   | 4    | 363   |
| >TP53-F212I- YLDDRNTF   | 2259  | >TP53-F212I- YLDDRNTI   | 9    | 2250  |
| >TP53-F212I- YLDDRNTF   | 4575  | >TP53-F212I- YLDDRNTI   | 19   | 4556  |
| >TP53-F212I- YLDDRNTF   | 87    | >TP53-F212I- YLDDRNTI   | 3    | 84    |
| >TP53-F212I- YLDDRNTFR  | 189   | >TP53-F212I- YLDDRNTIR  | 656  | 467   |
| >TP53-F212I- YLDDRNTFR+ | 187   | >TP53-F212I- YLDDRNTIRH | 450  | 263   |
| >TP53-F212I- YLDDRNTFR+ | 171   | >TP53-F212I- YLDDRNTIRH | 118  | 53    |
| >TP53-F212I- YLDDRNTFR  | 282   | >TP53-F212I- YLDDRNTIR  | 3240 | 2958  |

|                         |       |                         |      |       |
|-------------------------|-------|-------------------------|------|-------|
| >TP53-F212I- YLDDRNTFR  | 55    | >TP53-F212I- YLDDRNTIR  | 965  | 910   |
| >TP53-F212I- YLDDRNTFR  | 68    | >TP53-F212I- YLDDRNTIR  | 476  | 408   |
| >TP53-F212I- YLDDRNTF   | 255   | >TP53-F212I- YLDDRNTI   | 8113 | 7858  |
| >TP53-F212I- YLDDRNTFR  | 336   | >TP53-F212I- YLDDRNTIR  | 1292 | 956   |
| >TP53-F212I- EYLDDRNTF  | 10690 | >TP53-F212I- EYLDDRNTI  | 51   | 10639 |
| >TP53-F212I- EYLDDRNTF  | 103   | >TP53-F212I- EYLDDRNTI  | 600  | 497   |
| >TP53-F212I- EYLDDRNTF  | 18    | >TP53-F212I- EYLDDRNTI  | 73   | 55    |
| >TP53-F212I- EYLDDRNTF  | 381   | >TP53-F212I- EYLDDRNTI  | 2260 | 1879  |
| >TP53-F212I- EYLDDRNTF  | 301   | >TP53-F212I- EYLDDRNTI  | 8655 | 8354  |
| >TP53-F212I- EYLDDRNTFR | 328   | >TP53-F212I- EYLDDRNTIR | 2313 | 1985  |
| >TP53-F212I- EYLDDRNTFR | 88    | >TP53-F212I- EYLDDRNTIR | 769  | 681   |
| >TP53-F212I- EYLDDRNTFR | 19    | >TP53-F212I- EYLDDRNTIR | 31   | 12    |
| >TP53-F212I- VEYLDDRNTF | 622   | >TP53-F212I- VEYLDDRNTI | 17   | 605   |
| >TP53-F212I- VEYLDDRNTF | 124   | >TP53-F212I- VEYLDDRNTI | 3208 | 3084  |
| >TP53-F212I- VEYLDDRNTF | 594   | >TP53-F212I- VEYLDDRNTI | 279  | 315   |
| >TP53-F212I- VEYLDDRNTF | 2225  | >TP53-F212I- VEYLDDRNTI | 142  | 2083  |
| >TP53-F212I- VEYLDDRNTF | 555   | >TP53-F212I- VEYLDDRNTI | 115  | 440   |
| >TP53-F212L FRHSVVVPY   | 4     | >TP53-F212L LRHSVVVPY   | 7    | 3     |
| >TP53-F212L FRHSVVVPY   | 33    | >TP53-F212L LRHSVVVPY   | 77   | 44    |
| >TP53-F212L TFRHSVVV    | 13669 | >TP53-F212L TLRHSVVV    | 382  | 13287 |
| >TP53-F212L TFRHSVVV    | 8834  | >TP53-F212L TLRHSVVV    | 14   | 8820  |
| >TP53-F212L TFRHSVVV    | 15567 | >TP53-F212L TLRHSVVV    | 82   | 15485 |
| >TP53-F212L TFRHSVVV    | 20790 | >TP53-F212L TLRHSVVV    | 88   | 20702 |
| >TP53-F212L TFRHSVVV    | 18767 | >TP53-F212L TLRHSVVV    | 180  | 18587 |
| >TP53-F212L TFRHSVVV    | 7945  | >TP53-F212L TLRHSVVV    | 7    | 7938  |
| >TP53-F212L TFRHSVVVPY  | 185   | >TP53-F212L TLRHSVVVPY  | 983  | 798   |
| >TP53-F212L TFRHSVVV    | 139   | >TP53-F212L TLRHSVVV    | 318  | 179   |
| >TP53-F212L TFRHSVVVPY  | 162   | >TP53-F212L TLRHSVVVPY  | 339  | 177   |
| >TP53-F212L TFRHSVVVPY  | 140   | >TP53-F212L TLRHSVVVPY  | 36   | 104   |
| >TP53-F212L TFRHSVVVPY  | 225   | >TP53-F212L TLRHSVVVPY  | 66   | 159   |
| >TP53-F212L TFRHSVVV    | 5988  | >TP53-F212L TLRHSVVV    | 339  | 5649  |
| >TP53-F212L TFRHSVVVPY  | 271   | >TP53-F212L TLRHSVVVPY  | 17   | 254   |
| >TP53-F212L TFRHSVVVPY  | 11035 | >TP53-F212L TLRHSVVVPY  | 219  | 10816 |
| >TP53-F212L RVEYLDDRNT  | 40    | >TP53-F212L RVEYLDDRNT  | 121  | 81    |
| >TP53-F212L RVEYLDDRNT  | 78    | >TP53-F212L RVEYLDDRNT  | 455  | 377   |
| >TP53-F212L NTFRHSVV    | 382   | >TP53-F212L NTLRHSVV    | 2262 | 1880  |
| >TP53-F212L NTFRHSVV    | 309   | >TP53-F212L NTLRHSVV    | 516  | 207   |
| >TP53-F212L NTFRHSVVV   | 265   | >TP53-F212L NTLRHSVVV   | 447  | 182   |
| >TP53-F212L NTFRHSVVVF  | 128   | >TP53-F212L NTLRHSVVVF  | 637  | 509   |
| >TP53-F212L NTFRHSVVVF  | 97    | >TP53-F212L NTLRHSVVVF  | 1638 | 1541  |
| >TP53-F212L NTFRHSVVVF  | 123   | >TP53-F212L NTLRHSVVVF  | 31   | 92    |
| >TP53-F212L NTFRHSVVVF  | 678   | >TP53-F212L NTLRHSVVVF  | 444  | 234   |
| >TP53-F212L NTFRHSVVVF  | 82    | >TP53-F212L NTLRHSVVVF  | 285  | 203   |

|                        |       |                        |      |       |
|------------------------|-------|------------------------|------|-------|
| >TP53-F212L NTFRHSVVV  | 412   | >TP53-F212L NTLRHSVVV  | 2060 | 1648  |
| >TP53-F212L NTFRHSVVVF | 61    | >TP53-F212L NTLRHSVVVF | 386  | 325   |
| >TP53-F212L NTFRHSVVVF | 34    | >TP53-F212L NTLRHSVVVF | 1226 | 1192  |
| >TP53-F212L NTFRHSVV   | 11    | >TP53-F212L NTLRHSVV   | 179  | 168   |
| >TP53-F212L NTFRHSVVV  | 8     | >TP53-F212L NTLRHSVVV  | 97   | 89    |
| >TP53-F212L NTFRHSVV   | 50    | >TP53-F212L NTLRHSVV   | 26   | 24    |
| >TP53-F212L NTFRHSVVV  | 25    | >TP53-F212L NTLRHSVVV  | 14   | 11    |
| >TP53-F212L NTFRHSVVVF | 65    | >TP53-F212L NTLRHSVVVF | 217  | 152   |
| >TP53-F212L NTFRHSVVVF | 492   | >TP53-F212L NTLRHSVVVF | 1277 | 785   |
| >TP53-F212L NTFRHSVVVF | 33    | >TP53-F212L NTLRHSVVVF | 208  | 175   |
| >TP53-F212L NTFRHSVVVF | 23    | >TP53-F212L NTLRHSVVVF | 51   | 28    |
| >TP53-F212L NTFRHSVVVF | 105   | >TP53-F212L NTLRHSVVVF | 199  | 94    |
| >TP53-F212L NTFRHSVVVF | 289   | >TP53-F212L NTLRHSVVVF | 1302 | 1013  |
| >TP53-F212L NTFRHSVVVF | 23    | >TP53-F212L NTLRHSVVVF | 110  | 87    |
| >TP53-F212L RNTFRHSVV  | 224   | >TP53-F212L RNTLRHSVV  | 694  | 470   |
| >TP53-F212L LDDRNTFRHS | 482   | >TP53-F212L LDDRNTLRHS | 726  | 244   |
| >TP53-F212L YLDDRNTF   | 2206  | >TP53-F212L YLDDRNTL   | 18   | 2188  |
| >TP53-F212L YLDDRNTF   | 708   | >TP53-F212L YLDDRNTL   | 9    | 699   |
| >TP53-F212L YLDDRNTF   | 4668  | >TP53-F212L YLDDRNTL   | 64   | 4604  |
| >TP53-F212L YLDDRNTF   | 187   | >TP53-F212L YLDDRNTL   | 25   | 162   |
| >TP53-F212L YLDDRNTFRH | 333   | >TP53-F212L YLDDRNTLRH | 548  | 215   |
| >TP53-F212L YLDDRNTF   | 149   | >TP53-F212L YLDDRNTL   | 4    | 145   |
| >TP53-F212L YLDDRNTFRH | 155   | >TP53-F212L YLDDRNTLRH | 143  | 12    |
| >TP53-F212L YLDDRNTF   | 367   | >TP53-F212L YLDDRNTL   | 4    | 363   |
| >TP53-F212L YLDDRNTF   | 2259  | >TP53-F212L YLDDRNTL   | 9    | 2250  |
| >TP53-F212L YLDDRNTF   | 4575  | >TP53-F212L YLDDRNTL   | 15   | 4560  |
| >TP53-F212L YLDDRNTF   | 87    | >TP53-F212L YLDDRNTL   | 2    | 85    |
| >TP53-F212L YLDDRNTFR  | 189   | >TP53-F212L YLDDRNTLR  | 224  | 35    |
| >TP53-F212L YLDDRNTFRH | 187   | >TP53-F212L YLDDRNTLRH | 444  | 257   |
| >TP53-F212L YLDDRNTFRH | 171   | >TP53-F212L YLDDRNTLRH | 147  | 24    |
| >TP53-F212L YLDDRNTFR  | 282   | >TP53-F212L YLDDRNTLR  | 1195 | 913   |
| >TP53-F212L YLDDRNTFR  | 55    | >TP53-F212L YLDDRNTLR  | 202  | 147   |
| >TP53-F212L YLDDRNTFR  | 68    | >TP53-F212L YLDDRNTLR  | 155  | 87    |
| >TP53-F212L YLDDRNTF   | 255   | >TP53-F212L YLDDRNTL   | 4877 | 4622  |
| >TP53-F212L YLDDRNTF   | 8457  | >TP53-F212L YLDDRNTL   | 339  | 8118  |
| >TP53-F212L YLDDRNTFR  | 336   | >TP53-F212L YLDDRNTLR  | 754  | 418   |
| >TP53-F212L EYLDDRNTF  | 10690 | >TP53-F212L EYLDDRNTL  | 193  | 10497 |
| >TP53-F212L EYLDDRNTF  | 103   | >TP53-F212L EYLDDRNTL  | 1425 | 1322  |
| >TP53-F212L EYLDDRNTF  | 18    | >TP53-F212L EYLDDRNTL  | 67   | 49    |
| >TP53-F212L EYLDDRNTF  | 381   | >TP53-F212L EYLDDRNTL  | 1452 | 1071  |
| >TP53-F212L EYLDDRNTF  | 301   | >TP53-F212L EYLDDRNTL  | 2424 | 2123  |
| >TP53-F212L EYLDDRNTFR | 328   | >TP53-F212L EYLDDRNTLR | 988  | 660   |
| >TP53-F212L EYLDDRNTFR | 88    | >TP53-F212L EYLDDRNTLR | 303  | 215   |

|                        |       |                        |      |       |
|------------------------|-------|------------------------|------|-------|
| >TP53-F212L EYLDDRNTFR | 19    | >TP53-F212L EYLDDRNTLR | 23   | 4     |
| >TP53-F212L VEYLDDRNTF | 622   | >TP53-F212L VEYLDDRNTL | 162  | 460   |
| >TP53-F212L VEYLDDRNTF | 124   | >TP53-F212L VEYLDDRNTL | 2101 | 1977  |
| >TP53-F212L VEYLDDRNTF | 594   | >TP53-F212L VEYLDDRNTL | 180  | 414   |
| >TP53-F212L VEYLDDRNTF | 555   | >TP53-F212L VEYLDDRNTL | 432  | 123   |
| >TP53-F212S FRHSVVVPY  | 4     | >TP53-F212S SRHSVVVPY  | 8    | 4     |
| >TP53-F212S FRHSVVVPY  | 33    | >TP53-F212S SRHSVVVPY  | 133  | 100   |
| >TP53-F212S TFRHSVVVPY | 2572  | >TP53-F212S TSRHSVVVPY | 106  | 2466  |
| >TP53-F212S TFRHSVVVPY | 185   | >TP53-F212S TSRHSVVVPY | 700  | 515   |
| >TP53-F212S TFRHSVVV   | 139   | >TP53-F212S TSRHSVVV   | 41   | 98    |
| >TP53-F212S TFRHSVVVPY | 162   | >TP53-F212S TSRHSVVVPY | 44   | 118   |
| >TP53-F212S TFRHSVVVPY | 1278  | >TP53-F212S TSRHSVVVPY | 426  | 852   |
| >TP53-F212S TFRHSVVVPY | 687   | >TP53-F212S TSRHSVVVPY | 229  | 458   |
| >TP53-F212S TFRHSVVVPY | 140   | >TP53-F212S TSRHSVVVPY | 42   | 98    |
| >TP53-F212S TFRHSVVVPY | 225   | >TP53-F212S TSRHSVVVPY | 1487 | 1262  |
| >TP53-F212S TFRHSVVV   | 5988  | >TP53-F212S TSRHSVVV   | 245  | 5743  |
| >TP53-F212S TFRHSVVVPY | 271   | >TP53-F212S TSRHSVVVPY | 13   | 258   |
| >TP53-F212S TFRHSVVV   | 25016 | >TP53-F212S TSRHSVVV   | 257  | 24759 |
| >TP53-F212S TFRHSVVVPY | 11035 | >TP53-F212S TSRHSVVVPY | 4    | 11031 |
| >TP53-F212S TFRHSVVV   | 12839 | >TP53-F212S TSRHSVVV   | 246  | 12593 |
| >TP53-F212S TFRHSVVVPY | 15465 | >TP53-F212S TSRHSVVVPY | 200  | 15265 |
| >TP53-F212S RVEYLDDRNT | 40    | >TP53-F212S RVEYLDDRNT | 5194 | 5154  |
| >TP53-F212S RVEYLDDRNT | 78    | >TP53-F212S RVEYLDDRNT | 7373 | 7295  |
| >TP53-F212S NTFRHSVVVF | 562   | >TP53-F212S NTSRHSVVVF | 54   | 508   |
| >TP53-F212S NTFRHSVV   | 382   | >TP53-F212S NTSRHSVV   | 617  | 235   |
| >TP53-F212S NTFRHSVV   | 309   | >TP53-F212S NTSRHSVV   | 3256 | 2947  |
| >TP53-F212S NTFRHSVVV  | 265   | >TP53-F212S NTSRHSVVV  | 2916 | 2651  |
| >TP53-F212S NTFRHSVVVF | 128   | >TP53-F212S NTSRHSVVVF | 533  | 405   |
| >TP53-F212S NTFRHSVVVF | 97    | >TP53-F212S NTSRHSVVVF | 424  | 327   |
| >TP53-F212S NTFRHSVVVF | 123   | >TP53-F212S NTSRHSVVVF | 68   | 55    |
| >TP53-F212S NTFRHSVVVF | 82    | >TP53-F212S NTSRHSVVVF | 278  | 196   |
| >TP53-F212S NTFRHSVVV  | 412   | >TP53-F212S NTSRHSVVV  | 5964 | 5552  |
| >TP53-F212S NTFRHSVVVF | 61    | >TP53-F212S NTSRHSVVVF | 1693 | 1632  |
| >TP53-F212S NTFRHSVVVF | 34    | >TP53-F212S NTSRHSVVVF | 269  | 235   |
| >TP53-F212S NTFRHSVV   | 11    | >TP53-F212S NTSRHSVV   | 35   | 24    |
| >TP53-F212S NTFRHSVVV  | 8     | >TP53-F212S NTSRHSVVV  | 23   | 15    |
| >TP53-F212S NTFRHSVV   | 50    | >TP53-F212S NTSRHSVV   | 312  | 262   |
| >TP53-F212S NTFRHSVVV  | 25    | >TP53-F212S NTSRHSVVV  | 143  | 118   |
| >TP53-F212S NTFRHSVVVF | 65    | >TP53-F212S NTSRHSVVVF | 110  | 45    |
| >TP53-F212S NTFRHSVVVF | 492   | >TP53-F212S NTSRHSVVVF | 2520 | 2028  |
| >TP53-F212S NTFRHSVVVF | 33    | >TP53-F212S NTSRHSVVVF | 369  | 336   |
| >TP53-F212S NTFRHSVVVF | 23    | >TP53-F212S NTSRHSVVVF | 124  | 101   |
| >TP53-F212S NTFRHSVVVF | 105   | >TP53-F212S NTSRHSVVVF | 139  | 34    |

|                        |       |                        |       |       |
|------------------------|-------|------------------------|-------|-------|
| >TP53-F212S NTFRHSVVVF | 289   | >TP53-F212S NTSRHSVVVF | 1293  | 1004  |
| >TP53-F212S NTFRHSVVVF | 23    | >TP53-F212S NTSRHSVVVF | 38    | 15    |
| >TP53-F212S RNTFRHSVV  | 224   | >TP53-F212S RNTSRHSVV  | 110   | 114   |
| >TP53-F212S LDDRNTFRHS | 482   | >TP53-F212S LDDRNTSRHS | 683   | 201   |
| >TP53-F212S YLDDRNTF   | 187   | >TP53-F212S YLDDRNTS   | 868   | 681   |
| >TP53-F212S YLDDRNTFRH | 333   | >TP53-F212S YLDDRNTSRH | 1261  | 928   |
| >TP53-F212S YLDDRNTF   | 149   | >TP53-F212S YLDDRNTS   | 188   | 39    |
| >TP53-F212S YLDDRNTFRH | 155   | >TP53-F212S YLDDRNTSRH | 184   | 29    |
| >TP53-F212S YLDDRNTF   | 367   | >TP53-F212S YLDDRNTS   | 461   | 94    |
| >TP53-F212S YLDDRNTF   | 87    | >TP53-F212S YLDDRNTS   | 36    | 51    |
| >TP53-F212S YLDDRNTFR  | 189   | >TP53-F212S YLDDRNTSR  | 129   | 60    |
| >TP53-F212S YLDDRNTFRH | 187   | >TP53-F212S YLDDRNTSRH | 323   | 136   |
| >TP53-F212S YLDDRNTFRH | 171   | >TP53-F212S YLDDRNTSRH | 198   | 27    |
| >TP53-F212S YLDDRNTFR  | 282   | >TP53-F212S YLDDRNTSR  | 2623  | 2341  |
| >TP53-F212S YLDDRNTFR  | 55    | >TP53-F212S YLDDRNTSR  | 261   | 206   |
| >TP53-F212S YLDDRNTFR  | 68    | >TP53-F212S YLDDRNTSR  | 428   | 360   |
| >TP53-F212S YLDDRNTF   | 255   | >TP53-F212S YLDDRNTS   | 20232 | 19977 |
| >TP53-F212S YLDDRNTFR  | 336   | >TP53-F212S YLDDRNTSR  | 1422  | 1086  |
| >TP53-F212S EYLDDRNTF  | 103   | >TP53-F212S EYLDDRNTS  | 18964 | 18861 |
| >TP53-F212S EYLDDRNTF  | 18    | >TP53-F212S EYLDDRNTS  | 6809  | 6791  |
| >TP53-F212S EYLDDRNTF  | 381   | >TP53-F212S EYLDDRNTS  | 10549 | 10168 |
| >TP53-F212S EYLDDRNTF  | 301   | >TP53-F212S EYLDDRNTS  | 19150 | 18849 |
| >TP53-F212S EYLDDRNTFR | 328   | >TP53-F212S EYLDDRNTSR | 1757  | 1429  |
| >TP53-F212S EYLDDRNTFR | 88    | >TP53-F212S EYLDDRNTSR | 483   | 395   |
| >TP53-F212S EYLDDRNTFR | 19    | >TP53-F212S EYLDDRNTSR | 34    | 15    |
| >TP53-F212S VEYLDDRNTF | 124   | >TP53-F212S VEYLDDRNTS | 17087 | 16963 |
| >TP53-F212Y FRHSVVVPY  | 4     | >TP53-F212Y YRHSVVVPY  | 4     | 0     |
| >TP53-F212Y FRHSVVVPY  | 33    | >TP53-F212Y YRHSVVVPY  | 30    | 3     |
| >TP53-F212Y FRHSVVVPY  | 946   | >TP53-F212Y YRHSVVVPY  | 145   | 801   |
| >TP53-F212Y TFRHSVVVPY | 185   | >TP53-F212Y TYRHSVVVPY | 99    | 86    |
| >TP53-F212Y TFRHSVVV   | 139   | >TP53-F212Y TYRHSVVV   | 43    | 96    |
| >TP53-F212Y TFRHSVVVPY | 162   | >TP53-F212Y TYRHSVVVPY | 48    | 114   |
| >TP53-F212Y TFRHSVVVPY | 1278  | >TP53-F212Y TYRHSVVVPY | 435   | 843   |
| >TP53-F212Y TFRHSVVVPY | 687   | >TP53-F212Y TYRHSVVVPY | 226   | 461   |
| >TP53-F212Y TFRHSVVVPY | 140   | >TP53-F212Y TYRHSVVVPY | 657   | 517   |
| >TP53-F212Y TFRHSVVVPY | 225   | >TP53-F212Y TYRHSVVVPY | 823   | 598   |
| >TP53-F212Y TFRHSVVVPY | 271   | >TP53-F212Y TYRHSVVVPY | 107   | 164   |
| >TP53-F212Y RVEYLDDRNT | 4944  | >TP53-F212Y RVEYLDDRNT | 50    | 4894  |
| >TP53-F212Y RVEYLDDRNT | 40    | >TP53-F212Y RVEYLDDRNT | 447   | 407   |
| >TP53-F212Y RVEYLDDRNT | 78    | >TP53-F212Y RVEYLDDRNT | 55    | 23    |
| >TP53-F212Y RVEYLDDRNT | 11526 | >TP53-F212Y RVEYLDDRNT | 365   | 11161 |
| >TP53-F212Y NTFRHSVV   | 382   | >TP53-F212Y NTYRHSVV   | 157   | 225   |
| >TP53-F212Y NTFRHSVVV  | 581   | >TP53-F212Y NTYRHSVVV  | 225   | 356   |



|                        |       |                        |      |       |
|------------------------|-------|------------------------|------|-------|
| >TP53-F212Y NTFRHSVV   | 309   | >TP53-F212Y NTYRHSVV   | 204  | 105   |
| >TP53-F212Y NTFRHSVVV  | 265   | >TP53-F212Y NTYRHSVVV  | 176  | 89    |
| >TP53-F212Y NTFRHSVVVF | 647   | >TP53-F212Y NTYRHSVVVF | 240  | 407   |
| >TP53-F212Y NTFRHSVVVF | 128   | >TP53-F212Y NTYRHSVVVF | 140  | 12    |
| >TP53-F212Y NTFRHSVVVF | 97    | >TP53-F212Y NTYRHSVVVF | 80   | 17    |
| >TP53-F212Y NTFRHSVVVF | 123   | >TP53-F212Y NTYRHSVVVF | 17   | 106   |
| >TP53-F212Y NTFRHSVVVF | 678   | >TP53-F212Y NTYRHSVVVF | 433  | 245   |
| >TP53-F212Y NTFRHSVVVF | 82    | >TP53-F212Y NTYRHSVVVF | 121  | 39    |
| >TP53-F212Y NTFRHSVVV  | 412   | >TP53-F212Y NTYRHSVVV  | 857  | 445   |
| >TP53-F212Y NTFRHSVVVF | 61    | >TP53-F212Y NTYRHSVVVF | 153  | 92    |
| >TP53-F212Y NTFRHSVVVF | 34    | >TP53-F212Y NTYRHSVVVF | 64   | 30    |
| >TP53-F212Y NTFRHSVV   | 11    | >TP53-F212Y NTYRHSVV   | 28   | 17    |
| >TP53-F212Y NTFRHSVVV  | 8     | >TP53-F212Y NTYRHSVVV  | 17   | 9     |
| >TP53-F212Y NTFRHSVV   | 50    | >TP53-F212Y NTYRHSVV   | 27   | 23    |
| >TP53-F212Y NTFRHSVVV  | 25    | >TP53-F212Y NTYRHSVVV  | 15   | 10    |
| >TP53-F212Y NTFRHSVVVF | 65    | >TP53-F212Y NTYRHSVVVF | 63   | 2     |
| >TP53-F212Y NTFRHSVVVF | 492   | >TP53-F212Y NTYRHSVVVF | 335  | 157   |
| >TP53-F212Y NTFRHSVVVF | 33    | >TP53-F212Y NTYRHSVVVF | 46   | 13    |
| >TP53-F212Y NTFRHSVVVF | 23    | >TP53-F212Y NTYRHSVVVF | 15   | 8     |
| >TP53-F212Y NTFRHSVVVF | 105   | >TP53-F212Y NTYRHSVVVF | 102  | 3     |
| >TP53-F212Y NTFRHSVVVF | 289   | >TP53-F212Y NTYRHSVVVF | 696  | 407   |
| >TP53-F212Y NTFRHSVVVF | 23    | >TP53-F212Y NTYRHSVVVF | 25   | 2     |
| >TP53-F212Y RNTFRHSVV  | 224   | >TP53-F212Y RNTYRHSVV  | 207  | 17    |
| >TP53-F212Y LDDRNTFRHS | 482   | >TP53-F212Y LDDRNTYRHS | 374  | 108   |
| >TP53-F212Y YLDDRNTF   | 3372  | >TP53-F212Y YLDDRNTY   | 22   | 3350  |
| >TP53-F212Y YLDDRNTF   | 187   | >TP53-F212Y YLDDRNTY   | 2361 | 2174  |
| >TP53-F212Y YLDDRNTFRF | 333   | >TP53-F212Y YLDDRNTYRF | 997  | 664   |
| >TP53-F212Y YLDDRNTF   | 149   | >TP53-F212Y YLDDRNTY   | 616  | 467   |
| >TP53-F212Y YLDDRNTFR  | 1191  | >TP53-F212Y YLDDRNTYR  | 342  | 849   |
| >TP53-F212Y YLDDRNTFRF | 155   | >TP53-F212Y YLDDRNTYRF | 125  | 30    |
| >TP53-F212Y YLDDRNTF   | 367   | >TP53-F212Y YLDDRNTY   | 1115 | 748   |
| >TP53-F212Y YLDDRNTF   | 87    | >TP53-F212Y YLDDRNTY   | 76   | 11    |
| >TP53-F212Y YLDDRNTFR  | 189   | >TP53-F212Y YLDDRNTYR  | 104  | 85    |
| >TP53-F212Y YLDDRNTFRF | 187   | >TP53-F212Y YLDDRNTYRF | 349  | 162   |
| >TP53-F212Y YLDDRNTFRF | 171   | >TP53-F212Y YLDDRNTYRF | 171  | 0     |
| >TP53-F212Y YLDDRNTF   | 4578  | >TP53-F212Y YLDDRNTY   | 356  | 4222  |
| >TP53-F212Y YLDDRNTFR  | 282   | >TP53-F212Y YLDDRNTYR  | 169  | 113   |
| >TP53-F212Y YLDDRNTFR  | 55    | >TP53-F212Y YLDDRNTYR  | 82   | 27    |
| >TP53-F212Y YLDDRNTFR  | 68    | >TP53-F212Y YLDDRNTYR  | 105  | 37    |
| >TP53-F212Y YLDDRNTF   | 255   | >TP53-F212Y YLDDRNTY   | 90   | 165   |
| >TP53-F212Y YLDDRNTF   | 10925 | >TP53-F212Y YLDDRNTY   | 378  | 10547 |
| >TP53-F212Y YLDDRNTFR  | 336   | >TP53-F212Y YLDDRNTYR  | 107  | 229   |
| >TP53-F212Y EYLDDRNTF  | 103   | >TP53-F212Y EYLDDRNTY  | 9221 | 9118  |

|                        |       |                        |       |       |
|------------------------|-------|------------------------|-------|-------|
| >TP53-F212Y EYLDDRNTF  | 18    | >TP53-F212Y EYLDDRNTY  | 2842  | 2824  |
| >TP53-F212Y EYLDDRNTF  | 381   | >TP53-F212Y EYLDDRNTY  | 116   | 265   |
| >TP53-F212Y EYLDDRNTF  | 301   | >TP53-F212Y EYLDDRNTY  | 141   | 160   |
| >TP53-F212Y EYLDDRNTF  | 1315  | >TP53-F212Y EYLDDRNTY  | 136   | 1179  |
| >TP53-F212Y EYLDDRNTF  | 7414  | >TP53-F212Y EYLDDRNTY  | 419   | 6995  |
| >TP53-F212Y EYLDDRNTF  | 11777 | >TP53-F212Y EYLDDRNTY  | 237   | 11540 |
| >TP53-F212Y EYLDDRNTFR | 328   | >TP53-F212Y EYLDDRNTYR | 347   | 19    |
| >TP53-F212Y EYLDDRNTFR | 88    | >TP53-F212Y EYLDDRNTYR | 137   | 49    |
| >TP53-F212Y EYLDDRNTFR | 508   | >TP53-F212Y EYLDDRNTYR | 372   | 136   |
| >TP53-F212Y EYLDDRNTFR | 19    | >TP53-F212Y EYLDDRNTYR | 13    | 6     |
| >TP53-F212Y VEYLDDRNTF | 124   | >TP53-F212Y VEYLDDRNTY | 511   | 387   |
| >TP53-F212Y VEYLDDRNTF | 1478  | >TP53-F212Y VEYLDDRNTY | 365   | 1113  |
| >TP53-F212Y VEYLDDRNTF | 524   | >TP53-F212Y VEYLDDRNTY | 230   | 294   |
| >TP53-F270C FEVRVCACPC | 370   | >TP53-F270C CEVRVCACPC | 1715  | 1345  |
| >TP53-F270C SSGNLLGRNS | 245   | >TP53-F270C SSGNLLGRNS | 18840 | 18595 |
| >TP53-F270C SSGNLLGRNS | 390   | >TP53-F270C SSGNLLGRNS | 25937 | 25547 |
| >TP53-F270C SSGNLLGRNS | 32    | >TP53-F270C SSGNLLGRNS | 7939  | 7907  |
| >TP53-F270C NSFQVRVCA  | 21    | >TP53-F270C NSQEVVCA   | 610   | 589   |
| >TP53-F270C GRNSQEVV   | 405   | >TP53-F270C GRNSQEVV   | 2614  | 2209  |
| >TP53-F270C LGRNSQEVV  | 286   | >TP53-F270C LGRNSQEVV  | 2572  | 2286  |
| >TP53-F270C LLGRNSQEV  | 26    | >TP53-F270C LLGRNSQEV  | 277   | 251   |
| >TP53-F270C LLGRNSQEVV | 137   | >TP53-F270C LLGRNSQEVV | 310   | 173   |
| >TP53-F270C LLGRNSQEV  | 16    | >TP53-F270C LLGRNSQEV  | 70    | 54    |
| >TP53-F270C LLGRNSQEVV | 62    | >TP53-F270C LLGRNSQEVV | 116   | 54    |
| >TP53-F270C LLGRNSQEV  | 47    | >TP53-F270C LLGRNSQEV  | 69    | 22    |
| >TP53-F270C LLGRNSQEVV | 214   | >TP53-F270C LLGRNSQEVV | 268   | 54    |
| >TP53-F270C LLGRNSQEV  | 39    | >TP53-F270C LLGRNSQEV  | 504   | 465   |
| >TP53-F270C LLGRNSQEV  | 2     | >TP53-F270C LLGRNSQEV  | 2     | 0     |
| >TP53-F270C LLGRNSQEVV | 3     | >TP53-F270C LLGRNSQEVV | 5     | 2     |
| >TP53-F270C LLGRNSQEV  | 2     | >TP53-F270C LLGRNSQEV  | 3     | 1     |
| >TP53-F270C LLGRNSQEVV | 7     | >TP53-F270C LLGRNSQEVV | 8     | 1     |
| >TP53-F270C LLGRNSQEV  | 5     | >TP53-F270C LLGRNSQEV  | 6     | 1     |
| >TP53-F270C LLGRNSQEVV | 9     | >TP53-F270C LLGRNSQEVV | 10    | 1     |
| >TP53-F270C LLGRNSQEV  | 2     | >TP53-F270C LLGRNSQEV  | 3     | 1     |
| >TP53-F270C LLGRNSQEVV | 6     | >TP53-F270C LLGRNSQEVV | 7     | 1     |
| >TP53-F270C LLGRNSQEV  | 2     | >TP53-F270C LLGRNSQEV  | 2     | 0     |
| >TP53-F270C LLGRNSQEVV | 2     | >TP53-F270C LLGRNSQEVV | 2     | 0     |
| >TP53-F270C LLGRNSQEVV | 429   | >TP53-F270C LLGRNSQEVV | 1197  | 768   |
| >TP53-F270C LLGRNSQEV  | 425   | >TP53-F270C LLGRNSQEV  | 1879  | 1454  |
| >TP53-F270C NLLGRNSQEV | 29    | >TP53-F270C NLLGRNSQEV | 118   | 89    |
| >TP53-F270C NLLGRNSQEV | 89    | >TP53-F270C NLLGRNSQEV | 205   | 116   |
| >TP53-F270C NLLGRNSQEV | 94    | >TP53-F270C NLLGRNSQEV | 53    | 41    |
| >TP53-F270C NLLGRNSQEV | 137   | >TP53-F270C NLLGRNSQEV | 393   | 256   |

|                         |      |                         |       |       |
|-------------------------|------|-------------------------|-------|-------|
| >TP53-F270C NLLGRNSFEV  | 3    | >TP53-F270C NLLGRNSCEV  | 4     | 1     |
| >TP53-F270C NLLGRNSFEV  | 5    | >TP53-F270C NLLGRNSCEV  | 9     | 4     |
| >TP53-F270C NLLGRNSFEV  | 7    | >TP53-F270C NLLGRNSCEV  | 8     | 1     |
| >TP53-F270C NLLGRNSFEV  | 3    | >TP53-F270C NLLGRNSCEV  | 5     | 2     |
| >TP53-F270C NLLGRNSF    | 7305 | >TP53-F270C NLLGRNSC    | 346   | 6959  |
| >TP53-F270C NLLGRNSFEV  | 3    | >TP53-F270C NLLGRNSCEV  | 3     | 0     |
| >TP53-F270C NLLGRNSFEV  | 109  | >TP53-F270C NLLGRNSCEV  | 199   | 90    |
| >TP53-F270C NLLGRNSFEV  | 309  | >TP53-F270C NLLGRNSCEV  | 406   | 97    |
| >TP53-F270C NLLGRNSFEV  | 52   | >TP53-F270C NLLGRNSCEV  | 173   | 121   |
| >TP53-F270C NLLGRNSF    | 65   | >TP53-F270C NLLGRNSC    | 11690 | 11625 |
| >TP53-F270C NLLGRNSF    | 418  | >TP53-F270C NLLGRNSC    | 22838 | 22420 |
| >TP53-F270C NLLGRNSFEV  | 195  | >TP53-F270C NLLGRNSCEV  | 733   | 538   |
| >TP53-F270C SGNLLGRNSF  | 311  | >TP53-F270C SGNLLGRNSC  | 23558 | 23247 |
| >TP53-F270I- FEVRVCACPG | 370  | >TP53-F270I- IEVRVCACPG | 1537  | 1167  |
| >TP53-F270I- SSGNLLGRNS | 245  | >TP53-F270I- SSGNLLGRNS | 10266 | 10021 |
| >TP53-F270I- SSGNLLGRNS | 390  | >TP53-F270I- SSGNLLGRNS | 8891  | 8501  |
| >TP53-F270I- SSGNLLGRNS | 32   | >TP53-F270I- SSGNLLGRNS | 568   | 536   |
| >TP53-F270I- SSGNLLGRNS | 9035 | >TP53-F270I- SSGNLLGRNS | 37    | 8998  |
| >TP53-F270I- NSFVCA     | 21   | >TP53-F270I- NSIEVCA    | 37    | 16    |
| >TP53-F270I- GRNSFEVR   | 405  | >TP53-F270I- GRNSIEVR   | 454   | 49    |
| >TP53-F270I- LGRNSFEVR  | 286  | >TP53-F270I- LGRNSIEVR  | 829   | 543   |
| >TP53-F270I- LLGRNSFEV  | 26   | >TP53-F270I- LLGRNSIEV  | 88    | 62    |
| >TP53-F270I- LLGRNSFEVR | 137  | >TP53-F270I- LLGRNSIEVR | 246   | 109   |
| >TP53-F270I- LLGRNSFEV  | 16   | >TP53-F270I- LLGRNSIEV  | 76    | 60    |
| >TP53-F270I- LLGRNSFEVR | 62   | >TP53-F270I- LLGRNSIEVR | 96    | 34    |
| >TP53-F270I- LLGRNSFEV  | 47   | >TP53-F270I- LLGRNSIEV  | 80    | 33    |
| >TP53-F270I- LLGRNSFEVR | 214  | >TP53-F270I- LLGRNSIEVR | 246   | 32    |
| >TP53-F270I- LLGRNSFEV  | 39   | >TP53-F270I- LLGRNSIEV  | 368   | 329   |
| >TP53-F270I- LLGRNSFEV  | 2    | >TP53-F270I- LLGRNSIEV  | 3     | 1     |
| >TP53-F270I- LLGRNSFEVR | 3    | >TP53-F270I- LLGRNSIEVR | 4     | 1     |
| >TP53-F270I- LLGRNSFEV  | 2    | >TP53-F270I- LLGRNSIEV  | 3     | 1     |
| >TP53-F270I- LLGRNSFEVR | 7    | >TP53-F270I- LLGRNSIEVR | 8     | 1     |
| >TP53-F270I- LLGRNSFEV  | 5    | >TP53-F270I- LLGRNSIEV  | 7     | 2     |
| >TP53-F270I- LLGRNSFEVR | 9    | >TP53-F270I- LLGRNSIEVR | 10    | 1     |
| >TP53-F270I- LLGRNSFEV  | 2    | >TP53-F270I- LLGRNSIEV  | 4     | 2     |
| >TP53-F270I- LLGRNSFEVR | 6    | >TP53-F270I- LLGRNSIEVR | 6     | 0     |
| >TP53-F270I- LLGRNSFEV  | 2    | >TP53-F270I- LLGRNSIEV  | 2     | 0     |
| >TP53-F270I- LLGRNSFEVR | 2    | >TP53-F270I- LLGRNSIEVR | 2     | 0     |
| >TP53-F270I- LLGRNSFEVR | 429  | >TP53-F270I- LLGRNSIEVR | 1534  | 1105  |
| >TP53-F270I- LLGRNSFEV  | 425  | >TP53-F270I- LLGRNSIEV  | 1286  | 861   |
| >TP53-F270I- NLLGRNSFEV | 29   | >TP53-F270I- NLLGRNSIEV | 50    | 21    |
| >TP53-F270I- NLLGRNSF   | 5015 | >TP53-F270I- NLLGRNSI   | 274   | 4741  |
| >TP53-F270I- NLLGRNSFEV | 89   | >TP53-F270I- NLLGRNSIEV | 160   | 71    |

|                        |       |                         |      |       |
|------------------------|-------|-------------------------|------|-------|
| >TP53-F270I-NLLGRNSF   | 12898 | >TP53-F270I-NLLGRNSI    | 361  | 12537 |
| >TP53-F270I-NLLGRNSFEV | 94    | >TP53-F270I-NLLGRNSIEV  | 65   | 29    |
| >TP53-F270I-NLLGRNSFEV | 137   | >TP53-F270I-NLLGRNSIEV  | 200  | 63    |
| >TP53-F270I-NLLGRNSF   | 7094  | >TP53-F270I-NLLGRNSI    | 104  | 6990  |
| >TP53-F270I-NLLGRNSFEV | 3     | >TP53-F270I-NLLGRNSIEV  | 5    | 2     |
| >TP53-F270I-NLLGRNSF   | 10562 | >TP53-F270I-NLLGRNSI    | 174  | 10388 |
| >TP53-F270I-NLLGRNSFEV | 5     | >TP53-F270I-NLLGRNSIEV  | 9    | 4     |
| >TP53-F270I-NLLGRNSF   | 17245 | >TP53-F270I-NLLGRNSI    | 496  | 16749 |
| >TP53-F270I-NLLGRNSFEV | 7     | >TP53-F270I-NLLGRNSIEV  | 10   | 3     |
| >TP53-F270I-NLLGRNSF   | 13213 | >TP53-F270I-NLLGRNSI    | 207  | 13006 |
| >TP53-F270I-NLLGRNSFEV | 3     | >TP53-F270I-NLLGRNSIEV  | 7    | 4     |
| >TP53-F270I-NLLGRNSF   | 7305  | >TP53-F270I-NLLGRNSI    | 47   | 7258  |
| >TP53-F270I-NLLGRNSFEV | 3     | >TP53-F270I-NLLGRNSIEV  | 3    | 0     |
| >TP53-F270I-NLLGRNSFEV | 109   | >TP53-F270I-NLLGRNSIEVI | 203  | 94    |
| >TP53-F270I-NLLGRNSFEV | 309   | >TP53-F270I-NLLGRNSIEVI | 415  | 106   |
| >TP53-F270I-NLLGRNSFEV | 52    | >TP53-F270I-NLLGRNSIEV  | 152  | 100   |
| >TP53-F270I-NLLGRNSF   | 501   | >TP53-F270I-NLLGRNSI    | 332  | 169   |
| >TP53-F270I-NLLGRNSF   | 65    | >TP53-F270I-NLLGRNSI    | 2254 | 2189  |
| >TP53-F270I-NLLGRNSF   | 418   | >TP53-F270I-NLLGRNSI    | 8862 | 8444  |
| >TP53-F270I-NLLGRNSFEV | 195   | >TP53-F270I-NLLGRNSIEVI | 388  | 193   |
| >TP53-F270I-SGNLLGRNSF | 311   | >TP53-F270I-SGNLLGRNSI  | 7424 | 7113  |
| >TP53-F270L FEVRVCACPG | 370   | >TP53-F270L LEVRVCACPG  | 1706 | 1336  |
| >TP53-F270L SFEVRVCA   | 27268 | >TP53-F270L SLEVRVCA    | 144  | 27124 |
| >TP53-F270L SFEVRVCAC  | 30184 | >TP53-F270L SLEVRVCAC   | 142  | 30042 |
| >TP53-F270L SSGNLLGRNS | 245   | >TP53-F270L SSGNLLGRNS  | 6670 | 6425  |
| >TP53-F270L SSGNLLGRNS | 390   | >TP53-F270L SSGNLLGRNS  | 3045 | 2655  |
| >TP53-F270L SSGNLLGRNS | 32    | >TP53-F270L SSGNLLGRNS  | 244  | 212   |
| >TP53-F270L NSFVVRVCA  | 21    | >TP53-F270L NSLEVRVCA   | 673  | 652   |
| >TP53-F270L GRNSFEVR   | 405   | >TP53-F270L GRNSLEVR    | 462  | 57    |
| >TP53-F270L LGRNSFEVR  | 286   | >TP53-F270L LGRNSLEVR   | 997  | 711   |
| >TP53-F270L LLGRNSFEV  | 26    | >TP53-F270L LLGRNSLEV   | 138  | 112   |
| >TP53-F270L LLGRNSFEVR | 137   | >TP53-F270L LLGRNSLEVR' | 330  | 193   |
| >TP53-F270L LLGRNSFEV  | 16    | >TP53-F270L LLGRNSLEV   | 114  | 98    |
| >TP53-F270L LLGRNSFEVR | 62    | >TP53-F270L LLGRNSLEVR' | 153  | 91    |
| >TP53-F270L LLGRNSFEV  | 47    | >TP53-F270L LLGRNSLEV   | 64   | 17    |
| >TP53-F270L LLGRNSFEVR | 214   | >TP53-F270L LLGRNSLEVR' | 287  | 73    |
| >TP53-F270L LLGRNSFEV  | 39    | >TP53-F270L LLGRNSLEV   | 420  | 381   |
| >TP53-F270L LLGRNSFEV  | 2     | >TP53-F270L LLGRNSLEV   | 3    | 1     |
| >TP53-F270L LLGRNSFEVR | 3     | >TP53-F270L LLGRNSLEVR' | 4    | 1     |
| >TP53-F270L LLGRNSFEV  | 2     | >TP53-F270L LLGRNSLEV   | 4    | 2     |
| >TP53-F270L LLGRNSFEVR | 7     | >TP53-F270L LLGRNSLEVR' | 10   | 3     |
| >TP53-F270L LLGRNSFEV  | 5     | >TP53-F270L LLGRNSLEV   | 8    | 3     |
| >TP53-F270L LLGRNSFEVR | 9     | >TP53-F270L LLGRNSLEVR' | 11   | 2     |

|                        |       |                        |       |       |
|------------------------|-------|------------------------|-------|-------|
| >TP53-F270L LLGRNSFEV  | 2     | >TP53-F270L LLGRNSLEV  | 5     | 3     |
| >TP53-F270L LLGRNSFEVR | 6     | >TP53-F270L LLGRNSLEVR | 10    | 4     |
| >TP53-F270L LLGRNSFEV  | 2     | >TP53-F270L LLGRNSLEV  | 2     | 0     |
| >TP53-F270L LLGRNSFEVR | 2     | >TP53-F270L LLGRNSLEVR | 2     | 0     |
| >TP53-F270L LLGRNSFEVR | 429   | >TP53-F270L LLGRNSLEVR | 813   | 384   |
| >TP53-F270L LLGRNSFEV  | 425   | >TP53-F270L LLGRNSLEV  | 1703  | 1278  |
| >TP53-F270L NLLGRNSFEV | 29    | >TP53-F270L NLLGRNSLEV | 49    | 20    |
| >TP53-F270L NLLGRNSF   | 5015  | >TP53-F270L NLLGRNSL   | 85    | 4930  |
| >TP53-F270L NLLGRNSFEV | 89    | >TP53-F270L NLLGRNSLEV | 131   | 42    |
| >TP53-F270L NLLGRNSFEV | 94    | >TP53-F270L NLLGRNSLEV | 40    | 54    |
| >TP53-F270L NLLGRNSFEV | 137   | >TP53-F270L NLLGRNSLEV | 179   | 42    |
| >TP53-F270L NLLGRNSF   | 7094  | >TP53-F270L NLLGRNSL   | 121   | 6973  |
| >TP53-F270L NLLGRNSFEV | 3     | >TP53-F270L NLLGRNSLEV | 5     | 2     |
| >TP53-F270L NLLGRNSF   | 10562 | >TP53-F270L NLLGRNSL   | 189   | 10373 |
| >TP53-F270L NLLGRNSFEV | 5     | >TP53-F270L NLLGRNSLEV | 12    | 7     |
| >TP53-F270L NLLGRNSF   | 17245 | >TP53-F270L NLLGRNSL   | 318   | 16927 |
| >TP53-F270L NLLGRNSFEV | 7     | >TP53-F270L NLLGRNSLEV | 10    | 3     |
| >TP53-F270L NLLGRNSF   | 13213 | >TP53-F270L NLLGRNSL   | 146   | 13067 |
| >TP53-F270L NLLGRNSFEV | 3     | >TP53-F270L NLLGRNSLEV | 8     | 5     |
| >TP53-F270L NLLGRNSF   | 7305  | >TP53-F270L NLLGRNSL   | 12    | 7293  |
| >TP53-F270L NLLGRNSFEV | 3     | >TP53-F270L NLLGRNSLEV | 3     | 0     |
| >TP53-F270L NLLGRNSFEV | 109   | >TP53-F270L NLLGRNSLEV | 198   | 89    |
| >TP53-F270L NLLGRNSFEV | 309   | >TP53-F270L NLLGRNSLEV | 473   | 164   |
| >TP53-F270L NLLGRNSFEV | 52    | >TP53-F270L NLLGRNSLEV | 162   | 110   |
| >TP53-F270L NLLGRNSF   | 501   | >TP53-F270L NLLGRNSL   | 125   | 376   |
| >TP53-F270L NLLGRNSF   | 65    | >TP53-F270L NLLGRNSL   | 1117  | 1052  |
| >TP53-F270L NLLGRNSF   | 418   | >TP53-F270L NLLGRNSL   | 7267  | 6849  |
| >TP53-F270L NLLGRNSFEV | 195   | >TP53-F270L NLLGRNSLEV | 601   | 406   |
| >TP53-F270L SGNLLGRNSF | 311   | >TP53-F270L SGNLLGRNSL | 3628  | 3317  |
| >TP53-F270S FEVRVCACPC | 370   | >TP53-F270S SEVRVCACPC | 1555  | 1185  |
| >TP53-F270S FEVRVCACPC | 2847  | >TP53-F270S SEVRVCACPC | 472   | 2375  |
| >TP53-F270S SSGNLLGRNS | 245   | >TP53-F270S SSGNLLGRNS | 18071 | 17826 |
| >TP53-F270S SSGNLLGRNS | 390   | >TP53-F270S SSGNLLGRNS | 24981 | 24591 |
| >TP53-F270S SSGNLLGRNS | 32    | >TP53-F270S SSGNLLGRNS | 5373  | 5341  |
| >TP53-F270S NSFVCA     | 21    | >TP53-F270S NSSEVRVCA  | 80    | 59    |
| >TP53-F270S GRNSFEVR   | 405   | >TP53-F270S GRNSSEVR   | 1496  | 1091  |
| >TP53-F270S LGRNSFEVR  | 286   | >TP53-F270S LGRNSSEVR  | 1822  | 1536  |
| >TP53-F270S LLGRNSFEV  | 26    | >TP53-F270S LLGRNSSEV  | 497   | 471   |
| >TP53-F270S LLGRNSFEVR | 137   | >TP53-F270S LLGRNSSEVR | 603   | 466   |
| >TP53-F270S LLGRNSFEV  | 16    | >TP53-F270S LLGRNSSEV  | 45    | 29    |
| >TP53-F270S LLGRNSFEVR | 62    | >TP53-F270S LLGRNSSEVR | 116   | 54    |
| >TP53-F270S LLGRNSFEV  | 47    | >TP53-F270S LLGRNSSEV  | 17    | 30    |
| >TP53-F270S LLGRNSFEVR | 214   | >TP53-F270S LLGRNSSEVR | 153   | 61    |

|                        |     |                        |       |       |
|------------------------|-----|------------------------|-------|-------|
| >TP53-F270S LLGRNSFEV  | 39  | >TP53-F270S LLGRNSSEV  | 894   | 855   |
| >TP53-F270S LLGRNSFEV  | 2   | >TP53-F270S LLGRNSSEV  | 3     | 1     |
| >TP53-F270S LLGRNSFEVR | 3   | >TP53-F270S LLGRNSSEVR | 5     | 2     |
| >TP53-F270S LLGRNSFEV  | 2   | >TP53-F270S LLGRNSSEV  | 4     | 2     |
| >TP53-F270S LLGRNSFEVR | 7   | >TP53-F270S LLGRNSSEVR | 9     | 2     |
| >TP53-F270S LLGRNSFEV  | 5   | >TP53-F270S LLGRNSSEV  | 11    | 6     |
| >TP53-F270S LLGRNSFEVR | 9   | >TP53-F270S LLGRNSSEVR | 12    | 3     |
| >TP53-F270S LLGRNSFEV  | 2   | >TP53-F270S LLGRNSSEV  | 4     | 2     |
| >TP53-F270S LLGRNSFEVR | 6   | >TP53-F270S LLGRNSSEVR | 8     | 2     |
| >TP53-F270S LLGRNSFEV  | 2   | >TP53-F270S LLGRNSSEV  | 2     | 0     |
| >TP53-F270S LLGRNSFEVR | 2   | >TP53-F270S LLGRNSSEVR | 2     | 0     |
| >TP53-F270S LLGRNSFEVR | 429 | >TP53-F270S LLGRNSSEVR | 1446  | 1017  |
| >TP53-F270S LLGRNSFEV  | 425 | >TP53-F270S LLGRNSSEV  | 2527  | 2102  |
| >TP53-F270S NLLGRNSFEV | 29  | >TP53-F270S NLLGRNSSEV | 155   | 126   |
| >TP53-F270S NLLGRNSFEV | 89  | >TP53-F270S NLLGRNSSEV | 136   | 47    |
| >TP53-F270S NLLGRNSFEV | 94  | >TP53-F270S NLLGRNSSEV | 35    | 59    |
| >TP53-F270S NLLGRNSFEV | 137 | >TP53-F270S NLLGRNSSEV | 400   | 263   |
| >TP53-F270S NLLGRNSFEV | 3   | >TP53-F270S NLLGRNSSEV | 5     | 2     |
| >TP53-F270S NLLGRNSFEV | 5   | >TP53-F270S NLLGRNSSEV | 9     | 4     |
| >TP53-F270S NLLGRNSFEV | 7   | >TP53-F270S NLLGRNSSEV | 12    | 5     |
| >TP53-F270S NLLGRNSFEV | 3   | >TP53-F270S NLLGRNSSEV | 6     | 3     |
| >TP53-F270S NLLGRNSFEV | 3   | >TP53-F270S NLLGRNSSEV | 3     | 0     |
| >TP53-F270S NLLGRNSFEV | 109 | >TP53-F270S NLLGRNSSEV | 286   | 177   |
| >TP53-F270S NLLGRNSFEV | 309 | >TP53-F270S NLLGRNSSEV | 461   | 152   |
| >TP53-F270S NLLGRNSFEV | 52  | >TP53-F270S NLLGRNSSEV | 174   | 122   |
| >TP53-F270S NLLGRNSF   | 65  | >TP53-F270S NLLGRNSS   | 10950 | 10885 |
| >TP53-F270S NLLGRNSF   | 418 | >TP53-F270S NLLGRNSS   | 24104 | 23686 |
| >TP53-F270S NLLGRNSFEV | 195 | >TP53-F270S NLLGRNSSEV | 482   | 287   |
| >TP53-F270S SGNLLGRNSF | 311 | >TP53-F270S SGNLLGRNSS | 23210 | 22899 |
| >TP53-F270V FEVRVCACPC | 370 | >TP53-F270V VEVRVCACPC | 3704  | 3334  |
| >TP53-F270V SSGNLLGRNS | 245 | >TP53-F270V SSGNLLGRNS | 11201 | 10956 |
| >TP53-F270V SSGNLLGRNS | 390 | >TP53-F270V SSGNLLGRNS | 18169 | 17779 |
| >TP53-F270V SSGNLLGRNS | 32  | >TP53-F270V SSGNLLGRNS | 828   | 796   |
| >TP53-F270V NSFVEVRVCA | 21  | >TP53-F270V NSVEVRVCA  | 70    | 49    |
| >TP53-F270V GRNSFEVR   | 405 | >TP53-F270V GRNSVEVR   | 729   | 324   |
| >TP53-F270V LGRNSFEVR  | 286 | >TP53-F270V LGRNSVEVR  | 1440  | 1154  |
| >TP53-F270V LLGRNSFEV  | 26  | >TP53-F270V LLGRNSVEV  | 141   | 115   |
| >TP53-F270V LLGRNSFEVR | 137 | >TP53-F270V LLGRNSVEVR | 304   | 167   |
| >TP53-F270V LLGRNSFEV  | 16  | >TP53-F270V LLGRNSVEV  | 37    | 21    |
| >TP53-F270V LLGRNSFEVR | 62  | >TP53-F270V LLGRNSVEVR | 96    | 34    |
| >TP53-F270V LLGRNSFEV  | 47  | >TP53-F270V LLGRNSVEV  | 69    | 22    |
| >TP53-F270V LLGRNSFEVR | 214 | >TP53-F270V LLGRNSVEVR | 256   | 42    |
| >TP53-F270V LLGRNSFEV  | 39  | >TP53-F270V LLGRNSVEV  | 351   | 312   |

|                        |       |                        |       |       |
|------------------------|-------|------------------------|-------|-------|
| >TP53-F270V LLGRNSFEV  | 2     | >TP53-F270V LLGRNSVEV  | 3     | 1     |
| >TP53-F270V LLGRNSFEVR | 3     | >TP53-F270V LLGRNSVEVR | 3     | 0     |
| >TP53-F270V LLGRNSFEV  | 2     | >TP53-F270V LLGRNSVEV  | 3     | 1     |
| >TP53-F270V LLGRNSFEVR | 7     | >TP53-F270V LLGRNSVEVR | 8     | 1     |
| >TP53-F270V LLGRNSFEV  | 5     | >TP53-F270V LLGRNSVEV  | 7     | 2     |
| >TP53-F270V LLGRNSFEVR | 9     | >TP53-F270V LLGRNSVEVR | 9     | 0     |
| >TP53-F270V LLGRNSFEV  | 2     | >TP53-F270V LLGRNSVEV  | 4     | 2     |
| >TP53-F270V LLGRNSFEVR | 6     | >TP53-F270V LLGRNSVEVR | 7     | 1     |
| >TP53-F270V LLGRNSFEV  | 2     | >TP53-F270V LLGRNSVEV  | 2     | 0     |
| >TP53-F270V LLGRNSFEVR | 2     | >TP53-F270V LLGRNSVEVR | 2     | 0     |
| >TP53-F270V LLGRNSFEVR | 429   | >TP53-F270V LLGRNSVEVR | 1287  | 858   |
| >TP53-F270V LLGRNSFEV  | 425   | >TP53-F270V LLGRNSVEV  | 1522  | 1097  |
| >TP53-F270V NLLGRNSF   | 18188 | >TP53-F270V NLLGRNSV   | 166   | 18022 |
| >TP53-F270V NLLGRNSFEV | 29    | >TP53-F270V NLLGRNSVEV | 97    | 68    |
| >TP53-F270V NLLGRNSF   | 5015  | >TP53-F270V NLLGRNSV   | 53    | 4962  |
| >TP53-F270V NLLGRNSFEV | 89    | >TP53-F270V NLLGRNSVEV | 240   | 151   |
| >TP53-F270V NLLGRNSF   | 12898 | >TP53-F270V NLLGRNSV   | 59    | 12839 |
| >TP53-F270V NLLGRNSFEV | 94    | >TP53-F270V NLLGRNSVEV | 69    | 25    |
| >TP53-F270V NLLGRNSF   | 2963  | >TP53-F270V NLLGRNSV   | 97    | 2866  |
| >TP53-F270V NLLGRNSFEV | 137   | >TP53-F270V NLLGRNSVEV | 344   | 207   |
| >TP53-F270V NLLGRNSF   | 7094  | >TP53-F270V NLLGRNSV   | 10    | 7084  |
| >TP53-F270V NLLGRNSFEV | 3     | >TP53-F270V NLLGRNSVEV | 5     | 2     |
| >TP53-F270V NLLGRNSF   | 10562 | >TP53-F270V NLLGRNSV   | 24    | 10538 |
| >TP53-F270V NLLGRNSFEV | 5     | >TP53-F270V NLLGRNSVEV | 9     | 4     |
| >TP53-F270V NLLGRNSF   | 17245 | >TP53-F270V NLLGRNSV   | 20    | 17225 |
| >TP53-F270V NLLGRNSFEV | 7     | >TP53-F270V NLLGRNSVEV | 10    | 3     |
| >TP53-F270V NLLGRNSF   | 13213 | >TP53-F270V NLLGRNSV   | 14    | 13199 |
| >TP53-F270V NLLGRNSFEV | 3     | >TP53-F270V NLLGRNSVEV | 6     | 3     |
| >TP53-F270V NLLGRNSF   | 7305  | >TP53-F270V NLLGRNSV   | 3     | 7302  |
| >TP53-F270V NLLGRNSFEV | 3     | >TP53-F270V NLLGRNSVEV | 3     | 0     |
| >TP53-F270V NLLGRNSFEV | 109   | >TP53-F270V NLLGRNSVEV | 295   | 186   |
| >TP53-F270V NLLGRNSFEV | 309   | >TP53-F270V NLLGRNSVEV | 426   | 117   |
| >TP53-F270V NLLGRNSF   | 16647 | >TP53-F270V NLLGRNSV   | 261   | 16386 |
| >TP53-F270V NLLGRNSFEV | 52    | >TP53-F270V NLLGRNSVEV | 167   | 115   |
| >TP53-F270V NLLGRNSF   | 65    | >TP53-F270V NLLGRNSV   | 1823  | 1758  |
| >TP53-F270V NLLGRNSF   | 418   | >TP53-F270V NLLGRNSV   | 10615 | 10197 |
| >TP53-F270V NLLGRNSFEV | 195   | >TP53-F270V NLLGRNSVEV | 467   | 272   |
| >TP53-F270V SGNLLGRNSF | 311   | >TP53-F270V SGNLLGRNSV | 5843  | 5532  |
| >TP53-F270Y FEVRVCAC   | 822   | >TP53-F270Y YEVRVCAC   | 488   | 334   |
| >TP53-F270Y FEVRVCACPC | 370   | >TP53-F270Y YEVRVCACPC | 430   | 60    |
| >TP53-F270Y SSGNLLGRNS | 2774  | >TP53-F270Y SSGNLLGRNS | 475   | 2299  |
| >TP53-F270Y SSGNLLGRNS | 2192  | >TP53-F270Y SSGNLLGRNS | 20    | 2172  |
| >TP53-F270Y SSGNLLGRNS | 245   | >TP53-F270Y SSGNLLGRNS | 194   | 51    |

|                        |       |                        |      |       |
|------------------------|-------|------------------------|------|-------|
| >TP53-F270Y SSGNLLGRNS | 390   | >TP53-F270Y SSGNLLGRNS | 599  | 209   |
| >TP53-F270Y SSGNLLGRNS | 32    | >TP53-F270Y SSGNLLGRNS | 23   | 9     |
| >TP53-F270Y NSFVCA     | 21    | >TP53-F270Y NSFVCA     | 67   | 46    |
| >TP53-F270Y GRNSFEVR   | 405   | >TP53-F270Y GRNSFEVR   | 583  | 178   |
| >TP53-F270Y LGRNSFEVR  | 286   | >TP53-F270Y LGRNSFEVR  | 341  | 55    |
| >TP53-F270Y LLGRNSFEV  | 26    | >TP53-F270Y LLGRNSFEV  | 34   | 8     |
| >TP53-F270Y LLGRNSFEVR | 137   | >TP53-F270Y LLGRNSFEVR | 127  | 10    |
| >TP53-F270Y LLGRNSFEV  | 16    | >TP53-F270Y LLGRNSFEV  | 13   | 3     |
| >TP53-F270Y LLGRNSFEVR | 62    | >TP53-F270Y LLGRNSFEVR | 49   | 13    |
| >TP53-F270Y LLGRNSFEV  | 47    | >TP53-F270Y LLGRNSFEV  | 55   | 8     |
| >TP53-F270Y LLGRNSFEVR | 214   | >TP53-F270Y LLGRNSFEVR | 202  | 12    |
| >TP53-F270Y LLGRNSFEV  | 39    | >TP53-F270Y LLGRNSFEV  | 246  | 207   |
| >TP53-F270Y LLGRNSFEV  | 2     | >TP53-F270Y LLGRNSFEV  | 2    | 0     |
| >TP53-F270Y LLGRNSFEVR | 3     | >TP53-F270Y LLGRNSFEVR | 3    | 0     |
| >TP53-F270Y LLGRNSFEV  | 2     | >TP53-F270Y LLGRNSFEV  | 2    | 0     |
| >TP53-F270Y LLGRNSFEVR | 7     | >TP53-F270Y LLGRNSFEVR | 7    | 0     |
| >TP53-F270Y LLGRNSFEV  | 5     | >TP53-F270Y LLGRNSFEV  | 7    | 2     |
| >TP53-F270Y LLGRNSFEVR | 9     | >TP53-F270Y LLGRNSFEVR | 11   | 2     |
| >TP53-F270Y LLGRNSFEV  | 2     | >TP53-F270Y LLGRNSFEV  | 2    | 0     |
| >TP53-F270Y LLGRNSFEVR | 6     | >TP53-F270Y LLGRNSFEVR | 6    | 0     |
| >TP53-F270Y LLGRNSFEV  | 2     | >TP53-F270Y LLGRNSFEV  | 2    | 0     |
| >TP53-F270Y LLGRNSFEVR | 2     | >TP53-F270Y LLGRNSFEVR | 2    | 0     |
| >TP53-F270Y LLGRNSFEVR | 429   | >TP53-F270Y LLGRNSFEVR | 707  | 278   |
| >TP53-F270Y LLGRNSFEV  | 425   | >TP53-F270Y LLGRNSFEV  | 1004 | 579   |
| >TP53-F270Y NLLGRNSFEV | 29    | >TP53-F270Y NLLGRNSFEV | 34   | 5     |
| >TP53-F270Y NLLGRNSFEV | 89    | >TP53-F270Y NLLGRNSFEV | 79   | 10    |
| >TP53-F270Y NLLGRNSFEV | 94    | >TP53-F270Y NLLGRNSFEV | 88   | 6     |
| >TP53-F270Y NLLGRNSFEV | 137   | >TP53-F270Y NLLGRNSFEV | 120  | 17    |
| >TP53-F270Y NLLGRNSFEV | 3     | >TP53-F270Y NLLGRNSFEV | 3    | 0     |
| >TP53-F270Y NLLGRNSFEV | 5     | >TP53-F270Y NLLGRNSFEV | 5    | 0     |
| >TP53-F270Y NLLGRNSFEV | 7     | >TP53-F270Y NLLGRNSFEV | 8    | 1     |
| >TP53-F270Y NLLGRNSFEV | 3     | >TP53-F270Y NLLGRNSFEV | 4    | 1     |
| >TP53-F270Y NLLGRNSFEV | 3     | >TP53-F270Y NLLGRNSFEV | 3    | 0     |
| >TP53-F270Y NLLGRNSF   | 1873  | >TP53-F270Y NLLGRNSF   | 242  | 1631  |
| >TP53-F270Y NLLGRNSF   | 8048  | >TP53-F270Y NLLGRNSF   | 250  | 7798  |
| >TP53-F270Y NLLGRNSF   | 14420 | >TP53-F270Y NLLGRNSF   | 340  | 14080 |
| >TP53-F270Y NLLGRNSFEV | 109   | >TP53-F270Y NLLGRNSFEV | 154  | 45    |
| >TP53-F270Y NLLGRNSFEV | 309   | >TP53-F270Y NLLGRNSFEV | 381  | 72    |
| >TP53-F270Y NLLGRNSFEV | 52    | >TP53-F270Y NLLGRNSFEV | 81   | 29    |
| >TP53-F270Y NLLGRNSF   | 65    | >TP53-F270Y NLLGRNSF   | 38   | 27    |
| >TP53-F270Y NLLGRNSF   | 418   | >TP53-F270Y NLLGRNSF   | 1879 | 1461  |
| >TP53-F270Y NLLGRNSFEV | 195   | >TP53-F270Y NLLGRNSFEV | 271  | 76    |
| >TP53-F270Y GNLLGRNSF  | 19183 | >TP53-F270Y GNLLGRNSF  | 426  | 18757 |



|                         |      |                         |       |       |
|-------------------------|------|-------------------------|-------|-------|
| >TP53-F270Y GNLLGRNSF   | 525  | >TP53-F270Y GNLLGRNSY   | 337   | 188   |
| >TP53-F270Y SGNLLGRNSF  | 311  | >TP53-F270Y SGNLLGRNSY  | 251   | 60    |
| >TP53-F328S FTLQIRGRER  | 1535 | >TP53-F328S STLQIRGRER  | 207   | 1328  |
| >TP53-F328S FTLQIRGRERI | 169  | >TP53-F328S STLQIRGRERI | 1024  | 855   |
| >TP53-F328S FTLQIRGRERI | 289  | >TP53-F328S STLQIRGRERI | 153   | 136   |
| >TP53-F328S FTLQIRGR    | 873  | >TP53-F328S STLQIRGR    | 103   | 770   |
| >TP53-F328S FTLQIRGRER  | 50   | >TP53-F328S STLQIRGRER  | 26    | 24    |
| >TP53-F328S FTLQIRGRERI | 1480 | >TP53-F328S STLQIRGRERI | 197   | 1283  |
| >TP53-F328S FTLQIRGR    | 174  | >TP53-F328S STLQIRGR    | 501   | 327   |
| >TP53-F328S FTLQIRGRER  | 431  | >TP53-F328S STLQIRGRER  | 1115  | 684   |
| >TP53-F328S FTLQIRGR    | 25   | >TP53-F328S STLQIRGR    | 48    | 23    |
| >TP53-F328S FTLQIRGRER  | 86   | >TP53-F328S STLQIRGRER  | 161   | 75    |
| >TP53-F328S FTLQIRGRERI | 8    | >TP53-F328S STLQIRGRERI | 13    | 5     |
| >TP53-F328S FTLQIRGRERI | 289  | >TP53-F328S STLQIRGRERI | 1845  | 1556  |
| >TP53-F328S FTLQIRGRERI | 8    | >TP53-F328S STLQIRGRERI | 6     | 2     |
| >TP53-F328S FTLQIRGR    | 3625 | >TP53-F328S STLQIRGR    | 315   | 3310  |
| >TP53-F328S FTLQIRGRER  | 4642 | >TP53-F328S STLQIRGRER  | 373   | 4269  |
| >TP53-F328S FTLQIRGR    | 422  | >TP53-F328S STLQIRGR    | 324   | 98    |
| >TP53-F328S YFTLQIRGREF | 337  | >TP53-F328S YSTLQIRGREF | 994   | 657   |
| >TP53-F328S YFTLQIRGR   | 129  | >TP53-F328S YSTLQIRGR   | 1285  | 1156  |
| >TP53-F328S YFTLQIRGREF | 126  | >TP53-F328S YSTLQIRGREF | 1153  | 1027  |
| >TP53-F328S YFTLQIRGR   | 788  | >TP53-F328S YSTLQIRGR   | 141   | 647   |
| >TP53-F328S YFTLQIRGREF | 1008 | >TP53-F328S YSTLQIRGREF | 173   | 835   |
| >TP53-F328S YFTLQIRGR   | 152  | >TP53-F328S YSTLQIRGR   | 1915  | 1763  |
| >TP53-F328S PKKKPLDGEY  | 78   | >TP53-F328S PKKKPLDGEY  | 14399 | 14321 |
| >TP53-F328S EYFTLQIR    | 335  | >TP53-F328S EYSTLQIR    | 2092  | 1757  |
| >TP53-F328S EYFTLQIR    | 31   | >TP53-F328S EYSTLQIR    | 98    | 67    |
| >TP53-F328S EYFTLQIRGR  | 315  | >TP53-F328S EYSTLQIRGR  | 601   | 286   |
| >TP53-F328S EYFTLQIR    | 26   | >TP53-F328S EYSTLQIR    | 89    | 63    |
| >TP53-F328S EYFTLQIR    | 19   | >TP53-F328S EYSTLQIR    | 39    | 20    |
| >TP53-F328S EYFTLQIRGR  | 20   | >TP53-F328S EYSTLQIRGR  | 37    | 17    |
| >TP53-F328S GEYFTLQI    | 102  | >TP53-F328S GEYSTLQI    | 511   | 409   |
| >TP53-F328S GEYFTLQI    | 44   | >TP53-F328S GEYSTLQI    | 49    | 5     |
| >TP53-F328S GEYFTLQI    | 43   | >TP53-F328S GEYSTLQI    | 68    | 25    |
| >TP53-F328S GEYFTLQI    | 539  | >TP53-F328S GEYSTLQI    | 242   | 297   |
| >TP53-F328S GEYFTLQI    | 11   | >TP53-F328S GEYSTLQI    | 20    | 9     |
| >TP53-F328S GEYFTLQIR   | 190  | >TP53-F328S GEYSTLQIR   | 108   | 82    |
| >TP53-F328S GEYFTLQIRGI | 512  | >TP53-F328S GEYSTLQIRGI | 305   | 207   |
| >TP53-F328S LDGEYFTLQI  | 87   | >TP53-F328S LDGEYSTLQI  | 119   | 32    |
| >TP53-F328S LDGEYFTL    | 344  | >TP53-F328S LDGEYSTL    | 1237  | 893   |
| >TP53-F328S LDGEYFTLQI  | 94   | >TP53-F328S LDGEYSTLQI  | 96    | 2     |
| >TP53-F328S PLDGEYFTL   | 249  | >TP53-F328S PLDGEYSTL   | 914   | 665   |
| >TP53-F328S PLDGEYFTL   | 22   | >TP53-F328S PLDGEYSTL   | 101   | 79    |

|                         |      |                         |       |       |
|-------------------------|------|-------------------------|-------|-------|
| >TP53-F328S PLDGEYFTLQ  | 68   | >TP53-F328S PLDGEYSTLQ  | 176   | 108   |
| >TP53-F328S PLDGEYFTL   | 224  | >TP53-F328S PLDGEYSTL   | 1379  | 1155  |
| >TP53-F328S PLDGEYFTL   | 22   | >TP53-F328S PLDGEYSTL   | 222   | 200   |
| >TP53-F328S PLDGEYFTLQ  | 140  | >TP53-F328S PLDGEYSTLQ  | 337   | 197   |
| >TP53-F328S PLDGEYFTL   | 23   | >TP53-F328S PLDGEYSTL   | 595   | 572   |
| >TP53-F328S PLDGEYFTLQ  | 158  | >TP53-F328S PLDGEYSTLQ  | 455   | 297   |
| >TP53-F328S PLDGEYFTL   | 11   | >TP53-F328S PLDGEYSTL   | 21    | 10    |
| >TP53-F328S PLDGEYFTLQ  | 111  | >TP53-F328S PLDGEYSTLQ  | 147   | 36    |
| >TP53-F328S KPLDGEYF    | 296  | >TP53-F328S KPLDGEYS    | 33729 | 33433 |
| >TP53-F328S KPLDGEYFTL  | 212  | >TP53-F328S KPLDGEYSTL  | 1009  | 797   |
| >TP53-F328S KPLDGEYFTL  | 526  | >TP53-F328S KPLDGEYSTL  | 356   | 170   |
| >TP53-F328S KPLDGEYFTL  | 321  | >TP53-F328S KPLDGEYSTL  | 377   | 56    |
| >TP53-F328S KPLDGEYF    | 287  | >TP53-F328S KPLDGEYS    | 22862 | 22575 |
| >TP53-F328S KPLDGEYF    | 195  | >TP53-F328S KPLDGEYS    | 20914 | 20719 |
| >TP53-F328S KPLDGEYFTL  | 306  | >TP53-F328S KPLDGEYSTL  | 464   | 158   |
| >TP53-F328S KKPLDGEYF   | 31   | >TP53-F328S KKPLDGEYS   | 13321 | 13290 |
| >TP53-F328S KKPLDGEYFT  | 611  | >TP53-F328S KKPLDGEYST  | 219   | 392   |
| >TP53-F328S KKKPLDGEYF  | 14   | >TP53-F328S KKKPLDGEYS  | 5136  | 5122  |
| >TP53-F328V FTLQIRGRERI | 169  | >TP53-F328V VTLQIRGRERI | 1268  | 1099  |
| >TP53-F328V FTLQIRGRERI | 289  | >TP53-F328V VTLQIRGRERI | 838   | 549   |
| >TP53-F328V FTLQIRGR    | 873  | >TP53-F328V VTLQIRGR    | 179   | 694   |
| >TP53-F328V FTLQIRGRER  | 50   | >TP53-F328V VTLQIRGRER  | 49    | 1     |
| >TP53-F328V FTLQIRGR    | 174  | >TP53-F328V VTLQIRGR    | 401   | 227   |
| >TP53-F328V FTLQIRGRER  | 431  | >TP53-F328V VTLQIRGRER  | 1521  | 1090  |
| >TP53-F328V FTLQIRGR    | 25   | >TP53-F328V VTLQIRGR    | 240   | 215   |
| >TP53-F328V FTLQIRGRER  | 86   | >TP53-F328V VTLQIRGRER  | 1322  | 1236  |
| >TP53-F328V FTLQIRGRERI | 8    | >TP53-F328V VTLQIRGRERI | 7     | 1     |
| >TP53-F328V FTLQIRGRERI | 1464 | >TP53-F328V VTLQIRGRERI | 471   | 993   |
| >TP53-F328V FTLQIRGRERI | 289  | >TP53-F328V VTLQIRGRERI | 281   | 8     |
| >TP53-F328V FTLQIRGRERI | 8    | >TP53-F328V VTLQIRGRERI | 8     | 0     |
| >TP53-F328V FTLQIRGR    | 422  | >TP53-F328V VTLQIRGR    | 577   | 155   |
| >TP53-F328V YFTLQIRGREI | 337  | >TP53-F328V YVTLQIRGREI | 899   | 562   |
| >TP53-F328V YFTLQIRGR   | 129  | >TP53-F328V YVTLQIRGR   | 688   | 559   |
| >TP53-F328V YFTLQIRGREI | 126  | >TP53-F328V YVTLQIRGREI | 566   | 440   |
| >TP53-F328V YFTLQIRGR   | 788  | >TP53-F328V YVTLQIRGR   | 65    | 723   |
| >TP53-F328V YFTLQIRGREI | 1008 | >TP53-F328V YVTLQIRGREI | 78    | 930   |
| >TP53-F328V YFTLQIRGR   | 152  | >TP53-F328V YVTLQIRGR   | 853   | 701   |
| >TP53-F328V PKKKPLDGEY  | 78   | >TP53-F328V PKKKPLDGEY  | 3409  | 3331  |
| >TP53-F328V EYFTLQIR    | 335  | >TP53-F328V EYVTLQIR    | 2082  | 1747  |
| >TP53-F328V EYFTLQIR    | 31   | >TP53-F328V EYVTLQIR    | 116   | 85    |
| >TP53-F328V EYFTLQIRGR  | 315  | >TP53-F328V EYVTLQIRGR  | 868   | 553   |
| >TP53-F328V EYFTLQIR    | 26   | >TP53-F328V EYVTLQIR    | 87    | 61    |
| >TP53-F328V EYFTLQIR    | 19   | >TP53-F328V EYVTLQIR    | 29    | 10    |

|                          |       |                          |       |       |
|--------------------------|-------|--------------------------|-------|-------|
| >TP53-F328V EYFTLQIRGR   | 20    | >TP53-F328V EYVTLQIRGR   | 27    | 7     |
| >TP53-F328V GEYFTLQI     | 102   | >TP53-F328V GEYVTLQI     | 118   | 16    |
| >TP53-F328V GEYFTLQI     | 44    | >TP53-F328V GEYVTLQI     | 68    | 24    |
| >TP53-F328V GEYFTLQI     | 43    | >TP53-F328V GEYVTLQI     | 55    | 12    |
| >TP53-F328V GEYFTLQI     | 539   | >TP53-F328V GEYVTLQI     | 317   | 222   |
| >TP53-F328V GEYFTLQI     | 11    | >TP53-F328V GEYVTLQI     | 20    | 9     |
| >TP53-F328V GEYFTLQIR    | 190   | >TP53-F328V GEYVTLQIR    | 119   | 71    |
| >TP53-F328V GEYFTLQIRGI  | 512   | >TP53-F328V GEYVTLQIRG   | 343   | 169   |
| >TP53-F328V LDGEYFTLQI   | 87    | >TP53-F328V LDGEYVTLQI   | 82    | 5     |
| >TP53-F328V LDGEYFTL     | 344   | >TP53-F328V LDGEYVTL     | 1070  | 726   |
| >TP53-F328V LDGEYFTLQI   | 94    | >TP53-F328V LDGEYVTLQI   | 126   | 32    |
| >TP53-F328V PLDGEYFTL    | 249   | >TP53-F328V PLDGEYVTL    | 671   | 422   |
| >TP53-F328V PLDGEYFTL    | 22    | >TP53-F328V PLDGEYVTL    | 72    | 50    |
| >TP53-F328V PLDGEYFTLQ   | 68    | >TP53-F328V PLDGEYVTLQ   | 91    | 23    |
| >TP53-F328V PLDGEYFTL    | 224   | >TP53-F328V PLDGEYVTL    | 1046  | 822   |
| >TP53-F328V PLDGEYFTL    | 22    | >TP53-F328V PLDGEYVTL    | 89    | 67    |
| >TP53-F328V PLDGEYFTLQ   | 140   | >TP53-F328V PLDGEYVTLQ   | 160   | 20    |
| >TP53-F328V PLDGEYFTL    | 23    | >TP53-F328V PLDGEYVTL    | 380   | 357   |
| >TP53-F328V PLDGEYFTLQ   | 158   | >TP53-F328V PLDGEYVTLQ   | 374   | 216   |
| >TP53-F328V PLDGEYFTL    | 11    | >TP53-F328V PLDGEYVTL    | 21    | 10    |
| >TP53-F328V PLDGEYFTLQ   | 111   | >TP53-F328V PLDGEYVTLQ   | 172   | 61    |
| >TP53-F328V KPLDGEYF     | 296   | >TP53-F328V KPLDGEYV     | 1558  | 1262  |
| >TP53-F328V KPLDGEYFTL   | 212   | >TP53-F328V KPLDGEYVTL   | 773   | 561   |
| >TP53-F328V KPLDGEYFTL   | 321   | >TP53-F328V KPLDGEYVTL   | 191   | 130   |
| >TP53-F328V KPLDGEYF     | 287   | >TP53-F328V KPLDGEYV     | 4345  | 4058  |
| >TP53-F328V KPLDGEYF     | 195   | >TP53-F328V KPLDGEYV     | 9103  | 8908  |
| >TP53-F328V KPLDGEYFTL   | 306   | >TP53-F328V KPLDGEYVTL   | 217   | 89    |
| >TP53-F328V KKPLDGEYF    | 31    | >TP53-F328V KKPLDGEYV    | 2099  | 2068  |
| >TP53-F328V KKPLDGEYFT   | 611   | >TP53-F328V KKPLDGEYVT   | 235   | 376   |
| >TP53-F328V KKKPLDGEYF   | 14    | >TP53-F328V KKKPLDGEYV   | 552   | 538   |
| >TP53-F338I- FEMFRELNEA  | 301   | >TP53-F338I- IEMFRELNEA  | 590   | 289   |
| >TP53-F338I- FEMFRELNEA  | 394   | >TP53-F338I- IEMFRELNEA  | 3308  | 2914  |
| >TP53-F338I- FEMFRELNEA  | 253   | >TP53-F338I- IEMFRELNEA  | 254   | 1     |
| >TP53-F338I- FEMFRELNEA  | 94    | >TP53-F338I- IEMFRELNEA  | 2485  | 2391  |
| >TP53-F338I- FEMFRELNEA  | 18    | >TP53-F338I- IEMFRELNEA  | 24    | 6     |
| >TP53-F338I- FEMFRELNEA  | 47    | >TP53-F338I- IEMFRELNEA  | 126   | 79    |
| >TP53-F338I- FEMFRELNEA  | 29    | >TP53-F338I- IEMFRELNEA  | 35    | 6     |
| >TP53-F338I- RFEMFREL    | 253   | >TP53-F338I- RIEMFREL    | 16988 | 16735 |
| >TP53-F338I- RFEMFREL    | 308   | >TP53-F338I- RIEMFREL    | 21137 | 20829 |
| >TP53-F338I- FTLQIRGRERI | 14487 | >TP53-F338I- FTLQIRGRERI | 485   | 14002 |
| >TP53-F338I- FTLQIRGRERI | 169   | >TP53-F338I- FTLQIRGRERI | 3619  | 3450  |
| >TP53-F338I- FTLQIRGRERI | 289   | >TP53-F338I- FTLQIRGRERI | 7634  | 7345  |
| >TP53-F338I- FTLQIRGRERI | 8875  | >TP53-F338I- FTLQIRGRERI | 42    | 8833  |

|                         |       |                         |      |       |
|-------------------------|-------|-------------------------|------|-------|
| >TP53-F338I-FTLQIRGRERI | 7487  | >TP53-F338I-FTLQIRGRERI | 121  | 7366  |
| >TP53-F338I-FTLQIRGRERI | 8     | >TP53-F338I-FTLQIRGRERI | 478  | 470   |
| >TP53-F338I-FTLQIRGRERI | 289   | >TP53-F338I-FTLQIRGRERI | 3217 | 2928  |
| >TP53-F338I-FTLQIRGRERI | 8     | >TP53-F338I-FTLQIRGRERI | 75   | 67    |
| >TP53-F338I-FTLQIRGRERI | 7880  | >TP53-F338I-FTLQIRGRERI | 29   | 7851  |
| >TP53-F338I-ERFEMFREL   | 1246  | >TP53-F338I-ERIEMFREL   | 400  | 846   |
| >TP53-F338I-ERFEMFREL   | 185   | >TP53-F338I-ERIEMFREL   | 842  | 657   |
| >TP53-F338I-ERFEMFREL   | 421   | >TP53-F338I-ERIEMFREL   | 586  | 165   |
| >TP53-F338I-ERFEMFREL   | 172   | >TP53-F338I-ERIEMFREL   | 202  | 30    |
| >TP53-F338I-ERFEMFREL   | 10    | >TP53-F338I-ERIEMFREL   | 18   | 8     |
| >TP53-F338I-RERFEMFR    | 166   | >TP53-F338I-RERIEMFR    | 211  | 45    |
| >TP53-F338I-RERFEMFREL  | 48    | >TP53-F338I-RERIEMFREL  | 90   | 42    |
| >TP53-F338I-RERFEMFREL  | 142   | >TP53-F338I-RERIEMFREL  | 328  | 186   |
| >TP53-F338I-RERFEMFREL  | 29    | >TP53-F338I-RERIEMFREL  | 41   | 12    |
| >TP53-F338I-RERFEMFREL  | 703   | >TP53-F338I-RERIEMFRELI | 411  | 292   |
| >TP53-F338I-RERFEMFREL  | 1449  | >TP53-F338I-RERIEMFREL  | 393  | 1056  |
| >TP53-F338I-RERFEMFR    | 144   | >TP53-F338I-RERIEMFR    | 141  | 3     |
| >TP53-F338I-GRERFEMFRI  | 71    | >TP53-F338I-GRERIEMFRE  | 93   | 22    |
| >TP53-F338I-GRERFEMFRI  | 11    | >TP53-F338I-GRERIEMFRE  | 11   | 0     |
| >TP53-F338I-RGRERFEM    | 90    | >TP53-F338I-RGRERIEM    | 63   | 27    |
| >TP53-F338I-RGRERFEMFI  | 35    | >TP53-F338I-RGRERIEMFR  | 46   | 11    |
| >TP53-F338I-RGRERFEMFI  | 39    | >TP53-F338I-RGRERIEMFR  | 48   | 9     |
| >TP53-F338I-RGRERFEMF   | 226   | >TP53-F338I-RGRERIEMF   | 448  | 222   |
| >TP53-F338I-RGRERFEMF   | 118   | >TP53-F338I-RGRERIEMF   | 380  | 262   |
| >TP53-F338I-RGRERFEM    | 226   | >TP53-F338I-RGRERIEM    | 197  | 29    |
| >TP53-F338I-RGRERFEMF   | 85    | >TP53-F338I-RGRERIEMF   | 29   | 56    |
| >TP53-F338I-RGRERFEMF   | 108   | >TP53-F338I-RGRERIEMF   | 352  | 244   |
| >TP53-F338I-RGRERFEMFI  | 95    | >TP53-F338I-RGRERIEMFR  | 168  | 73    |
| >TP53-F338I-IRGRERFEMF  | 126   | >TP53-F338I-IRGRERIEMF  | 143  | 17    |
| >TP53-F338I-IRGRERFEMF  | 187   | >TP53-F338I-IRGRERIEMFI | 242  | 55    |
| >TP53-F338I-QIRGRERFEM  | 435   | >TP53-F338I-QIRGRERIEM  | 349  | 86    |
| >TP53-F338I-QIRGRERFEM  | 524   | >TP53-F338I-QIRGRERIEM  | 352  | 172   |
| >TP53-F338I-LQIRGRERF   | 2043  | >TP53-F338I-LQIRGRERI   | 451  | 1592  |
| >TP53-F338I-LQIRGRERFEI | 192   | >TP53-F338I-LQIRGRERIEI | 759  | 567   |
| >TP53-F338I-LQIRGRERF   | 54    | >TP53-F338I-LQIRGRERI   | 680  | 626   |
| >TP53-F338I-LQIRGRERFEI | 105   | >TP53-F338I-LQIRGRERIEI | 106  | 1     |
| >TP53-F338I-LQIRGRERF   | 12    | >TP53-F338I-LQIRGRERI   | 477  | 465   |
| >TP53-F338I-LQIRGRERFEI | 34    | >TP53-F338I-LQIRGRERIEI | 26   | 8     |
| >TP53-F338I-TLQIRGRERF  | 15104 | >TP53-F338I-TLQIRGRERI  | 313  | 14791 |
| >TP53-F341C FRELNEALEL  | 379   | >TP53-F341C CRELNEALEL  | 307  | 72    |
| >TP53-F341C FRELNEAL    | 31    | >TP53-F341C CRELNEAL    | 1012 | 981   |
| >TP53-F341C FRELNEALEL  | 65    | >TP53-F341C CRELNEALEL  | 1922 | 1857  |
| >TP53-F341C FRELNEALEL  | 471   | >TP53-F341C CRELNEALEL  | 410  | 61    |

|                        |      |                        |       |       |
|------------------------|------|------------------------|-------|-------|
| >TP53-F341C MFRELNEALE | 200  | >TP53-F341C MCRELNEALE | 19090 | 18890 |
| >TP53-F341C MFRELNEA   | 62   | >TP53-F341C MCRELNEA   | 251   | 189   |
| >TP53-F341C MFRELNEALE | 217  | >TP53-F341C MCRELNEALE | 766   | 549   |
| >TP53-F341C MFRELNEAL  | 152  | >TP53-F341C MCRELNEAL  | 24419 | 24267 |
| >TP53-F341C MFRELNEALE | 467  | >TP53-F341C MCRELNEALE | 28240 | 27773 |
| >TP53-F341C EMFRELNEA  | 133  | >TP53-F341C EMCRELNEA  | 2118  | 1985  |
| >TP53-F341C EMFRELNEAL | 89   | >TP53-F341C EMCRELNEAL | 535   | 446   |
| >TP53-F341C EMFRELNEA  | 401  | >TP53-F341C EMCRELNEA  | 3166  | 2765  |
| >TP53-F341C EMFRELNEAL | 360  | >TP53-F341C EMCRELNEAL | 1631  | 1271  |
| >TP53-F341C EMFRELNEA  | 161  | >TP53-F341C EMCRELNEA  | 1897  | 1736  |
| >TP53-F341C EMFRELNEAL | 24   | >TP53-F341C EMCRELNEAL | 236   | 212   |
| >TP53-F341C EMFRELNEAL | 169  | >TP53-F341C EMCRELNEAL | 2802  | 2633  |
| >TP53-F341C EMFRELNEAL | 431  | >TP53-F341C EMCRELNEAL | 7324  | 6893  |
| >TP53-F341C EMFRELNEAL | 431  | >TP53-F341C EMCRELNEAL | 3517  | 3086  |
| >TP53-F341C EMFRELNEA  | 119  | >TP53-F341C EMCRELNEA  | 1126  | 1007  |
| >TP53-F341C EMFRELNEAL | 72   | >TP53-F341C EMCRELNEAL | 545   | 473   |
| >TP53-F341C EMFRELNEAL | 2179 | >TP53-F341C EMCRELNEAL | 247   | 1932  |
| >TP53-F341C EMFRELNEAL | 272  | >TP53-F341C EMCRELNEAL | 2813  | 2541  |
| >TP53-F341C EMFRELNEAL | 291  | >TP53-F341C EMCRELNEAL | 4068  | 3777  |
| >TP53-F341C EMFRELNEAL | 98   | >TP53-F341C EMCRELNEAL | 2239  | 2141  |
| >TP53-F341C EMFRELNEAL | 495  | >TP53-F341C EMCRELNEAL | 2003  | 1508  |
| >TP53-F341C FEMFRELNEA | 301  | >TP53-F341C FEMCRELNEA | 549   | 248   |
| >TP53-F341C FEMFRELNEA | 394  | >TP53-F341C FEMCRELNEA | 459   | 65    |
| >TP53-F341C FEMFRELNEA | 525  | >TP53-F341C FEMCRELNEA | 276   | 249   |
| >TP53-F341C FEMFRELNEA | 558  | >TP53-F341C FEMCRELNEA | 301   | 257   |
| >TP53-F341C FEMFRELNEA | 724  | >TP53-F341C FEMCRELNEA | 292   | 432   |
| >TP53-F341C FEMFRELNEA | 253  | >TP53-F341C FEMCRELNEA | 352   | 99    |
| >TP53-F341C FEMFRELNEA | 94   | >TP53-F341C FEMCRELNEA | 78    | 16    |
| >TP53-F341C FEMFRELNEA | 18   | >TP53-F341C FEMCRELNEA | 21    | 3     |
| >TP53-F341C FEMFRELNEA | 47   | >TP53-F341C FEMCRELNEA | 79    | 32    |
| >TP53-F341C FEMFRELNEA | 1314 | >TP53-F341C FEMCRELNEA | 461   | 853   |
| >TP53-F341C FEMFRELNEA | 29   | >TP53-F341C FEMCRELNEA | 23    | 6     |
| >TP53-F341C RFEMFREL   | 253  | >TP53-F341C RFEMCREL   | 732   | 479   |
| >TP53-F341C RFEMFREL   | 308  | >TP53-F341C RFEMCREL   | 413   | 105   |
| >TP53-F341C ERFEMFREL  | 185  | >TP53-F341C ERFEMCREL  | 1929  | 1744  |
| >TP53-F341C ERFEMFREL  | 421  | >TP53-F341C ERFEMCREL  | 1620  | 1199  |
| >TP53-F341C ERFEMFREL  | 172  | >TP53-F341C ERFEMCREL  | 545   | 373   |
| >TP53-F341C ERFEMFREL  | 10   | >TP53-F341C ERFEMCREL  | 61    | 51    |
| >TP53-F341C RERFEMFR   | 166  | >TP53-F341C RERFEMCR   | 1681  | 1515  |
| >TP53-F341C RERFEMFREL | 48   | >TP53-F341C RERFEMCREL | 77    | 29    |
| >TP53-F341C RERFEMFREL | 142  | >TP53-F341C RERFEMCREL | 632   | 490   |
| >TP53-F341C RERFEMFREL | 29   | >TP53-F341C RERFEMCREL | 17    | 12    |
| >TP53-F341C RERFEMFR   | 144  | >TP53-F341C RERFEMCR   | 422   | 278   |

|                         |       |                         |       |       |
|-------------------------|-------|-------------------------|-------|-------|
| >TP53-F341C GRERFEMFRI  | 71    | >TP53-F341C GRERFEMCRI  | 114   | 43    |
| >TP53-F341C GRERFEMFRI  | 11    | >TP53-F341C GRERFEMCRI  | 21    | 10    |
| >TP53-F341C RGRERFEMFI  | 35    | >TP53-F341C RGRERFEMCI  | 314   | 279   |
| >TP53-F341C RGRERFEMFI  | 39    | >TP53-F341C RGRERFEMCI  | 120   | 81    |
| >TP53-F341C RGRERFEMF   | 226   | >TP53-F341C RGRERFEMC   | 19617 | 19391 |
| >TP53-F341C RGRERFEMF   | 118   | >TP53-F341C RGRERFEMC   | 20730 | 20612 |
| >TP53-F341C RGRERFEMF   | 85    | >TP53-F341C RGRERFEMC   | 24289 | 24204 |
| >TP53-F341C RGRERFEMF   | 108   | >TP53-F341C RGRERFEMC   | 14710 | 14602 |
| >TP53-F341C RGRERFEMFI  | 95    | >TP53-F341C RGRERFEMCI  | 344   | 249   |
| >TP53-F341C IRGRERFEMF  | 126   | >TP53-F341C IRGRERFEMC  | 11346 | 11220 |
| >TP53-F341C IRGRERFEMF  | 187   | >TP53-F341C IRGRERFEMC  | 869   | 682   |
| >TP53-F54L-\ WFTEDPGPD  | 8800  | >TP53-F54L-r WLTEDPGPD  | 172   | 8628  |
| >TP53-F54L-\ WFTEDPGPD  | 14633 | >TP53-F54L-r WLTEDPGPD  | 41    | 14592 |
| >TP53-F54L-\ WFTEDPGPD  | 12218 | >TP53-F54L-r WLTEDPGPD  | 346   | 11872 |
| >TP53-F54L-\ WFTEDPGPD  | 11682 | >TP53-F54L-r WLTEDPGPD  | 20    | 11662 |
| >TP53-F54L-\ WFTEDPGPD  | 19464 | >TP53-F54L-r WLTEDPGPD  | 108   | 19356 |
| >TP53-F54L-\ WFTEDPGPD  | 12821 | >TP53-F54L-r WLTEDPGPD  | 43    | 12778 |
| >TP53-F54L-\ WFTEDPGPD  | 19250 | >TP53-F54L-r WLTEDPGPD  | 189   | 19061 |
| >TP53-F54L-\ WFTEDPGPD  | 16580 | >TP53-F54L-r WLTEDPGPD  | 12    | 16568 |
| >TP53-F54L-\ MLSPDDIEQ\ | 6841  | >TP53-F54L-r MLSPDDIEQ\ | 39    | 6802  |
| >TP53-F54L-\ MLSPDDIEQ\ | 107   | >TP53-F54L-r MLSPDDIEQ\ | 4     | 103   |
| >TP53-F54L-\ MLSPDDIEQ\ | 4004  | >TP53-F54L-r MLSPDDIEQ\ | 37    | 3967  |
| >TP53-F54L-\ MLSPDDIEQ\ | 1389  | >TP53-F54L-r MLSPDDIEQ\ | 185   | 1204  |
| >TP53-F54L-\ MLSPDDIEQ\ | 2338  | >TP53-F54L-r MLSPDDIEQ\ | 29    | 2309  |
| >TP53-F54L-\ MLSPDDIEQ\ | 11809 | >TP53-F54L-r MLSPDDIEQ\ | 78    | 11731 |
| >TP53-F54L-\ MLSPDDIEQ\ | 6240  | >TP53-F54L-r MLSPDDIEQ\ | 27    | 6213  |
| >TP53-F54L-\ MLSPDDIEQ\ | 11047 | >TP53-F54L-r MLSPDDIEQ\ | 42    | 11005 |
| >TP53-F54L-\ MLSPDDIEQ\ | 129   | >TP53-F54L-r MLSPDDIEQ\ | 2     | 127   |
| >TP53-F54L-\ MLSPDDIEQ\ | 213   | >TP53-F54L-r MLSPDDIEQ\ | 3720  | 3507  |
| >TP53-F54L-\ MLSPDDIEQ\ | 427   | >TP53-F54L-r MLSPDDIEQ\ | 5088  | 4661  |
| >TP53-F54L-\ MLSPDDIEQ\ | 131   | >TP53-F54L-r MLSPDDIEQ\ | 1787  | 1656  |
| >TP53-F54L-\ MLSPDDIEQ\ | 445   | >TP53-F54L-r MLSPDDIEQ\ | 4260  | 3815  |
| >TP53-F54L-\ QWFTEDPG   | 275   | >TP53-F54L-r QWLTEDPG   | 320   | 45    |
| >TP53-F54L-\ PDDIEQWFT  | 240   | >TP53-F54L-r PDDIEQWLT  | 187   | 53    |
| >TP53-F54L-\ SPDDIEQWF  | 339   | >TP53-F54L-r SPDDIEQWL  | 4338  | 3999  |
| >TP53-F54L-\ LSPDDIEQWF | 180   | >TP53-F54L-r LSPDDIEQWL | 2011  | 1831  |
| >TP53-F54L-\ LSPDDIEQWF | 10    | >TP53-F54L-r LSPDDIEQWL | 6     | 4     |
| >TP53-F54L-\ LSPDDIEQWF | 190   | >TP53-F54L-r LSPDDIEQWL | 116   | 74    |
| >TP53-F54L-\ LSPDDIEQWF | 84    | >TP53-F54L-r LSPDDIEQWL | 478   | 394   |
| >TP53-G105/ GSYGFRLGF   | 78    | >TP53-G105/ ASYGFRLGF   | 21    | 57    |
| >TP53-G105/ GSYGFRLGFL  | 227   | >TP53-G105/ ASYGFRLGFL  | 139   | 88    |
| >TP53-G105/ GSYGFRLGFL  | 237   | >TP53-G105/ ASYGFRLGFL  | 218   | 19    |
| >TP53-G105/ GSYGFRLGFL  | 549   | >TP53-G105/ ASYGFRLGFL  | 335   | 214   |

|                        |      |                        |     |      |
|------------------------|------|------------------------|-----|------|
| >TP53-G105/GSYGFRLGFL  | 491  | >TP53-G105/ASYGFRLGFLI | 270 | 221  |
| >TP53-G105/GSYGFRLGFL  | 98   | >TP53-G105/ASYGFRLGFLI | 40  | 58   |
| >TP53-G105/GSYGFRLGFL  | 2575 | >TP53-G105/ASYGFRLGFL  | 360 | 2215 |
| >TP53-G105/GSYGFRLGFL  | 760  | >TP53-G105/ASYGFRLGFL  | 417 | 343  |
| >TP53-G105/GSYGFRLGF   | 61   | >TP53-G105/ASYGFRLGF   | 17  | 44   |
| >TP53-G105/GSYGFRLGFL  | 621  | >TP53-G105/ASYGFRLGFL  | 286 | 335  |
| >TP53-G105/GSYGFRLGF   | 365  | >TP53-G105/ASYGFRLGF   | 177 | 188  |
| >TP53-G105/GSYGFRLGF   | 111  | >TP53-G105/ASYGFRLGF   | 23  | 88   |
| >TP53-G105/GSYGFRLGF   | 4    | >TP53-G105/ASYGFRLGF   | 3   | 1    |
| >TP53-G105/GSYGFRLGFL  | 31   | >TP53-G105/ASYGFRLGFL  | 13  | 18   |
| >TP53-G105/GSYGFRLGFL  | 2038 | >TP53-G105/ASYGFRLGFLI | 491 | 1547 |
| >TP53-G105/GSYGFRLGF   | 222  | >TP53-G105/ASYGFRLGF   | 218 | 4    |
| >TP53-G105/GSYGFRLGF   | 264  | >TP53-G105/ASYGFRLGF   | 138 | 126  |
| >TP53-G105/GSYGFRLGFL  | 802  | >TP53-G105/ASYGFRLGFL  | 320 | 482  |
| >TP53-G105/GSYGFRLGF   | 44   | >TP53-G105/ASYGFRLGF   | 118 | 74   |
| >TP53-G105/GSYGFRLGFL  | 70   | >TP53-G105/ASYGFRLGFL  | 55  | 15   |
| >TP53-G105/GSYGFRLGFL  | 63   | >TP53-G105/ASYGFRLGFLI | 161 | 98   |
| >TP53-G105/GSYGFRLGFLI | 651  | >TP53-G105/ASYGFRLGFLI | 359 | 292  |
| >TP53-G105/QGSYGFRLGF  | 5781 | >TP53-G105/QASYGFRLGF  | 317 | 5464 |
| >TP53-G105/QGSYGFRLGF  | 1171 | >TP53-G105/QASYGFRLGF  | 161 | 1010 |
| >TP53-G105/QGSYGFRL    | 8905 | >TP53-G105/QASYGFRL    | 409 | 8496 |
| >TP53-G105/QGSYGFRLGF  | 4530 | >TP53-G105/QASYGFRLGF  | 110 | 4420 |
| >TP53-G105/QGSYGFRLGF  | 278  | >TP53-G105/QASYGFRLGF  | 371 | 93   |
| >TP53-G105/YQGSYGFRL   | 30   | >TP53-G105/YQASYGFRL   | 12  | 18   |
| >TP53-G105/YQGSYGFRL   | 36   | >TP53-G105/YQASYGFRL   | 6   | 30   |
| >TP53-G105/YQGSYGFRL   | 1457 | >TP53-G105/YQASYGFRL   | 84  | 1373 |
| >TP53-G105/YQGSYGFRL   | 15   | >TP53-G105/YQASYGFRL   | 5   | 10   |
| >TP53-G105/YQGSYGFRLC  | 189  | >TP53-G105/YQASYGFRLG  | 25  | 164  |
| >TP53-G105/YQGSYGFRL   | 32   | >TP53-G105/YQASYGFRL   | 30  | 2    |
| >TP53-G105/YQGSYGFRL   | 167  | >TP53-G105/YQASYGFRL   | 204 | 37   |
| >TP53-G105/YQGSYGFRL   | 632  | >TP53-G105/YQASYGFRL   | 231 | 401  |
| >TP53-G105/YQGSYGFRL   | 993  | >TP53-G105/YQASYGFRL   | 321 | 672  |
| >TP53-G105/YQGSYGFRL   | 558  | >TP53-G105/YQASYGFRL   | 198 | 360  |
| >TP53-G105/YQGSYGFRLC  | 1223 | >TP53-G105/YQASYGFRLG  | 465 | 758  |
| >TP53-G105/YQGSYGFR    | 54   | >TP53-G105/YQASYGFR    | 33  | 21   |
| >TP53-G105/YQGSYGFR    | 476  | >TP53-G105/YQASYGFR    | 30  | 446  |
| >TP53-G105/YQGSYGFRL   | 211  | >TP53-G105/YQASYGFRL   | 124 | 87   |
| >TP53-G105/YQGSYGFRLC  | 32   | >TP53-G105/YQASYGFRLG  | 29  | 3    |
| >TP53-G105/YQGSYGFRLC  | 158  | >TP53-G105/YQASYGFRLG  | 59  | 99   |
| >TP53-G105/YQGSYGFR    | 1093 | >TP53-G105/YQASYGFR    | 251 | 842  |
| >TP53-G105/YQGSYGFRL   | 77   | >TP53-G105/YQASYGFRL   | 16  | 61   |
| >TP53-G105/YQGSYGFRLC  | 6    | >TP53-G105/YQASYGFRLG  | 3   | 3    |
| >TP53-G105/YQGSYGFRLC  | 1769 | >TP53-G105/YQASYGFRLG  | 436 | 1333 |

|                       |      |                       |     |      |
|-----------------------|------|-----------------------|-----|------|
| >TP53-G105/YQGSYGFRL  | 145  | >TP53-G105/YQASYGFRL  | 13  | 132  |
| >TP53-G105/YQGSYGFRLG | 4801 | >TP53-G105/YQASYGFRLG | 249 | 4552 |
| >TP53-G105/YQGSYGF    | 223  | >TP53-G105/YQASYGF    | 281 | 58   |
| >TP53-G105/TYQGSYGFRL | 141  | >TP53-G105/TYQASYGFRL | 49  | 92   |
| >TP53-G105/TYQGSYGF   | 28   | >TP53-G105/TYQASYGF   | 23  | 5    |
| >TP53-G105/TYQGSYGFRL | 316  | >TP53-G105/TYQASYGFRL | 217 | 99   |
| >TP53-G105/TYQGSYGF   | 93   | >TP53-G105/TYQASYGF   | 94  | 1    |
| >TP53-G105/TYQGSYGFRL | 163  | >TP53-G105/TYQASYGFRL | 145 | 18   |
| >TP53-G105/TYQGSYGF   | 5    | >TP53-G105/TYQASYGF   | 5   | 0    |
| >TP53-G105/TYQGSYGF   | 255  | >TP53-G105/TYQASYGF   | 369 | 114  |
| >TP53-G105/TYQGSYGFRL | 7    | >TP53-G105/TYQASYGFRL | 8   | 1    |
| >TP53-G105/TYQGSYGF   | 19   | >TP53-G105/TYQASYGF   | 11  | 8    |
| >TP53-G105/TYQGSYGF   | 25   | >TP53-G105/TYQASYGF   | 30  | 5    |
| >TP53-G105/TYQGSYGF   | 154  | >TP53-G105/TYQASYGF   | 120 | 34   |
| >TP53-G105/TYQGSYGF   | 53   | >TP53-G105/TYQASYGF   | 45  | 8    |
| >TP53-G105/KTYQGSYGF  | 220  | >TP53-G105/KTYQASYGF  | 112 | 108  |
| >TP53-G105/KTYQGSYGF  | 169  | >TP53-G105/KTYQASYGF  | 168 | 1    |
| >TP53-G105/KTYQGSYGF  | 260  | >TP53-G105/KTYQASYGF  | 120 | 140  |
| >TP53-G105/KTYQGSYGF  | 391  | >TP53-G105/KTYQASYGF  | 404 | 13   |
| >TP53-G105/KTYQGSYGF  | 77   | >TP53-G105/KTYQASYGF  | 79  | 2    |
| >TP53-G105/KTYQGSYGF  | 23   | >TP53-G105/KTYQASYGF  | 33  | 10   |
| >TP53-G105/KTYQGSYGF  | 175  | >TP53-G105/KTYQASYGF  | 209 | 34   |
| >TP53-G105/KTYQGSYGF  | 50   | >TP53-G105/KTYQASYGF  | 46  | 4    |
| >TP53-G105/KTYQGSYGF  | 57   | >TP53-G105/KTYQASYGF  | 37  | 20   |
| >TP53-G105/KTYQGSYGF  | 645  | >TP53-G105/KTYQASYGF  | 424 | 221  |
| >TP53-G105/KTYQGSYGF  | 481  | >TP53-G105/KTYQASYGF  | 645 | 164  |
| >TP53-G105/KTYQGSYGF  | 192  | >TP53-G105/KTYQASYGF  | 368 | 176  |
| >TP53-G105/KTYQGSYGF  | 294  | >TP53-G105/KTYQASYGF  | 931 | 637  |
| >TP53-G105/KTYQGSY    | 773  | >TP53-G105/KTYQASYG   | 383 | 390  |
| >TP53-G105/KTYQGSYGF  | 96   | >TP53-G105/KTYQASYGF  | 42  | 54   |
| >TP53-G105/KTYQGSYGF  | 795  | >TP53-G105/KTYQASYGF  | 360 | 435  |
| >TP53-G105/KTYQGSYGF  | 325  | >TP53-G105/KTYQASYGF  | 669 | 344  |
| >TP53-G105/KTYQGSYGF  | 10   | >TP53-G105/KTYQASYGF  | 8   | 2    |
| >TP53-G105/KTYQGSYGF  | 4    | >TP53-G105/KTYQASYGF  | 4   | 0    |
| >TP53-G105/KTYQGSYGF  | 21   | >TP53-G105/KTYQASYGF  | 23  | 2    |
| >TP53-G105/KTYQGSYGF  | 407  | >TP53-G105/KTYQASYGF  | 300 | 107  |
| >TP53-G105/KTYQGSYGF  | 57   | >TP53-G105/KTYQASYGF  | 41  | 16   |
| >TP53-G105/KTYQGSYGF  | 402  | >TP53-G105/KTYQASYGF  | 342 | 60   |
| >TP53-G105/KTYQGSYGF  | 55   | >TP53-G105/KTYQASYGF  | 48  | 7    |
| >TP53-G105/KTYQGSYGF  | 36   | >TP53-G105/KTYQASYGF  | 23  | 13   |
| >TP53-G105/KTYQGSY    | 249  | >TP53-G105/KTYQASYG   | 217 | 32   |
| >TP53-G105/KTYQGSYGF  | 2    | >TP53-G105/KTYQASYGF  | 2   | 0    |
| >TP53-G105/KTYQGSYGF  | 465  | >TP53-G105/KTYQASYGF  | 625 | 160  |



|                       |      |                        |      |      |
|-----------------------|------|------------------------|------|------|
| >TP53-G105/KTYQGSGYGF | 3    | >TP53-G105/KTYQASYGFR  | 3    | 0    |
| >TP53-G105/KTYQGSGYGF | 101  | >TP53-G105/KTYQASYGF   | 51   | 50   |
| >TP53-G105/KTYQGSGYGF | 439  | >TP53-G105/KTYQASYGFR  | 170  | 269  |
| >TP53-G105/KTYQGSGYGF | 15   | >TP53-G105/KTYQASYGF   | 14   | 1    |
| >TP53-G105/KTYQGSGYGF | 35   | >TP53-G105/KTYQASYGFR  | 32   | 3    |
| >TP53-G105/KTYQGSGYGF | 569  | >TP53-G105/KTYQASYGF   | 82   | 487  |
| >TP53-G105/KTYQGSGYGF | 151  | >TP53-G105/KTYQASYGFR  | 48   | 103  |
| >TP53-G105/KTYQGSGYGF | 25   | >TP53-G105/KTYQASYGF   | 43   | 18   |
| >TP53-G105/KTYQGSGYGF | 28   | >TP53-G105/KTYQASYGFR  | 40   | 12   |
| >TP53-G105/KTYQGSGYGF | 345  | >TP53-G105/KTYQASYGFR  | 276  | 69   |
| >TP53-G105/KTYQGSGYGF | 370  | >TP53-G105/KTYQASYGFR  | 416  | 46   |
| >TP53-G105/KTYQGSGYGF | 25   | >TP53-G105/KTYQASYGFR  | 20   | 5    |
| >TP53-G105/KTYQGSGYGF | 43   | >TP53-G105/KTYQASYGFR  | 41   | 2    |
| >TP53-G105/QKTYQGSY   | 308  | >TP53-G105/QKTYQASY    | 431  | 123  |
| >TP53-G105/QKTYQGSYGI | 814  | >TP53-G105/QKTYQASYGI  | 413  | 401  |
| >TP53-G105/QKTYQGSY   | 40   | >TP53-G105/QKTYQASY    | 15   | 25   |
| >TP53-G105/QKTYQGSYGI | 10   | >TP53-G105/QKTYQASYGI  | 11   | 1    |
| >TP53-G105/SQKTYQGSY  | 15   | >TP53-G105/SQKTYQASY   | 21   | 6    |
| >TP53-G105/SQKTYQGSY  | 38   | >TP53-G105/SQKTYQASY   | 34   | 4    |
| >TP53-G105/SQKTYQGSY  | 36   | >TP53-G105/SQKTYQASY   | 33   | 3    |
| >TP53-G105/SQKTYQGSY  | 198  | >TP53-G105/SQKTYQASY   | 252  | 54   |
| >TP53-G105/SQKTYQGSY  | 268  | >TP53-G105/SQKTYQASY   | 427  | 159  |
| >TP53-G105/SQKTYQGSY  | 19   | >TP53-G105/SQKTYQASY   | 5    | 14   |
| >TP53-G105/SQKTYQGSY  | 9    | >TP53-G105/SQKTYQASY   | 5    | 4    |
| >TP53-G105/PSQKTYQGSY | 513  | >TP53-G105/PSQKTYQASY  | 396  | 117  |
| >TP53-G105/PSQKTYQGSY | 71   | >TP53-G105/PSQKTYQASY  | 100  | 29   |
| >TP53-G105/PSQKTYQGSY | 228  | >TP53-G105/PSQKTYQASY  | 313  | 85   |
| >TP53-G105/VPSQKTYQGS | 92   | >TP53-G105/VPSQKTYQAS  | 134  | 42   |
| >TP53-G105/VPSQKTYQGS | 19   | >TP53-G105/VPSQKTYQAS  | 15   | 4    |
| >TP53-G105/VPSQKTYQGS | 254  | >TP53-G105/VPSQKTYQAS  | 135  | 119  |
| >TP53-G105/VPSQKTYQG  | 6121 | >TP53-G105/VPSQKTYQA   | 279  | 5842 |
| >TP53-G105/VPSQKTYQGS | 15   | >TP53-G105/VPSQKTYQAS  | 10   | 5    |
| >TP53-G105(GSYGFRLGF  | 78   | >TP53-G105(CSYGFRLGF   | 20   | 58   |
| >TP53-G105(GSYGFRLGFL | 227  | >TP53-G105(CSYGFRLGFL  | 180  | 47   |
| >TP53-G105(GSYGFRLGFL | 237  | >TP53-G105(CSYGFRLGFL  | 507  | 270  |
| >TP53-G105(GSYGFRLGFL | 491  | >TP53-G105(CSYGFRLGFLI | 722  | 231  |
| >TP53-G105(GSYGFRLGFL | 98   | >TP53-G105(CSYGFRLGFLI | 257  | 159  |
| >TP53-G105(GSYGFRLGF  | 61   | >TP53-G105(CSYGFRLGF   | 345  | 284  |
| >TP53-G105(GSYGFRLGFL | 621  | >TP53-G105(CSYGFRLGFL  | 163  | 458  |
| >TP53-G105(GSYGFRLGF  | 365  | >TP53-G105(CSYGFRLGF   | 1367 | 1002 |
| >TP53-G105(GSYGFRLGF  | 111  | >TP53-G105(CSYGFRLGF   | 64   | 47   |
| >TP53-G105(GSYGFRLGF  | 4    | >TP53-G105(CSYGFRLGF   | 5    | 1    |
| >TP53-G105(GSYGFRLGFL | 31   | >TP53-G105(CSYGFRLGFL  | 92   | 61   |

|                        |      |                        |      |      |
|------------------------|------|------------------------|------|------|
| >TP53-G105(GSYGFRLGF   | 222  | >TP53-G105(CSYGFRLGF   | 194  | 28   |
| >TP53-G105(GSYGFRLGF   | 264  | >TP53-G105(CSYGFRLGF   | 63   | 201  |
| >TP53-G105(GSYGFRLGFL  | 802  | >TP53-G105(CSYGFRLGFL  | 403  | 399  |
| >TP53-G105(GSYGFRLGF   | 44   | >TP53-G105(CSYGFRLGF   | 665  | 621  |
| >TP53-G105(GSYGFRLGFL  | 70   | >TP53-G105(CSYGFRLGFL  | 131  | 61   |
| >TP53-G105(GSYGFRLGFLI | 63   | >TP53-G105(CSYGFRLGFLI | 878  | 815  |
| >TP53-G105(GSYGFRLGFL  | 1593 | >TP53-G105(CSYGFRLGFL  | 305  | 1288 |
| >TP53-G105(QGSYGFRLGF  | 278  | >TP53-G105(QCSYGFRLGF  | 1508 | 1230 |
| >TP53-G105(YQGSYGFRL   | 30   | >TP53-G105(YQCSYGFRL   | 25   | 5    |
| >TP53-G105(YQGSYGFRL   | 36   | >TP53-G105(YQCSYGFRL   | 48   | 12   |
| >TP53-G105(YQGSYGFRL   | 15   | >TP53-G105(YQCSYGFRL   | 8    | 7    |
| >TP53-G105(YQGSYGFRLC  | 189  | >TP53-G105(YQCSYGFRLG  | 59   | 130  |
| >TP53-G105(YQGSYGFRL   | 32   | >TP53-G105(YQCSYGFRL   | 35   | 3    |
| >TP53-G105(YQGSYGFRL   | 167  | >TP53-G105(YQCSYGFRL   | 1712 | 1545 |
| >TP53-G105(YQGSYGFRL   | 54   | >TP53-G105(YQCSYGFRL   | 19   | 35   |
| >TP53-G105(YQGSYGFRL   | 1625 | >TP53-G105(YQCSYGFRL   | 228  | 1397 |
| >TP53-G105(YQGSYGFRL   | 476  | >TP53-G105(YQCSYGFRL   | 132  | 344  |
| >TP53-G105(YQGSYGFRL   | 211  | >TP53-G105(YQCSYGFRL   | 157  | 54   |
| >TP53-G105(YQGSYGFRLC  | 32   | >TP53-G105(YQCSYGFRLG  | 34   | 2    |
| >TP53-G105(YQGSYGFRLC  | 158  | >TP53-G105(YQCSYGFRLG  | 168  | 10   |
| >TP53-G105(YQGSYGFRL   | 77   | >TP53-G105(YQCSYGFRL   | 44   | 33   |
| >TP53-G105(YQGSYGFRLC  | 6    | >TP53-G105(YQCSYGFRLG  | 4    | 2    |
| >TP53-G105(YQGSYGFRLC  | 1715 | >TP53-G105(YQCSYGFRLG  | 448  | 1267 |
| >TP53-G105(YQGSYGFRL   | 145  | >TP53-G105(YQCSYGFRL   | 22   | 123  |
| >TP53-G105(YQGSYGFRL   | 223  | >TP53-G105(YQCSYGFRL   | 195  | 28   |
| >TP53-G105(TYQGSYGFRL  | 141  | >TP53-G105(TYQCSYGFRL  | 131  | 10   |
| >TP53-G105(TYQGSYGF    | 28   | >TP53-G105(TYQCSYGF    | 14   | 14   |
| >TP53-G105(TYQGSYGFRL  | 316  | >TP53-G105(TYQCSYGFRL  | 305  | 11   |
| >TP53-G105(TYQGSYGF    | 93   | >TP53-G105(TYQCSYGF    | 74   | 19   |
| >TP53-G105(TYQGSYGFRL  | 163  | >TP53-G105(TYQCSYGFRL  | 172  | 9    |
| >TP53-G105(TYQGSYGF    | 5    | >TP53-G105(TYQCSYGF    | 6    | 1    |
| >TP53-G105(TYQGSYGFRL  | 255  | >TP53-G105(TYQCSYGFRL  | 435  | 180  |
| >TP53-G105(TYQGSYGFRL  | 7    | >TP53-G105(TYQCSYGFRL  | 9    | 2    |
| >TP53-G105(TYQGSYGFRL  | 19   | >TP53-G105(TYQCSYGFRL  | 17   | 2    |
| >TP53-G105(TYQGSYGFRL  | 25   | >TP53-G105(TYQCSYGFRL  | 24   | 1    |
| >TP53-G105(TYQGSYGFRL  | 154  | >TP53-G105(TYQCSYGFRL  | 128  | 26   |
| >TP53-G105(TYQGSYGFRL  | 53   | >TP53-G105(TYQCSYGFRL  | 40   | 13   |
| >TP53-G105(TYQGSYGFRL  | 1969 | >TP53-G105(TYQCSYGFRL  | 437  | 1532 |
| >TP53-G105(KTYQGSYGF   | 1708 | >TP53-G105(KTYQCSYGF   | 478  | 1230 |
| >TP53-G105(KTYQGSYGFRL | 220  | >TP53-G105(KTYQCSYGFRL | 92   | 128  |
| >TP53-G105(KTYQGSYGFRL | 169  | >TP53-G105(KTYQCSYGFRL | 73   | 96   |
| >TP53-G105(KTYQGSYGFRL | 260  | >TP53-G105(KTYQCSYGFRL | 89   | 171  |
| >TP53-G105(KTYQGSYGF   | 391  | >TP53-G105(KTYQCSYGF   | 449  | 58   |

|                       |      |                       |      |      |
|-----------------------|------|-----------------------|------|------|
| >TP53-G105(KTYQGSGYFR | 77   | >TP53-G105(KTYQCSYGR  | 86   | 9    |
| >TP53-G105(KTYQGSGYFR | 23   | >TP53-G105(KTYQCSYGR  | 52   | 29   |
| >TP53-G105(KTYQGSGYFR | 175  | >TP53-G105(KTYQCSYGR  | 452  | 277  |
| >TP53-G105(KTYQGSGYFR | 50   | >TP53-G105(KTYQCSYGR  | 42   | 8    |
| >TP53-G105(KTYQGSGYFR | 57   | >TP53-G105(KTYQCSYGR  | 53   | 4    |
| >TP53-G105(KTYQGSGYGF | 1631 | >TP53-G105(KTYQCSYGF  | 233  | 1398 |
| >TP53-G105(KTYQGSGYGF | 481  | >TP53-G105(KTYQCSYGF  | 1160 | 679  |
| >TP53-G105(KTYQGSGYGF | 192  | >TP53-G105(KTYQCSYGF  | 1506 | 1314 |
| >TP53-G105(KTYQGSGYGF | 294  | >TP53-G105(KTYQCSYGF  | 579  | 285  |
| >TP53-G105(KTYQGSGYFR | 96   | >TP53-G105(KTYQCSYGR  | 173  | 77   |
| >TP53-G105(KTYQGSGYGF | 325  | >TP53-G105(KTYQCSYGF  | 218  | 107  |
| >TP53-G105(KTYQGSGYFR | 10   | >TP53-G105(KTYQCSYGR  | 5    | 5    |
| >TP53-G105(KTYQGSGYFR | 643  | >TP53-G105(KTYQCSYGR  | 345  | 298  |
| >TP53-G105(KTYQGSGYGF | 4    | >TP53-G105(KTYQCSYGF  | 4    | 0    |
| >TP53-G105(KTYQGSGYFR | 21   | >TP53-G105(KTYQCSYGR  | 28   | 7    |
| >TP53-G105(KTYQGSGYFR | 407  | >TP53-G105(KTYQCSYGR  | 104  | 303  |
| >TP53-G105(KTYQGSGYFR | 57   | >TP53-G105(KTYQCSYGR  | 36   | 21   |
| >TP53-G105(KTYQGSGYFR | 402  | >TP53-G105(KTYQCSYGR  | 1103 | 701  |
| >TP53-G105(KTYQGSGYGF | 55   | >TP53-G105(KTYQCSYGF  | 67   | 12   |
| >TP53-G105(KTYQGSGYGF | 36   | >TP53-G105(KTYQCSYGF  | 23   | 13   |
| >TP53-G105(KTYQGSGY   | 249  | >TP53-G105(KTYQCSY    | 652  | 403  |
| >TP53-G105(KTYQGSGYGF | 2    | >TP53-G105(KTYQCSYGF  | 2    | 0    |
| >TP53-G105(KTYQGSGYFR | 465  | >TP53-G105(KTYQCSYGR  | 911  | 446  |
| >TP53-G105(KTYQGSGYFR | 3    | >TP53-G105(KTYQCSYGR  | 3    | 0    |
| >TP53-G105(KTYQGSGYGF | 101  | >TP53-G105(KTYQCSYGF  | 54   | 47   |
| >TP53-G105(KTYQGSGYFR | 439  | >TP53-G105(KTYQCSYGR  | 175  | 264  |
| >TP53-G105(KTYQGSGYGF | 15   | >TP53-G105(KTYQCSYGF  | 14   | 1    |
| >TP53-G105(KTYQGSGYFR | 35   | >TP53-G105(KTYQCSYGR  | 37   | 2    |
| >TP53-G105(KTYQGSGYGF | 569  | >TP53-G105(KTYQCSYGF  | 186  | 383  |
| >TP53-G105(KTYQGSGYFR | 151  | >TP53-G105(KTYQCSYGR  | 80   | 71   |
| >TP53-G105(KTYQGSGYGF | 25   | >TP53-G105(KTYQCSYGF  | 16   | 9    |
| >TP53-G105(KTYQGSGYFR | 28   | >TP53-G105(KTYQCSYGR  | 20   | 8    |
| >TP53-G105(KTYQGSGYFR | 345  | >TP53-G105(KTYQCSYGR  | 170  | 175  |
| >TP53-G105(KTYQGSGYFR | 370  | >TP53-G105(KTYQCSYGR  | 280  | 90   |
| >TP53-G105(KTYQGSGYFR | 25   | >TP53-G105(KTYQCSYGR  | 15   | 10   |
| >TP53-G105(KTYQGSGYFR | 43   | >TP53-G105(KTYQCSYGR  | 36   | 7    |
| >TP53-G105(QKTYQGSY   | 308  | >TP53-G105(QKTYQCSY   | 1213 | 905  |
| >TP53-G105(QKTYQGSYGI | 814  | >TP53-G105(QKTYQCSYGF | 473  | 341  |
| >TP53-G105(QKTYQGSY   | 40   | >TP53-G105(QKTYQCSY   | 17   | 23   |
| >TP53-G105(QKTYQGSYGI | 10   | >TP53-G105(QKTYQCSYGF | 12   | 2    |
| >TP53-G105(SQKTYQGSY  | 15   | >TP53-G105(SQKTYQCSY  | 133  | 118  |
| >TP53-G105(SQKTYQGSY  | 38   | >TP53-G105(SQKTYQCSY  | 30   | 8    |
| >TP53-G105(SQKTYQGSYC | 36   | >TP53-G105(SQKTYQCSYC | 32   | 4    |

|                       |       |                       |       |       |
|-----------------------|-------|-----------------------|-------|-------|
| >TP53-G105(SQKTYQGSY  | 198   | >TP53-G105(SQKTYQCSY  | 450   | 252   |
| >TP53-G105(SQKTYQGSYC | 268   | >TP53-G105(SQKTYQCSYC | 914   | 646   |
| >TP53-G105(SQKTYQGSY  | 19    | >TP53-G105(SQKTYQCSY  | 6     | 13    |
| >TP53-G105(SQKTYQGSYC | 9     | >TP53-G105(SQKTYQCSYC | 6     | 3     |
| >TP53-G105(PSQKTYQGSY | 71    | >TP53-G105(PSQKTYQCSY | 152   | 81    |
| >TP53-G105(PSQKTYQGSY | 228   | >TP53-G105(PSQKTYQCSY | 385   | 157   |
| >TP53-G105(VPSQKTYQGS | 92    | >TP53-G105(VPSQKTYQCS | 549   | 457   |
| >TP53-G105(VPSQKTYQGS | 19    | >TP53-G105(VPSQKTYQCS | 18    | 1     |
| >TP53-G105(VPSQKTYQGS | 254   | >TP53-G105(VPSQKTYQCS | 103   | 151   |
| >TP53-G105(VPSQKTYQGS | 15    | >TP53-G105(VPSQKTYQCS | 22    | 7     |
| >TP53-G105[GSYGFRLGF  | 78    | >TP53-G105[DSYGFRLGF  | 111   | 33    |
| >TP53-G105[GSYGFRLGFL | 227   | >TP53-G105[DSYGFRLGFL | 270   | 43    |
| >TP53-G105[GSYGFRLGFL | 237   | >TP53-G105[DSYGFRLGFL | 1453  | 1216  |
| >TP53-G105[GSYGFRLGFL | 491   | >TP53-G105[DSYGFRLGFL | 10668 | 10177 |
| >TP53-G105[GSYGFRLGFL | 98    | >TP53-G105[DSYGFRLGFL | 5652  | 5554  |
| >TP53-G105[GSYGFRLGFL | 4194  | >TP53-G105[DSYGFRLGFL | 219   | 3975  |
| >TP53-G105[GSYGFRLGF  | 6441  | >TP53-G105[DSYGFRLGF  | 228   | 6213  |
| >TP53-G105[GSYGFRLGF  | 61    | >TP53-G105[DSYGFRLGF  | 338   | 277   |
| >TP53-G105[GSYGFRLGFL | 5184  | >TP53-G105[DSYGFRLGFL | 404   | 4780  |
| >TP53-G105[GSYGFRLGFL | 621   | >TP53-G105[DSYGFRLGFL | 153   | 468   |
| >TP53-G105[GSYGFRLGFL | 9242  | >TP53-G105[DSYGFRLGFL | 458   | 8784  |
| >TP53-G105[GSYGFRLGF  | 365   | >TP53-G105[DSYGFRLGF  | 7477  | 7112  |
| >TP53-G105[GSYGFRLGF  | 111   | >TP53-G105[DSYGFRLGF  | 433   | 322   |
| >TP53-G105[GSYGFRLGF  | 4     | >TP53-G105[DSYGFRLGF  | 20    | 16    |
| >TP53-G105[GSYGFRLGFL | 31    | >TP53-G105[DSYGFRLGFL | 717   | 686   |
| >TP53-G105[GSYGFRLGF  | 13414 | >TP53-G105[DSYGFRLGF  | 261   | 13153 |
| >TP53-G105[GSYGFRLGF  | 222   | >TP53-G105[DSYGFRLGF  | 1382  | 1160  |
| >TP53-G105[GSYGFRLGF  | 264   | >TP53-G105[DSYGFRLGF  | 6024  | 5760  |
| >TP53-G105[GSYGFRLGF  | 44    | >TP53-G105[DSYGFRLGF  | 1766  | 1722  |
| >TP53-G105[GSYGFRLGFL | 70    | >TP53-G105[DSYGFRLGFL | 333   | 263   |
| >TP53-G105[GSYGFRLGFL | 63    | >TP53-G105[DSYGFRLGFL | 2267  | 2204  |
| >TP53-G105[QGSYGFRL   | 28905 | >TP53-G105[QDSYGFRL   | 377   | 28528 |
| >TP53-G105[QGSYGFRLGF | 278   | >TP53-G105[QDSYGFRLGF | 2936  | 2658  |
| >TP53-G105[YQGSYGFRL  | 30    | >TP53-G105[YQDSYGFRL  | 13    | 17    |
| >TP53-G105[YQGSYGFRL  | 36    | >TP53-G105[YQDSYGFRL  | 34    | 2     |
| >TP53-G105[YQGSYGFRL  | 15    | >TP53-G105[YQDSYGFRL  | 6     | 9     |
| >TP53-G105[YQGSYGFRLC | 189   | >TP53-G105[YQDSYGFRLC | 39    | 150   |
| >TP53-G105[YQGSYGFRL  | 32    | >TP53-G105[YQDSYGFRL  | 16    | 16    |
| >TP53-G105[YQGSYGFRL  | 167   | >TP53-G105[YQDSYGFRL  | 74    | 93    |
| >TP53-G105[YQGSYGFRL  | 632   | >TP53-G105[YQDSYGFRL  | 197   | 435   |
| >TP53-G105[YQGSYGFRL  | 993   | >TP53-G105[YQDSYGFRL  | 467   | 526   |
| >TP53-G105[YQGSYGFR   | 54    | >TP53-G105[YQDSYGFR   | 219   | 165   |
| >TP53-G105[YQGSYGFR   | 476   | >TP53-G105[YQDSYGFR   | 847   | 371   |

|                         |      |                         |      |      |
|-------------------------|------|-------------------------|------|------|
| >TP53-G105I YQGSYGFRL   | 211  | >TP53-G105I YQDSYGFRL   | 3703 | 3492 |
| >TP53-G105I YQGSYGFRLC  | 32   | >TP53-G105I YQDSYGFRLC  | 133  | 101  |
| >TP53-G105I YQGSYGFRLC  | 158  | >TP53-G105I YQDSYGFRLC  | 311  | 153  |
| >TP53-G105I YQGSYGFRL   | 77   | >TP53-G105I YQDSYGFRL   | 542  | 465  |
| >TP53-G105I YQGSYGFRLC  | 6    | >TP53-G105I YQDSYGFRLC  | 21   | 15   |
| >TP53-G105I YQGSYGFRL   | 145  | >TP53-G105I YQDSYGFRL   | 15   | 130  |
| >TP53-G105I YQGSYGFRLC  | 4801 | >TP53-G105I YQDSYGFRLC  | 245  | 4556 |
| >TP53-G105I YQGSYGFRL   | 223  | >TP53-G105I YQDSYGFRL   | 939  | 716  |
| >TP53-G105I TYQGSYGFRL  | 141  | >TP53-G105I TYQDSYGFRL  | 776  | 635  |
| >TP53-G105I TYQGSYGF    | 28   | >TP53-G105I TYQDSYGF    | 22   | 6    |
| >TP53-G105I TYQGSYGFRL  | 316  | >TP53-G105I TYQDSYGFRL  | 226  | 90   |
| >TP53-G105I TYQGSYGF    | 93   | >TP53-G105I TYQDSYGF    | 141  | 48   |
| >TP53-G105I TYQGSYGFRL  | 163  | >TP53-G105I TYQDSYGFRL  | 169  | 6    |
| >TP53-G105I TYQGSYGF    | 5    | >TP53-G105I TYQDSYGF    | 6    | 1    |
| >TP53-G105I TYQGSYGFRL  | 255  | >TP53-G105I TYQDSYGFRL  | 782  | 527  |
| >TP53-G105I TYQGSYGFRL  | 7    | >TP53-G105I TYQDSYGFRL  | 12   | 5    |
| >TP53-G105I TYQGSYGFRL  | 19   | >TP53-G105I TYQDSYGFRL  | 15   | 4    |
| >TP53-G105I TYQGSYGFRL  | 25   | >TP53-G105I TYQDSYGFRL  | 24   | 1    |
| >TP53-G105I TYQGSYGFRL  | 154  | >TP53-G105I TYQDSYGFRL  | 108  | 46   |
| >TP53-G105I TYQGSYGFRL  | 53   | >TP53-G105I TYQDSYGFRL  | 53   | 0    |
| >TP53-G105I KTYQGSYGFRL | 220  | >TP53-G105I KTYQDSYGFRL | 397  | 177  |
| >TP53-G105I KTYQGSYGFRL | 169  | >TP53-G105I KTYQDSYGFRL | 204  | 35   |
| >TP53-G105I KTYQGSYGFRL | 260  | >TP53-G105I KTYQDSYGFRL | 205  | 55   |
| >TP53-G105I KTYQGSYGF   | 391  | >TP53-G105I KTYQDSYGF   | 664  | 273  |
| >TP53-G105I KTYQGSYGFRL | 77   | >TP53-G105I KTYQDSYGFRL | 125  | 48   |
| >TP53-G105I KTYQGSYGFRL | 23   | >TP53-G105I KTYQDSYGFRL | 32   | 9    |
| >TP53-G105I KTYQGSYGFRL | 175  | >TP53-G105I KTYQDSYGFRL | 336  | 161  |
| >TP53-G105I KTYQGSYGFRL | 50   | >TP53-G105I KTYQDSYGFRL | 222  | 172  |
| >TP53-G105I KTYQGSYGFRL | 57   | >TP53-G105I KTYQDSYGFRL | 71   | 14   |
| >TP53-G105I KTYQGSYGF   | 481  | >TP53-G105I KTYQDSYGF   | 265  | 216  |
| >TP53-G105I KTYQGSYGF   | 192  | >TP53-G105I KTYQDSYGF   | 433  | 241  |
| >TP53-G105I KTYQGSYGF   | 294  | >TP53-G105I KTYQDSYGF   | 832  | 538  |
| >TP53-G105I KTYQGSYGFRL | 96   | >TP53-G105I KTYQDSYGFRL | 310  | 214  |
| >TP53-G105I KTYQGSYGF   | 325  | >TP53-G105I KTYQDSYGF   | 527  | 202  |
| >TP53-G105I KTYQGSYGFRL | 10   | >TP53-G105I KTYQDSYGFRL | 15   | 5    |
| >TP53-G105I KTYQGSYGF   | 4    | >TP53-G105I KTYQDSYGF   | 4    | 0    |
| >TP53-G105I KTYQGSYGFRL | 21   | >TP53-G105I KTYQDSYGFRL | 26   | 5    |
| >TP53-G105I KTYQGSYGFRL | 407  | >TP53-G105I KTYQDSYGFRL | 310  | 97   |
| >TP53-G105I KTYQGSYGFRL | 57   | >TP53-G105I KTYQDSYGFRL | 92   | 35   |
| >TP53-G105I KTYQGSYGFRL | 402  | >TP53-G105I KTYQDSYGFRL | 689  | 287  |
| >TP53-G105I KTYQGSYGF   | 55   | >TP53-G105I KTYQDSYGF   | 89   | 34   |
| >TP53-G105I KTYQGSYGF   | 36   | >TP53-G105I KTYQDSYGF   | 43   | 7    |
| >TP53-G105I KTYQGSYGF   | 249  | >TP53-G105I KTYQDSYGF   | 868  | 619  |

|                         |      |                       |      |      |
|-------------------------|------|-----------------------|------|------|
| >TP53-G105I KTYQGSGYGF  | 2    | >TP53-G105I KTYQDSYGF | 3    | 1    |
| >TP53-G105I KTYQGSGYGFR | 465  | >TP53-G105I KTYQDSYGF | 1391 | 926  |
| >TP53-G105I KTYQGSGYGF  | 3    | >TP53-G105I KTYQDSYGF | 3    | 0    |
| >TP53-G105I KTYQGSGYGF  | 101  | >TP53-G105I KTYQDSYGF | 73   | 28   |
| >TP53-G105I KTYQGSGYGFR | 439  | >TP53-G105I KTYQDSYGF | 259  | 180  |
| >TP53-G105I KTYQGSGYGF  | 15   | >TP53-G105I KTYQDSYGF | 17   | 2    |
| >TP53-G105I KTYQGSGYGFR | 35   | >TP53-G105I KTYQDSYGF | 47   | 12   |
| >TP53-G105I KTYQGSGYGF  | 151  | >TP53-G105I KTYQDSYGF | 215  | 64   |
| >TP53-G105I KTYQGSGYGF  | 25   | >TP53-G105I KTYQDSYGF | 83   | 58   |
| >TP53-G105I KTYQGSGYGFR | 28   | >TP53-G105I KTYQDSYGF | 58   | 30   |
| >TP53-G105I KTYQGSGYGFR | 345  | >TP53-G105I KTYQDSYGF | 755  | 410  |
| >TP53-G105I KTYQGSGYGF  | 370  | >TP53-G105I KTYQDSYGF | 303  | 67   |
| >TP53-G105I KTYQGSGYGFR | 25   | >TP53-G105I KTYQDSYGF | 22   | 3    |
| >TP53-G105I KTYQGSGYGF  | 43   | >TP53-G105I KTYQDSYGF | 54   | 11   |
| >TP53-G105I KTYQGSGYGF  | 308  | >TP53-G105I KTYQDSYGF | 843  | 535  |
| >TP53-G105I KTYQGSY     | 40   | >TP53-G105I KTYQDSY   | 58   | 18   |
| >TP53-G105I KTYQGSY     | 10   | >TP53-G105I KTYQDSY   | 22   | 12   |
| >TP53-G105I KTYQGSYGI   | 15   | >TP53-G105I KTYQDSYGI | 60   | 45   |
| >TP53-G105I KTYQGSY     | 38   | >TP53-G105I KTYQDSY   | 50   | 12   |
| >TP53-G105I KTYQGSY     | 36   | >TP53-G105I KTYQDSY   | 44   | 8    |
| >TP53-G105I KTYQGSY     | 198  | >TP53-G105I KTYQDSY   | 471  | 273  |
| >TP53-G105I KTYQGSY     | 268  | >TP53-G105I KTYQDSY   | 632  | 364  |
| >TP53-G105I KTYQGSY     | 19   | >TP53-G105I KTYQDSY   | 13   | 6    |
| >TP53-G105I KTYQGSY     | 9    | >TP53-G105I KTYQDSY   | 8    | 1    |
| >TP53-G105I KTYQGSY     | 71   | >TP53-G105I KTYQDSY   | 293  | 222  |
| >TP53-G105I KTYQGSY     | 228  | >TP53-G105I KTYQDSY   | 1495 | 1267 |
| >TP53-G105I KTYQGSY     | 92   | >TP53-G105I KTYQDSY   | 307  | 215  |
| >TP53-G105I KTYQGSY     | 19   | >TP53-G105I KTYQDSY   | 15   | 4    |
| >TP53-G105I KTYQGSY     | 254  | >TP53-G105I KTYQDSY   | 173  | 81   |
| >TP53-G105I KTYQGSY     | 15   | >TP53-G105I KTYQDSY   | 18   | 3    |
| >TP53-G105I KTYQGSY     | 78   | >TP53-G105I KTYQDSY   | 33   | 45   |
| >TP53-G105I KTYQGSY     | 227  | >TP53-G105I KTYQDSY   | 241  | 14   |
| >TP53-G105I KTYQGSY     | 237  | >TP53-G105I KTYQDSY   | 254  | 17   |
| >TP53-G105I KTYQGSY     | 549  | >TP53-G105I KTYQDSY   | 351  | 198  |
| >TP53-G105I KTYQGSY     | 491  | >TP53-G105I KTYQDSY   | 85   | 406  |
| >TP53-G105I KTYQGSY     | 98   | >TP53-G105I KTYQDSY   | 46   | 52   |
| >TP53-G105I KTYQGSY     | 2575 | >TP53-G105I KTYQDSY   | 39   | 2536 |
| >TP53-G105I KTYQGSY     | 760  | >TP53-G105I KTYQDSY   | 103  | 657  |
| >TP53-G105I KTYQGSY     | 2384 | >TP53-G105I KTYQDSY   | 190  | 2194 |
| >TP53-G105I KTYQGSY     | 1289 | >TP53-G105I KTYQDSY   | 111  | 1178 |
| >TP53-G105I KTYQGSY     | 61   | >TP53-G105I KTYQDSY   | 6    | 55   |
| >TP53-G105I KTYQGSY     | 5680 | >TP53-G105I KTYQDSY   | 312  | 5368 |
| >TP53-G105I KTYQGSY     | 621  | >TP53-G105I KTYQDSY   | 149  | 472  |

|                         |       |                         |      |       |
|-------------------------|-------|-------------------------|------|-------|
| >TP53-G105F GSYGFRLGF   | 365   | >TP53-G105F RSYGFRLGF   | 101  | 264   |
| >TP53-G105F GSYGFRLGF   | 111   | >TP53-G105F RSYGFRLGF   | 12   | 99    |
| >TP53-G105F GSYGFRLGF   | 4     | >TP53-G105F RSYGFRLGF   | 2    | 2     |
| >TP53-G105F GSYGFRLGFL  | 31    | >TP53-G105F RSYGFRLGFL  | 4    | 27    |
| >TP53-G105F GSYGFRLGFL  | 2038  | >TP53-G105F RSYGFRLGFLI | 34   | 2004  |
| >TP53-G105F GSYGFRLGFL  | 3970  | >TP53-G105F RSYGFRLGFL  | 338  | 3632  |
| >TP53-G105F GSYGFRLGF   | 222   | >TP53-G105F RSYGFRLGF   | 40   | 182   |
| >TP53-G105F GSYGFRLGFL  | 4480  | >TP53-G105F RSYGFRLGFL  | 308  | 4172  |
| >TP53-G105F GSYGFRLGFL  | 8555  | >TP53-G105F RSYGFRLGFLI | 466  | 8089  |
| >TP53-G105F GSYGFRLGF   | 264   | >TP53-G105F RSYGFRLGF   | 13   | 251   |
| >TP53-G105F GSYGFRLGFL  | 8504  | >TP53-G105F RSYGFRLGFL  | 213  | 8291  |
| >TP53-G105F GSYGFRLGFLI | 10881 | >TP53-G105F RSYGFRLGFLI | 240  | 10641 |
| >TP53-G105F GSYGFRLGFL  | 802   | >TP53-G105F RSYGFRLGFL  | 273  | 529   |
| >TP53-G105F GSYGFRLGF   | 44    | >TP53-G105F RSYGFRLGF   | 40   | 4     |
| >TP53-G105F GSYGFRLGFL  | 70    | >TP53-G105F RSYGFRLGFL  | 26   | 44    |
| >TP53-G105F GSYGFRLGFLI | 63    | >TP53-G105F RSYGFRLGFLI | 51   | 12    |
| >TP53-G105F GSYGFRLGF   | 4767  | >TP53-G105F RSYGFRLGF   | 309  | 4458  |
| >TP53-G105F GSYGFRLGFL  | 7771  | >TP53-G105F RSYGFRLGFL  | 382  | 7389  |
| >TP53-G105F QGSYGFRLGF  | 1171  | >TP53-G105F QRSYGFRLGF  | 57   | 1114  |
| >TP53-G105F QGSYGFRL    | 22680 | >TP53-G105F QRSYGFRL    | 275  | 22405 |
| >TP53-G105F QGSYGFRLGF  | 29652 | >TP53-G105F QRSYGFRLGF  | 314  | 29338 |
| >TP53-G105F QGSYGFRLGF  | 22076 | >TP53-G105F QRSYGFRLGF  | 448  | 21628 |
| >TP53-G105F QGSYGFRLGF  | 278   | >TP53-G105F QRSYGFRLGF  | 2481 | 2203  |
| >TP53-G105F QGSYGFRLGF  | 20848 | >TP53-G105F QRSYGFRLGF  | 140  | 20708 |
| >TP53-G105F QGSYGFRLGF  | 31551 | >TP53-G105F QRSYGFRLGF  | 430  | 31121 |
| >TP53-G105F QGSYGFRLGF  | 12975 | >TP53-G105F QRSYGFRLGF  | 18   | 12957 |
| >TP53-G105F SSVPSQKTYQ  | 24325 | >TP53-G105F SSVPSQKTYQ  | 319  | 24006 |
| >TP53-G105F SSVPSQKTYQ  | 20255 | >TP53-G105F SSVPSQKTYQ  | 58   | 20197 |
| >TP53-G105F SSVPSQKTYQ  | 27286 | >TP53-G105F SSVPSQKTYQ  | 38   | 27248 |
| >TP53-G105F SSVPSQKTYQ  | 4856  | >TP53-G105F SSVPSQKTYQ  | 105  | 4751  |
| >TP53-G105F SSVPSQKTYQ  | 35065 | >TP53-G105F SSVPSQKTYQ  | 479  | 34586 |
| >TP53-G105F YQGSYGFRL   | 30    | >TP53-G105F YQRSYGFRL   | 299  | 269   |
| >TP53-G105F YQGSYGFRL   | 36    | >TP53-G105F YQRSYGFRL   | 249  | 213   |
| >TP53-G105F YQGSYGFRL   | 15    | >TP53-G105F YQRSYGFRL   | 30   | 15    |
| >TP53-G105F YQGSYGFRLC  | 189   | >TP53-G105F YQRSYGFRLG  | 355  | 166   |
| >TP53-G105F YQGSYGFRL   | 32    | >TP53-G105F YQRSYGFRL   | 261  | 229   |
| >TP53-G105F YQGSYGFRL   | 167   | >TP53-G105F YQRSYGFRL   | 3009 | 2842  |
| >TP53-G105F YQGSYGFR    | 54    | >TP53-G105F YQRSYGFR    | 16   | 38    |
| >TP53-G105F YQGSYGFR    | 1625  | >TP53-G105F YQRSYGFR    | 178  | 1447  |
| >TP53-G105F YQGSYGFR    | 476   | >TP53-G105F YQRSYGFR    | 773  | 297   |
| >TP53-G105F YQGSYGFRL   | 211   | >TP53-G105F YQRSYGFRL   | 82   | 129   |
| >TP53-G105F YQGSYGFRLC  | 1485  | >TP53-G105F YQRSYGFRLG  | 419  | 1066  |
| >TP53-G105F YQGSYGFRLC  | 32    | >TP53-G105F YQRSYGFRLG  | 27   | 5     |

|                        |      |                        |      |      |
|------------------------|------|------------------------|------|------|
| >TP53-G105FYQGSYGFRLC  | 158  | >TP53-G105FYQRSYGFRLG  | 45   | 113  |
| >TP53-G105FYQGSYGFR    | 1093 | >TP53-G105FYQRSYGFRL   | 99   | 994  |
| >TP53-G105FYQGSYGFR    | 77   | >TP53-G105FYQRSYGFRL   | 10   | 67   |
| >TP53-G105FYQGSYGFRLC  | 6    | >TP53-G105FYQRSYGFRLG  | 2    | 4    |
| >TP53-G105FYQGSYGFRLC  | 6196 | >TP53-G105FYQRSYGFRLG  | 276  | 5920 |
| >TP53-G105FYQGSYGFR    | 145  | >TP53-G105FYQRSYGFRL   | 190  | 45   |
| >TP53-G105FYQGSYGFR    | 223  | >TP53-G105FYQRSYGFRL   | 534  | 311  |
| >TP53-G105FTYQGSYGFR   | 141  | >TP53-G105FTYQRSYGFRL  | 142  | 1    |
| >TP53-G105FTYQGSYGF    | 28   | >TP53-G105FTYQRSYGF    | 25   | 3    |
| >TP53-G105FTYQGSYGFR   | 316  | >TP53-G105FTYQRSYGFRL  | 556  | 240  |
| >TP53-G105FTYQGSYGF    | 93   | >TP53-G105FTYQRSYGF    | 50   | 43   |
| >TP53-G105FTYQGSYGFR   | 163  | >TP53-G105FTYQRSYGFRL  | 181  | 18   |
| >TP53-G105FTYQGSYGF    | 5    | >TP53-G105FTYQRSYGF    | 5    | 0    |
| >TP53-G105FTYQGSYGFR   | 255  | >TP53-G105FTYQRSYGFRL  | 278  | 23   |
| >TP53-G105FTYQGSYGFR   | 7    | >TP53-G105FTYQRSYGFRL  | 7    | 0    |
| >TP53-G105FTYQGSYGFR   | 19   | >TP53-G105FTYQRSYGFRL  | 10   | 9    |
| >TP53-G105FTYQGSYGFR   | 25   | >TP53-G105FTYQRSYGFRL  | 30   | 5    |
| >TP53-G105FTYQGSYGF    | 154  | >TP53-G105FTYQRSYGFRL  | 170  | 16   |
| >TP53-G105FTYQGSYGF    | 53   | >TP53-G105FTYQRSYGFRL  | 111  | 58   |
| >TP53-G105FKTYQGSYGF   | 1708 | >TP53-G105FKTYQRSYGF   | 137  | 1571 |
| >TP53-G105FKTYQGSYGFRL | 220  | >TP53-G105FKTYQRSYGFRL | 43   | 177  |
| >TP53-G105FKTYQGSYGFRL | 169  | >TP53-G105FKTYQRSYGFRL | 250  | 81   |
| >TP53-G105FKTYQGSYGFRL | 260  | >TP53-G105FKTYQRSYGFRL | 235  | 25   |
| >TP53-G105FKTYQGSYGF   | 391  | >TP53-G105FKTYQRSYGF   | 917  | 526  |
| >TP53-G105FKTYQGSYGFRL | 77   | >TP53-G105FKTYQRSYGFRL | 148  | 71   |
| >TP53-G105FKTYQGSYGFRL | 23   | >TP53-G105FKTYQRSYGFRL | 44   | 21   |
| >TP53-G105FKTYQGSYGFRL | 175  | >TP53-G105FKTYQRSYGFRL | 559  | 384  |
| >TP53-G105FKTYQGSYGFRL | 50   | >TP53-G105FKTYQRSYGFRL | 44   | 6    |
| >TP53-G105FKTYQGSYGFRL | 57   | >TP53-G105FKTYQRSYGFRL | 59   | 2    |
| >TP53-G105FKTYQGSYGF   | 481  | >TP53-G105FKTYQRSYGF   | 2302 | 1821 |
| >TP53-G105FKTYQGSYGF   | 192  | >TP53-G105FKTYQRSYGF   | 180  | 12   |
| >TP53-G105FKTYQGSYGF   | 294  | >TP53-G105FKTYQRSYGF   | 1327 | 1033 |
| >TP53-G105FKTYQGSYGF   | 773  | >TP53-G105FKTYQRSYGF   | 296  | 477  |
| >TP53-G105FKTYQGSYGFRL | 96   | >TP53-G105FKTYQRSYGFRL | 55   | 41   |
| >TP53-G105FKTYQGSYGF   | 325  | >TP53-G105FKTYQRSYGF   | 1424 | 1099 |
| >TP53-G105FKTYQGSYGFRL | 10   | >TP53-G105FKTYQRSYGFRL | 5    | 5    |
| >TP53-G105FKTYQGSYGFRL | 643  | >TP53-G105FKTYQRSYGFRL | 311  | 332  |
| >TP53-G105FKTYQGSYGF   | 4    | >TP53-G105FKTYQRSYGF   | 4    | 0    |
| >TP53-G105FKTYQGSYGFRL | 21   | >TP53-G105FKTYQRSYGFRL | 20   | 1    |
| >TP53-G105FKTYQGSYGFRL | 407  | >TP53-G105FKTYQRSYGFRL | 92   | 315  |
| >TP53-G105FKTYQGSYGFRL | 57   | >TP53-G105FKTYQRSYGFRL | 81   | 24   |
| >TP53-G105FKTYQGSYGFRL | 402  | >TP53-G105FKTYQRSYGFRL | 1324 | 922  |
| >TP53-G105FKTYQGSYGF   | 55   | >TP53-G105FKTYQRSYGF   | 78   | 23   |



|                       |       |                       |     |       |
|-----------------------|-------|-----------------------|-----|-------|
| >TP53-G105FKTYQGSGYF  | 36    | >TP53-G105FKTYQRSYGF  | 43  | 7     |
| >TP53-G105FKTYQGSYG   | 249   | >TP53-G105FKTYQRSYG   | 561 | 312   |
| >TP53-G105FKTYQGSGYF  | 2     | >TP53-G105FKTYQRSYGF  | 2   | 0     |
| >TP53-G105FKTYQGSGYFR | 465   | >TP53-G105FKTYQRSYGF  | 737 | 272   |
| >TP53-G105FKTYQGSGYFR | 3     | >TP53-G105FKTYQRSYGF  | 3   | 0     |
| >TP53-G105FKTYQGSGYF  | 101   | >TP53-G105FKTYQRSYGF  | 78  | 23    |
| >TP53-G105FKTYQGSGYFR | 439   | >TP53-G105FKTYQRSYGF  | 322 | 117   |
| >TP53-G105FKTYQGSGYF  | 15    | >TP53-G105FKTYQRSYGF  | 22  | 7     |
| >TP53-G105FKTYQGSGYFR | 35    | >TP53-G105FKTYQRSYGF  | 70  | 35    |
| >TP53-G105FKTYQGSGYFR | 151   | >TP53-G105FKTYQRSYGF  | 172 | 21    |
| >TP53-G105FKTYQGSGYF  | 25    | >TP53-G105FKTYQRSYGF  | 62  | 37    |
| >TP53-G105FKTYQGSGYFR | 28    | >TP53-G105FKTYQRSYGF  | 48  | 20    |
| >TP53-G105FKTYQGSGYFR | 345   | >TP53-G105FKTYQRSYGF  | 284 | 61    |
| >TP53-G105FKTYQGSGYFR | 370   | >TP53-G105FKTYQRSYGF  | 284 | 86    |
| >TP53-G105FKTYQGSGYFR | 25    | >TP53-G105FKTYQRSYGF  | 22  | 3     |
| >TP53-G105FKTYQGSGYFR | 43    | >TP53-G105FKTYQRSYGF  | 52  | 9     |
| >TP53-G105FKTYQGSGY   | 308   | >TP53-G105FKTYQRSY    | 898 | 590   |
| >TP53-G105FKTYQGSYGI  | 814   | >TP53-G105FKTYQRSYGF  | 441 | 373   |
| >TP53-G105FKTYQGSY    | 40    | >TP53-G105FKTYQRSY    | 15  | 25    |
| >TP53-G105FKTYQGSYGI  | 10    | >TP53-G105FKTYQRSYGF  | 13  | 3     |
| >TP53-G105FSQKTYQGSY  | 15    | >TP53-G105FSQKTYQRSY  | 92  | 77    |
| >TP53-G105FSQKTYQGSY  | 38    | >TP53-G105FSQKTYQRSY  | 45  | 7     |
| >TP53-G105FSQKTYQGSYC | 36    | >TP53-G105FSQKTYQRSYC | 40  | 4     |
| >TP53-G105FSQKTYQGSY  | 198   | >TP53-G105FSQKTYQRSY  | 351 | 153   |
| >TP53-G105FSQKTYQGSYC | 268   | >TP53-G105FSQKTYQRSYC | 504 | 236   |
| >TP53-G105FSQKTYQGSY  | 19    | >TP53-G105FSQKTYQRSY  | 6   | 13    |
| >TP53-G105FSQKTYQGSYC | 9     | >TP53-G105FSQKTYQRSYC | 6   | 3     |
| >TP53-G105FPSQKTYQGSY | 71    | >TP53-G105FPSQKTYQRSY | 253 | 182   |
| >TP53-G105FPSQKTYQGSY | 228   | >TP53-G105FPSQKTYQRSY | 664 | 436   |
| >TP53-G105FVPSQKTYQGS | 92    | >TP53-G105FVPSQKTYQRS | 404 | 312   |
| >TP53-G105FVPSQKTYQGS | 19    | >TP53-G105FVPSQKTYQRS | 22  | 3     |
| >TP53-G105FVPSQKTYQGS | 254   | >TP53-G105FVPSQKTYQRS | 254 | 0     |
| >TP53-G105FVPSQKTYQGS | 15    | >TP53-G105FVPSQKTYQRS | 9   | 6     |
| >TP53-G105FVPSQKTYQG  | 34223 | >TP53-G105FVPSQKTYQR  | 219 | 34004 |
| >TP53-G105FSVPSQKTYQC | 29204 | >TP53-G105FSVPSQKTYQR | 144 | 29060 |
| >TP53-G105FSVPSQKTYQC | 25273 | >TP53-G105FSVPSQKTYQR | 121 | 25152 |
| >TP53-G105FSVPSQKTYQC | 29674 | >TP53-G105FSVPSQKTYQR | 70  | 29604 |
| >TP53-G105FSVPSQKTYQC | 32898 | >TP53-G105FSVPSQKTYQR | 158 | 32740 |
| >TP53-G105\GSYGFRLG   | 5436  | >TP53-G105\GSYGFRLG   | 254 | 5182  |
| >TP53-G105\GSYGFRLGF  | 78    | >TP53-G105\GSYGFRLGF  | 12  | 66    |
| >TP53-G105\GSYGFRLGFL | 227   | >TP53-G105\GSYGFRLGFL | 164 | 63    |
| >TP53-G105\GSYGFRLGFL | 237   | >TP53-G105\GSYGFRLGFL | 466 | 229   |
| >TP53-G105\GSYGFRLGFL | 491   | >TP53-G105\GSYGFRLGFL | 292 | 199   |

|                       |       |                        |     |       |
|-----------------------|-------|------------------------|-----|-------|
| >TP53-G105\GSYGFRLGFL | 98    | >TP53-G105\VSYGFRLGFLI | 112 | 14    |
| >TP53-G105\GSYGFRLGFL | 760   | >TP53-G105\VSYGFRLGFL  | 337 | 423   |
| >TP53-G105\GSYGFRLGF  | 61    | >TP53-G105\VSYGFRLGF   | 54  | 7     |
| >TP53-G105\GSYGFRLGFL | 621   | >TP53-G105\VSYGFRLGFL  | 405 | 216   |
| >TP53-G105\GSYGFRLGF  | 365   | >TP53-G105\VSYGFRLGF   | 272 | 93    |
| >TP53-G105\GSYGFRLGF  | 111   | >TP53-G105\VSYGFRLGF   | 32  | 79    |
| >TP53-G105\GSYGFRLGF  | 4     | >TP53-G105\VSYGFRLGF   | 3   | 1     |
| >TP53-G105\GSYGFRLGFL | 31    | >TP53-G105\VSYGFRLGFL  | 10  | 21    |
| >TP53-G105\GSYGFRLGFL | 2038  | >TP53-G105\VSYGFRLGFLI | 376 | 1662  |
| >TP53-G105\GSYGFRLGF  | 222   | >TP53-G105\VSYGFRLGF   | 83  | 139   |
| >TP53-G105\GSYGFRLGF  | 264   | >TP53-G105\VSYGFRLGF   | 32  | 232   |
| >TP53-G105\GSYGFRLGFL | 802   | >TP53-G105\VSYGFRLGFL  | 185 | 617   |
| >TP53-G105\GSYGFRLGF  | 44    | >TP53-G105\VSYGFRLGF   | 70  | 26    |
| >TP53-G105\GSYGFRLGFL | 70    | >TP53-G105\VSYGFRLGFL  | 62  | 8     |
| >TP53-G105\GSYGFRLGFL | 63    | >TP53-G105\VSYGFRLGFLI | 97  | 34    |
| >TP53-G105\QGSYGFRLGF | 4746  | >TP53-G105\QVSYGFRLGF  | 465 | 4281  |
| >TP53-G105\QGSYGFRLGF | 9008  | >TP53-G105\QVSYGFRLGF  | 409 | 8599  |
| >TP53-G105\QGSYGFRLGF | 26817 | >TP53-G105\QVSYGFRLGF  | 499 | 26318 |
| >TP53-G105\QGSYGFRLGF | 16522 | >TP53-G105\QVSYGFRLGF  | 315 | 16207 |
| >TP53-G105\QGSYGFRL   | 7459  | >TP53-G105\QVSYGFRL    | 92  | 7367  |
| >TP53-G105\QGSYGFRLGF | 5781  | >TP53-G105\QVSYGFRLGF  | 62  | 5719  |
| >TP53-G105\QGSYGFRLGF | 1989  | >TP53-G105\QVSYGFRLGF  | 420 | 1569  |
| >TP53-G105\QGSYGFRLGF | 278   | >TP53-G105\QVSYGFRLGF  | 192 | 86    |
| >TP53-G105\SSVPSQKTYQ | 11121 | >TP53-G105\SSVPSQKTYQ  | 97  | 11024 |
| >TP53-G105\SSVPSQKTYQ | 1654  | >TP53-G105\SSVPSQKTYQ  | 38  | 1616  |
| >TP53-G105\YQGSYGFRL  | 30    | >TP53-G105\YQVSYGFRL   | 18  | 12    |
| >TP53-G105\YQGSYGFRL  | 36    | >TP53-G105\YQVSYGFRL   | 16  | 20    |
| >TP53-G105\YQGSYGFRL  | 1457  | >TP53-G105\YQVSYGFRL   | 232 | 1225  |
| >TP53-G105\YQGSYGFRL  | 15    | >TP53-G105\YQVSYGFRL   | 4   | 11    |
| >TP53-G105\YQGSYGFRLC | 189   | >TP53-G105\YQVSYGFRLG  | 18  | 171   |
| >TP53-G105\YQGSYGFRL  | 32    | >TP53-G105\YQVSYGFRL   | 33  | 1     |
| >TP53-G105\YQGSYGFRL  | 167   | >TP53-G105\YQVSYGFRL   | 176 | 9     |
| >TP53-G105\YQGSYGFRL  | 54    | >TP53-G105\YQVSYGFRL   | 33  | 21    |
| >TP53-G105\YQGSYGFRL  | 476   | >TP53-G105\YQVSYGFRL   | 60  | 416   |
| >TP53-G105\YQGSYGFRL  | 211   | >TP53-G105\YQVSYGFRL   | 162 | 49    |
| >TP53-G105\YQGSYGFRLC | 32    | >TP53-G105\YQVSYGFRLG  | 33  | 1     |
| >TP53-G105\YQGSYGFRLC | 158   | >TP53-G105\YQVSYGFRLG  | 98  | 60    |
| >TP53-G105\YQGSYGFRL  | 1093  | >TP53-G105\YQVSYGFRL   | 191 | 902   |
| >TP53-G105\YQGSYGFRL  | 77    | >TP53-G105\YQVSYGFRL   | 15  | 62    |
| >TP53-G105\YQGSYGFRLC | 6     | >TP53-G105\YQVSYGFRLG  | 3   | 3     |
| >TP53-G105\YQGSYGFRLC | 1715  | >TP53-G105\YQVSYGFRLG  | 319 | 1396  |
| >TP53-G105\YQGSYGFRLC | 1769  | >TP53-G105\YQVSYGFRLG  | 446 | 1323  |
| >TP53-G105\YQGSYGFRL  | 145   | >TP53-G105\YQVSYGFRL   | 14  | 131   |

|                       |      |                       |      |      |
|-----------------------|------|-----------------------|------|------|
| >TP53-G105\YQGSYGFRLC | 4801 | >TP53-G105\YQVSYGFRLG | 274  | 4527 |
| >TP53-G105\YQGSYGFR   | 223  | >TP53-G105\YQVSYGFR   | 213  | 10   |
| >TP53-G105\TYQGSYGFR  | 141  | >TP53-G105\TYQVSYGFR  | 125  | 16   |
| >TP53-G105\TYQGSYGF   | 28   | >TP53-G105\TYQVSYGF   | 19   | 9    |
| >TP53-G105\TYQGSYGFR  | 316  | >TP53-G105\TYQVSYGFR  | 649  | 333  |
| >TP53-G105\TYQGSYGF   | 93   | >TP53-G105\TYQVSYGF   | 72   | 21   |
| >TP53-G105\TYQGSYGFR  | 163  | >TP53-G105\TYQVSYGFR  | 224  | 61   |
| >TP53-G105\TYQGSYGF   | 5    | >TP53-G105\TYQVSYGF   | 6    | 1    |
| >TP53-G105\TYQGSYGFR  | 255  | >TP53-G105\TYQVSYGFR  | 563  | 308  |
| >TP53-G105\TYQGSYGFR  | 7    | >TP53-G105\TYQVSYGFR  | 10   | 3    |
| >TP53-G105\TYQGSYGFR  | 19   | >TP53-G105\TYQVSYGFR  | 11   | 8    |
| >TP53-G105\TYQGSYGFR  | 25   | >TP53-G105\TYQVSYGFR  | 24   | 1    |
| >TP53-G105\TYQGSYGFR  | 154  | >TP53-G105\TYQVSYGFR  | 162  | 8    |
| >TP53-G105\TYQGSYGFR  | 53   | >TP53-G105\TYQVSYGFR  | 123  | 70   |
| >TP53-G105\KTYQGSYGFR | 220  | >TP53-G105\KTYQVSYGFR | 186  | 34   |
| >TP53-G105\KTYQGSYGFR | 169  | >TP53-G105\KTYQVSYGFR | 115  | 54   |
| >TP53-G105\KTYQGSYGFR | 260  | >TP53-G105\KTYQVSYGFR | 114  | 146  |
| >TP53-G105\KTYQGSYGF  | 391  | >TP53-G105\KTYQVSYGF  | 434  | 43   |
| >TP53-G105\KTYQGSYGFR | 77   | >TP53-G105\KTYQVSYGFR | 72   | 5    |
| >TP53-G105\KTYQGSYGFR | 23   | >TP53-G105\KTYQVSYGFR | 12   | 11   |
| >TP53-G105\KTYQGSYGFR | 175  | >TP53-G105\KTYQVSYGFR | 115  | 60   |
| >TP53-G105\KTYQGSYGFR | 50   | >TP53-G105\KTYQVSYGFR | 48   | 2    |
| >TP53-G105\KTYQGSYGFR | 57   | >TP53-G105\KTYQVSYGFR | 59   | 2    |
| >TP53-G105\KTYQGSYGF  | 645  | >TP53-G105\KTYQVSYGF  | 340  | 305  |
| >TP53-G105\KTYQGSYGF  | 481  | >TP53-G105\KTYQVSYGF  | 1510 | 1029 |
| >TP53-G105\KTYQGSYGF  | 192  | >TP53-G105\KTYQVSYGF  | 453  | 261  |
| >TP53-G105\KTYQGSYGF  | 294  | >TP53-G105\KTYQVSYGF  | 887  | 593  |
| >TP53-G105\KTYQGSYGFR | 96   | >TP53-G105\KTYQVSYGFR | 104  | 8    |
| >TP53-G105\KTYQGSYGF  | 325  | >TP53-G105\KTYQVSYGF  | 492  | 167  |
| >TP53-G105\KTYQGSYGFR | 10   | >TP53-G105\KTYQVSYGFR | 7    | 3    |
| >TP53-G105\KTYQGSYGFR | 643  | >TP53-G105\KTYQVSYGFR | 343  | 300  |
| >TP53-G105\KTYQGSYGF  | 4    | >TP53-G105\KTYQVSYGF  | 3    | 1    |
| >TP53-G105\KTYQGSYGFR | 21   | >TP53-G105\KTYQVSYGFR | 13   | 8    |
| >TP53-G105\KTYQGSYGFR | 407  | >TP53-G105\KTYQVSYGFR | 142  | 265  |
| >TP53-G105\KTYQGSYGFR | 57   | >TP53-G105\KTYQVSYGFR | 25   | 32   |
| >TP53-G105\KTYQGSYGFR | 402  | >TP53-G105\KTYQVSYGFR | 406  | 4    |
| >TP53-G105\KTYQGSYGF  | 55   | >TP53-G105\KTYQVSYGF  | 67   | 12   |
| >TP53-G105\KTYQGSYGF  | 36   | >TP53-G105\KTYQVSYGF  | 44   | 8    |
| >TP53-G105\KTYQGSYG   | 249  | >TP53-G105\KTYQVSYG   | 666  | 417  |
| >TP53-G105\KTYQGSYGF  | 2    | >TP53-G105\KTYQVSYGF  | 3    | 1    |
| >TP53-G105\KTYQGSYGFR | 465  | >TP53-G105\KTYQVSYGFR | 1654 | 1189 |
| >TP53-G105\KTYQGSYGFR | 3    | >TP53-G105\KTYQVSYGFR | 3    | 0    |
| >TP53-G105\KTYQGSYGF  | 101  | >TP53-G105\KTYQVSYGF  | 49   | 52   |

|                         |       |                         |      |       |
|-------------------------|-------|-------------------------|------|-------|
| >TP53-G105\KTYQGSYGFR   | 439   | >TP53-G105\KTYQVSYGFR   | 171  | 268   |
| >TP53-G105\KTYQGSYGF    | 15    | >TP53-G105\KTYQVSYGF    | 10   | 5     |
| >TP53-G105\KTYQGSYGFR   | 35    | >TP53-G105\KTYQVSYGFR   | 21   | 14    |
| >TP53-G105\KTYQGSYGF    | 569   | >TP53-G105\KTYQVSYGF    | 142  | 427   |
| >TP53-G105\KTYQGSYGFR   | 151   | >TP53-G105\KTYQVSYGFR   | 70   | 81    |
| >TP53-G105\KTYQGSYGF    | 25    | >TP53-G105\KTYQVSYGF    | 18   | 7     |
| >TP53-G105\KTYQGSYGFR   | 28    | >TP53-G105\KTYQVSYGFR   | 21   | 7     |
| >TP53-G105\KTYQGSYGFR   | 345   | >TP53-G105\KTYQVSYGFR   | 343  | 2     |
| >TP53-G105\KTYQGSYGFR   | 370   | >TP53-G105\KTYQVSYGFR   | 441  | 71    |
| >TP53-G105\KTYQGSYGFR   | 25    | >TP53-G105\KTYQVSYGFR   | 27   | 2     |
| >TP53-G105\KTYQGSYGFR   | 43    | >TP53-G105\KTYQVSYGFR   | 41   | 2     |
| >TP53-G105\QKTYQGSY     | 308   | >TP53-G105\QKTYQVSY     | 1286 | 978   |
| >TP53-G105\QKTYQGSYGI   | 814   | >TP53-G105\QKTYQVSYGI   | 445  | 369   |
| >TP53-G105\QKTYQGSY     | 40    | >TP53-G105\QKTYQVSY     | 9    | 31    |
| >TP53-G105\QKTYQGSYGI   | 10    | >TP53-G105\QKTYQVSYGI   | 11   | 1     |
| >TP53-G105\SQKTYQGSY    | 15    | >TP53-G105\SQKTYQVSY    | 81   | 66    |
| >TP53-G105\SQKTYQGSY    | 38    | >TP53-G105\SQKTYQVSY    | 39   | 1     |
| >TP53-G105\SQKTYQGSY    | 36    | >TP53-G105\SQKTYQVSY    | 36   | 0     |
| >TP53-G105\SQKTYQGSY    | 198   | >TP53-G105\SQKTYQVSY    | 483  | 285   |
| >TP53-G105\SQKTYQGSY    | 268   | >TP53-G105\SQKTYQVSY    | 638  | 370   |
| >TP53-G105\SQKTYQGSY    | 19    | >TP53-G105\SQKTYQVSY    | 4    | 15    |
| >TP53-G105\SQKTYQGSY    | 9     | >TP53-G105\SQKTYQVSY    | 6    | 3     |
| >TP53-G105\PSQKTYQGSY   | 71    | >TP53-G105\PSQKTYQVSY   | 267  | 196   |
| >TP53-G105\PSQKTYQGSY   | 1929  | >TP53-G105\PSQKTYQVSY   | 335  | 1594  |
| >TP53-G105\PSQKTYQGSY   | 228   | >TP53-G105\PSQKTYQVSY   | 245  | 17    |
| >TP53-G105\VPSQKTYQGSY  | 92    | >TP53-G105\VPSQKTYQVSY  | 430  | 338   |
| >TP53-G105\VPSQKTYQGSY  | 20275 | >TP53-G105\VPSQKTYQVSY  | 144  | 20131 |
| >TP53-G105\VPSQKTYQGSY  | 19    | >TP53-G105\VPSQKTYQVSY  | 15   | 4     |
| >TP53-G105\VPSQKTYQGSY  | 254   | >TP53-G105\VPSQKTYQVSY  | 84   | 170   |
| >TP53-G105\VPSQKTYQGSY  | 15    | >TP53-G105\VPSQKTYQVSY  | 9    | 6     |
| >TP53-G105\VPSQKTYQGSY  | 1252  | >TP53-G105\VPSQKTYQVSY  | 324  | 928   |
| >TP53-G105\SVPSQKTYQGSY | 19814 | >TP53-G105\SVPSQKTYQVSY | 356  | 19458 |
| >TP53-G105\SVPSQKTYQGSY | 22824 | >TP53-G105\SVPSQKTYQVSY | 111  | 22713 |
| >TP53-G105\SVPSQKTYQGSY | 22871 | >TP53-G105\SVPSQKTYQVSY | 124  | 22747 |
| >TP53-G105\SVPSQKTYQGSY | 28385 | >TP53-G105\SVPSQKTYQVSY | 15   | 28370 |
| >TP53-G105\SVPSQKTYQGSY | 27665 | >TP53-G105\SVPSQKTYQVSY | 190  | 27475 |
| >TP53-G105\SVPSQKTYQGSY | 20466 | >TP53-G105\SVPSQKTYQVSY | 447  | 20019 |
| >TP53-G108\YGFRLGFL     | 116   | >TP53-G108\YDFRLGFL     | 1470 | 1354  |
| >TP53-G108\YGFRLGFL     | 486   | >TP53-G108\YDFRLGFL     | 1979 | 1493  |
| >TP53-G108\YGFRLGFL     | 443   | >TP53-G108\YDFRLGFL     | 3008 | 2565  |
| >TP53-G108\YGFRLGFL     | 20447 | >TP53-G108\YDFRLGFL     | 120  | 20327 |
| >TP53-G108\YGFRLGFLH    | 89    | >TP53-G108\YDFRLGFLH    | 295  | 206   |
| >TP53-G108\YGFRLGFL     | 12617 | >TP53-G108\YDFRLGFL     | 183  | 12434 |

|                        |     |                        |      |      |
|------------------------|-----|------------------------|------|------|
| >TP53-G108I SYGFRLGFL  | 95  | >TP53-G108I SYDFRLGFL  | 273  | 178  |
| >TP53-G108I SYGFRLGF   | 356 | >TP53-G108I SYDFRLGF   | 1890 | 1534 |
| >TP53-G108I SYGFRLGF   | 232 | >TP53-G108I SYDFRLGF   | 1040 | 808  |
| >TP53-G108I SYGFRLGFL  | 319 | >TP53-G108I SYDFRLGFL  | 1524 | 1205 |
| >TP53-G108I SYGFRLGF   | 7   | >TP53-G108I SYDFRLGF   | 23   | 16   |
| >TP53-G108I SYGFRLGFL  | 12  | >TP53-G108I SYDFRLGFL  | 62   | 50   |
| >TP53-G108I SYGFRLGF   | 338 | >TP53-G108I SYDFRLGF   | 428  | 90   |
| >TP53-G108I SYGFRLGFL  | 139 | >TP53-G108I SYDFRLGFL  | 167  | 28   |
| >TP53-G108I SYGFRLGFL  | 222 | >TP53-G108I SYDFRLGFL  | 141  | 81   |
| >TP53-G108I GSYGFRLGF  | 78  | >TP53-G108I GSYDFRLGF  | 65   | 13   |
| >TP53-G108I GSYGFRLGFL | 227 | >TP53-G108I GSYDFRLGFL | 131  | 96   |
| >TP53-G108I GSYGFRLGFL | 237 | >TP53-G108I GSYDFRLGFL | 165  | 72   |
| >TP53-G108I GSYGFRLGFL | 491 | >TP53-G108I GSYDFRLGFL | 940  | 449  |
| >TP53-G108I GSYGFRLGFL | 98  | >TP53-G108I GSYDFRLGFL | 65   | 33   |
| >TP53-G108I GSYGFRLGF  | 61  | >TP53-G108I GSYDFRLGF  | 209  | 148  |
| >TP53-G108I GSYGFRLGFL | 621 | >TP53-G108I GSYDFRLGFL | 399  | 222  |
| >TP53-G108I GSYGFRLGF  | 365 | >TP53-G108I GSYDFRLGF  | 230  | 135  |
| >TP53-G108I GSYGFRLGF  | 111 | >TP53-G108I GSYDFRLGF  | 51   | 60   |
| >TP53-G108I GSYGFRLGF  | 4   | >TP53-G108I GSYDFRLGF  | 4    | 0    |
| >TP53-G108I GSYGFRLGFL | 31  | >TP53-G108I GSYDFRLGFL | 29   | 2    |
| >TP53-G108I GSYGFRLGF  | 222 | >TP53-G108I GSYDFRLGF  | 933  | 711  |
| >TP53-G108I GSYGFRLGF  | 264 | >TP53-G108I GSYDFRLGF  | 498  | 234  |
| >TP53-G108I GSYGFRLGF  | 44  | >TP53-G108I GSYDFRLGF  | 48   | 4    |
| >TP53-G108I GSYGFRLGFL | 70  | >TP53-G108I GSYDFRLGFL | 59   | 11   |
| >TP53-G108I GSYGFRLGFL | 63  | >TP53-G108I GSYDFRLGFL | 70   | 7    |
| >TP53-G108I QGSYGFRLGF | 278 | >TP53-G108I QGSYDFRLGF | 341  | 63   |
| >TP53-G108I YQGSYGFRL  | 30  | >TP53-G108I YQGSYDFRL  | 21   | 9    |
| >TP53-G108I YQGSYGFRL  | 36  | >TP53-G108I YQGSYDFRL  | 42   | 6    |
| >TP53-G108I YQGSYGFRL  | 15  | >TP53-G108I YQGSYDFRL  | 20   | 5    |
| >TP53-G108I YQGSYGFRLC | 189 | >TP53-G108I YQGSYDFRLC | 145  | 44   |
| >TP53-G108I YQGSYGFRL  | 32  | >TP53-G108I YQGSYDFRL  | 89   | 57   |
| >TP53-G108I YQGSYGFRL  | 167 | >TP53-G108I YQGSYDFRL  | 148  | 19   |
| >TP53-G108I YQGSYGFR   | 54  | >TP53-G108I YQGSYDFR   | 89   | 35   |
| >TP53-G108I YQGSYGFR   | 476 | >TP53-G108I YQGSYDFR   | 222  | 254  |
| >TP53-G108I YQGSYGFRL  | 211 | >TP53-G108I YQGSYDFRL  | 476  | 265  |
| >TP53-G108I YQGSYGFRLC | 32  | >TP53-G108I YQGSYDFRLC | 33   | 1    |
| >TP53-G108I YQGSYGFRLC | 158 | >TP53-G108I YQGSYDFRLC | 276  | 118  |
| >TP53-G108I YQGSYGFRL  | 77  | >TP53-G108I YQGSYDFRL  | 617  | 540  |
| >TP53-G108I YQGSYGFRLC | 6   | >TP53-G108I YQGSYDFRLC | 9    | 3    |
| >TP53-G108I YQGSYGFRL  | 145 | >TP53-G108I YQGSYDFRL  | 382  | 237  |
| >TP53-G108I YQGSYGFR   | 223 | >TP53-G108I YQGSYDFR   | 138  | 85   |
| >TP53-G108I TYQGSYGFRL | 141 | >TP53-G108I TYQGSYDFRL | 170  | 29   |
| >TP53-G108I TYQGSYGF   | 28  | >TP53-G108I TYQGSYDF   | 16   | 12   |

|                       |      |                        |      |      |
|-----------------------|------|------------------------|------|------|
| >TP53-G108I TYQGSYGFR | 316  | >TP53-G108I TYQGSYDFRL | 409  | 93   |
| >TP53-G108I TYQGSYGF  | 93   | >TP53-G108I TYQGSYDF   | 57   | 36   |
| >TP53-G108I TYQGSYGFR | 163  | >TP53-G108I TYQGSYDFRL | 122  | 41   |
| >TP53-G108I TYQGSYGF  | 5    | >TP53-G108I TYQGSYDF   | 5    | 0    |
| >TP53-G108I TYQGSYGFR | 255  | >TP53-G108I TYQGSYDFR  | 203  | 52   |
| >TP53-G108I TYQGSYGFR | 7    | >TP53-G108I TYQGSYDFRL | 8    | 1    |
| >TP53-G108I TYQGSYGF  | 19   | >TP53-G108I TYQGSYDFR  | 34   | 15   |
| >TP53-G108I TYQGSYGF  | 25   | >TP53-G108I TYQGSYDFR  | 39   | 14   |
| >TP53-G108I TYQGSYGF  | 154  | >TP53-G108I TYQGSYDFR  | 89   | 65   |
| >TP53-G108I TYQGSYGF  | 53   | >TP53-G108I TYQGSYDFR  | 43   | 10   |
| >TP53-G108I TYQGSYGF  | 580  | >TP53-G108I TYQGSYDFR  | 379  | 201  |
| >TP53-G108I KTYQGSYGF | 220  | >TP53-G108I KTYQGSYDFR | 244  | 24   |
| >TP53-G108I KTYQGSYGF | 169  | >TP53-G108I KTYQGSYDFR | 197  | 28   |
| >TP53-G108I KTYQGSYGF | 260  | >TP53-G108I KTYQGSYDFR | 348  | 88   |
| >TP53-G108I KTYQGSYGF | 391  | >TP53-G108I KTYQGSYDF  | 5536 | 5145 |
| >TP53-G108I KTYQGSYGF | 77   | >TP53-G108I KTYQGSYDFR | 152  | 75   |
| >TP53-G108I KTYQGSYGF | 23   | >TP53-G108I KTYQGSYDFR | 64   | 41   |
| >TP53-G108I KTYQGSYGF | 175  | >TP53-G108I KTYQGSYDFR | 216  | 41   |
| >TP53-G108I KTYQGSYGF | 50   | >TP53-G108I KTYQGSYDFR | 98   | 48   |
| >TP53-G108I KTYQGSYGF | 57   | >TP53-G108I KTYQGSYDFR | 47   | 10   |
| >TP53-G108I KTYQGSYGF | 1631 | >TP53-G108I KTYQGSYDF  | 341  | 1290 |
| >TP53-G108I KTYQGSYGF | 481  | >TP53-G108I KTYQGSYDF  | 1611 | 1130 |
| >TP53-G108I KTYQGSYGF | 192  | >TP53-G108I KTYQGSYDF  | 1131 | 939  |
| >TP53-G108I KTYQGSYGF | 294  | >TP53-G108I KTYQGSYDF  | 147  | 147  |
| >TP53-G108I KTYQGSYGF | 96   | >TP53-G108I KTYQGSYDFR | 444  | 348  |
| >TP53-G108I KTYQGSYGF | 325  | >TP53-G108I KTYQGSYDF  | 367  | 42   |
| >TP53-G108I KTYQGSYGF | 10   | >TP53-G108I KTYQGSYDFR | 14   | 4    |
| >TP53-G108I KTYQGSYGF | 4    | >TP53-G108I KTYQGSYDF  | 4    | 0    |
| >TP53-G108I KTYQGSYGF | 21   | >TP53-G108I KTYQGSYDFR | 18   | 3    |
| >TP53-G108I KTYQGSYGF | 407  | >TP53-G108I KTYQGSYDFR | 500  | 93   |
| >TP53-G108I KTYQGSYGF | 57   | >TP53-G108I KTYQGSYDFR | 29   | 28   |
| >TP53-G108I KTYQGSYGF | 402  | >TP53-G108I KTYQGSYDFR | 1436 | 1034 |
| >TP53-G108I KTYQGSYGF | 55   | >TP53-G108I KTYQGSYDF  | 98   | 43   |
| >TP53-G108I KTYQGSYGF | 36   | >TP53-G108I KTYQGSYDF  | 22   | 14   |
| >TP53-G108I KTYQGSYGF | 249  | >TP53-G108I KTYQGSYD   | 910  | 661  |
| >TP53-G108I KTYQGSYGF | 2    | >TP53-G108I KTYQGSYDF  | 3    | 1    |
| >TP53-G108I KTYQGSYGF | 465  | >TP53-G108I KTYQGSYDFR | 1279 | 814  |
| >TP53-G108I KTYQGSYGF | 3    | >TP53-G108I KTYQGSYDFR | 3    | 0    |
| >TP53-G108I KTYQGSYGF | 101  | >TP53-G108I KTYQGSYDF  | 105  | 4    |
| >TP53-G108I KTYQGSYGF | 439  | >TP53-G108I KTYQGSYDFR | 359  | 80   |
| >TP53-G108I KTYQGSYGF | 15   | >TP53-G108I KTYQGSYDF  | 27   | 12   |
| >TP53-G108I KTYQGSYGF | 35   | >TP53-G108I KTYQGSYDFR | 31   | 4    |
| >TP53-G108I KTYQGSYGF | 151  | >TP53-G108I KTYQGSYDFR | 367  | 216  |

|                        |      |                        |     |      |
|------------------------|------|------------------------|-----|------|
| >TP53-G108I KTYQGSYGF  | 25   | >TP53-G108I KTYQGSYDF  | 40  | 15   |
| >TP53-G108I KTYQGSYGFR | 28   | >TP53-G108I KTYQGSYDFR | 59  | 31   |
| >TP53-G108I KTYQGSYGFR | 345  | >TP53-G108I KTYQGSYDFR | 199 | 146  |
| >TP53-G108I KTYQGSYGFR | 370  | >TP53-G108I KTYQGSYDFR | 371 | 1    |
| >TP53-G108I KTYQGSYGFR | 25   | >TP53-G108I KTYQGSYDFR | 24  | 1    |
| >TP53-G108I KTYQGSYGFR | 43   | >TP53-G108I KTYQGSYDFR | 59  | 16   |
| >TP53-G108I KQTYQGSYGI | 10   | >TP53-G108I KQTYQGSYDI | 8   | 2    |
| >TP53-G108I SQKTYQGSYC | 36   | >TP53-G108I SQKTYQGSYL | 54  | 18   |
| >TP53-G108I SQKTYQGSYC | 268  | >TP53-G108I SQKTYQGSYL | 457 | 189  |
| >TP53-G108I SQKTYQGSYC | 9    | >TP53-G108I SQKTYQGSYL | 7   | 2    |
| >TP53-G108S GFRLGFLHS  | 921  | >TP53-G108S SFRLGFLHS  | 150 | 771  |
| >TP53-G108S GFRLGFLHSG | 1432 | >TP53-G108S SFRLGFLHSG | 246 | 1186 |
| >TP53-G108S YGFRLGFL   | 2957 | >TP53-G108S YSFRLGFL   | 359 | 2598 |
| >TP53-G108S YGFRLGFL   | 116  | >TP53-G108S YSFRLGFL   | 23  | 93   |
| >TP53-G108S YGFRLGFL   | 486  | >TP53-G108S YSFRLGFL   | 188 | 298  |
| >TP53-G108S YGFRLGFL   | 443  | >TP53-G108S YSFRLGFL   | 138 | 305  |
| >TP53-G108S YGFRLGFLH  | 7954 | >TP53-G108S YSFRLGFLH  | 239 | 7715 |
| >TP53-G108S YGFRLGFLH  | 1068 | >TP53-G108S YSFRLGFLH  | 243 | 825  |
| >TP53-G108S YGFRLGFLH  | 6163 | >TP53-G108S YSFRLGFLH  | 257 | 5906 |
| >TP53-G108S YGFRLGFL   | 3396 | >TP53-G108S YSFRLGFL   | 201 | 3195 |
| >TP53-G108S YGFRLGFL   | 3487 | >TP53-G108S YSFRLGFL   | 352 | 3135 |
| >TP53-G108S YGFRLGFL   | 4335 | >TP53-G108S YSFRLGFL   | 15  | 4320 |
| >TP53-G108S YGFRLGFLH  | 89   | >TP53-G108S YSFRLGFLH  | 9   | 80   |
| >TP53-G108S YGFRLGFL   | 2188 | >TP53-G108S YSFRLGFL   | 84  | 2104 |
| >TP53-G108S SYGFRLGFL  | 95   | >TP53-G108S SYSFRLGFL  | 30  | 65   |
| >TP53-G108S SYGFRLGF   | 356  | >TP53-G108S SYSFRLGF   | 804 | 448  |
| >TP53-G108S SYGFRLGF   | 232  | >TP53-G108S SYSFRLGF   | 253 | 21   |
| >TP53-G108S SYGFRLGFL  | 319  | >TP53-G108S SYSFRLGFL  | 331 | 12   |
| >TP53-G108S SYGFRLGF   | 7    | >TP53-G108S SYSFRLGF   | 9   | 2    |
| >TP53-G108S SYGFRLGFL  | 12   | >TP53-G108S SYSFRLGFL  | 13  | 1    |
| >TP53-G108S SYGFRLGFLH | 2016 | >TP53-G108S SYSFRLGFLH | 470 | 1546 |
| >TP53-G108S SYGFRLGF   | 338  | >TP53-G108S SYSFRLGF   | 275 | 63   |
| >TP53-G108S SYGFRLGFL  | 139  | >TP53-G108S SYSFRLGFL  | 114 | 25   |
| >TP53-G108S SYGFRLGFL  | 222  | >TP53-G108S SYSFRLGFL  | 56  | 166  |
| >TP53-G108S GSYGFRLGF  | 78   | >TP53-G108S GSYSFRLGF  | 58  | 20   |
| >TP53-G108S GSYGFRLGFL | 227  | >TP53-G108S GSYSFRLGFL | 174 | 53   |
| >TP53-G108S GSYGFRLGFL | 237  | >TP53-G108S GSYSFRLGFL | 148 | 89   |
| >TP53-G108S GSYGFRLGFL | 549  | >TP53-G108S GSYSFRLGFL | 440 | 109  |
| >TP53-G108S GSYGFRLGFL | 491  | >TP53-G108S GSYSFRLGFL | 385 | 106  |
| >TP53-G108S GSYGFRLGFL | 98   | >TP53-G108S GSYSFRLGFL | 64  | 34   |
| >TP53-G108S GSYGFRLGF  | 61   | >TP53-G108S GSYSFRLGF  | 159 | 98   |
| >TP53-G108S GSYGFRLGFL | 621  | >TP53-G108S GSYSFRLGFL | 416 | 205  |
| >TP53-G108S GSYGFRLGF  | 365  | >TP53-G108S GSYSFRLGF  | 205 | 160  |

|                            |      |                            |     |      |
|----------------------------|------|----------------------------|-----|------|
| >TP53-G108 $\S$ GSYGFRLGF  | 111  | >TP53-G108 $\S$ GSYSFRLGF  | 17  | 94   |
| >TP53-G108 $\S$ GSYGFRLGF  | 4    | >TP53-G108 $\S$ GSYSFRLGF  | 4   | 0    |
| >TP53-G108 $\S$ GSYGFRLGFL | 31   | >TP53-G108 $\S$ GSYSFRLGFL | 56  | 25   |
| >TP53-G108 $\S$ GSYGFRLGF  | 222  | >TP53-G108 $\S$ GSYSFRLGF  | 527 | 305  |
| >TP53-G108 $\S$ GSYGFRLGF  | 264  | >TP53-G108 $\S$ GSYSFRLGF  | 226 | 38   |
| >TP53-G108 $\S$ GSYGFRLGF  | 44   | >TP53-G108 $\S$ GSYSFRLGF  | 20  | 24   |
| >TP53-G108 $\S$ GSYGFRLGFL | 70   | >TP53-G108 $\S$ GSYSFRLGFL | 58  | 12   |
| >TP53-G108 $\S$ GSYGFRLGFL | 63   | >TP53-G108 $\S$ GSYSFRLGFL | 31  | 32   |
| >TP53-G108 $\S$ GSYGFRLGFL | 651  | >TP53-G108 $\S$ GSYSFRLGFL | 411 | 240  |
| >TP53-G108 $\S$ GSYGFRLGFL | 1593 | >TP53-G108 $\S$ GSYSFRLGFL | 491 | 1102 |
| >TP53-G108 $\S$ QGSYGFRLGF | 1171 | >TP53-G108 $\S$ QGSYSFRLGF | 313 | 858  |
| >TP53-G108 $\S$ QGSYGFRLGF | 278  | >TP53-G108 $\S$ QGSYSFRLGF | 195 | 83   |
| >TP53-G108 $\S$ YQGSYGFRL  | 30   | >TP53-G108 $\S$ YQGSYSFRL  | 12  | 18   |
| >TP53-G108 $\S$ YQGSYGFRL  | 36   | >TP53-G108 $\S$ YQGSYSFRL  | 13  | 23   |
| >TP53-G108 $\S$ YQGSYGFRL  | 15   | >TP53-G108 $\S$ YQGSYSFRL  | 9   | 6    |
| >TP53-G108 $\S$ YQGSYGFRLC | 189  | >TP53-G108 $\S$ YQGSYSFRLG | 139 | 50   |
| >TP53-G108 $\S$ YQGSYGFRL  | 32   | >TP53-G108 $\S$ YQGSYSFRL  | 28  | 4    |
| >TP53-G108 $\S$ YQGSYGFRL  | 167  | >TP53-G108 $\S$ YQGSYSFRL  | 50  | 117  |
| >TP53-G108 $\S$ YQGSYGFRL  | 632  | >TP53-G108 $\S$ YQGSYSFRL  | 286 | 346  |
| >TP53-G108 $\S$ YQGSYGFRL  | 993  | >TP53-G108 $\S$ YQGSYSFRL  | 134 | 859  |
| >TP53-G108 $\S$ YQGSYGFRL  | 558  | >TP53-G108 $\S$ YQGSYSFRL  | 316 | 242  |
| >TP53-G108 $\S$ YQGSYGFRL  | 54   | >TP53-G108 $\S$ YQGSYSFR   | 28  | 26   |
| >TP53-G108 $\S$ YQGSYGFRL  | 476  | >TP53-G108 $\S$ YQGSYSFR   | 160 | 316  |
| >TP53-G108 $\S$ YQGSYGFRL  | 211  | >TP53-G108 $\S$ YQGSYSFRL  | 142 | 69   |
| >TP53-G108 $\S$ YQGSYGFRLC | 32   | >TP53-G108 $\S$ YQGSYSFRLG | 28  | 4    |
| >TP53-G108 $\S$ YQGSYGFRLC | 158  | >TP53-G108 $\S$ YQGSYSFRLG | 210 | 52   |
| >TP53-G108 $\S$ YQGSYGFRL  | 1093 | >TP53-G108 $\S$ YQGSYSFR   | 250 | 843  |
| >TP53-G108 $\S$ YQGSYGFRL  | 77   | >TP53-G108 $\S$ YQGSYSFRL  | 93  | 16   |
| >TP53-G108 $\S$ YQGSYGFRLC | 6    | >TP53-G108 $\S$ YQGSYSFRLG | 5   | 1    |
| >TP53-G108 $\S$ YQGSYGFRL  | 145  | >TP53-G108 $\S$ YQGSYSFRL  | 46  | 99   |
| >TP53-G108 $\S$ YQGSYGFRL  | 223  | >TP53-G108 $\S$ YQGSYSFR   | 180 | 43   |
| >TP53-G108 $\S$ TYQGSYGFRL | 141  | >TP53-G108 $\S$ TYQGSYSFRL | 86  | 55   |
| >TP53-G108 $\S$ TYQGSYGF   | 28   | >TP53-G108 $\S$ TYQGSYSF   | 17  | 11   |
| >TP53-G108 $\S$ TYQGSYGFRL | 316  | >TP53-G108 $\S$ TYQGSYSFRL | 437 | 121  |
| >TP53-G108 $\S$ TYQGSYGF   | 93   | >TP53-G108 $\S$ TYQGSYSF   | 41  | 52   |
| >TP53-G108 $\S$ TYQGSYGFRL | 163  | >TP53-G108 $\S$ TYQGSYSFRL | 159 | 4    |
| >TP53-G108 $\S$ TYQGSYGF   | 5    | >TP53-G108 $\S$ TYQGSYSF   | 4   | 1    |
| >TP53-G108 $\S$ TYQGSYGFRL | 255  | >TP53-G108 $\S$ TYQGSYSFR  | 286 | 31   |
| >TP53-G108 $\S$ TYQGSYGFRL | 7    | >TP53-G108 $\S$ TYQGSYSFRL | 7   | 0    |
| >TP53-G108 $\S$ TYQGSYGFRL | 19   | >TP53-G108 $\S$ TYQGSYSFR  | 11  | 8    |
| >TP53-G108 $\S$ TYQGSYGFRL | 25   | >TP53-G108 $\S$ TYQGSYSFR  | 15  | 10   |
| >TP53-G108 $\S$ TYQGSYGFRL | 154  | >TP53-G108 $\S$ TYQGSYSFR  | 50  | 104  |
| >TP53-G108 $\S$ TYQGSYGFRL | 53   | >TP53-G108 $\S$ TYQGSYSFR  | 59  | 6    |



|                      |      |                      |     |      |
|----------------------|------|----------------------|-----|------|
| >TP53-G108KTYQGSYGFR | 220  | >TP53-G108KTYQGSYSFR | 169 | 51   |
| >TP53-G108KTYQGSYGFR | 169  | >TP53-G108KTYQGSYSFR | 79  | 90   |
| >TP53-G108KTYQGSYGFR | 260  | >TP53-G108KTYQGSYSFR | 122 | 138  |
| >TP53-G108KTYQGSYGF  | 391  | >TP53-G108KTYQGSYSF  | 422 | 31   |
| >TP53-G108KTYQGSYGFR | 77   | >TP53-G108KTYQGSYSFR | 46  | 31   |
| >TP53-G108KTYQGSYGFR | 23   | >TP53-G108KTYQGSYSFR | 23  | 0    |
| >TP53-G108KTYQGSYGFR | 175  | >TP53-G108KTYQGSYSFR | 129 | 46   |
| >TP53-G108KTYQGSYGFR | 638  | >TP53-G108KTYQGSYSFR | 445 | 193  |
| >TP53-G108KTYQGSYGFR | 50   | >TP53-G108KTYQGSYSFR | 26  | 24   |
| >TP53-G108KTYQGSYGFR | 57   | >TP53-G108KTYQGSYSFR | 24  | 33   |
| >TP53-G108KTYQGSYGF  | 1631 | >TP53-G108KTYQGSYSF  | 425 | 1206 |
| >TP53-G108KTYQGSYGF  | 645  | >TP53-G108KTYQGSYSF  | 232 | 413  |
| >TP53-G108KTYQGSYGF  | 481  | >TP53-G108KTYQGSYSF  | 611 | 130  |
| >TP53-G108KTYQGSYGF  | 192  | >TP53-G108KTYQGSYSF  | 404 | 212  |
| >TP53-G108KTYQGSYGF  | 294  | >TP53-G108KTYQGSYSF  | 191 | 103  |
| >TP53-G108KTYQGSYGFR | 96   | >TP53-G108KTYQGSYSFR | 62  | 34   |
| >TP53-G108KTYQGSYGFR | 795  | >TP53-G108KTYQGSYSFR | 299 | 496  |
| >TP53-G108KTYQGSYGF  | 325  | >TP53-G108KTYQGSYSF  | 148 | 177  |
| >TP53-G108KTYQGSYGFR | 10   | >TP53-G108KTYQGSYSFR | 6   | 4    |
| >TP53-G108KTYQGSYGF  | 4    | >TP53-G108KTYQGSYSF  | 3   | 1    |
| >TP53-G108KTYQGSYGFR | 21   | >TP53-G108KTYQGSYSFR | 9   | 12   |
| >TP53-G108KTYQGSYGFR | 407  | >TP53-G108KTYQGSYSFR | 156 | 251  |
| >TP53-G108KTYQGSYGFR | 57   | >TP53-G108KTYQGSYSFR | 16  | 41   |
| >TP53-G108KTYQGSYGFR | 402  | >TP53-G108KTYQGSYSFR | 207 | 195  |
| >TP53-G108KTYQGSYGF  | 55   | >TP53-G108KTYQGSYSF  | 30  | 25   |
| >TP53-G108KTYQGSYGF  | 36   | >TP53-G108KTYQGSYSF  | 8   | 28   |
| >TP53-G108KTYQGSYG   | 249  | >TP53-G108KTYQGSYS   | 122 | 127  |
| >TP53-G108KTYQGSYGF  | 2    | >TP53-G108KTYQGSYSF  | 2   | 0    |
| >TP53-G108KTYQGSYGFR | 465  | >TP53-G108KTYQGSYSFR | 162 | 303  |
| >TP53-G108KTYQGSYGFR | 3    | >TP53-G108KTYQGSYSFR | 3   | 0    |
| >TP53-G108KTYQGSYGF  | 101  | >TP53-G108KTYQGSYSF  | 70  | 31   |
| >TP53-G108KTYQGSYGFR | 439  | >TP53-G108KTYQGSYSFR | 364 | 75   |
| >TP53-G108KTYQGSYGF  | 15   | >TP53-G108KTYQGSYSF  | 12  | 3    |
| >TP53-G108KTYQGSYGFR | 35   | >TP53-G108KTYQGSYSFR | 22  | 13   |
| >TP53-G108KTYQGSYGF  | 569  | >TP53-G108KTYQGSYSF  | 254 | 315  |
| >TP53-G108KTYQGSYGFR | 151  | >TP53-G108KTYQGSYSFR | 104 | 47   |
| >TP53-G108KTYQGSYGF  | 25   | >TP53-G108KTYQGSYSF  | 8   | 17   |
| >TP53-G108KTYQGSYGFR | 28   | >TP53-G108KTYQGSYSFR | 22  | 6    |
| >TP53-G108KTYQGSYGFR | 345  | >TP53-G108KTYQGSYSFR | 144 | 201  |
| >TP53-G108KTYQGSYGFR | 370  | >TP53-G108KTYQGSYSFR | 365 | 5    |
| >TP53-G108KTYQGSYGFR | 25   | >TP53-G108KTYQGSYSFR | 26  | 1    |
| >TP53-G108KTYQGSYGF  | 1452 | >TP53-G108KTYQGSYSF  | 416 | 1036 |
| >TP53-G108KTYQGSYGFR | 43   | >TP53-G108KTYQGSYSFR | 39  | 4    |

|                         |       |                        |      |       |
|-------------------------|-------|------------------------|------|-------|
| >TP53-G108S QKTYQGSYGI  | 814   | >TP53-G108S QKTYQGSYSF | 354  | 460   |
| >TP53-G108S QKTYQGSYGI  | 10    | >TP53-G108S QKTYQGSYSF | 4    | 6     |
| >TP53-G108S QKTYQGSYGI  | 808   | >TP53-G108S QKTYQGSYSF | 430  | 378   |
| >TP53-G108S SQKTYQGSYC  | 36    | >TP53-G108S SQKTYQGSYS | 28   | 8     |
| >TP53-G108S SQKTYQGSYC  | 268   | >TP53-G108S SQKTYQGSYS | 263  | 5     |
| >TP53-G108S SQKTYQGSYC  | 9     | >TP53-G108S SQKTYQGSYS | 4    | 5     |
| >TP53-G112I GFLHSGTAK   | 14071 | >TP53-G112I DFLHSGTAK  | 239  | 13832 |
| >TP53-G112I RLGFLHSGTA  | 326   | >TP53-G112I RLDLHSGTA  | 512  | 186   |
| >TP53-G112I RLGFLHSGT   | 719   | >TP53-G112I RLDLHSGT   | 223  | 496   |
| >TP53-G112I RLGFLHSGTA  | 162   | >TP53-G112I RLDLHSGTA  | 55   | 107   |
| >TP53-G112I RLGFLHSGTA  | 866   | >TP53-G112I RLDLHSGTA  | 377  | 489   |
| >TP53-G112I RLGFLHSGTA  | 43    | >TP53-G112I RLDLHSGTA  | 57   | 14    |
| >TP53-G112I RLGFLHSGTA  | 125   | >TP53-G112I RLDLHSGTA  | 134  | 9     |
| >TP53-G112I RLGFLHSGTA  | 384   | >TP53-G112I RLDLHSGTA  | 3274 | 2890  |
| >TP53-G112I RLGFLHSGTA  | 262   | >TP53-G112I RLDLHSGTA  | 1400 | 1138  |
| >TP53-G112I FRLGFLHS    | 142   | >TP53-G112I FRLDLHS    | 287  | 145   |
| >TP53-G112I FRLGFLHSG   | 306   | >TP53-G112I FRLDLHSG   | 698  | 392   |
| >TP53-G112I FRLGFLHSGT  | 412   | >TP53-G112I FRLDLHSGT  | 478  | 66    |
| >TP53-G112I FRLGFLHSGT, | 174   | >TP53-G112I FRLDLHSGT, | 346  | 172   |
| >TP53-G112I YGFRLGFL    | 116   | >TP53-G112I YGFRLDFL   | 1726 | 1610  |
| >TP53-G112I YGFRLGFL    | 486   | >TP53-G112I YGFRLDFL   | 144  | 342   |
| >TP53-G112I YGFRLGFL    | 443   | >TP53-G112I YGFRLDFL   | 228  | 215   |
| >TP53-G112I YGFRLGFLH   | 89    | >TP53-G112I YGFRLDFLH  | 419  | 330   |
| >TP53-G112I SYGFRLGFL   | 95    | >TP53-G112I SYGFRLDFL  | 162  | 67    |
| >TP53-G112I SYGFRLGF    | 356   | >TP53-G112I SYGFRLDF   | 103  | 253   |
| >TP53-G112I SYGFRLGF    | 232   | >TP53-G112I SYGFRLDF   | 129  | 103   |
| >TP53-G112I SYGFRLGFL   | 319   | >TP53-G112I SYGFRLDFL  | 288  | 31    |
| >TP53-G112I SYGFRLGF    | 7     | >TP53-G112I SYGFRLDF   | 7    | 0     |
| >TP53-G112I SYGFRLGFL   | 12    | >TP53-G112I SYGFRLDFL  | 10   | 2     |
| >TP53-G112I SYGFRLGF    | 338   | >TP53-G112I SYGFRLDF   | 215  | 123   |
| >TP53-G112I SYGFRLGFL   | 139   | >TP53-G112I SYGFRLDFL  | 95   | 44    |
| >TP53-G112I SYGFRLGFL   | 222   | >TP53-G112I SYGFRLDFL  | 124  | 98    |
| >TP53-G112I GSYGFRLGF   | 78    | >TP53-G112I GSYGFRLDF  | 235  | 157   |
| >TP53-G112I GSYGFRLGFL  | 227   | >TP53-G112I GSYGFRLDFL | 360  | 133   |
| >TP53-G112I GSYGFRLGFL  | 237   | >TP53-G112I GSYGFRLDFL | 150  | 87    |
| >TP53-G112I GSYGFRLGFL  | 491   | >TP53-G112I GSYGFRLDFL | 1278 | 787   |
| >TP53-G112I GSYGFRLGFL  | 98    | >TP53-G112I GSYGFRLDFL | 211  | 113   |
| >TP53-G112I GSYGFRLGF   | 631   | >TP53-G112I GSYGFRLDF  | 312  | 319   |
| >TP53-G112I GSYGFRLGF   | 61    | >TP53-G112I GSYGFRLDF  | 72   | 11    |
| >TP53-G112I GSYGFRLGF   | 365   | >TP53-G112I GSYGFRLDF  | 1118 | 753   |
| >TP53-G112I GSYGFRLGF   | 111   | >TP53-G112I GSYGFRLDF  | 77   | 34    |
| >TP53-G112I GSYGFRLGF   | 4     | >TP53-G112I GSYGFRLDF  | 8    | 4     |
| >TP53-G112I GSYGFRLGFL  | 31    | >TP53-G112I GSYGFRLDFL | 89   | 58    |

|                       |       |                        |      |       |
|-----------------------|-------|------------------------|------|-------|
| >TP53-G112[GSYGFRLGF  | 222   | >TP53-G112[GSYGFRLDF   | 250  | 28    |
| >TP53-G112[GSYGFRLGF  | 264   | >TP53-G112[GSYGFRLDF   | 1078 | 814   |
| >TP53-G112[GSYGFRLGF  | 44    | >TP53-G112[GSYGFRLDF   | 76   | 32    |
| >TP53-G112[GSYGFRLGFL | 70    | >TP53-G112[GSYGFRLDFL  | 1065 | 995   |
| >TP53-G112[GSYGFRLGFL | 63    | >TP53-G112[GSYGFRLDFL  | 144  | 81    |
| >TP53-G112[QGSYGFRLGF | 278   | >TP53-G112[QGSYGFRLDF  | 413  | 135   |
| >TP53-G112[YGQSYGFRLC | 189   | >TP53-G112[YGQSYGFRLC  | 1507 | 1318  |
| >TP53-G112[YGQSYGFRLC | 32    | >TP53-G112[YGQSYGFRLC  | 44   | 12    |
| >TP53-G112[YGQSYGFRLC | 158   | >TP53-G112[YGQSYGFRLC  | 277  | 119   |
| >TP53-G112[YGQSYGFRLC | 6     | >TP53-G112[YGQSYGFRLC  | 5    | 1     |
| >TP53-G112[GFLHSGTAK  | 1580  | >TP53-G112[SFLHSGTAK   | 256  | 1324  |
| >TP53-G112[GFLHSGTAK  | 1163  | >TP53-G112[SFLHSGTAK   | 443  | 720   |
| >TP53-G112[GFLHSGTAKS | 2547  | >TP53-G112[SFLHSGTAKS  | 300  | 2247  |
| >TP53-G112[LGFLHSGTAK | 4427  | >TP53-G112[LSFLHSGTAK  | 46   | 4381  |
| >TP53-G112[LGFLHSGTAK | 12214 | >TP53-G112[LSFLHSGTAK  | 36   | 12178 |
| >TP53-G112[LGFLHSGTAK | 1843  | >TP53-G112[LSFLHSGTAK  | 99   | 1744  |
| >TP53-G112[LGFLHSGTAK | 6718  | >TP53-G112[LSFLHSGTAK  | 40   | 6678  |
| >TP53-G112[LGFLHSGTAK | 3247  | >TP53-G112[LSFLHSGTAK  | 457  | 2790  |
| >TP53-G112[LGFLHSGTAK | 3040  | >TP53-G112[LSFLHSGTAK  | 315  | 2725  |
| >TP53-G112[RLGFLHSGTA | 993   | >TP53-G112[RLSFLHSGTA  | 308  | 685   |
| >TP53-G112[RLGFLHSGT  | 1194  | >TP53-G112[RLSFLHSGT   | 122  | 1072  |
| >TP53-G112[RLGFLHSGTA | 326   | >TP53-G112[RLSFLHSGTA  | 128  | 198   |
| >TP53-G112[RLGFLHSGTA | 162   | >TP53-G112[RLSFLHSGTA  | 278  | 116   |
| >TP53-G112[RLGFLHSGTA | 554   | >TP53-G112[RLSFLHSGTA  | 352  | 202   |
| >TP53-G112[RLGFLHSGTA | 43    | >TP53-G112[RLSFLHSGTAI | 32   | 11    |
| >TP53-G112[RLGFLHSGTA | 125   | >TP53-G112[RLSFLHSGTAI | 43   | 82    |
| >TP53-G112[RLGFLHSGTA | 384   | >TP53-G112[RLSFLHSGTAI | 77   | 307   |
| >TP53-G112[RLGFLHSGTA | 262   | >TP53-G112[RLSFLHSGTAI | 161  | 101   |
| >TP53-G112[RLGFLHSGTA | 3998  | >TP53-G112[RLSFLHSGTA  | 456  | 3542  |
| >TP53-G112[FRLGFLHS   | 142   | >TP53-G112[FRLSFLHS    | 170  | 28    |
| >TP53-G112[FRLGFLHSG  | 306   | >TP53-G112[FRLSFLHSG   | 355  | 49    |
| >TP53-G112[FRLGFLHSGT | 412   | >TP53-G112[FRLSFLHSGT  | 431  | 19    |
| >TP53-G112[FRLGFLHSGT | 174   | >TP53-G112[FRLSFLHSGT/ | 199  | 25    |
| >TP53-G112[GFRLGFLHS  | 921   | >TP53-G112[GFRLSFLHS   | 378  | 543   |
| >TP53-G112[YGFRLGFL   | 116   | >TP53-G112[YGFRLSFL    | 94   | 22    |
| >TP53-G112[YGFRLGFL   | 486   | >TP53-G112[YGFRLSFL    | 117  | 369   |
| >TP53-G112[YGFRLGFL   | 443   | >TP53-G112[YGFRLSFL    | 139  | 304   |
| >TP53-G112[YGFRLGFLH  | 89    | >TP53-G112[YGFRLSFLH   | 94   | 5     |
| >TP53-G112[SYGFRLGFL  | 95    | >TP53-G112[SYGFRLSFL   | 21   | 74    |
| >TP53-G112[SYGFRLGF   | 356   | >TP53-G112[SYGFRLSF    | 118  | 238   |
| >TP53-G112[SYGFRLGF   | 232   | >TP53-G112[SYGFRLSF    | 89   | 143   |
| >TP53-G112[SYGFRLGFL  | 319   | >TP53-G112[SYGFRLSFL   | 126  | 193   |
| >TP53-G112[SYGFRLGF   | 7     | >TP53-G112[SYGFRLSF    | 7    | 0     |

|                        |       |                        |      |       |
|------------------------|-------|------------------------|------|-------|
| >TP53-G112\$SYGFRLGFL  | 12    | >TP53-G112\$SYGFRLSFL  | 12   | 0     |
| >TP53-G112\$SYGFRLGF   | 338   | >TP53-G112\$SYGFRLSF   | 154  | 184   |
| >TP53-G112\$SYGFRLGFL  | 139   | >TP53-G112\$SYGFRLSFL  | 117  | 22    |
| >TP53-G112\$SYGFRLGFL  | 222   | >TP53-G112\$SYGFRLSFL  | 283  | 61    |
| >TP53-G112\$GSYGFRLGF  | 78    | >TP53-G112\$GSYGFRLSF  | 116  | 38    |
| >TP53-G112\$GSYGFRLGFL | 227   | >TP53-G112\$GSYGFRLSFL | 251  | 24    |
| >TP53-G112\$GSYGFRLGFL | 237   | >TP53-G112\$GSYGFRLSFL | 88   | 149   |
| >TP53-G112\$GSYGFRLGFL | 549   | >TP53-G112\$GSYGFRLSFL | 328  | 221   |
| >TP53-G112\$GSYGFRLGFL | 491   | >TP53-G112\$GSYGFRLSFL | 273  | 218   |
| >TP53-G112\$GSYGFRLGFL | 98    | >TP53-G112\$GSYGFRLSFL | 66   | 32    |
| >TP53-G112\$GSYGFRLGF  | 631   | >TP53-G112\$GSYGFRLSF  | 443  | 188   |
| >TP53-G112\$GSYGFRLGF  | 61    | >TP53-G112\$GSYGFRLSF  | 21   | 40    |
| >TP53-G112\$GSYGFRLGF  | 365   | >TP53-G112\$GSYGFRLSF  | 98   | 267   |
| >TP53-G112\$GSYGFRLGF  | 111   | >TP53-G112\$GSYGFRLSF  | 27   | 84    |
| >TP53-G112\$GSYGFRLGF  | 4     | >TP53-G112\$GSYGFRLSF  | 4    | 0     |
| >TP53-G112\$GSYGFRLGFL | 31    | >TP53-G112\$GSYGFRLSFL | 12   | 19    |
| >TP53-G112\$GSYGFRLGF  | 222   | >TP53-G112\$GSYGFRLSF  | 124  | 98    |
| >TP53-G112\$GSYGFRLGF  | 264   | >TP53-G112\$GSYGFRLSF  | 75   | 189   |
| >TP53-G112\$GSYGFRLGFL | 802   | >TP53-G112\$GSYGFRLSFL | 370  | 432   |
| >TP53-G112\$GSYGFRLGF  | 44    | >TP53-G112\$GSYGFRLSF  | 15   | 29    |
| >TP53-G112\$GSYGFRLGFL | 70    | >TP53-G112\$GSYGFRLSFL | 94   | 24    |
| >TP53-G112\$GSYGFRLGFL | 63    | >TP53-G112\$GSYGFRLSFL | 53   | 10    |
| >TP53-G112\$GSYGFRLGFL | 651   | >TP53-G112\$GSYGFRLSFL | 487  | 164   |
| >TP53-G112\$GSYGFRLGFL | 1593  | >TP53-G112\$GSYGFRLSFL | 347  | 1246  |
| >TP53-G112\$QGSYGFRLGF | 1171  | >TP53-G112\$QGSYGFRLSF | 315  | 856   |
| >TP53-G112\$QGSYGFRLGF | 278   | >TP53-G112\$QGSYGFRLSF | 144  | 134   |
| >TP53-G112\$YQGSYGFRLC | 189   | >TP53-G112\$YQGSYGFRLS | 199  | 10    |
| >TP53-G112\$YQGSYGFRLC | 32    | >TP53-G112\$YQGSYGFRLS | 25   | 7     |
| >TP53-G112\$YQGSYGFRLC | 158   | >TP53-G112\$YQGSYGFRLS | 155  | 3     |
| >TP53-G112\$YQGSYGFRLC | 6     | >TP53-G112\$YQGSYGFRLS | 3    | 3     |
| >TP53-G117\$GTAKSVTCTY | 682   | >TP53-G117\$GTAKSVTCTY | 239  | 443   |
| >TP53-G117\$GTAKSVTCTY | 466   | >TP53-G117\$GTAKSVTCTY | 2279 | 1813  |
| >TP53-G117\$GTAKSVTCTY | 518   | >TP53-G117\$GTAKSVTCTY | 18   | 500   |
| >TP53-G117\$GTAKSVTCTY | 775   | >TP53-G117\$GTAKSVTCTY | 72   | 703   |
| >TP53-G117\$GTAKSVTCTY | 521   | >TP53-G117\$GTAKSVTCTY | 6    | 515   |
| >TP53-G117\$GTAKSVTCTY | 3961  | >TP53-G117\$GTAKSVTCTY | 44   | 3917  |
| >TP53-G117\$GTAKSVTCTY | 122   | >TP53-G117\$GTAKSVTCTY | 209  | 87    |
| >TP53-G117\$GTAKSVTCTY | 69    | >TP53-G117\$GTAKSVTCTY | 106  | 37    |
| >TP53-G117\$GTAKSVTCTY | 1301  | >TP53-G117\$GTAKSVTCTY | 82   | 1219  |
| >TP53-G117\$GTAKSVTCTY | 7872  | >TP53-G117\$GTAKSVTCTY | 164  | 7708  |
| >TP53-G117\$GTAKSVTC   | 17874 | >TP53-G117\$GTAKSVTC   | 491  | 17383 |
| >TP53-G117\$GTAKSVTCT  | 14816 | >TP53-G117\$GTAKSVTCT  | 238  | 14578 |
| >TP53-G117\$GTAKSVTCTY | 9136  | >TP53-G117\$GTAKSVTCTY | 72   | 9064  |

|                        |       |                        |      |       |
|------------------------|-------|------------------------|------|-------|
| >TP53-G117E GTAKSVTCTY | 71    | >TP53-G117E ETAKSVTCTY | 202  | 131   |
| >TP53-G117E GTAKSVTCTY | 461   | >TP53-G117E ETAKSVTCTY | 606  | 145   |
| >TP53-G117E GTAKSVTCTY | 8     | >TP53-G117E ETAKSVTCTY | 16   | 8     |
| >TP53-G117E GTAKSVTCTY | 296   | >TP53-G117E ETAKSVTCTY | 1182 | 886   |
| >TP53-G117E GTAKSVTCTY | 39    | >TP53-G117E ETAKSVTCTY | 174  | 135   |
| >TP53-G117E GTAKSVTCTY | 143   | >TP53-G117E ETAKSVTCTY | 118  | 25    |
| >TP53-G117E SGTAKSVTCT | 19036 | >TP53-G117E SETAKSVTCT | 360  | 18676 |
| >TP53-G117E SGTAKSVTCT | 19769 | >TP53-G117E SETAKSVTCT | 141  | 19628 |
| >TP53-G117E SGTAKSVTCT | 35356 | >TP53-G117E SETAKSVTCT | 225  | 35131 |
| >TP53-G117E SGTAKSVT   | 40087 | >TP53-G117E SETAKSVT   | 169  | 39918 |
| >TP53-G117E SGTAKSVTCT | 374   | >TP53-G117E SETAKSVTCT | 1158 | 784   |
| >TP53-G117E FLHSGTAKSV | 122   | >TP53-G117E FLHSETAKSV | 100  | 22    |
| >TP53-G117E FLHSGTAKS  | 179   | >TP53-G117E FLHSETAKS  | 76   | 103   |
| >TP53-G117E FLHSGTAKSV | 13    | >TP53-G117E FLHSETAKSV | 16   | 3     |
| >TP53-G117E FLHSGTAKSV | 413   | >TP53-G117E FLHSETAKSV | 250  | 163   |
| >TP53-G117E FLHSGTAKS  | 26    | >TP53-G117E FLHSETAKS  | 67   | 41    |
| >TP53-G117E FLHSGTAKSV | 11    | >TP53-G117E FLHSETAKSV | 11   | 0     |
| >TP53-G117E FLHSGTAKSV | 27    | >TP53-G117E FLHSETAKSV | 45   | 18    |
| >TP53-G117E FLHSGTAKSV | 504   | >TP53-G117E FLHSETAKSV | 371  | 133   |
| >TP53-G117E FLHSGTAKS  | 188   | >TP53-G117E FLHSETAKS  | 492  | 304   |
| >TP53-G117E FLHSGTAKSV | 2     | >TP53-G117E FLHSETAKSV | 2    | 0     |
| >TP53-G117E FLHSGTAKSV | 116   | >TP53-G117E FLHSETAKSV | 211  | 95    |
| >TP53-G117E FLHSGTAKSV | 5     | >TP53-G117E FLHSETAKSV | 5    | 0     |
| >TP53-G117E FLHSGTAKSV | 7     | >TP53-G117E FLHSETAKSV | 9    | 2     |
| >TP53-G117E FLHSGTAKSV | 7     | >TP53-G117E FLHSETAKSV | 11   | 4     |
| >TP53-G117E FLHSGTAK   | 124   | >TP53-G117E FLHSETAK   | 273  | 149   |
| >TP53-G117E FLHSGTAKS  | 31    | >TP53-G117E FLHSETAKS  | 91   | 60    |
| >TP53-G117E FLHSGTAKSV | 2     | >TP53-G117E FLHSETAKSV | 2    | 0     |
| >TP53-G117E FLHSGTAKSV | 13    | >TP53-G117E FLHSETAKSV | 23   | 10    |
| >TP53-G117E FLHSGTAK   | 114   | >TP53-G117E FLHSETAK   | 294  | 180   |
| >TP53-G117E FLHSGTAK   | 256   | >TP53-G117E FLHSETAK   | 188  | 68    |
| >TP53-G117E FLHSGTAKSV | 283   | >TP53-G117E FLHSETAKSV | 1286 | 1003  |
| >TP53-G117E FLHSGTAKSV | 261   | >TP53-G117E FLHSETAKSV | 203  | 58    |
| >TP53-G117E RLGFLHSGTA | 993   | >TP53-G117E RLGFLHSETA | 340  | 653   |
| >TP53-G117E RLGFLHSGTA | 326   | >TP53-G117E RLGFLHSETA | 613  | 287   |
| >TP53-G117E RLGFLHSGTA | 162   | >TP53-G117E RLGFLHSETA | 64   | 98    |
| >TP53-G117E RLGFLHSGTA | 866   | >TP53-G117E RLGFLHSETA | 365  | 501   |
| >TP53-G117E RLGFLHSGTA | 554   | >TP53-G117E RLGFLHSETA | 161  | 393   |
| >TP53-G117E RLGFLHSGTA | 43    | >TP53-G117E RLGFLHSETA | 50   | 7     |
| >TP53-G117E RLGFLHSGTA | 125   | >TP53-G117E RLGFLHSETA | 152  | 27    |
| >TP53-G117E RLGFLHSGTA | 384   | >TP53-G117E RLGFLHSETA | 578  | 194   |
| >TP53-G117E RLGFLHSGTA | 262   | >TP53-G117E RLGFLHSETA | 316  | 54    |
| >TP53-G117E FRLGFLHSG  | 306   | >TP53-G117E FRLGFLHSE  | 387  | 81    |

|                         |       |                         |      |       |
|-------------------------|-------|-------------------------|------|-------|
| >TP53-G117F FRLGFLHSGT  | 412   | >TP53-G117F FRLGFLHSET  | 411  | 1     |
| >TP53-G117F FRLGFLHSGT, | 174   | >TP53-G117F FRLGFLHSET/ | 231  | 57    |
| >TP53-G117F GTAKSVTCTY  | 1973  | >TP53-G117F RTAKSVTCTY  | 434  | 1539  |
| >TP53-G117F GTAKSVTCTY  | 466   | >TP53-G117F RTAKSVTCTY  | 250  | 216   |
| >TP53-G117F GTAKSVTCTY  | 518   | >TP53-G117F RTAKSVTCTY  | 218  | 300   |
| >TP53-G117F GTAKSVTCTY  | 521   | >TP53-G117F RTAKSVTCTY  | 140  | 381   |
| >TP53-G117F GTAKSVTCTY  | 122   | >TP53-G117F RTAKSVTCTY  | 143  | 21    |
| >TP53-G117F GTAKSVTCTY  | 69    | >TP53-G117F RTAKSVTCTY  | 20   | 49    |
| >TP53-G117F GTAKSVTC    | 7004  | >TP53-G117F RTAKSVTC    | 299  | 6705  |
| >TP53-G117F GTAKSVTCTY  | 1215  | >TP53-G117F RTAKSVTCTY  | 63   | 1152  |
| >TP53-G117F GTAKSVTCTY  | 1713  | >TP53-G117F RTAKSVTCTY  | 41   | 1672  |
| >TP53-G117F GTAKSVTCTY  | 71    | >TP53-G117F RTAKSVTCTY  | 38   | 33    |
| >TP53-G117F GTAKSVTCTY  | 461   | >TP53-G117F RTAKSVTCTY  | 40   | 421   |
| >TP53-G117F GTAKSVTC    | 7191  | >TP53-G117F RTAKSVTC    | 264  | 6927  |
| >TP53-G117F GTAKSVTCTY  | 8     | >TP53-G117F RTAKSVTCTY  | 3    | 5     |
| >TP53-G117F GTAKSVTCTY  | 1910  | >TP53-G117F RTAKSVTCTY  | 105  | 1805  |
| >TP53-G117F GTAKSVTCTY  | 296   | >TP53-G117F RTAKSVTCTY  | 18   | 278   |
| >TP53-G117F GTAKSVTCTY  | 39    | >TP53-G117F RTAKSVTCTY  | 19   | 20    |
| >TP53-G117F GTAKSVTCTY  | 143   | >TP53-G117F RTAKSVTCTY  | 50   | 93    |
| >TP53-G117F SGTAKSVTCT  | 4766  | >TP53-G117F SRTAKSVTCT  | 205  | 4561  |
| >TP53-G117F SGTAKSVTCT  | 374   | >TP53-G117F SRTAKSVTCT  | 1406 | 1032  |
| >TP53-G117F YGFRLGFLHS  | 21131 | >TP53-G117F YGFRLGFLHS  | 79   | 21052 |
| >TP53-G117F YGFRLGFLHS  | 29697 | >TP53-G117F YGFRLGFLHS  | 30   | 29667 |
| >TP53-G117F YGFRLGFLHS  | 28188 | >TP53-G117F YGFRLGFLHS  | 146  | 28042 |
| >TP53-G117F HSGTAKSV    | 4674  | >TP53-G117F HSRTAKSV    | 8    | 4666  |
| >TP53-G117F HSGTAKSVT   | 12593 | >TP53-G117F HSRTAKSVT   | 83   | 12510 |
| >TP53-G117F HSGTAKSVTC  | 12306 | >TP53-G117F HSRTAKSVTC  | 69   | 12237 |
| >TP53-G117F HSGTAKSVTC  | 14867 | >TP53-G117F HSRTAKSVTC  | 305  | 14562 |
| >TP53-G117F HSGTAKSV    | 4145  | >TP53-G117F HSRTAKSV    | 195  | 3950  |
| >TP53-G117F HSGTAKSVT   | 4291  | >TP53-G117F HSRTAKSVT   | 279  | 4012  |
| >TP53-G117F LHSGTAKSV   | 1632  | >TP53-G117F LHSRTAKSV   | 323  | 1309  |
| >TP53-G117F FLHSGTAKSV  | 122   | >TP53-G117F FLHSRTAKSV  | 400  | 278   |
| >TP53-G117F FLHSGTAKS   | 179   | >TP53-G117F FLHSRTAKS   | 174  | 5     |
| >TP53-G117F FLHSGTAKSV  | 13    | >TP53-G117F FLHSRTAKSV  | 28   | 15    |
| >TP53-G117F FLHSGTAKSV  | 413   | >TP53-G117F FLHSRTAKSV  | 405  | 8     |
| >TP53-G117F FLHSGTAKS   | 26    | >TP53-G117F FLHSRTAKS   | 41   | 15    |
| >TP53-G117F FLHSGTAKSV  | 11    | >TP53-G117F FLHSRTAKSV  | 14   | 3     |
| >TP53-G117F FLHSGTAKSV  | 27    | >TP53-G117F FLHSRTAKSV  | 35   | 8     |
| >TP53-G117F FLHSGTAKS   | 188   | >TP53-G117F FLHSRTAKS   | 606  | 418   |
| >TP53-G117F FLHSGTAKSV  | 2     | >TP53-G117F FLHSRTAKSV  | 2    | 0     |
| >TP53-G117F FLHSGTAKSV  | 116   | >TP53-G117F FLHSRTAKSV  | 242  | 126   |
| >TP53-G117F FLHSGTAKSV  | 5     | >TP53-G117F FLHSRTAKSV  | 6    | 1     |
| >TP53-G117F FLHSGTAKSV  | 7     | >TP53-G117F FLHSRTAKSV  | 12   | 5     |

|                        |       |                        |     |       |
|------------------------|-------|------------------------|-----|-------|
| >TP53-G117F FLHSGTAKSV | 7     | >TP53-G117F FLHSRTAKSV | 21  | 14    |
| >TP53-G117F FLHSGTAK   | 124   | >TP53-G117F FLHSRTAK   | 227 | 103   |
| >TP53-G117F FLHSGTAKS  | 31    | >TP53-G117F FLHSRTAKS  | 73  | 42    |
| >TP53-G117F FLHSGTAKSV | 2     | >TP53-G117F FLHSRTAKSV | 2   | 0     |
| >TP53-G117F FLHSGTAKSV | 13    | >TP53-G117F FLHSRTAKSV | 21  | 8     |
| >TP53-G117F FLHSGTAK   | 114   | >TP53-G117F FLHSRTAK   | 74  | 40    |
| >TP53-G117F FLHSGTAK   | 256   | >TP53-G117F FLHSRTAK   | 132 | 124   |
| >TP53-G117F FLHSGTAKSV | 283   | >TP53-G117F FLHSRTAKSV | 782 | 499   |
| >TP53-G117F FLHSGTAKSV | 261   | >TP53-G117F FLHSRTAKSV | 215 | 46    |
| >TP53-G117F GFLHSGTAK  | 1580  | >TP53-G117F GFLHSRTAK  | 305 | 1275  |
| >TP53-G117F GFLHSGTAK  | 1163  | >TP53-G117F GFLHSRTAK  | 175 | 988   |
| >TP53-G117F RLGFLHSGTA | 326   | >TP53-G117F RLGFLHSRTA | 613 | 287   |
| >TP53-G117F RLGFLHSGTA | 162   | >TP53-G117F RLGFLHSRTA | 187 | 25    |
| >TP53-G117F RLGFLHSG   | 19727 | >TP53-G117F RLGFLHSR   | 481 | 19246 |
| >TP53-G117F RLGFLHSGTA | 43    | >TP53-G117F RLGFLHSRTA | 37  | 6     |
| >TP53-G117F RLGFLHSGTA | 125   | >TP53-G117F RLGFLHSRTA | 110 | 15    |
| >TP53-G117F RLGFLHSGTA | 384   | >TP53-G117F RLGFLHSRTA | 164 | 220   |
| >TP53-G117F RLGFLHSG   | 14408 | >TP53-G117F RLGFLHSR   | 14  | 14394 |
| >TP53-G117F RLGFLHSGTA | 262   | >TP53-G117F RLGFLHSRTA | 92  | 170   |
| >TP53-G117F RLGFLHSG   | 28213 | >TP53-G117F RLGFLHSR   | 47  | 28166 |
| >TP53-G117F FRLGFLHSG  | 306   | >TP53-G117F FRLGFLHSR  | 17  | 289   |
| >TP53-G117F FRLGFLHSGT | 412   | >TP53-G117F FRLGFLHSRT | 275 | 137   |
| >TP53-G117F FRLGFLHSGT | 174   | >TP53-G117F FRLGFLHSRT | 143 | 31    |
| >TP53-G117F FRLGFLHSG  | 30317 | >TP53-G117F FRLGFLHSR  | 142 | 30175 |
| >TP53-G117F GFRLGFLHSG | 13522 | >TP53-G117F GFRLGFLHSR | 28  | 13494 |
| >TP53-G117F GFRLGFLHSG | 29726 | >TP53-G117F GFRLGFLHSR | 337 | 29389 |
| >TP53-G117F GFRLGFLHSG | 34381 | >TP53-G117F GFRLGFLHSR | 313 | 34068 |
| >TP53-G154/ GTRVRAMAI\ | 269   | >TP53-G154/ ATRVRAMAI\ | 123 | 146   |
| >TP53-G154/ GTRVRAMAI\ | 50    | >TP53-G154/ ATRVRAMAI\ | 42  | 8     |
| >TP53-G154/ GTRVRAMAI\ | 39    | >TP53-G154/ ATRVRAMAI\ | 39  | 0     |
| >TP53-G154/ GTRVRAMAI\ | 715   | >TP53-G154/ ATRVRAMAI\ | 106 | 609   |
| >TP53-G154/ GTRVRAMA   | 18    | >TP53-G154/ ATRVRAMA   | 6   | 12    |
| >TP53-G154/ GTRVRAMAI  | 9     | >TP53-G154/ ATRVRAMAI  | 4   | 5     |
| >TP53-G154/ GTRVRAMAI\ | 30    | >TP53-G154/ ATRVRAMAI\ | 7   | 23    |
| >TP53-G154/ GTRVRAMAI\ | 3     | >TP53-G154/ ATRVRAMAI\ | 3   | 0     |
| >TP53-G154/ GTRVRAMAI\ | 130   | >TP53-G154/ ATRVRAMAI\ | 66  | 64    |
| >TP53-G154/ GTRVRAMAI\ | 115   | >TP53-G154/ ATRVRAMAI\ | 57  | 58    |
| >TP53-G154/ GTRVRAMAI  | 2287  | >TP53-G154/ ATRVRAMAI  | 362 | 1925  |
| >TP53-G154/ GTRVRAMAI  | 687   | >TP53-G154/ ATRVRAMAI  | 286 | 401   |
| >TP53-G154/ GTRVRAMAI\ | 405   | >TP53-G154/ ATRVRAMAI\ | 220 | 185   |
| >TP53-G154/ GTRVRAMAI\ | 1212  | >TP53-G154/ ATRVRAMAI\ | 189 | 1023  |
| >TP53-G154/ GTRVRAMAI  | 40    | >TP53-G154/ ATRVRAMAI  | 13  | 27    |
| >TP53-G154/ GTRVRAMAI\ | 4     | >TP53-G154/ ATRVRAMAI\ | 3   | 1     |

|                       |       |                       |     |       |
|-----------------------|-------|-----------------------|-----|-------|
| >TP53-G154/GTRVRAMAI  | 122   | >TP53-G154/ATRVRAMAI  | 364 | 242   |
| >TP53-G154/GTRVRAMAI\ | 21    | >TP53-G154/ATRVRAMAI\ | 19  | 2     |
| >TP53-G154/GTRVRAMAI\ | 269   | >TP53-G154/ATRVRAMAI\ | 151 | 118   |
| >TP53-G154/GTRVRAMAI  | 387   | >TP53-G154/ATRVRAMAI  | 176 | 211   |
| >TP53-G154/QLWVDSTPP  | 13082 | >TP53-G154/QLWVDSTPP  | 70  | 13012 |
| >TP53-G154/QLWVDSTPP  | 8934  | >TP53-G154/QLWVDSTPP  | 245 | 8689  |
| >TP53-G154/QLWVDSTPP  | 3314  | >TP53-G154/QLWVDSTPP  | 60  | 3254  |
| >TP53-G154/QLWVDSTPP  | 8017  | >TP53-G154/QLWVDSTPP  | 132 | 7885  |
| >TP53-G154/QLWVDSTPP  | 5687  | >TP53-G154/QLWVDSTPP  | 60  | 5627  |
| >TP53-G154/QLWVDSTPP  | 14765 | >TP53-G154/QLWVDSTPP  | 137 | 14628 |
| >TP53-G154/QLWVDSTPP  | 12786 | >TP53-G154/QLWVDSTPP  | 70  | 12716 |
| >TP53-G154/QLWVDSTPP  | 10814 | >TP53-G154/QLWVDSTPP  | 334 | 10480 |
| >TP53-G154/PPGTRVRAM  | 68    | >TP53-G154/PPATRVRAM  | 14  | 54    |
| >TP53-G154/PPGTRVRAM  | 709   | >TP53-G154/PPATRVRAM  | 53  | 656   |
| >TP53-G154/PPPGRVRAM  | 370   | >TP53-G154/PPPATRVRAM | 533 | 163   |
| >TP53-G154/PPPGRVRAM  | 450   | >TP53-G154/PPPATRVRAM | 225 | 225   |
| >TP53-G154/TPPPGRVRA  | 583   | >TP53-G154/TPPPATRVA  | 270 | 313   |
| >TP53-G154/TPPPGRV    | 763   | >TP53-G154/TPPPATRV   | 143 | 620   |
| >TP53-G154/TPPPGRVRA  | 482   | >TP53-G154/TPPPATRVA  | 87  | 395   |
| >TP53-G154/TPPPGRVRA  | 32    | >TP53-G154/TPPPATRVA  | 33  | 1     |
| >TP53-G154/TPPPGRVRA  | 139   | >TP53-G154/TPPPATRVA  | 119 | 20    |
| >TP53-G154/TPPPGRV    | 273   | >TP53-G154/TPPPATRV   | 151 | 122   |
| >TP53-G154/TPPPGRVRA  | 727   | >TP53-G154/TPPPATRVA  | 175 | 552   |
| >TP53-G154/STPPPGRV   | 136   | >TP53-G154/STPPPATRV  | 164 | 28    |
| >TP53-G154/STPPPGRV   | 116   | >TP53-G154/STPPPATRV  | 94  | 22    |
| >TP53-G154/STPPPGR    | 925   | >TP53-G154/STPPPATR   | 342 | 583   |
| >TP53-G154/STPPPGR    | 352   | >TP53-G154/STPPPATR   | 104 | 248   |
| >TP53-G154/STPPPGRV   | 129   | >TP53-G154/STPPPATRV  | 69  | 60    |
| >TP53-G154/STPPPGRV   | 18    | >TP53-G154/STPPPATRV  | 11  | 7     |
| >TP53-G154/STPPPGRV   | 82    | >TP53-G154/STPPPATRV  | 44  | 38    |
| >TP53-G154/STPPPGRV   | 512   | >TP53-G154/STPPPATRV  | 137 | 375   |
| >TP53-G154/STPPPGRV   | 4     | >TP53-G154/STPPPATRV  | 3   | 1     |
| >TP53-G154/STPPPGRV   | 96    | >TP53-G154/STPPPATRV  | 40  | 56    |
| >TP53-G154/STPPPGRV   | 54    | >TP53-G154/STPPPATRV  | 37  | 17    |
| >TP53-G154/STPPPGRV   | 259   | >TP53-G154/STPPPATRV  | 253 | 6     |
| >TP53-G154/STPPPGRV   | 311   | >TP53-G154/STPPPATRV  | 332 | 21    |
| >TP53-G154/DSTPPPGR   | 203   | >TP53-G154/DSTPPPATR  | 56  | 147   |
| >TP53-G154/DSTPPPGRV  | 372   | >TP53-G154/DSTPPPATRV | 286 | 86    |
| >TP53-G154/DSTPPPGR   | 161   | >TP53-G154/DSTPPPATR  | 44  | 117   |
| >TP53-G154/DSTPPPGRV  | 208   | >TP53-G154/DSTPPPATRV | 104 | 104   |
| >TP53-G154/DSTPPPGRV  | 1466  | >TP53-G154/DSTPPPATRV | 488 | 978   |
| >TP53-G154/WVDSTPPPG  | 12552 | >TP53-G154/WVDSTPPPA  | 171 | 12381 |
| >TP53-G154/WVDSTPPPG  | 10213 | >TP53-G154/WVDSTPPPA  | 318 | 9895  |



|                       |       |                       |      |       |
|-----------------------|-------|-----------------------|------|-------|
| >TP53-G154/WVDSTPPPG  | 6072  | >TP53-G154/WVDSTPPPA  | 38   | 6034  |
| >TP53-G154/WVDSTPPPG  | 489   | >TP53-G154/WVDSTPPPA  | 721  | 232   |
| >TP53-G154/LWVDSTPPP  | 6381  | >TP53-G154/LWVDSTPPP/ | 364  | 6017  |
| >TP53-G154/LWVDSTPPP  | 485   | >TP53-G154/LWVDSTPPP/ | 225  | 260   |
| >TP53-G154(GTRVRAMAI  | 269   | >TP53-G154(CTRVRAMAI  | 129  | 140   |
| >TP53-G154(GTRVRAMAI  | 50    | >TP53-G154(CTRVRAMAI  | 61   | 11    |
| >TP53-G154(GTRVRAMAI  | 39    | >TP53-G154(CTRVRAMAI  | 86   | 47    |
| >TP53-G154(GTRVRAMAI  | 715   | >TP53-G154(CTRVRAMAI  | 209  | 506   |
| >TP53-G154(GTRVRAMA   | 18    | >TP53-G154(CTRVRAMA   | 17   | 1     |
| >TP53-G154(GTRVRAMAI  | 9     | >TP53-G154(CTRVRAMAI  | 9    | 0     |
| >TP53-G154(GTRVRAMAI  | 30    | >TP53-G154(CTRVRAMAI  | 33   | 3     |
| >TP53-G154(GTRVRAMAI  | 3     | >TP53-G154(CTRVRAMAI  | 3    | 0     |
| >TP53-G154(GTRVRAMAI  | 130   | >TP53-G154(CTRVRAMAI  | 114  | 16    |
| >TP53-G154(GTRVRAMAI  | 115   | >TP53-G154(CTRVRAMAI  | 157  | 42    |
| >TP53-G154(GTRVRAMAI  | 671   | >TP53-G154(CTRVRAMAI  | 112  | 559   |
| >TP53-G154(GTRVRAMAI  | 687   | >TP53-G154(CTRVRAMAI  | 261  | 426   |
| >TP53-G154(GTRVRAMAI  | 405   | >TP53-G154(CTRVRAMAI  | 1230 | 825   |
| >TP53-G154(GTRVRAMAI  | 40    | >TP53-G154(CTRVRAMAI  | 81   | 41    |
| >TP53-G154(GTRVRAMAI  | 4     | >TP53-G154(CTRVRAMAI  | 6    | 2     |
| >TP53-G154(GTRVRAMAI  | 122   | >TP53-G154(CTRVRAMAI  | 1911 | 1789  |
| >TP53-G154(GTRVRAMAI  | 21    | >TP53-G154(CTRVRAMAI  | 27   | 6     |
| >TP53-G154(GTRVRAMAI  | 269   | >TP53-G154(CTRVRAMAI  | 1121 | 852   |
| >TP53-G154(GTRVRAMAI  | 387   | >TP53-G154(CTRVRAMAI  | 28   | 359   |
| >TP53-G154(QLWVDSTPP  | 3314  | >TP53-G154(QLWVDSTPP  | 178  | 3136  |
| >TP53-G154(QLWVDSTPP  | 12786 | >TP53-G154(QLWVDSTPP  | 351  | 12435 |
| >TP53-G154(PPGTRVRAM  | 68    | >TP53-G154(PPCTRVRAM  | 619  | 551   |
| >TP53-G154(PPPCTRVRAM | 370   | >TP53-G154(PPPCTRVRAM | 706  | 336   |
| >TP53-G154(PPPCTRVRAM | 450   | >TP53-G154(PPPCTRVRAM | 781  | 331   |
| >TP53-G154(TPPPCTRVR  | 583   | >TP53-G154(TPPPCTRVR  | 95   | 488   |
| >TP53-G154(TPPPCTRVR  | 763   | >TP53-G154(TPPPCTRVR  | 474  | 289   |
| >TP53-G154(TPPPCTRVR  | 482   | >TP53-G154(TPPPCTRVR  | 378  | 104   |
| >TP53-G154(TPPPCTRVR  | 32    | >TP53-G154(TPPPCTRVR  | 32   | 0     |
| >TP53-G154(TPPPCTRVR  | 139   | >TP53-G154(TPPPCTRVR  | 104  | 35    |
| >TP53-G154(TPPPCTRVR  | 273   | >TP53-G154(TPPPCTRVR  | 923  | 650   |
| >TP53-G154(TPPPCTRVR  | 727   | >TP53-G154(TPPPCTRVR  | 353  | 374   |
| >TP53-G154(TPPPCTRVR  | 4145  | >TP53-G154(TPPPCTRVR  | 235  | 3910  |
| >TP53-G154(STPPPCTRVR | 136   | >TP53-G154(STPPPCTRVR | 507  | 371   |
| >TP53-G154(STPPPCTRVR | 116   | >TP53-G154(STPPPCTRVR | 105  | 11    |
| >TP53-G154(STPPPCTR   | 925   | >TP53-G154(STPPPCTR   | 488  | 437   |
| >TP53-G154(STPPPCTRVR | 730   | >TP53-G154(STPPPCTRVR | 213  | 517   |
| >TP53-G154(STPPPCTR   | 352   | >TP53-G154(STPPPCTR   | 130  | 222   |
| >TP53-G154(STPPPCTRVR | 129   | >TP53-G154(STPPPCTRVR | 170  | 41    |
| >TP53-G154(STPPPCTRVR | 18    | >TP53-G154(STPPPCTRVR | 13   | 5     |

|                       |      |                       |      |      |
|-----------------------|------|-----------------------|------|------|
| >TP53-G154(STPPPCTRVR | 82   | >TP53-G154(STPPPCTRVR | 46   | 36   |
| >TP53-G154(STPPPCTR   | 7371 | >TP53-G154(STPPPCTR   | 221  | 7150 |
| >TP53-G154(STPPPCTR   | 4    | >TP53-G154(STPPPCTR   | 4    | 0    |
| >TP53-G154(STPPPCTRVR | 96   | >TP53-G154(STPPPCTRVR | 65   | 31   |
| >TP53-G154(STPPPCTRVR | 54   | >TP53-G154(STPPPCTRVR | 56   | 2    |
| >TP53-G154(STPPPCTR   | 259  | >TP53-G154(STPPPCTR   | 244  | 15   |
| >TP53-G154(STPPPCTR   | 311  | >TP53-G154(STPPPCTR   | 327  | 16   |
| >TP53-G154(DSTPPPCTR  | 203  | >TP53-G154(DSTPPPCTR  | 69   | 134  |
| >TP53-G154(DSTPPPCTR  | 372  | >TP53-G154(DSTPPPCTR  | 235  | 137  |
| >TP53-G154(DSTPPPCTR  | 161  | >TP53-G154(DSTPPPCTR  | 68   | 93   |
| >TP53-G154(DSTPPPCTR  | 208  | >TP53-G154(DSTPPPCTR  | 144  | 64   |
| >TP53-G154(WVDSTPPPG  | 489  | >TP53-G154(WVDSTPPPG  | 3534 | 3045 |
| >TP53-G154(LWVDSTPPPG | 485  | >TP53-G154(LWVDSTPPPG | 522  | 37   |
| >TP53-G154[GTRVRAMAI  | 269  | >TP53-G154[DTRVRAMAI  | 199  | 70   |
| >TP53-G154[GTRVRAMAI  | 50   | >TP53-G154[DTRVRAMAI  | 962  | 912  |
| >TP53-G154[GTRVRAMAI  | 39   | >TP53-G154[DTRVRAMAI  | 2004 | 1965 |
| >TP53-G154[GTRVRAMAI  | 715  | >TP53-G154[DTRVRAMAI  | 47   | 668  |
| >TP53-G154[GTRVRAMAI  | 3287 | >TP53-G154[DTRVRAMAI  | 79   | 3208 |
| >TP53-G154[GTRVRAMA   | 18   | >TP53-G154[DTRVRAMA   | 741  | 723  |
| >TP53-G154[GTRVRAMAI  | 9    | >TP53-G154[DTRVRAMAI  | 272  | 263  |
| >TP53-G154[GTRVRAMAI  | 30   | >TP53-G154[DTRVRAMAI  | 1206 | 1176 |
| >TP53-G154[GTRVRAMAI  | 3    | >TP53-G154[DTRVRAMAI  | 14   | 11   |
| >TP53-G154[GTRVRAMAI  | 130  | >TP53-G154[DTRVRAMAI  | 203  | 73   |
| >TP53-G154[GTRVRAMAI  | 115  | >TP53-G154[DTRVRAMAI  | 1911 | 1796 |
| >TP53-G154[GTRVRAMAI  | 4835 | >TP53-G154[DTRVRAMAI  | 62   | 4773 |
| >TP53-G154[GTRVRAMAI  | 671  | >TP53-G154[DTRVRAMAI  | 32   | 639  |
| >TP53-G154[GTRVRAMAI  | 687  | >TP53-G154[DTRVRAMAI  | 308  | 379  |
| >TP53-G154[GTRVRAMAI  | 405  | >TP53-G154[DTRVRAMAI  | 6130 | 5725 |
| >TP53-G154[GTRVRAMAI  | 40   | >TP53-G154[DTRVRAMAI  | 870  | 830  |
| >TP53-G154[GTRVRAMAI  | 4    | >TP53-G154[DTRVRAMAI  | 19   | 15   |
| >TP53-G154[GTRVRAMAI  | 122  | >TP53-G154[DTRVRAMAI  | 4209 | 4087 |
| >TP53-G154[GTRVRAMAI  | 21   | >TP53-G154[DTRVRAMAI  | 38   | 17   |
| >TP53-G154[GTRVRAMAI  | 269  | >TP53-G154[DTRVRAMAI  | 1495 | 1226 |
| >TP53-G154[GTRVRAMAI  | 387  | >TP53-G154[DTRVRAMAI  | 3574 | 3187 |
| >TP53-G154[PGTRVRAMA  | 9723 | >TP53-G154[PDTRVRAMA  | 94   | 9629 |
| >TP53-G154[PPGTRVRAM  | 68   | >TP53-G154[PPDTRVRAM  | 94   | 26   |
| >TP53-G154[PPPGTRVRAM | 370  | >TP53-G154[PPPDTRVRAM | 522  | 152  |
| >TP53-G154[PPPGTRVRAM | 450  | >TP53-G154[PPPDTRVRAM | 2237 | 1787 |
| >TP53-G154[TPPPGTRVRA | 583  | >TP53-G154[TPPPDTRVRA | 493  | 90   |
| >TP53-G154[TPPPGTRVRA | 482  | >TP53-G154[TPPPDTRVRA | 4609 | 4127 |
| >TP53-G154[TPPPGTRVRA | 32   | >TP53-G154[TPPPDTRVRA | 58   | 26   |
| >TP53-G154[TPPPGTRVRA | 139  | >TP53-G154[TPPPDTRVRA | 141  | 2    |
| >TP53-G154[TPPPGTRV   | 273  | >TP53-G154[TPPPDTRV   | 7087 | 6814 |

|                        |       |                        |      |       |
|------------------------|-------|------------------------|------|-------|
| >TP53-G154[STPPPGTRV   | 136   | >TP53-G154[STPPPDTRV   | 499  | 363   |
| >TP53-G154[STPPPGTRV   | 116   | >TP53-G154[STPPPDTRV   | 151  | 35    |
| >TP53-G154[STPPPGTR    | 352   | >TP53-G154[STPPPDTR    | 165  | 187   |
| >TP53-G154[STPPPGTRVR  | 129   | >TP53-G154[STPPPDTRVR  | 66   | 63    |
| >TP53-G154[STPPPGTRV   | 18    | >TP53-G154[STPPPDTRV   | 10   | 8     |
| >TP53-G154[STPPPGTRVR  | 82    | >TP53-G154[STPPPDTRVR  | 41   | 41    |
| >TP53-G154[STPPPGTRV   | 4     | >TP53-G154[STPPPDTRV   | 12   | 8     |
| >TP53-G154[STPPPGTRVR  | 96    | >TP53-G154[STPPPDTRVR  | 340  | 244   |
| >TP53-G154[STPPPGTRVR  | 54    | >TP53-G154[STPPPDTRVR  | 159  | 105   |
| >TP53-G154[STPPPGTRV   | 259   | >TP53-G154[STPPPDTRV   | 1103 | 844   |
| >TP53-G154[STPPPGTRV   | 311   | >TP53-G154[STPPPDTRV   | 382  | 71    |
| >TP53-G154[ DSTPPPGTR  | 203   | >TP53-G154[ DSTPPPDTR  | 371  | 168   |
| >TP53-G154[ DSTPPPGTRV | 372   | >TP53-G154[ DSTPPPDTRV | 645  | 273   |
| >TP53-G154[ DSTPPPGTR  | 161   | >TP53-G154[ DSTPPPDTR  | 79   | 82    |
| >TP53-G154[ DSTPPPGTRV | 208   | >TP53-G154[ DSTPPPDTRV | 174  | 34    |
| >TP53-G154[ WVDSTPPPG  | 489   | >TP53-G154[ WVDSTPPPD  | 2733 | 2244  |
| >TP53-G154[ LWVDSTPPPG | 485   | >TP53-G154[ LWVDSTPPPD | 698  | 213   |
| >TP53-G154[ GTRVRAMAIY | 269   | >TP53-G154[ ITRVRAMAIY | 144  | 125   |
| >TP53-G154[ GTRVRAMAIY | 50    | >TP53-G154[ ITRVRAMAIY | 36   | 14    |
| >TP53-G154[ GTRVRAMAIY | 39    | >TP53-G154[ ITRVRAMAIY | 57   | 18    |
| >TP53-G154[ GTRVRAMAIY | 715   | >TP53-G154[ ITRVRAMAIY | 347  | 368   |
| >TP53-G154[ GTRVRAMA   | 18    | >TP53-G154[ ITRVRAMA   | 10   | 8     |
| >TP53-G154[ GTRVRAMAI  | 9     | >TP53-G154[ ITRVRAMAI  | 6    | 3     |
| >TP53-G154[ GTRVRAMAIY | 30    | >TP53-G154[ ITRVRAMAIY | 17   | 13    |
| >TP53-G154[ GTRVRAMAIY | 3     | >TP53-G154[ ITRVRAMAIY | 3    | 0     |
| >TP53-G154[ GTRVRAMAIY | 130   | >TP53-G154[ ITRVRAMAIY | 54   | 76    |
| >TP53-G154[ GTRVRAMAIY | 115   | >TP53-G154[ ITRVRAMAIY | 59   | 56    |
| >TP53-G154[ GTRVRAMAIY | 4835  | >TP53-G154[ ITRVRAMAIY | 464  | 4371  |
| >TP53-G154[ GTRVRAMAIY | 671   | >TP53-G154[ ITRVRAMAIY | 91   | 580   |
| >TP53-G154[ GTRVRAMAIY | 3456  | >TP53-G154[ ITRVRAMAIY | 418  | 3038  |
| >TP53-G154[ GTRVRAMAI  | 687   | >TP53-G154[ ITRVRAMAI  | 221  | 466   |
| >TP53-G154[ GTRVRAMAIY | 405   | >TP53-G154[ ITRVRAMAIY | 239  | 166   |
| >TP53-G154[ GTRVRAMAI  | 3101  | >TP53-G154[ ITRVRAMAI  | 369  | 2732  |
| >TP53-G154[ GTRVRAMAIY | 1212  | >TP53-G154[ ITRVRAMAIY | 128  | 1084  |
| >TP53-G154[ GTRVRAMAI  | 40    | >TP53-G154[ ITRVRAMAI  | 8    | 32    |
| >TP53-G154[ GTRVRAMAIY | 4     | >TP53-G154[ ITRVRAMAIY | 3    | 1     |
| >TP53-G154[ GTRVRAMAIY | 2443  | >TP53-G154[ ITRVRAMAIY | 180  | 2263  |
| >TP53-G154[ GTRVRAMAI  | 122   | >TP53-G154[ ITRVRAMAI  | 108  | 14    |
| >TP53-G154[ GTRVRAMAIY | 21    | >TP53-G154[ ITRVRAMAIY | 25   | 4     |
| >TP53-G154[ GTRVRAMAIY | 269   | >TP53-G154[ ITRVRAMAIY | 630  | 361   |
| >TP53-G154[ GTRVRAMAI  | 387   | >TP53-G154[ ITRVRAMAI  | 182  | 205   |
| >TP53-G154[ PGTRVRAMA  | 14188 | >TP53-G154[ PITRVRAMAI | 274  | 13914 |
| >TP53-G154[ PGTRVRAMA  | 619   | >TP53-G154[ PITRVRAMAI | 347  | 272   |

|                        |       |                         |      |       |
|------------------------|-------|-------------------------|------|-------|
| >TP53-G154I QLWVDSTPP  | 13082 | >TP53-G154I QLWVDSTPP   | 32   | 13050 |
| >TP53-G154I QLWVDSTPP  | 17968 | >TP53-G154I QLWVDSTPP   | 473  | 17495 |
| >TP53-G154I QLWVDSTPP  | 8934  | >TP53-G154I QLWVDSTPP   | 182  | 8752  |
| >TP53-G154I QLWVDSTPP  | 3314  | >TP53-G154I QLWVDSTPP   | 18   | 3296  |
| >TP53-G154I QLWVDSTPP  | 8017  | >TP53-G154I QLWVDSTPP   | 34   | 7983  |
| >TP53-G154I QLWVDSTPP  | 5687  | >TP53-G154I QLWVDSTPP   | 35   | 5652  |
| >TP53-G154I QLWVDSTPP  | 14765 | >TP53-G154I QLWVDSTPP   | 34   | 14731 |
| >TP53-G154I QLWVDSTPP  | 12786 | >TP53-G154I QLWVDSTPP   | 60   | 12726 |
| >TP53-G154I QLWVDSTPP  | 8234  | >TP53-G154I QLWVDSTPP   | 101  | 8133  |
| >TP53-G154I QLWVDSTPP  | 10814 | >TP53-G154I QLWVDSTPP   | 70   | 10744 |
| >TP53-G154I QLWVDSTPP  | 9131  | >TP53-G154I QLWVDSTPP   | 326  | 8805  |
| >TP53-G154I PPGTRVRAM  | 68    | >TP53-G154I PPITRVRAM   | 30   | 38    |
| >TP53-G154I PPGTRVRAM  | 709   | >TP53-G154I PPITRVRAMA  | 230  | 479   |
| >TP53-G154I PPGTRVRAM  | 1110  | >TP53-G154I PPITRVRAM   | 444  | 666   |
| >TP53-G154I PPGTRVRAM  | 1167  | >TP53-G154I PPITRVRAMA  | 445  | 722   |
| >TP53-G154I PPPGTRVRAM | 370   | >TP53-G154I PPPITRVRAM  | 478  | 108   |
| >TP53-G154I PPPGTRVRAM | 450   | >TP53-G154I PPPITRVRAM  | 2098 | 1648  |
| >TP53-G154I TPPPGRVRA  | 583   | >TP53-G154I TPPPITRVRAI | 176  | 407   |
| >TP53-G154I TPPPGRVRA  | 482   | >TP53-G154I TPPPITRVRAI | 1466 | 984   |
| >TP53-G154I TPPPGRV    | 2295  | >TP53-G154I TPPPITRV    | 209  | 2086  |
| >TP53-G154I TPPPGRVRA  | 32    | >TP53-G154I TPPPITRVRAI | 54   | 22    |
| >TP53-G154I TPPPGRVRA  | 139   | >TP53-G154I TPPPITRVRAI | 130  | 9     |
| >TP53-G154I TPPPGRVRA  | 2306  | >TP53-G154I TPPPITRVRA  | 351  | 1955  |
| >TP53-G154I TPPPGRV    | 273   | >TP53-G154I TPPPITRV    | 351  | 78    |
| >TP53-G154I TPPPGRVRA  | 727   | >TP53-G154I TPPPITRVRAI | 228  | 499   |
| >TP53-G154I STPPPGRV   | 1710  | >TP53-G154I STPPPITRV   | 206  | 1504  |
| >TP53-G154I STPPPGRV   | 1981  | >TP53-G154I STPPPITRV   | 187  | 1794  |
| >TP53-G154I STPPPGRV   | 136   | >TP53-G154I STPPPITRV   | 23   | 113   |
| >TP53-G154I STPPPGRV   | 743   | >TP53-G154I STPPPITRV   | 257  | 486   |
| >TP53-G154I STPPPGRV   | 116   | >TP53-G154I STPPPITRV   | 30   | 86    |
| >TP53-G154I STPPPGRVR  | 851   | >TP53-G154I STPPPITRVR  | 330  | 521   |
| >TP53-G154I STPPPGR    | 925   | >TP53-G154I STPPPITR    | 363  | 562   |
| >TP53-G154I STPPPGRVR  | 730   | >TP53-G154I STPPPITRVR  | 161  | 569   |
| >TP53-G154I STPPPGR    | 352   | >TP53-G154I STPPPITR    | 134  | 218   |
| >TP53-G154I STPPPGRVR  | 129   | >TP53-G154I STPPPITRVR  | 21   | 108   |
| >TP53-G154I STPPPGRV   | 18    | >TP53-G154I STPPPITRV   | 6    | 12    |
| >TP53-G154I STPPPGRVR  | 82    | >TP53-G154I STPPPITRVR  | 36   | 46    |
| >TP53-G154I STPPPGRV   | 512   | >TP53-G154I STPPPITRV   | 188  | 324   |
| >TP53-G154I STPPPGRV   | 4     | >TP53-G154I STPPPITRV   | 2    | 2     |
| >TP53-G154I STPPPGRVR  | 96    | >TP53-G154I STPPPITRVR  | 27   | 69    |
| >TP53-G154I STPPPGRVR  | 54    | >TP53-G154I STPPPITRVR  | 24   | 30    |
| >TP53-G154I STPPPGRV   | 259   | >TP53-G154I STPPPITRV   | 753  | 494   |
| >TP53-G154I STPPPGRV   | 311   | >TP53-G154I STPPPITRV   | 306  | 5     |

|                        |       |                         |      |       |
|------------------------|-------|-------------------------|------|-------|
| >TP53-G154I DSTPPPGTR  | 203   | >TP53-G154I DSTPPPITR   | 108  | 95    |
| >TP53-G154I DSTPPPGTRV | 372   | >TP53-G154I DSTPPPITRVF | 221  | 151   |
| >TP53-G154I DSTPPPGTR  | 161   | >TP53-G154I DSTPPPITR   | 77   | 84    |
| >TP53-G154I DSTPPPGTRV | 208   | >TP53-G154I DSTPPPITRVF | 89   | 119   |
| >TP53-G154I VDSTPPPG   | 30985 | >TP53-G154I VDSTPPPI    | 384  | 30601 |
| >TP53-G154I WVDSTPPPG  | 20336 | >TP53-G154I WVDSTPPPI   | 267  | 20069 |
| >TP53-G154I WVDSTPPPG  | 12552 | >TP53-G154I WVDSTPPPI   | 92   | 12460 |
| >TP53-G154I WVDSTPPPG  | 10213 | >TP53-G154I WVDSTPPPI   | 60   | 10153 |
| >TP53-G154I WVDSTPPPG  | 12950 | >TP53-G154I WVDSTPPPI   | 203  | 12747 |
| >TP53-G154I WVDSTPPPG  | 6072  | >TP53-G154I WVDSTPPPI   | 10   | 6062  |
| >TP53-G154I WVDSTPPPG  | 489   | >TP53-G154I WVDSTPPPIT  | 2612 | 2123  |
| >TP53-G154I WVDSTPPPG  | 13074 | >TP53-G154I WVDSTPPPI   | 488  | 12586 |
| >TP53-G154I LWVDSTPPPG | 24016 | >TP53-G154I LWVDSTPPPI  | 384  | 23632 |
| >TP53-G154I LWVDSTPPPG | 18678 | >TP53-G154I LWVDSTPPPI  | 379  | 18299 |
| >TP53-G154I LWVDSTPPPG | 6381  | >TP53-G154I LWVDSTPPPI  | 227  | 6154  |
| >TP53-G154I LWVDSTPPPG | 485   | >TP53-G154I LWVDSTPPPI  | 507  | 22    |
| >TP53-G154I GTRVRAMAI  | 269   | >TP53-G154I STRVRAMAI   | 117  | 152   |
| >TP53-G154I GTRVRAMAI  | 50    | >TP53-G154I STRVRAMAI   | 44   | 6     |
| >TP53-G154I GTRVRAMAI  | 39    | >TP53-G154I STRVRAMAI   | 22   | 17    |
| >TP53-G154I GTRVRAMAI  | 715   | >TP53-G154I STRVRAMAI   | 96   | 619   |
| >TP53-G154I GTRVRAMA   | 18    | >TP53-G154I STRVRAMA    | 7    | 11    |
| >TP53-G154I GTRVRAMAI  | 9     | >TP53-G154I STRVRAMAI   | 5    | 4     |
| >TP53-G154I GTRVRAMAI  | 30    | >TP53-G154I STRVRAMAI   | 9    | 21    |
| >TP53-G154I GTRVRAMAI  | 3     | >TP53-G154I STRVRAMAI   | 3    | 0     |
| >TP53-G154I GTRVRAMAI  | 130   | >TP53-G154I STRVRAMAI   | 63   | 67    |
| >TP53-G154I GTRVRAMAI  | 115   | >TP53-G154I STRVRAMAI   | 55   | 60    |
| >TP53-G154I GTRVRAMAI  | 671   | >TP53-G154I STRVRAMAI   | 82   | 589   |
| >TP53-G154I GTRVRAMAI  | 3456  | >TP53-G154I STRVRAMAI   | 206  | 3250  |
| >TP53-G154I GTRVRAMAI  | 687   | >TP53-G154I STRVRAMAI   | 85   | 602   |
| >TP53-G154I GTRVRAMAI  | 405   | >TP53-G154I STRVRAMAI   | 224  | 181   |
| >TP53-G154I GTRVRAMAI  | 1212  | >TP53-G154I STRVRAMAI   | 437  | 775   |
| >TP53-G154I GTRVRAMAI  | 40    | >TP53-G154I STRVRAMAI   | 20   | 20    |
| >TP53-G154I GTRVRAMAI  | 4     | >TP53-G154I STRVRAMAI   | 4    | 0     |
| >TP53-G154I GTRVRAMAI  | 122   | >TP53-G154I STRVRAMAI   | 125  | 3     |
| >TP53-G154I GTRVRAMAI  | 21    | >TP53-G154I STRVRAMAI   | 16   | 5     |
| >TP53-G154I GTRVRAMAI  | 269   | >TP53-G154I STRVRAMAI   | 176  | 93    |
| >TP53-G154I GTRVRAMAI  | 387   | >TP53-G154I STRVRAMAI   | 79   | 308   |
| >TP53-G154I PGTRVRAMA  | 14188 | >TP53-G154I PSTRVRAMAI  | 282  | 13906 |
| >TP53-G154I PGTRVRAMA  | 619   | >TP53-G154I PSTRVRAMAI  | 161  | 458   |
| >TP53-G154I PGTRVRAM   | 13239 | >TP53-G154I PSTRVRAM    | 341  | 12898 |
| >TP53-G154I PPGTRVRAM  | 68    | >TP53-G154I PPSTRVRAM   | 29   | 39    |
| >TP53-G154I PPGTRVRAM  | 709   | >TP53-G154I PPSTRVRAM   | 219  | 490   |
| >TP53-G154I PPPGTRVRAM | 370   | >TP53-G154I PPPSTRVRAM  | 186  | 184   |

|                        |      |                        |     |      |
|------------------------|------|------------------------|-----|------|
| >TP53-G154€ PPPGTRVRAM | 450  | >TP53-G154€ PPPSTRVRAM | 203 | 247  |
| >TP53-G154€ TPPPSTRVRA | 583  | >TP53-G154€ TPPPSTRVRA | 203 | 380  |
| >TP53-G154€ TPPPSTRVRA | 482  | >TP53-G154€ TPPPSTRVRA | 558 | 76   |
| >TP53-G154€ TPPPSTRVRA | 32   | >TP53-G154€ TPPPSTRVRA | 33  | 1    |
| >TP53-G154€ TPPPSTRVRA | 139  | >TP53-G154€ TPPPSTRVRA | 188 | 49   |
| >TP53-G154€ TPPPSTRV   | 273  | >TP53-G154€ TPPPSTRV   | 217 | 56   |
| >TP53-G154€ TPPPSTRVRA | 727  | >TP53-G154€ TPPPSTRVRA | 223 | 504  |
| >TP53-G154€ STPPPSTRV  | 136  | >TP53-G154€ STPPPSTRV  | 132 | 4    |
| >TP53-G154€ STPPPSTRV  | 116  | >TP53-G154€ STPPPSTRV  | 83  | 33   |
| >TP53-G154€ STPPPSTRVR | 851  | >TP53-G154€ STPPPSTRVR | 367 | 484  |
| >TP53-G154€ STPPPSTR   | 925  | >TP53-G154€ STPPPSTR   | 451 | 474  |
| >TP53-G154€ STPPPSTRVR | 730  | >TP53-G154€ STPPPSTRVR | 297 | 433  |
| >TP53-G154€ STPPPSTR   | 352  | >TP53-G154€ STPPPSTR   | 126 | 226  |
| >TP53-G154€ STPPPSTRVR | 129  | >TP53-G154€ STPPPSTRVR | 39  | 90   |
| >TP53-G154€ STPPPSTRV  | 18   | >TP53-G154€ STPPPSTRV  | 9   | 9    |
| >TP53-G154€ STPPPSTRVR | 82   | >TP53-G154€ STPPPSTRVR | 41  | 41   |
| >TP53-G154€ STPPPSTRV  | 512  | >TP53-G154€ STPPPSTRV  | 139 | 373  |
| >TP53-G154€ STPPPSTRV  | 4    | >TP53-G154€ STPPPSTRV  | 3   | 1    |
| >TP53-G154€ STPPPSTRVR | 96   | >TP53-G154€ STPPPSTRVR | 48  | 48   |
| >TP53-G154€ STPPPSTRVR | 54   | >TP53-G154€ STPPPSTRVR | 40  | 14   |
| >TP53-G154€ STPPPSTRV  | 259  | >TP53-G154€ STPPPSTRV  | 327 | 68   |
| >TP53-G154€ STPPPSTRV  | 311  | >TP53-G154€ STPPPSTRV  | 297 | 14   |
| >TP53-G154€ DSTPPPSTR  | 203  | >TP53-G154€ DSTPPPSTR  | 84  | 119  |
| >TP53-G154€ DSTPPPSTRV | 372  | >TP53-G154€ DSTPPPSTRV | 315 | 57   |
| >TP53-G154€ DSTPPPSTR  | 161  | >TP53-G154€ DSTPPPSTR  | 50  | 111  |
| >TP53-G154€ DSTPPPSTRV | 208  | >TP53-G154€ DSTPPPSTRV | 99  | 109  |
| >TP53-G154€ WVDSTPPPG  | 489  | >TP53-G154€ WVDSTPPPS  | 798 | 309  |
| >TP53-G154€ LWVDSTPPPG | 485  | >TP53-G154€ LWVDSTPPPG | 296 | 189  |
| >TP53-G154\ GTRVRAMAI\ | 269  | >TP53-G154\ VTRVRAMAI\ | 86  | 183  |
| >TP53-G154\ GTRVRAMAI\ | 50   | >TP53-G154\ VTRVRAMAI\ | 39  | 11   |
| >TP53-G154\ GTRVRAMAI\ | 39   | >TP53-G154\ VTRVRAMAI\ | 42  | 3    |
| >TP53-G154\ GTRVRAMAI\ | 715  | >TP53-G154\ VTRVRAMAI\ | 270 | 445  |
| >TP53-G154\ GTRVRAMA   | 18   | >TP53-G154\ VTRVRAMA   | 23  | 5    |
| >TP53-G154\ GTRVRAMAI  | 9    | >TP53-G154\ VTRVRAMAI  | 11  | 2    |
| >TP53-G154\ GTRVRAMAI\ | 30   | >TP53-G154\ VTRVRAMAI\ | 41  | 11   |
| >TP53-G154\ GTRVRAMAI\ | 3    | >TP53-G154\ VTRVRAMAI\ | 3   | 0    |
| >TP53-G154\ GTRVRAMAI\ | 130  | >TP53-G154\ VTRVRAMAI\ | 61  | 69   |
| >TP53-G154\ GTRVRAMAI\ | 115  | >TP53-G154\ VTRVRAMAI\ | 96  | 19   |
| >TP53-G154\ GTRVRAMAI\ | 671  | >TP53-G154\ VTRVRAMAI\ | 355 | 316  |
| >TP53-G154\ GTRVRAMAI\ | 3456 | >TP53-G154\ VTRVRAMAI\ | 229 | 3227 |
| >TP53-G154\ GTRVRAMAI  | 687  | >TP53-G154\ VTRVRAMAI  | 246 | 441  |
| >TP53-G154\ GTRVRAMAI\ | 405  | >TP53-G154\ VTRVRAMAI\ | 308 | 97   |
| >TP53-G154\ GTRVRAMAI\ | 1212 | >TP53-G154\ VTRVRAMAI\ | 286 | 926  |

|                       |       |                       |      |       |
|-----------------------|-------|-----------------------|------|-------|
| >TP53-G154\GTRVRAMAI  | 40    | >TP53-G154\VTRVRAMAI  | 16   | 24    |
| >TP53-G154\GTRVRAMAI\ | 4     | >TP53-G154\VTRVRAMAI\ | 3    | 1     |
| >TP53-G154\GTRVRAMAI  | 122   | >TP53-G154\VTRVRAMAI  | 217  | 95    |
| >TP53-G154\GTRVRAMAI\ | 21    | >TP53-G154\VTRVRAMAI\ | 21   | 0     |
| >TP53-G154\GTRVRAMAI\ | 269   | >TP53-G154\VTRVRAMAI\ | 1020 | 751   |
| >TP53-G154\GTRVRAMAI  | 387   | >TP53-G154\VTRVRAMAI  | 387  | 0     |
| >TP53-G154\PGTRVRAMA  | 14188 | >TP53-G154\PVTRVRAMA  | 86   | 14102 |
| >TP53-G154\PGTRVRAMA  | 619   | >TP53-G154\PVTRVRAMA  | 279  | 340   |
| >TP53-G154\QLWVDSTPP  | 13082 | >TP53-G154\QLWVDSTPP  | 13   | 13069 |
| >TP53-G154\QLWVDSTPP  | 11856 | >TP53-G154\QLWVDSTPP  | 118  | 11738 |
| >TP53-G154\QLWVDSTPP  | 17968 | >TP53-G154\QLWVDSTPP  | 74   | 17894 |
| >TP53-G154\QLWVDSTPP  | 8934  | >TP53-G154\QLWVDSTPP  | 30   | 8904  |
| >TP53-G154\QLWVDSTPP  | 3314  | >TP53-G154\QLWVDSTPP  | 4    | 3310  |
| >TP53-G154\QLWVDSTPP  | 8017  | >TP53-G154\QLWVDSTPP  | 8    | 8009  |
| >TP53-G154\QLWVDSTPP  | 5687  | >TP53-G154\QLWVDSTPP  | 5    | 5682  |
| >TP53-G154\QLWVDSTPP  | 14765 | >TP53-G154\QLWVDSTPP  | 3    | 14762 |
| >TP53-G154\QLWVDSTPP  | 12786 | >TP53-G154\QLWVDSTPP  | 6    | 12780 |
| >TP53-G154\QLWVDSTPP  | 10814 | >TP53-G154\QLWVDSTPP  | 21   | 10793 |
| >TP53-G154\QLWVDSTPP  | 9131  | >TP53-G154\QLWVDSTPP  | 409  | 8722  |
| >TP53-G154\PPGTRVRAM  | 68    | >TP53-G154\PPVTRVRAM  | 29   | 39    |
| >TP53-G154\PPGTRVRAM  | 709   | >TP53-G154\PPVTRVRAM  | 236  | 473   |
| >TP53-G154\PPGTRVRAM  | 3088  | >TP53-G154\PPVTRVRAM  | 484  | 2604  |
| >TP53-G154\PPPGTRVRAM | 370   | >TP53-G154\PPPVTRVRAM | 538  | 168   |
| >TP53-G154\PPPGTRVRAM | 450   | >TP53-G154\PPPVTRVRAM | 1775 | 1325  |
| >TP53-G154\TPPPGTRVRA | 583   | >TP53-G154\TPPPVTRVRA | 257  | 326   |
| >TP53-G154\TPPPGTRVRA | 482   | >TP53-G154\TPPPVTRVRA | 890  | 408   |
| >TP53-G154\TPPPGTRV   | 2295  | >TP53-G154\TPPPVTRV   | 348  | 1947  |
| >TP53-G154\TPPPGTRVRA | 32    | >TP53-G154\TPPPVTRVRA | 50   | 18    |
| >TP53-G154\TPPPGTRVRA | 139   | >TP53-G154\TPPPVTRVRA | 154  | 15    |
| >TP53-G154\TPPPGTRVRA | 2306  | >TP53-G154\TPPPVTRVRA | 494  | 1812  |
| >TP53-G154\TPPPGTRV   | 273   | >TP53-G154\TPPPVTRV   | 1650 | 1377  |
| >TP53-G154\TPPPGTRVRA | 727   | >TP53-G154\TPPPVTRVRA | 247  | 480   |
| >TP53-G154\STPPPGTRV  | 1710  | >TP53-G154\STPPPVTRV  | 152  | 1558  |
| >TP53-G154\STPPPGTRV  | 1981  | >TP53-G154\STPPPVTRV  | 498  | 1483  |
| >TP53-G154\STPPPGTRV  | 136   | >TP53-G154\STPPPVTRV  | 31   | 105   |
| >TP53-G154\STPPPGTRV  | 743   | >TP53-G154\STPPPVTRV  | 263  | 480   |
| >TP53-G154\STPPPGTRV  | 116   | >TP53-G154\STPPPVTRV  | 41   | 75    |
| >TP53-G154\STPPPGTRVR | 851   | >TP53-G154\STPPPVTRVR | 282  | 569   |
| >TP53-G154\STPPPGTR   | 925   | >TP53-G154\STPPPVTR   | 292  | 633   |
| >TP53-G154\STPPPGTRVR | 730   | >TP53-G154\STPPPVTRVR | 242  | 488   |
| >TP53-G154\STPPPGTR   | 352   | >TP53-G154\STPPPVTR   | 122  | 230   |
| >TP53-G154\STPPPGTRVR | 129   | >TP53-G154\STPPPVTRVR | 38   | 91    |
| >TP53-G154\STPPPGTRV  | 18    | >TP53-G154\STPPPVTRV  | 7    | 11    |

|                       |       |                       |      |       |
|-----------------------|-------|-----------------------|------|-------|
| >TP53-G154\STPPPGTRVR | 82    | >TP53-G154\STPPPVTRVR | 40   | 42    |
| >TP53-G154\STPPPGTRV  | 512   | >TP53-G154\STPPPVTRV  | 182  | 330   |
| >TP53-G154\STPPPGTR   | 7371  | >TP53-G154\STPPPVTR   | 358  | 7013  |
| >TP53-G154\STPPPGTRV  | 4     | >TP53-G154\STPPPVTRV  | 3    | 1     |
| >TP53-G154\STPPPGTRVR | 96    | >TP53-G154\STPPPVTRVR | 35   | 61    |
| >TP53-G154\STPPPGTRVR | 54    | >TP53-G154\STPPPVTRVR | 34   | 20    |
| >TP53-G154\STPPPGTRV  | 259   | >TP53-G154\STPPPVTRV  | 693  | 434   |
| >TP53-G154\STPPPGTRV  | 311   | >TP53-G154\STPPPVTRV  | 455  | 144   |
| >TP53-G154\STPPPGTR   | 203   | >TP53-G154\STPPPVTR   | 98   | 105   |
| >TP53-G154\STPPPGTRV  | 372   | >TP53-G154\STPPPVTRV  | 204  | 168   |
| >TP53-G154\STPPPGTR   | 161   | >TP53-G154\STPPPVTR   | 58   | 103   |
| >TP53-G154\STPPPGTRV  | 208   | >TP53-G154\STPPPVTRV  | 83   | 125   |
| >TP53-G154\WVDSTPPPG  | 20336 | >TP53-G154\WVDSTPPPV  | 56   | 20280 |
| >TP53-G154\WVDSTPPPG  | 22327 | >TP53-G154\WVDSTPPPV  | 454  | 21873 |
| >TP53-G154\WVDSTPPPG  | 12552 | >TP53-G154\WVDSTPPPV  | 19   | 12533 |
| >TP53-G154\WVDSTPPPG  | 10213 | >TP53-G154\WVDSTPPPV  | 6    | 10207 |
| >TP53-G154\WVDSTPPPG  | 16420 | >TP53-G154\WVDSTPPPV  | 81   | 16339 |
| >TP53-G154\WVDSTPPPG  | 12950 | >TP53-G154\WVDSTPPPV  | 10   | 12940 |
| >TP53-G154\WVDSTPPPG  | 20939 | >TP53-G154\WVDSTPPPV  | 10   | 20929 |
| >TP53-G154\WVDSTPPPG  | 29209 | >TP53-G154\WVDSTPPPV  | 23   | 29186 |
| >TP53-G154\WVDSTPPPG  | 6072  | >TP53-G154\WVDSTPPPV  | 5    | 6067  |
| >TP53-G154\WVDSTPPPG  | 489   | >TP53-G154\WVDSTPPPV  | 2506 | 2017  |
| >TP53-G154\LWVDSTPPPG | 6381  | >TP53-G154\LWVDSTPPPV | 136  | 6245  |
| >TP53-G154\LWVDSTPPPG | 485   | >TP53-G154\LWVDSTPPPV | 511  | 26    |
| >TP53-G187(GLAPPQHL   | 285   | >TP53-G187(CLAPPQHL   | 831  | 546   |
| >TP53-G187(GLAPPQHLI  | 65    | >TP53-G187(CLAPPQHLI  | 161  | 96    |
| >TP53-G187(GLAPPQHLIR | 20    | >TP53-G187(CLAPPQHLIR | 38   | 18    |
| >TP53-G187(GLAPPQHL   | 22    | >TP53-G187(CLAPPQHL   | 52   | 30    |
| >TP53-G187(GLAPPQHLI  | 15    | >TP53-G187(CLAPPQHLI  | 25   | 10    |
| >TP53-G187(GLAPPQHLIR | 9     | >TP53-G187(CLAPPQHLIR | 16   | 7     |
| >TP53-G187(GLAPPQHL   | 61    | >TP53-G187(CLAPPQHL   | 202  | 141   |
| >TP53-G187(GLAPPQHLI  | 31    | >TP53-G187(CLAPPQHLI  | 90   | 59    |
| >TP53-G187(GLAPPQHLIR | 7     | >TP53-G187(CLAPPQHLIR | 16   | 9     |
| >TP53-G187(GLAPPQHLIR | 44    | >TP53-G187(CLAPPQHLIR | 106  | 62    |
| >TP53-G187(GLAPPQHL   | 16    | >TP53-G187(CLAPPQHL   | 71   | 55    |
| >TP53-G187(GLAPPQHLI  | 13    | >TP53-G187(CLAPPQHLI  | 50   | 37    |
| >TP53-G187(GLAPPQHLIR | 3     | >TP53-G187(CLAPPQHLIR | 5    | 2     |
| >TP53-G187(GLAPPQHL   | 26    | >TP53-G187(CLAPPQHL   | 244  | 218   |
| >TP53-G187(GLAPPQHLI  | 22    | >TP53-G187(CLAPPQHLI  | 209  | 187   |
| >TP53-G187(GLAPPQHLIR | 7     | >TP53-G187(CLAPPQHLIR | 31   | 24    |
| >TP53-G187(GLAPPQHL   | 11    | >TP53-G187(CLAPPQHL   | 202  | 191   |
| >TP53-G187(GLAPPQHLI  | 13    | >TP53-G187(CLAPPQHLI  | 285  | 272   |
| >TP53-G187(GLAPPQHLIR | 5     | >TP53-G187(CLAPPQHLIR | 24   | 19    |



|                         |      |                         |       |       |
|-------------------------|------|-------------------------|-------|-------|
| >TP53-G187(GLAPPQHL     | 175  | >TP53-G187(CLAPPQHL     | 110   | 65    |
| >TP53-G187(GLAPPQHLI    | 76   | >TP53-G187(CLAPPQHLI    | 39    | 37    |
| >TP53-G187(GLAPPQHLIR'  | 9    | >TP53-G187(CLAPPQHLIR'  | 6     | 3     |
| >TP53-G187(GLAPPQHL     | 5    | >TP53-G187(CLAPPQHL     | 12    | 7     |
| >TP53-G187(GLAPPQHLI    | 5    | >TP53-G187(CLAPPQHLI    | 12    | 7     |
| >TP53-G187(GLAPPQHLIR'  | 2    | >TP53-G187(CLAPPQHLIR'  | 3     | 1     |
| >TP53-G187(GLAPPQHLI    | 1622 | >TP53-G187(CLAPPQHLI    | 54    | 1568  |
| >TP53-G187(GLAPPQHLIR'  | 1462 | >TP53-G187(CLAPPQHLIR'  | 102   | 1360  |
| >TP53-G187(GLAPPQHLIR   | 282  | >TP53-G187(CLAPPQHLIR   | 154   | 128   |
| >TP53-G187(GLAPPQHLIR   | 1493 | >TP53-G187(CLAPPQHLIR   | 159   | 1334  |
| >TP53-G187(GLAPPQHLI    | 1527 | >TP53-G187(CLAPPQHLI    | 79    | 1448  |
| >TP53-G187(DGLAPPQHLI   | 1466 | >TP53-G187(DCLAPPQHLI   | 216   | 1250  |
| >TP53-G187(SDGLAPPQHL   | 507  | >TP53-G187(SDCLAPPQHL   | 405   | 102   |
| >TP53-G187(SDGLAPPQHI   | 104  | >TP53-G187(SDCLAPPQHL   | 68    | 36    |
| >TP53-G187(CSDSDGLA     | 178  | >TP53-G187(CSDSDCLA     | 589   | 411   |
| >TP53-G187(ERCSDSDGL    | 1614 | >TP53-G187(ERCSDSDCL    | 368   | 1246  |
| >TP53-G187(HERCSDSDGL   | 422  | >TP53-G187(HERCSDSDCL   | 408   | 14    |
| >TP53-G187(HHERCSDSDC   | 126  | >TP53-G187(HHERCSDSDC   | 44    | 82    |
| >TP53-G187[ GLAPPQHL    | 285  | >TP53-G187[ DLAPPQHL    | 13646 | 13361 |
| >TP53-G187[ GLAPPQHLI   | 65   | >TP53-G187[ DLAPPQHLI   | 10593 | 10528 |
| >TP53-G187[ GLAPPQHLIR' | 20   | >TP53-G187[ DLAPPQHLIR' | 2698  | 2678  |
| >TP53-G187[ GLAPPQHL    | 22   | >TP53-G187[ DLAPPQHL    | 1485  | 1463  |
| >TP53-G187[ GLAPPQHLI   | 15   | >TP53-G187[ DLAPPQHLI   | 823   | 808   |
| >TP53-G187[ GLAPPQHLIR' | 9    | >TP53-G187[ DLAPPQHLIR' | 386   | 377   |
| >TP53-G187[ GLAPPQHL    | 61   | >TP53-G187[ DLAPPQHL    | 5489  | 5428  |
| >TP53-G187[ GLAPPQHLI   | 31   | >TP53-G187[ DLAPPQHLI   | 3914  | 3883  |
| >TP53-G187[ GLAPPQHLIR' | 7    | >TP53-G187[ DLAPPQHLIR' | 517   | 510   |
| >TP53-G187[ GLAPPQHLIR' | 44   | >TP53-G187[ DLAPPQHLIR' | 1730  | 1686  |
| >TP53-G187[ GLAPPQHL    | 16   | >TP53-G187[ DLAPPQHL    | 437   | 421   |
| >TP53-G187[ GLAPPQHLI   | 13   | >TP53-G187[ DLAPPQHLI   | 329   | 316   |
| >TP53-G187[ GLAPPQHLIR' | 3    | >TP53-G187[ DLAPPQHLIR' | 19    | 16    |
| >TP53-G187[ GLAPPQHL    | 26   | >TP53-G187[ DLAPPQHL    | 2704  | 2678  |
| >TP53-G187[ GLAPPQHLI   | 22   | >TP53-G187[ DLAPPQHLI   | 2675  | 2653  |
| >TP53-G187[ GLAPPQHLIR' | 7    | >TP53-G187[ DLAPPQHLIR' | 454   | 447   |
| >TP53-G187[ GLAPPQHL    | 11   | >TP53-G187[ DLAPPQHL    | 265   | 254   |
| >TP53-G187[ GLAPPQHLI   | 13   | >TP53-G187[ DLAPPQHLI   | 425   | 412   |
| >TP53-G187[ GLAPPQHLIR' | 5    | >TP53-G187[ DLAPPQHLIR' | 25    | 20    |
| >TP53-G187[ GLAPPQHL    | 175  | >TP53-G187[ DLAPPQHL    | 393   | 218   |
| >TP53-G187[ GLAPPQHLI   | 76   | >TP53-G187[ DLAPPQHLI   | 147   | 71    |
| >TP53-G187[ GLAPPQHLIR' | 9    | >TP53-G187[ DLAPPQHLIR' | 15    | 6     |
| >TP53-G187[ GLAPPQHL    | 5    | >TP53-G187[ DLAPPQHL    | 35    | 30    |
| >TP53-G187[ GLAPPQHLI   | 5    | >TP53-G187[ DLAPPQHLI   | 38    | 33    |
| >TP53-G187[ GLAPPQHLIR' | 2    | >TP53-G187[ DLAPPQHLIR' | 5     | 3     |

|                         |       |                         |      |       |
|-------------------------|-------|-------------------------|------|-------|
| >TP53-G187[ GLAPPQHLIR  | 8318  | >TP53-G187[ DLAPPQHLIR  | 355  | 7963  |
| >TP53-G187[ GLAPPQHLIR  | 1936  | >TP53-G187[ DLAPPQHLIR  | 204  | 1732  |
| >TP53-G187[ GLAPPQHL    | 8205  | >TP53-G187[ DLAPPQHL    | 465  | 7740  |
| >TP53-G187[ GLAPPQHLI   | 1622  | >TP53-G187[ DLAPPQHLI   | 32   | 1590  |
| >TP53-G187[ GLAPPQHLIR' | 1462  | >TP53-G187[ DLAPPQHLIR' | 62   | 1400  |
| >TP53-G187[ GLAPPQHLI   | 5490  | >TP53-G187[ DLAPPQHLI   | 75   | 5415  |
| >TP53-G187[ GLAPPQHLIR' | 1739  | >TP53-G187[ DLAPPQHLIR' | 39   | 1700  |
| >TP53-G187[ GLAPPQHLIR  | 282   | >TP53-G187[ DLAPPQHLIR  | 585  | 303   |
| >TP53-G187[ DGLAPPQHLI  | 15581 | >TP53-G187[ DDLAPPQHLI  | 185  | 15396 |
| >TP53-G187[ SDGLAPPQHI  | 104   | >TP53-G187[ SDDLAPPQHI  | 49   | 55    |
| >TP53-G187[ DSDGLAPPQI  | 1128  | >TP53-G187[ DSDDLAPPQI  | 386  | 742   |
| >TP53-G187[ CSDSDGLA    | 178   | >TP53-G187[ CSDSDDLA    | 212  | 34    |
| >TP53-G187[ HERCSDSDGL  | 602   | >TP53-G187[ HERCSDSDDL  | 377  | 225   |
| >TP53-G187[ HERCSDSDGL  | 422   | >TP53-G187[ HERCSDSDDL  | 1055 | 633   |
| >TP53-G187[ HHERCSDSDI  | 126   | >TP53-G187[ HHERCSDSDI  | 225  | 99    |
| >TP53-G187[ GLAPPQHL    | 285   | >TP53-G187[ SLAPPQHL    | 120  | 165   |
| >TP53-G187[ GLAPPQHLI   | 65    | >TP53-G187[ SLAPPQHLI   | 39   | 26    |
| >TP53-G187[ GLAPPQHLIR' | 20    | >TP53-G187[ SLAPPQHLIR\ | 15   | 5     |
| >TP53-G187[ GLAPPQHL    | 22    | >TP53-G187[ SLAPPQHL    | 17   | 5     |
| >TP53-G187[ GLAPPQHLI   | 15    | >TP53-G187[ SLAPPQHLI   | 13   | 2     |
| >TP53-G187[ GLAPPQHLIR' | 9     | >TP53-G187[ SLAPPQHLIR\ | 7    | 2     |
| >TP53-G187[ GLAPPQHL    | 61    | >TP53-G187[ SLAPPQHL    | 47   | 14    |
| >TP53-G187[ GLAPPQHLI   | 31    | >TP53-G187[ SLAPPQHLI   | 26   | 5     |
| >TP53-G187[ GLAPPQHLIR' | 7     | >TP53-G187[ SLAPPQHLIR\ | 6    | 1     |
| >TP53-G187[ GLAPPQHL    | 755   | >TP53-G187[ SLAPPQHL    | 408  | 347   |
| >TP53-G187[ GLAPPQHLI   | 500   | >TP53-G187[ SLAPPQHLI   | 278  | 222   |
| >TP53-G187[ GLAPPQHLIR' | 44    | >TP53-G187[ SLAPPQHLIR\ | 27   | 17    |
| >TP53-G187[ GLAPPQHL    | 16    | >TP53-G187[ SLAPPQHL    | 9    | 7     |
| >TP53-G187[ GLAPPQHLI   | 13    | >TP53-G187[ SLAPPQHLI   | 7    | 6     |
| >TP53-G187[ GLAPPQHLIR' | 3     | >TP53-G187[ SLAPPQHLIR\ | 2    | 1     |
| >TP53-G187[ GLAPPQHL    | 26    | >TP53-G187[ SLAPPQHL    | 46   | 20    |
| >TP53-G187[ GLAPPQHLI   | 22    | >TP53-G187[ SLAPPQHLI   | 41   | 19    |
| >TP53-G187[ GLAPPQHLIR' | 7     | >TP53-G187[ SLAPPQHLIR\ | 11   | 4     |
| >TP53-G187[ GLAPPQHL    | 11    | >TP53-G187[ SLAPPQHL    | 8    | 3     |
| >TP53-G187[ GLAPPQHLI   | 13    | >TP53-G187[ SLAPPQHLI   | 9    | 4     |
| >TP53-G187[ GLAPPQHLIR' | 5     | >TP53-G187[ SLAPPQHLIR\ | 5    | 0     |
| >TP53-G187[ GLAPPQHL    | 175   | >TP53-G187[ SLAPPQHL    | 123  | 52    |
| >TP53-G187[ GLAPPQHLI   | 76    | >TP53-G187[ SLAPPQHLI   | 50   | 26    |
| >TP53-G187[ GLAPPQHLIR' | 9     | >TP53-G187[ SLAPPQHLIR\ | 9    | 0     |
| >TP53-G187[ GLAPPQHL    | 5     | >TP53-G187[ SLAPPQHL    | 3    | 2     |
| >TP53-G187[ GLAPPQHLI   | 5     | >TP53-G187[ SLAPPQHLI   | 3    | 2     |
| >TP53-G187[ GLAPPQHLIR' | 2     | >TP53-G187[ SLAPPQHLIR\ | 1    | 1     |
| >TP53-G187[ GLAPPQHLIR  | 1986  | >TP53-G187[ SLAPPQHLIR  | 365  | 1621  |

|                                   |       |                                   |     |       |
|-----------------------------------|-------|-----------------------------------|-----|-------|
| >TP53-G187 $\epsilon$ GLAPPQHLIR  | 1936  | >TP53-G187 $\epsilon$ SLAPPQHLIR  | 279 | 1657  |
| >TP53-G187 $\epsilon$ GLAPPQHLI   | 1622  | >TP53-G187 $\epsilon$ SLAPPQHLI   | 37  | 1585  |
| >TP53-G187 $\epsilon$ GLAPPQHLIR' | 1462  | >TP53-G187 $\epsilon$ SLAPPQHLIR\ | 71  | 1391  |
| >TP53-G187 $\epsilon$ GLAPPQHLI   | 5490  | >TP53-G187 $\epsilon$ SLAPPQHLI   | 167 | 5323  |
| >TP53-G187 $\epsilon$ GLAPPQHLIR' | 1739  | >TP53-G187 $\epsilon$ SLAPPQHLIR\ | 66  | 1673  |
| >TP53-G187 $\epsilon$ GLAPPQHLIR  | 282   | >TP53-G187 $\epsilon$ SLAPPQHLIR  | 74  | 208   |
| >TP53-G187 $\epsilon$ GLAPPQHLIR  | 1493  | >TP53-G187 $\epsilon$ SLAPPQHLIR  | 222 | 1271  |
| >TP53-G187 $\epsilon$ GLAPPQHLI   | 1527  | >TP53-G187 $\epsilon$ SLAPPQHLI   | 220 | 1307  |
| >TP53-G187 $\epsilon$ DGLAPPQHLI  | 6184  | >TP53-G187 $\epsilon$ DSLAPPQHLI  | 207 | 5977  |
| >TP53-G187 $\epsilon$ DGLAPPQHLI  | 10861 | >TP53-G187 $\epsilon$ DSLAPPQHLI  | 441 | 10420 |
| >TP53-G187 $\epsilon$ DGLAPPQHL   | 5985  | >TP53-G187 $\epsilon$ DSLAPPQHL   | 398 | 5587  |
| >TP53-G187 $\epsilon$ DGLAPPQHLI  | 1466  | >TP53-G187 $\epsilon$ DSLAPPQHLI  | 88  | 1378  |
| >TP53-G187 $\epsilon$ SDGLAPPQHL  | 507   | >TP53-G187 $\epsilon$ SDSLAPPQHL  | 375 | 132   |
| >TP53-G187 $\epsilon$ SDGLAPPQHL  | 104   | >TP53-G187 $\epsilon$ SDSLAPPQHL  | 42  | 62    |
| >TP53-G187 $\epsilon$ CSDSDGLA    | 178   | >TP53-G187 $\epsilon$ CSDSDSLA    | 214 | 36    |
| >TP53-G187 $\epsilon$ ERCSDSDGL   | 1614  | >TP53-G187 $\epsilon$ ERCSDSDSL   | 240 | 1374  |
| >TP53-G187 $\epsilon$ HERCSDSDGL  | 602   | >TP53-G187 $\epsilon$ HERCSDSDSL  | 413 | 189   |
| >TP53-G187 $\epsilon$ HERCSDSDGL  | 422   | >TP53-G187 $\epsilon$ HERCSDSDSL  | 578 | 156   |
| >TP53-G187 $\epsilon$ HHERCSDSDC  | 126   | >TP53-G187 $\epsilon$ HHERCSDSDC  | 30  | 96    |
| >TP53-G187\GLAPPQHL               | 285   | >TP53-G187\VLAPPQHL               | 218 | 67    |
| >TP53-G187\GLAPPQHLI              | 65    | >TP53-G187\VLAPPQHLI              | 54  | 11    |
| >TP53-G187\GLAPPQHLIR'            | 20    | >TP53-G187\VLAPPQHLIR'            | 18  | 2     |
| >TP53-G187\GLAPPQHL               | 22    | >TP53-G187\VLAPPQHL               | 24  | 2     |
| >TP53-G187\GLAPPQHLI              | 15    | >TP53-G187\VLAPPQHLI              | 15  | 0     |
| >TP53-G187\GLAPPQHLIR'            | 9     | >TP53-G187\VLAPPQHLIR'            | 8   | 1     |
| >TP53-G187\GLAPPQHL               | 61    | >TP53-G187\VLAPPQHL               | 57  | 4     |
| >TP53-G187\GLAPPQHLI              | 31    | >TP53-G187\VLAPPQHLI              | 28  | 3     |
| >TP53-G187\GLAPPQHLIR'            | 7     | >TP53-G187\VLAPPQHLIR'            | 7   | 0     |
| >TP53-G187\GLAPPQHL               | 755   | >TP53-G187\VLAPPQHL               | 302 | 453   |
| >TP53-G187\GLAPPQHLI              | 500   | >TP53-G187\VLAPPQHLI              | 205 | 295   |
| >TP53-G187\GLAPPQHLIR'            | 44    | >TP53-G187\VLAPPQHLIR'            | 24  | 20    |
| >TP53-G187\GLAPPQHL               | 16    | >TP53-G187\VLAPPQHL               | 8   | 8     |
| >TP53-G187\GLAPPQHLI              | 13    | >TP53-G187\VLAPPQHLI              | 7   | 6     |
| >TP53-G187\GLAPPQHLIR'            | 3     | >TP53-G187\VLAPPQHLIR'            | 2   | 1     |
| >TP53-G187\GLAPPQHL               | 26    | >TP53-G187\VLAPPQHL               | 39  | 13    |
| >TP53-G187\GLAPPQHLI              | 22    | >TP53-G187\VLAPPQHLI              | 33  | 11    |
| >TP53-G187\GLAPPQHLIR'            | 7     | >TP53-G187\VLAPPQHLIR'            | 8   | 1     |
| >TP53-G187\GLAPPQHL               | 11    | >TP53-G187\VLAPPQHL               | 13  | 2     |
| >TP53-G187\GLAPPQHLI              | 13    | >TP53-G187\VLAPPQHLI              | 15  | 2     |
| >TP53-G187\GLAPPQHLIR'            | 5     | >TP53-G187\VLAPPQHLIR'            | 6   | 1     |
| >TP53-G187\GLAPPQHL               | 175   | >TP53-G187\VLAPPQHL               | 25  | 150   |
| >TP53-G187\GLAPPQHLI              | 76    | >TP53-G187\VLAPPQHLI              | 10  | 66    |
| >TP53-G187\GLAPPQHLIR'            | 9     | >TP53-G187\VLAPPQHLIR'            | 3   | 6     |

|                        |       |                        |     |       |
|------------------------|-------|------------------------|-----|-------|
| >TP53-G187\GLAPPQHL    | 5     | >TP53-G187\VLAPPQHL    | 3   | 2     |
| >TP53-G187\GLAPPQHLI   | 5     | >TP53-G187\VLAPPQHLI   | 3   | 2     |
| >TP53-G187\GLAPPQHLIR' | 2     | >TP53-G187\VLAPPQHLIR' | 1   | 1     |
| >TP53-G187\GLAPPQHLI   | 1622  | >TP53-G187\VLAPPQHLI   | 256 | 1366  |
| >TP53-G187\GLAPPQHLIR' | 1462  | >TP53-G187\VLAPPQHLIR' | 310 | 1152  |
| >TP53-G187\GLAPPQHLI   | 2635  | >TP53-G187\VLAPPQHLI   | 401 | 2234  |
| >TP53-G187\GLAPPQHLIR  | 282   | >TP53-G187\VLAPPQHLIR  | 405 | 123   |
| >TP53-G187\GLAPPQHLIR  | 1493  | >TP53-G187\VLAPPQHLIR  | 466 | 1027  |
| >TP53-G187\DGLAPPQHL   | 27159 | >TP53-G187\DLAPPQHL    | 209 | 26950 |
| >TP53-G187\DGLAPPQHLI  | 6184  | >TP53-G187\DLAPPQHLI   | 99  | 6085  |
| >TP53-G187\DGLAPPQHLI  | 6227  | >TP53-G187\DLAPPQHLI   | 224 | 6003  |
| >TP53-G187\DGLAPPQHLI  | 10861 | >TP53-G187\DLAPPQHLI   | 252 | 10609 |
| >TP53-G187\DGLAPPQHL   | 5985  | >TP53-G187\DLAPPQHL    | 45  | 5940  |
| >TP53-G187\DGLAPPQHLI  | 1466  | >TP53-G187\DLAPPQHLI   | 13  | 1453  |
| >TP53-G187\SDGLAPPQHI  | 507   | >TP53-G187\SDVLAPPQHI  | 396 | 111   |
| >TP53-G187\SDGLAPPQHI  | 1651  | >TP53-G187\SDVLAPPQHI  | 363 | 1288  |
| >TP53-G187\SDGLAPPQHI  | 104   | >TP53-G187\SDVLAPPQHI  | 45  | 59    |
| >TP53-G187\CSDSDGLA    | 178   | >TP53-G187\CSDSDVLA    | 230 | 52    |
| >TP53-G187\ERCSDSDGL   | 1614  | >TP53-G187\ERCSDSDVL   | 80  | 1534  |
| >TP53-G187\HERCSDSDGL  | 602   | >TP53-G187\HERCSDSDVL  | 232 | 370   |
| >TP53-G187\HERCSDSDG   | 9135  | >TP53-G187\HERCSDSDV   | 53  | 9082  |
| >TP53-G187\HERCSDSDGL  | 422   | >TP53-G187\HERCSDSDVL  | 905 | 483   |
| >TP53-G187\HHERCSDSDC  | 833   | >TP53-G187\HHERCSDSD\  | 317 | 516   |
| >TP53-G187\HHERCSDSDC  | 126   | >TP53-G187\HHERCSDSD\  | 18  | 108   |
| >TP53-G199\EGNLRVEY    | 7554  | >TP53-G199\EANLRVEY    | 361 | 7193  |
| >TP53-G199\EGNLRVEYL   | 2216  | >TP53-G199\EANLRVEYL   | 74  | 2142  |
| >TP53-G199\EGNLRVEY    | 1669  | >TP53-G199\EANLRVEY    | 131 | 1538  |
| >TP53-G199\VEGNLRVEYL  | 312   | >TP53-G199\VEANLRVEYL  | 78  | 234   |
| >TP53-G199\VEGNLRVEY   | 1192  | >TP53-G199\VEANLRVEY   | 255 | 937   |
| >TP53-G199\VEGNLRVEY   | 67    | >TP53-G199\VEANLRVEY   | 28  | 39    |
| >TP53-G199\VEGNLRVEYL  | 799   | >TP53-G199\VEANLRVEYL  | 356 | 443   |
| >TP53-G199\VEGNLRVEYL  | 472   | >TP53-G199\VEANLRVEYL  | 197 | 275   |
| >TP53-G199\VEGNLRVEY   | 338   | >TP53-G199\VEANLRVEY   | 257 | 81    |
| >TP53-G199\VEGNLRVEYL  | 278   | >TP53-G199\VEANLRVEYL  | 262 | 16    |
| >TP53-G199\RVEGNLRV    | 54    | >TP53-G199\RVEANLRV    | 179 | 125   |
| >TP53-G199\RVEGNLRVEY  | 224   | >TP53-G199\RVEANLRVEY  | 257 | 33    |
| >TP53-G199\RVEGNLRVEY  | 1157  | >TP53-G199\RVEANLRVEY  | 236 | 921   |
| >TP53-G199\RVEGNLRVEY  | 301   | >TP53-G199\RVEANLRVEY  | 230 | 71    |
| >TP53-G199\RVEGNLRVEY  | 400   | >TP53-G199\RVEANLRVEY  | 351 | 49    |
| >TP53-G199\RVEGNLRVEY  | 933   | >TP53-G199\RVEANLRVEY  | 273 | 660   |
| >TP53-G199\IRVEGNLRVE' | 53    | >TP53-G199\IRVEANLRVE' | 44  | 9     |
| >TP53-G199\IRVEGNLRVE' | 668   | >TP53-G199\IRVEANLRVE' | 444 | 224   |
| >TP53-G199\LIRVEGNLRV  | 35    | >TP53-G199\LIRVEANLRV  | 38  | 3     |

|                        |       |                        |     |       |
|------------------------|-------|------------------------|-----|-------|
| >TP53-G199/LIRVEGNLRV  | 296   | >TP53-G199/LIRVEANLRV  | 205 | 91    |
| >TP53-G199/LIRVEGNLR   | 1411  | >TP53-G199/LIRVEANLR   | 462 | 949   |
| >TP53-G199/HLIRVEGNL   | 4684  | >TP53-G199/HLIRVEANL   | 387 | 4297  |
| >TP53-G199/HLIRVEGNLR' | 156   | >TP53-G199/HLIRVEANLR' | 56  | 100   |
| >TP53-G199/HLIRVEGNL   | 226   | >TP53-G199/HLIRVEANL   | 30  | 196   |
| >TP53-G199/HLIRVEGNLR' | 111   | >TP53-G199/HLIRVEANLR' | 43  | 68    |
| >TP53-G199/HLIRVEGNL   | 690   | >TP53-G199/HLIRVEANL   | 265 | 425   |
| >TP53-G199/HLIRVEGNLR' | 41    | >TP53-G199/HLIRVEANLR' | 33  | 8     |
| >TP53-G199/HLIRVEGNLR' | 322   | >TP53-G199/HLIRVEANLR' | 167 | 155   |
| >TP53-G199/HLIRVEGNL   | 327   | >TP53-G199/HLIRVEANL   | 75  | 252   |
| >TP53-G199/HLIRVEGNLR' | 9     | >TP53-G199/HLIRVEANLR' | 8   | 1     |
| >TP53-G199/HLIRVEGNL   | 806   | >TP53-G199/HLIRVEANL   | 47  | 759   |
| >TP53-G199/HLIRVEGNLR' | 27    | >TP53-G199/HLIRVEANLR' | 13  | 14    |
| >TP53-G199/HLIRVEGNL   | 878   | >TP53-G199/HLIRVEANL   | 166 | 712   |
| >TP53-G199/HLIRVEGNLR' | 27    | >TP53-G199/HLIRVEANLR' | 20  | 7     |
| >TP53-G199/HLIRVEGNLR' | 701   | >TP53-G199/HLIRVEANLR' | 283 | 418   |
| >TP53-G199/HLIRVEGNL   | 153   | >TP53-G199/HLIRVEANL   | 16  | 137   |
| >TP53-G199/HLIRVEGNLR' | 4     | >TP53-G199/HLIRVEANLR' | 3   | 1     |
| >TP53-G199/HLIRVEGNLR  | 241   | >TP53-G199/HLIRVEANLR  | 225 | 16    |
| >TP53-G199/HLIRVEGNLR  | 381   | >TP53-G199/HLIRVEANLR  | 446 | 65    |
| >TP53-G199/HLIRVEGNLR  | 24    | >TP53-G199/HLIRVEANLR  | 26  | 2     |
| >TP53-G199/HLIRVEGNLR' | 398   | >TP53-G199/HLIRVEANLR' | 222 | 176   |
| >TP53-G199/HLIRVEGNLR  | 478   | >TP53-G199/HLIRVEANLR  | 239 | 239   |
| >TP53-G199/PPQHLIRVEG  | 11406 | >TP53-G199/PPQHLIRVEA  | 211 | 11195 |
| >TP53-G199EGNLRVEYLDC  | 8656  | >TP53-G199EENLRVEYLDD  | 280 | 8376  |
| >TP53-G199EGNLRVEYL    | 14521 | >TP53-G199EENLRVEYL    | 51  | 14470 |
| >TP53-G199EGNLRVEY     | 12687 | >TP53-G199EENLRVEY     | 152 | 12535 |
| >TP53-G199EGNLRVEY     | 17851 | >TP53-G199EENLRVEY     | 326 | 17525 |
| >TP53-G199EGNLRVEY     | 31890 | >TP53-G199EENLRVEY     | 257 | 31633 |
| >TP53-G199VEGNLRVEYL   | 312   | >TP53-G199VEENLRVEYL   | 196 | 116   |
| >TP53-G199VEGNLRVEY    | 67    | >TP53-G199VEENLRVEY    | 61  | 6     |
| >TP53-G199VEGNLRVEYL   | 799   | >TP53-G199VEENLRVEYL   | 478 | 321   |
| >TP53-G199VEGNLRVEYL   | 472   | >TP53-G199VEENLRVEYL   | 270 | 202   |
| >TP53-G199VEGNLRVEY    | 338   | >TP53-G199VEENLRVEY    | 661 | 323   |
| >TP53-G199VEGNLRVEYL   | 278   | >TP53-G199VEENLRVEYL   | 251 | 27    |
| >TP53-G199RVEGNLRV     | 732   | >TP53-G199RVEENLRV     | 291 | 441   |
| >TP53-G199RVEGNLRVEY   | 946   | >TP53-G199RVEENLRVEY   | 307 | 639   |
| >TP53-G199RVEGNLRV     | 604   | >TP53-G199RVEENLRV     | 239 | 365   |
| >TP53-G199RVEGNLRVEY   | 974   | >TP53-G199RVEENLRVEY   | 358 | 616   |
| >TP53-G199RVEGNLRV     | 54    | >TP53-G199RVEENLRV     | 79  | 25    |
| >TP53-G199RVEGNLRVEY   | 224   | >TP53-G199RVEENLRVEY   | 455 | 231   |
| >TP53-G199RVEGNLRVEY   | 301   | >TP53-G199RVEENLRVEY   | 197 | 104   |
| >TP53-G199RVEGNLRVEY   | 400   | >TP53-G199RVEENLRVEY   | 416 | 16    |

|                         |      |                         |     |      |
|-------------------------|------|-------------------------|-----|------|
| >TP53-G199F RVEGNLRVEY  | 933  | >TP53-G199F RVEENLRVEY  | 162 | 771  |
| >TP53-G199F IRVEGNLRVE' | 53   | >TP53-G199F IRVEENLRVE\ | 50  | 3    |
| >TP53-G199F LIRVEGNLRV  | 35   | >TP53-G199F LIRVEENLRV  | 45  | 10   |
| >TP53-G199F LIRVEGNLRV  | 296  | >TP53-G199F LIRVEENLRV  | 733 | 437  |
| >TP53-G199F HLIRVEGNLR' | 156  | >TP53-G199F HLIRVEENLR\ | 94  | 62   |
| >TP53-G199F HLIRVEGNL   | 226  | >TP53-G199F HLIRVEENL   | 30  | 196  |
| >TP53-G199F HLIRVEGNLR' | 111  | >TP53-G199F HLIRVEENLR\ | 46  | 65   |
| >TP53-G199F HLIRVEGNLR' | 41   | >TP53-G199F HLIRVEENLR\ | 73  | 32   |
| >TP53-G199F HLIRVEGNLR' | 322  | >TP53-G199F HLIRVEENLR\ | 261 | 61   |
| >TP53-G199F HLIRVEGNL   | 327  | >TP53-G199F HLIRVEENL   | 91  | 236  |
| >TP53-G199F HLIRVEGNLR' | 9    | >TP53-G199F HLIRVEENLR\ | 9   | 0    |
| >TP53-G199F HLIRVEGNL   | 806  | >TP53-G199F HLIRVEENL   | 175 | 631  |
| >TP53-G199F HLIRVEGNLR' | 27   | >TP53-G199F HLIRVEENLR\ | 18  | 9    |
| >TP53-G199F HLIRVEGNL   | 878  | >TP53-G199F HLIRVEENL   | 214 | 664  |
| >TP53-G199F HLIRVEGNLR' | 27   | >TP53-G199F HLIRVEENLR\ | 27  | 0    |
| >TP53-G199F HLIRVEGNL   | 153  | >TP53-G199F HLIRVEENL   | 45  | 108  |
| >TP53-G199F HLIRVEGNLR' | 4    | >TP53-G199F HLIRVEENLR\ | 4   | 0    |
| >TP53-G199F HLIRVEGNLR  | 241  | >TP53-G199F HLIRVEENLR  | 453 | 212  |
| >TP53-G199F HLIRVEGNLR  | 381  | >TP53-G199F HLIRVEENLR  | 875 | 494  |
| >TP53-G199F HLIRVEGNLR  | 24   | >TP53-G199F HLIRVEENLR  | 41  | 17   |
| >TP53-G199F HLIRVEGNLR' | 398  | >TP53-G199F HLIRVEENLR\ | 411 | 13   |
| >TP53-G199F HLIRVEGNLR  | 478  | >TP53-G199F HLIRVEENLR  | 395 | 83   |
| >TP53-G199F VEGNLRVEYL  | 312  | >TP53-G199F VERNLRVEYL  | 445 | 133  |
| >TP53-G199F VEGNLRVEY   | 1192 | >TP53-G199F VERNLRVEY   | 95  | 1097 |
| >TP53-G199F VEGNLRVEY   | 67   | >TP53-G199F VERNLRVEY   | 24  | 43   |
| >TP53-G199F VEGNLRVEYL  | 472  | >TP53-G199F VERNLRVEYL  | 286 | 186  |
| >TP53-G199F VEGNLRVEY   | 338  | >TP53-G199F VERNLRVEY   | 620 | 282  |
| >TP53-G199F VEGNLRVEYL  | 278  | >TP53-G199F VERNLRVEYL  | 186 | 92   |
| >TP53-G199F RVEGNLRV    | 54   | >TP53-G199F RVERNLRV    | 216 | 162  |
| >TP53-G199F RVEGNLRVEY  | 224  | >TP53-G199F RVERNLRVEY  | 219 | 5    |
| >TP53-G199F RVEGNLRVEY  | 1157 | >TP53-G199F RVERNLRVEY  | 387 | 770  |
| >TP53-G199F RVEGNLRVEY  | 301  | >TP53-G199F RVERNLRVEY  | 933 | 632  |
| >TP53-G199F RVEGNLRVEY  | 400  | >TP53-G199F RVERNLRVEY  | 226 | 174  |
| >TP53-G199F RVEGNLRVEY  | 933  | >TP53-G199F RVERNLRVEY  | 205 | 728  |
| >TP53-G199F IRVEGNLRVE' | 53   | >TP53-G199F IRVERNLRVE\ | 60  | 7    |
| >TP53-G199F IRVEGNLRVE' | 668  | >TP53-G199F IRVERNLRVE\ | 423 | 245  |
| >TP53-G199F LIRVEGNLRV  | 35   | >TP53-G199F LIRVERNLRV  | 42  | 7    |
| >TP53-G199F LIRVEGNLR   | 1087 | >TP53-G199F LIRVERNLR   | 197 | 890  |
| >TP53-G199F LIRVEGNLRV  | 296  | >TP53-G199F LIRVERNLRV  | 108 | 188  |
| >TP53-G199F LIRVEGNLR   | 570  | >TP53-G199F LIRVERNLR   | 85  | 485  |
| >TP53-G199F LIRVEGNLR   | 1131 | >TP53-G199F LIRVERNLR   | 184 | 947  |
| >TP53-G199F LIRVEGNLR   | 1411 | >TP53-G199F LIRVERNLR   | 489 | 922  |
| >TP53-G199F HLIRVEGNLR' | 156  | >TP53-G199F HLIRVERNLR\ | 191 | 35   |

|                        |       |                        |     |       |
|------------------------|-------|------------------------|-----|-------|
| >TP53-G199FHLIRVEGNL   | 226   | >TP53-G199FHLIRVERNLR  | 378 | 152   |
| >TP53-G199FHLIRVEGNLR' | 111   | >TP53-G199FHLIRVERNLR\ | 135 | 24    |
| >TP53-G199FHLIRVEGNLR' | 41    | >TP53-G199FHLIRVERNLR\ | 67  | 26    |
| >TP53-G199FHLIRVEGNLR' | 322   | >TP53-G199FHLIRVERNLR\ | 586 | 264   |
| >TP53-G199FHLIRVEGNL   | 327   | >TP53-G199FHLIRVERNLR  | 376 | 49    |
| >TP53-G199FHLIRVEGNLR' | 9     | >TP53-G199FHLIRVERNLR\ | 12  | 3     |
| >TP53-G199FHLIRVEGNLR' | 27    | >TP53-G199FHLIRVERNLR\ | 37  | 10    |
| >TP53-G199FHLIRVEGNLR' | 27    | >TP53-G199FHLIRVERNLR\ | 49  | 22    |
| >TP53-G199FHLIRVEGNL   | 153   | >TP53-G199FHLIRVERNLR  | 255 | 102   |
| >TP53-G199FHLIRVEGNLR' | 4     | >TP53-G199FHLIRVERNLR\ | 5   | 1     |
| >TP53-G199FHLIRVEGNLR  | 241   | >TP53-G199FHLIRVERNLR  | 56  | 185   |
| >TP53-G199FHLIRVEGNLR  | 381   | >TP53-G199FHLIRVERNLR  | 339 | 42    |
| >TP53-G199FHLIRVEGNLR  | 24    | >TP53-G199FHLIRVERNLR  | 37  | 13    |
| >TP53-G199FHLIRVEGNLR' | 398   | >TP53-G199FHLIRVERNLR\ | 894 | 496   |
| >TP53-G199FHLIRVEGNLR  | 478   | >TP53-G199FHLIRVERNLR  | 306 | 172   |
| >TP53-G199FQHLIRVEG    | 34991 | >TP53-G199FQHLIRVER    | 419 | 34572 |
| >TP53-G199FPQHLIRVEG   | 21417 | >TP53-G199FPQHLIRVER   | 278 | 21139 |
| >TP53-G199\GNLRVEYL    | 5657  | >TP53-G199\VNLRVEYL    | 73  | 5584  |
| >TP53-G199\EGNLRVEY    | 16614 | >TP53-G199\EVNLRVEY    | 397 | 16217 |
| >TP53-G199\EGNLRVEY    | 18052 | >TP53-G199\EVNLRVEY    | 56  | 17996 |
| >TP53-G199\EGNLRVEYL   | 26112 | >TP53-G199\EVNLRVEYL   | 181 | 25931 |
| >TP53-G199\EGNLRVEY    | 7554  | >TP53-G199\EVNLRVEY    | 162 | 7392  |
| >TP53-G199\EGNLRVEYL   | 2216  | >TP53-G199\EVNLRVEYL   | 18  | 2198  |
| >TP53-G199\EGNLRVEYL   | 12933 | >TP53-G199\EVNLRVEYL   | 436 | 12497 |
| >TP53-G199\APPQHLIRVE  | 30288 | >TP53-G199\APPQHLIRVE' | 340 | 29948 |
| >TP53-G199\APPQHLIRVE  | 17526 | >TP53-G199\APPQHLIRVE' | 209 | 17317 |
| >TP53-G199\VEGNLRVEYL  | 312   | >TP53-G199\VEVNLRVEYL  | 249 | 63    |
| >TP53-G199\VEGNLRVEY   | 1192  | >TP53-G199\VEVNLRVEY   | 228 | 964   |
| >TP53-G199\VEGNLRVEY   | 67    | >TP53-G199\VEVNLRVEY   | 17  | 50    |
| >TP53-G199\VEGNLRVEYL  | 799   | >TP53-G199\VEVNLRVEYL  | 304 | 495   |
| >TP53-G199\VEGNLRVEYL  | 472   | >TP53-G199\VEVNLRVEYL  | 183 | 289   |
| >TP53-G199\VEGNLRVEY   | 338   | >TP53-G199\VEVNLRVEY   | 128 | 210   |
| >TP53-G199\VEGNLRVEYL  | 278   | >TP53-G199\VEVNLRVEYL  | 282 | 4     |
| >TP53-G199\RVEGNLRV    | 54    | >TP53-G199\RVEVNLRV    | 464 | 410   |
| >TP53-G199\RVEGNLRVEY  | 224   | >TP53-G199\RVEVNLRVEY  | 217 | 7     |
| >TP53-G199\RVEGNLRVEY  | 301   | >TP53-G199\RVEVNLRVEY  | 265 | 36    |
| >TP53-G199\RVEGNLRVEY  | 400   | >TP53-G199\RVEVNLRVEY  | 247 | 153   |
| >TP53-G199\IRVEGNLRVE' | 53    | >TP53-G199\IRVEVNLRVE' | 61  | 8     |
| >TP53-G199\IRVEGNLRVE' | 668   | >TP53-G199\IRVEVNLRVE' | 448 | 220   |
| >TP53-G199\LIRVEGNLRV  | 35    | >TP53-G199\LIRVEVNLRV  | 25  | 10    |
| >TP53-G199\LIRVEGNLRV  | 296   | >TP53-G199\LIRVEVNLRV  | 269 | 27    |
| >TP53-G199\LIRVEGNLR   | 570   | >TP53-G199\LIRVEVNLR   | 324 | 246   |
| >TP53-G199\HLIRVEGNL   | 4684  | >TP53-G199\HLIRVEVNL   | 422 | 4262  |

|                        |       |                        |     |       |
|------------------------|-------|------------------------|-----|-------|
| >TP53-G199\HLIRVEGNLR' | 156   | >TP53-G199\HLIRVEVNLR' | 54  | 102   |
| >TP53-G199\HLIRVEGNL   | 226   | >TP53-G199\HLIRVEVNL   | 39  | 187   |
| >TP53-G199\HLIRVEGNLR' | 111   | >TP53-G199\HLIRVEVNLR' | 47  | 64    |
| >TP53-G199\HLIRVEGNLR' | 41    | >TP53-G199\HLIRVEVNLR' | 53  | 12    |
| >TP53-G199\HLIRVEGNLR' | 322   | >TP53-G199\HLIRVEVNLR' | 162 | 160   |
| >TP53-G199\HLIRVEGNL   | 327   | >TP53-G199\HLIRVEVNL   | 90  | 237   |
| >TP53-G199\HLIRVEGNLR' | 9     | >TP53-G199\HLIRVEVNLR' | 6   | 3     |
| >TP53-G199\HLIRVEGNL   | 806   | >TP53-G199\HLIRVEVNL   | 74  | 732   |
| >TP53-G199\HLIRVEGNLR' | 27    | >TP53-G199\HLIRVEVNLR' | 14  | 13    |
| >TP53-G199\HLIRVEGNL   | 878   | >TP53-G199\HLIRVEVNL   | 92  | 786   |
| >TP53-G199\HLIRVEGNLR' | 27    | >TP53-G199\HLIRVEVNLR' | 17  | 10    |
| >TP53-G199\HLIRVEGNLR' | 701   | >TP53-G199\HLIRVEVNLR' | 436 | 265   |
| >TP53-G199\HLIRVEGNL   | 153   | >TP53-G199\HLIRVEVNL   | 22  | 131   |
| >TP53-G199\HLIRVEGNLR' | 4     | >TP53-G199\HLIRVEVNLR' | 3   | 1     |
| >TP53-G199\HLIRVEGNLR  | 241   | >TP53-G199\HLIRVEVNLR  | 264 | 23    |
| >TP53-G199\HLIRVEGNLR  | 381   | >TP53-G199\HLIRVEVNLR  | 459 | 78    |
| >TP53-G199\HLIRVEGNLR  | 24    | >TP53-G199\HLIRVEVNLR  | 36  | 12    |
| >TP53-G199\HLIRVEGNLR' | 398   | >TP53-G199\HLIRVEVNLR' | 178 | 220   |
| >TP53-G199\HLIRVEGNLR  | 478   | >TP53-G199\HLIRVEVNLR  | 202 | 276   |
| >TP53-G199\PPQHLIRVEG  | 13532 | >TP53-G199\PPQHLIRVEV  | 402 | 13130 |
| >TP53-G226/GSDCTTIHY   | 18    | >TP53-G226/ASDCTTIHY   | 11  | 7     |
| >TP53-G226/GSDCTTIHYN  | 34    | >TP53-G226/ASDCTTIHYN' | 16  | 18    |
| >TP53-G226/GSDCTTIHYN  | 1028  | >TP53-G226/ASDCTTIHYN' | 324 | 704   |
| >TP53-G226/GSDCTTIHYN  | 174   | >TP53-G226/ASDCTTIHYN' | 411 | 237   |
| >TP53-G226/GSDCTTIHYN  | 582   | >TP53-G226/ASDCTTIHYN' | 410 | 172   |
| >TP53-G226/GSDCTTIHY   | 1974  | >TP53-G226/ASDCTTIHY   | 370 | 1604  |
| >TP53-G226/GSDCTTIHYN  | 1576  | >TP53-G226/ASDCTTIHYN' | 304 | 1272  |
| >TP53-G226/GSDCTTIHY   | 68    | >TP53-G226/ASDCTTIHY   | 17  | 51    |
| >TP53-G226/GSDCTTIHYN  | 99    | >TP53-G226/ASDCTTIHYN' | 27  | 72    |
| >TP53-G226/GSDCTTIHYN  | 247   | >TP53-G226/ASDCTTIHYN' | 650 | 403   |
| >TP53-G226/GSDCTTIHY   | 242   | >TP53-G226/ASDCTTIHY   | 437 | 195   |
| >TP53-G226/GSDCTTIHYN  | 97    | >TP53-G226/ASDCTTIHYN' | 167 | 70    |
| >TP53-G226/VGSDCTTIHY  | 353   | >TP53-G226/VASDCTTIHY  | 102 | 251   |
| >TP53-G226/VGSDCTTIHY  | 19009 | >TP53-G226/VASDCTTIHY  | 242 | 18767 |
| >TP53-G226/VGSDCTTIHY  | 184   | >TP53-G226/VASDCTTIHY  | 124 | 60    |
| >TP53-G226/VGSDCTTIHY  | 642   | >TP53-G226/VASDCTTIHY  | 247 | 395   |
| >TP53-G226/VGSDCTTIHY  | 1444  | >TP53-G226/VASDCTTIHY  | 316 | 1128  |
| >TP53-G226/VGSDCTTIHY  | 377   | >TP53-G226/VASDCTTIHY  | 161 | 216   |
| >TP53-G226/VGSDCTTIHY  | 2195  | >TP53-G226/VASDCTTIHY  | 303 | 1892  |
| >TP53-G226/VGSDCTTIHY  | 1948  | >TP53-G226/VASDCTTIHY  | 34  | 1914  |
| >TP53-G226/VGSDCTTIH   | 3714  | >TP53-G226/VASDCTTIH   | 458 | 3256  |
| >TP53-G226/VGSDCTTIHY  | 4763  | >TP53-G226/VASDCTTIHY  | 233 | 4530  |
| >TP53-G226/VGSDCTTIHY  | 449   | >TP53-G226/VASDCTTIHY  | 709 | 260   |



|                        |       |                        |      |       |
|------------------------|-------|------------------------|------|-------|
| >TP53-G226/VGSDCTTI    | 605   | >TP53-G226/VASDCTTI    | 90   | 515   |
| >TP53-G226/EVGSDCTTIH' | 2209  | >TP53-G226/EVASDCTTIH' | 47   | 2162  |
| >TP53-G226/EVGSDCTTIH' | 11    | >TP53-G226/EVASDCTTIH' | 4    | 7     |
| >TP53-G226/EVGSDCTTIH' | 75    | >TP53-G226/EVASDCTTIH' | 250  | 175   |
| >TP53-G226/EVGSDCTTIH' | 387   | >TP53-G226/EVASDCTTIH' | 137  | 250   |
| >TP53-G226/EVGSDCTTIH' | 1152  | >TP53-G226/EVASDCTTIH' | 375  | 777   |
| >TP53-G226/EVGSDCTTIH' | 612   | >TP53-G226/EVASDCTTIH' | 34   | 578   |
| >TP53-G226/EVGSDCTTI   | 1082  | >TP53-G226/EVASDCTTI   | 20   | 1062  |
| >TP53-G226/EVGSDCTTI   | 504   | >TP53-G226/EVASDCTTI   | 65   | 439   |
| >TP53-G226/EVGSDCTTIH' | 326   | >TP53-G226/EVASDCTTIH' | 552  | 226   |
| >TP53-G226/EVGSDCTTIH' | 819   | >TP53-G226/EVASDCTTIH' | 411  | 408   |
| >TP53-G226/EVGSDCTTIH' | 1160  | >TP53-G226/EVASDCTTIH' | 124  | 1036  |
| >TP53-G226/PEVGSDCTTI  | 342   | >TP53-G226/PEVASDCTTI  | 680  | 338   |
| >TP53-G226/VPYEPPEVG   | 2108  | >TP53-G226/VPYEPPEVA   | 347  | 1761  |
| >TP53-G226/VPYEPPEVG   | 1696  | >TP53-G226/VPYEPPEVA   | 71   | 1625  |
| >TP53-G226[GSDCTTIHY   | 18    | >TP53-G226[GSDCTTIHY   | 14   | 4     |
| >TP53-G226[GSDCTTIHYN  | 34    | >TP53-G226[GSDCTTIHYN  | 25   | 9     |
| >TP53-G226[GSDCTTIHYN  | 174   | >TP53-G226[GSDCTTIHYN  | 720  | 546   |
| >TP53-G226[GSDCTTIHY   | 68    | >TP53-G226[GSDCTTIHY   | 1559 | 1491  |
| >TP53-G226[GSDCTTIHYN  | 99    | >TP53-G226[GSDCTTIHYN  | 1655 | 1556  |
| >TP53-G226[GSDCTTIHYN  | 247   | >TP53-G226[GSDCTTIHYN  | 5391 | 5144  |
| >TP53-G226[GSDCTTIHY   | 242   | >TP53-G226[GSDCTTIHY   | 576  | 334   |
| >TP53-G226[GSDCTTIHYN  | 97    | >TP53-G226[GSDCTTIHYN  | 207  | 110   |
| >TP53-G226[VGSDCTTIHY  | 353   | >TP53-G226[VSDCTTIHY   | 1630 | 1277  |
| >TP53-G226[VGSDCTTIHY  | 184   | >TP53-G226[VSDCTTIHY   | 466  | 282   |
| >TP53-G226[VGSDCTTIHY  | 377   | >TP53-G226[VSDCTTIHY   | 3374 | 2997  |
| >TP53-G226[VGSDCTTIHY  | 449   | >TP53-G226[VSDCTTIHY   | 5757 | 5308  |
| >TP53-G226[VGSDCTTI    | 12420 | >TP53-G226[VSDCTTI     | 97   | 12323 |
| >TP53-G226[EVGSDCTTIH' | 7892  | >TP53-G226[EVDSDCTTIH' | 143  | 7749  |
| >TP53-G226[EVGSDCTTIH' | 11    | >TP53-G226[EVDSDCTTIH' | 143  | 132   |
| >TP53-G226[EVGSDCTTIH' | 75    | >TP53-G226[EVDSDCTTIH' | 1566 | 1491  |
| >TP53-G226[EVGSDCTTIH' | 387   | >TP53-G226[EVDSDCTTIH' | 1061 | 674   |
| >TP53-G226[EVGSDCTTI   | 504   | >TP53-G226[EVDSDCTTI   | 92   | 412   |
| >TP53-G226[EVGSDCTTIH' | 326   | >TP53-G226[EVDSDCTTIH' | 1006 | 680   |
| >TP53-G226[PEVGSDCTTI  | 342   | >TP53-G226[PEVSDCTTI   | 704  | 362   |
| >TP53-G226[PPEVGSDCTT  | 657   | >TP53-G226[PPEVSDCTT   | 441  | 216   |
| >TP53-G226[GSDCTTIHY   | 18    | >TP53-G226[SSDCTTIHY   | 9    | 9     |
| >TP53-G226[GSDCTTIHYN  | 34    | >TP53-G226[SSDCTTIHYN  | 14   | 20    |
| >TP53-G226[GSDCTTIHYN  | 1028  | >TP53-G226[SSDCTTIHYN  | 225  | 803   |
| >TP53-G226[GSDCTTIHYN  | 174   | >TP53-G226[SSDCTTIHYN  | 237  | 63    |
| >TP53-G226[GSDCTTIHYN  | 582   | >TP53-G226[SSDCTTIHYN  | 339  | 243   |
| >TP53-G226[GSDCTTIHY   | 1974  | >TP53-G226[SSDCTTIHY   | 135  | 1839  |
| >TP53-G226[GSDCTTIHYN  | 1576  | >TP53-G226[SSDCTTIHYN  | 105  | 1471  |

|                                |       |                                |     |       |
|--------------------------------|-------|--------------------------------|-----|-------|
| >TP53-G226 $\leq$ GSDCTTIHY    | 68    | >TP53-G226 $\leq$ SSDCTTIHY    | 58  | 10    |
| >TP53-G226 $\leq$ GSDCTTIHYN   | 99    | >TP53-G226 $\leq$ SSDCTTIHYN\` | 84  | 15    |
| >TP53-G226 $\leq$ GSDCTTIHYN   | 247   | >TP53-G226 $\leq$ SSDCTTIHYN\` | 250 | 3     |
| >TP53-G226 $\leq$ GSDCTTIHY    | 242   | >TP53-G226 $\leq$ SSDCTTIHY    | 313 | 71    |
| >TP53-G226 $\leq$ GSDCTTIHYN   | 97    | >TP53-G226 $\leq$ SSDCTTIHYN\` | 122 | 25    |
| >TP53-G226 $\leq$ VGSDCTTIHY   | 353   | >TP53-G226 $\leq$ VSSDCTTIHY   | 17  | 336   |
| >TP53-G226 $\leq$ VGSDCTTIHY   | 14963 | >TP53-G226 $\leq$ VSSDCTTIHY   | 428 | 14535 |
| >TP53-G226 $\leq$ VGSDCTTIHY   | 19009 | >TP53-G226 $\leq$ VSSDCTTIHY   | 72  | 18937 |
| >TP53-G226 $\leq$ VGSDCTTIHY   | 184   | >TP53-G226 $\leq$ VSSDCTTIHY   | 59  | 125   |
| >TP53-G226 $\leq$ VGSDCTTIHY   | 642   | >TP53-G226 $\leq$ VSSDCTTIHY   | 55  | 587   |
| >TP53-G226 $\leq$ VGSDCTTIHY   | 1444  | >TP53-G226 $\leq$ VSSDCTTIHY   | 223 | 1221  |
| >TP53-G226 $\leq$ VGSDCTTIHY   | 377   | >TP53-G226 $\leq$ VSSDCTTIHY   | 98  | 279   |
| >TP53-G226 $\leq$ VGSDCTTIHY   | 2195  | >TP53-G226 $\leq$ VSSDCTTIHY   | 150 | 2045  |
| >TP53-G226 $\leq$ VGSDCTTI     | 11600 | >TP53-G226 $\leq$ VSSDCTTI     | 69  | 11531 |
| >TP53-G226 $\leq$ VGSDCTTIHY   | 1948  | >TP53-G226 $\leq$ VSSDCTTIHY   | 8   | 1940  |
| >TP53-G226 $\leq$ VGSDCTTIHY   | 4763  | >TP53-G226 $\leq$ VSSDCTTIHY   | 86  | 4677  |
| >TP53-G226 $\leq$ VGSDCTTI     | 11574 | >TP53-G226 $\leq$ VSSDCTTI     | 346 | 11228 |
| >TP53-G226 $\leq$ VGSDCTTIH    | 1591  | >TP53-G226 $\leq$ VSSDCTTIH    | 95  | 1496  |
| >TP53-G226 $\leq$ VGSDCTTIHY   | 449   | >TP53-G226 $\leq$ VSSDCTTIHY   | 43  | 406   |
| >TP53-G226 $\leq$ VGSDCTTI     | 605   | >TP53-G226 $\leq$ VSSDCTTI     | 24  | 581   |
| >TP53-G226 $\leq$ EVGSDCTTIH\` | 2209  | >TP53-G226 $\leq$ EVSSDCTTIH\` | 294 | 1915  |
| >TP53-G226 $\leq$ EVGSDCTTIH\` | 11    | >TP53-G226 $\leq$ EVSSDCTTIH\` | 10  | 1     |
| >TP53-G226 $\leq$ EVGSDCTTIH\` | 75    | >TP53-G226 $\leq$ EVSSDCTTIH\` | 571 | 496   |
| >TP53-G226 $\leq$ EVGSDCTTIH\` | 387   | >TP53-G226 $\leq$ EVSSDCTTIH\` | 203 | 184   |
| >TP53-G226 $\leq$ EVGSDCTTIH\` | 1152  | >TP53-G226 $\leq$ EVSSDCTTIH\` | 386 | 766   |
| >TP53-G226 $\leq$ EVGSDCTTIH\` | 612   | >TP53-G226 $\leq$ EVSSDCTTIH\` | 71  | 541   |
| >TP53-G226 $\leq$ EVGSDCTTI    | 1082  | >TP53-G226 $\leq$ EVSSDCTTI    | 63  | 1019  |
| >TP53-G226 $\leq$ EVGSDCTTI    | 504   | >TP53-G226 $\leq$ EVSSDCTTI    | 410 | 94    |
| >TP53-G226 $\leq$ EVGSDCTTIH\` | 326   | >TP53-G226 $\leq$ EVSSDCTTIH\` | 921 | 595   |
| >TP53-G226 $\leq$ EVGSDCTTIH\` | 819   | >TP53-G226 $\leq$ EVSSDCTTIH\` | 452 | 367   |
| >TP53-G226 $\leq$ EVGSDCTTIH\` | 1160  | >TP53-G226 $\leq$ EVSSDCTTIH\` | 134 | 1026  |
| >TP53-G226 $\leq$ PEVGSDCTTI   | 342   | >TP53-G226 $\leq$ PEVSSDCTTI   | 289 | 53    |
| >TP53-G226\`GSDCTTIHY          | 18    | >TP53-G226\`VSDCTTIHY          | 9   | 9     |
| >TP53-G226\`GSDCTTIHYN         | 34    | >TP53-G226\`VSDCTTIHYN\`       | 13  | 21    |
| >TP53-G226\`GSDCTTIHYN         | 174   | >TP53-G226\`VSDCTTIHYN\`       | 311 | 137   |
| >TP53-G226\`GSDCTTIHYN         | 582   | >TP53-G226\`VSDCTTIHYN\`       | 301 | 281   |
| >TP53-G226\`GSDCTTIHY          | 1974  | >TP53-G226\`VSDCTTIHY          | 145 | 1829  |
| >TP53-G226\`GSDCTTIHYN         | 1576  | >TP53-G226\`VSDCTTIHYN\`       | 106 | 1470  |
| >TP53-G226\`GSDCTTIHY          | 68    | >TP53-G226\`VSDCTTIHY          | 23  | 45    |
| >TP53-G226\`GSDCTTIHYN         | 99    | >TP53-G226\`VSDCTTIHYN\`       | 28  | 71    |
| >TP53-G226\`GSDCTTIHY          | 2361  | >TP53-G226\`VSDCTTIHY          | 256 | 2105  |
| >TP53-G226\`GSDCTTIHYN         | 247   | >TP53-G226\`VSDCTTIHYN\`       | 398 | 151   |
| >TP53-G226\`GSDCTTIHY          | 242   | >TP53-G226\`VSDCTTIHY          | 540 | 298   |

|                        |       |                        |     |       |
|------------------------|-------|------------------------|-----|-------|
| >TP53-G226\GSDCTTIHYN  | 97    | >TP53-G226\VSDCTTIHYN' | 215 | 118   |
| >TP53-G226\VGSDCTTIHY  | 353   | >TP53-G226\VVSDCTTIHY  | 63  | 290   |
| >TP53-G226\VGSDCTTI    | 4423  | >TP53-G226\VVSDCTTI    | 197 | 4226  |
| >TP53-G226\VGSDCTTI    | 10709 | >TP53-G226\VVSDCTTI    | 60  | 10649 |
| >TP53-G226\VGSDCTTI    | 5950  | >TP53-G226\VVSDCTTI    | 85  | 5865  |
| >TP53-G226\VGSDCTTI    | 16736 | >TP53-G226\VVSDCTTI    | 120 | 16616 |
| >TP53-G226\VGSDCTTIHY  | 14963 | >TP53-G226\VVSDCTTIHY  | 213 | 14750 |
| >TP53-G226\VGSDCTTIHY  | 19009 | >TP53-G226\VVSDCTTIHY  | 85  | 18924 |
| >TP53-G226\VGSDCTTIHY  | 184   | >TP53-G226\VVSDCTTIHY  | 86  | 98    |
| >TP53-G226\VGSDCTTIHY  | 642   | >TP53-G226\VVSDCTTIHY  | 216 | 426   |
| >TP53-G226\VGSDCTTIHY  | 1444  | >TP53-G226\VVSDCTTIHY  | 24  | 1420  |
| >TP53-G226\VGSDCTTIHY  | 377   | >TP53-G226\VVSDCTTIHY  | 109 | 268   |
| >TP53-G226\VGSDCTTIHY  | 1948  | >TP53-G226\VVSDCTTIHY  | 341 | 1607  |
| >TP53-G226\VGSDCTTIH   | 1591  | >TP53-G226\VVSDCTTIH   | 481 | 1110  |
| >TP53-G226\VGSDCTTIHY  | 449   | >TP53-G226\VVSDCTTIHY  | 425 | 24    |
| >TP53-G226\VVVPYEPPEV  | 15602 | >TP53-G226\VVVPYEPPEV  | 84  | 15518 |
| >TP53-G226\VVVPYEPPEV  | 17556 | >TP53-G226\VVVPYEPPEV  | 28  | 17528 |
| >TP53-G226\VVVPYEPPEV  | 24735 | >TP53-G226\VVVPYEPPEV  | 445 | 24290 |
| >TP53-G226\VVVPYEPPEV  | 28532 | >TP53-G226\VVVPYEPPEV  | 19  | 28513 |
| >TP53-G226\VVVPYEPPEV  | 17518 | >TP53-G226\VVVPYEPPEV  | 290 | 17228 |
| >TP53-G226\EVGSDCTTIH' | 2209  | >TP53-G226\EVVSDCTTIH' | 36  | 2173  |
| >TP53-G226\EVGSDCTTI   | 5524  | >TP53-G226\EVVSDCTTI   | 176 | 5348  |
| >TP53-G226\EVGSDCTTIH  | 3391  | >TP53-G226\EVVSDCTTIH  | 135 | 3256  |
| >TP53-G226\EVGSDCTTIH' | 11    | >TP53-G226\EVVSDCTTIH' | 3   | 8     |
| >TP53-G226\EVGSDCTTIH' | 75    | >TP53-G226\EVVSDCTTIH' | 32  | 43    |
| >TP53-G226\EVGSDCTTIH' | 387   | >TP53-G226\EVVSDCTTIH' | 248 | 139   |
| >TP53-G226\EVGSDCTTIH' | 612   | >TP53-G226\EVVSDCTTIH' | 80  | 532   |
| >TP53-G226\EVGSDCTTI   | 1082  | >TP53-G226\EVVSDCTTI   | 53  | 1029  |
| >TP53-G226\EVGSDCTTI   | 504   | >TP53-G226\EVVSDCTTI   | 133 | 371   |
| >TP53-G226\EVGSDCTTIH' | 326   | >TP53-G226\EVVSDCTTIH' | 908 | 582   |
| >TP53-G226\EVGSDCTTIH' | 1160  | >TP53-G226\EVVSDCTTIH' | 139 | 1021  |
| >TP53-G226\PEVSDCTTI   | 342   | >TP53-G226\PEVSDCTTI   | 592 | 250   |
| >TP53-G226\VPYEPPEVG   | 20941 | >TP53-G226\VPYEPPEVV   | 176 | 20765 |
| >TP53-G226\VPYEPPEVG   | 2108  | >TP53-G226\VPYEPPEVV   | 51  | 2057  |
| >TP53-G226\VPYEPPEVG   | 1696  | >TP53-G226\VPYEPPEVV   | 394 | 1302  |
| >TP53-G226\VVVPYEPPEVG | 24376 | >TP53-G226\VVVPYEPPEVV | 244 | 24132 |
| >TP53-G226\VVVPYEPPEVG | 35288 | >TP53-G226\VVVPYEPPEVV | 221 | 35067 |
| >TP53-G244\GGMNRRPIL   | 2269  | >TP53-G244\AGMNRRPIL   | 319 | 1950  |
| >TP53-G244\GGMNRRPIL   | 444   | >TP53-G244\AGMNRRPIL   | 186 | 258   |
| >TP53-G244\GGMNRRPIL'  | 538   | >TP53-G244\AGMNRRPIL'  | 255 | 283   |
| >TP53-G244\MGGMNRRP    | 803   | >TP53-G244\MAGMNRRP    | 62  | 741   |
| >TP53-G244\MGGMNRRP    | 4447  | >TP53-G244\MAGMNRRP    | 186 | 4261  |
| >TP53-G244\CMGGMNRR    | 1556  | >TP53-G244\CMAGMNRR    | 432 | 1124  |

|                      |       |                      |     |       |
|----------------------|-------|----------------------|-----|-------|
| >TP53-G244/CMGGMNRR  | 2664  | >TP53-G244/CMAGMNRR  | 272 | 2392  |
| >TP53-G244/CMGGMNRR  | 88    | >TP53-G244/CMAGMNRR  | 44  | 44    |
| >TP53-G244/CMGGMNRR  | 314   | >TP53-G244/CMAGMNRR  | 163 | 151   |
| >TP53-G244/CMGGMNRR  | 1022  | >TP53-G244/CMAGMNRR  | 80  | 942   |
| >TP53-G244/CMGGMNRR  | 117   | >TP53-G244/CMAGMNRR  | 163 | 46    |
| >TP53-G244/SCMGGMNR  | 464   | >TP53-G244/SCMAGMNR  | 332 | 132   |
| >TP53-G244/SSCMGGMNI | 58    | >TP53-G244/SSCMAGMNI | 45  | 13    |
| >TP53-G244/SSCMGGMNI | 192   | >TP53-G244/SSCMAGMNI | 124 | 68    |
| >TP53-G244/SSCMGGMNI | 110   | >TP53-G244/SSCMAGMNI | 111 | 1     |
| >TP53-G244/SSCMGGMNI | 56    | >TP53-G244/SSCMAGMNI | 45  | 11    |
| >TP53-G244/SSCMGGMNI | 220   | >TP53-G244/SSCMAGMNI | 86  | 134   |
| >TP53-G244/SSCMGGMNI | 361   | >TP53-G244/SSCMAGMNI | 235 | 126   |
| >TP53-G244/SSCMGGMNI | 398   | >TP53-G244/SSCMAGMNI | 551 | 153   |
| >TP53-G244/SSCMGGMNI | 460   | >TP53-G244/SSCMAGMNI | 564 | 104   |
| >TP53-G244/NSSCMGGMI | 111   | >TP53-G244/NSSCMAGMI | 69  | 42    |
| >TP53-G244/NSSCMGGMI | 55    | >TP53-G244/NSSCMAGMI | 50  | 5     |
| >TP53-G244/NSSCMGGMI | 365   | >TP53-G244/NSSCMAGMI | 215 | 150   |
| >TP53-G244/NSSCMGGMI | 12    | >TP53-G244/NSSCMAGMI | 9   | 3     |
| >TP53-G244/NSSCMGGMI | 39    | >TP53-G244/NSSCMAGMI | 21  | 18    |
| >TP53-G244/NSSCMGGM  | 848   | >TP53-G244/NSSCMAGM  | 185 | 663   |
| >TP53-G244/CNSSCMGGN | 876   | >TP53-G244/CNSSCMAGN | 486 | 390   |
| >TP53-G244/CNSSCMGGN | 639   | >TP53-G244/CNSSCMAGN | 361 | 278   |
| >TP53-G244/YMCNSSCMC | 13880 | >TP53-G244/YMCNSSCMA | 65  | 13815 |
| >TP53-G244/YMCNSSCMC | 252   | >TP53-G244/YMCNSSCMA | 46  | 206   |
| >TP53-G244/YMCNSSCMC | 4010  | >TP53-G244/YMCNSSCMA | 109 | 3901  |
| >TP53-G244/YMCNSSCMC | 167   | >TP53-G244/YMCNSSCMA | 43  | 124   |
| >TP53-G244/YMCNSSCMC | 3523  | >TP53-G244/YMCNSSCMA | 14  | 3509  |
| >TP53-G244/YMCNSSCMC | 41    | >TP53-G244/YMCNSSCMA | 26  | 15    |
| >TP53-G244/YMCNSSCMC | 5317  | >TP53-G244/YMCNSSCMA | 66  | 5251  |
| >TP53-G244/YMCNSSCMC | 143   | >TP53-G244/YMCNSSCMA | 47  | 96    |
| >TP53-G244/YMCNSSCMC | 92    | >TP53-G244/YMCNSSCMA | 4   | 88    |
| >TP53-G244/YMCNSSCMC | 399   | >TP53-G244/YMCNSSCMA | 440 | 41    |
| >TP53-G244/YMCNSSCMC | 16    | >TP53-G244/YMCNSSCMA | 9   | 7     |
| >TP53-G244/YMCNSSCMC | 5683  | >TP53-G244/YMCNSSCMA | 44  | 5639  |
| >TP53-G244/YMCNSSCMC | 197   | >TP53-G244/YMCNSSCMA | 47  | 150   |
| >TP53-G244/YMCNSSCMC | 1738  | >TP53-G244/YMCNSSCMA | 16  | 1722  |
| >TP53-G244/YMCNSSCMC | 421   | >TP53-G244/YMCNSSCMA | 157 | 264   |
| >TP53-G244/YMCNSSCMC | 11963 | >TP53-G244/YMCNSSCMA | 46  | 11917 |
| >TP53-G244/YMCNSSCMC | 332   | >TP53-G244/YMCNSSCMA | 43  | 289   |
| >TP53-G244/YMCNSSCMC | 903   | >TP53-G244/YMCNSSCMA | 4   | 899   |
| >TP53-G244/YMCNSSCMC | 53    | >TP53-G244/YMCNSSCMA | 9   | 44    |
| >TP53-G244/YMCNSSCMC | 591   | >TP53-G244/YMCNSSCMA | 479 | 112   |
| >TP53-G244/YMCNSSCMC | 127   | >TP53-G244/YMCNSSCMA | 84  | 43    |

|                      |      |                       |      |      |
|----------------------|------|-----------------------|------|------|
| >TP53-G244/YMCNSSCMC | 292  | >TP53-G244/YMCNSSCMA  | 109  | 183  |
| >TP53-G244/YMCNSSCMC | 44   | >TP53-G244/YMCNSSCMA  | 35   | 9    |
| >TP53-G244/YMCNSSCMC | 145  | >TP53-G244/YMCNSSCMA  | 186  | 41   |
| >TP53-G244/YMCNSSCMC | 1624 | >TP53-G244/YMCNSSCMA  | 185  | 1439 |
| >TP53-G244/YMCNSSCMC | 160  | >TP53-G244/YMCNSSCMA  | 49   | 111  |
| >TP53-G244/YMCNSSCMC | 294  | >TP53-G244/YMCNSSCMA  | 111  | 183  |
| >TP53-G244(GGMNRRPIL | 2269 | >TP53-G244(CGMNRRPIL  | 230  | 2039 |
| >TP53-G244(GGMNRRPIL | 444  | >TP53-G244(CGMNRRPIL  | 136  | 308  |
| >TP53-G244(GGMNRRPI  | 1811 | >TP53-G244(CGMNRRPI   | 196  | 1615 |
| >TP53-G244(GGMNRRPIL | 538  | >TP53-G244(CGMNRRPILT | 42   | 496  |
| >TP53-G244(CMGGMNRR  | 88   | >TP53-G244(CMCGMNRR   | 119  | 31   |
| >TP53-G244(CMGGMNRR  | 314  | >TP53-G244(CMCGMNRR   | 114  | 200  |
| >TP53-G244(CMGGMNRR  | 1526 | >TP53-G244(CMCGMNRR   | 227  | 1299 |
| >TP53-G244(CMGGMNRR  | 1022 | >TP53-G244(CMCGMNRR   | 373  | 649  |
| >TP53-G244(CMGGMNRR  | 117  | >TP53-G244(CMCGMNRR   | 115  | 2    |
| >TP53-G244(SCMGGMNR  | 2430 | >TP53-G244(SCMCGMNR   | 373  | 2057 |
| >TP53-G244(SCMGGMNR  | 464  | >TP53-G244(SCMCGMNR   | 219  | 245  |
| >TP53-G244(SSCMGGMNI | 58   | >TP53-G244(SSCMCGMNF  | 46   | 12   |
| >TP53-G244(SSCMGGMNI | 192  | >TP53-G244(SSCMCGMNF  | 201  | 9    |
| >TP53-G244(SSCMGGMNI | 110  | >TP53-G244(SSCMCGMNF  | 39   | 71   |
| >TP53-G244(SSCMGGMNI | 56   | >TP53-G244(SSCMCGMNF  | 16   | 40   |
| >TP53-G244(SSCMGGMNI | 220  | >TP53-G244(SSCMCGMNF  | 155  | 65   |
| >TP53-G244(SSCMGGMNI | 361  | >TP53-G244(SSCMCGMNF  | 146  | 215  |
| >TP53-G244(SSCMGGMNI | 398  | >TP53-G244(SSCMCGMNF  | 288  | 110  |
| >TP53-G244(SSCMGGMNI | 460  | >TP53-G244(SSCMCGMNF  | 330  | 130  |
| >TP53-G244(SSCMGGMNI | 3470 | >TP53-G244(SSCMCGMNF  | 226  | 3244 |
| >TP53-G244(NSSCMGGMI | 111  | >TP53-G244(NSSCMCGMI  | 86   | 25   |
| >TP53-G244(NSSCMGGMI | 55   | >TP53-G244(NSSCMCGMI  | 23   | 32   |
| >TP53-G244(NSSCMGGMI | 365  | >TP53-G244(NSSCMCGMI  | 247  | 118  |
| >TP53-G244(NSSCMGGMI | 12   | >TP53-G244(NSSCMCGMI  | 13   | 1    |
| >TP53-G244(NSSCMGGMI | 39   | >TP53-G244(NSSCMCGMI  | 25   | 14   |
| >TP53-G244(NSSCMGGM  | 848  | >TP53-G244(NSSCMCGM   | 496  | 352  |
| >TP53-G244(CNSSCMGGN | 639  | >TP53-G244(CNSSCMCGN  | 120  | 519  |
| >TP53-G244(YMCNSSCMC | 252  | >TP53-G244(YMCNSSCMC  | 67   | 185  |
| >TP53-G244(YMCNSSCMC | 167  | >TP53-G244(YMCNSSCMC  | 71   | 96   |
| >TP53-G244(YMCNSSCMC | 41   | >TP53-G244(YMCNSSCMC  | 50   | 9    |
| >TP53-G244(YMCNSSCMC | 143  | >TP53-G244(YMCNSSCMC  | 45   | 98   |
| >TP53-G244(YMCNSSCMC | 92   | >TP53-G244(YMCNSSCMC  | 7    | 85   |
| >TP53-G244(YMCNSSCMC | 399  | >TP53-G244(YMCNSSCMC  | 1591 | 1192 |
| >TP53-G244(YMCNSSCMC | 16   | >TP53-G244(YMCNSSCMC  | 7    | 9    |
| >TP53-G244(YMCNSSCMC | 5683 | >TP53-G244(YMCNSSCMC  | 156  | 5527 |
| >TP53-G244(YMCNSSCMC | 197  | >TP53-G244(YMCNSSCMC  | 53   | 144  |
| >TP53-G244(YMCNSSCMC | 1738 | >TP53-G244(YMCNSSCMC  | 133  | 1605 |

|                       |       |                       |      |       |
|-----------------------|-------|-----------------------|------|-------|
| >TP53-G244(YMCNSSCMC  | 421   | >TP53-G244(YMCNSSCMC  | 66   | 355   |
| >TP53-G244(YMCNSSCMC  | 11963 | >TP53-G244(YMCNSSCMC  | 143  | 11820 |
| >TP53-G244(YMCNSSCMC  | 332   | >TP53-G244(YMCNSSCMC  | 41   | 291   |
| >TP53-G244(YMCNSSCMC  | 903   | >TP53-G244(YMCNSSCMC  | 9    | 894   |
| >TP53-G244(YMCNSSCMC  | 53    | >TP53-G244(YMCNSSCMC  | 7    | 46    |
| >TP53-G244(YMCNSSCMC  | 127   | >TP53-G244(YMCNSSCMC  | 726  | 599   |
| >TP53-G244(YMCNSSCMC  | 292   | >TP53-G244(YMCNSSCMC  | 349  | 57    |
| >TP53-G244(YMCNSSCMC  | 44    | >TP53-G244(YMCNSSCMC  | 32   | 12    |
| >TP53-G244(YMCNSSCMC  | 145   | >TP53-G244(YMCNSSCMC  | 277  | 132   |
| >TP53-G244(YMCNSSCMC  | 160   | >TP53-G244(YMCNSSCMC  | 51   | 109   |
| >TP53-G244(YMCNSSCMC  | 294   | >TP53-G244(YMCNSSCMC  | 171  | 123   |
| >TP53-G244[ GGMNRRPIL | 444   | >TP53-G244[ DGMNRRPIL | 231  | 213   |
| >TP53-G244[ CMGGMNRR  | 984   | >TP53-G244[ CMDGMNRR  | 305  | 679   |
| >TP53-G244[ CMGGMNRR  | 88    | >TP53-G244[ CMDGMNRR  | 113  | 25    |
| >TP53-G244[ CMGGMNRR  | 314   | >TP53-G244[ CMDGMNRR  | 1513 | 1199  |
| >TP53-G244[ CMGGMNRR  | 117   | >TP53-G244[ CMDGMNRR  | 770  | 653   |
| >TP53-G244[ SCMGGMNR  | 464   | >TP53-G244[ SCMDGMNR  | 357  | 107   |
| >TP53-G244[ SSCMGGMNI | 58    | >TP53-G244[ SSCMDGMNI | 88   | 30    |
| >TP53-G244[ SSCMGGMNI | 192   | >TP53-G244[ SSCMDGMNI | 261  | 69    |
| >TP53-G244[ SSCMGGMNI | 110   | >TP53-G244[ SSCMDGMNI | 292  | 182   |
| >TP53-G244[ SSCMGGMNI | 56    | >TP53-G244[ SSCMDGMNI | 115  | 59    |
| >TP53-G244[ SSCMGGMNI | 220   | >TP53-G244[ SSCMDGMNI | 217  | 3     |
| >TP53-G244[ SSCMGGMNI | 361   | >TP53-G244[ SSCMDGMNI | 628  | 267   |
| >TP53-G244[ SSCMGGMNI | 398   | >TP53-G244[ SSCMDGMNI | 316  | 82    |
| >TP53-G244[ SSCMGGMNI | 460   | >TP53-G244[ SSCMDGMNI | 360  | 100   |
| >TP53-G244[ NSSCMGGMI | 111   | >TP53-G244[ NSSCMDGMI | 117  | 6     |
| >TP53-G244[ NSSCMGGMI | 55    | >TP53-G244[ NSSCMDGMI | 159  | 104   |
| >TP53-G244[ NSSCMGGMI | 365   | >TP53-G244[ NSSCMDGMI | 665  | 300   |
| >TP53-G244[ NSSCMGGMI | 12    | >TP53-G244[ NSSCMDGMI | 9    | 3     |
| >TP53-G244[ NSSCMGGMI | 39    | >TP53-G244[ NSSCMDGMI | 25   | 14    |
| >TP53-G244[ YMCNSSCMC | 252   | >TP53-G244[ YMCNSSCMC | 113  | 139   |
| >TP53-G244[ YMCNSSCMC | 167   | >TP53-G244[ YMCNSSCMC | 48   | 119   |
| >TP53-G244[ YMCNSSCMC | 41    | >TP53-G244[ YMCNSSCMC | 75   | 34    |
| >TP53-G244[ YMCNSSCMC | 143   | >TP53-G244[ YMCNSSCMC | 57   | 86    |
| >TP53-G244[ YMCNSSCMC | 92    | >TP53-G244[ YMCNSSCMC | 569  | 477   |
| >TP53-G244[ YMCNSSCMC | 399   | >TP53-G244[ YMCNSSCMC | 2589 | 2190  |
| >TP53-G244[ YMCNSSCMC | 16    | >TP53-G244[ YMCNSSCMC | 13   | 3     |
| >TP53-G244[ YMCNSSCMC | 197   | >TP53-G244[ YMCNSSCMC | 74   | 123   |
| >TP53-G244[ YMCNSSCMC | 421   | >TP53-G244[ YMCNSSCMC | 158  | 263   |
| >TP53-G244[ YMCNSSCMC | 332   | >TP53-G244[ YMCNSSCMC | 90   | 242   |
| >TP53-G244[ YMCNSSCMC | 53    | >TP53-G244[ YMCNSSCMC | 36   | 17    |
| >TP53-G244[ YMCNSSCMC | 127   | >TP53-G244[ YMCNSSCMC | 2297 | 2170  |
| >TP53-G244[ YMCNSSCMC | 292   | >TP53-G244[ YMCNSSCMC | 573  | 281   |

|                      |       |                       |     |       |
|----------------------|-------|-----------------------|-----|-------|
| >TP53-G244[YMCNSSCMC | 44    | >TP53-G244[YMCNSSCMC  | 64  | 20    |
| >TP53-G244[YMCNSSCMC | 145   | >TP53-G244[YMCNSSCMC  | 274 | 129   |
| >TP53-G244[YMCNSSCMC | 160   | >TP53-G244[YMCNSSCMC  | 114 | 46    |
| >TP53-G244[YMCNSSCMC | 294   | >TP53-G244[YMCNSSCMC  | 573 | 279   |
| >TP53-G244[GGMNRPI   | 1849  | >TP53-G244[EGMNRPI    | 431 | 1418  |
| >TP53-G244[GGMNRPI   | 444   | >TP53-G244[EGMNRPI    | 100 | 344   |
| >TP53-G244[MGGMNRPI  | 5248  | >TP53-G244[MEGMNRPI   | 15  | 5233  |
| >TP53-G244[MGGMNRPI  | 27065 | >TP53-G244[MEGMNRPI   | 196 | 26869 |
| >TP53-G244[MGGMNRPI  | 38130 | >TP53-G244[MEGMNRPI   | 83  | 38047 |
| >TP53-G244[MGGMNRPI  | 34635 | >TP53-G244[MEGMNRPI   | 299 | 34336 |
| >TP53-G244[MGGMNRPI  | 39974 | >TP53-G244[MEGMNRPI   | 212 | 39762 |
| >TP53-G244[MGGMNRPI  | 39413 | >TP53-G244[MEGMNRPI   | 157 | 39256 |
| >TP53-G244[MGGMNRPI  | 31558 | >TP53-G244[MEGMNRPI   | 110 | 31448 |
| >TP53-G244[MGGMNRPI  | 34246 | >TP53-G244[MEGMNRPI   | 89  | 34157 |
| >TP53-G244[CMGGMNR   | 88    | >TP53-G244[CEGMNR     | 191 | 103   |
| >TP53-G244[CMGGMNR   | 314   | >TP53-G244[CEGMNR     | 482 | 168   |
| >TP53-G244[CMGGMNR   | 117   | >TP53-G244[CEGMNR     | 284 | 167   |
| >TP53-G244[SCMGGMNR  | 464   | >TP53-G244[SCMEGMNR   | 574 | 110   |
| >TP53-G244[SSCMGGMNI | 58    | >TP53-G244[SSCEGMNF   | 80  | 22    |
| >TP53-G244[SSCMGGMNI | 192   | >TP53-G244[SSCEGMNF   | 389 | 197   |
| >TP53-G244[SSCMGGMNI | 110   | >TP53-G244[SSCEGMNF   | 391 | 281   |
| >TP53-G244[SSCMGGMNI | 56    | >TP53-G244[SSCEGMNF   | 134 | 78    |
| >TP53-G244[SSCMGGMNI | 220   | >TP53-G244[SSCEGMNF   | 194 | 26    |
| >TP53-G244[SSCMGGMNI | 361   | >TP53-G244[SSCEGMNF   | 653 | 292   |
| >TP53-G244[SSCMGGMNI | 398   | >TP53-G244[SSCEGMNF   | 412 | 14    |
| >TP53-G244[SSCMGGMNI | 460   | >TP53-G244[SSCEGMNF   | 439 | 21    |
| >TP53-G244[NSSCMGGMI | 111   | >TP53-G244[NSSCEGMNF  | 85  | 26    |
| >TP53-G244[NSSCMGGMI | 55    | >TP53-G244[NSSCEGMNF  | 88  | 33    |
| >TP53-G244[NSSCMGGMI | 365   | >TP53-G244[NSSCEGMNF  | 359 | 6     |
| >TP53-G244[NSSCMGGMI | 12    | >TP53-G244[NSSCEGMNF  | 9   | 3     |
| >TP53-G244[NSSCMGGMI | 39    | >TP53-G244[NSSCEGMNF  | 26  | 13    |
| >TP53-G244[CNSSCMGGN | 639   | >TP53-G244[CNSSCEGMNF | 418 | 221   |
| >TP53-G244[YMCNSSCMC | 252   | >TP53-G244[YMCNSSCME  | 77  | 175   |
| >TP53-G244[YMCNSSCMC | 167   | >TP53-G244[YMCNSSCME  | 43  | 124   |
| >TP53-G244[YMCNSSCMC | 41    | >TP53-G244[YMCNSSCME  | 62  | 21    |
| >TP53-G244[YMCNSSCMC | 143   | >TP53-G244[YMCNSSCME  | 47  | 96    |
| >TP53-G244[YMCNSSCMC | 92    | >TP53-G244[YMCNSSCME  | 711 | 619   |
| >TP53-G244[YMCNSSCMC | 399   | >TP53-G244[YMCNSSCME  | 387 | 12    |
| >TP53-G244[YMCNSSCMC | 16    | >TP53-G244[YMCNSSCME  | 10  | 6     |
| >TP53-G244[YMCNSSCMC | 197   | >TP53-G244[YMCNSSCME  | 88  | 109   |
| >TP53-G244[YMCNSSCMC | 421   | >TP53-G244[YMCNSSCME  | 176 | 245   |
| >TP53-G244[YMCNSSCMC | 332   | >TP53-G244[YMCNSSCME  | 61  | 271   |
| >TP53-G244[YMCNSSCMC | 53    | >TP53-G244[YMCNSSCME  | 17  | 36    |

|                        |       |                        |     |       |
|------------------------|-------|------------------------|-----|-------|
| >TP53-G244E YMCNSSCMC  | 127   | >TP53-G244E YMCNSSCME  | 507 | 380   |
| >TP53-G244E YMCNSSCMC  | 292   | >TP53-G244E YMCNSSCME  | 250 | 42    |
| >TP53-G244E YMCNSSCMC  | 44    | >TP53-G244E YMCNSSCME  | 41  | 3     |
| >TP53-G244E YMCNSSCMC  | 145   | >TP53-G244E YMCNSSCME  | 271 | 126   |
| >TP53-G244E YMCNSSCMC  | 160   | >TP53-G244E YMCNSSCME  | 61  | 99    |
| >TP53-G244E YMCNSSCMC  | 294   | >TP53-G244E YMCNSSCME  | 360 | 66    |
| >TP53-G244F GGMNRRPI   | 7530  | >TP53-G244F RGMNRRPI   | 247 | 7283  |
| >TP53-G244F GGMNRRPIL  | 9523  | >TP53-G244F RGMNRRPIL  | 444 | 9079  |
| >TP53-G244F GGMNRRPIL  | 7545  | >TP53-G244F RGMNRRPIL  | 293 | 7252  |
| >TP53-G244F GGMNRRPIL  | 5972  | >TP53-G244F RGMNRRPIL  | 351 | 5621  |
| >TP53-G244F GGMNRRPI   | 1849  | >TP53-G244F RGMNRRPI   | 485 | 1364  |
| >TP53-G244F GGMNRRPIL  | 444   | >TP53-G244F RGMNRRPIL  | 106 | 338   |
| >TP53-G244F GGMNRRPIL  | 1950  | >TP53-G244F RGMNRRPIL  | 288 | 1662  |
| >TP53-G244F GGMNRRPI   | 1811  | >TP53-G244F RGMNRRPI   | 278 | 1533  |
| >TP53-G244F GGMNRRPIL  | 538   | >TP53-G244F RGMNRRPIL  | 56  | 482   |
| >TP53-G244F MGGMNRPP   | 25529 | >TP53-G244F MRGMNRRPI  | 478 | 25051 |
| >TP53-G244F MGGMNRPP   | 25035 | >TP53-G244F MRGMNRRPI  | 94  | 24941 |
| >TP53-G244F MGGMNRPP   | 28132 | >TP53-G244F MRGMNRRPI  | 287 | 27845 |
| >TP53-G244F YNYMCNSSCI | 25803 | >TP53-G244F YNYMCNSSCI | 38  | 25765 |
| >TP53-G244F YNYMCNSSCI | 33702 | >TP53-G244F YNYMCNSSCI | 156 | 33546 |
| >TP53-G244F CMGGMNRR   | 88    | >TP53-G244F CMRGMNRR   | 157 | 69    |
| >TP53-G244F CMGGMNRR   | 12327 | >TP53-G244F CMRGMNRR   | 67  | 12260 |
| >TP53-G244F CMGGMNRR   | 14590 | >TP53-G244F CMRGMNRR   | 223 | 14367 |
| >TP53-G244F CMGGMNRR   | 314   | >TP53-G244F CMRGMNRR   | 45  | 269   |
| >TP53-G244F CMGGMNRR   | 1526  | >TP53-G244F CMRGMNRR   | 152 | 1374  |
| >TP53-G244F CMGGMNRR   | 117   | >TP53-G244F CMRGMNRR   | 274 | 157   |
| >TP53-G244F SCMGGMNR   | 2430  | >TP53-G244F SCMRGMNRI  | 399 | 2031  |
| >TP53-G244F SCMGGMNR   | 1170  | >TP53-G244F SCMRGMNR   | 426 | 744   |
| >TP53-G244F SCMGGMNR   | 464   | >TP53-G244F SCMRGMNR   | 658 | 194   |
| >TP53-G244F SSCMGGMNI  | 58    | >TP53-G244F SSCMRGMNF  | 41  | 17    |
| >TP53-G244F SSCMGGMNI  | 192   | >TP53-G244F SSCMRGMNF  | 220 | 28    |
| >TP53-G244F SSCMGGMNI  | 110   | >TP53-G244F SSCMRGMNF  | 34  | 76    |
| >TP53-G244F SSCMGGMNI  | 56    | >TP53-G244F SSCMRGMNF  | 22  | 34    |
| >TP53-G244F SSCMGGMNI  | 1403  | >TP53-G244F SSCMRGMNF  | 467 | 936   |
| >TP53-G244F SSCMGGMNI  | 220   | >TP53-G244F SSCMRGMNF  | 195 | 25    |
| >TP53-G244F SSCMGGMNI  | 361   | >TP53-G244F SSCMRGMNF  | 554 | 193   |
| >TP53-G244F SSCMGGMNI  | 398   | >TP53-G244F SSCMRGMNF  | 284 | 114   |
| >TP53-G244F SSCMGGMNI  | 460   | >TP53-G244F SSCMRGMNF  | 337 | 123   |
| >TP53-G244F NSSCMGGMI  | 111   | >TP53-G244F NSSCMRGMIF | 80  | 31    |
| >TP53-G244F NSSCMGGMI  | 55    | >TP53-G244F NSSCMRGMIF | 24  | 31    |
| >TP53-G244F NSSCMGGMI  | 365   | >TP53-G244F NSSCMRGMIF | 185 | 180   |
| >TP53-G244F NSSCMGGMI  | 1183  | >TP53-G244F NSSCMRGMIF | 391 | 792   |
| >TP53-G244F NSSCMGGMI  | 12    | >TP53-G244F NSSCMRGMIF | 10  | 2     |



|                      |       |                      |      |       |
|----------------------|-------|----------------------|------|-------|
| >TP53-G244FNSSCMGGMI | 39    | >TP53-G244FNSSCMRGM  | 23   | 16    |
| >TP53-G244FCNSSCMGGN | 639   | >TP53-G244FCNSSCMRGN | 461  | 178   |
| >TP53-G244FMCNSSCMG  | 21580 | >TP53-G244FMCNSSCMR  | 125  | 21455 |
| >TP53-G244FMCNSSCMG  | 35490 | >TP53-G244FMCNSSCMR  | 158  | 35332 |
| >TP53-G244FYMCNSSCMC | 252   | >TP53-G244FYMCNSSCMR | 312  | 60    |
| >TP53-G244FYMCNSSCMC | 167   | >TP53-G244FYMCNSSCMR | 250  | 83    |
| >TP53-G244FYMCNSSCMC | 41    | >TP53-G244FYMCNSSCMR | 75   | 34    |
| >TP53-G244FYMCNSSCMC | 143   | >TP53-G244FYMCNSSCMR | 251  | 108   |
| >TP53-G244FYMCNSSCMC | 92    | >TP53-G244FYMCNSSCMR | 700  | 608   |
| >TP53-G244FYMCNSSCMC | 399   | >TP53-G244FYMCNSSCMR | 535  | 136   |
| >TP53-G244FYMCNSSCMC | 16    | >TP53-G244FYMCNSSCMR | 18   | 2     |
| >TP53-G244FYMCNSSCMC | 197   | >TP53-G244FYMCNSSCMR | 228  | 31    |
| >TP53-G244FYMCNSSCMC | 421   | >TP53-G244FYMCNSSCMR | 606  | 185   |
| >TP53-G244FYMCNSSCMC | 332   | >TP53-G244FYMCNSSCMR | 354  | 22    |
| >TP53-G244FYMCNSSCMC | 53    | >TP53-G244FYMCNSSCMR | 65   | 12    |
| >TP53-G244FYMCNSSCMC | 18194 | >TP53-G244FYMCNSSCMR | 54   | 18140 |
| >TP53-G244FYMCNSSCMC | 29660 | >TP53-G244FYMCNSSCMR | 82   | 29578 |
| >TP53-G244FYMCNSSCMC | 28199 | >TP53-G244FYMCNSSCMR | 26   | 28173 |
| >TP53-G244FYMCNSSCMC | 127   | >TP53-G244FYMCNSSCMR | 1371 | 1244  |
| >TP53-G244FYMCNSSCMC | 292   | >TP53-G244FYMCNSSCMR | 375  | 83    |
| >TP53-G244FYMCNSSCMC | 44    | >TP53-G244FYMCNSSCMR | 50   | 6     |
| >TP53-G244FYMCNSSCMC | 145   | >TP53-G244FYMCNSSCMR | 212  | 67    |
| >TP53-G244FYMCNSSCMC | 1624  | >TP53-G244FYMCNSSCMR | 155  | 1469  |
| >TP53-G244FYMCNSSCMC | 160   | >TP53-G244FYMCNSSCMR | 54   | 106   |
| >TP53-G244FYMCNSSCMC | 294   | >TP53-G244FYMCNSSCMR | 288  | 6     |
| >TP53-G244FYMCNSSCMC | 34036 | >TP53-G244FYMCNSSCMR | 269  | 33767 |
| >TP53-G244FYMCNSSCN  | 20093 | >TP53-G244FYMCNSSCN  | 28   | 20065 |
| >TP53-G244FYMCNSSCN  | 8423  | >TP53-G244FYMCNSSCN  | 26   | 8397  |
| >TP53-G244FYMCNSSCN  | 30359 | >TP53-G244FYMCNSSCN  | 42   | 30317 |
| >TP53-G244FYMCNSSCN  | 27750 | >TP53-G244FYMCNSSCN  | 28   | 27722 |
| >TP53-G244SGMNRPPIL  | 2269  | >TP53-G244SGMNRPPIL  | 195  | 2074  |
| >TP53-G244SGMNRPPIL  | 1849  | >TP53-G244SGMNRPPIL  | 268  | 1581  |
| >TP53-G244SGMNRPPIL  | 444   | >TP53-G244SGMNRPPIL  | 59   | 385   |
| >TP53-G244SGMNRPPIL  | 1929  | >TP53-G244SGMNRPPILT | 382  | 1547  |
| >TP53-G244SGMNRPPIL  | 538   | >TP53-G244SGMNRPPILT | 121  | 417   |
| >TP53-G244MSGMNRPP   | 803   | >TP53-G244MSGMNRPP   | 70   | 733   |
| >TP53-G244MSGMNRPP   | 2893  | >TP53-G244MSGMNRPP   | 187  | 2706  |
| >TP53-G244MSGMNRRI   | 1556  | >TP53-G244MSGMNRRI   | 414  | 1142  |
| >TP53-G244MSGMNRRI   | 2664  | >TP53-G244MSGMNRRI   | 478  | 2186  |
| >TP53-G244MSGMNRRI   | 1329  | >TP53-G244MSGMNRRI   | 414  | 915   |
| >TP53-G244MSGMNRRI   | 88    | >TP53-G244MSGMNRRI   | 62   | 26    |
| >TP53-G244MSGMNRRI   | 314   | >TP53-G244MSGMNRRI   | 160  | 154   |
| >TP53-G244MSGMNRRI   | 1022  | >TP53-G244MSGMNRRI   | 162  | 860   |

|                      |      |                      |     |      |
|----------------------|------|----------------------|-----|------|
| >TP53-G244!CMGGMNR   | 117  | >TP53-G244!CMSGMNRR  | 184 | 67   |
| >TP53-G244!SCMGGMNR  | 1170 | >TP53-G244!SCMSGMNR  | 423 | 747  |
| >TP53-G244!SCMGGMNR  | 1568 | >TP53-G244!SCMSGMNR  | 425 | 1143 |
| >TP53-G244!SCMGGMNR  | 464  | >TP53-G244!SCMSGMNR  | 530 | 66   |
| >TP53-G244!SSCMGGMNI | 58   | >TP53-G244!SSCMSGMNF | 24  | 34   |
| >TP53-G244!SSCMGGMNI | 192  | >TP53-G244!SSCMSGMNF | 176 | 16   |
| >TP53-G244!SSCMGGMNI | 110  | >TP53-G244!SSCMSGMNF | 57  | 53   |
| >TP53-G244!SSCMGGMNI | 56   | >TP53-G244!SSCMSGMNF | 42  | 14   |
| >TP53-G244!SSCMGGMNI | 220  | >TP53-G244!SSCMSGMNF | 70  | 150  |
| >TP53-G244!SSCMGGMNI | 361  | >TP53-G244!SSCMSGMNF | 331 | 30   |
| >TP53-G244!SSCMGGMNI | 398  | >TP53-G244!SSCMSGMNF | 225 | 173  |
| >TP53-G244!SSCMGGMNI | 460  | >TP53-G244!SSCMSGMNF | 282 | 178  |
| >TP53-G244!NSSCMGGMI | 111  | >TP53-G244!NSSCMSGMN | 47  | 64   |
| >TP53-G244!NSSCMGGMI | 55   | >TP53-G244!NSSCMSGMN | 33  | 22   |
| >TP53-G244!NSSCMGGMI | 365  | >TP53-G244!NSSCMSGMN | 204 | 161  |
| >TP53-G244!NSSCMGGMI | 12   | >TP53-G244!NSSCMSGMN | 7   | 5    |
| >TP53-G244!NSSCMGGMI | 39   | >TP53-G244!NSSCMSGMN | 24  | 15   |
| >TP53-G244!NSSCMGGM  | 848  | >TP53-G244!NSSCMSGM  | 240 | 608  |
| >TP53-G244!CNSSCMGGM | 876  | >TP53-G244!CNSSCMSGM | 450 | 426  |
| >TP53-G244!CNSSCMGGM | 2175 | >TP53-G244!CNSSCMSGM | 168 | 2007 |
| >TP53-G244!MCNSSCMGC | 2844 | >TP53-G244!MCNSSCMSC | 498 | 2346 |
| >TP53-G244!YMCNSSCMC | 252  | >TP53-G244!YMCNSSCMS | 91  | 161  |
| >TP53-G244!YMCNSSCMC | 167  | >TP53-G244!YMCNSSCMS | 57  | 110  |
| >TP53-G244!YMCNSSCMC | 41   | >TP53-G244!YMCNSSCMS | 24  | 17   |
| >TP53-G244!YMCNSSCMC | 143  | >TP53-G244!YMCNSSCMS | 64  | 79   |
| >TP53-G244!YMCNSSCMC | 92   | >TP53-G244!YMCNSSCMS | 39  | 53   |
| >TP53-G244!YMCNSSCMC | 399  | >TP53-G244!YMCNSSCMS | 477 | 78   |
| >TP53-G244!YMCNSSCMC | 16   | >TP53-G244!YMCNSSCMS | 10  | 6    |
| >TP53-G244!YMCNSSCMC | 197  | >TP53-G244!YMCNSSCMS | 74  | 123  |
| >TP53-G244!YMCNSSCMC | 421  | >TP53-G244!YMCNSSCMS | 179 | 242  |
| >TP53-G244!YMCNSSCMC | 332  | >TP53-G244!YMCNSSCMS | 84  | 248  |
| >TP53-G244!YMCNSSCMC | 903  | >TP53-G244!YMCNSSCMS | 117 | 786  |
| >TP53-G244!YMCNSSCMC | 53   | >TP53-G244!YMCNSSCMS | 12  | 41   |
| >TP53-G244!YMCNSSCMC | 591  | >TP53-G244!YMCNSSCMS | 475 | 116  |
| >TP53-G244!YMCNSSCMC | 127  | >TP53-G244!YMCNSSCMS | 372 | 245  |
| >TP53-G244!YMCNSSCMC | 292  | >TP53-G244!YMCNSSCMS | 114 | 178  |
| >TP53-G244!YMCNSSCMC | 44   | >TP53-G244!YMCNSSCMS | 35  | 9    |
| >TP53-G244!YMCNSSCMC | 145  | >TP53-G244!YMCNSSCMS | 101 | 44   |
| >TP53-G244!YMCNSSCMC | 160  | >TP53-G244!YMCNSSCMS | 25  | 135  |
| >TP53-G244!YMCNSSCMC | 294  | >TP53-G244!YMCNSSCMS | 133 | 161  |
| >TP53-G244!YMCNSSCMC | 1073 | >TP53-G244!YMCNSSCMS | 174 | 899  |
| >TP53-G244\GGMNRRPIL | 2269 | >TP53-G244\VGMNRRPIL | 87  | 2182 |
| >TP53-G244\GGMNRRPIL | 444  | >TP53-G244\VGMNRRPIL | 156 | 288  |

|                       |       |                       |      |       |
|-----------------------|-------|-----------------------|------|-------|
| >TP53-G244\GGMNRRLPIL | 538   | >TP53-G244\VGMNRRLPIL | 459  | 79    |
| >TP53-G244\MGGMNRRLP  | 5857  | >TP53-G244\MVGMNRRLP  | 393  | 5464  |
| >TP53-G244\MGGMNRRLP  | 12151 | >TP53-G244\MVGMNRRLP  | 304  | 11847 |
| >TP53-G244\MGGMNRRLP  | 4447  | >TP53-G244\MVGMNRRLP  | 156  | 4291  |
| >TP53-G244\YNYMCNSSCI | 18333 | >TP53-G244\YNYMCNSSCI | 366  | 17967 |
| >TP53-G244\YNYMCNSSCI | 21000 | >TP53-G244\YNYMCNSSCI | 282  | 20718 |
| >TP53-G244\YNYMCNSSCI | 24048 | >TP53-G244\YNYMCNSSCI | 478  | 23570 |
| >TP53-G244\YNYMCNSSCI | 36009 | >TP53-G244\YNYMCNSSCI | 443  | 35566 |
| >TP53-G244\YNYMCNSSCI | 6071  | >TP53-G244\YNYMCNSSCI | 130  | 5941  |
| >TP53-G244\YNYMCNSSCI | 5020  | >TP53-G244\YNYMCNSSCI | 421  | 4599  |
| >TP53-G244\CMGGMNRRL  | 635   | >TP53-G244\CMVGMNRRL  | 308  | 327   |
| >TP53-G244\CMGGMNRRL  | 88    | >TP53-G244\CMVGMNRRL  | 79   | 9     |
| >TP53-G244\CMGGMNRRL  | 314   | >TP53-G244\CMVGMNRRL  | 177  | 137   |
| >TP53-G244\CMGGMNRRL  | 1022  | >TP53-G244\CMVGMNRRL  | 154  | 868   |
| >TP53-G244\CMGGMNRRL  | 117   | >TP53-G244\CMVGMNRRL  | 117  | 0     |
| >TP53-G244\SCMGGMNR   | 2430  | >TP53-G244\SCMVGMNR   | 343  | 2087  |
| >TP53-G244\SCMGGMNR   | 464   | >TP53-G244\SCMVGMNR   | 1053 | 589   |
| >TP53-G244\SSCMGGMNI  | 58    | >TP53-G244\SSCMVGMNI  | 23   | 35    |
| >TP53-G244\SSCMGGMNI  | 192   | >TP53-G244\SSCMVGMNI  | 181  | 11    |
| >TP53-G244\SSCMGGMNI  | 110   | >TP53-G244\SSCMVGMNI  | 48   | 62    |
| >TP53-G244\SSCMGGMNI  | 56    | >TP53-G244\SSCMVGMNI  | 32   | 24    |
| >TP53-G244\SSCMGGMNI  | 220   | >TP53-G244\SSCMVGMNI  | 40   | 180   |
| >TP53-G244\SSCMGGMNI  | 361   | >TP53-G244\SSCMVGMNI  | 107  | 254   |
| >TP53-G244\SSCMGGMNI  | 398   | >TP53-G244\SSCMVGMNI  | 641  | 243   |
| >TP53-G244\SSCMGGMNI  | 460   | >TP53-G244\SSCMVGMNI  | 567  | 107   |
| >TP53-G244\NSSCMGGMI  | 111   | >TP53-G244\NSSCMVGMNI | 40   | 71    |
| >TP53-G244\NSSCMGGMI  | 55    | >TP53-G244\NSSCMVGMNI | 27   | 28    |
| >TP53-G244\NSSCMGGMI  | 365   | >TP53-G244\NSSCMVGMNI | 219  | 146   |
| >TP53-G244\NSSCMGGMI  | 12    | >TP53-G244\NSSCMVGMNI | 6    | 6     |
| >TP53-G244\NSSCMGGMI  | 39    | >TP53-G244\NSSCMVGMNI | 24   | 15    |
| >TP53-G244\NSSCMGGM   | 848   | >TP53-G244\NSSCMVGM   | 437  | 411   |
| >TP53-G244\CNSSCMGGN  | 876   | >TP53-G244\CNSSCMVGN  | 387  | 489   |
| >TP53-G244\CNSSCMGGN  | 639   | >TP53-G244\CNSSCMVGN  | 306  | 333   |
| >TP53-G244\MCNSSCMG   | 25630 | >TP53-G244\MCNSSCMV   | 478  | 25152 |
| >TP53-G244\MCNSSCMG   | 34970 | >TP53-G244\MCNSSCMV   | 278  | 34692 |
| >TP53-G244\MCNSSCMG   | 17424 | >TP53-G244\MCNSSCMV   | 319  | 17105 |
| >TP53-G244\YMCNSSCMC  | 13880 | >TP53-G244\YMCNSSCMV  | 14   | 13866 |
| >TP53-G244\YMCNSSCMC  | 252   | >TP53-G244\YMCNSSCMV  | 48   | 204   |
| >TP53-G244\YMCNSSCMC  | 4010  | >TP53-G244\YMCNSSCMV  | 12   | 3998  |
| >TP53-G244\YMCNSSCMC  | 167   | >TP53-G244\YMCNSSCMV  | 48   | 119   |
| >TP53-G244\YMCNSSCMC  | 3523  | >TP53-G244\YMCNSSCMV  | 4    | 3519  |
| >TP53-G244\YMCNSSCMC  | 41    | >TP53-G244\YMCNSSCMV  | 54   | 13    |
| >TP53-G244\YMCNSSCMC  | 5317  | >TP53-G244\YMCNSSCMV  | 10   | 5307  |

|                       |       |                       |     |       |
|-----------------------|-------|-----------------------|-----|-------|
| >TP53-G244\YMCNSSCMC  | 143   | >TP53-G244\YMCNSSCMV  | 48  | 95    |
| >TP53-G244\YMCNSSCMC  | 92    | >TP53-G244\YMCNSSCMV  | 1   | 91    |
| >TP53-G244\YMCNSSCMC  | 399   | >TP53-G244\YMCNSSCMV  | 837 | 438   |
| >TP53-G244\YMCNSSCMC  | 16    | >TP53-G244\YMCNSSCMV  | 9   | 7     |
| >TP53-G244\YMCNSSCMC  | 5683  | >TP53-G244\YMCNSSCMV  | 5   | 5678  |
| >TP53-G244\YMCNSSCMC  | 197   | >TP53-G244\YMCNSSCMV  | 68  | 129   |
| >TP53-G244\YMCNSSCMC  | 1738  | >TP53-G244\YMCNSSCMV  | 5   | 1733  |
| >TP53-G244\YMCNSSCMC  | 421   | >TP53-G244\YMCNSSCMV  | 104 | 317   |
| >TP53-G244\YMCNSSCMC  | 11963 | >TP53-G244\YMCNSSCMV  | 3   | 11960 |
| >TP53-G244\YMCNSSCMC  | 332   | >TP53-G244\YMCNSSCMV  | 66  | 266   |
| >TP53-G244\YMCNSSCMC  | 903   | >TP53-G244\YMCNSSCMV  | 2   | 901   |
| >TP53-G244\YMCNSSCMC  | 53    | >TP53-G244\YMCNSSCMV  | 10  | 43    |
| >TP53-G244\YMCNSSCMC  | 19946 | >TP53-G244\YMCNSSCMV  | 343 | 19603 |
| >TP53-G244\YMCNSSCMC  | 127   | >TP53-G244\YMCNSSCMV  | 71  | 56    |
| >TP53-G244\YMCNSSCMC  | 292   | >TP53-G244\YMCNSSCMV  | 106 | 186   |
| >TP53-G244\YMCNSSCMC  | 44    | >TP53-G244\YMCNSSCMV  | 40  | 4     |
| >TP53-G244\YMCNSSCMC  | 145   | >TP53-G244\YMCNSSCMV  | 250 | 105   |
| >TP53-G244\YMCNSSCMC  | 1624  | >TP53-G244\YMCNSSCMV  | 55  | 1569  |
| >TP53-G244\YMCNSSCMC  | 160   | >TP53-G244\YMCNSSCMV  | 27  | 133   |
| >TP53-G244\YMCNSSCMC  | 294   | >TP53-G244\YMCNSSCMV  | 209 | 85    |
| >TP53-G244\NYMCNSSCN  | 19318 | >TP53-G244\NYMCNSSCN  | 80  | 19238 |
| >TP53-G244\NYMCNSSCN  | 2980  | >TP53-G244\NYMCNSSCN  | 223 | 2757  |
| >TP53-G245\GMNRRPILTI | 755   | >TP53-G245\AMNRRPILTI | 423 | 332   |
| >TP53-G245\GMNRRPIL   | 678   | >TP53-G245\AMNRRPIL   | 386 | 292   |
| >TP53-G245\GMNRRPILTI | 185   | >TP53-G245\AMNRRPILTI | 162 | 23    |
| >TP53-G245\GMNRRPILTI | 168   | >TP53-G245\AMNRRPILTI | 106 | 62    |
| >TP53-G245\GMNRRPIL   | 213   | >TP53-G245\AMNRRPIL   | 135 | 78    |
| >TP53-G245\GMNRRPILT  | 728   | >TP53-G245\AMNRRPILT  | 457 | 271   |
| >TP53-G245\GMNRRPILTI | 61    | >TP53-G245\AMNRRPILTI | 39  | 22    |
| >TP53-G245\GMNRRPILTI | 13    | >TP53-G245\AMNRRPILTI | 10  | 3     |
| >TP53-G245\GMNRRPIL   | 229   | >TP53-G245\AMNRRPIL   | 128 | 101   |
| >TP53-G245\GMNRRPILT  | 822   | >TP53-G245\AMNRRPILT  | 444 | 378   |
| >TP53-G245\GMNRRPILTI | 10    | >TP53-G245\AMNRRPILTI | 7   | 3     |
| >TP53-G245\GMNRRPILTI | 93    | >TP53-G245\AMNRRPILTI | 53  | 40    |
| >TP53-G245\GMNRRPIL   | 182   | >TP53-G245\AMNRRPIL   | 369 | 187   |
| >TP53-G245\GMNRRPILTI | 21    | >TP53-G245\AMNRRPILTI | 40  | 19    |
| >TP53-G245\GMNRRPILTI | 53    | >TP53-G245\AMNRRPILTI | 114 | 61    |
| >TP53-G245\GMNRRPIL   | 160   | >TP53-G245\AMNRRPIL   | 177 | 17    |
| >TP53-G245\GMNRRPILTI | 66    | >TP53-G245\AMNRRPILTI | 70  | 4     |
| >TP53-G245\GMNRRPILTI | 192   | >TP53-G245\AMNRRPILTI | 228 | 36    |
| >TP53-G245\GMNRRPIL   | 32    | >TP53-G245\AMNRRPIL   | 18  | 14    |
| >TP53-G245\GMNRRPILT  | 744   | >TP53-G245\AMNRRPILT  | 331 | 413   |
| >TP53-G245\GMNRRPILTI | 43    | >TP53-G245\AMNRRPILTI | 19  | 24    |

|                       |      |                       |     |      |
|-----------------------|------|-----------------------|-----|------|
| >TP53-G245/GMNRRPILTI | 102  | >TP53-G245/AMNRRPILTI | 44  | 58   |
| >TP53-G245/GMNRRPILTI | 3089 | >TP53-G245/AMNRRPILTI | 371 | 2718 |
| >TP53-G245/GMNRRPILTI | 147  | >TP53-G245/AMNRRPILTI | 41  | 106  |
| >TP53-G245/GMNRRPILTI | 646  | >TP53-G245/AMNRRPILTI | 158 | 488  |
| >TP53-G245/GMNRRPIL   | 976  | >TP53-G245/AMNRRPIL   | 141 | 835  |
| >TP53-G245/GMNRRPILTI | 844  | >TP53-G245/AMNRRPILTI | 113 | 731  |
| >TP53-G245/GMNRRPILTI | 1583 | >TP53-G245/AMNRRPILTI | 229 | 1354 |
| >TP53-G245/GGMNRRPIL  | 444  | >TP53-G245/GAMNRRPIL  | 130 | 314  |
| >TP53-G245/GGMNRRPI   | 1811 | >TP53-G245/GAMNRRPI   | 464 | 1347 |
| >TP53-G245/GGMNRRPIL  | 538  | >TP53-G245/GAMNRRPIL  | 113 | 425  |
| >TP53-G245/MGGMNRRP   | 4447 | >TP53-G245/MGAMNRRP   | 472 | 3975 |
| >TP53-G245/CMGGMNRR   | 88   | >TP53-G245/CMGAMNRR   | 210 | 122  |
| >TP53-G245/CMGGMNRR   | 314  | >TP53-G245/CMGAMNRR   | 142 | 172  |
| >TP53-G245/CMGGMNRR   | 117  | >TP53-G245/CMGAMNRR   | 81  | 36   |
| >TP53-G245/SCMGGMNR   | 464  | >TP53-G245/SCMGAMNR   | 204 | 260  |
| >TP53-G245/SSCMGGMNI  | 58   | >TP53-G245/SSCMGAMNI  | 45  | 13   |
| >TP53-G245/SSCMGGMNI  | 192  | >TP53-G245/SSCMGAMNI  | 109 | 83   |
| >TP53-G245/SSCMGGMNI  | 110  | >TP53-G245/SSCMGAMNI  | 172 | 62   |
| >TP53-G245/SSCMGGMNI  | 56   | >TP53-G245/SSCMGAMNI  | 43  | 13   |
| >TP53-G245/SSCMGGMNI  | 220  | >TP53-G245/SSCMGAMNI  | 72  | 148  |
| >TP53-G245/SSCMGGMNI  | 361  | >TP53-G245/SSCMGAMNI  | 187 | 174  |
| >TP53-G245/SSCMGGMNI  | 398  | >TP53-G245/SSCMGAMNI  | 302 | 96   |
| >TP53-G245/SSCMGGMNI  | 460  | >TP53-G245/SSCMGAMNI  | 437 | 23   |
| >TP53-G245/NSSCMGGMI  | 111  | >TP53-G245/NSSCMGAMI  | 134 | 23   |
| >TP53-G245/NSSCMGGMI  | 55   | >TP53-G245/NSSCMGAMI  | 45  | 10   |
| >TP53-G245/NSSCMGGMI  | 365  | >TP53-G245/NSSCMGAMI  | 411 | 46   |
| >TP53-G245/NSSCMGGMI  | 12   | >TP53-G245/NSSCMGAMI  | 12  | 0    |
| >TP53-G245/NSSCMGGMI  | 39   | >TP53-G245/NSSCMGAMI  | 19  | 20   |
| >TP53-G245/NSSCMGGM   | 2064 | >TP53-G245/NSSCMGAM   | 207 | 1857 |
| >TP53-G245/NSSCMGGM   | 851  | >TP53-G245/NSSCMGAM   | 222 | 629  |
| >TP53-G245/CNSSCMGGM  | 639  | >TP53-G245/CNSSCMGAN  | 445 | 194  |
| >TP53-G245/YMCNSSCMC  | 988  | >TP53-G245/YMCNSSCMC  | 17  | 971  |
| >TP53-G245/YMCNSSCMC  | 252  | >TP53-G245/YMCNSSCMC  | 212 | 40   |
| >TP53-G245/YMCNSSCMC  | 2002 | >TP53-G245/YMCNSSCMC  | 27  | 1975 |
| >TP53-G245/YMCNSSCMC  | 167  | >TP53-G245/YMCNSSCMC  | 149 | 18   |
| >TP53-G245/YMCNSSCMC  | 1968 | >TP53-G245/YMCNSSCMC  | 16  | 1952 |
| >TP53-G245/YMCNSSCMC  | 41   | >TP53-G245/YMCNSSCMC  | 41  | 0    |
| >TP53-G245/YMCNSSCMC  | 1794 | >TP53-G245/YMCNSSCMC  | 44  | 1750 |
| >TP53-G245/YMCNSSCMC  | 143  | >TP53-G245/YMCNSSCMC  | 146 | 3    |
| >TP53-G245/YMCNSSCMC  | 399  | >TP53-G245/YMCNSSCMC  | 7   | 392  |
| >TP53-G245/YMCNSSCMC  | 16   | >TP53-G245/YMCNSSCMC  | 17  | 1    |
| >TP53-G245/YMCNSSCMC  | 5487 | >TP53-G245/YMCNSSCMC  | 65  | 5422 |
| >TP53-G245/YMCNSSCMC  | 197  | >TP53-G245/YMCNSSCMC  | 200 | 3    |

|                       |       |                       |      |       |
|-----------------------|-------|-----------------------|------|-------|
| >TP53-G245/YMCNSSCMC  | 4958  | >TP53-G245/YMCNSSCMC  | 32   | 4926  |
| >TP53-G245/YMCNSSCMC  | 421   | >TP53-G245/YMCNSSCMC  | 876  | 455   |
| >TP53-G245/YMCNSSCMC  | 12730 | >TP53-G245/YMCNSSCMC  | 50   | 12680 |
| >TP53-G245/YMCNSSCMC  | 332   | >TP53-G245/YMCNSSCMC  | 714  | 382   |
| >TP53-G245/YMCNSSCMC  | 1350  | >TP53-G245/YMCNSSCMC  | 4    | 1346  |
| >TP53-G245/YMCNSSCMC  | 53    | >TP53-G245/YMCNSSCMC  | 87   | 34    |
| >TP53-G245/YMCNSSCMC  | 591   | >TP53-G245/YMCNSSCMC  | 402  | 189   |
| >TP53-G245/YMCNSSCMC  | 18229 | >TP53-G245/YMCNSSCMC  | 224  | 18005 |
| >TP53-G245/YMCNSSCMC  | 292   | >TP53-G245/YMCNSSCMC  | 174  | 118   |
| >TP53-G245/YMCNSSCMC  | 44    | >TP53-G245/YMCNSSCMC  | 26   | 18    |
| >TP53-G245/YMCNSSCMC  | 145   | >TP53-G245/YMCNSSCMC  | 90   | 55    |
| >TP53-G245/YMCNSSCMC  | 2531  | >TP53-G245/YMCNSSCMC  | 269  | 2262  |
| >TP53-G245/YMCNSSCMC  | 160   | >TP53-G245/YMCNSSCMC  | 37   | 123   |
| >TP53-G245/YMCNSSCMC  | 294   | >TP53-G245/YMCNSSCMC  | 469  | 175   |
| >TP53-G245/YMCNSSCMC  | 958   | >TP53-G245/YMCNSSCMC  | 125  | 833   |
| >TP53-G245/YMCNSSCMC  | 3120  | >TP53-G245/YMCNSSCMC  | 301  | 2819  |
| >TP53-G245/YMCNSSCMC  | 5958  | >TP53-G245/YMCNSSCMC  | 389  | 5569  |
| >TP53-G245(GMNRRPILTI | 185   | >TP53-G245(CMNRRPILTI | 434  | 249   |
| >TP53-G245(GMNRRPILTI | 168   | >TP53-G245(CMNRRPILTI | 462  | 294   |
| >TP53-G245(GMNRRPIL   | 213   | >TP53-G245(CMNRRPIL   | 586  | 373   |
| >TP53-G245(GMNRRPILTI | 61    | >TP53-G245(CMNRRPILTI | 102  | 41    |
| >TP53-G245(GMNRRPILTI | 13    | >TP53-G245(CMNRRPILTI | 27   | 14    |
| >TP53-G245(GMNRRPIL   | 229   | >TP53-G245(CMNRRPIL   | 1014 | 785   |
| >TP53-G245(GMNRRPILTI | 10    | >TP53-G245(CMNRRPILTI | 32   | 22    |
| >TP53-G245(GMNRRPILTI | 93    | >TP53-G245(CMNRRPILTI | 463  | 370   |
| >TP53-G245(GMNRRPIL   | 182   | >TP53-G245(CMNRRPIL   | 1224 | 1042  |
| >TP53-G245(GMNRRPILTI | 21    | >TP53-G245(CMNRRPILTI | 137  | 116   |
| >TP53-G245(GMNRRPILTI | 53    | >TP53-G245(CMNRRPILTI | 509  | 456   |
| >TP53-G245(GMNRRPIL   | 160   | >TP53-G245(CMNRRPIL   | 3536 | 3376  |
| >TP53-G245(GMNRRPILTI | 66    | >TP53-G245(CMNRRPILTI | 1407 | 1341  |
| >TP53-G245(GMNRRPILTI | 192   | >TP53-G245(CMNRRPILTI | 3825 | 3633  |
| >TP53-G245(GMNRRPIL   | 32    | >TP53-G245(CMNRRPIL   | 102  | 70    |
| >TP53-G245(GMNRRPILTI | 43    | >TP53-G245(CMNRRPILTI | 174  | 131   |
| >TP53-G245(GMNRRPILTI | 102   | >TP53-G245(CMNRRPILTI | 440  | 338   |
| >TP53-G245(GMNRRPILTI | 147   | >TP53-G245(CMNRRPILTI | 534  | 387   |
| >TP53-G245(GMNRRPIL   | 1241  | >TP53-G245(CMNRRPIL   | 405  | 836   |
| >TP53-G245(GMNRRPILTI | 844   | >TP53-G245(CMNRRPILTI | 460  | 384   |
| >TP53-G245(GGMNRRPIL  | 444   | >TP53-G245(GCMNRRPIL  | 419  | 25    |
| >TP53-G245(CMGGMNRR   | 88    | >TP53-G245(CMGGMNRR   | 872  | 784   |
| >TP53-G245(CMGGMNRR   | 314   | >TP53-G245(CMGGMNRR   | 224  | 90    |
| >TP53-G245(CMGGMNRR   | 117   | >TP53-G245(CMGGMNRR   | 58   | 59    |
| >TP53-G245(SCMGGMNR   | 464   | >TP53-G245(SCMGGMNR   | 80   | 384   |
| >TP53-G245(SCMGGMNR   | 1578  | >TP53-G245(SCMGGMNR   | 81   | 1497  |

|                       |       |                       |      |       |
|-----------------------|-------|-----------------------|------|-------|
| >TP53-G245(SSCMGGMNI  | 58    | >TP53-G245(SSCMGCMNF  | 55   | 3     |
| >TP53-G245(SSCMGGMNI  | 192   | >TP53-G245(SSCMGCMNF  | 132  | 60    |
| >TP53-G245(SSCMGGMNI  | 110   | >TP53-G245(SSCMGCMNF  | 103  | 7     |
| >TP53-G245(SSCMGGMNI  | 56    | >TP53-G245(SSCMGCMNF  | 22   | 34    |
| >TP53-G245(SSCMGGMNI  | 1403  | >TP53-G245(SSCMGCMNF  | 273  | 1130  |
| >TP53-G245(SSCMGGMNI  | 220   | >TP53-G245(SSCMGCMNF  | 85   | 135   |
| >TP53-G245(SSCMGGMNI  | 361   | >TP53-G245(SSCMGCMNF  | 457  | 96    |
| >TP53-G245(SSCMGGMNI  | 398   | >TP53-G245(SSCMGCMNF  | 219  | 179   |
| >TP53-G245(SSCMGGMNI  | 460   | >TP53-G245(SSCMGCMNF  | 286  | 174   |
| >TP53-G245(NSSCMGGMI  | 111   | >TP53-G245(NSSCMGCMF  | 89   | 22    |
| >TP53-G245(NSSCMGGMI  | 55    | >TP53-G245(NSSCMGCMF  | 46   | 9     |
| >TP53-G245(NSSCMGGMI  | 365   | >TP53-G245(NSSCMGCMF  | 189  | 176   |
| >TP53-G245(NSSCMGGMI  | 12    | >TP53-G245(NSSCMGCMF  | 12   | 0     |
| >TP53-G245(NSSCMGGMI  | 39    | >TP53-G245(NSSCMGCMF  | 27   | 12    |
| >TP53-G245(NSSCMGGM   | 851   | >TP53-G245(NSSCMGCM   | 110  | 741   |
| >TP53-G245(YMCNSSCMC  | 252   | >TP53-G245(YMCNSSCMC  | 334  | 82    |
| >TP53-G245(YMCNSSCMC  | 167   | >TP53-G245(YMCNSSCMC  | 349  | 182   |
| >TP53-G245(YMCNSSCMC  | 1968  | >TP53-G245(YMCNSSCMC  | 463  | 1505  |
| >TP53-G245(YMCNSSCMC  | 41    | >TP53-G245(YMCNSSCMC  | 331  | 290   |
| >TP53-G245(YMCNSSCMC  | 143   | >TP53-G245(YMCNSSCMC  | 800  | 657   |
| >TP53-G245(YMCNSSCMC  | 399   | >TP53-G245(YMCNSSCMC  | 16   | 383   |
| >TP53-G245(YMCNSSCMC  | 16    | >TP53-G245(YMCNSSCMC  | 66   | 50    |
| >TP53-G245(YMCNSSCMC  | 5487  | >TP53-G245(YMCNSSCMC  | 243  | 5244  |
| >TP53-G245(YMCNSSCMC  | 197   | >TP53-G245(YMCNSSCMC  | 402  | 205   |
| >TP53-G245(YMCNSSCMC  | 421   | >TP53-G245(YMCNSSCMC  | 462  | 41    |
| >TP53-G245(YMCNSSCMC  | 12730 | >TP53-G245(YMCNSSCMC  | 168  | 12562 |
| >TP53-G245(YMCNSSCMC  | 332   | >TP53-G245(YMCNSSCMC  | 501  | 169   |
| >TP53-G245(YMCNSSCMC  | 1350  | >TP53-G245(YMCNSSCMC  | 10   | 1340  |
| >TP53-G245(YMCNSSCMC  | 53    | >TP53-G245(YMCNSSCMC  | 189  | 136   |
| >TP53-G245(YMCNSSCMC  | 292   | >TP53-G245(YMCNSSCMC  | 1912 | 1620  |
| >TP53-G245(YMCNSSCMC  | 44    | >TP53-G245(YMCNSSCMC  | 49   | 5     |
| >TP53-G245(YMCNSSCMC  | 145   | >TP53-G245(YMCNSSCMC  | 330  | 185   |
| >TP53-G245(YMCNSSCMC  | 160   | >TP53-G245(YMCNSSCMC  | 90   | 70    |
| >TP53-G245(YMCNSSCMC  | 294   | >TP53-G245(YMCNSSCMC  | 2070 | 1776  |
| >TP53-G245[GMNRRPILTI | 185   | >TP53-G245[DMNRRPILTI | 1725 | 1540  |
| >TP53-G245[GMNRRPILTI | 168   | >TP53-G245[DMNRRPILTI | 5436 | 5268  |
| >TP53-G245[GMNRRPIL   | 213   | >TP53-G245[DMNRRPIL   | 8667 | 8454  |
| >TP53-G245[GMNRRPILTI | 61    | >TP53-G245[DMNRRPILTI | 280  | 219   |
| >TP53-G245[GMNRRPILTI | 13    | >TP53-G245[DMNRRPILTI | 938  | 925   |
| >TP53-G245[GMNRRPIL   | 229   | >TP53-G245[DMNRRPIL   | 3841 | 3612  |
| >TP53-G245[GMNRRPILTI | 10    | >TP53-G245[DMNRRPILTI | 178  | 168   |
| >TP53-G245[GMNRRPILTI | 93    | >TP53-G245[DMNRRPILTI | 2275 | 2182  |
| >TP53-G245[GMNRRPIL   | 182   | >TP53-G245[DMNRRPIL   | 6392 | 6210  |

|                       |       |                       |      |       |
|-----------------------|-------|-----------------------|------|-------|
| >TP53-G245[GMNRRPILTI | 21    | >TP53-G245[DMNRRPILTI | 1624 | 1603  |
| >TP53-G245[GMNRRPILTI | 53    | >TP53-G245[DMNRRPILTI | 4872 | 4819  |
| >TP53-G245[GMNRRPIL   | 160   | >TP53-G245[DMNRRPIL   | 4615 | 4455  |
| >TP53-G245[GMNRRPILTI | 66    | >TP53-G245[DMNRRPILTI | 1832 | 1766  |
| >TP53-G245[GMNRRPILTI | 192   | >TP53-G245[DMNRRPILTI | 4536 | 4344  |
| >TP53-G245[GMNRRPIL   | 32    | >TP53-G245[DMNRRPIL   | 470  | 438   |
| >TP53-G245[GMNRRPILTI | 43    | >TP53-G245[DMNRRPILTI | 704  | 661   |
| >TP53-G245[GMNRRPILTI | 102   | >TP53-G245[DMNRRPILTI | 1643 | 1541  |
| >TP53-G245[GMNRRPILTI | 147   | >TP53-G245[DMNRRPILTI | 508  | 361   |
| >TP53-G245[GGMNRRPIL  | 444   | >TP53-G245[GDMNRRPIL  | 1757 | 1313  |
| >TP53-G245[GGMNRRPI   | 32023 | >TP53-G245[GDMNRRPI   | 349  | 31674 |
| >TP53-G245[GGMNRRPIL  | 29798 | >TP53-G245[GDMNRRPIL  | 257  | 29541 |
| >TP53-G245[GGMNRRPI   | 2924  | >TP53-G245[GDMNRRPI   | 35   | 2889  |
| >TP53-G245[GGMNRRPIL  | 11906 | >TP53-G245[GDMNRRPIL  | 110  | 11796 |
| >TP53-G245[GGMNRRPIL  | 5281  | >TP53-G245[GDMNRRPIL  | 22   | 5259  |
| >TP53-G245[GGMNRRPIL  | 13991 | >TP53-G245[GDMNRRPIL  | 260  | 13731 |
| >TP53-G245[CMGGMNRR   | 88    | >TP53-G245[CMGDMNRR   | 46   | 42    |
| >TP53-G245[CMGGMNRR   | 314   | >TP53-G245[CMGDMNRR   | 283  | 31    |
| >TP53-G245[CMGGMNRR   | 117   | >TP53-G245[CMGDMNRR   | 88   | 29    |
| >TP53-G245[SCMGGMNR   | 464   | >TP53-G245[SCMGDMNR   | 270  | 194   |
| >TP53-G245[SSCMGGMNI  | 58    | >TP53-G245[SSCMGDMNI  | 123  | 65    |
| >TP53-G245[SSCMGGMNI  | 192   | >TP53-G245[SSCMGDMNI  | 220  | 28    |
| >TP53-G245[SSCMGGMNI  | 110   | >TP53-G245[SSCMGDMNI  | 152  | 42    |
| >TP53-G245[SSCMGGMNI  | 56    | >TP53-G245[SSCMGDMNI  | 163  | 107   |
| >TP53-G245[SSCMGGMNI  | 220   | >TP53-G245[SSCMGDMNI  | 93   | 127   |
| >TP53-G245[SSCMGGMNI  | 361   | >TP53-G245[SSCMGDMNI  | 183  | 178   |
| >TP53-G245[SSCMGGMNI  | 398   | >TP53-G245[SSCMGDMNI  | 513  | 115   |
| >TP53-G245[SSCMGGMNI  | 460   | >TP53-G245[SSCMGDMNI  | 486  | 26    |
| >TP53-G245[NSSCMGGMI  | 111   | >TP53-G245[NSSCMGDMI  | 195  | 84    |
| >TP53-G245[NSSCMGGMI  | 55    | >TP53-G245[NSSCMGDMI  | 107  | 52    |
| >TP53-G245[NSSCMGGMI  | 365   | >TP53-G245[NSSCMGDMI  | 867  | 502   |
| >TP53-G245[NSSCMGGMI  | 12    | >TP53-G245[NSSCMGDMI  | 16   | 4     |
| >TP53-G245[NSSCMGGMI  | 39    | >TP53-G245[NSSCMGDMI  | 29   | 10    |
| >TP53-G245[CNSSCMGGN  | 639   | >TP53-G245[CNSSCMGDM  | 495  | 144   |
| >TP53-G245[YMCNSSCMC  | 252   | >TP53-G245[YMCNSSCMC  | 1091 | 839   |
| >TP53-G245[YMCNSSCMC  | 167   | >TP53-G245[YMCNSSCMC  | 862  | 695   |
| >TP53-G245[YMCNSSCMC  | 41    | >TP53-G245[YMCNSSCMC  | 193  | 152   |
| >TP53-G245[YMCNSSCMC  | 143   | >TP53-G245[YMCNSSCMC  | 1513 | 1370  |
| >TP53-G245[YMCNSSCMC  | 399   | >TP53-G245[YMCNSSCMC  | 2084 | 1685  |
| >TP53-G245[YMCNSSCMC  | 16    | >TP53-G245[YMCNSSCMC  | 128  | 112   |
| >TP53-G245[YMCNSSCMC  | 197   | >TP53-G245[YMCNSSCMC  | 926  | 729   |
| >TP53-G245[YMCNSSCMC  | 421   | >TP53-G245[YMCNSSCMC  | 1161 | 740   |
| >TP53-G245[YMCNSSCMC  | 332   | >TP53-G245[YMCNSSCMC  | 1948 | 1616  |



|                        |       |                        |      |       |
|------------------------|-------|------------------------|------|-------|
| >TP53-G245I YMCNSSCMC  | 53    | >TP53-G245I YMCNSSCMC  | 122  | 69    |
| >TP53-G245I YMCNSSCMC  | 292   | >TP53-G245I YMCNSSCMC  | 4845 | 4553  |
| >TP53-G245I YMCNSSCMC  | 44    | >TP53-G245I YMCNSSCMC  | 69   | 25    |
| >TP53-G245I YMCNSSCMC  | 145   | >TP53-G245I YMCNSSCMC  | 238  | 93    |
| >TP53-G245I YMCNSSCMC  | 160   | >TP53-G245I YMCNSSCMC  | 122  | 38    |
| >TP53-G245I YMCNSSCMC  | 294   | >TP53-G245I YMCNSSCMC  | 965  | 671   |
| >TP53-G245I GMNRRPILTI | 185   | >TP53-G245I EMNRRPILTI | 1226 | 1041  |
| >TP53-G245I GMNRRPILTI | 168   | >TP53-G245I EMNRRPILTI | 1616 | 1448  |
| >TP53-G245I GMNRRPIL   | 213   | >TP53-G245I EMNRRPIL   | 4474 | 4261  |
| >TP53-G245I GMNRRPILTI | 61    | >TP53-G245I EMNRRPILTI | 178  | 117   |
| >TP53-G245I GMNRRPILTI | 13    | >TP53-G245I EMNRRPILTI | 233  | 220   |
| >TP53-G245I GMNRRPIL   | 229   | >TP53-G245I EMNRRPIL   | 1446 | 1217  |
| >TP53-G245I GMNRRPILTI | 10    | >TP53-G245I EMNRRPILTI | 48   | 38    |
| >TP53-G245I GMNRRPILTI | 93    | >TP53-G245I EMNRRPILTI | 659  | 566   |
| >TP53-G245I GMNRRPIL   | 182   | >TP53-G245I EMNRRPIL   | 3560 | 3378  |
| >TP53-G245I GMNRRPILTI | 21    | >TP53-G245I EMNRRPILTI | 558  | 537   |
| >TP53-G245I GMNRRPILTI | 53    | >TP53-G245I EMNRRPILTI | 1965 | 1912  |
| >TP53-G245I GMNRRPIL   | 160   | >TP53-G245I EMNRRPIL   | 2753 | 2593  |
| >TP53-G245I GMNRRPILTI | 66    | >TP53-G245I EMNRRPILTI | 975  | 909   |
| >TP53-G245I GMNRRPILTI | 192   | >TP53-G245I EMNRRPILTI | 2852 | 2660  |
| >TP53-G245I GMNRRPIL   | 32    | >TP53-G245I EMNRRPIL   | 162  | 130   |
| >TP53-G245I GMNRRPILTI | 43    | >TP53-G245I EMNRRPILTI | 260  | 217   |
| >TP53-G245I GMNRRPILTI | 102   | >TP53-G245I EMNRRPILTI | 625  | 523   |
| >TP53-G245I GMNRRPILTI | 147   | >TP53-G245I EMNRRPILTI | 211  | 64    |
| >TP53-G245I GMNRRPIL   | 1241  | >TP53-G245I EMNRRPIL   | 247  | 994   |
| >TP53-G245I GGMNRRPIL  | 13610 | >TP53-G245I GEMNRRPIL  | 72   | 13538 |
| >TP53-G245I GGMNRRPIL  | 444   | >TP53-G245I GEMNRRPIL  | 1091 | 647   |
| >TP53-G245I GGMNRRPI   | 23855 | >TP53-G245I GEMNRRPI   | 174  | 23681 |
| >TP53-G245I GGMNRRPIL  | 21499 | >TP53-G245I GEMNRRPIL  | 42   | 21457 |
| >TP53-G245I GGMNRRPIL  | 23356 | >TP53-G245I GEMNRRPIL  | 84   | 23272 |
| >TP53-G245I GGMNRRPI   | 32023 | >TP53-G245I GEMNRRPI   | 36   | 31987 |
| >TP53-G245I GGMNRRPIL  | 29798 | >TP53-G245I GEMNRRPIL  | 28   | 29770 |
| >TP53-G245I GGMNRRPIL  | 32576 | >TP53-G245I GEMNRRPIL  | 54   | 32522 |
| >TP53-G245I GGMNRRPIL  | 23198 | >TP53-G245I GEMNRRPIL  | 465  | 22733 |
| >TP53-G245I GGMNRRPI   | 41340 | >TP53-G245I GEMNRRPI   | 363  | 40977 |
| >TP53-G245I GGMNRRPIL  | 41229 | >TP53-G245I GEMNRRPIL  | 441  | 40788 |
| >TP53-G245I GGMNRRPI   | 2924  | >TP53-G245I GEMNRRPI   | 15   | 2909  |
| >TP53-G245I GGMNRRPIL  | 11906 | >TP53-G245I GEMNRRPIL  | 5    | 11901 |
| >TP53-G245I GGMNRRPIL  | 5281  | >TP53-G245I GEMNRRPIL  | 3    | 5278  |
| >TP53-G245I GGMNRRPIL  | 1950  | >TP53-G245I GEMNRRPIL  | 462  | 1488  |
| >TP53-G245I CMGGMNRR   | 984   | >TP53-G245I CMGEMNRR   | 330  | 654   |
| >TP53-G245I CMGGMNRR   | 88    | >TP53-G245I CMGEMNRR   | 97   | 9     |
| >TP53-G245I CMGGMNRR   | 314   | >TP53-G245I CMGEMNRR   | 393  | 79    |

|                        |      |                         |      |      |
|------------------------|------|-------------------------|------|------|
| >TP53-G245E CMGGMNRR   | 117  | >TP53-G245E CMGEMNRR    | 130  | 13   |
| >TP53-G245E SCMGGMNR   | 464  | >TP53-G245E SCMGEMNR    | 214  | 250  |
| >TP53-G245E SCMGGMNR   | 1578 | >TP53-G245E SCMGEMNRI   | 466  | 1112 |
| >TP53-G245E SSCMGGMNI  | 58   | >TP53-G245E SSCMGEMNF   | 79   | 21   |
| >TP53-G245E SSCMGGMNI  | 192  | >TP53-G245E SSCMGEMNF   | 148  | 44   |
| >TP53-G245E SSCMGGMNI  | 110  | >TP53-G245E SSCMGEMNF   | 208  | 98   |
| >TP53-G245E SSCMGGMNI  | 56   | >TP53-G245E SSCMGEMNF   | 69   | 13   |
| >TP53-G245E SSCMGGMNI  | 220  | >TP53-G245E SSCMGEMNF   | 102  | 118  |
| >TP53-G245E SSCMGGMNI  | 361  | >TP53-G245E SSCMGEMNF   | 164  | 197  |
| >TP53-G245E SSCMGGMNI  | 398  | >TP53-G245E SSCMGEMNF   | 484  | 86   |
| >TP53-G245E SSCMGGMNI  | 460  | >TP53-G245E SSCMGEMNF   | 512  | 52   |
| >TP53-G245E NSSCMGGMI  | 111  | >TP53-G245E NSSCMGEMF   | 218  | 107  |
| >TP53-G245E NSSCMGGMI  | 55   | >TP53-G245E NSSCMGEMF   | 100  | 45   |
| >TP53-G245E NSSCMGGMI  | 365  | >TP53-G245E NSSCMGEMF   | 822  | 457  |
| >TP53-G245E NSSCMGGMI  | 12   | >TP53-G245E NSSCMGEMF   | 20   | 8    |
| >TP53-G245E NSSCMGGMI  | 39   | >TP53-G245E NSSCMGEMF   | 28   | 11   |
| >TP53-G245E NSSCMGGM   | 851  | >TP53-G245E NSSCMGEM    | 347  | 504  |
| >TP53-G245E YMCNSSCMC  | 252  | >TP53-G245E YMCNSSCMC   | 126  | 126  |
| >TP53-G245E YMCNSSCMC  | 167  | >TP53-G245E YMCNSSCMC   | 103  | 64   |
| >TP53-G245E YMCNSSCMC  | 41   | >TP53-G245E YMCNSSCMC   | 56   | 15   |
| >TP53-G245E YMCNSSCMC  | 143  | >TP53-G245E YMCNSSCMC   | 272  | 129  |
| >TP53-G245E YMCNSSCMC  | 399  | >TP53-G245E YMCNSSCMC   | 2425 | 2026 |
| >TP53-G245E YMCNSSCMC  | 16   | >TP53-G245E YMCNSSCMC   | 15   | 1    |
| >TP53-G245E YMCNSSCMC  | 197  | >TP53-G245E YMCNSSCMC   | 299  | 102  |
| >TP53-G245E YMCNSSCMC  | 421  | >TP53-G245E YMCNSSCMC   | 366  | 55   |
| >TP53-G245E YMCNSSCMC  | 332  | >TP53-G245E YMCNSSCMC   | 572  | 240  |
| >TP53-G245E YMCNSSCMC  | 53   | >TP53-G245E YMCNSSCMC   | 36   | 17   |
| >TP53-G245E YMCNSSCMC  | 292  | >TP53-G245E YMCNSSCMC   | 1402 | 1110 |
| >TP53-G245E YMCNSSCMC  | 44   | >TP53-G245E YMCNSSCMC   | 40   | 4    |
| >TP53-G245E YMCNSSCMC  | 145  | >TP53-G245E YMCNSSCMC   | 223  | 78   |
| >TP53-G245E YMCNSSCMC  | 160  | >TP53-G245E YMCNSSCMC   | 75   | 85   |
| >TP53-G245E YMCNSSCMC  | 294  | >TP53-G245E YMCNSSCMC   | 376  | 82   |
| >TP53-G245E YMCNSSCMC  | 958  | >TP53-G245E YMCNSSCMC   | 427  | 531  |
| >TP53-G245F GMNRRPIL   | 2183 | >TP53-G245F FMNRRPIL    | 64   | 2119 |
| >TP53-G245F GMNRRPILT  | 6990 | >TP53-G245F FMNRRPILT   | 288  | 6702 |
| >TP53-G245F GMNRRPILTI | 972  | >TP53-G245F FMNRRPILTI  | 57   | 915  |
| >TP53-G245F GMNRRPILTI | 755  | >TP53-G245F FMNRRPILTII | 36   | 719  |
| >TP53-G245F GMNRRPIL   | 678  | >TP53-G245F FMNRRPIL    | 18   | 660  |
| >TP53-G245F GMNRRPILT  | 8577 | >TP53-G245F FMNRRPILT   | 304  | 8273 |
| >TP53-G245F GMNRRPILTI | 185  | >TP53-G245F FMNRRPILTI  | 26   | 159  |
| >TP53-G245F GMNRRPILTI | 168  | >TP53-G245F FMNRRPILTII | 9    | 159  |
| >TP53-G245F GMNRRPIL   | 213  | >TP53-G245F FMNRRPIL    | 14   | 199  |
| >TP53-G245F GMNRRPILT  | 728  | >TP53-G245F FMNRRPILT   | 31   | 697  |

|                        |       |                         |     |       |
|------------------------|-------|-------------------------|-----|-------|
| >TP53-G245F GMNRRPILTI | 61    | >TP53-G245F FMNRRPILTI  | 14  | 47    |
| >TP53-G245F GMNRRPILTI | 13    | >TP53-G245F FMNRRPILTII | 4   | 9     |
| >TP53-G245F GMNRRPIL   | 9296  | >TP53-G245F FMNRRPIL    | 301 | 8995  |
| >TP53-G245F GMNRRPILTI | 4938  | >TP53-G245F FMNRRPILTI  | 146 | 4792  |
| >TP53-G245F GMNRRPILTI | 2592  | >TP53-G245F FMNRRPILTII | 119 | 2473  |
| >TP53-G245F GMNRRPIL   | 229   | >TP53-G245F FMNRRPIL    | 17  | 212   |
| >TP53-G245F GMNRRPILT  | 822   | >TP53-G245F FMNRRPILT   | 43  | 779   |
| >TP53-G245F GMNRRPILTI | 10    | >TP53-G245F FMNRRPILTI  | 3   | 7     |
| >TP53-G245F GMNRRPILTI | 93    | >TP53-G245F FMNRRPILTII | 9   | 84    |
| >TP53-G245F GMNRRPIL   | 182   | >TP53-G245F FMNRRPIL    | 37  | 145   |
| >TP53-G245F GMNRRPILTI | 21    | >TP53-G245F FMNRRPILTI  | 7   | 14    |
| >TP53-G245F GMNRRPILTI | 53    | >TP53-G245F FMNRRPILTII | 12  | 41    |
| >TP53-G245F GMNRRPIL   | 160   | >TP53-G245F FMNRRPIL    | 30  | 130   |
| >TP53-G245F GMNRRPILTI | 66    | >TP53-G245F FMNRRPILTI  | 17  | 49    |
| >TP53-G245F GMNRRPILTI | 192   | >TP53-G245F FMNRRPILTII | 36  | 156   |
| >TP53-G245F GMNRRPIL   | 5904  | >TP53-G245F FMNRRPIL    | 174 | 5730  |
| >TP53-G245F GMNRRPILTI | 2202  | >TP53-G245F FMNRRPILTI  | 38  | 2164  |
| >TP53-G245F GMNRRPILTI | 3605  | >TP53-G245F FMNRRPILTII | 114 | 3491  |
| >TP53-G245F GMNRRPIL   | 32    | >TP53-G245F FMNRRPIL    | 6   | 26    |
| >TP53-G245F GMNRRPILT  | 744   | >TP53-G245F FMNRRPILT   | 61  | 683   |
| >TP53-G245F GMNRRPILTI | 43    | >TP53-G245F FMNRRPILTI  | 5   | 38    |
| >TP53-G245F GMNRRPILTI | 102   | >TP53-G245F FMNRRPILTII | 9   | 93    |
| >TP53-G245F GMNRRPILTI | 147   | >TP53-G245F FMNRRPILTI  | 336 | 189   |
| >TP53-G245F GMNRRPIL   | 1241  | >TP53-G245F FMNRRPIL    | 62  | 1179  |
| >TP53-G245F GMNRRPILTI | 4785  | >TP53-G245F FMNRRPILTII | 444 | 4341  |
| >TP53-G245F GMNRRPIL   | 976   | >TP53-G245F FMNRRPIL    | 62  | 914   |
| >TP53-G245F GMNRRPILTI | 844   | >TP53-G245F FMNRRPILTI  | 56  | 788   |
| >TP53-G245F GMNRRPILTI | 1583  | >TP53-G245F FMNRRPILTII | 102 | 1481  |
| >TP53-G245F GMNRRPIL   | 8167  | >TP53-G245F FMNRRPIL    | 375 | 7792  |
| >TP53-G245F GGMNRRPIL  | 20715 | >TP53-G245F GFMNRRPILT  | 125 | 20590 |
| >TP53-G245F GGMNRRPIL  | 444   | >TP53-G245F GFMNRRPIL   | 495 | 51    |
| >TP53-G245F NYMCNSSCN  | 16896 | >TP53-G245F NYMCNSSCN   | 27  | 16869 |
| >TP53-G245F NYMCNSSCN  | 14347 | >TP53-G245F NYMCNSSCN   | 143 | 14204 |
| >TP53-G245F NYMCNSSCN  | 2608  | >TP53-G245F NYMCNSSCN   | 7   | 2601  |
| >TP53-G245F NYMCNSSCN  | 26156 | >TP53-G245F NYMCNSSCN   | 290 | 25866 |
| >TP53-G245F MGGMNR     | 803   | >TP53-G245F MGFMMNRPI   | 187 | 616   |
| >TP53-G245F MGGMNR     | 3318  | >TP53-G245F MGFMMNRPI   | 315 | 3003  |
| >TP53-G245F MGGMNR     | 5857  | >TP53-G245F MGFMMNRPI   | 334 | 5523  |
| >TP53-G245F MGGMNR     | 2893  | >TP53-G245F MGFMMNRPI   | 388 | 2505  |
| >TP53-G245F CMGGMNR    | 88    | >TP53-G245F CMGFMNRR    | 592 | 504   |
| >TP53-G245F CMGGMNR    | 314   | >TP53-G245F CMGFMNRR    | 101 | 213   |
| >TP53-G245F CMGGMNR    | 1022  | >TP53-G245F CMGFMNRR    | 428 | 594   |
| >TP53-G245F CMGGMNR    | 117   | >TP53-G245F CMGFMNRR    | 89  | 28    |

|                      |       |                      |     |       |
|----------------------|-------|----------------------|-----|-------|
| >TP53-G245FSCMGGMNR  | 1170  | >TP53-G245FSCMGFMNR  | 259 | 911   |
| >TP53-G245FSCMGGMNR  | 1568  | >TP53-G245FSCMGFMNRF | 441 | 1127  |
| >TP53-G245FSCMGGMNR  | 994   | >TP53-G245FSCMGFMNRF | 315 | 679   |
| >TP53-G245FSCMGGMNR  | 1031  | >TP53-G245FSCMGFMNRF | 404 | 627   |
| >TP53-G245FSCMGGMNR  | 2133  | >TP53-G245FSCMGFMNR  | 290 | 1843  |
| >TP53-G245FSCMGGMNR  | 464   | >TP53-G245FSCMGFMNR  | 51  | 413   |
| >TP53-G245FSCMGGMNR  | 1578  | >TP53-G245FSCMGFMNRF | 80  | 1498  |
| >TP53-G245FSSCMGGMNI | 58    | >TP53-G245FSSCMGFMNF | 16  | 42    |
| >TP53-G245FSSCMGGMNI | 192   | >TP53-G245FSSCMGFMNF | 56  | 136   |
| >TP53-G245FSSCMGGMNI | 110   | >TP53-G245FSSCMGFMNF | 18  | 92    |
| >TP53-G245FSSCMGGMNI | 56    | >TP53-G245FSSCMGFMNF | 14  | 42    |
| >TP53-G245FSSCMGGMNI | 1403  | >TP53-G245FSSCMGFMNF | 143 | 1260  |
| >TP53-G245FSSCMGGMNI | 220   | >TP53-G245FSSCMGFMNF | 55  | 165   |
| >TP53-G245FSSCMGGMNI | 361   | >TP53-G245FSSCMGFMNF | 117 | 244   |
| >TP53-G245FSSCMGGMNI | 398   | >TP53-G245FSSCMGFMNF | 70  | 328   |
| >TP53-G245FSSCMGGMNI | 460   | >TP53-G245FSSCMGFMNF | 109 | 351   |
| >TP53-G245FSSCMGGMNI | 3470  | >TP53-G245FSSCMGFMNF | 378 | 3092  |
| >TP53-G245FNSSCMGGMI | 111   | >TP53-G245FNSSCMGFMM | 63  | 48    |
| >TP53-G245FNSSCMGGMI | 55    | >TP53-G245FNSSCMGFMM | 15  | 40    |
| >TP53-G245FNSSCMGGMI | 1517  | >TP53-G245FNSSCMGFMM | 318 | 1199  |
| >TP53-G245FNSSCMGGMI | 365   | >TP53-G245FNSSCMGFMM | 153 | 212   |
| >TP53-G245FNSSCMGGMI | 1183  | >TP53-G245FNSSCMGFMM | 466 | 717   |
| >TP53-G245FNSSCMGGMI | 12    | >TP53-G245FNSSCMGFMM | 11  | 1     |
| >TP53-G245FNSSCMGGMI | 39    | >TP53-G245FNSSCMGFMM | 14  | 25    |
| >TP53-G245FNSSCMGGM  | 851   | >TP53-G245FNSSCMGFMM | 388 | 463   |
| >TP53-G245FNSSCMGGMI | 1914  | >TP53-G245FNSSCMGFMM | 289 | 1625  |
| >TP53-G245FCNSSCMGGN | 876   | >TP53-G245FCNSSCMGFV | 357 | 519   |
| >TP53-G245FCNSSCMGGN | 2175  | >TP53-G245FCNSSCMGFV | 462 | 1713  |
| >TP53-G245FCNSSCMGGN | 639   | >TP53-G245FCNSSCMGFV | 161 | 478   |
| >TP53-G245FCNSSCMGC  | 18926 | >TP53-G245FCNSSCMGF  | 27  | 18899 |
| >TP53-G245FCNSSCMGC  | 16962 | >TP53-G245FCNSSCMGF  | 272 | 16690 |
| >TP53-G245FCNSSCMGC  | 944   | >TP53-G245FCNSSCMGF  | 346 | 598   |
| >TP53-G245FYMCNSSCMC | 988   | >TP53-G245FYMCNSSCMC | 447 | 541   |
| >TP53-G245FYMCNSSCMC | 252   | >TP53-G245FYMCNSSCMC | 80  | 172   |
| >TP53-G245FYMCNSSCMC | 167   | >TP53-G245FYMCNSSCMC | 47  | 120   |
| >TP53-G245FYMCNSSCMC | 41    | >TP53-G245FYMCNSSCMC | 39  | 2     |
| >TP53-G245FYMCNSSCMC | 143   | >TP53-G245FYMCNSSCMC | 102 | 41    |
| >TP53-G245FYMCNSSCMC | 399   | >TP53-G245FYMCNSSCMC | 131 | 268   |
| >TP53-G245FYMCNSSCMC | 16    | >TP53-G245FYMCNSSCMC | 13  | 3     |
| >TP53-G245FYMCNSSCMC | 197   | >TP53-G245FYMCNSSCMC | 179 | 18    |
| >TP53-G245FYMCNSSCMC | 421   | >TP53-G245FYMCNSSCMC | 153 | 268   |
| >TP53-G245FYMCNSSCMC | 332   | >TP53-G245FYMCNSSCMC | 240 | 92    |
| >TP53-G245FYMCNSSCMC | 1350  | >TP53-G245FYMCNSSCMC | 371 | 979   |

|                       |       |                       |      |       |
|-----------------------|-------|-----------------------|------|-------|
| >TP53-G245FYMCNSSCMC  | 53    | >TP53-G245FYMCNSSCMC  | 51   | 2     |
| >TP53-G245FYMCNSSCMC  | 18074 | >TP53-G245FYMCNSSCMC  | 186  | 17888 |
| >TP53-G245FYMCNSSCMC  | 591   | >TP53-G245FYMCNSSCMC  | 260  | 331   |
| >TP53-G245FYMCNSSCMC  | 292   | >TP53-G245FYMCNSSCMC  | 21   | 271   |
| >TP53-G245FYMCNSSCMC  | 44    | >TP53-G245FYMCNSSCMC  | 51   | 7     |
| >TP53-G245FYMCNSSCMC  | 11920 | >TP53-G245FYMCNSSCMC  | 38   | 11882 |
| >TP53-G245FYMCNSSCMC  | 145   | >TP53-G245FYMCNSSCMC  | 336  | 191   |
| >TP53-G245FYMCNSSCMC  | 2531  | >TP53-G245FYMCNSSCMC  | 4    | 2527  |
| >TP53-G245FYMCNSSCMC  | 160   | >TP53-G245FYMCNSSCMC  | 117  | 43    |
| >TP53-G245FYMCNSSCMC  | 18442 | >TP53-G245FYMCNSSCMC  | 61   | 18381 |
| >TP53-G245FYMCNSSCMC  | 294   | >TP53-G245FYMCNSSCMC  | 566  | 272   |
| >TP53-G245FYMCNSSCMC  | 1073  | >TP53-G245FYMCNSSCMC  | 276  | 797   |
| >TP53-G245FGMNRRPILTI | 185   | >TP53-G245FGMNRRPILTI | 282  | 97    |
| >TP53-G245FGMNRRPILTI | 168   | >TP53-G245FGMNRRPILTI | 145  | 23    |
| >TP53-G245FGMNRRPIL   | 213   | >TP53-G245FGMNRRPIL   | 352  | 139   |
| >TP53-G245FGMNRRPILTI | 61    | >TP53-G245FGMNRRPILTI | 81   | 20    |
| >TP53-G245FGMNRRPILTI | 13    | >TP53-G245FGMNRRPILTI | 18   | 5     |
| >TP53-G245FGMNRRPIL   | 229   | >TP53-G245FGMNRRPIL   | 472  | 243   |
| >TP53-G245FGMNRRPILTI | 10    | >TP53-G245FGMNRRPILTI | 17   | 7     |
| >TP53-G245FGMNRRPILTI | 93    | >TP53-G245FGMNRRPILTI | 194  | 101   |
| >TP53-G245FGMNRRPIL   | 182   | >TP53-G245FGMNRRPIL   | 423  | 241   |
| >TP53-G245FGMNRRPILTI | 21    | >TP53-G245FGMNRRPILTI | 40   | 19    |
| >TP53-G245FGMNRRPILTI | 53    | >TP53-G245FGMNRRPILTI | 119  | 66    |
| >TP53-G245FGMNRRPIL   | 160   | >TP53-G245FGMNRRPIL   | 709  | 549   |
| >TP53-G245FGMNRRPILTI | 66    | >TP53-G245FGMNRRPILTI | 256  | 190   |
| >TP53-G245FGMNRRPILTI | 192   | >TP53-G245FGMNRRPILTI | 850  | 658   |
| >TP53-G245FGMNRRPIL   | 32    | >TP53-G245FGMNRRPIL   | 41   | 9     |
| >TP53-G245FGMNRRPILTI | 43    | >TP53-G245FGMNRRPILTI | 56   | 13    |
| >TP53-G245FGMNRRPILTI | 102   | >TP53-G245FGMNRRPILTI | 129  | 27    |
| >TP53-G245FGMNRRPIL   | 5998  | >TP53-G245FGMNRRPIL   | 474  | 5524  |
| >TP53-G245FGMNRRPILTI | 3089  | >TP53-G245FGMNRRPILTI | 153  | 2936  |
| >TP53-G245FGMNRRPILTI | 147   | >TP53-G245FGMNRRPILTI | 53   | 94    |
| >TP53-G245FGMNRRPILTI | 646   | >TP53-G245FGMNRRPILTI | 222  | 424   |
| >TP53-G245FGMNRRPIL   | 1241  | >TP53-G245FGMNRRPIL   | 257  | 984   |
| >TP53-G245FGMNRRPIL   | 976   | >TP53-G245FGMNRRPIL   | 244  | 732   |
| >TP53-G245FGMNRRPILTI | 844   | >TP53-G245FGMNRRPILTI | 220  | 624   |
| >TP53-G245FGMNRRPILTI | 1583  | >TP53-G245FGMNRRPILTI | 408  | 1175  |
| >TP53-G245FGMNRRPIL   | 8167  | >TP53-G245FGMNRRPIL   | 468  | 7699  |
| >TP53-G245FGGMNRRPIL  | 444   | >TP53-G245FGGMNRRPIL  | 2180 | 1736  |
| >TP53-G245FGGMNRRPIL  | 19831 | >TP53-G245FGGMNRRPIL  | 357  | 19474 |
| >TP53-G245FGGMNRRPIL  | 12303 | >TP53-G245FGGMNRRPIL  | 94   | 12209 |
| >TP53-G245FGGMNRRPIL  | 1950  | >TP53-G245FGGMNRRPIL  | 328  | 1622  |
| >TP53-G245FMGGMNRPP   | 803   | >TP53-G245FMGGMNRPP   | 124  | 679   |

|                       |      |                       |      |      |
|-----------------------|------|-----------------------|------|------|
| >TP53-G245F MGGMNRRP  | 5857 | >TP53-G245F MGHMNRRP  | 56   | 5801 |
| >TP53-G245F MGGMNRRP  | 9334 | >TP53-G245F MGHMNRRP  | 195  | 9139 |
| >TP53-G245F MGGMNRRP  | 1831 | >TP53-G245F MGHMNRRP  | 307  | 1524 |
| >TP53-G245F CMGGMNRR  | 635  | >TP53-G245F CMGHMNRR  | 433  | 202  |
| >TP53-G245F CMGGMNRR  | 88   | >TP53-G245F CMGHMNRR  | 495  | 407  |
| >TP53-G245F CMGGMNRR  | 314  | >TP53-G245F CMGHMNRR  | 146  | 168  |
| >TP53-G245F CMGGMNRR  | 117  | >TP53-G245F CMGHMNRR  | 98   | 19   |
| >TP53-G245F SCMGGMNR  | 1170 | >TP53-G245F SCMGHMNR  | 311  | 859  |
| >TP53-G245F SCMGGMNR  | 464  | >TP53-G245F SCMGHMNR  | 148  | 316  |
| >TP53-G245F SCMGGMNR  | 1578 | >TP53-G245F SCMGHMNR  | 406  | 1172 |
| >TP53-G245F SSCMGGMNI | 58   | >TP53-G245F SSCMGHMNI | 34   | 24   |
| >TP53-G245F SSCMGGMNI | 192  | >TP53-G245F SSCMGHMNI | 203  | 11   |
| >TP53-G245F SSCMGGMNI | 110  | >TP53-G245F SSCMGHMNI | 21   | 89   |
| >TP53-G245F SSCMGGMNI | 56   | >TP53-G245F SSCMGHMNI | 46   | 10   |
| >TP53-G245F SSCMGGMNI | 1403 | >TP53-G245F SSCMGHMNI | 253  | 1150 |
| >TP53-G245F SSCMGGMNI | 220  | >TP53-G245F SSCMGHMNI | 53   | 167  |
| >TP53-G245F SSCMGGMNI | 361  | >TP53-G245F SSCMGHMNI | 229  | 132  |
| >TP53-G245F SSCMGGMNI | 398  | >TP53-G245F SSCMGHMNI | 208  | 190  |
| >TP53-G245F SSCMGGMNI | 460  | >TP53-G245F SSCMGHMNI | 231  | 229  |
| >TP53-G245F NSSCMGGMI | 111  | >TP53-G245F NSSCMGHMI | 109  | 2    |
| >TP53-G245F NSSCMGGMI | 55   | >TP53-G245F NSSCMGHMI | 25   | 30   |
| >TP53-G245F NSSCMGGMI | 365  | >TP53-G245F NSSCMGHMI | 173  | 192  |
| >TP53-G245F NSSCMGGMI | 12   | >TP53-G245F NSSCMGHMI | 20   | 8    |
| >TP53-G245F NSSCMGGMI | 39   | >TP53-G245F NSSCMGHMI | 22   | 17   |
| >TP53-G245F NSSCMGGM  | 851  | >TP53-G245F NSSCMGHM  | 439  | 412  |
| >TP53-G245F CNSSCMGGN | 876  | >TP53-G245F CNSSCMGHM | 484  | 392  |
| >TP53-G245F CNSSCMGGN | 639  | >TP53-G245F CNSSCMGHM | 319  | 320  |
| >TP53-G245F YMCNSSCMC | 252  | >TP53-G245F YMCNSSCMC | 292  | 40   |
| >TP53-G245F YMCNSSCMC | 167  | >TP53-G245F YMCNSSCMC | 224  | 57   |
| >TP53-G245F YMCNSSCMC | 41   | >TP53-G245F YMCNSSCMC | 72   | 31   |
| >TP53-G245F YMCNSSCMC | 143  | >TP53-G245F YMCNSSCMC | 161  | 18   |
| >TP53-G245F YMCNSSCMC | 399  | >TP53-G245F YMCNSSCMC | 3635 | 3236 |
| >TP53-G245F YMCNSSCMC | 16   | >TP53-G245F YMCNSSCMC | 27   | 11   |
| >TP53-G245F YMCNSSCMC | 197  | >TP53-G245F YMCNSSCMC | 248  | 51   |
| >TP53-G245F YMCNSSCMC | 421  | >TP53-G245F YMCNSSCMC | 312  | 109  |
| >TP53-G245F YMCNSSCMC | 332  | >TP53-G245F YMCNSSCMC | 898  | 566  |
| >TP53-G245F YMCNSSCMC | 53   | >TP53-G245F YMCNSSCMC | 65   | 12   |
| >TP53-G245F YMCNSSCMC | 591  | >TP53-G245F YMCNSSCMC | 394  | 197  |
| >TP53-G245F YMCNSSCMC | 292  | >TP53-G245F YMCNSSCMC | 170  | 122  |
| >TP53-G245F YMCNSSCMC | 44   | >TP53-G245F YMCNSSCMC | 27   | 17   |
| >TP53-G245F YMCNSSCMC | 145  | >TP53-G245F YMCNSSCMC | 340  | 195  |
| >TP53-G245F YMCNSSCMC | 2531 | >TP53-G245F YMCNSSCMC | 171  | 2360 |
| >TP53-G245F YMCNSSCMC | 160  | >TP53-G245F YMCNSSCMC | 92   | 68   |

|                        |       |                        |     |       |
|------------------------|-------|------------------------|-----|-------|
| >TP53-G245I YMCNSSCMC  | 294   | >TP53-G245I YMCNSSCMC  | 500 | 206   |
| >TP53-G245I GMNRRPILTI | 972   | >TP53-G245I LMNRRPILTI | 492 | 480   |
| >TP53-G245I GMNRRPILTI | 755   | >TP53-G245I LMNRRPILTI | 395 | 360   |
| >TP53-G245I GMNRRPIL   | 678   | >TP53-G245I LMNRRPIL   | 308 | 370   |
| >TP53-G245I GMNRRPILTI | 185   | >TP53-G245I LMNRRPILTI | 111 | 74    |
| >TP53-G245I GMNRRPILTI | 168   | >TP53-G245I LMNRRPILTI | 87  | 81    |
| >TP53-G245I GMNRRPIL   | 213   | >TP53-G245I LMNRRPIL   | 117 | 96    |
| >TP53-G245I GMNRRPILT  | 728   | >TP53-G245I LMNRRPILT  | 377 | 351   |
| >TP53-G245I GMNRRPILTI | 61    | >TP53-G245I LMNRRPILTI | 34  | 27    |
| >TP53-G245I GMNRRPILTI | 13    | >TP53-G245I LMNRRPILTI | 9   | 4     |
| >TP53-G245I GMNRRPIL   | 229   | >TP53-G245I LMNRRPIL   | 112 | 117   |
| >TP53-G245I GMNRRPILT  | 822   | >TP53-G245I LMNRRPILT  | 417 | 405   |
| >TP53-G245I GMNRRPILTI | 10    | >TP53-G245I LMNRRPILTI | 6   | 4     |
| >TP53-G245I GMNRRPILTI | 93    | >TP53-G245I LMNRRPILTI | 47  | 46    |
| >TP53-G245I GMNRRPIL   | 182   | >TP53-G245I LMNRRPIL   | 283 | 101   |
| >TP53-G245I GMNRRPILTI | 21    | >TP53-G245I LMNRRPILTI | 33  | 12    |
| >TP53-G245I GMNRRPILTI | 53    | >TP53-G245I LMNRRPILTI | 85  | 32    |
| >TP53-G245I GMNRRPIL   | 160   | >TP53-G245I LMNRRPIL   | 281 | 121   |
| >TP53-G245I GMNRRPILTI | 66    | >TP53-G245I LMNRRPILTI | 100 | 34    |
| >TP53-G245I GMNRRPILTI | 192   | >TP53-G245I LMNRRPILTI | 338 | 146   |
| >TP53-G245I GMNRRPILTI | 2202  | >TP53-G245I LMNRRPILTI | 324 | 1878  |
| >TP53-G245I GMNRRPIL   | 32    | >TP53-G245I LMNRRPIL   | 14  | 18    |
| >TP53-G245I GMNRRPILT  | 744   | >TP53-G245I LMNRRPILT  | 277 | 467   |
| >TP53-G245I GMNRRPILTI | 43    | >TP53-G245I LMNRRPILTI | 13  | 30    |
| >TP53-G245I GMNRRPILTI | 102   | >TP53-G245I LMNRRPILTI | 28  | 74    |
| >TP53-G245I GMNRRPILTI | 147   | >TP53-G245I LMNRRPILTI | 203 | 56    |
| >TP53-G245I GMNRRPIL   | 1241  | >TP53-G245I LMNRRPIL   | 145 | 1096  |
| >TP53-G245I GMNRRPIL   | 976   | >TP53-G245I LMNRRPIL   | 136 | 840   |
| >TP53-G245I GMNRRPILTI | 844   | >TP53-G245I LMNRRPILTI | 112 | 732   |
| >TP53-G245I GMNRRPILTI | 1583  | >TP53-G245I LMNRRPILTI | 212 | 1371  |
| >TP53-G245I GGMNRRPI   | 19973 | >TP53-G245I GLMNRRPI   | 250 | 19723 |
| >TP53-G245I GGMNRRPIL  | 21219 | >TP53-G245I GLMNRRPIL  | 153 | 21066 |
| >TP53-G245I GGMNRRPIL  | 23553 | >TP53-G245I GLMNRRPILT | 340 | 23213 |
| >TP53-G245I GGMNRRPIL  | 15268 | >TP53-G245I GLMNRRPILT | 57  | 15211 |
| >TP53-G245I GGMNRRPI   | 20846 | >TP53-G245I GLMNRRPI   | 307 | 20539 |
| >TP53-G245I GGMNRRPIL  | 22793 | >TP53-G245I GLMNRRPIL  | 318 | 22475 |
| >TP53-G245I GGMNRRPIL  | 19381 | >TP53-G245I GLMNRRPILT | 138 | 19243 |
| >TP53-G245I GGMNRRPIL  | 16672 | >TP53-G245I GLMNRRPILT | 339 | 16333 |
| >TP53-G245I GGMNRRPI   | 14284 | >TP53-G245I GLMNRRPI   | 32  | 14252 |
| >TP53-G245I GGMNRRPIL  | 20352 | >TP53-G245I GLMNRRPIL  | 236 | 20116 |
| >TP53-G245I GGMNRRPIL  | 18768 | >TP53-G245I GLMNRRPILT | 116 | 18652 |
| >TP53-G245I GGMNRRPIL  | 11086 | >TP53-G245I GLMNRRPILT | 32  | 11054 |
| >TP53-G245I GGMNRRPIL  | 4872  | >TP53-G245I GLMNRRPILT | 399 | 4473  |

|                       |       |                        |     |       |
|-----------------------|-------|------------------------|-----|-------|
| >TP53-G245L GGMNRRPI  | 22303 | >TP53-G245L GLMNRRPI   | 121 | 22182 |
| >TP53-G245L GGMNRRPIL | 11331 | >TP53-G245L GLMNRRPILT | 26  | 11305 |
| >TP53-G245L GGMNRRPI  | 20086 | >TP53-G245L GLMNRRPI   | 53  | 20033 |
| >TP53-G245L GGMNRRPIL | 21244 | >TP53-G245L GLMNRRPIL  | 160 | 21084 |
| >TP53-G245L GGMNRRPIL | 15783 | >TP53-G245L GLMNRRPILT | 15  | 15768 |
| >TP53-G245L GGMNRRPI  | 22370 | >TP53-G245L GLMNRRPI   | 489 | 21881 |
| >TP53-G245L GGMNRRPIL | 20594 | >TP53-G245L GLMNRRPIL  | 105 | 20489 |
| >TP53-G245L GGMNRRPIL | 17115 | >TP53-G245L GLMNRRPILT | 46  | 17069 |
| >TP53-G245L GGMNRRPIL | 21746 | >TP53-G245L GLMNRRPILT | 266 | 21480 |
| >TP53-G245L GGMNRRPI  | 32496 | >TP53-G245L GLMNRRPI   | 88  | 32408 |
| >TP53-G245L GGMNRRPIL | 22278 | >TP53-G245L GLMNRRPIL  | 14  | 22264 |
| >TP53-G245L GGMNRRPIL | 34397 | >TP53-G245L GLMNRRPILT | 211 | 34186 |
| >TP53-G245L GGMNRRPIL | 24487 | >TP53-G245L GLMNRRPILT | 11  | 24476 |
| >TP53-G245L GGMNRRPI  | 15397 | >TP53-G245L GLMNRRPI   | 300 | 15097 |
| >TP53-G245L GGMNRRPIL | 5972  | >TP53-G245L GLMNRRPILT | 79  | 5893  |
| >TP53-G245L GGMNRRPI  | 1849  | >TP53-G245L GLMNRRPI   | 212 | 1637  |
| >TP53-G245L GGMNRRPIL | 444   | >TP53-G245L GLMNRRPIL  | 49  | 395   |
| >TP53-G245L GGMNRRPIL | 1929  | >TP53-G245L GLMNRRPILT | 372 | 1557  |
| >TP53-G245L NYMCNSSCN | 18912 | >TP53-G245L NYMCNSSCN  | 19  | 18893 |
| >TP53-G245L NYMCNSSCN | 16896 | >TP53-G245L NYMCNSSCN  | 181 | 16715 |
| >TP53-G245L NYMCNSSCN | 2608  | >TP53-G245L NYMCNSSCN  | 13  | 2595  |
| >TP53-G245L MGGMNRRP  | 803   | >TP53-G245L MGLMNRRPI  | 13  | 790   |
| >TP53-G245L MGGMNRRP  | 1831  | >TP53-G245L MGLMNRRPI  | 455 | 1376  |
| >TP53-G245L CMGGMNRR  | 635   | >TP53-G245L CMGLMNRRP  | 474 | 161   |
| >TP53-G245L CMGGMNRR  | 88    | >TP53-G245L CMGLMNRRP  | 682 | 594   |
| >TP53-G245L CMGGMNRR  | 314   | >TP53-G245L CMGLMNRR   | 194 | 120   |
| >TP53-G245L CMGGMNRR  | 117   | >TP53-G245L CMGLMNRR   | 95  | 22    |
| >TP53-G245L SCMGGMNR  | 994   | >TP53-G245L SCMGLMNRF  | 426 | 568   |
| >TP53-G245L SCMGGMNR  | 464   | >TP53-G245L SCMGLMNRF  | 146 | 318   |
| >TP53-G245L SCMGGMNR  | 1578  | >TP53-G245L SCMGLMNRF  | 248 | 1330  |
| >TP53-G245L SSCMGGMNI | 58    | >TP53-G245L SSCMGLMNF  | 39  | 19    |
| >TP53-G245L SSCMGGMNI | 192   | >TP53-G245L SSCMGLMNF  | 82  | 110   |
| >TP53-G245L SSCMGGMNI | 110   | >TP53-G245L SSCMGLMNF  | 42  | 68    |
| >TP53-G245L SSCMGGMNI | 56    | >TP53-G245L SSCMGLMNF  | 34  | 22    |
| >TP53-G245L SSCMGGMNI | 1403  | >TP53-G245L SSCMGLMNF  | 370 | 1033  |
| >TP53-G245L SSCMGGMNI | 220   | >TP53-G245L SSCMGLMNF  | 128 | 92    |
| >TP53-G245L SSCMGGMNI | 361   | >TP53-G245L SSCMGLMNF  | 239 | 122   |
| >TP53-G245L SSCMGGMNI | 398   | >TP53-G245L SSCMGLMNF  | 210 | 188   |
| >TP53-G245L SSCMGGMNI | 460   | >TP53-G245L SSCMGLMNF  | 284 | 176   |
| >TP53-G245L NSSCMGGMI | 111   | >TP53-G245L NSSCMGLMN  | 66  | 45    |
| >TP53-G245L NSSCMGGMI | 55    | >TP53-G245L NSSCMGLMN  | 28  | 27    |
| >TP53-G245L NSSCMGGMI | 365   | >TP53-G245L NSSCMGLMN  | 242 | 123   |
| >TP53-G245L NSSCMGGMI | 12    | >TP53-G245L NSSCMGLMN  | 10  | 2     |



|                        |       |                        |     |       |
|------------------------|-------|------------------------|-----|-------|
| >TP53-G245L NSSCMGGMI  | 39    | >TP53-G245L NSSCMGLMN  | 32  | 7     |
| >TP53-G245L NSSCMGGM   | 851   | >TP53-G245L NSSCMGLM   | 107 | 744   |
| >TP53-G245L CNSSCMGGN  | 2175  | >TP53-G245L CNSSCMGLM  | 208 | 1967  |
| >TP53-G245L CNSSCMGGN  | 639   | >TP53-G245L CNSSCMGLM  | 499 | 140   |
| >TP53-G245L YMCNSSCMC  | 988   | >TP53-G245L YMCNSSCMC  | 10  | 978   |
| >TP53-G245L YMCNSSCMC  | 252   | >TP53-G245L YMCNSSCMC  | 137 | 115   |
| >TP53-G245L YMCNSSCMC  | 2002  | >TP53-G245L YMCNSSCMC  | 9   | 1993  |
| >TP53-G245L YMCNSSCMC  | 167   | >TP53-G245L YMCNSSCMC  | 106 | 61    |
| >TP53-G245L YMCNSSCMC  | 1968  | >TP53-G245L YMCNSSCMC  | 13  | 1955  |
| >TP53-G245L YMCNSSCMC  | 41    | >TP53-G245L YMCNSSCMC  | 48  | 7     |
| >TP53-G245L YMCNSSCMC  | 1794  | >TP53-G245L YMCNSSCMC  | 40  | 1754  |
| >TP53-G245L YMCNSSCMC  | 143   | >TP53-G245L YMCNSSCMC  | 277 | 134   |
| >TP53-G245L YMCNSSCMC  | 399   | >TP53-G245L YMCNSSCMC  | 4   | 395   |
| >TP53-G245L YMCNSSCMC  | 16    | >TP53-G245L YMCNSSCMC  | 29  | 13    |
| >TP53-G245L YMCNSSCMC  | 5487  | >TP53-G245L YMCNSSCMC  | 23  | 5464  |
| >TP53-G245L YMCNSSCMC  | 197   | >TP53-G245L YMCNSSCMC  | 559 | 362   |
| >TP53-G245L YMCNSSCMC  | 4958  | >TP53-G245L YMCNSSCMC  | 16  | 4942  |
| >TP53-G245L YMCNSSCMC  | 421   | >TP53-G245L YMCNSSCMC  | 610 | 189   |
| >TP53-G245L YMCNSSCMC  | 12730 | >TP53-G245L YMCNSSCMC  | 12  | 12718 |
| >TP53-G245L YMCNSSCMC  | 332   | >TP53-G245L YMCNSSCMC  | 901 | 569   |
| >TP53-G245L YMCNSSCMC  | 1350  | >TP53-G245L YMCNSSCMC  | 2   | 1348  |
| >TP53-G245L YMCNSSCMC  | 53    | >TP53-G245L YMCNSSCMC  | 63  | 10    |
| >TP53-G245L YMCNSSCMC  | 18229 | >TP53-G245L YMCNSSCMC  | 231 | 17998 |
| >TP53-G245L YMCNSSCMC  | 292   | >TP53-G245L YMCNSSCMC  | 74  | 218   |
| >TP53-G245L YMCNSSCMC  | 44    | >TP53-G245L YMCNSSCMC  | 61  | 17    |
| >TP53-G245L YMCNSSCMC  | 145   | >TP53-G245L YMCNSSCMC  | 270 | 125   |
| >TP53-G245L YMCNSSCMC  | 2531  | >TP53-G245L YMCNSSCMC  | 33  | 2498  |
| >TP53-G245L YMCNSSCMC  | 160   | >TP53-G245L YMCNSSCMC  | 153 | 7     |
| >TP53-G245L YMCNSSCMC  | 18442 | >TP53-G245L YMCNSSCMC  | 416 | 18026 |
| >TP53-G245L YMCNSSCMC  | 294   | >TP53-G245L YMCNSSCMC  | 717 | 423   |
| >TP53-G245L YMCNSSCMC  | 24852 | >TP53-G245L YMCNSSCMC  | 323 | 24529 |
| >TP53-G245L YMCNSSCMC  | 1073  | >TP53-G245L YMCNSSCMC  | 139 | 934   |
| >TP53-G245I GMNRRPILTI | 185   | >TP53-G245I NMNRRPILTI | 378 | 193   |
| >TP53-G245I GMNRRPILTI | 168   | >TP53-G245I NMNRRPILTI | 266 | 98    |
| >TP53-G245I GMNRRPIL   | 213   | >TP53-G245I NMNRRPIL   | 415 | 202   |
| >TP53-G245I GMNRRPILTI | 61    | >TP53-G245I NMNRRPILTI | 62  | 1     |
| >TP53-G245I GMNRRPILTI | 13    | >TP53-G245I NMNRRPILTI | 19  | 6     |
| >TP53-G245I GMNRRPIL   | 229   | >TP53-G245I NMNRRPIL   | 832 | 603   |
| >TP53-G245I GMNRRPILTI | 10    | >TP53-G245I NMNRRPILTI | 28  | 18    |
| >TP53-G245I GMNRRPILTI | 93    | >TP53-G245I NMNRRPILTI | 348 | 255   |
| >TP53-G245I GMNRRPIL   | 182   | >TP53-G245I NMNRRPIL   | 846 | 664   |
| >TP53-G245I GMNRRPILTI | 21    | >TP53-G245I NMNRRPILTI | 78  | 57    |
| >TP53-G245I GMNRRPILTI | 53    | >TP53-G245I NMNRRPILTI | 273 | 220   |

|                        |      |                        |      |      |
|------------------------|------|------------------------|------|------|
| >TP53-G245I GMNRRPIL   | 160  | >TP53-G245I NMNRRPIL   | 2248 | 2088 |
| >TP53-G245I GMNRRPILTI | 66   | >TP53-G245I NMNRRPILTI | 737  | 671  |
| >TP53-G245I GMNRRPILTI | 192  | >TP53-G245I NMNRRPILTI | 2298 | 2106 |
| >TP53-G245I GMNRRPIL   | 32   | >TP53-G245I NMNRRPIL   | 135  | 103  |
| >TP53-G245I GMNRRPILTI | 43   | >TP53-G245I NMNRRPILTI | 208  | 165  |
| >TP53-G245I GMNRRPILTI | 102  | >TP53-G245I NMNRRPILTI | 470  | 368  |
| >TP53-G245I GMNRRPILTI | 147  | >TP53-G245I NMNRRPILTI | 392  | 245  |
| >TP53-G245I GMNRRPIL   | 1241 | >TP53-G245I NMNRRPIL   | 156  | 1085 |
| >TP53-G245I GGMNRRPIL  | 444  | >TP53-G245I GNMNRRPIL  | 321  | 123  |
| >TP53-G245I GGMNRRPI   | 2924 | >TP53-G245I GNMNRRPI   | 357  | 2567 |
| >TP53-G245I GGMNRRPIL  | 5281 | >TP53-G245I GNMNRRPIL  | 487  | 4794 |
| >TP53-G245I MGGMNRRP   | 803  | >TP53-G245I MGNMNRRP   | 404  | 399  |
| >TP53-G245I CMGGMNRR   | 635  | >TP53-G245I CMGNMNRR   | 462  | 173  |
| >TP53-G245I CMGGMNRR   | 88   | >TP53-G245I CMGNMNRR   | 229  | 141  |
| >TP53-G245I CMGGMNRR   | 314  | >TP53-G245I CMGNMNRR   | 135  | 179  |
| >TP53-G245I CMGGMNRR   | 117  | >TP53-G245I CMGNMNRR   | 148  | 31   |
| >TP53-G245I SCMGGMNR   | 2430 | >TP53-G245I SCMGNMNR   | 251  | 2179 |
| >TP53-G245I SCMGGMNR   | 464  | >TP53-G245I SCMGNMNR   | 150  | 314  |
| >TP53-G245I SCMGGMNR   | 1578 | >TP53-G245I SCMGNMNR   | 412  | 1166 |
| >TP53-G245I SSCMGGMNI  | 58   | >TP53-G245I SSCMGNMNI  | 44   | 14   |
| >TP53-G245I SSCMGGMNI  | 192  | >TP53-G245I SSCMGNMNI  | 134  | 58   |
| >TP53-G245I SSCMGGMNI  | 110  | >TP53-G245I SSCMGNMNI  | 76   | 34   |
| >TP53-G245I SSCMGGMNI  | 56   | >TP53-G245I SSCMGNMNI  | 50   | 6    |
| >TP53-G245I SSCMGGMNI  | 1403 | >TP53-G245I SSCMGNMNI  | 390  | 1013 |
| >TP53-G245I SSCMGGMNI  | 220  | >TP53-G245I SSCMGNMNI  | 55   | 165  |
| >TP53-G245I SSCMGGMNI  | 361  | >TP53-G245I SSCMGNMNI  | 171  | 190  |
| >TP53-G245I SSCMGGMNI  | 398  | >TP53-G245I SSCMGNMNI  | 430  | 32   |
| >TP53-G245I SSCMGGMNI  | 460  | >TP53-G245I SSCMGNMNI  | 410  | 50   |
| >TP53-G245I NSSCMGGMI  | 111  | >TP53-G245I NSSCMGNMI  | 98   | 13   |
| >TP53-G245I NSSCMGGMI  | 55   | >TP53-G245I NSSCMGNMI  | 51   | 4    |
| >TP53-G245I NSSCMGGMI  | 365  | >TP53-G245I NSSCMGNMI  | 600  | 235  |
| >TP53-G245I NSSCMGGMI  | 12   | >TP53-G245I NSSCMGNMI  | 15   | 3    |
| >TP53-G245I NSSCMGGMI  | 39   | >TP53-G245I NSSCMGNMI  | 22   | 17   |
| >TP53-G245I NSSCMGGM   | 851  | >TP53-G245I NSSCMGNM   | 342  | 509  |
| >TP53-G245I CNSSCMGGN  | 876  | >TP53-G245I CNSSCMGN   | 494  | 382  |
| >TP53-G245I CNSSCMGGN  | 639  | >TP53-G245I CNSSCMGN   | 346  | 293  |
| >TP53-G245I YMCNSSCMC  | 252  | >TP53-G245I YMCNSSCMC  | 295  | 43   |
| >TP53-G245I YMCNSSCMC  | 167  | >TP53-G245I YMCNSSCMC  | 153  | 14   |
| >TP53-G245I YMCNSSCMC  | 41   | >TP53-G245I YMCNSSCMC  | 53   | 12   |
| >TP53-G245I YMCNSSCMC  | 143  | >TP53-G245I YMCNSSCMC  | 591  | 448  |
| >TP53-G245I YMCNSSCMC  | 399  | >TP53-G245I YMCNSSCMC  | 790  | 391  |
| >TP53-G245I YMCNSSCMC  | 16   | >TP53-G245I YMCNSSCMC  | 32   | 16   |
| >TP53-G245I YMCNSSCMC  | 197  | >TP53-G245I YMCNSSCMC  | 418  | 221  |

|                       |       |                       |      |       |
|-----------------------|-------|-----------------------|------|-------|
| >TP53-G245FYMCNSSCMC  | 421   | >TP53-G245FYMCNSSCMC  | 590  | 169   |
| >TP53-G245FYMCNSSCMC  | 332   | >TP53-G245FYMCNSSCMC  | 565  | 233   |
| >TP53-G245FYMCNSSCMC  | 53    | >TP53-G245FYMCNSSCMC  | 74   | 21    |
| >TP53-G245FYMCNSSCMC  | 292   | >TP53-G245FYMCNSSCMC  | 2243 | 1951  |
| >TP53-G245FYMCNSSCMC  | 44    | >TP53-G245FYMCNSSCMC  | 53   | 9     |
| >TP53-G245FYMCNSSCMC  | 145   | >TP53-G245FYMCNSSCMC  | 221  | 76    |
| >TP53-G245FYMCNSSCMC  | 160   | >TP53-G245FYMCNSSCMC  | 77   | 83    |
| >TP53-G245FYMCNSSCMC  | 294   | >TP53-G245FYMCNSSCMC  | 363  | 69    |
| >TP53-G245FGMNRRPILTI | 185   | >TP53-G245FRMNRRPILTI | 207  | 22    |
| >TP53-G245FGMNRRPILTI | 168   | >TP53-G245FRMNRRPILTI | 204  | 36    |
| >TP53-G245FGMNRRPIL   | 213   | >TP53-G245FRMNRRPIL   | 145  | 68    |
| >TP53-G245FGMNRRPILT  | 728   | >TP53-G245FRMNRRPILT  | 467  | 261   |
| >TP53-G245FGMNRRPILTI | 61    | >TP53-G245FRMNRRPILTI | 43   | 18    |
| >TP53-G245FGMNRRPILTI | 13    | >TP53-G245FRMNRRPILTI | 10   | 3     |
| >TP53-G245FGMNRRPIL   | 229   | >TP53-G245FRMNRRPIL   | 118  | 111   |
| >TP53-G245FGMNRRPILT  | 822   | >TP53-G245FRMNRRPILT  | 392  | 430   |
| >TP53-G245FGMNRRPILTI | 10    | >TP53-G245FRMNRRPILTI | 7    | 3     |
| >TP53-G245FGMNRRPILTI | 93    | >TP53-G245FRMNRRPILTI | 50   | 43    |
| >TP53-G245FGMNRRPIL   | 182   | >TP53-G245FRMNRRPIL   | 348  | 166   |
| >TP53-G245FGMNRRPILTI | 21    | >TP53-G245FRMNRRPILTI | 35   | 14    |
| >TP53-G245FGMNRRPILTI | 53    | >TP53-G245FRMNRRPILTI | 96   | 43    |
| >TP53-G245FGMNRRPIL   | 160   | >TP53-G245FRMNRRPIL   | 340  | 180   |
| >TP53-G245FGMNRRPILTI | 66    | >TP53-G245FRMNRRPILTI | 121  | 55    |
| >TP53-G245FGMNRRPILTI | 192   | >TP53-G245FRMNRRPILTI | 405  | 213   |
| >TP53-G245FGMNRRPIL   | 32    | >TP53-G245FRMNRRPIL   | 40   | 8     |
| >TP53-G245FGMNRRPILTI | 43    | >TP53-G245FRMNRRPILTI | 57   | 14    |
| >TP53-G245FGMNRRPILTI | 102   | >TP53-G245FRMNRRPILTI | 131  | 29    |
| >TP53-G245FGMNRRPIL   | 5998  | >TP53-G245FRMNRRPIL   | 122  | 5876  |
| >TP53-G245FGMNRRPILTI | 3089  | >TP53-G245FRMNRRPILTI | 45   | 3044  |
| >TP53-G245FGMNRRPILTI | 6615  | >TP53-G245FRMNRRPILTI | 258  | 6357  |
| >TP53-G245FGMNRRPIL   | 4877  | >TP53-G245FRMNRRPIL   | 257  | 4620  |
| >TP53-G245FGMNRRPILTI | 147   | >TP53-G245FRMNRRPILTI | 12   | 135   |
| >TP53-G245FGMNRRPILTI | 646   | >TP53-G245FRMNRRPILTI | 27   | 619   |
| >TP53-G245FGMNRRPIL   | 1241  | >TP53-G245FRMNRRPIL   | 277  | 964   |
| >TP53-G245FGMNRRPIL   | 976   | >TP53-G245FRMNRRPIL   | 50   | 926   |
| >TP53-G245FGMNRRPILTI | 844   | >TP53-G245FRMNRRPILTI | 53   | 791   |
| >TP53-G245FGMNRRPILTI | 1583  | >TP53-G245FRMNRRPILTI | 93   | 1490  |
| >TP53-G245FGMNRRPIL   | 1607  | >TP53-G245FRMNRRPIL   | 258  | 1349  |
| >TP53-G245FGMNRRPILTI | 7888  | >TP53-G245FRMNRRPILTI | 113  | 7775  |
| >TP53-G245FGMNRRPILTI | 12001 | >TP53-G245FRMNRRPILTI | 235  | 11766 |
| >TP53-G245FGMNRRPIL   | 14569 | >TP53-G245FRMNRRPIL   | 344  | 14225 |
| >TP53-G245FGMNRRPIL   | 444   | >TP53-G245FRMNRRPIL   | 368  | 76    |
| >TP53-G245FGMNRRPIL   | 10442 | >TP53-G245FRMNRRPIL   | 493  | 9949  |

|                       |       |                          |     |       |
|-----------------------|-------|--------------------------|-----|-------|
| >TP53-G245F GGMNRRPI  | 15102 | >TP53-G245F GRMNRRPI     | 24  | 15078 |
| >TP53-G245F GGMNRRPIL | 17714 | >TP53-G245F GRMNRRPIL    | 37  | 17677 |
| >TP53-G245F GGMNRRPIL | 24194 | >TP53-G245F GRMNRRPIL    | 85  | 24109 |
| >TP53-G245F GGMNRRPIL | 16448 | >TP53-G245F GRMNRRPIL    | 27  | 16421 |
| >TP53-G245F GGMNRRPIL | 12303 | >TP53-G245F GRMNRRPIL    | 213 | 12090 |
| >TP53-G245F GGMNRRPIL | 15337 | >TP53-G245F GRMNRRPIL    | 60  | 15277 |
| >TP53-G245F GGMNRRPIL | 24988 | >TP53-G245F GRMNRRPIL    | 247 | 24741 |
| >TP53-G245F GGMNRRPIL | 15482 | >TP53-G245F GRMNRRPIL    | 69  | 15413 |
| >TP53-G245F GGMNRRPIL | 1950  | >TP53-G245F GRMNRRPIL    | 4   | 1946  |
| >TP53-G245F GGMNRRPIL | 24207 | >TP53-G245F GRMNRRPIL    | 193 | 24014 |
| >TP53-G245F GGMNRRPIL | 7343  | >TP53-G245F GRMNRRPIL    | 10  | 7333  |
| >TP53-G245F NYMCNSSCV | 25101 | >TP53-G245F NYMCNSSCV    | 57  | 25044 |
| >TP53-G245F NYMCNSSCV | 32154 | >TP53-G245F NYMCNSSCV    | 82  | 32072 |
| >TP53-G245F NYMCNSSCV | 27312 | >TP53-G245F NYMCNSSCV    | 24  | 27288 |
| >TP53-G245F MGGMNR    | 5857  | >TP53-G245F MGRMNRRPIL   | 10  | 5847  |
| >TP53-G245F MGGMNR    | 9334  | >TP53-G245F MGRMNRRPIL   | 22  | 9312  |
| >TP53-G245F MGGMNR    | 14327 | >TP53-G245F MGRMNRRPIL   | 181 | 14146 |
| >TP53-G245F MGGMNR    | 4447  | >TP53-G245F MGRMNRRPIL   | 76  | 4371  |
| >TP53-G245F MGGMNR    | 1831  | >TP53-G245F MGRMNRRPIL   | 91  | 1740  |
| >TP53-G245F CMGGMNR   | 635   | >TP53-G245F CMGRMNRR     | 405 | 230   |
| >TP53-G245F CMGGMNR   | 88    | >TP53-G245F CMGRMNRR     | 239 | 151   |
| >TP53-G245F CMGGMNR   | 314   | >TP53-G245F CMGRMNRR     | 94  | 220   |
| >TP53-G245F CMGGMNR   | 117   | >TP53-G245F CMGRMNRR     | 154 | 37    |
| >TP53-G245F SCMGGMNR  | 1170  | >TP53-G245F SCMGRMNRR    | 310 | 860   |
| >TP53-G245F SCMGGMNR  | 1568  | >TP53-G245F SCMGRMNRR    | 474 | 1094  |
| >TP53-G245F SCMGGMNR  | 464   | >TP53-G245F SCMGRMNRR    | 183 | 281   |
| >TP53-G245F SSCMGGMNI | 58    | >TP53-G245F SSCMGRMNRR   | 42  | 16    |
| >TP53-G245F SSCMGGMNI | 192   | >TP53-G245F SSCMGRMNRR   | 144 | 48    |
| >TP53-G245F SSCMGGMNI | 110   | >TP53-G245F SSCMGRMNRR   | 26  | 84    |
| >TP53-G245F SSCMGGMNI | 56    | >TP53-G245F SSCMGRMNRR   | 19  | 37    |
| >TP53-G245F SSCMGGMNI | 1403  | >TP53-G245F SSCMGRMNRR   | 179 | 1224  |
| >TP53-G245F SSCMGGMNI | 220   | >TP53-G245F SSCMGRMNRR   | 66  | 154   |
| >TP53-G245F SSCMGGMNI | 361   | >TP53-G245F SSCMGRMNRR   | 237 | 124   |
| >TP53-G245F SSCMGGMNI | 398   | >TP53-G245F SSCMGRMNRR   | 531 | 133   |
| >TP53-G245F SSCMGGMNI | 460   | >TP53-G245F SSCMGRMNRR   | 463 | 3     |
| >TP53-G245F NSSCMGGMI | 111   | >TP53-G245F NSSCMGRMNRR  | 190 | 79    |
| >TP53-G245F NSSCMGGMI | 55    | >TP53-G245F NSSCMGRMNRR  | 17  | 38    |
| >TP53-G245F NSSCMGGMI | 365   | >TP53-G245F NSSCMGRMNRR  | 324 | 41    |
| >TP53-G245F NSSCMGGMI | 12    | >TP53-G245F NSSCMGRMNRR  | 19  | 7     |
| >TP53-G245F NSSCMGGMI | 39    | >TP53-G245F NSSCMGRMNRR  | 49  | 10    |
| >TP53-G245F NSSCMGGMI | 851   | >TP53-G245F NSSCMGRMNRR  | 419 | 432   |
| >TP53-G245F CNSSCMGG  | 39331 | >TP53-G245F CNSSCMGRMNRR | 468 | 38863 |
| >TP53-G245F CNSSCMGG  | 2175  | >TP53-G245F CNSSCMGRMNRR | 425 | 1750  |

|                       |       |                        |      |       |
|-----------------------|-------|------------------------|------|-------|
| >TP53-G245FCNSSCMGG   | 35990 | >TP53-G245FCNSSCMGR    | 398  | 35592 |
| >TP53-G245FCNSSCMGGM  | 639   | >TP53-G245FCNSSCMGRM   | 430  | 209   |
| >TP53-G245FMCNSSCMGC  | 22937 | >TP53-G245FMCNSSCMGF   | 322  | 22615 |
| >TP53-G245FMCNSSCMGC  | 35609 | >TP53-G245FMCNSSCMGF   | 156  | 35453 |
| >TP53-G245FYMCNSSCMC  | 252   | >TP53-G245FYMCNSSCMC   | 303  | 51    |
| >TP53-G245FYMCNSSCMC  | 167   | >TP53-G245FYMCNSSCMC   | 293  | 126   |
| >TP53-G245FYMCNSSCMC  | 41    | >TP53-G245FYMCNSSCMC   | 94   | 53    |
| >TP53-G245FYMCNSSCMC  | 143   | >TP53-G245FYMCNSSCMC   | 816  | 673   |
| >TP53-G245FYMCNSSCMC  | 399   | >TP53-G245FYMCNSSCMC   | 2252 | 1853  |
| >TP53-G245FYMCNSSCMC  | 16    | >TP53-G245FYMCNSSCMC   | 21   | 5     |
| >TP53-G245FYMCNSSCMC  | 197   | >TP53-G245FYMCNSSCMC   | 655  | 458   |
| >TP53-G245FYMCNSSCMC  | 421   | >TP53-G245FYMCNSSCMC   | 811  | 390   |
| >TP53-G245FYMCNSSCMC  | 332   | >TP53-G245FYMCNSSCMC   | 687  | 355   |
| >TP53-G245FYMCNSSCMC  | 53    | >TP53-G245FYMCNSSCMC   | 43   | 10    |
| >TP53-G245FYMCNSSCMC  | 18150 | >TP53-G245FYMCNSSCMC   | 296  | 17854 |
| >TP53-G245FYMCNSSCMC  | 31271 | >TP53-G245FYMCNSSCMC   | 233  | 31038 |
| >TP53-G245FYMCNSSCMC  | 16748 | >TP53-G245FYMCNSSCMC   | 26   | 16722 |
| >TP53-G245FYMCNSSCMC  | 17929 | >TP53-G245FYMCNSSCMC   | 85   | 17844 |
| >TP53-G245FYMCNSSCMC  | 30445 | >TP53-G245FYMCNSSCMC   | 66   | 30379 |
| >TP53-G245FYMCNSSCMC  | 292   | >TP53-G245FYMCNSSCMC   | 3251 | 2959  |
| >TP53-G245FYMCNSSCMC  | 44    | >TP53-G245FYMCNSSCMC   | 53   | 9     |
| >TP53-G245FYMCNSSCMC  | 145   | >TP53-G245FYMCNSSCMC   | 323  | 178   |
| >TP53-G245FYMCNSSCMC  | 2531  | >TP53-G245FYMCNSSCMC   | 214  | 2317  |
| >TP53-G245FYMCNSSCMC  | 160   | >TP53-G245FYMCNSSCMC   | 218  | 58    |
| >TP53-G245FYMCNSSCMC  | 294   | >TP53-G245FYMCNSSCMC   | 264  | 30    |
| >TP53-G245FYMCNSSCMC  | 1073  | >TP53-G245FYMCNSSCMC   | 248  | 825   |
| >TP53-G245FYMCNSSCMC  | 16457 | >TP53-G245FYMCNSSCMC   | 50   | 16407 |
| >TP53-G245FYMCNSSCMC  | 32293 | >TP53-G245FYMCNSSCMC   | 194  | 32099 |
| >TP53-G245SGMNRPPILTI | 972   | >TP53-G245SGMNRPPILTI  | 432  | 540   |
| >TP53-G245SGMNRPPILTI | 755   | >TP53-G245SGMNRPPILTII | 330  | 425   |
| >TP53-G245SGMNRPPIL   | 678   | >TP53-G245SGMNRPPIL    | 391  | 287   |
| >TP53-G245SGMNRPPILTI | 185   | >TP53-G245SGMNRPPILTI  | 113  | 72    |
| >TP53-G245SGMNRPPILTI | 168   | >TP53-G245SGMNRPPILTII | 109  | 59    |
| >TP53-G245SGMNRPPIL   | 213   | >TP53-G245SGMNRPPIL    | 139  | 74    |
| >TP53-G245SGMNRPPILT  | 728   | >TP53-G245SGMNRPPILT   | 453  | 275   |
| >TP53-G245SGMNRPPILTI | 61    | >TP53-G245SGMNRPPILTI  | 29   | 32    |
| >TP53-G245SGMNRPPILTI | 13    | >TP53-G245SGMNRPPILTII | 12   | 1     |
| >TP53-G245SGMNRPPIL   | 229   | >TP53-G245SGMNRPPIL    | 96   | 133   |
| >TP53-G245SGMNRPPILT  | 822   | >TP53-G245SGMNRPPILT   | 329  | 493   |
| >TP53-G245SGMNRPPILTI | 10    | >TP53-G245SGMNRPPILTI  | 6    | 4     |
| >TP53-G245SGMNRPPILTI | 93    | >TP53-G245SGMNRPPILTII | 40   | 53    |
| >TP53-G245SGMNRPPIL   | 182   | >TP53-G245SGMNRPPIL    | 296  | 114   |
| >TP53-G245SGMNRPPILTI | 21    | >TP53-G245SGMNRPPILTI  | 40   | 19    |

|                       |       |                       |     |       |
|-----------------------|-------|-----------------------|-----|-------|
| >TP53-G245€GMNRRPILTI | 53    | >TP53-G245€SMNRRPILTI | 99  | 46    |
| >TP53-G245€GMNRRPIL   | 160   | >TP53-G245€SMNRRPIL   | 64  | 96    |
| >TP53-G245€GMNRRPILTI | 66    | >TP53-G245€SMNRRPILTI | 29  | 37    |
| >TP53-G245€GMNRRPILTI | 192   | >TP53-G245€SMNRRPILTI | 76  | 116   |
| >TP53-G245€GMNRRPIL   | 32    | >TP53-G245€SMNRRPIL   | 23  | 9     |
| >TP53-G245€GMNRRPILT  | 744   | >TP53-G245€SMNRRPILT  | 380 | 364   |
| >TP53-G245€GMNRRPILTI | 43    | >TP53-G245€SMNRRPILTI | 25  | 18    |
| >TP53-G245€GMNRRPILTI | 102   | >TP53-G245€SMNRRPILTI | 55  | 47    |
| >TP53-G245€GMNRRPILTI | 147   | >TP53-G245€SMNRRPILTI | 46  | 101   |
| >TP53-G245€GMNRRPILTI | 646   | >TP53-G245€SMNRRPILTI | 195 | 451   |
| >TP53-G245€GMNRRPIL   | 1241  | >TP53-G245€SMNRRPIL   | 154 | 1087  |
| >TP53-G245€GMNRRPIL   | 976   | >TP53-G245€SMNRRPIL   | 304 | 672   |
| >TP53-G245€GMNRRPILTI | 844   | >TP53-G245€SMNRRPILTI | 308 | 536   |
| >TP53-G245€GGMNRRPIL  | 5972  | >TP53-G245€GSMNRRPILT | 133 | 5839  |
| >TP53-G245€GGMNRRPIL  | 444   | >TP53-G245€GSMNRRPIL  | 503 | 59    |
| >TP53-G245€GGMNRRPIL  | 12934 | >TP53-G245€GSMNRRPILT | 140 | 12794 |
| >TP53-G245€GGMNRRPIL  | 2885  | >TP53-G245€GSMNRRPIL  | 172 | 2713  |
| >TP53-G245€GGMNRRPIL  | 2293  | >TP53-G245€GSMNRRPILT | 178 | 2115  |
| >TP53-G245€GGMNRRPI   | 1811  | >TP53-G245€GSMNRRPI   | 129 | 1682  |
| >TP53-G245€GGMNRRPIL  | 538   | >TP53-G245€GSMNRRPILT | 35  | 503   |
| >TP53-G245€CMGGMNRR   | 635   | >TP53-G245€CMGSMNRR   | 472 | 163   |
| >TP53-G245€CMGGMNRR   | 88    | >TP53-G245€CMGSMNRR   | 240 | 152   |
| >TP53-G245€CMGGMNRR   | 314   | >TP53-G245€CMGSMNRR   | 90  | 224   |
| >TP53-G245€CMGGMNRR   | 117   | >TP53-G245€CMGSMNRR   | 128 | 11    |
| >TP53-G245€SCMGGMNR   | 464   | >TP53-G245€SCMGSMNRR  | 227 | 237   |
| >TP53-G245€SSCMGGMNI  | 58    | >TP53-G245€SSCMGSMNF  | 35  | 23    |
| >TP53-G245€SSCMGGMNI  | 192   | >TP53-G245€SSCMGSMNF  | 75  | 117   |
| >TP53-G245€SSCMGGMNI  | 110   | >TP53-G245€SSCMGSMNF  | 75  | 35    |
| >TP53-G245€SSCMGGMNI  | 56    | >TP53-G245€SSCMGSMNF  | 25  | 31    |
| >TP53-G245€SSCMGGMNI  | 220   | >TP53-G245€SSCMGSMNF  | 86  | 134   |
| >TP53-G245€SSCMGGMNI  | 361   | >TP53-G245€SSCMGSMNF  | 99  | 262   |
| >TP53-G245€SSCMGGMNI  | 398   | >TP53-G245€SSCMGSMNF  | 258 | 140   |
| >TP53-G245€SSCMGGMNI  | 460   | >TP53-G245€SSCMGSMNF  | 302 | 158   |
| >TP53-G245€NSSCMGGMI  | 111   | >TP53-G245€NSSCMGSMN  | 71  | 40    |
| >TP53-G245€NSSCMGGMI  | 55    | >TP53-G245€NSSCMGSMN  | 43  | 12    |
| >TP53-G245€NSSCMGGMI  | 365   | >TP53-G245€NSSCMGSMN  | 444 | 79    |
| >TP53-G245€NSSCMGGMI  | 12    | >TP53-G245€NSSCMGSMN  | 12  | 0     |
| >TP53-G245€NSSCMGGMI  | 39    | >TP53-G245€NSSCMGSMN  | 19  | 20    |
| >TP53-G245€NSSCMGGM   | 851   | >TP53-G245€NSSCMGSM   | 198 | 653   |
| >TP53-G245€NSSCMGGMI  | 3920  | >TP53-G245€NSSCMGSMN  | 315 | 3605  |
| >TP53-G245€CNSSCMGGN  | 639   | >TP53-G245€CNSSCMGSM  | 465 | 174   |
| >TP53-G245€MCNSSCMG   | 944   | >TP53-G245€MCNSSCMG   | 475 | 469   |
| >TP53-G245€YMCNSSCMC  | 252   | >TP53-G245€YMCNSSCMC  | 172 | 80    |

|                       |       |                       |      |       |
|-----------------------|-------|-----------------------|------|-------|
| >TP53-G245\YMCNSSCMC  | 167   | >TP53-G245\YMCNSSCMC  | 138  | 29    |
| >TP53-G245\YMCNSSCMC  | 41    | >TP53-G245\YMCNSSCMC  | 34   | 7     |
| >TP53-G245\YMCNSSCMC  | 143   | >TP53-G245\YMCNSSCMC  | 206  | 63    |
| >TP53-G245\YMCNSSCMC  | 399   | >TP53-G245\YMCNSSCMC  | 166  | 233   |
| >TP53-G245\YMCNSSCMC  | 16    | >TP53-G245\YMCNSSCMC  | 18   | 2     |
| >TP53-G245\YMCNSSCMC  | 197   | >TP53-G245\YMCNSSCMC  | 261  | 64    |
| >TP53-G245\YMCNSSCMC  | 421   | >TP53-G245\YMCNSSCMC  | 582  | 161   |
| >TP53-G245\YMCNSSCMC  | 332   | >TP53-G245\YMCNSSCMC  | 448  | 116   |
| >TP53-G245\YMCNSSCMC  | 1350  | >TP53-G245\YMCNSSCMC  | 176  | 1174  |
| >TP53-G245\YMCNSSCMC  | 53    | >TP53-G245\YMCNSSCMC  | 40   | 13    |
| >TP53-G245\YMCNSSCMC  | 292   | >TP53-G245\YMCNSSCMC  | 1078 | 786   |
| >TP53-G245\YMCNSSCMC  | 44    | >TP53-G245\YMCNSSCMC  | 26   | 18    |
| >TP53-G245\YMCNSSCMC  | 145   | >TP53-G245\YMCNSSCMC  | 141  | 4     |
| >TP53-G245\YMCNSSCMC  | 160   | >TP53-G245\YMCNSSCMC  | 41   | 119   |
| >TP53-G245\YMCNSSCMC  | 294   | >TP53-G245\YMCNSSCMC  | 299  | 5     |
| >TP53-G245\YMCNSSCMC  | 1073  | >TP53-G245\YMCNSSCMC  | 295  | 778   |
| >TP53-G245\GMNRRPILTI | 185   | >TP53-G245\VMNRRPILTI | 400  | 215   |
| >TP53-G245\GMNRRPILTI | 168   | >TP53-G245\VMNRRPILTI | 202  | 34    |
| >TP53-G245\GMNRRPIL   | 213   | >TP53-G245\VMNRRPIL   | 198  | 15    |
| >TP53-G245\GMNRRPILTI | 61    | >TP53-G245\VMNRRPILTI | 77   | 16    |
| >TP53-G245\GMNRRPILTI | 13    | >TP53-G245\VMNRRPILTI | 13   | 0     |
| >TP53-G245\GMNRRPIL   | 229   | >TP53-G245\VMNRRPIL   | 96   | 133   |
| >TP53-G245\GMNRRPILT  | 822   | >TP53-G245\VMNRRPILT  | 319  | 503   |
| >TP53-G245\GMNRRPILTI | 10    | >TP53-G245\VMNRRPILTI | 6    | 4     |
| >TP53-G245\GMNRRPILTI | 93    | >TP53-G245\VMNRRPILTI | 41   | 52    |
| >TP53-G245\GMNRRPIL   | 182   | >TP53-G245\VMNRRPIL   | 311  | 129   |
| >TP53-G245\GMNRRPILTI | 21    | >TP53-G245\VMNRRPILTI | 39   | 18    |
| >TP53-G245\GMNRRPILTI | 53    | >TP53-G245\VMNRRPILTI | 103  | 50    |
| >TP53-G245\GMNRRPIL   | 160   | >TP53-G245\VMNRRPIL   | 169  | 9     |
| >TP53-G245\GMNRRPILTI | 66    | >TP53-G245\VMNRRPILTI | 64   | 2     |
| >TP53-G245\GMNRRPILTI | 192   | >TP53-G245\VMNRRPILTI | 217  | 25    |
| >TP53-G245\GMNRRPILTI | 2202  | >TP53-G245\VMNRRPILTI | 228  | 1974  |
| >TP53-G245\GMNRRPIL   | 32    | >TP53-G245\VMNRRPIL   | 17   | 15    |
| >TP53-G245\GMNRRPILT  | 744   | >TP53-G245\VMNRRPILT  | 434  | 310   |
| >TP53-G245\GMNRRPILTI | 43    | >TP53-G245\VMNRRPILTI | 16   | 27    |
| >TP53-G245\GMNRRPILTI | 102   | >TP53-G245\VMNRRPILTI | 39   | 63    |
| >TP53-G245\GMNRRPILTI | 147   | >TP53-G245\VMNRRPILTI | 109  | 38    |
| >TP53-G245\GMNRRPIL   | 1241  | >TP53-G245\VMNRRPIL   | 451  | 790   |
| >TP53-G245\GMNRRPIL   | 976   | >TP53-G245\VMNRRPIL   | 224  | 752   |
| >TP53-G245\GMNRRPILTI | 844   | >TP53-G245\VMNRRPILTI | 206  | 638   |
| >TP53-G245\GMNRRPILTI | 1583  | >TP53-G245\VMNRRPILTI | 378  | 1205  |
| >TP53-G245\GGMNRRPIL  | 11086 | >TP53-G245\GVMNRRPIL  | 428  | 10658 |
| >TP53-G245\GGMNRRPIL  | 4872  | >TP53-G245\GVMNRRPIL  | 237  | 4635  |

|                      |       |                       |     |       |
|----------------------|-------|-----------------------|-----|-------|
| >TP53-G245\GGMNRRPI  | 15397 | >TP53-G245\GVMNRRPI   | 258 | 15139 |
| >TP53-G245\GGMNRRPIL | 5972  | >TP53-G245\GVMNRRPIL  | 85  | 5887  |
| >TP53-G245\GGMNRRPIL | 444   | >TP53-G245\GVMNRRPIL  | 239 | 205   |
| >TP53-G245\NYMCNSSCN | 18912 | >TP53-G245\NYMCNSSCN  | 77  | 18835 |
| >TP53-G245\NYMCNSSCN | 2608  | >TP53-G245\NYMCNSSCN  | 203 | 2405  |
| >TP53-G245\NYMCNSSCN | 18827 | >TP53-G245\NYMCNSSCN  | 132 | 18695 |
| >TP53-G245\MGGMNRRP  | 803   | >TP53-G245\MGVMNRRP   | 27  | 776   |
| >TP53-G245\CMGGMNRR  | 635   | >TP53-G245\CMGVMNRR   | 390 | 245   |
| >TP53-G245\CMGGMNRR  | 88    | >TP53-G245\CMGVMNRR   | 484 | 396   |
| >TP53-G245\CMGGMNRR  | 314   | >TP53-G245\CMGVMNRR   | 114 | 200   |
| >TP53-G245\CMGGMNRR  | 117   | >TP53-G245\CMGVMNRR   | 260 | 143   |
| >TP53-G245\SCMGGMNR  | 994   | >TP53-G245\SCMGVMNRI  | 415 | 579   |
| >TP53-G245\SCMGGMNR  | 1031  | >TP53-G245\SCMGVMNRI  | 255 | 776   |
| >TP53-G245\SCMGGMNR  | 464   | >TP53-G245\SCMGVMNR   | 234 | 230   |
| >TP53-G245\SSCMGGMNI | 58    | >TP53-G245\SSCMGVMNI  | 34  | 24    |
| >TP53-G245\SSCMGGMNI | 192   | >TP53-G245\SSCMGVMNI  | 57  | 135   |
| >TP53-G245\SSCMGGMNI | 110   | >TP53-G245\SSCMGVMNI  | 55  | 55    |
| >TP53-G245\SSCMGGMNI | 56    | >TP53-G245\SSCMGVMNI  | 24  | 32    |
| >TP53-G245\SSCMGGMNI | 220   | >TP53-G245\SSCMGVMNI  | 72  | 148   |
| >TP53-G245\SSCMGGMNI | 361   | >TP53-G245\SSCMGVMNI  | 97  | 264   |
| >TP53-G245\SSCMGGMNI | 398   | >TP53-G245\SSCMGVMNI  | 168 | 230   |
| >TP53-G245\SSCMGGMNI | 460   | >TP53-G245\SSCMGVMNI  | 317 | 143   |
| >TP53-G245\NSSCMGGMI | 111   | >TP53-G245\NSSCMGVMII | 119 | 8     |
| >TP53-G245\NSSCMGGMI | 55    | >TP53-G245\NSSCMGVMII | 35  | 20    |
| >TP53-G245\NSSCMGGMI | 365   | >TP53-G245\NSSCMGVMII | 417 | 52    |
| >TP53-G245\NSSCMGGMI | 12    | >TP53-G245\NSSCMGVMII | 14  | 2     |
| >TP53-G245\NSSCMGGMI | 39    | >TP53-G245\NSSCMGVMII | 17  | 22    |
| >TP53-G245\NSSCMGGM  | 851   | >TP53-G245\NSSCMGVM   | 117 | 734   |
| >TP53-G245\CNSSCMGGN | 2175  | >TP53-G245\CNSSCMGVN  | 317 | 1858  |
| >TP53-G245\CNSSCMGGN | 639   | >TP53-G245\CNSSCMGVN  | 415 | 224   |
| >TP53-G245\MCNSSCMGC | 34977 | >TP53-G245\MCNSSCMG\  | 341 | 34636 |
| >TP53-G245\MCNSSCMGC | 13447 | >TP53-G245\MCNSSCMG\  | 73  | 13374 |
| >TP53-G245\MCNSSCMGC | 19803 | >TP53-G245\MCNSSCMG\  | 413 | 19390 |
| >TP53-G245\YMCNSSCMC | 988   | >TP53-G245\YMCNSSCMC  | 6   | 982   |
| >TP53-G245\YMCNSSCMC | 252   | >TP53-G245\YMCNSSCMC  | 516 | 264   |
| >TP53-G245\YMCNSSCMC | 2002  | >TP53-G245\YMCNSSCMC  | 9   | 1993  |
| >TP53-G245\YMCNSSCMC | 167   | >TP53-G245\YMCNSSCMC  | 456 | 289   |
| >TP53-G245\YMCNSSCMC | 1968  | >TP53-G245\YMCNSSCMC  | 6   | 1962  |
| >TP53-G245\YMCNSSCMC | 41    | >TP53-G245\YMCNSSCMC  | 112 | 71    |
| >TP53-G245\YMCNSSCMC | 1794  | >TP53-G245\YMCNSSCMC  | 21  | 1773  |
| >TP53-G245\YMCNSSCMC | 143   | >TP53-G245\YMCNSSCMC  | 608 | 465   |
| >TP53-G245\YMCNSSCMC | 399   | >TP53-G245\YMCNSSCMC  | 2   | 397   |
| >TP53-G245\YMCNSSCMC | 16    | >TP53-G245\YMCNSSCMC  | 32  | 16    |



|                        |       |                        |      |       |
|------------------------|-------|------------------------|------|-------|
| >TP53-G245\YMCNSSCMC   | 5487  | >TP53-G245\YMCNSSCMC   | 7    | 5480  |
| >TP53-G245\YMCNSSCMC   | 197   | >TP53-G245\YMCNSSCMC   | 396  | 199   |
| >TP53-G245\YMCNSSCMC   | 4958  | >TP53-G245\YMCNSSCMC   | 5    | 4953  |
| >TP53-G245\YMCNSSCMC   | 421   | >TP53-G245\YMCNSSCMC   | 818  | 397   |
| >TP53-G245\YMCNSSCMC   | 12730 | >TP53-G245\YMCNSSCMC   | 3    | 12727 |
| >TP53-G245\YMCNSSCMC   | 332   | >TP53-G245\YMCNSSCMC   | 845  | 513   |
| >TP53-G245\YMCNSSCMC   | 1350  | >TP53-G245\YMCNSSCMC   | 2    | 1348  |
| >TP53-G245\YMCNSSCMC   | 53    | >TP53-G245\YMCNSSCMC   | 104  | 51    |
| >TP53-G245\YMCNSSCMC   | 18229 | >TP53-G245\YMCNSSCMC   | 62   | 18167 |
| >TP53-G245\YMCNSSCMC   | 20384 | >TP53-G245\YMCNSSCMC   | 347  | 20037 |
| >TP53-G245\YMCNSSCMC   | 292   | >TP53-G245\YMCNSSCMC   | 149  | 143   |
| >TP53-G245\YMCNSSCMC   | 44    | >TP53-G245\YMCNSSCMC   | 26   | 18    |
| >TP53-G245\YMCNSSCMC   | 145   | >TP53-G245\YMCNSSCMC   | 160  | 15    |
| >TP53-G245\YMCNSSCMC   | 2531  | >TP53-G245\YMCNSSCMC   | 63   | 2468  |
| >TP53-G245\YMCNSSCMC   | 160   | >TP53-G245\YMCNSSCMC   | 56   | 104   |
| >TP53-G245\YMCNSSCMC   | 294   | >TP53-G245\YMCNSSCMC   | 540  | 246   |
| >TP53-G245\YMCNSSCMC   | 958   | >TP53-G245\YMCNSSCMC   | 476  | 482   |
| >TP53-G245\YMCNSSCMC   | 3120  | >TP53-G245\YMCNSSCMC   | 380  | 2740  |
| >TP53-G245\YMCNSSCMC   | 1073  | >TP53-G245\YMCNSSCMC   | 199  | 874   |
| >TP53-G262[SGNLLGRNSF  | 311   | >TP53-G262[SDNLLGRNSF  | 3635 | 3324  |
| >TP53-G262[SSGNLLGRNS  | 245   | >TP53-G262[SSDNLLGRNS  | 4217 | 3972  |
| >TP53-G262[SSGNLLGRNS  | 390   | >TP53-G262[SSDNLLGRNS  | 225  | 165   |
| >TP53-G262[SSGNLLGRNS  | 32    | >TP53-G262[SSDNLLGRNS  | 30   | 2     |
| >TP53-G262[SSGNLLGR    | 357   | >TP53-G262[SSDNLLGR    | 377  | 20    |
| >TP53-G262[DSSGNLLGR   | 664   | >TP53-G262[DSSDNLLGR   | 401  | 263   |
| >TP53-G262[DSSGNLLGR   | 68    | >TP53-G262[DSSDNLLGR   | 53   | 15    |
| >TP53-G262[EDSSGNLL    | 273   | >TP53-G262[EDSSDNLL    | 4065 | 3792  |
| >TP53-G262[LEDSSGNL    | 33    | >TP53-G262[LEDSSDNL    | 27   | 6     |
| >TP53-G262[LEDSSGNLL   | 20    | >TP53-G262[LEDSSDNLL   | 27   | 7     |
| >TP53-G262[TLEDSSGNL   | 62    | >TP53-G262[TLEDSSDNL   | 14   | 48    |
| >TP53-G262[TLEDSSGNLL  | 133   | >TP53-G262[TLEDSSDNLL  | 60   | 73    |
| >TP53-G262[TLEDSSGNL   | 947   | >TP53-G262[TLEDSSDNL   | 176  | 771   |
| >TP53-G262[TLEDSSGNLL  | 736   | >TP53-G262[TLEDSSDNLL  | 443  | 293   |
| >TP53-G262[TLEDSSGNL   | 24    | >TP53-G262[TLEDSSDNL   | 22   | 2     |
| >TP53-G262[TLEDSSGNLL  | 23    | >TP53-G262[TLEDSSDNLL  | 25   | 2     |
| >TP53-G262[ITLEDSSGNL  | 495   | >TP53-G262[ITLEDSSDNL  | 320  | 175   |
| >TP53-G262[ITLEDSSGNL  | 471   | >TP53-G262[ITLEDSSDNL  | 1379 | 908   |
| >TP53-G262[ITLEDSSGNL  | 371   | >TP53-G262[ITLEDSSDNL  | 202  | 169   |
| >TP53-G262[ITLEDSSGNLL | 270   | >TP53-G262[ITLEDSSDNLL | 419  | 149   |
| >TP53-G262[ITLEDSSGNL  | 302   | >TP53-G262[ITLEDSSDNL  | 332  | 30    |
| >TP53-G262[ITLEDSSGNLL | 339   | >TP53-G262[ITLEDSSDNLL | 874  | 535   |
| >TP53-G262[ITLEDSSGNL  | 137   | >TP53-G262[ITLEDSSDNL  | 317  | 180   |
| >TP53-G262[ITLEDSSGNLL | 354   | >TP53-G262[ITLEDSSDNLL | 1255 | 901   |

|                        |      |                        |      |      |
|------------------------|------|------------------------|------|------|
| >TP53-G262[ITLEDSSGNL  | 6    | >TP53-G262[ITLEDSSDNL  | 9    | 3    |
| >TP53-G262[ITLEDSSGNLL | 18   | >TP53-G262[ITLEDSSDNL  | 27   | 9    |
| >TP53-G262[ITLEDSSGNLL | 259  | >TP53-G262[ITLEDSSDNL  | 592  | 333  |
| >TP53-G262[ITLEDSSGNL  | 341  | >TP53-G262[ITLEDSSDNL  | 4908 | 4567 |
| >TP53-G262[ITLEDSSGNLL | 30   | >TP53-G262[ITLEDSSDNL  | 61   | 31   |
| >TP53-G262[ITLEDSSGNL  | 1406 | >TP53-G262[ITLEDSSDNL  | 475  | 931  |
| >TP53-G262[GNLLGRNSF   | 1249 | >TP53-G262[HNLLGRNSF   | 260  | 989  |
| >TP53-G262[SGNLLGRNSF  | 1928 | >TP53-G262[SHNLLGRNSF  | 138  | 1790 |
| >TP53-G262[SGNLLGRNSF  | 311  | >TP53-G262[SHNLLGRNSF  | 4945 | 4634 |
| >TP53-G262[LTIITLEDSSG | 3869 | >TP53-G262[LTIITLEDSSH | 254  | 3615 |
| >TP53-G262[LTIITLEDSSG | 4086 | >TP53-G262[LTIITLEDSSH | 238  | 3848 |
| >TP53-G262[SSGNLLGR    | 627  | >TP53-G262[SSHNLLGR    | 349  | 278  |
| >TP53-G262[SSGNLLGR    | 554  | >TP53-G262[SSHNLLGR    | 119  | 435  |
| >TP53-G262[SSGNLLGR    | 744  | >TP53-G262[SSHNLLGR    | 184  | 560  |
| >TP53-G262[SSGNLLGRNS  | 245  | >TP53-G262[SSHNLLGRNS  | 148  | 97   |
| >TP53-G262[SSGNLLGRNS  | 701  | >TP53-G262[SSHNLLGRNS  | 99   | 602  |
| >TP53-G262[SSGNLLGRNS  | 390  | >TP53-G262[SSHNLLGRNS  | 37   | 353  |
| >TP53-G262[SSGNLLGRNS  | 32   | >TP53-G262[SSHNLLGRNS  | 20   | 12   |
| >TP53-G262[SSGNLLGR    | 357  | >TP53-G262[SSHNLLGR    | 332  | 25   |
| >TP53-G262[DSSGNLLGR   | 68   | >TP53-G262[DSSHNLLGR   | 66   | 2    |
| >TP53-G262[EDSSGNLL    | 273  | >TP53-G262[EDSSHNL     | 2705 | 2432 |
| >TP53-G262[LEDSSGNL    | 33   | >TP53-G262[LEDSSHNL    | 20   | 13   |
| >TP53-G262[LEDSSGNLL   | 20   | >TP53-G262[LEDSSHNL    | 19   | 1    |
| >TP53-G262[TLEDSSGNL   | 62   | >TP53-G262[TLEDSSHNL   | 9    | 53   |
| >TP53-G262[TLEDSSGNLL  | 133  | >TP53-G262[TLEDSSHNL   | 100  | 33   |
| >TP53-G262[TLEDSSGNL   | 513  | >TP53-G262[TLEDSSHNL   | 374  | 139  |
| >TP53-G262[TLEDSSGNL   | 1522 | >TP53-G262[TLEDSSHNL   | 197  | 1325 |
| >TP53-G262[TLEDSSGNL   | 947  | >TP53-G262[TLEDSSHNL   | 23   | 924  |
| >TP53-G262[TLEDSSGNLL  | 736  | >TP53-G262[TLEDSSHNL   | 309  | 427  |
| >TP53-G262[TLEDSSGNL   | 3341 | >TP53-G262[TLEDSSHNL   | 362  | 2979 |
| >TP53-G262[TLEDSSGNL   | 4640 | >TP53-G262[TLEDSSHNL   | 153  | 4487 |
| >TP53-G262[TLEDSSGNL   | 24   | >TP53-G262[TLEDSSHNL   | 3    | 21   |
| >TP53-G262[TLEDSSGNLL  | 23   | >TP53-G262[TLEDSSHNL   | 9    | 14   |
| >TP53-G262[ITLEDSSGNL  | 495  | >TP53-G262[ITLEDSSHNL  | 241  | 254  |
| >TP53-G262[ITLEDSSGNLL | 536  | >TP53-G262[ITLEDSSHNL  | 495  | 41   |
| >TP53-G262[ITLEDSSGNL  | 471  | >TP53-G262[ITLEDSSHNL  | 684  | 213  |
| >TP53-G262[ITLEDSSGNL  | 371  | >TP53-G262[ITLEDSSHNL  | 196  | 175  |
| >TP53-G262[ITLEDSSGNLL | 270  | >TP53-G262[ITLEDSSHNL  | 305  | 35   |
| >TP53-G262[ITLEDSSGNL  | 302  | >TP53-G262[ITLEDSSHNL  | 84   | 218  |
| >TP53-G262[ITLEDSSGNLL | 339  | >TP53-G262[ITLEDSSHNL  | 337  | 2    |
| >TP53-G262[ITLEDSSGNL  | 1372 | >TP53-G262[ITLEDSSHNL  | 136  | 1236 |
| >TP53-G262[ITLEDSSGNL  | 1829 | >TP53-G262[ITLEDSSHNL  | 381  | 1448 |
| >TP53-G262[ITLEDSSGNL  | 3672 | >TP53-G262[ITLEDSSHNL  | 300  | 3372 |

|                        |      |                        |      |      |
|------------------------|------|------------------------|------|------|
| >TP53-G262HITLEDSSGNL  | 3363 | >TP53-G262HITLEDSSHNL  | 318  | 3045 |
| >TP53-G262HITLEDSSGNL  | 137  | >TP53-G262HITLEDSSHNL  | 38   | 99   |
| >TP53-G262HITLEDSSGNLL | 354  | >TP53-G262HITLEDSSHNLL | 279  | 75   |
| >TP53-G262HITLEDSSG    | 3812 | >TP53-G262HITLEDSSH    | 206  | 3606 |
| >TP53-G262HITLEDSSGNL  | 6    | >TP53-G262HITLEDSSHNL  | 5    | 1    |
| >TP53-G262HITLEDSSGNLL | 18   | >TP53-G262HITLEDSSHNLL | 19   | 1    |
| >TP53-G262HITLEDSSGNLL | 259  | >TP53-G262HITLEDSSHNLL | 161  | 98   |
| >TP53-G262HITLEDSSGNL  | 341  | >TP53-G262HITLEDSSHNL  | 4458 | 4117 |
| >TP53-G262HITLEDSSGNLL | 30   | >TP53-G262HITLEDSSHNLL | 30   | 0    |
| >TP53-G262HITLEDSSGNL  | 1406 | >TP53-G262HITLEDSSHNL  | 312  | 1094 |
| >TP53-G262HITLEDSSGNL  | 2131 | >TP53-G262HITLEDSSHNL  | 215  | 1916 |
| >TP53-G262HGNLLGRNSF   | 1249 | >TP53-G262HGNLLGRNSF   | 364  | 885  |
| >TP53-G262HSGNLLGRNSF  | 2012 | >TP53-G262HSSNLLGRNSF  | 353  | 1659 |
| >TP53-G262HSGNLLGRNSF  | 1928 | >TP53-G262HSSNLLGRNSF  | 168  | 1760 |
| >TP53-G262HSGNLLGRNSF  | 5804 | >TP53-G262HSSNLLGRNSF  | 50   | 5754 |
| >TP53-G262HSGNLLGRNSF  | 311  | >TP53-G262HSSNLLGRNSF  | 37   | 274  |
| >TP53-G262HSSGNLLGR    | 627  | >TP53-G262HSSNLLGR     | 176  | 451  |
| >TP53-G262HSSGNLLGR    | 554  | >TP53-G262HSSNLLGR     | 262  | 292  |
| >TP53-G262HSSGNLLGR    | 744  | >TP53-G262HSSNLLGR     | 105  | 639  |
| >TP53-G262HSSGNLLGRNS  | 245  | >TP53-G262HSSNLLGRNS   | 169  | 76   |
| >TP53-G262HSSGNLLGRNS  | 701  | >TP53-G262HSSNLLGRNS   | 164  | 537  |
| >TP53-G262HSSGNLLGRNS  | 390  | >TP53-G262HSSNLLGRNS   | 55   | 335  |
| >TP53-G262HSSGNLLGRNS  | 32   | >TP53-G262HSSNLLGRNS   | 10   | 22   |
| >TP53-G262HSSGNLLGR    | 357  | >TP53-G262HSSNLLGR     | 150  | 207  |
| >TP53-G262HDSSGNLLGR   | 68   | >TP53-G262DSSNLLGR     | 35   | 33   |
| >TP53-G262HEDSSGNLL    | 273  | >TP53-G262HEDSSSNLL    | 1821 | 1548 |
| >TP53-G262HLEDSSGNLL   | 745  | >TP53-G262HLEDSSSNLL   | 98   | 647  |
| >TP53-G262HLEDSSGNL    | 33   | >TP53-G262HLEDSSSNL    | 43   | 10   |
| >TP53-G262HLEDSSGNLL   | 20   | >TP53-G262HLEDSSSNLL   | 31   | 11   |
| >TP53-G262HLEDSSGNLL   | 816  | >TP53-G262HLEDSSSNLL   | 336  | 480  |
| >TP53-G262HTLEDSSGNL   | 62   | >TP53-G262HTLEDSSSNL   | 17   | 45   |
| >TP53-G262HTLEDSSGNLL  | 133  | >TP53-G262HTLEDSSSNLL  | 79   | 54   |
| >TP53-G262HTLEDSSGNL   | 513  | >TP53-G262HTLEDSSSNL   | 141  | 372  |
| >TP53-G262HTLEDSSGNLL  | 977  | >TP53-G262HTLEDSSSNLL  | 448  | 529  |
| >TP53-G262HTLEDSSGNL   | 947  | >TP53-G262HTLEDSSSNL   | 145  | 802  |
| >TP53-G262HTLEDSSGNLL  | 736  | >TP53-G262HTLEDSSSNLL  | 236  | 500  |
| >TP53-G262HTLEDSSGNL   | 24   | >TP53-G262HTLEDSSSNL   | 6    | 18   |
| >TP53-G262HTLEDSSGNLL  | 23   | >TP53-G262HTLEDSSSNLL  | 11   | 12   |
| >TP53-G262HITLEDSSGNL  | 495  | >TP53-G262HITLEDSSSNL  | 184  | 311  |
| >TP53-G262HITLEDSSGNLL | 536  | >TP53-G262HITLEDSSSNLL | 238  | 298  |
| >TP53-G262HITLEDSSGNL  | 471  | >TP53-G262HITLEDSSSNL  | 297  | 174  |
| >TP53-G262HITLEDSSGNL  | 371  | >TP53-G262HITLEDSSSNL  | 164  | 207  |
| >TP53-G262HITLEDSSGNLL | 270  | >TP53-G262HITLEDSSSNLL | 163  | 107  |

|                        |       |                        |     |       |
|------------------------|-------|------------------------|-----|-------|
| >TP53-G262\ITLEDSSGNL  | 302   | >TP53-G262\ITLEDSSSNL  | 174 | 128   |
| >TP53-G262\ITLEDSSGNLL | 339   | >TP53-G262\ITLEDSSSNLL | 332 | 7     |
| >TP53-G262\ITLEDSSGNL  | 137   | >TP53-G262\ITLEDSSSNL  | 134 | 3     |
| >TP53-G262\ITLEDSSGNLL | 354   | >TP53-G262\ITLEDSSSNLL | 214 | 140   |
| >TP53-G262\ITLEDSSGNL  | 2256  | >TP53-G262\ITLEDSSSNL  | 347 | 1909  |
| >TP53-G262\ITLEDSSGNL  | 6     | >TP53-G262\ITLEDSSSNL  | 4   | 2     |
| >TP53-G262\ITLEDSSGNLL | 18    | >TP53-G262\ITLEDSSSNLL | 15  | 3     |
| >TP53-G262\ITLEDSSGNLL | 259   | >TP53-G262\ITLEDSSSNLL | 182 | 77    |
| >TP53-G262\ITLEDSSGNL  | 341   | >TP53-G262\ITLEDSSSNL  | 481 | 140   |
| >TP53-G262\ITLEDSSGNLL | 30    | >TP53-G262\ITLEDSSSNLL | 24  | 6     |
| >TP53-G262\ITLEDSSGNL  | 1970  | >TP53-G262\ITLEDSSSNL  | 463 | 1507  |
| >TP53-G262\ITLEDSSGNLL | 604   | >TP53-G262\ITLEDSSSNLL | 452 | 152   |
| >TP53-G262\GNLLGRNSF   | 1249  | >TP53-G262\VNLLGRNSF   | 263 | 986   |
| >TP53-G262\SGNLLGRNSF  | 2012  | >TP53-G262\SVNLLGRNSF  | 402 | 1610  |
| >TP53-G262\SGNLLGRNSF  | 311   | >TP53-G262\SVNLLGRNSF  | 250 | 61    |
| >TP53-G262\LTITLEDSSG  | 17657 | >TP53-G262\LTITLEDSSV  | 216 | 17441 |
| >TP53-G262\LTITLEDSSG  | 15201 | >TP53-G262\LTITLEDSSV  | 103 | 15098 |
| >TP53-G262\LTITLEDSSG  | 26006 | >TP53-G262\LTITLEDSSV  | 374 | 25632 |
| >TP53-G262\LTITLEDSSG  | 35405 | >TP53-G262\LTITLEDSSV  | 211 | 35194 |
| >TP53-G262\LTITLEDSSG  | 12005 | >TP53-G262\LTITLEDSSV  | 155 | 11850 |
| >TP53-G262\LTITLEDSSG  | 3869  | >TP53-G262\LTITLEDSSV  | 116 | 3753  |
| >TP53-G262\LTITLEDSSG  | 4086  | >TP53-G262\LTITLEDSSV  | 309 | 3777  |
| >TP53-G262\SSGNLLGR    | 627   | >TP53-G262\SSVNLLGR    | 357 | 270   |
| >TP53-G262\SSGNLLGRNS  | 2212  | >TP53-G262\SSVNLLGRNS  | 84  | 2128  |
| >TP53-G262\SSGNLLGR    | 554   | >TP53-G262\SSVNLLGR    | 296 | 258   |
| >TP53-G262\SSGNLLGR    | 744   | >TP53-G262\SSVNLLGR    | 89  | 655   |
| >TP53-G262\SSGNLLGRNS  | 245   | >TP53-G262\SSVNLLGRNS  | 171 | 74    |
| >TP53-G262\SSGNLLGRNS  | 701   | >TP53-G262\SSVNLLGRNS  | 143 | 558   |
| >TP53-G262\SSGNLLGRNS  | 390   | >TP53-G262\SSVNLLGRNS  | 17  | 373   |
| >TP53-G262\SSGNLLGRNS  | 32    | >TP53-G262\SSVNLLGRNS  | 11  | 21    |
| >TP53-G262\SSGNLLGR    | 357   | >TP53-G262\SSVNLLGR    | 191 | 166   |
| >TP53-G262\DSSGNLLGR   | 68    | >TP53-G262\DSSVNLLGR   | 59  | 9     |
| >TP53-G262\EDSSGNLL    | 273   | >TP53-G262\EDSSVNLL    | 837 | 564   |
| >TP53-G262\LEDSSGNLL   | 745   | >TP53-G262\LEDSSVNLL   | 112 | 633   |
| >TP53-G262\LEDSSGNL    | 33    | >TP53-G262\LEDSSVNL    | 27  | 6     |
| >TP53-G262\LEDSSGNLL   | 20    | >TP53-G262\LEDSSVNLL   | 39  | 19    |
| >TP53-G262\LEDSSGNLL   | 816   | >TP53-G262\LEDSSVNLL   | 92  | 724   |
| >TP53-G262\TLEDSSGNL   | 62    | >TP53-G262\TLEDSSVNL   | 17  | 45    |
| >TP53-G262\TLEDSSGNLL  | 133   | >TP53-G262\TLEDSSVNLL  | 71  | 62    |
| >TP53-G262\TLEDSSGNLL  | 977   | >TP53-G262\TLEDSSVNLL  | 319 | 658   |
| >TP53-G262\TLEDSSGNL   | 1522  | >TP53-G262\TLEDSSVNL   | 493 | 1029  |
| >TP53-G262\TLEDSSGNL   | 947   | >TP53-G262\TLEDSSVNL   | 73  | 874   |
| >TP53-G262\TLEDSSGNLL  | 736   | >TP53-G262\TLEDSSVNLL  | 164 | 572   |

|                        |       |                       |     |       |
|------------------------|-------|-----------------------|-----|-------|
| >TP53-G262\TLEDSSGNL   | 24    | >TP53-G262\TLEDSSVNL  | 5   | 19    |
| >TP53-G262\TLEDSSGNLL  | 23    | >TP53-G262\TLEDSSVNL  | 8   | 15    |
| >TP53-G262\ITLEDSSG    | 22648 | >TP53-G262\ITLEDSSV   | 320 | 22328 |
| >TP53-G262\ITLEDSSGNL  | 495   | >TP53-G262\ITLEDSSVNL | 290 | 205   |
| >TP53-G262\ITLEDSSGNLL | 536   | >TP53-G262\ITLEDSSVNL | 277 | 259   |
| >TP53-G262\ITLEDSSG    | 20894 | >TP53-G262\ITLEDSSV   | 313 | 20581 |
| >TP53-G262\ITLEDSSGNL  | 471   | >TP53-G262\ITLEDSSVNL | 670 | 199   |
| >TP53-G262\ITLEDSSG    | 11196 | >TP53-G262\ITLEDSSV   | 50  | 11146 |
| >TP53-G262\ITLEDSSGNL  | 371   | >TP53-G262\ITLEDSSVNL | 143 | 228   |
| >TP53-G262\ITLEDSSGNLL | 270   | >TP53-G262\ITLEDSSVNL | 165 | 105   |
| >TP53-G262\ITLEDSSG    | 13834 | >TP53-G262\ITLEDSSV   | 16  | 13818 |
| >TP53-G262\ITLEDSSGNL  | 302   | >TP53-G262\ITLEDSSVNL | 152 | 150   |
| >TP53-G262\ITLEDSSGNLL | 339   | >TP53-G262\ITLEDSSVNL | 195 | 144   |
| >TP53-G262\ITLEDSSG    | 17391 | >TP53-G262\ITLEDSSV   | 68  | 17323 |
| >TP53-G262\ITLEDSSGNL  | 1372  | >TP53-G262\ITLEDSSVNL | 399 | 973   |
| >TP53-G262\ITLEDSSG    | 20426 | >TP53-G262\ITLEDSSV   | 78  | 20348 |
| >TP53-G262\ITLEDSSG    | 20259 | >TP53-G262\ITLEDSSV   | 216 | 20043 |
| >TP53-G262\ITLEDSSG    | 32773 | >TP53-G262\ITLEDSSV   | 37  | 32736 |
| >TP53-G262\ITLEDSSGNL  | 5735  | >TP53-G262\ITLEDSSVNL | 474 | 5261  |
| >TP53-G262\ITLEDSSG    | 20700 | >TP53-G262\ITLEDSSV   | 463 | 20237 |
| >TP53-G262\ITLEDSSG    | 14853 | >TP53-G262\ITLEDSSV   | 79  | 14774 |
| >TP53-G262\ITLEDSSGNL  | 137   | >TP53-G262\ITLEDSSVNL | 118 | 19    |
| >TP53-G262\ITLEDSSGNLL | 354   | >TP53-G262\ITLEDSSVNL | 319 | 35    |
| >TP53-G262\ITLEDSSGNL  | 2256  | >TP53-G262\ITLEDSSVNL | 358 | 1898  |
| >TP53-G262\ITLEDSSG    | 3812  | >TP53-G262\ITLEDSSV   | 85  | 3727  |
| >TP53-G262\ITLEDSSGNL  | 6     | >TP53-G262\ITLEDSSVNL | 5   | 1     |
| >TP53-G262\ITLEDSSGNLL | 18    | >TP53-G262\ITLEDSSVNL | 17  | 1     |
| >TP53-G262\ITLEDSSGNLL | 259   | >TP53-G262\ITLEDSSVNL | 218 | 41    |
| >TP53-G262\ITLEDSSGN   | 1858  | >TP53-G262\ITLEDSSVN  | 367 | 1491  |
| >TP53-G262\ITLEDSSGNL  | 341   | >TP53-G262\ITLEDSSVNL | 474 | 133   |
| >TP53-G262\ITLEDSSGNLL | 30    | >TP53-G262\ITLEDSSVNL | 32  | 2     |
| >TP53-G262\IITLEDSSG   | 34540 | >TP53-G262\IITLEDSSV  | 40  | 34500 |
| >TP53-G262\TIITLEDSSG  | 21695 | >TP53-G262\TIITLEDSSV | 308 | 21387 |
| >TP53-G262\TIITLEDSSG  | 12011 | >TP53-G262\TIITLEDSSV | 101 | 11910 |
| >TP53-G262\TIITLEDSSG  | 12202 | >TP53-G262\TIITLEDSSV | 38  | 12164 |
| >TP53-G262\TIITLEDSSG  | 12300 | >TP53-G262\TIITLEDSSV | 79  | 12221 |
| >TP53-G262\TIITLEDSSG  | 34505 | >TP53-G262\TIITLEDSSV | 130 | 34375 |
| >TP53-G262\TIITLEDSSG  | 28635 | >TP53-G262\TIITLEDSSV | 401 | 28234 |
| >TP53-G266\GRNSFEVR    | 405   | >TP53-G266\ARNSFEVR   | 339 | 66    |
| >TP53-G266\GRNSFEVRV   | 631   | >TP53-G266\ARNSFEVRV  | 482 | 149   |
| >TP53-G266\LGRNSFEV    | 3827  | >TP53-G266\LARNSFEV   | 334 | 3493  |
| >TP53-G266\LGRNSFEV    | 3319  | >TP53-G266\LARNSFEV   | 74  | 3245  |
| >TP53-G266\LGRNSFEVRV  | 6207  | >TP53-G266\LARNSFEVRV | 234 | 5973  |

|                        |       |                        |     |       |
|------------------------|-------|------------------------|-----|-------|
| >TP53-G266/LGRNSFEV    | 820   | >TP53-G266/LARNSFEV    | 110 | 710   |
| >TP53-G266/LGRNSFEVR   | 286   | >TP53-G266/LARNSFEVR   | 40  | 246   |
| >TP53-G266/LGRNSFEVR   | 4910  | >TP53-G266/LARNSFEVR   | 336 | 4574  |
| >TP53-G266/LGRNSFEV    | 2840  | >TP53-G266/LARNSFEV    | 340 | 2500  |
| >TP53-G266/LGRNSFEVR   | 2836  | >TP53-G266/LARNSFEVR   | 389 | 2447  |
| >TP53-G266/LGRNSFEVRV  | 2611  | >TP53-G266/LARNSFEVRV  | 339 | 2272  |
| >TP53-G266/TLEDSSGNLL  | 11553 | >TP53-G266/TLEDSSGNLL  | 52  | 11501 |
| >TP53-G266/LLGRNSFEV   | 26    | >TP53-G266/LLARNSFEV   | 9   | 17    |
| >TP53-G266/LLGRNSFEVR' | 137   | >TP53-G266/LLARNSFEVR' | 28  | 109   |
| >TP53-G266/LLGRNSFEV   | 16    | >TP53-G266/LLARNSFEV   | 3   | 13    |
| >TP53-G266/LLGRNSFEVR' | 62    | >TP53-G266/LLARNSFEVR' | 7   | 55    |
| >TP53-G266/LLGRNSFEV   | 47    | >TP53-G266/LLARNSFEV   | 6   | 41    |
| >TP53-G266/LLGRNSFEVR' | 214   | >TP53-G266/LLARNSFEVR' | 16  | 198   |
| >TP53-G266/LLGRNSFEV   | 39    | >TP53-G266/LLARNSFEV   | 7   | 32    |
| >TP53-G266/LLGRNSFEVR' | 582   | >TP53-G266/LLARNSFEVR' | 87  | 495   |
| >TP53-G266/LLGRNSFEV   | 2     | >TP53-G266/LLARNSFEV   | 2   | 0     |
| >TP53-G266/LLGRNSFEVR' | 3     | >TP53-G266/LLARNSFEVR' | 3   | 0     |
| >TP53-G266/LLGRNSFEV   | 2     | >TP53-G266/LLARNSFEV   | 2   | 0     |
| >TP53-G266/LLGRNSFEVR' | 7     | >TP53-G266/LLARNSFEVR' | 8   | 1     |
| >TP53-G266/LLGRNSFEV   | 5     | >TP53-G266/LLARNSFEV   | 5   | 0     |
| >TP53-G266/LLGRNSFEVR' | 9     | >TP53-G266/LLARNSFEVR' | 7   | 2     |
| >TP53-G266/LLGRNSFEV   | 2     | >TP53-G266/LLARNSFEV   | 2   | 0     |
| >TP53-G266/LLGRNSFEVR' | 6     | >TP53-G266/LLARNSFEVR' | 4   | 2     |
| >TP53-G266/LLGRNSFEV   | 2     | >TP53-G266/LLARNSFEV   | 1   | 1     |
| >TP53-G266/LLGRNSFEVR' | 2     | >TP53-G266/LLARNSFEVR' | 2   | 0     |
| >TP53-G266/LLGRNSFEVR  | 429   | >TP53-G266/LLARNSFEVR  | 340 | 89    |
| >TP53-G266/LLGRNSFEV   | 3452  | >TP53-G266/LLARNSFEV   | 103 | 3349  |
| >TP53-G266/LLGRNSFEVR' | 6410  | >TP53-G266/LLARNSFEVR' | 413 | 5997  |
| >TP53-G266/LLGRNSFEV   | 425   | >TP53-G266/LLARNSFEV   | 104 | 321   |
| >TP53-G266/NLLGRNSFEV  | 29    | >TP53-G266/NLLARNSFEV  | 28  | 1     |
| >TP53-G266/NLLGRNSFEV  | 89    | >TP53-G266/NLLARNSFEV  | 80  | 9     |
| >TP53-G266/NLLGRNSFEV  | 94    | >TP53-G266/NLLARNSFEV  | 74  | 20    |
| >TP53-G266/NLLGRNSFEV  | 137   | >TP53-G266/NLLARNSFEV  | 184 | 47    |
| >TP53-G266/NLLGRNSFEV  | 3     | >TP53-G266/NLLARNSFEV  | 3   | 0     |
| >TP53-G266/NLLGRNSFEV  | 5     | >TP53-G266/NLLARNSFEV  | 5   | 0     |
| >TP53-G266/NLLGRNSFEV  | 7     | >TP53-G266/NLLARNSFEV  | 7   | 0     |
| >TP53-G266/NLLGRNSFEV  | 3     | >TP53-G266/NLLARNSFEV  | 3   | 0     |
| >TP53-G266/NLLGRNSFEV  | 3     | >TP53-G266/NLLARNSFEV  | 3   | 0     |
| >TP53-G266/NLLGRNSFEV  | 502   | >TP53-G266/NLLARNSFEV  | 230 | 272   |
| >TP53-G266/NLLGRNSFEV  | 109   | >TP53-G266/NLLARNSFEV  | 125 | 16    |
| >TP53-G266/NLLGRNSFEV  | 309   | >TP53-G266/NLLARNSFEV  | 240 | 69    |
| >TP53-G266/NLLGRNSFEV  | 52    | >TP53-G266/NLLARNSFEV  | 31  | 21    |
| >TP53-G266/NLLGRNSF    | 501   | >TP53-G266/NLLARNSF    | 162 | 339   |

|                       |       |                       |      |       |
|-----------------------|-------|-----------------------|------|-------|
| >TP53-G266/NLLGRNSF   | 968   | >TP53-G266/NLLARNSF   | 459  | 509   |
| >TP53-G266/NLLGRNSF   | 65    | >TP53-G266/NLLARNSF   | 63   | 2     |
| >TP53-G266/NLLGRNSF   | 418   | >TP53-G266/NLLARNSF   | 94   | 324   |
| >TP53-G266/NLLGRNSFEV | 195   | >TP53-G266/NLLARNSFEV | 159  | 36    |
| >TP53-G266/SGNLLGRNSF | 311   | >TP53-G266/SGNLLARNSF | 269  | 42    |
| >TP53-G266/SSGNLLGR   | 627   | >TP53-G266/SSGNLLAR   | 383  | 244   |
| >TP53-G266/SSGNLLGR   | 554   | >TP53-G266/SSGNLLAR   | 144  | 410   |
| >TP53-G266/SSGNLLGRNS | 245   | >TP53-G266/SSGNLLARNS | 182  | 63    |
| >TP53-G266/SSGNLLGRNS | 701   | >TP53-G266/SSGNLLARNS | 401  | 300   |
| >TP53-G266/SSGNLLGRNS | 390   | >TP53-G266/SSGNLLARNS | 237  | 153   |
| >TP53-G266/SSGNLLGRNS | 32    | >TP53-G266/SSGNLLARNS | 39   | 7     |
| >TP53-G266/SSGNLLGR   | 357   | >TP53-G266/SSGNLLAR   | 286  | 71    |
| >TP53-G266/DSSGNLLGR  | 664   | >TP53-G266/DSSGNLLAR  | 227  | 437   |
| >TP53-G266/DSSGNLLGR  | 68    | >TP53-G266/DSSGNLLAR  | 79   | 11    |
| >TP53-G266ERNSFEVR    | 8679  | >TP53-G266ERNSFEVR    | 243  | 8436  |
| >TP53-G266ERNSFEVR    | 405   | >TP53-G266ERNSFEVR    | 3111 | 2706  |
| >TP53-G266ELGRNSFEVR  | 286   | >TP53-G266ELERNSFEVR  | 2344 | 2058  |
| >TP53-G266ELGRNSFEV   | 36258 | >TP53-G266ELERNSFEV   | 61   | 36197 |
| >TP53-G266ELGRNSFEV   | 40387 | >TP53-G266ELERNSFEV   | 356  | 40031 |
| >TP53-G266ELGRNSFEV   | 21797 | >TP53-G266ELERNSFEV   | 115  | 21682 |
| >TP53-G266ELGRNSFEVRV | 36580 | >TP53-G266ELERNSFEVRV | 304  | 36276 |
| >TP53-G266ELLGRNSFEV  | 26    | >TP53-G266ELLERNSFEV  | 75   | 49    |
| >TP53-G266ELLGRNSFEVR | 137   | >TP53-G266ELLERNSFEVR | 482  | 345   |
| >TP53-G266ELLGRNSFEV  | 16    | >TP53-G266ELLERNSFEV  | 21   | 5     |
| >TP53-G266ELLGRNSFEVR | 62    | >TP53-G266ELLERNSFEVR | 94   | 32    |
| >TP53-G266ELLGRNSFEV  | 47    | >TP53-G266ELLERNSFEV  | 244  | 197   |
| >TP53-G266ELLGRNSFEVR | 214   | >TP53-G266ELLERNSFEVR | 916  | 702   |
| >TP53-G266ELLGRNSFEV  | 39    | >TP53-G266ELLERNSFEV  | 52   | 13    |
| >TP53-G266ELLGRNSFEV  | 2     | >TP53-G266ELLERNSFEV  | 4    | 2     |
| >TP53-G266ELLGRNSFEVR | 3     | >TP53-G266ELLERNSFEVR | 10   | 7     |
| >TP53-G266ELLGRNSFEV  | 2     | >TP53-G266ELLERNSFEV  | 3    | 1     |
| >TP53-G266ELLGRNSFEVR | 7     | >TP53-G266ELLERNSFEVR | 19   | 12    |
| >TP53-G266ELLGRNSFEV  | 5     | >TP53-G266ELLERNSFEV  | 14   | 9     |
| >TP53-G266ELLGRNSFEVR | 9     | >TP53-G266ELLERNSFEVR | 71   | 62    |
| >TP53-G266ELLGRNSFEV  | 2     | >TP53-G266ELLERNSFEV  | 10   | 8     |
| >TP53-G266ELLGRNSFEVR | 6     | >TP53-G266ELLERNSFEVR | 146  | 140   |
| >TP53-G266ELLGRNSFEV  | 2     | >TP53-G266ELLERNSFEV  | 2    | 0     |
| >TP53-G266ELLGRNSFEVR | 2     | >TP53-G266ELLERNSFEVR | 2    | 0     |
| >TP53-G266ELLGRNSFEVR | 429   | >TP53-G266ELLERNSFEVR | 1100 | 671   |
| >TP53-G266ELLGRNSFEV  | 425   | >TP53-G266ELLERNSFEV  | 1055 | 630   |
| >TP53-G266ENLLGRNSFEV | 29    | >TP53-G266ENLLERNSFEV | 23   | 6     |
| >TP53-G266ENLLGRNSFEV | 89    | >TP53-G266ENLLERNSFEV | 81   | 8     |
| >TP53-G266ENLLGRNSFEV | 94    | >TP53-G266ENLLERNSFEV | 93   | 1     |

|                         |       |                         |      |       |
|-------------------------|-------|-------------------------|------|-------|
| >TP53-G266E NLLGRNSFEV  | 137   | >TP53-G266E NLLERNSFEV  | 131  | 6     |
| >TP53-G266E NLLGRNSFEV  | 3     | >TP53-G266E NLLERNSFEV  | 2    | 1     |
| >TP53-G266E NLLGRNSFEV  | 5     | >TP53-G266E NLLERNSFEV  | 3    | 2     |
| >TP53-G266E NLLGRNSFEV  | 7     | >TP53-G266E NLLERNSFEV  | 5    | 2     |
| >TP53-G266E NLLGRNSFEV  | 3     | >TP53-G266E NLLERNSFEV  | 2    | 1     |
| >TP53-G266E NLLGRNSFEV  | 3     | >TP53-G266E NLLERNSFEV  | 3    | 0     |
| >TP53-G266E NLLGRNSFEV  | 502   | >TP53-G266E NLLERNSFEV  | 482  | 20    |
| >TP53-G266E NLLGRNSFEV  | 109   | >TP53-G266E NLLERNSFEV  | 82   | 27    |
| >TP53-G266E NLLGRNSFEV  | 309   | >TP53-G266E NLLERNSFEV  | 244  | 65    |
| >TP53-G266E NLLGRNSFEV  | 52    | >TP53-G266E NLLERNSFEV  | 14   | 38    |
| >TP53-G266E NLLGRNSF    | 501   | >TP53-G266E NLLERNSF    | 241  | 260   |
| >TP53-G266E NLLGRNSF    | 65    | >TP53-G266E NLLERNSF    | 116  | 51    |
| >TP53-G266E NLLGRNSF    | 418   | >TP53-G266E NLLERNSF    | 163  | 255   |
| >TP53-G266E NLLGRNSFEV  | 195   | >TP53-G266E NLLERNSFEV  | 325  | 130   |
| >TP53-G266E SGNLLGRNSF  | 311   | >TP53-G266E SGNLLERNSF  | 408  | 97    |
| >TP53-G266E SSGNLLGR    | 627   | >TP53-G266E SSGNLLER    | 373  | 254   |
| >TP53-G266E SSGNLLGR    | 554   | >TP53-G266E SSGNLLER    | 243  | 311   |
| >TP53-G266E SSGNLLGRNS  | 974   | >TP53-G266E SSGNLLERNS  | 462  | 512   |
| >TP53-G266E SSGNLLGR    | 744   | >TP53-G266E SSGNLLER    | 430  | 314   |
| >TP53-G266E SSGNLLGRNS  | 245   | >TP53-G266E SSGNLLERNS  | 321  | 76    |
| >TP53-G266E SSGNLLGRNS  | 390   | >TP53-G266E SSGNLLERNS  | 625  | 235   |
| >TP53-G266E SSGNLLGRNS  | 32    | >TP53-G266E SSGNLLERNS  | 59   | 27    |
| >TP53-G266E SSGNLLGR    | 357   | >TP53-G266E SSGNLLER    | 251  | 106   |
| >TP53-G266E DSSGNLLGR   | 664   | >TP53-G266E DSSGNLLER   | 378  | 286   |
| >TP53-G266E DSSGNLLGR   | 68    | >TP53-G266E DSSGNLLER   | 42   | 26    |
| >TP53-G266F GRNSFEVR    | 2808  | >TP53-G266F RRNSFEVR    | 318  | 2490  |
| >TP53-G266F GRNSFEVRV   | 1849  | >TP53-G266F RRNSFEVRV   | 253  | 1596  |
| >TP53-G266F GRNSFEVR    | 405   | >TP53-G266F RRNSFEVR    | 62   | 343   |
| >TP53-G266F GRNSFEVRV   | 631   | >TP53-G266F RRNSFEVRV   | 74   | 557   |
| >TP53-G266F GRNSFEVRVC  | 3082  | >TP53-G266F RRNSFEVRVC  | 238  | 2844  |
| >TP53-G266F GRNSFEVRVC  | 1232  | >TP53-G266F RRNSFEVRVC  | 165  | 1067  |
| >TP53-G266F GRNSFEVR    | 14033 | >TP53-G266F RRNSFEVR    | 141  | 13892 |
| >TP53-G266F GRNSFEVRV   | 1254  | >TP53-G266F RRNSFEVRV   | 94   | 1160  |
| >TP53-G266F GRNSFEVRVC  | 4653  | >TP53-G266F RRNSFEVRVC  | 317  | 4336  |
| >TP53-G266F GRNSFEVRV   | 1117  | >TP53-G266F RRNSFEVRV   | 320  | 797   |
| >TP53-G266F GRNSFEVR    | 4432  | >TP53-G266F RRNSFEVR    | 152  | 4280  |
| >TP53-G266F LGRNSFEVR   | 286   | >TP53-G266F LRRNSFEVR   | 5684 | 5398  |
| >TP53-G266F LGRNSFEV    | 2840  | >TP53-G266F LRRNSFEV    | 91   | 2749  |
| >TP53-G266F LGRNSFEVR   | 2836  | >TP53-G266F LRRNSFEVR   | 113  | 2723  |
| >TP53-G266F LGRNSFEVRV  | 2611  | >TP53-G266F LRRNSFEVRV  | 115  | 2496  |
| >TP53-G266F TLEDSSGNLLI | 35710 | >TP53-G266F TLEDSSGNLLI | 113  | 35597 |
| >TP53-G266F LLGRNSFEV   | 26    | >TP53-G266F LLRRNSFEV   | 167  | 141   |
| >TP53-G266F LLGRNSFEVR  | 137   | >TP53-G266F LLRRNSFEVR  | 1105 | 968   |



|                        |       |                        |      |       |
|------------------------|-------|------------------------|------|-------|
| >TP53-G266F LLGRNSFEV  | 16    | >TP53-G266F LLRRNSFEV  | 58   | 42    |
| >TP53-G266F LLGRNSFEVR | 62    | >TP53-G266F LLRRNSFEVR | 271  | 209   |
| >TP53-G266F LLGRNSFEV  | 47    | >TP53-G266F LLRRNSFEV  | 19   | 28    |
| >TP53-G266F LLGRNSFEVR | 214   | >TP53-G266F LLRRNSFEVR | 82   | 132   |
| >TP53-G266F LLGRNSFEV  | 39    | >TP53-G266F LLRRNSFEV  | 139  | 100   |
| >TP53-G266F LLGRNSFEV  | 2     | >TP53-G266F LLRRNSFEV  | 4    | 2     |
| >TP53-G266F LLGRNSFEVR | 3     | >TP53-G266F LLRRNSFEVR | 9    | 6     |
| >TP53-G266F LLGRNSFEV  | 2     | >TP53-G266F LLRRNSFEV  | 4    | 2     |
| >TP53-G266F LLGRNSFEVR | 7     | >TP53-G266F LLRRNSFEVR | 43   | 36    |
| >TP53-G266F LLGRNSFEV  | 5     | >TP53-G266F LLRRNSFEV  | 13   | 8     |
| >TP53-G266F LLGRNSFEVR | 9     | >TP53-G266F LLRRNSFEVR | 67   | 58    |
| >TP53-G266F LLGRNSFEV  | 2     | >TP53-G266F LLRRNSFEV  | 9    | 7     |
| >TP53-G266F LLGRNSFEVR | 6     | >TP53-G266F LLRRNSFEVR | 193  | 187   |
| >TP53-G266F LLGRNSFEV  | 2     | >TP53-G266F LLRRNSFEV  | 2    | 0     |
| >TP53-G266F LLGRNSFEVR | 2     | >TP53-G266F LLRRNSFEVR | 2    | 0     |
| >TP53-G266F LLGRNSFEV  | 11873 | >TP53-G266F LLRRNSFEV  | 42   | 11831 |
| >TP53-G266F LLGRNSFEVR | 14331 | >TP53-G266F LLRRNSFEVR | 241  | 14090 |
| >TP53-G266F LLGRNSFEVR | 429   | >TP53-G266F LLRRNSFEVR | 84   | 345   |
| >TP53-G266F LLGRNSFEVR | 1284  | >TP53-G266F LLRRNSFEVR | 457  | 827   |
| >TP53-G266F LLGRNSFEV  | 425   | >TP53-G266F LLRRNSFEV  | 1879 | 1454  |
| >TP53-G266F NLLGRNSFEV | 29    | >TP53-G266F NLLRRNSFEV | 66   | 37    |
| >TP53-G266F NLLGRNSFEV | 89    | >TP53-G266F NLLRRNSFEV | 272  | 183   |
| >TP53-G266F NLLGRNSFEV | 94    | >TP53-G266F NLLRRNSFEV | 130  | 36    |
| >TP53-G266F NLLGRNSFEV | 137   | >TP53-G266F NLLRRNSFEV | 337  | 200   |
| >TP53-G266F NLLGRNSFEV | 3     | >TP53-G266F NLLRRNSFEV | 4    | 1     |
| >TP53-G266F NLLGRNSFEV | 5     | >TP53-G266F NLLRRNSFEV | 5    | 0     |
| >TP53-G266F NLLGRNSFEV | 7     | >TP53-G266F NLLRRNSFEV | 9    | 2     |
| >TP53-G266F NLLGRNSFEV | 3     | >TP53-G266F NLLRRNSFEV | 5    | 2     |
| >TP53-G266F NLLGRNSFEV | 3     | >TP53-G266F NLLRRNSFEV | 4    | 1     |
| >TP53-G266F NLLGRNSFEV | 502   | >TP53-G266F NLLRRNSFEV | 210  | 292   |
| >TP53-G266F NLLGRNSFEV | 109   | >TP53-G266F NLLRRNSFEV | 119  | 10    |
| >TP53-G266F NLLGRNSFEV | 309   | >TP53-G266F NLLRRNSFEV | 339  | 30    |
| >TP53-G266F NLLGRNSFEV | 52    | >TP53-G266F NLLRRNSFEV | 62   | 10    |
| >TP53-G266F NLLGRNSF   | 501   | >TP53-G266F NLLRRNSF   | 39   | 462   |
| >TP53-G266F NLLGRNSF   | 65    | >TP53-G266F NLLRRNSF   | 166  | 101   |
| >TP53-G266F NLLGRNSF   | 418   | >TP53-G266F NLLRRNSF   | 106  | 312   |
| >TP53-G266F NLLGRNSFEV | 195   | >TP53-G266F NLLRRNSFEV | 369  | 174   |
| >TP53-G266F SGNLLGRNSF | 311   | >TP53-G266F SGNLLRRNSF | 408  | 97    |
| >TP53-G266F SSGNLLGR   | 554   | >TP53-G266F SSGNLLRR   | 269  | 285   |
| >TP53-G266F SSGNLLGRNS | 245   | >TP53-G266F SSGNLLRRNS | 370  | 125   |
| >TP53-G266F SSGNLLGRNS | 390   | >TP53-G266F SSGNLLRRNS | 407  | 17    |
| >TP53-G266F SSGNLLGRNS | 32    | >TP53-G266F SSGNLLRRNS | 58   | 26    |
| >TP53-G266F SSGNLLGR   | 357   | >TP53-G266F SSGNLLRR   | 222  | 135   |

|                       |       |                       |      |       |
|-----------------------|-------|-----------------------|------|-------|
| >TP53-G266FDSSGNLLG   | 33180 | >TP53-G266FDSSGNLLR   | 114  | 33066 |
| >TP53-G266FDSSGNLLG   | 28652 | >TP53-G266FDSSGNLLR   | 22   | 28630 |
| >TP53-G266FDSSGNLLGR  | 68    | >TP53-G266FDSSGNLLRR  | 58   | 10    |
| >TP53-G266FEDSSGNLLG  | 36658 | >TP53-G266FEDSSGNLLR  | 169  | 36489 |
| >TP53-G2667GRNSFEVR   | 405   | >TP53-G2667TRNSFEVR   | 1142 | 737   |
| >TP53-G2667LGRNSFEV   | 8641  | >TP53-G2667LTRNSFEV   | 383  | 8258  |
| >TP53-G2667LGRNSFEV   | 3827  | >TP53-G2667LTRNSFEV   | 205  | 3622  |
| >TP53-G2667LGRNSFEV   | 7800  | >TP53-G2667LTRNSFEV   | 328  | 7472  |
| >TP53-G2667LGRNSFEV   | 3319  | >TP53-G2667LTRNSFEV   | 54   | 3265  |
| >TP53-G2667LGRNSFEVRV | 6207  | >TP53-G2667LTRNSFEVRV | 171  | 6036  |
| >TP53-G2667LGRNSFEV   | 820   | >TP53-G2667LTRNSFEV   | 25   | 795   |
| >TP53-G2667LGRNSFEVR  | 6129  | >TP53-G2667LTRNSFEVR  | 400  | 5729  |
| >TP53-G2667LGRNSFEVRV | 2669  | >TP53-G2667LTRNSFEVRV | 97   | 2572  |
| >TP53-G2667LGRNSFEVR  | 286   | >TP53-G2667LTRNSFEVR  | 18   | 268   |
| >TP53-G2667LGRNSFEVR  | 12847 | >TP53-G2667LTRNSFEVR  | 286  | 12561 |
| >TP53-G2667LGRNSFEVR  | 4910  | >TP53-G2667LTRNSFEVR  | 101  | 4809  |
| >TP53-G2667LGRNSFEV   | 12807 | >TP53-G2667LTRNSFEV   | 383  | 12424 |
| >TP53-G2667LGRNSFEVRV | 22519 | >TP53-G2667LTRNSFEVRV | 257  | 22262 |
| >TP53-G2667LGRNSFEV   | 13156 | >TP53-G2667LTRNSFEV   | 80   | 13076 |
| >TP53-G2667LGRNSFEVRV | 15669 | >TP53-G2667LTRNSFEVRV | 192  | 15477 |
| >TP53-G2667LGRNSFEVR  | 5777  | >TP53-G2667LTRNSFEVR  | 180  | 5597  |
| >TP53-G2667LGRNSFEVRV | 9083  | >TP53-G2667LTRNSFEVRV | 229  | 8854  |
| >TP53-G2667LLGRNSFEV  | 26    | >TP53-G2667LLTRNSFEV  | 17   | 9     |
| >TP53-G2667LLGRNSFEVR | 137   | >TP53-G2667LLTRNSFEVR | 88   | 49    |
| >TP53-G2667LLGRNSFEV  | 16    | >TP53-G2667LLTRNSFEV  | 10   | 6     |
| >TP53-G2667LLGRNSFEVR | 62    | >TP53-G2667LLTRNSFEVR | 33   | 29    |
| >TP53-G2667LLGRNSFEV  | 47    | >TP53-G2667LLTRNSFEV  | 25   | 22    |
| >TP53-G2667LLGRNSFEVR | 214   | >TP53-G2667LLTRNSFEVR | 103  | 111   |
| >TP53-G2667LLGRNSFEV  | 39    | >TP53-G2667LLTRNSFEV  | 14   | 25    |
| >TP53-G2667LLGRNSFEVR | 582   | >TP53-G2667LLTRNSFEVR | 211  | 371   |
| >TP53-G2667LLGRNSFEV  | 2     | >TP53-G2667LLTRNSFEV  | 2    | 0     |
| >TP53-G2667LLGRNSFEVR | 3     | >TP53-G2667LLTRNSFEVR | 4    | 1     |
| >TP53-G2667LLGRNSFEV  | 2     | >TP53-G2667LLTRNSFEV  | 3    | 1     |
| >TP53-G2667LLGRNSFEVR | 7     | >TP53-G2667LLTRNSFEVR | 10   | 3     |
| >TP53-G2667LLGRNSFEV  | 5     | >TP53-G2667LLTRNSFEV  | 5    | 0     |
| >TP53-G2667LLGRNSFEVR | 9     | >TP53-G2667LLTRNSFEVR | 9    | 0     |
| >TP53-G2667LLGRNSFEV  | 2     | >TP53-G2667LLTRNSFEV  | 3    | 1     |
| >TP53-G2667LLGRNSFEVR | 6     | >TP53-G2667LLTRNSFEVR | 15   | 9     |
| >TP53-G2667LLGRNSFEV  | 2     | >TP53-G2667LLTRNSFEV  | 1    | 1     |
| >TP53-G2667LLGRNSFEVR | 2     | >TP53-G2667LLTRNSFEVR | 2    | 0     |
| >TP53-G2667LLGRNSFEVR | 429   | >TP53-G2667LLTRNSFEVR | 233  | 196   |
| >TP53-G2667LLGRNSFEV  | 425   | >TP53-G2667LLTRNSFEV  | 476  | 51    |
| >TP53-G2667NLLGRNSFEV | 29    | >TP53-G2667NLLTRNSFEV | 37   | 8     |

|                        |       |                        |      |       |
|------------------------|-------|------------------------|------|-------|
| >TP53-G2661NLLGRNSFEV  | 89    | >TP53-G2661NLLTRNSFEV  | 98   | 9     |
| >TP53-G2661NLLGRNSFEV  | 94    | >TP53-G2661NLLTRNSFEV  | 108  | 14    |
| >TP53-G2661NLLGRNSFEV  | 137   | >TP53-G2661NLLTRNSFEV  | 163  | 26    |
| >TP53-G2661NLLGRNSFEV  | 3     | >TP53-G2661NLLTRNSFEV  | 5    | 2     |
| >TP53-G2661NLLGRNSFEV  | 5     | >TP53-G2661NLLTRNSFEV  | 5    | 0     |
| >TP53-G2661NLLGRNSFEV  | 7     | >TP53-G2661NLLTRNSFEV  | 9    | 2     |
| >TP53-G2661NLLGRNSFEV  | 3     | >TP53-G2661NLLTRNSFEV  | 4    | 1     |
| >TP53-G2661NLLGRNSFEV  | 3     | >TP53-G2661NLLTRNSFEV  | 4    | 1     |
| >TP53-G2661NLLGRNSFEV  | 502   | >TP53-G2661NLLTRNSFEV  | 328  | 174   |
| >TP53-G2661NLLGRNSFEV  | 109   | >TP53-G2661NLLTRNSFEV  | 159  | 50    |
| >TP53-G2661NLLGRNSFEV  | 309   | >TP53-G2661NLLTRNSFEV  | 273  | 36    |
| >TP53-G2661NLLGRNSFEV  | 52    | >TP53-G2661NLLTRNSFEV  | 58   | 6     |
| >TP53-G2661NLLGRNSF    | 501   | >TP53-G2661NLLTRNSF    | 134  | 367   |
| >TP53-G2661NLLGRNSF    | 65    | >TP53-G2661NLLTRNSF    | 158  | 93    |
| >TP53-G2661NLLGRNSF    | 418   | >TP53-G2661NLLTRNSF    | 79   | 339   |
| >TP53-G2661NLLGRNSFEV  | 195   | >TP53-G2661NLLTRNSFEV  | 162  | 33    |
| >TP53-G2661GNLLGRNSF   | 1249  | >TP53-G2661GNLLTRNSF   | 477  | 772   |
| >TP53-G2661GNLLGRNSF   | 525   | >TP53-G2661GNLLTRNSF   | 467  | 58    |
| >TP53-G2661SGNLLGRNSF  | 311   | >TP53-G2661SGNLLTRNSF  | 388  | 77    |
| >TP53-G2661SSGNLLGR    | 554   | >TP53-G2661SSGNLLTR    | 176  | 378   |
| >TP53-G2661SSGNLLGRNS  | 974   | >TP53-G2661SSGNLLTRNS  | 355  | 619   |
| >TP53-G2661SSGNLLGRNS  | 245   | >TP53-G2661SSGNLLTRNS  | 217  | 28    |
| >TP53-G2661SSGNLLGRNS  | 701   | >TP53-G2661SSGNLLTRNS  | 252  | 449   |
| >TP53-G2661SSGNLLGRNS  | 390   | >TP53-G2661SSGNLLTRNS  | 277  | 113   |
| >TP53-G2661SSGNLLGRNS  | 32    | >TP53-G2661SSGNLLTRNS  | 24   | 8     |
| >TP53-G2661SSGNLLGR    | 357   | >TP53-G2661SSGNLLTR    | 279  | 78    |
| >TP53-G2661DSSGNLLGR   | 664   | >TP53-G2661DSSGNLLTR   | 259  | 405   |
| >TP53-G2661DSSGNLLGR   | 68    | >TP53-G2661DSSGNLLTR   | 47   | 21    |
| >TP53-G266\GRNSFEVR    | 405   | >TP53-G266\VRNSFEVR    | 1007 | 602   |
| >TP53-G266\LGRNSFEV    | 8641  | >TP53-G266\LVRNSFEV    | 121  | 8520  |
| >TP53-G266\LGRNSFEV    | 3827  | >TP53-G266\LVRNSFEV    | 54   | 3773  |
| >TP53-G266\LGRNSFEV    | 7800  | >TP53-G266\LVRNSFEV    | 234  | 7566  |
| >TP53-G266\LGRNSFEV    | 3319  | >TP53-G266\LVRNSFEV    | 8    | 3311  |
| >TP53-G266\LGRNSFEVRV  | 6207  | >TP53-G266\LVRNSFEVRV  | 17   | 6190  |
| >TP53-G266\LGRNSFEV    | 820   | >TP53-G266\LVRNSFEV    | 36   | 784   |
| >TP53-G266\LGRNSFEVRV  | 2669  | >TP53-G266\LVRNSFEVRV  | 160  | 2509  |
| >TP53-G266\LGRNSFEVR   | 286   | >TP53-G266\LVRNSFEVR   | 27   | 259   |
| >TP53-G266\LGRNSFEVR   | 4910  | >TP53-G266\LVRNSFEVR   | 283  | 4627  |
| >TP53-G266\TLEDSSGNLL\ | 22393 | >TP53-G266\TLEDSSGNLL\ | 262  | 22131 |
| >TP53-G266\TLEDSSGNLL\ | 10126 | >TP53-G266\TLEDSSGNLL\ | 49   | 10077 |
| >TP53-G266\TLEDSSGNLL\ | 18799 | >TP53-G266\TLEDSSGNLL\ | 66   | 18733 |
| >TP53-G266\TLEDSSGNLL\ | 25673 | >TP53-G266\TLEDSSGNLL\ | 311  | 25362 |
| >TP53-G266\TLEDSSGNLL\ | 19086 | >TP53-G266\TLEDSSGNLL\ | 80   | 19006 |

|                        |       |                        |     |       |
|------------------------|-------|------------------------|-----|-------|
| >TP53-G266\TLEDSSGNLL\ | 23407 | >TP53-G266\TLEDSSGNLL\ | 74  | 23333 |
| >TP53-G266\TLEDSSGNLL\ | 21639 | >TP53-G266\TLEDSSGNLL\ | 102 | 21537 |
| >TP53-G266\TLEDSSGNLL\ | 11553 | >TP53-G266\TLEDSSGNLL\ | 3   | 11550 |
| >TP53-G266\LLGRNSFEV   | 26    | >TP53-G266\LLVRNSFEV   | 17  | 9     |
| >TP53-G266\LLGRNSFEVR' | 137   | >TP53-G266\LLVRNSFEVR' | 75  | 62    |
| >TP53-G266\LLGRNSFEV   | 16    | >TP53-G266\LLVRNSFEV   | 8   | 8     |
| >TP53-G266\LLGRNSFEVR' | 62    | >TP53-G266\LLVRNSFEVR' | 30  | 32    |
| >TP53-G266\LLGRNSFEV   | 47    | >TP53-G266\LLVRNSFEV   | 13  | 34    |
| >TP53-G266\LLGRNSFEVR' | 214   | >TP53-G266\LLVRNSFEVR' | 45  | 169   |
| >TP53-G266\LLGRNSFEV   | 39    | >TP53-G266\LLVRNSFEV   | 8   | 31    |
| >TP53-G266\LLGRNSFEVR' | 582   | >TP53-G266\LLVRNSFEVR' | 80  | 502   |
| >TP53-G266\LLGRNSFEV   | 2     | >TP53-G266\LLVRNSFEV   | 2   | 0     |
| >TP53-G266\LLGRNSFEVR' | 3     | >TP53-G266\LLVRNSFEVR' | 3   | 0     |
| >TP53-G266\LLGRNSFEV   | 2     | >TP53-G266\LLVRNSFEV   | 2   | 0     |
| >TP53-G266\LLGRNSFEVR' | 7     | >TP53-G266\LLVRNSFEVR' | 8   | 1     |
| >TP53-G266\LLGRNSFEV   | 5     | >TP53-G266\LLVRNSFEV   | 6   | 1     |
| >TP53-G266\LLGRNSFEVR' | 9     | >TP53-G266\LLVRNSFEVR' | 12  | 3     |
| >TP53-G266\LLGRNSFEV   | 2     | >TP53-G266\LLVRNSFEV   | 3   | 1     |
| >TP53-G266\LLGRNSFEVR' | 6     | >TP53-G266\LLVRNSFEVR' | 17  | 11    |
| >TP53-G266\LLGRNSFEV   | 2     | >TP53-G266\LLVRNSFEV   | 2   | 0     |
| >TP53-G266\LLGRNSFEVR' | 2     | >TP53-G266\LLVRNSFEVR' | 2   | 0     |
| >TP53-G266\LLGRNSFEVR  | 429   | >TP53-G266\LLVRNSFEVR  | 273 | 156   |
| >TP53-G266\LLGRNSFEV   | 3452  | >TP53-G266\LLVRNSFEV   | 341 | 3111  |
| >TP53-G266\LLGRNSFEV   | 425   | >TP53-G266\LLVRNSFEV   | 203 | 222   |
| >TP53-G266\NLLGRNSFEV  | 29    | >TP53-G266\NLLVRNSFEV  | 50  | 21    |
| >TP53-G266\NLLGRNSFEV  | 89    | >TP53-G266\NLLVRNSFEV  | 217 | 128   |
| >TP53-G266\NLLGRNSFEV  | 94    | >TP53-G266\NLLVRNSFEV  | 156 | 62    |
| >TP53-G266\NLLGRNSFEV  | 137   | >TP53-G266\NLLVRNSFEV  | 181 | 44    |
| >TP53-G266\NLLGRNSFEV  | 3     | >TP53-G266\NLLVRNSFEV  | 7   | 4     |
| >TP53-G266\NLLGRNSFEV  | 5     | >TP53-G266\NLLVRNSFEV  | 7   | 2     |
| >TP53-G266\NLLGRNSFEV  | 7     | >TP53-G266\NLLVRNSFEV  | 9   | 2     |
| >TP53-G266\NLLGRNSFEV  | 3     | >TP53-G266\NLLVRNSFEV  | 4   | 1     |
| >TP53-G266\NLLGRNSFEV  | 3     | >TP53-G266\NLLVRNSFEV  | 5   | 2     |
| >TP53-G266\NLLGRNSFEV  | 502   | >TP53-G266\NLLVRNSFEV  | 249 | 253   |
| >TP53-G266\NLLGRNSFEV  | 109   | >TP53-G266\NLLVRNSFEV  | 92  | 17    |
| >TP53-G266\NLLGRNSFEV  | 309   | >TP53-G266\NLLVRNSFEV  | 307 | 2     |
| >TP53-G266\NLLGRNSFEV  | 52    | >TP53-G266\NLLVRNSFEV  | 62  | 10    |
| >TP53-G266\NLLGRNSF    | 501   | >TP53-G266\NLLVRNSF    | 162 | 339   |
| >TP53-G266\NLLGRNSF    | 65    | >TP53-G266\NLLVRNSF    | 138 | 73    |
| >TP53-G266\NLLGRNSF    | 418   | >TP53-G266\NLLVRNSF    | 163 | 255   |
| >TP53-G266\NLLGRNSFEV  | 195   | >TP53-G266\NLLVRNSFEV  | 422 | 227   |
| >TP53-G266\GNLLGRNSF   | 525   | >TP53-G266\GNLLVRNSF   | 440 | 85    |
| >TP53-G266\SGNLLGRNSF  | 311   | >TP53-G266\SGNLLVRNSF  | 368 | 57    |

|                       |       |                       |      |       |
|-----------------------|-------|-----------------------|------|-------|
| >TP53-G266\SSGNLLGR   | 554   | >TP53-G266\SSGNLLVR   | 263  | 291   |
| >TP53-G266\SSGNLLGRNS | 974   | >TP53-G266\SSGNLLVRNS | 205  | 769   |
| >TP53-G266\SSGNLLGRNS | 245   | >TP53-G266\SSGNLLVRNS | 267  | 22    |
| >TP53-G266\SSGNLLGRNS | 701   | >TP53-G266\SSGNLLVRNS | 370  | 331   |
| >TP53-G266\SSGNLLGRNS | 390   | >TP53-G266\SSGNLLVRNS | 504  | 114   |
| >TP53-G266\SSGNLLGRNS | 32    | >TP53-G266\SSGNLLVRNS | 42   | 10    |
| >TP53-G266\SSGNLLGR   | 357   | >TP53-G266\SSGNLLVR   | 352  | 5     |
| >TP53-G266\DSSGNLLGR  | 68    | >TP53-G266\DSSGNLLVR  | 101  | 33    |
| >TP53-G266\DSSGNLLG   | 15878 | >TP53-G266\DSSGNLLV   | 306  | 15572 |
| >TP53-G266\EDSSGNLLG  | 27962 | >TP53-G266\EDSSGNLLV  | 317  | 27645 |
| >TP53-G266\LEDSSGNLLG | 25664 | >TP53-G266\LEDSSGNLLV | 222  | 25442 |
| >TP53-G279\GRDRRTEEN  | 446   | >TP53-G279\ERDRRTEEN  | 6363 | 5917  |
| >TP53-G279\CACPGRDRR  | 132   | >TP53-G279\CACPERDRR  | 155  | 23    |
| >TP53-G279\RVCACPCR   | 367   | >TP53-G279\RVCACPER   | 253  | 114   |
| >TP53-G279\RVCACPCRDI | 435   | >TP53-G279\RVCACPERDF | 470  | 35    |
| >TP53-G279\RVCACPCR   | 40    | >TP53-G279\RVCACPER   | 25   | 15    |
| >TP53-G279\RVCACPCRDI | 37    | >TP53-G279\RVCACPERDF | 61   | 24    |
| >TP53-G279\RVCACPCRDI | 33    | >TP53-G279\RVCACPERDF | 43   | 10    |
| >TP53-G279\RVCACPCR   | 481   | >TP53-G279\RVCACPER   | 287  | 194   |
| >TP53-G279\RVCACPCRDI | 584   | >TP53-G279\RVCACPERDF | 437  | 147   |
| >TP53-G279\RVCACPCRDI | 297   | >TP53-G279\RVCACPERDF | 428  | 131   |
| >TP53-G279\RVCACPCR   | 66    | >TP53-G279\RVCACPER   | 117  | 51    |
| >TP53-G279\RVCACPCRDI | 255   | >TP53-G279\RVCACPERDF | 206  | 49    |
| >TP53-G279\RVCACPCRDI | 109   | >TP53-G279\RVCACPERDF | 70   | 39    |
| >TP53-G279\EVRVCACPGF | 329   | >TP53-G279\EVRVCACPER | 263  | 66    |
| >TP53-G279\EVRVCACPGF | 70    | >TP53-G279\EVRVCACPER | 51   | 19    |
| >TP53-G279\FEVRVCACPC | 370   | >TP53-G279\FEVRVCACPE | 277  | 93    |
| >TP53-G279\GRDRRTEE   | 5114  | >TP53-G279\RRDRRTEE   | 51   | 5063  |
| >TP53-G279\GRDRRTEEN  | 6004  | >TP53-G279\RRDRRTEEN  | 210  | 5794  |
| >TP53-G279\GRDRRTEEN  | 1630  | >TP53-G279\RRDRRTEEN  | 136  | 1494  |
| >TP53-G279\GRDRRTEEN  | 446   | >TP53-G279\RRDRRTEEN  | 200  | 246   |
| >TP53-G279\SFEVRVCACP | 20484 | >TP53-G279\SFEVRVCACP | 34   | 20450 |
| >TP53-G279\SFEVRVCACP | 35643 | >TP53-G279\SFEVRVCACP | 163  | 35480 |
| >TP53-G279\SFEVRVCACP | 29821 | >TP53-G279\SFEVRVCACP | 46   | 29775 |
| >TP53-G279\CACPGRDRR  | 921   | >TP53-G279\CACPRRDRR  | 308  | 613   |
| >TP53-G279\CACPGRDR   | 1363  | >TP53-G279\CACPRRDR   | 343  | 1020  |
| >TP53-G279\CACPGRDRR  | 545   | >TP53-G279\CACPRRDRR  | 199  | 346   |
| >TP53-G279\CACPGRDRR  | 132   | >TP53-G279\CACPRRDRR  | 130  | 2     |
| >TP53-G279\RVCACPCR   | 367   | >TP53-G279\RVCACPRR   | 354  | 13    |
| >TP53-G279\RVCACPCRDI | 435   | >TP53-G279\RVCACPRRDF | 469  | 34    |
| >TP53-G279\RVCACPCR   | 40    | >TP53-G279\RVCACPRR   | 28   | 12    |
| >TP53-G279\RVCACPCRDI | 37    | >TP53-G279\RVCACPRRDF | 12   | 25    |
| >TP53-G279\RVCACPCRDI | 33    | >TP53-G279\RVCACPRRDF | 25   | 8     |

|                        |       |                        |      |       |
|------------------------|-------|------------------------|------|-------|
| >TP53-G279F RVCACPGR   | 481   | >TP53-G279F RVCACPRR   | 556  | 75    |
| >TP53-G279F RVCACPGRDI | 297   | >TP53-G279F RVCACPRRDF | 294  | 3     |
| >TP53-G279F RVCACPGR   | 66    | >TP53-G279F RVCACPRR   | 76   | 10    |
| >TP53-G279F RVCACPGRDI | 255   | >TP53-G279F RVCACPRRDF | 153  | 102   |
| >TP53-G279F RVCACPGRDI | 109   | >TP53-G279F RVCACPRRDF | 72   | 37    |
| >TP53-G279F VRVCACPG   | 33690 | >TP53-G279F VRVCACPR   | 300  | 33390 |
| >TP53-G279F EVRVCACPG  | 23001 | >TP53-G279F EVRVCACPR  | 251  | 22750 |
| >TP53-G279F EVRVCACPG  | 19612 | >TP53-G279F EVRVCACPR  | 21   | 19591 |
| >TP53-G279F EVRVCACPGF | 329   | >TP53-G279F EVRVCACPRF | 402  | 73    |
| >TP53-G279F EVRVCACPG  | 30329 | >TP53-G279F EVRVCACPR  | 25   | 30304 |
| >TP53-G279F EVRVCACPGF | 70    | >TP53-G279F EVRVCACPRF | 93   | 23    |
| >TP53-G279F EVRVCACPG  | 33076 | >TP53-G279F EVRVCACPR  | 92   | 32984 |
| >TP53-G279F FEVRVCACPC | 370   | >TP53-G279F FEVRVCACPR | 336  | 34    |
| >TP53-G279\ GRDRRTEEN  | 446   | >TP53-G279\ VRDRRTEEN  | 1680 | 1234  |
| >TP53-G279\ CACPGRDRR  | 921   | >TP53-G279\ CACPVRDRR  | 356  | 565   |
| >TP53-G279\ CACPGRDRR  | 545   | >TP53-G279\ CACPVRDRR  | 241  | 304   |
| >TP53-G279\ CACPGRDR   | 824   | >TP53-G279\ CACPVRDR   | 227  | 597   |
| >TP53-G279\ CACPGRDRR  | 132   | >TP53-G279\ CACPVRDRR  | 33   | 99    |
| >TP53-G279\ RVCACPGR   | 367   | >TP53-G279\ RVCACPVR   | 285  | 82    |
| >TP53-G279\ RVCACPGRDI | 435   | >TP53-G279\ RVCACPVRDF | 205  | 230   |
| >TP53-G279\ RVCACPGR   | 40    | >TP53-G279\ RVCACPVR   | 27   | 13    |
| >TP53-G279\ RVCACPGRDI | 37    | >TP53-G279\ RVCACPVRDF | 27   | 10    |
| >TP53-G279\ RVCACPGRDI | 33    | >TP53-G279\ RVCACPVRDF | 21   | 12    |
| >TP53-G279\ RVCACPGR   | 481   | >TP53-G279\ RVCACPVR   | 444  | 37    |
| >TP53-G279\ RVCACPGRDI | 584   | >TP53-G279\ RVCACPVRDF | 239  | 345   |
| >TP53-G279\ RVCACPGRDI | 297   | >TP53-G279\ RVCACPVRDF | 111  | 186   |
| >TP53-G279\ RVCACPGR   | 66    | >TP53-G279\ RVCACPVR   | 58   | 8     |
| >TP53-G279\ RVCACPGRDI | 255   | >TP53-G279\ RVCACPVRDF | 101  | 154   |
| >TP53-G279\ RVCACPGRDI | 109   | >TP53-G279\ RVCACPVRDF | 66   | 43    |
| >TP53-G279\ VRVCACPG   | 6273  | >TP53-G279\ VRVCACPV   | 343  | 5930  |
| >TP53-G279\ EVRVCACPGF | 329   | >TP53-G279\ EVRVCACPVF | 560  | 231   |
| >TP53-G279\ EVRVCACPGF | 70    | >TP53-G279\ EVRVCACPVF | 98   | 28    |
| >TP53-G279\ EVRVCACPG  | 16572 | >TP53-G279\ EVRVCACPV  | 69   | 16503 |
| >TP53-G279\ EVRVCACPG  | 18198 | >TP53-G279\ EVRVCACPV  | 120  | 18078 |
| >TP53-G279\ FEVRVCACPC | 1728  | >TP53-G279\ FEVRVCACPV | 15   | 1713  |
| >TP53-G279\ FEVRVCACPC | 370   | >TP53-G279\ FEVRVCACPV | 430  | 60    |
| >TP53-G279\ GRDRRTEEN  | 446   | >TP53-G279\ WRDRRTEEEI | 559  | 113   |
| >TP53-G279\ CACPGRDRR  | 921   | >TP53-G279\ CACPWRDRR  | 252  | 669   |
| >TP53-G279\ CACPGRDR   | 1363  | >TP53-G279\ CACPWRDR   | 257  | 1106  |
| >TP53-G279\ CACPGRDRR  | 545   | >TP53-G279\ CACPWRDRR  | 112  | 433   |
| >TP53-G279\ CACPGRDRR  | 132   | >TP53-G279\ CACPWRDRR  | 109  | 23    |
| >TP53-G279\ RVCACPGR   | 367   | >TP53-G279\ RVCACPWR   | 221  | 146   |
| >TP53-G279\ RVCACPGRDI | 435   | >TP53-G279\ RVCACPWRD  | 143  | 292   |

|                       |       |                       |     |       |
|-----------------------|-------|-----------------------|-----|-------|
| >TP53-G279\RVCACPGR   | 40    | >TP53-G279\RVCACPWR   | 20  | 20    |
| >TP53-G279\RVCACPGRDI | 37    | >TP53-G279\RVCACPWRD  | 22  | 15    |
| >TP53-G279\RVCACPGRDI | 33    | >TP53-G279\RVCACPWRD  | 19  | 14    |
| >TP53-G279\RVCACPGR   | 481   | >TP53-G279\RVCACPWR   | 201 | 280   |
| >TP53-G279\RVCACPGRDI | 584   | >TP53-G279\RVCACPWRD  | 406 | 178   |
| >TP53-G279\RVCACPGRDI | 297   | >TP53-G279\RVCACPWRD  | 122 | 175   |
| >TP53-G279\RVCACPGR   | 66    | >TP53-G279\RVCACPWR   | 53  | 13    |
| >TP53-G279\RVCACPGRDI | 255   | >TP53-G279\RVCACPWRD  | 76  | 179   |
| >TP53-G279\RVCACPGRDI | 109   | >TP53-G279\RVCACPWRD  | 45  | 64    |
| >TP53-G279\VRVCACPG   | 27488 | >TP53-G279\VRVCACPW   | 51  | 27437 |
| >TP53-G279\EVRVCACPGF | 673   | >TP53-G279\EVRVCACPW  | 253 | 420   |
| >TP53-G279\EVRVCACPGF | 329   | >TP53-G279\EVRVCACPW  | 153 | 176   |
| >TP53-G279\EVRVCACPGF | 70    | >TP53-G279\EVRVCACPW  | 33  | 37    |
| >TP53-G279\EVRVCACPG  | 19762 | >TP53-G279\EVRVCACPW  | 187 | 19575 |
| >TP53-G279\FEVRVCACPC | 1728  | >TP53-G279\FEVRVCACPV | 75  | 1653  |
| >TP53-G279\FEVRVCACPC | 370   | >TP53-G279\FEVRVCACPV | 177 | 193   |
| >TP53-G279\FEVRVCACPC | 18031 | >TP53-G279\FEVRVCACPV | 449 | 17582 |
| >TP53-G279\FEVRVCACPC | 6116  | >TP53-G279\FEVRVCACPV | 314 | 5802  |
| >TP53-G279\FEVRVCACPC | 26788 | >TP53-G279\FEVRVCACPV | 79  | 26709 |
| >TP53-G293\KGEPHHEL   | 8803  | >TP53-G293\KREPHHEL   | 29  | 8774  |
| >TP53-G293\KGEPHHEL   | 10699 | >TP53-G293\KREPHHEL   | 138 | 10561 |
| >TP53-G293\RTEEENLRKK | 21126 | >TP53-G293\RTEEENLRKK | 230 | 20896 |
| >TP53-G293\RTEEENLRKK | 35343 | >TP53-G293\RTEEENLRKK | 273 | 35070 |
| >TP53-G293\KKGEPHHEL  | 15624 | >TP53-G293\KKREPHHEL  | 316 | 15308 |
| >TP53-G293\KKGEPHHEL  | 167   | >TP53-G293\KKREPHHEL  | 20  | 147   |
| >TP53-G293\KKGEPHHELP | 2691  | >TP53-G293\KKREPHHELP | 285 | 2406  |
| >TP53-G293\RKKGEPHH   | 928   | >TP53-G293\RKKREPHH   | 279 | 649   |
| >TP53-G293\RKKGEPHHEL | 62    | >TP53-G293\RKKREPHHEL | 19  | 43    |
| >TP53-G293\RKKGEPHHEL | 682   | >TP53-G293\RKKREPHHEL | 135 | 547   |
| >TP53-G293\LRKKGEPHHE | 5677  | >TP53-G293\LRKKREPHHE | 317 | 5360  |
| >TP53-G293\LRKKGEPHHE | 405   | >TP53-G293\LRKKREPHHE | 507 | 102   |
| >TP53-G293\LRKKGEPHHE | 321   | >TP53-G293\LRKKREPHHE | 179 | 142   |
| >TP53-G293\KGEPHHEL   | 19368 | >TP53-G293\KVEPHHEL   | 464 | 18904 |
| >TP53-G293\KGEPHHEL   | 3378  | >TP53-G293\KVEPHHEL   | 489 | 2889  |
| >TP53-G293\RTEEENLRKK | 7736  | >TP53-G293\RTEEENLRKK | 432 | 7304  |
| >TP53-G293\KKGEPHHEL  | 167   | >TP53-G293\KKVEPHHEL  | 32  | 135   |
| >TP53-G293\RKKGEPHH   | 928   | >TP53-G293\RKKVEPHH   | 381 | 547   |
| >TP53-G293\RKKGEPHHEL | 62    | >TP53-G293\RKKVEPHHEL | 25  | 37    |
| >TP53-G293\RKKGEPHHEL | 682   | >TP53-G293\RKKVEPHHEL | 269 | 413   |
| >TP53-G293\LRKKGEPHHE | 405   | >TP53-G293\LRKKVEPHHE | 484 | 79    |
| >TP53-G293\LRKKGEPHHE | 321   | >TP53-G293\LRKKVEPHHE | 248 | 73    |
| >TP53-G293\EENLRKKG   | 2483  | >TP53-G293\EENLRKKV   | 56  | 2427  |
| >TP53-G293\EENLRKKG   | 10827 | >TP53-G293\EENLRKKV   | 40  | 10787 |

|                        |       |                        |      |       |
|------------------------|-------|------------------------|------|-------|
| >TP53-G293\ EEENLRKKG  | 7336  | >TP53-G293\ EEENLRKKV  | 450  | 6886  |
| >TP53-G293\ TEEENLRKKG | 10292 | >TP53-G293\ TEEENLRKKV | 37   | 10255 |
| >TP53-G293\ TEEENLRKKG | 23469 | >TP53-G293\ TEEENLRKKV | 175  | 23294 |
| >TP53-G293\ KGEPHHEL   | 20450 | >TP53-G293\ KWEPHHEL   | 136  | 20314 |
| >TP53-G293\ KGEPHHEL   | 21211 | >TP53-G293\ KWEPHHEL   | 59   | 21152 |
| >TP53-G293\ KGEPHHELP  | 27211 | >TP53-G293\ KWEPHHELP  | 170  | 27041 |
| >TP53-G293\ KGEPHHELP  | 30851 | >TP53-G293\ KWEPHHELP  | 226  | 30625 |
| >TP53-G293\ RTEENLRKK  | 7736  | >TP53-G293\ RTEENLRKK' | 6    | 7730  |
| >TP53-G293\ RTEENLRKK  | 22747 | >TP53-G293\ RTEENLRKK' | 63   | 22684 |
| >TP53-G293\ RTEENLRKK  | 22325 | >TP53-G293\ RTEENLRKK' | 175  | 22150 |
| >TP53-G293\ KKGEPHHEL  | 2128  | >TP53-G293\ KKWEPHHEL  | 96   | 2032  |
| >TP53-G293\ KKGEPHHEL  | 167   | >TP53-G293\ KKWEPHHEL  | 11   | 156   |
| >TP53-G293\ KKGEPHHELP | 2691  | >TP53-G293\ KKWEPHHEL  | 191  | 2500  |
| >TP53-G293\ KKGEPHHEL  | 9722  | >TP53-G293\ KKWEPHHEL  | 241  | 9481  |
| >TP53-G293\ KKGEPHHEL  | 4258  | >TP53-G293\ KKWEPHHEL  | 287  | 3971  |
| >TP53-G293\ RKKGEPHHEL | 62    | >TP53-G293\ RKKWEPHHE  | 58   | 4     |
| >TP53-G293\ RKKGEPHHEL | 740   | >TP53-G293\ RKKWEPHHE  | 254  | 486   |
| >TP53-G293\ RKKGEPHHEL | 682   | >TP53-G293\ RKKWEPHHE  | 130  | 552   |
| >TP53-G293\ RKKGEPHHEL | 1048  | >TP53-G293\ RKKWEPHHE  | 320  | 728   |
| >TP53-G293\ LRKKGEPHHE | 405   | >TP53-G293\ LRKKWEPHH  | 406  | 1     |
| >TP53-G293\ LRKKGEPHHE | 824   | >TP53-G293\ LRKKWEPHH  | 444  | 380   |
| >TP53-G293\ LRKKGEPHHE | 321   | >TP53-G293\ LRKKWEPHH  | 285  | 36    |
| >TP53-G293\ EENLRKKG   | 2483  | >TP53-G293\ EENLRKKW   | 431  | 2052  |
| >TP53-G293\ EENLRKKG   | 8097  | >TP53-G293\ EENLRKKW   | 124  | 7973  |
| >TP53-G293\ EENLRKKG   | 9667  | >TP53-G293\ EENLRKKW   | 107  | 9560  |
| >TP53-G293\ EEENLRKKG  | 12914 | >TP53-G293\ EEENLRKKW  | 327  | 12587 |
| >TP53-G293\ EEENLRKKG  | 11444 | >TP53-G293\ EEENLRKKW  | 55   | 11389 |
| >TP53-G293\ TEEENLRKKG | 10292 | >TP53-G293\ TEEENLRKKW | 418  | 9874  |
| >TP53-G293\ TEEENLRKKG | 12154 | >TP53-G293\ TEEENLRKKW | 108  | 12046 |
| >TP53-G302\ PPGSTKRAL  | 44    | >TP53-G302\ PPESTKRAL  | 57   | 13    |
| >TP53-G302\ LPPGSTKRAL | 296   | >TP53-G302\ LPPESTKRAL | 1270 | 974   |
| >TP53-G302\ LPPGSTKRAL | 75    | >TP53-G302\ LPPESTKRAL | 158  | 83    |
| >TP53-G302\ LPPGSTKRA  | 99    | >TP53-G302\ LPPESTKRA  | 204  | 105   |
| >TP53-G302\ ELPPGSTKRA | 98    | >TP53-G302\ ELPPESTKRA | 206  | 108   |
| >TP53-G302\ ELPPGSTKRA | 151   | >TP53-G302\ ELPPESTKRA | 282  | 131   |
| >TP53-G302\ ELPPGSTKR  | 321   | >TP53-G302\ ELPPESTKR  | 349  | 28    |
| >TP53-G302\ ELPPGSTKR  | 1696  | >TP53-G302\ ELPPESTKR  | 414  | 1282  |
| >TP53-G302\ HELPPGSTKR | 250   | >TP53-G302\ HELPPESTKR | 261  | 11    |
| >TP53-G302\ HELPPGSTKR | 437   | >TP53-G302\ HELPPESTKR | 274  | 163   |
| >TP53-G325\ GEYFTLQI   | 102   | >TP53-G325\ AEYFTLQI   | 58   | 44    |
| >TP53-G325\ GEYFTLQI   | 44    | >TP53-G325\ AEYFTLQI   | 39   | 5     |
| >TP53-G325\ GEYFTLQI   | 43    | >TP53-G325\ AEYFTLQI   | 35   | 8     |
| >TP53-G325\ GEYFTLQI   | 539   | >TP53-G325\ AEYFTLQI   | 303  | 236   |



|                       |       |                       |     |       |
|-----------------------|-------|-----------------------|-----|-------|
| >TP53-G325/GEYFTLQIRG | 6400  | >TP53-G325/AEYFTLQIRG | 362 | 6038  |
| >TP53-G325/GEYFTLQI   | 744   | >TP53-G325/AEYFTLQI   | 203 | 541   |
| >TP53-G325/GEYFTLQIRG | 1512  | >TP53-G325/AEYFTLQIRG | 276 | 1236  |
| >TP53-G325/GEYFTLQI   | 807   | >TP53-G325/AEYFTLQI   | 80  | 727   |
| >TP53-G325/GEYFTLQIR  | 3942  | >TP53-G325/AEYFTLQIR  | 432 | 3510  |
| >TP53-G325/GEYFTLQIRG | 916   | >TP53-G325/AEYFTLQIRG | 86  | 830   |
| >TP53-G325/GEYFTLQI   | 11    | >TP53-G325/AEYFTLQI   | 16  | 5     |
| >TP53-G325/GEYFTLQIR  | 190   | >TP53-G325/AEYFTLQIR  | 257 | 67    |
| >TP53-G325/DGEYFTLQIR | 3222  | >TP53-G325/DAEYFTLQIR | 490 | 2732  |
| >TP53-G325/DGEYFTLQIR | 17428 | >TP53-G325/DAEYFTLQIR | 243 | 17185 |
| >TP53-G325/LDGEYFTLQI | 87    | >TP53-G325/LDAEYFTLQI | 26  | 61    |
| >TP53-G325/LDGEYFTL   | 344   | >TP53-G325/LDAEYFTL   | 105 | 239   |
| >TP53-G325/LDGEYFTLQI | 94    | >TP53-G325/LDAEYFTLQI | 40  | 54    |
| >TP53-G325/PLDGEYFTL  | 249   | >TP53-G325/PLDAEYFTL  | 229 | 20    |
| >TP53-G325/PLDGEYFTL  | 22    | >TP53-G325/PLDAEYFTL  | 33  | 11    |
| >TP53-G325/PLDGEYFTLQ | 68    | >TP53-G325/PLDAEYFTLQ | 101 | 33    |
| >TP53-G325/PLDGEYFTL  | 224   | >TP53-G325/PLDAEYFTL  | 139 | 85    |
| >TP53-G325/PLDGEYFTL  | 22    | >TP53-G325/PLDAEYFTL  | 31  | 9     |
| >TP53-G325/PLDGEYFTLQ | 140   | >TP53-G325/PLDAEYFTLQ | 205 | 65    |
| >TP53-G325/PLDGEYFTL  | 23    | >TP53-G325/PLDAEYFTL  | 78  | 55    |
| >TP53-G325/PLDGEYFTLQ | 158   | >TP53-G325/PLDAEYFTLQ | 401 | 243   |
| >TP53-G325/PLDGEYFTL  | 11    | >TP53-G325/PLDAEYFTL  | 28  | 17    |
| >TP53-G325/PLDGEYFTLQ | 111   | >TP53-G325/PLDAEYFTLQ | 274 | 163   |
| >TP53-G325/KPLDGEYF   | 296   | >TP53-G325/KPLDAEYF   | 49  | 247   |
| >TP53-G325/KPLDGEYFTL | 212   | >TP53-G325/KPLDAEYFTL | 33  | 179   |
| >TP53-G325/KPLDGEYFTL | 526   | >TP53-G325/KPLDAEYFTL | 366 | 160   |
| >TP53-G325/KPLDGEYF   | 541   | >TP53-G325/KPLDAEYF   | 372 | 169   |
| >TP53-G325/KPLDGEYFTL | 321   | >TP53-G325/KPLDAEYFTL | 400 | 79    |
| >TP53-G325/KPLDGEYF   | 287   | >TP53-G325/KPLDAEYF   | 268 | 19    |
| >TP53-G325/KPLDGEYF   | 195   | >TP53-G325/KPLDAEYF   | 146 | 49    |
| >TP53-G325/KPLDGEYFTL | 306   | >TP53-G325/KPLDAEYFTL | 314 | 8     |
| >TP53-G325/KKPLDGEY   | 504   | >TP53-G325/KKPLDAEY   | 235 | 269   |
| >TP53-G325/KKPLDGEYF  | 31    | >TP53-G325/KKPLDAEYF  | 55  | 24    |
| >TP53-G325/KKKPLDGEY  | 83    | >TP53-G325/KKKPLDAEY  | 135 | 52    |
| >TP53-G325/KKKPLDGEY  | 138   | >TP53-G325/KKKPLDAEY  | 25  | 113   |
| >TP53-G325/KKKPLDGEYF | 14    | >TP53-G325/KKKPLDAEYF | 10  | 4     |
| >TP53-G325/PKKKPLDGEY | 315   | >TP53-G325/PKKKPLDAEY | 500 | 185   |
| >TP53-G325/PKKKPLDGEY | 994   | >TP53-G325/PKKKPLDAEY | 303 | 691   |
| >TP53-G325/PKKKPLDGEY | 78    | >TP53-G325/PKKKPLDAEY | 76  | 2     |
| >TP53-G325/QPKKKPLDG  | 913   | >TP53-G325/QPKKKPLDA  | 169 | 744   |
| >TP53-G325/QPKKKPLDGE | 303   | >TP53-G325/QPKKKPLDAE | 191 | 112   |
| >TP53-G325/QPKKKPLDGE | 812   | >TP53-G325/QPKKKPLDAE | 392 | 420   |
| >TP53-G325/GEYFTLQI   | 102   | >TP53-G325/EEYFTLQI   | 14  | 88    |

|                         |       |                         |      |       |
|-------------------------|-------|-------------------------|------|-------|
| >TP53-G325E GEYFTLQIR   | 9972  | >TP53-G325E EEYFTLQIR   | 247  | 9725  |
| >TP53-G325E GEYFTLQIRGI | 10111 | >TP53-G325E EEYFTLQIRGF | 282  | 9829  |
| >TP53-G325E GEYFTLQI    | 44    | >TP53-G325E EEYFTLQI    | 194  | 150   |
| >TP53-G325E GEYFTLQI    | 43    | >TP53-G325E EEYFTLQI    | 173  | 130   |
| >TP53-G325E GEYFTLQI    | 744   | >TP53-G325E EEYFTLQI    | 363  | 381   |
| >TP53-G325E GEYFTLQI    | 807   | >TP53-G325E EEYFTLQI    | 209  | 598   |
| >TP53-G325E GEYFTLQIRG  | 916   | >TP53-G325E EEYFTLQIRG  | 286  | 630   |
| >TP53-G325E GEYFTLQI    | 11    | >TP53-G325E EEYFTLQI    | 142  | 131   |
| >TP53-G325E GEYFTLQIR   | 190   | >TP53-G325E EEYFTLQIR   | 7389 | 7199  |
| >TP53-G325E DGEYFTLQI   | 2173  | >TP53-G325E DEEYFTLQI   | 9    | 2164  |
| >TP53-G325E DGEYFTLQ    | 22636 | >TP53-G325E DEEYFTLQ    | 380  | 22256 |
| >TP53-G325E DGEYFTLQI   | 22646 | >TP53-G325E DEEYFTLQI   | 185  | 22461 |
| >TP53-G325E DGEYFTLQI   | 29987 | >TP53-G325E DEEYFTLQI   | 108  | 29879 |
| >TP53-G325E LDGEYFTLQI  | 87    | >TP53-G325E LDEEYFTLQI  | 52   | 35    |
| >TP53-G325E LDGEYFTL    | 344   | >TP53-G325E LDEEYFTL    | 121  | 223   |
| >TP53-G325E LDGEYFTLQI  | 94    | >TP53-G325E LDEEYFTLQI  | 44   | 50    |
| >TP53-G325E PLDGEYFTL   | 1391  | >TP53-G325E PLDEEYFTL   | 238  | 1153  |
| >TP53-G325E PLDGEYFTL   | 249   | >TP53-G325E PLDEEYFTL   | 166  | 83    |
| >TP53-G325E PLDGEYFTL   | 2655  | >TP53-G325E PLDEEYFTL   | 471  | 2184  |
| >TP53-G325E PLDGEYFT    | 1065  | >TP53-G325E PLDEEYFT    | 433  | 632   |
| >TP53-G325E PLDGEYFTL   | 22    | >TP53-G325E PLDEEYFTL   | 8    | 14    |
| >TP53-G325E PLDGEYFTLQ  | 68    | >TP53-G325E PLDEEYFTLQI | 27   | 41    |
| >TP53-G325E PLDGEYFTL   | 224   | >TP53-G325E PLDEEYFTL   | 28   | 196   |
| >TP53-G325E PLDGEYFTLQ  | 2258  | >TP53-G325E PLDEEYFTLQI | 471  | 1787  |
| >TP53-G325E PLDGEYFTL   | 22    | >TP53-G325E PLDEEYFTL   | 11   | 11    |
| >TP53-G325E PLDGEYFTLQ  | 140   | >TP53-G325E PLDEEYFTLQI | 60   | 80    |
| >TP53-G325E PLDGEYFTL   | 23    | >TP53-G325E PLDEEYFTL   | 13   | 10    |
| >TP53-G325E PLDGEYFTLQ  | 158   | >TP53-G325E PLDEEYFTLQI | 74   | 84    |
| >TP53-G325E PLDGEYFTL   | 11    | >TP53-G325E PLDEEYFTL   | 13   | 2     |
| >TP53-G325E PLDGEYFTLQ  | 111   | >TP53-G325E PLDEEYFTLQI | 124  | 13    |
| >TP53-G325E KPLDGEYF    | 296   | >TP53-G325E KPLDEEYF    | 1459 | 1163  |
| >TP53-G325E KPLDGEYFTL  | 212   | >TP53-G325E KPLDEEYFTL  | 2184 | 1972  |
| >TP53-G325E KPLDGEYFTL  | 321   | >TP53-G325E KPLDEEYFTL  | 649  | 328   |
| >TP53-G325E KPLDGEYF    | 287   | >TP53-G325E KPLDEEYF    | 137  | 150   |
| >TP53-G325E KPLDGEYF    | 195   | >TP53-G325E KPLDEEYF    | 192  | 3     |
| >TP53-G325E KPLDGEYFTL  | 306   | >TP53-G325E KPLDEEYFTL  | 300  | 6     |
| >TP53-G325E KKPLDGEY    | 504   | >TP53-G325E KKPLDEEY    | 422  | 82    |
| >TP53-G325E KKPLDGEYF   | 31    | >TP53-G325E KKPLDEEYF   | 124  | 93    |
| >TP53-G325E KKKPLDGEY   | 83    | >TP53-G325E KKKPLDEEY   | 927  | 844   |
| >TP53-G325E KKKPLDGEY   | 138   | >TP53-G325E KKKPLDEEY   | 40   | 98    |
| >TP53-G325E KKKPLDGEYF  | 14    | >TP53-G325E KKKPLDEEYF  | 14   | 0     |
| >TP53-G325E PKKKPLDGEY  | 315   | >TP53-G325E PKKKPLDEEY  | 2429 | 2114  |
| >TP53-G325E PKKKPLDGEY  | 994   | >TP53-G325E PKKKPLDEEY  | 441  | 553   |

|                       |       |                        |      |       |
|-----------------------|-------|------------------------|------|-------|
| >TP53-G325\PKKKPLDGEY | 78    | >TP53-G325\PKKKPLDEEYI | 120  | 42    |
| >TP53-G325\QPKKKPLDGE | 303   | >TP53-G325\QPKKKPLDEE  | 309  | 6     |
| >TP53-G325\GEYFTLQI   | 102   | >TP53-G325\VEYFTLQI    | 59   | 43    |
| >TP53-G325\GEYFTLQI   | 44    | >TP53-G325\VEYFTLQI    | 143  | 99    |
| >TP53-G325\GEYFTLQI   | 43    | >TP53-G325\VEYFTLQI    | 151  | 108   |
| >TP53-G325\GEYFTLQI   | 11    | >TP53-G325\VEYFTLQI    | 51   | 40    |
| >TP53-G325\GEYFTLQIR  | 190   | >TP53-G325\VEYFTLQIR   | 1393 | 1203  |
| >TP53-G325\DGEYFTLQI  | 17984 | >TP53-G325\DVEYFTLQI   | 479  | 17505 |
| >TP53-G325\DGEYFTLQIR | 3222  | >TP53-G325\DVEYFTLQIR  | 168  | 3054  |
| >TP53-G325\DGEYFTLQIR | 17428 | >TP53-G325\DVEYFTLQIR  | 98   | 17330 |
| >TP53-G325\DGEYFTLQI  | 10221 | >TP53-G325\DVEYFTLQI   | 241  | 9980  |
| >TP53-G325\SPQPKKKPLD | 21742 | >TP53-G325\SPQPKKKPLD  | 462  | 21280 |
| >TP53-G325\LDGEYFTLQI | 87    | >TP53-G325\LDVEYFTLQI  | 72   | 15    |
| >TP53-G325\LDGEYFTL   | 1176  | >TP53-G325\LDVEYFTL    | 445  | 731   |
| >TP53-G325\LDGEYFTL   | 344   | >TP53-G325\LDVEYFTL    | 116  | 228   |
| >TP53-G325\LDGEYFTLQI | 94    | >TP53-G325\LDVEYFTLQI  | 44   | 50    |
| >TP53-G325\PLDGEYFTL  | 249   | >TP53-G325\PLDVEYFTL   | 1008 | 759   |
| >TP53-G325\PLDGEYFTL  | 22    | >TP53-G325\PLDVEYFTL   | 170  | 148   |
| >TP53-G325\PLDGEYFTLQ | 68    | >TP53-G325\PLDVEYFTLQ  | 379  | 311   |
| >TP53-G325\PLDGEYFTL  | 224   | >TP53-G325\PLDVEYFTL   | 279  | 55    |
| >TP53-G325\PLDGEYFTL  | 22    | >TP53-G325\PLDVEYFTL   | 80   | 58    |
| >TP53-G325\PLDGEYFTLQ | 140   | >TP53-G325\PLDVEYFTLQ  | 419  | 279   |
| >TP53-G325\PLDGEYFTL  | 23    | >TP53-G325\PLDVEYFTL   | 185  | 162   |
| >TP53-G325\PLDGEYFTLQ | 158   | >TP53-G325\PLDVEYFTLQ  | 770  | 612   |
| >TP53-G325\PLDGEYFTL  | 11    | >TP53-G325\PLDVEYFTL   | 71   | 60    |
| >TP53-G325\PLDGEYFTLQ | 111   | >TP53-G325\PLDVEYFTLQ  | 643  | 532   |
| >TP53-G325\KPLDGEYF   | 296   | >TP53-G325\KPLDVEYF    | 310  | 14    |
| >TP53-G325\KPLDGEYFTL | 212   | >TP53-G325\KPLDVEYFTL  | 473  | 261   |
| >TP53-G325\KPLDGEYF   | 541   | >TP53-G325\KPLDVEYF    | 470  | 71    |
| >TP53-G325\KPLDGEYFTL | 321   | >TP53-G325\KPLDVEYFTL  | 464  | 143   |
| >TP53-G325\KPLDGEYF   | 287   | >TP53-G325\KPLDVEYF    | 170  | 117   |
| >TP53-G325\KPLDGEYF   | 195   | >TP53-G325\KPLDVEYF    | 72   | 123   |
| >TP53-G325\KPLDGEYFTL | 306   | >TP53-G325\KPLDVEYFTL  | 219  | 87    |
| >TP53-G325\KKPLDGEY   | 504   | >TP53-G325\KKPLDVEY    | 114  | 390   |
| >TP53-G325\KKPLDGEYF  | 31    | >TP53-G325\KKPLDVEYF   | 38   | 7     |
| >TP53-G325\KKKPLDGEY  | 83    | >TP53-G325\KKKPLDVEY   | 801  | 718   |
| >TP53-G325\KKKPLDGEY  | 138   | >TP53-G325\KKKPLDVEY   | 14   | 124   |
| >TP53-G325\KKKPLDGEYF | 14    | >TP53-G325\KKKPLDVEYF  | 8    | 6     |
| >TP53-G325\PKKKPLDGEY | 315   | >TP53-G325\PKKKPLDVEY  | 1853 | 1538  |
| >TP53-G325\PKKKPLDGEY | 994   | >TP53-G325\PKKKPLDVEY  | 191  | 803   |
| >TP53-G325\PKKKPLDGEY | 78    | >TP53-G325\PKKKPLDVEY  | 70   | 8     |
| >TP53-G325\QPKKKPLDG  | 913   | >TP53-G325\QPKKKPLDV   | 87   | 826   |
| >TP53-G325\QPKKKPLDGE | 303   | >TP53-G325\QPKKKPLDVE  | 164  | 139   |

|                        |       |                        |     |       |
|------------------------|-------|------------------------|-----|-------|
| >TP53-G325\QPKKKPLDGE  | 812   | >TP53-G325\QPKKKPLDVE  | 332 | 480   |
| >TP53-G334\GRERFEMF    | 846   | >TP53-G334\VRERFEMF    | 342 | 504   |
| >TP53-G334\GRERFEMFRE  | 71    | >TP53-G334\VRERFEMFRE  | 223 | 152   |
| >TP53-G334\GRERFEMFRE  | 11    | >TP53-G334\VRERFEMFRE  | 26  | 15    |
| >TP53-G334\GRERFEMFR   | 1179  | >TP53-G334\VRERFEMFR   | 473 | 706   |
| >TP53-G334\RGRERFEMFI  | 16840 | >TP53-G334\RVRERFEMFF  | 462 | 16378 |
| >TP53-G334\RGRERFEMFI  | 21742 | >TP53-G334\RVRERFEMFF  | 308 | 21434 |
| >TP53-G334\RGRERFEMF   | 8160  | >TP53-G334\RVRERFEMF   | 362 | 7798  |
| >TP53-G334\RGRERFEM    | 90    | >TP53-G334\RVRERFEM    | 8   | 82    |
| >TP53-G334\RGRERFEMF   | 5451  | >TP53-G334\RVRERFEMF   | 442 | 5009  |
| >TP53-G334\RGRERFEMFI  | 35    | >TP53-G334\RVRERFEMFF  | 7   | 28    |
| >TP53-G334\RGRERFEMFI  | 3751  | >TP53-G334\RVRERFEMFF  | 382 | 3369  |
| >TP53-G334\RGRERFEMFI  | 39    | >TP53-G334\RVRERFEMFF  | 4   | 35    |
| >TP53-G334\RGRERFEMF   | 16317 | >TP53-G334\RVRERFEMF   | 323 | 15994 |
| >TP53-G334\RGRERFEMFI  | 1687  | >TP53-G334\RVRERFEMFF  | 65  | 1622  |
| >TP53-G334\RGRERFEMFI  | 18767 | >TP53-G334\RVRERFEMFF  | 193 | 18574 |
| >TP53-G334\RGRERFEM    | 1630  | >TP53-G334\RVRERFEM    | 37  | 1593  |
| >TP53-G334\RGRERFEMF   | 658   | >TP53-G334\RVRERFEMF   | 302 | 356   |
| >TP53-G334\RGRERFEMF   | 226   | >TP53-G334\RVRERFEMF   | 64  | 162   |
| >TP53-G334\RGRERFEMF   | 118   | >TP53-G334\RVRERFEMF   | 61  | 57    |
| >TP53-G334\RGRERFEM    | 226   | >TP53-G334\RVRERFEM    | 40  | 186   |
| >TP53-G334\RGRERFEMF   | 85    | >TP53-G334\RVRERFEMF   | 19  | 66    |
| >TP53-G334\RGRERFEMF   | 108   | >TP53-G334\RVRERFEMF   | 34  | 74    |
| >TP53-G334\RGRERFEMFI  | 95    | >TP53-G334\RVRERFEMFF  | 127 | 32    |
| >TP53-G334\IRGRERFEM   | 1335  | >TP53-G334\IRVRERFEM   | 219 | 1116  |
| >TP53-G334\IRGRERFEMF  | 126   | >TP53-G334\IRVRERFEMF  | 25  | 101   |
| >TP53-G334\IRGRERFEM   | 585   | >TP53-G334\IRVRERFEM   | 155 | 430   |
| >TP53-G334\IRGRERFEMF  | 721   | >TP53-G334\IRVRERFEMF  | 226 | 495   |
| >TP53-G334\IRGRERFEMF  | 658   | >TP53-G334\IRVRERFEMF  | 452 | 206   |
| >TP53-G334\IRGRERFEMF  | 187   | >TP53-G334\IRVRERFEMF  | 204 | 17    |
| >TP53-G334\QIRGRERFEM  | 435   | >TP53-G334\QIRVRERFEM  | 285 | 150   |
| >TP53-G334\QIRGRERFEM  | 743   | >TP53-G334\QIRVRERFEM  | 262 | 481   |
| >TP53-G334\QIRGRERFEM  | 1348  | >TP53-G334\QIRVRERFEM  | 494 | 854   |
| >TP53-G334\QIRGRERFEM  | 524   | >TP53-G334\QIRVRERFEM  | 377 | 147   |
| >TP53-G334\LQIRGRERFEI | 192   | >TP53-G334\LQIRVRERFEI | 190 | 2     |
| >TP53-G334\LQIRGRERF   | 766   | >TP53-G334\LQIRVRERF   | 321 | 445   |
| >TP53-G334\LQIRGRER    | 138   | >TP53-G334\LQIRVRER    | 64  | 74    |
| >TP53-G334\LQIRGRERF   | 54    | >TP53-G334\LQIRVRERF   | 65  | 11    |
| >TP53-G334\LQIRGRERFEI | 105   | >TP53-G334\LQIRVRERFEI | 125 | 20    |
| >TP53-G334\LQIRGRER    | 495   | >TP53-G334\LQIRVRER    | 616 | 121   |
| >TP53-G334\LQIRGRERF   | 12    | >TP53-G334\LQIRVRERF   | 20  | 8     |
| >TP53-G334\LQIRGRERFEI | 34    | >TP53-G334\LQIRVRERFEI | 46  | 12    |
| >TP53-G334\TLQIRGRER   | 238   | >TP53-G334\TLQIRVRER   | 128 | 110   |

|                        |       |                        |       |       |
|------------------------|-------|------------------------|-------|-------|
| >TP53-G334\FTLQIRGRERI | 169   | >TP53-G334\FTLQIRVRERI | 114   | 55    |
| >TP53-G334\FTLQIRGRERI | 289   | >TP53-G334\FTLQIRVRERI | 647   | 358   |
| >TP53-G334\FTLQIRGR    | 873   | >TP53-G334\FTLQIRVR    | 407   | 466   |
| >TP53-G334\FTLQIRGRER  | 50    | >TP53-G334\FTLQIRVRER  | 49    | 1     |
| >TP53-G334\FTLQIRGRERI | 1480  | >TP53-G334\FTLQIRVRERI | 301   | 1179  |
| >TP53-G334\FTLQIRGR    | 174   | >TP53-G334\FTLQIRVR    | 180   | 6     |
| >TP53-G334\FTLQIRGRER  | 431   | >TP53-G334\FTLQIRVRER  | 558   | 127   |
| >TP53-G334\FTLQIRGR    | 25    | >TP53-G334\FTLQIRVR    | 36    | 11    |
| >TP53-G334\FTLQIRGRER  | 86    | >TP53-G334\FTLQIRVRER  | 137   | 51    |
| >TP53-G334\FTLQIRGRERI | 585   | >TP53-G334\FTLQIRVRERI | 288   | 297   |
| >TP53-G334\FTLQIRGRERI | 8     | >TP53-G334\FTLQIRVRERI | 11    | 3     |
| >TP53-G334\FTLQIRGRERI | 289   | >TP53-G334\FTLQIRVRERI | 133   | 156   |
| >TP53-G334\FTLQIRGRERI | 8     | >TP53-G334\FTLQIRVRERI | 11    | 3     |
| >TP53-G334\FTLQIRGR    | 422   | >TP53-G334\FTLQIRVR    | 370   | 52    |
| >TP53-G334\YFTLQIRG    | 34321 | >TP53-G334\YFTLQIRV    | 93    | 34228 |
| >TP53-G334\YFTLQIRGR   | 680   | >TP53-G334\YFTLQIRVR   | 303   | 377   |
| >TP53-G334\YFTLQIRGREF | 337   | >TP53-G334\YFTLQIRVREF | 224   | 113   |
| >TP53-G334\YFTLQIRGR   | 129   | >TP53-G334\YFTLQIRVR   | 154   | 25    |
| >TP53-G334\YFTLQIRGREF | 126   | >TP53-G334\YFTLQIRVREF | 90    | 36    |
| >TP53-G334\YFTLQIRGR   | 152   | >TP53-G334\YFTLQIRVR   | 163   | 11    |
| >TP53-G334\YFTLQIRGREF | 524   | >TP53-G334\YFTLQIRVREF | 339   | 185   |
| >TP53-G334\EYFTLQIRGR  | 315   | >TP53-G334\EYFTLQIRVR  | 370   | 55    |
| >TP53-G334\EYFTLQIRG   | 18287 | >TP53-G334\EYFTLQIRV   | 85    | 18202 |
| >TP53-G334\EYFTLQIRGR  | 20    | >TP53-G334\EYFTLQIRVR  | 18    | 2     |
| >TP53-G334\GEYFTLQIRG  | 19224 | >TP53-G334\GEYFTLQIRV  | 180   | 19044 |
| >TP53-G334\GEYFTLQIRG  | 20375 | >TP53-G334\GEYFTLQIRV  | 72    | 20303 |
| >TP53-G334\GRERFEMF    | 846   | >TP53-G334\WRERFEMF    | 217   | 629   |
| >TP53-G334\GRERFEMF    | 988   | >TP53-G334\WRERFEMF    | 243   | 745   |
| >TP53-G334\GRERFEMFR   | 71    | >TP53-G334\WRERFEMFR   | 169   | 98    |
| >TP53-G334\GRERFEMFR   | 11    | >TP53-G334\WRERFEMFR   | 13    | 2     |
| >TP53-G334\GRERFEMFR   | 1179  | >TP53-G334\WRERFEMFR   | 147   | 1032  |
| >TP53-G334\RGRERFEMF   | 4327  | >TP53-G334\RWRERFEMF   | 48    | 4279  |
| >TP53-G334\RGRERFEMF   | 4156  | >TP53-G334\RWRERFEMF   | 45    | 4111  |
| >TP53-G334\RGRERFEMF   | 8160  | >TP53-G334\RWRERFEMF   | 7     | 8153  |
| >TP53-G334\RGRERFEM    | 90    | >TP53-G334\RWRERFEM    | 62    | 28    |
| >TP53-G334\RGRERFEMFI  | 35    | >TP53-G334\RWRERFEMF   | 29    | 6     |
| >TP53-G334\RGRERFEMFI  | 39    | >TP53-G334\RWRERFEMF   | 7     | 32    |
| >TP53-G334\RGRERFEMFI  | 1687  | >TP53-G334\RWRERFEMF   | 157   | 1530  |
| >TP53-G334\RGRERFEMF   | 226   | >TP53-G334\RWRERFEMF   | 2838  | 2612  |
| >TP53-G334\RGRERFEMF   | 118   | >TP53-G334\RWRERFEMF   | 239   | 121   |
| >TP53-G334\RGRERFEM    | 226   | >TP53-G334\RWRERFEM    | 16214 | 15988 |
| >TP53-G334\RGRERFEMF   | 85    | >TP53-G334\RWRERFEMF   | 12383 | 12298 |
| >TP53-G334\RGRERFEMF   | 108   | >TP53-G334\RWRERFEMF   | 765   | 657   |

|                        |       |                       |     |       |
|------------------------|-------|-----------------------|-----|-------|
| >TP53-G334\RGRERFEMFI  | 2268  | >TP53-G334\RWRERFEMF  | 194 | 2074  |
| >TP53-G334\RGRERFEMFI  | 2894  | >TP53-G334\RWRERFEMF  | 234 | 2660  |
| >TP53-G334\RGRERFEMFI  | 95    | >TP53-G334\RWRERFEMF  | 16  | 79    |
| >TP53-G334\RGRERFEM    | 32708 | >TP53-G334\RWRERFEM   | 146 | 32562 |
| >TP53-G334\RGRERFEMF   | 35091 | >TP53-G334\RWRERFEMF  | 134 | 34957 |
| >TP53-G334\IRGRERFEMF  | 5844  | >TP53-G334\IRWRERFEMI | 462 | 5382  |
| >TP53-G334\IRGRERFEM   | 1335  | >TP53-G334\IRWRERFEM  | 67  | 1268  |
| >TP53-G334\IRGRERFEMF  | 126   | >TP53-G334\IRWRERFEMI | 9   | 117   |
| >TP53-G334\IRGRERFEM   | 585   | >TP53-G334\IRWRERFEM  | 26  | 559   |
| >TP53-G334\IRGRERFEMF  | 721   | >TP53-G334\IRWRERFEMI | 92  | 629   |
| >TP53-G334\IRGRERFEMF  | 2006  | >TP53-G334\IRWRERFEMI | 52  | 1954  |
| >TP53-G334\IRGRERFEM   | 6211  | >TP53-G334\IRWRERFEM  | 308 | 5903  |
| >TP53-G334\IRGRERFEMF  | 2819  | >TP53-G334\IRWRERFEMI | 312 | 2507  |
| >TP53-G334\IRGRERFEM   | 4088  | >TP53-G334\IRWRERFEM  | 128 | 3960  |
| >TP53-G334\IRGRERFEMF  | 658   | >TP53-G334\IRWRERFEMI | 198 | 460   |
| >TP53-G334\IRGRERFEMF  | 8001  | >TP53-G334\IRWRERFEMI | 424 | 7577  |
| >TP53-G334\IRGRERFEMF  | 187   | >TP53-G334\IRWRERFEMI | 67  | 120   |
| >TP53-G334\QIRGRERFEN  | 435   | >TP53-G334\QIRWRERFEN | 664 | 229   |
| >TP53-G334\QIRGRERFEN  | 743   | >TP53-G334\QIRWRERFEN | 406 | 337   |
| >TP53-G334\QIRGRERFEN  | 524   | >TP53-G334\QIRWRERFEN | 243 | 281   |
| >TP53-G334\LQIRGRERFEI | 192   | >TP53-G334\LQIRWRERFE | 133 | 59    |
| >TP53-G334\LQIRGRERF   | 766   | >TP53-G334\LQIRWRERF  | 90  | 676   |
| >TP53-G334\LQIRGRER    | 138   | >TP53-G334\LQIRWRER   | 37  | 101   |
| >TP53-G334\LQIRGRERF   | 54    | >TP53-G334\LQIRWRERF  | 51  | 3     |
| >TP53-G334\LQIRGRERFEI | 105   | >TP53-G334\LQIRWRERFE | 95  | 10    |
| >TP53-G334\LQIRGRER    | 495   | >TP53-G334\LQIRWRER   | 627 | 132   |
| >TP53-G334\LQIRGRERF   | 12    | >TP53-G334\LQIRWRERF  | 12  | 0     |
| >TP53-G334\LQIRGRERFEI | 34    | >TP53-G334\LQIRWRERFE | 37  | 3     |
| >TP53-G334\TLQIRGRER   | 238   | >TP53-G334\TLQIRWRER  | 48  | 190   |
| >TP53-G334\TLQIRGRER   | 1304  | >TP53-G334\TLQIRWRER  | 194 | 1110  |
| >TP53-G334\FTLQIRGRERI | 1492  | >TP53-G334\FTLQIRWRER | 216 | 1276  |
| >TP53-G334\FTLQIRGRERI | 169   | >TP53-G334\FTLQIRWRER | 73  | 96    |
| >TP53-G334\FTLQIRGRERI | 289   | >TP53-G334\FTLQIRWRER | 301 | 12    |
| >TP53-G334\FTLQIRGRERI | 946   | >TP53-G334\FTLQIRWRER | 395 | 551   |
| >TP53-G334\FTLQIRGR    | 873   | >TP53-G334\FTLQIRWR   | 223 | 650   |
| >TP53-G334\FTLQIRGRER  | 50    | >TP53-G334\FTLQIRWRER | 35  | 15    |
| >TP53-G334\FTLQIRGRERI | 1480  | >TP53-G334\FTLQIRWRER | 448 | 1032  |
| >TP53-G334\FTLQIRGR    | 174   | >TP53-G334\FTLQIRWR   | 66  | 108   |
| >TP53-G334\FTLQIRGRER  | 431   | >TP53-G334\FTLQIRWRER | 713 | 282   |
| >TP53-G334\FTLQIRGR    | 25    | >TP53-G334\FTLQIRWR   | 17  | 8     |
| >TP53-G334\FTLQIRGRER  | 86    | >TP53-G334\FTLQIRWRER | 107 | 21    |
| >TP53-G334\FTLQIRGRERI | 585   | >TP53-G334\FTLQIRWRER | 383 | 202   |
| >TP53-G334\FTLQIRGRERI | 8     | >TP53-G334\FTLQIRWRER | 8   | 0     |

|                        |       |                       |     |       |
|------------------------|-------|-----------------------|-----|-------|
| >TP53-G334\FTLQIRGRERI | 1464  | >TP53-G334\FTLQIRWRER | 315 | 1149  |
| >TP53-G334\FTLQIRGRERI | 289   | >TP53-G334\FTLQIRWRER | 81  | 208   |
| >TP53-G334\FTLQIRGRERI | 8     | >TP53-G334\FTLQIRWRER | 16  | 8     |
| >TP53-G334\FTLQIRGR    | 422   | >TP53-G334\FTLQIRWR   | 227 | 195   |
| >TP53-G334\FTLQIRGRER  | 1841  | >TP53-G334\FTLQIRWRER | 419 | 1422  |
| >TP53-G334\YFTLQIRG    | 14985 | >TP53-G334\YFTLQIRW   | 207 | 14778 |
| >TP53-G334\YFTLQIRGR   | 680   | >TP53-G334\YFTLQIRWR  | 196 | 484   |
| >TP53-G334\YFTLQIRGREF | 337   | >TP53-G334\YFTLQIRWRE | 122 | 215   |
| >TP53-G334\YFTLQIRGR   | 129   | >TP53-G334\YFTLQIRWR  | 50  | 79    |
| >TP53-G334\YFTLQIRGREF | 126   | >TP53-G334\YFTLQIRWRE | 45  | 81    |
| >TP53-G334\YFTLQIRGR   | 788   | >TP53-G334\YFTLQIRWR  | 308 | 480   |
| >TP53-G334\YFTLQIRGR   | 152   | >TP53-G334\YFTLQIRWR  | 118 | 34    |
| >TP53-G334\YFTLQIRGREF | 524   | >TP53-G334\YFTLQIRWRE | 218 | 306   |
| >TP53-G334\EYFTLQIRG   | 13823 | >TP53-G334\EYFTLQIRW  | 202 | 13621 |
| >TP53-G334\EYFTLQIRGR  | 546   | >TP53-G334\EYFTLQIRWR | 169 | 377   |
| >TP53-G334\EYFTLQIRGR  | 315   | >TP53-G334\EYFTLQIRWR | 118 | 197   |
| >TP53-G334\EYFTLQIRGR  | 20    | >TP53-G334\EYFTLQIRWR | 17  | 3     |
| >TP53-G334\GEYFTLQIRG  | 6400  | >TP53-G334\GEYFTLQIRW | 38  | 6362  |
| >TP53-G334\GEYFTLQIRG  | 1512  | >TP53-G334\GEYFTLQIRW | 38  | 1474  |
| >TP53-G356\EALELKDAQA  | 26364 | >TP53-G356\EALELKDAQA | 300 | 26064 |
| >TP53-G356\EALELKDAQA  | 4112  | >TP53-G356\EALELKDAQA | 454 | 3658  |
| >TP53-G356\EALELKDAQA  | 33414 | >TP53-G356\EALELKDAQA | 153 | 33261 |
| >TP53-G356\EALELKDAQA  | 29669 | >TP53-G356\EALELKDAQA | 129 | 29540 |
| >TP53-G356\ELKDAQAGK   | 136   | >TP53-G356\ELKDAQAWK  | 59  | 77    |
| >TP53-G356\LELKDAQAG   | 5542  | >TP53-G356\LELKDAQAW  | 76  | 5466  |
| >TP53-G356\LELKDAQAG   | 1690  | >TP53-G356\LELKDAQAW  | 52  | 1638  |
| >TP53-G356\LELKDAQAG   | 6554  | >TP53-G356\LELKDAQAW  | 45  | 6509  |
| >TP53-G356\LELKDAQAG   | 28918 | >TP53-G356\LELKDAQAW  | 111 | 28807 |
| >TP53-G389\RHKKLMFKTE  | 28248 | >TP53-G389\RHKKLMFKTE | 57  | 28191 |
| >TP53-G389\KLMFKTEGP   | 752   | >TP53-G389\KLMFKTEWP  | 334 | 418   |
| >TP53-G389\KLMFKTEG    | 1467  | >TP53-G389\KLMFKTEW   | 20  | 1447  |
| >TP53-G389\KLMFKTEG    | 22682 | >TP53-G389\KLMFKTEW   | 187 | 22495 |
| >TP53-G389\KLMFKTEG    | 24872 | >TP53-G389\KLMFKTEW   | 274 | 24598 |
| >TP53-G389\KLMFKTEG    | 20769 | >TP53-G389\KLMFKTEW   | 38  | 20731 |
| >TP53-G389\KKLMFKTEG   | 1339  | >TP53-G389\KKLMFKTEW  | 46  | 1293  |
| >TP53-G389\HKKLMFKTEC  | 26873 | >TP53-G389\HKKLMFKTEW | 213 | 26660 |
| >TP53-G59C-GPDEAPRM    | 1067  | >TP53-G59C-CPDEAPRM   | 106 | 961   |
| >TP53-G59C-GPDEAPRM    | 2243  | >TP53-G59C-CPDEAPRM   | 264 | 1979  |
| >TP53-G59C-GPDEAPRMP   | 3292  | >TP53-G59C-CPDEAPRMP  | 165 | 3127  |
| >TP53-G59C-DPGPDEAPR   | 1293  | >TP53-G59C-DPCPDEAPR  | 174 | 1119  |
| >TP53-G59C-FTEDPGPDEA  | 736   | >TP53-G59C-FTEDPCPDEA | 190 | 546   |
| >TP53-G59C-QWFTEDPG    | 275   | >TP53-G59C-QWFTEDPC   | 169 | 106   |
| >TP53-G59D-GPDEAPRM    | 1067  | >TP53-G59D-DPDEAPRM   | 186 | 881   |

|                        |      |                        |       |       |
|------------------------|------|------------------------|-------|-------|
| >TP53-G59D·QWFTEDPG    | 275  | >TP53-G59D·QWFTEDPD    | 511   | 236   |
| >TP53-G59N·GPDEAPRM    | 1067 | >TP53-G59N·NPDEAPRM    | 112   | 955   |
| >TP53-G59N·DPGPDEAPR   | 1293 | >TP53-G59N·DPNPDEAPR   | 322   | 971   |
| >TP53-G59N·QWFTEDPG    | 275  | >TP53-G59N·QWFTEDPN    | 477   | 202   |
| >TP53-H168I·HMTEVVRRRC | 38   | >TP53-H168I·DMTEVVRRRC | 494   | 456   |
| >TP53-H168I·HMTEVVRR   | 38   | >TP53-H168I·DMTEVVRR   | 1792  | 1754  |
| >TP53-H168I·HMTEVVRR   | 65   | >TP53-H168I·DMTEVVRR   | 22    | 43    |
| >TP53-H168I·HMTEVVRR   | 35   | >TP53-H168I·DMTEVVRR   | 29    | 6     |
| >TP53-H168I·HMTEVVRR   | 64   | >TP53-H168I·DMTEVVRR   | 1159  | 1095  |
| >TP53-H168I·QHMTEVVRR  | 269  | >TP53-H168I·QDMTEVVRR  | 910   | 641   |
| >TP53-H168I·QHMTEVVRR  | 195  | >TP53-H168I·QDMTEVVRR  | 610   | 415   |
| >TP53-H168I·RAMAIYKQSC | 354  | >TP53-H168I·RAMAIYKQSC | 5076  | 4722  |
| >TP53-H168I·RAMAIYKQSC | 375  | >TP53-H168I·RAMAIYKQSC | 10877 | 10502 |
| >TP53-H168I·SQHMTEVV   | 115  | >TP53-H168I·SQDMTEVV   | 45    | 70    |
| >TP53-H168I·SQHMTEVV   | 256  | >TP53-H168I·SQDMTEVV   | 135   | 121   |
| >TP53-H168I·SQHMTEVV   | 1833 | >TP53-H168I·SQDMTEVV   | 420   | 1413  |
| >TP53-H168I·SQHMTEVV   | 543  | >TP53-H168I·SQDMTEVV   | 82    | 461   |
| >TP53-H168I·SQHMTEVVRR | 115  | >TP53-H168I·SQDMTEVVRR | 2258  | 2143  |
| >TP53-H168I·SQHMTEVV   | 88   | >TP53-H168I·SQDMTEVV   | 3517  | 3429  |
| >TP53-H168I·SQHMTEVVRR | 162  | >TP53-H168I·SQDMTEVVRR | 3898  | 3736  |
| >TP53-H168I·SQHMTEVVRR | 434  | >TP53-H168I·SQDMTEVVRR | 2107  | 1673  |
| >TP53-H168I·SQHMTEVVRR | 363  | >TP53-H168I·SQDMTEVVRR | 1535  | 1172  |
| >TP53-H168I·QSQHMTEVV  | 230  | >TP53-H168I·QSQDMTEVV  | 309   | 79    |
| >TP53-H168I·QSQHMTEVV  | 321  | >TP53-H168I·QSQDMTEVV  | 424   | 103   |
| >TP53-H168I·QSQHMTEVV  | 973  | >TP53-H168I·QSQDMTEVV  | 275   | 698   |
| >TP53-H168I·QSQHMTEVV  | 185  | >TP53-H168I·QSQDMTEVV  | 96    | 89    |
| >TP53-H168I·QSQHMTEV   | 206  | >TP53-H168I·QSQDMTEV   | 159   | 47    |
| >TP53-H168I·QSQHMTEVV  | 303  | >TP53-H168I·QSQDMTEVV  | 204   | 99    |
| >TP53-H168I·QSQHMTEVV  | 306  | >TP53-H168I·QSQDMTEVV  | 471   | 165   |
| >TP53-H168I·KQSQHMTEV  | 82   | >TP53-H168I·KQSQDMTEV  | 151   | 69    |
| >TP53-H168I·KQSQHMTEV  | 51   | >TP53-H168I·KQSQDMTEV  | 81    | 30    |
| >TP53-H168I·KQSQHMTEV  | 298  | >TP53-H168I·KQSQDMTEV  | 165   | 133   |
| >TP53-H168I·KQSQHMTEV  | 9    | >TP53-H168I·KQSQDMTEV  | 21    | 12    |
| >TP53-H168I·KQSQHMTEV  | 273  | >TP53-H168I·KQSQDMTEV  | 299   | 26    |
| >TP53-H168I·KQSQHMTEV  | 10   | >TP53-H168I·KQSQDMTEV  | 12    | 2     |
| >TP53-H168I·KQSQHMTEV  | 993  | >TP53-H168I·KQSQDMTEV  | 433   | 560   |
| >TP53-H168I·KQSQHMTEV  | 426  | >TP53-H168I·KQSQDMTEV  | 688   | 262   |
| >TP53-H168I·KQSQHMTEV  | 1212 | >TP53-H168I·KQSQDMTEV  | 409   | 803   |
| >TP53-H168I·KQSQHMTEV  | 35   | >TP53-H168I·KQSQDMTEV  | 145   | 110   |
| >TP53-H168I·KQSQHMTEV  | 222  | >TP53-H168I·KQSQDMTEV  | 467   | 245   |
| >TP53-H168I·KQSQHMTEV  | 86   | >TP53-H168I·KQSQDMTEV  | 122   | 36    |
| >TP53-H168I·KQSQHMTEV  | 110  | >TP53-H168I·KQSQDMTEV  | 180   | 70    |
| >TP53-H168I·KQSQHMTEV  | 185  | >TP53-H168I·KQSQDMTEV  | 285   | 100   |



|                        |       |                        |       |       |
|------------------------|-------|------------------------|-------|-------|
| >TP53-H168I KQSQHMTEV  | 60    | >TP53-H168I KQSQDMTEV  | 86    | 26    |
| >TP53-H168I YKQSQHMTE  | 467   | >TP53-H168I YKQSQDMTE  | 740   | 273   |
| >TP53-H168I YKQSQHMTE  | 30    | >TP53-H168I YKQSQDMTE  | 69    | 39    |
| >TP53-H168I YKQSQHMTE  | 42    | >TP53-H168I YKQSQDMTE  | 108   | 66    |
| >TP53-H168I IYKQSQHMTI | 402   | >TP53-H168I IYKQSQDMTI | 204   | 198   |
| >TP53-H168I IYKQSQHM   | 394   | >TP53-H168I IYKQSQDM   | 2947  | 2553  |
| >TP53-H168I AIYKQSQHM  | 91    | >TP53-H168I AIYKQSQDM  | 408   | 317   |
| >TP53-H168I AIYKQSQH   | 349   | >TP53-H168I AIYKQSQD   | 15431 | 15082 |
| >TP53-H168I AIYKQSQHM  | 62    | >TP53-H168I AIYKQSQDM  | 507   | 445   |
| >TP53-H168I AIYKQSQHM  | 198   | >TP53-H168I AIYKQSQDM  | 269   | 71    |
| >TP53-H168I MAIYKQSQH  | 226   | >TP53-H168I MAIYKQSQDI | 1501  | 1275  |
| >TP53-H168I MAIYKQSQH  | 205   | >TP53-H168I MAIYKQSQDI | 299   | 94    |
| >TP53-H168I MAIYKQSQH  | 20    | >TP53-H168I MAIYKQSQDI | 48    | 28    |
| >TP53-H168I MAIYKQSQH  | 151   | >TP53-H168I MAIYKQSQDI | 2127  | 1976  |
| >TP53-H168I MAIYKQSQH  | 583   | >TP53-H168I MAIYKQSQDI | 355   | 228   |
| >TP53-H168I AMAIYKQSQI | 221   | >TP53-H168I AMAIYKQSQI | 900   | 679   |
| >TP53-H168I AMAIYKQSQI | 161   | >TP53-H168I AMAIYKQSQI | 640   | 479   |
| >TP53-H168I AMAIYKQSQI | 199   | >TP53-H168I AMAIYKQSQI | 732   | 533   |
| >TP53-H168I AMAIYKQSQI | 283   | >TP53-H168I AMAIYKQSQI | 1301  | 1018  |
| >TP53-H168I AMAIYKQSQI | 49    | >TP53-H168I AMAIYKQSQI | 114   | 65    |
| >TP53-H168I AMAIYKQSQI | 55    | >TP53-H168I AMAIYKQSQI | 256   | 201   |
| >TP53-H168I AMAIYKQSQI | 69    | >TP53-H168I AMAIYKQSQI | 97    | 28    |
| >TP53-H168I HMTEVVRR   | 38    | >TP53-H168I LMTEVVRR   | 11    | 27    |
| >TP53-H168I HMTEVVRR   | 579   | >TP53-H168I LMTEVVRR   | 90    | 489   |
| >TP53-H168I HMTEVVRR   | 38    | >TP53-H168I LMTEVVRR   | 95    | 57    |
| >TP53-H168I HMTEVVRR   | 65    | >TP53-H168I LMTEVVRR   | 373   | 308   |
| >TP53-H168I HMTEVVRR   | 35    | >TP53-H168I LMTEVVRR   | 97    | 62    |
| >TP53-H168I HMTEVVRR   | 64    | >TP53-H168I LMTEVVRR   | 545   | 481   |
| >TP53-H168I QHMTEVVRR  | 25724 | >TP53-H168I QLMTEVVRR  | 474   | 25250 |
| >TP53-H168I QHMTEVVR   | 2953  | >TP53-H168I QLMTEVVR   | 175   | 2778  |
| >TP53-H168I QHMTEVVRR  | 2161  | >TP53-H168I QLMTEVVRR  | 131   | 2030  |
| >TP53-H168I QHMTEVVR   | 269   | >TP53-H168I QLMTEVVR   | 122   | 147   |
| >TP53-H168I QHMTEVVRR  | 195   | >TP53-H168I QLMTEVVRR  | 79    | 116   |
| >TP53-H168I RAMAIYKQSC | 27350 | >TP53-H168I RAMAIYKQSC | 321   | 27029 |
| >TP53-H168I RAMAIYKQSC | 13470 | >TP53-H168I RAMAIYKQSC | 420   | 13050 |
| >TP53-H168I RAMAIYKQSC | 3083  | >TP53-H168I RAMAIYKQSC | 336   | 2747  |
| >TP53-H168I RAMAIYKQSC | 354   | >TP53-H168I RAMAIYKQSC | 9     | 345   |
| >TP53-H168I RAMAIYKQSC | 11147 | >TP53-H168I RAMAIYKQSC | 122   | 11025 |
| >TP53-H168I RAMAIYKQSC | 1142  | >TP53-H168I RAMAIYKQSC | 68    | 1074  |
| >TP53-H168I RAMAIYKQSC | 375   | >TP53-H168I RAMAIYKQSC | 190   | 185   |
| >TP53-H168I RAMAIYKQSC | 30782 | >TP53-H168I RAMAIYKQSC | 165   | 30617 |
| >TP53-H168I SQHMTEVV   | 115   | >TP53-H168I SQLMTEVV   | 17    | 98    |
| >TP53-H168I SQHMTEVV   | 256   | >TP53-H168I SQLMTEVV   | 64    | 192   |

|                        |       |                        |      |       |
|------------------------|-------|------------------------|------|-------|
| >TP53-H168L SQHMTEVV   | 1833  | >TP53-H168L SQLMTEVV   | 148  | 1685  |
| >TP53-H168L SQHMTEVV   | 543   | >TP53-H168L SQLMTEVV   | 39   | 504   |
| >TP53-H168L SQHMTEVVVR | 2206  | >TP53-H168L SQLMTEVVRI | 336  | 1870  |
| >TP53-H168L SQHMTEVVVR | 115   | >TP53-H168L SQLMTEVVVR | 105  | 10    |
| >TP53-H168L SQHMTEVVVR | 504   | >TP53-H168L SQLMTEVVRI | 137  | 367   |
| >TP53-H168L SQHMTEVV   | 88    | >TP53-H168L SQLMTEVV   | 78   | 10    |
| >TP53-H168L SQHMTEVVVR | 162   | >TP53-H168L SQLMTEVVVR | 130  | 32    |
| >TP53-H168L SQHMTEVVVR | 572   | >TP53-H168L SQLMTEVVRI | 484  | 88    |
| >TP53-H168L SQHMTEVVVR | 434   | >TP53-H168L SQLMTEVVVR | 285  | 149   |
| >TP53-H168L SQHMTEVVVR | 363   | >TP53-H168L SQLMTEVVRI | 230  | 133   |
| >TP53-H168L QSQHMTEVV  | 230   | >TP53-H168L QSQLMTEVV  | 160  | 70    |
| >TP53-H168L QSQHMTEVV  | 321   | >TP53-H168L QSQLMTEVV  | 404  | 83    |
| >TP53-H168L QSQHMTEVV  | 185   | >TP53-H168L QSQLMTEVV  | 225  | 40    |
| >TP53-H168L QSQHMTEV   | 206   | >TP53-H168L QSQLMTEV   | 490  | 284   |
| >TP53-H168L QSQHMTEVV  | 303   | >TP53-H168L QSQLMTEVV  | 1182 | 879   |
| >TP53-H168L QSQHMTEVV  | 306   | >TP53-H168L QSQLMTEVV  | 749  | 443   |
| >TP53-H168L KQSQHMTEV  | 82    | >TP53-H168L KQSQLMTEV  | 79   | 3     |
| >TP53-H168L KQSQHMTEV  | 51    | >TP53-H168L KQSQLMTEV  | 26   | 25    |
| >TP53-H168L KQSQHMTEV  | 298   | >TP53-H168L KQSQLMTEV' | 218  | 80    |
| >TP53-H168L KQSQHMTEV  | 9     | >TP53-H168L KQSQLMTEV  | 17   | 8     |
| >TP53-H168L KQSQHMTEV  | 273   | >TP53-H168L KQSQLMTEV' | 186  | 87    |
| >TP53-H168L KQSQHMTEV  | 10    | >TP53-H168L KQSQLMTEV  | 7    | 3     |
| >TP53-H168L KQSQHMTEV  | 993   | >TP53-H168L KQSQLMTEV' | 371  | 622   |
| >TP53-H168L KQSQHMTEV  | 426   | >TP53-H168L KQSQLMTEV  | 443  | 17    |
| >TP53-H168L KQSQHMTEV  | 1212  | >TP53-H168L KQSQLMTEV  | 193  | 1019  |
| >TP53-H168L KQSQHMTEV  | 35    | >TP53-H168L KQSQLMTEV' | 46   | 11    |
| >TP53-H168L KQSQHMTEV  | 222   | >TP53-H168L KQSQLMTEV' | 376  | 154   |
| >TP53-H168L KQSQHMTEV  | 86    | >TP53-H168L KQSQLMTEV  | 209  | 123   |
| >TP53-H168L KQSQHMTEV  | 110   | >TP53-H168L KQSQLMTEV' | 286  | 176   |
| >TP53-H168L KQSQHMTEV  | 185   | >TP53-H168L KQSQLMTEV' | 320  | 135   |
| >TP53-H168L KQSQHMTEV  | 60    | >TP53-H168L KQSQLMTEV' | 44   | 16    |
| >TP53-H168L YKQSQHMTE  | 467   | >TP53-H168L YKQSQLMTE\ | 316  | 151   |
| >TP53-H168L YKQSQHMTE  | 30    | >TP53-H168L YKQSQLMTE\ | 49   | 19    |
| >TP53-H168L YKQSQHMTE  | 42    | >TP53-H168L YKQSQLMTE\ | 73   | 31    |
| >TP53-H168L IYKQSQHMTE | 402   | >TP53-H168L IYKQSQLMTE | 182  | 220   |
| >TP53-H168L IYKQSQHM   | 957   | >TP53-H168L IYKQSQLM   | 481  | 476   |
| >TP53-H168L IYKQSQHM   | 394   | >TP53-H168L IYKQSQLM   | 384  | 10    |
| >TP53-H168L AIYKQSQH   | 20668 | >TP53-H168L AIYKQSQL   | 100  | 20568 |
| >TP53-H168L AIYKQSQHM  | 91    | >TP53-H168L AIYKQSQLM  | 63   | 28    |
| >TP53-H168L AIYKQSQH   | 27301 | >TP53-H168L AIYKQSQL   | 174  | 27127 |
| >TP53-H168L AIYKQSQH   | 19356 | >TP53-H168L AIYKQSQL   | 116  | 19240 |
| >TP53-H168L AIYKQSQH   | 21745 | >TP53-H168L AIYKQSQL   | 131  | 21614 |
| >TP53-H168L AIYKQSQH   | 24278 | >TP53-H168L AIYKQSQL   | 280  | 23998 |

|                        |       |                        |      |       |
|------------------------|-------|------------------------|------|-------|
| >TP53-H168L AIYKQSQH   | 24831 | >TP53-H168L AIYKQSQL   | 25   | 24806 |
| >TP53-H168L AIYKQSQH   | 349   | >TP53-H168L AIYKQSQL   | 9491 | 9142  |
| >TP53-H168L AIYKQSQHM  | 62    | >TP53-H168L AIYKQSQLM  | 405  | 343   |
| >TP53-H168L AIYKQSQHM  | 198   | >TP53-H168L AIYKQSQLM  | 446  | 248   |
| >TP53-H168L AIYKQSQH   | 11192 | >TP53-H168L AIYKQSQL   | 321  | 10871 |
| >TP53-H168L MAIYKQSQH  | 9514  | >TP53-H168L MAIYKQSQL  | 159  | 9355  |
| >TP53-H168L MAIYKQSQH  | 18994 | >TP53-H168L MAIYKQSQL  | 47   | 18947 |
| >TP53-H168L MAIYKQSQH  | 9463  | >TP53-H168L MAIYKQSQL  | 63   | 9400  |
| >TP53-H168L MAIYKQSQH  | 226   | >TP53-H168L MAIYKQSQLM | 1245 | 1019  |
| >TP53-H168L MAIYKQSQH  | 205   | >TP53-H168L MAIYKQSQLM | 395  | 190   |
| >TP53-H168L MAIYKQSQH  | 911   | >TP53-H168L MAIYKQSQL  | 12   | 899   |
| >TP53-H168L MAIYKQSQH  | 20    | >TP53-H168L MAIYKQSQLM | 27   | 7     |
| >TP53-H168L MAIYKQSQH  | 6958  | >TP53-H168L MAIYKQSQL  | 360  | 6598  |
| >TP53-H168L MAIYKQSQH  | 151   | >TP53-H168L MAIYKQSQLM | 224  | 73    |
| >TP53-H168L MAIYKQSQH  | 894   | >TP53-H168L MAIYKQSQL  | 394  | 500   |
| >TP53-H168L MAIYKQSQH  | 583   | >TP53-H168L MAIYKQSQLM | 151  | 432   |
| >TP53-H168L AMAIYKQSQI | 221   | >TP53-H168L AMAIYKQSQI | 311  | 90    |
| >TP53-H168L AMAIYKQSQI | 22425 | >TP53-H168L AMAIYKQSQI | 132  | 22293 |
| >TP53-H168L AMAIYKQSQI | 161   | >TP53-H168L AMAIYKQSQI | 63   | 98    |
| >TP53-H168L AMAIYKQSQI | 12738 | >TP53-H168L AMAIYKQSQI | 30   | 12708 |
| >TP53-H168L AMAIYKQSQI | 199   | >TP53-H168L AMAIYKQSQI | 194  | 5     |
| >TP53-H168L AMAIYKQSQI | 21950 | >TP53-H168L AMAIYKQSQI | 87   | 21863 |
| >TP53-H168L AMAIYKQSQI | 283   | >TP53-H168L AMAIYKQSQI | 677  | 394   |
| >TP53-H168L AMAIYKQSQI | 24854 | >TP53-H168L AMAIYKQSQI | 231  | 24623 |
| >TP53-H168L AMAIYKQSQI | 10103 | >TP53-H168L AMAIYKQSQI | 5    | 10098 |
| >TP53-H168L AMAIYKQSQI | 49    | >TP53-H168L AMAIYKQSQI | 53   | 4     |
| >TP53-H168L AMAIYKQSQI | 55    | >TP53-H168L AMAIYKQSQI | 206  | 151   |
| >TP53-H168L AMAIYKQSQI | 2139  | >TP53-H168L AMAIYKQSQI | 337  | 1802  |
| >TP53-H168L AMAIYKQSQI | 69    | >TP53-H168L AMAIYKQSQI | 135  | 66    |
| >TP53-H168L HMTEVVRR   | 38    | >TP53-H168L NMTEVVRR   | 61   | 23    |
| >TP53-H168L HMTEVVRR   | 38    | >TP53-H168L NMTEVVRR   | 429  | 391   |
| >TP53-H168L HMTEVVRR   | 65    | >TP53-H168L NMTEVVRR   | 89   | 24    |
| >TP53-H168L HMTEVVRR   | 35    | >TP53-H168L NMTEVVRR   | 35   | 0     |
| >TP53-H168L HMTEVVRR   | 64    | >TP53-H168L NMTEVVRR   | 272  | 208   |
| >TP53-H168L QHMTEVVRR  | 2161  | >TP53-H168L QNMTEVVRR  | 488  | 1673  |
| >TP53-H168L QHMTEVVRR  | 269   | >TP53-H168L QNMTEVVRR  | 264  | 5     |
| >TP53-H168L QHMTEVVRR  | 195   | >TP53-H168L QNMTEVVRR  | 179  | 16    |
| >TP53-H168L RAMAIYKQSC | 354   | >TP53-H168L RAMAIYKQSC | 2982 | 2628  |
| >TP53-H168L RAMAIYKQSC | 375   | >TP53-H168L RAMAIYKQSC | 3645 | 3270  |
| >TP53-H168L SQHMTEVV   | 670   | >TP53-H168L SQNMTEVV   | 350  | 320   |
| >TP53-H168L SQHMTEVV   | 115   | >TP53-H168L SQNMTEVV   | 84   | 31    |
| >TP53-H168L SQHMTEVV   | 256   | >TP53-H168L SQNMTEVV   | 250  | 6     |
| >TP53-H168L SQHMTEVV   | 543   | >TP53-H168L SQNMTEVV   | 257  | 286   |

|                       |       |                       |       |       |
|-----------------------|-------|-----------------------|-------|-------|
| >TP53-H168†SQHMTEVV   | 115   | >TP53-H168†SQNMTEVV   | 64    | 51    |
| >TP53-H168†SQHMTEVV   | 504   | >TP53-H168†SQNMTEVV   | 220   | 284   |
| >TP53-H168†SQHMTEVV   | 88    | >TP53-H168†SQNMTEVV   | 181   | 93    |
| >TP53-H168†SQHMTEVV   | 162   | >TP53-H168†SQNMTEVV   | 316   | 154   |
| >TP53-H168†SQHMTEVV   | 434   | >TP53-H168†SQNMTEVV   | 838   | 404   |
| >TP53-H168†SQHMTEVV   | 363   | >TP53-H168†SQNMTEVV   | 664   | 301   |
| >TP53-H168†QSQHMTEVV  | 230   | >TP53-H168†QSQNMTEVV  | 268   | 38    |
| >TP53-H168†QSQHMTEVV  | 321   | >TP53-H168†QSQNMTEVV  | 246   | 75    |
| >TP53-H168†QSQHMTEVV  | 973   | >TP53-H168†QSQNMTEVV  | 407   | 566   |
| >TP53-H168†QSQHMTEVV  | 185   | >TP53-H168†QSQNMTEVV  | 126   | 59    |
| >TP53-H168†QSQHMTEV   | 206   | >TP53-H168†QSQNMTEV   | 350   | 144   |
| >TP53-H168†QSQHMTEVV  | 303   | >TP53-H168†QSQNMTEVV  | 699   | 396   |
| >TP53-H168†QSQHMTEVV  | 306   | >TP53-H168†QSQNMTEVV  | 344   | 38    |
| >TP53-H168†KQSQHMTEV  | 16035 | >TP53-H168†KQSQNMTEV  | 290   | 15745 |
| >TP53-H168†KQSQHMTEV  | 82    | >TP53-H168†KQSQNMTEV  | 212   | 130   |
| >TP53-H168†KQSQHMTEV  | 51    | >TP53-H168†KQSQNMTEV  | 80    | 29    |
| >TP53-H168†KQSQHMTEV  | 298   | >TP53-H168†KQSQNMTEV  | 317   | 19    |
| >TP53-H168†KQSQHMTEV  | 9     | >TP53-H168†KQSQNMTEV  | 22    | 13    |
| >TP53-H168†KQSQHMTEV  | 273   | >TP53-H168†KQSQNMTEV  | 246   | 27    |
| >TP53-H168†KQSQHMTEV  | 10    | >TP53-H168†KQSQNMTEV  | 12    | 2     |
| >TP53-H168†KQSQHMTEV  | 426   | >TP53-H168†KQSQNMTEV  | 258   | 168   |
| >TP53-H168†KQSQHMTEV  | 718   | >TP53-H168†KQSQNMTEV  | 440   | 278   |
| >TP53-H168†KQSQHMTEV  | 2400  | >TP53-H168†KQSQNMTEV  | 423   | 1977  |
| >TP53-H168†KQSQHMTEV  | 1427  | >TP53-H168†KQSQNMTEV  | 417   | 1010  |
| >TP53-H168†KQSQHMTEV  | 35    | >TP53-H168†KQSQNMTEV  | 71    | 36    |
| >TP53-H168†KQSQHMTEV  | 222   | >TP53-H168†KQSQNMTEV  | 347   | 125   |
| >TP53-H168†KQSQHMTEV  | 86    | >TP53-H168†KQSQNMTEV  | 81    | 5     |
| >TP53-H168†KQSQHMTEV  | 110   | >TP53-H168†KQSQNMTEV  | 116   | 6     |
| >TP53-H168†KQSQHMTEV  | 185   | >TP53-H168†KQSQNMTEV  | 179   | 6     |
| >TP53-H168†KQSQHMTEV  | 60    | >TP53-H168†KQSQNMTEV  | 60    | 0     |
| >TP53-H168†YKQSQHMTE  | 467   | >TP53-H168†YKQSQNMTE  | 491   | 24    |
| >TP53-H168†YKQSQHMTE  | 30    | >TP53-H168†YKQSQNMTE  | 34    | 4     |
| >TP53-H168†YKQSQHMTE  | 42    | >TP53-H168†YKQSQNMTE  | 48    | 6     |
| >TP53-H168†IYKQSQHMTI | 402   | >TP53-H168†IYKQSQNMTI | 93    | 309   |
| >TP53-H168†IYKQSQHM   | 394   | >TP53-H168†IYKQSQNM   | 538   | 144   |
| >TP53-H168†AIYKQSQHM  | 91    | >TP53-H168†AIYKQSQNM  | 158   | 67    |
| >TP53-H168†AIYKQSQH   | 349   | >TP53-H168†AIYKQSQN   | 11839 | 11490 |
| >TP53-H168†AIYKQSQHM  | 62    | >TP53-H168†AIYKQSQNM  | 367   | 305   |
| >TP53-H168†AIYKQSQHM  | 198   | >TP53-H168†AIYKQSQNM  | 172   | 26    |
| >TP53-H168†AIYKQSQHM  | 514   | >TP53-H168†AIYKQSQNM  | 336   | 178   |
| >TP53-H168†MAIYKQSQH  | 226   | >TP53-H168†MAIYKQSQN  | 1164  | 938   |
| >TP53-H168†MAIYKQSQH  | 205   | >TP53-H168†MAIYKQSQN  | 174   | 31    |
| >TP53-H168†MAIYKQSQH  | 20    | >TP53-H168†MAIYKQSQN  | 15    | 5     |

|                        |     |                        |      |      |
|------------------------|-----|------------------------|------|------|
| >TP53-H168F MAIYKQSQH  | 151 | >TP53-H168F MAIYKQSQN  | 570  | 419  |
| >TP53-H168F MAIYKQSQH  | 583 | >TP53-H168F MAIYKQSQN  | 241  | 342  |
| >TP53-H168F AMAIYKQSQI | 221 | >TP53-H168F AMAIYKQSQI | 468  | 247  |
| >TP53-H168F AMAIYKQSQI | 161 | >TP53-H168F AMAIYKQSQI | 111  | 50   |
| >TP53-H168F AMAIYKQSQI | 199 | >TP53-H168F AMAIYKQSQI | 233  | 34   |
| >TP53-H168F AMAIYKQSQI | 283 | >TP53-H168F AMAIYKQSQI | 605  | 322  |
| >TP53-H168F AMAIYKQSQI | 49  | >TP53-H168F AMAIYKQSQI | 56   | 7    |
| >TP53-H168F AMAIYKQSQI | 55  | >TP53-H168F AMAIYKQSQI | 194  | 139  |
| >TP53-H168F AMAIYKQSQI | 69  | >TP53-H168F AMAIYKQSQI | 60   | 9    |
| >TP53-H168F HMTEVVRR   | 38  | >TP53-H168F PMTEVVRR   | 225  | 187  |
| >TP53-H168F HMTEVVRR   | 38  | >TP53-H168F PMTEVVRR   | 2130 | 2092 |
| >TP53-H168F HMTEVVRR   | 65  | >TP53-H168F PMTEVVRR   | 1912 | 1847 |
| >TP53-H168F HMTEVVRR   | 35  | >TP53-H168F PMTEVVRR   | 2067 | 2032 |
| >TP53-H168F HMTEVVRR   | 64  | >TP53-H168F PMTEVVRR   | 561  | 497  |
| >TP53-H168F QHMTEVVR   | 269 | >TP53-H168F QPMTEVVR   | 282  | 13   |
| >TP53-H168F QHMTEVVR   | 195 | >TP53-H168F QPMTEVVR   | 199  | 4    |
| >TP53-H168F RAMAIYKQSC | 354 | >TP53-H168F RAMAIYKQSC | 7437 | 7083 |
| >TP53-H168F RAMAIYKQSC | 375 | >TP53-H168F RAMAIYKQSC | 9044 | 8669 |
| >TP53-H168F SQHMTEVV   | 115 | >TP53-H168F SQPMTEVV   | 75   | 40   |
| >TP53-H168F SQHMTEVV   | 256 | >TP53-H168F SQPMTEVV   | 513  | 257  |
| >TP53-H168F SQHMTEVV   | 543 | >TP53-H168F SQPMTEVV   | 386  | 157  |
| >TP53-H168F SQHMTEVVR  | 115 | >TP53-H168F SQPMTEVVR  | 1938 | 1823 |
| >TP53-H168F SQHMTEVV   | 88  | >TP53-H168F SQPMTEVV   | 1193 | 1105 |
| >TP53-H168F SQHMTEVVR  | 162 | >TP53-H168F SQPMTEVVR  | 1229 | 1067 |
| >TP53-H168F SQHMTEVVR  | 434 | >TP53-H168F SQPMTEVVR  | 411  | 23   |
| >TP53-H168F SQHMTEVVR  | 363 | >TP53-H168F SQPMTEVVR  | 315  | 48   |
| >TP53-H168F QSQHMTEVV  | 230 | >TP53-H168F QSQPMTEVV  | 351  | 121  |
| >TP53-H168F QSQHMTEVV  | 321 | >TP53-H168F QSQPMTEVV  | 234  | 87   |
| >TP53-H168F QSQHMTEVV  | 973 | >TP53-H168F QSQPMTEVV  | 375  | 598  |
| >TP53-H168F QSQHMTEVV  | 185 | >TP53-H168F QSQPMTEVV  | 152  | 33   |
| >TP53-H168F QSQHMTEV   | 206 | >TP53-H168F QSQPMTEV   | 126  | 80   |
| >TP53-H168F QSQHMTEVV  | 303 | >TP53-H168F QSQPMTEVV  | 247  | 56   |
| >TP53-H168F QSQHMTEVV  | 306 | >TP53-H168F QSQPMTEVV  | 284  | 22   |
| >TP53-H168F KQSQHMTEV  | 82  | >TP53-H168F KQSQPMTEV  | 283  | 201  |
| >TP53-H168F KQSQHMTEV  | 51  | >TP53-H168F KQSQPMTEV  | 219  | 168  |
| >TP53-H168F KQSQHMTEV  | 298 | >TP53-H168F KQSQPMTEV  | 334  | 36   |
| >TP53-H168F KQSQHMTEV  | 9   | >TP53-H168F KQSQPMTEV  | 44   | 35   |
| >TP53-H168F KQSQHMTEV  | 273 | >TP53-H168F KQSQPMTEV  | 290  | 17   |
| >TP53-H168F KQSQHMTEV  | 10  | >TP53-H168F KQSQPMTEV  | 10   | 0    |
| >TP53-H168F KQSQHMTEV  | 426 | >TP53-H168F KQSQPMTEV  | 212  | 214  |
| >TP53-H168F KQSQHMTEV  | 718 | >TP53-H168F KQSQPMTEV  | 405  | 313  |
| >TP53-H168F KQSQHMTEV  | 35  | >TP53-H168F KQSQPMTEV  | 79   | 44   |
| >TP53-H168F KQSQHMTEV  | 222 | >TP53-H168F KQSQPMTEV  | 408  | 186  |

|                       |      |                       |       |       |
|-----------------------|------|-----------------------|-------|-------|
| >TP53-H168FKQSQHMTEV  | 86   | >TP53-H168FKQSQPMTEV  | 60    | 26    |
| >TP53-H168FKQSQHMTEV  | 110  | >TP53-H168FKQSQPMTEV  | 101   | 9     |
| >TP53-H168FKQSQHMTEV  | 185  | >TP53-H168FKQSQPMTEV  | 164   | 21    |
| >TP53-H168FKQSQHMTEV  | 60   | >TP53-H168FKQSQPMTEV  | 72    | 12    |
| >TP53-H168FYKQSQHMTE  | 467  | >TP53-H168FYKQSQPMTE' | 721   | 254   |
| >TP53-H168FYKQSQHMTE  | 30   | >TP53-H168FYKQSQPMTE' | 29    | 1     |
| >TP53-H168FYKQSQHMTE  | 42   | >TP53-H168FYKQSQPMTE' | 48    | 6     |
| >TP53-H168FIYKQSQHMTI | 402  | >TP53-H168FIYKQSQPMTE | 752   | 350   |
| >TP53-H168FIYKQSQHM   | 394  | >TP53-H168FIYKQSQPM   | 158   | 236   |
| >TP53-H168FAIYKQSQHM  | 91   | >TP53-H168FAIYKQSQPM  | 57    | 34    |
| >TP53-H168FAIYKQSQH   | 349  | >TP53-H168FAIYKQSQP   | 15258 | 14909 |
| >TP53-H168FAIYKQSQHM  | 750  | >TP53-H168FAIYKQSQPM  | 335   | 415   |
| >TP53-H168FAIYKQSQHM  | 62   | >TP53-H168FAIYKQSQPM  | 45    | 17    |
| >TP53-H168FAIYKQSQHM  | 2859 | >TP53-H168FAIYKQSQPM  | 416   | 2443  |
| >TP53-H168FAIYKQSQHM  | 198  | >TP53-H168FAIYKQSQPM  | 74    | 124   |
| >TP53-H168FAIYKQSQHM  | 514  | >TP53-H168FAIYKQSQPM  | 190   | 324   |
| >TP53-H168FAIYKQSQHM  | 5730 | >TP53-H168FAIYKQSQPM  | 377   | 5353  |
| >TP53-H168FMAIYKQSQHI | 226  | >TP53-H168FMAIYKQSQPI | 157   | 69    |
| >TP53-H168FMAIYKQSQHI | 205  | >TP53-H168FMAIYKQSQPI | 81    | 124   |
| >TP53-H168FMAIYKQSQHI | 20   | >TP53-H168FMAIYKQSQPI | 12    | 8     |
| >TP53-H168FMAIYKQSQHI | 151  | >TP53-H168FMAIYKQSQPI | 753   | 602   |
| >TP53-H168FMAIYKQSQHI | 583  | >TP53-H168FMAIYKQSQPI | 403   | 180   |
| >TP53-H168FAMAIYKQSQI | 221  | >TP53-H168FAMAIYKQSQI | 186   | 35    |
| >TP53-H168FAMAIYKQSQI | 161  | >TP53-H168FAMAIYKQSQI | 79    | 82    |
| >TP53-H168FAMAIYKQSQI | 732  | >TP53-H168FAMAIYKQSQI | 234   | 498   |
| >TP53-H168FAMAIYKQSQI | 199  | >TP53-H168FAMAIYKQSQI | 116   | 83    |
| >TP53-H168FAMAIYKQSQI | 283  | >TP53-H168FAMAIYKQSQI | 413   | 130   |
| >TP53-H168FAMAIYKQSQI | 49   | >TP53-H168FAMAIYKQSQI | 54    | 5     |
| >TP53-H168FAMAIYKQSQI | 55   | >TP53-H168FAMAIYKQSQI | 43    | 12    |
| >TP53-H168FAMAIYKQSQI | 69   | >TP53-H168FAMAIYKQSQI | 29    | 40    |
| >TP53-H168(HMTEVVRR   | 38   | >TP53-H168(QMTEVVRR   | 74    | 36    |
| >TP53-H168(HMTEVVRR   | 38   | >TP53-H168(QMTEVVRR   | 216   | 178   |
| >TP53-H168(HMTEVVRR   | 65   | >TP53-H168(QMTEVVRR   | 513   | 448   |
| >TP53-H168(HMTEVVRR   | 35   | >TP53-H168(QMTEVVRR   | 82    | 47    |
| >TP53-H168(HMTEVVRR   | 64   | >TP53-H168(QMTEVVRR   | 207   | 143   |
| >TP53-H168(QHMTEVVR   | 2199 | >TP53-H168(QQMTEVVR   | 147   | 2052  |
| >TP53-H168(QHMTEVVR   | 269  | >TP53-H168(QQMTEVVR   | 114   | 155   |
| >TP53-H168(QHMTEVVR   | 195  | >TP53-H168(QQMTEVVR   | 87    | 108   |
| >TP53-H168(RAMAIYKQSC | 354  | >TP53-H168(RAMAIYKQSC | 1611  | 1257  |
| >TP53-H168(RAMAIYKQSC | 375  | >TP53-H168(RAMAIYKQSC | 2014  | 1639  |
| >TP53-H168(SQHMTEVV   | 115  | >TP53-H168(SQQMTEVV   | 131   | 16    |
| >TP53-H168(SQHMTEVV   | 256  | >TP53-H168(SQQMTEVV   | 659   | 403   |
| >TP53-H168(SQHMTEVVR  | 115  | >TP53-H168(SQQMTEVVR  | 171   | 56    |

|                       |      |                       |       |       |
|-----------------------|------|-----------------------|-------|-------|
| >TP53-H168(SQHMTEVV   | 504  | >TP53-H168(SQQMTEVV   | 262   | 242   |
| >TP53-H168(SQHMTEVV   | 88   | >TP53-H168(SQQMTEVV   | 373   | 285   |
| >TP53-H168(SQHMTEVV   | 162  | >TP53-H168(SQQMTEVV   | 614   | 452   |
| >TP53-H168(SQHMTEVV   | 434  | >TP53-H168(SQQMTEVV   | 925   | 491   |
| >TP53-H168(SQHMTEVV   | 363  | >TP53-H168(SQQMTEVV   | 750   | 387   |
| >TP53-H168(QSQHMTEVV  | 230  | >TP53-H168(QSQQMTEVV  | 414   | 184   |
| >TP53-H168(QSQHMTEVV  | 321  | >TP53-H168(QSQQMTEVV  | 916   | 595   |
| >TP53-H168(QSQHMTEVV  | 185  | >TP53-H168(QSQQMTEVV  | 167   | 18    |
| >TP53-H168(QSQHMTEV   | 206  | >TP53-H168(QSQQMTEV   | 760   | 554   |
| >TP53-H168(QSQHMTEVV  | 303  | >TP53-H168(QSQQMTEVV  | 1492  | 1189  |
| >TP53-H168(QSQHMTEVV  | 306  | >TP53-H168(QSQQMTEVV  | 428   | 122   |
| >TP53-H168(KQSQHMTEV  | 82   | >TP53-H168(KQSQQMTEV  | 260   | 178   |
| >TP53-H168(KQSQHMTEV  | 51   | >TP53-H168(KQSQQMTEV  | 92    | 41    |
| >TP53-H168(KQSQHMTEV  | 298  | >TP53-H168(KQSQQMTEV  | 488   | 190   |
| >TP53-H168(KQSQHMTEV  | 9    | >TP53-H168(KQSQQMTEV  | 23    | 14    |
| >TP53-H168(KQSQHMTEV  | 273  | >TP53-H168(KQSQQMTEV  | 409   | 136   |
| >TP53-H168(KQSQHMTEV  | 10   | >TP53-H168(KQSQQMTEV  | 13    | 3     |
| >TP53-H168(KQSQHMTEV  | 426  | >TP53-H168(KQSQQMTEV  | 799   | 373   |
| >TP53-H168(KQSQHMTEV  | 1212 | >TP53-H168(KQSQQMTEV  | 456   | 756   |
| >TP53-H168(KQSQHMTEV  | 35   | >TP53-H168(KQSQQMTEV  | 58    | 23    |
| >TP53-H168(KQSQHMTEV  | 222  | >TP53-H168(KQSQQMTEV  | 354   | 132   |
| >TP53-H168(KQSQHMTEV  | 86   | >TP53-H168(KQSQQMTEV  | 121   | 35    |
| >TP53-H168(KQSQHMTEV  | 110  | >TP53-H168(KQSQQMTEV  | 179   | 69    |
| >TP53-H168(KQSQHMTEV  | 185  | >TP53-H168(KQSQQMTEV  | 265   | 80    |
| >TP53-H168(KQSQHMTEV  | 60   | >TP53-H168(KQSQQMTEV  | 59    | 1     |
| >TP53-H168(YKQSQHMTE  | 467  | >TP53-H168(YKQSQQMTE  | 366   | 101   |
| >TP53-H168(YKQSQHMTE  | 30   | >TP53-H168(YKQSQQMTE  | 40    | 10    |
| >TP53-H168(YKQSQHMTE  | 42   | >TP53-H168(YKQSQQMTE  | 59    | 17    |
| >TP53-H168(IYKQSQHMTI | 402  | >TP53-H168(IYKQSQQMTI | 150   | 252   |
| >TP53-H168(IYKQSQHM   | 561  | >TP53-H168(IYKQSQQM   | 402   | 159   |
| >TP53-H168(IYKQSQHM   | 394  | >TP53-H168(IYKQSQQM   | 781   | 387   |
| >TP53-H168(AIYKQSQHM  | 91   | >TP53-H168(AIYKQSQQM  | 162   | 71    |
| >TP53-H168(AIYKQSQH   | 349  | >TP53-H168(AIYKQSQQ   | 10542 | 10193 |
| >TP53-H168(AIYKQSQHM  | 62   | >TP53-H168(AIYKQSQQM  | 184   | 122   |
| >TP53-H168(AIYKQSQHM  | 198  | >TP53-H168(AIYKQSQQM  | 351   | 153   |
| >TP53-H168(AIYKQSQHM  | 514  | >TP53-H168(AIYKQSQQM  | 130   | 384   |
| >TP53-H168(MAIYKQSQH  | 526  | >TP53-H168(MAIYKQSQQ  | 305   | 221   |
| >TP53-H168(MAIYKQSQH  | 226  | >TP53-H168(MAIYKQSQQ  | 631   | 405   |
| >TP53-H168(MAIYKQSQH  | 205  | >TP53-H168(MAIYKQSQQ  | 312   | 107   |
| >TP53-H168(MAIYKQSQH  | 20   | >TP53-H168(MAIYKQSQQ  | 11    | 9     |
| >TP53-H168(MAIYKQSQH  | 151  | >TP53-H168(MAIYKQSQQ  | 154   | 3     |
| >TP53-H168(MAIYKQSQH  | 583  | >TP53-H168(MAIYKQSQQ  | 220   | 363   |
| >TP53-H168(AMAIYKQSQ  | 221  | >TP53-H168(AMAIYKQSQ  | 482   | 261   |

|                        |       |                        |      |       |
|------------------------|-------|------------------------|------|-------|
| >TP53-H168C AMAIYKQSQI | 161   | >TP53-H168C AMAIYKQSQI | 137  | 24    |
| >TP53-H168C AMAIYKQSQI | 199   | >TP53-H168C AMAIYKQSQI | 122  | 77    |
| >TP53-H168C AMAIYKQSQI | 283   | >TP53-H168C AMAIYKQSQI | 495  | 212   |
| >TP53-H168C AMAIYKQSQI | 10103 | >TP53-H168C AMAIYKQSQI | 126  | 9977  |
| >TP53-H168C AMAIYKQSQI | 49    | >TP53-H168C AMAIYKQSQI | 26   | 23    |
| >TP53-H168C AMAIYKQSQI | 55    | >TP53-H168C AMAIYKQSQI | 125  | 70    |
| >TP53-H168C AMAIYKQSQI | 69    | >TP53-H168C AMAIYKQSQI | 101  | 32    |
| >TP53-H168C AMAIYKQSQI | 1491  | >TP53-H168C AMAIYKQSQI | 468  | 1023  |
| >TP53-H168F HMTEVVRR   | 38    | >TP53-H168F RMTEVVRR   | 11   | 27    |
| >TP53-H168F HMTEVVRR   | 1236  | >TP53-H168F RMTEVVRR   | 406  | 830   |
| >TP53-H168F HMTEVVRR   | 38    | >TP53-H168F RMTEVVRR   | 15   | 23    |
| >TP53-H168F HMTEVVRR   | 1361  | >TP53-H168F RMTEVVRR   | 353  | 1008  |
| >TP53-H168F HMTEVVRR   | 65    | >TP53-H168F RMTEVVRR   | 1690 | 1625  |
| >TP53-H168F HMTEVVRR   | 35    | >TP53-H168F RMTEVVRR   | 420  | 385   |
| >TP53-H168F HMTEVVRR   | 64    | >TP53-H168F RMTEVVRR   | 71   | 7     |
| >TP53-H168F QHMTEVVR   | 17622 | >TP53-H168F QRMTEVVR   | 134  | 17488 |
| >TP53-H168F QHMTEVVR   | 16541 | >TP53-H168F QRMTEVVR   | 82   | 16459 |
| >TP53-H168F QHMTEVVR   | 269   | >TP53-H168F QRMTEVVR   | 253  | 16    |
| >TP53-H168F QHMTEVVR   | 195   | >TP53-H168F QRMTEVVR   | 166  | 29    |
| >TP53-H168F RAMAIYKQSC | 3448  | >TP53-H168F RAMAIYKQSC | 231  | 3217  |
| >TP53-H168F RAMAIYKQSC | 809   | >TP53-H168F RAMAIYKQSC | 8    | 801   |
| >TP53-H168F RAMAIYKQSC | 12454 | >TP53-H168F RAMAIYKQSC | 82   | 12372 |
| >TP53-H168F RAMAIYKQSC | 354   | >TP53-H168F RAMAIYKQSC | 2811 | 2457  |
| >TP53-H168F RAMAIYKQSC | 375   | >TP53-H168F RAMAIYKQSC | 4315 | 3940  |
| >TP53-H168F RAMAIYKQSC | 31574 | >TP53-H168F RAMAIYKQSC | 291  | 31283 |
| >TP53-H168F SQHMTEVV   | 115   | >TP53-H168F SQRMTEVV   | 581  | 466   |
| >TP53-H168F SQHMTEVV   | 256   | >TP53-H168F SQRMTEVV   | 2770 | 2514  |
| >TP53-H168F SQHMTEVVR  | 115   | >TP53-H168F SQRMTEVVR  | 89   | 26    |
| >TP53-H168F SQHMTEVVR  | 504   | >TP53-H168F SQRMTEVVR  | 145  | 359   |
| >TP53-H168F SQHMTEVV   | 504   | >TP53-H168F SQRMTEVV   | 284  | 220   |
| >TP53-H168F SQHMTEVV   | 88    | >TP53-H168F SQRMTEVV   | 58   | 30    |
| >TP53-H168F SQHMTEVVR  | 162   | >TP53-H168F SQRMTEVVR  | 80   | 82    |
| >TP53-H168F SQHMTEVVR  | 572   | >TP53-H168F SQRMTEVVR  | 334  | 238   |
| >TP53-H168F SQHMTEVVR  | 434   | >TP53-H168F SQRMTEVVR  | 988  | 554   |
| >TP53-H168F SQHMTEVVR  | 363   | >TP53-H168F SQRMTEVVR  | 836  | 473   |
| >TP53-H168F QSQHMTEVV  | 230   | >TP53-H168F QSQRMTEVV  | 313  | 83    |
| >TP53-H168F QSQHMTEVV  | 321   | >TP53-H168F QSQRMTEVV  | 218  | 103   |
| >TP53-H168F QSQHMTEVV  | 185   | >TP53-H168F QSQRMTEVV  | 179  | 6     |
| >TP53-H168F QSQHMTEV   | 206   | >TP53-H168F QSQRMTEV   | 652  | 446   |
| >TP53-H168F QSQHMTEVV  | 303   | >TP53-H168F QSQRMTEVV  | 1097 | 794   |
| >TP53-H168F QSQHMTEVV  | 306   | >TP53-H168F QSQRMTEVV  | 525  | 219   |
| >TP53-H168F KQSQHMTEV  | 82    | >TP53-H168F KQSQRMTEV  | 197  | 115   |
| >TP53-H168F KQSQHMTEV  | 51    | >TP53-H168F KQSQRMTEV  | 125  | 74    |



|                       |       |                       |      |       |
|-----------------------|-------|-----------------------|------|-------|
| >TP53-H168FKQSQHMTEV  | 298   | >TP53-H168FKQSQRMTEV  | 492  | 194   |
| >TP53-H168FKQSQHMTEV  | 9     | >TP53-H168FKQSQRMTEV  | 18   | 9     |
| >TP53-H168FKQSQHMTEV  | 273   | >TP53-H168FKQSQRMTEV  | 461  | 188   |
| >TP53-H168FKQSQHMTEV  | 10    | >TP53-H168FKQSQRMTEV  | 11   | 1     |
| >TP53-H168FKQSQHMTEV  | 426   | >TP53-H168FKQSQRMTEV  | 1077 | 651   |
| >TP53-H168FKQSQHMTEV  | 35    | >TP53-H168FKQSQRMTEV  | 38   | 3     |
| >TP53-H168FKQSQHMTEV  | 222   | >TP53-H168FKQSQRMTEV  | 438  | 216   |
| >TP53-H168FKQSQHMTEV  | 86    | >TP53-H168FKQSQRMTEV  | 140  | 54    |
| >TP53-H168FKQSQHMTEV  | 110   | >TP53-H168FKQSQRMTEV  | 176  | 66    |
| >TP53-H168FKQSQHMTEV  | 185   | >TP53-H168FKQSQRMTEV  | 296  | 111   |
| >TP53-H168FKQSQHMTEV  | 60    | >TP53-H168FKQSQRMTEV  | 62   | 2     |
| >TP53-H168FYKQSQHMTE  | 467   | >TP53-H168FYKQSQRMTE  | 578  | 111   |
| >TP53-H168FYKQSQHMTE  | 30    | >TP53-H168FYKQSQRMTE  | 43   | 13    |
| >TP53-H168FYKQSQHMTE  | 42    | >TP53-H168FYKQSQRMTE  | 52   | 10    |
| >TP53-H168FIYKQSQHMTE | 402   | >TP53-H168FIYKQSQRMTE | 174  | 228   |
| >TP53-H168FIYKQSQHM   | 394   | >TP53-H168FIYKQSQRM   | 1061 | 667   |
| >TP53-H168FAIYKQSQHM  | 91    | >TP53-H168FAIYKQSQRM  | 65   | 26    |
| >TP53-H168FAIYKQSQH   | 349   | >TP53-H168FAIYKQSQR   | 128  | 221   |
| >TP53-H168FAIYKQSQH   | 4120  | >TP53-H168FAIYKQSQR   | 275  | 3845  |
| >TP53-H168FAIYKQSQH   | 9199  | >TP53-H168FAIYKQSQR   | 50   | 9149  |
| >TP53-H168FAIYKQSQH   | 17514 | >TP53-H168FAIYKQSQR   | 213  | 17301 |
| >TP53-H168FAIYKQSQHM  | 62    | >TP53-H168FAIYKQSQRM  | 282  | 220   |
| >TP53-H168FAIYKQSQHM  | 198   | >TP53-H168FAIYKQSQRM  | 650  | 452   |
| >TP53-H168FAIYKQSQHM  | 514   | >TP53-H168FAIYKQSQRM  | 166  | 348   |
| >TP53-H168FMAIYKQSQH  | 5150  | >TP53-H168FMAIYKQSQR  | 18   | 5132  |
| >TP53-H168FMAIYKQSQH  | 18163 | >TP53-H168FMAIYKQSQR  | 85   | 18078 |
| >TP53-H168FMAIYKQSQH  | 526   | >TP53-H168FMAIYKQSQR  | 4    | 522   |
| >TP53-H168FMAIYKQSQH  | 226   | >TP53-H168FMAIYKQSQRI | 934  | 708   |
| >TP53-H168FMAIYKQSQH  | 205   | >TP53-H168FMAIYKQSQRI | 583  | 378   |
| >TP53-H168FMAIYKQSQH  | 20    | >TP53-H168FMAIYKQSQRI | 11   | 9     |
| >TP53-H168FMAIYKQSQH  | 151   | >TP53-H168FMAIYKQSQRI | 387  | 236   |
| >TP53-H168FMAIYKQSQH  | 583   | >TP53-H168FMAIYKQSQRI | 362  | 221   |
| >TP53-H168FAMAIYKQSQI | 221   | >TP53-H168FAMAIYKQSQI | 262  | 41    |
| >TP53-H168FAMAIYKQSQI | 161   | >TP53-H168FAMAIYKQSQI | 189  | 28    |
| >TP53-H168FAMAIYKQSQI | 199   | >TP53-H168FAMAIYKQSQI | 150  | 49    |
| >TP53-H168FAMAIYKQSQI | 283   | >TP53-H168FAMAIYKQSQI | 966  | 683   |
| >TP53-H168FAMAIYKQSQI | 49    | >TP53-H168FAMAIYKQSQI | 31   | 18    |
| >TP53-H168FAMAIYKQSQI | 8709  | >TP53-H168FAMAIYKQSQI | 58   | 8651  |
| >TP53-H168FAMAIYKQSQI | 18847 | >TP53-H168FAMAIYKQSQI | 198  | 18649 |
| >TP53-H168FAMAIYKQSQI | 55    | >TP53-H168FAMAIYKQSQI | 167  | 112   |
| >TP53-H168FAMAIYKQSQI | 69    | >TP53-H168FAMAIYKQSQI | 195  | 126   |
| >TP53-H168\HMTEVVRR   | 4723  | >TP53-H168\YMTEVVRR   | 334  | 4389  |
| >TP53-H168\HMTEVVRR   | 5899  | >TP53-H168\YMTEVVRR   | 245  | 5654  |

|                       |       |                       |     |       |
|-----------------------|-------|-----------------------|-----|-------|
| >TP53-H168\HMTEVRRRC  | 38    | >TP53-H168\YMTEVRRRC  | 3   | 35    |
| >TP53-H168\HMTEVRRRC  | 2818  | >TP53-H168\YMTEVRRRC  | 114 | 2704  |
| >TP53-H168\HMTEVRRRC  | 4120  | >TP53-H168\YMTEVRRRC  | 80  | 4040  |
| >TP53-H168\HMTEVRRRC  | 6679  | >TP53-H168\YMTEVRRRC  | 168 | 6511  |
| >TP53-H168\HMTEVRRR   | 7299  | >TP53-H168\YMTEVRRR   | 284 | 7015  |
| >TP53-H168\HMTEVRRRC  | 579   | >TP53-H168\YMTEVRRRC  | 16  | 563   |
| >TP53-H168\HMTEVRRR   | 38    | >TP53-H168\YMTEVRRR   | 142 | 104   |
| >TP53-H168\HMTEVRRR   | 65    | >TP53-H168\YMTEVRRR   | 138 | 73    |
| >TP53-H168\HMTEVRRR   | 35    | >TP53-H168\YMTEVRRR   | 21  | 14    |
| >TP53-H168\HMTEVRRR   | 64    | >TP53-H168\YMTEVRRR   | 259 | 195   |
| >TP53-H168\QHMTEVVR   | 10190 | >TP53-H168\QYMTEVVR   | 368 | 9822  |
| >TP53-H168\QHMTEVRR   | 11347 | >TP53-H168\QYMTEVRR   | 409 | 10938 |
| >TP53-H168\QHMTEVVR   | 2953  | >TP53-H168\QYMTEVVR   | 459 | 2494  |
| >TP53-H168\QHMTEVRR   | 2161  | >TP53-H168\QYMTEVRR   | 375 | 1786  |
| >TP53-H168\QHMTEVVR   | 269   | >TP53-H168\QYMTEVVR   | 18  | 251   |
| >TP53-H168\QHMTEVRR   | 195   | >TP53-H168\QYMTEVRR   | 15  | 180   |
| >TP53-H168\RAMAIYKQSC | 3448  | >TP53-H168\RAMAIYKQSC | 359 | 3089  |
| >TP53-H168\RAMAIYKQSC | 12435 | >TP53-H168\RAMAIYKQSC | 241 | 12194 |
| >TP53-H168\RAMAIYKQSC | 18428 | >TP53-H168\RAMAIYKQSC | 339 | 18089 |
| >TP53-H168\RAMAIYKQSC | 7652  | >TP53-H168\RAMAIYKQSC | 159 | 7493  |
| >TP53-H168\RAMAIYKQSC | 3083  | >TP53-H168\RAMAIYKQSC | 49  | 3034  |
| >TP53-H168\RAMAIYKQSC | 354   | >TP53-H168\RAMAIYKQSC | 5   | 349   |
| >TP53-H168\RAMAIYKQSC | 4623  | >TP53-H168\RAMAIYKQSC | 104 | 4519  |
| >TP53-H168\RAMAIYKQSC | 1142  | >TP53-H168\RAMAIYKQSC | 20  | 1122  |
| >TP53-H168\RAMAIYKQSC | 375   | >TP53-H168\RAMAIYKQSC | 31  | 344   |
| >TP53-H168\SQHMTEVV   | 3869  | >TP53-H168\SQYMTEVV   | 357 | 3512  |
| >TP53-H168\SQHMTEVV   | 670   | >TP53-H168\SQYMTEVV   | 117 | 553   |
| >TP53-H168\SQHMTEVV   | 115   | >TP53-H168\SQYMTEVV   | 19  | 96    |
| >TP53-H168\SQHMTEVV   | 256   | >TP53-H168\SQYMTEVV   | 28  | 228   |
| >TP53-H168\SQHMTEVV   | 1833  | >TP53-H168\SQYMTEVV   | 183 | 1650  |
| >TP53-H168\SQHMTEVV   | 543   | >TP53-H168\SQYMTEVV   | 32  | 511   |
| >TP53-H168\SQHMTEVV   | 1694  | >TP53-H168\SQYMTEVV   | 293 | 1401  |
| >TP53-H168\SQHMTEVVR  | 2206  | >TP53-H168\SQYMTEVVR  | 193 | 2013  |
| >TP53-H168\SQHMTEVVR  | 115   | >TP53-H168\SQYMTEVVR  | 47  | 68    |
| >TP53-H168\SQHMTEVVR  | 504   | >TP53-H168\SQYMTEVVR  | 74  | 430   |
| >TP53-H168\SQHMTEVVR  | 1038  | >TP53-H168\SQYMTEVVR  | 112 | 926   |
| >TP53-H168\SQHMTEVV   | 504   | >TP53-H168\SQYMTEVV   | 215 | 289   |
| >TP53-H168\SQHMTEVV   | 88    | >TP53-H168\SQYMTEVV   | 23  | 65    |
| >TP53-H168\SQHMTEVVR  | 162   | >TP53-H168\SQYMTEVVR  | 43  | 119   |
| >TP53-H168\SQHMTEVVR  | 572   | >TP53-H168\SQYMTEVVR  | 153 | 419   |
| >TP53-H168\SQHMTEVVR  | 434   | >TP53-H168\SQYMTEVVR  | 190 | 244   |
| >TP53-H168\SQHMTEVVR  | 363   | >TP53-H168\SQYMTEVVR  | 151 | 212   |
| >TP53-H168\QSQHMTEVV  | 230   | >TP53-H168\QSQYMTEVV  | 210 | 20    |

|                       |       |                       |     |       |
|-----------------------|-------|-----------------------|-----|-------|
| >TP53-H168\QSQHMTEVV  | 321   | >TP53-H168\QSQYMTEVV  | 217 | 104   |
| >TP53-H168\QSQHMTEVV  | 1104  | >TP53-H168\QSQYMTEVV  | 380 | 724   |
| >TP53-H168\QSQHMTEVV  | 973   | >TP53-H168\QSQYMTEVV  | 216 | 757   |
| >TP53-H168\QSQHMTEVV  | 185   | >TP53-H168\QSQYMTEVV  | 66  | 119   |
| >TP53-H168\QSQHMTEV   | 206   | >TP53-H168\QSQYMTEV   | 123 | 83    |
| >TP53-H168\QSQHMTEVV  | 303   | >TP53-H168\QSQYMTEVV  | 188 | 115   |
| >TP53-H168\QSQHMTEVV  | 306   | >TP53-H168\QSQYMTEVV  | 400 | 94    |
| >TP53-H168\KQSQHMTEV  | 82    | >TP53-H168\KQSQYMTEV  | 24  | 58    |
| >TP53-H168\KQSQHMTEV  | 51    | >TP53-H168\KQSQYMTEV  | 21  | 30    |
| >TP53-H168\KQSQHMTEV  | 298   | >TP53-H168\KQSQYMTEV  | 166 | 132   |
| >TP53-H168\KQSQHMTEV  | 9     | >TP53-H168\KQSQYMTEV  | 9   | 0     |
| >TP53-H168\KQSQHMTEV  | 273   | >TP53-H168\KQSQYMTEV  | 184 | 89    |
| >TP53-H168\KQSQHMTEV  | 10    | >TP53-H168\KQSQYMTEV  | 5   | 5     |
| >TP53-H168\KQSQHMTEV  | 426   | >TP53-H168\KQSQYMTEV  | 133 | 293   |
| >TP53-H168\KQSQHMTEV  | 718   | >TP53-H168\KQSQYMTEV  | 402 | 316   |
| >TP53-H168\KQSQHMTEV  | 1212  | >TP53-H168\KQSQYMTEV  | 383 | 829   |
| >TP53-H168\KQSQHMTEV  | 35    | >TP53-H168\KQSQYMTEV  | 33  | 2     |
| >TP53-H168\KQSQHMTEV  | 222   | >TP53-H168\KQSQYMTEV  | 241 | 19    |
| >TP53-H168\KQSQHMTEV  | 86    | >TP53-H168\KQSQYMTEV  | 62  | 24    |
| >TP53-H168\KQSQHMTEV  | 110   | >TP53-H168\KQSQYMTEV  | 88  | 22    |
| >TP53-H168\KQSQHMTEV  | 185   | >TP53-H168\KQSQYMTEV  | 137 | 48    |
| >TP53-H168\KQSQHMTEV  | 60    | >TP53-H168\KQSQYMTEV  | 51  | 9     |
| >TP53-H168\YKQSQHMTE  | 467   | >TP53-H168\YKQSQYMTE' | 317 | 150   |
| >TP53-H168\YKQSQHMTE  | 30    | >TP53-H168\YKQSQYMTE' | 23  | 7     |
| >TP53-H168\YKQSQHMTE  | 42    | >TP53-H168\YKQSQYMTE' | 35  | 7     |
| >TP53-H168\IYKQSQHMTI | 402   | >TP53-H168\IYKQSQYMTE | 663 | 261   |
| >TP53-H168\IYKQSQHM   | 561   | >TP53-H168\IYKQSQYM   | 305 | 256   |
| >TP53-H168\IYKQSQHM   | 394   | >TP53-H168\IYKQSQYM   | 204 | 190   |
| >TP53-H168\AIYKQSQHM  | 91    | >TP53-H168\AIYKQSQYM  | 149 | 58    |
| >TP53-H168\AIYKQSQHM  | 1225  | >TP53-H168\AIYKQSQYM  | 155 | 1070  |
| >TP53-H168\AIYKQSQH   | 349   | >TP53-H168\AIYKQSQY   | 101 | 248   |
| >TP53-H168\AIYKQSQH   | 4120  | >TP53-H168\AIYKQSQY   | 417 | 3703  |
| >TP53-H168\AIYKQSQH   | 14595 | >TP53-H168\AIYKQSQY   | 249 | 14346 |
| >TP53-H168\AIYKQSQH   | 10823 | >TP53-H168\AIYKQSQY   | 137 | 10686 |
| >TP53-H168\AIYKQSQHM  | 750   | >TP53-H168\AIYKQSQYM  | 292 | 458   |
| >TP53-H168\AIYKQSQH   | 13211 | >TP53-H168\AIYKQSQY   | 232 | 12979 |
| >TP53-H168\AIYKQSQH   | 19133 | >TP53-H168\AIYKQSQY   | 234 | 18899 |
| >TP53-H168\AIYKQSQH   | 6129  | >TP53-H168\AIYKQSQY   | 100 | 6029  |
| >TP53-H168\AIYKQSQHM  | 62    | >TP53-H168\AIYKQSQYM  | 158 | 96    |
| >TP53-H168\AIYKQSQH   | 8381  | >TP53-H168\AIYKQSQY   | 213 | 8168  |
| >TP53-H168\AIYKQSQH   | 4366  | >TP53-H168\AIYKQSQY   | 191 | 4175  |
| >TP53-H168\AIYKQSQHM  | 198   | >TP53-H168\AIYKQSQYM  | 202 | 4     |
| >TP53-H168\AIYKQSQH   | 11192 | >TP53-H168\AIYKQSQY   | 23  | 11169 |

|                        |       |                        |      |       |
|------------------------|-------|------------------------|------|-------|
| >TP53-H168\AIYKQSQHM   | 514   | >TP53-H168\AIYKQSQYM   | 416  | 98    |
| >TP53-H168\AIYKQSQH    | 26515 | >TP53-H168\AIYKQSQY    | 71   | 26444 |
| >TP53-H168\MAIYKQSQH   | 2519  | >TP53-H168\MAIYKQSQYI  | 322  | 2197  |
| >TP53-H168\MAIYKQSQH   | 14531 | >TP53-H168\MAIYKQSQY   | 152  | 14379 |
| >TP53-H168\MAIYKQSQH   | 7601  | >TP53-H168\MAIYKQSQY   | 35   | 7566  |
| >TP53-H168\MAIYKQSQH   | 13036 | >TP53-H168\MAIYKQSQY   | 96   | 12940 |
| >TP53-H168\MAIYKQSQH   | 526   | >TP53-H168\MAIYKQSQY   | 63   | 463   |
| >TP53-H168\MAIYKQSQH   | 672   | >TP53-H168\MAIYKQSQYI  | 337  | 335   |
| >TP53-H168\MAIYKQSQH   | 10450 | >TP53-H168\MAIYKQSQY   | 210  | 10240 |
| >TP53-H168\MAIYKQSQH   | 226   | >TP53-H168\MAIYKQSQYI  | 596  | 370   |
| >TP53-H168\MAIYKQSQH   | 4273  | >TP53-H168\MAIYKQSQY   | 107  | 4166  |
| >TP53-H168\MAIYKQSQH   | 205   | >TP53-H168\MAIYKQSQYI  | 204  | 1     |
| >TP53-H168\MAIYKQSQH   | 911   | >TP53-H168\MAIYKQSQY   | 7    | 904   |
| >TP53-H168\MAIYKQSQH   | 20    | >TP53-H168\MAIYKQSQYI  | 20   | 0     |
| >TP53-H168\MAIYKQSQH   | 1726  | >TP53-H168\MAIYKQSQY   | 35   | 1691  |
| >TP53-H168\MAIYKQSQH   | 6958  | >TP53-H168\MAIYKQSQY   | 56   | 6902  |
| >TP53-H168\MAIYKQSQH   | 151   | >TP53-H168\MAIYKQSQYI  | 112  | 39    |
| >TP53-H168\MAIYKQSQH   | 894   | >TP53-H168\MAIYKQSQY   | 64   | 830   |
| >TP53-H168\MAIYKQSQH   | 583   | >TP53-H168\MAIYKQSQYI  | 126  | 457   |
| >TP53-H168\MAIYKQSQH   | 32039 | >TP53-H168\MAIYKQSQY   | 280  | 31759 |
| >TP53-H168\AMAIYKQSQI  | 221   | >TP53-H168\AMAIYKQSQ'  | 430  | 209   |
| >TP53-H168\AMAIYKQSQI  | 24607 | >TP53-H168\AMAIYKQSQ'  | 369  | 24238 |
| >TP53-H168\AMAIYKQSQI  | 2136  | >TP53-H168\AMAIYKQSQ'  | 386  | 1750  |
| >TP53-H168\AMAIYKQSQI  | 161   | >TP53-H168\AMAIYKQSQ'  | 31   | 130   |
| >TP53-H168\AMAIYKQSQI  | 732   | >TP53-H168\AMAIYKQSQ'  | 330  | 402   |
| >TP53-H168\AMAIYKQSQI  | 199   | >TP53-H168\AMAIYKQSQ'  | 34   | 165   |
| >TP53-H168\AMAIYKQSQI  | 283   | >TP53-H168\AMAIYKQSQ'  | 155  | 128   |
| >TP53-H168\AMAIYKQSQI  | 3162  | >TP53-H168\AMAIYKQSQ'  | 493  | 2669  |
| >TP53-H168\AMAIYKQSQI  | 49    | >TP53-H168\AMAIYKQSQ'  | 22   | 27    |
| >TP53-H168\AMAIYKQSQI  | 6153  | >TP53-H168\AMAIYKQSQ'  | 289  | 5864  |
| >TP53-H168\AMAIYKQSQI  | 15927 | >TP53-H168\AMAIYKQSQ'  | 106  | 15821 |
| >TP53-H168\AMAIYKQSQI  | 9422  | >TP53-H168\AMAIYKQSQ'  | 34   | 9388  |
| >TP53-H168\AMAIYKQSQI  | 3476  | >TP53-H168\AMAIYKQSQ'  | 71   | 3405  |
| >TP53-H168\AMAIYKQSQI  | 55    | >TP53-H168\AMAIYKQSQ'  | 113  | 58    |
| >TP53-H168\AMAIYKQSQI  | 11150 | >TP53-H168\AMAIYKQSQ'  | 256  | 10894 |
| >TP53-H168\AMAIYKQSQI  | 2139  | >TP53-H168\AMAIYKQSQ'  | 40   | 2099  |
| >TP53-H168\AMAIYKQSQI  | 69    | >TP53-H168\AMAIYKQSQ'  | 67   | 2     |
| >TP53-H168\AMAIYKQSQI  | 13427 | >TP53-H168\AMAIYKQSQ'  | 88   | 13339 |
| >TP53-H168\AMAIYKQSQI  | 23640 | >TP53-H168\AMAIYKQSQ'  | 465  | 23175 |
| >TP53-H178[ HHERCSDSDC | 126   | >TP53-H178[ DHERCSDSDC | 4084 | 3958  |
| >TP53-H178[ RRCPPHER   | 405   | >TP53-H178[ RRCPDHER   | 3304 | 2899  |
| >TP53-H178[ RRCPPHER   | 102   | >TP53-H178[ RRCPDHER   | 72   | 30    |
| >TP53-H178[ RRCPPHER   | 312   | >TP53-H178[ RRCPDHER   | 447  | 135   |

|                        |       |                         |       |       |
|------------------------|-------|-------------------------|-------|-------|
| >TP53-H178I RRCPHHERC  | 320   | >TP53-H178I RRCPDHERC   | 1201  | 881   |
| >TP53-H178I RRCPHHER   | 87    | >TP53-H178I RRCPDHER    | 205   | 118   |
| >TP53-H178I VVRRCPHHEI | 145   | >TP53-H178I VVRRCPDHEI  | 1520  | 1375  |
| >TP53-H178I VVRRCPHHEI | 63    | >TP53-H178I VVRRCPDHEI  | 329   | 266   |
| >TP53-H178I EVVRRCPH   | 400   | >TP53-H178I EVVRRCPD    | 10389 | 9989  |
| >TP53-H178I EVVRRCPHH  | 98    | >TP53-H178I EVVRRCPDH   | 604   | 506   |
| >TP53-H178I EVVRRCPHHE | 428   | >TP53-H178I EVVRRCPDHE  | 758   | 330   |
| >TP53-H178I EVVRRCPHHE | 371   | >TP53-H178I EVVRRCPDHE  | 1709  | 1338  |
| >TP53-H178I EVVRRCPHHE | 53    | >TP53-H178I EVVRRCPDHE  | 120   | 67    |
| >TP53-H178I EVVRRCPHHE | 5     | >TP53-H178I EVVRRCPDHE  | 7     | 2     |
| >TP53-H178I HHERCSDSDG | 126   | >TP53-H178I LHERCSDSDG  | 2219  | 2093  |
| >TP53-H178I HMTEVVRRRC | 22637 | >TP53-H178I HMTEVVRRRC  | 347   | 22290 |
| >TP53-H178I HMTEVVRRRC | 17253 | >TP53-H178I HMTEVVRRRC  | 72    | 17181 |
| >TP53-H178I HMTEVVRRRC | 16394 | >TP53-H178I HMTEVVRRRC  | 107   | 16287 |
| >TP53-H178I HMTEVVRRRC | 21244 | >TP53-H178I HMTEVVRRRC  | 367   | 20877 |
| >TP53-H178I HMTEVVRRRC | 10027 | >TP53-H178I HMTEVVRRRC  | 27    | 10000 |
| >TP53-H178I HMTEVVRRRC | 17569 | >TP53-H178I HMTEVVRRRC  | 48    | 17521 |
| >TP53-H178I HMTEVVRRRC | 18128 | >TP53-H178I HMTEVVRRRC  | 54    | 18074 |
| >TP53-H178I HMTEVVRRRC | 14027 | >TP53-H178I HMTEVVRRRC  | 9     | 14018 |
| >TP53-H178I HMTEVVRRRC | 17175 | >TP53-H178I HMTEVVRRRC  | 224   | 16951 |
| >TP53-H178I RRCPHHER   | 405   | >TP53-H178I RRCPLHER    | 684   | 279   |
| >TP53-H178I RRCPHHER   | 729   | >TP53-H178I RRCPLHER    | 315   | 414   |
| >TP53-H178I RRCPHHER   | 102   | >TP53-H178I RRCPLHER    | 38    | 64    |
| >TP53-H178I RRCPHHERC  | 689   | >TP53-H178I RRCPLHERC   | 322   | 367   |
| >TP53-H178I RRCPHHER   | 312   | >TP53-H178I RRCPLHER    | 100   | 212   |
| >TP53-H178I RRCPHHERC  | 320   | >TP53-H178I RRCPLHERC   | 237   | 83    |
| >TP53-H178I RRCPHHERCS | 717   | >TP53-H178I RRCPLHERCS  | 299   | 418   |
| >TP53-H178I RRCPHHER   | 87    | >TP53-H178I RRCPLHER    | 102   | 15    |
| >TP53-H178I VVRRCPHHEI | 145   | >TP53-H178I VVRRCPPLHER | 242   | 97    |
| >TP53-H178I VVRRCPHHEI | 63    | >TP53-H178I VVRRCPPLHER | 64    | 1     |
| >TP53-H178I EVVRRCPH   | 400   | >TP53-H178I EVVRRCPPL   | 79    | 321   |
| >TP53-H178I EVVRRCPHH  | 98    | >TP53-H178I EVVRRCPPLH  | 820   | 722   |
| >TP53-H178I EVVRRCPHHE | 428   | >TP53-H178I EVVRRCPPLHE | 1729  | 1301  |
| >TP53-H178I EVVRRCPHHE | 912   | >TP53-H178I EVVRRCPPLHE | 384   | 528   |
| >TP53-H178I EVVRRCPHHE | 371   | >TP53-H178I EVVRRCPPLHE | 603   | 232   |
| >TP53-H178I EVVRRCPHHE | 53    | >TP53-H178I EVVRRCPPLHE | 65    | 12    |
| >TP53-H178I EVVRRCPHHE | 5     | >TP53-H178I EVVRRCPPLHE | 6     | 1     |
| >TP53-H178I EVVRRCPH   | 17679 | >TP53-H178I EVVRRCPPL   | 65    | 17614 |
| >TP53-H178I EVVRRCPH   | 18438 | >TP53-H178I EVVRRCPPL   | 213   | 18225 |
| >TP53-H178I EVVRRCPH   | 13921 | >TP53-H178I EVVRRCPPL   | 324   | 13597 |
| >TP53-H178I TEVVRRCPH  | 8495  | >TP53-H178I TEVVRRCPPL  | 55    | 8440  |
| >TP53-H178I TEVVRRCPH  | 15586 | >TP53-H178I TEVVRRCPPL  | 308   | 15278 |
| >TP53-H178I TEVVRRCPH  | 3764  | >TP53-H178I TEVVRRCPPL  | 39    | 3725  |

|                        |       |                        |       |       |
|------------------------|-------|------------------------|-------|-------|
| >TP53-H178L TEVVRRCPH  | 11830 | >TP53-H178L TEVVRRCPL  | 39    | 11791 |
| >TP53-H178L MTEVVRRCPI | 5886  | >TP53-H178L MTEVVRRCPI | 179   | 5707  |
| >TP53-H178L MTEVVRRCPI | 2160  | >TP53-H178L MTEVVRRCPI | 285   | 1875  |
| >TP53-H178M HHERCSDSDC | 126   | >TP53-H178M HHERCSDSDC | 311   | 185   |
| >TP53-H178M RRCPPHER   | 405   | >TP53-H178M RRCPPHER   | 1506  | 1101  |
| >TP53-H178M RRCPPHER   | 102   | >TP53-H178M RRCPPHER   | 55    | 47    |
| >TP53-H178M RRCPPHER   | 312   | >TP53-H178M RRCPPHER   | 472   | 160   |
| >TP53-H178M RRCPPHERC  | 320   | >TP53-H178M RRCPPHERC  | 667   | 347   |
| >TP53-H178M RRCPPHER   | 87    | >TP53-H178M RRCPPHER   | 91    | 4     |
| >TP53-H178M VVRRCPHHEI | 145   | >TP53-H178M VVRRCPHHEI | 252   | 107   |
| >TP53-H178M VVRRCPHHEI | 63    | >TP53-H178M VVRRCPHHEI | 134   | 71    |
| >TP53-H178M EVVRRCPH   | 400   | >TP53-H178M EVVRRCPH   | 4733  | 4333  |
| >TP53-H178M EVVRRCPHH  | 98    | >TP53-H178M EVVRRCPHH  | 207   | 109   |
| >TP53-H178M EVVRRCPHHE | 428   | >TP53-H178M EVVRRCPHHE | 665   | 237   |
| >TP53-H178M EVVRRCPHHE | 371   | >TP53-H178M EVVRRCPHHE | 884   | 513   |
| >TP53-H178M EVVRRCPHHE | 53    | >TP53-H178M EVVRRCPHHE | 81    | 28    |
| >TP53-H178M EVVRRCPHHE | 5     | >TP53-H178M EVVRRCPHHE | 5     | 0     |
| >TP53-H178F HHERCSDSDC | 126   | >TP53-H178F HHERCSDSDC | 10600 | 10474 |
| >TP53-H178F RRCPPHER   | 405   | >TP53-H178F RRCPPHER   | 1735  | 1330  |
| >TP53-H178F RRCPPHER   | 102   | >TP53-H178F RRCPPHER   | 142   | 40    |
| >TP53-H178F RRCPPHERCS | 720   | >TP53-H178F RRCPPHERCS | 468   | 252   |
| >TP53-H178F RRCPPHER   | 312   | >TP53-H178F RRCPPHER   | 339   | 27    |
| >TP53-H178F RRCPPHERC  | 320   | >TP53-H178F RRCPPHERC  | 1114  | 794   |
| >TP53-H178F RRCPPHERCS | 717   | >TP53-H178F RRCPPHERCS | 388   | 329   |
| >TP53-H178F RRCPPHER   | 87    | >TP53-H178F RRCPPHER   | 159   | 72    |
| >TP53-H178F VVRRCPHH   | 1099  | >TP53-H178F VVRRCPHH   | 489   | 610   |
| >TP53-H178F VVRRCPHHEI | 145   | >TP53-H178F VVRRCPHHEI | 184   | 39    |
| >TP53-H178F VVRRCPHHEI | 63    | >TP53-H178F VVRRCPHHEI | 140   | 77    |
| >TP53-H178F EVVRRCPH   | 400   | >TP53-H178F EVVRRCPH   | 8196  | 7796  |
| >TP53-H178F EVVRRCPHH  | 98    | >TP53-H178F EVVRRCPHH  | 154   | 56    |
| >TP53-H178F EVVRRCPHHE | 428   | >TP53-H178F EVVRRCPHHE | 506   | 78    |
| >TP53-H178F EVVRRCPHHE | 371   | >TP53-H178F EVVRRCPHHE | 1016  | 645   |
| >TP53-H178F EVVRRCPHHE | 53    | >TP53-H178F EVVRRCPHHE | 93    | 40    |
| >TP53-H178F EVVRRCPHHE | 5     | >TP53-H178F EVVRRCPHHE | 7     | 2     |
| >TP53-H178C HHERCSDSDC | 126   | >TP53-H178C HHERCSDSDC | 1263  | 1137  |
| >TP53-H178C HMTEVVRRC  | 14027 | >TP53-H178C HMTEVVRRC  | 405   | 13622 |
| >TP53-H178C RRCPPHER   | 405   | >TP53-H178C RRCPPHER   | 1078  | 673   |
| >TP53-H178C RRCPPHER   | 102   | >TP53-H178C RRCPPHER   | 68    | 34    |
| >TP53-H178C RRCPPHER   | 312   | >TP53-H178C RRCPPHER   | 178   | 134   |
| >TP53-H178C RRCPPHERC  | 320   | >TP53-H178C RRCPPHERC  | 1100  | 780   |
| >TP53-H178C RRCPPHERCS | 717   | >TP53-H178C RRCPPHERCS | 345   | 372   |
| >TP53-H178C RRCPPHER   | 87    | >TP53-H178C RRCPPHER   | 119   | 32    |
| >TP53-H178C VVRRCPHHEI | 145   | >TP53-H178C VVRRCPHHEI | 289   | 144   |

|                       |       |                        |     |       |
|-----------------------|-------|------------------------|-----|-------|
| >TP53-H178(VVRRCPHHEF | 63    | >TP53-H178(VVRRCPQHEI  | 150 | 87    |
| >TP53-H178(EVRRRCPH   | 400   | >TP53-H178(EVRRRCPQ    | 697 | 297   |
| >TP53-H178(EVRRRCPHH  | 98    | >TP53-H178(EVRRRCPQH   | 280 | 182   |
| >TP53-H178(EVRRRCPHHE | 428   | >TP53-H178(EVRRRCPQHI  | 976 | 548   |
| >TP53-H178(EVRRRCPHHE | 371   | >TP53-H178(EVRRRCPQHI  | 826 | 455   |
| >TP53-H178(EVRRRCPHHE | 53    | >TP53-H178(EVRRRCPQHI  | 92  | 39    |
| >TP53-H178(EVRRRCPHHE | 5     | >TP53-H178(EVRRRCPQHI  | 6   | 1     |
| >TP53-H178\HHERCSDSDC | 126   | >TP53-H178\YHERCSDSDC  | 85  | 41    |
| >TP53-H178\HMTEVVRR   | 18047 | >TP53-H178\HMTEVVRR    | 460 | 17587 |
| >TP53-H178\HMTEVVRR   | 19654 | >TP53-H178\HMTEVVRR    | 400 | 19254 |
| >TP53-H178\HMTEVVRR   | 3938  | >TP53-H178\HMTEVVRR    | 83  | 3855  |
| >TP53-H178\HMTEVVRR   | 2976  | >TP53-H178\HMTEVVRR    | 64  | 2912  |
| >TP53-H178\HMTEVVRR   | 4030  | >TP53-H178\HMTEVVRR    | 105 | 3925  |
| >TP53-H178\HMTEVVRR   | 3481  | >TP53-H178\HMTEVVRR    | 183 | 3298  |
| >TP53-H178\HMTEVVRR   | 24190 | >TP53-H178\HMTEVVRR    | 276 | 23914 |
| >TP53-H178\RRCPPHER   | 405   | >TP53-H178\RRCPPYHER   | 322 | 83    |
| >TP53-H178\RRCPPHER   | 729   | >TP53-H178\RRCPPYHER   | 386 | 343   |
| >TP53-H178\RRCPPHER   | 102   | >TP53-H178\RRCPPYHER   | 36  | 66    |
| >TP53-H178\RRCPPHERC  | 689   | >TP53-H178\RRCPPYHERC  | 356 | 333   |
| >TP53-H178\RRCPPHER   | 312   | >TP53-H178\RRCPPYHER   | 143 | 169   |
| >TP53-H178\RRCPPHERC  | 320   | >TP53-H178\RRCPPYHERC  | 266 | 54    |
| >TP53-H178\RRCPPHERCS | 717   | >TP53-H178\RRCPPYHERCS | 388 | 329   |
| >TP53-H178\RRCPPHER   | 87    | >TP53-H178\RRCPPYHER   | 91  | 4     |
| >TP53-H178\VRRCPPHER  | 680   | >TP53-H178\VRRCPPYHER  | 419 | 261   |
| >TP53-H178\VRRCPHHEF  | 145   | >TP53-H178\VRRCPYHEF   | 202 | 57    |
| >TP53-H178\VRRCPHHEF  | 63    | >TP53-H178\VRRCPYHEF   | 55  | 8     |
| >TP53-H178\EVRRRCPH   | 1432  | >TP53-H178\EVRRRCPY    | 16  | 1416  |
| >TP53-H178\EVRRRCPH   | 400   | >TP53-H178\EVRRRCPY    | 7   | 393   |
| >TP53-H178\EVRRRCPHH  | 98    | >TP53-H178\EVRRRCPYH   | 100 | 2     |
| >TP53-H178\EVRRRCPHHE | 428   | >TP53-H178\EVRRRCPYHE  | 647 | 219   |
| >TP53-H178\EVRRRCPH   | 4044  | >TP53-H178\EVRRRCPY    | 50  | 3994  |
| >TP53-H178\EVRRRCPHHE | 371   | >TP53-H178\EVRRRCPYHE  | 312 | 59    |
| >TP53-H178\EVRRRCPHHE | 53    | >TP53-H178\EVRRRCPYHE  | 48  | 5     |
| >TP53-H178\EVRRRCPH   | 1639  | >TP53-H178\EVRRRCPY    | 212 | 1427  |
| >TP53-H178\EVRRRCPHH  | 1841  | >TP53-H178\EVRRRCPYH   | 407 | 1434  |
| >TP53-H178\EVRRRCPHHE | 5     | >TP53-H178\EVRRRCPYHE  | 5   | 0     |
| >TP53-H178\EVRRRCPH   | 12964 | >TP53-H178\EVRRRCPY    | 479 | 12485 |
| >TP53-H178\EVRRRCPH   | 8394  | >TP53-H178\EVRRRCPY    | 348 | 8046  |
| >TP53-H178\TEVRRCPH   | 8495  | >TP53-H178\TEVRRCPY    | 440 | 8055  |
| >TP53-H178\TEVRRCPH   | 14915 | >TP53-H178\TEVRRCPY    | 466 | 14449 |
| >TP53-H178\TEVRRCPH   | 2407  | >TP53-H178\TEVRRCPY    | 41  | 2366  |
| >TP53-H178\MTEVVRRCP  | 22452 | >TP53-H178\MTEVVRRCP'  | 210 | 22242 |
| >TP53-H178\MTEVVRRCP  | 18962 | >TP53-H178\MTEVVRRCP'  | 177 | 18785 |

|                       |       |                       |      |       |
|-----------------------|-------|-----------------------|------|-------|
| >TP53-H178\MTEVRRCP   | 14176 | >TP53-H178\MTEVRRCP'  | 107  | 14069 |
| >TP53-H178\MTEVRRCP   | 5886  | >TP53-H178\MTEVRRCP'  | 33   | 5853  |
| >TP53-H178\MTEVRRCP   | 12955 | >TP53-H178\MTEVRRCP'  | 141  | 12814 |
| >TP53-H179[HERCSDSDGL | 422   | >TP53-H179[DERCSDSDGL | 4662 | 4240  |
| >TP53-H179[HHERCSDSDC | 126   | >TP53-H179[HDERCSDSDC | 9911 | 9785  |
| >TP53-H179[RRCPPHER   | 405   | >TP53-H179[RRCPPHER   | 4479 | 4074  |
| >TP53-H179[RRCPPHER   | 102   | >TP53-H179[RRCPPHER   | 815  | 713   |
| >TP53-H179[RRCPPHER   | 312   | >TP53-H179[RRCPPHER   | 1841 | 1529  |
| >TP53-H179[RRCPPHERC  | 320   | >TP53-H179[RRCPPHERC  | 985  | 665   |
| >TP53-H179[RRCPPHER   | 87    | >TP53-H179[RRCPPHER   | 393  | 306   |
| >TP53-H179[VVRRCPHHEF | 145   | >TP53-H179[VVRRCPHDEF | 1237 | 1092  |
| >TP53-H179[VVRRCPHHEF | 63    | >TP53-H179[VVRRCPHDEF | 467  | 404   |
| >TP53-H179[EVVRRCPHH  | 98    | >TP53-H179[EVVRRCPHD  | 8162 | 8064  |
| >TP53-H179[EVVRRCPHHE | 428   | >TP53-H179[EVVRRCPHDE | 1231 | 803   |
| >TP53-H179[EVVRRCPHHE | 371   | >TP53-H179[EVVRRCPHDE | 2444 | 2073  |
| >TP53-H179[EVVRRCPHHE | 53    | >TP53-H179[EVVRRCPHDE | 121  | 68    |
| >TP53-H179[EVVRRCPHHE | 5     | >TP53-H179[EVVRRCPHDE | 6    | 1     |
| >TP53-H179[HERCSDSDGL | 422   | >TP53-H179[LERCSDSDGL | 292  | 130   |
| >TP53-H179[HHERCSDSDC | 19255 | >TP53-H179[HLERCSDSDC | 41   | 19214 |
| >TP53-H179[HHERCSDSDC | 21208 | >TP53-H179[HLERCSDSDC | 114  | 21094 |
| >TP53-H179[HHERCSDSDC | 33269 | >TP53-H179[HLERCSDSDC | 101  | 33168 |
| >TP53-H179[HHERCSDSDC | 126   | >TP53-H179[HLERCSDSDC | 6256 | 6130  |
| >TP53-H179[MTEVRRCP   | 11173 | >TP53-H179[MTEVRRCP   | 476  | 10697 |
| >TP53-H179[MTEVRRCP   | 27023 | >TP53-H179[MTEVRRCP   | 413  | 26610 |
| >TP53-H179[RRCPPHER   | 405   | >TP53-H179[RRCPPHER   | 1864 | 1459  |
| >TP53-H179[RRCPPHER   | 102   | >TP53-H179[RRCPPHER   | 111  | 9     |
| >TP53-H179[RRCPPHERC  | 689   | >TP53-H179[RRCPPHERC  | 490  | 199   |
| >TP53-H179[RRCPPHER   | 312   | >TP53-H179[RRCPPHER   | 212  | 100   |
| >TP53-H179[RRCPPHERC  | 320   | >TP53-H179[RRCPPHERC  | 204  | 116   |
| >TP53-H179[RRCPPHERCS | 717   | >TP53-H179[RRCPPHERCS | 469  | 248   |
| >TP53-H179[RRCPPHER   | 87    | >TP53-H179[RRCPPHER   | 146  | 59    |
| >TP53-H179[VVRRCPHHER | 680   | >TP53-H179[VVRRCPHLER | 419  | 261   |
| >TP53-H179[VVRRCPHH   | 25006 | >TP53-H179[VVRRCPHL   | 279  | 24727 |
| >TP53-H179[VVRRCPHH   | 1099  | >TP53-H179[VVRRCPHL   | 71   | 1028  |
| >TP53-H179[VVRRCPHHEF | 145   | >TP53-H179[VVRRCPHLER | 88   | 57    |
| >TP53-H179[VVRRCPHHEF | 63    | >TP53-H179[VVRRCPHLER | 96   | 33    |
| >TP53-H179[VVRRCPHHEF | 534   | >TP53-H179[VVRRCPHLER | 310  | 224   |
| >TP53-H179[EVVRRCPHH  | 98    | >TP53-H179[EVVRRCPHL  | 20   | 78    |
| >TP53-H179[EVVRRCPHHE | 428   | >TP53-H179[EVVRRCPHLE | 1739 | 1311  |
| >TP53-H179[EVVRRCPHHE | 371   | >TP53-H179[EVVRRCPHLE | 1362 | 991   |
| >TP53-H179[EVVRRCPHHE | 53    | >TP53-H179[EVVRRCPHLE | 81   | 28    |
| >TP53-H179[EVVRRCPHHE | 5     | >TP53-H179[EVVRRCPHLE | 8    | 3     |
| >TP53-H179[EVVRRCPHH  | 19860 | >TP53-H179[EVVRRCPHL  | 471  | 19389 |



|                        |       |                        |      |       |
|------------------------|-------|------------------------|------|-------|
| >TP53-H179L TEVVRRCPHL | 16968 | >TP53-H179L TEVVRRCPHL | 196  | 16772 |
| >TP53-H179L TEVVRRCPHL | 3175  | >TP53-H179L TEVVRRCPHL | 236  | 2939  |
| >TP53-H179M HERCSDSDGL | 422   | >TP53-H179M NERCSDSDGL | 290  | 132   |
| >TP53-H179M HHERCSDSDC | 126   | >TP53-H179M HNERCSDSDC | 6534 | 6408  |
| >TP53-H179M RRCPPHER   | 405   | >TP53-H179M RRCPPNER   | 1874 | 1469  |
| >TP53-H179M RRCPPHER   | 102   | >TP53-H179M RRCPPNER   | 302  | 200   |
| >TP53-H179M RRCPPHER   | 312   | >TP53-H179M RRCPPNER   | 589  | 277   |
| >TP53-H179M RRCPPHERC  | 320   | >TP53-H179M RRCPPNERC  | 449  | 129   |
| >TP53-H179M RRCPPHER   | 87    | >TP53-H179M RRCPPNER   | 225  | 138   |
| >TP53-H179M VVRRCPPHEF | 145   | >TP53-H179M VVRRCPPNEF | 143  | 2     |
| >TP53-H179M VVRRCPPHEF | 63    | >TP53-H179M VVRRCPPNEF | 130  | 67    |
| >TP53-H179M EVVRRCPHH  | 98    | >TP53-H179M EVVRRCPHN  | 2518 | 2420  |
| >TP53-H179M EVVRRCPHHE | 428   | >TP53-H179M EVVRRCPHNI | 682  | 254   |
| >TP53-H179M EVVRRCPHHE | 371   | >TP53-H179M EVVRRCPHNI | 1034 | 663   |
| >TP53-H179M EVVRRCPHHE | 53    | >TP53-H179M EVVRRCPHNI | 65   | 12    |
| >TP53-H179M EVVRRCPHHE | 5     | >TP53-H179M EVVRRCPHNI | 6    | 1     |
| >TP53-H179F HERCSDSDGL | 422   | >TP53-H179F PERCSDSDGL | 3895 | 3473  |
| >TP53-H179F HHERCSDSDC | 24303 | >TP53-H179F HPERCSDSDC | 114  | 24189 |
| >TP53-H179F HHERCSDSDC | 15775 | >TP53-H179F HPERCSDSDC | 154  | 15621 |
| >TP53-H179F HHERCSDSDC | 126   | >TP53-H179F HPERCSDSDC | 778  | 652   |
| >TP53-H179F RRCPPHER   | 405   | >TP53-H179F RRCPPHER   | 2010 | 1605  |
| >TP53-H179F RRCPPHER   | 102   | >TP53-H179F RRCPPHER   | 114  | 12    |
| >TP53-H179F RRCPPHER   | 312   | >TP53-H179F RRCPPHER   | 575  | 263   |
| >TP53-H179F RRCPPHERC  | 320   | >TP53-H179F RRCPPHERC  | 256  | 64    |
| >TP53-H179F RRCPPHER   | 87    | >TP53-H179F RRCPPHER   | 274  | 187   |
| >TP53-H179F VVRRCPPHEF | 145   | >TP53-H179F VVRRCPPHEF | 55   | 90    |
| >TP53-H179F VVRRCPPHEF | 63    | >TP53-H179F VVRRCPPHEF | 215  | 152   |
| >TP53-H179F EVVRRCPHH  | 98    | >TP53-H179F EVVRRCPHP  | 5513 | 5415  |
| >TP53-H179F EVVRRCPHHE | 428   | >TP53-H179F EVVRRCPHPE | 433  | 5     |
| >TP53-H179F EVVRRCPHHE | 371   | >TP53-H179F EVVRRCPHPE | 989  | 618   |
| >TP53-H179F EVVRRCPHHE | 53    | >TP53-H179F EVVRRCPHPE | 102  | 49    |
| >TP53-H179F EVVRRCPHHE | 5     | >TP53-H179F EVVRRCPHPE | 7    | 2     |
| >TP53-H179C HERCSDSDGL | 602   | >TP53-H179C QERCSDSDGL | 291  | 311   |
| >TP53-H179C HERCSDSDGL | 422   | >TP53-H179C QERCSDSDGL | 427  | 5     |
| >TP53-H179C HHERCSDSDC | 126   | >TP53-H179C HQERCSDSDC | 307  | 181   |
| >TP53-H179C RRCPPHER   | 405   | >TP53-H179C RRCPPHER   | 1638 | 1233  |
| >TP53-H179C RRCPPHER   | 102   | >TP53-H179C RRCPPHER   | 328  | 226   |
| >TP53-H179C RRCPPHER   | 312   | >TP53-H179C RRCPPHER   | 412  | 100   |
| >TP53-H179C RRCPPHERC  | 320   | >TP53-H179C RRCPPHERC  | 325  | 5     |
| >TP53-H179C RRCPPHER   | 87    | >TP53-H179C RRCPPHER   | 323  | 236   |
| >TP53-H179C VVRRCPPHER | 680   | >TP53-H179C VVRRCPPHER | 255  | 425   |
| >TP53-H179C VVRRCPPHH  | 1099  | >TP53-H179C VVRRCPPHQ  | 315  | 784   |
| >TP53-H179C VVRRCPPHEF | 145   | >TP53-H179C VVRRCPPHEI | 158  | 13    |

|                        |       |                        |      |       |
|------------------------|-------|------------------------|------|-------|
| >TP53-H179C VVRRCPHHEF | 63    | >TP53-H179C VVRRCPHQEI | 172  | 109   |
| >TP53-H179C EVVRRCPHH  | 98    | >TP53-H179C EVVRRCPHQ  | 207  | 109   |
| >TP53-H179C EVVRRCPHHE | 428   | >TP53-H179C EVVRRCPHQI | 860  | 432   |
| >TP53-H179C EVVRRCPHHE | 371   | >TP53-H179C EVVRRCPHQI | 1003 | 632   |
| >TP53-H179C EVVRRCPHHE | 53    | >TP53-H179C EVVRRCPHQI | 84   | 31    |
| >TP53-H179C EVVRRCPHHE | 5     | >TP53-H179C EVVRRCPHQI | 9    | 4     |
| >TP53-H179F HERCSDSDGL | 602   | >TP53-H179F RERCSDSDGL | 277  | 325   |
| >TP53-H179F HERCSDSDGL | 422   | >TP53-H179F RERCSDSDGL | 63   | 359   |
| >TP53-H179F HHERCSDSDC | 126   | >TP53-H179F HRERCSDSDC | 360  | 234   |
| >TP53-H179F HHERCSDSDC | 12015 | >TP53-H179F HRERCSDSDC | 214  | 11801 |
| >TP53-H179F MTEVRRCPH  | 2700  | >TP53-H179F MTEVRRCPH  | 22   | 2678  |
| >TP53-H179F MTEVRRCPH  | 15793 | >TP53-H179F MTEVRRCPH  | 53   | 15740 |
| >TP53-H179F MTEVRRCPH  | 2918  | >TP53-H179F MTEVRRCPH  | 10   | 2908  |
| >TP53-H179F RRCPPHER   | 405   | >TP53-H179F RRCPPHER   | 1282 | 877   |
| >TP53-H179F RRCPPHER   | 102   | >TP53-H179F RRCPPHER   | 247  | 145   |
| >TP53-H179F RRCPPHERC  | 689   | >TP53-H179F RRCPPHERC  | 378  | 311   |
| >TP53-H179F RRCPPHER   | 312   | >TP53-H179F RRCPPHER   | 260  | 52    |
| >TP53-H179F RRCPPHERC  | 320   | >TP53-H179F RRCPPHERC  | 157  | 163   |
| >TP53-H179F RRCPPHER   | 87    | >TP53-H179F RRCPPHER   | 407  | 320   |
| >TP53-H179F VVRRCPHH   | 1099  | >TP53-H179F VVRRCPHR   | 111  | 988   |
| >TP53-H179F VVRRCPHHEF | 145   | >TP53-H179F VVRRCPHREF | 207  | 62    |
| >TP53-H179F VVRRCPHH   | 6143  | >TP53-H179F VVRRCPHR   | 28   | 6115  |
| >TP53-H179F VVRRCPHHEF | 63    | >TP53-H179F VVRRCPHREF | 77   | 14    |
| >TP53-H179F VVRRCPHH   | 21657 | >TP53-H179F VVRRCPHR   | 220  | 21437 |
| >TP53-H179F EVVRRCPHH  | 98    | >TP53-H179F EVVRRCPHR  | 1418 | 1320  |
| >TP53-H179F EVVRRCPHHE | 428   | >TP53-H179F EVVRRCPHRE | 732  | 304   |
| >TP53-H179F EVVRRCPHHE | 371   | >TP53-H179F EVVRRCPHRE | 1371 | 1000  |
| >TP53-H179F EVVRRCPHH  | 15713 | >TP53-H179F EVVRRCPHR  | 61   | 15652 |
| >TP53-H179F EVVRRCPHHE | 53    | >TP53-H179F EVVRRCPHRE | 101  | 48    |
| >TP53-H179F EVVRRCPHH  | 1841  | >TP53-H179F EVVRRCPHR  | 10   | 1831  |
| >TP53-H179F EVVRRCPHHE | 5     | >TP53-H179F EVVRRCPHRE | 12   | 7     |
| >TP53-H179\ HERCSDSDGL | 422   | >TP53-H179\ YERCSDSDGL | 158  | 264   |
| >TP53-H179\ HHERCSDSDC | 17657 | >TP53-H179\ HYERCSDSDC | 58   | 17599 |
| >TP53-H179\ HHERCSDSDC | 126   | >TP53-H179\ HYERCSDSDC | 6748 | 6622  |
| >TP53-H179\ MTEVRRCPH  | 16575 | >TP53-H179\ MTEVRRCPH  | 72   | 16503 |
| >TP53-H179\ MTEVRRCPH  | 14883 | >TP53-H179\ MTEVRRCPH  | 337  | 14546 |
| >TP53-H179\ MTEVRRCPH  | 10982 | >TP53-H179\ MTEVRRCPH  | 109  | 10873 |
| >TP53-H179\ MTEVRRCPH  | 2918  | >TP53-H179\ MTEVRRCPH  | 393  | 2525  |
| >TP53-H179\ MTEVRRCPH  | 11173 | >TP53-H179\ MTEVRRCPH  | 57   | 11116 |
| >TP53-H179\ MTEVRRCPH  | 2160  | >TP53-H179\ MTEVRRCPH  | 97   | 2063  |
| >TP53-H179\ RRCPPHER   | 405   | >TP53-H179\ RRCPPHER   | 223  | 182   |
| >TP53-H179\ RRCPPHER   | 102   | >TP53-H179\ RRCPPHER   | 262  | 160   |
| >TP53-H179\ RRCPPHERC  | 689   | >TP53-H179\ RRCPPHERC  | 476  | 213   |

|                        |       |                        |      |       |
|------------------------|-------|------------------------|------|-------|
| >TP53-H179\RRCPHHER    | 312   | >TP53-H179\RRCPHYER    | 505  | 193   |
| >TP53-H179\RRCPHHERC   | 320   | >TP53-H179\RRCPHYERC   | 177  | 143   |
| >TP53-H179\RRCPHHERCS  | 717   | >TP53-H179\RRCPHYERCS  | 316  | 401   |
| >TP53-H179\RRCPHHER    | 87    | >TP53-H179\RRCPHYER    | 64   | 23    |
| >TP53-H179\VRRRCPHH    | 14242 | >TP53-H179\VRRRCPHY    | 334  | 13908 |
| >TP53-H179\VRRRCPHH    | 12998 | >TP53-H179\VRRRCPHY    | 150  | 12848 |
| >TP53-H179\VRRRCPHH    | 1099  | >TP53-H179\VRRRCPHY    | 116  | 983   |
| >TP53-H179\VRRRCPHHEF  | 145   | >TP53-H179\VRRRCPHYEF  | 149  | 4     |
| >TP53-H179\VRRRCPHH    | 6963  | >TP53-H179\VRRRCPHY    | 54   | 6909  |
| >TP53-H179\VRRRCPHHEF  | 63    | >TP53-H179\VRRRCPHYEF  | 39   | 24    |
| >TP53-H179\VRRRCPHHEF  | 534   | >TP53-H179\VRRRCPHYEF  | 298  | 236   |
| >TP53-H179\VRRRCPHH    | 16548 | >TP53-H179\VRRRCPHY    | 193  | 16355 |
| >TP53-H179\VRRRCPHH    | 8389  | >TP53-H179\VRRRCPHY    | 182  | 8207  |
| >TP53-H179\VRRRCPHH    | 16390 | >TP53-H179\VRRRCPHY    | 317  | 16073 |
| >TP53-H179\VRRRCPHHEF  | 713   | >TP53-H179\VRRRCPHYEF  | 339  | 374   |
| >TP53-H179\EVRRRCPHH   | 2653  | >TP53-H179\EVRRRCPHY   | 34   | 2619  |
| >TP53-H179\EVRRRCPHH   | 98    | >TP53-H179\EVRRRCPHY   | 4    | 94    |
| >TP53-H179\EVRRRCPHHE  | 428   | >TP53-H179\EVRRRCPHYE  | 424  | 4     |
| >TP53-H179\EVRRRCPHH   | 10799 | >TP53-H179\EVRRRCPHY   | 251  | 10548 |
| >TP53-H179\EVRRRCPHHE  | 371   | >TP53-H179\EVRRRCPHYE  | 213  | 158   |
| >TP53-H179\EVRRRCPHHE  | 53    | >TP53-H179\EVRRRCPHYE  | 31   | 22    |
| >TP53-H179\EVRRRCPHH   | 1841  | >TP53-H179\EVRRRCPHY   | 251  | 1590  |
| >TP53-H179\EVRRRCPHHE  | 5     | >TP53-H179\EVRRRCPHYE  | 5    | 0     |
| >TP53-H193[HLIRVEGNLR' | 156   | >TP53-H193[DLIRVEGNLR' | 6362 | 6206  |
| >TP53-H193[HLIRVEGNL   | 226   | >TP53-H193[DLIRVEGNL   | 4442 | 4216  |
| >TP53-H193[HLIRVEGNLR' | 111   | >TP53-H193[DLIRVEGNLR' | 3515 | 3404  |
| >TP53-H193[HLIRVEGNLR' | 41    | >TP53-H193[DLIRVEGNLR' | 2350 | 2309  |
| >TP53-H193[HLIRVEGNLR' | 322   | >TP53-H193[DLIRVEGNLR' | 4960 | 4638  |
| >TP53-H193[HLIRVEGNL   | 327   | >TP53-H193[DLIRVEGNL   | 2954 | 2627  |
| >TP53-H193[HLIRVEGNLR' | 9     | >TP53-H193[DLIRVEGNLR' | 84   | 75    |
| >TP53-H193[HLIRVEGNLR' | 27    | >TP53-H193[DLIRVEGNLR' | 1315 | 1288  |
| >TP53-H193[HLIRVEGNLR' | 27    | >TP53-H193[DLIRVEGNLR' | 156  | 129   |
| >TP53-H193[HLIRVEGNL   | 153   | >TP53-H193[DLIRVEGNL   | 2430 | 2277  |
| >TP53-H193[HLIRVEGNLR' | 4     | >TP53-H193[DLIRVEGNLR' | 26   | 22    |
| >TP53-H193[HLIRVEGNLR  | 241   | >TP53-H193[DLIRVEGNLR  | 870  | 629   |
| >TP53-H193[HLIRVEGNLR  | 381   | >TP53-H193[DLIRVEGNLR  | 66   | 315   |
| >TP53-H193[HLIRVEGNLR  | 24    | >TP53-H193[DLIRVEGNLR  | 35   | 11    |
| >TP53-H193[HLIRVEGNLR' | 398   | >TP53-H193[DLIRVEGNLR' | 763  | 365   |
| >TP53-H193[HLIRVEGNLR  | 478   | >TP53-H193[DLIRVEGNLR  | 8246 | 7768  |
| >TP53-H193[QHILIRVEGNL | 24566 | >TP53-H193[QDLIRVEGNL  | 447  | 24119 |
| >TP53-H193[LAPPQHILIRV | 395   | >TP53-H193[LAPPQDLIRV  | 245  | 150   |
| >TP53-H193[LAPPQHILIRV | 52    | >TP53-H193[LAPPQDLIRV  | 69   | 17    |
| >TP53-H193[LAPPQHILI   | 5     | >TP53-H193[LAPPQDLI    | 90   | 85    |

|                          |     |                         |      |      |
|--------------------------|-----|-------------------------|------|------|
| >TP53-H193[ LAPPQH LIRV  | 28  | >TP53-H193[ LAPPQDLIRV  | 237  | 209  |
| >TP53-H193[ LAPPQH LI    | 70  | >TP53-H193[ LAPPQDLI    | 57   | 13   |
| >TP53-H193[ GLAPPQHL     | 285 | >TP53-H193[ GLAPPQDL    | 1664 | 1379 |
| >TP53-H193[ GLAPPQH LI   | 65  | >TP53-H193[ GLAPPQDLI   | 523  | 458  |
| >TP53-H193[ GLAPPQH LIR' | 20  | >TP53-H193[ GLAPPQDLIR' | 39   | 19   |
| >TP53-H193[ GLAPPQHL     | 22  | >TP53-H193[ GLAPPQDL    | 79   | 57   |
| >TP53-H193[ GLAPPQH LI   | 15  | >TP53-H193[ GLAPPQDLI   | 27   | 12   |
| >TP53-H193[ GLAPPQH LIR' | 9   | >TP53-H193[ GLAPPQDLIR' | 11   | 2    |
| >TP53-H193[ GLAPPQHL     | 61  | >TP53-H193[ GLAPPQDL    | 208  | 147  |
| >TP53-H193[ GLAPPQH LI   | 31  | >TP53-H193[ GLAPPQDLI   | 107  | 76   |
| >TP53-H193[ GLAPPQH LIR' | 7   | >TP53-H193[ GLAPPQDLIR' | 11   | 4    |
| >TP53-H193[ GLAPPQH LIR' | 44  | >TP53-H193[ GLAPPQDLIR' | 66   | 22   |
| >TP53-H193[ GLAPPQHL     | 16  | >TP53-H193[ GLAPPQDL    | 86   | 70   |
| >TP53-H193[ GLAPPQH LI   | 13  | >TP53-H193[ GLAPPQDLI   | 52   | 39   |
| >TP53-H193[ GLAPPQH LIR' | 3   | >TP53-H193[ GLAPPQDLIR' | 4    | 1    |
| >TP53-H193[ GLAPPQHL     | 26  | >TP53-H193[ GLAPPQDL    | 192  | 166  |
| >TP53-H193[ GLAPPQH LI   | 22  | >TP53-H193[ GLAPPQDLI   | 123  | 101  |
| >TP53-H193[ GLAPPQH LIR' | 7   | >TP53-H193[ GLAPPQDLIR' | 9    | 2    |
| >TP53-H193[ GLAPPQHL     | 11  | >TP53-H193[ GLAPPQDL    | 43   | 32   |
| >TP53-H193[ GLAPPQH LI   | 13  | >TP53-H193[ GLAPPQDLI   | 34   | 21   |
| >TP53-H193[ GLAPPQH LIR' | 5   | >TP53-H193[ GLAPPQDLIR' | 6    | 1    |
| >TP53-H193[ GLAPPQHL     | 175 | >TP53-H193[ GLAPPQDL    | 1349 | 1174 |
| >TP53-H193[ GLAPPQH LI   | 76  | >TP53-H193[ GLAPPQDLI   | 1218 | 1142 |
| >TP53-H193[ GLAPPQH LIR' | 9   | >TP53-H193[ GLAPPQDLIR' | 10   | 1    |
| >TP53-H193[ GLAPPQHL     | 5   | >TP53-H193[ GLAPPQDL    | 10   | 5    |
| >TP53-H193[ GLAPPQH LI   | 5   | >TP53-H193[ GLAPPQDLI   | 37   | 32   |
| >TP53-H193[ GLAPPQH LIR' | 2   | >TP53-H193[ GLAPPQDLIR' | 2    | 0    |
| >TP53-H193[ GLAPPQH LIR  | 282 | >TP53-H193[ GLAPPQDLIR  | 616  | 334  |
| >TP53-H193[ SDGLAPPQHI   | 104 | >TP53-H193[ SDGLAPPQDI  | 99   | 5    |
| >TP53-H193L HLIRVEGNLR'  | 156 | >TP53-H193L LLIRVEGNLR\ | 68   | 88   |
| >TP53-H193L HLIRVEGNL    | 226 | >TP53-H193L LLIRVEGNL   | 178  | 48   |
| >TP53-H193L HLIRVEGNLR'  | 111 | >TP53-H193L LLIRVEGNLR\ | 73   | 38   |
| >TP53-H193L HLIRVEGNL    | 690 | >TP53-H193L LLIRVEGNL   | 214  | 476  |
| >TP53-H193L HLIRVEGNLR'  | 41  | >TP53-H193L LLIRVEGNLR\ | 19   | 22   |
| >TP53-H193L HLIRVEGNLR'  | 322 | >TP53-H193L LLIRVEGNLR\ | 111  | 211  |
| >TP53-H193L HLIRVEGNL    | 327 | >TP53-H193L LLIRVEGNL   | 66   | 261  |
| >TP53-H193L HLIRVEGNLR'  | 9   | >TP53-H193L LLIRVEGNLR\ | 4    | 5    |
| >TP53-H193L HLIRVEGNL    | 806 | >TP53-H193L LLIRVEGNL   | 476  | 330  |
| >TP53-H193L HLIRVEGNLR'  | 27  | >TP53-H193L LLIRVEGNLR\ | 18   | 9    |
| >TP53-H193L HLIRVEGNL    | 878 | >TP53-H193L LLIRVEGNL   | 352  | 526  |
| >TP53-H193L HLIRVEGNLR'  | 27  | >TP53-H193L LLIRVEGNLR\ | 16   | 11   |
| >TP53-H193L HLIRVEGNLR'  | 701 | >TP53-H193L LLIRVEGNLR\ | 176  | 525  |
| >TP53-H193L HLIRVEGNL    | 153 | >TP53-H193L LLIRVEGNL   | 26   | 127  |

|                          |       |                         |      |       |
|--------------------------|-------|-------------------------|------|-------|
| >TP53-H193L HLIRVEGNLR'  | 4     | >TP53-H193L LLIRVEGNLR\ | 3    | 1     |
| >TP53-H193L HLIRVEGNLR   | 241   | >TP53-H193L LLIRVEGNLR  | 160  | 81    |
| >TP53-H193L HLIRVEGNLR   | 381   | >TP53-H193L LLIRVEGNLR  | 318  | 63    |
| >TP53-H193L HLIRVEGNLR   | 24    | >TP53-H193L LLIRVEGNLR  | 84   | 60    |
| >TP53-H193L HLIRVEGNLR'  | 398   | >TP53-H193L LLIRVEGNLR\ | 2437 | 2039  |
| >TP53-H193L HLIRVEGNLR   | 478   | >TP53-H193L LLIRVEGNLR  | 2682 | 2204  |
| >TP53-H193L QHLIRVEGNL   | 21923 | >TP53-H193L QLLIRVEGNL  | 317  | 21606 |
| >TP53-H193L QHLIRVEGNL   | 24871 | >TP53-H193L QLLIRVEGNL  | 100  | 24771 |
| >TP53-H193L QHLIRVEGNL   | 24400 | >TP53-H193L QLLIRVEGNL  | 372  | 24028 |
| >TP53-H193L QHLIRVEGNL   | 34283 | >TP53-H193L QLLIRVEGNL  | 130  | 34153 |
| >TP53-H193L QHLIRVEGNL   | 7915  | >TP53-H193L QLLIRVEGNLI | 431  | 7484  |
| >TP53-H193L QHLIRVEGNL   | 709   | >TP53-H193L QLLIRVEGNLI | 275  | 434   |
| >TP53-H193L APPQHILIRV   | 2001  | >TP53-H193L APPQLLIRV   | 392  | 1609  |
| >TP53-H193L LAPPQHILIRV  | 395   | >TP53-H193L LAPPQLLIRV  | 128  | 267   |
| >TP53-H193L LAPPQHILIRV  | 577   | >TP53-H193L LAPPQLLIRV  | 470  | 107   |
| >TP53-H193L LAPPQHILIRV  | 52    | >TP53-H193L LAPPQLLIRV  | 40   | 12    |
| >TP53-H193L LAPPQHILI    | 5     | >TP53-H193L LAPPQLLI    | 15   | 10    |
| >TP53-H193L LAPPQHILIRV  | 28    | >TP53-H193L LAPPQLLIRV  | 36   | 8     |
| >TP53-H193L LAPPQHILI    | 70    | >TP53-H193L LAPPQLLI    | 54   | 16    |
| >TP53-H193L GLAPPQHL     | 285   | >TP53-H193L GLAPPQLL    | 138  | 147   |
| >TP53-H193L GLAPPQHILI   | 65    | >TP53-H193L GLAPPQLLI   | 96   | 31    |
| >TP53-H193L GLAPPQHILIR' | 20    | >TP53-H193L GLAPPQLLIR\ | 23   | 3     |
| >TP53-H193L GLAPPQHL     | 22    | >TP53-H193L GLAPPQLL    | 14   | 8     |
| >TP53-H193L GLAPPQHILI   | 15    | >TP53-H193L GLAPPQLLI   | 53   | 38    |
| >TP53-H193L GLAPPQHILIR' | 9     | >TP53-H193L GLAPPQLLIR\ | 13   | 4     |
| >TP53-H193L GLAPPQHL     | 61    | >TP53-H193L GLAPPQLL    | 48   | 13    |
| >TP53-H193L GLAPPQHILI   | 31    | >TP53-H193L GLAPPQLLI   | 51   | 20    |
| >TP53-H193L GLAPPQHILIR' | 7     | >TP53-H193L GLAPPQLLIR\ | 10   | 3     |
| >TP53-H193L GLAPPQHILIR' | 44    | >TP53-H193L GLAPPQLLIR\ | 54   | 10    |
| >TP53-H193L GLAPPQHL     | 16    | >TP53-H193L GLAPPQLL    | 21   | 5     |
| >TP53-H193L GLAPPQHILI   | 13    | >TP53-H193L GLAPPQLLI   | 41   | 28    |
| >TP53-H193L GLAPPQHILIR' | 3     | >TP53-H193L GLAPPQLLIR\ | 3    | 0     |
| >TP53-H193L GLAPPQHL     | 26    | >TP53-H193L GLAPPQLL    | 81   | 55    |
| >TP53-H193L GLAPPQHILI   | 22    | >TP53-H193L GLAPPQLLI   | 235  | 213   |
| >TP53-H193L GLAPPQHILIR' | 7     | >TP53-H193L GLAPPQLLIR\ | 11   | 4     |
| >TP53-H193L GLAPPQHL     | 11    | >TP53-H193L GLAPPQLL    | 20   | 9     |
| >TP53-H193L GLAPPQHILI   | 13    | >TP53-H193L GLAPPQLLI   | 28   | 15    |
| >TP53-H193L GLAPPQHILIR' | 5     | >TP53-H193L GLAPPQLLIR\ | 5    | 0     |
| >TP53-H193L GLAPPQHL     | 175   | >TP53-H193L GLAPPQLL    | 421  | 246   |
| >TP53-H193L GLAPPQHILI   | 76    | >TP53-H193L GLAPPQLLI   | 1778 | 1702  |
| >TP53-H193L GLAPPQHILIR' | 9     | >TP53-H193L GLAPPQLLIR\ | 12   | 3     |
| >TP53-H193L GLAPPQHL     | 5     | >TP53-H193L GLAPPQLL    | 7    | 2     |
| >TP53-H193L GLAPPQHILI   | 5     | >TP53-H193L GLAPPQLLI   | 14   | 9     |

|                         |       |                         |      |       |
|-------------------------|-------|-------------------------|------|-------|
| >TP53-H193L GLAPPQHLIR' | 2     | >TP53-H193L GLAPPQLLIR' | 2    | 0     |
| >TP53-H193L GLAPPQHLIR  | 282   | >TP53-H193L GLAPPQLLIR  | 253  | 29    |
| >TP53-H193L SDGLAPPQHI  | 104   | >TP53-H193L SDGLAPPQLL  | 106  | 2     |
| >TP53-H193L DSDGLAPPQI  | 16745 | >TP53-H193L DSDGLAPPQL  | 322  | 16423 |
| >TP53-H193I HLIRVEGNLR' | 156   | >TP53-H193I NLIRVEGNLR' | 248  | 92    |
| >TP53-H193I HLIRVEGNL   | 226   | >TP53-H193I NLIRVEGNL   | 331  | 105   |
| >TP53-H193I HLIRVEGNLR' | 111   | >TP53-H193I NLIRVEGNLR' | 159  | 48    |
| >TP53-H193I HLIRVEGNLR' | 41    | >TP53-H193I NLIRVEGNLR' | 47   | 6     |
| >TP53-H193I HLIRVEGNLR' | 322   | >TP53-H193I NLIRVEGNLR' | 386  | 64    |
| >TP53-H193I HLIRVEGNL   | 327   | >TP53-H193I NLIRVEGNL   | 535  | 208   |
| >TP53-H193I HLIRVEGNLR' | 9     | >TP53-H193I NLIRVEGNLR' | 16   | 7     |
| >TP53-H193I HLIRVEGNLR' | 27    | >TP53-H193I NLIRVEGNLR' | 64   | 37    |
| >TP53-H193I HLIRVEGNLR' | 27    | >TP53-H193I NLIRVEGNLR' | 60   | 33    |
| >TP53-H193I HLIRVEGNLR' | 701   | >TP53-H193I NLIRVEGNLR' | 417  | 284   |
| >TP53-H193I HLIRVEGNL   | 153   | >TP53-H193I NLIRVEGNL   | 757  | 604   |
| >TP53-H193I HLIRVEGNLR' | 4     | >TP53-H193I NLIRVEGNLR' | 9    | 5     |
| >TP53-H193I HLIRVEGNLR  | 241   | >TP53-H193I NLIRVEGNLR  | 375  | 134   |
| >TP53-H193I HLIRVEGNLR  | 381   | >TP53-H193I NLIRVEGNLR  | 167  | 214   |
| >TP53-H193I HLIRVEGNLR  | 24    | >TP53-H193I NLIRVEGNLR  | 20   | 4     |
| >TP53-H193I HLIRVEGNLR' | 398   | >TP53-H193I NLIRVEGNLR' | 374  | 24    |
| >TP53-H193I HLIRVEGNLR  | 478   | >TP53-H193I NLIRVEGNLR  | 2874 | 2396  |
| >TP53-H193I APPQHLIRV   | 2001  | >TP53-H193I APPQNLIRV   | 100  | 1901  |
| >TP53-H193I LAPPQHLIRV  | 395   | >TP53-H193I LAPPQNLIRV  | 351  | 44    |
| >TP53-H193I LAPPQHLIRV  | 52    | >TP53-H193I LAPPQNLIRV  | 54   | 2     |
| >TP53-H193I LAPPQHLI    | 5     | >TP53-H193I LAPPQQLI    | 25   | 20    |
| >TP53-H193I LAPPQHLIRV  | 28    | >TP53-H193I LAPPQNLIRV  | 74   | 46    |
| >TP53-H193I LAPPQHLI    | 70    | >TP53-H193I LAPPQQLI    | 65   | 5     |
| >TP53-H193I GLAPPQHL    | 285   | >TP53-H193I GLAPPQNL    | 372  | 87    |
| >TP53-H193I GLAPPQHLI   | 65    | >TP53-H193I GLAPPQQLI   | 369  | 304   |
| >TP53-H193I GLAPPQHLIR' | 20    | >TP53-H193I GLAPPQNLIR' | 36   | 16    |
| >TP53-H193I GLAPPQHL    | 22    | >TP53-H193I GLAPPQNL    | 17   | 5     |
| >TP53-H193I GLAPPQHLI   | 15    | >TP53-H193I GLAPPQQLI   | 21   | 6     |
| >TP53-H193I GLAPPQHLIR' | 9     | >TP53-H193I GLAPPQNLIR' | 11   | 2     |
| >TP53-H193I GLAPPQHL    | 61    | >TP53-H193I GLAPPQNL    | 49   | 12    |
| >TP53-H193I GLAPPQHLI   | 31    | >TP53-H193I GLAPPQQLI   | 37   | 6     |
| >TP53-H193I GLAPPQHLIR' | 7     | >TP53-H193I GLAPPQNLIR' | 8    | 1     |
| >TP53-H193I GLAPPQHLIR' | 44    | >TP53-H193I GLAPPQNLIR' | 73   | 29    |
| >TP53-H193I GLAPPQHL    | 16    | >TP53-H193I GLAPPQNL    | 26   | 10    |
| >TP53-H193I GLAPPQHLI   | 13    | >TP53-H193I GLAPPQQLI   | 77   | 64    |
| >TP53-H193I GLAPPQHLIR' | 3     | >TP53-H193I GLAPPQNLIR' | 4    | 1     |
| >TP53-H193I GLAPPQHL    | 26    | >TP53-H193I GLAPPQNL    | 58   | 32    |
| >TP53-H193I GLAPPQHLI   | 22    | >TP53-H193I GLAPPQQLI   | 113  | 91    |
| >TP53-H193I GLAPPQHLIR' | 7     | >TP53-H193I GLAPPQNLIR' | 8    | 1     |

|                         |     |                         |       |       |
|-------------------------|-----|-------------------------|-------|-------|
| >TP53-H193F GLAPPQHL    | 11  | >TP53-H193F GLAPPQNL    | 23    | 12    |
| >TP53-H193F GLAPPQHLI   | 13  | >TP53-H193F GLAPPQNLI   | 57    | 44    |
| >TP53-H193F GLAPPQHLIR' | 5   | >TP53-H193F GLAPPQNLIR' | 6     | 1     |
| >TP53-H193F GLAPPQHL    | 175 | >TP53-H193F GLAPPQNL    | 181   | 6     |
| >TP53-H193F GLAPPQHLI   | 76  | >TP53-H193F GLAPPQNLI   | 1750  | 1674  |
| >TP53-H193F GLAPPQHLIR' | 9   | >TP53-H193F GLAPPQNLIR' | 11    | 2     |
| >TP53-H193F GLAPPQHL    | 5   | >TP53-H193F GLAPPQNL    | 7     | 2     |
| >TP53-H193F GLAPPQHLI   | 5   | >TP53-H193F GLAPPQNLI   | 20    | 15    |
| >TP53-H193F GLAPPQHLIR' | 2   | >TP53-H193F GLAPPQNLIR' | 2     | 0     |
| >TP53-H193F GLAPPQHLIR  | 282 | >TP53-H193F GLAPPQNLIR  | 366   | 84    |
| >TP53-H193F SDGLAPPQHI  | 104 | >TP53-H193F SDGLAPPQNI  | 136   | 32    |
| >TP53-H193F HLIRVEGNLR' | 156 | >TP53-H193F PLIRVEGNLR' | 2916  | 2760  |
| >TP53-H193F HLIRVEGNL   | 226 | >TP53-H193F PLIRVEGNL   | 2551  | 2325  |
| >TP53-H193F HLIRVEGNLR' | 111 | >TP53-H193F PLIRVEGNLR' | 1732  | 1621  |
| >TP53-H193F HLIRVEGNLR' | 41  | >TP53-H193F PLIRVEGNLR' | 1271  | 1230  |
| >TP53-H193F HLIRVEGNLR' | 322 | >TP53-H193F PLIRVEGNLR' | 4669  | 4347  |
| >TP53-H193F HLIRVEGNL   | 327 | >TP53-H193F PLIRVEGNL   | 1646  | 1319  |
| >TP53-H193F HLIRVEGNLR' | 9   | >TP53-H193F PLIRVEGNLR' | 44    | 35    |
| >TP53-H193F HLIRVEGNLR' | 27  | >TP53-H193F PLIRVEGNLR' | 1584  | 1557  |
| >TP53-H193F HLIRVEGNLR' | 27  | >TP53-H193F PLIRVEGNLR' | 116   | 89    |
| >TP53-H193F HLIRVEGNL   | 153 | >TP53-H193F PLIRVEGNL   | 1299  | 1146  |
| >TP53-H193F HLIRVEGNLR' | 4   | >TP53-H193F PLIRVEGNLR' | 15    | 11    |
| >TP53-H193F HLIRVEGNLR  | 241 | >TP53-H193F PLIRVEGNLR  | 2324  | 2083  |
| >TP53-H193F HLIRVEGNLR  | 381 | >TP53-H193F PLIRVEGNLR  | 1897  | 1516  |
| >TP53-H193F HLIRVEGNLR  | 24  | >TP53-H193F PLIRVEGNLR  | 1795  | 1771  |
| >TP53-H193F HLIRVEGNLR' | 398 | >TP53-H193F PLIRVEGNLR' | 11611 | 11213 |
| >TP53-H193F HLIRVEGNLR  | 478 | >TP53-H193F PLIRVEGNLR  | 5257  | 4779  |
| >TP53-H193F LAPPQHILIRV | 395 | >TP53-H193F LAPPQPLIRV  | 278   | 117   |
| >TP53-H193F LAPPQHILIRV | 577 | >TP53-H193F LAPPQPLIRV  | 383   | 194   |
| >TP53-H193F LAPPQHILIRV | 52  | >TP53-H193F LAPPQPLIRV  | 62    | 10    |
| >TP53-H193F LAPPQHILI   | 5   | >TP53-H193F LAPPQPLI    | 53    | 48    |
| >TP53-H193F LAPPQHILIRV | 28  | >TP53-H193F LAPPQPLIRV  | 82    | 54    |
| >TP53-H193F LAPPQHILI   | 70  | >TP53-H193F LAPPQPLI    | 46    | 24    |
| >TP53-H193F GLAPPQHL    | 285 | >TP53-H193F GLAPPQPL    | 87    | 198   |
| >TP53-H193F GLAPPQHLI   | 65  | >TP53-H193F GLAPPQPLI   | 51    | 14    |
| >TP53-H193F GLAPPQHLIR' | 20  | >TP53-H193F GLAPPQPLIR' | 23    | 3     |
| >TP53-H193F GLAPPQHL    | 22  | >TP53-H193F GLAPPQPL    | 18    | 4     |
| >TP53-H193F GLAPPQHLI   | 15  | >TP53-H193F GLAPPQPLI   | 79    | 64    |
| >TP53-H193F GLAPPQHLIR' | 9   | >TP53-H193F GLAPPQPLIR' | 21    | 12    |
| >TP53-H193F GLAPPQHL    | 61  | >TP53-H193F GLAPPQPL    | 28    | 33    |
| >TP53-H193F GLAPPQHLI   | 31  | >TP53-H193F GLAPPQPLI   | 71    | 40    |
| >TP53-H193F GLAPPQHLIR' | 7   | >TP53-H193F GLAPPQPLIR' | 11    | 4     |
| >TP53-H193F GLAPPQHL    | 755 | >TP53-H193F GLAPPQPL    | 405   | 350   |

|                        |       |                        |      |       |
|------------------------|-------|------------------------|------|-------|
| >TP53-H193FGLAPPQHLI   | 500   | >TP53-H193FGLAPPQPLI   | 374  | 126   |
| >TP53-H193FGLAPPQHLIR' | 44    | >TP53-H193FGLAPPQPLIR\ | 56   | 12    |
| >TP53-H193FGLAPPQHL    | 16    | >TP53-H193FGLAPPQPL    | 11   | 5     |
| >TP53-H193FGLAPPQHLI   | 13    | >TP53-H193FGLAPPQPLI   | 19   | 6     |
| >TP53-H193FGLAPPQHLIR' | 3     | >TP53-H193FGLAPPQPLIR\ | 3    | 0     |
| >TP53-H193FGLAPPQHL    | 26    | >TP53-H193FGLAPPQPL    | 27   | 1     |
| >TP53-H193FGLAPPQHLI   | 22    | >TP53-H193FGLAPPQPLI   | 123  | 101   |
| >TP53-H193FGLAPPQHLIR' | 7     | >TP53-H193FGLAPPQPLIR\ | 11   | 4     |
| >TP53-H193FGLAPPQHL    | 11    | >TP53-H193FGLAPPQPL    | 15   | 4     |
| >TP53-H193FGLAPPQHLI   | 13    | >TP53-H193FGLAPPQPLI   | 11   | 2     |
| >TP53-H193FGLAPPQHLIR' | 5     | >TP53-H193FGLAPPQPLIR\ | 5    | 0     |
| >TP53-H193FGLAPPQHL    | 175   | >TP53-H193FGLAPPQPL    | 180  | 5     |
| >TP53-H193FGLAPPQHLI   | 76    | >TP53-H193FGLAPPQPLI   | 192  | 116   |
| >TP53-H193FGLAPPQHLIR' | 9     | >TP53-H193FGLAPPQPLIR\ | 8    | 1     |
| >TP53-H193FGLAPPQHL    | 5     | >TP53-H193FGLAPPQPL    | 6    | 1     |
| >TP53-H193FGLAPPQHLI   | 5     | >TP53-H193FGLAPPQPLI   | 11   | 6     |
| >TP53-H193FGLAPPQHLIR' | 2     | >TP53-H193FGLAPPQPLIR\ | 2    | 0     |
| >TP53-H193FGLAPPQHLIR  | 282   | >TP53-H193FGLAPPQPLIR  | 271  | 11    |
| >TP53-H193FSDGLAPPQHL  | 104   | >TP53-H193FSDGLAPPQPL  | 201  | 97    |
| >TP53-H193FSDGLAPPQHL  | 1128  | >TP53-H193FSDGLAPPQPL  | 277  | 851   |
| >TP53-H193FHLIRVEGNLR' | 156   | >TP53-H193FRLIRVEGNLR\ | 86   | 70    |
| >TP53-H193FHLIRVEGNL   | 226   | >TP53-H193FRLIRVEGNL   | 233  | 7     |
| >TP53-H193FHLIRVEGNLR' | 111   | >TP53-H193FRLIRVEGNLR\ | 120  | 9     |
| >TP53-H193FHLIRVEGNL   | 690   | >TP53-H193FRLIRVEGNL   | 262  | 428   |
| >TP53-H193FHLIRVEGNLR' | 41    | >TP53-H193FRLIRVEGNLR\ | 18   | 23    |
| >TP53-H193FHLIRVEGNLR' | 322   | >TP53-H193FRLIRVEGNLR\ | 129  | 193   |
| >TP53-H193FHLIRVEGNL   | 327   | >TP53-H193FRLIRVEGNL   | 66   | 261   |
| >TP53-H193FHLIRVEGNLR' | 9     | >TP53-H193FRLIRVEGNLR\ | 4    | 5     |
| >TP53-H193FHLIRVEGNLR' | 27    | >TP53-H193FRLIRVEGNLR\ | 23   | 4     |
| >TP53-H193FHLIRVEGNL   | 878   | >TP53-H193FRLIRVEGNL   | 458  | 420   |
| >TP53-H193FHLIRVEGNLR' | 27    | >TP53-H193FRLIRVEGNLR\ | 18   | 9     |
| >TP53-H193FHLIRVEGNL   | 153   | >TP53-H193FRLIRVEGNL   | 155  | 2     |
| >TP53-H193FHLIRVEGNLR' | 4     | >TP53-H193FRLIRVEGNLR\ | 4    | 0     |
| >TP53-H193FHLIRVEGNLR  | 241   | >TP53-H193FRLIRVEGNLR  | 37   | 204   |
| >TP53-H193FHLIRVEGNLR  | 381   | >TP53-H193FRLIRVEGNLR  | 1130 | 749   |
| >TP53-H193FHLIRVEGNLR  | 24    | >TP53-H193FRLIRVEGNLR  | 188  | 164   |
| >TP53-H193FHLIRVEGNLR' | 398   | >TP53-H193FRLIRVEGNLR\ | 6616 | 6218  |
| >TP53-H193FHLIRVEGNLR  | 478   | >TP53-H193FRLIRVEGNLR  | 457  | 21    |
| >TP53-H193FQHLIRVEGNL  | 3884  | >TP53-H193FQRLIRVEGNL  | 38   | 3846  |
| >TP53-H193FQHLIRVEGNL  | 18586 | >TP53-H193FQRLIRVEGNL  | 230  | 18356 |
| >TP53-H193FQHLIRVEGNL  | 13588 | >TP53-H193FQRLIRVEGNL  | 103  | 13485 |
| >TP53-H193FQHLIRVEGNL  | 10610 | >TP53-H193FQRLIRVEGNL  | 45   | 10565 |
| >TP53-H193FAPPQHLIRV   | 2001  | >TP53-H193FAPPQHLIRV   | 476  | 1525  |



|                        |       |                         |      |       |
|------------------------|-------|-------------------------|------|-------|
| >TP53-H193FLAPPQHILIRV | 395   | >TP53-H193FLAPPQRLIRV   | 366  | 29    |
| >TP53-H193FLAPPQHILIRV | 52    | >TP53-H193FLAPPQRLIRV   | 57   | 5     |
| >TP53-H193FLAPPQHILI   | 5     | >TP53-H193FLAPPQRLI     | 27   | 22    |
| >TP53-H193FLAPPQHILIRV | 28    | >TP53-H193FLAPPQRLIRV   | 118  | 90    |
| >TP53-H193FLAPPQHILI   | 70    | >TP53-H193FLAPPQRLI     | 61   | 9     |
| >TP53-H193FLAPPQHL     | 285   | >TP53-H193FLAPPQRL      | 588  | 303   |
| >TP53-H193FLAPPQHILI   | 65    | >TP53-H193FLAPPQRLI     | 2547 | 2482  |
| >TP53-H193FLAPPQHILIR' | 20    | >TP53-H193FLAPPQRLIR'   | 74   | 54    |
| >TP53-H193FLAPPQHL     | 22    | >TP53-H193FLAPPQRL      | 39   | 17    |
| >TP53-H193FLAPPQHILI   | 15    | >TP53-H193FLAPPQRLI     | 262  | 247   |
| >TP53-H193FLAPPQHILIR' | 9     | >TP53-H193FLAPPQRLIR'   | 23   | 14    |
| >TP53-H193FLAPPQHL     | 61    | >TP53-H193FLAPPQRL      | 107  | 46    |
| >TP53-H193FLAPPQHILI   | 31    | >TP53-H193FLAPPQRLI     | 113  | 82    |
| >TP53-H193FLAPPQHILIR' | 7     | >TP53-H193FLAPPQRLIR'   | 11   | 4     |
| >TP53-H193FLAPPQHILIR' | 44    | >TP53-H193FLAPPQRLIR'   | 152  | 108   |
| >TP53-H193FLAPPQHL     | 16    | >TP53-H193FLAPPQRL      | 19   | 3     |
| >TP53-H193FLAPPQHILI   | 13    | >TP53-H193FLAPPQRLI     | 87   | 74    |
| >TP53-H193FLAPPQHILIR' | 3     | >TP53-H193FLAPPQRLIR'   | 4    | 1     |
| >TP53-H193FLAPPQHL     | 26    | >TP53-H193FLAPPQRL      | 132  | 106   |
| >TP53-H193FLAPPQHILI   | 22    | >TP53-H193FLAPPQRLI     | 875  | 853   |
| >TP53-H193FLAPPQHILIR' | 7     | >TP53-H193FLAPPQRLIR'   | 18   | 11    |
| >TP53-H193FLAPPQHL     | 11    | >TP53-H193FLAPPQRL      | 49   | 38    |
| >TP53-H193FLAPPQHILI   | 13    | >TP53-H193FLAPPQRLI     | 348  | 335   |
| >TP53-H193FLAPPQHILIR' | 5     | >TP53-H193FLAPPQRLIR'   | 8    | 3     |
| >TP53-H193FLAPPQHL     | 175   | >TP53-H193FLAPPQRL      | 357  | 182   |
| >TP53-H193FLAPPQHILI   | 76    | >TP53-H193FLAPPQRLI     | 6523 | 6447  |
| >TP53-H193FLAPPQHILIR' | 9     | >TP53-H193FLAPPQRLIR'   | 31   | 22    |
| >TP53-H193FLAPPQHL     | 5     | >TP53-H193FLAPPQRL      | 6    | 1     |
| >TP53-H193FLAPPQHILI   | 5     | >TP53-H193FLAPPQRLI     | 56   | 51    |
| >TP53-H193FLAPPQHILIR' | 2     | >TP53-H193FLAPPQRLIR'   | 2    | 0     |
| >TP53-H193FLAPPQHILIR  | 282   | >TP53-H193FLAPPQRLIR    | 593  | 311   |
| >TP53-H193FLSDGLAPPQHI | 104   | >TP53-H193FLSDGLAPPQRL  | 237  | 133   |
| >TP53-H193FLDSDGLAPPQI | 27248 | >TP53-H193FLDSDGLAPPQRL | 450  | 26798 |
| >TP53-H193\HLIRVEGNL   | 4684  | >TP53-H193\YLIRVEGNL    | 155  | 4529  |
| >TP53-H193\HLIRVEGNLR' | 156   | >TP53-H193\YLIRVEGNLR'  | 17   | 139   |
| >TP53-H193\HLIRVEGNL   | 226   | >TP53-H193\YLIRVEGNL    | 34   | 192   |
| >TP53-H193\HLIRVEGNLR' | 111   | >TP53-H193\YLIRVEGNLR'  | 18   | 93    |
| >TP53-H193\HLIRVEGNL   | 690   | >TP53-H193\YLIRVEGNL    | 29   | 661   |
| >TP53-H193\HLIRVEGNLR' | 41    | >TP53-H193\YLIRVEGNLR'  | 5    | 36    |
| >TP53-H193\HLIRVEGNLR' | 322   | >TP53-H193\YLIRVEGNLR'  | 20   | 302   |
| >TP53-H193\HLIRVEGN    | 9818  | >TP53-H193\YLIRVEGN     | 487  | 9331  |
| >TP53-H193\HLIRVEGNL   | 327   | >TP53-H193\YLIRVEGNL    | 9    | 318   |
| >TP53-H193\HLIRVEGNLR' | 9     | >TP53-H193\YLIRVEGNLR'  | 2    | 7     |

|                         |       |                        |      |       |
|-------------------------|-------|------------------------|------|-------|
| >TP53-H193\HLIRVEGNL    | 806   | >TP53-H193\YLIRVEGNL   | 23   | 783   |
| >TP53-H193\HLIRVEGNLR'  | 27    | >TP53-H193\YLIRVEGNLR\ | 4    | 23    |
| >TP53-H193\HLIRVEGNL    | 878   | >TP53-H193\YLIRVEGNL   | 32   | 846   |
| >TP53-H193\HLIRVEGNLR'  | 27    | >TP53-H193\YLIRVEGNLR\ | 6    | 21    |
| >TP53-H193\HLIRVEGNLR'  | 701   | >TP53-H193\YLIRVEGNLR\ | 16   | 685   |
| >TP53-H193\HLIRVEGNL    | 153   | >TP53-H193\YLIRVEGNL   | 7    | 146   |
| >TP53-H193\HLIRVEGNLR'  | 4     | >TP53-H193\YLIRVEGNLR\ | 2    | 2     |
| >TP53-H193\HLIRVEGNLR   | 241   | >TP53-H193\YLIRVEGNLR  | 290  | 49    |
| >TP53-H193\HLIRVEGNLR   | 381   | >TP53-H193\YLIRVEGNLR  | 201  | 180   |
| >TP53-H193\HLIRVEGNLR   | 24    | >TP53-H193\YLIRVEGNLR  | 20   | 4     |
| >TP53-H193\HLIRVEGNLR'  | 398   | >TP53-H193\YLIRVEGNLR\ | 769  | 371   |
| >TP53-H193\HLIRVEGNLR   | 478   | >TP53-H193\YLIRVEGNLR  | 1751 | 1273  |
| >TP53-H193\QHLIRVEGNL   | 11213 | >TP53-H193\QYLIRVEGNL  | 77   | 11136 |
| >TP53-H193\QHLIRVEGNL   | 13287 | >TP53-H193\QYLIRVEGNL  | 13   | 13274 |
| >TP53-H193\QHLIRVEGNL   | 7915  | >TP53-H193\QYLIRVEGNL  | 185  | 7730  |
| >TP53-H193\QHLIRVEGNL   | 12474 | >TP53-H193\QYLIRVEGNL  | 182  | 12292 |
| >TP53-H193\QHLIRVEGNL   | 709   | >TP53-H193\QYLIRVEGNL  | 34   | 675   |
| >TP53-H193\SDSDGLAPPC   | 15985 | >TP53-H193\SDSDGLAPPC  | 445  | 15540 |
| >TP53-H193\LAPPQHILRV   | 395   | >TP53-H193\LAPPQYLIRV  | 191  | 204   |
| >TP53-H193\LAPPQHILRV   | 577   | >TP53-H193\LAPPQYLIRV  | 393  | 184   |
| >TP53-H193\LAPPQHILRV   | 52    | >TP53-H193\LAPPQYLIRV  | 38   | 14    |
| >TP53-H193\LAPPQHILI    | 898   | >TP53-H193\LAPPQYLI    | 423  | 475   |
| >TP53-H193\LAPPQHILI    | 5     | >TP53-H193\LAPPQYLI    | 6    | 1     |
| >TP53-H193\LAPPQHILRV   | 28    | >TP53-H193\LAPPQYLIRV  | 31   | 3     |
| >TP53-H193\LAPPQHILI    | 70    | >TP53-H193\LAPPQYLI    | 55   | 15    |
| >TP53-H193\GLAPPQHL     | 285   | >TP53-H193\GLAPPQYL    | 44   | 241   |
| >TP53-H193\GLAPPQHILI   | 65    | >TP53-H193\GLAPPQYLI   | 26   | 39    |
| >TP53-H193\GLAPPQHILIR' | 20    | >TP53-H193\GLAPPQYLIR\ | 14   | 6     |
| >TP53-H193\GLAPPQHL     | 22    | >TP53-H193\GLAPPQYL    | 6    | 16    |
| >TP53-H193\GLAPPQHILI   | 15    | >TP53-H193\GLAPPQYLI   | 10   | 5     |
| >TP53-H193\GLAPPQHILIR' | 9     | >TP53-H193\GLAPPQYLIR\ | 7    | 2     |
| >TP53-H193\GLAPPQHL     | 61    | >TP53-H193\GLAPPQYL    | 32   | 29    |
| >TP53-H193\GLAPPQHILI   | 31    | >TP53-H193\GLAPPQYLI   | 46   | 15    |
| >TP53-H193\GLAPPQHILIR' | 7     | >TP53-H193\GLAPPQYLIR\ | 8    | 1     |
| >TP53-H193\GLAPPQHL     | 755   | >TP53-H193\GLAPPQYL    | 377  | 378   |
| >TP53-H193\GLAPPQHILI   | 500   | >TP53-H193\GLAPPQYLI   | 478  | 22    |
| >TP53-H193\GLAPPQHILIR' | 44    | >TP53-H193\GLAPPQYLIR\ | 40   | 4     |
| >TP53-H193\GLAPPQHL     | 16    | >TP53-H193\GLAPPQYL    | 5    | 11    |
| >TP53-H193\GLAPPQHILI   | 13    | >TP53-H193\GLAPPQYLI   | 12   | 1     |
| >TP53-H193\GLAPPQHILIR' | 3     | >TP53-H193\GLAPPQYLIR\ | 3    | 0     |
| >TP53-H193\GLAPPQHL     | 26    | >TP53-H193\GLAPPQYL    | 11   | 15    |
| >TP53-H193\GLAPPQHILI   | 22    | >TP53-H193\GLAPPQYLI   | 13   | 9     |
| >TP53-H193\GLAPPQHILIR' | 7     | >TP53-H193\GLAPPQYLIR\ | 6    | 1     |

|                         |       |                         |       |       |
|-------------------------|-------|-------------------------|-------|-------|
| >TP53-H193\GLAPPQHL     | 11    | >TP53-H193\GLAPPQYL     | 9     | 2     |
| >TP53-H193\GLAPPQHLI    | 13    | >TP53-H193\GLAPPQYLI    | 17    | 4     |
| >TP53-H193\GLAPPQHLIR   | 5     | >TP53-H193\GLAPPQYLIR   | 5     | 0     |
| >TP53-H193\GLAPPQHL     | 175   | >TP53-H193\GLAPPQYL     | 16    | 159   |
| >TP53-H193\GLAPPQHLI    | 76    | >TP53-H193\GLAPPQYLI    | 95    | 19    |
| >TP53-H193\GLAPPQHLIR   | 9     | >TP53-H193\GLAPPQYLIR   | 6     | 3     |
| >TP53-H193\GLAPPQHL     | 5     | >TP53-H193\GLAPPQYL     | 4     | 1     |
| >TP53-H193\GLAPPQHLI    | 5     | >TP53-H193\GLAPPQYLI    | 9     | 4     |
| >TP53-H193\GLAPPQHLIR   | 2     | >TP53-H193\GLAPPQYLIR   | 2     | 0     |
| >TP53-H193\GLAPPQHLIR   | 282   | >TP53-H193\GLAPPQYLIR   | 171   | 111   |
| >TP53-H193\SDGLAPPQHI   | 104   | >TP53-H193\SDGLAPPQYL   | 74    | 30    |
| >TP53-H193\SDGLAPPQHL   | 14432 | >TP53-H193\SDGLAPPQYLI  | 110   | 14322 |
| >TP53-H193\SDGLAPPQHLIR | 21973 | >TP53-H193\SDGLAPPQYLIR | 484   | 21489 |
| >TP53-H193\SDGLAPPQHLIR | 1128  | >TP53-H193\SDGLAPPQYLIR | 348   | 780   |
| >TP53-H214[RHSVVVPY     | 23    | >TP53-H214[RDSVVVPY     | 752   | 729   |
| >TP53-H214[RHSVVVPY     | 413   | >TP53-H214[RDSVVVPY     | 29660 | 29247 |
| >TP53-H214[FRHSVVVPY    | 4     | >TP53-H214[FRDSVVVPY    | 89    | 85    |
| >TP53-H214[FRHSVVVPY    | 33    | >TP53-H214[FRDSVVVPY    | 241   | 208   |
| >TP53-H214[TFRHSVVVPY   | 185   | >TP53-H214[TFRDSVVVPY   | 229   | 44    |
| >TP53-H214[TFRHSVVV     | 139   | >TP53-H214[TFRDSVVV     | 437   | 298   |
| >TP53-H214[TFRHSVVVPY   | 162   | >TP53-H214[TFRDSVVVPY   | 292   | 130   |
| >TP53-H214[TFRHSVVVPY   | 140   | >TP53-H214[TFRDSVVVPY   | 150   | 10    |
| >TP53-H214[TFRHSVVVPY   | 225   | >TP53-H214[TFRDSVVVPY   | 245   | 20    |
| >TP53-H214[TFRHSVVVPY   | 271   | >TP53-H214[TFRDSVVVPY   | 786   | 515   |
| >TP53-H214[NTFRHSVV     | 382   | >TP53-H214[NTFRDSVV     | 1357  | 975   |
| >TP53-H214[NTFRHSVV     | 309   | >TP53-H214[NTFRDSVV     | 668   | 359   |
| >TP53-H214[NTFRHSVVV    | 265   | >TP53-H214[NTFRDSVVV    | 372   | 107   |
| >TP53-H214[NTFRHSVVVF   | 128   | >TP53-H214[NTFRDSVVVF   | 249   | 121   |
| >TP53-H214[NTFRHSVVVF   | 97    | >TP53-H214[NTFRDSVVVF   | 245   | 148   |
| >TP53-H214[NTFRHSVVVF   | 123   | >TP53-H214[NTFRDSVVVF   | 186   | 63    |
| >TP53-H214[NTFRHSVVVF   | 678   | >TP53-H214[NTFRDSVVVF   | 334   | 344   |
| >TP53-H214[NTFRHSVVVF   | 82    | >TP53-H214[NTFRDSVVVF   | 135   | 53    |
| >TP53-H214[NTFRHSVVV    | 412   | >TP53-H214[NTFRDSVVV    | 854   | 442   |
| >TP53-H214[NTFRHSVVVF   | 61    | >TP53-H214[NTFRDSVVVF   | 121   | 60    |
| >TP53-H214[NTFRHSVVVF   | 34    | >TP53-H214[NTFRDSVVVF   | 34    | 0     |
| >TP53-H214[NTFRHSVV     | 11    | >TP53-H214[NTFRDSVV     | 13    | 2     |
| >TP53-H214[NTFRHSVVV    | 8     | >TP53-H214[NTFRDSVVV    | 11    | 3     |
| >TP53-H214[NTFRHSVV     | 50    | >TP53-H214[NTFRDSVV     | 205   | 155   |
| >TP53-H214[NTFRHSVVV    | 25    | >TP53-H214[NTFRDSVVV    | 42    | 17    |
| >TP53-H214[NTFRHSVVVF   | 65    | >TP53-H214[NTFRDSVVVF   | 86    | 21    |
| >TP53-H214[NTFRHSVVVF   | 492   | >TP53-H214[NTFRDSVVVF   | 680   | 188   |
| >TP53-H214[NTFRHSVVVF   | 33    | >TP53-H214[NTFRDSVVVF   | 51    | 18    |
| >TP53-H214[NTFRHSVVVF   | 23    | >TP53-H214[NTFRDSVVVF   | 49    | 26    |

|                       |      |                       |      |      |
|-----------------------|------|-----------------------|------|------|
| >TP53-H214[NTFRHSVVVF | 105  | >TP53-H214[NTFRDSVVVF | 116  | 11   |
| >TP53-H214[NTFRHSVVVF | 289  | >TP53-H214[NTFRDSVVVF | 200  | 89   |
| >TP53-H214[NTFRHSVVVF | 23   | >TP53-H214[NTFRDSVVVF | 42   | 19   |
| >TP53-H214[RNTFRHSVV  | 224  | >TP53-H214[RNTFRDSVV  | 1020 | 796  |
| >TP53-H214[LDDRNTFRHS | 482  | >TP53-H214[LDDRNTFRDS | 433  | 49   |
| >TP53-H214[YLDDRNTFRH | 333  | >TP53-H214[YLDDRNTFRD | 1958 | 1625 |
| >TP53-H214[YLDDRNTFRH | 800  | >TP53-H214[YLDDRNTFRD | 349  | 451  |
| >TP53-H214[YLDDRNTFRH | 155  | >TP53-H214[YLDDRNTFRD | 738  | 583  |
| >TP53-H214[YLDDRNTFRH | 187  | >TP53-H214[YLDDRNTFRD | 189  | 2    |
| >TP53-H214[YLDDRNTFRH | 171  | >TP53-H214[YLDDRNTFRD | 352  | 181  |
| >TP53-H214(RHSVVVPY   | 642  | >TP53-H214(RQSVVVPY   | 167  | 475  |
| >TP53-H214(RHSVVVPY   | 5812 | >TP53-H214(RQSVVVPY   | 366  | 5446 |
| >TP53-H214(RHSVVVPY   | 2425 | >TP53-H214(RQSVVVPY   | 37   | 2388 |
| >TP53-H214(RHSVVVPY   | 23   | >TP53-H214(RQSVVVPY   | 4    | 19   |
| >TP53-H214(RHSVVVPY   | 413  | >TP53-H214(RQSVVVPY   | 8677 | 8264 |
| >TP53-H214(FRHSVVVPY  | 4    | >TP53-H214(FRQSVVVPY  | 10   | 6    |
| >TP53-H214(FRHSVVVPY  | 33   | >TP53-H214(FRQSVVVPY  | 35   | 2    |
| >TP53-H214(FRHSVVVPY  | 946  | >TP53-H214(FRQSVVVPY  | 305  | 641  |
| >TP53-H214(FRHSVVVPY  | 1518 | >TP53-H214(FRQSVVVPY  | 474  | 1044 |
| >TP53-H214(TFRHSVVVPY | 185  | >TP53-H214(TFRQSVVVPY | 164  | 21   |
| >TP53-H214(TFRHSVVV   | 139  | >TP53-H214(TFRQSVVV   | 542  | 403  |
| >TP53-H214(TFRHSVVVPY | 162  | >TP53-H214(TFRQSVVVPY | 643  | 481  |
| >TP53-H214(TFRHSVVVPY | 140  | >TP53-H214(TFRQSVVVPY | 131  | 9    |
| >TP53-H214(TFRHSVVVPY | 225  | >TP53-H214(TFRQSVVVPY | 163  | 62   |
| >TP53-H214(TFRHSVVVPY | 271  | >TP53-H214(TFRQSVVVPY | 628  | 357  |
| >TP53-H214(NTFRHSVV   | 382  | >TP53-H214(NTFRQSVV   | 980  | 598  |
| >TP53-H214(NTFRHSVV   | 309  | >TP53-H214(NTFRQSVV   | 543  | 234  |
| >TP53-H214(NTFRHSVVV  | 265  | >TP53-H214(NTFRQSVVV  | 456  | 191  |
| >TP53-H214(NTFRHSVVVF | 128  | >TP53-H214(NTFRQSVVVF | 164  | 36   |
| >TP53-H214(NTFRHSVVVF | 97   | >TP53-H214(NTFRQSVVVF | 130  | 33   |
| >TP53-H214(NTFRHSVVVF | 123  | >TP53-H214(NTFRQSVVVF | 295  | 172  |
| >TP53-H214(NTFRHSVVVF | 678  | >TP53-H214(NTFRQSVVVF | 336  | 342  |
| >TP53-H214(NTFRHSVVVF | 82   | >TP53-H214(NTFRQSVVVF | 117  | 35   |
| >TP53-H214(NTFRHSVVV  | 412  | >TP53-H214(NTFRQSVVV  | 528  | 116  |
| >TP53-H214(NTFRHSVVVF | 61   | >TP53-H214(NTFRQSVVVF | 75   | 14   |
| >TP53-H214(NTFRHSVVVF | 34   | >TP53-H214(NTFRQSVVVF | 38   | 4    |
| >TP53-H214(NTFRHSVV   | 11   | >TP53-H214(NTFRQSVV   | 12   | 1    |
| >TP53-H214(NTFRHSVVV  | 8    | >TP53-H214(NTFRQSVVV  | 9    | 1    |
| >TP53-H214(NTFRHSVV   | 50   | >TP53-H214(NTFRQSVV   | 105  | 55   |
| >TP53-H214(NTFRHSVVV  | 25   | >TP53-H214(NTFRQSVVV  | 53   | 28   |
| >TP53-H214(NTFRHSVVVF | 766  | >TP53-H214(NTFRQSVVVF | 338  | 428  |
| >TP53-H214(NTFRHSVVVF | 65   | >TP53-H214(NTFRQSVVVF | 83   | 18   |
| >TP53-H214(NTFRHSVVVF | 492  | >TP53-H214(NTFRQSVVVF | 569  | 77   |

|                        |       |                        |      |       |
|------------------------|-------|------------------------|------|-------|
| >TP53-H214CNTFRHSVVVF  | 33    | >TP53-H214CNTFRQSVVVF  | 48   | 15    |
| >TP53-H214CNTFRHSVVVF  | 23    | >TP53-H214CNTFRQSVVVF  | 22   | 1     |
| >TP53-H214CNTFRHSVVVF  | 105   | >TP53-H214CNTFRQSVVVF  | 118  | 13    |
| >TP53-H214CNTFRHSVVVF  | 289   | >TP53-H214CNTFRQSVVVF  | 245  | 44    |
| >TP53-H214CNTFRHSVVVF  | 23    | >TP53-H214CNTFRQSVVVF  | 25   | 2     |
| >TP53-H214C RNTFRHSVV  | 224   | >TP53-H214C RNTFRQSVV  | 554  | 330   |
| >TP53-H214C LDDRNTFRHS | 482   | >TP53-H214C LDDRNTFRQS | 813  | 331   |
| >TP53-H214C YLDDRNTFRF | 333   | >TP53-H214C YLDDRNTFRC | 905  | 572   |
| >TP53-H214C YLDDRNTFRF | 800   | >TP53-H214C YLDDRNTFRC | 43   | 757   |
| >TP53-H214C YLDDRNTFRF | 155   | >TP53-H214C YLDDRNTFRC | 88   | 67    |
| >TP53-H214C YLDDRNTFRF | 3628  | >TP53-H214C YLDDRNTFRC | 175  | 3453  |
| >TP53-H214C YLDDRNTFRF | 5619  | >TP53-H214C YLDDRNTFRC | 69   | 5550  |
| >TP53-H214C YLDDRNTFRF | 6951  | >TP53-H214C YLDDRNTFRC | 410  | 6541  |
| >TP53-H214C YLDDRNTFRF | 187   | >TP53-H214C YLDDRNTFRC | 4    | 183   |
| >TP53-H214C YLDDRNTFRF | 171   | >TP53-H214C YLDDRNTFRC | 81   | 90    |
| >TP53-H214F RHSVVVPY   | 23    | >TP53-H214F RRSVVVPY   | 14   | 9     |
| >TP53-H214F RHSVVVPY   | 7794  | >TP53-H214F RRSVVVPY   | 38   | 7756  |
| >TP53-H214F RHSVVVPY   | 3863  | >TP53-H214F RRSVVVPY   | 36   | 3827  |
| >TP53-H214F RHSVVVPYE  | 11877 | >TP53-H214F RRSVVVPYE  | 256  | 11621 |
| >TP53-H214F RHSVVVPY   | 3401  | >TP53-H214F RRSVVVPY   | 100  | 3301  |
| >TP53-H214F RHSVVVPY   | 413   | >TP53-H214F RRSVVVPY   | 2022 | 1609  |
| >TP53-H214F EYLDDRNTFR | 14213 | >TP53-H214F EYLDDRNTFR | 325  | 13888 |
| >TP53-H214F EYLDDRNTFR | 8305  | >TP53-H214F EYLDDRNTFR | 20   | 8285  |
| >TP53-H214F EYLDDRNTFR | 12781 | >TP53-H214F EYLDDRNTFR | 71   | 12710 |
| >TP53-H214F EYLDDRNTFR | 7169  | >TP53-H214F EYLDDRNTFR | 24   | 7145  |
| >TP53-H214F FRHSVVVP   | 690   | >TP53-H214F FRRSVVVP   | 415  | 275   |
| >TP53-H214F FRHSVVVPY  | 4     | >TP53-H214F FRRSVVVPY  | 4    | 0     |
| >TP53-H214F FRHSVVVPY  | 33    | >TP53-H214F FRRSVVVPY  | 80   | 47    |
| >TP53-H214F TFRHSVVVPY | 185   | >TP53-H214F TFRRSVVVPY | 211  | 26    |
| >TP53-H214F TFRHSVVV   | 139   | >TP53-H214F TFRRSVV    | 78   | 61    |
| >TP53-H214F TFRHSVVVPY | 162   | >TP53-H214F TFRRSVVVPY | 95   | 67    |
| >TP53-H214F TFRHSVVVPY | 687   | >TP53-H214F TFRRSVVVPY | 486  | 201   |
| >TP53-H214F TFRHSVVVPY | 140   | >TP53-H214F TFRRSVVVPY | 203  | 63    |
| >TP53-H214F TFRHSVVVPY | 225   | >TP53-H214F TFRRSVVVPY | 283  | 58    |
| >TP53-H214F TFRHSVVVPY | 271   | >TP53-H214F TFRRSVVVPY | 425  | 154   |
| >TP53-H214F NTFRHSVV   | 382   | >TP53-H214F NTFRRSVV   | 1135 | 753   |
| >TP53-H214F NTFRHSVV   | 309   | >TP53-H214F NTFRRSVV   | 1254 | 945   |
| >TP53-H214F NTFRHSVVV  | 265   | >TP53-H214F NTFRRSVV   | 635  | 370   |
| >TP53-H214F NTFRHSVVVF | 128   | >TP53-H214F NTFRRSVVVF | 130  | 2     |
| >TP53-H214F NTFRHSVVVF | 97    | >TP53-H214F NTFRRSVVVF | 148  | 51    |
| >TP53-H214F NTFRHSVVVF | 123   | >TP53-H214F NTFRRSVVVF | 540  | 417   |
| >TP53-H214F NTFRHSVVVF | 678   | >TP53-H214F NTFRRSVVVF | 200  | 478   |
| >TP53-H214F NTFRHSVVVF | 82    | >TP53-H214F NTFRRSVVVF | 189  | 107   |

|                       |       |                       |       |       |
|-----------------------|-------|-----------------------|-------|-------|
| >TP53-H214FNTFRHSVVV  | 412   | >TP53-H214FNTFRRSVVV  | 511   | 99    |
| >TP53-H214FNTFRHSVVVF | 61    | >TP53-H214FNTFRRSVVVP | 79    | 18    |
| >TP53-H214FNTFRHSVVVF | 34    | >TP53-H214FNTFRRSVVVP | 30    | 4     |
| >TP53-H214FNTFRHSVV   | 11    | >TP53-H214FNTFRRSVV   | 12    | 1     |
| >TP53-H214FNTFRHSVVV  | 8     | >TP53-H214FNTFRRSVVV  | 11    | 3     |
| >TP53-H214FNTFRHSVV   | 50    | >TP53-H214FNTFRRSVV   | 241   | 191   |
| >TP53-H214FNTFRHSVVV  | 25    | >TP53-H214FNTFRRSVVV  | 150   | 125   |
| >TP53-H214FNTFRHSVVVF | 766   | >TP53-H214FNTFRRSVVVP | 446   | 320   |
| >TP53-H214FNTFRHSVVVF | 65    | >TP53-H214FNTFRRSVVVP | 82    | 17    |
| >TP53-H214FNTFRHSVVVF | 492   | >TP53-H214FNTFRRSVVVP | 545   | 53    |
| >TP53-H214FNTFRHSVVVF | 33    | >TP53-H214FNTFRRSVVVP | 55    | 22    |
| >TP53-H214FNTFRHSVVVF | 23    | >TP53-H214FNTFRRSVVVP | 20    | 3     |
| >TP53-H214FNTFRHSVVVF | 105   | >TP53-H214FNTFRRSVVVP | 344   | 239   |
| >TP53-H214FNTFRHSVVVF | 289   | >TP53-H214FNTFRRSVVVP | 166   | 123   |
| >TP53-H214FNTFRHSVVVF | 23    | >TP53-H214FNTFRRSVVVP | 42    | 19    |
| >TP53-H214FRNTFRHSVV  | 224   | >TP53-H214FRNTFRRSVV  | 462   | 238   |
| >TP53-H214FLDDRNTFRHS | 482   | >TP53-H214FLDDRNTFRRS | 1057  | 575   |
| >TP53-H214FYLDDRNTFRF | 333   | >TP53-H214FYLDDRNTFRR | 1299  | 966   |
| >TP53-H214FYLDDRNTFRF | 800   | >TP53-H214FYLDDRNTFRR | 401   | 399   |
| >TP53-H214FYLDDRNTFRF | 155   | >TP53-H214FYLDDRNTFRR | 110   | 45    |
| >TP53-H214FYLDDRNTFRF | 187   | >TP53-H214FYLDDRNTFRR | 72    | 115   |
| >TP53-H214FYLDDRNTFRF | 171   | >TP53-H214FYLDDRNTFRR | 108   | 63    |
| >TP53-H214FYLDDRNTFRF | 16423 | >TP53-H214FYLDDRNTFRR | 278   | 16145 |
| >TP53-H214FYLDDRNTFRF | 22598 | >TP53-H214FYLDDRNTFRR | 463   | 22135 |
| >TP53-H214FYLDDRNTFRF | 26037 | >TP53-H214FYLDDRNTFRR | 455   | 25582 |
| >TP53-H214FYLDDRNTFRF | 31144 | >TP53-H214FYLDDRNTFRR | 326   | 30818 |
| >TP53-H214\RHSVVVPY   | 15321 | >TP53-H214\RYSVVVPY   | 149   | 15172 |
| >TP53-H214\RHSVVVPYE  | 18705 | >TP53-H214\RYSVVVPYE  | 401   | 18304 |
| >TP53-H214\RHSVVVPY   | 3555  | >TP53-H214\RYSVVVPY   | 338   | 3217  |
| >TP53-H214\RHSVVVPY   | 642   | >TP53-H214\RYSVVVPY   | 161   | 481   |
| >TP53-H214\RHSVVVPY   | 1776  | >TP53-H214\RYSVVVPY   | 195   | 1581  |
| >TP53-H214\RHSVVVPY   | 23    | >TP53-H214\RYSVVVPY   | 376   | 353   |
| >TP53-H214\RHSVVVPY   | 522   | >TP53-H214\RYSVVVPY   | 273   | 249   |
| >TP53-H214\RHSVVVPY   | 413   | >TP53-H214\RYSVVVPY   | 20921 | 20508 |
| >TP53-H214\RHSVVVPY   | 3191  | >TP53-H214\RYSVVVPY   | 308   | 2883  |
| >TP53-H214\EYLDDRNTFR | 6761  | >TP53-H214\EYLDDRNTFR | 106   | 6655  |
| >TP53-H214\EYLDDRNTFR | 5630  | >TP53-H214\EYLDDRNTFR | 75    | 5555  |
| >TP53-H214\EYLDDRNTFR | 16492 | >TP53-H214\EYLDDRNTFR | 365   | 16127 |
| >TP53-H214\FRHSVVVPY  | 1048  | >TP53-H214\FRYSVVVPY  | 183   | 865   |
| >TP53-H214\FRHSVVVPY  | 1164  | >TP53-H214\FRYSVVVPY  | 453   | 711   |
| >TP53-H214\FRHSVVVPY  | 894   | >TP53-H214\FRYSVVVPY  | 257   | 637   |
| >TP53-H214\FRHSVVVP   | 690   | >TP53-H214\FRYSVVVP   | 190   | 500   |
| >TP53-H214\FRHSVVVPY  | 4     | >TP53-H214\FRYSVVVPY  | 2     | 2     |

|                      |      |                      |     |      |
|----------------------|------|----------------------|-----|------|
| >TP53-H214\FRHSVVPYE | 1625 | >TP53-H214\FRYSVVPYE | 472 | 1153 |
| >TP53-H214\FRHSVVPY  | 33   | >TP53-H214\FRYSVVPY  | 17  | 16   |
| >TP53-H214\FRHSVVPYE | 1718 | >TP53-H214\FRYSVVPYE | 455 | 1263 |
| >TP53-H214\FRHSVVPY  | 1057 | >TP53-H214\FRYSVVPY  | 256 | 801  |
| >TP53-H214\FRHSVVP   | 1807 | >TP53-H214\FRYSVVP   | 271 | 1536 |
| >TP53-H214\FRHSVVPYE | 1396 | >TP53-H214\FRYSVVPYE | 253 | 1143 |
| >TP53-H214\FRHSVVPYE | 1395 | >TP53-H214\FRYSVVPYE | 247 | 1148 |
| >TP53-H214\FRHSVVPY  | 946  | >TP53-H214\FRYSVVPY  | 115 | 831  |
| >TP53-H214\FRHSVVPY  | 1518 | >TP53-H214\FRYSVVPY  | 390 | 1128 |
| >TP53-H214\TFRHSVVPY | 185  | >TP53-H214\TFRYSVVPY | 125 | 60   |
| >TP53-H214\TFRHSVV   | 139  | >TP53-H214\TFRYSVV   | 177 | 38   |
| >TP53-H214\TFRHSVVPY | 162  | >TP53-H214\TFRYSVVPY | 191 | 29   |
| >TP53-H214\TFRHSVVPY | 687  | >TP53-H214\TFRYSVVPY | 354 | 333  |
| >TP53-H214\TFRHSVVPY | 140  | >TP53-H214\TFRYSVVPY | 142 | 2    |
| >TP53-H214\TFRHSVVPY | 225  | >TP53-H214\TFRYSVVPY | 226 | 1    |
| >TP53-H214\TFRHSVVPY | 271  | >TP53-H214\TFRYSVVPY | 291 | 20   |
| >TP53-H214\NTFRHSV   | 2267 | >TP53-H214\NTFRYSV   | 96  | 2171 |
| >TP53-H214\NTFRHSVV  | 562  | >TP53-H214\NTFRYSVV  | 314 | 248  |
| >TP53-H214\NTFRHSVV  | 872  | >TP53-H214\NTFRYSVV  | 282 | 590  |
| >TP53-H214\NTFRHSV   | 382  | >TP53-H214\NTFRYSV   | 283 | 99   |
| >TP53-H214\NTFRHSVV  | 680  | >TP53-H214\NTFRYSVV  | 250 | 430  |
| >TP53-H214\NTFRHSV   | 309  | >TP53-H214\NTFRYSV   | 152 | 157  |
| >TP53-H214\NTFRHSVV  | 265  | >TP53-H214\NTFRYSVV  | 79  | 186  |
| >TP53-H214\NTFRHSVV  | 128  | >TP53-H214\NTFRYSVV  | 100 | 28   |
| >TP53-H214\NTFRHSVV  | 97   | >TP53-H214\NTFRYSVV  | 148 | 51   |
| >TP53-H214\NTFRHSVV  | 123  | >TP53-H214\NTFRYSVV  | 262 | 139  |
| >TP53-H214\NTFRHSVV  | 678  | >TP53-H214\NTFRYSVV  | 309 | 369  |
| >TP53-H214\NTFRHSVV  | 82   | >TP53-H214\NTFRYSVV  | 78  | 4    |
| >TP53-H214\NTFRHSVV  | 412  | >TP53-H214\NTFRYSVV  | 526 | 114  |
| >TP53-H214\NTFRHSVV  | 61   | >TP53-H214\NTFRYSVV  | 83  | 22   |
| >TP53-H214\NTFRHSVV  | 34   | >TP53-H214\NTFRYSVV  | 22  | 12   |
| >TP53-H214\NTFRHSV   | 11   | >TP53-H214\NTFRYSV   | 9   | 2    |
| >TP53-H214\NTFRHSVV  | 8    | >TP53-H214\NTFRYSVV  | 7   | 1    |
| >TP53-H214\NTFRHSV   | 50   | >TP53-H214\NTFRYSV   | 28  | 22   |
| >TP53-H214\NTFRHSVV  | 25   | >TP53-H214\NTFRYSVV  | 14  | 11   |
| >TP53-H214\NTFRHSVV  | 766  | >TP53-H214\NTFRYSVV  | 368 | 398  |
| >TP53-H214\NTFRHSVV  | 65   | >TP53-H214\NTFRYSVV  | 70  | 5    |
| >TP53-H214\NTFRHSVV  | 492  | >TP53-H214\NTFRYSVV  | 711 | 219  |
| >TP53-H214\NTFRHSVV  | 798  | >TP53-H214\NTFRYSVV  | 436 | 362  |
| >TP53-H214\NTFRHSVV  | 33   | >TP53-H214\NTFRYSVV  | 26  | 7    |
| >TP53-H214\NTFRHSVV  | 23   | >TP53-H214\NTFRYSVV  | 17  | 6    |
| >TP53-H214\NTFRHSVV  | 105  | >TP53-H214\NTFRYSVV  | 99  | 6    |
| >TP53-H214\NTFRHSVV  | 289  | >TP53-H214\NTFRYSVV  | 102 | 187  |

|                        |       |                        |      |       |
|------------------------|-------|------------------------|------|-------|
| >TP53-H214\NTRFRHSVVVF | 23    | >TP53-H214\NTRFRYSVVVP | 19   | 4     |
| >TP53-H214\RNTFRHSVV   | 224   | >TP53-H214\RNTFRYSVV   | 415  | 191   |
| >TP53-H214\LDDRNTFRH   | 18562 | >TP53-H214\LDDRNTFRY   | 165  | 18397 |
| >TP53-H214\LDDRNTFRHS  | 482   | >TP53-H214\LDDRNTFRYS  | 276  | 206   |
| >TP53-H214\YLDDRNTFRF  | 12405 | >TP53-H214\YLDDRNTFRY  | 50   | 12355 |
| >TP53-H214\YLDDRNTFRF  | 1704  | >TP53-H214\YLDDRNTFRY  | 351  | 1353  |
| >TP53-H214\YLDDRNTFRF  | 1276  | >TP53-H214\YLDDRNTFRY  | 311  | 965   |
| >TP53-H214\YLDDRNTFRF  | 333   | >TP53-H214\YLDDRNTFRY  | 192  | 141   |
| >TP53-H214\YLDDRNTFRF  | 800   | >TP53-H214\YLDDRNTFRY  | 78   | 722   |
| >TP53-H214\YLDDRNTFRF  | 155   | >TP53-H214\YLDDRNTFRY  | 24   | 131   |
| >TP53-H214\YLDDRNTFRF  | 3628  | >TP53-H214\YLDDRNTFRY  | 338  | 3290  |
| >TP53-H214\YLDDRNTFRF  | 1022  | >TP53-H214\YLDDRNTFRY  | 381  | 641   |
| >TP53-H214\YLDDRNTFRF  | 648   | >TP53-H214\YLDDRNTFRY  | 399  | 249   |
| >TP53-H214\YLDDRNTFRF  | 187   | >TP53-H214\YLDDRNTFRY  | 22   | 165   |
| >TP53-H214\YLDDRNTFRF  | 171   | >TP53-H214\YLDDRNTFRY  | 78   | 93    |
| >TP53-H214\YLDDRNTFRF  | 17094 | >TP53-H214\YLDDRNTFRY  | 107  | 16987 |
| >TP53-H214\YLDDRNTFRF  | 23963 | >TP53-H214\YLDDRNTFRY  | 355  | 23608 |
| >TP53-H214\YLDDRNTFRF  | 7634  | >TP53-H214\YLDDRNTFRY  | 28   | 7606  |
| >TP53-H214\YLDDRNTFRF  | 9215  | >TP53-H214\YLDDRNTFRY  | 188  | 9027  |
| >TP53-H233[ HYNMYCNSS  | 70    | >TP53-H233[ DYNMYCNSS  | 262  | 192   |
| >TP53-H233[ TTIHYNM    | 46    | >TP53-H233[ TTIDYNM    | 56   | 10    |
| >TP53-H233[ TTIHYNM    | 1038  | >TP53-H233[ TTIDYNM    | 423  | 615   |
| >TP53-H233[ TTIHYNM    | 1118  | >TP53-H233[ TTIDYNM    | 282  | 836   |
| >TP53-H233[ TTIHYNM    | 46    | >TP53-H233[ TTIDYNM    | 14   | 32    |
| >TP53-H233[ TTIHYNM    | 5     | >TP53-H233[ TTIDYNM    | 4    | 1     |
| >TP53-H233[ TTIHYNM    | 135   | >TP53-H233[ TTIDYNM    | 78   | 57    |
| >TP53-H233[ TTIHYNM    | 17    | >TP53-H233[ TTIDYNM    | 15   | 2     |
| >TP53-H233[ TTIHYNMCM  | 120   | >TP53-H233[ TTIDYNMCM  | 91   | 29    |
| >TP53-H233[ TTIHYNMCM  | 102   | >TP53-H233[ TTIDYNMCM  | 79   | 23    |
| >TP53-H233[ TTIHYNM    | 69    | >TP53-H233[ TTIDYNM    | 21   | 48    |
| >TP53-H233[ TTIHYNM    | 61    | >TP53-H233[ TTIDYNM    | 68   | 7     |
| >TP53-H233[ TTIHYNM    | 260   | >TP53-H233[ TTIDYNM    | 550  | 290   |
| >TP53-H233[ CTTIHYNM   | 116   | >TP53-H233[ CTTIDYNM   | 1772 | 1656  |
| >TP53-H233[ CTTIHYNM   | 117   | >TP53-H233[ CTTIDYNM   | 177  | 60    |
| >TP53-H233[ CTTIHYNM   | 161   | >TP53-H233[ CTTIDYNM   | 358  | 197   |
| >TP53-H233[ CTTIHYNM   | 207   | >TP53-H233[ CTTIDYNM   | 370  | 163   |
| >TP53-H233[ CTTIHYNM   | 35    | >TP53-H233[ CTTIDYNM   | 66   | 31    |
| >TP53-H233[ CTTIHYNM   | 130   | >TP53-H233[ CTTIDYNM   | 58   | 72    |
| >TP53-H233[ CTTIHYNM   | 355   | >TP53-H233[ CTTIDYNM   | 554  | 199   |
| >TP53-H233[ CTTIHYNM   | 50    | >TP53-H233[ CTTIDYNM   | 194  | 144   |
| >TP53-H233[ CTTIHYNM   | 11    | >TP53-H233[ CTTIDYNM   | 59   | 48    |
| >TP53-H233[ CTTIHYNMCM | 184   | >TP53-H233[ CTTIDYNMCM | 671  | 487   |
| >TP53-H233[ CTTIHYNM   | 999   | >TP53-H233[ CTTIDYNM   | 499  | 500   |



|                        |       |                        |      |       |
|------------------------|-------|------------------------|------|-------|
| >TP53-H233LCTTIHYN     | 68    | >TP53-H233LCTTIDYNY    | 71   | 3     |
| >TP53-H233LCTTIHYNM    | 405   | >TP53-H233LCTTIDYNM    | 380  | 25    |
| >TP53-H233LDCTTIHYN    | 287   | >TP53-H233LDCTTIDYNY   | 658  | 371   |
| >TP53-H233LSDCTTIHYN   | 400   | >TP53-H233LSDCTTIDYNY  | 366  | 34    |
| >TP53-H233LGSDCTTIHY   | 18    | >TP53-H233LGSDCTTIDY   | 21   | 3     |
| >TP53-H233LGSDCTTIHYN  | 34    | >TP53-H233LGSDCTTIDYN  | 43   | 9     |
| >TP53-H233LGSDCTTIHYN  | 174   | >TP53-H233LGSDCTTIDYN  | 256  | 82    |
| >TP53-H233LGSDCTTIHY   | 68    | >TP53-H233LGSDCTTIDY   | 281  | 213   |
| >TP53-H233LGSDCTTIHYN  | 99    | >TP53-H233LGSDCTTIDYN  | 171  | 72    |
| >TP53-H233LGSDCTTIHYN  | 247   | >TP53-H233LGSDCTTIDYN  | 542  | 295   |
| >TP53-H233LGSDCTTIHY   | 242   | >TP53-H233LGSDCTTIDY   | 249  | 7     |
| >TP53-H233LGSDCTTIHYN  | 97    | >TP53-H233LGSDCTTIDYN  | 93   | 4     |
| >TP53-H233LVGSDCTTIHY  | 353   | >TP53-H233LVGSDCTTIDY  | 558  | 205   |
| >TP53-H233LVGSDCTTIHY  | 184   | >TP53-H233LVGSDCTTIDY  | 352  | 168   |
| >TP53-H233LVGSDCTTIHY  | 377   | >TP53-H233LVGSDCTTIDY  | 2706 | 2329  |
| >TP53-H233LVGSDCTTIHY  | 449   | >TP53-H233LVGSDCTTIDY  | 307  | 142   |
| >TP53-H233LEVGSDCTTIH' | 11    | >TP53-H233LEVGSDCTTID' | 34   | 23    |
| >TP53-H233LEVGSDCTTIH' | 75    | >TP53-H233LEVGSDCTTID' | 53   | 22    |
| >TP53-H233LEVGSDCTTIH' | 387   | >TP53-H233LEVGSDCTTID' | 437  | 50    |
| >TP53-H233LEVGSDCTTIH' | 326   | >TP53-H233LEVGSDCTTID' | 648  | 322   |
| >TP53-H233LIHYNMNCNS   | 70    | >TP53-H233LIYNMNCNS    | 93   | 23    |
| >TP53-H233LIHYNMNCNS   | 25294 | >TP53-H233LIYNMNCNS    | 185  | 25109 |
| >TP53-H233LIHYNMNCNS   | 18761 | >TP53-H233LIYNMNCNS    | 85   | 18676 |
| >TP53-H233LIHYNMNCNS   | 25075 | >TP53-H233LIYNMNCNS    | 427  | 24648 |
| >TP53-H233LIHYNMNCNS   | 19098 | >TP53-H233LIYNMNCNS    | 106  | 18992 |
| >TP53-H233LIHYNMNCNS   | 21571 | >TP53-H233LIYNMNCNS    | 34   | 21537 |
| >TP53-H233LIHYNMNCNS   | 25268 | >TP53-H233LIYNMNCNS    | 291  | 24977 |
| >TP53-H233LIHYNMNCNS   | 13527 | >TP53-H233LIYNMNCNS    | 14   | 13513 |
| >TP53-H233LIHYNMNCNS   | 20613 | >TP53-H233LIYNMNCNS    | 181  | 20432 |
| >TP53-H233LIHYNMNCNS   | 33796 | >TP53-H233LIYNMNCNS    | 93   | 33703 |
| >TP53-H233LIHYNMNCNS   | 35350 | >TP53-H233LIYNMNCNS    | 325  | 35025 |
| >TP53-H233LIHYNMNCNS   | 27216 | >TP53-H233LIYNMNCNS    | 13   | 27203 |
| >TP53-H233LPEVGSDCTTII | 12413 | >TP53-H233LPEVGSDCTTII | 74   | 12339 |
| >TP53-H233LTTIHYNM     | 46    | >TP53-H233LTTILYNM     | 15   | 31    |
| >TP53-H233LTTIHYNM     | 46    | >TP53-H233LTTILYNM     | 258  | 212   |
| >TP53-H233LTTIHYNM     | 5     | >TP53-H233LTTILYNM     | 7    | 2     |
| >TP53-H233LTTIHYNM     | 135   | >TP53-H233LTTILYNM     | 102  | 33    |
| >TP53-H233LTTIHYNM     | 17    | >TP53-H233LTTILYNM     | 29   | 12    |
| >TP53-H233LTTIHYNMCM   | 120   | >TP53-H233LTTILYNMCM   | 422  | 302   |
| >TP53-H233LTTIHYNMCM   | 102   | >TP53-H233LTTILYNMCM   | 267  | 165   |
| >TP53-H233LTTIHYNM     | 69    | >TP53-H233LTTILYNM     | 87   | 18    |
| >TP53-H233LTTIHYNM     | 61    | >TP53-H233LTTILYNM     | 77   | 16    |
| >TP53-H233LTTIHYNM     | 260   | >TP53-H233LTTILYNM     | 451  | 191   |

|                         |       |                         |      |       |
|-------------------------|-------|-------------------------|------|-------|
| >TP53-H233L CTTIHYNM    | 116   | >TP53-H233L CTTILYNM    | 211  | 95    |
| >TP53-H233L CTTIHNY     | 117   | >TP53-H233L CTTILNY     | 90   | 27    |
| >TP53-H233L CTTIHNY     | 161   | >TP53-H233L CTTILNY     | 246  | 85    |
| >TP53-H233L CTTIHYNM    | 207   | >TP53-H233L CTTILYNM    | 1282 | 1075  |
| >TP53-H233L CTTIHNY     | 35    | >TP53-H233L CTTILNY     | 48   | 13    |
| >TP53-H233L CTTIHNY     | 130   | >TP53-H233L CTTILNY     | 74   | 56    |
| >TP53-H233L CTTIHYNM    | 1337  | >TP53-H233L CTTILYNM    | 347  | 990   |
| >TP53-H233L CTTIHNY     | 355   | >TP53-H233L CTTILNY     | 89   | 266   |
| >TP53-H233L CTTIHNY     | 50    | >TP53-H233L CTTILNY     | 75   | 25    |
| >TP53-H233L CTTIHYNM    | 11    | >TP53-H233L CTTILYNM    | 13   | 2     |
| >TP53-H233L CTTIHNYMC   | 184   | >TP53-H233L CTTILNYMC   | 202  | 18    |
| >TP53-H233L CTTIHYNM    | 999   | >TP53-H233L CTTILYNM    | 94   | 905   |
| >TP53-H233L CTTIHNY     | 68    | >TP53-H233L CTTILNY     | 62   | 6     |
| >TP53-H233L CTTIHYNM    | 405   | >TP53-H233L CTTILYNM    | 694  | 289   |
| >TP53-H233L DCTTIHNY    | 521   | >TP53-H233L DCTTILNY    | 36   | 485   |
| >TP53-H233L DCTTIHYNM   | 585   | >TP53-H233L DCTTILYNM   | 299  | 286   |
| >TP53-H233L DCTTIHNY    | 287   | >TP53-H233L DCTTILNY    | 567  | 280   |
| >TP53-H233L SDCTTIHNY   | 400   | >TP53-H233L SDCTTILNY   | 540  | 140   |
| >TP53-H233L GSDCTTIH    | 18    | >TP53-H233L GSDCTTILY   | 10   | 8     |
| >TP53-H233L GSDCTTIHYN  | 34    | >TP53-H233L GSDCTTILYN  | 32   | 2     |
| >TP53-H233L GSDCTTIH    | 2475  | >TP53-H233L GSDCTTILY   | 372  | 2103  |
| >TP53-H233L GSDCTTIH    | 659   | >TP53-H233L GSDCTTILY   | 157  | 502   |
| >TP53-H233L GSDCTTIHYN  | 174   | >TP53-H233L GSDCTTILYN  | 193  | 19    |
| >TP53-H233L GSDCTTIHYN  | 582   | >TP53-H233L GSDCTTILYN  | 471  | 111   |
| >TP53-H233L GSDCTTIH    | 68    | >TP53-H233L GSDCTTILY   | 104  | 36    |
| >TP53-H233L GSDCTTIHYN  | 99    | >TP53-H233L GSDCTTILYN  | 124  | 25    |
| >TP53-H233L GSDCTTIH    | 535   | >TP53-H233L GSDCTTILY   | 47   | 488   |
| >TP53-H233L GSDCTTIHYN  | 247   | >TP53-H233L GSDCTTILYN  | 183  | 64    |
| >TP53-H233L GSDCTTIH    | 242   | >TP53-H233L GSDCTTILY   | 95   | 147   |
| >TP53-H233L GSDCTTIHYN  | 97    | >TP53-H233L GSDCTTILYN  | 79   | 18    |
| >TP53-H233L VGSDCTTIH   | 353   | >TP53-H233L VGSDCTTILY  | 621  | 268   |
| >TP53-H233L VGSDCTTIH   | 184   | >TP53-H233L VGSDCTTILY  | 117  | 67    |
| >TP53-H233L VGSDCTTIH   | 642   | >TP53-H233L VGSDCTTILY  | 380  | 262   |
| >TP53-H233L VGSDCTTIH   | 377   | >TP53-H233L VGSDCTTILY  | 2453 | 2076  |
| >TP53-H233L VGSDCTTIH   | 449   | >TP53-H233L VGSDCTTILY  | 108  | 341   |
| >TP53-H233L EVGSDCTTIH' | 11    | >TP53-H233L EVGSDCTTILY | 42   | 31    |
| >TP53-H233L EVGSDCTTIH' | 75    | >TP53-H233L EVGSDCTTILY | 70   | 5     |
| >TP53-H233L EVGSDCTTIH' | 387   | >TP53-H233L EVGSDCTTILY | 120  | 267   |
| >TP53-H233L EVGSDCTTIH' | 612   | >TP53-H233L EVGSDCTTILY | 272  | 340   |
| >TP53-H233L EVGSDCTTIH' | 326   | >TP53-H233L EVGSDCTTILY | 209  | 117   |
| >TP53-H233F HYNMNCSS    | 70    | >TP53-H233F PYNMNCSS    | 800  | 730   |
| >TP53-H233F IHYNMNCNS   | 20776 | >TP53-H233F IPYNMNCNS   | 164  | 20612 |
| >TP53-H233F TTIHYNM     | 46    | >TP53-H233F TTIPYNM     | 55   | 9     |

|                        |      |                        |      |      |
|------------------------|------|------------------------|------|------|
| >TP53-H233FTTIHYNYM    | 46   | >TP53-H233FTTIPYNYM    | 67   | 21   |
| >TP53-H233FTTIHYNYM    | 5    | >TP53-H233FTTIPYNYM    | 6    | 1    |
| >TP53-H233FTTIHYNYM    | 135  | >TP53-H233FTTIPYNYM    | 113  | 22   |
| >TP53-H233FTTIHYNYM    | 17   | >TP53-H233FTTIPYNYM    | 13   | 4    |
| >TP53-H233FTTIHYNMYC   | 120  | >TP53-H233FTTIPYNYMC   | 99   | 21   |
| >TP53-H233FTTIHYNMYCN  | 102  | >TP53-H233FTTIPYNYMCN  | 82   | 20   |
| >TP53-H233FTTIHYNYM    | 69   | >TP53-H233FTTIPYNYM    | 31   | 38   |
| >TP53-H233FTTIHYNYM    | 61   | >TP53-H233FTTIPYNYM    | 30   | 31   |
| >TP53-H233FTTIHYNYM    | 838  | >TP53-H233FTTIPYNYM    | 462  | 376  |
| >TP53-H233FTTIHYNMYC   | 1474 | >TP53-H233FTTIPYNYMC   | 263  | 1211 |
| >TP53-H233FTTIHYNYM    | 260  | >TP53-H233FTTIPYNYM    | 1167 | 907  |
| >TP53-H233FCTTIHYNYM   | 116  | >TP53-H233FCTTIPYNYM   | 709  | 593  |
| >TP53-H233FCTTIHYN     | 117  | >TP53-H233FCTTIPYNY    | 294  | 177  |
| >TP53-H233FCTTIHYN     | 161  | >TP53-H233FCTTIPYNY    | 359  | 198  |
| >TP53-H233FCTTIHYNMYC  | 207  | >TP53-H233FCTTIPYNYM   | 394  | 187  |
| >TP53-H233FCTTIHYN     | 35   | >TP53-H233FCTTIPYNY    | 57   | 22   |
| >TP53-H233FCTTIHYN     | 130  | >TP53-H233FCTTIPYNY    | 136  | 6    |
| >TP53-H233FCTTIHYNMYC  | 1337 | >TP53-H233FCTTIPYNYM   | 176  | 1161 |
| >TP53-H233FCTTIHYN     | 355  | >TP53-H233FCTTIPYNY    | 293  | 62   |
| >TP53-H233FCTTIHYN     | 50   | >TP53-H233FCTTIPYNY    | 45   | 5    |
| >TP53-H233FCTTIHYNMYC  | 11   | >TP53-H233FCTTIPYNYM   | 8    | 3    |
| >TP53-H233FCTTIHYNMYC  | 184  | >TP53-H233FCTTIPYNYMC  | 106  | 78   |
| >TP53-H233FCTTIHYNMYC  | 999  | >TP53-H233FCTTIPYNYM   | 90   | 909  |
| >TP53-H233FCTTIHYN     | 68   | >TP53-H233FCTTIPYNY    | 50   | 18   |
| >TP53-H233FCTTIHYNMYC  | 405  | >TP53-H233FCTTIPYNYM   | 220  | 185  |
| >TP53-H233FDCTTIHYN    | 287  | >TP53-H233FDCTTIPYNY   | 420  | 133  |
| >TP53-H233FSDCTTIHYN   | 400  | >TP53-H233FSDCTTIPYNY  | 295  | 105  |
| >TP53-H233FGSDCTTIHY   | 18   | >TP53-H233FGSDCTTIPY   | 12   | 6    |
| >TP53-H233FGSDCTTIHYN  | 34   | >TP53-H233FGSDCTTIPYN' | 30   | 4    |
| >TP53-H233FGSDCTTIHYN  | 174  | >TP53-H233FGSDCTTIPYN' | 204  | 30   |
| >TP53-H233FGSDCTTIHY   | 68   | >TP53-H233FGSDCTTIPY   | 36   | 32   |
| >TP53-H233FGSDCTTIHYN  | 99   | >TP53-H233FGSDCTTIPYN' | 118  | 19   |
| >TP53-H233FGSDCTTIHY   | 6900 | >TP53-H233FGSDCTTIPY   | 272  | 6628 |
| >TP53-H233FGSDCTTIHYN  | 247  | >TP53-H233FGSDCTTIPYN' | 460  | 213  |
| >TP53-H233FGSDCTTIHY   | 242  | >TP53-H233FGSDCTTIPY   | 378  | 136  |
| >TP53-H233FGSDCTTIHYN  | 97   | >TP53-H233FGSDCTTIPYN' | 95   | 2    |
| >TP53-H233FVGSDCTTIHY  | 353  | >TP53-H233FVGSDCTTIPY  | 1368 | 1015 |
| >TP53-H233FVGSDCTTIHY  | 184  | >TP53-H233FVGSDCTTIPY  | 167  | 17   |
| >TP53-H233FVGSDCTTIHY  | 377  | >TP53-H233FVGSDCTTIPY  | 260  | 117  |
| >TP53-H233FVGSDCTTIHY  | 449  | >TP53-H233FVGSDCTTIPY  | 327  | 122  |
| >TP53-H233FEVGSDCCTIH' | 11   | >TP53-H233FEVGSDCCTIP\ | 14   | 3    |
| >TP53-H233FEVGSDCCTIH' | 75   | >TP53-H233FEVGSDCCTIP\ | 31   | 44   |
| >TP53-H233FEVGSDCCTIH' | 387  | >TP53-H233FEVGSDCCTIP\ | 477  | 90   |

|                         |       |                         |     |       |
|-------------------------|-------|-------------------------|-----|-------|
| >TP53-H233F EVGSDCTTIH' | 326   | >TP53-H233F EVGSDCTTIP' | 915 | 589   |
| >TP53-H233F EVGSDCTTIH' | 1160  | >TP53-H233F EVGSDCTTIP' | 51  | 1109  |
| >TP53-H233C(HYNYMCNSS   | 70    | >TP53-H233C(QYNYMCNSS   | 56  | 14    |
| >TP53-H233C(IHYNYMCNS   | 25721 | >TP53-H233C(IQYNYMCNS   | 454 | 25267 |
| >TP53-H233C(IHYNYMCNS'  | 21003 | >TP53-H233C(IQYNYMCNS'  | 137 | 20866 |
| >TP53-H233C(IHYNYMCN    | 3197  | >TP53-H233C(IQYNYMCN    | 296 | 2901  |
| >TP53-H233C(IHYNYMCNS   | 1897  | >TP53-H233C(IQYNYMCNS   | 173 | 1724  |
| >TP53-H233C(IHYNYMCNS'  | 1688  | >TP53-H233C(IQYNYMCNS'  | 109 | 1579  |
| >TP53-H233C(IHYNYMCNS'  | 575   | >TP53-H233C(IQYNYMCNS'  | 51  | 524   |
| >TP53-H233C(TTIHYNYM    | 46    | >TP53-H233C(TTIQYNYM    | 16  | 30    |
| >TP53-H233C(TTIHYNYM    | 46    | >TP53-H233C(TTIQYNYM    | 53  | 7     |
| >TP53-H233C(TTIHYNYM    | 5     | >TP53-H233C(TTIQYNYM    | 4   | 1     |
| >TP53-H233C(TTIHYNYM    | 135   | >TP53-H233C(TTIQYNYM    | 20  | 115   |
| >TP53-H233C(TTIHYNYM    | 17    | >TP53-H233C(TTIQYNYM    | 36  | 19    |
| >TP53-H233C(TTIHYNYMC   | 120   | >TP53-H233C(TTIQYNYMC   | 519 | 399   |
| >TP53-H233C(TTIHYNYMCF  | 102   | >TP53-H233C(TTIQYNYMCF  | 325 | 223   |
| >TP53-H233C(TTIHYNYM    | 69    | >TP53-H233C(TTIQYNYM    | 55  | 14    |
| >TP53-H233C(TTIHYNYM    | 61    | >TP53-H233C(TTIQYNYM    | 64  | 3     |
| >TP53-H233C(TTIHYNYM    | 260   | >TP53-H233C(TTIQYNYM    | 527 | 267   |
| >TP53-H233C(CTTIHYNYM   | 116   | >TP53-H233C(CTTIQYNYM   | 405 | 289   |
| >TP53-H233C(CTTIHYNY    | 117   | >TP53-H233C(CTTIQYNY    | 101 | 16    |
| >TP53-H233C(CTTIHYNY    | 161   | >TP53-H233C(CTTIQYNY    | 403 | 242   |
| >TP53-H233C(CTTIHYNYM   | 207   | >TP53-H233C(CTTIQYNYM   | 716 | 509   |
| >TP53-H233C(CTTIHYNY    | 35    | >TP53-H233C(CTTIQYNY    | 58  | 23    |
| >TP53-H233C(CTTIHYNY    | 130   | >TP53-H233C(CTTIQYNY    | 69  | 61    |
| >TP53-H233C(CTTIHYNY    | 355   | >TP53-H233C(CTTIQYNY    | 153 | 202   |
| >TP53-H233C(CTTIHYNY    | 50    | >TP53-H233C(CTTIQYNY    | 67  | 17    |
| >TP53-H233C(CTTIHYNYM   | 11    | >TP53-H233C(CTTIQYNYM   | 55  | 44    |
| >TP53-H233C(CTTIHYNYMC  | 184   | >TP53-H233C(CTTIQYNYMC  | 598 | 414   |
| >TP53-H233C(CTTIHYNY    | 68    | >TP53-H233C(CTTIQYNY    | 72  | 4     |
| >TP53-H233C(CTTIHYNYM   | 405   | >TP53-H233C(CTTIQYNYM   | 702 | 297   |
| >TP53-H233C(DCTTIHYNY   | 287   | >TP53-H233C(DCTTIQYNY   | 576 | 289   |
| >TP53-H233C(DCTTIHYNY   | 787   | >TP53-H233C(DCTTIQYNY   | 464 | 323   |
| >TP53-H233C(SDCTTIHYNY  | 400   | >TP53-H233C(SDCTTIQYNY  | 552 | 152   |
| >TP53-H233C(GSDCTTIHY   | 18    | >TP53-H233C(GSDCTTIQY   | 26  | 8     |
| >TP53-H233C(GSDCTTIHYN  | 34    | >TP53-H233C(GSDCTTIQYN  | 33  | 1     |
| >TP53-H233C(GSDCTTIHYN  | 174   | >TP53-H233C(GSDCTTIQYN  | 235 | 61    |
| >TP53-H233C(GSDCTTIHYN  | 582   | >TP53-H233C(GSDCTTIQYN  | 438 | 144   |
| >TP53-H233C(GSDCTTIHY   | 68    | >TP53-H233C(GSDCTTIQY   | 37  | 31    |
| >TP53-H233C(GSDCTTIHYN  | 99    | >TP53-H233C(GSDCTTIQYN  | 142 | 43    |
| >TP53-H233C(GSDCTTIHY   | 535   | >TP53-H233C(GSDCTTIQY   | 151 | 384   |
| >TP53-H233C(GSDCTTIHYN  | 247   | >TP53-H233C(GSDCTTIQYN  | 302 | 55    |
| >TP53-H233C(GSDCTTIHY   | 242   | >TP53-H233C(GSDCTTIQY   | 208 | 34    |

|                        |      |                        |      |      |
|------------------------|------|------------------------|------|------|
| >TP53-H233CGSDCTTIHYN  | 97   | >TP53-H233CGSDCTTIQYN  | 71   | 26   |
| >TP53-H233CVGSDCTTIHY  | 353  | >TP53-H233CVGSDCTTIQY  | 585  | 232  |
| >TP53-H233CVGSDCTTIHY  | 184  | >TP53-H233CVGSDCTTIQY  | 171  | 13   |
| >TP53-H233CVGSDCTTIHY  | 377  | >TP53-H233CVGSDCTTIQY  | 1241 | 864  |
| >TP53-H233CVGSDCTTIHY  | 449  | >TP53-H233CVGSDCTTIQY  | 173  | 276  |
| >TP53-H233CEVGSDCTTIH' | 11   | >TP53-H233CEVGSDCTTIQ  | 17   | 6    |
| >TP53-H233CEVGSDCTTIH' | 75   | >TP53-H233CEVGSDCTTIQ  | 125  | 50   |
| >TP53-H233CEVGSDCTTIH' | 387  | >TP53-H233CEVGSDCTTIQ  | 335  | 52   |
| >TP53-H233CEVGSDCTTIH' | 612  | >TP53-H233CEVGSDCTTIQ  | 452  | 160  |
| >TP53-H233CEVGSDCTTIH' | 326  | >TP53-H233CEVGSDCTTIQ  | 1090 | 764  |
| >TP53-H233CEVGSDCTTIH' | 1160 | >TP53-H233CEVGSDCTTIQ  | 450  | 710  |
| >TP53-H233FHYNMYMCNSS  | 70   | >TP53-H233FRYNMYMCNSS  | 75   | 5    |
| >TP53-H233FHYNMYMCNSS  | 1117 | >TP53-H233FRYNMYMCNSS  | 465  | 652  |
| >TP53-H233FIHYNMYMCNSS | 575  | >TP53-H233FIRYNMYMCNSS | 251  | 324  |
| >TP53-H233FTIHYNYMCNS  | 2418 | >TP53-H233FTIRYNYMCNS  | 319  | 2099 |
| >TP53-H233FTTIHYNYM    | 46   | >TP53-H233FTTIRYNYM    | 12   | 34   |
| >TP53-H233FTTIHYNYM    | 46   | >TP53-H233FTTIRYNYM    | 73   | 27   |
| >TP53-H233FTTIHYNYM    | 5    | >TP53-H233FTTIRYNYM    | 4    | 1    |
| >TP53-H233FTTIHYNYM    | 135  | >TP53-H233FTTIRYNYM    | 53   | 82   |
| >TP53-H233FTTIHYNYM    | 17   | >TP53-H233FTTIRYNYM    | 31   | 14   |
| >TP53-H233FTTIHYNYMC   | 120  | >TP53-H233FTTIRYNYMC   | 383  | 263  |
| >TP53-H233FTTIHYNYMCN  | 102  | >TP53-H233FTTIRYNYMCN  | 249  | 147  |
| >TP53-H233FTTIHYNYM    | 69   | >TP53-H233FTTIRYNYM    | 102  | 33   |
| >TP53-H233FTTIHYNYM    | 61   | >TP53-H233FTTIRYNYM    | 173  | 112  |
| >TP53-H233FTTIHYNYM    | 260  | >TP53-H233FTTIRYNYM    | 571  | 311  |
| >TP53-H233FCTTIHYNYM   | 116  | >TP53-H233FCTTIRYNYM   | 83   | 33   |
| >TP53-H233FCTTIHYNY    | 117  | >TP53-H233FCTTIRYNY    | 207  | 90   |
| >TP53-H233FCTTIHYNY    | 161  | >TP53-H233FCTTIRYNY    | 1391 | 1230 |
| >TP53-H233FCTTIHYNYM   | 207  | >TP53-H233FCTTIRYNYM   | 2672 | 2465 |
| >TP53-H233FCTTIHYNY    | 35   | >TP53-H233FCTTIRYNY    | 102  | 67   |
| >TP53-H233FCTTIHYNY    | 130  | >TP53-H233FCTTIRYNY    | 89   | 41   |
| >TP53-H233FCTTIHYNY    | 355  | >TP53-H233FCTTIRYNY    | 384  | 29   |
| >TP53-H233FCTTIHYNY    | 50   | >TP53-H233FCTTIRYNY    | 84   | 34   |
| >TP53-H233FCTTIHYNYM   | 11   | >TP53-H233FCTTIRYNYM   | 40   | 29   |
| >TP53-H233FCTTIHYNYMC  | 184  | >TP53-H233FCTTIRYNYMC  | 547  | 363  |
| >TP53-H233FCTTIHYNYM   | 999  | >TP53-H233FCTTIRYNYM   | 388  | 611  |
| >TP53-H233FCTTIHYNY    | 68   | >TP53-H233FCTTIRYNY    | 64   | 4    |
| >TP53-H233FCTTIHYNYM   | 405  | >TP53-H233FCTTIRYNYM   | 466  | 61   |
| >TP53-H233FDCTTIHYNY   | 287  | >TP53-H233FDCTTIRYNY   | 1092 | 805  |
| >TP53-H233FSDCTTIHYNY  | 400  | >TP53-H233FSDCTTIRYNY  | 481  | 81   |
| >TP53-H233FGSDCTTIHY   | 18   | >TP53-H233FGSDCTTIRY   | 16   | 2    |
| >TP53-H233FGSDCTTIHYN  | 34   | >TP53-H233FGSDCTTIRYN' | 53   | 19   |
| >TP53-H233FGSDCTTIHYN  | 174  | >TP53-H233FGSDCTTIRYN' | 353  | 179  |

|                         |       |                         |      |       |
|-------------------------|-------|-------------------------|------|-------|
| >TP53-H233FGSDCTTIHYN   | 582   | >TP53-H233FGSDCTTIRYN'  | 421  | 161   |
| >TP53-H233FGSDCTTIHY    | 68    | >TP53-H233FGSDCTTIRY    | 34   | 34    |
| >TP53-H233FGSDCTTIHYN   | 99    | >TP53-H233FGSDCTTIRYN'  | 201  | 102   |
| >TP53-H233FGSDCTTIHY    | 535   | >TP53-H233FGSDCTTIRY    | 102  | 433   |
| >TP53-H233FGSDCTTIHYN   | 247   | >TP53-H233FGSDCTTIRYN'  | 253  | 6     |
| >TP53-H233FGSDCTTIHY    | 242   | >TP53-H233FGSDCTTIRY    | 101  | 141   |
| >TP53-H233FGSDCTTIHYN   | 97    | >TP53-H233FGSDCTTIRYN'  | 80   | 17    |
| >TP53-H233FVGSDCTTIHY   | 353   | >TP53-H233FVGSDCTTIRY   | 1204 | 851   |
| >TP53-H233FVGSDCTTIHY   | 184   | >TP53-H233FVGSDCTTIRY   | 213  | 29    |
| >TP53-H233FVGSDCTTIHY   | 377   | >TP53-H233FVGSDCTTIRY   | 1735 | 1358  |
| >TP53-H233FVGSDCTTIHY   | 449   | >TP53-H233FVGSDCTTIRY   | 278  | 171   |
| >TP53-H233FVGSDCTTIH    | 29189 | >TP53-H233FVGSDCTTIR    | 147  | 29042 |
| >TP53-H233FEVGSDDCTTIH' | 11    | >TP53-H233FEVGSDDCTTIR' | 16   | 5     |
| >TP53-H233FEVGSDDCTTIH' | 75    | >TP53-H233FEVGSDDCTTIR' | 89   | 14    |
| >TP53-H233FEVGSDDCTTIH' | 387   | >TP53-H233FEVGSDDCTTIR' | 518  | 131   |
| >TP53-H233FEVGSDDCTTIH  | 14704 | >TP53-H233FEVGSDDCTTIR  | 124  | 14580 |
| >TP53-H233FEVGSDDCTTIH' | 326   | >TP53-H233FEVGSDDCTTIR' | 689  | 363   |
| >TP53-H233\HYNMYCNSS    | 919   | >TP53-H233\YNYMYCNSS    | 397  | 522   |
| >TP53-H233\HYNMYCNSS    | 70    | >TP53-H233\YNYMYCNSS    | 47   | 23    |
| >TP53-H233\HYNMYCNSS    | 2416  | >TP53-H233\YNYMYCNSS    | 327  | 2089  |
| >TP53-H233\PEVGSDDCTTI  | 6973  | >TP53-H233\PEVGSDDCTTI  | 244  | 6729  |
| >TP53-H233\PEVGSDDCTTI  | 6826  | >TP53-H233\PEVGSDDCTTI  | 391  | 6435  |
| >TP53-H233\TTIHYNYM     | 46    | >TP53-H233\TTIYNYM      | 29   | 17    |
| >TP53-H233\TTIHYNYM     | 46    | >TP53-H233\TTIYNYM      | 36   | 10    |
| >TP53-H233\TTIHYNYM     | 5     | >TP53-H233\TTIYNYM      | 4    | 1     |
| >TP53-H233\TTIHYNYM     | 135   | >TP53-H233\TTIYNYM      | 123  | 12    |
| >TP53-H233\TTIHYNYM     | 1012  | >TP53-H233\TTIYNYM      | 316  | 696   |
| >TP53-H233\TTIHYNYM     | 17    | >TP53-H233\TTIYNYM      | 13   | 4     |
| >TP53-H233\TTIHYNYMC    | 120   | >TP53-H233\TTIYNYMC     | 77   | 43    |
| >TP53-H233\TTIHYNYMCN   | 102   | >TP53-H233\TTIYNYMCN    | 71   | 31    |
| >TP53-H233\TTIHYNYM     | 69    | >TP53-H233\TTIYNYM      | 60   | 9     |
| >TP53-H233\TTIHYNYM     | 61    | >TP53-H233\TTIYNYM      | 67   | 6     |
| >TP53-H233\TTIHYNYM     | 260   | >TP53-H233\TTIYNYM      | 424  | 164   |
| >TP53-H233\CTTIHYNYM    | 116   | >TP53-H233\CTTIYNYM     | 63   | 53    |
| >TP53-H233\CTTIHYNY     | 117   | >TP53-H233\CTTIYNY      | 85   | 32    |
| >TP53-H233\CTTIHYNY     | 161   | >TP53-H233\CTTIYNY      | 386  | 225   |
| >TP53-H233\CTTIHYNYM    | 207   | >TP53-H233\CTTIYNYM     | 589  | 382   |
| >TP53-H233\CTTIHYNY     | 35    | >TP53-H233\CTTIYNY      | 42   | 7     |
| >TP53-H233\CTTIHYNY     | 130   | >TP53-H233\CTTIYNY      | 87   | 43    |
| >TP53-H233\CTTIHYNY     | 355   | >TP53-H233\CTTIYNY      | 234  | 121   |
| >TP53-H233\CTTIHYNY     | 50    | >TP53-H233\CTTIYNY      | 52   | 2     |
| >TP53-H233\CTTIHYNYM    | 11    | >TP53-H233\CTTIYNYM     | 9    | 2     |
| >TP53-H233\CTTIHYNYMC   | 184   | >TP53-H233\CTTIYNYMC    | 135  | 49    |

|                        |       |                        |      |       |
|------------------------|-------|------------------------|------|-------|
| >TP53-H233\CTTIHYNYM   | 999   | >TP53-H233\CTTIYNYM    | 173  | 826   |
| >TP53-H233\CTTIHYNY    | 68    | >TP53-H233\CTTIYNY     | 57   | 11    |
| >TP53-H233\CTTIHYNYM   | 405   | >TP53-H233\CTTIYNYM    | 472  | 67    |
| >TP53-H233\DCTTIHYNY   | 287   | >TP53-H233\DCTTIYNY    | 392  | 105   |
| >TP53-H233\SDCTTIHYNY  | 400   | >TP53-H233\SDCTTIYNY   | 334  | 66    |
| >TP53-H233\GSDCTTIH    | 9255  | >TP53-H233\GSDCTTIY    | 37   | 9218  |
| >TP53-H233\GSDCTTIHY   | 18    | >TP53-H233\GSDCTTIYY   | 13   | 5     |
| >TP53-H233\GSDCTTIHYN  | 34    | >TP53-H233\GSDCTTIYYN' | 39   | 5     |
| >TP53-H233\GSDCTTIHY   | 2475  | >TP53-H233\GSDCTTIYY   | 162  | 2313  |
| >TP53-H233\GSDCTTIHY   | 659   | >TP53-H233\GSDCTTIYY   | 207  | 452   |
| >TP53-H233\GSDCTTIHYN  | 174   | >TP53-H233\GSDCTTIYYN' | 170  | 4     |
| >TP53-H233\GSDCTTIH    | 14460 | >TP53-H233\GSDCTTIY    | 140  | 14320 |
| >TP53-H233\GSDCTTIHY   | 68    | >TP53-H233\GSDCTTIYY   | 55   | 13    |
| >TP53-H233\GSDCTTIHYN  | 99    | >TP53-H233\GSDCTTIYYN' | 159  | 60    |
| >TP53-H233\GSDCTTIH    | 5144  | >TP53-H233\GSDCTTIY    | 144  | 5000  |
| >TP53-H233\GSDCTTIHY   | 535   | >TP53-H233\GSDCTTIYY   | 121  | 414   |
| >TP53-H233\GSDCTTIHYN  | 247   | >TP53-H233\GSDCTTIYYN' | 257  | 10    |
| >TP53-H233\GSDCTTIH    | 20692 | >TP53-H233\GSDCTTIY    | 284  | 20408 |
| >TP53-H233\GSDCTTIHY   | 242   | >TP53-H233\GSDCTTIYY   | 85   | 157   |
| >TP53-H233\GSDCTTIHYN  | 97    | >TP53-H233\GSDCTTIYYN' | 85   | 12    |
| >TP53-H233\VGSDCTTIHY  | 353   | >TP53-H233\VGSDCTTIYY  | 402  | 49    |
| >TP53-H233\VGSDCTTIHY  | 184   | >TP53-H233\VGSDCTTIYY  | 71   | 113   |
| >TP53-H233\VGSDCTTIH   | 10848 | >TP53-H233\VGSDCTTIY   | 64   | 10784 |
| >TP53-H233\VGSDCTTIHY  | 642   | >TP53-H233\VGSDCTTIYY  | 278  | 364   |
| >TP53-H233\VGSDCTTIHY  | 377   | >TP53-H233\VGSDCTTIYY  | 1223 | 846   |
| >TP53-H233\VGSDCTTIH   | 3714  | >TP53-H233\VGSDCTTIY   | 117  | 3597  |
| >TP53-H233\VGSDCTTIH   | 1591  | >TP53-H233\VGSDCTTIY   | 50   | 1541  |
| >TP53-H233\VGSDCTTIHY  | 449   | >TP53-H233\VGSDCTTIYY  | 92   | 357   |
| >TP53-H233\EVGSDCTTIH  | 9007  | >TP53-H233\EVGSDCTTIY  | 311  | 8696  |
| >TP53-H233\EVGSDCTTIH  | 3391  | >TP53-H233\EVGSDCTTIY  | 32   | 3359  |
| >TP53-H233\EVGSDCTTIH' | 11    | >TP53-H233\EVGSDCTTIY\ | 11   | 0     |
| >TP53-H233\EVGSDCTTIH  | 10897 | >TP53-H233\EVGSDCTTIY  | 488  | 10409 |
| >TP53-H233\EVGSDCTTIH' | 75    | >TP53-H233\EVGSDCTTIY\ | 69   | 6     |
| >TP53-H233\EVGSDCTTIH' | 387   | >TP53-H233\EVGSDCTTIY\ | 134  | 253   |
| >TP53-H233\EVGSDCTTIH' | 612   | >TP53-H233\EVGSDCTTIY\ | 171  | 441   |
| >TP53-H233\EVGSDCTTIH' | 326   | >TP53-H233\EVGSDCTTIY\ | 422  | 96    |
| >TP53-H296L EENLRKKGEP | 7803  | >TP53-H296L EENLRKKGEP | 136  | 7667  |
| >TP53-H296L KKGEPHHEL  | 167   | >TP53-H296L KKGEPHHEL  | 446  | 279   |
| >TP53-H296L RKKGEPHHEL | 62    | >TP53-H296L RKKGEPHHEL | 70   | 8     |
| >TP53-H296L LRKKGEPH   | 1925  | >TP53-H296L LRKKGEPH   | 342  | 1583  |
| >TP53-H296L LRKKGEPHHE | 405   | >TP53-H296L LRKKGEPHHE | 681  | 276   |
| >TP53-H296L LRKKGEPHHE | 321   | >TP53-H296L LRKKGEPHHE | 218  | 103   |
| >TP53-H296L NLRKKGEPH  | 6800  | >TP53-H296L NLRKKGEPH  | 43   | 6757  |

|                        |       |                        |      |       |
|------------------------|-------|------------------------|------|-------|
| >TP53-H296M KKGEPHHEL  | 167   | >TP53-H296M KKGEPNHEL  | 260  | 93    |
| >TP53-H296M RKKGEPHHEL | 62    | >TP53-H296M RKKGEPNHEL | 66   | 4     |
| >TP53-H296M LRKKGEPHHE | 405   | >TP53-H296M LRKKGEPNHE | 431  | 26    |
| >TP53-H296M LRKKGEPHHE | 321   | >TP53-H296M LRKKGEPNHE | 454  | 133   |
| >TP53-H296F KKGEPHHEL  | 167   | >TP53-H296F KKGEPHHEL  | 234  | 67    |
| >TP53-H296F RKKGEPHH   | 928   | >TP53-H296F RKKGEPHH   | 404  | 524   |
| >TP53-H296F RKKGEPHHEL | 62    | >TP53-H296F RKKGEPHHEL | 57   | 5     |
| >TP53-H296F RKKGEPHHEL | 740   | >TP53-H296F RKKGEPHHEL | 405  | 335   |
| >TP53-H296F LRKKGEPHHE | 405   | >TP53-H296F LRKKGEPHHE | 381  | 24    |
| >TP53-H296F LRKKGEPHHE | 321   | >TP53-H296F LRKKGEPHHE | 303  | 18    |
| >TP53-H296C KKGEPHHEL  | 167   | >TP53-H296C KKGEPQHEL  | 300  | 133   |
| >TP53-H296C RKKGEPHHEL | 62    | >TP53-H296C RKKGEPQHEL | 57   | 5     |
| >TP53-H296C LRKKGEPHHE | 405   | >TP53-H296C LRKKGEPQHE | 554  | 149   |
| >TP53-H296C LRKKGEPHHE | 321   | >TP53-H296C LRKKGEPQHE | 417  | 96    |
| >TP53-H296F KKGEPHHEL  | 167   | >TP53-H296F KKGEPHHEL  | 260  | 93    |
| >TP53-H296F RKKGEPHHEL | 62    | >TP53-H296F RKKGEPHHEL | 82   | 20    |
| >TP53-H296F LRKKGEPHHE | 405   | >TP53-H296F LRKKGEPHHE | 603  | 198   |
| >TP53-H296F LRKKGEPHHE | 321   | >TP53-H296F LRKKGEPHHE | 214  | 107   |
| >TP53-H296F NLRKKGEPH  | 16074 | >TP53-H296F NLRKKGEPH  | 331  | 15743 |
| >TP53-H296F NLRKKGEPH  | 27724 | >TP53-H296F NLRKKGEPH  | 388  | 27336 |
| >TP53-H296\ PHHELPPGST | 9358  | >TP53-H296\ PYHELPPGST | 182  | 9176  |
| >TP53-H296\ EENLRKKGEP | 7673  | >TP53-H296\ EENLRKKGEP | 249  | 7424  |
| >TP53-H296\ EPHHELPPG  | 1764  | >TP53-H296\ EPHHELPPG  | 274  | 1490  |
| >TP53-H296\ KKGEPHHEL  | 167   | >TP53-H296\ KKGEPYHEL  | 115  | 52    |
| >TP53-H296\ RKKGEPHHEL | 62    | >TP53-H296\ RKKGEPYHEL | 49   | 13    |
| >TP53-H296\ LRKKGEPH   | 1925  | >TP53-H296\ LRKKGEPY   | 74   | 1851  |
| >TP53-H296\ LRKKGEPHHE | 405   | >TP53-H296\ LRKKGEPYHE | 347  | 58    |
| >TP53-H296\ LRKKGEPHHE | 321   | >TP53-H296\ LRKKGEPYHE | 231  | 90    |
| >TP53-H296\ NLRKKGEPH  | 3656  | >TP53-H296\ NLRKKGEPY  | 65   | 3591  |
| >TP53-H296\ NLRKKGEPH  | 1175  | >TP53-H296\ NLRKKGEPY  | 38   | 1137  |
| >TP53-H297M HELPPGSTKR | 250   | >TP53-H297M HELPPGSTKR | 283  | 33    |
| >TP53-H297M HELPPGSTKR | 437   | >TP53-H297M HELPPGSTKR | 3633 | 3196  |
| >TP53-H297M KKGEPHHEL  | 167   | >TP53-H297M KKGEPHHEL  | 107  | 60    |
| >TP53-H297M RKKGEPHHEL | 62    | >TP53-H297M RKKGEPHHEL | 47   | 15    |
| >TP53-H297M LRKKGEPHHE | 405   | >TP53-H297M LRKKGEPHHE | 356  | 49    |
| >TP53-H297M LRKKGEPHHE | 321   | >TP53-H297M LRKKGEPHHE | 350  | 29    |
| >TP53-H297F HELPPGSTKR | 250   | >TP53-H297F HELPPGSTKR | 3094 | 2844  |
| >TP53-H297F HELPPGSTKR | 437   | >TP53-H297F HELPPGSTKR | 6955 | 6518  |
| >TP53-H297F KKGEPHHEL  | 167   | >TP53-H297F KKGEPHHEL  | 125  | 42    |
| >TP53-H297F RKKGEPHHEL | 62    | >TP53-H297F RKKGEPHHEL | 45   | 17    |
| >TP53-H297F LRKKGEPHHE | 405   | >TP53-H297F LRKKGEPHHE | 396  | 9     |
| >TP53-H297F LRKKGEPHHE | 321   | >TP53-H297F LRKKGEPHHE | 290  | 31    |
| >TP53-H297\ HELPPGSTKR | 250   | >TP53-H297\ HELPPGSTKR | 1005 | 755   |



|                        |       |                        |      |       |
|------------------------|-------|------------------------|------|-------|
| >TP53-H297\HELPPGSTKR  | 437   | >TP53-H297\YELPPGSTKR  | 2071 | 1634  |
| >TP53-H297\HHELPPGSTK  | 10830 | >TP53-H297\HYELPPGSTK  | 432  | 10398 |
| >TP53-H297\HHELPPGSTK  | 14051 | >TP53-H297\HYELPPGSTK  | 207  | 13844 |
| >TP53-H297\HHELPPGSTK  | 1787  | >TP53-H297\HYELPPGSTK  | 49   | 1738  |
| >TP53-H297\KKGEPHHEL   | 167   | >TP53-H297\KKGEPHYEL   | 120  | 47    |
| >TP53-H297\RKKGEPHH    | 16949 | >TP53-H297\RKKGEPHY    | 372  | 16577 |
| >TP53-H297\RKKGEPHH    | 928   | >TP53-H297\RKKGEPHY    | 14   | 914   |
| >TP53-H297\RKKGEPHHEL  | 62    | >TP53-H297\RKKGEPHYEL  | 49   | 13    |
| >TP53-H297\LRKKGEPHH   | 19259 | >TP53-H297\LRKKGEPHY   | 325  | 18934 |
| >TP53-H297\LRKKGEPHH   | 3249  | >TP53-H297\LRKKGEPHY   | 184  | 3065  |
| >TP53-H297\LRKKGEPHHE  | 405   | >TP53-H297\LRKKGEPHYE  | 369  | 36    |
| >TP53-H297\LRKKGEPHHE  | 321   | >TP53-H297\LRKKGEPHYE  | 536  | 215   |
| >TP53-H297\NLRKKGEPHI  | 6600  | >TP53-H297\NLRKKGEPHY  | 112  | 6488  |
| >TP53-H297\NLRKKGEPHI  | 7426  | >TP53-H297\NLRKKGEPHY  | 228  | 7198  |
| >TP53-I162F-IYKQSQHM   | 510   | >TP53-I162F-FYKQSQHM   | 108  | 402   |
| >TP53-I162F-IYKQSQHMTI | 402   | >TP53-I162F-FYKQSQHMT  | 122  | 280   |
| >TP53-I162F-IYKQSQHMTI | 727   | >TP53-I162F-FYKQSQHMT  | 60   | 667   |
| >TP53-I162F-IYKQSQHM   | 561   | >TP53-I162F-FYKQSQHM   | 56   | 505   |
| >TP53-I162F-IYKQSQHMTI | 864   | >TP53-I162F-FYKQSQHMT  | 103  | 761   |
| >TP53-I162F-IYKQSQHM   | 394   | >TP53-I162F-FYKQSQHM   | 5028 | 4634  |
| >TP53-I162F-AIYKQSQHM  | 91    | >TP53-I162F-AFYKQSQHM  | 347  | 256   |
| >TP53-I162F-AIYKQSQH   | 349   | >TP53-I162F-AFYKQSQH   | 8252 | 7903  |
| >TP53-I162F-AIYKQSQHM  | 62    | >TP53-I162F-AFYKQSQHM  | 443  | 381   |
| >TP53-I162F-AIYKQSQHM  | 198   | >TP53-I162F-AFYKQSQHM  | 693  | 495   |
| >TP53-I162F-MAIYKQSQ   | 841   | >TP53-I162F-MAFYKQSQ   | 266  | 575   |
| >TP53-I162F-MAIYKQSQH  | 526   | >TP53-I162F-MAFYKQSQH  | 164  | 362   |
| >TP53-I162F-MAIYKQSQH  | 672   | >TP53-I162F-MAFYKQSQH  | 292  | 380   |
| >TP53-I162F-MAIYKQSQH  | 226   | >TP53-I162F-MAFYKQSQH  | 159  | 67    |
| >TP53-I162F-MAIYKQSQH  | 205   | >TP53-I162F-MAFYKQSQH  | 36   | 169   |
| >TP53-I162F-MAIYKQSQH  | 911   | >TP53-I162F-MAFYKQSQH  | 324  | 587   |
| >TP53-I162F-MAIYKQSQH  | 20    | >TP53-I162F-MAFYKQSQH  | 14   | 6     |
| >TP53-I162F-MAIYKQSQH  | 151   | >TP53-I162F-MAFYKQSQH  | 199  | 48    |
| >TP53-I162F-MAIYKQSQH  | 894   | >TP53-I162F-MAFYKQSQH  | 115  | 779   |
| >TP53-I162F-AMAIYKQSQI | 221   | >TP53-I162F-AMAFYKQSQ  | 218  | 3     |
| >TP53-I162F-AMAIYKQSQI | 161   | >TP53-I162F-AMAFYKQSQ  | 82   | 79    |
| >TP53-I162F-AMAIYKQSQI | 732   | >TP53-I162F-AMAFYKQSQ  | 310  | 422   |
| >TP53-I162F-AMAIYKQSQI | 199   | >TP53-I162F-AMAFYKQSQ  | 219  | 20    |
| >TP53-I162F-AMAIYKQSQI | 283   | >TP53-I162F-AMAFYKQSQ  | 399  | 116   |
| >TP53-I162F-AMAIYKQSQ  | 69    | >TP53-I162F-AMAFYKQSQ  | 137  | 68    |
| >TP53-I162F-AMAIYKQSQI | 49    | >TP53-I162F-AMAFYKQSQ  | 78   | 29    |
| >TP53-I162F-AMAIYKQSQI | 55    | >TP53-I162F-AMAFYKQSQ  | 40   | 15    |
| >TP53-I162F-AMAIYKQSQI | 69    | >TP53-I162F-AMAFYKQSQ  | 50   | 19    |
| >TP53-I162F-RAMAIYKQSC | 354   | >TP53-I162F-RAMAFYKQSC | 234  | 120   |

|                        |      |                        |     |      |
|------------------------|------|------------------------|-----|------|
| >TP53-I162F-RAMAIYKQSC | 375  | >TP53-I162F-RAMAFYKQSC | 398 | 23   |
| >TP53-I162F-VRAMAIYK   | 159  | >TP53-I162F-VRAMAFYK   | 120 | 39   |
| >TP53-I162F-RVRAMAIY   | 205  | >TP53-I162F-RVRAMAFY   | 64  | 141  |
| >TP53-I162F-RVRAMAIYK  | 28   | >TP53-I162F-RVRAMAFYK  | 27  | 1    |
| >TP53-I162F-RVRAMAIYK  | 20   | >TP53-I162F-RVRAMAFYK  | 14  | 6    |
| >TP53-I162F-RVRAMAIY   | 241  | >TP53-I162F-RVRAMAFY   | 72  | 169  |
| >TP53-I162F-RVRAMAIY   | 398  | >TP53-I162F-RVRAMAFY   | 53  | 345  |
| >TP53-I162F-RVRAMAIY   | 5    | >TP53-I162F-RVRAMAFY   | 4   | 1    |
| >TP53-I162F-RVRAMAIYK  | 3    | >TP53-I162F-RVRAMAFYK  | 3   | 0    |
| >TP53-I162F-RVRAMAIYKC | 10   | >TP53-I162F-RVRAMAFYKC | 10  | 0    |
| >TP53-I162F-RVRAMAIYKC | 9    | >TP53-I162F-RVRAMAFYKC | 8   | 1    |
| >TP53-I162F-RVRAMAIY   | 107  | >TP53-I162F-RVRAMAFY   | 35  | 72   |
| >TP53-I162F-RVRAMAIY   | 2353 | >TP53-I162F-RVRAMAFY   | 264 | 2089 |
| >TP53-I162F-RVRAMAIYK  | 18   | >TP53-I162F-RVRAMAFYK  | 9   | 9    |
| >TP53-I162F-RVRAMAIYK  | 588  | >TP53-I162F-RVRAMAFYK  | 158 | 430  |
| >TP53-I162F-RVRAMAIY   | 26   | >TP53-I162F-RVRAMAFY   | 8   | 18   |
| >TP53-I162F-RVRAMAIY   | 85   | >TP53-I162F-RVRAMAFY   | 81  | 4    |
| >TP53-I162F-RVRAMAIY   | 311  | >TP53-I162F-RVRAMAFY   | 661 | 350  |
| >TP53-I162F-RVRAMAIY   | 7    | >TP53-I162F-RVRAMAFY   | 7   | 0    |
| >TP53-I162F-RVRAMAIY   | 211  | >TP53-I162F-RVRAMAFY   | 502 | 291  |
| >TP53-I162F-RVRAMAIYK  | 156  | >TP53-I162F-RVRAMAFYK  | 154 | 2    |
| >TP53-I162F-TRVRAMAIY  | 62   | >TP53-I162F-TRVRAMAFY  | 10  | 52   |
| >TP53-I162F-TRVRAMAIY  | 1130 | >TP53-I162F-TRVRAMAFY  | 379 | 751  |
| >TP53-I162F-TRVRAMAIYK | 765  | >TP53-I162F-TRVRAMAFYK | 491 | 274  |
| >TP53-I162F-TRVRAMAI   | 746  | >TP53-I162F-TRVRAMAF   | 43  | 703  |
| >TP53-I162F-TRVRAMAIY  | 278  | >TP53-I162F-TRVRAMAFY  | 492 | 214  |
| >TP53-I162F-TRVRAMAI   | 215  | >TP53-I162F-TRVRAMAF   | 398 | 183  |
| >TP53-I162F-GTRVRAMAI  | 269  | >TP53-I162F-GTRVRAMAF  | 196 | 73   |
| >TP53-I162F-GTRVRAMAI  | 1539 | >TP53-I162F-GTRVRAMAF  | 322 | 1217 |
| >TP53-I162F-GTRVRAMAI  | 50   | >TP53-I162F-GTRVRAMAF  | 48  | 2    |
| >TP53-I162F-GTRVRAMAI  | 39   | >TP53-I162F-GTRVRAMAF  | 27  | 12   |
| >TP53-I162F-GTRVRAMAI  | 715  | >TP53-I162F-GTRVRAMAF  | 227 | 488  |
| >TP53-I162F-GTRVRAMAI  | 9    | >TP53-I162F-GTRVRAMAF  | 168 | 159  |
| >TP53-I162F-GTRVRAMAI  | 30   | >TP53-I162F-GTRVRAMAF  | 10  | 20   |
| >TP53-I162F-GTRVRAMAI  | 3    | >TP53-I162F-GTRVRAMAF  | 4   | 1    |
| >TP53-I162F-GTRVRAMAI  | 130  | >TP53-I162F-GTRVRAMAF  | 54  | 76   |
| >TP53-I162F-GTRVRAMAI  | 115  | >TP53-I162F-GTRVRAMAF  | 35  | 80   |
| >TP53-I162F-GTRVRAMAI  | 671  | >TP53-I162F-GTRVRAMAF  | 270 | 401  |
| >TP53-I162F-GTRVRAMAI  | 9122 | >TP53-I162F-GTRVRAMAF  | 247 | 8875 |
| >TP53-I162F-GTRVRAMAI  | 405  | >TP53-I162F-GTRVRAMAF  | 398 | 7    |
| >TP53-I162F-GTRVRAMAI  | 3101 | >TP53-I162F-GTRVRAMAF  | 85  | 3016 |
| >TP53-I162F-GTRVRAMAI  | 40   | >TP53-I162F-GTRVRAMAF  | 4   | 36   |
| >TP53-I162F-GTRVRAMAI  | 4    | >TP53-I162F-GTRVRAMAF  | 5   | 1    |

|                        |      |                        |       |       |
|------------------------|------|------------------------|-------|-------|
| >TP53-I162F- GTRVRAMAI | 122  | >TP53-I162F- GTRVRAMAF | 14    | 108   |
| >TP53-I162F- GTRVRAMAI | 21   | >TP53-I162F- GTRVRAMAF | 19    | 2     |
| >TP53-I162F- GTRVRAMAI | 269  | >TP53-I162F- GTRVRAMAF | 156   | 113   |
| >TP53-I162F- GTRVRAMAI | 387  | >TP53-I162F- GTRVRAMAF | 26630 | 26243 |
| >TP53-I162F- PGTRVRAMA | 619  | >TP53-I162F- PGTRVRAMA | 254   | 365   |
| >TP53-I162N IYKQSQHMTI | 402  | >TP53-I162N MYKQSQHM   | 828   | 426   |
| >TP53-I162N IYKQSQHMTI | 727  | >TP53-I162N MYKQSQHM   | 236   | 491   |
| >TP53-I162N IYKQSQHM   | 561  | >TP53-I162N MYKQSQHM   | 80    | 481   |
| >TP53-I162N IYKQSQHMTI | 864  | >TP53-I162N MYKQSQHM   | 147   | 717   |
| >TP53-I162N IYKQSQHM   | 394  | >TP53-I162N MYKQSQHM   | 51    | 343   |
| >TP53-I162N IYKQSQHMTI | 1709 | >TP53-I162N MYKQSQHM   | 247   | 1462  |
| >TP53-I162N AIYKQSQHM  | 91   | >TP53-I162N AMYKQSQHM  | 36    | 55    |
| >TP53-I162N AIYKQSQHM  | 3877 | >TP53-I162N AMYKQSQHM  | 463   | 3414  |
| >TP53-I162N AIYKQSQHM  | 2067 | >TP53-I162N AMYKQSQHM  | 198   | 1869  |
| >TP53-I162N AIYKQSQHM  | 1225 | >TP53-I162N AMYKQSQHM  | 45    | 1180  |
| >TP53-I162N AIYKQSQHM  | 1331 | >TP53-I162N AMYKQSQHM  | 32    | 1299  |
| >TP53-I162N AIYKQSQHM  | 7282 | >TP53-I162N AMYKQSQHM  | 80    | 7202  |
| >TP53-I162N AIYKQSQHM  | 1358 | >TP53-I162N AMYKQSQHM  | 32    | 1326  |
| >TP53-I162N AIYKQSQHM  | 3687 | >TP53-I162N AMYKQSQHM  | 72    | 3615  |
| >TP53-I162N AIYKQSQHM  | 1683 | >TP53-I162N AMYKQSQHM  | 43    | 1640  |
| >TP53-I162N AIYKQSQHM  | 662  | >TP53-I162N AMYKQSQHM  | 28    | 634   |
| >TP53-I162N AIYKQSQH   | 349  | >TP53-I162N AMYKQSQH   | 136   | 213   |
| >TP53-I162N AIYKQSQHM  | 62   | >TP53-I162N AMYKQSQHM  | 24    | 38    |
| >TP53-I162N AIYKQSQHM  | 2859 | >TP53-I162N AMYKQSQHM  | 339   | 2520  |
| >TP53-I162N AIYKQSQH   | 4366 | >TP53-I162N AMYKQSQH   | 205   | 4161  |
| >TP53-I162N AIYKQSQHM  | 198  | >TP53-I162N AMYKQSQHM  | 8     | 190   |
| >TP53-I162N AIYKQSQHM  | 514  | >TP53-I162N AMYKQSQHM  | 274   | 240   |
| >TP53-I162N PPGTRVRAM  | 709  | >TP53-I162N PPGTRVRAM  | 86    | 623   |
| >TP53-I162N MAIYKQSQH  | 672  | >TP53-I162N MAMYKQSQI  | 363   | 309   |
| >TP53-I162N MAIYKQSQH  | 226  | >TP53-I162N MAMYKQSQI  | 193   | 33    |
| >TP53-I162N MAIYKQSQH  | 205  | >TP53-I162N MAMYKQSQI  | 110   | 95    |
| >TP53-I162N MAIYKQSQH  | 20   | >TP53-I162N MAMYKQSQI  | 20    | 0     |
| >TP53-I162N MAIYKQSQH  | 151  | >TP53-I162N MAMYKQSQI  | 97    | 54    |
| >TP53-I162N MAIYKQSQH  | 894  | >TP53-I162N MAMYKQSQI  | 373   | 521   |
| >TP53-I162N MAIYKQSQH  | 583  | >TP53-I162N MAMYKQSQI  | 368   | 215   |
| >TP53-I162N AMAIYKQSQI | 221  | >TP53-I162N AMAMYKQSQ  | 130   | 91    |
| >TP53-I162N AMAIYKQSQI | 161  | >TP53-I162N AMAMYKQSQ  | 154   | 7     |
| >TP53-I162N AMAIYKQSQI | 732  | >TP53-I162N AMAMYKQSQ  | 448   | 284   |
| >TP53-I162N AMAIYKQSQI | 199  | >TP53-I162N AMAMYKQSQ  | 201   | 2     |
| >TP53-I162N AMAIYKQSQI | 283  | >TP53-I162N AMAMYKQSQ  | 290   | 7     |
| >TP53-I162N AMAIYKQSQ  | 69   | >TP53-I162N AMAMYKQSQ  | 46    | 23    |
| >TP53-I162N AMAIYKQSQI | 49   | >TP53-I162N AMAMYKQSQ  | 36    | 13    |
| >TP53-I162N AMAIYKQSQI | 55   | >TP53-I162N AMAMYKQSQ  | 34    | 21    |

|                        |      |                        |       |       |
|------------------------|------|------------------------|-------|-------|
| >TP53-I162N AMAIYKQSQI | 69   | >TP53-I162N AMAMYKQSC  | 30    | 39    |
| >TP53-I162N RAMAIYKQSC | 354  | >TP53-I162N RAMAMYKQSC | 200   | 154   |
| >TP53-I162N RAMAIYKQSC | 375  | >TP53-I162N RAMAMYKQSC | 463   | 88    |
| >TP53-I162N VRAMAIYK   | 159  | >TP53-I162N VRAMAMYK   | 295   | 136   |
| >TP53-I162N RVRAMAIY   | 205  | >TP53-I162N RVRAMAMY   | 124   | 81    |
| >TP53-I162N RVRAMAIYK  | 28   | >TP53-I162N RVRAMAMY†  | 25    | 3     |
| >TP53-I162N RVRAMAIYK  | 20   | >TP53-I162N RVRAMAMY†  | 18    | 2     |
| >TP53-I162N RVRAMAIY   | 241  | >TP53-I162N RVRAMAMY   | 245   | 4     |
| >TP53-I162N RVRAMAIY   | 398  | >TP53-I162N RVRAMAMY   | 101   | 297   |
| >TP53-I162N RVRAMAIY   | 5    | >TP53-I162N RVRAMAMY   | 5     | 0     |
| >TP53-I162N RVRAMAIYK  | 3    | >TP53-I162N RVRAMAMY†  | 3     | 0     |
| >TP53-I162N RVRAMAIYKC | 10   | >TP53-I162N RVRAMAMY†  | 10    | 0     |
| >TP53-I162N RVRAMAIYKC | 9    | >TP53-I162N RVRAMAMY†  | 8     | 1     |
| >TP53-I162N RVRAMAIY   | 107  | >TP53-I162N RVRAMAMY   | 102   | 5     |
| >TP53-I162N RVRAMAIYK  | 18   | >TP53-I162N RVRAMAMY†  | 20    | 2     |
| >TP53-I162N RVRAMAIYK  | 588  | >TP53-I162N RVRAMAMY†  | 397   | 191   |
| >TP53-I162N RVRAMAIY   | 26   | >TP53-I162N RVRAMAMY   | 25    | 1     |
| >TP53-I162N RVRAMAIY   | 85   | >TP53-I162N RVRAMAMY   | 78    | 7     |
| >TP53-I162N RVRAMAIY   | 311  | >TP53-I162N RVRAMAMY   | 348   | 37    |
| >TP53-I162N RVRAMAIY   | 7    | >TP53-I162N RVRAMAMY   | 6     | 1     |
| >TP53-I162N RVRAMAIY   | 211  | >TP53-I162N RVRAMAMY   | 237   | 26    |
| >TP53-I162N RVRAMAIYK  | 156  | >TP53-I162N RVRAMAMY†  | 165   | 9     |
| >TP53-I162N TRVRAMAIYK | 1127 | >TP53-I162N TRVRAMAM†  | 449   | 678   |
| >TP53-I162N TRVRAMAIY  | 62   | >TP53-I162N TRVRAMAM†  | 50    | 12    |
| >TP53-I162N TRVRAMAI   | 746  | >TP53-I162N TRVRAMAM   | 324   | 422   |
| >TP53-I162N TRVRAMAIY  | 278  | >TP53-I162N TRVRAMAM†  | 318   | 40    |
| >TP53-I162N TRVRAMAI   | 542  | >TP53-I162N TRVRAMAM   | 244   | 298   |
| >TP53-I162N TRVRAMAI   | 215  | >TP53-I162N TRVRAMAM   | 68    | 147   |
| >TP53-I162N GTRVRAMAI† | 269  | >TP53-I162N GTRVRAMAM  | 315   | 46    |
| >TP53-I162N GTRVRAMAI† | 50   | >TP53-I162N GTRVRAMAM  | 42    | 8     |
| >TP53-I162N GTRVRAMAI† | 39   | >TP53-I162N GTRVRAMAM  | 34    | 5     |
| >TP53-I162N GTRVRAMAI  | 9    | >TP53-I162N GTRVRAMAM  | 17    | 8     |
| >TP53-I162N GTRVRAMAI† | 30   | >TP53-I162N GTRVRAMAM  | 36    | 6     |
| >TP53-I162N GTRVRAMAI† | 3    | >TP53-I162N GTRVRAMAM  | 3     | 0     |
| >TP53-I162N GTRVRAMAI† | 130  | >TP53-I162N GTRVRAMAM  | 92    | 38    |
| >TP53-I162N GTRVRAMAI† | 115  | >TP53-I162N GTRVRAMAM  | 109   | 6     |
| >TP53-I162N GTRVRAMAI† | 405  | >TP53-I162N GTRVRAMAM  | 326   | 79    |
| >TP53-I162N GTRVRAMAI  | 40   | >TP53-I162N GTRVRAMAM  | 11    | 29    |
| >TP53-I162N GTRVRAMAI† | 4    | >TP53-I162N GTRVRAMAM  | 4     | 0     |
| >TP53-I162N GTRVRAMAI  | 122  | >TP53-I162N GTRVRAMAM  | 11    | 111   |
| >TP53-I162N GTRVRAMAI† | 21   | >TP53-I162N GTRVRAMAM  | 19    | 2     |
| >TP53-I162N GTRVRAMAI† | 269  | >TP53-I162N GTRVRAMAM  | 219   | 50    |
| >TP53-I162N GTRVRAMAI  | 387  | >TP53-I162N GTRVRAMAM  | 11573 | 11186 |

|                        |      |                        |       |       |
|------------------------|------|------------------------|-------|-------|
| >TP53-I162N IYKQSQHM   | 510  | >TP53-I162N NYKQSQHM   | 286   | 224   |
| >TP53-I162N IYKQSQHMTI | 402  | >TP53-I162N NYKQSQHMTI | 245   | 157   |
| >TP53-I162N IYKQSQHM   | 394  | >TP53-I162N NYKQSQHM   | 4202  | 3808  |
| >TP53-I162N AIYKQSQHM  | 91   | >TP53-I162N ANYKQSQHM  | 114   | 23    |
| >TP53-I162N AIYKQSQH   | 349  | >TP53-I162N ANYKQSQH   | 15541 | 15192 |
| >TP53-I162N AIYKQSQHM  | 62   | >TP53-I162N ANYKQSQHM  | 369   | 307   |
| >TP53-I162N AIYKQSQHM  | 198  | >TP53-I162N ANYKQSQHM  | 192   | 6     |
| >TP53-I162N MAIYKQSQH  | 226  | >TP53-I162N MANYKQSQH  | 395   | 169   |
| >TP53-I162N MAIYKQSQH  | 205  | >TP53-I162N MANYKQSQH  | 414   | 209   |
| >TP53-I162N MAIYKQSQH  | 20   | >TP53-I162N MANYKQSQH  | 76    | 56    |
| >TP53-I162N MAIYKQSQH  | 151  | >TP53-I162N MANYKQSQH  | 170   | 19    |
| >TP53-I162N AMAIYKQSQH | 221  | >TP53-I162N AMANYKQSC  | 197   | 24    |
| >TP53-I162N AMAIYKQSQH | 161  | >TP53-I162N AMANYKQSC  | 150   | 11    |
| >TP53-I162N AMAIYKQSQH | 732  | >TP53-I162N AMANYKQSC  | 275   | 457   |
| >TP53-I162N AMAIYKQSQH | 199  | >TP53-I162N AMANYKQSC  | 93    | 106   |
| >TP53-I162N AMAIYKQSQH | 1607 | >TP53-I162N AMANYKQSC  | 301   | 1306  |
| >TP53-I162N AMAIYKQSQH | 283  | >TP53-I162N AMANYKQSC  | 123   | 160   |
| >TP53-I162N AMAIYKQSQ  | 69   | >TP53-I162N AMANYKQSC  | 30    | 39    |
| >TP53-I162N AMAIYKQSQH | 49   | >TP53-I162N AMANYKQSC  | 26    | 23    |
| >TP53-I162N AMAIYKQSQH | 55   | >TP53-I162N AMANYKQSC  | 34    | 21    |
| >TP53-I162N AMAIYKQSQH | 69   | >TP53-I162N AMANYKQSC  | 27    | 42    |
| >TP53-I162N RAMAIYKQSC | 354  | >TP53-I162N RAMANYKQS  | 186   | 168   |
| >TP53-I162N RAMAIYKQSC | 375  | >TP53-I162N RAMANYKQS  | 1248  | 873   |
| >TP53-I162N VRAMAIYK   | 159  | >TP53-I162N VRAMANYK   | 485   | 326   |
| >TP53-I162N RVRAMAIY   | 205  | >TP53-I162N RVRAMANY   | 137   | 68    |
| >TP53-I162N RVRAMAIYK  | 28   | >TP53-I162N RVRAMANYK  | 33    | 5     |
| >TP53-I162N RVRAMAIYK  | 20   | >TP53-I162N RVRAMANYK  | 54    | 34    |
| >TP53-I162N RVRAMAIY   | 241  | >TP53-I162N RVRAMANY   | 123   | 118   |
| >TP53-I162N RVRAMAIY   | 2338 | >TP53-I162N RVRAMANY   | 390   | 1948  |
| >TP53-I162N RVRAMAIY   | 398  | >TP53-I162N RVRAMANY   | 285   | 113   |
| >TP53-I162N RVRAMAIY   | 5    | >TP53-I162N RVRAMANY   | 5     | 0     |
| >TP53-I162N RVRAMAIYK  | 3    | >TP53-I162N RVRAMANYK  | 3     | 0     |
| >TP53-I162N RVRAMAIYKC | 10   | >TP53-I162N RVRAMANYK  | 10    | 0     |
| >TP53-I162N RVRAMAIYKC | 9    | >TP53-I162N RVRAMANYK  | 9     | 0     |
| >TP53-I162N RVRAMAIY   | 107  | >TP53-I162N RVRAMANY   | 117   | 10    |
| >TP53-I162N RVRAMAIYK  | 18   | >TP53-I162N RVRAMANYK  | 25    | 7     |
| >TP53-I162N RVRAMAIYK  | 588  | >TP53-I162N RVRAMANYK  | 498   | 90    |
| >TP53-I162N RVRAMAIY   | 26   | >TP53-I162N RVRAMANY   | 21    | 5     |
| >TP53-I162N RVRAMAIY   | 85   | >TP53-I162N RVRAMANY   | 89    | 4     |
| >TP53-I162N RVRAMAIY   | 311  | >TP53-I162N RVRAMANY   | 358   | 47    |
| >TP53-I162N RVRAMAIY   | 7    | >TP53-I162N RVRAMANY   | 6     | 1     |
| >TP53-I162N RVRAMAIY   | 211  | >TP53-I162N RVRAMANY   | 457   | 246   |
| >TP53-I162N RVRAMAIYK  | 156  | >TP53-I162N RVRAMANYK  | 556   | 400   |

|                        |       |                       |       |       |
|------------------------|-------|-----------------------|-------|-------|
| >TP53-I162N TRVRAMAIY  | 62    | >TP53-I162N TRVRAMANY | 27    | 35    |
| >TP53-I162N TRVRAMAIY  | 278   | >TP53-I162N TRVRAMANY | 337   | 59    |
| >TP53-I162N TRVRAMAI   | 215   | >TP53-I162N TRVRAMAN  | 13649 | 13434 |
| >TP53-I162N GTRVRAMAI\ | 269   | >TP53-I162N GTRVRAMAN | 312   | 43    |
| >TP53-I162N GTRVRAMAI\ | 50    | >TP53-I162N GTRVRAMAN | 76    | 26    |
| >TP53-I162N GTRVRAMAI\ | 39    | >TP53-I162N GTRVRAMAN | 85    | 46    |
| >TP53-I162N GTRVRAMAI\ | 715   | >TP53-I162N GTRVRAMAN | 437   | 278   |
| >TP53-I162N GTRVRAMAI  | 9     | >TP53-I162N GTRVRAMAN | 291   | 282   |
| >TP53-I162N GTRVRAMAI\ | 30    | >TP53-I162N GTRVRAMAN | 25    | 5     |
| >TP53-I162N GTRVRAMAI\ | 3     | >TP53-I162N GTRVRAMAN | 4     | 1     |
| >TP53-I162N GTRVRAMAI\ | 130   | >TP53-I162N GTRVRAMAN | 96    | 34    |
| >TP53-I162N GTRVRAMAI\ | 115   | >TP53-I162N GTRVRAMAN | 139   | 24    |
| >TP53-I162N GTRVRAMAI\ | 405   | >TP53-I162N GTRVRAMAN | 524   | 119   |
| >TP53-I162N GTRVRAMAI  | 40    | >TP53-I162N GTRVRAMAN | 6771  | 6731  |
| >TP53-I162N GTRVRAMAI\ | 4     | >TP53-I162N GTRVRAMAN | 4     | 0     |
| >TP53-I162N GTRVRAMAI  | 122   | >TP53-I162N GTRVRAMAN | 1716  | 1594  |
| >TP53-I162N GTRVRAMAI\ | 21    | >TP53-I162N GTRVRAMAN | 26    | 5     |
| >TP53-I162N GTRVRAMAI\ | 269   | >TP53-I162N GTRVRAMAN | 464   | 195   |
| >TP53-I162N GTRVRAMAI  | 387   | >TP53-I162N GTRVRAMAN | 38272 | 37885 |
| >TP53-I162S-IYKQSQHM   | 510   | >TP53-I162S-SYKQSQHM  | 38    | 472   |
| >TP53-I162S-IYKQSQHMTI | 402   | >TP53-I162S-SYKQSQHMT | 45    | 357   |
| >TP53-I162S-IYKQSQHM   | 561   | >TP53-I162S-SYKQSQHM  | 268   | 293   |
| >TP53-I162S-IYKQSQHMTI | 864   | >TP53-I162S-SYKQSQHMT | 451   | 413   |
| >TP53-I162S-IYKQSQHM   | 394   | >TP53-I162S-SYKQSQHM  | 150   | 244   |
| >TP53-I162S-AIYKQSQHM  | 91    | >TP53-I162S-ASYKQSQHM | 76    | 15    |
| >TP53-I162S-AIYKQSQH   | 349   | >TP53-I162S-ASYKQSQH  | 1001  | 652   |
| >TP53-I162S-AIYKQSQHM  | 750   | >TP53-I162S-ASYKQSQHM | 286   | 464   |
| >TP53-I162S-AIYKQSQHM  | 62    | >TP53-I162S-ASYKQSQHM | 74    | 12    |
| >TP53-I162S-AIYKQSQHM  | 198   | >TP53-I162S-ASYKQSQHM | 38    | 160   |
| >TP53-I162S-AIYKQSQH   | 11192 | >TP53-I162S-ASYKQSQH  | 101   | 11091 |
| >TP53-I162S-AIYKQSQHM  | 514   | >TP53-I162S-ASYKQSQHM | 14    | 500   |
| >TP53-I162S-AIYKQSQHM  | 6451  | >TP53-I162S-ASYKQSQHM | 478   | 5973  |
| >TP53-I162S-AIYKQSQHM  | 14628 | >TP53-I162S-ASYKQSQHM | 292   | 14336 |
| >TP53-I162S-MAIYKQSQHI | 226   | >TP53-I162S-MASYKQSQH | 437   | 211   |
| >TP53-I162S-MAIYKQSQHI | 205   | >TP53-I162S-MASYKQSQH | 399   | 194   |
| >TP53-I162S-MAIYKQSQHI | 20    | >TP53-I162S-MASYKQSQH | 50    | 30    |
| >TP53-I162S-MAIYKQSQHI | 151   | >TP53-I162S-MASYKQSQH | 241   | 90    |
| >TP53-I162S-MAIYKQSQHI | 583   | >TP53-I162S-MASYKQSQH | 213   | 370   |
| >TP53-I162S-AMAIYKQSQI | 221   | >TP53-I162S-AMASYKQSQ | 191   | 30    |
| >TP53-I162S-AMAIYKQSQI | 161   | >TP53-I162S-AMASYKQSQ | 77    | 84    |
| >TP53-I162S-AMAIYKQSQI | 732   | >TP53-I162S-AMASYKQSQ | 236   | 496   |
| >TP53-I162S-AMAIYKQSQI | 199   | >TP53-I162S-AMASYKQSQ | 126   | 73    |
| >TP53-I162S-AMAIYKQSQI | 283   | >TP53-I162S-AMASYKQSQ | 189   | 94    |

|                        |      |                        |       |      |
|------------------------|------|------------------------|-------|------|
| >TP53-I162S-AMAIYKQSQ  | 69   | >TP53-I162S-AMASYKQSQ  | 33    | 36   |
| >TP53-I162S-AMAIYKQSQI | 49   | >TP53-I162S-AMASYKQSQ  | 27    | 22   |
| >TP53-I162S-AMAIYKQSQI | 55   | >TP53-I162S-AMASYKQSQ  | 36    | 19   |
| >TP53-I162S-AMAIYKQSQI | 69   | >TP53-I162S-AMASYKQSQ  | 19    | 50   |
| >TP53-I162S-RAMAIYKQSQ | 354  | >TP53-I162S-RAMASYKQSQ | 67    | 287  |
| >TP53-I162S-RAMAIYKQSQ | 375  | >TP53-I162S-RAMASYKQSQ | 624   | 249  |
| >TP53-I162S-VRAMAIYK   | 159  | >TP53-I162S-VRAMASYK   | 292   | 133  |
| >TP53-I162S-RVRAMAIY   | 205  | >TP53-I162S-RVRAMASY   | 127   | 78   |
| >TP53-I162S-RVRAMAIYK  | 28   | >TP53-I162S-RVRAMASYK  | 27    | 1    |
| >TP53-I162S-RVRAMAIYK  | 20   | >TP53-I162S-RVRAMASYK  | 33    | 13   |
| >TP53-I162S-RVRAMAIY   | 241  | >TP53-I162S-RVRAMASY   | 147   | 94   |
| >TP53-I162S-RVRAMAIY   | 398  | >TP53-I162S-RVRAMASY   | 274   | 124  |
| >TP53-I162S-RVRAMAIY   | 5    | >TP53-I162S-RVRAMASY   | 5     | 0    |
| >TP53-I162S-RVRAMAIYK  | 3    | >TP53-I162S-RVRAMASYK  | 3     | 0    |
| >TP53-I162S-RVRAMAIYKC | 10   | >TP53-I162S-RVRAMASYKC | 10    | 0    |
| >TP53-I162S-RVRAMAIYKC | 9    | >TP53-I162S-RVRAMASYKC | 9     | 0    |
| >TP53-I162S-RVRAMAIY   | 107  | >TP53-I162S-RVRAMASY   | 56    | 51   |
| >TP53-I162S-RVRAMAIYK  | 18   | >TP53-I162S-RVRAMASYK  | 18    | 0    |
| >TP53-I162S-RVRAMAIYK  | 588  | >TP53-I162S-RVRAMASYK  | 333   | 255  |
| >TP53-I162S-RVRAMAIY   | 26   | >TP53-I162S-RVRAMASY   | 40    | 14   |
| >TP53-I162S-RVRAMAIY   | 85   | >TP53-I162S-RVRAMASY   | 51    | 34   |
| >TP53-I162S-RVRAMAIY   | 311  | >TP53-I162S-RVRAMASY   | 161   | 150  |
| >TP53-I162S-RVRAMAIY   | 7    | >TP53-I162S-RVRAMASY   | 4     | 3    |
| >TP53-I162S-RVRAMAIY   | 211  | >TP53-I162S-RVRAMASY   | 262   | 51   |
| >TP53-I162S-RVRAMAIYK  | 5863 | >TP53-I162S-RVRAMASYK  | 248   | 5615 |
| >TP53-I162S-RVRAMAIYK  | 156  | >TP53-I162S-RVRAMASYK  | 1096  | 940  |
| >TP53-I162S-TRVRAMAIY  | 62   | >TP53-I162S-TRVRAMASY  | 35    | 27   |
| >TP53-I162S-TRVRAMAIY  | 278  | >TP53-I162S-TRVRAMASY  | 184   | 94   |
| >TP53-I162S-TRVRAMAIY  | 1249 | >TP53-I162S-TRVRAMASY  | 469   | 780  |
| >TP53-I162S-TRVRAMAI   | 215  | >TP53-I162S-TRVRAMAS   | 10030 | 9815 |
| >TP53-I162S-GTRVRAMAI  | 269  | >TP53-I162S-GTRVRAMAS  | 575   | 306  |
| >TP53-I162S-GTRVRAMAI  | 50   | >TP53-I162S-GTRVRAMAS  | 50    | 0    |
| >TP53-I162S-GTRVRAMAI  | 39   | >TP53-I162S-GTRVRAMAS  | 60    | 21   |
| >TP53-I162S-GTRVRAMAI  | 9    | >TP53-I162S-GTRVRAMAS  | 57    | 48   |
| >TP53-I162S-GTRVRAMAI  | 30   | >TP53-I162S-GTRVRAMAS  | 19    | 11   |
| >TP53-I162S-GTRVRAMAI  | 3    | >TP53-I162S-GTRVRAMAS  | 4     | 1    |
| >TP53-I162S-GTRVRAMAI  | 130  | >TP53-I162S-GTRVRAMAS  | 111   | 19   |
| >TP53-I162S-GTRVRAMAI  | 115  | >TP53-I162S-GTRVRAMAS  | 103   | 12   |
| >TP53-I162S-GTRVRAMAI  | 405  | >TP53-I162S-GTRVRAMAS  | 123   | 282  |
| >TP53-I162S-GTRVRAMAI  | 40   | >TP53-I162S-GTRVRAMAS  | 5320  | 5280 |
| >TP53-I162S-GTRVRAMAI  | 4    | >TP53-I162S-GTRVRAMAS  | 4     | 0    |
| >TP53-I162S-GTRVRAMAI  | 122  | >TP53-I162S-GTRVRAMAS  | 1690  | 1568 |
| >TP53-I162S-GTRVRAMAI  | 21   | >TP53-I162S-GTRVRAMAS  | 22    | 1    |

|                        |      |                       |       |       |
|------------------------|------|-----------------------|-------|-------|
| >TP53-I162S-GTRVRAMAI  | 1542 | >TP53-I162S-GTRVRAMAS | 153   | 1389  |
| >TP53-I162S-GTRVRAMAI  | 269  | >TP53-I162S-GTRVRAMAS | 481   | 212   |
| >TP53-I162S-GTRVRAMAI  | 387  | >TP53-I162S-GTRVRAMAS | 35699 | 35312 |
| >TP53-I162S-PGTRVRAMA  | 619  | >TP53-I162S-PGTRVRAMA | 428   | 191   |
| >TP53-I162V-IYKQSQHMTI | 402  | >TP53-I162V-VYKQSQHMT | 583   | 181   |
| >TP53-I162V-IYKQSQHM   | 561  | >TP53-I162V-VYKQSQHM  | 379   | 182   |
| >TP53-I162V-IYKQSQHM   | 394  | >TP53-I162V-VYKQSQHM  | 972   | 578   |
| >TP53-I162V-AIYKQSQHM  | 91   | >TP53-I162V-AVYKQSQHM | 63    | 28    |
| >TP53-I162V-AIYKQSQH   | 349  | >TP53-I162V-AVYKQSQH  | 319   | 30    |
| >TP53-I162V-AIYKQSQHM  | 804  | >TP53-I162V-AVYKQSQHM | 144   | 660   |
| >TP53-I162V-AIYKQSQHM  | 750  | >TP53-I162V-AVYKQSQHM | 213   | 537   |
| >TP53-I162V-AIYKQSQHM  | 62   | >TP53-I162V-AVYKQSQHM | 72    | 10    |
| >TP53-I162V-AIYKQSQHM  | 198  | >TP53-I162V-AVYKQSQHM | 289   | 91    |
| >TP53-I162V-AIYKQSQHM  | 514  | >TP53-I162V-AVYKQSQHM | 155   | 359   |
| >TP53-I162V-MAIYKQSQH  | 226  | >TP53-I162V-MAVYKQSQH | 477   | 251   |
| >TP53-I162V-MAIYKQSQH  | 205  | >TP53-I162V-MAVYKQSQH | 298   | 93    |
| >TP53-I162V-MAIYKQSQH  | 20   | >TP53-I162V-MAVYKQSQH | 21    | 1     |
| >TP53-I162V-MAIYKQSQH  | 151  | >TP53-I162V-MAVYKQSQH | 251   | 100   |
| >TP53-I162V-AMAIYKQSQI | 221  | >TP53-I162V-AMAVYKQSC | 144   | 77    |
| >TP53-I162V-AMAIYKQSQI | 161  | >TP53-I162V-AMAVYKQSC | 163   | 2     |
| >TP53-I162V-AMAIYKQSQI | 199  | >TP53-I162V-AMAVYKQSC | 391   | 192   |
| >TP53-I162V-AMAIYKQSQI | 283  | >TP53-I162V-AMAVYKQSC | 405   | 122   |
| >TP53-I162V-AMAIYKQSQ  | 69   | >TP53-I162V-AMAVYKQSC | 113   | 44    |
| >TP53-I162V-AMAIYKQSQI | 49   | >TP53-I162V-AMAVYKQSC | 70    | 21    |
| >TP53-I162V-AMAIYKQSQI | 55   | >TP53-I162V-AMAVYKQSC | 45    | 10    |
| >TP53-I162V-AMAIYKQSQI | 69   | >TP53-I162V-AMAVYKQSC | 41    | 28    |
| >TP53-I162V-RAMAIYKQSC | 354  | >TP53-I162V-RAMAVYKQS | 532   | 178   |
| >TP53-I162V-RAMAIYKQSC | 375  | >TP53-I162V-RAMAVYKQS | 415   | 40    |
| >TP53-I162V-VRAMAIYK   | 159  | >TP53-I162V-VRAMAVYK  | 168   | 9     |
| >TP53-I162V-RVRAMAIY   | 205  | >TP53-I162V-RVRAMAVY  | 198   | 7     |
| >TP53-I162V-RVRAMAIYK  | 28   | >TP53-I162V-RVRAMAVYK | 29    | 1     |
| >TP53-I162V-RVRAMAIYK  | 20   | >TP53-I162V-RVRAMAVYK | 31    | 11    |
| >TP53-I162V-RVRAMAIY   | 241  | >TP53-I162V-RVRAMAVY  | 202   | 39    |
| >TP53-I162V-RVRAMAIY   | 398  | >TP53-I162V-RVRAMAVY  | 438   | 40    |
| >TP53-I162V-RVRAMAIY   | 5    | >TP53-I162V-RVRAMAVY  | 6     | 1     |
| >TP53-I162V-RVRAMAIYK  | 3    | >TP53-I162V-RVRAMAVYK | 3     | 0     |
| >TP53-I162V-RVRAMAIYKC | 10   | >TP53-I162V-RVRAMAVYK | 12    | 2     |
| >TP53-I162V-RVRAMAIYKC | 9    | >TP53-I162V-RVRAMAVYK | 10    | 1     |
| >TP53-I162V-RVRAMAIY   | 107  | >TP53-I162V-RVRAMAVY  | 100   | 7     |
| >TP53-I162V-RVRAMAIYK  | 18   | >TP53-I162V-RVRAMAVYK | 13    | 5     |
| >TP53-I162V-RVRAMAIYK  | 588  | >TP53-I162V-RVRAMAVYK | 329   | 259   |
| >TP53-I162V-RVRAMAIY   | 26   | >TP53-I162V-RVRAMAVY  | 45    | 19    |
| >TP53-I162V-RVRAMAIY   | 85   | >TP53-I162V-RVRAMAVY  | 56    | 29    |



|                         |      |                        |       |       |
|-------------------------|------|------------------------|-------|-------|
| >TP53-I162V·RVRAMAIY    | 311  | >TP53-I162V·RVRAMAVY   | 219   | 92    |
| >TP53-I162V·RVRAMAIY    | 7    | >TP53-I162V·RVRAMAVY   | 5     | 2     |
| >TP53-I162V·RVRAMAIY    | 211  | >TP53-I162V·RVRAMAVY   | 127   | 84    |
| >TP53-I162V·RVRAMAIYK   | 156  | >TP53-I162V·RVRAMAVYK  | 121   | 35    |
| >TP53-I162V·TRVRAMAIY   | 62   | >TP53-I162V·TRVRAMAVY  | 42    | 20    |
| >TP53-I162V·TRVRAMAIY   | 278  | >TP53-I162V·TRVRAMAVY  | 235   | 43    |
| >TP53-I162V·TRVRAMAI    | 215  | >TP53-I162V·TRVRAMAV   | 233   | 18    |
| >TP53-I162V·GTRVRAMAI\  | 269  | >TP53-I162V·GTRVRAMAV  | 434   | 165   |
| >TP53-I162V·GTRVRAMAI\  | 50   | >TP53-I162V·GTRVRAMAV  | 58    | 8     |
| >TP53-I162V·GTRVRAMAI\  | 39   | >TP53-I162V·GTRVRAMAV  | 54    | 15    |
| >TP53-I162V·GTRVRAMAI   | 9    | >TP53-I162V·GTRVRAMAV  | 13    | 4     |
| >TP53-I162V·GTRVRAMAI\  | 30   | >TP53-I162V·GTRVRAMAV  | 32    | 2     |
| >TP53-I162V·GTRVRAMAI\  | 3    | >TP53-I162V·GTRVRAMAV  | 4     | 1     |
| >TP53-I162V·GTRVRAMAI\  | 130  | >TP53-I162V·GTRVRAMAV  | 176   | 46    |
| >TP53-I162V·GTRVRAMAI\  | 115  | >TP53-I162V·GTRVRAMAV  | 74    | 41    |
| >TP53-I162V·GTRVRAMAI\  | 671  | >TP53-I162V·GTRVRAMAV  | 488   | 183   |
| >TP53-I162V·GTRVRAMAI\  | 405  | >TP53-I162V·GTRVRAMAV  | 126   | 279   |
| >TP53-I162V·GTRVRAMAI   | 40   | >TP53-I162V·GTRVRAMAV  | 209   | 169   |
| >TP53-I162V·GTRVRAMAI\  | 4    | >TP53-I162V·GTRVRAMAV  | 4     | 0     |
| >TP53-I162V·GTRVRAMAI   | 122  | >TP53-I162V·GTRVRAMAV  | 170   | 48    |
| >TP53-I162V·GTRVRAMAI\  | 21   | >TP53-I162V·GTRVRAMAV  | 23    | 2     |
| >TP53-I162V·GTRVRAMAI\  | 269  | >TP53-I162V·GTRVRAMAV  | 266   | 3     |
| >TP53-I162V·GTRVRAMAI   | 387  | >TP53-I162V·GTRVRAMAV  | 17408 | 17021 |
| >TP53-I195F·IRVEGNLRV   | 3633 | >TP53-I195F·FRVEGNLRV  | 344   | 3289  |
| >TP53-I195F·IRVEGNLRVE' | 1106 | >TP53-I195F·FRVEGNLRVE | 312   | 794   |
| >TP53-I195F·IRVEGNLRVE' | 53   | >TP53-I195F·FRVEGNLRVE | 37    | 16    |
| >TP53-I195F·IRVEGNLR    | 1338 | >TP53-I195F·FRVEGNLR   | 330   | 1008  |
| >TP53-I195F·IRVEGNLRV   | 1217 | >TP53-I195F·FRVEGNLRV  | 287   | 930   |
| >TP53-I195F·IRVEGNLRVE' | 668  | >TP53-I195F·FRVEGNLRVE | 151   | 517   |
| >TP53-I195F·IRVEGNLRV   | 4404 | >TP53-I195F·FRVEGNLRV  | 113   | 4291  |
| >TP53-I195F·LIRVEGNLRV  | 35   | >TP53-I195F·LFRVEGNLRV | 3687  | 3652  |
| >TP53-I195F·LIRVEGNLRV  | 296  | >TP53-I195F·LFRVEGNLRV | 416   | 120   |
| >TP53-I195F·LIRVEGNLR   | 570  | >TP53-I195F·LFRVEGNLR  | 122   | 448   |
| >TP53-I195F·LIRVEGNLR   | 1131 | >TP53-I195F·LFRVEGNLR  | 190   | 941   |
| >TP53-I195F·SDGLAPPQHI  | 104  | >TP53-I195F·SDGLAPPQHI | 12731 | 12627 |
| >TP53-I195F·HLIRVEGNLR' | 156  | >TP53-I195F·HLFRVEGNLR | 69    | 87    |
| >TP53-I195F·HLIRVEGNL   | 226  | >TP53-I195F·HLFRVEGNL  | 78    | 148   |
| >TP53-I195F·HLIRVEGNLR' | 111  | >TP53-I195F·HLFRVEGNLR | 35    | 76    |
| >TP53-I195F·HLIRVEGNLR' | 41   | >TP53-I195F·HLFRVEGNLR | 39    | 2     |
| >TP53-I195F·HLIRVEGNLR' | 322  | >TP53-I195F·HLFRVEGNLR | 348   | 26    |
| >TP53-I195F·HLIRVEGNL   | 327  | >TP53-I195F·HLFRVEGNL  | 39    | 288   |
| >TP53-I195F·HLIRVEGNLR' | 9    | >TP53-I195F·HLFRVEGNLR | 3     | 6     |
| >TP53-I195F·HLIRVEGNLR' | 27   | >TP53-I195F·HLFRVEGNLR | 27    | 0     |

|                          |      |                         |       |       |
|--------------------------|------|-------------------------|-------|-------|
| >TP53-I195F-HLIRVEGNL    | 878  | >TP53-I195F-HLFRVEGNL   | 84    | 794   |
| >TP53-I195F-HLIRVEGNLR'  | 27   | >TP53-I195F-HLFRVEGNLR  | 9     | 18    |
| >TP53-I195F-HLIRVEGNLR'  | 701  | >TP53-I195F-HLFRVEGNLR  | 231   | 470   |
| >TP53-I195F-HLIRVEGNL    | 153  | >TP53-I195F-HLFRVEGNL   | 46    | 107   |
| >TP53-I195F-HLIRVEGNLR'  | 4    | >TP53-I195F-HLFRVEGNLR  | 3     | 1     |
| >TP53-I195F-HLIRVEGNLR   | 241  | >TP53-I195F-HLFRVEGNLR  | 157   | 84    |
| >TP53-I195F-HLIRVEGNLR   | 381  | >TP53-I195F-HLFRVEGNLR  | 259   | 122   |
| >TP53-I195F-HLIRVEGNLR   | 24   | >TP53-I195F-HLFRVEGNLR  | 24    | 0     |
| >TP53-I195F-HLIRVEGNLR'  | 398  | >TP53-I195F-HLFRVEGNLR  | 174   | 224   |
| >TP53-I195F-HLIRVEGNLR   | 478  | >TP53-I195F-HLFRVEGNLR  | 127   | 351   |
| >TP53-I195F-LAPPQHILRV   | 395  | >TP53-I195F-LAPPQHILFRV | 232   | 163   |
| >TP53-I195F-LAPPQHILRV   | 577  | >TP53-I195F-LAPPQHILFRV | 201   | 376   |
| >TP53-I195F-LAPPQHILRV   | 52   | >TP53-I195F-LAPPQHILFRV | 25    | 27    |
| >TP53-I195F-LAPPQHILI    | 3938 | >TP53-I195F-LAPPQHILF   | 184   | 3754  |
| >TP53-I195F-LAPPQHILIR   | 1307 | >TP53-I195F-LAPPQHILFR  | 84    | 1223  |
| >TP53-I195F-LAPPQHILIR   | 1385 | >TP53-I195F-LAPPQHILFR  | 168   | 1217  |
| >TP53-I195F-LAPPQHILI    | 7452 | >TP53-I195F-LAPPQHILF   | 217   | 7235  |
| >TP53-I195F-LAPPQHILI    | 5    | >TP53-I195F-LAPPQHILF   | 6     | 1     |
| >TP53-I195F-LAPPQHILRV   | 28   | >TP53-I195F-LAPPQHILFRV | 19    | 9     |
| >TP53-I195F-LAPPQHILRV   | 865  | >TP53-I195F-LAPPQHILFRV | 498   | 367   |
| >TP53-I195F-LAPPQHILIR   | 504  | >TP53-I195F-LAPPQHILFR  | 163   | 341   |
| >TP53-I195F-LAPPQHILI    | 70   | >TP53-I195F-LAPPQHILF   | 12623 | 12553 |
| >TP53-I195F-GLAPPQHILI   | 65   | >TP53-I195F-GLAPPQHILF  | 11329 | 11264 |
| >TP53-I195F-GLAPPQHILIR' | 20   | >TP53-I195F-GLAPPQHILFR | 13    | 7     |
| >TP53-I195F-GLAPPQHILI   | 15   | >TP53-I195F-GLAPPQHILF  | 359   | 344   |
| >TP53-I195F-GLAPPQHILIR' | 9    | >TP53-I195F-GLAPPQHILFR | 5     | 4     |
| >TP53-I195F-GLAPPQHILI   | 31   | >TP53-I195F-GLAPPQHILF  | 5893  | 5862  |
| >TP53-I195F-GLAPPQHILIR' | 7    | >TP53-I195F-GLAPPQHILFR | 6     | 1     |
| >TP53-I195F-GLAPPQHILIR' | 44   | >TP53-I195F-GLAPPQHILFR | 19    | 25    |
| >TP53-I195F-GLAPPQHILI   | 13   | >TP53-I195F-GLAPPQHILF  | 1645  | 1632  |
| >TP53-I195F-GLAPPQHILIR' | 3    | >TP53-I195F-GLAPPQHILFR | 2     | 1     |
| >TP53-I195F-GLAPPQHILI   | 22   | >TP53-I195F-GLAPPQHILF  | 8860  | 8838  |
| >TP53-I195F-GLAPPQHILIR' | 7    | >TP53-I195F-GLAPPQHILFR | 5     | 2     |
| >TP53-I195F-GLAPPQHILI   | 13   | >TP53-I195F-GLAPPQHILF  | 6175  | 6162  |
| >TP53-I195F-GLAPPQHILIR' | 5    | >TP53-I195F-GLAPPQHILFR | 5     | 0     |
| >TP53-I195F-GLAPPQHILI   | 76   | >TP53-I195F-GLAPPQHILF  | 15430 | 15354 |
| >TP53-I195F-GLAPPQHILIR' | 9    | >TP53-I195F-GLAPPQHILFR | 4     | 5     |
| >TP53-I195F-GLAPPQHILI   | 5    | >TP53-I195F-GLAPPQHILF  | 192   | 187   |
| >TP53-I195F-GLAPPQHILIR' | 2    | >TP53-I195F-GLAPPQHILFR | 2     | 0     |
| >TP53-I195F-GLAPPQHILIR  | 1148 | >TP53-I195F-GLAPPQHILFR | 204   | 944   |
| >TP53-I195F-GLAPPQHILIR  | 1986 | >TP53-I195F-GLAPPQHILFR | 342   | 1644  |
| >TP53-I195F-GLAPPQHILI   | 2951 | >TP53-I195F-GLAPPQHILF  | 75    | 2876  |
| >TP53-I195F-GLAPPQHILIR  | 1723 | >TP53-I195F-GLAPPQHILFR | 240   | 1483  |

|                         |      |                         |      |      |
|-------------------------|------|-------------------------|------|------|
| >TP53-I195F-GLAPPQHLIR  | 1936 | >TP53-I195F-GLAPPQHLFR  | 348  | 1588 |
| >TP53-I195F-GLAPPQHLI   | 7649 | >TP53-I195F-GLAPPQHLLF  | 242  | 7407 |
| >TP53-I195F-GLAPPQHLI   | 3811 | >TP53-I195F-GLAPPQHLLF  | 270  | 3541 |
| >TP53-I195F-GLAPPQHLIR  | 282  | >TP53-I195F-GLAPPQHLLFR | 53   | 229  |
| >TP53-I195F-GLAPPQHLIR  | 1493 | >TP53-I195F-GLAPPQHLLFR | 487  | 1006 |
| >TP53-I195F-DGLAPPQHLLI | 968  | >TP53-I195F-DGLAPPQHLLF | 297  | 671  |
| >TP53-I195L-IRVEGNLRVE' | 53   | >TP53-I195L-LRVEGNLRVE  | 77   | 24   |
| >TP53-I195L-IRVEGNLRVE' | 668  | >TP53-I195L-LRVEGNLRVE  | 383  | 285  |
| >TP53-I195L-LIRVEGNLRV  | 2070 | >TP53-I195L-LLRVEGNLRV  | 251  | 1819 |
| >TP53-I195L-LIRVEGNLRV  | 555  | >TP53-I195L-LLRVEGNLRV  | 111  | 444  |
| >TP53-I195L-LIRVEGNLRV  | 1834 | >TP53-I195L-LLRVEGNLRV  | 98   | 1736 |
| >TP53-I195L-LIRVEGNLRV  | 9171 | >TP53-I195L-LLRVEGNLRV  | 445  | 8726 |
| >TP53-I195L-LIRVEGNLRV  | 5793 | >TP53-I195L-LLRVEGNLRV  | 303  | 5490 |
| >TP53-I195L-LIRVEGNL    | 4603 | >TP53-I195L-LLRVEGNL    | 68   | 4535 |
| >TP53-I195L-LIRVEGNLRV  | 35   | >TP53-I195L-LLRVEGNLRV  | 4    | 31   |
| >TP53-I195L-LIRVEGNLRV  | 296  | >TP53-I195L-LLRVEGNLRV  | 833  | 537  |
| >TP53-I195L-SDGLAPPQHI  | 104  | >TP53-I195L-SDGLAPPQHI  | 1157 | 1053 |
| >TP53-I195L-HLIRVEGNLR' | 156  | >TP53-I195L-HLLRVEGNLR  | 127  | 29   |
| >TP53-I195L-HLIRVEGNL   | 226  | >TP53-I195L-HLLRVEGNL   | 675  | 449  |
| >TP53-I195L-HLIRVEGNLR' | 111  | >TP53-I195L-HLLRVEGNLR  | 319  | 208  |
| >TP53-I195L-HLIRVEGNLR' | 41   | >TP53-I195L-HLLRVEGNLR  | 300  | 259  |
| >TP53-I195L-HLIRVEGNLR' | 322  | >TP53-I195L-HLLRVEGNLR  | 306  | 16   |
| >TP53-I195L-HLIRVEGNL   | 327  | >TP53-I195L-HLLRVEGNL   | 68   | 259  |
| >TP53-I195L-HLIRVEGNLR' | 9    | >TP53-I195L-HLLRVEGNLR  | 4    | 5    |
| >TP53-I195L-HLIRVEGNL   | 806  | >TP53-I195L-HLLRVEGNL   | 399  | 407  |
| >TP53-I195L-HLIRVEGNLR' | 27   | >TP53-I195L-HLLRVEGNLR  | 18   | 9    |
| >TP53-I195L-HLIRVEGNL   | 878  | >TP53-I195L-HLLRVEGNL   | 81   | 797  |
| >TP53-I195L-HLIRVEGNLR' | 27   | >TP53-I195L-HLLRVEGNLR  | 9    | 18   |
| >TP53-I195L-HLIRVEGNLR' | 701  | >TP53-I195L-HLLRVEGNLR  | 34   | 667  |
| >TP53-I195L-HLIRVEGNL   | 153  | >TP53-I195L-HLLRVEGNL   | 93   | 60   |
| >TP53-I195L-HLIRVEGNLR' | 4    | >TP53-I195L-HLLRVEGNLR  | 3    | 1    |
| >TP53-I195L-HLIRVEGNLR  | 241  | >TP53-I195L-HLLRVEGNLR  | 209  | 32   |
| >TP53-I195L-HLIRVEGNLR  | 381  | >TP53-I195L-HLLRVEGNLR  | 367  | 14   |
| >TP53-I195L-HLIRVEGNLR  | 24   | >TP53-I195L-HLLRVEGNLR  | 162  | 138  |
| >TP53-I195L-HLIRVEGNLR' | 398  | >TP53-I195L-HLLRVEGNLR  | 3658 | 3260 |
| >TP53-I195L-HLIRVEGNLR' | 1132 | >TP53-I195L-HLLRVEGNLR  | 402  | 730  |
| >TP53-I195L-HLIRVEGNLR  | 478  | >TP53-I195L-HLLRVEGNLR  | 250  | 228  |
| >TP53-I195L-APPQHLLIRV  | 759  | >TP53-I195L-APPQHLLRV   | 363  | 396  |
| >TP53-I195L-LAPPQHLLIRV | 395  | >TP53-I195L-LAPPQHLLRV  | 347  | 48   |
| >TP53-I195L-LAPPQHLLIRV | 52   | >TP53-I195L-LAPPQHLLRV  | 51   | 1    |
| >TP53-I195L-LAPPQHLLIR  | 1307 | >TP53-I195L-LAPPQHLLR   | 405  | 902  |
| >TP53-I195L-LAPPQHLLIR  | 1385 | >TP53-I195L-LAPPQHLLR   | 403  | 982  |
| >TP53-I195L-LAPPQHLLI   | 5    | >TP53-I195L-LAPPQHLL    | 3    | 2    |

|                          |      |                         |       |       |
|--------------------------|------|-------------------------|-------|-------|
| >TP53-I195L- LAPPQHLLR   | 959  | >TP53-I195L- LAPPQHLLR  | 340   | 619   |
| >TP53-I195L- LAPPQHLLRV  | 28   | >TP53-I195L- LAPPQHLLRV | 29    | 1     |
| >TP53-I195L- LAPPQHLLR   | 504  | >TP53-I195L- LAPPQHLLR  | 301   | 203   |
| >TP53-I195L- LAPPQHLLI   | 70   | >TP53-I195L- LAPPQHLLI  | 1085  | 1015  |
| >TP53-I195L- GLAPPQHLLI  | 65   | >TP53-I195L- GLAPPQHLLI | 51    | 14    |
| >TP53-I195L- GLAPPQHLLR' | 20   | >TP53-I195L- GLAPPQHLLR | 21    | 1     |
| >TP53-I195L- GLAPPQHLLI  | 15   | >TP53-I195L- GLAPPQHLLI | 7     | 8     |
| >TP53-I195L- GLAPPQHLLR' | 9    | >TP53-I195L- GLAPPQHLLR | 10    | 1     |
| >TP53-I195L- GLAPPQHLLI  | 31   | >TP53-I195L- GLAPPQHLLI | 56    | 25    |
| >TP53-I195L- GLAPPQHLLR' | 7    | >TP53-I195L- GLAPPQHLLR | 6     | 1     |
| >TP53-I195L- GLAPPQHLLI  | 500  | >TP53-I195L- GLAPPQHLLI | 476   | 24    |
| >TP53-I195L- GLAPPQHLLR' | 44   | >TP53-I195L- GLAPPQHLLR | 46    | 2     |
| >TP53-I195L- GLAPPQHLLI  | 13   | >TP53-I195L- GLAPPQHLLI | 14    | 1     |
| >TP53-I195L- GLAPPQHLLR' | 3    | >TP53-I195L- GLAPPQHLLR | 3     | 0     |
| >TP53-I195L- GLAPPQHLLI  | 22   | >TP53-I195L- GLAPPQHLLI | 20    | 2     |
| >TP53-I195L- GLAPPQHLLR' | 7    | >TP53-I195L- GLAPPQHLLR | 10    | 3     |
| >TP53-I195L- GLAPPQHLLI  | 13   | >TP53-I195L- GLAPPQHLLI | 11    | 2     |
| >TP53-I195L- GLAPPQHLLR' | 5    | >TP53-I195L- GLAPPQHLLR | 6     | 1     |
| >TP53-I195L- GLAPPQHLLI  | 76   | >TP53-I195L- GLAPPQHLLI | 41    | 35    |
| >TP53-I195L- GLAPPQHLLR' | 9    | >TP53-I195L- GLAPPQHLLR | 12    | 3     |
| >TP53-I195L- GLAPPQHLLI  | 5    | >TP53-I195L- GLAPPQHLLI | 3     | 2     |
| >TP53-I195L- GLAPPQHLLR' | 2    | >TP53-I195L- GLAPPQHLLR | 2     | 0     |
| >TP53-I195L- GLAPPQHLLR  | 1148 | >TP53-I195L- GLAPPQHLLR | 459   | 689   |
| >TP53-I195L- GLAPPQHLLR  | 282  | >TP53-I195L- GLAPPQHLLR | 74    | 208   |
| >TP53-I195N IRVEGNLNRVE' | 53   | >TP53-I195N NRVEGNLNRVI | 476   | 423   |
| >TP53-I195N IRVEGNLNRV   | 4404 | >TP53-I195N NRVEGNLNRV  | 425   | 3979  |
| >TP53-I195N LIRVEGNLNRV  | 35   | >TP53-I195N LNRVEGNLNRV | 19547 | 19512 |
| >TP53-I195N LIRVEGNLNRV  | 296  | >TP53-I195N LNRVEGNLNRV | 3436  | 3140  |
| >TP53-I195N SDGLAPPQHI   | 104  | >TP53-I195N SDGLAPPQHI  | 22361 | 22257 |
| >TP53-I195N HLIRVEGNLNR' | 156  | >TP53-I195N HLNRVEGNLNF | 564   | 408   |
| >TP53-I195N HLIRVEGNL    | 226  | >TP53-I195N HLNRVEGNL   | 148   | 78    |
| >TP53-I195N HLIRVEGNLNR' | 111  | >TP53-I195N HLNRVEGNLNF | 116   | 5     |
| >TP53-I195N HLIRVEGNLNR' | 41   | >TP53-I195N HLNRVEGNLNF | 36    | 5     |
| >TP53-I195N HLIRVEGNLNR' | 322  | >TP53-I195N HLNRVEGNLNF | 1890  | 1568  |
| >TP53-I195N HLIRVEGNL    | 327  | >TP53-I195N HLNRVEGNL   | 325   | 2     |
| >TP53-I195N HLIRVEGNLNR' | 9    | >TP53-I195N HLNRVEGNLNF | 8     | 1     |
| >TP53-I195N HLIRVEGNLNR' | 27   | >TP53-I195N HLNRVEGNLNF | 75    | 48    |
| >TP53-I195N HLIRVEGNLNR' | 27   | >TP53-I195N HLNRVEGNLNF | 22    | 5     |
| >TP53-I195N HLIRVEGNLNR' | 701  | >TP53-I195N HLNRVEGNLNF | 204   | 497   |
| >TP53-I195N HLIRVEGNL    | 153  | >TP53-I195N HLNRVEGNL   | 189   | 36    |
| >TP53-I195N HLIRVEGNLNR' | 4    | >TP53-I195N HLNRVEGNLNF | 4     | 0     |
| >TP53-I195N HLIRVEGNLNR  | 241  | >TP53-I195N HLNRVEGNLNF | 296   | 55    |
| >TP53-I195N HLIRVEGNLNR  | 381  | >TP53-I195N HLNRVEGNLNF | 550   | 169   |

|                         |      |                         |       |       |
|-------------------------|------|-------------------------|-------|-------|
| >TP53-I195N HLIRVEGNLR  | 24   | >TP53-I195N HLN RVEGNLF | 210   | 186   |
| >TP53-I195N HLIRVEGNLR' | 398  | >TP53-I195N HLN RVEGNLF | 1133  | 735   |
| >TP53-I195N HLIRVEGNLR  | 478  | >TP53-I195N HLN RVEGNLF | 1139  | 661   |
| >TP53-I195N APPQHLIRV   | 759  | >TP53-I195N APPQHLNRV   | 484   | 275   |
| >TP53-I195N LAPPQHLIRV  | 395  | >TP53-I195N LAPPQHLNR\  | 1099  | 704   |
| >TP53-I195N LAPPQHLIRV  | 52   | >TP53-I195N LAPPQHLNR\  | 79    | 27    |
| >TP53-I195N LAPPQHLIR   | 1307 | >TP53-I195N LAPPQHLNR   | 460   | 847   |
| >TP53-I195N LAPPQHLI    | 5    | >TP53-I195N LAPPQHNLN   | 2792  | 2787  |
| >TP53-I195N LAPPQHLIRV  | 28   | >TP53-I195N LAPPQHLNR\  | 27    | 1     |
| >TP53-I195N LAPPQHLIR   | 504  | >TP53-I195N LAPPQHLNR   | 323   | 181   |
| >TP53-I195N LAPPQHLI    | 70   | >TP53-I195N LAPPQHNLN   | 37058 | 36988 |
| >TP53-I195N GLAPPQHLI   | 65   | >TP53-I195N GLAPPQHNLN  | 21592 | 21527 |
| >TP53-I195N GLAPPQHLIR' | 20   | >TP53-I195N GLAPPQHNLNf | 35    | 15    |
| >TP53-I195N GLAPPQHLI   | 15   | >TP53-I195N GLAPPQHNLN  | 3094  | 3079  |
| >TP53-I195N GLAPPQHLIR' | 9    | >TP53-I195N GLAPPQHNLNf | 6     | 3     |
| >TP53-I195N GLAPPQHLI   | 31   | >TP53-I195N GLAPPQHNLN  | 15122 | 15091 |
| >TP53-I195N GLAPPQHLIR' | 7    | >TP53-I195N GLAPPQHNLNf | 6     | 1     |
| >TP53-I195N GLAPPQHLIR' | 44   | >TP53-I195N GLAPPQHNLNf | 64    | 20    |
| >TP53-I195N GLAPPQHLI   | 13   | >TP53-I195N GLAPPQHNLN  | 6095  | 6082  |
| >TP53-I195N GLAPPQHLIR' | 3    | >TP53-I195N GLAPPQHNLNf | 4     | 1     |
| >TP53-I195N GLAPPQHLI   | 22   | >TP53-I195N GLAPPQHNLN  | 17372 | 17350 |
| >TP53-I195N GLAPPQHLIR' | 7    | >TP53-I195N GLAPPQHNLNf | 8     | 1     |
| >TP53-I195N GLAPPQHLI   | 13   | >TP53-I195N GLAPPQHNLN  | 10505 | 10492 |
| >TP53-I195N GLAPPQHLIR' | 5    | >TP53-I195N GLAPPQHNLNf | 7     | 2     |
| >TP53-I195N GLAPPQHLI   | 76   | >TP53-I195N GLAPPQHNLN  | 22856 | 22780 |
| >TP53-I195N GLAPPQHLIR' | 9    | >TP53-I195N GLAPPQHNLNf | 15    | 6     |
| >TP53-I195N GLAPPQHLI   | 5    | >TP53-I195N GLAPPQHNLN  | 720   | 715   |
| >TP53-I195N GLAPPQHLIR' | 2    | >TP53-I195N GLAPPQHNLNf | 2     | 0     |
| >TP53-I195N GLAPPQHLIR  | 282  | >TP53-I195N GLAPPQHNLNf | 147   | 135   |
| >TP53-I195S-IRVEGNLRVE' | 53   | >TP53-I195S-SRVEGNLRVE  | 130   | 77    |
| >TP53-I195S-LIRVEGNLRV  | 35   | >TP53-I195S-LSRVEGNLRV  | 12971 | 12936 |
| >TP53-I195S-LIRVEGNLR   | 1087 | >TP53-I195S-LSRVEGNLR   | 425   | 662   |
| >TP53-I195S-LIRVEGNLRV  | 296  | >TP53-I195S-LSRVEGNLRV  | 124   | 172   |
| >TP53-I195S-LIRVEGNLR   | 570  | >TP53-I195S-LSRVEGNLR   | 307   | 263   |
| >TP53-I195S-LIRVEGNL    | 6578 | >TP53-I195S-LSRVEGNL    | 32    | 6546  |
| >TP53-I195S-LIRVEGNLRV  | 9478 | >TP53-I195S-LSRVEGNLRV  | 128   | 9350  |
| >TP53-I195S-LIRVEGNLRV  | 6414 | >TP53-I195S-LSRVEGNLRV  | 371   | 6043  |
| >TP53-I195S-SDGLAPPQHI  | 104  | >TP53-I195S-SDGLAPPQHI  | 16835 | 16731 |
| >TP53-I195S-HLIRVEGNLR' | 156  | >TP53-I195S-HLSRVEGNLR  | 434   | 278   |
| >TP53-I195S-HLIRVEGNL   | 226  | >TP53-I195S-HLSRVEGNL   | 71    | 155   |
| >TP53-I195S-HLIRVEGNLR' | 111  | >TP53-I195S-HLSRVEGNLR  | 60    | 51    |
| >TP53-I195S-HLIRVEGNLR' | 41   | >TP53-I195S-HLSRVEGNLR  | 55    | 14    |
| >TP53-I195S-HLIRVEGNLR' | 322  | >TP53-I195S-HLSRVEGNLR  | 1346  | 1024  |

|                         |      |                        |       |       |
|-------------------------|------|------------------------|-------|-------|
| >TP53-I195S-HLIRVEGNL   | 327  | >TP53-I195S-HLSRVEGNL  | 780   | 453   |
| >TP53-I195S-HLIRVEGNLR' | 9    | >TP53-I195S-HLSRVEGNLR | 15    | 6     |
| >TP53-I195S-HLIRVEGNLR' | 27   | >TP53-I195S-HLSRVEGNLR | 105   | 78    |
| >TP53-I195S-HLIRVEGNLR' | 27   | >TP53-I195S-HLSRVEGNLR | 23    | 4     |
| >TP53-I195S-HLIRVEGNLR' | 701  | >TP53-I195S-HLSRVEGNLR | 193   | 508   |
| >TP53-I195S-HLIRVEGNL   | 153  | >TP53-I195S-HLSRVEGNL  | 142   | 11    |
| >TP53-I195S-HLIRVEGNLR' | 4    | >TP53-I195S-HLSRVEGNLR | 4     | 0     |
| >TP53-I195S-HLIRVEGNLR  | 241  | >TP53-I195S-HLSRVEGNLR | 180   | 61    |
| >TP53-I195S-HLIRVEGNLR  | 381  | >TP53-I195S-HLSRVEGNLR | 497   | 116   |
| >TP53-I195S-HLIRVEGNLR  | 24   | >TP53-I195S-HLSRVEGNLR | 45    | 21    |
| >TP53-I195S-HLIRVEGNLR' | 398  | >TP53-I195S-HLSRVEGNLR | 809   | 411   |
| >TP53-I195S-HLIRVEGNLR  | 478  | >TP53-I195S-HLSRVEGNLR | 778   | 300   |
| >TP53-I195S-APPQHILRV   | 759  | >TP53-I195S-APPQHLSRV  | 220   | 539   |
| >TP53-I195S-LAPPQHILRV  | 395  | >TP53-I195S-LAPPQHLSRV | 801   | 406   |
| >TP53-I195S-LAPPQHILRV  | 52   | >TP53-I195S-LAPPQHLSRV | 37    | 15    |
| >TP53-I195S-LAPPQHILI   | 5    | >TP53-I195S-LAPPQHLS   | 2640  | 2635  |
| >TP53-I195S-LAPPQHILRV  | 28   | >TP53-I195S-LAPPQHLSRV | 44    | 16    |
| >TP53-I195S-LAPPQHILI   | 70   | >TP53-I195S-LAPPQHLS   | 30983 | 30913 |
| >TP53-I195S-GLAPPQHILI  | 65   | >TP53-I195S-GLAPPQHLS  | 9076  | 9011  |
| >TP53-I195S-GLAPPQHILR' | 20   | >TP53-I195S-GLAPPQHLSR | 34    | 14    |
| >TP53-I195S-GLAPPQHILI  | 15   | >TP53-I195S-GLAPPQHLS  | 509   | 494   |
| >TP53-I195S-GLAPPQHILR' | 9    | >TP53-I195S-GLAPPQHLSR | 7     | 2     |
| >TP53-I195S-GLAPPQHILI  | 31   | >TP53-I195S-GLAPPQHLS  | 3865  | 3834  |
| >TP53-I195S-GLAPPQHILR' | 7    | >TP53-I195S-GLAPPQHLSR | 5     | 2     |
| >TP53-I195S-GLAPPQHILR' | 44   | >TP53-I195S-GLAPPQHLSR | 71    | 27    |
| >TP53-I195S-GLAPPQHILI  | 13   | >TP53-I195S-GLAPPQHLS  | 1793  | 1780  |
| >TP53-I195S-GLAPPQHILR' | 3    | >TP53-I195S-GLAPPQHLSR | 3     | 0     |
| >TP53-I195S-GLAPPQHILI  | 22   | >TP53-I195S-GLAPPQHLS  | 8237  | 8215  |
| >TP53-I195S-GLAPPQHILR' | 7    | >TP53-I195S-GLAPPQHLSR | 8     | 1     |
| >TP53-I195S-GLAPPQHILI  | 13   | >TP53-I195S-GLAPPQHLS  | 3296  | 3283  |
| >TP53-I195S-GLAPPQHILR' | 5    | >TP53-I195S-GLAPPQHLSR | 7     | 2     |
| >TP53-I195S-GLAPPQHILI  | 76   | >TP53-I195S-GLAPPQHLS  | 17026 | 16950 |
| >TP53-I195S-GLAPPQHILR' | 9    | >TP53-I195S-GLAPPQHLSR | 9     | 0     |
| >TP53-I195S-GLAPPQHILI  | 5    | >TP53-I195S-GLAPPQHLS  | 87    | 82    |
| >TP53-I195S-GLAPPQHILR' | 2    | >TP53-I195S-GLAPPQHLSR | 2     | 0     |
| >TP53-I195S-GLAPPQHILR  | 282  | >TP53-I195S-GLAPPQHLSR | 192   | 90    |
| >TP53-I195T-IRVEGNLRVE' | 53   | >TP53-I195T-TRVEGNLRVE | 347   | 294   |
| >TP53-I195T-IRVEGNLRV   | 4404 | >TP53-I195T-TRVEGNLRV  | 448   | 3956  |
| >TP53-I195T-LIRVEGNLRV  | 35   | >TP53-I195T-LTRVEGNLRV | 1038  | 1003  |
| >TP53-I195T-LIRVEGNL    | 1610 | >TP53-I195T-LTRVEGNL   | 286   | 1324  |
| >TP53-I195T-LIRVEGNLR   | 1087 | >TP53-I195T-LTRVEGNLR  | 188   | 899   |
| >TP53-I195T-LIRVEGNLRV  | 296  | >TP53-I195T-LTRVEGNLRV | 63    | 233   |
| >TP53-I195T-LIRVEGNLR   | 570  | >TP53-I195T-LTRVEGNLR  | 176   | 394   |

|                         |      |                         |       |       |
|-------------------------|------|-------------------------|-------|-------|
| >TP53-I195T·LIRVEGNLR   | 1131 | >TP53-I195T·LTRVEGNLR   | 415   | 716   |
| >TP53-I195T·LIRVEGNLR   | 1411 | >TP53-I195T·LTRVEGNLR   | 340   | 1071  |
| >TP53-I195T·LIRVEGNL    | 6578 | >TP53-I195T·LTRVEGNL    | 21    | 6557  |
| >TP53-I195T·LIRVEGNLRV  | 9478 | >TP53-I195T·LTRVEGNLRV  | 85    | 9393  |
| >TP53-I195T·LIRVEGNLRV  | 6414 | >TP53-I195T·LTRVEGNLRV  | 135   | 6279  |
| >TP53-I195T·SDGLAPPQHI  | 104  | >TP53-I195T·SDGLAPPQHI  | 7561  | 7457  |
| >TP53-I195T·HLIRVEGNLR' | 156  | >TP53-I195T·HLTRVEGNLR  | 735   | 579   |
| >TP53-I195T·HLIRVEGNL   | 226  | >TP53-I195T·HLTRVEGNL   | 375   | 149   |
| >TP53-I195T·HLIRVEGNLR' | 111  | >TP53-I195T·HLTRVEGNLR  | 257   | 146   |
| >TP53-I195T·HLIRVEGNLR' | 41   | >TP53-I195T·HLTRVEGNLR  | 234   | 193   |
| >TP53-I195T·HLIRVEGNLR' | 322  | >TP53-I195T·HLTRVEGNLR  | 1292  | 970   |
| >TP53-I195T·HLIRVEGNL   | 327  | >TP53-I195T·HLTRVEGNL   | 1168  | 841   |
| >TP53-I195T·HLIRVEGNLR' | 9    | >TP53-I195T·HLTRVEGNLR  | 21    | 12    |
| >TP53-I195T·HLIRVEGNLR' | 27   | >TP53-I195T·HLTRVEGNLR  | 136   | 109   |
| >TP53-I195T·HLIRVEGNLR' | 27   | >TP53-I195T·HLTRVEGNLR  | 20    | 7     |
| >TP53-I195T·HLIRVEGNL   | 153  | >TP53-I195T·HLTRVEGNL   | 99    | 54    |
| >TP53-I195T·HLIRVEGNLR' | 4    | >TP53-I195T·HLTRVEGNLR  | 3     | 1     |
| >TP53-I195T·HLIRVEGNLR  | 241  | >TP53-I195T·HLTRVEGNLR  | 522   | 281   |
| >TP53-I195T·HLIRVEGNLR  | 381  | >TP53-I195T·HLTRVEGNLR  | 644   | 263   |
| >TP53-I195T·HLIRVEGNLR  | 24   | >TP53-I195T·HLTRVEGNLR  | 84    | 60    |
| >TP53-I195T·HLIRVEGNLR' | 398  | >TP53-I195T·HLTRVEGNLR  | 1158  | 760   |
| >TP53-I195T·HLIRVEGNLR  | 478  | >TP53-I195T·HLTRVEGNLR  | 816   | 338   |
| >TP53-I195T·QHLIRVEGNL  | 709  | >TP53-I195T·QHLTRVEGNI  | 478   | 231   |
| >TP53-I195T·APPQHLIRV   | 759  | >TP53-I195T·APPQHLTRV   | 311   | 448   |
| >TP53-I195T·LAPPQHLIRV  | 395  | >TP53-I195T·LAPPQHLTRV  | 761   | 366   |
| >TP53-I195T·LAPPQHLIRV  | 52   | >TP53-I195T·LAPPQHLTRV  | 36    | 16    |
| >TP53-I195T·LAPPQHLI    | 5    | >TP53-I195T·LAPPQHLT    | 1078  | 1073  |
| >TP53-I195T·LAPPQHLIRV  | 28   | >TP53-I195T·LAPPQHLTRV  | 44    | 16    |
| >TP53-I195T·LAPPQHLIR   | 504  | >TP53-I195T·LAPPQHLTR   | 488   | 16    |
| >TP53-I195T·LAPPQHLI    | 70   | >TP53-I195T·LAPPQHLT    | 32325 | 32255 |
| >TP53-I195T·GLAPPQHLI   | 65   | >TP53-I195T·GLAPPQHLT   | 1907  | 1842  |
| >TP53-I195T·GLAPPQHLIR' | 20   | >TP53-I195T·GLAPPQHILTF | 24    | 4     |
| >TP53-I195T·GLAPPQHLI   | 15   | >TP53-I195T·GLAPPQHLT   | 205   | 190   |
| >TP53-I195T·GLAPPQHLIR' | 9    | >TP53-I195T·GLAPPQHILTF | 6     | 3     |
| >TP53-I195T·GLAPPQHLI   | 31   | >TP53-I195T·GLAPPQHLT   | 710   | 679   |
| >TP53-I195T·GLAPPQHLIR' | 7    | >TP53-I195T·GLAPPQHILTF | 5     | 2     |
| >TP53-I195T·GLAPPQHLIR' | 44   | >TP53-I195T·GLAPPQHILTF | 47    | 3     |
| >TP53-I195T·GLAPPQHLI   | 13   | >TP53-I195T·GLAPPQHLT   | 327   | 314   |
| >TP53-I195T·GLAPPQHLIR' | 3    | >TP53-I195T·GLAPPQHILTF | 4     | 1     |
| >TP53-I195T·GLAPPQHLI   | 22   | >TP53-I195T·GLAPPQHLT   | 2512  | 2490  |
| >TP53-I195T·GLAPPQHLIR' | 7    | >TP53-I195T·GLAPPQHILTF | 10    | 3     |
| >TP53-I195T·GLAPPQHLI   | 13   | >TP53-I195T·GLAPPQHLT   | 348   | 335   |
| >TP53-I195T·GLAPPQHLIR' | 5    | >TP53-I195T·GLAPPQHILTF | 6     | 1     |

|                         |      |                         |      |      |
|-------------------------|------|-------------------------|------|------|
| >TP53-I195T-GLAPPQHLI   | 76   | >TP53-I195T-GLAPPQHLT   | 5373 | 5297 |
| >TP53-I195T-GLAPPQHLIR  | 9    | >TP53-I195T-GLAPPQHLLTF | 12   | 3    |
| >TP53-I195T-GLAPPQHLI   | 5    | >TP53-I195T-GLAPPQHLT   | 16   | 11   |
| >TP53-I195T-GLAPPQHLIR  | 2    | >TP53-I195T-GLAPPQHLLTF | 2    | 0    |
| >TP53-I195T-GLAPPQHLIR  | 282  | >TP53-I195T-GLAPPQHLLTF | 139  | 143  |
| >TP53-I232F-IHYNMYMCNS  | 575  | >TP53-I232F-FHYNMYMCNS  | 371  | 204  |
| >TP53-I232F-PPEVGSDCTT  | 8073 | >TP53-I232F-PPEVGSDCTT  | 286  | 7787 |
| >TP53-I232F-PPEVGSDCTT  | 7153 | >TP53-I232F-PPEVGSDCTT  | 358  | 6795 |
| >TP53-I232F-TTIHYNMY    | 46   | >TP53-I232F-TTFHYNMY    | 10   | 36   |
| >TP53-I232F-TTIHYNMY    | 1038 | >TP53-I232F-TTFHYNMY    | 294  | 744  |
| >TP53-I232F-TTIHYNMY    | 46   | >TP53-I232F-TTFHYNMY    | 242  | 196  |
| >TP53-I232F-TTIHYNMY    | 5    | >TP53-I232F-TTFHYNMY    | 217  | 212  |
| >TP53-I232F-TTIHYNMY    | 135  | >TP53-I232F-TTFHYNMY    | 343  | 208  |
| >TP53-I232F-TTIHYNMY    | 1012 | >TP53-I232F-TTFHYNMY    | 269  | 743  |
| >TP53-I232F-TTIHYNMY    | 17   | >TP53-I232F-TTFHYNMY    | 11   | 6    |
| >TP53-I232F-TTIHYNMYMC  | 120  | >TP53-I232F-TTFHYNMYMC  | 55   | 65   |
| >TP53-I232F-TTIHYNMYMCI | 102  | >TP53-I232F-TTFHYNMYMCI | 49   | 53   |
| >TP53-I232F-TTIHYNMY    | 69   | >TP53-I232F-TTFHYNMY    | 48   | 21   |
| >TP53-I232F-TTIHYNMY    | 1287 | >TP53-I232F-TTFHYNMY    | 261  | 1026 |
| >TP53-I232F-TTIHYNMY    | 61   | >TP53-I232F-TTFHYNMY    | 30   | 31   |
| >TP53-I232F-TTIHYNMY    | 260  | >TP53-I232F-TTFHYNMY    | 338  | 78   |
| >TP53-I232F-CTTIHYNMY   | 116  | >TP53-I232F-CTTFHYNMY   | 91   | 25   |
| >TP53-I232F-CTTIHYNMY   | 117  | >TP53-I232F-CTTFHYNMY   | 101  | 16   |
| >TP53-I232F-CTTIHYNMY   | 161  | >TP53-I232F-CTTFHYNMY   | 45   | 116  |
| >TP53-I232F-CTTIHYNMY   | 207  | >TP53-I232F-CTTFHYNMY   | 54   | 153  |
| >TP53-I232F-CTTIHYNMY   | 35   | >TP53-I232F-CTTFHYNMY   | 19   | 16   |
| >TP53-I232F-CTTIHYNMY   | 130  | >TP53-I232F-CTTFHYNMY   | 103  | 27   |
| >TP53-I232F-CTTIHYNMY   | 767  | >TP53-I232F-CTTFHYNMY   | 312  | 455  |
| >TP53-I232F-CTTIHYNMY   | 1337 | >TP53-I232F-CTTFHYNMY   | 165  | 1172 |
| >TP53-I232F-CTTIHYNMY   | 355  | >TP53-I232F-CTTFHYNMY   | 205  | 150  |
| >TP53-I232F-CTTIHYNMY   | 50   | >TP53-I232F-CTTFHYNMY   | 92   | 42   |
| >TP53-I232F-CTTIHYNMY   | 11   | >TP53-I232F-CTTFHYNMY   | 21   | 10   |
| >TP53-I232F-CTTIHYNMYMC | 184  | >TP53-I232F-CTTFHYNMYMC | 304  | 120  |
| >TP53-I232F-CTTIHYNMY   | 999  | >TP53-I232F-CTTFHYNMY   | 303  | 696  |
| >TP53-I232F-CTTIHYNMY   | 68   | >TP53-I232F-CTTFHYNMY   | 43   | 25   |
| >TP53-I232F-CTTIHYNMY   | 405  | >TP53-I232F-CTTFHYNMY   | 561  | 156  |
| >TP53-I232F-DCTTIHYNMY  | 521  | >TP53-I232F-DCTTFHYNMY  | 301  | 220  |
| >TP53-I232F-DCTTIHYNMY  | 585  | >TP53-I232F-DCTTFHYNMY  | 421  | 164  |
| >TP53-I232F-DCTTIHYNMY  | 287  | >TP53-I232F-DCTTFHYNMY  | 359  | 72   |
| >TP53-I232F-SDCTTIHY    | 1951 | >TP53-I232F-SDCTTFHY    | 415  | 1536 |
| >TP53-I232F-SDCTTIHYNMY | 400  | >TP53-I232F-SDCTTFHYNMY | 242  | 158  |
| >TP53-I232F-SDCTTIHY    | 1995 | >TP53-I232F-SDCTTFHY    | 465  | 1530 |
| >TP53-I232F-GSDCTTIHY   | 18   | >TP53-I232F-GSDCTTFHY   | 15   | 3    |



|                         |       |                        |      |       |
|-------------------------|-------|------------------------|------|-------|
| >TP53-I232F-GSDCTTIHYN  | 34    | >TP53-I232F-GSDCTTFHYN | 30   | 4     |
| >TP53-I232F-GSDCTTIHYN  | 1028  | >TP53-I232F-GSDCTTFHYN | 486  | 542   |
| >TP53-I232F-GSDCTTIHY   | 659   | >TP53-I232F-GSDCTTFHY  | 111  | 548   |
| >TP53-I232F-GSDCTTIHYN  | 174   | >TP53-I232F-GSDCTTFHYN | 105  | 69    |
| >TP53-I232F-GSDCTTIHY   | 1997  | >TP53-I232F-GSDCTTFHY  | 436  | 1561  |
| >TP53-I232F-GSDCTTIHYN  | 582   | >TP53-I232F-GSDCTTFHYN | 379  | 203   |
| >TP53-I232F-GSDCTTIHY   | 68    | >TP53-I232F-GSDCTTFHY  | 32   | 36    |
| >TP53-I232F-GSDCTTIHYN  | 99    | >TP53-I232F-GSDCTTFHYN | 59   | 40    |
| >TP53-I232F-GSDCTTIHY   | 2361  | >TP53-I232F-GSDCTTFHY  | 280  | 2081  |
| >TP53-I232F-GSDCTTIHY   | 535   | >TP53-I232F-GSDCTTFHY  | 373  | 162   |
| >TP53-I232F-GSDCTTIHYN  | 247   | >TP53-I232F-GSDCTTFHYN | 232  | 15    |
| >TP53-I232F-GSDCTTIHY   | 242   | >TP53-I232F-GSDCTTFHY  | 44   | 198   |
| >TP53-I232F-GSDCTTIHYN  | 97    | >TP53-I232F-GSDCTTFHYN | 54   | 43    |
| >TP53-I232F-VGSDCTTIHY  | 353   | >TP53-I232F-VGSDCTTFHY | 555  | 202   |
| >TP53-I232F-VGSDCTTIHY  | 184   | >TP53-I232F-VGSDCTTFHY | 60   | 124   |
| >TP53-I232F-VGSDCTTIHY  | 642   | >TP53-I232F-VGSDCTTFHY | 242  | 400   |
| >TP53-I232F-VGSDCTTIHY  | 1444  | >TP53-I232F-VGSDCTTFHY | 333  | 1111  |
| >TP53-I232F-VGSDCTTIHY  | 377   | >TP53-I232F-VGSDCTTFHY | 343  | 34    |
| >TP53-I232F-VGSDCTTI    | 10223 | >TP53-I232F-VGSDCTTF   | 316  | 9907  |
| >TP53-I232F-VGSDCTTIHY  | 449   | >TP53-I232F-VGSDCTTFHY | 769  | 320   |
| >TP53-I232F-EVGSDCCTI   | 5524  | >TP53-I232F-EVGSDCCTF  | 92   | 5432  |
| >TP53-I232F-EVGSDCCTIH' | 11    | >TP53-I232F-EVGSDCCTFH | 12   | 1     |
| >TP53-I232F-EVGSDCCTIH' | 75    | >TP53-I232F-EVGSDCCTFH | 173  | 98    |
| >TP53-I232F-EVGSDCCTIH' | 387   | >TP53-I232F-EVGSDCCTFH | 113  | 274   |
| >TP53-I232F-EVGSDCCTIH' | 1152  | >TP53-I232F-EVGSDCCTFH | 352  | 800   |
| >TP53-I232F-EVGSDCCTIH' | 612   | >TP53-I232F-EVGSDCCTFH | 250  | 362   |
| >TP53-I232F-EVGSDCCTIH' | 326   | >TP53-I232F-EVGSDCCTFH | 145  | 181   |
| >TP53-I232F-EVGSDCCTI   | 14992 | >TP53-I232F-EVGSDCCTF  | 466  | 14526 |
| >TP53-I232F-PEVGSDCCTI  | 342   | >TP53-I232F-PEVGSDCCTF | 5235 | 4893  |
| >TP53-I232L-TTIHYNYM    | 46    | >TP53-I232L-TTLHYNYM   | 62   | 16    |
| >TP53-I232L-TTIHYNYM    | 46    | >TP53-I232L-TTLHYNYM   | 2333 | 2287  |
| >TP53-I232L-TTIHYNYM    | 5     | >TP53-I232L-TTLHYNYM   | 51   | 46    |
| >TP53-I232L-TTIHYNYM    | 135   | >TP53-I232L-TTLHYNYM   | 422  | 287   |
| >TP53-I232L-TTIHYNYM    | 17    | >TP53-I232L-TTLHYNYM   | 168  | 151   |
| >TP53-I232L-TTIHYNYMC   | 120   | >TP53-I232L-TTLHYNYMC  | 1735 | 1615  |
| >TP53-I232L-TTIHYNYMCN  | 102   | >TP53-I232L-TTLHYNYMCI | 1417 | 1315  |
| >TP53-I232L-TTIHYNYM    | 69    | >TP53-I232L-TTLHYNYM   | 28   | 41    |
| >TP53-I232L-TTIHYNYM    | 61    | >TP53-I232L-TTLHYNYM   | 69   | 8     |
| >TP53-I232L-TTIHYNYM    | 260   | >TP53-I232L-TTLHYNYM   | 251  | 9     |
| >TP53-I232L-CTTIHYNYM   | 116   | >TP53-I232L-CTTLHYNYM  | 114  | 2     |
| >TP53-I232L-CTTIHYN     | 117   | >TP53-I232L-CTTLHYN    | 105  | 12    |
| >TP53-I232L-CTTIHYN     | 161   | >TP53-I232L-CTTLHYN    | 73   | 88    |
| >TP53-I232L-CTTIHYNYM   | 207   | >TP53-I232L-CTTLHYNYM  | 90   | 117   |

|                         |      |                        |      |      |
|-------------------------|------|------------------------|------|------|
| >TP53-I232L-CTTIHYN     | 35   | >TP53-I232L-CTTLHYN    | 39   | 4    |
| >TP53-I232L-CTTIHYN     | 130  | >TP53-I232L-CTTLHYN    | 322  | 192  |
| >TP53-I232L-CTTIHYN     | 355  | >TP53-I232L-CTTLHYN    | 538  | 183  |
| >TP53-I232L-CTTIHYN     | 50   | >TP53-I232L-CTTLHYN    | 103  | 53   |
| >TP53-I232L-CTTIHYNM    | 11   | >TP53-I232L-CTTLHYNM   | 15   | 4    |
| >TP53-I232L-CTTIHYNMC   | 184  | >TP53-I232L-CTTLHYNMC  | 229  | 45   |
| >TP53-I232L-CTTIHYN     | 68   | >TP53-I232L-CTTLHYN    | 93   | 25   |
| >TP53-I232L-CTTIHYNM    | 405  | >TP53-I232L-CTTLHYNM   | 703  | 298  |
| >TP53-I232L-DCTTIHYN    | 521  | >TP53-I232L-DCTTLHYN   | 479  | 42   |
| >TP53-I232L-DCTTIHYN    | 287  | >TP53-I232L-DCTTLHYN   | 414  | 127  |
| >TP53-I232L-SDCTTIH     | 1951 | >TP53-I232L-SDCTTLH    | 486  | 1465 |
| >TP53-I232L-SDCTTIHYN   | 400  | >TP53-I232L-SDCTTLHYN  | 1153 | 753  |
| >TP53-I232L-SDCTTIH     | 1995 | >TP53-I232L-SDCTTLH    | 202  | 1793 |
| >TP53-I232L-GSDCTTIH    | 18   | >TP53-I232L-GSDCTTLH   | 10   | 8    |
| >TP53-I232L-GSDCTTIHYN  | 34   | >TP53-I232L-GSDCTTLHYN | 25   | 9    |
| >TP53-I232L-GSDCTTIH    | 659  | >TP53-I232L-GSDCTTLH   | 88   | 571  |
| >TP53-I232L-GSDCTTIHYN  | 174  | >TP53-I232L-GSDCTTLHYN | 98   | 76   |
| >TP53-I232L-GSDCTTIH    | 1974 | >TP53-I232L-GSDCTTLH   | 124  | 1850 |
| >TP53-I232L-GSDCTTIH    | 68   | >TP53-I232L-GSDCTTLH   | 24   | 44   |
| >TP53-I232L-GSDCTTIHYN  | 99   | >TP53-I232L-GSDCTTLHYN | 63   | 36   |
| >TP53-I232L-GSDCTTIH    | 535  | >TP53-I232L-GSDCTTLH   | 346  | 189  |
| >TP53-I232L-GSDCTTIHYN  | 247  | >TP53-I232L-GSDCTTLHYN | 227  | 20   |
| >TP53-I232L-GSDCTTIH    | 242  | >TP53-I232L-GSDCTTLH   | 122  | 120  |
| >TP53-I232L-GSDCTTIHYN  | 97   | >TP53-I232L-GSDCTTLHYN | 77   | 20   |
| >TP53-I232L-VGSDCTTIH   | 353  | >TP53-I232L-VGSDCTTLH  | 334  | 19   |
| >TP53-I232L-VGSDCTTIH   | 184  | >TP53-I232L-VGSDCTTLH  | 82   | 102  |
| >TP53-I232L-VGSDCTTIH   | 1444 | >TP53-I232L-VGSDCTTLH  | 117  | 1327 |
| >TP53-I232L-VGSDCTTIH   | 377  | >TP53-I232L-VGSDCTTLH  | 224  | 153  |
| >TP53-I232L-VGSDCTTIH   | 449  | >TP53-I232L-VGSDCTTLH  | 866  | 417  |
| >TP53-I232L-EVGSDCCTIH' | 11   | >TP53-I232L-EVGSDCCTLH | 15   | 4    |
| >TP53-I232L-EVGSDCCTIH' | 75   | >TP53-I232L-EVGSDCCTLH | 103  | 28   |
| >TP53-I232L-EVGSDCCTIH' | 387  | >TP53-I232L-EVGSDCCTLH | 96   | 291  |
| >TP53-I232L-EVGSDCCTIH' | 326  | >TP53-I232L-EVGSDCCTLH | 75   | 251  |
| >TP53-I232L-EVGSDCCTIH' | 819  | >TP53-I232L-EVGSDCCTLH | 391  | 428  |
| >TP53-I232L-PEVGSDCCTI  | 342  | >TP53-I232L-PEVGSDCCTL | 2374 | 2032 |
| >TP53-I232N TTIHYNM     | 46   | >TP53-I232N TTNHYNM    | 3007 | 2961 |
| >TP53-I232N TTIHYNM     | 46   | >TP53-I232N TTNHYNM    | 953  | 907  |
| >TP53-I232N TTIHYNM     | 5    | >TP53-I232N TTNHYNM    | 134  | 129  |
| >TP53-I232N TTIHYNM     | 135  | >TP53-I232N TTNHYNM    | 1005 | 870  |
| >TP53-I232N TTIHYNM     | 17   | >TP53-I232N TTNHYNM    | 35   | 18   |
| >TP53-I232N TTIHYNMC    | 120  | >TP53-I232N TTNHYNMC   | 386  | 266  |
| >TP53-I232N TTIHYNMCM   | 102  | >TP53-I232N TTNHYNMC   | 317  | 215  |
| >TP53-I232N TTIHYNM     | 69   | >TP53-I232N TTNHYNM    | 139  | 70   |

|                        |      |                        |       |       |
|------------------------|------|------------------------|-------|-------|
| >TP53-I232N TTIHYNYM   | 61   | >TP53-I232N TTNHYNYM   | 247   | 186   |
| >TP53-I232N TTIHYNYM   | 260  | >TP53-I232N TTNHYNYM   | 480   | 220   |
| >TP53-I232N CTTIHYNYM  | 116  | >TP53-I232N CTTNHYNYM  | 115   | 1     |
| >TP53-I232N CTTIHYNY   | 117  | >TP53-I232N CTTNHYNY   | 122   | 5     |
| >TP53-I232N CTTIHYNYM  | 754  | >TP53-I232N CTTNHYNYM  | 95    | 659   |
| >TP53-I232N CTTIHYNY   | 161  | >TP53-I232N CTTNHYNY   | 46    | 115   |
| >TP53-I232N CTTIHYNYM  | 207  | >TP53-I232N CTTNHYNYM  | 55    | 152   |
| >TP53-I232N CTTIHYNY   | 35   | >TP53-I232N CTTNHYNY   | 34    | 1     |
| >TP53-I232N CTTIHYNY   | 130  | >TP53-I232N CTTNHYNY   | 108   | 22    |
| >TP53-I232N CTTIHYNY   | 355  | >TP53-I232N CTTNHYNY   | 411   | 56    |
| >TP53-I232N CTTIHYNY   | 50   | >TP53-I232N CTTNHYNY   | 100   | 50    |
| >TP53-I232N CTTIHYNYM  | 11   | >TP53-I232N CTTNHYNYM  | 18    | 7     |
| >TP53-I232N CTTIHYNMYC | 184  | >TP53-I232N CTTNHYNYM  | 305   | 121   |
| >TP53-I232N CTTIHYNYM  | 999  | >TP53-I232N CTTNHYNYM  | 226   | 773   |
| >TP53-I232N CTTIHYNY   | 68   | >TP53-I232N CTTNHYNY   | 83    | 15    |
| >TP53-I232N CTTIHYNYM  | 405  | >TP53-I232N CTTNHYNYM  | 623   | 218   |
| >TP53-I232N DCTTIHYN   | 521  | >TP53-I232N DCTTNHYN   | 168   | 353   |
| >TP53-I232N DCTTIHYNM  | 585  | >TP53-I232N DCTTNHYNM  | 303   | 282   |
| >TP53-I232N DCTTIHYN   | 287  | >TP53-I232N DCTTNHYN   | 519   | 232   |
| >TP53-I232N SDCTTIHYN  | 400  | >TP53-I232N SDCTTNHYN  | 677   | 277   |
| >TP53-I232N GSDCTTIH   | 18   | >TP53-I232N GSDCTTNH   | 18    | 0     |
| >TP53-I232N GSDCTTIHYN | 34   | >TP53-I232N GSDCTTNHYN | 36    | 2     |
| >TP53-I232N GSDCTTIHYN | 174  | >TP53-I232N GSDCTTNHYN | 245   | 71    |
| >TP53-I232N GSDCTTIHYN | 582  | >TP53-I232N GSDCTTNHYN | 434   | 148   |
| >TP53-I232N GSDCTTIH   | 68   | >TP53-I232N GSDCTTNH   | 345   | 277   |
| >TP53-I232N GSDCTTIHYN | 99   | >TP53-I232N GSDCTTNHYN | 115   | 16    |
| >TP53-I232N GSDCTTIH   | 535  | >TP53-I232N GSDCTTNH   | 145   | 390   |
| >TP53-I232N GSDCTTIHYN | 247  | >TP53-I232N GSDCTTNHYN | 319   | 72    |
| >TP53-I232N GSDCTTIH   | 242  | >TP53-I232N GSDCTTNH   | 249   | 7     |
| >TP53-I232N GSDCTTIHYN | 97   | >TP53-I232N GSDCTTNHYN | 94    | 3     |
| >TP53-I232N VGSDCTTIH  | 353  | >TP53-I232N VGSDCTTNH  | 334   | 19    |
| >TP53-I232N VGSDCTTIH  | 184  | >TP53-I232N VGSDCTTNH  | 379   | 195   |
| >TP53-I232N VGSDCTTIH  | 642  | >TP53-I232N VGSDCTTNH  | 327   | 315   |
| >TP53-I232N VGSDCTTIH  | 377  | >TP53-I232N VGSDCTTNH  | 371   | 6     |
| >TP53-I232N VGSDCTTIH  | 449  | >TP53-I232N VGSDCTTNH  | 1395  | 946   |
| >TP53-I232N EVGSDCTTIH | 11   | >TP53-I232N EVGSDCTTNH | 9     | 2     |
| >TP53-I232N EVGSDCTTIH | 75   | >TP53-I232N EVGSDCTTNH | 49    | 26    |
| >TP53-I232N EVGSDCTTIH | 387  | >TP53-I232N EVGSDCTTNH | 514   | 127   |
| >TP53-I232N EVGSDCTTIH | 1152 | >TP53-I232N EVGSDCTTNH | 414   | 738   |
| >TP53-I232N EVGSDCTTIH | 612  | >TP53-I232N EVGSDCTTNH | 443   | 169   |
| >TP53-I232N EVGSDCTTIH | 326  | >TP53-I232N EVGSDCTTNH | 424   | 98    |
| >TP53-I232N PEVGSDCTTI | 342  | >TP53-I232N PEVGSDCTTN | 34524 | 34182 |
| >TP53-I232S-TTIHYNYM   | 46   | >TP53-I232S-TTSHYNYM   | 1169  | 1123  |

|                        |     |                        |      |      |
|------------------------|-----|------------------------|------|------|
| >TP53-I232S-TTIHYNM    | 46  | >TP53-I232S-TTSHYNM    | 833  | 787  |
| >TP53-I232S-TTIHYNM    | 5   | >TP53-I232S-TTSHYNM    | 148  | 143  |
| >TP53-I232S-TTIHYNM    | 135 | >TP53-I232S-TTSHYNM    | 2026 | 1891 |
| >TP53-I232S-TTIHYNM    | 17  | >TP53-I232S-TTSHYNM    | 27   | 10   |
| >TP53-I232S-TTIHYNMC   | 120 | >TP53-I232S-TTSHYNMC   | 263  | 143  |
| >TP53-I232S-TTIHYNMCI  | 102 | >TP53-I232S-TTSHYNMCI  | 209  | 107  |
| >TP53-I232S-TTIHYNM    | 69  | >TP53-I232S-TTSHYNM    | 262  | 193  |
| >TP53-I232S-TTIHYNM    | 61  | >TP53-I232S-TTSHYNM    | 158  | 97   |
| >TP53-I232S-TTIHYNM    | 260 | >TP53-I232S-TTSHYNM    | 123  | 137  |
| >TP53-I232S-CTTIHYNM   | 116 | >TP53-I232S-CTTSHYNM   | 134  | 18   |
| >TP53-I232S-CTTIHYN    | 117 | >TP53-I232S-CTTSHYN    | 85   | 32   |
| >TP53-I232S-CTTIHYNM   | 754 | >TP53-I232S-CTTSHYNM   | 316  | 438  |
| >TP53-I232S-CTTIHYN    | 161 | >TP53-I232S-CTTSHYN    | 23   | 138  |
| >TP53-I232S-CTTIHYNM   | 207 | >TP53-I232S-CTTSHYNM   | 22   | 185  |
| >TP53-I232S-CTTIHYN    | 35  | >TP53-I232S-CTTSHYN    | 27   | 8    |
| >TP53-I232S-CTTIHYN    | 130 | >TP53-I232S-CTTSHYN    | 76   | 54   |
| >TP53-I232S-CTTIHYN    | 767 | >TP53-I232S-CTTSHYN    | 483  | 284  |
| >TP53-I232S-CTTIHYN    | 355 | >TP53-I232S-CTTSHYN    | 349  | 6    |
| >TP53-I232S-CTTIHYN    | 50  | >TP53-I232S-CTTSHYN    | 70   | 20   |
| >TP53-I232S-CTTIHYNM   | 11  | >TP53-I232S-CTTSHYNM   | 7    | 4    |
| >TP53-I232S-CTTIHYNMC  | 184 | >TP53-I232S-CTTSHYNM   | 114  | 70   |
| >TP53-I232S-CTTIHYNM   | 999 | >TP53-I232S-CTTSHYNM   | 153  | 846  |
| >TP53-I232S-CTTIHYN    | 68  | >TP53-I232S-CTTSHYN    | 66   | 2    |
| >TP53-I232S-CTTIHYNM   | 405 | >TP53-I232S-CTTSHYNM   | 419  | 14   |
| >TP53-I232S-DCTTIHYN   | 521 | >TP53-I232S-DCTTSHYN   | 241  | 280  |
| >TP53-I232S-DCTTIHYNM  | 585 | >TP53-I232S-DCTTSHYNM  | 324  | 261  |
| >TP53-I232S-DCTTIHYN   | 287 | >TP53-I232S-DCTTSHYN   | 1056 | 769  |
| >TP53-I232S-SDCTTIHYN  | 400 | >TP53-I232S-SDCTTSHYN  | 691  | 291  |
| >TP53-I232S-GSDCTTIH   | 18  | >TP53-I232S-GSDCTTSHY  | 28   | 10   |
| >TP53-I232S-GSDCTTIHYN | 34  | >TP53-I232S-GSDCTTSHYN | 46   | 12   |
| >TP53-I232S-GSDCTTIHYN | 174 | >TP53-I232S-GSDCTTSHYN | 284  | 110  |
| >TP53-I232S-GSDCTTIHYN | 582 | >TP53-I232S-GSDCTTSHYN | 482  | 100  |
| >TP53-I232S-GSDCTTIH   | 68  | >TP53-I232S-GSDCTTSHY  | 32   | 36   |
| >TP53-I232S-GSDCTTIHYN | 99  | >TP53-I232S-GSDCTTSHYN | 32   | 67   |
| >TP53-I232S-GSDCTTIH   | 535 | >TP53-I232S-GSDCTTSHY  | 11   | 524  |
| >TP53-I232S-GSDCTTIHYN | 247 | >TP53-I232S-GSDCTTSHYN | 89   | 158  |
| >TP53-I232S-GSDCTTIH   | 242 | >TP53-I232S-GSDCTTSHY  | 247  | 5    |
| >TP53-I232S-GSDCTTIHYN | 97  | >TP53-I232S-GSDCTTSHYN | 101  | 4    |
| >TP53-I232S-VGSDCTTIH  | 353 | >TP53-I232S-VGSDCTTSHY | 206  | 147  |
| >TP53-I232S-VGSDCTTIH  | 184 | >TP53-I232S-VGSDCTTSHY | 221  | 37   |
| >TP53-I232S-VGSDCTTIH  | 642 | >TP53-I232S-VGSDCTTSHY | 150  | 492  |
| >TP53-I232S-VGSDCTTIH  | 377 | >TP53-I232S-VGSDCTTSHY | 155  | 222  |
| >TP53-I232S-VGSDCTTIH  | 449 | >TP53-I232S-VGSDCTTSHY | 784  | 335  |

|                          |      |                         |       |       |
|--------------------------|------|-------------------------|-------|-------|
| >TP53-I232S-EVGSDCCTI'H' | 11   | >TP53-I232S-EVGSDCCTTSH | 8     | 3     |
| >TP53-I232S-EVGSDCCTI'H' | 75   | >TP53-I232S-EVGSDCCTTSH | 86    | 11    |
| >TP53-I232S-EVGSDCCTI'H' | 387  | >TP53-I232S-EVGSDCCTTSH | 451   | 64    |
| >TP53-I232S-EVGSDCCTI'H' | 1152 | >TP53-I232S-EVGSDCCTTSH | 385   | 767   |
| >TP53-I232S-EVGSDCCTI'H' | 612  | >TP53-I232S-EVGSDCCTTSH | 363   | 249   |
| >TP53-I232S-EVGSDCCTI'H' | 326  | >TP53-I232S-EVGSDCCTTSH | 378   | 52    |
| >TP53-I232S-EVGSDCCTI'H' | 819  | >TP53-I232S-EVGSDCCTTSH | 382   | 437   |
| >TP53-I232S-PEVGSDCCTI'  | 342  | >TP53-I232S-PEVGSDCCTTS | 30143 | 29801 |
| >TP53-I232T-TIHYNMCMC'   | 2304 | >TP53-I232T-TTHYNMCMC   | 297   | 2007  |
| >TP53-I232T-TTIHYNM      | 46   | >TP53-I232T-TTTHYNM     | 735   | 689   |
| >TP53-I232T-TTIHYNM      | 46   | >TP53-I232T-TTTHYNM     | 559   | 513   |
| >TP53-I232T-TTIHYNM      | 5    | >TP53-I232T-TTTHYNM     | 54    | 49    |
| >TP53-I232T-TTIHYNM      | 135  | >TP53-I232T-TTTHYNM     | 1155  | 1020  |
| >TP53-I232T-TTIHYNM      | 17   | >TP53-I232T-TTTHYNM     | 35    | 18    |
| >TP53-I232T-TTIHYNMCMC   | 120  | >TP53-I232T-TTTHYNMCMC  | 384   | 264   |
| >TP53-I232T-TTIHYNMCMC'  | 102  | >TP53-I232T-TTTHYNMCMC' | 301   | 199   |
| >TP53-I232T-TTIHYNM      | 69   | >TP53-I232T-TTTHYNM     | 309   | 240   |
| >TP53-I232T-TTIHYNM      | 61   | >TP53-I232T-TTTHYNM     | 205   | 144   |
| >TP53-I232T-TTIHYNMCMC   | 1474 | >TP53-I232T-TTTHYNMCMC  | 225   | 1249  |
| >TP53-I232T-TTIHYNM      | 260  | >TP53-I232T-TTTHYNM     | 64    | 196   |
| >TP53-I232T-CTTIHYNM     | 116  | >TP53-I232T-CTTTHYNM    | 136   | 20    |
| >TP53-I232T-CTTIHYNM     | 117  | >TP53-I232T-CTTTHYNM    | 82    | 35    |
| >TP53-I232T-CTTIHYNM     | 754  | >TP53-I232T-CTTTHYNM    | 303   | 451   |
| >TP53-I232T-CTTIHYNM     | 161  | >TP53-I232T-CTTTHYNM    | 25    | 136   |
| >TP53-I232T-CTTIHYNM     | 207  | >TP53-I232T-CTTTHYNM    | 21    | 186   |
| >TP53-I232T-CTTIHYNM     | 35   | >TP53-I232T-CTTTHYNM    | 36    | 1     |
| >TP53-I232T-CTTIHYNM     | 130  | >TP53-I232T-CTTTHYNM    | 130   | 0     |
| >TP53-I232T-CTTIHYNM     | 1337 | >TP53-I232T-CTTTHYNM    | 472   | 865   |
| >TP53-I232T-CTTIHYNM     | 355  | >TP53-I232T-CTTTHYNM    | 388   | 33    |
| >TP53-I232T-CTTIHYNM     | 50   | >TP53-I232T-CTTTHYNM    | 102   | 52    |
| >TP53-I232T-CTTIHYNM     | 11   | >TP53-I232T-CTTTHYNM    | 12    | 1     |
| >TP53-I232T-CTTIHYNMCMC  | 184  | >TP53-I232T-CTTTHYNMCMC | 188   | 4     |
| >TP53-I232T-CTTIHYNM     | 68   | >TP53-I232T-CTTTHYNM    | 57    | 11    |
| >TP53-I232T-CTTIHYNM     | 405  | >TP53-I232T-CTTTHYNM    | 639   | 234   |
| >TP53-I232T-DCTTIHYNM    | 521  | >TP53-I232T-DCTTTHYNM   | 389   | 132   |
| >TP53-I232T-DCTTIHYNM    | 585  | >TP53-I232T-DCTTTHYNM   | 408   | 177   |
| >TP53-I232T-DCTTIHYNM    | 287  | >TP53-I232T-DCTTTHYNM   | 651   | 364   |
| >TP53-I232T-DCTTIHYNM    | 787  | >TP53-I232T-DCTTTHYNM   | 463   | 324   |
| >TP53-I232T-SDCTTIHYNM   | 400  | >TP53-I232T-SDCTTTHYNM  | 602   | 202   |
| >TP53-I232T-GSDCTTIHY    | 18   | >TP53-I232T-GSDCTTTHY   | 30    | 12    |
| >TP53-I232T-GSDCTTIHYN   | 34   | >TP53-I232T-GSDCTTTHYN  | 48    | 14    |
| >TP53-I232T-GSDCTTIHYN   | 174  | >TP53-I232T-GSDCTTTHYN  | 253   | 79    |
| >TP53-I232T-GSDCTTIHY    | 68   | >TP53-I232T-GSDCTTTHY   | 46    | 22    |

|                         |     |                        |       |       |
|-------------------------|-----|------------------------|-------|-------|
| >TP53-I232T·GSDCTTIHYN  | 99  | >TP53-I232T·GSDCTTTHYN | 47    | 52    |
| >TP53-I232T·GSDCTTIHY   | 535 | >TP53-I232T·GSDCTTTHY  | 63    | 472   |
| >TP53-I232T·GSDCTTIHYN  | 247 | >TP53-I232T·GSDCTTTHYN | 132   | 115   |
| >TP53-I232T·GSDCTTIHY   | 242 | >TP53-I232T·GSDCTTTHY  | 357   | 115   |
| >TP53-I232T·GSDCTTIHYN  | 97  | >TP53-I232T·GSDCTTTHYN | 103   | 6     |
| >TP53-I232T·VGSDCTTIHY  | 353 | >TP53-I232T·VGSDCTTTHY | 305   | 48    |
| >TP53-I232T·VGSDCTTIHY  | 184 | >TP53-I232T·VGSDCTTTHY | 156   | 28    |
| >TP53-I232T·VGSDCTTIHY  | 642 | >TP53-I232T·VGSDCTTTHY | 372   | 270   |
| >TP53-I232T·VGSDCTTIHY  | 377 | >TP53-I232T·VGSDCTTTHY | 196   | 181   |
| >TP53-I232T·VGSDCTTIHY  | 449 | >TP53-I232T·VGSDCTTTHY | 995   | 546   |
| >TP53-I232T·EVGSDCTTIH' | 11  | >TP53-I232T·EVGSDCTTTH | 13    | 2     |
| >TP53-I232T·EVGSDCTTIH' | 75  | >TP53-I232T·EVGSDCTTTH | 160   | 85    |
| >TP53-I232T·EVGSDCTTIH' | 387 | >TP53-I232T·EVGSDCTTTH | 558   | 171   |
| >TP53-I232T·EVGSDCTTIH' | 326 | >TP53-I232T·EVGSDCTTTH | 473   | 147   |
| >TP53-I232T·EVGSDCTTIH' | 819 | >TP53-I232T·EVGSDCTTTH | 481   | 338   |
| >TP53-I232T·PEVGSDCTTI  | 342 | >TP53-I232T·PEVGSDCTTT | 17488 | 17146 |
| >TP53-I232V·TTIHYNYM    | 46  | >TP53-I232V·TTVHYNYM   | 160   | 114   |
| >TP53-I232V·TTIHYNYM    | 46  | >TP53-I232V·TTVHYNYM   | 83    | 37    |
| >TP53-I232V·TTIHYNYM    | 5   | >TP53-I232V·TTVHYNYM   | 9     | 4     |
| >TP53-I232V·TTIHYNYM    | 135 | >TP53-I232V·TTVHYNYM   | 302   | 167   |
| >TP53-I232V·TTIHYNYM    | 17  | >TP53-I232V·TTVHYNYM   | 27    | 10    |
| >TP53-I232V·TTIHYNYMC   | 120 | >TP53-I232V·TTVHYNYMC  | 241   | 121   |
| >TP53-I232V·TTIHYNYMCN  | 102 | >TP53-I232V·TTVHYNYMC  | 196   | 94    |
| >TP53-I232V·TTIHYNYM    | 69  | >TP53-I232V·TTVHYNYM   | 93    | 24    |
| >TP53-I232V·TTIHYNYM    | 61  | >TP53-I232V·TTVHYNYM   | 52    | 9     |
| >TP53-I232V·TTIHYNYM    | 260 | >TP53-I232V·TTVHYNYM   | 174   | 86    |
| >TP53-I232V·CTTIHYNYM   | 116 | >TP53-I232V·CTTVHYNYM  | 72    | 44    |
| >TP53-I232V·CTTIHYN     | 117 | >TP53-I232V·CTTVHYN    | 101   | 16    |
| >TP53-I232V·CTTIHYN     | 161 | >TP53-I232V·CTTVHYN    | 97    | 64    |
| >TP53-I232V·CTTIHYNYM   | 207 | >TP53-I232V·CTTVHYNYM  | 105   | 102   |
| >TP53-I232V·CTTIHYN     | 35  | >TP53-I232V·CTTVHYN    | 45    | 10    |
| >TP53-I232V·CTTIHYN     | 130 | >TP53-I232V·CTTVHYN    | 161   | 31    |
| >TP53-I232V·CTTIHYN     | 355 | >TP53-I232V·CTTVHYN    | 413   | 58    |
| >TP53-I232V·CTTIHYN     | 50  | >TP53-I232V·CTTVHYN    | 95    | 45    |
| >TP53-I232V·CTTIHYNYM   | 11  | >TP53-I232V·CTTVHYNYM  | 20    | 9     |
| >TP53-I232V·CTTIHYNYMC  | 184 | >TP53-I232V·CTTVHYNYM  | 284   | 100   |
| >TP53-I232V·CTTIHYN     | 68  | >TP53-I232V·CTTVHYN    | 60    | 8     |
| >TP53-I232V·CTTIHYNYM   | 405 | >TP53-I232V·CTTVHYNYM  | 459   | 54    |
| >TP53-I232V·DCTTIHYN    | 287 | >TP53-I232V·DCTTVHYN   | 722   | 435   |
| >TP53-I232V·DCTTIHYN    | 787 | >TP53-I232V·DCTTVHYN   | 450   | 337   |
| >TP53-I232V·SDCTTIHYN   | 400 | >TP53-I232V·SDCTTVHYN  | 750   | 350   |
| >TP53-I232V·GSDCTTIHY   | 18  | >TP53-I232V·GSDCTTVHY  | 26    | 8     |
| >TP53-I232V·GSDCTTIHYN  | 34  | >TP53-I232V·GSDCTTVHYN | 42    | 8     |

|                          |       |                          |      |       |
|--------------------------|-------|--------------------------|------|-------|
| >TP53-I232V·GSDCTTIHYN   | 174   | >TP53-I232V·GSDCTTVHYN   | 235  | 61    |
| >TP53-I232V·GSDCTTIHY    | 68    | >TP53-I232V·GSDCTTVHY    | 57   | 11    |
| >TP53-I232V·GSDCTTIHYN   | 99    | >TP53-I232V·GSDCTTVHYN   | 106  | 7     |
| >TP53-I232V·GSDCTTIHYN   | 247   | >TP53-I232V·GSDCTTVHYN   | 275  | 28    |
| >TP53-I232V·GSDCTTIHY    | 242   | >TP53-I232V·GSDCTTVHY    | 642  | 400   |
| >TP53-I232V·GSDCTTIHYN   | 97    | >TP53-I232V·GSDCTTVHYN   | 121  | 24    |
| >TP53-I232V·VGS DCTTIHY  | 353   | >TP53-I232V·VGS DCTTVHY  | 296  | 57    |
| >TP53-I232V·VGS DCTTI    | 16736 | >TP53-I232V·VGS DCTTV    | 410  | 16326 |
| >TP53-I232V·VGS DCTTIHY  | 184   | >TP53-I232V·VGS DCTTVHY  | 137  | 47    |
| >TP53-I232V·VGS DCTTIHY  | 377   | >TP53-I232V·VGS DCTTVHY  | 204  | 173   |
| >TP53-I232V·VGS DCTTIHY  | 449   | >TP53-I232V·VGS DCTTVHY  | 744  | 295   |
| >TP53-I232V·EVGS DCTTI   | 13155 | >TP53-I232V·EVGS DCTTV   | 337  | 12818 |
| >TP53-I232V·EVGS DCTTIH' | 11    | >TP53-I232V·EVGS DCTTVH' | 12   | 1     |
| >TP53-I232V·EVGS DCTTIH' | 75    | >TP53-I232V·EVGS DCTTVH' | 129  | 54    |
| >TP53-I232V·EVGS DCTTIH' | 387   | >TP53-I232V·EVGS DCTTVH' | 447  | 60    |
| >TP53-I232V·EVGS DCTTIH' | 612   | >TP53-I232V·EVGS DCTTVH' | 467  | 145   |
| >TP53-I232V·EVGS DCTTI   | 1082  | >TP53-I232V·EVGS DCTTV   | 173  | 909   |
| >TP53-I232V·EVGS DCTTI   | 504   | >TP53-I232V·EVGS DCTTV   | 80   | 424   |
| >TP53-I232V·EVGS DCTTIH' | 326   | >TP53-I232V·EVGS DCTTVH' | 525  | 199   |
| >TP53-I232V·PEVGS DCTTI  | 342   | >TP53-I232V·PEVGS DCTTV  | 2878 | 2536  |
| >TP53-I251F·ILTIITLE     | 2676  | >TP53-I251F·FLTIITLE     | 192  | 2484  |
| >TP53-I251F·ILTIITLED    | 4430  | >TP53-I251F·FLTIITLED    | 359  | 4071  |
| >TP53-I251F·ILTIITLEDSS  | 1325  | >TP53-I251F·FLTIITLEDSS  | 83   | 1242  |
| >TP53-I251F·ILTIITLEDS   | 3891  | >TP53-I251F·FLTIITLEDS   | 256  | 3635  |
| >TP53-I251F·ILTIITLEDSS  | 4003  | >TP53-I251F·FLTIITLEDSS  | 330  | 3673  |
| >TP53-I251F·PILTIITL     | 19215 | >TP53-I251F·PFLTIITL     | 457  | 18758 |
| >TP53-I251F·SCMGGMNR     | 2939  | >TP53-I251F·SCMGGMNR     | 248  | 2691  |
| >TP53-I251F·RPILTIITL    | 104   | >TP53-I251F·RPFLTIITL    | 28   | 76    |
| >TP53-I251F·RPILTIITL    | 34    | >TP53-I251F·RPFLTIITL    | 69   | 35    |
| >TP53-I251F·RPILTIITL    | 391   | >TP53-I251F·RPFLTIITL    | 418  | 27    |
| >TP53-I251F·RPILTIITL    | 66    | >TP53-I251F·RPFLTIITL    | 56   | 10    |
| >TP53-I251F·RPILTIITL    | 89    | >TP53-I251F·RPFLTIITL    | 115  | 26    |
| >TP53-I251F·RRPILTII     | 220   | >TP53-I251F·RRPFLTII     | 314  | 94    |
| >TP53-I251F·RRPILTII TL  | 14    | >TP53-I251F·RRPFLTII TL  | 16   | 2     |
| >TP53-I251F·RRPILTII TL  | 492   | >TP53-I251F·RRPFLTII TL  | 1195 | 703   |
| >TP53-I251F·RRPILTII     | 33    | >TP53-I251F·RRPFLTII     | 43   | 10    |
| >TP53-I251F·RRPILTII T   | 86    | >TP53-I251F·RRPFLTII T   | 74   | 12    |
| >TP53-I251F·RRPILTII TL  | 16    | >TP53-I251F·RRPFLTII TL  | 33   | 17    |
| >TP53-I251F·RRPILTII TLE | 129   | >TP53-I251F·RRPFLTII TLE | 106  | 23    |
| >TP53-I251F·RRPILTII     | 319   | >TP53-I251F·RRPFLTII     | 755  | 436   |
| >TP53-I251F·RRPILTII T   | 329   | >TP53-I251F·RRPFLTII T   | 169  | 160   |
| >TP53-I251F·RRPILTII TL  | 14    | >TP53-I251F·RRPFLTII TL  | 22   | 8     |
| >TP53-I251F·RRPILTII TLE | 467   | >TP53-I251F·RRPFLTII TLE | 259  | 208   |

|                         |      |                         |     |      |
|-------------------------|------|-------------------------|-----|------|
| >TP53-I251F-NRRPILTIITL | 710  | >TP53-I251F-NRRPFLTIITL | 424 | 286  |
| >TP53-I251F-NRRPILTI    | 674  | >TP53-I251F-NRRPFLTI    | 428 | 246  |
| >TP53-I251F-NRRPILTII   | 281  | >TP53-I251F-NRRPFLTII   | 165 | 116  |
| >TP53-I251F-NRRPILTIITL | 50   | >TP53-I251F-NRRPFLTIITL | 40  | 10   |
| >TP53-I251F-NRRPILTII   | 224  | >TP53-I251F-NRRPFLTII   | 182 | 42   |
| >TP53-I251F-NRRPILTIITL | 12   | >TP53-I251F-NRRPFLTIITL | 11  | 1    |
| >TP53-I251F-MNRRPILTI   | 35   | >TP53-I251F-MNRRPFLTI   | 26  | 9    |
| >TP53-I251F-MNRRPILTII  | 200  | >TP53-I251F-MNRRPFLTII  | 126 | 74   |
| >TP53-I251F-MNRRPILTI   | 2118 | >TP53-I251F-MNRRPFLTI   | 227 | 1891 |
| >TP53-I251F-MNRRPILTI   | 457  | >TP53-I251F-MNRRPFLTI   | 182 | 275  |
| >TP53-I251F-MNRRPILTII  | 821  | >TP53-I251F-MNRRPFLTII  | 319 | 502  |
| >TP53-I251F-MNRRPILTI   | 1235 | >TP53-I251F-MNRRPFLTI   | 484 | 751  |
| >TP53-I251F-MNRRPILTI   | 399  | >TP53-I251F-MNRRPFLTI   | 286 | 113  |
| >TP53-I251F-GMNRRPIL    | 2183 | >TP53-I251F-GMNRRPFL    | 250 | 1933 |
| >TP53-I251F-GMNRRPILTI  | 755  | >TP53-I251F-GMNRRPFLTI  | 358 | 397  |
| >TP53-I251F-GMNRRPIL    | 678  | >TP53-I251F-GMNRRPFL    | 59  | 619  |
| >TP53-I251F-GMNRRPILTI  | 185  | >TP53-I251F-GMNRRPFLTI  | 196 | 11   |
| >TP53-I251F-GMNRRPILTI  | 168  | >TP53-I251F-GMNRRPFLTI  | 96  | 72   |
| >TP53-I251F-GMNRRPIL    | 213  | >TP53-I251F-GMNRRPFL    | 71  | 142  |
| >TP53-I251F-GMNRRPILT   | 728  | >TP53-I251F-GMNRRPFLT   | 395 | 333  |
| >TP53-I251F-GMNRRPILTI  | 61   | >TP53-I251F-GMNRRPFLTI  | 72  | 11   |
| >TP53-I251F-GMNRRPILTI  | 13   | >TP53-I251F-GMNRRPFLTI  | 11  | 2    |
| >TP53-I251F-GMNRRPIL    | 229  | >TP53-I251F-GMNRRPFL    | 28  | 201  |
| >TP53-I251F-GMNRRPILT   | 822  | >TP53-I251F-GMNRRPFLT   | 284 | 538  |
| >TP53-I251F-GMNRRPILTI  | 10   | >TP53-I251F-GMNRRPFLTI  | 13  | 3    |
| >TP53-I251F-GMNRRPILTI  | 93   | >TP53-I251F-GMNRRPFLTI  | 55  | 38   |
| >TP53-I251F-GMNRRPIL    | 182  | >TP53-I251F-GMNRRPFL    | 54  | 128  |
| >TP53-I251F-GMNRRPILTI  | 21   | >TP53-I251F-GMNRRPFLTI  | 18  | 3    |
| >TP53-I251F-GMNRRPILTI  | 53   | >TP53-I251F-GMNRRPFLTI  | 32  | 21   |
| >TP53-I251F-GMNRRPIL    | 160  | >TP53-I251F-GMNRRPFL    | 21  | 139  |
| >TP53-I251F-GMNRRPILTI  | 66   | >TP53-I251F-GMNRRPFLTI  | 64  | 2    |
| >TP53-I251F-GMNRRPILTI  | 192  | >TP53-I251F-GMNRRPFLTI  | 126 | 66   |
| >TP53-I251F-GMNRRPIL    | 32   | >TP53-I251F-GMNRRPFL    | 17  | 15   |
| >TP53-I251F-GMNRRPILT   | 744  | >TP53-I251F-GMNRRPFLT   | 347 | 397  |
| >TP53-I251F-GMNRRPILTI  | 43   | >TP53-I251F-GMNRRPFLTI  | 52  | 9    |
| >TP53-I251F-GMNRRPILTI  | 102  | >TP53-I251F-GMNRRPFLTI  | 69  | 33   |
| >TP53-I251F-GMNRRPILTI  | 147  | >TP53-I251F-GMNRRPFLTI  | 141 | 6    |
| >TP53-I251F-GGMNRRPIL   | 444  | >TP53-I251F-GGMNRRPFL   | 919 | 475  |
| >TP53-I251F-GGMNRRPIL   | 538  | >TP53-I251F-GGMNRRPFL   | 460 | 78   |
| >TP53-I251F-CMGGMNRR    | 2664 | >TP53-I251F-CMGGMNRR    | 494 | 2170 |
| >TP53-I251F-CMGGMNRR    | 2150 | >TP53-I251F-CMGGMNRR    | 335 | 1815 |
| >TP53-I251F-CMGGMNRR    | 2155 | >TP53-I251F-CMGGMNRR    | 351 | 1804 |
| >TP53-I251F-CMGGMNRR    | 88   | >TP53-I251F-CMGGMNRR    | 41  | 47   |



|                           |      |                            |     |      |
|---------------------------|------|----------------------------|-----|------|
| >TP53-I251F-CMGGMNRR      | 6386 | >TP53-I251F-CMGGMNRR       | 194 | 6192 |
| >TP53-I251F-CMGGMNRR      | 7621 | >TP53-I251F-CMGGMNRR       | 303 | 7318 |
| >TP53-I251L-PILTIITL      | 508  | >TP53-I251L-PLLTIITL       | 20  | 488  |
| >TP53-I251L-PILTIITL      | 5502 | >TP53-I251L-PLLTIITL       | 239 | 5263 |
| >TP53-I251L-PILTIITL      | 1435 | >TP53-I251L-PLLTIITL       | 41  | 1394 |
| >TP53-I251L-PILTIITL      | 1459 | >TP53-I251L-PLLTIITL       | 22  | 1437 |
| >TP53-I251L-PILTIITL      | 906  | >TP53-I251L-PLLTIITL       | 18  | 888  |
| >TP53-I251L-RPILTIITL     | 104  | >TP53-I251L-RPLLLTIITL     | 202 | 98   |
| >TP53-I251L-RPILTIITL     | 34   | >TP53-I251L-RPLLLTIITL     | 54  | 20   |
| >TP53-I251L-RPILTIITL     | 391  | >TP53-I251L-RPLLLTIITL     | 964 | 573  |
| >TP53-I251L-RPILTIITL     | 66   | >TP53-I251L-RPLLLTIITL     | 105 | 39   |
| >TP53-I251L-RPILTIITL     | 89   | >TP53-I251L-RPLLLTIITL     | 577 | 488  |
| >TP53-I251L-RRPILTII      | 220  | >TP53-I251L-RRPLLTII       | 182 | 38   |
| >TP53-I251L-RRPILTIITL    | 14   | >TP53-I251L-RRPLLTIIITL    | 13  | 1    |
| >TP53-I251L-RRPILTIITL    | 492  | >TP53-I251L-RRPLLTIIITL    | 814 | 322  |
| >TP53-I251L-RRPILTII      | 33   | >TP53-I251L-RRPLLTII       | 45  | 12   |
| >TP53-I251L-RRPILTIIT     | 86   | >TP53-I251L-RRPLLTIIIT     | 105 | 19   |
| >TP53-I251L-RRPILTIITL    | 16   | >TP53-I251L-RRPLLTIIITL    | 17  | 1    |
| >TP53-I251L-RRPILTIITL    | 129  | >TP53-I251L-RRPLLTIIITL    | 152 | 23   |
| >TP53-I251L-RRPILTIITL    | 319  | >TP53-I251L-RRPLLTIIITL    | 340 | 21   |
| >TP53-I251L-RRPILTIITL    | 329  | >TP53-I251L-RRPLLTIIITL    | 287 | 42   |
| >TP53-I251L-RRPILTIITL    | 14   | >TP53-I251L-RRPLLTIIITL    | 15  | 1    |
| >TP53-I251L-RRPILTIITL    | 467  | >TP53-I251L-RRPLLTIIITL    | 408 | 59   |
| >TP53-I251L-NRRPILTII     | 281  | >TP53-I251L-NRRPLLTII      | 214 | 67   |
| >TP53-I251L-NRRPILTIITL   | 50   | >TP53-I251L-NRRPLLTIIITL   | 45  | 5    |
| >TP53-I251L-NRRPILTI      | 1150 | >TP53-I251L-NRRPLLTIIITL   | 428 | 722  |
| >TP53-I251L-NRRPILTIITL   | 224  | >TP53-I251L-NRRPLLTIIITL   | 134 | 90   |
| >TP53-I251L-NRRPILTIITL   | 876  | >TP53-I251L-NRRPLLTIIITL   | 493 | 383  |
| >TP53-I251L-NRRPILTIITL   | 12   | >TP53-I251L-NRRPLLTIIITL   | 11  | 1    |
| >TP53-I251L-MNRRPILTI     | 35   | >TP53-I251L-MNRRPLLTII     | 33  | 2    |
| >TP53-I251L-MNRRPILTIITL  | 200  | >TP53-I251L-MNRRPLLTIIITL  | 207 | 7    |
| >TP53-I251L-MNRRPILTIITL  | 457  | >TP53-I251L-MNRRPLLTIIITL  | 889 | 432  |
| >TP53-I251L-MNRRPILTIITL  | 399  | >TP53-I251L-MNRRPLLTIIITL  | 417 | 18   |
| >TP53-I251L-GMNRRPIL      | 678  | >TP53-I251L-GMNRRPLLTII    | 186 | 492  |
| >TP53-I251L-GMNRRPILTI    | 185  | >TP53-I251L-GMNRRPLLTIIITL | 142 | 43   |
| >TP53-I251L-GMNRRPILTIITL | 168  | >TP53-I251L-GMNRRPLLTIIITL | 251 | 83   |
| >TP53-I251L-GMNRRPILTIITL | 213  | >TP53-I251L-GMNRRPLLTIIITL | 100 | 113  |
| >TP53-I251L-GMNRRPIL      | 61   | >TP53-I251L-GMNRRPLLTIIITL | 50  | 11   |
| >TP53-I251L-GMNRRPILTI    | 13   | >TP53-I251L-GMNRRPLLTIIITL | 12  | 1    |
| >TP53-I251L-GMNRRPILTIITL | 229  | >TP53-I251L-GMNRRPLLTIIITL | 94  | 135  |
| >TP53-I251L-GMNRRPILTIITL | 10   | >TP53-I251L-GMNRRPLLTIIITL | 15  | 5    |
| >TP53-I251L-GMNRRPILTIITL | 93   | >TP53-I251L-GMNRRPLLTIIITL | 119 | 26   |
| >TP53-I251L-GMNRRPIL      | 182  | >TP53-I251L-GMNRRPLLTIIITL | 261 | 79   |

|                         |      |                         |      |      |
|-------------------------|------|-------------------------|------|------|
| >TP53-I251L- GMNRRPILTI | 21   | >TP53-I251L- GMNRRPLLTI | 26   | 5    |
| >TP53-I251L- GMNRRPILTI | 53   | >TP53-I251L- GMNRRPLLTI | 78   | 25   |
| >TP53-I251L- GMNRRPIL   | 160  | >TP53-I251L- GMNRRPLL   | 95   | 65   |
| >TP53-I251L- GMNRRPILTI | 66   | >TP53-I251L- GMNRRPLLTI | 95   | 29   |
| >TP53-I251L- GMNRRPILTI | 192  | >TP53-I251L- GMNRRPLLTI | 217  | 25   |
| >TP53-I251L- GMNRRPIL   | 32   | >TP53-I251L- GMNRRPLL   | 22   | 10   |
| >TP53-I251L- GMNRRPILTI | 43   | >TP53-I251L- GMNRRPLLTI | 58   | 15   |
| >TP53-I251L- GMNRRPILTI | 102  | >TP53-I251L- GMNRRPLLTI | 120  | 18   |
| >TP53-I251L- GMNRRPILTI | 147  | >TP53-I251L- GMNRRPLLTI | 179  | 32   |
| >TP53-I251L- GGMNRRPIL  | 444  | >TP53-I251L- GGMNRRPLL  | 1580 | 1136 |
| >TP53-I251L- GGMNRRPIL  | 1950 | >TP53-I251L- GGMNRRPLL  | 490  | 1460 |
| >TP53-I251L- CMGGMNRR   | 635  | >TP53-I251L- CMGGMNRR   | 293  | 342  |
| >TP53-I251L- CMGGMNRR   | 1849 | >TP53-I251L- CMGGMNRR   | 330  | 1519 |
| >TP53-I251L- CMGGMNRR   | 88   | >TP53-I251L- CMGGMNRR   | 49   | 39   |
| >TP53-I251N RPILTIITL   | 104  | >TP53-I251N RPNLTIITL   | 1064 | 960  |
| >TP53-I251N RPILTIITL   | 34   | >TP53-I251N RPNLTIITL   | 38   | 4    |
| >TP53-I251N RPILTIITL   | 391  | >TP53-I251N RPNLTIITL   | 682  | 291  |
| >TP53-I251N RPILTIITL   | 66   | >TP53-I251N RPNLTIITL   | 297  | 231  |
| >TP53-I251N RPILTIITL   | 89   | >TP53-I251N RPNLTIITL   | 122  | 33   |
| >TP53-I251N RRPILTII    | 220  | >TP53-I251N RRPNLTI     | 197  | 23   |
| >TP53-I251N RRPILTIITL  | 14   | >TP53-I251N RRPNLTIITL  | 14   | 0    |
| >TP53-I251N RRPILTIITL  | 492  | >TP53-I251N RRPNLTIITL  | 1157 | 665  |
| >TP53-I251N RRPILTII    | 33   | >TP53-I251N RRPNLTI     | 101  | 68   |
| >TP53-I251N RRPILTIIT   | 86   | >TP53-I251N RRPNLTIIT   | 113  | 27   |
| >TP53-I251N RRPILTIITL  | 16   | >TP53-I251N RRPNLTIITL  | 17   | 1    |
| >TP53-I251N RRPILTIITL  | 129  | >TP53-I251N RRPNLTIITL  | 155  | 26   |
| >TP53-I251N RRPILTII    | 319  | >TP53-I251N RRPNLTI     | 368  | 49   |
| >TP53-I251N RRPILTIIT   | 329  | >TP53-I251N RRPNLTIIT   | 471  | 142  |
| >TP53-I251N RRPILTIITL  | 14   | >TP53-I251N RRPNLTIITL  | 15   | 1    |
| >TP53-I251N RRPILTIITL  | 467  | >TP53-I251N RRPNLTIITL  | 613  | 146  |
| >TP53-I251N NRRPILTII   | 281  | >TP53-I251N NRRPNLTI    | 755  | 474  |
| >TP53-I251N NRRPILTIITL | 50   | >TP53-I251N NRRPNLTIITL | 78   | 28   |
| >TP53-I251N NRRPILTII   | 224  | >TP53-I251N NRRPNLTI    | 480  | 256  |
| >TP53-I251N NRRPILTIITL | 12   | >TP53-I251N NRRPNLTIITL | 19   | 7    |
| >TP53-I251N MNRRPILTI   | 35   | >TP53-I251N MNRRPNLTI   | 25   | 10   |
| >TP53-I251N MNRRPILTII  | 200  | >TP53-I251N MNRRPNLTI   | 140  | 60   |
| >TP53-I251N MNRRPILTI   | 457  | >TP53-I251N MNRRPNLTI   | 350  | 107  |
| >TP53-I251N MNRRPILTI   | 399  | >TP53-I251N MNRRPNLTI   | 338  | 61   |
| >TP53-I251N GMNRRPIL    | 678  | >TP53-I251N GMNRRPNL    | 215  | 463  |
| >TP53-I251N GMNRRPILTI  | 185  | >TP53-I251N GMNRRPNLT   | 276  | 91   |
| >TP53-I251N GMNRRPILTI  | 168  | >TP53-I251N GMNRRPNLT   | 210  | 42   |
| >TP53-I251N GMNRRPIL    | 213  | >TP53-I251N GMNRRPNL    | 113  | 100  |
| >TP53-I251N GMNRRPILT   | 728  | >TP53-I251N GMNRRPNLT   | 331  | 397  |

|                          |      |                          |      |      |
|--------------------------|------|--------------------------|------|------|
| >TP53-I251N GMNRRPILTI   | 61   | >TP53-I251N GMNRRPNLT    | 236  | 175  |
| >TP53-I251N GMNRRPILTI   | 13   | >TP53-I251N GMNRRPNLT    | 12   | 1    |
| >TP53-I251N GMNRRPIL     | 229  | >TP53-I251N GMNRRPNL     | 124  | 105  |
| >TP53-I251N GMNRRPILTI   | 10   | >TP53-I251N GMNRRPNLT    | 31   | 21   |
| >TP53-I251N GMNRRPILTI   | 93   | >TP53-I251N GMNRRPNLT    | 132  | 39   |
| >TP53-I251N GMNRRPIL     | 182  | >TP53-I251N GMNRRPNL     | 181  | 1    |
| >TP53-I251N GMNRRPILTI   | 21   | >TP53-I251N GMNRRPNLT    | 39   | 18   |
| >TP53-I251N GMNRRPILTI   | 53   | >TP53-I251N GMNRRPNLT    | 46   | 7    |
| >TP53-I251N GMNRRPIL     | 160  | >TP53-I251N GMNRRPNL     | 110  | 50   |
| >TP53-I251N GMNRRPILTI   | 66   | >TP53-I251N GMNRRPNLT    | 207  | 141  |
| >TP53-I251N GMNRRPILTI   | 192  | >TP53-I251N GMNRRPNLT    | 377  | 185  |
| >TP53-I251N GMNRRPIL     | 32   | >TP53-I251N GMNRRPNL     | 26   | 6    |
| >TP53-I251N GMNRRPILTI   | 43   | >TP53-I251N GMNRRPNLT    | 119  | 76   |
| >TP53-I251N GMNRRPILTI   | 102  | >TP53-I251N GMNRRPNLT    | 121  | 19   |
| >TP53-I251N GMNRRPILTI   | 147  | >TP53-I251N GMNRRPNLT    | 157  | 10   |
| >TP53-I251N GGMNRRPIL    | 444  | >TP53-I251N GGMNRRPNI    | 917  | 473  |
| >TP53-I251N CMGGMNRR     | 88   | >TP53-I251N CMGGMNRR     | 57   | 31   |
| >TP53-I251S- RPILTIITL   | 104  | >TP53-I251S- RPSLTIITL   | 2123 | 2019 |
| >TP53-I251S- RPILTIITL   | 34   | >TP53-I251S- RPSLTIITL   | 33   | 1    |
| >TP53-I251S- RPILTIITL   | 391  | >TP53-I251S- RPSLTIITL   | 532  | 141  |
| >TP53-I251S- RPILTIITL   | 66   | >TP53-I251S- RPSLTIITL   | 153  | 87   |
| >TP53-I251S- RPILTIITL   | 89   | >TP53-I251S- RPSLTIITL   | 87   | 2    |
| >TP53-I251S- RRPILTIITL  | 921  | >TP53-I251S- RRPSLTIITL  | 385  | 536  |
| >TP53-I251S- RRPILTII    | 220  | >TP53-I251S- RRPSLTII    | 228  | 8    |
| >TP53-I251S- RRPILTIITL  | 14   | >TP53-I251S- RRPSLTIITL  | 15   | 1    |
| >TP53-I251S- RRPILTIITL  | 492  | >TP53-I251S- RRPSLTIITL  | 326  | 166  |
| >TP53-I251S- RRPILTII    | 33   | >TP53-I251S- RRPSLTII    | 58   | 25   |
| >TP53-I251S- RRPILTIIT   | 86   | >TP53-I251S- RRPSLTIIT   | 97   | 11   |
| >TP53-I251S- RRPILTIITL  | 16   | >TP53-I251S- RRPSLTIITL  | 22   | 6    |
| >TP53-I251S- RRPILTIITL  | 129  | >TP53-I251S- RRPSLTIITL  | 136  | 7    |
| >TP53-I251S- RRPILTII    | 319  | >TP53-I251S- RRPSLTII    | 722  | 403  |
| >TP53-I251S- RRPILTIIT   | 329  | >TP53-I251S- RRPSLTIIT   | 742  | 413  |
| >TP53-I251S- RRPILTIITL  | 14   | >TP53-I251S- RRPSLTIITL  | 19   | 5    |
| >TP53-I251S- RRPILTIITL  | 467  | >TP53-I251S- RRPSLTIITL  | 877  | 410  |
| >TP53-I251S- NRRPILTI    | 1113 | >TP53-I251S- NRRPSLTI    | 451  | 662  |
| >TP53-I251S- NRRPILTII   | 1273 | >TP53-I251S- NRRPSLTII   | 355  | 918  |
| >TP53-I251S- NRRPILTIITL | 710  | >TP53-I251S- NRRPSLTIITL | 277  | 433  |
| >TP53-I251S- NRRPILTII   | 281  | >TP53-I251S- NRRPSLTII   | 744  | 463  |
| >TP53-I251S- NRRPILTIITL | 50   | >TP53-I251S- NRRPSLTIITL | 79   | 29   |
| >TP53-I251S- NRRPILTII   | 224  | >TP53-I251S- NRRPSLTII   | 843  | 619  |
| >TP53-I251S- NRRPILTIITL | 12   | >TP53-I251S- NRRPSLTIITL | 25   | 13   |
| >TP53-I251S- MNRRPILTI   | 35   | >TP53-I251S- MNRRPSLTI   | 15   | 20   |
| >TP53-I251S- MNRRPILTII  | 200  | >TP53-I251S- MNRRPSLTII  | 87   | 113  |

|                        |      |                        |      |     |
|------------------------|------|------------------------|------|-----|
| >TP53-I251S-MNRRPILTI  | 457  | >TP53-I251S-MNRRPSLTI  | 295  | 162 |
| >TP53-I251S-MNRRPILTII | 821  | >TP53-I251S-MNRRPSLTII | 358  | 463 |
| >TP53-I251S-MNRRPILTI  | 399  | >TP53-I251S-MNRRPSLTI  | 328  | 71  |
| >TP53-I251S-GMNRPPIL   | 678  | >TP53-I251S-GMNRPPSL   | 231  | 447 |
| >TP53-I251S-GMNRPPILTI | 185  | >TP53-I251S-GMNRPPSLTI | 306  | 121 |
| >TP53-I251S-GMNRPPILTI | 168  | >TP53-I251S-GMNRPPSLTI | 227  | 59  |
| >TP53-I251S-GMNRPPIL   | 213  | >TP53-I251S-GMNRPPSL   | 59   | 154 |
| >TP53-I251S-GMNRPPILT  | 728  | >TP53-I251S-GMNRPPSLT  | 106  | 622 |
| >TP53-I251S-GMNRPPILTI | 61   | >TP53-I251S-GMNRPPSLTI | 146  | 85  |
| >TP53-I251S-GMNRPPILTI | 13   | >TP53-I251S-GMNRPPSLTI | 8    | 5   |
| >TP53-I251S-GMNRPPIL   | 229  | >TP53-I251S-GMNRPPSL   | 56   | 173 |
| >TP53-I251S-GMNRPPILTI | 10   | >TP53-I251S-GMNRPPSLTI | 19   | 9   |
| >TP53-I251S-GMNRPPILTI | 93   | >TP53-I251S-GMNRPPSLTI | 126  | 33  |
| >TP53-I251S-GMNRPPIL   | 182  | >TP53-I251S-GMNRPPSL   | 112  | 70  |
| >TP53-I251S-GMNRPPILTI | 21   | >TP53-I251S-GMNRPPSLTI | 26   | 5   |
| >TP53-I251S-GMNRPPILTI | 53   | >TP53-I251S-GMNRPPSLTI | 61   | 8   |
| >TP53-I251S-GMNRPPIL   | 160  | >TP53-I251S-GMNRPPSL   | 99   | 61  |
| >TP53-I251S-GMNRPPILTI | 66   | >TP53-I251S-GMNRPPSLTI | 114  | 48  |
| >TP53-I251S-GMNRPPILTI | 192  | >TP53-I251S-GMNRPPSLTI | 313  | 121 |
| >TP53-I251S-GMNRPPIL   | 32   | >TP53-I251S-GMNRPPSL   | 16   | 16  |
| >TP53-I251S-GMNRPPILTI | 43   | >TP53-I251S-GMNRPPSLTI | 70   | 27  |
| >TP53-I251S-GMNRPPILTI | 102  | >TP53-I251S-GMNRPPSLTI | 95   | 7   |
| >TP53-I251S-GMNRPPILTI | 147  | >TP53-I251S-GMNRPPSLTI | 189  | 42  |
| >TP53-I251S-GMNRPPIL   | 1241 | >TP53-I251S-GMNRPPSL   | 319  | 922 |
| >TP53-I251S-GGMNRPPIL  | 444  | >TP53-I251S-GGMNRPPSL  | 118  | 326 |
| >TP53-I251S-GGMNRPPIL  | 538  | >TP53-I251S-GGMNRPPSL  | 464  | 74  |
| >TP53-I251S-CMGGMNRR   | 88   | >TP53-I251S-CMGGMNRR   | 33   | 55  |
| >TP53-I251T-PILTIITL   | 1347 | >TP53-I251T-PTLTIITL   | 405  | 942 |
| >TP53-I251T-RPILTIITL  | 104  | >TP53-I251T-RPTLTIITL  | 1097 | 993 |
| >TP53-I251T-RPILTIITL  | 34   | >TP53-I251T-RPTLTIITL  | 52   | 18  |
| >TP53-I251T-RPILTIITL  | 391  | >TP53-I251T-RPTLTIITL  | 767  | 376 |
| >TP53-I251T-RPILTIITL  | 66   | >TP53-I251T-RPTLTIITL  | 520  | 454 |
| >TP53-I251T-RPILTIITL  | 89   | >TP53-I251T-RPTLTIITL  | 229  | 140 |
| >TP53-I251T-RRPILTII   | 220  | >TP53-I251T-RRPTLTII   | 235  | 15  |
| >TP53-I251T-RRPILTIITL | 14   | >TP53-I251T-RRPTLTIITL | 15   | 1   |
| >TP53-I251T-RRPILTIITL | 492  | >TP53-I251T-RRPTLTIITL | 619  | 127 |
| >TP53-I251T-RRPILTII   | 33   | >TP53-I251T-RRPTLTII   | 22   | 11  |
| >TP53-I251T-RRPILTIIT  | 86   | >TP53-I251T-RRPTLTIIT  | 68   | 18  |
| >TP53-I251T-RRPILTIITL | 16   | >TP53-I251T-RRPTLTIITL | 17   | 1   |
| >TP53-I251T-RRPILTIITL | 129  | >TP53-I251T-RRPTLTIITL | 101  | 28  |
| >TP53-I251T-RRPILTII   | 319  | >TP53-I251T-RRPTLTII   | 352  | 33  |
| >TP53-I251T-RRPILTIIT  | 329  | >TP53-I251T-RRPTLTIIT  | 492  | 163 |
| >TP53-I251T-RRPILTIITL | 14   | >TP53-I251T-RRPTLTIITL | 15   | 1   |

|                          |      |                          |     |      |
|--------------------------|------|--------------------------|-----|------|
| >TP53-I251T·RRPILTIITLE  | 467  | >TP53-I251T·RRPTLTIITLE  | 640 | 173  |
| >TP53-I251T·NRRPILTIITL  | 710  | >TP53-I251T·NRRPTLTIITL  | 392 | 318  |
| >TP53-I251T·NRRPILTIITL  | 701  | >TP53-I251T·NRRPTLTIITL  | 384 | 317  |
| >TP53-I251T·NRRPILTII    | 281  | >TP53-I251T·NRRPTLTII    | 393 | 112  |
| >TP53-I251T·NRRPILTIITL  | 50   | >TP53-I251T·NRRPTLTIITL  | 58  | 8    |
| >TP53-I251T·NRRPILTII    | 224  | >TP53-I251T·NRRPTLTII    | 455 | 231  |
| >TP53-I251T·NRRPILTIITL  | 12   | >TP53-I251T·NRRPTLTIITL  | 18  | 6    |
| >TP53-I251T·MNRRRPILTI   | 35   | >TP53-I251T·MNRRRPTLTI   | 21  | 14   |
| >TP53-I251T·MNRRRPILTII  | 200  | >TP53-I251T·MNRRRPTLTII  | 95  | 105  |
| >TP53-I251T·MNRRRPILTI   | 457  | >TP53-I251T·MNRRRPTLTI   | 404 | 53   |
| >TP53-I251T·MNRRRPILTII  | 821  | >TP53-I251T·MNRRRPTLTII  | 481 | 340  |
| >TP53-I251T·MNRRRPILTI   | 399  | >TP53-I251T·MNRRRPTLTI   | 243 | 156  |
| >TP53-I251T·GMNRRRPIL    | 678  | >TP53-I251T·GMNRRRPTL    | 416 | 262  |
| >TP53-I251T·GMNRRRPILTI  | 185  | >TP53-I251T·GMNRRRPTLTI  | 224 | 39   |
| >TP53-I251T·GMNRRRPILTII | 168  | >TP53-I251T·GMNRRRPTLTII | 219 | 51   |
| >TP53-I251T·GMNRRRPIL    | 213  | >TP53-I251T·GMNRRRPTL    | 73  | 140  |
| >TP53-I251T·GMNRRRPILT   | 728  | >TP53-I251T·GMNRRRPTLT   | 100 | 628  |
| >TP53-I251T·GMNRRRPILTI  | 61   | >TP53-I251T·GMNRRRPTLTI  | 85  | 24   |
| >TP53-I251T·GMNRRRPILTII | 13   | >TP53-I251T·GMNRRRPTLTII | 9   | 4    |
| >TP53-I251T·GMNRRRPIL    | 229  | >TP53-I251T·GMNRRRPTL    | 42  | 187  |
| >TP53-I251T·GMNRRRPILTI  | 10   | >TP53-I251T·GMNRRRPTLTI  | 20  | 10   |
| >TP53-I251T·GMNRRRPILTII | 93   | >TP53-I251T·GMNRRRPTLTII | 117 | 24   |
| >TP53-I251T·GMNRRRPIL    | 182  | >TP53-I251T·GMNRRRPTL    | 61  | 121  |
| >TP53-I251T·GMNRRRPILTI  | 21   | >TP53-I251T·GMNRRRPTLTI  | 29  | 8    |
| >TP53-I251T·GMNRRRPILTII | 53   | >TP53-I251T·GMNRRRPTLTII | 65  | 12   |
| >TP53-I251T·GMNRRRPIL    | 160  | >TP53-I251T·GMNRRRPTL    | 60  | 100  |
| >TP53-I251T·GMNRRRPILTI  | 66   | >TP53-I251T·GMNRRRPTLTI  | 102 | 36   |
| >TP53-I251T·GMNRRRPILTII | 192  | >TP53-I251T·GMNRRRPTLTII | 233 | 41   |
| >TP53-I251T·GMNRRRPIL    | 32   | >TP53-I251T·GMNRRRPTL    | 15  | 17   |
| >TP53-I251T·GMNRRRPILTI  | 43   | >TP53-I251T·GMNRRRPTLTI  | 57  | 14   |
| >TP53-I251T·GMNRRRPILTII | 102  | >TP53-I251T·GMNRRRPTLTII | 96  | 6    |
| >TP53-I251T·GMNRRRPILTI  | 147  | >TP53-I251T·GMNRRRPTLTI  | 85  | 62   |
| >TP53-I251T·GGMNRRPIL    | 444  | >TP53-I251T·GGMNRRRPTL   | 225 | 219  |
| >TP53-I251T·GGMNRRPIL    | 538  | >TP53-I251T·GGMNRRRPTL   | 395 | 143  |
| >TP53-I251T·CMGGMNRR     | 635  | >TP53-I251T·CMGGMNRR     | 498 | 137  |
| >TP53-I251T·CMGGMNRR     | 2150 | >TP53-I251T·CMGGMNRR     | 370 | 1780 |
| >TP53-I251T·CMGGMNRR     | 88   | >TP53-I251T·CMGGMNRR     | 31  | 57   |
| >TP53-I251V·SCMGGMNR     | 1031 | >TP53-I251V·SCMGGMNR     | 182 | 849  |
| >TP53-I251V·RPILTIITL    | 104  | >TP53-I251V·RPVLTIIITL   | 505 | 401  |
| >TP53-I251V·RPILTIITL    | 34   | >TP53-I251V·RPVLTIIITL   | 40  | 6    |
| >TP53-I251V·RPILTIITL    | 391  | >TP53-I251V·RPVLTIIITL   | 362 | 29   |
| >TP53-I251V·RPILTIITL    | 66   | >TP53-I251V·RPVLTIIITL   | 91  | 25   |
| >TP53-I251V·RPILTIITL    | 89   | >TP53-I251V·RPVLTIIITL   | 97  | 8    |

|                         |      |                          |     |      |
|-------------------------|------|--------------------------|-----|------|
| >TP53-I251V·RRPILTII    | 220  | >TP53-I251V·RRPVLTII     | 198 | 22   |
| >TP53-I251V·RRPILTIITL  | 14   | >TP53-I251V·RRPVLTIIITL  | 16  | 2    |
| >TP53-I251V·RRPILTIITL  | 492  | >TP53-I251V·RRPVLTIIITL  | 936 | 444  |
| >TP53-I251V·RRPILTII    | 33   | >TP53-I251V·RRPVLTII     | 29  | 4    |
| >TP53-I251V·RRPILTIIT   | 86   | >TP53-I251V·RRPVLTIIIT   | 69  | 17   |
| >TP53-I251V·RRPILTIITL  | 16   | >TP53-I251V·RRPVLTIIITL  | 17  | 1    |
| >TP53-I251V·RRPILTIITLE | 129  | >TP53-I251V·RRPVLTIIITLE | 105 | 24   |
| >TP53-I251V·RRPILTII    | 319  | >TP53-I251V·RRPVLTII     | 263 | 56   |
| >TP53-I251V·RRPILTIIT   | 329  | >TP53-I251V·RRPVLTIIIT   | 276 | 53   |
| >TP53-I251V·RRPILTIITL  | 14   | >TP53-I251V·RRPVLTIIITL  | 17  | 3    |
| >TP53-I251V·RRPILTIITLE | 467  | >TP53-I251V·RRPVLTIIITLE | 397 | 70   |
| >TP53-I251V·NRRPILTII   | 281  | >TP53-I251V·NRRPVLTII    | 265 | 16   |
| >TP53-I251V·NRRPILTIITL | 50   | >TP53-I251V·NRRPVLTIIITL | 49  | 1    |
| >TP53-I251V·NRRPILTII   | 224  | >TP53-I251V·NRRPVLTII    | 289 | 65   |
| >TP53-I251V·NRRPILTIITL | 12   | >TP53-I251V·NRRPVLTIIITL | 15  | 3    |
| >TP53-I251V·MNRRPILTI   | 35   | >TP53-I251V·MNRRPVLTII   | 37  | 2    |
| >TP53-I251V·MNRRPILTI   | 200  | >TP53-I251V·MNRRPVLTII   | 216 | 16   |
| >TP53-I251V·MNRRPILTI   | 457  | >TP53-I251V·MNRRPVLTII   | 267 | 190  |
| >TP53-I251V·MNRRPILTI   | 399  | >TP53-I251V·MNRRPVLTII   | 632 | 233  |
| >TP53-I251V·GMNRRPILTI  | 185  | >TP53-I251V·GMNRRPVLTII  | 275 | 90   |
| >TP53-I251V·GMNRRPILTI  | 168  | >TP53-I251V·GMNRRPVLTII  | 177 | 9    |
| >TP53-I251V·GMNRRPIL    | 213  | >TP53-I251V·GMNRRPVLTII  | 239 | 26   |
| >TP53-I251V·GMNRRPILTI  | 61   | >TP53-I251V·GMNRRPVLTII  | 94  | 33   |
| >TP53-I251V·GMNRRPILTI  | 13   | >TP53-I251V·GMNRRPVLTII  | 13  | 0    |
| >TP53-I251V·GMNRRPIL    | 229  | >TP53-I251V·GMNRRPVLTII  | 93  | 136  |
| >TP53-I251V·GMNRRPILTI  | 10   | >TP53-I251V·GMNRRPVLTII  | 12  | 2    |
| >TP53-I251V·GMNRRPILTI  | 93   | >TP53-I251V·GMNRRPVLTII  | 70  | 23   |
| >TP53-I251V·GMNRRPIL    | 182  | >TP53-I251V·GMNRRPVLTII  | 147 | 35   |
| >TP53-I251V·GMNRRPILTI  | 21   | >TP53-I251V·GMNRRPVLTII  | 22  | 1    |
| >TP53-I251V·GMNRRPILTI  | 53   | >TP53-I251V·GMNRRPVLTII  | 50  | 3    |
| >TP53-I251V·GMNRRPIL    | 160  | >TP53-I251V·GMNRRPVLTII  | 131 | 29   |
| >TP53-I251V·GMNRRPILTI  | 66   | >TP53-I251V·GMNRRPVLTII  | 69  | 3    |
| >TP53-I251V·GMNRRPILTI  | 192  | >TP53-I251V·GMNRRPVLTII  | 160 | 32   |
| >TP53-I251V·GMNRRPIL    | 32   | >TP53-I251V·GMNRRPVLTII  | 25  | 7    |
| >TP53-I251V·GMNRRPILTI  | 43   | >TP53-I251V·GMNRRPVLTII  | 46  | 3    |
| >TP53-I251V·GMNRRPILTI  | 102  | >TP53-I251V·GMNRRPVLTII  | 103 | 1    |
| >TP53-I251V·GMNRRPILTI  | 147  | >TP53-I251V·GMNRRPVLTII  | 93  | 54   |
| >TP53-I251V·GGMNRRPIL   | 444  | >TP53-I251V·GGMNRRPVLTII | 265 | 179  |
| >TP53-I251V·CMGGMNRR    | 1329 | >TP53-I251V·CMGGMNRR     | 373 | 956  |
| >TP53-I251V·CMGGMNRR    | 984  | >TP53-I251V·CMGGMNRR     | 63  | 921  |
| >TP53-I251V·CMGGMNRR    | 3061 | >TP53-I251V·CMGGMNRR     | 496 | 2565 |
| >TP53-I251V·CMGGMNRR    | 6204 | >TP53-I251V·CMGGMNRR     | 479 | 5725 |
| >TP53-I251V·CMGGMNRR    | 1849 | >TP53-I251V·CMGGMNRR     | 14  | 1835 |

|                         |      |                         |       |       |
|-------------------------|------|-------------------------|-------|-------|
| >TP53-I251V·CMGGMNRR    | 88   | >TP53-I251V·CMGGMNRR    | 70    | 18    |
| >TP53-I254D ILTIITLEDSS | 1325 | >TP53-I254D ILTDITLEDSS | 201   | 1124  |
| >TP53-I254D ILTIITLEDSS | 3891 | >TP53-I254D ILTDITLEDSS | 265   | 3626  |
| >TP53-I254D ILTIITLEDSS | 4003 | >TP53-I254D ILTDITLEDSS | 313   | 3690  |
| >TP53-I254D RPILTIITL   | 104  | >TP53-I254D RPILTDITL   | 109   | 5     |
| >TP53-I254D RPILTIITL   | 34   | >TP53-I254D RPILTDITL   | 59    | 25    |
| >TP53-I254D RPILTIITL   | 391  | >TP53-I254D RPILTDITL   | 98    | 293   |
| >TP53-I254D RPILTIITL   | 66   | >TP53-I254D RPILTDITL   | 292   | 226   |
| >TP53-I254D RPILTIITL   | 89   | >TP53-I254D RPILTDITL   | 278   | 189   |
| >TP53-I254D RRPILTII    | 220  | >TP53-I254D RRPILTDI    | 580   | 360   |
| >TP53-I254D RRPILTIITL  | 14   | >TP53-I254D RRPILTDITL  | 14    | 0     |
| >TP53-I254D RRPILTIITL  | 492  | >TP53-I254D RRPILTDITL  | 4186  | 3694  |
| >TP53-I254D RRPILTII    | 33   | >TP53-I254D RRPILTDI    | 22    | 11    |
| >TP53-I254D RRPILTIIT   | 86   | >TP53-I254D RRPILTDIT   | 220   | 134   |
| >TP53-I254D RRPILTIITL  | 16   | >TP53-I254D RRPILTDITL  | 16    | 0     |
| >TP53-I254D RRPILTIITL  | 129  | >TP53-I254D RRPILTDITL  | 247   | 118   |
| >TP53-I254D RRPILTII    | 319  | >TP53-I254D RRPILTDI    | 259   | 60    |
| >TP53-I254D RRPILTIIT   | 329  | >TP53-I254D RRPILTDIT   | 878   | 549   |
| >TP53-I254D RRPILTIITL  | 14   | >TP53-I254D RRPILTDITL  | 16    | 2     |
| >TP53-I254D RRPILTIITL  | 467  | >TP53-I254D RRPILTDITL  | 960   | 493   |
| >TP53-I254D NRRPILTII   | 281  | >TP53-I254D NRRPILTDI   | 414   | 133   |
| >TP53-I254D NRRPILTIITL | 50   | >TP53-I254D NRRPILTDITL | 96    | 46    |
| >TP53-I254D NRRPILTII   | 224  | >TP53-I254D NRRPILTDI   | 590   | 366   |
| >TP53-I254D NRRPILTIITL | 12   | >TP53-I254D NRRPILTDITL | 44    | 32    |
| >TP53-I254D MNRRPILTI   | 35   | >TP53-I254D MNRRPILTD   | 2101  | 2066  |
| >TP53-I254D MNRRPILTII  | 200  | >TP53-I254D MNRRPILTDI  | 740   | 540   |
| >TP53-I254D MNRRPILTI   | 457  | >TP53-I254D MNRRPILTD   | 20157 | 19700 |
| >TP53-I254D MNRRPILTI   | 399  | >TP53-I254D MNRRPILTD   | 41107 | 40708 |
| >TP53-I254D GMNRRPILTI  | 185  | >TP53-I254D GMNRRPILTE  | 18987 | 18802 |
| >TP53-I254D GMNRRPILTI  | 168  | >TP53-I254D GMNRRPILTE  | 335   | 167   |
| >TP53-I254D GMNRRPILTI  | 61   | >TP53-I254D GMNRRPILTE  | 12343 | 12282 |
| >TP53-I254D GMNRRPILTI  | 13   | >TP53-I254D GMNRRPILTE  | 19    | 6     |
| >TP53-I254D GMNRRPILTI  | 10   | >TP53-I254D GMNRRPILTE  | 7514  | 7504  |
| >TP53-I254D GMNRRPILTI  | 93   | >TP53-I254D GMNRRPILTE  | 145   | 52    |
| >TP53-I254D GMNRRPILTI  | 21   | >TP53-I254D GMNRRPILTE  | 15968 | 15947 |
| >TP53-I254D GMNRRPILTI  | 53   | >TP53-I254D GMNRRPILTE  | 127   | 74    |
| >TP53-I254D GMNRRPILTI  | 66   | >TP53-I254D GMNRRPILTE  | 18234 | 18168 |
| >TP53-I254D GMNRRPILTI  | 192  | >TP53-I254D GMNRRPILTE  | 232   | 40    |
| >TP53-I254D GMNRRPILTI  | 43   | >TP53-I254D GMNRRPILTE  | 14687 | 14644 |
| >TP53-I254D GMNRRPILTI  | 102  | >TP53-I254D GMNRRPILTE  | 102   | 0     |
| >TP53-I254D GMNRRPILTI  | 147  | >TP53-I254D GMNRRPILTE  | 11225 | 11078 |
| >TP53-I254F·IITLEDSSGNL | 1406 | >TP53-I254F·FITLEDSSGNL | 75    | 1331  |
| >TP53-I254F·IITLEDSSGNL | 2966 | >TP53-I254F·FITLEDSSGNL | 372   | 2594  |

|                         |       |                         |       |       |
|-------------------------|-------|-------------------------|-------|-------|
| >TP53-I254F-IITLEDSSGNL | 2131  | >TP53-I254F-FITLEDSSGNL | 212   | 1919  |
| >TP53-I254F-GGMNRRPIL   | 10442 | >TP53-I254F-GGMNRRPIL   | 455   | 9987  |
| >TP53-I254F-GGMNRRPIL   | 2293  | >TP53-I254F-GGMNRRPIL   | 196   | 2097  |
| >TP53-I254F-RPILTIITL   | 104   | >TP53-I254F-RPILTFITL   | 45    | 59    |
| >TP53-I254F-RPILTIITL   | 34    | >TP53-I254F-RPILTFITL   | 27    | 7     |
| >TP53-I254F-RPILTIITL   | 391   | >TP53-I254F-RPILTFITL   | 255   | 136   |
| >TP53-I254F-RPILTIITL   | 66    | >TP53-I254F-RPILTFITL   | 75    | 9     |
| >TP53-I254F-RPILTIIT    | 1102  | >TP53-I254F-RPILTFIT    | 227   | 875   |
| >TP53-I254F-RPILTIITL   | 89    | >TP53-I254F-RPILTFITL   | 141   | 52    |
| >TP53-I254F-RPILTIITL   | 671   | >TP53-I254F-RPILTFITL   | 361   | 310   |
| >TP53-I254F-RPILTIITL   | 915   | >TP53-I254F-RPILTFITL   | 459   | 456   |
| >TP53-I254F-RRPILTI     | 220   | >TP53-I254F-RRPILTFI    | 121   | 99    |
| >TP53-I254F-RRPILTIITL  | 14    | >TP53-I254F-RRPILTFITL  | 12    | 2     |
| >TP53-I254F-RRPILTIITL  | 492   | >TP53-I254F-RRPILTFITL  | 267   | 225   |
| >TP53-I254F-RRPILTI     | 33    | >TP53-I254F-RRPILTFI    | 28    | 5     |
| >TP53-I254F-RRPILTIIT   | 86    | >TP53-I254F-RRPILTFIT   | 112   | 26    |
| >TP53-I254F-RRPILTIITL  | 16    | >TP53-I254F-RRPILTFITL  | 13    | 3     |
| >TP53-I254F-RRPILTIITL  | 129   | >TP53-I254F-RRPILTFITL  | 123   | 6     |
| >TP53-I254F-RRPILTI     | 319   | >TP53-I254F-RRPILTFI    | 282   | 37    |
| >TP53-I254F-RRPILTIIT   | 329   | >TP53-I254F-RRPILTFIT   | 651   | 322   |
| >TP53-I254F-RRPILTIITL  | 14    | >TP53-I254F-RRPILTFITL  | 11    | 3     |
| >TP53-I254F-RRPILTIITL  | 467   | >TP53-I254F-RRPILTFITL  | 538   | 71    |
| >TP53-I254F-NRRPILTI    | 1242  | >TP53-I254F-NRRPILTFI   | 66    | 1176  |
| >TP53-I254F-NRRPILTI    | 1113  | >TP53-I254F-NRRPILTF    | 59    | 1054  |
| >TP53-I254F-NRRPILTI    | 281   | >TP53-I254F-NRRPILTFI   | 225   | 56    |
| >TP53-I254F-NRRPILTIITL | 50    | >TP53-I254F-NRRPILTFITL | 48    | 2     |
| >TP53-I254F-NRRPILTI    | 224   | >TP53-I254F-NRRPILTFI   | 111   | 113   |
| >TP53-I254F-NRRPILTIITL | 12    | >TP53-I254F-NRRPILTFITL | 9     | 3     |
| >TP53-I254F-MNRRPILTI   | 35    | >TP53-I254F-MNRRPILTF   | 1395  | 1360  |
| >TP53-I254F-MNRRPILTI   | 200   | >TP53-I254F-MNRRPILTFI  | 36    | 164   |
| >TP53-I254F-MNRRPILTI   | 8517  | >TP53-I254F-MNRRPILTF   | 249   | 8268  |
| >TP53-I254F-MNRRPILTI   | 457   | >TP53-I254F-MNRRPILTF   | 10    | 447   |
| >TP53-I254F-MNRRPILTI   | 8475  | >TP53-I254F-MNRRPILTF   | 444   | 8031  |
| >TP53-I254F-MNRRPILTI   | 1235  | >TP53-I254F-MNRRPILTF   | 134   | 1101  |
| >TP53-I254F-MNRRPILTI   | 399   | >TP53-I254F-MNRRPILTF   | 23294 | 22895 |
| >TP53-I254F-GMNRRPILTI  | 755   | >TP53-I254F-GMNRRPILTF  | 137   | 618   |
| >TP53-I254F-GMNRRPILTI  | 185   | >TP53-I254F-GMNRRPILTF  | 9559  | 9374  |
| >TP53-I254F-GMNRRPILTI  | 168   | >TP53-I254F-GMNRRPILTF  | 33    | 135   |
| >TP53-I254F-GMNRRPILTI  | 61    | >TP53-I254F-GMNRRPILTF  | 8050  | 7989  |
| >TP53-I254F-GMNRRPILTI  | 13    | >TP53-I254F-GMNRRPILTF  | 8     | 5     |
| >TP53-I254F-GMNRRPILTI  | 10    | >TP53-I254F-GMNRRPILTF  | 877   | 867   |
| >TP53-I254F-GMNRRPILTI  | 93    | >TP53-I254F-GMNRRPILTF  | 16    | 77    |
| >TP53-I254F-GMNRRPILTI  | 21    | >TP53-I254F-GMNRRPILTF  | 6239  | 6218  |



|                         |      |                          |       |       |
|-------------------------|------|--------------------------|-------|-------|
| >TP53-I254F-GMNRRPILTI  | 53   | >TP53-I254F-GMNRRPILTF   | 21    | 32    |
| >TP53-I254F-GMNRRPILTI  | 66   | >TP53-I254F-GMNRRPILTF   | 12641 | 12575 |
| >TP53-I254F-GMNRRPILTI  | 192  | >TP53-I254F-GMNRRPILTF   | 36    | 156   |
| >TP53-I254F-GMNRRPILTI  | 43   | >TP53-I254F-GMNRRPILTF   | 3273  | 3230  |
| >TP53-I254F-GMNRRPILTI  | 102  | >TP53-I254F-GMNRRPILTF   | 47    | 55    |
| >TP53-I254F-GMNRRPILTI  | 147  | >TP53-I254F-GMNRRPILTF   | 150   | 3     |
| >TP53-I254F-GMNRRPILTI  | 3384 | >TP53-I254F-GMNRRPILTF   | 107   | 3277  |
| >TP53-I254F-GMNRRPILTI  | 844  | >TP53-I254F-GMNRRPILTF   | 15    | 829   |
| >TP53-I254N RPILTIITL   | 104  | >TP53-I254N RPILTNI TL   | 186   | 82    |
| >TP53-I254N RPILTIITL   | 34   | >TP53-I254N RPILTNI TL   | 21    | 13    |
| >TP53-I254N RPILTIITL   | 391  | >TP53-I254N RPILTNI TL   | 313   | 78    |
| >TP53-I254N RPILTIITL   | 66   | >TP53-I254N RPILTNI TL   | 46    | 20    |
| >TP53-I254N RPILTIITL   | 89   | >TP53-I254N RPILTNI TL   | 211   | 122   |
| >TP53-I254N RRPILTII    | 220  | >TP53-I254N RRPILTNI     | 166   | 54    |
| >TP53-I254N RRPILTIITL  | 14   | >TP53-I254N RRPILTNI TL  | 17    | 3     |
| >TP53-I254N RRPILTIITL  | 492  | >TP53-I254N RRPILTNI TL  | 1494  | 1002  |
| >TP53-I254N RRPILTII    | 33   | >TP53-I254N RRPILTNI     | 24    | 9     |
| >TP53-I254N RRPILTIIT   | 86   | >TP53-I254N RRPILTNI T   | 166   | 80    |
| >TP53-I254N RRPILTIITL  | 16   | >TP53-I254N RRPILTNI TL  | 18    | 2     |
| >TP53-I254N RRPILTIITLE | 129  | >TP53-I254N RRPILTNI TLE | 216   | 87    |
| >TP53-I254N RRPILTII    | 319  | >TP53-I254N RRPILTNI     | 129   | 190   |
| >TP53-I254N RRPILTIIT   | 329  | >TP53-I254N RRPILTNI T   | 381   | 52    |
| >TP53-I254N RRPILTIITL  | 14   | >TP53-I254N RRPILTNI TL  | 18    | 4     |
| >TP53-I254N RRPILTIITLE | 467  | >TP53-I254N RRPILTNI TLE | 630   | 163   |
| >TP53-I254N NRRPILTI    | 281  | >TP53-I254N NRRPILTNI    | 609   | 328   |
| >TP53-I254N NRRPILTIITL | 50   | >TP53-I254N NRRPILTNI TL | 70    | 20    |
| >TP53-I254N NRRPILTIITL | 224  | >TP53-I254N NRRPILTNI TL | 242   | 18    |
| >TP53-I254N NRRPILTIITL | 12   | >TP53-I254N NRRPILTNI TL | 22    | 10    |
| >TP53-I254N MNRRPILTI   | 35   | >TP53-I254N MNRRPILTN    | 1779  | 1744  |
| >TP53-I254N MNRRPILTI   | 200  | >TP53-I254N MNRRPILTN    | 155   | 45    |
| >TP53-I254N MNRRPILTI   | 457  | >TP53-I254N MNRRPILTN    | 13540 | 13083 |
| >TP53-I254N MNRRPILTI   | 399  | >TP53-I254N MNRRPILTN    | 39003 | 38604 |
| >TP53-I254N GMNRRPILTI  | 755  | >TP53-I254N GMNRRPILTN   | 424   | 331   |
| >TP53-I254N GMNRRPILTI  | 185  | >TP53-I254N GMNRRPILTN   | 21158 | 20973 |
| >TP53-I254N GMNRRPILTI  | 168  | >TP53-I254N GMNRRPILTN   | 84    | 84    |
| >TP53-I254N GMNRRPILTI  | 61   | >TP53-I254N GMNRRPILTN   | 14463 | 14402 |
| >TP53-I254N GMNRRPILTI  | 13   | >TP53-I254N GMNRRPILTN   | 9     | 4     |
| >TP53-I254N GMNRRPILTI  | 10   | >TP53-I254N GMNRRPILTN   | 3901  | 3891  |
| >TP53-I254N GMNRRPILTI  | 93   | >TP53-I254N GMNRRPILTN   | 39    | 54    |
| >TP53-I254N GMNRRPILTI  | 21   | >TP53-I254N GMNRRPILTN   | 15056 | 15035 |
| >TP53-I254N GMNRRPILTI  | 53   | >TP53-I254N GMNRRPILTN   | 46    | 7     |
| >TP53-I254N GMNRRPILTI  | 66   | >TP53-I254N GMNRRPILTN   | 17051 | 16985 |
| >TP53-I254N GMNRRPILTI  | 192  | >TP53-I254N GMNRRPILTN   | 97    | 95    |

|                          |      |                          |       |       |
|--------------------------|------|--------------------------|-------|-------|
| >TP53-I254N GMNRRPILTI   | 43   | >TP53-I254N GMNRRPILTI   | 11233 | 11190 |
| >TP53-I254N GMNRRPILTI   | 102  | >TP53-I254N GMNRRPILTI   | 58    | 44    |
| >TP53-I254N GMNRRPILTI   | 147  | >TP53-I254N GMNRRPILTI   | 11547 | 11400 |
| >TP53-I254S- RPILTIITL   | 104  | >TP53-I254S- RPILTSITL   | 142   | 38    |
| >TP53-I254S- RPILTIIT    | 1023 | >TP53-I254S- RPILTSIT    | 257   | 766   |
| >TP53-I254S- RPILTIITL   | 34   | >TP53-I254S- RPILTSITL   | 15    | 19    |
| >TP53-I254S- RPILTIITL   | 391  | >TP53-I254S- RPILTSITL   | 124   | 267   |
| >TP53-I254S- RPILTIITL   | 66   | >TP53-I254S- RPILTSITL   | 35    | 31    |
| >TP53-I254S- RPILTIITL   | 89   | >TP53-I254S- RPILTSITL   | 49    | 40    |
| >TP53-I254S- RRPILTII    | 220  | >TP53-I254S- RRPILTSI    | 138   | 82    |
| >TP53-I254S- RRPILTIITL  | 14   | >TP53-I254S- RRPILTSITL  | 17    | 3     |
| >TP53-I254S- RRPILTIITL  | 492  | >TP53-I254S- RRPILTSITL  | 1449  | 957   |
| >TP53-I254S- RRPILTII    | 33   | >TP53-I254S- RRPILTSI    | 26    | 7     |
| >TP53-I254S- RRPILTIIT   | 86   | >TP53-I254S- RRPILTSIT   | 114   | 28    |
| >TP53-I254S- RRPILTIITL  | 16   | >TP53-I254S- RRPILTSITL  | 16    | 0     |
| >TP53-I254S- RRPILTIITL  | 129  | >TP53-I254S- RRPILTSITL  | 195   | 66    |
| >TP53-I254S- RRPILTII    | 319  | >TP53-I254S- RRPILTSI    | 167   | 152   |
| >TP53-I254S- RRPILTIIT   | 329  | >TP53-I254S- RRPILTSIT   | 273   | 56    |
| >TP53-I254S- RRPILTIITL  | 14   | >TP53-I254S- RRPILTSITL  | 16    | 2     |
| >TP53-I254S- RRPILTIITL  | 467  | >TP53-I254S- RRPILTSITL  | 649   | 182   |
| >TP53-I254S- NRRPILTIITL | 701  | >TP53-I254S- NRRPILTSITL | 439   | 262   |
| >TP53-I254S- NRRPILTII   | 281  | >TP53-I254S- NRRPILTSI   | 592   | 311   |
| >TP53-I254S- NRRPILTIITL | 50   | >TP53-I254S- NRRPILTSITL | 80    | 30    |
| >TP53-I254S- NRRPILTII   | 224  | >TP53-I254S- NRRPILTSI   | 296   | 72    |
| >TP53-I254S- NRRPILTIITL | 12   | >TP53-I254S- NRRPILTSITL | 25    | 13    |
| >TP53-I254S- MNRRPILTI   | 35   | >TP53-I254S- MNRRPILTS   | 449   | 414   |
| >TP53-I254S- MNRRPILTII  | 200  | >TP53-I254S- MNRRPILTSI  | 104   | 96    |
| >TP53-I254S- MNRRPILTI   | 457  | >TP53-I254S- MNRRPILTS   | 10337 | 9880  |
| >TP53-I254S- MNRRPILTII  | 821  | >TP53-I254S- MNRRPILTSI  | 433   | 388   |
| >TP53-I254S- MNRRPILTI   | 399  | >TP53-I254S- MNRRPILTS   | 34108 | 33709 |
| >TP53-I254S- GMNRRPILTI  | 755  | >TP53-I254S- GMNRRPILTS  | 267   | 488   |
| >TP53-I254S- GMNRRPILTI  | 185  | >TP53-I254S- GMNRRPILTS  | 8899  | 8714  |
| >TP53-I254S- GMNRRPILTI  | 168  | >TP53-I254S- GMNRRPILTS  | 77    | 91    |
| >TP53-I254S- GMNRRPILTI  | 61   | >TP53-I254S- GMNRRPILTS  | 3927  | 3866  |
| >TP53-I254S- GMNRRPILTI  | 13   | >TP53-I254S- GMNRRPILTS  | 8     | 5     |
| >TP53-I254S- GMNRRPILTI  | 10   | >TP53-I254S- GMNRRPILTS  | 1105  | 1095  |
| >TP53-I254S- GMNRRPILTI  | 93   | >TP53-I254S- GMNRRPILTS  | 22    | 71    |
| >TP53-I254S- GMNRRPILTI  | 21   | >TP53-I254S- GMNRRPILTS  | 6695  | 6674  |
| >TP53-I254S- GMNRRPILTI  | 53   | >TP53-I254S- GMNRRPILTS  | 30    | 23    |
| >TP53-I254S- GMNRRPILTI  | 66   | >TP53-I254S- GMNRRPILTS  | 9160  | 9094  |
| >TP53-I254S- GMNRRPILTI  | 192  | >TP53-I254S- GMNRRPILTS  | 96    | 96    |
| >TP53-I254S- GMNRRPILTI  | 43   | >TP53-I254S- GMNRRPILTS  | 3307  | 3264  |
| >TP53-I254S- GMNRRPILTI  | 102  | >TP53-I254S- GMNRRPILTS  | 33    | 69    |

|                         |      |                         |       |       |
|-------------------------|------|-------------------------|-------|-------|
| >TP53-I254S-GMNRRPILTI  | 147  | >TP53-I254S-GMNRRPILTS  | 10636 | 10489 |
| >TP53-I254S-GMNRRPILTI  | 646  | >TP53-I254S-GMNRRPILTS  | 185   | 461   |
| >TP53-I254T-RPILTIITL   | 104  | >TP53-I254T-RPILTTITL   | 192   | 88    |
| >TP53-I254T-RPILTIIT    | 1023 | >TP53-I254T-RPILTTIT    | 254   | 769   |
| >TP53-I254T-RPILTIITL   | 34   | >TP53-I254T-RPILTTITL   | 13    | 21    |
| >TP53-I254T-RPILTIITL   | 391  | >TP53-I254T-RPILTTITL   | 103   | 288   |
| >TP53-I254T-RPILTIITL   | 66   | >TP53-I254T-RPILTTITL   | 33    | 33    |
| >TP53-I254T-RPILTIITL   | 89   | >TP53-I254T-RPILTTITL   | 88    | 1     |
| >TP53-I254T-RRPILTII    | 220  | >TP53-I254T-RRPILTTI    | 146   | 74    |
| >TP53-I254T-RRPILTIITL  | 14   | >TP53-I254T-RRPILTTITL  | 14    | 0     |
| >TP53-I254T-RRPILTIITL  | 492  | >TP53-I254T-RRPILTTITL  | 1373  | 881   |
| >TP53-I254T-RRPILTII    | 33   | >TP53-I254T-RRPILTTI    | 25    | 8     |
| >TP53-I254T-RRPILTIIT   | 86   | >TP53-I254T-RRPILTTIT   | 113   | 27    |
| >TP53-I254T-RRPILTIITL  | 16   | >TP53-I254T-RRPILTTITL  | 16    | 0     |
| >TP53-I254T-RRPILTIITLE | 129  | >TP53-I254T-RRPILTTITLE | 160   | 31    |
| >TP53-I254T-RRPILTII    | 319  | >TP53-I254T-RRPILTTI    | 192   | 127   |
| >TP53-I254T-RRPILTIIT   | 329  | >TP53-I254T-RRPILTTIT   | 661   | 332   |
| >TP53-I254T-RRPILTIITL  | 14   | >TP53-I254T-RRPILTTITL  | 14    | 0     |
| >TP53-I254T-RRPILTIITLE | 467  | >TP53-I254T-RRPILTTITLE | 741   | 274   |
| >TP53-I254T-NRRPILTIITL | 701  | >TP53-I254T-NRRPILTTITL | 433   | 268   |
| >TP53-I254T-NRRPILTII   | 281  | >TP53-I254T-NRRPILTTI   | 157   | 124   |
| >TP53-I254T-NRRPILTIITL | 50   | >TP53-I254T-NRRPILTTITL | 51    | 1     |
| >TP53-I254T-NRRPILTII   | 224  | >TP53-I254T-NRRPILTTI   | 116   | 108   |
| >TP53-I254T-NRRPILTIITL | 12   | >TP53-I254T-NRRPILTTITL | 15    | 3     |
| >TP53-I254T-MNRRPILTI   | 35   | >TP53-I254T-MNRRPILTT   | 993   | 958   |
| >TP53-I254T-MNRRPILTII  | 200  | >TP53-I254T-MNRRPILTTI  | 142   | 58    |
| >TP53-I254T-MNRRPILTI   | 457  | >TP53-I254T-MNRRPILTT   | 10636 | 10179 |
| >TP53-I254T-MNRRPILTI   | 399  | >TP53-I254T-MNRRPILTT   | 35004 | 34605 |
| >TP53-I254T-GMNRRPILTI  | 755  | >TP53-I254T-GMNRRPILTT  | 338   | 417   |
| >TP53-I254T-GMNRRPILTI  | 185  | >TP53-I254T-GMNRRPILTT  | 1466  | 1281  |
| >TP53-I254T-GMNRRPILTI  | 168  | >TP53-I254T-GMNRRPILTT  | 141   | 27    |
| >TP53-I254T-GMNRRPILTI  | 61   | >TP53-I254T-GMNRRPILTT  | 246   | 185   |
| >TP53-I254T-GMNRRPILTI  | 13   | >TP53-I254T-GMNRRPILTT  | 10    | 3     |
| >TP53-I254T-GMNRRPILTI  | 10   | >TP53-I254T-GMNRRPILTT  | 182   | 172   |
| >TP53-I254T-GMNRRPILTI  | 93   | >TP53-I254T-GMNRRPILTT  | 16    | 77    |
| >TP53-I254T-GMNRRPILTI  | 21   | >TP53-I254T-GMNRRPILTT  | 1805  | 1784  |
| >TP53-I254T-GMNRRPILTI  | 53   | >TP53-I254T-GMNRRPILTT  | 17    | 36    |
| >TP53-I254T-GMNRRPILTI  | 66   | >TP53-I254T-GMNRRPILTT  | 1876  | 1810  |
| >TP53-I254T-GMNRRPILTI  | 192  | >TP53-I254T-GMNRRPILTT  | 61    | 131   |
| >TP53-I254T-GMNRRPILTI  | 43   | >TP53-I254T-GMNRRPILTT  | 319   | 276   |
| >TP53-I254T-GMNRRPILTI  | 102  | >TP53-I254T-GMNRRPILTT  | 30    | 72    |
| >TP53-I254T-GMNRRPILTI  | 147  | >TP53-I254T-GMNRRPILTT  | 8579  | 8432  |
| >TP53-I254T-GMNRRPILTI  | 646  | >TP53-I254T-GMNRRPILTT  | 109   | 537   |

|                         |      |                         |       |       |
|-------------------------|------|-------------------------|-------|-------|
| >TP53-I254V·PILTIITL    | 508  | >TP53-I254V·PILTVITL    | 299   | 209   |
| >TP53-I254V·RPILTIITL   | 104  | >TP53-I254V·RPILTVITL   | 104   | 0     |
| >TP53-I254V·RPILTIITL   | 34   | >TP53-I254V·RPILTVITL   | 26    | 8     |
| >TP53-I254V·RPILTIITL   | 391  | >TP53-I254V·RPILTVITL   | 289   | 102   |
| >TP53-I254V·RPILTIITL   | 66   | >TP53-I254V·RPILTVITL   | 44    | 22    |
| >TP53-I254V·RPILTIITL   | 89   | >TP53-I254V·RPILTVITL   | 65    | 24    |
| >TP53-I254V·RRPILTII    | 220  | >TP53-I254V·RRPILTVI    | 175   | 45    |
| >TP53-I254V·RRPILTIITL  | 14   | >TP53-I254V·RRPILTVITL  | 15    | 1     |
| >TP53-I254V·RRPILTIITL  | 492  | >TP53-I254V·RRPILTVITL  | 940   | 448   |
| >TP53-I254V·RRPILTII    | 33   | >TP53-I254V·RRPILTVI    | 35    | 2     |
| >TP53-I254V·RRPILTIIT   | 86   | >TP53-I254V·RRPILTVIT   | 112   | 26    |
| >TP53-I254V·RRPILTIITL  | 16   | >TP53-I254V·RRPILTVITL  | 16    | 0     |
| >TP53-I254V·RRPILTIITLE | 129  | >TP53-I254V·RRPILTVITLE | 137   | 8     |
| >TP53-I254V·RRPILTII    | 319  | >TP53-I254V·RRPILTVI    | 246   | 73    |
| >TP53-I254V·RRPILTIIT   | 329  | >TP53-I254V·RRPILTVIT   | 412   | 83    |
| >TP53-I254V·RRPILTIITL  | 14   | >TP53-I254V·RRPILTVITL  | 15    | 1     |
| >TP53-I254V·RRPILTIITLE | 467  | >TP53-I254V·RRPILTVITLE | 530   | 63    |
| >TP53-I254V·NRRPILTIITL | 701  | >TP53-I254V·NRRPILTVITL | 454   | 247   |
| >TP53-I254V·NRRPILTII   | 281  | >TP53-I254V·NRRPILTVI   | 235   | 46    |
| >TP53-I254V·NRRPILTIITL | 50   | >TP53-I254V·NRRPILTVITL | 57    | 7     |
| >TP53-I254V·NRRPILTII   | 224  | >TP53-I254V·NRRPILTVI   | 235   | 11    |
| >TP53-I254V·NRRPILTIITL | 12   | >TP53-I254V·NRRPILTVITL | 15    | 3     |
| >TP53-I254V·MNRRPILTI   | 35   | >TP53-I254V·MNRRPILTV   | 54    | 19    |
| >TP53-I254V·MNRRPILTII  | 200  | >TP53-I254V·MNRRPILTVI  | 227   | 27    |
| >TP53-I254V·MNRRPILTI   | 457  | >TP53-I254V·MNRRPILTV   | 632   | 175   |
| >TP53-I254V·MNRRPILTI   | 399  | >TP53-I254V·MNRRPILTV   | 11956 | 11557 |
| >TP53-I254V·GMNRRPILTI  | 972  | >TP53-I254V·GMNRRPILTV  | 173   | 799   |
| >TP53-I254V·GMNRRPILTI  | 185  | >TP53-I254V·GMNRRPILTV  | 96    | 89    |
| >TP53-I254V·GMNRRPILTI  | 168  | >TP53-I254V·GMNRRPILTV  | 178   | 10    |
| >TP53-I254V·GMNRRPILTI  | 61   | >TP53-I254V·GMNRRPILTV  | 23    | 38    |
| >TP53-I254V·GMNRRPILTI  | 13   | >TP53-I254V·GMNRRPILTV  | 14    | 1     |
| >TP53-I254V·GMNRRPILTI  | 10   | >TP53-I254V·GMNRRPILTV  | 3     | 7     |
| >TP53-I254V·GMNRRPILTI  | 93   | >TP53-I254V·GMNRRPILTV  | 36    | 57    |
| >TP53-I254V·GMNRRPILTI  | 21   | >TP53-I254V·GMNRRPILTV  | 5     | 16    |
| >TP53-I254V·GMNRRPILTI  | 53   | >TP53-I254V·GMNRRPILTV  | 42    | 11    |
| >TP53-I254V·GMNRRPILTI  | 66   | >TP53-I254V·GMNRRPILTV  | 8     | 58    |
| >TP53-I254V·GMNRRPILTI  | 192  | >TP53-I254V·GMNRRPILTV  | 150   | 42    |
| >TP53-I254V·GMNRRPILTI  | 2202 | >TP53-I254V·GMNRRPILTV  | 50    | 2152  |
| >TP53-I254V·GMNRRPILTI  | 43   | >TP53-I254V·GMNRRPILTV  | 4     | 39    |
| >TP53-I254V·GMNRRPILTI  | 102  | >TP53-I254V·GMNRRPILTV  | 80    | 22    |
| >TP53-I254V·GMNRRPILTI  | 147  | >TP53-I254V·GMNRRPILTV  | 1686  | 1539  |
| >TP53-I254V·GMNRRPILTI  | 646  | >TP53-I254V·GMNRRPILTV  | 456   | 190   |
| >TP53-I255F·ITLEDSSGNL  | 2969 | >TP53-I255F·FTLEDSSGNL  | 482   | 2487  |

|                         |      |                         |       |       |
|-------------------------|------|-------------------------|-------|-------|
| >TP53-I255F-ITLEDSSGNLL | 1773 | >TP53-I255F-FTLEDSSGNLI | 91    | 1682  |
| >TP53-I255F-ITLEDSSGNL  | 495  | >TP53-I255F-FTLEDSSGNL  | 98    | 397   |
| >TP53-I255F-ITLEDSSGNLL | 536  | >TP53-I255F-FTLEDSSGNLI | 29    | 507   |
| >TP53-I255F-ITLEDSSGNL  | 471  | >TP53-I255F-FTLEDSSGNL  | 101   | 370   |
| >TP53-I255F-ITLEDSSGNLL | 2717 | >TP53-I255F-FTLEDSSGNLI | 329   | 2388  |
| >TP53-I255F-ITLEDSSGNL  | 371  | >TP53-I255F-FTLEDSSGNL  | 49    | 322   |
| >TP53-I255F-ITLEDSSGNLL | 270  | >TP53-I255F-FTLEDSSGNLI | 20    | 250   |
| >TP53-I255F-ITLEDSSGNL  | 302  | >TP53-I255F-FTLEDSSGNL  | 38    | 264   |
| >TP53-I255F-ITLEDSSGNLL | 339  | >TP53-I255F-FTLEDSSGNLI | 43    | 296   |
| >TP53-I255F-ITLEDSSGNL  | 1372 | >TP53-I255F-FTLEDSSGNL  | 64    | 1308  |
| >TP53-I255F-ITLEDSSGNLL | 1053 | >TP53-I255F-FTLEDSSGNLI | 54    | 999   |
| >TP53-I255F-ITLEDSSGNL  | 1829 | >TP53-I255F-FTLEDSSGNL  | 187   | 1642  |
| >TP53-I255F-ITLEDSSGNLL | 1648 | >TP53-I255F-FTLEDSSGNLI | 160   | 1488  |
| >TP53-I255F-ITLEDSSGNL  | 3363 | >TP53-I255F-FTLEDSSGNL  | 326   | 3037  |
| >TP53-I255F-ITLEDSSGNLL | 2830 | >TP53-I255F-FTLEDSSGNLI | 274   | 2556  |
| >TP53-I255F-ITLEDSSGNL  | 1180 | >TP53-I255F-FTLEDSSGNL  | 499   | 681   |
| >TP53-I255F-ITLEDSSGNL  | 1595 | >TP53-I255F-FTLEDSSGNL  | 281   | 1314  |
| >TP53-I255F-ITLEDSSGNLL | 3820 | >TP53-I255F-FTLEDSSGNLI | 238   | 3582  |
| >TP53-I255F-ITLEDSSGNL  | 137  | >TP53-I255F-FTLEDSSGNL  | 10    | 127   |
| >TP53-I255F-ITLEDSSGNLL | 354  | >TP53-I255F-FTLEDSSGNLI | 20    | 334   |
| >TP53-I255F-ITLEDSSGNL  | 6    | >TP53-I255F-FTLEDSSGNL  | 16    | 10    |
| >TP53-I255F-ITLEDSSGNLL | 18   | >TP53-I255F-FTLEDSSGNLI | 58    | 40    |
| >TP53-I255F-ITLEDSSGNLL | 259  | >TP53-I255F-FTLEDSSGNLI | 194   | 65    |
| >TP53-I255F-ITLEDSSGNL  | 341  | >TP53-I255F-FTLEDSSGNL  | 105   | 236   |
| >TP53-I255F-ITLEDSSGNLL | 30   | >TP53-I255F-FTLEDSSGNLI | 49    | 19    |
| >TP53-I255F-ITLEDSSGNLL | 604  | >TP53-I255F-FTLEDSSGNLI | 310   | 294   |
| >TP53-I255F-GMNRRPILTI  | 168  | >TP53-I255F-GMNRRPILTI  | 3302  | 3134  |
| >TP53-I255F-GMNRRPILTI  | 13   | >TP53-I255F-GMNRRPILTI  | 1677  | 1664  |
| >TP53-I255F-GMNRRPILTI  | 93   | >TP53-I255F-GMNRRPILTI  | 6928  | 6835  |
| >TP53-I255F-GMNRRPILTI  | 53   | >TP53-I255F-GMNRRPILTI  | 12138 | 12085 |
| >TP53-I255F-GMNRRPILTI  | 192  | >TP53-I255F-GMNRRPILTI  | 16208 | 16016 |
| >TP53-I255F-GMNRRPILTI  | 102  | >TP53-I255F-GMNRRPILTI  | 6306  | 6204  |
| >TP53-I255F-GMNRRPILTI  | 7912 | >TP53-I255F-GMNRRPILTI  | 269   | 7643  |
| >TP53-I255F-GMNRRPILTI  | 1583 | >TP53-I255F-GMNRRPILTI  | 25    | 1558  |
| >TP53-I255F-PILTIITL    | 508  | >TP53-I255F-PILTIFTL    | 465   | 43    |
| >TP53-I255F-PILTIITL    | 1459 | >TP53-I255F-PILTIFTL    | 396   | 1063  |
| >TP53-I255F-RPILTIITL   | 104  | >TP53-I255F-RPILTIFTL   | 36    | 68    |
| >TP53-I255F-RPILTIITL   | 34   | >TP53-I255F-RPILTIFTL   | 36    | 2     |
| >TP53-I255F-RPILTIITL   | 391  | >TP53-I255F-RPILTIFTL   | 447   | 56    |
| >TP53-I255F-RPILTIITL   | 66   | >TP53-I255F-RPILTIFTL   | 66    | 0     |
| >TP53-I255F-RPILTIITL   | 1363 | >TP53-I255F-RPILTIFTL   | 396   | 967   |
| >TP53-I255F-RPILTIITL   | 89   | >TP53-I255F-RPILTIFTL   | 59    | 30    |
| >TP53-I255F-RRPILTI     | 1610 | >TP53-I255F-RRPILTI     | 85    | 1525  |

|                         |      |                          |      |      |
|-------------------------|------|--------------------------|------|------|
| >TP53-I255F-RRPILTI     | 220  | >TP53-I255F-RRPILTI      | 242  | 22   |
| >TP53-I255F-RRPILTIITL  | 14   | >TP53-I255F-RRPILTIIFTL  | 17   | 3    |
| >TP53-I255F-RRPILTIITL  | 492  | >TP53-I255F-RRPILTIIFTL  | 302  | 190  |
| >TP53-I255F-RRPILTI     | 33   | >TP53-I255F-RRPILTI      | 65   | 32   |
| >TP53-I255F-RRPILTIIT   | 86   | >TP53-I255F-RRPILTIIFT   | 71   | 15   |
| >TP53-I255F-RRPILTIITL  | 16   | >TP53-I255F-RRPILTIIFTL  | 24   | 8    |
| >TP53-I255F-RRPILTIITLE | 129  | >TP53-I255F-RRPILTIIFTLE | 124  | 5    |
| >TP53-I255F-RRPILTI     | 319  | >TP53-I255F-RRPILTI      | 222  | 97   |
| >TP53-I255F-RRPILTIIT   | 329  | >TP53-I255F-RRPILTIIFT   | 159  | 170  |
| >TP53-I255F-RRPILTIITL  | 14   | >TP53-I255F-RRPILTIIFTL  | 18   | 4    |
| >TP53-I255F-RRPILTIITLE | 467  | >TP53-I255F-RRPILTIIFTLE | 289  | 178  |
| >TP53-I255F-NRRPILTI    | 1273 | >TP53-I255F-NRRPILTI     | 86   | 1187 |
| >TP53-I255F-NRRPILTI    | 4591 | >TP53-I255F-NRRPILTI     | 448  | 4143 |
| >TP53-I255F-NRRPILTI    | 281  | >TP53-I255F-NRRPILTI     | 354  | 73   |
| >TP53-I255F-NRRPILTIITL | 50   | >TP53-I255F-NRRPILTIIFTL | 59   | 9    |
| >TP53-I255F-NRRPILTI    | 224  | >TP53-I255F-NRRPILTI     | 60   | 164  |
| >TP53-I255F-NRRPILTIITL | 12   | >TP53-I255F-NRRPILTIIFTL | 18   | 6    |
| >TP53-I255F-MNRRPILTI   | 200  | >TP53-I255F-MNRRPILTI    | 4482 | 4282 |
| >TP53-I255F-MNRRPILTIIT | 1029 | >TP53-I255F-MNRRPILTIIF  | 165  | 864  |
| >TP53-I255F-MNRRPILTI   | 821  | >TP53-I255F-MNRRPILTI    | 15   | 806  |
| >TP53-I255M ITLEDSSGNL  | 1773 | >TP53-I255M MTLEDSSGNI   | 413  | 1360 |
| >TP53-I255M ITLEDSSGNL  | 495  | >TP53-I255M MTLEDSSGNI   | 277  | 218  |
| >TP53-I255M ITLEDSSGNL  | 536  | >TP53-I255M MTLEDSSGNI   | 92   | 444  |
| >TP53-I255M ITLEDSSGNL  | 471  | >TP53-I255M MTLEDSSGNI   | 266  | 205  |
| >TP53-I255M ITLEDSSGNL  | 371  | >TP53-I255M MTLEDSSGNI   | 171  | 200  |
| >TP53-I255M ITLEDSSGNL  | 270  | >TP53-I255M MTLEDSSGNI   | 89   | 181  |
| >TP53-I255M ITLEDSSGNL  | 302  | >TP53-I255M MTLEDSSGNI   | 126  | 176  |
| >TP53-I255M ITLEDSSGNL  | 339  | >TP53-I255M MTLEDSSGNI   | 141  | 198  |
| >TP53-I255M ITLEDSSGNL  | 1372 | >TP53-I255M MTLEDSSGNI   | 497  | 875  |
| >TP53-I255M ITLEDSSGNL  | 1053 | >TP53-I255M MTLEDSSGNI   | 382  | 671  |
| >TP53-I255M ITLEDSSGNL  | 1595 | >TP53-I255M MTLEDSSGNI   | 175  | 1420 |
| >TP53-I255M ITLEDSSGNL  | 3820 | >TP53-I255M MTLEDSSGNI   | 63   | 3757 |
| >TP53-I255M ITLEDSSGNL  | 137  | >TP53-I255M MTLEDSSGNI   | 13   | 124  |
| >TP53-I255M ITLEDSSGNL  | 354  | >TP53-I255M MTLEDSSGNI   | 28   | 326  |
| >TP53-I255M ITLEDSSGNL  | 6    | >TP53-I255M MTLEDSSGNI   | 8    | 2    |
| >TP53-I255M ITLEDSSGNL  | 18   | >TP53-I255M MTLEDSSGNI   | 24   | 6    |
| >TP53-I255M ITLEDSSGNL  | 259  | >TP53-I255M MTLEDSSGNI   | 355  | 96   |
| >TP53-I255M ITLEDSSGNL  | 341  | >TP53-I255M MTLEDSSGNI   | 98   | 243  |
| >TP53-I255M ITLEDSSGNL  | 30   | >TP53-I255M MTLEDSSGNI   | 39   | 9    |
| >TP53-I255M ITLEDSSGNL  | 604  | >TP53-I255M MTLEDSSGNI   | 254  | 350  |
| >TP53-I255M IITLEDSSGNL | 1406 | >TP53-I255M IMTLEDSSGN   | 107  | 1299 |
| >TP53-I255M IITLEDSSGNL | 2966 | >TP53-I255M IMTLEDSSGN   | 386  | 2580 |
| >TP53-I255M IITLEDSSGNL | 2131 | >TP53-I255M IMTLEDSSGN   | 80   | 2051 |

|                         |      |                         |      |      |
|-------------------------|------|-------------------------|------|------|
| >TP53-I255M GMNRRPILTI  | 168  | >TP53-I255M GMNRRPILTI  | 596  | 428  |
| >TP53-I255M GMNRRPILTI  | 13   | >TP53-I255M GMNRRPILTI  | 128  | 115  |
| >TP53-I255M GMNRRPILTI  | 93   | >TP53-I255M GMNRRPILTI  | 807  | 714  |
| >TP53-I255M GMNRRPILTI  | 53   | >TP53-I255M GMNRRPILTI  | 829  | 776  |
| >TP53-I255M GMNRRPILTI  | 192  | >TP53-I255M GMNRRPILTI  | 2040 | 1848 |
| >TP53-I255M GMNRRPILTI  | 102  | >TP53-I255M GMNRRPILTI  | 552  | 450  |
| >TP53-I255M RPILTIITL   | 104  | >TP53-I255M RPILTIMTL   | 527  | 423  |
| >TP53-I255M RPILTIITL   | 34   | >TP53-I255M RPILTIMTL   | 24   | 10   |
| >TP53-I255M RPILTIITL   | 391  | >TP53-I255M RPILTIMTL   | 988  | 597  |
| >TP53-I255M RPILTIITL   | 66   | >TP53-I255M RPILTIMTL   | 81   | 15   |
| >TP53-I255M RPILTIITL   | 89   | >TP53-I255M RPILTIMTL   | 121  | 32   |
| >TP53-I255M RRPILTII    | 220  | >TP53-I255M RRPILTIM    | 129  | 91   |
| >TP53-I255M RRPILTIITL  | 14   | >TP53-I255M RRPILTIMTL  | 17   | 3    |
| >TP53-I255M RRPILTIITL  | 492  | >TP53-I255M RRPILTIMTL  | 825  | 333  |
| >TP53-I255M RRPILTII    | 33   | >TP53-I255M RRPILTIM    | 42   | 9    |
| >TP53-I255M RRPILTIIT   | 86   | >TP53-I255M RRPILTIMT   | 82   | 4    |
| >TP53-I255M RRPILTIITL  | 16   | >TP53-I255M RRPILTIMTL  | 15   | 1    |
| >TP53-I255M RRPILTIITL  | 129  | >TP53-I255M RRPILTIMTLE | 171  | 42   |
| >TP53-I255M RRPILTII    | 319  | >TP53-I255M RRPILTIM    | 167  | 152  |
| >TP53-I255M RRPILTIIT   | 329  | >TP53-I255M RRPILTIMT   | 170  | 159  |
| >TP53-I255M RRPILTIITL  | 14   | >TP53-I255M RRPILTIMTL  | 13   | 1    |
| >TP53-I255M RRPILTIITL  | 467  | >TP53-I255M RRPILTIMTLE | 658  | 191  |
| >TP53-I255M NRRPILTIITL | 710  | >TP53-I255M NRRPILTIMTL | 480  | 230  |
| >TP53-I255M NRRPILTII   | 4591 | >TP53-I255M NRRPILTIM   | 412  | 4179 |
| >TP53-I255M NRRPILTII   | 281  | >TP53-I255M NRRPILTIM   | 489  | 208  |
| >TP53-I255M NRRPILTIITL | 50   | >TP53-I255M NRRPILTIMTL | 54   | 4    |
| >TP53-I255M NRRPILTII   | 224  | >TP53-I255M NRRPILTIM   | 215  | 9    |
| >TP53-I255M NRRPILTIITL | 12   | >TP53-I255M NRRPILTIMTL | 17   | 5    |
| >TP53-I255M MNRRPILTII  | 200  | >TP53-I255M MNRRPILTIM  | 568  | 368  |
| >TP53-I255M MNRRPILTII  | 821  | >TP53-I255M MNRRPILTIM  | 279  | 542  |
| >TP53-I255N ITLEDSSGNL  | 495  | >TP53-I255N NTLEDSSGNL  | 1190 | 695  |
| >TP53-I255N ITLEDSSGNL  | 471  | >TP53-I255N NTLEDSSGNL  | 1043 | 572  |
| >TP53-I255N ITLEDSSGNL  | 371  | >TP53-I255N NTLEDSSGNL  | 943  | 572  |
| >TP53-I255N ITLEDSSGNLL | 270  | >TP53-I255N NTLEDSSGNL  | 700  | 430  |
| >TP53-I255N ITLEDSSGNL  | 302  | >TP53-I255N NTLEDSSGNL  | 1750 | 1448 |
| >TP53-I255N ITLEDSSGNLL | 339  | >TP53-I255N NTLEDSSGNL  | 2003 | 1664 |
| >TP53-I255N ITLEDSSGNLL | 1180 | >TP53-I255N NTLEDSSGNL  | 489  | 691  |
| >TP53-I255N ITLEDSSGNL  | 1595 | >TP53-I255N NTLEDSSGNL  | 321  | 1274 |
| >TP53-I255N ITLEDSSGNLL | 3820 | >TP53-I255N NTLEDSSGNL  | 380  | 3440 |
| >TP53-I255N ITLEDSSGNL  | 137  | >TP53-I255N NTLEDSSGNL  | 13   | 124  |
| >TP53-I255N ITLEDSSGNLL | 354  | >TP53-I255N NTLEDSSGNL  | 28   | 326  |
| >TP53-I255N ITLEDSSGNL  | 6    | >TP53-I255N NTLEDSSGNL  | 204  | 198  |
| >TP53-I255N ITLEDSSGNLL | 18   | >TP53-I255N NTLEDSSGNL  | 872  | 854  |

|                          |      |                         |       |       |
|--------------------------|------|-------------------------|-------|-------|
| >TP53-I255N ITLEDSSGNLL  | 259  | >TP53-I255N NTLEDSSGNL  | 3475  | 3216  |
| >TP53-I255N ITLEDSSGNL   | 341  | >TP53-I255N NTLEDSSGNL  | 1017  | 676   |
| >TP53-I255N ITLEDSSGNLL  | 30   | >TP53-I255N NTLEDSSGNL  | 349   | 319   |
| >TP53-I255N GMNRRPILTI   | 168  | >TP53-I255N GMNRRPILTI  | 12069 | 11901 |
| >TP53-I255N GMNRRPILTI   | 13   | >TP53-I255N GMNRRPILTI  | 8172  | 8159  |
| >TP53-I255N GMNRRPILTI   | 93   | >TP53-I255N GMNRRPILTI  | 14562 | 14469 |
| >TP53-I255N GMNRRPILTI   | 53   | >TP53-I255N GMNRRPILTI  | 21145 | 21092 |
| >TP53-I255N GMNRRPILTI   | 192  | >TP53-I255N GMNRRPILTI  | 19902 | 19710 |
| >TP53-I255N GMNRRPILTI   | 102  | >TP53-I255N GMNRRPILTI  | 16407 | 16305 |
| >TP53-I255N RPILTIITL    | 104  | >TP53-I255N RPILTINTL   | 1015  | 911   |
| >TP53-I255N RPILTIITL    | 34   | >TP53-I255N RPILTINTL   | 21    | 13    |
| >TP53-I255N RPILTIITL    | 391  | >TP53-I255N RPILTINTL   | 853   | 462   |
| >TP53-I255N RPILTIITL    | 66   | >TP53-I255N RPILTINTL   | 107   | 41    |
| >TP53-I255N RPILTIITL    | 89   | >TP53-I255N RPILTINTL   | 82    | 7     |
| >TP53-I255N RRPILTIITL   | 220  | >TP53-I255N RRPILTIN    | 2747  | 2527  |
| >TP53-I255N RRPILTIITL   | 14   | >TP53-I255N RRPILTINTL  | 18    | 4     |
| >TP53-I255N RRPILTIITL   | 492  | >TP53-I255N RRPILTINTL  | 752   | 260   |
| >TP53-I255N RRPILTIITL   | 33   | >TP53-I255N RRPILTIN    | 629   | 596   |
| >TP53-I255N RRPILTIITL   | 86   | >TP53-I255N RRPILTINTL  | 174   | 88    |
| >TP53-I255N RRPILTIITL   | 16   | >TP53-I255N RRPILTINTL  | 26    | 10    |
| >TP53-I255N RRPILTIITL   | 129  | >TP53-I255N RRPILTINTL  | 200   | 71    |
| >TP53-I255N RRPILTIITL   | 319  | >TP53-I255N RRPILTIN    | 5175  | 4856  |
| >TP53-I255N RRPILTIITL   | 329  | >TP53-I255N RRPILTINTL  | 351   | 22    |
| >TP53-I255N RRPILTIITL   | 14   | >TP53-I255N RRPILTINTL  | 24    | 10    |
| >TP53-I255N RRPILTIITL   | 467  | >TP53-I255N RRPILTINTL  | 845   | 378   |
| >TP53-I255N NRRPILTIITL  | 281  | >TP53-I255N NRRPILTIN   | 1489  | 1208  |
| >TP53-I255N NRRPILTIITL  | 50   | >TP53-I255N NRRPILTINTL | 72    | 22    |
| >TP53-I255N NRRPILTIITL  | 224  | >TP53-I255N NRRPILTIN   | 4525  | 4301  |
| >TP53-I255N NRRPILTIITL  | 12   | >TP53-I255N NRRPILTINTL | 15    | 3     |
| >TP53-I255N MNRRPILTIITL | 200  | >TP53-I255N MNRRPILTIN  | 4951  | 4751  |
| >TP53-I255S-ITLEDSSGNL   | 495  | >TP53-I255S-STLEDSSGNL  | 475   | 20    |
| >TP53-I255S-ITLEDSSGNL   | 471  | >TP53-I255S-STLEDSSGNL  | 389   | 82    |
| >TP53-I255S-ITLEDSSGNL   | 371  | >TP53-I255S-STLEDSSGNL  | 297   | 74    |
| >TP53-I255S-ITLEDSSGNLL  | 270  | >TP53-I255S-STLEDSSGNLI | 228   | 42    |
| >TP53-I255S-ITLEDSSGNL   | 302  | >TP53-I255S-STLEDSSGNL  | 271   | 31    |
| >TP53-I255S-ITLEDSSGNLL  | 339  | >TP53-I255S-STLEDSSGNLI | 283   | 56    |
| >TP53-I255S-ITLEDSSGNL   | 1829 | >TP53-I255S-STLEDSSGNL  | 435   | 1394  |
| >TP53-I255S-ITLEDSSGNLL  | 1648 | >TP53-I255S-STLEDSSGNLI | 374   | 1274  |
| >TP53-I255S-ITLEDSSGNL   | 3298 | >TP53-I255S-STLEDSSGNL  | 414   | 2884  |
| >TP53-I255S-ITLEDSSGNL   | 1595 | >TP53-I255S-STLEDSSGNL  | 463   | 1132  |
| >TP53-I255S-ITLEDSSGNL   | 137  | >TP53-I255S-STLEDSSGNL  | 20    | 117   |
| >TP53-I255S-ITLEDSSGNLL  | 354  | >TP53-I255S-STLEDSSGNLI | 51    | 303   |
| >TP53-I255S-ITLEDSSGNL   | 6    | >TP53-I255S-STLEDSSGNL  | 15    | 9     |



|                         |      |                         |       |       |
|-------------------------|------|-------------------------|-------|-------|
| >TP53-I255S-ITLEDSSGNLL | 18   | >TP53-I255S-STLEDSSGNLI | 75    | 57    |
| >TP53-I255S-ITLEDSSGNLL | 259  | >TP53-I255S-STLEDSSGNLI | 334   | 75    |
| >TP53-I255S-ITLEDSSGNL  | 341  | >TP53-I255S-STLEDSSGNL  | 79    | 262   |
| >TP53-I255S-ITLEDSSGNLL | 30   | >TP53-I255S-STLEDSSGNLI | 36    | 6     |
| >TP53-I255S-ITLEDSSGNLL | 604  | >TP53-I255S-STLEDSSGNLI | 198   | 406   |
| >TP53-I255S-IITLEDSSGNL | 3765 | >TP53-I255S-ISTLEDSSGNL | 17    | 3748  |
| >TP53-I255S-GMNRPPILTI  | 168  | >TP53-I255S-GMNRPPILTI  | 4216  | 4048  |
| >TP53-I255S-GMNRPPILTI  | 13   | >TP53-I255S-GMNRPPILTI  | 877   | 864   |
| >TP53-I255S-GMNRPPILTI  | 93   | >TP53-I255S-GMNRPPILTI  | 7634  | 7541  |
| >TP53-I255S-GMNRPPILTI  | 53   | >TP53-I255S-GMNRPPILTI  | 13630 | 13577 |
| >TP53-I255S-GMNRPPILTI  | 192  | >TP53-I255S-GMNRPPILTI  | 13597 | 13405 |
| >TP53-I255S-GMNRPPILTI  | 102  | >TP53-I255S-GMNRPPILTI  | 6599  | 6497  |
| >TP53-I255S-RPILTIITL   | 6617 | >TP53-I255S-RPILTISTL   | 444   | 6173  |
| >TP53-I255S-RPILTIITL   | 104  | >TP53-I255S-RPILTISTL   | 367   | 263   |
| >TP53-I255S-RPILTIIT    | 1023 | >TP53-I255S-RPILTIST    | 250   | 773   |
| >TP53-I255S-RPILTIITL   | 34   | >TP53-I255S-RPILTISTL   | 17    | 17    |
| >TP53-I255S-RPILTIITL   | 391  | >TP53-I255S-RPILTISTL   | 626   | 235   |
| >TP53-I255S-RPILTIITL   | 66   | >TP53-I255S-RPILTISTL   | 148   | 82    |
| >TP53-I255S-RPILTIITL   | 7692 | >TP53-I255S-RPILTISTL   | 394   | 7298  |
| >TP53-I255S-RPILTIITL   | 89   | >TP53-I255S-RPILTISTL   | 119   | 30    |
| >TP53-I255S-RRPILTIITL  | 921  | >TP53-I255S-RRPILTISTL  | 490   | 431   |
| >TP53-I255S-RRPILTII    | 220  | >TP53-I255S-RRPILTIS    | 2000  | 1780  |
| >TP53-I255S-RRPILTIITL  | 14   | >TP53-I255S-RRPILTISTL  | 15    | 1     |
| >TP53-I255S-RRPILTIITL  | 492  | >TP53-I255S-RRPILTISTL  | 1211  | 719   |
| >TP53-I255S-RRPILTII    | 33   | >TP53-I255S-RRPILTIS    | 571   | 538   |
| >TP53-I255S-RRPILTIIT   | 86   | >TP53-I255S-RRPILTIST   | 171   | 85    |
| >TP53-I255S-RRPILTIITL  | 16   | >TP53-I255S-RRPILTISTL  | 25    | 9     |
| >TP53-I255S-RRPILTIITL  | 129  | >TP53-I255S-RRPILTISTLE | 232   | 103   |
| >TP53-I255S-RRPILTII    | 319  | >TP53-I255S-RRPILTIS    | 4852  | 4533  |
| >TP53-I255S-RRPILTIIT   | 329  | >TP53-I255S-RRPILTIST   | 440   | 111   |
| >TP53-I255S-RRPILTIITL  | 14   | >TP53-I255S-RRPILTISTL  | 20    | 6     |
| >TP53-I255S-RRPILTIITL  | 467  | >TP53-I255S-RRPILTISTLE | 948   | 481   |
| >TP53-I255S-NRRPILTIITL | 710  | >TP53-I255S-NRRPILTISTL | 440   | 270   |
| >TP53-I255S-NRRPILTII   | 281  | >TP53-I255S-NRRPILTIS   | 2681  | 2400  |
| >TP53-I255S-NRRPILTIITL | 50   | >TP53-I255S-NRRPILTISTL | 59    | 9     |
| >TP53-I255S-NRRPILTII   | 224  | >TP53-I255S-NRRPILTIS   | 5368  | 5144  |
| >TP53-I255S-NRRPILTIITL | 12   | >TP53-I255S-NRRPILTISTL | 12    | 0     |
| >TP53-I255S-MNRRPILTII  | 200  | >TP53-I255S-MNRRPILTIS  | 2083  | 1883  |
| >TP53-I255T-ITLEDSSGNL  | 495  | >TP53-I255T-TTLEDSSGNL  | 933   | 438   |
| >TP53-I255T-ITLEDSSGNL  | 471  | >TP53-I255T-TTLEDSSGNL  | 607   | 136   |
| >TP53-I255T-ITLEDSSGNL  | 371  | >TP53-I255T-TTLEDSSGNL  | 596   | 225   |
| >TP53-I255T-ITLEDSSGNLL | 270  | >TP53-I255T-TTLEDSSGNLI | 545   | 275   |
| >TP53-I255T-ITLEDSSGNL  | 302  | >TP53-I255T-TTLEDSSGNL  | 1361  | 1059  |

|                         |       |                         |      |       |
|-------------------------|-------|-------------------------|------|-------|
| >TP53-I255T·ITLEDSSGNLL | 339   | >TP53-I255T·TTLEDSSGNLL | 1430 | 1091  |
| >TP53-I255T·ITLEDSSGNL  | 3298  | >TP53-I255T·TTLEDSSGNL  | 388  | 2910  |
| >TP53-I255T·ITLEDSSGNLL | 1180  | >TP53-I255T·TTLEDSSGNLL | 372  | 808   |
| >TP53-I255T·ITLEDSSGNL  | 1595  | >TP53-I255T·TTLEDSSGNL  | 376  | 1219  |
| >TP53-I255T·ITLEDSSGNLL | 3820  | >TP53-I255T·TTLEDSSGNLL | 238  | 3582  |
| >TP53-I255T·ITLEDSSGNL  | 137   | >TP53-I255T·TTLEDSSGNL  | 15   | 122   |
| >TP53-I255T·ITLEDSSGNLL | 354   | >TP53-I255T·TTLEDSSGNLL | 35   | 319   |
| >TP53-I255T·ITLEDSSGNL  | 6     | >TP53-I255T·TTLEDSSGNL  | 23   | 17    |
| >TP53-I255T·ITLEDSSGNLL | 18    | >TP53-I255T·TTLEDSSGNLL | 112  | 94    |
| >TP53-I255T·ITLEDSSGNLL | 259   | >TP53-I255T·TTLEDSSGNLL | 384  | 125   |
| >TP53-I255T·ITLEDSSGNL  | 341   | >TP53-I255T·TTLEDSSGNL  | 246  | 95    |
| >TP53-I255T·ITLEDSSGNLL | 30    | >TP53-I255T·TTLEDSSGNLL | 103  | 73    |
| >TP53-I255T·IITLEDSSGNL | 3765  | >TP53-I255T·ITTLEDSSGNL | 13   | 3752  |
| >TP53-I255T·IITLEDSSGNL | 14793 | >TP53-I255T·ITTLEDSSGNL | 209  | 14584 |
| >TP53-I255T·IITLEDSSGNL | 7350  | >TP53-I255T·ITTLEDSSGNL | 270  | 7080  |
| >TP53-I255T·GMNRRPILTI  | 168   | >TP53-I255T·GMNRRPILTI  | 2069 | 1901  |
| >TP53-I255T·GMNRRPILTI  | 13    | >TP53-I255T·GMNRRPILTI  | 137  | 124   |
| >TP53-I255T·GMNRRPILTI  | 93    | >TP53-I255T·GMNRRPILTI  | 2344 | 2251  |
| >TP53-I255T·GMNRRPILTI  | 53    | >TP53-I255T·GMNRRPILTI  | 5645 | 5592  |
| >TP53-I255T·GMNRRPILTI  | 192   | >TP53-I255T·GMNRRPILTI  | 4635 | 4443  |
| >TP53-I255T·GMNRRPILTI  | 102   | >TP53-I255T·GMNRRPILTI  | 826  | 724   |
| >TP53-I255T·RPILTIITL   | 104   | >TP53-I255T·RPILTITTL   | 249  | 145   |
| >TP53-I255T·RPILTIITL   | 34    | >TP53-I255T·RPILTITTL   | 18   | 16    |
| >TP53-I255T·RPILTIITL   | 391   | >TP53-I255T·RPILTITTL   | 570  | 179   |
| >TP53-I255T·RPILTIITL   | 66    | >TP53-I255T·RPILTITTL   | 241  | 175   |
| >TP53-I255T·RPILTIITL   | 89    | >TP53-I255T·RPILTITTL   | 126  | 37    |
| >TP53-I255T·RRPILTII    | 220   | >TP53-I255T·RRPILTIT    | 2326 | 2106  |
| >TP53-I255T·RRPILTIITL  | 14    | >TP53-I255T·RRPILTITTL  | 14   | 0     |
| >TP53-I255T·RRPILTIITL  | 492   | >TP53-I255T·RRPILTITTL  | 1200 | 708   |
| >TP53-I255T·RRPILTII    | 33    | >TP53-I255T·RRPILTIT    | 135  | 102   |
| >TP53-I255T·RRPILTIIT   | 86    | >TP53-I255T·RRPILTITT   | 69   | 17    |
| >TP53-I255T·RRPILTIITL  | 16    | >TP53-I255T·RRPILTITTL  | 16   | 0     |
| >TP53-I255T·RRPILTIITL  | 129   | >TP53-I255T·RRPILTITLLE | 139  | 10    |
| >TP53-I255T·RRPILTII    | 319   | >TP53-I255T·RRPILTIT    | 1392 | 1073  |
| >TP53-I255T·RRPILTIIT   | 329   | >TP53-I255T·RRPILTITT   | 201  | 128   |
| >TP53-I255T·RRPILTIITL  | 14    | >TP53-I255T·RRPILTITTL  | 15   | 1     |
| >TP53-I255T·RRPILTIITL  | 467   | >TP53-I255T·RRPILTITLLE | 562  | 95    |
| >TP53-I255T·NRRPILTII   | 281   | >TP53-I255T·NRRPILTIT   | 1579 | 1298  |
| >TP53-I255T·NRRPILTIITL | 50    | >TP53-I255T·NRRPILTITTL | 58   | 8     |
| >TP53-I255T·NRRPILTII   | 224   | >TP53-I255T·NRRPILTIT   | 6325 | 6101  |
| >TP53-I255T·NRRPILTIITL | 12    | >TP53-I255T·NRRPILTITTL | 18   | 6     |
| >TP53-I255T·MNRRPILTII  | 200   | >TP53-I255T·MNRRPILTIT  | 3526 | 3326  |
| >TP53-I255V·ITLEDSSGNL  | 495   | >TP53-I255V·VTLEDSSGNL  | 1313 | 818   |

|                         |      |                         |      |      |
|-------------------------|------|-------------------------|------|------|
| >TP53-I255V·ITLEDSSGNL  | 471  | >TP53-I255V·VTLEDSSGNL  | 1310 | 839  |
| >TP53-I255V·ITLEDSSGNL  | 371  | >TP53-I255V·VTLEDSSGNL  | 926  | 555  |
| >TP53-I255V·ITLEDSSGNLL | 270  | >TP53-I255V·VTLEDSSGNL  | 337  | 67   |
| >TP53-I255V·ITLEDSSGNL  | 302  | >TP53-I255V·VTLEDSSGNL  | 257  | 45   |
| >TP53-I255V·ITLEDSSGNLL | 339  | >TP53-I255V·VTLEDSSGNL  | 288  | 51   |
| >TP53-I255V·ITLEDSSGNL  | 137  | >TP53-I255V·VTLEDSSGNL  | 167  | 30   |
| >TP53-I255V·ITLEDSSGNLL | 354  | >TP53-I255V·VTLEDSSGNL  | 432  | 78   |
| >TP53-I255V·ITLEDSSGNL  | 6    | >TP53-I255V·VTLEDSSGNL  | 9    | 3    |
| >TP53-I255V·ITLEDSSGNLL | 18   | >TP53-I255V·VTLEDSSGNL  | 30   | 12   |
| >TP53-I255V·ITLEDSSGNLL | 259  | >TP53-I255V·VTLEDSSGNL  | 264  | 5    |
| >TP53-I255V·ITLEDSSGNL  | 341  | >TP53-I255V·VTLEDSSGNL  | 164  | 177  |
| >TP53-I255V·ITLEDSSGNLL | 30   | >TP53-I255V·VTLEDSSGNL  | 53   | 23   |
| >TP53-I255V·GMNRRPILTI  | 755  | >TP53-I255V·GMNRRPILTI' | 148  | 607  |
| >TP53-I255V·GMNRRPILTI  | 168  | >TP53-I255V·GMNRRPILTI' | 50   | 118  |
| >TP53-I255V·GMNRRPILTI  | 13   | >TP53-I255V·GMNRRPILTI' | 4    | 9    |
| >TP53-I255V·GMNRRPILTI  | 2592 | >TP53-I255V·GMNRRPILTI' | 445  | 2147 |
| >TP53-I255V·GMNRRPILTI  | 93   | >TP53-I255V·GMNRRPILTI' | 9    | 84   |
| >TP53-I255V·GMNRRPILTI  | 53   | >TP53-I255V·GMNRRPILTI' | 8    | 45   |
| >TP53-I255V·GMNRRPILTI  | 192  | >TP53-I255V·GMNRRPILTI' | 12   | 180  |
| >TP53-I255V·GMNRRPILTI  | 3605 | >TP53-I255V·GMNRRPILTI' | 182  | 3423 |
| >TP53-I255V·GMNRRPILTI  | 102  | >TP53-I255V·GMNRRPILTI' | 6    | 96   |
| >TP53-I255V·PILTIITL    | 1347 | >TP53-I255V·PILTIVTL    | 435  | 912  |
| >TP53-I255V·RPILTIITL   | 104  | >TP53-I255V·RPILTIVTL   | 152  | 48   |
| >TP53-I255V·RPILTIIT    | 1023 | >TP53-I255V·RPILTIVT    | 471  | 552  |
| >TP53-I255V·RPILTIITL   | 34   | >TP53-I255V·RPILTIVTL   | 30   | 4    |
| >TP53-I255V·RPILTIITL   | 391  | >TP53-I255V·RPILTIVTL   | 492  | 101  |
| >TP53-I255V·RPILTIITL   | 66   | >TP53-I255V·RPILTIVTL   | 66   | 0    |
| >TP53-I255V·RPILTIITL   | 89   | >TP53-I255V·RPILTIVTL   | 53   | 36   |
| >TP53-I255V·RPILTIITL   | 671  | >TP53-I255V·RPILTIVTL   | 357  | 314  |
| >TP53-I255V·RRPILTII    | 220  | >TP53-I255V·RRPILTIV    | 493  | 273  |
| >TP53-I255V·RRPILTIITL  | 14   | >TP53-I255V·RRPILTIVTL  | 17   | 3    |
| >TP53-I255V·RRPILTIITL  | 492  | >TP53-I255V·RRPILTIVTL  | 855  | 363  |
| >TP53-I255V·RRPILTII    | 33   | >TP53-I255V·RRPILTIV    | 56   | 23   |
| >TP53-I255V·RRPILTIIT   | 86   | >TP53-I255V·RRPILTIVT   | 85   | 1    |
| >TP53-I255V·RRPILTIITL  | 16   | >TP53-I255V·RRPILTIVTL  | 22   | 6    |
| >TP53-I255V·RRPILTIITL  | 129  | >TP53-I255V·RRPILTIVTLE | 155  | 26   |
| >TP53-I255V·RRPILTII    | 319  | >TP53-I255V·RRPILTIV    | 592  | 273  |
| >TP53-I255V·RRPILTIIT   | 329  | >TP53-I255V·RRPILTIVT   | 352  | 23   |
| >TP53-I255V·RRPILTIITL  | 14   | >TP53-I255V·RRPILTIVTL  | 16   | 2    |
| >TP53-I255V·RRPILTIITL  | 467  | >TP53-I255V·RRPILTIVTLE | 563  | 96   |
| >TP53-I255V·NRRPILTIITL | 710  | >TP53-I255V·NRRPILTIVTL | 491  | 219  |
| >TP53-I255V·NRRPILTII   | 281  | >TP53-I255V·NRRPILTIV   | 462  | 181  |
| >TP53-I255V·NRRPILTIITL | 50   | >TP53-I255V·NRRPILTIVTL | 57   | 7    |

|                         |      |                         |     |      |
|-------------------------|------|-------------------------|-----|------|
| >TP53-I255V·NRRPILTI    | 224  | >TP53-I255V·NRRPILTIV   | 388 | 164  |
| >TP53-I255V·NRRPILTIITL | 12   | >TP53-I255V·NRRPILTIVTL | 14  | 2    |
| >TP53-I255V·MNRRPILTI   | 200  | >TP53-I255V·MNRRPILTIV  | 348 | 148  |
| >TP53-I332V·IRGRERFEMF  | 126  | >TP53-I332V·VRGRERFEM   | 268 | 142  |
| >TP53-I332V·IRGRERFEMF  | 187  | >TP53-I332V·VRGRERFEM   | 509 | 322  |
| >TP53-I332V·QIRGRERFEM  | 435  | >TP53-I332V·QVRGRERFEM  | 130 | 305  |
| >TP53-I332V·QIRGRERF    | 1423 | >TP53-I332V·QVRGRERF    | 328 | 1095 |
| >TP53-I332V·QIRGRERFEM  | 524  | >TP53-I332V·QVRGRERFEM  | 410 | 114  |
| >TP53-I332V·QIRGRERFEM  | 628  | >TP53-I332V·QVRGRERFEM  | 161 | 467  |
| >TP53-I332V·PLDGEYFTLQ  | 1235 | >TP53-I332V·PLDGEYFTLQ  | 308 | 927  |
| >TP53-I332V·PLDGEYFTLQ  | 68   | >TP53-I332V·PLDGEYFTLQ  | 8   | 60   |
| >TP53-I332V·PLDGEYFTLQ  | 2258 | >TP53-I332V·PLDGEYFTLQ  | 376 | 1882 |
| >TP53-I332V·PLDGEYFTLQ  | 140  | >TP53-I332V·PLDGEYFTLQ  | 11  | 129  |
| >TP53-I332V·PLDGEYFTLQ  | 158  | >TP53-I332V·PLDGEYFTLQ  | 8   | 150  |
| >TP53-I332V·PLDGEYFTLQ  | 111  | >TP53-I332V·PLDGEYFTLQ  | 5   | 106  |
| >TP53-I332V·LQIRGRERFEI | 192  | >TP53-I332V·LQVRGRERFE  | 309 | 117  |
| >TP53-I332V·LQIRGRER    | 138  | >TP53-I332V·LQVRGRER    | 240 | 102  |
| >TP53-I332V·LQIRGRERF   | 54   | >TP53-I332V·LQVRGRERF   | 78  | 24   |
| >TP53-I332V·LQIRGRERFEI | 105  | >TP53-I332V·LQVRGRERFE  | 195 | 90   |
| >TP53-I332V·LQIRGRER    | 495  | >TP53-I332V·LQVRGRER    | 733 | 238  |
| >TP53-I332V·LQIRGRERF   | 12   | >TP53-I332V·LQVRGRERF   | 15  | 3    |
| >TP53-I332V·LQIRGRERFEI | 34   | >TP53-I332V·LQVRGRERFE  | 48  | 14   |
| >TP53-I332V·TLQIRGRER   | 238  | >TP53-I332V·TLQVRGRER   | 194 | 44   |
| >TP53-I332V·TLQIRGRERF  | 517  | >TP53-I332V·TLQVRGRERF  | 327 | 190  |
| >TP53-I332V·FTLQIRGRERI | 169  | >TP53-I332V·FTLQVRGRER  | 133 | 36   |
| >TP53-I332V·FTLQIRGRERI | 289  | >TP53-I332V·FTLQVRGRER  | 329 | 40   |
| >TP53-I332V·FTLQIRGRER  | 50   | >TP53-I332V·FTLQVRGRER  | 67  | 17   |
| >TP53-I332V·FTLQIRGR    | 174  | >TP53-I332V·FTLQVRGR    | 221 | 47   |
| >TP53-I332V·FTLQIRGRER  | 431  | >TP53-I332V·FTLQVRGRER  | 328 | 103  |
| >TP53-I332V·FTLQIRGR    | 25   | >TP53-I332V·FTLQVRGR    | 30  | 5    |
| >TP53-I332V·FTLQIRGRER  | 86   | >TP53-I332V·FTLQVRGRER  | 62  | 24   |
| >TP53-I332V·FTLQIRGRERI | 8    | >TP53-I332V·FTLQVRGRER  | 10  | 2    |
| >TP53-I332V·FTLQIRGRERI | 289  | >TP53-I332V·FTLQVRGRER  | 117 | 172  |
| >TP53-I332V·FTLQIRGRERI | 8    | >TP53-I332V·FTLQVRGRER  | 9   | 1    |
| >TP53-I332V·FTLQIRGR    | 422  | >TP53-I332V·FTLQVRGR    | 911 | 489  |
| >TP53-I332V·YFTLQIRGREF | 337  | >TP53-I332V·YFTLQVRGRE  | 456 | 119  |
| >TP53-I332V·YFTLQIRGR   | 129  | >TP53-I332V·YFTLQVRGR   | 302 | 173  |
| >TP53-I332V·YFTLQIRGREF | 126  | >TP53-I332V·YFTLQVRGRE  | 177 | 51   |
| >TP53-I332V·YFTLQIRGR   | 152  | >TP53-I332V·YFTLQVRGR   | 226 | 74   |
| >TP53-I332V·EYFTLQIR    | 335  | >TP53-I332V·EYFTLQVR    | 241 | 94   |
| >TP53-I332V·EYFTLQIRGR  | 546  | >TP53-I332V·EYFTLQVRGR  | 452 | 94   |
| >TP53-I332V·EYFTLQIR    | 31   | >TP53-I332V·EYFTLQVR    | 24  | 7    |
| >TP53-I332V·EYFTLQIRGR  | 315  | >TP53-I332V·EYFTLQVRGR  | 339 | 24   |

|                        |      |                        |       |       |
|------------------------|------|------------------------|-------|-------|
| >TP53-I332V·EYFTLQIR   | 26   | >TP53-I332V·EYFTLQVR   | 25    | 1     |
| >TP53-I332V·EYFTLQIR   | 19   | >TP53-I332V·EYFTLQVR   | 19    | 0     |
| >TP53-I332V·EYFTLQIRGR | 20   | >TP53-I332V·EYFTLQVRGR | 22    | 2     |
| >TP53-I332V·GEYFTLQI   | 102  | >TP53-I332V·GEYFTLQV   | 362   | 260   |
| >TP53-I332V·GEYFTLQI   | 44   | >TP53-I332V·GEYFTLQV   | 93    | 49    |
| >TP53-I332V·GEYFTLQI   | 43   | >TP53-I332V·GEYFTLQV   | 59    | 16    |
| >TP53-I332V·GEYFTLQI   | 807  | >TP53-I332V·GEYFTLQV   | 191   | 616   |
| >TP53-I332V·GEYFTLQI   | 11   | >TP53-I332V·GEYFTLQV   | 57    | 46    |
| >TP53-I332V·GEYFTLQIR  | 190  | >TP53-I332V·GEYFTLQVR  | 335   | 145   |
| >TP53-I332V·LDGEYFTLQI | 87   | >TP53-I332V·LDGEYFTLQV | 768   | 681   |
| >TP53-I332V·LDGEYFTLQI | 94   | >TP53-I332V·LDGEYFTLQV | 179   | 85    |
| >TP53-K101M·KTYQGSYGFR | 220  | >TP53-K101M·NTYQGSYGFF | 799   | 579   |
| >TP53-K101M·KTYQGSYGFR | 169  | >TP53-K101M·NTYQGSYGFF | 1924  | 1755  |
| >TP53-K101M·KTYQGSYGFR | 260  | >TP53-K101M·NTYQGSYGFF | 571   | 311   |
| >TP53-K101M·KTYQGSYGF  | 391  | >TP53-K101M·NTYQGSYGF  | 2308  | 1917  |
| >TP53-K101M·KTYQGSYGFR | 77   | >TP53-K101M·NTYQGSYGFF | 541   | 464   |
| >TP53-K101M·KTYQGSYGFR | 23   | >TP53-K101M·NTYQGSYGFF | 199   | 176   |
| >TP53-K101M·KTYQGSYGFR | 175  | >TP53-K101M·NTYQGSYGFF | 2466  | 2291  |
| >TP53-K101M·KTYQGSYGFR | 50   | >TP53-K101M·NTYQGSYGFF | 295   | 245   |
| >TP53-K101M·KTYQGSYGFR | 57   | >TP53-K101M·NTYQGSYGFF | 133   | 76    |
| >TP53-K101M·KTYQGSYGF  | 8482 | >TP53-K101M·NTYQGSYGF  | 164   | 8318  |
| >TP53-K101M·KTYQGSYGF  | 481  | >TP53-K101M·NTYQGSYGF  | 118   | 363   |
| >TP53-K101M·KTYQGSYGF  | 192  | >TP53-K101M·NTYQGSYGF  | 69    | 123   |
| >TP53-K101M·KTYQGSYGF  | 294  | >TP53-K101M·NTYQGSYGF  | 276   | 18    |
| >TP53-K101M·KTYQGSYGFR | 96   | >TP53-K101M·NTYQGSYGFF | 9368  | 9272  |
| >TP53-K101M·KTYQGSYGF  | 325  | >TP53-K101M·NTYQGSYGF  | 3387  | 3062  |
| >TP53-K101M·KTYQGSYGFR | 10   | >TP53-K101M·NTYQGSYGFF | 64    | 54    |
| >TP53-K101M·KTYQGSYGF  | 4    | >TP53-K101M·NTYQGSYGF  | 65    | 61    |
| >TP53-K101M·KTYQGSYGFR | 21   | >TP53-K101M·NTYQGSYGFF | 1330  | 1309  |
| >TP53-K101M·KTYQGSYGFR | 407  | >TP53-K101M·NTYQGSYGFF | 57    | 350   |
| >TP53-K101M·KTYQGSYGFR | 57   | >TP53-K101M·NTYQGSYGFF | 5     | 52    |
| >TP53-K101M·KTYQGSYGFR | 3483 | >TP53-K101M·NTYQGSYGFF | 46    | 3437  |
| >TP53-K101M·KTYQGSYGFR | 402  | >TP53-K101M·NTYQGSYGFF | 15    | 387   |
| >TP53-K101M·KTYQGSYGF  | 55   | >TP53-K101M·NTYQGSYGF  | 118   | 63    |
| >TP53-K101M·KTYQGSYGF  | 819  | >TP53-K101M·NTYQGSYGF  | 127   | 692   |
| >TP53-K101M·KTYQGSYGF  | 36   | >TP53-K101M·NTYQGSYGF  | 399   | 363   |
| >TP53-K101M·KTYQGSYGF  | 249  | >TP53-K101M·NTYQGSYG   | 8704  | 8455  |
| >TP53-K101M·KTYQGSYGF  | 2    | >TP53-K101M·NTYQGSYGF  | 4     | 2     |
| >TP53-K101M·KTYQGSYGFR | 465  | >TP53-K101M·NTYQGSYGFF | 10727 | 10262 |
| >TP53-K101M·KTYQGSYGFR | 3    | >TP53-K101M·NTYQGSYGFF | 12    | 9     |
| >TP53-K101M·KTYQGSYGF  | 1932 | >TP53-K101M·NTYQGSYGF  | 219   | 1713  |
| >TP53-K101M·KTYQGSYGF  | 101  | >TP53-K101M·NTYQGSYGF  | 4912  | 4811  |
| >TP53-K101M·KTYQGSYGFR | 439  | >TP53-K101M·NTYQGSYGFF | 13299 | 12860 |

|                         |      |                         |      |      |
|-------------------------|------|-------------------------|------|------|
| >TP53-K101M KTYQGSYGF   | 15   | >TP53-K101M NTYQGSYGF   | 2087 | 2072 |
| >TP53-K101M KTYQGSYGFR  | 35   | >TP53-K101M NTYQGSYGFF  | 9520 | 9485 |
| >TP53-K101M KTYQGSYGF   | 151  | >TP53-K101M NTYQGSYGF   | 1251 | 1100 |
| >TP53-K101M KTYQGSYGF   | 25   | >TP53-K101M NTYQGSYGF   | 202  | 177  |
| >TP53-K101M KTYQGSYGFR  | 28   | >TP53-K101M NTYQGSYGFF  | 233  | 205  |
| >TP53-K101M KTYQGSYGFR  | 345  | >TP53-K101M NTYQGSYGFF  | 5035 | 4690 |
| >TP53-K101M KTYQGSYGFR  | 370  | >TP53-K101M NTYQGSYGFF  | 747  | 377  |
| >TP53-K101M KTYQGSYGF   | 25   | >TP53-K101M NTYQGSYGF   | 131  | 106  |
| >TP53-K101M KTYQGSYGFR  | 43   | >TP53-K101M NTYQGSYGFF  | 206  | 163  |
| >TP53-K101M QKTYQGSY    | 308  | >TP53-K101M QNTYQGSY    | 310  | 2    |
| >TP53-K101M QKTYQGSYGI  | 814  | >TP53-K101M QNTYQGSYG   | 182  | 632  |
| >TP53-K101M QKTYQGSY    | 40   | >TP53-K101M QNTYQGSY    | 2161 | 2121 |
| >TP53-K101M QKTYQGSYGI  | 10   | >TP53-K101M QNTYQGSYG   | 805  | 795  |
| >TP53-K101M SQKTYQGSY   | 15   | >TP53-K101M SQNTYQGSY   | 9    | 6    |
| >TP53-K101M SQKTYQGSY   | 38   | >TP53-K101M SQNTYQGSY   | 42   | 4    |
| >TP53-K101M SQKTYQGSY   | 36   | >TP53-K101M SQNTYQGSY   | 44   | 8    |
| >TP53-K101M SQKTYQGSY   | 198  | >TP53-K101M SQNTYQGSY   | 320  | 122  |
| >TP53-K101M SQKTYQGSY   | 268  | >TP53-K101M SQNTYQGSY   | 494  | 226  |
| >TP53-K101M SQKTYQGSY   | 19   | >TP53-K101M SQNTYQGSY   | 24   | 5    |
| >TP53-K101M SQKTYQGSY   | 9    | >TP53-K101M SQNTYQGSY   | 10   | 1    |
| >TP53-K101M PSQKTYQGSY  | 513  | >TP53-K101M PSQNTYQGSY  | 281  | 232  |
| >TP53-K101M PSQKTYQGSY  | 71   | >TP53-K101M PSQNTYQGSY  | 69   | 2    |
| >TP53-K101M PSQKTYQGSY  | 228  | >TP53-K101M PSQNTYQGSY  | 151  | 77   |
| >TP53-K101M VPSQKTYQGSY | 92   | >TP53-K101M VPSQNTYQGSY | 57   | 35   |
| >TP53-K101M VPSQKTYQGSY | 19   | >TP53-K101M VPSQNTYQGSY | 14   | 5    |
| >TP53-K101M VPSQKTYQGSY | 254  | >TP53-K101M VPSQNTYQGSY | 178  | 76   |
| >TP53-K101M VPSQKTYQGSY | 15   | >TP53-K101M VPSQNTYQGSY | 22   | 7    |
| >TP53-K101M SVPSQKTY    | 183  | >TP53-K101M SVPSQNTY    | 83   | 100  |
| >TP53-K101M SVPSQKTY    | 1228 | >TP53-K101M SVPSQNTY    | 420  | 808  |
| >TP53-K101M SVPSQKTY    | 442  | >TP53-K101M SVPSQNTY    | 115  | 327  |
| >TP53-K101M SSVPSQKTY   | 1152 | >TP53-K101M SSVPSQNTY   | 343  | 809  |
| >TP53-K101M SSVPSQKTY   | 122  | >TP53-K101M SSVPSQNTY   | 69   | 53   |
| >TP53-K101M SSVPSQKTY   | 963  | >TP53-K101M SSVPSQNTY   | 307  | 656  |
| >TP53-K101M SSVPSQKTY   | 146  | >TP53-K101M SSVPSQNTY   | 23   | 123  |
| >TP53-K101M SSVPSQKTY   | 227  | >TP53-K101M SSVPSQNTY   | 133  | 94   |
| >TP53-K101M SSVPSQKTY   | 40   | >TP53-K101M SSVPSQNTY   | 44   | 4    |
| >TP53-K101M SSVPSQKTY   | 2    | >TP53-K101M SSVPSQNTY   | 3    | 1    |
| >TP53-K101M SSVPSQKTY   | 1268 | >TP53-K101M SSVPSQNTY   | 369  | 899  |
| >TP53-K101M SSVPSQKTY   | 119  | >TP53-K101M SSVPSQNTY   | 278  | 159  |
| >TP53-K101M SSVPSQKTY   | 195  | >TP53-K101M SSVPSQNTY   | 60   | 135  |
| >TP53-K101M SSVPSQKTY   | 23   | >TP53-K101M SSVPSQNTY   | 11   | 12   |
| >TP53-K101M SSVPSQKTY   | 188  | >TP53-K101M SSVPSQNTY   | 80   | 108  |
| >TP53-K101M SSSVPSQKTY  | 415  | >TP53-K101M SSSVPSQNTY  | 265  | 150  |

|                       |     |                       |       |       |
|-----------------------|-----|-----------------------|-------|-------|
| >TP53-K101MSSSVPSQK   | 230 | >TP53-K101MSSSVPSQN   | 21120 | 20890 |
| >TP53-K101MSSSVPSQK   | 20  | >TP53-K101MSSSVPSQN   | 18434 | 18414 |
| >TP53-K101MSSSVPSQKTY | 514 | >TP53-K101MSSSVPSQNTY | 238   | 276   |
| >TP53-K101MSSSVPSQK   | 223 | >TP53-K101MSSSVPSQN   | 14676 | 14453 |
| >TP53-K101MSSSVPSQKTY | 105 | >TP53-K101MSSSVPSQNTY | 47    | 58    |
| >TP53-K101MSSSVPSQK   | 226 | >TP53-K101MSSSVPSQN   | 20095 | 19869 |
| >TP53-K101MSSSVPSQKTY | 317 | >TP53-K101MSSSVPSQNTY | 188   | 129   |
| >TP53-K101MSSSVPSQKTY | 112 | >TP53-K101MSSSVPSQNTY | 94    | 18    |
| >TP53-K101MSSSVPSQKTY | 4   | >TP53-K101MSSSVPSQNTY | 7     | 3     |
| >TP53-K101MSSSVPSQKTY | 27  | >TP53-K101MSSSVPSQNTY | 21    | 6     |
| >TP53-K101MSSSVPSQKTY | 457 | >TP53-K101MSSSVPSQNTY | 300   | 157   |
| >TP53-K101MSSSVPSQK   | 286 | >TP53-K101MSSSVPSQN   | 9221  | 8935  |
| >TP53-K101MLSSSVPSQKT | 164 | >TP53-K101MLSSSVPSQNT | 29    | 135   |
| >TP53-K101MLSSSVPSQK  | 103 | >TP53-K101MLSSSVPSQN  | 19814 | 19711 |
| >TP53-K101MLSSSVPSQK  | 23  | >TP53-K101MLSSSVPSQN  | 21790 | 21767 |
| >TP53-K101MLSSSVPSQKT | 450 | >TP53-K101MLSSSVPSQNT | 247   | 203   |
| >TP53-K101MLSSSVPSQKT | 50  | >TP53-K101MLSSSVPSQNT | 18    | 32    |
| >TP53-K101MLSSSVPSQK  | 34  | >TP53-K101MLSSSVPSQN  | 12829 | 12795 |
| >TP53-K101MLSSSVPSQKT | 149 | >TP53-K101MLSSSVPSQNT | 112   | 37    |
| >TP53-K101MLSSSVPSQKT | 32  | >TP53-K101MLSSSVPSQNT | 33    | 1     |
| >TP53-K101MLSSSVPSQKT | 6   | >TP53-K101MLSSSVPSQNT | 12    | 6     |
| >TP53-K101MLSSSVPSQKT | 229 | >TP53-K101MLSSSVPSQNT | 89    | 140   |
| >TP53-K101MLSSSVPSQKT | 204 | >TP53-K101MLSSSVPSQNT | 314   | 110   |
| >TP53-K101MLSSSVPSQKT | 32  | >TP53-K101MLSSSVPSQNT | 21    | 11    |
| >TP53-K101MLSSSVPSQK  | 189 | >TP53-K101MLSSSVPSQN  | 118   | 71    |
| >TP53-K101MLSSSVPSQKT | 8   | >TP53-K101MLSSSVPSQNT | 5     | 3     |
| >TP53-K101MLSSSVPSQKT | 743 | >TP53-K101MLSSSVPSQNT | 448   | 295   |
| >TP53-K101MLSSSVPSQK  | 472 | >TP53-K101MLSSSVPSQN  | 28353 | 27881 |
| >TP53-K101MLSSSVPSQK  | 382 | >TP53-K101MLSSSVPSQN  | 34971 | 34589 |
| >TP53-K101FKTYQGSYGFR | 220 | >TP53-K101FRTYQGSYGFF | 359   | 139   |
| >TP53-K101FKTYQGSYGFR | 169 | >TP53-K101FRTYQGSYGFF | 510   | 341   |
| >TP53-K101FKTYQGSYGFR | 260 | >TP53-K101FRTYQGSYGFF | 610   | 350   |
| >TP53-K101FKTYQGSYGF  | 391 | >TP53-K101FRTYQGSYGF  | 748   | 357   |
| >TP53-K101FKTYQGSYGFR | 77  | >TP53-K101FRTYQGSYGFF | 135   | 58    |
| >TP53-K101FKTYQGSYGFR | 23  | >TP53-K101FRTYQGSYGFF | 25    | 2     |
| >TP53-K101FKTYQGSYGFR | 175 | >TP53-K101FRTYQGSYGFF | 432   | 257   |
| >TP53-K101FKTYQGSYGFR | 50  | >TP53-K101FRTYQGSYGFF | 44    | 6     |
| >TP53-K101FKTYQGSYGFR | 57  | >TP53-K101FRTYQGSYGFF | 40    | 17    |
| >TP53-K101FKTYQGSYGF  | 645 | >TP53-K101FRTYQGSYGF  | 124   | 521   |
| >TP53-K101FKTYQGSYGF  | 481 | >TP53-K101FRTYQGSYGF  | 340   | 141   |
| >TP53-K101FKTYQGSYGF  | 192 | >TP53-K101FRTYQGSYGF  | 192   | 0     |
| >TP53-K101FKTYQGSYGF  | 294 | >TP53-K101FRTYQGSYGF  | 297   | 3     |
| >TP53-K101FKTYQGSYGFR | 96  | >TP53-K101FRTYQGSYGFF | 86    | 10    |

|                       |       |                       |     |       |
|-----------------------|-------|-----------------------|-----|-------|
| >TP53-K101FKTYQGSYGF  | 325   | >TP53-K101FRTYQGSYGF  | 539 | 214   |
| >TP53-K101FKTYQGSYGFR | 10    | >TP53-K101FRTYQGSYGFR | 10  | 0     |
| >TP53-K101FKTYQGSYGF  | 4     | >TP53-K101FRTYQGSYGF  | 4   | 0     |
| >TP53-K101FKTYQGSYGFR | 21    | >TP53-K101FRTYQGSYGFR | 21  | 0     |
| >TP53-K101FKTYQGSYGF  | 407   | >TP53-K101FRTYQGSYGFR | 312 | 95    |
| >TP53-K101FKTYQGSYGFR | 57    | >TP53-K101FRTYQGSYGFR | 22  | 35    |
| >TP53-K101FKTYQGSYGF  | 402   | >TP53-K101FRTYQGSYGFR | 337 | 65    |
| >TP53-K101FKTYQGSYGF  | 55    | >TP53-K101FRTYQGSYGF  | 36  | 19    |
| >TP53-K101FKTYQGSYGF  | 36    | >TP53-K101FRTYQGSYGF  | 23  | 13    |
| >TP53-K101FKTYQGSYG   | 249   | >TP53-K101FRTYQGSYG   | 116 | 133   |
| >TP53-K101FKTYQGSYGF  | 2     | >TP53-K101FRTYQGSYGF  | 2   | 0     |
| >TP53-K101FKTYQGSYGFR | 465   | >TP53-K101FRTYQGSYGFR | 215 | 250   |
| >TP53-K101FKTYQGSYGFR | 3     | >TP53-K101FRTYQGSYGFR | 2   | 1     |
| >TP53-K101FKTYQGSYGF  | 101   | >TP53-K101FRTYQGSYGF  | 106 | 5     |
| >TP53-K101FKTYQGSYGFR | 439   | >TP53-K101FRTYQGSYGFR | 436 | 3     |
| >TP53-K101FKTYQGSYGF  | 15    | >TP53-K101FRTYQGSYGF  | 15  | 0     |
| >TP53-K101FKTYQGSYGFR | 35    | >TP53-K101FRTYQGSYGFR | 43  | 8     |
| >TP53-K101FKTYQGSYGF  | 569   | >TP53-K101FRTYQGSYGF  | 447 | 122   |
| >TP53-K101FKTYQGSYGFR | 151   | >TP53-K101FRTYQGSYGFR | 126 | 25    |
| >TP53-K101FKTYQGSYGF  | 25    | >TP53-K101FRTYQGSYGF  | 16  | 9     |
| >TP53-K101FKTYQGSYGFR | 28    | >TP53-K101FRTYQGSYGFR | 18  | 10    |
| >TP53-K101FKTYQGSYGFR | 345   | >TP53-K101FRTYQGSYGFR | 367 | 22    |
| >TP53-K101FKTYQGSYGFR | 370   | >TP53-K101FRTYQGSYGFR | 423 | 53    |
| >TP53-K101FKTYQGSYGFR | 25    | >TP53-K101FRTYQGSYGFR | 47  | 22    |
| >TP53-K101FKTYQGSYGFR | 43    | >TP53-K101FRTYQGSYGFR | 24  | 19    |
| >TP53-K101FQKTYQGSY   | 308   | >TP53-K101FRQTYQGSY   | 312 | 4     |
| >TP53-K101FQKTYQGSY   | 40    | >TP53-K101FRQTYQGSY   | 272 | 232   |
| >TP53-K101FQKTYQGSYGI | 10    | >TP53-K101FRQTYQGSYGI | 77  | 67    |
| >TP53-K101FQKTYQGSYGI | 14701 | >TP53-K101FRQTYQGSYGI | 213 | 14488 |
| >TP53-K101FSQKTYQGSY  | 15    | >TP53-K101FSQRTYQGSY  | 22  | 7     |
| >TP53-K101FSQKTYQGSY  | 38    | >TP53-K101FSQRTYQGSY  | 40  | 2     |
| >TP53-K101FSQKTYQGSYC | 36    | >TP53-K101FSQRTYQGSYC | 38  | 2     |
| >TP53-K101FSQKTYQGSY  | 198   | >TP53-K101FSQRTYQGSY  | 125 | 73    |
| >TP53-K101FSQKTYQGSYC | 268   | >TP53-K101FSQRTYQGSYC | 164 | 104   |
| >TP53-K101FSQKTYQGSY  | 19    | >TP53-K101FSQRTYQGSY  | 10  | 9     |
| >TP53-K101FSQKTYQGSYC | 9     | >TP53-K101FSQRTYQGSYC | 5   | 4     |
| >TP53-K101FPSQKTYQGSY | 71    | >TP53-K101FPSQRTYQGSY | 71  | 0     |
| >TP53-K101FPSQKTYQGSY | 228   | >TP53-K101FPSQRTYQGSY | 108 | 120   |
| >TP53-K101FVPSQKTYQGS | 92    | >TP53-K101FVPSQRTYQGS | 104 | 12    |
| >TP53-K101FVPSQKTYQGS | 19    | >TP53-K101FVPSQRTYQGS | 20  | 1     |
| >TP53-K101FVPSQKTYQGS | 254   | >TP53-K101FVPSQRTYQGS | 272 | 18    |
| >TP53-K101FVPSQKTYQGS | 15    | >TP53-K101FVPSQRTYQGS | 21  | 6     |
| >TP53-K101FSVPSQKTY   | 183   | >TP53-K101FSVPSQRTY   | 136 | 47    |



|                         |      |                         |      |      |
|-------------------------|------|-------------------------|------|------|
| >TP53-K101F SVPSQKTY    | 442  | >TP53-K101F SVPSQRTY    | 235  | 207  |
| >TP53-K101F SSVPSQKTY   | 122  | >TP53-K101F SSVPSQRTY   | 121  | 1    |
| >TP53-K101F SSVPSQKTY   | 146  | >TP53-K101F SSVPSQRTY   | 79   | 67   |
| >TP53-K101F SSVPSQKTY   | 227  | >TP53-K101F SSVPSQRTY   | 172  | 55   |
| >TP53-K101F SSVPSQKTY   | 40   | >TP53-K101F SSVPSQRTY   | 71   | 31   |
| >TP53-K101F SSVPSQKTY   | 2    | >TP53-K101F SSVPSQRTY   | 3    | 1    |
| >TP53-K101F SSVPSQKTY   | 119  | >TP53-K101F SSVPSQRTY   | 106  | 13   |
| >TP53-K101F SSVPSQKTY   | 195  | >TP53-K101F SSVPSQRTY   | 376  | 181  |
| >TP53-K101F SSVPSQKTY   | 23   | >TP53-K101F SSVPSQRTY   | 28   | 5    |
| >TP53-K101F SSVPSQKTY   | 188  | >TP53-K101F SSVPSQRTY   | 84   | 104  |
| >TP53-K101F SSSVPSQKTY  | 415  | >TP53-K101F SSSVPSQRTY  | 273  | 142  |
| >TP53-K101F SSSVPSQK    | 230  | >TP53-K101F SSSVPSQR    | 4868 | 4638 |
| >TP53-K101F SSSVPSQK    | 20   | >TP53-K101F SSSVPSQR    | 281  | 261  |
| >TP53-K101F SSSVPSQKTY  | 514  | >TP53-K101F SSSVPSQRTY  | 437  | 77   |
| >TP53-K101F SSSVPSQKTY  | 817  | >TP53-K101F SSSVPSQRTY  | 483  | 334  |
| >TP53-K101F SSSVPSQK    | 223  | >TP53-K101F SSSVPSQR    | 9192 | 8969 |
| >TP53-K101F SSSVPSQKTY  | 105  | >TP53-K101F SSSVPSQRTY  | 81   | 24   |
| >TP53-K101F SSSVPSQK    | 3767 | >TP53-K101F SSSVPSQR    | 172  | 3595 |
| >TP53-K101F SSSVPSQK    | 226  | >TP53-K101F SSSVPSQR    | 67   | 159  |
| >TP53-K101F SSSVPSQKTY  | 317  | >TP53-K101F SSSVPSQRTY  | 218  | 99   |
| >TP53-K101F SSSVPSQKTY  | 112  | >TP53-K101F SSSVPSQRTY  | 205  | 93   |
| >TP53-K101F SSSVPSQKTY  | 4    | >TP53-K101F SSSVPSQRTY  | 5    | 1    |
| >TP53-K101F SSSVPSQKTY  | 27   | >TP53-K101F SSSVPSQRTY  | 30   | 3    |
| >TP53-K101F SSSVPSQKTY  | 457  | >TP53-K101F SSSVPSQRTY  | 304  | 153  |
| >TP53-K101F SSSVPSQK    | 286  | >TP53-K101F SSSVPSQR    | 481  | 195  |
| >TP53-K101F LSSSVPSQKTY | 164  | >TP53-K101F LSSSVPSQRTY | 103  | 61   |
| >TP53-K101F LSSSVPSQK   | 103  | >TP53-K101F LSSSVPSQR   | 1947 | 1844 |
| >TP53-K101F LSSSVPSQK   | 23   | >TP53-K101F LSSSVPSQR   | 574  | 551  |
| >TP53-K101F LSSSVPSQKTY | 450  | >TP53-K101F LSSSVPSQRTY | 386  | 64   |
| >TP53-K101F LSSSVPSQKTY | 50   | >TP53-K101F LSSSVPSQRTY | 35   | 15   |
| >TP53-K101F LSSSVPSQK   | 2167 | >TP53-K101F LSSSVPSQR   | 85   | 2082 |
| >TP53-K101F LSSSVPSQK   | 34   | >TP53-K101F LSSSVPSQR   | 14   | 20   |
| >TP53-K101F LSSSVPSQKTY | 149  | >TP53-K101F LSSSVPSQRTY | 126  | 23   |
| >TP53-K101F LSSSVPSQKTY | 32   | >TP53-K101F LSSSVPSQRTY | 47   | 15   |
| >TP53-K101F LSSSVPSQKTY | 6    | >TP53-K101F LSSSVPSQRTY | 8    | 2    |
| >TP53-K101F LSSSVPSQKTY | 229  | >TP53-K101F LSSSVPSQRTY | 178  | 51   |
| >TP53-K101F LSSSVPSQKTY | 204  | >TP53-K101F LSSSVPSQRTY | 186  | 18   |
| >TP53-K101F LSSSVPSQKTY | 32   | >TP53-K101F LSSSVPSQRTY | 39   | 7    |
| >TP53-K101F LSSSVPSQK   | 189  | >TP53-K101F LSSSVPSQR   | 152  | 37   |
| >TP53-K101F LSSSVPSQKTY | 8    | >TP53-K101F LSSSVPSQRTY | 9    | 1    |
| >TP53-K101F PLSSSVPSQK  | 472  | >TP53-K101F PLSSSVPSQR  | 7428 | 6956 |
| >TP53-K101F PLSSSVPSQK  | 382  | >TP53-K101F PLSSSVPSQR  | 4381 | 3999 |
| >TP53-K120E KSVTCTYSPAI | 396  | >TP53-K120E ESVTCTYSPAI | 6863 | 6467 |

|                         |       |                         |       |       |
|-------------------------|-------|-------------------------|-------|-------|
| >TP53-K120E KSVTCTYSPA  | 1648  | >TP53-K120E ESVTCTYSPA  | 13    | 1635  |
| >TP53-K120E KSVTCTYSPA  | 149   | >TP53-K120E ESVTCTYSPA  | 14749 | 14600 |
| >TP53-K120E KSVTCTYSPA  | 488   | >TP53-K120E ESVTCTYSPA  | 16537 | 16049 |
| >TP53-K120E KSVTCTYSPA  | 107   | >TP53-K120E ESVTCTYSPA  | 4458  | 4351  |
| >TP53-K120E KSVTCTYS    | 13575 | >TP53-K120E ESVTCTYS    | 402   | 13173 |
| >TP53-K120E KSVTCTYSPA  | 3435  | >TP53-K120E ESVTCTYSPA  | 129   | 3306  |
| >TP53-K120E KSVTCTYSPA  | 5199  | >TP53-K120E ESVTCTYSPA  | 110   | 5089  |
| >TP53-K120E KSVTCTYSPA  | 9366  | >TP53-K120E ESVTCTYSPA  | 236   | 9130  |
| >TP53-K120E KSVTCTYSPA  | 349   | >TP53-K120E ESVTCTYSPA  | 2838  | 2489  |
| >TP53-K120E KSVTCTYSPA  | 89    | >TP53-K120E ESVTCTYSPA  | 952   | 863   |
| >TP53-K120E KSVTCTYSPA  | 6     | >TP53-K120E ESVTCTYSPA  | 133   | 127   |
| >TP53-K120E KSVTCTYSPA  | 3558  | >TP53-K120E ESVTCTYSPA  | 345   | 3213  |
| >TP53-K120E KSVTCTYSPA  | 669   | >TP53-K120E ESVTCTYSPA  | 152   | 517   |
| >TP53-K120E KSVTCTYSPA  | 113   | >TP53-K120E ESVTCTYSPA  | 14568 | 14455 |
| >TP53-K120E KSVTCTYSPA  | 198   | >TP53-K120E ESVTCTYSPA  | 1527  | 1329  |
| >TP53-K120E AKSVTCTY    | 2810  | >TP53-K120E AESVTCTY    | 293   | 2517  |
| >TP53-K120E AKSVTCTY    | 8     | >TP53-K120E AESVTCTY    | 186   | 178   |
| >TP53-K120E AKSVTCTYSP  | 483   | >TP53-K120E AESVTCTYSP  | 9189  | 8706  |
| >TP53-K120E AKSVTCTYSP, | 56    | >TP53-K120E AESVTCTYSP, | 1239  | 1183  |
| >TP53-K120E AKSVTCTYSP  | 30331 | >TP53-K120E AESVTCTYSP  | 422   | 29909 |
| >TP53-K120E AKSVTCTYSP, | 24915 | >TP53-K120E AESVTCTYSP, | 97    | 24818 |
| >TP53-K120E AKSVTCTY    | 11336 | >TP53-K120E AESVTCTY    | 136   | 11200 |
| >TP53-K120E AKSVTCTY    | 15464 | >TP53-K120E AESVTCTY    | 138   | 15326 |
| >TP53-K120E AKSVTCTY    | 29059 | >TP53-K120E AESVTCTY    | 407   | 28652 |
| >TP53-K120E AKSVTCTYS   | 18525 | >TP53-K120E AESVTCTYS   | 36    | 18489 |
| >TP53-K120E AKSVTCTYSP  | 7169  | >TP53-K120E AESVTCTYSP  | 79    | 7090  |
| >TP53-K120E AKSVTCTYSP, | 1921  | >TP53-K120E AESVTCTYSP, | 5     | 1916  |
| >TP53-K120E RLGFLHSGTA  | 43    | >TP53-K120E RLGFLHSGTA  | 15291 | 15248 |
| >TP53-K120E RLGFLHSGTA  | 125   | >TP53-K120E RLGFLHSGTA  | 25979 | 25854 |
| >TP53-K120E RLGFLHSGTA  | 384   | >TP53-K120E RLGFLHSGTA  | 15480 | 15096 |
| >TP53-K120E RLGFLHSGTA  | 262   | >TP53-K120E RLGFLHSGTA  | 11321 | 11059 |
| >TP53-K120E TAKSVTCTY   | 312   | >TP53-K120E TAESVTCTY   | 654   | 342   |
| >TP53-K120E TAKSVTCTY   | 247   | >TP53-K120E TAESVTCTY   | 310   | 63    |
| >TP53-K120E TAKSVTCTY   | 78    | >TP53-K120E TAESVTCTY   | 1778  | 1700  |
| >TP53-K120E TAKSVTCTY   | 430   | >TP53-K120E TAESVTCTY   | 3447  | 3017  |
| >TP53-K120E TAKSVTCTY   | 265   | >TP53-K120E TAESVTCTY   | 613   | 348   |
| >TP53-K120E TAKSVTCTY   | 100   | >TP53-K120E TAESVTCTY   | 31    | 69    |
| >TP53-K120E TAKSVTCTY   | 336   | >TP53-K120E TAESVTCTY   | 504   | 168   |
| >TP53-K120E GTAESVTCTY  | 682   | >TP53-K120E GTAESVTCTY  | 245   | 437   |
| >TP53-K120E GTAESVTCTY  | 466   | >TP53-K120E GTAESVTCTY  | 362   | 104   |
| >TP53-K120E GTAESVTCTY  | 518   | >TP53-K120E GTAESVTCTY  | 264   | 254   |
| >TP53-K120E GTAESVTCTY  | 775   | >TP53-K120E GTAESVTCTY  | 494   | 281   |
| >TP53-K120E GTAESVTCTY  | 521   | >TP53-K120E GTAESVTCTY  | 245   | 276   |

|                         |       |                         |       |       |
|-------------------------|-------|-------------------------|-------|-------|
| >TP53-K120E GTAKSVTCTY  | 122   | >TP53-K120E GTAESVTCTY  | 151   | 29    |
| >TP53-K120E GTAKSVTCTY  | 69    | >TP53-K120E GTAESVTCTY  | 125   | 56    |
| >TP53-K120E GTAKSVTCTY  | 71    | >TP53-K120E GTAESVTCTY  | 77    | 6     |
| >TP53-K120E GTAKSVTCTY  | 461   | >TP53-K120E GTAESVTCTY  | 641   | 180   |
| >TP53-K120E GTAKSVTCTY  | 8     | >TP53-K120E GTAESVTCTY  | 6     | 2     |
| >TP53-K120E GTAKSVTCTY  | 296   | >TP53-K120E GTAESVTCTY  | 223   | 73    |
| >TP53-K120E GTAKSVTCTY  | 39    | >TP53-K120E GTAESVTCTY  | 31    | 8     |
| >TP53-K120E GTAKSVTCTY  | 143   | >TP53-K120E GTAESVTCTY  | 143   | 0     |
| >TP53-K120E SGTAKSVTCT  | 624   | >TP53-K120E SGTAESVTCT  | 485   | 139   |
| >TP53-K120E SGTAKSVTCT  | 585   | >TP53-K120E SGTAESVTCT  | 207   | 378   |
| >TP53-K120E SGTAKSVTCT  | 374   | >TP53-K120E SGTAESVTCT  | 379   | 5     |
| >TP53-K120E LHS GTAKSV  | 4739  | >TP53-K120E LHS GTAESV  | 326   | 4413  |
| >TP53-K120E FLHS GTAKS  | 1705  | >TP53-K120E FLHS GTAES  | 319   | 1386  |
| >TP53-K120E FLHS GTAKSV | 122   | >TP53-K120E FLHS GTAESV | 25    | 97    |
| >TP53-K120E FLHS GTAKS  | 179   | >TP53-K120E FLHS GTAES  | 58    | 121   |
| >TP53-K120E FLHS GTAKSV | 13    | >TP53-K120E FLHS GTAESV | 6     | 7     |
| >TP53-K120E FLHS GTAKSV | 413   | >TP53-K120E FLHS GTAESV | 200   | 213   |
| >TP53-K120E FLHS GTAKS  | 26    | >TP53-K120E FLHS GTAES  | 16    | 10    |
| >TP53-K120E FLHS GTAKSV | 11    | >TP53-K120E FLHS GTAESV | 9     | 2     |
| >TP53-K120E FLHS GTAKSV | 27    | >TP53-K120E FLHS GTAESV | 26    | 1     |
| >TP53-K120E FLHS GTAKSV | 504   | >TP53-K120E FLHS GTAESV | 111   | 393   |
| >TP53-K120E FLHS GTAKS  | 188   | >TP53-K120E FLHS GTAES  | 65    | 123   |
| >TP53-K120E FLHS GTAKSV | 2     | >TP53-K120E FLHS GTAESV | 1     | 1     |
| >TP53-K120E FLHS GTAKSV | 116   | >TP53-K120E FLHS GTAESV | 92    | 24    |
| >TP53-K120E FLHS GTAKSV | 5     | >TP53-K120E FLHS GTAESV | 3     | 2     |
| >TP53-K120E FLHS GTAKSV | 7     | >TP53-K120E FLHS GTAESV | 5     | 2     |
| >TP53-K120E FLHS GTAKSV | 7     | >TP53-K120E FLHS GTAESV | 3     | 4     |
| >TP53-K120E FLHS GTAK   | 124   | >TP53-K120E FLHS GTAE   | 761   | 637   |
| >TP53-K120E FLHS GTAKS  | 31    | >TP53-K120E FLHS GTAES  | 12    | 19    |
| >TP53-K120E FLHS GTAKSV | 2     | >TP53-K120E FLHS GTAESV | 1     | 1     |
| >TP53-K120E FLHS GTAKSV | 13    | >TP53-K120E FLHS GTAESV | 11    | 2     |
| >TP53-K120E FLHS GTAK   | 114   | >TP53-K120E FLHS GTAE   | 19838 | 19724 |
| >TP53-K120E FLHS GTAK   | 256   | >TP53-K120E FLHS GTAE   | 19478 | 19222 |
| >TP53-K120E FLHS GTAKSV | 815   | >TP53-K120E FLHS GTAESV | 235   | 580   |
| >TP53-K120E FLHS GTAKSV | 283   | >TP53-K120E FLHS GTAESV | 363   | 80    |
| >TP53-K120E FLHS GTAKSV | 261   | >TP53-K120E FLHS GTAESV | 328   | 67    |
| >TP53-K120M KSVTCTYSPA  | 710   | >TP53-K120M MSVTCTYSPA  | 473   | 237   |
| >TP53-K120M KSVTCTYSPA  | 821   | >TP53-K120M MSVTCTYSPA  | 151   | 670   |
| >TP53-K120M KSVTCTYSPA  | 396   | >TP53-K120M MSVTCTYSPA  | 215   | 181   |
| >TP53-K120M KSVTCTYSPA  | 149   | >TP53-K120M MSVTCTYSPA  | 631   | 482   |
| >TP53-K120M KSVTCTYSPA  | 488   | >TP53-K120M MSVTCTYSPA  | 1773  | 1285  |
| >TP53-K120M KSVTCTYSPA  | 107   | >TP53-K120M MSVTCTYSPA  | 1096  | 989   |
| >TP53-K120M KSVTCTYS    | 13575 | >TP53-K120M MSVTCTYS    | 294   | 13281 |

|                         |       |                        |       |       |
|-------------------------|-------|------------------------|-------|-------|
| >TP53-K120M KSVTCTYSPA  | 3435  | >TP53-K120M MSVTCTYSPA | 153   | 3282  |
| >TP53-K120M KSVTCTYSPA  | 5199  | >TP53-K120M MSVTCTYSPA | 89    | 5110  |
| >TP53-K120M KSVTCTYSPA  | 349   | >TP53-K120M MSVTCTYSPA | 212   | 137   |
| >TP53-K120M KSVTCTYSPA  | 89    | >TP53-K120M MSVTCTYSPA | 57    | 32    |
| >TP53-K120M KSVTCTYSPA  | 6     | >TP53-K120M MSVTCTYSPA | 8     | 2     |
| >TP53-K120M KSVTCTYSPA  | 3558  | >TP53-K120M MSVTCTYSPA | 48    | 3510  |
| >TP53-K120M KSVTCTYSPA  | 669   | >TP53-K120M MSVTCTYSPA | 38    | 631   |
| >TP53-K120M KSVTCTYSPA  | 113   | >TP53-K120M MSVTCTYSPA | 411   | 298   |
| >TP53-K120M KSVTCTYSPA  | 198   | >TP53-K120M MSVTCTYSPA | 131   | 67    |
| >TP53-K120M AKSVTCTYSP, | 17604 | >TP53-K120M AMSVTCTYSF | 44    | 17560 |
| >TP53-K120M AKSVTCTYSP, | 9860  | >TP53-K120M AMSVTCTYSF | 9     | 9851  |
| >TP53-K120M AKSVTCTYSP, | 13019 | >TP53-K120M AMSVTCTYSF | 430   | 12589 |
| >TP53-K120M AKSVTCTYSP, | 26325 | >TP53-K120M AMSVTCTYSF | 269   | 26056 |
| >TP53-K120M AKSVTCTYSP, | 21480 | >TP53-K120M AMSVTCTYSF | 365   | 21115 |
| >TP53-K120M AKSVTCTYSP, | 23239 | >TP53-K120M AMSVTCTYSF | 223   | 23016 |
| >TP53-K120M AKSVTCTYSP, | 30930 | >TP53-K120M AMSVTCTYSF | 46    | 30884 |
| >TP53-K120M AKSVTCTY    | 6780  | >TP53-K120M AMSVTCTY   | 91    | 6689  |
| >TP53-K120M AKSVTCTY    | 888   | >TP53-K120M AMSVTCTY   | 30    | 858   |
| >TP53-K120M AKSVTCTY    | 2810  | >TP53-K120M AMSVTCTY   | 39    | 2771  |
| >TP53-K120M AKSVTCTYSP, | 16209 | >TP53-K120M AMSVTCTYSF | 252   | 15957 |
| >TP53-K120M AKSVTCTY    | 10399 | >TP53-K120M AMSVTCTY   | 270   | 10129 |
| >TP53-K120M AKSVTCTY    | 8     | >TP53-K120M AMSVTCTY   | 15    | 7     |
| >TP53-K120M AKSVTCTYSP  | 483   | >TP53-K120M AMSVTCTYSF | 998   | 515   |
| >TP53-K120M AKSVTCTYSP, | 56    | >TP53-K120M AMSVTCTYSF | 102   | 46    |
| >TP53-K120M AKSVTCTY    | 11071 | >TP53-K120M AMSVTCTY   | 172   | 10899 |
| >TP53-K120M RLGFLHSGTA  | 12232 | >TP53-K120M RLGFLHSGTA | 371   | 11861 |
| >TP53-K120M RLGFLHSGTA  | 43    | >TP53-K120M RLGFLHSGTA | 14709 | 14666 |
| >TP53-K120M RLGFLHSGTA  | 125   | >TP53-K120M RLGFLHSGTA | 24287 | 24162 |
| >TP53-K120M RLGFLHSGTA  | 384   | >TP53-K120M RLGFLHSGTA | 8459  | 8075  |
| >TP53-K120M RLGFLHSGTA  | 262   | >TP53-K120M RLGFLHSGTA | 10430 | 10168 |
| >TP53-K120M RLGFLHSGTA  | 8599  | >TP53-K120M RLGFLHSGTA | 62    | 8537  |
| >TP53-K120M RLGFLHSGTA  | 5036  | >TP53-K120M RLGFLHSGTA | 367   | 4669  |
| >TP53-K120M RLGFLHSGTA  | 19002 | >TP53-K120M RLGFLHSGTA | 325   | 18677 |
| >TP53-K120M TAKSVTCTY   | 5937  | >TP53-K120M TAMSVTCTY  | 110   | 5827  |
| >TP53-K120M TAKSVTCTY   | 312   | >TP53-K120M TAMSVTCTY  | 251   | 61    |
| >TP53-K120M TAKSVTCTY   | 247   | >TP53-K120M TAMSVTCTY  | 41    | 206   |
| >TP53-K120M TAKSVTCTY   | 78    | >TP53-K120M TAMSVTCTY  | 72    | 6     |
| >TP53-K120M TAKSVTCTY   | 430   | >TP53-K120M TAMSVTCTY  | 163   | 267   |
| >TP53-K120M TAKSVTCTY   | 265   | >TP53-K120M TAMSVTCTY  | 60    | 205   |
| >TP53-K120M TAKSVTCTY   | 100   | >TP53-K120M TAMSVTCTY  | 14    | 86    |
| >TP53-K120M TAKSVTCTY   | 4476  | >TP53-K120M TAMSVTCTY  | 284   | 4192  |
| >TP53-K120M TAKSVTCTY   | 746   | >TP53-K120M TAMSVTCTY  | 353   | 393   |
| >TP53-K120M TAKSVTCTY   | 2180  | >TP53-K120M TAMSVTCTY  | 35    | 2145  |

|                        |       |                        |     |       |
|------------------------|-------|------------------------|-----|-------|
| >TP53-K120M TAKSVTCTY  | 336   | >TP53-K120M TAMSVTCTY  | 243 | 93    |
| >TP53-K120M TAKSVTCTY  | 1427  | >TP53-K120M TAMSVTCTY  | 268 | 1159  |
| >TP53-K120M GTAKSVTCTY | 682   | >TP53-K120M GTAMSVTCT  | 294 | 388   |
| >TP53-K120M GTAKSVTCTY | 466   | >TP53-K120M GTAMSVTCT  | 129 | 337   |
| >TP53-K120M GTAKSVTCTY | 122   | >TP53-K120M GTAMSVTCT  | 95  | 27    |
| >TP53-K120M GTAKSVTCTY | 69    | >TP53-K120M GTAMSVTCT  | 66  | 3     |
| >TP53-K120M GTAKSVTCTY | 71    | >TP53-K120M GTAMSVTCT  | 60  | 11    |
| >TP53-K120M GTAKSVTCTY | 461   | >TP53-K120M GTAMSVTCT  | 407 | 54    |
| >TP53-K120M GTAKSVTCTY | 8     | >TP53-K120M GTAMSVTCT  | 6   | 2     |
| >TP53-K120M GTAKSVTCTY | 296   | >TP53-K120M GTAMSVTCT  | 276 | 20    |
| >TP53-K120M GTAKSVTCTY | 39    | >TP53-K120M GTAMSVTCT  | 33  | 6     |
| >TP53-K120M GTAKSVTCTY | 143   | >TP53-K120M GTAMSVTCT  | 434 | 291   |
| >TP53-K120M SGTAKSVTCT | 624   | >TP53-K120M SGTAMSVTC  | 412 | 212   |
| >TP53-K120M SGTAKSVTCT | 585   | >TP53-K120M SGTAMSVTC  | 156 | 429   |
| >TP53-K120M SGTAKSVTCT | 917   | >TP53-K120M SGTAMSVTC  | 350 | 567   |
| >TP53-K120M SGTAKSVTCT | 374   | >TP53-K120M SGTAMSVTC  | 243 | 131   |
| >TP53-K120M HSGTAKSV   | 3331  | >TP53-K120M HSGTAMSV   | 221 | 3110  |
| >TP53-K120M LHSGTAKSV  | 884   | >TP53-K120M LHSGTAMSV  | 73  | 811   |
| >TP53-K120M LHSGTAKSV  | 4739  | >TP53-K120M LHSGTAMSV  | 130 | 4609  |
| >TP53-K120M FLHSGTAK   | 16047 | >TP53-K120M FLHSGTAM   | 82  | 15965 |
| >TP53-K120M FLHSGTAKSV | 122   | >TP53-K120M FLHSGTAMS\ | 10  | 112   |
| >TP53-K120M FLHSGTAKSV | 1619  | >TP53-K120M FLHSGTAMS\ | 450 | 1169  |
| >TP53-K120M FLHSGTAK   | 1754  | >TP53-K120M FLHSGTAM   | 14  | 1740  |
| >TP53-K120M FLHSGTAKS  | 179   | >TP53-K120M FLHSGTAMS  | 113 | 66    |
| >TP53-K120M FLHSGTAKSV | 13    | >TP53-K120M FLHSGTAMS\ | 5   | 8     |
| >TP53-K120M FLHSGTAKSV | 413   | >TP53-K120M FLHSGTAMS\ | 81  | 332   |
| >TP53-K120M FLHSGTAK   | 837   | >TP53-K120M FLHSGTAM   | 7   | 830   |
| >TP53-K120M FLHSGTAKS  | 26    | >TP53-K120M FLHSGTAMS  | 17  | 9     |
| >TP53-K120M FLHSGTAKSV | 11    | >TP53-K120M FLHSGTAMS\ | 6   | 5     |
| >TP53-K120M FLHSGTAKSV | 27    | >TP53-K120M FLHSGTAMS\ | 6   | 21    |
| >TP53-K120M FLHSGTAK   | 8832  | >TP53-K120M FLHSGTAM   | 184 | 8648  |
| >TP53-K120M FLHSGTAKSV | 504   | >TP53-K120M FLHSGTAMS\ | 41  | 463   |
| >TP53-K120M FLHSGTAK   | 1218  | >TP53-K120M FLHSGTAM   | 11  | 1207  |
| >TP53-K120M FLHSGTAKS  | 188   | >TP53-K120M FLHSGTAMS  | 70  | 118   |
| >TP53-K120M FLHSGTAKSV | 2     | >TP53-K120M FLHSGTAMS\ | 1   | 1     |
| >TP53-K120M FLHSGTAKSV | 116   | >TP53-K120M FLHSGTAMS\ | 64  | 52    |
| >TP53-K120M FLHSGTAK   | 11921 | >TP53-K120M FLHSGTAM   | 49  | 11872 |
| >TP53-K120M FLHSGTAKSV | 5     | >TP53-K120M FLHSGTAMS\ | 3   | 2     |
| >TP53-K120M FLHSGTAK   | 8630  | >TP53-K120M FLHSGTAM   | 198 | 8432  |
| >TP53-K120M FLHSGTAKSV | 7     | >TP53-K120M FLHSGTAMS\ | 4   | 3     |
| >TP53-K120M FLHSGTAKSV | 7     | >TP53-K120M FLHSGTAMS\ | 3   | 4     |
| >TP53-K120M FLHSGTAK   | 124   | >TP53-K120M FLHSGTAM   | 7   | 117   |
| >TP53-K120M FLHSGTAKS  | 31    | >TP53-K120M FLHSGTAMS  | 28  | 3     |

|                         |       |                        |       |       |
|-------------------------|-------|------------------------|-------|-------|
| >TP53-K120M FLHSGTAKSV  | 2     | >TP53-K120M FLHSGTAMS\ | 1     | 1     |
| >TP53-K120M FLHSGTAKSV  | 13    | >TP53-K120M FLHSGTAMS\ | 10    | 3     |
| >TP53-K120M FLHSGTAK    | 114   | >TP53-K120M FLHSGTAM   | 19683 | 19569 |
| >TP53-K120M FLHSGTAK    | 256   | >TP53-K120M FLHSGTAM   | 24383 | 24127 |
| >TP53-K120M FLHSGTAKSV  | 1820  | >TP53-K120M FLHSGTAMS\ | 166   | 1654  |
| >TP53-K120M FLHSGTAKSV  | 815   | >TP53-K120M FLHSGTAMS\ | 99    | 716   |
| >TP53-K120M FLHSGTAK    | 8049  | >TP53-K120M FLHSGTAM   | 48    | 8001  |
| >TP53-K120M FLHSGTAK    | 1542  | >TP53-K120M FLHSGTAM   | 25    | 1517  |
| >TP53-K120M FLHSGTAKSV  | 283   | >TP53-K120M FLHSGTAMS\ | 310   | 27    |
| >TP53-K120M FLHSGTAK    | 811   | >TP53-K120M FLHSGTAM   | 32    | 779   |
| >TP53-K120M FLHSGTAKSV  | 261   | >TP53-K120M FLHSGTAMS\ | 135   | 126   |
| >TP53-K120M FLHSGTAK    | 15734 | >TP53-K120M FLHSGTAM   | 130   | 15604 |
| >TP53-K120M FLHSGTAK    | 14860 | >TP53-K120M FLHSGTAM   | 472   | 14388 |
| >TP53-K120M GFLHSGTAK   | 15424 | >TP53-K120M GFLHSGTAM  | 490   | 14934 |
| >TP53-K120M LGFLHSGTAK  | 14882 | >TP53-K120M LGFLHSGTAM | 172   | 14710 |
| >TP53-K120M LGFLHSGTAK  | 3247  | >TP53-K120M LGFLHSGTAM | 308   | 2939  |
| >TP53-K120M LGFLHSGTAK  | 27336 | >TP53-K120M LGFLHSGTAM | 248   | 27088 |
| >TP53-K120M KSVTCTYSPA  | 396   | >TP53-K120M NSVTCTYSPA | 1887  | 1491  |
| >TP53-K120M KSVTCTYSPA  | 149   | >TP53-K120M NSVTCTYSPA | 10754 | 10605 |
| >TP53-K120M KSVTCTYSPA  | 488   | >TP53-K120M NSVTCTYSPA | 13606 | 13118 |
| >TP53-K120M KSVTCTYSPA  | 107   | >TP53-K120M NSVTCTYSPA | 6610  | 6503  |
| >TP53-K120M KSVTCTYSPA  | 3435  | >TP53-K120M NSVTCTYSPA | 274   | 3161  |
| >TP53-K120M KSVTCTYSPA  | 5199  | >TP53-K120M NSVTCTYSPA | 303   | 4896  |
| >TP53-K120M KSVTCTYSPA  | 349   | >TP53-K120M NSVTCTYSPA | 3052  | 2703  |
| >TP53-K120M KSVTCTYSPA  | 89    | >TP53-K120M NSVTCTYSPA | 887   | 798   |
| >TP53-K120M KSVTCTYSPA  | 6     | >TP53-K120M NSVTCTYSPA | 432   | 426   |
| >TP53-K120M KSVTCTYSPA  | 669   | >TP53-K120M NSVTCTYSPA | 52    | 617   |
| >TP53-K120M KSVTCTYSPA  | 113   | >TP53-K120M NSVTCTYSPA | 14512 | 14399 |
| >TP53-K120M KSVTCTYSPA  | 198   | >TP53-K120M NSVTCTYSPA | 1855  | 1657  |
| >TP53-K120M AKSVTCTY    | 8     | >TP53-K120M ANSVTCTY   | 417   | 409   |
| >TP53-K120M AKSVTCTYSP  | 483   | >TP53-K120M ANSVTCTYSP | 13442 | 12959 |
| >TP53-K120M AKSVTCTYSP, | 56    | >TP53-K120M ANSVTCTYSP | 2385  | 2329  |
| >TP53-K120M RLGFLHSGTA  | 43    | >TP53-K120M RLGFLHSGTA | 14658 | 14615 |
| >TP53-K120M RLGFLHSGTA  | 125   | >TP53-K120M RLGFLHSGTA | 24987 | 24862 |
| >TP53-K120M RLGFLHSGTA  | 384   | >TP53-K120M RLGFLHSGTA | 14738 | 14354 |
| >TP53-K120M RLGFLHSGTA  | 262   | >TP53-K120M RLGFLHSGTA | 12022 | 11760 |
| >TP53-K120M TAKSVTCTY   | 312   | >TP53-K120M TANSVTCTY  | 173   | 139   |
| >TP53-K120M TAKSVTCTY   | 247   | >TP53-K120M TANSVTCTY  | 89    | 158   |
| >TP53-K120M TAKSVTCTY   | 78    | >TP53-K120M TANSVTCTY  | 102   | 24    |
| >TP53-K120M TAKSVTCTY   | 430   | >TP53-K120M TANSVTCTY  | 521   | 91    |
| >TP53-K120M TAKSVTCTY   | 265   | >TP53-K120M TANSVTCTY  | 271   | 6     |
| >TP53-K120M TAKSVTCTY   | 100   | >TP53-K120M TANSVTCTY  | 20    | 80    |
| >TP53-K120M TAKSVTCTY   | 4476  | >TP53-K120M TANSVTCTY  | 364   | 4112  |

|                        |      |                        |       |       |
|------------------------|------|------------------------|-------|-------|
| >TP53-K120M TAKSVTCTY  | 2180 | >TP53-K120M TANSVTCTY  | 51    | 2129  |
| >TP53-K120M TAKSVTCTY  | 336  | >TP53-K120M TANSVTCTY  | 545   | 209   |
| >TP53-K120M TAKSVTCTY  | 1427 | >TP53-K120M TANSVTCTY  | 183   | 1244  |
| >TP53-K120M GTAKSVTCTY | 682  | >TP53-K120M GTANSVTCTY | 375   | 307   |
| >TP53-K120M GTAKSVTCTY | 466  | >TP53-K120M GTANSVTCTY | 185   | 281   |
| >TP53-K120M GTAKSVTCTY | 122  | >TP53-K120M GTANSVTCTY | 164   | 42    |
| >TP53-K120M GTAKSVTCTY | 69   | >TP53-K120M GTANSVTCTY | 68    | 1     |
| >TP53-K120M GTAKSVTCTY | 71   | >TP53-K120M GTANSVTCTY | 62    | 9     |
| >TP53-K120M GTAKSVTCTY | 461  | >TP53-K120M GTANSVTCTY | 360   | 101   |
| >TP53-K120M GTAKSVTCTY | 8    | >TP53-K120M GTANSVTCTY | 8     | 0     |
| >TP53-K120M GTAKSVTCTY | 296  | >TP53-K120M GTANSVTCTY | 381   | 85    |
| >TP53-K120M GTAKSVTCTY | 39   | >TP53-K120M GTANSVTCTY | 30    | 9     |
| >TP53-K120M GTAKSVTCTY | 672  | >TP53-K120M GTANSVTCTY | 437   | 235   |
| >TP53-K120M GTAKSVTCTY | 143  | >TP53-K120M GTANSVTCTY | 251   | 108   |
| >TP53-K120M SGTAKSVTCT | 624  | >TP53-K120M SGTANSVTCT | 381   | 243   |
| >TP53-K120M SGTAKSVTCT | 585  | >TP53-K120M SGTANSVTCT | 184   | 401   |
| >TP53-K120M SGTAKSVTCT | 374  | >TP53-K120M SGTANSVTCT | 550   | 176   |
| >TP53-K120M HSGTAKSV   | 3331 | >TP53-K120M HSGTANSV   | 423   | 2908  |
| >TP53-K120M LHSGTAKSV  | 884  | >TP53-K120M LHSGTANSV  | 94    | 790   |
| >TP53-K120M FLHSGTAKSV | 122  | >TP53-K120M FLHSGTANSV | 35    | 87    |
| >TP53-K120M FLHSGTAKS  | 179  | >TP53-K120M FLHSGTANS  | 90    | 89    |
| >TP53-K120M FLHSGTAKSV | 13   | >TP53-K120M FLHSGTANSV | 7     | 6     |
| >TP53-K120M FLHSGTAKSV | 413  | >TP53-K120M FLHSGTANSV | 127   | 286   |
| >TP53-K120M FLHSGTAKS  | 26   | >TP53-K120M FLHSGTANS  | 13    | 13    |
| >TP53-K120M FLHSGTAKSV | 11   | >TP53-K120M FLHSGTANSV | 8     | 3     |
| >TP53-K120M FLHSGTAKSV | 27   | >TP53-K120M FLHSGTANSV | 13    | 14    |
| >TP53-K120M FLHSGTAKSV | 504  | >TP53-K120M FLHSGTANSV | 130   | 374   |
| >TP53-K120M FLHSGTAKS  | 188  | >TP53-K120M FLHSGTANS  | 194   | 6     |
| >TP53-K120M FLHSGTAKSV | 2    | >TP53-K120M FLHSGTANSV | 2     | 0     |
| >TP53-K120M FLHSGTAKSV | 116  | >TP53-K120M FLHSGTANSV | 92    | 24    |
| >TP53-K120M FLHSGTAKSV | 5    | >TP53-K120M FLHSGTANSV | 3     | 2     |
| >TP53-K120M FLHSGTAKSV | 7    | >TP53-K120M FLHSGTANSV | 6     | 1     |
| >TP53-K120M FLHSGTAKSV | 7    | >TP53-K120M FLHSGTANSV | 4     | 3     |
| >TP53-K120M FLHSGTAK   | 124  | >TP53-K120M FLHSGTAN   | 857   | 733   |
| >TP53-K120M FLHSGTAKS  | 31   | >TP53-K120M FLHSGTANS  | 29    | 2     |
| >TP53-K120M FLHSGTAKSV | 2    | >TP53-K120M FLHSGTANSV | 1     | 1     |
| >TP53-K120M FLHSGTAKSV | 13   | >TP53-K120M FLHSGTANSV | 12    | 1     |
| >TP53-K120M FLHSGTAK   | 114  | >TP53-K120M FLHSGTAN   | 19604 | 19490 |
| >TP53-K120M FLHSGTAK   | 256  | >TP53-K120M FLHSGTAN   | 22219 | 21963 |
| >TP53-K120M FLHSGTAKSV | 815  | >TP53-K120M FLHSGTANSV | 215   | 600   |
| >TP53-K120M FLHSGTAKSV | 283  | >TP53-K120M FLHSGTANSV | 278   | 5     |
| >TP53-K120M FLHSGTAKSV | 261  | >TP53-K120M FLHSGTANSV | 220   | 41    |
| >TP53-K120C KSVTCTYSPA | 396  | >TP53-K120C QSVTCTYSPA | 1489  | 1093  |

|                         |       |                        |       |       |
|-------------------------|-------|------------------------|-------|-------|
| >TP53-K120C KSVTCTYSPA  | 1648  | >TP53-K120C QSVTCTYSPA | 227   | 1421  |
| >TP53-K120C KSVTCTYSPA  | 149   | >TP53-K120C QSVTCTYSPA | 4073  | 3924  |
| >TP53-K120C KSVTCTYSPA  | 488   | >TP53-K120C QSVTCTYSPA | 7384  | 6896  |
| >TP53-K120C KSVTCTYSPA  | 107   | >TP53-K120C QSVTCTYSPA | 1020  | 913   |
| >TP53-K120C KSVTCTYSPA  | 349   | >TP53-K120C QSVTCTYSPA | 909   | 560   |
| >TP53-K120C KSVTCTYSPA  | 89    | >TP53-K120C QSVTCTYSPA | 228   | 139   |
| >TP53-K120C KSVTCTYSPA  | 6     | >TP53-K120C QSVTCTYSPA | 29    | 23    |
| >TP53-K120C KSVTCTYSPA  | 669   | >TP53-K120C QSVTCTYSPA | 218   | 451   |
| >TP53-K120C KSVTCTYSPA  | 113   | >TP53-K120C QSVTCTYSPA | 5751  | 5638  |
| >TP53-K120C KSVTCTYSPA  | 198   | >TP53-K120C QSVTCTYSPA | 356   | 158   |
| >TP53-K120C AKSVTCTYSP, | 9860  | >TP53-K120C AQSVTCTYSP | 184   | 9676  |
| >TP53-K120C AKSVTCTYSP, | 13019 | >TP53-K120C AQSVTCTYSP | 80    | 12939 |
| >TP53-K120C AKSVTCTY    | 888   | >TP53-K120C AQSVTCTY   | 149   | 739   |
| >TP53-K120C AKSVTCTY    | 2810  | >TP53-K120C AQSVTCTY   | 42    | 2768  |
| >TP53-K120C AKSVTCTYSP, | 16209 | >TP53-K120C AQSVTCTYSP | 198   | 16011 |
| >TP53-K120C AKSVTCTY    | 8     | >TP53-K120C AQSVTCTY   | 8     | 0     |
| >TP53-K120C AKSVTCTYSP  | 483   | >TP53-K120C AQSVTCTYSP | 558   | 75    |
| >TP53-K120C AKSVTCTYSP, | 56    | >TP53-K120C AQSVTCTYSP | 50    | 6     |
| >TP53-K120C AKSVTCTYSP, | 1921  | >TP53-K120C AQSVTCTYSP | 166   | 1755  |
| >TP53-K120C RLGFLHSGTA  | 43    | >TP53-K120C RLGFLHSGTA | 12608 | 12565 |
| >TP53-K120C RLGFLHSGTA  | 125   | >TP53-K120C RLGFLHSGTA | 24982 | 24857 |
| >TP53-K120C RLGFLHSGTA  | 384   | >TP53-K120C RLGFLHSGTA | 11075 | 10691 |
| >TP53-K120C RLGFLHSGTA  | 262   | >TP53-K120C RLGFLHSGTA | 7993  | 7731  |
| >TP53-K120C TAKSVTCTY   | 312   | >TP53-K120C TAQSVTCTY  | 263   | 49    |
| >TP53-K120C TAKSVTCTY   | 247   | >TP53-K120C TAQSVTCTY  | 313   | 66    |
| >TP53-K120C TAKSVTCTY   | 78    | >TP53-K120C TAQSVTCTY  | 117   | 39    |
| >TP53-K120C TAKSVTCTY   | 430   | >TP53-K120C TAQSVTCTY  | 851   | 421   |
| >TP53-K120C TAKSVTCTY   | 265   | >TP53-K120C TAQSVTCTY  | 443   | 178   |
| >TP53-K120C TAKSVTCTY   | 100   | >TP53-K120C TAQSVTCTY  | 39    | 61    |
| >TP53-K120C TAKSVTCTY   | 2180  | >TP53-K120C TAQSVTCTY  | 222   | 1958  |
| >TP53-K120C TAKSVTCTY   | 336   | >TP53-K120C TAQSVTCTY  | 449   | 113   |
| >TP53-K120C TAKSVTCTY   | 1427  | >TP53-K120C TAQSVTCTY  | 308   | 1119  |
| >TP53-K120C GTAKSVTCTY  | 466   | >TP53-K120C GTAQSVTCTY | 282   | 184   |
| >TP53-K120C GTAKSVTCTY  | 518   | >TP53-K120C GTAQSVTCTY | 328   | 190   |
| >TP53-K120C GTAKSVTCTY  | 521   | >TP53-K120C GTAQSVTCTY | 262   | 259   |
| >TP53-K120C GTAKSVTCTY  | 122   | >TP53-K120C GTAQSVTCTY | 114   | 8     |
| >TP53-K120C GTAKSVTCTY  | 69    | >TP53-K120C GTAQSVTCTY | 137   | 68    |
| >TP53-K120C GTAKSVTCTY  | 71    | >TP53-K120C GTAQSVTCTY | 57    | 14    |
| >TP53-K120C GTAKSVTCTY  | 461   | >TP53-K120C GTAQSVTCTY | 649   | 188   |
| >TP53-K120C GTAKSVTCTY  | 8     | >TP53-K120C GTAQSVTCTY | 7     | 1     |
| >TP53-K120C GTAKSVTCTY  | 296   | >TP53-K120C GTAQSVTCTY | 167   | 129   |
| >TP53-K120C GTAKSVTCTY  | 39    | >TP53-K120C GTAQSVTCTY | 38    | 1     |
| >TP53-K120C GTAKSVTCTY  | 143   | >TP53-K120C GTAQSVTCTY | 212   | 69    |



|                        |      |                          |       |       |
|------------------------|------|--------------------------|-------|-------|
| >TP53-K120C SGTAKSVTCT | 585  | >TP53-K120C SGTAQSVTCT   | 178   | 407   |
| >TP53-K120C SGTAKSVTCT | 374  | >TP53-K120C SGTAQSVTCT   | 278   | 96    |
| >TP53-K120C LHS GTAKSV | 884  | >TP53-K120C LHS GTAQSV   | 183   | 701   |
| >TP53-K120C FLHSGTAKSV | 122  | >TP53-K120C FLHSGT AQSV  | 39    | 83    |
| >TP53-K120C FLHSGTAK   | 1754 | >TP53-K120C FLHSGT AQ    | 177   | 1577  |
| >TP53-K120C FLHSGTAKS  | 179  | >TP53-K120C FLHSGT AQ S  | 115   | 64    |
| >TP53-K120C FLHSGTAKSV | 13   | >TP53-K120C FLHSGT AQ SV | 8     | 5     |
| >TP53-K120C FLHSGTAKSV | 413  | >TP53-K120C FLHSGT AQ SV | 138   | 275   |
| >TP53-K120C FLHSGTAK   | 837  | >TP53-K120C FLHSGT AQ    | 163   | 674   |
| >TP53-K120C FLHSGTAKS  | 26   | >TP53-K120C FLHSGT AQ S  | 18    | 8     |
| >TP53-K120C FLHSGTAKSV | 11   | >TP53-K120C FLHSGT AQ SV | 10    | 1     |
| >TP53-K120C FLHSGTAKSV | 27   | >TP53-K120C FLHSGT AQ SV | 12    | 15    |
| >TP53-K120C FLHSGTAKSV | 504  | >TP53-K120C FLHSGT AQ SV | 242   | 262   |
| >TP53-K120C FLHSGTAK   | 1218 | >TP53-K120C FLHSGT AQ    | 291   | 927   |
| >TP53-K120C FLHSGTAKS  | 188  | >TP53-K120C FLHSGT AQ S  | 79    | 109   |
| >TP53-K120C FLHSGTAKSV | 2    | >TP53-K120C FLHSGT AQ SV | 1     | 1     |
| >TP53-K120C FLHSGTAKSV | 116  | >TP53-K120C FLHSGT AQ SV | 74    | 42    |
| >TP53-K120C FLHSGTAKSV | 5    | >TP53-K120C FLHSGT AQ SV | 3     | 2     |
| >TP53-K120C FLHSGTAKSV | 7    | >TP53-K120C FLHSGT AQ SV | 5     | 2     |
| >TP53-K120C FLHSGTAKSV | 7    | >TP53-K120C FLHSGT AQ SV | 3     | 4     |
| >TP53-K120C FLHSGTAK   | 124  | >TP53-K120C FLHSGT AQ    | 14    | 110   |
| >TP53-K120C FLHSGTAKS  | 31   | >TP53-K120C FLHSGT AQ S  | 13    | 18    |
| >TP53-K120C FLHSGTAKSV | 2    | >TP53-K120C FLHSGT AQ SV | 1     | 1     |
| >TP53-K120C FLHSGTAKSV | 13   | >TP53-K120C FLHSGT AQ SV | 8     | 5     |
| >TP53-K120C FLHSGTAK   | 114  | >TP53-K120C FLHSGT AQ    | 18344 | 18230 |
| >TP53-K120C FLHSGTAK   | 256  | >TP53-K120C FLHSGT AQ    | 9385  | 9129  |
| >TP53-K120C FLHSGTAKSV | 1820 | >TP53-K120C FLHSGT AQ SV | 286   | 1534  |
| >TP53-K120C FLHSGTAKSV | 815  | >TP53-K120C FLHSGT AQ SV | 206   | 609   |
| >TP53-K120C FLHSGTAKSV | 283  | >TP53-K120C FLHSGT AQ SV | 200   | 83    |
| >TP53-K120C FLHSGTAKSV | 261  | >TP53-K120C FLHSGT AQ SV | 176   | 85    |
| >TP53-K120F KSVTCTYSPA | 396  | >TP53-K120F RSVTCTYSPA   | 581   | 185   |
| >TP53-K120F KSVTCTYSPA | 149  | >TP53-K120F RSVTCTYSPA   | 133   | 16    |
| >TP53-K120F KSVTCTYSPA | 488  | >TP53-K120F RSVTCTYSPA   | 448   | 40    |
| >TP53-K120F KSVTCTYSPA | 107  | >TP53-K120F RSVTCTYSPA   | 116   | 9     |
| >TP53-K120F KSVTCTYSPA | 349  | >TP53-K120F RSVTCTYSPA   | 232   | 117   |
| >TP53-K120F KSVTCTYSPA | 89   | >TP53-K120F RSVTCTYSPA   | 53    | 36    |
| >TP53-K120F KSVTCTYSPA | 6    | >TP53-K120F RSVTCTYSPA   | 4     | 2     |
| >TP53-K120F KSVTCTYSPA | 669  | >TP53-K120F RSVTCTYSPA   | 320   | 349   |
| >TP53-K120F KSVTCTYSPA | 3005 | >TP53-K120F RSVTCTYSPA   | 462   | 2543  |
| >TP53-K120F KSVTCTYSPA | 113  | >TP53-K120F RSVTCTYSPA   | 164   | 51    |
| >TP53-K120F KSVTCTYSPA | 198  | >TP53-K120F RSVTCTYSPA   | 146   | 52    |
| >TP53-K120F KSVTCTYSPA | 882  | >TP53-K120F RSVTCTYSPA   | 496   | 386   |
| >TP53-K120F KSVTCTYSPA | 766  | >TP53-K120F RSVTCTYSPA   | 309   | 457   |

|                         |      |                         |      |      |
|-------------------------|------|-------------------------|------|------|
| >TP53-K120F AKSVTCTY    | 8    | >TP53-K120F ARSVTCTY    | 46   | 38   |
| >TP53-K120F AKSVTCTYSP  | 483  | >TP53-K120F ARSVTCTYSP  | 2666 | 2183 |
| >TP53-K120F AKSVTCTYSP, | 56   | >TP53-K120F ARSVTCTYSP, | 249  | 193  |
| >TP53-K120F RLGFLHSGTA  | 43   | >TP53-K120F RLGFLHSGTA  | 343  | 300  |
| >TP53-K120F RLGFLHSGTA  | 125  | >TP53-K120F RLGFLHSGTA  | 3686 | 3561 |
| >TP53-K120F RLGFLHSGTA  | 384  | >TP53-K120F RLGFLHSGTA  | 9426 | 9042 |
| >TP53-K120F RLGFLHSGTA  | 262  | >TP53-K120F RLGFLHSGTA  | 19   | 243  |
| >TP53-K120F RLGFLHSGTA  | 3275 | >TP53-K120F RLGFLHSGTA  | 149  | 3126 |
| >TP53-K120F TAKSVTCTY   | 1756 | >TP53-K120F TARSVTCTY   | 281  | 1475 |
| >TP53-K120F TAKSVTCTY   | 312  | >TP53-K120F TARSVTCTY   | 601  | 289  |
| >TP53-K120F TAKSVTCTY   | 247  | >TP53-K120F TARSVTCTY   | 696  | 449  |
| >TP53-K120F TAKSVTCTY   | 78   | >TP53-K120F TARSVTCTY   | 79   | 1    |
| >TP53-K120F TAKSVTCTY   | 430  | >TP53-K120F TARSVTCTY   | 209  | 221  |
| >TP53-K120F TAKSVTCTY   | 265  | >TP53-K120F TARSVTCTY   | 47   | 218  |
| >TP53-K120F TAKSVTCTY   | 100  | >TP53-K120F TARSVTCTY   | 57   | 43   |
| >TP53-K120F TAKSVTCTY   | 746  | >TP53-K120F TARSVTCTY   | 382  | 364  |
| >TP53-K120F TAKSVTCTY   | 336  | >TP53-K120F TARSVTCTY   | 105  | 231  |
| >TP53-K120F GTAKSVTCTY  | 466  | >TP53-K120F GTARSVTCTY  | 433  | 33   |
| >TP53-K120F GTAKSVTCTY  | 521  | >TP53-K120F GTARSVTCTY  | 276  | 245  |
| >TP53-K120F GTAKSVTCTY  | 122  | >TP53-K120F GTARSVTCTY  | 140  | 18   |
| >TP53-K120F GTAKSVTCTY  | 69   | >TP53-K120F GTARSVTCTY  | 67   | 2    |
| >TP53-K120F GTAKSVTCTY  | 71   | >TP53-K120F GTARSVTCTY  | 80   | 9    |
| >TP53-K120F GTAKSVTCTY  | 461  | >TP53-K120F GTARSVTCTY  | 426  | 35   |
| >TP53-K120F GTAKSVTCTY  | 8    | >TP53-K120F GTARSVTCTY  | 11   | 3    |
| >TP53-K120F GTAKSVTCTY  | 296  | >TP53-K120F GTARSVTCTY  | 101  | 195  |
| >TP53-K120F GTAKSVTCTY  | 39   | >TP53-K120F GTARSVTCTY  | 27   | 12   |
| >TP53-K120F GTAKSVTCTY  | 143  | >TP53-K120F GTARSVTCTY  | 158  | 15   |
| >TP53-K120F SGTAKSVTCT  | 374  | >TP53-K120F SGTARSVTCT  | 587  | 213  |
| >TP53-K120F FLHSGTAKSV  | 122  | >TP53-K120F FLHSGTARSV  | 68   | 54   |
| >TP53-K120F FLHSGTAKS   | 179  | >TP53-K120F FLHSGTARS   | 166  | 13   |
| >TP53-K120F FLHSGTAKSV  | 13   | >TP53-K120F FLHSGTARSV  | 10   | 3    |
| >TP53-K120F FLHSGTAKSV  | 413  | >TP53-K120F FLHSGTARSV  | 350  | 63   |
| >TP53-K120F FLHSGTAKS   | 26   | >TP53-K120F FLHSGTARS   | 24   | 2    |
| >TP53-K120F FLHSGTAKSV  | 11   | >TP53-K120F FLHSGTARSV  | 9    | 2    |
| >TP53-K120F FLHSGTAKSV  | 27   | >TP53-K120F FLHSGTARSV  | 21   | 6    |
| >TP53-K120F FLHSGTAKSV  | 504  | >TP53-K120F FLHSGTARSV  | 259  | 245  |
| >TP53-K120F FLHSGTAKS   | 188  | >TP53-K120F FLHSGTARS   | 102  | 86   |
| >TP53-K120F FLHSGTAKSV  | 2    | >TP53-K120F FLHSGTARSV  | 2    | 0    |
| >TP53-K120F FLHSGTAKSV  | 116  | >TP53-K120F FLHSGTARSV  | 201  | 85   |
| >TP53-K120F FLHSGTAKSV  | 5    | >TP53-K120F FLHSGTARSV  | 4    | 1    |
| >TP53-K120F FLHSGTAKSV  | 7    | >TP53-K120F FLHSGTARSV  | 8    | 1    |
| >TP53-K120F FLHSGTAKSV  | 7    | >TP53-K120F FLHSGTARSV  | 8    | 1    |
| >TP53-K120F FLHSGTAK    | 124  | >TP53-K120F FLHSGTAR    | 704  | 580  |

|                        |       |                        |       |       |
|------------------------|-------|------------------------|-------|-------|
| >TP53-K120F FLHSGTAKS  | 31    | >TP53-K120F FLHSGTARS  | 14    | 17    |
| >TP53-K120F FLHSGTAKSV | 2     | >TP53-K120F FLHSGTARSV | 2     | 0     |
| >TP53-K120F FLHSGTAKSV | 13    | >TP53-K120F FLHSGTARSV | 11    | 2     |
| >TP53-K120F FLHSGTAK   | 114   | >TP53-K120F FLHSGTAR   | 2563  | 2449  |
| >TP53-K120F FLHSGTAK   | 5207  | >TP53-K120F FLHSGTAR   | 290   | 4917  |
| >TP53-K120F FLHSGTAK   | 7329  | >TP53-K120F FLHSGTAR   | 487   | 6842  |
| >TP53-K120F FLHSGTAK   | 256   | >TP53-K120F FLHSGTAR   | 84    | 172   |
| >TP53-K120F FLHSGTAKSV | 283   | >TP53-K120F FLHSGTARSV | 301   | 18    |
| >TP53-K120F FLHSGTAKSV | 261   | >TP53-K120F FLHSGTARSV | 508   | 247   |
| >TP53-K120F GFLHSGTAK  | 1163  | >TP53-K120F GFLHSGTAR  | 43    | 1120  |
| >TP53-K132E KMFCQLAKT  | 89    | >TP53-K132E EMFCQLAKT  | 7478  | 7389  |
| >TP53-K132E KMFCQLAKT  | 102   | >TP53-K132E EMFCQLAKT  | 2283  | 2181  |
| >TP53-K132E KMFCQLAKT  | 19    | >TP53-K132E EMFCQLAKT  | 805   | 786   |
| >TP53-K132E KMFCQLAKT  | 199   | >TP53-K132E EMFCQLAKT  | 3863  | 3664  |
| >TP53-K132E KMFCQLAKT  | 19    | >TP53-K132E EMFCQLAKT  | 317   | 298   |
| >TP53-K132E KMFCQLAKT  | 23    | >TP53-K132E EMFCQLAKT  | 243   | 220   |
| >TP53-K132E KMFCQLAKT  | 55    | >TP53-K132E EMFCQLAKT  | 1509  | 1454  |
| >TP53-K132E KMFCQLAKT  | 61    | >TP53-K132E EMFCQLAKT  | 1166  | 1105  |
| >TP53-K132E KMFCQLAK   | 26    | >TP53-K132E EMFCQLAK   | 116   | 90    |
| >TP53-K132E KMFCQLAK   | 12    | >TP53-K132E EMFCQLAK   | 122   | 110   |
| >TP53-K132E KMFCQLAK   | 8     | >TP53-K132E EMFCQLAK   | 6352  | 6344  |
| >TP53-K132E KMFCQLAK   | 35    | >TP53-K132E EMFCQLAK   | 2485  | 2450  |
| >TP53-K132E KMFCQLAK   | 371   | >TP53-K132E EMFCQLAK   | 7997  | 7626  |
| >TP53-K132E KMFCQLAKT  | 81    | >TP53-K132E EMFCQLAKT  | 2671  | 2590  |
| >TP53-K132E KMFCQLAK   | 3283  | >TP53-K132E EMFCQLAK   | 30    | 3253  |
| >TP53-K132E KMFCQLAK   | 58    | >TP53-K132E EMFCQLAK   | 466   | 408   |
| >TP53-K132E KMFCQLAKT  | 491   | >TP53-K132E EMFCQLAKT  | 3554  | 3063  |
| >TP53-K132E KMFCQLAK   | 39    | >TP53-K132E EMFCQLAK   | 273   | 234   |
| >TP53-K132E NKMFCQLAK  | 17624 | >TP53-K132E NEMFCQLAK  | 132   | 17492 |
| >TP53-K132E NKMFCQLAK  | 20765 | >TP53-K132E NEMFCQLAK  | 281   | 20484 |
| >TP53-K132E NKMFCQLA   | 32708 | >TP53-K132E NEMFCQLA   | 376   | 32332 |
| >TP53-K132E NKMFCQLA   | 12215 | >TP53-K132E NEMFCQLA   | 22    | 12193 |
| >TP53-K132E VTCTYSPALN | 80    | >TP53-K132E VTCTYSPALN | 18704 | 18624 |
| >TP53-K132E VTCTYSPALN | 14    | >TP53-K132E VTCTYSPALN | 14111 | 14097 |
| >TP53-K132E VTCTYSPALN | 146   | >TP53-K132E VTCTYSPALN | 11522 | 11376 |
| >TP53-K132E VTCTYSPALN | 490   | >TP53-K132E VTCTYSPALN | 24430 | 23940 |
| >TP53-K132E LNKMFCQL   | 100   | >TP53-K132E LNEMFCQL   | 136   | 36    |
| >TP53-K132E LNKMFCQLAI | 161   | >TP53-K132E LNEMFCQLAI | 9675  | 9514  |
| >TP53-K132E LNKMFCQL   | 153   | >TP53-K132E LNEMFCQL   | 3390  | 3237  |
| >TP53-K132E ALNKMFCQL  | 238   | >TP53-K132E ALNEMFCQL  | 32    | 206   |
| >TP53-K132E ALNKMFCQ   | 1744  | >TP53-K132E ALNEMFCQ   | 390   | 1354  |
| >TP53-K132E ALNKMFCQL  | 17    | >TP53-K132E ALNEMFCQL  | 6     | 11    |
| >TP53-K132E ALNKMFCQL  | 1394  | >TP53-K132E ALNEMFCQL  | 478   | 916   |

|                         |      |                        |       |       |
|-------------------------|------|------------------------|-------|-------|
| >TP53-K132E ALNKMFCQL   | 30   | >TP53-K132E ALNEMFCQL  | 7     | 23    |
| >TP53-K132E ALNKMFCQL   | 442  | >TP53-K132E ALNEMFCQL  | 268   | 174   |
| >TP53-K132E ALNKMFCQL   | 297  | >TP53-K132E ALNEMFCQL  | 25    | 272   |
| >TP53-K132E ALNKMFCQL   | 22   | >TP53-K132E ALNEMFCQL  | 4     | 18    |
| >TP53-K132E ALNKMFCQL   | 255  | >TP53-K132E ALNEMFCQL  | 29    | 226   |
| >TP53-K132E ALNKMFCQL   | 198  | >TP53-K132E ALNEMFCQL  | 15    | 183   |
| >TP53-K132E ALNKMFCQL   | 3615 | >TP53-K132E ALNEMFCQL  | 389   | 3226  |
| >TP53-K132E ALNKMFCQL   | 21   | >TP53-K132E ALNEMFCQL  | 9     | 12    |
| >TP53-K132E ALNKMFCQL   | 256  | >TP53-K132E ALNEMFCQL  | 55    | 201   |
| >TP53-K132E ALNKMFCQL   | 66   | >TP53-K132E ALNEMFCQL  | 7     | 59    |
| >TP53-K132E ALNKMFCQL   | 4922 | >TP53-K132E ALNEMFCQL  | 493   | 4429  |
| >TP53-K132E ALNKMFCQ    | 245  | >TP53-K132E ALNEMFCQ   | 54    | 191   |
| >TP53-K132E ALNKMFCQL   | 3    | >TP53-K132E ALNEMFCQL  | 2     | 1     |
| >TP53-K132E ALNKMFCQL   | 11   | >TP53-K132E ALNEMFCQL  | 4     | 7     |
| >TP53-K132E ALNKMFCQL   | 2597 | >TP53-K132E ALNEMFCQL  | 439   | 2158  |
| >TP53-K132E ALNKMFCQL   | 37   | >TP53-K132E ALNEMFCQL  | 42    | 5     |
| >TP53-K132E ALNKMFCQL   | 25   | >TP53-K132E ALNEMFCQL  | 24    | 1     |
| >TP53-K132E ALNKMFCQL   | 113  | >TP53-K132E ALNEMFCQL  | 226   | 113   |
| >TP53-K132E ALNKMFCQL   | 431  | >TP53-K132E ALNEMFCQL  | 601   | 170   |
| >TP53-K132E ALNKMFCQL   | 288  | >TP53-K132E ALNEMFCQL  | 1276  | 988   |
| >TP53-K132E ALNKMFCQL   | 416  | >TP53-K132E ALNEMFCQL  | 500   | 84    |
| >TP53-K132E SPALNKMFCQ  | 432  | >TP53-K132E SPALNEMFCC | 612   | 180   |
| >TP53-K132E SPALNKMFC   | 100  | >TP53-K132E SPALNEMF   | 240   | 140   |
| >TP53-K132E SPALNKMFCQ  | 41   | >TP53-K132E SPALNEMFCC | 66    | 25    |
| >TP53-K132E SPALNKMFCQ  | 372  | >TP53-K132E SPALNEMFCC | 801   | 429   |
| >TP53-K132E SPALNKMFC   | 326  | >TP53-K132E SPALNEMF   | 115   | 211   |
| >TP53-K132E SPALNKMFC   | 450  | >TP53-K132E SPALNEMF   | 900   | 450   |
| >TP53-K132E SPALNKMFC   | 677  | >TP53-K132E SPALNEMF   | 307   | 370   |
| >TP53-K132E YSPALNKM    | 2026 | >TP53-K132E YSPALNEM   | 221   | 1805  |
| >TP53-K132E YSPALNKMFC  | 384  | >TP53-K132E YSPALNEMF  | 169   | 215   |
| >TP53-K132E YSPALNKM    | 717  | >TP53-K132E YSPALNEM   | 434   | 283   |
| >TP53-K132E YSPALNKMFC  | 1020 | >TP53-K132E YSPALNEMF  | 318   | 702   |
| >TP53-K132E YSPALNKMFC  | 104  | >TP53-K132E YSPALNEMF  | 207   | 103   |
| >TP53-K132E YSPALNKMFC  | 43   | >TP53-K132E YSPALNEMF  | 138   | 95    |
| >TP53-K132E YSPALNKM    | 40   | >TP53-K132E YSPALNEM   | 118   | 78    |
| >TP53-K132E YSPALNKMFC  | 3    | >TP53-K132E YSPALNEMF  | 3     | 0     |
| >TP53-K132E YSPALNKMFCQ | 22   | >TP53-K132E YSPALNEMFC | 28    | 6     |
| >TP53-K132E YSPALNKMFCQ | 124  | >TP53-K132E YSPALNEMFC | 81    | 43    |
| >TP53-K132E YSPALNKM    | 67   | >TP53-K132E YSPALNEM   | 50    | 17    |
| >TP53-K132E YSPALNKMFC  | 103  | >TP53-K132E YSPALNEMF  | 59    | 44    |
| >TP53-K132E TYSPALNKM   | 136  | >TP53-K132E TYSPALNEM  | 52    | 84    |
| >TP53-K132E TYSPALNK    | 220  | >TP53-K132E TYSPALNE   | 28131 | 27911 |
| >TP53-K132E TYSPALNKMFC | 179  | >TP53-K132E TYSPALNEMF | 157   | 22    |

|                         |      |                         |       |       |
|-------------------------|------|-------------------------|-------|-------|
| >TP53-K132E TYSPALNKMF  | 64   | >TP53-K132E TYSPALNEMF  | 47    | 17    |
| >TP53-K132E TYSPALNKM   | 27   | >TP53-K132E TYSPALNEM   | 13    | 14    |
| >TP53-K132E TYSPALNKMF  | 5    | >TP53-K132E TYSPALNEMF  | 4     | 1     |
| >TP53-K132E TYSPALNKMF  | 551  | >TP53-K132E TYSPALNEMF  | 350   | 201   |
| >TP53-K132E TYSPALNKMF  | 586  | >TP53-K132E TYSPALNEMF  | 464   | 122   |
| >TP53-K132E TYSPALNK    | 222  | >TP53-K132E TYSPALNE    | 15839 | 15617 |
| >TP53-K132E TYSPALNKMF  | 439  | >TP53-K132E TYSPALNEMF  | 568   | 129   |
| >TP53-K132E CTYSPALNK   | 30   | >TP53-K132E CTYSPALNE   | 9353  | 9323  |
| >TP53-K132E CTYSPALNK   | 11   | >TP53-K132E CTYSPALNE   | 10093 | 10082 |
| >TP53-K132E CTYSPALNKM  | 343  | >TP53-K132E CTYSPALNEM  | 202   | 141   |
| >TP53-K132E CTYSPALNKM  | 63   | >TP53-K132E CTYSPALNEM  | 44    | 19    |
| >TP53-K132E CTYSPALNKM  | 380  | >TP53-K132E CTYSPALNEM  | 192   | 188   |
| >TP53-K132E CTYSPALNKM  | 246  | >TP53-K132E CTYSPALNEM  | 201   | 45    |
| >TP53-K132E CTYSPALNK   | 215  | >TP53-K132E CTYSPALNE   | 13912 | 13697 |
| >TP53-K132E CTYSPALNKM  | 767  | >TP53-K132E CTYSPALNEM  | 355   | 412   |
| >TP53-K132E CTYSPALNK   | 30   | >TP53-K132E CTYSPALNE   | 6843  | 6813  |
| >TP53-K132E CTYSPALNKM  | 488  | >TP53-K132E CTYSPALNEM  | 329   | 159   |
| >TP53-K132E CTYSPALNKM  | 610  | >TP53-K132E CTYSPALNEM  | 331   | 279   |
| >TP53-K132E CTYSPALNKM  | 23   | >TP53-K132E CTYSPALNEM  | 32    | 9     |
| >TP53-K132E CTYSPALNKM  | 24   | >TP53-K132E CTYSPALNEM  | 26    | 2     |
| >TP53-K132E CTYSPALNKM  | 5    | >TP53-K132E CTYSPALNEM  | 7     | 2     |
| >TP53-K132E CTYSPALNKM  | 627  | >TP53-K132E CTYSPALNEM  | 127   | 500   |
| >TP53-K132E CTYSPALNKM  | 76   | >TP53-K132E CTYSPALNEM  | 149   | 73    |
| >TP53-K132E CTYSPALNKM  | 146  | >TP53-K132E CTYSPALNEM  | 122   | 24    |
| >TP53-K132E CTYSPALNKM  | 30   | >TP53-K132E CTYSPALNEM  | 35    | 5     |
| >TP53-K132E CTYSPALNKM  | 13   | >TP53-K132E CTYSPALNEM  | 10    | 3     |
| >TP53-K132E CTYSPALNKM  | 358  | >TP53-K132E CTYSPALNEM  | 302   | 56    |
| >TP53-K132E TCTYSPALNKI | 453  | >TP53-K132E TCTYSPALNEI | 610   | 157   |
| >TP53-K132M KMFCQLAKT   | 89   | >TP53-K132M MMFCQLAKT   | 51    | 38    |
| >TP53-K132M KMFCQLAKT   | 102  | >TP53-K132M MMFCQLAKT   | 25    | 77    |
| >TP53-K132M KMFCQLAKT   | 19   | >TP53-K132M MMFCQLAKT   | 8     | 11    |
| >TP53-K132M KMFCQLAKT   | 199  | >TP53-K132M MMFCQLAKT   | 147   | 52    |
| >TP53-K132M KMFCQLAK    | 1003 | >TP53-K132M MMFCQLAK    | 454   | 549   |
| >TP53-K132M KMFCQLAKT   | 19   | >TP53-K132M MMFCQLAKT   | 10    | 9     |
| >TP53-K132M KMFCQLAKT   | 23   | >TP53-K132M MMFCQLAKT   | 12    | 11    |
| >TP53-K132M KMFCQLAKT   | 55   | >TP53-K132M MMFCQLAKT   | 80    | 25    |
| >TP53-K132M KMFCQLAKT   | 61   | >TP53-K132M MMFCQLAKT   | 90    | 29    |
| >TP53-K132M KMFCQLAKT   | 518  | >TP53-K132M MMFCQLAKT   | 41    | 477   |
| >TP53-K132M KMFCQLAKT   | 805  | >TP53-K132M MMFCQLAKT   | 102   | 703   |
| >TP53-K132M KMFCQLAK    | 26   | >TP53-K132M MMFCQLAK    | 28    | 2     |
| >TP53-K132M KMFCQLAK    | 12   | >TP53-K132M MMFCQLAK    | 9     | 3     |
| >TP53-K132M KMFCQLAK    | 8    | >TP53-K132M MMFCQLAK    | 18    | 10    |
| >TP53-K132M KMFCQLAK    | 35   | >TP53-K132M MMFCQLAK    | 54    | 19    |

|                       |       |                       |       |       |
|-----------------------|-------|-----------------------|-------|-------|
| >TP53-K132NKMFCQLAK   | 371   | >TP53-K132NMMFCQLAK   | 2419  | 2048  |
| >TP53-K132NKMFCQLAKT  | 81    | >TP53-K132NMMFCQLAKT  | 679   | 598   |
| >TP53-K132NKMFCQLAK   | 3283  | >TP53-K132NMMFCQLAK   | 32    | 3251  |
| >TP53-K132NKMFCQLAK   | 58    | >TP53-K132NMMFCQLAK   | 42    | 16    |
| >TP53-K132NKMFCQLAKT  | 491   | >TP53-K132NMMFCQLAKT  | 338   | 153   |
| >TP53-K132NKMFCQLAK   | 39    | >TP53-K132NMMFCQLAK   | 146   | 107   |
| >TP53-K132NKMFCQLA    | 20464 | >TP53-K132NMMFCQLA    | 44    | 20420 |
| >TP53-K132NKMFCQLAK   | 25331 | >TP53-K132NMMFCQLA    | 436   | 24895 |
| >TP53-K132NKMFCQLA    | 7876  | >TP53-K132NMMFCQLA    | 20    | 7856  |
| >TP53-K132NKMFCQLAK   | 18725 | >TP53-K132NMMFCQLA    | 210   | 18515 |
| >TP53-K132NKMFCQLA    | 10707 | >TP53-K132NMMFCQLA    | 22    | 10685 |
| >TP53-K132NKMFCQLAK   | 14965 | >TP53-K132NMMFCQLA    | 117   | 14848 |
| >TP53-K132NKMFCQLA    | 14281 | >TP53-K132NMMFCQLA    | 300   | 13981 |
| >TP53-K132NKMFCQLA    | 20944 | >TP53-K132NMMFCQLA    | 346   | 20598 |
| >TP53-K132NKMFCQLA    | 18507 | >TP53-K132NMMFCQLA    | 120   | 18387 |
| >TP53-K132NKMFCQLAK   | 21810 | >TP53-K132NMMFCQLA    | 475   | 21335 |
| >TP53-K132NKMFCQLAK   | 15943 | >TP53-K132NMMFCQLA    | 46    | 15897 |
| >TP53-K132NKMFCQLAK   | 8363  | >TP53-K132NMMFCQLA    | 27    | 8336  |
| >TP53-K132NKMFCQLAK   | 4212  | >TP53-K132NMMFCQLA    | 219   | 3993  |
| >TP53-K132NVTCTYSPALN | 80    | >TP53-K132NVTCTYSPALN | 18417 | 18337 |
| >TP53-K132NVTCTYSPALN | 14    | >TP53-K132NVTCTYSPALN | 11005 | 10991 |
| >TP53-K132NVTCTYSPALN | 23041 | >TP53-K132NVTCTYSPALN | 213   | 22828 |
| >TP53-K132NVTCTYSPALN | 14261 | >TP53-K132NVTCTYSPALN | 485   | 13776 |
| >TP53-K132NVTCTYSPALN | 146   | >TP53-K132NVTCTYSPALN | 4629  | 4483  |
| >TP53-K132NVTCTYSPALN | 490   | >TP53-K132NVTCTYSPALN | 28106 | 27616 |
| >TP53-K132NVTCTYSPALN | 8437  | >TP53-K132NVTCTYSPALN | 7     | 8430  |
| >TP53-K132NVTCTYSPALN | 15068 | >TP53-K132NVTCTYSPALN | 159   | 14909 |
| >TP53-K132NVTCTYSPALN | 10723 | >TP53-K132NVTCTYSPALN | 65    | 10658 |
| >TP53-K132NLNKMFCQL   | 100   | >TP53-K132NLNMMFCQL   | 12    | 88    |
| >TP53-K132NLNKMFCQLA  | 2286  | >TP53-K132NLNMMFCQLA  | 327   | 1959  |
| >TP53-K132NLNKMFCQLA  | 161   | >TP53-K132NLNMMFCQLA  | 2789  | 2628  |
| >TP53-K132NLNKMFCQL   | 153   | >TP53-K132NLNMMFCQL   | 228   | 75    |
| >TP53-K132NALNKMFCQL  | 238   | >TP53-K132NALNMMFCQL  | 217   | 21    |
| >TP53-K132NALNKMFCQL  | 17    | >TP53-K132NALNMMFCQL  | 29    | 12    |
| >TP53-K132NALNKMFCQL  | 30    | >TP53-K132NALNMMFCQL  | 24    | 6     |
| >TP53-K132NALNKMFCQL  | 442   | >TP53-K132NALNMMFCQL  | 365   | 77    |
| >TP53-K132NALNKMFCQL  | 297   | >TP53-K132NALNMMFCQL  | 393   | 96    |
| >TP53-K132NALNKMFCQL  | 22    | >TP53-K132NALNMMFCQL  | 16    | 6     |
| >TP53-K132NALNKMFCQL  | 255   | >TP53-K132NALNMMFCQL  | 186   | 69    |
| >TP53-K132NALNKMFCQL  | 198   | >TP53-K132NALNMMFCQL  | 253   | 55    |
| >TP53-K132NALNKMFCQL  | 21    | >TP53-K132NALNMMFCQL  | 24    | 3     |
| >TP53-K132NALNKMFCQL  | 256   | >TP53-K132NALNMMFCQL  | 289   | 33    |
| >TP53-K132NALNKMFCQL  | 66    | >TP53-K132NALNMMFCQL  | 57    | 9     |

|                         |       |                        |       |       |
|-------------------------|-------|------------------------|-------|-------|
| >TP53-K132NALNKMFCQ     | 245   | >TP53-K132NALNMMFCQ    | 135   | 110   |
| >TP53-K132NALNKMFCQL    | 3     | >TP53-K132NALNMMFCQL   | 2     | 1     |
| >TP53-K132NALNKMFCQL    | 11    | >TP53-K132NALNMMFCQL   | 8     | 3     |
| >TP53-K132NALNKMFCQL    | 37    | >TP53-K132NALNMMFCQL   | 44    | 7     |
| >TP53-K132NALNKMFCQL    | 25    | >TP53-K132NALNMMFCQL   | 21    | 4     |
| >TP53-K132NALNKMFCQL    | 113   | >TP53-K132NALNMMFCQL   | 114   | 1     |
| >TP53-K132NALNKMFCQL    | 431   | >TP53-K132NALNMMFCQL   | 346   | 85    |
| >TP53-K132NALNKMFCQL    | 288   | >TP53-K132NALNMMFCQL   | 185   | 103   |
| >TP53-K132NALNKMFCQL    | 416   | >TP53-K132NALNMMFCQL   | 325   | 91    |
| >TP53-K132N SPALNKMFCQ  | 432   | >TP53-K132N SPALNMMFC  | 985   | 553   |
| >TP53-K132N SPALNKMFC   | 100   | >TP53-K132N SPALNMMF   | 67    | 33    |
| >TP53-K132N SPALNKMFCQ  | 41    | >TP53-K132N SPALNMMFC  | 45    | 4     |
| >TP53-K132N SPALNKMFCQ  | 372   | >TP53-K132N SPALNMMFC  | 518   | 146   |
| >TP53-K132N SPALNKMFC   | 326   | >TP53-K132N SPALNMMF   | 112   | 214   |
| >TP53-K132N SPALNKMFC   | 450   | >TP53-K132N SPALNMMF   | 358   | 92    |
| >TP53-K132N SPALNKMFC   | 677   | >TP53-K132N SPALNMMF   | 190   | 487   |
| >TP53-K132N YSPALNKMFC  | 384   | >TP53-K132N YSPALNMMF  | 37    | 347   |
| >TP53-K132N YSPALNKMFC  | 1020  | >TP53-K132N YSPALNMMF  | 297   | 723   |
| >TP53-K132N YSPALNKMFC  | 104   | >TP53-K132N YSPALNMMF  | 46    | 58    |
| >TP53-K132N YSPALNKMFC  | 43    | >TP53-K132N YSPALNMMF  | 43    | 0     |
| >TP53-K132N YSPALNKM    | 40    | >TP53-K132N YSPALNMM   | 12    | 28    |
| >TP53-K132N YSPALNKMFC  | 3     | >TP53-K132N YSPALNMMF  | 2     | 1     |
| >TP53-K132N YSPALNKMFCQ | 22    | >TP53-K132N YSPALNMMF  | 6     | 16    |
| >TP53-K132N YSPALNKMFCQ | 124   | >TP53-K132N YSPALNMMF  | 48    | 76    |
| >TP53-K132N YSPALNKM    | 67    | >TP53-K132N YSPALNMM   | 34    | 33    |
| >TP53-K132N YSPALNKMFC  | 103   | >TP53-K132N YSPALNMMF  | 52    | 51    |
| >TP53-K132N TYSPALNKM   | 136   | >TP53-K132N TYSPALNMM  | 69    | 67    |
| >TP53-K132N TYSPALNK    | 220   | >TP53-K132N TYSPALNM   | 26172 | 25952 |
| >TP53-K132N TYSPALNKMFC | 179   | >TP53-K132N TYSPALNMM  | 96    | 83    |
| >TP53-K132N TYSPALNKMFC | 64    | >TP53-K132N TYSPALNMM  | 37    | 27    |
| >TP53-K132N TYSPALNK    | 1599  | >TP53-K132N TYSPALNM   | 76    | 1523  |
| >TP53-K132N TYSPALNKM   | 27    | >TP53-K132N TYSPALNMM  | 17    | 10    |
| >TP53-K132N TYSPALNKMFC | 5     | >TP53-K132N TYSPALNMM  | 4     | 1     |
| >TP53-K132N TYSPALNKMFC | 551   | >TP53-K132N TYSPALNMM  | 255   | 296   |
| >TP53-K132N TYSPALNKMFC | 586   | >TP53-K132N TYSPALNMM  | 154   | 432   |
| >TP53-K132N TYSPALNK    | 222   | >TP53-K132N TYSPALNM   | 7379  | 7157  |
| >TP53-K132N TYSPALNKMFC | 439   | >TP53-K132N TYSPALNMM  | 426   | 13    |
| >TP53-K132N CTYSPALNK   | 23478 | >TP53-K132N CTYSPALNM  | 443   | 23035 |
| >TP53-K132N CTYSPALNK   | 30    | >TP53-K132N CTYSPALNM  | 7561  | 7531  |
| >TP53-K132N CTYSPALNK   | 11    | >TP53-K132N CTYSPALNM  | 6646  | 6635  |
| >TP53-K132N CTYSPALNKM  | 343   | >TP53-K132N CTYSPALNMI | 81    | 262   |
| >TP53-K132N CTYSPALNK   | 23656 | >TP53-K132N CTYSPALNM  | 123   | 23533 |
| >TP53-K132N CTYSPALNKM  | 63    | >TP53-K132N CTYSPALNMI | 43    | 20    |

|                        |       |                       |       |       |
|------------------------|-------|-----------------------|-------|-------|
| >TP53-K132MCTYSPALNKM  | 380   | >TP53-K132MCTYSPALNMI | 444   | 64    |
| >TP53-K132MCTYSPALNK   | 6925  | >TP53-K132MCTYSPALNM  | 80    | 6845  |
| >TP53-K132MCTYSPALNKM  | 246   | >TP53-K132MCTYSPALNMI | 159   | 87    |
| >TP53-K132MCTYSPALNKM  | 1390  | >TP53-K132MCTYSPALNMI | 363   | 1027  |
| >TP53-K132MCTYSPALNK   | 215   | >TP53-K132MCTYSPALNM  | 7156  | 6941  |
| >TP53-K132MCTYSPALNKM  | 767   | >TP53-K132MCTYSPALNMI | 355   | 412   |
| >TP53-K132MCTYSPALNK   | 30    | >TP53-K132MCTYSPALNM  | 9843  | 9813  |
| >TP53-K132MCTYSPALNK   | 9976  | >TP53-K132MCTYSPALNM  | 157   | 9819  |
| >TP53-K132MCTYSPALNKM  | 488   | >TP53-K132MCTYSPALNMI | 174   | 314   |
| >TP53-K132MCTYSPALNK   | 3428  | >TP53-K132MCTYSPALNM  | 196   | 3232  |
| >TP53-K132MCTYSPALNKM  | 610   | >TP53-K132MCTYSPALNMI | 366   | 244   |
| >TP53-K132MCTYSPALNKM  | 23    | >TP53-K132MCTYSPALNMI | 14    | 9     |
| >TP53-K132MCTYSPALNK   | 6036  | >TP53-K132MCTYSPALNM  | 8     | 6028  |
| >TP53-K132MCTYSPALNKM  | 24    | >TP53-K132MCTYSPALNMI | 26    | 2     |
| >TP53-K132MCTYSPALNKM  | 5     | >TP53-K132MCTYSPALNMI | 5     | 0     |
| >TP53-K132MCTYSPALNKM  | 627   | >TP53-K132MCTYSPALNMI | 79    | 548   |
| >TP53-K132MCTYSPALNK   | 12183 | >TP53-K132MCTYSPALNM  | 74    | 12109 |
| >TP53-K132MCTYSPALNKM  | 76    | >TP53-K132MCTYSPALNMI | 35    | 41    |
| >TP53-K132MCTYSPALNKM  | 146   | >TP53-K132MCTYSPALNMI | 79    | 67    |
| >TP53-K132MCTYSPALNK   | 5088  | >TP53-K132MCTYSPALNM  | 34    | 5054  |
| >TP53-K132MCTYSPALNKM  | 30    | >TP53-K132MCTYSPALNMI | 26    | 4     |
| >TP53-K132MCTYSPALNKM  | 13    | >TP53-K132MCTYSPALNMI | 9     | 4     |
| >TP53-K132MCTYSPALNK   | 16172 | >TP53-K132MCTYSPALNM  | 26    | 16146 |
| >TP53-K132MCTYSPALNKM  | 358   | >TP53-K132MCTYSPALNMI | 468   | 110   |
| >TP53-K132MTCTYSPALNK  | 29172 | >TP53-K132MTCTYSPALNM | 450   | 28722 |
| >TP53-K132MTCTYSPALNKI | 453   | >TP53-K132MTCTYSPALNM | 134   | 319   |
| >TP53-K132MKMFCQLAKT   | 89    | >TP53-K132NMFCQLAKT   | 725   | 636   |
| >TP53-K132MKMFCQLAKT   | 102   | >TP53-K132NMFCQLAKT   | 278   | 176   |
| >TP53-K132MKMFCQLAKT   | 19    | >TP53-K132NMFCQLAKT   | 40    | 21    |
| >TP53-K132MKMFCQLAKT   | 199   | >TP53-K132NMFCQLAKT   | 820   | 621   |
| >TP53-K132MKMFCQLAKT   | 19    | >TP53-K132NMFCQLAKT   | 157   | 138   |
| >TP53-K132MKMFCQLAKT   | 23    | >TP53-K132NMFCQLAKT   | 136   | 113   |
| >TP53-K132MKMFCQLAKT   | 55    | >TP53-K132NMFCQLAKT   | 259   | 204   |
| >TP53-K132MKMFCQLAKT   | 61    | >TP53-K132NMFCQLAKT   | 255   | 194   |
| >TP53-K132MKMFCQLAK    | 26    | >TP53-K132NMFCQLAK    | 76    | 50    |
| >TP53-K132MKMFCQLAK    | 12    | >TP53-K132NMFCQLAK    | 47    | 35    |
| >TP53-K132MKMFCQLAK    | 8     | >TP53-K132NMFCQLAK    | 2190  | 2182  |
| >TP53-K132MKMFCQLAK    | 35    | >TP53-K132NMFCQLAK    | 1067  | 1032  |
| >TP53-K132MKMFCQLAK    | 371   | >TP53-K132NMFCQLAK    | 12711 | 12340 |
| >TP53-K132MKMFCQLAKT   | 81    | >TP53-K132NMFCQLAKT   | 4853  | 4772  |
| >TP53-K132MKMFCQLAK    | 3283  | >TP53-K132NMFCQLAK    | 141   | 3142  |
| >TP53-K132MKMFCQLAK    | 58    | >TP53-K132NMFCQLAK    | 469   | 411   |
| >TP53-K132MKMFCQLAKT   | 491   | >TP53-K132NMFCQLAKT   | 2927  | 2436  |



|                        |      |                        |       |       |
|------------------------|------|------------------------|-------|-------|
| >TP53-K132M KMFCQLAK   | 39   | >TP53-K132M NMFCQLAK   | 294   | 255   |
| >TP53-K132M VTCTYSPALN | 80   | >TP53-K132M VTCTYSPALN | 18154 | 18074 |
| >TP53-K132M VTCTYSPALN | 14   | >TP53-K132M VTCTYSPALN | 11956 | 11942 |
| >TP53-K132M VTCTYSPALN | 146  | >TP53-K132M VTCTYSPALN | 10435 | 10289 |
| >TP53-K132M VTCTYSPALN | 490  | >TP53-K132M VTCTYSPALN | 26360 | 25870 |
| >TP53-K132M LNKMFQQL   | 100  | >TP53-K132M LNNMFQQL   | 123   | 23    |
| >TP53-K132M LNKMFQQLA  | 161  | >TP53-K132M LNNMFQQLA  | 2872  | 2711  |
| >TP53-K132M LNKMFQQL   | 153  | >TP53-K132M LNNMFQQL   | 2959  | 2806  |
| >TP53-K132M ALNKMFQQL  | 238  | >TP53-K132M ALNNMFQQL  | 122   | 116   |
| >TP53-K132M ALNKMFQQL  | 17   | >TP53-K132M ALNNMFQQL  | 13    | 4     |
| >TP53-K132M ALNKMFQQL  | 1394 | >TP53-K132M ALNNMFQQL  | 400   | 994   |
| >TP53-K132M ALNKMFQQL  | 30   | >TP53-K132M ALNNMFQQL  | 15    | 15    |
| >TP53-K132M ALNKMFQQL  | 442  | >TP53-K132M ALNNMFQQL  | 248   | 194   |
| >TP53-K132M ALNKMFQQL  | 297  | >TP53-K132M ALNNMFQQL  | 145   | 152   |
| >TP53-K132M ALNKMFQQL  | 22   | >TP53-K132M ALNNMFQQL  | 9     | 13    |
| >TP53-K132M ALNKMFQQL  | 255  | >TP53-K132M ALNNMFQQL  | 95    | 160   |
| >TP53-K132M ALNKMFQQL  | 198  | >TP53-K132M ALNNMFQQL  | 42    | 156   |
| >TP53-K132M ALNKMFQQL  | 21   | >TP53-K132M ALNNMFQQL  | 15    | 6     |
| >TP53-K132M ALNKMFQQL  | 256  | >TP53-K132M ALNNMFQQL  | 133   | 123   |
| >TP53-K132M ALNKMFQQL  | 66   | >TP53-K132M ALNNMFQQL  | 20    | 46    |
| >TP53-K132M ALNKMFQ    | 245  | >TP53-K132M ALNNMFQ    | 105   | 140   |
| >TP53-K132M ALNKMFQQL  | 3    | >TP53-K132M ALNNMFQQL  | 2     | 1     |
| >TP53-K132M ALNKMFQQL  | 11   | >TP53-K132M ALNNMFQQL  | 6     | 5     |
| >TP53-K132M ALNKMFQQL  | 37   | >TP53-K132M ALNNMFQQL  | 37    | 0     |
| >TP53-K132M ALNKMFQQL  | 25   | >TP53-K132M ALNNMFQQL  | 19    | 6     |
| >TP53-K132M ALNKMFQQL  | 113  | >TP53-K132M ALNNMFQQL  | 132   | 19    |
| >TP53-K132M ALNKMFQQL  | 431  | >TP53-K132M ALNNMFQQL  | 336   | 95    |
| >TP53-K132M ALNKMFQQL  | 860  | >TP53-K132M ALNNMFQQL  | 316   | 544   |
| >TP53-K132M ALNKMFQQL  | 288  | >TP53-K132M ALNNMFQQL  | 781   | 493   |
| >TP53-K132M ALNKMFQQL  | 416  | >TP53-K132M ALNNMFQQL  | 313   | 103   |
| >TP53-K132M PALNKMFQ   | 8941 | >TP53-K132M PALNNMFQ   | 468   | 8473  |
| >TP53-K132M SPALNKMFQ  | 432  | >TP53-K132M SPALNNMFQ  | 538   | 106   |
| >TP53-K132M SPALNKMF   | 100  | >TP53-K132M SPALNNMF   | 67    | 33    |
| >TP53-K132M SPALNKMFQ  | 41   | >TP53-K132M SPALNNMFQ  | 47    | 6     |
| >TP53-K132M SPALNKMFQ  | 372  | >TP53-K132M SPALNNMFQ  | 641   | 269   |
| >TP53-K132M SPALNKMF   | 326  | >TP53-K132M SPALNNMF   | 102   | 224   |
| >TP53-K132M SPALNKMF   | 450  | >TP53-K132M SPALNNMF   | 235   | 215   |
| >TP53-K132M SPALNKMF   | 677  | >TP53-K132M SPALNNMF   | 397   | 280   |
| >TP53-K132M YSPALNKMF  | 384  | >TP53-K132M YSPALNNMF  | 142   | 242   |
| >TP53-K132M YSPALNKM   | 717  | >TP53-K132M YSPALNNM   | 290   | 427   |
| >TP53-K132M YSPALNKM   | 2112 | >TP53-K132M YSPALNNM   | 271   | 1841  |
| >TP53-K132M YSPALNKMF  | 1020 | >TP53-K132M YSPALNNMF  | 484   | 536   |
| >TP53-K132M YSPALNKMF  | 104  | >TP53-K132M YSPALNNMF  | 133   | 29    |

|                         |     |                        |       |       |
|-------------------------|-----|------------------------|-------|-------|
| >TP53-K132MYSPALNKMF    | 43  | >TP53-K132MYSPALNNMF   | 246   | 203   |
| >TP53-K132MYSPALNKM     | 40  | >TP53-K132MYSPALNNM    | 208   | 168   |
| >TP53-K132MYSPALNKMF    | 3   | >TP53-K132MYSPALNNMF   | 2     | 1     |
| >TP53-K132MYSPALNKMFC   | 22  | >TP53-K132MYSPALNNMFC  | 9     | 13    |
| >TP53-K132MYSPALNKMFC   | 124 | >TP53-K132MYSPALNNMFC  | 57    | 67    |
| >TP53-K132MYSPALNKM     | 67  | >TP53-K132MYSPALNNM    | 49    | 18    |
| >TP53-K132MYSPALNKMF    | 103 | >TP53-K132MYSPALNNMF   | 34    | 69    |
| >TP53-K132MYSPALNKM     | 136 | >TP53-K132MYSPALNNM    | 77    | 59    |
| >TP53-K132MYSPALNK      | 220 | >TP53-K132MYSPALNN     | 27474 | 27254 |
| >TP53-K132MYSPALNKMF    | 179 | >TP53-K132MYSPALNNMI   | 76    | 103   |
| >TP53-K132MYSPALNKMF    | 64  | >TP53-K132MYSPALNNMI   | 34    | 30    |
| >TP53-K132MYSPALNKM     | 27  | >TP53-K132MYSPALNNM    | 31    | 4     |
| >TP53-K132MYSPALNKMF    | 5   | >TP53-K132MYSPALNNMI   | 4     | 1     |
| >TP53-K132MYSPALNKMF    | 551 | >TP53-K132MYSPALNNMI   | 439   | 112   |
| >TP53-K132MYSPALNK      | 222 | >TP53-K132MYSPALNN     | 14817 | 14595 |
| >TP53-K132MYSPALNKMF    | 439 | >TP53-K132MYSPALNNMI   | 422   | 17    |
| >TP53-K132MYCTYSPALNK   | 30  | >TP53-K132MYCTYSPALNN  | 8115  | 8085  |
| >TP53-K132MYCTYSPALNK   | 11  | >TP53-K132MYCTYSPALNN  | 7965  | 7954  |
| >TP53-K132MYCTYSPALNKM  | 343 | >TP53-K132MYCTYSPALNNM | 184   | 159   |
| >TP53-K132MYCTYSPALNKM  | 63  | >TP53-K132MYCTYSPALNNM | 30    | 33    |
| >TP53-K132MYCTYSPALNKM  | 380 | >TP53-K132MYCTYSPALNNM | 180   | 200   |
| >TP53-K132MYCTYSPALNKM  | 246 | >TP53-K132MYCTYSPALNNM | 39    | 207   |
| >TP53-K132MYCTYSPALNK   | 215 | >TP53-K132MYCTYSPALNN  | 12361 | 12146 |
| >TP53-K132MYCTYSPALNK   | 30  | >TP53-K132MYCTYSPALNN  | 8075  | 8045  |
| >TP53-K132MYCTYSPALNKM  | 488 | >TP53-K132MYCTYSPALNNM | 268   | 220   |
| >TP53-K132MYCTYSPALNKM  | 610 | >TP53-K132MYCTYSPALNNM | 312   | 298   |
| >TP53-K132MYCTYSPALNKM  | 23  | >TP53-K132MYCTYSPALNNM | 24    | 1     |
| >TP53-K132MYCTYSPALNKM  | 24  | >TP53-K132MYCTYSPALNNM | 25    | 1     |
| >TP53-K132MYCTYSPALNKM  | 5   | >TP53-K132MYCTYSPALNNM | 9     | 4     |
| >TP53-K132MYCTYSPALNKM  | 627 | >TP53-K132MYCTYSPALNNM | 330   | 297   |
| >TP53-K132MYCTYSPALNKM  | 76  | >TP53-K132MYCTYSPALNNM | 71    | 5     |
| >TP53-K132MYCTYSPALNKM  | 146 | >TP53-K132MYCTYSPALNNM | 61    | 85    |
| >TP53-K132MYCTYSPALNKM  | 30  | >TP53-K132MYCTYSPALNNM | 37    | 7     |
| >TP53-K132MYCTYSPALNKM  | 13  | >TP53-K132MYCTYSPALNNM | 8     | 5     |
| >TP53-K132MYCTYSPALNKM  | 358 | >TP53-K132MYCTYSPALNNM | 431   | 73    |
| >TP53-K132MYTCTYSPALNKI | 453 | >TP53-K132MYTCTYSPALNN | 973   | 520   |
| >TP53-K132CKMFCQLAKT    | 89  | >TP53-K132CKMFCQLAKT   | 934   | 845   |
| >TP53-K132CKMFCQLAKT    | 102 | >TP53-K132CKMFCQLAKT   | 274   | 172   |
| >TP53-K132CKMFCQLAKT    | 19  | >TP53-K132CKMFCQLAKT   | 69    | 50    |
| >TP53-K132CKMFCQLAKT    | 199 | >TP53-K132CKMFCQLAKT   | 684   | 485   |
| >TP53-K132CKMFCQLAKT    | 19  | >TP53-K132CKMFCQLAKT   | 174   | 155   |
| >TP53-K132CKMFCQLAKT    | 23  | >TP53-K132CKMFCQLAKT   | 152   | 129   |
| >TP53-K132CKMFCQLAKT    | 55  | >TP53-K132CKMFCQLAKT   | 609   | 554   |

|                       |       |                        |       |       |
|-----------------------|-------|------------------------|-------|-------|
| >TP53-K132CKMFCQLAKT  | 61    | >TP53-K132C QMFCQLAKT  | 509   | 448   |
| >TP53-K132CKMFCQLAK   | 26    | >TP53-K132C QMFCQLAK   | 44    | 18    |
| >TP53-K132CKMFCQLAK   | 12    | >TP53-K132C QMFCQLAK   | 24    | 12    |
| >TP53-K132CKMFCQLAK   | 8     | >TP53-K132C QMFCQLAK   | 171   | 163   |
| >TP53-K132CKMFCQLAK   | 35    | >TP53-K132C QMFCQLAK   | 572   | 537   |
| >TP53-K132CKMFCQLAK   | 371   | >TP53-K132C QMFCQLAK   | 2586  | 2215  |
| >TP53-K132CKMFCQLAKT  | 81    | >TP53-K132C QMFCQLAKT  | 623   | 542   |
| >TP53-K132CKMFCQLAK   | 3283  | >TP53-K132C QMFCQLAK   | 359   | 2924  |
| >TP53-K132CKMFCQLAK   | 58    | >TP53-K132C QMFCQLAK   | 147   | 89    |
| >TP53-K132CKMFCQLAKT  | 491   | >TP53-K132C QMFCQLAKT  | 968   | 477   |
| >TP53-K132CKMFCQLAK   | 802   | >TP53-K132C QMFCQLAK   | 435   | 367   |
| >TP53-K132CKMFCQLAK   | 39    | >TP53-K132C QMFCQLAK   | 163   | 124   |
| >TP53-K132CNKMFCQLA   | 7876  | >TP53-K132C NQMFCQLA   | 479   | 7397  |
| >TP53-K132CNKMFCQLA   | 14281 | >TP53-K132C NQMFCQLA   | 101   | 14180 |
| >TP53-K132CNKMFCQLAK  | 15943 | >TP53-K132C NQMFCQLAK  | 413   | 15530 |
| >TP53-K132CNKMFCQLAK  | 8363  | >TP53-K132C NQMFCQLAK  | 74    | 8289  |
| >TP53-K132CVTCTYSPALN | 80    | >TP53-K132C VTCTYSPALN | 16891 | 16811 |
| >TP53-K132CVTCTYSPALN | 14    | >TP53-K132C VTCTYSPALN | 13148 | 13134 |
| >TP53-K132CVTCTYSPALN | 146   | >TP53-K132C VTCTYSPALN | 6492  | 6346  |
| >TP53-K132CVTCTYSPALN | 490   | >TP53-K132C VTCTYSPALN | 14339 | 13849 |
| >TP53-K132CLNKMFCQL   | 100   | >TP53-K132C LNQMFCQL   | 25    | 75    |
| >TP53-K132CLNKMFCQLA  | 161   | >TP53-K132C LNQMFCQLA  | 5633  | 5472  |
| >TP53-K132CLNKMFCQL   | 153   | >TP53-K132C LNQMFCQL   | 1497  | 1344  |
| >TP53-K132CALNKMFCQL  | 238   | >TP53-K132C ALNQMFCQL  | 250   | 12    |
| >TP53-K132CALNKMFCQL  | 17    | >TP53-K132C ALNQMFCQL  | 14    | 3     |
| >TP53-K132CALNKMFCQL  | 30    | >TP53-K132C ALNQMFCQL  | 27    | 3     |
| >TP53-K132CALNKMFCQL  | 442   | >TP53-K132C ALNQMFCQL  | 348   | 94    |
| >TP53-K132CALNKMFCQL  | 297   | >TP53-K132C ALNQMFCQL  | 256   | 41    |
| >TP53-K132CALNKMFCQL  | 22    | >TP53-K132C ALNQMFCQL  | 11    | 11    |
| >TP53-K132CALNKMFCQL  | 255   | >TP53-K132C ALNQMFCQL  | 137   | 118   |
| >TP53-K132CALNKMFCQL  | 198   | >TP53-K132C ALNQMFCQL  | 208   | 10    |
| >TP53-K132CALNKMFCQL  | 21    | >TP53-K132C ALNQMFCQL  | 19    | 2     |
| >TP53-K132CALNKMFCQL  | 256   | >TP53-K132C ALNQMFCQL  | 202   | 54    |
| >TP53-K132CALNKMFCQL  | 66    | >TP53-K132C ALNQMFCQL  | 34    | 32    |
| >TP53-K132CALNKMFCQ   | 245   | >TP53-K132C ALNQMFCQ   | 100   | 145   |
| >TP53-K132CALNKMFCQL  | 3     | >TP53-K132C ALNQMFCQL  | 2     | 1     |
| >TP53-K132CALNKMFCQL  | 11    | >TP53-K132C ALNQMFCQL  | 6     | 5     |
| >TP53-K132CALNKMFCQL  | 37    | >TP53-K132C ALNQMFCQL  | 48    | 11    |
| >TP53-K132CALNKMFCQL  | 25    | >TP53-K132C ALNQMFCQL  | 34    | 9     |
| >TP53-K132CALNKMFCQL  | 113   | >TP53-K132C ALNQMFCQL  | 397   | 284   |
| >TP53-K132CALNKMFCQL  | 431   | >TP53-K132C ALNQMFCQL  | 1188  | 757   |
| >TP53-K132CALNKMFCQL  | 288   | >TP53-K132C ALNQMFCQL  | 452   | 164   |
| >TP53-K132CALNKMFCQL  | 416   | >TP53-K132C ALNQMFCQL  | 279   | 137   |

|                        |      |                        |       |       |
|------------------------|------|------------------------|-------|-------|
| >TP53-K132C SPALNKMFC  | 432  | >TP53-K132C SPALNQMFC  | 312   | 120   |
| >TP53-K132C SPALNKMF   | 100  | >TP53-K132C SPALNQMF   | 99    | 1     |
| >TP53-K132C SPALNKMFC  | 41   | >TP53-K132C SPALNQMFC  | 56    | 15    |
| >TP53-K132C SPALNKMFC  | 372  | >TP53-K132C SPALNQMFC  | 508   | 136   |
| >TP53-K132C SPALNKMF   | 326  | >TP53-K132C SPALNQMF   | 109   | 217   |
| >TP53-K132C SPALNKMF   | 450  | >TP53-K132C SPALNQMF   | 214   | 236   |
| >TP53-K132C YSPALNKMF  | 384  | >TP53-K132C YSPALNQMF  | 128   | 256   |
| >TP53-K132C YSPALNKM   | 717  | >TP53-K132C YSPALNQM   | 436   | 281   |
| >TP53-K132C YSPALNKMF  | 1020 | >TP53-K132C YSPALNQMF  | 282   | 738   |
| >TP53-K132C YSPALNKMF  | 104  | >TP53-K132C YSPALNQMF  | 64    | 40    |
| >TP53-K132C YSPALNKM   | 586  | >TP53-K132C YSPALNQM   | 352   | 234   |
| >TP53-K132C YSPALNKMF  | 43   | >TP53-K132C YSPALNQMF  | 39    | 4     |
| >TP53-K132C YSPALNKM   | 40   | >TP53-K132C YSPALNQM   | 45    | 5     |
| >TP53-K132C YSPALNKMF  | 3    | >TP53-K132C YSPALNQMF  | 3     | 0     |
| >TP53-K132C YSPALNKMFC | 22   | >TP53-K132C YSPALNQMFC | 13    | 9     |
| >TP53-K132C YSPALNKMFC | 124  | >TP53-K132C YSPALNQMFC | 107   | 17    |
| >TP53-K132C YSPALNKM   | 67   | >TP53-K132C YSPALNQM   | 67    | 0     |
| >TP53-K132C YSPALNKMF  | 103  | >TP53-K132C YSPALNQMF  | 81    | 22    |
| >TP53-K132C TYSPALNKM  | 136  | >TP53-K132C TYSPALNQM  | 51    | 85    |
| >TP53-K132C TYSPALNK   | 220  | >TP53-K132C TYSPALNQ   | 27345 | 27125 |
| >TP53-K132C TYSPALNKMF | 179  | >TP53-K132C TYSPALNQMF | 99    | 80    |
| >TP53-K132C TYSPALNKMF | 64   | >TP53-K132C TYSPALNQMF | 43    | 21    |
| >TP53-K132C TYSPALNKM  | 27   | >TP53-K132C TYSPALNQM  | 17    | 10    |
| >TP53-K132C TYSPALNKMF | 5    | >TP53-K132C TYSPALNQMF | 4     | 1     |
| >TP53-K132C TYSPALNKMF | 551  | >TP53-K132C TYSPALNQMF | 321   | 230   |
| >TP53-K132C TYSPALNKMF | 586  | >TP53-K132C TYSPALNQMF | 272   | 314   |
| >TP53-K132C TYSPALNK   | 222  | >TP53-K132C TYSPALNQ   | 10912 | 10690 |
| >TP53-K132C TYSPALNKMF | 439  | >TP53-K132C TYSPALNQMF | 556   | 117   |
| >TP53-K132C CTYSPALNK  | 30   | >TP53-K132C CTYSPALNQ  | 7073  | 7043  |
| >TP53-K132C CTYSPALNK  | 11   | >TP53-K132C CTYSPALNQ  | 9176  | 9165  |
| >TP53-K132C CTYSPALNKM | 343  | >TP53-K132C CTYSPALNQM | 174   | 169   |
| >TP53-K132C CTYSPALNKM | 63   | >TP53-K132C CTYSPALNQM | 42    | 21    |
| >TP53-K132C CTYSPALNKM | 380  | >TP53-K132C CTYSPALNQM | 252   | 128   |
| >TP53-K132C CTYSPALNKM | 246  | >TP53-K132C CTYSPALNQM | 280   | 34    |
| >TP53-K132C CTYSPALNK  | 215  | >TP53-K132C CTYSPALNQ  | 9681  | 9466  |
| >TP53-K132C CTYSPALNK  | 30   | >TP53-K132C CTYSPALNQ  | 1696  | 1666  |
| >TP53-K132C CTYSPALNKM | 488  | >TP53-K132C CTYSPALNQM | 232   | 256   |
| >TP53-K132C CTYSPALNKM | 23   | >TP53-K132C CTYSPALNQM | 17    | 6     |
| >TP53-K132C CTYSPALNKM | 24   | >TP53-K132C CTYSPALNQM | 17    | 7     |
| >TP53-K132C CTYSPALNKM | 5    | >TP53-K132C CTYSPALNQM | 5     | 0     |
| >TP53-K132C CTYSPALNKM | 627  | >TP53-K132C CTYSPALNQM | 209   | 418   |
| >TP53-K132C CTYSPALNKM | 76   | >TP53-K132C CTYSPALNQM | 70    | 6     |
| >TP53-K132C CTYSPALNKM | 146  | >TP53-K132C CTYSPALNQM | 114   | 32    |

|                         |      |                        |      |      |
|-------------------------|------|------------------------|------|------|
| >TP53-K132C CTYSPALNKM  | 30   | >TP53-K132C CTYSPALNQM | 35   | 5    |
| >TP53-K132C CTYSPALNKM  | 13   | >TP53-K132C CTYSPALNQM | 11   | 2    |
| >TP53-K132C CTYSPALNKM  | 358  | >TP53-K132C CTYSPALNQM | 298  | 60   |
| >TP53-K132C TCTYSPALNKI | 453  | >TP53-K132C TCTYSPALNQ | 309  | 144  |
| >TP53-K132F KMFCQLAKT   | 89   | >TP53-K132F RMFCQLAKT  | 208  | 119  |
| >TP53-K132F KMFCQLAKT   | 102  | >TP53-K132F RMFCQLAKT  | 219  | 117  |
| >TP53-K132F KMFCQLAKT   | 19   | >TP53-K132F RMFCQLAKT  | 18   | 1    |
| >TP53-K132F KMFCQLAKT   | 199  | >TP53-K132F RMFCQLAKT  | 353  | 154  |
| >TP53-K132F KMFCQLAKT   | 19   | >TP53-K132F RMFCQLAKT  | 21   | 2    |
| >TP53-K132F KMFCQLAKT(  | 23   | >TP53-K132F RMFCQLAKT( | 27   | 4    |
| >TP53-K132F KMFCQLAKT   | 55   | >TP53-K132F RMFCQLAKT  | 119  | 64   |
| >TP53-K132F KMFCQLAKT(  | 61   | >TP53-K132F RMFCQLAKT( | 129  | 68   |
| >TP53-K132F KMFCQLAK    | 26   | >TP53-K132F RMFCQLAK   | 26   | 0    |
| >TP53-K132F KMFCQLAK    | 12   | >TP53-K132F RMFCQLAK   | 10   | 2    |
| >TP53-K132F KMFCQLAK    | 8    | >TP53-K132F RMFCQLAK   | 8    | 0    |
| >TP53-K132F KMFCQLAK    | 35   | >TP53-K132F RMFCQLAK   | 33   | 2    |
| >TP53-K132F KMFCQLAK    | 371  | >TP53-K132F RMFCQLAK   | 461  | 90   |
| >TP53-K132F KMFCQLAKT(  | 81   | >TP53-K132F RMFCQLAKT( | 100  | 19   |
| >TP53-K132F KMFCQLAK    | 58   | >TP53-K132F RMFCQLAK   | 36   | 22   |
| >TP53-K132F KMFCQLAKT(  | 491  | >TP53-K132F RMFCQLAKT( | 316  | 175  |
| >TP53-K132F KMFCQLAK    | 2466 | >TP53-K132F RMFCQLAK   | 380  | 2086 |
| >TP53-K132F KMFCQLAK    | 39   | >TP53-K132F RMFCQLAK   | 60   | 21   |
| >TP53-K132F NKMFCQLAK   | 9571 | >TP53-K132F NRMFCQLAK  | 185  | 9386 |
| >TP53-K132F NKMFCQLAK   | 7221 | >TP53-K132F NRMFCQLAK  | 429  | 6792 |
| >TP53-K132F NKMFCQLAK   | 6901 | >TP53-K132F NRMFCQLAK  | 103  | 6798 |
| >TP53-K132F VTCTYSPALN  | 80   | >TP53-K132F VTCTYSPALN | 1406 | 1326 |
| >TP53-K132F VTCTYSPALN  | 14   | >TP53-K132F VTCTYSPALN | 67   | 53   |
| >TP53-K132F VTCTYSPALN  | 146  | >TP53-K132F VTCTYSPALN | 5431 | 5285 |
| >TP53-K132F VTCTYSPALN  | 2145 | >TP53-K132F VTCTYSPALN | 126  | 2019 |
| >TP53-K132F VTCTYSPALN  | 490  | >TP53-K132F VTCTYSPALN | 142  | 348  |
| >TP53-K132F VTCTYSPALN  | 9561 | >TP53-K132F VTCTYSPALN | 499  | 9062 |
| >TP53-K132F LNKMFQQL    | 100  | >TP53-K132F LNRMFQQL   | 25   | 75   |
| >TP53-K132F LNKMFQQLA   | 161  | >TP53-K132F LNRMFQQLA  | 31   | 130  |
| >TP53-K132F LNKMFQQL    | 153  | >TP53-K132F LNRMFQQL   | 184  | 31   |
| >TP53-K132F ALNKMFCQL   | 238  | >TP53-K132F ALNRMFCQL  | 379  | 141  |
| >TP53-K132F ALNKMFCQL   | 17   | >TP53-K132F ALNRMFCQL  | 22   | 5    |
| >TP53-K132F ALNKMFCQL   | 30   | >TP53-K132F ALNRMFCQL  | 29   | 1    |
| >TP53-K132F ALNKMFCQL   | 442  | >TP53-K132F ALNRMFCQL  | 381  | 61   |
| >TP53-K132F ALNKMFCQL   | 297  | >TP53-K132F ALNRMFCQL  | 359  | 62   |
| >TP53-K132F ALNKMFCQL   | 22   | >TP53-K132F ALNRMFCQL  | 17   | 5    |
| >TP53-K132F ALNKMFCQL   | 255  | >TP53-K132F ALNRMFCQL  | 192  | 63   |
| >TP53-K132F ALNKMFCQL   | 198  | >TP53-K132F ALNRMFCQL  | 131  | 67   |
| >TP53-K132F ALNKMFCQL   | 21   | >TP53-K132F ALNRMFCQL  | 28   | 7    |

|                        |      |                        |      |      |
|------------------------|------|------------------------|------|------|
| >TP53-K132FALNKMFCQL   | 256  | >TP53-K132FALNRMFCQL   | 373  | 117  |
| >TP53-K132FALNKMFCQL   | 66   | >TP53-K132FALNRMFCQL   | 54   | 12   |
| >TP53-K132FALNKMFCQ    | 245  | >TP53-K132FALNRMFCQ    | 134  | 111  |
| >TP53-K132FALNKMFCQL   | 3    | >TP53-K132FALNRMFCQL   | 2    | 1    |
| >TP53-K132FALNKMFCQL   | 11   | >TP53-K132FALNRMFCQL   | 8    | 3    |
| >TP53-K132FALNKMFCQL   | 37   | >TP53-K132FALNRMFCQL   | 37   | 0    |
| >TP53-K132FALNKMFCQL   | 25   | >TP53-K132FALNRMFCQL   | 24   | 1    |
| >TP53-K132FALNKMFCQL   | 113  | >TP53-K132FALNRMFCQL   | 59   | 54   |
| >TP53-K132FALNKMFCQL   | 431  | >TP53-K132FALNRMFCQL   | 312  | 119  |
| >TP53-K132FALNKMFCQL   | 288  | >TP53-K132FALNRMFCQL   | 251  | 37   |
| >TP53-K132FALNKMFCQL   | 416  | >TP53-K132FALNRMFCQL   | 565  | 149  |
| >TP53-K132FSPALNKMFCQ  | 432  | >TP53-K132FSPALNRMFCQ  | 301  | 131  |
| >TP53-K132FSPALNKMFM   | 100  | >TP53-K132FSPALNRMFM   | 27   | 73   |
| >TP53-K132FSPALNKMFC   | 2294 | >TP53-K132FSPALNRMFC   | 494  | 1800 |
| >TP53-K132FSPALNKMFCQ  | 41   | >TP53-K132FSPALNRMFCQ  | 28   | 13   |
| >TP53-K132FSPALNKMFCQ  | 372  | >TP53-K132FSPALNRMFCQ  | 231  | 141  |
| >TP53-K132FSPALNKMFM   | 326  | >TP53-K132FSPALNRMFM   | 214  | 112  |
| >TP53-K132FSPALNKMFM   | 450  | >TP53-K132FSPALNRMFM   | 183  | 267  |
| >TP53-K132FYSPALNKMFM  | 384  | >TP53-K132FYSPALNRMFM  | 641  | 257  |
| >TP53-K132FYSPALNKM    | 717  | >TP53-K132FYSPALNRM    | 403  | 314  |
| >TP53-K132FYSPALNKMFM  | 104  | >TP53-K132FYSPALNRMFM  | 199  | 95   |
| >TP53-K132FYSPALNKM    | 586  | >TP53-K132FYSPALNRM    | 497  | 89   |
| >TP53-K132FYSPALNKMFM  | 43   | >TP53-K132FYSPALNRMFM  | 83   | 40   |
| >TP53-K132FYSPALNKM    | 40   | >TP53-K132FYSPALNRM    | 34   | 6    |
| >TP53-K132FYSPALNKMFM  | 3    | >TP53-K132FYSPALNRMFM  | 2    | 1    |
| >TP53-K132FYSPALNKMFC  | 22   | >TP53-K132FYSPALNRMFC  | 12   | 10   |
| >TP53-K132FYSPALNKMFC  | 124  | >TP53-K132FYSPALNRMFC  | 89   | 35   |
| >TP53-K132FYSPALNKM    | 67   | >TP53-K132FYSPALNRM    | 61   | 6    |
| >TP53-K132FYSPALNKMFM  | 103  | >TP53-K132FYSPALNRMFM  | 120  | 17   |
| >TP53-K132FTYSPALNKM   | 136  | >TP53-K132FTYSPALNRM   | 55   | 81   |
| >TP53-K132FTYSPALNK    | 220  | >TP53-K132FTYSPALNR    | 4684 | 4464 |
| >TP53-K132FTYSPALNKMFM | 179  | >TP53-K132FTYSPALNRMFM | 94   | 85   |
| >TP53-K132FTYSPALNKMFM | 64   | >TP53-K132FTYSPALNRMFM | 43   | 21   |
| >TP53-K132FTYSPALNKM   | 27   | >TP53-K132FTYSPALNRM   | 48   | 21   |
| >TP53-K132FTYSPALNKMFM | 5    | >TP53-K132FTYSPALNRMFM | 5    | 0    |
| >TP53-K132FTYSPALNKMFM | 551  | >TP53-K132FTYSPALNRMFM | 442  | 109  |
| >TP53-K132FTYSPALNKMFM | 586  | >TP53-K132FTYSPALNRMFM | 329  | 257  |
| >TP53-K132FTYSPALNK    | 222  | >TP53-K132FTYSPALNR    | 9052 | 8830 |
| >TP53-K132FTYSPALNK    | 4258 | >TP53-K132FTYSPALNR    | 234  | 4024 |
| >TP53-K132FTYSPALNK    | 7366 | >TP53-K132FTYSPALNR    | 307  | 7059 |
| >TP53-K132FTYSPALNK    | 1077 | >TP53-K132FTYSPALNR    | 276  | 801  |
| >TP53-K132FTYSPALNK    | 674  | >TP53-K132FTYSPALNR    | 38   | 636  |
| >TP53-K132FTYSPALNKMFM | 439  | >TP53-K132FTYSPALNRMFM | 303  | 136  |

|                       |       |                       |      |       |
|-----------------------|-------|-----------------------|------|-------|
| >TP53-K132FCTYSPALNK  | 30    | >TP53-K132FCTYSPALNR  | 88   | 58    |
| >TP53-K132FCTYSPALNK  | 11    | >TP53-K132FCTYSPALNR  | 31   | 20    |
| >TP53-K132FCTYSPALNKM | 343   | >TP53-K132FCTYSPALNRM | 445  | 102   |
| >TP53-K132FCTYSPALNKM | 63    | >TP53-K132FCTYSPALNRM | 41   | 22    |
| >TP53-K132FCTYSPALNKM | 380   | >TP53-K132FCTYSPALNRM | 345  | 35    |
| >TP53-K132FCTYSPALNKM | 246   | >TP53-K132FCTYSPALNRM | 196  | 50    |
| >TP53-K132FCTYSPALNK  | 215   | >TP53-K132FCTYSPALNR  | 7919 | 7704  |
| >TP53-K132FCTYSPALNK  | 2398  | >TP53-K132FCTYSPALNR  | 128  | 2270  |
| >TP53-K132FCTYSPALNK  | 30    | >TP53-K132FCTYSPALNR  | 15   | 15    |
| >TP53-K132FCTYSPALNKM | 488   | >TP53-K132FCTYSPALNRM | 575  | 87    |
| >TP53-K132FCTYSPALNKM | 23    | >TP53-K132FCTYSPALNRM | 36   | 13    |
| >TP53-K132FCTYSPALNKM | 24    | >TP53-K132FCTYSPALNRM | 18   | 6     |
| >TP53-K132FCTYSPALNKM | 5     | >TP53-K132FCTYSPALNRM | 6    | 1     |
| >TP53-K132FCTYSPALNKM | 76    | >TP53-K132FCTYSPALNRM | 94   | 18    |
| >TP53-K132FCTYSPALNKM | 146   | >TP53-K132FCTYSPALNRM | 105  | 41    |
| >TP53-K132FCTYSPALNKM | 30    | >TP53-K132FCTYSPALNRM | 46   | 16    |
| >TP53-K132FCTYSPALNKM | 13    | >TP53-K132FCTYSPALNRM | 14   | 1     |
| >TP53-K132FCTYSPALNK  | 3222  | >TP53-K132FCTYSPALNR  | 81   | 3141  |
| >TP53-K132FCTYSPALNKM | 358   | >TP53-K132FCTYSPALNRM | 350  | 8     |
| >TP53-K132FTCTYSPALNK | 453   | >TP53-K132FTCTYSPALNR | 282  | 171   |
| >TP53-K132TKMFCQLAKT  | 89    | >TP53-K132TMMFCQLAKT  | 407  | 318   |
| >TP53-K132TKMFCQLAKT  | 102   | >TP53-K132TMMFCQLAKT  | 277  | 175   |
| >TP53-K132TKMFCQLAKT  | 19    | >TP53-K132TMMFCQLAKT  | 33   | 14    |
| >TP53-K132TKMFCQLAKT  | 199   | >TP53-K132TMMFCQLAKT  | 709  | 510   |
| >TP53-K132TKMFCQLAKT  | 19    | >TP53-K132TMMFCQLAKT  | 95   | 76    |
| >TP53-K132TKMFCQLAKT  | 23    | >TP53-K132TMMFCQLAKT  | 91   | 68    |
| >TP53-K132TKMFCQLAKT  | 55    | >TP53-K132TMMFCQLAKT  | 378  | 323   |
| >TP53-K132TKMFCQLAKT  | 61    | >TP53-K132TMMFCQLAKT  | 360  | 299   |
| >TP53-K132TKMFCQLAK   | 26    | >TP53-K132TMMFCQLAK   | 35   | 9     |
| >TP53-K132TKMFCQLAK   | 12    | >TP53-K132TMMFCQLAK   | 10   | 2     |
| >TP53-K132TKMFCQLAK   | 8     | >TP53-K132TMMFCQLAK   | 238  | 230   |
| >TP53-K132TKMFCQLAK   | 35    | >TP53-K132TMMFCQLAK   | 230  | 195   |
| >TP53-K132TKMFCQLAK   | 371   | >TP53-K132TMMFCQLAK   | 4683 | 4312  |
| >TP53-K132TKMFCQLAKT  | 81    | >TP53-K132TMMFCQLAKT  | 1656 | 1575  |
| >TP53-K132TKMFCQLAK   | 3283  | >TP53-K132TMMFCQLAK   | 92   | 3191  |
| >TP53-K132TKMFCQLAK   | 58    | >TP53-K132TMMFCQLAK   | 335  | 277   |
| >TP53-K132TKMFCQLAKT  | 491   | >TP53-K132TMMFCQLAKT  | 2021 | 1530  |
| >TP53-K132TKMFCQLAK   | 39    | >TP53-K132TMMFCQLAK   | 317  | 278   |
| >TP53-K132TNKMFCQLAK  | 15943 | >TP53-K132NTMFCQLAK   | 116  | 15827 |
| >TP53-K132TNKMFCQLAK  | 8363  | >TP53-K132NTMFCQLAK   | 25   | 8338  |
| >TP53-K132TNKMFCQLAK  | 4212  | >TP53-K132NTMFCQLAK   | 13   | 4199  |
| >TP53-K132TNKMFCQLA   | 7247  | >TP53-K132NTMFCQLA    | 16   | 7231  |
| >TP53-K132TNKMFCQLAK  | 21555 | >TP53-K132NTMFCQLAK   | 180  | 21375 |

|                        |      |                        |       |       |
|------------------------|------|------------------------|-------|-------|
| >TP53-K132TNKMFCQLAK   | 5111 | >TP53-K132TNTMFCQLAK   | 145   | 4966  |
| >TP53-K132T VTCTYSPALN | 80   | >TP53-K132T VTCTYSPALN | 19839 | 19759 |
| >TP53-K132T VTCTYSPALN | 14   | >TP53-K132T VTCTYSPALN | 18034 | 18020 |
| >TP53-K132T VTCTYSPALN | 146  | >TP53-K132T VTCTYSPALN | 9358  | 9212  |
| >TP53-K132T VTCTYSPALN | 490  | >TP53-K132T VTCTYSPALN | 30333 | 29843 |
| >TP53-K132TLNKMFCQL    | 100  | >TP53-K132TLNTMFCQL    | 37    | 63    |
| >TP53-K132TLNKMFCQLAI  | 161  | >TP53-K132TLNTMFCQLAI  | 6532  | 6371  |
| >TP53-K132TLNKMFCQL    | 153  | >TP53-K132TLNTMFCQL    | 3130  | 2977  |
| >TP53-K132TALNKMFCQL   | 238  | >TP53-K132TALNTMFCQL   | 136   | 102   |
| >TP53-K132TALNKMFCQL   | 17   | >TP53-K132TALNTMFCQL   | 12    | 5     |
| >TP53-K132TALNKMFCQL   | 30   | >TP53-K132TALNTMFCQL   | 19    | 11    |
| >TP53-K132TALNKMFCQL   | 442  | >TP53-K132TALNTMFCQL   | 310   | 132   |
| >TP53-K132TALNKMFCQL   | 297  | >TP53-K132TALNTMFCQL   | 264   | 33    |
| >TP53-K132TALNKMFCQL   | 22   | >TP53-K132TALNTMFCQL   | 23    | 1     |
| >TP53-K132TALNKMFCQL   | 255  | >TP53-K132TALNTMFCQL   | 265   | 10    |
| >TP53-K132TALNKMFCQL   | 198  | >TP53-K132TALNTMFCQL   | 129   | 69    |
| >TP53-K132TALNKMFCQL   | 21   | >TP53-K132TALNTMFCQL   | 28    | 7     |
| >TP53-K132TALNKMFCQL   | 256  | >TP53-K132TALNTMFCQL   | 362   | 106   |
| >TP53-K132TALNKMFCQL   | 66   | >TP53-K132TALNTMFCQL   | 36    | 30    |
| >TP53-K132TALNKMFCQ    | 245  | >TP53-K132TALNTMFCQ    | 192   | 53    |
| >TP53-K132TALNKMFCQL   | 3    | >TP53-K132TALNTMFCQL   | 2     | 1     |
| >TP53-K132TALNKMFCQL   | 11   | >TP53-K132TALNTMFCQL   | 9     | 2     |
| >TP53-K132TALNKMFCQL   | 37   | >TP53-K132TALNTMFCQL   | 37    | 0     |
| >TP53-K132TALNKMFCQL   | 25   | >TP53-K132TALNTMFCQL   | 22    | 3     |
| >TP53-K132TALNKMFCQL   | 113  | >TP53-K132TALNTMFCQL   | 126   | 13    |
| >TP53-K132TALNKMFCQL   | 431  | >TP53-K132TALNTMFCQL   | 489   | 58    |
| >TP53-K132TALNKMFCQL   | 288  | >TP53-K132TALNTMFCQL   | 588   | 300   |
| >TP53-K132TALNKMFCQL   | 416  | >TP53-K132TALNTMFCQL   | 879   | 463   |
| >TP53-K132TSPALNKMFCQ  | 432  | >TP53-K132TSPALNTMFCC  | 501   | 69    |
| >TP53-K132TSPALNKMFC   | 100  | >TP53-K132TSPALNTMF    | 44    | 56    |
| >TP53-K132TSPALNKMFCQ  | 41   | >TP53-K132TSPALNTMFCC  | 38    | 3     |
| >TP53-K132TSPALNKMFCQ  | 372  | >TP53-K132TSPALNTMFCC  | 447   | 75    |
| >TP53-K132TSPALNKMFC   | 326  | >TP53-K132TSPALNTMF    | 46    | 280   |
| >TP53-K132TSPALNKMFC   | 450  | >TP53-K132TSPALNTMF    | 239   | 211   |
| >TP53-K132TSPALNKMFC   | 677  | >TP53-K132TSPALNTMF    | 215   | 462   |
| >TP53-K132TYSPALNKM    | 2026 | >TP53-K132TYSPALNTM    | 118   | 1908  |
| >TP53-K132TYSPALNKMFC  | 384  | >TP53-K132TYSPALNTMF   | 461   | 77    |
| >TP53-K132TYSPALNKM    | 717  | >TP53-K132TYSPALNTM    | 452   | 265   |
| >TP53-K132TYSPALNKMFC  | 1020 | >TP53-K132TYSPALNTMF   | 235   | 785   |
| >TP53-K132TYSPALNKMFC  | 104  | >TP53-K132TYSPALNTMF   | 55    | 49    |
| >TP53-K132TYSPALNKM    | 586  | >TP53-K132TYSPALNTM    | 270   | 316   |
| >TP53-K132TYSPALNKMFC  | 43   | >TP53-K132TYSPALNTMF   | 39    | 4     |
| >TP53-K132TYSPALNKM    | 40   | >TP53-K132TYSPALNTM    | 62    | 22    |



|                       |      |                       |       |       |
|-----------------------|------|-----------------------|-------|-------|
| >TP53-K132TYSPALNKMF  | 3    | >TP53-K132TYSPALNTMF  | 2     | 1     |
| >TP53-K132TYSPALNKMFC | 22   | >TP53-K132TYSPALNTMFC | 8     | 14    |
| >TP53-K132TYSPALNKMFC | 124  | >TP53-K132TYSPALNTMFC | 48    | 76    |
| >TP53-K132TYSPALNKMF  | 67   | >TP53-K132TYSPALNTM   | 38    | 29    |
| >TP53-K132TYSPALNKMF  | 103  | >TP53-K132TYSPALNTMF  | 18    | 85    |
| >TP53-K132TYSPALNKMF  | 136  | >TP53-K132TYSPALNTM   | 10    | 126   |
| >TP53-K132TYSPALNKMF  | 2357 | >TP53-K132TYSPALNTMF  | 143   | 2214  |
| >TP53-K132TYSPALNK    | 220  | >TP53-K132TYSPALNT    | 28936 | 28716 |
| >TP53-K132TYSPALNKMF  | 179  | >TP53-K132TYSPALNTMF  | 65    | 114   |
| >TP53-K132TYSPALNKMF  | 1122 | >TP53-K132TYSPALNTM   | 269   | 853   |
| >TP53-K132TYSPALNKMF  | 64   | >TP53-K132TYSPALNTMF  | 31    | 33    |
| >TP53-K132TYSPALNKMF  | 27   | >TP53-K132TYSPALNTM   | 17    | 10    |
| >TP53-K132TYSPALNKMF  | 5    | >TP53-K132TYSPALNTMF  | 5     | 0     |
| >TP53-K132TYSPALNKMF  | 551  | >TP53-K132TYSPALNTMF  | 183   | 368   |
| >TP53-K132TYSPALNKMF  | 586  | >TP53-K132TYSPALNTMF  | 228   | 358   |
| >TP53-K132TYSPALNK    | 222  | >TP53-K132TYSPALNT    | 13759 | 13537 |
| >TP53-K132TYSPALNKMF  | 439  | >TP53-K132TYSPALNTMF  | 448   | 9     |
| >TP53-K132CTYSPALNKMF | 1199 | >TP53-K132CTYSPALNTM  | 464   | 735   |
| >TP53-K132CTYSPALNK   | 30   | >TP53-K132CTYSPALNT   | 10770 | 10740 |
| >TP53-K132CTYSPALNK   | 11   | >TP53-K132CTYSPALNT   | 14081 | 14070 |
| >TP53-K132CTYSPALNKMF | 343  | >TP53-K132CTYSPALNTM  | 368   | 25    |
| >TP53-K132CTYSPALNKMF | 63   | >TP53-K132CTYSPALNTM  | 37    | 26    |
| >TP53-K132CTYSPALNKMF | 380  | >TP53-K132CTYSPALNTM  | 414   | 34    |
| >TP53-K132CTYSPALNKMF | 246  | >TP53-K132CTYSPALNTM  | 56    | 190   |
| >TP53-K132CTYSPALNK   | 215  | >TP53-K132CTYSPALNT   | 11856 | 11641 |
| >TP53-K132CTYSPALNKMF | 767  | >TP53-K132CTYSPALNTM  | 353   | 414   |
| >TP53-K132CTYSPALNK   | 30   | >TP53-K132CTYSPALNT   | 11365 | 11335 |
| >TP53-K132CTYSPALNKMF | 488  | >TP53-K132CTYSPALNTM  | 306   | 182   |
| >TP53-K132CTYSPALNKMF | 610  | >TP53-K132CTYSPALNTM  | 245   | 365   |
| >TP53-K132CTYSPALNKMF | 23   | >TP53-K132CTYSPALNTM  | 16    | 7     |
| >TP53-K132CTYSPALNKMF | 24   | >TP53-K132CTYSPALNTM  | 16    | 8     |
| >TP53-K132CTYSPALNKMF | 5    | >TP53-K132CTYSPALNTM  | 5     | 0     |
| >TP53-K132CTYSPALNKMF | 627  | >TP53-K132CTYSPALNTM  | 167   | 460   |
| >TP53-K132CTYSPALNKMF | 76   | >TP53-K132CTYSPALNTM  | 46    | 30    |
| >TP53-K132CTYSPALNKMF | 146  | >TP53-K132CTYSPALNTM  | 92    | 54    |
| >TP53-K132CTYSPALNKMF | 30   | >TP53-K132CTYSPALNTM  | 31    | 1     |
| >TP53-K132CTYSPALNKMF | 13   | >TP53-K132CTYSPALNTM  | 6     | 7     |
| >TP53-K132CTYSPALNKMF | 358  | >TP53-K132CTYSPALNTM  | 280   | 78    |
| >TP53-K132TCTYSPALNK  | 453  | >TP53-K132TCTYSPALNTI | 170   | 283   |
| >TP53-K132VKMFCQLAKT  | 89   | >TP53-K132VWMFCQLAKT  | 131   | 42    |
| >TP53-K132VKMFCQLAKT  | 102  | >TP53-K132VWMFCQLAKT  | 72    | 30    |
| >TP53-K132VKMFCQLAKT  | 19   | >TP53-K132VWMFCQLAKT  | 15    | 4     |
| >TP53-K132VKMFCQLAKT  | 199  | >TP53-K132VWMFCQLAKT  | 134   | 65    |

|                        |       |                        |       |       |
|------------------------|-------|------------------------|-------|-------|
| >TP53-K132VKMFCQLAKT   | 19    | >TP53-K132V WMFCQLAKT  | 18    | 1     |
| >TP53-K132VKMFCQLAKT   | 23    | >TP53-K132V WMFCQLAKT  | 26    | 3     |
| >TP53-K132VKMFCQLAKT   | 55    | >TP53-K132V WMFCQLAKT  | 160   | 105   |
| >TP53-K132VKMFCQLAKT   | 61    | >TP53-K132V WMFCQLAKT  | 165   | 104   |
| >TP53-K132VKMFCQLAKT   | 518   | >TP53-K132V WMFCQLAKT  | 116   | 402   |
| >TP53-K132VKMFCQLAKT   | 805   | >TP53-K132V WMFCQLAKT  | 229   | 576   |
| >TP53-K132VKMFCQLAK    | 26    | >TP53-K132V WMFCQLAK   | 109   | 83    |
| >TP53-K132VKMFCQLAK    | 12    | >TP53-K132V WMFCQLAK   | 136   | 124   |
| >TP53-K132VKMFCQLAK    | 8     | >TP53-K132V WMFCQLAK   | 3923  | 3915  |
| >TP53-K132VKMFCQLAK    | 35    | >TP53-K132V WMFCQLAK   | 2278  | 2243  |
| >TP53-K132VKMFCQLAK    | 371   | >TP53-K132V WMFCQLAK   | 11978 | 11607 |
| >TP53-K132VKMFCQLAKT   | 81    | >TP53-K132V WMFCQLAKT  | 6972  | 6891  |
| >TP53-K132VKMFCQLAK    | 3283  | >TP53-K132V WMFCQLAK   | 432   | 2851  |
| >TP53-K132VKMFCQLAK    | 58    | >TP53-K132V WMFCQLAK   | 78    | 20    |
| >TP53-K132VKMFCQLAKT   | 491   | >TP53-K132V WMFCQLAKT  | 573   | 82    |
| >TP53-K132VKMFCQLAK    | 39    | >TP53-K132V WMFCQLAK   | 200   | 161   |
| >TP53-K132V NKMFCQLAK  | 6655  | >TP53-K132V NWMFCQLAI  | 37    | 6618  |
| >TP53-K132V NKMFCQLA   | 31807 | >TP53-K132V NWMFCQLA   | 205   | 31602 |
| >TP53-K132V NKMFCQLAK  | 35419 | >TP53-K132V NWMFCQLAI  | 297   | 35122 |
| >TP53-K132V VTCTYSPALN | 80    | >TP53-K132V VTCTYSPALN | 20200 | 20120 |
| >TP53-K132V VTCTYSPALN | 14    | >TP53-K132V VTCTYSPALN | 21921 | 21907 |
| >TP53-K132V VTCTYSPALN | 146   | >TP53-K132V VTCTYSPALN | 13499 | 13353 |
| >TP53-K132V VTCTYSPALN | 490   | >TP53-K132V VTCTYSPALN | 28706 | 28216 |
| >TP53-K132V VTCTYSPALN | 8437  | >TP53-K132V VTCTYSPALN | 5     | 8432  |
| >TP53-K132V VTCTYSPALN | 21925 | >TP53-K132V VTCTYSPALN | 27    | 21898 |
| >TP53-K132V LNKMFCQL   | 100   | >TP53-K132V LNWMFCQL   | 7     | 93    |
| >TP53-K132V LNKMFCQLAI | 161   | >TP53-K132V LNWMFCQLA  | 5221  | 5060  |
| >TP53-K132V LNKMFCQL   | 153   | >TP53-K132V LNWMFCQL   | 1934  | 1781  |
| >TP53-K132V ALNKMFCQL  | 238   | >TP53-K132V ALNWMFCQI  | 64    | 174   |
| >TP53-K132V ALNKMFCQL  | 17    | >TP53-K132V ALNWMFCQI  | 12    | 5     |
| >TP53-K132V ALNKMFCQL  | 30    | >TP53-K132V ALNWMFCQI  | 17    | 13    |
| >TP53-K132V ALNKMFCQL  | 442   | >TP53-K132V ALNWMFCQI  | 331   | 111   |
| >TP53-K132V ALNKMFCQL  | 297   | >TP53-K132V ALNWMFCQI  | 165   | 132   |
| >TP53-K132V ALNKMFCQL  | 22    | >TP53-K132V ALNWMFCQI  | 5     | 17    |
| >TP53-K132V ALNKMFCQL  | 255   | >TP53-K132V ALNWMFCQI  | 37    | 218   |
| >TP53-K132V ALNKMFCQL  | 198   | >TP53-K132V ALNWMFCQI  | 166   | 32    |
| >TP53-K132V ALNKMFCQL  | 21    | >TP53-K132V ALNWMFCQI  | 12    | 9     |
| >TP53-K132V ALNKMFCQL  | 256   | >TP53-K132V ALNWMFCQI  | 84    | 172   |
| >TP53-K132V ALNKMFCQL  | 66    | >TP53-K132V ALNWMFCQI  | 12    | 54    |
| >TP53-K132V ALNKMFCQ   | 245   | >TP53-K132V ALNWMFCQ   | 26    | 219   |
| >TP53-K132V ALNKMFCQL  | 3     | >TP53-K132V ALNWMFCQI  | 2     | 1     |
| >TP53-K132V ALNKMFCQL  | 11    | >TP53-K132V ALNWMFCQI  | 4     | 7     |
| >TP53-K132V ALNKMFCQL  | 2597  | >TP53-K132V ALNWMFCQI  | 351   | 2246  |

|                        |      |                      |       |       |
|------------------------|------|----------------------|-------|-------|
| >TP53-K132VALNKMFCQL   | 37   | >TP53-K132VALNWMFCQI | 34    | 3     |
| >TP53-K132VALNKMFCQL   | 25   | >TP53-K132VALNWMFCQI | 16    | 9     |
| >TP53-K132VALNKMFCQL   | 113  | >TP53-K132VALNWMFCQI | 334   | 221   |
| >TP53-K132VALNKMFCQL   | 431  | >TP53-K132VALNWMFCQI | 272   | 159   |
| >TP53-K132VALNKMFCQL   | 860  | >TP53-K132VALNWMFCQI | 219   | 641   |
| >TP53-K132VALNKMFCQL   | 288  | >TP53-K132VALNWMFCQI | 1080  | 792   |
| >TP53-K132VALNKMFCQL   | 416  | >TP53-K132VALNWMFCQI | 1232  | 816   |
| >TP53-K132VALNKMFCQL   | 981  | >TP53-K132VALNWMFCQI | 373   | 608   |
| >TP53-K132VSPALNKMFCQ  | 432  | >TP53-K132VSPALNWMFC | 499   | 67    |
| >TP53-K132VSPALNKMFC   | 100  | >TP53-K132VSPALNWMF  | 142   | 42    |
| >TP53-K132VSPALNKMFCQ  | 41   | >TP53-K132VSPALNWMFC | 40    | 1     |
| >TP53-K132VSPALNKMFCQ  | 372  | >TP53-K132VSPALNWMFC | 576   | 204   |
| >TP53-K132VSPALNKMFC   | 326  | >TP53-K132VSPALNWMF  | 61    | 265   |
| >TP53-K132VSPALNKMFC   | 1312 | >TP53-K132VSPALNWMF  | 192   | 1120  |
| >TP53-K132VSPALNKMFC   | 450  | >TP53-K132VSPALNWMF  | 254   | 196   |
| >TP53-K132VSPALNKMFC   | 677  | >TP53-K132VSPALNWMF  | 155   | 522   |
| >TP53-K132VYSPALNKMFC  | 6359 | >TP53-K132VYSPALNWMF | 483   | 5876  |
| >TP53-K132VYSPALNKMFC  | 2228 | >TP53-K132VYSPALNWMF | 121   | 2107  |
| >TP53-K132VYSPALNKMFC  | 384  | >TP53-K132VYSPALNWMF | 16    | 368   |
| >TP53-K132VYSPALNKMFC  | 717  | >TP53-K132VYSPALNWM  | 130   | 587   |
| >TP53-K132VYSPALNKMFC  | 2112 | >TP53-K132VYSPALNWM  | 479   | 1633  |
| >TP53-K132VYSPALNKMFC  | 104  | >TP53-K132VYSPALNWMF | 199   | 95    |
| >TP53-K132VYSPALNKMFC  | 43   | >TP53-K132VYSPALNWMF | 73    | 30    |
| >TP53-K132VYSPALNKMFC  | 40   | >TP53-K132VYSPALNWM  | 24    | 16    |
| >TP53-K132VYSPALNKMFC  | 3    | >TP53-K132VYSPALNWMF | 2     | 1     |
| >TP53-K132VYSPALNKMFC  | 22   | >TP53-K132VYSPALNWMF | 8     | 14    |
| >TP53-K132VYSPALNKMFC  | 124  | >TP53-K132VYSPALNWMF | 32    | 92    |
| >TP53-K132VYSPALNKMFC  | 67   | >TP53-K132VYSPALNWM  | 321   | 254   |
| >TP53-K132VYSPALNKMFC  | 103  | >TP53-K132VYSPALNWMF | 572   | 469   |
| >TP53-K132VTYSPALNKMFC | 136  | >TP53-K132VTYSPALNWM | 58    | 78    |
| >TP53-K132VTYSPALNKMFC | 220  | >TP53-K132VTYSPALNW  | 28872 | 28652 |
| >TP53-K132VTYSPALNKMFC | 1483 | >TP53-K132VTYSPALNW  | 218   | 1265  |
| >TP53-K132VTYSPALNKMFC | 179  | >TP53-K132VTYSPALNWM | 32    | 147   |
| >TP53-K132VTYSPALNKMFC | 4985 | >TP53-K132VTYSPALNW  | 225   | 4760  |
| >TP53-K132VTYSPALNKMFC | 64   | >TP53-K132VTYSPALNWM | 27    | 37    |
| >TP53-K132VTYSPALNKMFC | 1599 | >TP53-K132VTYSPALNW  | 14    | 1585  |
| >TP53-K132VTYSPALNKMFC | 27   | >TP53-K132VTYSPALNWM | 28    | 1     |
| >TP53-K132VTYSPALNKMFC | 5    | >TP53-K132VTYSPALNWM | 4     | 1     |
| >TP53-K132VTYSPALNKMFC | 551  | >TP53-K132VTYSPALNWM | 398   | 153   |
| >TP53-K132VTYSPALNKMFC | 2923 | >TP53-K132VTYSPALNWM | 443   | 2480  |
| >TP53-K132VTYSPALNKMFC | 586  | >TP53-K132VTYSPALNWM | 77    | 509   |
| >TP53-K132VTYSPALNKMFC | 222  | >TP53-K132VTYSPALNW  | 16076 | 15854 |
| >TP53-K132VTYSPALNKMFC | 4028 | >TP53-K132VTYSPALNWM | 248   | 3780  |

|                        |       |                        |       |       |
|------------------------|-------|------------------------|-------|-------|
| >TP53-K132V TYSPALNKM  | 439   | >TP53-K132V TYSPALNWM  | 380   | 59    |
| >TP53-K132V CTYSPALNK  | 30    | >TP53-K132V CTYSPALNW  | 12166 | 12136 |
| >TP53-K132V CTYSPALNK  | 11    | >TP53-K132V CTYSPALNW  | 18897 | 18886 |
| >TP53-K132V CTYSPALNKM | 3604  | >TP53-K132V CTYSPALNWI | 465   | 3139  |
| >TP53-K132V CTYSPALNKM | 343   | >TP53-K132V CTYSPALNWI | 44    | 299   |
| >TP53-K132V CTYSPALNKM | 63    | >TP53-K132V CTYSPALNWI | 17    | 46    |
| >TP53-K132V CTYSPALNKM | 380   | >TP53-K132V CTYSPALNWI | 237   | 143   |
| >TP53-K132V CTYSPALNK  | 6925  | >TP53-K132V CTYSPALNW  | 325   | 6600  |
| >TP53-K132V CTYSPALNKM | 246   | >TP53-K132V CTYSPALNWI | 58    | 188   |
| >TP53-K132V CTYSPALNKM | 1390  | >TP53-K132V CTYSPALNWI | 189   | 1201  |
| >TP53-K132V CTYSPALNK  | 215   | >TP53-K132V CTYSPALNW  | 15085 | 14870 |
| >TP53-K132V CTYSPALNKM | 767   | >TP53-K132V CTYSPALNWI | 327   | 440   |
| >TP53-K132V CTYSPALNK  | 30    | >TP53-K132V CTYSPALNW  | 11246 | 11216 |
| >TP53-K132V CTYSPALNKM | 488   | >TP53-K132V CTYSPALNWI | 434   | 54    |
| >TP53-K132V CTYSPALNKM | 23    | >TP53-K132V CTYSPALNWI | 32    | 9     |
| >TP53-K132V CTYSPALNK  | 6036  | >TP53-K132V CTYSPALNW  | 3     | 6033  |
| >TP53-K132V CTYSPALNKM | 24    | >TP53-K132V CTYSPALNWI | 27    | 3     |
| >TP53-K132V CTYSPALNKM | 5     | >TP53-K132V CTYSPALNWI | 5     | 0     |
| >TP53-K132V CTYSPALNK  | 31925 | >TP53-K132V CTYSPALNW  | 490   | 31435 |
| >TP53-K132V CTYSPALNK  | 23574 | >TP53-K132V CTYSPALNW  | 75    | 23499 |
| >TP53-K132V CTYSPALNKM | 1345  | >TP53-K132V CTYSPALNWI | 455   | 890   |
| >TP53-K132V CTYSPALNK  | 20002 | >TP53-K132V CTYSPALNW  | 14    | 19988 |
| >TP53-K132V CTYSPALNKM | 627   | >TP53-K132V CTYSPALNWI | 47    | 580   |
| >TP53-K132V CTYSPALNKM | 76    | >TP53-K132V CTYSPALNWI | 26    | 50    |
| >TP53-K132V CTYSPALNKM | 146   | >TP53-K132V CTYSPALNWI | 40    | 106   |
| >TP53-K132V CTYSPALNK  | 5088  | >TP53-K132V CTYSPALNW  | 380   | 4708  |
| >TP53-K132V CTYSPALNKM | 30    | >TP53-K132V CTYSPALNWI | 23    | 7     |
| >TP53-K132V CTYSPALNKM | 13    | >TP53-K132V CTYSPALNWI | 31    | 18    |
| >TP53-K132V CTYSPALNK  | 31778 | >TP53-K132V CTYSPALNW  | 360   | 31418 |
| >TP53-K132V CTYSPALNKM | 358   | >TP53-K132V CTYSPALNWI | 394   | 36    |
| >TP53-K132V TCTYSPALNK | 2112  | >TP53-K132V TCTYSPALNW | 400   | 1712  |
| >TP53-K132V TCTYSPALNK | 453   | >TP53-K132V TCTYSPALNW | 194   | 259   |
| >TP53-K139E KTCPVQLWV  | 125   | >TP53-K139E ETCPVQLWV  | 4229  | 4104  |
| >TP53-K139E KTCPVQLWV  | 53    | >TP53-K139E ETCPVQLWV  | 706   | 653   |
| >TP53-K139E KTCPVQLWV  | 338   | >TP53-K139E ETCPVQLWV  | 4707  | 4369  |
| >TP53-K139E KTCPVQLWV  | 202   | >TP53-K139E ETCPVQLWV  | 1496  | 1294  |
| >TP53-K139E KTCPVQLWV  | 224   | >TP53-K139E ETCPVQLWV  | 14962 | 14738 |
| >TP53-K139E KTCPVQLW   | 165   | >TP53-K139E ETCPVQLW   | 8422  | 8257  |
| >TP53-K139E KTCPVQLWV  | 1487  | >TP53-K139E ETCPVQLWV  | 11    | 1476  |
| >TP53-K139E KTCPVQLWV  | 7602  | >TP53-K139E ETCPVQLWV  | 66    | 7536  |
| >TP53-K139E KTCPVQLW   | 4     | >TP53-K139E ETCPVQLW   | 8     | 4     |
| >TP53-K139E KTCPVQLWV  | 118   | >TP53-K139E ETCPVQLWV  | 1775  | 1657  |
| >TP53-K139E KTCPVQLW   | 34    | >TP53-K139E ETCPVQLW   | 223   | 189   |

|                        |       |                        |       |       |
|------------------------|-------|------------------------|-------|-------|
| >TP53-K139E KTCPVQLW   | 10    | >TP53-K139E ETCPVQLW   | 71    | 61    |
| >TP53-K139E KTCPVQLWV  | 254   | >TP53-K139E ETCPVQLWV  | 2760  | 2506  |
| >TP53-K139E KTCPVQLWV  | 272   | >TP53-K139E ETCPVQLWV  | 4593  | 4321  |
| >TP53-K139E AKTCPVQL   | 41    | >TP53-K139E AETCPVQL   | 2459  | 2418  |
| >TP53-K139E AKTCPVQLW  | 192   | >TP53-K139E AETCPVQLW  | 6114  | 5922  |
| >TP53-K139E AKTCPVQL   | 17322 | >TP53-K139E AETCPVQL   | 50    | 17272 |
| >TP53-K139E AKTCPVQL   | 14118 | >TP53-K139E AETCPVQL   | 212   | 13906 |
| >TP53-K139E AKTCPVQLW  | 616   | >TP53-K139E AETCPVQLW  | 36    | 580   |
| >TP53-K139E AKTCPVQLW  | 18765 | >TP53-K139E AETCPVQLW' | 375   | 18390 |
| >TP53-K139E AKTCPVQL   | 26242 | >TP53-K139E AETCPVQL   | 425   | 25817 |
| >TP53-K139E AKTCPVQLW  | 2471  | >TP53-K139E AETCPVQLW  | 33    | 2438  |
| >TP53-K139E AKTCPVQLW  | 20946 | >TP53-K139E AETCPVQLW' | 400   | 20546 |
| >TP53-K139E AKTCPVQLW  | 24707 | >TP53-K139E AETCPVQLW  | 101   | 24606 |
| >TP53-K139E AKTCPVQLW  | 23051 | >TP53-K139E AETCPVQLW' | 106   | 22945 |
| >TP53-K139E ALNKMFCQL  | 37    | >TP53-K139E ALNKMFCQL  | 13890 | 13853 |
| >TP53-K139E ALNKMFCQL  | 25    | >TP53-K139E ALNKMFCQL  | 19206 | 19181 |
| >TP53-K139E ALNKMFCQL  | 113   | >TP53-K139E ALNKMFCQL  | 13794 | 13681 |
| >TP53-K139E ALNKMFCQL  | 431   | >TP53-K139E ALNKMFCQL  | 13496 | 13065 |
| >TP53-K139E LAKTCPVQLW | 482   | >TP53-K139E LAETCPVQLW | 351   | 131   |
| >TP53-K139E LAKTCPVQL  | 417   | >TP53-K139E LAETCPVQL  | 4814  | 4397  |
| >TP53-K139E LAKTCPVQL  | 405   | >TP53-K139E LAETCPVQL  | 1041  | 636   |
| >TP53-K139E LAKTCPVQLV | 45    | >TP53-K139E LAETCPVQLV | 91    | 46    |
| >TP53-K139E LAKTCPVQLV | 42    | >TP53-K139E LAETCPVQLV | 110   | 68    |
| >TP53-K139E LAKTCPVQLV | 42    | >TP53-K139E LAETCPVQLV | 95    | 53    |
| >TP53-K139E LAKTCPVQLV | 689   | >TP53-K139E LAETCPVQLV | 87    | 602   |
| >TP53-K139E QLAETCPV   | 58    | >TP53-K139E QLAETCPV   | 19    | 39    |
| >TP53-K139E QLAETCPVQL | 1834  | >TP53-K139E QLAETCPVQL | 377   | 1457  |
| >TP53-K139E QLAETCPV   | 13    | >TP53-K139E QLAETCPV   | 6     | 7     |
| >TP53-K139E QLAETCPVQL | 315   | >TP53-K139E QLAETCPVQL | 87    | 228   |
| >TP53-K139E QLAETCPV   | 10    | >TP53-K139E QLAETCPV   | 5     | 5     |
| >TP53-K139E QLAETCPVQL | 383   | >TP53-K139E QLAETCPVQL | 226   | 157   |
| >TP53-K139E QLAETCPV   | 37    | >TP53-K139E QLAETCPV   | 11    | 26    |
| >TP53-K139E QLAETCPV   | 14    | >TP53-K139E QLAETCPV   | 4     | 10    |
| >TP53-K139E QLAETCPVQL | 323   | >TP53-K139E QLAETCPVQL | 39    | 284   |
| >TP53-K139E QLAETCPV   | 30    | >TP53-K139E QLAETCPV   | 9     | 21    |
| >TP53-K139E QLAETCPVQL | 1584  | >TP53-K139E QLAETCPVQL | 195   | 1389  |
| >TP53-K139E QLAETCPV   | 10    | >TP53-K139E QLAETCPV   | 6     | 4     |
| >TP53-K139E QLAETCPVQL | 177   | >TP53-K139E QLAETCPVQL | 39    | 138   |
| >TP53-K139E QLAETCPV   | 10    | >TP53-K139E QLAETCPV   | 3     | 7     |
| >TP53-K139E QLAETCPVQL | 117   | >TP53-K139E QLAETCPVQL | 12    | 105   |
| >TP53-K139E QLAETCPV   | 3     | >TP53-K139E QLAETCPV   | 2     | 1     |
| >TP53-K139E QLAETCPVQ  | 2094  | >TP53-K139E QLAETCPVQ  | 316   | 1778  |
| >TP53-K139E QLAETCPVQL | 20    | >TP53-K139E QLAETCPVQL | 7     | 13    |

|                        |      |                        |       |       |
|------------------------|------|------------------------|-------|-------|
| >TP53-K139E QLAKTCPV   | 217  | >TP53-K139E QLAETCPV   | 114   | 103   |
| >TP53-K139E QLAKTCPV   | 60   | >TP53-K139E QLAETCPV   | 14    | 46    |
| >TP53-K139E QLAKTCPVQL | 967  | >TP53-K139E QLAETCPVQL | 454   | 513   |
| >TP53-K139E QLAKTCPVQL | 343  | >TP53-K139E QLAETCPVQL | 228   | 115   |
| >TP53-K139E CQLAKTCPV  | 121  | >TP53-K139E CQLAETCPV  | 103   | 18    |
| >TP53-K139E CQLAKTCPV  | 565  | >TP53-K139E CQLAETCPV  | 323   | 242   |
| >TP53-K139E CQLAKTCPV  | 173  | >TP53-K139E CQLAETCPV  | 260   | 87    |
| >TP53-K139E CQLAKTCPV  | 22   | >TP53-K139E CQLAETCPV  | 16    | 6     |
| >TP53-K139E CQLAKTCPVC | 463  | >TP53-K139E CQLAETCPVC | 304   | 159   |
| >TP53-K139E CQLAKTCPV  | 136  | >TP53-K139E CQLAETCPV  | 139   | 3     |
| >TP53-K139E CQLAKTCPV  | 77   | >TP53-K139E CQLAETCPV  | 61    | 16    |
| >TP53-K139E CQLAKTCPV  | 457  | >TP53-K139E CQLAETCPV  | 338   | 119   |
| >TP53-K139E CQLAKTCPV  | 268  | >TP53-K139E CQLAETCPV  | 123   | 145   |
| >TP53-K139E CQLAKTCPVC | 155  | >TP53-K139E CQLAETCPVC | 89    | 66    |
| >TP53-K139E CQLAKTCPVC | 231  | >TP53-K139E CQLAETCPVC | 101   | 130   |
| >TP53-K139E FCQLAKTCPV | 443  | >TP53-K139E FCQLAETCPV | 410   | 33    |
| >TP53-K139E MFCQLAKTCI | 1152 | >TP53-K139E MFCQLAETCI | 473   | 679   |
| >TP53-K139E MFCQLAKTCI | 679  | >TP53-K139E MFCQLAETCI | 468   | 211   |
| >TP53-K139E MFCQLAKTC  | 450  | >TP53-K139E MFCQLAETC  | 349   | 101   |
| >TP53-K139E KMFCQLAKT  | 89   | >TP53-K139E KMFCQLAET  | 28    | 61    |
| >TP53-K139E KMFCQLAKT  | 102  | >TP53-K139E KMFCQLAET  | 38    | 64    |
| >TP53-K139E KMFCQLAKT  | 19   | >TP53-K139E KMFCQLAET  | 13    | 6     |
| >TP53-K139E KMFCQLAKT  | 199  | >TP53-K139E KMFCQLAET  | 76    | 123   |
| >TP53-K139E KMFCQLAKT  | 19   | >TP53-K139E KMFCQLAET  | 9     | 10    |
| >TP53-K139E KMFCQLAKT( | 23   | >TP53-K139E KMFCQLAET( | 8     | 15    |
| >TP53-K139E KMFCQLAKT  | 55   | >TP53-K139E KMFCQLAET  | 24    | 31    |
| >TP53-K139E KMFCQLAKT( | 61   | >TP53-K139E KMFCQLAET( | 21    | 40    |
| >TP53-K139E KMFCQLAKT  | 673  | >TP53-K139E KMFCQLAET  | 308   | 365   |
| >TP53-K139E KMFCQLAKT  | 518  | >TP53-K139E KMFCQLAET  | 169   | 349   |
| >TP53-K139E KMFCQLAKT( | 805  | >TP53-K139E KMFCQLAET( | 268   | 537   |
| >TP53-K139E KMFCQLAK   | 26   | >TP53-K139E KMFCQLAE   | 5578  | 5552  |
| >TP53-K139E KMFCQLAK   | 12   | >TP53-K139E KMFCQLAE   | 15857 | 15845 |
| >TP53-K139E KMFCQLAK   | 8    | >TP53-K139E KMFCQLAE   | 6011  | 6003  |
| >TP53-K139E KMFCQLAK   | 35   | >TP53-K139E KMFCQLAE   | 2623  | 2588  |
| >TP53-K139E KMFCQLAK   | 371  | >TP53-K139E KMFCQLAE   | 451   | 80    |
| >TP53-K139E KMFCQLAKT( | 81   | >TP53-K139E KMFCQLAET( | 50    | 31    |
| >TP53-K139E KMFCQLAK   | 58   | >TP53-K139E KMFCQLAE   | 742   | 684   |
| >TP53-K139E KMFCQLAKT( | 491  | >TP53-K139E KMFCQLAET( | 610   | 119   |
| >TP53-K139E KMFCQLAK   | 39   | >TP53-K139E KMFCQLAE   | 2996  | 2957  |
| >TP53-K139E LNKMFCQLAI | 161  | >TP53-K139E LNKMFCQLAI | 14362 | 14201 |
| >TP53-K139E NTCPVQLWV  | 125  | >TP53-K139E NTCPVQLWV  | 738   | 613   |
| >TP53-K139E NTCPVQLWV  | 53   | >TP53-K139E NTCPVQLWV  | 387   | 334   |
| >TP53-K139E NTCPVQLWV  | 338  | >TP53-K139E NTCPVQLWV  | 3833  | 3495  |

|                        |      |                        |       |       |
|------------------------|------|------------------------|-------|-------|
| >TP53-K139M KTCPVQLWV  | 202  | >TP53-K139M NTCPVQLWV  | 1068  | 866   |
| >TP53-K139M KTCPVQLWV  | 224  | >TP53-K139M NTCPVQLWV  | 11305 | 11081 |
| >TP53-K139M KTCPVQLW   | 165  | >TP53-K139M NTCPVQLW   | 11715 | 11550 |
| >TP53-K139M KTCPVQLWV  | 1487 | >TP53-K139M NTCPVQLWV  | 26    | 1461  |
| >TP53-K139M KTCPVQLWV  | 7602 | >TP53-K139M NTCPVQLWV  | 471   | 7131  |
| >TP53-K139M KTCPVQLW   | 4    | >TP53-K139M NTCPVQLW   | 12    | 8     |
| >TP53-K139M KTCPVQLWV  | 118  | >TP53-K139M NTCPVQLWV  | 4763  | 4645  |
| >TP53-K139M KTCPVQLW   | 34   | >TP53-K139M NTCPVQLW   | 186   | 152   |
| >TP53-K139M KTCPVQLW   | 10   | >TP53-K139M NTCPVQLW   | 74    | 64    |
| >TP53-K139M KTCPVQLWV  | 254  | >TP53-K139M NTCPVQLWV  | 2020  | 1766  |
| >TP53-K139M KTCPVQLWV  | 272  | >TP53-K139M NTCPVQLWV  | 2748  | 2476  |
| >TP53-K139M AKTCPVQL   | 41   | >TP53-K139M ANTCPVQL   | 4459  | 4418  |
| >TP53-K139M AKTCPVQLW  | 192  | >TP53-K139M ANTCPVQLW  | 8870  | 8678  |
| >TP53-K139M ALNKMFCQL  | 37   | >TP53-K139M ALNKMFCQL  | 12962 | 12925 |
| >TP53-K139M ALNKMFCQL  | 25   | >TP53-K139M ALNKMFCQL  | 17413 | 17388 |
| >TP53-K139M ALNKMFCQL  | 113  | >TP53-K139M ALNKMFCQL  | 12812 | 12699 |
| >TP53-K139M ALNKMFCQL  | 431  | >TP53-K139M ALNKMFCQL  | 14780 | 14349 |
| >TP53-K139M LAKTCPVQLV | 830  | >TP53-K139M LANTCPVQLV | 440   | 390   |
| >TP53-K139M LAKTCPVQLV | 482  | >TP53-K139M LANTCPVQLV | 120   | 362   |
| >TP53-K139M LAKTCPVQL  | 417  | >TP53-K139M LANTCPVQL  | 606   | 189   |
| >TP53-K139M LAKTCPVQL  | 405  | >TP53-K139M LANTCPVQL  | 527   | 122   |
| >TP53-K139M LAKTCPVQLV | 45   | >TP53-K139M LANTCPVQLV | 50    | 5     |
| >TP53-K139M LAKTCPVQL  | 5347 | >TP53-K139M LANTCPVQL  | 235   | 5112  |
| >TP53-K139M LAKTCPVQLV | 42   | >TP53-K139M LANTCPVQLV | 46    | 4     |
| >TP53-K139M LAKTCPVQLV | 42   | >TP53-K139M LANTCPVQLV | 12    | 30    |
| >TP53-K139M LAKTCPVQLV | 689  | >TP53-K139M LANTCPVQLV | 98    | 591   |
| >TP53-K139M QLAKTCPV   | 58   | >TP53-K139M QLANTCPV   | 35    | 23    |
| >TP53-K139M QLAKTCPVQL | 1834 | >TP53-K139M QLANTCPVQL | 437   | 1397  |
| >TP53-K139M QLAKTCPV   | 13   | >TP53-K139M QLANTCPV   | 11    | 2     |
| >TP53-K139M QLAKTCPVQL | 315  | >TP53-K139M QLANTCPVQL | 74    | 241   |
| >TP53-K139M QLAKTCPV   | 10   | >TP53-K139M QLANTCPV   | 7     | 3     |
| >TP53-K139M QLAKTCPVQL | 383  | >TP53-K139M QLANTCPVQL | 212   | 171   |
| >TP53-K139M QLAKTCPV   | 37   | >TP53-K139M QLANTCPV   | 22    | 15    |
| >TP53-K139M QLAKTCPV   | 14   | >TP53-K139M QLANTCPV   | 6     | 8     |
| >TP53-K139M QLAKTCPVQL | 323  | >TP53-K139M QLANTCPVQL | 127   | 196   |
| >TP53-K139M QLAKTCPV   | 30   | >TP53-K139M QLANTCPV   | 11    | 19    |
| >TP53-K139M QLAKTCPV   | 10   | >TP53-K139M QLANTCPV   | 8     | 2     |
| >TP53-K139M QLAKTCPVQL | 177  | >TP53-K139M QLANTCPVQL | 90    | 87    |
| >TP53-K139M QLAKTCPV   | 10   | >TP53-K139M QLANTCPV   | 5     | 5     |
| >TP53-K139M QLAKTCPVQL | 117  | >TP53-K139M QLANTCPVQL | 36    | 81    |
| >TP53-K139M QLAKTCPV   | 3    | >TP53-K139M QLANTCPV   | 2     | 1     |
| >TP53-K139M QLAKTCPVQL | 20   | >TP53-K139M QLANTCPVQL | 10    | 10    |
| >TP53-K139M QLAKTCPV   | 217  | >TP53-K139M QLANTCPV   | 143   | 74    |

|                        |       |                        |       |       |
|------------------------|-------|------------------------|-------|-------|
| >TP53-K139MQLAKTCPV    | 60    | >TP53-K139MQLANTCPV    | 37    | 23    |
| >TP53-K139MQLAKTCPVQL  | 343   | >TP53-K139MQLANTCPVQL  | 390   | 47    |
| >TP53-K139MCQLAKTCPV   | 12908 | >TP53-K139MCQLANTCPV   | 18    | 12890 |
| >TP53-K139MCQLAKTCPVC  | 16370 | >TP53-K139MCQLANTCPVC  | 297   | 16073 |
| >TP53-K139MCQLAKTCPV   | 121   | >TP53-K139MCQLANTCPV   | 108   | 13    |
| >TP53-K139MCQLAKTCPV   | 173   | >TP53-K139MCQLANTCPV   | 218   | 45    |
| >TP53-K139MCQLAKTCPV   | 22    | >TP53-K139MCQLANTCPV   | 16    | 6     |
| >TP53-K139MCQLAKTCPVC  | 463   | >TP53-K139MCQLANTCPVC  | 327   | 136   |
| >TP53-K139MCQLAKTCPV   | 136   | >TP53-K139MCQLANTCPV   | 49    | 87    |
| >TP53-K139MCQLAKTCPV   | 77    | >TP53-K139MCQLANTCPV   | 14    | 63    |
| >TP53-K139MCQLAKTCPV   | 457   | >TP53-K139MCQLANTCPV   | 288   | 169   |
| >TP53-K139MCQLAKTCPV   | 720   | >TP53-K139MCQLANTCPV   | 186   | 534   |
| >TP53-K139MCQLAKTCPV   | 268   | >TP53-K139MCQLANTCPV   | 89    | 179   |
| >TP53-K139MCQLAKTCPVC  | 155   | >TP53-K139MCQLANTCPVC  | 64    | 91    |
| >TP53-K139MCQLAKTCPVC  | 231   | >TP53-K139MCQLANTCPVC  | 79    | 152   |
| >TP53-K139MFCQLAKTCPV  | 443   | >TP53-K139MFCQLANTCPV  | 324   | 119   |
| >TP53-K139MFCQLAKTCI   | 1152  | >TP53-K139MFCQLANTC    | 497   | 655   |
| >TP53-K139MFCQLAKTCI   | 679   | >TP53-K139MFCQLANTC    | 355   | 324   |
| >TP53-K139MFCQLAKTC    | 450   | >TP53-K139MFCQLANTC    | 275   | 175   |
| >TP53-K139MKMFCQLAKT   | 89    | >TP53-K139MKMFCQLANT   | 50    | 39    |
| >TP53-K139MKMFCQLAKT   | 102   | >TP53-K139MKMFCQLANT   | 53    | 49    |
| >TP53-K139MKMFCQLAKT   | 19    | >TP53-K139MKMFCQLANT   | 12    | 7     |
| >TP53-K139MKMFCQLAKT   | 199   | >TP53-K139MKMFCQLANT   | 130   | 69    |
| >TP53-K139MKMFCQLAKT   | 19    | >TP53-K139MKMFCQLANT   | 20    | 1     |
| >TP53-K139MKMFCQLAKTC  | 23    | >TP53-K139MKMFCQLANTC  | 16    | 7     |
| >TP53-K139MKMFCQLAKT   | 55    | >TP53-K139MKMFCQLANT   | 34    | 21    |
| >TP53-K139MKMFCQLAKTC  | 61    | >TP53-K139MKMFCQLANTC  | 20    | 41    |
| >TP53-K139MKMFCQLAKTC  | 805   | >TP53-K139MKMFCQLANTC  | 438   | 367   |
| >TP53-K139MKMFCQLAK    | 26    | >TP53-K139MKMFCQLAN    | 4526  | 4500  |
| >TP53-K139MKMFCQLAK    | 12    | >TP53-K139MKMFCQLAN    | 14177 | 14165 |
| >TP53-K139MKMFCQLAK    | 8     | >TP53-K139MKMFCQLAN    | 4076  | 4068  |
| >TP53-K139MKMFCQLAK    | 35    | >TP53-K139MKMFCQLAN    | 3076  | 3041  |
| >TP53-K139MKMFCQLAK    | 371   | >TP53-K139MKMFCQLAN    | 496   | 125   |
| >TP53-K139MKMFCQLAKTC  | 81    | >TP53-K139MKMFCQLANTC  | 60    | 21    |
| >TP53-K139MKMFCQLAK    | 58    | >TP53-K139MKMFCQLAN    | 575   | 517   |
| >TP53-K139MKMFCQLAKTC  | 491   | >TP53-K139MKMFCQLANTC  | 415   | 76    |
| >TP53-K139MKMFCQLAKTC  | 802   | >TP53-K139MKMFCQLANTC  | 454   | 348   |
| >TP53-K139MKMFCQLAK    | 39    | >TP53-K139MKMFCQLAN    | 1750  | 1711  |
| >TP53-K139M LNKMFCQLAI | 161   | >TP53-K139M LNKMFCQLAI | 12562 | 12401 |
| >TP53-K139C KTCPVQLWV  | 125   | >TP53-K139C QTCPVQLWV  | 723   | 598   |
| >TP53-K139C KTCPVQLWV  | 53    | >TP53-K139C QTCPVQLWV  | 415   | 362   |
| >TP53-K139C KTCPVQLWV  | 338   | >TP53-K139C QTCPVQLWV  | 4567  | 4229  |
| >TP53-K139C KTCPVQLWV  | 202   | >TP53-K139C QTCPVQLWV  | 839   | 637   |



|                        |       |                        |       |       |
|------------------------|-------|------------------------|-------|-------|
| >TP53-K139C KTCPVQLWV  | 224   | >TP53-K139C QTCPVQLWV  | 5362  | 5138  |
| >TP53-K139C KTCPVQLW   | 165   | >TP53-K139C QTCPVQLW   | 1857  | 1692  |
| >TP53-K139C KTCPVQLWV  | 1487  | >TP53-K139C QTCPVQLWV  | 42    | 1445  |
| >TP53-K139C KTCPVQLW   | 4     | >TP53-K139C QTCPVQLW   | 6     | 2     |
| >TP53-K139C KTCPVQLWV  | 118   | >TP53-K139C QTCPVQLWV  | 631   | 513   |
| >TP53-K139C KTCPVQLW   | 34    | >TP53-K139C QTCPVQLW   | 131   | 97    |
| >TP53-K139C KTCPVQLW   | 10    | >TP53-K139C QTCPVQLW   | 24    | 14    |
| >TP53-K139C KTCPVQLWV  | 254   | >TP53-K139C QTCPVQLWV  | 670   | 416   |
| >TP53-K139C KTCPVQLWV  | 272   | >TP53-K139C QTCPVQLWV  | 986   | 714   |
| >TP53-K139C AKTCPVQL   | 17500 | >TP53-K139C AQTCPVQL   | 308   | 17192 |
| >TP53-K139C AKTCPVQLW  | 2559  | >TP53-K139C AQTCPVQLW  | 102   | 2457  |
| >TP53-K139C AKTCPVQLW  | 6563  | >TP53-K139C AQTCPVQLW  | 306   | 6257  |
| >TP53-K139C AKTCPVQL   | 41    | >TP53-K139C AQTCPVQL   | 43    | 2     |
| >TP53-K139C AKTCPVQLW  | 192   | >TP53-K139C AQTCPVQLW  | 215   | 23    |
| >TP53-K139C AKTCPVQLW  | 616   | >TP53-K139C AQTCPVQLW  | 276   | 340   |
| >TP53-K139C ALNKMFCQL  | 2597  | >TP53-K139C ALNKMFCQL  | 259   | 2338  |
| >TP53-K139C ALNKMFCQL  | 37    | >TP53-K139C ALNKMFCQL  | 11971 | 11934 |
| >TP53-K139C ALNKMFCQL  | 25    | >TP53-K139C ALNKMFCQL  | 18173 | 18148 |
| >TP53-K139C ALNKMFCQL  | 113   | >TP53-K139C ALNKMFCQL  | 8136  | 8023  |
| >TP53-K139C ALNKMFCQL  | 431   | >TP53-K139C ALNKMFCQL  | 10247 | 9816  |
| >TP53-K139C LAKTCPVQLW | 482   | >TP53-K139C LAQTCPVQLV | 146   | 336   |
| >TP53-K139C LAKTCPVQL  | 417   | >TP53-K139C LAQTCPVQL  | 1247  | 830   |
| >TP53-K139C LAKTCPVQL  | 405   | >TP53-K139C LAQTCPVQL  | 604   | 199   |
| >TP53-K139C LAKTCPVQLV | 45    | >TP53-K139C LAQTCPVQLV | 66    | 21    |
| >TP53-K139C LAKTCPVQLV | 42    | >TP53-K139C LAQTCPVQLV | 54    | 12    |
| >TP53-K139C LAKTCPVQLV | 42    | >TP53-K139C LAQTCPVQLV | 17    | 25    |
| >TP53-K139C LAKTCPVQLV | 689   | >TP53-K139C LAQTCPVQLV | 244   | 445   |
| >TP53-K139C QLAKTCPV   | 58    | >TP53-K139C QLAQTCPV   | 63    | 5     |
| >TP53-K139C QLAKTCPV   | 13    | >TP53-K139C QLAQTCPV   | 12    | 1     |
| >TP53-K139C QLAKTCPVQL | 315   | >TP53-K139C QLAQTCPVQL | 165   | 150   |
| >TP53-K139C QLAKTCPV   | 10    | >TP53-K139C QLAQTCPV   | 10    | 0     |
| >TP53-K139C QLAKTCPVQL | 383   | >TP53-K139C QLAQTCPVQL | 291   | 92    |
| >TP53-K139C QLAKTCPV   | 37    | >TP53-K139C QLAQTCPV   | 32    | 5     |
| >TP53-K139C QLAKTCPV   | 14    | >TP53-K139C QLAQTCPV   | 9     | 5     |
| >TP53-K139C QLAKTCPVQL | 323   | >TP53-K139C QLAQTCPVQL | 183   | 140   |
| >TP53-K139C QLAKTCPV   | 30    | >TP53-K139C QLAQTCPV   | 31    | 1     |
| >TP53-K139C QLAKTCPV   | 10    | >TP53-K139C QLAQTCPV   | 9     | 1     |
| >TP53-K139C QLAKTCPVQL | 177   | >TP53-K139C QLAQTCPVQL | 138   | 39    |
| >TP53-K139C QLAKTCPV   | 10    | >TP53-K139C QLAQTCPV   | 7     | 3     |
| >TP53-K139C QLAKTCPVQL | 117   | >TP53-K139C QLAQTCPVQL | 63    | 54    |
| >TP53-K139C QLAKTCPV   | 3     | >TP53-K139C QLAQTCPV   | 2     | 1     |
| >TP53-K139C QLAKTCPVQL | 20    | >TP53-K139C QLAQTCPVQL | 11    | 9     |
| >TP53-K139C QLAKTCPV   | 217   | >TP53-K139C QLAQTCPV   | 264   | 47    |

|                        |      |                        |       |       |
|------------------------|------|------------------------|-------|-------|
| >TP53-K139C QLAKTCPV   | 60   | >TP53-K139C QLAQTCPV   | 40    | 20    |
| >TP53-K139C QLAKTCPVQL | 967  | >TP53-K139C QLAQTCPVQI | 469   | 498   |
| >TP53-K139C QLAKTCPVQL | 343  | >TP53-K139C QLAQTCPVQI | 199   | 144   |
| >TP53-K139C CQLAKTCPV  | 121  | >TP53-K139C CQLAQTCPV  | 131   | 10    |
| >TP53-K139C CQLAKTCPV  | 565  | >TP53-K139C CQLAQTCPV  | 420   | 145   |
| >TP53-K139C CQLAKTCPV  | 173  | >TP53-K139C CQLAQTCPV  | 233   | 60    |
| >TP53-K139C CQLAKTCPV  | 22   | >TP53-K139C CQLAQTCPV  | 17    | 5     |
| >TP53-K139C CQLAKTCPVC | 463  | >TP53-K139C CQLAQTCPV( | 340   | 123   |
| >TP53-K139C CQLAKTCPV  | 136  | >TP53-K139C CQLAQTCPV  | 125   | 11    |
| >TP53-K139C CQLAKTCPV  | 77   | >TP53-K139C CQLAQTCPV  | 55    | 22    |
| >TP53-K139C CQLAKTCPV  | 457  | >TP53-K139C CQLAQTCPV  | 271   | 186   |
| >TP53-K139C CQLAKTCPV  | 268  | >TP53-K139C CQLAQTCPV  | 125   | 143   |
| >TP53-K139C CQLAKTCPVC | 155  | >TP53-K139C CQLAQTCPV( | 85    | 70    |
| >TP53-K139C CQLAKTCPVC | 231  | >TP53-K139C CQLAQTCPV( | 106   | 125   |
| >TP53-K139C CQLAKTCPVC | 762  | >TP53-K139C CQLAQTCPV( | 495   | 267   |
| >TP53-K139C FCQLAKTCPV | 443  | >TP53-K139C FCQLAQTCPV | 249   | 194   |
| >TP53-K139C MFCQLAKTCI | 679  | >TP53-K139C MFCQLAQTC  | 276   | 403   |
| >TP53-K139C MFCQLAKTC  | 450  | >TP53-K139C MFCQLAQTC  | 573   | 123   |
| >TP53-K139C KMFCQLAKT  | 89   | >TP53-K139C KMFCQLAQT  | 66    | 23    |
| >TP53-K139C KMFCQLAKT  | 102  | >TP53-K139C KMFCQLAQT  | 69    | 33    |
| >TP53-K139C KMFCQLAKT  | 19   | >TP53-K139C KMFCQLAQT  | 14    | 5     |
| >TP53-K139C KMFCQLAKT  | 199  | >TP53-K139C KMFCQLAQT  | 162   | 37    |
| >TP53-K139C KMFCQLAK   | 1003 | >TP53-K139C KMFCQLAQ   | 260   | 743   |
| >TP53-K139C KMFCQLAKT  | 19   | >TP53-K139C KMFCQLAQT  | 11    | 8     |
| >TP53-K139C KMFCQLAKT( | 23   | >TP53-K139C KMFCQLAQT  | 8     | 15    |
| >TP53-K139C KMFCQLAKT  | 55   | >TP53-K139C KMFCQLAQT  | 50    | 5     |
| >TP53-K139C KMFCQLAKT( | 61   | >TP53-K139C KMFCQLAQT  | 19    | 42    |
| >TP53-K139C KMFCQLAKT  | 673  | >TP53-K139C KMFCQLAQT  | 397   | 276   |
| >TP53-K139C KMFCQLAKT  | 518  | >TP53-K139C KMFCQLAQT  | 160   | 358   |
| >TP53-K139C KMFCQLAKT( | 805  | >TP53-K139C KMFCQLAQT  | 109   | 696   |
| >TP53-K139C KMFCQLAK   | 26   | >TP53-K139C KMFCQLAQ   | 4088  | 4062  |
| >TP53-K139C KMFCQLAK   | 12   | >TP53-K139C KMFCQLAQ   | 15387 | 15375 |
| >TP53-K139C KMFCQLAK   | 8    | >TP53-K139C KMFCQLAQ   | 1246  | 1238  |
| >TP53-K139C KMFCQLAK   | 35   | >TP53-K139C KMFCQLAQ   | 1382  | 1347  |
| >TP53-K139C KMFCQLAK   | 371  | >TP53-K139C KMFCQLAQ   | 353   | 18    |
| >TP53-K139C KMFCQLAKT( | 81   | >TP53-K139C KMFCQLAQT  | 61    | 20    |
| >TP53-K139C KMFCQLAK   | 58   | >TP53-K139C KMFCQLAQ   | 178   | 120   |
| >TP53-K139C KMFCQLAKT( | 491  | >TP53-K139C KMFCQLAQT  | 374   | 117   |
| >TP53-K139C KMFCQLAK   | 39   | >TP53-K139C KMFCQLAQ   | 264   | 225   |
| >TP53-K139C LNKMFCQLAI | 161  | >TP53-K139C LNKMFCQLAI | 9699  | 9538  |
| >TP53-K139F KTCPVQLWV  | 125  | >TP53-K139F RTCPVQLWV  | 173   | 48    |
| >TP53-K139F KTCPVQLWV  | 53   | >TP53-K139F RTCPVQLWV  | 54    | 1     |
| >TP53-K139F KTCPVQLWV  | 338  | >TP53-K139F RTCPVQLWV  | 817   | 479   |

|                       |       |                       |      |       |
|-----------------------|-------|-----------------------|------|-------|
| >TP53-K139FKTCPVQLWV  | 202   | >TP53-K139FRTCPVQLWV  | 224  | 22    |
| >TP53-K139FKTCPVQLWV  | 224   | >TP53-K139FRTCPVQLWV  | 199  | 25    |
| >TP53-K139FKTCPVQLW   | 165   | >TP53-K139FRTCPVQLW   | 144  | 21    |
| >TP53-K139FKTCPVQLW   | 4     | >TP53-K139FRTCPVQLW   | 3    | 1     |
| >TP53-K139FKTCPVQLWV  | 118   | >TP53-K139FRTCPVQLWV  | 76   | 42    |
| >TP53-K139FKTCPVQLW   | 34    | >TP53-K139FRTCPVQLW   | 33   | 1     |
| >TP53-K139FKTCPVQLW   | 10    | >TP53-K139FRTCPVQLW   | 9    | 1     |
| >TP53-K139FKTCPVQLW   | 2991  | >TP53-K139FRTCPVQLW   | 459  | 2532  |
| >TP53-K139FKTCPVQLWV  | 254   | >TP53-K139FRTCPVQLWV  | 141  | 113   |
| >TP53-K139FKTCPVQLWV  | 272   | >TP53-K139FRTCPVQLWV  | 151  | 121   |
| >TP53-K139FAKTCPVQL   | 41    | >TP53-K139FARTCPVQL   | 268  | 227   |
| >TP53-K139FAKTCPVQLW  | 192   | >TP53-K139FARTCPVQLW  | 840  | 648   |
| >TP53-K139FAKTCPVQL   | 11705 | >TP53-K139FARTCPVQL   | 248  | 11457 |
| >TP53-K139FAKTCPVQL   | 12394 | >TP53-K139FARTCPVQL   | 395  | 11999 |
| >TP53-K139FALNKMFCQL  | 37    | >TP53-K139FALNKMFCQL  | 158  | 121   |
| >TP53-K139FALNKMFCQL  | 25    | >TP53-K139FALNKMFCQL  | 411  | 386   |
| >TP53-K139FALNKMFCQL  | 113   | >TP53-K139FALNKMFCQL  | 6240 | 6127  |
| >TP53-K139FALNKMFCQL  | 431   | >TP53-K139FALNKMFCQL  | 24   | 407   |
| >TP53-K139FALNKMFCQL  | 8735  | >TP53-K139FALNKMFCQL  | 446  | 8289  |
| >TP53-K139FLAKTCPVQLV | 482   | >TP53-K139FLARTCPVQLV | 303  | 179   |
| >TP53-K139FLAKTCPVQLV | 1694  | >TP53-K139FLARTCPVQLV | 267  | 1427  |
| >TP53-K139FLAKTCPVQL  | 11331 | >TP53-K139FLARTCPVQL  | 479  | 10852 |
| >TP53-K139FLAKTCPVQL  | 417   | >TP53-K139FLARTCPVQL  | 210  | 207   |
| >TP53-K139FLAKTCPVQL  | 405   | >TP53-K139FLARTCPVQL  | 54   | 351   |
| >TP53-K139FLAKTCPVQLV | 45    | >TP53-K139FLARTCPVQLV | 13   | 32    |
| >TP53-K139FLAKTCPVQLV | 42    | >TP53-K139FLARTCPVQLV | 36   | 6     |
| >TP53-K139FLAKTCPVQLV | 42    | >TP53-K139FLARTCPVQLV | 43   | 1     |
| >TP53-K139FQLAKTCPV   | 58    | >TP53-K139FQLARTCPV   | 89   | 31    |
| >TP53-K139FQLAKTCPV   | 13    | >TP53-K139FQLARTCPV   | 17   | 4     |
| >TP53-K139FQLAKTCPVQL | 315   | >TP53-K139FQLARTCPVQL | 328  | 13    |
| >TP53-K139FQLAKTCPV   | 10    | >TP53-K139FQLARTCPV   | 11   | 1     |
| >TP53-K139FQLAKTCPVQL | 383   | >TP53-K139FQLARTCPVQL | 330  | 53    |
| >TP53-K139FQLAKTCPV   | 37    | >TP53-K139FQLARTCPV   | 38   | 1     |
| >TP53-K139FQLAKTCPV   | 14    | >TP53-K139FQLARTCPV   | 12   | 2     |
| >TP53-K139FQLAKTCPVQL | 323   | >TP53-K139FQLARTCPVQL | 262  | 61    |
| >TP53-K139FQLAKTCPV   | 30    | >TP53-K139FQLARTCPV   | 27   | 3     |
| >TP53-K139FQLAKTCPV   | 10    | >TP53-K139FQLARTCPV   | 12   | 2     |
| >TP53-K139FQLAKTCPVQL | 177   | >TP53-K139FQLARTCPVQL | 266  | 89    |
| >TP53-K139FQLAKTCPV   | 10    | >TP53-K139FQLARTCPV   | 10   | 0     |
| >TP53-K139FQLAKTCPVQL | 117   | >TP53-K139FQLARTCPVQL | 97   | 20    |
| >TP53-K139FQLAKTCPV   | 3     | >TP53-K139FQLARTCPV   | 3    | 0     |
| >TP53-K139FQLAKTCPVQL | 20    | >TP53-K139FQLARTCPVQL | 14   | 6     |
| >TP53-K139FQLAKTCPV   | 217   | >TP53-K139FQLARTCPV   | 232  | 15    |

|                       |      |                       |      |      |
|-----------------------|------|-----------------------|------|------|
| >TP53-K139FQLAKTCPV   | 60   | >TP53-K139FQLARTCPV   | 72   | 12   |
| >TP53-K139FQLAKTCPVQL | 343  | >TP53-K139FQLARTCPVQL | 119  | 224  |
| >TP53-K139FCQLAKTCPV  | 121  | >TP53-K139FCQLARTCPV  | 104  | 17   |
| >TP53-K139FCQLAKTCPV  | 173  | >TP53-K139FCQLARTCPV  | 162  | 11   |
| >TP53-K139FCQLAKTCPV  | 22   | >TP53-K139FCQLARTCPV  | 13   | 9    |
| >TP53-K139FCQLAKTCPVC | 463  | >TP53-K139FCQLARTCPVC | 261  | 202  |
| >TP53-K139FCQLAKTCPV  | 136  | >TP53-K139FCQLARTCPV  | 174  | 38   |
| >TP53-K139FCQLAKTCPV  | 77   | >TP53-K139FCQLARTCPV  | 114  | 37   |
| >TP53-K139FCQLAKTCPV  | 457  | >TP53-K139FCQLARTCPV  | 484  | 27   |
| >TP53-K139FCQLAKTCPV  | 268  | >TP53-K139FCQLARTCPV  | 160  | 108  |
| >TP53-K139FCQLAKTCPVC | 155  | >TP53-K139FCQLARTCPVC | 100  | 55   |
| >TP53-K139FCQLAKTCPVC | 231  | >TP53-K139FCQLARTCPVC | 120  | 111  |
| >TP53-K139FCQLAKTCPV  | 443  | >TP53-K139FCQLARTCPV  | 350  | 93   |
| >TP53-K139FMFCQLAKTC  | 450  | >TP53-K139FMFCQLARTC  | 412  | 38   |
| >TP53-K139FMFCQLAKT   | 89   | >TP53-K139FMFCQLART   | 64   | 25   |
| >TP53-K139FMFCQLAKT   | 102  | >TP53-K139FMFCQLART   | 100  | 2    |
| >TP53-K139FMFCQLAKT   | 19   | >TP53-K139FMFCQLART   | 19   | 0    |
| >TP53-K139FMFCQLAKT   | 199  | >TP53-K139FMFCQLART   | 210  | 11   |
| >TP53-K139FMFCQLAKT   | 19   | >TP53-K139FMFCQLART   | 13   | 6    |
| >TP53-K139FMFCQLAKT   | 23   | >TP53-K139FMFCQLART   | 17   | 6    |
| >TP53-K139FMFCQLAKT   | 55   | >TP53-K139FMFCQLART   | 62   | 7    |
| >TP53-K139FMFCQLAKT   | 61   | >TP53-K139FMFCQLART   | 60   | 1    |
| >TP53-K139FMFCQLAKT   | 518  | >TP53-K139FMFCQLART   | 224  | 294  |
| >TP53-K139FMFCQLAK    | 26   | >TP53-K139FMFCQLAR    | 51   | 25   |
| >TP53-K139FMFCQLAK    | 12   | >TP53-K139FMFCQLAR    | 94   | 82   |
| >TP53-K139FMFCQLAK    | 8    | >TP53-K139FMFCQLAR    | 485  | 477  |
| >TP53-K139FMFCQLAK    | 35   | >TP53-K139FMFCQLAR    | 9    | 26   |
| >TP53-K139FMFCQLAK    | 371  | >TP53-K139FMFCQLAR    | 366  | 5    |
| >TP53-K139FMFCQLAKT   | 81   | >TP53-K139FMFCQLART   | 72   | 9    |
| >TP53-K139FMFCQLAK    | 58   | >TP53-K139FMFCQLAR    | 47   | 11   |
| >TP53-K139FMFCQLAKT   | 491  | >TP53-K139FMFCQLART   | 759  | 268  |
| >TP53-K139FMFCQLAK    | 39   | >TP53-K139FMFCQLAR    | 11   | 28   |
| >TP53-K139FNKMFCQLAK  | 6655 | >TP53-K139FNKMFCQLAR  | 293  | 6362 |
| >TP53-K139FLNKMFCQLAI | 161  | >TP53-K139FLNKMFCQLAI | 6832 | 6671 |
| >TP53-K139FLNKMFCQLAI | 2155 | >TP53-K139FLNKMFCQLAI | 135  | 2020 |
| >TP53-K139FLNKMFCQLAI | 4893 | >TP53-K139FLNKMFCQLAI | 311  | 4582 |
| >TP53-K139TKTCPVQLWV  | 125  | >TP53-K139TTCPVQLWV   | 578  | 453  |
| >TP53-K139TKTCPVQLWV  | 53   | >TP53-K139TTCPVQLWV   | 225  | 172  |
| >TP53-K139TKTCPVQLWV  | 338  | >TP53-K139TTCPVQLWV   | 1971 | 1633 |
| >TP53-K139TKTCPVQLWV  | 202  | >TP53-K139TTCPVQLWV   | 346  | 144  |
| >TP53-K139TKTCPVQLWV  | 224  | >TP53-K139TTCPVQLWV   | 6012 | 5788 |
| >TP53-K139TKTCPVQLW   | 165  | >TP53-K139TTCPVQLW    | 4418 | 4253 |
| >TP53-K139TKTCPVQLWV  | 1487 | >TP53-K139TTCPVQLWV   | 18   | 1469 |

|                        |       |                        |       |       |
|------------------------|-------|------------------------|-------|-------|
| >TP53-K139T KTCPVQLW   | 4     | >TP53-K139T TTCPVQLW   | 6     | 2     |
| >TP53-K139T KTCPVQLWV  | 118   | >TP53-K139T TTCPVQLWV  | 869   | 751   |
| >TP53-K139T KTCPVQLW   | 34    | >TP53-K139T TTCPVQLW   | 51    | 17    |
| >TP53-K139T KTCPVQLW   | 10    | >TP53-K139T TTCPVQLW   | 22    | 12    |
| >TP53-K139T KTCPVQLWV  | 254   | >TP53-K139T TTCPVQLWV  | 654   | 400   |
| >TP53-K139T KTCPVQLWV  | 272   | >TP53-K139T TTCPVQLWV  | 1150  | 878   |
| >TP53-K139T AKTCPVQLW  | 2559  | >TP53-K139T ATTCPVQLW' | 80    | 2479  |
| >TP53-K139T AKTCPVQLW  | 6563  | >TP53-K139T ATTCPVQLW' | 350   | 6213  |
| >TP53-K139T AKTCPVQLW  | 4125  | >TP53-K139T ATTCPVQLW' | 154   | 3971  |
| >TP53-K139T AKTCPVQL   | 20835 | >TP53-K139T ATTCPVQL   | 416   | 20419 |
| >TP53-K139T AKTCPVQLW  | 21430 | >TP53-K139T ATTCPVQLW' | 408   | 21022 |
| >TP53-K139T AKTCPVQLW  | 19378 | >TP53-K139T ATTCPVQLW' | 498   | 18880 |
| >TP53-K139T AKTCPVQL   | 41    | >TP53-K139T ATTCPVQL   | 2699  | 2658  |
| >TP53-K139T AKTCPVQLW  | 192   | >TP53-K139T ATTCPVQLW  | 6532  | 6340  |
| >TP53-K139T AKTCPVQL   | 19529 | >TP53-K139T ATTCPVQL   | 17    | 19512 |
| >TP53-K139T AKTCPVQLW  | 4223  | >TP53-K139T ATTCPVQLW  | 5     | 4218  |
| >TP53-K139T AKTCPVQLW  | 17986 | >TP53-K139T ATTCPVQLW  | 177   | 17809 |
| >TP53-K139T AKTCPVQLW  | 12204 | >TP53-K139T ATTCPVQLW  | 41    | 12163 |
| >TP53-K139T AKTCPVQL   | 39069 | >TP53-K139T ATTCPVQL   | 252   | 38817 |
| >TP53-K139T AKTCPVQLW  | 30666 | >TP53-K139T ATTCPVQLW  | 234   | 30432 |
| >TP53-K139T AKTCPVQLW  | 25650 | >TP53-K139T ATTCPVQLW' | 169   | 25481 |
| >TP53-K139T AKTCPVQLW  | 10445 | >TP53-K139T ATTCPVQLW  | 81    | 10364 |
| >TP53-K139T AKTCPVQLW  | 11893 | >TP53-K139T ATTCPVQLW' | 97    | 11796 |
| >TP53-K139T ALNKMFCQL  | 11412 | >TP53-K139T ALNKMFCQL  | 316   | 11096 |
| >TP53-K139T ALNKMFCQL  | 2597  | >TP53-K139T ALNKMFCQL  | 159   | 2438  |
| >TP53-K139T ALNKMFCQL  | 37    | >TP53-K139T ALNKMFCQL  | 14634 | 14597 |
| >TP53-K139T ALNKMFCQL  | 25    | >TP53-K139T ALNKMFCQL  | 21703 | 21678 |
| >TP53-K139T ALNKMFCQL  | 113   | >TP53-K139T ALNKMFCQL  | 11229 | 11116 |
| >TP53-K139T ALNKMFCQL  | 431   | >TP53-K139T ALNKMFCQL  | 15263 | 14832 |
| >TP53-K139T LAKTCPVQLV | 482   | >TP53-K139T LATTCPVQLV | 73    | 409   |
| >TP53-K139T LAKTCPVQL  | 417   | >TP53-K139T LATTCPVQL  | 1318  | 901   |
| >TP53-K139T LAKTCPVQL  | 405   | >TP53-K139T LATTCPVQL  | 447   | 42    |
| >TP53-K139T LAKTCPVQLV | 45    | >TP53-K139T LATTCPVQLV | 61    | 16    |
| >TP53-K139T LAKTCPVQL  | 5347  | >TP53-K139T LATTCPVQL  | 385   | 4962  |
| >TP53-K139T LAKTCPVQLV | 42    | >TP53-K139T LATTCPVQLV | 53    | 11    |
| >TP53-K139T LAKTCPVQLV | 42    | >TP53-K139T LATTCPVQLV | 14    | 28    |
| >TP53-K139T LAKTCPVQLV | 689   | >TP53-K139T LATTCPVQLV | 132   | 557   |
| >TP53-K139T QLAKTCPV   | 58    | >TP53-K139T QLATTCPV   | 42    | 16    |
| >TP53-K139T QLAKTCPV   | 13    | >TP53-K139T QLATTCPV   | 10    | 3     |
| >TP53-K139T QLAKTCPVQL | 315   | >TP53-K139T QLATTCPVQL | 112   | 203   |
| >TP53-K139T QLAKTCPV   | 10    | >TP53-K139T QLATTCPV   | 8     | 2     |
| >TP53-K139T QLAKTCPVQL | 383   | >TP53-K139T QLATTCPVQL | 279   | 104   |
| >TP53-K139T QLAKTCPV   | 37    | >TP53-K139T QLATTCPV   | 26    | 11    |

|                        |      |                        |     |      |
|------------------------|------|------------------------|-----|------|
| >TP53-K139T QLAKTCPV   | 14   | >TP53-K139T QLATTCPV   | 13  | 1    |
| >TP53-K139T QLAKTCPVQL | 323  | >TP53-K139T QLATTCPVQL | 368 | 45   |
| >TP53-K139T QLAKTCPV   | 30   | >TP53-K139T QLATTCPV   | 21  | 9    |
| >TP53-K139T QLAKTCPV   | 10   | >TP53-K139T QLATTCPV   | 11  | 1    |
| >TP53-K139T QLAKTCPVQL | 177  | >TP53-K139T QLATTCPVQL | 266 | 89   |
| >TP53-K139T QLAKTCPV   | 10   | >TP53-K139T QLATTCPV   | 7   | 3    |
| >TP53-K139T QLAKTCPVQL | 117  | >TP53-K139T QLATTCPVQL | 58  | 59   |
| >TP53-K139T QLAKTCPV   | 3    | >TP53-K139T QLATTCPV   | 3   | 0    |
| >TP53-K139T QLAKTCPVQL | 20   | >TP53-K139T QLATTCPVQL | 17  | 3    |
| >TP53-K139T QLAKTCPV   | 217  | >TP53-K139T QLATTCPV   | 141 | 76   |
| >TP53-K139T QLAKTCPV   | 60   | >TP53-K139T QLATTCPV   | 51  | 9    |
| >TP53-K139T QLAKTCPVQL | 343  | >TP53-K139T QLATTCPVQL | 253 | 90   |
| >TP53-K139T CQLAKTCPV  | 121  | >TP53-K139T CQLATTCPV  | 74  | 47   |
| >TP53-K139T CQLAKTCPV  | 173  | >TP53-K139T CQLATTCPV  | 172 | 1    |
| >TP53-K139T CQLAKTCPV  | 22   | >TP53-K139T CQLATTCPV  | 7   | 15   |
| >TP53-K139T CQLAKTCPVC | 463  | >TP53-K139T CQLATTCPVC | 190 | 273  |
| >TP53-K139T CQLAKTCPV  | 136  | >TP53-K139T CQLATTCPV  | 54  | 82   |
| >TP53-K139T CQLAKTCPV  | 77   | >TP53-K139T CQLATTCPV  | 26  | 51   |
| >TP53-K139T CQLAKTCPV  | 457  | >TP53-K139T CQLATTCPV  | 102 | 355  |
| >TP53-K139T CQLAKTCPV  | 720  | >TP53-K139T CQLATTCPV  | 232 | 488  |
| >TP53-K139T CQLAKTCPV  | 268  | >TP53-K139T CQLATTCPV  | 58  | 210  |
| >TP53-K139T CQLAKTCPVC | 155  | >TP53-K139T CQLATTCPVC | 45  | 110  |
| >TP53-K139T CQLAKTCPV  | 2778 | >TP53-K139T CQLATTCPV  | 241 | 2537 |
| >TP53-K139T CQLAKTCPVC | 231  | >TP53-K139T CQLATTCPVC | 49  | 182  |
| >TP53-K139T FCQLAKTCPV | 1178 | >TP53-K139T FCQLATTCPV | 397 | 781  |
| >TP53-K139T FCQLAKTCPV | 443  | >TP53-K139T FCQLATTCPV | 215 | 228  |
| >TP53-K139T FCQLAKTCPV | 1688 | >TP53-K139T FCQLATTCPV | 470 | 1218 |
| >TP53-K139T MFCQLAKTCI | 679  | >TP53-K139T MFCQLATTCI | 307 | 372  |
| >TP53-K139T MFCQLAKTC  | 450  | >TP53-K139T MFCQLATTC  | 540 | 90   |
| >TP53-K139T MFCQLAKTCI | 721  | >TP53-K139T MFCQLATTCI | 434 | 287  |
| >TP53-K139T KMFCQLAK   | 8327 | >TP53-K139T KMFCQLAT   | 54  | 8273 |
| >TP53-K139T KMFCQLAKT  | 89   | >TP53-K139T KMFCQLATT  | 56  | 33   |
| >TP53-K139T KMFCQLAK   | 4426 | >TP53-K139T KMFCQLAT   | 187 | 4239 |
| >TP53-K139T KMFCQLAKT  | 102  | >TP53-K139T KMFCQLATT  | 141 | 39   |
| >TP53-K139T KMFCQLAK   | 4759 | >TP53-K139T KMFCQLAT   | 62  | 4697 |
| >TP53-K139T KMFCQLAKT  | 19   | >TP53-K139T KMFCQLATT  | 14  | 5    |
| >TP53-K139T KMFCQLAK   | 4270 | >TP53-K139T KMFCQLAT   | 125 | 4145 |
| >TP53-K139T KMFCQLAKT  | 199  | >TP53-K139T KMFCQLATT  | 112 | 87   |
| >TP53-K139T KMFCQLAK   | 1003 | >TP53-K139T KMFCQLAT   | 26  | 977  |
| >TP53-K139T KMFCQLAKT  | 19   | >TP53-K139T KMFCQLATT  | 8   | 11   |
| >TP53-K139T KMFCQLAKT  | 23   | >TP53-K139T KMFCQLATT  | 11  | 12   |
| >TP53-K139T KMFCQLAK   | 3313 | >TP53-K139T KMFCQLAT   | 86  | 3227 |
| >TP53-K139T KMFCQLAKT  | 55   | >TP53-K139T KMFCQLATT  | 13  | 42   |

|                       |       |                       |       |       |
|-----------------------|-------|-----------------------|-------|-------|
| >TP53-K139T KMFCQLAKT | 61    | >TP53-K139T KMFCQLATT | 23    | 38    |
| >TP53-K139T KMFCQLAKT | 673   | >TP53-K139T KMFCQLATT | 302   | 371   |
| >TP53-K139T KMFCQLAKT | 518   | >TP53-K139T KMFCQLATT | 159   | 359   |
| >TP53-K139T KMFCQLAKT | 805   | >TP53-K139T KMFCQLATT | 144   | 661   |
| >TP53-K139T KMFCQLAK  | 26    | >TP53-K139T KMFCQLAT  | 6452  | 6426  |
| >TP53-K139T KMFCQLAK  | 12    | >TP53-K139T KMFCQLAT  | 18759 | 18747 |
| >TP53-K139T KMFCQLAK  | 8     | >TP53-K139T KMFCQLAT  | 2695  | 2687  |
| >TP53-K139T KMFCQLAK  | 35    | >TP53-K139T KMFCQLAT  | 4266  | 4231  |
| >TP53-K139T KMFCQLAK  | 371   | >TP53-K139T KMFCQLAT  | 234   | 137   |
| >TP53-K139T KMFCQLAKT | 1105  | >TP53-K139T KMFCQLATT | 134   | 971   |
| >TP53-K139T KMFCQLAKT | 81    | >TP53-K139T KMFCQLATT | 29    | 52    |
| >TP53-K139T KMFCQLAK  | 58    | >TP53-K139T KMFCQLAT  | 243   | 185   |
| >TP53-K139T KMFCQLAKT | 1350  | >TP53-K139T KMFCQLATT | 410   | 940   |
| >TP53-K139T KMFCQLAKT | 491   | >TP53-K139T KMFCQLATT | 323   | 168   |
| >TP53-K139T KMFCQLAKT | 802   | >TP53-K139T KMFCQLATT | 403   | 399   |
| >TP53-K139T KMFCQLAK  | 39    | >TP53-K139T KMFCQLAT  | 3175  | 3136  |
| >TP53-K139T LNKMFQQLA | 161   | >TP53-K139T LNKMFQQLA | 12020 | 11859 |
| >TP53-K164E KQSQHMTEV | 82    | >TP53-K164E EQSQHMTEV | 8132  | 8050  |
| >TP53-K164E KQSQHMTEV | 51    | >TP53-K164E EQSQHMTEV | 818   | 767   |
| >TP53-K164E KQSQHMTEV | 298   | >TP53-K164E EQSQHMTEV | 1905  | 1607  |
| >TP53-K164E KQSQHMTEV | 9     | >TP53-K164E EQSQHMTEV | 176   | 167   |
| >TP53-K164E KQSQHMTEV | 273   | >TP53-K164E EQSQHMTEV | 1333  | 1060  |
| >TP53-K164E KQSQHMTEV | 10    | >TP53-K164E EQSQHMTEV | 130   | 120   |
| >TP53-K164E KQSQHMTEV | 426   | >TP53-K164E EQSQHMTEV | 5009  | 4583  |
| >TP53-K164E KQSQHMTEV | 35    | >TP53-K164E EQSQHMTEV | 4028  | 3993  |
| >TP53-K164E KQSQHMTEV | 9474  | >TP53-K164E EQSQHMTEV | 131   | 9343  |
| >TP53-K164E KQSQHMTEV | 222   | >TP53-K164E EQSQHMTEV | 1154  | 932   |
| >TP53-K164E KQSQHMTEV | 86    | >TP53-K164E EQSQHMTEV | 1228  | 1142  |
| >TP53-K164E KQSQHMTEV | 110   | >TP53-K164E EQSQHMTEV | 1260  | 1150  |
| >TP53-K164E KQSQHMTEV | 185   | >TP53-K164E EQSQHMTEV | 2627  | 2442  |
| >TP53-K164E KQSQHMTEV | 60    | >TP53-K164E EQSQHMTEV | 463   | 403   |
| >TP53-K164E YKQSQHMT  | 29137 | >TP53-K164E YEQSQHMT  | 461   | 28676 |
| >TP53-K164E YKQSQHMT  | 8978  | >TP53-K164E YEQSQHMT  | 311   | 8667  |
| >TP53-K164E YKQSQHMT  | 6869  | >TP53-K164E YEQSQHMT  | 231   | 6638  |
| >TP53-K164E YKQSQHMT  | 467   | >TP53-K164E YEQSQHMT  | 770   | 303   |
| >TP53-K164E YKQSQHMT  | 30    | >TP53-K164E YEQSQHMT  | 1430  | 1400  |
| >TP53-K164E YKQSQHMT  | 42    | >TP53-K164E YEQSQHMT  | 1557  | 1515  |
| >TP53-K164E YKQSQHMT  | 20616 | >TP53-K164E YEQSQHMT  | 139   | 20477 |
| >TP53-K164E YKQSQHMT  | 33887 | >TP53-K164E YEQSQHMT  | 479   | 33408 |
| >TP53-K164E YKQSQHMT  | 25741 | >TP53-K164E YEQSQHMT  | 204   | 25537 |
| >TP53-K164E YKQSQHMT  | 27527 | >TP53-K164E YEQSQHMT  | 285   | 27242 |
| >TP53-K164E YKQSQHMT  | 18682 | >TP53-K164E YEQSQHMT  | 459   | 18223 |
| >TP53-K164E YKQSQHMT  | 17081 | >TP53-K164E YEQSQHMT  | 63    | 17018 |

|                       |      |                       |       |       |
|-----------------------|------|-----------------------|-------|-------|
| >TP53-K164EYKQSQHMTE  | 6830 | >TP53-K164EYEQSQHMTE  | 14    | 6816  |
| >TP53-K164EGTRVRAMAI\ | 50   | >TP53-K164EGTRVRAMAI\ | 16787 | 16737 |
| >TP53-K164EGTRVRAMAI\ | 39   | >TP53-K164EGTRVRAMAI\ | 22276 | 22237 |
| >TP53-K164EGTRVRAMAI\ | 3    | >TP53-K164EGTRVRAMAI\ | 320   | 317   |
| >TP53-K164EGTRVRAMAI\ | 115  | >TP53-K164EGTRVRAMAI\ | 10653 | 10538 |
| >TP53-K164EGTRVRAMAI\ | 269  | >TP53-K164EGTRVRAMAI\ | 7445  | 7176  |
| >TP53-K164EIYKQSQHMTI | 402  | >TP53-K164EIYEQSQHMTI | 620   | 218   |
| >TP53-K164EIYKQSQHM   | 394  | >TP53-K164EIYEQSQHM   | 11743 | 11349 |
| >TP53-K164EAIYKQSQHM  | 91   | >TP53-K164EAIYEQSQHM  | 74    | 17    |
| >TP53-K164EAIYKQSQHM  | 2067 | >TP53-K164EAIYEQSQHM  | 459   | 1608  |
| >TP53-K164EAIYKQSQHM  | 3214 | >TP53-K164EAIYEQSQHM  | 263   | 2951  |
| >TP53-K164EAIYKQSQHM  | 1225 | >TP53-K164EAIYEQSQHM  | 109   | 1116  |
| >TP53-K164EAIYKQSQHM  | 1331 | >TP53-K164EAIYEQSQHM  | 142   | 1189  |
| >TP53-K164EAIYKQSQHM  | 1358 | >TP53-K164EAIYEQSQHM  | 184   | 1174  |
| >TP53-K164EAIYKQSQHM  | 1683 | >TP53-K164EAIYEQSQHM  | 132   | 1551  |
| >TP53-K164EAIYKQSQHM  | 662  | >TP53-K164EAIYEQSQHM  | 99    | 563   |
| >TP53-K164EAIYKQSQH   | 349  | >TP53-K164EAIYEQSQH   | 576   | 227   |
| >TP53-K164EAIYKQSQHM  | 804  | >TP53-K164EAIYEQSQHM  | 312   | 492   |
| >TP53-K164EAIYKQSQHM  | 62   | >TP53-K164EAIYEQSQHM  | 72    | 10    |
| >TP53-K164EAIYKQSQHM  | 198  | >TP53-K164EAIYEQSQHM  | 354   | 156   |
| >TP53-K164EAIYKQSQHM  | 514  | >TP53-K164EAIYEQSQHM  | 197   | 317   |
| >TP53-K164EMAIYKQSQHI | 633  | >TP53-K164EMAIYEQSQHI | 284   | 349   |
| >TP53-K164EMAIYKQSQH  | 526  | >TP53-K164EMAIYEQSQH  | 403   | 123   |
| >TP53-K164EMAIYKQSQHI | 226  | >TP53-K164EMAIYEQSQHI | 209   | 17    |
| >TP53-K164EMAIYKQSQHI | 205  | >TP53-K164EMAIYEQSQHI | 134   | 71    |
| >TP53-K164EMAIYKQSQHI | 20   | >TP53-K164EMAIYEQSQHI | 32    | 12    |
| >TP53-K164EMAIYKQSQH  | 1726 | >TP53-K164EMAIYEQSQH  | 416   | 1310  |
| >TP53-K164EMAIYKQSQHI | 151  | >TP53-K164EMAIYEQSQHI | 99    | 52    |
| >TP53-K164EAMAIYKQSQI | 221  | >TP53-K164EAMAIYEQSQI | 205   | 16    |
| >TP53-K164EAMAIYKQS   | 3226 | >TP53-K164EAMAIYEQS   | 459   | 2767  |
| >TP53-K164EAMAIYKQSQI | 161  | >TP53-K164EAMAIYEQSQI | 73    | 88    |
| >TP53-K164EAMAIYKQSQI | 199  | >TP53-K164EAMAIYEQSQI | 122   | 77    |
| >TP53-K164EAMAIYKQSQI | 283  | >TP53-K164EAMAIYEQSQI | 136   | 147   |
| >TP53-K164EAMAIYKQSQ  | 69   | >TP53-K164EAMAIYEQSQ  | 73    | 4     |
| >TP53-K164EAMAIYKQSQI | 49   | >TP53-K164EAMAIYEQSQI | 37    | 12    |
| >TP53-K164EAMAIYKQSQI | 55   | >TP53-K164EAMAIYEQSQI | 63    | 8     |
| >TP53-K164EAMAIYKQSQI | 69   | >TP53-K164EAMAIYEQSQI | 55    | 14    |
| >TP53-K164ERAMAIYKQSC | 354  | >TP53-K164ERAMAIYEQSC | 673   | 319   |
| >TP53-K164ERAMAIYKQSC | 1142 | >TP53-K164ERAMAIYEQSC | 403   | 739   |
| >TP53-K164ERAMAIYKQSC | 375  | >TP53-K164ERAMAIYEQSC | 339   | 36    |
| >TP53-K164EVRAMAIYK   | 159  | >TP53-K164EVRAMAIYE   | 10225 | 10066 |
| >TP53-K164EVRAMAIYK   | 28   | >TP53-K164EVRAMAIYE   | 6210  | 6182  |
| >TP53-K164EVRAMAIYK   | 20   | >TP53-K164EVRAMAIYE   | 13413 | 13393 |



|                        |       |                        |       |       |
|------------------------|-------|------------------------|-------|-------|
| >TP53-K164E RVRAMAIYK  | 3     | >TP53-K164E RVRAMAIYE  | 10    | 7     |
| >TP53-K164E RVRAMAIYKC | 10    | >TP53-K164E RVRAMAIYEC | 8     | 2     |
| >TP53-K164E RVRAMAIYKC | 9     | >TP53-K164E RVRAMAIYEC | 25    | 16    |
| >TP53-K164E RVRAMAIYK  | 18    | >TP53-K164E RVRAMAIYE  | 2391  | 2373  |
| >TP53-K164E RVRAMAIYK  | 156   | >TP53-K164E RVRAMAIYE  | 16251 | 16095 |
| >TP53-K164M KQSQHMTEV  | 82    | >TP53-K164M MQSQHMTE'  | 38    | 44    |
| >TP53-K164M KQSQHMTEV  | 51    | >TP53-K164M MQSQHMTE'  | 13    | 38    |
| >TP53-K164M KQSQHMTEV  | 298   | >TP53-K164M MQSQHMTE'  | 152   | 146   |
| >TP53-K164M KQSQHMTEV  | 9     | >TP53-K164M MQSQHMTE'  | 5     | 4     |
| >TP53-K164M KQSQHMTEV  | 273   | >TP53-K164M MQSQHMTE'  | 121   | 152   |
| >TP53-K164M KQSQHMTEV  | 10    | >TP53-K164M MQSQHMTE'  | 6     | 4     |
| >TP53-K164M KQSQHMTEV  | 993   | >TP53-K164M MQSQHMTE'  | 458   | 535   |
| >TP53-K164M KQSQHMTEV  | 426   | >TP53-K164M MQSQHMTE'  | 185   | 241   |
| >TP53-K164M KQSQHMTEV  | 718   | >TP53-K164M MQSQHMTE'  | 330   | 388   |
| >TP53-K164M KQSQHMTEV  | 1607  | >TP53-K164M MQSQHMTE'  | 112   | 1495  |
| >TP53-K164M KQSQHMTEV  | 35    | >TP53-K164M MQSQHMTE'  | 54    | 19    |
| >TP53-K164M KQSQHMTEV  | 9474  | >TP53-K164M MQSQHMTE'  | 202   | 9272  |
| >TP53-K164M KQSQHMTEV  | 541   | >TP53-K164M MQSQHMTE'  | 263   | 278   |
| >TP53-K164M KQSQHMTEV  | 222   | >TP53-K164M MQSQHMTE'  | 120   | 102   |
| >TP53-K164M KQSQHMTEV  | 86    | >TP53-K164M MQSQHMTE'  | 55    | 31    |
| >TP53-K164M KQSQHMTEV  | 110   | >TP53-K164M MQSQHMTE'  | 77    | 33    |
| >TP53-K164M KQSQHMTEV  | 185   | >TP53-K164M MQSQHMTE'  | 141   | 44    |
| >TP53-K164M KQSQHMTEV  | 4774  | >TP53-K164M MQSQHMTE'  | 319   | 4455  |
| >TP53-K164M KQSQHMTEV  | 60    | >TP53-K164M MQSQHMTE'  | 231   | 171   |
| >TP53-K164M YKQSQHMT   | 23395 | >TP53-K164M YMQSQHMT   | 295   | 23100 |
| >TP53-K164M YKQSQHMT   | 17082 | >TP53-K164M YMQSQHMT   | 61    | 17021 |
| >TP53-K164M YKQSQHMT   | 14705 | >TP53-K164M YMQSQHMT   | 26    | 14679 |
| >TP53-K164M YKQSQHMT   | 26932 | >TP53-K164M YMQSQHMT   | 467   | 26465 |
| >TP53-K164M YKQSQHMT   | 10084 | >TP53-K164M YMQSQHMT   | 28    | 10056 |
| >TP53-K164M YKQSQHMT   | 9718  | >TP53-K164M YMQSQHMT   | 12    | 9706  |
| >TP53-K164M YKQSQHMT   | 20275 | >TP53-K164M YMQSQHMT   | 274   | 20001 |
| >TP53-K164M YKQSQHMT   | 5412  | >TP53-K164M YMQSQHMT   | 15    | 5397  |
| >TP53-K164M YKQSQHMT   | 8671  | >TP53-K164M YMQSQHMT   | 5     | 8666  |
| >TP53-K164M YKQSQHMT   | 5236  | >TP53-K164M YMQSQHMT   | 127   | 5109  |
| >TP53-K164M YKQSQHMT   | 3907  | >TP53-K164M YMQSQHMT   | 51    | 3856  |
| >TP53-K164M YKQSQHMT   | 17837 | >TP53-K164M YMQSQHMT   | 28    | 17809 |
| >TP53-K164M YKQSQHMT   | 1636  | >TP53-K164M YMQSQHMT   | 2     | 1634  |
| >TP53-K164M YKQSQHMT   | 2428  | >TP53-K164M YMQSQHMT   | 2     | 2426  |
| >TP53-K164M YKQSQHMT   | 21637 | >TP53-K164M YMQSQHMT   | 178   | 21459 |
| >TP53-K164M YKQSQHMT   | 6003  | >TP53-K164M YMQSQHMT   | 3     | 6000  |
| >TP53-K164M YKQSQHMT   | 4681  | >TP53-K164M YMQSQHMT   | 3     | 4678  |
| >TP53-K164M YKQSQHMT   | 23119 | >TP53-K164M YMQSQHMT   | 372   | 22747 |
| >TP53-K164M YKQSQHMT   | 8677  | >TP53-K164M YMQSQHMT   | 7     | 8670  |

|                        |       |                       |       |       |
|------------------------|-------|-----------------------|-------|-------|
| >TP53-K164M YKQSQHMTE  | 10322 | >TP53-K164M YMQSQHMTI | 10    | 10312 |
| >TP53-K164M YKQSQHMT   | 21695 | >TP53-K164M YMQSQHMT  | 356   | 21339 |
| >TP53-K164M YKQSQHMTE  | 17417 | >TP53-K164M YMQSQHMTI | 7     | 17410 |
| >TP53-K164M YKQSQHMTE  | 10918 | >TP53-K164M YMQSQHMTI | 4     | 10914 |
| >TP53-K164M YKQSQHMT   | 23094 | >TP53-K164M YMQSQHMT  | 9     | 23085 |
| >TP53-K164M YKQSQHMTE  | 467   | >TP53-K164M YMQSQHMTI | 1     | 466   |
| >TP53-K164M YKQSQHMTE  | 1555  | >TP53-K164M YMQSQHMTI | 2     | 1553  |
| >TP53-K164M YKQSQHMTE  | 8990  | >TP53-K164M YMQSQHMTI | 227   | 8763  |
| >TP53-K164M YKQSQHMTE  | 18514 | >TP53-K164M YMQSQHMTI | 283   | 18231 |
| >TP53-K164M YKQSQHMTE  | 14893 | >TP53-K164M YMQSQHMTI | 119   | 14774 |
| >TP53-K164M YKQSQHMTE  | 30    | >TP53-K164M YMQSQHMTI | 58    | 28    |
| >TP53-K164M YKQSQHMTE  | 42    | >TP53-K164M YMQSQHMTI | 79    | 37    |
| >TP53-K164M GTRVRAMAI  | 50    | >TP53-K164M GTRVRAMAI | 15878 | 15828 |
| >TP53-K164M GTRVRAMAI  | 39    | >TP53-K164M GTRVRAMAI | 19311 | 19272 |
| >TP53-K164M GTRVRAMAI  | 3     | >TP53-K164M GTRVRAMAI | 11    | 8     |
| >TP53-K164M GTRVRAMAI  | 115   | >TP53-K164M GTRVRAMAI | 10262 | 10147 |
| >TP53-K164M GTRVRAMAI  | 9973  | >TP53-K164M GTRVRAMAI | 9     | 9964  |
| >TP53-K164M GTRVRAMAI  | 1542  | >TP53-K164M GTRVRAMAI | 8     | 1534  |
| >TP53-K164M GTRVRAMAI  | 269   | >TP53-K164M GTRVRAMAI | 6337  | 6068  |
| >TP53-K164M IYKQSQHM   | 510   | >TP53-K164M IYMQSQHM  | 60    | 450   |
| >TP53-K164M IYKQSQHMTI | 402   | >TP53-K164M IYMQSQHMT | 58    | 344   |
| >TP53-K164M IYKQSQHMTI | 6288  | >TP53-K164M IYMQSQHMT | 150   | 6138  |
| >TP53-K164M IYKQSQHMTI | 727   | >TP53-K164M IYMQSQHMT | 110   | 617   |
| >TP53-K164M IYKQSQHM   | 2436  | >TP53-K164M IYMQSQHM  | 371   | 2065  |
| >TP53-K164M IYKQSQHM   | 957   | >TP53-K164M IYMQSQHM  | 232   | 725   |
| >TP53-K164M IYKQSQHM   | 561   | >TP53-K164M IYMQSQHM  | 40    | 521   |
| >TP53-K164M IYKQSQHMT  | 3820  | >TP53-K164M IYMQSQHMT | 396   | 3424  |
| >TP53-K164M IYKQSQHMTI | 864   | >TP53-K164M IYMQSQHMT | 84    | 780   |
| >TP53-K164M IYKQSQHM   | 394   | >TP53-K164M IYMQSQHM  | 5206  | 4812  |
| >TP53-K164M AIYKQSQHM  | 91    | >TP53-K164M AIYMQSQHM | 30    | 61    |
| >TP53-K164M AIYKQSQHM  | 662   | >TP53-K164M AIYMQSQHM | 364   | 298   |
| >TP53-K164M AIYKQSQH   | 349   | >TP53-K164M AIYMQSQH  | 432   | 83    |
| >TP53-K164M AIYKQSQHM  | 62    | >TP53-K164M AIYMQSQHM | 48    | 14    |
| >TP53-K164M AIYKQSQHM  | 198   | >TP53-K164M AIYMQSQHM | 219   | 21    |
| >TP53-K164M AIYKQSQHM  | 514   | >TP53-K164M AIYMQSQHM | 190   | 324   |
| >TP53-K164M MAIYKQSQHI | 633   | >TP53-K164M MAIYMQSQH | 484   | 149   |
| >TP53-K164M MAIYKQSQ   | 841   | >TP53-K164M MAIYMQSQ  | 328   | 513   |
| >TP53-K164M MAIYKQSQH  | 526   | >TP53-K164M MAIYMQSQH | 160   | 366   |
| >TP53-K164M MAIYKQSQHI | 672   | >TP53-K164M MAIYMQSQH | 344   | 328   |
| >TP53-K164M MAIYKQSQHI | 226   | >TP53-K164M MAIYMQSQH | 133   | 93    |
| >TP53-K164M MAIYKQSQHI | 205   | >TP53-K164M MAIYMQSQH | 148   | 57    |
| >TP53-K164M MAIYKQSQHI | 20    | >TP53-K164M MAIYMQSQH | 19    | 1     |
| >TP53-K164M MAIYKQSQH  | 1726  | >TP53-K164M MAIYMQSQH | 285   | 1441  |

|                        |       |                        |       |       |
|------------------------|-------|------------------------|-------|-------|
| >TP53-K164M MAIYKQSQH  | 151   | >TP53-K164M MAIYMQSQH  | 81    | 70    |
| >TP53-K164M MAIYKQSQH  | 894   | >TP53-K164M MAIYMQSQH  | 215   | 679   |
| >TP53-K164M MAIYKQSQH  | 583   | >TP53-K164M MAIYMQSQH  | 382   | 201   |
| >TP53-K164M AMAIYKQSQI | 221   | >TP53-K164M AMAIYMQSC  | 144   | 77    |
| >TP53-K164M AMAIYKQSQI | 2136  | >TP53-K164M AMAIYMQSC  | 462   | 1674  |
| >TP53-K164M AMAIYKQS   | 3226  | >TP53-K164M AMAIYMQS   | 337   | 2889  |
| >TP53-K164M AMAIYKQSQ  | 2444  | >TP53-K164M AMAIYMQSC  | 196   | 2248  |
| >TP53-K164M AMAIYKQSQI | 161   | >TP53-K164M AMAIYMQSC  | 43    | 118   |
| >TP53-K164M AMAIYKQS   | 3937  | >TP53-K164M AMAIYMQS   | 494   | 3443  |
| >TP53-K164M AMAIYKQSQI | 732   | >TP53-K164M AMAIYMQSC  | 142   | 590   |
| >TP53-K164M AMAIYKQSQI | 199   | >TP53-K164M AMAIYMQSC  | 128   | 71    |
| >TP53-K164M AMAIYKQSQI | 283   | >TP53-K164M AMAIYMQSC  | 183   | 100   |
| >TP53-K164M AMAIYKQSQ  | 69    | >TP53-K164M AMAIYMQSC  | 48    | 21    |
| >TP53-K164M AMAIYKQSQI | 49    | >TP53-K164M AMAIYMQSC  | 39    | 10    |
| >TP53-K164M AMAIYKQSQI | 55    | >TP53-K164M AMAIYMQSC  | 39    | 16    |
| >TP53-K164M AMAIYKQSQI | 69    | >TP53-K164M AMAIYMQSC  | 47    | 22    |
| >TP53-K164M AMAIYKQSQI | 1491  | >TP53-K164M AMAIYMQSC  | 353   | 1138  |
| >TP53-K164M RAMAIYKQS  | 2875  | >TP53-K164M RAMAIYMQS  | 369   | 2506  |
| >TP53-K164M RAMAIYKQSC | 354   | >TP53-K164M RAMAIYMQS  | 445   | 91    |
| >TP53-K164M RAMAIYKQSC | 1142  | >TP53-K164M RAMAIYMQS  | 229   | 913   |
| >TP53-K164M RAMAIYKQSC | 375   | >TP53-K164M RAMAIYMQS  | 174   | 201   |
| >TP53-K164M VRAMAIYK   | 4527  | >TP53-K164M VRAMAIYM   | 422   | 4105  |
| >TP53-K164M VRAMAIYK   | 159   | >TP53-K164M VRAMAIYM   | 145   | 14    |
| >TP53-K164M RVRAMAIYK  | 28    | >TP53-K164M RVRAMAIYM  | 4371  | 4343  |
| >TP53-K164M RVRAMAIYK  | 20    | >TP53-K164M RVRAMAIYM  | 10003 | 9983  |
| >TP53-K164M RVRAMAIYK  | 3     | >TP53-K164M RVRAMAIYM  | 3     | 0     |
| >TP53-K164M RVRAMAIYK  | 10    | >TP53-K164M RVRAMAIYM  | 9     | 1     |
| >TP53-K164M RVRAMAIYK  | 9     | >TP53-K164M RVRAMAIYM  | 5     | 4     |
| >TP53-K164M RVRAMAIYK  | 18    | >TP53-K164M RVRAMAIYM  | 2229  | 2211  |
| >TP53-K164M RVRAMAIYK  | 16095 | >TP53-K164M RVRAMAIYM  | 40    | 16055 |
| >TP53-K164M RVRAMAIYK  | 16682 | >TP53-K164M RVRAMAIYM  | 356   | 16326 |
| >TP53-K164M RVRAMAIYK  | 11100 | >TP53-K164M RVRAMAIYM  | 17    | 11083 |
| >TP53-K164M RVRAMAIYK  | 5863  | >TP53-K164M RVRAMAIYM  | 27    | 5836  |
| >TP53-K164M RVRAMAIYK  | 156   | >TP53-K164M RVRAMAIYM  | 10016 | 9860  |
| >TP53-K164M TRVRAMAIYK | 15837 | >TP53-K164M TRVRAMAIYM | 432   | 15405 |
| >TP53-K164M TRVRAMAIYK | 1215  | >TP53-K164M TRVRAMAIYM | 418   | 797   |
| >TP53-K164M KQSQHMTEV  | 82    | >TP53-K164M NQSQHMTEV  | 893   | 811   |
| >TP53-K164M KQSQHMTEV  | 51    | >TP53-K164M NQSQHMTEV  | 111   | 60    |
| >TP53-K164M KQSQHMTEV  | 298   | >TP53-K164M NQSQHMTEV  | 687   | 389   |
| >TP53-K164M KQSQHMTEV  | 9     | >TP53-K164M NQSQHMTEV  | 17    | 8     |
| >TP53-K164M KQSQHMTEV  | 273   | >TP53-K164M NQSQHMTEV  | 436   | 163   |
| >TP53-K164M KQSQHMTEV  | 10    | >TP53-K164M NQSQHMTEV  | 23    | 13    |
| >TP53-K164M KQSQHMTEV  | 426   | >TP53-K164M NQSQHMTEV  | 3146  | 2720  |

|                        |      |                        |       |       |
|------------------------|------|------------------------|-------|-------|
| >TP53-K164M KQSQHMTEV  | 35   | >TP53-K164M NQSQHMTEV  | 1256  | 1221  |
| >TP53-K164M KQSQHMTEV  | 222  | >TP53-K164M NQSQHMTEV  | 688   | 466   |
| >TP53-K164M KQSQHMTEV  | 86   | >TP53-K164M NQSQHMTEV  | 1133  | 1047  |
| >TP53-K164M KQSQHMTEV  | 110  | >TP53-K164M NQSQHMTEV  | 1093  | 983   |
| >TP53-K164M KQSQHMTEV  | 185  | >TP53-K164M NQSQHMTEV  | 2407  | 2222  |
| >TP53-K164M KQSQHMTEV  | 4774 | >TP53-K164M NQSQHMTEV  | 474   | 4300  |
| >TP53-K164M KQSQHMTEV  | 60   | >TP53-K164M NQSQHMTEV  | 485   | 425   |
| >TP53-K164M YKQSQHMTE  | 467  | >TP53-K164M YNQSQHMTE  | 2395  | 1928  |
| >TP53-K164M YKQSQHMTE  | 30   | >TP53-K164M YNQSQHMTE  | 2928  | 2898  |
| >TP53-K164M YKQSQHMTE  | 42   | >TP53-K164M YNQSQHMTE  | 2987  | 2945  |
| >TP53-K164M GTRVRAMAI  | 50   | >TP53-K164M GTRVRAMAI  | 16000 | 15950 |
| >TP53-K164M GTRVRAMAI  | 39   | >TP53-K164M GTRVRAMAI  | 20628 | 20589 |
| >TP53-K164M GTRVRAMAI  | 3    | >TP53-K164M GTRVRAMAI  | 164   | 161   |
| >TP53-K164M GTRVRAMAI  | 115  | >TP53-K164M GTRVRAMAI  | 11900 | 11785 |
| >TP53-K164M GTRVRAMAI  | 269  | >TP53-K164M GTRVRAMAI  | 7956  | 7687  |
| >TP53-K164M IYKQSQHM   | 510  | >TP53-K164M IYNQSQHM   | 223   | 287   |
| >TP53-K164M IYKQSQHMTI | 402  | >TP53-K164M IYNQSQHMTI | 202   | 200   |
| >TP53-K164M IYKQSQHMTI | 727  | >TP53-K164M IYNQSQHMTI | 203   | 524   |
| >TP53-K164M IYKQSQHM   | 394  | >TP53-K164M IYNQSQHM   | 4816  | 4422  |
| >TP53-K164M AIYKQSQHM  | 91   | >TP53-K164M AIYNQSQHM  | 51    | 40    |
| >TP53-K164M AIYKQSQHM  | 1225 | >TP53-K164M AIYNQSQHM  | 479   | 746   |
| >TP53-K164M AIYKQSQHM  | 662  | >TP53-K164M AIYNQSQHM  | 291   | 371   |
| >TP53-K164M AIYKQSQH   | 349  | >TP53-K164M AIYNQSQH   | 353   | 4     |
| >TP53-K164M AIYKQSQHM  | 62   | >TP53-K164M AIYNQSQHM  | 50    | 12    |
| >TP53-K164M AIYKQSQHM  | 198  | >TP53-K164M AIYNQSQHM  | 153   | 45    |
| >TP53-K164M AIYKQSQHM  | 514  | >TP53-K164M AIYNQSQHM  | 399   | 115   |
| >TP53-K164M MAIYKQSQH  | 2519 | >TP53-K164M MAIYNQSQH  | 111   | 2408  |
| >TP53-K164M MAIYKQSQH  | 633  | >TP53-K164M MAIYNQSQH  | 284   | 349   |
| >TP53-K164M MAIYKQSQ   | 841  | >TP53-K164M MAIYNQSQ   | 369   | 472   |
| >TP53-K164M MAIYKQSQH  | 526  | >TP53-K164M MAIYNQSQH  | 200   | 326   |
| >TP53-K164M MAIYKQSQH  | 672  | >TP53-K164M MAIYNQSQH  | 356   | 316   |
| >TP53-K164M MAIYKQSQH  | 226  | >TP53-K164M MAIYNQSQH  | 152   | 74    |
| >TP53-K164M MAIYKQSQH  | 205  | >TP53-K164M MAIYNQSQH  | 76    | 129   |
| >TP53-K164M MAIYKQSQH  | 20   | >TP53-K164M MAIYNQSQH  | 21    | 1     |
| >TP53-K164M MAIYKQSQH  | 1726 | >TP53-K164M MAIYNQSQH  | 327   | 1399  |
| >TP53-K164M MAIYKQSQH  | 151  | >TP53-K164M MAIYNQSQH  | 90    | 61    |
| >TP53-K164M AMAIYKQSQI | 221  | >TP53-K164M AMAIYNQSQ  | 313   | 92    |
| >TP53-K164M AMAIYKQS   | 3226 | >TP53-K164M AMAIYNQS   | 256   | 2970  |
| >TP53-K164M AMAIYKQSQ  | 2444 | >TP53-K164M AMAIYNQSQ  | 348   | 2096  |
| >TP53-K164M AMAIYKQSQI | 161  | >TP53-K164M AMAIYNQSQ  | 53    | 108   |
| >TP53-K164M AMAIYKQSQI | 732  | >TP53-K164M AMAIYNQSQ  | 321   | 411   |
| >TP53-K164M AMAIYKQSQI | 199  | >TP53-K164M AMAIYNQSQ  | 133   | 66    |
| >TP53-K164M AMAIYKQSQI | 283  | >TP53-K164M AMAIYNQSQ  | 194   | 89    |

|                       |       |                       |       |       |
|-----------------------|-------|-----------------------|-------|-------|
| >TP53-K164MAMAIYKQSQ  | 69    | >TP53-K164MAMAIYNQSQ  | 70    | 1     |
| >TP53-K164MAMAIYKQSQI | 49    | >TP53-K164MAMAIYNQSQ  | 43    | 6     |
| >TP53-K164MAMAIYKQSQI | 55    | >TP53-K164MAMAIYNQSQ  | 38    | 17    |
| >TP53-K164MAMAIYKQSQI | 69    | >TP53-K164MAMAIYNQSQ  | 39    | 30    |
| >TP53-K164MRAMAIYKQSC | 354   | >TP53-K164MRAMAIYNQSI | 591   | 237   |
| >TP53-K164MRAMAIYKQSC | 375   | >TP53-K164MRAMAIYNQSI | 302   | 73    |
| >TP53-K164MVRAMAIYK   | 159   | >TP53-K164MVRAMAIYN   | 5156  | 4997  |
| >TP53-K164MRVRAMAIYK  | 28    | >TP53-K164MRVRAMAIYN  | 5245  | 5217  |
| >TP53-K164MRVRAMAIYK  | 20    | >TP53-K164MRVRAMAIYN  | 11186 | 11166 |
| >TP53-K164MRVRAMAIYK  | 3     | >TP53-K164MRVRAMAIYN  | 7     | 4     |
| >TP53-K164MRVRAMAIYKC | 10    | >TP53-K164MRVRAMAIYNC | 7     | 3     |
| >TP53-K164MRVRAMAIYKC | 9     | >TP53-K164MRVRAMAIYNC | 6     | 3     |
| >TP53-K164MRVRAMAIYK  | 18    | >TP53-K164MRVRAMAIYN  | 3144  | 3126  |
| >TP53-K164MRVRAMAIYK  | 156   | >TP53-K164MRVRAMAIYN  | 13385 | 13229 |
| >TP53-K164CQSQQHMTEV  | 82    | >TP53-K164CQSQQHMTEV  | 1229  | 1147  |
| >TP53-K164CQSQQHMTEV  | 51    | >TP53-K164CQSQQHMTEV  | 129   | 78    |
| >TP53-K164CQSQQHMTEV  | 298   | >TP53-K164CQSQQHMTEV  | 641   | 343   |
| >TP53-K164CQSQQHMTEV  | 9     | >TP53-K164CQSQQHMTEV  | 24    | 15    |
| >TP53-K164CQSQQHMTEV  | 273   | >TP53-K164CQSQQHMTEV  | 554   | 281   |
| >TP53-K164CQSQQHMTEV  | 10    | >TP53-K164CQSQQHMTEV  | 24    | 14    |
| >TP53-K164CQSQQHMTEV  | 426   | >TP53-K164CQSQQHMTEV  | 3363  | 2937  |
| >TP53-K164CQSQQHMTEV  | 35    | >TP53-K164CQSQQHMTEV  | 802   | 767   |
| >TP53-K164CQSQQHMTEV  | 222   | >TP53-K164CQSQQHMTEV  | 387   | 165   |
| >TP53-K164CQSQQHMTEV  | 86    | >TP53-K164CQSQQHMTEV  | 257   | 171   |
| >TP53-K164CQSQQHMTEV  | 110   | >TP53-K164CQSQQHMTEV  | 277   | 167   |
| >TP53-K164CQSQQHMTEV  | 185   | >TP53-K164CQSQQHMTEV  | 643   | 458   |
| >TP53-K164CQSQQHMTEV  | 60    | >TP53-K164CQSQQHMTEV  | 290   | 230   |
| >TP53-K164CYKQSQHMTE  | 14705 | >TP53-K164CYKQSQHMTE  | 222   | 14483 |
| >TP53-K164CYKQSQHMTE  | 10084 | >TP53-K164CYKQSQHMTE  | 288   | 9796  |
| >TP53-K164CYKQSQHMTE  | 9718  | >TP53-K164CYKQSQHMTE  | 490   | 9228  |
| >TP53-K164CYKQSQHMTE  | 5412  | >TP53-K164CYKQSQHMTE  | 113   | 5299  |
| >TP53-K164CYKQSQHMTE  | 8671  | >TP53-K164CYKQSQHMTE  | 95    | 8576  |
| >TP53-K164CYKQSQHMTE  | 5236  | >TP53-K164CYKQSQHMTE  | 213   | 5023  |
| >TP53-K164CYKQSQHMTE  | 3907  | >TP53-K164CYKQSQHMTE  | 32    | 3875  |
| >TP53-K164CYKQSQHMTE  | 1636  | >TP53-K164CYKQSQHMTE  | 44    | 1592  |
| >TP53-K164CYKQSQHMTE  | 2428  | >TP53-K164CYKQSQHMTE  | 74    | 2354  |
| >TP53-K164CYKQSQHMTE  | 6003  | >TP53-K164CYKQSQHMTE  | 63    | 5940  |
| >TP53-K164CYKQSQHMTE  | 4681  | >TP53-K164CYKQSQHMTE  | 44    | 4637  |
| >TP53-K164CYKQSQHMTE  | 8677  | >TP53-K164CYKQSQHMTE  | 319   | 8358  |
| >TP53-K164CYKQSQHMTE  | 10322 | >TP53-K164CYKQSQHMTE  | 441   | 9881  |
| >TP53-K164CYKQSQHMTE  | 467   | >TP53-K164CYKQSQHMTE  | 28    | 439   |
| >TP53-K164CYKQSQHMTE  | 1555  | >TP53-K164CYKQSQHMTE  | 104   | 1451  |
| >TP53-K164CYKQSQHMTE  | 18514 | >TP53-K164CYKQSQHMTE  | 250   | 18264 |

|                       |       |                        |       |       |
|-----------------------|-------|------------------------|-------|-------|
| >TP53-K164CYKQSQHMTE  | 14893 | >TP53-K164C YQQSQHMTE  | 114   | 14779 |
| >TP53-K164CYKQSQHMTE  | 30    | >TP53-K164C YQQSQHMTE  | 29    | 1     |
| >TP53-K164CYKQSQHMTE  | 42    | >TP53-K164C YQQSQHMTE  | 43    | 1     |
| >TP53-K164CYKQSQHMTE  | 945   | >TP53-K164C YQQSQHMTE  | 229   | 716   |
| >TP53-K164CGTRVRAMAI  | 50    | >TP53-K164C GTRVRAMAI  | 14933 | 14883 |
| >TP53-K164CGTRVRAMAI  | 39    | >TP53-K164C GTRVRAMAI  | 21017 | 20978 |
| >TP53-K164CGTRVRAMAI  | 3     | >TP53-K164C GTRVRAMAI  | 36    | 33    |
| >TP53-K164CGTRVRAMAI  | 115   | >TP53-K164C GTRVRAMAI  | 7191  | 7076  |
| >TP53-K164CGTRVRAMAI  | 269   | >TP53-K164C GTRVRAMAI  | 4271  | 4002  |
| >TP53-K164CIYKQSQHM   | 510   | >TP53-K164C IYKQSQHM   | 82    | 428   |
| >TP53-K164CIYKQSQHMTE | 402   | >TP53-K164C IYKQSQHMT  | 82    | 320   |
| >TP53-K164CIYKQSQHMTE | 727   | >TP53-K164C IYKQSQHMT  | 267   | 460   |
| >TP53-K164CIYKQSQHM   | 2436  | >TP53-K164C IYKQSQHM   | 425   | 2011  |
| >TP53-K164CIYKQSQHM   | 561   | >TP53-K164C IYKQSQHM   | 73    | 488   |
| >TP53-K164CIYKQSQHMTE | 864   | >TP53-K164C IYKQSQHMT  | 145   | 719   |
| >TP53-K164CIYKQSQHM   | 394   | >TP53-K164C IYKQSQHM   | 7814  | 7420  |
| >TP53-K164CAIYKQSQHM  | 91    | >TP53-K164C AIYKQSQHM  | 67    | 24    |
| >TP53-K164CAIYKQSQHM  | 662   | >TP53-K164C AIYKQSQHM  | 262   | 400   |
| >TP53-K164CAIYKQSQH   | 349   | >TP53-K164C AIYKQSQH   | 787   | 438   |
| >TP53-K164CAIYKQSQHM  | 804   | >TP53-K164C AIYKQSQHM  | 355   | 449   |
| >TP53-K164CAIYKQSQHM  | 62    | >TP53-K164C AIYKQSQHM  | 50    | 12    |
| >TP53-K164CAIYKQSQHM  | 198   | >TP53-K164C AIYKQSQHM  | 358   | 160   |
| >TP53-K164CAIYKQSQHM  | 514   | >TP53-K164C AIYKQSQHM  | 162   | 352   |
| >TP53-K164CAIYKQSQH   | 633   | >TP53-K164C MAIYKQSQH  | 266   | 367   |
| >TP53-K164CAIYKQSQH   | 526   | >TP53-K164C MAIYKQSQH  | 391   | 135   |
| >TP53-K164CAIYKQSQH   | 226   | >TP53-K164C MAIYKQSQH  | 152   | 74    |
| >TP53-K164CAIYKQSQH   | 205   | >TP53-K164C MAIYKQSQH  | 128   | 77    |
| >TP53-K164CAIYKQSQH   | 20    | >TP53-K164C MAIYKQSQH  | 22    | 2     |
| >TP53-K164CAIYKQSQH   | 1726  | >TP53-K164C MAIYKQSQH  | 309   | 1417  |
| >TP53-K164CAIYKQSQH   | 151   | >TP53-K164C MAIYKQSQH  | 102   | 49    |
| >TP53-K164CAMAIYKQSQ  | 221   | >TP53-K164C AMAIYKQSQ  | 183   | 38    |
| >TP53-K164CAMAIYKQSQ  | 2444  | >TP53-K164C AMAIYKQSQ  | 427   | 2017  |
| >TP53-K164CAMAIYKQSQ  | 161   | >TP53-K164C AMAIYKQSQ  | 58    | 103   |
| >TP53-K164CAMAIYKQSQ  | 732   | >TP53-K164C AMAIYKQSQ  | 393   | 339   |
| >TP53-K164CAMAIYKQSQ  | 199   | >TP53-K164C AMAIYKQSQ  | 135   | 64    |
| >TP53-K164CAMAIYKQSQ  | 283   | >TP53-K164C AMAIYKQSQ  | 148   | 135   |
| >TP53-K164CAMAIYKQS   | 2825  | >TP53-K164C AMAIYKQS   | 395   | 2430  |
| >TP53-K164CAMAIYKQS   | 69    | >TP53-K164C AMAIYKQS   | 37    | 32    |
| >TP53-K164CAMAIYKQSQ  | 49    | >TP53-K164C AMAIYKQSQ  | 32    | 17    |
| >TP53-K164CAMAIYKQSQ  | 55    | >TP53-K164C AMAIYKQSQ  | 44    | 11    |
| >TP53-K164CAMAIYKQSQ  | 69    | >TP53-K164C AMAIYKQSQ  | 49    | 20    |
| >TP53-K164RAMAIYKQSC  | 354   | >TP53-K164C RAMAIYKQSC | 372   | 18    |
| >TP53-K164RAMAIYKQSC  | 1142  | >TP53-K164C RAMAIYKQSC | 493   | 649   |

|                        |       |                        |       |       |
|------------------------|-------|------------------------|-------|-------|
| >TP53-K164C RAMAIYKQSC | 375   | >TP53-K164C RAMAIYQQSI | 344   | 31    |
| >TP53-K164C VRAMAIYK   | 159   | >TP53-K164C VRAMAIYQ   | 4911  | 4752  |
| >TP53-K164C RVRAMAIYK  | 28    | >TP53-K164C RVRAMAIYQ  | 5232  | 5204  |
| >TP53-K164C RVRAMAIYK  | 20    | >TP53-K164C RVRAMAIYQ  | 12746 | 12726 |
| >TP53-K164C RVRAMAIYK  | 3     | >TP53-K164C RVRAMAIYQ  | 4     | 1     |
| >TP53-K164C RVRAMAIYK  | 10    | >TP53-K164C RVRAMAIYQ  | 8     | 2     |
| >TP53-K164C RVRAMAIYK  | 9     | >TP53-K164C RVRAMAIYQ  | 6     | 3     |
| >TP53-K164C RVRAMAIYK  | 18    | >TP53-K164C RVRAMAIYQ  | 1208  | 1190  |
| >TP53-K164C RVRAMAIYK  | 156   | >TP53-K164C RVRAMAIYQ  | 2027  | 1871  |
| >TP53-K164F KQSQHMTEV  | 82    | >TP53-K164F RQSQHMTEV  | 227   | 145   |
| >TP53-K164F KQSQHMTEV  | 51    | >TP53-K164F RQSQHMTEV  | 118   | 67    |
| >TP53-K164F KQSQHMTEV  | 298   | >TP53-K164F RQSQHMTEV  | 381   | 83    |
| >TP53-K164F KQSQHMTEV  | 9     | >TP53-K164F RQSQHMTEV  | 9     | 0     |
| >TP53-K164F KQSQHMTEV  | 273   | >TP53-K164F RQSQHMTEV  | 287   | 14    |
| >TP53-K164F KQSQHMTEV  | 10    | >TP53-K164F RQSQHMTEV  | 9     | 1     |
| >TP53-K164F KQSQHMTEV  | 426   | >TP53-K164F RQSQHMTEV  | 433   | 7     |
| >TP53-K164F KQSQHMTEV  | 35    | >TP53-K164F RQSQHMTEV  | 34    | 1     |
| >TP53-K164F KQSQHMTEV  | 541   | >TP53-K164F RQSQHMTEV  | 191   | 350   |
| >TP53-K164F KQSQHMTEV  | 222   | >TP53-K164F RQSQHMTEV  | 100   | 122   |
| >TP53-K164F KQSQHMTEV  | 86    | >TP53-K164F RQSQHMTEV  | 50    | 36    |
| >TP53-K164F KQSQHMTEV  | 110   | >TP53-K164F RQSQHMTEV  | 65    | 45    |
| >TP53-K164F KQSQHMTEV  | 185   | >TP53-K164F RQSQHMTEV  | 96    | 89    |
| >TP53-K164F KQSQHMTEV  | 863   | >TP53-K164F RQSQHMTEV  | 462   | 401   |
| >TP53-K164F KQSQHMTEV  | 60    | >TP53-K164F RQSQHMTEV  | 101   | 41    |
| >TP53-K164F YKQSQHMTE  | 467   | >TP53-K164F YRQSQHMTE  | 1045  | 578   |
| >TP53-K164F YKQSQHMTE  | 30    | >TP53-K164F YRQSQHMTE  | 185   | 155   |
| >TP53-K164F YKQSQHMTE  | 42    | >TP53-K164F YRQSQHMTE  | 214   | 172   |
| >TP53-K164F YKQSQHMTE  | 11534 | >TP53-K164F YRQSQHMTE  | 436   | 11098 |
| >TP53-K164F YKQSQHMTE  | 945   | >TP53-K164F YRQSQHMTE  | 292   | 653   |
| >TP53-K164F GTRVRAMAI  | 50    | >TP53-K164F GTRVRAMAI  | 439   | 389   |
| >TP53-K164F GTRVRAMAI  | 39    | >TP53-K164F GTRVRAMAI  | 633   | 594   |
| >TP53-K164F GTRVRAMAI  | 3     | >TP53-K164F GTRVRAMAI  | 15    | 12    |
| >TP53-K164F GTRVRAMAI  | 115   | >TP53-K164F GTRVRAMAI  | 14    | 101   |
| >TP53-K164F GTRVRAMAI  | 4835  | >TP53-K164F GTRVRAMAI  | 241   | 4594  |
| >TP53-K164F GTRVRAMAI  | 671   | >TP53-K164F GTRVRAMAI  | 190   | 481   |
| >TP53-K164F GTRVRAMAI  | 269   | >TP53-K164F GTRVRAMAI  | 419   | 150   |
| >TP53-K164F IYKQSQHMTI | 402   | >TP53-K164F IYRQSQHMTI | 721   | 319   |
| >TP53-K164F IYKQSQHM   | 394   | >TP53-K164F IYRQSQHM   | 60    | 334   |
| >TP53-K164F IYKQSQHMTI | 1709  | >TP53-K164F IYRQSQHMTI | 281   | 1428  |
| >TP53-K164F AIYKQSQHM  | 91    | >TP53-K164F AIYRQSQHM  | 48    | 43    |
| >TP53-K164F AIYKQSQHM  | 662   | >TP53-K164F AIYRQSQHM  | 333   | 329   |
| >TP53-K164F AIYKQSQH   | 349   | >TP53-K164F AIYRQSQH   | 274   | 75    |
| >TP53-K164F AIYKQSQHM  | 804   | >TP53-K164F AIYRQSQHM  | 406   | 398   |

|                        |      |                        |      |      |
|------------------------|------|------------------------|------|------|
| >TP53-K164F AIYKQSQHM  | 750  | >TP53-K164F AIYRQSQHM  | 298  | 452  |
| >TP53-K164F AIYKQSQHM  | 62   | >TP53-K164F AIYRQSQHM  | 74   | 12   |
| >TP53-K164F AIYKQSQHM  | 198  | >TP53-K164F AIYRQSQHM  | 204  | 6    |
| >TP53-K164F MAIYKQSQ   | 841  | >TP53-K164F MAIYRQSQ   | 453  | 388  |
| >TP53-K164F MAIYKQSQH  | 526  | >TP53-K164F MAIYRQSQH  | 283  | 243  |
| >TP53-K164F MAIYKQSQH  | 226  | >TP53-K164F MAIYRQSQH  | 176  | 50   |
| >TP53-K164F MAIYKQSQH  | 205  | >TP53-K164F MAIYRQSQH  | 129  | 76   |
| >TP53-K164F MAIYKQSQH  | 20   | >TP53-K164F MAIYRQSQH  | 22   | 2    |
| >TP53-K164F MAIYKQSQH  | 151  | >TP53-K164F MAIYRQSQH  | 134  | 17   |
| >TP53-K164F MAIYKQSQH  | 583  | >TP53-K164F MAIYRQSQH  | 389  | 194  |
| >TP53-K164F AMAIYKQSQ  | 221  | >TP53-K164F AMAIYRQSQ  | 174  | 47   |
| >TP53-K164F AMAIYKQSQ  | 161  | >TP53-K164F AMAIYRQSQ  | 149  | 12   |
| >TP53-K164F AMAIYKQSQ  | 199  | >TP53-K164F AMAIYRQSQ  | 338  | 139  |
| >TP53-K164F AMAIYKQSQ  | 283  | >TP53-K164F AMAIYRQSQ  | 467  | 184  |
| >TP53-K164F AMAIYKQSQ  | 69   | >TP53-K164F AMAIYRQSQ  | 71   | 2    |
| >TP53-K164F AMAIYKQSQ  | 49   | >TP53-K164F AMAIYRQSQ  | 44   | 5    |
| >TP53-K164F AMAIYKQSQ  | 55   | >TP53-K164F AMAIYRQSQ  | 46   | 9    |
| >TP53-K164F AMAIYKQSQ  | 69   | >TP53-K164F AMAIYRQSQ  | 43   | 26   |
| >TP53-K164F RAMAIYKQSC | 354  | >TP53-K164F RAMAIYRQSC | 449  | 95   |
| >TP53-K164F RAMAIYKQSC | 375  | >TP53-K164F RAMAIYRQSC | 321  | 54   |
| >TP53-K164F VRAMAIYK   | 159  | >TP53-K164F VRAMAIYR   | 336  | 177  |
| >TP53-K164F VRAMAIYK   | 5173 | >TP53-K164F VRAMAIYR   | 194  | 4979 |
| >TP53-K164F RVRAMAIYK  | 28   | >TP53-K164F RVRAMAIYR  | 56   | 28   |
| >TP53-K164F RVRAMAIYK  | 20   | >TP53-K164F RVRAMAIYR  | 145  | 125  |
| >TP53-K164F RVRAMAIYK  | 3    | >TP53-K164F RVRAMAIYR  | 4    | 1    |
| >TP53-K164F RVRAMAIYK  | 10   | >TP53-K164F RVRAMAIYR  | 10   | 0    |
| >TP53-K164F RVRAMAIYK  | 9    | >TP53-K164F RVRAMAIYR  | 7    | 2    |
| >TP53-K164F RVRAMAIYK  | 18   | >TP53-K164F RVRAMAIYR  | 7    | 11   |
| >TP53-K164F RVRAMAIYK  | 588  | >TP53-K164F RVRAMAIYR  | 130  | 458  |
| >TP53-K164F RVRAMAIYK  | 156  | >TP53-K164F RVRAMAIYR  | 24   | 132  |
| >TP53-K164F TRVRAMAIYk | 4341 | >TP53-K164F TRVRAMAIYF | 361  | 3980 |
| >TP53-K164F TRVRAMAIYk | 8393 | >TP53-K164F TRVRAMAIYF | 468  | 7925 |
| >TP53-K164F TRVRAMAIYk | 765  | >TP53-K164F TRVRAMAIYF | 253  | 512  |
| >TP53-K164F TRVRAMAIYk | 733  | >TP53-K164F TRVRAMAIYF | 491  | 242  |
| >TP53-K164F TRVRAMAIYk | 4141 | >TP53-K164F TRVRAMAIYF | 226  | 3915 |
| >TP53-K164T KQSQHMTEV  | 82   | >TP53-K164T KQSQHMTEV  | 471  | 389  |
| >TP53-K164T KQSQHMTEV  | 51   | >TP53-K164T KQSQHMTEV  | 108  | 57   |
| >TP53-K164T KQSQHMTEV  | 298  | >TP53-K164T KQSQHMTEV  | 521  | 223  |
| >TP53-K164T KQSQHMTEV  | 9    | >TP53-K164T KQSQHMTEV  | 14   | 5    |
| >TP53-K164T KQSQHMTEV  | 273  | >TP53-K164T KQSQHMTEV  | 261  | 12   |
| >TP53-K164T KQSQHMTEV  | 10   | >TP53-K164T KQSQHMTEV  | 16   | 6    |
| >TP53-K164T KQSQHMTEV  | 426  | >TP53-K164T KQSQHMTEV  | 2140 | 1714 |
| >TP53-K164T KQSQHMTEV  | 35   | >TP53-K164T KQSQHMTEV  | 336  | 301  |



|                       |       |                       |       |       |
|-----------------------|-------|-----------------------|-------|-------|
| >TP53-K164TKQSQHMTEV  | 222   | >TP53-K164TTQSQHMTEV  | 444   | 222   |
| >TP53-K164TKQSQHMTEV  | 86    | >TP53-K164TTQSQHMTEV  | 709   | 623   |
| >TP53-K164TKQSQHMTEV  | 110   | >TP53-K164TTQSQHMTEV  | 701   | 591   |
| >TP53-K164TKQSQHMTEV  | 185   | >TP53-K164TTQSQHMTEV  | 1791  | 1606  |
| >TP53-K164TKQSQHMTEV  | 4774  | >TP53-K164TTQSQHMTEV  | 439   | 4335  |
| >TP53-K164TKQSQHMTEV  | 60    | >TP53-K164TTQSQHMTEV  | 490   | 430   |
| >TP53-K164TYKQSQHMTE  | 10084 | >TP53-K164TYTQSQHMTE  | 466   | 9618  |
| >TP53-K164TYKQSQHMTE  | 5412  | >TP53-K164TYTQSQHMTE  | 116   | 5296  |
| >TP53-K164TYKQSQHMTE  | 8671  | >TP53-K164TYTQSQHMTE  | 292   | 8379  |
| >TP53-K164TYKQSQHMTE  | 5236  | >TP53-K164TYTQSQHMTE  | 259   | 4977  |
| >TP53-K164TYKQSQHMTE  | 3907  | >TP53-K164TYTQSQHMTE  | 446   | 3461  |
| >TP53-K164TYKQSQHMTE  | 1636  | >TP53-K164TYTQSQHMTE  | 31    | 1605  |
| >TP53-K164TYKQSQHMTE  | 2428  | >TP53-K164TYTQSQHMTE  | 53    | 2375  |
| >TP53-K164TYKQSQHMTE  | 6003  | >TP53-K164TYTQSQHMTE  | 267   | 5736  |
| >TP53-K164TYKQSQHMTE  | 4681  | >TP53-K164TYTQSQHMTE  | 179   | 4502  |
| >TP53-K164TYKQSQHMTE  | 8677  | >TP53-K164TYTQSQHMTE  | 395   | 8282  |
| >TP53-K164TYKQSQHMTE  | 467   | >TP53-K164TYTQSQHMTE  | 9     | 458   |
| >TP53-K164TYKQSQHMTE  | 1555  | >TP53-K164TYTQSQHMTE  | 30    | 1525  |
| >TP53-K164TYKQSQHMTE  | 23650 | >TP53-K164TYTQSQHMTE  | 387   | 23263 |
| >TP53-K164TYKQSQHMTE  | 12445 | >TP53-K164TYTQSQHMTE  | 72    | 12373 |
| >TP53-K164TYKQSQHMTE  | 8990  | >TP53-K164TYTQSQHMTE  | 34    | 8956  |
| >TP53-K164TYKQSQHMTE  | 15560 | >TP53-K164TYTQSQHMTE  | 160   | 15400 |
| >TP53-K164TYKQSQHMTE  | 30    | >TP53-K164TYTQSQHMTE  | 1374  | 1344  |
| >TP53-K164TYKQSQHMTE  | 42    | >TP53-K164TYTQSQHMTE  | 1459  | 1417  |
| >TP53-K164TYKQSQHMTE  | 26285 | >TP53-K164TYTQSQHMTE  | 218   | 26067 |
| >TP53-K164TYKQSQHMTE  | 6037  | >TP53-K164TYTQSQHMTE  | 40    | 5997  |
| >TP53-K164TYKQSQHMTE  | 7399  | >TP53-K164TYTQSQHMTE  | 52    | 7347  |
| >TP53-K164TGTRVRAMAI\ | 50    | >TP53-K164TGTRVRAMAI\ | 17816 | 17766 |
| >TP53-K164TGTRVRAMAI\ | 39    | >TP53-K164TGTRVRAMAI\ | 24570 | 24531 |
| >TP53-K164TGTRVRAMAI\ | 3     | >TP53-K164TGTRVRAMAI\ | 68    | 65    |
| >TP53-K164TGTRVRAMAI\ | 115   | >TP53-K164TGTRVRAMAI\ | 13624 | 13509 |
| >TP53-K164TGTRVRAMAI\ | 269   | >TP53-K164TGTRVRAMAI\ | 9380  | 9111  |
| >TP53-K164TIYKQSQHM   | 510   | >TP53-K164TIYTQSQHM   | 202   | 308   |
| >TP53-K164TIYKQSQHMTI | 402   | >TP53-K164TIYTQSQHMTI | 195   | 207   |
| >TP53-K164TIYKQSQHMTI | 727   | >TP53-K164TIYTQSQHMTI | 126   | 601   |
| >TP53-K164TIYKQSQHM   | 561   | >TP53-K164TIYTQSQHM   | 274   | 287   |
| >TP53-K164TIYKQSQHMTI | 864   | >TP53-K164TIYTQSQHMTI | 487   | 377   |
| >TP53-K164TIYKQSQHM   | 394   | >TP53-K164TIYTQSQHM   | 8608  | 8214  |
| >TP53-K164TAIYKQSQHM  | 91    | >TP53-K164TAIYTQSQHM  | 64    | 27    |
| >TP53-K164TAIYKQSQH   | 349   | >TP53-K164TAIYTQSQH   | 362   | 13    |
| >TP53-K164TAIYKQSQHM  | 804   | >TP53-K164TAIYTQSQHM  | 370   | 434   |
| >TP53-K164TAIYKQSQHM  | 62    | >TP53-K164TAIYTQSQHM  | 92    | 30    |
| >TP53-K164TAIYKQSQHM  | 198   | >TP53-K164TAIYTQSQHM  | 187   | 11    |

|                        |       |                        |       |       |
|------------------------|-------|------------------------|-------|-------|
| >TP53-K164T AIYKQSQHM  | 514   | >TP53-K164T AIYTQSQHM  | 425   | 89    |
| >TP53-K164T MAIYKQSQHI | 633   | >TP53-K164T MAIYTQSQHI | 377   | 256   |
| >TP53-K164T MAIYKQSQ   | 841   | >TP53-K164T MAIYTQSQ   | 300   | 541   |
| >TP53-K164T MAIYKQSQH  | 526   | >TP53-K164T MAIYTQSQH  | 204   | 322   |
| >TP53-K164T MAIYKQSQHI | 226   | >TP53-K164T MAIYTQSQHI | 132   | 94    |
| >TP53-K164T MAIYKQSQHI | 205   | >TP53-K164T MAIYTQSQHI | 50    | 155   |
| >TP53-K164T MAIYKQSQHI | 20    | >TP53-K164T MAIYTQSQHI | 18    | 2     |
| >TP53-K164T MAIYKQSQH  | 1726  | >TP53-K164T MAIYTQSQH  | 466   | 1260  |
| >TP53-K164T MAIYKQSQHI | 151   | >TP53-K164T MAIYTQSQHI | 57    | 94    |
| >TP53-K164T MAIYKQSQH  | 894   | >TP53-K164T MAIYTQSQH  | 213   | 681   |
| >TP53-K164T AMAIYKQSQI | 221   | >TP53-K164T AMAIYTQSQI | 232   | 11    |
| >TP53-K164T AMAIYKQSQI | 2136  | >TP53-K164T AMAIYTQSQI | 471   | 1665  |
| >TP53-K164T AMAIYKQS   | 3226  | >TP53-K164T AMAIYTQS   | 202   | 3024  |
| >TP53-K164T AMAIYKQSQ  | 2444  | >TP53-K164T AMAIYTQSQ  | 171   | 2273  |
| >TP53-K164T AMAIYKQSQI | 161   | >TP53-K164T AMAIYTQSQI | 39    | 122   |
| >TP53-K164T AMAIYKQS   | 3937  | >TP53-K164T AMAIYTQS   | 397   | 3540  |
| >TP53-K164T AMAIYKQSQI | 732   | >TP53-K164T AMAIYTQSQI | 158   | 574   |
| >TP53-K164T AMAIYKQSQI | 199   | >TP53-K164T AMAIYTQSQI | 121   | 78    |
| >TP53-K164T AMAIYKQSQI | 283   | >TP53-K164T AMAIYTQSQI | 134   | 149   |
| >TP53-K164T AMAIYKQS   | 2825  | >TP53-K164T AMAIYTQS   | 485   | 2340  |
| >TP53-K164T AMAIYKQSQ  | 69    | >TP53-K164T AMAIYTQSQ  | 28    | 41    |
| >TP53-K164T AMAIYKQSQI | 49    | >TP53-K164T AMAIYTQSQI | 33    | 16    |
| >TP53-K164T AMAIYKQSQI | 55    | >TP53-K164T AMAIYTQSQI | 37    | 18    |
| >TP53-K164T AMAIYKQSQI | 69    | >TP53-K164T AMAIYTQSQI | 35    | 34    |
| >TP53-K164T RAMAIYKQSC | 354   | >TP53-K164T RAMAIYTQSC | 289   | 65    |
| >TP53-K164T RAMAIYKQSC | 1142  | >TP53-K164T RAMAIYTQSC | 250   | 892   |
| >TP53-K164T RAMAIYKQSC | 375   | >TP53-K164T RAMAIYTQSC | 127   | 248   |
| >TP53-K164T VRAMAIYK   | 159   | >TP53-K164T VRAMAIYT   | 4173  | 4014  |
| >TP53-K164T RVRAMAIYK  | 28    | >TP53-K164T RVRAMAIYT  | 6588  | 6560  |
| >TP53-K164T RVRAMAIYK  | 20    | >TP53-K164T RVRAMAIYT  | 15892 | 15872 |
| >TP53-K164T RVRAMAIYK  | 3     | >TP53-K164T RVRAMAIYT  | 5     | 2     |
| >TP53-K164T RVRAMAIYKC | 10    | >TP53-K164T RVRAMAIYTC | 7     | 3     |
| >TP53-K164T RVRAMAIYKC | 9     | >TP53-K164T RVRAMAIYTC | 11    | 2     |
| >TP53-K164T RVRAMAIYK  | 18    | >TP53-K164T RVRAMAIYT  | 4357  | 4339  |
| >TP53-K164T RVRAMAIYK  | 156   | >TP53-K164T RVRAMAIYT  | 17569 | 17413 |
| >TP53-K291E KKGEPHHEL  | 167   | >TP53-K291E EKGEPHHEL  | 2742  | 2575  |
| >TP53-K291E RKKGEPHHEL | 62    | >TP53-K291E REKGEPHHEL | 2311  | 2249  |
| >TP53-K291E RKKGEPHHEL | 16835 | >TP53-K291E REKGEPHHEL | 49    | 16786 |
| >TP53-K291E LRKKGEPHHE | 405   | >TP53-K291E LREKGEPHHE | 2887  | 2482  |
| >TP53-K291E LRKKGEPHHE | 321   | >TP53-K291E LREKGEPHHE | 194   | 127   |
| >TP53-K291E RTEEENLRK  | 88    | >TP53-K291E RTEEENLRE  | 25455 | 25367 |
| >TP53-K291E RTEEENLRK  | 126   | >TP53-K291E RTEEENLRE  | 13060 | 12934 |
| >TP53-K291E RTEEENLRKK | 174   | >TP53-K291E RTEEENLREK | 122   | 52    |

|                        |       |                        |       |       |
|------------------------|-------|------------------------|-------|-------|
| >TP53-K291E RRTEENLRK  | 34    | >TP53-K291E RRTEENLRE  | 447   | 413   |
| >TP53-K291E RRTEENLRK  | 71    | >TP53-K291E RRTEENLRE  | 128   | 57    |
| >TP53-K291E RRTEENLRK  | 383   | >TP53-K291E RRTEENLRE  | 769   | 386   |
| >TP53-K291E RRTEENLRK  | 163   | >TP53-K291E RRTEENLRE  | 952   | 789   |
| >TP53-K291E RRTEENLRK  | 634   | >TP53-K291E RRTEENLRE  | 432   | 202   |
| >TP53-K291M KKGEPHHEL  | 167   | >TP53-K291M MKGEPHHEL  | 130   | 37    |
| >TP53-K291M RKKGEPHHEL | 16612 | >TP53-K291M RMKGEPHHE  | 117   | 16495 |
| >TP53-K291M RKKGEPHHEL | 19555 | >TP53-K291M RMKGEPHHE  | 248   | 19307 |
| >TP53-K291M RKKGEPHHEL | 18180 | >TP53-K291M RMKGEPHHE  | 22    | 18158 |
| >TP53-K291M RKKGEPHHEL | 22316 | >TP53-K291M RMKGEPHHE  | 165   | 22151 |
| >TP53-K291M RKKGEPHHEL | 17786 | >TP53-K291M RMKGEPHHE  | 6     | 17780 |
| >TP53-K291M RKKGEPHHEL | 3390  | >TP53-K291M RMKGEPHHE  | 111   | 3279  |
| >TP53-K291M RKKGEPHHEL | 17582 | >TP53-K291M RMKGEPHHE  | 424   | 17158 |
| >TP53-K291M RKKGEPHHEL | 18737 | >TP53-K291M RMKGEPHHE  | 442   | 18295 |
| >TP53-K291M RKKGEPHHEL | 62    | >TP53-K291M RMKGEPHHE  | 140   | 78    |
| >TP53-K291M LRKKGEPHHE | 405   | >TP53-K291M LRMKGEPHH  | 156   | 249   |
| >TP53-K291M LRKKGEPH   | 2726  | >TP53-K291M LRMKGEPH   | 261   | 2465  |
| >TP53-K291M LRKKGEPHHE | 1692  | >TP53-K291M LRMKGEPHH  | 133   | 1559  |
| >TP53-K291M LRKKGEPHHE | 9936  | >TP53-K291M LRMKGEPHH  | 114   | 9822  |
| >TP53-K291M LRKKGEPHHE | 321   | >TP53-K291M LRMKGEPHH  | 82    | 239   |
| >TP53-K291M TEEENLRK   | 2199  | >TP53-K291M TEEENLRM   | 194   | 2005  |
| >TP53-K291M RTEENLRK   | 88    | >TP53-K291M RTEENLRM   | 22429 | 22341 |
| >TP53-K291M RTEENLRKK  | 674   | >TP53-K291M RTEENLRM   | 394   | 280   |
| >TP53-K291M RTEENLRK   | 126   | >TP53-K291M RTEENLRM   | 5222  | 5096  |
| >TP53-K291M RTEENLRKK  | 174   | >TP53-K291M RTEENLRM   | 132   | 42    |
| >TP53-K291M RTEENLRK   | 6448  | >TP53-K291M RTEENLRM   | 6     | 6442  |
| >TP53-K291M RTEENLRK   | 12895 | >TP53-K291M RTEENLRM   | 120   | 12775 |
| >TP53-K291M RRTEENLRK  | 34    | >TP53-K291M RRTEENLRM  | 28    | 6     |
| >TP53-K291M RRTEENLRK  | 71    | >TP53-K291M RRTEENLRM  | 89    | 18    |
| >TP53-K291M RRTEENLRK  | 383   | >TP53-K291M RRTEENLRM  | 130   | 253   |
| >TP53-K291M RRTEENLRK  | 163   | >TP53-K291M RRTEENLRM  | 63    | 100   |
| >TP53-K291M RRTEENLRK  | 634   | >TP53-K291M RRTEENLRM  | 331   | 303   |
| >TP53-K291M KKGEPHHEL  | 167   | >TP53-K291M NKGEPHHEL  | 2350  | 2183  |
| >TP53-K291M RKKGEPHHEL | 62    | >TP53-K291M RNKGEPHHEI | 4486  | 4424  |
| >TP53-K291M LRKKGEPHHE | 405   | >TP53-K291M LRNKGEPHHI | 439   | 34    |
| >TP53-K291M LRKKGEPHHE | 321   | >TP53-K291M LRNKGEPHHI | 409   | 88    |
| >TP53-K291M RTEENLRK   | 88    | >TP53-K291M RTEENLRN   | 24202 | 24114 |
| >TP53-K291M RTEENLRKK  | 674   | >TP53-K291M RTEENLRNK  | 475   | 199   |
| >TP53-K291M RTEENLRK   | 126   | >TP53-K291M RTEENLRN   | 11828 | 11702 |
| >TP53-K291M RTEENLRKK  | 174   | >TP53-K291M RTEENLRNK  | 86    | 88    |
| >TP53-K291M RRTEENLRK  | 34    | >TP53-K291M RRTEENLRN  | 353   | 319   |
| >TP53-K291M RRTEENLRK  | 71    | >TP53-K291M RRTEENLRN  | 101   | 30    |
| >TP53-K291M RRTEENLRK  | 383   | >TP53-K291M RRTEENLRN  | 910   | 527   |

|                        |       |                        |       |       |
|------------------------|-------|------------------------|-------|-------|
| >TP53-K291MRRTEENLRK   | 163   | >TP53-K291MRRTEENLRN   | 618   | 455   |
| >TP53-K291C KKGEPHHEL  | 167   | >TP53-K291C QKGEPHHEL  | 499   | 332   |
| >TP53-K291C RKKGEPHHEL | 3390  | >TP53-K291C RQKGEPHHEI | 453   | 2937  |
| >TP53-K291C RKKGEPHHEL | 18737 | >TP53-K291C RQKGEPHHEI | 370   | 18367 |
| >TP53-K291C RKKGEPHHEL | 62    | >TP53-K291C RQKGEPHHEI | 64    | 2     |
| >TP53-K291C RKKGEPHHEL | 2250  | >TP53-K291C RQKGEPHHEI | 239   | 2011  |
| >TP53-K291C LRKKGEPHHE | 405   | >TP53-K291C LRQKGEPHHI | 870   | 465   |
| >TP53-K291C LRKKGEPHHE | 824   | >TP53-K291C LRQKGEPHHI | 248   | 576   |
| >TP53-K291C LRKKGEPHHE | 321   | >TP53-K291C LRQKGEPHHI | 44    | 277   |
| >TP53-K291C RTEEENLRK  | 88    | >TP53-K291C RTEEENLRQ  | 24040 | 23952 |
| >TP53-K291C RTEEENLRK  | 126   | >TP53-K291C RTEEENLRQ  | 7362  | 7236  |
| >TP53-K291C RTEEENLRKK | 174   | >TP53-K291C RTEEENLRQK | 123   | 51    |
| >TP53-K291C RRTEEENLRK | 34    | >TP53-K291C RRTEEENLRQ | 148   | 114   |
| >TP53-K291C RRTEEENLRK | 71    | >TP53-K291C RRTEEENLRQ | 92    | 21    |
| >TP53-K291C RRTEEENLRK | 383   | >TP53-K291C RRTEEENLRQ | 395   | 12    |
| >TP53-K291C RRTEEENLRK | 163   | >TP53-K291C RRTEEENLRQ | 534   | 371   |
| >TP53-K291F KKGEPHHEL  | 167   | >TP53-K291F RKGEPHHEL  | 89    | 78    |
| >TP53-K291F RKKGEPHHEL | 62    | >TP53-K291F RRKGEPHHEL | 318   | 256   |
| >TP53-K291F RKKGEPHH   | 8794  | >TP53-K291F RRKGEPHH   | 334   | 8460  |
| >TP53-K291F RKKGEPHHEL | 740   | >TP53-K291F RRKGEPHHEL | 15    | 725   |
| >TP53-K291F RKKGEPHHEL | 682   | >TP53-K291F RRKGEPHHEL | 33    | 649   |
| >TP53-K291F RKKGEPHHEL | 1048  | >TP53-K291F RRKGEPHHEL | 33    | 1015  |
| >TP53-K291F LRKKGEPHHE | 405   | >TP53-K291F LRRKGEPHHE | 182   | 223   |
| >TP53-K291F LRKKGEPHHE | 824   | >TP53-K291F LRRKGEPHHE | 319   | 505   |
| >TP53-K291F LRKKGEPHHE | 321   | >TP53-K291F LRRKGEPHHE | 126   | 195   |
| >TP53-K291F RTEEENLRK  | 88    | >TP53-K291F RTEEENLRR  | 2294  | 2206  |
| >TP53-K291F RTEEENLRK  | 126   | >TP53-K291F RTEEENLRR  | 6277  | 6151  |
| >TP53-K291F RTEEENLRKK | 174   | >TP53-K291F RTEEENLRRK | 170   | 4     |
| >TP53-K291F RTEEENLRK  | 5808  | >TP53-K291F RTEEENLRR  | 125   | 5683  |
| >TP53-K291F RRTEEENLRK | 34    | >TP53-K291F RRTEEENLRR | 28    | 6     |
| >TP53-K291F RRTEEENLRK | 71    | >TP53-K291F RRTEEENLRR | 101   | 30    |
| >TP53-K291F RRTEEENLRK | 383   | >TP53-K291F RRTEEENLRR | 261   | 122   |
| >TP53-K291F RRTEEENLRK | 163   | >TP53-K291F RRTEEENLRR | 134   | 29    |
| >TP53-K291F RRTEEENLRK | 7792  | >TP53-K291F RRTEEENLRR | 261   | 7531  |
| >TP53-K291T KKGEPHHEL  | 167   | >TP53-K291T TKGEPHHEL  | 1385  | 1218  |
| >TP53-K291T RKKGEPHH   | 9148  | >TP53-K291T RTKGEPHH   | 191   | 8957  |
| >TP53-K291T RKKGEPHHEL | 3390  | >TP53-K291T RTKGEPHHEL | 19    | 3371  |
| >TP53-K291T RKKGEPHHEL | 10699 | >TP53-K291T RTKGEPHHEL | 391   | 10308 |
| >TP53-K291T RKKGEPHHEL | 17582 | >TP53-K291T RTKGEPHHEL | 277   | 17305 |
| >TP53-K291T RKKGEPHHEL | 62    | >TP53-K291T RTKGEPHHEL | 3051  | 2989  |
| >TP53-K291T RKKGEPHH   | 27347 | >TP53-K291T RTKGEPHH   | 414   | 26933 |
| >TP53-K291T RKKGEPHHEL | 16592 | >TP53-K291T RTKGEPHHEL | 6     | 16586 |
| >TP53-K291T RKKGEPHHEL | 19329 | >TP53-K291T RTKGEPHHEL | 244   | 19085 |

|                        |       |                         |       |       |
|------------------------|-------|-------------------------|-------|-------|
| >TP53-K291T LRKKGEPHHE | 405   | >TP53-K291T LRTKGEPPHE  | 749   | 344   |
| >TP53-K291T LRKKGEPHHE | 321   | >TP53-K291T LRTKGEPPHE  | 236   | 85    |
| >TP53-K291T RTEEENLRK  | 88    | >TP53-K291T RTEEENLRT   | 26566 | 26478 |
| >TP53-K291T RTEEENLRKK | 674   | >TP53-K291T RTEEENLRTK  | 365   | 309   |
| >TP53-K291T RTEEENLRK  | 126   | >TP53-K291T RTEEENLRT   | 10835 | 10709 |
| >TP53-K291T RTEEENLRKK | 174   | >TP53-K291T RTEEENLRTK  | 74    | 100   |
| >TP53-K291T RRTEEENLRK | 34    | >TP53-K291T RRTEEENLRT  | 130   | 96    |
| >TP53-K291T RRTEEENLRK | 71    | >TP53-K291T RRTEEENLRTK | 104   | 33    |
| >TP53-K291T RRTEEENLRK | 383   | >TP53-K291T RRTEEENLRT  | 337   | 46    |
| >TP53-K291T RRTEEENLRK | 163   | >TP53-K291T RRTEEENLRT  | 202   | 39    |
| >TP53-K291T RRTEEENLRK | 634   | >TP53-K291T RRTEEENLRTK | 361   | 273   |
| >TP53-K292E KKGEPHHEL  | 167   | >TP53-K292E KEGEPHHEL   | 4131  | 3964  |
| >TP53-K292E KKGEPHHEL  | 17845 | >TP53-K292E KEGEPHHEL   | 35    | 17810 |
| >TP53-K292E KKGEPHHEL  | 27145 | >TP53-K292E KEGEPHHEL   | 76    | 27069 |
| >TP53-K292E KKGEPHHEL  | 31329 | >TP53-K292E KEGEPHHEL   | 209   | 31120 |
| >TP53-K292E RRTEEENLRK | 71    | >TP53-K292E RRTEEENLRK  | 2110  | 2039  |
| >TP53-K292E RKKGEPHHEL | 62    | >TP53-K292E RKEGEPHHEL  | 1184  | 1122  |
| >TP53-K292E LRKKGEPHHE | 405   | >TP53-K292E LRKEGEPHHE  | 531   | 126   |
| >TP53-K292E LRKKGEPHHE | 321   | >TP53-K292E LRKEGEPHHE  | 410   | 89    |
| >TP53-K292E RTEEENLRKK | 174   | >TP53-K292E RTEEENLRKE  | 14182 | 14008 |
| >TP53-K292E KKGEPHHEL  | 167   | >TP53-K292E KNGEPHHEL   | 6580  | 6413  |
| >TP53-K292E RRTEEENLRK | 71    | >TP53-K292E RRTEEENLRK  | 895   | 824   |
| >TP53-K292E RKKGEPHHEL | 62    | >TP53-K292E RKNGEPHHEI  | 75    | 13    |
| >TP53-K292E LRKKGEPHHE | 405   | >TP53-K292E LRKNGEPHHEI | 327   | 78    |
| >TP53-K292E LRKKGEPHHE | 321   | >TP53-K292E LRKNGEPHHEI | 352   | 31    |
| >TP53-K292E NLRKKGEPH  | 1175  | >TP53-K292E NLRKNGEPH   | 336   | 839   |
| >TP53-K292E RTEEENLRKK | 174   | >TP53-K292E RTEEENLRKN  | 13079 | 12905 |
| >TP53-K292E KKGEPHHEL  | 167   | >TP53-K292E KRGEPPHHEL  | 905   | 738   |
| >TP53-K292E KKGEPHHEL  | 4258  | >TP53-K292E KRGEPPHHEL  | 158   | 4100  |
| >TP53-K292E KKGEPHHEL  | 11152 | >TP53-K292E KRGEPPHHEL  | 218   | 10934 |
| >TP53-K292E RRTEEENLRK | 71    | >TP53-K292E RRTEEENLRK  | 114   | 43    |
| >TP53-K292E RKKGEPHHE  | 928   | >TP53-K292E RKRGEPPH    | 478   | 450   |
| >TP53-K292E RKKGEPHHEL | 62    | >TP53-K292E RKRGEPPHHEL | 31    | 31    |
| >TP53-K292E RKKGEPHHEL | 740   | >TP53-K292E RKRGEPPHHEL | 372   | 368   |
| >TP53-K292E RKKGEPHHEL | 682   | >TP53-K292E RKRGEPPHHEL | 189   | 493   |
| >TP53-K292E RKKGEPHHEL | 1048  | >TP53-K292E RKRGEPPHHEL | 439   | 609   |
| >TP53-K292E LRKKGEPHHE | 405   | >TP53-K292E LRKRGEPPHE  | 382   | 23    |
| >TP53-K292E LRKKGEPHHE | 321   | >TP53-K292E LRKRGEPPHE  | 244   | 77    |
| >TP53-K292E RTEEENLRKK | 174   | >TP53-K292E RTEEENLRKR  | 7581  | 7407  |
| >TP53-K292T KKGEPHHEL  | 2128  | >TP53-K292T KTGEPPHHEL  | 33    | 2095  |
| >TP53-K292T KKGEPHHEL  | 15593 | >TP53-K292T KTGEPPHHEL  | 128   | 15465 |
| >TP53-K292T KKGEPHHEL  | 17060 | >TP53-K292T KTGEPPHHEL  | 154   | 16906 |
| >TP53-K292T KKGEPHHEL  | 167   | >TP53-K292T KTGEPPHHEL  | 5943  | 5776  |

|                        |       |                        |       |       |
|------------------------|-------|------------------------|-------|-------|
| >TP53-K292T KKGEPHHEL  | 20675 | >TP53-K292T KTGEPHHEL  | 13    | 20662 |
| >TP53-K292T KKGEPHHEL  | 18489 | >TP53-K292T KTGEPHHEL  | 468   | 18021 |
| >TP53-K292T KKGEPHHEL  | 29620 | >TP53-K292T KTGEPHHEL  | 105   | 29515 |
| >TP53-K292T RRTEEENLRK | 71    | >TP53-K292T RRTEEENLRK | 676   | 605   |
| >TP53-K292T RKKGEPHHEL | 62    | >TP53-K292T RKTGEPHHEL | 167   | 105   |
| >TP53-K292T LRKKGEPHHE | 405   | >TP53-K292T LRKTGEPHHE | 370   | 35    |
| >TP53-K292T LRKKGEPHHE | 321   | >TP53-K292T LRKTGEPHHE | 336   | 15    |
| >TP53-K292T NLRKKGEPH  | 1175  | >TP53-K292T NLRKTGEPH  | 343   | 832   |
| >TP53-K292T EEENLRKK   | 4628  | >TP53-K292T EEENLRKT   | 412   | 4216  |
| >TP53-K292T RTEEENLRKK | 174   | >TP53-K292T RTEEENLRKT | 12077 | 11903 |
| >TP53-K305E TKRALPNNT  | 31529 | >TP53-K305E TERALPNNT  | 200   | 31329 |
| >TP53-K305E TKRALPNNTS | 32613 | >TP53-K305E TERALPNNTS | 413   | 32200 |
| >TP53-K305E STKRALPN   | 100   | >TP53-K305E STERALPN   | 7879  | 7779  |
| >TP53-K305E STKRALPNN  | 60    | >TP53-K305E STERALPNN  | 6081  | 6021  |
| >TP53-K305E STKRALPNNT | 89    | >TP53-K305E STERALPNNT | 8160  | 8071  |
| >TP53-K305E STKRALPNNT | 46    | >TP53-K305E STERALPNNT | 6284  | 6238  |
| >TP53-K305E PPGSTKRAL  | 44    | >TP53-K305E PPGSTERAL  | 238   | 194   |
| >TP53-K305E LPPGSTKRAL | 296   | >TP53-K305E LPPGSTERAL | 295   | 1     |
| >TP53-K305E LPPGSTKRAL | 75    | >TP53-K305E LPPGSTERAL | 144   | 69    |
| >TP53-K305E LPPGSTKRA  | 99    | >TP53-K305E LPPGSTERA  | 440   | 341   |
| >TP53-K305E ELPPGSTKRA | 98    | >TP53-K305E ELPPGSTERA | 40    | 58    |
| >TP53-K305E ELPPGSTKRA | 151   | >TP53-K305E ELPPGSTERA | 133   | 18    |
| >TP53-K305E ELPPGSTKR  | 321   | >TP53-K305E ELPPGSTER  | 208   | 113   |
| >TP53-K305E HELPPGSTKR | 250   | >TP53-K305E HELPPGSTER | 197   | 53    |
| >TP53-K305E HELPPGSTKR | 437   | >TP53-K305E HELPPGSTER | 968   | 531   |
| >TP53-K305M STKRALPN   | 100   | >TP53-K305M STNRALPN   | 1983  | 1883  |
| >TP53-K305M STKRALPNN  | 60    | >TP53-K305M STNRALPNN  | 1220  | 1160  |
| >TP53-K305M STKRALPNNT | 89    | >TP53-K305M STNRALPNNT | 1975  | 1886  |
| >TP53-K305M STKRALPNNT | 46    | >TP53-K305M STNRALPNNT | 1095  | 1049  |
| >TP53-K305M PPGSTKRAL  | 44    | >TP53-K305M PPGSTNRAL  | 70    | 26    |
| >TP53-K305M LPPGSTKRAL | 296   | >TP53-K305M LPPGSTNRAL | 344   | 48    |
| >TP53-K305M LPPGSTKRAL | 75    | >TP53-K305M LPPGSTNRAL | 149   | 74    |
| >TP53-K305M LPPGSTKRA  | 99    | >TP53-K305M LPPGSTNRA  | 24    | 75    |
| >TP53-K305M LPPGSTKRAL | 592   | >TP53-K305M LPPGSTNRAL | 144   | 448   |
| >TP53-K305M ELPPGSTKRA | 98    | >TP53-K305M ELPPGSTNRA | 55    | 43    |
| >TP53-K305M ELPPGSTKRA | 151   | >TP53-K305M ELPPGSTNRA | 158   | 7     |
| >TP53-K305M ELPPGSTKR  | 321   | >TP53-K305M ELPPGSTNR  | 269   | 52    |
| >TP53-K305M HELPPGSTKR | 250   | >TP53-K305M HELPPGSTNR | 205   | 45    |
| >TP53-K305M HELPPGSTKR | 437   | >TP53-K305M HELPPGSTNR | 341   | 96    |
| >TP53-K305F KRALPNNTSS | 3488  | >TP53-K305F RRALPNNTSS | 477   | 3011  |
| >TP53-K305F KRALPNNT   | 597   | >TP53-K305F RRALPNNT   | 189   | 408   |
| >TP53-K305F KRALPNNTS  | 869   | >TP53-K305F RRALPNNTS  | 317   | 552   |
| >TP53-K305F KRALPNNTSS | 1055  | >TP53-K305F RRALPNNTSS | 287   | 768   |

|                       |       |                        |      |       |
|-----------------------|-------|------------------------|------|-------|
| >TP53-K305FKRALPNNTSS | 1665  | >TP53-K305FRRALPNNTSS  | 314  | 1351  |
| >TP53-K305FSTKRALPN   | 100   | >TP53-K305FSTRRALPN    | 22   | 78    |
| >TP53-K305FSTKRALPNN  | 60    | >TP53-K305FSTRRALPNN   | 15   | 45    |
| >TP53-K305FSTKRALPNNT | 89    | >TP53-K305FSTRRALPNNT  | 20   | 69    |
| >TP53-K305FSTKRALPNNT | 46    | >TP53-K305FSTRRALPNNT  | 13   | 33    |
| >TP53-K305FSTKRALPNNT | 1170  | >TP53-K305FSTRRALPNNT  | 382  | 788   |
| >TP53-K305FPPGSTKRAL  | 44    | >TP53-K305FPPGSTRRAL   | 16   | 28    |
| >TP53-K305FLPPGSTKRAL | 296   | >TP53-K305FLPPGSTRRAL  | 276  | 20    |
| >TP53-K305FLPPGSTKRA  | 3689  | >TP53-K305FLPPGSTARRA  | 449  | 3240  |
| >TP53-K305FLPPGSTKRAL | 75    | >TP53-K305FLPPGSTRRAL  | 65   | 10    |
| >TP53-K305FLPPGSTKRA  | 99    | >TP53-K305FLPPGSTARRA  | 141  | 42    |
| >TP53-K305FLPPGSTKRAL | 592   | >TP53-K305FLPPGSTRRAL  | 291  | 301   |
| >TP53-K305FELPPGSTKRA | 98    | >TP53-K305FELPPGSTARRA | 145  | 47    |
| >TP53-K305FELPPGSTKRA | 151   | >TP53-K305FELPPGSTARRA | 129  | 22    |
| >TP53-K305FELPPGSTK   | 689   | >TP53-K305FELPPGSTRR   | 198  | 491   |
| >TP53-K305FELPPGSTKR  | 321   | >TP53-K305FELPPGSTRR   | 322  | 1     |
| >TP53-K305FHELPPGSTKR | 250   | >TP53-K305FHELPPGSTRR  | 207  | 43    |
| >TP53-K305FHELPPGSTKR | 437   | >TP53-K305FHELPPGSTRR  | 513  | 76    |
| >TP53-K305TKRALPNN    | 10159 | >TP53-K305TTRALPNN     | 412  | 9747  |
| >TP53-K305TKRALPNNT   | 12060 | >TP53-K305TTRALPNNT    | 385  | 11675 |
| >TP53-K305TKRALPNNTS  | 10733 | >TP53-K305TTRALPNNTS   | 178  | 10555 |
| >TP53-K305TKRALPNNTS  | 11127 | >TP53-K305TTRALPNNTS   | 227  | 10900 |
| >TP53-K305STKRALPN    | 100   | >TP53-K305STTRALPN     | 4737 | 4637  |
| >TP53-K305STKRALPNN   | 60    | >TP53-K305STTRALPNN    | 3299 | 3239  |
| >TP53-K305STKRALPNNT  | 89    | >TP53-K305STTRALPNNT   | 4715 | 4626  |
| >TP53-K305STKRALPNNT  | 46    | >TP53-K305STTRALPNNT   | 3066 | 3020  |
| >TP53-K305STKRALPNNT  | 1231  | >TP53-K305STTRALPNNT   | 332  | 899   |
| >TP53-K305STKRALPNNT  | 44    | >TP53-K305STTRALPNNT   | 32   | 12    |
| >TP53-K305STKRALPNNT  | 296   | >TP53-K305STTRALPNNT   | 263  | 33    |
| >TP53-K305STKRALPNNT  | 75    | >TP53-K305STTRALPNNT   | 158  | 83    |
| >TP53-K305STKRALPNNT  | 99    | >TP53-K305STTRALPNNT   | 77   | 22    |
| >TP53-K305STKRALPNNT  | 592   | >TP53-K305STTRALPNNT   | 124  | 468   |
| >TP53-K305STKRALPNNT  | 893   | >TP53-K305STTRALPNNT   | 428  | 465   |
| >TP53-K305STKRALPNNT  | 98    | >TP53-K305STTRALPNNT   | 25   | 73    |
| >TP53-K305STKRALPNNT  | 151   | >TP53-K305STTRALPNNT   | 87   | 64    |
| >TP53-K305STKRALPNNT  | 321   | >TP53-K305STTRALPNNT   | 183  | 138   |
| >TP53-K305STKRALPNNT  | 250   | >TP53-K305STTRALPNNT   | 180  | 70    |
| >TP53-K305STKRALPNNT  | 437   | >TP53-K305STTRALPNNT   | 475  | 38    |
| >TP53-K319EKKKPLDGEY  | 83    | >TP53-K319EKKKPLDGEY   | 1368 | 1285  |
| >TP53-K319EKKKPLDGEY  | 138   | >TP53-K319EKKKPLDGEY   | 1400 | 1262  |
| >TP53-K319EKKKPLDGEYF | 14    | >TP53-K319EKKKPLDGEYF  | 118  | 104   |
| >TP53-K319EKKKPLDGEY  | 315   | >TP53-K319EKKKPLDGEY   | 529  | 214   |
| >TP53-K319EKKKPLDGEY  | 78    | >TP53-K319EKKKPLDGEY   | 2453 | 2375  |

|                        |      |                        |       |       |
|------------------------|------|------------------------|-------|-------|
| >TP53-K319E QPKKKPLDGE | 303  | >TP53-K319E QPEKKPLDGE | 79    | 224   |
| >TP53-K319E QPKKKPLDGE | 812  | >TP53-K319E QPEKKPLDGE | 465   | 347   |
| >TP53-K319E SPQPKKKPL  | 13   | >TP53-K319E SPQPEKKPL  | 60    | 47    |
| >TP53-K319E SPQPKKKPL  | 67   | >TP53-K319E SPQPEKKPL  | 2184  | 2117  |
| >TP53-K319E SSPQPKKKPL | 40   | >TP53-K319E SSPQPEKKPL | 32    | 8     |
| >TP53-K319E SSSPQPKK   | 390  | >TP53-K319E SSSPQPEK   | 757   | 367   |
| >TP53-K319E SSSPQPKK   | 28   | >TP53-K319E SSSPQPEK   | 21    | 7     |
| >TP53-K319E SSSPQPKK   | 70   | >TP53-K319E SSSPQPEKK  | 37    | 33    |
| >TP53-K319E SSSPQPKK   | 73   | >TP53-K319E SSSPQPEK   | 86    | 13    |
| >TP53-K319E SSSPQPKK   | 186  | >TP53-K319E SSSPQPEKK  | 1465  | 1279  |
| >TP53-K319E SSSPQPKKKP | 16   | >TP53-K319E SSSPQPEKKP | 30    | 14    |
| >TP53-K319E SSSPQPKK   | 109  | >TP53-K319E SSSPQPEK   | 97    | 12    |
| >TP53-K319E SSSPQPKK   | 87   | >TP53-K319E SSSPQPEKK  | 93    | 6     |
| >TP53-K319E SSSPQPKKKP | 528  | >TP53-K319E SSSPQPEKKP | 413   | 115   |
| >TP53-K319E TSSSPQPK   | 326  | >TP53-K319E TSSSPQPE   | 21437 | 21111 |
| >TP53-K319E TSSSPQPKK  | 136  | >TP53-K319E TSSSPQPEK  | 252   | 116   |
| >TP53-K319E TSSSPQPK   | 20   | >TP53-K319E TSSSPQPE   | 20035 | 20015 |
| >TP53-K319E TSSSPQPKK  | 33   | >TP53-K319E TSSSPQPEK  | 26    | 7     |
| >TP53-K319E TSSSPQPKK  | 60   | >TP53-K319E TSSSPQPEKK | 31    | 29    |
| >TP53-K319E TSSSPQPK   | 262  | >TP53-K319E TSSSPQPE   | 15893 | 15631 |
| >TP53-K319E TSSSPQPKK  | 733  | >TP53-K319E TSSSPQPEK  | 478   | 255   |
| >TP53-K319E TSSSPQPK   | 121  | >TP53-K319E TSSSPQPE   | 14580 | 14459 |
| >TP53-K319E TSSSPQPKK  | 125  | >TP53-K319E TSSSPQPEK  | 72    | 53    |
| >TP53-K319E TSSSPQPKK  | 208  | >TP53-K319E TSSSPQPEKK | 34    | 174   |
| >TP53-K319E NTSSSPQPK  | 58   | >TP53-K319E NTSSSPQPE  | 24574 | 24516 |
| >TP53-K319E NTSSSPQPKK | 41   | >TP53-K319E NTSSSPQPEK | 33    | 8     |
| >TP53-K319E NTSSSPQPKK | 251  | >TP53-K319E NTSSSPQPEK | 133   | 118   |
| >TP53-K319E NTSSSPQPK  | 339  | >TP53-K319E NTSSSPQPE  | 16019 | 15680 |
| >TP53-K319E NTSSSPQPK  | 37   | >TP53-K319E NTSSSPQPE  | 7605  | 7568  |
| >TP53-K319E NTSSSPQPKK | 28   | >TP53-K319E NTSSSPQPEK | 27    | 1     |
| >TP53-K319E NTSSSPQPKK | 95   | >TP53-K319E NTSSSPQPEK | 30    | 65    |
| >TP53-K319M KKKPLDGEY  | 83   | >TP53-K319M NKKPLDGEY  | 947   | 864   |
| >TP53-K319M KKKPLDGEY  | 138  | >TP53-K319M NKKPLDGEY  | 1224  | 1086  |
| >TP53-K319M KKKPLDGEYF | 14   | >TP53-K319M NKKPLDGEYF | 107   | 93    |
| >TP53-K319M PKKKPLDGEY | 315  | >TP53-K319M PNKKPLDGEY | 369   | 54    |
| >TP53-K319M PKKKPLDGEY | 78   | >TP53-K319M PNKKPLDGEY | 4146  | 4068  |
| >TP53-K319M QPKKKPLDGE | 303  | >TP53-K319M QPNKKPLDGI | 45    | 258   |
| >TP53-K319M QPKKKPLDGE | 3820 | >TP53-K319M QPNKKPLDGI | 354   | 3466  |
| >TP53-K319M QPKKKPLDGE | 812  | >TP53-K319M QPNKKPLDGI | 144   | 668   |
| >TP53-K319M SPQPKKKPL  | 13   | >TP53-K319M SPQPNKKPL  | 17    | 4     |
| >TP53-K319M SPQPKKKPL  | 67   | >TP53-K319M SPQPNKKPL  | 1653  | 1586  |
| >TP53-K319M SSPQPKK    | 1497 | >TP53-K319M SSPQPNKK   | 494   | 1003  |
| >TP53-K319M SSPQPKKKPL | 40   | >TP53-K319M SSPQPNKKPL | 16    | 24    |



|                        |     |                        |       |       |
|------------------------|-----|------------------------|-------|-------|
| >TP53-K319M SSSPQPKK   | 390 | >TP53-K319M SSSPQPNK   | 265   | 125   |
| >TP53-K319M SSSPQPKK   | 28  | >TP53-K319M SSSPQPNK   | 18    | 10    |
| >TP53-K319M SSSPQPKKK  | 70  | >TP53-K319M SSSPQPNKK  | 30    | 40    |
| >TP53-K319M SSSPQPKK   | 73  | >TP53-K319M SSSPQPNK   | 34    | 39    |
| >TP53-K319M SSSPQPKKK  | 186 | >TP53-K319M SSSPQPNKK  | 74    | 112   |
| >TP53-K319M SSSPQPKKKP | 16  | >TP53-K319M SSSPQPNKKP | 30    | 14    |
| >TP53-K319M SSSPQPKK   | 109 | >TP53-K319M SSSPQPNK   | 92    | 17    |
| >TP53-K319M SSSPQPKKK  | 87  | >TP53-K319M SSSPQPNKK  | 112   | 25    |
| >TP53-K319M SSSPQPKKKP | 528 | >TP53-K319M SSSPQPNKKP | 495   | 33    |
| >TP53-K319M TSSSPQPK   | 326 | >TP53-K319M TSSSPQPN   | 21313 | 20987 |
| >TP53-K319M TSSSPQPKK  | 136 | >TP53-K319M TSSSPQPNK  | 106   | 30    |
| >TP53-K319M TSSSPQPK   | 20  | >TP53-K319M TSSSPQPN   | 18436 | 18416 |
| >TP53-K319M TSSSPQPKK  | 33  | >TP53-K319M TSSSPQPNK  | 22    | 11    |
| >TP53-K319M TSSSPQPKKK | 60  | >TP53-K319M TSSSPQPNKK | 35    | 25    |
| >TP53-K319M TSSSPQPK   | 262 | >TP53-K319M TSSSPQPN   | 15022 | 14760 |
| >TP53-K319M TSSSPQPKK  | 733 | >TP53-K319M TSSSPQPNK  | 290   | 443   |
| >TP53-K319M TSSSPQPK   | 121 | >TP53-K319M TSSSPQPN   | 17232 | 17111 |
| >TP53-K319M TSSSPQPKK  | 125 | >TP53-K319M TSSSPQPNK  | 81    | 44    |
| >TP53-K319M TSSSPQPKKK | 208 | >TP53-K319M TSSSPQPNKK | 51    | 157   |
| >TP53-K319M TSSSPQPKK  | 724 | >TP53-K319M TSSSPQPNK  | 431   | 293   |
| >TP53-K319M NTSSSPQPK  | 58  | >TP53-K319M NTSSSPQPN  | 23028 | 22970 |
| >TP53-K319M NTSSSPQPKK | 41  | >TP53-K319M NTSSSPQPNK | 31    | 10    |
| >TP53-K319M NTSSSPQPKK | 251 | >TP53-K319M NTSSSPQPNK | 113   | 138   |
| >TP53-K319M NTSSSPQPK  | 339 | >TP53-K319M NTSSSPQPN  | 14996 | 14657 |
| >TP53-K319M NTSSSPQPK  | 37  | >TP53-K319M NTSSSPQPN  | 9420  | 9383  |
| >TP53-K319M NTSSSPQPKK | 28  | >TP53-K319M NTSSSPQPNK | 30    | 2     |
| >TP53-K319M NTSSSPQPKK | 95  | >TP53-K319M NTSSSPQPNK | 31    | 64    |
| >TP53-K319F KKKPLDGEY  | 83  | >TP53-K319F RKKPLDGEY  | 153   | 70    |
| >TP53-K319F KKKPLDGEY  | 138 | >TP53-K319F RKKPLDGEY  | 89    | 49    |
| >TP53-K319F KKKPLDGEYF | 14  | >TP53-K319F RKKPLDGEYF | 10    | 4     |
| >TP53-K319F PKKKPLDGEY | 315 | >TP53-K319F PRKKPLDGEY | 595   | 280   |
| >TP53-K319F PKKKPLDGEY | 78  | >TP53-K319F PRKKPLDGEY | 471   | 393   |
| >TP53-K319F QPKKKPLDGE | 303 | >TP53-K319F QPRKKPLDGE | 168   | 135   |
| >TP53-K319F SPQPKKKPL  | 13  | >TP53-K319F SPQPRKKPL  | 9     | 4     |
| >TP53-K319F SPQPKKKPL  | 67  | >TP53-K319F SPQPRKKPL  | 36    | 31    |
| >TP53-K319F SSPQPKKKPL | 40  | >TP53-K319F SSPQPRKKPL | 24    | 16    |
| >TP53-K319F SSSPQPKK   | 390 | >TP53-K319F SSSPQPRK   | 341   | 49    |
| >TP53-K319F SSSPQPKK   | 28  | >TP53-K319F SSSPQPRK   | 28    | 0     |
| >TP53-K319F SSSPQPKKK  | 70  | >TP53-K319F SSSPQPRKK  | 53    | 17    |
| >TP53-K319F SSSPQPKK   | 73  | >TP53-K319F SSSPQPRK   | 63    | 10    |
| >TP53-K319F SSSPQPKKK  | 186 | >TP53-K319F SSSPQPRKK  | 100   | 86    |
| >TP53-K319F SSSPQPKKKP | 16  | >TP53-K319F SSSPQPRKKP | 20    | 4     |
| >TP53-K319F SSSPQPKK   | 109 | >TP53-K319F SSSPQPRK   | 91    | 18    |

|                        |      |                        |       |       |
|------------------------|------|------------------------|-------|-------|
| >TP53-K319FSSSPQPKKK   | 87   | >TP53-K319FSSSPQPRKK   | 82    | 5     |
| >TP53-K319FSSSPQPKKKP  | 528  | >TP53-K319FSSSPQPRKKP  | 444   | 84    |
| >TP53-K319FTSSSPQPK    | 326  | >TP53-K319FTSSSPQPR    | 6250  | 5924  |
| >TP53-K319FTSSSPQPKK   | 136  | >TP53-K319FTSSSPQPRK   | 136   | 0     |
| >TP53-K319FTSSSPQPK    | 20   | >TP53-K319FTSSSPQPR    | 315   | 295   |
| >TP53-K319FTSSSPQPKK   | 33   | >TP53-K319FTSSSPQPRK   | 35    | 2     |
| >TP53-K319FTSSSPQPKKK  | 60   | >TP53-K319FTSSSPQPRKK  | 54    | 6     |
| >TP53-K319FTSSSPQPK    | 262  | >TP53-K319FTSSSPQPR    | 9233  | 8971  |
| >TP53-K319FTSSSPQPK    | 2222 | >TP53-K319FTSSSPQPR    | 97    | 2125  |
| >TP53-K319FTSSSPQPK    | 121  | >TP53-K319FTSSSPQPR    | 39    | 82    |
| >TP53-K319FTSSSPQPKK   | 125  | >TP53-K319FTSSSPQPRK   | 124   | 1     |
| >TP53-K319FTSSSPQPKKK  | 208  | >TP53-K319FTSSSPQPRKK  | 225   | 17    |
| >TP53-K319FTSSSPQPKK   | 724  | >TP53-K319FTSSSPQPRK   | 498   | 226   |
| >TP53-K319FNTSSSPQPK   | 58   | >TP53-K319FNTSSSPQPR   | 1278  | 1220  |
| >TP53-K319FNTSSSPQPKK  | 41   | >TP53-K319FNTSSSPQPRK  | 49    | 8     |
| >TP53-K319FNTSSSPQPKK  | 251  | >TP53-K319FNTSSSPQPRK  | 204   | 47    |
| >TP53-K319FNTSSSPQPK   | 339  | >TP53-K319FNTSSSPQPR   | 10044 | 9705  |
| >TP53-K319FNTSSSPQPK   | 4098 | >TP53-K319FNTSSSPQPR   | 203   | 3895  |
| >TP53-K319FNTSSSPQPK   | 5544 | >TP53-K319FNTSSSPQPR   | 178   | 5366  |
| >TP53-K319FNTSSSPQPK   | 37   | >TP53-K319FNTSSSPQPR   | 14    | 23    |
| >TP53-K319FNTSSSPQPKK  | 28   | >TP53-K319FNTSSSPQPRK  | 40    | 12    |
| >TP53-K319FNTSSSPQPKK  | 95   | >TP53-K319FNTSSSPQPRK  | 96    | 1     |
| >TP53-K320M KKPLDGEYF  | 31   | >TP53-K320M NKPLDGEYF  | 532   | 501   |
| >TP53-K320M KKKPLDGEY  | 83   | >TP53-K320M KNKPLDGEY  | 78    | 5     |
| >TP53-K320M KKKPLDGEY  | 138  | >TP53-K320M KNKPLDGEY  | 5472  | 5334  |
| >TP53-K320M KKKPLDGEYF | 14   | >TP53-K320M KNKPLDGEYF | 696   | 682   |
| >TP53-K320M PKKKPLDGEY | 315  | >TP53-K320M PKNKPLDGEY | 251   | 64    |
| >TP53-K320M PKKKPLDGEY | 78   | >TP53-K320M PKNKPLDGEY | 77    | 1     |
| >TP53-K320M QPKKKPLDGE | 303  | >TP53-K320M QPKNKPLDGI | 208   | 95    |
| >TP53-K320M SPQPKKKPL  | 13   | >TP53-K320M SPQPKNKPL  | 17    | 4     |
| >TP53-K320M SPQPKKKPL  | 67   | >TP53-K320M SPQPKNKPL  | 181   | 114   |
| >TP53-K320M SSPQPKKKPL | 40   | >TP53-K320M SSPQPKNKPL | 13    | 27    |
| >TP53-K320M SSSPQPKK   | 390  | >TP53-K320M SSSPQPKN   | 21556 | 21166 |
| >TP53-K320M SSSPQPKK   | 28   | >TP53-K320M SSSPQPKN   | 20645 | 20617 |
| >TP53-K320M SSSPQPKKK  | 70   | >TP53-K320M SSSPQPKNK  | 51    | 19    |
| >TP53-K320M SSSPQPKK   | 73   | >TP53-K320M SSSPQPKN   | 12444 | 12371 |
| >TP53-K320M SSSPQPKKK  | 186  | >TP53-K320M SSSPQPKNK  | 75    | 111   |
| >TP53-K320M SSSPQPKKKP | 16   | >TP53-K320M SSSPQPKNKP | 12    | 4     |
| >TP53-K320M SSSPQPKK   | 109  | >TP53-K320M SSSPQPKN   | 5174  | 5065  |
| >TP53-K320M SSSPQPKKK  | 87   | >TP53-K320M SSSPQPKNK  | 68    | 19    |
| >TP53-K320M SSSPQPKKKP | 528  | >TP53-K320M SSSPQPKNKP | 370   | 158   |
| >TP53-K320M TSSSPQPKK  | 136  | >TP53-K320M TSSSPQPKN  | 20738 | 20602 |
| >TP53-K320M TSSSPQPKK  | 33   | >TP53-K320M TSSSPQPKN  | 21537 | 21504 |

|                         |       |                         |       |       |
|-------------------------|-------|-------------------------|-------|-------|
| >TP53-K320M TSSSPQPKKK  | 60    | >TP53-K320M TSSSPQPKNK  | 46    | 14    |
| >TP53-K320M TSSSPQPKK   | 125   | >TP53-K320M TSSSPQPKN   | 15766 | 15641 |
| >TP53-K320M TSSSPQPKKK  | 208   | >TP53-K320M TSSSPQPKNK  | 213   | 5     |
| >TP53-K320M TSSSPQPKKK  | 637   | >TP53-K320M TSSSPQPKNK  | 378   | 259   |
| >TP53-K320M NTSSSPQPKK  | 41    | >TP53-K320M NTSSSPQPKN  | 30899 | 30858 |
| >TP53-K320M NTSSSPQPKK  | 251   | >TP53-K320M NTSSSPQPKN  | 210   | 41    |
| >TP53-K320M NTSSSPQPKK  | 28    | >TP53-K320M NTSSSPQPKN  | 26981 | 26953 |
| >TP53-K320M NTSSSPQPKK  | 95    | >TP53-K320M NTSSSPQPKN  | 98    | 3     |
| >TP53-K320M NTSSSPQPKK  | 721   | >TP53-K320M NTSSSPQPKN  | 431   | 290   |
| >TP53-K370C KSKKGQST    | 105   | >TP53-K370C QSKKGQST    | 4268  | 4163  |
| >TP53-K370C KSKKGQSTS   | 47    | >TP53-K370C QSKKGQSTS   | 2439  | 2392  |
| >TP53-K370C KSKKGQSTSR  | 18    | >TP53-K370C QSKKGQSTSF  | 919   | 901   |
| >TP53-K370C KSKKGQSTSR  | 313   | >TP53-K370C QSKKGQSTSF  | 6538  | 6225  |
| >TP53-K370C KSKKGQSTSR  | 90    | >TP53-K370C QSKKGQSTSF  | 683   | 593   |
| >TP53-K370C KSKKGQSTSR  | 131   | >TP53-K370C QSKKGQSTSF  | 1456  | 1325  |
| >TP53-K370C KSKKGQSTS   | 236   | >TP53-K370C QSKKGQSTS   | 516   | 280   |
| >TP53-K370C KSKKGQSTSR  | 32    | >TP53-K370C QSKKGQSTSF  | 66    | 34    |
| >TP53-K370C LSKKKGQSTS  | 11296 | >TP53-K370C LQSKKKGQSTS | 361   | 10935 |
| >TP53-K370C LSKKKGQSTS  | 207   | >TP53-K370C LQSKKKGQSTS | 240   | 33    |
| >TP53-K370C GGSRAHSSHI  | 286   | >TP53-K370C GGSRAHSSHI  | 24508 | 24222 |
| >TP53-K370C SSHLKSJK    | 601   | >TP53-K370C SSHLQSKK    | 459   | 142   |
| >TP53-K370C SSHLKSJK    | 63    | >TP53-K370C SSHLQSKK    | 40    | 23    |
| >TP53-K370C SSHLKSJK    | 20    | >TP53-K370C SSHLQSKK    | 13    | 7     |
| >TP53-K370C HSSHLKSK    | 278   | >TP53-K370C HSSHLQSK    | 169   | 109   |
| >TP53-K370C HSSHLKSJK   | 133   | >TP53-K370C HSSHLQSKK   | 82    | 51    |
| >TP53-K370C HSSHLKSK    | 410   | >TP53-K370C HSSHLQSK    | 209   | 201   |
| >TP53-K370C HSSHLKSJK   | 234   | >TP53-K370C HSSHLQSKK   | 143   | 91    |
| >TP53-K370C HSSHLKSK    | 48    | >TP53-K370C HSSHLQSK    | 25    | 23    |
| >TP53-K370C HSSHLKSJK   | 172   | >TP53-K370C HSSHLQSKK   | 72    | 100   |
| >TP53-K370C HSSHLKSK    | 499   | >TP53-K370C HSSHLQSKK   | 1079  | 580   |
| >TP53-K370C HSSHLKSK    | 289   | >TP53-K370C HSSHLQSK    | 165   | 124   |
| >TP53-K370C HSSHLKSJK   | 93    | >TP53-K370C HSSHLQSKK   | 62    | 31    |
| >TP53-K370C RAHSSHLK    | 80    | >TP53-K370C RAHSSHLQ    | 15895 | 15815 |
| >TP53-K370C RAHSSHLKSJK | 307   | >TP53-K370C RAHSSHLQSK  | 208   | 99    |
| >TP53-K370C RAHSSHLKSJK | 101   | >TP53-K370C RAHSSHLQSK  | 82    | 19    |
| >TP53-K370C RAHSSHLK    | 27    | >TP53-K370C RAHSSHLQ    | 17415 | 17388 |
| >TP53-K370C RAHSSHLKSJK | 777   | >TP53-K370C RAHSSHLQSK  | 295   | 482   |
| >TP53-K370C RAHSSHLKSJK | 92    | >TP53-K370C RAHSSHLQSK  | 70    | 22    |
| >TP53-K370C RAHSSHLK    | 4     | >TP53-K370C RAHSSHLQ    | 48    | 44    |
| >TP53-K370C RAHSSHLKS   | 31    | >TP53-K370C RAHSSHLQS   | 23    | 8     |
| >TP53-K370C RAHSSHLKSJK | 4     | >TP53-K370C RAHSSHLQSK  | 4     | 0     |
| >TP53-K370C RAHSSHLKSJK | 6     | >TP53-K370C RAHSSHLQSK  | 5     | 1     |
| >TP53-K370C RAHSSHLK    | 50    | >TP53-K370C RAHSSHLQ    | 4347  | 4297  |

|                        |      |                         |       |       |
|------------------------|------|-------------------------|-------|-------|
| >TP53-K370C RAHSSHLKSK | 72   | >TP53-K370C RAHSSHLQSK  | 95    | 23    |
| >TP53-K370C RAHSSHLK   | 249  | >TP53-K370C RAHSSHLQ    | 8612  | 8363  |
| >TP53-K370C RAHSSHLKS  | 917  | >TP53-K370C RAHSSHLQS   | 447   | 470   |
| >TP53-K370C SRAHSSHLK  | 168  | >TP53-K370C SRAHSSHLQ   | 4160  | 3992  |
| >TP53-K370C SRAHSSHLKS | 221  | >TP53-K370C SRAHSSHLQS  | 241   | 20    |
| >TP53-K370C GSRAHSSHLK | 61   | >TP53-K370C GSRAHSSHLC  | 18021 | 17960 |
| >TP53-K370C GSRAHSSHLK | 90   | >TP53-K370C GSRAHSSHLC  | 30622 | 30532 |
| >TP53-K370C GSRAHSSHLK | 4    | >TP53-K370C GSRAHSSHLC  | 85    | 81    |
| >TP53-K370C GSRAHSSHLK | 96   | >TP53-K370C GSRAHSSHLC  | 72    | 24    |
| >TP53-K370C GSRAHSSHLK | 281  | >TP53-K370C GSRAHSSHLC  | 5467  | 5186  |
| >TP53-L111N LGFLHSGTAK | 1843 | >TP53-L111N MGFLHSGTAK  | 294   | 1549  |
| >TP53-L111N RLGFLHSGTA | 326  | >TP53-L111N RMGFLHSGTAK | 311   | 15    |
| >TP53-L111N RLGFLHSGT  | 719  | >TP53-L111N RMGFLHSGT   | 367   | 352   |
| >TP53-L111N RLGFLHSGTA | 162  | >TP53-L111N RMGFLHSGTAK | 87    | 75    |
| >TP53-L111N RLGFLHSGTA | 866  | >TP53-L111N RMGFLHSGTAK | 484   | 382   |
| >TP53-L111N RLGFLHSGTA | 43   | >TP53-L111N RMGFLHSGTAK | 39    | 4     |
| >TP53-L111N RLGFLHSGTA | 125  | >TP53-L111N RMGFLHSGTAK | 41    | 84    |
| >TP53-L111N RLGFLHSGTA | 384  | >TP53-L111N RMGFLHSGTAK | 191   | 193   |
| >TP53-L111N RLGFLHSGTA | 262  | >TP53-L111N RMGFLHSGTAK | 56    | 206   |
| >TP53-L111N RLGFLHSGTA | 1627 | >TP53-L111N RMGFLHSGTAK | 375   | 1252  |
| >TP53-L111N KTYQGSYGFR | 220  | >TP53-L111N KTYQGSYGFR  | 159   | 61    |
| >TP53-L111N KTYQGSYGFR | 169  | >TP53-L111N KTYQGSYGFR  | 1254  | 1085  |
| >TP53-L111N KTYQGSYGFR | 260  | >TP53-L111N KTYQGSYGFR  | 2395  | 2135  |
| >TP53-L111N KTYQGSYGFR | 77   | >TP53-L111N KTYQGSYGFR  | 506   | 429   |
| >TP53-L111N KTYQGSYGFR | 23   | >TP53-L111N KTYQGSYGFR  | 191   | 168   |
| >TP53-L111N KTYQGSYGFR | 175  | >TP53-L111N KTYQGSYGFR  | 2992  | 2817  |
| >TP53-L111N KTYQGSYGFR | 2740 | >TP53-L111N KTYQGSYGFR  | 426   | 2314  |
| >TP53-L111N KTYQGSYGFR | 21   | >TP53-L111N KTYQGSYGFR  | 77    | 56    |
| >TP53-L111N KTYQGSYGFR | 402  | >TP53-L111N KTYQGSYGFR  | 532   | 130   |
| >TP53-L111N KTYQGSYGFR | 2004 | >TP53-L111N KTYQGSYGFR  | 411   | 1593  |
| >TP53-L111N KTYQGSYGFR | 3    | >TP53-L111N KTYQGSYGFR  | 3     | 0     |
| >TP53-L111N KTYQGSYGFR | 439  | >TP53-L111N KTYQGSYGFR  | 171   | 268   |
| >TP53-L111N KTYQGSYGFR | 35   | >TP53-L111N KTYQGSYGFR  | 20    | 15    |
| >TP53-L111N KTYQGSYGFR | 151  | >TP53-L111N KTYQGSYGFR  | 232   | 81    |
| >TP53-L111N KTYQGSYGFR | 28   | >TP53-L111N KTYQGSYGFR  | 8     | 20    |
| >TP53-L111N KTYQGSYGFR | 43   | >TP53-L111N KTYQGSYGFR  | 76    | 33    |
| >TP53-L111N FRLGFLHSGT | 716  | >TP53-L111N FRMGFLHSGT  | 468   | 248   |
| >TP53-L111N FRLGFLHS   | 142  | >TP53-L111N FRMGFLHS    | 70    | 72    |
| >TP53-L111N FRLGFLHSG  | 306  | >TP53-L111N FRMGFLHSG   | 142   | 164   |
| >TP53-L111N FRLGFLHSGT | 412  | >TP53-L111N FRMGFLHSGT  | 334   | 78    |
| >TP53-L111N FRLGFLHSGT | 174  | >TP53-L111N FRMGFLHSGT  | 90    | 84    |
| >TP53-L111N GFRLGFLHS  | 921  | >TP53-L111N GFRMGFLHS   | 484   | 437   |
| >TP53-L111N YGFRLGFL   | 116  | >TP53-L111N YGFRMGFL    | 110   | 6     |

|                        |     |                       |      |      |
|------------------------|-----|-----------------------|------|------|
| >TP53-L111N YGFRLGFL   | 486 | >TP53-L111N YGFRMGFL  | 782  | 296  |
| >TP53-L111N YGFRLGFL   | 443 | >TP53-L111N YGFRMGFL  | 948  | 505  |
| >TP53-L111N YGFRLGFLH  | 89  | >TP53-L111N YGFRMGFLH | 111  | 22   |
| >TP53-L111N SYGFRLGFL  | 95  | >TP53-L111N SYGFRMGFL | 92   | 3    |
| >TP53-L111N SYGFRLGF   | 356 | >TP53-L111N SYGFRMGF  | 347  | 9    |
| >TP53-L111N SYGFRLGF   | 232 | >TP53-L111N SYGFRMGF  | 300  | 68   |
| >TP53-L111N SYGFRLGFL  | 319 | >TP53-L111N SYGFRMGFL | 585  | 266  |
| >TP53-L111N SYGFRLGF   | 7   | >TP53-L111N SYGFRMGF  | 6    | 1    |
| >TP53-L111N SYGFRLGFL  | 12  | >TP53-L111N SYGFRMGFL | 13   | 1    |
| >TP53-L111N SYGFRLGF   | 338 | >TP53-L111N SYGFRMGF  | 752  | 414  |
| >TP53-L111N SYGFRLGFL  | 139 | >TP53-L111N SYGFRMGFL | 228  | 89   |
| >TP53-L111N SYGFRLGFL  | 222 | >TP53-L111N SYGFRMGFL | 279  | 57   |
| >TP53-L111N GSYGFRLGF  | 78  | >TP53-L111N GSYGFRMGF | 50   | 28   |
| >TP53-L111N GSYGFRLGFL | 227 | >TP53-L111N GSYGFRMGF | 235  | 8    |
| >TP53-L111N GSYGFRLGFL | 237 | >TP53-L111N GSYGFRMGF | 363  | 126  |
| >TP53-L111N GSYGFRLGFL | 491 | >TP53-L111N GSYGFRMGF | 448  | 43   |
| >TP53-L111N GSYGFRLGFL | 98  | >TP53-L111N GSYGFRMGF | 83   | 15   |
| >TP53-L111N GSYGFRLGF  | 61  | >TP53-L111N GSYGFRMGF | 72   | 11   |
| >TP53-L111N GSYGFRLGFL | 621 | >TP53-L111N GSYGFRMGF | 451  | 170  |
| >TP53-L111N GSYGFRLGF  | 365 | >TP53-L111N GSYGFRMGF | 576  | 211  |
| >TP53-L111N GSYGFRLGF  | 111 | >TP53-L111N GSYGFRMGF | 64   | 47   |
| >TP53-L111N GSYGFRLGF  | 4   | >TP53-L111N GSYGFRMGF | 6    | 2    |
| >TP53-L111N GSYGFRLGFL | 31  | >TP53-L111N GSYGFRMGF | 28   | 3    |
| >TP53-L111N GSYGFRLGF  | 222 | >TP53-L111N GSYGFRMGF | 128  | 94   |
| >TP53-L111N GSYGFRLGF  | 264 | >TP53-L111N GSYGFRMGF | 356  | 92   |
| >TP53-L111N GSYGFRLGF  | 44  | >TP53-L111N GSYGFRMGF | 27   | 17   |
| >TP53-L111N GSYGFRLGFL | 70  | >TP53-L111N GSYGFRMGF | 67   | 3    |
| >TP53-L111N GSYGFRLGFL | 63  | >TP53-L111N GSYGFRMGF | 57   | 6    |
| >TP53-L111N QGSYGFRLGF | 278 | >TP53-L111N QGSYFRMG  | 263  | 15   |
| >TP53-L111N YQGSYGFRL  | 30  | >TP53-L111N YQGSYFRM  | 154  | 124  |
| >TP53-L111N YQGSYGFRL  | 36  | >TP53-L111N YQGSYFRM  | 519  | 483  |
| >TP53-L111N YQGSYGFRL  | 15  | >TP53-L111N YQGSYFRM  | 60   | 45   |
| >TP53-L111N YQGSYGFRLC | 189 | >TP53-L111N YQGSYFRM  | 182  | 7    |
| >TP53-L111N YQGSYGFRL  | 32  | >TP53-L111N YQGSYFRM  | 224  | 192  |
| >TP53-L111N YQGSYGFRL  | 167 | >TP53-L111N YQGSYFRM  | 1978 | 1811 |
| >TP53-L111N YQGSYGFRL  | 211 | >TP53-L111N YQGSYFRM  | 65   | 146  |
| >TP53-L111N YQGSYGFRLC | 32  | >TP53-L111N YQGSYFRM  | 36   | 4    |
| >TP53-L111N YQGSYGFRLC | 158 | >TP53-L111N YQGSYFRM  | 162  | 4    |
| >TP53-L111N YQGSYGFRL  | 77  | >TP53-L111N YQGSYFRM  | 51   | 26   |
| >TP53-L111N YQGSYGFRLC | 6   | >TP53-L111N YQGSYFRM  | 5    | 1    |
| >TP53-L111N YQGSYGFRL  | 145 | >TP53-L111N YQGSYFRM  | 754  | 609  |
| >TP53-L111N TYQGSYGFRL | 141 | >TP53-L111N TYQGSYFRM | 423  | 282  |
| >TP53-L111N TYQGSYGFRL | 316 | >TP53-L111N TYQGSYFRM | 3051 | 2735 |

|                        |     |                        |       |       |
|------------------------|-----|------------------------|-------|-------|
| >TP53-L111N TYQGSYGFR  | 163 | >TP53-L111N TYQGSYGF   | 836   | 673   |
| >TP53-L111N TYQGSYGFR  | 7   | >TP53-L111N TYQGSYGF   | 32    | 25    |
| >TP53-L111P RLGFLHSGTA | 326 | >TP53-L111P RLGFLHSGTA | 24826 | 24500 |
| >TP53-L111P RLGFLHSGTA | 162 | >TP53-L111P RLGFLHSGTA | 28234 | 28072 |
| >TP53-L111P RLGFLHSGTA | 43  | >TP53-L111P RLGFLHSGTA | 9215  | 9172  |
| >TP53-L111P RLGFLHSGTA | 125 | >TP53-L111P RLGFLHSGTA | 10181 | 10056 |
| >TP53-L111P RLGFLHSGTA | 384 | >TP53-L111P RLGFLHSGTA | 13598 | 13214 |
| >TP53-L111P RLGFLHSGTA | 262 | >TP53-L111P RLGFLHSGTA | 8824  | 8562  |
| >TP53-L111P KTYQGSYGFR | 220 | >TP53-L111P KTYQGSYGFR | 5194  | 4974  |
| >TP53-L111P KTYQGSYGFR | 169 | >TP53-L111P KTYQGSYGFR | 21670 | 21501 |
| >TP53-L111P KTYQGSYGFR | 260 | >TP53-L111P KTYQGSYGFR | 15439 | 15179 |
| >TP53-L111P KTYQGSYGFR | 77  | >TP53-L111P KTYQGSYGFR | 10954 | 10877 |
| >TP53-L111P KTYQGSYGFR | 23  | >TP53-L111P KTYQGSYGFR | 9623  | 9600  |
| >TP53-L111P KTYQGSYGFR | 175 | >TP53-L111P KTYQGSYGFR | 18855 | 18680 |
| >TP53-L111P KTYQGSYGFR | 21  | >TP53-L111P KTYQGSYGFR | 1029  | 1008  |
| >TP53-L111P KTYQGSYGFR | 402 | >TP53-L111P KTYQGSYGFR | 14361 | 13959 |
| >TP53-L111P KTYQGSYGFR | 3   | >TP53-L111P KTYQGSYGFR | 616   | 613   |
| >TP53-L111P KTYQGSYGFR | 439 | >TP53-L111P KTYQGSYGFR | 13784 | 13345 |
| >TP53-L111P KTYQGSYGFR | 35  | >TP53-L111P KTYQGSYGFR | 9794  | 9759  |
| >TP53-L111P KTYQGSYGFR | 151 | >TP53-L111P KTYQGSYGFR | 14293 | 14142 |
| >TP53-L111P KTYQGSYGFR | 28  | >TP53-L111P KTYQGSYGFR | 2923  | 2895  |
| >TP53-L111P KTYQGSYGFR | 43  | >TP53-L111P KTYQGSYGFR | 8083  | 8040  |
| >TP53-L111P FRLGFLHS   | 142 | >TP53-L111P FRLGFLHS   | 2161  | 2019  |
| >TP53-L111P FRLGFLHSG  | 306 | >TP53-L111P FRLGFLHSG  | 3836  | 3530  |
| >TP53-L111P FRLGFLHSGT | 412 | >TP53-L111P FRLGFLHSGT | 4409  | 3997  |
| >TP53-L111P FRLGFLHSGT | 174 | >TP53-L111P FRLGFLHSGT | 2212  | 2038  |
| >TP53-L111P GFRLGFLH   | 561 | >TP53-L111P GFRLGFLH   | 255   | 306   |
| >TP53-L111P GFRLGFLHS  | 921 | >TP53-L111P GFRLGFLHS  | 354   | 567   |
| >TP53-L111P YGFRPGFL   | 116 | >TP53-L111P YGFRPGFL   | 523   | 407   |
| >TP53-L111P YGFRPGFL   | 486 | >TP53-L111P YGFRPGFL   | 2163  | 1677  |
| >TP53-L111P YGFRPGFL   | 443 | >TP53-L111P YGFRPGFL   | 2636  | 2193  |
| >TP53-L111P YGFRPGFLH  | 89  | >TP53-L111P YGFRPGFLH  | 84    | 5     |
| >TP53-L111P SYGFRPGFL  | 95  | >TP53-L111P SYGFRPGFL  | 265   | 170   |
| >TP53-L111P SYGFRPGF   | 356 | >TP53-L111P SYGFRPGF   | 370   | 14    |
| >TP53-L111P SYGFRPGF   | 232 | >TP53-L111P SYGFRPGF   | 266   | 34    |
| >TP53-L111P SYGFRPGFL  | 319 | >TP53-L111P SYGFRPGFL  | 201   | 118   |
| >TP53-L111P SYGFRPGF   | 7   | >TP53-L111P SYGFRPGF   | 11    | 4     |
| >TP53-L111P SYGFRPGFL  | 12  | >TP53-L111P SYGFRPGFL  | 33    | 21    |
| >TP53-L111P SYGFRPGF   | 338 | >TP53-L111P SYGFRPGF   | 1265  | 927   |
| >TP53-L111P SYGFRPGFL  | 139 | >TP53-L111P SYGFRPGFL  | 463   | 324   |
| >TP53-L111P SYGFRPGFL  | 222 | >TP53-L111P SYGFRPGFL  | 178   | 44    |
| >TP53-L111P GSYGFRPGF  | 78  | >TP53-L111P GSYGFRPGF  | 46    | 32    |
| >TP53-L111P GSYGFRPGFL | 227 | >TP53-L111P GSYGFRPGFL | 247   | 20    |

|                        |      |                        |       |       |
|------------------------|------|------------------------|-------|-------|
| >TP53-L111P GSYGFRLGFL | 237  | >TP53-L111P GSYGFRPGFL | 403   | 166   |
| >TP53-L111P GSYGFRLGFL | 491  | >TP53-L111P GSYGFRPGFL | 628   | 137   |
| >TP53-L111P GSYGFRLGFL | 98   | >TP53-L111P GSYGFRPGFL | 185   | 87    |
| >TP53-L111P GSYGFRLGF  | 61   | >TP53-L111P GSYGFRPGF  | 211   | 150   |
| >TP53-L111P GSYGFRLGF  | 365  | >TP53-L111P GSYGFRPGF  | 665   | 300   |
| >TP53-L111P GSYGFRLGF  | 111  | >TP53-L111P GSYGFRPGF  | 139   | 28    |
| >TP53-L111P GSYGFRLGF  | 4    | >TP53-L111P GSYGFRPGF  | 5     | 1     |
| >TP53-L111P GSYGFRLGFL | 31   | >TP53-L111P GSYGFRPGFL | 35    | 4     |
| >TP53-L111P GSYGFRLGF  | 222  | >TP53-L111P GSYGFRPGF  | 406   | 184   |
| >TP53-L111P GSYGFRLGF  | 264  | >TP53-L111P GSYGFRPGF  | 739   | 475   |
| >TP53-L111P GSYGFRLGF  | 44   | >TP53-L111P GSYGFRPGF  | 56    | 12    |
| >TP53-L111P GSYGFRLGFL | 70   | >TP53-L111P GSYGFRPGFL | 40    | 30    |
| >TP53-L111P GSYGFRLGFL | 63   | >TP53-L111P GSYGFRPGFL | 74    | 11    |
| >TP53-L111P QGSYGFRLGF | 278  | >TP53-L111P QGSYGFRPGI | 801   | 523   |
| >TP53-L111P YQGSYGFRL  | 30   | >TP53-L111P YQGSYGFRL  | 18909 | 18879 |
| >TP53-L111P YQGSYGFRL  | 36   | >TP53-L111P YQGSYGFRL  | 9192  | 9156  |
| >TP53-L111P YQGSYGFRL  | 15   | >TP53-L111P YQGSYGFRL  | 3357  | 3342  |
| >TP53-L111P YQGSYGFRLC | 189  | >TP53-L111P YQGSYGFRLC | 98    | 91    |
| >TP53-L111P YQGSYGFRL  | 32   | >TP53-L111P YQGSYGFRL  | 8839  | 8807  |
| >TP53-L111P YQGSYGFRL  | 167  | >TP53-L111P YQGSYGFRL  | 13033 | 12866 |
| >TP53-L111P YQGSYGFRL  | 211  | >TP53-L111P YQGSYGFRL  | 4947  | 4736  |
| >TP53-L111P YQGSYGFRLC | 1485 | >TP53-L111P YQGSYGFRLC | 195   | 1290  |
| >TP53-L111P YQGSYGFRLC | 32   | >TP53-L111P YQGSYGFRLC | 40    | 8     |
| >TP53-L111P YQGSYGFRLC | 158  | >TP53-L111P YQGSYGFRLC | 263   | 105   |
| >TP53-L111P YQGSYGFRL  | 77   | >TP53-L111P YQGSYGFRL  | 4755  | 4678  |
| >TP53-L111P YQGSYGFRLC | 6    | >TP53-L111P YQGSYGFRLC | 7     | 1     |
| >TP53-L111P YQGSYGFRL  | 145  | >TP53-L111P YQGSYGFRL  | 19692 | 19547 |
| >TP53-L111P TYQGSYGFRL | 141  | >TP53-L111P TYQGSYGFRL | 20335 | 20194 |
| >TP53-L111P TYQGSYGFRL | 316  | >TP53-L111P TYQGSYGFRL | 29513 | 29197 |
| >TP53-L111P TYQGSYGFRL | 163  | >TP53-L111P TYQGSYGFRL | 16332 | 16169 |
| >TP53-L111P TYQGSYGFRL | 7    | >TP53-L111P TYQGSYGFRL | 2013  | 2006  |
| >TP53-L111C RLGFLHSGTA | 326  | >TP53-L111C RQGFLHSGT/ | 3276  | 2950  |
| >TP53-L111C RLGFLHSGTA | 162  | >TP53-L111C RQGFLHSGT/ | 9942  | 9780  |
| >TP53-L111C RLGFLHSGTA | 43   | >TP53-L111C RQGFLHSGT/ | 253   | 210   |
| >TP53-L111C RLGFLHSGTA | 125  | >TP53-L111C RQGFLHSGT/ | 124   | 1     |
| >TP53-L111C RLGFLHSGTA | 384  | >TP53-L111C RQGFLHSGT/ | 746   | 362   |
| >TP53-L111C RLGFLHSGTA | 262  | >TP53-L111C RQGFLHSGT/ | 202   | 60    |
| >TP53-L111C RLGFLHSGTA | 1627 | >TP53-L111C RQGFLHSGT/ | 302   | 1325  |
| >TP53-L111C RLGFLHSGTA | 5036 | >TP53-L111C RQGFLHSGT/ | 330   | 4706  |
| >TP53-L111C KTYQGSYGFR | 220  | >TP53-L111C KTYQGSYGFR | 9911  | 9691  |
| >TP53-L111C KTYQGSYGFR | 169  | >TP53-L111C KTYQGSYGFR | 17600 | 17431 |
| >TP53-L111C KTYQGSYGFR | 260  | >TP53-L111C KTYQGSYGFR | 10994 | 10734 |
| >TP53-L111C KTYQGSYGFR | 77   | >TP53-L111C KTYQGSYGFR | 7477  | 7400  |

|                         |     |                        |       |       |
|-------------------------|-----|------------------------|-------|-------|
| >TP53-L111C KTYQGSYGFR  | 23  | >TP53-L111C KTYQGSYGFR | 4543  | 4520  |
| >TP53-L111C KTYQGSYGFR  | 175 | >TP53-L111C KTYQGSYGFR | 11066 | 10891 |
| >TP53-L111C KTYQGSYGFR  | 21  | >TP53-L111C KTYQGSYGFR | 823   | 802   |
| >TP53-L111C KTYQGSYGFR  | 402 | >TP53-L111C KTYQGSYGFR | 10262 | 9860  |
| >TP53-L111C KTYQGSYGFR  | 3   | >TP53-L111C KTYQGSYGFR | 26    | 23    |
| >TP53-L111C KTYQGSYGFR  | 439 | >TP53-L111C KTYQGSYGFR | 6348  | 5909  |
| >TP53-L111C KTYQGSYGFR  | 35  | >TP53-L111C KTYQGSYGFR | 4495  | 4460  |
| >TP53-L111C KTYQGSYGFR  | 151 | >TP53-L111C KTYQGSYGFR | 10094 | 9943  |
| >TP53-L111C KTYQGSYGFR  | 28  | >TP53-L111C KTYQGSYGFR | 443   | 415   |
| >TP53-L111C KTYQGSYGFR  | 43  | >TP53-L111C KTYQGSYGFR | 23965 | 23922 |
| >TP53-L111C FRLGFLHS    | 142 | >TP53-L111C FRQGFLHS   | 221   | 79    |
| >TP53-L111C FRLGFLHSG   | 306 | >TP53-L111C FRQGFLHSG  | 527   | 221   |
| >TP53-L111C FRLGFLHSGT  | 412 | >TP53-L111C FRQGFLHSGT | 718   | 306   |
| >TP53-L111C FRLGFLHSGT, | 174 | >TP53-L111C FRQGFLHSGT | 244   | 70    |
| >TP53-L111C YGFRLGFL    | 116 | >TP53-L111C YGFRQGFL   | 366   | 250   |
| >TP53-L111C YGFRLGFL    | 486 | >TP53-L111C YGFRQGFL   | 971   | 485   |
| >TP53-L111C YGFRLGFL    | 443 | >TP53-L111C YGFRQGFL   | 2404  | 1961  |
| >TP53-L111C YGFRLGFLH   | 89  | >TP53-L111C YGFRQGFLH  | 608   | 519   |
| >TP53-L111C SYGFRLGFL   | 95  | >TP53-L111C SYGFRQGFL  | 71    | 24    |
| >TP53-L111C SYGFRLGF    | 356 | >TP53-L111C SYGFRQGF   | 509   | 153   |
| >TP53-L111C SYGFRLGF    | 232 | >TP53-L111C SYGFRQGF   | 309   | 77    |
| >TP53-L111C SYGFRLGFL   | 319 | >TP53-L111C SYGFRQGFL  | 617   | 298   |
| >TP53-L111C SYGFRLGF    | 7   | >TP53-L111C SYGFRQGF   | 9     | 2     |
| >TP53-L111C SYGFRLGFL   | 12  | >TP53-L111C SYGFRQGFL  | 20    | 8     |
| >TP53-L111C SYGFRLGF    | 338 | >TP53-L111C SYGFRQGF   | 1189  | 851   |
| >TP53-L111C SYGFRLGFL   | 139 | >TP53-L111C SYGFRQGFL  | 571   | 432   |
| >TP53-L111C SYGFRLGFL   | 222 | >TP53-L111C SYGFRQGFL  | 481   | 259   |
| >TP53-L111C GSYGFRLGF   | 78  | >TP53-L111C GSYGFRQGF  | 77    | 1     |
| >TP53-L111C GSYGFRLGFL  | 227 | >TP53-L111C GSYGFRQGFL | 258   | 31    |
| >TP53-L111C GSYGFRLGFL  | 237 | >TP53-L111C GSYGFRQGFL | 920   | 683   |
| >TP53-L111C GSYGFRLGFL  | 491 | >TP53-L111C GSYGFRQGFL | 1011  | 520   |
| >TP53-L111C GSYGFRLGFL  | 98  | >TP53-L111C GSYGFRQGFL | 291   | 193   |
| >TP53-L111C GSYGFRLGFL  | 760 | >TP53-L111C GSYGFRQGFL | 485   | 275   |
| >TP53-L111C GSYGFRLGF   | 61  | >TP53-L111C GSYGFRQGF  | 154   | 93    |
| >TP53-L111C GSYGFRLGF   | 365 | >TP53-L111C GSYGFRQGF  | 559   | 194   |
| >TP53-L111C GSYGFRLGF   | 111 | >TP53-L111C GSYGFRQGF  | 93    | 18    |
| >TP53-L111C GSYGFRLGF   | 4   | >TP53-L111C GSYGFRQGF  | 5     | 1     |
| >TP53-L111C GSYGFRLGFL  | 31  | >TP53-L111C GSYGFRQGFL | 49    | 18    |
| >TP53-L111C GSYGFRLGF   | 222 | >TP53-L111C GSYGFRQGF  | 121   | 101   |
| >TP53-L111C GSYGFRLGF   | 264 | >TP53-L111C GSYGFRQGF  | 1972  | 1708  |
| >TP53-L111C GSYGFRLGF   | 44  | >TP53-L111C GSYGFRQGF  | 47    | 3     |
| >TP53-L111C GSYGFRLGFL  | 70  | >TP53-L111C GSYGFRQGFL | 69    | 1     |
| >TP53-L111C GSYGFRLGFL  | 63  | >TP53-L111C GSYGFRQGFL | 127   | 64    |



|                         |       |                         |       |       |
|-------------------------|-------|-------------------------|-------|-------|
| >TP53-L111C QGSYGFRLGF  | 278   | >TP53-L111C QGSYGFRRQ   | 731   | 453   |
| >TP53-L111C YQGSYGFRL   | 30    | >TP53-L111C YQGSYGFRRQ  | 11657 | 11627 |
| >TP53-L111C YQGSYGFRL   | 36    | >TP53-L111C YQGSYGFRRQ  | 5849  | 5813  |
| >TP53-L111C YQGSYGFRL   | 15    | >TP53-L111C YQGSYGFRRQ  | 2162  | 2147  |
| >TP53-L111C YQGSYGFRLC  | 189   | >TP53-L111C YQGSYGFRRQ  | 249   | 60    |
| >TP53-L111C YQGSYGFRL   | 32    | >TP53-L111C YQGSYGFRRQ  | 4683  | 4651  |
| >TP53-L111C YQGSYGFRL   | 167   | >TP53-L111C YQGSYGFRRQ  | 13382 | 13215 |
| >TP53-L111C YQGSYGFRL   | 211   | >TP53-L111C YQGSYGFRRQ  | 2013  | 1802  |
| >TP53-L111C YQGSYGFRLC  | 32    | >TP53-L111C YQGSYGFRRQ  | 35    | 3     |
| >TP53-L111C YQGSYGFRLC  | 158   | >TP53-L111C YQGSYGFRRQ  | 108   | 50    |
| >TP53-L111C YQGSYGFRL   | 77    | >TP53-L111C YQGSYGFRRQ  | 3413  | 3336  |
| >TP53-L111C YQGSYGFRLC  | 6     | >TP53-L111C YQGSYGFRRQ  | 5     | 1     |
| >TP53-L111C YQGSYGFRL   | 145   | >TP53-L111C YQGSYGFRRQ  | 16718 | 16573 |
| >TP53-L111C TYQGSYGFRL  | 141   | >TP53-L111C TYQGSYGFRC  | 17194 | 17053 |
| >TP53-L111C TYQGSYGFRL  | 316   | >TP53-L111C TYQGSYGFRC  | 25202 | 24886 |
| >TP53-L111C TYQGSYGFRL  | 163   | >TP53-L111C TYQGSYGFRC  | 12591 | 12428 |
| >TP53-L111C TYQGSYGFRL  | 7     | >TP53-L111C TYQGSYGFRC  | 1263  | 1256  |
| >TP53-L111R LGFLHSGTAK  | 1843  | >TP53-L111R RGFLHSGTAK  | 60    | 1783  |
| >TP53-L111R RLGFLHSGTA  | 326   | >TP53-L111R RRGFLHSGTA  | 22001 | 21675 |
| >TP53-L111R RLGFLHSGTA  | 162   | >TP53-L111R RRGFLHSGTA  | 27241 | 27079 |
| >TP53-L111R RLGFLHSGTA  | 43    | >TP53-L111R RRGFLHSGTA  | 15167 | 15124 |
| >TP53-L111R RLGFLHSGTA  | 125   | >TP53-L111R RRGFLHSGTA  | 13742 | 13617 |
| >TP53-L111R RLGFLHSGTA  | 384   | >TP53-L111R RRGFLHSGTA  | 4408  | 4024  |
| >TP53-L111R RLGFLHSGTA  | 262   | >TP53-L111R RRGFLHSGTA  | 13674 | 13412 |
| >TP53-L111R RLGFLHSGTA  | 25486 | >TP53-L111R RRGFLHSGTA  | 155   | 25331 |
| >TP53-L111R RLGFLHSGTA  | 12214 | >TP53-L111R RRGFLHSGTA  | 139   | 12075 |
| >TP53-L111R RLGFLHSG    | 4444  | >TP53-L111R RRGFLHSG    | 65    | 4379  |
| >TP53-L111R RLGFLHSGT   | 18464 | >TP53-L111R RRGFLHSGT   | 287   | 18177 |
| >TP53-L111R RLGFLHSGT   | 16189 | >TP53-L111R RRGFLHSGT   | 236   | 15953 |
| >TP53-L111R RLGFLHSGTA  | 23360 | >TP53-L111R RRGFLHSGTA  | 223   | 23137 |
| >TP53-L111R RLGFLHSGTA  | 7256  | >TP53-L111R RRGFLHSGTA  | 124   | 7132  |
| >TP53-L111R KTYQGSYGFRR | 220   | >TP53-L111R KTYQGSYGFRR | 15362 | 15142 |
| >TP53-L111R KTYQGSYGFRR | 169   | >TP53-L111R KTYQGSYGFRR | 22065 | 21896 |
| >TP53-L111R KTYQGSYGFRR | 260   | >TP53-L111R KTYQGSYGFRR | 22181 | 21921 |
| >TP53-L111R KTYQGSYGFRR | 77    | >TP53-L111R KTYQGSYGFRR | 19608 | 19531 |
| >TP53-L111R KTYQGSYGFRR | 23    | >TP53-L111R KTYQGSYGFRR | 13531 | 13508 |
| >TP53-L111R KTYQGSYGFRR | 175   | >TP53-L111R KTYQGSYGFRR | 20674 | 20499 |
| >TP53-L111R KTYQGSYGFRR | 6144  | >TP53-L111R KTYQGSYGFRR | 84    | 6060  |
| >TP53-L111R KTYQGSYGFRR | 6108  | >TP53-L111R KTYQGSYGFRR | 34    | 6074  |
| >TP53-L111R KTYQGSYGFRR | 643   | >TP53-L111R KTYQGSYGFRR | 9     | 634   |
| >TP53-L111R KTYQGSYGFRR | 21    | >TP53-L111R KTYQGSYGFRR | 954   | 933   |
| >TP53-L111R KTYQGSYGFRR | 16831 | >TP53-L111R KTYQGSYGFRR | 49    | 16782 |
| >TP53-L111R KTYQGSYGFRR | 402   | >TP53-L111R KTYQGSYGFRR | 15918 | 15516 |

|                        |       |                        |       |       |
|------------------------|-------|------------------------|-------|-------|
| >TP53-L111R KTYQGSYGFR | 3     | >TP53-L111R KTYQGSYGFR | 73    | 70    |
| >TP53-L111R KTYQGSYGFR | 439   | >TP53-L111R KTYQGSYGFR | 10483 | 10044 |
| >TP53-L111R KTYQGSYGFR | 35    | >TP53-L111R KTYQGSYGFR | 10867 | 10832 |
| >TP53-L111R KTYQGSYGFR | 151   | >TP53-L111R KTYQGSYGFR | 15516 | 15365 |
| >TP53-L111R KTYQGSYGFR | 28    | >TP53-L111R KTYQGSYGFR | 1126  | 1098  |
| >TP53-L111R KTYQGSYGFR | 2929  | >TP53-L111R KTYQGSYGFR | 195   | 2734  |
| >TP53-L111R KTYQGSYGFR | 17540 | >TP53-L111R KTYQGSYGFR | 30    | 17510 |
| >TP53-L111R KTYQGSYGFR | 43    | >TP53-L111R KTYQGSYGFR | 27959 | 27916 |
| >TP53-L111R FRLGFLHS   | 142   | >TP53-L111R FRRGFLHS   | 651   | 509   |
| >TP53-L111R FRLGFLHSG  | 306   | >TP53-L111R FRRGFLHSG  | 1278  | 972   |
| >TP53-L111R FRLGFLHSGT | 412   | >TP53-L111R FRRGFLHSGT | 547   | 135   |
| >TP53-L111R FRLGFLHSGT | 174   | >TP53-L111R FRRGFLHSGT | 817   | 643   |
| >TP53-L111R GFRLGFLHS  | 921   | >TP53-L111R GFRRGFLHS  | 199   | 722   |
| >TP53-L111R GFRLGFLHSG | 1432  | >TP53-L111R GFRRGFLHSG | 414   | 1018  |
| >TP53-L111R YGFRLGFL   | 116   | >TP53-L111R YGFRRGFL   | 971   | 855   |
| >TP53-L111R YGFRLGFL   | 486   | >TP53-L111R YGFRRGFL   | 2128  | 1642  |
| >TP53-L111R YGFRLGFL   | 443   | >TP53-L111R YGFRRGFL   | 2265  | 1822  |
| >TP53-L111R YGFRLGFLH  | 89    | >TP53-L111R YGFRRGFLH  | 331   | 242   |
| >TP53-L111R SYGFRLGFL  | 95    | >TP53-L111R SYGFRRGFL  | 32    | 63    |
| >TP53-L111R SYGFRLGF   | 356   | >TP53-L111R SYGFRRGF   | 1146  | 790   |
| >TP53-L111R SYGFRLGF   | 232   | >TP53-L111R SYGFRRGF   | 849   | 617   |
| >TP53-L111R SYGFRLGFL  | 319   | >TP53-L111R SYGFRRGFL  | 1382  | 1063  |
| >TP53-L111R SYGFRLGF   | 7     | >TP53-L111R SYGFRRGF   | 14    | 7     |
| >TP53-L111R SYGFRLGFL  | 12    | >TP53-L111R SYGFRRGFL  | 22    | 10    |
| >TP53-L111R SYGFRLGF   | 338   | >TP53-L111R SYGFRRGF   | 1465  | 1127  |
| >TP53-L111R SYGFRLGFL  | 139   | >TP53-L111R SYGFRRGFL  | 462   | 323   |
| >TP53-L111R SYGFRLGFL  | 222   | >TP53-L111R SYGFRRGFL  | 114   | 108   |
| >TP53-L111R GSYGFRLGF  | 78    | >TP53-L111R GSYGFRRGF  | 161   | 83    |
| >TP53-L111R GSYGFRLGFL | 227   | >TP53-L111R GSYGFRRGFL | 288   | 61    |
| >TP53-L111R GSYGFRLGFL | 237   | >TP53-L111R GSYGFRRGFL | 884   | 647   |
| >TP53-L111R GSYGFRLGFL | 491   | >TP53-L111R GSYGFRRGFL | 696   | 205   |
| >TP53-L111R GSYGFRLGFL | 98    | >TP53-L111R GSYGFRRGFL | 275   | 177   |
| >TP53-L111R GSYGFRLGF  | 61    | >TP53-L111R GSYGFRRGF  | 186   | 125   |
| >TP53-L111R GSYGFRLGF  | 365   | >TP53-L111R GSYGFRRGF  | 1386  | 1021  |
| >TP53-L111R GSYGFRLGF  | 111   | >TP53-L111R GSYGFRRGF  | 232   | 121   |
| >TP53-L111R GSYGFRLGF  | 4     | >TP53-L111R GSYGFRRGF  | 7     | 3     |
| >TP53-L111R GSYGFRLGFL | 31    | >TP53-L111R GSYGFRRGFL | 82    | 51    |
| >TP53-L111R GSYGFRLGF  | 222   | >TP53-L111R GSYGFRRGF  | 132   | 90    |
| >TP53-L111R GSYGFRLGF  | 264   | >TP53-L111R GSYGFRRGF  | 9672  | 9408  |
| >TP53-L111R GSYGFRLGF  | 44    | >TP53-L111R GSYGFRRGF  | 62    | 18    |
| >TP53-L111R GSYGFRLGFL | 70    | >TP53-L111R GSYGFRRGFL | 146   | 76    |
| >TP53-L111R GSYGFRLGFL | 63    | >TP53-L111R GSYGFRRGFL | 115   | 52    |
| >TP53-L111R QGSYGFRLGF | 278   | >TP53-L111R QGSYGFRRGI | 772   | 494   |

|                        |       |                        |       |       |
|------------------------|-------|------------------------|-------|-------|
| >TP53-L111R YQGSYGFRL  | 30    | >TP53-L111R YQGSYGFRR  | 19306 | 19276 |
| >TP53-L111R YQGSYGFRL  | 36    | >TP53-L111R YQGSYGFRR  | 18835 | 18799 |
| >TP53-L111R YQGSYGFRL  | 15    | >TP53-L111R YQGSYGFRR  | 11386 | 11371 |
| >TP53-L111R YQGSYGFRLC | 189   | >TP53-L111R YQGSYGFRRC | 681   | 492   |
| >TP53-L111R YQGSYGFRL  | 32    | >TP53-L111R YQGSYGFRR  | 13280 | 13248 |
| >TP53-L111R YQGSYGFRL  | 167   | >TP53-L111R YQGSYGFRR  | 19053 | 18886 |
| >TP53-L111R YQGSYGFRL  | 13218 | >TP53-L111R YQGSYGFRR  | 36    | 13182 |
| >TP53-L111R YQGSYGFRL  | 211   | >TP53-L111R YQGSYGFRR  | 9799  | 9588  |
| >TP53-L111R YQGSYGFRLC | 32    | >TP53-L111R YQGSYGFRRC | 44    | 12    |
| >TP53-L111R YQGSYGFRLC | 158   | >TP53-L111R YQGSYGFRRC | 155   | 3     |
| >TP53-L111R YQGSYGFRL  | 77    | >TP53-L111R YQGSYGFRR  | 1243  | 1166  |
| >TP53-L111R YQGSYGFRLC | 6     | >TP53-L111R YQGSYGFRRC | 7     | 1     |
| >TP53-L111R YQGSYGFRL  | 145   | >TP53-L111R YQGSYGFRR  | 16793 | 16648 |
| >TP53-L111R YQGSYGFRL  | 27707 | >TP53-L111R YQGSYGFRR  | 339   | 27368 |
| >TP53-L111R TYQGSYGFRL | 141   | >TP53-L111R TYQGSYGFRR | 23467 | 23326 |
| >TP53-L111R TYQGSYGFRL | 316   | >TP53-L111R TYQGSYGFRR | 24936 | 24620 |
| >TP53-L111R TYQGSYGFRL | 163   | >TP53-L111R TYQGSYGFRR | 10826 | 10663 |
| >TP53-L111R TYQGSYGFRL | 7     | >TP53-L111R TYQGSYGFRR | 750   | 743   |
| >TP53-L111R TYQGSYGFRL | 7749  | >TP53-L111R TYQGSYGFRR | 45    | 7704  |
| >TP53-L111R TYQGSYGFRL | 14822 | >TP53-L111R TYQGSYGFRR | 300   | 14522 |
| >TP53-L111R TYQGSYGFRL | 26272 | >TP53-L111R TYQGSYGFRR | 76    | 26196 |
| >TP53-L130F LNKMFQQL   | 100   | >TP53-L130F FNKMFQQL   | 73    | 27    |
| >TP53-L130F LNKMFQQLA  | 161   | >TP53-L130F FNKMFQQLA  | 2656  | 2495  |
| >TP53-L130F LNKMFQQL   | 153   | >TP53-L130F FNKMFQQL   | 62    | 91    |
| >TP53-L130F ALNKMFQQL  | 238   | >TP53-L130F AFNKMFQQL  | 20836 | 20598 |
| >TP53-L130F ALNKMFQQL  | 17    | >TP53-L130F AFNKMFQQL  | 2537  | 2520  |
| >TP53-L130F ALNKMFQQL  | 30    | >TP53-L130F AFNKMFQQL  | 13056 | 13026 |
| >TP53-L130F ALNKMFQQL  | 442   | >TP53-L130F AFNKMFQQL  | 19645 | 19203 |
| >TP53-L130F ALNKMFQQL  | 297   | >TP53-L130F AFNKMFQQL  | 15437 | 15140 |
| >TP53-L130F ALNKMFQQL  | 22    | >TP53-L130F AFNKMFQQL  | 12453 | 12431 |
| >TP53-L130F ALNKMFQQL  | 255   | >TP53-L130F AFNKMFQQL  | 21140 | 20885 |
| >TP53-L130F ALNKMFQQL  | 198   | >TP53-L130F AFNKMFQQL  | 22148 | 21950 |
| >TP53-L130F ALNKMFQQL  | 21    | >TP53-L130F AFNKMFQQL  | 11456 | 11435 |
| >TP53-L130F ALNKMFQQL  | 256   | >TP53-L130F AFNKMFQQL  | 19724 | 19468 |
| >TP53-L130F ALNKMFQQL  | 66    | >TP53-L130F AFNKMFQQL  | 17809 | 17743 |
| >TP53-L130F ALNKMFQQL  | 245   | >TP53-L130F AFNKMFQQL  | 28464 | 28219 |
| >TP53-L130F ALNKMFQQL  | 3     | >TP53-L130F AFNKMFQQL  | 3862  | 3859  |
| >TP53-L130F ALNKMFQQL  | 11    | >TP53-L130F AFNKMFQQL  | 16585 | 16574 |
| >TP53-L130F ALNKMFQQL  | 37    | >TP53-L130F AFNKMFQQL  | 576   | 539   |
| >TP53-L130F ALNKMFQQL  | 25    | >TP53-L130F AFNKMFQQL  | 138   | 113   |
| >TP53-L130F ALNKMFQQL  | 10286 | >TP53-L130F AFNKMFQQL  | 140   | 10146 |
| >TP53-L130F ALNKMFQQL  | 113   | >TP53-L130F AFNKMFQQL  | 55    | 58    |
| >TP53-L130F ALNKMFQQL  | 431   | >TP53-L130F AFNKMFQQL  | 110   | 321   |

|                         |      |                         |      |      |
|-------------------------|------|-------------------------|------|------|
| >TP53-L130F ALNKMFCQL   | 288  | >TP53-L130F AFNKMFCQL   | 3847 | 3559 |
| >TP53-L130F ALNKMFCQL   | 416  | >TP53-L130F AFNKMFCQL   | 7509 | 7093 |
| >TP53-L130F ALNKMFCQL   | 981  | >TP53-L130F AFNKMFCQL   | 168  | 813  |
| >TP53-L130F KSVTCTYSPA  | 396  | >TP53-L130F KSVTCTYSPA  | 2863 | 2467 |
| >TP53-L130F KSVTCTYSPA  | 1648 | >TP53-L130F KSVTCTYSPA  | 171  | 1477 |
| >TP53-L130F KSVTCTYSPA  | 488  | >TP53-L130F KSVTCTYSPA  | 4004 | 3516 |
| >TP53-L130F KSVTCTYSPA  | 107  | >TP53-L130F KSVTCTYSPA  | 29   | 78   |
| >TP53-L130F KSVTCTYSPA  | 2855 | >TP53-L130F KSVTCTYSPA  | 114  | 2741 |
| >TP53-L130F KSVTCTYSPA  | 89   | >TP53-L130F KSVTCTYSPA  | 6    | 83   |
| >TP53-L130F KSVTCTYSPA  | 6    | >TP53-L130F KSVTCTYSPA  | 4    | 2    |
| >TP53-L130F KSVTCTYSPA  | 3558 | >TP53-L130F KSVTCTYSPA  | 243  | 3315 |
| >TP53-L130F KSVTCTYSPA  | 3754 | >TP53-L130F KSVTCTYSPA  | 497  | 3257 |
| >TP53-L130F KSVTCTYSPA  | 113  | >TP53-L130F KSVTCTYSPA  | 17   | 96   |
| >TP53-L130F KSVTCTYSPA  | 198  | >TP53-L130F KSVTCTYSPA  | 467  | 269  |
| >TP53-L130F KSVTCTYSPA  | 882  | >TP53-L130F KSVTCTYSPA  | 124  | 758  |
| >TP53-L130F SPALNKMFC   | 432  | >TP53-L130F SPAFNKMFC   | 295  | 137  |
| >TP53-L130F SPALNKMFC   | 100  | >TP53-L130F SPAFNKMFC   | 117  | 17   |
| >TP53-L130F SPALNKMFC   | 41   | >TP53-L130F SPAFNKMFC   | 45   | 4    |
| >TP53-L130F SPALNKMFC   | 372  | >TP53-L130F SPAFNKMFC   | 403  | 31   |
| >TP53-L130F SPALNKMFC   | 326  | >TP53-L130F SPAFNKMFC   | 335  | 9    |
| >TP53-L130F SPALNKMFC   | 450  | >TP53-L130F SPAFNKMFC   | 480  | 30   |
| >TP53-L130F YSPALNKM    | 7535 | >TP53-L130F YSPAFNKM    | 132  | 7403 |
| >TP53-L130F YSPALNKMFC  | 384  | >TP53-L130F YSPAFNKMFC  | 299  | 85   |
| >TP53-L130F YSPALNKMFC  | 104  | >TP53-L130F YSPAFNKMFC  | 25   | 79   |
| >TP53-L130F YSPALNKMFC  | 43   | >TP53-L130F YSPAFNKMFC  | 26   | 17   |
| >TP53-L130F YSPALNKMFC  | 40   | >TP53-L130F YSPAFNKMFC  | 21   | 19   |
| >TP53-L130F YSPALNKMFC  | 3    | >TP53-L130F YSPAFNKMFC  | 2    | 1    |
| >TP53-L130F YSPALNKMFC  | 22   | >TP53-L130F YSPAFNKMFC  | 14   | 8    |
| >TP53-L130F YSPALNKMFC  | 124  | >TP53-L130F YSPAFNKMFC  | 59   | 65   |
| >TP53-L130F YSPALNKMFC  | 67   | >TP53-L130F YSPAFNKMFC  | 55   | 12   |
| >TP53-L130F YSPALNKMFC  | 103  | >TP53-L130F YSPAFNKMFC  | 93   | 10   |
| >TP53-L130F TYSPALNKM   | 136  | >TP53-L130F TYSPAFNKM   | 146  | 10   |
| >TP53-L130F TYSPALNKM   | 220  | >TP53-L130F TYSPAFNKM   | 89   | 131  |
| >TP53-L130F TYSPALNKM   | 1483 | >TP53-L130F TYSPAFNKM   | 461  | 1022 |
| >TP53-L130F TYSPALNKM   | 1702 | >TP53-L130F TYSPAFNKM   | 354  | 1348 |
| >TP53-L130F TYSPALNKMFC | 179  | >TP53-L130F TYSPAFNKMFC | 73   | 106  |
| >TP53-L130F TYSPALNKMFC | 1122 | >TP53-L130F TYSPAFNKMFC | 353  | 769  |
| >TP53-L130F TYSPALNKMFC | 64   | >TP53-L130F TYSPAFNKMFC | 44   | 20   |
| >TP53-L130F TYSPALNKMFC | 27   | >TP53-L130F TYSPAFNKMFC | 14   | 13   |
| >TP53-L130F TYSPALNKMFC | 5    | >TP53-L130F TYSPAFNKMFC | 5    | 0    |
| >TP53-L130F TYSPALNKMFC | 551  | >TP53-L130F TYSPAFNKMFC | 286  | 265  |
| >TP53-L130F TYSPALNKMFC | 586  | >TP53-L130F TYSPAFNKMFC | 101  | 485  |
| >TP53-L130F TYSPALNKMFC | 222  | >TP53-L130F TYSPAFNKMFC | 282  | 60   |

|                        |      |                        |       |       |
|------------------------|------|------------------------|-------|-------|
| >TP53-L130F TYSPALNK   | 1077 | >TP53-L130F TYSPAFNK   | 299   | 778   |
| >TP53-L130F TYSPALNK   | 1692 | >TP53-L130F TYSPAFNK   | 466   | 1226  |
| >TP53-L130F TYSPALNK   | 674  | >TP53-L130F TYSPAFNK   | 272   | 402   |
| >TP53-L130F TYSPALNKMF | 439  | >TP53-L130F TYSPAFNKMF | 423   | 16    |
| >TP53-L130F CTYSPALNK  | 30   | >TP53-L130F CTYSPAFNK  | 31    | 1     |
| >TP53-L130F CTYSPALNK  | 11   | >TP53-L130F CTYSPAFNK  | 8     | 3     |
| >TP53-L130F CTYSPALNKN | 343  | >TP53-L130F CTYSPAFNKN | 238   | 105   |
| >TP53-L130F CTYSPALNKN | 63   | >TP53-L130F CTYSPAFNKN | 122   | 59    |
| >TP53-L130F CTYSPALNKN | 380  | >TP53-L130F CTYSPAFNKN | 302   | 78    |
| >TP53-L130F CTYSPALNKN | 246  | >TP53-L130F CTYSPAFNKN | 161   | 85    |
| >TP53-L130F CTYSPALNK  | 215  | >TP53-L130F CTYSPAFNK  | 388   | 173   |
| >TP53-L130F CTYSPALNK  | 2398 | >TP53-L130F CTYSPAFNK  | 90    | 2308  |
| >TP53-L130F CTYSPALNK  | 30   | >TP53-L130F CTYSPAFNK  | 7     | 23    |
| >TP53-L130F CTYSPALNKN | 1364 | >TP53-L130F CTYSPAFNKN | 462   | 902   |
| >TP53-L130F CTYSPALNKN | 488  | >TP53-L130F CTYSPAFNKN | 211   | 277   |
| >TP53-L130F CTYSPALNKN | 610  | >TP53-L130F CTYSPAFNKN | 437   | 173   |
| >TP53-L130F CTYSPALNKN | 23   | >TP53-L130F CTYSPAFNKN | 20    | 3     |
| >TP53-L130F CTYSPALNKN | 24   | >TP53-L130F CTYSPAFNKN | 44    | 20    |
| >TP53-L130F CTYSPALNKN | 5    | >TP53-L130F CTYSPAFNKN | 5     | 0     |
| >TP53-L130F CTYSPALNKN | 76   | >TP53-L130F CTYSPAFNKN | 28    | 48    |
| >TP53-L130F CTYSPALNKN | 146  | >TP53-L130F CTYSPAFNKN | 78    | 68    |
| >TP53-L130F CTYSPALNKN | 30   | >TP53-L130F CTYSPAFNKN | 42    | 12    |
| >TP53-L130F CTYSPALNKN | 13   | >TP53-L130F CTYSPAFNKN | 12    | 1     |
| >TP53-L130F CTYSPALNK  | 572  | >TP53-L130F CTYSPAFNK  | 314   | 258   |
| >TP53-L130F CTYSPALNKN | 358  | >TP53-L130F CTYSPAFNKN | 191   | 167   |
| >TP53-L130F TCTYSPAL   | 7184 | >TP53-L130F TCTYSPAF   | 419   | 6765  |
| >TP53-L130F TCTYSPALNK | 453  | >TP53-L130F TCTYSPAFNK | 432   | 21    |
| >TP53-L130F VTCTYSPAL  | 397  | >TP53-L130F VTCTYSPAF  | 2609  | 2212  |
| >TP53-L130F VTCTYSPALN | 80   | >TP53-L130F VTCTYSPAFN | 87    | 7     |
| >TP53-L130F VTCTYSPALN | 14   | >TP53-L130F VTCTYSPAFN | 10    | 4     |
| >TP53-L130F VTCTYSPAL  | 720  | >TP53-L130F VTCTYSPAF  | 61    | 659   |
| >TP53-L130F VTCTYSPALN | 146  | >TP53-L130F VTCTYSPAFN | 210   | 64    |
| >TP53-L130F VTCTYSPALN | 2145 | >TP53-L130F VTCTYSPAFN | 278   | 1867  |
| >TP53-L130F VTCTYSPAL  | 1995 | >TP53-L130F VTCTYSPAF  | 390   | 1605  |
| >TP53-L130F VTCTYSPALN | 490  | >TP53-L130F VTCTYSPAFN | 123   | 367   |
| >TP53-L130F VTCTYSPAL  | 2181 | >TP53-L130F VTCTYSPAF  | 91    | 2090  |
| >TP53-L130F VTCTYSPAL  | 1053 | >TP53-L130F VTCTYSPAF  | 54    | 999   |
| >TP53-L130F VTCTYSPAL  | 12   | >TP53-L130F VTCTYSPAF  | 7     | 5     |
| >TP53-L130F VTCTYSPAL  | 4897 | >TP53-L130F VTCTYSPAF  | 380   | 4517  |
| >TP53-L130F VTCTYSPAL  | 66   | >TP53-L130F VTCTYSPAF  | 133   | 67    |
| >TP53-L130F VTCTYSPAL  | 951  | >TP53-L130F VTCTYSPAF  | 110   | 841   |
| >TP53-L130F SVTCTYSPAL | 268  | >TP53-L130F SVTCTYSPAF | 12188 | 11920 |
| >TP53-L130F SVTCTYSPAL | 1465 | >TP53-L130F SVTCTYSPAF | 123   | 1342  |

|                        |      |                        |       |       |
|------------------------|------|------------------------|-------|-------|
| >TP53-L130F SVTCTYSPAL | 149  | >TP53-L130F SVTCTYSPAF | 8733  | 8584  |
| >TP53-L130F SVTCTYSPAL | 4988 | >TP53-L130F SVTCTYSPAF | 242   | 4746  |
| >TP53-L130F SVTCTYSPAL | 1647 | >TP53-L130F SVTCTYSPAF | 53    | 1594  |
| >TP53-L130H LNKMFQQL   | 100  | >TP53-L130H HNKMFQQL   | 523   | 423   |
| >TP53-L130H LNKMFQQLA  | 161  | >TP53-L130H HNKMFQQLA  | 22    | 139   |
| >TP53-L130H LNKMFQQL   | 153  | >TP53-L130H HNKMFQQL   | 246   | 93    |
| >TP53-L130H ALNKMFQQL  | 238  | >TP53-L130H AHNKMFQQL  | 24031 | 23793 |
| >TP53-L130H ALNKMFQQL  | 17   | >TP53-L130H AHNKMFQQL  | 11881 | 11864 |
| >TP53-L130H ALNKMFQQL  | 30   | >TP53-L130H AHNKMFQQL  | 18425 | 18395 |
| >TP53-L130H ALNKMFQQL  | 442  | >TP53-L130H AHNKMFQQL  | 24044 | 23602 |
| >TP53-L130H ALNKMFQQL  | 297  | >TP53-L130H AHNKMFQQL  | 20780 | 20483 |
| >TP53-L130H ALNKMFQQL  | 22   | >TP53-L130H AHNKMFQQL  | 19459 | 19437 |
| >TP53-L130H ALNKMFQQL  | 255  | >TP53-L130H AHNKMFQQL  | 26012 | 25757 |
| >TP53-L130H ALNKMFQQL  | 198  | >TP53-L130H AHNKMFQQL  | 24534 | 24336 |
| >TP53-L130H ALNKMFQQL  | 21   | >TP53-L130H AHNKMFQQL  | 19358 | 19337 |
| >TP53-L130H ALNKMFQQL  | 256  | >TP53-L130H AHNKMFQQL  | 24093 | 23837 |
| >TP53-L130H ALNKMFQQL  | 66   | >TP53-L130H AHNKMFQQL  | 21945 | 21879 |
| >TP53-L130H ALNKMFQ    | 245  | >TP53-L130H AHNKMFQ    | 34242 | 33997 |
| >TP53-L130H ALNKMFQQL  | 3    | >TP53-L130H AHNKMFQQL  | 17440 | 17437 |
| >TP53-L130H ALNKMFQQL  | 11   | >TP53-L130H AHNKMFQQL  | 28592 | 28581 |
| >TP53-L130H ALNKMFQQL  | 37   | >TP53-L130H AHNKMFQQL  | 4983  | 4946  |
| >TP53-L130H ALNKMFQQL  | 25   | >TP53-L130H AHNKMFQQL  | 2677  | 2652  |
| >TP53-L130H ALNKMFQQL  | 113  | >TP53-L130H AHNKMFQQL  | 3265  | 3152  |
| >TP53-L130H ALNKMFQQL  | 431  | >TP53-L130H AHNKMFQQL  | 7769  | 7338  |
| >TP53-L130H ALNKMFQQL  | 288  | >TP53-L130H AHNKMFQQL  | 8280  | 7992  |
| >TP53-L130H ALNKMFQQL  | 416  | >TP53-L130H AHNKMFQQL  | 16653 | 16237 |
| >TP53-L130H KSVTCTYSPA | 396  | >TP53-L130H KSVTCTYSPA | 25432 | 25036 |
| >TP53-L130H KSVTCTYSPA | 488  | >TP53-L130H KSVTCTYSPA | 4255  | 3767  |
| >TP53-L130H KSVTCTYSPA | 107  | >TP53-L130H KSVTCTYSPA | 3229  | 3122  |
| >TP53-L130H KSVTCTYSPA | 89   | >TP53-L130H KSVTCTYSPA | 713   | 624   |
| >TP53-L130H KSVTCTYSPA | 6    | >TP53-L130H KSVTCTYSPA | 212   | 206   |
| >TP53-L130H KSVTCTYSPA | 113  | >TP53-L130H KSVTCTYSPA | 2653  | 2540  |
| >TP53-L130H KSVTCTYSPA | 198  | >TP53-L130H KSVTCTYSPA | 17495 | 17297 |
| >TP53-L130H SPALNKMFQ  | 432  | >TP53-L130H SPAHNKMF   | 204   | 228   |
| >TP53-L130H SPALNKMF   | 100  | >TP53-L130H SPAHNKMF   | 51    | 49    |
| >TP53-L130H SPALNKMFQ  | 41   | >TP53-L130H SPAHNKMF   | 27    | 14    |
| >TP53-L130H SPALNKMFQ  | 372  | >TP53-L130H SPAHNKMF   | 419   | 47    |
| >TP53-L130H SPALNKMF   | 2836 | >TP53-L130H SPAHNKMF   | 473   | 2363  |
| >TP53-L130H SPALNKMF   | 326  | >TP53-L130H SPAHNKMF   | 194   | 132   |
| >TP53-L130H SPALNKMF   | 450  | >TP53-L130H SPAHNKMF   | 325   | 125   |
| >TP53-L130H SPALNKMF   | 677  | >TP53-L130H SPAHNKMF   | 134   | 543   |
| >TP53-L130H YSPALNKMF  | 384  | >TP53-L130H YSPAHNKMF  | 566   | 182   |
| >TP53-L130H YSPALNKMF  | 104  | >TP53-L130H YSPAHNKMF  | 50    | 54    |

|                       |      |                       |       |       |
|-----------------------|------|-----------------------|-------|-------|
| >TP53-L130HYSPALNKM   | 586  | >TP53-L130HYSPAHNKM   | 406   | 180   |
| >TP53-L130HYSPALNKMF  | 43   | >TP53-L130HYSPAHNKMF  | 27    | 16    |
| >TP53-L130HYSPALNKM   | 40   | >TP53-L130HYSPAHNKM   | 22    | 18    |
| >TP53-L130HYSPALNKMF  | 3    | >TP53-L130HYSPAHNKMF  | 2     | 1     |
| >TP53-L130HYSPALNKMFC | 22   | >TP53-L130HYSPAHNKMF  | 24    | 2     |
| >TP53-L130HYSPALNKMFC | 124  | >TP53-L130HYSPAHNKMF  | 105   | 19    |
| >TP53-L130HYSPALNKM   | 67   | >TP53-L130HYSPAHNKM   | 184   | 117   |
| >TP53-L130HYSPALNKMF  | 103  | >TP53-L130HYSPAHNKMF  | 838   | 735   |
| >TP53-L130HTYSPALNKM  | 136  | >TP53-L130HTYSPAHNKM  | 373   | 237   |
| >TP53-L130HTYSPALNK   | 220  | >TP53-L130HTYSPAHNK   | 277   | 57    |
| >TP53-L130HTYSPALNKMF | 179  | >TP53-L130HTYSPAHNKM  | 185   | 6     |
| >TP53-L130HTYSPALNKMF | 64   | >TP53-L130HTYSPAHNKM  | 93    | 29    |
| >TP53-L130HTYSPALNKM  | 27   | >TP53-L130HTYSPAHNKM  | 54    | 27    |
| >TP53-L130HTYSPALNKMF | 5    | >TP53-L130HTYSPAHNKM  | 5     | 0     |
| >TP53-L130HTYSPALNK   | 222  | >TP53-L130HTYSPAHNK   | 200   | 22    |
| >TP53-L130HTYSPALNK   | 1077 | >TP53-L130HTYSPAHNK   | 389   | 688   |
| >TP53-L130HTYSPALNK   | 674  | >TP53-L130HTYSPAHNK   | 478   | 196   |
| >TP53-L130HTYSPALNKMF | 439  | >TP53-L130HTYSPAHNKM  | 418   | 21    |
| >TP53-L130HCTYSPALNK  | 30   | >TP53-L130HCTYSPAHNK  | 38    | 8     |
| >TP53-L130HCTYSPALNK  | 11   | >TP53-L130HCTYSPAHNK  | 13    | 2     |
| >TP53-L130HCTYSPALNKM | 343  | >TP53-L130HCTYSPAHNKM | 360   | 17    |
| >TP53-L130HCTYSPALNKM | 63   | >TP53-L130HCTYSPAHNKM | 84    | 21    |
| >TP53-L130HCTYSPALNKM | 380  | >TP53-L130HCTYSPAHNKM | 101   | 279   |
| >TP53-L130HCTYSPALNKM | 246  | >TP53-L130HCTYSPAHNKM | 259   | 13    |
| >TP53-L130HCTYSPALNK  | 215  | >TP53-L130HCTYSPAHNK  | 482   | 267   |
| >TP53-L130HCTYSPALNK  | 2398 | >TP53-L130HCTYSPAHNK  | 316   | 2082  |
| >TP53-L130HCTYSPALNK  | 30   | >TP53-L130HCTYSPAHNK  | 11    | 19    |
| >TP53-L130HCTYSPALNKM | 488  | >TP53-L130HCTYSPAHNKM | 320   | 168   |
| >TP53-L130HCTYSPALNKM | 23   | >TP53-L130HCTYSPAHNKM | 22    | 1     |
| >TP53-L130HCTYSPALNKM | 24   | >TP53-L130HCTYSPAHNKM | 25    | 1     |
| >TP53-L130HCTYSPALNKM | 5    | >TP53-L130HCTYSPAHNKM | 5     | 0     |
| >TP53-L130HCTYSPALNKM | 76   | >TP53-L130HCTYSPAHNKM | 36    | 40    |
| >TP53-L130HCTYSPALNKM | 146  | >TP53-L130HCTYSPAHNKM | 103   | 43    |
| >TP53-L130HCTYSPALNKM | 30   | >TP53-L130HCTYSPAHNKM | 43    | 13    |
| >TP53-L130HCTYSPALNKM | 13   | >TP53-L130HCTYSPAHNKM | 25    | 12    |
| >TP53-L130HCTYSPALNK  | 572  | >TP53-L130HCTYSPAHNK  | 292   | 280   |
| >TP53-L130HCTYSPALNKM | 358  | >TP53-L130HCTYSPAHNKM | 362   | 4     |
| >TP53-L130HTCTYSPALNK | 453  | >TP53-L130HTCTYSPAHNK | 571   | 118   |
| >TP53-L130HVTCTYSPAL  | 397  | >TP53-L130HVTCTYSPAH  | 26420 | 26023 |
| >TP53-L130HVTCTYSPALN | 80   | >TP53-L130HVTCTYSPAHN | 146   | 66    |
| >TP53-L130HVTCTYSPALN | 14   | >TP53-L130HVTCTYSPAHN | 14    | 0     |
| >TP53-L130HVTCTYSPALN | 146  | >TP53-L130HVTCTYSPAHN | 237   | 91    |
| >TP53-L130HVTCTYSPALN | 490  | >TP53-L130HVTCTYSPAHN | 163   | 327   |

|                        |       |                        |       |       |
|------------------------|-------|------------------------|-------|-------|
| >TP53-L130HVTCTYSPAL   | 12    | >TP53-L130HVTCTYSPAH   | 786   | 774   |
| >TP53-L130HVTCTYSPAL   | 66    | >TP53-L130HVTCTYSPAH   | 9651  | 9585  |
| >TP53-L130H SVTCTYSPAL | 268   | >TP53-L130H SVTCTYSPAH | 20924 | 20656 |
| >TP53-L130H SVTCTYSPAL | 149   | >TP53-L130H SVTCTYSPAH | 17928 | 17779 |
| >TP53-L130P LNKMFCQL   | 100   | >TP53-L130P PNKMFCQL   | 3327  | 3227  |
| >TP53-L130P LNKMFCQLAI | 161   | >TP53-L130P PNKMFCQLA  | 1075  | 914   |
| >TP53-L130P LNKMFCQL   | 153   | >TP53-L130P PNKMFCQL   | 1604  | 1451  |
| >TP53-L130P ALNKMFCQL  | 33034 | >TP53-L130P APNKMFCQL  | 54    | 32980 |
| >TP53-L130P ALNKMFCQL  | 238   | >TP53-L130P APNKMFCQL  | 24189 | 23951 |
| >TP53-L130P ALNKMFCQL  | 17    | >TP53-L130P APNKMFCQL  | 23848 | 23831 |
| >TP53-L130P ALNKMFCQL  | 30    | >TP53-L130P APNKMFCQL  | 20152 | 20122 |
| >TP53-L130P ALNKMFCQL  | 442   | >TP53-L130P APNKMFCQL  | 26003 | 25561 |
| >TP53-L130P ALNKMFCQL  | 297   | >TP53-L130P APNKMFCQL  | 20605 | 20308 |
| >TP53-L130P ALNKMFCQL  | 22    | >TP53-L130P APNKMFCQL  | 21818 | 21796 |
| >TP53-L130P ALNKMFCQL  | 255   | >TP53-L130P APNKMFCQL  | 27783 | 27528 |
| >TP53-L130P ALNKMFCQL  | 198   | >TP53-L130P APNKMFCQL  | 24643 | 24445 |
| >TP53-L130P ALNKMFCQL  | 21    | >TP53-L130P APNKMFCQL  | 21801 | 21780 |
| >TP53-L130P ALNKMFCQL  | 256   | >TP53-L130P APNKMFCQL  | 25690 | 25434 |
| >TP53-L130P ALNKMFCQL  | 66    | >TP53-L130P APNKMFCQL  | 21627 | 21561 |
| >TP53-L130P ALNKMFCQ   | 245   | >TP53-L130P APNKMFCQ   | 35396 | 35151 |
| >TP53-L130P ALNKMFCQL  | 3     | >TP53-L130P APNKMFCQL  | 22178 | 22175 |
| >TP53-L130P ALNKMFCQL  | 11    | >TP53-L130P APNKMFCQL  | 31292 | 31281 |
| >TP53-L130P ALNKMFCQL  | 37    | >TP53-L130P APNKMFCQL  | 7754  | 7717  |
| >TP53-L130P ALNKMFCQL  | 25    | >TP53-L130P APNKMFCQL  | 2270  | 2245  |
| >TP53-L130P ALNKMFCQL  | 113   | >TP53-L130P APNKMFCQL  | 11247 | 11134 |
| >TP53-L130P ALNKMFCQL  | 431   | >TP53-L130P APNKMFCQL  | 9498  | 9067  |
| >TP53-L130P ALNKMFCQL  | 17545 | >TP53-L130P APNKMFCQL  | 59    | 17486 |
| >TP53-L130P ALNKMFCQL  | 288   | >TP53-L130P APNKMFCQL  | 300   | 12    |
| >TP53-L130P ALNKMFCQL  | 416   | >TP53-L130P APNKMFCQL  | 15911 | 15495 |
| >TP53-L130P ALNKMFCQL  | 23053 | >TP53-L130P APNKMFCQL  | 122   | 22931 |
| >TP53-L130P ALNKMFCQL  | 19371 | >TP53-L130P APNKMFCQL  | 260   | 19111 |
| >TP53-L130P KSVTCTYSPA | 396   | >TP53-L130P KSVTCTYSPA | 16750 | 16354 |
| >TP53-L130P KSVTCTYSPA | 488   | >TP53-L130P KSVTCTYSPA | 3799  | 3311  |
| >TP53-L130P KSVTCTYSPA | 107   | >TP53-L130P KSVTCTYSPA | 5553  | 5446  |
| >TP53-L130P KSVTCTYSPA | 89    | >TP53-L130P KSVTCTYSPA | 2485  | 2396  |
| >TP53-L130P KSVTCTYSPA | 6     | >TP53-L130P KSVTCTYSPA | 9197  | 9191  |
| >TP53-L130P KSVTCTYSPA | 113   | >TP53-L130P KSVTCTYSPA | 14804 | 14691 |
| >TP53-L130P KSVTCTYSPA | 198   | >TP53-L130P KSVTCTYSPA | 18114 | 17916 |
| >TP53-L130P PALNKMFCQ  | 20059 | >TP53-L130P PAPNKMFCQ  | 244   | 19815 |
| >TP53-L130P SPALNKMFCQ | 432   | >TP53-L130P SPAPNKMFCQ | 64    | 368   |
| >TP53-L130P SPALNKMFC  | 100   | >TP53-L130P SPAPNKMFC  | 62    | 38    |
| >TP53-L130P SPALNKMFCQ | 41    | >TP53-L130P SPAPNKMFCQ | 30    | 11    |
| >TP53-L130P SPALNKMFCQ | 372   | >TP53-L130P SPAPNKMFCQ | 804   | 432   |



|                        |      |                        |       |       |
|------------------------|------|------------------------|-------|-------|
| >TP53-L130P SPALNKMF   | 326  | >TP53-L130P SPAPNKMF   | 243   | 83    |
| >TP53-L130P SPALNKMF   | 450  | >TP53-L130P SPAPNKMF   | 226   | 224   |
| >TP53-L130P SPALNKMF   | 677  | >TP53-L130P SPAPNKMF   | 457   | 220   |
| >TP53-L130P YSPALNKMF  | 384  | >TP53-L130P YSPAPNKMF  | 944   | 560   |
| >TP53-L130P YSPALNKMF  | 3198 | >TP53-L130P YSPAPNKMF  | 346   | 2852  |
| >TP53-L130P YSPALNKMF  | 104  | >TP53-L130P YSPAPNKMF  | 60    | 44    |
| >TP53-L130P YSPALNKM   | 586  | >TP53-L130P YSPAPNKM   | 437   | 149   |
| >TP53-L130P YSPALNKMF  | 43   | >TP53-L130P YSPAPNKMF  | 17    | 26    |
| >TP53-L130P YSPALNKM   | 40   | >TP53-L130P YSPAPNKM   | 7     | 33    |
| >TP53-L130P YSPALNKMF  | 3    | >TP53-L130P YSPAPNKMF  | 2     | 1     |
| >TP53-L130P YSPALNKMFC | 22   | >TP53-L130P YSPAPNKMF  | 14    | 8     |
| >TP53-L130P YSPALNKMFC | 124  | >TP53-L130P YSPAPNKMF  | 81    | 43    |
| >TP53-L130P YSPALNKM   | 67   | >TP53-L130P YSPAPNKM   | 67    | 0     |
| >TP53-L130P YSPALNKMF  | 103  | >TP53-L130P YSPAPNKMF  | 96    | 7     |
| >TP53-L130P TYSPALNKM  | 136  | >TP53-L130P TYSPAPNKM  | 409   | 273   |
| >TP53-L130P TYSPALNK   | 220  | >TP53-L130P TYSPAPNK   | 484   | 264   |
| >TP53-L130P TYSPALNKMF | 179  | >TP53-L130P TYSPAPNKMI | 133   | 46    |
| >TP53-L130P TYSPALNKMF | 64   | >TP53-L130P TYSPAPNKMI | 65    | 1     |
| >TP53-L130P TYSPALNKM  | 27   | >TP53-L130P TYSPAPNKM  | 155   | 128   |
| >TP53-L130P TYSPALNKMF | 5    | >TP53-L130P TYSPAPNKMI | 6     | 1     |
| >TP53-L130P TYSPALNKMF | 586  | >TP53-L130P TYSPAPNKMI | 286   | 300   |
| >TP53-L130P TYSPALNK   | 222  | >TP53-L130P TYSPAPNK   | 148   | 74    |
| >TP53-L130P TYSPALNKMF | 439  | >TP53-L130P TYSPAPNKMI | 326   | 113   |
| >TP53-L130P CTYSPALNK  | 30   | >TP53-L130P CTYSPAPNK  | 37    | 7     |
| >TP53-L130P CTYSPALNK  | 11   | >TP53-L130P CTYSPAPNK  | 19    | 8     |
| >TP53-L130P CTYSPALNKM | 343  | >TP53-L130P CTYSPAPNKM | 599   | 256   |
| >TP53-L130P CTYSPALNKM | 63   | >TP53-L130P CTYSPAPNKM | 116   | 53    |
| >TP53-L130P CTYSPALNKM | 380  | >TP53-L130P CTYSPAPNKM | 130   | 250   |
| >TP53-L130P CTYSPALNKM | 246  | >TP53-L130P CTYSPAPNKM | 391   | 145   |
| >TP53-L130P CTYSPALNK  | 215  | >TP53-L130P CTYSPAPNK  | 124   | 91    |
| >TP53-L130P CTYSPALNK  | 30   | >TP53-L130P CTYSPAPNK  | 34    | 4     |
| >TP53-L130P CTYSPALNKM | 488  | >TP53-L130P CTYSPAPNKM | 414   | 74    |
| >TP53-L130P CTYSPALNKM | 23   | >TP53-L130P CTYSPAPNKM | 19    | 4     |
| >TP53-L130P CTYSPALNKM | 24   | >TP53-L130P CTYSPAPNKM | 30    | 6     |
| >TP53-L130P CTYSPALNKM | 5    | >TP53-L130P CTYSPAPNKM | 4     | 1     |
| >TP53-L130P CTYSPALNKM | 76   | >TP53-L130P CTYSPAPNKM | 121   | 45    |
| >TP53-L130P CTYSPALNKM | 146  | >TP53-L130P CTYSPAPNKM | 106   | 40    |
| >TP53-L130P CTYSPALNKM | 30   | >TP53-L130P CTYSPAPNKM | 22    | 8     |
| >TP53-L130P CTYSPALNKM | 13   | >TP53-L130P CTYSPAPNKM | 13    | 0     |
| >TP53-L130P CTYSPALNKM | 358  | >TP53-L130P CTYSPAPNKM | 258   | 100   |
| >TP53-L130P TCTYSPALNK | 453  | >TP53-L130P TCTYSPAPNK | 1049  | 596   |
| >TP53-L130P VTCTYSPAL  | 397  | >TP53-L130P VTCTYSPAP  | 18704 | 18307 |
| >TP53-L130P VTCTYSPALN | 80   | >TP53-L130P VTCTYSPAPN | 126   | 46    |

|                        |       |                        |       |       |
|------------------------|-------|------------------------|-------|-------|
| >TP53-L130P VTCTYSPALN | 14    | >TP53-L130P VTCTYSPAPN | 18    | 4     |
| >TP53-L130P VTCTYSPALN | 146   | >TP53-L130P VTCTYSPAPN | 101   | 45    |
| >TP53-L130P VTCTYSPALN | 490   | >TP53-L130P VTCTYSPAPN | 376   | 114   |
| >TP53-L130P VTCTYSPAL  | 12    | >TP53-L130P VTCTYSPAP  | 15176 | 15164 |
| >TP53-L130P VTCTYSPAL  | 66    | >TP53-L130P VTCTYSPAP  | 9828  | 9762  |
| >TP53-L130P SVTCTYSPAL | 268   | >TP53-L130P SVTCTYSPAP | 14579 | 14311 |
| >TP53-L130P SVTCTYSPAL | 149   | >TP53-L130P SVTCTYSPAP | 12514 | 12365 |
| >TP53-L130R LNKMFQQL   | 100   | >TP53-L130R RNKMFQQL   | 86    | 14    |
| >TP53-L130R LNKMFQQL   | 7014  | >TP53-L130R RNKMFQQL   | 495   | 6519  |
| >TP53-L130R LNKMFQQLA  | 3711  | >TP53-L130R RNKMFQQLA  | 169   | 3542  |
| >TP53-L130R LNKMFQQLA  | 161   | >TP53-L130R RNKMFQQLA  | 10    | 151   |
| >TP53-L130R LNKMFQQL   | 153   | >TP53-L130R RNKMFQQL   | 255   | 102   |
| >TP53-L130R ALNKMFQQL  | 238   | >TP53-L130R ARNKMFQQL  | 24133 | 23895 |
| >TP53-L130R ALNKMFQQL  | 17    | >TP53-L130R ARNKMFQQL  | 17141 | 17124 |
| >TP53-L130R ALNKMFQQL  | 30    | >TP53-L130R ARNKMFQQL  | 18289 | 18259 |
| >TP53-L130R ALNKMFQQL  | 442   | >TP53-L130R ARNKMFQQL  | 23126 | 22684 |
| >TP53-L130R ALNKMFQQL  | 297   | >TP53-L130R ARNKMFQQL  | 20277 | 19980 |
| >TP53-L130R ALNKMFQQL  | 22    | >TP53-L130R ARNKMFQQL  | 19993 | 19971 |
| >TP53-L130R ALNKMFQQL  | 255   | >TP53-L130R ARNKMFQQL  | 26476 | 26221 |
| >TP53-L130R ALNKMFQQL  | 198   | >TP53-L130R ARNKMFQQL  | 24562 | 24364 |
| >TP53-L130R ALNKMFQQL  | 21    | >TP53-L130R ARNKMFQQL  | 20122 | 20101 |
| >TP53-L130R ALNKMFQQL  | 256   | >TP53-L130R ARNKMFQQL  | 24450 | 24194 |
| >TP53-L130R ALNKMFQQL  | 66    | >TP53-L130R ARNKMFQQL  | 21384 | 21318 |
| >TP53-L130R ALNKMFQQL  | 245   | >TP53-L130R ARNKMFQQL  | 33395 | 33150 |
| >TP53-L130R ALNKMFQQL  | 3     | >TP53-L130R ARNKMFQQL  | 15892 | 15889 |
| >TP53-L130R ALNKMFQQL  | 11    | >TP53-L130R ARNKMFQQL  | 27468 | 27457 |
| >TP53-L130R ALNKMFQQL  | 37    | >TP53-L130R ARNKMFQQL  | 14230 | 14193 |
| >TP53-L130R ALNKMFQQL  | 25    | >TP53-L130R ARNKMFQQL  | 4661  | 4636  |
| >TP53-L130R ALNKMFQQL  | 113   | >TP53-L130R ARNKMFQQL  | 2115  | 2002  |
| >TP53-L130R ALNKMFQQL  | 431   | >TP53-L130R ARNKMFQQL  | 14628 | 14197 |
| >TP53-L130R ALNKMFQQL  | 288   | >TP53-L130R ARNKMFQQL  | 2893  | 2605  |
| >TP53-L130R ALNKMFQQL  | 416   | >TP53-L130R ARNKMFQQL  | 16415 | 15999 |
| >TP53-L130R ALNKMFQQL  | 18692 | >TP53-L130R ARNKMFQQL  | 114   | 18578 |
| >TP53-L130R ALNKMFQQL  | 16468 | >TP53-L130R ARNKMFQQL  | 89    | 16379 |
| >TP53-L130R ALNKMFQQL  | 12778 | >TP53-L130R ARNKMFQQL  | 168   | 12610 |
| >TP53-L130R ALNKMFQQL  | 6923  | >TP53-L130R ARNKMFQQL  | 19    | 6904  |
| >TP53-L130R ALNKMFQQL  | 12990 | >TP53-L130R ARNKMFQQL  | 109   | 12881 |
| >TP53-L130R KSVTCTYSPA | 396   | >TP53-L130R KSVTCTYSPA | 24823 | 24427 |
| >TP53-L130R KSVTCTYSPA | 18686 | >TP53-L130R KSVTCTYSPA | 365   | 18321 |
| >TP53-L130R KSVTCTYSPA | 488   | >TP53-L130R KSVTCTYSPA | 748   | 260   |
| >TP53-L130R KSVTCTYSPA | 4334  | >TP53-L130R KSVTCTYSPA | 15    | 4319  |
| >TP53-L130R KSVTCTYSPA | 107   | >TP53-L130R KSVTCTYSPA | 4898  | 4791  |
| >TP53-L130R KSVTCTYSPA | 36619 | >TP53-L130R KSVTCTYSPA | 493   | 36126 |

|                        |       |                        |       |       |
|------------------------|-------|------------------------|-------|-------|
| >TP53-L130R KSVTCTYSPA | 89    | >TP53-L130R KSVTCTYSPA | 696   | 607   |
| >TP53-L130R KSVTCTYSPA | 6     | >TP53-L130R KSVTCTYSPA | 3027  | 3021  |
| >TP53-L130R KSVTCTYSPA | 113   | >TP53-L130R KSVTCTYSPA | 15969 | 15856 |
| >TP53-L130R KSVTCTYSPA | 198   | >TP53-L130R KSVTCTYSPA | 19366 | 19168 |
| >TP53-L130R KSVTCTYSPA | 14191 | >TP53-L130R KSVTCTYSPA | 36    | 14155 |
| >TP53-L130R SPALNKMFC  | 432   | >TP53-L130R SPARNKMFC  | 73    | 359   |
| >TP53-L130R SPALNKMFC  | 100   | >TP53-L130R SPARNKMFC  | 54    | 46    |
| >TP53-L130R SPALNKMFC  | 41    | >TP53-L130R SPARNKMFC  | 31    | 10    |
| >TP53-L130R SPALNKMFC  | 372   | >TP53-L130R SPARNKMFC  | 186   | 186   |
| >TP53-L130R SPALNKMFC  | 326   | >TP53-L130R SPARNKMFC  | 717   | 391   |
| >TP53-L130R SPALNKMFC  | 450   | >TP53-L130R SPARNKMFC  | 187   | 263   |
| >TP53-L130R SPALNKMFC  | 677   | >TP53-L130R SPARNKMFC  | 423   | 254   |
| >TP53-L130R YSPALNKMFC | 1122  | >TP53-L130R YSPARNKMFC | 102   | 1020  |
| >TP53-L130R YSPALNKMFC | 384   | >TP53-L130R YSPARNKMFC | 948   | 564   |
| >TP53-L130R YSPALNKMFC | 104   | >TP53-L130R YSPARNKMFC | 146   | 42    |
| >TP53-L130R YSPALNKMFC | 43    | >TP53-L130R YSPARNKMFC | 23    | 20    |
| >TP53-L130R YSPALNKMFC | 40    | >TP53-L130R YSPARNKMFC | 127   | 87    |
| >TP53-L130R YSPALNKMFC | 3     | >TP53-L130R YSPARNKMFC | 4     | 1     |
| >TP53-L130R YSPALNKMFC | 22    | >TP53-L130R YSPARNKMFC | 61    | 39    |
| >TP53-L130R YSPALNKMFC | 124   | >TP53-L130R YSPARNKMFC | 336   | 212   |
| >TP53-L130R YSPALNKMFC | 67    | >TP53-L130R YSPARNKMFC | 118   | 51    |
| >TP53-L130R YSPALNKMFC | 103   | >TP53-L130R YSPARNKMFC | 381   | 278   |
| >TP53-L130R TYSPALNKM  | 136   | >TP53-L130R TYSPARNKM  | 51    | 85    |
| >TP53-L130R TYSPALNKM  | 220   | >TP53-L130R TYSPARNKM  | 1300  | 1080  |
| >TP53-L130R TYSPALNKM  | 179   | >TP53-L130R TYSPARNKM  | 118   | 61    |
| >TP53-L130R TYSPALNKM  | 64    | >TP53-L130R TYSPARNKM  | 65    | 1     |
| >TP53-L130R TYSPALNKM  | 27    | >TP53-L130R TYSPARNKM  | 79    | 52    |
| >TP53-L130R TYSPALNKM  | 5     | >TP53-L130R TYSPARNKM  | 6     | 1     |
| >TP53-L130R TYSPALNKM  | 222   | >TP53-L130R TYSPARNKM  | 257   | 35    |
| >TP53-L130R TYSPALNKM  | 439   | >TP53-L130R TYSPARNKM  | 301   | 138   |
| >TP53-L130R CTYSPALNK  | 30    | >TP53-L130R CTYSPARNK  | 45    | 15    |
| >TP53-L130R CTYSPALNK  | 11    | >TP53-L130R CTYSPARNK  | 39    | 28    |
| >TP53-L130R CTYSPALNK  | 343   | >TP53-L130R CTYSPARNK  | 801   | 458   |
| >TP53-L130R CTYSPALNK  | 63    | >TP53-L130R CTYSPARNK  | 214   | 151   |
| >TP53-L130R CTYSPALNK  | 380   | >TP53-L130R CTYSPARNK  | 375   | 5     |
| >TP53-L130R CTYSPALNK  | 246   | >TP53-L130R CTYSPARNK  | 330   | 84    |
| >TP53-L130R CTYSPALNK  | 215   | >TP53-L130R CTYSPARNK  | 537   | 322   |
| >TP53-L130R CTYSPALNK  | 30    | >TP53-L130R CTYSPARNK  | 92    | 62    |
| >TP53-L130R CTYSPALNK  | 488   | >TP53-L130R CTYSPARNK  | 1354  | 866   |
| >TP53-L130R CTYSPALNK  | 23    | >TP53-L130R CTYSPARNK  | 30    | 7     |
| >TP53-L130R CTYSPALNK  | 24    | >TP53-L130R CTYSPARNK  | 51    | 27    |
| >TP53-L130R CTYSPALNK  | 5     | >TP53-L130R CTYSPARNK  | 5     | 0     |
| >TP53-L130R CTYSPALNK  | 76    | >TP53-L130R CTYSPARNK  | 155   | 79    |

|                        |       |                        |       |       |
|------------------------|-------|------------------------|-------|-------|
| >TP53-L130R CTYSPALNKM | 146   | >TP53-L130R CTYSPARNKM | 287   | 141   |
| >TP53-L130R CTYSPALNKM | 30    | >TP53-L130R CTYSPARNKM | 41    | 11    |
| >TP53-L130R CTYSPALNKM | 13    | >TP53-L130R CTYSPARNKM | 20    | 7     |
| >TP53-L130R CTYSPALNKM | 358   | >TP53-L130R CTYSPARNKM | 307   | 51    |
| >TP53-L130R TCTYSPALNK | 453   | >TP53-L130R TCTYSPARNK | 615   | 162   |
| >TP53-L130R VTCTYSPAL  | 397   | >TP53-L130R VTCTYSPAR  | 25912 | 25515 |
| >TP53-L130R VTCTYSPALN | 80    | >TP53-L130R VTCTYSPARN | 190   | 110   |
| >TP53-L130R VTCTYSPAL  | 18055 | >TP53-L130R VTCTYSPAR  | 150   | 17905 |
| >TP53-L130R VTCTYSPALN | 14    | >TP53-L130R VTCTYSPARN | 33    | 19    |
| >TP53-L130R VTCTYSPALN | 146   | >TP53-L130R VTCTYSPARN | 258   | 112   |
| >TP53-L130R VTCTYSPAL  | 12132 | >TP53-L130R VTCTYSPAR  | 51    | 12081 |
| >TP53-L130R VTCTYSPAL  | 26926 | >TP53-L130R VTCTYSPAR  | 494   | 26432 |
| >TP53-L130R VTCTYSPAL  | 28385 | >TP53-L130R VTCTYSPAR  | 116   | 28269 |
| >TP53-L130R VTCTYSPALN | 490   | >TP53-L130R VTCTYSPARN | 789   | 299   |
| >TP53-L130R VTCTYSPAL  | 12    | >TP53-L130R VTCTYSPAR  | 8376  | 8364  |
| >TP53-L130R VTCTYSPAL  | 66    | >TP53-L130R VTCTYSPAR  | 11730 | 11664 |
| >TP53-L130R SVTCTYSPAL | 268   | >TP53-L130R SVTCTYSPAR | 12762 | 12494 |
| >TP53-L130R SVTCTYSPAL | 28258 | >TP53-L130R SVTCTYSPAR | 96    | 28162 |
| >TP53-L130R SVTCTYSPAL | 19258 | >TP53-L130R SVTCTYSPAR | 234   | 19024 |
| >TP53-L130R SVTCTYSPAL | 23383 | >TP53-L130R SVTCTYSPAR | 18    | 23365 |
| >TP53-L130R SVTCTYSPAL | 149   | >TP53-L130R SVTCTYSPAR | 15548 | 15399 |
| >TP53-L130R SVTCTYSPAL | 28371 | >TP53-L130R SVTCTYSPAR | 143   | 28228 |
| >TP53-L130V LNKMFQQL   | 100   | >TP53-L130V VNKMFCQL   | 15    | 85    |
| >TP53-L130V LNKMFQQLAI | 161   | >TP53-L130V VNKMFCQLA  | 449   | 288   |
| >TP53-L130V LNKMFQQL   | 153   | >TP53-L130V VNKMFCQL   | 445   | 292   |
| >TP53-L130V ALNKMFQQL  | 238   | >TP53-L130V AVNKMFQQL  | 6493  | 6255  |
| >TP53-L130V ALNKMFQQL  | 17    | >TP53-L130V AVNKMFQQL  | 588   | 571   |
| >TP53-L130V ALNKMFQQL  | 30    | >TP53-L130V AVNKMFQQL  | 916   | 886   |
| >TP53-L130V ALNKMFQQL  | 442   | >TP53-L130V AVNKMFQQL  | 3401  | 2959  |
| >TP53-L130V ALNKMFQQL  | 297   | >TP53-L130V AVNKMFQQL  | 529   | 232   |
| >TP53-L130V ALNKMFQQL  | 22    | >TP53-L130V AVNKMFQQL  | 1831  | 1809  |
| >TP53-L130V ALNKMFQQL  | 255   | >TP53-L130V AVNKMFQQL  | 8836  | 8581  |
| >TP53-L130V ALNKMFQQL  | 198   | >TP53-L130V AVNKMFQQL  | 12233 | 12035 |
| >TP53-L130V ALNKMFQQL  | 21    | >TP53-L130V AVNKMFQQL  | 1842  | 1821  |
| >TP53-L130V ALNKMFQQL  | 256   | >TP53-L130V AVNKMFQQL  | 9533  | 9277  |
| >TP53-L130V ALNKMFQQL  | 66    | >TP53-L130V AVNKMFQQL  | 6658  | 6592  |
| >TP53-L130V ALNKMFQQL  | 245   | >TP53-L130V AVNKMFQQL  | 14188 | 13943 |
| >TP53-L130V ALNKMFQQL  | 3     | >TP53-L130V AVNKMFQQL  | 55    | 52    |
| >TP53-L130V ALNKMFQQL  | 11    | >TP53-L130V AVNKMFQQL  | 1517  | 1506  |
| >TP53-L130V ALNKMFQQL  | 37    | >TP53-L130V AVNKMFQQL  | 58    | 21    |
| >TP53-L130V ALNKMFQQL  | 25    | >TP53-L130V AVNKMFQQL  | 14    | 11    |
| >TP53-L130V ALNKMFQQL  | 113   | >TP53-L130V AVNKMFQQL  | 16    | 97    |
| >TP53-L130V ALNKMFQQL  | 431   | >TP53-L130V AVNKMFQQL  | 193   | 238   |

|                          |      |                          |      |      |
|--------------------------|------|--------------------------|------|------|
| >TP53-L130V ALNKMFCQL    | 288  | >TP53-L130V AVNKMFCQL    | 1974 | 1686 |
| >TP53-L130V ALNKMFCQL    | 416  | >TP53-L130V AVNKMFCQL    | 1338 | 922  |
| >TP53-L130V ALNKMFCQL    | 1052 | >TP53-L130V AVNKMFCQL    | 222  | 830  |
| >TP53-L130V KSVTCTYSPA   | 396  | >TP53-L130V KSVTCTYSPA'  | 75   | 321  |
| >TP53-L130V KSVTCTYSPA   | 488  | >TP53-L130V KSVTCTYSPA'  | 301  | 187  |
| >TP53-L130V KSVTCTYSPA   | 107  | >TP53-L130V KSVTCTYSPA'  | 512  | 405  |
| >TP53-L130V KSVTCTYSPA   | 89   | >TP53-L130V KSVTCTYSPA'  | 185  | 96   |
| >TP53-L130V KSVTCTYSPA   | 6    | >TP53-L130V KSVTCTYSPA'  | 92   | 86   |
| >TP53-L130V KSVTCTYSPA   | 113  | >TP53-L130V KSVTCTYSPA'  | 2241 | 2128 |
| >TP53-L130V KSVTCTYSPA   | 198  | >TP53-L130V KSVTCTYSPA'  | 1188 | 990  |
| >TP53-L130V SPALNKMFC    | 432  | >TP53-L130V SPAVNKMFC    | 295  | 137  |
| >TP53-L130V SPALNKMFC    | 100  | >TP53-L130V SPAVNKMFC    | 120  | 20   |
| >TP53-L130V SPALNKMFC    | 41   | >TP53-L130V SPAVNKMFC    | 40   | 1    |
| >TP53-L130V SPALNKMFC    | 372  | >TP53-L130V SPAVNKMFC    | 373  | 1    |
| >TP53-L130V SPALNKMFC    | 326  | >TP53-L130V SPAVNKMFC    | 412  | 86   |
| >TP53-L130V SPALNKMFC    | 450  | >TP53-L130V SPAVNKMFC    | 272  | 178  |
| >TP53-L130V SPALNKMFC    | 677  | >TP53-L130V SPAVNKMFC    | 292  | 385  |
| >TP53-L130V YSPALNKMFC   | 384  | >TP53-L130V YSPAVNKMFC   | 260  | 124  |
| >TP53-L130V YSPALNKMFC   | 104  | >TP53-L130V YSPAVNKMFC   | 114  | 10   |
| >TP53-L130V YSPALNKMFC   | 43   | >TP53-L130V YSPAVNKMFC   | 90   | 47   |
| >TP53-L130V YSPALNKMFC   | 40   | >TP53-L130V YSPAVNKMFC   | 28   | 12   |
| >TP53-L130V YSPALNKMFC   | 3    | >TP53-L130V YSPAVNKMFC   | 3    | 0    |
| >TP53-L130V YSPALNKMFC   | 22   | >TP53-L130V YSPAVNKMFC   | 24   | 2    |
| >TP53-L130V YSPALNKMFC   | 124  | >TP53-L130V YSPAVNKMFC   | 122  | 2    |
| >TP53-L130V YSPALNKMFC   | 67   | >TP53-L130V YSPAVNKMFC   | 58   | 9    |
| >TP53-L130V YSPALNKMFC   | 103  | >TP53-L130V YSPAVNKMFC   | 103  | 0    |
| >TP53-L130V TYSPALNKMFC  | 136  | >TP53-L130V TYSPAVNKMFC  | 206  | 70   |
| >TP53-L130V TYSPALNKMFC  | 220  | >TP53-L130V TYSPAVNKMFC  | 361  | 141  |
| >TP53-L130V TYSPALNKMFC  | 179  | >TP53-L130V TYSPAVNKMFC  | 182  | 3    |
| >TP53-L130V TYSPALNKMFC  | 64   | >TP53-L130V TYSPAVNKMFC  | 51   | 13   |
| >TP53-L130V TYSPALNKMFC  | 27   | >TP53-L130V TYSPAVNKMFC  | 30   | 3    |
| >TP53-L130V TYSPALNKMFC  | 5    | >TP53-L130V TYSPAVNKMFC  | 5    | 0    |
| >TP53-L130V TYSPALNKMFC  | 586  | >TP53-L130V TYSPAVNKMFC  | 335  | 251  |
| >TP53-L130V TYSPALNKMFC  | 222  | >TP53-L130V TYSPAVNKMFC  | 364  | 142  |
| >TP53-L130V TYSPALNKMFC  | 1077 | >TP53-L130V TYSPAVNKMFC  | 477  | 600  |
| >TP53-L130V TYSPALNKMFC  | 439  | >TP53-L130V TYSPAVNKMFC  | 446  | 7    |
| >TP53-L130V CTYSPALNKMFC | 30   | >TP53-L130V CTYSPAVNKMFC | 35   | 5    |
| >TP53-L130V CTYSPALNKMFC | 11   | >TP53-L130V CTYSPAVNKMFC | 16   | 5    |
| >TP53-L130V CTYSPALNKMFC | 343  | >TP53-L130V CTYSPAVNKMFC | 267  | 76   |
| >TP53-L130V CTYSPALNKMFC | 63   | >TP53-L130V CTYSPAVNKMFC | 75   | 12   |
| >TP53-L130V CTYSPALNKMFC | 380  | >TP53-L130V CTYSPAVNKMFC | 343  | 37   |
| >TP53-L130V CTYSPALNKMFC | 246  | >TP53-L130V CTYSPAVNKMFC | 273  | 27   |
| >TP53-L130V CTYSPALNKMFC | 215  | >TP53-L130V CTYSPAVNKMFC | 435  | 220  |

|                        |      |                        |     |      |
|------------------------|------|------------------------|-----|------|
| >TP53-L130V CTYSPALNK  | 30   | >TP53-L130V CTYSPAVNK  | 15  | 15   |
| >TP53-L130V CTYSPALNKM | 488  | >TP53-L130V CTYSPAVNKM | 514 | 26   |
| >TP53-L130V CTYSPALNKM | 610  | >TP53-L130V CTYSPAVNKM | 331 | 279  |
| >TP53-L130V CTYSPALNKM | 23   | >TP53-L130V CTYSPAVNKM | 19  | 4    |
| >TP53-L130V CTYSPALNKM | 24   | >TP53-L130V CTYSPAVNKM | 25  | 1    |
| >TP53-L130V CTYSPALNKM | 5    | >TP53-L130V CTYSPAVNKM | 6   | 1    |
| >TP53-L130V CTYSPALNKM | 76   | >TP53-L130V CTYSPAVNKM | 70  | 6    |
| >TP53-L130V CTYSPALNKM | 146  | >TP53-L130V CTYSPAVNKM | 155 | 9    |
| >TP53-L130V CTYSPALNKM | 30   | >TP53-L130V CTYSPAVNKM | 41  | 11   |
| >TP53-L130V CTYSPALNKM | 13   | >TP53-L130V CTYSPAVNKM | 14  | 1    |
| >TP53-L130V CTYSPALNKM | 358  | >TP53-L130V CTYSPAVNKM | 311 | 47   |
| >TP53-L130V TCTYSPALNK | 453  | >TP53-L130V TCTYSPAVNK | 633 | 180  |
| >TP53-L130V VTCTYSPAL  | 2470 | >TP53-L130V VTCTYSPAV  | 446 | 2024 |
| >TP53-L130V VTCTYSPAL  | 397  | >TP53-L130V VTCTYSPAV  | 48  | 349  |
| >TP53-L130V VTCTYSPAL  | 766  | >TP53-L130V VTCTYSPAV  | 32  | 734  |
| >TP53-L130V VTCTYSPAL  | 6296 | >TP53-L130V VTCTYSPAV  | 264 | 6032 |
| >TP53-L130V VTCTYSPALN | 80   | >TP53-L130V VTCTYSPAVN | 114 | 34   |
| >TP53-L130V VTCTYSPALN | 14   | >TP53-L130V VTCTYSPAVN | 16  | 2    |
| >TP53-L130V VTCTYSPALN | 146  | >TP53-L130V VTCTYSPAVN | 227 | 81   |
| >TP53-L130V VTCTYSPALN | 490  | >TP53-L130V VTCTYSPAVN | 256 | 234  |
| >TP53-L130V VTCTYSPAL  | 3501 | >TP53-L130V VTCTYSPAV  | 292 | 3209 |
| >TP53-L130V VTCTYSPAL  | 12   | >TP53-L130V VTCTYSPAV  | 279 | 267  |
| >TP53-L130V VTCTYSPAL  | 66   | >TP53-L130V VTCTYSPAV  | 393 | 327  |
| >TP53-L130V SVTCTYSPAL | 1772 | >TP53-L130V SVTCTYSPAV | 326 | 1446 |
| >TP53-L130V SVTCTYSPAL | 268  | >TP53-L130V SVTCTYSPAV | 73  | 195  |
| >TP53-L130V SVTCTYSPAL | 923  | >TP53-L130V SVTCTYSPAV | 61  | 862  |
| >TP53-L130V SVTCTYSPAL | 877  | >TP53-L130V SVTCTYSPAV | 70  | 807  |
| >TP53-L130V SVTCTYSPAL | 1635 | >TP53-L130V SVTCTYSPAV | 60  | 1575 |
| >TP53-L130V SVTCTYSPAL | 1003 | >TP53-L130V SVTCTYSPAV | 40  | 963  |
| >TP53-L130V SVTCTYSPAL | 1417 | >TP53-L130V SVTCTYSPAV | 216 | 1201 |
| >TP53-L130V SVTCTYSPAL | 149  | >TP53-L130V SVTCTYSPAV | 17  | 132  |
| >TP53-L137N LAKTCPVQLV | 830  | >TP53-L137N MAKTCPVQL' | 268 | 562  |
| >TP53-L137N LAKTCPVQLV | 482  | >TP53-L137N MAKTCPVQL' | 350 | 132  |
| >TP53-L137N LAKTCPVQLV | 1694 | >TP53-L137N MAKTCPVQL' | 228 | 1466 |
| >TP53-L137N LAKTCPVQLV | 4775 | >TP53-L137N MAKTCPVQL' | 219 | 4556 |
| >TP53-L137N LAKTCPVQL  | 417  | >TP53-L137N MAKTCPVQL  | 203 | 214  |
| >TP53-L137N LAKTCPVQL  | 405  | >TP53-L137N MAKTCPVQL  | 152 | 253  |
| >TP53-L137N LAKTCPVQLV | 45   | >TP53-L137N MAKTCPVQL' | 24  | 21   |
| >TP53-L137N LAKTCPVQLV | 42   | >TP53-L137N MAKTCPVQL' | 36  | 6    |
| >TP53-L137N LAKTCPVQLV | 42   | >TP53-L137N MAKTCPVQL' | 25  | 17   |
| >TP53-L137N LAKTCPVQLV | 1046 | >TP53-L137N MAKTCPVQL' | 344 | 702  |
| >TP53-L137N QLAKTCPV   | 58   | >TP53-L137N QMAKTCPV   | 50  | 8    |
| >TP53-L137N QLAKTCPV   | 13   | >TP53-L137N QMAKTCPV   | 15  | 2    |

|                        |      |                       |      |      |
|------------------------|------|-----------------------|------|------|
| >TP53-L137N QLAKTCPVQL | 315  | >TP53-L137N QMAKTCPVC | 359  | 44   |
| >TP53-L137N QLAKTCPV   | 10   | >TP53-L137N QMAKTCPV  | 9    | 1    |
| >TP53-L137N QLAKTCPVQL | 383  | >TP53-L137N QMAKTCPVC | 359  | 24   |
| >TP53-L137N QLAKTCPV   | 37   | >TP53-L137N QMAKTCPV  | 28   | 9    |
| >TP53-L137N QLAKTCPV   | 14   | >TP53-L137N QMAKTCPV  | 10   | 4    |
| >TP53-L137N QLAKTCPVQL | 323  | >TP53-L137N QMAKTCPVC | 191  | 132  |
| >TP53-L137N QLAKTCPV   | 30   | >TP53-L137N QMAKTCPV  | 19   | 11   |
| >TP53-L137N QLAKTCPV   | 10   | >TP53-L137N QMAKTCPV  | 10   | 0    |
| >TP53-L137N QLAKTCPVQL | 177  | >TP53-L137N QMAKTCPVC | 155  | 22   |
| >TP53-L137N QLAKTCPV   | 10   | >TP53-L137N QMAKTCPV  | 8    | 2    |
| >TP53-L137N QLAKTCPVQL | 117  | >TP53-L137N QMAKTCPVC | 76   | 41   |
| >TP53-L137N QLAKTCPV   | 3    | >TP53-L137N QMAKTCPV  | 4    | 1    |
| >TP53-L137N QLAKTCPVQL | 20   | >TP53-L137N QMAKTCPVC | 33   | 13   |
| >TP53-L137N QLAKTCPV   | 217  | >TP53-L137N QMAKTCPV  | 318  | 101  |
| >TP53-L137N QLAKTCPV   | 60   | >TP53-L137N QMAKTCPV  | 48   | 12   |
| >TP53-L137N QLAKTCPV   | 1790 | >TP53-L137N QMAKTCPV  | 454  | 1336 |
| >TP53-L137N QLAKTCPV   | 1898 | >TP53-L137N QMAKTCPV  | 269  | 1629 |
| >TP53-L137N QLAKTCPVQL | 1062 | >TP53-L137N QMAKTCPVC | 117  | 945  |
| >TP53-L137N QLAKTCPVQL | 3540 | >TP53-L137N QMAKTCPVC | 459  | 3081 |
| >TP53-L137N QLAKTCPVQL | 967  | >TP53-L137N QMAKTCPVC | 464  | 503  |
| >TP53-L137N QLAKTCPVQL | 3303 | >TP53-L137N QMAKTCPVC | 492  | 2811 |
| >TP53-L137N QLAKTCPVQL | 343  | >TP53-L137N QMAKTCPVC | 43   | 300  |
| >TP53-L137N SPALNKMFC  | 432  | >TP53-L137N SPALNKMFC | 227  | 205  |
| >TP53-L137N SPALNKMFC  | 41   | >TP53-L137N SPALNKMFC | 30   | 11   |
| >TP53-L137N SPALNKMFC  | 372  | >TP53-L137N SPALNKMFC | 835  | 463  |
| >TP53-L137N SPALNKMFC  | 2976 | >TP53-L137N SPALNKMFC | 248  | 2728 |
| >TP53-L137N CQLAKTCPV  | 121  | >TP53-L137N CQMAKTCPV | 42   | 79   |
| >TP53-L137N CQLAKTCPVC | 1090 | >TP53-L137N CQMAKTCPV | 242  | 848  |
| >TP53-L137N CQLAKTCPV  | 565  | >TP53-L137N CQMAKTCPV | 49   | 516  |
| >TP53-L137N CQLAKTCPVC | 1773 | >TP53-L137N CQMAKTCPV | 163  | 1610 |
| >TP53-L137N CQLAKTCPV  | 173  | >TP53-L137N CQMAKTCPV | 16   | 157  |
| >TP53-L137N CQLAKTCPVC | 3649 | >TP53-L137N CQMAKTCPV | 454  | 3195 |
| >TP53-L137N CQLAKTCPV  | 22   | >TP53-L137N CQMAKTCPV | 13   | 9    |
| >TP53-L137N CQLAKTCPVC | 463  | >TP53-L137N CQMAKTCPV | 203  | 260  |
| >TP53-L137N CQLAKTCPV  | 136  | >TP53-L137N CQMAKTCPV | 313  | 177  |
| >TP53-L137N CQLAKTCPV  | 77   | >TP53-L137N CQMAKTCPV | 59   | 18   |
| >TP53-L137N CQLAKTCPV  | 457  | >TP53-L137N CQMAKTCPV | 2011 | 1554 |
| >TP53-L137N CQLAKTCPV  | 720  | >TP53-L137N CQMAKTCPV | 216  | 504  |
| >TP53-L137N CQLAKTCPV  | 2033 | >TP53-L137N CQMAKTCPV | 466  | 1567 |
| >TP53-L137N CQLAKTCPV  | 1648 | >TP53-L137N CQMAKTCPV | 211  | 1437 |
| >TP53-L137N CQLAKTCPV  | 268  | >TP53-L137N CQMAKTCPV | 165  | 103  |
| >TP53-L137N CQLAKTCPVC | 155  | >TP53-L137N CQMAKTCPV | 92   | 63   |
| >TP53-L137N CQLAKTCPVC | 231  | >TP53-L137N CQMAKTCPV | 53   | 178  |

|                        |     |                        |      |      |
|------------------------|-----|------------------------|------|------|
| >TP53-L137N CQLAKTCPVC | 762 | >TP53-L137N CQMAKTCPV  | 456  | 306  |
| >TP53-L137N FCQLAKTCPV | 443 | >TP53-L137N FCQMAKTCPV | 132  | 311  |
| >TP53-L137N MFCQLAKTCI | 679 | >TP53-L137N MFCQMAKTCI | 425  | 254  |
| >TP53-L137N MFCQLAKTC  | 450 | >TP53-L137N MFCQMAKTC  | 604  | 154  |
| >TP53-L137N KMFCQLAKT  | 89  | >TP53-L137N KMFCQMAKT  | 137  | 48   |
| >TP53-L137N KMFCQLAKT  | 102 | >TP53-L137N KMFCQMAKT  | 154  | 52   |
| >TP53-L137N KMFCQLAKT  | 19  | >TP53-L137N KMFCQMAKT  | 28   | 9    |
| >TP53-L137N KMFCQLAKT  | 199 | >TP53-L137N KMFCQMAKT  | 380  | 181  |
| >TP53-L137N KMFCQLAKT  | 19  | >TP53-L137N KMFCQMAKT  | 44   | 25   |
| >TP53-L137N KMFCQLAKTC | 23  | >TP53-L137N KMFCQMAKT  | 41   | 18   |
| >TP53-L137N KMFCQLAKT  | 55  | >TP53-L137N KMFCQMAKT  | 129  | 74   |
| >TP53-L137N KMFCQLAKTC | 61  | >TP53-L137N KMFCQMAKT  | 90   | 29   |
| >TP53-L137N KMFCQLAK   | 26  | >TP53-L137N KMFCQMAK   | 24   | 2    |
| >TP53-L137N KMFCQLAK   | 12  | >TP53-L137N KMFCQMAK   | 8    | 4    |
| >TP53-L137N KMFCQLAK   | 8   | >TP53-L137N KMFCQMAK   | 7    | 1    |
| >TP53-L137N KMFCQLAK   | 35  | >TP53-L137N KMFCQMAK   | 25   | 10   |
| >TP53-L137N KMFCQLAK   | 371 | >TP53-L137N KMFCQMAK   | 400  | 29   |
| >TP53-L137N KMFCQLAKTC | 81  | >TP53-L137N KMFCQMAKT  | 79   | 2    |
| >TP53-L137N KMFCQLAK   | 58  | >TP53-L137N KMFCQMAK   | 44   | 14   |
| >TP53-L137N KMFCQLAKTC | 491 | >TP53-L137N KMFCQMAKT  | 502  | 11   |
| >TP53-L137N KMFCQLAK   | 39  | >TP53-L137N KMFCQMAK   | 37   | 2    |
| >TP53-L137N NKMFCQLAK  | 646 | >TP53-L137N NKMFCQMAI  | 315  | 331  |
| >TP53-L137N LNKMFQQL   | 100 | >TP53-L137N LNKMFQQM   | 381  | 281  |
| >TP53-L137N LNKMFQQLAI | 161 | >TP53-L137N LNKMFQQM/  | 127  | 34   |
| >TP53-L137N LNKMFQQL   | 153 | >TP53-L137N LNKMFQQM   | 338  | 185  |
| >TP53-L137N ALNKMFQQL  | 238 | >TP53-L137N ALNKMFQQM  | 1780 | 1542 |
| >TP53-L137N ALNKMFQQL  | 17  | >TP53-L137N ALNKMFQQM  | 200  | 183  |
| >TP53-L137N ALNKMFQQL  | 30  | >TP53-L137N ALNKMFQQM  | 320  | 290  |
| >TP53-L137N ALNKMFQQL  | 442 | >TP53-L137N ALNKMFQQM  | 734  | 292  |
| >TP53-L137N ALNKMFQQL  | 297 | >TP53-L137N ALNKMFQQM  | 1495 | 1198 |
| >TP53-L137N ALNKMFQQL  | 22  | >TP53-L137N ALNKMFQQM  | 168  | 146  |
| >TP53-L137N ALNKMFQQL  | 255 | >TP53-L137N ALNKMFQQM  | 127  | 128  |
| >TP53-L137N ALNKMFQQL  | 198 | >TP53-L137N ALNKMFQQM  | 2847 | 2649 |
| >TP53-L137N ALNKMFQQL  | 21  | >TP53-L137N ALNKMFQQM  | 190  | 169  |
| >TP53-L137N ALNKMFQQL  | 256 | >TP53-L137N ALNKMFQQM  | 175  | 81   |
| >TP53-L137N ALNKMFQQL  | 66  | >TP53-L137N ALNKMFQQM  | 884  | 818  |
| >TP53-L137N ALNKMFQQL  | 3   | >TP53-L137N ALNKMFQQM  | 11   | 8    |
| >TP53-L137N ALNKMFQQL  | 11  | >TP53-L137N ALNKMFQQM  | 11   | 0    |
| >TP53-L137N ALNKMFQQL  | 37  | >TP53-L137N ALNKMFQQM  | 34   | 3    |
| >TP53-L137N ALNKMFQQL  | 25  | >TP53-L137N ALNKMFQQM  | 20   | 5    |
| >TP53-L137N ALNKMFQQL  | 113 | >TP53-L137N ALNKMFQQM  | 75   | 38   |
| >TP53-L137N ALNKMFQQL  | 431 | >TP53-L137N ALNKMFQQM  | 256  | 175  |
| >TP53-L137N ALNKMFQQL  | 288 | >TP53-L137N ALNKMFQQM  | 762  | 474  |



|                        |       |                        |       |       |
|------------------------|-------|------------------------|-------|-------|
| >TP53-L137N ALNKMFCQL  | 416   | >TP53-L137N ALNKMFCQN  | 89    | 327   |
| >TP53-L137P LAKTCPVQLV | 482   | >TP53-L137P PAKTCPVQLV | 7712  | 7230  |
| >TP53-L137P LAKTCPVQL  | 417   | >TP53-L137P PAKTCPVQL  | 4567  | 4150  |
| >TP53-L137P LAKTCPVQL  | 405   | >TP53-L137P PAKTCPVQL  | 13454 | 13049 |
| >TP53-L137P LAKTCPVQLV | 45    | >TP53-L137P PAKTCPVQLV | 2356  | 2311  |
| >TP53-L137P LAKTCPVQLV | 42    | >TP53-L137P PAKTCPVQLV | 372   | 330   |
| >TP53-L137P LAKTCPVQLV | 42    | >TP53-L137P PAKTCPVQLV | 6615  | 6573  |
| >TP53-L137P QLAKTCPVQL | 35855 | >TP53-L137P QPAKTCPVQI | 305   | 35550 |
| >TP53-L137P QLAKTCPV   | 58    | >TP53-L137P QPAKTCPV   | 21513 | 21455 |
| >TP53-L137P QLAKTCPV   | 13    | >TP53-L137P QPAKTCPV   | 18852 | 18839 |
| >TP53-L137P QLAKTCPVQL | 315   | >TP53-L137P QPAKTCPVQI | 25884 | 25569 |
| >TP53-L137P QLAKTCPV   | 10    | >TP53-L137P QPAKTCPV   | 16411 | 16401 |
| >TP53-L137P QLAKTCPVQL | 383   | >TP53-L137P QPAKTCPVQI | 26946 | 26563 |
| >TP53-L137P QLAKTCPV   | 37    | >TP53-L137P QPAKTCPV   | 10153 | 10116 |
| >TP53-L137P QLAKTCPV   | 14    | >TP53-L137P QPAKTCPV   | 20061 | 20047 |
| >TP53-L137P QLAKTCPVQL | 323   | >TP53-L137P QPAKTCPVQI | 28856 | 28533 |
| >TP53-L137P QLAKTCPV   | 30    | >TP53-L137P QPAKTCPV   | 21715 | 21685 |
| >TP53-L137P QLAKTCPV   | 10    | >TP53-L137P QPAKTCPV   | 18277 | 18267 |
| >TP53-L137P QLAKTCPVQL | 177   | >TP53-L137P QPAKTCPVQI | 25070 | 24893 |
| >TP53-L137P QLAKTCPV   | 10    | >TP53-L137P QPAKTCPV   | 21547 | 21537 |
| >TP53-L137P QLAKTCPVQL | 117   | >TP53-L137P QPAKTCPVQI | 23783 | 23666 |
| >TP53-L137P QLAKTCPV   | 3     | >TP53-L137P QPAKTCPV   | 23276 | 23273 |
| >TP53-L137P QLAKTCPVQL | 20    | >TP53-L137P QPAKTCPVQI | 32200 | 32180 |
| >TP53-L137P QLAKTCPV   | 217   | >TP53-L137P QPAKTCPV   | 1593  | 1376  |
| >TP53-L137P QLAKTCPV   | 60    | >TP53-L137P QPAKTCPV   | 185   | 125   |
| >TP53-L137P QLAKTCPV   | 16045 | >TP53-L137P QPAKTCPV   | 82    | 15963 |
| >TP53-L137P QLAKTCPVQL | 32028 | >TP53-L137P QPAKTCPVQI | 410   | 31618 |
| >TP53-L137P QLAKTCPVQL | 3303  | >TP53-L137P QPAKTCPVQI | 308   | 2995  |
| >TP53-L137P QLAKTCPVQL | 20510 | >TP53-L137P QPAKTCPVQI | 87    | 20423 |
| >TP53-L137P QLAKTCPV   | 30068 | >TP53-L137P QPAKTCPV   | 255   | 29813 |
| >TP53-L137P QLAKTCPVQL | 343   | >TP53-L137P QPAKTCPVQI | 5290  | 4947  |
| >TP53-L137P QLAKTCPVQL | 6059  | >TP53-L137P QPAKTCPVQI | 23    | 6036  |
| >TP53-L137P SPALNKMFCQ | 432   | >TP53-L137P SPALNKMFCQ | 40870 | 40438 |
| >TP53-L137P SPALNKMFCQ | 41    | >TP53-L137P SPALNKMFCQ | 13470 | 13429 |
| >TP53-L137P SPALNKMFCQ | 372   | >TP53-L137P SPALNKMFCQ | 10000 | 9628  |
| >TP53-L137P CQLAKTCPV  | 121   | >TP53-L137P CQPAKTCPV  | 1371  | 1250  |
| >TP53-L137P CQLAKTCPV  | 173   | >TP53-L137P CQPAKTCPV  | 97    | 76    |
| >TP53-L137P CQLAKTCPV  | 22    | >TP53-L137P CQPAKTCPV  | 76    | 54    |
| >TP53-L137P CQLAKTCPVC | 463   | >TP53-L137P CQPAKTCPVC | 2389  | 1926  |
| >TP53-L137P CQLAKTCPV  | 136   | >TP53-L137P CQPAKTCPV  | 1158  | 1022  |
| >TP53-L137P CQLAKTCPV  | 77    | >TP53-L137P CQPAKTCPV  | 2762  | 2685  |
| >TP53-L137P CQLAKTCPV  | 457   | >TP53-L137P CQPAKTCPV  | 3567  | 3110  |
| >TP53-L137P CQLAKTCPV  | 268   | >TP53-L137P CQPAKTCPV  | 2290  | 2022  |

|                        |      |                        |       |       |
|------------------------|------|------------------------|-------|-------|
| >TP53-L137P CQLAKTCPVC | 155  | >TP53-L137P CQPAKTCPVC | 1640  | 1485  |
| >TP53-L137P CQLAKTCPVC | 231  | >TP53-L137P CQPAKTCPVC | 3615  | 3384  |
| >TP53-L137P FCQLAKTCPV | 443  | >TP53-L137P FCQPAKTCPV | 40    | 403   |
| >TP53-L137P MFCQLAKTC  | 450  | >TP53-L137P MFCQPAKTC  | 721   | 271   |
| >TP53-L137P KMFCQLAKT  | 89   | >TP53-L137P KMFCQPAKT  | 234   | 145   |
| >TP53-L137P KMFCQLAKT  | 102  | >TP53-L137P KMFCQPAKT  | 650   | 548   |
| >TP53-L137P KMFCQLAKT  | 19   | >TP53-L137P KMFCQPAKT  | 63    | 44    |
| >TP53-L137P KMFCQLAKT  | 199  | >TP53-L137P KMFCQPAKT  | 4160  | 3961  |
| >TP53-L137P KMFCQLAKT  | 19   | >TP53-L137P KMFCQPAKT  | 19    | 0     |
| >TP53-L137P KMFCQLAKT  | 23   | >TP53-L137P KMFCQPAKT  | 19    | 4     |
| >TP53-L137P KMFCQLAKT  | 55   | >TP53-L137P KMFCQPAKT  | 107   | 52    |
| >TP53-L137P KMFCQLAKT  | 61   | >TP53-L137P KMFCQPAKT  | 98    | 37    |
| >TP53-L137P KMFCQLAK   | 26   | >TP53-L137P KMFCQPAK   | 27    | 1     |
| >TP53-L137P KMFCQLAK   | 12   | >TP53-L137P KMFCQPAK   | 15    | 3     |
| >TP53-L137P KMFCQLAK   | 8    | >TP53-L137P KMFCQPAK   | 7     | 1     |
| >TP53-L137P KMFCQLAK   | 35   | >TP53-L137P KMFCQPAK   | 39    | 4     |
| >TP53-L137P KMFCQLAK   | 371  | >TP53-L137P KMFCQPAK   | 489   | 118   |
| >TP53-L137P KMFCQLAKT  | 1105 | >TP53-L137P KMFCQPAKT  | 472   | 633   |
| >TP53-L137P KMFCQLAKT  | 81   | >TP53-L137P KMFCQPAKT  | 66    | 15    |
| >TP53-L137P KMFCQLAK   | 58   | >TP53-L137P KMFCQPAK   | 55    | 3     |
| >TP53-L137P KMFCQLAKT  | 491  | >TP53-L137P KMFCQPAKT  | 301   | 190   |
| >TP53-L137P KMFCQLAK   | 39   | >TP53-L137P KMFCQPAK   | 65    | 26    |
| >TP53-L137P LNKMFQCQL  | 100  | >TP53-L137P LNKMFQCQP  | 21178 | 21078 |
| >TP53-L137P LNKMFQCQL  | 161  | >TP53-L137P LNKMFQCQA  | 98    | 63    |
| >TP53-L137P LNKMFQCQL  | 153  | >TP53-L137P LNKMFQCQP  | 8882  | 8729  |
| >TP53-L137P ALNKMFQCQL | 238  | >TP53-L137P ALNKMFQCQP | 23228 | 22990 |
| >TP53-L137P ALNKMFQCQL | 17   | >TP53-L137P ALNKMFQCQP | 4545  | 4528  |
| >TP53-L137P ALNKMFQCQL | 30   | >TP53-L137P ALNKMFQCQP | 10069 | 10039 |
| >TP53-L137P ALNKMFQCQL | 442  | >TP53-L137P ALNKMFQCQP | 348   | 94    |
| >TP53-L137P ALNKMFQCQL | 297  | >TP53-L137P ALNKMFQCQP | 15041 | 14744 |
| >TP53-L137P ALNKMFQCQL | 22   | >TP53-L137P ALNKMFQCQP | 9375  | 9353  |
| >TP53-L137P ALNKMFQCQL | 255  | >TP53-L137P ALNKMFQCQP | 143   | 112   |
| >TP53-L137P ALNKMFQCQL | 198  | >TP53-L137P ALNKMFQCQP | 21731 | 21533 |
| >TP53-L137P ALNKMFQCQL | 21   | >TP53-L137P ALNKMFQCQP | 11738 | 11717 |
| >TP53-L137P ALNKMFQCQL | 256  | >TP53-L137P ALNKMFQCQP | 165   | 91    |
| >TP53-L137P ALNKMFQCQL | 66   | >TP53-L137P ALNKMFQCQP | 23870 | 23804 |
| >TP53-L137P ALNKMFQCQL | 3    | >TP53-L137P ALNKMFQCQP | 2152  | 2149  |
| >TP53-L137P ALNKMFQCQL | 11   | >TP53-L137P ALNKMFQCQP | 10    | 1     |
| >TP53-L137P ALNKMFQCQL | 37   | >TP53-L137P ALNKMFQCQP | 43    | 6     |
| >TP53-L137P ALNKMFQCQL | 25   | >TP53-L137P ALNKMFQCQP | 38    | 13    |
| >TP53-L137P ALNKMFQCQL | 113  | >TP53-L137P ALNKMFQCQP | 79    | 34    |
| >TP53-L137P ALNKMFQCQL | 431  | >TP53-L137P ALNKMFQCQP | 306   | 125   |
| >TP53-L137P ALNKMFQCQL | 288  | >TP53-L137P ALNKMFQCQP | 11495 | 11207 |

|                        |       |                        |       |       |
|------------------------|-------|------------------------|-------|-------|
| >TP53-L137P ALNKMFCQL  | 416   | >TP53-L137P ALNKMFCQP  | 6093  | 5677  |
| >TP53-L137C LAKTCPVQLV | 482   | >TP53-L137C QAKTCPVQL\ | 4785  | 4303  |
| >TP53-L137C LAKTCPVQL  | 417   | >TP53-L137C QAKTCPVQL  | 952   | 535   |
| >TP53-L137C LAKTCPVQL  | 405   | >TP53-L137C QAKTCPVQL  | 929   | 524   |
| >TP53-L137C LAKTCPVQLV | 45    | >TP53-L137C QAKTCPVQL\ | 139   | 94    |
| >TP53-L137C LAKTCPVQLV | 42    | >TP53-L137C QAKTCPVQL\ | 89    | 47    |
| >TP53-L137C LAKTCPVQLV | 42    | >TP53-L137C QAKTCPVQL\ | 306   | 264   |
| >TP53-L137C QLAKTCPV   | 58    | >TP53-L137C QQAKTCPV   | 914   | 856   |
| >TP53-L137C QLAKTCPV   | 13    | >TP53-L137C QQAKTCPV   | 416   | 403   |
| >TP53-L137C QLAKTCPVQL | 315   | >TP53-L137C QQAKTCPVQ  | 3667  | 3352  |
| >TP53-L137C QLAKTCPV   | 10    | >TP53-L137C QQAKTCPV   | 167   | 157   |
| >TP53-L137C QLAKTCPVQL | 383   | >TP53-L137C QQAKTCPVQ  | 3885  | 3502  |
| >TP53-L137C QLAKTCPV   | 37    | >TP53-L137C QQAKTCPV   | 25    | 12    |
| >TP53-L137C QLAKTCPV   | 14    | >TP53-L137C QQAKTCPV   | 1545  | 1531  |
| >TP53-L137C QLAKTCPVQL | 323   | >TP53-L137C QQAKTCPVQ  | 12214 | 11891 |
| >TP53-L137C QLAKTCPV   | 30    | >TP53-L137C QQAKTCPV   | 1935  | 1905  |
| >TP53-L137C QLAKTCPV   | 10    | >TP53-L137C QQAKTCPV   | 705   | 695   |
| >TP53-L137C QLAKTCPVQL | 177   | >TP53-L137C QQAKTCPVQ  | 11144 | 10967 |
| >TP53-L137C QLAKTCPV   | 10    | >TP53-L137C QQAKTCPV   | 5647  | 5637  |
| >TP53-L137C QLAKTCPVQL | 117   | >TP53-L137C QQAKTCPVQ  | 12799 | 12682 |
| >TP53-L137C QLAKTCPV   | 3     | >TP53-L137C QQAKTCPV   | 4320  | 4317  |
| >TP53-L137C QLAKTCPVQL | 20    | >TP53-L137C QQAKTCPVQ  | 20113 | 20093 |
| >TP53-L137C QLAKTCPV   | 217   | >TP53-L137C QQAKTCPV   | 1720  | 1503  |
| >TP53-L137C QLAKTCPV   | 60    | >TP53-L137C QQAKTCPV   | 2769  | 2709  |
| >TP53-L137C QLAKTCPV   | 1790  | >TP53-L137C QQAKTCPV   | 411   | 1379  |
| >TP53-L137C QLAKTCPV   | 1898  | >TP53-L137C QQAKTCPV   | 105   | 1793  |
| >TP53-L137C QLAKTCPVQL | 1062  | >TP53-L137C QQAKTCPVQ  | 42    | 1020  |
| >TP53-L137C QLAKTCPVQL | 3540  | >TP53-L137C QQAKTCPVQ  | 197   | 3343  |
| >TP53-L137C QLAKTCPVQL | 3303  | >TP53-L137C QQAKTCPVQ  | 109   | 3194  |
| >TP53-L137C QLAKTCPVQL | 11701 | >TP53-L137C QQAKTCPVQ  | 416   | 11285 |
| >TP53-L137C QLAKTCPVQL | 343   | >TP53-L137C QQAKTCPVQ  | 1106  | 763   |
| >TP53-L137C SPALNKMFCQ | 432   | >TP53-L137C SPALNKMFCQ | 24891 | 24459 |
| >TP53-L137C SPALNKMFCQ | 41    | >TP53-L137C SPALNKMFCQ | 3262  | 3221  |
| >TP53-L137C SPALNKMFCQ | 372   | >TP53-L137C SPALNKMFCQ | 9790  | 9418  |
| >TP53-L137C CQLAKTCPV  | 121   | >TP53-L137C CQQAKTCPV  | 675   | 554   |
| >TP53-L137C CQLAKTCPV  | 173   | >TP53-L137C CQQAKTCPV  | 180   | 7     |
| >TP53-L137C CQLAKTCPV  | 22    | >TP53-L137C CQQAKTCPV  | 103   | 81    |
| >TP53-L137C CQLAKTCPVC | 463   | >TP53-L137C CQQAKTCPV\ | 3376  | 2913  |
| >TP53-L137C CQLAKTCPV  | 136   | >TP53-L137C CQQAKTCPV  | 1420  | 1284  |
| >TP53-L137C CQLAKTCPV  | 77    | >TP53-L137C CQQAKTCPV  | 490   | 413   |
| >TP53-L137C CQLAKTCPV  | 457   | >TP53-L137C CQQAKTCPV  | 5787  | 5330  |
| >TP53-L137C CQLAKTCPV  | 268   | >TP53-L137C CQQAKTCPV  | 699   | 431   |
| >TP53-L137C CQLAKTCPVC | 155   | >TP53-L137C CQQAKTCPV\ | 545   | 390   |

|                        |     |                        |       |       |
|------------------------|-----|------------------------|-------|-------|
| >TP53-L137C CQLAKTCPVC | 231 | >TP53-L137C CQQAKTCPVI | 687   | 456   |
| >TP53-L137C FCQLAKTCPV | 443 | >TP53-L137C FCQQAKTCPV | 93    | 350   |
| >TP53-L137C MFCQLAKTC  | 450 | >TP53-L137C MFCQQAKTC  | 1111  | 661   |
| >TP53-L137C KMFCQLAKT  | 89  | >TP53-L137C KMFCQQAKT  | 332   | 243   |
| >TP53-L137C KMFCQLAKT  | 102 | >TP53-L137C KMFCQQAKT  | 369   | 267   |
| >TP53-L137C KMFCQLAKT  | 19  | >TP53-L137C KMFCQQAKT  | 163   | 144   |
| >TP53-L137C KMFCQLAKT  | 199 | >TP53-L137C KMFCQQAKT  | 2578  | 2379  |
| >TP53-L137C KMFCQLAKT  | 19  | >TP53-L137C KMFCQQAKT  | 56    | 37    |
| >TP53-L137C KMFCQLAKT  | 23  | >TP53-L137C KMFCQQAKT  | 41    | 18    |
| >TP53-L137C KMFCQLAKT  | 55  | >TP53-L137C KMFCQQAKT  | 122   | 67    |
| >TP53-L137C KMFCQLAKT  | 61  | >TP53-L137C KMFCQQAKT  | 78    | 17    |
| >TP53-L137C KMFCQLAK   | 26  | >TP53-L137C KMFCQQAK   | 29    | 3     |
| >TP53-L137C KMFCQLAK   | 12  | >TP53-L137C KMFCQQAK   | 26    | 14    |
| >TP53-L137C KMFCQLAK   | 8   | >TP53-L137C KMFCQQAK   | 9     | 1     |
| >TP53-L137C KMFCQLAK   | 35  | >TP53-L137C KMFCQQAK   | 32    | 3     |
| >TP53-L137C KMFCQLAK   | 371 | >TP53-L137C KMFCQQAK   | 522   | 151   |
| >TP53-L137C KMFCQLAKT  | 81  | >TP53-L137C KMFCQQAKT  | 103   | 22    |
| >TP53-L137C KMFCQLAK   | 58  | >TP53-L137C KMFCQQAK   | 45    | 13    |
| >TP53-L137C KMFCQLAKT  | 491 | >TP53-L137C KMFCQQAKT  | 405   | 86    |
| >TP53-L137C KMFCQLAK   | 39  | >TP53-L137C KMFCQQAK   | 62    | 23    |
| >TP53-L137C NKMFCQLAK  | 646 | >TP53-L137C NKMFCQQAK  | 470   | 176   |
| >TP53-L137C LNKMFCQL   | 100 | >TP53-L137C LNKMFCQQ   | 16905 | 16805 |
| >TP53-L137C LNKMFCQLA  | 161 | >TP53-L137C LNKMFCQQA  | 283   | 122   |
| >TP53-L137C LNKMFCQL   | 153 | >TP53-L137C LNKMFCQQ   | 8730  | 8577  |
| >TP53-L137C ALNKMFCQL  | 238 | >TP53-L137C ALNKMFCQQ  | 18676 | 18438 |
| >TP53-L137C ALNKMFCQL  | 17  | >TP53-L137C ALNKMFCQQ  | 2814  | 2797  |
| >TP53-L137C ALNKMFCQL  | 30  | >TP53-L137C ALNKMFCQQ  | 5621  | 5591  |
| >TP53-L137C ALNKMFCQL  | 442 | >TP53-L137C ALNKMFCQQ  | 1077  | 635   |
| >TP53-L137C ALNKMFCQL  | 297 | >TP53-L137C ALNKMFCQQ  | 12799 | 12502 |
| >TP53-L137C ALNKMFCQL  | 22  | >TP53-L137C ALNKMFCQQ  | 3593  | 3571  |
| >TP53-L137C ALNKMFCQL  | 255 | >TP53-L137C ALNKMFCQQ  | 139   | 116   |
| >TP53-L137C ALNKMFCQL  | 198 | >TP53-L137C ALNKMFCQQ  | 17881 | 17683 |
| >TP53-L137C ALNKMFCQL  | 21  | >TP53-L137C ALNKMFCQQ  | 2584  | 2563  |
| >TP53-L137C ALNKMFCQL  | 256 | >TP53-L137C ALNKMFCQQ  | 181   | 75    |
| >TP53-L137C ALNKMFCQL  | 66  | >TP53-L137C ALNKMFCQQ  | 17746 | 17680 |
| >TP53-L137C ALNKMFCQL  | 3   | >TP53-L137C ALNKMFCQQ  | 26    | 23    |
| >TP53-L137C ALNKMFCQL  | 11  | >TP53-L137C ALNKMFCQQ  | 7     | 4     |
| >TP53-L137C ALNKMFCQL  | 37  | >TP53-L137C ALNKMFCQQ  | 56    | 19    |
| >TP53-L137C ALNKMFCQL  | 25  | >TP53-L137C ALNKMFCQQ  | 77    | 52    |
| >TP53-L137C ALNKMFCQL  | 113 | >TP53-L137C ALNKMFCQQ  | 183   | 70    |
| >TP53-L137C ALNKMFCQL  | 431 | >TP53-L137C ALNKMFCQQ  | 293   | 138   |
| >TP53-L137C ALNKMFCQL  | 288 | >TP53-L137C ALNKMFCQQ  | 11642 | 11354 |
| >TP53-L137C ALNKMFCQL  | 416 | >TP53-L137C ALNKMFCQQ  | 3032  | 2616  |

|                        |      |                        |      |      |
|------------------------|------|------------------------|------|------|
| >TP53-L137V LAKTCPVQLV | 482  | >TP53-L137V VAKTCPVQLV | 786  | 304  |
| >TP53-L137V LAKTCPVQL  | 417  | >TP53-L137V VAKTCPVQL  | 755  | 338  |
| >TP53-L137V LAKTCPVQL  | 405  | >TP53-L137V VAKTCPVQL  | 335  | 70   |
| >TP53-L137V LAKTCPVQLV | 45   | >TP53-L137V VAKTCPVQLV | 43   | 2    |
| >TP53-L137V LAKTCPVQLV | 42   | >TP53-L137V VAKTCPVQLV | 46   | 4    |
| >TP53-L137V LAKTCPVQLV | 42   | >TP53-L137V VAKTCPVQLV | 63   | 21   |
| >TP53-L137V QLAKTCPV   | 58   | >TP53-L137V QVAKTCPV   | 1509 | 1451 |
| >TP53-L137V QLAKTCPV   | 13   | >TP53-L137V QVAKTCPV   | 326  | 313  |
| >TP53-L137V QLAKTCPVQL | 315  | >TP53-L137V QVAKTCPVQL | 4205 | 3890 |
| >TP53-L137V QLAKTCPV   | 10   | >TP53-L137V QVAKTCPV   | 151  | 141  |
| >TP53-L137V QLAKTCPVQL | 383  | >TP53-L137V QVAKTCPVQL | 3212 | 2829 |
| >TP53-L137V QLAKTCPV   | 37   | >TP53-L137V QVAKTCPV   | 71   | 34   |
| >TP53-L137V QLAKTCPV   | 14   | >TP53-L137V QVAKTCPV   | 951  | 937  |
| >TP53-L137V QLAKTCPVQL | 323  | >TP53-L137V QVAKTCPVQL | 9606 | 9283 |
| >TP53-L137V QLAKTCPV   | 30   | >TP53-L137V QVAKTCPV   | 2274 | 2244 |
| >TP53-L137V QLAKTCPV   | 10   | >TP53-L137V QVAKTCPV   | 389  | 379  |
| >TP53-L137V QLAKTCPVQL | 177  | >TP53-L137V QVAKTCPVQL | 8807 | 8630 |
| >TP53-L137V QLAKTCPV   | 10   | >TP53-L137V QVAKTCPV   | 1218 | 1208 |
| >TP53-L137V QLAKTCPVQL | 117  | >TP53-L137V QVAKTCPVQL | 7116 | 6999 |
| >TP53-L137V QLAKTCPV   | 3    | >TP53-L137V QVAKTCPV   | 84   | 81   |
| >TP53-L137V QLAKTCPVQL | 20   | >TP53-L137V QVAKTCPVQL | 3503 | 3483 |
| >TP53-L137V QLAKTCPV   | 217  | >TP53-L137V QVAKTCPV   | 21   | 196  |
| >TP53-L137V QLAKTCPV   | 60   | >TP53-L137V QVAKTCPV   | 14   | 46   |
| >TP53-L137V QLAKTCPVQL | 967  | >TP53-L137V QVAKTCPVQL | 397  | 570  |
| >TP53-L137V QLAKTCPVQL | 343  | >TP53-L137V QVAKTCPVQL | 61   | 282  |
| >TP53-L137V SPALNKMFC  | 432  | >TP53-L137V SPALNKMFC  | 2545 | 2113 |
| >TP53-L137V SPALNKMFC  | 41   | >TP53-L137V SPALNKMFC  | 93   | 52   |
| >TP53-L137V SPALNKMFC  | 372  | >TP53-L137V SPALNKMFC  | 1321 | 949  |
| >TP53-L137V SPALNKMFC  | 2488 | >TP53-L137V SPALNKMFC  | 130  | 2358 |
| >TP53-L137V CQLAKTCPV  | 121  | >TP53-L137V CQVAKTCPV  | 732  | 611  |
| >TP53-L137V CQLAKTCPV  | 565  | >TP53-L137V CQVAKTCPV  | 300  | 265  |
| >TP53-L137V CQLAKTCPV  | 173  | >TP53-L137V CQVAKTCPV  | 49   | 124  |
| >TP53-L137V CQLAKTCPV  | 22   | >TP53-L137V CQVAKTCPV  | 26   | 4    |
| >TP53-L137V CQLAKTCPVC | 463  | >TP53-L137V CQVAKTCPVC | 638  | 175  |
| >TP53-L137V CQLAKTCPV  | 136  | >TP53-L137V CQVAKTCPV  | 964  | 828  |
| >TP53-L137V CQLAKTCPV  | 77   | >TP53-L137V CQVAKTCPV  | 700  | 623  |
| >TP53-L137V CQLAKTCPV  | 457  | >TP53-L137V CQVAKTCPV  | 4180 | 3723 |
| >TP53-L137V CQLAKTCPV  | 268  | >TP53-L137V CQVAKTCPV  | 342  | 74   |
| >TP53-L137V CQLAKTCPVC | 155  | >TP53-L137V CQVAKTCPVC | 234  | 79   |
| >TP53-L137V CQLAKTCPVC | 231  | >TP53-L137V CQVAKTCPVC | 200  | 31   |
| >TP53-L137V FCQLAKTCPV | 443  | >TP53-L137V FCQVAKTCPV | 288  | 155  |
| >TP53-L137V MFCQLAKTCI | 924  | >TP53-L137V MFCQVAKTC  | 415  | 509  |
| >TP53-L137V MFCQLAKTC  | 450  | >TP53-L137V MFCQVAKTC  | 579  | 129  |

|                       |      |                       |      |      |
|-----------------------|------|-----------------------|------|------|
| >TP53-L137V KMFCQLAKT | 89   | >TP53-L137V KMFCQVAKT | 101  | 12   |
| >TP53-L137V KMFCQLAKT | 102  | >TP53-L137V KMFCQVAKT | 147  | 45   |
| >TP53-L137V KMFCQLAKT | 19   | >TP53-L137V KMFCQVAKT | 19   | 0    |
| >TP53-L137V KMFCQLAKT | 199  | >TP53-L137V KMFCQVAKT | 720  | 521  |
| >TP53-L137V KMFCQLAKT | 19   | >TP53-L137V KMFCQVAKT | 12   | 7    |
| >TP53-L137V KMFCQLAKT | 23   | >TP53-L137V KMFCQVAKT | 13   | 10   |
| >TP53-L137V KMFCQLAKT | 55   | >TP53-L137V KMFCQVAKT | 76   | 21   |
| >TP53-L137V KMFCQLAKT | 61   | >TP53-L137V KMFCQVAKT | 65   | 4    |
| >TP53-L137V KMFCQLAKT | 673  | >TP53-L137V KMFCQVAKT | 376  | 297  |
| >TP53-L137V KMFCQLAK  | 26   | >TP53-L137V KMFCQVAK  | 27   | 1    |
| >TP53-L137V KMFCQLAK  | 12   | >TP53-L137V KMFCQVAK  | 14   | 2    |
| >TP53-L137V KMFCQLAK  | 8    | >TP53-L137V KMFCQVAK  | 10   | 2    |
| >TP53-L137V KMFCQLAK  | 35   | >TP53-L137V KMFCQVAK  | 24   | 11   |
| >TP53-L137V KMFCQLAK  | 371  | >TP53-L137V KMFCQVAK  | 181  | 190  |
| >TP53-L137V KMFCQLAKT | 1105 | >TP53-L137V KMFCQVAKT | 420  | 685  |
| >TP53-L137V KMFCQLAKT | 81   | >TP53-L137V KMFCQVAKT | 51   | 30   |
| >TP53-L137V KMFCQLAK  | 58   | >TP53-L137V KMFCQVAK  | 37   | 21   |
| >TP53-L137V KMFCQLAKT | 491  | >TP53-L137V KMFCQVAKT | 323  | 168  |
| >TP53-L137V KMFCQLAKT | 802  | >TP53-L137V KMFCQVAKT | 460  | 342  |
| >TP53-L137V KMFCQLAK  | 39   | >TP53-L137V KMFCQVAK  | 35   | 4    |
| >TP53-L137V NKMFCQLAK | 646  | >TP53-L137V NKMFCQVAK | 298  | 348  |
| >TP53-L137V LNKMFQQL  | 100  | >TP53-L137V LNKMFQVQ  | 801  | 701  |
| >TP53-L137V LNKMFQQLA | 161  | >TP53-L137V LNKMFQVA  | 302  | 141  |
| >TP53-L137V LNKMFQQL  | 153  | >TP53-L137V LNKMFQVQ  | 599  | 446  |
| >TP53-L137V ALNKMFQQL | 238  | >TP53-L137V ALNKMFQVQ | 53   | 185  |
| >TP53-L137V ALNKMFQQL | 17   | >TP53-L137V ALNKMFQVQ | 14   | 3    |
| >TP53-L137V ALNKMFQQL | 30   | >TP53-L137V ALNKMFQVQ | 6    | 24   |
| >TP53-L137V ALNKMFQQL | 442  | >TP53-L137V ALNKMFQVQ | 772  | 330  |
| >TP53-L137V ALNKMFQQL | 297  | >TP53-L137V ALNKMFQVQ | 32   | 265  |
| >TP53-L137V ALNKMFQQL | 22   | >TP53-L137V ALNKMFQVQ | 4    | 18   |
| >TP53-L137V ALNKMFQQL | 255  | >TP53-L137V ALNKMFQVQ | 267  | 12   |
| >TP53-L137V ALNKMFQQL | 198  | >TP53-L137V ALNKMFQVQ | 15   | 183  |
| >TP53-L137V ALNKMFQQL | 21   | >TP53-L137V ALNKMFQVQ | 7    | 14   |
| >TP53-L137V ALNKMFQQL | 256  | >TP53-L137V ALNKMFQVQ | 365  | 109  |
| >TP53-L137V ALNKMFQQL | 66   | >TP53-L137V ALNKMFQVQ | 6    | 60   |
| >TP53-L137V ALNKMFQQL | 3    | >TP53-L137V ALNKMFQVQ | 2    | 1    |
| >TP53-L137V ALNKMFQQL | 11   | >TP53-L137V ALNKMFQVQ | 15   | 4    |
| >TP53-L137V ALNKMFQQL | 37   | >TP53-L137V ALNKMFQVQ | 41   | 4    |
| >TP53-L137V ALNKMFQQL | 25   | >TP53-L137V ALNKMFQVQ | 35   | 10   |
| >TP53-L137V ALNKMFQQL | 113  | >TP53-L137V ALNKMFQVQ | 184  | 71   |
| >TP53-L137V ALNKMFQQL | 431  | >TP53-L137V ALNKMFQVQ | 164  | 267  |
| >TP53-L137V ALNKMFQQL | 288  | >TP53-L137V ALNKMFQVQ | 1301 | 1013 |
| >TP53-L137V ALNKMFQQL | 416  | >TP53-L137V ALNKMFQVQ | 1173 | 757  |

|                        |      |                        |      |      |
|------------------------|------|------------------------|------|------|
| >TP53-L145N LWVDSTPP   | 386  | >TP53-L145N MWVDSTPP   | 157  | 229  |
| >TP53-L145N LWVDSTPPP  | 467  | >TP53-L145N MWVDSTPPF  | 197  | 270  |
| >TP53-L145N LWVDSTPPPC | 485  | >TP53-L145N MWVDSTPPF  | 195  | 290  |
| >TP53-L145N CQLAKTCPVC | 463  | >TP53-L145N CQLAKTCPVC | 1787 | 1324 |
| >TP53-L145N CQLAKTCPVC | 155  | >TP53-L145N CQLAKTCPVC | 81   | 74   |
| >TP53-L145N CQLAKTCPVC | 231  | >TP53-L145N CQLAKTCPVC | 1015 | 784  |
| >TP53-L145N VQLWVDST   | 120  | >TP53-L145N VQMWVDST   | 54   | 66   |
| >TP53-L145N VQLWVDSTP  | 552  | >TP53-L145N VQMWVDST   | 288  | 264  |
| >TP53-L145N CPVQLWVDS  | 675  | >TP53-L145N CPVQMWVD   | 400  | 275  |
| >TP53-L145N CPVQLWVDS  | 635  | >TP53-L145N CPVQMWVD   | 434  | 201  |
| >TP53-L145N TCPVQLWV   | 1807 | >TP53-L145N TCPVQMWV   | 418  | 1389 |
| >TP53-L145N KTCPVQLWV  | 125  | >TP53-L145N KTCPVQMW   | 160  | 35   |
| >TP53-L145N KTCPVQLWV  | 53   | >TP53-L145N KTCPVQMW   | 44   | 9    |
| >TP53-L145N KTCPVQLWV  | 338  | >TP53-L145N KTCPVQMW   | 344  | 6    |
| >TP53-L145N KTCPVQLWV  | 202  | >TP53-L145N KTCPVQMW   | 99   | 103  |
| >TP53-L145N KTCPVQLWV  | 224  | >TP53-L145N KTCPVQMW   | 110  | 114  |
| >TP53-L145N KTCPVQLW   | 165  | >TP53-L145N KTCPVQMW   | 132  | 33   |
| >TP53-L145N KTCPVQLWV  | 1487 | >TP53-L145N KTCPVQMW   | 129  | 1358 |
| >TP53-L145N KTCPVQLW   | 4    | >TP53-L145N KTCPVQMW   | 5    | 1    |
| >TP53-L145N KTCPVQLWV  | 118  | >TP53-L145N KTCPVQMW   | 242  | 124  |
| >TP53-L145N KTCPVQLW   | 34   | >TP53-L145N KTCPVQMW   | 36   | 2    |
| >TP53-L145N KTCPVQLW   | 10   | >TP53-L145N KTCPVQMW   | 13   | 3    |
| >TP53-L145N KTCPVQLWV  | 254  | >TP53-L145N KTCPVQMW   | 163  | 91   |
| >TP53-L145N KTCPVQLWV  | 272  | >TP53-L145N KTCPVQMW   | 632  | 360  |
| >TP53-L145N AKTCPVQL   | 41   | >TP53-L145N AKTCPVQM   | 26   | 15   |
| >TP53-L145N AKTCPVQLW  | 192  | >TP53-L145N AKTCPVQMV  | 87   | 105  |
| >TP53-L145N AKTCPVQLW  | 503  | >TP53-L145N AKTCPVQMV  | 287  | 216  |
| >TP53-L145N AKTCPVQLW  | 616  | >TP53-L145N AKTCPVQMV  | 491  | 125  |
| >TP53-L145N LAKTCPVQLV | 830  | >TP53-L145N LAKTCPVQM  | 479  | 351  |
| >TP53-L145N LAKTCPVQLV | 482  | >TP53-L145N LAKTCPVQM  | 281  | 201  |
| >TP53-L145N LAKTCPVQL  | 417  | >TP53-L145N LAKTCPVQM  | 217  | 200  |
| >TP53-L145N LAKTCPVQL  | 405  | >TP53-L145N LAKTCPVQM  | 246  | 159  |
| >TP53-L145N LAKTCPVQLV | 45   | >TP53-L145N LAKTCPVQM  | 39   | 6    |
| >TP53-L145N LAKTCPVQLV | 42   | >TP53-L145N LAKTCPVQM  | 48   | 6    |
| >TP53-L145N LAKTCPVQLV | 42   | >TP53-L145N LAKTCPVQM  | 99   | 57   |
| >TP53-L145N LAKTCPVQLV | 689  | >TP53-L145N LAKTCPVQM  | 422  | 267  |
| >TP53-L145N QLAKTCPVQL | 315  | >TP53-L145N QLAKTCPVQI | 1596 | 1281 |
| >TP53-L145N QLAKTCPVQL | 383  | >TP53-L145N QLAKTCPVQI | 1834 | 1451 |
| >TP53-L145N QLAKTCPVQL | 323  | >TP53-L145N QLAKTCPVQI | 2162 | 1839 |
| >TP53-L145N QLAKTCPVQL | 177  | >TP53-L145N QLAKTCPVQI | 2489 | 2312 |
| >TP53-L145N QLAKTCPVQL | 117  | >TP53-L145N QLAKTCPVQI | 919  | 802  |
| >TP53-L145N QLAKTCPVQL | 20   | >TP53-L145N QLAKTCPVQI | 554  | 534  |
| >TP53-L145N QLAKTCPVQL | 343  | >TP53-L145N QLAKTCPVQI | 756  | 413  |

|                        |       |                        |       |       |
|------------------------|-------|------------------------|-------|-------|
| >TP53-L145N QLAKTCPVQL | 3164  | >TP53-L145N QLAKTCPVQF | 145   | 3019  |
| >TP53-L145P LWVDSTPP   | 386   | >TP53-L145P PWVDSTPP   | 1195  | 809   |
| >TP53-L145P LWVDSTPPP  | 467   | >TP53-L145P PWVDSTPPP  | 1233  | 766   |
| >TP53-L145P LWVDSTPPPC | 485   | >TP53-L145P PWVDSTPPPC | 1361  | 876   |
| >TP53-L145P QLWVDSTPP  | 16239 | >TP53-L145P QPWVDSTPP  | 229   | 16010 |
| >TP53-L145P QLWVDSTPPC | 10293 | >TP53-L145P QPWVDSTPPC | 119   | 10174 |
| >TP53-L145P CQLAKTCPVC | 463   | >TP53-L145P CQLAKTCPVC | 13582 | 13119 |
| >TP53-L145P CQLAKTCPVC | 155   | >TP53-L145P CQLAKTCPVC | 4506  | 4351  |
| >TP53-L145P CQLAKTCPVC | 231   | >TP53-L145P CQLAKTCPVC | 19443 | 19212 |
| >TP53-L145P VQLWVDST   | 120   | >TP53-L145P VQPWVDST   | 565   | 445   |
| >TP53-L145P KTCPVQLWV  | 575   | >TP53-L145P KTCPVQPWV  | 350   | 225   |
| >TP53-L145P KTCPVQLWV  | 125   | >TP53-L145P KTCPVQPWV  | 92    | 33    |
| >TP53-L145P KTCPVQLWV  | 53    | >TP53-L145P KTCPVQPWV  | 23    | 30    |
| >TP53-L145P KTCPVQLWV  | 338   | >TP53-L145P KTCPVQPWV  | 66    | 272   |
| >TP53-L145P KTCPVQLWV  | 202   | >TP53-L145P KTCPVQPWV  | 65    | 137   |
| >TP53-L145P KTCPVQLWV  | 224   | >TP53-L145P KTCPVQPWV  | 131   | 93    |
| >TP53-L145P KTCPVQLW   | 165   | >TP53-L145P KTCPVQPW   | 52    | 113   |
| >TP53-L145P KTCPVQLW   | 4     | >TP53-L145P KTCPVQPW   | 4     | 0     |
| >TP53-L145P KTCPVQLWV  | 118   | >TP53-L145P KTCPVQPWV  | 204   | 86    |
| >TP53-L145P KTCPVQLW   | 34    | >TP53-L145P KTCPVQPW   | 34    | 0     |
| >TP53-L145P KTCPVQLW   | 10    | >TP53-L145P KTCPVQPW   | 14    | 4     |
| >TP53-L145P KTCPVQLWV  | 254   | >TP53-L145P KTCPVQPWV  | 415   | 161   |
| >TP53-L145P KTCPVQLWV  | 272   | >TP53-L145P KTCPVQPWV  | 306   | 34    |
| >TP53-L145P AKTCPVQL   | 41    | >TP53-L145P AKTCPVQP   | 1719  | 1678  |
| >TP53-L145P AKTCPVQLW  | 192   | >TP53-L145P AKTCPVQPW  | 28    | 164   |
| >TP53-L145P AKTCPVQLW  | 503   | >TP53-L145P AKTCPVQPW  | 435   | 68    |
| >TP53-L145P LAKTCPVQLW | 482   | >TP53-L145P LAKTCPVQPW | 195   | 287   |
| >TP53-L145P LAKTCPVQL  | 417   | >TP53-L145P LAKTCPVQP  | 8401  | 7984  |
| >TP53-L145P LAKTCPVQLW | 2082  | >TP53-L145P LAKTCPVQPW | 474   | 1608  |
| >TP53-L145P LAKTCPVQL  | 405   | >TP53-L145P LAKTCPVQP  | 23185 | 22780 |
| >TP53-L145P LAKTCPVQLW | 45    | >TP53-L145P LAKTCPVQPW | 25    | 20    |
| >TP53-L145P LAKTCPVQLW | 42    | >TP53-L145P LAKTCPVQPW | 43    | 1     |
| >TP53-L145P LAKTCPVQLW | 42    | >TP53-L145P LAKTCPVQPW | 113   | 71    |
| >TP53-L145P QLAKTCPVQL | 315   | >TP53-L145P QLAKTCPVQF | 22584 | 22269 |
| >TP53-L145P QLAKTCPVQL | 383   | >TP53-L145P QLAKTCPVQF | 17912 | 17529 |
| >TP53-L145P QLAKTCPVQL | 323   | >TP53-L145P QLAKTCPVQF | 19497 | 19174 |
| >TP53-L145P QLAKTCPVQL | 177   | >TP53-L145P QLAKTCPVQF | 18222 | 18045 |
| >TP53-L145P QLAKTCPVQL | 117   | >TP53-L145P QLAKTCPVQF | 23179 | 23062 |
| >TP53-L145P QLAKTCPVQL | 20    | >TP53-L145P QLAKTCPVQF | 17744 | 17724 |
| >TP53-L145P QLAKTCPVQL | 343   | >TP53-L145P QLAKTCPVQF | 950   | 607   |
| >TP53-L145C LWVDSTPP   | 386   | >TP53-L145C QWVDSTPP   | 398   | 12    |
| >TP53-L145C LWVDSTPPP  | 467   | >TP53-L145C QWVDSTPPP  | 456   | 11    |
| >TP53-L145C LWVDSTPPPC | 485   | >TP53-L145C QWVDSTPPP  | 471   | 14    |



|                        |       |                        |       |       |
|------------------------|-------|------------------------|-------|-------|
| >TP53-L145C QLWVDSTPP  | 5003  | >TP53-L145C QQWVDSTPF  | 354   | 4649  |
| >TP53-L145C QLWVDSTPP  | 5242  | >TP53-L145C QQWVDSTPF  | 412   | 4830  |
| >TP53-L145C CQLAKTCPVC | 463   | >TP53-L145C CQLAKTCPVC | 12053 | 11590 |
| >TP53-L145C CQLAKTCPVC | 155   | >TP53-L145C CQLAKTCPVC | 4475  | 4320  |
| >TP53-L145C CQLAKTCPVC | 231   | >TP53-L145C CQLAKTCPVC | 16506 | 16275 |
| >TP53-L145C VQLWVDST   | 120   | >TP53-L145C VQQWVDST   | 1066  | 946   |
| >TP53-L145C KTCPVQLWV  | 125   | >TP53-L145C KTCPVQQWV  | 358   | 233   |
| >TP53-L145C KTCPVQLWV  | 53    | >TP53-L145C KTCPVQQWV  | 38    | 15    |
| >TP53-L145C KTCPVQLWV  | 338   | >TP53-L145C KTCPVQQWV  | 438   | 100   |
| >TP53-L145C KTCPVQLWV  | 202   | >TP53-L145C KTCPVQQWV  | 78    | 124   |
| >TP53-L145C KTCPVQLWV  | 224   | >TP53-L145C KTCPVQQWV  | 455   | 231   |
| >TP53-L145C KTCPVQLW   | 165   | >TP53-L145C KTCPVQQW   | 102   | 63    |
| >TP53-L145C KTCPVQLW   | 4     | >TP53-L145C KTCPVQQW   | 4     | 0     |
| >TP53-L145C KTCPVQLWV  | 118   | >TP53-L145C KTCPVQQWV  | 218   | 100   |
| >TP53-L145C KTCPVQLW   | 34    | >TP53-L145C KTCPVQQW   | 31    | 3     |
| >TP53-L145C KTCPVQLW   | 10    | >TP53-L145C KTCPVQQW   | 9     | 1     |
| >TP53-L145C KTCPVQLWV  | 254   | >TP53-L145C KTCPVQQWV  | 302   | 48    |
| >TP53-L145C KTCPVQLWV  | 272   | >TP53-L145C KTCPVQQWV  | 378   | 106   |
| >TP53-L145C AKTCPVQL   | 41    | >TP53-L145C AKTCPVQQ   | 1580  | 1539  |
| >TP53-L145C AKTCPVQLW  | 192   | >TP53-L145C AKTCPVQQW  | 108   | 84    |
| >TP53-L145C AKTCPVQLW  | 503   | >TP53-L145C AKTCPVQQW  | 350   | 153   |
| >TP53-L145C AKTCPVQLW  | 616   | >TP53-L145C AKTCPVQQW  | 415   | 201   |
| >TP53-L145C LAKTCPVQLV | 482   | >TP53-L145C LAKTCPVQQV | 246   | 236   |
| >TP53-L145C LAKTCPVQL  | 417   | >TP53-L145C LAKTCPVQQ  | 8225  | 7808  |
| >TP53-L145C LAKTCPVQL  | 405   | >TP53-L145C LAKTCPVQQ  | 15541 | 15136 |
| >TP53-L145C LAKTCPVQLV | 45    | >TP53-L145C LAKTCPVQQV | 23    | 22    |
| >TP53-L145C LAKTCPVQLV | 42    | >TP53-L145C LAKTCPVQQV | 41    | 1     |
| >TP53-L145C LAKTCPVQLV | 42    | >TP53-L145C LAKTCPVQQV | 33    | 9     |
| >TP53-L145C QLAKTCPVQL | 315   | >TP53-L145C QLAKTCPVQC | 22700 | 22385 |
| >TP53-L145C QLAKTCPVQL | 383   | >TP53-L145C QLAKTCPVQC | 20388 | 20005 |
| >TP53-L145C QLAKTCPVQL | 323   | >TP53-L145C QLAKTCPVQC | 12394 | 12071 |
| >TP53-L145C QLAKTCPVQL | 177   | >TP53-L145C QLAKTCPVQC | 9466  | 9289  |
| >TP53-L145C QLAKTCPVQL | 117   | >TP53-L145C QLAKTCPVQC | 17269 | 17152 |
| >TP53-L145C QLAKTCPVQL | 20    | >TP53-L145C QLAKTCPVQC | 1343  | 1323  |
| >TP53-L145C QLAKTCPVQL | 967   | >TP53-L145C QLAKTCPVQC | 472   | 495   |
| >TP53-L145C QLAKTCPVQL | 343   | >TP53-L145C QLAKTCPVQC | 241   | 102   |
| >TP53-L145R LWVDSTPP   | 386   | >TP53-L145R RWVDSTPP   | 248   | 138   |
| >TP53-L145R LWVDSTPPP  | 467   | >TP53-L145R RWVDSTPPP  | 289   | 178   |
| >TP53-L145R LWVDSTPPPC | 485   | >TP53-L145R RWVDSTPPPC | 301   | 184   |
| >TP53-L145R QLWVDSTPP  | 23647 | >TP53-L145R QRWVDSTPP  | 430   | 23217 |
| >TP53-L145R QLWVDSTP   | 20155 | >TP53-L145R QRWVDSTP   | 284   | 19871 |
| >TP53-L145R QLWVDSTPP  | 21253 | >TP53-L145R QRWVDSTPP  | 271   | 20982 |
| >TP53-L145R QLWVDSTPP  | 15076 | >TP53-L145R QRWVDSTPP  | 165   | 14911 |

|                        |       |                        |       |       |
|------------------------|-------|------------------------|-------|-------|
| >TP53-L145RQLWVDSTPP   | 13681 | >TP53-L145RQRWVDSTPP   | 184   | 13497 |
| >TP53-L145RCQLAKTCPVC  | 463   | >TP53-L145RCQLAKTCPVC  | 22347 | 21884 |
| >TP53-L145RCQLAKTCPVC  | 12076 | >TP53-L145RCQLAKTCPVC  | 66    | 12010 |
| >TP53-L145RCQLAKTCPVC  | 155   | >TP53-L145RCQLAKTCPVC  | 1626  | 1471  |
| >TP53-L145RCQLAKTCPVC  | 231   | >TP53-L145RCQLAKTCPVC  | 17380 | 17149 |
| >TP53-L145RCQLAKTCPVC  | 20955 | >TP53-L145RCQLAKTCPVC  | 42    | 20913 |
| >TP53-L145RVQLWVDST    | 120   | >TP53-L145RVQRWVDST    | 3078  | 2958  |
| >TP53-L145RKTCPVQLWV   | 125   | >TP53-L145RKTCPVQRWV   | 1684  | 1559  |
| >TP53-L145RKTCPVQLWV   | 53    | >TP53-L145RKTCPVQRWV   | 135   | 82    |
| >TP53-L145RKTCPVQLWV   | 338   | >TP53-L145RKTCPVQRWV   | 3755  | 3417  |
| >TP53-L145RKTCPVQLWV   | 202   | >TP53-L145RKTCPVQRWV   | 1647  | 1445  |
| >TP53-L145RKTCPVQLWV   | 224   | >TP53-L145RKTCPVQRWV   | 605   | 381   |
| >TP53-L145RKTCPVQLW    | 165   | >TP53-L145RKTCPVQRW    | 188   | 23    |
| >TP53-L145RKTCPVQLW    | 4     | >TP53-L145RKTCPVQRW    | 4     | 0     |
| >TP53-L145RKTCPVQLWV   | 118   | >TP53-L145RKTCPVQRWV   | 332   | 214   |
| >TP53-L145RKTCPVQLW    | 34    | >TP53-L145RKTCPVQRW    | 32    | 2     |
| >TP53-L145RKTCPVQLW    | 10    | >TP53-L145RKTCPVQRW    | 11    | 1     |
| >TP53-L145RKTCPVQLWV   | 254   | >TP53-L145RKTCPVQRWV   | 365   | 111   |
| >TP53-L145RKTCPVQLWV   | 272   | >TP53-L145RKTCPVQRWV   | 382   | 110   |
| >TP53-L145RAKTCPVQL    | 41    | >TP53-L145RAKTCPVQR    | 496   | 455   |
| >TP53-L145RAKTCPVQLW   | 192   | >TP53-L145RAKTCPVQRW   | 236   | 44    |
| >TP53-L145RALAKTCPVQLV | 482   | >TP53-L145RALAKTCPVQRV | 1789  | 1307  |
| >TP53-L145RALAKTCPVQL  | 11381 | >TP53-L145RALAKTCPVQR  | 38    | 11343 |
| >TP53-L145RALAKTCPVQL  | 31657 | >TP53-L145RALAKTCPVQR  | 307   | 31350 |
| >TP53-L145RALAKTCPVQL  | 417   | >TP53-L145RALAKTCPVQR  | 4078  | 3661  |
| >TP53-L145RALAKTCPVQL  | 405   | >TP53-L145RALAKTCPVQR  | 18720 | 18315 |
| >TP53-L145RALAKTCPVQLV | 45    | >TP53-L145RALAKTCPVQRV | 24    | 21    |
| >TP53-L145RALAKTCPVQLV | 42    | >TP53-L145RALAKTCPVQRV | 43    | 1     |
| >TP53-L145RALAKTCPVQLV | 42    | >TP53-L145RALAKTCPVQRV | 61    | 19    |
| >TP53-L145RALAKTCPVQL  | 33440 | >TP53-L145RALAKTCPVQR  | 283   | 33157 |
| >TP53-L145RQLAKTCPVQL  | 315   | >TP53-L145RQLAKTCPVQF  | 20411 | 20096 |
| >TP53-L145RQLAKTCPVQL  | 383   | >TP53-L145RQLAKTCPVQF  | 16363 | 15980 |
| >TP53-L145RQLAKTCPVQL  | 323   | >TP53-L145RQLAKTCPVQF  | 22608 | 22285 |
| >TP53-L145RQLAKTCPVQL  | 177   | >TP53-L145RQLAKTCPVQF  | 20348 | 20171 |
| >TP53-L145RQLAKTCPVQL  | 117   | >TP53-L145RQLAKTCPVQF  | 24065 | 23948 |
| >TP53-L145RQLAKTCPVQL  | 20    | >TP53-L145RQLAKTCPVQF  | 15351 | 15331 |
| >TP53-L145RQLAKTCPVQL  | 25801 | >TP53-L145RQLAKTCPVQF  | 368   | 25433 |
| >TP53-L145RQLAKTCPVQL  | 343   | >TP53-L145RQLAKTCPVQF  | 498   | 155   |
| >TP53-L145RQLAKTCPVQL  | 27605 | >TP53-L145RQLAKTCPVQF  | 159   | 27446 |
| >TP53-L145RQLAKTCPVQL  | 28477 | >TP53-L145RQLAKTCPVQF  | 142   | 28335 |
| >TP53-L145VLWVDSTPP    | 386   | >TP53-L145VVWVDSTPP    | 522   | 136   |
| >TP53-L145VLWVDSTPPP   | 467   | >TP53-L145VVWVDSTPPP   | 603   | 136   |
| >TP53-L145VLWVDSTPPPC  | 485   | >TP53-L145VVWVDSTPPPC  | 645   | 160   |

|                         |      |                         |      |      |
|-------------------------|------|-------------------------|------|------|
| >TP53-L145V CQLAKTCPVC  | 1090 | >TP53-L145V CQLAKTCPVC  | 171  | 919  |
| >TP53-L145V CQLAKTCPVC  | 463  | >TP53-L145V CQLAKTCPVC  | 80   | 383  |
| >TP53-L145V CQLAKTCPVC  | 3238 | >TP53-L145V CQLAKTCPVC  | 217  | 3021 |
| >TP53-L145V CQLAKTCPVC  | 3566 | >TP53-L145V CQLAKTCPVC  | 462  | 3104 |
| >TP53-L145V CQLAKTCPVC  | 5023 | >TP53-L145V CQLAKTCPVC  | 488  | 4535 |
| >TP53-L145V CQLAKTCPVC  | 155  | >TP53-L145V CQLAKTCPVC  | 355  | 200  |
| >TP53-L145V CQLAKTCPVC  | 231  | >TP53-L145V CQLAKTCPVC  | 2946 | 2715 |
| >TP53-L145V VQLWVDST    | 120  | >TP53-L145V VQVWVDST    | 152  | 32   |
| >TP53-L145V KTCPVQLWV   | 923  | >TP53-L145V KTCPVQVWV   | 397  | 526  |
| >TP53-L145V KTCPVQLWV   | 125  | >TP53-L145V KTCPVQVWV   | 130  | 5    |
| >TP53-L145V KTCPVQLWV   | 53   | >TP53-L145V KTCPVQVWV   | 39   | 14   |
| >TP53-L145V KTCPVQLWV   | 338  | >TP53-L145V KTCPVQVWV   | 254  | 84   |
| >TP53-L145V KTCPVQLWV   | 202  | >TP53-L145V KTCPVQVWV   | 120  | 82   |
| >TP53-L145V KTCPVQLWV   | 224  | >TP53-L145V KTCPVQVWV   | 481  | 257  |
| >TP53-L145V KTCPVQLW    | 165  | >TP53-L145V KTCPVQVW    | 69   | 96   |
| >TP53-L145V KTCPVQLWV   | 1487 | >TP53-L145V KTCPVQVWV   | 195  | 1292 |
| >TP53-L145V KTCPVQLW    | 4    | >TP53-L145V KTCPVQVW    | 4    | 0    |
| >TP53-L145V KTCPVQLWV   | 118  | >TP53-L145V KTCPVQVWV   | 219  | 101  |
| >TP53-L145V KTCPVQLW    | 34   | >TP53-L145V KTCPVQVW    | 34   | 0    |
| >TP53-L145V KTCPVQLW    | 10   | >TP53-L145V KTCPVQVW    | 10   | 0    |
| >TP53-L145V KTCPVQLWV   | 254  | >TP53-L145V KTCPVQVWV   | 499  | 245  |
| >TP53-L145V KTCPVQLWV   | 272  | >TP53-L145V KTCPVQVWV   | 306  | 34   |
| >TP53-L145V AKTCPVQL    | 41   | >TP53-L145V AKTCPVQV    | 96   | 55   |
| >TP53-L145V AKTCPVQLW   | 192  | >TP53-L145V AKTCPVQVW   | 37   | 155  |
| >TP53-L145V AKTCPVQLW   | 503  | >TP53-L145V AKTCPVQVW   | 286  | 217  |
| >TP53-L145V LAKTCPVQLV  | 482  | >TP53-L145V LAKTCPVQVV  | 304  | 178  |
| >TP53-L145V LAKTCPVQL   | 417  | >TP53-L145V LAKTCPVQV   | 1024 | 607  |
| >TP53-L145V LAKTCPVQL   | 405  | >TP53-L145V LAKTCPVQV   | 6919 | 6514 |
| >TP53-L145V LAKTCPVQLV  | 45   | >TP53-L145V LAKTCPVQVV  | 36   | 9    |
| >TP53-L145V LAKTCPVQLV  | 42   | >TP53-L145V LAKTCPVQVV  | 47   | 5    |
| >TP53-L145V LAKTCPVQLV  | 42   | >TP53-L145V LAKTCPVQVV  | 37   | 5    |
| >TP53-L145V QLAKTCPVQL  | 1834 | >TP53-L145V QLAKTCPVQ\  | 441  | 1393 |
| >TP53-L145V QLAKTCPVQL  | 315  | >TP53-L145V QLAKTCPVQ\  | 302  | 13   |
| >TP53-L145V QLAKTCPVQL  | 383  | >TP53-L145V QLAKTCPVQ\  | 73   | 310  |
| >TP53-L145V QLAKTCPVQL  | 323  | >TP53-L145V QLAKTCPVQ\  | 24   | 299  |
| >TP53-L145V QLAKTCPVQL  | 1584 | >TP53-L145V QLAKTCPVQ\  | 152  | 1432 |
| >TP53-L145V QLAKTCPVQL  | 177  | >TP53-L145V QLAKTCPVQ\  | 16   | 161  |
| >TP53-L145V QLAKTCPVQL  | 117  | >TP53-L145V QLAKTCPVQ\  | 8    | 109  |
| >TP53-L145V QLAKTCPVQL  | 20   | >TP53-L145V QLAKTCPVQ\  | 5    | 15   |
| >TP53-L145V QLAKTCPVQL  | 3162 | >TP53-L145V QLAKTCPVQ\  | 284  | 2878 |
| >TP53-L145V QLAKTCPVQL  | 343  | >TP53-L145V QLAKTCPVQ\  | 297  | 46   |
| >TP53-L188V LAPPQHILIRV | 395  | >TP53-L188V VAPPQHILIRV | 1497 | 1102 |
| >TP53-L188V LAPPQHILIRV | 577  | >TP53-L188V VAPPQHILIRV | 463  | 114  |

|                        |      |                        |       |       |
|------------------------|------|------------------------|-------|-------|
| >TP53-L188V LAPPQHILRV | 52   | >TP53-L188V VAPPQHILRV | 77    | 25    |
| >TP53-L188V LAPPQHLI   | 5    | >TP53-L188V VAPPQHLI   | 4     | 1     |
| >TP53-L188V LAPPQHILRV | 28   | >TP53-L188V VAPPQHILRV | 25    | 3     |
| >TP53-L188V LAPPQHLI   | 70   | >TP53-L188V VAPPQHLI   | 201   | 131   |
| >TP53-L188V GLAPPQHL   | 285  | >TP53-L188V GVAPPQHL   | 7006  | 6721  |
| >TP53-L188V GLAPPQHLI  | 65   | >TP53-L188V GVAPPQHLI  | 2695  | 2630  |
| >TP53-L188V GLAPPQHLIR | 20   | >TP53-L188V GVAPPQHLIR | 347   | 327   |
| >TP53-L188V GLAPPQHL   | 22   | >TP53-L188V GVAPPQHL   | 614   | 592   |
| >TP53-L188V GLAPPQHLI  | 15   | >TP53-L188V GVAPPQHLI  | 291   | 276   |
| >TP53-L188V GLAPPQHLIR | 9    | >TP53-L188V GVAPPQHLIR | 158   | 149   |
| >TP53-L188V GLAPPQHL   | 61   | >TP53-L188V GVAPPQHL   | 2259  | 2198  |
| >TP53-L188V GLAPPQHLI  | 31   | >TP53-L188V GVAPPQHLI  | 1214  | 1183  |
| >TP53-L188V GLAPPQHLIR | 7    | >TP53-L188V GVAPPQHLIR | 93    | 86    |
| >TP53-L188V GLAPPQHLIR | 44   | >TP53-L188V GVAPPQHLIR | 86    | 42    |
| >TP53-L188V GLAPPQHL   | 16   | >TP53-L188V GVAPPQHL   | 1387  | 1371  |
| >TP53-L188V GLAPPQHLI  | 13   | >TP53-L188V GVAPPQHLI  | 1006  | 993   |
| >TP53-L188V GLAPPQHLIR | 3    | >TP53-L188V GVAPPQHLIR | 53    | 50    |
| >TP53-L188V GLAPPQHL   | 26   | >TP53-L188V GVAPPQHL   | 3189  | 3163  |
| >TP53-L188V GLAPPQHLI  | 22   | >TP53-L188V GVAPPQHLI  | 3515  | 3493  |
| >TP53-L188V GLAPPQHLIR | 7    | >TP53-L188V GVAPPQHLIR | 553   | 546   |
| >TP53-L188V GLAPPQHL   | 11   | >TP53-L188V GVAPPQHL   | 1047  | 1036  |
| >TP53-L188V GLAPPQHLI  | 13   | >TP53-L188V GVAPPQHLI  | 1536  | 1523  |
| >TP53-L188V GLAPPQHLIR | 5    | >TP53-L188V GVAPPQHLIR | 93    | 88    |
| >TP53-L188V GLAPPQHL   | 175  | >TP53-L188V GVAPPQHL   | 10639 | 10464 |
| >TP53-L188V GLAPPQHLI  | 76   | >TP53-L188V GVAPPQHLI  | 8795  | 8719  |
| >TP53-L188V GLAPPQHLIR | 9    | >TP53-L188V GVAPPQHLIR | 1414  | 1405  |
| >TP53-L188V GLAPPQHL   | 5    | >TP53-L188V GVAPPQHL   | 186   | 181   |
| >TP53-L188V GLAPPQHLI  | 5    | >TP53-L188V GVAPPQHLI  | 174   | 169   |
| >TP53-L188V GLAPPQHLIR | 2    | >TP53-L188V GVAPPQHLIR | 8     | 6     |
| >TP53-L188V GLAPPQHLIR | 1936 | >TP53-L188V GVAPPQHLIR | 172   | 1764  |
| >TP53-L188V GLAPPQHLI  | 1622 | >TP53-L188V GVAPPQHLI  | 67    | 1555  |
| >TP53-L188V GLAPPQHLIR | 1462 | >TP53-L188V GVAPPQHLIR | 129   | 1333  |
| >TP53-L188V GLAPPQHLIR | 282  | >TP53-L188V GVAPPQHLIR | 1288  | 1006  |
| >TP53-L188V GLAPPQHLIR | 3330 | >TP53-L188V GVAPPQHLIR | 397   | 2933  |
| >TP53-L188V GLAPPQHLI  | 1527 | >TP53-L188V GVAPPQHLI  | 242   | 1285  |
| >TP53-L188V HHERCSDSDC | 126  | >TP53-L188V HHERCSDSDC | 2199  | 2073  |
| >TP53-L188V SDGLAPPQHI | 104  | >TP53-L188V SDGVAPPQH  | 95    | 9     |
| >TP53-L188V CSDSDGLA   | 178  | >TP53-L188V CSDSDGVA   | 983   | 805   |
| >TP53-L188V HERCSDSDGL | 602  | >TP53-L188V HERCSDSDG\ | 205   | 397   |
| >TP53-L188V HERCSDSDGL | 422  | >TP53-L188V HERCSDSDG\ | 555   | 133   |
| >TP53-L194F LIRVEGNLRV | 2070 | >TP53-L194F FIRVEGNLRV | 425   | 1645  |
| >TP53-L194F LIRVEGNLRV | 555  | >TP53-L194F FIRVEGNLRV | 114   | 441   |
| >TP53-L194F LIRVEGNLRV | 2785 | >TP53-L194F FIRVEGNLRV | 383   | 2402  |

|                         |       |                         |       |       |
|-------------------------|-------|-------------------------|-------|-------|
| >TP53-L194F LIRVEGNLRV  | 1834  | >TP53-L194F FIRVEGNLRV  | 295   | 1539  |
| >TP53-L194F LIRVEGNLRV  | 35    | >TP53-L194F FIRVEGNLRV  | 10    | 25    |
| >TP53-L194F LIRVEGNLRV  | 296   | >TP53-L194F FIRVEGNLRV  | 3222  | 2926  |
| >TP53-L194F LIRVEGNLR   | 1411  | >TP53-L194F FIRVEGNLR   | 316   | 1095  |
| >TP53-L194F HLIRVEGNLR' | 156   | >TP53-L194F HFIRVEGNLR' | 14174 | 14018 |
| >TP53-L194F HLIRVEGNL   | 226   | >TP53-L194F HFIRVEGNL   | 8685  | 8459  |
| >TP53-L194F HLIRVEGNLR' | 111   | >TP53-L194F HFIRVEGNLR' | 6857  | 6746  |
| >TP53-L194F HLIRVEGNLR' | 41    | >TP53-L194F HFIRVEGNLR' | 12800 | 12759 |
| >TP53-L194F HLIRVEGNLR' | 322   | >TP53-L194F HFIRVEGNLR' | 10635 | 10313 |
| >TP53-L194F HLIRVEGNL   | 327   | >TP53-L194F HFIRVEGNL   | 22908 | 22581 |
| >TP53-L194F HLIRVEGNLR' | 9     | >TP53-L194F HFIRVEGNLR' | 6247  | 6238  |
| >TP53-L194F HLIRVEGNLR' | 27    | >TP53-L194F HFIRVEGNLR' | 14207 | 14180 |
| >TP53-L194F HLIRVEGNLR' | 27    | >TP53-L194F HFIRVEGNLR' | 10849 | 10822 |
| >TP53-L194F HLIRVEGNL   | 153   | >TP53-L194F HFIRVEGNL   | 25494 | 25341 |
| >TP53-L194F HLIRVEGNLR' | 4     | >TP53-L194F HFIRVEGNLR' | 4080  | 4076  |
| >TP53-L194F HLIRVEGNL   | 13425 | >TP53-L194F HFIRVEGNL   | 121   | 13304 |
| >TP53-L194F HLIRVEGNLR  | 241   | >TP53-L194F HFIRVEGNLR  | 85    | 156   |
| >TP53-L194F HLIRVEGNLR  | 381   | >TP53-L194F HFIRVEGNLR  | 64    | 317   |
| >TP53-L194F HLIRVEGNLR  | 24    | >TP53-L194F HFIRVEGNLR  | 19    | 5     |
| >TP53-L194F HLIRVEGNLR' | 398   | >TP53-L194F HFIRVEGNLR' | 6483  | 6085  |
| >TP53-L194F HLIRVEGNLR  | 478   | >TP53-L194F HFIRVEGNLR  | 137   | 341   |
| >TP53-L194F QHLIRVEGNL  | 709   | >TP53-L194F QHFIRVEGNL  | 353   | 356   |
| >TP53-L194F APPQHLIRV   | 2001  | >TP53-L194F APPQHFI     | 499   | 1502  |
| >TP53-L194F APPQHLIRV   | 1104  | >TP53-L194F APPQHFI     | 189   | 915   |
| >TP53-L194F LAPPQHLIRV  | 395   | >TP53-L194F LAPPQHFI    | 355   | 40    |
| >TP53-L194F LAPPQHLIRV  | 577   | >TP53-L194F LAPPQHFI    | 463   | 114   |
| >TP53-L194F LAPPQHLIRV  | 52    | >TP53-L194F LAPPQHFI    | 41    | 11    |
| >TP53-L194F LAPPQHLIR   | 1307  | >TP53-L194F LAPPQHFI    | 42    | 1265  |
| >TP53-L194F LAPPQHLIR   | 1385  | >TP53-L194F LAPPQHFI    | 229   | 1156  |
| >TP53-L194F LAPPQHFI    | 898   | >TP53-L194F LAPPQHFI    | 266   | 632   |
| >TP53-L194F LAPPQHFI    | 5     | >TP53-L194F LAPPQHFI    | 8     | 3     |
| >TP53-L194F LAPPQHFI    | 959   | >TP53-L194F LAPPQHFI    | 390   | 569   |
| >TP53-L194F LAPPQHFI    | 28    | >TP53-L194F LAPPQHFI    | 12    | 16    |
| >TP53-L194F LAPPQHFI    | 865   | >TP53-L194F LAPPQHFI    | 438   | 427   |
| >TP53-L194F LAPPQHFI    | 70    | >TP53-L194F LAPPQHFI    | 56    | 14    |
| >TP53-L194F GLAPPQHL    | 285   | >TP53-L194F GLAPPQHFI   | 16448 | 16163 |
| >TP53-L194F GLAPPQHFI   | 65    | >TP53-L194F GLAPPQHFI   | 38    | 27    |
| >TP53-L194F GLAPPQHFI   | 20    | >TP53-L194F GLAPPQHFI   | 22    | 2     |
| >TP53-L194F GLAPPQHFI   | 22    | >TP53-L194F GLAPPQHFI   | 2359  | 2337  |
| >TP53-L194F GLAPPQHFI   | 15    | >TP53-L194F GLAPPQHFI   | 8     | 7     |
| >TP53-L194F GLAPPQHFI   | 9     | >TP53-L194F GLAPPQHFI   | 9     | 0     |
| >TP53-L194F GLAPPQHFI   | 61    | >TP53-L194F GLAPPQHFI   | 5589  | 5528  |
| >TP53-L194F GLAPPQHFI   | 31    | >TP53-L194F GLAPPQHFI   | 23    | 8     |

|                         |      |                        |       |       |
|-------------------------|------|------------------------|-------|-------|
| >TP53-L194F GLAPPQHLIR' | 7    | >TP53-L194F GLAPPQHFI  | 8     | 1     |
| >TP53-L194F GLAPPQHFI   | 500  | >TP53-L194F GLAPPQHFI  | 112   | 388   |
| >TP53-L194F GLAPPQHLIR' | 44   | >TP53-L194F GLAPPQHFI  | 31    | 13    |
| >TP53-L194F GLAPPQHL    | 16   | >TP53-L194F GLAPPQHF   | 1879  | 1863  |
| >TP53-L194F GLAPPQHFI   | 13   | >TP53-L194F GLAPPQHFI  | 7     | 6     |
| >TP53-L194F GLAPPQHLIR' | 3    | >TP53-L194F GLAPPQHFI  | 3     | 0     |
| >TP53-L194F GLAPPQHL    | 26   | >TP53-L194F GLAPPQHF   | 8204  | 8178  |
| >TP53-L194F GLAPPQHFI   | 22   | >TP53-L194F GLAPPQHF   | 7     | 15    |
| >TP53-L194F GLAPPQHLIR' | 7    | >TP53-L194F GLAPPQHFI  | 8     | 1     |
| >TP53-L194F GLAPPQHL    | 11   | >TP53-L194F GLAPPQHF   | 5358  | 5347  |
| >TP53-L194F GLAPPQHFI   | 13   | >TP53-L194F GLAPPQHFI  | 7     | 6     |
| >TP53-L194F GLAPPQHLIR' | 5    | >TP53-L194F GLAPPQHFI  | 5     | 0     |
| >TP53-L194F GLAPPQHL    | 175  | >TP53-L194F GLAPPQHF   | 16532 | 16357 |
| >TP53-L194F GLAPPQHFI   | 76   | >TP53-L194F GLAPPQHFI  | 12    | 64    |
| >TP53-L194F GLAPPQHLIR' | 9    | >TP53-L194F GLAPPQHFI  | 13    | 4     |
| >TP53-L194F GLAPPQHL    | 5    | >TP53-L194F GLAPPQHF   | 921   | 916   |
| >TP53-L194F GLAPPQHFI   | 5    | >TP53-L194F GLAPPQHFI  | 4     | 1     |
| >TP53-L194F GLAPPQHLIR' | 2    | >TP53-L194F GLAPPQHFI  | 2     | 0     |
| >TP53-L194F GLAPPQHLIR' | 1723 | >TP53-L194F GLAPPQHFI  | 457   | 1266  |
| >TP53-L194F GLAPPQHL    | 3426 | >TP53-L194F GLAPPQHF   | 141   | 3285  |
| >TP53-L194F GLAPPQHL    | 5978 | >TP53-L194F GLAPPQHF   | 416   | 5562  |
| >TP53-L194F GLAPPQHL    | 4874 | >TP53-L194F GLAPPQHF   | 253   | 4621  |
| >TP53-L194F GLAPPQHLIR' | 282  | >TP53-L194F GLAPPQHFI  | 167   | 115   |
| >TP53-L194F SDGLAPPQHI  | 507  | >TP53-L194F SDGLAPPQHI | 200   | 307   |
| >TP53-L194F SDGLAPPQHI  | 104  | >TP53-L194F SDGLAPPQHI | 141   | 37    |
| >TP53-L194H LIRVEGNLRV  | 35   | >TP53-L194H HIRVEGNLRV | 162   | 127   |
| >TP53-L194H LIRVEGNL    | 1610 | >TP53-L194H HIRVEGNL   | 145   | 1465  |
| >TP53-L194H LIRVEGNLR   | 1087 | >TP53-L194H HIRVEGNLR  | 95    | 992   |
| >TP53-L194H LIRVEGNLRV  | 296  | >TP53-L194H HIRVEGNLRV | 35    | 261   |
| >TP53-L194H LIRVEGNLR   | 570  | >TP53-L194H HIRVEGNLR  | 194   | 376   |
| >TP53-L194H LIRVEGNLR   | 1131 | >TP53-L194H HIRVEGNLR  | 205   | 926   |
| >TP53-L194H HLIRVEGNLR' | 156  | >TP53-L194H HHIRVEGNLR | 21243 | 21087 |
| >TP53-L194H HLIRVEGNL   | 226  | >TP53-L194H HHIRVEGNL  | 19194 | 18968 |
| >TP53-L194H HLIRVEGNLR' | 111  | >TP53-L194H HHIRVEGNLR | 17867 | 17756 |
| >TP53-L194H HLIRVEGNLR' | 41   | >TP53-L194H HHIRVEGNLR | 18590 | 18549 |
| >TP53-L194H HLIRVEGNLR' | 322  | >TP53-L194H HHIRVEGNLR | 15687 | 15365 |
| >TP53-L194H HLIRVEGNL   | 327  | >TP53-L194H HHIRVEGNL  | 28726 | 28399 |
| >TP53-L194H HLIRVEGNLR' | 9    | >TP53-L194H HHIRVEGNLR | 15240 | 15231 |
| >TP53-L194H HLIRVEGNLR' | 27   | >TP53-L194H HHIRVEGNLR | 20587 | 20560 |
| >TP53-L194H HLIRVEGNLR' | 27   | >TP53-L194H HHIRVEGNLR | 19641 | 19614 |
| >TP53-L194H HLIRVEGNL   | 153  | >TP53-L194H HHIRVEGNL  | 33352 | 33199 |
| >TP53-L194H HLIRVEGNLR' | 4    | >TP53-L194H HHIRVEGNLR | 16104 | 16100 |
| >TP53-L194H HLIRVEGNLR  | 241  | >TP53-L194H HHIRVEGNLR | 2709  | 2468  |

|                         |      |                         |       |       |
|-------------------------|------|-------------------------|-------|-------|
| >TP53-L194H HLIRVEGNLR  | 381  | >TP53-L194H HHIRVEGNLR  | 4301  | 3920  |
| >TP53-L194H HLIRVEGNLR  | 24   | >TP53-L194H HHIRVEGNLR  | 4001  | 3977  |
| >TP53-L194H HLIRVEGNLR' | 398  | >TP53-L194H HHIRVEGNLR  | 14264 | 13866 |
| >TP53-L194H HLIRVEGNLR  | 478  | >TP53-L194H HHIRVEGNLR  | 1280  | 802   |
| >TP53-L194H APPQHLIRV   | 759  | >TP53-L194H APPQHHIRV   | 306   | 453   |
| >TP53-L194H LAPPQHLIRV  | 395  | >TP53-L194H LAPPQHHIRV  | 2147  | 1752  |
| >TP53-L194H LAPPQHLIRV  | 52   | >TP53-L194H LAPPQHHIRV  | 40    | 12    |
| >TP53-L194H LAPPQHLIR   | 1307 | >TP53-L194H LAPPQHHIR   | 140   | 1167  |
| >TP53-L194H LAPPQHLIR   | 1385 | >TP53-L194H LAPPQHHIR   | 440   | 945   |
| >TP53-L194H LAPPQHLI    | 5    | >TP53-L194H LAPPQHHI    | 20    | 15    |
| >TP53-L194H LAPPQHLIR   | 959  | >TP53-L194H LAPPQHHIR   | 280   | 679   |
| >TP53-L194H LAPPQHLIRV  | 28   | >TP53-L194H LAPPQHHIRV  | 18    | 10    |
| >TP53-L194H LAPPQHLI    | 70   | >TP53-L194H LAPPQHHI    | 67    | 3     |
| >TP53-L194H GLAPPQHL    | 285  | >TP53-L194H GLAPPQHH    | 24310 | 24025 |
| >TP53-L194H GLAPPQHLI   | 65   | >TP53-L194H GLAPPQHHI   | 156   | 91    |
| >TP53-L194H GLAPPQHLIR' | 20   | >TP53-L194H GLAPPQHHIR  | 45    | 25    |
| >TP53-L194H GLAPPQHL    | 22   | >TP53-L194H GLAPPQHH    | 14301 | 14279 |
| >TP53-L194H GLAPPQHLI   | 15   | >TP53-L194H GLAPPQHHI   | 37    | 22    |
| >TP53-L194H GLAPPQHLIR' | 9    | >TP53-L194H GLAPPQHHIR  | 19    | 10    |
| >TP53-L194H GLAPPQHL    | 61   | >TP53-L194H GLAPPQHH    | 18413 | 18352 |
| >TP53-L194H GLAPPQHLI   | 31   | >TP53-L194H GLAPPQHHI   | 50    | 19    |
| >TP53-L194H GLAPPQHLIR' | 7    | >TP53-L194H GLAPPQHHIR  | 12    | 5     |
| >TP53-L194H GLAPPQHLI   | 500  | >TP53-L194H GLAPPQHHI   | 234   | 266   |
| >TP53-L194H GLAPPQHLIR' | 44   | >TP53-L194H GLAPPQHHIR  | 146   | 102   |
| >TP53-L194H GLAPPQHL    | 16   | >TP53-L194H GLAPPQHH    | 14252 | 14236 |
| >TP53-L194H GLAPPQHLI   | 13   | >TP53-L194H GLAPPQHHI   | 14    | 1     |
| >TP53-L194H GLAPPQHLIR' | 3    | >TP53-L194H GLAPPQHHIR  | 4     | 1     |
| >TP53-L194H GLAPPQHL    | 26   | >TP53-L194H GLAPPQHH    | 21223 | 21197 |
| >TP53-L194H GLAPPQHLI   | 22   | >TP53-L194H GLAPPQHHI   | 10    | 12    |
| >TP53-L194H GLAPPQHLIR' | 7    | >TP53-L194H GLAPPQHHIR  | 17    | 10    |
| >TP53-L194H GLAPPQHL    | 11   | >TP53-L194H GLAPPQHH    | 15113 | 15102 |
| >TP53-L194H GLAPPQHLI   | 13   | >TP53-L194H GLAPPQHHI   | 9     | 4     |
| >TP53-L194H GLAPPQHLIR' | 5    | >TP53-L194H GLAPPQHHIR  | 6     | 1     |
| >TP53-L194H GLAPPQHL    | 175  | >TP53-L194H GLAPPQHH    | 25167 | 24992 |
| >TP53-L194H GLAPPQHLI   | 76   | >TP53-L194H GLAPPQHHI   | 79    | 3     |
| >TP53-L194H GLAPPQHLIR' | 9    | >TP53-L194H GLAPPQHHIR  | 28    | 19    |
| >TP53-L194H GLAPPQHL    | 5    | >TP53-L194H GLAPPQHH    | 6010  | 6005  |
| >TP53-L194H GLAPPQHLI   | 5    | >TP53-L194H GLAPPQHHI   | 4     | 1     |
| >TP53-L194H GLAPPQHLIR' | 2    | >TP53-L194H GLAPPQHHIR  | 2     | 0     |
| >TP53-L194H GLAPPQHLIR  | 282  | >TP53-L194H GLAPPQHHIR  | 395   | 113   |
| >TP53-L194H SDGLAPPQHI  | 104  | >TP53-L194H SDGLAPPQHI  | 393   | 289   |
| >TP53-L194I- LIRVEGNL   | 4392 | >TP53-L194I- IIRVEGNL   | 489   | 3903  |
| >TP53-L194I- LIRVEGNLRV | 35   | >TP53-L194I- IIRVEGNLRV | 63    | 28    |

|                           |      |                           |      |      |
|---------------------------|------|---------------------------|------|------|
| >TP53-L194I- LIRVEGNLRV   | 296  | >TP53-L194I- IIRVEGNLRV   | 296  | 0    |
| >TP53-L194I- LIRVEGNLR    | 570  | >TP53-L194I- IIRVEGNLR    | 467  | 103  |
| >TP53-L194I- HLIRVEGNLR'  | 156  | >TP53-L194I- HIIRVEGNLR\  | 1392 | 1236 |
| >TP53-L194I- HLIRVEGNL    | 226  | >TP53-L194I- HIIRVEGNL    | 2470 | 2244 |
| >TP53-L194I- HLIRVEGNLR'  | 111  | >TP53-L194I- HIIRVEGNLR\  | 1438 | 1327 |
| >TP53-L194I- HLIRVEGNLR'  | 41   | >TP53-L194I- HIIRVEGNLR\  | 433  | 392  |
| >TP53-L194I- HLIRVEGNLR'  | 322  | >TP53-L194I- HIIRVEGNLR\  | 504  | 182  |
| >TP53-L194I- HLIRVEGNL    | 327  | >TP53-L194I- HIIRVEGNL    | 6557 | 6230 |
| >TP53-L194I- HLIRVEGNLR'  | 9    | >TP53-L194I- HIIRVEGNLR\  | 180  | 171  |
| >TP53-L194I- HLIRVEGNLR'  | 27   | >TP53-L194I- HIIRVEGNLR\  | 1885 | 1858 |
| >TP53-L194I- HLIRVEGNLR'  | 27   | >TP53-L194I- HIIRVEGNLR\  | 716  | 689  |
| >TP53-L194I- HLIRVEGNL    | 153  | >TP53-L194I- HIIRVEGNL    | 6120 | 5967 |
| >TP53-L194I- HLIRVEGNLR'  | 4    | >TP53-L194I- HIIRVEGNLR\  | 46   | 42   |
| >TP53-L194I- HLIRVEGNL    | 2394 | >TP53-L194I- HIIRVEGNL    | 456  | 1938 |
| >TP53-L194I- HLIRVEGNLR   | 241  | >TP53-L194I- HIIRVEGNLR   | 157  | 84   |
| >TP53-L194I- HLIRVEGNLR   | 381  | >TP53-L194I- HIIRVEGNLR   | 241  | 140  |
| >TP53-L194I- HLIRVEGNLR   | 24   | >TP53-L194I- HIIRVEGNLR   | 7    | 17   |
| >TP53-L194I- HLIRVEGNLR'  | 398  | >TP53-L194I- HIIRVEGNLR\  | 62   | 336  |
| >TP53-L194I- HLIRVEGNLR'  | 1132 | >TP53-L194I- HIIRVEGNLR\  | 449  | 683  |
| >TP53-L194I- HLIRVEGNLR   | 478  | >TP53-L194I- HIIRVEGNLR   | 345  | 133  |
| >TP53-L194I- APPQHILIRV   | 1104 | >TP53-L194I- APPQHIIIRV   | 485  | 619  |
| >TP53-L194I- LAPPQHILIRV  | 395  | >TP53-L194I- LAPPQHIIIRV  | 573  | 178  |
| >TP53-L194I- LAPPQHILIRV  | 577  | >TP53-L194I- LAPPQHIIIRV  | 304  | 273  |
| >TP53-L194I- LAPPQHILIRV  | 52   | >TP53-L194I- LAPPQHIIIRV  | 38   | 14   |
| >TP53-L194I- LAPPQHILI    | 5    | >TP53-L194I- LAPPQHII     | 11   | 6    |
| >TP53-L194I- LAPPQHILIRV  | 28   | >TP53-L194I- LAPPQHIIIRV  | 19   | 9    |
| >TP53-L194I- LAPPQHILI    | 70   | >TP53-L194I- LAPPQHII     | 79   | 9    |
| >TP53-L194I- GLAPPQHL     | 285  | >TP53-L194I- GLAPPQHI     | 370  | 85   |
| >TP53-L194I- GLAPPQHILI   | 65   | >TP53-L194I- GLAPPQHII    | 318  | 253  |
| >TP53-L194I- GLAPPQHILIR' | 20   | >TP53-L194I- GLAPPQHIIIR\ | 24   | 4    |
| >TP53-L194I- GLAPPQHL     | 22   | >TP53-L194I- GLAPPQHI     | 67   | 45   |
| >TP53-L194I- GLAPPQHILI   | 15   | >TP53-L194I- GLAPPQHII    | 50   | 35   |
| >TP53-L194I- GLAPPQHILIR' | 9    | >TP53-L194I- GLAPPQHIIIR\ | 10   | 1    |
| >TP53-L194I- GLAPPQHL     | 61   | >TP53-L194I- GLAPPQHI     | 35   | 26   |
| >TP53-L194I- GLAPPQHILI   | 31   | >TP53-L194I- GLAPPQHII    | 67   | 36   |
| >TP53-L194I- GLAPPQHILIR' | 7    | >TP53-L194I- GLAPPQHIIIR\ | 8    | 1    |
| >TP53-L194I- GLAPPQHILIR' | 44   | >TP53-L194I- GLAPPQHIIIR\ | 65   | 21   |
| >TP53-L194I- GLAPPQHL     | 16   | >TP53-L194I- GLAPPQHI     | 16   | 0    |
| >TP53-L194I- GLAPPQHILI   | 13   | >TP53-L194I- GLAPPQHII    | 41   | 28   |
| >TP53-L194I- GLAPPQHILIR' | 3    | >TP53-L194I- GLAPPQHIIIR\ | 3    | 0    |
| >TP53-L194I- GLAPPQHL     | 26   | >TP53-L194I- GLAPPQHI     | 25   | 1    |
| >TP53-L194I- GLAPPQHILI   | 22   | >TP53-L194I- GLAPPQHII    | 19   | 3    |
| >TP53-L194I- GLAPPQHILIR' | 7    | >TP53-L194I- GLAPPQHIIIR\ | 7    | 0    |



|                          |       |                          |       |       |
|--------------------------|-------|--------------------------|-------|-------|
| >TP53-L194I- GLAPPQHL    | 11    | >TP53-L194I- GLAPPQHI    | 13    | 2     |
| >TP53-L194I- GLAPPQHLI   | 13    | >TP53-L194I- GLAPPQHII   | 21    | 8     |
| >TP53-L194I- GLAPPQHLIR' | 5     | >TP53-L194I- GLAPPQHIIR\ | 5     | 0     |
| >TP53-L194I- GLAPPQHL    | 175   | >TP53-L194I- GLAPPQHI    | 342   | 167   |
| >TP53-L194I- GLAPPQHLI   | 76    | >TP53-L194I- GLAPPQHII   | 113   | 37    |
| >TP53-L194I- GLAPPQHLIR' | 9     | >TP53-L194I- GLAPPQHIIR\ | 8     | 1     |
| >TP53-L194I- GLAPPQHL    | 5     | >TP53-L194I- GLAPPQHI    | 11    | 6     |
| >TP53-L194I- GLAPPQHLI   | 5     | >TP53-L194I- GLAPPQHII   | 7     | 2     |
| >TP53-L194I- GLAPPQHLIR' | 2     | >TP53-L194I- GLAPPQHIIR\ | 2     | 0     |
| >TP53-L194I- GLAPPQHLIR  | 282   | >TP53-L194I- GLAPPQHIIR  | 500   | 218   |
| >TP53-L194I- SDGLAPPQHI  | 104   | >TP53-L194I- SDGLAPPQHI  | 153   | 49    |
| >TP53-L194P LIRVEGNLRV   | 35    | >TP53-L194P PIRVEGNLRV   | 1341  | 1306  |
| >TP53-L194P LIRVEGNLRV   | 296   | >TP53-L194P PIRVEGNLRV   | 2095  | 1799  |
| >TP53-L194P HLIRVEGNL    | 24617 | >TP53-L194P HPIRVEGNL    | 19    | 24598 |
| >TP53-L194P HLIRVEGNLR'  | 37433 | >TP53-L194P HPIRVEGNLR   | 452   | 36981 |
| >TP53-L194P HLIRVEGNLR'  | 156   | >TP53-L194P HPIRVEGNLR   | 21916 | 21760 |
| >TP53-L194P HLIRVEGNL    | 226   | >TP53-L194P HPIRVEGNL    | 30869 | 30643 |
| >TP53-L194P HLIRVEGNLR'  | 111   | >TP53-L194P HPIRVEGNLR   | 28558 | 28447 |
| >TP53-L194P HLIRVEGNLR'  | 41    | >TP53-L194P HPIRVEGNLR   | 20393 | 20352 |
| >TP53-L194P HLIRVEGNLR'  | 322   | >TP53-L194P HPIRVEGNLR   | 16021 | 15699 |
| >TP53-L194P HLIRVEGNL    | 327   | >TP53-L194P HPIRVEGNL    | 29937 | 29610 |
| >TP53-L194P HLIRVEGNLR'  | 9     | >TP53-L194P HPIRVEGNLR   | 18408 | 18399 |
| >TP53-L194P HLIRVEGNLR'  | 27    | >TP53-L194P HPIRVEGNLR   | 21863 | 21836 |
| >TP53-L194P HLIRVEGNLR'  | 27    | >TP53-L194P HPIRVEGNLR   | 22312 | 22285 |
| >TP53-L194P HLIRVEGNL    | 153   | >TP53-L194P HPIRVEGNL    | 34983 | 34830 |
| >TP53-L194P HLIRVEGNLR'  | 4     | >TP53-L194P HPIRVEGNLR   | 21107 | 21103 |
| >TP53-L194P HLIRVEGNLR   | 241   | >TP53-L194P HPIRVEGNLR   | 2719  | 2478  |
| >TP53-L194P HLIRVEGNLR   | 381   | >TP53-L194P HPIRVEGNLR   | 3070  | 2689  |
| >TP53-L194P HLIRVEGNLR   | 24    | >TP53-L194P HPIRVEGNLR   | 244   | 220   |
| >TP53-L194P HLIRVEGNLR'  | 398   | >TP53-L194P HPIRVEGNLR   | 4226  | 3828  |
| >TP53-L194P HLIRVEGNL    | 19190 | >TP53-L194P HPIRVEGNL    | 111   | 19079 |
| >TP53-L194P HLIRVEGNLR'  | 21736 | >TP53-L194P HPIRVEGNLR   | 471   | 21265 |
| >TP53-L194P HLIRVEGNLR   | 478   | >TP53-L194P HPIRVEGNLR   | 1830  | 1352  |
| >TP53-L194P LAPPQHPIRV   | 395   | >TP53-L194P LAPPQHPIRV   | 1458  | 1063  |
| >TP53-L194P LAPPQHPIRV   | 52    | >TP53-L194P LAPPQHPIRV   | 60    | 8     |
| >TP53-L194P LAPPQHLI     | 898   | >TP53-L194P LAPPQHPI     | 309   | 589   |
| >TP53-L194P LAPPQHLI     | 5     | >TP53-L194P LAPPQHPI     | 19    | 14    |
| >TP53-L194P LAPPQHPIRV   | 28    | >TP53-L194P LAPPQHPIRV   | 76    | 48    |
| >TP53-L194P LAPPQHLI     | 70    | >TP53-L194P LAPPQHPI     | 94    | 24    |
| >TP53-L194P GLAPPQHL     | 285   | >TP53-L194P GLAPPQHP     | 23254 | 22969 |
| >TP53-L194P GLAPPQHLI    | 65    | >TP53-L194P GLAPPQHPI    | 46    | 19    |
| >TP53-L194P GLAPPQHLIR'  | 20    | >TP53-L194P GLAPPQHPIR   | 26    | 6     |
| >TP53-L194P GLAPPQHL     | 22    | >TP53-L194P GLAPPQHP     | 4920  | 4898  |

|                         |      |                        |       |       |
|-------------------------|------|------------------------|-------|-------|
| >TP53-L194P GLAPPQHLI   | 15   | >TP53-L194P GLAPPQHPI  | 19    | 4     |
| >TP53-L194P GLAPPQHLIR' | 9    | >TP53-L194P GLAPPQHPIR | 16    | 7     |
| >TP53-L194P GLAPPQHL    | 61   | >TP53-L194P GLAPPQHP   | 10979 | 10918 |
| >TP53-L194P GLAPPQHLI   | 31   | >TP53-L194P GLAPPQHPI  | 16    | 15    |
| >TP53-L194P GLAPPQHLIR' | 7    | >TP53-L194P GLAPPQHPIR | 8     | 1     |
| >TP53-L194P GLAPPQHLI   | 500  | >TP53-L194P GLAPPQHPI  | 103   | 397   |
| >TP53-L194P GLAPPQHLIR' | 44   | >TP53-L194P GLAPPQHPIR | 196   | 152   |
| >TP53-L194P GLAPPQHL    | 16   | >TP53-L194P GLAPPQHP   | 7194  | 7178  |
| >TP53-L194P GLAPPQHLI   | 13   | >TP53-L194P GLAPPQHPI  | 8     | 5     |
| >TP53-L194P GLAPPQHLIR' | 3    | >TP53-L194P GLAPPQHPIR | 3     | 0     |
| >TP53-L194P GLAPPQHL    | 26   | >TP53-L194P GLAPPQHP   | 14115 | 14089 |
| >TP53-L194P GLAPPQHLI   | 22   | >TP53-L194P GLAPPQHPI  | 9     | 13    |
| >TP53-L194P GLAPPQHLIR' | 7    | >TP53-L194P GLAPPQHPIR | 9     | 2     |
| >TP53-L194P GLAPPQHL    | 11   | >TP53-L194P GLAPPQHP   | 8097  | 8086  |
| >TP53-L194P GLAPPQHLI   | 13   | >TP53-L194P GLAPPQHPI  | 11    | 2     |
| >TP53-L194P GLAPPQHLIR' | 5    | >TP53-L194P GLAPPQHPIR | 5     | 0     |
| >TP53-L194P GLAPPQHL    | 175  | >TP53-L194P GLAPPQHP   | 23723 | 23548 |
| >TP53-L194P GLAPPQHLI   | 76   | >TP53-L194P GLAPPQHPI  | 48    | 28    |
| >TP53-L194P GLAPPQHLIR' | 9    | >TP53-L194P GLAPPQHPIR | 11    | 2     |
| >TP53-L194P GLAPPQHL    | 5    | >TP53-L194P GLAPPQHP   | 4160  | 4155  |
| >TP53-L194P GLAPPQHLI   | 5    | >TP53-L194P GLAPPQHPI  | 4     | 1     |
| >TP53-L194P GLAPPQHLIR' | 2    | >TP53-L194P GLAPPQHPIR | 2     | 0     |
| >TP53-L194P GLAPPQHLI   | 1622 | >TP53-L194P GLAPPQHPI  | 417   | 1205  |
| >TP53-L194P GLAPPQHLIR' | 282  | >TP53-L194P GLAPPQHPIR | 529   | 247   |
| >TP53-L194P DGLAPPQHLI  | 1466 | >TP53-L194P DGLAPPQHPI | 317   | 1149  |
| >TP53-L194P SDGLAPPQHI  | 104  | >TP53-L194P SDGLAPPQHI | 289   | 185   |
| >TP53-L194R LIRVEGNLRV  | 35   | >TP53-L194R RIRVEGNLRV | 151   | 116   |
| >TP53-L194R LIRVEGNL    | 1610 | >TP53-L194R RIRVEGNL   | 38    | 1572  |
| >TP53-L194R LIRVEGNLR   | 1087 | >TP53-L194R RIRVEGNLR  | 27    | 1060  |
| >TP53-L194R LIRVEGNLRV  | 296  | >TP53-L194R RIRVEGNLRV | 14    | 282   |
| >TP53-L194R LIRVEGNLR   | 570  | >TP53-L194R RIRVEGNLR  | 40    | 530   |
| >TP53-L194R HLIRVEGNLR' | 156  | >TP53-L194R HRIRVEGNLR | 21534 | 21378 |
| >TP53-L194R HLIRVEGNL   | 226  | >TP53-L194R HRIRVEGNL  | 22272 | 22046 |
| >TP53-L194R HLIRVEGNLR' | 111  | >TP53-L194R HRIRVEGNLR | 21031 | 20920 |
| >TP53-L194R HLIRVEGNLR' | 41   | >TP53-L194R HRIRVEGNLR | 18674 | 18633 |
| >TP53-L194R HLIRVEGNLR' | 322  | >TP53-L194R HRIRVEGNLR | 15151 | 14829 |
| >TP53-L194R HLIRVEGNL   | 327  | >TP53-L194R HRIRVEGNL  | 28986 | 28659 |
| >TP53-L194R HLIRVEGNLR' | 9    | >TP53-L194R HRIRVEGNLR | 15724 | 15715 |
| >TP53-L194R HLIRVEGNLR' | 27   | >TP53-L194R HRIRVEGNLR | 20051 | 20024 |
| >TP53-L194R HLIRVEGNLR' | 27   | >TP53-L194R HRIRVEGNLR | 20217 | 20190 |
| >TP53-L194R HLIRVEGNL   | 153  | >TP53-L194R HRIRVEGNL  | 32602 | 32449 |
| >TP53-L194R HLIRVEGNLR' | 4    | >TP53-L194R HRIRVEGNLR | 14637 | 14633 |
| >TP53-L194R HLIRVEGNLR  | 241  | >TP53-L194R HRIRVEGNLR | 1604  | 1363  |

|                         |       |                        |       |       |
|-------------------------|-------|------------------------|-------|-------|
| >TP53-L194R HLIRVEGNLR  | 381   | >TP53-L194R HRIRVEGNLR | 1870  | 1489  |
| >TP53-L194R HLIRVEGNLR  | 24    | >TP53-L194R HRIRVEGNLR | 647   | 623   |
| >TP53-L194R HLIRVEGNLR' | 398   | >TP53-L194R HRIRVEGNLR | 8960  | 8562  |
| >TP53-L194R HLIRVEGNL   | 18055 | >TP53-L194R HRIRVEGNL  | 118   | 17937 |
| >TP53-L194R HLIRVEGNLR  | 17595 | >TP53-L194R HRIRVEGNLR | 25    | 17570 |
| >TP53-L194R HLIRVEGNLR' | 17543 | >TP53-L194R HRIRVEGNLR | 162   | 17381 |
| >TP53-L194R HLIRVEGNL   | 19093 | >TP53-L194R HRIRVEGNL  | 240   | 18853 |
| >TP53-L194R HLIRVEGNLR  | 478   | >TP53-L194R HRIRVEGNLR | 1892  | 1414  |
| >TP53-L194R APPQHHRIV   | 759   | >TP53-L194R APPQHHRIV  | 79    | 680   |
| >TP53-L194R LAPPQHHRIV  | 395   | >TP53-L194R LAPPQHHRIV | 3072  | 2677  |
| >TP53-L194R LAPPQHHRIV  | 52    | >TP53-L194R LAPPQHHRIV | 170   | 118   |
| >TP53-L194R LAPPQHHRIV  | 5     | >TP53-L194R LAPPQHHRIV | 25    | 20    |
| >TP53-L194R LAPPQHHRIV  | 28    | >TP53-L194R LAPPQHHRIV | 65    | 37    |
| >TP53-L194R LAPPQHHRIV  | 70    | >TP53-L194R LAPPQHHRIV | 120   | 50    |
| >TP53-L194R GLAPPQHR    | 285   | >TP53-L194R GLAPPQHR   | 23339 | 23054 |
| >TP53-L194R GLAPPQHR    | 65    | >TP53-L194R GLAPPQHR   | 163   | 98    |
| >TP53-L194R GLAPPQHR    | 20    | >TP53-L194R GLAPPQHR   | 66    | 46    |
| >TP53-L194R GLAPPQHR    | 22    | >TP53-L194R GLAPPQHR   | 11996 | 11974 |
| >TP53-L194R GLAPPQHR    | 15    | >TP53-L194R GLAPPQHR   | 38    | 23    |
| >TP53-L194R GLAPPQHR    | 9     | >TP53-L194R GLAPPQHR   | 30    | 21    |
| >TP53-L194R GLAPPQHR    | 61    | >TP53-L194R GLAPPQHR   | 16285 | 16224 |
| >TP53-L194R GLAPPQHR    | 31    | >TP53-L194R GLAPPQHR   | 71    | 40    |
| >TP53-L194R GLAPPQHR    | 7     | >TP53-L194R GLAPPQHR   | 19    | 12    |
| >TP53-L194R GLAPPQHR    | 44    | >TP53-L194R GLAPPQHR   | 305   | 261   |
| >TP53-L194R GLAPPQHR    | 16    | >TP53-L194R GLAPPQHR   | 10847 | 10831 |
| >TP53-L194R GLAPPQHR    | 13    | >TP53-L194R GLAPPQHR   | 10    | 3     |
| >TP53-L194R GLAPPQHR    | 3     | >TP53-L194R GLAPPQHR   | 7     | 4     |
| >TP53-L194R GLAPPQHR    | 26    | >TP53-L194R GLAPPQHR   | 20651 | 20625 |
| >TP53-L194R GLAPPQHR    | 22    | >TP53-L194R GLAPPQHR   | 26    | 4     |
| >TP53-L194R GLAPPQHR    | 7     | >TP53-L194R GLAPPQHR   | 40    | 33    |
| >TP53-L194R GLAPPQHR    | 11    | >TP53-L194R GLAPPQHR   | 11727 | 11716 |
| >TP53-L194R GLAPPQHR    | 13    | >TP53-L194R GLAPPQHR   | 21    | 8     |
| >TP53-L194R GLAPPQHR    | 5     | >TP53-L194R GLAPPQHR   | 9     | 4     |
| >TP53-L194R GLAPPQHR    | 175   | >TP53-L194R GLAPPQHR   | 24889 | 24714 |
| >TP53-L194R GLAPPQHR    | 76    | >TP53-L194R GLAPPQHR   | 47    | 29    |
| >TP53-L194R GLAPPQHR    | 9     | >TP53-L194R GLAPPQHR   | 79    | 70    |
| >TP53-L194R GLAPPQHR    | 5     | >TP53-L194R GLAPPQHR   | 3162  | 3157  |
| >TP53-L194R GLAPPQHR    | 5     | >TP53-L194R GLAPPQHR   | 3     | 2     |
| >TP53-L194R GLAPPQHR    | 2     | >TP53-L194R GLAPPQHR   | 2     | 0     |
| >TP53-L194R GLAPPQHR    | 18372 | >TP53-L194R GLAPPQHR   | 274   | 18098 |
| >TP53-L194R GLAPPQHR    | 282   | >TP53-L194R GLAPPQHR   | 605   | 323   |
| >TP53-L194R SDGLAPPQHI  | 104   | >TP53-L194R SDGLAPPQHI | 294   | 190   |
| >TP53-L194V LIRVEGNLRV  | 35    | >TP53-L194V VIRVEGNLRV | 49    | 14    |

|                         |      |                         |       |       |
|-------------------------|------|-------------------------|-------|-------|
| >TP53-L194V LIRVEGNLRV  | 296  | >TP53-L194V VIRVEGNLRV  | 672   | 376   |
| >TP53-L194V HLIRVEGNLR' | 156  | >TP53-L194V HVIRVEGNLR  | 2311  | 2155  |
| >TP53-L194V HLIRVEGNL   | 226  | >TP53-L194V HVIRVEGNL   | 4457  | 4231  |
| >TP53-L194V HLIRVEGNLR' | 111  | >TP53-L194V HVIRVEGNLR  | 2940  | 2829  |
| >TP53-L194V HLIRVEGNLR' | 41   | >TP53-L194V HVIRVEGNLR  | 1037  | 996   |
| >TP53-L194V HLIRVEGNLR' | 322  | >TP53-L194V HVIRVEGNLR  | 466   | 144   |
| >TP53-L194V HLIRVEGNL   | 327  | >TP53-L194V HVIRVEGNL   | 11468 | 11141 |
| >TP53-L194V HLIRVEGNLR' | 9    | >TP53-L194V HVIRVEGNLR  | 668   | 659   |
| >TP53-L194V HLIRVEGNLR' | 27   | >TP53-L194V HVIRVEGNLR  | 3013  | 2986  |
| >TP53-L194V HLIRVEGNLR' | 27   | >TP53-L194V HVIRVEGNLR  | 2008  | 1981  |
| >TP53-L194V HLIRVEGNL   | 153  | >TP53-L194V HVIRVEGNL   | 10456 | 10303 |
| >TP53-L194V HLIRVEGNLR' | 4    | >TP53-L194V HVIRVEGNLR  | 138   | 134   |
| >TP53-L194V HLIRVEGNL   | 2394 | >TP53-L194V HVIRVEGNL   | 105   | 2289  |
| >TP53-L194V HLIRVEGNLR  | 241  | >TP53-L194V HVIRVEGNLR  | 187   | 54    |
| >TP53-L194V HLIRVEGNLR  | 381  | >TP53-L194V HVIRVEGNLR  | 295   | 86    |
| >TP53-L194V HLIRVEGNLR  | 24   | >TP53-L194V HVIRVEGNLR  | 5     | 19    |
| >TP53-L194V HLIRVEGNL   | 3502 | >TP53-L194V HVIRVEGNL   | 92    | 3410  |
| >TP53-L194V HLIRVEGNLR' | 398  | >TP53-L194V HVIRVEGNLR  | 18    | 380   |
| >TP53-L194V HLIRVEGNLR' | 1132 | >TP53-L194V HVIRVEGNLR  | 240   | 892   |
| >TP53-L194V HLIRVEGNLR  | 478  | >TP53-L194V HVIRVEGNLR  | 804   | 326   |
| >TP53-L194V DSDGLAPPQI  | 1128 | >TP53-L194V DSDGLAPPQI  | 125   | 1003  |
| >TP53-L194V LAPPQHILIRV | 395  | >TP53-L194V LAPPQHIVIRV | 1396  | 1001  |
| >TP53-L194V LAPPQHILIRV | 577  | >TP53-L194V LAPPQHIVIRV | 375   | 202   |
| >TP53-L194V LAPPQHILIRV | 52   | >TP53-L194V LAPPQHIVIRV | 43    | 9     |
| >TP53-L194V LAPPQHILIR  | 1307 | >TP53-L194V LAPPQHIVIR  | 286   | 1021  |
| >TP53-L194V LAPPQHILI   | 5    | >TP53-L194V LAPPQHIVI   | 11    | 6     |
| >TP53-L194V LAPPQHILIRV | 28   | >TP53-L194V LAPPQHIVIRV | 27    | 1     |
| >TP53-L194V LAPPQHILI   | 70   | >TP53-L194V LAPPQHIVI   | 66    | 4     |
| >TP53-L194V GLAPPQHL    | 285  | >TP53-L194V GLAPPQHVI   | 65    | 220   |
| >TP53-L194V GLAPPQHILI  | 65   | >TP53-L194V GLAPPQHVI   | 311   | 246   |
| >TP53-L194V GLAPPQHLIR' | 20   | >TP53-L194V GLAPPQHIVIR | 27    | 7     |
| >TP53-L194V GLAPPQHL    | 22   | >TP53-L194V GLAPPQHVI   | 19    | 3     |
| >TP53-L194V GLAPPQHILI  | 15   | >TP53-L194V GLAPPQHVI   | 57    | 42    |
| >TP53-L194V GLAPPQHLIR' | 9    | >TP53-L194V GLAPPQHIVIR | 11    | 2     |
| >TP53-L194V GLAPPQHL    | 61   | >TP53-L194V GLAPPQHVI   | 8     | 53    |
| >TP53-L194V GLAPPQHILI  | 31   | >TP53-L194V GLAPPQHVI   | 80    | 49    |
| >TP53-L194V GLAPPQHLIR' | 7    | >TP53-L194V GLAPPQHIVIR | 7     | 0     |
| >TP53-L194V GLAPPQHL    | 755  | >TP53-L194V GLAPPQHVI   | 100   | 655   |
| >TP53-L194V GLAPPQHLIR' | 44   | >TP53-L194V GLAPPQHIVIR | 91    | 47    |
| >TP53-L194V GLAPPQHL    | 16   | >TP53-L194V GLAPPQHVI   | 3     | 13    |
| >TP53-L194V GLAPPQHILI  | 13   | >TP53-L194V GLAPPQHVI   | 13    | 0     |
| >TP53-L194V GLAPPQHLIR' | 3    | >TP53-L194V GLAPPQHIVIR | 3     | 0     |
| >TP53-L194V GLAPPQHL    | 26   | >TP53-L194V GLAPPQHVI   | 6     | 20    |

|                        |      |                        |       |       |
|------------------------|------|------------------------|-------|-------|
| >TP53-L194V GLAPPQHLI  | 22   | >TP53-L194V GLAPPQHVI  | 14    | 8     |
| >TP53-L194V GLAPPQHLIR | 7    | >TP53-L194V GLAPPQHVR  | 7     | 0     |
| >TP53-L194V GLAPPQHL   | 11   | >TP53-L194V GLAPPQHV   | 5     | 6     |
| >TP53-L194V GLAPPQHLI  | 13   | >TP53-L194V GLAPPQHVI  | 17    | 4     |
| >TP53-L194V GLAPPQHLIR | 5    | >TP53-L194V GLAPPQHVR  | 5     | 0     |
| >TP53-L194V GLAPPQHL   | 175  | >TP53-L194V GLAPPQHV   | 14    | 161   |
| >TP53-L194V GLAPPQHLI  | 76   | >TP53-L194V GLAPPQHVI  | 46    | 30    |
| >TP53-L194V GLAPPQHLIR | 9    | >TP53-L194V GLAPPQHVR  | 7     | 2     |
| >TP53-L194V GLAPPQHL   | 5    | >TP53-L194V GLAPPQHV   | 2     | 3     |
| >TP53-L194V GLAPPQHLI  | 5    | >TP53-L194V GLAPPQHVI  | 6     | 1     |
| >TP53-L194V GLAPPQHLIR | 2    | >TP53-L194V GLAPPQHVR  | 2     | 0     |
| >TP53-L194V GLAPPQHLIR | 282  | >TP53-L194V GLAPPQHVR  | 641   | 359   |
| >TP53-L194V SDGLAPPQHI | 104  | >TP53-L194V SDGLAPPQH  | 183   | 79    |
| >TP53-L201F PQHLIRVEGN | 3922 | >TP53-L201F PQHLIRVEGN | 299   | 3623  |
| >TP53-L201F EGNLRVEYL  | 2216 | >TP53-L201F EGNFRVEYL  | 317   | 1899  |
| >TP53-L201F VEGNLRVEYL | 312  | >TP53-L201F VEGNFRVEYL | 350   | 38    |
| >TP53-L201F VEGNLRVEY  | 1192 | >TP53-L201F VEGNFRVEY  | 319   | 873   |
| >TP53-L201F VEGNLRVEY  | 67   | >TP53-L201F VEGNFRVEY  | 43    | 24    |
| >TP53-L201F VEGNLRVEYL | 799  | >TP53-L201F VEGNFRVEYL | 465   | 334   |
| >TP53-L201F VEGNLRVEYL | 472  | >TP53-L201F VEGNFRVEYL | 498   | 26    |
| >TP53-L201F VEGNLRVEY  | 338  | >TP53-L201F VEGNFRVEY  | 331   | 7     |
| >TP53-L201F VEGNLRVEYL | 278  | >TP53-L201F VEGNFRVEYL | 366   | 88    |
| >TP53-L201F RVEGNLRV   | 732  | >TP53-L201F RVEGNFRV   | 167   | 565   |
| >TP53-L201F RVEGNLRV   | 604  | >TP53-L201F RVEGNFRV   | 276   | 328   |
| >TP53-L201F RVEGNLRV   | 54   | >TP53-L201F RVEGNFRV   | 30    | 24    |
| >TP53-L201F RVEGNLRVEY | 1211 | >TP53-L201F RVEGNFRVEY | 215   | 996   |
| >TP53-L201F RVEGNLRVEY | 224  | >TP53-L201F RVEGNFRVEY | 216   | 8     |
| >TP53-L201F RVEGNLRVEY | 301  | >TP53-L201F RVEGNFRVEY | 597   | 296   |
| >TP53-L201F RVEGNLRVEY | 400  | >TP53-L201F RVEGNFRVEY | 370   | 30    |
| >TP53-L201F IRVEGNLRVE | 53   | >TP53-L201F IRVEGNFRVE | 48    | 5     |
| >TP53-L201F LIRVEGNLRV | 35   | >TP53-L201F LIRVEGNFRV | 19    | 16    |
| >TP53-L201F LIRVEGNLR  | 1087 | >TP53-L201F LIRVEGNFR  | 217   | 870   |
| >TP53-L201F LIRVEGNLRV | 296  | >TP53-L201F LIRVEGNFRV | 348   | 52    |
| >TP53-L201F LIRVEGNLR  | 570  | >TP53-L201F LIRVEGNFR  | 129   | 441   |
| >TP53-L201F LIRVEGNLR  | 1131 | >TP53-L201F LIRVEGNFR  | 266   | 865   |
| >TP53-L201F LIRVEGNL   | 7024 | >TP53-L201F LIRVEGNF   | 476   | 6548  |
| >TP53-L201F LIRVEGNL   | 4553 | >TP53-L201F LIRVEGNF   | 329   | 4224  |
| >TP53-L201F HLIRVEGNLR | 156  | >TP53-L201F HLIRVEGNFR | 71    | 85    |
| >TP53-L201F HLIRVEGNL  | 226  | >TP53-L201F HLIRVEGNF  | 6189  | 5963  |
| >TP53-L201F HLIRVEGNLR | 111  | >TP53-L201F HLIRVEGNFR | 35    | 76    |
| >TP53-L201F HLIRVEGNLR | 41   | >TP53-L201F HLIRVEGNFR | 35    | 6     |
| >TP53-L201F HLIRVEGNLR | 322  | >TP53-L201F HLIRVEGNFR | 94    | 228   |
| >TP53-L201F HLIRVEGNL  | 327  | >TP53-L201F HLIRVEGNF  | 12571 | 12244 |

|                         |      |                         |       |       |
|-------------------------|------|-------------------------|-------|-------|
| >TP53-L201F HLIRVEGNLR' | 9    | >TP53-L201F HLIRVEGNFR' | 6     | 3     |
| >TP53-L201F HLIRVEGNLR' | 27   | >TP53-L201F HLIRVEGNFR' | 11    | 16    |
| >TP53-L201F HLIRVEGNLR' | 27   | >TP53-L201F HLIRVEGNFR' | 16    | 11    |
| >TP53-L201F HLIRVEGNLR' | 701  | >TP53-L201F HLIRVEGNFR' | 113   | 588   |
| >TP53-L201F HLIRVEGNL   | 153  | >TP53-L201F HLIRVEGNF   | 17156 | 17003 |
| >TP53-L201F HLIRVEGNLR' | 4    | >TP53-L201F HLIRVEGNFR' | 3     | 1     |
| >TP53-L201F HLIRVEGNL   | 2394 | >TP53-L201F HLIRVEGNF   | 481   | 1913  |
| >TP53-L201F HLIRVEGNLR  | 241  | >TP53-L201F HLIRVEGNFR  | 74    | 167   |
| >TP53-L201F HLIRVEGNLR  | 381  | >TP53-L201F HLIRVEGNFR  | 95    | 286   |
| >TP53-L201F HLIRVEGNLR  | 24   | >TP53-L201F HLIRVEGNFR  | 16    | 8     |
| >TP53-L201F HLIRVEGNLR' | 398  | >TP53-L201F HLIRVEGNFR' | 78    | 320   |
| >TP53-L201F HLIRVEGNLR' | 1132 | >TP53-L201F HLIRVEGNFR' | 337   | 795   |
| >TP53-L201F HLIRVEGNLR  | 478  | >TP53-L201F HLIRVEGNFR  | 290   | 188   |
| >TP53-L201F QHLIRVEGNL  | 709  | >TP53-L201F QHLIRVEGNF  | 336   | 373   |
| >TP53-L201P EGNLRVEYL   | 2216 | >TP53-L201P EGNPRVEYL   | 485   | 1731  |
| >TP53-L201P VEGNLRVEYL  | 312  | >TP53-L201P VEGNPRVEYL  | 2306  | 1994  |
| >TP53-L201P VEGNLRVEY   | 67   | >TP53-L201P VEGNPRVEY   | 441   | 374   |
| >TP53-L201P VEGNLRVEYL  | 472  | >TP53-L201P VEGNPRVEYL  | 572   | 100   |
| >TP53-L201P VEGNLRVEY   | 338  | >TP53-L201P VEGNPRVEY   | 1710  | 1372  |
| >TP53-L201P VEGNLRVEYL  | 278  | >TP53-L201P VEGNPRVEYL  | 525   | 247   |
| >TP53-L201P RVEGNLRV    | 604  | >TP53-L201P RVEGNPRV    | 403   | 201   |
| >TP53-L201P RVEGNLRV    | 54   | >TP53-L201P RVEGNPRV    | 59    | 5     |
| >TP53-L201P RVEGNLRVEY  | 224  | >TP53-L201P RVEGNPRVEY  | 273   | 49    |
| >TP53-L201P RVEGNLRVEY  | 301  | >TP53-L201P RVEGNPRVEY  | 289   | 12    |
| >TP53-L201P RVEGNLRVEY  | 400  | >TP53-L201P RVEGNPRVEY  | 277   | 123   |
| >TP53-L201P IRVEGNLRVE' | 53   | >TP53-L201P IRVEGNPRVE  | 39    | 14    |
| >TP53-L201P LIRVEGNLRV  | 35   | >TP53-L201P LIRVEGNPRV  | 27    | 8     |
| >TP53-L201P LIRVEGNLR   | 1087 | >TP53-L201P LIRVEGNPR   | 419   | 668   |
| >TP53-L201P LIRVEGNLRV  | 296  | >TP53-L201P LIRVEGNPRV  | 180   | 116   |
| >TP53-L201P LIRVEGNLR   | 570  | >TP53-L201P LIRVEGNPR   | 364   | 206   |
| >TP53-L201P HLIRVEGNLR' | 156  | >TP53-L201P HLIRVEGNPR  | 110   | 46    |
| >TP53-L201P HLIRVEGNL   | 226  | >TP53-L201P HLIRVEGNP   | 12970 | 12744 |
| >TP53-L201P HLIRVEGNLR' | 111  | >TP53-L201P HLIRVEGNPR  | 113   | 2     |
| >TP53-L201P HLIRVEGNLR' | 41   | >TP53-L201P HLIRVEGNPR  | 49    | 8     |
| >TP53-L201P HLIRVEGNLR' | 322  | >TP53-L201P HLIRVEGNPR  | 234   | 88    |
| >TP53-L201P HLIRVEGNL   | 327  | >TP53-L201P HLIRVEGNP   | 20604 | 20277 |
| >TP53-L201P HLIRVEGNLR' | 9    | >TP53-L201P HLIRVEGNPR  | 8     | 1     |
| >TP53-L201P HLIRVEGNLR' | 27   | >TP53-L201P HLIRVEGNPR  | 23    | 4     |
| >TP53-L201P HLIRVEGNLR' | 27   | >TP53-L201P HLIRVEGNPR  | 17    | 10    |
| >TP53-L201P HLIRVEGNLR' | 701  | >TP53-L201P HLIRVEGNPR  | 259   | 442   |
| >TP53-L201P HLIRVEGNL   | 153  | >TP53-L201P HLIRVEGNP   | 25667 | 25514 |
| >TP53-L201P HLIRVEGNLR' | 4    | >TP53-L201P HLIRVEGNPR  | 4     | 0     |
| >TP53-L201P HLIRVEGNLR  | 241  | >TP53-L201P HLIRVEGNPR  | 200   | 41    |

|                         |      |                         |       |       |
|-------------------------|------|-------------------------|-------|-------|
| >TP53-L201P HLIRVEGNLR  | 381  | >TP53-L201P HLIRVEGNPR  | 249   | 132   |
| >TP53-L201P HLIRVEGNLR  | 24   | >TP53-L201P HLIRVEGNPR  | 44    | 20    |
| >TP53-L201P HLIRVEGNLR' | 398  | >TP53-L201P HLIRVEGNPR  | 703   | 305   |
| >TP53-L201P HLIRVEGNLR' | 1132 | >TP53-L201P HLIRVEGNPR  | 452   | 680   |
| >TP53-L201P HLIRVEGNLR  | 478  | >TP53-L201P HLIRVEGNPR  | 353   | 125   |
| >TP53-L201P QHLIRVEGNL  | 709  | >TP53-L201P QHLIRVEGNP  | 398   | 311   |
| >TP53-L201S VEGNLRVEYL  | 312  | >TP53-L201S VEGNSRVEYL  | 605   | 293   |
| >TP53-L201S VEGNLRVEY   | 1192 | >TP53-L201S VEGNSRVEY   | 261   | 931   |
| >TP53-L201S VEGNLRVEY   | 67   | >TP53-L201S VEGNSRVEY   | 217   | 150   |
| >TP53-L201S VEGNLRVEYL  | 472  | >TP53-L201S VEGNSRVEYL  | 587   | 115   |
| >TP53-L201S VEGNLRVEY   | 338  | >TP53-L201S VEGNSRVEY   | 503   | 165   |
| >TP53-L201S VEGNLRVEYL  | 278  | >TP53-L201S VEGNSRVEYL  | 334   | 56    |
| >TP53-L201S RVEGNLRV    | 54   | >TP53-L201S RVEGNSRV    | 56    | 2     |
| >TP53-L201S RVEGNLRVEY  | 224  | >TP53-L201S RVEGNSRVEY  | 216   | 8     |
| >TP53-L201S RVEGNLRVEY  | 301  | >TP53-L201S RVEGNSRVEY  | 83    | 218   |
| >TP53-L201S RVEGNLRVEY  | 400  | >TP53-L201S RVEGNSRVEY  | 275   | 125   |
| >TP53-L201S RVEGNLRVEY  | 933  | >TP53-L201S RVEGNSRVEY  | 478   | 455   |
| >TP53-L201S IRVEGNLRVE' | 53   | >TP53-L201S IRVEGNSRVE' | 24    | 29    |
| >TP53-L201S LIRVEGNLRV  | 555  | >TP53-L201S LIRVEGNSRV  | 472   | 83    |
| >TP53-L201S LIRVEGNLRV  | 35   | >TP53-L201S LIRVEGNSRV  | 27    | 8     |
| >TP53-L201S LIRVEGNLRV  | 296  | >TP53-L201S LIRVEGNSRV  | 552   | 256   |
| >TP53-L201S HLIRVEGNLR' | 156  | >TP53-L201S HLIRVEGNSR' | 314   | 158   |
| >TP53-L201S HLIRVEGNL   | 226  | >TP53-L201S HLIRVEGNS   | 9175  | 8949  |
| >TP53-L201S HLIRVEGNLR' | 111  | >TP53-L201S HLIRVEGNSR' | 66    | 45    |
| >TP53-L201S HLIRVEGNLR' | 41   | >TP53-L201S HLIRVEGNSR' | 21    | 20    |
| >TP53-L201S HLIRVEGNLR' | 322  | >TP53-L201S HLIRVEGNSR' | 595   | 273   |
| >TP53-L201S HLIRVEGNL   | 327  | >TP53-L201S HLIRVEGNS   | 13304 | 12977 |
| >TP53-L201S HLIRVEGNLR' | 9    | >TP53-L201S HLIRVEGNSR' | 9     | 0     |
| >TP53-L201S HLIRVEGNLR' | 27   | >TP53-L201S HLIRVEGNSR' | 21    | 6     |
| >TP53-L201S HLIRVEGNLR' | 27   | >TP53-L201S HLIRVEGNSR' | 32    | 5     |
| >TP53-L201S HLIRVEGNL   | 153  | >TP53-L201S HLIRVEGNS   | 16813 | 16660 |
| >TP53-L201S HLIRVEGNLR' | 4    | >TP53-L201S HLIRVEGNSR' | 4     | 0     |
| >TP53-L201S HLIRVEGNLR  | 241  | >TP53-L201S HLIRVEGNSR  | 335   | 94    |
| >TP53-L201S HLIRVEGNLR  | 381  | >TP53-L201S HLIRVEGNSR  | 538   | 157   |
| >TP53-L201S HLIRVEGNLR  | 24   | >TP53-L201S HLIRVEGNSR  | 82    | 58    |
| >TP53-L201S HLIRVEGNLR' | 398  | >TP53-L201S HLIRVEGNSR' | 178   | 220   |
| >TP53-L201S HLIRVEGNLR  | 478  | >TP53-L201S HLIRVEGNSR  | 865   | 387   |
| >TP53-L206F LDDRNTFRHS  | 482  | >TP53-L206F FDDRNTFRHS  | 332   | 150   |
| >TP53-L206F YLDDRNTF    | 187  | >TP53-L206F YFDDRNTF    | 8719  | 8532  |
| >TP53-L206F YLDDRNTFRH  | 333  | >TP53-L206F YFDDRNTFRH  | 13174 | 12841 |
| >TP53-L206F YLDDRNTF    | 149  | >TP53-L206F YFDDRNTF    | 17623 | 17474 |
| >TP53-L206F YLDDRNTFRH  | 155  | >TP53-L206F YFDDRNTFRH  | 18903 | 18748 |
| >TP53-L206F YLDDRNTF    | 367  | >TP53-L206F YFDDRNTF    | 20340 | 19973 |

|                        |      |                        |       |       |
|------------------------|------|------------------------|-------|-------|
| >TP53-L206F YLDDRNTF   | 87   | >TP53-L206F YFDDRNTF   | 25474 | 25387 |
| >TP53-L206F YLDDRNTFR  | 189  | >TP53-L206F YFDDRNTFR  | 27503 | 27314 |
| >TP53-L206F YLDDRNTFR+ | 187  | >TP53-L206F YFDDRNTFR+ | 26879 | 26692 |
| >TP53-L206F YLDDRNTFR+ | 171  | >TP53-L206F YFDDRNTFR+ | 26368 | 26197 |
| >TP53-L206F YLDDRNTF   | 5543 | >TP53-L206F YFDDRNTF   | 328   | 5215  |
| >TP53-L206F YLDDRNTF   | 7713 | >TP53-L206F YFDDRNTF   | 59    | 7654  |
| >TP53-L206F YLDDRNTFR  | 282  | >TP53-L206F YFDDRNTFR  | 89    | 193   |
| >TP53-L206F YLDDRNTFR  | 55   | >TP53-L206F YFDDRNTFR  | 17    | 38    |
| >TP53-L206F YLDDRNTFR  | 68   | >TP53-L206F YFDDRNTFR  | 103   | 35    |
| >TP53-L206F YLDDRNTF   | 255  | >TP53-L206F YFDDRNTF   | 1206  | 951   |
| >TP53-L206F YLDDRNTFR  | 336  | >TP53-L206F YFDDRNTFR  | 92    | 244   |
| >TP53-L206F RVEGNLRVEY | 1375 | >TP53-L206F RVEGNLRVEY | 328   | 1047  |
| >TP53-L206F RVEGNLRVEY | 1887 | >TP53-L206F RVEGNLRVEY | 149   | 1738  |
| >TP53-L206F EYLDDRNTF  | 103  | >TP53-L206F EYFDDRNTF  | 91    | 12    |
| >TP53-L206F EYLDDRNTF  | 18   | >TP53-L206F EYFDDRNTF  | 20    | 2     |
| >TP53-L206F EYLDDRNTF  | 381  | >TP53-L206F EYFDDRNTF  | 202   | 179   |
| >TP53-L206F EYLDDRNTF  | 301  | >TP53-L206F EYFDDRNTF  | 1584  | 1283  |
| >TP53-L206F EYLDDRNTFR | 328  | >TP53-L206F EYFDDRNTFR | 285   | 43    |
| >TP53-L206F EYLDDRNTFR | 88   | >TP53-L206F EYFDDRNTFR | 53    | 35    |
| >TP53-L206F EYLDDRNTFR | 508  | >TP53-L206F EYFDDRNTFR | 62    | 446   |
| >TP53-L206F EYLDDRNTFR | 19   | >TP53-L206F EYFDDRNTFR | 14    | 5     |
| >TP53-L206F VEYLDDRNTF | 124  | >TP53-L206F VEYFDDRNTF | 81    | 43    |
| >TP53-L206F VEYLDDRNTF | 594  | >TP53-L206F VEYFDDRNTF | 435   | 159   |
| >TP53-L206F VEYLDDRNTF | 870  | >TP53-L206F VEYFDDRNTF | 478   | 392   |
| >TP53-L206F RVEYLDDR   | 433  | >TP53-L206F RVEYFDDR   | 193   | 240   |
| >TP53-L206F RVEYLDDRNT | 40   | >TP53-L206F RVEYFDDRNT | 30    | 10    |
| >TP53-L206F RVEYLDDR   | 652  | >TP53-L206F RVEYFDDR   | 245   | 407   |
| >TP53-L206F RVEYLDDRNT | 78   | >TP53-L206F RVEYFDDRNT | 74    | 4     |
| >TP53-L206F RVEYLDDR   | 1045 | >TP53-L206F RVEYFDDR   | 278   | 767   |
| >TP53-L206F VEGNLRVEYL | 312  | >TP53-L206F VEGNLRVEYF | 1217  | 905   |
| >TP53-L206F VEGNLRVEYL | 472  | >TP53-L206F VEGNLRVEYF | 1671  | 1199  |
| >TP53-L206F VEGNLRVEYL | 278  | >TP53-L206F VEGNLRVEYF | 798   | 520   |
| >TP53-L252F CMGGMNRR   | 88   | >TP53-L252F CMGGMNRR   | 13262 | 13174 |
| >TP53-L252F PILTIITL   | 508  | >TP53-L252F PIFTIITL   | 290   | 218   |
| >TP53-L252F PILTIITL   | 906  | >TP53-L252F PIFTIITL   | 371   | 535   |
| >TP53-L252F PILTIITL   | 1347 | >TP53-L252F PIFTIITL   | 196   | 1151  |
| >TP53-L252F RPILTIITL  | 104  | >TP53-L252F RPIFTIITL  | 60    | 44    |
| >TP53-L252F RPILTIITL  | 34   | >TP53-L252F RPIFTIITL  | 28    | 6     |
| >TP53-L252F RPILTIITL  | 391  | >TP53-L252F RPIFTIITL  | 320   | 71    |
| >TP53-L252F RPILTIITL  | 66   | >TP53-L252F RPIFTIITL  | 115   | 49    |
| >TP53-L252F RPILTIITL  | 89   | >TP53-L252F RPIFTIITL  | 83    | 6     |
| >TP53-L252F RRPILTIITL | 921  | >TP53-L252F RRPIFTIITL | 465   | 456   |
| >TP53-L252F RRPILTI    | 220  | >TP53-L252F RRPIFTI    | 203   | 17    |



|                         |      |                         |       |       |
|-------------------------|------|-------------------------|-------|-------|
| >TP53-L252F RRPILTIITL  | 14   | >TP53-L252F RRPIFTIITL  | 15    | 1     |
| >TP53-L252F RRPILTIITL  | 492  | >TP53-L252F RRPIFTIITL  | 170   | 322   |
| >TP53-L252F RRPILTII    | 33   | >TP53-L252F RRPIFTII    | 26    | 7     |
| >TP53-L252F RRPILTIIT   | 86   | >TP53-L252F RRPIFTIIT   | 70    | 16    |
| >TP53-L252F RRPILTIITL  | 16   | >TP53-L252F RRPIFTIITL  | 16    | 0     |
| >TP53-L252F RRPILTIITL  | 129  | >TP53-L252F RRPIFTIITL  | 109   | 20    |
| >TP53-L252F RRPILTIITL  | 319  | >TP53-L252F RRPIFTIITL  | 482   | 163   |
| >TP53-L252F RRPILTIITL  | 329  | >TP53-L252F RRPIFTIITL  | 404   | 75    |
| >TP53-L252F RRPILTIITL  | 14   | >TP53-L252F RRPIFTIITL  | 18    | 4     |
| >TP53-L252F RRPILTIITL  | 467  | >TP53-L252F RRPIFTIITL  | 537   | 70    |
| >TP53-L252F NRRPILTIITL | 710  | >TP53-L252F NRRPILTIITL | 432   | 278   |
| >TP53-L252F NRRPILTIITL | 281  | >TP53-L252F NRRPILTIITL | 194   | 87    |
| >TP53-L252F NRRPILTIITL | 50   | >TP53-L252F NRRPILTIITL | 41    | 9     |
| >TP53-L252F NRRPILTIITL | 224  | >TP53-L252F NRRPILTIITL | 65    | 159   |
| >TP53-L252F NRRPILTIITL | 12   | >TP53-L252F NRRPILTIITL | 8     | 4     |
| >TP53-L252F MNRRPILTI   | 945  | >TP53-L252F MNRRPILTI   | 276   | 669   |
| >TP53-L252F MNRRPILTI   | 35   | >TP53-L252F MNRRPILTI   | 65    | 30    |
| >TP53-L252F MNRRPILTI   | 200  | >TP53-L252F MNRRPILTI   | 212   | 12    |
| >TP53-L252F MNRRPILTI   | 457  | >TP53-L252F MNRRPILTI   | 1165  | 708   |
| >TP53-L252F MNRRPILTI   | 399  | >TP53-L252F MNRRPILTI   | 238   | 161   |
| >TP53-L252F MNRRPILTI   | 972  | >TP53-L252F MNRRPILTI   | 442   | 530   |
| >TP53-L252F MNRRPILTI   | 185  | >TP53-L252F MNRRPILTI   | 113   | 72    |
| >TP53-L252F MNRRPILTI   | 168  | >TP53-L252F MNRRPILTI   | 177   | 9     |
| >TP53-L252F MNRRPILTI   | 213  | >TP53-L252F MNRRPILTI   | 9299  | 9086  |
| >TP53-L252F MNRRPILTI   | 61   | >TP53-L252F MNRRPILTI   | 161   | 100   |
| >TP53-L252F MNRRPILTI   | 13   | >TP53-L252F MNRRPILTI   | 15    | 2     |
| >TP53-L252F MNRRPILTI   | 229  | >TP53-L252F MNRRPILTI   | 9477  | 9248  |
| >TP53-L252F MNRRPILTI   | 822  | >TP53-L252F MNRRPILTI   | 233   | 589   |
| >TP53-L252F MNRRPILTI   | 10   | >TP53-L252F MNRRPILTI   | 5     | 5     |
| >TP53-L252F MNRRPILTI   | 93   | >TP53-L252F MNRRPILTI   | 108   | 15    |
| >TP53-L252F MNRRPILTI   | 182  | >TP53-L252F MNRRPILTI   | 14672 | 14490 |
| >TP53-L252F MNRRPILTI   | 21   | >TP53-L252F MNRRPILTI   | 7     | 14    |
| >TP53-L252F MNRRPILTI   | 53   | >TP53-L252F MNRRPILTI   | 62    | 9     |
| >TP53-L252F MNRRPILTI   | 160  | >TP53-L252F MNRRPILTI   | 16957 | 16797 |
| >TP53-L252F MNRRPILTI   | 66   | >TP53-L252F MNRRPILTI   | 24    | 42    |
| >TP53-L252F MNRRPILTI   | 192  | >TP53-L252F MNRRPILTI   | 174   | 18    |
| >TP53-L252F MNRRPILTI   | 2202 | >TP53-L252F MNRRPILTI   | 188   | 2014  |
| >TP53-L252F MNRRPILTI   | 32   | >TP53-L252F MNRRPILTI   | 6691  | 6659  |
| >TP53-L252F MNRRPILTI   | 43   | >TP53-L252F MNRRPILTI   | 22    | 21    |
| >TP53-L252F MNRRPILTI   | 102  | >TP53-L252F MNRRPILTI   | 120   | 18    |
| >TP53-L252F MNRRPILTI   | 147  | >TP53-L252F MNRRPILTI   | 138   | 9     |
| >TP53-L252F MNRRPILTI   | 5268 | >TP53-L252F MNRRPILTI   | 274   | 4994  |
| >TP53-L252F MNRRPILTI   | 976  | >TP53-L252F MNRRPILTI   | 26    | 950   |

|                         |      |                          |       |       |
|-------------------------|------|--------------------------|-------|-------|
| >TP53-L252F GGMNRRPIL   | 444  | >TP53-L252F GGMNRRPIF    | 1693  | 1249  |
| >TP53-L252F GGMNRRPIL   | 2885 | >TP53-L252F GGMNRRPIF    | 384   | 2501  |
| >TP53-L252F GGMNRRPIL   | 538  | >TP53-L252F GGMNRRPIF    | 370   | 168   |
| >TP53-L252H CMGGMNRR    | 88   | >TP53-L252H CMGGMNRR     | 25195 | 25107 |
| >TP53-L252H RPILTIITL   | 104  | >TP53-L252H RPIHTIITL    | 52    | 52    |
| >TP53-L252H RPILTIIT    | 1023 | >TP53-L252H RPIHTIIT     | 293   | 730   |
| >TP53-L252H RPILTIITL   | 34   | >TP53-L252H RPIHTIITL    | 17    | 17    |
| >TP53-L252H RPILTIITL   | 1974 | >TP53-L252H RPIHTIITL    | 295   | 1679  |
| >TP53-L252H RPILTIITL   | 391  | >TP53-L252H RPIHTIITL    | 171   | 220   |
| >TP53-L252H RPILTIITL   | 66   | >TP53-L252H RPIHTIITL    | 54    | 12    |
| >TP53-L252H RPILTIITL   | 89   | >TP53-L252H RPIHTIITL    | 52    | 37    |
| >TP53-L252H RPILTIITL   | 671  | >TP53-L252H RPIHTIITL    | 132   | 539   |
| >TP53-L252H RRPILTIITL  | 921  | >TP53-L252H RRPPIHTIITL  | 463   | 458   |
| >TP53-L252H RRPILTII    | 220  | >TP53-L252H RRPPIHTII    | 594   | 374   |
| >TP53-L252H RRPILTIITL  | 14   | >TP53-L252H RRPPIHTIITL  | 22    | 8     |
| >TP53-L252H RRPILTIITL  | 492  | >TP53-L252H RRPPIHTIITL  | 487   | 5     |
| >TP53-L252H RRPILTII    | 33   | >TP53-L252H RRPPIHTII    | 81    | 48    |
| >TP53-L252H RRPILTIIT   | 86   | >TP53-L252H RRPPIHTIIT   | 159   | 73    |
| >TP53-L252H RRPILTIITL  | 16   | >TP53-L252H RRPPIHTIITL  | 17    | 1     |
| >TP53-L252H RRPILTIITL  | 129  | >TP53-L252H RRPPIHTIITL  | 208   | 79    |
| >TP53-L252H RRPILTII    | 319  | >TP53-L252H RRPPIHTII    | 1386  | 1067  |
| >TP53-L252H RRPILTIIT   | 329  | >TP53-L252H RRPPIHTIIT   | 519   | 190   |
| >TP53-L252H RRPILTIITL  | 14   | >TP53-L252H RRPPIHTIITL  | 23    | 9     |
| >TP53-L252H RRPILTIITL  | 467  | >TP53-L252H RRPPIHTIITL  | 635   | 168   |
| >TP53-L252H NRRPILTIITL | 710  | >TP53-L252H NRRPPIHTIITL | 409   | 301   |
| >TP53-L252H NRRPILTIITL | 701  | >TP53-L252H NRRPPIHTIITL | 409   | 292   |
| >TP53-L252H NRRPILTI    | 674  | >TP53-L252H NRRPPIHTI    | 486   | 188   |
| >TP53-L252H NRRPILTII   | 281  | >TP53-L252H NRRPPIHTII   | 347   | 66    |
| >TP53-L252H NRRPILTIITL | 50   | >TP53-L252H NRRPPIHTIITL | 50    | 0     |
| >TP53-L252H NRRPILTII   | 224  | >TP53-L252H NRRPPIHTII   | 325   | 101   |
| >TP53-L252H NRRPILTIITL | 12   | >TP53-L252H NRRPPIHTIITL | 16    | 4     |
| >TP53-L252H MNRRPILTI   | 35   | >TP53-L252H MNRRPPIHTI   | 74    | 39    |
| >TP53-L252H MNRRPILTII  | 200  | >TP53-L252H MNRRPPIHTII  | 114   | 86    |
| >TP53-L252H MNRRPILTI   | 457  | >TP53-L252H MNRRPPIHTI   | 793   | 336   |
| >TP53-L252H MNRRPILTI   | 399  | >TP53-L252H MNRRPPIHTI   | 697   | 298   |
| >TP53-L252H GMNRRPILTI  | 185  | >TP53-L252H GMNRRPPIHTI  | 277   | 92    |
| >TP53-L252H GMNRRPILTI  | 168  | >TP53-L252H GMNRRPPIHTI  | 486   | 318   |
| >TP53-L252H GMNRRPIL    | 213  | >TP53-L252H GMNRRPIH     | 21373 | 21160 |
| >TP53-L252H GMNRRPILTI  | 61   | >TP53-L252H GMNRRPPIHTI  | 110   | 49    |
| >TP53-L252H GMNRRPILTI  | 13   | >TP53-L252H GMNRRPPIHTI  | 29    | 16    |
| >TP53-L252H GMNRRPIL    | 229  | >TP53-L252H GMNRRPIH     | 24180 | 23951 |
| >TP53-L252H GMNRRPILTI  | 10   | >TP53-L252H GMNRRPPIHTI  | 7     | 3     |
| >TP53-L252H GMNRRPILTI  | 93   | >TP53-L252H GMNRRPPIHTI  | 119   | 26    |

|                         |       |                           |       |       |
|-------------------------|-------|---------------------------|-------|-------|
| >TP53-L252HGMNRRPIL     | 182   | >TP53-L252HGMNRRPIH       | 24663 | 24481 |
| >TP53-L252HGMNRRPILTI   | 21    | >TP53-L252HGMNRRPIHTI     | 8     | 13    |
| >TP53-L252HGMNRRPILTI   | 53    | >TP53-L252HGMNRRPIHTI     | 158   | 105   |
| >TP53-L252HGMNRRPIL     | 160   | >TP53-L252HGMNRRPIH       | 23286 | 23126 |
| >TP53-L252HGMNRRPILTI   | 66    | >TP53-L252HGMNRRPIHTI     | 36    | 30    |
| >TP53-L252HGMNRRPILTI   | 192   | >TP53-L252HGMNRRPIHTI     | 300   | 108   |
| >TP53-L252HGMNRRPILTI   | 2202  | >TP53-L252HGMNRRPIHTI     | 325   | 1877  |
| >TP53-L252HGMNRRPIL     | 32    | >TP53-L252HGMNRRPIH       | 19183 | 19151 |
| >TP53-L252HGMNRRPILTI   | 43    | >TP53-L252HGMNRRPIHTI     | 17    | 26    |
| >TP53-L252HGMNRRPILTI   | 102   | >TP53-L252HGMNRRPIHTI     | 143   | 41    |
| >TP53-L252HGMNRRPILTI   | 147   | >TP53-L252HGMNRRPIHTI     | 213   | 66    |
| >TP53-L252HGGMNRRPIL    | 444   | >TP53-L252HGGMNRRPIH      | 16697 | 16253 |
| >TP53-L252P ILTIITLEDSS | 31918 | >TP53-L252P IPTIITLEDSS   | 473   | 31445 |
| >TP53-L252P CMGGMNRR    | 88    | >TP53-L252P CMGGMNRR      | 23233 | 23145 |
| >TP53-L252P RPILTIITL   | 104   | >TP53-L252P RPIPTIITL     | 17    | 87    |
| >TP53-L252P RPILTIIT    | 1023  | >TP53-L252P RPIPTIIT      | 357   | 666   |
| >TP53-L252P RPILTIITL   | 34    | >TP53-L252P RPIPTIITL     | 22    | 12    |
| >TP53-L252P RPILTIITL   | 3886  | >TP53-L252P RPIPTIITL     | 387   | 3499  |
| >TP53-L252P RPILTIITL   | 391   | >TP53-L252P RPIPTIITL     | 195   | 196   |
| >TP53-L252P RPILTIITL   | 66    | >TP53-L252P RPIPTIITL     | 37    | 29    |
| >TP53-L252P RPILTIITL   | 89    | >TP53-L252P RPIPTIITL     | 40    | 49    |
| >TP53-L252P RPILTIITL   | 671   | >TP53-L252P RPIPTIITL     | 379   | 292   |
| >TP53-L252P RRPILTII    | 220   | >TP53-L252P RRP IPTII     | 829   | 609   |
| >TP53-L252P RRPILTIIITL | 14    | >TP53-L252P RRP IPTIIITL  | 25    | 11    |
| >TP53-L252P RRPILTIIITL | 492   | >TP53-L252P RRP IPTIIITL  | 237   | 255   |
| >TP53-L252P RRPILTII    | 33    | >TP53-L252P RRP IPTII     | 176   | 143   |
| >TP53-L252P RRPILTIIIT  | 86    | >TP53-L252P RRP IPTIIIT   | 152   | 66    |
| >TP53-L252P RRPILTIIITL | 16    | >TP53-L252P RRP IPTIIITL  | 15    | 1     |
| >TP53-L252P RRPILTIIITL | 129   | >TP53-L252P RRP IPTIIITL  | 209   | 80    |
| >TP53-L252P RRPILTII    | 319   | >TP53-L252P RRP IPTII     | 1859  | 1540  |
| >TP53-L252P RRPILTIIIT  | 329   | >TP53-L252P RRP IPTIIIT   | 2186  | 1857  |
| >TP53-L252P RRPILTIIITL | 14    | >TP53-L252P RRP IPTIIITL  | 17    | 3     |
| >TP53-L252P RRPILTIIITL | 467   | >TP53-L252P RRP IPTIIITL  | 1596  | 1129  |
| >TP53-L252P NRRPILTIITL | 710   | >TP53-L252P NRRP IPTIIITL | 490   | 220   |
| >TP53-L252P NRRPILTIITL | 701   | >TP53-L252P NRRP IPTIIITL | 282   | 419   |
| >TP53-L252P NRRPILTII   | 281   | >TP53-L252P NRRP IPTII    | 444   | 163   |
| >TP53-L252P NRRPILTIITL | 50    | >TP53-L252P NRRP IPTIIITL | 54    | 4     |
| >TP53-L252P NRRPILTII   | 224   | >TP53-L252P NRRP IPTII    | 256   | 32    |
| >TP53-L252P NRRPILTIITL | 12    | >TP53-L252P NRRP IPTIIITL | 13    | 1     |
| >TP53-L252P MNRRPILTI   | 945   | >TP53-L252P MNRRP IPT     | 386   | 559   |
| >TP53-L252P MNRRPILTI   | 35    | >TP53-L252P MNRRP IPTI    | 22    | 13    |
| >TP53-L252P MNRRPILTII  | 200   | >TP53-L252P MNRRP IPTII   | 157   | 43    |
| >TP53-L252P MNRRPILTI   | 457   | >TP53-L252P MNRRP IPTI    | 820   | 363   |

|                         |       |                         |       |       |
|-------------------------|-------|-------------------------|-------|-------|
| >TP53-L252P MNRRPILTI   | 399   | >TP53-L252P MNRRPIPTI   | 300   | 99    |
| >TP53-L252P GMNRRPILTI  | 185   | >TP53-L252P GMNRRPIPTI  | 462   | 277   |
| >TP53-L252P GMNRRPILTI  | 168   | >TP53-L252P GMNRRPIPTI  | 392   | 224   |
| >TP53-L252P GMNRRPIL    | 213   | >TP53-L252P GMNRRPIP    | 15597 | 15384 |
| >TP53-L252P GMNRRPILT   | 728   | >TP53-L252P GMNRRPIPT   | 307   | 421   |
| >TP53-L252P GMNRRPILTI  | 61    | >TP53-L252P GMNRRPIPTI  | 163   | 102   |
| >TP53-L252P GMNRRPILTI  | 13    | >TP53-L252P GMNRRPIPTI  | 16    | 3     |
| >TP53-L252P GMNRRPIL    | 229   | >TP53-L252P GMNRRPIP    | 19019 | 18790 |
| >TP53-L252P GMNRRPILT   | 822   | >TP53-L252P GMNRRPIPT   | 393   | 429   |
| >TP53-L252P GMNRRPILTI  | 10    | >TP53-L252P GMNRRPIPTI  | 7     | 3     |
| >TP53-L252P GMNRRPILTI  | 93    | >TP53-L252P GMNRRPIPTI  | 82    | 11    |
| >TP53-L252P GMNRRPIL    | 182   | >TP53-L252P GMNRRPIP    | 21608 | 21426 |
| >TP53-L252P GMNRRPILTI  | 21    | >TP53-L252P GMNRRPIPTI  | 13    | 8     |
| >TP53-L252P GMNRRPILTI  | 53    | >TP53-L252P GMNRRPIPTI  | 72    | 19    |
| >TP53-L252P GMNRRPIL    | 160   | >TP53-L252P GMNRRPIP    | 19822 | 19662 |
| >TP53-L252P GMNRRPILTI  | 66    | >TP53-L252P GMNRRPIPTI  | 32    | 34    |
| >TP53-L252P GMNRRPILTI  | 192   | >TP53-L252P GMNRRPIPTI  | 220   | 28    |
| >TP53-L252P GMNRRPIL    | 32    | >TP53-L252P GMNRRPIP    | 17390 | 17358 |
| >TP53-L252P GMNRRPILTI  | 43    | >TP53-L252P GMNRRPIPTI  | 31    | 12    |
| >TP53-L252P GMNRRPILTI  | 102   | >TP53-L252P GMNRRPIPTI  | 181   | 79    |
| >TP53-L252P GMNRRPILTI  | 147   | >TP53-L252P GMNRRPIPTI  | 231   | 84    |
| >TP53-L252P GMNRRPILTI  | 646   | >TP53-L252P GMNRRPIPTI  | 314   | 332   |
| >TP53-L252P GGMNRRPIL   | 444   | >TP53-L252P GGMNRRPIP   | 13170 | 12726 |
| >TP53-L252P GGMNRRPIL   | 538   | >TP53-L252P GGMNRRPIP   | 444   | 94    |
| >TP53-L257P LEDSSGNL    | 33    | >TP53-L257P PEDSSGNL    | 660   | 627   |
| >TP53-L257P LEDSSGNLL   | 20    | >TP53-L257P PEDSSGNLL   | 332   | 312   |
| >TP53-L257P TLEDSSGNL   | 37537 | >TP53-L257P TPEDSSGNL   | 274   | 37263 |
| >TP53-L257P TLEDSSGNL   | 62    | >TP53-L257P TPEDSSGNL   | 30764 | 30702 |
| >TP53-L257P TLEDSSGNLL  | 133   | >TP53-L257P TPEDSSGNLL  | 21519 | 21386 |
| >TP53-L257P TLEDSSGNL   | 24    | >TP53-L257P TPEDSSGNL   | 31642 | 31618 |
| >TP53-L257P TLEDSSGNLL  | 23    | >TP53-L257P TPEDSSGNLL  | 30320 | 30297 |
| >TP53-L257P TLEDSSGNL   | 21995 | >TP53-L257P TPEDSSGNL   | 291   | 21704 |
| >TP53-L257P TLEDSSGNLL  | 25328 | >TP53-L257P TPEDSSGNLL  | 168   | 25160 |
| >TP53-L257P TLEDSSGNLL  | 2950  | >TP53-L257P TPEDSSGNLL  | 226   | 2724  |
| >TP53-L257P NRRPILTIITL | 50    | >TP53-L257P NRRPILTIITP | 1784  | 1734  |
| >TP53-L257P NRRPILTIITL | 12    | >TP53-L257P NRRPILTIITP | 5409  | 5397  |
| >TP53-L257P ITLEDSSGNL  | 495   | >TP53-L257P ITPEDSSGNL  | 1322  | 827   |
| >TP53-L257P ITLEDSSGNL  | 471   | >TP53-L257P ITPEDSSGNL  | 1508  | 1037  |
| >TP53-L257P ITLEDSSGNL  | 371   | >TP53-L257P ITPEDSSGNL  | 1863  | 1492  |
| >TP53-L257P ITLEDSSGNLL | 270   | >TP53-L257P ITPEDSSGNLL | 1027  | 757   |
| >TP53-L257P ITLEDSSGNL  | 302   | >TP53-L257P ITPEDSSGNL  | 2008  | 1706  |
| >TP53-L257P ITLEDSSGNLL | 339   | >TP53-L257P ITPEDSSGNLL | 2162  | 1823  |
| >TP53-L257P ITLEDSSGNL  | 1595  | >TP53-L257P ITPEDSSGNL  | 340   | 1255  |

|                         |      |                         |       |       |
|-------------------------|------|-------------------------|-------|-------|
| >TP53-L257P ITLEDSSGNL  | 137  | >TP53-L257P ITPEDSSGNL  | 4899  | 4762  |
| >TP53-L257P ITLEDSSGNLL | 354  | >TP53-L257P ITPEDSSGNLL | 7815  | 7461  |
| >TP53-L257P ITLEDSSGNL  | 6    | >TP53-L257P ITPEDSSGNL  | 122   | 116   |
| >TP53-L257P ITLEDSSGNLL | 18   | >TP53-L257P ITPEDSSGNLL | 546   | 528   |
| >TP53-L257P ITLEDSSGNL  | 3272 | >TP53-L257P ITPEDSSGNL  | 5     | 3267  |
| >TP53-L257P ITLEDSSGNLL | 259  | >TP53-L257P ITPEDSSGNLL | 2     | 257   |
| >TP53-L257P ITLEDSSGNL  | 341  | >TP53-L257P ITPEDSSGNL  | 359   | 18    |
| >TP53-L257P ITLEDSSGNLL | 30   | >TP53-L257P ITPEDSSGNLL | 574   | 544   |
| >TP53-L257P IITLEDSSGNL | 2131 | >TP53-L257P IITPEDSSGNL | 265   | 1866  |
| >TP53-L257P RPILTIITL   | 104  | >TP53-L257P RPILTIITP   | 38347 | 38243 |
| >TP53-L257P RPILTIITL   | 34   | >TP53-L257P RPILTIITP   | 15996 | 15962 |
| >TP53-L257P RPILTIITL   | 391  | >TP53-L257P RPILTIITP   | 9601  | 9210  |
| >TP53-L257P RPILTIITL   | 66   | >TP53-L257P RPILTIITP   | 11475 | 11409 |
| >TP53-L257P RPILTIITL   | 89   | >TP53-L257P RPILTIITP   | 8308  | 8219  |
| >TP53-L257P RRPILTIITL  | 14   | >TP53-L257P RRPILTIITP  | 1360  | 1346  |
| >TP53-L257P RRPILTIITL  | 492  | >TP53-L257P RRPILTIITP  | 25679 | 25187 |
| >TP53-L257P RRPILTIITL  | 16   | >TP53-L257P RRPILTIITP  | 345   | 329   |
| >TP53-L257P RRPILTIITL  | 129  | >TP53-L257P RRPILTIITPE | 268   | 139   |
| >TP53-L257P RRPILTIITL  | 14   | >TP53-L257P RRPILTIITP  | 544   | 530   |
| >TP53-L257P RRPILTIITL  | 467  | >TP53-L257P RRPILTIITPE | 1386  | 919   |
| >TP53-L257C LEDSSGNL    | 727  | >TP53-L257C QEDSSGNL    | 126   | 601   |
| >TP53-L257C LEDSSGNL    | 33   | >TP53-L257C QEDSSGNL    | 54    | 21    |
| >TP53-L257C LEDSSGNLL   | 20   | >TP53-L257C QEDSSGNLL   | 30    | 10    |
| >TP53-L257C TLEDSSGNL   | 62   | >TP53-L257C TQEDSSGNL   | 5235  | 5173  |
| >TP53-L257C TLEDSSGNLL  | 133  | >TP53-L257C TQEDSSGNLL  | 2403  | 2270  |
| >TP53-L257C TLEDSSGNL   | 24   | >TP53-L257C TQEDSSGNL   | 21049 | 21025 |
| >TP53-L257C TLEDSSGNLL  | 23   | >TP53-L257C TQEDSSGNLL  | 18732 | 18709 |
| >TP53-L257C TLEDSSGNLL  | 2950 | >TP53-L257C TQEDSSGNLL  | 92    | 2858  |
| >TP53-L257C NRRPILTIITL | 50   | >TP53-L257C NRRPILTIITQ | 1285  | 1235  |
| >TP53-L257C NRRPILTIITL | 12   | >TP53-L257C NRRPILTIITQ | 2396  | 2384  |
| >TP53-L257C ITLEDSSGNL  | 495  | >TP53-L257C ITQEDSSGNL  | 2344  | 1849  |
| >TP53-L257C ITLEDSSGNL  | 471  | >TP53-L257C ITQEDSSGNL  | 2025  | 1554  |
| >TP53-L257C ITLEDSSGNL  | 371  | >TP53-L257C ITQEDSSGNL  | 4074  | 3703  |
| >TP53-L257C ITLEDSSGNLL | 270  | >TP53-L257C ITQEDSSGNL  | 1939  | 1669  |
| >TP53-L257C ITLEDSSGNL  | 302  | >TP53-L257C ITQEDSSGNL  | 2502  | 2200  |
| >TP53-L257C ITLEDSSGNLL | 339  | >TP53-L257C ITQEDSSGNL  | 2714  | 2375  |
| >TP53-L257C ITLEDSSGNL  | 137  | >TP53-L257C ITQEDSSGNL  | 3265  | 3128  |
| >TP53-L257C ITLEDSSGNLL | 354  | >TP53-L257C ITQEDSSGNL  | 5838  | 5484  |
| >TP53-L257C ITLEDSSGNL  | 6    | >TP53-L257C ITQEDSSGNL  | 11    | 5     |
| >TP53-L257C ITLEDSSGNLL | 18   | >TP53-L257C ITQEDSSGNL  | 52    | 34    |
| >TP53-L257C ITLEDSSGNLL | 259  | >TP53-L257C ITQEDSSGNL  | 103   | 156   |
| >TP53-L257C ITLEDSSGNL  | 341  | >TP53-L257C ITQEDSSGNL  | 111   | 230   |
| >TP53-L257C ITLEDSSGNLL | 30   | >TP53-L257C ITQEDSSGNL  | 49    | 19    |

|                         |       |                         |       |       |
|-------------------------|-------|-------------------------|-------|-------|
| >TP53-L257C RPILTIITL   | 104   | >TP53-L257C RPILTIITQ   | 18077 | 17973 |
| >TP53-L257C RPILTIITL   | 34    | >TP53-L257C RPILTIITQ   | 6131  | 6097  |
| >TP53-L257C RPILTIITL   | 391   | >TP53-L257C RPILTIITQ   | 2770  | 2379  |
| >TP53-L257C RPILTIITL   | 66    | >TP53-L257C RPILTIITQ   | 9430  | 9364  |
| >TP53-L257C RPILTIITL   | 89    | >TP53-L257C RPILTIITQ   | 10283 | 10194 |
| >TP53-L257C RRPILTIITL  | 14    | >TP53-L257C RRPILTIITQ  | 159   | 145   |
| >TP53-L257C RRPILTIITL  | 492   | >TP53-L257C RRPILTIITQ  | 20498 | 20006 |
| >TP53-L257C RRPILTIITL  | 16    | >TP53-L257C RRPILTIITQ  | 71    | 55    |
| >TP53-L257C RRPILTIITLE | 129   | >TP53-L257C RRPILTIITQE | 268   | 139   |
| >TP53-L257C RRPILTIITL  | 14    | >TP53-L257C RRPILTIITQ  | 133   | 119   |
| >TP53-L257C RRPILTIITLE | 467   | >TP53-L257C RRPILTIITQE | 1245  | 778   |
| >TP53-L257R LEDSSGNL    | 33    | >TP53-L257R REDSSGNL    | 10    | 23    |
| >TP53-L257R LEDSSGNLL   | 20    | >TP53-L257R REDSSGNLL   | 8     | 12    |
| >TP53-L257R LEDSSGNLL   | 1775  | >TP53-L257R REDSSGNLL   | 462   | 1313  |
| >TP53-L257R LEDSSGNLL   | 816   | >TP53-L257R REDSSGNLL   | 174   | 642   |
| >TP53-L257R TLEDSSGNL   | 62    | >TP53-L257R TREDSSGNL   | 26077 | 26015 |
| >TP53-L257R TLEDSSGNLL  | 133   | >TP53-L257R TREDSSGNLL  | 18642 | 18509 |
| >TP53-L257R TLEDSSGNL   | 24    | >TP53-L257R TREDSSGNL   | 28236 | 28212 |
| >TP53-L257R TLEDSSGNLL  | 23    | >TP53-L257R TREDSSGNLL  | 26630 | 26607 |
| >TP53-L257R TLEDSSGNLL  | 2950  | >TP53-L257R TREDSSGNLL  | 120   | 2830  |
| >TP53-L257R NRRPILTIITL | 50    | >TP53-L257R NRRPILTIITR | 874   | 824   |
| >TP53-L257R NRRPILTIITL | 12    | >TP53-L257R NRRPILTIITR | 488   | 476   |
| >TP53-L257R ITLEDSSGNL  | 495   | >TP53-L257R ITREDSSGNL  | 2844  | 2349  |
| >TP53-L257R ITLEDSSGNL  | 471   | >TP53-L257R ITREDSSGNL  | 1789  | 1318  |
| >TP53-L257R ITLEDSSGNL  | 371   | >TP53-L257R ITREDSSGNL  | 8535  | 8164  |
| >TP53-L257R ITLEDSSGNLL | 270   | >TP53-L257R ITREDSSGNLI | 5558  | 5288  |
| >TP53-L257R ITLEDSSGNL  | 302   | >TP53-L257R ITREDSSGNL  | 7072  | 6770  |
| >TP53-L257R ITLEDSSGNLL | 339   | >TP53-L257R ITREDSSGNLI | 7213  | 6874  |
| >TP53-L257R ITLEDSSGNL  | 6012  | >TP53-L257R ITREDSSGNL  | 114   | 5898  |
| >TP53-L257R ITLEDSSGNLL | 6121  | >TP53-L257R ITREDSSGNLI | 111   | 6010  |
| >TP53-L257R ITLEDSSGNL  | 137   | >TP53-L257R ITREDSSGNL  | 8172  | 8035  |
| >TP53-L257R ITLEDSSGNLL | 354   | >TP53-L257R ITREDSSGNLI | 11311 | 10957 |
| >TP53-L257R ITLEDSSGNL  | 6     | >TP53-L257R ITREDSSGNL  | 4     | 2     |
| >TP53-L257R ITLEDSSGNLL | 18    | >TP53-L257R ITREDSSGNLI | 10    | 8     |
| >TP53-L257R ITLEDSSGNLL | 259   | >TP53-L257R ITREDSSGNLI | 226   | 33    |
| >TP53-L257R ITLEDSSGNL  | 341   | >TP53-L257R ITREDSSGNL  | 142   | 199   |
| >TP53-L257R ITLEDSSGNLL | 30    | >TP53-L257R ITREDSSGNLI | 14    | 16    |
| >TP53-L257R PILTIITL    | 26866 | >TP53-L257R PILTIITR    | 65    | 26801 |
| >TP53-L257R RPILTIITL   | 104   | >TP53-L257R RPILTIITR   | 35697 | 35593 |
| >TP53-L257R RPILTIITL   | 34    | >TP53-L257R RPILTIITR   | 14523 | 14489 |
| >TP53-L257R RPILTIITL   | 391   | >TP53-L257R RPILTIITR   | 7728  | 7337  |
| >TP53-L257R RPILTIITL   | 66    | >TP53-L257R RPILTIITR   | 11111 | 11045 |
| >TP53-L257R RPILTIITL   | 89    | >TP53-L257R RPILTIITR   | 12006 | 11917 |

|                         |       |                         |       |       |
|-------------------------|-------|-------------------------|-------|-------|
| >TP53-L257R RPILTIITL   | 28999 | >TP53-L257R RPILTIITR   | 112   | 28887 |
| >TP53-L257R RRPILTIITL  | 18436 | >TP53-L257R RRPILTIITR  | 441   | 17995 |
| >TP53-L257R RRPILTIITL  | 14    | >TP53-L257R RRPILTIITR  | 31    | 17    |
| >TP53-L257R RRPILTIITL  | 492   | >TP53-L257R RRPILTIITR  | 27468 | 26976 |
| >TP53-L257R RRPILTIITL  | 16    | >TP53-L257R RRPILTIITR  | 56    | 40    |
| >TP53-L257R RRPILTIITLE | 129   | >TP53-L257R RRPILTIITRE | 258   | 129   |
| >TP53-L257R RRPILTIITL  | 14    | >TP53-L257R RRPILTIITR  | 47    | 33    |
| >TP53-L257R RRPILTIITLE | 467   | >TP53-L257R RRPILTIITRE | 1071  | 604   |
| >TP53-L257R RRPILTIITL  | 23325 | >TP53-L257R RRPILTIITR  | 47    | 23278 |
| >TP53-L257V LEDSSGNL    | 33    | >TP53-L257V VEDSSGNL    | 58    | 25    |
| >TP53-L257V LEDSSGNLL   | 20    | >TP53-L257V VEDSSGNLL   | 35    | 15    |
| >TP53-L257V TLEDSSGNL   | 62    | >TP53-L257V TVEDSSGNL   | 3848  | 3786  |
| >TP53-L257V TLEDSSGNLL  | 133   | >TP53-L257V TVEDSSGNLL  | 2712  | 2579  |
| >TP53-L257V TLEDSSGNL   | 24    | >TP53-L257V TVEDSSGNL   | 4702  | 4678  |
| >TP53-L257V TLEDSSGNLL  | 23    | >TP53-L257V TVEDSSGNLL  | 3605  | 3582  |
| >TP53-L257V NRRPILTIITL | 50    | >TP53-L257V NRRPILTIITV | 194   | 144   |
| >TP53-L257V NRRPILTIITL | 12    | >TP53-L257V NRRPILTIITV | 158   | 146   |
| >TP53-L257V ITLEDSSGNL  | 495   | >TP53-L257V ITVEDSSGNL  | 862   | 367   |
| >TP53-L257V ITLEDSSGNLL | 536   | >TP53-L257V ITVEDSSGNLI | 230   | 306   |
| >TP53-L257V ITLEDSSGNL  | 471   | >TP53-L257V ITVEDSSGNL  | 713   | 242   |
| >TP53-L257V ITLEDSSGNL  | 371   | >TP53-L257V ITVEDSSGNL  | 976   | 605   |
| >TP53-L257V ITLEDSSGNLL | 270   | >TP53-L257V ITVEDSSGNLI | 348   | 78    |
| >TP53-L257V ITLEDSSGNL  | 302   | >TP53-L257V ITVEDSSGNL  | 2009  | 1707  |
| >TP53-L257V ITLEDSSGNLL | 339   | >TP53-L257V ITVEDSSGNLI | 2174  | 1835  |
| >TP53-L257V ITLEDSSGNL  | 3298  | >TP53-L257V ITVEDSSGNL  | 254   | 3044  |
| >TP53-L257V ITLEDSSGNL  | 1595  | >TP53-L257V ITVEDSSGNL  | 265   | 1330  |
| >TP53-L257V ITLEDSSGNL  | 137   | >TP53-L257V ITVEDSSGNL  | 608   | 471   |
| >TP53-L257V ITLEDSSGNLL | 354   | >TP53-L257V ITVEDSSGNLI | 1436  | 1082  |
| >TP53-L257V ITLEDSSGNL  | 6     | >TP53-L257V ITVEDSSGNL  | 5     | 1     |
| >TP53-L257V ITLEDSSGNLL | 18    | >TP53-L257V ITVEDSSGNLI | 14    | 4     |
| >TP53-L257V ITLEDSSGNLL | 259   | >TP53-L257V ITVEDSSGNLI | 49    | 210   |
| >TP53-L257V ITLEDSSGNL  | 341   | >TP53-L257V ITVEDSSGNL  | 309   | 32    |
| >TP53-L257V ITLEDSSGNLL | 30    | >TP53-L257V ITVEDSSGNLI | 40    | 10    |
| >TP53-L257V PILTIITL    | 2805  | >TP53-L257V PILTIITV    | 404   | 2401  |
| >TP53-L257V PILTIITL    | 508   | >TP53-L257V PILTIITV    | 29    | 479   |
| >TP53-L257V PILTIITL    | 1435  | >TP53-L257V PILTIITV    | 56    | 1379  |
| >TP53-L257V PILTIITL    | 1459  | >TP53-L257V PILTIITV    | 39    | 1420  |
| >TP53-L257V PILTIITL    | 906   | >TP53-L257V PILTIITV    | 37    | 869   |
| >TP53-L257V RPILTIITL   | 104   | >TP53-L257V RPILTIITV   | 789   | 685   |
| >TP53-L257V RPILTIITL   | 34    | >TP53-L257V RPILTIITV   | 146   | 112   |
| >TP53-L257V RPILTIITL   | 391   | >TP53-L257V RPILTIITV   | 2828  | 2437  |
| >TP53-L257V RPILTIITL   | 66    | >TP53-L257V RPILTIITV   | 1420  | 1354  |
| >TP53-L257V RPILTIITL   | 10279 | >TP53-L257V RPILTIITV   | 215   | 10064 |

|                         |     |                         |      |      |
|-------------------------|-----|-------------------------|------|------|
| >TP53-L257V RPILTIITL   | 89  | >TP53-L257V RPILTIITV   | 634  | 545  |
| >TP53-L257V RRPILTIITL  | 14  | >TP53-L257V RRPILTIITV  | 71   | 57   |
| >TP53-L257V RRPILTIITL  | 492 | >TP53-L257V RRPILTIITV  | 3469 | 2977 |
| >TP53-L257V RRPILTIITL  | 16  | >TP53-L257V RRPILTIITV  | 51   | 35   |
| >TP53-L257V RRPILTIITLE | 129 | >TP53-L257V RRPILTIITVE | 193  | 64   |
| >TP53-L257V RRPILTIITL  | 14  | >TP53-L257V RRPILTIITV  | 40   | 26   |
| >TP53-L257V RRPILTIITLE | 467 | >TP53-L257V RRPILTIITVE | 1187 | 720  |
| >TP53-L264I- LLGRNSFEV  | 26  | >TP53-L264I- ILGRNSFEV  | 29   | 3    |
| >TP53-L264I- LLGRNSFEVR | 137 | >TP53-L264I- ILGRNSFEVR | 140  | 3    |
| >TP53-L264I- LLGRNSFEV  | 16  | >TP53-L264I- ILGRNSFEV  | 16   | 0    |
| >TP53-L264I- LLGRNSFEVR | 62  | >TP53-L264I- ILGRNSFEVR | 61   | 1    |
| >TP53-L264I- LLGRNSFEV  | 47  | >TP53-L264I- ILGRNSFEV  | 55   | 8    |
| >TP53-L264I- LLGRNSFEVR | 214 | >TP53-L264I- ILGRNSFEVR | 258  | 44   |
| >TP53-L264I- LLGRNSFEV  | 39  | >TP53-L264I- ILGRNSFEV  | 47   | 8    |
| >TP53-L264I- LLGRNSFEV  | 2   | >TP53-L264I- ILGRNSFEV  | 2    | 0    |
| >TP53-L264I- LLGRNSFEVR | 3   | >TP53-L264I- ILGRNSFEVR | 3    | 0    |
| >TP53-L264I- LLGRNSFEV  | 2   | >TP53-L264I- ILGRNSFEV  | 3    | 1    |
| >TP53-L264I- LLGRNSFEVR | 7   | >TP53-L264I- ILGRNSFEVR | 10   | 3    |
| >TP53-L264I- LLGRNSFEV  | 5   | >TP53-L264I- ILGRNSFEV  | 5    | 0    |
| >TP53-L264I- LLGRNSFEVR | 9   | >TP53-L264I- ILGRNSFEVR | 10   | 1    |
| >TP53-L264I- LLGRNSFEV  | 2   | >TP53-L264I- ILGRNSFEV  | 2    | 0    |
| >TP53-L264I- LLGRNSFEVR | 6   | >TP53-L264I- ILGRNSFEVR | 5    | 1    |
| >TP53-L264I- LLGRNSFEV  | 2   | >TP53-L264I- ILGRNSFEV  | 2    | 0    |
| >TP53-L264I- LLGRNSFEVR | 2   | >TP53-L264I- ILGRNSFEVR | 2    | 0    |
| >TP53-L264I- LLGRNSFEVR | 429 | >TP53-L264I- ILGRNSFEVR | 509  | 80   |
| >TP53-L264I- LLGRNSFEV  | 425 | >TP53-L264I- ILGRNSFEV  | 829  | 404  |
| >TP53-L264I- LLGRNSFEVR | 773 | >TP53-L264I- ILGRNSFEVR | 326  | 447  |
| >TP53-L264I- NLLGRNSFEV | 29  | >TP53-L264I- NILGRNSFEV | 182  | 153  |
| >TP53-L264I- NLLGRNSFEV | 89  | >TP53-L264I- NILGRNSFEV | 608  | 519  |
| >TP53-L264I- NLLGRNSFEV | 94  | >TP53-L264I- NILGRNSFEV | 361  | 267  |
| >TP53-L264I- NLLGRNSFEV | 137 | >TP53-L264I- NILGRNSFEV | 154  | 17   |
| >TP53-L264I- NLLGRNSFEV | 3   | >TP53-L264I- NILGRNSFEV | 19   | 16   |
| >TP53-L264I- NLLGRNSFEV | 5   | >TP53-L264I- NILGRNSFEV | 65   | 60   |
| >TP53-L264I- NLLGRNSFEV | 7   | >TP53-L264I- NILGRNSFEV | 41   | 34   |
| >TP53-L264I- NLLGRNSFEV | 3   | >TP53-L264I- NILGRNSFEV | 18   | 15   |
| >TP53-L264I- NLLGRNSFEV | 3   | >TP53-L264I- NILGRNSFEV | 10   | 7    |
| >TP53-L264I- NLLGRNSFEV | 109 | >TP53-L264I- NILGRNSFEV | 108  | 1    |
| >TP53-L264I- NLLGRNSFEV | 309 | >TP53-L264I- NILGRNSFEV | 84   | 225  |
| >TP53-L264I- NLLGRNSFEV | 52  | >TP53-L264I- NILGRNSFEV | 19   | 33   |
| >TP53-L264I- NLLGRNSF   | 65  | >TP53-L264I- NILGRNSF   | 343  | 278  |
| >TP53-L264I- NLLGRNSF   | 418 | >TP53-L264I- NILGRNSF   | 1780 | 1362 |
| >TP53-L264I- NLLGRNSFEV | 195 | >TP53-L264I- NILGRNSFEV | 125  | 70   |
| >TP53-L264I- SGNLLGRNSF | 311 | >TP53-L264I- SGNILGRNSF | 318  | 7    |



|                         |      |                         |      |      |
|-------------------------|------|-------------------------|------|------|
| >TP53-L264I-SSGNLLGR    | 627  | >TP53-L264I-SSGNILGR    | 426  | 201  |
| >TP53-L264I-SSGNLLGR    | 554  | >TP53-L264I-SSGNILGR    | 484  | 70   |
| >TP53-L264I-SSGNLLGR    | 744  | >TP53-L264I-SSGNILGR    | 232  | 512  |
| >TP53-L264I-SSGNLLGRNS  | 245  | >TP53-L264I-SSGNILGRNS  | 394  | 149  |
| >TP53-L264I-SSGNLLGRNS  | 390  | >TP53-L264I-SSGNILGRNS  | 563  | 173  |
| >TP53-L264I-SSGNLLGRNS  | 32   | >TP53-L264I-SSGNILGRNS  | 29   | 3    |
| >TP53-L264I-SSGNLLGR    | 357  | >TP53-L264I-SSGNILGR    | 464  | 107  |
| >TP53-L264I-DSSGNLLGR   | 664  | >TP53-L264I-DSSGNILGR   | 466  | 198  |
| >TP53-L264I-DSSGNLLGR   | 68   | >TP53-L264I-DSSGNILGR   | 35   | 33   |
| >TP53-L264I-EDSSGNLL    | 273  | >TP53-L264I-EDSSGNIL    | 742  | 469  |
| >TP53-L264I-LEDSSGNL    | 727  | >TP53-L264I-LEDSSGNI    | 316  | 411  |
| >TP53-L264I-LEDSSGNL    | 33   | >TP53-L264I-LEDSSGNI    | 119  | 86   |
| >TP53-L264I-LEDSSGNLL   | 20   | >TP53-L264I-LEDSSGNIL   | 14   | 6    |
| >TP53-L264I-TLEDSSGNL   | 62   | >TP53-L264I-TLEDSSGNI   | 296  | 234  |
| >TP53-L264I-TLEDSSGNLL  | 133  | >TP53-L264I-TLEDSSGNIL  | 491  | 358  |
| >TP53-L264I-TLEDSSGNL   | 513  | >TP53-L264I-TLEDSSGNI   | 263  | 250  |
| >TP53-L264I-TLEDSSGNL   | 24   | >TP53-L264I-TLEDSSGNI   | 126  | 102  |
| >TP53-L264I-TLEDSSGNLL  | 23   | >TP53-L264I-TLEDSSGNIL  | 50   | 27   |
| >TP53-L264I-ITLEDSSGNL  | 495  | >TP53-L264I-ITLEDSSGNI  | 938  | 443  |
| >TP53-L264I-ITLEDSSGNL  | 471  | >TP53-L264I-ITLEDSSGNI  | 328  | 143  |
| >TP53-L264I-ITLEDSSGNL  | 371  | >TP53-L264I-ITLEDSSGNI  | 338  | 33   |
| >TP53-L264I-ITLEDSSGNLL | 270  | >TP53-L264I-ITLEDSSGNIL | 639  | 369  |
| >TP53-L264I-ITLEDSSGNL  | 302  | >TP53-L264I-ITLEDSSGNI  | 260  | 42   |
| >TP53-L264I-ITLEDSSGNLL | 339  | >TP53-L264I-ITLEDSSGNIL | 966  | 627  |
| >TP53-L264I-ITLEDSSGNL  | 137  | >TP53-L264I-ITLEDSSGNI  | 74   | 63   |
| >TP53-L264I-ITLEDSSGNLL | 354  | >TP53-L264I-ITLEDSSGNIL | 923  | 569  |
| >TP53-L264I-ITLEDSSGNLL | 1117 | >TP53-L264I-ITLEDSSGNIL | 494  | 623  |
| >TP53-L264I-ITLEDSSGNL  | 6    | >TP53-L264I-ITLEDSSGNI  | 15   | 9    |
| >TP53-L264I-ITLEDSSGNLL | 18   | >TP53-L264I-ITLEDSSGNIL | 20   | 2    |
| >TP53-L264I-ITLEDSSGNLL | 259  | >TP53-L264I-ITLEDSSGNIL | 652  | 393  |
| >TP53-L264I-ITLEDSSGNL  | 341  | >TP53-L264I-ITLEDSSGNI  | 907  | 566  |
| >TP53-L264I-ITLEDSSGNLL | 30   | >TP53-L264I-ITLEDSSGNIL | 42   | 12   |
| >TP53-L264I-ITLEDSSGNL  | 1970 | >TP53-L264I-ITLEDSSGNI  | 168  | 1802 |
| >TP53-L264P LLGRNSFEV   | 26   | >TP53-L264P PLGRNSFEV   | 2306 | 2280 |
| >TP53-L264P LLGRNSFEVR  | 137  | >TP53-L264P PLGRNSFEVR  | 6062 | 5925 |
| >TP53-L264P LLGRNSFEV   | 16   | >TP53-L264P PLGRNSFEV   | 667  | 651  |
| >TP53-L264P LLGRNSFEVR  | 62   | >TP53-L264P PLGRNSFEVR  | 2069 | 2007 |
| >TP53-L264P LLGRNSFEV   | 47   | >TP53-L264P PLGRNSFEV   | 4203 | 4156 |
| >TP53-L264P LLGRNSFEVR  | 214  | >TP53-L264P PLGRNSFEVR  | 7211 | 6997 |
| >TP53-L264P LLGRNSFEV   | 39   | >TP53-L264P PLGRNSFEV   | 4732 | 4693 |
| >TP53-L264P LLGRNSFEV   | 2    | >TP53-L264P PLGRNSFEV   | 9    | 7    |
| >TP53-L264P LLGRNSFEVR  | 3    | >TP53-L264P PLGRNSFEVR  | 25   | 22   |
| >TP53-L264P LLGRNSFEV   | 2    | >TP53-L264P PLGRNSFEV   | 22   | 20   |

|                        |       |                        |       |       |
|------------------------|-------|------------------------|-------|-------|
| >TP53-L264P LLGRNSFEVR | 7     | >TP53-L264P PLGRNSFEVR | 323   | 316   |
| >TP53-L264P LLGRNSFEV  | 5     | >TP53-L264P PLGRNSFEV  | 14    | 9     |
| >TP53-L264P LLGRNSFEVR | 9     | >TP53-L264P PLGRNSFEVR | 52    | 43    |
| >TP53-L264P LLGRNSFEV  | 2     | >TP53-L264P PLGRNSFEV  | 4     | 2     |
| >TP53-L264P LLGRNSFEVR | 6     | >TP53-L264P PLGRNSFEVR | 45    | 39    |
| >TP53-L264P LLGRNSFEV  | 2     | >TP53-L264P PLGRNSFEV  | 4     | 2     |
| >TP53-L264P LLGRNSFEVR | 2     | >TP53-L264P PLGRNSFEVR | 7     | 5     |
| >TP53-L264P LLGRNSFEVR | 429   | >TP53-L264P PLGRNSFEVR | 4290  | 3861  |
| >TP53-L264P LLGRNSFEV  | 425   | >TP53-L264P PLGRNSFEV  | 1661  | 1236  |
| >TP53-L264P NLLGRNSF   | 35500 | >TP53-L264P NPLGRNSF   | 324   | 35176 |
| >TP53-L264P NLLGRNSFEV | 32773 | >TP53-L264P NPLGRNSFEV | 189   | 32584 |
| >TP53-L264P NLLGRNSFEV | 29    | >TP53-L264P NPLGRNSFEV | 12801 | 12772 |
| >TP53-L264P NLLGRNSFEV | 89    | >TP53-L264P NPLGRNSFEV | 15722 | 15633 |
| >TP53-L264P NLLGRNSFEV | 94    | >TP53-L264P NPLGRNSFEV | 15490 | 15396 |
| >TP53-L264P NLLGRNSFEV | 137   | >TP53-L264P NPLGRNSFEV | 4945  | 4808  |
| >TP53-L264P NLLGRNSFEV | 3     | >TP53-L264P NPLGRNSFEV | 7520  | 7517  |
| >TP53-L264P NLLGRNSFEV | 5     | >TP53-L264P NPLGRNSFEV | 13294 | 13289 |
| >TP53-L264P NLLGRNSFEV | 7     | >TP53-L264P NPLGRNSFEV | 11502 | 11495 |
| >TP53-L264P NLLGRNSFEV | 3     | >TP53-L264P NPLGRNSFEV | 10967 | 10964 |
| >TP53-L264P NLLGRNSFEV | 3     | >TP53-L264P NPLGRNSFEV | 15438 | 15435 |
| >TP53-L264P NLLGRNSFEV | 109   | >TP53-L264P NPLGRNSFEV | 763   | 654   |
| >TP53-L264P NLLGRNSFEV | 309   | >TP53-L264P NPLGRNSFEV | 1851  | 1542  |
| >TP53-L264P NLLGRNSFEV | 52    | >TP53-L264P NPLGRNSFEV | 110   | 58    |
| >TP53-L264P NLLGRNSF   | 15498 | >TP53-L264P NPLGRNSF   | 32    | 15466 |
| >TP53-L264P NLLGRNSF   | 65    | >TP53-L264P NPLGRNSF   | 1039  | 974   |
| >TP53-L264P NLLGRNSF   | 418   | >TP53-L264P NPLGRNSF   | 2658  | 2240  |
| >TP53-L264P NLLGRNSF   | 4270  | >TP53-L264P NPLGRNSF   | 110   | 4160  |
| >TP53-L264P NLLGRNSF   | 29995 | >TP53-L264P NPLGRNSF   | 367   | 29628 |
| >TP53-L264P NLLGRNSF   | 22650 | >TP53-L264P NPLGRNSF   | 367   | 22283 |
| >TP53-L264P NLLGRNSFEV | 195   | >TP53-L264P NPLGRNSFEV | 712   | 517   |
| >TP53-L264P SGNLLGRNSF | 311   | >TP53-L264P SGNPLGRNSF | 750   | 439   |
| >TP53-L264P SSGNLLGRNS | 245   | >TP53-L264P SSGNPLGRNS | 310   | 65    |
| >TP53-L264P SSGNLLGRNS | 701   | >TP53-L264P SSGNPLGRNS | 442   | 259   |
| >TP53-L264P SSGNLLGRNS | 390   | >TP53-L264P SSGNPLGRNS | 188   | 202   |
| >TP53-L264P SSGNLLGRNS | 32    | >TP53-L264P SSGNPLGRNS | 33    | 1     |
| >TP53-L264P SSGNLLGR   | 357   | >TP53-L264P SSGNPLGR   | 517   | 160   |
| >TP53-L264P DSSGNLLGR  | 68    | >TP53-L264P DSSGNPLGR  | 90    | 22    |
| >TP53-L264P EDSSGNLL   | 273   | >TP53-L264P EDSSGNPL   | 4028  | 3755  |
| >TP53-L264P LEDSSGNLL  | 2402  | >TP53-L264P LEDSSGNPL  | 422   | 1980  |
| >TP53-L264P LEDSSGNL   | 33    | >TP53-L264P LEDSSGNP   | 7599  | 7566  |
| >TP53-L264P LEDSSGNLL  | 20    | >TP53-L264P LEDSSGNPL  | 16    | 4     |
| >TP53-L264P LEDSSGNLL  | 1775  | >TP53-L264P LEDSSGNPL  | 328   | 1447  |
| >TP53-L264P TLEDSSGNL  | 62    | >TP53-L264P TLEDSSGNP  | 12653 | 12591 |

|                         |      |                         |       |       |
|-------------------------|------|-------------------------|-------|-------|
| >TP53-L264P TLEDSSGNLL  | 133  | >TP53-L264P TLEDSSGNPL  | 110   | 23    |
| >TP53-L264P TLEDSSGNLL  | 736  | >TP53-L264P TLEDSSGNPL  | 201   | 535   |
| >TP53-L264P TLEDSSGNL   | 24   | >TP53-L264P TLEDSSGNP   | 18879 | 18855 |
| >TP53-L264P TLEDSSGNLL  | 23   | >TP53-L264P TLEDSSGNPL  | 24    | 1     |
| >TP53-L264P ITLEDSSGNL  | 495  | >TP53-L264P ITLEDSSGNP  | 22140 | 21645 |
| >TP53-L264P ITLEDSSGNL  | 471  | >TP53-L264P ITLEDSSGNP  | 18557 | 18086 |
| >TP53-L264P ITLEDSSGNL  | 371  | >TP53-L264P ITLEDSSGNP  | 14221 | 13850 |
| >TP53-L264P ITLEDSSGNLL | 270  | >TP53-L264P ITLEDSSGNPL | 136   | 134   |
| >TP53-L264P ITLEDSSGNL  | 302  | >TP53-L264P ITLEDSSGNP  | 19062 | 18760 |
| >TP53-L264P ITLEDSSGNLL | 339  | >TP53-L264P ITLEDSSGNPL | 186   | 153   |
| >TP53-L264P ITLEDSSGNLL | 1053 | >TP53-L264P ITLEDSSGNPL | 314   | 739   |
| >TP53-L264P ITLEDSSGNL  | 137  | >TP53-L264P ITLEDSSGNP  | 10759 | 10622 |
| >TP53-L264P ITLEDSSGNLL | 354  | >TP53-L264P ITLEDSSGNPL | 95    | 259   |
| >TP53-L264P ITLEDSSGNLL | 1117 | >TP53-L264P ITLEDSSGNPL | 266   | 851   |
| >TP53-L264P ITLEDSSGNL  | 6    | >TP53-L264P ITLEDSSGNP  | 6413  | 6407  |
| >TP53-L264P ITLEDSSGNLL | 18   | >TP53-L264P ITLEDSSGNPL | 9     | 9     |
| >TP53-L264P ITLEDSSGNLL | 259  | >TP53-L264P ITLEDSSGNPL | 949   | 690   |
| >TP53-L264P ITLEDSSGNL  | 341  | >TP53-L264P ITLEDSSGNP  | 19825 | 19484 |
| >TP53-L264P ITLEDSSGNLL | 30   | >TP53-L264P ITLEDSSGNPL | 244   | 214   |
| >TP53-L264R LLGRNSFEV   | 26   | >TP53-L264R RLGRNSFEV   | 34    | 8     |
| >TP53-L264R LLGRNSFEVR  | 137  | >TP53-L264R RLGRNSFEVR  | 193   | 56    |
| >TP53-L264R LLGRNSFEV   | 16   | >TP53-L264R RLGRNSFEV   | 33    | 17    |
| >TP53-L264R LLGRNSFEVR  | 62   | >TP53-L264R RLGRNSFEVR  | 127   | 65    |
| >TP53-L264R LLGRNSFEV   | 47   | >TP53-L264R RLGRNSFEV   | 50    | 3     |
| >TP53-L264R LLGRNSFEVR  | 214  | >TP53-L264R RLGRNSFEVR  | 246   | 32    |
| >TP53-L264R LLGRNSFEV   | 39   | >TP53-L264R RLGRNSFEV   | 46    | 7     |
| >TP53-L264R LLGRNSFEV   | 2    | >TP53-L264R RLGRNSFEV   | 2     | 0     |
| >TP53-L264R LLGRNSFEVR  | 3    | >TP53-L264R RLGRNSFEVR  | 3     | 0     |
| >TP53-L264R LLGRNSFEV   | 2    | >TP53-L264R RLGRNSFEV   | 3     | 1     |
| >TP53-L264R LLGRNSFEVR  | 7    | >TP53-L264R RLGRNSFEVR  | 9     | 2     |
| >TP53-L264R LLGRNSFEV   | 5    | >TP53-L264R RLGRNSFEV   | 6     | 1     |
| >TP53-L264R LLGRNSFEVR  | 9    | >TP53-L264R RLGRNSFEVR  | 10    | 1     |
| >TP53-L264R LLGRNSFEV   | 2    | >TP53-L264R RLGRNSFEV   | 3     | 1     |
| >TP53-L264R LLGRNSFEVR  | 6    | >TP53-L264R RLGRNSFEVR  | 12    | 6     |
| >TP53-L264R LLGRNSFEV   | 2    | >TP53-L264R RLGRNSFEV   | 2     | 0     |
| >TP53-L264R LLGRNSFEVR  | 2    | >TP53-L264R RLGRNSFEVR  | 3     | 1     |
| >TP53-L264R LLGRNSFEVR  | 429  | >TP53-L264R RLGRNSFEVR  | 75    | 354   |
| >TP53-L264R LLGRNSFEV   | 425  | >TP53-L264R RLGRNSFEV   | 909   | 484   |
| >TP53-L264R LLGRNSFEVR  | 2135 | >TP53-L264R RLGRNSFEVR  | 178   | 1957  |
| >TP53-L264R LLGRNSFEVR  | 773  | >TP53-L264R RLGRNSFEVR  | 117   | 656   |
| >TP53-L264R NLLGRNSFEV  | 29   | >TP53-L264R NRLGRNSFEV  | 10845 | 10816 |
| >TP53-L264R NLLGRNSFEV  | 89   | >TP53-L264R NRLGRNSFEV  | 12725 | 12636 |
| >TP53-L264R NLLGRNSFEV  | 94   | >TP53-L264R NRLGRNSFEV  | 13212 | 13118 |

|                         |       |                         |       |       |
|-------------------------|-------|-------------------------|-------|-------|
| >TP53-L264R NLLGRNSFEV  | 137   | >TP53-L264R NRLGRNSFEV  | 3709  | 3572  |
| >TP53-L264R NLLGRNSFEV  | 3     | >TP53-L264R NRLGRNSFEV  | 5674  | 5671  |
| >TP53-L264R NLLGRNSFEV  | 5     | >TP53-L264R NRLGRNSFEV  | 10167 | 10162 |
| >TP53-L264R NLLGRNSFEV  | 7     | >TP53-L264R NRLGRNSFEV  | 8993  | 8986  |
| >TP53-L264R NLLGRNSFEV  | 3     | >TP53-L264R NRLGRNSFEV  | 10645 | 10642 |
| >TP53-L264R NLLGRNSFEV  | 3     | >TP53-L264R NRLGRNSFEV  | 9004  | 9001  |
| >TP53-L264R NLLGRNSFEV  | 109   | >TP53-L264R NRLGRNSFEV  | 3368  | 3259  |
| >TP53-L264R NLLGRNSFEV  | 309   | >TP53-L264R NRLGRNSFEV  | 5553  | 5244  |
| >TP53-L264R NLLGRNSFEV  | 52    | >TP53-L264R NRLGRNSFEV  | 6383  | 6331  |
| >TP53-L264R NLLGRNSF    | 65    | >TP53-L264R NRLGRNSF    | 3198  | 3133  |
| >TP53-L264R NLLGRNSF    | 418   | >TP53-L264R NRLGRNSF    | 195   | 223   |
| >TP53-L264R NLLGRNSF    | 18424 | >TP53-L264R NRLGRNSF    | 473   | 17951 |
| >TP53-L264R NLLGRNSFEV  | 21002 | >TP53-L264R NRLGRNSFEV  | 443   | 20559 |
| >TP53-L264R NLLGRNSFEV  | 195   | >TP53-L264R NRLGRNSFEV  | 692   | 497   |
| >TP53-L264R IITLEDSSGNL | 29930 | >TP53-L264R IITLEDSSGNR | 104   | 29826 |
| >TP53-L264R GNLLGRNSF   | 525   | >TP53-L264R GNRLGRNSF   | 249   | 276   |
| >TP53-L264R SGNLLGRNSF  | 311   | >TP53-L264R SGNRLGRNSF  | 511   | 200   |
| >TP53-L264R SSGNLLGR    | 554   | >TP53-L264R SSGNRLGR    | 329   | 225   |
| >TP53-L264R SSGNLLGRNS  | 245   | >TP53-L264R SSGNRLGRNS  | 317   | 72    |
| >TP53-L264R SSGNLLGRNS  | 390   | >TP53-L264R SSGNRLGRNS  | 238   | 152   |
| >TP53-L264R SSGNLLGRNS  | 32    | >TP53-L264R SSGNRLGRNS  | 71    | 39    |
| >TP53-L264R SSGNLLGR    | 357   | >TP53-L264R SSGNRLGR    | 565   | 208   |
| >TP53-L264R DSSGNLLGR   | 664   | >TP53-L264R DSSGNRLGR   | 247   | 417   |
| >TP53-L264R DSSGNLLGR   | 68    | >TP53-L264R DSSGNRLGR   | 31    | 37    |
| >TP53-L264R EDSSGNLL    | 273   | >TP53-L264R EDSSGNRL    | 4743  | 4470  |
| >TP53-L264R LEDSSGNL    | 33    | >TP53-L264R LEDSSGNR    | 14967 | 14934 |
| >TP53-L264R LEDSSGNLL   | 20    | >TP53-L264R LEDSSGNRL   | 65    | 45    |
| >TP53-L264R TLEDSSGNL   | 62    | >TP53-L264R TLEDSSGNR   | 18161 | 18099 |
| >TP53-L264R TLEDSSGNLL  | 133   | >TP53-L264R TLEDSSGNRL  | 459   | 326   |
| >TP53-L264R TLEDSSGNL   | 24    | >TP53-L264R TLEDSSGNR   | 16197 | 16173 |
| >TP53-L264R TLEDSSGNLL  | 23    | >TP53-L264R TLEDSSGNRL  | 15    | 8     |
| >TP53-L264R TLEDSSGNL   | 33888 | >TP53-L264R TLEDSSGNR   | 233   | 33655 |
| >TP53-L264R ITLEDSSGNL  | 495   | >TP53-L264R ITLEDSSGNR  | 20027 | 19532 |
| >TP53-L264R ITLEDSSGNL  | 471   | >TP53-L264R ITLEDSSGNR  | 17198 | 16727 |
| >TP53-L264R ITLEDSSGNL  | 371   | >TP53-L264R ITLEDSSGNR  | 12665 | 12294 |
| >TP53-L264R ITLEDSSGNLL | 270   | >TP53-L264R ITLEDSSGNRI | 722   | 452   |
| >TP53-L264R ITLEDSSGNL  | 302   | >TP53-L264R ITLEDSSGNR  | 20576 | 20274 |
| >TP53-L264R ITLEDSSGNLL | 339   | >TP53-L264R ITLEDSSGNRI | 236   | 103   |
| >TP53-L264R ITLEDSSGNL  | 32564 | >TP53-L264R ITLEDSSGNR  | 349   | 32215 |
| >TP53-L264R ITLEDSSGNL  | 137   | >TP53-L264R ITLEDSSGNR  | 11776 | 11639 |
| >TP53-L264R ITLEDSSGNLL | 354   | >TP53-L264R ITLEDSSGNRI | 580   | 226   |
| >TP53-L264R ITLEDSSGNL  | 6     | >TP53-L264R ITLEDSSGNR  | 2455  | 2449  |
| >TP53-L264R ITLEDSSGNLL | 18    | >TP53-L264R ITLEDSSGNRI | 8     | 10    |

|                        |      |                        |       |       |
|------------------------|------|------------------------|-------|-------|
| >TP53-L264RITLEDSSGNLL | 259  | >TP53-L264RITLEDSSGNRI | 1678  | 1419  |
| >TP53-L264RITLEDSSGNL  | 341  | >TP53-L264RITLEDSSGNR  | 14156 | 13815 |
| >TP53-L264RITLEDSSGNLL | 30   | >TP53-L264RITLEDSSGNRI | 46    | 16    |
| >TP53-L264VLLGRNSFEV   | 26   | >TP53-L264VVLGRNSFEV   | 34    | 8     |
| >TP53-L264VLLGRNSFEVR  | 137  | >TP53-L264VVLGRNSFEVR  | 189   | 52    |
| >TP53-L264VLLGRNSFEV   | 16   | >TP53-L264VVLGRNSFEV   | 28    | 12    |
| >TP53-L264VLLGRNSFEVR  | 62   | >TP53-L264VVLGRNSFEVR  | 114   | 52    |
| >TP53-L264VLLGRNSFEV   | 47   | >TP53-L264VVLGRNSFEV   | 68    | 21    |
| >TP53-L264VLLGRNSFEVR  | 214  | >TP53-L264VVLGRNSFEVR  | 316   | 102   |
| >TP53-L264VLLGRNSFEV   | 39   | >TP53-L264VVLGRNSFEV   | 64    | 25    |
| >TP53-L264VLLGRNSFEV   | 2    | >TP53-L264VVLGRNSFEV   | 2     | 0     |
| >TP53-L264VLLGRNSFEVR  | 3    | >TP53-L264VVLGRNSFEVR  | 3     | 0     |
| >TP53-L264VLLGRNSFEV   | 2    | >TP53-L264VVLGRNSFEV   | 2     | 0     |
| >TP53-L264VLLGRNSFEVR  | 7    | >TP53-L264VVLGRNSFEVR  | 8     | 1     |
| >TP53-L264VLLGRNSFEV   | 5    | >TP53-L264VVLGRNSFEV   | 5     | 0     |
| >TP53-L264VLLGRNSFEVR  | 9    | >TP53-L264VVLGRNSFEVR  | 8     | 1     |
| >TP53-L264VLLGRNSFEV   | 2    | >TP53-L264VVLGRNSFEV   | 2     | 0     |
| >TP53-L264VLLGRNSFEVR  | 6    | >TP53-L264VVLGRNSFEVR  | 5     | 1     |
| >TP53-L264VLLGRNSFEV   | 2    | >TP53-L264VVLGRNSFEV   | 2     | 0     |
| >TP53-L264VLLGRNSFEVR  | 2    | >TP53-L264VVLGRNSFEVR  | 2     | 0     |
| >TP53-L264VLLGRNSFEVR  | 429  | >TP53-L264VVLGRNSFEVR  | 687   | 258   |
| >TP53-L264VLLGRNSFEV   | 425  | >TP53-L264VVLGRNSFEV   | 975   | 550   |
| >TP53-L264VNLLGRNSFEV  | 29   | >TP53-L264VNVLGRNSFEV  | 439   | 410   |
| >TP53-L264VNLLGRNSFEV  | 89   | >TP53-L264VNVLGRNSFEV  | 996   | 907   |
| >TP53-L264VNLLGRNSFEV  | 94   | >TP53-L264VNVLGRNSFEV  | 620   | 526   |
| >TP53-L264VNLLGRNSFEV  | 137  | >TP53-L264VNVLGRNSFEV  | 166   | 29    |
| >TP53-L264VNLLGRNSFEV  | 3    | >TP53-L264VNVLGRNSFEV  | 49    | 46    |
| >TP53-L264VNLLGRNSFEV  | 5    | >TP53-L264VNVLGRNSFEV  | 125   | 120   |
| >TP53-L264VNLLGRNSFEV  | 7    | >TP53-L264VNVLGRNSFEV  | 100   | 93    |
| >TP53-L264VNLLGRNSFEV  | 3    | >TP53-L264VNVLGRNSFEV  | 38    | 35    |
| >TP53-L264VNLLGRNSFEV  | 3    | >TP53-L264VNVLGRNSFEV  | 23    | 20    |
| >TP53-L264VNLLGRNSF    | 1873 | >TP53-L264VNVLGRNSF    | 423   | 1450  |
| >TP53-L264VNLLGRNSFEV  | 502  | >TP53-L264VNVLGRNSFEV  | 303   | 199   |
| >TP53-L264VNLLGRNSFEV  | 109  | >TP53-L264VNVLGRNSFEV  | 95    | 14    |
| >TP53-L264VNLLGRNSFEV  | 309  | >TP53-L264VNVLGRNSFEV  | 42    | 267   |
| >TP53-L264VNLLGRNSFEV  | 52   | >TP53-L264VNVLGRNSFEV  | 12    | 40    |
| >TP53-L264VNLLGRNSF    | 65   | >TP53-L264VNVLGRNSF    | 439   | 374   |
| >TP53-L264VNLLGRNSF    | 418  | >TP53-L264VNVLGRNSF    | 2369  | 1951  |
| >TP53-L264VNLLGRNSFEV  | 195  | >TP53-L264VNVLGRNSFEV  | 345   | 150   |
| >TP53-L264VIITLEDSSGNL | 2966 | >TP53-L264VIITLEDSSGNV | 352   | 2614  |
| >TP53-L264VIITLEDSSGNL | 2131 | >TP53-L264VIITLEDSSGNV | 96    | 2035  |
| >TP53-L264VSGNLLGRNSF  | 311  | >TP53-L264VSGNVLGRNSF  | 505   | 194   |
| >TP53-L264VSSGNLLGR    | 627  | >TP53-L264VSSGNVLGR    | 401   | 226   |

|                         |      |                         |      |      |
|-------------------------|------|-------------------------|------|------|
| >TP53-L264V SSGNLLGR    | 744  | >TP53-L264V SSGNVLGR    | 285  | 459  |
| >TP53-L264V SSGNLLGRNS  | 245  | >TP53-L264V SSGNVLGRNS  | 273  | 28   |
| >TP53-L264V SSGNLLGRNS  | 390  | >TP53-L264V SSGNVLGRNS  | 702  | 312  |
| >TP53-L264V SSGNLLGRNS  | 32   | >TP53-L264V SSGNVLGRNS  | 31   | 1    |
| >TP53-L264V SSGNLLGR    | 357  | >TP53-L264V SSGNVLGR    | 512  | 155  |
| >TP53-L264V DSSGNLLGR   | 68   | >TP53-L264V DSSGNVLGR   | 38   | 30   |
| >TP53-L264V EDSSGNLL    | 273  | >TP53-L264V EDSSGNVL    | 892  | 619  |
| >TP53-L264V LEDSSGNLL   | 2402 | >TP53-L264V LEDSSGNVL   | 279  | 2123 |
| >TP53-L264V LEDSSGNL    | 33   | >TP53-L264V LEDSSGNV    | 388  | 355  |
| >TP53-L264V LEDSSGNLL   | 20   | >TP53-L264V LEDSSGNVL   | 16   | 4    |
| >TP53-L264V TLEDSSGNL   | 62   | >TP53-L264V TLEDSSGNV   | 66   | 4    |
| >TP53-L264V TLEDSSGNLL  | 133  | >TP53-L264V TLEDSSGNVL  | 445  | 312  |
| >TP53-L264V TLEDSSGNL   | 513  | >TP53-L264V TLEDSSGNV   | 37   | 476  |
| >TP53-L264V TLEDSSGNL   | 1522 | >TP53-L264V TLEDSSGNV   | 100  | 1422 |
| >TP53-L264V TLEDSSGNL   | 947  | >TP53-L264V TLEDSSGNV   | 68   | 879  |
| >TP53-L264V TLEDSSGNL   | 3341 | >TP53-L264V TLEDSSGNV   | 207  | 3134 |
| >TP53-L264V TLEDSSGNL   | 24   | >TP53-L264V TLEDSSGNV   | 4    | 20   |
| >TP53-L264V TLEDSSGNLL  | 23   | >TP53-L264V TLEDSSGNVL  | 36   | 13   |
| >TP53-L264V ITLEDSSGNL  | 495  | >TP53-L264V ITLEDSSGNV  | 481  | 14   |
| >TP53-L264V ITLEDSSGNL  | 471  | >TP53-L264V ITLEDSSGNV  | 85   | 386  |
| >TP53-L264V ITLEDSSGNL  | 371  | >TP53-L264V ITLEDSSGNV  | 91   | 280  |
| >TP53-L264V ITLEDSSGNLL | 270  | >TP53-L264V ITLEDSSGNVI | 631  | 361  |
| >TP53-L264V ITLEDSSGNL  | 302  | >TP53-L264V ITLEDSSGNV  | 21   | 281  |
| >TP53-L264V ITLEDSSGNLL | 339  | >TP53-L264V ITLEDSSGNVI | 359  | 20   |
| >TP53-L264V ITLEDSSGNL  | 1372 | >TP53-L264V ITLEDSSGNV  | 133  | 1239 |
| >TP53-L264V ITLEDSSGNL  | 1829 | >TP53-L264V ITLEDSSGNV  | 107  | 1722 |
| >TP53-L264V ITLEDSSGNL  | 3672 | >TP53-L264V ITLEDSSGNV  | 252  | 3420 |
| >TP53-L264V ITLEDSSGNL  | 3363 | >TP53-L264V ITLEDSSGNV  | 144  | 3219 |
| >TP53-L264V ITLEDSSGNL  | 1595 | >TP53-L264V ITLEDSSGNV  | 287  | 1308 |
| >TP53-L264V ITLEDSSGNL  | 137  | >TP53-L264V ITLEDSSGNV  | 15   | 122  |
| >TP53-L264V ITLEDSSGNLL | 354  | >TP53-L264V ITLEDSSGNVI | 788  | 434  |
| >TP53-L264V ITLEDSSGNLL | 1117 | >TP53-L264V ITLEDSSGNVI | 366  | 751  |
| >TP53-L264V ITLEDSSGNL  | 6    | >TP53-L264V ITLEDSSGNV  | 61   | 55   |
| >TP53-L264V ITLEDSSGNLL | 18   | >TP53-L264V ITLEDSSGNVI | 14   | 4    |
| >TP53-L264V ITLEDSSGNLL | 259  | >TP53-L264V ITLEDSSGNVI | 1001 | 742  |
| >TP53-L264V ITLEDSSGNL  | 341  | >TP53-L264V ITLEDSSGNV  | 630  | 289  |
| >TP53-L264V ITLEDSSGNLL | 30   | >TP53-L264V ITLEDSSGNVI | 39   | 9    |
| >TP53-L265N LGRNSFEV    | 820  | >TP53-L265N MGRNSFEV    | 114  | 706  |
| >TP53-L265N LGRNSFEVR   | 286  | >TP53-L265N MGRNSFEVR   | 51   | 235  |
| >TP53-L265N LLGRNSFEV   | 5632 | >TP53-L265N LMGRNSFEV   | 282  | 5350 |
| >TP53-L265N LLGRNSFEV   | 26   | >TP53-L265N LMGRNSFEV   | 22   | 4    |
| >TP53-L265N LLGRNSFEVR  | 137  | >TP53-L265N LMGRNSFEVI  | 109  | 28   |
| >TP53-L265N LLGRNSFEV   | 16   | >TP53-L265N LMGRNSFEV   | 14   | 2    |

|                         |      |                         |      |      |
|-------------------------|------|-------------------------|------|------|
| >TP53-L265N LLGRNSFEVR  | 62   | >TP53-L265N LMGRNSFEVI  | 60   | 2    |
| >TP53-L265N LLGRNSFEV   | 47   | >TP53-L265N LMGRNSFEV   | 32   | 15   |
| >TP53-L265N LLGRNSFEVR  | 214  | >TP53-L265N LMGRNSFEVI  | 151  | 63   |
| >TP53-L265N LLGRNSFEV   | 39   | >TP53-L265N LMGRNSFEV   | 23   | 16   |
| >TP53-L265N LLGRNSFEVR  | 582  | >TP53-L265N LMGRNSFEVI  | 379  | 203  |
| >TP53-L265N LLGRNSFEV   | 2    | >TP53-L265N LMGRNSFEV   | 2    | 0    |
| >TP53-L265N LLGRNSFEVR  | 3    | >TP53-L265N LMGRNSFEVI  | 3    | 0    |
| >TP53-L265N LLGRNSFEV   | 2    | >TP53-L265N LMGRNSFEV   | 2    | 0    |
| >TP53-L265N LLGRNSFEVR  | 7    | >TP53-L265N LMGRNSFEVI  | 6    | 1    |
| >TP53-L265N LLGRNSFEV   | 5    | >TP53-L265N LMGRNSFEV   | 6    | 1    |
| >TP53-L265N LLGRNSFEVR  | 9    | >TP53-L265N LMGRNSFEVI  | 10   | 1    |
| >TP53-L265N LLGRNSFEV   | 2    | >TP53-L265N LMGRNSFEV   | 2    | 0    |
| >TP53-L265N LLGRNSFEVR  | 6    | >TP53-L265N LMGRNSFEVI  | 5    | 1    |
| >TP53-L265N LLGRNSFEV   | 2    | >TP53-L265N LMGRNSFEV   | 2    | 0    |
| >TP53-L265N LLGRNSFEVR  | 2    | >TP53-L265N LMGRNSFEVI  | 2    | 0    |
| >TP53-L265N LLGRNSFEVR  | 429  | >TP53-L265N LMGRNSFEVI  | 151  | 278  |
| >TP53-L265N LLGRNSFEV   | 425  | >TP53-L265N LMGRNSFEV   | 397  | 28   |
| >TP53-L265N LLGRNSFEVR  | 773  | >TP53-L265N LMGRNSFEVI  | 327  | 446  |
| >TP53-L265N ITLEDSSGNLL | 270  | >TP53-L265N ITLEDSSGNLM | 1047 | 777  |
| >TP53-L265N ITLEDSSGNLL | 339  | >TP53-L265N ITLEDSSGNLM | 1976 | 1637 |
| >TP53-L265N ITLEDSSGNLL | 1180 | >TP53-L265N ITLEDSSGNLM | 136  | 1044 |
| >TP53-L265N ITLEDSSGNLL | 354  | >TP53-L265N ITLEDSSGNLM | 424  | 70   |
| >TP53-L265N ITLEDSSGNLL | 18   | >TP53-L265N ITLEDSSGNLM | 13   | 5    |
| >TP53-L265N ITLEDSSGNLL | 259  | >TP53-L265N ITLEDSSGNLM | 410  | 151  |
| >TP53-L265N ITLEDSSGNLL | 30   | >TP53-L265N ITLEDSSGNLM | 7    | 23   |
| >TP53-L265N NLLGRNSFEV  | 29   | >TP53-L265N NLMGRNSFE'  | 15   | 14   |
| >TP53-L265N NLLGRNSFEV  | 89   | >TP53-L265N NLMGRNSFE'  | 23   | 66   |
| >TP53-L265N NLLGRNSFEV  | 94   | >TP53-L265N NLMGRNSFE'  | 29   | 65   |
| >TP53-L265N NLLGRNSFEV  | 137  | >TP53-L265N NLMGRNSFE'  | 106  | 31   |
| >TP53-L265N NLLGRNSFEV  | 3    | >TP53-L265N NLMGRNSFE'  | 4    | 1    |
| >TP53-L265N NLLGRNSFEV  | 5    | >TP53-L265N NLMGRNSFE'  | 5    | 0    |
| >TP53-L265N NLLGRNSFEV  | 7    | >TP53-L265N NLMGRNSFE'  | 12   | 5    |
| >TP53-L265N NLLGRNSFEV  | 3    | >TP53-L265N NLMGRNSFE'  | 3    | 0    |
| >TP53-L265N NLLGRNSFEV  | 3    | >TP53-L265N NLMGRNSFE'  | 2    | 1    |
| >TP53-L265N NLLGRNSFEV  | 502  | >TP53-L265N NLMGRNSFE'  | 347  | 155  |
| >TP53-L265N NLLGRNSF    | 826  | >TP53-L265N NLMGRNSF    | 369  | 457  |
| >TP53-L265N NLLGRNSFEV  | 109  | >TP53-L265N NLMGRNSFE'  | 78   | 31   |
| >TP53-L265N NLLGRNSFEV  | 309  | >TP53-L265N NLMGRNSFE'  | 50   | 259  |
| >TP53-L265N NLLGRNSFEV  | 52   | >TP53-L265N NLMGRNSFE'  | 56   | 4    |
| >TP53-L265N NLLGRNSF    | 501  | >TP53-L265N NLMGRNSF    | 164  | 337  |
| >TP53-L265N NLLGRNSF    | 968  | >TP53-L265N NLMGRNSF    | 133  | 835  |
| >TP53-L265N NLLGRNSF    | 65   | >TP53-L265N NLMGRNSF    | 41   | 24   |
| >TP53-L265N NLLGRNSF    | 418  | >TP53-L265N NLMGRNSF    | 223  | 195  |

|                         |       |                         |       |       |
|-------------------------|-------|-------------------------|-------|-------|
| >TP53-L265N NLLGRNSFEV  | 195   | >TP53-L265N NLMGRNSFE'  | 287   | 92    |
| >TP53-L265N GNLLGRNSF   | 1249  | >TP53-L265N GNLMGRNSF   | 281   | 968   |
| >TP53-L265N GNLLGRNSF   | 525   | >TP53-L265N GNLMGRNSF   | 289   | 236   |
| >TP53-L265N SGNLLGRNSF  | 311   | >TP53-L265N SGNLMGRNS   | 223   | 88    |
| >TP53-L265N SSGNLLGR    | 627   | >TP53-L265N SSGNLMGR    | 360   | 267   |
| >TP53-L265N SSGNLLGR    | 554   | >TP53-L265N SSGNLMGR    | 277   | 277   |
| >TP53-L265N SSGNLLGR    | 744   | >TP53-L265N SSGNLMGR    | 310   | 434   |
| >TP53-L265N SSGNLLGRNS  | 245   | >TP53-L265N SSGNLMGRN   | 189   | 56    |
| >TP53-L265N SSGNLLGRNS  | 390   | >TP53-L265N SSGNLMGRN   | 191   | 199   |
| >TP53-L265N SSGNLLGRNS  | 32    | >TP53-L265N SSGNLMGRN   | 25    | 7     |
| >TP53-L265N SSGNLLGR    | 357   | >TP53-L265N SSGNLMGR    | 263   | 94    |
| >TP53-L265N DSSGNLLGR   | 664   | >TP53-L265N DSSGNLMGR   | 190   | 474   |
| >TP53-L265N DSSGNLLGR   | 68    | >TP53-L265N DSSGNLMGR   | 21    | 47    |
| >TP53-L265N EDSSGNLL    | 273   | >TP53-L265N EDSSGNLM    | 515   | 242   |
| >TP53-L265N LEDSSGNLL   | 20    | >TP53-L265N LEDSSGNLM   | 127   | 107   |
| >TP53-L265N TLEDSSGNLL  | 133   | >TP53-L265N TLEDSSGNLM  | 763   | 630   |
| >TP53-L265N TLEDSSGNLL  | 23    | >TP53-L265N TLEDSSGNLM  | 691   | 668   |
| >TP53-L265P LGRNSFEVR   | 286   | >TP53-L265P PGRNSFEVR   | 3340  | 3054  |
| >TP53-L265P LLGRNSFEV   | 30935 | >TP53-L265P LPGRNSFEV   | 32    | 30903 |
| >TP53-L265P LLGRNSFEV   | 26    | >TP53-L265P LPGRNSFEV   | 19322 | 19296 |
| >TP53-L265P LLGRNSFEVR  | 137   | >TP53-L265P LPGRNSFEVR  | 22246 | 22109 |
| >TP53-L265P LLGRNSFEV   | 16    | >TP53-L265P LPGRNSFEV   | 17981 | 17965 |
| >TP53-L265P LLGRNSFEVR  | 62    | >TP53-L265P LPGRNSFEVR  | 24522 | 24460 |
| >TP53-L265P LLGRNSFEV   | 47    | >TP53-L265P LPGRNSFEV   | 21585 | 21538 |
| >TP53-L265P LLGRNSFEVR  | 214   | >TP53-L265P LPGRNSFEVR  | 23285 | 23071 |
| >TP53-L265P LLGRNSFEV   | 39    | >TP53-L265P LPGRNSFEV   | 13331 | 13292 |
| >TP53-L265P LLGRNSFEV   | 2     | >TP53-L265P LPGRNSFEV   | 6099  | 6097  |
| >TP53-L265P LLGRNSFEVR  | 3     | >TP53-L265P LPGRNSFEVR  | 9715  | 9712  |
| >TP53-L265P LLGRNSFEV   | 2     | >TP53-L265P LPGRNSFEV   | 10695 | 10693 |
| >TP53-L265P LLGRNSFEVR  | 7     | >TP53-L265P LPGRNSFEVR  | 17910 | 17903 |
| >TP53-L265P LLGRNSFEV   | 5     | >TP53-L265P LPGRNSFEV   | 12585 | 12580 |
| >TP53-L265P LLGRNSFEVR  | 9     | >TP53-L265P LPGRNSFEVR  | 17998 | 17989 |
| >TP53-L265P LLGRNSFEV   | 2     | >TP53-L265P LPGRNSFEV   | 17301 | 17299 |
| >TP53-L265P LLGRNSFEVR  | 6     | >TP53-L265P LPGRNSFEVR  | 20818 | 20812 |
| >TP53-L265P LLGRNSFEV   | 2     | >TP53-L265P LPGRNSFEV   | 6676  | 6674  |
| >TP53-L265P LLGRNSFEVR  | 2     | >TP53-L265P LPGRNSFEVR  | 9831  | 9829  |
| >TP53-L265P LLGRNSFEVR  | 429   | >TP53-L265P LPGRNSFEVR  | 5255  | 4826  |
| >TP53-L265P LLGRNSFEV   | 425   | >TP53-L265P LPGRNSFEV   | 1806  | 1381  |
| >TP53-L265P LLGRNSFEV   | 23925 | >TP53-L265P LPGRNSFEV   | 420   | 23505 |
| >TP53-L265P LLGRNSFEV   | 22826 | >TP53-L265P LPGRNSFEV   | 370   | 22456 |
| >TP53-L265P LLGRNSFEV   | 28344 | >TP53-L265P LPGRNSFEV   | 164   | 28180 |
| >TP53-L265P LLGRNSFEVR  | 29846 | >TP53-L265P LPGRNSFEVR  | 385   | 29461 |
| >TP53-L265P ITLEDSSGNLL | 270   | >TP53-L265P ITLEDSSGNLF | 11005 | 10735 |



|                         |      |                         |       |       |
|-------------------------|------|-------------------------|-------|-------|
| >TP53-L265P ITLEDSSGNLL | 339  | >TP53-L265P ITLEDSSGNLF | 19171 | 18832 |
| >TP53-L265P ITLEDSSGNLL | 354  | >TP53-L265P ITLEDSSGNLF | 14289 | 13935 |
| >TP53-L265P ITLEDSSGNLL | 18   | >TP53-L265P ITLEDSSGNLF | 9147  | 9129  |
| >TP53-L265P ITLEDSSGNLL | 259  | >TP53-L265P ITLEDSSGNLF | 13542 | 13283 |
| >TP53-L265P ITLEDSSGNLL | 30   | >TP53-L265P ITLEDSSGNLF | 2742  | 2712  |
| >TP53-L265P NLLGRNSFEV  | 29   | >TP53-L265P NLPGRNSFEV  | 325   | 296   |
| >TP53-L265P NLLGRNSFEV  | 89   | >TP53-L265P NLPGRNSFEV  | 179   | 90    |
| >TP53-L265P NLLGRNSFEV  | 94   | >TP53-L265P NLPGRNSFEV  | 269   | 175   |
| >TP53-L265P NLLGRNSFEV  | 137  | >TP53-L265P NLPGRNSFEV  | 521   | 384   |
| >TP53-L265P NLLGRNSFEV  | 3    | >TP53-L265P NLPGRNSFEV  | 9     | 6     |
| >TP53-L265P NLLGRNSFEV  | 5    | >TP53-L265P NLPGRNSFEV  | 29    | 24    |
| >TP53-L265P NLLGRNSFEV  | 7    | >TP53-L265P NLPGRNSFEV  | 16    | 9     |
| >TP53-L265P NLLGRNSFEV  | 3    | >TP53-L265P NLPGRNSFEV  | 15    | 12    |
| >TP53-L265P NLLGRNSFEV  | 3    | >TP53-L265P NLPGRNSFEV  | 3     | 0     |
| >TP53-L265P NLLGRNSFEV  | 109  | >TP53-L265P NLPGRNSFEV  | 760   | 651   |
| >TP53-L265P NLLGRNSFEV  | 309  | >TP53-L265P NLPGRNSFEV  | 386   | 77    |
| >TP53-L265P NLLGRNSFEV  | 52   | >TP53-L265P NLPGRNSFEV  | 787   | 735   |
| >TP53-L265P NLLGRNSF    | 65   | >TP53-L265P NLPGRNSF    | 197   | 132   |
| >TP53-L265P NLLGRNSF    | 418  | >TP53-L265P NLPGRNSF    | 3725  | 3307  |
| >TP53-L265P NLLGRNSFEV  | 195  | >TP53-L265P NLPGRNSFEV  | 523   | 328   |
| >TP53-L265P GNLLGRNSF   | 1249 | >TP53-L265P GNLPGRNSF   | 348   | 901   |
| >TP53-L265P GNLLGRNSF   | 525  | >TP53-L265P GNLPGRNSF   | 231   | 294   |
| >TP53-L265P SGNLLGRNSF  | 311  | >TP53-L265P SGNLPGRNSF  | 511   | 200   |
| >TP53-L265P SSGNLLGRNS  | 245  | >TP53-L265P SSGNLPGRNS  | 335   | 90    |
| >TP53-L265P SSGNLLGRNS  | 701  | >TP53-L265P SSGNLPGRNS  | 446   | 255   |
| >TP53-L265P SSGNLLGRNS  | 390  | >TP53-L265P SSGNLPGRNS  | 292   | 98    |
| >TP53-L265P SSGNLLGRNS  | 32   | >TP53-L265P SSGNLPGRNS  | 42    | 10    |
| >TP53-L265P SSGNLLGR    | 357  | >TP53-L265P SSGNLPGR    | 429   | 72    |
| >TP53-L265P DSSGNLLGR   | 68   | >TP53-L265P DSSGNLPGR   | 43    | 25    |
| >TP53-L265P EDSSGNLL    | 273  | >TP53-L265P EDSSGNLP    | 9686  | 9413  |
| >TP53-L265P LEDSSGNLL   | 20   | >TP53-L265P LEDSSGNLP   | 5741  | 5721  |
| >TP53-L265P TLEDSSGNLL  | 133  | >TP53-L265P TLEDSSGNLP  | 17212 | 17079 |
| >TP53-L265P TLEDSSGNLL  | 23   | >TP53-L265P TLEDSSGNLP  | 16747 | 16724 |
| >TP53-L265C LGRNSFEVR   | 286  | >TP53-L265C QGRNSFEVR   | 887   | 601   |
| >TP53-L265C LLGRNSFEV   | 26   | >TP53-L265C LQGRNSFEV   | 229   | 203   |
| >TP53-L265C LLGRNSFEVR  | 137  | >TP53-L265C LQGRNSFEVF  | 1596  | 1459  |
| >TP53-L265C LLGRNSFEV   | 16   | >TP53-L265C LQGRNSFEV   | 257   | 241   |
| >TP53-L265C LLGRNSFEVR  | 62   | >TP53-L265C LQGRNSFEVF  | 1435  | 1373  |
| >TP53-L265C LLGRNSFEV   | 47   | >TP53-L265C LQGRNSFEV   | 1309  | 1262  |
| >TP53-L265C LLGRNSFEVR  | 214  | >TP53-L265C LQGRNSFEVF  | 3639  | 3425  |
| >TP53-L265C LLGRNSFEV   | 39   | >TP53-L265C LQGRNSFEV   | 14    | 25    |
| >TP53-L265C LLGRNSFEVR  | 582  | >TP53-L265C LQGRNSFEVF  | 297   | 285   |
| >TP53-L265C LLGRNSFEV   | 2    | >TP53-L265C LQGRNSFEV   | 35    | 33    |

|                         |     |                         |       |       |
|-------------------------|-----|-------------------------|-------|-------|
| >TP53-L265C LLGRNSFEVR  | 3   | >TP53-L265C LQGRNSFEVF  | 121   | 118   |
| >TP53-L265C LLGRNSFEV   | 2   | >TP53-L265C LQGRNSFEV   | 16    | 14    |
| >TP53-L265C LLGRNSFEVR  | 7   | >TP53-L265C LQGRNSFEVF  | 335   | 328   |
| >TP53-L265C LLGRNSFEV   | 5   | >TP53-L265C LQGRNSFEV   | 102   | 97    |
| >TP53-L265C LLGRNSFEVR  | 9   | >TP53-L265C LQGRNSFEVF  | 923   | 914   |
| >TP53-L265C LLGRNSFEV   | 2   | >TP53-L265C LQGRNSFEV   | 199   | 197   |
| >TP53-L265C LLGRNSFEVR  | 6   | >TP53-L265C LQGRNSFEVF  | 2528  | 2522  |
| >TP53-L265C LLGRNSFEV   | 2   | >TP53-L265C LQGRNSFEV   | 53    | 51    |
| >TP53-L265C LLGRNSFEVR  | 2   | >TP53-L265C LQGRNSFEVF  | 167   | 165   |
| >TP53-L265C LLGRNSFEVR  | 429 | >TP53-L265C LQGRNSFEVF  | 845   | 416   |
| >TP53-L265C LLGRNSFEV   | 425 | >TP53-L265C LQGRNSFEV   | 6967  | 6542  |
| >TP53-L265C ITLEDSSGNLL | 270 | >TP53-L265C ITLEDSSGNLC | 7796  | 7526  |
| >TP53-L265C ITLEDSSGNLL | 339 | >TP53-L265C ITLEDSSGNLC | 11380 | 11041 |
| >TP53-L265C ITLEDSSGNLL | 354 | >TP53-L265C ITLEDSSGNLC | 9370  | 9016  |
| >TP53-L265C ITLEDSSGNLL | 18  | >TP53-L265C ITLEDSSGNLC | 2901  | 2883  |
| >TP53-L265C ITLEDSSGNLL | 259 | >TP53-L265C ITLEDSSGNLC | 10219 | 9960  |
| >TP53-L265C ITLEDSSGNLL | 30  | >TP53-L265C ITLEDSSGNLC | 435   | 405   |
| >TP53-L265C NLLGRNSFEV  | 29  | >TP53-L265C NLQGRNSFEV  | 450   | 421   |
| >TP53-L265C NLLGRNSFEV  | 89  | >TP53-L265C NLQGRNSFEV  | 260   | 171   |
| >TP53-L265C NLLGRNSFEV  | 94  | >TP53-L265C NLQGRNSFEV  | 308   | 214   |
| >TP53-L265C NLLGRNSFEV  | 137 | >TP53-L265C NLQGRNSFEV  | 1127  | 990   |
| >TP53-L265C NLLGRNSFEV  | 3   | >TP53-L265C NLQGRNSFEV  | 10    | 7     |
| >TP53-L265C NLLGRNSFEV  | 5   | >TP53-L265C NLQGRNSFEV  | 9     | 4     |
| >TP53-L265C NLLGRNSFEV  | 7   | >TP53-L265C NLQGRNSFEV  | 30    | 23    |
| >TP53-L265C NLLGRNSFEV  | 3   | >TP53-L265C NLQGRNSFEV  | 11    | 8     |
| >TP53-L265C NLLGRNSFEV  | 3   | >TP53-L265C NLQGRNSFEV  | 3     | 0     |
| >TP53-L265C NLLGRNSFEV  | 109 | >TP53-L265C NLQGRNSFEV  | 159   | 50    |
| >TP53-L265C NLLGRNSFEV  | 309 | >TP53-L265C NLQGRNSFEV  | 332   | 23    |
| >TP53-L265C NLLGRNSFEV  | 52  | >TP53-L265C NLQGRNSFEV  | 551   | 499   |
| >TP53-L265C NLLGRNSF    | 968 | >TP53-L265C NLQGRNSF    | 297   | 671   |
| >TP53-L265C NLLGRNSF    | 65  | >TP53-L265C NLQGRNSF    | 58    | 7     |
| >TP53-L265C NLLGRNSF    | 418 | >TP53-L265C NLQGRNSF    | 1787  | 1369  |
| >TP53-L265C NLLGRNSFEV  | 195 | >TP53-L265C NLQGRNSFEV  | 1122  | 927   |
| >TP53-L265C GNLLGRNSF   | 525 | >TP53-L265C GNLQGRNSF   | 239   | 286   |
| >TP53-L265C SGNLLGRNSF  | 311 | >TP53-L265C SGNLQGRNSF  | 279   | 32    |
| >TP53-L265C SSGNLLGR    | 554 | >TP53-L265C SSGNLQGR    | 474   | 80    |
| >TP53-L265C SSGNLLGRNS  | 245 | >TP53-L265C SSGNLQGRN!  | 245   | 0     |
| >TP53-L265C SSGNLLGRNS  | 390 | >TP53-L265C SSGNLQGRN!  | 469   | 79    |
| >TP53-L265C SSGNLLGRNS  | 32  | >TP53-L265C SSGNLQGRN!  | 37    | 5     |
| >TP53-L265C SSGNLLGR    | 357 | >TP53-L265C SSGNLQGR    | 1192  | 835   |
| >TP53-L265C DSSGNLLGR   | 68  | >TP53-L265C DSSGNLQGR   | 72    | 4     |
| >TP53-L265C EDSSGNLL    | 273 | >TP53-L265C EDSSGNLQ    | 8210  | 7937  |
| >TP53-L265C LEDSSGNLL   | 20  | >TP53-L265C LEDSSGNLQ   | 11477 | 11457 |

|                         |       |                         |       |       |
|-------------------------|-------|-------------------------|-------|-------|
| >TP53-L265C TLEDSSGNLL  | 133   | >TP53-L265C TLEDSSGNLQ  | 17633 | 17500 |
| >TP53-L265C TLEDSSGNLL  | 23    | >TP53-L265C TLEDSSGNLQ  | 1602  | 1579  |
| >TP53-L265R LGRNSFEV    | 820   | >TP53-L265R RGRNSFEV    | 29    | 791   |
| >TP53-L265R LGRNSFEVR   | 6129  | >TP53-L265R RGRNSFEVR   | 469   | 5660  |
| >TP53-L265R LGRNSFEVRV  | 2669  | >TP53-L265R RGRNSFEVRV  | 120   | 2549  |
| >TP53-L265R LGRNSFEVR   | 286   | >TP53-L265R RGRNSFEVR   | 30    | 256   |
| >TP53-L265R LGRNSFEVR   | 3056  | >TP53-L265R RGRNSFEVR   | 422   | 2634  |
| >TP53-L265R LLGRNSFEV   | 26    | >TP53-L265R LRGRNSFEV   | 18783 | 18757 |
| >TP53-L265R LLGRNSFEVR  | 137   | >TP53-L265R LRGRNSFEVR  | 21946 | 21809 |
| >TP53-L265R LLGRNSFEV   | 16    | >TP53-L265R LRGRNSFEV   | 11890 | 11874 |
| >TP53-L265R LLGRNSFEVR  | 62    | >TP53-L265R LRGRNSFEVR  | 18138 | 18076 |
| >TP53-L265R LLGRNSFEV   | 47    | >TP53-L265R LRGRNSFEV   | 20041 | 19994 |
| >TP53-L265R LLGRNSFEVR  | 214   | >TP53-L265R LRGRNSFEVR  | 22084 | 21870 |
| >TP53-L265R LLGRNSFEV   | 39    | >TP53-L265R LRGRNSFEV   | 12276 | 12237 |
| >TP53-L265R LLGRNSFEV   | 2     | >TP53-L265R LRGRNSFEV   | 4526  | 4524  |
| >TP53-L265R LLGRNSFEVR  | 3     | >TP53-L265R LRGRNSFEVR  | 8023  | 8020  |
| >TP53-L265R LLGRNSFEV   | 2     | >TP53-L265R LRGRNSFEV   | 7741  | 7739  |
| >TP53-L265R LLGRNSFEVR  | 7     | >TP53-L265R LRGRNSFEVR  | 15565 | 15558 |
| >TP53-L265R LLGRNSFEV   | 5     | >TP53-L265R LRGRNSFEV   | 9909  | 9904  |
| >TP53-L265R LLGRNSFEVR  | 9     | >TP53-L265R LRGRNSFEVR  | 15829 | 15820 |
| >TP53-L265R LLGRNSFEV   | 2     | >TP53-L265R LRGRNSFEV   | 15123 | 15121 |
| >TP53-L265R LLGRNSFEVR  | 6     | >TP53-L265R LRGRNSFEVR  | 19487 | 19481 |
| >TP53-L265R LLGRNSFEV   | 2     | >TP53-L265R LRGRNSFEV   | 2292  | 2290  |
| >TP53-L265R LLGRNSFEVR  | 2     | >TP53-L265R LRGRNSFEVR  | 4433  | 4431  |
| >TP53-L265R LLGRNSFEVR  | 429   | >TP53-L265R LRGRNSFEVR  | 3229  | 2800  |
| >TP53-L265R LLGRNSFEV   | 425   | >TP53-L265R LRGRNSFEV   | 15532 | 15107 |
| >TP53-L265R ITLEDSSGNLL | 270   | >TP53-L265R ITLEDSSGNLF | 20152 | 19882 |
| >TP53-L265R ITLEDSSGNLL | 339   | >TP53-L265R ITLEDSSGNLF | 20813 | 20474 |
| >TP53-L265R ITLEDSSGNLL | 20677 | >TP53-L265R ITLEDSSGNLF | 388   | 20289 |
| >TP53-L265R ITLEDSSGNLL | 16754 | >TP53-L265R ITLEDSSGNLF | 189   | 16565 |
| >TP53-L265R ITLEDSSGNLL | 21813 | >TP53-L265R ITLEDSSGNLF | 233   | 21580 |
| >TP53-L265R ITLEDSSGNLL | 19930 | >TP53-L265R ITLEDSSGNLF | 37    | 19893 |
| >TP53-L265R ITLEDSSGNLL | 354   | >TP53-L265R ITLEDSSGNLF | 14853 | 14499 |
| >TP53-L265R ITLEDSSGNLL | 18    | >TP53-L265R ITLEDSSGNLF | 5016  | 4998  |
| >TP53-L265R ITLEDSSGNLL | 259   | >TP53-L265R ITLEDSSGNLF | 15243 | 14984 |
| >TP53-L265R ITLEDSSGNLL | 30    | >TP53-L265R ITLEDSSGNLF | 1034  | 1004  |
| >TP53-L265R NLLGRNSFEV  | 29    | >TP53-L265R NLRGRNSFEV  | 802   | 773   |
| >TP53-L265R NLLGRNSFEV  | 89    | >TP53-L265R NLRGRNSFEV  | 403   | 314   |
| >TP53-L265R NLLGRNSFEV  | 94    | >TP53-L265R NLRGRNSFEV  | 282   | 188   |
| >TP53-L265R NLLGRNSFEV  | 137   | >TP53-L265R NLRGRNSFEV  | 3367  | 3230  |
| >TP53-L265R NLLGRNSFEV  | 3     | >TP53-L265R NLRGRNSFEV  | 33    | 30    |
| >TP53-L265R NLLGRNSFEV  | 5     | >TP53-L265R NLRGRNSFEV  | 78    | 73    |
| >TP53-L265R NLLGRNSFEV  | 7     | >TP53-L265R NLRGRNSFEV  | 105   | 98    |

|                        |       |                        |       |       |
|------------------------|-------|------------------------|-------|-------|
| >TP53-L265R NLLGRNSFEV | 3     | >TP53-L265R NLRGRNSFEV | 109   | 106   |
| >TP53-L265R NLLGRNSFEV | 3     | >TP53-L265R NLRGRNSFEV | 3     | 0     |
| >TP53-L265R NLLGRNSFEV | 502   | >TP53-L265R NLRGRNSFEV | 297   | 205   |
| >TP53-L265R NLLGRNSFEV | 109   | >TP53-L265R NLRGRNSFEV | 62    | 47    |
| >TP53-L265R NLLGRNSFEV | 309   | >TP53-L265R NLRGRNSFEV | 595   | 286   |
| >TP53-L265R NLLGRNSFEV | 52    | >TP53-L265R NLRGRNSFEV | 1356  | 1304  |
| >TP53-L265R NLLGRNSF   | 501   | >TP53-L265R NLRGRNSF   | 119   | 382   |
| >TP53-L265R NLLGRNSF   | 968   | >TP53-L265R NLRGRNSF   | 151   | 817   |
| >TP53-L265R NLLGRNSF   | 65    | >TP53-L265R NLRGRNSF   | 48    | 17    |
| >TP53-L265R NLLGRNSF   | 418   | >TP53-L265R NLRGRNSF   | 278   | 140   |
| >TP53-L265R NLLGRNSFEV | 195   | >TP53-L265R NLRGRNSFEV | 1108  | 913   |
| >TP53-L265R GNLLGRNSF  | 1249  | >TP53-L265R GNLRGRNSF  | 266   | 983   |
| >TP53-L265R GNLLGRNSF  | 525   | >TP53-L265R GNLRGRNSF  | 314   | 211   |
| >TP53-L265R SGNLLGRNSF | 311   | >TP53-L265R SGNLRGRNSF | 248   | 63    |
| >TP53-L265R SSGNLLGR   | 554   | >TP53-L265R SSGNLRGR   | 396   | 158   |
| >TP53-L265R SSGNLLGRNS | 245   | >TP53-L265R SSGNLRGRNS | 263   | 18    |
| >TP53-L265R SSGNLLGRNS | 701   | >TP53-L265R SSGNLRGRNS | 469   | 232   |
| >TP53-L265R SSGNLLGRNS | 390   | >TP53-L265R SSGNLRGRNS | 838   | 448   |
| >TP53-L265R SSGNLLGRNS | 32    | >TP53-L265R SSGNLRGRNS | 37    | 5     |
| >TP53-L265R SSGNLLGR   | 357   | >TP53-L265R SSGNLRGR   | 1115  | 758   |
| >TP53-L265R DSSGNLLGR  | 68    | >TP53-L265R DSSGNLRGR  | 124   | 56    |
| >TP53-L265R EDSSGNLL   | 273   | >TP53-L265R EDSSGNLR   | 10180 | 9907  |
| >TP53-L265R EDSSGNLL   | 28579 | >TP53-L265R EDSSGNLR   | 158   | 28421 |
| >TP53-L265R LEDSSGNLL  | 20    | >TP53-L265R LEDSSGNLR  | 14694 | 14674 |
| >TP53-L265R TLEDSSGNLL | 133   | >TP53-L265R TLEDSSGNLR | 15450 | 15317 |
| >TP53-L265R TLEDSSGNLL | 23    | >TP53-L265R TLEDSSGNLR | 14173 | 14150 |
| >TP53-L265R TLEDSSGNLL | 32138 | >TP53-L265R TLEDSSGNLR | 319   | 31819 |
| >TP53-L289F LRKKGEPHHE | 405   | >TP53-L289F FRKKGEPHHE | 219   | 186   |
| >TP53-L289F LRKKGEPHHE | 824   | >TP53-L289F FRKKGEPHHE | 277   | 547   |
| >TP53-L289F LRKKGEPHHE | 321   | >TP53-L289F FRKKGEPHHE | 481   | 160   |
| >TP53-L289F GRDRRTEEN  | 446   | >TP53-L289F GRDRRTEEN  | 1352  | 906   |
| >TP53-L289F RTEEENLRK  | 88    | >TP53-L289F RTEEENFRK  | 42    | 46    |
| >TP53-L289F RTEEENLRK  | 126   | >TP53-L289F RTEEENFRK  | 231   | 105   |
| >TP53-L289F RTEEENLRKK | 174   | >TP53-L289F RTEEENFRKK | 181   | 7     |
| >TP53-L289F RTEEENLR   | 242   | >TP53-L289F RTEEENFR   | 49    | 193   |
| >TP53-L289F RTEEENLR   | 188   | >TP53-L289F RTEEENFR   | 57    | 131   |
| >TP53-L289F RTEEENLR   | 456   | >TP53-L289F RTEEENFR   | 221   | 235   |
| >TP53-L289F RRTEEENL   | 791   | >TP53-L289F RRTEEENF   | 58    | 733   |
| >TP53-L289F RRTEEENL   | 171   | >TP53-L289F RRTEEENF   | 219   | 48    |
| >TP53-L289F RRTEEENLR  | 424   | >TP53-L289F RRTEEENFR  | 610   | 186   |
| >TP53-L289F RRTEEENLRK | 34    | >TP53-L289F RRTEEENFRK | 66    | 32    |
| >TP53-L289F RRTEEENLRK | 71    | >TP53-L289F RRTEEENFRK | 69    | 2     |
| >TP53-L289F RRTEEENL   | 66    | >TP53-L289F RRTEEENF   | 394   | 328   |

|                        |       |                        |       |       |
|------------------------|-------|------------------------|-------|-------|
| >TP53-L289F RRTEENLRK  | 383   | >TP53-L289F RRTEENFRK  | 1975  | 1592  |
| >TP53-L289F RRTEENL    | 94    | >TP53-L289F RRTEENF    | 232   | 138   |
| >TP53-L289F RRTEENLRK  | 163   | >TP53-L289F RRTEENFRK  | 549   | 386   |
| >TP53-L289F RRTEENLRK  | 634   | >TP53-L289F RRTEENFRK  | 374   | 260   |
| >TP53-L289F RRTEENL    | 4146  | >TP53-L289F RRTEENF    | 353   | 3793  |
| >TP53-L289F RRTEENLR   | 993   | >TP53-L289F RRTEENFR   | 317   | 676   |
| >TP53-L289F RDRRTEENL  | 3530  | >TP53-L289F RDRRTEENF  | 225   | 3305  |
| >TP53-L289P LRKKGEPHHE | 405   | >TP53-L289P PRKKGEPHHE | 3680  | 3275  |
| >TP53-L289P LRKKGEPHHE | 321   | >TP53-L289P PRKKGEPHHE | 1462  | 1141  |
| >TP53-L289P NLRKKGEPH  | 18361 | >TP53-L289P NPRKKGEPH  | 51    | 18310 |
| >TP53-L289P GRDRRTEEN  | 446   | >TP53-L289P GRDRRTEEN  | 14713 | 14267 |
| >TP53-L289P RTEENLRK   | 88    | >TP53-L289P RTEENPRK   | 264   | 176   |
| >TP53-L289P RTEENLRK   | 126   | >TP53-L289P RTEENPRK   | 70    | 56    |
| >TP53-L289P RTEENLRKK  | 174   | >TP53-L289P RTEENPRKK  | 133   | 41    |
| >TP53-L289P RTEENLR    | 242   | >TP53-L289P RTEENPR    | 133   | 109   |
| >TP53-L289P RTEENLR    | 188   | >TP53-L289P RTEENPR    | 396   | 208   |
| >TP53-L289P RTEENLR    | 456   | >TP53-L289P RTEENPR    | 209   | 247   |
| >TP53-L289P RRTEENL    | 171   | >TP53-L289P RRTEENP    | 3558  | 3387  |
| >TP53-L289P RRTEENLR   | 424   | >TP53-L289P RRTEENPR   | 424   | 0     |
| >TP53-L289P RRTEENLRK  | 34    | >TP53-L289P RRTEENPRK  | 44    | 10    |
| >TP53-L289P RRTEENLRK  | 71    | >TP53-L289P RRTEENPRK  | 82    | 11    |
| >TP53-L289P RRTEENL    | 66    | >TP53-L289P RRTEENP    | 1590  | 1524  |
| >TP53-L289P RRTEENLRK  | 383   | >TP53-L289P RRTEENPRK  | 1675  | 1292  |
| >TP53-L289P RRTEENL    | 94    | >TP53-L289P RRTEENP    | 3487  | 3393  |
| >TP53-L289P RRTEENLRK  | 163   | >TP53-L289P RRTEENPRK  | 575   | 412   |
| >TP53-L289P RRTEENLR   | 993   | >TP53-L289P RRTEENPR   | 247   | 746   |
| >TP53-L289P LRKKGEPHHE | 405   | >TP53-L289P RRKKGEPHHE | 138   | 267   |
| >TP53-L289P LRKKGEPH   | 2726  | >TP53-L289P RRKKGEPH   | 338   | 2388  |
| >TP53-L289P LRKKGEPHHE | 8723  | >TP53-L289P RRKKGEPHHE | 321   | 8402  |
| >TP53-L289P LRKKGEPHHE | 1692  | >TP53-L289P RRKKGEPHHE | 176   | 1516  |
| >TP53-L289P LRKKGEPHH  | 12047 | >TP53-L289P RRKKGEPHH  | 283   | 11764 |
| >TP53-L289P LRKKGEPHHE | 10360 | >TP53-L289P RRKKGEPHHE | 209   | 10151 |
| >TP53-L289P LRKKGEPHHE | 824   | >TP53-L289P RRKKGEPHHE | 25    | 799   |
| >TP53-L289P LRKKGEPHHE | 321   | >TP53-L289P RRKKGEPHHE | 34    | 287   |
| >TP53-L289P GRDRRTEEN  | 446   | >TP53-L289P GRDRRTEEN  | 6860  | 6414  |
| >TP53-L289P RTEENLRK   | 88    | >TP53-L289P RTEENRRK   | 1368  | 1280  |
| >TP53-L289P RTEENLRK   | 126   | >TP53-L289P RTEENRRK   | 358   | 232   |
| >TP53-L289P RTEENLRKK  | 174   | >TP53-L289P RTEENRRKK  | 139   | 35    |
| >TP53-L289P RTEENLR    | 242   | >TP53-L289P RTEENRR    | 405   | 163   |
| >TP53-L289P RTEENLR    | 188   | >TP53-L289P RTEENRR    | 477   | 289   |
| >TP53-L289P RTEENLR    | 456   | >TP53-L289P RTEENRR    | 949   | 493   |
| >TP53-L289P RRTEENL    | 171   | >TP53-L289P RRTEENR    | 281   | 110   |
| >TP53-L289P RRTEENLR   | 424   | >TP53-L289P RRTEENRR   | 635   | 211   |

|                        |       |                        |       |       |
|------------------------|-------|------------------------|-------|-------|
| >TP53-L289R RRTEEENLRK | 34    | >TP53-L289R RRTEEENRRK | 68    | 34    |
| >TP53-L289R RRTEEENLRK | 71    | >TP53-L289R RRTEEENRRK | 82    | 11    |
| >TP53-L289R RRTEEENL   | 66    | >TP53-L289R RRTEEENR   | 694   | 628   |
| >TP53-L289R RRTEEENLRK | 383   | >TP53-L289R RRTEEENRRK | 1170  | 787   |
| >TP53-L289R RRTEEENL   | 94    | >TP53-L289R RRTEEENR   | 2387  | 2293  |
| >TP53-L289R RRTEEENLRK | 163   | >TP53-L289R RRTEEENRRK | 567   | 404   |
| >TP53-L299P LPPGSTKRAL | 619   | >TP53-L299P PPPGSTKRAL | 406   | 213   |
| >TP53-L299P LPPGSTKRAL | 296   | >TP53-L299P PPPGSTKRAL | 1090  | 794   |
| >TP53-L299P LPPGSTKRAL | 75    | >TP53-L299P PPPGSTKRAL | 388   | 313   |
| >TP53-L299P LPPGSTKRA  | 99    | >TP53-L299P PPPGSTKRA  | 4189  | 4090  |
| >TP53-L299P ELPPGSTKRA | 98    | >TP53-L299P EPPPGSTKRA | 34986 | 34888 |
| >TP53-L299P ELPPGSTKRA | 151   | >TP53-L299P EPPPGSTKRA | 33023 | 32872 |
| >TP53-L299P ELPPGSTKR  | 321   | >TP53-L299P EPPPGSTKR  | 1447  | 1126  |
| >TP53-L299P ELPPGSTKRA | 13946 | >TP53-L299P EPPPGSTKRA | 174   | 13772 |
| >TP53-L299P LRKKGEPHHE | 405   | >TP53-L299P LRKKGEPHHE | 6642  | 6237  |
| >TP53-L299P LRKKGEPHHE | 321   | >TP53-L299P LRKKGEPHHE | 21964 | 21643 |
| >TP53-L299P HELPPGSTKR | 250   | >TP53-L299P HEPPPGSTKR | 7950  | 7700  |
| >TP53-L299P HELPPGSTKR | 437   | >TP53-L299P HEPPPGSTKR | 1327  | 890   |
| >TP53-L299P KKGEPHHEL  | 167   | >TP53-L299P KKGEPHHEP  | 3835  | 3668  |
| >TP53-L299P RKKGEPHHEL | 62    | >TP53-L299P RKKGEPHHEF | 2366  | 2304  |
| >TP53-L299V LPPGSTKRAL | 619   | >TP53-L299V VPPGSTKRAL | 274   | 345   |
| >TP53-L299V LPPGSTKRAL | 296   | >TP53-L299V VPPGSTKRAL | 267   | 29    |
| >TP53-L299V LPPGSTKRAL | 75    | >TP53-L299V VPPGSTKRAL | 58    | 17    |
| >TP53-L299V LPPGSTKRA  | 99    | >TP53-L299V VPPGSTKRA  | 1613  | 1514  |
| >TP53-L299V ELPPGSTKRA | 98    | >TP53-L299V EVPPGSTKRA | 11305 | 11207 |
| >TP53-L299V ELPPGSTKRA | 151   | >TP53-L299V EVPPGSTKRA | 7548  | 7397  |
| >TP53-L299V ELPPGSTK   | 689   | >TP53-L299V EVPPGSTK   | 78    | 611   |
| >TP53-L299V ELPPGSTKR  | 321   | >TP53-L299V EVPPGSTKR  | 50    | 271   |
| >TP53-L299V ELPPGSTKRA | 2067  | >TP53-L299V EVPPGSTKRA | 154   | 1913  |
| >TP53-L299V LRKKGEPHHE | 405   | >TP53-L299V LRKKGEPHHE | 776   | 371   |
| >TP53-L299V LRKKGEPHHE | 321   | >TP53-L299V LRKKGEPHHE | 3971  | 3650  |
| >TP53-L299V HELPPGSTKR | 250   | >TP53-L299V HEVPPGSTKR | 278   | 28    |
| >TP53-L299V HELPPGSTKR | 437   | >TP53-L299V HEVPPGSTKR | 943   | 506   |
| >TP53-L299V KKGEPHHEL  | 2128  | >TP53-L299V KKGEPHHEV  | 113   | 2015  |
| >TP53-L299V KKGEPHHEL  | 167   | >TP53-L299V KKGEPHHEV  | 369   | 202   |
| >TP53-L299V RKKGEPHHEL | 62    | >TP53-L299V RKKGEPHHEV | 135   | 73    |
| >TP53-L308N LPNNTSSS   | 383   | >TP53-L308N MPNNTSSS   | 66    | 317   |
| >TP53-L308N LPNNTSSSP  | 2942  | >TP53-L308N MPNNTSSSP  | 428   | 2514  |
| >TP53-L308N LPNNTSSS   | 301   | >TP53-L308N MPNNTSSS   | 75    | 226   |
| >TP53-L308N LPNNTSSSP  | 568   | >TP53-L308N MPNNTSSSP  | 129   | 439   |
| >TP53-L308N LPNNTSSSPQ | 260   | >TP53-L308N MPNNTSSSPQ | 76    | 184   |
| >TP53-L308N ALPNNTSSS  | 534   | >TP53-L308N AMPNNTSSS  | 427   | 107   |
| >TP53-L308N ALPNNTSSS  | 301   | >TP53-L308N AMPNNTSSS  | 665   | 364   |

|                        |      |                         |       |       |
|------------------------|------|-------------------------|-------|-------|
| >TP53-L308N ALPNNTSSSP | 111  | >TP53-L308N AMPNNTSSSI  | 241   | 130   |
| >TP53-L308N ELPPGSTKRA | 151  | >TP53-L308N ELPPGSTKRA  | 2552  | 2401  |
| >TP53-L308N STKRALPN   | 100  | >TP53-L308N STKRAMPN    | 67    | 33    |
| >TP53-L308N STKRALPNN  | 60   | >TP53-L308N STKRAMPNN   | 59    | 1     |
| >TP53-L308N STKRALPNNT | 89   | >TP53-L308N STKRAMPNN   | 77    | 12    |
| >TP53-L308N STKRALPNNT | 46   | >TP53-L308N STKRAMPNN   | 41    | 5     |
| >TP53-L308N PPGSTKRAL  | 44   | >TP53-L308N PPGSTKRAM   | 46    | 2     |
| >TP53-L308N LPPGSTKRAL | 296  | >TP53-L308N LPPGSTKRAM  | 163   | 133   |
| >TP53-L308N LPPGSTKRAL | 75   | >TP53-L308N LPPGSTKRAM  | 75    | 0     |
| >TP53-L308V LPNNTSSS   | 383  | >TP53-L308V VPNNTSSS    | 1444  | 1061  |
| >TP53-L308V LPNNTSSS   | 301  | >TP53-L308V VPNNTSSS    | 3180  | 2879  |
| >TP53-L308V LPNNTSSSPQ | 260  | >TP53-L308V VPNNTSSSPC  | 2560  | 2300  |
| >TP53-L308V ALPNNTSSS  | 301  | >TP53-L308V AVPNNTSSS   | 16643 | 16342 |
| >TP53-L308V ALPNNTSSSP | 111  | >TP53-L308V AVPNNTSSSP  | 10951 | 10840 |
| >TP53-L308V ELPPGSTKRA | 893  | >TP53-L308V ELPPGSTKRA' | 53    | 840   |
| >TP53-L308V ELPPGSTKRA | 2349 | >TP53-L308V ELPPGSTKRA' | 218   | 2131  |
| >TP53-L308V ELPPGSTKRA | 3412 | >TP53-L308V ELPPGSTKRA' | 381   | 3031  |
| >TP53-L308V ELPPGSTKRA | 151  | >TP53-L308V ELPPGSTKRA' | 12    | 139   |
| >TP53-L308V ELPPGSTKRA | 2067 | >TP53-L308V ELPPGSTKRA' | 281   | 1786  |
| >TP53-L308V KRALPNNT   | 597  | >TP53-L308V KRAVPNNT    | 418   | 179   |
| >TP53-L308V STKRALPN   | 100  | >TP53-L308V STKRAVPN    | 151   | 51    |
| >TP53-L308V STKRALPNN  | 60   | >TP53-L308V STKRAVPNN   | 63    | 3     |
| >TP53-L308V STKRALPNNT | 89   | >TP53-L308V STKRAVPNN1  | 91    | 2     |
| >TP53-L308V STKRALPNNT | 46   | >TP53-L308V STKRAVPNN1  | 43    | 3     |
| >TP53-L308V PPGSTKRAL  | 44   | >TP53-L308V PPGSTKRAV   | 268   | 224   |
| >TP53-L308V LPPGSTKRAL | 296  | >TP53-L308V LPPGSTKRAV  | 1420  | 1124  |
| >TP53-L308V LPPGSTKRAL | 75   | >TP53-L308V LPPGSTKRAV  | 105   | 30    |
| >TP53-L323G LDGEYFTLQI | 87   | >TP53-L323G GDGEYFTLQI  | 331   | 244   |
| >TP53-L323G LDGEYFTL   | 1176 | >TP53-L323G GDGEYFTL    | 498   | 678   |
| >TP53-L323G LDGEYFTL   | 344  | >TP53-L323G GDGEYFTL    | 402   | 58    |
| >TP53-L323G LDGEYFTLQI | 94   | >TP53-L323G GDGEYFTLQI  | 107   | 13    |
| >TP53-L323G PLDGEYFTL  | 249  | >TP53-L323G PGDGEYFTL   | 17300 | 17051 |
| >TP53-L323G PLDGEYFTL  | 22   | >TP53-L323G PGDGEYFTL   | 15025 | 15003 |
| >TP53-L323G PLDGEYFTLQ | 68   | >TP53-L323G PGDGEYFTLC  | 18580 | 18512 |
| >TP53-L323G PLDGEYFTL  | 224  | >TP53-L323G PGDGEYFTL   | 22727 | 22503 |
| >TP53-L323G PLDGEYFTL  | 22   | >TP53-L323G PGDGEYFTL   | 14503 | 14481 |
| >TP53-L323G PLDGEYFTLQ | 140  | >TP53-L323G PGDGEYFTLC  | 19186 | 19046 |
| >TP53-L323G PLDGEYFTL  | 23   | >TP53-L323G PGDGEYFTL   | 20841 | 20818 |
| >TP53-L323G PLDGEYFTLQ | 158  | >TP53-L323G PGDGEYFTLC  | 22088 | 21930 |
| >TP53-L323G PLDGEYFTL  | 11   | >TP53-L323G PGDGEYFTL   | 22312 | 22301 |
| >TP53-L323G PLDGEYFTLQ | 111  | >TP53-L323G PGDGEYFTLC  | 30980 | 30869 |
| >TP53-L323G SSSPQPKKKP | 16   | >TP53-L323G SSSPQPKKKP  | 10025 | 10009 |
| >TP53-L323G KPLDGEYF   | 296  | >TP53-L323G KPGDGEYF    | 1461  | 1165  |

|                        |      |                        |       |       |
|------------------------|------|------------------------|-------|-------|
| >TP53-L323G KPLDGEYFTL | 212  | >TP53-L323G KPGDGEYFTL | 1004  | 792   |
| >TP53-L323G KPLDGEYFTL | 321  | >TP53-L323G KPGDGEYFTL | 4187  | 3866  |
| >TP53-L323G KPLDGEYF   | 287  | >TP53-L323G KPGDGEYF   | 1051  | 764   |
| >TP53-L323G KPLDGEYF   | 195  | >TP53-L323G KPGDGEYF   | 3157  | 2962  |
| >TP53-L323G KPLDGEYFTL | 306  | >TP53-L323G KPGDGEYFTL | 3589  | 3283  |
| >TP53-L323G KKPLDGEYF  | 31   | >TP53-L323G KKPGDGEYF  | 42    | 11    |
| >TP53-L323G KKKPLDGEY  | 83   | >TP53-L323G KKKPGDGEY  | 46    | 37    |
| >TP53-L323G KKKPLDGEY  | 138  | >TP53-L323G KKKPGDGEY  | 101   | 37    |
| >TP53-L323G KKKPLDGEYF | 14   | >TP53-L323G KKKPGDGEYF | 11    | 3     |
| >TP53-L323G PKKKPLDGEY | 315  | >TP53-L323G PKKKPGDGEY | 250   | 65    |
| >TP53-L323G PKKKPLDGEY | 78   | >TP53-L323G PKKKPGDGEY | 52    | 26    |
| >TP53-L323G QPKKKPLDGE | 303  | >TP53-L323G QPKKKPGDGE | 430   | 127   |
| >TP53-L323G SPQPKKKPL  | 13   | >TP53-L323G SPQPKKKPG  | 12921 | 12908 |
| >TP53-L323G SPQPKKKPL  | 67   | >TP53-L323G SPQPKKKPG  | 2469  | 2402  |
| >TP53-L323G SSPQPKKKPL | 40   | >TP53-L323G SSPQPKKKPG | 8265  | 8225  |
| >TP53-L323M LDGEYFTLQI | 87   | >TP53-L323M MDGEYFTLQI | 81    | 6     |
| >TP53-L323M LDGEYFTL   | 344  | >TP53-L323M MDGEYFTL   | 321   | 23    |
| >TP53-L323M LDGEYFTLQI | 94   | >TP53-L323M MDGEYFTLQI | 91    | 3     |
| >TP53-L323M PLDGEYFTL  | 249  | >TP53-L323M PMDGEYFTL  | 252   | 3     |
| >TP53-L323M PLDGEYFTL  | 22   | >TP53-L323M PMDGEYFTL  | 15    | 7     |
| >TP53-L323M PLDGEYFTLQ | 68   | >TP53-L323M PMDGEYFTLQ | 40    | 28    |
| >TP53-L323M PLDGEYFTL  | 224  | >TP53-L323M PMDGEYFTL  | 137   | 87    |
| >TP53-L323M PLDGEYFTL  | 22   | >TP53-L323M PMDGEYFTL  | 21    | 1     |
| >TP53-L323M PLDGEYFTLQ | 140  | >TP53-L323M PMDGEYFTLQ | 116   | 24    |
| >TP53-L323M PLDGEYFTL  | 23   | >TP53-L323M PMDGEYFTL  | 18    | 5     |
| >TP53-L323M PLDGEYFTLQ | 158  | >TP53-L323M PMDGEYFTLQ | 117   | 41    |
| >TP53-L323M PLDGEYFTL  | 11   | >TP53-L323M PMDGEYFTL  | 18    | 7     |
| >TP53-L323M PLDGEYFTLQ | 111  | >TP53-L323M PMDGEYFTLQ | 211   | 100   |
| >TP53-L323M SSSPQPKKKP | 16   | >TP53-L323M SSSPQPKKKP | 12    | 4     |
| >TP53-L323M KPLDGEYF   | 296  | >TP53-L323M KPMDGEYF   | 465   | 169   |
| >TP53-L323M KPLDGEYFTL | 212  | >TP53-L323M KPMDGEYFTI | 344   | 132   |
| >TP53-L323M KPLDGEYF   | 1487 | >TP53-L323M KPMDGEYF   | 143   | 1344  |
| >TP53-L323M KPLDGEYFTL | 526  | >TP53-L323M KPMDGEYFTI | 71    | 455   |
| >TP53-L323M KPLDGEYF   | 516  | >TP53-L323M KPMDGEYF   | 296   | 220   |
| >TP53-L323M KPLDGEYF   | 541  | >TP53-L323M KPMDGEYF   | 343   | 198   |
| >TP53-L323M KPLDGEYFTL | 321  | >TP53-L323M KPMDGEYFTI | 71    | 250   |
| >TP53-L323M KPLDGEYF   | 287  | >TP53-L323M KPMDGEYF   | 141   | 146   |
| >TP53-L323M KPLDGEYF   | 195  | >TP53-L323M KPMDGEYF   | 355   | 160   |
| >TP53-L323M KPLDGEYFTL | 306  | >TP53-L323M KPMDGEYFTI | 503   | 197   |
| >TP53-L323M KKPLDGEY   | 504  | >TP53-L323M KKPM DGEY  | 183   | 321   |
| >TP53-L323M KKPLDGEYF  | 31   | >TP53-L323M KKPM DGEYF | 10    | 21    |
| >TP53-L323M KKPLDGEYFT | 611  | >TP53-L323M KKPM DGEYF | 153   | 458   |
| >TP53-L323M KKKPLDGEY  | 83   | >TP53-L323M KKKPM DGEY | 77    | 6     |



|                         |       |                          |       |       |
|-------------------------|-------|--------------------------|-------|-------|
| >TP53-L323N KKKPLDGEY   | 138   | >TP53-L323N KKKPMDGEY    | 156   | 18    |
| >TP53-L323N KKKPLDGEYF  | 14    | >TP53-L323N KKKPMDGEYF   | 13    | 1     |
| >TP53-L323N PKKKPLDGEY  | 315   | >TP53-L323N PKKKPMMDGEY  | 245   | 70    |
| >TP53-L323N PKKKPLDGEYF | 78    | >TP53-L323N PKKKPMMDGEYF | 61    | 17    |
| >TP53-L323N QPKKKPLDGEY | 303   | >TP53-L323N QPKKKPMMDGEY | 328   | 25    |
| >TP53-L323N SPQPKKKPL   | 13    | >TP53-L323N SPQPKKKPM    | 12    | 1     |
| >TP53-L323N SPQPKKKPLF  | 67    | >TP53-L323N SPQPKKKPMF   | 137   | 70    |
| >TP53-L323N SSPQPKKKPL  | 40    | >TP53-L323N SSPQPKKKPM   | 68    | 28    |
| >TP53-L323P LDGEYFTLQI  | 87    | >TP53-L323P PDGEYFTLQI   | 1162  | 1075  |
| >TP53-L323P LDGEYFTL    | 344   | >TP53-L323P PDGEYFTL     | 238   | 106   |
| >TP53-L323P LDGEYFTLQI  | 94    | >TP53-L323P PDGEYFTLQI   | 74    | 20    |
| >TP53-L323P PLDGEYFTL   | 35399 | >TP53-L323P PPDGEYFTL    | 418   | 34981 |
| >TP53-L323P PLDGEYFTL   | 249   | >TP53-L323P PPDGEYFTL    | 31607 | 31358 |
| >TP53-L323P PLDGEYFTL   | 22    | >TP53-L323P PPDGEYFTL    | 21249 | 21227 |
| >TP53-L323P PLDGEYFTLQ  | 68    | >TP53-L323P PPDGEYFTLQ   | 23990 | 23922 |
| >TP53-L323P PLDGEYFTL   | 224   | >TP53-L323P PPDGEYFTL    | 24052 | 23828 |
| >TP53-L323P PLDGEYFTL   | 22    | >TP53-L323P PPDGEYFTL    | 21267 | 21245 |
| >TP53-L323P PLDGEYFTLQ  | 140   | >TP53-L323P PPDGEYFTLQ   | 23793 | 23653 |
| >TP53-L323P PLDGEYFTL   | 23    | >TP53-L323P PPDGEYFTL    | 22698 | 22675 |
| >TP53-L323P PLDGEYFTLQ  | 158   | >TP53-L323P PPDGEYFTLQ   | 23272 | 23114 |
| >TP53-L323P PLDGEYFTL   | 11    | >TP53-L323P PPDGEYFTL    | 29171 | 29160 |
| >TP53-L323P PLDGEYFTLQ  | 111   | >TP53-L323P PPDGEYFTLQ   | 34610 | 34499 |
| >TP53-L323P PLDGEYFTL   | 22220 | >TP53-L323P PPDGEYFTL    | 102   | 22118 |
| >TP53-L323P PLDGEYFTLQ  | 21383 | >TP53-L323P PPDGEYFTLQ   | 165   | 21218 |
| >TP53-L323P SSSPQPKKKP  | 16    | >TP53-L323P SSSPQPKKKP   | 15720 | 15704 |
| >TP53-L323P KPLDGEYF    | 296   | >TP53-L323P KPPDGEYF     | 332   | 36    |
| >TP53-L323P KPLDGEYFTL  | 212   | >TP53-L323P KPPDGEYFTL   | 275   | 63    |
| >TP53-L323P KPLDGEYFTL  | 526   | >TP53-L323P KPPDGEYFTL   | 339   | 187   |
| >TP53-L323P KPLDGEYFTL  | 321   | >TP53-L323P KPPDGEYFTL   | 4540  | 4219  |
| >TP53-L323P KPLDGEYF    | 287   | >TP53-L323P KPPDGEYF     | 2520  | 2233  |
| >TP53-L323P KPLDGEYFTL  | 20194 | >TP53-L323P KPPDGEYFTL   | 328   | 19866 |
| >TP53-L323P KPLDGEYF    | 195   | >TP53-L323P KPPDGEYF     | 3516  | 3321  |
| >TP53-L323P KPLDGEYFTL  | 306   | >TP53-L323P KPPDGEYFTL   | 3853  | 3547  |
| >TP53-L323P KKPLDGEY    | 504   | >TP53-L323P KKPPDGEY     | 140   | 364   |
| >TP53-L323P KKPLDGEYF   | 31    | >TP53-L323P KKPPDGEYF    | 12    | 19    |
| >TP53-L323P KKPLDGEYFT  | 611   | >TP53-L323P KKPPDGEYFT   | 203   | 408   |
| >TP53-L323P KKKPLDGEY   | 83    | >TP53-L323P KKKPPDGEY    | 151   | 68    |
| >TP53-L323P KKKPLDGEY   | 138   | >TP53-L323P KKKPPDGEY    | 52    | 86    |
| >TP53-L323P KKKPLDGEYF  | 14    | >TP53-L323P KKKPPDGEYF   | 7     | 7     |
| >TP53-L323P PKKKPLDGEY  | 315   | >TP53-L323P PKKKPPDGEY   | 363   | 48    |
| >TP53-L323P PKKKPLDGEY  | 78    | >TP53-L323P PKKKPPDGEY   | 46    | 32    |
| >TP53-L323P QPKKKPLDGEY | 303   | >TP53-L323P QPKKKPPDGEY  | 408   | 105   |
| >TP53-L323P SPQPKKKPL   | 13    | >TP53-L323P SPQPKKKPP    | 11986 | 11973 |

|                        |       |                        |       |       |
|------------------------|-------|------------------------|-------|-------|
| >TP53-L323P SPQPKKKPL  | 67    | >TP53-L323P SPQPKKKPP  | 7009  | 6942  |
| >TP53-L323P SSPQPKKKPL | 40    | >TP53-L323P SSPQPKKKPP | 10696 | 10656 |
| >TP53-L323R LDGEYFTLQI | 87    | >TP53-L323R RDGEYFTLQI | 363   | 276   |
| >TP53-L323R LDGEYFTL   | 1176  | >TP53-L323R RDGEYFTL   | 291   | 885   |
| >TP53-L323R LDGEYFTLQI | 3164  | >TP53-L323R RDGEYFTLQI | 382   | 2782  |
| >TP53-L323R LDGEYFTL   | 344   | >TP53-L323R RDGEYFTL   | 285   | 59    |
| >TP53-L323R LDGEYFTLQI | 94    | >TP53-L323R RDGEYFTLQI | 80    | 14    |
| >TP53-L323R PLDGEYFTL  | 249   | >TP53-L323R PRDGEYFTL  | 26746 | 26497 |
| >TP53-L323R PLDGEYFTL  | 22    | >TP53-L323R PRDGEYFTL  | 20071 | 20049 |
| >TP53-L323R PLDGEYFTLQ | 68    | >TP53-L323R PRDGEYFTLQ | 22951 | 22883 |
| >TP53-L323R PLDGEYFTL  | 224   | >TP53-L323R PRDGEYFTL  | 23613 | 23389 |
| >TP53-L323R PLDGEYFTL  | 22    | >TP53-L323R PRDGEYFTL  | 20041 | 20019 |
| >TP53-L323R PLDGEYFTLQ | 140   | >TP53-L323R PRDGEYFTLQ | 22803 | 22663 |
| >TP53-L323R PLDGEYFTL  | 23    | >TP53-L323R PRDGEYFTL  | 22197 | 22174 |
| >TP53-L323R PLDGEYFTLQ | 158   | >TP53-L323R PRDGEYFTLQ | 23013 | 22855 |
| >TP53-L323R PLDGEYFTL  | 11    | >TP53-L323R PRDGEYFTL  | 24642 | 24631 |
| >TP53-L323R PLDGEYFTLQ | 111   | >TP53-L323R PRDGEYFTLQ | 32097 | 31986 |
| >TP53-L323R SSSPQPKKKP | 16117 | >TP53-L323R SSSPQPKKKP | 113   | 16004 |
| >TP53-L323R SSSPQPKKKP | 16    | >TP53-L323R SSSPQPKKKP | 10021 | 10005 |
| >TP53-L323R SSSPQPKKKP | 5406  | >TP53-L323R SSSPQPKKKP | 226   | 5180  |
| >TP53-L323R KPLDGEYF   | 296   | >TP53-L323R KPRDGEYF   | 5620  | 5324  |
| >TP53-L323R KPLDGEYFTL | 212   | >TP53-L323R KPRDGEYFTL | 5193  | 4981  |
| >TP53-L323R KPLDGEYF   | 1487  | >TP53-L323R KPRDGEYF   | 36    | 1451  |
| >TP53-L323R KPLDGEYFTL | 526   | >TP53-L323R KPRDGEYFTL | 101   | 425   |
| >TP53-L323R KPLDGEYF   | 516   | >TP53-L323R KPRDGEYF   | 387   | 129   |
| >TP53-L323R KPLDGEYFTL | 321   | >TP53-L323R KPRDGEYFTL | 4510  | 4189  |
| >TP53-L323R KPLDGEYF   | 287   | >TP53-L323R KPRDGEYF   | 3457  | 3170  |
| >TP53-L323R KPLDGEYF   | 195   | >TP53-L323R KPRDGEYF   | 3393  | 3198  |
| >TP53-L323R KPLDGEYFTL | 306   | >TP53-L323R KPRDGEYFTL | 3667  | 3361  |
| >TP53-L323R KKPLDGEY   | 504   | >TP53-L323R KKPRDGEY   | 165   | 339   |
| >TP53-L323R KKPLDGEYF  | 31    | >TP53-L323R KKPRDGEYF  | 10    | 21    |
| >TP53-L323R KKPLDGEYFT | 611   | >TP53-L323R KKPRDGEYFT | 154   | 457   |
| >TP53-L323R KKKPLDGEY  | 83    | >TP53-L323R KKKPRDGEY  | 190   | 107   |
| >TP53-L323R KKKPLDGEY  | 138   | >TP53-L323R KKKPRDGEY  | 121   | 17    |
| >TP53-L323R KKKPLDGEYF | 14    | >TP53-L323R KKKPRDGEYF | 11    | 3     |
| >TP53-L323R PKKKPLDGEY | 315   | >TP53-L323R PKKKPRDGEY | 287   | 28    |
| >TP53-L323R PKKKPLDGEY | 78    | >TP53-L323R PKKKPRDGEY | 55    | 23    |
| >TP53-L323R QPKKKPLDGE | 303   | >TP53-L323R QPKKKPRDGI | 746   | 443   |
| >TP53-L323R SPQPKKKPL  | 13    | >TP53-L323R SPQPKKKPR  | 11971 | 11958 |
| >TP53-L323R SPQPKKKPL  | 67    | >TP53-L323R SPQPKKKPR  | 10111 | 10044 |
| >TP53-L323R SSPQPKKKPL | 21808 | >TP53-L323R SSPQPKKKPR | 222   | 21586 |
| >TP53-L323R SSPQPKKKPL | 40    | >TP53-L323R SSPQPKKKPR | 11662 | 11622 |
| >TP53-L323V LDGEYFTLQI | 87    | >TP53-L323V VDGEYFTLQI | 184   | 97    |

|                         |      |                         |      |      |
|-------------------------|------|-------------------------|------|------|
| >TP53-L323V LDGEYFTL    | 344  | >TP53-L323V VDGEYFTL    | 285  | 59   |
| >TP53-L323V LDGEYFTLQI  | 94   | >TP53-L323V VDGEYFTLQI  | 81   | 13   |
| >TP53-L323V PLDGEYFTL   | 249  | >TP53-L323V PVDGEYFTL   | 3899 | 3650 |
| >TP53-L323V PLDGEYFTL   | 22   | >TP53-L323V PVDGEYFTL   | 1771 | 1749 |
| >TP53-L323V PLDGEYFTLQ  | 68   | >TP53-L323V PVDGEYFTLQ  | 3721 | 3653 |
| >TP53-L323V PLDGEYFTL   | 224  | >TP53-L323V PVDGEYFTL   | 8510 | 8286 |
| >TP53-L323V PLDGEYFTL   | 22   | >TP53-L323V PVDGEYFTL   | 2693 | 2671 |
| >TP53-L323V PLDGEYFTLQ  | 140  | >TP53-L323V PVDGEYFTLQ  | 7259 | 7119 |
| >TP53-L323V PLDGEYFTL   | 23   | >TP53-L323V PVDGEYFTL   | 3512 | 3489 |
| >TP53-L323V PLDGEYFTLQ  | 158  | >TP53-L323V PVDGEYFTLQ  | 7035 | 6877 |
| >TP53-L323V PLDGEYFTL   | 11   | >TP53-L323V PVDGEYFTL   | 1436 | 1425 |
| >TP53-L323V PLDGEYFTLQ  | 111  | >TP53-L323V PVDGEYFTLQ  | 8550 | 8439 |
| >TP53-L323V SSSPQPKKKP  | 16   | >TP53-L323V SSSPQPKKKP' | 627  | 611  |
| >TP53-L323V KPLDGEYF    | 296  | >TP53-L323V KPVDGEYF    | 531  | 235  |
| >TP53-L323V KPLDGEYFTL  | 212  | >TP53-L323V KPVDGEYFTL  | 395  | 183  |
| >TP53-L323V KPLDGEYFTL  | 526  | >TP53-L323V KPVDGEYFTL  | 368  | 158  |
| >TP53-L323V KPLDGEYF    | 541  | >TP53-L323V KPVDGEYF    | 280  | 261  |
| >TP53-L323V KPLDGEYFTL  | 321  | >TP53-L323V KPVDGEYFTL  | 280  | 41   |
| >TP53-L323V KPLDGEYF    | 287  | >TP53-L323V KPVDGEYF    | 176  | 111  |
| >TP53-L323V KPLDGEYF    | 195  | >TP53-L323V KPVDGEYF    | 339  | 144  |
| >TP53-L323V KPLDGEYFTL  | 306  | >TP53-L323V KPVDGEYFTL  | 517  | 211  |
| >TP53-L323V KKPLDGEY    | 504  | >TP53-L323V KKPVDGEY    | 237  | 267  |
| >TP53-L323V KKPLDGEYF   | 31   | >TP53-L323V KKPVDGEYF   | 15   | 16   |
| >TP53-L323V KKPLDGEYFT  | 611  | >TP53-L323V KKPVDGEYFT  | 227  | 384  |
| >TP53-L323V KKKPLDGEY   | 83   | >TP53-L323V KKKPVDGEY   | 64   | 19   |
| >TP53-L323V KKKPLDGEY   | 138  | >TP53-L323V KKKPVDGEY   | 126  | 12   |
| >TP53-L323V KKKPLDGEYF  | 14   | >TP53-L323V KKKPVDGEYF  | 12   | 2    |
| >TP53-L323V PKKKPLDGEY  | 315  | >TP53-L323V PKKKPV      | 155  | 160  |
| >TP53-L323V PKKKPLDGEY  | 78   | >TP53-L323V PKKKPV      | 46   | 32   |
| >TP53-L323V QPKKKPLDGE  | 303  | >TP53-L323V QPKKKPVDGI  | 282  | 21   |
| >TP53-L323V SPQPKKKPL   | 13   | >TP53-L323V SPQPKKKPV   | 30   | 17   |
| >TP53-L323V SPQPKKKPL   | 67   | >TP53-L323V SPQPKKKPV   | 252  | 185  |
| >TP53-L323V SSPQPKKKPL  | 40   | >TP53-L323V SSPQPKKKPV  | 344  | 304  |
| >TP53-L330H LQIRGRERFEI | 192  | >TP53-L330H HQIRGRERFE  | 499  | 307  |
| >TP53-L330H LQIRGRER    | 138  | >TP53-L330H HQIRGRER    | 57   | 81   |
| >TP53-L330H LQIRGRERF   | 54   | >TP53-L330H HQIRGRERF   | 72   | 18   |
| >TP53-L330H LQIRGRERFEI | 105  | >TP53-L330H HQIRGRERFE  | 217  | 112  |
| >TP53-L330H LQIRGRER    | 495  | >TP53-L330H HQIRGRER    | 850  | 355  |
| >TP53-L330H LQIRGRERF   | 12   | >TP53-L330H HQIRGRERF   | 18   | 6    |
| >TP53-L330H LQIRGRERFEI | 34   | >TP53-L330H HQIRGRERFE  | 61   | 27   |
| >TP53-L330H LQIRGRERFEI | 3528 | >TP53-L330H HQIRGRERFE  | 206  | 3322 |
| >TP53-L330H TLQIRGRER   | 238  | >TP53-L330H THQIRGRER   | 7049 | 6811 |
| >TP53-L330H FTLQIRGRERI | 169  | >TP53-L330H FTHQIRGRER  | 522  | 353  |

|                        |      |                       |       |       |
|------------------------|------|-----------------------|-------|-------|
| >TP53-L330HFTLQIRGRERI | 289  | >TP53-L330HFTHQIRGRER | 280   | 9     |
| >TP53-L330HFTLQIRGRER  | 50   | >TP53-L330HFTHQIRGRER | 136   | 86    |
| >TP53-L330HFTLQIRGR    | 174  | >TP53-L330HFTHQIRGR   | 409   | 235   |
| >TP53-L330HFTLQIRGRER  | 431  | >TP53-L330HFTHQIRGRER | 652   | 221   |
| >TP53-L330HFTLQIRGR    | 25   | >TP53-L330HFTHQIRGR   | 14    | 11    |
| >TP53-L330HFTLQIRGRER  | 86   | >TP53-L330HFTHQIRGRER | 89    | 3     |
| >TP53-L330HFTLQIRGRERI | 8    | >TP53-L330HFTHQIRGRER | 12    | 4     |
| >TP53-L330HFTLQIRGRERI | 289  | >TP53-L330HFTHQIRGRER | 1595  | 1306  |
| >TP53-L330HFTLQIRGRERI | 8    | >TP53-L330HFTHQIRGRER | 17    | 9     |
| >TP53-L330HFTLQIRGR    | 422  | >TP53-L330HFTHQIRGR   | 642   | 220   |
| >TP53-L330HYFTLQIRGREF | 337  | >TP53-L330HYFTHQIRGRE | 291   | 46    |
| >TP53-L330HYFTLQIRGR   | 129  | >TP53-L330HYFTHQIRGR  | 181   | 52    |
| >TP53-L330HYFTLQIRGREF | 126  | >TP53-L330HYFTHQIRGRE | 169   | 43    |
| >TP53-L330HYFTLQIRGR   | 152  | >TP53-L330HYFTHQIRGR  | 181   | 29    |
| >TP53-L330HEYFTLQIR    | 335  | >TP53-L330HEYFTHQIR   | 200   | 135   |
| >TP53-L330HEYFTLQIRGR  | 546  | >TP53-L330HEYFTHQIRGR | 458   | 88    |
| >TP53-L330HEYFTLQIR    | 31   | >TP53-L330HEYFTHQIR   | 37    | 6     |
| >TP53-L330HEYFTLQIRGR  | 315  | >TP53-L330HEYFTHQIRGR | 999   | 684   |
| >TP53-L330HEYFTLQIR    | 26   | >TP53-L330HEYFTHQIR   | 20    | 6     |
| >TP53-L330HEYFTLQIR    | 19   | >TP53-L330HEYFTHQIR   | 17    | 2     |
| >TP53-L330HEYFTLQIRGR  | 20   | >TP53-L330HEYFTHQIRGR | 26    | 6     |
| >TP53-L330HGEYFTLQI    | 102  | >TP53-L330HGEYFTHQI   | 69    | 33    |
| >TP53-L330HGEYFTLQI    | 44   | >TP53-L330HGEYFTHQI   | 29    | 15    |
| >TP53-L330HGEYFTLQI    | 43   | >TP53-L330HGEYFTHQI   | 57    | 14    |
| >TP53-L330HGEYFTLQI    | 807  | >TP53-L330HGEYFTHQI   | 329   | 478   |
| >TP53-L330HGEYFTLQI    | 11   | >TP53-L330HGEYFTHQI   | 13    | 2     |
| >TP53-L330HGEYFTLQIR   | 190  | >TP53-L330HGEYFTHQIR  | 2328  | 2138  |
| >TP53-L330HLDGEYFTLQI  | 87   | >TP53-L330HLDGEYFTHQI | 99    | 12    |
| >TP53-L330HLDGEYFTL    | 344  | >TP53-L330HLDGEYFTH   | 17845 | 17501 |
| >TP53-L330HLDGEYFTLQI  | 94   | >TP53-L330HLDGEYFTHQI | 111   | 17    |
| >TP53-L330HPLDGEYFTL   | 249  | >TP53-L330HPLDGEYFTH  | 23928 | 23679 |
| >TP53-L330HPLDGEYFTLQ  | 1235 | >TP53-L330HPLDGEYFTHC | 470   | 765   |
| >TP53-L330HPLDGEYFTL   | 22   | >TP53-L330HPLDGEYFTH  | 15317 | 15295 |
| >TP53-L330HPLDGEYFTLQ  | 68   | >TP53-L330HPLDGEYFTHC | 30    | 38    |
| >TP53-L330HPLDGEYFTL   | 224  | >TP53-L330HPLDGEYFTH  | 23475 | 23251 |
| >TP53-L330HPLDGEYFTL   | 22   | >TP53-L330HPLDGEYFTH  | 17361 | 17339 |
| >TP53-L330HPLDGEYFTLQ  | 140  | >TP53-L330HPLDGEYFTHC | 72    | 68    |
| >TP53-L330HPLDGEYFTL   | 23   | >TP53-L330HPLDGEYFTH  | 23000 | 22977 |
| >TP53-L330HPLDGEYFTLQ  | 158  | >TP53-L330HPLDGEYFTHC | 31    | 127   |
| >TP53-L330HPLDGEYFTL   | 11   | >TP53-L330HPLDGEYFTH  | 14218 | 14207 |
| >TP53-L330HPLDGEYFTLQ  | 111  | >TP53-L330HPLDGEYFTHC | 31    | 80    |
| >TP53-L330HKPLDGEYFTL  | 212  | >TP53-L330HKPLDGEYFTH | 33562 | 33350 |
| >TP53-L330HKPLDGEYFTL  | 321  | >TP53-L330HKPLDGEYFTH | 17447 | 17126 |

|                         |       |                         |       |       |
|-------------------------|-------|-------------------------|-------|-------|
| >TP53-L330HKPLDGEYFTL   | 306   | >TP53-L330HKPLDGEYFTH   | 5146  | 4840  |
| >TP53-L330P LQIRGRERFEI | 192   | >TP53-L330P PQIRGRERFEI | 7822  | 7630  |
| >TP53-L330P LQIRGRER    | 138   | >TP53-L330P PQIRGRER    | 3387  | 3249  |
| >TP53-L330P LQIRGRERF   | 54    | >TP53-L330P PQIRGRERF   | 1164  | 1110  |
| >TP53-L330P LQIRGRERFEI | 105   | >TP53-L330P PQIRGRERFEI | 5342  | 5237  |
| >TP53-L330P LQIRGRER    | 495   | >TP53-L330P PQIRGRER    | 4948  | 4453  |
| >TP53-L330P LQIRGRERF   | 12    | >TP53-L330P PQIRGRERF   | 183   | 171   |
| >TP53-L330P LQIRGRERFEI | 34    | >TP53-L330P PQIRGRERFEI | 819   | 785   |
| >TP53-L330P TLQIRGRER   | 238   | >TP53-L330P TPQIRGRER   | 7839  | 7601  |
| >TP53-L330P TLQIRGRERF  | 31752 | >TP53-L330P TPQIRGRERF  | 414   | 31338 |
| >TP53-L330P FTLQIRGRERI | 169   | >TP53-L330P FTPQIRGRER  | 119   | 50    |
| >TP53-L330P FTLQIRGRERI | 289   | >TP53-L330P FTPQIRGRER  | 473   | 184   |
| >TP53-L330P FTLQIRGRER  | 50    | >TP53-L330P FTPQIRGRER  | 237   | 187   |
| >TP53-L330P FTLQIRGR    | 174   | >TP53-L330P FTPQIRGR    | 1230  | 1056  |
| >TP53-L330P FTLQIRGRER  | 431   | >TP53-L330P FTPQIRGRER  | 1126  | 695   |
| >TP53-L330P FTLQIRGR    | 25    | >TP53-L330P FTPQIRGR    | 38    | 13    |
| >TP53-L330P FTLQIRGRER  | 86    | >TP53-L330P FTPQIRGRER  | 50    | 36    |
| >TP53-L330P FTLQIRGRERI | 8     | >TP53-L330P FTPQIRGRER  | 393   | 385   |
| >TP53-L330P FTLQIRGRERI | 289   | >TP53-L330P FTPQIRGRER  | 12824 | 12535 |
| >TP53-L330P FTLQIRGRERI | 6128  | >TP53-L330P FTPQIRGRER  | 15    | 6113  |
| >TP53-L330P FTLQIRGRERI | 8     | >TP53-L330P FTPQIRGRER  | 115   | 107   |
| >TP53-L330P FTLQIRGR    | 422   | >TP53-L330P FTPQIRGR    | 878   | 456   |
| >TP53-L330P YFTLQIRGR   | 680   | >TP53-L330P YFTPQIRGR   | 429   | 251   |
| >TP53-L330P YFTLQIRGREI | 337   | >TP53-L330P YFTPQIRGREI | 234   | 103   |
| >TP53-L330P YFTLQIRGR   | 129   | >TP53-L330P YFTPQIRGR   | 246   | 117   |
| >TP53-L330P YFTLQIRGREI | 126   | >TP53-L330P YFTPQIRGREI | 234   | 108   |
| >TP53-L330P YFTLQIRGR   | 152   | >TP53-L330P YFTPQIRGR   | 159   | 7     |
| >TP53-L330P YFTLQIRGREI | 524   | >TP53-L330P YFTPQIRGREI | 450   | 74    |
| >TP53-L330P EYFTLQIR    | 335   | >TP53-L330P EYFTPQIR    | 827   | 492   |
| >TP53-L330P EYFTLQIR    | 31    | >TP53-L330P EYFTPQIR    | 54    | 23    |
| >TP53-L330P EYFTLQIRGR  | 315   | >TP53-L330P EYFTPQIRGR  | 738   | 423   |
| >TP53-L330P EYFTLQIR    | 26    | >TP53-L330P EYFTPQIR    | 46    | 20    |
| >TP53-L330P EYFTLQIR    | 19    | >TP53-L330P EYFTPQIR    | 19    | 0     |
| >TP53-L330P EYFTLQIRGR  | 20    | >TP53-L330P EYFTPQIRGR  | 25    | 5     |
| >TP53-L330P GEYFTLQI    | 102   | >TP53-L330P GEYFTPQI    | 341   | 239   |
| >TP53-L330P GEYFTLQI    | 44    | >TP53-L330P GEYFTPQI    | 60    | 16    |
| >TP53-L330P GEYFTLQI    | 43    | >TP53-L330P GEYFTPQI    | 69    | 26    |
| >TP53-L330P GEYFTLQI    | 539   | >TP53-L330P GEYFTPQI    | 473   | 66    |
| >TP53-L330P GEYFTLQI    | 11    | >TP53-L330P GEYFTPQI    | 16    | 5     |
| >TP53-L330P GEYFTLQIR   | 190   | >TP53-L330P GEYFTPQIR   | 881   | 691   |
| >TP53-L330P LDGEYFTLQI  | 87    | >TP53-L330P LDGEYFTPQI  | 151   | 64    |
| >TP53-L330P LDGEYFTL    | 344   | >TP53-L330P LDGEYFTP    | 15651 | 15307 |
| >TP53-L330P LDGEYFTLQI  | 94    | >TP53-L330P LDGEYFTPQI  | 206   | 112   |

|                         |       |                         |       |       |
|-------------------------|-------|-------------------------|-------|-------|
| >TP53-L330P PLDGEYFTL   | 249   | >TP53-L330P PLDGEYFTP   | 17837 | 17588 |
| >TP53-L330P PLDGEYFTL   | 22    | >TP53-L330P PLDGEYFTP   | 8923  | 8901  |
| >TP53-L330P PLDGEYFTLQ  | 68    | >TP53-L330P PLDGEYFTPQ  | 41    | 27    |
| >TP53-L330P PLDGEYFTL   | 224   | >TP53-L330P PLDGEYFTP   | 20346 | 20122 |
| >TP53-L330P PLDGEYFTL   | 22    | >TP53-L330P PLDGEYFTP   | 12043 | 12021 |
| >TP53-L330P PLDGEYFTLQ  | 140   | >TP53-L330P PLDGEYFTPQ  | 54    | 86    |
| >TP53-L330P PLDGEYFTL   | 23    | >TP53-L330P PLDGEYFTP   | 21245 | 21222 |
| >TP53-L330P PLDGEYFTLQ  | 158   | >TP53-L330P PLDGEYFTPQ  | 51    | 107   |
| >TP53-L330P PLDGEYFTL   | 11    | >TP53-L330P PLDGEYFTP   | 11872 | 11861 |
| >TP53-L330P PLDGEYFTLQ  | 111   | >TP53-L330P PLDGEYFTPQ  | 58    | 53    |
| >TP53-L330P KPLDGEYFTL  | 212   | >TP53-L330P KPLDGEYFTP  | 37710 | 37498 |
| >TP53-L330P KPLDGEYFTL  | 321   | >TP53-L330P KPLDGEYFTP  | 20006 | 19685 |
| >TP53-L330P KPLDGEYFTL  | 306   | >TP53-L330P KPLDGEYFTP  | 15245 | 14939 |
| >TP53-L330R LQIRGRERFEI | 192   | >TP53-L330R RQIRGRERFE  | 149   | 43    |
| >TP53-L330R LQIRGRERF   | 766   | >TP53-L330R RQIRGRERF   | 392   | 374   |
| >TP53-L330R LQIRGRER    | 138   | >TP53-L330R RQIRGRER    | 19    | 119   |
| >TP53-L330R LQIRGRERF   | 54    | >TP53-L330R RQIRGRERF   | 49    | 5     |
| >TP53-L330R LQIRGRERFEI | 105   | >TP53-L330R RQIRGRERFE  | 91    | 14    |
| >TP53-L330R LQIRGRER    | 495   | >TP53-L330R RQIRGRER    | 157   | 338   |
| >TP53-L330R LQIRGRERF   | 12    | >TP53-L330R RQIRGRERF   | 6     | 6     |
| >TP53-L330R LQIRGRERFEI | 34    | >TP53-L330R RQIRGRERFE  | 15    | 19    |
| >TP53-L330R LQIRGRER    | 5061  | >TP53-L330R RQIRGRER    | 406   | 4655  |
| >TP53-L330R LQIRGRERF   | 4628  | >TP53-L330R RQIRGRERF   | 363   | 4265  |
| >TP53-L330R LQIRGRERFEI | 2016  | >TP53-L330R RQIRGRERFE  | 120   | 1896  |
| >TP53-L330R LQIRGRERF   | 11168 | >TP53-L330R RQIRGRERF   | 499   | 10669 |
| >TP53-L330R TLQIRGRER   | 238   | >TP53-L330R TRQIRGRER   | 12681 | 12443 |
| >TP53-L330R KKPLDGEYFT  | 30375 | >TP53-L330R KKPLDGEYFT  | 219   | 30156 |
| >TP53-L330R FTLQIRGRERI | 169   | >TP53-L330R FTRQIRGRER  | 3253  | 3084  |
| >TP53-L330R FTLQIRGRERI | 289   | >TP53-L330R FTRQIRGRER  | 586   | 297   |
| >TP53-L330R FTLQIRGRER  | 50    | >TP53-L330R FTRQIRGRER  | 50    | 0     |
| >TP53-L330R FTLQIRGR    | 174   | >TP53-L330R FTRQIRGR    | 97    | 77    |
| >TP53-L330R FTLQIRGRER  | 431   | >TP53-L330R FTRQIRGRER  | 654   | 223   |
| >TP53-L330R FTLQIRGR    | 25    | >TP53-L330R FTRQIRGR    | 59    | 34    |
| >TP53-L330R FTLQIRGRER  | 86    | >TP53-L330R FTRQIRGRER  | 257   | 171   |
| >TP53-L330R FTLQIRGRERI | 1910  | >TP53-L330R FTRQIRGRER  | 297   | 1613  |
| >TP53-L330R FTLQIRGRERI | 585   | >TP53-L330R FTRQIRGRER  | 451   | 134   |
| >TP53-L330R FTLQIRGRERI | 8     | >TP53-L330R FTRQIRGRER  | 7     | 1     |
| >TP53-L330R FTLQIRGRERI | 289   | >TP53-L330R FTRQIRGRER  | 6523  | 6234  |
| >TP53-L330R FTLQIRGRE   | 1312  | >TP53-L330R FTRQIRGRE   | 485   | 827   |
| >TP53-L330R FTLQIRGRERI | 8     | >TP53-L330R FTRQIRGRER  | 5     | 3     |
| >TP53-L330R FTLQIRGR    | 422   | >TP53-L330R FTRQIRGR    | 1346  | 924   |
| >TP53-L330R YFTLQIRGR   | 680   | >TP53-L330R YFTRQIRGR   | 360   | 320   |
| >TP53-L330R YFTLQIRGREI | 337   | >TP53-L330R YFTRQIRGREI | 196   | 141   |

|                         |       |                         |       |       |
|-------------------------|-------|-------------------------|-------|-------|
| >TP53-L330R YFTLQIRGR   | 129   | >TP53-L330R YFTRQIRGR   | 249   | 120   |
| >TP53-L330R YFTLQIRGREI | 126   | >TP53-L330R YFTRQIRGREI | 215   | 89    |
| >TP53-L330R YFTLQIRGR   | 152   | >TP53-L330R YFTRQIRGR   | 265   | 113   |
| >TP53-L330R EYFTLQIR    | 335   | >TP53-L330R EYFTRQIR    | 167   | 168   |
| >TP53-L330R EYFTLQIRGR  | 546   | >TP53-L330R EYFTRQIRGR  | 411   | 135   |
| >TP53-L330R EYFTLQIR    | 31    | >TP53-L330R EYFTRQIR    | 20    | 11    |
| >TP53-L330R EYFTLQIRGR  | 315   | >TP53-L330R EYFTRQIRGR  | 265   | 50    |
| >TP53-L330R EYFTLQIR    | 26    | >TP53-L330R EYFTRQIR    | 28    | 2     |
| >TP53-L330R EYFTLQIR    | 19    | >TP53-L330R EYFTRQIR    | 19    | 0     |
| >TP53-L330R EYFTLQIRGR  | 20    | >TP53-L330R EYFTRQIRGR  | 26    | 6     |
| >TP53-L330R GEYFTLQI    | 102   | >TP53-L330R GEYFTRQI    | 52    | 50    |
| >TP53-L330R GEYFTLQI    | 44    | >TP53-L330R GEYFTRQI    | 95    | 51    |
| >TP53-L330R GEYFTLQI    | 43    | >TP53-L330R GEYFTRQI    | 88    | 45    |
| >TP53-L330R GEYFTLQI    | 11    | >TP53-L330R GEYFTRQI    | 9     | 2     |
| >TP53-L330R GEYFTLQIR   | 190   | >TP53-L330R GEYFTRQIR   | 783   | 593   |
| >TP53-L330R LDGEYFTLQI  | 87    | >TP53-L330R LDGEYFTRQI  | 116   | 29    |
| >TP53-L330R LDGEYFTL    | 344   | >TP53-L330R LDGEYFTR    | 16269 | 15925 |
| >TP53-L330R LDGEYFTLQI  | 94    | >TP53-L330R LDGEYFTRQI  | 244   | 150   |
| >TP53-L330R PLDGEYFTL   | 249   | >TP53-L330R PLDGEYFTR   | 22451 | 22202 |
| >TP53-L330R PLDGEYFTL   | 22    | >TP53-L330R PLDGEYFTR   | 11776 | 11754 |
| >TP53-L330R PLDGEYFTLQ  | 68    | >TP53-L330R PLDGEYFTRQ  | 118   | 50    |
| >TP53-L330R PLDGEYFTL   | 224   | >TP53-L330R PLDGEYFTR   | 23022 | 22798 |
| >TP53-L330R PLDGEYFTL   | 22    | >TP53-L330R PLDGEYFTR   | 14685 | 14663 |
| >TP53-L330R PLDGEYFTLQ  | 140   | >TP53-L330R PLDGEYFTRQ  | 676   | 536   |
| >TP53-L330R PLDGEYFTL   | 23    | >TP53-L330R PLDGEYFTR   | 22364 | 22341 |
| >TP53-L330R PLDGEYFTLQ  | 158   | >TP53-L330R PLDGEYFTRQ  | 458   | 300   |
| >TP53-L330R PLDGEYFTL   | 11    | >TP53-L330R PLDGEYFTR   | 9416  | 9405  |
| >TP53-L330R PLDGEYFTLQ  | 111   | >TP53-L330R PLDGEYFTRQ  | 412   | 301   |
| >TP53-L330R KPLDGEYFTL  | 212   | >TP53-L330R KPLDGEYFTR  | 34886 | 34674 |
| >TP53-L330R KPLDGEYFTL  | 16127 | >TP53-L330R KPLDGEYFTR  | 179   | 15948 |
| >TP53-L330R KPLDGEYFTL  | 321   | >TP53-L330R KPLDGEYFTR  | 17955 | 17634 |
| >TP53-L330R KPLDGEYFTL  | 306   | >TP53-L330R KPLDGEYFTR  | 8581  | 8275  |
| >TP53-L330R KPLDGEYFTL  | 20370 | >TP53-L330R KPLDGEYFTR  | 50    | 20320 |
| >TP53-L344P ELNEALEL    | 71    | >TP53-L344P EPNEALEL    | 28248 | 28177 |
| >TP53-L344P ELNEALEL    | 410   | >TP53-L344P EPNEALEL    | 23509 | 23099 |
| >TP53-L344P ELNEALEL    | 41    | >TP53-L344P EPNEALEL    | 24459 | 24418 |
| >TP53-L344P ELNEALEL    | 264   | >TP53-L344P EPNEALEL    | 25324 | 25060 |
| >TP53-L344P ELNEALEL    | 85    | >TP53-L344P EPNEALEL    | 24965 | 24880 |
| >TP53-L344P ELNEALEL    | 44    | >TP53-L344P EPNEALEL    | 21819 | 21775 |
| >TP53-L344P ELNEALEL    | 13    | >TP53-L344P EPNEALEL    | 31581 | 31568 |
| >TP53-L344P ELNEALELK   | 33    | >TP53-L344P EPNEALELK   | 283   | 250   |
| >TP53-L344P ELNEALEL    | 94    | >TP53-L344P EPNEALEL    | 297   | 203   |
| >TP53-L344P ELNEALEL    | 8243  | >TP53-L344P EPNEALEL    | 87    | 8156  |

|                        |       |                         |       |       |
|------------------------|-------|-------------------------|-------|-------|
| >TP53-L344P ELNEALEL   | 29297 | >TP53-L344P EPNEALEL    | 165   | 29132 |
| >TP53-L344P GRERFEMFRI | 71    | >TP53-L344P GRERFEMFRI  | 2988  | 2917  |
| >TP53-L344P GRERFEMFRI | 11    | >TP53-L344P GRERFEMFRI  | 1491  | 1480  |
| >TP53-L344P RELNEALEL  | 390   | >TP53-L344P REPNEALEL   | 4128  | 3738  |
| >TP53-L344P RELNEALEL  | 14    | >TP53-L344P REPNEALEL   | 225   | 211   |
| >TP53-L344P RELNEALEL  | 18    | >TP53-L344P REPNEALEL   | 225   | 207   |
| >TP53-L344P RELNEALEL  | 222   | >TP53-L344P REPNEALEL   | 3871  | 3649  |
| >TP53-L344P RELNEALEL  | 19    | >TP53-L344P REPNEALEL   | 93    | 74    |
| >TP53-L344P FRELNEALEL | 379   | >TP53-L344P FREPNEALEL  | 1034  | 655   |
| >TP53-L344P FRELNEAL   | 31    | >TP53-L344P FREPNEAL    | 22    | 9     |
| >TP53-L344P FRELNEALEL | 65    | >TP53-L344P FREPNEALEL  | 37    | 28    |
| >TP53-L344P FRELNEALEL | 471   | >TP53-L344P FREPNEALEL  | 521   | 50    |
| >TP53-L344P MFRELNEALE | 200   | >TP53-L344P MFREPNEALEL | 318   | 118   |
| >TP53-L344P MFRELNEA   | 62    | >TP53-L344P MFREPNEA    | 69    | 7     |
| >TP53-L344P MFRELNEALE | 217   | >TP53-L344P MFREPNEALEL | 245   | 28    |
| >TP53-L344P MFRELNEAL  | 152   | >TP53-L344P MFREPNEAL   | 225   | 73    |
| >TP53-L344P MFRELNEALE | 467   | >TP53-L344P MFREPNEALEL | 630   | 163   |
| >TP53-L344P EMFRELNEA  | 133   | >TP53-L344P EMFREPNEA   | 956   | 823   |
| >TP53-L344P EMFRELNEAL | 89    | >TP53-L344P EMFREPNEAL  | 83    | 6     |
| >TP53-L344P EMFRELNEA  | 401   | >TP53-L344P EMFREPNEA   | 1295  | 894   |
| >TP53-L344P EMFRELNEAL | 360   | >TP53-L344P EMFREPNEAL  | 416   | 56    |
| >TP53-L344P EMFRELNEA  | 161   | >TP53-L344P EMFREPNEA   | 141   | 20    |
| >TP53-L344P EMFRELNEAL | 24    | >TP53-L344P EMFREPNEAL  | 20    | 4     |
| >TP53-L344P EMFRELNEAL | 169   | >TP53-L344P EMFREPNEAL  | 286   | 117   |
| >TP53-L344P EMFRELNEAL | 431   | >TP53-L344P EMFREPNEAL  | 778   | 347   |
| >TP53-L344P EMFRELNEAL | 431   | >TP53-L344P EMFREPNEAL  | 551   | 120   |
| >TP53-L344P EMFRELNEA  | 119   | >TP53-L344P EMFREPNEA   | 322   | 203   |
| >TP53-L344P EMFRELNEAL | 72    | >TP53-L344P EMFREPNEAL  | 102   | 30    |
| >TP53-L344P EMFRELNEAL | 272   | >TP53-L344P EMFREPNEAL  | 240   | 32    |
| >TP53-L344P EMFRELNEAL | 769   | >TP53-L344P EMFREPNEAL  | 473   | 296   |
| >TP53-L344P EMFRELNEAL | 291   | >TP53-L344P EMFREPNEAL  | 310   | 19    |
| >TP53-L344P EMFRELNEAL | 98    | >TP53-L344P EMFREPNEAL  | 46    | 52    |
| >TP53-L344P EMFRELNEAL | 495   | >TP53-L344P EMFREPNEAL  | 305   | 190   |
| >TP53-L344P FEMFRELNEA | 301   | >TP53-L344P FEMFREPNEA  | 864   | 563   |
| >TP53-L344P FEMFRELNEA | 394   | >TP53-L344P FEMFREPNEA  | 864   | 470   |
| >TP53-L344P FEMFRELNEA | 525   | >TP53-L344P FEMFREPNEA  | 490   | 35    |
| >TP53-L344P FEMFRELNEA | 253   | >TP53-L344P FEMFREPNEA  | 511   | 258   |
| >TP53-L344P FEMFRELNEA | 94    | >TP53-L344P FEMFREPNEA  | 122   | 28    |
| >TP53-L344P FEMFRELNEA | 18    | >TP53-L344P FEMFREPNEA  | 22    | 4     |
| >TP53-L344P FEMFRELNEA | 47    | >TP53-L344P FEMFREPNEA  | 73    | 26    |
| >TP53-L344P FEMFRELNEA | 29    | >TP53-L344P FEMFREPNEA  | 25    | 4     |
| >TP53-L344P RFEMFREL   | 253   | >TP53-L344P RFEMFREP    | 14646 | 14393 |
| >TP53-L344P RFEMFREL   | 308   | >TP53-L344P RFEMFREP    | 1565  | 1257  |



|                        |      |                         |       |       |
|------------------------|------|-------------------------|-------|-------|
| >TP53-L344P RFEMFRELNE | 517  | >TP53-L344P RFEMFREPNE  | 466   | 51    |
| >TP53-L344P ERFEMFREL  | 185  | >TP53-L344P ERFEMFREP   | 3843  | 3658  |
| >TP53-L344P ERFEMFREL  | 421  | >TP53-L344P ERFEMFREP   | 22292 | 21871 |
| >TP53-L344P ERFEMFREL  | 172  | >TP53-L344P ERFEMFREP   | 6725  | 6553  |
| >TP53-L344P ERFEMFREL  | 10   | >TP53-L344P ERFEMFREP   | 3919  | 3909  |
| >TP53-L344P RERFEMFREL | 48   | >TP53-L344P RERFEMFREP  | 314   | 266   |
| >TP53-L344P RERFEMFREL | 142  | >TP53-L344P RERFEMFREP  | 5649  | 5507  |
| >TP53-L344P RERFEMFREL | 29   | >TP53-L344P RERFEMFREP  | 7486  | 7457  |
| >TP53-L344R ELNEALEL   | 71   | >TP53-L344R ERNEALEL    | 22899 | 22828 |
| >TP53-L344R ELNEALEL   | 410  | >TP53-L344R ERNEALEL    | 22324 | 21914 |
| >TP53-L344R ELNEALEL   | 41   | >TP53-L344R ERNEALEL    | 22942 | 22901 |
| >TP53-L344R ELNEALEL   | 264  | >TP53-L344R ERNEALEL    | 24843 | 24579 |
| >TP53-L344R ELNEALEL   | 85   | >TP53-L344R ERNEALEL    | 23919 | 23834 |
| >TP53-L344R ELNEALEL   | 44   | >TP53-L344R ERNEALEL    | 21225 | 21181 |
| >TP53-L344R ELNEALEL   | 13   | >TP53-L344R ERNEALEL    | 27430 | 27417 |
| >TP53-L344R ELNEALELK  | 33   | >TP53-L344R ERNEALELK   | 1423  | 1390  |
| >TP53-L344R ELNEALEL   | 94   | >TP53-L344R ERNEALEL    | 12552 | 12458 |
| >TP53-L344R GRERFEMFRI | 71   | >TP53-L344R GRERFEMFRI  | 1522  | 1451  |
| >TP53-L344R GRERFEMFRI | 11   | >TP53-L344R GRERFEMFRI  | 168   | 157   |
| >TP53-L344R RELNEALELK | 6190 | >TP53-L344R RERNEALELK  | 206   | 5984  |
| >TP53-L344R RELNEALEL  | 390  | >TP53-L344R RERNEALEL   | 225   | 165   |
| >TP53-L344R RELNEALEL  | 14   | >TP53-L344R RERNEALEL   | 119   | 105   |
| >TP53-L344R RELNEALEL  | 18   | >TP53-L344R RERNEALEL   | 22    | 4     |
| >TP53-L344R RELNEALEL  | 222  | >TP53-L344R RERNEALEL   | 1121  | 899   |
| >TP53-L344R RELNEALEL  | 19   | >TP53-L344R RERNEALEL   | 23    | 4     |
| >TP53-L344R FRELNEALEL | 379  | >TP53-L344R FRERNEALEL  | 536   | 157   |
| >TP53-L344R FRELNEAL   | 31   | >TP53-L344R FRERNEAL    | 43    | 12    |
| >TP53-L344R FRELNEALEL | 65   | >TP53-L344R FRERNEALEL  | 87    | 22    |
| >TP53-L344R FRELNEALEL | 471  | >TP53-L344R FRERNEALEL  | 376   | 95    |
| >TP53-L344R MFRELNEALE | 200  | >TP53-L344R MFRERNEALI  | 373   | 173   |
| >TP53-L344R MFRELNEA   | 62   | >TP53-L344R MFRERNEA    | 27    | 35    |
| >TP53-L344R MFRELNEAL  | 932  | >TP53-L344R MFRERNEAL   | 370   | 562   |
| >TP53-L344R MFRELNEALE | 217  | >TP53-L344R MFRERNEALI  | 125   | 92    |
| >TP53-L344R MFRELNEAL  | 3161 | >TP53-L344R MFRERNEAL   | 91    | 3070  |
| >TP53-L344R MFRELNEALE | 4698 | >TP53-L344R MFRERNEALI  | 483   | 4215  |
| >TP53-L344R MFRELNEAL  | 152  | >TP53-L344R MFRERNEAL   | 340   | 188   |
| >TP53-L344R MFRELNEALE | 467  | >TP53-L344R MFRERNEALI  | 788   | 321   |
| >TP53-L344R EMFRELNEA  | 133  | >TP53-L344R EMFRRERNEA  | 2971  | 2838  |
| >TP53-L344R EMFRELNEAL | 89   | >TP53-L344R EMFRRERNEAI | 271   | 182   |
| >TP53-L344R EMFRELNEA  | 401  | >TP53-L344R EMFRRERNEA  | 5552  | 5151  |
| >TP53-L344R EMFRELNEAL | 360  | >TP53-L344R EMFRRERNEAI | 733   | 373   |
| >TP53-L344R EMFRELNEA  | 161  | >TP53-L344R EMFRRERNEA  | 3005  | 2844  |
| >TP53-L344R EMFRELNEAL | 24   | >TP53-L344R EMFRRERNEAI | 134   | 110   |

|                        |       |                         |       |       |
|------------------------|-------|-------------------------|-------|-------|
| >TP53-L344R EMFRELNEAL | 169   | >TP53-L344R EMFRERNEAI  | 1133  | 964   |
| >TP53-L344R EMFRELNEAL | 431   | >TP53-L344R EMFRERNEAI  | 1907  | 1476  |
| >TP53-L344R EMFRELNEAL | 431   | >TP53-L344R EMFRERNEAI  | 2488  | 2057  |
| >TP53-L344R EMFRELNEA  | 119   | >TP53-L344R EMFRERNEA   | 293   | 174   |
| >TP53-L344R EMFRELNEAL | 72    | >TP53-L344R EMFRERNEAI  | 98    | 26    |
| >TP53-L344R EMFRELNEAL | 272   | >TP53-L344R EMFRERNEAI  | 362   | 90    |
| >TP53-L344R EMFRELNEAL | 291   | >TP53-L344R EMFRERNEAI  | 1128  | 837   |
| >TP53-L344R EMFRELNEAL | 98    | >TP53-L344R EMFRERNEAI  | 75    | 23    |
| >TP53-L344R EMFRELNEAL | 495   | >TP53-L344R EMFRERNEAI  | 413   | 82    |
| >TP53-L344R FEMFRELNEA | 301   | >TP53-L344R FEMFRERNE/  | 269   | 32    |
| >TP53-L344R FEMFRELNEA | 394   | >TP53-L344R FEMFRERNE/  | 821   | 427   |
| >TP53-L344R FEMFRELNEA | 558   | >TP53-L344R FEMFRERNE/  | 191   | 367   |
| >TP53-L344R FEMFRELNEA | 253   | >TP53-L344R FEMFRERNE/  | 554   | 301   |
| >TP53-L344R FEMFRELNEA | 94    | >TP53-L344R FEMFRERNE/  | 201   | 107   |
| >TP53-L344R FEMFRELNEA | 18    | >TP53-L344R FEMFRERNE/  | 33    | 15    |
| >TP53-L344R FEMFRELNEA | 47    | >TP53-L344R FEMFRERNE/  | 107   | 60    |
| >TP53-L344R FEMFRELNEA | 29    | >TP53-L344R FEMFRERNE/  | 49    | 20    |
| >TP53-L344R RFEMFREL   | 253   | >TP53-L344R RFEMFRER    | 9616  | 9363  |
| >TP53-L344R RFEMFREL   | 5399  | >TP53-L344R RFEMFRER    | 11    | 5388  |
| >TP53-L344R RFEMFREL   | 21214 | >TP53-L344R RFEMFRER    | 39    | 21175 |
| >TP53-L344R RFEMFREL   | 308   | >TP53-L344R RFEMFRER    | 1786  | 1478  |
| >TP53-L344R RFEMFRELNE | 517   | >TP53-L344R RFEMFRERNEI | 420   | 97    |
| >TP53-L344R ERFEMFREL  | 28023 | >TP53-L344R ERFEMFRER   | 120   | 27903 |
| >TP53-L344R ERFEMFREL  | 185   | >TP53-L344R ERFEMFRER   | 237   | 52    |
| >TP53-L344R ERFEMFREL  | 421   | >TP53-L344R ERFEMFRER   | 20336 | 19915 |
| >TP53-L344R ERFEMFREL  | 172   | >TP53-L344R ERFEMFRER   | 4430  | 4258  |
| >TP53-L344R ERFEMFREL  | 10    | >TP53-L344R ERFEMFRER   | 446   | 436   |
| >TP53-L344R ERFEMFREL  | 34065 | >TP53-L344R ERFEMFRER   | 441   | 33624 |
| >TP53-L344R RERFEMFREL | 15306 | >TP53-L344R RERFEMFREF  | 144   | 15162 |
| >TP53-L344R RERFEMFREL | 48    | >TP53-L344R RERFEMFREF  | 316   | 268   |
| >TP53-L344R RERFEMFREL | 142   | >TP53-L344R RERFEMFREF  | 6479  | 6337  |
| >TP53-L344R RERFEMFREL | 29    | >TP53-L344R RERFEMFREF  | 10249 | 10220 |
| >TP53-L348F ALELKDAQA  | 144   | >TP53-L348F AFELKDAQA   | 30676 | 30532 |
| >TP53-L348F FEMFRELNEA | 301   | >TP53-L348F FEMFRELNEA  | 971   | 670   |
| >TP53-L348F FEMFRELNEA | 394   | >TP53-L348F FEMFRELNEA  | 9071  | 8677  |
| >TP53-L348F FEMFRELNEA | 4384  | >TP53-L348F FEMFRELNEA  | 240   | 4144  |
| >TP53-L348F FEMFRELNEA | 724   | >TP53-L348F FEMFRELNEA  | 34    | 690   |
| >TP53-L348F FEMFRELNEA | 253   | >TP53-L348F FEMFRELNEA  | 27    | 226   |
| >TP53-L348F FEMFRELNEA | 94    | >TP53-L348F FEMFRELNEA  | 2561  | 2467  |
| >TP53-L348F FEMFRELNEA | 18    | >TP53-L348F FEMFRELNEA  | 111   | 93    |
| >TP53-L348F FEMFRELNEA | 47    | >TP53-L348F FEMFRELNEA  | 156   | 109   |
| >TP53-L348F FEMFRELNEA | 1314  | >TP53-L348F FEMFRELNEA  | 300   | 1014  |
| >TP53-L348F FEMFRELNEA | 1268  | >TP53-L348F FEMFRELNEA  | 215   | 1053  |

|                        |      |                        |       |       |
|------------------------|------|------------------------|-------|-------|
| >TP53-L348F FEMFRELNEA | 29   | >TP53-L348F FEMFRELNEA | 70    | 41    |
| >TP53-L348F EALELKDAQA | 3912 | >TP53-L348F EAFELKDAQA | 366   | 3546  |
| >TP53-L348F EALELKDAQA | 161  | >TP53-L348F EAFELKDAQA | 292   | 131   |
| >TP53-L348F NEALELKDA  | 240  | >TP53-L348F NEAFELKDA  | 1286  | 1046  |
| >TP53-L348F NEALELKDA  | 288  | >TP53-L348F NEAFELKDA  | 233   | 55    |
| >TP53-L348F NEALELKDAC | 461  | >TP53-L348F NEAFELKDAC | 367   | 94    |
| >TP53-L348F ELNEALEL   | 71   | >TP53-L348F ELNEAFEL   | 23    | 48    |
| >TP53-L348F ELNEALEL   | 410  | >TP53-L348F ELNEAFEL   | 573   | 163   |
| >TP53-L348F ELNEALEL   | 1231 | >TP53-L348F ELNEAFEL   | 274   | 957   |
| >TP53-L348F ELNEALEL   | 41   | >TP53-L348F ELNEAFEL   | 21    | 20    |
| >TP53-L348F ELNEALEL   | 264  | >TP53-L348F ELNEAFEL   | 81    | 183   |
| >TP53-L348F ELNEALEL   | 85   | >TP53-L348F ELNEAFEL   | 39    | 46    |
| >TP53-L348F ELNEALEL   | 44   | >TP53-L348F ELNEAFEL   | 12    | 32    |
| >TP53-L348F ELNEALEL   | 13   | >TP53-L348F ELNEAFEL   | 9     | 4     |
| >TP53-L348F ELNEALELK  | 33   | >TP53-L348F ELNEAFELK  | 22    | 11    |
| >TP53-L348F ELNEALEL   | 836  | >TP53-L348F ELNEAFEL   | 107   | 729   |
| >TP53-L348F ELNEALEL   | 94   | >TP53-L348F ELNEAFEL   | 30    | 64    |
| >TP53-L348F RELNEALEL  | 390  | >TP53-L348F RELNEAFEL  | 822   | 432   |
| >TP53-L348F RELNEALEL  | 14   | >TP53-L348F RELNEAFEL  | 8     | 6     |
| >TP53-L348F RELNEALEL  | 18   | >TP53-L348F RELNEAFEL  | 21    | 3     |
| >TP53-L348F RELNEALEL  | 222  | >TP53-L348F RELNEAFEL  | 173   | 49    |
| >TP53-L348F RELNEALEL  | 2070 | >TP53-L348F RELNEAFEL  | 469   | 1601  |
| >TP53-L348F RELNEALEL  | 19   | >TP53-L348F RELNEAFEL  | 8     | 11    |
| >TP53-L348F FRELNEAL   | 2698 | >TP53-L348F FRELNEAF   | 317   | 2381  |
| >TP53-L348F FRELNEALEL | 379  | >TP53-L348F FRELNEAFEL | 1001  | 622   |
| >TP53-L348F FRELNEAL   | 31   | >TP53-L348F FRELNEAF   | 820   | 789   |
| >TP53-L348F FRELNEALEL | 65   | >TP53-L348F FRELNEAFEL | 54    | 11    |
| >TP53-L348F FRELNEALEL | 471  | >TP53-L348F FRELNEAFEL | 1770  | 1299  |
| >TP53-L348F MFRELNEAL  | 4951 | >TP53-L348F MFRELNEAF  | 200   | 4751  |
| >TP53-L348F MFRELNEAL  | 851  | >TP53-L348F MFRELNEAF  | 43    | 808   |
| >TP53-L348F MFRELNEALE | 200  | >TP53-L348F MFRELNEAFE | 100   | 100   |
| >TP53-L348F MFRELNEALE | 217  | >TP53-L348F MFRELNEAFE | 328   | 111   |
| >TP53-L348F MFRELNEAL  | 5405 | >TP53-L348F MFRELNEAF  | 202   | 5203  |
| >TP53-L348F MFRELNEAL  | 5012 | >TP53-L348F MFRELNEAF  | 283   | 4729  |
| >TP53-L348F MFRELNEAL  | 3694 | >TP53-L348F MFRELNEAF  | 193   | 3501  |
| >TP53-L348F MFRELNEAL  | 1717 | >TP53-L348F MFRELNEAF  | 94    | 1623  |
| >TP53-L348F MFRELNEAL  | 152  | >TP53-L348F MFRELNEAF  | 711   | 559   |
| >TP53-L348F MFRELNEALE | 467  | >TP53-L348F MFRELNEAFE | 459   | 8     |
| >TP53-L348F EMFRELNEAL | 89   | >TP53-L348F EMFRELNEAF | 8331  | 8242  |
| >TP53-L348F EMFRELNEAL | 360  | >TP53-L348F EMFRELNEAF | 12685 | 12325 |
| >TP53-L348F EMFRELNEAL | 24   | >TP53-L348F EMFRELNEAF | 2256  | 2232  |
| >TP53-L348F EMFRELNEAL | 169  | >TP53-L348F EMFRELNEAF | 11158 | 10989 |
| >TP53-L348F EMFRELNEAL | 431  | >TP53-L348F EMFRELNEAF | 19855 | 19424 |

|                          |       |                          |       |       |
|--------------------------|-------|--------------------------|-------|-------|
| >TP53-L348F EMFRELNEAL   | 431   | >TP53-L348F EMFRELNEAF   | 16026 | 15595 |
| >TP53-L348F EMFRELNEAL   | 72    | >TP53-L348F EMFRELNEAF   | 17522 | 17450 |
| >TP53-L348F EMFRELNEAL   | 2179  | >TP53-L348F EMFRELNEAF   | 304   | 1875  |
| >TP53-L348F EMFRELNEAL   | 272   | >TP53-L348F EMFRELNEAF   | 91    | 181   |
| >TP53-L348F EMFRELNEAL   | 291   | >TP53-L348F EMFRELNEAF   | 9376  | 9085  |
| >TP53-L348F EMFRELNEAL   | 1014  | >TP53-L348F EMFRELNEAF   | 67    | 947   |
| >TP53-L348F EMFRELNEAL   | 4490  | >TP53-L348F EMFRELNEAF   | 327   | 4163  |
| >TP53-L348F EMFRELNEAL   | 98    | >TP53-L348F EMFRELNEAF   | 6     | 92    |
| >TP53-L348F EMFRELNEAL   | 495   | >TP53-L348F EMFRELNEAF   | 8313  | 7818  |
| >TP53-L35F-\ LPSQAMDDL   | 8     | >TP53-L35F-r FPSQAMDDL   | 8     | 0     |
| >TP53-L35F-\ LPSQAMDDL   | 42    | >TP53-L35F-r FPSQAMDDL   | 40    | 2     |
| >TP53-L35F-\ LPSQAMDDL   | 173   | >TP53-L35F-r FPSQAMDDL   | 162   | 11    |
| >TP53-L35F-\ LPSQAMDDL   | 95    | >TP53-L35F-r FPSQAMDDL   | 80    | 15    |
| >TP53-L35F-\ LPSQAMDDL   | 86    | >TP53-L35F-r FPSQAMDDL   | 66    | 20    |
| >TP53-L35F-\ LPSQAMDDL   | 114   | >TP53-L35F-r FPSQAMDDL   | 44    | 70    |
| >TP53-L35F-\ LPSQAMDDL   | 125   | >TP53-L35F-r FPSQAMDDL   | 29    | 96    |
| >TP53-L35F-\ LPSQAMDDL   | 57    | >TP53-L35F-r FPSQAMDDL   | 25    | 32    |
| >TP53-L35F-\ LPSQAMDDL   | 4515  | >TP53-L35F-r FPSQAMDDL   | 269   | 4246  |
| >TP53-L35F-\ LPSQAMDDL   | 874   | >TP53-L35F-r FPSQAMDDL   | 478   | 396   |
| >TP53-L35F-\ LPSQAMDDL   | 838   | >TP53-L35F-r FPSQAMDDL   | 207   | 631   |
| >TP53-L35F-\ LPSQAMDDL   | 90    | >TP53-L35F-r FPSQAMDDL   | 48    | 42    |
| >TP53-L35F-\ LPSQAMDDL   | 1666  | >TP53-L35F-r FPSQAMDDL   | 476   | 1190  |
| >TP53-L35F-\ LPSQAMDDL   | 1308  | >TP53-L35F-r FPSQAMDDL   | 375   | 933   |
| >TP53-L35F-\ LPSQAMDDL   | 273   | >TP53-L35F-r FPSQAMDDL   | 90    | 183   |
| >TP53-L35F-\ PLPSQAMDD   | 14175 | >TP53-L35F-r PFPSQAMDD   | 337   | 13838 |
| >TP53-L35F-\ LLPENNVLSPI | 41    | >TP53-L35F-r LLPENNVLSPI | 6614  | 6573  |
| >TP53-L35F-\ LLPENNVLSPI | 12    | >TP53-L35F-r LLPENNVLSPI | 748   | 736   |
| >TP53-L35F-\ LLPENNVLSPI | 12    | >TP53-L35F-r LLPENNVLSPI | 727   | 715   |
| >TP53-L35F-\ LLPENNVLSPI | 33    | >TP53-L35F-r LLPENNVLSPI | 196   | 163   |
| >TP53-L35F-\ LLPENNVLSPI | 4     | >TP53-L35F-r LLPENNVLSPI | 232   | 228   |
| >TP53-L35F-\ LLPENNVLSPI | 8     | >TP53-L35F-r LLPENNVLSPI | 2048  | 2040  |
| >TP53-L35F-\ LLPENNVLSPI | 27    | >TP53-L35F-r LLPENNVLSPI | 7127  | 7100  |
| >TP53-L35F-\ LLPENNVLSPI | 45    | >TP53-L35F-r LLPENNVLSPI | 12366 | 12321 |
| >TP53-L35F-\ LLPENNVLSPI | 3     | >TP53-L35F-r LLPENNVLSPI | 642   | 639   |
| >TP53-L35F-\ LLPENNVLSPI | 1442  | >TP53-L35F-r LLPENNVLSPI | 90    | 1352  |
| >TP53-L35F-\ LLPENNVLSPI | 3094  | >TP53-L35F-r LLPENNVLSPI | 191   | 2903  |
| >TP53-L35F-\ LLPENNVLSPI | 2767  | >TP53-L35F-r LLPENNVLSPI | 107   | 2660  |
| >TP53-L35F-\ LLPENNVLSPI | 63    | >TP53-L35F-r LLPENNVLSPI | 146   | 83    |
| >TP53-L35F-\ SPLPSQAM    | 35    | >TP53-L35F-r SPFPSQAM    | 10    | 25    |
| >TP53-L35F-\ SPLPSQAMDI  | 7     | >TP53-L35F-r SPFPSQAMDI  | 4     | 3     |
| >TP53-L35F-\ SPLPSQAM    | 19    | >TP53-L35F-r SPFPSQAM    | 19    | 0     |
| >TP53-L35F-\ SPLPSQAMDI  | 189   | >TP53-L35F-r SPFPSQAMDI  | 248   | 59    |
| >TP53-L35F-\ SPLPSQAM    | 860   | >TP53-L35F-r SPFPSQAM    | 156   | 704   |

|                         |      |                         |      |      |
|-------------------------|------|-------------------------|------|------|
| >TP53-L35F-\ SPLPSQAM   | 28   | >TP53-L35F-r SPFPSQAM   | 17   | 11   |
| >TP53-L35F-\ SPLPSQAM   | 309  | >TP53-L35F-r SPFPSQAM   | 148  | 161  |
| >TP53-L35F-\ SPLPSQAM   | 508  | >TP53-L35F-r SPFPSQAM   | 65   | 443  |
| >TP53-L35F-\ LSPLPSQAM  | 1350 | >TP53-L35F-r LSPFPSQAM  | 443  | 907  |
| >TP53-L35F-\ LSPLPSQAM  | 264  | >TP53-L35F-r LSPFPSQAM  | 228  | 36   |
| >TP53-L35F-\ LSPLPSQAM  | 5    | >TP53-L35F-r LSPFPSQAM  | 6    | 1    |
| >TP53-L35F-\ LSPLPSQAM  | 398  | >TP53-L35F-r LSPFPSQAM  | 550  | 152  |
| >TP53-L35F-\ VLSPLPSQA  | 1151 | >TP53-L35F-r VLSPFPSQA  | 423  | 728  |
| >TP53-L35F-\ VLSPLPSQA  | 52   | >TP53-L35F-r VLSPFPSQA  | 26   | 26   |
| >TP53-L35F-\ VLSPLPSQAM | 255  | >TP53-L35F-r VLSPFPSQAM | 105  | 150  |
| >TP53-L35F-\ VLSPLPSQA  | 8    | >TP53-L35F-r VLSPFPSQA  | 6    | 2    |
| >TP53-L35F-\ VLSPLPSQAM | 909  | >TP53-L35F-r VLSPFPSQAM | 476  | 433  |
| >TP53-L35F-\ VLSPLPSQA  | 26   | >TP53-L35F-r VLSPFPSQA  | 12   | 14   |
| >TP53-L35F-\ VLSPLPSQAM | 76   | >TP53-L35F-r VLSPFPSQAM | 31   | 45   |
| >TP53-L35F-\ VLSPLPSQAM | 543  | >TP53-L35F-r VLSPFPSQAM | 397  | 146  |
| >TP53-L35F-\ VLSPLPSQA  | 64   | >TP53-L35F-r VLSPFPSQA  | 90   | 26   |
| >TP53-L35F-\ VLSPLPSQA  | 125  | >TP53-L35F-r VLSPFPSQA  | 69   | 56   |
| >TP53-L35F-\ VLSPLPSQAM | 241  | >TP53-L35F-r VLSPFPSQAM | 140  | 101  |
| >TP53-L35F-\ VLSPLPSQ   | 28   | >TP53-L35F-r VLSPFPSQ   | 20   | 8    |
| >TP53-L35F-\ VLSPLPSQA  | 6    | >TP53-L35F-r VLSPFPSQA  | 4    | 2    |
| >TP53-L35F-\ VLSPLPSQAM | 43   | >TP53-L35F-r VLSPFPSQAM | 26   | 17   |
| >TP53-L35F-\ VLSPLPSQAM | 204  | >TP53-L35F-r VLSPFPSQAM | 219  | 15   |
| >TP53-L35F-\ VLSPLPSQAM | 1068 | >TP53-L35F-r VLSPFPSQAM | 382  | 686  |
| >TP53-L35F-\ VLSPLPSQAM | 243  | >TP53-L35F-r VLSPFPSQAM | 104  | 139  |
| >TP53-L35F-\ VLSPLPSQAM | 269  | >TP53-L35F-r VLSPFPSQAM | 173  | 96   |
| >TP53-L35F-\ NVLSPLPSQ  | 498  | >TP53-L35F-r NVLSPFPSQ  | 2591 | 2093 |
| >TP53-L35F-\ NVLSPLPSQA | 45   | >TP53-L35F-r NVLSPFPSQA | 73   | 28   |
| >TP53-L35F-\ NVLSPLPSQA | 439  | >TP53-L35F-r NVLSPFPSQA | 261  | 178  |
| >TP53-L35F-\ NVLSPLPS   | 1626 | >TP53-L35F-r NVLSPFPS   | 481  | 1145 |
| >TP53-L35F-\ NVLSPLPSQ  | 284  | >TP53-L35F-r NVLSPFPSQ  | 159  | 125  |
| >TP53-L35F-\ NVLSPLPSQA | 43   | >TP53-L35F-r NVLSPFPSQA | 23   | 20   |
| >TP53-L35F-\ NVLSPLPSQA | 19   | >TP53-L35F-r NVLSPFPSQA | 15   | 4    |
| >TP53-L35F-\ NVLSPLPSQA | 193  | >TP53-L35F-r NVLSPFPSQA | 132  | 61   |
| >TP53-L35F-\ PENNVLSPL  | 445  | >TP53-L35F-r PENNVLSPF  | 1665 | 1220 |
| >TP53-L35F-\ PENNVLSPL  | 6588 | >TP53-L35F-r PENNVLSPF  | 384  | 6204 |
| >TP53-L35F-\ PENNVLSPL  | 1275 | >TP53-L35F-r PENNVLSPF  | 110  | 1165 |
| >TP53-L35F-\ PENNVLSPL  | 277  | >TP53-L35F-r PENNVLSPF  | 2612 | 2335 |
| >TP53-L35F-\ PENNVLSPL  | 333  | >TP53-L35F-r PENNVLSPF  | 997  | 664  |
| >TP53-L35F-\ PENNVLSPL  | 214  | >TP53-L35F-r PENNVLSPF  | 835  | 621  |
| >TP53-L35F-\ LPENNVLSPL | 455  | >TP53-L35F-r LPENNVLSPF | 363  | 92   |
| >TP53-L35F-\ LPENNVLSPL | 59   | >TP53-L35F-r LPENNVLSPF | 101  | 42   |
| >TP53-L35F-\ LPENNVLSPL | 327  | >TP53-L35F-r LPENNVLSPF | 52   | 275  |
| >TP53-L35F-\ LPENNVLSPL | 526  | >TP53-L35F-r LPENNVLSPF | 135  | 391  |

|                         |       |                         |       |       |
|-------------------------|-------|-------------------------|-------|-------|
| >TP53-L35F-\ LPENNVLSPL | 2337  | >TP53-L35F-r LPENNVLSPF | 168   | 2169  |
| >TP53-L35F-\ LPENNVLSPL | 162   | >TP53-L35F-r LPENNVLSPF | 20    | 142   |
| >TP53-L45P-\ LSPDDIEQW  | 195   | >TP53-L45P-i PSPDDIEQW  | 4859  | 4664  |
| >TP53-L45P-\ LSPDDIEQWF | 180   | >TP53-L45P-i PSPDDIEQWF | 7975  | 7795  |
| >TP53-L45P-\ LSPDDIEQW  | 126   | >TP53-L45P-i PSPDDIEQW  | 2647  | 2521  |
| >TP53-L45P-\ LSPDDIEQW  | 149   | >TP53-L45P-i PSPDDIEQW  | 7729  | 7580  |
| >TP53-L45P-\ LSPDDIEQW  | 181   | >TP53-L45P-i PSPDDIEQW  | 2734  | 2553  |
| >TP53-L45P-\ LSPDDIEQWF | 10    | >TP53-L45P-i PSPDDIEQWF | 158   | 148   |
| >TP53-L45P-\ LSPDDIEQWF | 190   | >TP53-L45P-i PSPDDIEQWF | 3408  | 3218  |
| >TP53-L45P-\ LSPDDIEQWF | 84    | >TP53-L45P-i PSPDDIEQWF | 1072  | 988   |
| >TP53-L45P-\ LSPDDIEQW  | 218   | >TP53-L45P-i PSPDDIEQW  | 3517  | 3299  |
| >TP53-L45P-\ MLSPDDIEQ  | 405   | >TP53-L45P-i MPSPDDIEQ  | 33271 | 32866 |
| >TP53-L45P-\ MLSPDDIEQ\ | 107   | >TP53-L45P-i MPSPDDIEQ\ | 28630 | 28523 |
| >TP53-L45P-\ MLSPDDIEQ  | 21    | >TP53-L45P-i MPSPDDIEQ  | 34113 | 34092 |
| >TP53-L45P-\ MLSPDDIEQ\ | 129   | >TP53-L45P-i MPSPDDIEQ\ | 35522 | 35393 |
| >TP53-L45P-\ MLSPDDIEQ\ | 213   | >TP53-L45P-i MPSPDDIEQ\ | 1387  | 1174  |
| >TP53-L45P-\ MLSPDDIEQ\ | 93    | >TP53-L45P-i MPSPDDIEQ\ | 2346  | 2253  |
| >TP53-L45P-\ MLSPDDIEQ\ | 427   | >TP53-L45P-i MPSPDDIEQ\ | 7947  | 7520  |
| >TP53-L45P-\ MLSPDDIE   | 11334 | >TP53-L45P-i MPSPDDIE   | 77    | 11257 |
| >TP53-L45P-\ MLSPDDIEQ  | 2227  | >TP53-L45P-i MPSPDDIEQ  | 15    | 2212  |
| >TP53-L45P-\ MLSPDDIEQ\ | 37016 | >TP53-L45P-i MPSPDDIEQ\ | 492   | 36524 |
| >TP53-L45P-\ MLSPDDIEQ\ | 131   | >TP53-L45P-i MPSPDDIEQ\ | 9     | 122   |
| >TP53-L45P-\ MLSPDDIEQ\ | 7781  | >TP53-L45P-i MPSPDDIEQ\ | 93    | 7688  |
| >TP53-L45P-\ MLSPDDIEQ\ | 17338 | >TP53-L45P-i MPSPDDIEQ\ | 30    | 17308 |
| >TP53-L45P-\ MLSPDDIEQ\ | 204   | >TP53-L45P-i MPSPDDIEQ\ | 1095  | 891   |
| >TP53-L45P-\ MLSPDDIEQ\ | 20    | >TP53-L45P-i MPSPDDIEQ\ | 475   | 455   |
| >TP53-L45P-\ MLSPDDIEQ\ | 8753  | >TP53-L45P-i MPSPDDIEQ\ | 198   | 8555  |
| >TP53-L45P-\ MLSPDDIEQ\ | 292   | >TP53-L45P-i MPSPDDIEQ\ | 4     | 288   |
| >TP53-L45P-\ MLSPDDIEQ\ | 18350 | >TP53-L45P-i MPSPDDIEQ\ | 127   | 18223 |
| >TP53-L45P-\ MLSPDDIEQ\ | 80    | >TP53-L45P-i MPSPDDIEQ\ | 69    | 11    |
| >TP53-L45P-\ MLSPDDIEQ\ | 445   | >TP53-L45P-i MPSPDDIEQ\ | 65    | 380   |
| >TP53-L45P-\ LPSQAMDDL  | 173   | >TP53-L45P-i LPSQAMDDL  | 37429 | 37256 |
| >TP53-L45P-\ LPSQAMDDL  | 86    | >TP53-L45P-i LPSQAMDDL  | 19188 | 19102 |
| >TP53-L45P-\ LPSQAMDDL  | 57    | >TP53-L45P-i LPSQAMDDL  | 2024  | 1967  |
| >TP53-L45P-\ LPSQAMDDL  | 90    | >TP53-L45P-i LPSQAMDDL  | 2870  | 2780  |
| >TP53-L45P-\ LPSQAMDDL  | 273   | >TP53-L45P-i LPSQAMDDL  | 15090 | 14817 |
| >TP53-L45P-\ LMLSPDDI   | 14    | >TP53-L45P-i LMPSPDDI   | 109   | 95    |
| >TP53-L45P-\ LMLSPDDI   | 35    | >TP53-L45P-i LMPSPDDI   | 1011  | 976   |
| >TP53-L45P-\ LMLSPDDI   | 41    | >TP53-L45P-i LMPSPDDI   | 573   | 532   |
| >TP53-L45P-\ LMLSPDDI   | 149   | >TP53-L45P-i LMPSPDDI   | 5197  | 5048  |
| >TP53-L45P-\ LMLSPDDI   | 113   | >TP53-L45P-i LMPSPDDI   | 242   | 129   |
| >TP53-L45P-\ LMLSPDDIEQ | 315   | >TP53-L45P-i LMPSPDDIEC | 643   | 328   |
| >TP53-L45P-\ LMLSPDDI   | 314   | >TP53-L45P-i LMPSPDDI   | 2661  | 2347  |

|                         |      |                         |       |       |
|-------------------------|------|-------------------------|-------|-------|
| >TP53-L45P-1 LMLSPDDIEQ | 130  | >TP53-L45P-1 LMPSPDDIEC | 3846  | 3716  |
| >TP53-L45P-1 LMLSPDDIEQ | 212  | >TP53-L45P-1 LMPSPDDIEC | 1355  | 1143  |
| >TP53-L45P-1 LMLSPDDIEQ | 17   | >TP53-L45P-1 LMPSPDDIEC | 1241  | 1224  |
| >TP53-L45P-1 LMLSPDDIEQ | 79   | >TP53-L45P-1 LMPSPDDIEC | 1137  | 1058  |
| >TP53-L45P-1 LMLSPDDIEQ | 174  | >TP53-L45P-1 LMPSPDDIEC | 503   | 329   |
| >TP53-L45P-1 DDLMLSPDDI | 436  | >TP53-L45P-1 DDLMPSPDD  | 2881  | 2445  |
| >TP53-L45P-1 DDLMLSPDDI | 237  | >TP53-L45P-1 DDLMPSPDD  | 438   | 201   |
| >TP53-L45P-1 MDDLMLSPDC | 277  | >TP53-L45P-1 MDDLMPSPC  | 679   | 402   |
| >TP53-L45P-1 MDDLMLSPDC | 107  | >TP53-L45P-1 MDDLMPSPC  | 114   | 7     |
| >TP53-L45P-1 AMDDLMLS   | 743  | >TP53-L45P-1 AMDDLMP    | 453   | 290   |
| >TP53-L45P-1 AMDDLMLS   | 808  | >TP53-L45P-1 AMDDLMP    | 244   | 564   |
| >TP53-L45P-1 AMDDLMLS   | 255  | >TP53-L45P-1 AMDDLMP    | 123   | 132   |
| >TP53-L45P-1 AMDDLMLS   | 463  | >TP53-L45P-1 AMDDLMP    | 456   | 7     |
| >TP53-L45P-1 QAMDDLML   | 318  | >TP53-L45P-1 QAMDDLMP   | 10058 | 9740  |
| >TP53-L45P-1 QAMDDLML   | 386  | >TP53-L45P-1 QAMDDLMP   | 13447 | 13061 |
| >TP53-L45P-1 QAMDDLML   | 307  | >TP53-L45P-1 QAMDDLMP   | 24781 | 24474 |
| >TP53-L45P-1 SQAMDDLMI  | 155  | >TP53-L45P-1 SQAMDDLMI  | 10996 | 10841 |
| >TP53-L45P-1 SQAMDDLMI  | 473  | >TP53-L45P-1 SQAMDDLMI  | 8546  | 8073  |
| >TP53-L93M- LSSSVPSQKT  | 164  | >TP53-L93M- MSSSVPSQT   | 146   | 18    |
| >TP53-L93M- LSSSVPSQK   | 103  | >TP53-L93M- MSSSVPSQK   | 59    | 44    |
| >TP53-L93M- LSSSVPSQK   | 23   | >TP53-L93M- MSSSVPSQK   | 12    | 11    |
| >TP53-L93M- LSSSVPSQKT  | 450  | >TP53-L93M- MSSSVPSQT   | 141   | 309   |
| >TP53-L93M- LSSSVPSQK   | 945  | >TP53-L93M- MSSSVPSQK   | 96    | 849   |
| >TP53-L93M- LSSSVPSQKT  | 50   | >TP53-L93M- MSSSVPSQT   | 34    | 16    |
| >TP53-L93M- LSSSVPSQK   | 2167 | >TP53-L93M- MSSSVPSQK   | 466   | 1701  |
| >TP53-L93M- LSSSVPSQK   | 34   | >TP53-L93M- MSSSVPSQK   | 5     | 29    |
| >TP53-L93M- LSSSVPSQKT  | 2498 | >TP53-L93M- MSSSVPSQT   | 167   | 2331  |
| >TP53-L93M- LSSSVPSQKT  | 149  | >TP53-L93M- MSSSVPSQT   | 178   | 29    |
| >TP53-L93M- LSSSVPSQKT  | 32   | >TP53-L93M- MSSSVPSQT   | 17    | 15    |
| >TP53-L93M- LSSSVPSQKT  | 6    | >TP53-L93M- MSSSVPSQT   | 5     | 1     |
| >TP53-L93M- LSSSVPSQKT  | 229  | >TP53-L93M- MSSSVPSQT   | 42    | 187   |
| >TP53-L93M- LSSSVPSQKT  | 204  | >TP53-L93M- MSSSVPSQT   | 132   | 72    |
| >TP53-L93M- LSSSVPSQKT  | 32   | >TP53-L93M- MSSSVPSQT   | 19    | 13    |
| >TP53-L93M- LSSSVPSQK   | 189  | >TP53-L93M- MSSSVPSQK   | 168   | 21    |
| >TP53-L93M- LSSSVPSQKT  | 8    | >TP53-L93M- MSSSVPSQT   | 8     | 0     |
| >TP53-L93M- LSSSVPSQKT  | 1112 | >TP53-L93M- MSSSVPSQT   | 427   | 685   |
| >TP53-L93M- PLSSSVPSQK  | 472  | >TP53-L93M- PMSSSVPSQT  | 424   | 48    |
| >TP53-L93M- PLSSSVPSQK  | 382  | >TP53-L93M- PMSSSVPSQT  | 191   | 191   |
| >TP53-L93M- AAPAPAPSW   | 1323 | >TP53-L93M- AAPAPAPSW   | 441   | 882   |
| >TP53-L93M- AAPAPAPSW   | 136  | >TP53-L93M- AAPAPAPSW   | 732   | 596   |
| >TP53-L93M- AAPAPAPSW   | 380  | >TP53-L93M- AAPAPAPSW   | 3076  | 2696  |
| >TP53-L93M- AAPAPAPSW   | 4    | >TP53-L93M- AAPAPAPSW   | 5     | 1     |
| >TP53-L93M- WPLSSSV     | 706  | >TP53-L93M- WPMSSSV     | 358   | 348   |

|                       |     |                       |      |      |
|-----------------------|-----|-----------------------|------|------|
| >TP53-L93M·WPLSSSVPS  | 27  | >TP53-L93M·WPMSSSVPS  | 18   | 9    |
| >TP53-L93M·WPLSSSVPSC | 865 | >TP53-L93M·WPMSSSVPS  | 478  | 387  |
| >TP53-L93M·WPLSSSV    | 829 | >TP53-L93M·WPMSSSV    | 494  | 335  |
| >TP53-L93M·WPLSSSVPS  | 159 | >TP53-L93M·WPMSSSVPS  | 101  | 58   |
| >TP53-L93M·SWPLSSSV   | 157 | >TP53-L93M·SWPMSSSV   | 113  | 44   |
| >TP53-L93M·SWPLSSSVPS | 447 | >TP53-L93M·SWPMSSSV   | 305  | 142  |
| >TP53-L93M·APSWPLSSS  | 328 | >TP53-L93M·APSWPMSSS  | 160  | 168  |
| >TP53-L93M·APSWPLSSSV | 286 | >TP53-L93M·APSWPMSSS  | 158  | 128  |
| >TP53-L93M·APAPSWPL   | 12  | >TP53-L93M·APAPSWPM   | 11   | 1    |
| >TP53-L93M·APAPSWPLSS | 292 | >TP53-L93M·APAPSWPMS  | 205  | 87   |
| >TP53-L93M·APAPSWPL   | 196 | >TP53-L93M·APAPSWPM   | 22   | 174  |
| >TP53-L93M·APAPSWPL   | 49  | >TP53-L93M·APAPSWPM   | 218  | 169  |
| >TP53-L93M·APAPSWPL   | 87  | >TP53-L93M·APAPSWPM   | 116  | 29   |
| >TP53-L93M·PAPAPSWPL  | 9   | >TP53-L93M·PAPAPSWPM  | 12   | 3    |
| >TP53-L93M·APAPAPSWP  | 576 | >TP53-L93M·APAPAPSWP  | 361  | 215  |
| >TP53-L93M·APAPAPSWP  | 73  | >TP53-L93M·APAPAPSWP  | 75   | 2    |
| >TP53-L93M·APAPAPSWP  | 41  | >TP53-L93M·APAPAPSWP  | 150  | 109  |
| >TP53-L93M·APAPAPSWP  | 390 | >TP53-L93M·APAPAPSWP  | 476  | 86   |
| >TP53-M133 MFCQLAKTC  | 450 | >TP53-M133 IFCQLAKTC  | 3383 | 2933 |
| >TP53-M133 KMFCQLAKT  | 89  | >TP53-M133 KIFCQLAKT  | 1373 | 1284 |
| >TP53-M133 KMFCQLAKT  | 102 | >TP53-M133 KIFCQLAKT  | 1361 | 1259 |
| >TP53-M133 KMFCQLAKT  | 19  | >TP53-M133 KIFCQLAKT  | 249  | 230  |
| >TP53-M133 KMFCQLAKT  | 199 | >TP53-M133 KIFCQLAKT  | 559  | 360  |
| >TP53-M133 KMFCQLAKT  | 19  | >TP53-M133 KIFCQLAKT  | 1185 | 1166 |
| >TP53-M133 KMFCQLAKTC | 23  | >TP53-M133 KIFCQLAKTC | 743  | 720  |
| >TP53-M133 KMFCQLAKT  | 55  | >TP53-M133 KIFCQLAKT  | 3459 | 3404 |
| >TP53-M133 KMFCQLAKTC | 61  | >TP53-M133 KIFCQLAKTC | 2690 | 2629 |
| >TP53-M133 KMFCQLAK   | 26  | >TP53-M133 KIFCQLAK   | 32   | 6    |
| >TP53-M133 KMFCQLAK   | 12  | >TP53-M133 KIFCQLAK   | 18   | 6    |
| >TP53-M133 KMFCQLAK   | 8   | >TP53-M133 KIFCQLAK   | 7    | 1    |
| >TP53-M133 KMFCQLAK   | 35  | >TP53-M133 KIFCQLAK   | 115  | 80   |
| >TP53-M133 KMFCQLAK   | 371 | >TP53-M133 KIFCQLAK   | 639  | 268  |
| >TP53-M133 KMFCQLAKTC | 81  | >TP53-M133 KIFCQLAKTC | 143  | 62   |
| >TP53-M133 KMFCQLAK   | 58  | >TP53-M133 KIFCQLAK   | 1866 | 1808 |
| >TP53-M133 KMFCQLAKTC | 491 | >TP53-M133 KIFCQLAKTC | 8495 | 8004 |
| >TP53-M133 KMFCQLAK   | 39  | >TP53-M133 KIFCQLAK   | 53   | 14   |
| >TP53-M133 TCTYSPALNK | 453 | >TP53-M133 TCTYSPALNK | 4314 | 3861 |
| >TP53-M133 LNKMFCQL   | 100 | >TP53-M133 LNKIFCQL   | 177  | 77   |
| >TP53-M133 LNKMFCQLA  | 161 | >TP53-M133 LNKIFCQLAK | 237  | 76   |
| >TP53-M133 LNKMFCQL   | 153 | >TP53-M133 LNKIFCQL   | 344  | 191  |
| >TP53-M133 ALNKMFCQL  | 238 | >TP53-M133 ALNKIFCQL  | 144  | 94   |
| >TP53-M133 ALNKMFCQL  | 17  | >TP53-M133 ALNKIFCQL  | 6    | 11   |
| >TP53-M133 ALNKMFCQL  | 30  | >TP53-M133 ALNKIFCQL  | 23   | 7    |



|                         |      |                        |      |      |
|-------------------------|------|------------------------|------|------|
| >TP53-M133 ALNKMFCQL    | 442  | >TP53-M133 ALNKIFCQLA  | 380  | 62   |
| >TP53-M133 ALNKMFCQL    | 297  | >TP53-M133 ALNKIFCQL   | 187  | 110  |
| >TP53-M133 ALNKMFCQL    | 22   | >TP53-M133 ALNKIFCQL   | 10   | 12   |
| >TP53-M133 ALNKMFCQL    | 255  | >TP53-M133 ALNKIFCQLA  | 138  | 117  |
| >TP53-M133 ALNKMFCQL    | 198  | >TP53-M133 ALNKIFCQL   | 105  | 93   |
| >TP53-M133 ALNKMFCQL    | 21   | >TP53-M133 ALNKIFCQL   | 16   | 5    |
| >TP53-M133 ALNKMFCQL    | 256  | >TP53-M133 ALNKIFCQLA  | 181  | 75   |
| >TP53-M133 ALNKMFCQL    | 66   | >TP53-M133 ALNKIFCQL   | 27   | 39   |
| >TP53-M133 ALNKMFCQ     | 245  | >TP53-M133 ALNKIFCQ    | 171  | 74   |
| >TP53-M133 ALNKMFCQL    | 3    | >TP53-M133 ALNKIFCQL   | 3    | 0    |
| >TP53-M133 ALNKMFCQL    | 11   | >TP53-M133 ALNKIFCQLA  | 13   | 2    |
| >TP53-M133 ALNKMFCQL    | 37   | >TP53-M133 ALNKIFCQLAI | 36   | 1    |
| >TP53-M133 ALNKMFCQL    | 25   | >TP53-M133 ALNKIFCQLAI | 27   | 2    |
| >TP53-M133 ALNKMFCQL    | 113  | >TP53-M133 ALNKIFCQLAI | 136  | 23   |
| >TP53-M133 ALNKMFCQL    | 431  | >TP53-M133 ALNKIFCQLAI | 326  | 105  |
| >TP53-M133 ALNKMFCQL    | 860  | >TP53-M133 ALNKIFCQL   | 406  | 454  |
| >TP53-M133 ALNKMFCQL    | 288  | >TP53-M133 ALNKIFCQL   | 481  | 193  |
| >TP53-M133 ALNKMFCQL    | 416  | >TP53-M133 ALNKIFCQL   | 672  | 256  |
| >TP53-M133 SPALNKMFCQ   | 432  | >TP53-M133 SPALNKIFCQI | 351  | 81   |
| >TP53-M133 SPALNKMFCQ   | 100  | >TP53-M133 SPALNKIF    | 81   | 19   |
| >TP53-M133 SPALNKMFCQ   | 41   | >TP53-M133 SPALNKIFCQI | 52   | 11   |
| >TP53-M133 SPALNKMFCQ   | 372  | >TP53-M133 SPALNKIFCQI | 626  | 254  |
| >TP53-M133 SPALNKMFCQ   | 326  | >TP53-M133 SPALNKIF    | 163  | 163  |
| >TP53-M133 SPALNKMFCQ   | 450  | >TP53-M133 SPALNKIF    | 409  | 41   |
| >TP53-M133 YSPALNKMFCQ  | 384  | >TP53-M133 YSPALNKIF   | 1722 | 1338 |
| >TP53-M133 YSPALNKMFCQ  | 5281 | >TP53-M133 YSPALNKI    | 324  | 4957 |
| >TP53-M133 YSPALNKMFCQ  | 104  | >TP53-M133 YSPALNKIF   | 70   | 34   |
| >TP53-M133 YSPALNKMFCQ  | 43   | >TP53-M133 YSPALNKIF   | 98   | 55   |
| >TP53-M133 YSPALNKMFCQ  | 40   | >TP53-M133 YSPALNKI    | 101  | 61   |
| >TP53-M133 YSPALNKMFCQ  | 3    | >TP53-M133 YSPALNKIF   | 2    | 1    |
| >TP53-M133 YSPALNKMFCQ  | 22   | >TP53-M133 YSPALNKIFC  | 15   | 7    |
| >TP53-M133 YSPALNKMFCQ  | 124  | >TP53-M133 YSPALNKIFCC | 97   | 27   |
| >TP53-M133 YSPALNKMFCQ  | 67   | >TP53-M133 YSPALNKI    | 406  | 339  |
| >TP53-M133 YSPALNKMFCQ  | 103  | >TP53-M133 YSPALNKIF   | 211  | 108  |
| >TP53-M133 YSPALNKMFCQ  | 4293 | >TP53-M133 YSPALNKI    | 145  | 4148 |
| >TP53-M133 TYSPALNKMFCQ | 136  | >TP53-M133 TYSPALNKI   | 12   | 124  |
| >TP53-M133 TYSPALNKMFCQ | 1702 | >TP53-M133 TYSPALNKI   | 82   | 1620 |
| >TP53-M133 TYSPALNKMFCQ | 179  | >TP53-M133 TYSPALNKIF  | 157  | 22   |
| >TP53-M133 TYSPALNKMFCQ | 1122 | >TP53-M133 TYSPALNKI   | 137  | 985  |
| >TP53-M133 TYSPALNKMFCQ | 64   | >TP53-M133 TYSPALNKIF  | 55   | 9    |
| >TP53-M133 TYSPALNKMFCQ | 27   | >TP53-M133 TYSPALNKI   | 6    | 21   |
| >TP53-M133 TYSPALNKMFCQ | 5    | >TP53-M133 TYSPALNKIF  | 7    | 2    |
| >TP53-M133 TYSPALNKMFCQ | 439  | >TP53-M133 TYSPALNKIFC | 586  | 147  |

|                        |       |                        |       |       |
|------------------------|-------|------------------------|-------|-------|
| >TP53-M133 CTYSPALNKM  | 2550  | >TP53-M133 CTYSPALNKI  | 379   | 2171  |
| >TP53-M133 CTYSPALNKM  | 343   | >TP53-M133 CTYSPALNKIF | 1264  | 921   |
| >TP53-M133 CTYSPALNKM  | 63    | >TP53-M133 CTYSPALNKI  | 2288  | 2225  |
| >TP53-M133 CTYSPALNKM  | 380   | >TP53-M133 CTYSPALNKIF | 401   | 21    |
| >TP53-M133 CTYSPALNKM  | 246   | >TP53-M133 CTYSPALNKI  | 5735  | 5489  |
| >TP53-M133 CTYSPALNKM  | 1364  | >TP53-M133 CTYSPALNKI  | 100   | 1264  |
| >TP53-M133 CTYSPALNKM  | 488   | >TP53-M133 CTYSPALNKI  | 236   | 252   |
| >TP53-M133 CTYSPALNKM  | 23    | >TP53-M133 CTYSPALNKIF | 18    | 5     |
| >TP53-M133 CTYSPALNKM  | 24    | >TP53-M133 CTYSPALNKI  | 97    | 73    |
| >TP53-M133 CTYSPALNKM  | 5     | >TP53-M133 CTYSPALNKIF | 6     | 1     |
| >TP53-M133 CTYSPALNKM  | 627   | >TP53-M133 CTYSPALNKIF | 297   | 330   |
| >TP53-M133 CTYSPALNKM  | 76    | >TP53-M133 CTYSPALNKI  | 154   | 78    |
| >TP53-M133 CTYSPALNKM  | 146   | >TP53-M133 CTYSPALNKIF | 177   | 31    |
| >TP53-M133 CTYSPALNKM  | 30    | >TP53-M133 CTYSPALNKI  | 433   | 403   |
| >TP53-M133 CTYSPALNKM  | 13    | >TP53-M133 CTYSPALNKIF | 19    | 6     |
| >TP53-M133 CTYSPALNKM  | 10304 | >TP53-M133 CTYSPALNKI  | 107   | 10197 |
| >TP53-M133 CTYSPALNKM  | 358   | >TP53-M133 CTYSPALNKIF | 412   | 54    |
| >TP53-M133 MFCQLAKTC   | 450   | >TP53-M133 KFCQLAKTC   | 395   | 55    |
| >TP53-M133 KMFCQLAKT   | 89    | >TP53-M133 KKFCQLAKT   | 21708 | 21619 |
| >TP53-M133 KMFCQLAKT   | 102   | >TP53-M133 KKFCQLAKT   | 17174 | 17072 |
| >TP53-M133 KMFCQLAKT   | 19    | >TP53-M133 KKFCQLAKT   | 14684 | 14665 |
| >TP53-M133 KMFCQLAKT   | 199   | >TP53-M133 KKFCQLAKT   | 15355 | 15156 |
| >TP53-M133 KMFCQLAKT   | 19    | >TP53-M133 KKFCQLAKT   | 19017 | 18998 |
| >TP53-M133 KMFCQLAKTC  | 23    | >TP53-M133 KKFCQLAKTC  | 15099 | 15076 |
| >TP53-M133 KMFCQLAKT   | 55    | >TP53-M133 KKFCQLAKT   | 15212 | 15157 |
| >TP53-M133 KMFCQLAKTC  | 61    | >TP53-M133 KKFCQLAKTC  | 14257 | 14196 |
| >TP53-M133 KMFCQLAK    | 26    | >TP53-M133 KKFCQLAK    | 5303  | 5277  |
| >TP53-M133 KMFCQLAK    | 12    | >TP53-M133 KKFCQLAK    | 4243  | 4231  |
| >TP53-M133 KMFCQLAK    | 8     | >TP53-M133 KKFCQLAK    | 121   | 113   |
| >TP53-M133 KMFCQLAK    | 35    | >TP53-M133 KKFCQLAK    | 5663  | 5628  |
| >TP53-M133 KMFCQLAK    | 371   | >TP53-M133 KKFCQLAK    | 14062 | 13691 |
| >TP53-M133 KMFCQLAKTC  | 81    | >TP53-M133 KKFCQLAKTC  | 6695  | 6614  |
| >TP53-M133 KMFCQLAK    | 58    | >TP53-M133 KKFCQLAK    | 34    | 24    |
| >TP53-M133 KMFCQLAKTC  | 491   | >TP53-M133 KKFCQLAKTC  | 225   | 266   |
| >TP53-M133 KMFCQLAKTC  | 802   | >TP53-M133 KKFCQLAKTC  | 404   | 398   |
| >TP53-M133 KMFCQLAK    | 39    | >TP53-M133 KKFCQLAK    | 327   | 288   |
| >TP53-M133 TCTYSPALNKI | 453   | >TP53-M133 TCTYSPALNKI | 21037 | 20584 |
| >TP53-M133 LNKMFQCL    | 100   | >TP53-M133 LNKKFCQL    | 199   | 99    |
| >TP53-M133 LNKMFQCLAI  | 161   | >TP53-M133 LNKKFCQLAK  | 161   | 0     |
| >TP53-M133 LNKMFQCL    | 153   | >TP53-M133 LNKKFCQL    | 169   | 16    |
| >TP53-M133 ALNKMFCQL   | 238   | >TP53-M133 ALNKKFCQL   | 631   | 393   |
| >TP53-M133 ALNKMFCQL   | 17    | >TP53-M133 ALNKKFCQL   | 30    | 13    |
| >TP53-M133 ALNKMFCQL   | 30    | >TP53-M133 ALNKKFCQL   | 35    | 5     |

|                          |       |                          |       |       |
|--------------------------|-------|--------------------------|-------|-------|
| >TP53-M133 ALNKMFCQL     | 442   | >TP53-M133 ALNKKFCQLA    | 769   | 327   |
| >TP53-M133 ALNKMFCQL     | 297   | >TP53-M133 ALNKKFCQL     | 649   | 352   |
| >TP53-M133 ALNKMFCQL     | 22    | >TP53-M133 ALNKKFCQL     | 18    | 4     |
| >TP53-M133 ALNKMFCQL     | 255   | >TP53-M133 ALNKKFCQLA    | 243   | 12    |
| >TP53-M133 ALNKMFCQL     | 198   | >TP53-M133 ALNKKFCQL     | 145   | 53    |
| >TP53-M133 ALNKMFCQL     | 21    | >TP53-M133 ALNKKFCQL     | 26    | 5     |
| >TP53-M133 ALNKMFCQL     | 256   | >TP53-M133 ALNKKFCQLA    | 335   | 79    |
| >TP53-M133 ALNKMFCQL     | 66    | >TP53-M133 ALNKKFCQL     | 144   | 78    |
| >TP53-M133 ALNKMFCQ      | 245   | >TP53-M133 ALNKKFCQ      | 385   | 140   |
| >TP53-M133 ALNKMFCQL     | 3     | >TP53-M133 ALNKKFCQL     | 4     | 1     |
| >TP53-M133 ALNKMFCQL     | 11    | >TP53-M133 ALNKKFCQLA    | 17    | 6     |
| >TP53-M133 ALNKMFCQL     | 37    | >TP53-M133 ALNKKFCQLA    | 38    | 1     |
| >TP53-M133 ALNKMFCQL     | 25    | >TP53-M133 ALNKKFCQLA    | 43    | 18    |
| >TP53-M133 ALNKMFCQL     | 113   | >TP53-M133 ALNKKFCQLA    | 127   | 14    |
| >TP53-M133 ALNKMFCQL     | 431   | >TP53-M133 ALNKKFCQLA    | 421   | 10    |
| >TP53-M133 ALNKMFCQL     | 288   | >TP53-M133 ALNKKFCQL     | 33    | 255   |
| >TP53-M133 ALNKMFCQL     | 416   | >TP53-M133 ALNKKFCQL     | 909   | 493   |
| >TP53-M133 SPALNKMFCQ    | 432   | >TP53-M133 SPALNKKFCQ    | 1287  | 855   |
| >TP53-M133 SPALNKMFCQ    | 100   | >TP53-M133 SPALNKKFCQ    | 226   | 126   |
| >TP53-M133 SPALNKMFCQ    | 41    | >TP53-M133 SPALNKKFCQ    | 49    | 8     |
| >TP53-M133 SPALNKMFCQ    | 372   | >TP53-M133 SPALNKKFCQ    | 253   | 119   |
| >TP53-M133 SPALNKMFCQ    | 326   | >TP53-M133 SPALNKKFCQ    | 590   | 264   |
| >TP53-M133 SPALNKMFCQ    | 450   | >TP53-M133 SPALNKKFCQ    | 642   | 192   |
| >TP53-M133 YSPALNKMFCQ   | 384   | >TP53-M133 YSPALNKKFCQ   | 837   | 453   |
| >TP53-M133 YSPALNKMFCQ   | 28623 | >TP53-M133 YSPALNKKFCQ   | 338   | 28285 |
| >TP53-M133 YSPALNKMFCQ   | 104   | >TP53-M133 YSPALNKKFCQ   | 222   | 118   |
| >TP53-M133 YSPALNKMFCQ   | 43    | >TP53-M133 YSPALNKKFCQ   | 29    | 14    |
| >TP53-M133 YSPALNKMFCQ   | 40    | >TP53-M133 YSPALNKKFCQ   | 9767  | 9727  |
| >TP53-M133 YSPALNKMFCQ   | 3     | >TP53-M133 YSPALNKKFCQ   | 4     | 1     |
| >TP53-M133 YSPALNKMFCQ   | 22    | >TP53-M133 YSPALNKKFCQ   | 45    | 23    |
| >TP53-M133 YSPALNKMFCQ   | 124   | >TP53-M133 YSPALNKKFCQ   | 728   | 604   |
| >TP53-M133 YSPALNKMFCQ   | 67    | >TP53-M133 YSPALNKKFCQ   | 10325 | 10258 |
| >TP53-M133 YSPALNKMFCQ   | 103   | >TP53-M133 YSPALNKKFCQ   | 434   | 331   |
| >TP53-M133 TYSPALNKMFCQ  | 136   | >TP53-M133 TYSPALNKKFCQ  | 20301 | 20165 |
| >TP53-M133 TYSPALNKMFCQ  | 179   | >TP53-M133 TYSPALNKKFCQ  | 434   | 255   |
| >TP53-M133 TYSPALNKMFCQ  | 64    | >TP53-M133 TYSPALNKKFCQ  | 87    | 23    |
| >TP53-M133 TYSPALNKMFCQ  | 27    | >TP53-M133 TYSPALNKKFCQ  | 591   | 564   |
| >TP53-M133 TYSPALNKMFCQ  | 5     | >TP53-M133 TYSPALNKKFCQ  | 6     | 1     |
| >TP53-M133 TYSPALNKMFCQ  | 8331  | >TP53-M133 TYSPALNKKFCQ  | 268   | 8063  |
| >TP53-M133 TYSPALNKMFCQ  | 439   | >TP53-M133 TYSPALNKKFCQ  | 526   | 87    |
| >TP53-M133 CTYSPALNKMFCQ | 22657 | >TP53-M133 CTYSPALNKKFCQ | 50    | 22607 |
| >TP53-M133 CTYSPALNKMFCQ | 31946 | >TP53-M133 CTYSPALNKKFCQ | 19    | 31927 |
| >TP53-M133 CTYSPALNKMFCQ | 343   | >TP53-M133 CTYSPALNKKFCQ | 661   | 318   |

|                        |       |                        |       |       |
|------------------------|-------|------------------------|-------|-------|
| >TP53-M133 CTYSPALNKM  | 63    | >TP53-M133 CTYSPALNKK  | 12107 | 12044 |
| >TP53-M133 CTYSPALNKM  | 380   | >TP53-M133 CTYSPALNKK  | 483   | 103   |
| >TP53-M133 CTYSPALNKM  | 246   | >TP53-M133 CTYSPALNKK  | 8906  | 8660  |
| >TP53-M133 CTYSPALNKM  | 7650  | >TP53-M133 CTYSPALNKK  | 274   | 7376  |
| >TP53-M133 CTYSPALNKM  | 23722 | >TP53-M133 CTYSPALNKK  | 18    | 23704 |
| >TP53-M133 CTYSPALNKM  | 488   | >TP53-M133 CTYSPALNKK  | 13511 | 13023 |
| >TP53-M133 CTYSPALNKM  | 23    | >TP53-M133 CTYSPALNKK  | 39    | 16    |
| >TP53-M133 CTYSPALNKM  | 24    | >TP53-M133 CTYSPALNKK  | 9583  | 9559  |
| >TP53-M133 CTYSPALNKM  | 5     | >TP53-M133 CTYSPALNKK  | 5     | 0     |
| >TP53-M133 CTYSPALNKM  | 627   | >TP53-M133 CTYSPALNKK  | 494   | 133   |
| >TP53-M133 CTYSPALNKM  | 76    | >TP53-M133 CTYSPALNKK  | 10320 | 10244 |
| >TP53-M133 CTYSPALNKM  | 146   | >TP53-M133 CTYSPALNKK  | 427   | 281   |
| >TP53-M133 CTYSPALNKM  | 30    | >TP53-M133 CTYSPALNKK  | 8648  | 8618  |
| >TP53-M133 CTYSPALNKM  | 13    | >TP53-M133 CTYSPALNKK  | 31    | 18    |
| >TP53-M133 CTYSPALNKM  | 358   | >TP53-M133 CTYSPALNKK  | 407   | 49    |
| >TP53-M133 MFCQLAKTC   | 450   | >TP53-M133 LFCQLAKTC   | 2277  | 1827  |
| >TP53-M133 KMFCQLAKT   | 89    | >TP53-M133 KLFCQLAKT   | 119   | 30    |
| >TP53-M133 KMFCQLAKT   | 102   | >TP53-M133 KLFCQLAKT   | 94    | 8     |
| >TP53-M133 KMFCQLAKT   | 19    | >TP53-M133 KLFCQLAKT   | 23    | 4     |
| >TP53-M133 KMFCQLAKT   | 199   | >TP53-M133 KLFCQLAKT   | 289   | 90    |
| >TP53-M133 KMFCQLAKT   | 19    | >TP53-M133 KLFCQLAKT   | 29    | 10    |
| >TP53-M133 KMFCQLAKTC  | 23    | >TP53-M133 KLFCQLAKTC  | 36    | 13    |
| >TP53-M133 KMFCQLAKT   | 55    | >TP53-M133 KLFCQLAKT   | 75    | 20    |
| >TP53-M133 KMFCQLAKTC  | 61    | >TP53-M133 KLFCQLAKTC  | 79    | 18    |
| >TP53-M133 KMFCQLAKT   | 518   | >TP53-M133 KLFCQLAKT   | 218   | 300   |
| >TP53-M133 KMFCQLAKTC  | 805   | >TP53-M133 KLFCQLAKTC  | 380   | 425   |
| >TP53-M133 KMFCQLAK    | 26    | >TP53-M133 KLFCQLAK    | 27    | 1     |
| >TP53-M133 KMFCQLAK    | 12    | >TP53-M133 KLFCQLAK    | 27    | 15    |
| >TP53-M133 KMFCQLAK    | 8     | >TP53-M133 KLFCQLAK    | 11    | 3     |
| >TP53-M133 KMFCQLAK    | 35    | >TP53-M133 KLFCQLAK    | 112   | 77    |
| >TP53-M133 KMFCQLAK    | 371   | >TP53-M133 KLFCQLAK    | 497   | 126   |
| >TP53-M133 KMFCQLAKTC  | 81    | >TP53-M133 KLFCQLAKTC  | 108   | 27    |
| >TP53-M133 KMFCQLAK    | 58    | >TP53-M133 KLFCQLAK    | 460   | 402   |
| >TP53-M133 KMFCQLAKTC  | 491   | >TP53-M133 KLFCQLAKTC  | 3283  | 2792  |
| >TP53-M133 KMFCQLAK    | 39    | >TP53-M133 KLFCQLAK    | 68    | 29    |
| >TP53-M133 TCTYSPALNKI | 453   | >TP53-M133 TCTYSPALNKI | 2446  | 1993  |
| >TP53-M133 LNKMFQQL    | 100   | >TP53-M133 LNKLFCQL    | 142   | 42    |
| >TP53-M133 LNKMFQQLAI  | 161   | >TP53-M133 LNKLFCQLAK  | 269   | 108   |
| >TP53-M133 LNKMFQQL    | 153   | >TP53-M133 LNKLFCQL    | 415   | 262   |
| >TP53-M133 ALNKMFCQL   | 238   | >TP53-M133 ALNKLFCQL   | 217   | 21    |
| >TP53-M133 ALNKMFCQL   | 17    | >TP53-M133 ALNKLFCQL   | 12    | 5     |
| >TP53-M133 ALNKMFCQL   | 30    | >TP53-M133 ALNKLFCQL   | 41    | 11    |
| >TP53-M133 ALNKMFCQL   | 442   | >TP53-M133 ALNKLFCQLA  | 335   | 107   |

|                        |      |                         |      |      |
|------------------------|------|-------------------------|------|------|
| >TP53-M133 ALNKMFCQL   | 297  | >TP53-M133 ALNKLFCQL    | 242  | 55   |
| >TP53-M133 ALNKMFCQL   | 22   | >TP53-M133 ALNKLFCQL    | 12   | 10   |
| >TP53-M133 ALNKMFCQL   | 255  | >TP53-M133 ALNKLFCQLA   | 198  | 57   |
| >TP53-M133 ALNKMFCQL   | 198  | >TP53-M133 ALNKLFCQL    | 141  | 57   |
| >TP53-M133 ALNKMFCQL   | 21   | >TP53-M133 ALNKLFCQL    | 16   | 5    |
| >TP53-M133 ALNKMFCQL   | 256  | >TP53-M133 ALNKLFCQLA   | 204  | 52   |
| >TP53-M133 ALNKMFCQL   | 66   | >TP53-M133 ALNKLFCQL    | 111  | 45   |
| >TP53-M133 ALNKMFCQ    | 245  | >TP53-M133 ALNKLFCQ     | 281  | 36   |
| >TP53-M133 ALNKMFCQL   | 3    | >TP53-M133 ALNKLFCQL    | 3    | 0    |
| >TP53-M133 ALNKMFCQL   | 11   | >TP53-M133 ALNKLFCQLA   | 16   | 5    |
| >TP53-M133 ALNKMFCQL   | 37   | >TP53-M133 ALNKLFCQLA   | 39   | 2    |
| >TP53-M133 ALNKMFCQL   | 25   | >TP53-M133 ALNKLFCQLA   | 29   | 4    |
| >TP53-M133 ALNKMFCQL   | 113  | >TP53-M133 ALNKLFCQLA   | 149  | 36   |
| >TP53-M133 ALNKMFCQL   | 431  | >TP53-M133 ALNKLFCQLA   | 410  | 21   |
| >TP53-M133 ALNKMFCQL   | 288  | >TP53-M133 ALNKLFCQL    | 489  | 201  |
| >TP53-M133 ALNKMFCQL   | 416  | >TP53-M133 ALNKLFCQL    | 382  | 34   |
| >TP53-M133 SPALNKMFM   | 1125 | >TP53-M133 SPALNKLFM    | 413  | 712  |
| >TP53-M133 SPALNKMFCQ  | 432  | >TP53-M133 SPALNKLFCQ   | 504  | 72   |
| >TP53-M133 SPALNKMFM   | 100  | >TP53-M133 SPALNKLFM    | 186  | 86   |
| >TP53-M133 SPALNKMFCQ  | 41   | >TP53-M133 SPALNKLFCQ   | 47   | 6    |
| >TP53-M133 SPALNKMFCQ  | 372  | >TP53-M133 SPALNKLFCQ   | 481  | 109  |
| >TP53-M133 SPALNKMFM   | 326  | >TP53-M133 SPALNKLFM    | 380  | 54   |
| >TP53-M133 SPALNKMFM   | 450  | >TP53-M133 SPALNKLFM    | 1244 | 794  |
| >TP53-M133 YSPALNKMFM  | 384  | >TP53-M133 YSPALNKLFM   | 1290 | 906  |
| >TP53-M133 YSPALNKMFM  | 104  | >TP53-M133 YSPALNKLFM   | 243  | 139  |
| >TP53-M133 YSPALNKMFM  | 43   | >TP53-M133 YSPALNKLFM   | 69   | 26   |
| >TP53-M133 YSPALNKM    | 40   | >TP53-M133 YSPALNKL     | 26   | 14   |
| >TP53-M133 YSPALNKMFM  | 3    | >TP53-M133 YSPALNKLFM   | 2    | 1    |
| >TP53-M133 YSPALNKMFCQ | 22   | >TP53-M133 YSPALNKLFCQ  | 15   | 7    |
| >TP53-M133 YSPALNKMFCQ | 124  | >TP53-M133 YSPALNKLFCQ  | 122  | 2    |
| >TP53-M133 YSPALNKM    | 67   | >TP53-M133 YSPALNKL     | 278  | 211  |
| >TP53-M133 YSPALNKMFM  | 103  | >TP53-M133 YSPALNKLFM   | 116  | 13   |
| >TP53-M133 TYSPALNKM   | 136  | >TP53-M133 TYSPALNKL    | 35   | 101  |
| >TP53-M133 TYSPALNKM   | 1702 | >TP53-M133 TYSPALNKL    | 171  | 1531 |
| >TP53-M133 TYSPALNKMFM | 179  | >TP53-M133 TYSPALNKLFM  | 109  | 70   |
| >TP53-M133 TYSPALNKM   | 1122 | >TP53-M133 TYSPALNKL    | 330  | 792  |
| >TP53-M133 TYSPALNKMFM | 64   | >TP53-M133 TYSPALNKLFM  | 51   | 13   |
| >TP53-M133 TYSPALNKM   | 27   | >TP53-M133 TYSPALNKL    | 6    | 21   |
| >TP53-M133 TYSPALNKMFM | 5    | >TP53-M133 TYSPALNKLFM  | 6    | 1    |
| >TP53-M133 TYSPALNKMFM | 586  | >TP53-M133 TYSPALNKLFM  | 425  | 161  |
| >TP53-M133 TYSPALNKM   | 866  | >TP53-M133 TYSPALNKL    | 472  | 394  |
| >TP53-M133 TYSPALNKMFM | 439  | >TP53-M133 TYSPALNKLFCQ | 483  | 44   |
| >TP53-M133 CTYSPALNKM  | 1199 | >TP53-M133 CTYSPALNKL   | 243  | 956  |

|                        |       |                        |       |       |
|------------------------|-------|------------------------|-------|-------|
| >TP53-M133 CTYSPALNKM  | 343   | >TP53-M133 CTYSPALNKLI | 945   | 602   |
| >TP53-M133 CTYSPALNKM  | 63    | >TP53-M133 CTYSPALNKL  | 489   | 426   |
| >TP53-M133 CTYSPALNKM  | 380   | >TP53-M133 CTYSPALNKLI | 823   | 443   |
| >TP53-M133 CTYSPALNKM  | 246   | >TP53-M133 CTYSPALNKL  | 1741  | 1495  |
| >TP53-M133 CTYSPALNKM  | 1364  | >TP53-M133 CTYSPALNKL  | 232   | 1132  |
| >TP53-M133 CTYSPALNKM  | 488   | >TP53-M133 CTYSPALNKL  | 396   | 92    |
| >TP53-M133 CTYSPALNKM  | 23    | >TP53-M133 CTYSPALNKLI | 43    | 20    |
| >TP53-M133 CTYSPALNKM  | 24    | >TP53-M133 CTYSPALNKL  | 32    | 8     |
| >TP53-M133 CTYSPALNKM  | 5     | >TP53-M133 CTYSPALNKLI | 6     | 1     |
| >TP53-M133 CTYSPALNKM  | 627   | >TP53-M133 CTYSPALNKLI | 254   | 373   |
| >TP53-M133 CTYSPALNKM  | 76    | >TP53-M133 CTYSPALNKL  | 52    | 24    |
| >TP53-M133 CTYSPALNKM  | 146   | >TP53-M133 CTYSPALNKLI | 74    | 72    |
| >TP53-M133 CTYSPALNKM  | 30    | >TP53-M133 CTYSPALNKL  | 182   | 152   |
| >TP53-M133 CTYSPALNKM  | 13    | >TP53-M133 CTYSPALNKLI | 14    | 1     |
| >TP53-M133 CTYSPALNKM  | 358   | >TP53-M133 CTYSPALNKLI | 348   | 10    |
| >TP53-M133 MFCQLAKTC   | 450   | >TP53-M133 RFCQLAKTC   | 1061  | 611   |
| >TP53-M133 KMFCQLAKT   | 89    | >TP53-M133 KRFCQLAKT   | 22282 | 22193 |
| >TP53-M133 KMFCQLAKT   | 102   | >TP53-M133 KRFCQLAKT   | 22292 | 22190 |
| >TP53-M133 KMFCQLAKT   | 19    | >TP53-M133 KRFCQLAKT   | 18194 | 18175 |
| >TP53-M133 KMFCQLAKT   | 199   | >TP53-M133 KRFCQLAKT   | 22062 | 21863 |
| >TP53-M133 KMFCQLAKT   | 19    | >TP53-M133 KRFCQLAKT   | 22894 | 22875 |
| >TP53-M133 KMFCQLAKTC  | 23    | >TP53-M133 KRFCQLAKTC  | 20421 | 20398 |
| >TP53-M133 KMFCQLAKT   | 55    | >TP53-M133 KRFCQLAKT   | 18738 | 18683 |
| >TP53-M133 KMFCQLAKTC  | 61    | >TP53-M133 KRFCQLAKTC  | 17603 | 17542 |
| >TP53-M133 KMFCQLAK    | 26    | >TP53-M133 KRFCQLAK    | 6860  | 6834  |
| >TP53-M133 KMFCQLAK    | 12    | >TP53-M133 KRFCQLAK    | 4793  | 4781  |
| >TP53-M133 KMFCQLAK    | 8     | >TP53-M133 KRFCQLAK    | 134   | 126   |
| >TP53-M133 KMFCQLAK    | 35    | >TP53-M133 KRFCQLAK    | 8612  | 8577  |
| >TP53-M133 KMFCQLAK    | 371   | >TP53-M133 KRFCQLAK    | 15332 | 14961 |
| >TP53-M133 KMFCQLAKTC  | 81    | >TP53-M133 KRFCQLAKTC  | 8039  | 7958  |
| >TP53-M133 KMFCQLAK    | 58    | >TP53-M133 KRFCQLAK    | 148   | 90    |
| >TP53-M133 KMFCQLAKTC  | 491   | >TP53-M133 KRFCQLAKTC  | 699   | 208   |
| >TP53-M133 KMFCQLAK    | 2466  | >TP53-M133 KRFCQLAK    | 27    | 2439  |
| >TP53-M133 KMFCQLAKT   | 11813 | >TP53-M133 KRFCQLAKT   | 130   | 11683 |
| >TP53-M133 KMFCQLAKTC  | 15803 | >TP53-M133 KRFCQLAKTC  | 361   | 15442 |
| >TP53-M133 KMFCQLAK    | 14388 | >TP53-M133 KRFCQLAK    | 165   | 14223 |
| >TP53-M133 KMFCQLAK    | 39    | >TP53-M133 KRFCQLAK    | 249   | 210   |
| >TP53-M133 TCTYSPALNKI | 36093 | >TP53-M133 TCTYSPALNKI | 347   | 35746 |
| >TP53-M133 TCTYSPALNKI | 453   | >TP53-M133 TCTYSPALNKI | 19855 | 19402 |
| >TP53-M133 LNKMFQCQL   | 100   | >TP53-M133 LNKRFQCQL   | 79    | 21    |
| >TP53-M133 LNKMFQCQLAI | 161   | >TP53-M133 LNKRFQCQLAK | 85    | 76    |
| >TP53-M133 LNKMFQCQL   | 153   | >TP53-M133 LNKRFQCQL   | 137   | 16    |
| >TP53-M133 ALNKMFCQL   | 238   | >TP53-M133 ALNKRFCQL   | 530   | 292   |

|                        |       |                        |       |       |
|------------------------|-------|------------------------|-------|-------|
| >TP53-M133 ALNKMFCQL   | 17    | >TP53-M133 ALNKRFCQL   | 31    | 14    |
| >TP53-M133 ALNKMFCQL   | 30    | >TP53-M133 ALNKRFCQL   | 36    | 6     |
| >TP53-M133 ALNKMFCQL   | 442   | >TP53-M133 ALNKRFCQLA  | 889   | 447   |
| >TP53-M133 ALNKMFCQL   | 297   | >TP53-M133 ALNKRFCQL   | 324   | 27    |
| >TP53-M133 ALNKMFCQL   | 22    | >TP53-M133 ALNKRFCQL   | 23    | 1     |
| >TP53-M133 ALNKMFCQL   | 255   | >TP53-M133 ALNKRFCQLA  | 272   | 17    |
| >TP53-M133 ALNKMFCQL   | 198   | >TP53-M133 ALNKRFCQL   | 241   | 43    |
| >TP53-M133 ALNKMFCQL   | 21    | >TP53-M133 ALNKRFCQL   | 28    | 7     |
| >TP53-M133 ALNKMFCQL   | 256   | >TP53-M133 ALNKRFCQLA  | 383   | 127   |
| >TP53-M133 ALNKMFCQL   | 66    | >TP53-M133 ALNKRFCQL   | 420   | 354   |
| >TP53-M133 ALNKMFCQ    | 245   | >TP53-M133 ALNKRFCQ    | 309   | 64    |
| >TP53-M133 ALNKMFCQL   | 3     | >TP53-M133 ALNKRFCQL   | 3     | 0     |
| >TP53-M133 ALNKMFCQL   | 11    | >TP53-M133 ALNKRFCQLA  | 15    | 4     |
| >TP53-M133 ALNKMFCQL   | 37    | >TP53-M133 ALNKRFCQLA  | 33    | 4     |
| >TP53-M133 ALNKMFCQL   | 25    | >TP53-M133 ALNKRFCQLA  | 33    | 8     |
| >TP53-M133 ALNKMFCQL   | 113   | >TP53-M133 ALNKRFCQLA  | 85    | 28    |
| >TP53-M133 ALNKMFCQL   | 431   | >TP53-M133 ALNKRFCQLA  | 302   | 129   |
| >TP53-M133 ALNKMFCQL   | 288   | >TP53-M133 ALNKRFCQL   | 24    | 264   |
| >TP53-M133 ALNKMFCQL   | 416   | >TP53-M133 ALNKRFCQL   | 545   | 129   |
| >TP53-M133 SPALNKMFCQ  | 432   | >TP53-M133 SPALNKRFCQ  | 1620  | 1188  |
| >TP53-M133 SPALNKMFC   | 100   | >TP53-M133 SPALNKRF    | 136   | 36    |
| >TP53-M133 SPALNKMFCQ  | 41    | >TP53-M133 SPALNKRFCQ  | 31    | 10    |
| >TP53-M133 SPALNKMFCQ  | 372   | >TP53-M133 SPALNKRFCQ  | 273   | 99    |
| >TP53-M133 SPALNKMFC   | 326   | >TP53-M133 SPALNKRF    | 510   | 184   |
| >TP53-M133 SPALNKMFC   | 450   | >TP53-M133 SPALNKRF    | 765   | 315   |
| >TP53-M133 YSPALNKMFC  | 384   | >TP53-M133 YSPALNKRF   | 1765  | 1381  |
| >TP53-M133 YSPALNKM    | 28623 | >TP53-M133 YSPALNKR    | 80    | 28543 |
| >TP53-M133 YSPALNKMFC  | 104   | >TP53-M133 YSPALNKRF   | 405   | 301   |
| >TP53-M133 YSPALNKMFC  | 43    | >TP53-M133 YSPALNKRF   | 23    | 20    |
| >TP53-M133 YSPALNKM    | 40    | >TP53-M133 YSPALNKR    | 17108 | 17068 |
| >TP53-M133 YSPALNKMFC  | 3     | >TP53-M133 YSPALNKRF   | 5     | 2     |
| >TP53-M133 YSPALNKMFCQ | 22    | >TP53-M133 YSPALNKRFCQ | 34    | 12    |
| >TP53-M133 YSPALNKMFCQ | 124   | >TP53-M133 YSPALNKRFCQ | 460   | 336   |
| >TP53-M133 YSPALNKM    | 67    | >TP53-M133 YSPALNKR    | 6089  | 6022  |
| >TP53-M133 YSPALNKMFC  | 103   | >TP53-M133 YSPALNKRF   | 259   | 156   |
| >TP53-M133 TYSPALNKM   | 136   | >TP53-M133 TYSPALNKR   | 24455 | 24319 |
| >TP53-M133 TYSPALNKMFC | 179   | >TP53-M133 TYSPALNKRF  | 522   | 343   |
| >TP53-M133 TYSPALNKMFC | 64    | >TP53-M133 TYSPALNKRF  | 118   | 54    |
| >TP53-M133 TYSPALNKM   | 27    | >TP53-M133 TYSPALNKR   | 704   | 677   |
| >TP53-M133 TYSPALNKMFC | 5     | >TP53-M133 TYSPALNKRF  | 7     | 2     |
| >TP53-M133 TYSPALNKM   | 20061 | >TP53-M133 TYSPALNKR   | 200   | 19861 |
| >TP53-M133 TYSPALNKM   | 32080 | >TP53-M133 TYSPALNKR   | 414   | 31666 |
| >TP53-M133 TYSPALNKM   | 29475 | >TP53-M133 TYSPALNKR   | 239   | 29236 |

|                        |       |                        |       |       |
|------------------------|-------|------------------------|-------|-------|
| >TP53-M133 TYSPALNKM   | 23488 | >TP53-M133 TYSPALNKR   | 107   | 23381 |
| >TP53-M133 TYSPALNKMFI | 439   | >TP53-M133 TYSPALNKRFI | 470   | 31    |
| >TP53-M133 CTYSPALNKM  | 31946 | >TP53-M133 CTYSPALNKR  | 169   | 31777 |
| >TP53-M133 CTYSPALNKM  | 343   | >TP53-M133 CTYSPALNKR  | 1293  | 950   |
| >TP53-M133 CTYSPALNKM  | 63    | >TP53-M133 CTYSPALNKR  | 10778 | 10715 |
| >TP53-M133 CTYSPALNKM  | 380   | >TP53-M133 CTYSPALNKR  | 268   | 112   |
| >TP53-M133 CTYSPALNKM  | 246   | >TP53-M133 CTYSPALNKR  | 11079 | 10833 |
| >TP53-M133 CTYSPALNKM  | 21545 | >TP53-M133 CTYSPALNKR  | 55    | 21490 |
| >TP53-M133 CTYSPALNKM  | 24462 | >TP53-M133 CTYSPALNKR  | 226   | 24236 |
| >TP53-M133 CTYSPALNKM  | 23722 | >TP53-M133 CTYSPALNKR  | 8     | 23714 |
| >TP53-M133 CTYSPALNKM  | 488   | >TP53-M133 CTYSPALNKR  | 15717 | 15229 |
| >TP53-M133 CTYSPALNKM  | 23    | >TP53-M133 CTYSPALNKR  | 64    | 41    |
| >TP53-M133 CTYSPALNKM  | 24    | >TP53-M133 CTYSPALNKR  | 6656  | 6632  |
| >TP53-M133 CTYSPALNKM  | 5     | >TP53-M133 CTYSPALNKR  | 4     | 1     |
| >TP53-M133 CTYSPALNKM  | 627   | >TP53-M133 CTYSPALNKR  | 432   | 195   |
| >TP53-M133 CTYSPALNKM  | 76    | >TP53-M133 CTYSPALNKR  | 9910  | 9834  |
| >TP53-M133 CTYSPALNKM  | 146   | >TP53-M133 CTYSPALNKR  | 526   | 380   |
| >TP53-M133 CTYSPALNKM  | 30    | >TP53-M133 CTYSPALNKR  | 10016 | 9986  |
| >TP53-M133 CTYSPALNKM  | 13    | >TP53-M133 CTYSPALNKR  | 23    | 10    |
| >TP53-M133 CTYSPALNKM  | 32875 | >TP53-M133 CTYSPALNKR  | 319   | 32556 |
| >TP53-M133 CTYSPALNKM  | 358   | >TP53-M133 CTYSPALNKR  | 504   | 146   |
| >TP53-M133 MFCQLAKTC   | 450   | >TP53-M133 TFCQLAKTC   | 3268  | 2818  |
| >TP53-M133 KMFCQLAKT   | 89    | >TP53-M133 KTFCQLAKT   | 4907  | 4818  |
| >TP53-M133 KMFCQLAKT   | 102   | >TP53-M133 KTFCQLAKT   | 4112  | 4010  |
| >TP53-M133 KMFCQLAKT   | 19    | >TP53-M133 KTFCQLAKT   | 1877  | 1858  |
| >TP53-M133 KMFCQLAKT   | 199   | >TP53-M133 KTFCQLAKT   | 2324  | 2125  |
| >TP53-M133 KMFCQLAKT   | 19    | >TP53-M133 KTFCQLAKT   | 4266  | 4247  |
| >TP53-M133 KMFCQLAKTC  | 23    | >TP53-M133 KTFCQLAKTC  | 2411  | 2388  |
| >TP53-M133 KMFCQLAKT   | 55    | >TP53-M133 KTFCQLAKT   | 6671  | 6616  |
| >TP53-M133 KMFCQLAKTC  | 61    | >TP53-M133 KTFCQLAKTC  | 5634  | 5573  |
| >TP53-M133 KMFCQLAK    | 26    | >TP53-M133 KTFCQLAK    | 35    | 9     |
| >TP53-M133 KMFCQLAK    | 12    | >TP53-M133 KTFCQLAK    | 12    | 0     |
| >TP53-M133 KMFCQLAK    | 8     | >TP53-M133 KTFCQLAK    | 4     | 4     |
| >TP53-M133 KMFCQLAK    | 35    | >TP53-M133 KTFCQLAK    | 31    | 4     |
| >TP53-M133 KMFCQLAK    | 371   | >TP53-M133 KTFCQLAK    | 245   | 126   |
| >TP53-M133 KMFCQLAKTC  | 81    | >TP53-M133 KTFCQLAKTC  | 54    | 27    |
| >TP53-M133 KMFCQLAK    | 3283  | >TP53-M133 KTFCQLAK    | 152   | 3131  |
| >TP53-M133 KMFCQLAK    | 58    | >TP53-M133 KTFCQLAK    | 1107  | 1049  |
| >TP53-M133 KMFCQLAKTC  | 491   | >TP53-M133 KTFCQLAKTC  | 5051  | 4560  |
| >TP53-M133 KMFCQLAKT   | 8468  | >TP53-M133 KTFCQLAKT   | 102   | 8366  |
| >TP53-M133 KMFCQLAKTC  | 9704  | >TP53-M133 KTFCQLAKTC  | 130   | 9574  |
| >TP53-M133 KMFCQLAK    | 802   | >TP53-M133 KTFCQLAK    | 95    | 707   |
| >TP53-M133 KMFCQLAK    | 39    | >TP53-M133 KTFCQLAK    | 194   | 155   |



|                       |      |                       |       |       |
|-----------------------|------|-----------------------|-------|-------|
| >TP53-M133 TCTYSPALNK | 453  | >TP53-M133 TCTYSPALNK | 16025 | 15572 |
| >TP53-M133 LNKMFQQL   | 100  | >TP53-M133 LNKTFCQL   | 145   | 45    |
| >TP53-M133 LNKMFQQLA  | 161  | >TP53-M133 LNKTFCQLAK | 178   | 17    |
| >TP53-M133 LNKMFQQL   | 153  | >TP53-M133 LNKTFCQL   | 420   | 267   |
| >TP53-M133 ALNKMFCQL  | 238  | >TP53-M133 ALNKTFCQL  | 461   | 223   |
| >TP53-M133 ALNKMFCQL  | 17   | >TP53-M133 ALNKTFCQL  | 22    | 5     |
| >TP53-M133 ALNKMFCQL  | 30   | >TP53-M133 ALNKTFCQL  | 44    | 14    |
| >TP53-M133 ALNKMFCQL  | 442  | >TP53-M133 ALNKTFCQLA | 404   | 38    |
| >TP53-M133 ALNKMFCQL  | 297  | >TP53-M133 ALNKTFCQL  | 354   | 57    |
| >TP53-M133 ALNKMFCQL  | 22   | >TP53-M133 ALNKTFCQL  | 9     | 13    |
| >TP53-M133 ALNKMFCQL  | 255  | >TP53-M133 ALNKTFCQLA | 142   | 113   |
| >TP53-M133 ALNKMFCQL  | 198  | >TP53-M133 ALNKTFCQL  | 52    | 146   |
| >TP53-M133 ALNKMFCQL  | 21   | >TP53-M133 ALNKTFCQL  | 15    | 6     |
| >TP53-M133 ALNKMFCQL  | 256  | >TP53-M133 ALNKTFCQLA | 182   | 74    |
| >TP53-M133 ALNKMFCQL  | 66   | >TP53-M133 ALNKTFCQL  | 46    | 20    |
| >TP53-M133 ALNKMFCQ   | 245  | >TP53-M133 ALNKTFCQ   | 216   | 29    |
| >TP53-M133 ALNKMFCQL  | 3    | >TP53-M133 ALNKTFCQL  | 3     | 0     |
| >TP53-M133 ALNKMFCQL  | 11   | >TP53-M133 ALNKTFCQLA | 12    | 1     |
| >TP53-M133 ALNKMFCQL  | 37   | >TP53-M133 ALNKTFCQLA | 39    | 2     |
| >TP53-M133 ALNKMFCQL  | 25   | >TP53-M133 ALNKTFCQLA | 32    | 7     |
| >TP53-M133 ALNKMFCQL  | 113  | >TP53-M133 ALNKTFCQLA | 63    | 50    |
| >TP53-M133 ALNKMFCQL  | 431  | >TP53-M133 ALNKTFCQLA | 593   | 162   |
| >TP53-M133 ALNKMFCQL  | 288  | >TP53-M133 ALNKTFCQL  | 639   | 351   |
| >TP53-M133 ALNKMFCQL  | 416  | >TP53-M133 ALNKTFCQL  | 309   | 107   |
| >TP53-M133 ALNKMFCQL  | 1551 | >TP53-M133 ALNKTFCQL  | 455   | 1096  |
| >TP53-M133 SPALNKMFCQ | 432  | >TP53-M133 SPALNKTFCQ | 446   | 14    |
| >TP53-M133 SPALNKMFC  | 100  | >TP53-M133 SPALNKTF   | 66    | 34    |
| >TP53-M133 SPALNKMFCQ | 41   | >TP53-M133 SPALNKTFCQ | 39    | 2     |
| >TP53-M133 SPALNKMFCQ | 372  | >TP53-M133 SPALNKTFCQ | 545   | 173   |
| >TP53-M133 SPALNKMFC  | 326  | >TP53-M133 SPALNKTF   | 69    | 257   |
| >TP53-M133 SPALNKMFC  | 450  | >TP53-M133 SPALNKTF   | 85    | 365   |
| >TP53-M133 YSPALNKMFC | 384  | >TP53-M133 YSPALNKTF  | 449   | 65    |
| >TP53-M133 YSPALNKMFC | 3422 | >TP53-M133 YSPALNKTF  | 295   | 3127  |
| >TP53-M133 YSPALNKMFC | 1020 | >TP53-M133 YSPALNKTF  | 402   | 618   |
| >TP53-M133 YSPALNKMFC | 104  | >TP53-M133 YSPALNKTF  | 56    | 48    |
| >TP53-M133 YSPALNKMFC | 43   | >TP53-M133 YSPALNKTF  | 15    | 28    |
| >TP53-M133 YSPALNKM   | 40   | >TP53-M133 YSPALNKT   | 15270 | 15230 |
| >TP53-M133 YSPALNKMFC | 3    | >TP53-M133 YSPALNKTF  | 4     | 1     |
| >TP53-M133 YSPALNKMFC | 22   | >TP53-M133 YSPALNKTFC | 30    | 8     |
| >TP53-M133 YSPALNKMFC | 124  | >TP53-M133 YSPALNKTFC | 219   | 95    |
| >TP53-M133 YSPALNKM   | 67   | >TP53-M133 YSPALNKT   | 4016  | 3949  |
| >TP53-M133 YSPALNKMFC | 103  | >TP53-M133 YSPALNKTF  | 162   | 59    |
| >TP53-M133 TYSPALNKM  | 136  | >TP53-M133 TYSPALNKT  | 5301  | 5165  |

|                       |      |                       |       |       |
|-----------------------|------|-----------------------|-------|-------|
| >TP53-M133 TYSPALNKM  | 2357 | >TP53-M133 TYSPALNKTF | 268   | 2089  |
| >TP53-M133 TYSPALNKM  | 179  | >TP53-M133 TYSPALNKTF | 144   | 35    |
| >TP53-M133 TYSPALNKM  | 64   | >TP53-M133 TYSPALNKTF | 50    | 14    |
| >TP53-M133 TYSPALNKM  | 27   | >TP53-M133 TYSPALNKT  | 616   | 589   |
| >TP53-M133 TYSPALNKM  | 5    | >TP53-M133 TYSPALNKTF | 5     | 0     |
| >TP53-M133 TYSPALNKM  | 439  | >TP53-M133 TYSPALNKTF | 579   | 140   |
| >TP53-M133 CTYSPALNKM | 343  | >TP53-M133 CTYSPALNKT | 404   | 61    |
| >TP53-M133 CTYSPALNKM | 63   | >TP53-M133 CTYSPALNKT | 8138  | 8075  |
| >TP53-M133 CTYSPALNKM | 380  | >TP53-M133 CTYSPALNKT | 299   | 81    |
| >TP53-M133 CTYSPALNKM | 246  | >TP53-M133 CTYSPALNKT | 16489 | 16243 |
| >TP53-M133 CTYSPALNKM | 767  | >TP53-M133 CTYSPALNKT | 90    | 677   |
| >TP53-M133 CTYSPALNKM | 488  | >TP53-M133 CTYSPALNKT | 4634  | 4146  |
| >TP53-M133 CTYSPALNKM | 23   | >TP53-M133 CTYSPALNKT | 16    | 7     |
| >TP53-M133 CTYSPALNKM | 24   | >TP53-M133 CTYSPALNKT | 2779  | 2755  |
| >TP53-M133 CTYSPALNKM | 5    | >TP53-M133 CTYSPALNKT | 4     | 1     |
| >TP53-M133 CTYSPALNKM | 627  | >TP53-M133 CTYSPALNKT | 233   | 394   |
| >TP53-M133 CTYSPALNKM | 76   | >TP53-M133 CTYSPALNKT | 6432  | 6356  |
| >TP53-M133 CTYSPALNKM | 146  | >TP53-M133 CTYSPALNKT | 220   | 74    |
| >TP53-M133 CTYSPALNKM | 30   | >TP53-M133 CTYSPALNKT | 4600  | 4570  |
| >TP53-M133 CTYSPALNKM | 13   | >TP53-M133 CTYSPALNKT | 17    | 4     |
| >TP53-M133 CTYSPALNKM | 358  | >TP53-M133 CTYSPALNKT | 235   | 123   |
| >TP53-M133 MFCQLAKTC  | 450  | >TP53-M133 VFCQLAKTC  | 2689  | 2239  |
| >TP53-M133 KMFCQLAKT  | 89   | >TP53-M133 KVFCQLAKT  | 2363  | 2274  |
| >TP53-M133 KMFCQLAKT  | 102  | >TP53-M133 KVFCQLAKT  | 2588  | 2486  |
| >TP53-M133 KMFCQLAKT  | 19   | >TP53-M133 KVFCQLAKT  | 592   | 573   |
| >TP53-M133 KMFCQLAKT  | 199  | >TP53-M133 KVFCQLAKT  | 583   | 384   |
| >TP53-M133 KMFCQLAKT  | 19   | >TP53-M133 KVFCQLAKT  | 3520  | 3501  |
| >TP53-M133 KMFCQLAKTC | 23   | >TP53-M133 KVFCQLAKTC | 1925  | 1902  |
| >TP53-M133 KMFCQLAKT  | 55   | >TP53-M133 KVFCQLAKT  | 4734  | 4679  |
| >TP53-M133 KMFCQLAKTC | 61   | >TP53-M133 KVFCQLAKTC | 4026  | 3965  |
| >TP53-M133 KMFCQLAK   | 26   | >TP53-M133 KVFCQLAK   | 35    | 9     |
| >TP53-M133 KMFCQLAK   | 12   | >TP53-M133 KVFCQLAK   | 17    | 5     |
| >TP53-M133 KMFCQLAK   | 8    | >TP53-M133 KVFCQLAK   | 5     | 3     |
| >TP53-M133 KMFCQLAK   | 35   | >TP53-M133 KVFCQLAK   | 57    | 22    |
| >TP53-M133 KMFCQLAK   | 371  | >TP53-M133 KVFCQLAK   | 566   | 195   |
| >TP53-M133 KMFCQLAKTC | 81   | >TP53-M133 KVFCQLAKTC | 125   | 44    |
| >TP53-M133 KMFCQLAK   | 3283 | >TP53-M133 KVFCQLAK   | 423   | 2860  |
| >TP53-M133 KMFCQLAK   | 58   | >TP53-M133 KVFCQLAK   | 2317  | 2259  |
| >TP53-M133 KMFCQLAKTC | 491  | >TP53-M133 KVFCQLAKTC | 9792  | 9301  |
| >TP53-M133 KMFCQLAK   | 802  | >TP53-M133 KVFCQLAK   | 339   | 463   |
| >TP53-M133 KMFCQLAK   | 39   | >TP53-M133 KVFCQLAK   | 108   | 69    |
| >TP53-M133 TCTYSPALNK | 9150 | >TP53-M133 TCTYSPALNK | 219   | 8931  |
| >TP53-M133 TCTYSPALNK | 453  | >TP53-M133 TCTYSPALNK | 5776  | 5323  |

|                       |      |                       |      |      |
|-----------------------|------|-----------------------|------|------|
| >TP53-M133 LNKMFQQL   | 100  | >TP53-M133 LNKVFCQL   | 131  | 31   |
| >TP53-M133 LNKMFQQLAI | 161  | >TP53-M133 LNKVFCQLAK | 175  | 14   |
| >TP53-M133 LNKMFQQL   | 153  | >TP53-M133 LNKVFCQL   | 491  | 338  |
| >TP53-M133 ALNKMFQQL  | 238  | >TP53-M133 ALNKVFCQL  | 201  | 37   |
| >TP53-M133 ALNKMFQQL  | 17   | >TP53-M133 ALNKVFCQL  | 10   | 7    |
| >TP53-M133 ALNKMFQQL  | 30   | >TP53-M133 ALNKVFCQL  | 30   | 0    |
| >TP53-M133 ALNKMFQQL  | 442  | >TP53-M133 ALNKVFCQLA | 549  | 107  |
| >TP53-M133 ALNKMFQQL  | 297  | >TP53-M133 ALNKVFCQL  | 165  | 132  |
| >TP53-M133 ALNKMFQQL  | 22   | >TP53-M133 ALNKVFCQL  | 5    | 17   |
| >TP53-M133 ALNKMFQQL  | 255  | >TP53-M133 ALNKVFCQLA | 81   | 174  |
| >TP53-M133 ALNKMFQQL  | 198  | >TP53-M133 ALNKVFCQL  | 92   | 106  |
| >TP53-M133 ALNKMFQQL  | 21   | >TP53-M133 ALNKVFCQL  | 11   | 10   |
| >TP53-M133 ALNKMFQQL  | 256  | >TP53-M133 ALNKVFCQLA | 122  | 134  |
| >TP53-M133 ALNKMFQQL  | 66   | >TP53-M133 ALNKVFCQL  | 82   | 16   |
| >TP53-M133 ALNKMFQQL  | 245  | >TP53-M133 ALNKVFCQL  | 269  | 24   |
| >TP53-M133 ALNKMFQQL  | 3    | >TP53-M133 ALNKVFCQL  | 3    | 0    |
| >TP53-M133 ALNKMFQQL  | 11   | >TP53-M133 ALNKVFCQLA | 15   | 4    |
| >TP53-M133 ALNKMFQQL  | 37   | >TP53-M133 ALNKVFCQLA | 34   | 3    |
| >TP53-M133 ALNKMFQQL  | 25   | >TP53-M133 ALNKVFCQLA | 25   | 0    |
| >TP53-M133 ALNKMFQQL  | 113  | >TP53-M133 ALNKVFCQLA | 147  | 34   |
| >TP53-M133 ALNKMFQQL  | 431  | >TP53-M133 ALNKVFCQLA | 419  | 12   |
| >TP53-M133 ALNKMFQQL  | 288  | >TP53-M133 ALNKVFCQL  | 1115 | 827  |
| >TP53-M133 ALNKMFQQL  | 416  | >TP53-M133 ALNKVFCQL  | 449  | 33   |
| >TP53-M133 SPALNKMFCC | 432  | >TP53-M133 SPALNKVFCQ | 325  | 107  |
| >TP53-M133 SPALNKMF   | 100  | >TP53-M133 SPALNKVF   | 45   | 55   |
| >TP53-M133 SPALNKMFCC | 41   | >TP53-M133 SPALNKVFCQ | 49   | 8    |
| >TP53-M133 SPALNKMFCC | 372  | >TP53-M133 SPALNKVFCQ | 668  | 296  |
| >TP53-M133 SPALNKMF   | 326  | >TP53-M133 SPALNKVF   | 114  | 212  |
| >TP53-M133 SPALNKMF   | 450  | >TP53-M133 SPALNKVF   | 155  | 295  |
| >TP53-M133 YSPALNKMF  | 1122 | >TP53-M133 YSPALNKVF  | 453  | 669  |
| >TP53-M133 YSPALNKMF  | 384  | >TP53-M133 YSPALNKVF  | 740  | 356  |
| >TP53-M133 YSPALNKMF  | 5281 | >TP53-M133 YSPALNKV   | 66   | 5215 |
| >TP53-M133 YSPALNKMF  | 1020 | >TP53-M133 YSPALNKVF  | 201  | 819  |
| >TP53-M133 YSPALNKMF  | 104  | >TP53-M133 YSPALNKVF  | 58   | 46   |
| >TP53-M133 YSPALNKMF  | 43   | >TP53-M133 YSPALNKVF  | 51   | 8    |
| >TP53-M133 YSPALNKMF  | 40   | >TP53-M133 YSPALNKV   | 244  | 204  |
| >TP53-M133 YSPALNKMF  | 3    | >TP53-M133 YSPALNKVF  | 3    | 0    |
| >TP53-M133 YSPALNKMF  | 22   | >TP53-M133 YSPALNKVFC | 22   | 0    |
| >TP53-M133 YSPALNKMF  | 124  | >TP53-M133 YSPALNKVFC | 162  | 38   |
| >TP53-M133 YSPALNKMF  | 67   | >TP53-M133 YSPALNKV   | 1029 | 962  |
| >TP53-M133 YSPALNKMF  | 103  | >TP53-M133 YSPALNKVF  | 221  | 118  |
| >TP53-M133 TYSPALNKMF | 136  | >TP53-M133 TYSPALNKV  | 128  | 8    |
| >TP53-M133 TYSPALNKMF | 179  | >TP53-M133 TYSPALNKVF | 123  | 56   |

|                       |      |                        |      |      |
|-----------------------|------|------------------------|------|------|
| >TP53-M133 TYSPALNKM  | 64   | >TP53-M133 TYSPALNKVF  | 51   | 13   |
| >TP53-M133 TYSPALNKM  | 27   | >TP53-M133 TYSPALNKV   | 55   | 28   |
| >TP53-M133 TYSPALNKM  | 5    | >TP53-M133 TYSPALNKVF  | 5    | 0    |
| >TP53-M133 TYSPALNKM  | 439  | >TP53-M133 TYSPALNKVF  | 553  | 114  |
| >TP53-M133 CTYSPALNKM | 1199 | >TP53-M133 CTYSPALNKV  | 247  | 952  |
| >TP53-M133 CTYSPALNKM | 2550 | >TP53-M133 CTYSPALNKV  | 100  | 2450 |
| >TP53-M133 CTYSPALNKM | 4341 | >TP53-M133 CTYSPALNKV  | 288  | 4053 |
| >TP53-M133 CTYSPALNKM | 9862 | >TP53-M133 CTYSPALNKV  | 193  | 9669 |
| >TP53-M133 CTYSPALNKM | 343  | >TP53-M133 CTYSPALNKV  | 622  | 279  |
| >TP53-M133 CTYSPALNKM | 63   | >TP53-M133 CTYSPALNKV  | 3302 | 3239 |
| >TP53-M133 CTYSPALNKM | 380  | >TP53-M133 CTYSPALNKV  | 272  | 108  |
| >TP53-M133 CTYSPALNKM | 246  | >TP53-M133 CTYSPALNKV  | 7187 | 6941 |
| >TP53-M133 CTYSPALNKM | 767  | >TP53-M133 CTYSPALNKV  | 490  | 277  |
| >TP53-M133 CTYSPALNKM | 1364 | >TP53-M133 CTYSPALNKV  | 55   | 1309 |
| >TP53-M133 CTYSPALNKM | 488  | >TP53-M133 CTYSPALNKV  | 34   | 454  |
| >TP53-M133 CTYSPALNKM | 23   | >TP53-M133 CTYSPALNKV  | 17   | 6    |
| >TP53-M133 CTYSPALNKM | 24   | >TP53-M133 CTYSPALNKV  | 418  | 394  |
| >TP53-M133 CTYSPALNKM | 5    | >TP53-M133 CTYSPALNKV  | 5    | 0    |
| >TP53-M133 CTYSPALNKM | 627  | >TP53-M133 CTYSPALNKV  | 231  | 396  |
| >TP53-M133 CTYSPALNKM | 76   | >TP53-M133 CTYSPALNKV  | 287  | 211  |
| >TP53-M133 CTYSPALNKM | 146  | >TP53-M133 CTYSPALNKV  | 272  | 126  |
| >TP53-M133 CTYSPALNKM | 30   | >TP53-M133 CTYSPALNKV  | 319  | 289  |
| >TP53-M133 CTYSPALNKM | 13   | >TP53-M133 CTYSPALNKV  | 20   | 7    |
| >TP53-M133 CTYSPALNKM | 358  | >TP53-M133 CTYSPALNKV  | 362  | 4    |
| >TP53-M160 MAIYKQSQH  | 226  | >TP53-M160 IAIYKQSQHM  | 388  | 162  |
| >TP53-M160 MAIYKQSQH  | 205  | >TP53-M160 IAIYKQSQHM  | 275  | 70   |
| >TP53-M160 MAIYKQSQH  | 20   | >TP53-M160 IAIYKQSQHM  | 22   | 2    |
| >TP53-M160 MAIYKQSQH  | 151  | >TP53-M160 IAIYKQSQHM  | 294  | 143  |
| >TP53-M160 AMAIYKQSQ  | 221  | >TP53-M160 AIAIYKQSQHI | 654  | 433  |
| >TP53-M160 AMAIYKQSQ  | 161  | >TP53-M160 AIAIYKQSQHI | 1646 | 1485 |
| >TP53-M160 AMAIYKQSQ  | 199  | >TP53-M160 AIAIYKQSQHI | 3920 | 3721 |
| >TP53-M160 AMAIYKQSQ  | 283  | >TP53-M160 AIAIYKQSQHI | 7045 | 6762 |
| >TP53-M160 AMAIYKQSQ  | 69   | >TP53-M160 AIAIYKQSQ   | 4792 | 4723 |
| >TP53-M160 AMAIYKQSQ  | 49   | >TP53-M160 AIAIYKQSQHI | 2982 | 2933 |
| >TP53-M160 AMAIYKQSQ  | 55   | >TP53-M160 AIAIYKQSQHI | 403  | 348  |
| >TP53-M160 AMAIYKQSQ  | 69   | >TP53-M160 AIAIYKQSQHI | 2387 | 2318 |
| >TP53-M160 TPPPGRVRA  | 583  | >TP53-M160 TPPPGRVRA   | 239  | 344  |
| >TP53-M160 TPPPGRVRA  | 482  | >TP53-M160 TPPPGRVRA   | 1992 | 1510 |
| >TP53-M160 TPPPGRVRA  | 32   | >TP53-M160 TPPPGRVRA   | 128  | 96   |
| >TP53-M160 TPPPGRVRA  | 139  | >TP53-M160 TPPPGRVRA   | 4755 | 4616 |
| >TP53-M160 RAMAIYKQS  | 354  | >TP53-M160 RAIYKQSQHI  | 360  | 6    |
| >TP53-M160 RAMAIYKQS  | 375  | >TP53-M160 RAIYKQSQHI  | 862  | 487  |
| >TP53-M160 VRAMAIYK   | 159  | >TP53-M160 VRAIYK      | 178  | 19   |

|                       |      |                         |      |      |
|-----------------------|------|-------------------------|------|------|
| >TP53-M160 RVRAMAIY   | 205  | >TP53-M160 RVRRAIAIY    | 197  | 8    |
| >TP53-M160 RVRAMAIYK  | 28   | >TP53-M160 RVRRAIAIYK   | 28   | 0    |
| >TP53-M160 RVRAMAIYK  | 20   | >TP53-M160 RVRRAIAIYK   | 25   | 5    |
| >TP53-M160 RVRAMAIY   | 241  | >TP53-M160 RVRRAIAIY    | 496  | 255  |
| >TP53-M160 RVRAMAIY   | 398  | >TP53-M160 RVRRAIAIY    | 486  | 88   |
| >TP53-M160 RVRAMAIY   | 5    | >TP53-M160 RVRRAIAIY    | 6    | 1    |
| >TP53-M160 RVRAMAIYK  | 3    | >TP53-M160 RVRRAIAIYK   | 3    | 0    |
| >TP53-M160 RVRAMAIYKQ | 10   | >TP53-M160 RVRRAIAIYKQ  | 12   | 2    |
| >TP53-M160 RVRAMAIYKQ | 9    | >TP53-M160 RVRRAIAIYKQ  | 9    | 0    |
| >TP53-M160 RVRAMAIY   | 107  | >TP53-M160 RVRRAIAIY    | 83   | 24   |
| >TP53-M160 RVRAMAIYK  | 18   | >TP53-M160 RVRRAIAIYK   | 17   | 1    |
| >TP53-M160 RVRAMAIYK  | 588  | >TP53-M160 RVRRAIAIYK   | 211  | 377  |
| >TP53-M160 RVRAMAIY   | 26   | >TP53-M160 RVRRAIAIY    | 37   | 11   |
| >TP53-M160 RVRAMAIY   | 85   | >TP53-M160 RVRRAIAIY    | 95   | 10   |
| >TP53-M160 RVRAMAIY   | 311  | >TP53-M160 RVRRAIAIY    | 271  | 40   |
| >TP53-M160 RVRAMAIY   | 7    | >TP53-M160 RVRRAIAIY    | 13   | 6    |
| >TP53-M160 RVRAMAIY   | 211  | >TP53-M160 RVRRAIAIY    | 171  | 40   |
| >TP53-M160 RVRAMAIYK  | 156  | >TP53-M160 RVRRAIAIYK   | 80   | 76   |
| >TP53-M160 TRVRAMAIY  | 62   | >TP53-M160 TRVRRAIAIY   | 385  | 323  |
| >TP53-M160 TRVRAMAIY  | 278  | >TP53-M160 TRVRRAIAIY   | 217  | 61   |
| >TP53-M160 TRVRAMAI   | 542  | >TP53-M160 TRVRRAIAI    | 264  | 278  |
| >TP53-M160 TRVRAMAIY  | 1249 | >TP53-M160 TRVRRAIAIY   | 453  | 796  |
| >TP53-M160 TRVRAMAIYK | 733  | >TP53-M160 TRVRRAIAIYK  | 238  | 495  |
| >TP53-M160 TRVRAMAI   | 215  | >TP53-M160 TRVRRAIAI    | 205  | 10   |
| >TP53-M160 GTRVRAMAI  | 269  | >TP53-M160 GTRVRRAIAIY  | 318  | 49   |
| >TP53-M160 GTRVRAMAI  | 50   | >TP53-M160 GTRVRRAIAIYK | 56   | 6    |
| >TP53-M160 GTRVRAMAI  | 39   | >TP53-M160 GTRVRRAIAIYK | 48   | 9    |
| >TP53-M160 GTRVRAMA   | 18   | >TP53-M160 GTRVRRAIA    | 15   | 3    |
| >TP53-M160 GTRVRAMAI  | 9    | >TP53-M160 GTRVRRAIAI   | 11   | 2    |
| >TP53-M160 GTRVRAMAI  | 30   | >TP53-M160 GTRVRRAIAIY  | 32   | 2    |
| >TP53-M160 GTRVRAMAI  | 3    | >TP53-M160 GTRVRRAIAIYK | 4    | 1    |
| >TP53-M160 GTRVRAMAI  | 130  | >TP53-M160 GTRVRRAIAIY  | 142  | 12   |
| >TP53-M160 GTRVRAMAI  | 115  | >TP53-M160 GTRVRRAIAIYK | 106  | 9    |
| >TP53-M160 GTRVRAMAI  | 405  | >TP53-M160 GTRVRRAIAIY  | 443  | 38   |
| >TP53-M160 GTRVRAMAI  | 40   | >TP53-M160 GTRVRRAIAI   | 44   | 4    |
| >TP53-M160 GTRVRAMAI  | 4    | >TP53-M160 GTRVRRAIAIY  | 5    | 1    |
| >TP53-M160 GTRVRAMAI  | 122  | >TP53-M160 GTRVRRAIAI   | 350  | 228  |
| >TP53-M160 GTRVRAMAI  | 21   | >TP53-M160 GTRVRRAIAIY  | 24   | 3    |
| >TP53-M160 GTRVRAMAI  | 269  | >TP53-M160 GTRVRRAIAIYK | 374  | 105  |
| >TP53-M160 GTRVRAMAI  | 387  | >TP53-M160 GTRVRRAIAI   | 169  | 218  |
| >TP53-M160 PPGTRVRAM  | 68   | >TP53-M160 PPGTRVRAI    | 531  | 463  |
| >TP53-M160 PPPGTRVRAM | 370  | >TP53-M160 PPPGTRVRAI   | 193  | 177  |
| >TP53-M160 PPPGTRVRAM | 450  | >TP53-M160 PPPGTRVRAI   | 1729 | 1279 |

|                       |      |                       |       |       |
|-----------------------|------|-----------------------|-------|-------|
| >TP53-M160 MAIYKQSQH  | 226  | >TP53-M160 KAIYKQSQHM | 435   | 209   |
| >TP53-M160 MAIYKQSQH  | 205  | >TP53-M160 KAIYKQSQHM | 280   | 75    |
| >TP53-M160 MAIYKQSQH  | 20   | >TP53-M160 KAIYKQSQHM | 14    | 6     |
| >TP53-M160 MAIYKQSQH  | 151  | >TP53-M160 KAIYKQSQHM | 49    | 102   |
| >TP53-M160 AMAIYKQSQI | 221  | >TP53-M160 AKAIYKQSQH | 4462  | 4241  |
| >TP53-M160 AMAIYKQSQI | 161  | >TP53-M160 AKAIYKQSQH | 19011 | 18850 |
| >TP53-M160 AMAIYKQSQI | 199  | >TP53-M160 AKAIYKQSQH | 24460 | 24261 |
| >TP53-M160 AMAIYKQSQI | 283  | >TP53-M160 AKAIYKQSQH | 24143 | 23860 |
| >TP53-M160 AMAIYKQSQ  | 69   | >TP53-M160 AKAIYKQSQ  | 32940 | 32871 |
| >TP53-M160 AMAIYKQSQI | 49   | >TP53-M160 AKAIYKQSQH | 32318 | 32269 |
| >TP53-M160 AMAIYKQSQI | 55   | >TP53-M160 AKAIYKQSQH | 7963  | 7908  |
| >TP53-M160 AMAIYKQSQI | 69   | >TP53-M160 AKAIYKQSQH | 31    | 38    |
| >TP53-M160 TPPPGRVRA  | 482  | >TP53-M160 TPPPGRVRA  | 39582 | 39100 |
| >TP53-M160 TPPPGRVRA  | 32   | >TP53-M160 TPPPGRVRA  | 10967 | 10935 |
| >TP53-M160 TPPPGRVRA  | 139  | >TP53-M160 TPPPGRVRA  | 9282  | 9143  |
| >TP53-M160 RAMAIYKQ   | 2989 | >TP53-M160 RAKAIYKQ   | 201   | 2788  |
| >TP53-M160 RAMAIYKQS  | 2875 | >TP53-M160 RAKAIYKQS  | 123   | 2752  |
| >TP53-M160 RAMAIYKQSC | 1651 | >TP53-M160 RAKAIYKQSQ | 82    | 1569  |
| >TP53-M160 RAMAIYKQSC | 354  | >TP53-M160 RAKAIYKQSQ | 1132  | 778   |
| >TP53-M160 RAMAIYKQSC | 375  | >TP53-M160 RAKAIYKQSQ | 525   | 150   |
| >TP53-M160 VRAMAIYK   | 159  | >TP53-M160 VRAKAIYK   | 149   | 10    |
| >TP53-M160 RVRAMAIY   | 205  | >TP53-M160 RVRAKAIY   | 354   | 149   |
| >TP53-M160 RVRAMAIYK  | 28   | >TP53-M160 RVRAKAIYK  | 28    | 0     |
| >TP53-M160 RVRAMAIYK  | 20   | >TP53-M160 RVRAKAIYK  | 43    | 23    |
| >TP53-M160 RVRAMAIY   | 241  | >TP53-M160 RVRAKAIY   | 2414  | 2173  |
| >TP53-M160 RVRAMAIY   | 398  | >TP53-M160 RVRAKAIY   | 1527  | 1129  |
| >TP53-M160 RVRAMAIY   | 5    | >TP53-M160 RVRAKAIY   | 6     | 1     |
| >TP53-M160 RVRAMAIYK  | 3    | >TP53-M160 RVRAKAIYK  | 3     | 0     |
| >TP53-M160 RVRAMAIYKQ | 10   | >TP53-M160 RVRAKAIYKQ | 11    | 1     |
| >TP53-M160 RVRAMAIYKQ | 9    | >TP53-M160 RVRAKAIYKQ | 9     | 0     |
| >TP53-M160 RVRAMAIY   | 107  | >TP53-M160 RVRAKAIY   | 194   | 87    |
| >TP53-M160 RVRAMAIYK  | 18   | >TP53-M160 RVRAKAIYK  | 23    | 5     |
| >TP53-M160 RVRAMAIY   | 26   | >TP53-M160 RVRAKAIY   | 115   | 89    |
| >TP53-M160 RVRAMAIY   | 85   | >TP53-M160 RVRAKAIY   | 126   | 41    |
| >TP53-M160 RVRAMAIY   | 311  | >TP53-M160 RVRAKAIY   | 574   | 263   |
| >TP53-M160 RVRAMAIY   | 7    | >TP53-M160 RVRAKAIY   | 13    | 6     |
| >TP53-M160 RVRAMAIY   | 211  | >TP53-M160 RVRAKAIY   | 2011  | 1800  |
| >TP53-M160 RVRAMAIYK  | 156  | >TP53-M160 RVRAKAIYK  | 211   | 55    |
| >TP53-M160 TRVRAMAIY  | 62   | >TP53-M160 TRVRAKAIY  | 6029  | 5967  |
| >TP53-M160 TRVRAMAIY  | 278  | >TP53-M160 TRVRAKAIY  | 446   | 168   |
| >TP53-M160 TRVRAMAI   | 215  | >TP53-M160 TRVRAKAI   | 915   | 700   |
| >TP53-M160 GTRVRAMAI  | 269  | >TP53-M160 GTRVRAKAIY | 729   | 460   |
| >TP53-M160 GTRVRAMAI  | 50   | >TP53-M160 GTRVRAKAIY | 94    | 44    |

|                       |     |                       |       |       |
|-----------------------|-----|-----------------------|-------|-------|
| >TP53-M160 GTRVRAMAI  | 39  | >TP53-M160 GTRVRAKAIY | 147   | 108   |
| >TP53-M160 GTRVRAMA   | 18  | >TP53-M160 GTRVRAKA   | 28    | 10    |
| >TP53-M160 GTRVRAMAI  | 9   | >TP53-M160 GTRVRAKAI  | 41    | 32    |
| >TP53-M160 GTRVRAMAI  | 30  | >TP53-M160 GTRVRAKAIY | 87    | 57    |
| >TP53-M160 GTRVRAMAI  | 3   | >TP53-M160 GTRVRAKAIY | 4     | 1     |
| >TP53-M160 GTRVRAMAI  | 130 | >TP53-M160 GTRVRAKAIY | 237   | 107   |
| >TP53-M160 GTRVRAMAI  | 115 | >TP53-M160 GTRVRAKAIY | 176   | 61    |
| >TP53-M160 GTRVRAMAI  | 405 | >TP53-M160 GTRVRAKAIY | 907   | 502   |
| >TP53-M160 GTRVRAMAI  | 40  | >TP53-M160 GTRVRAKAI  | 34    | 6     |
| >TP53-M160 GTRVRAMAI  | 4   | >TP53-M160 GTRVRAKAIY | 7     | 3     |
| >TP53-M160 GTRVRAMAI  | 122 | >TP53-M160 GTRVRAKAI  | 305   | 183   |
| >TP53-M160 GTRVRAMAI  | 21  | >TP53-M160 GTRVRAKAIY | 26    | 5     |
| >TP53-M160 GTRVRAMAI  | 269 | >TP53-M160 GTRVRAKAIY | 438   | 169   |
| >TP53-M160 GTRVRAMAI  | 387 | >TP53-M160 GTRVRAKAI  | 184   | 203   |
| >TP53-M160 PPGTRVRAM  | 68  | >TP53-M160 PPGTRVRAK  | 19715 | 19647 |
| >TP53-M160 PPPGTRVRAM | 370 | >TP53-M160 PPPGTRVRAK | 2229  | 1859  |
| >TP53-M160 PPPGTRVRAM | 450 | >TP53-M160 PPPGTRVRAK | 37972 | 37522 |
| >TP53-M160 MAIYKQSQHI | 226 | >TP53-M160 LAIYKQSQHM | 176   | 50    |
| >TP53-M160 MAIYKQSQHI | 205 | >TP53-M160 LAIYKQSQHM | 415   | 210   |
| >TP53-M160 MAIYKQSQHI | 20  | >TP53-M160 LAIYKQSQHM | 43    | 23    |
| >TP53-M160 MAIYKQSQHI | 151 | >TP53-M160 LAIYKQSQHM | 333   | 182   |
| >TP53-M160 MAIYKQSQHI | 583 | >TP53-M160 LAIYKQSQHM | 329   | 254   |
| >TP53-M160 AMAIYKQSQI | 221 | >TP53-M160 ALAIYKQSQH | 2635  | 2414  |
| >TP53-M160 AMAIYKQSQI | 161 | >TP53-M160 ALAIYKQSQH | 122   | 39    |
| >TP53-M160 AMAIYKQSQI | 199 | >TP53-M160 ALAIYKQSQH | 286   | 87    |
| >TP53-M160 AMAIYKQSQI | 283 | >TP53-M160 ALAIYKQSQH | 314   | 31    |
| >TP53-M160 AMAIYKQSQ  | 69  | >TP53-M160 ALAIYKQSQ  | 33    | 36    |
| >TP53-M160 AMAIYKQSQI | 49  | >TP53-M160 ALAIYKQSQH | 25    | 24    |
| >TP53-M160 AMAIYKQSQI | 55  | >TP53-M160 ALAIYKQSQH | 164   | 109   |
| >TP53-M160 AMAIYKQSQI | 69  | >TP53-M160 ALAIYKQSQH | 796   | 727   |
| >TP53-M160 TPPPGTRVRA | 583 | >TP53-M160 TPPPGTRVRA | 304   | 279   |
| >TP53-M160 TPPPGTRVRA | 482 | >TP53-M160 TPPPGTRVRA | 990   | 508   |
| >TP53-M160 TPPPGTRVRA | 32  | >TP53-M160 TPPPGTRVRA | 33    | 1     |
| >TP53-M160 TPPPGTRVRA | 139 | >TP53-M160 TPPPGTRVRA | 1487  | 1348  |
| >TP53-M160 TPPPGTRVRA | 727 | >TP53-M160 TPPPGTRVRA | 411   | 316   |
| >TP53-M160 RAMAIYKQSC | 354 | >TP53-M160 RALAIYKQSQ | 405   | 51    |
| >TP53-M160 RAMAIYKQSC | 375 | >TP53-M160 RALAIYKQSQ | 470   | 95    |
| >TP53-M160 VRAMAIYK   | 159 | >TP53-M160 VRALAIYK   | 140   | 19    |
| >TP53-M160 RVRAMAIY   | 205 | >TP53-M160 RVRALAIY   | 282   | 77    |
| >TP53-M160 RVRAMAIYK  | 28  | >TP53-M160 RVRALAIYK  | 30    | 2     |
| >TP53-M160 RVRAMAIYK  | 20  | >TP53-M160 RVRALAIYK  | 22    | 2     |
| >TP53-M160 RVRAMAIY   | 241 | >TP53-M160 RVRALAIY   | 356   | 115   |
| >TP53-M160 RVRAMAIY   | 398 | >TP53-M160 RVRALAIY   | 500   | 102   |

|                       |     |                        |      |      |
|-----------------------|-----|------------------------|------|------|
| >TP53-M160 RVRAMAIY   | 5   | >TP53-M160 RVRALAIY    | 6    | 1    |
| >TP53-M160 RVRAMAIYK  | 3   | >TP53-M160 RVRALAIYK   | 3    | 0    |
| >TP53-M160 RVRAMAIYKC | 10  | >TP53-M160 RVRALAIYKQ  | 12   | 2    |
| >TP53-M160 RVRAMAIYKC | 9   | >TP53-M160 RVRALAIYKQ  | 10   | 1    |
| >TP53-M160 RVRAMAIY   | 107 | >TP53-M160 RVRALAIY    | 125  | 18   |
| >TP53-M160 RVRAMAIYK  | 18  | >TP53-M160 RVRALAIYK   | 19   | 1    |
| >TP53-M160 RVRAMAIY   | 26  | >TP53-M160 RVRALAIY    | 29   | 3    |
| >TP53-M160 RVRAMAIY   | 85  | >TP53-M160 RVRALAIY    | 84   | 1    |
| >TP53-M160 RVRAMAIY   | 311 | >TP53-M160 RVRALAIY    | 334  | 23   |
| >TP53-M160 RVRAMAIY   | 7   | >TP53-M160 RVRALAIY    | 12   | 5    |
| >TP53-M160 RVRAMAIY   | 211 | >TP53-M160 RVRALAIY    | 348  | 137  |
| >TP53-M160 RVRAMAIYK  | 156 | >TP53-M160 RVRALAIYK   | 78   | 78   |
| >TP53-M160 TRVRAMAIY  | 62  | >TP53-M160 TRVRALAIY   | 172  | 110  |
| >TP53-M160 TRVRAMAIY  | 278 | >TP53-M160 TRVRALAIY   | 328  | 50   |
| >TP53-M160 TRVRAMAI   | 542 | >TP53-M160 TRVRALAI    | 267  | 275  |
| >TP53-M160 TRVRAMAIYK | 733 | >TP53-M160 TRVRALAIYK  | 394  | 339  |
| >TP53-M160 TRVRAMAI   | 215 | >TP53-M160 TRVRALAI    | 340  | 125  |
| >TP53-M160 GTRVRAMAI  | 269 | >TP53-M160 GTRVRALAIY  | 201  | 68   |
| >TP53-M160 GTRVRAMAI  | 50  | >TP53-M160 GTRVRALAIYI | 56   | 6    |
| >TP53-M160 GTRVRAMAI  | 39  | >TP53-M160 GTRVRALAIYI | 47   | 8    |
| >TP53-M160 GTRVRAMA   | 18  | >TP53-M160 GTRVRALA    | 12   | 6    |
| >TP53-M160 GTRVRAMAI  | 9   | >TP53-M160 GTRVRALAI   | 13   | 4    |
| >TP53-M160 GTRVRAMAI  | 30  | >TP53-M160 GTRVRALAIY  | 36   | 6    |
| >TP53-M160 GTRVRAMAI  | 3   | >TP53-M160 GTRVRALAIYI | 4    | 1    |
| >TP53-M160 GTRVRAMAI  | 130 | >TP53-M160 GTRVRALAIY  | 139  | 9    |
| >TP53-M160 GTRVRAMAI  | 115 | >TP53-M160 GTRVRALAIYI | 162  | 47   |
| >TP53-M160 GTRVRAMAI  | 405 | >TP53-M160 GTRVRALAIY  | 377  | 28   |
| >TP53-M160 GTRVRAMAI  | 40  | >TP53-M160 GTRVRALAI   | 16   | 24   |
| >TP53-M160 GTRVRAMAI  | 4   | >TP53-M160 GTRVRALAIY  | 5    | 1    |
| >TP53-M160 GTRVRAMAI  | 122 | >TP53-M160 GTRVRALAI   | 228  | 106  |
| >TP53-M160 GTRVRAMAI  | 21  | >TP53-M160 GTRVRALAIY  | 22   | 1    |
| >TP53-M160 GTRVRAMAI  | 269 | >TP53-M160 GTRVRALAIYI | 263  | 6    |
| >TP53-M160 GTRVRAMAI  | 387 | >TP53-M160 GTRVRALAI   | 154  | 233  |
| >TP53-M160 PPGTRVRAM  | 68  | >TP53-M160 PPGTRVRAL   | 61   | 7    |
| >TP53-M160 PPPGTRVRAM | 370 | >TP53-M160 PPPGTRVRAL  | 256  | 114  |
| >TP53-M160 PPPGTRVRAM | 450 | >TP53-M160 PPPGTRVRAL  | 807  | 357  |
| >TP53-M160 MAIYKQSQHI | 633 | >TP53-M160 TAIYKQSQHM  | 192  | 441  |
| >TP53-M160 MAIYKQSQHI | 226 | >TP53-M160 TAIYKQSQHM  | 874  | 648  |
| >TP53-M160 MAIYKQSQHI | 205 | >TP53-M160 TAIYKQSQHM  | 2218 | 2013 |
| >TP53-M160 MAIYKQSQHI | 20  | >TP53-M160 TAIYKQSQHM  | 174  | 154  |
| >TP53-M160 MAIYKQSQHI | 151 | >TP53-M160 TAIYKQSQHM  | 2480 | 2329 |
| >TP53-M160 AMAIYKQSQI | 221 | >TP53-M160 ATAIYKQSQH  | 810  | 589  |
| >TP53-M160 AMAIYKQSQI | 161 | >TP53-M160 ATAIYKQSQH  | 4790 | 4629 |



|                       |       |                       |       |       |
|-----------------------|-------|-----------------------|-------|-------|
| >TP53-M160 AMAIYKQSQI | 199   | >TP53-M160 ATAIYKQSQH | 9264  | 9065  |
| >TP53-M160 AMAIYKQSQI | 283   | >TP53-M160 ATAIYKQSQH | 14705 | 14422 |
| >TP53-M160 AMAIYKQSQ  | 69    | >TP53-M160 ATAIYKQSQ  | 21680 | 21611 |
| >TP53-M160 AMAIYKQSQI | 49    | >TP53-M160 ATAIYKQSQH | 19261 | 19212 |
| >TP53-M160 AMAIYKQSQI | 11450 | >TP53-M160 ATAIYKQSQH | 375   | 11075 |
| >TP53-M160 AMAIYKQSQI | 55    | >TP53-M160 ATAIYKQSQH | 578   | 523   |
| >TP53-M160 AMAIYKQSQI | 69    | >TP53-M160 ATAIYKQSQH | 1683  | 1614  |
| >TP53-M160 AMAIYKQSQI | 13427 | >TP53-M160 ATAIYKQSQH | 264   | 13163 |
| >TP53-M160 AMAIYKQSQI | 1491  | >TP53-M160 ATAIYKQSQH | 10    | 1481  |
| >TP53-M160 AMAIYKQSQI | 13886 | >TP53-M160 ATAIYKQSQH | 298   | 13588 |
| >TP53-M160 AMAIYKQSQI | 7848  | >TP53-M160 ATAIYKQSQH | 496   | 7352  |
| >TP53-M160 TPPPGRVRA  | 482   | >TP53-M160 TPPPGRVRA  | 31760 | 31278 |
| >TP53-M160 TPPPGRVRA  | 32    | >TP53-M160 TPPPGRVRA  | 1552  | 1520  |
| >TP53-M160 TPPPGRVRA  | 139   | >TP53-M160 TPPPGRVRA  | 3612  | 3473  |
| >TP53-M160 RAMAIYKQSC | 354   | >TP53-M160 RATAIYKQSQ | 1080  | 726   |
| >TP53-M160 RAMAIYKQSC | 375   | >TP53-M160 RATAIYKQSQ | 526   | 151   |
| >TP53-M160 VRAMAIYK   | 159   | >TP53-M160 VRATAIYK   | 175   | 16    |
| >TP53-M160 RVRAMAIY   | 205   | >TP53-M160 RVRATAIY   | 226   | 21    |
| >TP53-M160 RVRAMAIYK  | 28    | >TP53-M160 RVRATAIYK  | 29    | 1     |
| >TP53-M160 RVRAMAIYK  | 20    | >TP53-M160 RVRATAIYK  | 31    | 11    |
| >TP53-M160 RVRAMAIY   | 241   | >TP53-M160 RVRATAIY   | 775   | 534   |
| >TP53-M160 RVRAMAIY   | 398   | >TP53-M160 RVRATAIY   | 562   | 164   |
| >TP53-M160 RVRAMAIY   | 5     | >TP53-M160 RVRATAIY   | 4     | 1     |
| >TP53-M160 RVRAMAIYK  | 3     | >TP53-M160 RVRATAIYK  | 3     | 0     |
| >TP53-M160 RVRAMAIYKC | 10    | >TP53-M160 RVRATAIYKQ | 8     | 2     |
| >TP53-M160 RVRAMAIYKC | 9     | >TP53-M160 RVRATAIYKQ | 7     | 2     |
| >TP53-M160 RVRAMAIY   | 107   | >TP53-M160 RVRATAIY   | 116   | 9     |
| >TP53-M160 RVRAMAIYK  | 18    | >TP53-M160 RVRATAIYK  | 22    | 4     |
| >TP53-M160 RVRAMAIY   | 26    | >TP53-M160 RVRATAIY   | 29    | 3     |
| >TP53-M160 RVRAMAIY   | 85    | >TP53-M160 RVRATAIY   | 66    | 19    |
| >TP53-M160 RVRAMAIY   | 311   | >TP53-M160 RVRATAIY   | 95    | 216   |
| >TP53-M160 RVRAMAIY   | 7     | >TP53-M160 RVRATAIY   | 8     | 1     |
| >TP53-M160 RVRAMAIY   | 211   | >TP53-M160 RVRATAIY   | 113   | 98    |
| >TP53-M160 RVRAMAIYK  | 156   | >TP53-M160 RVRATAIYK  | 157   | 1     |
| >TP53-M160 TRVRAMAIY  | 62    | >TP53-M160 TRVRATAIY  | 1142  | 1080  |
| >TP53-M160 TRVRAMAIY  | 278   | >TP53-M160 TRVRATAIY  | 190   | 88    |
| >TP53-M160 TRVRAMAI   | 542   | >TP53-M160 TRVRATAI   | 476   | 66    |
| >TP53-M160 TRVRAMAIYK | 733   | >TP53-M160 TRVRATAIYK | 329   | 404   |
| >TP53-M160 TRVRAMAI   | 215   | >TP53-M160 TRVRATAI   | 281   | 66    |
| >TP53-M160 GTRVRAMAIY | 269   | >TP53-M160 GTRVRATAIY | 250   | 19    |
| >TP53-M160 GTRVRAMAIY | 50    | >TP53-M160 GTRVRATAIY | 62    | 12    |
| >TP53-M160 GTRVRAMAIY | 39    | >TP53-M160 GTRVRATAIY | 76    | 37    |
| >TP53-M160 GTRVRAMA   | 18    | >TP53-M160 GTRVRATA   | 19    | 1     |

|                       |     |                        |       |       |
|-----------------------|-----|------------------------|-------|-------|
| >TP53-M160 GTRVRAMAI  | 9   | >TP53-M160 GTRVRATAI   | 71    | 62    |
| >TP53-M160 GTRVRAMAI  | 30  | >TP53-M160 GTRVRATAIY  | 61    | 31    |
| >TP53-M160 GTRVRAMAI  | 3   | >TP53-M160 GTRVRATAIY  | 4     | 1     |
| >TP53-M160 GTRVRAMAI  | 130 | >TP53-M160 GTRVRATAIY  | 147   | 17    |
| >TP53-M160 GTRVRAMAI  | 115 | >TP53-M160 GTRVRATAIY  | 115   | 0     |
| >TP53-M160 GTRVRAMAI  | 405 | >TP53-M160 GTRVRATAIY  | 301   | 104   |
| >TP53-M160 GTRVRAMAI  | 40  | >TP53-M160 GTRVRATAI   | 27    | 13    |
| >TP53-M160 GTRVRAMAI  | 4   | >TP53-M160 GTRVRATAIY  | 5     | 1     |
| >TP53-M160 GTRVRAMAI  | 122 | >TP53-M160 GTRVRATAI   | 50    | 72    |
| >TP53-M160 GTRVRAMAI  | 21  | >TP53-M160 GTRVRATAIY  | 21    | 0     |
| >TP53-M160 GTRVRAMAI  | 269 | >TP53-M160 GTRVRATAIY  | 381   | 112   |
| >TP53-M160 GTRVRAMAI  | 387 | >TP53-M160 GTRVRATAI   | 116   | 271   |
| >TP53-M160 PPGTRVRAM  | 68  | >TP53-M160 PPGTRVRAT   | 7022  | 6954  |
| >TP53-M160 PPPGTRVRAM | 370 | >TP53-M160 PPPGTRVRAT  | 1065  | 695   |
| >TP53-M160 PPPGTRVRAM | 450 | >TP53-M160 PPPGTRVRAT  | 25851 | 25401 |
| >TP53-M160 MAIYKQSQHI | 226 | >TP53-M160 VAIYKQSQHM  | 504   | 278   |
| >TP53-M160 MAIYKQSQHI | 205 | >TP53-M160 VAIYKQSQHM  | 713   | 508   |
| >TP53-M160 MAIYKQSQHI | 20  | >TP53-M160 VAIYKQSQHM  | 40    | 20    |
| >TP53-M160 MAIYKQSQHI | 151 | >TP53-M160 VAIYKQSQHM  | 619   | 468   |
| >TP53-M160 AMAIYKQSQI | 221 | >TP53-M160 AVAIYKQSQHF | 493   | 272   |
| >TP53-M160 AMAIYKQSQI | 161 | >TP53-M160 AVAIYKQSQHF | 3169  | 3008  |
| >TP53-M160 AMAIYKQSQI | 199 | >TP53-M160 AVAIYKQSQHF | 7775  | 7576  |
| >TP53-M160 AMAIYKQSQI | 283 | >TP53-M160 AVAIYKQSQHF | 11139 | 10856 |
| >TP53-M160 AMAIYKQSQI | 69  | >TP53-M160 AVAIYKQSQ   | 9994  | 9925  |
| >TP53-M160 AMAIYKQSQI | 49  | >TP53-M160 AVAIYKQSQHF | 7078  | 7029  |
| >TP53-M160 AMAIYKQSQI | 55  | >TP53-M160 AVAIYKQSQHF | 461   | 406   |
| >TP53-M160 AMAIYKQSQI | 69  | >TP53-M160 AVAIYKQSQHF | 3501  | 3432  |
| >TP53-M160 TPPPGRVRA  | 482 | >TP53-M160 TPPPGRVRA   | 4167  | 3685  |
| >TP53-M160 TPPPGRVRA  | 32  | >TP53-M160 TPPPGRVRA   | 116   | 84    |
| >TP53-M160 TPPPGRVRA  | 139 | >TP53-M160 TPPPGRVRA   | 5947  | 5808  |
| >TP53-M160 RAMAIYKQSC | 354 | >TP53-M160 RAVAIYKQSQ  | 321   | 33    |
| >TP53-M160 RAMAIYKQSC | 375 | >TP53-M160 RAVAIYKQSQ  | 616   | 241   |
| >TP53-M160 VRAMAIYK   | 159 | >TP53-M160 VRAVAIYK    | 148   | 11    |
| >TP53-M160 RVRAMAIY   | 205 | >TP53-M160 RVRAVAIY    | 179   | 26    |
| >TP53-M160 RVRAMAIYK  | 28  | >TP53-M160 RVRAVAIYK   | 27    | 1     |
| >TP53-M160 RVRAMAIYK  | 20  | >TP53-M160 RVRAVAIYK   | 22    | 2     |
| >TP53-M160 RVRAMAIY   | 241 | >TP53-M160 RVRAVAIY    | 522   | 281   |
| >TP53-M160 RVRAMAIY   | 398 | >TP53-M160 RVRAVAIY    | 897   | 499   |
| >TP53-M160 RVRAMAIY   | 5   | >TP53-M160 RVRAVAIY    | 6     | 1     |
| >TP53-M160 RVRAMAIYK  | 3   | >TP53-M160 RVRAVAIYK   | 3     | 0     |
| >TP53-M160 RVRAMAIYKC | 10  | >TP53-M160 RVRAVAIYKQ  | 12    | 2     |
| >TP53-M160 RVRAMAIYKC | 9   | >TP53-M160 RVRAVAIYKQ  | 10    | 1     |
| >TP53-M160 RVRAMAIY   | 107 | >TP53-M160 RVRAVAIY    | 135   | 28    |

|                       |      |                       |      |      |
|-----------------------|------|-----------------------|------|------|
| >TP53-M160 RVRAMAIYK  | 18   | >TP53-M160 RVRAVAIYK  | 20   | 2    |
| >TP53-M160 RVRAMAIYK  | 588  | >TP53-M160 RVRAVAIYK  | 217  | 371  |
| >TP53-M160 RVRAMAIY   | 26   | >TP53-M160 RVRAVAIY   | 44   | 18   |
| >TP53-M160 RVRAMAIY   | 85   | >TP53-M160 RVRAVAIY   | 76   | 9    |
| >TP53-M160 RVRAMAIY   | 311  | >TP53-M160 RVRAVAIY   | 215  | 96   |
| >TP53-M160 RVRAMAIY   | 7    | >TP53-M160 RVRAVAIY   | 15   | 8    |
| >TP53-M160 RVRAMAIY   | 211  | >TP53-M160 RVRAVAIY   | 286  | 75   |
| >TP53-M160 RVRAMAIYK  | 156  | >TP53-M160 RVRAVAIYK  | 303  | 147  |
| >TP53-M160 TRVRAMAIY  | 62   | >TP53-M160 TRVRAVAIY  | 355  | 293  |
| >TP53-M160 TRVRAMAIY  | 278  | >TP53-M160 TRVRAVAIY  | 162  | 116  |
| >TP53-M160 TRVRAMAI   | 542  | >TP53-M160 TRVRAVAI   | 314  | 228  |
| >TP53-M160 TRVRAMAIYK | 733  | >TP53-M160 TRVRAVAIYK | 440  | 293  |
| >TP53-M160 TRVRAMAI   | 215  | >TP53-M160 TRVRAVAI   | 154  | 61   |
| >TP53-M160 GTRVRAMAI\ | 269  | >TP53-M160 GTRVRAVAIY | 363  | 94   |
| >TP53-M160 GTRVRAMAI\ | 50   | >TP53-M160 GTRVRAVAIY | 59   | 9    |
| >TP53-M160 GTRVRAMAI\ | 39   | >TP53-M160 GTRVRAVAIY | 56   | 17   |
| >TP53-M160 GTRVRAMA   | 18   | >TP53-M160 GTRVRAVA   | 19   | 1    |
| >TP53-M160 GTRVRAMAI  | 9    | >TP53-M160 GTRVRAVAI  | 19   | 10   |
| >TP53-M160 GTRVRAMAI\ | 30   | >TP53-M160 GTRVRAVAIY | 46   | 16   |
| >TP53-M160 GTRVRAMAI\ | 3    | >TP53-M160 GTRVRAVAIY | 4    | 1    |
| >TP53-M160 GTRVRAMAI\ | 130  | >TP53-M160 GTRVRAVAIY | 157  | 27   |
| >TP53-M160 GTRVRAMAI\ | 115  | >TP53-M160 GTRVRAVAIY | 93   | 22   |
| >TP53-M160 GTRVRAMAI\ | 671  | >TP53-M160 GTRVRAVAIY | 476  | 195  |
| >TP53-M160 GTRVRAMAI\ | 405  | >TP53-M160 GTRVRAVAIY | 312  | 93   |
| >TP53-M160 GTRVRAMAI  | 40   | >TP53-M160 GTRVRAVAI  | 36   | 4    |
| >TP53-M160 GTRVRAMAI\ | 4    | >TP53-M160 GTRVRAVAIY | 5    | 1    |
| >TP53-M160 GTRVRAMAI  | 122  | >TP53-M160 GTRVRAVAI  | 426  | 304  |
| >TP53-M160 GTRVRAMAI\ | 21   | >TP53-M160 GTRVRAVAIY | 28   | 7    |
| >TP53-M160 GTRVRAMAI\ | 269  | >TP53-M160 GTRVRAVAIY | 371  | 102  |
| >TP53-M160 GTRVRAMAI  | 387  | >TP53-M160 GTRVRAVAI  | 151  | 236  |
| >TP53-M160 PPGTRVRAM  | 68   | >TP53-M160 PPGTRVRAV  | 478  | 410  |
| >TP53-M160 PPPGTRVRAM | 370  | >TP53-M160 PPPGTRVRAV | 533  | 163  |
| >TP53-M160 PPPGTRVRAM | 450  | >TP53-M160 PPPGTRVRAV | 2932 | 2482 |
| >TP53-M169 HMTEVVRR   | 38   | >TP53-M169 HITEVVRR   | 1705 | 1667 |
| >TP53-M169 HMTEVVRR   | 38   | >TP53-M169 HITEVVRR   | 194  | 156  |
| >TP53-M169 HMTEVVRR   | 65   | >TP53-M169 HITEVVRR   | 145  | 80   |
| >TP53-M169 HMTEVVRR   | 35   | >TP53-M169 HITEVVRR   | 17   | 18   |
| >TP53-M169 HMTEVVRR   | 64   | >TP53-M169 HITEVVRR   | 99   | 35   |
| >TP53-M169 AMAIYKQSQI | 221  | >TP53-M169 AMAIYKQSQI | 832  | 611  |
| >TP53-M169 AMAIYKQSQI | 2136 | >TP53-M169 AMAIYKQSQI | 420  | 1716 |
| >TP53-M169 AMAIYKQSQI | 161  | >TP53-M169 AMAIYKQSQI | 40   | 121  |
| >TP53-M169 AMAIYKQSQI | 732  | >TP53-M169 AMAIYKQSQI | 42   | 690  |
| >TP53-M169 AMAIYKQSQI | 1909 | >TP53-M169 AMAIYKQSQI | 402  | 1507 |

|                       |      |                       |     |      |
|-----------------------|------|-----------------------|-----|------|
| >TP53-M169 AMAIYKQSQI | 199  | >TP53-M169 AMAIYKQSQI | 26  | 173  |
| >TP53-M169 AMAIYKQSQI | 1607 | >TP53-M169 AMAIYKQSQI | 137 | 1470 |
| >TP53-M169 AMAIYKQSQI | 283  | >TP53-M169 AMAIYKQSQI | 32  | 251  |
| >TP53-M169 AMAIYKQSQI | 49   | >TP53-M169 AMAIYKQSQI | 12  | 37   |
| >TP53-M169 AMAIYKQSQI | 55   | >TP53-M169 AMAIYKQSQI | 474 | 419  |
| >TP53-M169 AMAIYKQSQI | 69   | >TP53-M169 AMAIYKQSQI | 222 | 153  |
| >TP53-M169 QHMTEVVR   | 269  | >TP53-M169 QHITEVVR   | 338 | 69   |
| >TP53-M169 QHMTEVRR   | 195  | >TP53-M169 QHITEVRR   | 248 | 53   |
| >TP53-M169 SQHMTEVV   | 115  | >TP53-M169 SQHITEVV   | 134 | 19   |
| >TP53-M169 SQHMTEVV   | 256  | >TP53-M169 SQHITEVV   | 211 | 45   |
| >TP53-M169 SQHMTEVV   | 543  | >TP53-M169 SQHITEVV   | 470 | 73   |
| >TP53-M169 SQHMTEVVR  | 115  | >TP53-M169 SQHITEVVR  | 152 | 37   |
| >TP53-M169 SQHMTEVV   | 88   | >TP53-M169 SQHITEVV   | 224 | 136  |
| >TP53-M169 SQHMTEVVR  | 162  | >TP53-M169 SQHITEVVR  | 471 | 309  |
| >TP53-M169 SQHMTEVVR  | 434  | >TP53-M169 SQHITEVVR  | 444 | 10   |
| >TP53-M169 SQHMTEVVR  | 363  | >TP53-M169 SQHITEVRR  | 350 | 13   |
| >TP53-M169 QSQHMTEVV  | 230  | >TP53-M169 QSQHITEVVR | 215 | 15   |
| >TP53-M169 QSQHMTEVV  | 321  | >TP53-M169 QSQHITEVVR | 277 | 44   |
| >TP53-M169 QSQHMTEVV  | 185  | >TP53-M169 QSQHITEVVR | 103 | 82   |
| >TP53-M169 QSQHMTEV   | 206  | >TP53-M169 QSQHITEV   | 67  | 139  |
| >TP53-M169 QSQHMTEVV  | 303  | >TP53-M169 QSQHITEVV  | 38  | 265  |
| >TP53-M169 QSQHMTEVV  | 306  | >TP53-M169 QSQHITEVVR | 518 | 212  |
| >TP53-M169 KQSQHMTEV  | 82   | >TP53-M169 KQSQHITEV  | 39  | 43   |
| >TP53-M169 KQSQHMTEV  | 51   | >TP53-M169 KQSQHITEV  | 38  | 13   |
| >TP53-M169 KQSQHMTEV  | 298  | >TP53-M169 KQSQHITEVV | 259 | 39   |
| >TP53-M169 KQSQHMTEV  | 9    | >TP53-M169 KQSQHITEV  | 7   | 2    |
| >TP53-M169 KQSQHMTEV  | 273  | >TP53-M169 KQSQHITEVV | 222 | 51   |
| >TP53-M169 KQSQHMTEV  | 10   | >TP53-M169 KQSQHITEV  | 8   | 2    |
| >TP53-M169 KQSQHMTEV  | 426  | >TP53-M169 KQSQHITEV  | 68  | 358  |
| >TP53-M169 KQSQHMTEV  | 718  | >TP53-M169 KQSQHITEVV | 213 | 505  |
| >TP53-M169 KQSQHMTEV  | 1212 | >TP53-M169 KQSQHITEV  | 273 | 939  |
| >TP53-M169 KQSQHMTEV  | 1607 | >TP53-M169 KQSQHITEV  | 229 | 1378 |
| >TP53-M169 KQSQHMTEV  | 35   | >TP53-M169 KQSQHITEVV | 40  | 5    |
| >TP53-M169 KQSQHMTEV  | 541  | >TP53-M169 KQSQHITEV  | 386 | 155  |
| >TP53-M169 KQSQHMTEV  | 222  | >TP53-M169 KQSQHITEVV | 225 | 3    |
| >TP53-M169 KQSQHMTEV  | 86   | >TP53-M169 KQSQHITEV  | 52  | 34   |
| >TP53-M169 KQSQHMTEV  | 110  | >TP53-M169 KQSQHITEVV | 84  | 26   |
| >TP53-M169 KQSQHMTEV  | 185  | >TP53-M169 KQSQHITEVV | 180 | 5    |
| >TP53-M169 KQSQHMTEV  | 60   | >TP53-M169 KQSQHITEVV | 49  | 11   |
| >TP53-M169 YKQSQHMTE  | 467  | >TP53-M169 YKQSQHITEV | 211 | 256  |
| >TP53-M169 YKQSQHMTE  | 30   | >TP53-M169 YKQSQHITEV | 30  | 0    |
| >TP53-M169 YKQSQHMTE  | 42   | >TP53-M169 YKQSQHITEV | 52  | 10   |
| >TP53-M169 IYKQSQHM   | 510  | >TP53-M169 IYKQSQHI   | 31  | 479  |

|                       |      |                        |      |      |
|-----------------------|------|------------------------|------|------|
| >TP53-M169 IYKQSQHMTI | 402  | >TP53-M169 IYKQSQHITEV | 423  | 21   |
| >TP53-M169 IYKQSQHMTI | 727  | >TP53-M169 IYKQSQHITEV | 378  | 349  |
| >TP53-M169 IYKQSQHM   | 2436 | >TP53-M169 IYKQSQHI    | 130  | 2306 |
| >TP53-M169 IYKQSQHM   | 957  | >TP53-M169 IYKQSQHI    | 122  | 835  |
| >TP53-M169 IYKQSQHM   | 561  | >TP53-M169 IYKQSQHI    | 34   | 527  |
| >TP53-M169 IYKQSQHM   | 394  | >TP53-M169 IYKQSQHI    | 136  | 258  |
| >TP53-M169 AIYKQSQHM  | 91   | >TP53-M169 AIYKQSQHI   | 433  | 342  |
| >TP53-M169 AIYKQSQHM  | 2067 | >TP53-M169 AIYKQSQHI   | 147  | 1920 |
| >TP53-M169 AIYKQSQHM  | 1225 | >TP53-M169 AIYKQSQHI   | 205  | 1020 |
| >TP53-M169 AIYKQSQHM  | 1358 | >TP53-M169 AIYKQSQHI   | 103  | 1255 |
| >TP53-M169 AIYKQSQHM  | 1683 | >TP53-M169 AIYKQSQHI   | 180  | 1503 |
| >TP53-M169 AIYKQSQHM  | 750  | >TP53-M169 AIYKQSQHI   | 246  | 504  |
| >TP53-M169 AIYKQSQHM  | 62   | >TP53-M169 AIYKQSQHI   | 657  | 595  |
| >TP53-M169 AIYKQSQHM  | 198  | >TP53-M169 AIYKQSQHI   | 520  | 322  |
| >TP53-M169 MAIYKQSQHI | 3250 | >TP53-M169 MAIYKQSQHI  | 331  | 2919 |
| >TP53-M169 MAIYKQSQHI | 226  | >TP53-M169 MAIYKQSQHI  | 2463 | 2237 |
| >TP53-M169 MAIYKQSQHI | 205  | >TP53-M169 MAIYKQSQHI  | 703  | 498  |
| >TP53-M169 MAIYKQSQHI | 20   | >TP53-M169 MAIYKQSQHI  | 153  | 133  |
| >TP53-M169 MAIYKQSQHI | 151  | >TP53-M169 MAIYKQSQHI  | 200  | 49   |
| >TP53-M169 HMTEVVRR   | 38   | >TP53-M169 HTTEVVRR    | 4330 | 4292 |
| >TP53-M169 HMTEVVRR   | 38   | >TP53-M169 HTTEVVRR    | 68   | 30   |
| >TP53-M169 HMTEVVRR   | 65   | >TP53-M169 HTTEVVRR    | 64   | 1    |
| >TP53-M169 HMTEVVRR   | 35   | >TP53-M169 HTTEVVRR    | 6    | 29   |
| >TP53-M169 HMTEVVRR   | 64   | >TP53-M169 HTTEVVRR    | 339  | 275  |
| >TP53-M169 AMAIYKQSQI | 221  | >TP53-M169 AMAIYKQSQI  | 7185 | 6964 |
| >TP53-M169 AMAIYKQSQI | 161  | >TP53-M169 AMAIYKQSQI  | 828  | 667  |
| >TP53-M169 AMAIYKQSQI | 199  | >TP53-M169 AMAIYKQSQI  | 559  | 360  |
| >TP53-M169 AMAIYKQSQI | 283  | >TP53-M169 AMAIYKQSQI  | 815  | 532  |
| >TP53-M169 AMAIYKQSQI | 49   | >TP53-M169 AMAIYKQSQI  | 81   | 32   |
| >TP53-M169 AMAIYKQSQI | 55   | >TP53-M169 AMAIYKQSQI  | 4226 | 4171 |
| >TP53-M169 AMAIYKQSQI | 69   | >TP53-M169 AMAIYKQSQI  | 3828 | 3759 |
| >TP53-M169 QHMTEVVR   | 269  | >TP53-M169 QHTTEVVR    | 471  | 202  |
| >TP53-M169 QHMTEVVR   | 195  | >TP53-M169 QHTTEVVR    | 347  | 152  |
| >TP53-M169 SQHMTEVV   | 115  | >TP53-M169 SQHTTEVV    | 125  | 10   |
| >TP53-M169 SQHMTEVV   | 256  | >TP53-M169 SQHTTEVV    | 290  | 34   |
| >TP53-M169 SQHMTEVVR  | 115  | >TP53-M169 SQHTTEVVR   | 213  | 98   |
| >TP53-M169 SQHMTEVV   | 88   | >TP53-M169 SQHTTEVV    | 63   | 25   |
| >TP53-M169 SQHMTEVVR  | 162  | >TP53-M169 SQHTTEVVR   | 145  | 17   |
| >TP53-M169 SQHMTEVVR  | 434  | >TP53-M169 SQHTTEVVR   | 255  | 179  |
| >TP53-M169 SQHMTEVVR  | 363  | >TP53-M169 SQHTTEVVR   | 234  | 129  |
| >TP53-M169 QSQHMTEVV  | 230  | >TP53-M169 QSQHTTEVVI  | 633  | 403  |
| >TP53-M169 QSQHMTEVV  | 321  | >TP53-M169 QSQHTTEVVI  | 451  | 130  |
| >TP53-M169 QSQHMTEVV  | 185  | >TP53-M169 QSQHTTEVVI  | 213  | 28   |

|                       |      |                        |       |       |
|-----------------------|------|------------------------|-------|-------|
| >TP53-M169 QSQHMTEV   | 206  | >TP53-M169 QSQHTTEV    | 342   | 136   |
| >TP53-M169 QSQHMTEVV  | 303  | >TP53-M169 QSQHTTEVV   | 654   | 351   |
| >TP53-M169 QSQHMTEVVI | 306  | >TP53-M169 QSQHTTEVVI  | 352   | 46    |
| >TP53-M169 KQSQHMTEV  | 82   | >TP53-M169 KQSQHTTEV   | 86    | 4     |
| >TP53-M169 KQSQHMTEV  | 51   | >TP53-M169 KQSQHTTEV   | 55    | 4     |
| >TP53-M169 KQSQHMTEV  | 298  | >TP53-M169 KQSQHTTEV\  | 340   | 42    |
| >TP53-M169 KQSQHMTEV  | 9    | >TP53-M169 KQSQHTTEV   | 12    | 3     |
| >TP53-M169 KQSQHMTEV  | 273  | >TP53-M169 KQSQHTTEV\  | 242   | 31    |
| >TP53-M169 KQSQHMTEV  | 10   | >TP53-M169 KQSQHTTEV   | 15    | 5     |
| >TP53-M169 KQSQHMTEV  | 426  | >TP53-M169 KQSQHTTEV   | 342   | 84    |
| >TP53-M169 KQSQHMTEV  | 718  | >TP53-M169 KQSQHTTEV\  | 465   | 253   |
| >TP53-M169 KQSQHMTEV  | 35   | >TP53-M169 KQSQHTTEV\  | 49    | 14    |
| >TP53-M169 KQSQHMTEV  | 541  | >TP53-M169 KQSQHTTEV   | 363   | 178   |
| >TP53-M169 KQSQHMTEV  | 222  | >TP53-M169 KQSQHTTEV\  | 173   | 49    |
| >TP53-M169 KQSQHMTEV  | 86   | >TP53-M169 KQSQHTTEV   | 48    | 38    |
| >TP53-M169 KQSQHMTEV  | 110  | >TP53-M169 KQSQHTTEV\  | 53    | 57    |
| >TP53-M169 KQSQHMTEV  | 185  | >TP53-M169 KQSQHTTEV\  | 134   | 51    |
| >TP53-M169 KQSQHMTEV  | 60   | >TP53-M169 KQSQHTTEV\  | 35    | 25    |
| >TP53-M169 YKQSQHMTE  | 467  | >TP53-M169 YKQSQHTTEV  | 351   | 116   |
| >TP53-M169 YKQSQHMTE  | 30   | >TP53-M169 YKQSQHTTEV  | 26    | 4     |
| >TP53-M169 YKQSQHMTE  | 42   | >TP53-M169 YKQSQHTTEV  | 29    | 13    |
| >TP53-M169 IYKQSQHMTI | 402  | >TP53-M169 IYKQSQHTTE' | 260   | 142   |
| >TP53-M169 IYKQSQHMTI | 727  | >TP53-M169 IYKQSQHTTE' | 483   | 244   |
| >TP53-M169 IYKQSQHM   | 394  | >TP53-M169 IYKQSQHT    | 2842  | 2448  |
| >TP53-M169 AIYKQSQHM  | 91   | >TP53-M169 AIYKQSQHT   | 3623  | 3532  |
| >TP53-M169 AIYKQSQHM' | 662  | >TP53-M169 AIYKQSQHTT  | 294   | 368   |
| >TP53-M169 AIYKQSQHM  | 62   | >TP53-M169 AIYKQSQHT   | 6232  | 6170  |
| >TP53-M169 AIYKQSQHM  | 198  | >TP53-M169 AIYKQSQHT   | 7122  | 6924  |
| >TP53-M169 MAIYKQSQH  | 226  | >TP53-M169 MAIYKQSQH'  | 10536 | 10310 |
| >TP53-M169 MAIYKQSQH  | 205  | >TP53-M169 MAIYKQSQH'  | 9946  | 9741  |
| >TP53-M169 MAIYKQSQH  | 20   | >TP53-M169 MAIYKQSQH'  | 7017  | 6997  |
| >TP53-M169 MAIYKQSQH  | 151  | >TP53-M169 MAIYKQSQH'  | 15246 | 15095 |
| >TP53-M169 HMTEVVRR   | 38   | >TP53-M169 HVTEVVRR    | 3845  | 3807  |
| >TP53-M169 HMTEVVRR   | 38   | >TP53-M169 HVTEVVRR    | 107   | 69    |
| >TP53-M169 HMTEVVRR   | 65   | >TP53-M169 HVTEVVRR    | 134   | 69    |
| >TP53-M169 HMTEVVRR   | 35   | >TP53-M169 HVTEVVRR    | 10    | 25    |
| >TP53-M169 HMTEVVRR   | 64   | >TP53-M169 HVTEVVRR    | 241   | 177   |
| >TP53-M169 AMAIYKQSQI | 221  | >TP53-M169 AMAIYKQSQI  | 954   | 733   |
| >TP53-M169 AMAIYKQSQI | 2136 | >TP53-M169 AMAIYKQSQI  | 76    | 2060  |
| >TP53-M169 AMAIYKQSQI | 161  | >TP53-M169 AMAIYKQSQI  | 11    | 150   |
| >TP53-M169 AMAIYKQSQI | 732  | >TP53-M169 AMAIYKQSQI  | 10    | 722   |
| >TP53-M169 AMAIYKQSQI | 1909 | >TP53-M169 AMAIYKQSQI  | 46    | 1863  |
| >TP53-M169 AMAIYKQSQI | 199  | >TP53-M169 AMAIYKQSQI  | 4     | 195   |

|                       |      |                       |      |      |
|-----------------------|------|-----------------------|------|------|
| >TP53-M169 AMAIYKQSQI | 1607 | >TP53-M169 AMAIYKQSQI | 15   | 1592 |
| >TP53-M169 AMAIYKQSQI | 283  | >TP53-M169 AMAIYKQSQI | 7    | 276  |
| >TP53-M169 AMAIYKQSQI | 3162 | >TP53-M169 AMAIYKQSQI | 39   | 3123 |
| >TP53-M169 AMAIYKQSQI | 49   | >TP53-M169 AMAIYKQSQI | 2    | 47   |
| >TP53-M169 AMAIYKQSQI | 55   | >TP53-M169 AMAIYKQSQI | 529  | 474  |
| >TP53-M169 AMAIYKQSQI | 69   | >TP53-M169 AMAIYKQSQI | 300  | 231  |
| >TP53-M169 QHMTEVVR   | 269  | >TP53-M169 QHVTEVVR   | 271  | 2    |
| >TP53-M169 QHMTEVRR   | 195  | >TP53-M169 QHVTEVRR   | 191  | 4    |
| >TP53-M169 SQHMTEVV   | 115  | >TP53-M169 SQHVTEVV   | 112  | 3    |
| >TP53-M169 SQHMTEVV   | 256  | >TP53-M169 SQHVTEVV   | 345  | 89   |
| >TP53-M169 SQHMTEVVR  | 115  | >TP53-M169 SQHVTEVVR  | 125  | 10   |
| >TP53-M169 SQHMTEVV   | 88   | >TP53-M169 SQHVTEVV   | 131  | 43   |
| >TP53-M169 SQHMTEVVR  | 162  | >TP53-M169 SQHVTEVVR  | 252  | 90   |
| >TP53-M169 SQHMTEVVR  | 434  | >TP53-M169 SQHVTEVVR  | 1024 | 590  |
| >TP53-M169 SQHMTEVVR  | 363  | >TP53-M169 SQHVTEVVR  | 697  | 334  |
| >TP53-M169 QSQHMTEVV  | 230  | >TP53-M169 QSQHVTEVVI | 338  | 108  |
| >TP53-M169 QSQHMTEVV  | 321  | >TP53-M169 QSQHVTEVVI | 339  | 18   |
| >TP53-M169 QSQHMTEVV  | 185  | >TP53-M169 QSQHVTEVVI | 119  | 66   |
| >TP53-M169 QSQHMTEV   | 206  | >TP53-M169 QSQHVTEV   | 108  | 98   |
| >TP53-M169 QSQHMTEVV  | 303  | >TP53-M169 QSQHVTEVV  | 66   | 237  |
| >TP53-M169 QSQHMTEVV  | 306  | >TP53-M169 QSQHVTEVVI | 507  | 201  |
| >TP53-M169 KQSQHMTEV  | 82   | >TP53-M169 KQSQHVTEV  | 50   | 32   |
| >TP53-M169 KQSQHMTEV  | 51   | >TP53-M169 KQSQHVTEV  | 42   | 9    |
| >TP53-M169 KQSQHMTEV  | 298  | >TP53-M169 KQSQHVTEV  | 324  | 26   |
| >TP53-M169 KQSQHMTEV  | 9    | >TP53-M169 KQSQHVTEV  | 7    | 2    |
| >TP53-M169 KQSQHMTEV  | 273  | >TP53-M169 KQSQHVTEV  | 253  | 20   |
| >TP53-M169 KQSQHMTEV  | 10   | >TP53-M169 KQSQHVTEV  | 11   | 1    |
| >TP53-M169 KQSQHMTEV  | 426  | >TP53-M169 KQSQHVTEV  | 93   | 333  |
| >TP53-M169 KQSQHMTEV  | 718  | >TP53-M169 KQSQHVTEV  | 175  | 543  |
| >TP53-M169 KQSQHMTEV  | 1212 | >TP53-M169 KQSQHVTEV  | 285  | 927  |
| >TP53-M169 KQSQHMTEV  | 1607 | >TP53-M169 KQSQHVTEV  | 496  | 1111 |
| >TP53-M169 KQSQHMTEV  | 35   | >TP53-M169 KQSQHVTEV  | 48   | 13   |
| >TP53-M169 KQSQHMTEV  | 541  | >TP53-M169 KQSQHVTEV  | 271  | 270  |
| >TP53-M169 KQSQHMTEV  | 222  | >TP53-M169 KQSQHVTEV  | 172  | 50   |
| >TP53-M169 KQSQHMTEV  | 86   | >TP53-M169 KQSQHVTEV  | 40   | 46   |
| >TP53-M169 KQSQHMTEV  | 110  | >TP53-M169 KQSQHVTEV  | 72   | 38   |
| >TP53-M169 KQSQHMTEV  | 185  | >TP53-M169 KQSQHVTEV  | 135  | 50   |
| >TP53-M169 KQSQHMTEV  | 60   | >TP53-M169 KQSQHVTEV  | 59   | 1    |
| >TP53-M169 YKQSQHMTE  | 467  | >TP53-M169 YKQSQHVTE  | 285  | 182  |
| >TP53-M169 YKQSQHMTE  | 30   | >TP53-M169 YKQSQHVTE  | 22   | 8    |
| >TP53-M169 YKQSQHMTE  | 42   | >TP53-M169 YKQSQHVTE  | 42   | 0    |
| >TP53-M169 IYKQSQHMTI | 402  | >TP53-M169 IYKQSQHVTE | 450  | 48   |
| >TP53-M169 IYKQSQHMTI | 727  | >TP53-M169 IYKQSQHVTE | 498  | 229  |

|                      |       |                       |      |       |
|----------------------|-------|-----------------------|------|-------|
| >TP53-M169 IYKQSQHM  | 394   | >TP53-M169 IYKQSQHV   | 236  | 158   |
| >TP53-M169 AIYKQSQHM | 91    | >TP53-M169 AIYKQSQHV  | 409  | 318   |
| >TP53-M169 AIYKQSQHM | 3877  | >TP53-M169 AIYKQSQHV  | 174  | 3703  |
| >TP53-M169 AIYKQSQHM | 2067  | >TP53-M169 AIYKQSQHV  | 26   | 2041  |
| >TP53-M169 AIYKQSQHM | 3214  | >TP53-M169 AIYKQSQHV  | 59   | 3155  |
| >TP53-M169 AIYKQSQHM | 1225  | >TP53-M169 AIYKQSQHV  | 19   | 1206  |
| >TP53-M169 AIYKQSQHM | 7282  | >TP53-M169 AIYKQSQHV  | 80   | 7202  |
| >TP53-M169 AIYKQSQHM | 1358  | >TP53-M169 AIYKQSQHV  | 10   | 1348  |
| >TP53-M169 AIYKQSQHM | 1683  | >TP53-M169 AIYKQSQHV  | 7    | 1676  |
| >TP53-M169 AIYKQSQHM | 750   | >TP53-M169 AIYKQSQHV  | 479  | 271   |
| >TP53-M169 AIYKQSQHM | 62    | >TP53-M169 AIYKQSQHV  | 698  | 636   |
| >TP53-M169 AIYKQSQHM | 198   | >TP53-M169 AIYKQSQHV  | 603  | 405   |
| >TP53-M169 MAIYKQSQH | 26593 | >TP53-M169 MAIYKQSQH' | 470  | 26123 |
| >TP53-M169 MAIYKQSQH | 3250  | >TP53-M169 MAIYKQSQH' | 110  | 3140  |
| >TP53-M169 MAIYKQSQH | 226   | >TP53-M169 MAIYKQSQH' | 2657 | 2431  |
| >TP53-M169 MAIYKQSQH | 205   | >TP53-M169 MAIYKQSQH' | 941  | 736   |
| >TP53-M169 MAIYKQSQH | 20    | >TP53-M169 MAIYKQSQH' | 1126 | 1106  |
| >TP53-M169 MAIYKQSQH | 151   | >TP53-M169 MAIYKQSQH' | 5961 | 5810  |
| >TP53-M237 YMCNSSCM  | 262   | >TP53-M237 YICNSSCM   | 4776 | 4514  |
| >TP53-M237 YMCNSSCMG | 252   | >TP53-M237 YICNSSCMG  | 3527 | 3275  |
| >TP53-M237 YMCNSSCM  | 205   | >TP53-M237 YICNSSCM   | 2707 | 2502  |
| >TP53-M237 YMCNSSCMG | 167   | >TP53-M237 YICNSSCMG  | 2114 | 1947  |
| >TP53-M237 YMCNSSCM  | 283   | >TP53-M237 YICNSSCM   | 3420 | 3137  |
| >TP53-M237 YMCNSSCMG | 41    | >TP53-M237 YICNSSCMG  | 610  | 569   |
| >TP53-M237 YMCNSSCMG | 143   | >TP53-M237 YICNSSCMG  | 443  | 300   |
| >TP53-M237 YMCNSSCM  | 24    | >TP53-M237 YICNSSCM   | 932  | 908   |
| >TP53-M237 YMCNSSCMG | 92    | >TP53-M237 YICNSSCMG  | 3723 | 3631  |
| >TP53-M237 YMCNSSCMG | 399   | >TP53-M237 YICNSSCMG  | 8288 | 7889  |
| >TP53-M237 YMCNSSCMG | 16    | >TP53-M237 YICNSSCMG  | 544  | 528   |
| >TP53-M237 YMCNSSCM  | 92    | >TP53-M237 YICNSSCM   | 5715 | 5623  |
| >TP53-M237 YMCNSSCMG | 197   | >TP53-M237 YICNSSCMG  | 7777 | 7580  |
| >TP53-M237 YMCNSSCM  | 150   | >TP53-M237 YICNSSCM   | 4647 | 4497  |
| >TP53-M237 YMCNSSCMG | 421   | >TP53-M237 YICNSSCMG  | 6340 | 5919  |
| >TP53-M237 YMCNSSCM  | 67    | >TP53-M237 YICNSSCM   | 3526 | 3459  |
| >TP53-M237 YMCNSSCMG | 332   | >TP53-M237 YICNSSCMG  | 6186 | 5854  |
| >TP53-M237 YMCNSSCM  | 33    | >TP53-M237 YICNSSCM   | 1341 | 1308  |
| >TP53-M237 YMCNSSCMG | 53    | >TP53-M237 YICNSSCMG  | 1219 | 1166  |
| >TP53-M237 YMCNSSCMG | 2458  | >TP53-M237 YICNSSCMG  | 202  | 2256  |
| >TP53-M237 YMCNSSCMG | 591   | >TP53-M237 YICNSSCMG  | 146  | 445   |
| >TP53-M237 YMCNSSCM  | 33    | >TP53-M237 YICNSSCM   | 112  | 79    |
| >TP53-M237 YMCNSSCMG | 127   | >TP53-M237 YICNSSCMG  | 887  | 760   |
| >TP53-M237 YMCNSSCMG | 292   | >TP53-M237 YICNSSCMG  | 2215 | 1923  |
| >TP53-M237 YMCNSSCMG | 44    | >TP53-M237 YICNSSCMG  | 179  | 135   |



|                       |      |                       |       |       |
|-----------------------|------|-----------------------|-------|-------|
| >TP53-M237 YMCNSSCM   | 98   | >TP53-M237 YICNSSCM   | 888   | 790   |
| >TP53-M237 YMCNSSCMC  | 145  | >TP53-M237 YICNSSCMGC | 1154  | 1009  |
| >TP53-M237 YMCNSSCM   | 20   | >TP53-M237 YICNSSCM   | 450   | 430   |
| >TP53-M237 YMCNSSCMC  | 160  | >TP53-M237 YICNSSCMGC | 2640  | 2480  |
| >TP53-M237 YMCNSSCMC  | 294  | >TP53-M237 YICNSSCMGC | 475   | 181   |
| >TP53-M237 YMCNSSCM   | 310  | >TP53-M237 YICNSSCM   | 684   | 374   |
| >TP53-M237 YMCNSSCM   | 346  | >TP53-M237 YICNSSCM   | 3371  | 3025  |
| >TP53-M237 YMCNSSCMC  | 1073 | >TP53-M237 YICNSSCMGC | 414   | 659   |
| >TP53-M237 SDCTTIHNYI | 3428 | >TP53-M237 SDCTTIHNYI | 143   | 3285  |
| >TP53-M237 SDCTTIHNYI | 2288 | >TP53-M237 SDCTTIHNYI | 102   | 2186  |
| >TP53-M237 NYMCNSSCM  | 53   | >TP53-M237 NYICNSSCM  | 71    | 18    |
| >TP53-M237 YNYMCNSSCI | 429  | >TP53-M237 YNYICNSSCM | 902   | 473   |
| >TP53-M237 YNYMCNSSCI | 31   | >TP53-M237 YNYICNSSCM | 72    | 41    |
| >TP53-M237 YNYMCNSSCI | 911  | >TP53-M237 YNYICNSSCM | 307   | 604   |
| >TP53-M237 HNYMCNSS   | 70   | >TP53-M237 HNYICNSSCI | 150   | 80    |
| >TP53-M237 TTIHNYM    | 46   | >TP53-M237 TTIHNYI    | 121   | 75    |
| >TP53-M237 TTIHNYM    | 1038 | >TP53-M237 TTIHNYI    | 193   | 845   |
| >TP53-M237 TTIHNYM    | 4872 | >TP53-M237 TTIHNYI    | 476   | 4396  |
| >TP53-M237 TTIHNYM    | 1118 | >TP53-M237 TTIHNYI    | 157   | 961   |
| >TP53-M237 TTIHNYM    | 46   | >TP53-M237 TTIHNYI    | 2633  | 2587  |
| >TP53-M237 TTIHNYM    | 5    | >TP53-M237 TTIHNYI    | 145   | 140   |
| >TP53-M237 TTIHNYM    | 135  | >TP53-M237 TTIHNYI    | 4618  | 4483  |
| >TP53-M237 TTIHNYM    | 17   | >TP53-M237 TTIHNYI    | 6     | 11    |
| >TP53-M237 TTIHNYMC   | 120  | >TP53-M237 TTIHNYIC   | 438   | 318   |
| >TP53-M237 TTIHNYMCI  | 102  | >TP53-M237 TTIHNYICNS | 141   | 39    |
| >TP53-M237 TTIHNYM    | 69   | >TP53-M237 TTIHNYI    | 30    | 39    |
| >TP53-M237 TTIHNYM    | 61   | >TP53-M237 TTIHNYI    | 577   | 516   |
| >TP53-M237 TTIHNYM    | 260  | >TP53-M237 TTIHNYI    | 2129  | 1869  |
| >TP53-M237 TTIHNYM    | 3330 | >TP53-M237 TTIHNYI    | 115   | 3215  |
| >TP53-M237 CTTIHNYM   | 116  | >TP53-M237 CTTIHNYI   | 358   | 242   |
| >TP53-M237 CTTIHNYM   | 207  | >TP53-M237 CTTIHNYI   | 4801  | 4594  |
| >TP53-M237 CTTIHNYM   | 1337 | >TP53-M237 CTTIHNYI   | 50    | 1287  |
| >TP53-M237 CTTIHNYM   | 11   | >TP53-M237 CTTIHNYI   | 19    | 8     |
| >TP53-M237 CTTIHNYMC  | 184  | >TP53-M237 CTTIHNYIC  | 211   | 27    |
| >TP53-M237 CTTIHNYM   | 405  | >TP53-M237 CTTIHNYI   | 18    | 387   |
| >TP53-M237 YMCNSSCM   | 262  | >TP53-M237 YKCNSSCM   | 23301 | 23039 |
| >TP53-M237 YMCNSSCMC  | 252  | >TP53-M237 YKCNSSCMG  | 22445 | 22193 |
| >TP53-M237 YMCNSSCM   | 205  | >TP53-M237 YKCNSSCM   | 24035 | 23830 |
| >TP53-M237 YMCNSSCMC  | 167  | >TP53-M237 YKCNSSCMG  | 22339 | 22172 |
| >TP53-M237 YMCNSSCM   | 283  | >TP53-M237 YKCNSSCM   | 20069 | 19786 |
| >TP53-M237 YMCNSSCMC  | 41   | >TP53-M237 YKCNSSCMG  | 16339 | 16298 |
| >TP53-M237 YMCNSSCMC  | 143  | >TP53-M237 YKCNSSCMG  | 11957 | 11814 |
| >TP53-M237 YMCNSSCM   | 24   | >TP53-M237 YKCNSSCM   | 17192 | 17168 |

|                      |       |                       |       |       |
|----------------------|-------|-----------------------|-------|-------|
| >TP53-M237 YMCNSSCMC | 92    | >TP53-M237 YKCNSSCMG  | 21400 | 21308 |
| >TP53-M237 YMCNSSCMC | 399   | >TP53-M237 YKCNSSCMG  | 25478 | 25079 |
| >TP53-M237 YMCNSSCMC | 16    | >TP53-M237 YKCNSSCMG  | 14200 | 14184 |
| >TP53-M237 YMCNSSCM  | 92    | >TP53-M237 YKCNSSCM   | 20918 | 20826 |
| >TP53-M237 YMCNSSCMC | 197   | >TP53-M237 YKCNSSCMG  | 21522 | 21325 |
| >TP53-M237 YMCNSSCM  | 150   | >TP53-M237 YKCNSSCM   | 22783 | 22633 |
| >TP53-M237 YMCNSSCMC | 421   | >TP53-M237 YKCNSSCMG  | 21938 | 21517 |
| >TP53-M237 YMCNSSCM  | 67    | >TP53-M237 YKCNSSCM   | 20189 | 20122 |
| >TP53-M237 YMCNSSCMC | 332   | >TP53-M237 YKCNSSCMG  | 21882 | 21550 |
| >TP53-M237 YMCNSSCM  | 33    | >TP53-M237 YKCNSSCM   | 28087 | 28054 |
| >TP53-M237 YMCNSSCMC | 53    | >TP53-M237 YKCNSSCMG  | 27770 | 27717 |
| >TP53-M237 YMCNSSCM  | 33    | >TP53-M237 YKCNSSCM   | 4026  | 3993  |
| >TP53-M237 YMCNSSCMC | 127   | >TP53-M237 YKCNSSCMG  | 12729 | 12602 |
| >TP53-M237 YMCNSSCMC | 292   | >TP53-M237 YKCNSSCMG  | 15565 | 15273 |
| >TP53-M237 YMCNSSCMC | 44    | >TP53-M237 YKCNSSCMG  | 4799  | 4755  |
| >TP53-M237 YMCNSSCM  | 98    | >TP53-M237 YKCNSSCM   | 6065  | 5967  |
| >TP53-M237 YMCNSSCMC | 145   | >TP53-M237 YKCNSSCMG  | 6574  | 6429  |
| >TP53-M237 YMCNSSCM  | 20    | >TP53-M237 YKCNSSCM   | 10    | 10    |
| >TP53-M237 YMCNSSCMC | 160   | >TP53-M237 YKCNSSCMG  | 76    | 84    |
| >TP53-M237 YMCNSSCMC | 294   | >TP53-M237 YKCNSSCMG  | 10471 | 10177 |
| >TP53-M237 YMCNSSCM  | 310   | >TP53-M237 YKCNSSCM   | 4699  | 4389  |
| >TP53-M237 YMCNSSCM  | 346   | >TP53-M237 YKCNSSCM   | 245   | 101   |
| >TP53-M237 NYMCNSSCM | 53    | >TP53-M237 NYKCNSSCM  | 343   | 290   |
| >TP53-M237 YNYMCNSSC | 429   | >TP53-M237 YNYKCNSSCM | 553   | 124   |
| >TP53-M237 YNYMCNSSC | 31    | >TP53-M237 YNYKCNSSCM | 32    | 1     |
| >TP53-M237 HNYMCNSS  | 70    | >TP53-M237 HNYKCNSSC  | 888   | 818   |
| >TP53-M237 TTIHYNM   | 46    | >TP53-M237 TTIHYNK    | 7131  | 7085  |
| >TP53-M237 TTIHYNM   | 20631 | >TP53-M237 TTIHYNK    | 204   | 20427 |
| >TP53-M237 TTIHYNM   | 5965  | >TP53-M237 TTIHYNK    | 8     | 5957  |
| >TP53-M237 TTIHYNM   | 46    | >TP53-M237 TTIHYNK    | 12521 | 12475 |
| >TP53-M237 TTIHYNM   | 5     | >TP53-M237 TTIHYNK    | 2129  | 2124  |
| >TP53-M237 TTIHYNM   | 135   | >TP53-M237 TTIHYNK    | 6815  | 6680  |
| >TP53-M237 TTIHYNM   | 3790  | >TP53-M237 TTIHYNK    | 62    | 3728  |
| >TP53-M237 TTIHYNM   | 6570  | >TP53-M237 TTIHYNK    | 46    | 6524  |
| >TP53-M237 TTIHYNM   | 1012  | >TP53-M237 TTIHYNK    | 3     | 1009  |
| >TP53-M237 TTIHYNM   | 17    | >TP53-M237 TTIHYNK    | 3022  | 3005  |
| >TP53-M237 TTIHYNMC  | 120   | >TP53-M237 TTIHYNKC   | 170   | 50    |
| >TP53-M237 TTIHYNMCM | 102   | >TP53-M237 TTIHYNKCN  | 290   | 188   |
| >TP53-M237 TTIHYNM   | 69    | >TP53-M237 TTIHYNK    | 8633  | 8564  |
| >TP53-M237 TTIHYNM   | 61    | >TP53-M237 TTIHYNK    | 17387 | 17326 |
| >TP53-M237 TTIHYNM   | 260   | >TP53-M237 TTIHYNK    | 17026 | 16766 |
| >TP53-M237 TTIHYNM   | 2309  | >TP53-M237 TTIHYNK    | 144   | 2165  |
| >TP53-M237 CTTIHYNM  | 116   | >TP53-M237 CTTIHYNK   | 14739 | 14623 |

|                       |       |                       |       |       |
|-----------------------|-------|-----------------------|-------|-------|
| >TP53-M237 CTTIHYNM   | 21039 | >TP53-M237 CTTIHNYK   | 346   | 20693 |
| >TP53-M237 CTTIHYNM   | 18964 | >TP53-M237 CTTIHNYK   | 28    | 18936 |
| >TP53-M237 CTTIHYNM   | 207   | >TP53-M237 CTTIHNYK   | 25262 | 25055 |
| >TP53-M237 CTTIHYNM   | 3610  | >TP53-M237 CTTIHNYK   | 63    | 3547  |
| >TP53-M237 CTTIHYNM   | 7088  | >TP53-M237 CTTIHNYK   | 98    | 6990  |
| >TP53-M237 CTTIHYNM   | 11421 | >TP53-M237 CTTIHNYK   | 24    | 11397 |
| >TP53-M237 CTTIHYNM   | 11    | >TP53-M237 CTTIHNYK   | 1338  | 1327  |
| >TP53-M237 CTTIHYNM   | 184   | >TP53-M237 CTTIHNYKC  | 573   | 389   |
| >TP53-M237 CTTIHYNM   | 3413  | >TP53-M237 CTTIHNYK   | 232   | 3181  |
| >TP53-M237 CTTIHYNM   | 405   | >TP53-M237 CTTIHNYK   | 29736 | 29331 |
| >TP53-M237 YMCNSSCM   | 262   | >TP53-M237 YLCNSSCM   | 316   | 54    |
| >TP53-M237 YMCNSSCM   | 252   | >TP53-M237 YLCNSSCMG  | 308   | 56    |
| >TP53-M237 YMCNSSCM   | 205   | >TP53-M237 YLCNSSCM   | 144   | 61    |
| >TP53-M237 YMCNSSCM   | 167   | >TP53-M237 YLCNSSCMG  | 114   | 53    |
| >TP53-M237 YMCNSSCM   | 283   | >TP53-M237 YLCNSSCM   | 347   | 64    |
| >TP53-M237 YMCNSSCM   | 41    | >TP53-M237 YLCNSSCMG  | 49    | 8     |
| >TP53-M237 YMCNSSCM   | 143   | >TP53-M237 YLCNSSCMG  | 264   | 121   |
| >TP53-M237 YMCNSSCM   | 24    | >TP53-M237 YLCNSSCM   | 35    | 11    |
| >TP53-M237 YMCNSSCM   | 92    | >TP53-M237 YLCNSSCMG  | 147   | 55    |
| >TP53-M237 YMCNSSCM   | 399   | >TP53-M237 YLCNSSCMG  | 687   | 288   |
| >TP53-M237 YMCNSSCM   | 16    | >TP53-M237 YLCNSSCMG  | 21    | 5     |
| >TP53-M237 YMCNSSCM   | 92    | >TP53-M237 YLCNSSCM   | 118   | 26    |
| >TP53-M237 YMCNSSCM   | 197   | >TP53-M237 YLCNSSCMG  | 282   | 85    |
| >TP53-M237 YMCNSSCM   | 150   | >TP53-M237 YLCNSSCM   | 161   | 11    |
| >TP53-M237 YMCNSSCM   | 421   | >TP53-M237 YLCNSSCMG  | 449   | 28    |
| >TP53-M237 YMCNSSCM   | 67    | >TP53-M237 YLCNSSCM   | 97    | 30    |
| >TP53-M237 YMCNSSCM   | 332   | >TP53-M237 YLCNSSCMG  | 469   | 137   |
| >TP53-M237 YMCNSSCM   | 33    | >TP53-M237 YLCNSSCM   | 18    | 15    |
| >TP53-M237 YMCNSSCM   | 903   | >TP53-M237 YLCNSSCMG  | 411   | 492   |
| >TP53-M237 YMCNSSCM   | 53    | >TP53-M237 YLCNSSCMG  | 28    | 25    |
| >TP53-M237 YMCNSSCM   | 33    | >TP53-M237 YLCNSSCM   | 60    | 27    |
| >TP53-M237 YMCNSSCM   | 127   | >TP53-M237 YLCNSSCMG  | 341   | 214   |
| >TP53-M237 YMCNSSCM   | 292   | >TP53-M237 YLCNSSCMG  | 925   | 633   |
| >TP53-M237 YMCNSSCM   | 44    | >TP53-M237 YLCNSSCMG  | 90    | 46    |
| >TP53-M237 YMCNSSCM   | 98    | >TP53-M237 YLCNSSCM   | 145   | 47    |
| >TP53-M237 YMCNSSCM   | 145   | >TP53-M237 YLCNSSCMG  | 218   | 73    |
| >TP53-M237 YMCNSSCM   | 20    | >TP53-M237 YLCNSSCM   | 131   | 111   |
| >TP53-M237 YMCNSSCM   | 160   | >TP53-M237 YLCNSSCMG  | 1168  | 1008  |
| >TP53-M237 YMCNSSCM   | 294   | >TP53-M237 YLCNSSCMG  | 734   | 440   |
| >TP53-M237 YMCNSSCM   | 310   | >TP53-M237 YLCNSSCM   | 1028  | 718   |
| >TP53-M237 YMCNSSCM   | 346   | >TP53-M237 YLCNSSCM   | 2671  | 2325  |
| >TP53-M237 NYMCNSSCM  | 53    | >TP53-M237 NYLCNSSCM  | 120   | 67    |
| >TP53-M237 YNYMCNSSCM | 429   | >TP53-M237 YNYLCNSSCM | 1155  | 726   |

|                       |      |                       |       |       |
|-----------------------|------|-----------------------|-------|-------|
| >TP53-M237 YNYMCNSSCI | 31   | >TP53-M237 YNYLCNSSCM | 83    | 52    |
| >TP53-M237 YNYMCNSSCI | 911  | >TP53-M237 YNYLCNSSCM | 294   | 617   |
| >TP53-M237 HNYMCNSS   | 70   | >TP53-M237 HNYLCNSSC  | 160   | 90    |
| >TP53-M237 TTIHYNM    | 46   | >TP53-M237 TTIHYNL    | 18    | 28    |
| >TP53-M237 TTIHYNM    | 1038 | >TP53-M237 TTIHYNL    | 58    | 980   |
| >TP53-M237 TTIHYNM    | 1118 | >TP53-M237 TTIHYNL    | 180   | 938   |
| >TP53-M237 TTIHYNM    | 46   | >TP53-M237 TTIHYNL    | 646   | 600   |
| >TP53-M237 TTIHYNM    | 5    | >TP53-M237 TTIHYNL    | 26    | 21    |
| >TP53-M237 TTIHYNM    | 135  | >TP53-M237 TTIHYNL    | 1099  | 964   |
| >TP53-M237 TTIHYNM    | 17   | >TP53-M237 TTIHYNL    | 7     | 10    |
| >TP53-M237 TTIHYNMC   | 120  | >TP53-M237 TTIHYNLC   | 69    | 51    |
| >TP53-M237 TTIHYNMCM  | 102  | >TP53-M237 TTIHYNLCN  | 177   | 75    |
| >TP53-M237 TTIHYNM    | 69   | >TP53-M237 TTIHYNL    | 47    | 22    |
| >TP53-M237 TTIHYNM    | 61   | >TP53-M237 TTIHYNL    | 99    | 38    |
| >TP53-M237 TTIHYNM    | 260  | >TP53-M237 TTIHYNL    | 1343  | 1083  |
| >TP53-M237 CTTIHYNM   | 116  | >TP53-M237 CTTIHYNL   | 139   | 23    |
| >TP53-M237 CTTIHYNM   | 207  | >TP53-M237 CTTIHYNL   | 1371  | 1164  |
| >TP53-M237 CTTIHYNM   | 1337 | >TP53-M237 CTTIHYNL   | 105   | 1232  |
| >TP53-M237 CTTIHYNM   | 11   | >TP53-M237 CTTIHYNL   | 9     | 2     |
| >TP53-M237 CTTIHYNMC  | 184  | >TP53-M237 CTTIHYNLC  | 84    | 100   |
| >TP53-M237 CTTIHYNM   | 405  | >TP53-M237 CTTIHYNL   | 192   | 213   |
| >TP53-M237 MCNSSCMGC  | 944  | >TP53-M237 RCNSSCMGG  | 300   | 644   |
| >TP53-M237 YMCNSSCM   | 262  | >TP53-M237 YRCNSSCM   | 23772 | 23510 |
| >TP53-M237 YMCNSSCMC  | 252  | >TP53-M237 YRCNSSCMG  | 23227 | 22975 |
| >TP53-M237 YMCNSSCM   | 205  | >TP53-M237 YRCNSSCM   | 27446 | 27241 |
| >TP53-M237 YMCNSSCMC  | 167  | >TP53-M237 YRCNSSCMG  | 25791 | 25624 |
| >TP53-M237 YMCNSSCM   | 283  | >TP53-M237 YRCNSSCM   | 21590 | 21307 |
| >TP53-M237 YMCNSSCMC  | 41   | >TP53-M237 YRCNSSCMG  | 18978 | 18937 |
| >TP53-M237 YMCNSSCMC  | 143  | >TP53-M237 YRCNSSCMG  | 18505 | 18362 |
| >TP53-M237 YMCNSSCM   | 24   | >TP53-M237 YRCNSSCM   | 20698 | 20674 |
| >TP53-M237 YMCNSSCMC  | 92   | >TP53-M237 YRCNSSCMG  | 24163 | 24071 |
| >TP53-M237 YMCNSSCMC  | 399  | >TP53-M237 YRCNSSCMG  | 27459 | 27060 |
| >TP53-M237 YMCNSSCMC  | 16   | >TP53-M237 YRCNSSCMG  | 18264 | 18248 |
| >TP53-M237 YMCNSSCM   | 92   | >TP53-M237 YRCNSSCM   | 22707 | 22615 |
| >TP53-M237 YMCNSSCMC  | 197  | >TP53-M237 YRCNSSCMG  | 23177 | 22980 |
| >TP53-M237 YMCNSSCM   | 150  | >TP53-M237 YRCNSSCM   | 24422 | 24272 |
| >TP53-M237 YMCNSSCMC  | 421  | >TP53-M237 YRCNSSCMG  | 23681 | 23260 |
| >TP53-M237 YMCNSSCM   | 67   | >TP53-M237 YRCNSSCM   | 21075 | 21008 |
| >TP53-M237 YMCNSSCMC  | 332  | >TP53-M237 YRCNSSCMG  | 22678 | 22346 |
| >TP53-M237 YMCNSSCM   | 33   | >TP53-M237 YRCNSSCM   | 29406 | 29373 |
| >TP53-M237 YMCNSSCMC  | 53   | >TP53-M237 YRCNSSCMG  | 29352 | 29299 |
| >TP53-M237 YMCNSSCM   | 33   | >TP53-M237 YRCNSSCM   | 7758  | 7725  |
| >TP53-M237 YMCNSSCMC  | 127  | >TP53-M237 YRCNSSCMG  | 16675 | 16548 |

|                       |       |                       |       |       |
|-----------------------|-------|-----------------------|-------|-------|
| >TP53-M237 YMCNSSCMC  | 292   | >TP53-M237 YRCNSSCMG  | 18558 | 18266 |
| >TP53-M237 YMCNSSCMC  | 44    | >TP53-M237 YRCNSSCMG  | 8807  | 8763  |
| >TP53-M237 YMCNSSCM   | 98    | >TP53-M237 YRCNSSCM   | 7220  | 7122  |
| >TP53-M237 YMCNSSCMC  | 145   | >TP53-M237 YRCNSSCMG  | 7731  | 7586  |
| >TP53-M237 YMCNSSCM   | 20    | >TP53-M237 YRCNSSCM   | 36    | 16    |
| >TP53-M237 YMCNSSCMC  | 160   | >TP53-M237 YRCNSSCMG  | 317   | 157   |
| >TP53-M237 YMCNSSCMC  | 294   | >TP53-M237 YRCNSSCMG  | 17346 | 17052 |
| >TP53-M237 YMCNSSCMC  | 13516 | >TP53-M237 YRCNSSCMG  | 442   | 13074 |
| >TP53-M237 YMCNSSCM   | 310   | >TP53-M237 YRCNSSCM   | 7268  | 6958  |
| >TP53-M237 YMCNSSCM   | 346   | >TP53-M237 YRCNSSCM   | 77    | 269   |
| >TP53-M237 SDCTTIHNYI | 22140 | >TP53-M237 SDCTTIHNYI | 224   | 21916 |
| >TP53-M237 NYMCNSSCM  | 53    | >TP53-M237 NYRCNSSCM  | 824   | 771   |
| >TP53-M237 YNYMCNSSCI | 429   | >TP53-M237 YNYRCNSSCM | 671   | 242   |
| >TP53-M237 YNYMCNSSCI | 31    | >TP53-M237 YNYRCNSSCM | 32    | 1     |
| >TP53-M237 HNYMCNSS   | 70    | >TP53-M237 HNYRCNSS   | 276   | 206   |
| >TP53-M237 TTIHNYM    | 46    | >TP53-M237 TTIHNYR    | 2686  | 2640  |
| >TP53-M237 TTIHNYM    | 5965  | >TP53-M237 TTIHNYR    | 26    | 5939  |
| >TP53-M237 TTIHNYM    | 46    | >TP53-M237 TTIHNYR    | 8106  | 8060  |
| >TP53-M237 TTIHNYM    | 5     | >TP53-M237 TTIHNYR    | 1667  | 1662  |
| >TP53-M237 TTIHNYM    | 135   | >TP53-M237 TTIHNYR    | 8426  | 8291  |
| >TP53-M237 TTIHNYM    | 6570  | >TP53-M237 TTIHNYR    | 8     | 6562  |
| >TP53-M237 TTIHNYM    | 13097 | >TP53-M237 TTIHNYR    | 33    | 13064 |
| >TP53-M237 TTIHNYM    | 1012  | >TP53-M237 TTIHNYR    | 2     | 1010  |
| >TP53-M237 TTIHNYM    | 17    | >TP53-M237 TTIHNYR    | 1828  | 1811  |
| >TP53-M237 TTIHNYMC   | 120   | >TP53-M237 TTIHNYRC   | 94    | 26    |
| >TP53-M237 TTIHNYMCM  | 102   | >TP53-M237 TTIHNYRCN  | 130   | 28    |
| >TP53-M237 TTIHNYM    | 69    | >TP53-M237 TTIHNYR    | 11540 | 11471 |
| >TP53-M237 TTIHNYM    | 61    | >TP53-M237 TTIHNYR    | 13563 | 13502 |
| >TP53-M237 TTIHNYM    | 260   | >TP53-M237 TTIHNYR    | 12506 | 12246 |
| >TP53-M237 TTIHNYM    | 2309  | >TP53-M237 TTIHNYR    | 194   | 2115  |
| >TP53-M237 TTIHNYM    | 26150 | >TP53-M237 TTIHNYR    | 93    | 26057 |
| >TP53-M237 CTTIHNYM   | 116   | >TP53-M237 CTTIHNYR   | 12991 | 12875 |
| >TP53-M237 CTTIHNYM   | 18964 | >TP53-M237 CTTIHNYR   | 319   | 18645 |
| >TP53-M237 CTTIHNYM   | 207   | >TP53-M237 CTTIHNYR   | 23598 | 23391 |
| >TP53-M237 CTTIHNYM   | 7088  | >TP53-M237 CTTIHNYR   | 13    | 7075  |
| >TP53-M237 CTTIHNYM   | 22151 | >TP53-M237 CTTIHNYR   | 90    | 22061 |
| >TP53-M237 CTTIHNYM   | 11421 | >TP53-M237 CTTIHNYR   | 10    | 11411 |
| >TP53-M237 CTTIHNYM   | 11    | >TP53-M237 CTTIHNYR   | 1325  | 1314  |
| >TP53-M237 CTTIHNYMC  | 184   | >TP53-M237 CTTIHNYRC  | 682   | 498   |
| >TP53-M237 CTTIHNYM   | 3413  | >TP53-M237 CTTIHNYR   | 306   | 3107  |
| >TP53-M237 CTTIHNYM   | 29197 | >TP53-M237 CTTIHNYR   | 74    | 29123 |
| >TP53-M237 CTTIHNYM   | 405   | >TP53-M237 CTTIHNYR   | 33223 | 32818 |
| >TP53-M237 DCTTIHNYM  | 20852 | >TP53-M237 DCTTIHNYR  | 183   | 20669 |

|                        |       |                        |       |       |
|------------------------|-------|------------------------|-------|-------|
| >TP53-M237 DCTTIHYNM   | 20317 | >TP53-M237 DCTTIHYNR   | 136   | 20181 |
| >TP53-M237 YMCNSSCM    | 262   | >TP53-M237 YTCNSSCM    | 11610 | 11348 |
| >TP53-M237 YMCNSSCMG   | 252   | >TP53-M237 YTCNSSCMG   | 8997  | 8745  |
| >TP53-M237 YMCNSSCM    | 205   | >TP53-M237 YTCNSSCM    | 8225  | 8020  |
| >TP53-M237 YMCNSSCMG   | 167   | >TP53-M237 YTCNSSCMG   | 6892  | 6725  |
| >TP53-M237 YMCNSSCM    | 283   | >TP53-M237 YTCNSSCM    | 9824  | 9541  |
| >TP53-M237 YMCNSSCMG   | 41    | >TP53-M237 YTCNSSCMG   | 3732  | 3691  |
| >TP53-M237 YMCNSSCMG   | 143   | >TP53-M237 YTCNSSCMG   | 1898  | 1755  |
| >TP53-M237 YMCNSSCM    | 24    | >TP53-M237 YTCNSSCM    | 3236  | 3212  |
| >TP53-M237 YMCNSSCMG   | 92    | >TP53-M237 YTCNSSCMG   | 7973  | 7881  |
| >TP53-M237 YMCNSSCMG   | 399   | >TP53-M237 YTCNSSCMG   | 13495 | 13096 |
| >TP53-M237 YMCNSSCMG   | 16    | >TP53-M237 YTCNSSCMG   | 1970  | 1954  |
| >TP53-M237 YMCNSSCM    | 92    | >TP53-M237 YTCNSSCM    | 10972 | 10880 |
| >TP53-M237 YMCNSSCMG   | 197   | >TP53-M237 YTCNSSCMG   | 12882 | 12685 |
| >TP53-M237 YMCNSSCM    | 150   | >TP53-M237 YTCNSSCM    | 11724 | 11574 |
| >TP53-M237 YMCNSSCMG   | 421   | >TP53-M237 YTCNSSCMG   | 12300 | 11879 |
| >TP53-M237 YMCNSSCM    | 67    | >TP53-M237 YTCNSSCM    | 12792 | 12725 |
| >TP53-M237 YMCNSSCMG   | 332   | >TP53-M237 YTCNSSCMG   | 15661 | 15329 |
| >TP53-M237 YMCNSSCM    | 33    | >TP53-M237 YTCNSSCM    | 13405 | 13372 |
| >TP53-M237 YMCNSSCMG   | 53    | >TP53-M237 YTCNSSCMG   | 12252 | 12199 |
| >TP53-M237 YMCNSSCMG   | 2458  | >TP53-M237 YTCNSSCMG   | 45    | 2413  |
| >TP53-M237 YMCNSSCM    | 3613  | >TP53-M237 YTCNSSCM    | 79    | 3534  |
| >TP53-M237 YMCNSSCMG   | 591   | >TP53-M237 YTCNSSCMG   | 36    | 555   |
| >TP53-M237 YMCNSSCMG   | 6947  | >TP53-M237 YTCNSSCMG   | 218   | 6729  |
| >TP53-M237 YMCNSSCM    | 33    | >TP53-M237 YTCNSSCM    | 143   | 110   |
| >TP53-M237 YMCNSSCMG   | 127   | >TP53-M237 YTCNSSCMG   | 1142  | 1015  |
| >TP53-M237 YMCNSSCMG   | 292   | >TP53-M237 YTCNSSCMG   | 2684  | 2392  |
| >TP53-M237 YMCNSSCMG   | 44    | >TP53-M237 YTCNSSCMG   | 235   | 191   |
| >TP53-M237 YMCNSSCM    | 98    | >TP53-M237 YTCNSSCM    | 3936  | 3838  |
| >TP53-M237 YMCNSSCMG   | 145   | >TP53-M237 YTCNSSCMG   | 4361  | 4216  |
| >TP53-M237 YMCNSSCM    | 20    | >TP53-M237 YTCNSSCM    | 281   | 261   |
| >TP53-M237 YMCNSSCMG   | 160   | >TP53-M237 YTCNSSCMG   | 2039  | 1879  |
| >TP53-M237 YMCNSSCM    | 1533  | >TP53-M237 YTCNSSCM    | 14    | 1519  |
| >TP53-M237 YMCNSSCMG   | 294   | >TP53-M237 YTCNSSCMG   | 6     | 288   |
| >TP53-M237 YMCNSSCM    | 310   | >TP53-M237 YTCNSSCM    | 790   | 480   |
| >TP53-M237 YMCNSSCM    | 346   | >TP53-M237 YTCNSSCM    | 5580  | 5234  |
| >TP53-M237 YMCNSSCM    | 1863  | >TP53-M237 YTCNSSCM    | 38    | 1825  |
| >TP53-M237 YMCNSSCMG   | 1073  | >TP53-M237 YTCNSSCMG   | 13    | 1060  |
| >TP53-M237 NYMCNSSCM   | 53    | >TP53-M237 NYTCNSSCM   | 161   | 108   |
| >TP53-M237 YNYMCNSSCM  | 429   | >TP53-M237 YNYTCNSSCM  | 960   | 531   |
| >TP53-M237 YNYMCNSSCM  | 31    | >TP53-M237 YNYTCNSSCM  | 31    | 0     |
| >TP53-M237 HNYMCNSSCM  | 70    | >TP53-M237 HNYTCNSSCM  | 131   | 61    |
| >TP53-M237 IHNYMCNSSCM | 575   | >TP53-M237 IHNYTCNSSCM | 442   | 133   |

|                       |      |                       |       |       |
|-----------------------|------|-----------------------|-------|-------|
| >TP53-M237 TTIHYNYM   | 46   | >TP53-M237 TTIHNYT    | 2270  | 2224  |
| >TP53-M237 TTIHYNYM   | 46   | >TP53-M237 TTIHNYT    | 8636  | 8590  |
| >TP53-M237 TTIHYNYM   | 5    | >TP53-M237 TTIHNYT    | 812   | 807   |
| >TP53-M237 TTIHYNYM   | 135  | >TP53-M237 TTIHNYT    | 13628 | 13493 |
| >TP53-M237 TTIHYNYM   | 17   | >TP53-M237 TTIHNYT    | 34    | 17    |
| >TP53-M237 TTIHYNMYC  | 120  | >TP53-M237 TTIHNYTC   | 132   | 12    |
| >TP53-M237 TTIHYNMCM  | 102  | >TP53-M237 TTIHNYTCN! | 108   | 6     |
| >TP53-M237 TTIHYNYM   | 69   | >TP53-M237 TTIHNYT    | 1279  | 1210  |
| >TP53-M237 TTIHYNYM   | 61   | >TP53-M237 TTIHNYT    | 10222 | 10161 |
| >TP53-M237 TTIHYNYM   | 260  | >TP53-M237 TTIHNYT    | 9562  | 9302  |
| >TP53-M237 CTTIHYNYM  | 116  | >TP53-M237 CTTIHNYT   | 3488  | 3372  |
| >TP53-M237 CTTIHYNYM  | 207  | >TP53-M237 CTTIHNYT   | 20564 | 20357 |
| >TP53-M237 CTTIHYNYM  | 11   | >TP53-M237 CTTIHNYT   | 734   | 723   |
| >TP53-M237 CTTIHYNMYC | 184  | >TP53-M237 CTTIHNYTC  | 292   | 108   |
| >TP53-M237 CTTIHYNYM  | 405  | >TP53-M237 CTTIHNYT   | 17627 | 17222 |
| >TP53-M237 YMCNSSCM   | 262  | >TP53-M237 YVCNSSCM   | 7429  | 7167  |
| >TP53-M237 YMCNSSCMC  | 252  | >TP53-M237 YVCNSSCMG  | 5569  | 5317  |
| >TP53-M237 YMCNSSCM   | 205  | >TP53-M237 YVCNSSCM   | 5870  | 5665  |
| >TP53-M237 YMCNSSCMC  | 167  | >TP53-M237 YVCNSSCMG  | 4793  | 4626  |
| >TP53-M237 YMCNSSCM   | 283  | >TP53-M237 YVCNSSCM   | 6029  | 5746  |
| >TP53-M237 YMCNSSCMC  | 41   | >TP53-M237 YVCNSSCMG  | 1541  | 1500  |
| >TP53-M237 YMCNSSCMC  | 143  | >TP53-M237 YVCNSSCMG  | 434   | 291   |
| >TP53-M237 YMCNSSCM   | 24   | >TP53-M237 YVCNSSCM   | 2713  | 2689  |
| >TP53-M237 YMCNSSCMC  | 92   | >TP53-M237 YVCNSSCMG  | 7692  | 7600  |
| >TP53-M237 YMCNSSCMC  | 399  | >TP53-M237 YVCNSSCMG  | 13018 | 12619 |
| >TP53-M237 YMCNSSCMC  | 16   | >TP53-M237 YVCNSSCMG  | 1620  | 1604  |
| >TP53-M237 YMCNSSCM   | 92   | >TP53-M237 YVCNSSCM   | 7885  | 7793  |
| >TP53-M237 YMCNSSCMC  | 197  | >TP53-M237 YVCNSSCMG  | 10081 | 9884  |
| >TP53-M237 YMCNSSCM   | 150  | >TP53-M237 YVCNSSCM   | 8448  | 8298  |
| >TP53-M237 YMCNSSCMC  | 421  | >TP53-M237 YVCNSSCMG  | 9862  | 9441  |
| >TP53-M237 YMCNSSCM   | 67   | >TP53-M237 YVCNSSCM   | 5841  | 5774  |
| >TP53-M237 YMCNSSCMC  | 332  | >TP53-M237 YVCNSSCMG  | 8838  | 8506  |
| >TP53-M237 YMCNSSCM   | 33   | >TP53-M237 YVCNSSCM   | 3613  | 3580  |
| >TP53-M237 YMCNSSCMC  | 53   | >TP53-M237 YVCNSSCMG  | 3064  | 3011  |
| >TP53-M237 YMCNSSCMC  | 2458 | >TP53-M237 YVCNSSCMG  | 85    | 2373  |
| >TP53-M237 YMCNSSCM   | 3613 | >TP53-M237 YVCNSSCM   | 147   | 3466  |
| >TP53-M237 YMCNSSCMC  | 591  | >TP53-M237 YVCNSSCMG  | 56    | 535   |
| >TP53-M237 YMCNSSCM   | 33   | >TP53-M237 YVCNSSCM   | 121   | 88    |
| >TP53-M237 YMCNSSCMC  | 127  | >TP53-M237 YVCNSSCMG  | 909   | 782   |
| >TP53-M237 YMCNSSCMC  | 292  | >TP53-M237 YVCNSSCMG  | 2223  | 1931  |
| >TP53-M237 YMCNSSCMC  | 44   | >TP53-M237 YVCNSSCMG  | 193   | 149   |
| >TP53-M237 YMCNSSCM   | 98   | >TP53-M237 YVCNSSCM   | 1183  | 1085  |
| >TP53-M237 YMCNSSCMC  | 145  | >TP53-M237 YVCNSSCMG  | 1494  | 1349  |

|                      |       |                      |      |       |
|----------------------|-------|----------------------|------|-------|
| >TP53-M237 YMCNSSCM  | 20    | >TP53-M237 YVCNSSCM  | 710  | 690   |
| >TP53-M237 YMCNSSCMC | 160   | >TP53-M237 YVCNSSCMG | 3465 | 3305  |
| >TP53-M237 YMCNSSCMC | 294   | >TP53-M237 YVCNSSCMG | 140  | 154   |
| >TP53-M237 YMCNSSCM  | 310   | >TP53-M237 YVCNSSCM  | 163  | 147   |
| >TP53-M237 YMCNSSCM  | 346   | >TP53-M237 YVCNSSCM  | 3900 | 3554  |
| >TP53-M237 YMCNSSCMC | 1073  | >TP53-M237 YVCNSSCMG | 102  | 971   |
| >TP53-M237 SDCTTIHYN | 2288  | >TP53-M237 SDCTTIHYN | 185  | 2103  |
| >TP53-M237 NYMCNSSC  | 53    | >TP53-M237 NYVCNSSC  | 171  | 118   |
| >TP53-M237 YNYMCNSSC | 429   | >TP53-M237 YNYVCNSSC | 714  | 285   |
| >TP53-M237 YNYMCNSSC | 31    | >TP53-M237 YNYVCNSSC | 44   | 13    |
| >TP53-M237 YNYMCNSSC | 911   | >TP53-M237 YNYVCNSSC | 440  | 471   |
| >TP53-M237 HNYMCNSS  | 70    | >TP53-M237 HNYVCNSS  | 123  | 53    |
| >TP53-M237 IHNYMCNSS | 575   | >TP53-M237 IHNYVCNSS | 432  | 143   |
| >TP53-M237 TTIHYNM   | 46    | >TP53-M237 TTIHYNV   | 74   | 28    |
| >TP53-M237 TTIHYNM   | 4180  | >TP53-M237 TTIHYNV   | 146  | 4034  |
| >TP53-M237 TTIHYNM   | 1038  | >TP53-M237 TTIHYNV   | 45   | 993   |
| >TP53-M237 TTIHYNM   | 4872  | >TP53-M237 TTIHYNV   | 63   | 4809  |
| >TP53-M237 TTIHYNM   | 1118  | >TP53-M237 TTIHYNV   | 24   | 1094  |
| >TP53-M237 TTIHYNM   | 10085 | >TP53-M237 TTIHYNV   | 148  | 9937  |
| >TP53-M237 TTIHYNM   | 11596 | >TP53-M237 TTIHYNV   | 433  | 11163 |
| >TP53-M237 TTIHYNM   | 46    | >TP53-M237 TTIHYNV   | 1413 | 1367  |
| >TP53-M237 TTIHYNM   | 5     | >TP53-M237 TTIHYNV   | 208  | 203   |
| >TP53-M237 TTIHYNM   | 135   | >TP53-M237 TTIHYNV   | 5836 | 5701  |
| >TP53-M237 TTIHYNM   | 17    | >TP53-M237 TTIHYNV   | 5    | 12    |
| >TP53-M237 TTIHYNMC  | 120   | >TP53-M237 TTIHYNVC  | 242  | 122   |
| >TP53-M237 TTIHYNMCM | 102   | >TP53-M237 TTIHYNVCN | 163  | 61    |
| >TP53-M237 TTIHYNM   | 69    | >TP53-M237 TTIHYNV   | 7    | 62    |
| >TP53-M237 TTIHYNM   | 61    | >TP53-M237 TTIHYNV   | 2883 | 2822  |
| >TP53-M237 TTIHYNM   | 260   | >TP53-M237 TTIHYNV   | 4598 | 4338  |
| >TP53-M237 CTTIHYNM  | 116   | >TP53-M237 CTTIHYNV  | 433  | 317   |
| >TP53-M237 CTTIHYNM  | 5332  | >TP53-M237 CTTIHYNV  | 487  | 4845  |
| >TP53-M237 CTTIHYNM  | 207   | >TP53-M237 CTTIHYNV  | 8203 | 7996  |
| >TP53-M237 CTTIHYNM  | 1337  | >TP53-M237 CTTIHYNV  | 15   | 1322  |
| >TP53-M237 CTTIHYNM  | 11    | >TP53-M237 CTTIHYNV  | 34   | 23    |
| >TP53-M237 CTTIHYNMC | 184   | >TP53-M237 CTTIHYNVC | 343  | 159   |
| >TP53-M237 CTTIHYNM  | 405   | >TP53-M237 CTTIHYNV  | 976  | 571   |
| >TP53-M243 MGGMNR    | 803   | >TP53-M243 IGGMNRPI  | 354  | 449   |
| >TP53-M243 CMGGMNR   | 88    | >TP53-M243 CIGGMNRPI | 2196 | 2108  |
| >TP53-M243 CMGGMNR   | 314   | >TP53-M243 CIGGMNR   | 2203 | 1889  |
| >TP53-M243 CMGGMNR   | 117   | >TP53-M243 CIGGMNR   | 202  | 85    |
| >TP53-M243 HNYMCNSS  | 70    | >TP53-M243 HNYMCNSS  | 9    | 61    |
| >TP53-M243 HNYMCNSS  | 9506  | >TP53-M243 HNYMCNSS  | 450  | 9056  |
| >TP53-M243 HNYMCNSS  | 5639  | >TP53-M243 HNYMCNSS  | 348  | 5291  |



|                      |      |                       |     |      |
|----------------------|------|-----------------------|-----|------|
| >TP53-M243 HYNMYCNSS | 3499 | >TP53-M243 HYNMYCNSS  | 464 | 3035 |
| >TP53-M243 HYNMYCNSS | 2755 | >TP53-M243 HYNMYCNSS  | 273 | 2482 |
| >TP53-M243 SCMGGMNR  | 464  | >TP53-M243 SCIGGMNR   | 682 | 218  |
| >TP53-M243 SSCMGGMNI | 58   | >TP53-M243 SSCIGGMNR  | 128 | 70   |
| >TP53-M243 SSCMGGMNI | 192  | >TP53-M243 SSCIGGMNRF | 444 | 252  |
| >TP53-M243 SSCMGGMNI | 110  | >TP53-M243 SSCIGGMNR  | 150 | 40   |
| >TP53-M243 SSCMGGMNI | 56   | >TP53-M243 SSCIGGMNRF | 69  | 13   |
| >TP53-M243 SSCMGGMNI | 220  | >TP53-M243 SSCIGGMNR  | 340 | 120  |
| >TP53-M243 SSCMGGMNI | 361  | >TP53-M243 SSCIGGMNRF | 417 | 56   |
| >TP53-M243 SSCMGGMNI | 398  | >TP53-M243 SSCIGGMNR  | 300 | 98   |
| >TP53-M243 SSCMGGMNI | 460  | >TP53-M243 SSCIGGMNRF | 345 | 115  |
| >TP53-M243 NSSCMGGMI | 111  | >TP53-M243 NSSCIGGMNI | 171 | 60   |
| >TP53-M243 NSSCMGGMI | 55   | >TP53-M243 NSSCIGGMNI | 67  | 12   |
| >TP53-M243 NSSCMGGMI | 365  | >TP53-M243 NSSCIGGMNI | 405 | 40   |
| >TP53-M243 NSSCMGGMI | 12   | >TP53-M243 NSSCIGGMNI | 12  | 0    |
| >TP53-M243 NSSCMGGMI | 39   | >TP53-M243 NSSCIGGMNI | 23  | 16   |
| >TP53-M243 CNSSCMGGM | 639  | >TP53-M243 CNSSCIGGMI | 452 | 187  |
| >TP53-M243 YMCNSSCM  | 262  | >TP53-M243 YMCNSSCI   | 55  | 207  |
| >TP53-M243 YMCNSSCMC | 252  | >TP53-M243 YMCNSSCIGC | 196 | 56   |
| >TP53-M243 YMCNSSCM  | 205  | >TP53-M243 YMCNSSCI   | 47  | 158  |
| >TP53-M243 YMCNSSCMC | 167  | >TP53-M243 YMCNSSCIGC | 162 | 5    |
| >TP53-M243 YMCNSSCM  | 283  | >TP53-M243 YMCNSSCI   | 19  | 264  |
| >TP53-M243 YMCNSSCMC | 41   | >TP53-M243 YMCNSSCIGC | 39  | 2    |
| >TP53-M243 YMCNSSCM  | 676  | >TP53-M243 YMCNSSCI   | 122 | 554  |
| >TP53-M243 YMCNSSCMC | 143  | >TP53-M243 YMCNSSCIGC | 143 | 0    |
| >TP53-M243 YMCNSSCM  | 24   | >TP53-M243 YMCNSSCI   | 5   | 19   |
| >TP53-M243 YMCNSSCMC | 92   | >TP53-M243 YMCNSSCIG  | 693 | 601  |
| >TP53-M243 YMCNSSCMC | 399  | >TP53-M243 YMCNSSCIGC | 398 | 1    |
| >TP53-M243 YMCNSSCMC | 16   | >TP53-M243 YMCNSSCIGC | 10  | 6    |
| >TP53-M243 YMCNSSCM  | 92   | >TP53-M243 YMCNSSCI   | 14  | 78   |
| >TP53-M243 YMCNSSCMC | 197  | >TP53-M243 YMCNSSCIGC | 124 | 73   |
| >TP53-M243 YMCNSSCM  | 150  | >TP53-M243 YMCNSSCI   | 24  | 126  |
| >TP53-M243 YMCNSSCMC | 421  | >TP53-M243 YMCNSSCIGC | 247 | 174  |
| >TP53-M243 YMCNSSCM  | 67   | >TP53-M243 YMCNSSCI   | 22  | 45   |
| >TP53-M243 YMCNSSCMC | 332  | >TP53-M243 YMCNSSCIGC | 100 | 232  |
| >TP53-M243 YMCNSSCM  | 33   | >TP53-M243 YMCNSSCI   | 8   | 25   |
| >TP53-M243 YMCNSSCMC | 53   | >TP53-M243 YMCNSSCIGC | 25  | 28   |
| >TP53-M243 YMCNSSCM  | 33   | >TP53-M243 YMCNSSCI   | 145 | 112  |
| >TP53-M243 YMCNSSCMC | 127  | >TP53-M243 YMCNSSCIG  | 143 | 16   |
| >TP53-M243 YMCNSSCMC | 292  | >TP53-M243 YMCNSSCIGC | 406 | 114  |
| >TP53-M243 YMCNSSCMC | 44   | >TP53-M243 YMCNSSCIGC | 40  | 4    |
| >TP53-M243 YMCNSSCM  | 98   | >TP53-M243 YMCNSSCI   | 863 | 765  |
| >TP53-M243 YMCNSSCMC | 145  | >TP53-M243 YMCNSSCIGC | 154 | 9    |

|                       |       |                       |       |       |
|-----------------------|-------|-----------------------|-------|-------|
| >TP53-M243 YMCNSSCM   | 20    | >TP53-M243 YMCNSSCI   | 41    | 21    |
| >TP53-M243 YMCNSSCMC  | 160   | >TP53-M243 YMCNSSCIGC | 125   | 35    |
| >TP53-M243 YMCNSSCMC  | 294   | >TP53-M243 YMCNSSCIGC | 505   | 211   |
| >TP53-M243 YMCNSSCM   | 310   | >TP53-M243 YMCNSSCI   | 8098  | 7788  |
| >TP53-M243 YMCNSSCM   | 346   | >TP53-M243 YMCNSSCI   | 986   | 640   |
| >TP53-M243 NYMCNSSCV  | 53    | >TP53-M243 NYMCNSSCI  | 6     | 47    |
| >TP53-M243 NYMCNSSCV  | 924   | >TP53-M243 NYMCNSSCI  | 61    | 863   |
| >TP53-M243 NYMCNSSCV  | 942   | >TP53-M243 NYMCNSSCI  | 109   | 833   |
| >TP53-M243 NYMCNSSCV  | 650   | >TP53-M243 NYMCNSSCI  | 63    | 587   |
| >TP53-M243 YNYMCNSSCI | 1308  | >TP53-M243 YNYMCNSSCI | 81    | 1227  |
| >TP53-M243 YNYMCNSSCI | 429   | >TP53-M243 YNYMCNSSCI | 4182  | 3753  |
| >TP53-M243 YNYMCNSSCI | 31    | >TP53-M243 YNYMCNSSCI | 82    | 51    |
| >TP53-M243 CMGGMNRR   | 88    | >TP53-M243 CKGGMNRRF  | 27758 | 27670 |
| >TP53-M243 CMGGMNRR   | 314   | >TP53-M243 CKGGMNRR   | 14842 | 14528 |
| >TP53-M243 CMGGMNRR   | 117   | >TP53-M243 CKGGMNRR   | 1572  | 1455  |
| >TP53-M243 HNYMCNSS   | 70    | >TP53-M243 HNYMCNSS   | 11339 | 11269 |
| >TP53-M243 HNYMCNSS   | 2187  | >TP53-M243 HNYMCNSS   | 56    | 2131  |
| >TP53-M243 HNYMCNSS   | 11621 | >TP53-M243 HNYMCNSS   | 266   | 11355 |
| >TP53-M243 HNYMCNSS   | 11024 | >TP53-M243 HNYMCNSS   | 409   | 10615 |
| >TP53-M243 HNYMCNSS   | 24541 | >TP53-M243 HNYMCNSS   | 231   | 24310 |
| >TP53-M243 SCMGGMNR   | 3859  | >TP53-M243 SCKGGMNR   | 286   | 3573  |
| >TP53-M243 SCMGGMNR   | 464   | >TP53-M243 SCKGGMNR   | 913   | 449   |
| >TP53-M243 SSCMGGMNI  | 58    | >TP53-M243 SSCKGGMNR  | 129   | 71    |
| >TP53-M243 SSCMGGMNI  | 192   | >TP53-M243 SSCKGGMNR  | 892   | 700   |
| >TP53-M243 SSCMGGMNI  | 110   | >TP53-M243 SSCKGGMNR  | 169   | 59    |
| >TP53-M243 SSCMGGMNI  | 56    | >TP53-M243 SSCKGGMNR  | 75    | 19    |
| >TP53-M243 SSCMGGMNI  | 220   | >TP53-M243 SSCKGGMNR  | 313   | 93    |
| >TP53-M243 SSCMGGMNI  | 361   | >TP53-M243 SSCKGGMNR  | 1414  | 1053  |
| >TP53-M243 SSCMGGMNI  | 398   | >TP53-M243 SSCKGGMNR  | 419   | 21    |
| >TP53-M243 SSCMGGMNI  | 460   | >TP53-M243 SSCKGGMNR  | 443   | 17    |
| >TP53-M243 NSSCMGGMI  | 111   | >TP53-M243 NSSCKGGMN  | 333   | 222   |
| >TP53-M243 NSSCMGGMI  | 55    | >TP53-M243 NSSCKGGMN  | 103   | 48    |
| >TP53-M243 NSSCMGGMI  | 365   | >TP53-M243 NSSCKGGMN  | 570   | 205   |
| >TP53-M243 NSSCMGGMI  | 12    | >TP53-M243 NSSCKGGMN  | 47    | 35    |
| >TP53-M243 NSSCMGGMI  | 39    | >TP53-M243 NSSCKGGMN  | 112   | 73    |
| >TP53-M243 YMCNSSCM   | 262   | >TP53-M243 YMCNSSCK   | 18277 | 18015 |
| >TP53-M243 YMCNSSCMC  | 252   | >TP53-M243 YMCNSSCKG  | 1034  | 782   |
| >TP53-M243 YMCNSSCM   | 205   | >TP53-M243 YMCNSSCK   | 11701 | 11496 |
| >TP53-M243 YMCNSSCMC  | 167   | >TP53-M243 YMCNSSCKG  | 686   | 519   |
| >TP53-M243 YMCNSSCM   | 283   | >TP53-M243 YMCNSSCK   | 11141 | 10858 |
| >TP53-M243 YMCNSSCMC  | 41    | >TP53-M243 YMCNSSCKG  | 242   | 201   |
| >TP53-M243 YMCNSSCMC  | 143   | >TP53-M243 YMCNSSCKG  | 869   | 726   |
| >TP53-M243 YMCNSSCM   | 24    | >TP53-M243 YMCNSSCK   | 1926  | 1902  |

|                       |       |                       |       |       |
|-----------------------|-------|-----------------------|-------|-------|
| >TP53-M243 YMCNSSCMC  | 92    | >TP53-M243 YMCNSSCKG  | 217   | 125   |
| >TP53-M243 YMCNSSCMC  | 399   | >TP53-M243 YMCNSSCKG  | 1014  | 615   |
| >TP53-M243 YMCNSSCMC  | 16    | >TP53-M243 YMCNSSCKG  | 24    | 8     |
| >TP53-M243 YMCNSSCM   | 92    | >TP53-M243 YMCNSSCK   | 10470 | 10378 |
| >TP53-M243 YMCNSSCMC  | 197   | >TP53-M243 YMCNSSCKG  | 348   | 151   |
| >TP53-M243 YMCNSSCM   | 150   | >TP53-M243 YMCNSSCK   | 7454  | 7304  |
| >TP53-M243 YMCNSSCMC  | 421   | >TP53-M243 YMCNSSCKG  | 597   | 176   |
| >TP53-M243 YMCNSSCM   | 67    | >TP53-M243 YMCNSSCK   | 15556 | 15489 |
| >TP53-M243 YMCNSSCMC  | 332   | >TP53-M243 YMCNSSCKG  | 419   | 87    |
| >TP53-M243 YMCNSSCM   | 33    | >TP53-M243 YMCNSSCK   | 1157  | 1124  |
| >TP53-M243 YMCNSSCMC  | 53    | >TP53-M243 YMCNSSCKG  | 59    | 6     |
| >TP53-M243 YMCNSSCM   | 20291 | >TP53-M243 YMCNSSCK   | 144   | 20147 |
| >TP53-M243 YMCNSSCM   | 19576 | >TP53-M243 YMCNSSCK   | 56    | 19520 |
| >TP53-M243 YMCNSSCM   | 22347 | >TP53-M243 YMCNSSCK   | 138   | 22209 |
| >TP53-M243 YMCNSSCM   | 33    | >TP53-M243 YMCNSSCK   | 3283  | 3250  |
| >TP53-M243 YMCNSSCMC  | 127   | >TP53-M243 YMCNSSCKG  | 340   | 213   |
| >TP53-M243 YMCNSSCMC  | 292   | >TP53-M243 YMCNSSCKG  | 660   | 368   |
| >TP53-M243 YMCNSSCMC  | 44    | >TP53-M243 YMCNSSCKG  | 66    | 22    |
| >TP53-M243 YMCNSSCM   | 98    | >TP53-M243 YMCNSSCK   | 7043  | 6945  |
| >TP53-M243 YMCNSSCMC  | 145   | >TP53-M243 YMCNSSCKG  | 174   | 29    |
| >TP53-M243 YMCNSSCM   | 20    | >TP53-M243 YMCNSSCK   | 314   | 294   |
| >TP53-M243 YMCNSSCMC  | 160   | >TP53-M243 YMCNSSCKG  | 229   | 69    |
| >TP53-M243 YMCNSSCMC  | 294   | >TP53-M243 YMCNSSCKG  | 747   | 453   |
| >TP53-M243 YMCNSSCM   | 310   | >TP53-M243 YMCNSSCK   | 16709 | 16399 |
| >TP53-M243 YMCNSSCM   | 346   | >TP53-M243 YMCNSSCK   | 17099 | 16753 |
| >TP53-M243 NYMCNSSCN  | 53    | >TP53-M243 NYMCNSSCK  | 15526 | 15473 |
| >TP53-M243 NYMCNSSCN  | 24702 | >TP53-M243 NYMCNSSCK  | 318   | 24384 |
| >TP53-M243 YNYMCNSSCI | 429   | >TP53-M243 YNYMCNSSCI | 16107 | 15678 |
| >TP53-M243 YNYMCNSSCI | 31    | >TP53-M243 YNYMCNSSCI | 590   | 559   |
| >TP53-M243 CMGGMNRR   | 88    | >TP53-M243 CLGGMNRRP  | 51    | 37    |
| >TP53-M243 CMGGMNRR   | 314   | >TP53-M243 CLGGMNRR   | 2044  | 1730  |
| >TP53-M243 CMGGMNRR   | 117   | >TP53-M243 CLGGMNRR   | 328   | 211   |
| >TP53-M243 HNYMCNSS   | 70    | >TP53-M243 HNYMCNSS   | 21    | 49    |
| >TP53-M243 HNYMCNSS   | 2755  | >TP53-M243 HNYMCNSS   | 228   | 2527  |
| >TP53-M243 SCMGGMNR   | 464   | >TP53-M243 SCLGGMNR   | 317   | 147   |
| >TP53-M243 SSCMGGMNI  | 58    | >TP53-M243 SSCLGGMNR  | 95    | 37    |
| >TP53-M243 SSCMGGMNI  | 192   | >TP53-M243 SSCLGGMNR  | 337   | 145   |
| >TP53-M243 SSCMGGMNI  | 110   | >TP53-M243 SSCLGGMNR  | 214   | 104   |
| >TP53-M243 SSCMGGMNI  | 56    | >TP53-M243 SSCLGGMNR  | 64    | 8     |
| >TP53-M243 SSCMGGMNI  | 220   | >TP53-M243 SSCLGGMNR  | 390   | 170   |
| >TP53-M243 SSCMGGMNI  | 361   | >TP53-M243 SSCLGGMNR  | 901   | 540   |
| >TP53-M243 SSCMGGMNI  | 398   | >TP53-M243 SSCLGGMNR  | 654   | 256   |
| >TP53-M243 SSCMGGMNI  | 460   | >TP53-M243 SSCLGGMNR  | 658   | 198   |

|                       |      |                       |      |      |
|-----------------------|------|-----------------------|------|------|
| >TP53-M243 NSSCMGGMI  | 111  | >TP53-M243 NSSCLGGMN  | 169  | 58   |
| >TP53-M243 NSSCMGGMI  | 55   | >TP53-M243 NSSCLGGMN  | 82   | 27   |
| >TP53-M243 NSSCMGGMI  | 365  | >TP53-M243 NSSCLGGMN  | 359  | 6    |
| >TP53-M243 NSSCMGGMI  | 12   | >TP53-M243 NSSCLGGMN  | 12   | 0    |
| >TP53-M243 NSSCMGGMI  | 39   | >TP53-M243 NSSCLGGMN  | 53   | 14   |
| >TP53-M243 YMCNSSCM   | 262  | >TP53-M243 YMCNSSCL   | 49   | 213  |
| >TP53-M243 YMCNSSCMC  | 252  | >TP53-M243 YMCNSSCLG  | 149  | 103  |
| >TP53-M243 YMCNSSCM   | 205  | >TP53-M243 YMCNSSCL   | 13   | 192  |
| >TP53-M243 YMCNSSCMC  | 167  | >TP53-M243 YMCNSSCLG  | 112  | 55   |
| >TP53-M243 YMCNSSCM   | 283  | >TP53-M243 YMCNSSCL   | 30   | 253  |
| >TP53-M243 YMCNSSCMC  | 41   | >TP53-M243 YMCNSSCLG  | 31   | 10   |
| >TP53-M243 YMCNSSCM   | 676  | >TP53-M243 YMCNSSCL   | 129  | 547  |
| >TP53-M243 YMCNSSCMC  | 143  | >TP53-M243 YMCNSSCLG  | 84   | 59   |
| >TP53-M243 YMCNSSCM   | 24   | >TP53-M243 YMCNSSCL   | 5    | 19   |
| >TP53-M243 YMCNSSCMC  | 92   | >TP53-M243 YMCNSSCLG  | 202  | 110  |
| >TP53-M243 YMCNSSCMC  | 399  | >TP53-M243 YMCNSSCLG  | 493  | 94   |
| >TP53-M243 YMCNSSCMC  | 16   | >TP53-M243 YMCNSSCLG  | 12   | 4    |
| >TP53-M243 YMCNSSCM   | 92   | >TP53-M243 YMCNSSCL   | 15   | 77   |
| >TP53-M243 YMCNSSCMC  | 197  | >TP53-M243 YMCNSSCLG  | 120  | 77   |
| >TP53-M243 YMCNSSCM   | 150  | >TP53-M243 YMCNSSCL   | 19   | 131  |
| >TP53-M243 YMCNSSCMC  | 421  | >TP53-M243 YMCNSSCLG  | 317  | 104  |
| >TP53-M243 YMCNSSCM   | 67   | >TP53-M243 YMCNSSCL   | 16   | 51   |
| >TP53-M243 YMCNSSCMC  | 332  | >TP53-M243 YMCNSSCLG  | 128  | 204  |
| >TP53-M243 YMCNSSCM   | 33   | >TP53-M243 YMCNSSCL   | 4    | 29   |
| >TP53-M243 YMCNSSCMC  | 53   | >TP53-M243 YMCNSSCLG  | 32   | 21   |
| >TP53-M243 YMCNSSCM   | 33   | >TP53-M243 YMCNSSCL   | 73   | 40   |
| >TP53-M243 YMCNSSCMC  | 127  | >TP53-M243 YMCNSSCLG  | 190  | 63   |
| >TP53-M243 YMCNSSCMC  | 292  | >TP53-M243 YMCNSSCLG  | 254  | 38   |
| >TP53-M243 YMCNSSCMC  | 44   | >TP53-M243 YMCNSSCLG  | 46   | 2    |
| >TP53-M243 YMCNSSCM   | 98   | >TP53-M243 YMCNSSCL   | 385  | 287  |
| >TP53-M243 YMCNSSCMC  | 145  | >TP53-M243 YMCNSSCLG  | 190  | 45   |
| >TP53-M243 YMCNSSCM   | 20   | >TP53-M243 YMCNSSCL   | 34   | 14   |
| >TP53-M243 YMCNSSCMC  | 160  | >TP53-M243 YMCNSSCLG  | 177  | 17   |
| >TP53-M243 YMCNSSCMC  | 294  | >TP53-M243 YMCNSSCLG  | 507  | 213  |
| >TP53-M243 YMCNSSCM   | 310  | >TP53-M243 YMCNSSCL   | 3513 | 3203 |
| >TP53-M243 YMCNSSCM   | 346  | >TP53-M243 YMCNSSCL   | 62   | 284  |
| >TP53-M243 NYMCNSSCN  | 53   | >TP53-M243 NYMCNSSCL  | 14   | 39   |
| >TP53-M243 NYMCNSSCN  | 924  | >TP53-M243 NYMCNSSCL  | 134  | 790  |
| >TP53-M243 NYMCNSSCN  | 942  | >TP53-M243 NYMCNSSCL  | 273  | 669  |
| >TP53-M243 NYMCNSSCN  | 650  | >TP53-M243 NYMCNSSCL  | 58   | 592  |
| >TP53-M243 NYMCNSSCN  | 1703 | >TP53-M243 NYMCNSSCL  | 282  | 1421 |
| >TP53-M243 YNYMCNSSCI | 1351 | >TP53-M243 YNYMCNSSCI | 317  | 1034 |
| >TP53-M243 YNYMCNSSCI | 429  | >TP53-M243 YNYMCNSSCI | 2060 | 1631 |

|                       |       |                       |       |       |
|-----------------------|-------|-----------------------|-------|-------|
| >TP53-M243 YNYMCNSSCI | 31    | >TP53-M243 YNYMCNSSCI | 55    | 24    |
| >TP53-M243 YNYMCNSSCI | 1238  | >TP53-M243 YNYMCNSSCI | 216   | 1022  |
| >TP53-M243 MGGMNRRP   | 803   | >TP53-M243 RGGMNRRPI  | 385   | 418   |
| >TP53-M243 CMGGMNRR   | 88    | >TP53-M243 CRGGMNRRF  | 29179 | 29091 |
| >TP53-M243 CMGGMNRR   | 314   | >TP53-M243 CRGGMNRR   | 17715 | 17401 |
| >TP53-M243 CMGGMNRR   | 18820 | >TP53-M243 CRGGMNRRF  | 152   | 18668 |
| >TP53-M243 CMGGMNRR   | 117   | >TP53-M243 CRGGMNRR   | 1084  | 967   |
| >TP53-M243 HNYMCNSS   | 70    | >TP53-M243 HNYMCNSS   | 15698 | 15628 |
| >TP53-M243 HNYMCNSS   | 11621 | >TP53-M243 HNYMCNSS   | 19    | 11602 |
| >TP53-M243 HNYMCNSS   | 11024 | >TP53-M243 HNYMCNSS   | 24    | 11000 |
| >TP53-M243 HNYMCNSS   | 24541 | >TP53-M243 HNYMCNSS   | 74    | 24467 |
| >TP53-M243 HNYMCNSS   | 26722 | >TP53-M243 HNYMCNSS   | 66    | 26656 |
| >TP53-M243 SCMGGMNR   | 3859  | >TP53-M243 SCRGGMNR   | 49    | 3810  |
| >TP53-M243 SCMGGMNR   | 464   | >TP53-M243 SCRGGMNR   | 1324  | 860   |
| >TP53-M243 SSCMGGMNI  | 58    | >TP53-M243 SSCRGGMNR  | 89    | 31    |
| >TP53-M243 SSCMGGMNI  | 192   | >TP53-M243 SSCRGGMNR  | 872   | 680   |
| >TP53-M243 SSCMGGMNI  | 110   | >TP53-M243 SSCRGGMNR  | 105   | 5     |
| >TP53-M243 SSCMGGMNI  | 56    | >TP53-M243 SSCRGGMNR  | 88    | 32    |
| >TP53-M243 SSCMGGMNI  | 220   | >TP53-M243 SSCRGGMNR  | 352   | 132   |
| >TP53-M243 SSCMGGMNI  | 361   | >TP53-M243 SSCRGGMNR  | 2060  | 1699  |
| >TP53-M243 SSCMGGMNI  | 398   | >TP53-M243 SSCRGGMNR  | 487   | 89    |
| >TP53-M243 SSCMGGMNI  | 460   | >TP53-M243 SSCRGGMNR  | 508   | 48    |
| >TP53-M243 NSSCMGGMI  | 111   | >TP53-M243 NSSCRGGMN  | 222   | 111   |
| >TP53-M243 NSSCMGGMI  | 55    | >TP53-M243 NSSCRGGMN  | 61    | 6     |
| >TP53-M243 NSSCMGGMI  | 365   | >TP53-M243 NSSCRGGMN  | 213   | 152   |
| >TP53-M243 NSSCMGGMI  | 12    | >TP53-M243 NSSCRGGMN  | 32    | 20    |
| >TP53-M243 NSSCMGGMI  | 39    | >TP53-M243 NSSCRGGMN  | 83    | 44    |
| >TP53-M243 YMCNSSCM   | 262   | >TP53-M243 YMCNSSCR   | 19928 | 19666 |
| >TP53-M243 YMCNSSCMC  | 252   | >TP53-M243 YMCNSSCRG  | 909   | 657   |
| >TP53-M243 YMCNSSCM   | 205   | >TP53-M243 YMCNSSCR   | 12292 | 12087 |
| >TP53-M243 YMCNSSCMC  | 167   | >TP53-M243 YMCNSSCRG  | 621   | 454   |
| >TP53-M243 YMCNSSCM   | 283   | >TP53-M243 YMCNSSCR   | 12860 | 12577 |
| >TP53-M243 YMCNSSCMC  | 41    | >TP53-M243 YMCNSSCRG  | 190   | 149   |
| >TP53-M243 YMCNSSCMC  | 143   | >TP53-M243 YMCNSSCRG  | 760   | 617   |
| >TP53-M243 YMCNSSCM   | 24    | >TP53-M243 YMCNSSCR   | 4032  | 4008  |
| >TP53-M243 YMCNSSCMC  | 92    | >TP53-M243 YMCNSSCRG  | 133   | 41    |
| >TP53-M243 YMCNSSCMC  | 399   | >TP53-M243 YMCNSSCRG  | 795   | 396   |
| >TP53-M243 YMCNSSCMC  | 16    | >TP53-M243 YMCNSSCRG  | 46    | 30    |
| >TP53-M243 YMCNSSCM   | 92    | >TP53-M243 YMCNSSCR   | 12831 | 12739 |
| >TP53-M243 YMCNSSCMC  | 197   | >TP53-M243 YMCNSSCRG  | 591   | 394   |
| >TP53-M243 YMCNSSCM   | 150   | >TP53-M243 YMCNSSCR   | 12034 | 11884 |
| >TP53-M243 YMCNSSCMC  | 421   | >TP53-M243 YMCNSSCRG  | 843   | 422   |
| >TP53-M243 YMCNSSCM   | 67    | >TP53-M243 YMCNSSCR   | 19201 | 19134 |

|                       |       |                       |       |       |
|-----------------------|-------|-----------------------|-------|-------|
| >TP53-M243 YMCNSSCMC  | 332   | >TP53-M243 YMCNSSCRG  | 634   | 302   |
| >TP53-M243 YMCNSSCM   | 33    | >TP53-M243 YMCNSSCR   | 4259  | 4226  |
| >TP53-M243 YMCNSSCMC  | 903   | >TP53-M243 YMCNSSCRG  | 386   | 517   |
| >TP53-M243 YMCNSSCMC  | 53    | >TP53-M243 YMCNSSCRG  | 53    | 0     |
| >TP53-M243 YMCNSSCM   | 14422 | >TP53-M243 YMCNSSCR   | 56    | 14366 |
| >TP53-M243 YMCNSSCM   | 21898 | >TP53-M243 YMCNSSCR   | 102   | 21796 |
| >TP53-M243 YMCNSSCM   | 22347 | >TP53-M243 YMCNSSCR   | 38    | 22309 |
| >TP53-M243 YMCNSSCM   | 33    | >TP53-M243 YMCNSSCR   | 3690  | 3657  |
| >TP53-M243 YMCNSSCMC  | 127   | >TP53-M243 YMCNSSCRG  | 164   | 37    |
| >TP53-M243 YMCNSSCMC  | 292   | >TP53-M243 YMCNSSCRG  | 469   | 177   |
| >TP53-M243 YMCNSSCMC  | 44    | >TP53-M243 YMCNSSCRG  | 54    | 10    |
| >TP53-M243 YMCNSSCM   | 98    | >TP53-M243 YMCNSSCR   | 5923  | 5825  |
| >TP53-M243 YMCNSSCMC  | 145   | >TP53-M243 YMCNSSCRG  | 209   | 64    |
| >TP53-M243 YMCNSSCM   | 20    | >TP53-M243 YMCNSSCR   | 253   | 233   |
| >TP53-M243 YMCNSSCMC  | 160   | >TP53-M243 YMCNSSCRG  | 159   | 1     |
| >TP53-M243 YMCNSSCMC  | 294   | >TP53-M243 YMCNSSCRG  | 690   | 396   |
| >TP53-M243 YMCNSSCM   | 310   | >TP53-M243 YMCNSSCR   | 17223 | 16913 |
| >TP53-M243 YMCNSSCM   | 346   | >TP53-M243 YMCNSSCR   | 16899 | 16553 |
| >TP53-M243 NYMCNSSCM  | 53    | >TP53-M243 NYMCNSSCR  | 19552 | 19499 |
| >TP53-M243 NYMCNSSCM  | 16165 | >TP53-M243 NYMCNSSCR  | 60    | 16105 |
| >TP53-M243 NYMCNSSCM  | 24702 | >TP53-M243 NYMCNSSCR  | 111   | 24591 |
| >TP53-M243 NYMCNSSCM  | 26039 | >TP53-M243 NYMCNSSCR  | 52    | 25987 |
| >TP53-M243 YNYMCNSSCI | 25061 | >TP53-M243 YNYMCNSSCI | 406   | 24655 |
| >TP53-M243 YNYMCNSSCI | 13197 | >TP53-M243 YNYMCNSSCI | 115   | 13082 |
| >TP53-M243 YNYMCNSSCI | 30848 | >TP53-M243 YNYMCNSSCI | 172   | 30676 |
| >TP53-M243 YNYMCNSSCI | 429   | >TP53-M243 YNYMCNSSCI | 16490 | 16061 |
| >TP53-M243 YNYMCNSSCI | 31    | >TP53-M243 YNYMCNSSCI | 520   | 489   |
| >TP53-M243 YNYMCNSSCI | 32282 | >TP53-M243 YNYMCNSSCI | 449   | 31833 |
| >TP53-M243 CMGGMNRR   | 88    | >TP53-M243 CTGGMNRRF  | 13481 | 13393 |
| >TP53-M243 CMGGMNRR   | 314   | >TP53-M243 CTGGMNRR   | 689   | 375   |
| >TP53-M243 CMGGMNRR   | 1022  | >TP53-M243 CTGGMNRR   | 121   | 901   |
| >TP53-M243 CMGGMNRR   | 117   | >TP53-M243 CTGGMNRR   | 876   | 759   |
| >TP53-M243 CMGGMNRR   | 9250  | >TP53-M243 CTGGMNRRF  | 446   | 8804  |
| >TP53-M243 HNYMCNSS   | 70    | >TP53-M243 HNYMCNSS   | 2495  | 2425  |
| >TP53-M243 SCMGGMNR   | 464   | >TP53-M243 SCTGGMNR   | 1016  | 552   |
| >TP53-M243 SSCMGGMNI  | 58    | >TP53-M243 SSCTGGMNR  | 78    | 20    |
| >TP53-M243 SSCMGGMNI  | 192   | >TP53-M243 SSCTGGMNR  | 435   | 243   |
| >TP53-M243 SSCMGGMNI  | 110   | >TP53-M243 SSCTGGMNR  | 178   | 68    |
| >TP53-M243 SSCMGGMNI  | 56    | >TP53-M243 SSCTGGMNR  | 75    | 19    |
| >TP53-M243 SSCMGGMNI  | 220   | >TP53-M243 SSCTGGMNR  | 242   | 22    |
| >TP53-M243 SSCMGGMNI  | 361   | >TP53-M243 SSCTGGMNR  | 574   | 213   |
| >TP53-M243 SSCMGGMNI  | 398   | >TP53-M243 SSCTGGMNR  | 569   | 171   |
| >TP53-M243 SSCMGGMNI  | 460   | >TP53-M243 SSCTGGMNR  | 592   | 132   |

|                       |     |                      |       |       |
|-----------------------|-----|----------------------|-------|-------|
| >TP53-M243'NSSCMGGMI  | 111 | >TP53-M243'NSSCTGGMN | 165   | 54    |
| >TP53-M243'NSSCMGGMI  | 55  | >TP53-M243'NSSCTGGMN | 147   | 92    |
| >TP53-M243'NSSCMGGMI  | 365 | >TP53-M243'NSSCTGGMN | 692   | 327   |
| >TP53-M243'NSSCMGGMI  | 12  | >TP53-M243'NSSCTGGMN | 20    | 8     |
| >TP53-M243'NSSCMGGMI  | 39  | >TP53-M243'NSSCTGGMN | 46    | 7     |
| >TP53-M243'NSSCMGGM   | 851 | >TP53-M243'NSSCTGGM  | 448   | 403   |
| >TP53-M243'CNSSCMGGM  | 639 | >TP53-M243'CNSSCTGGM | 336   | 303   |
| >TP53-M243'YMCNSSCM   | 262 | >TP53-M243'YMCNSSCT  | 1329  | 1067  |
| >TP53-M243'YMCNSSCMC  | 252 | >TP53-M243'YMCNSSCTG | 250   | 2     |
| >TP53-M243'YMCNSSCM   | 205 | >TP53-M243'YMCNSSCT  | 1297  | 1092  |
| >TP53-M243'YMCNSSCMC  | 167 | >TP53-M243'YMCNSSCTG | 157   | 10    |
| >TP53-M243'YMCNSSCM   | 283 | >TP53-M243'YMCNSSCT  | 339   | 56    |
| >TP53-M243'YMCNSSCMC  | 41  | >TP53-M243'YMCNSSCTG | 42    | 1     |
| >TP53-M243'YMCNSSCMC  | 143 | >TP53-M243'YMCNSSCTG | 206   | 63    |
| >TP53-M243'YMCNSSCM   | 24  | >TP53-M243'YMCNSSCT  | 62    | 38    |
| >TP53-M243'YMCNSSCMC  | 92  | >TP53-M243'YMCNSSCTG | 68    | 24    |
| >TP53-M243'YMCNSSCMC  | 399 | >TP53-M243'YMCNSSCTG | 471   | 72    |
| >TP53-M243'YMCNSSCMC  | 16  | >TP53-M243'YMCNSSCTG | 13    | 3     |
| >TP53-M243'YMCNSSCM   | 92  | >TP53-M243'YMCNSSCT  | 567   | 475   |
| >TP53-M243'YMCNSSCMC  | 197 | >TP53-M243'YMCNSSCTG | 104   | 93    |
| >TP53-M243'YMCNSSCM   | 150 | >TP53-M243'YMCNSSCT  | 354   | 204   |
| >TP53-M243'YMCNSSCMC  | 421 | >TP53-M243'YMCNSSCTG | 291   | 130   |
| >TP53-M243'YMCNSSCM   | 67  | >TP53-M243'YMCNSSCT  | 577   | 510   |
| >TP53-M243'YMCNSSCMC  | 332 | >TP53-M243'YMCNSSCTG | 83    | 249   |
| >TP53-M243'YMCNSSCM   | 33  | >TP53-M243'YMCNSSCT  | 53    | 20    |
| >TP53-M243'YMCNSSCMC  | 903 | >TP53-M243'YMCNSSCTG | 267   | 636   |
| >TP53-M243'YMCNSSCMC  | 53  | >TP53-M243'YMCNSSCTG | 34    | 19    |
| >TP53-M243'YMCNSSCM   | 33  | >TP53-M243'YMCNSSCT  | 1541  | 1508  |
| >TP53-M243'YMCNSSCMC  | 127 | >TP53-M243'YMCNSSCTG | 72    | 55    |
| >TP53-M243'YMCNSSCMC  | 292 | >TP53-M243'YMCNSSCTG | 238   | 54    |
| >TP53-M243'YMCNSSCMC  | 44  | >TP53-M243'YMCNSSCTG | 38    | 6     |
| >TP53-M243'YMCNSSCM   | 98  | >TP53-M243'YMCNSSCT  | 4534  | 4436  |
| >TP53-M243'YMCNSSCMC  | 145 | >TP53-M243'YMCNSSCTG | 102   | 43    |
| >TP53-M243'YMCNSSCM   | 20  | >TP53-M243'YMCNSSCT  | 870   | 850   |
| >TP53-M243'YMCNSSCMC  | 160 | >TP53-M243'YMCNSSCTG | 115   | 45    |
| >TP53-M243'YMCNSSCMC  | 294 | >TP53-M243'YMCNSSCTG | 405   | 111   |
| >TP53-M243'YMCNSSCM   | 310 | >TP53-M243'YMCNSSCT  | 10228 | 9918  |
| >TP53-M243'YMCNSSCMC  | 958 | >TP53-M243'YMCNSSCTG | 373   | 585   |
| >TP53-M243'YMCNSSCM   | 346 | >TP53-M243'YMCNSSCT  | 13733 | 13387 |
| >TP53-M243'NYMCNSSCV  | 53  | >TP53-M243'NYMCNSSCT | 3273  | 3220  |
| >TP53-M243'YNYMCNSSCI | 429 | >TP53-M243'YNYMCNSSC | 13352 | 12923 |
| >TP53-M243'YNYMCNSSCI | 31  | >TP53-M243'YNYMCNSSC | 2564  | 2533  |
| >TP53-M243'MGGMNRRP   | 803 | >TP53-M243'VGGMNRRPI | 461   | 342   |

|                      |      |                      |      |      |
|----------------------|------|----------------------|------|------|
| >TP53-M243 CMGGMNRR  | 88   | >TP53-M243 CVGGMNRRF | 4795 | 4707 |
| >TP53-M243 CMGGMNRR  | 314  | >TP53-M243 CVGGMNRR  | 1228 | 914  |
| >TP53-M243 CMGGMNRR  | 1022 | >TP53-M243 CVGGMNRR  | 273  | 749  |
| >TP53-M243 CMGGMNRR  | 117  | >TP53-M243 CVGGMNRR  | 582  | 465  |
| >TP53-M243 HNYMNCSS  | 70   | >TP53-M243 HNYMNCSS  | 71   | 1    |
| >TP53-M243 SCMGGMNR  | 464  | >TP53-M243 SCVGGMNR  | 588  | 124  |
| >TP53-M243 SSCMGGMNI | 58   | >TP53-M243 SSCVGGMNR | 119  | 61   |
| >TP53-M243 SSCMGGMNI | 192  | >TP53-M243 SSCVGGMNR | 606  | 414  |
| >TP53-M243 SSCMGGMNI | 110  | >TP53-M243 SSCVGGMNR | 120  | 10   |
| >TP53-M243 SSCMGGMNI | 56   | >TP53-M243 SSCVGGMNR | 130  | 74   |
| >TP53-M243 SSCMGGMNI | 220  | >TP53-M243 SSCVGGMNR | 285  | 65   |
| >TP53-M243 SSCMGGMNI | 361  | >TP53-M243 SSCVGGMNR | 610  | 249  |
| >TP53-M243 SSCMGGMNI | 398  | >TP53-M243 SSCVGGMNR | 351  | 47   |
| >TP53-M243 SSCMGGMNI | 460  | >TP53-M243 SSCVGGMNR | 417  | 43   |
| >TP53-M243 NSSCMGGMI | 111  | >TP53-M243 NSSCVGGMI | 192  | 81   |
| >TP53-M243 NSSCMGGMI | 55   | >TP53-M243 NSSCVGGMI | 92   | 37   |
| >TP53-M243 NSSCMGGMI | 365  | >TP53-M243 NSSCVGGMI | 295  | 70   |
| >TP53-M243 NSSCMGGMI | 12   | >TP53-M243 NSSCVGGMI | 10   | 2    |
| >TP53-M243 NSSCMGGMI | 39   | >TP53-M243 NSSCVGGMI | 26   | 13   |
| >TP53-M243 YMCNSSCM  | 262  | >TP53-M243 YMCNSSCV  | 21   | 241  |
| >TP53-M243 YMCNSSCMC | 252  | >TP53-M243 YMCNSSCVG | 224  | 28   |
| >TP53-M243 YMCNSSCM  | 205  | >TP53-M243 YMCNSSCV  | 11   | 194  |
| >TP53-M243 YMCNSSCMC | 167  | >TP53-M243 YMCNSSCVG | 180  | 13   |
| >TP53-M243 YMCNSSCM  | 283  | >TP53-M243 YMCNSSCV  | 5    | 278  |
| >TP53-M243 YMCNSSCMC | 41   | >TP53-M243 YMCNSSCVG | 37   | 4    |
| >TP53-M243 YMCNSSCM  | 676  | >TP53-M243 YMCNSSCV  | 20   | 656  |
| >TP53-M243 YMCNSSCMC | 143  | >TP53-M243 YMCNSSCVG | 209  | 66   |
| >TP53-M243 YMCNSSCM  | 24   | >TP53-M243 YMCNSSCV  | 2    | 22   |
| >TP53-M243 YMCNSSCMC | 92   | >TP53-M243 YMCNSSCVG | 218  | 126  |
| >TP53-M243 YMCNSSCMC | 399  | >TP53-M243 YMCNSSCVG | 372  | 27   |
| >TP53-M243 YMCNSSCMC | 16   | >TP53-M243 YMCNSSCVG | 10   | 6    |
| >TP53-M243 YMCNSSCM  | 92   | >TP53-M243 YMCNSSCV  | 5    | 87   |
| >TP53-M243 YMCNSSCMC | 197  | >TP53-M243 YMCNSSCVG | 129  | 68   |
| >TP53-M243 YMCNSSCM  | 150  | >TP53-M243 YMCNSSCV  | 6    | 144  |
| >TP53-M243 YMCNSSCMC | 421  | >TP53-M243 YMCNSSCVG | 239  | 182  |
| >TP53-M243 YMCNSSCM  | 67   | >TP53-M243 YMCNSSCV  | 4    | 63   |
| >TP53-M243 YMCNSSCMC | 332  | >TP53-M243 YMCNSSCVG | 80   | 252  |
| >TP53-M243 YMCNSSCM  | 33   | >TP53-M243 YMCNSSCV  | 2    | 31   |
| >TP53-M243 YMCNSSCMC | 53   | >TP53-M243 YMCNSSCVG | 34   | 19   |
| >TP53-M243 YMCNSSCM  | 33   | >TP53-M243 YMCNSSCV  | 152  | 119  |
| >TP53-M243 YMCNSSCMC | 127  | >TP53-M243 YMCNSSCVG | 54   | 73   |
| >TP53-M243 YMCNSSCMC | 292  | >TP53-M243 YMCNSSCVG | 237  | 55   |
| >TP53-M243 YMCNSSCMC | 44   | >TP53-M243 YMCNSSCVG | 34   | 10   |



|                       |      |                       |       |       |
|-----------------------|------|-----------------------|-------|-------|
| >TP53-M243 YMCNSSCM   | 98   | >TP53-M243 YMCNSSCV   | 666   | 568   |
| >TP53-M243 YMCNSSCMC  | 145  | >TP53-M243 YMCNSSCVG  | 158   | 13    |
| >TP53-M243 YMCNSSCM   | 20   | >TP53-M243 YMCNSSCV   | 61    | 41    |
| >TP53-M243 YMCNSSCMC  | 160  | >TP53-M243 YMCNSSCVG  | 99    | 61    |
| >TP53-M243 YMCNSSCMC  | 294  | >TP53-M243 YMCNSSCVG  | 419   | 125   |
| >TP53-M243 YMCNSSCM   | 310  | >TP53-M243 YMCNSSCV   | 10772 | 10462 |
| >TP53-M243 YMCNSSCM   | 346  | >TP53-M243 YMCNSSCV   | 1380  | 1034  |
| >TP53-M243 NYMCNSSCM  | 53   | >TP53-M243 NYMCNSSCV  | 57    | 4     |
| >TP53-M243 NYMCNSSCM  | 8069 | >TP53-M243 NYMCNSSCV  | 456   | 7613  |
| >TP53-M243 YNYMCNSSC  | 1351 | >TP53-M243 YNYMCNSSC  | 302   | 1049  |
| >TP53-M243 YNYMCNSSC  | 7165 | >TP53-M243 YNYMCNSSC  | 456   | 6709  |
| >TP53-M243 YNYMCNSSC  | 5312 | >TP53-M243 YNYMCNSSC  | 419   | 4893  |
| >TP53-M243 YNYMCNSSC  | 429  | >TP53-M243 YNYMCNSSC  | 4763  | 4334  |
| >TP53-M243 YNYMCNSSC  | 31   | >TP53-M243 YNYMCNSSC  | 115   | 84    |
| >TP53-M246 MNRRPILTI  | 35   | >TP53-M246 INRRPILTI  | 256   | 221   |
| >TP53-M246 MNRRPILTI  | 200  | >TP53-M246 INRRPILTI  | 1314  | 1114  |
| >TP53-M246 MNRRPILTI  | 457  | >TP53-M246 INRRPILTI  | 606   | 149   |
| >TP53-M246 MNRRPILTI  | 399  | >TP53-M246 INRRPILTI  | 847   | 448   |
| >TP53-M246 GMNRRPILTI | 185  | >TP53-M246 GINRRPILTI | 1336  | 1151  |
| >TP53-M246 GMNRRPILTI | 168  | >TP53-M246 GINRRPILTI | 1525  | 1357  |
| >TP53-M246 GMNRRPIL   | 213  | >TP53-M246 GINRRPIL   | 2919  | 2706  |
| >TP53-M246 GMNRRPILTI | 61   | >TP53-M246 GINRRPILTI | 254   | 193   |
| >TP53-M246 GMNRRPILTI | 13   | >TP53-M246 GINRRPILTI | 107   | 94    |
| >TP53-M246 GMNRRPIL   | 229  | >TP53-M246 GINRRPIL   | 5413  | 5184  |
| >TP53-M246 GMNRRPILTI | 10   | >TP53-M246 GINRRPILTI | 289   | 279   |
| >TP53-M246 GMNRRPILTI | 93   | >TP53-M246 GINRRPILTI | 3318  | 3225  |
| >TP53-M246 GMNRRPIL   | 182  | >TP53-M246 GINRRPIL   | 7929  | 7747  |
| >TP53-M246 GMNRRPILTI | 21   | >TP53-M246 GINRRPILTI | 2210  | 2189  |
| >TP53-M246 GMNRRPILTI | 53   | >TP53-M246 GINRRPILTI | 6034  | 5981  |
| >TP53-M246 GMNRRPIL   | 160  | >TP53-M246 GINRRPIL   | 6178  | 6018  |
| >TP53-M246 GMNRRPILTI | 66   | >TP53-M246 GINRRPILTI | 2782  | 2716  |
| >TP53-M246 GMNRRPILTI | 192  | >TP53-M246 GINRRPILTI | 5916  | 5724  |
| >TP53-M246 GMNRRPIL   | 32   | >TP53-M246 GINRRPIL   | 629   | 597   |
| >TP53-M246 GMNRRPILTI | 43   | >TP53-M246 GINRRPILTI | 1022  | 979   |
| >TP53-M246 GMNRRPILTI | 102  | >TP53-M246 GINRRPILTI | 2375  | 2273  |
| >TP53-M246 GMNRRPILTI | 147  | >TP53-M246 GINRRPILTI | 266   | 119   |
| >TP53-M246 YMCNSSCMC  | 252  | >TP53-M246 YMCNSSCMC  | 60    | 192   |
| >TP53-M246 YMCNSSCMC  | 167  | >TP53-M246 YMCNSSCMC  | 39    | 128   |
| >TP53-M246 YMCNSSCMC  | 41   | >TP53-M246 YMCNSSCMC  | 6     | 35    |
| >TP53-M246 YMCNSSCMC  | 143  | >TP53-M246 YMCNSSCMC  | 31    | 112   |
| >TP53-M246 YMCNSSCMC  | 16   | >TP53-M246 YMCNSSCMC  | 5     | 11    |
| >TP53-M246 YMCNSSCMC  | 197  | >TP53-M246 YMCNSSCMC  | 27    | 170   |
| >TP53-M246 YMCNSSCMC  | 421  | >TP53-M246 YMCNSSCMC  | 56    | 365   |

|                        |      |                        |       |       |
|------------------------|------|------------------------|-------|-------|
| >TP53-M246 YMCNSSCMC   | 332  | >TP53-M246 YMCNSSCMC   | 99    | 233   |
| >TP53-M246 YMCNSSCMC   | 53   | >TP53-M246 YMCNSSCMC   | 11    | 42    |
| >TP53-M246 YMCNSSCMC   | 44   | >TP53-M246 YMCNSSCMC   | 243   | 199   |
| >TP53-M246 YMCNSSCMC   | 145  | >TP53-M246 YMCNSSCMC   | 1101  | 956   |
| >TP53-M246 YMCNSSCMC   | 160  | >TP53-M246 YMCNSSCMC   | 428   | 268   |
| >TP53-M246 YMCNSSCMC   | 294  | >TP53-M246 YMCNSSCMC   | 1464  | 1170  |
| >TP53-M246 GGMNRRPIL   | 444  | >TP53-M246 GGINRRPIL   | 2957  | 2513  |
| >TP53-M246 CMGGMNRR    | 984  | >TP53-M246 CMGGINRRP   | 465   | 519   |
| >TP53-M246 CMGGMNRR    | 88   | >TP53-M246 CMGGINRRP   | 105   | 17    |
| >TP53-M246 CMGGMNRR    | 314  | >TP53-M246 CMGGINRR    | 253   | 61    |
| >TP53-M246 CMGGMNRR    | 1022 | >TP53-M246 CMGGINRR    | 492   | 530   |
| >TP53-M246 CMGGMNRR    | 117  | >TP53-M246 CMGGINRR    | 61    | 56    |
| >TP53-M246 SCMGGMNR    | 464  | >TP53-M246 SCMGGINR    | 333   | 131   |
| >TP53-M246 SSCMGGMNI   | 58   | >TP53-M246 SSCMGGINR   | 100   | 42    |
| >TP53-M246 SSCMGGMNI   | 192  | >TP53-M246 SSCMGGINRF  | 340   | 148   |
| >TP53-M246 SSCMGGMNI   | 110  | >TP53-M246 SSCMGGINR   | 95    | 15    |
| >TP53-M246 SSCMGGMNI   | 56   | >TP53-M246 SSCMGGINRF  | 67    | 11    |
| >TP53-M246 SSCMGGMNI   | 220  | >TP53-M246 SSCMGGINR   | 333   | 113   |
| >TP53-M246 SSCMGGMNI   | 361  | >TP53-M246 SSCMGGINRF  | 470   | 109   |
| >TP53-M246 SSCMGGMNI   | 398  | >TP53-M246 SSCMGGINR   | 547   | 149   |
| >TP53-M246 SSCMGGMNI   | 460  | >TP53-M246 SSCMGGINRF  | 679   | 219   |
| >TP53-M246 NSSCMGGMI   | 111  | >TP53-M246 NSSCMGGINI  | 257   | 146   |
| >TP53-M246 NSSCMGGMI   | 55   | >TP53-M246 NSSCMGGINI  | 72    | 17    |
| >TP53-M246 NSSCMGGMI   | 365  | >TP53-M246 NSSCMGGINI  | 326   | 39    |
| >TP53-M246 NSSCMGGMI   | 12   | >TP53-M246 NSSCMGGINI  | 11    | 1     |
| >TP53-M246 NSSCMGGMI   | 39   | >TP53-M246 NSSCMGGINI  | 39    | 0     |
| >TP53-M246 NSSCMGGM    | 2429 | >TP53-M246 NSSCMGGI    | 147   | 2282  |
| >TP53-M246 NSSCMGGM    | 6983 | >TP53-M246 NSSCMGGI    | 231   | 6752  |
| >TP53-M246 CNSSCMGGN   | 4332 | >TP53-M246 CNSSCMGGI   | 150   | 4182  |
| >TP53-M246 MNRRPILT    | 945  | >TP53-M246 KNRRPILT    | 191   | 754   |
| >TP53-M246 MNRRPILTI   | 35   | >TP53-M246 KNRRPILTI   | 11    | 24    |
| >TP53-M246 MNRRPILTI   | 200  | >TP53-M246 KNRRPILTI   | 44    | 156   |
| >TP53-M246 MNRRPILTIIT | 1029 | >TP53-M246 KNRRPILTIIT | 207   | 822   |
| >TP53-M246 MNRRPILTI   | 457  | >TP53-M246 KNRRPILTI   | 642   | 185   |
| >TP53-M246 MNRRPILTI   | 3584 | >TP53-M246 KNRRPILTI   | 249   | 3335  |
| >TP53-M246 MNRRPILTI   | 399  | >TP53-M246 KNRRPILTI   | 352   | 47    |
| >TP53-M246 GMNRRPILTI  | 185  | >TP53-M246 GKNRRPILTI  | 18418 | 18233 |
| >TP53-M246 GMNRRPILTI  | 168  | >TP53-M246 GKNRRPILTI  | 18614 | 18446 |
| >TP53-M246 GMNRRPIL    | 213  | >TP53-M246 GKNRRPIL    | 21504 | 21291 |
| >TP53-M246 GMNRRPILTI  | 61   | >TP53-M246 GKNRRPILTI  | 13271 | 13210 |
| >TP53-M246 GMNRRPILTI  | 13   | >TP53-M246 GKNRRPILTI  | 11500 | 11487 |
| >TP53-M246 GMNRRPIL    | 229  | >TP53-M246 GKNRRPIL    | 25148 | 24919 |
| >TP53-M246 GMNRRPILTI  | 10   | >TP53-M246 GKNRRPILTI  | 13061 | 13051 |

|                       |       |                       |       |       |
|-----------------------|-------|-----------------------|-------|-------|
| >TP53-M246 GMNRRPILTI | 93    | >TP53-M246 GKNRRPILTI | 22498 | 22405 |
| >TP53-M246 GMNRRPIL   | 182   | >TP53-M246 GKNRRPIL   | 22519 | 22337 |
| >TP53-M246 GMNRRPILTI | 21    | >TP53-M246 GKNRRPILTI | 18972 | 18951 |
| >TP53-M246 GMNRRPILTI | 53    | >TP53-M246 GKNRRPILTI | 21774 | 21721 |
| >TP53-M246 GMNRRPIL   | 160   | >TP53-M246 GKNRRPIL   | 23052 | 22892 |
| >TP53-M246 GMNRRPILTI | 66    | >TP53-M246 GKNRRPILTI | 21219 | 21153 |
| >TP53-M246 GMNRRPILTI | 192   | >TP53-M246 GKNRRPILTI | 22617 | 22425 |
| >TP53-M246 GMNRRPIL   | 32    | >TP53-M246 GKNRRPIL   | 24284 | 24252 |
| >TP53-M246 GMNRRPILTI | 43    | >TP53-M246 GKNRRPILTI | 26182 | 26139 |
| >TP53-M246 GMNRRPILTI | 102   | >TP53-M246 GKNRRPILTI | 29269 | 29167 |
| >TP53-M246 GMNRRPILTI | 147   | >TP53-M246 GKNRRPILTI | 10889 | 10742 |
| >TP53-M246 GMNRRPIL   | 976   | >TP53-M246 GKNRRPIL   | 413   | 563   |
| >TP53-M246 GMNRRPILTI | 844   | >TP53-M246 GKNRRPILTI | 353   | 491   |
| >TP53-M246 YMCNSSCMC  | 252   | >TP53-M246 YMCNSSCMC  | 15294 | 15042 |
| >TP53-M246 YMCNSSCMC  | 167   | >TP53-M246 YMCNSSCMC  | 10560 | 10393 |
| >TP53-M246 YMCNSSCMC  | 41    | >TP53-M246 YMCNSSCMC  | 5047  | 5006  |
| >TP53-M246 YMCNSSCMC  | 143   | >TP53-M246 YMCNSSCMC  | 11830 | 11687 |
| >TP53-M246 YMCNSSCMC  | 16    | >TP53-M246 YMCNSSCMC  | 1184  | 1168  |
| >TP53-M246 YMCNSSCMC  | 197   | >TP53-M246 YMCNSSCMC  | 12843 | 12646 |
| >TP53-M246 YMCNSSCMC  | 421   | >TP53-M246 YMCNSSCMC  | 8605  | 8184  |
| >TP53-M246 YMCNSSCMC  | 332   | >TP53-M246 YMCNSSCMC  | 17278 | 16946 |
| >TP53-M246 YMCNSSCMC  | 53    | >TP53-M246 YMCNSSCMC  | 1311  | 1258  |
| >TP53-M246 YMCNSSCMC  | 19518 | >TP53-M246 YMCNSSCMC  | 108   | 19410 |
| >TP53-M246 YMCNSSCMC  | 21336 | >TP53-M246 YMCNSSCMC  | 82    | 21254 |
| >TP53-M246 YMCNSSCMC  | 25671 | >TP53-M246 YMCNSSCMC  | 294   | 25377 |
| >TP53-M246 YMCNSSCMC  | 44    | >TP53-M246 YMCNSSCMC  | 4034  | 3990  |
| >TP53-M246 YMCNSSCMC  | 145   | >TP53-M246 YMCNSSCMC  | 7276  | 7131  |
| >TP53-M246 YMCNSSCMC  | 160   | >TP53-M246 YMCNSSCMC  | 2074  | 1914  |
| >TP53-M246 YMCNSSCMC  | 294   | >TP53-M246 YMCNSSCMC  | 21821 | 21527 |
| >TP53-M246 GGMNRRPIL  | 444   | >TP53-M246 GGKNRRPIL  | 306   | 138   |
| >TP53-M246 CMGGMNRR   | 88    | >TP53-M246 CMGGKNRRF  | 141   | 53    |
| >TP53-M246 CMGGMNRR   | 314   | >TP53-M246 CMGGKNRR   | 352   | 38    |
| >TP53-M246 CMGGMNRR   | 117   | >TP53-M246 CMGGKNRR   | 113   | 4     |
| >TP53-M246 SCMGGMNR   | 464   | >TP53-M246 SCMGGKNR   | 777   | 313   |
| >TP53-M246 SSCMGGMNI  | 58    | >TP53-M246 SSCMGGKNR  | 1902  | 1844  |
| >TP53-M246 SSCMGGMNI  | 192   | >TP53-M246 SSCMGGKNR  | 753   | 561   |
| >TP53-M246 SSCMGGMNI  | 110   | >TP53-M246 SSCMGGKNR  | 280   | 170   |
| >TP53-M246 SSCMGGMNI  | 56    | >TP53-M246 SSCMGGKNR  | 53    | 3     |
| >TP53-M246 SSCMGGMNI  | 220   | >TP53-M246 SSCMGGKNR  | 1326  | 1106  |
| >TP53-M246 SSCMGGMNI  | 361   | >TP53-M246 SSCMGGKNR  | 706   | 345   |
| >TP53-M246 SSCMGGMNI  | 398   | >TP53-M246 SSCMGGKNR  | 1087  | 689   |
| >TP53-M246 SSCMGGMNI  | 460   | >TP53-M246 SSCMGGKNR  | 1427  | 967   |
| >TP53-M246 NSSCMGGM   | 25714 | >TP53-M246 NSSCMGGK   | 463   | 25251 |

|                       |       |                       |      |       |
|-----------------------|-------|-----------------------|------|-------|
| >TP53-M246 NSSCMGGMI  | 111   | >TP53-M246 NSSCMGGKN  | 2119 | 2008  |
| >TP53-M246 NSSCMGGMI  | 55    | >TP53-M246 NSSCMGGKN  | 184  | 129   |
| >TP53-M246 NSSCMGGMI  | 365   | >TP53-M246 NSSCMGGKN  | 1104 | 739   |
| >TP53-M246 NSSCMGGM   | 22287 | >TP53-M246 NSSCMGGK   | 176  | 22111 |
| >TP53-M246 NSSCMGGMI  | 12    | >TP53-M246 NSSCMGGKN  | 47   | 35    |
| >TP53-M246 NSSCMGGMI  | 39    | >TP53-M246 NSSCMGGKN  | 54   | 15    |
| >TP53-M246 MNRRPILTI  | 35    | >TP53-M246 LNRRPILTI  | 251  | 216   |
| >TP53-M246 MNRRPILTI  | 200   | >TP53-M246 LNRRPILTI  | 1376 | 1176  |
| >TP53-M246 MNRRPILTI  | 457   | >TP53-M246 LNRRPILTI  | 860  | 403   |
| >TP53-M246 MNRRPILTI  | 399   | >TP53-M246 LNRRPILTI  | 421  | 22    |
| >TP53-M246 GMNRRPILTI | 185   | >TP53-M246 GLNRRPILTI | 170  | 15    |
| >TP53-M246 GMNRRPILTI | 168   | >TP53-M246 GLNRRPILTI | 132  | 36    |
| >TP53-M246 GMNRRPIL   | 213   | >TP53-M246 GLNRRPIL   | 250  | 37    |
| >TP53-M246 GMNRRPILTI | 61    | >TP53-M246 GLNRRPILTI | 64   | 3     |
| >TP53-M246 GMNRRPILTI | 13    | >TP53-M246 GLNRRPILTI | 14   | 1     |
| >TP53-M246 GMNRRPIL   | 229   | >TP53-M246 GLNRRPIL   | 394  | 165   |
| >TP53-M246 GMNRRPILTI | 10    | >TP53-M246 GLNRRPILTI | 14   | 4     |
| >TP53-M246 GMNRRPILTI | 93    | >TP53-M246 GLNRRPILTI | 156  | 63    |
| >TP53-M246 GMNRRPIL   | 182   | >TP53-M246 GLNRRPIL   | 288  | 106   |
| >TP53-M246 GMNRRPILTI | 21    | >TP53-M246 GLNRRPILTI | 30   | 9     |
| >TP53-M246 GMNRRPILTI | 53    | >TP53-M246 GLNRRPILTI | 81   | 28    |
| >TP53-M246 GMNRRPIL   | 160   | >TP53-M246 GLNRRPIL   | 180  | 20    |
| >TP53-M246 GMNRRPILTI | 66    | >TP53-M246 GLNRRPILTI | 73   | 7     |
| >TP53-M246 GMNRRPILTI | 192   | >TP53-M246 GLNRRPILTI | 238  | 46    |
| >TP53-M246 GMNRRPIL   | 32    | >TP53-M246 GLNRRPIL   | 21   | 11    |
| >TP53-M246 GMNRRPILT  | 744   | >TP53-M246 GLNRRPILT  | 411  | 333   |
| >TP53-M246 GMNRRPILTI | 43    | >TP53-M246 GLNRRPILTI | 26   | 17    |
| >TP53-M246 GMNRRPILTI | 102   | >TP53-M246 GLNRRPILTI | 57   | 45    |
| >TP53-M246 GMNRRPILTI | 147   | >TP53-M246 GLNRRPILTI | 201  | 54    |
| >TP53-M246 YMCNSSCMC  | 252   | >TP53-M246 YMCNSSCMC  | 56   | 196   |
| >TP53-M246 YMCNSSCMC  | 167   | >TP53-M246 YMCNSSCMC  | 12   | 155   |
| >TP53-M246 YMCNSSCMC  | 41    | >TP53-M246 YMCNSSCMC  | 8    | 33    |
| >TP53-M246 YMCNSSCMC  | 143   | >TP53-M246 YMCNSSCMC  | 33   | 110   |
| >TP53-M246 YMCNSSCMC  | 16    | >TP53-M246 YMCNSSCMC  | 5    | 11    |
| >TP53-M246 YMCNSSCMC  | 197   | >TP53-M246 YMCNSSCMC  | 26   | 171   |
| >TP53-M246 YMCNSSCMC  | 421   | >TP53-M246 YMCNSSCMC  | 42   | 379   |
| >TP53-M246 YMCNSSCMC  | 332   | >TP53-M246 YMCNSSCMC  | 72   | 260   |
| >TP53-M246 YMCNSSCMC  | 53    | >TP53-M246 YMCNSSCMC  | 4    | 49    |
| >TP53-M246 YMCNSSCMC  | 44    | >TP53-M246 YMCNSSCMC  | 117  | 73    |
| >TP53-M246 YMCNSSCMC  | 145   | >TP53-M246 YMCNSSCMC  | 541  | 396   |
| >TP53-M246 YMCNSSCMC  | 160   | >TP53-M246 YMCNSSCMC  | 301  | 141   |
| >TP53-M246 YMCNSSCMC  | 294   | >TP53-M246 YMCNSSCMC  | 432  | 138   |
| >TP53-M246 GGMNRRPIL  | 444   | >TP53-M246 GGLNRRPIL  | 1750 | 1306  |

|                       |       |                       |       |       |
|-----------------------|-------|-----------------------|-------|-------|
| >TP53-M246 CMGGMNRR   | 88    | >TP53-M246 CMGGLNRRP  | 143   | 55    |
| >TP53-M246 CMGGMNRR   | 314   | >TP53-M246 CMGGLNRR   | 364   | 50    |
| >TP53-M246 CMGGMNRR   | 117   | >TP53-M246 CMGGLNRR   | 95    | 22    |
| >TP53-M246 SCMGGMNR   | 464   | >TP53-M246 SCMGGLNR   | 449   | 15    |
| >TP53-M246 SSCMGGMNI  | 58    | >TP53-M246 SSCMGGLNR  | 76    | 18    |
| >TP53-M246 SSCMGGMNI  | 192   | >TP53-M246 SSCMGGLNR  | 201   | 9     |
| >TP53-M246 SSCMGGMNI  | 110   | >TP53-M246 SSCMGGLNR  | 227   | 117   |
| >TP53-M246 SSCMGGMNI  | 56    | >TP53-M246 SSCMGGLNR  | 40    | 16    |
| >TP53-M246 SSCMGGMNI  | 220   | >TP53-M246 SSCMGGLNR  | 584   | 364   |
| >TP53-M246 SSCMGGMNI  | 361   | >TP53-M246 SSCMGGLNR  | 276   | 85    |
| >TP53-M246 SSCMGGMNI  | 398   | >TP53-M246 SSCMGGLNR  | 389   | 9     |
| >TP53-M246 SSCMGGMNI  | 460   | >TP53-M246 SSCMGGLNR  | 777   | 317   |
| >TP53-M246 NSSCMGGMI  | 111   | >TP53-M246 NSSCMGGLN  | 174   | 63    |
| >TP53-M246 NSSCMGGMI  | 55    | >TP53-M246 NSSCMGGLN  | 98    | 43    |
| >TP53-M246 NSSCMGGMI  | 365   | >TP53-M246 NSSCMGGLN  | 399   | 34    |
| >TP53-M246 NSSCMGGMI  | 12    | >TP53-M246 NSSCMGGLN  | 16    | 4     |
| >TP53-M246 NSSCMGGMI  | 39    | >TP53-M246 NSSCMGGLN  | 44    | 5     |
| >TP53-M246 NSSCMGGM   | 2429  | >TP53-M246 NSSCMGGL   | 279   | 2150  |
| >TP53-M246 MNRRPILT   | 945   | >TP53-M246 RNRRPILT   | 166   | 779   |
| >TP53-M246 MNRRPILTI  | 35    | >TP53-M246 RNRRPILTI  | 11    | 24    |
| >TP53-M246 MNRRPILTI  | 200   | >TP53-M246 RNRRPILTI  | 41    | 159   |
| >TP53-M246 MNRRPILTI  | 1029  | >TP53-M246 RNRRPILTI  | 183   | 846   |
| >TP53-M246 MNRRPILTI  | 457   | >TP53-M246 RNRRPILTI  | 382   | 75    |
| >TP53-M246 MNRRPILTI  | 3584  | >TP53-M246 RNRRPILTI  | 138   | 3446  |
| >TP53-M246 MNRRPILTI  | 5094  | >TP53-M246 RNRRPILTI  | 249   | 4845  |
| >TP53-M246 MNRRPILTI  | 17992 | >TP53-M246 RNRRPILTI  | 476   | 17516 |
| >TP53-M246 MNRRPILTI  | 399   | >TP53-M246 RNRRPILTI  | 150   | 249   |
| >TP53-M246 GMNRRPILTI | 185   | >TP53-M246 GRNRRPILTI | 18500 | 18315 |
| >TP53-M246 GMNRRPILTI | 168   | >TP53-M246 GRNRRPILTI | 23232 | 23064 |
| >TP53-M246 GMNRRPIL   | 213   | >TP53-M246 GRNRRPIL   | 23258 | 23045 |
| >TP53-M246 GMNRRPILTI | 61    | >TP53-M246 GRNRRPILTI | 13892 | 13831 |
| >TP53-M246 GMNRRPILTI | 13    | >TP53-M246 GRNRRPILTI | 16222 | 16209 |
| >TP53-M246 GMNRRPIL   | 229   | >TP53-M246 GRNRRPIL   | 27689 | 27460 |
| >TP53-M246 GMNRRPILTI | 10    | >TP53-M246 GRNRRPILTI | 18048 | 18038 |
| >TP53-M246 GMNRRPILTI | 93    | >TP53-M246 GRNRRPILTI | 25855 | 25762 |
| >TP53-M246 GMNRRPIL   | 182   | >TP53-M246 GRNRRPIL   | 24268 | 24086 |
| >TP53-M246 GMNRRPILTI | 21    | >TP53-M246 GRNRRPILTI | 21555 | 21534 |
| >TP53-M246 GMNRRPILTI | 53    | >TP53-M246 GRNRRPILTI | 23530 | 23477 |
| >TP53-M246 GMNRRPIL   | 160   | >TP53-M246 GRNRRPIL   | 24740 | 24580 |
| >TP53-M246 GMNRRPILTI | 66    | >TP53-M246 GRNRRPILTI | 23459 | 23393 |
| >TP53-M246 GMNRRPILTI | 192   | >TP53-M246 GRNRRPILTI | 24198 | 24006 |
| >TP53-M246 GMNRRPIL   | 32    | >TP53-M246 GRNRRPIL   | 26160 | 26128 |
| >TP53-M246 GMNRRPILTI | 43    | >TP53-M246 GRNRRPILTI | 27865 | 27822 |

|                       |       |                       |       |       |
|-----------------------|-------|-----------------------|-------|-------|
| >TP53-M246 GMNRRPILTI | 102   | >TP53-M246 GRNRRPILTI | 30438 | 30336 |
| >TP53-M246 GMNRRPILTI | 147   | >TP53-M246 GRNRRPILTI | 12487 | 12340 |
| >TP53-M246 GMNRRPIL   | 10490 | >TP53-M246 GRNRRPIL   | 288   | 10202 |
| >TP53-M246 GMNRRPILTI | 22377 | >TP53-M246 GRNRRPILTI | 53    | 22324 |
| >TP53-M246 GMNRRPILTI | 9039  | >TP53-M246 GRNRRPILTI | 209   | 8830  |
| >TP53-M246 GMNRRPIL   | 14569 | >TP53-M246 GRNRRPIL   | 159   | 14410 |
| >TP53-M246 GMNRRPILTI | 16517 | >TP53-M246 GRNRRPILTI | 125   | 16392 |
| >TP53-M246 GMNRRPILTI | 14472 | >TP53-M246 GRNRRPILTI | 360   | 14112 |
| >TP53-M246 GMNRRPILTI | 19834 | >TP53-M246 GRNRRPILTI | 106   | 19728 |
| >TP53-M246 GMNRRPILTI | 2737  | >TP53-M246 GRNRRPILTI | 64    | 2673  |
| >TP53-M246 YMCNSSCMC  | 252   | >TP53-M246 YMCNSSCMC  | 17557 | 17305 |
| >TP53-M246 YMCNSSCMC  | 167   | >TP53-M246 YMCNSSCMC  | 11363 | 11196 |
| >TP53-M246 YMCNSSCMC  | 41    | >TP53-M246 YMCNSSCMC  | 7087  | 7046  |
| >TP53-M246 YMCNSSCMC  | 143   | >TP53-M246 YMCNSSCMC  | 14295 | 14152 |
| >TP53-M246 YMCNSSCMC  | 16    | >TP53-M246 YMCNSSCMC  | 2881  | 2865  |
| >TP53-M246 YMCNSSCMC  | 197   | >TP53-M246 YMCNSSCMC  | 15546 | 15349 |
| >TP53-M246 YMCNSSCMC  | 421   | >TP53-M246 YMCNSSCMC  | 12746 | 12325 |
| >TP53-M246 YMCNSSCMC  | 332   | >TP53-M246 YMCNSSCMC  | 20754 | 20422 |
| >TP53-M246 YMCNSSCMC  | 53    | >TP53-M246 YMCNSSCMC  | 4312  | 4259  |
| >TP53-M246 YMCNSSCMC  | 15815 | >TP53-M246 YMCNSSCMC  | 94    | 15721 |
| >TP53-M246 YMCNSSCMC  | 24449 | >TP53-M246 YMCNSSCMC  | 161   | 24288 |
| >TP53-M246 YMCNSSCMC  | 25671 | >TP53-M246 YMCNSSCMC  | 75    | 25596 |
| >TP53-M246 YMCNSSCMC  | 44    | >TP53-M246 YMCNSSCMC  | 4487  | 4443  |
| >TP53-M246 YMCNSSCMC  | 145   | >TP53-M246 YMCNSSCMC  | 6295  | 6150  |
| >TP53-M246 YMCNSSCMC  | 160   | >TP53-M246 YMCNSSCMC  | 1729  | 1569  |
| >TP53-M246 YMCNSSCMC  | 294   | >TP53-M246 YMCNSSCMC  | 19942 | 19648 |
| >TP53-M246 YMCNSSCMC  | 22847 | >TP53-M246 YMCNSSCMC  | 225   | 22622 |
| >TP53-M246 GGMNRRPI   | 7530  | >TP53-M246 GGRNRRPI   | 135   | 7395  |
| >TP53-M246 GGMNRRPIL  | 9523  | >TP53-M246 GGRNRRPIL  | 229   | 9294  |
| >TP53-M246 GGMNRRPIL  | 7545  | >TP53-M246 GGRNRRPILT | 169   | 7376  |
| >TP53-M246 GGMNRRPIL  | 444   | >TP53-M246 GGRNRRPIL  | 411   | 33    |
| >TP53-M246 CMGGMNRR   | 635   | >TP53-M246 CMGGRNRRF  | 419   | 216   |
| >TP53-M246 CMGGMNRR   | 88    | >TP53-M246 CMGGRNRRF  | 122   | 34    |
| >TP53-M246 CMGGMNRR   | 314   | >TP53-M246 CMGGRNRR   | 205   | 109   |
| >TP53-M246 CMGGMNRR   | 117   | >TP53-M246 CMGGRNRR   | 95    | 22    |
| >TP53-M246 SCMGGMNR   | 464   | >TP53-M246 SCMGGRNR   | 1368  | 904   |
| >TP53-M246 SSCMGGMNI  | 58    | >TP53-M246 SSCMGGRNR  | 1342  | 1284  |
| >TP53-M246 SSCMGGMNI  | 192   | >TP53-M246 SSCMGGRNR  | 704   | 512   |
| >TP53-M246 SSCMGGMNI  | 110   | >TP53-M246 SSCMGGRNR  | 234   | 124   |
| >TP53-M246 SSCMGGMNI  | 56    | >TP53-M246 SSCMGGRNR  | 23    | 33    |
| >TP53-M246 SSCMGGMNI  | 220   | >TP53-M246 SSCMGGRNR  | 1338  | 1118  |
| >TP53-M246 SSCMGGMNI  | 361   | >TP53-M246 SSCMGGRNR  | 547   | 186   |
| >TP53-M246 SSCMGGMNI  | 398   | >TP53-M246 SSCMGGRNR  | 948   | 550   |

|                       |       |                       |       |       |
|-----------------------|-------|-----------------------|-------|-------|
| >TP53-M246 SSCMGGMNI  | 460   | >TP53-M246 SSCMGGNRN  | 1776  | 1316  |
| >TP53-M246 NSSCMGGMI  | 111   | >TP53-M246 NSSCMGGRN  | 1860  | 1749  |
| >TP53-M246 NSSCMGGMI  | 55    | >TP53-M246 NSSCMGGRN  | 73    | 18    |
| >TP53-M246 NSSCMGGMI  | 365   | >TP53-M246 NSSCMGGRN  | 1022  | 657   |
| >TP53-M246 NSSCMGGM   | 22287 | >TP53-M246 NSSCMGGR   | 53    | 22234 |
| >TP53-M246 NSSCMGGMI  | 12    | >TP53-M246 NSSCMGGRN  | 47    | 35    |
| >TP53-M246 NSSCMGGMI  | 39    | >TP53-M246 NSSCMGGRN  | 38    | 1     |
| >TP53-M246 MCNSSCMGC  | 27058 | >TP53-M246 MCNSSCMGC  | 273   | 26785 |
| >TP53-M246 MNRRPILTI  | 35    | >TP53-M246 TNRRPILTI  | 536   | 501   |
| >TP53-M246 MNRRPILTI  | 200   | >TP53-M246 TNRRPILTI  | 2424  | 2224  |
| >TP53-M246 MNRRPILTI  | 457   | >TP53-M246 TNRRPILTI  | 4051  | 3594  |
| >TP53-M246 MNRRPILTI  | 399   | >TP53-M246 TNRRPILTI  | 1338  | 939   |
| >TP53-M246 GMNRRPILTI | 185   | >TP53-M246 GTNRRPILTI | 2453  | 2268  |
| >TP53-M246 GMNRRPILTI | 168   | >TP53-M246 GTNRRPILTI | 4500  | 4332  |
| >TP53-M246 GMNRRPIL   | 213   | >TP53-M246 GTNRRPIL   | 9545  | 9332  |
| >TP53-M246 GMNRRPILTI | 61    | >TP53-M246 GTNRRPILTI | 655   | 594   |
| >TP53-M246 GMNRRPILTI | 13    | >TP53-M246 GTNRRPILTI | 862   | 849   |
| >TP53-M246 GMNRRPIL   | 229   | >TP53-M246 GTNRRPIL   | 11151 | 10922 |
| >TP53-M246 GMNRRPILTI | 10    | >TP53-M246 GTNRRPILTI | 1184  | 1174  |
| >TP53-M246 GMNRRPILTI | 93    | >TP53-M246 GTNRRPILTI | 7741  | 7648  |
| >TP53-M246 GMNRRPIL   | 182   | >TP53-M246 GTNRRPIL   | 13650 | 13468 |
| >TP53-M246 GMNRRPILTI | 21    | >TP53-M246 GTNRRPILTI | 6797  | 6776  |
| >TP53-M246 GMNRRPILTI | 53    | >TP53-M246 GTNRRPILTI | 12480 | 12427 |
| >TP53-M246 GMNRRPIL   | 160   | >TP53-M246 GTNRRPIL   | 13137 | 12977 |
| >TP53-M246 GMNRRPILTI | 66    | >TP53-M246 GTNRRPILTI | 9114  | 9048  |
| >TP53-M246 GMNRRPILTI | 192   | >TP53-M246 GTNRRPILTI | 13201 | 13009 |
| >TP53-M246 GMNRRPIL   | 32    | >TP53-M246 GTNRRPIL   | 7893  | 7861  |
| >TP53-M246 GMNRRPILTI | 43    | >TP53-M246 GTNRRPILTI | 10421 | 10378 |
| >TP53-M246 GMNRRPILTI | 102   | >TP53-M246 GTNRRPILTI | 15272 | 15170 |
| >TP53-M246 GMNRRPILTI | 3089  | >TP53-M246 GTNRRPILTI | 483   | 2606  |
| >TP53-M246 GMNRRPILTI | 147   | >TP53-M246 GTNRRPILTI | 93    | 54    |
| >TP53-M246 GMNRRPILTI | 646   | >TP53-M246 GTNRRPILTI | 436   | 210   |
| >TP53-M246 GMNRRPILTI | 14265 | >TP53-M246 GTNRRPILTI | 408   | 13857 |
| >TP53-M246 GMNRRPILTI | 16037 | >TP53-M246 GTNRRPILTI | 371   | 15666 |
| >TP53-M246 GMNRRPILTI | 7597  | >TP53-M246 GTNRRPILTI | 144   | 7453  |
| >TP53-M246 GMNRRPILTI | 18788 | >TP53-M246 GTNRRPILTI | 386   | 18402 |
| >TP53-M246 GMNRRPILTI | 5457  | >TP53-M246 GTNRRPILTI | 148   | 5309  |
| >TP53-M246 YMCNSSCMC  | 252   | >TP53-M246 YMCNSSCMC  | 1078  | 826   |
| >TP53-M246 YMCNSSCMC  | 167   | >TP53-M246 YMCNSSCMC  | 958   | 791   |
| >TP53-M246 YMCNSSCMC  | 41    | >TP53-M246 YMCNSSCMC  | 45    | 4     |
| >TP53-M246 YMCNSSCMC  | 143   | >TP53-M246 YMCNSSCMC  | 370   | 227   |
| >TP53-M246 YMCNSSCMC  | 16    | >TP53-M246 YMCNSSCMC  | 39    | 23    |
| >TP53-M246 YMCNSSCMC  | 197   | >TP53-M246 YMCNSSCMC  | 1183  | 986   |

|                       |      |                       |       |       |
|-----------------------|------|-----------------------|-------|-------|
| >TP53-M246 YMCNSSCMC  | 421  | >TP53-M246 YMCNSSCMC  | 912   | 491   |
| >TP53-M246 YMCNSSCMC  | 332  | >TP53-M246 YMCNSSCMC  | 1850  | 1518  |
| >TP53-M246 YMCNSSCMC  | 53   | >TP53-M246 YMCNSSCMC  | 84    | 31    |
| >TP53-M246 YMCNSSCMC  | 44   | >TP53-M246 YMCNSSCMC  | 2105  | 2061  |
| >TP53-M246 YMCNSSCMC  | 145  | >TP53-M246 YMCNSSCMC  | 4759  | 4614  |
| >TP53-M246 YMCNSSCMC  | 160  | >TP53-M246 YMCNSSCMC  | 4689  | 4529  |
| >TP53-M246 YMCNSSCMC  | 294  | >TP53-M246 YMCNSSCMC  | 14020 | 13726 |
| >TP53-M246 GGMNRRPIL  | 444  | >TP53-M246 GGTNRRPIL  | 6338  | 5894  |
| >TP53-M246 CMGGMNRR   | 984  | >TP53-M246 CMGGTNRRF  | 479   | 505   |
| >TP53-M246 CMGGMNRR   | 88   | >TP53-M246 CMGGTNRRF  | 106   | 18    |
| >TP53-M246 CMGGMNRR   | 314  | >TP53-M246 CMGGTNRR   | 620   | 306   |
| >TP53-M246 CMGGMNRR   | 117  | >TP53-M246 CMGGTNRR   | 74    | 43    |
| >TP53-M246 SCMGGMNR   | 994  | >TP53-M246 SCMGGTNRR  | 334   | 660   |
| >TP53-M246 SCMGGMNR   | 464  | >TP53-M246 SCMGGTNR   | 542   | 78    |
| >TP53-M246 SCMGGMNR   | 1578 | >TP53-M246 SCMGGTNRR  | 471   | 1107  |
| >TP53-M246 SSCMGGMNI  | 58   | >TP53-M246 SSCMGGTNR  | 369   | 311   |
| >TP53-M246 SSCMGGMNI  | 192  | >TP53-M246 SSCMGGTNR  | 288   | 96    |
| >TP53-M246 SSCMGGMNI  | 110  | >TP53-M246 SSCMGGTNR  | 61    | 49    |
| >TP53-M246 SSCMGGMNI  | 56   | >TP53-M246 SSCMGGTNR  | 58    | 2     |
| >TP53-M246 SSCMGGMNI  | 220  | >TP53-M246 SSCMGGTNR  | 329   | 109   |
| >TP53-M246 SSCMGGMNI  | 361  | >TP53-M246 SSCMGGTNR  | 304   | 57    |
| >TP53-M246 SSCMGGMNI  | 398  | >TP53-M246 SSCMGGTNR  | 1069  | 671   |
| >TP53-M246 SSCMGGMNI  | 460  | >TP53-M246 SSCMGGTNR  | 987   | 527   |
| >TP53-M246 NSSCMGGMI  | 111  | >TP53-M246 NSSCMGGTN  | 547   | 436   |
| >TP53-M246 NSSCMGGMI  | 55   | >TP53-M246 NSSCMGGTN  | 112   | 57    |
| >TP53-M246 NSSCMGGMI  | 365  | >TP53-M246 NSSCMGGTN  | 756   | 391   |
| >TP53-M246 NSSCMGGMI  | 12   | >TP53-M246 NSSCMGGTN  | 11    | 1     |
| >TP53-M246 NSSCMGGMI  | 39   | >TP53-M246 NSSCMGGTN  | 33    | 6     |
| >TP53-M246 MNRRPILTI  | 35   | >TP53-M246 VNRRPILTI  | 697   | 662   |
| >TP53-M246 MNRRPILTI  | 200  | >TP53-M246 VNRRPILTI  | 2782  | 2582  |
| >TP53-M246 MNRRPILTI  | 457  | >TP53-M246 VNRRPILTI  | 1410  | 953   |
| >TP53-M246 MNRRPILTI  | 399  | >TP53-M246 VNRRPILTI  | 1381  | 982   |
| >TP53-M246 GMNRRPILTI | 185  | >TP53-M246 GVNRRPILTI | 2284  | 2099  |
| >TP53-M246 GMNRRPILTI | 168  | >TP53-M246 GVNRRPILTI | 3136  | 2968  |
| >TP53-M246 GMNRRPIL   | 213  | >TP53-M246 GVNRRPIL   | 5460  | 5247  |
| >TP53-M246 GMNRRPILTI | 61   | >TP53-M246 GVNRRPILTI | 485   | 424   |
| >TP53-M246 GMNRRPILTI | 13   | >TP53-M246 GVNRRPILTI | 269   | 256   |
| >TP53-M246 GMNRRPIL   | 229  | >TP53-M246 GVNRRPIL   | 9497  | 9268  |
| >TP53-M246 GMNRRPILTI | 10   | >TP53-M246 GVNRRPILTI | 944   | 934   |
| >TP53-M246 GMNRRPILTI | 93   | >TP53-M246 GVNRRPILTI | 6649  | 6556  |
| >TP53-M246 GMNRRPIL   | 182  | >TP53-M246 GVNRRPIL   | 10533 | 10351 |
| >TP53-M246 GMNRRPILTI | 21   | >TP53-M246 GVNRRPILTI | 4130  | 4109  |
| >TP53-M246 GMNRRPILTI | 53   | >TP53-M246 GVNRRPILTI | 8957  | 8904  |



|                        |      |                        |       |       |
|------------------------|------|------------------------|-------|-------|
| >TP53-M246 GMNRRPIL    | 160  | >TP53-M246 GVNRRPIL    | 10217 | 10057 |
| >TP53-M246 GMNRRPILTI  | 66   | >TP53-M246 GVNRRPILTI  | 6112  | 6046  |
| >TP53-M246 GMNRRPILTI  | 192  | >TP53-M246 GVNRRPILTI  | 10071 | 9879  |
| >TP53-M246 GMNRRPIL    | 32   | >TP53-M246 GVNRRPIL    | 1705  | 1673  |
| >TP53-M246 GMNRRPILTI  | 43   | >TP53-M246 GVNRRPILTI  | 2586  | 2543  |
| >TP53-M246 GMNRRPILTI  | 102  | >TP53-M246 GVNRRPILTI  | 5255  | 5153  |
| >TP53-M246 GMNRRPILTI  | 147  | >TP53-M246 GVNRRPILTI  | 228   | 81    |
| >TP53-M246 YMCNSSCMC   | 252  | >TP53-M246 YMCNSSCMC   | 27    | 225   |
| >TP53-M246 YMCNSSCMC   | 167  | >TP53-M246 YMCNSSCMC   | 10    | 157   |
| >TP53-M246 YMCNSSCMC   | 41   | >TP53-M246 YMCNSSCMC   | 3     | 38    |
| >TP53-M246 YMCNSSCMC   | 143  | >TP53-M246 YMCNSSCMC   | 9     | 134   |
| >TP53-M246 YMCNSSCMC   | 16   | >TP53-M246 YMCNSSCMC   | 2     | 14    |
| >TP53-M246 YMCNSSCMC   | 197  | >TP53-M246 YMCNSSCMC   | 6     | 191   |
| >TP53-M246 YMCNSSCMC   | 421  | >TP53-M246 YMCNSSCMC   | 8     | 413   |
| >TP53-M246 YMCNSSCMC   | 332  | >TP53-M246 YMCNSSCMC   | 8     | 324   |
| >TP53-M246 YMCNSSCMC   | 53   | >TP53-M246 YMCNSSCMC   | 2     | 51    |
| >TP53-M246 YMCNSSCMC   | 44   | >TP53-M246 YMCNSSCMC   | 255   | 211   |
| >TP53-M246 YMCNSSCMC   | 145  | >TP53-M246 YMCNSSCMC   | 863   | 718   |
| >TP53-M246 YMCNSSCMC   | 160  | >TP53-M246 YMCNSSCMC   | 561   | 401   |
| >TP53-M246 YMCNSSCMC   | 294  | >TP53-M246 YMCNSSCMC   | 4375  | 4081  |
| >TP53-M246 GGMNRRPIL   | 444  | >TP53-M246 GGVNRRPIL   | 6547  | 6103  |
| >TP53-M246 MGGMNR      | 803  | >TP53-M246 MGGVNRRPI   | 447   | 356   |
| >TP53-M246 CMGGMNR     | 984  | >TP53-M246 CMGGVNRRF   | 259   | 725   |
| >TP53-M246 CMGGMNR     | 88   | >TP53-M246 CMGGVNRRF   | 136   | 48    |
| >TP53-M246 CMGGMNR     | 314  | >TP53-M246 CMGGVNRR    | 436   | 122   |
| >TP53-M246 CMGGMNR     | 117  | >TP53-M246 CMGGVNRR    | 158   | 41    |
| >TP53-M246 SCMGGMNR    | 464  | >TP53-M246 SCMGGVNR    | 343   | 121   |
| >TP53-M246 SSCMGGMNI   | 58   | >TP53-M246 SSCMGGVNR   | 224   | 166   |
| >TP53-M246 SSCMGGMNI   | 192  | >TP53-M246 SSCMGGVNR   | 431   | 239   |
| >TP53-M246 SSCMGGMNI   | 110  | >TP53-M246 SSCMGGVNR   | 54    | 56    |
| >TP53-M246 SSCMGGMNI   | 56   | >TP53-M246 SSCMGGVNR   | 51    | 5     |
| >TP53-M246 SSCMGGMNI   | 220  | >TP53-M246 SSCMGGVNR   | 245   | 25    |
| >TP53-M246 SSCMGGMNI   | 361  | >TP53-M246 SSCMGGVNR   | 417   | 56    |
| >TP53-M246 SSCMGGMNI   | 398  | >TP53-M246 SSCMGGVNR   | 537   | 139   |
| >TP53-M246 SSCMGGMNI   | 460  | >TP53-M246 SSCMGGVNR   | 754   | 294   |
| >TP53-M246 NSSCMGGMI   | 111  | >TP53-M246 NSSCMGGVN   | 418   | 307   |
| >TP53-M246 NSSCMGGMI   | 55   | >TP53-M246 NSSCMGGVN   | 64    | 9     |
| >TP53-M246 NSSCMGGMI   | 365  | >TP53-M246 NSSCMGGVN   | 322   | 43    |
| >TP53-M246 NSSCMGGMI   | 12   | >TP53-M246 NSSCMGGVN   | 10    | 2     |
| >TP53-M246 NSSCMGGMI   | 39   | >TP53-M246 NSSCMGGVN   | 41    | 2     |
| >TP53-M246 NSSCMGGM    | 2429 | >TP53-M246 NSSCMGGV    | 33    | 2396  |
| >TP53-M44I- MLSPDDIEQ  | 405  | >TP53-M44I- ILSPDDIEQ  | 1704  | 1299  |
| >TP53-M44I- MLSPDDIEQV | 107  | >TP53-M44I- ILSPDDIEQW | 470   | 363   |

|                        |      |                         |      |      |
|------------------------|------|-------------------------|------|------|
| >TP53-M44I- MLSPDDIEQ  | 21   | >TP53-M44I- ILSPDDIEQ   | 63   | 42   |
| >TP53-M44I- MLSPDDIEQV | 129  | >TP53-M44I- ILSPDDIEQW  | 435  | 306  |
| >TP53-M44I- MLSPDDIEQV | 213  | >TP53-M44I- ILSPDDIEQW  | 262  | 49   |
| >TP53-M44I- MLSPDDIEQV | 93   | >TP53-M44I- ILSPDDIEQW  | 133  | 40   |
| >TP53-M44I- MLSPDDIEQV | 427  | >TP53-M44I- ILSPDDIEQW  | 587  | 160  |
| >TP53-M44I- MLSPDDIEQV | 131  | >TP53-M44I- ILSPDDIEQW  | 1264 | 1133 |
| >TP53-M44I- MLSPDDIEQV | 204  | >TP53-M44I- ILSPDDIEQW  | 145  | 59   |
| >TP53-M44I- MLSPDDIEQV | 20   | >TP53-M44I- ILSPDDIEQW  | 30   | 10   |
| >TP53-M44I- MLSPDDIEQV | 292  | >TP53-M44I- ILSPDDIEQW  | 335  | 43   |
| >TP53-M44I- MLSPDDIEQV | 80   | >TP53-M44I- ILSPDDIEQW  | 232  | 152  |
| >TP53-M44I- MLSPDDIEQV | 445  | >TP53-M44I- ILSPDDIEQW  | 8256 | 7811 |
| >TP53-M44I- LMLSPDDI   | 14   | >TP53-M44I- LILSPDDI    | 702  | 688  |
| >TP53-M44I- LMLSPDDI   | 35   | >TP53-M44I- LILSPDDI    | 3868 | 3833 |
| >TP53-M44I- LMLSPDDI   | 41   | >TP53-M44I- LILSPDDI    | 2651 | 2610 |
| >TP53-M44I- LMLSPDDI   | 149  | >TP53-M44I- LILSPDDI    | 5191 | 5042 |
| >TP53-M44I- LMLSPDDI   | 113  | >TP53-M44I- LILSPDDI    | 3941 | 3828 |
| >TP53-M44I- LMLSPDDIEQ | 315  | >TP53-M44I- LILSPDDIEQ  | 7558 | 7243 |
| >TP53-M44I- LMLSPDDI   | 314  | >TP53-M44I- LILSPDDI    | 5343 | 5029 |
| >TP53-M44I- LMLSPDDIEQ | 130  | >TP53-M44I- LILSPDDIEQV | 325  | 195  |
| >TP53-M44I- LMLSPDDIEQ | 212  | >TP53-M44I- LILSPDDIEQV | 347  | 135  |
| >TP53-M44I- LMLSPDDIEQ | 17   | >TP53-M44I- LILSPDDIEQV | 26   | 9    |
| >TP53-M44I- LMLSPDDIEQ | 79   | >TP53-M44I- LILSPDDIEQV | 88   | 9    |
| >TP53-M44I- LMLSPDDIEQ | 174  | >TP53-M44I- LILSPDDIEQV | 1596 | 1422 |
| >TP53-M44I- DDLMLSPDDI | 436  | >TP53-M44I- DDLILSPDDI  | 729  | 293  |
| >TP53-M44I- DDLMLSPDDI | 237  | >TP53-M44I- DDLILSPDDI  | 191  | 46   |
| >TP53-M44I- MDDLMLSPDC | 520  | >TP53-M44I- MDDLILSPDC  | 438  | 82   |
| >TP53-M44I- MDDLMLSPDC | 277  | >TP53-M44I- MDDLILSPDC  | 301  | 24   |
| >TP53-M44I- MDDLMLSPDC | 107  | >TP53-M44I- MDDLILSPDC  | 162  | 55   |
| >TP53-M44I- AMDDLMLS   | 743  | >TP53-M44I- AMDDLILS    | 432  | 311  |
| >TP53-M44I- AMDDLMLS   | 255  | >TP53-M44I- AMDDLILS    | 94   | 161  |
| >TP53-M44I- AMDDLMLSP  | 1226 | >TP53-M44I- AMDDLILSP   | 205  | 1021 |
| >TP53-M44I- AMDDLMLS   | 463  | >TP53-M44I- AMDDLILS    | 310  | 153  |
| >TP53-M44I- QAMDDLML   | 318  | >TP53-M44I- QAMDDLIL    | 450  | 132  |
| >TP53-M44I- QAMDDLML   | 386  | >TP53-M44I- QAMDDLIL    | 1593 | 1207 |
| >TP53-M44I- QAMDDLML   | 307  | >TP53-M44I- QAMDDLIL    | 875  | 568  |
| >TP53-M44I- SQAMDDLMI  | 593  | >TP53-M44I- SQAMDDLIL   | 97   | 496  |
| >TP53-M44I- SQAMDDLMI  | 155  | >TP53-M44I- SQAMDDLIL   | 382  | 227  |
| >TP53-M44I- SQAMDDLMI  | 463  | >TP53-M44I- SQAMDDLIL   | 4730 | 4267 |
| >TP53-M44I- SQAMDDLMI  | 473  | >TP53-M44I- SQAMDDLIL   | 316  | 157  |
| >TP53-M44I- SQAMDDLMI  | 1528 | >TP53-M44I- SQAMDDLIL   | 394  | 1134 |
| >TP53-M44I- LPSQAMDDL  | 42   | >TP53-M44I- LPSQAMDDL   | 195  | 153  |
| >TP53-M44I- LPSQAMDDL  | 173  | >TP53-M44I- LPSQAMDDL   | 198  | 25   |
| >TP53-M44I- LPSQAMDDL  | 86   | >TP53-M44I- LPSQAMDDL   | 65   | 21   |

|                        |      |                        |       |       |
|------------------------|------|------------------------|-------|-------|
| >TP53-M44I- LPSQAMDDL  | 125  | >TP53-M44I- LPSQAMDDL  | 2068  | 1943  |
| >TP53-M44I- LPSQAMDDL  | 57   | >TP53-M44I- LPSQAMDDL  | 45    | 12    |
| >TP53-M44I- LPSQAMDDL  | 90   | >TP53-M44I- LPSQAMDDL  | 97    | 7     |
| >TP53-M44I- LPSQAMDDL  | 273  | >TP53-M44I- LPSQAMDDL  | 497   | 224   |
| >TP53-M44T- MLSPDDIEQ  | 405  | >TP53-M44T- TLSPDDIEQ  | 4130  | 3725  |
| >TP53-M44T- MLSPDDIEQ  | 107  | >TP53-M44T- TLSPDDIEQ  | 1128  | 1021  |
| >TP53-M44T- MLSPDDIEQ  | 21   | >TP53-M44T- TLSPDDIEQ  | 289   | 268   |
| >TP53-M44T- MLSPDDIEQ  | 129  | >TP53-M44T- TLSPDDIEQ  | 1198  | 1069  |
| >TP53-M44T- MLSPDDIEQ  | 213  | >TP53-M44T- TLSPDDIEQ  | 1466  | 1253  |
| >TP53-M44T- MLSPDDIEQ  | 93   | >TP53-M44T- TLSPDDIEQ  | 1127  | 1034  |
| >TP53-M44T- MLSPDDIEQ  | 427  | >TP53-M44T- TLSPDDIEQ  | 3677  | 3250  |
| >TP53-M44T- MLSPDDIEQ  | 131  | >TP53-M44T- TLSPDDIEQ  | 1347  | 1216  |
| >TP53-M44T- MLSPDDIEQ  | 204  | >TP53-M44T- TLSPDDIEQ  | 370   | 166   |
| >TP53-M44T- MLSPDDIEQ  | 20   | >TP53-M44T- TLSPDDIEQ  | 162   | 142   |
| >TP53-M44T- MLSPDDIEQ  | 292  | >TP53-M44T- TLSPDDIEQ  | 608   | 316   |
| >TP53-M44T- MLSPDDIEQ  | 80   | >TP53-M44T- TLSPDDIEQ  | 1310  | 1230  |
| >TP53-M44T- MLSPDDIEQ  | 445  | >TP53-M44T- TLSPDDIEQ  | 25260 | 24815 |
| >TP53-M44T- LMLSPDDI   | 14   | >TP53-M44T- LTLSPDDI   | 2849  | 2835  |
| >TP53-M44T- LMLSPDDI   | 35   | >TP53-M44T- LTLSPDDI   | 8671  | 8636  |
| >TP53-M44T- LMLSPDDI   | 41   | >TP53-M44T- LTLSPDDI   | 8131  | 8090  |
| >TP53-M44T- LMLSPDDI   | 149  | >TP53-M44T- LTLSPDDI   | 13493 | 13344 |
| >TP53-M44T- LMLSPDDI   | 113  | >TP53-M44T- LTLSPDDI   | 18821 | 18708 |
| >TP53-M44T- LMLSPDDIEQ | 315  | >TP53-M44T- LTLSPDDIEQ | 23543 | 23228 |
| >TP53-M44T- LMLSPDDI   | 314  | >TP53-M44T- LTLSPDDI   | 4526  | 4212  |
| >TP53-M44T- LMLSPDDIEQ | 130  | >TP53-M44T- LTLSPDDIEQ | 8     | 122   |
| >TP53-M44T- LMLSPDDIEQ | 212  | >TP53-M44T- LTLSPDDIEQ | 45    | 167   |
| >TP53-M44T- LMLSPDDIEQ | 17   | >TP53-M44T- LTLSPDDIEQ | 12    | 5     |
| >TP53-M44T- LMLSPDDIEQ | 7830 | >TP53-M44T- LTLSPDDIEQ | 102   | 7728  |
| >TP53-M44T- LMLSPDDIEQ | 79   | >TP53-M44T- LTLSPDDIEQ | 42    | 37    |
| >TP53-M44T- LMLSPDDIEQ | 174  | >TP53-M44T- LTLSPDDIEQ | 1661  | 1487  |
| >TP53-M44T- LMLSPDDI   | 1947 | >TP53-M44T- LTLSPDDI   | 35    | 1912  |
| >TP53-M44T- DDLMLSPDDI | 436  | >TP53-M44T- DDLTLSPDDI | 666   | 230   |
| >TP53-M44T- DDLMLSPDDI | 237  | >TP53-M44T- DDLTLSPDDI | 288   | 51    |
| >TP53-M44T- MDDLMLSPD  | 277  | >TP53-M44T- MDDLTLSPDI | 560   | 283   |
| >TP53-M44T- MDDLMLSPD  | 107  | >TP53-M44T- MDDLTLSPDI | 65    | 42    |
| >TP53-M44T- AMDDLMLS   | 255  | >TP53-M44T- AMDDLTL    | 309   | 54    |
| >TP53-M44T- AMDDLMLS   | 463  | >TP53-M44T- AMDDLTL    | 444   | 19    |
| >TP53-M44T- QAMDDLML   | 318  | >TP53-M44T- QAMDDLTL   | 149   | 169   |
| >TP53-M44T- QAMDDLML   | 386  | >TP53-M44T- QAMDDLTL   | 736   | 350   |
| >TP53-M44T- QAMDDLML   | 307  | >TP53-M44T- QAMDDLTL   | 88    | 219   |
| >TP53-M44T- QAMDDLML   | 1714 | >TP53-M44T- QAMDDLTL   | 415   | 1299  |
| >TP53-M44T- SQAMDDLMI  | 155  | >TP53-M44T- SQAMDDLTL  | 68    | 87    |
| >TP53-M44T- SQAMDDLMI  | 463  | >TP53-M44T- SQAMDDLTL  | 13799 | 13336 |

|                       |       |                       |       |       |
|-----------------------|-------|-----------------------|-------|-------|
| >TP53-M44T SQAMDDLMI  | 577   | >TP53-M44T SQAMDDLTL  | 234   | 343   |
| >TP53-M44T SQAMDDLMI  | 473   | >TP53-M44T SQAMDDLTL  | 267   | 206   |
| >TP53-M44T SQAMDDLMI  | 1528  | >TP53-M44T SQAMDDLTL  | 379   | 1149  |
| >TP53-M44T LPSQAMDDL  | 42    | >TP53-M44T LPSQAMDDL  | 18499 | 18457 |
| >TP53-M44T LPSQAMDDL  | 173   | >TP53-M44T LPSQAMDDL  | 114   | 59    |
| >TP53-M44T LPSQAMDDL  | 86    | >TP53-M44T LPSQAMDDL  | 55    | 31    |
| >TP53-M44T LPSQAMDDL  | 125   | >TP53-M44T LPSQAMDDL  | 4354  | 4229  |
| >TP53-M44T LPSQAMDDL  | 57    | >TP53-M44T LPSQAMDDL  | 23    | 34    |
| >TP53-M44T LPSQAMDDL  | 90    | >TP53-M44T LPSQAMDDL  | 79    | 11    |
| >TP53-M44T LPSQAMDDL  | 273   | >TP53-M44T LPSQAMDDL  | 214   | 59    |
| >TP53-M44V MLSPDDIEQ  | 405   | >TP53-M44V VLSPDDIEQ  | 3807  | 3402  |
| >TP53-M44V MLSPDDIEQ  | 107   | >TP53-M44V VLSPDDIEQ  | 969   | 862   |
| >TP53-M44V MLSPDDIEQ  | 21    | >TP53-M44V VLSPDDIEQ  | 45    | 24    |
| >TP53-M44V MLSPDDIEQ  | 129   | >TP53-M44V VLSPDDIEQ  | 320   | 191   |
| >TP53-M44V MLSPDDIEQ  | 213   | >TP53-M44V VLSPDDIEQ  | 610   | 397   |
| >TP53-M44V MLSPDDIEQ  | 93    | >TP53-M44V VLSPDDIEQ  | 222   | 129   |
| >TP53-M44V MLSPDDIEQ  | 427   | >TP53-M44V VLSPDDIEQ  | 951   | 524   |
| >TP53-M44V MLSPDDIEQ  | 131   | >TP53-M44V VLSPDDIEQ  | 1625  | 1494  |
| >TP53-M44V MLSPDDIEQ  | 204   | >TP53-M44V VLSPDDIEQ  | 345   | 141   |
| >TP53-M44V MLSPDDIEQ  | 20    | >TP53-M44V VLSPDDIEQ  | 45    | 25    |
| >TP53-M44V MLSPDDIEQ  | 292   | >TP53-M44V VLSPDDIEQ  | 803   | 511   |
| >TP53-M44V MLSPDDIEQ  | 80    | >TP53-M44V VLSPDDIEQ  | 1233  | 1153  |
| >TP53-M44V MLSPDDIEQ  | 445   | >TP53-M44V VLSPDDIEQ  | 10444 | 9999  |
| >TP53-M44V LMLSPDDI   | 14    | >TP53-M44V LVLSPPDI   | 2209  | 2195  |
| >TP53-M44V LMLSPDDI   | 35    | >TP53-M44V LVLSPPDI   | 5875  | 5840  |
| >TP53-M44V LMLSPDDI   | 41    | >TP53-M44V LVLSPPDI   | 5655  | 5614  |
| >TP53-M44V LMLSPDDI   | 149   | >TP53-M44V LVLSPPDI   | 7253  | 7104  |
| >TP53-M44V LMLSPDDI   | 113   | >TP53-M44V LVLSPPDI   | 8296  | 8183  |
| >TP53-M44V LMLSPDDIEQ | 315   | >TP53-M44V LVLSPPDIEQ | 13062 | 12747 |
| >TP53-M44V LMLSPDDI   | 314   | >TP53-M44V LVLSPPDI   | 7290  | 6976  |
| >TP53-M44V LMLSPDDIEQ | 130   | >TP53-M44V LVLSPPDIEQ | 96    | 34    |
| >TP53-M44V LMLSPDDIEQ | 2233  | >TP53-M44V LVLSPPDIEQ | 338   | 1895  |
| >TP53-M44V LMLSPDDIEQ | 212   | >TP53-M44V LVLSPPDIEQ | 231   | 19    |
| >TP53-M44V LMLSPDDIEQ | 17    | >TP53-M44V LVLSPPDIEQ | 19    | 2     |
| >TP53-M44V LMLSPDDIEQ | 79    | >TP53-M44V LVLSPPDIEQ | 61    | 18    |
| >TP53-M44V LMLSPDDIEQ | 174   | >TP53-M44V LVLSPPDIEQ | 1803  | 1629  |
| >TP53-M44V PLPSQAMDD  | 12350 | >TP53-M44V PLPSQAMDD  | 120   | 12230 |
| >TP53-M44V PLPSQAMDD  | 4962  | >TP53-M44V PLPSQAMDD  | 27    | 4935  |
| >TP53-M44V DDLMLSPDDI | 436   | >TP53-M44V DDLVLSPPDI | 1112  | 676   |
| >TP53-M44V DDLMLSPDDI | 237   | >TP53-M44V DDLVLSPPDI | 175   | 62    |
| >TP53-M44V MDDLMLSPDI | 520   | >TP53-M44V MDDLVLSPDI | 414   | 106   |
| >TP53-M44V MDDLMLSPDI | 277   | >TP53-M44V MDDLVLSPDI | 340   | 63    |
| >TP53-M44V MDDLMLSPDI | 107   | >TP53-M44V MDDLVLSPDI | 150   | 43    |

|                       |       |                         |      |       |
|-----------------------|-------|-------------------------|------|-------|
| >TP53-M44V AMDDLMLS   | 255   | >TP53-M44V AMDDLVL      | 121  | 134   |
| >TP53-M44V AMDDLMLSP  | 1226  | >TP53-M44V AMDDLVLSP    | 291  | 935   |
| >TP53-M44V AMDDLMLS   | 463   | >TP53-M44V AMDDLVL      | 364  | 99    |
| >TP53-M44V QAMDDLML   | 318   | >TP53-M44V QAMDDLVL     | 433  | 115   |
| >TP53-M44V QAMDDLML   | 386   | >TP53-M44V QAMDDLVL     | 1746 | 1360  |
| >TP53-M44V QAMDDLML   | 307   | >TP53-M44V QAMDDLVL     | 409  | 102   |
| >TP53-M44V SQAMDDLML  | 3497  | >TP53-M44V SQAMDDLVL    | 199  | 3298  |
| >TP53-M44V SQAMDDLML  | 11262 | >TP53-M44V SQAMDDLVL    | 432  | 10830 |
| >TP53-M44V SQAMDDLML  | 593   | >TP53-M44V SQAMDDLVL    | 20   | 573   |
| >TP53-M44V SQAMDDLMI  | 155   | >TP53-M44V SQAMDDLVL    | 324  | 169   |
| >TP53-M44V SQAMDDLML  | 13019 | >TP53-M44V SQAMDDLVL    | 106  | 12913 |
| >TP53-M44V SQAMDDLML  | 463   | >TP53-M44V SQAMDDLVL    | 5339 | 4876  |
| >TP53-M44V SQAMDDLMI  | 577   | >TP53-M44V SQAMDDLVL    | 127  | 450   |
| >TP53-M44V SQAMDDLMI  | 473   | >TP53-M44V SQAMDDLVL    | 267  | 206   |
| >TP53-M44V SQAMDDLMI  | 1528  | >TP53-M44V SQAMDDLVL    | 135  | 1393  |
| >TP53-M44V LPSQAMDDL  | 42    | >TP53-M44V LPSQAMDDL'   | 430  | 388   |
| >TP53-M44V LPSQAMDDL  | 173   | >TP53-M44V LPSQAMDDL'   | 154  | 19    |
| >TP53-M44V LPSQAMDDL  | 86    | >TP53-M44V LPSQAMDDL'   | 41   | 45    |
| >TP53-M44V LPSQAMDDL  | 125   | >TP53-M44V LPSQAMDDL'   | 1967 | 1842  |
| >TP53-M44V LPSQAMDDL  | 57    | >TP53-M44V LPSQAMDDL'   | 32   | 25    |
| >TP53-M44V LPSQAMDDL  | 90    | >TP53-M44V LPSQAMDDL'   | 114  | 24    |
| >TP53-M44V LPSQAMDDL  | 4556  | >TP53-M44V LPSQAMDDL'   | 117  | 4439  |
| >TP53-M44V LPSQAMDDL  | 273   | >TP53-M44V LPSQAMDDL'   | 349  | 76    |
| >TP53-M66I- MPEAAPRV  | 23    | >TP53-M66I- IPEAAPRV    | 26   | 3     |
| >TP53-M66I- MPEAAPRV  | 487   | >TP53-M66I- IPEAAPRV    | 1200 | 713   |
| >TP53-M66I- MPEAAPRVA | 177   | >TP53-M66I- IPEAAPRVA   | 542  | 365   |
| >TP53-M66I- MPEAAPRVA | 65    | >TP53-M66I- IPEAAPRVAP, | 134  | 69    |
| >TP53-M66I- MPEAAPRVA | 258   | >TP53-M66I- IPEAAPRVA   | 2987 | 2729  |
| >TP53-M66I- MPEAAPRVA | 76    | >TP53-M66I- IPEAAPRVAP, | 918  | 842   |
| >TP53-M66I- MPEAAPRV  | 496   | >TP53-M66I- IPEAAPRV    | 947  | 451   |
| >TP53-M66I- MPEAAPRV  | 83    | >TP53-M66I- IPEAAPRV    | 1160 | 1077  |
| >TP53-M66I- MPEAAPRVA | 15    | >TP53-M66I- IPEAAPRVA   | 117  | 102   |
| >TP53-M66I- MPEAAPRVA | 10    | >TP53-M66I- IPEAAPRVAP, | 41   | 31    |
| >TP53-M66I- RMPEAAPRV | 35    | >TP53-M66I- RIPEAAPRV   | 408  | 373   |
| >TP53-M66I- RMPEAAPRV | 224   | >TP53-M66I- RIPEAAPRV   | 2562 | 2338  |
| >TP53-M66I- RMPEAAPRV | 15    | >TP53-M66I- RIPEAAPRV   | 133  | 118   |
| >TP53-M66I- RMPEAAPRV | 480   | >TP53-M66I- RIPEAAPRVA  | 2126 | 1646  |
| >TP53-M66I- RMPEAAPRV | 12    | >TP53-M66I- RIPEAAPRV   | 27   | 15    |
| >TP53-M66I- RMPEAAPRV | 2     | >TP53-M66I- RIPEAAPRV   | 13   | 11    |
| >TP53-M66I- RMPEAAPRV | 39    | >TP53-M66I- RIPEAAPRVA  | 1568 | 1529  |
| >TP53-M66I- RMPEAAPRV | 17    | >TP53-M66I- RIPEAAPRV   | 969  | 952   |
| >TP53-M66I- RMPEAAPRV | 5     | >TP53-M66I- RIPEAAPRV   | 16   | 11    |
| >TP53-M66I- RMPEAAPRV | 356   | >TP53-M66I- RIPEAAPRVA  | 5670 | 5314  |

|                       |       |                          |       |       |
|-----------------------|-------|--------------------------|-------|-------|
| >TP53-M66I- RMPEAAPRV | 6     | >TP53-M66I- RIPEAAPRV    | 130   | 124   |
| >TP53-M66I- RMPEAAPRV | 4     | >TP53-M66I- RIPEAAPRV    | 11    | 7     |
| >TP53-M66I- RMPEAAPRV | 318   | >TP53-M66I- RIPEAAPRVA   | 4323  | 4005  |
| >TP53-M66I- RMPEAAPR  | 53    | >TP53-M66I- RIPEAAPR     | 254   | 201   |
| >TP53-M66I- RMPEAAPRV | 846   | >TP53-M66I- RIPEAAPRV    | 458   | 388   |
| >TP53-M66I- RMPEAAPRV | 229   | >TP53-M66I- RIPEAAPRV    | 429   | 200   |
| >TP53-M66I- RMPEAAPR  | 26    | >TP53-M66I- RIPEAAPR     | 37    | 11    |
| >TP53-M66I- APRMPEAA  | 25    | >TP53-M66I- APRRIPEAA    | 54    | 29    |
| >TP53-M66I- APRMPEAAP | 261   | >TP53-M66I- APRRIPEAAP   | 940   | 679   |
| >TP53-M66I- APRMPEAAP | 38    | >TP53-M66I- APRRIPEAAPR' | 53    | 15    |
| >TP53-M66I- APRMPEAA  | 771   | >TP53-M66I- APRRIPEAA    | 387   | 384   |
| >TP53-M66I- EAPRMPEAA | 30    | >TP53-M66I- EAPRIPEAAPI  | 18    | 12    |
| >TP53-M66I- EAPRMPEA  | 802   | >TP53-M66I- EAPRIPEA     | 217   | 585   |
| >TP53-M66I- EAPRMPEAA | 215   | >TP53-M66I- EAPRIPEAA    | 26    | 189   |
| >TP53-M66I- DEAPRMPE  | 449   | >TP53-M66I- DEAPRIPE     | 388   | 61    |
| >TP53-M66I- DEAPRMPEA | 493   | >TP53-M66I- DEAPRIPEA    | 423   | 70    |
| >TP53-M66I- PGPDEAPRM | 1233  | >TP53-M66I- PGPDEAPRI    | 494   | 739   |
| >TP53-M66R MPEAAPRV   | 23    | >TP53-M66R RPEAAPRV      | 66    | 43    |
| >TP53-M66R MPEAAPRV   | 487   | >TP53-M66R RPEAAPRV      | 229   | 258   |
| >TP53-M66R MPEAAPRVA  | 177   | >TP53-M66R RPEAAPRVA     | 91    | 86    |
| >TP53-M66R MPEAAPRVA  | 65    | >TP53-M66R RPEAAPRVAF    | 32    | 33    |
| >TP53-M66R MPEAAPRVA  | 258   | >TP53-M66R RPEAAPRVA     | 6606  | 6348  |
| >TP53-M66R MPEAAPRVA  | 76    | >TP53-M66R RPEAAPRVAF    | 3169  | 3093  |
| >TP53-M66R MPEAAPRV   | 496   | >TP53-M66R RPEAAPRV      | 11376 | 10880 |
| >TP53-M66R MPEAAPRV   | 83    | >TP53-M66R RPEAAPRV      | 12405 | 12322 |
| >TP53-M66R MPEAAPRVA  | 15    | >TP53-M66R RPEAAPRVA     | 4337  | 4322  |
| >TP53-M66R MPEAAPRVA  | 10    | >TP53-M66R RPEAAPRVAF    | 1154  | 1144  |
| >TP53-M66R RMPEAAPRV  | 35    | >TP53-M66R RRPEAAPRV     | 19668 | 19633 |
| >TP53-M66R RMPEAAPRV  | 224   | >TP53-M66R RRPEAAPRV     | 26606 | 26382 |
| >TP53-M66R RMPEAAPRV  | 15    | >TP53-M66R RRPEAAPRV     | 18525 | 18510 |
| >TP53-M66R RMPEAAPRV  | 480   | >TP53-M66R RRPEAAPRVA    | 24594 | 24114 |
| >TP53-M66R RMPEAAPRV  | 12    | >TP53-M66R RRPEAAPRV     | 4051  | 4039  |
| >TP53-M66R RMPEAAPRV  | 2     | >TP53-M66R RRPEAAPRV     | 4208  | 4206  |
| >TP53-M66R RMPEAAPRV  | 39    | >TP53-M66R RRPEAAPRVA    | 22274 | 22235 |
| >TP53-M66R RMPEAAPRV  | 17    | >TP53-M66R RRPEAAPRV     | 19504 | 19487 |
| >TP53-M66R RMPEAAPRV  | 5     | >TP53-M66R RRPEAAPRV     | 6719  | 6714  |
| >TP53-M66R RMPEAAPRV  | 356   | >TP53-M66R RRPEAAPRVA    | 24251 | 23895 |
| >TP53-M66R RMPEAAPRV  | 6     | >TP53-M66R RRPEAAPRV     | 19348 | 19342 |
| >TP53-M66R RMPEAAPRV  | 4     | >TP53-M66R RRPEAAPRV     | 4948  | 4944  |
| >TP53-M66R RMPEAAPRV  | 318   | >TP53-M66R RRPEAAPRVA    | 32538 | 32220 |
| >TP53-M66R RMPEAAPR   | 53    | >TP53-M66R RRPEAAPR      | 12401 | 12348 |
| >TP53-M66R RMPEAAPR   | 5091  | >TP53-M66R RRPEAAPR      | 238   | 4853  |
| >TP53-M66R RMPEAAPRV  | 22664 | >TP53-M66R RRPEAAPRVA    | 202   | 22462 |

|                         |       |                         |      |       |
|-------------------------|-------|-------------------------|------|-------|
| >TP53-M66R RMPEAAPRV    | 229   | >TP53-M66R RRPEAAPRV    | 7803 | 7574  |
| >TP53-M66R RMPEAAPR     | 21179 | >TP53-M66R RRPEAAPR     | 237  | 20942 |
| >TP53-M66R RMPEAAPRV    | 15289 | >TP53-M66R RRPEAAPRV    | 307  | 14982 |
| >TP53-M66R RMPEAAPRV    | 16757 | >TP53-M66R RRPEAAPRV    | 151  | 16606 |
| >TP53-M66R RMPEAAPRV    | 9632  | >TP53-M66R RRPEAAPRV    | 271  | 9361  |
| >TP53-M66R RMPEAAPRV    | 22111 | >TP53-M66R RRPEAAPRV    | 164  | 21947 |
| >TP53-M66R RMPEAAPR     | 26    | >TP53-M66R RRPEAAPR     | 84   | 58    |
| >TP53-M66R APRMPEAA     | 25    | >TP53-M66R APRRPEAA     | 24   | 1     |
| >TP53-M66R APRMPEAAP    | 261   | >TP53-M66R APRRPEAAP    | 338  | 77    |
| >TP53-M66R APRMPEAAP    | 38    | >TP53-M66R APRRPEAAPF   | 35   | 3     |
| >TP53-M66R EAPRMPEAA    | 30    | >TP53-M66R EAPRRPEAAP   | 50   | 20    |
| >TP53-M66R EAPRMPEAA    | 215   | >TP53-M66R EAPRRPEAA    | 882  | 667   |
| >TP53-M66R DEAPRMPE     | 449   | >TP53-M66R DEAPRRPE     | 604  | 155   |
| >TP53-M66R DEAPRMPEA    | 493   | >TP53-M66R DEAPRRPEA    | 1008 | 515   |
| >TP53-N131F NKMFCQLAK   | 646   | >TP53-N131F HKMFCQLAK   | 141  | 505   |
| >TP53-N131F LNKMFCQL    | 100   | >TP53-N131F LHKMFCQL    | 883  | 783   |
| >TP53-N131F LNKMFCQLA   | 161   | >TP53-N131F LHKMFCQLA   | 928  | 767   |
| >TP53-N131F LNKMFCQL    | 153   | >TP53-N131F LHKMFCQL    | 919  | 766   |
| >TP53-N131F LNKMFCQL    | 1911  | >TP53-N131F LHKMFCQL    | 486  | 1425  |
| >TP53-N131F SVTCTYSPALF | 2955  | >TP53-N131F SVTCTYSPALF | 286  | 2669  |
| >TP53-N131F ALNKMFCQL   | 238   | >TP53-N131F ALHKMFCQL   | 331  | 93    |
| >TP53-N131F ALNKMFCQL   | 17    | >TP53-N131F ALHKMFCQL   | 62   | 45    |
| >TP53-N131F ALNKMFCQL   | 30    | >TP53-N131F ALHKMFCQL   | 83   | 53    |
| >TP53-N131F ALNKMFCQL   | 442   | >TP53-N131F ALHKMFCQL   | 351  | 91    |
| >TP53-N131F ALNKMFCQL   | 297   | >TP53-N131F ALHKMFCQL   | 481  | 184   |
| >TP53-N131F ALNKMFCQL   | 22    | >TP53-N131F ALHKMFCQL   | 21   | 1     |
| >TP53-N131F ALNKMFCQL   | 255   | >TP53-N131F ALHKMFCQL   | 259  | 4     |
| >TP53-N131F ALNKMFCQL   | 198   | >TP53-N131F ALHKMFCQL   | 372  | 174   |
| >TP53-N131F ALNKMFCQL   | 21    | >TP53-N131F ALHKMFCQL   | 35   | 14    |
| >TP53-N131F ALNKMFCQL   | 256   | >TP53-N131F ALHKMFCQL   | 547  | 291   |
| >TP53-N131F ALNKMFCQL   | 66    | >TP53-N131F ALHKMFCQL   | 1567 | 1501  |
| >TP53-N131F ALNKMFCQ    | 245   | >TP53-N131F ALHKMFCQ    | 214  | 31    |
| >TP53-N131F ALNKMFCQL   | 3     | >TP53-N131F ALHKMFCQL   | 3    | 0     |
| >TP53-N131F ALNKMFCQL   | 11    | >TP53-N131F ALHKMFCQL   | 11   | 0     |
| >TP53-N131F ALNKMFCQL   | 37    | >TP53-N131F ALHKMFCQL   | 41   | 4     |
| >TP53-N131F ALNKMFCQL   | 25    | >TP53-N131F ALHKMFCQL   | 47   | 22    |
| >TP53-N131F ALNKMFCQL   | 3345  | >TP53-N131F ALHKMFCQL   | 278  | 3067  |
| >TP53-N131F ALNKMFCQL   | 113   | >TP53-N131F ALHKMFCQL   | 12   | 101   |
| >TP53-N131F ALNKMFCQL   | 431   | >TP53-N131F ALHKMFCQL   | 877  | 446   |
| >TP53-N131F ALNKMFCQL   | 288   | >TP53-N131F ALHKMFCQL   | 48   | 240   |
| >TP53-N131F ALNKMFCQL   | 416   | >TP53-N131F ALHKMFCQL   | 414  | 2     |
| >TP53-N131F SPALNKMFCC  | 432   | >TP53-N131F SPALHKMFCC  | 2398 | 1966  |
| >TP53-N131F SPALNKMF    | 100   | >TP53-N131F SPALHKMF    | 55   | 45    |

|                         |       |                         |     |       |
|-------------------------|-------|-------------------------|-----|-------|
| >TP53-N131F SPALNKMFC   | 41    | >TP53-N131F SPALHKMFCC  | 31  | 10    |
| >TP53-N131F SPALNKMFC   | 372   | >TP53-N131F SPALHKMFCC  | 70  | 302   |
| >TP53-N131F SPALNKMFM   | 326   | >TP53-N131F SPALHKMF    | 221 | 105   |
| >TP53-N131F SPALNKMFM   | 450   | >TP53-N131F SPALHKMF    | 278 | 172   |
| >TP53-N131F YSPALNKMFM  | 384   | >TP53-N131F YSPALHKMF   | 157 | 227   |
| >TP53-N131F YSPALNKM    | 717   | >TP53-N131F YSPALHKM    | 435 | 282   |
| >TP53-N131F YSPALNKMFM  | 104   | >TP53-N131F YSPALHKMF   | 91  | 13    |
| >TP53-N131F YSPALNKM    | 586   | >TP53-N131F YSPALHKM    | 167 | 419   |
| >TP53-N131F YSPALNKMFM  | 43    | >TP53-N131F YSPALHKMF   | 29  | 14    |
| >TP53-N131F YSPALNKM    | 40    | >TP53-N131F YSPALHKM    | 7   | 33    |
| >TP53-N131F YSPALNKMFM  | 3     | >TP53-N131F YSPALHKMF   | 2   | 1     |
| >TP53-N131F YSPALNKMFC  | 22    | >TP53-N131F YSPALHKMFCC | 10  | 12    |
| >TP53-N131F YSPALNKMFC  | 124   | >TP53-N131F YSPALHKMFCC | 67  | 57    |
| >TP53-N131F YSPALNKM    | 67    | >TP53-N131F YSPALHKM    | 257 | 190   |
| >TP53-N131F YSPALNKMFM  | 103   | >TP53-N131F YSPALHKMF   | 78  | 25    |
| >TP53-N131F TYSPALNKM   | 136   | >TP53-N131F TYSPALHKM   | 543 | 407   |
| >TP53-N131F TYSPALNK    | 220   | >TP53-N131F TYSPALHK    | 372 | 152   |
| >TP53-N131F TYSPALNKM   | 1702  | >TP53-N131F TYSPALHKM   | 310 | 1392  |
| >TP53-N131F TYSPALNKMFM | 179   | >TP53-N131F TYSPALHKMF  | 95  | 84    |
| >TP53-N131F TYSPALNKMFM | 64    | >TP53-N131F TYSPALHKMF  | 55  | 9     |
| >TP53-N131F TYSPALNKM   | 27    | >TP53-N131F TYSPALHKM   | 20  | 7     |
| >TP53-N131F TYSPALNKMFM | 5     | >TP53-N131F TYSPALHKMF  | 5   | 0     |
| >TP53-N131F TYSPALNK    | 222   | >TP53-N131F TYSPALHK    | 160 | 62    |
| >TP53-N131F TYSPALNK    | 674   | >TP53-N131F TYSPALHK    | 299 | 375   |
| >TP53-N131F TYSPALNKMFM | 439   | >TP53-N131F TYSPALHKMF  | 454 | 15    |
| >TP53-N131F CTYSPALN    | 10709 | >TP53-N131F CTYSPALH    | 353 | 10356 |
| >TP53-N131F CTYSPALNK   | 30    | >TP53-N131F CTYSPALHK   | 31  | 1     |
| >TP53-N131F CTYSPALNK   | 11    | >TP53-N131F CTYSPALHK   | 20  | 9     |
| >TP53-N131F CTYSPALNKM  | 343   | >TP53-N131F CTYSPALHKM  | 228 | 115   |
| >TP53-N131F CTYSPALNKM  | 63    | >TP53-N131F CTYSPALHKM  | 36  | 27    |
| >TP53-N131F CTYSPALNKM  | 380   | >TP53-N131F CTYSPALHKM  | 259 | 121   |
| >TP53-N131F CTYSPALNKM  | 246   | >TP53-N131F CTYSPALHKM  | 611 | 365   |
| >TP53-N131F CTYSPALNK   | 215   | >TP53-N131F CTYSPALHK   | 139 | 76    |
| >TP53-N131F CTYSPALNK   | 30    | >TP53-N131F CTYSPALHK   | 52  | 22    |
| >TP53-N131F CTYSPALNKM  | 1364  | >TP53-N131F CTYSPALHKM  | 495 | 869   |
| >TP53-N131F CTYSPALNKM  | 488   | >TP53-N131F CTYSPALHKM  | 151 | 337   |
| >TP53-N131F CTYSPALNKM  | 23    | >TP53-N131F CTYSPALHKM  | 21  | 2     |
| >TP53-N131F CTYSPALNKM  | 24    | >TP53-N131F CTYSPALHKM  | 14  | 10    |
| >TP53-N131F CTYSPALNKM  | 5     | >TP53-N131F CTYSPALHKM  | 4   | 1     |
| >TP53-N131F CTYSPALNKM  | 1669  | >TP53-N131F CTYSPALHKM  | 189 | 1480  |
| >TP53-N131F CTYSPALNKM  | 627   | >TP53-N131F CTYSPALHKM  | 429 | 198   |
| >TP53-N131F CTYSPALNKM  | 76    | >TP53-N131F CTYSPALHKM  | 49  | 27    |
| >TP53-N131F CTYSPALNKM  | 146   | >TP53-N131F CTYSPALHKM  | 85  | 61    |



|                         |       |                         |      |       |
|-------------------------|-------|-------------------------|------|-------|
| >TP53-N131FCTYSPALNKM   | 30    | >TP53-N131FCTYSPALHKM   | 80   | 50    |
| >TP53-N131FCTYSPALNKM   | 13    | >TP53-N131FCTYSPALHKM   | 12   | 1     |
| >TP53-N131FCTYSPALNKM   | 358   | >TP53-N131FCTYSPALHKM   | 299  | 59    |
| >TP53-N131FTCTYSPALNKI  | 453   | >TP53-N131FTCTYSPALHKI  | 807  | 354   |
| >TP53-N131FVTCTYSPALN   | 80    | >TP53-N131FVTCTYSPALH   | 93   | 13    |
| >TP53-N131FVTCTYSPALN   | 14    | >TP53-N131FVTCTYSPALH   | 18   | 4     |
| >TP53-N131FVTCTYSPALN   | 146   | >TP53-N131FVTCTYSPALH   | 108  | 38    |
| >TP53-N131FVTCTYSPALN   | 490   | >TP53-N131FVTCTYSPALH   | 543  | 53    |
| >TP53-N131I NKMFCQLA    | 3092  | >TP53-N131I IKMFCQLA    | 276  | 2816  |
| >TP53-N131I NKMFCQLAK   | 646   | >TP53-N131I IKMFCQLAK   | 62   | 584   |
| >TP53-N131I LNKMFCQL    | 100   | >TP53-N131I LIKMFCQL    | 97   | 3     |
| >TP53-N131I LNKMFCQLA   | 13704 | >TP53-N131I LIKMFCQLA   | 480  | 13224 |
| >TP53-N131I LNKMFCQL    | 25396 | >TP53-N131I LIKMFCQL    | 63   | 25333 |
| >TP53-N131I LNKMFCQLAI  | 5768  | >TP53-N131I LIKMFCQLAK  | 48   | 5720  |
| >TP53-N131I LNKMFCQLAI  | 8328  | >TP53-N131I LIKMFCQLAK  | 46   | 8282  |
| >TP53-N131I LNKMFCQLA   | 3711  | >TP53-N131I LIKMFCQLA   | 387  | 3324  |
| >TP53-N131I LNKMFCQLAI  | 161   | >TP53-N131I LIKMFCQLAK  | 17   | 144   |
| >TP53-N131I LNKMFCQLAI  | 2155  | >TP53-N131I LIKMFCQLAK  | 134  | 2021  |
| >TP53-N131I LNKMFCQL    | 153   | >TP53-N131I LIKMFCQL    | 41   | 112   |
| >TP53-N131I SVTCTYSPALI | 18591 | >TP53-N131I SVTCTYSPALI | 197  | 18394 |
| >TP53-N131I SVTCTYSPALI | 12109 | >TP53-N131I SVTCTYSPALI | 33   | 12076 |
| >TP53-N131I SVTCTYSPALI | 18428 | >TP53-N131I SVTCTYSPALI | 479  | 17949 |
| >TP53-N131I SVTCTYSPALI | 2955  | >TP53-N131I SVTCTYSPALI | 273  | 2682  |
| >TP53-N131I SVTCTYSPALI | 38909 | >TP53-N131I SVTCTYSPALI | 208  | 38701 |
| >TP53-N131I ALNKMFCQL   | 238   | >TP53-N131I ALIKMFCQL   | 61   | 177   |
| >TP53-N131I ALNKMFCQL   | 17    | >TP53-N131I ALIKMFCQL   | 24   | 7     |
| >TP53-N131I ALNKMFCQL   | 30    | >TP53-N131I ALIKMFCQL   | 40   | 10    |
| >TP53-N131I ALNKMFCQL   | 442   | >TP53-N131I ALIKMFCQLA  | 147  | 295   |
| >TP53-N131I ALNKMFCQL   | 297   | >TP53-N131I ALIKMFCQL   | 34   | 263   |
| >TP53-N131I ALNKMFCQL   | 22    | >TP53-N131I ALIKMFCQL   | 22   | 0     |
| >TP53-N131I ALNKMFCQL   | 255   | >TP53-N131I ALIKMFCQLA  | 281  | 26    |
| >TP53-N131I ALNKMFCQL   | 198   | >TP53-N131I ALIKMFCQL   | 74   | 124   |
| >TP53-N131I ALNKMFCQL   | 21    | >TP53-N131I ALIKMFCQL   | 25   | 4     |
| >TP53-N131I ALNKMFCQL   | 256   | >TP53-N131I ALIKMFCQLA  | 354  | 98    |
| >TP53-N131I ALNKMFCQL   | 66    | >TP53-N131I ALIKMFCQL   | 653  | 587   |
| >TP53-N131I ALNKMFCQ    | 245   | >TP53-N131I ALIKMFCQ    | 226  | 19    |
| >TP53-N131I ALNKMFCQL   | 3     | >TP53-N131I ALIKMFCQL   | 3    | 0     |
| >TP53-N131I ALNKMFCQL   | 11    | >TP53-N131I ALIKMFCQLA  | 13   | 2     |
| >TP53-N131I ALNKMFCQL   | 37    | >TP53-N131I ALIKMFCQLA  | 53   | 16    |
| >TP53-N131I ALNKMFCQL   | 25    | >TP53-N131I ALIKMFCQLA  | 26   | 1     |
| >TP53-N131I ALNKMFCQL   | 113   | >TP53-N131I ALIKMFCQLA  | 309  | 196   |
| >TP53-N131I ALNKMFCQL   | 431   | >TP53-N131I ALIKMFCQLA  | 1322 | 891   |
| >TP53-N131I ALNKMFCQL   | 288   | >TP53-N131I ALIKMFCQL   | 120  | 168   |

|                          |       |                          |      |       |
|--------------------------|-------|--------------------------|------|-------|
| >TP53-N131I ALNKMFCQL    | 416   | >TP53-N131I ALIKMFCQL    | 222  | 194   |
| >TP53-N131I SPALNKMFCQ   | 432   | >TP53-N131I SPALIKMFCQ   | 1282 | 850   |
| >TP53-N131I SPALNKMFC    | 100   | >TP53-N131I SPALIKMFC    | 213  | 113   |
| >TP53-N131I SPALNKMFCQ   | 41    | >TP53-N131I SPALIKMFCQ   | 53   | 12    |
| >TP53-N131I SPALNKMFCQ   | 372   | >TP53-N131I SPALIKMFCQ   | 323  | 49    |
| >TP53-N131I SPALNKMFC    | 326   | >TP53-N131I SPALIKMFC    | 271  | 55    |
| >TP53-N131I SPALNKMFC    | 450   | >TP53-N131I SPALIKMFC    | 138  | 312   |
| >TP53-N131I SPALNKMFC    | 677   | >TP53-N131I SPALIKMFC    | 276  | 401   |
| >TP53-N131I YSPALNKMFC   | 384   | >TP53-N131I YSPALIKMFC   | 90   | 294   |
| >TP53-N131I YSPALNKMFC   | 717   | >TP53-N131I YSPALIKMFC   | 475  | 242   |
| >TP53-N131I YSPALNKMFC   | 104   | >TP53-N131I YSPALIKMFC   | 138  | 34    |
| >TP53-N131I YSPALNKMFC   | 586   | >TP53-N131I YSPALIKMFC   | 165  | 421   |
| >TP53-N131I YSPALNKMFC   | 43    | >TP53-N131I YSPALIKMFC   | 25   | 18    |
| >TP53-N131I YSPALNKMFC   | 40    | >TP53-N131I YSPALIKMFC   | 21   | 19    |
| >TP53-N131I YSPALNKMFC   | 3     | >TP53-N131I YSPALIKMFC   | 2    | 1     |
| >TP53-N131I YSPALNKMFCQ  | 22    | >TP53-N131I YSPALIKMFCQ  | 9    | 13    |
| >TP53-N131I YSPALNKMFCQ  | 124   | >TP53-N131I YSPALIKMFCQ  | 41   | 83    |
| >TP53-N131I YSPALNKMFC   | 67    | >TP53-N131I YSPALIKMFC   | 361  | 294   |
| >TP53-N131I YSPALNKMFC   | 103   | >TP53-N131I YSPALIKMFC   | 184  | 81    |
| >TP53-N131I TYSPALNKMFC  | 136   | >TP53-N131I TYSPALIKMFC  | 2342 | 2206  |
| >TP53-N131I TYSPALNKMFC  | 220   | >TP53-N131I TYSPALIKMFC  | 298  | 78    |
| >TP53-N131I TYSPALNKMFC  | 179   | >TP53-N131I TYSPALIKMFC  | 102  | 77    |
| >TP53-N131I TYSPALNKMFC  | 64    | >TP53-N131I TYSPALIKMFC  | 100  | 36    |
| >TP53-N131I TYSPALNKMFC  | 27    | >TP53-N131I TYSPALIKMFC  | 39   | 12    |
| >TP53-N131I TYSPALNKMFC  | 5     | >TP53-N131I TYSPALIKMFC  | 5    | 0     |
| >TP53-N131I TYSPALNKMFC  | 222   | >TP53-N131I TYSPALIKMFC  | 233  | 11    |
| >TP53-N131I TYSPALNKMFC  | 439   | >TP53-N131I TYSPALIKMFC  | 450  | 11    |
| >TP53-N131I CTYSPALNKMFC | 30    | >TP53-N131I CTYSPALIKMFC | 38   | 8     |
| >TP53-N131I CTYSPALNKMFC | 11    | >TP53-N131I CTYSPALIKMFC | 12   | 1     |
| >TP53-N131I CTYSPALNKMFC | 343   | >TP53-N131I CTYSPALIKMFC | 204  | 139   |
| >TP53-N131I CTYSPALNKMFC | 63    | >TP53-N131I CTYSPALIKMFC | 96   | 33    |
| >TP53-N131I CTYSPALNKMFC | 380   | >TP53-N131I CTYSPALIKMFC | 140  | 240   |
| >TP53-N131I CTYSPALNKMFC | 246   | >TP53-N131I CTYSPALIKMFC | 531  | 285   |
| >TP53-N131I CTYSPALNKMFC | 215   | >TP53-N131I CTYSPALIKMFC | 280  | 65    |
| >TP53-N131I CTYSPALNKMFC | 30    | >TP53-N131I CTYSPALIKMFC | 38   | 8     |
| >TP53-N131I CTYSPALNKMFC | 11769 | >TP53-N131I CTYSPALIKMFC | 50   | 11719 |
| >TP53-N131I CTYSPALNKMFC | 15081 | >TP53-N131I CTYSPALIKMFC | 225  | 14856 |
| >TP53-N131I CTYSPALNKMFC | 488   | >TP53-N131I CTYSPALIKMFC | 439  | 49    |
| >TP53-N131I CTYSPALNKMFC | 23    | >TP53-N131I CTYSPALIKMFC | 27   | 4     |
| >TP53-N131I CTYSPALNKMFC | 6176  | >TP53-N131I CTYSPALIKMFC | 79   | 6097  |
| >TP53-N131I CTYSPALNKMFC | 24    | >TP53-N131I CTYSPALIKMFC | 16   | 8     |
| >TP53-N131I CTYSPALNKMFC | 5     | >TP53-N131I CTYSPALIKMFC | 5    | 0     |
| >TP53-N131I CTYSPALNKMFC | 16669 | >TP53-N131I CTYSPALIKMFC | 476  | 16193 |

|                         |       |                         |      |       |
|-------------------------|-------|-------------------------|------|-------|
| >TP53-N131I CTYSPALNKM  | 627   | >TP53-N131I CTYSPALIKMI | 410  | 217   |
| >TP53-N131I CTYSPALN    | 13462 | >TP53-N131I CTYSPALI    | 26   | 13436 |
| >TP53-N131I CTYSPALNKM  | 76    | >TP53-N131I CTYSPALIKMI | 60   | 16    |
| >TP53-N131I CTYSPALNKM  | 146   | >TP53-N131I CTYSPALIKMI | 84   | 62    |
| >TP53-N131I CTYSPALNKM  | 30    | >TP53-N131I CTYSPALIKMI | 23   | 7     |
| >TP53-N131I CTYSPALNKM  | 13    | >TP53-N131I CTYSPALIKMI | 13   | 0     |
| >TP53-N131I CTYSPALN    | 8562  | >TP53-N131I CTYSPALI    | 5    | 8557  |
| >TP53-N131I CTYSPALNKM  | 358   | >TP53-N131I CTYSPALIKMI | 275  | 83    |
| >TP53-N131I TCTYSPALNK  | 453   | >TP53-N131I TCTYSPALIKM | 912  | 459   |
| >TP53-N131I VTCTYSPALN  | 26312 | >TP53-N131I VTCTYSPALI  | 457  | 25855 |
| >TP53-N131I VTCTYSPALN  | 80    | >TP53-N131I VTCTYSPALIK | 148  | 68    |
| >TP53-N131I VTCTYSPALN  | 14    | >TP53-N131I VTCTYSPALIK | 15   | 1     |
| >TP53-N131I VTCTYSPALN  | 146   | >TP53-N131I VTCTYSPALIK | 176  | 30    |
| >TP53-N131I VTCTYSPALN  | 490   | >TP53-N131I VTCTYSPALIK | 616  | 126   |
| >TP53-N131I VTCTYSPALN  | 6827  | >TP53-N131I VTCTYSPALI  | 36   | 6791  |
| >TP53-N131I VTCTYSPALN  | 5993  | >TP53-N131I VTCTYSPALI  | 83   | 5910  |
| >TP53-N131I VTCTYSPALN  | 7897  | >TP53-N131I VTCTYSPALI  | 206  | 7691  |
| >TP53-N131I VTCTYSPALN  | 22811 | >TP53-N131I VTCTYSPALI  | 21   | 22790 |
| >TP53-N131I NKMFQQLAK   | 13147 | >TP53-N131I KKMFCQLAK   | 400  | 12747 |
| >TP53-N131I NKMFQQLA    | 3092  | >TP53-N131I KKMFCQLA    | 313  | 2779  |
| >TP53-N131I NKMFQQLAK   | 646   | >TP53-N131I KKMFCQLAK   | 67   | 579   |
| >TP53-N131I LNKMFQQL    | 100   | >TP53-N131I LKKMFQQL    | 1823 | 1723  |
| >TP53-N131I LNKMFQQLA   | 161   | >TP53-N131I LKKMFQQLA   | 508  | 347   |
| >TP53-N131I LNKMFQQL    | 153   | >TP53-N131I LKKMFQQL    | 303  | 150   |
| >TP53-N131I LNKMFQQL    | 1911  | >TP53-N131I LKKMFQQL    | 44   | 1867  |
| >TP53-N131I LNKMFQQLA   | 9120  | >TP53-N131I LKKMFQQLA   | 235  | 8885  |
| >TP53-N131I LNKMFQQLA   | 4728  | >TP53-N131I LKKMFQQLA   | 120  | 4608  |
| >TP53-N131I SVTCTYSPALI | 18431 | >TP53-N131I SVTCTYSPALI | 212  | 18219 |
| >TP53-N131I SVTCTYSPALI | 12324 | >TP53-N131I SVTCTYSPALI | 16   | 12308 |
| >TP53-N131I SVTCTYSPALI | 8128  | >TP53-N131I SVTCTYSPALI | 20   | 8108  |
| >TP53-N131I SVTCTYSPALI | 6263  | >TP53-N131I SVTCTYSPALI | 23   | 6240  |
| >TP53-N131I ALNKMFQQL   | 238   | >TP53-N131I ALKKMFQQL   | 2890 | 2652  |
| >TP53-N131I ALNKMFQQL   | 17    | >TP53-N131I ALKKMFQQL   | 123  | 106   |
| >TP53-N131I ALNKMFQQL   | 30    | >TP53-N131I ALKKMFQQL   | 64   | 34    |
| >TP53-N131I ALNKMFQQL   | 442   | >TP53-N131I ALKKMFQQL   | 369  | 73    |
| >TP53-N131I ALNKMFQQL   | 297   | >TP53-N131I ALKKMFQQL   | 1517 | 1220  |
| >TP53-N131I ALNKMFQQL   | 22    | >TP53-N131I ALKKMFQQL   | 619  | 597   |
| >TP53-N131I ALNKMFQQL   | 255   | >TP53-N131I ALKKMFQQL   | 4344 | 4089  |
| >TP53-N131I ALNKMFQQL   | 198   | >TP53-N131I ALKKMFQQL   | 2050 | 1852  |
| >TP53-N131I ALNKMFQQL   | 21    | >TP53-N131I ALKKMFQQL   | 613  | 592   |
| >TP53-N131I ALNKMFQQL   | 256   | >TP53-N131I ALKKMFQQL   | 5470 | 5214  |
| >TP53-N131I ALNKMFQQL   | 66    | >TP53-N131I ALKKMFQQL   | 7467 | 7401  |
| >TP53-N131I ALNKMFQQL   | 245   | >TP53-N131I ALKKMFQQL   | 968  | 723   |

|                        |       |                       |      |       |
|------------------------|-------|-----------------------|------|-------|
| >TP53-N131†ALNKMFCQL   | 3     | >TP53-N131†ALKKMFCQL  | 4    | 1     |
| >TP53-N131†ALNKMFCQL   | 11    | >TP53-N131†ALKKMFCQL/ | 26   | 15    |
| >TP53-N131†ALNKMFCQL   | 37    | >TP53-N131†ALKKMFCQL/ | 52   | 15    |
| >TP53-N131†ALNKMFCQL   | 25    | >TP53-N131†ALKKMFCQL/ | 135  | 110   |
| >TP53-N131†ALNKMFCQL   | 6046  | >TP53-N131†ALKKMFCQL  | 430  | 5616  |
| >TP53-N131†ALNKMFCQL   | 3345  | >TP53-N131†ALKKMFCQL/ | 165  | 3180  |
| >TP53-N131†ALNKMFCQL   | 113   | >TP53-N131†ALKKMFCQL/ | 9    | 104   |
| >TP53-N131†ALNKMFCQL   | 431   | >TP53-N131†ALKKMFCQL/ | 309  | 122   |
| >TP53-N131†ALNKMFCQL   | 288   | >TP53-N131†ALKKMFCQL  | 19   | 269   |
| >TP53-N131†ALNKMFCQL   | 416   | >TP53-N131†ALKKMFCQL  | 225  | 191   |
| >TP53-N131†SPALNKMFC   | 432   | >TP53-N131†SPALKKMFC  | 2149 | 1717  |
| >TP53-N131†SPALNKMFC   | 100   | >TP53-N131†SPALKKMF   | 82   | 18    |
| >TP53-N131†SPALNKMFC   | 41    | >TP53-N131†SPALKKMFC  | 37   | 4     |
| >TP53-N131†SPALNKMFC   | 372   | >TP53-N131†SPALKKMFC  | 59   | 313   |
| >TP53-N131†SPALNKMFC   | 326   | >TP53-N131†SPALKKMF   | 1227 | 901   |
| >TP53-N131†SPALNKMFC   | 450   | >TP53-N131†SPALKKMF   | 310  | 140   |
| >TP53-N131†YSPALNKMFC  | 384   | >TP53-N131†YSPALKKMF  | 699  | 315   |
| >TP53-N131†YSPALNKMFC  | 104   | >TP53-N131†YSPALKKMF  | 378  | 274   |
| >TP53-N131†YSPALNKM    | 586   | >TP53-N131†YSPALKKM   | 294  | 292   |
| >TP53-N131†YSPALNKMFC  | 43    | >TP53-N131†YSPALKKMF  | 111  | 68    |
| >TP53-N131†YSPALNKM    | 40    | >TP53-N131†YSPALKKM   | 114  | 74    |
| >TP53-N131†YSPALNKMFC  | 3     | >TP53-N131†YSPALKKMF  | 5    | 2     |
| >TP53-N131†YSPALNKMFC  | 22    | >TP53-N131†YSPALKKMFC | 58   | 36    |
| >TP53-N131†YSPALNKMFC  | 124   | >TP53-N131†YSPALKKMFC | 267  | 143   |
| >TP53-N131†YSPALNKM    | 67    | >TP53-N131†YSPALKKM   | 180  | 113   |
| >TP53-N131†YSPALNKMFC  | 103   | >TP53-N131†YSPALKKMF  | 164  | 61    |
| >TP53-N131†TYSPALNKM   | 136   | >TP53-N131†TYSPALKKM  | 1592 | 1456  |
| >TP53-N131†TYSPALNK    | 220   | >TP53-N131†TYSPALKK   | 455  | 235   |
| >TP53-N131†TYSPALNKMFC | 179   | >TP53-N131†TYSPALKKMF | 155  | 24    |
| >TP53-N131†TYSPALNKMFC | 64    | >TP53-N131†TYSPALKKMF | 79   | 15    |
| >TP53-N131†TYSPALNKM   | 27    | >TP53-N131†TYSPALKKM  | 56   | 29    |
| >TP53-N131†TYSPALNKMFC | 5     | >TP53-N131†TYSPALKKMF | 6    | 1     |
| >TP53-N131†TYSPALNK    | 222   | >TP53-N131†TYSPALKK   | 569  | 347   |
| >TP53-N131†TYSPALNKMFC | 439   | >TP53-N131†TYSPALKKMF | 566  | 127   |
| >TP53-N131†CTYSPALN    | 10709 | >TP53-N131†CTYSPALK   | 34   | 10675 |
| >TP53-N131†CTYSPALNK   | 30    | >TP53-N131†CTYSPALKK  | 31   | 1     |
| >TP53-N131†CTYSPALN    | 10717 | >TP53-N131†CTYSPALK   | 12   | 10705 |
| >TP53-N131†CTYSPALNK   | 11    | >TP53-N131†CTYSPALKK  | 15   | 4     |
| >TP53-N131†CTYSPALNKM  | 343   | >TP53-N131†CTYSPALKKM | 435  | 92    |
| >TP53-N131†CTYSPALNKM  | 63    | >TP53-N131†CTYSPALKKM | 127  | 64    |
| >TP53-N131†CTYSPALNKM  | 380   | >TP53-N131†CTYSPALKKM | 795  | 415   |
| >TP53-N131†CTYSPALNKM  | 246   | >TP53-N131†CTYSPALKKM | 1473 | 1227  |
| >TP53-N131†CTYSPALN    | 11944 | >TP53-N131†CTYSPALK   | 136  | 11808 |

|                        |       |                        |      |       |
|------------------------|-------|------------------------|------|-------|
| >TP53-N131†CTYSPALNK   | 215   | >TP53-N131†CTYSPALKK   | 474  | 259   |
| >TP53-N131†CTYSPALN    | 13128 | >TP53-N131†CTYSPALK    | 435  | 12693 |
| >TP53-N131†CTYSPALN    | 2355  | >TP53-N131†CTYSPALK    | 10   | 2345  |
| >TP53-N131†CTYSPALNK   | 30    | >TP53-N131†CTYSPALKK   | 38   | 8     |
| >TP53-N131†CTYSPALNKM  | 488   | >TP53-N131†CTYSPALKKM  | 1319 | 831   |
| >TP53-N131†CTYSPALNKM  | 23    | >TP53-N131†CTYSPALKKM  | 46   | 23    |
| >TP53-N131†CTYSPALNKM  | 24    | >TP53-N131†CTYSPALKKM  | 13   | 11    |
| >TP53-N131†CTYSPALNKM  | 5     | >TP53-N131†CTYSPALKKM  | 6    | 1     |
| >TP53-N131†CTYSPALNKM  | 76    | >TP53-N131†CTYSPALKKM  | 187  | 111   |
| >TP53-N131†CTYSPALNKM  | 146   | >TP53-N131†CTYSPALKKM  | 298  | 152   |
| >TP53-N131†CTYSPALNKM  | 30    | >TP53-N131†CTYSPALKKM  | 40   | 10    |
| >TP53-N131†CTYSPALNKM  | 13    | >TP53-N131†CTYSPALKKM  | 13   | 0     |
| >TP53-N131†CTYSPALNKM  | 358   | >TP53-N131†CTYSPALKKM  | 422  | 64    |
| >TP53-N131†TCTYSPALNKI | 453   | >TP53-N131†TCTYSPALKKI | 829  | 376   |
| >TP53-N131†VTCTYSPALN  | 22206 | >TP53-N131†VTCTYSPALK  | 48   | 22158 |
| >TP53-N131†VTCTYSPALN  | 80    | >TP53-N131†VTCTYSPALKI | 89   | 9     |
| >TP53-N131†VTCTYSPALN  | 31268 | >TP53-N131†VTCTYSPALK  | 17   | 31251 |
| >TP53-N131†VTCTYSPALN  | 14    | >TP53-N131†VTCTYSPALKI | 14   | 0     |
| >TP53-N131†VTCTYSPALN  | 9480  | >TP53-N131†VTCTYSPALK  | 61   | 9419  |
| >TP53-N131†VTCTYSPALN  | 146   | >TP53-N131†VTCTYSPALKI | 263  | 117   |
| >TP53-N131†VTCTYSPALN  | 12647 | >TP53-N131†VTCTYSPALK  | 273  | 12374 |
| >TP53-N131†VTCTYSPALN  | 25889 | >TP53-N131†VTCTYSPALK  | 51   | 25838 |
| >TP53-N131†VTCTYSPALN  | 490   | >TP53-N131†VTCTYSPALKI | 523  | 33    |
| >TP53-N131‡NKMFCQLAK   | 646   | >TP53-N131‡SKMFCQLAK   | 158  | 488   |
| >TP53-N131‡LNKMFCQL    | 100   | >TP53-N131‡LSKMFCQL    | 38   | 62    |
| >TP53-N131‡LNKMFCQLAI  | 5768  | >TP53-N131‡LSKMFCQLAK  | 97   | 5671  |
| >TP53-N131‡LNKMFCQLAI  | 8328  | >TP53-N131‡LSKMFCQLAK  | 34   | 8294  |
| >TP53-N131‡LNKMFCQL    | 7014  | >TP53-N131‡LSKMFCQL    | 448  | 6566  |
| >TP53-N131‡LNKMFCQLA   | 3711  | >TP53-N131‡LSKMFCQLA   | 143  | 3568  |
| >TP53-N131‡LNKMFCQLAI  | 161   | >TP53-N131‡LSKMFCQLAK  | 9    | 152   |
| >TP53-N131‡LNKMFCQLAI  | 2155  | >TP53-N131‡LSKMFCQLAK  | 124  | 2031  |
| >TP53-N131‡LNKMFCQL    | 153   | >TP53-N131‡LSKMFCQL    | 209  | 56    |
| >TP53-N131‡LNKMFCQL    | 1911  | >TP53-N131‡LSKMFCQL    | 498  | 1413  |
| >TP53-N131‡LNKMFCQL    | 19530 | >TP53-N131‡LSKMFCQL    | 29   | 19501 |
| >TP53-N131‡LNKMFCQL    | 21001 | >TP53-N131‡LSKMFCQL    | 410  | 20591 |
| >TP53-N131‡ALNKMFCQL   | 238   | >TP53-N131‡ALSKMFCQL   | 151  | 87    |
| >TP53-N131‡ALNKMFCQL   | 17    | >TP53-N131‡ALSKMFCQL   | 10   | 7     |
| >TP53-N131‡ALNKMFCQL   | 1394  | >TP53-N131‡ALSKMFCQLA  | 495  | 899   |
| >TP53-N131‡ALNKMFCQL   | 30    | >TP53-N131‡ALSKMFCQL   | 44   | 14    |
| >TP53-N131‡ALNKMFCQL   | 442   | >TP53-N131‡ALSKMFCQLA  | 216  | 226   |
| >TP53-N131‡ALNKMFCQL   | 297   | >TP53-N131‡ALSKMFCQL   | 164  | 133   |
| >TP53-N131‡ALNKMFCQL   | 22    | >TP53-N131‡ALSKMFCQL   | 47   | 25    |
| >TP53-N131‡ALNKMFCQL   | 255   | >TP53-N131‡ALSKMFCQLA  | 582  | 327   |

|                        |      |                        |      |      |
|------------------------|------|------------------------|------|------|
| >TP53-N131!ALNKMFCQL   | 198  | >TP53-N131!ALSKMFCQL   | 264  | 66   |
| >TP53-N131!ALNKMFCQL   | 21   | >TP53-N131!ALSKMFCQL   | 22   | 1    |
| >TP53-N131!ALNKMFCQL   | 256  | >TP53-N131!ALSKMFCQL/  | 295  | 39   |
| >TP53-N131!ALNKMFCQL   | 66   | >TP53-N131!ALSKMFCQL   | 67   | 1    |
| >TP53-N131!ALNKMFCQ    | 245  | >TP53-N131!ALSKMFCQ    | 215  | 30   |
| >TP53-N131!ALNKMFCQL   | 3    | >TP53-N131!ALSKMFCQL   | 2    | 1    |
| >TP53-N131!ALNKMFCQL   | 11   | >TP53-N131!ALSKMFCQL/  | 10   | 1    |
| >TP53-N131!ALNKMFCQL   | 37   | >TP53-N131!ALSKMFCQL/  | 39   | 2    |
| >TP53-N131!ALNKMFCQL   | 25   | >TP53-N131!ALSKMFCQL/  | 25   | 0    |
| >TP53-N131!ALNKMFCQL   | 113  | >TP53-N131!ALSKMFCQL/  | 237  | 124  |
| >TP53-N131!ALNKMFCQL   | 431  | >TP53-N131!ALSKMFCQL/  | 1864 | 1433 |
| >TP53-N131!ALNKMFCQL   | 288  | >TP53-N131!ALSKMFCQL   | 145  | 143  |
| >TP53-N131!ALNKMFCQL   | 416  | >TP53-N131!ALSKMFCQL   | 451  | 35   |
| >TP53-N131!ALNKMFCQL   | 1052 | >TP53-N131!ALSKMFCQL/  | 403  | 649  |
| >TP53-N131!SPALNKMFCQ  | 432  | >TP53-N131!SPALSKMFCC  | 450  | 18   |
| >TP53-N131!SPALNKMFC   | 100  | >TP53-N131!SPALSKMF    | 72   | 28   |
| >TP53-N131!SPALNKMFCQ  | 41   | >TP53-N131!SPALSKMFCC  | 36   | 5    |
| >TP53-N131!SPALNKMFCQ  | 372  | >TP53-N131!SPALSKMFCC  | 403  | 31   |
| >TP53-N131!SPALNKMFC   | 326  | >TP53-N131!SPALSKMF    | 225  | 101  |
| >TP53-N131!SPALNKMFC   | 450  | >TP53-N131!SPALSKMF    | 108  | 342  |
| >TP53-N131!YSPALNKMFC  | 384  | >TP53-N131!YSPALSKMF   | 182  | 202  |
| >TP53-N131!YSPALNKMFC  | 1020 | >TP53-N131!YSPALSKMF   | 306  | 714  |
| >TP53-N131!YSPALNKMFC  | 104  | >TP53-N131!YSPALSKMF   | 86   | 18   |
| >TP53-N131!YSPALNKMFC  | 586  | >TP53-N131!YSPALSKM    | 76   | 510  |
| >TP53-N131!YSPALNKMFC  | 43   | >TP53-N131!YSPALSKMF   | 16   | 27   |
| >TP53-N131!YSPALNKMFC  | 40   | >TP53-N131!YSPALSKM    | 58   | 18   |
| >TP53-N131!YSPALNKMFC  | 3    | >TP53-N131!YSPALSKMF   | 2    | 1    |
| >TP53-N131!YSPALNKMFCQ | 22   | >TP53-N131!YSPALSKMFCC | 13   | 9    |
| >TP53-N131!YSPALNKMFCQ | 124  | >TP53-N131!YSPALSKMFCC | 70   | 54   |
| >TP53-N131!YSPALNKMFC  | 67   | >TP53-N131!YSPALSKM    | 274  | 207  |
| >TP53-N131!YSPALNKMFC  | 103  | >TP53-N131!YSPALSKMF   | 83   | 20   |
| >TP53-N131!YSPALNKMFC  | 136  | >TP53-N131!YSPALSKM    | 31   | 105  |
| >TP53-N131!YSPALNKMFC  | 220  | >TP53-N131!YSPALSK     | 246  | 26   |
| >TP53-N131!YSPALNKMFC  | 179  | >TP53-N131!YSPALSKMF   | 136  | 43   |
| >TP53-N131!YSPALNKMFC  | 64   | >TP53-N131!YSPALSKMF   | 70   | 6    |
| >TP53-N131!YSPALNKMFC  | 27   | >TP53-N131!YSPALSKM    | 41   | 14   |
| >TP53-N131!YSPALNKMFC  | 5    | >TP53-N131!YSPALSKMF   | 5    | 0    |
| >TP53-N131!YSPALNKMFC  | 222  | >TP53-N131!YSPALSK     | 159  | 63   |
| >TP53-N131!YSPALNKMFC  | 4265 | >TP53-N131!YSPALSKM    | 384  | 3881 |
| >TP53-N131!YSPALNKMFC  | 439  | >TP53-N131!YSPALSKMF   | 416  | 23   |
| >TP53-N131!YSPALNKMFC  | 30   | >TP53-N131!YSPALSK     | 31   | 1    |
| >TP53-N131!YSPALNKMFC  | 11   | >TP53-N131!YSPALSK     | 12   | 1    |
| >TP53-N131!YSPALNKMFC  | 343  | >TP53-N131!YSPALSKM    | 234  | 109  |

|                                    |       |                                      |     |       |
|------------------------------------|-------|--------------------------------------|-----|-------|
| >TP53-N131 <sup>!</sup> CTYSPALNKM | 63    | >TP53-N131 <sup>!</sup> CTYSPALSKM   | 51  | 12    |
| >TP53-N131 <sup>!</sup> CTYSPALNKM | 380   | >TP53-N131 <sup>!</sup> CTYSPALSKM   | 543 | 163   |
| >TP53-N131 <sup>!</sup> CTYSPALNKM | 246   | >TP53-N131 <sup>!</sup> CTYSPALSKM   | 521 | 275   |
| >TP53-N131 <sup>!</sup> CTYSPALNK  | 215   | >TP53-N131 <sup>!</sup> CTYSPALSK    | 134 | 81    |
| >TP53-N131 <sup>!</sup> CTYSPALNK  | 30    | >TP53-N131 <sup>!</sup> CTYSPALSK    | 31  | 1     |
| >TP53-N131 <sup>!</sup> CTYSPALNKM | 488   | >TP53-N131 <sup>!</sup> CTYSPALSKM   | 549 | 61    |
| >TP53-N131 <sup>!</sup> CTYSPALNKM | 610   | >TP53-N131 <sup>!</sup> CTYSPALSKM   | 302 | 308   |
| >TP53-N131 <sup>!</sup> CTYSPALNKM | 23    | >TP53-N131 <sup>!</sup> CTYSPALSKM   | 19  | 4     |
| >TP53-N131 <sup>!</sup> CTYSPALNKM | 24    | >TP53-N131 <sup>!</sup> CTYSPALSKM   | 9   | 15    |
| >TP53-N131 <sup>!</sup> CTYSPALNKM | 5     | >TP53-N131 <sup>!</sup> CTYSPALSKM   | 4   | 1     |
| >TP53-N131 <sup>!</sup> CTYSPALNKM | 627   | >TP53-N131 <sup>!</sup> CTYSPALSKM   | 424 | 203   |
| >TP53-N131 <sup>!</sup> CTYSPALNKM | 76    | >TP53-N131 <sup>!</sup> CTYSPALSKM   | 100 | 24    |
| >TP53-N131 <sup>!</sup> CTYSPALNKM | 146   | >TP53-N131 <sup>!</sup> CTYSPALSKM   | 106 | 40    |
| >TP53-N131 <sup>!</sup> CTYSPALNKM | 30    | >TP53-N131 <sup>!</sup> CTYSPALSKM   | 26  | 4     |
| >TP53-N131 <sup>!</sup> CTYSPALNKM | 13    | >TP53-N131 <sup>!</sup> CTYSPALSKM   | 11  | 2     |
| >TP53-N131 <sup>!</sup> CTYSPALNKM | 358   | >TP53-N131 <sup>!</sup> CTYSPALSKM   | 213 | 145   |
| >TP53-N131 <sup>!</sup> TCTYSPALNK | 453   | >TP53-N131 <sup>!</sup> TCTYSPALSKM  | 77  | 376   |
| >TP53-N131 <sup>!</sup> VTCTYSPALN | 80    | >TP53-N131 <sup>!</sup> VTCTYSPALSKM | 89  | 9     |
| >TP53-N131 <sup>!</sup> VTCTYSPALN | 14    | >TP53-N131 <sup>!</sup> VTCTYSPALSKM | 13  | 1     |
| >TP53-N131 <sup>!</sup> VTCTYSPALN | 146   | >TP53-N131 <sup>!</sup> VTCTYSPALSKM | 97  | 49    |
| >TP53-N131 <sup>!</sup> VTCTYSPALN | 490   | >TP53-N131 <sup>!</sup> VTCTYSPALSKM | 485 | 5     |
| >TP53-N131 <sup>!</sup> NKMFCQLAK  | 646   | >TP53-N131 <sup>!</sup> TKMFCQLAK    | 472 | 174   |
| >TP53-N131 <sup>!</sup> LNKMFCQL   | 100   | >TP53-N131 <sup>!</sup> LTKMFCQL     | 108 | 8     |
| >TP53-N131 <sup>!</sup> LNKMFCQLA  | 5768  | >TP53-N131 <sup>!</sup> LTKMFCQLAK   | 54  | 5714  |
| >TP53-N131 <sup>!</sup> LNKMFCQLA  | 8328  | >TP53-N131 <sup>!</sup> LTKMFCQLAK   | 20  | 8308  |
| >TP53-N131 <sup>!</sup> LNKMFCQL   | 7014  | >TP53-N131 <sup>!</sup> LTKMFCQL     | 201 | 6813  |
| >TP53-N131 <sup>!</sup> LNKMFCQLA  | 3711  | >TP53-N131 <sup>!</sup> LTKMFCQLA    | 70  | 3641  |
| >TP53-N131 <sup>!</sup> LNKMFCQLA  | 161   | >TP53-N131 <sup>!</sup> LTKMFCQLAK   | 7   | 154   |
| >TP53-N131 <sup>!</sup> LNKMFCQLA  | 2155  | >TP53-N131 <sup>!</sup> LTKMFCQLAK   | 136 | 2019  |
| >TP53-N131 <sup>!</sup> LNKMFCQLA  | 13781 | >TP53-N131 <sup>!</sup> LTKMFCQLAK   | 321 | 13460 |
| >TP53-N131 <sup>!</sup> LNKMFCQL   | 153   | >TP53-N131 <sup>!</sup> LTKMFCQL     | 245 | 92    |
| >TP53-N131 <sup>!</sup> LNKMFCQL   | 19530 | >TP53-N131 <sup>!</sup> LTKMFCQL     | 21  | 19509 |
| >TP53-N131 <sup>!</sup> LNKMFCQL   | 21001 | >TP53-N131 <sup>!</sup> LTKMFCQL     | 156 | 20845 |
| >TP53-N131 <sup>!</sup> LNKMFCQLA  | 9958  | >TP53-N131 <sup>!</sup> LTKMFCQLA    | 321 | 9637  |
| >TP53-N131 <sup>!</sup> ALNKMFCQL  | 238   | >TP53-N131 <sup>!</sup> ALTKMFCQL    | 346 | 108   |
| >TP53-N131 <sup>!</sup> ALNKMFCQL  | 17    | >TP53-N131 <sup>!</sup> ALTKMFCQL    | 44  | 27    |
| >TP53-N131 <sup>!</sup> ALNKMFCQL  | 30    | >TP53-N131 <sup>!</sup> ALTKMFCQL    | 222 | 192   |
| >TP53-N131 <sup>!</sup> ALNKMFCQL  | 442   | >TP53-N131 <sup>!</sup> ALTKMFCQL    | 448 | 6     |
| >TP53-N131 <sup>!</sup> ALNKMFCQL  | 297   | >TP53-N131 <sup>!</sup> ALTKMFCQL    | 179 | 118   |
| >TP53-N131 <sup>!</sup> ALNKMFCQL  | 22    | >TP53-N131 <sup>!</sup> ALTKMFCQL    | 70  | 48    |
| >TP53-N131 <sup>!</sup> ALNKMFCQL  | 255   | >TP53-N131 <sup>!</sup> ALTKMFCQL    | 790 | 535   |
| >TP53-N131 <sup>!</sup> ALNKMFCQL  | 198   | >TP53-N131 <sup>!</sup> ALTKMFCQL    | 398 | 200   |
| >TP53-N131 <sup>!</sup> ALNKMFCQL  | 21    | >TP53-N131 <sup>!</sup> ALTKMFCQL    | 19  | 2     |

|                        |      |                       |      |      |
|------------------------|------|-----------------------|------|------|
| >TP53-N1311ALNKMFCQL   | 256  | >TP53-N1311ALTKMFCQL/ | 232  | 24   |
| >TP53-N1311ALNKMFCQL   | 66   | >TP53-N1311ALTKMFCQL  | 436  | 370  |
| >TP53-N1311ALNKMFCQ    | 245  | >TP53-N1311ALTKMFCQ   | 162  | 83   |
| >TP53-N1311ALNKMFCQL   | 3    | >TP53-N1311ALTKMFCQL  | 2    | 1    |
| >TP53-N1311ALNKMFCQL   | 11   | >TP53-N1311ALTKMFCQL/ | 9    | 2    |
| >TP53-N1311ALNKMFCQL   | 37   | >TP53-N1311ALTKMFCQL/ | 60   | 23   |
| >TP53-N1311ALNKMFCQL   | 25   | >TP53-N1311ALTKMFCQL/ | 53   | 28   |
| >TP53-N1311ALNKMFCQL   | 113  | >TP53-N1311ALTKMFCQL/ | 470  | 357  |
| >TP53-N1311ALNKMFCQL   | 431  | >TP53-N1311ALTKMFCQL/ | 1883 | 1452 |
| >TP53-N1311ALNKMFCQL   | 288  | >TP53-N1311ALTKMFCQL  | 296  | 8    |
| >TP53-N1311ALNKMFCQL   | 416  | >TP53-N1311ALTKMFCQL  | 3366 | 2950 |
| >TP53-N1311SPALNKMFCQ  | 432  | >TP53-N1311SPALTKMFCC | 1033 | 601  |
| >TP53-N1311SPALNKMFC   | 100  | >TP53-N1311SPALTKMF   | 72   | 28   |
| >TP53-N1311SPALNKMFCQ  | 41   | >TP53-N1311SPALTKMFCC | 39   | 2    |
| >TP53-N1311SPALNKMFCQ  | 372  | >TP53-N1311SPALTKMFCC | 406  | 34   |
| >TP53-N1311SPALNKMFC   | 326  | >TP53-N1311SPALTKMF   | 202  | 124  |
| >TP53-N1311SPALNKMFC   | 450  | >TP53-N1311SPALTKMF   | 168  | 282  |
| >TP53-N1311SPALNKMFC   | 677  | >TP53-N1311SPALTKMF   | 413  | 264  |
| >TP53-N1311YSPALNKM    | 2026 | >TP53-N1311YSPALTKM   | 307  | 1719 |
| >TP53-N1311YSPALNKMFC  | 384  | >TP53-N1311YSPALTKMF  | 67   | 317  |
| >TP53-N1311YSPALNKMFC  | 104  | >TP53-N1311YSPALTKMF  | 92   | 12   |
| >TP53-N1311YSPALNKM    | 586  | >TP53-N1311YSPALTKM   | 156  | 430  |
| >TP53-N1311YSPALNKMFC  | 43   | >TP53-N1311YSPALTKMF  | 32   | 11   |
| >TP53-N1311YSPALNKM    | 40   | >TP53-N1311YSPALTKM   | 57   | 17   |
| >TP53-N1311YSPALNKMFC  | 3    | >TP53-N1311YSPALTKMF  | 2    | 1    |
| >TP53-N1311YSPALNKMFC  | 22   | >TP53-N1311YSPALTKMFC | 12   | 10   |
| >TP53-N1311YSPALNKMFC  | 124  | >TP53-N1311YSPALTKMFC | 70   | 54   |
| >TP53-N1311YSPALNKM    | 67   | >TP53-N1311YSPALTKM   | 181  | 114  |
| >TP53-N1311YSPALNKMFC  | 103  | >TP53-N1311YSPALTKMF  | 192  | 89   |
| >TP53-N1311TYSPALNKM   | 136  | >TP53-N1311TYSPALTKM  | 37   | 99   |
| >TP53-N1311TYSPALNK    | 220  | >TP53-N1311TYSPALTK   | 408  | 188  |
| >TP53-N1311TYSPALNKMFC | 179  | >TP53-N1311TYSPALTKMF | 99   | 80   |
| >TP53-N1311TYSPALNKMFC | 64   | >TP53-N1311TYSPALTKMF | 60   | 4    |
| >TP53-N1311TYSPALNKM   | 27   | >TP53-N1311TYSPALTKM  | 75   | 48   |
| >TP53-N1311TYSPALNKMFC | 5    | >TP53-N1311TYSPALTKMF | 5    | 0    |
| >TP53-N1311TYSPALNKMFC | 586  | >TP53-N1311TYSPALTKMF | 301  | 285  |
| >TP53-N1311TYSPALNK    | 222  | >TP53-N1311TYSPALTK   | 282  | 60   |
| >TP53-N1311TYSPALNKMFC | 439  | >TP53-N1311TYSPALTKMF | 378  | 61   |
| >TP53-N1311CTYSPALNK   | 30   | >TP53-N1311CTYSPALTK  | 35   | 5    |
| >TP53-N1311CTYSPALNK   | 11   | >TP53-N1311CTYSPALTK  | 16   | 5    |
| >TP53-N1311CTYSPALNKM  | 343  | >TP53-N1311CTYSPALTKM | 133  | 210  |
| >TP53-N1311CTYSPALNKM  | 63   | >TP53-N1311CTYSPALTKM | 126  | 63   |
| >TP53-N1311CTYSPALNKM  | 380  | >TP53-N1311CTYSPALTKM | 231  | 149  |



|                        |       |                        |     |       |
|------------------------|-------|------------------------|-----|-------|
| >TP53-N131\CTYSPALNKM  | 246   | >TP53-N131\CTYSPALTKM  | 912 | 666   |
| >TP53-N131\CTYSPALNK   | 215   | >TP53-N131\CTYSPALTK   | 189 | 26    |
| >TP53-N131\CTYSPALNKM  | 767   | >TP53-N131\CTYSPALTKM  | 301 | 466   |
| >TP53-N131\CTYSPALNK   | 30    | >TP53-N131\CTYSPALTK   | 31  | 1     |
| >TP53-N131\CTYSPALNKM  | 488   | >TP53-N131\CTYSPALTKM  | 572 | 84    |
| >TP53-N131\CTYSPALNKM  | 610   | >TP53-N131\CTYSPALTKM  | 396 | 214   |
| >TP53-N131\CTYSPALNKM  | 23    | >TP53-N131\CTYSPALTKM  | 20  | 3     |
| >TP53-N131\CTYSPALNKM  | 24    | >TP53-N131\CTYSPALTKM  | 12  | 12    |
| >TP53-N131\CTYSPALNKM  | 5     | >TP53-N131\CTYSPALTKM  | 4   | 1     |
| >TP53-N131\CTYSPALNKM  | 627   | >TP53-N131\CTYSPALTKM  | 306 | 321   |
| >TP53-N131\CTYSPALNKM  | 76    | >TP53-N131\CTYSPALTKM  | 105 | 29    |
| >TP53-N131\CTYSPALNKM  | 146   | >TP53-N131\CTYSPALTKM  | 105 | 41    |
| >TP53-N131\CTYSPALNKM  | 30    | >TP53-N131\CTYSPALTKM  | 27  | 3     |
| >TP53-N131\CTYSPALNKM  | 13    | >TP53-N131\CTYSPALTKM  | 13  | 0     |
| >TP53-N131\CTYSPALNKM  | 358   | >TP53-N131\CTYSPALTKM  | 204 | 154   |
| >TP53-N131\TCTYSPALNKI | 453   | >TP53-N131\TCTYSPALTKI | 259 | 194   |
| >TP53-N131\VTCTYSPALN  | 80    | >TP53-N131\VTCTYSPALTI | 115 | 35    |
| >TP53-N131\VTCTYSPALN  | 14    | >TP53-N131\VTCTYSPALTI | 15  | 1     |
| >TP53-N131\VTCTYSPALN  | 146   | >TP53-N131\VTCTYSPALTI | 128 | 18    |
| >TP53-N131\VTCTYSPALN  | 490   | >TP53-N131\VTCTYSPALTI | 447 | 43    |
| >TP53-N131\NKMFCQLA    | 3092  | >TP53-N131\YKMFCQLA    | 160 | 2932  |
| >TP53-N131\NKMFCQLAK   | 646   | >TP53-N131\YKMFCQLAK   | 47  | 599   |
| >TP53-N131\NKMFCQLAK   | 4154  | >TP53-N131\YKMFCQLAK   | 359 | 3795  |
| >TP53-N131\LNKMFCQL    | 100   | >TP53-N131\LYKMFCQL    | 769 | 669   |
| >TP53-N131\LNKMFCQL    | 25342 | >TP53-N131\LYKMFCQL    | 383 | 24959 |
| >TP53-N131\LNKMFCQL    | 23814 | >TP53-N131\LYKMFCQL    | 445 | 23369 |
| >TP53-N131\LNKMFCQL    | 22235 | >TP53-N131\LYKMFCQL    | 23  | 22212 |
| >TP53-N131\LNKMFCQL    | 7014  | >TP53-N131\LYKMFCQL    | 470 | 6544  |
| >TP53-N131\LNKMFCQLA   | 3711  | >TP53-N131\LYKMFCQLA   | 151 | 3560  |
| >TP53-N131\LNKMFCQLAI  | 161   | >TP53-N131\LYKMFCQLAI  | 9   | 152   |
| >TP53-N131\LNKMFCQLAI  | 2155  | >TP53-N131\LYKMFCQLAI  | 182 | 1973  |
| >TP53-N131\LNKMFCQL    | 153   | >TP53-N131\LYKMFCQL    | 499 | 346   |
| >TP53-N131\LNKMFCQLAI  | 7312  | >TP53-N131\LYKMFCQLAI  | 306 | 7006  |
| >TP53-N131\LNKMFCQLA   | 31898 | >TP53-N131\LYKMFCQLA   | 362 | 31536 |
| >TP53-N131\SVTCTYSPALI | 12324 | >TP53-N131\SVTCTYSPALI | 146 | 12178 |
| >TP53-N131\SVTCTYSPALI | 28303 | >TP53-N131\SVTCTYSPALI | 158 | 28145 |
| >TP53-N131\SVTCTYSPALI | 15941 | >TP53-N131\SVTCTYSPALI | 20  | 15921 |
| >TP53-N131\SVTCTYSPALI | 24349 | >TP53-N131\SVTCTYSPALI | 231 | 24118 |
| >TP53-N131\SVTCTYSPALI | 6263  | >TP53-N131\SVTCTYSPALI | 257 | 6006  |
| >TP53-N131\SVTCTYSPALI | 23470 | >TP53-N131\SVTCTYSPALI | 60  | 23410 |
| >TP53-N131\SVTCTYSPALI | 2955  | >TP53-N131\SVTCTYSPALI | 18  | 2937  |
| >TP53-N131\SVTCTYSPALI | 34092 | >TP53-N131\SVTCTYSPALI | 333 | 33759 |
| >TP53-N131\ALNKMFCQL   | 2201  | >TP53-N131\ALYKMFCQL   | 90  | 2111  |

|                        |      |                        |      |      |
|------------------------|------|------------------------|------|------|
| >TP53-N131\ALNKMFCQL   | 238  | >TP53-N131\ALYKMFCQL   | 38   | 200  |
| >TP53-N131\ALNKMFCQL   | 3416 | >TP53-N131\ALYKMFCQL/  | 398  | 3018 |
| >TP53-N131\ALNKMFCQL   | 17   | >TP53-N131\ALYKMFCQL   | 23   | 6    |
| >TP53-N131\ALNKMFCQL   | 1394 | >TP53-N131\ALYKMFCQL/  | 260  | 1134 |
| >TP53-N131\ALNKMFCQL   | 30   | >TP53-N131\ALYKMFCQL   | 21   | 9    |
| >TP53-N131\ALNKMFCQL   | 442  | >TP53-N131\ALYKMFCQL/  | 75   | 367  |
| >TP53-N131\ALNKMFCQL   | 297  | >TP53-N131\ALYKMFCQL   | 60   | 237  |
| >TP53-N131\ALNKMFCQL   | 22   | >TP53-N131\ALYKMFCQL   | 4    | 18   |
| >TP53-N131\ALNKMFCQL   | 255  | >TP53-N131\ALYKMFCQL/  | 27   | 228  |
| >TP53-N131\ALNKMFCQL   | 198  | >TP53-N131\ALYKMFCQL   | 46   | 152  |
| >TP53-N131\ALNKMFCQ    | 2503 | >TP53-N131\ALYKMFCQ    | 278  | 2225 |
| >TP53-N131\ALNKMFCQL   | 21   | >TP53-N131\ALYKMFCQL   | 7    | 14   |
| >TP53-N131\ALNKMFCQL   | 256  | >TP53-N131\ALYKMFCQL/  | 30   | 226  |
| >TP53-N131\ALNKMFCQL   | 66   | >TP53-N131\ALYKMFCQL   | 80   | 14   |
| >TP53-N131\ALNKMFCQ    | 245  | >TP53-N131\ALYKMFCQ    | 47   | 198  |
| >TP53-N131\ALNKMFCQL   | 3    | >TP53-N131\ALYKMFCQL   | 2    | 1    |
| >TP53-N131\ALNKMFCQL   | 11   | >TP53-N131\ALYKMFCQL/  | 7    | 4    |
| >TP53-N131\ALNKMFCQL   | 37   | >TP53-N131\ALYKMFCQL/  | 25   | 12   |
| >TP53-N131\ALNKMFCQL   | 25   | >TP53-N131\ALYKMFCQL/  | 17   | 8    |
| >TP53-N131\ALNKMFCQL   | 113  | >TP53-N131\ALYKMFCQL/  | 92   | 21   |
| >TP53-N131\ALNKMFCQL   | 431  | >TP53-N131\ALYKMFCQL/  | 414  | 17   |
| >TP53-N131\ALNKMFCQL   | 860  | >TP53-N131\ALYKMFCQL   | 241  | 619  |
| >TP53-N131\ALNKMFCQL   | 288  | >TP53-N131\ALYKMFCQL   | 88   | 200  |
| >TP53-N131\ALNKMFCQL   | 416  | >TP53-N131\ALYKMFCQL   | 178  | 238  |
| >TP53-N131\ALNKMFCQL   | 1551 | >TP53-N131\ALYKMFCQL   | 321  | 1230 |
| >TP53-N131\ALNKMFCQL   | 1052 | >TP53-N131\ALYKMFCQL/  | 340  | 712  |
| >TP53-N131\SPALNKMFCQ  | 432  | >TP53-N131\SPALYKMFCQ  | 2199 | 1767 |
| >TP53-N131\SPALNKMFC   | 100  | >TP53-N131\SPALYKMF    | 127  | 27   |
| >TP53-N131\SPALNKMFCQ  | 41   | >TP53-N131\SPALYKMFCQ  | 37   | 4    |
| >TP53-N131\SPALNKMFCQ  | 372  | >TP53-N131\SPALYKMFCQ  | 141  | 231  |
| >TP53-N131\SPALNKMFC   | 326  | >TP53-N131\SPALYKMF    | 286  | 40   |
| >TP53-N131\SPALNKMFC   | 450  | >TP53-N131\SPALYKMF    | 162  | 288  |
| >TP53-N131\SPALNKMFC   | 677  | >TP53-N131\SPALYKMF    | 234  | 443  |
| >TP53-N131\YSPALNKMFC  | 2228 | >TP53-N131\YSPALYKMF   | 353  | 1875 |
| >TP53-N131\YSPALNKMFC  | 384  | >TP53-N131\YSPALYKMF   | 19   | 365  |
| >TP53-N131\YSPALNKMFC  | 104  | >TP53-N131\YSPALYKMF   | 57   | 47   |
| >TP53-N131\YSPALNKM    | 586  | >TP53-N131\YSPALYKM    | 292  | 294  |
| >TP53-N131\YSPALNKMFC  | 43   | >TP53-N131\YSPALYKMF   | 62   | 19   |
| >TP53-N131\YSPALNKM    | 40   | >TP53-N131\YSPALYKM    | 6    | 34   |
| >TP53-N131\YSPALNKMFC  | 3    | >TP53-N131\YSPALYKMF   | 2    | 1    |
| >TP53-N131\YSPALNKMFCQ | 22   | >TP53-N131\YSPALYKMFCQ | 11   | 11   |
| >TP53-N131\YSPALNKMFCQ | 124  | >TP53-N131\YSPALYKMFCQ | 65   | 59   |
| >TP53-N131\YSPALNKM    | 67   | >TP53-N131\YSPALYKM    | 1236 | 1169 |

|                       |       |                       |      |       |
|-----------------------|-------|-----------------------|------|-------|
| >TP53-N131\YSPALNKMF  | 103   | >TP53-N131\YSPALYKMF  | 139  | 36    |
| >TP53-N131\TYSPALNKM  | 136   | >TP53-N131\TYSPALYKM  | 2000 | 1864  |
| >TP53-N131\TYSPALNK   | 220   | >TP53-N131\TYSPALYK   | 52   | 168   |
| >TP53-N131\TYSPALNKM  | 1702  | >TP53-N131\TYSPALYKM  | 238  | 1464  |
| >TP53-N131\TYSPALNKMF | 179   | >TP53-N131\TYSPALYKMF | 70   | 109   |
| >TP53-N131\TYSPALNKM  | 1122  | >TP53-N131\TYSPALYKM  | 375  | 747   |
| >TP53-N131\TYSPALNKMF | 64    | >TP53-N131\TYSPALYKMF | 70   | 6     |
| >TP53-N131\TYSPALNKM  | 27    | >TP53-N131\TYSPALYKM  | 26   | 1     |
| >TP53-N131\TYSPALNKMF | 5     | >TP53-N131\TYSPALYKMF | 4    | 1     |
| >TP53-N131\TYSPALNKMF | 586   | >TP53-N131\TYSPALYKMF | 456  | 130   |
| >TP53-N131\TYSPALNK   | 222   | >TP53-N131\TYSPALYK   | 84   | 138   |
| >TP53-N131\TYSPALNK   | 1077  | >TP53-N131\TYSPALYK   | 333  | 744   |
| >TP53-N131\TYSPALNK   | 674   | >TP53-N131\TYSPALYK   | 74   | 600   |
| >TP53-N131\TYSPALNKM  | 866   | >TP53-N131\TYSPALYKM  | 385  | 481   |
| >TP53-N131\TYSPALNKMF | 439   | >TP53-N131\TYSPALYKMF | 387  | 52    |
| >TP53-N131\CTYSPALNKM | 1314  | >TP53-N131\CTYSPALYKM | 305  | 1009  |
| >TP53-N131\CTYSPALN   | 20005 | >TP53-N131\CTYSPALY   | 78   | 19927 |
| >TP53-N131\CTYSPALNKM | 1199  | >TP53-N131\CTYSPALYKM | 319  | 880   |
| >TP53-N131\CTYSPALN   | 10709 | >TP53-N131\CTYSPALY   | 96   | 10613 |
| >TP53-N131\CTYSPALNK  | 30    | >TP53-N131\CTYSPALYK  | 27   | 3     |
| >TP53-N131\CTYSPALN   | 10717 | >TP53-N131\CTYSPALY   | 59   | 10658 |
| >TP53-N131\CTYSPALNK  | 11    | >TP53-N131\CTYSPALYK  | 7    | 4     |
| >TP53-N131\CTYSPALNKM | 343   | >TP53-N131\CTYSPALYKM | 74   | 269   |
| >TP53-N131\CTYSPALN   | 24352 | >TP53-N131\CTYSPALY   | 67   | 24285 |
| >TP53-N131\CTYSPALNKM | 63    | >TP53-N131\CTYSPALYKM | 55   | 8     |
| >TP53-N131\CTYSPALNKM | 380   | >TP53-N131\CTYSPALYKM | 301  | 79    |
| >TP53-N131\CTYSPALN   | 28931 | >TP53-N131\CTYSPALY   | 126  | 28805 |
| >TP53-N131\CTYSPALNKM | 246   | >TP53-N131\CTYSPALYKM | 807  | 561   |
| >TP53-N131\CTYSPALN   | 10536 | >TP53-N131\CTYSPALY   | 10   | 10526 |
| >TP53-N131\CTYSPALNK  | 215   | >TP53-N131\CTYSPALYK  | 64   | 151   |
| >TP53-N131\CTYSPALN   | 15855 | >TP53-N131\CTYSPALY   | 46   | 15809 |
| >TP53-N131\CTYSPALNK  | 2398  | >TP53-N131\CTYSPALYK  | 344  | 2054  |
| >TP53-N131\CTYSPALN   | 2355  | >TP53-N131\CTYSPALY   | 88   | 2267  |
| >TP53-N131\CTYSPALNK  | 30    | >TP53-N131\CTYSPALYK  | 9    | 21    |
| >TP53-N131\CTYSPALNKM | 488   | >TP53-N131\CTYSPALYKM | 218  | 270   |
| >TP53-N131\CTYSPALN   | 24077 | >TP53-N131\CTYSPALY   | 63   | 24014 |
| >TP53-N131\CTYSPALN   | 16830 | >TP53-N131\CTYSPALY   | 164  | 16666 |
| >TP53-N131\CTYSPALNKM | 23    | >TP53-N131\CTYSPALYKM | 18   | 5     |
| >TP53-N131\CTYSPALN   | 6176  | >TP53-N131\CTYSPALY   | 5    | 6171  |
| >TP53-N131\CTYSPALNKM | 24    | >TP53-N131\CTYSPALYKM | 15   | 9     |
| >TP53-N131\CTYSPALNKM | 5     | >TP53-N131\CTYSPALYKM | 5    | 0     |
| >TP53-N131\CTYSPALN   | 16669 | >TP53-N131\CTYSPALY   | 179  | 16490 |
| >TP53-N131\CTYSPALNKM | 1669  | >TP53-N131\CTYSPALYKM | 362  | 1307  |

|                        |       |                        |     |       |
|------------------------|-------|------------------------|-----|-------|
| >TP53-N131\CTYSPALNKM  | 627   | >TP53-N131\CTYSPALYKM  | 323 | 304   |
| >TP53-N131\CTYSPALN    | 13462 | >TP53-N131\CTYSPALY    | 346 | 13116 |
| >TP53-N131\CTYSPALNKM  | 76    | >TP53-N131\CTYSPALYKM  | 34  | 42    |
| >TP53-N131\CTYSPALNKM  | 146   | >TP53-N131\CTYSPALYKM  | 85  | 61    |
| >TP53-N131\CTYSPALN    | 11904 | >TP53-N131\CTYSPALY    | 202 | 11702 |
| >TP53-N131\CTYSPALNKM  | 30    | >TP53-N131\CTYSPALYKM  | 39  | 9     |
| >TP53-N131\CTYSPALNKM  | 13    | >TP53-N131\CTYSPALYKM  | 12  | 1     |
| >TP53-N131\CTYSPALN    | 25186 | >TP53-N131\CTYSPALY    | 76  | 25110 |
| >TP53-N131\CTYSPALNK   | 572   | >TP53-N131\CTYSPALYK   | 484 | 88    |
| >TP53-N131\CTYSPALNK   | 3222  | >TP53-N131\CTYSPALYK   | 340 | 2882  |
| >TP53-N131\CTYSPALNKM  | 358   | >TP53-N131\CTYSPALYKM  | 259 | 99    |
| >TP53-N131\TCTYSPALNK  | 1144  | >TP53-N131\TCTYSPALYK  | 254 | 890   |
| >TP53-N131\TCTYSPALNK  | 807   | >TP53-N131\TCTYSPALYK  | 225 | 582   |
| >TP53-N131\TCTYSPALN   | 22955 | >TP53-N131\TCTYSPALY   | 159 | 22796 |
| >TP53-N131\TCTYSPALN   | 26277 | >TP53-N131\TCTYSPALY   | 346 | 25931 |
| >TP53-N131\TCTYSPALN   | 14780 | >TP53-N131\TCTYSPALY   | 168 | 14612 |
| >TP53-N131\TCTYSPALNK  | 453   | >TP53-N131\TCTYSPALYK  | 859 | 406   |
| >TP53-N131\TCTYSPALNK  | 1940  | >TP53-N131\TCTYSPALYK  | 381 | 1559  |
| >TP53-N131\VTCTYSPALN  | 25936 | >TP53-N131\VTCTYSPALY  | 100 | 25836 |
| >TP53-N131\VTCTYSPALN  | 22206 | >TP53-N131\VTCTYSPALY  | 456 | 21750 |
| >TP53-N131\VTCTYSPALN  | 80    | >TP53-N131\VTCTYSPALY  | 56  | 24    |
| >TP53-N131\VTCTYSPALN  | 31268 | >TP53-N131\VTCTYSPALY  | 263 | 31005 |
| >TP53-N131\VTCTYSPALN  | 14    | >TP53-N131\VTCTYSPALY  | 9   | 5     |
| >TP53-N131\VTCTYSPALN  | 21375 | >TP53-N131\VTCTYSPALY  | 124 | 21251 |
| >TP53-N131\VTCTYSPALN  | 23121 | >TP53-N131\VTCTYSPALY  | 50  | 23071 |
| >TP53-N131\VTCTYSPALN  | 146   | >TP53-N131\VTCTYSPALY  | 56  | 90    |
| >TP53-N131\VTCTYSPALN  | 14962 | >TP53-N131\VTCTYSPALY  | 103 | 14859 |
| >TP53-N131\VTCTYSPALN  | 2145  | >TP53-N131\VTCTYSPALY  | 475 | 1670  |
| >TP53-N131\VTCTYSPALN  | 490   | >TP53-N131\VTCTYSPALY  | 124 | 366   |
| >TP53-N131\VTCTYSPALN  | 22728 | >TP53-N131\VTCTYSPALY  | 40  | 22688 |
| >TP53-N131\VTCTYSPALN  | 6827  | >TP53-N131\VTCTYSPALY  | 5   | 6822  |
| >TP53-N131\VTCTYSPALN  | 7897  | >TP53-N131\VTCTYSPALY  | 25  | 7872  |
| >TP53-N200[VEGNLRVEYL  | 312   | >TP53-N200[VEGDLRVEYL  | 447 | 135   |
| >TP53-N200[VEGNLRVEY   | 67    | >TP53-N200[VEGDLRVEY   | 36  | 31    |
| >TP53-N200[VEGNLRVEYL  | 472   | >TP53-N200[VEGDLRVEYL  | 419 | 53    |
| >TP53-N200[VEGNLRVEY   | 338   | >TP53-N200[VEGDLRVEY   | 329 | 9     |
| >TP53-N200[VEGNLRVEYL  | 278   | >TP53-N200[VEGDLRVEYL  | 543 | 265   |
| >TP53-N200[RVEGNLRV    | 54    | >TP53-N200[RVEGDLRV    | 85  | 31    |
| >TP53-N200[RVEGNLRVEY  | 224   | >TP53-N200[RVEGDLRVEY  | 379 | 155   |
| >TP53-N200[RVEGNLRVEY  | 301   | >TP53-N200[RVEGDLRVEY  | 911 | 610   |
| >TP53-N200[RVEGNLRVEY  | 400   | >TP53-N200[RVEGDLRVEY  | 901 | 501   |
| >TP53-N200[IRVEGNLRVE' | 53    | >TP53-N200[IRVEGDLRVE' | 115 | 62    |
| >TP53-N200[LIRVEGNLRV  | 35    | >TP53-N200[LIRVEGDLRV  | 50  | 15    |

|                         |       |                         |      |       |
|-------------------------|-------|-------------------------|------|-------|
| >TP53-N200I LIRVEGNLRV  | 296   | >TP53-N200I LIRVEGDLRV  | 1436 | 1140  |
| >TP53-N200I HLIRVEGNLR' | 156   | >TP53-N200I HLIRVEGDLR' | 267  | 111   |
| >TP53-N200I HLIRVEGNL   | 226   | >TP53-N200I HLIRVEGDL   | 1375 | 1149  |
| >TP53-N200I HLIRVEGNLR' | 111   | >TP53-N200I HLIRVEGDLR' | 249  | 138   |
| >TP53-N200I HLIRVEGNLR' | 41    | >TP53-N200I HLIRVEGDLR' | 82   | 41    |
| >TP53-N200I HLIRVEGNLR' | 322   | >TP53-N200I HLIRVEGDLR' | 431  | 109   |
| >TP53-N200I HLIRVEGNL   | 327   | >TP53-N200I HLIRVEGDL   | 1649 | 1322  |
| >TP53-N200I HLIRVEGNLR' | 9     | >TP53-N200I HLIRVEGDLR' | 16   | 7     |
| >TP53-N200I HLIRVEGNLR' | 27    | >TP53-N200I HLIRVEGDLR' | 33   | 6     |
| >TP53-N200I HLIRVEGNLR' | 27    | >TP53-N200I HLIRVEGDLR' | 27   | 0     |
| >TP53-N200I HLIRVEGNL   | 153   | >TP53-N200I HLIRVEGDL   | 287  | 134   |
| >TP53-N200I HLIRVEGNLR' | 4     | >TP53-N200I HLIRVEGDLR' | 5    | 1     |
| >TP53-N200I HLIRVEGNLR  | 241   | >TP53-N200I HLIRVEGDLR  | 1015 | 774   |
| >TP53-N200I HLIRVEGNLR  | 381   | >TP53-N200I HLIRVEGDLR  | 854  | 473   |
| >TP53-N200I HLIRVEGNLR  | 24    | >TP53-N200I HLIRVEGDLR  | 30   | 6     |
| >TP53-N200I HLIRVEGNLR' | 398   | >TP53-N200I HLIRVEGDLR' | 689  | 291   |
| >TP53-N200I HLIRVEGNLR  | 478   | >TP53-N200I HLIRVEGDLR  | 756  | 278   |
| >TP53-N200I GNLRVEYL    | 19916 | >TP53-N200I GILRVEYL    | 350  | 19566 |
| >TP53-N200I GNLRVEYL    | 7062  | >TP53-N200I GILRVEYL    | 235  | 6827  |
| >TP53-N200I GNLRVEYL    | 14686 | >TP53-N200I GILRVEYL    | 176  | 14510 |
| >TP53-N200I GNLRVEYL    | 7164  | >TP53-N200I GILRVEYL    | 16   | 7148  |
| >TP53-N200I GNLRVEYL    | 17866 | >TP53-N200I GILRVEYL    | 140  | 17726 |
| >TP53-N200I GNLRVEYL    | 13279 | >TP53-N200I GILRVEYL    | 48   | 13231 |
| >TP53-N200I GNLRVEYL    | 26830 | >TP53-N200I GILRVEYL    | 207  | 26623 |
| >TP53-N200I VEGNLRVEYL  | 312   | >TP53-N200I VEGILRVEYL  | 162  | 150   |
| >TP53-N200I VEGNLRVEY   | 67    | >TP53-N200I VEGILRVEY   | 57   | 10    |
| >TP53-N200I VEGNLRVEYL  | 472   | >TP53-N200I VEGILRVEYL  | 467  | 5     |
| >TP53-N200I VEGNLRVEY   | 338   | >TP53-N200I VEGILRVEY   | 593  | 255   |
| >TP53-N200I VEGNLRVEYL  | 278   | >TP53-N200I VEGILRVEYL  | 306  | 28    |
| >TP53-N200I RVEGNLRVEY  | 844   | >TP53-N200I RVEGILRVEYL | 298  | 546   |
| >TP53-N200I RVEGNLRV    | 732   | >TP53-N200I RVEGILRV    | 214  | 518   |
| >TP53-N200I RVEGNLRV    | 604   | >TP53-N200I RVEGILRV    | 262  | 342   |
| >TP53-N200I RVEGNLRV    | 54    | >TP53-N200I RVEGILRV    | 34   | 20    |
| >TP53-N200I RVEGNLRVEY  | 224   | >TP53-N200I RVEGILRVEY  | 225  | 1     |
| >TP53-N200I RVEGNLRVEY  | 810   | >TP53-N200I RVEGILRVEY  | 348  | 462   |
| >TP53-N200I RVEGNLRVEY  | 1375  | >TP53-N200I RVEGILRVEYL | 465  | 910   |
| >TP53-N200I RVEGNLRVEY  | 1157  | >TP53-N200I RVEGILRVEY  | 276  | 881   |
| >TP53-N200I RVEGNLRVEY  | 301   | >TP53-N200I RVEGILRVEY  | 503  | 202   |
| >TP53-N200I RVEGNLRVEY  | 400   | >TP53-N200I RVEGILRVEY  | 572  | 172   |
| >TP53-N200I RVEGNLRVEY  | 933   | >TP53-N200I RVEGILRVEY  | 308  | 625   |
| >TP53-N200I IRVEGNLRVE' | 53    | >TP53-N200I IRVEGILRVEY | 66   | 13    |
| >TP53-N200I IRVEGNLR    | 1338  | >TP53-N200I IRVEGILR    | 411  | 927   |
| >TP53-N200I IRVEGNLRV   | 1217  | >TP53-N200I IRVEGILRV   | 319  | 898   |

|                         |       |                         |      |       |
|-------------------------|-------|-------------------------|------|-------|
| >TP53-N200I IRVEGNLRVE' | 668   | >TP53-N200I IRVEGILRVEY | 422  | 246   |
| >TP53-N200I IRVEGNLRV   | 1782  | >TP53-N200I IRVEGILRV   | 354  | 1428  |
| >TP53-N200I LIRVEGNLRV  | 555   | >TP53-N200I LIRVEGILRV  | 179  | 376   |
| >TP53-N200I LIRVEGNLRV  | 1834  | >TP53-N200I LIRVEGILRV  | 462  | 1372  |
| >TP53-N200I LIRVEGNLRV  | 35    | >TP53-N200I LIRVEGILRV  | 16   | 19    |
| >TP53-N200I LIRVEGNLR   | 1087  | >TP53-N200I LIRVEGILR   | 435  | 652   |
| >TP53-N200I LIRVEGNLRV  | 296   | >TP53-N200I LIRVEGILRV  | 260  | 36    |
| >TP53-N200I LIRVEGNLR   | 570   | >TP53-N200I LIRVEGILR   | 415  | 155   |
| >TP53-N200I HLIRVEGNLR' | 156   | >TP53-N200I HLIRVEGILRV | 111  | 45    |
| >TP53-N200I HLIRVEGN    | 7893  | >TP53-N200I HLIRVEGI    | 85   | 7808  |
| >TP53-N200I HLIRVEGNL   | 226   | >TP53-N200I HLIRVEGIL   | 917  | 691   |
| >TP53-N200I HLIRVEGNLR' | 111   | >TP53-N200I HLIRVEGILRV | 113  | 2     |
| >TP53-N200I HLIRVEGN    | 15691 | >TP53-N200I HLIRVEGI    | 76   | 15615 |
| >TP53-N200I HLIRVEGNLR' | 41    | >TP53-N200I HLIRVEGILRV | 27   | 14    |
| >TP53-N200I HLIRVEGN    | 20252 | >TP53-N200I HLIRVEGI    | 360  | 19892 |
| >TP53-N200I HLIRVEGNLR' | 322   | >TP53-N200I HLIRVEGILRV | 188  | 134   |
| >TP53-N200I HLIRVEGN    | 9818  | >TP53-N200I HLIRVEGI    | 28   | 9790  |
| >TP53-N200I HLIRVEGNL   | 327   | >TP53-N200I HLIRVEGIL   | 1134 | 807   |
| >TP53-N200I HLIRVEGNLR' | 9     | >TP53-N200I HLIRVEGILRV | 7    | 2     |
| >TP53-N200I HLIRVEGN    | 14809 | >TP53-N200I HLIRVEGI    | 45   | 14764 |
| >TP53-N200I HLIRVEGNLR' | 27    | >TP53-N200I HLIRVEGILRV | 18   | 9     |
| >TP53-N200I HLIRVEGN    | 20581 | >TP53-N200I HLIRVEGI    | 279  | 20302 |
| >TP53-N200I HLIRVEGNLR' | 27    | >TP53-N200I HLIRVEGILRV | 20   | 7     |
| >TP53-N200I HLIRVEGNLR' | 701   | >TP53-N200I HLIRVEGILRV | 355  | 346   |
| >TP53-N200I HLIRVEGN    | 16387 | >TP53-N200I HLIRVEGI    | 72   | 16315 |
| >TP53-N200I HLIRVEGNL   | 153   | >TP53-N200I HLIRVEGIL   | 306  | 153   |
| >TP53-N200I HLIRVEGNLR' | 4     | >TP53-N200I HLIRVEGILRV | 4    | 0     |
| >TP53-N200I HLIRVEGNLR  | 241   | >TP53-N200I HLIRVEGILR  | 197  | 44    |
| >TP53-N200I HLIRVEGNLR  | 381   | >TP53-N200I HLIRVEGILR  | 146  | 235   |
| >TP53-N200I HLIRVEGNLR  | 24    | >TP53-N200I HLIRVEGILR  | 17   | 7     |
| >TP53-N200I HLIRVEGNLR' | 398   | >TP53-N200I HLIRVEGILRV | 385  | 13    |
| >TP53-N200I HLIRVEGNLR  | 478   | >TP53-N200I HLIRVEGILR  | 299  | 179   |
| >TP53-N200I QHLIRVEGN   | 32185 | >TP53-N200I QHLIRVEGI   | 294  | 31891 |
| >TP53-N200I QHLIRVEGNL  | 709   | >TP53-N200I QHLIRVEGILF | 390  | 319   |
| >TP53-N200ϑ VEGNLRVEYL  | 312   | >TP53-N200ϑ VEGSLRVEYL  | 389  | 77    |
| >TP53-N200ϑ VEGNLRVEY   | 67    | >TP53-N200ϑ VEGSLRVEY   | 60   | 7     |
| >TP53-N200ϑ VEGNLRVEYL  | 472   | >TP53-N200ϑ VEGSLRVEYL  | 287  | 185   |
| >TP53-N200ϑ VEGNLRVEY   | 338   | >TP53-N200ϑ VEGSLRVEY   | 321  | 17    |
| >TP53-N200ϑ VEGNLRVEYL  | 278   | >TP53-N200ϑ VEGSLRVEYL  | 152  | 126   |
| >TP53-N200ϑ RVEGNLRV    | 732   | >TP53-N200ϑ RVEGSLRV    | 425  | 307   |
| >TP53-N200ϑ RVEGNLRV    | 54    | >TP53-N200ϑ RVEGSLRV    | 52   | 2     |
| >TP53-N200ϑ RVEGNLRVEY  | 224   | >TP53-N200ϑ RVEGSLRVEY  | 170  | 54    |
| >TP53-N200ϑ RVEGNLRVEY  | 301   | >TP53-N200ϑ RVEGSLRVEY  | 93   | 208   |

|                         |       |                         |     |       |
|-------------------------|-------|-------------------------|-----|-------|
| >TP53-N200\$RVEGNLRVEY  | 400   | >TP53-N200\$RVEGSLRVEY  | 389 | 11    |
| >TP53-N200\$RVEGNLRVEY  | 933   | >TP53-N200\$RVEGSLRVEY  | 278 | 655   |
| >TP53-N200\$IRVEGNLRVE\ | 53    | >TP53-N200\$IRVEGSLRVE\ | 43  | 10    |
| >TP53-N200\$LIRVEGNLRV  | 555   | >TP53-N200\$LIRVEGSLRV  | 337 | 218   |
| >TP53-N200\$LIRVEGNLRV  | 35    | >TP53-N200\$LIRVEGSLRV  | 23  | 12    |
| >TP53-N200\$LIRVEGNLRV  | 296   | >TP53-N200\$LIRVEGSLRV  | 238 | 58    |
| >TP53-N200\$LIRVEGNLR   | 570   | >TP53-N200\$LIRVEGSLR   | 360 | 210   |
| >TP53-N200\$HLIRVEGNLR\ | 156   | >TP53-N200\$HLIRVEGSLR\ | 138 | 18    |
| >TP53-N200\$HLIRVEGNL   | 226   | >TP53-N200\$HLIRVEGSL   | 223 | 3     |
| >TP53-N200\$HLIRVEGNLR\ | 111   | >TP53-N200\$HLIRVEGSLR\ | 93  | 18    |
| >TP53-N200\$HLIRVEGNL   | 690   | >TP53-N200\$HLIRVEGSL   | 403 | 287   |
| >TP53-N200\$HLIRVEGNLR\ | 41    | >TP53-N200\$HLIRVEGSLR\ | 28  | 13    |
| >TP53-N200\$HLIRVEGNLR\ | 322   | >TP53-N200\$HLIRVEGSLR\ | 207 | 115   |
| >TP53-N200\$HLIRVEGNL   | 327   | >TP53-N200\$HLIRVEGSL   | 152 | 175   |
| >TP53-N200\$HLIRVEGNLR\ | 9     | >TP53-N200\$HLIRVEGSLR\ | 7   | 2     |
| >TP53-N200\$HLIRVEGNL   | 806   | >TP53-N200\$HLIRVEGSL   | 384 | 422   |
| >TP53-N200\$HLIRVEGNLR\ | 27    | >TP53-N200\$HLIRVEGSLR\ | 17  | 10    |
| >TP53-N200\$HLIRVEGNLR\ | 27    | >TP53-N200\$HLIRVEGSLR\ | 22  | 5     |
| >TP53-N200\$HLIRVEGNLR\ | 701   | >TP53-N200\$HLIRVEGSLR\ | 452 | 249   |
| >TP53-N200\$HLIRVEGNL   | 153   | >TP53-N200\$HLIRVEGSL   | 64  | 89    |
| >TP53-N200\$HLIRVEGNLR\ | 4     | >TP53-N200\$HLIRVEGSLR\ | 3   | 1     |
| >TP53-N200\$HLIRVEGNLR  | 241   | >TP53-N200\$HLIRVEGSLR  | 218 | 23    |
| >TP53-N200\$HLIRVEGNLR  | 381   | >TP53-N200\$HLIRVEGSLR  | 204 | 177   |
| >TP53-N200\$HLIRVEGNLR  | 24    | >TP53-N200\$HLIRVEGSLR  | 16  | 8     |
| >TP53-N200\$HLIRVEGNLR\ | 398   | >TP53-N200\$HLIRVEGSLR\ | 399 | 1     |
| >TP53-N200\$HLIRVEGNLR  | 478   | >TP53-N200\$HLIRVEGSLR  | 724 | 246   |
| >TP53-N200\$GNLRVEYL    | 7164  | >TP53-N200\$GTLRVEYL    | 62  | 7102  |
| >TP53-N200\$GNLRVEYL    | 13279 | >TP53-N200\$GTLRVEYL    | 265 | 13014 |
| >TP53-N200\$GNLRVEYLDL  | 4900  | >TP53-N200\$GTLRVEYLDL  | 339 | 4561  |
| >TP53-N200\$GNLRVEYLDL  | 8656  | >TP53-N200\$GTLRVEYLDL  | 279 | 8377  |
| >TP53-N200\$GNLRVEYLDL  | 5603  | >TP53-N200\$GTLRVEYLDL  | 349 | 5254  |
| >TP53-N200\$VEGNLRVEYL  | 312   | >TP53-N200\$VEGTLRVEYL  | 136 | 176   |
| >TP53-N200\$VEGNLRVEY   | 67    | >TP53-N200\$VEGTLRVEY   | 57  | 10    |
| >TP53-N200\$VEGNLRVEYL  | 472   | >TP53-N200\$VEGTLRVEYL  | 556 | 84    |
| >TP53-N200\$VEGNLRVEY   | 338   | >TP53-N200\$VEGTLRVEY   | 508 | 170   |
| >TP53-N200\$VEGNLRVEYL  | 278   | >TP53-N200\$VEGTLRVEYL  | 163 | 115   |
| >TP53-N200\$RVEGNLRV    | 732   | >TP53-N200\$RVEGTLRV    | 405 | 327   |
| >TP53-N200\$RVEGNLRV    | 54    | >TP53-N200\$RVEGTLRV    | 46  | 8     |
| >TP53-N200\$RVEGNLRVEY  | 224   | >TP53-N200\$RVEGTLRVEY  | 196 | 28    |
| >TP53-N200\$RVEGNLRVEY  | 301   | >TP53-N200\$RVEGTLRVEY  | 181 | 120   |
| >TP53-N200\$RVEGNLRVEY  | 400   | >TP53-N200\$RVEGTLRVEY  | 557 | 157   |
| >TP53-N200\$RVEGNLRVEY  | 933   | >TP53-N200\$RVEGTLRVEY  | 424 | 509   |
| >TP53-N200\$IRVEGNLRVE\ | 53    | >TP53-N200\$IRVEGTLRVE\ | 53  | 0     |

|                        |     |                        |      |      |
|------------------------|-----|------------------------|------|------|
| >TP53-N2001LIRVEGNLRV  | 555 | >TP53-N2001LIRVEGTLRV  | 199  | 356  |
| >TP53-N2001LIRVEGNLRV  | 35  | >TP53-N2001LIRVEGTLRV  | 20   | 15   |
| >TP53-N2001LIRVEGNLRV  | 296 | >TP53-N2001LIRVEGTLRV  | 400  | 104  |
| >TP53-N2001LIRVEGNLR   | 570 | >TP53-N2001LIRVEGTLR   | 217  | 353  |
| >TP53-N2001HLIRVEGNLR' | 156 | >TP53-N2001HLIRVEGTLR\ | 122  | 34   |
| >TP53-N2001HLIRVEGNL   | 226 | >TP53-N2001HLIRVEGTL   | 505  | 279  |
| >TP53-N2001HLIRVEGNLR' | 111 | >TP53-N2001HLIRVEGTLR\ | 92   | 19   |
| >TP53-N2001HLIRVEGNLR' | 41  | >TP53-N2001HLIRVEGTLR\ | 26   | 15   |
| >TP53-N2001HLIRVEGNLR' | 322 | >TP53-N2001HLIRVEGTLR\ | 201  | 121  |
| >TP53-N2001HLIRVEGNL   | 327 | >TP53-N2001HLIRVEGTL   | 89   | 238  |
| >TP53-N2001HLIRVEGNLR' | 9   | >TP53-N2001HLIRVEGTLR\ | 6    | 3    |
| >TP53-N2001HLIRVEGNL   | 806 | >TP53-N2001HLIRVEGTL   | 108  | 698  |
| >TP53-N2001HLIRVEGNLR' | 27  | >TP53-N2001HLIRVEGTLR\ | 14   | 13   |
| >TP53-N2001HLIRVEGNL   | 878 | >TP53-N2001HLIRVEGTL   | 433  | 445  |
| >TP53-N2001HLIRVEGNLR' | 27  | >TP53-N2001HLIRVEGTLR\ | 21   | 6    |
| >TP53-N2001HLIRVEGNLR' | 701 | >TP53-N2001HLIRVEGTLR\ | 348  | 353  |
| >TP53-N2001HLIRVEGNL   | 153 | >TP53-N2001HLIRVEGTL   | 53   | 100  |
| >TP53-N2001HLIRVEGNLR' | 4   | >TP53-N2001HLIRVEGTLR\ | 3    | 1    |
| >TP53-N2001HLIRVEGNL   | 241 | >TP53-N2001HLIRVEGTLR  | 291  | 50   |
| >TP53-N2001HLIRVEGNL   | 381 | >TP53-N2001HLIRVEGTLR  | 331  | 50   |
| >TP53-N2001HLIRVEGNL   | 24  | >TP53-N2001HLIRVEGTLR  | 18   | 6    |
| >TP53-N2001HLIRVEGNLR' | 398 | >TP53-N2001HLIRVEGTLR\ | 321  | 77   |
| >TP53-N2001HLIRVEGNL   | 478 | >TP53-N2001HLIRVEGTLR  | 461  | 17   |
| >TP53-N210[NTFRHSVV    | 382 | >TP53-N210[DTFRHSVV    | 7168 | 6786 |
| >TP53-N210[NTFRHSVV    | 309 | >TP53-N210[DTFRHSVV    | 1955 | 1646 |
| >TP53-N210[NTFRHSVVV   | 265 | >TP53-N210[DTFRHSVVV   | 1659 | 1394 |
| >TP53-N210[NTFRHSVVVF  | 128 | >TP53-N210[DTFRHSVVVF  | 1695 | 1567 |
| >TP53-N210[NTFRHSVVVF  | 845 | >TP53-N210[DTFRHSVVVF  | 173  | 672  |
| >TP53-N210[NTFRHSVVVF  | 97  | >TP53-N210[DTFRHSVVVF  | 19   | 78   |
| >TP53-N210[NTFRHSVVVF  | 123 | >TP53-N210[DTFRHSVVVF  | 24   | 99   |
| >TP53-N210[NTFRHSVVVF  | 678 | >TP53-N210[DTFRHSVVVF  | 177  | 501  |
| >TP53-N210[NTFRHSVVVF  | 82  | >TP53-N210[DTFRHSVVVF  | 187  | 105  |
| >TP53-N210[NTFRHSVVV   | 412 | >TP53-N210[DTFRHSVVV   | 489  | 77   |
| >TP53-N210[NTFRHSVVVF  | 61  | >TP53-N210[DTFRHSVVVF  | 80   | 19   |
| >TP53-N210[NTFRHSVVVF  | 34  | >TP53-N210[DTFRHSVVVF  | 27   | 7    |
| >TP53-N210[NTFRHSVV    | 11  | >TP53-N210[DTFRHSVV    | 17   | 6    |
| >TP53-N210[NTFRHSVVV   | 8   | >TP53-N210[DTFRHSVVV   | 11   | 3    |
| >TP53-N210[NTFRHSVV    | 50  | >TP53-N210[DTFRHSVV    | 59   | 9    |
| >TP53-N210[NTFRHSVVV   | 25  | >TP53-N210[DTFRHSVVV   | 29   | 4    |
| >TP53-N210[NTFRHSVVVF  | 65  | >TP53-N210[DTFRHSVVVF  | 322  | 257  |
| >TP53-N210[NTFRHSVVVF  | 492 | >TP53-N210[DTFRHSVVVF  | 1896 | 1404 |
| >TP53-N210[NTFRHSVVVF  | 33  | >TP53-N210[DTFRHSVVVF  | 222  | 189  |
| >TP53-N210[NTFRHSVVVF  | 23  | >TP53-N210[DTFRHSVVVF  | 57   | 34   |



|                        |      |                        |      |     |
|------------------------|------|------------------------|------|-----|
| >TP53-N210I NTFRHSVVVF | 609  | >TP53-N210I DTFRHSVVVF | 182  | 427 |
| >TP53-N210I NTFRHSVVVF | 105  | >TP53-N210I DTFRHSVVVF | 145  | 40  |
| >TP53-N210I NTFRHSVVVF | 289  | >TP53-N210I DTFRHSVVVF | 937  | 648 |
| >TP53-N210I NTFRHSVVVF | 23   | >TP53-N210I DTFRHSVVVF | 139  | 116 |
| >TP53-N210I RNTFRHSVV  | 224  | >TP53-N210I RDTFRHSVV  | 499  | 275 |
| >TP53-N210I LDDRNTFRHS | 482  | >TP53-N210I LDDRDTFRHS | 575  | 93  |
| >TP53-N210I YLDDRNTF   | 187  | >TP53-N210I YLDDRDTF   | 212  | 25  |
| >TP53-N210I YLDDRNTFRH | 333  | >TP53-N210I YLDDRDTFRH | 294  | 39  |
| >TP53-N210I YLDDRNTF   | 149  | >TP53-N210I YLDDRDTF   | 158  | 9   |
| >TP53-N210I YLDDRNTFRH | 155  | >TP53-N210I YLDDRDTFRH | 187  | 32  |
| >TP53-N210I YLDDRNTF   | 367  | >TP53-N210I YLDDRDTF   | 413  | 46  |
| >TP53-N210I YLDDRNTFRH | 648  | >TP53-N210I YLDDRDTFRH | 473  | 175 |
| >TP53-N210I YLDDRNTF   | 87   | >TP53-N210I YLDDRDTF   | 155  | 68  |
| >TP53-N210I YLDDRNTFR  | 189  | >TP53-N210I YLDDRDTFR  | 272  | 83  |
| >TP53-N210I YLDDRNTFRH | 187  | >TP53-N210I YLDDRDTFRH | 253  | 66  |
| >TP53-N210I YLDDRNTFRH | 171  | >TP53-N210I YLDDRDTFRH | 144  | 27  |
| >TP53-N210I YLDDRNTFR  | 282  | >TP53-N210I YLDDRDTFR  | 661  | 379 |
| >TP53-N210I YLDDRNTFR  | 55   | >TP53-N210I YLDDRDTFR  | 87   | 32  |
| >TP53-N210I YLDDRNTFR  | 68   | >TP53-N210I YLDDRDTFR  | 80   | 12  |
| >TP53-N210I YLDDRNTF   | 255  | >TP53-N210I YLDDRDTF   | 414  | 159 |
| >TP53-N210I YLDDRNTFR  | 336  | >TP53-N210I YLDDRDTFR  | 406  | 70  |
| >TP53-N210I EYLDDRNTF  | 103  | >TP53-N210I EYLDDRDTF  | 166  | 63  |
| >TP53-N210I EYLDDRNTF  | 18   | >TP53-N210I EYLDDRDTF  | 20   | 2   |
| >TP53-N210I EYLDDRNTF  | 381  | >TP53-N210I EYLDDRDTF  | 1335 | 954 |
| >TP53-N210I EYLDDRNTF  | 301  | >TP53-N210I EYLDDRDTF  | 277  | 24  |
| >TP53-N210I EYLDDRNTFR | 328  | >TP53-N210I EYLDDRDTFR | 757  | 429 |
| >TP53-N210I EYLDDRNTFR | 88   | >TP53-N210I EYLDDRDTFR | 97   | 9   |
| >TP53-N210I EYLDDRNTFR | 19   | >TP53-N210I EYLDDRDTFR | 21   | 2   |
| >TP53-N210I VEYLDDRNTF | 124  | >TP53-N210I VEYLDDRDTF | 401  | 277 |
| >TP53-N210I VEYLDDRNTF | 594  | >TP53-N210I VEYLDDRDTF | 450  | 144 |
| >TP53-N210I VEYLDDRNTF | 555  | >TP53-N210I VEYLDDRDTF | 410  | 145 |
| >TP53-N210I RVEYLDDRNT | 40   | >TP53-N210I RVEYLDDRDT | 44   | 4   |
| >TP53-N210I RVEYLDDRNT | 78   | >TP53-N210I RVEYLDDRDT | 143  | 65  |
| >TP53-N210I NTFRHSVVVF | 562  | >TP53-N210I HTFRHSVVVF | 270  | 292 |
| >TP53-N210I NTFRHSVV   | 382  | >TP53-N210I HTFRHSVV   | 358  | 24  |
| >TP53-N210I NTFRHSVV   | 309  | >TP53-N210I HTFRHSVV   | 176  | 133 |
| >TP53-N210I NTFRHSVVV  | 265  | >TP53-N210I HTFRHSVVV  | 148  | 117 |
| >TP53-N210I NTFRHSVV   | 1246 | >TP53-N210I HTFRHSVV   | 276  | 970 |
| >TP53-N210I NTFRHSVVV  | 1108 | >TP53-N210I HTFRHSVVV  | 254  | 854 |
| >TP53-N210I NTFRHSVVVF | 647  | >TP53-N210I HTFRHSVVVF | 72   | 575 |
| >TP53-N210I NTFRHSVVVF | 128  | >TP53-N210I HTFRHSVVVF | 56   | 72  |
| >TP53-N210I NTFRHSVVVF | 845  | >TP53-N210I HTFRHSVVVF | 98   | 747 |
| >TP53-N210I NTFRHSVVVF | 97   | >TP53-N210I HTFRHSVVVF | 25   | 72  |

|                        |      |                        |      |      |
|------------------------|------|------------------------|------|------|
| >TP53-N210f NTFRHSVVVF | 123  | >TP53-N210f HTFRHSVVVF | 54   | 69   |
| >TP53-N210f NTFRHSVVVF | 678  | >TP53-N210f HTFRHSVVVF | 283  | 395  |
| >TP53-N210f NTFRHSVVVF | 82   | >TP53-N210f HTFRHSVVVF | 46   | 36   |
| >TP53-N210f NTFRHSVV   | 4212 | >TP53-N210f HTFRHSVV   | 31   | 4181 |
| >TP53-N210f NTFRHSVVV  | 3068 | >TP53-N210f HTFRHSVVV  | 20   | 3048 |
| >TP53-N210f NTFRHSVVVF | 3577 | >TP53-N210f HTFRHSVVVF | 34   | 3543 |
| >TP53-N210f NTFRHSVV   | 2452 | >TP53-N210f HTFRHSVV   | 451  | 2001 |
| >TP53-N210f NTFRHSVVV  | 412  | >TP53-N210f HTFRHSVVV  | 49   | 363  |
| >TP53-N210f NTFRHSVVVF | 61   | >TP53-N210f HTFRHSVVVF | 16   | 45   |
| >TP53-N210f NTFRHSVVVF | 34   | >TP53-N210f HTFRHSVVVF | 26   | 8    |
| >TP53-N210f NTFRHSVV   | 11   | >TP53-N210f HTFRHSVV   | 11   | 0    |
| >TP53-N210f NTFRHSVVV  | 8    | >TP53-N210f HTFRHSVVV  | 8    | 0    |
| >TP53-N210f NTFRHSVV   | 50   | >TP53-N210f HTFRHSVV   | 66   | 16   |
| >TP53-N210f NTFRHSVVV  | 25   | >TP53-N210f HTFRHSVVV  | 33   | 8    |
| >TP53-N210f NTFRHSVVVF | 766  | >TP53-N210f HTFRHSVVVF | 290  | 476  |
| >TP53-N210f NTFRHSVVVF | 65   | >TP53-N210f HTFRHSVVVF | 39   | 26   |
| >TP53-N210f NTFRHSVVVF | 492  | >TP53-N210f HTFRHSVVVF | 285  | 207  |
| >TP53-N210f NTFRHSVV   | 1520 | >TP53-N210f HTFRHSVV   | 321  | 1199 |
| >TP53-N210f NTFRHSVVV  | 798  | >TP53-N210f HTFRHSVVV  | 170  | 628  |
| >TP53-N210f NTFRHSVVVF | 33   | >TP53-N210f HTFRHSVVVF | 10   | 23   |
| >TP53-N210f NTFRHSVV   | 4902 | >TP53-N210f HTFRHSVV   | 159  | 4743 |
| >TP53-N210f NTFRHSVVV  | 6172 | >TP53-N210f HTFRHSVVV  | 267  | 5905 |
| >TP53-N210f NTFRHSVVVF | 23   | >TP53-N210f HTFRHSVVVF | 5    | 18   |
| >TP53-N210f NTFRHSVVVF | 105  | >TP53-N210f HTFRHSVVVF | 49   | 56   |
| >TP53-N210f NTFRHSVVVF | 3862 | >TP53-N210f HTFRHSVVVF | 209  | 3653 |
| >TP53-N210f NTFRHSVVVF | 6301 | >TP53-N210f HTFRHSVVVF | 349  | 5952 |
| >TP53-N210f NTFRHSVVVF | 289  | >TP53-N210f HTFRHSVVVF | 109  | 180  |
| >TP53-N210f NTFRHSVVVF | 23   | >TP53-N210f HTFRHSVVVF | 12   | 11   |
| >TP53-N210f NTFRHSVV   | 1488 | >TP53-N210f HTFRHSVV   | 413  | 1075 |
| >TP53-N210f NTFRHSVVV  | 1558 | >TP53-N210f HTFRHSVVV  | 439  | 1119 |
| >TP53-N210f NTFRHSVV   | 224  | >TP53-N210f HTFRHSVV   | 1446 | 1222 |
| >TP53-N210f LDDRNTFRHS | 482  | >TP53-N210f LDDRHTFRHS | 510  | 28   |
| >TP53-N210f YLDDRNTF   | 187  | >TP53-N210f YLDDRHTF   | 164  | 23   |
| >TP53-N210f YLDDRNTFRf | 333  | >TP53-N210f YLDDRHTFRf | 432  | 99   |
| >TP53-N210f YLDDRNTF   | 149  | >TP53-N210f YLDDRHTF   | 35   | 114  |
| >TP53-N210f YLDDRNTFRf | 155  | >TP53-N210f YLDDRHTFRf | 127  | 28   |
| >TP53-N210f YLDDRNTF   | 367  | >TP53-N210f YLDDRHTF   | 208  | 159  |
| >TP53-N210f YLDDRNTF   | 87   | >TP53-N210f YLDDRHTF   | 19   | 68   |
| >TP53-N210f YLDDRNTFR  | 189  | >TP53-N210f YLDDRHTFR  | 119  | 70   |
| >TP53-N210f YLDDRNTFRf | 187  | >TP53-N210f YLDDRHTFRf | 183  | 4    |
| >TP53-N210f YLDDRNTFRf | 171  | >TP53-N210f YLDDRHTFRf | 152  | 19   |
| >TP53-N210f YLDDRNTFR  | 282  | >TP53-N210f YLDDRHTFR  | 62   | 220  |
| >TP53-N210f YLDDRNTFR  | 55   | >TP53-N210f YLDDRHTFR  | 30   | 25   |

|                        |       |                        |      |       |
|------------------------|-------|------------------------|------|-------|
| >TP53-N210f YLDDRNTFR  | 68    | >TP53-N210f YLDDRHTFR  | 59   | 9     |
| >TP53-N210f YLDDRNTF   | 255   | >TP53-N210f YLDDRHTF   | 265  | 10    |
| >TP53-N210f YLDDRNTFR  | 336   | >TP53-N210f YLDDRHTFR  | 300  | 36    |
| >TP53-N210f EYLDDRNTF  | 103   | >TP53-N210f EYLDDRHTF  | 26   | 77    |
| >TP53-N210f EYLDDRNTF  | 667   | >TP53-N210f EYLDDRHTF  | 379  | 288   |
| >TP53-N210f EYLDDRNTF  | 18    | >TP53-N210f EYLDDRHTF  | 13   | 5     |
| >TP53-N210f EYLDDRNTF  | 381   | >TP53-N210f EYLDDRHTF  | 490  | 109   |
| >TP53-N210f EYLDDRNTF  | 301   | >TP53-N210f EYLDDRHTF  | 200  | 101   |
| >TP53-N210f EYLDDRNTFR | 328   | >TP53-N210f EYLDDRHTFR | 139  | 189   |
| >TP53-N210f EYLDDRNTFR | 88    | >TP53-N210f EYLDDRHTFR | 32   | 56    |
| >TP53-N210f EYLDDRNTFR | 19    | >TP53-N210f EYLDDRHTFR | 16   | 3     |
| >TP53-N210f VEYLDDRNTF | 622   | >TP53-N210f VEYLDDRHTF | 493  | 129   |
| >TP53-N210f VEYLDDRNTF | 124   | >TP53-N210f VEYLDDRHTF | 161  | 37    |
| >TP53-N210f VEYLDDRNTF | 594   | >TP53-N210f VEYLDDRHTF | 119  | 475   |
| >TP53-N210f VEYLDDRNTF | 524   | >TP53-N210f VEYLDDRHTF | 499  | 25    |
| >TP53-N210f RVEYLDDRNT | 40    | >TP53-N210f RVEYLDDRHT | 34   | 6     |
| >TP53-N210f RVEYLDDRNT | 1271  | >TP53-N210f RVEYLDDRHT | 359  | 912   |
| >TP53-N210f RVEYLDDRNT | 78    | >TP53-N210f RVEYLDDRHT | 151  | 73    |
| >TP53-N210f NTFRHSVV   | 2267  | >TP53-N210f KTFRHSVV   | 261  | 2006  |
| >TP53-N210f NTFRHSVVV  | 3293  | >TP53-N210f KTFRHSVVV  | 337  | 2956  |
| >TP53-N210f NTFRHSVVV  | 872   | >TP53-N210f KTFRHSVVV  | 334  | 538   |
| >TP53-N210f NTFRHSVV   | 382   | >TP53-N210f KTFRHSVV   | 137  | 245   |
| >TP53-N210f NTFRHSVVV  | 581   | >TP53-N210f KTFRHSVVV  | 198  | 383   |
| >TP53-N210f NTFRHSVV   | 1308  | >TP53-N210f KTFRHSVV   | 229  | 1079  |
| >TP53-N210f NTFRHSVVV  | 680   | >TP53-N210f KTFRHSVVV  | 102  | 578   |
| >TP53-N210f NTFRHSVV   | 309   | >TP53-N210f KTFRHSVV   | 35   | 274   |
| >TP53-N210f NTFRHSVVV  | 265   | >TP53-N210f KTFRHSVVV  | 31   | 234   |
| >TP53-N210f NTFRHSVVV  | 1835  | >TP53-N210f KTFRHSVVV  | 299  | 1536  |
| >TP53-N210f NTFRHSVV   | 4059  | >TP53-N210f KTFRHSVV   | 463  | 3596  |
| >TP53-N210f NTFRHSVVV  | 3077  | >TP53-N210f KTFRHSVVV  | 251  | 2826  |
| >TP53-N210f NTFRHSVV   | 1246  | >TP53-N210f KTFRHSVV   | 226  | 1020  |
| >TP53-N210f NTFRHSVVV  | 1108  | >TP53-N210f KTFRHSVVV  | 213  | 895   |
| >TP53-N210f NTFRHSVVVF | 647   | >TP53-N210f KTFRHSVVVP | 42   | 605   |
| >TP53-N210f NTFRHSVVVF | 128   | >TP53-N210f KTFRHSVVVP | 18   | 110   |
| >TP53-N210f NTFRHSVVVF | 97    | >TP53-N210f KTFRHSVVVP | 6381 | 6284  |
| >TP53-N210f NTFRHSVVVF | 123   | >TP53-N210f KTFRHSVVVP | 352  | 229   |
| >TP53-N210f NTFRHSVVVF | 82    | >TP53-N210f KTFRHSVVVP | 87   | 5     |
| >TP53-N210f NTFRHSVV   | 4212  | >TP53-N210f KTFRHSVV   | 13   | 4199  |
| >TP53-N210f NTFRHSVVV  | 3068  | >TP53-N210f KTFRHSVVV  | 9    | 3059  |
| >TP53-N210f NTFRHSVVVF | 12803 | >TP53-N210f KTFRHSVVVP | 208  | 12595 |
| >TP53-N210f NTFRHSVVVF | 3577  | >TP53-N210f KTFRHSVVVP | 14   | 3563  |
| >TP53-N210f NTFRHSVVVF | 1274  | >TP53-N210f KTFRHSVVVP | 148  | 1126  |
| >TP53-N210f NTFRHSVV   | 8675  | >TP53-N210f KTFRHSVV   | 490  | 8185  |

|                       |       |                       |      |       |
|-----------------------|-------|-----------------------|------|-------|
| >TP53-N210fNTFRHSVVVF | 4760  | >TP53-N210fKTFRHSVVVP | 125  | 4635  |
| >TP53-N210fNTFRHSVV   | 2452  | >TP53-N210fKTFRHSVV   | 47   | 2405  |
| >TP53-N210fNTFRHSVVV  | 412   | >TP53-N210fKTFRHSVVV  | 10   | 402   |
| >TP53-N210fNTFRHSVVVF | 5931  | >TP53-N210fKTFRHSVVVP | 62   | 5869  |
| >TP53-N210fNTFRHSVVVF | 61    | >TP53-N210fKTFRHSVVVP | 5    | 56    |
| >TP53-N210fNTFRHSVVVF | 34    | >TP53-N210fKTFRHSVVVP | 619  | 585   |
| >TP53-N210fNTFRHSVV   | 11    | >TP53-N210fKTFRHSVV   | 446  | 435   |
| >TP53-N210fNTFRHSVVV  | 8     | >TP53-N210fKTFRHSVVV  | 263  | 255   |
| >TP53-N210fNTFRHSVV   | 50    | >TP53-N210fKTFRHSVV   | 1772 | 1722  |
| >TP53-N210fNTFRHSVVV  | 25    | >TP53-N210fKTFRHSVVV  | 999  | 974   |
| >TP53-N210fNTFRHSVVVF | 766   | >TP53-N210fKTFRHSVVVP | 143  | 623   |
| >TP53-N210fNTFRHSVVVF | 65    | >TP53-N210fKTFRHSVVVP | 40   | 25    |
| >TP53-N210fNTFRHSVVVF | 492   | >TP53-N210fKTFRHSVVVP | 2448 | 1956  |
| >TP53-N210fNTFRHSVV   | 1520  | >TP53-N210fKTFRHSVV   | 138  | 1382  |
| >TP53-N210fNTFRHSVVV  | 798   | >TP53-N210fKTFRHSVVV  | 78   | 720   |
| >TP53-N210fNTFRHSVVVF | 33    | >TP53-N210fKTFRHSVVVP | 6    | 27    |
| >TP53-N210fNTFRHSVV   | 4902  | >TP53-N210fKTFRHSVV   | 39   | 4863  |
| >TP53-N210fNTFRHSVVV  | 6172  | >TP53-N210fKTFRHSVVV  | 73   | 6099  |
| >TP53-N210fNTFRHSVVVF | 23    | >TP53-N210fKTFRHSVVVP | 4    | 19    |
| >TP53-N210fNTFRHSVVVF | 105   | >TP53-N210fKTFRHSVVVP | 768  | 663   |
| >TP53-N210fNTFRHSVVVF | 3862  | >TP53-N210fKTFRHSVVVP | 83   | 3779  |
| >TP53-N210fNTFRHSVVVF | 6301  | >TP53-N210fKTFRHSVVVP | 30   | 6271  |
| >TP53-N210fNTFRHSVVV  | 2753  | >TP53-N210fKTFRHSVVV  | 306  | 2447  |
| >TP53-N210fNTFRHSVVVF | 289   | >TP53-N210fKTFRHSVVVP | 39   | 250   |
| >TP53-N210fNTFRHSVVVF | 23    | >TP53-N210fKTFRHSVVVP | 25   | 2     |
| >TP53-N210fNTFRHSVV   | 1488  | >TP53-N210fKTFRHSVV   | 188  | 1300  |
| >TP53-N210fNTFRHSVVV  | 1558  | >TP53-N210fKTFRHSVVV  | 200  | 1358  |
| >TP53-N210fRNTFRHSV   | 7876  | >TP53-N210fRKTFRHSV   | 105  | 7771  |
| >TP53-N210fRNTFRHSVV  | 5927  | >TP53-N210fRKTFRHSVV  | 47   | 5880  |
| >TP53-N210fRNTFRHSVV\ | 4456  | >TP53-N210fRKTFRHSVVV | 37   | 4419  |
| >TP53-N210fRNTFRHSVV\ | 13345 | >TP53-N210fRKTFRHSVVV | 496  | 12849 |
| >TP53-N210fRNTFRHSVV  | 224   | >TP53-N210fRKTFRHSVV  | 1000 | 776   |
| >TP53-N210fRNTFRHSVV  | 2022  | >TP53-N210fRKTFRHSVV  | 276  | 1746  |
| >TP53-N210fLDDRNTFRHS | 482   | >TP53-N210fLDDRKTFRHS | 681  | 199   |
| >TP53-N210fYLDDRNTF   | 187   | >TP53-N210fYLDDRKTF   | 977  | 790   |
| >TP53-N210fYLDDRNTFRf | 333   | >TP53-N210fYLDDRKTFRH | 715  | 382   |
| >TP53-N210fYLDDRNTF   | 149   | >TP53-N210fYLDDRKTF   | 240  | 91    |
| >TP53-N210fYLDDRNTFRf | 155   | >TP53-N210fYLDDRKTFRH | 230  | 75    |
| >TP53-N210fYLDDRNTF   | 367   | >TP53-N210fYLDDRKTF   | 1708 | 1341  |
| >TP53-N210fYLDDRNTF   | 87    | >TP53-N210fYLDDRKTF   | 142  | 55    |
| >TP53-N210fYLDDRNTFR  | 189   | >TP53-N210fYLDDRKTFR  | 197  | 8     |
| >TP53-N210fYLDDRNTFRf | 187   | >TP53-N210fYLDDRKTFRH | 262  | 75    |
| >TP53-N210fYLDDRNTFRf | 171   | >TP53-N210fYLDDRKTFRH | 196  | 25    |

|                        |       |                       |      |       |
|------------------------|-------|-----------------------|------|-------|
| >TP53-N210†YLDDRNTFR   | 282   | >TP53-N210†YLDDRKTFR  | 115  | 167   |
| >TP53-N210†YLDDRNTFR   | 55    | >TP53-N210†YLDDRKTFR  | 64   | 9     |
| >TP53-N210†YLDDRNTFR   | 68    | >TP53-N210†YLDDRKTFR  | 114  | 46    |
| >TP53-N210†YLDDRNTF    | 255   | >TP53-N210†YLDDRKTF   | 490  | 235   |
| >TP53-N210†YLDDRNTFR   | 336   | >TP53-N210†YLDDRKTFR  | 383  | 47    |
| >TP53-N210†EYLDDRNTF   | 103   | >TP53-N210†EYLDDRKTF  | 205  | 102   |
| >TP53-N210†EYLDDRNTF   | 18    | >TP53-N210†EYLDDRKTF  | 30   | 12    |
| >TP53-N210†EYLDDRNTF   | 381   | >TP53-N210†EYLDDRKTF  | 1581 | 1200  |
| >TP53-N210†EYLDDRNTF   | 301   | >TP53-N210†EYLDDRKTF  | 874  | 573   |
| >TP53-N210†EYLDDRNTFR  | 328   | >TP53-N210†EYLDDRKTFR | 218  | 110   |
| >TP53-N210†EYLDDRNTFR  | 88    | >TP53-N210†EYLDDRKTFR | 51   | 37    |
| >TP53-N210†EYLDDRNTFR  | 19    | >TP53-N210†EYLDDRKTFR | 20   | 1     |
| >TP53-N210†VEYLDDRNTF  | 622   | >TP53-N210†VEYLDDRKTF | 275  | 347   |
| >TP53-N210†VEYLDDRNTF  | 124   | >TP53-N210†VEYLDDRKTF | 136  | 12    |
| >TP53-N210†RVEYLDDRNT  | 25451 | >TP53-N210†RVEYLDDRK  | 489  | 24962 |
| >TP53-N210†RVEYLDDRNT  | 40    | >TP53-N210†RVEYLDDRKT | 55   | 15    |
| >TP53-N210†RVEYLDDRNT  | 1271  | >TP53-N210†RVEYLDDRKT | 389  | 882   |
| >TP53-N210†RVEYLDDRNT  | 78    | >TP53-N210†RVEYLDDRKT | 158  | 80    |
| >TP53-N210†LRVEYLDDRNT | 3956  | >TP53-N210†LRVEYLDDRK | 345  | 3611  |
| >TP53-N210‡NTFRHSVV    | 2267  | >TP53-N210‡STFRHSVV   | 76   | 2191  |
| >TP53-N210‡NTFRHSVVV   | 2837  | >TP53-N210‡STFRHSVVV  | 381  | 2456  |
| >TP53-N210‡NTFRHSVVVF  | 562   | >TP53-N210‡STFRHSVVVP | 462  | 100   |
| >TP53-N210‡NTFRHSVVV   | 872   | >TP53-N210‡STFRHSVVV  | 379  | 493   |
| >TP53-N210‡NTFRHSVV    | 382   | >TP53-N210‡STFRHSVV   | 141  | 241   |
| >TP53-N210‡NTFRHSVVV   | 581   | >TP53-N210‡STFRHSVVV  | 213  | 368   |
| >TP53-N210‡NTFRHSVV    | 1308  | >TP53-N210‡STFRHSVV   | 395  | 913   |
| >TP53-N210‡NTFRHSVVV   | 680   | >TP53-N210‡STFRHSVVV  | 162  | 518   |
| >TP53-N210‡NTFRHSVV    | 309   | >TP53-N210‡STFRHSVV   | 33   | 276   |
| >TP53-N210‡NTFRHSVVV   | 265   | >TP53-N210‡STFRHSVVV  | 30   | 235   |
| >TP53-N210‡NTFRHSVVV   | 1835  | >TP53-N210‡STFRHSVVV  | 491  | 1344  |
| >TP53-N210‡NTFRHSVV    | 4059  | >TP53-N210‡STFRHSVV   | 244  | 3815  |
| >TP53-N210‡NTFRHSVVV   | 3077  | >TP53-N210‡STFRHSVVV  | 120  | 2957  |
| >TP53-N210‡NTFRHSVV    | 1246  | >TP53-N210‡STFRHSVV   | 99   | 1147  |
| >TP53-N210‡NTFRHSVVV   | 1108  | >TP53-N210‡STFRHSVVV  | 98   | 1010  |
| >TP53-N210‡NTFRHSVVVF  | 647   | >TP53-N210‡STFRHSVVVP | 109  | 538   |
| >TP53-N210‡NTFRHSVVVF  | 128   | >TP53-N210‡STFRHSVVVP | 13   | 115   |
| >TP53-N210‡NTFRHSVVVF  | 97    | >TP53-N210‡STFRHSVVVP | 83   | 14    |
| >TP53-N210‡NTFRHSVVVF  | 123   | >TP53-N210‡STFRHSVVVP | 52   | 71    |
| >TP53-N210‡NTFRHSVVVF  | 82    | >TP53-N210‡STFRHSVVVP | 36   | 46    |
| >TP53-N210‡NTFRHSVV    | 4212  | >TP53-N210‡STFRHSVV   | 115  | 4097  |
| >TP53-N210‡NTFRHSVVV   | 3068  | >TP53-N210‡STFRHSVVV  | 65   | 3003  |
| >TP53-N210‡NTFRHSVVVF  | 3577  | >TP53-N210‡STFRHSVVVP | 116  | 3461  |
| >TP53-N210‡NTFRHSVVVF  | 1274  | >TP53-N210‡STFRHSVVVP | 304  | 970   |

|                       |       |                       |     |       |
|-----------------------|-------|-----------------------|-----|-------|
| >TP53-N210ϵNTFRHSV    | 2452  | >TP53-N210ϵSTFRHSV    | 381 | 2071  |
| >TP53-N210ϵNTFRHSVV   | 412   | >TP53-N210ϵSTFRHSVV   | 49  | 363   |
| >TP53-N210ϵNTFRHSVVV  | 61    | >TP53-N210ϵSTFRHSVVV  | 14  | 47    |
| >TP53-N210ϵNTFRHSVVV  | 34    | >TP53-N210ϵSTFRHSVVV  | 51  | 17    |
| >TP53-N210ϵNTFRHSVV   | 11    | >TP53-N210ϵSTFRHSVV   | 20  | 9     |
| >TP53-N210ϵNTFRHSVV   | 8     | >TP53-N210ϵSTFRHSVV   | 13  | 5     |
| >TP53-N210ϵNTFRHSVV   | 50    | >TP53-N210ϵSTFRHSVV   | 111 | 61    |
| >TP53-N210ϵNTFRHSVV   | 25    | >TP53-N210ϵSTFRHSVV   | 55  | 30    |
| >TP53-N210ϵNTFRHSVVV  | 766   | >TP53-N210ϵSTFRHSVVV  | 222 | 544   |
| >TP53-N210ϵNTFRHSVVV  | 65    | >TP53-N210ϵSTFRHSVVV  | 34  | 31    |
| >TP53-N210ϵNTFRHSVVV  | 492   | >TP53-N210ϵSTFRHSVVV  | 443 | 49    |
| >TP53-N210ϵNTFRHSVV   | 1520  | >TP53-N210ϵSTFRHSVV   | 451 | 1069  |
| >TP53-N210ϵNTFRHSVV   | 798   | >TP53-N210ϵSTFRHSVV   | 222 | 576   |
| >TP53-N210ϵNTFRHSVVV  | 33    | >TP53-N210ϵSTFRHSVVV  | 12  | 21    |
| >TP53-N210ϵNTFRHSVV   | 4902  | >TP53-N210ϵSTFRHSVV   | 426 | 4476  |
| >TP53-N210ϵNTFRHSVVV  | 23    | >TP53-N210ϵSTFRHSVVV  | 5   | 18    |
| >TP53-N210ϵNTFRHSVVV  | 105   | >TP53-N210ϵSTFRHSVVV  | 222 | 117   |
| >TP53-N210ϵNTFRHSVV   | 2753  | >TP53-N210ϵSTFRHSVV   | 230 | 2523  |
| >TP53-N210ϵNTFRHSVVV  | 289   | >TP53-N210ϵSTFRHSVVV  | 31  | 258   |
| >TP53-N210ϵNTFRHSVVV  | 23    | >TP53-N210ϵSTFRHSVVV  | 28  | 5     |
| >TP53-N210ϵNTFRHSVVV  | 1476  | >TP53-N210ϵSTFRHSVVV  | 142 | 1334  |
| >TP53-N210ϵNTFRHSVV   | 1488  | >TP53-N210ϵSTFRHSVV   | 186 | 1302  |
| >TP53-N210ϵNTFRHSVV   | 1558  | >TP53-N210ϵSTFRHSVV   | 209 | 1349  |
| >TP53-N210ϵRNTFRHS    | 3737  | >TP53-N210ϵRSTFRHS    | 113 | 3624  |
| >TP53-N210ϵRNTFRHSV   | 3775  | >TP53-N210ϵRSTFRHSV   | 127 | 3648  |
| >TP53-N210ϵRNTFRHSV   | 3904  | >TP53-N210ϵRSTFRHSV   | 135 | 3769  |
| >TP53-N210ϵRNTFRHS    | 22263 | >TP53-N210ϵRSTFRHS    | 149 | 22114 |
| >TP53-N210ϵRNTFRHSV   | 21201 | >TP53-N210ϵRSTFRHSV   | 64  | 21137 |
| >TP53-N210ϵRNTFRHSV   | 21344 | >TP53-N210ϵRSTFRHSV   | 135 | 21209 |
| >TP53-N210ϵRNTFRHS    | 3791  | >TP53-N210ϵRSTFRHS    | 141 | 3650  |
| >TP53-N210ϵRNTFRHSV   | 224   | >TP53-N210ϵRSTFRHSV   | 12  | 212   |
| >TP53-N210ϵRNTFRHSV   | 642   | >TP53-N210ϵRSTFRHSV   | 25  | 617   |
| >TP53-N210ϵLDDRNTFRH  | 482   | >TP53-N210ϵLDDRSTFRH  | 379 | 103   |
| >TP53-N210ϵYLDDRNTF   | 187   | >TP53-N210ϵYLDDRSTF   | 190 | 3     |
| >TP53-N210ϵYLDDRNTFRH | 333   | >TP53-N210ϵYLDDRSTFRH | 286 | 47    |
| >TP53-N210ϵYLDDRNTF   | 149   | >TP53-N210ϵYLDDRSTF   | 71  | 78    |
| >TP53-N210ϵYLDDRNTFRH | 155   | >TP53-N210ϵYLDDRSTFRH | 120 | 35    |
| >TP53-N210ϵYLDDRNTF   | 367   | >TP53-N210ϵYLDDRSTF   | 258 | 109   |
| >TP53-N210ϵYLDDRNTFRH | 648   | >TP53-N210ϵYLDDRSTFRH | 449 | 199   |
| >TP53-N210ϵYLDDRNTF   | 87    | >TP53-N210ϵYLDDRSTF   | 43  | 44    |
| >TP53-N210ϵYLDDRNTFR  | 189   | >TP53-N210ϵYLDDRSTFR  | 113 | 76    |
| >TP53-N210ϵYLDDRNTFRH | 187   | >TP53-N210ϵYLDDRSTFRH | 165 | 22    |
| >TP53-N210ϵYLDDRNTFRH | 171   | >TP53-N210ϵYLDDRSTFRH | 138 | 33    |

|                       |      |                       |     |      |
|-----------------------|------|-----------------------|-----|------|
| >TP53-N210ϵYLDDRNTFR  | 282  | >TP53-N210ϵYLDDRSTFR  | 327 | 45   |
| >TP53-N210ϵYLDDRNTFR  | 55   | >TP53-N210ϵYLDDRSTFR  | 80  | 25   |
| >TP53-N210ϵYLDDRNTFR  | 68   | >TP53-N210ϵYLDDRSTFR  | 79  | 11   |
| >TP53-N210ϵYLDDRNTF   | 847  | >TP53-N210ϵYLDDRSTF   | 284 | 563  |
| >TP53-N210ϵYLDDRNTF   | 255  | >TP53-N210ϵYLDDRSTF   | 128 | 127  |
| >TP53-N210ϵYLDDRNTF   | 1811 | >TP53-N210ϵYLDDRSTF   | 356 | 1455 |
| >TP53-N210ϵYLDDRNTFR  | 336  | >TP53-N210ϵYLDDRSTFR  | 471 | 135  |
| >TP53-N210ϵEYLDDRNTF  | 103  | >TP53-N210ϵEYLDDRSTF  | 136 | 33   |
| >TP53-N210ϵEYLDDRNTF  | 18   | >TP53-N210ϵEYLDDRSTF  | 25  | 7    |
| >TP53-N210ϵEYLDDRNTF  | 381  | >TP53-N210ϵEYLDDRSTF  | 426 | 45   |
| >TP53-N210ϵEYLDDRNTF  | 301  | >TP53-N210ϵEYLDDRSTF  | 190 | 111  |
| >TP53-N210ϵEYLDDRNTFR | 328  | >TP53-N210ϵEYLDDRSTFR | 343 | 15   |
| >TP53-N210ϵEYLDDRNTFR | 88   | >TP53-N210ϵEYLDDRSTFR | 61  | 27   |
| >TP53-N210ϵEYLDDRNTFR | 508  | >TP53-N210ϵEYLDDRSTFR | 365 | 143  |
| >TP53-N210ϵEYLDDRNTFR | 19   | >TP53-N210ϵEYLDDRSTFR | 23  | 4    |
| >TP53-N210ϵVEYLDDRNTF | 124  | >TP53-N210ϵVEYLDDRSTF | 65  | 59   |
| >TP53-N210ϵVEYLDDRNTF | 594  | >TP53-N210ϵVEYLDDRSTF | 283 | 311  |
| >TP53-N210ϵVEYLDDRNTF | 870  | >TP53-N210ϵVEYLDDRSTF | 425 | 445  |
| >TP53-N210ϵRVEYLDDRNT | 40   | >TP53-N210ϵRVEYLDDRST | 63  | 23   |
| >TP53-N210ϵRVEYLDDRNT | 1271 | >TP53-N210ϵRVEYLDDRST | 298 | 973  |
| >TP53-N210ϵRVEYLDDRNT | 78   | >TP53-N210ϵRVEYLDDRST | 20  | 58   |
| >TP53-N210⌈NTFRHSVV   | 2267 | >TP53-N210⌈TFRHSVV    | 144 | 2123 |
| >TP53-N210⌈NTFRHSVVV  | 2837 | >TP53-N210⌈TFRHSVVV   | 444 | 2393 |
| >TP53-N210⌈NTFRHSVVVF | 562  | >TP53-N210⌈TFRHSVVVP  | 464 | 98   |
| >TP53-N210⌈NTFRHSVV   | 382  | >TP53-N210⌈TFRHSVV    | 285 | 97   |
| >TP53-N210⌈NTFRHSVVV  | 581  | >TP53-N210⌈TFRHSVVV   | 427 | 154  |
| >TP53-N210⌈NTFRHSVV   | 309  | >TP53-N210⌈TFRHSVV    | 191 | 118  |
| >TP53-N210⌈NTFRHSVVV  | 265  | >TP53-N210⌈TFRHSVVV   | 161 | 104  |
| >TP53-N210⌈NTFRHSVV   | 1246 | >TP53-N210⌈TFRHSVV    | 386 | 860  |
| >TP53-N210⌈NTFRHSVVV  | 1108 | >TP53-N210⌈TFRHSVVV   | 356 | 752  |
| >TP53-N210⌈NTFRHSVVVF | 647  | >TP53-N210⌈TFRHSVVVP  | 106 | 541  |
| >TP53-N210⌈NTFRHSVVVF | 128  | >TP53-N210⌈TFRHSVVVP  | 17  | 111  |
| >TP53-N210⌈NTFRHSVVVF | 97   | >TP53-N210⌈TFRHSVVVP  | 71  | 26   |
| >TP53-N210⌈NTFRHSVVVF | 123  | >TP53-N210⌈TFRHSVVVP  | 47  | 76   |
| >TP53-N210⌈NTFRHSVVVF | 82   | >TP53-N210⌈TFRHSVVVP  | 36  | 46   |
| >TP53-N210⌈NTFRHSVVV  | 3068 | >TP53-N210⌈TFRHSVVV   | 383 | 2685 |
| >TP53-N210⌈NTFRHSVVV  | 412  | >TP53-N210⌈TFRHSVVV   | 98  | 314  |
| >TP53-N210⌈NTFRHSVVVF | 61   | >TP53-N210⌈TFRHSVVVP  | 25  | 36   |
| >TP53-N210⌈NTFRHSVVVF | 34   | >TP53-N210⌈TFRHSVVVP  | 23  | 11   |
| >TP53-N210⌈NTFRHSVV   | 11   | >TP53-N210⌈TFRHSVV    | 9   | 2    |
| >TP53-N210⌈NTFRHSVVV  | 8    | >TP53-N210⌈TFRHSVVV   | 7   | 1    |
| >TP53-N210⌈NTFRHSVV   | 50   | >TP53-N210⌈TFRHSVV    | 70  | 20   |
| >TP53-N210⌈NTFRHSVVV  | 25   | >TP53-N210⌈TFRHSVVV   | 35  | 10   |

|                       |       |                        |     |       |
|-----------------------|-------|------------------------|-----|-------|
| >TP53-N2101NTFRHSVVVF | 766   | >TP53-N2101TTFRHSVVVP  | 435 | 331   |
| >TP53-N2101NTFRHSVVVF | 65    | >TP53-N2101TTFRHSVVVP  | 50  | 15    |
| >TP53-N2101NTFRHSVVVF | 492   | >TP53-N2101TTFRHSVVVP  | 644 | 152   |
| >TP53-N2101NTFRHSVVVF | 33    | >TP53-N2101TTFRHSVVVP  | 23  | 10    |
| >TP53-N2101NTFRHSVVVF | 23    | >TP53-N2101TTFRHSVVVP  | 7   | 16    |
| >TP53-N2101NTFRHSVVVF | 105   | >TP53-N2101TTFRHSVVVP  | 131 | 26    |
| >TP53-N2101NTFRHSVVVF | 3862  | >TP53-N2101TTFRHSVVVP  | 414 | 3448  |
| >TP53-N2101NTFRHSVVVF | 289   | >TP53-N2101TTFRHSVVVP  | 91  | 198   |
| >TP53-N2101NTFRHSVVVF | 23    | >TP53-N2101TTFRHSVVVP  | 46  | 23    |
| >TP53-N2101NTFRHSVVVF | 1476  | >TP53-N2101TTFRHSVVVP  | 468 | 1008  |
| >TP53-N2101RNTFRHSV   | 15200 | >TP53-N2101RTTFRHSV    | 266 | 14934 |
| >TP53-N2101RNTFRHSV   | 3737  | >TP53-N2101RTTFRHSV    | 53  | 3684  |
| >TP53-N2101RNTFRHSVV  | 3775  | >TP53-N2101RTTFRHSVV   | 60  | 3715  |
| >TP53-N2101RNTFRHSVV\ | 3904  | >TP53-N2101RTTFRHSVVV  | 63  | 3841  |
| >TP53-N2101RNTFRHSV   | 9886  | >TP53-N2101RTTFRHSV    | 258 | 9628  |
| >TP53-N2101RNTFRHSVV\ | 8407  | >TP53-N2101RTTFRHSVVV  | 206 | 8201  |
| >TP53-N2101RNTFRHSV   | 7354  | >TP53-N2101RTTFRHSV    | 139 | 7215  |
| >TP53-N2101RNTFRHSVV\ | 8846  | >TP53-N2101RTTFRHSVVV  | 195 | 8651  |
| >TP53-N2101RNTFRHSV   | 22263 | >TP53-N2101RTTFRHSV    | 85  | 22178 |
| >TP53-N2101RNTFRHSVV  | 21201 | >TP53-N2101RTTFRHSVV   | 38  | 21163 |
| >TP53-N2101RNTFRHSVV\ | 21344 | >TP53-N2101RTTFRHSVVV  | 76  | 21268 |
| >TP53-N2101RNTFRHSV   | 3791  | >TP53-N2101RTTFRHSV    | 187 | 3604  |
| >TP53-N2101RNTFRHSVV  | 224   | >TP53-N2101RTTFRHSVV   | 6   | 218   |
| >TP53-N2101RNTFRHSVV\ | 642   | >TP53-N2101RTTFRHSVVV  | 19  | 623   |
| >TP53-N2101LDDRNTFRHS | 482   | >TP53-N2101LDDRNTTFRHS | 341 | 141   |
| >TP53-N2101YLDDRNTFR  | 789   | >TP53-N2101YLDDRNTTFR  | 385 | 404   |
| >TP53-N2101YLDDRNTF   | 187   | >TP53-N2101YLDDRNTTF   | 127 | 60    |
| >TP53-N2101YLDDRNTFRH | 333   | >TP53-N2101YLDDRNTTFRH | 263 | 70    |
| >TP53-N2101YLDDRNTF   | 149   | >TP53-N2101YLDDRNTTF   | 84  | 65    |
| >TP53-N2101YLDDRNTFRH | 155   | >TP53-N2101YLDDRNTTFRH | 132 | 23    |
| >TP53-N2101YLDDRNTF   | 367   | >TP53-N2101YLDDRNTTF   | 391 | 24    |
| >TP53-N2101YLDDRNTFRH | 648   | >TP53-N2101YLDDRNTTFRH | 482 | 166   |
| >TP53-N2101YLDDRNTF   | 87    | >TP53-N2101YLDDRNTTF   | 36  | 51    |
| >TP53-N2101YLDDRNTFR  | 189   | >TP53-N2101YLDDRNTTFR  | 71  | 118   |
| >TP53-N2101YLDDRNTFRH | 187   | >TP53-N2101YLDDRNTTFRH | 133 | 54    |
| >TP53-N2101YLDDRNTFRH | 171   | >TP53-N2101YLDDRNTTFRH | 121 | 50    |
| >TP53-N2101YLDDRNTFR  | 282   | >TP53-N2101YLDDRNTTFR  | 202 | 80    |
| >TP53-N2101YLDDRNTFR  | 55    | >TP53-N2101YLDDRNTTFR  | 67  | 12    |
| >TP53-N2101YLDDRNTFR  | 68    | >TP53-N2101YLDDRNTTFR  | 48  | 20    |
| >TP53-N2101YLDDRNTF   | 847   | >TP53-N2101YLDDRNTTF   | 459 | 388   |
| >TP53-N2101YLDDRNTF   | 255   | >TP53-N2101YLDDRNTTF   | 311 | 56    |
| >TP53-N2101YLDDRNTFR  | 336   | >TP53-N2101YLDDRNTTFR  | 183 | 153   |
| >TP53-N2101EYLDDRNTF  | 103   | >TP53-N2101EYLDDRNTTF  | 183 | 80    |



|                        |      |                        |      |      |
|------------------------|------|------------------------|------|------|
| >TP53-N2101EYLDDRNTF   | 18   | >TP53-N2101EYLDDRTTF   | 35   | 17   |
| >TP53-N2101EYLDDRNTF   | 381  | >TP53-N2101EYLDDRTTF   | 547  | 166  |
| >TP53-N2101EYLDDRNTF   | 301  | >TP53-N2101EYLDDRTTF   | 1087 | 786  |
| >TP53-N2101EYLDDRNTFR  | 328  | >TP53-N2101EYLDDRTTFR  | 262  | 66   |
| >TP53-N2101EYLDDRNTFR  | 88   | >TP53-N2101EYLDDRTTFR  | 55   | 33   |
| >TP53-N2101EYLDDRNTFR  | 508  | >TP53-N2101EYLDDRTTFR  | 395  | 113  |
| >TP53-N2101EYLDDRNTFR  | 19   | >TP53-N2101EYLDDRTTFR  | 17   | 2    |
| >TP53-N2101VEYLDDRNTF  | 124  | >TP53-N2101VEYLDDRTTF  | 80   | 44   |
| >TP53-N2101VEYLDDRNTF  | 594  | >TP53-N2101VEYLDDRTTF  | 255  | 339  |
| >TP53-N2101VEYLDDRNTF  | 870  | >TP53-N2101VEYLDDRTTF  | 435  | 435  |
| >TP53-N2101VEYLDDRNTF  | 524  | >TP53-N2101VEYLDDRTTF  | 470  | 54   |
| >TP53-N2101RVEYLDDRNT  | 40   | >TP53-N2101RVEYLDDRTT  | 31   | 9    |
| >TP53-N2101RVEYLDDRNT  | 1271 | >TP53-N2101RVEYLDDRTT  | 334  | 937  |
| >TP53-N2101RVEYLDDRNT  | 78   | >TP53-N2101RVEYLDDRTT  | 50   | 28   |
| >TP53-N235[ NYMCNSSCM  | 53   | >TP53-N235[ DYMCNSSCM  | 369  | 316  |
| >TP53-N235[ YNYMCNSSCI | 1308 | >TP53-N235[ YDYMCNSSCI | 356  | 952  |
| >TP53-N235[ YNYMCNSSCI | 429  | >TP53-N235[ YDYMCNSSCI | 2264 | 1835 |
| >TP53-N235[ YNYMCNSSCI | 31   | >TP53-N235[ YDYMCNSSCI | 144  | 113  |
| >TP53-N235[ HNYMCNSS   | 70   | >TP53-N235[ HYDYMCNSS  | 1086 | 1016 |
| >TP53-N235[ TTIHYNYM   | 46   | >TP53-N235[ TTIHYDYM   | 433  | 387  |
| >TP53-N235[ TTIHYNYM   | 46   | >TP53-N235[ TTIHYDYM   | 126  | 80   |
| >TP53-N235[ TTIHYNYM   | 5    | >TP53-N235[ TTIHYDYM   | 5    | 0    |
| >TP53-N235[ TTIHYNYM   | 135  | >TP53-N235[ TTIHYDYM   | 806  | 671  |
| >TP53-N235[ TTIHYNYM   | 17   | >TP53-N235[ TTIHYDYM   | 22   | 5    |
| >TP53-N235[ TTIHYNYMC  | 120  | >TP53-N235[ TTIHYDYMC  | 190  | 70   |
| >TP53-N235[ TTIHYNYMCM | 102  | >TP53-N235[ TTIHYDYMCN | 103  | 1    |
| >TP53-N235[ TTIHYNYM   | 69   | >TP53-N235[ TTIHYDYM   | 303  | 234  |
| >TP53-N235[ TTIHYNYM   | 61   | >TP53-N235[ TTIHYDYM   | 69   | 8    |
| >TP53-N235[ TTIHYNYM   | 838  | >TP53-N235[ TTIHYDYM   | 471  | 367  |
| >TP53-N235[ TTIHYNYM   | 260  | >TP53-N235[ TTIHYDYM   | 2243 | 1983 |
| >TP53-N235[ CTTIHYNYM  | 116  | >TP53-N235[ CTTIHYDYM  | 465  | 349  |
| >TP53-N235[ CTTIHYNY   | 117  | >TP53-N235[ CTTIHYDY   | 70   | 47   |
| >TP53-N235[ CTTIHYNY   | 161  | >TP53-N235[ CTTIHYDY   | 492  | 331  |
| >TP53-N235[ CTTIHYNYM  | 207  | >TP53-N235[ CTTIHYDYM  | 213  | 6    |
| >TP53-N235[ CTTIHYNY   | 35   | >TP53-N235[ CTTIHYDY   | 34   | 1    |
| >TP53-N235[ CTTIHYNY   | 130  | >TP53-N235[ CTTIHYDY   | 152  | 22   |
| >TP53-N235[ CTTIHYNY   | 355  | >TP53-N235[ CTTIHYDY   | 494  | 139  |
| >TP53-N235[ CTTIHYNY   | 50   | >TP53-N235[ CTTIHYDY   | 221  | 171  |
| >TP53-N235[ CTTIHYNYM  | 11   | >TP53-N235[ CTTIHYDYM  | 27   | 16   |
| >TP53-N235[ CTTIHYNYMC | 184  | >TP53-N235[ CTTIHYDYMC | 566  | 382  |
| >TP53-N235[ CTTIHYNY   | 68   | >TP53-N235[ CTTIHYDY   | 81   | 13   |
| >TP53-N235[ CTTIHYNYM  | 405  | >TP53-N235[ CTTIHYDYM  | 286  | 119  |
| >TP53-N235[ DCTTIHYNY  | 287  | >TP53-N235[ DCTTIHYDY  | 186  | 101  |

|                       |      |                       |      |      |
|-----------------------|------|-----------------------|------|------|
| >TP53-N235[SDCTTIHYN  | 400  | >TP53-N235[SDCTTIHYD  | 1009 | 609  |
| >TP53-N235[GSDCTTIHYN | 34   | >TP53-N235[GSDCTTIHYD | 22   | 12   |
| >TP53-N235[GSDCTTIHYN | 174  | >TP53-N235[GSDCTTIHYD | 148  | 26   |
| >TP53-N235[GSDCTTIHYN | 99   | >TP53-N235[GSDCTTIHYD | 390  | 291  |
| >TP53-N235[GSDCTTIHYN | 247  | >TP53-N235[GSDCTTIHYD | 462  | 215  |
| >TP53-N235[GSDCTTIHYN | 97   | >TP53-N235[GSDCTTIHYD | 101  | 4    |
| >TP53-N235[NYMCNSSCM  | 53   | >TP53-N235[HYMCNSSCM  | 81   | 28   |
| >TP53-N235[NYMCNSSCM  | 650  | >TP53-N235[HYMCNSSCM  | 207  | 443  |
| >TP53-N235[YNMCNSSCI  | 429  | >TP53-N235[YHYMCNSSCI | 4884 | 4455 |
| >TP53-N235[YNMCNSSC   | 1155 | >TP53-N235[YHYMCNSSC  | 232  | 923  |
| >TP53-N235[YNMCNSSCI  | 31   | >TP53-N235[YHYMCNSSCI | 9    | 22   |
| >TP53-N235[YNMCNSSCI  | 6983 | >TP53-N235[YHYMCNSSCI | 328  | 6655 |
| >TP53-N235[YNMCNSSCI  | 1238 | >TP53-N235[YHYMCNSSCI | 24   | 1214 |
| >TP53-N235[HYNYMCNSS  | 70   | >TP53-N235[HYHYMCNSS  | 55   | 15   |
| >TP53-N235[HYNYMCNS   | 3880 | >TP53-N235[HYHYMCNS   | 347  | 3533 |
| >TP53-N235[HYNYMCNSS  | 4838 | >TP53-N235[HYHYMCNSS  | 492  | 4346 |
| >TP53-N235[HYNYMCNSS  | 2187 | >TP53-N235[HYHYMCNSS  | 218  | 1969 |
| >TP53-N235[IHNYMCNSS  | 575  | >TP53-N235[IHYHYMCNSS | 366  | 209  |
| >TP53-N235[TTIHYNM    | 46   | >TP53-N235[TTIHYYM    | 67   | 21   |
| >TP53-N235[TTIHYNM    | 46   | >TP53-N235[TTIHYYM    | 63   | 17   |
| >TP53-N235[TTIHYNM    | 5    | >TP53-N235[TTIHYYM    | 3    | 2    |
| >TP53-N235[TTIHYNM    | 135  | >TP53-N235[TTIHYYM    | 270  | 135  |
| >TP53-N235[TTIHYNM    | 1405 | >TP53-N235[TTIHYYM    | 282  | 1123 |
| >TP53-N235[TTIHYNM    | 17   | >TP53-N235[TTIHYYM    | 16   | 1    |
| >TP53-N235[TTIHYNMC   | 120  | >TP53-N235[TTIHYYMC   | 198  | 78   |
| >TP53-N235[TTIHYNMCM  | 102  | >TP53-N235[TTIHYYMCM  | 112  | 10   |
| >TP53-N235[TTIHYNM    | 69   | >TP53-N235[TTIHYYM    | 26   | 43   |
| >TP53-N235[TTIHYNM    | 61   | >TP53-N235[TTIHYYM    | 17   | 44   |
| >TP53-N235[TTIHYNM    | 838  | >TP53-N235[TTIHYYM    | 174  | 664  |
| >TP53-N235[TTIHYNM    | 1634 | >TP53-N235[TTIHYYM    | 80   | 1554 |
| >TP53-N235[TTIHYNM    | 260  | >TP53-N235[TTIHYYM    | 1176 | 916  |
| >TP53-N235[CTTIHYNM   | 116  | >TP53-N235[CTTIHYYM   | 377  | 261  |
| >TP53-N235[CTTIHYN    | 117  | >TP53-N235[CTTIHYH    | 47   | 70   |
| >TP53-N235[CTTIHYN    | 161  | >TP53-N235[CTTIHYH    | 89   | 72   |
| >TP53-N235[CTTIHYNM   | 207  | >TP53-N235[CTTIHYHYM  | 134  | 73   |
| >TP53-N235[CTTIHYN    | 35   | >TP53-N235[CTTIHYH    | 22   | 13   |
| >TP53-N235[CTTIHYN    | 130  | >TP53-N235[CTTIHYH    | 70   | 60   |
| >TP53-N235[CTTIHYN    | 355  | >TP53-N235[CTTIHYH    | 181  | 174  |
| >TP53-N235[CTTIHYN    | 50   | >TP53-N235[CTTIHYH    | 39   | 11   |
| >TP53-N235[CTTIHYNM   | 1487 | >TP53-N235[CTTIHYHYM  | 241  | 1246 |
| >TP53-N235[CTTIHYNM   | 3499 | >TP53-N235[CTTIHYHYM  | 217  | 3282 |
| >TP53-N235[CTTIHYNM   | 11   | >TP53-N235[CTTIHYHYM  | 7    | 4    |
| >TP53-N235[CTTIHYNMC  | 184  | >TP53-N235[CTTIHYHYMC | 83   | 101  |

|                        |       |                         |     |       |
|------------------------|-------|-------------------------|-----|-------|
| >TP53-N235I CTTIHYN    | 68    | >TP53-N235I CTTIHYHY    | 55  | 13    |
| >TP53-N235I CTTIHYNM   | 405   | >TP53-N235I CTTIHYYM    | 500 | 95    |
| >TP53-N235I DCTTIHYN   | 521   | >TP53-N235I DCTTIHYHY   | 231 | 290   |
| >TP53-N235I DCTTIHYNM  | 585   | >TP53-N235I DCTTIHYHYM  | 450 | 135   |
| >TP53-N235I DCTTIHYN   | 287   | >TP53-N235I DCTTIHYHY   | 159 | 128   |
| >TP53-N235I SDCTTIHYN  | 400   | >TP53-N235I SDCTTIHYHY  | 470 | 70    |
| >TP53-N235I GSDCTTIHYN | 34    | >TP53-N235I GSDCTTIHYH  | 18  | 16    |
| >TP53-N235I GSDCTTIHYN | 174   | >TP53-N235I GSDCTTIHYH  | 132 | 42    |
| >TP53-N235I GSDCTTIHYN | 582   | >TP53-N235I GSDCTTIHYH  | 429 | 153   |
| >TP53-N235I GSDCTTIHYN | 99    | >TP53-N235I GSDCTTIHYH  | 116 | 17    |
| >TP53-N235I GSDCTTIHYN | 247   | >TP53-N235I GSDCTTIHYH  | 306 | 59    |
| >TP53-N235I GSDCTTIHYN | 97    | >TP53-N235I GSDCTTIHYH  | 90  | 7     |
| >TP53-N235I NYMCNSSCM  | 53    | >TP53-N235I IYMCNSSCM   | 98  | 45    |
| >TP53-N235I NYMCNSSCM  | 924   | >TP53-N235I IYMCNSSCM   | 260 | 664   |
| >TP53-N235I NYMCNSSCM  | 942   | >TP53-N235I IYMCNSSCM   | 170 | 772   |
| >TP53-N235I NYMCNSSCM  | 1697  | >TP53-N235I IYMCNSSCM   | 194 | 1503  |
| >TP53-N235I YNYMCNSSCI | 1351  | >TP53-N235I YIYMCNSSCM  | 84  | 1267  |
| >TP53-N235I YNYMCNSSC  | 18663 | >TP53-N235I YIYMCNSSC   | 386 | 18277 |
| >TP53-N235I YNYMCNSSCI | 7165  | >TP53-N235I YIYMCNSSCM  | 245 | 6920  |
| >TP53-N235I YNYMCNSSCI | 5312  | >TP53-N235I YIYMCNSSCM  | 400 | 4912  |
| >TP53-N235I YNYMCNSSC  | 16007 | >TP53-N235I YIYMCNSSC   | 278 | 15729 |
| >TP53-N235I YNYMCNSSCI | 15286 | >TP53-N235I YIYMCNSSCM  | 299 | 14987 |
| >TP53-N235I YNYMCNSSC  | 27396 | >TP53-N235I YIYMCNSSC   | 91  | 27305 |
| >TP53-N235I YNYMCNSSCI | 30898 | >TP53-N235I YIYMCNSSCM  | 355 | 30543 |
| >TP53-N235I YNYMCNSSCI | 429   | >TP53-N235I YIYMCNSSCM  | 79  | 350   |
| >TP53-N235I YNYMCNSSCI | 893   | >TP53-N235I YIYMCNSSCM  | 239 | 654   |
| >TP53-N235I YNYMCNSSCI | 31    | >TP53-N235I YIYMCNSSCM  | 31  | 0     |
| >TP53-N235I YNYMCNSSCI | 911   | >TP53-N235I YIYMCNSSCM  | 205 | 706   |
| >TP53-N235I VGSDCTTIHY | 21548 | >TP53-N235I VGSDCTTIHYI | 471 | 21077 |
| >TP53-N235I HNYMCNSS   | 919   | >TP53-N235I HYIYMCNSS   | 438 | 481   |
| >TP53-N235I HNYMCNSS   | 70    | >TP53-N235I HYIYMCNSSC  | 42  | 28    |
| >TP53-N235I HNYMCNSS   | 5639  | >TP53-N235I HYIYMCNSSC  | 409 | 5230  |
| >TP53-N235I HNYMCNSS   | 12569 | >TP53-N235I HYIYMCNSSC  | 368 | 12201 |
| >TP53-N235I TTIHYNM    | 46    | >TP53-N235I TTIHYIYM    | 41  | 5     |
| >TP53-N235I TTIHYNM    | 1118  | >TP53-N235I TTIHYIYM    | 424 | 694   |
| >TP53-N235I TTIHYNM    | 46    | >TP53-N235I TTIHYIYM    | 28  | 18    |
| >TP53-N235I TTIHYNM    | 5     | >TP53-N235I TTIHYIYM    | 4   | 1     |
| >TP53-N235I TTIHYNM    | 135   | >TP53-N235I TTIHYIYM    | 236 | 101   |
| >TP53-N235I TTIHYNM    | 17    | >TP53-N235I TTIHYIYM    | 19  | 2     |
| >TP53-N235I TTIHYNMCM  | 120   | >TP53-N235I TTIHYIYMC   | 71  | 49    |
| >TP53-N235I TTIHYNMCM  | 102   | >TP53-N235I TTIHYIYMCN! | 89  | 13    |
| >TP53-N235I TTIHYNM    | 69    | >TP53-N235I TTIHYIYM    | 43  | 26    |
| >TP53-N235I TTIHYNM    | 61    | >TP53-N235I TTIHYIYM    | 21  | 40    |

|                        |       |                        |      |       |
|------------------------|-------|------------------------|------|-------|
| >TP53-N235I TTIHYNM    | 838   | >TP53-N235I TTIHYIYM   | 378  | 460   |
| >TP53-N235I TTIHYNM    | 260   | >TP53-N235I TTIHYIYM   | 1664 | 1404  |
| >TP53-N235I CTTIHYNM   | 116   | >TP53-N235I CTTIHYYM   | 107  | 9     |
| >TP53-N235I CTTIHNY    | 117   | >TP53-N235I CTTIHYY    | 54   | 63    |
| >TP53-N235I CTTIHNY    | 161   | >TP53-N235I CTTIHYY    | 362  | 201   |
| >TP53-N235I CTTIHYNM   | 207   | >TP53-N235I CTTIHYYM   | 320  | 113   |
| >TP53-N235I CTTIHNY    | 35    | >TP53-N235I CTTIHYY    | 42   | 7     |
| >TP53-N235I CTTIHNY    | 130   | >TP53-N235I CTTIHYY    | 113  | 17    |
| >TP53-N235I CTTIHNY    | 355   | >TP53-N235I CTTIHYY    | 414  | 59    |
| >TP53-N235I CTTIHNY    | 50    | >TP53-N235I CTTIHYY    | 76   | 26    |
| >TP53-N235I CTTIHYNM   | 1487  | >TP53-N235I CTTIHYYM   | 288  | 1199  |
| >TP53-N235I CTTIHYNM   | 11    | >TP53-N235I CTTIHYYM   | 11   | 0     |
| >TP53-N235I CTTIHYNM   | 184   | >TP53-N235I CTTIHYYMC  | 117  | 67    |
| >TP53-N235I CTTIHNY    | 68    | >TP53-N235I CTTIHYY    | 56   | 12    |
| >TP53-N235I CTTIHYNM   | 405   | >TP53-N235I CTTIHYYM   | 254  | 151   |
| >TP53-N235I DCTTIHNY   | 287   | >TP53-N235I DCTTIHYY   | 410  | 123   |
| >TP53-N235I DCTTIHYN   | 18546 | >TP53-N235I DCTTIHYI   | 220  | 18326 |
| >TP53-N235I SDCTTIHYN  | 26343 | >TP53-N235I SDCTTIHYI  | 79   | 26264 |
| >TP53-N235I SDCTTIHNY  | 400   | >TP53-N235I SDCTTIHYY  | 542  | 142   |
| >TP53-N235I SDCTTIHYN  | 18700 | >TP53-N235I SDCTTIHYI  | 67   | 18633 |
| >TP53-N235I GSDCTTIHYN | 34    | >TP53-N235I GSDCTTIHYY | 20   | 14    |
| >TP53-N235I GSDCTTIHYN | 174   | >TP53-N235I GSDCTTIHYY | 248  | 74    |
| >TP53-N235I GSDCTTIHYN | 582   | >TP53-N235I GSDCTTIHYY | 395  | 187   |
| >TP53-N235I GSDCTTIHYN | 99    | >TP53-N235I GSDCTTIHYY | 237  | 138   |
| >TP53-N235I GSDCTTIHYN | 247   | >TP53-N235I GSDCTTIHYY | 69   | 178   |
| >TP53-N235I GSDCTTIHYN | 97    | >TP53-N235I GSDCTTIHYY | 79   | 18    |
| >TP53-N235I NYMCNSSCN  | 53    | >TP53-N235I MYMCNSSCN  | 284  | 231   |
| >TP53-N235I NYMCNSSCN  | 924   | >TP53-N235I MYMCNSSCN  | 156  | 768   |
| >TP53-N235I NYMCNSSCN  | 942   | >TP53-N235I MYMCNSSCN  | 480  | 462   |
| >TP53-N235I NYMCNSSC   | 1997  | >TP53-N235I MYMCNSSC   | 342  | 1655  |
| >TP53-N235I NYMCNSSCN  | 650   | >TP53-N235I MYMCNSSCN  | 123  | 527   |
| >TP53-N235I NYMCNSSCN  | 1697  | >TP53-N235I MYMCNSSCN  | 133  | 1564  |
| >TP53-N235I NYMCNSSCN  | 1723  | >TP53-N235I MYMCNSSCN  | 143  | 1580  |
| >TP53-N235I NYMCNSSC   | 3435  | >TP53-N235I MYMCNSSC   | 465  | 2970  |
| >TP53-N235I YNYMCNSS   | 23119 | >TP53-N235I YMYMCNSS   | 225  | 22894 |
| >TP53-N235I YNYMCNSSC  | 23158 | >TP53-N235I YMYMCNSSC  | 243  | 22915 |
| >TP53-N235I YNYMCNSSC  | 11252 | >TP53-N235I YMYMCNSSC  | 82   | 11170 |
| >TP53-N235I YNYMCNSS   | 14514 | >TP53-N235I YMYMCNSS   | 170  | 14344 |
| >TP53-N235I YNYMCNSSC  | 1351  | >TP53-N235I YMYMCNSSC  | 17   | 1334  |
| >TP53-N235I YNYMCNSS   | 18871 | >TP53-N235I YMYMCNSS   | 41   | 18830 |
| >TP53-N235I YNYMCNSSC  | 18663 | >TP53-N235I YMYMCNSSC  | 32   | 18631 |
| >TP53-N235I YNYMCNSSC  | 7165  | >TP53-N235I YMYMCNSSC  | 61   | 7104  |
| >TP53-N235I YNYMCNSSC  | 22095 | >TP53-N235I YMYMCNSSC  | 302  | 21793 |

|                       |       |                        |     |       |
|-----------------------|-------|------------------------|-----|-------|
| >TP53-N235IYNYMCNSSC  | 18225 | >TP53-N235IYMYMCNSSC   | 403 | 17822 |
| >TP53-N235IYNYMCNSSCI | 5312  | >TP53-N235IYMYMCNSSC   | 226 | 5086  |
| >TP53-N235IYNYMCNSS   | 25444 | >TP53-N235IYMYMCNSS    | 108 | 25336 |
| >TP53-N235IYNYMCNSSC  | 16007 | >TP53-N235IYMYMCNSSC   | 8   | 15999 |
| >TP53-N235IYNYMCNSSCI | 15286 | >TP53-N235IYMYMCNSSC   | 12  | 15274 |
| >TP53-N235IYNYMCNSSCI | 21000 | >TP53-N235IYMYMCNSSC   | 42  | 20958 |
| >TP53-N235IYNYMCNSSC  | 20783 | >TP53-N235IYMYMCNSSC   | 25  | 20758 |
| >TP53-N235IYNYMCNSSCI | 17336 | >TP53-N235IYMYMCNSSC   | 13  | 17323 |
| >TP53-N235IYNYMCNSSC  | 24562 | >TP53-N235IYMYMCNSSC   | 241 | 24321 |
| >TP53-N235IYNYMCNSSCI | 21370 | >TP53-N235IYMYMCNSSC   | 29  | 21341 |
| >TP53-N235IYNYMCNSSCI | 24048 | >TP53-N235IYMYMCNSSC   | 457 | 23591 |
| >TP53-N235IYNYMCNSSC  | 23163 | >TP53-N235IYMYMCNSSC   | 119 | 23044 |
| >TP53-N235IYNYMCNSSCI | 21634 | >TP53-N235IYMYMCNSSC   | 25  | 21609 |
| >TP53-N235IYNYMCNSS   | 35100 | >TP53-N235IYMYMCNSS    | 74  | 35026 |
| >TP53-N235IYNYMCNSSC  | 27396 | >TP53-N235IYMYMCNSSC   | 7   | 27389 |
| >TP53-N235IYNYMCNSSCI | 30898 | >TP53-N235IYMYMCNSSC   | 17  | 30881 |
| >TP53-N235IYNYMCNSSCI | 36009 | >TP53-N235IYMYMCNSSC   | 192 | 35817 |
| >TP53-N235IYNYMCNSSCI | 429   | >TP53-N235IYMYMCNSSC   | 28  | 401   |
| >TP53-N235IYNYMCNSSCI | 4464  | >TP53-N235IYMYMCNSSC   | 126 | 4338  |
| >TP53-N235IYNYMCNSSCI | 893   | >TP53-N235IYMYMCNSSC   | 36  | 857   |
| >TP53-N235IYNYMCNSS   | 5404  | >TP53-N235IYMYMCNSS    | 146 | 5258  |
| >TP53-N235IYNYMCNSSC  | 1155  | >TP53-N235IYMYMCNSSC   | 54  | 1101  |
| >TP53-N235IYNYMCNSSCI | 31    | >TP53-N235IYMYMCNSSC   | 4   | 27    |
| >TP53-N235IYNYMCNSSCI | 6071  | >TP53-N235IYMYMCNSSC   | 296 | 5775  |
| >TP53-N235IYNYMCNSSCI | 5831  | >TP53-N235IYMYMCNSSC   | 291 | 5540  |
| >TP53-N235IYNYMCNSSCI | 1238  | >TP53-N235IYMYMCNSSC   | 131 | 1107  |
| >TP53-N235IYNYMCNSSCI | 911   | >TP53-N235IYMYMCNSSC   | 238 | 673   |
| >TP53-N235IVGSDCTTIHY | 19599 | >TP53-N235IVGSDCTTIHYI | 484 | 19115 |
| >TP53-N235IHNYMCNSS   | 919   | >TP53-N235IHYMYMCNSS   | 472 | 447   |
| >TP53-N235IHNYMCNSS   | 70    | >TP53-N235IHYMYMCNSS   | 36  | 34    |
| >TP53-N235IHNYMCNSS   | 2755  | >TP53-N235IHYMYMCNSS   | 249 | 2506  |
| >TP53-N235ITTIHYNM    | 46    | >TP53-N235ITTIHYMYM    | 34  | 12    |
| >TP53-N235ITTIHYNM    | 46    | >TP53-N235ITTIHYMYM    | 16  | 30    |
| >TP53-N235ITTIHYNM    | 5     | >TP53-N235ITTIHYMYM    | 4   | 1     |
| >TP53-N235ITTIHYNMCM  | 8451  | >TP53-N235ITTIHYMYMC   | 301 | 8150  |
| >TP53-N235ITTIHYNMCM  | 1485  | >TP53-N235ITTIHYMYMCI  | 256 | 1229  |
| >TP53-N235ITTIHYNM    | 135   | >TP53-N235ITTIHYMYM    | 338 | 203   |
| >TP53-N235ITTIHYNM    | 1405  | >TP53-N235ITTIHYMYM    | 442 | 963   |
| >TP53-N235ITTIHYNM    | 17    | >TP53-N235ITTIHYMYM    | 11  | 6     |
| >TP53-N235ITTIHYNMCM  | 120   | >TP53-N235ITTIHYMYMC   | 58  | 62    |
| >TP53-N235ITTIHYNMCM  | 102   | >TP53-N235ITTIHYMYMCI  | 82  | 20    |
| >TP53-N235ITTIHYNM    | 69    | >TP53-N235ITTIHYMYM    | 27  | 42    |
| >TP53-N235ITTIHYNM    | 61    | >TP53-N235ITTIHYMYM    | 18  | 43    |

|                        |       |                        |     |       |
|------------------------|-------|------------------------|-----|-------|
| >TP53-N235I TTIHYNM    | 838   | >TP53-N235I TTIHYMYM   | 259 | 579   |
| >TP53-N235I TTIHYNM    | 260   | >TP53-N235I TTIHYMYM   | 485 | 225   |
| >TP53-N235I CTTIHYNM   | 116   | >TP53-N235I CTTIHMYM   | 142 | 26    |
| >TP53-N235I CTTIHNY    | 117   | >TP53-N235I CTTIHMY    | 29  | 88    |
| >TP53-N235I CTTIHNY    | 161   | >TP53-N235I CTTIHMY    | 408 | 247   |
| >TP53-N235I CTTIHYNM   | 207   | >TP53-N235I CTTIHMYM   | 671 | 464   |
| >TP53-N235I CTTIHNY    | 35    | >TP53-N235I CTTIHMY    | 18  | 17    |
| >TP53-N235I CTTIHNY    | 130   | >TP53-N235I CTTIHMY    | 104 | 26    |
| >TP53-N235I CTTIHNY    | 767   | >TP53-N235I CTTIHMY    | 454 | 313   |
| >TP53-N235I CTTIHNY    | 355   | >TP53-N235I CTTIHMY    | 311 | 44    |
| >TP53-N235I CTTIHNY    | 50    | >TP53-N235I CTTIHMY    | 41  | 9     |
| >TP53-N235I CTTIHYNM   | 1487  | >TP53-N235I CTTIHMYM   | 295 | 1192  |
| >TP53-N235I CTTIHYNM   | 3499  | >TP53-N235I CTTIHMYM   | 383 | 3116  |
| >TP53-N235I CTTIHNY    | 10843 | >TP53-N235I CTTIHMY    | 370 | 10473 |
| >TP53-N235I CTTIHYNM   | 11    | >TP53-N235I CTTIHMYM   | 15  | 4     |
| >TP53-N235I CTTIHYNMCI | 184   | >TP53-N235I CTTIHMYMCI | 143 | 41    |
| >TP53-N235I CTTIHNY    | 68    | >TP53-N235I CTTIHMY    | 48  | 20    |
| >TP53-N235I CTTIHYNM   | 405   | >TP53-N235I CTTIHMYM   | 496 | 91    |
| >TP53-N235I DCTTIHYN   | 24103 | >TP53-N235I DCTTIHYM   | 415 | 23688 |
| >TP53-N235I DCTTIHNY   | 287   | >TP53-N235I DCTTIHYMY  | 102 | 185   |
| >TP53-N235I SDCTTIHNY  | 400   | >TP53-N235I SDCTTIHYMY | 426 | 26    |
| >TP53-N235I GSDCTTIHYN | 34    | >TP53-N235I GSDCTTIHYM | 13  | 21    |
| >TP53-N235I GSDCTTIHYN | 174   | >TP53-N235I GSDCTTIHYM | 116 | 58    |
| >TP53-N235I GSDCTTIHYN | 582   | >TP53-N235I GSDCTTIHYM | 384 | 198   |
| >TP53-N235I GSDCTTIHYN | 19195 | >TP53-N235I GSDCTTIHYM | 246 | 18949 |
| >TP53-N235I GSDCTTIHYN | 99    | >TP53-N235I GSDCTTIHYM | 126 | 27    |
| >TP53-N235I GSDCTTIHYN | 247   | >TP53-N235I GSDCTTIHYM | 43  | 204   |
| >TP53-N235I GSDCTTIHYN | 97    | >TP53-N235I GSDCTTIHYM | 69  | 28    |
| >TP53-N235I NYMCNSSCM  | 726   | >TP53-N235I SYMCNSSCM  | 247 | 479   |
| >TP53-N235I NYMCNSSC   | 2346  | >TP53-N235I SYMCNSSC   | 263 | 2083  |
| >TP53-N235I NYMCNSSCM  | 53    | >TP53-N235I SYMCNSSCM  | 11  | 42    |
| >TP53-N235I NYMCNSSCM  | 650   | >TP53-N235I SYMCNSSCM  | 269 | 381   |
| >TP53-N235I YNYMCNSSCI | 429   | >TP53-N235I YSYMCNSSCI | 79  | 350   |
| >TP53-N235I YNYMCNSSC  | 1155  | >TP53-N235I YSYMCNSSC  | 234 | 921   |
| >TP53-N235I YNYMCNSSCI | 31    | >TP53-N235I YSYMCNSSCI | 10  | 21    |
| >TP53-N235I YNYMCNSSC  | 21515 | >TP53-N235I YSYMCNSSC  | 447 | 21068 |
| >TP53-N235I YNYMCNSSCI | 5831  | >TP53-N235I YSYMCNSSCI | 6   | 5825  |
| >TP53-N235I YNYMCNSSCI | 20408 | >TP53-N235I YSYMCNSSCI | 416 | 19992 |
| >TP53-N235I YNYMCNSSC  | 1209  | >TP53-N235I YSYMCNSSC  | 56  | 1153  |
| >TP53-N235I YNYMCNSSCI | 911   | >TP53-N235I YSYMCNSSCI | 28  | 883   |
| >TP53-N235I YNYMCNSSCI | 5020  | >TP53-N235I YSYMCNSSCI | 477 | 4543  |
| >TP53-N235I HNYMCNSS   | 70    | >TP53-N235I HYSYMCNSSC | 115 | 45    |
| >TP53-N235I HNYMCNSS   | 1117  | >TP53-N235I HYSYMCNSS  | 458 | 659   |

|                        |      |                        |      |      |
|------------------------|------|------------------------|------|------|
| >TP53-N235€IHYNMNCNS€  | 575  | >TP53-N235€IHYSYMCNSS  | 429  | 146  |
| >TP53-N235€TTIHYNM     | 46   | >TP53-N235€TTIHYSYM    | 17   | 29   |
| >TP53-N235€TTIHYNM     | 46   | >TP53-N235€TTIHYSYM    | 22   | 24   |
| >TP53-N235€TTIHYNM     | 5    | >TP53-N235€TTIHYSYM    | 4    | 1    |
| >TP53-N235€TTIHYNM     | 135  | >TP53-N235€TTIHYSYM    | 360  | 225  |
| >TP53-N235€TTIHYNM     | 17   | >TP53-N235€TTIHYSYM    | 21   | 4    |
| >TP53-N235€TTIHYNMCM   | 120  | >TP53-N235€TTIHYSYMC   | 127  | 7    |
| >TP53-N235€TTIHYNMCM   | 102  | >TP53-N235€TTIHYSYMCN  | 96   | 6    |
| >TP53-N235€TTIHYNM     | 69   | >TP53-N235€TTIHYSYM    | 64   | 5    |
| >TP53-N235€TTIHYNM     | 61   | >TP53-N235€TTIHYSYM    | 11   | 50   |
| >TP53-N235€TTIHYNM     | 838  | >TP53-N235€TTIHYSYM    | 453  | 385  |
| >TP53-N235€TTIHYNM     | 260  | >TP53-N235€TTIHYSYM    | 1193 | 933  |
| >TP53-N235€CTTIHYNM    | 116  | >TP53-N235€CTTIHYSYM   | 120  | 4    |
| >TP53-N235€CTTIHYN     | 117  | >TP53-N235€CTTIHYSY    | 82   | 35   |
| >TP53-N235€CTTIHYNM    | 754  | >TP53-N235€CTTIHYSYM   | 278  | 476  |
| >TP53-N235€CTTIHYN     | 161  | >TP53-N235€CTTIHYSY    | 186  | 25   |
| >TP53-N235€CTTIHYNM    | 207  | >TP53-N235€CTTIHYSYM   | 128  | 79   |
| >TP53-N235€CTTIHYN     | 35   | >TP53-N235€CTTIHYSY    | 31   | 4    |
| >TP53-N235€CTTIHYN     | 130  | >TP53-N235€CTTIHYSY    | 60   | 70   |
| >TP53-N235€CTTIHYN     | 355  | >TP53-N235€CTTIHYSY    | 721  | 366  |
| >TP53-N235€CTTIHYN     | 50   | >TP53-N235€CTTIHYSY    | 29   | 21   |
| >TP53-N235€CTTIHYNM    | 1487 | >TP53-N235€CTTIHYSYM   | 83   | 1404 |
| >TP53-N235€CTTIHYNM    | 11   | >TP53-N235€CTTIHYSYM   | 16   | 5    |
| >TP53-N235€CTTIHYNMCM  | 184  | >TP53-N235€CTTIHYSYMC  | 171  | 13   |
| >TP53-N235€CTTIHYNM    | 999  | >TP53-N235€CTTIHYSYM   | 61   | 938  |
| >TP53-N235€CTTIHYN     | 68   | >TP53-N235€CTTIHYSY    | 62   | 6    |
| >TP53-N235€CTTIHYNM    | 405  | >TP53-N235€CTTIHYSYM   | 114  | 291  |
| >TP53-N235€DCTTIHYNM   | 585  | >TP53-N235€DCTTIHYSYM  | 494  | 91   |
| >TP53-N235€DCTTIHYN    | 287  | >TP53-N235€DCTTIHYSY   | 275  | 12   |
| >TP53-N235€DCTTIHYN    | 1323 | >TP53-N235€DCTTIHYSY   | 474  | 849  |
| >TP53-N235€SDCTTIHYN   | 400  | >TP53-N235€SDCTTIHYSY  | 753  | 353  |
| >TP53-N235€GSDCTTIHYN  | 34   | >TP53-N235€GSDCTTIHYS\ | 25   | 9    |
| >TP53-N235€GSDCTTIHYN  | 174  | >TP53-N235€GSDCTTIHYS\ | 178  | 4    |
| >TP53-N235€GSDCTTIHYN  | 582  | >TP53-N235€GSDCTTIHYS\ | 273  | 309  |
| >TP53-N235€GSDCTTIHYN  | 99   | >TP53-N235€GSDCTTIHYS\ | 91   | 8    |
| >TP53-N235€GSDCTTIHYN  | 247  | >TP53-N235€GSDCTTIHYS\ | 109  | 138  |
| >TP53-N235€GSDCTTIHYN  | 97   | >TP53-N235€GSDCTTIHYS\ | 87   | 10   |
| >TP53-N235\NYMNCNSSCM  | 53   | >TP53-N235\TYMNCNSSCM  | 45   | 8    |
| >TP53-N235\NYMNCNSSCM  | 924  | >TP53-N235\TYMNCNSSCM  | 393  | 531  |
| >TP53-N235\NYMNCNSSCM  | 942  | >TP53-N235\TYMNCNSSCM  | 347  | 595  |
| >TP53-N235\NYMNCNSSCM  | 650  | >TP53-N235\TYMNCNSSCM  | 405  | 245  |
| >TP53-N235\YNYMNCNSSCI | 1351 | >TP53-N235\TYMNCNSSCI  | 170  | 1181 |
| >TP53-N235\YNYMNCNSSCI | 5312 | >TP53-N235\TYMNCNSSCI  | 449  | 4863 |

|                       |       |                       |     |       |
|-----------------------|-------|-----------------------|-----|-------|
| >TP53-N2351YNYMCNSSCI | 8818  | >TP53-N2351YTYMCNSSCI | 73  | 8745  |
| >TP53-N2351YNYMCNSSCI | 14161 | >TP53-N2351YTYMCNSSCI | 438 | 13723 |
| >TP53-N2351YNYMCNSSCI | 429   | >TP53-N2351YTYMCNSSCI | 92  | 337   |
| >TP53-N2351YNYMCNSSCI | 31    | >TP53-N2351YTYMCNSSCI | 20  | 11    |
| >TP53-N2351YNYMCNSSC  | 21515 | >TP53-N2351YTYMCNSSC  | 266 | 21249 |
| >TP53-N2351YNYMCNSSCI | 5831  | >TP53-N2351YTYMCNSSCI | 5   | 5826  |
| >TP53-N2351YNYMCNSSCI | 20408 | >TP53-N2351YTYMCNSSCI | 271 | 20137 |
| >TP53-N2351YNYMCNSSCI | 19207 | >TP53-N2351YTYMCNSSCI | 190 | 19017 |
| >TP53-N2351YNYMCNSSC  | 1209  | >TP53-N2351YTYMCNSSC  | 22  | 1187  |
| >TP53-N2351YNYMCNSSCI | 911   | >TP53-N2351YTYMCNSSCI | 20  | 891   |
| >TP53-N2351YNYMCNSSCI | 5020  | >TP53-N2351YTYMCNSSCI | 182 | 4838  |
| >TP53-N2351HNYMCNSS   | 70    | >TP53-N2351HYTYMCNSS  | 75  | 5     |
| >TP53-N2351TTIHNYM    | 46    | >TP53-N2351TTIHITYM   | 28  | 18    |
| >TP53-N2351TTIHNYM    | 46    | >TP53-N2351TTIHITYM   | 26  | 20    |
| >TP53-N2351TTIHNYM    | 5     | >TP53-N2351TTIHITYM   | 5   | 0     |
| >TP53-N2351TTIHNYM    | 135   | >TP53-N2351TTIHITYM   | 293 | 158   |
| >TP53-N2351TTIHNYM    | 17    | >TP53-N2351TTIHITYM   | 18  | 1     |
| >TP53-N2351TTIHNYMC   | 120   | >TP53-N2351TTIHITYMC  | 68  | 52    |
| >TP53-N2351TTIHNYMCN  | 102   | >TP53-N2351TTIHITYMCN | 73  | 29    |
| >TP53-N2351TTIHNYM    | 69    | >TP53-N2351TTIHITYM   | 49  | 20    |
| >TP53-N2351TTIHNYM    | 61    | >TP53-N2351TTIHITYM   | 18  | 43    |
| >TP53-N2351TTIHNYM    | 838   | >TP53-N2351TTIHITYM   | 306 | 532   |
| >TP53-N2351TTIHNYM    | 260   | >TP53-N2351TTIHITYM   | 646 | 386   |
| >TP53-N2351CTTIHNYM   | 116   | >TP53-N2351CTTIHITYM  | 142 | 26    |
| >TP53-N2351CTTIHNY    | 117   | >TP53-N2351CTTIHITY   | 63  | 54    |
| >TP53-N2351CTTIHNY    | 161   | >TP53-N2351CTTIHITY   | 304 | 143   |
| >TP53-N2351CTTIHNYM   | 207   | >TP53-N2351CTTIHITYM  | 675 | 468   |
| >TP53-N2351CTTIHNY    | 35    | >TP53-N2351CTTIHITY   | 31  | 4     |
| >TP53-N2351CTTIHNY    | 130   | >TP53-N2351CTTIHITY   | 107 | 23    |
| >TP53-N2351CTTIHNY    | 355   | >TP53-N2351CTTIHITY   | 695 | 340   |
| >TP53-N2351CTTIHNY    | 50    | >TP53-N2351CTTIHITY   | 18  | 32    |
| >TP53-N2351CTTIHNYM   | 1487  | >TP53-N2351CTTIHITYM  | 203 | 1284  |
| >TP53-N2351CTTIHNYM   | 11    | >TP53-N2351CTTIHITYM  | 17  | 6     |
| >TP53-N2351CTTIHNYMC  | 184   | >TP53-N2351CTTIHITYMC | 175 | 9     |
| >TP53-N2351CTTIHNYM   | 999   | >TP53-N2351CTTIHITYM  | 441 | 558   |
| >TP53-N2351CTTIHNY    | 68    | >TP53-N2351CTTIHITY   | 52  | 16    |
| >TP53-N2351CTTIHNYM   | 405   | >TP53-N2351CTTIHITYM  | 209 | 196   |
| >TP53-N2351DCTTIHNY   | 287   | >TP53-N2351DCTTIHITY  | 247 | 40    |
| >TP53-N2351DCTTIHNY   | 3280  | >TP53-N2351DCTTIHITY  | 414 | 2866  |
| >TP53-N2351DCTTIHNY   | 787   | >TP53-N2351DCTTIHITY  | 477 | 310   |
| >TP53-N2351SDCTTIHNY  | 400   | >TP53-N2351SDCTTIHITY | 641 | 241   |
| >TP53-N2351GSDCTTIHYN | 34    | >TP53-N2351GSDCTTIHYT | 19  | 15    |
| >TP53-N2351GSDCTTIHYN | 174   | >TP53-N2351GSDCTTIHYT | 164 | 10    |



|                       |       |                       |      |       |
|-----------------------|-------|-----------------------|------|-------|
| >TP53-N235\GSDCTTIHYN | 582   | >TP53-N235\GSDCTTIHYT | 367  | 215   |
| >TP53-N235\GSDCTTIHYN | 99    | >TP53-N235\GSDCTTIHYT | 48   | 51    |
| >TP53-N235\GSDCTTIHYN | 247   | >TP53-N235\GSDCTTIHYT | 60   | 187   |
| >TP53-N235\GSDCTTIHYN | 97    | >TP53-N235\GSDCTTIHYT | 64   | 33    |
| >TP53-N235\NYMCNSSCN  | 726   | >TP53-N235\YYMCNSSCM  | 110  | 616   |
| >TP53-N235\NYMCNSSCN  | 53    | >TP53-N235\YYMCNSSCM  | 46   | 7     |
| >TP53-N235\NYMCNSSCN  | 924   | >TP53-N235\YYMCNSSCM  | 174  | 750   |
| >TP53-N235\NYMCNSSCN  | 942   | >TP53-N235\YYMCNSSCM  | 143  | 799   |
| >TP53-N235\NYMCNSSC   | 1997  | >TP53-N235\YYMCNSSC   | 136  | 1861  |
| >TP53-N235\NYMCNSSCN  | 650   | >TP53-N235\YYMCNSSCM  | 52   | 598   |
| >TP53-N235\NYMCNSSCN  | 2980  | >TP53-N235\YYMCNSSCM  | 302  | 2678  |
| >TP53-N235\NYMCNSSCN  | 2608  | >TP53-N235\YYMCNSSCM  | 297  | 2311  |
| >TP53-N235\NYMCNSSCN  | 1697  | >TP53-N235\YYMCNSSCM  | 117  | 1580  |
| >TP53-N235\NYMCNSSCN  | 1723  | >TP53-N235\YYMCNSSCM  | 252  | 1471  |
| >TP53-N235\NYMCNSSCN  | 1703  | >TP53-N235\YYMCNSSCM  | 442  | 1261  |
| >TP53-N235\NYMCNSSCN  | 5301  | >TP53-N235\YYMCNSSCM  | 311  | 4990  |
| >TP53-N235\YNYMCNSSCI | 21161 | >TP53-N235\YYMCNSSCI  | 216  | 20945 |
| >TP53-N235\YNYMCNSSCI | 26246 | >TP53-N235\YYMCNSSCI  | 257  | 25989 |
| >TP53-N235\YNYMCNSSCI | 429   | >TP53-N235\YYMCNSSCI  | 2728 | 2299  |
| >TP53-N235\YNYMCNSSCI | 31    | >TP53-N235\YYMCNSSCI  | 71   | 40    |
| >TP53-N235\VGSDCTTIHY | 19933 | >TP53-N235\VGSDCTTIHY | 363  | 19570 |
| >TP53-N235\VGSDCTTIHY | 7717  | >TP53-N235\VGSDCTTIHY | 14   | 7703  |
| >TP53-N235\VGSDCTTIHY | 19599 | >TP53-N235\VGSDCTTIHY | 275  | 19324 |
| >TP53-N235\HNYMCNSS   | 70    | >TP53-N235\HYYMCNSS   | 97   | 27    |
| >TP53-N235\HNYMCNSS   | 5639  | >TP53-N235\HYYMCNSS   | 372  | 5267  |
| >TP53-N235\HNYMCNSS   | 1117  | >TP53-N235\HYYMCNSS   | 371  | 746   |
| >TP53-N235\IHNYMCNSS  | 575   | >TP53-N235\IHYYMCNSS  | 432  | 143   |
| >TP53-N235\TTIHYNM    | 46    | >TP53-N235\TTIHYYM    | 22   | 24    |
| >TP53-N235\TTIHYNM    | 1118  | >TP53-N235\TTIHYYM    | 499  | 619   |
| >TP53-N235\TTIHYNM    | 46    | >TP53-N235\TTIHYYM    | 35   | 11    |
| >TP53-N235\TTIHYNM    | 5     | >TP53-N235\TTIHYYM    | 5    | 0     |
| >TP53-N235\TTIHYNM    | 135   | >TP53-N235\TTIHYYM    | 450  | 315   |
| >TP53-N235\TTIHYNM    | 1405  | >TP53-N235\TTIHYYM    | 189  | 1216  |
| >TP53-N235\TTIHYNM    | 17    | >TP53-N235\TTIHYYM    | 10   | 7     |
| >TP53-N235\TTIHYNMCM  | 120   | >TP53-N235\TTIHYYMCM  | 95   | 25    |
| >TP53-N235\TTIHYNMCM  | 102   | >TP53-N235\TTIHYYMCM  | 74   | 28    |
| >TP53-N235\TTIHYNM    | 69    | >TP53-N235\TTIHYYM    | 34   | 35    |
| >TP53-N235\TTIHYNM    | 61    | >TP53-N235\TTIHYYM    | 26   | 35    |
| >TP53-N235\TTIHYNM    | 838   | >TP53-N235\TTIHYYM    | 210  | 628   |
| >TP53-N235\TTIHYNM    | 1634  | >TP53-N235\TTIHYYM    | 140  | 1494  |
| >TP53-N235\TTIHYNM    | 260   | >TP53-N235\TTIHYYM    | 5283 | 5023  |
| >TP53-N235\CTTIHYNM   | 116   | >TP53-N235\CTTIHYYM   | 158  | 42    |
| >TP53-N235\CTTIHYNM   | 117   | >TP53-N235\CTTIHYYM   | 33   | 84    |

|                       |       |                        |     |       |
|-----------------------|-------|------------------------|-----|-------|
| >TP53-N235\CTTIHYN    | 1373  | >TP53-N235\CTTIHYYY    | 242 | 1131  |
| >TP53-N235\CTTIHYN    | 161   | >TP53-N235\CTTIHYYY    | 111 | 50    |
| >TP53-N235\CTTIHYNM   | 207   | >TP53-N235\CTTIHYYYM   | 220 | 13    |
| >TP53-N235\CTTIHYN    | 35    | >TP53-N235\CTTIHYYY    | 11  | 24    |
| >TP53-N235\CTTIHYN    | 130   | >TP53-N235\CTTIHYYY    | 41  | 89    |
| >TP53-N235\CTTIHYN    | 767   | >TP53-N235\CTTIHYYY    | 194 | 573   |
| >TP53-N235\CTTIHYNM   | 1337  | >TP53-N235\CTTIHYYYM   | 292 | 1045  |
| >TP53-N235\CTTIHYN    | 355   | >TP53-N235\CTTIHYYY    | 228 | 127   |
| >TP53-N235\CTTIHYN    | 50    | >TP53-N235\CTTIHYYY    | 36  | 14    |
| >TP53-N235\CTTIHYNM   | 1487  | >TP53-N235\CTTIHYYYM   | 306 | 1181  |
| >TP53-N235\CTTIHYNM   | 11    | >TP53-N235\CTTIHYYYM   | 7   | 4     |
| >TP53-N235\CTTIHYNM   | 184   | >TP53-N235\CTTIHYYYMC  | 108 | 76    |
| >TP53-N235\CTTIHYN    | 68    | >TP53-N235\CTTIHYYY    | 26  | 42    |
| >TP53-N235\CTTIHYNM   | 405   | >TP53-N235\CTTIHYYYM   | 329 | 76    |
| >TP53-N235\DCTTIHYN   | 24103 | >TP53-N235\DCTTIHYY    | 176 | 23927 |
| >TP53-N235\DCTTIHYN   | 521   | >TP53-N235\DCTTIHYY    | 256 | 265   |
| >TP53-N235\DCTTIHYN   | 287   | >TP53-N235\DCTTIHYY    | 44  | 243   |
| >TP53-N235\DCTTIHYN   | 28214 | >TP53-N235\DCTTIHYY    | 416 | 27798 |
| >TP53-N235\DCTTIHYN   | 1323  | >TP53-N235\DCTTIHYY    | 328 | 995   |
| >TP53-N235\DCTTIHYN   | 787   | >TP53-N235\DCTTIHYY    | 303 | 484   |
| >TP53-N235\SDCTTIHYN  | 24455 | >TP53-N235\SDCTTIHYY   | 440 | 24015 |
| >TP53-N235\SDCTTIHYN  | 400   | >TP53-N235\SDCTTIHYY   | 181 | 219   |
| >TP53-N235\SDCTTIHYN  | 22149 | >TP53-N235\SDCTTIHYY   | 144 | 22005 |
| >TP53-N235\GSDCTTIHYN | 17735 | >TP53-N235\GSDCTTIHYY  | 39  | 17696 |
| >TP53-N235\GSDCTTIHYN | 34    | >TP53-N235\GSDCTTIHYY` | 14  | 20    |
| >TP53-N235\GSDCTTIHYN | 1028  | >TP53-N235\GSDCTTIHYY` | 221 | 807   |
| >TP53-N235\GSDCTTIHYN | 28491 | >TP53-N235\GSDCTTIHYY  | 147 | 28344 |
| >TP53-N235\GSDCTTIHYN | 174   | >TP53-N235\GSDCTTIHYY` | 72  | 102   |
| >TP53-N235\GSDCTTIHYN | 17205 | >TP53-N235\GSDCTTIHYY  | 45  | 17160 |
| >TP53-N235\GSDCTTIHYN | 582   | >TP53-N235\GSDCTTIHYY` | 225 | 357   |
| >TP53-N235\GSDCTTIHYN | 19195 | >TP53-N235\GSDCTTIHYY  | 43  | 19152 |
| >TP53-N235\GSDCTTIHYN | 99    | >TP53-N235\GSDCTTIHYY` | 96  | 3     |
| >TP53-N235\GSDCTTIHYN | 247   | >TP53-N235\GSDCTTIHYY` | 92  | 155   |
| >TP53-N235\GSDCTTIHYN | 97    | >TP53-N235\GSDCTTIHYY` | 47  | 50    |
| >TP53-N239[DSSCMGGMI  | 111   | >TP53-N239[DSSCMGGMI   | 438 | 327   |
| >TP53-N239[DSSCMGGMI  | 55    | >TP53-N239[DSSCMGGMI   | 133 | 78    |
| >TP53-N239[DSSCMGGMI  | 365   | >TP53-N239[DSSCMGGMI   | 166 | 199   |
| >TP53-N239[DSSCMGGMI  | 1183  | >TP53-N239[DSSCMGGMI   | 240 | 943   |
| >TP53-N239[DSSCMGGMI  | 12    | >TP53-N239[DSSCMGGMI   | 21  | 9     |
| >TP53-N239[DSSCMGGMI  | 39    | >TP53-N239[DSSCMGGMI   | 31  | 8     |
| >TP53-N239[YMCNSSCM   | 262   | >TP53-N239[YMCDSSCM    | 81  | 181   |
| >TP53-N239[YMCDSSCM   | 252   | >TP53-N239[YMCDSSCM    | 90  | 162   |
| >TP53-N239[YMCDSSCM   | 205   | >TP53-N239[YMCDSSCM    | 51  | 154   |

|                        |      |                        |      |      |
|------------------------|------|------------------------|------|------|
| >TP53-N239I YMCNSSCMC  | 167  | >TP53-N239I YMCDSSCMC  | 42   | 125  |
| >TP53-N239I YMCNSSCM   | 283  | >TP53-N239I YMCDSSCM   | 139  | 144  |
| >TP53-N239I YMCNSSCMC  | 41   | >TP53-N239I YMCDSSCMC  | 20   | 21   |
| >TP53-N239I YMCNSSCM   | 676  | >TP53-N239I YMCDSSCM   | 184  | 492  |
| >TP53-N239I YMCNSSCMC  | 143  | >TP53-N239I YMCDSSCMC  | 45   | 98   |
| >TP53-N239I YMCNSSCM   | 24   | >TP53-N239I YMCDSSCM   | 15   | 9    |
| >TP53-N239I YMCNSSCMC  | 92   | >TP53-N239I YMCDSSCMC  | 37   | 55   |
| >TP53-N239I YMCNSSCMC  | 399  | >TP53-N239I YMCDSSCMC  | 163  | 236  |
| >TP53-N239I YMCNSSCMC  | 16   | >TP53-N239I YMCDSSCMC  | 9    | 7    |
| >TP53-N239I YMCNSSCM   | 92   | >TP53-N239I YMCDSSCM   | 60   | 32   |
| >TP53-N239I YMCNSSCMC  | 197  | >TP53-N239I YMCDSSCMC  | 101  | 96   |
| >TP53-N239I YMCNSSCM   | 150  | >TP53-N239I YMCDSSCM   | 86   | 64   |
| >TP53-N239I YMCNSSCMC  | 421  | >TP53-N239I YMCDSSCMC  | 244  | 177  |
| >TP53-N239I YMCNSSCM   | 67   | >TP53-N239I YMCDSSCM   | 22   | 45   |
| >TP53-N239I YMCNSSCMC  | 332  | >TP53-N239I YMCDSSCMC  | 105  | 227  |
| >TP53-N239I YMCNSSCM   | 33   | >TP53-N239I YMCDSSCM   | 10   | 23   |
| >TP53-N239I YMCNSSCMC  | 903  | >TP53-N239I YMCDSSCMC  | 66   | 837  |
| >TP53-N239I YMCNSSCMC  | 1350 | >TP53-N239I YMCDSSCMC  | 150  | 1200 |
| >TP53-N239I YMCNSSCMC  | 53   | >TP53-N239I YMCDSSCMC  | 13   | 40   |
| >TP53-N239I YMCNSSCMC  | 591  | >TP53-N239I YMCDSSCMC  | 396  | 195  |
| >TP53-N239I YMCNSSCM   | 33   | >TP53-N239I YMCDSSCM   | 37   | 4    |
| >TP53-N239I YMCNSSCMC  | 127  | >TP53-N239I YMCDSSCMC  | 142  | 15   |
| >TP53-N239I YMCNSSCMC  | 292  | >TP53-N239I YMCDSSCMC  | 309  | 17   |
| >TP53-N239I YMCNSSCMC  | 44   | >TP53-N239I YMCDSSCMC  | 49   | 5    |
| >TP53-N239I YMCNSSCM   | 98   | >TP53-N239I YMCDSSCM   | 171  | 73   |
| >TP53-N239I YMCNSSCMC  | 145  | >TP53-N239I YMCDSSCMC  | 219  | 74   |
| >TP53-N239I YMCNSSCM   | 20   | >TP53-N239I YMCDSSCM   | 42   | 22   |
| >TP53-N239I YMCNSSCMC  | 160  | >TP53-N239I YMCDSSCMC  | 386  | 226  |
| >TP53-N239I YMCNSSCMC  | 294  | >TP53-N239I YMCDSSCMC  | 136  | 158  |
| >TP53-N239I YMCNSSCM   | 310  | >TP53-N239I YMCDSSCM   | 208  | 102  |
| >TP53-N239I YMCNSSCM   | 346  | >TP53-N239I YMCDSSCM   | 248  | 98   |
| >TP53-N239I NYMCNSSCM  | 53   | >TP53-N239I NYMCDSSCM  | 270  | 217  |
| >TP53-N239I YNYMCNSSCI | 429  | >TP53-N239I YNYMCDSSCI | 536  | 107  |
| >TP53-N239I YNYMCNSSCI | 31   | >TP53-N239I YNYMCDSSCI | 70   | 39   |
| >TP53-N239I HNYMCNSS   | 70   | >TP53-N239I HNYMCDSS   | 142  | 72   |
| >TP53-N239I TTIHNYMCM  | 102  | >TP53-N239I TTIHNYMCE  | 577  | 475  |
| >TP53-N239I NSSCMGGMI  | 1185 | >TP53-N239I KSSCMGGMI  | 167  | 1018 |
| >TP53-N239I NSSCMGGMI  | 111  | >TP53-N239I KSSCMGGMI  | 46   | 65   |
| >TP53-N239I NSSCMGGMI  | 55   | >TP53-N239I KSSCMGGMI  | 9    | 46   |
| >TP53-N239I NSSCMGGMI  | 1517 | >TP53-N239I KSSCMGGMI  | 36   | 1481 |
| >TP53-N239I NSSCMGGMI  | 365  | >TP53-N239I KSSCMGGMI  | 3333 | 2968 |
| >TP53-N239I NSSCMGGMI  | 12   | >TP53-N239I KSSCMGGMI  | 188  | 176  |
| >TP53-N239I NSSCMGGMI  | 39   | >TP53-N239I KSSCMGGMI  | 820  | 781  |

|                       |       |                       |      |       |
|-----------------------|-------|-----------------------|------|-------|
| >TP53-N239fNSSCMGGM   | 848   | >TP53-N239fKSSCMGGM   | 10   | 838   |
| >TP53-N239fNSSCMGGM   | 851   | >TP53-N239fKSSCMGGM   | 322  | 529   |
| >TP53-N239fNSSCMGGMI  | 5543  | >TP53-N239fKSSCMGGMI  | 397  | 5146  |
| >TP53-N239fCTTIHYNMYC | 19230 | >TP53-N239fCTTIHYNMYC | 45   | 19185 |
| >TP53-N239fCTTIHYNMYC | 12866 | >TP53-N239fCTTIHYNMYC | 221  | 12645 |
| >TP53-N239fCTTIHYNMYC | 13248 | >TP53-N239fCTTIHYNMYC | 40   | 13208 |
| >TP53-N239fCTTIHYNMYC | 9071  | >TP53-N239fCTTIHYNMYC | 215  | 8856  |
| >TP53-N239fYMCNSSCM   | 262   | >TP53-N239fYMCKSSCM   | 487  | 225   |
| >TP53-N239fYMCNSSCMG  | 252   | >TP53-N239fYMCKSSCMG  | 438  | 186   |
| >TP53-N239fYMCNSSCM   | 205   | >TP53-N239fYMCKSSCM   | 232  | 27    |
| >TP53-N239fYMCNSSCMG  | 167   | >TP53-N239fYMCKSSCMG  | 186  | 19    |
| >TP53-N239fYMCNSSCM   | 283   | >TP53-N239fYMCKSSCM   | 541  | 258   |
| >TP53-N239fYMCNSSCMG  | 41    | >TP53-N239fYMCKSSCMG  | 83   | 42    |
| >TP53-N239fYMCNSSCMG  | 143   | >TP53-N239fYMCKSSCMG  | 316  | 173   |
| >TP53-N239fYMCNSSCM   | 24    | >TP53-N239fYMCKSSCM   | 70   | 46    |
| >TP53-N239fYMCNSSCMG  | 92    | >TP53-N239fYMCKSSCMG  | 296  | 204   |
| >TP53-N239fYMCNSSCMG  | 399   | >TP53-N239fYMCKSSCMG  | 1045 | 646   |
| >TP53-N239fYMCNSSCMG  | 16    | >TP53-N239fYMCKSSCMG  | 33   | 17    |
| >TP53-N239fYMCNSSCM   | 92    | >TP53-N239fYMCKSSCM   | 342  | 250   |
| >TP53-N239fYMCNSSCMG  | 197   | >TP53-N239fYMCKSSCMG  | 582  | 385   |
| >TP53-N239fYMCNSSCM   | 150   | >TP53-N239fYMCKSSCM   | 263  | 113   |
| >TP53-N239fYMCNSSCMG  | 421   | >TP53-N239fYMCKSSCMG  | 682  | 261   |
| >TP53-N239fYMCNSSCM   | 67    | >TP53-N239fYMCKSSCM   | 317  | 250   |
| >TP53-N239fYMCNSSCMG  | 332   | >TP53-N239fYMCKSSCMG  | 892  | 560   |
| >TP53-N239fYMCNSSCM   | 33    | >TP53-N239fYMCKSSCM   | 91   | 58    |
| >TP53-N239fYMCNSSCMG  | 53    | >TP53-N239fYMCKSSCMG  | 107  | 54    |
| >TP53-N239fYMCNSSCM   | 33    | >TP53-N239fYMCKSSCM   | 39   | 6     |
| >TP53-N239fYMCNSSCMG  | 127   | >TP53-N239fYMCKSSCMG  | 152  | 25    |
| >TP53-N239fYMCNSSCMG  | 292   | >TP53-N239fYMCKSSCMG  | 351  | 59    |
| >TP53-N239fYMCNSSCMG  | 44    | >TP53-N239fYMCKSSCMG  | 50   | 6     |
| >TP53-N239fYMCNSSCM   | 98    | >TP53-N239fYMCKSSCM   | 161  | 63    |
| >TP53-N239fYMCNSSCMG  | 145   | >TP53-N239fYMCKSSCMG  | 184  | 39    |
| >TP53-N239fYMCNSSCM   | 20    | >TP53-N239fYMCKSSCM   | 28   | 8     |
| >TP53-N239fYMCNSSCMG  | 160   | >TP53-N239fYMCKSSCMG  | 198  | 38    |
| >TP53-N239fYMCNSSCMG  | 294   | >TP53-N239fYMCKSSCMG  | 279  | 15    |
| >TP53-N239fYMCNSSCM   | 310   | >TP53-N239fYMCKSSCM   | 694  | 384   |
| >TP53-N239fYMCNSSCM   | 346   | >TP53-N239fYMCKSSCM   | 535  | 189   |
| >TP53-N239fNYMCNSSCN  | 53    | >TP53-N239fNYMCKSSCM  | 393  | 340   |
| >TP53-N239fNYMCNSSCN  | 3971  | >TP53-N239fNYMCKSSCM  | 156  | 3815  |
| >TP53-N239fYNYMCNSSCI | 429   | >TP53-N239fYNYMCKSSCI | 904  | 475   |
| >TP53-N239fYNYMCNSSCI | 31    | >TP53-N239fYNYMCKSSCI | 76   | 45    |
| >TP53-N239fHYNMYCNSS  | 70    | >TP53-N239fHYNMYCNSS  | 263  | 193   |
| >TP53-N239fIHYNMYCN   | 3197  | >TP53-N239fIHYNMYCN   | 419  | 2778  |

|                      |       |                      |     |       |
|----------------------|-------|----------------------|-----|-------|
| >TP53-N239†TIHYNMCM  | 19474 | >TP53-N239†TIHYNMCK  | 145 | 19329 |
| >TP53-N239†TIHYNMCM  | 11928 | >TP53-N239†TIHYNMCK  | 24  | 11904 |
| >TP53-N239†TIHYNMCM  | 7017  | >TP53-N239†TIHYNMCK  | 16  | 7001  |
| >TP53-N239†TIHYNMCM  | 10875 | >TP53-N239†TIHYNMCK  | 22  | 10853 |
| >TP53-N239†TTIHYNMCM | 12946 | >TP53-N239†TTIHYNMCK | 31  | 12915 |
| >TP53-N239†TTIHYNMCM | 20062 | >TP53-N239†TTIHYNMCK | 8   | 20054 |
| >TP53-N239†TTIHYNMCM | 13792 | >TP53-N239†TTIHYNMCK | 158 | 13634 |
| >TP53-N239†TTIHYNMCM | 9165  | >TP53-N239†TTIHYNMCK | 283 | 8882  |
| >TP53-N239†TTIHYNMCM | 14640 | >TP53-N239†TTIHYNMCK | 36  | 14604 |
| >TP53-N239†TTIHYNMCM | 102   | >TP53-N239†TTIHYNMCK | 187 | 85    |
| >TP53-N239†TTIHYNMCM | 3100  | >TP53-N239†TTIHYNMCK | 112 | 2988  |
| >TP53-N239‡NSSCMGGM  | 1185  | >TP53-N239‡SSSCMGGM  | 326 | 859   |
| >TP53-N239‡NSSCMGGM  | 111   | >TP53-N239‡SSSCMGGM  | 19  | 92    |
| >TP53-N239‡NSSCMGGM  | 55    | >TP53-N239‡SSSCMGGM  | 21  | 34    |
| >TP53-N239‡NSSCMGGM  | 1517  | >TP53-N239‡SSSCMGGM  | 233 | 1284  |
| >TP53-N239‡NSSCMGGM  | 365   | >TP53-N239‡SSSCMGGM  | 706 | 341   |
| >TP53-N239‡NSSCMGGM  | 12    | >TP53-N239‡SSSCMGGM  | 20  | 8     |
| >TP53-N239‡NSSCMGGM  | 39    | >TP53-N239‡SSSCMGGM  | 76  | 37    |
| >TP53-N239‡NSSCMGGM  | 848   | >TP53-N239‡SSSCMGGM  | 56  | 792   |
| >TP53-N239‡NSSCMGGM  | 3920  | >TP53-N239‡SSSCMGGM  | 385 | 3535  |
| >TP53-N239‡NSSCMGGM  | 1914  | >TP53-N239‡SSSCMGGM  | 282 | 1632  |
| >TP53-N239‡NSSCMGGM  | 2215  | >TP53-N239‡SSSCMGGM  | 301 | 1914  |
| >TP53-N239‡CNSSCMGGM | 8994  | >TP53-N239‡CSSSCMGGM | 149 | 8845  |
| >TP53-N239‡CNSSCMGGM | 3359  | >TP53-N239‡CSSSCMGGM | 174 | 3185  |
| >TP53-N239‡CNSSCMGGM | 876   | >TP53-N239‡CSSSCMGGM | 101 | 775   |
| >TP53-N239‡CNSSCMGGM | 21726 | >TP53-N239‡CSSSCMGGM | 200 | 21526 |
| >TP53-N239‡CNSSCMGGM | 2175  | >TP53-N239‡CSSSCMGGM | 133 | 2042  |
| >TP53-N239‡CNSSCMGGM | 4332  | >TP53-N239‡CSSSCMGGM | 235 | 4097  |
| >TP53-N239‡MCNSSCMG  | 944   | >TP53-N239‡MCSSSCMG  | 148 | 796   |
| >TP53-N239‡YMCNSSCM  | 262   | >TP53-N239‡YMCSSSCM  | 183 | 79    |
| >TP53-N239‡YMCNSSCMG | 252   | >TP53-N239‡YMCSSSCMG | 202 | 50    |
| >TP53-N239‡YMCNSSCM  | 205   | >TP53-N239‡YMCSSSCM  | 88  | 117   |
| >TP53-N239‡YMCNSSCMG | 167   | >TP53-N239‡YMCSSSCMG | 79  | 88    |
| >TP53-N239‡YMCNSSCM  | 283   | >TP53-N239‡YMCSSSCM  | 203 | 80    |
| >TP53-N239‡YMCNSSCMG | 41    | >TP53-N239‡YMCSSSCMG | 31  | 10    |
| >TP53-N239‡YMCNSSCMG | 143   | >TP53-N239‡YMCSSSCMG | 199 | 56    |
| >TP53-N239‡YMCNSSCM  | 24    | >TP53-N239‡YMCSSSCM  | 35  | 11    |
| >TP53-N239‡YMCNSSCMG | 92    | >TP53-N239‡YMCSSSCMG | 122 | 30    |
| >TP53-N239‡YMCNSSCMG | 399   | >TP53-N239‡YMCSSSCMG | 522 | 123   |
| >TP53-N239‡YMCNSSCMG | 16    | >TP53-N239‡YMCSSSCMG | 19  | 3     |
| >TP53-N239‡YMCNSSCM  | 92    | >TP53-N239‡YMCSSSCM  | 217 | 125   |
| >TP53-N239‡YMCNSSCMG | 197   | >TP53-N239‡YMCSSSCMG | 398 | 201   |
| >TP53-N239‡YMCNSSCM  | 150   | >TP53-N239‡YMCSSSCM  | 198 | 48    |

|                       |       |                       |      |       |
|-----------------------|-------|-----------------------|------|-------|
| >TP53-N239€YMCNSSCMC  | 421   | >TP53-N239€YMCSSSCMG  | 584  | 163   |
| >TP53-N239€YMCNSSCM   | 67    | >TP53-N239€YMCSSSCM   | 69   | 2     |
| >TP53-N239€YMCNSSCMC  | 332   | >TP53-N239€YMCSSSCMG  | 327  | 5     |
| >TP53-N239€YMCNSSCM   | 33    | >TP53-N239€YMCSSSCM   | 40   | 7     |
| >TP53-N239€YMCNSSCMC  | 53    | >TP53-N239€YMCSSSCMG  | 54   | 1     |
| >TP53-N239€YMCNSSCMC  | 591   | >TP53-N239€YMCSSSCMG  | 308  | 283   |
| >TP53-N239€YMCNSSCM   | 33    | >TP53-N239€YMCSSSCM   | 32   | 1     |
| >TP53-N239€YMCNSSCMC  | 127   | >TP53-N239€YMCSSSCMG  | 134  | 7     |
| >TP53-N239€YMCNSSCMC  | 292   | >TP53-N239€YMCSSSCMG  | 304  | 12    |
| >TP53-N239€YMCNSSCMC  | 44    | >TP53-N239€YMCSSSCMG  | 45   | 1     |
| >TP53-N239€YMCNSSCM   | 98    | >TP53-N239€YMCSSSCM   | 100  | 2     |
| >TP53-N239€YMCNSSCMC  | 145   | >TP53-N239€YMCSSSCMG  | 166  | 21    |
| >TP53-N239€YMCNSSCM   | 20    | >TP53-N239€YMCSSSCM   | 12   | 8     |
| >TP53-N239€YMCNSSCMC  | 160   | >TP53-N239€YMCSSSCMG  | 112  | 48    |
| >TP53-N239€YMCNSSCMC  | 294   | >TP53-N239€YMCSSSCMG  | 210  | 84    |
| >TP53-N239€YMCNSSCM   | 310   | >TP53-N239€YMCSSSCM   | 216  | 94    |
| >TP53-N239€YMCNSSCM   | 346   | >TP53-N239€YMCSSSCM   | 150  | 196   |
| >TP53-N239€NYMCNSSCM  | 53    | >TP53-N239€NYMCSSSCM  | 19   | 34    |
| >TP53-N239€YNYMCNSSCI | 429   | >TP53-N239€YNYMCSSSCI | 201  | 228   |
| >TP53-N239€YNYMCNSSCI | 31    | >TP53-N239€YNYMCSSSCI | 23   | 8     |
| >TP53-N239€HNYMCNSS   | 919   | >TP53-N239€HNYMCSSS   | 206  | 713   |
| >TP53-N239€HNYMCNSS   | 70    | >TP53-N239€HNYMCSSS   | 33   | 37    |
| >TP53-N239€IHNYMCNSS  | 575   | >TP53-N239€IHNYMCSSS  | 427  | 148   |
| >TP53-N239€TTIHNYMCS  | 102   | >TP53-N239€TTIHNYMCS  | 110  | 8     |
| >TP53-N239¶NSSCMGGMI  | 111   | >TP53-N239¶TSSCMGGMI  | 35   | 76    |
| >TP53-N239¶NSSCMGGMI  | 55    | >TP53-N239¶TSSCMGGMI  | 35   | 20    |
| >TP53-N239¶NSSCMGGMI  | 1517  | >TP53-N239¶TSSCMGGMI  | 341  | 1176  |
| >TP53-N239¶NSSCMGGMI  | 365   | >TP53-N239¶TSSCMGGMI  | 1021 | 656   |
| >TP53-N239¶NSSCMGGMI  | 12    | >TP53-N239¶TSSCMGGMI  | 13   | 1     |
| >TP53-N239¶NSSCMGGMI  | 39    | >TP53-N239¶TSSCMGGMI  | 28   | 11    |
| >TP53-N239¶NSSCMGGM   | 848   | >TP53-N239¶TSSCMGGM   | 93   | 755   |
| >TP53-N239¶NSSCMGGM   | 851   | >TP53-N239¶TSSCMGGM   | 150  | 701   |
| >TP53-N239¶CNSSCMGGM  | 15695 | >TP53-N239¶CTSSCMGGM  | 221  | 15474 |
| >TP53-N239¶CNSSCMGGM  | 16842 | >TP53-N239¶CTSSCMGGM  | 177  | 16665 |
| >TP53-N239¶CNSSCMGGM  | 8994  | >TP53-N239¶CTSSCMGGM  | 19   | 8975  |
| >TP53-N239¶CNSSCMGGM  | 3359  | >TP53-N239¶CTSSCMGGM  | 103  | 3256  |
| >TP53-N239¶CNSSCMGGM  | 11920 | >TP53-N239¶CTSSCMGGM  | 255  | 11665 |
| >TP53-N239¶CNSSCMGGM  | 876   | >TP53-N239¶CTSSCMGGM  | 29   | 847   |
| >TP53-N239¶CNSSCMGGM  | 11200 | >TP53-N239¶CTSSCMGGM  | 423  | 10777 |
| >TP53-N239¶CNSSCMGGM  | 21726 | >TP53-N239¶CTSSCMGGM  | 105  | 21621 |
| >TP53-N239¶CNSSCMGGM  | 2175  | >TP53-N239¶CTSSCMGGM  | 52   | 2123  |
| >TP53-N239¶CNSSCMGGM  | 9995  | >TP53-N239¶CTSSCMGGM  | 433  | 9562  |
| >TP53-N239¶CNSSCMGGM  | 639   | >TP53-N239¶CTSSCMGGM  | 463  | 176   |

|                       |       |                       |      |       |
|-----------------------|-------|-----------------------|------|-------|
| >TP53-N2391CNSSCMGGM  | 4332  | >TP53-N2391CTSSCMGGM  | 158  | 4174  |
| >TP53-N2391MCNSSCMGC  | 944   | >TP53-N2391MCTSSCMGC  | 201  | 743   |
| >TP53-N2391YMCNSSCM   | 262   | >TP53-N2391YMCTSSCM   | 311  | 49    |
| >TP53-N2391YMCNSSCMC  | 252   | >TP53-N2391YMCTSSCMG  | 331  | 79    |
| >TP53-N2391YMCNSSCM   | 205   | >TP53-N2391YMCTSSCM   | 162  | 43    |
| >TP53-N2391YMCNSSCMC  | 167   | >TP53-N2391YMCTSSCMG  | 143  | 24    |
| >TP53-N2391YMCNSSCM   | 283   | >TP53-N2391YMCTSSCM   | 363  | 80    |
| >TP53-N2391YMCNSSCMC  | 41    | >TP53-N2391YMCTSSCMG  | 50   | 9     |
| >TP53-N2391YMCNSSCMC  | 143   | >TP53-N2391YMCTSSCMG  | 257  | 114   |
| >TP53-N2391YMCNSSCM   | 24    | >TP53-N2391YMCTSSCM   | 60   | 36    |
| >TP53-N2391YMCNSSCMC  | 92    | >TP53-N2391YMCTSSCMG  | 290  | 198   |
| >TP53-N2391YMCNSSCMC  | 399   | >TP53-N2391YMCTSSCMG  | 1060 | 661   |
| >TP53-N2391YMCNSSCMC  | 16    | >TP53-N2391YMCTSSCMG  | 35   | 19    |
| >TP53-N2391YMCNSSCM   | 92    | >TP53-N2391YMCTSSCM   | 229  | 137   |
| >TP53-N2391YMCNSSCMC  | 197   | >TP53-N2391YMCTSSCMG  | 456  | 259   |
| >TP53-N2391YMCNSSCM   | 150   | >TP53-N2391YMCTSSCM   | 306  | 156   |
| >TP53-N2391YMCNSSCMC  | 421   | >TP53-N2391YMCTSSCMG  | 944  | 523   |
| >TP53-N2391YMCNSSCM   | 67    | >TP53-N2391YMCTSSCM   | 109  | 42    |
| >TP53-N2391YMCNSSCMC  | 332   | >TP53-N2391YMCTSSCMG  | 511  | 179   |
| >TP53-N2391YMCNSSCM   | 33    | >TP53-N2391YMCTSSCM   | 65   | 32    |
| >TP53-N2391YMCNSSCMC  | 53    | >TP53-N2391YMCTSSCMG  | 86   | 33    |
| >TP53-N2391YMCNSSCMC  | 591   | >TP53-N2391YMCTSSCMG  | 315  | 276   |
| >TP53-N2391YMCNSSCM   | 33    | >TP53-N2391YMCTSSCM   | 43   | 10    |
| >TP53-N2391YMCNSSCMC  | 127   | >TP53-N2391YMCTSSCMG  | 243  | 116   |
| >TP53-N2391YMCNSSCMC  | 292   | >TP53-N2391YMCTSSCMG  | 557  | 265   |
| >TP53-N2391YMCNSSCMC  | 44    | >TP53-N2391YMCTSSCMG  | 63   | 19    |
| >TP53-N2391YMCNSSCM   | 98    | >TP53-N2391YMCTSSCM   | 168  | 70    |
| >TP53-N2391YMCNSSCMC  | 145   | >TP53-N2391YMCTSSCMG  | 258  | 113   |
| >TP53-N2391YMCNSSCM   | 20    | >TP53-N2391YMCTSSCM   | 21   | 1     |
| >TP53-N2391YMCNSSCMC  | 160   | >TP53-N2391YMCTSSCMG  | 199  | 39    |
| >TP53-N2391YMCNSSCMC  | 294   | >TP53-N2391YMCTSSCMG  | 269  | 25    |
| >TP53-N2391YMCNSSCM   | 310   | >TP53-N2391YMCTSSCM   | 302  | 8     |
| >TP53-N2391YMCNSSCM   | 346   | >TP53-N2391YMCTSSCM   | 149  | 197   |
| >TP53-N2391NYMCNSSCN  | 53    | >TP53-N2391NYMCTSSCM  | 19   | 34    |
| >TP53-N2391YNYMCNSSCI | 1308  | >TP53-N2391YNYMCTSSCI | 366  | 942   |
| >TP53-N2391YNYMCNSSCI | 429   | >TP53-N2391YNYMCTSSCI | 316  | 113   |
| >TP53-N2391YNYMCNSSCI | 31    | >TP53-N2391YNYMCTSSCI | 25   | 6     |
| >TP53-N2391HNYMCNSS   | 919   | >TP53-N2391HNYMCTSS   | 198  | 721   |
| >TP53-N2391HNYMCNSS   | 70    | >TP53-N2391HNYMCTSS(  | 33   | 37    |
| >TP53-N2391IHNYMCMN   | 2571  | >TP53-N2391IHNYMCT    | 450  | 2121  |
| >TP53-N2391TTIHNYMCMN | 14744 | >TP53-N2391TTIHNYMCT  | 119  | 14625 |
| >TP53-N2391TTIHNYMCMN | 102   | >TP53-N2391TTIHNYMCT  | 149  | 47    |
| >TP53-N2391NSSCMGGMI  | 111   | >TP53-N2391YSSCMGGMI  | 80   | 31    |

|                       |       |                       |      |       |
|-----------------------|-------|-----------------------|------|-------|
| >TP53-N239\NSSCMGGMI  | 55    | >TP53-N239\YSSCMGGMI  | 39   | 16    |
| >TP53-N239\NSSCMGGMI  | 365   | >TP53-N239\YSSCMGGMI  | 519  | 154   |
| >TP53-N239\NSSCMGGMI  | 12    | >TP53-N239\YSSCMGGMI  | 10   | 2     |
| >TP53-N239\NSSCMGGMI  | 39    | >TP53-N239\YSSCMGGMI  | 20   | 19    |
| >TP53-N239\NSSCMGGM   | 5188  | >TP53-N239\YSSCMGGM   | 451  | 4737  |
| >TP53-N239\NSSCMGGM   | 848   | >TP53-N239\YSSCMGGM   | 12   | 836   |
| >TP53-N239\NSSCMGGM   | 2064  | >TP53-N239\YSSCMGGM   | 354  | 1710  |
| >TP53-N239\NSSCMGGM   | 851   | >TP53-N239\YSSCMGGM   | 61   | 790   |
| >TP53-N239\NSSCMGGMI  | 3920  | >TP53-N239\YSSCMGGMI  | 173  | 3747  |
| >TP53-N239\NSSCMGGMI  | 7484  | >TP53-N239\YSSCMGGMI  | 482  | 7002  |
| >TP53-N239\CNSSCMGGM  | 22728 | >TP53-N239\CYSSCMGGM  | 78   | 22650 |
| >TP53-N239\CNSSCMGGM  | 3359  | >TP53-N239\CYSSCMGGM  | 115  | 3244  |
| >TP53-N239\CNSSCMGGM  | 11920 | >TP53-N239\CYSSCMGGM  | 129  | 11791 |
| >TP53-N239\CNSSCMGGM  | 639   | >TP53-N239\CYSSCMGGM  | 26   | 613   |
| >TP53-N239\CTTIHYNMYC | 19078 | >TP53-N239\CTTIHYNMYC | 52   | 19026 |
| >TP53-N239\CTTIHYNMYC | 32077 | >TP53-N239\CTTIHYNMYC | 243  | 31834 |
| >TP53-N239\CTTIHYNMYC | 20515 | >TP53-N239\CTTIHYNMYC | 86   | 20429 |
| >TP53-N239\CTTIHYNMYC | 31294 | >TP53-N239\CTTIHYNMYC | 167  | 31127 |
| >TP53-N239\MCNSSCMGC  | 944   | >TP53-N239\MCYSSCMGC  | 209  | 735   |
| >TP53-N239\YMCNSSCM   | 262   | >TP53-N239\YMCYSSCM   | 169  | 93    |
| >TP53-N239\YMCNSSCMC  | 252   | >TP53-N239\YMCYSSCMG  | 269  | 17    |
| >TP53-N239\YMCNSSCM   | 205   | >TP53-N239\YMCYSSCM   | 87   | 118   |
| >TP53-N239\YMCNSSCMC  | 167   | >TP53-N239\YMCYSSCMG  | 113  | 54    |
| >TP53-N239\YMCNSSCM   | 283   | >TP53-N239\YMCYSSCM   | 328  | 45    |
| >TP53-N239\YMCNSSCMC  | 41    | >TP53-N239\YMCYSSCMG  | 64   | 23    |
| >TP53-N239\YMCNSSCMC  | 143   | >TP53-N239\YMCYSSCMG  | 329  | 186   |
| >TP53-N239\YMCNSSCM   | 24    | >TP53-N239\YMCYSSCM   | 92   | 68    |
| >TP53-N239\YMCNSSCMC  | 92    | >TP53-N239\YMCYSSCMG  | 726  | 634   |
| >TP53-N239\YMCNSSCMC  | 399   | >TP53-N239\YMCYSSCMG  | 2026 | 1627  |
| >TP53-N239\YMCNSSCMC  | 16    | >TP53-N239\YMCYSSCMG  | 61   | 45    |
| >TP53-N239\YMCNSSCM   | 92    | >TP53-N239\YMCYSSCM   | 265  | 173   |
| >TP53-N239\YMCNSSCMC  | 197   | >TP53-N239\YMCYSSCMG  | 510  | 313   |
| >TP53-N239\YMCNSSCM   | 150   | >TP53-N239\YMCYSSCM   | 534  | 384   |
| >TP53-N239\YMCNSSCMC  | 421   | >TP53-N239\YMCYSSCMG  | 1405 | 984   |
| >TP53-N239\YMCNSSCM   | 67    | >TP53-N239\YMCYSSCM   | 292  | 225   |
| >TP53-N239\YMCNSSCMC  | 332   | >TP53-N239\YMCYSSCMG  | 1128 | 796   |
| >TP53-N239\YMCNSSCM   | 33    | >TP53-N239\YMCYSSCM   | 175  | 142   |
| >TP53-N239\YMCNSSCMC  | 53    | >TP53-N239\YMCYSSCMG  | 255  | 202   |
| >TP53-N239\YMCNSSCMC  | 591   | >TP53-N239\YMCYSSCMG  | 353  | 238   |
| >TP53-N239\YMCNSSCM   | 33    | >TP53-N239\YMCYSSCM   | 31   | 2     |
| >TP53-N239\YMCNSSCMC  | 127   | >TP53-N239\YMCYSSCMG  | 117  | 10    |
| >TP53-N239\YMCNSSCMC  | 292   | >TP53-N239\YMCYSSCMG  | 265  | 27    |
| >TP53-N239\YMCNSSCMC  | 44    | >TP53-N239\YMCYSSCMG  | 43   | 1     |



|                        |       |                        |      |       |
|------------------------|-------|------------------------|------|-------|
| >TP53-N239\YMCNSSCM    | 98    | >TP53-N239\YMCYSSCM    | 154  | 56    |
| >TP53-N239\YMCNSSCMG   | 145   | >TP53-N239\YMCYSSCMG   | 192  | 47    |
| >TP53-N239\YMCNSSCM    | 20    | >TP53-N239\YMCYSSCM    | 20   | 0     |
| >TP53-N239\YMCNSSCMG   | 160   | >TP53-N239\YMCYSSCMG   | 146  | 14    |
| >TP53-N239\YMCNSSCMG   | 294   | >TP53-N239\YMCYSSCMG   | 226  | 68    |
| >TP53-N239\YMCNSSCM    | 310   | >TP53-N239\YMCYSSCM    | 257  | 53    |
| >TP53-N239\YMCNSSCM    | 346   | >TP53-N239\YMCYSSCM    | 333  | 13    |
| >TP53-N239\NYMCNSSCM   | 53    | >TP53-N239\NYMCYSSCM   | 1587 | 1534  |
| >TP53-N239\YNYMCNSSC   | 6059  | >TP53-N239\YNYMCYSSC   | 221  | 5838  |
| >TP53-N239\YNYMCNSSCI  | 1308  | >TP53-N239\YNYMCYSSCI  | 456  | 852   |
| >TP53-N239\YNYMCNSSCI  | 429   | >TP53-N239\YNYMCYSSCI  | 413  | 16    |
| >TP53-N239\YNYMCNSSCI  | 31    | >TP53-N239\YNYMCYSSCI  | 20   | 11    |
| >TP53-N239\HNYMCNSS    | 70    | >TP53-N239\HNYMCYSS    | 412  | 342   |
| >TP53-N239\IHNYMCNSS   | 1151  | >TP53-N239\IHNYMCYSS   | 225  | 926   |
| >TP53-N239\IHNYMCN     | 23183 | >TP53-N239\IHNYMCY     | 121  | 23062 |
| >TP53-N239\IHNYMCN     | 3197  | >TP53-N239\IHNYMCY     | 7    | 3190  |
| >TP53-N239\IHNYMCNSS   | 575   | >TP53-N239\IHNYMCYSS   | 422  | 153   |
| >TP53-N239\IHNYMCN     | 6773  | >TP53-N239\IHNYMCY     | 137  | 6636  |
| >TP53-N239\TIHNYMCN    | 11928 | >TP53-N239\TIHNYMCY    | 253  | 11675 |
| >TP53-N239\TIHNYMCN    | 32018 | >TP53-N239\TIHNYMCY    | 257  | 31761 |
| >TP53-N239\TIHNYMCN    | 20415 | >TP53-N239\TIHNYMCY    | 52   | 20363 |
| >TP53-N239\TIHNYMCN    | 25328 | >TP53-N239\TIHNYMCY    | 190  | 25138 |
| >TP53-N239\TIHNYMCN    | 20381 | >TP53-N239\TIHNYMCY    | 268  | 20113 |
| >TP53-N239\TTIHNYMCN   | 20734 | >TP53-N239\TTIHNYMCY   | 67   | 20667 |
| >TP53-N239\TTIHNYMCN   | 12946 | >TP53-N239\TTIHNYMCY   | 219  | 12727 |
| >TP53-N239\TTIHNYMCN   | 20062 | >TP53-N239\TTIHNYMCY   | 50   | 20012 |
| >TP53-N239\TTIHNYMCN   | 19460 | >TP53-N239\TTIHNYMCY   | 245  | 19215 |
| >TP53-N239\TTIHNYMCN   | 7501  | >TP53-N239\TTIHNYMCY   | 6    | 7495  |
| >TP53-N239\TTIHNYMCN   | 24996 | >TP53-N239\TTIHNYMCY   | 114  | 24882 |
| >TP53-N239\TTIHNYMCN   | 17187 | >TP53-N239\TTIHNYMCY   | 29   | 17158 |
| >TP53-N239\TTIHNYMCN   | 18014 | >TP53-N239\TTIHNYMCY   | 35   | 17979 |
| >TP53-N239\TTIHNYMCN   | 14640 | >TP53-N239\TTIHNYMCY   | 490  | 14150 |
| >TP53-N239\TTIHNYMCN   | 102   | >TP53-N239\TTIHNYMCY   | 38   | 64    |
| >TP53-N239\TTIHNYMCN   | 22430 | >TP53-N239\TTIHNYMCY   | 48   | 22382 |
| >TP53-N239\TTIHNYMCN   | 18179 | >TP53-N239\TTIHNYMCY   | 389  | 17790 |
| >TP53-N239\TTIHNYMCN   | 17680 | >TP53-N239\TTIHNYMCY   | 177  | 17503 |
| >TP53-N239\TTIHNYMCN   | 16770 | >TP53-N239\TTIHNYMCY   | 34   | 16736 |
| >TP53-N239\TTIHNYMCN   | 23848 | >TP53-N239\TTIHNYMCY   | 129  | 23719 |
| >TP53-N247[NRRPILTI    | 281   | >TP53-N247[DRRPILTI    | 1010 | 729   |
| >TP53-N247[NRRPILTIITL | 50    | >TP53-N247[DRRPILTIITL | 128  | 78    |
| >TP53-N247[NRRPILTI    | 224   | >TP53-N247[DRRPILTI    | 1202 | 978   |
| >TP53-N247[NRRPILTIITL | 12    | >TP53-N247[DRRPILTIITL | 41   | 29    |
| >TP53-N247[MNRRPILTI   | 35    | >TP53-N247[MDRRPILTI   | 861  | 826   |

|                        |       |                         |      |       |
|------------------------|-------|-------------------------|------|-------|
| >TP53-N247[ MNRRPILTII | 200   | >TP53-N247[ MDRRPILTII  | 3038 | 2838  |
| >TP53-N247[ MNRRPILTI  | 457   | >TP53-N247[ MDRRPILTI   | 2536 | 2079  |
| >TP53-N247[ MNRRPILTI  | 5808  | >TP53-N247[ MDRRPILTI   | 179  | 5629  |
| >TP53-N247[ MNRRPILTII | 5768  | >TP53-N247[ MDRRPILTII  | 194  | 5574  |
| >TP53-N247[ MNRRPILTI  | 399   | >TP53-N247[ MDRRPILTI   | 1592 | 1193  |
| >TP53-N247[ MNRRPILTI  | 9078  | >TP53-N247[ MDRRPILTI   | 191  | 8887  |
| >TP53-N247[ MNRRPILTII | 10512 | >TP53-N247[ MDRRPILTII  | 351  | 10161 |
| >TP53-N247[ GMNRRPILTI | 972   | >TP53-N247[ GMDRRPILTI  | 421  | 551   |
| >TP53-N247[ GMNRRPILTI | 755   | >TP53-N247[ GMDRRPILTII | 300  | 455   |
| >TP53-N247[ GMNRRPILTI | 185   | >TP53-N247[ GMDRRPILTI  | 205  | 20    |
| >TP53-N247[ GMNRRPILTI | 168   | >TP53-N247[ GMDRRPILTII | 595  | 427   |
| >TP53-N247[ GMNRRPIL   | 213   | >TP53-N247[ GMDRRPIL    | 4334 | 4121  |
| >TP53-N247[ GMNRRPILTI | 61    | >TP53-N247[ GMDRRPILTI  | 115  | 54    |
| >TP53-N247[ GMNRRPILTI | 13    | >TP53-N247[ GMDRRPILTII | 234  | 221   |
| >TP53-N247[ GMNRRPIL   | 229   | >TP53-N247[ GMDRRPIL    | 124  | 105   |
| >TP53-N247[ GMNRRPILT  | 822   | >TP53-N247[ GMDRRPILT   | 391  | 431   |
| >TP53-N247[ GMNRRPILTI | 10    | >TP53-N247[ GMDRRPILTI  | 7    | 3     |
| >TP53-N247[ GMNRRPILTI | 93    | >TP53-N247[ GMDRRPILTII | 50   | 43    |
| >TP53-N247[ GMNRRPIL   | 182   | >TP53-N247[ GMDRRPIL    | 86   | 96    |
| >TP53-N247[ GMNRRPILTI | 21    | >TP53-N247[ GMDRRPILTI  | 11   | 10    |
| >TP53-N247[ GMNRRPILTI | 53    | >TP53-N247[ GMDRRPILTII | 24   | 29    |
| >TP53-N247[ GMNRRPIL   | 160   | >TP53-N247[ GMDRRPIL    | 46   | 114   |
| >TP53-N247[ GMNRRPILTI | 66    | >TP53-N247[ GMDRRPILTI  | 23   | 43    |
| >TP53-N247[ GMNRRPILTI | 192   | >TP53-N247[ GMDRRPILTII | 58   | 134   |
| >TP53-N247[ GMNRRPIL   | 32    | >TP53-N247[ GMDRRPIL    | 44   | 12    |
| >TP53-N247[ GMNRRPILTI | 43    | >TP53-N247[ GMDRRPILTI  | 67   | 24    |
| >TP53-N247[ GMNRRPILTI | 102   | >TP53-N247[ GMDRRPILTII | 141  | 39    |
| >TP53-N247[ GMNRRPILTI | 147   | >TP53-N247[ GMDRRPILTI  | 563  | 416   |
| >TP53-N247[ GGMNRRPIL  | 444   | >TP53-N247[ GGMNRRPIL   | 2193 | 1749  |
| >TP53-N247[ CMGGMNRR   | 88    | >TP53-N247[ CMGGMDRR    | 80   | 8     |
| >TP53-N247[ CMGGMNRR   | 314   | >TP53-N247[ CMGGMDRR    | 1120 | 806   |
| >TP53-N247[ CMGGMNRR   | 117   | >TP53-N247[ CMGGMDRR    | 184  | 67    |
| >TP53-N247[ SCMGGMNR   | 464   | >TP53-N247[ SCMGGMDR    | 1571 | 1107  |
| >TP53-N247[ SSCMGGMNI  | 58    | >TP53-N247[ SSCMGGMDI   | 264  | 206   |
| >TP53-N247[ SSCMGGMNI  | 192   | >TP53-N247[ SSCMGGMDI   | 293  | 101   |
| >TP53-N247[ SSCMGGMNI  | 110   | >TP53-N247[ SSCMGGMDI   | 1243 | 1133  |
| >TP53-N247[ SSCMGGMNI  | 56    | >TP53-N247[ SSCMGGMDI   | 282  | 226   |
| >TP53-N247[ SSCMGGMNI  | 220   | >TP53-N247[ SSCMGGMDI   | 463  | 243   |
| >TP53-N247[ SSCMGGMNI  | 361   | >TP53-N247[ SSCMGGMDI   | 477  | 116   |
| >TP53-N247[ SSCMGGMNI  | 398   | >TP53-N247[ SSCMGGMDI   | 566  | 168   |
| >TP53-N247[ SSCMGGMNI  | 460   | >TP53-N247[ SSCMGGMDI   | 488  | 28    |
| >TP53-N247[ NSSCMGGMI  | 111   | >TP53-N247[ NSSCMGGMI   | 262  | 151   |
| >TP53-N247[ NSSCMGGMI  | 55    | >TP53-N247[ NSSCMGGMI   | 164  | 109   |

|                         |       |                         |      |       |
|-------------------------|-------|-------------------------|------|-------|
| >TP53-N247I NSSCMGGMI   | 365   | >TP53-N247I NSSCMGGMI   | 1063 | 698   |
| >TP53-N247I NSSCMGGMI   | 12    | >TP53-N247I NSSCMGGMI   | 17   | 5     |
| >TP53-N247I NSSCMGGMI   | 39    | >TP53-N247I NSSCMGGMI   | 42   | 3     |
| >TP53-N247F NRRPILTI    | 1113  | >TP53-N247F FRRPILTI    | 146  | 967   |
| >TP53-N247F NRRPILTII   | 1273  | >TP53-N247F FRRPILTII   | 209  | 1064  |
| >TP53-N247F NRRPILTIITL | 710   | >TP53-N247F FRRPILTIITL | 107  | 603   |
| >TP53-N247F NRRPILTI    | 1481  | >TP53-N247F FRRPILTI    | 173  | 1308  |
| >TP53-N247F NRRPILTII   | 2535  | >TP53-N247F FRRPILTII   | 374  | 2161  |
| >TP53-N247F NRRPILTIITL | 1047  | >TP53-N247F FRRPILTIITL | 128  | 919   |
| >TP53-N247F NRRPILTIITL | 701   | >TP53-N247F FRRPILTIITL | 183  | 518   |
| >TP53-N247F NRRPILTII   | 281   | >TP53-N247F FRRPILTII   | 153  | 128   |
| >TP53-N247F NRRPILTIIT  | 50    | >TP53-N247F FRRPILTIIT  | 33   | 17    |
| >TP53-N247F NRRPILTIITL | 224   | >TP53-N247F FRRPILTIITL | 266  | 42    |
| >TP53-N247F NRRPILTIIT  | 876   | >TP53-N247F FRRPILTIIT  | 344  | 532   |
| >TP53-N247F NRRPILTIITL | 12    | >TP53-N247F FRRPILTIITL | 13   | 1     |
| >TP53-N247F MNRRPILTI   | 22631 | >TP53-N247F MFRRPILTI   | 142  | 22489 |
| >TP53-N247F MNRRPILT    | 945   | >TP53-N247F MFRRPILT    | 72   | 873   |
| >TP53-N247F MNRRPILTI   | 35    | >TP53-N247F MFRRPILTI   | 7    | 28    |
| >TP53-N247F MNRRPILTII  | 200   | >TP53-N247F MFRRPILTII  | 21   | 179   |
| >TP53-N247F MNRRPILTIIT | 1029  | >TP53-N247F MFRRPILTIIT | 76   | 953   |
| >TP53-N247F MNRRPILTI   | 457   | >TP53-N247F MFRRPILTI   | 2576 | 2119  |
| >TP53-N247F MNRRPILTI   | 25335 | >TP53-N247F MFRRPILTI   | 382  | 24953 |
| >TP53-N247F MNRRPILTI   | 399   | >TP53-N247F MFRRPILTI   | 4067 | 3668  |
| >TP53-N247F MCNSSCMGC   | 18597 | >TP53-N247F MCNSSCMGC   | 149  | 18448 |
| >TP53-N247F MCNSSCMGC   | 4169  | >TP53-N247F MCNSSCMGC   | 41   | 4128  |
| >TP53-N247F GMNRRPIL    | 2183  | >TP53-N247F GMFRRPIL    | 148  | 2035  |
| >TP53-N247F GMNRRPILTI  | 972   | >TP53-N247F GMFRRPILTI  | 95   | 877   |
| >TP53-N247F GMNRRPILTI  | 755   | >TP53-N247F GMFRRPILTII | 67   | 688   |
| >TP53-N247F GMNRRPIL    | 678   | >TP53-N247F GMFRRPIL    | 178  | 500   |
| >TP53-N247F GMNRRPILTI  | 185   | >TP53-N247F GMFRRPILTI  | 41   | 144   |
| >TP53-N247F GMNRRPILTI  | 168   | >TP53-N247F GMFRRPILTII | 69   | 99    |
| >TP53-N247F GMNRRPIL    | 213   | >TP53-N247F GMFRRPIL    | 182  | 31    |
| >TP53-N247F GMNRRPILTI  | 61    | >TP53-N247F GMFRRPILTI  | 20   | 41    |
| >TP53-N247F GMNRRPILTI  | 13    | >TP53-N247F GMFRRPILTII | 14   | 1     |
| >TP53-N247F GMNRRPILTI  | 2592  | >TP53-N247F GMFRRPILTII | 386  | 2206  |
| >TP53-N247F GMNRRPIL    | 229   | >TP53-N247F GMFRRPIL    | 33   | 196   |
| >TP53-N247F GMNRRPILT   | 822   | >TP53-N247F GMFRRPILT   | 96   | 726   |
| >TP53-N247F GMNRRPILTI  | 10    | >TP53-N247F GMFRRPILTI  | 3    | 7     |
| >TP53-N247F GMNRRPILTI  | 93    | >TP53-N247F GMFRRPILTII | 15   | 78    |
| >TP53-N247F GMNRRPIL    | 182   | >TP53-N247F GMFRRPIL    | 70   | 112   |
| >TP53-N247F GMNRRPILTI  | 21    | >TP53-N247F GMFRRPILTI  | 12   | 9     |
| >TP53-N247F GMNRRPILTI  | 53    | >TP53-N247F GMFRRPILTII | 22   | 31    |
| >TP53-N247F GMNRRPIL    | 160   | >TP53-N247F GMFRRPIL    | 23   | 137   |

|                        |       |                         |     |       |
|------------------------|-------|-------------------------|-----|-------|
| >TP53-N247f GMNRRPILTI | 66    | >TP53-N247f GMFRRPILTI  | 16  | 50    |
| >TP53-N247f GMNRRPILTI | 192   | >TP53-N247f GMFRRPILTII | 32  | 160   |
| >TP53-N247f GMNRRPIL   | 32    | >TP53-N247f GMFRRPIL    | 18  | 14    |
| >TP53-N247f GMNRRPILT  | 744   | >TP53-N247f GMFRRPILT   | 232 | 512   |
| >TP53-N247f GMNRRPILTI | 43    | >TP53-N247f GMFRRPILTI  | 19  | 24    |
| >TP53-N247f GMNRRPILTI | 102   | >TP53-N247f GMFRRPILTII | 33  | 69    |
| >TP53-N247f GMNRRPILTI | 147   | >TP53-N247f GMFRRPILTI  | 25  | 122   |
| >TP53-N247f GMNRRPILTI | 646   | >TP53-N247f GMFRRPILTII | 82  | 564   |
| >TP53-N247f GMNRRPIL   | 1241  | >TP53-N247f GMFRRPIL    | 461 | 780   |
| >TP53-N247f GMNRRPIL   | 976   | >TP53-N247f GMFRRPIL    | 79  | 897   |
| >TP53-N247f GMNRRPILTI | 844   | >TP53-N247f GMFRRPILTI  | 91  | 753   |
| >TP53-N247f GMNRRPILTI | 1583  | >TP53-N247f GMFRRPILTII | 163 | 1420  |
| >TP53-N247f GMNRRPILTI | 5079  | >TP53-N247f GMFRRPILTII | 454 | 4625  |
| >TP53-N247f GGMNRRPIL  | 444   | >TP53-N247f GGMFRRPIL   | 381 | 63    |
| >TP53-N247f MGGMNRRP   | 3318  | >TP53-N247f MGGMFRRPI   | 464 | 2854  |
| >TP53-N247f CMGGMNRR   | 635   | >TP53-N247f CMGGMFRR    | 187 | 448   |
| >TP53-N247f CMGGMNRR   | 88    | >TP53-N247f CMGGMFRR    | 69  | 19    |
| >TP53-N247f CMGGMNRR   | 314   | >TP53-N247f CMGGMFRR    | 34  | 280   |
| >TP53-N247f CMGGMNRR   | 1526  | >TP53-N247f CMGGMFRR    | 322 | 1204  |
| >TP53-N247f CMGGMNRR   | 117   | >TP53-N247f CMGGMFRR    | 55  | 62    |
| >TP53-N247f SCMGGMNR   | 1170  | >TP53-N247f SCMGGMFR    | 244 | 926   |
| >TP53-N247f SCMGGMNR   | 1568  | >TP53-N247f SCMGGMFRf   | 113 | 1455  |
| >TP53-N247f SCMGGMNR   | 994   | >TP53-N247f SCMGGMFRf   | 456 | 538   |
| >TP53-N247f SCMGGMNR   | 2439  | >TP53-N247f SCMGGMFR    | 475 | 1964  |
| >TP53-N247f SCMGGMNR   | 2449  | >TP53-N247f SCMGGMFRf   | 220 | 2229  |
| >TP53-N247f SCMGGMNR   | 464   | >TP53-N247f SCMGGMFR    | 189 | 275   |
| >TP53-N247f SCMGGMNR   | 1578  | >TP53-N247f SCMGGMFRf   | 378 | 1200  |
| >TP53-N247f SSCMGGMNI  | 58    | >TP53-N247f SSCMGGMFF   | 18  | 40    |
| >TP53-N247f SSCMGGMNI  | 192   | >TP53-N247f SSCMGGMFF   | 31  | 161   |
| >TP53-N247f SSCMGGMNI  | 110   | >TP53-N247f SSCMGGMFF   | 28  | 82    |
| >TP53-N247f SSCMGGMNI  | 56    | >TP53-N247f SSCMGGMFF   | 16  | 40    |
| >TP53-N247f SSCMGGMNI  | 1403  | >TP53-N247f SSCMGGMFF   | 291 | 1112  |
| >TP53-N247f SSCMGGMNI  | 2693  | >TP53-N247f SSCMGGMFF   | 451 | 2242  |
| >TP53-N247f SSCMGGMNI  | 220   | >TP53-N247f SSCMGGMFF   | 34  | 186   |
| >TP53-N247f SSCMGGMNI  | 361   | >TP53-N247f SSCMGGMFF   | 115 | 246   |
| >TP53-N247f SSCMGGMN   | 18263 | >TP53-N247f SSCMGGMF    | 168 | 18095 |
| >TP53-N247f SSCMGGMN   | 25057 | >TP53-N247f SSCMGGMF    | 491 | 24566 |
| >TP53-N247f SSCMGGMN   | 14055 | >TP53-N247f SSCMGGMF    | 9   | 14046 |
| >TP53-N247f SSCMGGMN   | 23907 | >TP53-N247f SSCMGGMF    | 421 | 23486 |
| >TP53-N247f SSCMGGMNI  | 398   | >TP53-N247f SSCMGGMFF   | 488 | 90    |
| >TP53-N247f SSCMGGMNI  | 460   | >TP53-N247f SSCMGGMFF   | 164 | 296   |
| >TP53-N247f NSSCMGGMI  | 1185  | >TP53-N247f NSSCMGGMI   | 301 | 884   |
| >TP53-N247f NSSCMGGMI  | 111   | >TP53-N247f NSSCMGGMI   | 36  | 75    |

|                         |       |                         |      |       |
|-------------------------|-------|-------------------------|------|-------|
| >TP53-N247FNSSCMGGMI    | 55    | >TP53-N247FNSSCMGGMI    | 21   | 34    |
| >TP53-N247FNSSCMGGMI    | 1517  | >TP53-N247FNSSCMGGMI    | 219  | 1298  |
| >TP53-N247FNSSCMGGMI    | 365   | >TP53-N247FNSSCMGGMI    | 56   | 309   |
| >TP53-N247FNSSCMGGMI    | 1183  | >TP53-N247FNSSCMGGMI    | 399  | 784   |
| >TP53-N247FNSSCMGGMI    | 12    | >TP53-N247FNSSCMGGMI    | 5    | 7     |
| >TP53-N247FNSSCMGGMI    | 39    | >TP53-N247FNSSCMGGMI    | 24   | 15    |
| >TP53-N247FNSSCMGGMI    | 21984 | >TP53-N247FNSSCMGGMI    | 254  | 21730 |
| >TP53-N247FNSSCMGGMI    | 3920  | >TP53-N247FNSSCMGGMI    | 27   | 3893  |
| >TP53-N247FCNSSCMGGN    | 876   | >TP53-N247FCNSSCMGGN    | 210  | 666   |
| >TP53-N247FCNSSCMGGN    | 639   | >TP53-N247FCNSSCMGGN    | 300  | 339   |
| >TP53-N247I NRRPILTI    | 1113  | >TP53-N247I IRRPILTI    | 172  | 941   |
| >TP53-N247I NRRPILTII   | 1273  | >TP53-N247I IRRPILTII   | 232  | 1041  |
| >TP53-N247I NRRPILTIITL | 710   | >TP53-N247I IRRPILTIITL | 129  | 581   |
| >TP53-N247I NRRPILTII   | 4591  | >TP53-N247I IRRPILTII   | 487  | 4104  |
| >TP53-N247I NRRPILTI    | 674   | >TP53-N247I IRRPILTI    | 353  | 321   |
| >TP53-N247I NRRPILTII   | 281   | >TP53-N247I IRRPILTII   | 328  | 47    |
| >TP53-N247I NRRPILTIITL | 50    | >TP53-N247I IRRPILTIITL | 55   | 5     |
| >TP53-N247I NRRPILTII   | 224   | >TP53-N247I IRRPILTII   | 114  | 110   |
| >TP53-N247I NRRPILTIIT  | 876   | >TP53-N247I IRRPILTIIT  | 244  | 632   |
| >TP53-N247I NRRPILTIITL | 12    | >TP53-N247I IRRPILTIITL | 7    | 5     |
| >TP53-N247I MNRRPILTI   | 15324 | >TP53-N247I MIRRPILTI   | 276  | 15048 |
| >TP53-N247I MNRRPILTII  | 6239  | >TP53-N247I MIRRPILTII  | 200  | 6039  |
| >TP53-N247I MNRRPILTI   | 15369 | >TP53-N247I MIRRPILTI   | 203  | 15166 |
| >TP53-N247I MNRRPILTI   | 25130 | >TP53-N247I MIRRPILTI   | 213  | 24917 |
| >TP53-N247I MNRRPILT    | 945   | >TP53-N247I MIRRPILT    | 53   | 892   |
| >TP53-N247I MNRRPILTI   | 35    | >TP53-N247I MIRRPILTI   | 7    | 28    |
| >TP53-N247I MNRRPILTII  | 200   | >TP53-N247I MIRRPILTII  | 18   | 182   |
| >TP53-N247I MNRRPILTIIT | 1029  | >TP53-N247I MIRRPILTIIT | 57   | 972   |
| >TP53-N247I MNRRPILTI   | 2118  | >TP53-N247I MIRRPILTI   | 468  | 1650  |
| >TP53-N247I MNRRPILTI   | 457   | >TP53-N247I MIRRPILTI   | 450  | 7     |
| >TP53-N247I MNRRPILTI   | 399   | >TP53-N247I MIRRPILTI   | 1441 | 1042  |
| >TP53-N247I MCNSSCMGC   | 4169  | >TP53-N247I MCNSSCMGC   | 395  | 3774  |
| >TP53-N247I GMNRRPIL    | 2183  | >TP53-N247I GMIRRPIL    | 460  | 1723  |
| >TP53-N247I GMNRRPILTI  | 972   | >TP53-N247I GMIRRPILTI  | 181  | 791   |
| >TP53-N247I GMNRRPILTI  | 755   | >TP53-N247I GMIRRPILTII | 174  | 581   |
| >TP53-N247I GMNRRPILTI  | 185   | >TP53-N247I GMIRRPILTI  | 91   | 94    |
| >TP53-N247I GMNRRPILTI  | 168   | >TP53-N247I GMIRRPILTII | 167  | 1     |
| >TP53-N247I GMNRRPIL    | 213   | >TP53-N247I GMIRRPIL    | 225  | 12    |
| >TP53-N247I GMNRRPILTI  | 61    | >TP53-N247I GMIRRPILTI  | 31   | 30    |
| >TP53-N247I GMNRRPILTI  | 13    | >TP53-N247I GMIRRPILTII | 14   | 1     |
| >TP53-N247I GMNRRPILTI  | 2592  | >TP53-N247I GMIRRPILTII | 410  | 2182  |
| >TP53-N247I GMNRRPIL    | 229   | >TP53-N247I GMIRRPIL    | 235  | 6     |
| >TP53-N247I GMNRRPILTI  | 10    | >TP53-N247I GMIRRPILTI  | 10   | 0     |

|                         |       |                         |     |       |
|-------------------------|-------|-------------------------|-----|-------|
| >TP53-N247I GMNRRPILTI  | 93    | >TP53-N247I GMIRRPILTII | 94  | 1     |
| >TP53-N247I GMNRRPIL    | 182   | >TP53-N247I GMIRRPIL    | 71  | 111   |
| >TP53-N247I GMNRRPILTI  | 21    | >TP53-N247I GMIRRPILTI  | 11  | 10    |
| >TP53-N247I GMNRRPILTI  | 53    | >TP53-N247I GMIRRPILTII | 21  | 32    |
| >TP53-N247I GMNRRPIL    | 160   | >TP53-N247I GMIRRPIL    | 231 | 71    |
| >TP53-N247I GMNRRPILTI  | 66    | >TP53-N247I GMIRRPILTI  | 93  | 27    |
| >TP53-N247I GMNRRPILTI  | 192   | >TP53-N247I GMIRRPILTII | 276 | 84    |
| >TP53-N247I GMNRRPIL    | 32    | >TP53-N247I GMIRRPIL    | 32  | 0     |
| >TP53-N247I GMNRRPILTI  | 43    | >TP53-N247I GMIRRPILTI  | 41  | 2     |
| >TP53-N247I GMNRRPILTI  | 102   | >TP53-N247I GMIRRPILTII | 95  | 7     |
| >TP53-N247I GMNRRPILTI  | 147   | >TP53-N247I GMIRRPILTI  | 174 | 27    |
| >TP53-N247I GMNRRPIL    | 1241  | >TP53-N247I GMIRRPIL    | 441 | 800   |
| >TP53-N247I GGMNRRPIL   | 444   | >TP53-N247I GGMIRRPIL   | 247 | 197   |
| >TP53-N247I CMGGMNRR    | 635   | >TP53-N247I CMGGMIRRP   | 464 | 171   |
| >TP53-N247I CMGGMNRR    | 984   | >TP53-N247I CMGGMIRRP   | 304 | 680   |
| >TP53-N247I CMGGMNRR    | 88    | >TP53-N247I CMGGMIRRP   | 37  | 51    |
| >TP53-N247I CMGGMNRR    | 314   | >TP53-N247I CMGGMIRR    | 163 | 151   |
| >TP53-N247I CMGGMNRR    | 117   | >TP53-N247I CMGGMIRR    | 61  | 56    |
| >TP53-N247I SCMGGMNR    | 994   | >TP53-N247I SCMGGMIRR   | 495 | 499   |
| >TP53-N247I SCMGGMNR    | 464   | >TP53-N247I SCMGGMIR    | 560 | 96    |
| >TP53-N247I SCMGGMNR    | 1578  | >TP53-N247I SCMGGMIRR   | 426 | 1152  |
| >TP53-N247I SSCMGGMNI   | 58    | >TP53-N247I SSCMGGMIR   | 136 | 78    |
| >TP53-N247I SSCMGGMNI   | 192   | >TP53-N247I SSCMGGMIR   | 46  | 146   |
| >TP53-N247I SSCMGGMNI   | 110   | >TP53-N247I SSCMGGMIR   | 241 | 131   |
| >TP53-N247I SSCMGGMNI   | 56    | >TP53-N247I SSCMGGMIR   | 41  | 15    |
| >TP53-N247I SSCMGGMNI   | 220   | >TP53-N247I SSCMGGMIR   | 343 | 123   |
| >TP53-N247I SSCMGGMNI   | 361   | >TP53-N247I SSCMGGMIR   | 146 | 215   |
| >TP53-N247I SSCMGGMN    | 14055 | >TP53-N247I SSCMGGMI    | 308 | 13747 |
| >TP53-N247I SSCMGGMNI   | 398   | >TP53-N247I SSCMGGMIR   | 628 | 230   |
| >TP53-N247I SSCMGGMNI   | 460   | >TP53-N247I SSCMGGMIR   | 282 | 178   |
| >TP53-N247I SSCMGGMN    | 30772 | >TP53-N247I SSCMGGMI    | 23  | 30749 |
| >TP53-N247I NSSCMGGMI   | 111   | >TP53-N247I NSSCMGGMI   | 159 | 48    |
| >TP53-N247I NSSCMGGMI   | 55    | >TP53-N247I NSSCMGGMI   | 133 | 78    |
| >TP53-N247I NSSCMGGMI   | 365   | >TP53-N247I NSSCMGGMI   | 544 | 179   |
| >TP53-N247I NSSCMGGMI   | 12    | >TP53-N247I NSSCMGGMI   | 11  | 1     |
| >TP53-N247I NSSCMGGMI   | 39    | >TP53-N247I NSSCMGGMI   | 49  | 10    |
| >TP53-N247I NSSCMGGMI   | 3920  | >TP53-N247I NSSCMGGMI   | 335 | 3585  |
| >TP53-N247I NSSCMGGMI   | 36447 | >TP53-N247I NSSCMGGMI   | 101 | 36346 |
| >TP53-N247I NRRPILTI    | 9436  | >TP53-N247I KRRPILTI    | 82  | 9354  |
| >TP53-N247I NRRPILTII   | 13595 | >TP53-N247I KRRPILTII   | 399 | 13196 |
| >TP53-N247I NRRPILTIITL | 10311 | >TP53-N247I KRRPILTIITL | 128 | 10183 |
| >TP53-N247I NRRPILTI    | 1113  | >TP53-N247I KRRPILTI    | 190 | 923   |
| >TP53-N247I NRRPILTII   | 1273  | >TP53-N247I KRRPILTII   | 281 | 992   |

|                        |       |                        |      |       |
|------------------------|-------|------------------------|------|-------|
| >TP53-N247fNRRPILTIITL | 710   | >TP53-N247fKRRPILTIITL | 139  | 571   |
| >TP53-N247fNRRPILTI    | 1481  | >TP53-N247fKRRPILTI    | 162  | 1319  |
| >TP53-N247fNRRPILTI    | 2535  | >TP53-N247fKRRPILTI    | 286  | 2249  |
| >TP53-N247fNRRPILTIIT  | 3508  | >TP53-N247fKRRPILTIIT  | 316  | 3192  |
| >TP53-N247fNRRPILTIITL | 1047  | >TP53-N247fKRRPILTIITL | 126  | 921   |
| >TP53-N247fNRRPILTI    | 674   | >TP53-N247fKRRPILTI    | 22   | 652   |
| >TP53-N247fNRRPILTI    | 281   | >TP53-N247fKRRPILTI    | 28   | 253   |
| >TP53-N247fNRRPILTIIT  | 2086  | >TP53-N247fKRRPILTIIT  | 163  | 1923  |
| >TP53-N247fNRRPILTIITL | 50    | >TP53-N247fKRRPILTIITL | 15   | 35    |
| >TP53-N247fNRRPILTI    | 1150  | >TP53-N247fKRRPILTI    | 270  | 880   |
| >TP53-N247fNRRPILTI    | 224   | >TP53-N247fKRRPILTI    | 56   | 168   |
| >TP53-N247fNRRPILTIIT  | 876   | >TP53-N247fKRRPILTIIT  | 117  | 759   |
| >TP53-N247fNRRPILTIITL | 12    | >TP53-N247fKRRPILTIITL | 6    | 6     |
| >TP53-N247fMNRRPILTI   | 35    | >TP53-N247fMKRRPILTI   | 109  | 74    |
| >TP53-N247fMNRRPILTI   | 200   | >TP53-N247fMKRRPILTI   | 655  | 455   |
| >TP53-N247fMNRRPILTI   | 457   | >TP53-N247fMKRRPILTI   | 7    | 450   |
| >TP53-N247fMNRRPILTI   | 821   | >TP53-N247fMKRRPILTI   | 12   | 809   |
| >TP53-N247fMNRRPILTIIT | 13161 | >TP53-N247fMKRRPILTIIT | 322  | 12839 |
| >TP53-N247fMNRRPILTI   | 399   | >TP53-N247fMKRRPILTI   | 1487 | 1088  |
| >TP53-N247fGMNRRPILTI  | 185   | >TP53-N247fGMKRRPILTI  | 271  | 86    |
| >TP53-N247fGMNRRPILTI  | 168   | >TP53-N247fGMKRRPILTI  | 977  | 809   |
| >TP53-N247fGMNRRPIL    | 213   | >TP53-N247fGMKRRPIL    | 433  | 220   |
| >TP53-N247fGMNRRPILTI  | 61    | >TP53-N247fGMKRRPILTI  | 55   | 6     |
| >TP53-N247fGMNRRPILTI  | 13    | >TP53-N247fGMKRRPILTI  | 19   | 6     |
| >TP53-N247fGMNRRPIL    | 229   | >TP53-N247fGMKRRPIL    | 3683 | 3454  |
| >TP53-N247fGMNRRPILTI  | 10    | >TP53-N247fGMKRRPILTI  | 170  | 160   |
| >TP53-N247fGMNRRPILTI  | 93    | >TP53-N247fGMKRRPILTI  | 2071 | 1978  |
| >TP53-N247fGMNRRPIL    | 182   | >TP53-N247fGMKRRPIL    | 1544 | 1362  |
| >TP53-N247fGMNRRPILTI  | 21    | >TP53-N247fGMKRRPILTI  | 174  | 153   |
| >TP53-N247fGMNRRPILTI  | 53    | >TP53-N247fGMKRRPILTI  | 674  | 621   |
| >TP53-N247fGMNRRPIL    | 160   | >TP53-N247fGMKRRPIL    | 5736 | 5576  |
| >TP53-N247fGMNRRPILTI  | 66    | >TP53-N247fGMKRRPILTI  | 2701 | 2635  |
| >TP53-N247fGMNRRPILTI  | 192   | >TP53-N247fGMKRRPILTI  | 6141 | 5949  |
| >TP53-N247fGMNRRPIL    | 32    | >TP53-N247fGMKRRPIL    | 77   | 45    |
| >TP53-N247fGMNRRPILTI  | 43    | >TP53-N247fGMKRRPILTI  | 115  | 72    |
| >TP53-N247fGMNRRPILTI  | 102   | >TP53-N247fGMKRRPILTI  | 331  | 229   |
| >TP53-N247fGMNRRPIL    | 5998  | >TP53-N247fGMKRRPIL    | 380  | 5618  |
| >TP53-N247fGMNRRPILTI  | 3089  | >TP53-N247fGMKRRPILTI  | 127  | 2962  |
| >TP53-N247fGMNRRPILTI  | 147   | >TP53-N247fGMKRRPILTI  | 885  | 738   |
| >TP53-N247fGMNRRPIL    | 1241  | >TP53-N247fGMKRRPIL    | 53   | 1188  |
| >TP53-N247fGMNRRPILTI  | 4785  | >TP53-N247fGMKRRPILTI  | 379  | 4406  |
| >TP53-N247fGGMNRRPI    | 1849  | >TP53-N247fGGMKRRPI    | 485  | 1364  |
| >TP53-N247fGGMNRRPIL   | 444   | >TP53-N247fGGMKRRPIL   | 156  | 288   |

|                         |       |                         |      |       |
|-------------------------|-------|-------------------------|------|-------|
| >TP53-N247f MGGMNRRP    | 1831  | >TP53-N247f MGGMKRRPI   | 96   | 1735  |
| >TP53-N247f CMGGMNRR    | 635   | >TP53-N247f CMGGMKRRl   | 431  | 204   |
| >TP53-N247f CMGGMNRR    | 88    | >TP53-N247f CMGGMKRRl   | 97   | 9     |
| >TP53-N247f CMGGMNRR    | 314   | >TP53-N247f CMGGMKRR    | 331  | 17    |
| >TP53-N247f CMGGMNRR    | 117   | >TP53-N247f CMGGMKRR    | 99   | 18    |
| >TP53-N247f SCMGGMNR    | 464   | >TP53-N247f SCMGGMKR    | 539  | 75    |
| >TP53-N247f SSCMGGMN    | 19384 | >TP53-N247f SSCMGGMK    | 19   | 19365 |
| >TP53-N247f SSCMGGMNI   | 58    | >TP53-N247f SSCMGGMKF   | 113  | 55    |
| >TP53-N247f SSCMGGMNI   | 192   | >TP53-N247f SSCMGGMKF   | 439  | 247   |
| >TP53-N247f SSCMGGMN    | 13750 | >TP53-N247f SSCMGGMK    | 433  | 13317 |
| >TP53-N247f SSCMGGMNI   | 110   | >TP53-N247f SSCMGGMKF   | 145  | 35    |
| >TP53-N247f SSCMGGMNI   | 56    | >TP53-N247f SSCMGGMKF   | 91   | 35    |
| >TP53-N247f SSCMGGMNI   | 220   | >TP53-N247f SSCMGGMKF   | 263  | 43    |
| >TP53-N247f SSCMGGMNI   | 361   | >TP53-N247f SSCMGGMKF   | 1418 | 1057  |
| >TP53-N247f SSCMGGMNI   | 398   | >TP53-N247f SSCMGGMKF   | 840  | 442   |
| >TP53-N247f SSCMGGMNI   | 460   | >TP53-N247f SSCMGGMKF   | 473  | 13    |
| >TP53-N247f NSSCMGGMI   | 27437 | >TP53-N247f NSSCMGGMI   | 440  | 26997 |
| >TP53-N247f NSSCMGGMI   | 111   | >TP53-N247f NSSCMGGMI   | 142  | 31    |
| >TP53-N247f NSSCMGGMI   | 55    | >TP53-N247f NSSCMGGMI   | 81   | 26    |
| >TP53-N247f NSSCMGGMI   | 365   | >TP53-N247f NSSCMGGMI   | 393  | 28    |
| >TP53-N247f NSSCMGGMI   | 18366 | >TP53-N247f NSSCMGGMI   | 188  | 18178 |
| >TP53-N247f NSSCMGGMI   | 12    | >TP53-N247f NSSCMGGMI   | 9    | 3     |
| >TP53-N247f NSSCMGGMI   | 39    | >TP53-N247f NSSCMGGMI   | 121  | 82    |
| >TP53-N247f NRRPILTI    | 1113  | >TP53-N247f SRRPILTI    | 468  | 645   |
| >TP53-N247f NRRPILTIITL | 710   | >TP53-N247f SRRPILTIITL | 325  | 385   |
| >TP53-N247f NRRPILTIITL | 1047  | >TP53-N247f SRRPILTIITL | 368  | 679   |
| >TP53-N247f NRRPILTI    | 281   | >TP53-N247f SRRPILTI    | 129  | 152   |
| >TP53-N247f NRRPILTIITL | 50    | >TP53-N247f SRRPILTIITL | 32   | 18    |
| >TP53-N247f NRRPILTI    | 224   | >TP53-N247f SRRPILTI    | 96   | 128   |
| >TP53-N247f NRRPILTIITL | 12    | >TP53-N247f SRRPILTIITL | 8    | 4     |
| >TP53-N247f MNRRPILT    | 945   | >TP53-N247f MSRRPILT    | 25   | 920   |
| >TP53-N247f MNRRPILTI   | 35    | >TP53-N247f MSRRPILTI   | 5    | 30    |
| >TP53-N247f MNRRPILTI   | 200   | >TP53-N247f MSRRPILTI   | 10   | 190   |
| >TP53-N247f MNRRPILTIIT | 1029  | >TP53-N247f MSRRPILTIIT | 26   | 1003  |
| >TP53-N247f MNRRPILTI   | 457   | >TP53-N247f MSRRPILTI   | 67   | 390   |
| >TP53-N247f MNRRPILTI   | 821   | >TP53-N247f MSRRPILTI   | 123  | 698   |
| >TP53-N247f MNRRPILTI   | 8475  | >TP53-N247f MSRRPILTI   | 7    | 8468  |
| >TP53-N247f MNRRPILTI   | 16484 | >TP53-N247f MSRRPILTI   | 49   | 16435 |
| >TP53-N247f MNRRPILTI   | 18149 | >TP53-N247f MSRRPILTI   | 372  | 17777 |
| >TP53-N247f MNRRPILTI   | 1235  | >TP53-N247f MSRRPILTI   | 73   | 1162  |
| >TP53-N247f MNRRPILTI   | 14198 | >TP53-N247f MSRRPILTI   | 377  | 13821 |
| >TP53-N247f MNRRPILTI   | 399   | >TP53-N247f MSRRPILTI   | 20   | 379   |
| >TP53-N247f GMNRRPILTI  | 972   | >TP53-N247f GMSRRPILTI  | 483  | 489   |



|                                     |     |                                     |     |     |
|-------------------------------------|-----|-------------------------------------|-----|-----|
| >TP53-N247 <sup>5</sup> GMNRRPILTI  | 755 | >TP53-N247 <sup>5</sup> GMSRRPILTII | 498 | 257 |
| >TP53-N247 <sup>5</sup> GMNRRPIL    | 678 | >TP53-N247 <sup>5</sup> GMSRRPIL    | 299 | 379 |
| >TP53-N247 <sup>5</sup> GMNRRPILTI  | 185 | >TP53-N247 <sup>5</sup> GMSRRPILTI  | 58  | 127 |
| >TP53-N247 <sup>5</sup> GMNRRPILTI  | 168 | >TP53-N247 <sup>5</sup> GMSRRPILTII | 85  | 83  |
| >TP53-N247 <sup>5</sup> GMNRRPIL    | 213 | >TP53-N247 <sup>5</sup> GMSRRPIL    | 301 | 88  |
| >TP53-N247 <sup>5</sup> GMNRRPILTI  | 61  | >TP53-N247 <sup>5</sup> GMSRRPILTI  | 36  | 25  |
| >TP53-N247 <sup>5</sup> GMNRRPILTI  | 13  | >TP53-N247 <sup>5</sup> GMSRRPILTII | 16  | 3   |
| >TP53-N247 <sup>5</sup> GMNRRPIL    | 229 | >TP53-N247 <sup>5</sup> GMSRRPIL    | 494 | 265 |
| >TP53-N247 <sup>5</sup> GMNRRPILTI  | 10  | >TP53-N247 <sup>5</sup> GMSRRPILTI  | 18  | 8   |
| >TP53-N247 <sup>5</sup> GMNRRPILTI  | 93  | >TP53-N247 <sup>5</sup> GMSRRPILTII | 205 | 112 |
| >TP53-N247 <sup>5</sup> GMNRRPIL    | 182 | >TP53-N247 <sup>5</sup> GMSRRPIL    | 239 | 57  |
| >TP53-N247 <sup>5</sup> GMNRRPILTI  | 21  | >TP53-N247 <sup>5</sup> GMSRRPILTI  | 26  | 5   |
| >TP53-N247 <sup>5</sup> GMNRRPILTI  | 53  | >TP53-N247 <sup>5</sup> GMSRRPILTII | 69  | 16  |
| >TP53-N247 <sup>5</sup> GMNRRPIL    | 160 | >TP53-N247 <sup>5</sup> GMSRRPIL    | 195 | 35  |
| >TP53-N247 <sup>5</sup> GMNRRPILTI  | 66  | >TP53-N247 <sup>5</sup> GMSRRPILTI  | 71  | 5   |
| >TP53-N247 <sup>5</sup> GMNRRPILTI  | 192 | >TP53-N247 <sup>5</sup> GMSRRPILTII | 231 | 39  |
| >TP53-N247 <sup>5</sup> GMNRRPIL    | 32  | >TP53-N247 <sup>5</sup> GMSRRPIL    | 28  | 4   |
| >TP53-N247 <sup>5</sup> GMNRRPILTI  | 43  | >TP53-N247 <sup>5</sup> GMSRRPILTI  | 35  | 8   |
| >TP53-N247 <sup>5</sup> GMNRRPILTI  | 102 | >TP53-N247 <sup>5</sup> GMSRRPILTII | 87  | 15  |
| >TP53-N247 <sup>5</sup> GMNRRPILTI  | 147 | >TP53-N247 <sup>5</sup> GMSRRPILTI  | 274 | 127 |
| >TP53-N247 <sup>5</sup> GGMNRRPIL   | 444 | >TP53-N247 <sup>5</sup> GGMSRRPIL   | 355 | 89  |
| >TP53-N247 <sup>5</sup> GGMNRRPIL   | 538 | >TP53-N247 <sup>5</sup> GGMSRRPILT  | 464 | 74  |
| >TP53-N247 <sup>5</sup> CMGGMNRR    | 635 | >TP53-N247 <sup>5</sup> CMGGMSRRI   | 398 | 237 |
| >TP53-N247 <sup>5</sup> CMGGMNRR    | 88  | >TP53-N247 <sup>5</sup> CMGGMSRRI   | 70  | 18  |
| >TP53-N247 <sup>5</sup> CMGGMNRR    | 314 | >TP53-N247 <sup>5</sup> CMGGMSRR    | 247 | 67  |
| >TP53-N247 <sup>5</sup> CMGGMNRR    | 117 | >TP53-N247 <sup>5</sup> CMGGMSRR    | 197 | 80  |
| >TP53-N247 <sup>5</sup> SCMGGMNR    | 464 | >TP53-N247 <sup>5</sup> SCMGGMSR    | 911 | 447 |
| >TP53-N247 <sup>5</sup> SSCMGGMNI   | 58  | >TP53-N247 <sup>5</sup> SSCMGGMSF   | 94  | 36  |
| >TP53-N247 <sup>5</sup> SSCMGGMNI   | 192 | >TP53-N247 <sup>5</sup> SSCMGGMSF   | 103 | 89  |
| >TP53-N247 <sup>5</sup> SSCMGGMNI   | 110 | >TP53-N247 <sup>5</sup> SSCMGGMSF   | 183 | 73  |
| >TP53-N247 <sup>5</sup> SSCMGGMNI   | 56  | >TP53-N247 <sup>5</sup> SSCMGGMSF   | 52  | 4   |
| >TP53-N247 <sup>5</sup> SSCMGGMNI   | 220 | >TP53-N247 <sup>5</sup> SSCMGGMSF   | 206 | 14  |
| >TP53-N247 <sup>5</sup> SSCMGGMNI   | 361 | >TP53-N247 <sup>5</sup> SSCMGGMSF   | 191 | 170 |
| >TP53-N247 <sup>5</sup> SSCMGGMNI   | 398 | >TP53-N247 <sup>5</sup> SSCMGGMSF   | 727 | 329 |
| >TP53-N247 <sup>5</sup> SSCMGGMNI   | 460 | >TP53-N247 <sup>5</sup> SSCMGGMSF   | 529 | 69  |
| >TP53-N247 <sup>5</sup> NSSCMGGMI   | 111 | >TP53-N247 <sup>5</sup> NSSCMGGM!   | 115 | 4   |
| >TP53-N247 <sup>5</sup> NSSCMGGMI   | 55  | >TP53-N247 <sup>5</sup> NSSCMGGM!   | 80  | 25  |
| >TP53-N247 <sup>5</sup> NSSCMGGMI   | 365 | >TP53-N247 <sup>5</sup> NSSCMGGM!   | 344 | 21  |
| >TP53-N247 <sup>5</sup> NSSCMGGMI   | 12  | >TP53-N247 <sup>5</sup> NSSCMGGM!   | 15  | 3   |
| >TP53-N247 <sup>5</sup> NSSCMGGMI   | 39  | >TP53-N247 <sup>5</sup> NSSCMGGM!   | 34  | 5   |
| >TP53-N247 <sup>1</sup> NRRPILTII   | 281 | >TP53-N247 <sup>1</sup> TRRPILTII   | 234 | 47  |
| >TP53-N247 <sup>1</sup> NRRPILTIITL | 50  | >TP53-N247 <sup>1</sup> TRRPILTIITL | 46  | 4   |
| >TP53-N247 <sup>1</sup> NRRPILTII   | 224 | >TP53-N247 <sup>1</sup> TRRPILTII   | 290 | 66  |

|                        |       |                        |      |       |
|------------------------|-------|------------------------|------|-------|
| >TP53-N2471NRRPILTIITL | 12    | >TP53-N2471TRRPILTIITL | 13   | 1     |
| >TP53-N2471MNRRPILTI   | 6239  | >TP53-N2471MTRRPILTI   | 459  | 5780  |
| >TP53-N2471MNRRPILT    | 945   | >TP53-N2471MTRRPILT    | 15   | 930   |
| >TP53-N2471MNRRPILTI   | 35    | >TP53-N2471MTRRPILTI   | 4    | 31    |
| >TP53-N2471MNRRPILTI   | 200   | >TP53-N2471MTRRPILTI   | 7    | 193   |
| >TP53-N2471MNRRPILTIIT | 1029  | >TP53-N2471MTRRPILTIIT | 15   | 1014  |
| >TP53-N2471MNRRPILTI   | 12155 | >TP53-N2471MTRRPILTI   | 134  | 12021 |
| >TP53-N2471MNRRPILTI   | 14540 | >TP53-N2471MTRRPILTI   | 493  | 14047 |
| >TP53-N2471MNRRPILTI   | 13878 | >TP53-N2471MTRRPILTI   | 468  | 13410 |
| >TP53-N2471MNRRPILTI   | 457   | >TP53-N2471MTRRPILTI   | 268  | 189   |
| >TP53-N2471MNRRPILTI   | 821   | >TP53-N2471MTRRPILTI   | 460  | 361   |
| >TP53-N2471MNRRPILTI   | 8475  | >TP53-N2471MTRRPILTI   | 5    | 8470  |
| >TP53-N2471MNRRPILTI   | 16484 | >TP53-N2471MTRRPILTI   | 34   | 16450 |
| >TP53-N2471MNRRPILTI   | 1235  | >TP53-N2471MTRRPILTI   | 27   | 1208  |
| >TP53-N2471MNRRPILTI   | 14198 | >TP53-N2471MTRRPILTI   | 151  | 14047 |
| >TP53-N2471MNRRPILTIIT | 10346 | >TP53-N2471MTRRPILTIIT | 467  | 9879  |
| >TP53-N2471MNRRPILTI   | 399   | >TP53-N2471MTRRPILTI   | 19   | 380   |
| >TP53-N2471GMNRRPILTI  | 185   | >TP53-N2471GMTRRPILTI  | 173  | 12    |
| >TP53-N2471GMNRRPILTI  | 168   | >TP53-N2471GMTRRPILTI  | 390  | 222   |
| >TP53-N2471GMNRRPIL    | 213   | >TP53-N2471GMTRRPIL    | 1408 | 1195  |
| >TP53-N2471GMNRRPILTI  | 61    | >TP53-N2471GMTRRPILTI  | 66   | 5     |
| >TP53-N2471GMNRRPILTI  | 13    | >TP53-N2471GMTRRPILTI  | 53   | 40    |
| >TP53-N2471GMNRRPIL    | 229   | >TP53-N2471GMTRRPIL    | 682  | 453   |
| >TP53-N2471GMNRRPILTI  | 10    | >TP53-N2471GMTRRPILTI  | 22   | 12    |
| >TP53-N2471GMNRRPILTI  | 93    | >TP53-N2471GMTRRPILTI  | 288  | 195   |
| >TP53-N2471GMNRRPIL    | 182   | >TP53-N2471GMTRRPIL    | 302  | 120   |
| >TP53-N2471GMNRRPILTI  | 21    | >TP53-N2471GMTRRPILTI  | 36   | 15    |
| >TP53-N2471GMNRRPILTI  | 53    | >TP53-N2471GMTRRPILTI  | 93   | 40    |
| >TP53-N2471GMNRRPIL    | 160   | >TP53-N2471GMTRRPIL    | 152  | 8     |
| >TP53-N2471GMNRRPILTI  | 66    | >TP53-N2471GMTRRPILTI  | 61   | 5     |
| >TP53-N2471GMNRRPILTI  | 192   | >TP53-N2471GMTRRPILTI  | 187  | 5     |
| >TP53-N2471GMNRRPIL    | 32    | >TP53-N2471GMTRRPIL    | 25   | 7     |
| >TP53-N2471GMNRRPILTI  | 43    | >TP53-N2471GMTRRPILTI  | 29   | 14    |
| >TP53-N2471GMNRRPILTI  | 102   | >TP53-N2471GMTRRPILTI  | 68   | 34    |
| >TP53-N2471GMNRRPILTI  | 147   | >TP53-N2471GMTRRPILTI  | 458  | 311   |
| >TP53-N2471GGMNRPPIL   | 444   | >TP53-N2471GGMNRPPIL   | 289  | 155   |
| >TP53-N2471CMGGMNRR    | 635   | >TP53-N2471CMGGMTRRI   | 448  | 187   |
| >TP53-N2471CMGGMNRR    | 88    | >TP53-N2471CMGGMTRRI   | 59   | 29    |
| >TP53-N2471CMGGMNRR    | 314   | >TP53-N2471CMGGMTRR    | 152  | 162   |
| >TP53-N2471CMGGMNRR    | 117   | >TP53-N2471CMGGMTRR    | 86   | 31    |
| >TP53-N2471SCMGGMNR    | 464   | >TP53-N2471SCMGGMTR    | 607  | 143   |
| >TP53-N2471SSCMGGMNI   | 58    | >TP53-N2471SSCMGGMTF   | 145  | 87    |
| >TP53-N2471SSCMGGMNI   | 192   | >TP53-N2471SSCMGGMTF   | 103  | 89    |

|                        |       |                                  |      |       |
|------------------------|-------|----------------------------------|------|-------|
| >TP53-N247\SSCMGGMNI   | 110   | >TP53-N247\SSCMGGMTF             | 109  | 1     |
| >TP53-N247\SSCMGGMNI   | 56    | >TP53-N247\SSCMGGMTF             | 68   | 12    |
| >TP53-N247\SSCMGGMNI   | 220   | >TP53-N247\SSCMGGMTF             | 185  | 35    |
| >TP53-N247\SSCMGGMNI   | 361   | >TP53-N247\SSCMGGMTF             | 240  | 121   |
| >TP53-N247\SSCMGGMNI   | 398   | >TP53-N247\SSCMGGMTF             | 706  | 308   |
| >TP53-N247\SSCMGGMNI   | 460   | >TP53-N247\SSCMGGMTF             | 433  | 27    |
| >TP53-N247\NSSCMGGMI   | 111   | >TP53-N247\NSSCMGGM <sup>+</sup> | 81   | 30    |
| >TP53-N247\NSSCMGGMI   | 55    | >TP53-N247\NSSCMGGM <sup>+</sup> | 72   | 17    |
| >TP53-N247\NSSCMGGMI   | 365   | >TP53-N247\NSSCMGGM <sup>+</sup> | 449  | 84    |
| >TP53-N247\NSSCMGGMI   | 12    | >TP53-N247\NSSCMGGM <sup>+</sup> | 8    | 4     |
| >TP53-N247\NSSCMGGMI   | 39    | >TP53-N247\NSSCMGGM <sup>+</sup> | 44   | 5     |
| >TP53-N247\NRRPILTI    | 1113  | >TP53-N247\YRRPILTI              | 123  | 990   |
| >TP53-N247\NRRPILTI    | 1273  | >TP53-N247\YRRPILTI              | 189  | 1084  |
| >TP53-N247\NRRPILTIITL | 710   | >TP53-N247\YRRPILTIITL           | 87   | 623   |
| >TP53-N247\NRRPILTI    | 1481  | >TP53-N247\YRRPILTI              | 146  | 1335  |
| >TP53-N247\NRRPILTI    | 2535  | >TP53-N247\YRRPILTI              | 330  | 2205  |
| >TP53-N247\NRRPILTIITL | 1047  | >TP53-N247\YRRPILTIITL           | 114  | 933   |
| >TP53-N247\NRRPILTIITL | 701   | >TP53-N247\YRRPILTIITL           | 195  | 506   |
| >TP53-N247\NRRPILTI    | 4591  | >TP53-N247\YRRPILTI              | 270  | 4321  |
| >TP53-N247\NRRPILTI    | 5731  | >TP53-N247\YRRPILTI              | 283  | 5448  |
| >TP53-N247\NRRPILTI    | 281   | >TP53-N247\YRRPILTI              | 238  | 43    |
| >TP53-N247\NRRPILTIITL | 50    | >TP53-N247\YRRPILTIITL           | 42   | 8     |
| >TP53-N247\NRRPILTI    | 224   | >TP53-N247\YRRPILTI              | 248  | 24    |
| >TP53-N247\NRRPILTIIT  | 876   | >TP53-N247\YRRPILTIIT            | 406  | 470   |
| >TP53-N247\NRRPILTIITL | 12    | >TP53-N247\YRRPILTIITL           | 11   | 1     |
| >TP53-N247\MNRRPILTI   | 17073 | >TP53-N247\MYRRPILTI             | 198  | 16875 |
| >TP53-N247\MNRRPILTI   | 16064 | >TP53-N247\MYRRPILTI             | 198  | 15866 |
| >TP53-N247\MNRRPILTI   | 22631 | >TP53-N247\MYRRPILTI             | 9    | 22622 |
| >TP53-N247\MNRRPILTI   | 23633 | >TP53-N247\MYRRPILTI             | 33   | 23600 |
| >TP53-N247\MNRRPILTI   | 945   | >TP53-N247\MYRRPILTI             | 25   | 920   |
| >TP53-N247\MNRRPILTI   | 35    | >TP53-N247\MYRRPILTI             | 5    | 30    |
| >TP53-N247\MNRRPILTI   | 200   | >TP53-N247\MYRRPILTI             | 10   | 190   |
| >TP53-N247\MNRRPILTIIT | 1029  | >TP53-N247\MYRRPILTIIT           | 26   | 1003  |
| >TP53-N247\MNRRPILTI   | 457   | >TP53-N247\MYRRPILTI             | 1219 | 762   |
| >TP53-N247\MNRRPILTI   | 25335 | >TP53-N247\MYRRPILTI             | 376  | 24959 |
| >TP53-N247\MNRRPILTI   | 399   | >TP53-N247\MYRRPILTI             | 2708 | 2309  |
| >TP53-N247\MCNSSCMGC   | 21925 | >TP53-N247\MCNSSCMGC             | 161  | 21764 |
| >TP53-N247\MCNSSCMGC   | 25139 | >TP53-N247\MCNSSCMGC             | 127  | 25012 |
| >TP53-N247\MCNSSCMGC   | 26339 | >TP53-N247\MCNSSCMGC             | 469  | 25870 |
| >TP53-N247\MCNSSCMGC   | 4169  | >TP53-N247\MCNSSCMGC             | 29   | 4140  |
| >TP53-N247\GMNRRPIL    | 2183  | >TP53-N247\GMYRRPIL              | 250  | 1933  |
| >TP53-N247\GMNRRPILTI  | 972   | >TP53-N247\GMYRRPILTI            | 90   | 882   |
| >TP53-N247\GMNRRPILTI  | 755   | >TP53-N247\GMYRRPILTI            | 95   | 660   |

|                       |       |                       |     |       |
|-----------------------|-------|-----------------------|-----|-------|
| >TP53-N247\GMNRRPIL   | 678   | >TP53-N247\GMYRRPIL   | 465 | 213   |
| >TP53-N247\GMNRRPILTI | 185   | >TP53-N247\GMYRRPILTI | 34  | 151   |
| >TP53-N247\GMNRRPILTI | 168   | >TP53-N247\GMYRRPILTI | 139 | 29    |
| >TP53-N247\GMNRRPIL   | 213   | >TP53-N247\GMYRRPIL   | 77  | 136   |
| >TP53-N247\GMNRRPILT  | 728   | >TP53-N247\GMYRRPILT  | 243 | 485   |
| >TP53-N247\GMNRRPILTI | 61    | >TP53-N247\GMYRRPILTI | 17  | 44    |
| >TP53-N247\GMNRRPILTI | 13    | >TP53-N247\GMYRRPILTI | 9   | 4     |
| >TP53-N247\GMNRRPILTI | 2592  | >TP53-N247\GMYRRPILTI | 446 | 2146  |
| >TP53-N247\GMNRRPIL   | 229   | >TP53-N247\GMYRRPIL   | 25  | 204   |
| >TP53-N247\GMNRRPILT  | 822   | >TP53-N247\GMYRRPILT  | 64  | 758   |
| >TP53-N247\GMNRRPILTI | 10    | >TP53-N247\GMYRRPILTI | 3   | 7     |
| >TP53-N247\GMNRRPILTI | 93    | >TP53-N247\GMYRRPILTI | 11  | 82    |
| >TP53-N247\GMNRRPIL   | 182   | >TP53-N247\GMYRRPIL   | 54  | 128   |
| >TP53-N247\GMNRRPILTI | 21    | >TP53-N247\GMYRRPILTI | 9   | 12    |
| >TP53-N247\GMNRRPILTI | 53    | >TP53-N247\GMYRRPILTI | 16  | 37    |
| >TP53-N247\GMNRRPIL   | 160   | >TP53-N247\GMYRRPIL   | 19  | 141   |
| >TP53-N247\GMNRRPILTI | 66    | >TP53-N247\GMYRRPILTI | 14  | 52    |
| >TP53-N247\GMNRRPILTI | 192   | >TP53-N247\GMYRRPILTI | 25  | 167   |
| >TP53-N247\GMNRRPIL   | 32    | >TP53-N247\GMYRRPIL   | 16  | 16    |
| >TP53-N247\GMNRRPILT  | 744   | >TP53-N247\GMYRRPILT  | 193 | 551   |
| >TP53-N247\GMNRRPILTI | 43    | >TP53-N247\GMYRRPILTI | 16  | 27    |
| >TP53-N247\GMNRRPILTI | 102   | >TP53-N247\GMYRRPILTI | 27  | 75    |
| >TP53-N247\GMNRRPILTI | 147   | >TP53-N247\GMYRRPILTI | 45  | 102   |
| >TP53-N247\GMNRRPILTI | 646   | >TP53-N247\GMYRRPILTI | 182 | 464   |
| >TP53-N247\GMNRRPIL   | 1241  | >TP53-N247\GMYRRPIL   | 273 | 968   |
| >TP53-N247\GMNRRPIL   | 976   | >TP53-N247\GMYRRPIL   | 112 | 864   |
| >TP53-N247\GMNRRPILTI | 844   | >TP53-N247\GMYRRPILTI | 124 | 720   |
| >TP53-N247\GMNRRPILTI | 1583  | >TP53-N247\GMYRRPILTI | 228 | 1355  |
| >TP53-N247\GMNRRPIL   | 1607  | >TP53-N247\GMYRRPIL   | 260 | 1347  |
| >TP53-N247\GMNRRPILTI | 5079  | >TP53-N247\GMYRRPILTI | 429 | 4650  |
| >TP53-N247\GGMNRRPIL  | 4684  | >TP53-N247\GGMYRRPIL  | 400 | 4284  |
| >TP53-N247\GGMNRRPIL  | 444   | >TP53-N247\GGMYRRPIL  | 200 | 244   |
| >TP53-N247\CMGGMNRR   | 635   | >TP53-N247\CMGGMYRRI  | 130 | 505   |
| >TP53-N247\CMGGMNRR   | 88    | >TP53-N247\CMGGMYRRI  | 84  | 4     |
| >TP53-N247\CMGGMNRR   | 314   | >TP53-N247\CMGGMYRR   | 43  | 271   |
| >TP53-N247\CMGGMNRR   | 1526  | >TP53-N247\CMGGMYRR   | 474 | 1052  |
| >TP53-N247\CMGGMNRR   | 117   | >TP53-N247\CMGGMYRR   | 46  | 71    |
| >TP53-N247\SCMGGMNR   | 1170  | >TP53-N247\SCMGGMYR   | 195 | 975   |
| >TP53-N247\SCMGGMNR   | 1568  | >TP53-N247\SCMGGMYRf  | 177 | 1391  |
| >TP53-N247\SCMGGMNR   | 2449  | >TP53-N247\SCMGGMYRf  | 349 | 2100  |
| >TP53-N247\SCMGGMNR   | 464   | >TP53-N247\SCMGGMYR   | 67  | 397   |
| >TP53-N247\SCMGGMNR   | 1578  | >TP53-N247\SCMGGMYRf  | 106 | 1472  |
| >TP53-N247\SSCMGGMN   | 21835 | >TP53-N247\SSCMGGMY   | 252 | 21583 |

|                        |       |                        |     |       |
|------------------------|-------|------------------------|-----|-------|
| >TP53-N247\SSCMGGMNI   | 58    | >TP53-N247\SSCMGGMYF   | 21  | 37    |
| >TP53-N247\SSCMGGMNI   | 192   | >TP53-N247\SSCMGGMYF   | 32  | 160   |
| >TP53-N247\SSCMGGMN    | 21037 | >TP53-N247\SSCMGGMY    | 147 | 20890 |
| >TP53-N247\SSCMGGMN    | 11237 | >TP53-N247\SSCMGGMY    | 30  | 11207 |
| >TP53-N247\SSCMGGMNI   | 110   | >TP53-N247\SSCMGGMYF   | 22  | 88    |
| >TP53-N247\SSCMGGMNI   | 56    | >TP53-N247\SSCMGGMYF   | 18  | 38    |
| >TP53-N247\SSCMGGMNI   | 220   | >TP53-N247\SSCMGGMYF   | 52  | 168   |
| >TP53-N247\SSCMGGMNI   | 361   | >TP53-N247\SSCMGGMYF   | 106 | 255   |
| >TP53-N247\SSCMGGMN    | 25639 | >TP53-N247\SSCMGGMY    | 457 | 25182 |
| >TP53-N247\SSCMGGMN    | 18263 | >TP53-N247\SSCMGGMY    | 141 | 18122 |
| >TP53-N247\SSCMGGMN    | 14055 | >TP53-N247\SSCMGGMY    | 15  | 14040 |
| >TP53-N247\SSCMGGMN    | 23907 | >TP53-N247\SSCMGGMY    | 448 | 23459 |
| >TP53-N247\SSCMGGMNI   | 398   | >TP53-N247\SSCMGGMYF   | 379 | 19    |
| >TP53-N247\SSCMGGMNI   | 460   | >TP53-N247\SSCMGGMYF   | 201 | 259   |
| >TP53-N247\NSSCMGGMI   | 21256 | >TP53-N247\NSSCMGGM`   | 94  | 21162 |
| >TP53-N247\NSSCMGGMI   | 1185  | >TP53-N247\NSSCMGGM`   | 291 | 894   |
| >TP53-N247\NSSCMGGMI   | 111   | >TP53-N247\NSSCMGGM`   | 38  | 73    |
| >TP53-N247\NSSCMGGMI   | 22851 | >TP53-N247\NSSCMGGM`   | 138 | 22713 |
| >TP53-N247\NSSCMGGMI   | 23566 | >TP53-N247\NSSCMGGM`   | 173 | 23393 |
| >TP53-N247\NSSCMGGMI   | 55    | >TP53-N247\NSSCMGGM`   | 22  | 33    |
| >TP53-N247\NSSCMGGMI   | 1517  | >TP53-N247\NSSCMGGM`   | 280 | 1237  |
| >TP53-N247\NSSCMGGMI   | 365   | >TP53-N247\NSSCMGGM`   | 94  | 271   |
| >TP53-N247\NSSCMGGMI   | 1183  | >TP53-N247\NSSCMGGM`   | 456 | 727   |
| >TP53-N247\NSSCMGGMI   | 12    | >TP53-N247\NSSCMGGM`   | 4   | 8     |
| >TP53-N247\NSSCMGGMI   | 39    | >TP53-N247\NSSCMGGM`   | 29  | 10    |
| >TP53-N247\NSSCMGGMI   | 21984 | >TP53-N247\NSSCMGGM`   | 373 | 21611 |
| >TP53-N247\NSSCMGGMI   | 3920  | >TP53-N247\NSSCMGGM`   | 19  | 3901  |
| >TP53-N247\CNSSCMGGN   | 31450 | >TP53-N247\CNSSCMGGN   | 259 | 31191 |
| >TP53-N247\CNSSCMGGN   | 29333 | >TP53-N247\CNSSCMGGN   | 269 | 29064 |
| >TP53-N247\CNSSCMGGN   | 876   | >TP53-N247\CNSSCMGGN   | 304 | 572   |
| >TP53-N247\CNSSCMGGN   | 639   | >TP53-N247\CNSSCMGGN   | 136 | 503   |
| >TP53-N263[ NLLGRNSFEV | 29    | >TP53-N263[ DLLGRNSFEV | 159 | 130   |
| >TP53-N263[ NLLGRNSFEV | 89    | >TP53-N263[ DLLGRNSFEV | 445 | 356   |
| >TP53-N263[ NLLGRNSFEV | 94    | >TP53-N263[ DLLGRNSFEV | 433 | 339   |
| >TP53-N263[ NLLGRNSFEV | 137   | >TP53-N263[ DLLGRNSFEV | 643 | 506   |
| >TP53-N263[ NLLGRNSFEV | 3     | >TP53-N263[ DLLGRNSFEV | 8   | 5     |
| >TP53-N263[ NLLGRNSFEV | 5     | >TP53-N263[ DLLGRNSFEV | 36  | 31    |
| >TP53-N263[ NLLGRNSFEV | 7     | >TP53-N263[ DLLGRNSFEV | 9   | 2     |
| >TP53-N263[ NLLGRNSFEV | 3     | >TP53-N263[ DLLGRNSFEV | 5   | 2     |
| >TP53-N263[ NLLGRNSFEV | 3     | >TP53-N263[ DLLGRNSFEV | 4   | 1     |
| >TP53-N263[ NLLGRNSFEV | 109   | >TP53-N263[ DLLGRNSFEV | 25  | 84    |
| >TP53-N263[ NLLGRNSFEV | 309   | >TP53-N263[ DLLGRNSFEV | 267 | 42    |
| >TP53-N263[ NLLGRNSFEV | 52    | >TP53-N263[ DLLGRNSFEV | 58  | 6     |

|                         |       |                         |      |       |
|-------------------------|-------|-------------------------|------|-------|
| >TP53-N263I NLLGRNSF    | 65    | >TP53-N263I DLLGRNSF    | 250  | 185   |
| >TP53-N263I NLLGRNSF    | 418   | >TP53-N263I DLLGRNSF    | 1353 | 935   |
| >TP53-N263I NLLGRNSFEV  | 195   | >TP53-N263I DLLGRNSFEV  | 784  | 589   |
| >TP53-N263I GNLLGRNSF   | 14423 | >TP53-N263I GDLLGRNSF   | 277  | 14146 |
| >TP53-N263I GNLLGRNSFE  | 17064 | >TP53-N263I GDLLGRNSFE  | 418  | 16646 |
| >TP53-N263I GNLLGRNSFE  | 3100  | >TP53-N263I GDLLGRNSFE  | 135  | 2965  |
| >TP53-N263I GNLLGRNSFE  | 6865  | >TP53-N263I GDLLGRNSFE  | 191  | 6674  |
| >TP53-N263I SGNLLGRNSF  | 311   | >TP53-N263I SGDLLGRNSF  | 548  | 237   |
| >TP53-N263I SSGNLLGRNS  | 245   | >TP53-N263I SSGDLLGRNS  | 272  | 27    |
| >TP53-N263I SSGNLLGRNS  | 390   | >TP53-N263I SSGDLLGRNS  | 177  | 213   |
| >TP53-N263I SSGNLLGRNS  | 32    | >TP53-N263I SSGDLLGRNS  | 55   | 23    |
| >TP53-N263I SSGNLLGR    | 357   | >TP53-N263I SSGDLLGR    | 511  | 154   |
| >TP53-N263I DSSGNLLGR   | 68    | >TP53-N263I DSSGDLLGR   | 145  | 77    |
| >TP53-N263I EDSSGNLL    | 273   | >TP53-N263I EDSSGDLL    | 3147 | 2874  |
| >TP53-N263I LEDSSGNL    | 33    | >TP53-N263I LEDSSGDLL   | 40   | 7     |
| >TP53-N263I LEDSSGNL    | 20    | >TP53-N263I LEDSSGDLL   | 11   | 9     |
| >TP53-N263I TLEDSSGNL   | 62    | >TP53-N263I TLEDSSGDLL  | 562  | 500   |
| >TP53-N263I TLEDSSGNLL  | 133   | >TP53-N263I TLEDSSGDLL  | 151  | 18    |
| >TP53-N263I TLEDSSGNL   | 24    | >TP53-N263I TLEDSSGDLL  | 54   | 30    |
| >TP53-N263I TLEDSSGNLL  | 23    | >TP53-N263I TLEDSSGDLL  | 37   | 14    |
| >TP53-N263I ITLEDSSGNL  | 495   | >TP53-N263I ITLEDSSGDLL | 1492 | 997   |
| >TP53-N263I ITLEDSSGNL  | 471   | >TP53-N263I ITLEDSSGDLL | 1399 | 928   |
| >TP53-N263I ITLEDSSGNL  | 371   | >TP53-N263I ITLEDSSGDLL | 1373 | 1002  |
| >TP53-N263I ITLEDSSGNLL | 270   | >TP53-N263I ITLEDSSGDLL | 289  | 19    |
| >TP53-N263I ITLEDSSGNL  | 302   | >TP53-N263I ITLEDSSGDLL | 1054 | 752   |
| >TP53-N263I ITLEDSSGNLL | 339   | >TP53-N263I ITLEDSSGDLL | 256  | 83    |
| >TP53-N263I ITLEDSSGNL  | 137   | >TP53-N263I ITLEDSSGDLL | 838  | 701   |
| >TP53-N263I ITLEDSSGNLL | 354   | >TP53-N263I ITLEDSSGDLL | 541  | 187   |
| >TP53-N263I ITLEDSSGNL  | 6     | >TP53-N263I ITLEDSSGDLL | 12   | 6     |
| >TP53-N263I ITLEDSSGNLL | 18    | >TP53-N263I ITLEDSSGDLL | 20   | 2     |
| >TP53-N263I ITLEDSSGNLL | 259   | >TP53-N263I ITLEDSSGDLL | 554  | 295   |
| >TP53-N263I ITLEDSSGNL  | 341   | >TP53-N263I ITLEDSSGDLL | 573  | 232   |
| >TP53-N263I ITLEDSSGNLL | 30    | >TP53-N263I ITLEDSSGDLL | 49   | 19    |
| >TP53-N263I ITLEDSSGNLL | 604   | >TP53-N263I ITLEDSSGDLL | 476  | 128   |
| >TP53-N263I NLLGRNSFEV  | 29    | >TP53-N263I HLLGRNSFEV  | 26   | 3     |
| >TP53-N263I NLLGRNSFEV  | 89    | >TP53-N263I HLLGRNSFEV  | 76   | 13    |
| >TP53-N263I NLLGRNSFEV  | 94    | >TP53-N263I HLLGRNSFEV  | 131  | 37    |
| >TP53-N263I NLLGRNSFEV  | 137   | >TP53-N263I HLLGRNSFEV  | 158  | 21    |
| >TP53-N263I NLLGRNSFEV  | 3     | >TP53-N263I HLLGRNSFEV  | 2    | 1     |
| >TP53-N263I NLLGRNSFEV  | 5     | >TP53-N263I HLLGRNSFEV  | 4    | 1     |
| >TP53-N263I NLLGRNSFEV  | 7     | >TP53-N263I HLLGRNSFEV  | 5    | 2     |
| >TP53-N263I NLLGRNSFEV  | 3     | >TP53-N263I HLLGRNSFEV  | 3    | 0     |
| >TP53-N263I NLLGRNSFEV  | 3     | >TP53-N263I HLLGRNSFEV  | 2    | 1     |

|                        |      |                        |     |      |
|------------------------|------|------------------------|-----|------|
| >TP53-N263†NLLGRNSFEV  | 502  | >TP53-N263†HLLGRNSFEV  | 42  | 460  |
| >TP53-N263†NLLGRNSF    | 826  | >TP53-N263†HLLGRNSF    | 84  | 742  |
| >TP53-N263†NLLGRNSFEV  | 109  | >TP53-N263†HLLGRNSFEV  | 72  | 37   |
| >TP53-N263†NLLGRNSFEV  | 309  | >TP53-N263†HLLGRNSFEV  | 288 | 21   |
| >TP53-N263†NLLGRNSFEV  | 52   | >TP53-N263†HLLGRNSFEV  | 57  | 5    |
| >TP53-N263†NLLGRNSF    | 968  | >TP53-N263†HLLGRNSF    | 300 | 668  |
| >TP53-N263†NLLGRNSF    | 65   | >TP53-N263†HLLGRNSF    | 45  | 20   |
| >TP53-N263†NLLGRNSF    | 418  | >TP53-N263†HLLGRNSF    | 80  | 338  |
| >TP53-N263†NLLGRNSFEV  | 195  | >TP53-N263†HLLGRNSFEV  | 52  | 143  |
| >TP53-N263†GNLLGRNSF   | 1249 | >TP53-N263†GHLLGRNSF   | 188 | 1061 |
| >TP53-N263†SGNLLGRNSF  | 311  | >TP53-N263†SGHLLGRNSF  | 192 | 119  |
| >TP53-N263†SSGNLLGRNS  | 245  | >TP53-N263†SSGHLLGRNS  | 240 | 5    |
| >TP53-N263†SSGNLLGRNS  | 701  | >TP53-N263†SSGHLLGRNS  | 461 | 240  |
| >TP53-N263†SSGNLLGRNS  | 390  | >TP53-N263†SSGHLLGRNS  | 193 | 197  |
| >TP53-N263†SSGNLLGRNS  | 32   | >TP53-N263†SSGHLLGRNS  | 52  | 20   |
| >TP53-N263†SSGNLLGR    | 357  | >TP53-N263†SSGHLLGR    | 295 | 62   |
| >TP53-N263†DSSGNLLGR   | 664  | >TP53-N263†DSSGHLLGR   | 253 | 411  |
| >TP53-N263†DSSGNLLGR   | 68   | >TP53-N263†DSSGHLLGR   | 100 | 32   |
| >TP53-N263†EDSSGNLL    | 273  | >TP53-N263†EDSSGHLL    | 229 | 44   |
| >TP53-N263†LEDSSGNL    | 727  | >TP53-N263†LEDSSGHL    | 386 | 341  |
| >TP53-N263†LEDSSGNLL   | 745  | >TP53-N263†LEDSSGHLL   | 463 | 282  |
| >TP53-N263†LEDSSGNL    | 33   | >TP53-N263†LEDSSGHL    | 32  | 1    |
| >TP53-N263†LEDSSGNLL   | 20   | >TP53-N263†LEDSSGHLL   | 10  | 10   |
| >TP53-N263†TLEDSSGNL   | 62   | >TP53-N263†TLEDSSGHL   | 108 | 46   |
| >TP53-N263†TLEDSSGNLL  | 133  | >TP53-N263†TLEDSSGHLL  | 106 | 27   |
| >TP53-N263†TLEDSSGNLL  | 1674 | >TP53-N263†TLEDSSGHLL  | 472 | 1202 |
| >TP53-N263†TLEDSSGNL   | 947  | >TP53-N263†TLEDSSGHL   | 395 | 552  |
| >TP53-N263†TLEDSSGNLL  | 736  | >TP53-N263†TLEDSSGHLL  | 194 | 542  |
| >TP53-N263†TLEDSSGNL   | 24   | >TP53-N263†TLEDSSGHL   | 20  | 4    |
| >TP53-N263†TLEDSSGNLL  | 23   | >TP53-N263†TLEDSSGHLL  | 8   | 15   |
| >TP53-N263†ITLEDSSGNL  | 495  | >TP53-N263†ITLEDSSGHL  | 770 | 275  |
| >TP53-N263†ITLEDSSGNLL | 536  | >TP53-N263†ITLEDSSGHLL | 431 | 105  |
| >TP53-N263†ITLEDSSGNL  | 471  | >TP53-N263†ITLEDSSGHL  | 881 | 410  |
| >TP53-N263†ITLEDSSGNL  | 371  | >TP53-N263†ITLEDSSGHL  | 507 | 136  |
| >TP53-N263†ITLEDSSGNLL | 270  | >TP53-N263†ITLEDSSGHLL | 135 | 135  |
| >TP53-N263†ITLEDSSGNL  | 302  | >TP53-N263†ITLEDSSGHL  | 260 | 42   |
| >TP53-N263†ITLEDSSGNLL | 339  | >TP53-N263†ITLEDSSGHLL | 84  | 255  |
| >TP53-N263†ITLEDSSGNLL | 1053 | >TP53-N263†ITLEDSSGHLL | 361 | 692  |
| >TP53-N263†ITLEDSSGNL  | 137  | >TP53-N263†ITLEDSSGHL  | 210 | 73   |
| >TP53-N263†ITLEDSSGNLL | 354  | >TP53-N263†ITLEDSSGHLL | 99  | 255  |
| >TP53-N263†ITLEDSSGN   | 2207 | >TP53-N263†ITLEDSSGH   | 76  | 2131 |
| >TP53-N263†ITLEDSSGNL  | 6    | >TP53-N263†ITLEDSSGHL  | 8   | 2    |
| >TP53-N263†ITLEDSSGNLL | 18   | >TP53-N263†ITLEDSSGHLL | 8   | 10   |

|                        |       |                        |     |       |
|------------------------|-------|------------------------|-----|-------|
| >TP53-N263IITLEDSSGNLL | 259   | >TP53-N263IITLEDSSGHLL | 159 | 100   |
| >TP53-N263IITLEDSSGN   | 1858  | >TP53-N263IITLEDSSGH   | 165 | 1693  |
| >TP53-N263IITLEDSSGNL  | 341   | >TP53-N263IITLEDSSGHL  | 871 | 530   |
| >TP53-N263IITLEDSSGNLL | 30    | >TP53-N263IITLEDSSGHLL | 48  | 18    |
| >TP53-N263IILLGRNSFEV  | 29    | >TP53-N263IILLGRNSFEV  | 16  | 13    |
| >TP53-N263IILLGRNSFEV  | 89    | >TP53-N263IILLGRNSFEV  | 39  | 50    |
| >TP53-N263IILLGRNSFEV  | 94    | >TP53-N263IILLGRNSFEV  | 50  | 44    |
| >TP53-N263IILLGRNSFEV  | 137   | >TP53-N263IILLGRNSFEV  | 68  | 69    |
| >TP53-N263IILLGRNSFEV  | 3     | >TP53-N263IILLGRNSFEV  | 2   | 1     |
| >TP53-N263IILLGRNSFEV  | 5     | >TP53-N263IILLGRNSFEV  | 4   | 1     |
| >TP53-N263IILLGRNSFEV  | 7     | >TP53-N263IILLGRNSFEV  | 5   | 2     |
| >TP53-N263IILLGRNSFEV  | 3     | >TP53-N263IILLGRNSFEV  | 2   | 1     |
| >TP53-N263IILLGRNSFEV  | 3     | >TP53-N263IILLGRNSFEV  | 2   | 1     |
| >TP53-N263IILLGRNSFEV  | 502   | >TP53-N263IILLGRNSFEVF | 89  | 413   |
| >TP53-N263IILLGRNSF    | 826   | >TP53-N263IILLGRNSF    | 128 | 698   |
| >TP53-N263IILLGRNSFEV  | 109   | >TP53-N263IILLGRNSFEVF | 173 | 64    |
| >TP53-N263IILLGRNSFEV  | 309   | >TP53-N263IILLGRNSFEVF | 665 | 356   |
| >TP53-N263IILLGRNSFEV  | 52    | >TP53-N263IILLGRNSFEV  | 462 | 410   |
| >TP53-N263IILLGRNSF    | 968   | >TP53-N263IILLGRNSF    | 224 | 744   |
| >TP53-N263IILLGRNSF    | 65    | >TP53-N263IILLGRNSF    | 101 | 36    |
| >TP53-N263IILLGRNSF    | 418   | >TP53-N263IILLGRNSF    | 35  | 383   |
| >TP53-N263IILLGRNSFEV  | 195   | >TP53-N263IILLGRNSFEVF | 159 | 36    |
| >TP53-N263IGNLLGRNSFE  | 15033 | >TP53-N263IGILLGRNSFE\ | 200 | 14833 |
| >TP53-N263IGNLLGRNSFE  | 6785  | >TP53-N263IGILLGRNSFE\ | 40  | 6745  |
| >TP53-N263IGNLLGRNSFE  | 7473  | >TP53-N263IGILLGRNSFE\ | 58  | 7415  |
| >TP53-N263IGNLLGRNSFE  | 8741  | >TP53-N263IGILLGRNSFE\ | 64  | 8677  |
| >TP53-N263IGNLLGRNSFE  | 4945  | >TP53-N263IGILLGRNSFE\ | 23  | 4922  |
| >TP53-N263IGNLLGRNSFE  | 17594 | >TP53-N263IGILLGRNSFE\ | 119 | 17475 |
| >TP53-N263IGNLLGRNSFE  | 14500 | >TP53-N263IGILLGRNSFE\ | 11  | 14489 |
| >TP53-N263IGNLLGRNSF   | 525   | >TP53-N263IGILLGRNSF   | 471 | 54    |
| >TP53-N263IITILEDSSGN  | 19964 | >TP53-N263IITILEDSSGI  | 272 | 19692 |
| >TP53-N263IITILEDSSGN  | 13872 | >TP53-N263IITILEDSSGI  | 74  | 13798 |
| >TP53-N263ISGNLLGRNSF  | 311   | >TP53-N263ISGILLGRNSF  | 136 | 175   |
| >TP53-N263ISSGNLLGRNS  | 245   | >TP53-N263ISSGILLGRNSF | 565 | 320   |
| >TP53-N263ISSGNLLGRNS  | 390   | >TP53-N263ISSGILLGRNSF | 131 | 259   |
| >TP53-N263ISSGNLLGRNS  | 32    | >TP53-N263ISSGILLGRNSF | 91  | 59    |
| >TP53-N263ISSGNLLGR    | 357   | >TP53-N263ISSGILLGR    | 445 | 88    |
| >TP53-N263IDSSGNLLGR   | 664   | >TP53-N263IDSSGILLGR   | 102 | 562   |
| >TP53-N263IDSSGNLLGR   | 68    | >TP53-N263IDSSGILLGR   | 17  | 51    |
| >TP53-N263IEDSSGNLL    | 273   | >TP53-N263IEDSSGILL    | 538 | 265   |
| >TP53-N263ILEDSSGNL    | 727   | >TP53-N263ILEDSSGIL    | 65  | 662   |
| >TP53-N263ILEDSSGNL    | 33    | >TP53-N263ILEDSSGIL    | 13  | 20    |
| >TP53-N263ILEDSSGNLL   | 20    | >TP53-N263ILEDSSGILL   | 8   | 12    |



|                         |       |                         |     |       |
|-------------------------|-------|-------------------------|-----|-------|
| >TP53-N263I LEDSSGNLL   | 816   | >TP53-N263I LEDSSGILL   | 451 | 365   |
| >TP53-N263I TLEDSSGN    | 15196 | >TP53-N263I TLEDSSGI    | 146 | 15050 |
| >TP53-N263I TLEDSSGNL   | 62    | >TP53-N263I TLEDSSGIL   | 200 | 138   |
| >TP53-N263I TLEDSSGNLL  | 133   | >TP53-N263I TLEDSSGILL  | 91  | 42    |
| >TP53-N263I TLEDSSGN    | 20042 | >TP53-N263I TLEDSSGI    | 173 | 19869 |
| >TP53-N263I TLEDSSGN    | 18315 | >TP53-N263I TLEDSSGI    | 324 | 17991 |
| >TP53-N263I TLEDSSGN    | 22274 | >TP53-N263I TLEDSSGI    | 106 | 22168 |
| >TP53-N263I TLEDSSGNLL  | 736   | >TP53-N263I TLEDSSGILL  | 495 | 241   |
| >TP53-N263I TLEDSSGN    | 10524 | >TP53-N263I TLEDSSGI    | 24  | 10500 |
| >TP53-N263I TLEDSSGNL   | 24    | >TP53-N263I TLEDSSGIL   | 61  | 37    |
| >TP53-N263I TLEDSSGNLL  | 23    | >TP53-N263I TLEDSSGILL  | 18  | 5     |
| >TP53-N263I ITLEDSSGNL  | 495   | >TP53-N263I ITLEDSSGIL  | 923 | 428   |
| >TP53-N263I ITLEDSSGNL  | 471   | >TP53-N263I ITLEDSSGIL  | 954 | 483   |
| >TP53-N263I ITLEDSSGN   | 12319 | >TP53-N263I ITLEDSSGI   | 86  | 12233 |
| >TP53-N263I ITLEDSSGNL  | 371   | >TP53-N263I ITLEDSSGIL  | 746 | 375   |
| >TP53-N263I ITLEDSSGNLL | 270   | >TP53-N263I ITLEDSSGILL | 162 | 108   |
| >TP53-N263I ITLEDSSGN   | 10508 | >TP53-N263I ITLEDSSGI   | 53  | 10455 |
| >TP53-N263I ITLEDSSGNL  | 302   | >TP53-N263I ITLEDSSGIL  | 786 | 484   |
| >TP53-N263I ITLEDSSGNLL | 339   | >TP53-N263I ITLEDSSGILL | 137 | 202   |
| >TP53-N263I ITLEDSSGN   | 18560 | >TP53-N263I ITLEDSSGI   | 132 | 18428 |
| >TP53-N263I ITLEDSSGN   | 10846 | >TP53-N263I ITLEDSSGI   | 38  | 10808 |
| >TP53-N263I ITLEDSSGNL  | 137   | >TP53-N263I ITLEDSSGIL  | 488 | 351   |
| >TP53-N263I ITLEDSSGNLL | 354   | >TP53-N263I ITLEDSSGILL | 233 | 121   |
| >TP53-N263I ITLEDSSGN   | 2207  | >TP53-N263I ITLEDSSGI   | 10  | 2197  |
| >TP53-N263I ITLEDSSGNL  | 6     | >TP53-N263I ITLEDSSGIL  | 10  | 4     |
| >TP53-N263I ITLEDSSGNLL | 18    | >TP53-N263I ITLEDSSGILL | 9   | 9     |
| >TP53-N263I ITLEDSSGNLL | 259   | >TP53-N263I ITLEDSSGILL | 275 | 16    |
| >TP53-N263I ITLEDSSGN   | 1858  | >TP53-N263I ITLEDSSGI   | 154 | 1704  |
| >TP53-N263I ITLEDSSGNL  | 341   | >TP53-N263I ITLEDSSGIL  | 205 | 136   |
| >TP53-N263I ITLEDSSGNLL | 30    | >TP53-N263I ITLEDSSGILL | 53  | 23    |
| >TP53-N263I ITLEDSSGN   | 31805 | >TP53-N263I ITLEDSSGI   | 30  | 31775 |
| >TP53-N263I ITLEDSSGNLL | 604   | >TP53-N263I ITLEDSSGILL | 424 | 180   |
| >TP53-N263I IITLEDSSGN  | 25029 | >TP53-N263I IITLEDSSGI  | 485 | 24544 |
| >TP53-N263I ILLGRNSFEV  | 29    | >TP53-N263I KLLGRNSFEV  | 17  | 12    |
| >TP53-N263I ILLGRNSFEV  | 89    | >TP53-N263I KLLGRNSFEV  | 41  | 48    |
| >TP53-N263I ILLGRNSFEV  | 94    | >TP53-N263I KLLGRNSFEV  | 60  | 34    |
| >TP53-N263I ILLGRNSFEV  | 137   | >TP53-N263I KLLGRNSFEV  | 69  | 68    |
| >TP53-N263I ILLGRNSFEV  | 3     | >TP53-N263I KLLGRNSFEV  | 2   | 1     |
| >TP53-N263I ILLGRNSFEV  | 5     | >TP53-N263I KLLGRNSFEV  | 3   | 2     |
| >TP53-N263I ILLGRNSFEV  | 7     | >TP53-N263I KLLGRNSFEV  | 4   | 3     |
| >TP53-N263I ILLGRNSFEV  | 3     | >TP53-N263I KLLGRNSFEV  | 3   | 0     |
| >TP53-N263I ILLGRNSFEV  | 3     | >TP53-N263I KLLGRNSFEV  | 2   | 1     |
| >TP53-N263I ILLGRNSFEV  | 7167  | >TP53-N263I KLLGRNSFEV  | 356 | 6811  |

|                        |       |                        |      |       |
|------------------------|-------|------------------------|------|-------|
| >TP53-N263†NLLGRNSFEV  | 502   | >TP53-N263†KLLGRNSFEV  | 20   | 482   |
| >TP53-N263†NLLGRNSF    | 826   | >TP53-N263†KLLGRNSF    | 11   | 815   |
| >TP53-N263†NLLGRNSFEV  | 6133  | >TP53-N263†KLLGRNSFEV  | 207  | 5926  |
| >TP53-N263†NLLGRNSFEV  | 109   | >TP53-N263†KLLGRNSFEV  | 2581 | 2472  |
| >TP53-N263†NLLGRNSFEV  | 309   | >TP53-N263†KLLGRNSFEV  | 5044 | 4735  |
| >TP53-N263†NLLGRNSFEV  | 52    | >TP53-N263†KLLGRNSFEV  | 757  | 705   |
| >TP53-N263†NLLGRNSF    | 968   | >TP53-N263†KLLGRNSF    | 286  | 682   |
| >TP53-N263†NLLGRNSF    | 65    | >TP53-N263†KLLGRNSF    | 350  | 285   |
| >TP53-N263†NLLGRNSF    | 418   | >TP53-N263†KLLGRNSF    | 38   | 380   |
| >TP53-N263†NLLGRNSF    | 9998  | >TP53-N263†KLLGRNSF    | 492  | 9506  |
| >TP53-N263†NLLGRNSFEV  | 195   | >TP53-N263†KLLGRNSFEV  | 31   | 164   |
| >TP53-N263†GNLLGRNSF   | 1249  | >TP53-N263†GKLLGRNSF   | 14   | 1235  |
| >TP53-N263†TIITLEDSSGN | 23476 | >TP53-N263†TIITLEDSSGK | 50   | 23426 |
| >TP53-N263†TIITLEDSSGN | 11678 | >TP53-N263†TIITLEDSSGK | 37   | 11641 |
| >TP53-N263†SGNLLGRNSF  | 311   | >TP53-N263†SGKLLGRNSF  | 218  | 93    |
| >TP53-N263†SSGNLLGRNS  | 245   | >TP53-N263†SSGKLLGRNS  | 316  | 71    |
| >TP53-N263†SSGNLLGRNS  | 390   | >TP53-N263†SSGKLLGRNS  | 462  | 72    |
| >TP53-N263†SSGNLLGRNS  | 32    | >TP53-N263†SSGKLLGRNS  | 42   | 10    |
| >TP53-N263†SSGNLLGR    | 357   | >TP53-N263†SSGKLLGR    | 527  | 170   |
| >TP53-N263†DSSGNLLGR   | 664   | >TP53-N263†DSSGKLLGR   | 199  | 465   |
| >TP53-N263†DSSGNLLGR   | 68    | >TP53-N263†DSSGKLLGR   | 179  | 111   |
| >TP53-N263†EDSSGNLL    | 273   | >TP53-N263†EDSSGKLL    | 85   | 188   |
| >TP53-N263†LEDSSGNLL   | 745   | >TP53-N263†LEDSSGKLL   | 226  | 519   |
| >TP53-N263†LEDSSGNL    | 33    | >TP53-N263†LEDSSGKL    | 38   | 5     |
| >TP53-N263†LEDSSGNLL   | 20    | >TP53-N263†LEDSSGKLL   | 40   | 20    |
| >TP53-N263†TLEDSSGNL   | 62    | >TP53-N263†TLEDSSGKL   | 150  | 88    |
| >TP53-N263†TLEDSSGNLL  | 133   | >TP53-N263†TLEDSSGKLL  | 621  | 488   |
| >TP53-N263†TLEDSSGNL   | 24    | >TP53-N263†TLEDSSGKL   | 23   | 1     |
| >TP53-N263†TLEDSSGNLL  | 23    | >TP53-N263†TLEDSSGKLL  | 35   | 12    |
| >TP53-N263†ITLEDSSGNL  | 495   | >TP53-N263†ITLEDSSGKL  | 727  | 232   |
| >TP53-N263†ITLEDSSGNL  | 471   | >TP53-N263†ITLEDSSGKL  | 939  | 468   |
| >TP53-N263†ITLEDSSGNL  | 371   | >TP53-N263†ITLEDSSGKL  | 843  | 472   |
| >TP53-N263†ITLEDSSGNLL | 270   | >TP53-N263†ITLEDSSGKLL | 956  | 686   |
| >TP53-N263†ITLEDSSGNL  | 302   | >TP53-N263†ITLEDSSGKL  | 296  | 6     |
| >TP53-N263†ITLEDSSGNLL | 339   | >TP53-N263†ITLEDSSGKLL | 479  | 140   |
| >TP53-N263†ITLEDSSGN   | 20539 | >TP53-N263†ITLEDSSGK   | 209  | 20330 |
| >TP53-N263†ITLEDSSGN   | 25567 | >TP53-N263†ITLEDSSGK   | 68   | 25499 |
| >TP53-N263†ITLEDSSGN   | 21245 | >TP53-N263†ITLEDSSGK   | 222  | 21023 |
| >TP53-N263†ITLEDSSGNL  | 137   | >TP53-N263†ITLEDSSGKL  | 253  | 116   |
| >TP53-N263†ITLEDSSGNLL | 354   | >TP53-N263†ITLEDSSGKLL | 882  | 528   |
| >TP53-N263†ITLEDSSGNL  | 6     | >TP53-N263†ITLEDSSGKL  | 6    | 0     |
| >TP53-N263†ITLEDSSGNLL | 18    | >TP53-N263†ITLEDSSGKLL | 8    | 10    |
| >TP53-N263†ITLEDSSGNLL | 259   | >TP53-N263†ITLEDSSGKLL | 623  | 364   |

|                        |       |                        |     |       |
|------------------------|-------|------------------------|-----|-------|
| >TP53-N263FITLEDSSGNL  | 341   | >TP53-N263FITLEDSSGKL  | 194 | 147   |
| >TP53-N263FITLEDSSGNLL | 30    | >TP53-N263FITLEDSSGKLL | 50  | 20    |
| >TP53-N263FITLEDSSGNLL | 604   | >TP53-N263FITLEDSSGKLL | 431 | 173   |
| >TP53-N263FITLEDSSGN   | 35289 | >TP53-N263FITLEDSSGK   | 325 | 34964 |
| >TP53-N268FNSFEVRVCA   | 10009 | >TP53-N268FNSFEVRVCA   | 417 | 9592  |
| >TP53-N268FNSFEVRVCA   | 21    | >TP53-N268FNSFEVRVCA   | 21  | 0     |
| >TP53-N268FGRNSFEVRV   | 1849  | >TP53-N268FGRFSFEVRV   | 378 | 1471  |
| >TP53-N268FGRNSFEVR    | 405   | >TP53-N268FGRFSFEVR    | 45  | 360   |
| >TP53-N268FGRNSFEVRV   | 631   | >TP53-N268FGRFSFEVRV   | 61  | 570   |
| >TP53-N268FGRNSFEVRVC  | 1232  | >TP53-N268FGRFSFEVRVC  | 114 | 1118  |
| >TP53-N268FGRNSFEVRVC  | 2909  | >TP53-N268FGRFSFEVRVC  | 429 | 2480  |
| >TP53-N268FGRNSFEVRV   | 1117  | >TP53-N268FGRFSFEVRV   | 306 | 811   |
| >TP53-N268FLGRNSFEVR   | 286   | >TP53-N268FLGRFSFEVR   | 290 | 4     |
| >TP53-N268FLLGRNSFEV   | 26    | >TP53-N268FLLGRFSFEV   | 12  | 14    |
| >TP53-N268FLLGRNSFEVR  | 137   | >TP53-N268FLLGRFSFEVR  | 57  | 80    |
| >TP53-N268FLLGRNSFEV   | 16    | >TP53-N268FLLGRFSFEV   | 9   | 7     |
| >TP53-N268FLLGRNSFEVR  | 62    | >TP53-N268FLLGRFSFEVR  | 32  | 30    |
| >TP53-N268FLLGRNSFEV   | 47    | >TP53-N268FLLGRFSFEV   | 32  | 15    |
| >TP53-N268FLLGRNSFEVR  | 214   | >TP53-N268FLLGRFSFEVR  | 154 | 60    |
| >TP53-N268FLLGRNSFEV   | 39    | >TP53-N268FLLGRFSFEV   | 32  | 7     |
| >TP53-N268FLLGRNSFEVR  | 582   | >TP53-N268FLLGRFSFEVR  | 421 | 161   |
| >TP53-N268FLLGRNSFEV   | 2     | >TP53-N268FLLGRFSFEV   | 2   | 0     |
| >TP53-N268FLLGRNSFEVR  | 3     | >TP53-N268FLLGRFSFEVR  | 3   | 0     |
| >TP53-N268FLLGRNSFEV   | 2     | >TP53-N268FLLGRFSFEV   | 3   | 1     |
| >TP53-N268FLLGRNSFEVR  | 7     | >TP53-N268FLLGRFSFEVR  | 11  | 4     |
| >TP53-N268FLLGRNSFEV   | 5     | >TP53-N268FLLGRFSFEV   | 5   | 0     |
| >TP53-N268FLLGRNSFEVR  | 9     | >TP53-N268FLLGRFSFEVR  | 9   | 0     |
| >TP53-N268FLLGRNSFEV   | 2     | >TP53-N268FLLGRFSFEV   | 2   | 0     |
| >TP53-N268FLLGRNSFEVR  | 6     | >TP53-N268FLLGRFSFEVR  | 7   | 1     |
| >TP53-N268FLLGRNSFEV   | 2     | >TP53-N268FLLGRFSFEV   | 2   | 0     |
| >TP53-N268FLLGRNSFEVR  | 2     | >TP53-N268FLLGRFSFEVR  | 2   | 0     |
| >TP53-N268FLLGRNSFEVR  | 429   | >TP53-N268FLLGRFSFEVR  | 140 | 289   |
| >TP53-N268FLLGRNSFEVR  | 1284  | >TP53-N268FLLGRFSFEVR  | 287 | 997   |
| >TP53-N268FLLGRNSFEV   | 425   | >TP53-N268FLLGRFSFEV   | 159 | 266   |
| >TP53-N268FLLGRNSFEVR  | 2135  | >TP53-N268FLLGRFSFEVR  | 316 | 1819  |
| >TP53-N268FLLGRNSFEVR  | 773   | >TP53-N268FLLGRFSFEVR  | 397 | 376   |
| >TP53-N268FNLLGRNSFEV  | 29    | >TP53-N268FNLLGRFSFEV  | 19  | 10    |
| >TP53-N268FNLLGRNSFEV  | 89    | >TP53-N268FNLLGRFSFEV  | 54  | 35    |
| >TP53-N268FNLLGRNSFEV  | 94    | >TP53-N268FNLLGRFSFEV  | 63  | 31    |
| >TP53-N268FNLLGRNSF    | 2963  | >TP53-N268FNLLGRFSF    | 325 | 2638  |
| >TP53-N268FNLLGRNSFEV  | 137   | >TP53-N268FNLLGRFSFEV  | 43  | 94    |
| >TP53-N268FNLLGRNSFEV  | 3     | >TP53-N268FNLLGRFSFEV  | 2   | 1     |
| >TP53-N268FNLLGRNSFEV  | 5     | >TP53-N268FNLLGRFSFEV  | 4   | 1     |

|                        |       |                        |     |       |
|------------------------|-------|------------------------|-----|-------|
| >TP53-N268F NLLGRNSFEV | 7     | >TP53-N268F NLLGRFSFEV | 6   | 1     |
| >TP53-N268F NLLGRNSFEV | 3     | >TP53-N268F NLLGRFSFEV | 3   | 0     |
| >TP53-N268F NLLGRNSFEV | 3     | >TP53-N268F NLLGRFSFEV | 2   | 1     |
| >TP53-N268F NLLGRNSFEV | 502   | >TP53-N268F NLLGRFSFEV | 233 | 269   |
| >TP53-N268F NLLGRNSFEV | 109   | >TP53-N268F NLLGRFSFEV | 59  | 50    |
| >TP53-N268F NLLGRNSFEV | 309   | >TP53-N268F NLLGRFSFEV | 289 | 20    |
| >TP53-N268F NLLGRNSFEV | 52    | >TP53-N268F NLLGRFSFEV | 25  | 27    |
| >TP53-N268F NLLGRNSF   | 501   | >TP53-N268F NLLGRFSF   | 258 | 243   |
| >TP53-N268F NLLGRNSF   | 65    | >TP53-N268F NLLGRFSF   | 129 | 64    |
| >TP53-N268F NLLGRNSF   | 418   | >TP53-N268F NLLGRFSF   | 410 | 8     |
| >TP53-N268F NLLGRNSFEV | 195   | >TP53-N268F NLLGRFSFEV | 115 | 80    |
| >TP53-N268F SGNLLGRNSF | 311   | >TP53-N268F SGNLLGRFSF | 204 | 107   |
| >TP53-N268F SSGNLLGRN  | 31793 | >TP53-N268F SSGNLLGRF  | 466 | 31327 |
| >TP53-N268F SSGNLLGRNS | 974   | >TP53-N268F SSGNLLGRFS | 478 | 496   |
| >TP53-N268F SSGNLLGRNS | 245   | >TP53-N268F SSGNLLGRFS | 260 | 15    |
| >TP53-N268F SSGNLLGRN  | 22930 | >TP53-N268F SSGNLLGRF  | 137 | 22793 |
| >TP53-N268F SSGNLLGRNS | 390   | >TP53-N268F SSGNLLGRFS | 90  | 300   |
| >TP53-N268F SSGNLLGRN  | 4065  | >TP53-N268F SSGNLLGRF  | 15  | 4050  |
| >TP53-N268F SSGNLLGRNS | 32    | >TP53-N268F SSGNLLGRFS | 55  | 23    |
| >TP53-N268F DSSGNLLGRN | 19729 | >TP53-N268F DSSGNLLGRF | 64  | 19665 |
| >TP53-N268F DSSGNLLGRN | 19229 | >TP53-N268F DSSGNLLGRF | 230 | 18999 |
| >TP53-N268F DSSGNLLGRN | 17929 | >TP53-N268F DSSGNLLGRF | 156 | 17773 |
| >TP53-N268F NSFEVRVCA  | 11704 | >TP53-N268F HSFEVRVCA  | 428 | 11276 |
| >TP53-N268F NSFEVRVCA  | 21    | >TP53-N268F HSFEVRVCA  | 24  | 3     |
| >TP53-N268F GRNSFEVR   | 405   | >TP53-N268F GRHSFEVR   | 296 | 109   |
| >TP53-N268F GRNSFEVRV  | 631   | >TP53-N268F GRHSFEVRV  | 447 | 184   |
| >TP53-N268F LGRNSFEVR  | 286   | >TP53-N268F LGRHSFEVR  | 422 | 136   |
| >TP53-N268F LLGRNSFEV  | 26    | >TP53-N268F LLGRHSFEV  | 16  | 10    |
| >TP53-N268F LLGRNSFEVR | 137   | >TP53-N268F LLGRHSFEVR | 81  | 56    |
| >TP53-N268F LLGRNSFEV  | 16    | >TP53-N268F LLGRHSFEV  | 9   | 7     |
| >TP53-N268F LLGRNSFEVR | 62    | >TP53-N268F LLGRHSFEVR | 35  | 27    |
| >TP53-N268F LLGRNSFEV  | 47    | >TP53-N268F LLGRHSFEV  | 12  | 35    |
| >TP53-N268F LLGRNSFEVR | 214   | >TP53-N268F LLGRHSFEVR | 79  | 135   |
| >TP53-N268F LLGRNSFEV  | 39    | >TP53-N268F LLGRHSFEV  | 22  | 17    |
| >TP53-N268F LLGRNSFEVR | 582   | >TP53-N268F LLGRHSFEVR | 403 | 179   |
| >TP53-N268F LLGRNSFEV  | 2     | >TP53-N268F LLGRHSFEV  | 2   | 0     |
| >TP53-N268F LLGRNSFEVR | 3     | >TP53-N268F LLGRHSFEVR | 4   | 1     |
| >TP53-N268F LLGRNSFEV  | 2     | >TP53-N268F LLGRHSFEV  | 3   | 1     |
| >TP53-N268F LLGRNSFEVR | 7     | >TP53-N268F LLGRHSFEVR | 12  | 5     |
| >TP53-N268F LLGRNSFEV  | 5     | >TP53-N268F LLGRHSFEV  | 6   | 1     |
| >TP53-N268F LLGRNSFEVR | 9     | >TP53-N268F LLGRHSFEVR | 11  | 2     |
| >TP53-N268F LLGRNSFEV  | 2     | >TP53-N268F LLGRHSFEV  | 3   | 1     |
| >TP53-N268F LLGRNSFEVR | 6     | >TP53-N268F LLGRHSFEVR | 12  | 6     |

|                        |       |                         |      |       |
|------------------------|-------|-------------------------|------|-------|
| >TP53-N268I LLGRNSFEV  | 2     | >TP53-N268I LLGRHSFEV   | 2    | 0     |
| >TP53-N268I LLGRNSFEVR | 2     | >TP53-N268I LLGRHSFEVR  | 2    | 0     |
| >TP53-N268I LLGRNSFEVR | 429   | >TP53-N268I LLGRHSFEVR  | 265  | 164   |
| >TP53-N268I LLGRNSFEV  | 425   | >TP53-N268I LLGRHSFEV   | 353  | 72    |
| >TP53-N268I NLLGRNSFEV | 29    | >TP53-N268I NLLGRHSFEV  | 29   | 0     |
| >TP53-N268I NLLGRNSFEV | 89    | >TP53-N268I NLLGRHSFEV  | 88   | 1     |
| >TP53-N268I NLLGRNSFEV | 94    | >TP53-N268I NLLGRHSFEV  | 111  | 17    |
| >TP53-N268I NLLGRNSFEV | 137   | >TP53-N268I NLLGRHSFEV  | 149  | 12    |
| >TP53-N268I NLLGRNSFEV | 3     | >TP53-N268I NLLGRHSFEV  | 3    | 0     |
| >TP53-N268I NLLGRNSFEV | 5     | >TP53-N268I NLLGRHSFEV  | 8    | 3     |
| >TP53-N268I NLLGRNSFEV | 7     | >TP53-N268I NLLGRHSFEV  | 7    | 0     |
| >TP53-N268I NLLGRNSFEV | 3     | >TP53-N268I NLLGRHSFEV  | 4    | 1     |
| >TP53-N268I NLLGRNSFEV | 3     | >TP53-N268I NLLGRHSFEV  | 3    | 0     |
| >TP53-N268I NLLGRNSFEV | 502   | >TP53-N268I NLLGRHSFEV  | 244  | 258   |
| >TP53-N268I NLLGRNSFEV | 109   | >TP53-N268I NLLGRHSFEV  | 68   | 41    |
| >TP53-N268I NLLGRNSFEV | 309   | >TP53-N268I NLLGRHSFEV  | 334  | 25    |
| >TP53-N268I NLLGRNSFEV | 52    | >TP53-N268I NLLGRHSFEV  | 51   | 1     |
| >TP53-N268I NLLGRNSF   | 501   | >TP53-N268I NLLGRHSF    | 184  | 317   |
| >TP53-N268I NLLGRNSF   | 65    | >TP53-N268I NLLGRHSF    | 63   | 2     |
| >TP53-N268I NLLGRNSF   | 418   | >TP53-N268I NLLGRHSF    | 469  | 51    |
| >TP53-N268I NLLGRNSFEV | 195   | >TP53-N268I NLLGRHSFEV  | 193  | 2     |
| >TP53-N268I SGNLLGRNSF | 311   | >TP53-N268I SGNLLGRHSF  | 1595 | 1284  |
| >TP53-N268I SSGNLLGRNS | 245   | >TP53-N268I SSGNLLGRHS  | 233  | 12    |
| >TP53-N268I SSGNLLGRNS | 390   | >TP53-N268I SSGNLLGRHS  | 123  | 267   |
| >TP53-N268I SSGNLLGRN  | 4065  | >TP53-N268I SSGNLLGRH   | 269  | 3796  |
| >TP53-N268I SSGNLLGRNS | 32    | >TP53-N268I SSGNLLGRHS  | 59   | 27    |
| >TP53-N268I NSFVVRVCA  | 21    | >TP53-N268I ISFVVRVCA   | 235  | 214   |
| >TP53-N268I RNSFVVRV   | 12477 | >TP53-N268I RISFVVRV    | 207  | 12270 |
| >TP53-N268I RNSFVVRV   | 14349 | >TP53-N268I RISFVVRV    | 84   | 14265 |
| >TP53-N268I RNSFVVRV   | 13510 | >TP53-N268I RISFVVRV    | 93   | 13417 |
| >TP53-N268I RNSFVVRV   | 21592 | >TP53-N268I RISFVVRV    | 45   | 21547 |
| >TP53-N268I EDSSGNLLGR | 27175 | >TP53-N268I EDSSGNLLGR  | 221  | 26954 |
| >TP53-N268I GRNSFVVR   | 405   | >TP53-N268I GRISFVVR    | 195  | 210   |
| >TP53-N268I GRNSFVVRV  | 631   | >TP53-N268I GRISFVVRV   | 290  | 341   |
| >TP53-N268I LGRNSFVVR  | 286   | >TP53-N268I LGRISFVVR   | 312  | 26    |
| >TP53-N268I LLGRNSFEV  | 26    | >TP53-N268I LLGRISFEV   | 15   | 11    |
| >TP53-N268I LLGRNSFEVR | 137   | >TP53-N268I LLGRISFEVRV | 70   | 67    |
| >TP53-N268I LLGRNSFEV  | 16    | >TP53-N268I LLGRISFEV   | 7    | 9     |
| >TP53-N268I LLGRNSFEVR | 62    | >TP53-N268I LLGRISFEVRV | 26   | 36    |
| >TP53-N268I LLGRNSFEV  | 47    | >TP53-N268I LLGRISFEV   | 27   | 20    |
| >TP53-N268I LLGRNSFEVR | 214   | >TP53-N268I LLGRISFEVRV | 138  | 76    |
| >TP53-N268I LLGRNSFEV  | 39    | >TP53-N268I LLGRISFEV   | 31   | 8     |
| >TP53-N268I LLGRNSFEVR | 582   | >TP53-N268I LLGRISFEVRV | 424  | 158   |

|                        |       |                         |     |       |
|------------------------|-------|-------------------------|-----|-------|
| >TP53-N268I LLGRNSFEV  | 2     | >TP53-N268I LLGRISFEV   | 2   | 0     |
| >TP53-N268I LLGRNSFEVR | 3     | >TP53-N268I LLGRISFEVRV | 3   | 0     |
| >TP53-N268I LLGRNSFEV  | 2     | >TP53-N268I LLGRISFEV   | 3   | 1     |
| >TP53-N268I LLGRNSFEVR | 7     | >TP53-N268I LLGRISFEVRV | 10  | 3     |
| >TP53-N268I LLGRNSFEV  | 5     | >TP53-N268I LLGRISFEV   | 5   | 0     |
| >TP53-N268I LLGRNSFEVR | 9     | >TP53-N268I LLGRISFEVRV | 8   | 1     |
| >TP53-N268I LLGRNSFEV  | 2     | >TP53-N268I LLGRISFEV   | 2   | 0     |
| >TP53-N268I LLGRNSFEVR | 6     | >TP53-N268I LLGRISFEVRV | 6   | 0     |
| >TP53-N268I LLGRNSFEV  | 2     | >TP53-N268I LLGRISFEV   | 2   | 0     |
| >TP53-N268I LLGRNSFEVR | 2     | >TP53-N268I LLGRISFEVRV | 2   | 0     |
| >TP53-N268I LLGRNSFEVR | 429   | >TP53-N268I LLGRISFEVR  | 242 | 187   |
| >TP53-N268I LLGRNSFEV  | 425   | >TP53-N268I LLGRISFEV   | 302 | 123   |
| >TP53-N268I NLLGRNSFEV | 29    | >TP53-N268I NLLGRISFEV  | 18  | 11    |
| >TP53-N268I NLLGRNSFEV | 89    | >TP53-N268I NLLGRISFEV  | 48  | 41    |
| >TP53-N268I NLLGRNSFEV | 94    | >TP53-N268I NLLGRISFEV  | 54  | 40    |
| >TP53-N268I NLLGRNSFEV | 137   | >TP53-N268I NLLGRISFEV  | 61  | 76    |
| >TP53-N268I NLLGRNSFEV | 3     | >TP53-N268I NLLGRISFEV  | 2   | 1     |
| >TP53-N268I NLLGRNSFEV | 5     | >TP53-N268I NLLGRISFEV  | 4   | 1     |
| >TP53-N268I NLLGRNSFEV | 7     | >TP53-N268I NLLGRISFEV  | 5   | 2     |
| >TP53-N268I NLLGRNSFEV | 3     | >TP53-N268I NLLGRISFEV  | 2   | 1     |
| >TP53-N268I NLLGRNSFEV | 3     | >TP53-N268I NLLGRISFEV  | 2   | 1     |
| >TP53-N268I NLLGRNSFEV | 502   | >TP53-N268I NLLGRISFEVF | 328 | 174   |
| >TP53-N268I NLLGRNSFEV | 109   | >TP53-N268I NLLGRISFEVF | 90  | 19    |
| >TP53-N268I NLLGRNSFEV | 309   | >TP53-N268I NLLGRISFEVF | 323 | 14    |
| >TP53-N268I NLLGRNSFEV | 52    | >TP53-N268I NLLGRISFEV  | 39  | 13    |
| >TP53-N268I NLLGRNSF   | 65    | >TP53-N268I NLLGRISF    | 131 | 66    |
| >TP53-N268I NLLGRNSF   | 418   | >TP53-N268I NLLGRISF    | 453 | 35    |
| >TP53-N268I NLLGRNSFEV | 195   | >TP53-N268I NLLGRISFEVF | 165 | 30    |
| >TP53-N268I SGNLLGRNSF | 311   | >TP53-N268I SGNLLGRISF  | 134 | 177   |
| >TP53-N268I SSGNLLGRNS | 245   | >TP53-N268I SSGNLLGRISF | 263 | 18    |
| >TP53-N268I SSGNLLGRNS | 390   | >TP53-N268I SSGNLLGRISF | 151 | 239   |
| >TP53-N268I SSGNLLGRN  | 4065  | >TP53-N268I SSGNLLGRI   | 293 | 3772  |
| >TP53-N268I SSGNLLGRNS | 32    | >TP53-N268I SSGNLLGRISF | 72  | 40    |
| >TP53-N268I SSGNLLGRN  | 30891 | >TP53-N268I SSGNLLGRI   | 47  | 30844 |
| >TP53-N268I NSFEVRVCA  | 21    | >TP53-N268I SSFEVRVCA   | 55  | 34    |
| >TP53-N268I RNSFEVRV   | 21543 | >TP53-N268I RSSFEVRV    | 155 | 21388 |
| >TP53-N268I GRNSFEVR   | 405   | >TP53-N268I GRSSFEVR    | 508 | 103   |
| >TP53-N268I LGRNSFEVR  | 286   | >TP53-N268I LGRSSFEVR   | 200 | 86    |
| >TP53-N268I LLGRNSFEV  | 26    | >TP53-N268I LLGRSSFEV   | 21  | 5     |
| >TP53-N268I LLGRNSFEVR | 137   | >TP53-N268I LLGRSSFEVR  | 111 | 26    |
| >TP53-N268I LLGRNSFEV  | 16    | >TP53-N268I LLGRSSFEV   | 13  | 3     |
| >TP53-N268I LLGRNSFEVR | 62    | >TP53-N268I LLGRSSFEVR  | 49  | 13    |
| >TP53-N268I LLGRNSFEV  | 47    | >TP53-N268I LLGRSSFEV   | 29  | 18    |

|                            |     |                             |     |     |
|----------------------------|-----|-----------------------------|-----|-----|
| >TP53-N268 $\S$ LLGRNSFEVR | 214 | >TP53-N268 $\S$ LLGRSSFEVR\ | 149 | 65  |
| >TP53-N268 $\S$ LLGRNSFEV  | 39  | >TP53-N268 $\S$ LLGRSSFEV   | 32  | 7   |
| >TP53-N268 $\S$ LLGRNSFEVR | 582 | >TP53-N268 $\S$ LLGRSSFEVR\ | 487 | 95  |
| >TP53-N268 $\S$ LLGRNSFEV  | 2   | >TP53-N268 $\S$ LLGRSSFEV   | 2   | 0   |
| >TP53-N268 $\S$ LLGRNSFEVR | 3   | >TP53-N268 $\S$ LLGRSSFEVR\ | 4   | 1   |
| >TP53-N268 $\S$ LLGRNSFEV  | 2   | >TP53-N268 $\S$ LLGRSSFEV   | 3   | 1   |
| >TP53-N268 $\S$ LLGRNSFEVR | 7   | >TP53-N268 $\S$ LLGRSSFEVR\ | 10  | 3   |
| >TP53-N268 $\S$ LLGRNSFEV  | 5   | >TP53-N268 $\S$ LLGRSSFEV   | 5   | 0   |
| >TP53-N268 $\S$ LLGRNSFEVR | 9   | >TP53-N268 $\S$ LLGRSSFEVR\ | 9   | 0   |
| >TP53-N268 $\S$ LLGRNSFEV  | 2   | >TP53-N268 $\S$ LLGRSSFEV   | 3   | 1   |
| >TP53-N268 $\S$ LLGRNSFEVR | 6   | >TP53-N268 $\S$ LLGRSSFEVR\ | 8   | 2   |
| >TP53-N268 $\S$ LLGRNSFEV  | 2   | >TP53-N268 $\S$ LLGRSSFEV   | 2   | 0   |
| >TP53-N268 $\S$ LLGRNSFEVR | 2   | >TP53-N268 $\S$ LLGRSSFEVR\ | 2   | 0   |
| >TP53-N268 $\S$ LLGRNSFEVR | 429 | >TP53-N268 $\S$ LLGRSSFEVR  | 426 | 3   |
| >TP53-N268 $\S$ LLGRNSFEV  | 425 | >TP53-N268 $\S$ LLGRSSFEV   | 452 | 27  |
| >TP53-N268 $\S$ NLLGRNSFEV | 29  | >TP53-N268 $\S$ NLLGRSSFEV  | 25  | 4   |
| >TP53-N268 $\S$ NLLGRNSFEV | 89  | >TP53-N268 $\S$ NLLGRSSFEV  | 64  | 25  |
| >TP53-N268 $\S$ NLLGRNSFEV | 94  | >TP53-N268 $\S$ NLLGRSSFEV  | 56  | 38  |
| >TP53-N268 $\S$ NLLGRNSFEV | 137 | >TP53-N268 $\S$ NLLGRSSFEV  | 99  | 38  |
| >TP53-N268 $\S$ NLLGRNSFEV | 3   | >TP53-N268 $\S$ NLLGRSSFEV  | 3   | 0   |
| >TP53-N268 $\S$ NLLGRNSFEV | 5   | >TP53-N268 $\S$ NLLGRSSFEV  | 4   | 1   |
| >TP53-N268 $\S$ NLLGRNSFEV | 7   | >TP53-N268 $\S$ NLLGRSSFEV  | 6   | 1   |
| >TP53-N268 $\S$ NLLGRNSFEV | 3   | >TP53-N268 $\S$ NLLGRSSFEV  | 2   | 1   |
| >TP53-N268 $\S$ NLLGRNSFEV | 3   | >TP53-N268 $\S$ NLLGRSSFEV  | 2   | 1   |
| >TP53-N268 $\S$ NLLGRNSFEV | 502 | >TP53-N268 $\S$ NLLGRSSFEV  | 479 | 23  |
| >TP53-N268 $\S$ NLLGRNSFEV | 109 | >TP53-N268 $\S$ NLLGRSSFEV  | 127 | 18  |
| >TP53-N268 $\S$ NLLGRNSFEV | 309 | >TP53-N268 $\S$ NLLGRSSFEV  | 334 | 25  |
| >TP53-N268 $\S$ NLLGRNSFEV | 52  | >TP53-N268 $\S$ NLLGRSSFEV  | 44  | 8   |
| >TP53-N268 $\S$ NLLGRNSF   | 501 | >TP53-N268 $\S$ NLLGRSSF    | 271 | 230 |
| >TP53-N268 $\S$ NLLGRNSF   | 968 | >TP53-N268 $\S$ NLLGRSSF    | 317 | 651 |
| >TP53-N268 $\S$ NLLGRNSF   | 65  | >TP53-N268 $\S$ NLLGRSSF    | 37  | 28  |
| >TP53-N268 $\S$ NLLGRNSF   | 418 | >TP53-N268 $\S$ NLLGRSSF    | 209 | 209 |
| >TP53-N268 $\S$ NLLGRNSFEV | 195 | >TP53-N268 $\S$ NLLGRSSFEV  | 215 | 20  |
| >TP53-N268 $\S$ GNLLGRNSF  | 525 | >TP53-N268 $\S$ GNLLGRSSF   | 38  | 487 |
| >TP53-N268 $\S$ SGNLLGRNSF | 311 | >TP53-N268 $\S$ SGNLLGRSSF  | 197 | 114 |
| >TP53-N268 $\S$ SSGNLLGRNS | 245 | >TP53-N268 $\S$ SSGNLLGRSS  | 136 | 109 |
| >TP53-N268 $\S$ SSGNLLGRNS | 701 | >TP53-N268 $\S$ SSGNLLGRSS  | 397 | 304 |
| >TP53-N268 $\S$ SSGNLLGRNS | 390 | >TP53-N268 $\S$ SSGNLLGRSS  | 94  | 296 |
| >TP53-N268 $\S$ SSGNLLGRNS | 32  | >TP53-N268 $\S$ SSGNLLGRSS  | 9   | 23  |
| >TP53-N288  RTEEENLRK      | 88  | >TP53-N288  RTEEEDLRK       | 236 | 148 |
| >TP53-N288  RTEEENLRK      | 126 | >TP53-N288  RTEEEDLRK       | 797 | 671 |
| >TP53-N288  RTEEENLRKK     | 174 | >TP53-N288  RTEEEDLRKK      | 945 | 771 |
| >TP53-N288  RTEEENLR       | 242 | >TP53-N288  RTEEEDLR        | 875 | 633 |

|                        |       |                         |     |       |
|------------------------|-------|-------------------------|-----|-------|
| >TP53-N288I RTEEENLR   | 188   | >TP53-N288I RTEEEDLR    | 235 | 47    |
| >TP53-N288I RTEEENLR   | 456   | >TP53-N288I RTEEEDLR    | 699 | 243   |
| >TP53-N288I RRTEEENL   | 171   | >TP53-N288I RRTEEEDL    | 590 | 419   |
| >TP53-N288I RRTEEENLR  | 424   | >TP53-N288I RRTEEEDLR   | 424 | 0     |
| >TP53-N288I RRTEEENLRK | 34    | >TP53-N288I RRTEEEDLRK  | 27  | 7     |
| >TP53-N288I RRTEEENLRK | 71    | >TP53-N288I RRTEEEDLRK  | 77  | 6     |
| >TP53-N288I RRTEEENL   | 66    | >TP53-N288I RRTEEEDL    | 69  | 3     |
| >TP53-N288I RRTEEENLRK | 383   | >TP53-N288I RRTEEEDLRK  | 244 | 139   |
| >TP53-N288I RRTEEENL   | 94    | >TP53-N288I RRTEEEDL    | 185 | 91    |
| >TP53-N288I RRTEEENLRK | 163   | >TP53-N288I RRTEEEDLRK  | 120 | 43    |
| >TP53-N288I GRDRRTEEEN | 446   | >TP53-N288I GRDRRTEEEEL | 705 | 259   |
| >TP53-N288I NLRKKGEPHF | 11887 | >TP53-N288I KLRKKGEPHF  | 320 | 11567 |
| >TP53-N288I RTEEENLRK  | 88    | >TP53-N288I RTEEEKLRK   | 140 | 52    |
| >TP53-N288I RTEEENLRK  | 126   | >TP53-N288I RTEEEKLRK   | 368 | 242   |
| >TP53-N288I RTEEENLRKK | 174   | >TP53-N288I RTEEEKLRKK  | 338 | 164   |
| >TP53-N288I RTEEENLR   | 242   | >TP53-N288I RTEEEKLR    | 284 | 42    |
| >TP53-N288I RTEEENLR   | 188   | >TP53-N288I RTEEEKLR    | 749 | 561   |
| >TP53-N288I RTEEENLR   | 456   | >TP53-N288I RTEEEKLR    | 439 | 17    |
| >TP53-N288I RRTEEENL   | 171   | >TP53-N288I RRTEEEKL    | 98  | 73    |
| >TP53-N288I RRTEEENLR  | 424   | >TP53-N288I RRTEEEKLR   | 201 | 223   |
| >TP53-N288I RRTEEENLRK | 34    | >TP53-N288I RRTEEEKLRK  | 36  | 2     |
| >TP53-N288I RRTEEENLRK | 71    | >TP53-N288I RRTEEEKLRKI | 57  | 14    |
| >TP53-N288I RRTEEENL   | 66    | >TP53-N288I RRTEEEKL    | 68  | 2     |
| >TP53-N288I RRTEEENLRK | 383   | >TP53-N288I RRTEEEKLRK  | 286 | 97    |
| >TP53-N288I RRTEEENL   | 94    | >TP53-N288I RRTEEEKL    | 76  | 18    |
| >TP53-N288I RRTEEENLRK | 163   | >TP53-N288I RRTEEEKLRK  | 143 | 20    |
| >TP53-N288I RDRRTEEEN  | 11458 | >TP53-N288I RDRRTEEEK   | 345 | 11113 |
| >TP53-N288I RDRRTEEENL | 955   | >TP53-N288I RDRRTEEEKL  | 419 | 536   |
| >TP53-N288I GRDRRTEEEN | 446   | >TP53-N288I GRDRRTEEEEL | 428 | 18    |
| >TP53-N288I RTEEENLRK  | 882   | >TP53-N288I RTEEESLRK   | 309 | 573   |
| >TP53-N288I RTEEENLRK  | 88    | >TP53-N288I RTEEESLRK   | 71  | 17    |
| >TP53-N288I RTEEENLRKK | 674   | >TP53-N288I RTEEESLRKK  | 346 | 328   |
| >TP53-N288I RTEEENLRK  | 126   | >TP53-N288I RTEEESLRK   | 66  | 60    |
| >TP53-N288I RTEEENLRKK | 174   | >TP53-N288I RTEEESLRKK  | 104 | 70    |
| >TP53-N288I RTEEENLR   | 242   | >TP53-N288I RTEEESLR    | 202 | 40    |
| >TP53-N288I RTEEENLR   | 188   | >TP53-N288I RTEEESLR    | 181 | 7     |
| >TP53-N288I RTEEENLR   | 456   | >TP53-N288I RTEEESLR    | 711 | 255   |
| >TP53-N288I RRTEEENL   | 791   | >TP53-N288I RRTEEESL    | 476 | 315   |
| >TP53-N288I RRTEEENL   | 171   | >TP53-N288I RRTEEESL    | 140 | 31    |
| >TP53-N288I RRTEEENLR  | 424   | >TP53-N288I RRTEEESLR   | 217 | 207   |
| >TP53-N288I RRTEEENLRK | 34    | >TP53-N288I RRTEEESLRK  | 36  | 2     |
| >TP53-N288I RRTEEENLRK | 71    | >TP53-N288I RRTEEESLRKI | 61  | 10    |
| >TP53-N288I RRTEEENL   | 66    | >TP53-N288I RRTEEESL    | 80  | 14    |



|                       |       |                        |      |       |
|-----------------------|-------|------------------------|------|-------|
| >TP53-N288\RRTEENLRK  | 383   | >TP53-N288\RRTEEESLRK  | 318  | 65    |
| >TP53-N288\RRTEENL    | 94    | >TP53-N288\RRTEEESL    | 120  | 26    |
| >TP53-N288\RRTEENLRK  | 163   | >TP53-N288\RRTEEESLRK  | 133  | 30    |
| >TP53-N288\RDRRTEENL  | 955   | >TP53-N288\RDRRTEEESL  | 471  | 484   |
| >TP53-N288\GRDRRTEEN  | 446   | >TP53-N288\GRDRRTEEES  | 439  | 7     |
| >TP53-N288\NLRKKGEPH  | 3656  | >TP53-N288\YLRKKGEPH   | 245  | 3411  |
| >TP53-N288\NLRKKGEPH  | 1175  | >TP53-N288\YLRKKGEPH   | 277  | 898   |
| >TP53-N288\RTEENLRK   | 882   | >TP53-N288\RTEEEYLRK   | 473  | 409   |
| >TP53-N288\RTEENLRK   | 88    | >TP53-N288\RTEEEYLRK   | 36   | 52    |
| >TP53-N288\RTEENLRKK  | 674   | >TP53-N288\RTEEEYLRKK  | 386  | 288   |
| >TP53-N288\RTEENLRK   | 126   | >TP53-N288\RTEEEYLRK   | 65   | 61    |
| >TP53-N288\RTEENLRKK  | 174   | >TP53-N288\RTEEEYLRKK  | 124  | 50    |
| >TP53-N288\RTEENLR    | 242   | >TP53-N288\RTEEEYLR    | 42   | 200   |
| >TP53-N288\RTEENLR    | 188   | >TP53-N288\RTEEEYLR    | 172  | 16    |
| >TP53-N288\RTEENLRK   | 1433  | >TP53-N288\RTEEEYLRK   | 391  | 1042  |
| >TP53-N288\RTEENLR    | 456   | >TP53-N288\RTEEEYLR    | 105  | 351   |
| >TP53-N288\RRTEENL    | 171   | >TP53-N288\RRTEEEYL    | 166  | 5     |
| >TP53-N288\RRTEENLR   | 424   | >TP53-N288\RRTEEEYLR   | 110  | 314   |
| >TP53-N288\RRTEENLRK  | 34    | >TP53-N288\RRTEEEYLRK  | 21   | 13    |
| >TP53-N288\RRTEENLRK  | 71    | >TP53-N288\RRTEEEYLRK  | 41   | 30    |
| >TP53-N288\RRTEENL    | 66    | >TP53-N288\RRTEEEYL    | 125  | 59    |
| >TP53-N288\RRTEENLRK  | 383   | >TP53-N288\RRTEEEYLRK  | 225  | 158   |
| >TP53-N288\RRTEENL    | 94    | >TP53-N288\RRTEEEYL    | 88   | 6     |
| >TP53-N288\RRTEENLRK  | 163   | >TP53-N288\RRTEEEYLRK  | 76   | 87    |
| >TP53-N288\RRTEENLR   | 993   | >TP53-N288\RRTEEEYLR   | 74   | 919   |
| >TP53-N288\GRDRRTEEN  | 7283  | >TP53-N288\GRDRRTEEEY  | 168  | 7115  |
| >TP53-N288\GRDRRTEEN  | 446   | >TP53-N288\GRDRRTEEEY  | 342  | 104   |
| >TP53-N310\PNNTSSSPQF | 17692 | >TP53-N310\PLNTSSSPQF  | 337  | 17355 |
| >TP53-N310\PPGSTKRALP | 21954 | >TP53-N310\PPGSTKRALP  | 62   | 21892 |
| >TP53-N310\LPNNTSSS   | 383   | >TP53-N310\LPLNTSSS    | 491  | 108   |
| >TP53-N310\LPNNTSSS   | 301   | >TP53-N310\LPLNTSSS    | 287  | 14    |
| >TP53-N310\LPNNTSSSPQ | 260   | >TP53-N310\LPLNTSSSPQI | 244  | 16    |
| >TP53-N310\ALPNNTSSS  | 301   | >TP53-N310\ALPLNTSSS   | 2009 | 1708  |
| >TP53-N310\ALPNNTSSSP | 111   | >TP53-N310\ALPLNTSSSPC | 489  | 378   |
| >TP53-N310\KRALPNNT   | 597   | >TP53-N310\KRALPLNT    | 296  | 301   |
| >TP53-N310\STKRALPN   | 100   | >TP53-N310\STKRALPL    | 9    | 91    |
| >TP53-N310\STKRALPNN  | 60    | >TP53-N310\STKRALPLN   | 48   | 12    |
| >TP53-N310\STKRALPNNT | 89    | >TP53-N310\STKRALPLNT  | 55   | 34    |
| >TP53-N310\STKRALPNNT | 46    | >TP53-N310\STKRALPLNT  | 52   | 6     |
| >TP53-N310\STKRALPN   | 10714 | >TP53-N310\STKRALPL    | 30   | 10684 |
| >TP53-N310\GSTKRALPN  | 13743 | >TP53-N310\GSTKRALPL   | 20   | 13723 |
| >TP53-N310\PNNTSSSPQF | 15161 | >TP53-N310\PTNTSSSPQF  | 182  | 14979 |
| >TP53-N310\PNNTSSSPQF | 3152  | >TP53-N310\PTNTSSSPQF  | 45   | 3107  |

|                       |      |                       |     |      |
|-----------------------|------|-----------------------|-----|------|
| >TP53-N3101LPNNTSSS   | 383  | >TP53-N3101LPTNTSSS   | 488 | 105  |
| >TP53-N3101LPNNTSSS   | 301  | >TP53-N3101LPTNTSSS   | 368 | 67   |
| >TP53-N3101LPNNTSSSPQ | 260  | >TP53-N3101LPTNTSSSPQ | 293 | 33   |
| >TP53-N3101ALPNNTSSS  | 301  | >TP53-N3101ALPTNTSSS  | 755 | 454  |
| >TP53-N3101ALPNNTSSSP | 111  | >TP53-N3101ALPTNTSSSP | 222 | 111  |
| >TP53-N3101KRALPNNT   | 597  | >TP53-N3101KRALPTNT   | 176 | 421  |
| >TP53-N3101STKRALPN   | 100  | >TP53-N3101STKRALPT   | 43  | 57   |
| >TP53-N3101STKRALPNN  | 60   | >TP53-N3101STKRALPTN  | 49  | 11   |
| >TP53-N3101STKRALPNNT | 89   | >TP53-N3101STKRALPTNT | 224 | 135  |
| >TP53-N3101STKRALPNNT | 46   | >TP53-N3101STKRALPTNT | 40  | 6    |
| >TP53-N3111NTSSSPQPK  | 1176 | >TP53-N3111HTSSSPQPK  | 100 | 1076 |
| >TP53-N3111NTSSSPQPKK | 1986 | >TP53-N3111HTSSSPQPKK | 159 | 1827 |
| >TP53-N3111NTSSSPQPK  | 58   | >TP53-N3111HTSSSPQPK  | 34  | 24   |
| >TP53-N3111NTSSSPQPKK | 41   | >TP53-N3111HTSSSPQPKK | 35  | 6    |
| >TP53-N3111NTSSSPQPKK | 251  | >TP53-N3111HTSSSPQPKK | 120 | 131  |
| >TP53-N3111NTSSSPQPK  | 339  | >TP53-N3111HTSSSPQPK  | 6   | 333  |
| >TP53-N3111NTSSSPQPKK | 1198 | >TP53-N3111HTSSSPQPKK | 11  | 1187 |
| >TP53-N3111NTSSSPQPKK | 2675 | >TP53-N3111HTSSSPQPKK | 21  | 2654 |
| >TP53-N3111NTSSSPQPK  | 4098 | >TP53-N3111HTSSSPQPK  | 385 | 3713 |
| >TP53-N3111NTSSSPQPK  | 37   | >TP53-N3111HTSSSPQPK  | 29  | 8    |
| >TP53-N3111NTSSSPQPKK | 28   | >TP53-N3111HTSSSPQPKK | 34  | 6    |
| >TP53-N3111NTSSSPQPKK | 95   | >TP53-N3111HTSSSPQPKK | 81  | 14   |
| >TP53-N3111PNNTSSSPQF | 3152 | >TP53-N3111PNHTSSSPQF | 243 | 2909 |
| >TP53-N3111LPNNTSSS   | 383  | >TP53-N3111LPNHTSSS   | 259 | 124  |
| >TP53-N3111LPNNTSSS   | 301  | >TP53-N3111LPNHTSSS   | 279 | 22   |
| >TP53-N3111LPNNTSSSP  | 568  | >TP53-N3111LPNHTSSSP  | 447 | 121  |
| >TP53-N3111LPNNTSSSPQ | 260  | >TP53-N3111LPNHTSSSPQ | 200 | 60   |
| >TP53-N3111ALPNNTSSS  | 534  | >TP53-N3111ALPNHTSSS  | 91  | 443  |
| >TP53-N3111ALPNNTSSS  | 301  | >TP53-N3111ALPNHTSSS  | 689 | 388  |
| >TP53-N3111ALPNNTSSSP | 111  | >TP53-N3111ALPNHTSSSP | 194 | 83   |
| >TP53-N3111STKRALPNN  | 7927 | >TP53-N3111STKRALPNH  | 324 | 7603 |
| >TP53-N3111STKRALPNN  | 60   | >TP53-N3111STKRALPNH  | 48  | 12   |
| >TP53-N3111STKRALPNNT | 89   | >TP53-N3111STKRALPNHT | 62  | 27   |
| >TP53-N3111STKRALPNNT | 46   | >TP53-N3111STKRALPNHT | 50  | 4    |
| >TP53-N3111NTSSSPQPK  | 1176 | >TP53-N3111KTSSSPQPK  | 65  | 1111 |
| >TP53-N3111NTSSSPQPKK | 1342 | >TP53-N3111KTSSSPQPKK | 221 | 1121 |
| >TP53-N3111NTSSSPQPKK | 1986 | >TP53-N3111KTSSSPQPKK | 91  | 1895 |
| >TP53-N3111NTSSSPQPK  | 58   | >TP53-N3111KTSSSPQPK  | 16  | 42   |
| >TP53-N3111NTSSSPQPKK | 41   | >TP53-N3111KTSSSPQPKK | 20  | 21   |
| >TP53-N3111NTSSSPQPKK | 251  | >TP53-N3111KTSSSPQPKK | 39  | 212  |
| >TP53-N3111NTSSSPQPK  | 339  | >TP53-N3111KTSSSPQPK  | 4   | 335  |
| >TP53-N3111NTSSSPQPKK | 1198 | >TP53-N3111KTSSSPQPKK | 7   | 1191 |
| >TP53-N3111NTSSSPQPKK | 2675 | >TP53-N3111KTSSSPQPKK | 10  | 2665 |

|                        |       |                        |       |       |
|------------------------|-------|------------------------|-------|-------|
| >TP53-N311FNTSSSPQPK   | 4098  | >TP53-N311FKTSSSPQPK   | 85    | 4013  |
| >TP53-N311FNTSSSPQPK   | 37    | >TP53-N311FKTSSSPQPK   | 724   | 687   |
| >TP53-N311FNTSSSPQPKK  | 28    | >TP53-N311FKTSSSPQPKK  | 810   | 782   |
| >TP53-N311FNTSSSPQPKK  | 95    | >TP53-N311FKTSSSPQPKK  | 1749  | 1654  |
| >TP53-N311FNTSSSPQPK   | 839   | >TP53-N311FKTSSSPQPK   | 293   | 546   |
| >TP53-N311FNTSSSPQPKK  | 914   | >TP53-N311FKTSSSPQPKK  | 353   | 561   |
| >TP53-N311FNTSSSPQPKK  | 721   | >TP53-N311FKTSSSPQPKK  | 249   | 472   |
| >TP53-N311FNNTSSSPQPK  | 11819 | >TP53-N311FNKTSSSPQPK  | 333   | 11486 |
| >TP53-N311FPNNTSSSPQF  | 3152  | >TP53-N311FPNKTSSSPQP  | 141   | 3011  |
| >TP53-N311FLPNNTSSS    | 383   | >TP53-N311FLPNKTSSS    | 793   | 410   |
| >TP53-N311FLPNNTSSS    | 301   | >TP53-N311FLPNKTSSS    | 456   | 155   |
| >TP53-N311FLPNNTSSSPQ  | 260   | >TP53-N311FLPNKTSSSPQ  | 338   | 78    |
| >TP53-N311FALPNNTSSS   | 534   | >TP53-N311FALPNKTSSS   | 397   | 137   |
| >TP53-N311FALPNNTSSS   | 301   | >TP53-N311FALPNKTSSS   | 883   | 582   |
| >TP53-N311FALPNNTSSSP  | 111   | >TP53-N311FALPNKTSSSP  | 229   | 118   |
| >TP53-N311FTKRALPNN    | 10159 | >TP53-N311FTKRALPNK    | 78    | 10081 |
| >TP53-N311FSTKRALPNN   | 21318 | >TP53-N311FSTKRALPNK   | 238   | 21080 |
| >TP53-N311FSTKRALPNN   | 19941 | >TP53-N311FSTKRALPNK   | 41    | 19900 |
| >TP53-N311FSTKRALPNN   | 60    | >TP53-N311FSTKRALPNK   | 3     | 57    |
| >TP53-N311FSTKRALPNNT  | 89    | >TP53-N311FSTKRALPNKT  | 176   | 87    |
| >TP53-N311FSTKRALPNNT  | 46    | >TP53-N311FSTKRALPNKT  | 85    | 39    |
| >TP53-N311FSTKRALPNN   | 13384 | >TP53-N311FSTKRALPNK   | 155   | 13229 |
| >TP53-N311FSTKRALPNN   | 25553 | >TP53-N311FSTKRALPNK   | 228   | 25325 |
| >TP53-N311FSTKRALPNN   | 10994 | >TP53-N311FSTKRALPNK   | 247   | 10747 |
| >TP53-N311FGSTKRALPNN  | 34162 | >TP53-N311FGSTKRALPNK  | 73    | 34089 |
| >TP53-N311FGSTKRALPNN  | 12969 | >TP53-N311FGSTKRALPNK  | 148   | 12821 |
| >TP53-N311FGSTKRALPNN  | 11486 | >TP53-N311FGSTKRALPNK  | 274   | 11212 |
| >TP53-P128APALNKMFCQ   | 5785  | >TP53-P128AAALNKMFCQ   | 57    | 5728  |
| >TP53-P128APALNKMFCQ   | 432   | >TP53-P128AAALNKMFCQ   | 34351 | 33919 |
| >TP53-P128APALNKMFC    | 100   | >TP53-P128AAALNKMFC    | 14291 | 14191 |
| >TP53-P128APALNKMFCQ   | 41    | >TP53-P128AAALNKMFCQ   | 3020  | 2979  |
| >TP53-P128APALNKMFCQ   | 372   | >TP53-P128AAALNKMFCQ   | 1053  | 681   |
| >TP53-P128APALNKMFC    | 16115 | >TP53-P128AAALNKMFC    | 138   | 15977 |
| >TP53-P128APALNKMFC    | 326   | >TP53-P128AAALNKMFC    | 2010  | 1684  |
| >TP53-P128APALNKMFC    | 450   | >TP53-P128AAALNKMFC    | 9437  | 8987  |
| >TP53-P128ATAKSVTCTYSI | 14054 | >TP53-P128ATAKSVTCTYSI | 289   | 13765 |
| >TP53-P128AYSPALNKMFC  | 384   | >TP53-P128AYSAALNKMFC  | 2518  | 2134  |
| >TP53-P128AYSPALNKM    | 717   | >TP53-P128AYSAALNKM    | 256   | 461   |
| >TP53-P128AYSPALNKMFC  | 1020  | >TP53-P128AYSAALNKMFC  | 132   | 888   |
| >TP53-P128AYSPALNKMFC  | 104   | >TP53-P128AYSAALNKMFC  | 20    | 84    |
| >TP53-P128AYSPALNKM    | 586   | >TP53-P128AYSAALNKM    | 19    | 567   |
| >TP53-P128AYSPALNKMFC  | 43    | >TP53-P128AYSAALNKMFC  | 5     | 38    |
| >TP53-P128AYSPALNKM    | 3893  | >TP53-P128AYSAALNKM    | 466   | 3427  |

|                                    |       |                                    |      |       |
|------------------------------------|-------|------------------------------------|------|-------|
| >TP53-P128 <sup>A</sup> YSPALNKM   | 15948 | >TP53-P128 <sup>A</sup> YSAALNKM   | 363  | 15585 |
| >TP53-P128 <sup>A</sup> YSPALNKMF  | 12049 | >TP53-P128 <sup>A</sup> YSAALNKMF  | 165  | 11884 |
| >TP53-P128 <sup>A</sup> YSPALNKM   | 40    | >TP53-P128 <sup>A</sup> YSAALNKM   | 2426 | 2386  |
| >TP53-P128 <sup>A</sup> YSPALNKMF  | 3     | >TP53-P128 <sup>A</sup> YSAALNKMF  | 62   | 59    |
| >TP53-P128 <sup>A</sup> YSPALNKMFC | 22    | >TP53-P128 <sup>A</sup> YSAALNKMFC | 1321 | 1299  |
| >TP53-P128 <sup>A</sup> YSPALNKMFC | 124   | >TP53-P128 <sup>A</sup> YSAALNKMFC | 7997 | 7873  |
| >TP53-P128 <sup>A</sup> YSPALNKM   | 67    | >TP53-P128 <sup>A</sup> YSAALNKM   | 13   | 54    |
| >TP53-P128 <sup>A</sup> YSPALNKMF  | 103   | >TP53-P128 <sup>A</sup> YSAALNKMF  | 9    | 94    |
| >TP53-P128 <sup>A</sup> TYSPALNKM  | 136   | >TP53-P128 <sup>A</sup> TYSAALNKM  | 59   | 77    |
| >TP53-P128 <sup>A</sup> TYSPALNK   | 220   | >TP53-P128 <sup>A</sup> TYSAALNK   | 188  | 32    |
| >TP53-P128 <sup>A</sup> TYSPALNKMF | 179   | >TP53-P128 <sup>A</sup> TYSAALNKMI | 120  | 59    |
| >TP53-P128 <sup>A</sup> TYSPALNKMF | 64    | >TP53-P128 <sup>A</sup> TYSAALNKMI | 62   | 2     |
| >TP53-P128 <sup>A</sup> TYSPALNKM  | 27    | >TP53-P128 <sup>A</sup> TYSAALNKM  | 50   | 23    |
| >TP53-P128 <sup>A</sup> TYSPALNKMF | 5     | >TP53-P128 <sup>A</sup> TYSAALNKMI | 5    | 0     |
| >TP53-P128 <sup>A</sup> TYSPALNKMF | 586   | >TP53-P128 <sup>A</sup> TYSAALNKMI | 378  | 208   |
| >TP53-P128 <sup>A</sup> TYSPALNK   | 222   | >TP53-P128 <sup>A</sup> TYSAALNK   | 156  | 66    |
| >TP53-P128 <sup>A</sup> TYSPALNKMF | 439   | >TP53-P128 <sup>A</sup> TYSAALNKMI | 690  | 251   |
| >TP53-P128 <sup>A</sup> CTYSPALNK  | 30    | >TP53-P128 <sup>A</sup> CTYSAALNK  | 34   | 4     |
| >TP53-P128 <sup>A</sup> CTYSPALNK  | 11    | >TP53-P128 <sup>A</sup> CTYSAALNK  | 17   | 6     |
| >TP53-P128 <sup>A</sup> CTYSPALNKM | 343   | >TP53-P128 <sup>A</sup> CTYSAALNKM | 182  | 161   |
| >TP53-P128 <sup>A</sup> CTYSPALNKM | 63    | >TP53-P128 <sup>A</sup> CTYSAALNKM | 87   | 24    |
| >TP53-P128 <sup>A</sup> CTYSPALNKM | 380   | >TP53-P128 <sup>A</sup> CTYSAALNKM | 714  | 334   |
| >TP53-P128 <sup>A</sup> CTYSPALNKM | 246   | >TP53-P128 <sup>A</sup> CTYSAALNKM | 460  | 214   |
| >TP53-P128 <sup>A</sup> CTYSPALNK  | 215   | >TP53-P128 <sup>A</sup> CTYSAALNK  | 47   | 168   |
| >TP53-P128 <sup>A</sup> CTYSPALNK  | 30    | >TP53-P128 <sup>A</sup> CTYSAALNK  | 12   | 18    |
| >TP53-P128 <sup>A</sup> CTYSPALNKM | 488   | >TP53-P128 <sup>A</sup> CTYSAALNKM | 764  | 276   |
| >TP53-P128 <sup>A</sup> CTYSPALNKM | 23    | >TP53-P128 <sup>A</sup> CTYSAALNKM | 27   | 4     |
| >TP53-P128 <sup>A</sup> CTYSPALNKM | 24    | >TP53-P128 <sup>A</sup> CTYSAALNKM | 28   | 4     |
| >TP53-P128 <sup>A</sup> CTYSPALNKM | 5     | >TP53-P128 <sup>A</sup> CTYSAALNKM | 5    | 0     |
| >TP53-P128 <sup>A</sup> CTYSPALNKM | 627   | >TP53-P128 <sup>A</sup> CTYSAALNKM | 391  | 236   |
| >TP53-P128 <sup>A</sup> CTYSPALNKM | 76    | >TP53-P128 <sup>A</sup> CTYSAALNKM | 84   | 8     |
| >TP53-P128 <sup>A</sup> CTYSPALNKM | 146   | >TP53-P128 <sup>A</sup> CTYSAALNKM | 145  | 1     |
| >TP53-P128 <sup>A</sup> CTYSPALNKM | 30    | >TP53-P128 <sup>A</sup> CTYSAALNKM | 24   | 6     |
| >TP53-P128 <sup>A</sup> CTYSPALNKM | 13    | >TP53-P128 <sup>A</sup> CTYSAALNKM | 21   | 8     |
| >TP53-P128 <sup>A</sup> CTYSPALNK  | 572   | >TP53-P128 <sup>A</sup> CTYSAALNK  | 401  | 171   |
| >TP53-P128 <sup>A</sup> CTYSPALNKM | 358   | >TP53-P128 <sup>A</sup> CTYSAALNKM | 396  | 38    |
| >TP53-P128 <sup>A</sup> TCTYSPALNK | 453   | >TP53-P128 <sup>A</sup> TCTYSAALNK | 268  | 185   |
| >TP53-P128 <sup>A</sup> VTCTYSPA   | 415   | >TP53-P128 <sup>A</sup> VTCTYSAA   | 1042 | 627   |
| >TP53-P128 <sup>A</sup> VTCTYSPAL  | 2627  | >TP53-P128 <sup>A</sup> VTCTYSAAL  | 466  | 2161  |
| >TP53-P128 <sup>A</sup> VTCTYSPAL  | 397   | >TP53-P128 <sup>A</sup> VTCTYSAAL  | 703  | 306   |
| >TP53-P128 <sup>A</sup> VTCTYSPALN | 80    | >TP53-P128 <sup>A</sup> VTCTYSAALN | 85   | 5     |
| >TP53-P128 <sup>A</sup> VTCTYSPALN | 14    | >TP53-P128 <sup>A</sup> VTCTYSAALN | 16   | 2     |
| >TP53-P128 <sup>A</sup> VTCTYSPALN | 146   | >TP53-P128 <sup>A</sup> VTCTYSAALN | 116  | 30    |

|                                    |       |                                    |       |       |
|------------------------------------|-------|------------------------------------|-------|-------|
| >TP53-P128 <sup>A</sup> VTCTYSPALN | 490   | >TP53-P128 <sup>A</sup> VTCTYSAALN | 300   | 190   |
| >TP53-P128 <sup>A</sup> VTCTYSPAL  | 12    | >TP53-P128 <sup>A</sup> VTCTYSAAL  | 7     | 5     |
| >TP53-P128 <sup>A</sup> VTCTYSPAL  | 66    | >TP53-P128 <sup>A</sup> VTCTYSAAL  | 46    | 20    |
| >TP53-P128 <sup>A</sup> VTCTYSPAL  | 951   | >TP53-P128 <sup>A</sup> VTCTYSAAL  | 372   | 579   |
| >TP53-P128 <sup>A</sup> SVTCTYSPAL | 874   | >TP53-P128 <sup>A</sup> SVTCTYSAAL | 433   | 441   |
| >TP53-P128 <sup>A</sup> SVTCTYSPA  | 118   | >TP53-P128 <sup>A</sup> SVTCTYSAA  | 205   | 87    |
| >TP53-P128 <sup>A</sup> SVTCTYSP   | 13014 | >TP53-P128 <sup>A</sup> SVTCTYSA   | 453   | 12561 |
| >TP53-P128 <sup>A</sup> SVTCTYSPA  | 468   | >TP53-P128 <sup>A</sup> SVTCTYSAA  | 661   | 193   |
| >TP53-P128 <sup>A</sup> SVTCTYSPAL | 268   | >TP53-P128 <sup>A</sup> SVTCTYSAAL | 545   | 277   |
| >TP53-P128 <sup>A</sup> SVTCTYSPA  | 241   | >TP53-P128 <sup>A</sup> SVTCTYSAA  | 841   | 600   |
| >TP53-P128 <sup>A</sup> SVTCTYSP   | 7650  | >TP53-P128 <sup>A</sup> SVTCTYSA   | 58    | 7592  |
| >TP53-P128 <sup>A</sup> SVTCTYSPA  | 45    | >TP53-P128 <sup>A</sup> SVTCTYSAA  | 147   | 102   |
| >TP53-P128 <sup>A</sup> SVTCTYSPAL | 1417  | >TP53-P128 <sup>A</sup> SVTCTYSAAL | 323   | 1094  |
| >TP53-P128 <sup>A</sup> SVTCTYSPAL | 149   | >TP53-P128 <sup>A</sup> SVTCTYSAAL | 296   | 147   |
| >TP53-P128 <sup>A</sup> KSVTCTYSPA | 821   | >TP53-P128 <sup>A</sup> KSVTCTYSAA | 248   | 573   |
| >TP53-P128 <sup>A</sup> KSVTCTYSPA | 396   | >TP53-P128 <sup>A</sup> KSVTCTYSAA | 541   | 145   |
| >TP53-P128 <sup>A</sup> KSVTCTYSPA | 149   | >TP53-P128 <sup>A</sup> KSVTCTYSAA | 365   | 216   |
| >TP53-P128 <sup>A</sup> KSVTCTYSPA | 488   | >TP53-P128 <sup>A</sup> KSVTCTYSAA | 827   | 339   |
| >TP53-P128 <sup>A</sup> KSVTCTYSPA | 107   | >TP53-P128 <sup>A</sup> KSVTCTYSAA | 67    | 40    |
| >TP53-P128 <sup>A</sup> KSVTCTYSPA | 349   | >TP53-P128 <sup>A</sup> KSVTCTYSAA | 316   | 33    |
| >TP53-P128 <sup>A</sup> KSVTCTYSPA | 89    | >TP53-P128 <sup>A</sup> KSVTCTYSAA | 84    | 5     |
| >TP53-P128 <sup>A</sup> KSVTCTYSPA | 6     | >TP53-P128 <sup>A</sup> KSVTCTYSAA | 5     | 1     |
| >TP53-P128 <sup>A</sup> KSVTCTYSPA | 669   | >TP53-P128 <sup>A</sup> KSVTCTYSAA | 457   | 212   |
| >TP53-P128 <sup>A</sup> KSVTCTYSPA | 113   | >TP53-P128 <sup>A</sup> KSVTCTYSAA | 103   | 10    |
| >TP53-P128 <sup>A</sup> KSVTCTYSPA | 198   | >TP53-P128 <sup>A</sup> KSVTCTYSAA | 181   | 17    |
| >TP53-P128 <sup>A</sup> KSVTCTYSPA | 882   | >TP53-P128 <sup>A</sup> KSVTCTYSAA | 460   | 422   |
| >TP53-P128 <sup>A</sup> KSVTCTYSPA | 766   | >TP53-P128 <sup>A</sup> KSVTCTYSAA | 469   | 297   |
| >TP53-P128 <sup>A</sup> AKSVTCTYSP | 483   | >TP53-P128 <sup>A</sup> AKSVTCTYSA | 141   | 342   |
| >TP53-P128 <sup>A</sup> AKSVTCTYSP | 56    | >TP53-P128 <sup>A</sup> AKSVTCTYSA | 58    | 2     |
| >TP53-P128L PALNKMFCQ              | 12830 | >TP53-P128L LALNKMFCQ              | 271   | 12559 |
| >TP53-P128L PALNKMFCQ              | 5785  | >TP53-P128L LALNKMFCQ              | 73    | 5712  |
| >TP53-P128L SPALNKMFC              | 432   | >TP53-P128L SLALNKMFC              | 36687 | 36255 |
| >TP53-P128L SPALNKMFC              | 23954 | >TP53-P128L SLALNKMFC              | 443   | 23511 |
| >TP53-P128L SPALNKMFC              | 21609 | >TP53-P128L SLALNKMFC              | 25    | 21584 |
| >TP53-P128L SPALNKMFC              | 22001 | >TP53-P128L SLALNKMFC              | 129   | 21872 |
| >TP53-P128L SPALNKMFC              | 23337 | >TP53-P128L SLALNKMFC              | 42    | 23295 |
| >TP53-P128L SPALNKMFC              | 24187 | >TP53-P128L SLALNKMFC              | 189   | 23998 |
| >TP53-P128L SPALNKMFC              | 19928 | >TP53-P128L SLALNKMFC              | 17    | 19911 |
| >TP53-P128L SPALNKMFC              | 24378 | >TP53-P128L SLALNKMFC              | 92    | 24286 |
| >TP53-P128L SPALNKMFC              | 36810 | >TP53-P128L SLALNKMFC              | 65    | 36745 |
| >TP53-P128L SPALNKMFC              | 26387 | >TP53-P128L SLALNKMFC              | 4     | 26383 |
| >TP53-P128L SPALNKMFC              | 100   | >TP53-P128L SLALNKMFC              | 20928 | 20828 |
| >TP53-P128L SPALNKMFC              | 41    | >TP53-P128L SLALNKMFC              | 9914  | 9873  |

|                         |       |                         |       |       |
|-------------------------|-------|-------------------------|-------|-------|
| >TP53-P128L SPALNKMFC   | 372   | >TP53-P128L SLALNKMFC   | 373   | 1     |
| >TP53-P128L SPALNKM     | 5642  | >TP53-P128L SLALNKM     | 372   | 5270  |
| >TP53-P128L SPALNKM     | 2836  | >TP53-P128L SLALNKM     | 402   | 2434  |
| >TP53-P128L SPALNKM     | 326   | >TP53-P128L SLALNKM     | 8492  | 8166  |
| >TP53-P128L SPALNKM     | 450   | >TP53-P128L SLALNKM     | 13630 | 13180 |
| >TP53-P128L TAKSVTCTYSI | 14054 | >TP53-P128L TAKSVTCTYSI | 218   | 13836 |
| >TP53-P128L YSPALNKM    | 2026  | >TP53-P128L YSLALNKM    | 494   | 1532  |
| >TP53-P128L YSPALNKM    | 384   | >TP53-P128L YSLALNKM    | 629   | 245   |
| >TP53-P128L YSPALNKM    | 717   | >TP53-P128L YSLALNKM    | 465   | 252   |
| >TP53-P128L YSPALNKM    | 1020  | >TP53-P128L YSLALNKM    | 434   | 586   |
| >TP53-P128L YSPALNKM    | 4100  | >TP53-P128L YSLALNKM    | 340   | 3760  |
| >TP53-P128L YSPALNKM    | 104   | >TP53-P128L YSLALNKM    | 14    | 90    |
| >TP53-P128L YSPALNKM    | 586   | >TP53-P128L YSLALNKM    | 13    | 573   |
| >TP53-P128L YSPALNKM    | 43    | >TP53-P128L YSLALNKM    | 4     | 39    |
| >TP53-P128L YSPALNKM    | 12049 | >TP53-P128L YSLALNKM    | 353   | 11696 |
| >TP53-P128L YSPALNKM    | 40    | >TP53-P128L YSLALNKM    | 10622 | 10582 |
| >TP53-P128L YSPALNKM    | 3     | >TP53-P128L YSLALNKM    | 1042  | 1039  |
| >TP53-P128L YSPALNKMFC  | 22    | >TP53-P128L YSLALNKMFC  | 5772  | 5750  |
| >TP53-P128L YSPALNKMFC  | 124   | >TP53-P128L YSLALNKMFC  | 17856 | 17732 |
| >TP53-P128L YSPALNKM    | 67    | >TP53-P128L YSLALNKM    | 23    | 44    |
| >TP53-P128L YSPALNKM    | 103   | >TP53-P128L YSLALNKM    | 8     | 95    |
| >TP53-P128L TYSPALNKM   | 136   | >TP53-P128L TYSLALNKM   | 575   | 439   |
| >TP53-P128L TYSPALNK    | 220   | >TP53-P128L TYSLALNK    | 284   | 64    |
| >TP53-P128L TYSPALNKM   | 179   | >TP53-P128L TYSLALNKM   | 129   | 50    |
| >TP53-P128L TYSPALNKM   | 64    | >TP53-P128L TYSLALNKM   | 63    | 1     |
| >TP53-P128L TYSPALNKM   | 27    | >TP53-P128L TYSLALNKM   | 103   | 76    |
| >TP53-P128L TYSPALNKM   | 5     | >TP53-P128L TYSLALNKM   | 8     | 3     |
| >TP53-P128L TYSPALNKM   | 586   | >TP53-P128L TYSLALNKM   | 322   | 264   |
| >TP53-P128L TYSPALNK    | 222   | >TP53-P128L TYSLALNK    | 500   | 278   |
| >TP53-P128L TYSPALNKM   | 439   | >TP53-P128L TYSLALNKM   | 1003  | 564   |
| >TP53-P128L CTYSPALNK   | 30    | >TP53-P128L CTYSLALNK   | 35    | 5     |
| >TP53-P128L CTYSPALNK   | 11    | >TP53-P128L CTYSLALNK   | 13    | 2     |
| >TP53-P128L CTYSPALNKM  | 343   | >TP53-P128L CTYSLALNKM  | 207   | 136   |
| >TP53-P128L CTYSPALNKM  | 63    | >TP53-P128L CTYSLALNKM  | 142   | 79    |
| >TP53-P128L CTYSPALNKM  | 380   | >TP53-P128L CTYSLALNKM  | 1152  | 772   |
| >TP53-P128L CTYSPALNKM  | 246   | >TP53-P128L CTYSLALNKM  | 413   | 167   |
| >TP53-P128L CTYSPALNK   | 215   | >TP53-P128L CTYSLALNK   | 180   | 35    |
| >TP53-P128L CTYSPALNKM  | 767   | >TP53-P128L CTYSLALNKM  | 365   | 402   |
| >TP53-P128L CTYSPALNK   | 30    | >TP53-P128L CTYSLALNK   | 17    | 13    |
| >TP53-P128L CTYSPALNKM  | 488   | >TP53-P128L CTYSLALNKM  | 1075  | 587   |
| >TP53-P128L CTYSPALNKM  | 23    | >TP53-P128L CTYSLALNKM  | 38    | 15    |
| >TP53-P128L CTYSPALNKM  | 24    | >TP53-P128L CTYSLALNKM  | 36    | 12    |
| >TP53-P128L CTYSPALNKM  | 5     | >TP53-P128L CTYSLALNKM  | 5     | 0     |

|                         |       |                         |      |       |
|-------------------------|-------|-------------------------|------|-------|
| >TP53-P128L CTYSPALNKM  | 627   | >TP53-P128L CTYSLALNKM  | 290  | 337   |
| >TP53-P128L CTYSPALNKM  | 76    | >TP53-P128L CTYSLALNKM  | 142  | 66    |
| >TP53-P128L CTYSPALNKM  | 146   | >TP53-P128L CTYSLALNKM  | 217  | 71    |
| >TP53-P128L CTYSPALNKM  | 30    | >TP53-P128L CTYSLALNKM  | 22   | 8     |
| >TP53-P128L CTYSPALNKM  | 13    | >TP53-P128L CTYSLALNKM  | 14   | 1     |
| >TP53-P128L CTYSPALNK   | 572   | >TP53-P128L CTYSLALNK   | 253  | 319   |
| >TP53-P128L CTYSPALNKM  | 358   | >TP53-P128L CTYSLALNKM  | 647  | 289   |
| >TP53-P128L TCTYSPALNKI | 453   | >TP53-P128L TCTYSLALNKI | 341  | 112   |
| >TP53-P128L VTCTYSPA    | 415   | >TP53-P128L VTCTYSLA    | 1170 | 755   |
| >TP53-P128L VTCTYSPAL   | 397   | >TP53-P128L VTCTYSLAL   | 701  | 304   |
| >TP53-P128L VTCTYSPALN  | 80    | >TP53-P128L VTCTYSLALNI | 72   | 8     |
| >TP53-P128L VTCTYSPALN  | 14    | >TP53-P128L VTCTYSLALNI | 13   | 1     |
| >TP53-P128L VTCTYSPALN  | 146   | >TP53-P128L VTCTYSLALNI | 166  | 20    |
| >TP53-P128L VTCTYSPALN  | 490   | >TP53-P128L VTCTYSLALNI | 564  | 74    |
| >TP53-P128L VTCTYSPAL   | 12    | >TP53-P128L VTCTYSLAL   | 8    | 4     |
| >TP53-P128L VTCTYSPAL   | 66    | >TP53-P128L VTCTYSLAL   | 104  | 38    |
| >TP53-P128L SVTCTYSP    | 15733 | >TP53-P128L SVTCTYSL    | 193  | 15540 |
| >TP53-P128L SVTCTYSPAL  | 874   | >TP53-P128L SVTCTYSLAL  | 364  | 510   |
| >TP53-P128L SVTCTYSPA   | 118   | >TP53-P128L SVTCTYSLA   | 260  | 142   |
| >TP53-P128L SVTCTYSP    | 13014 | >TP53-P128L SVTCTYSL    | 251  | 12763 |
| >TP53-P128L SVTCTYSPA   | 468   | >TP53-P128L SVTCTYSLA   | 1258 | 790   |
| >TP53-P128L SVTCTYSPAL  | 268   | >TP53-P128L SVTCTYSLAL  | 259  | 9     |
| >TP53-P128L SVTCTYSP    | 17570 | >TP53-P128L SVTCTYSL    | 454  | 17116 |
| >TP53-P128L SVTCTYSPA   | 241   | >TP53-P128L SVTCTYSLA   | 688  | 447   |
| >TP53-P128L SVTCTYSP    | 7650  | >TP53-P128L SVTCTYSL    | 49   | 7601  |
| >TP53-P128L SVTCTYSPA   | 45    | >TP53-P128L SVTCTYSLA   | 133  | 88    |
| >TP53-P128L SVTCTYSPAL  | 149   | >TP53-P128L SVTCTYSLAL  | 519  | 370   |
| >TP53-P128L SVTCTYSPA   | 2869  | >TP53-P128L SVTCTYSLA   | 171  | 2698  |
| >TP53-P128L KSVTCTYSP   | 14533 | >TP53-P128L KSVTCTYSL   | 143  | 14390 |
| >TP53-P128L KSVTCTYSPA  | 396   | >TP53-P128L KSVTCTYSLAI | 629  | 233   |
| >TP53-P128L KSVTCTYSPA  | 149   | >TP53-P128L KSVTCTYSLA  | 320  | 171   |
| >TP53-P128L KSVTCTYSPA  | 488   | >TP53-P128L KSVTCTYSLAI | 730  | 242   |
| >TP53-P128L KSVTCTYSP   | 1211  | >TP53-P128L KSVTCTYSL   | 15   | 1196  |
| >TP53-P128L KSVTCTYSPA  | 107   | >TP53-P128L KSVTCTYSLAI | 46   | 61    |
| >TP53-P128L KSVTCTYSP   | 3563  | >TP53-P128L KSVTCTYSL   | 112  | 3451  |
| >TP53-P128L KSVTCTYSPA  | 349   | >TP53-P128L KSVTCTYSLA  | 1445 | 1096  |
| >TP53-P128L KSVTCTYSPA  | 89    | >TP53-P128L KSVTCTYSLAI | 67   | 22    |
| >TP53-P128L KSVTCTYSP   | 11360 | >TP53-P128L KSVTCTYSL   | 7    | 11353 |
| >TP53-P128L KSVTCTYSPA  | 6     | >TP53-P128L KSVTCTYSLAI | 5    | 1     |
| >TP53-P128L KSVTCTYSP   | 9076  | >TP53-P128L KSVTCTYSL   | 248  | 8828  |
| >TP53-P128L KSVTCTYSP   | 9585  | >TP53-P128L KSVTCTYSL   | 35   | 9550  |
| >TP53-P128L KSVTCTYSPA  | 113   | >TP53-P128L KSVTCTYSLAI | 64   | 49    |
| >TP53-P128L KSVTCTYSP   | 16345 | >TP53-P128L KSVTCTYSL   | 170  | 16175 |

|                          |       |                          |       |       |
|--------------------------|-------|--------------------------|-------|-------|
| >TP53-P128L KSVTCTYSPA   | 198   | >TP53-P128L KSVTCTYSLAI  | 266   | 68    |
| >TP53-P128L KSVTCTYSP    | 15749 | >TP53-P128L KSVTCTYSL    | 458   | 15291 |
| >TP53-P128L KSVTCTYSP    | 24615 | >TP53-P128L KSVTCTYSL    | 330   | 24285 |
| >TP53-P128L AKSVTCTYSP   | 483   | >TP53-P128L AKSVTCTYSL   | 18    | 465   |
| >TP53-P128L AKSVTCTYSP   | 56    | >TP53-P128L AKSVTCTYSL   | 169   | 113   |
| >TP53-P128L AKSVTCTYSP   | 19966 | >TP53-P128L AKSVTCTYSL   | 277   | 19689 |
| >TP53-P128S PALNKMFCQ    | 12830 | >TP53-P128S SALNKMFCQ    | 279   | 12551 |
| >TP53-P128S PALNKMFCQ    | 7546  | >TP53-P128S SALNKMFCQ    | 417   | 7129  |
| >TP53-P128S PALNKMFCQ    | 5785  | >TP53-P128S SALNKMFCQ    | 138   | 5647  |
| >TP53-P128S SPALNKMFCQ   | 432   | >TP53-P128S SSALNKMFCQ   | 34289 | 33857 |
| >TP53-P128S SPALNKMFC    | 100   | >TP53-P128S SSALNKMFC    | 22918 | 22818 |
| >TP53-P128S SPALNKMFCQ   | 41    | >TP53-P128S SSALNKMFCQ   | 14881 | 14840 |
| >TP53-P128S SPALNKMFCQ   | 372   | >TP53-P128S SSALNKMFCQ   | 3021  | 2649  |
| >TP53-P128S SPALNKMFC    | 2836  | >TP53-P128S SSALNKMFC    | 295   | 2541  |
| >TP53-P128S SPALNKMFC    | 16115 | >TP53-P128S SSALNKMFC    | 13    | 16102 |
| >TP53-P128S SPALNKMFCQ   | 20131 | >TP53-P128S SSALNKMFCQ   | 80    | 20051 |
| >TP53-P128S SPALNKMFC    | 326   | >TP53-P128S SSALNKMFC    | 7042  | 6716  |
| >TP53-P128S SPALNKMFC    | 9626  | >TP53-P128S SSALNKMFC    | 266   | 9360  |
| >TP53-P128S SPALNKMFC    | 450   | >TP53-P128S SSALNKMFC    | 16430 | 15980 |
| >TP53-P128S YSPALNKMFC   | 384   | >TP53-P128S YSSALNKMFC   | 2477  | 2093  |
| >TP53-P128S YSPALNKMFC   | 1020  | >TP53-P128S YSSALNKMFC   | 164   | 856   |
| >TP53-P128S YSPALNKMFC   | 104   | >TP53-P128S YSSALNKMFC   | 21    | 83    |
| >TP53-P128S YSPALNKMFC   | 586   | >TP53-P128S YSSALNKMFC   | 22    | 564   |
| >TP53-P128S YSPALNKMFC   | 43    | >TP53-P128S YSSALNKMFC   | 5     | 38    |
| >TP53-P128S YSPALNKMFC   | 12049 | >TP53-P128S YSSALNKMFC   | 304   | 11745 |
| >TP53-P128S YSPALNKMFC   | 40    | >TP53-P128S YSSALNKMFC   | 9484  | 9444  |
| >TP53-P128S YSPALNKMFC   | 3     | >TP53-P128S YSSALNKMFC   | 162   | 159   |
| >TP53-P128S YSPALNKMFCQ  | 22    | >TP53-P128S YSSALNKMFCQ  | 2226  | 2204  |
| >TP53-P128S YSPALNKMFCQ  | 124   | >TP53-P128S YSSALNKMFCQ  | 11052 | 10928 |
| >TP53-P128S YSPALNKMFC   | 67    | >TP53-P128S YSSALNKMFC   | 14    | 53    |
| >TP53-P128S YSPALNKMFC   | 103   | >TP53-P128S YSSALNKMFC   | 8     | 95    |
| >TP53-P128S TYSPALNKMFC  | 136   | >TP53-P128S TYSSALNKMFC  | 153   | 17    |
| >TP53-P128S TYSPALNKMFC  | 220   | >TP53-P128S TYSSALNKMFC  | 211   | 9     |
| >TP53-P128S TYSPALNKMFC  | 179   | >TP53-P128S TYSSALNKMFC  | 119   | 60    |
| >TP53-P128S TYSPALNKMFC  | 64    | >TP53-P128S TYSSALNKMFC  | 62    | 2     |
| >TP53-P128S TYSPALNKMFC  | 27    | >TP53-P128S TYSSALNKMFC  | 42    | 15    |
| >TP53-P128S TYSPALNKMFC  | 5     | >TP53-P128S TYSSALNKMFC  | 5     | 0     |
| >TP53-P128S TYSPALNKMFC  | 586   | >TP53-P128S TYSSALNKMFC  | 359   | 227   |
| >TP53-P128S TYSPALNKMFC  | 222   | >TP53-P128S TYSSALNKMFC  | 292   | 70    |
| >TP53-P128S TYSPALNKMFC  | 1077  | >TP53-P128S TYSSALNKMFC  | 447   | 630   |
| >TP53-P128S TYSPALNKMFC  | 866   | >TP53-P128S TYSSALNKMFC  | 343   | 523   |
| >TP53-P128S TYSPALNKMFC  | 439   | >TP53-P128S TYSSALNKMFC  | 522   | 83    |
| >TP53-P128S CTYSPALNKMFC | 30    | >TP53-P128S CTYSSALNKMFC | 29    | 1     |



|                         |      |                         |      |      |
|-------------------------|------|-------------------------|------|------|
| >TP53-P128S CTYSPALNK   | 11   | >TP53-P128S CTYSSALNK   | 10   | 1    |
| >TP53-P128S CTYSPALNKM  | 343  | >TP53-P128S CTYSSALNKM  | 315  | 28   |
| >TP53-P128S CTYSPALNKM  | 63   | >TP53-P128S CTYSSALNKM  | 82   | 19   |
| >TP53-P128S CTYSPALNKM  | 380  | >TP53-P128S CTYSSALNKM  | 792  | 412  |
| >TP53-P128S CTYSPALNKM  | 246  | >TP53-P128S CTYSSALNKM  | 306  | 60   |
| >TP53-P128S CTYSPALNK   | 215  | >TP53-P128S CTYSSALNK   | 58   | 157  |
| >TP53-P128S CTYSPALNK   | 30   | >TP53-P128S CTYSSALNK   | 11   | 19   |
| >TP53-P128S CTYSPALNKM  | 488  | >TP53-P128S CTYSSALNKM  | 1109 | 621  |
| >TP53-P128S CTYSPALNKM  | 610  | >TP53-P128S CTYSSALNKM  | 306  | 304  |
| >TP53-P128S CTYSPALNKM  | 23   | >TP53-P128S CTYSSALNKM  | 15   | 8    |
| >TP53-P128S CTYSPALNKM  | 24   | >TP53-P128S CTYSSALNKM  | 18   | 6    |
| >TP53-P128S CTYSPALNKM  | 5    | >TP53-P128S CTYSSALNKM  | 4    | 1    |
| >TP53-P128S CTYSPALNKM  | 627  | >TP53-P128S CTYSSALNKM  | 301  | 326  |
| >TP53-P128S CTYSPALNKM  | 76   | >TP53-P128S CTYSSALNKM  | 87   | 11   |
| >TP53-P128S CTYSPALNKM  | 146  | >TP53-P128S CTYSSALNKM  | 158  | 12   |
| >TP53-P128S CTYSPALNKM  | 30   | >TP53-P128S CTYSSALNKM  | 26   | 4    |
| >TP53-P128S CTYSPALNKM  | 13   | >TP53-P128S CTYSSALNKM  | 19   | 6    |
| >TP53-P128S CTYSPALNK   | 572  | >TP53-P128S CTYSSALNK   | 174  | 398  |
| >TP53-P128S CTYSPALNKM  | 358  | >TP53-P128S CTYSSALNKM  | 474  | 116  |
| >TP53-P128S TCTYSPALNKI | 453  | >TP53-P128S TCTYSSALNKI | 233  | 220  |
| >TP53-P128S VTCTYSPA    | 415  | >TP53-P128S VTCTYSSA    | 661  | 246  |
| >TP53-P128S VTCTYSPAL   | 397  | >TP53-P128S VTCTYSSAL   | 1822 | 1425 |
| >TP53-P128S VTCTYSPALN  | 80   | >TP53-P128S VTCTYSSALN  | 67   | 13   |
| >TP53-P128S VTCTYSPALN  | 14   | >TP53-P128S VTCTYSSALN  | 13   | 1    |
| >TP53-P128S VTCTYSPALN  | 146  | >TP53-P128S VTCTYSSALN  | 168  | 22   |
| >TP53-P128S VTCTYSPALN  | 490  | >TP53-P128S VTCTYSSALN  | 279  | 211  |
| >TP53-P128S VTCTYSPAL   | 1053 | >TP53-P128S VTCTYSSAL   | 430  | 623  |
| >TP53-P128S VTCTYSPAL   | 12   | >TP53-P128S VTCTYSSAL   | 9    | 3    |
| >TP53-P128S VTCTYSPAL   | 66   | >TP53-P128S VTCTYSSAL   | 176  | 110  |
| >TP53-P128S VTCTYSPAL   | 951  | >TP53-P128S VTCTYSSAL   | 24   | 927  |
| >TP53-P128S VTCTYSPAL   | 862  | >TP53-P128S VTCTYSSAL   | 317  | 545  |
| >TP53-P128S SVTCTYSPAL  | 874  | >TP53-P128S SVTCTYSSAL  | 391  | 483  |
| >TP53-P128S SVTCTYSPA   | 118  | >TP53-P128S SVTCTYSSA   | 168  | 50   |
| >TP53-P128S SVTCTYSPA   | 468  | >TP53-P128S SVTCTYSSA   | 965  | 497  |
| >TP53-P128S SVTCTYSPAL  | 268  | >TP53-P128S SVTCTYSSAL  | 552  | 284  |
| >TP53-P128S SVTCTYSPA   | 241  | >TP53-P128S SVTCTYSSA   | 545  | 304  |
| >TP53-P128S SVTCTYSPA   | 45   | >TP53-P128S SVTCTYSSA   | 170  | 125  |
| >TP53-P128S SVTCTYSPAL  | 149  | >TP53-P128S SVTCTYSSAL  | 601  | 452  |
| >TP53-P128S SVTCTYSPA   | 2869 | >TP53-P128S SVTCTYSSA   | 497  | 2372 |
| >TP53-P128S SVTCTYSPAL  | 1253 | >TP53-P128S SVTCTYSSAL  | 306  | 947  |
| >TP53-P128S KSVTCTYSPAI | 821  | >TP53-P128S KSVTCTYSSAI | 432  | 389  |
| >TP53-P128S KSVTCTYSPAI | 396  | >TP53-P128S KSVTCTYSSAI | 765  | 369  |
| >TP53-P128S KSVTCTYSPA  | 149  | >TP53-P128S KSVTCTYSSA  | 261  | 112  |

|                        |       |                         |      |       |
|------------------------|-------|-------------------------|------|-------|
| >TP53-P128S KSVTCTYSPA | 488   | >TP53-P128S KSVTCTYSSAI | 1445 | 957   |
| >TP53-P128S KSVTCTYSPA | 107   | >TP53-P128S KSVTCTYSSAI | 133  | 26    |
| >TP53-P128S KSVTCTYSPA | 349   | >TP53-P128S KSVTCTYSSA  | 368  | 19    |
| >TP53-P128S KSVTCTYSPA | 89    | >TP53-P128S KSVTCTYSSAI | 46   | 43    |
| >TP53-P128S KSVTCTYSPA | 6     | >TP53-P128S KSVTCTYSSAI | 5    | 1     |
| >TP53-P128S KSVTCTYSPA | 113   | >TP53-P128S KSVTCTYSSAI | 202  | 89    |
| >TP53-P128S KSVTCTYSPA | 198   | >TP53-P128S KSVTCTYSSAI | 458  | 260   |
| >TP53-P128S KSVTCTYSPA | 882   | >TP53-P128S KSVTCTYSSAI | 76   | 806   |
| >TP53-P128S KSVTCTYSPA | 766   | >TP53-P128S KSVTCTYSSAI | 364  | 402   |
| >TP53-P128S AKSVTCTYSP | 483   | >TP53-P128S AKSVTCTYSS  | 582  | 99    |
| >TP53-P128S AKSVTCTYSP | 56    | >TP53-P128S AKSVTCTYSS  | 57   | 1     |
| >TP53-P142A KMFCQLAKT  | 14273 | >TP53-P142A KMFCQLAKT   | 87   | 14186 |
| >TP53-P142A KMFCQLAKT  | 3651  | >TP53-P142A KMFCQLAKT   | 76   | 3575  |
| >TP53-P142A KMFCQLAKT  | 6128  | >TP53-P142A KMFCQLAKT   | 40   | 6088  |
| >TP53-P142A KMFCQLAKT  | 5563  | >TP53-P142A KMFCQLAKT   | 173  | 5390  |
| >TP53-P142A KMFCQLAKT  | 5136  | >TP53-P142A KMFCQLAKT   | 43   | 5093  |
| >TP53-P142A KMFCQLAKT  | 4667  | >TP53-P142A KMFCQLAKT   | 46   | 4621  |
| >TP53-P142A KMFCQLAKT  | 13526 | >TP53-P142A KMFCQLAKT   | 59   | 13467 |
| >TP53-P142A KMFCQLAKT  | 23106 | >TP53-P142A KMFCQLAKT   | 170  | 22936 |
| >TP53-P142A KMFCQLAKT  | 802   | >TP53-P142A KMFCQLAKT   | 230  | 572   |
| >TP53-P142A KTCPVQLWV  | 575   | >TP53-P142A KTCVQLWV    | 349  | 226   |
| >TP53-P142A KTCPVQLWV  | 125   | >TP53-P142A KTCVQLWV    | 205  | 80    |
| >TP53-P142A KTCPVQLWV  | 53    | >TP53-P142A KTCVQLWV    | 51   | 2     |
| >TP53-P142A KTCPVQLWV  | 338   | >TP53-P142A KTCVQLWV    | 392  | 54    |
| >TP53-P142A KTCPVQLWV  | 202   | >TP53-P142A KTCVQLWV    | 555  | 353   |
| >TP53-P142A KTCPVQLWV  | 224   | >TP53-P142A KTCVQLWV    | 232  | 8     |
| >TP53-P142A KTCPVQLW   | 165   | >TP53-P142A KTCVQLW     | 76   | 89    |
| >TP53-P142A KTCPVQLW   | 4     | >TP53-P142A KTCVQLW     | 6    | 2     |
| >TP53-P142A KTCPVQLWV  | 118   | >TP53-P142A KTCVQLWV    | 291  | 173   |
| >TP53-P142A KTCPVQLW   | 34    | >TP53-P142A KTCVQLW     | 39   | 5     |
| >TP53-P142A KTCPVQLW   | 10    | >TP53-P142A KTCVQLW     | 10   | 0     |
| >TP53-P142A KTCPVQLWV  | 254   | >TP53-P142A KTCVQLWV    | 492  | 238   |
| >TP53-P142A KTCPVQLWV  | 272   | >TP53-P142A KTCVQLWV    | 1145 | 873   |
| >TP53-P142A AKTCPVQL   | 41    | >TP53-P142A AKTCVQL     | 58   | 17    |
| >TP53-P142A AKTCPVQLW  | 192   | >TP53-P142A AKTCVQLW    | 223  | 31    |
| >TP53-P142A LAKTCPVQLV | 482   | >TP53-P142A LAKTCVQLV   | 510  | 28    |
| >TP53-P142A LAKTCPVQL  | 417   | >TP53-P142A LAKTCVQL    | 614  | 197   |
| >TP53-P142A LAKTCPVQL  | 405   | >TP53-P142A LAKTCVQL    | 98   | 307   |
| >TP53-P142A LAKTCPVQLV | 45    | >TP53-P142A LAKTCVQLV   | 28   | 17    |
| >TP53-P142A LAKTCPVQLV | 42    | >TP53-P142A LAKTCVQLV   | 41   | 1     |
| >TP53-P142A LAKTCPVQLV | 42    | >TP53-P142A LAKTCVQLV   | 39   | 3     |
| >TP53-P142A LAKTCPVQLV | 689   | >TP53-P142A LAKTCVQLV   | 205  | 484   |
| >TP53-P142A QLAKTCPV   | 58    | >TP53-P142A QLAKTCV     | 124  | 66    |

|                       |       |                       |      |       |
|-----------------------|-------|-----------------------|------|-------|
| >TP53-P142AQLAKTCPV   | 13    | >TP53-P142AQLAKTCAV   | 11   | 2     |
| >TP53-P142AQLAKTCPVQL | 315   | >TP53-P142AQLAKTCAVQI | 462  | 147   |
| >TP53-P142AQLAKTCPV   | 10    | >TP53-P142AQLAKTCAV   | 11   | 1     |
| >TP53-P142AQLAKTCPVQL | 383   | >TP53-P142AQLAKTCAVQI | 1303 | 920   |
| >TP53-P142AQLAKTCPV   | 37    | >TP53-P142AQLAKTCAV   | 65   | 28    |
| >TP53-P142AQLAKTCPV   | 14    | >TP53-P142AQLAKTCAV   | 13   | 1     |
| >TP53-P142AQLAKTCPVQL | 323   | >TP53-P142AQLAKTCAVQI | 672  | 349   |
| >TP53-P142AQLAKTCPV   | 30    | >TP53-P142AQLAKTCAV   | 25   | 5     |
| >TP53-P142AQLAKTCPV   | 10    | >TP53-P142AQLAKTCAV   | 18   | 8     |
| >TP53-P142AQLAKTCPVQL | 177   | >TP53-P142AQLAKTCAVQI | 371  | 194   |
| >TP53-P142AQLAKTCPV   | 10    | >TP53-P142AQLAKTCAV   | 10   | 0     |
| >TP53-P142AQLAKTCPVQL | 117   | >TP53-P142AQLAKTCAVQI | 160  | 43    |
| >TP53-P142AQLAKTCPV   | 3     | >TP53-P142AQLAKTCAV   | 3    | 0     |
| >TP53-P142AQLAKTCPVQL | 20    | >TP53-P142AQLAKTCAVQI | 17   | 3     |
| >TP53-P142AQLAKTCPV   | 217   | >TP53-P142AQLAKTCAV   | 362  | 145   |
| >TP53-P142AQLAKTCPV   | 60    | >TP53-P142AQLAKTCAV   | 208  | 148   |
| >TP53-P142AQLAKTCPVQL | 343   | >TP53-P142AQLAKTCAVQI | 272  | 71    |
| >TP53-P142AQLAKTCPV   | 121   | >TP53-P142AQLAKTCAV   | 311  | 190   |
| >TP53-P142AQLAKTCPV   | 173   | >TP53-P142AQLAKTCAV   | 285  | 112   |
| >TP53-P142AQLAKTCPV   | 22    | >TP53-P142AQLAKTCAV   | 28   | 6     |
| >TP53-P142AQLAKTCPVC  | 463   | >TP53-P142AQLAKTCAVC  | 209  | 254   |
| >TP53-P142AQLAKTCPV   | 136   | >TP53-P142AQLAKTCAV   | 121  | 15    |
| >TP53-P142AQLAKTCPV   | 77    | >TP53-P142AQLAKTCAV   | 108  | 31    |
| >TP53-P142AQLAKTCPV   | 457   | >TP53-P142AQLAKTCAV   | 1111 | 654   |
| >TP53-P142AQLAKTCPV   | 268   | >TP53-P142AQLAKTCAV   | 236  | 32    |
| >TP53-P142AQLAKTCPVC  | 155   | >TP53-P142AQLAKTCAVC  | 173  | 18    |
| >TP53-P142AQLAKTCPVC  | 231   | >TP53-P142AQLAKTCAVC  | 170  | 61    |
| >TP53-P142AFCQLAKTCPV | 443   | >TP53-P142AFCQLAKTCAV | 549  | 106   |
| >TP53-P142FKMFCQLAKT( | 6085  | >TP53-P142FKMFCQLAKT( | 39   | 6046  |
| >TP53-P142FKMFCQLAKT( | 7725  | >TP53-P142FKMFCQLAKT( | 46   | 7679  |
| >TP53-P142FKMFCQLAKT( | 802   | >TP53-P142FKMFCQLAKT( | 3    | 799   |
| >TP53-P142FKMFCQLAKT( | 23656 | >TP53-P142FKMFCQLAKT( | 312  | 23344 |
| >TP53-P142FTCPVQLWV   | 1807  | >TP53-P142FTCFVQLWV   | 470  | 1337  |
| >TP53-P142FKTCPVQLWV  | 125   | >TP53-P142FKTCFVQLWV  | 630  | 505   |
| >TP53-P142FKTCPVQLWV  | 53    | >TP53-P142FKTCFVQLWV  | 104  | 51    |
| >TP53-P142FKTCPVQLWV  | 338   | >TP53-P142FKTCFVQLWV  | 1145 | 807   |
| >TP53-P142FKTCPVQLWV  | 202   | >TP53-P142FKTCFVQLWV  | 2481 | 2279  |
| >TP53-P142FKTCPVQLWV  | 224   | >TP53-P142FKTCFVQLWV  | 275  | 51    |
| >TP53-P142FKTCPVQLW   | 165   | >TP53-P142FKTCFVQLW   | 43   | 122   |
| >TP53-P142FKTCPVQLWV  | 1821  | >TP53-P142FKTCFVQLWV  | 443  | 1378  |
| >TP53-P142FKTCPVQLW   | 4     | >TP53-P142FKTCFVQLW   | 8    | 4     |
| >TP53-P142FKTCPVQLWV  | 118   | >TP53-P142FKTCFVQLWV  | 358  | 240   |
| >TP53-P142FKTCPVQLW   | 34    | >TP53-P142FKTCFVQLW   | 46   | 12    |

|                        |      |                        |      |      |
|------------------------|------|------------------------|------|------|
| >TP53-P142F KTCPVQLW   | 10   | >TP53-P142F KTCFVQLW   | 11   | 1    |
| >TP53-P142F KTCPVQLWV  | 254  | >TP53-P142F KTCFVQLWV  | 217  | 37   |
| >TP53-P142F KTCPVQLWV  | 272  | >TP53-P142F KTCFVQLWV  | 1139 | 867  |
| >TP53-P142F AKTCPVQL   | 41   | >TP53-P142F AKTCFVQL   | 30   | 11   |
| >TP53-P142F AKTCPVQLW  | 192  | >TP53-P142F AKTCFVQLW  | 88   | 104  |
| >TP53-P142F AKTCPVQLW  | 503  | >TP53-P142F AKTCFVQLW  | 354  | 149  |
| >TP53-P142F AKTCPVQLW  | 3099 | >TP53-P142F AKTCFVQLW  | 407  | 2692 |
| >TP53-P142F LAKTCPVQLW | 482  | >TP53-P142F LAKTCFVQLW | 504  | 22   |
| >TP53-P142F LAKTCPVQL  | 3437 | >TP53-P142F LAKTCFVQL  | 235  | 3202 |
| >TP53-P142F LAKTCPVQL  | 417  | >TP53-P142F LAKTCFVQL  | 210  | 207  |
| >TP53-P142F LAKTCPVQL  | 405  | >TP53-P142F LAKTCFVQL  | 1197 | 792  |
| >TP53-P142F LAKTCPVQLW | 45   | >TP53-P142F LAKTCFVQLW | 70   | 25   |
| >TP53-P142F LAKTCPVQLW | 42   | >TP53-P142F LAKTCFVQLW | 41   | 1    |
| >TP53-P142F LAKTCPVQLW | 42   | >TP53-P142F LAKTCFVQLW | 43   | 1    |
| >TP53-P142F LAKTCPVQLW | 689  | >TP53-P142F LAKTCFVQLW | 58   | 631  |
| >TP53-P142F LAKTCPVQLW | 1046 | >TP53-P142F LAKTCFVQLW | 469  | 577  |
| >TP53-P142F QLAKTCPV   | 58   | >TP53-P142F QLAKTCFV   | 36   | 22   |
| >TP53-P142F QLAKTCPV   | 13   | >TP53-P142F QLAKTCFV   | 5    | 8    |
| >TP53-P142F QLAKTCPVQL | 315  | >TP53-P142F QLAKTCFVQL | 270  | 45   |
| >TP53-P142F QLAKTCPV   | 10   | >TP53-P142F QLAKTCFV   | 12   | 2    |
| >TP53-P142F QLAKTCPVQL | 383  | >TP53-P142F QLAKTCFVQL | 422  | 39   |
| >TP53-P142F QLAKTCPV   | 37   | >TP53-P142F QLAKTCFV   | 22   | 15   |
| >TP53-P142F QLAKTCPV   | 14   | >TP53-P142F QLAKTCFV   | 9    | 5    |
| >TP53-P142F QLAKTCPVQL | 323  | >TP53-P142F QLAKTCFVQL | 363  | 40   |
| >TP53-P142F QLAKTCPV   | 30   | >TP53-P142F QLAKTCFV   | 18   | 12   |
| >TP53-P142F QLAKTCPV   | 10   | >TP53-P142F QLAKTCFV   | 8    | 2    |
| >TP53-P142F QLAKTCPVQL | 177  | >TP53-P142F QLAKTCFVQL | 165  | 12   |
| >TP53-P142F QLAKTCPV   | 10   | >TP53-P142F QLAKTCFV   | 4    | 6    |
| >TP53-P142F QLAKTCPVQL | 117  | >TP53-P142F QLAKTCFVQL | 100  | 17   |
| >TP53-P142F QLAKTCPV   | 3    | >TP53-P142F QLAKTCFV   | 4    | 1    |
| >TP53-P142F QLAKTCPVQL | 20   | >TP53-P142F QLAKTCFVQL | 12   | 8    |
| >TP53-P142F QLAKTCPV   | 217  | >TP53-P142F QLAKTCFV   | 149  | 68   |
| >TP53-P142F QLAKTCPV   | 60   | >TP53-P142F QLAKTCFV   | 95   | 35   |
| >TP53-P142F QLAKTCPVQL | 343  | >TP53-P142F QLAKTCFVQL | 155  | 188  |
| >TP53-P142F CQLAKTCPV  | 3581 | >TP53-P142F CQLAKTCFV  | 335  | 3246 |
| >TP53-P142F CQLAKTCPV  | 121  | >TP53-P142F CQLAKTCFV  | 79   | 42   |
| >TP53-P142F CQLAKTCPV  | 565  | >TP53-P142F CQLAKTCFV  | 249  | 316  |
| >TP53-P142F CQLAKTCPV  | 173  | >TP53-P142F CQLAKTCFV  | 273  | 100  |
| >TP53-P142F CQLAKTCPV  | 22   | >TP53-P142F CQLAKTCFV  | 13   | 9    |
| >TP53-P142F CQLAKTCPVC | 463  | >TP53-P142F CQLAKTCFVC | 61   | 402  |
| >TP53-P142F CQLAKTCPV  | 136  | >TP53-P142F CQLAKTCFV  | 68   | 68   |
| >TP53-P142F CQLAKTCPV  | 77   | >TP53-P142F CQLAKTCFV  | 68   | 9    |
| >TP53-P142F CQLAKTCPV  | 457  | >TP53-P142F CQLAKTCFV  | 83   | 374  |

|                         |       |                         |      |       |
|-------------------------|-------|-------------------------|------|-------|
| >TP53-P142F CQLAKTCPV   | 720   | >TP53-P142F CQLAKTCFV   | 69   | 651   |
| >TP53-P142F CQLAKTCP    | 7895  | >TP53-P142F CQLAKTCF    | 15   | 7880  |
| >TP53-P142F CQLAKTCPV   | 268   | >TP53-P142F CQLAKTCFV   | 1059 | 791   |
| >TP53-P142F CQLAKTCPVC  | 155   | >TP53-P142F CQLAKTCFVC  | 145  | 10    |
| >TP53-P142F CQLAKTCPVC  | 231   | >TP53-P142F CQLAKTCFVC  | 476  | 245   |
| >TP53-P142F FCQLAKTCPV  | 443   | >TP53-P142F FCQLAKTCFV  | 286  | 157   |
| >TP53-P142F MFCQLAKTCI  | 1152  | >TP53-P142F MFCQLAKTCI  | 469  | 683   |
| >TP53-P142F MFCQLAKTCI  | 679   | >TP53-P142F MFCQLAKTCI  | 487  | 192   |
| >TP53-P142F MFCQLAKTCI  | 38734 | >TP53-P142F MFCQLAKTCI  | 96   | 38638 |
| >TP53-P142F MFCQLAKTCI  | 32560 | >TP53-P142F MFCQLAKTCI  | 161  | 32399 |
| >TP53-P142F MFCQLAKTCI  | 19642 | >TP53-P142F MFCQLAKTCI  | 104  | 19538 |
| >TP53-P142F MFCQLAKTCI  | 721   | >TP53-P142F MFCQLAKTCI  | 234  | 487   |
| >TP53-P142F KMFCQLAKTCI | 13317 | >TP53-P142F KMFCQLAKTCI | 270  | 13047 |
| >TP53-P142F KMFCQLAKTCI | 4304  | >TP53-P142F KMFCQLAKTCI | 220  | 4084  |
| >TP53-P142F KMFCQLAKTCI | 802   | >TP53-P142F KMFCQLAKTCI | 112  | 690   |
| >TP53-P142F KTCPVQLWV   | 125   | >TP53-P142F KTCHVQLWV   | 366  | 241   |
| >TP53-P142F KTCPVQLWV   | 53    | >TP53-P142F KTCHVQLWV   | 116  | 63    |
| >TP53-P142F KTCPVQLWV   | 338   | >TP53-P142F KTCHVQLWV   | 880  | 542   |
| >TP53-P142F KTCPVQLWV   | 202   | >TP53-P142F KTCHVQLWV   | 1903 | 1701  |
| >TP53-P142F KTCPVQLWV   | 224   | >TP53-P142F KTCHVQLWV   | 249  | 25    |
| >TP53-P142F KTCPVQLW    | 165   | >TP53-P142F KTCHVQLW    | 96   | 69    |
| >TP53-P142F KTCPVQLW    | 4     | >TP53-P142F KTCHVQLW    | 7    | 3     |
| >TP53-P142F KTCPVQLWV   | 118   | >TP53-P142F KTCHVQLWV   | 279  | 161   |
| >TP53-P142F KTCPVQLW    | 34    | >TP53-P142F KTCHVQLW    | 50   | 16    |
| >TP53-P142F KTCPVQLW    | 10    | >TP53-P142F KTCHVQLW    | 11   | 1     |
| >TP53-P142F KTCPVQLWV   | 254   | >TP53-P142F KTCHVQLWV   | 361  | 107   |
| >TP53-P142F KTCPVQLWV   | 272   | >TP53-P142F KTCHVQLWV   | 1008 | 736   |
| >TP53-P142F AKTCPVQL    | 41    | >TP53-P142F AKTCHVQL    | 46   | 5     |
| >TP53-P142F AKTCPVQLW   | 192   | >TP53-P142F AKTCHVQLW   | 191  | 1     |
| >TP53-P142F LAKTCPVQLV  | 482   | >TP53-P142F LAKTCHVQLV  | 580  | 98    |
| >TP53-P142F LAKTCPVQL   | 417   | >TP53-P142F LAKTCHVQL   | 412  | 5     |
| >TP53-P142F LAKTCPVQL   | 405   | >TP53-P142F LAKTCHVQL   | 233  | 172   |
| >TP53-P142F LAKTCPVQLV  | 45    | >TP53-P142F LAKTCHVQLV  | 42   | 3     |
| >TP53-P142F LAKTCPVQLV  | 42    | >TP53-P142F LAKTCHVQLV  | 47   | 5     |
| >TP53-P142F LAKTCPVQLV  | 42    | >TP53-P142F LAKTCHVQLV  | 46   | 4     |
| >TP53-P142F LAKTCPVQLV  | 689   | >TP53-P142F LAKTCHVQLV  | 196  | 493   |
| >TP53-P142F QLAKTCPV    | 58    | >TP53-P142F QLAKTCHV    | 166  | 108   |
| >TP53-P142F QLAKTCPV    | 13    | >TP53-P142F QLAKTCHV    | 15   | 2     |
| >TP53-P142F QLAKTCPVQL  | 315   | >TP53-P142F QLAKTCHVQL  | 439  | 124   |
| >TP53-P142F QLAKTCPV    | 10    | >TP53-P142F QLAKTCHV    | 16   | 6     |
| >TP53-P142F QLAKTCPVQL  | 383   | >TP53-P142F QLAKTCHVQL  | 1107 | 724   |
| >TP53-P142F QLAKTCPV    | 37    | >TP53-P142F QLAKTCHV    | 67   | 30    |
| >TP53-P142F QLAKTCPV    | 14    | >TP53-P142F QLAKTCHV    | 19   | 5     |

|                        |       |                        |      |       |
|------------------------|-------|------------------------|------|-------|
| >TP53-P142F QLAKTCPVQL | 323   | >TP53-P142F QLAKTCHVQI | 427  | 104   |
| >TP53-P142F QLAKTCPV   | 30    | >TP53-P142F QLAKTCHV   | 28   | 2     |
| >TP53-P142F QLAKTCPV   | 10    | >TP53-P142F QLAKTCHV   | 10   | 0     |
| >TP53-P142F QLAKTCPVQL | 177   | >TP53-P142F QLAKTCHVQI | 302  | 125   |
| >TP53-P142F QLAKTCPV   | 10    | >TP53-P142F QLAKTCHV   | 11   | 1     |
| >TP53-P142F QLAKTCPVQL | 117   | >TP53-P142F QLAKTCHVQI | 212  | 95    |
| >TP53-P142F QLAKTCPV   | 3     | >TP53-P142F QLAKTCHV   | 3    | 0     |
| >TP53-P142F QLAKTCPVQL | 20    | >TP53-P142F QLAKTCHVQI | 11   | 9     |
| >TP53-P142F QLAKTCPV   | 217   | >TP53-P142F QLAKTCHV   | 334  | 117   |
| >TP53-P142F QLAKTCPV   | 60    | >TP53-P142F QLAKTCHV   | 252  | 192   |
| >TP53-P142F QLAKTCPVQL | 343   | >TP53-P142F QLAKTCHVQI | 238  | 105   |
| >TP53-P142F CQLAKTCPV  | 121   | >TP53-P142F CQLAKTCHV  | 485  | 364   |
| >TP53-P142F CQLAKTCPV  | 173   | >TP53-P142F CQLAKTCHV  | 570  | 397   |
| >TP53-P142F CQLAKTCPV  | 22    | >TP53-P142F CQLAKTCHV  | 39   | 17    |
| >TP53-P142F CQLAKTCPVC | 463   | >TP53-P142F CQLAKTCHVC | 374  | 89    |
| >TP53-P142F CQLAKTCPV  | 136   | >TP53-P142F CQLAKTCHV  | 257  | 121   |
| >TP53-P142F CQLAKTCPV  | 77    | >TP53-P142F CQLAKTCHV  | 150  | 73    |
| >TP53-P142F CQLAKTCPV  | 457   | >TP53-P142F CQLAKTCHV  | 226  | 231   |
| >TP53-P142F CQLAKTCPV  | 268   | >TP53-P142F CQLAKTCHV  | 701  | 433   |
| >TP53-P142F CQLAKTCPVC | 155   | >TP53-P142F CQLAKTCHVC | 177  | 22    |
| >TP53-P142F CQLAKTCPVC | 231   | >TP53-P142F CQLAKTCHVC | 487  | 256   |
| >TP53-P142F FCQLAKTCPV | 443   | >TP53-P142F FCQLAKTCHV | 382  | 61    |
| >TP53-P142L KMFCQLAKT( | 14273 | >TP53-P142L KMFCQLAKT( | 37   | 14236 |
| >TP53-P142L KMFCQLAKT( | 3651  | >TP53-P142L KMFCQLAKT( | 12   | 3639  |
| >TP53-P142L KMFCQLAKT( | 6128  | >TP53-P142L KMFCQLAKT( | 53   | 6075  |
| >TP53-P142L KMFCQLAKT( | 5563  | >TP53-P142L KMFCQLAKT( | 123  | 5440  |
| >TP53-P142L KMFCQLAKT( | 5136  | >TP53-P142L KMFCQLAKT( | 15   | 5121  |
| >TP53-P142L KMFCQLAKT( | 4667  | >TP53-P142L KMFCQLAKT( | 15   | 4652  |
| >TP53-P142L KMFCQLAKT( | 13526 | >TP53-P142L KMFCQLAKT( | 20   | 13506 |
| >TP53-P142L KMFCQLAKT( | 24105 | >TP53-P142L KMFCQLAKT( | 292  | 23813 |
| >TP53-P142L KMFCQLAKT( | 23106 | >TP53-P142L KMFCQLAKT( | 39   | 23067 |
| >TP53-P142L KMFCQLAKT( | 6085  | >TP53-P142L KMFCQLAKT( | 138  | 5947  |
| >TP53-P142L KMFCQLAKT( | 7725  | >TP53-P142L KMFCQLAKT( | 498  | 7227  |
| >TP53-P142L KMFCQLAKT( | 802   | >TP53-P142L KMFCQLAKT( | 15   | 787   |
| >TP53-P142L KTCPVQLWV  | 125   | >TP53-P142L KTCLVQLWV  | 748  | 623   |
| >TP53-P142L KTCPVQLWV  | 53    | >TP53-P142L KTCLVQLWV  | 286  | 233   |
| >TP53-P142L KTCPVQLWV  | 338   | >TP53-P142L KTCLVQLWV  | 1434 | 1096  |
| >TP53-P142L KTCPVQLWV  | 202   | >TP53-P142L KTCLVQLWV  | 2668 | 2466  |
| >TP53-P142L KTCPVQLWV  | 224   | >TP53-P142L KTCLVQLWV  | 576  | 352   |
| >TP53-P142L KTCPVQLW   | 165   | >TP53-P142L KTCLVQLW   | 110  | 55    |
| >TP53-P142L KTCPVQLW   | 4     | >TP53-P142L KTCLVQLW   | 8    | 4     |
| >TP53-P142L KTCPVQLWV  | 118   | >TP53-P142L KTCLVQLWV  | 354  | 236   |
| >TP53-P142L KTCPVQLW   | 34    | >TP53-P142L KTCLVQLW   | 50   | 16    |

|                        |      |                        |      |      |
|------------------------|------|------------------------|------|------|
| >TP53-P142L KTCPVQLW   | 10   | >TP53-P142L KTCLVQLW   | 11   | 1    |
| >TP53-P142L KTCPVQLWV  | 254  | >TP53-P142L KTCLVQLWV  | 559  | 305  |
| >TP53-P142L KTCPVQLWV  | 272  | >TP53-P142L KTCLVQLWV  | 1431 | 1159 |
| >TP53-P142L AKTCPVQL   | 41   | >TP53-P142L AKTCLVQL   | 110  | 69   |
| >TP53-P142L AKTCPVQLW  | 192  | >TP53-P142L AKTCLVQLW  | 400  | 208  |
| >TP53-P142L LAKTCPVQLV | 830  | >TP53-P142L LAKTCLVQLM | 486  | 344  |
| >TP53-P142L LAKTCPVQLV | 482  | >TP53-P142L LAKTCLVQLM | 425  | 57   |
| >TP53-P142L LAKTCPVQL  | 417  | >TP53-P142L LAKTCLVQL  | 845  | 428  |
| >TP53-P142L LAKTCPVQL  | 405  | >TP53-P142L LAKTCLVQL  | 326  | 79   |
| >TP53-P142L LAKTCPVQLV | 45   | >TP53-P142L LAKTCLVQLM | 51   | 6    |
| >TP53-P142L LAKTCPVQLV | 42   | >TP53-P142L LAKTCLVQLM | 45   | 3    |
| >TP53-P142L LAKTCPVQLV | 42   | >TP53-P142L LAKTCLVQLM | 40   | 2    |
| >TP53-P142L LAKTCPVQLV | 689  | >TP53-P142L LAKTCLVQLM | 194  | 495  |
| >TP53-P142L QLAKTCPV   | 58   | >TP53-P142L QLAKTCLV   | 82   | 24   |
| >TP53-P142L QLAKTCPV   | 13   | >TP53-P142L QLAKTCLV   | 11   | 2    |
| >TP53-P142L QLAKTCPVQL | 315  | >TP53-P142L QLAKTCLVQL | 205  | 110  |
| >TP53-P142L QLAKTCPV   | 10   | >TP53-P142L QLAKTCLV   | 15   | 5    |
| >TP53-P142L QLAKTCPVQL | 383  | >TP53-P142L QLAKTCLVQL | 278  | 105  |
| >TP53-P142L QLAKTCPV   | 37   | >TP53-P142L QLAKTCLV   | 87   | 50   |
| >TP53-P142L QLAKTCPV   | 14   | >TP53-P142L QLAKTCLV   | 25   | 11   |
| >TP53-P142L QLAKTCPVQL | 323  | >TP53-P142L QLAKTCLVQL | 445  | 122  |
| >TP53-P142L QLAKTCPV   | 30   | >TP53-P142L QLAKTCLV   | 85   | 55   |
| >TP53-P142L QLAKTCPV   | 10   | >TP53-P142L QLAKTCLV   | 15   | 5    |
| >TP53-P142L QLAKTCPVQL | 177  | >TP53-P142L QLAKTCLVQL | 274  | 97   |
| >TP53-P142L QLAKTCPV   | 10   | >TP53-P142L QLAKTCLV   | 18   | 8    |
| >TP53-P142L QLAKTCPVQL | 117  | >TP53-P142L QLAKTCLVQL | 179  | 62   |
| >TP53-P142L QLAKTCPV   | 3    | >TP53-P142L QLAKTCLV   | 4    | 1    |
| >TP53-P142L QLAKTCPVQL | 20   | >TP53-P142L QLAKTCLVQL | 15   | 5    |
| >TP53-P142L QLAKTCPV   | 217  | >TP53-P142L QLAKTCLV   | 453  | 236  |
| >TP53-P142L QLAKTCPV   | 60   | >TP53-P142L QLAKTCLV   | 374  | 314  |
| >TP53-P142L QLAKTCPVQL | 343  | >TP53-P142L QLAKTCLVQL | 180  | 163  |
| >TP53-P142L CQLAKTCPV  | 121  | >TP53-P142L CQLAKTCLV  | 164  | 43   |
| >TP53-P142L CQLAKTCPV  | 173  | >TP53-P142L CQLAKTCLV  | 340  | 167  |
| >TP53-P142L CQLAKTCPV  | 22   | >TP53-P142L CQLAKTCLV  | 36   | 14   |
| >TP53-P142L CQLAKTCPVC | 463  | >TP53-P142L CQLAKTCLVC | 98   | 365  |
| >TP53-P142L CQLAKTCPV  | 136  | >TP53-P142L CQLAKTCLV  | 287  | 151  |
| >TP53-P142L CQLAKTCPV  | 77   | >TP53-P142L CQLAKTCLV  | 385  | 308  |
| >TP53-P142L CQLAKTCPV  | 457  | >TP53-P142L CQLAKTCLV  | 530  | 73   |
| >TP53-P142L CQLAKTCP   | 7895 | >TP53-P142L CQLAKTCL   | 343  | 7552 |
| >TP53-P142L CQLAKTCPV  | 268  | >TP53-P142L CQLAKTCLV  | 1271 | 1003 |
| >TP53-P142L CQLAKTCPVC | 155  | >TP53-P142L CQLAKTCLVC | 296  | 141  |
| >TP53-P142L CQLAKTCPVC | 231  | >TP53-P142L CQLAKTCLVC | 614  | 383  |
| >TP53-P142L FCQLAKTCPV | 443  | >TP53-P142L FCQLAKTCLV | 327  | 116  |

|                        |     |                        |     |     |
|------------------------|-----|------------------------|-----|-----|
| >TP53-P142S KTCPVQLWV  | 575 | >TP53-P142S KTCSVQLWV  | 406 | 169 |
| >TP53-P142S KTCPVQLWV  | 125 | >TP53-P142S KTCSVQLWV  | 384 | 259 |
| >TP53-P142S KTCPVQLWV  | 53  | >TP53-P142S KTCSVQLWV  | 58  | 5   |
| >TP53-P142S KTCPVQLWV  | 338 | >TP53-P142S KTCSVQLWV  | 506 | 168 |
| >TP53-P142S KTCPVQLWV  | 202 | >TP53-P142S KTCSVQLWV  | 665 | 463 |
| >TP53-P142S KTCPVQLWV  | 224 | >TP53-P142S KTCSVQLWV  | 419 | 195 |
| >TP53-P142S KTCPVQLW   | 165 | >TP53-P142S KTCSVQLW   | 98  | 67  |
| >TP53-P142S KTCPVQLW   | 4   | >TP53-P142S KTCSVQLW   | 6   | 2   |
| >TP53-P142S KTCPVQLWV  | 118 | >TP53-P142S KTCSVQLWV  | 484 | 366 |
| >TP53-P142S KTCPVQLW   | 34  | >TP53-P142S KTCSVQLW   | 46  | 12  |
| >TP53-P142S KTCPVQLW   | 10  | >TP53-P142S KTCSVQLW   | 11  | 1   |
| >TP53-P142S KTCPVQLWV  | 254 | >TP53-P142S KTCSVQLWV  | 117 | 137 |
| >TP53-P142S KTCPVQLWV  | 272 | >TP53-P142S KTCSVQLWV  | 892 | 620 |
| >TP53-P142S AKTCPVQL   | 41  | >TP53-P142S AKTCSVQL   | 25  | 16  |
| >TP53-P142S AKTCPVQLW  | 192 | >TP53-P142S AKTCSVQLW  | 61  | 131 |
| >TP53-P142S AKTCPVQLW  | 503 | >TP53-P142S AKTCSVQLW  | 230 | 273 |
| >TP53-P142S LAKTCPVQLW | 482 | >TP53-P142S LAKTCSVQLW | 495 | 13  |
| >TP53-P142S LAKTCPVQL  | 417 | >TP53-P142S LAKTCSVQL  | 381 | 36  |
| >TP53-P142S LAKTCPVQL  | 405 | >TP53-P142S LAKTCSVQL  | 136 | 269 |
| >TP53-P142S LAKTCPVQLV | 45  | >TP53-P142S LAKTCSVQLV | 20  | 25  |
| >TP53-P142S LAKTCPVQLV | 42  | >TP53-P142S LAKTCSVQLV | 44  | 2   |
| >TP53-P142S LAKTCPVQLV | 42  | >TP53-P142S LAKTCSVQLV | 34  | 8   |
| >TP53-P142S LAKTCPVQLV | 689 | >TP53-P142S LAKTCSVQLV | 172 | 517 |
| >TP53-P142S QLAKTCPV   | 58  | >TP53-P142S QLAKTCSV   | 138 | 80  |
| >TP53-P142S QLAKTCPV   | 13  | >TP53-P142S QLAKTCSV   | 12  | 1   |
| >TP53-P142S QLAKTCPVQL | 315 | >TP53-P142S QLAKTCSVQL | 352 | 37  |
| >TP53-P142S QLAKTCPV   | 10  | >TP53-P142S QLAKTCSV   | 10  | 0   |
| >TP53-P142S QLAKTCPVQL | 383 | >TP53-P142S QLAKTCSVQL | 727 | 344 |
| >TP53-P142S QLAKTCPV   | 37  | >TP53-P142S QLAKTCSV   | 86  | 49  |
| >TP53-P142S QLAKTCPV   | 14  | >TP53-P142S QLAKTCSV   | 17  | 3   |
| >TP53-P142S QLAKTCPVQL | 323 | >TP53-P142S QLAKTCSVQL | 648 | 325 |
| >TP53-P142S QLAKTCPV   | 30  | >TP53-P142S QLAKTCSV   | 41  | 11  |
| >TP53-P142S QLAKTCPV   | 10  | >TP53-P142S QLAKTCSV   | 15  | 5   |
| >TP53-P142S QLAKTCPVQL | 177 | >TP53-P142S QLAKTCSVQL | 321 | 144 |
| >TP53-P142S QLAKTCPV   | 10  | >TP53-P142S QLAKTCSV   | 9   | 1   |
| >TP53-P142S QLAKTCPVQL | 117 | >TP53-P142S QLAKTCSVQL | 158 | 41  |
| >TP53-P142S QLAKTCPV   | 3   | >TP53-P142S QLAKTCSV   | 3   | 0   |
| >TP53-P142S QLAKTCPVQL | 20  | >TP53-P142S QLAKTCSVQL | 17  | 3   |
| >TP53-P142S QLAKTCPV   | 217 | >TP53-P142S QLAKTCSV   | 441 | 224 |
| >TP53-P142S QLAKTCPV   | 60  | >TP53-P142S QLAKTCSV   | 293 | 233 |
| >TP53-P142S QLAKTCPVQL | 343 | >TP53-P142S QLAKTCSVQL | 300 | 43  |
| >TP53-P142S CQLAKTCPV  | 121 | >TP53-P142S CQLAKTCSV  | 228 | 107 |
| >TP53-P142S CQLAKTCPV  | 173 | >TP53-P142S CQLAKTCSV  | 268 | 95  |



|                         |       |                         |      |       |
|-------------------------|-------|-------------------------|------|-------|
| >TP53-P142S CQLAKTCPV   | 22    | >TP53-P142S CQLAKTCSV   | 27   | 5     |
| >TP53-P142S CQLAKTCPVC  | 463   | >TP53-P142S CQLAKTCSV   | 194  | 269   |
| >TP53-P142S CQLAKTCPV   | 136   | >TP53-P142S CQLAKTCSV   | 147  | 11    |
| >TP53-P142S CQLAKTCPV   | 77    | >TP53-P142S CQLAKTCSV   | 178  | 101   |
| >TP53-P142S CQLAKTCPV   | 457   | >TP53-P142S CQLAKTCSV   | 607  | 150   |
| >TP53-P142S CQLAKTCPV   | 720   | >TP53-P142S CQLAKTCSV   | 410  | 310   |
| >TP53-P142S CQLAKTCPV   | 268   | >TP53-P142S CQLAKTCSV   | 282  | 14    |
| >TP53-P142S CQLAKTCPVC  | 155   | >TP53-P142S CQLAKTCSV   | 144  | 11    |
| >TP53-P142S CQLAKTCPVC  | 231   | >TP53-P142S CQLAKTCSV   | 230  | 1     |
| >TP53-P142S FCQLAKTCPV  | 443   | >TP53-P142S FCQLAKTCSV  | 219  | 224   |
| >TP53-P142S MFCQLAKTCI  | 679   | >TP53-P142S MFCQLAKTCI  | 342  | 337   |
| >TP53-P142T KMFCQLAKTCI | 14273 | >TP53-P142T KMFCQLAKTCI | 488  | 13785 |
| >TP53-P142T KMFCQLAKTCI | 6128  | >TP53-P142T KMFCQLAKTCI | 308  | 5820  |
| >TP53-P142T KMFCQLAKTCI | 5136  | >TP53-P142T KMFCQLAKTCI | 248  | 4888  |
| >TP53-P142T KMFCQLAKTCI | 4667  | >TP53-P142T KMFCQLAKTCI | 378  | 4289  |
| >TP53-P142T KTCPVQLWV   | 125   | >TP53-P142T KTCTVQLWV   | 499  | 374   |
| >TP53-P142T KTCPVQLWV   | 53    | >TP53-P142T KTCTVQLWV   | 135  | 82    |
| >TP53-P142T KTCPVQLWV   | 338   | >TP53-P142T KTCTVQLWV   | 1066 | 728   |
| >TP53-P142T KTCPVQLWV   | 202   | >TP53-P142T KTCTVQLWV   | 1177 | 975   |
| >TP53-P142T KTCPVQLWV   | 224   | >TP53-P142T KTCTVQLWV   | 358  | 134   |
| >TP53-P142T KTCPVQLW    | 165   | >TP53-P142T KTCTVQLW    | 95   | 70    |
| >TP53-P142T KTCPVQLW    | 4     | >TP53-P142T KTCTVQLW    | 8    | 4     |
| >TP53-P142T KTCPVQLWV   | 118   | >TP53-P142T KTCTVQLWV   | 658  | 540   |
| >TP53-P142T KTCPVQLW    | 34    | >TP53-P142T KTCTVQLW    | 48   | 14    |
| >TP53-P142T KTCPVQLW    | 10    | >TP53-P142T KTCTVQLW    | 11   | 1     |
| >TP53-P142T KTCPVQLWV   | 254   | >TP53-P142T KTCTVQLWV   | 354  | 100   |
| >TP53-P142T KTCPVQLWV   | 272   | >TP53-P142T KTCTVQLWV   | 1196 | 924   |
| >TP53-P142T AKTCPVQL    | 41    | >TP53-P142T AKTCTVQL    | 35   | 6     |
| >TP53-P142T AKTCPVQLW   | 192   | >TP53-P142T AKTCTVQLW   | 97   | 95    |
| >TP53-P142T AKTCPVQLW   | 503   | >TP53-P142T AKTCTVQLW   | 339  | 164   |
| >TP53-P142T LAKTCPVQL   | 482   | >TP53-P142T LAKTCTVQLW  | 424  | 58    |
| >TP53-P142T LAKTCPVQL   | 417   | >TP53-P142T LAKTCTVQL   | 479  | 62    |
| >TP53-P142T LAKTCPVQL   | 405   | >TP53-P142T LAKTCTVQL   | 330  | 75    |
| >TP53-P142T LAKTCPVQLV  | 45    | >TP53-P142T LAKTCTVQLW  | 37   | 8     |
| >TP53-P142T LAKTCPVQLV  | 42    | >TP53-P142T LAKTCTVQLW  | 44   | 2     |
| >TP53-P142T LAKTCPVQLV  | 42    | >TP53-P142T LAKTCTVQLW  | 30   | 12    |
| >TP53-P142T LAKTCPVQLV  | 689   | >TP53-P142T LAKTCTVQLW  | 119  | 570   |
| >TP53-P142T LAKTCPVQLV  | 1046  | >TP53-P142T LAKTCTVQLW  | 427  | 619   |
| >TP53-P142T QLAKTCPV    | 58    | >TP53-P142T QLAKTCTV    | 129  | 71    |
| >TP53-P142T QLAKTCPV    | 13    | >TP53-P142T QLAKTCTV    | 20   | 7     |
| >TP53-P142T QLAKTCPVQL  | 315   | >TP53-P142T QLAKTCTVQL  | 271  | 44    |
| >TP53-P142T QLAKTCPV    | 10    | >TP53-P142T QLAKTCTV    | 12   | 2     |
| >TP53-P142T QLAKTCPVQL  | 383   | >TP53-P142T QLAKTCTVQL  | 420  | 37    |

|                         |       |                         |       |       |
|-------------------------|-------|-------------------------|-------|-------|
| >TP53-P142TQLAKTCPV     | 37    | >TP53-P142TQLAKTCTV     | 93    | 56    |
| >TP53-P142TQLAKTCPV     | 14    | >TP53-P142TQLAKTCTV     | 14    | 0     |
| >TP53-P142TQLAKTCPVQL   | 323   | >TP53-P142TQLAKTCTVQL   | 640   | 317   |
| >TP53-P142TQLAKTCPV     | 30    | >TP53-P142TQLAKTCTV     | 27    | 3     |
| >TP53-P142TQLAKTCPV     | 10    | >TP53-P142TQLAKTCTV     | 12    | 2     |
| >TP53-P142TQLAKTCPVQL   | 177   | >TP53-P142TQLAKTCTVQL   | 305   | 128   |
| >TP53-P142TQLAKTCPV     | 10    | >TP53-P142TQLAKTCTV     | 9     | 1     |
| >TP53-P142TQLAKTCPVQL   | 117   | >TP53-P142TQLAKTCTVQL   | 135   | 18    |
| >TP53-P142TQLAKTCPV     | 3     | >TP53-P142TQLAKTCTV     | 3     | 0     |
| >TP53-P142TQLAKTCPVQL   | 20    | >TP53-P142TQLAKTCTVQL   | 14    | 6     |
| >TP53-P142TQLAKTCPV     | 217   | >TP53-P142TQLAKTCTV     | 639   | 422   |
| >TP53-P142TQLAKTCPV     | 60    | >TP53-P142TQLAKTCTV     | 325   | 265   |
| >TP53-P142TQLAKTCPVQL   | 343   | >TP53-P142TQLAKTCTVQL   | 248   | 95    |
| >TP53-P142TQQLAKTCPV    | 121   | >TP53-P142TQQLAKTCTV    | 241   | 120   |
| >TP53-P142TQQLAKTCPV    | 173   | >TP53-P142TQQLAKTCTV    | 359   | 186   |
| >TP53-P142TQQLAKTCPV    | 22    | >TP53-P142TQQLAKTCTV    | 21    | 1     |
| >TP53-P142TQQLAKTCPVC   | 463   | >TP53-P142TQQLAKTCTVC   | 173   | 290   |
| >TP53-P142TQQLAKTCPV    | 136   | >TP53-P142TQQLAKTCTV    | 80    | 56    |
| >TP53-P142TQQLAKTCPV    | 77    | >TP53-P142TQQLAKTCTV    | 49    | 28    |
| >TP53-P142TQQLAKTCPV    | 457   | >TP53-P142TQQLAKTCTV    | 260   | 197   |
| >TP53-P142TQQLAKTCPV    | 720   | >TP53-P142TQQLAKTCTV    | 237   | 483   |
| >TP53-P142TQQLAKTCPV    | 268   | >TP53-P142TQQLAKTCTV    | 385   | 117   |
| >TP53-P142TQQLAKTCPVC   | 155   | >TP53-P142TQQLAKTCTVC   | 163   | 8     |
| >TP53-P142TQQLAKTCPVC   | 231   | >TP53-P142TQQLAKTCTVC   | 228   | 3     |
| >TP53-P142TFCQLAKTCPV   | 443   | >TP53-P142TFCQLAKTCTV   | 185   | 258   |
| >TP53-P142TMFCQLAKTCI   | 679   | >TP53-P142TMFCQLAKTC    | 305   | 374   |
| >TP53-P151A PPPGTRVRAI  | 370   | >TP53-P151A APPGTRVRAI  | 492   | 122   |
| >TP53-P151A PPPGTRVRAI  | 450   | >TP53-P151A APPGTRVRAI  | 151   | 299   |
| >TP53-P151A PPPGTRVRAI  | 1827  | >TP53-P151A APPGTRVRAI  | 106   | 1721  |
| >TP53-P151A PPPGTRVRAI  | 8825  | >TP53-P151A APPGTRVRAI  | 351   | 8474  |
| >TP53-P151A TPPP GTRVRA | 482   | >TP53-P151A TAPP GTRVRA | 33500 | 33018 |
| >TP53-P151A TPPP GTRV   | 14096 | >TP53-P151A TAPP GTRV   | 429   | 13667 |
| >TP53-P151A TPPP GTRVR  | 6341  | >TP53-P151A TAPP GTRVR  | 488   | 5853  |
| >TP53-P151A TPPP GTRV   | 2295  | >TP53-P151A TAPP GTRV   | 48    | 2247  |
| >TP53-P151A TPPP GTRVRA | 32    | >TP53-P151A TAPP GTRVRA | 2413  | 2381  |
| >TP53-P151A TPPP GTRVRA | 139   | >TP53-P151A TAPP GTRVRA | 631   | 492   |
| >TP53-P151A TPPP GTRV   | 273   | >TP53-P151A TAPP GTRV   | 82    | 191   |
| >TP53-P151A TPPP GTRVRA | 727   | >TP53-P151A TAPP GTRVRA | 24    | 703   |
| >TP53-P151A CPVQLWVDS   | 681   | >TP53-P151A CPVQLWVDS   | 71    | 610   |
| >TP53-P151A CPVQLWVDS   | 635   | >TP53-P151A CPVQLWVDS   | 18    | 617   |
| >TP53-P151A STPPP GTRV  | 1710  | >TP53-P151A STAPP GTRV  | 277   | 1433  |
| >TP53-P151A STPPP GTRV  | 136   | >TP53-P151A STAPP GTRV  | 85    | 51    |
| >TP53-P151A STPPP GTRV  | 743   | >TP53-P151A STAPP GTRV  | 259   | 484   |

|                         |       |                         |       |       |
|-------------------------|-------|-------------------------|-------|-------|
| >TP53-P151A STPPP GTRV  | 116   | >TP53-P151A STAPP GTRV  | 56    | 60    |
| >TP53-P151A STPPP GTR   | 2503  | >TP53-P151A STAPP GTR   | 261   | 2242  |
| >TP53-P151A STPPP GTR   | 925   | >TP53-P151A STAPP GTR   | 180   | 745   |
| >TP53-P151A STPPP GTR   | 352   | >TP53-P151A STAPP GTR   | 38    | 314   |
| >TP53-P151A STPPP GTRVR | 129   | >TP53-P151A STAPP GTRVR | 39    | 90    |
| >TP53-P151A STPPP GTRV  | 18    | >TP53-P151A STAPP GTRV  | 8     | 10    |
| >TP53-P151A STPPP GTRVR | 82    | >TP53-P151A STAPP GTRVR | 23    | 59    |
| >TP53-P151A STPPP GTRV  | 512   | >TP53-P151A STAPP GTRV  | 25    | 487   |
| >TP53-P151A STPPP GTRV  | 1690  | >TP53-P151A STAPP GTRV  | 50    | 1640  |
| >TP53-P151A STPPP GTRV  | 4     | >TP53-P151A STAPP GTRV  | 182   | 178   |
| >TP53-P151A STPPP GTRVR | 96    | >TP53-P151A STAPP GTRVR | 7321  | 7225  |
| >TP53-P151A STPPP GTRVR | 54    | >TP53-P151A STAPP GTRVR | 5538  | 5484  |
| >TP53-P151A STPPP GTRV  | 259   | >TP53-P151A STAPP GTRV  | 14    | 245   |
| >TP53-P151A STPPP GTR   | 1920  | >TP53-P151A STAPP GTR   | 220   | 1700  |
| >TP53-P151A STPPP GTRVR | 2937  | >TP53-P151A STAPP GTRVR | 313   | 2624  |
| >TP53-P151A STPPP GTRV  | 311   | >TP53-P151A STAPP GTRV  | 124   | 187   |
| >TP53-P151A DSTPPP GTR  | 203   | >TP53-P151A DSTAPP GTR  | 202   | 1     |
| >TP53-P151A DSTPPP GTRV | 372   | >TP53-P151A DSTAPP GTRV | 382   | 10    |
| >TP53-P151A DSTPPP GTR  | 161   | >TP53-P151A DSTAPP GTR  | 100   | 61    |
| >TP53-P151A DSTPPP GTRV | 208   | >TP53-P151A DSTAPP GTRV | 141   | 67    |
| >TP53-P151A DSTPPP GTRV | 866   | >TP53-P151A DSTAPP GTRV | 144   | 722   |
| >TP53-P151A WVDSTPPP G  | 489   | >TP53-P151A WVDSTAPP G  | 420   | 69    |
| >TP53-P151A LWVDSTPP    | 386   | >TP53-P151A LWVDSTAP    | 206   | 180   |
| >TP53-P151A LWVDSTPPP   | 467   | >TP53-P151A LWVDSTAPP   | 466   | 1     |
| >TP53-P151A LWVDSTPPP   | 485   | >TP53-P151A LWVDSTAPP   | 435   | 50    |
| >TP53-P151A QLWVDSTP    | 9064  | >TP53-P151A QLWVDSTA    | 121   | 8943  |
| >TP53-P151A QLWVDSTP    | 12851 | >TP53-P151A QLWVDSTA    | 154   | 12697 |
| >TP53-P151A QLWVDSTP    | 13059 | >TP53-P151A QLWVDSTA    | 123   | 12936 |
| >TP53-P151A QLWVDSTP    | 15893 | >TP53-P151A QLWVDSTA    | 55    | 15838 |
| >TP53-P151A VQLWVDSTP   | 3211  | >TP53-P151A VQLWVDSTA   | 48    | 3163  |
| >TP53-P151A VQLWVDSTP   | 12174 | >TP53-P151A VQLWVDSTA   | 134   | 12040 |
| >TP53-P151A VQLWVDSTP   | 16816 | >TP53-P151A VQLWVDSTA   | 264   | 16552 |
| >TP53-P151F PPPGTRVRAM  | 370   | >TP53-P151F HPPGTRVRAI  | 315   | 55    |
| >TP53-P151F PPPGTRVRAM  | 450   | >TP53-P151F HPPGTRVRAI  | 476   | 26    |
| >TP53-P151F PPPGTRVRAM  | 1827  | >TP53-P151F HPPGTRVRAI  | 199   | 1628  |
| >TP53-P151F PPPGTRVRAM  | 8825  | >TP53-P151F HPPGTRVRAI  | 330   | 8495  |
| >TP53-P151F PPPGTRVRA   | 2027  | >TP53-P151F HPPGTRVRA   | 137   | 1890  |
| >TP53-P151F PPPGTRVRAM  | 1897  | >TP53-P151F HPPGTRVRAI  | 100   | 1797  |
| >TP53-P151F PPPGTRVR    | 4110  | >TP53-P151F HPPGTRVR    | 298   | 3812  |
| >TP53-P151F TPPP GTRVRA | 482   | >TP53-P151F THPPGTRVR/  | 37315 | 36833 |
| >TP53-P151F TPPP GTRVRA | 32    | >TP53-P151F THPPGTRVR/  | 13830 | 13798 |
| >TP53-P151F TPPP GTRVRA | 139   | >TP53-P151F THPPGTRVR/  | 10975 | 10836 |
| >TP53-P151F TPPP GTRV   | 273   | >TP53-P151F THPPGTRV    | 7913  | 7640  |

|                        |       |                        |       |       |
|------------------------|-------|------------------------|-------|-------|
| >TP53-P151F CPVQLWVDS  | 681   | >TP53-P151F CPVQLWVDS  | 24    | 657   |
| >TP53-P151F STPPPGRV   | 136   | >TP53-P151F STHPPGRV   | 59    | 77    |
| >TP53-P151F STPPPGRV   | 116   | >TP53-P151F STHPPGRV   | 82    | 34    |
| >TP53-P151F STPPPGR    | 2503  | >TP53-P151F STHPPGR    | 480   | 2023  |
| >TP53-P151F STPPPGR    | 13160 | >TP53-P151F STHPPGR    | 457   | 12703 |
| >TP53-P151F STPPPGRVR  | 13585 | >TP53-P151F STHPPGRVR  | 476   | 13109 |
| >TP53-P151F STPPPGRVR  | 7320  | >TP53-P151F STHPPGRVR  | 89    | 7231  |
| >TP53-P151F STPPPGR    | 925   | >TP53-P151F STHPPGR    | 93    | 832   |
| >TP53-P151F STPPPGRVR  | 730   | >TP53-P151F STHPPGRVR  | 471   | 259   |
| >TP53-P151F STPPPGR    | 352   | >TP53-P151F STHPPGR    | 104   | 248   |
| >TP53-P151F STPPPGRVR  | 129   | >TP53-P151F STHPPGRVR  | 277   | 148   |
| >TP53-P151F STPPPGRV   | 18    | >TP53-P151F STHPPGRV   | 20    | 2     |
| >TP53-P151F STPPPGRVR  | 82    | >TP53-P151F STHPPGRVR  | 124   | 42    |
| >TP53-P151F STPPPGRV   | 512   | >TP53-P151F STHPPGRV   | 351   | 161   |
| >TP53-P151F STPPPGRV   | 1690  | >TP53-P151F STHPPGRV   | 49    | 1641  |
| >TP53-P151F STPPPGRV   | 4     | >TP53-P151F STHPPGRV   | 1148  | 1144  |
| >TP53-P151F STPPPGRVR  | 96    | >TP53-P151F STHPPGRVR  | 13677 | 13581 |
| >TP53-P151F STPPPGRVR  | 54    | >TP53-P151F STHPPGRVR  | 11751 | 11697 |
| >TP53-P151F STPPPGRV   | 259   | >TP53-P151F STHPPGRV   | 29    | 230   |
| >TP53-P151F STPPPGRV   | 311   | >TP53-P151F STHPPGRV   | 216   | 95    |
| >TP53-P151F DSTPPPGR   | 203   | >TP53-P151F DSTHPPGR   | 160   | 43    |
| >TP53-P151F DSTPPPGRV  | 372   | >TP53-P151F DSTHPPGRV  | 317   | 55    |
| >TP53-P151F DSTPPPGR   | 161   | >TP53-P151F DSTHPPGR   | 155   | 6     |
| >TP53-P151F DSTPPPGRV  | 208   | >TP53-P151F DSTHPPGRV  | 204   | 4     |
| >TP53-P151F DSTPPPGRV  | 866   | >TP53-P151F DSTHPPGRV  | 441   | 425   |
| >TP53-P151F WVDSTPPPG  | 489   | >TP53-P151F WVDSTHPPG  | 571   | 82    |
| >TP53-P151F LWVDSTPP   | 386   | >TP53-P151F LWVDSTHP   | 525   | 139   |
| >TP53-P151F LWVDSTPPP  | 467   | >TP53-P151F LWVDSTHPP  | 176   | 291   |
| >TP53-P151F LWVDSTPPPG | 485   | >TP53-P151F LWVDSTHPPG | 315   | 170   |
| >TP53-P151L PPPGTRVRAM | 370   | >TP53-P151L LPPGTRVRAM | 680   | 310   |
| >TP53-P151L PPPGTRVRAM | 450   | >TP53-P151L LPPGTRVRAM | 148   | 302   |
| >TP53-P151L PPPGTRVRAM | 1827  | >TP53-P151L LPPGTRVRAM | 281   | 1546  |
| >TP53-P151L PPPGTRVRA  | 2027  | >TP53-P151L LPPGTRVRA  | 35    | 1992  |
| >TP53-P151L PPPGTRVRAM | 1897  | >TP53-P151L LPPGTRVRAM | 22    | 1875  |
| >TP53-P151L TPPPGRVRA  | 482   | >TP53-P151L TLPPGRVRA  | 36943 | 36461 |
| >TP53-P151L TPPPGRV    | 29972 | >TP53-P151L TLPPGRV    | 157   | 29815 |
| >TP53-P151L TPPPGRV    | 20513 | >TP53-P151L TLPPGRV    | 12    | 20501 |
| >TP53-P151L TPPPGRV    | 16049 | >TP53-P151L TLPPGRV    | 242   | 15807 |
| >TP53-P151L TPPPGRV    | 18964 | >TP53-P151L TLPPGRV    | 11    | 18953 |
| >TP53-P151L TPPPGRV    | 25684 | >TP53-P151L TLPPGRV    | 239   | 25445 |
| >TP53-P151L TPPPGRV    | 20925 | >TP53-P151L TLPPGRV    | 25    | 20900 |
| >TP53-P151L TPPPGRV    | 25516 | >TP53-P151L TLPPGRV    | 142   | 25374 |
| >TP53-P151L TPPPGRV    | 14096 | >TP53-P151L TLPPGRV    | 3     | 14093 |

|                       |       |                       |       |       |
|-----------------------|-------|-----------------------|-------|-------|
| >TP53-P151L TPPPGRVRA | 31012 | >TP53-P151L TLPPGRVRA | 24    | 30988 |
| >TP53-P151L TPPPGRV   | 2295  | >TP53-P151L TLPPGRV   | 174   | 2121  |
| >TP53-P151L TPPPGRVRA | 32    | >TP53-P151L TLPPGRVRA | 7645  | 7613  |
| >TP53-P151L TPPPGRVRA | 139   | >TP53-P151L TLPPGRVRA | 6254  | 6115  |
| >TP53-P151L TPPPGRV   | 273   | >TP53-P151L TLPPGRV   | 3300  | 3027  |
| >TP53-P151L TPPPGRVRA | 727   | >TP53-P151L TLPPGRVRA | 214   | 513   |
| >TP53-P151L CPVQLWVDS | 24024 | >TP53-P151L CPVQLWVDS | 238   | 23786 |
| >TP53-P151L CPVQLWVDS | 681   | >TP53-P151L CPVQLWVDS | 28    | 653   |
| >TP53-P151L CPVQLWVDS | 2459  | >TP53-P151L CPVQLWVDS | 69    | 2390  |
| >TP53-P151L CPVQLWVDS | 9085  | >TP53-P151L CPVQLWVDS | 152   | 8933  |
| >TP53-P151L CPVQLWVDS | 17011 | >TP53-P151L CPVQLWVDS | 311   | 16700 |
| >TP53-P151L STPPPGRV  | 1981  | >TP53-P151L STLPPGRV  | 313   | 1668  |
| >TP53-P151L STPPPGRV  | 136   | >TP53-P151L STLPPGRV  | 16    | 120   |
| >TP53-P151L STPPPGRV  | 743   | >TP53-P151L STLPPGRV  | 99    | 644   |
| >TP53-P151L STPPPGRV  | 116   | >TP53-P151L STLPPGRV  | 57    | 59    |
| >TP53-P151L STPPPGR   | 2503  | >TP53-P151L STLPPGR   | 178   | 2325  |
| >TP53-P151L STPPPGRVR | 851   | >TP53-P151L STLPPGRVR | 298   | 553   |
| >TP53-P151L STPPPGR   | 925   | >TP53-P151L STLPPGR   | 89    | 836   |
| >TP53-P151L STPPPGRVR | 730   | >TP53-P151L STLPPGRVR | 163   | 567   |
| >TP53-P151L STPPPGR   | 352   | >TP53-P151L STLPPGR   | 234   | 118   |
| >TP53-P151L STPPPGRVR | 129   | >TP53-P151L STLPPGRVR | 263   | 134   |
| >TP53-P151L STPPPGRV  | 18    | >TP53-P151L STLPPGRV  | 61    | 43    |
| >TP53-P151L STPPPGRVR | 82    | >TP53-P151L STLPPGRVR | 573   | 491   |
| >TP53-P151L STPPPGRV  | 512   | >TP53-P151L STLPPGRV  | 12    | 500   |
| >TP53-P151L STPPPGRV  | 1690  | >TP53-P151L STLPPGRV  | 33    | 1657  |
| >TP53-P151L STPPPGRV  | 4     | >TP53-P151L STLPPGRV  | 2268  | 2264  |
| >TP53-P151L STPPPGRVR | 96    | >TP53-P151L STLPPGRVR | 17577 | 17481 |
| >TP53-P151L STPPPGRVR | 54    | >TP53-P151L STLPPGRVR | 14979 | 14925 |
| >TP53-P151L STPPPGRV  | 259   | >TP53-P151L STLPPGRV  | 13    | 246   |
| >TP53-P151L STPPPGR   | 1920  | >TP53-P151L STLPPGR   | 210   | 1710  |
| >TP53-P151L STPPPGRVR | 2937  | >TP53-P151L STLPPGRVR | 292   | 2645  |
| >TP53-P151L STPPPGRV  | 311   | >TP53-P151L STLPPGRV  | 181   | 130   |
| >TP53-P151L DSTPPPGR  | 203   | >TP53-P151L DSTLPPGR  | 107   | 96    |
| >TP53-P151L DSTPPPGRV | 372   | >TP53-P151L DSTLPPGRV | 228   | 144   |
| >TP53-P151L DSTPPPGR  | 161   | >TP53-P151L DSTLPPGR  | 215   | 54    |
| >TP53-P151L DSTPPPGRV | 208   | >TP53-P151L DSTLPPGRV | 257   | 49    |
| >TP53-P151L WVDSTPPP  | 489   | >TP53-P151L WVDSTLPPG | 501   | 12    |
| >TP53-P151L LWVDSTPP  | 386   | >TP53-P151L LWVDSTLP  | 384   | 2     |
| >TP53-P151L LWVDSTPPP | 467   | >TP53-P151L LWVDSTLPP | 350   | 117   |
| >TP53-P151L LWVDSTPPP | 485   | >TP53-P151L LWVDSTLPP | 310   | 175   |
| >TP53-P151L QLWVDSTP  | 22606 | >TP53-P151L QLWVDSTL  | 206   | 22400 |
| >TP53-P151L QLWVDSTP  | 12716 | >TP53-P151L QLWVDSTL  | 316   | 12400 |
| >TP53-P151L QLWVDSTP  | 9064  | >TP53-P151L QLWVDSTL  | 36    | 9028  |

|                        |       |                        |       |       |
|------------------------|-------|------------------------|-------|-------|
| >TP53-P151L QLWVDSTP   | 12851 | >TP53-P151L QLWVDSTL   | 40    | 12811 |
| >TP53-P151L QLWVDSTP   | 13059 | >TP53-P151L QLWVDSTL   | 46    | 13013 |
| >TP53-P151L QLWVDSTP   | 20410 | >TP53-P151L QLWVDSTL   | 50    | 20360 |
| >TP53-P151L QLWVDSTP   | 15893 | >TP53-P151L QLWVDSTL   | 16    | 15877 |
| >TP53-P151L QLWVDSTP   | 8368  | >TP53-P151L QLWVDSTL   | 277   | 8091  |
| >TP53-P151L VQLWVDSTP  | 3211  | >TP53-P151L VQLWVDSTL  | 32    | 3179  |
| >TP53-P151L VQLWVDSTP  | 12174 | >TP53-P151L VQLWVDSTL  | 37    | 12137 |
| >TP53-P151L VQLWVDSTP  | 16816 | >TP53-P151L VQLWVDSTL  | 93    | 16723 |
| >TP53-P151L VQLWVDSTP  | 8594  | >TP53-P151L VQLWVDSTL  | 320   | 8274  |
| >TP53-P151L VQLWVDSTP  | 22785 | >TP53-P151L VQLWVDSTL  | 328   | 22457 |
| >TP53-P151L VQLWVDSTP  | 12587 | >TP53-P151L VQLWVDSTL  | 321   | 12266 |
| >TP53-P151L VQLWVDSTP  | 16237 | >TP53-P151L VQLWVDSTL  | 169   | 16068 |
| >TP53-P151F PPPGTRVRAM | 370   | >TP53-P151F RPPGTRVRAM | 1428  | 1058  |
| >TP53-P151F PPPGTRVRAM | 450   | >TP53-P151F RPPGTRVRAM | 301   | 149   |
| >TP53-P151F PPPGTRVRA  | 9926  | >TP53-P151F RPPGTRVRA  | 165   | 9761  |
| >TP53-P151F PPPGTRVRAM | 1827  | >TP53-P151F RPPGTRVRAM | 37    | 1790  |
| >TP53-P151F PPPGTRVRAM | 8825  | >TP53-P151F RPPGTRVRAM | 99    | 8726  |
| >TP53-P151F PPPGTRVR   | 4110  | >TP53-P151F RPPGTRVR   | 232   | 3878  |
| >TP53-P151F TPPPGRVRA  | 482   | >TP53-P151F TRPPGRVRA  | 33862 | 33380 |
| >TP53-P151F TPPPGRVRA  | 32    | >TP53-P151F TRPPGRVRA  | 15868 | 15836 |
| >TP53-P151F TPPPGRVRA  | 139   | >TP53-P151F TRPPGRVRA  | 14027 | 13888 |
| >TP53-P151F TPPPGRV    | 273   | >TP53-P151F TRPPGRV    | 9951  | 9678  |
| >TP53-P151F TPPPGRVRA  | 34389 | >TP53-P151F TRPPGRVRA  | 493   | 33896 |
| >TP53-P151F CPVQLWVDS  | 681   | >TP53-P151F CPVQLWVDS  | 436   | 245   |
| >TP53-P151F CPVQLWVDS  | 34784 | >TP53-P151F CPVQLWVDS  | 388   | 34396 |
| >TP53-P151F STPPPGRV   | 136   | >TP53-P151F STRPPGRV   | 977   | 841   |
| >TP53-P151F STPPPGRV   | 116   | >TP53-P151F STRPPGRV   | 202   | 86    |
| >TP53-P151F STPPPGR    | 13160 | >TP53-P151F STRPPGR    | 52    | 13108 |
| >TP53-P151F STPPPGRV   | 14732 | >TP53-P151F STRPPGRV   | 107   | 14625 |
| >TP53-P151F STPPPGRVVR | 13585 | >TP53-P151F STRPPGRVVR | 51    | 13534 |
| >TP53-P151F STPPPGRVVR | 7320  | >TP53-P151F STRPPGRVVR | 15    | 7305  |
| >TP53-P151F STPPPGR    | 925   | >TP53-P151F STRPPGR    | 63    | 862   |
| >TP53-P151F STPPPGRVVR | 730   | >TP53-P151F STRPPGRVVR | 156   | 574   |
| >TP53-P151F STPPPGR    | 352   | >TP53-P151F STRPPGR    | 489   | 137   |
| >TP53-P151F STPPPGRVVR | 129   | >TP53-P151F STRPPGRVVR | 882   | 753   |
| >TP53-P151F STPPPGRV   | 18    | >TP53-P151F STRPPGRV   | 585   | 567   |
| >TP53-P151F STPPPGRVVR | 82    | >TP53-P151F STRPPGRVVR | 3772  | 3690  |
| >TP53-P151F STPPPGRV   | 1690  | >TP53-P151F STRPPGRV   | 14    | 1676  |
| >TP53-P151F STPPPGRV   | 4     | >TP53-P151F STRPPGRV   | 1969  | 1965  |
| >TP53-P151F STPPPGRVVR | 96    | >TP53-P151F STRPPGRVVR | 14934 | 14838 |
| >TP53-P151F STPPPGRVVR | 54    | >TP53-P151F STRPPGRVVR | 13722 | 13668 |
| >TP53-P151F STPPPGRV   | 259   | >TP53-P151F STRPPGRV   | 7     | 252   |
| >TP53-P151F STPPPGRVVR | 6289  | >TP53-P151F STRPPGRVVR | 179   | 6110  |

|                       |       |                       |       |       |
|-----------------------|-------|-----------------------|-------|-------|
| >TP53-P151FSTPPPGRV   | 311   | >TP53-P151FSTRPPGTRV  | 672   | 361   |
| >TP53-P151FDSTPPPGR   | 203   | >TP53-P151FDSTRPPGTR  | 202   | 1     |
| >TP53-P151FDSTPPPGRV  | 372   | >TP53-P151FDSTRPPGTRV | 390   | 18    |
| >TP53-P151FDSTPPPGR   | 161   | >TP53-P151FDSTRPPGTR  | 164   | 3     |
| >TP53-P151FDSTPPPGRV  | 208   | >TP53-P151FDSTRPPGTRV | 205   | 3     |
| >TP53-P151FWVDSTPPPG  | 489   | >TP53-P151FWVDSTRPPG  | 1514  | 1025  |
| >TP53-P151FLWVDSTPP   | 386   | >TP53-P151FLWVDSTRP   | 582   | 196   |
| >TP53-P151FLWVDSTPPP  | 467   | >TP53-P151FLWVDSTRPP  | 382   | 85    |
| >TP53-P151FLWVDSTPPPC | 485   | >TP53-P151FLWVDSTRPPC | 416   | 69    |
| >TP53-P151FQLWVDSTP   | 21765 | >TP53-P151FQLWVDSTR   | 210   | 21555 |
| >TP53-P151FQLWVDSTP   | 36099 | >TP53-P151FQLWVDSTR   | 370   | 35729 |
| >TP53-P151FQLWVDSTP   | 40721 | >TP53-P151FQLWVDSTR   | 489   | 40232 |
| >TP53-P151FQLWVDSTP   | 34843 | >TP53-P151FQLWVDSTR   | 331   | 34512 |
| >TP53-P151FVQLWVDSTP  | 22042 | >TP53-P151FVQLWVDSTR  | 87    | 21955 |
| >TP53-P151SPPPGTRVRAM | 370   | >TP53-P151SPPGTRVRAM  | 459   | 89    |
| >TP53-P151SPPPGTRVRAM | 450   | >TP53-P151SPPGTRVRAM  | 126   | 324   |
| >TP53-P151SPPPGTRVRAM | 1827  | >TP53-P151SPPGTRVRAM  | 50    | 1777  |
| >TP53-P151SPPPGTRVRAM | 1897  | >TP53-P151SPPGTRVRAM  | 456   | 1441  |
| >TP53-P151STPPPGRVRA  | 482   | >TP53-P151STSPPGTRVRA | 33881 | 33399 |
| >TP53-P151STPPPGRV    | 2295  | >TP53-P151STSPPGTRV   | 60    | 2235  |
| >TP53-P151STPPPGRVRA  | 32    | >TP53-P151STSPPGTRVRA | 10710 | 10678 |
| >TP53-P151STPPPGRVRA  | 139   | >TP53-P151STSPPGTRVRA | 4054  | 3915  |
| >TP53-P151STPPPGRV    | 273   | >TP53-P151STSPPGTRV   | 10    | 263   |
| >TP53-P151STPPPGRVRA  | 727   | >TP53-P151STSPPGTRVRA | 7     | 720   |
| >TP53-P151SCPVQLWVDS  | 681   | >TP53-P151SCPVQLWVDS  | 89    | 592   |
| >TP53-P151SCPVQLWVDS  | 635   | >TP53-P151SCPVQLWVDS  | 416   | 219   |
| >TP53-P151SSTPPPGRV   | 136   | >TP53-P151SSTSPPGTRV  | 166   | 30    |
| >TP53-P151SSTPPPGRV   | 116   | >TP53-P151SSTSPPGTRV  | 84    | 32    |
| >TP53-P151SSTPPPGR    | 2503  | >TP53-P151SSTSPPGTR   | 214   | 2289  |
| >TP53-P151SSTPPPGRVVR | 851   | >TP53-P151SSTSPPGTRVR | 204   | 647   |
| >TP53-P151SSTPPPGR    | 925   | >TP53-P151SSTSPPGTR   | 174   | 751   |
| >TP53-P151SSTPPPGRVVR | 730   | >TP53-P151SSTSPPGTRVR | 164   | 566   |
| >TP53-P151SSTPPPGR    | 352   | >TP53-P151SSTSPPGTR   | 63    | 289   |
| >TP53-P151SSTPPPGRVVR | 129   | >TP53-P151SSTSPPGTRVR | 64    | 65    |
| >TP53-P151SSTPPPGRV   | 18    | >TP53-P151SSTSPPGTRV  | 15    | 3     |
| >TP53-P151SSTPPPGRVVR | 82    | >TP53-P151SSTSPPGTRVR | 79    | 3     |
| >TP53-P151SSTPPPGRV   | 512   | >TP53-P151SSTSPPGTRV  | 131   | 381   |
| >TP53-P151SSTPPPGRV   | 1690  | >TP53-P151SSTSPPGTRV  | 65    | 1625  |
| >TP53-P151SSTPPPGRV   | 4     | >TP53-P151SSTSPPGTRV  | 451   | 447   |
| >TP53-P151SSTPPPGRVVR | 96    | >TP53-P151SSTSPPGTRVR | 10525 | 10429 |
| >TP53-P151SSTPPPGRVVR | 54    | >TP53-P151SSTSPPGTRVR | 8117  | 8063  |
| >TP53-P151SSTPPPGRV   | 259   | >TP53-P151SSTSPPGTRV  | 13    | 246   |
| >TP53-P151SSTPPPGR    | 1920  | >TP53-P151SSTSPPGTR   | 262   | 1658  |

|                        |       |                         |       |       |
|------------------------|-------|-------------------------|-------|-------|
| >TP53-P151SSTPPPGTRVR  | 2937  | >TP53-P151SSTSPPGTRVR   | 375   | 2562  |
| >TP53-P151SSTPPPGTRV   | 311   | >TP53-P151SSTSPPGTRV    | 243   | 68    |
| >TP53-P151SDSTPPPGTR   | 203   | >TP53-P151SDSTSPPGTR    | 149   | 54    |
| >TP53-P151SDSTPPPGTRV  | 372   | >TP53-P151SDSTSPPGTRV   | 308   | 64    |
| >TP53-P151SDSTPPPGTR   | 161   | >TP53-P151SDSTSPPGTR    | 70    | 91    |
| >TP53-P151SDSTPPPGTRV  | 208   | >TP53-P151SDSTSPPGTRV   | 105   | 103   |
| >TP53-P151SDSTPPPGTRV  | 866   | >TP53-P151SDSTSPPGTRV   | 312   | 554   |
| >TP53-P151SWVDSTPPPG   | 489   | >TP53-P151SWVDSTSPPG    | 498   | 9     |
| >TP53-P151SLWVDSTPP    | 386   | >TP53-P151SLWVDSTSP     | 262   | 124   |
| >TP53-P151SLWVDSTPPP   | 467   | >TP53-P151SLWVDSTSP     | 363   | 104   |
| >TP53-P151SLWVDSTPPPC  | 485   | >TP53-P151SLWVDSTSPPC   | 366   | 119   |
| >TP53-P151T PPPGTRVRAM | 370   | >TP53-P151T TTPPGTRVRAM | 297   | 73    |
| >TP53-P151T PPPGTRVRAM | 450   | >TP53-P151T TTPPGTRVRAM | 185   | 265   |
| >TP53-P151T PPPGTRVRAM | 1827  | >TP53-P151T TTPPGTRVRAM | 77    | 1750  |
| >TP53-P151T PPPGTRVRA  | 2027  | >TP53-P151T TTPPGTRVRA  | 441   | 1586  |
| >TP53-P151T PPPGTRVRAM | 1897  | >TP53-P151T TTPPGTRVRAM | 346   | 1551  |
| >TP53-P151T TTPPGTRVRA | 482   | >TP53-P151T TTPPGTRVRA  | 35468 | 34986 |
| >TP53-P151T TTPPGTRV   | 14096 | >TP53-P151T TTPPGTRV    | 316   | 13780 |
| >TP53-P151T TTPPGTRVRA | 10120 | >TP53-P151T TTPPGTRVRA  | 67    | 10053 |
| >TP53-P151T TTPPGTRVRA | 11342 | >TP53-P151T TTPPGTRVRA  | 84    | 11258 |
| >TP53-P151T TTPPGTRVR  | 6341  | >TP53-P151T TTPPGTRVR   | 181   | 6160  |
| >TP53-P151T TTPPGTRV   | 2295  | >TP53-P151T TTPPGTRV    | 13    | 2282  |
| >TP53-P151T TTPPGTRVRA | 21458 | >TP53-P151T TTPPGTRVRA  | 158   | 21300 |
| >TP53-P151T TTPPGTRV   | 6433  | >TP53-P151T TTPPGTRV    | 462   | 5971  |
| >TP53-P151T TTPPGTRVRA | 32    | >TP53-P151T TTPPGTRVRA  | 7176  | 7144  |
| >TP53-P151T TTPPGTRVRA | 25898 | >TP53-P151T TTPPGTRVRA  | 338   | 25560 |
| >TP53-P151T TTPPGTRVRA | 139   | >TP53-P151T TTPPGTRVRA  | 5601  | 5462  |
| >TP53-P151T TTPPGTRV   | 273   | >TP53-P151T TTPPGTRV    | 6     | 267   |
| >TP53-P151T TTPPGTRVR  | 23398 | >TP53-P151T TTPPGTRVR   | 317   | 23081 |
| >TP53-P151T TTPPGTRVRA | 18666 | >TP53-P151T TTPPGTRVRA  | 163   | 18503 |
| >TP53-P151T TTPPGTRVRA | 727   | >TP53-P151T TTPPGTRVRA  | 4     | 723   |
| >TP53-P151T CPVQLWVDS  | 681   | >TP53-P151T CPVQLWVDS   | 69    | 612   |
| >TP53-P151T CPVQLWVDS  | 635   | >TP53-P151T CPVQLWVDS   | 220   | 415   |
| >TP53-P151T STPPPGTRV  | 136   | >TP53-P151T STTPPGTRV   | 233   | 97    |
| >TP53-P151T STPPPGTRV  | 116   | >TP53-P151T STTPPGTRV   | 64    | 52    |
| >TP53-P151T STPPPGTR   | 925   | >TP53-P151T STTPPGTR    | 207   | 718   |
| >TP53-P151T STPPPGTRVR | 730   | >TP53-P151T STTPPGTRVR  | 368   | 362   |
| >TP53-P151T STPPPGTR   | 352   | >TP53-P151T STTPPGTR    | 63    | 289   |
| >TP53-P151T STPPPGTRVR | 129   | >TP53-P151T STTPPGTRVR  | 131   | 2     |
| >TP53-P151T STPPPGTRV  | 18    | >TP53-P151T STTPPGTRV   | 19    | 1     |
| >TP53-P151T STPPPGTRVR | 82    | >TP53-P151T STTPPGTRVR  | 111   | 29    |
| >TP53-P151T STPPPGTRV  | 512   | >TP53-P151T STTPPGTRV   | 153   | 359   |
| >TP53-P151T STPPPGTRV  | 1690  | >TP53-P151T STTPPGTRV   | 73    | 1617  |



|                       |       |                       |       |       |
|-----------------------|-------|-----------------------|-------|-------|
| >TP53-P151TSTPPPGRV   | 4     | >TP53-P151TSTTPPGTRV  | 112   | 108   |
| >TP53-P151TSTPPPGRVR  | 96    | >TP53-P151TSTTPPGTRVR | 4098  | 4002  |
| >TP53-P151TSTPPPGRV   | 54    | >TP53-P151TSTTPPGTRVR | 2697  | 2643  |
| >TP53-P151TSTPPPGRV   | 259   | >TP53-P151TSTTPPGTRV  | 14    | 245   |
| >TP53-P151TSTPPPGRV   | 311   | >TP53-P151TSTTPPGTRV  | 308   | 3     |
| >TP53-P151TDSTPPPGR   | 203   | >TP53-P151TDSTTPPGTR  | 276   | 73    |
| >TP53-P151TDSTPPPGRV  | 372   | >TP53-P151TDSTTPPGTRV | 515   | 143   |
| >TP53-P151TDSTPPPGR   | 161   | >TP53-P151TDSTTPPGTR  | 117   | 44    |
| >TP53-P151TDSTPPPGRV  | 208   | >TP53-P151TDSTTPPGTRV | 162   | 46    |
| >TP53-P151TDSTPPPGRV  | 866   | >TP53-P151TDSTTPPGTRV | 373   | 493   |
| >TP53-P151TWVDSTPPG   | 489   | >TP53-P151TWVDSTPPG   | 355   | 134   |
| >TP53-P151TLWVDSTPP   | 386   | >TP53-P151TLWVDSTPP   | 315   | 71    |
| >TP53-P151TLWVDSTPPP  | 467   | >TP53-P151TLWVDSTPPP  | 377   | 90    |
| >TP53-P151TLWVDSTPPPC | 485   | >TP53-P151TLWVDSTPPC  | 330   | 155   |
| >TP53-P151TQLWVDSTP   | 15893 | >TP53-P151TQLWVDSTT   | 443   | 15450 |
| >TP53-P151TVQLWVDSTP  | 3211  | >TP53-P151TVQLWVDSTT  | 306   | 2905  |
| >TP53-P152APPGTRVRAM  | 68    | >TP53-P152APGTRVRAM   | 11    | 57    |
| >TP53-P152APPGTRVRAM  | 709   | >TP53-P152APGTRVRAM   | 26    | 683   |
| >TP53-P152APPGTRVRAM  | 1110  | >TP53-P152APGTRVRAM   | 251   | 859   |
| >TP53-P152APPGTRVRAM  | 1167  | >TP53-P152APGTRVRAM   | 257   | 910   |
| >TP53-P152APPPGTRVRAM | 370   | >TP53-P152APAGTRVRAM  | 2089  | 1719  |
| >TP53-P152APPPGTRVRAM | 450   | >TP53-P152APAGTRVRAM  | 26825 | 26375 |
| >TP53-P152ATPPPGRVRA  | 482   | >TP53-P152ATPAGTRVRA  | 4322  | 3840  |
| >TP53-P152ATPPPGRV    | 1601  | >TP53-P152ATPAGTRV    | 78    | 1523  |
| >TP53-P152ATPPPGRVRA  | 32    | >TP53-P152ATPAGTRVRA  | 11    | 21    |
| >TP53-P152ATPPPGRVRA  | 139   | >TP53-P152ATPAGTRVRA  | 18    | 121   |
| >TP53-P152ATPPPGRVRA  | 4024  | >TP53-P152ATPAGTRVRA  | 185   | 3839  |
| >TP53-P152ATPPPGRV    | 273   | >TP53-P152ATPAGTRV    | 11356 | 11083 |
| >TP53-P152ATPPPGRVRA  | 13533 | >TP53-P152ATPAGTRVRA  | 283   | 13250 |
| >TP53-P152ASTPPPGRV   | 136   | >TP53-P152ASTPAGTRV   | 145   | 9     |
| >TP53-P152ASTPPPGRV   | 116   | >TP53-P152ASTPAGTRV   | 247   | 131   |
| >TP53-P152ASTPPPGR    | 352   | >TP53-P152ASTPAGTR    | 184   | 168   |
| >TP53-P152ASTPPPGRVR  | 129   | >TP53-P152ASTPAGTRVR  | 63    | 66    |
| >TP53-P152ASTPPPGRV   | 18    | >TP53-P152ASTPAGTRV   | 15    | 3     |
| >TP53-P152ASTPPPGRVR  | 82    | >TP53-P152ASTPAGTRVR  | 78    | 4     |
| >TP53-P152ASTPPPGRV   | 512   | >TP53-P152ASTPAGTRV   | 387   | 125   |
| >TP53-P152ASTPPPGRV   | 4     | >TP53-P152ASTPAGTRV   | 5     | 1     |
| >TP53-P152ASTPPPGRVR  | 96    | >TP53-P152ASTPAGTRVR  | 155   | 59    |
| >TP53-P152ASTPPPGRVR  | 54    | >TP53-P152ASTPAGTRVR  | 83    | 29    |
| >TP53-P152ASTPPPGRV   | 259   | >TP53-P152ASTPAGTRV   | 501   | 242   |
| >TP53-P152ASTPPPGRV   | 311   | >TP53-P152ASTPAGTRV   | 1189  | 878   |
| >TP53-P152ADSTPPPGR   | 203   | >TP53-P152ADSTPAGTR   | 264   | 61    |
| >TP53-P152ADSTPPPGRV  | 372   | >TP53-P152ADSTPAGTRV  | 451   | 79    |

|                        |       |                        |       |       |
|------------------------|-------|------------------------|-------|-------|
| >TP53-P152A DSTPPPGTR  | 161   | >TP53-P152A DSTPAPGTR  | 55    | 106   |
| >TP53-P152A DSTPPPGTRV | 208   | >TP53-P152A DSTPAPGTRV | 111   | 97    |
| >TP53-P152A WVDSTPPPG  | 489   | >TP53-P152A WVDSTPAPG  | 435   | 54    |
| >TP53-P152A LWVDSTPP   | 386   | >TP53-P152A LWVDSTPA   | 173   | 213   |
| >TP53-P152A LWVDSTPPP  | 467   | >TP53-P152A LWVDSTPAP  | 210   | 257   |
| >TP53-P152A LWVDSTPPPC | 485   | >TP53-P152A LWVDSTPAPC | 513   | 28    |
| >TP53-P152A QLWVDSTPP  | 20248 | >TP53-P152A QLWVDSTPA  | 169   | 20079 |
| >TP53-P152A QLWVDSTPP  | 9225  | >TP53-P152A QLWVDSTPA  | 393   | 8832  |
| >TP53-P152A QLWVDSTPP  | 18618 | >TP53-P152A QLWVDSTPA  | 352   | 18266 |
| >TP53-P152A QLWVDSTPP  | 7566  | >TP53-P152A QLWVDSTPA  | 151   | 7415  |
| >TP53-P152A QLWVDSTPP  | 12474 | >TP53-P152A QLWVDSTPA  | 267   | 12207 |
| >TP53-P152A QLWVDSTPP  | 13582 | >TP53-P152A QLWVDSTPA  | 181   | 13401 |
| >TP53-P152A QLWVDSTPP  | 13170 | >TP53-P152A QLWVDSTPA  | 210   | 12960 |
| >TP53-P152A QLWVDSTPP  | 19046 | >TP53-P152A QLWVDSTPA  | 99    | 18947 |
| >TP53-P152A VQLWVDSTP  | 14411 | >TP53-P152A VQLWVDSTP  | 301   | 14110 |
| >TP53-P152A VQLWVDSTP  | 14831 | >TP53-P152A VQLWVDSTP  | 351   | 14480 |
| >TP53-P152A VQLWVDSTP  | 14830 | >TP53-P152A VQLWVDSTP  | 486   | 14344 |
| >TP53-P152L PPGTRVRAM  | 68    | >TP53-P152L LPGTRVRAM  | 13    | 55    |
| >TP53-P152L PPGTRVRAM  | 709   | >TP53-P152L LPGTRVRAM  | 39    | 670   |
| >TP53-P152L PPGTRVRAM  | 1110  | >TP53-P152L LPGTRVRAM  | 75    | 1035  |
| >TP53-P152L PPGTRVRAM  | 1167  | >TP53-P152L LPGTRVRAM  | 84    | 1083  |
| >TP53-P152L PPGTRVRAM  | 3088  | >TP53-P152L LPGTRVRAM  | 75    | 3013  |
| >TP53-P152L PPGTRVRA   | 5528  | >TP53-P152L LPGTRVRA   | 197   | 5331  |
| >TP53-P152L PPPGTRVRAM | 370   | >TP53-P152L PLPGTRVRAM | 6794  | 6424  |
| >TP53-P152L PPPGTRVRAM | 450   | >TP53-P152L PLPGTRVRAM | 32792 | 32342 |
| >TP53-P152L PPPGTRVRA  | 34050 | >TP53-P152L PLPGTRVRA  | 98    | 33952 |
| >TP53-P152L PPPGTRVRAM | 34960 | >TP53-P152L PLPGTRVRAM | 170   | 34790 |
| >TP53-P152L TPPPGRVRA  | 482   | >TP53-P152L TPLPGTRVRA | 517   | 35    |
| >TP53-P152L TPPPGRV    | 6433  | >TP53-P152L TPLPGTRV   | 360   | 6073  |
| >TP53-P152L TPPPGRVRA  | 32    | >TP53-P152L TPLPGTRVRA | 15    | 17    |
| >TP53-P152L TPPPGRVRA  | 139   | >TP53-P152L TPLPGTRVRA | 26    | 113   |
| >TP53-P152L TPPPGRVRA  | 4024  | >TP53-P152L TPLPGTRVRA | 204   | 3820  |
| >TP53-P152L TPPPGRVRA  | 2306  | >TP53-P152L TPLPGTRVRA | 389   | 1917  |
| >TP53-P152L TPPPGRV    | 273   | >TP53-P152L TPLPGTRV   | 23825 | 23552 |
| >TP53-P152L STPPPGTRV  | 136   | >TP53-P152L STPLPGTRV  | 944   | 808   |
| >TP53-P152L STPPPGTRV  | 116   | >TP53-P152L STPLPGTRV  | 1108  | 992   |
| >TP53-P152L STPPPGTR   | 352   | >TP53-P152L STPLPGTR   | 319   | 33    |
| >TP53-P152L STPPPGTRVR | 129   | >TP53-P152L STPLPGTRVR | 218   | 89    |
| >TP53-P152L STPPPGTRV  | 18    | >TP53-P152L STPLPGTRV  | 47    | 29    |
| >TP53-P152L STPPPGTRVR | 82    | >TP53-P152L STPLPGTRVR | 270   | 188   |
| >TP53-P152L STPPPGTRV  | 4     | >TP53-P152L STPLPGTRV  | 8     | 4     |
| >TP53-P152L STPPPGTRVR | 96    | >TP53-P152L STPLPGTRVR | 300   | 204   |
| >TP53-P152L STPPPGTRVR | 54    | >TP53-P152L STPLPGTRVR | 159   | 105   |

|                        |       |                        |       |       |
|------------------------|-------|------------------------|-------|-------|
| >TP53-P152L STPPPGRV   | 259   | >TP53-P152L STPLPGTRV  | 587   | 328   |
| >TP53-P152L STPPPGRV   | 311   | >TP53-P152L STPLPGTRV  | 1681  | 1370  |
| >TP53-P152L DSTPPPGRV  | 203   | >TP53-P152L DSTPLPGTRV | 104   | 99    |
| >TP53-P152L DSTPPPGRV  | 372   | >TP53-P152L DSTPLPGTRV | 235   | 137   |
| >TP53-P152L DSTPPPGRV  | 161   | >TP53-P152L DSTPLPGTRV | 64    | 97    |
| >TP53-P152L DSTPPPGRV  | 208   | >TP53-P152L DSTPLPGTRV | 121   | 87    |
| >TP53-P152L WVDSTPPG   | 489   | >TP53-P152L WVDSTPLPG  | 533   | 44    |
| >TP53-P152L LWVDSTPP   | 17363 | >TP53-P152L LWVDSTPL   | 457   | 16906 |
| >TP53-P152L LWVDSTPP   | 386   | >TP53-P152L LWVDSTPL   | 122   | 264   |
| >TP53-P152L LWVDSTPPP  | 467   | >TP53-P152L LWVDSTPLP  | 466   | 1     |
| >TP53-P152L LWVDSTPPP  | 485   | >TP53-P152L LWVDSTPLPC | 509   | 24    |
| >TP53-P152L QLWVDSTPP  | 20248 | >TP53-P152L QLWVDSTPL  | 53    | 20195 |
| >TP53-P152L QLWVDSTPP  | 9225  | >TP53-P152L QLWVDSTPL  | 48    | 9177  |
| >TP53-P152L QLWVDSTPP  | 7566  | >TP53-P152L QLWVDSTPL  | 125   | 7441  |
| >TP53-P152L QLWVDSTPP  | 12474 | >TP53-P152L QLWVDSTPL  | 72    | 12402 |
| >TP53-P152L QLWVDSTPP  | 13582 | >TP53-P152L QLWVDSTPL  | 40    | 13542 |
| >TP53-P152L QLWVDSTPP  | 13170 | >TP53-P152L QLWVDSTPL  | 67    | 13103 |
| >TP53-P152L QLWVDSTPP  | 20445 | >TP53-P152L QLWVDSTPL  | 47    | 20398 |
| >TP53-P152L QLWVDSTPP  | 19046 | >TP53-P152L QLWVDSTPL  | 24    | 19022 |
| >TP53-P152L QLWVDSTPP  | 6302  | >TP53-P152L QLWVDSTPL  | 169   | 6133  |
| >TP53-P152L QLWVDSTPP  | 13141 | >TP53-P152L QLWVDSTPL  | 372   | 12769 |
| >TP53-P152L QLWVDSTPP  | 5003  | >TP53-P152L QLWVDSTPL  | 212   | 4791  |
| >TP53-P152L VQLWVDSTP  | 14411 | >TP53-P152L VQLWVDSTP  | 269   | 14142 |
| >TP53-P152L VQLWVDSTP  | 14831 | >TP53-P152L VQLWVDSTP  | 107   | 14724 |
| >TP53-P152L VQLWVDSTP  | 14830 | >TP53-P152L VQLWVDSTP  | 190   | 14640 |
| >TP53-P152L VQLWVDSTP  | 3326  | >TP53-P152L VQLWVDSTP  | 85    | 3241  |
| >TP53-P152L VQLWVDSTP  | 21199 | >TP53-P152L VQLWVDSTP  | 152   | 21047 |
| >TP53-P152L VQLWVDSTP  | 12588 | >TP53-P152L VQLWVDSTP  | 158   | 12430 |
| >TP53-P152C PPGTRVRAM  | 68    | >TP53-P152C QPGTRVRAM  | 26    | 42    |
| >TP53-P152C PPGTRVRAM  | 709   | >TP53-P152C QPGTRVRAM  | 140   | 569   |
| >TP53-P152C PPGTRVRAM  | 1110  | >TP53-P152C QPGTRVRAM  | 135   | 975   |
| >TP53-P152C PPGTRVRAM  | 1167  | >TP53-P152C QPGTRVRAM  | 143   | 1024  |
| >TP53-P152C PPGTRVRAM  | 3088  | >TP53-P152C QPGTRVRAM  | 285   | 2803  |
| >TP53-P152C PPPGTRVRAM | 370   | >TP53-P152C PQPGTRVRAI | 4205  | 3835  |
| >TP53-P152C PPPGTRVRAM | 450   | >TP53-P152C PQPGTRVRAI | 28298 | 27848 |
| >TP53-P152C TPPPGRVRA  | 482   | >TP53-P152C TPQPGTRVR/ | 1185  | 703   |
| >TP53-P152C TPPPGRVRA  | 1601  | >TP53-P152C TPQPGTRV   | 441   | 1160  |
| >TP53-P152C TPPPGRVRA  | 32    | >TP53-P152C TPQPGTRVR/ | 16    | 16    |
| >TP53-P152C TPPPGRVRA  | 139   | >TP53-P152C TPQPGTRVR/ | 44    | 95    |
| >TP53-P152C TPPPGRVRA  | 2306  | >TP53-P152C TPQPGTRVR/ | 314   | 1992  |
| >TP53-P152C TPPPGRVRA  | 273   | >TP53-P152C TPQPGTRV   | 24223 | 23950 |
| >TP53-P152C STPPPGRV   | 136   | >TP53-P152C STPQPGTRV  | 188   | 52    |
| >TP53-P152C STPPPGRV   | 116   | >TP53-P152C STPQPGTRV  | 258   | 142   |

|                       |       |                       |       |       |
|-----------------------|-------|-----------------------|-------|-------|
| >TP53-P152CSTPPPGTR   | 352   | >TP53-P152CSTPQPGTR   | 326   | 26    |
| >TP53-P152CSTPPPGTRVR | 129   | >TP53-P152CSTPQPGTRVF | 291   | 162   |
| >TP53-P152CSTPPPGTRV  | 18    | >TP53-P152CSTPQPGTRV  | 54    | 36    |
| >TP53-P152CSTPPPGTRVR | 82    | >TP53-P152CSTPQPGTRVF | 338   | 256   |
| >TP53-P152CSTPPPGTRV  | 4     | >TP53-P152CSTPQPGTRV  | 9     | 5     |
| >TP53-P152CSTPPPGTRVR | 96    | >TP53-P152CSTPQPGTRVF | 320   | 224   |
| >TP53-P152CSTPPPGTRVR | 54    | >TP53-P152CSTPQPGTRVF | 181   | 127   |
| >TP53-P152CSTPPPGTRV  | 259   | >TP53-P152CSTPQPGTRV  | 283   | 24    |
| >TP53-P152CSTPPPGTRV  | 311   | >TP53-P152CSTPQPGTRV  | 1007  | 696   |
| >TP53-P152CSTPPPGTRV  | 203   | >TP53-P152CSTPQPGTRV  | 280   | 77    |
| >TP53-P152CSTPPPGTRV  | 372   | >TP53-P152CSTPQPGTRV  | 448   | 76    |
| >TP53-P152CSTPPPGTRV  | 161   | >TP53-P152CSTPQPGTRV  | 154   | 7     |
| >TP53-P152CSTPPPGTRV  | 208   | >TP53-P152CSTPQPGTRV  | 225   | 17    |
| >TP53-P152CSTPPPGTRV  | 489   | >TP53-P152CSTPQPGTRV  | 1044  | 555   |
| >TP53-P152CSTPPPGTRV  | 386   | >TP53-P152CSTPQPGTRV  | 401   | 15    |
| >TP53-P152CSTPPPGTRV  | 467   | >TP53-P152CSTPQPGTRV  | 759   | 292   |
| >TP53-P152CSTPPPGTRV  | 485   | >TP53-P152CSTPQPGTRV  | 757   | 272   |
| >TP53-P152FPPGTRVRA   | 14220 | >TP53-P152FRPGTRVRA   | 318   | 13902 |
| >TP53-P152FPPGTRVRAM  | 68    | >TP53-P152FRPGTRVRAM  | 7     | 61    |
| >TP53-P152FPPGTRVRAM  | 12122 | >TP53-P152FRPGTRVRAM  | 280   | 11842 |
| >TP53-P152FPPGTRVRAM  | 709   | >TP53-P152FRPGTRVRAM  | 11    | 698   |
| >TP53-P152FPPGTRVRAM  | 1110  | >TP53-P152FRPGTRVRAM  | 126   | 984   |
| >TP53-P152FPPGTRVRAM  | 1167  | >TP53-P152FRPGTRVRAM  | 130   | 1037  |
| >TP53-P152FPPGTRVRAM  | 370   | >TP53-P152FRPGTRVRAM  | 8324  | 7954  |
| >TP53-P152FPPGTRVRAM  | 450   | >TP53-P152FRPGTRVRAM  | 27795 | 27345 |
| >TP53-P152FTPPPGTRVRA | 482   | >TP53-P152FTPRPGTRVRA | 13379 | 12897 |
| >TP53-P152FTPPPGTRV   | 1601  | >TP53-P152FTPRPGTRV   | 28    | 1573  |
| >TP53-P152FTPPPGTRVR  | 13757 | >TP53-P152FTPRPGTRVR  | 381   | 13376 |
| >TP53-P152FTPPPGTRVRA | 32    | >TP53-P152FTPRPGTRVRA | 9     | 23    |
| >TP53-P152FTPPPGTRVRA | 139   | >TP53-P152FTPRPGTRVRA | 65    | 74    |
| >TP53-P152FTPPPGTRV   | 273   | >TP53-P152FTPRPGTRV   | 28456 | 28183 |
| >TP53-P152FSTPPPGTRV  | 136   | >TP53-P152FSTPRPGTRV  | 331   | 195   |
| >TP53-P152FSTPPPGTRV  | 116   | >TP53-P152FSTPRPGTRV  | 293   | 177   |
| >TP53-P152FSTPPPGTR   | 352   | >TP53-P152FSTPRPGTR   | 334   | 18    |
| >TP53-P152FSTPPPGTRVR | 129   | >TP53-P152FSTPRPGTRVR | 498   | 369   |
| >TP53-P152FSTPPPGTRV  | 18    | >TP53-P152FSTPRPGTRV  | 42    | 24    |
| >TP53-P152FSTPPPGTRVR | 82    | >TP53-P152FSTPRPGTRVR | 260   | 178   |
| >TP53-P152FSTPPPGTRV  | 4     | >TP53-P152FSTPRPGTRV  | 16    | 12    |
| >TP53-P152FSTPPPGTRVR | 96    | >TP53-P152FSTPRPGTRVR | 711   | 615   |
| >TP53-P152FSTPPPGTRVR | 54    | >TP53-P152FSTPRPGTRVR | 397   | 343   |
| >TP53-P152FSTPPPGTRV  | 259   | >TP53-P152FSTPRPGTRV  | 357   | 98    |
| >TP53-P152FSTPPPGTRV  | 311   | >TP53-P152FSTPRPGTRV  | 1538  | 1227  |
| >TP53-P152FDSTPPPGTR  | 203   | >TP53-P152FDSTPRPGTR  | 56    | 147   |

|                       |       |                       |       |       |
|-----------------------|-------|-----------------------|-------|-------|
| >TP53-P152FDSTPPPGTRV | 372   | >TP53-P152FDSTPRPGTRV | 155   | 217   |
| >TP53-P152FDSTPPPGTR  | 161   | >TP53-P152FDSTPRPGTR  | 119   | 42    |
| >TP53-P152FDSTPPPGTRV | 208   | >TP53-P152FDSTPRPGTRV | 188   | 20    |
| >TP53-P152FWVDSTPPPG  | 489   | >TP53-P152FWVDSTPRPG  | 1772  | 1283  |
| >TP53-P152FLWVDSTPP   | 25152 | >TP53-P152FLWVDSTPR   | 489   | 24663 |
| >TP53-P152FLWVDSTPP   | 18534 | >TP53-P152FLWVDSTPR   | 18    | 18516 |
| >TP53-P152FLWVDSTPP   | 386   | >TP53-P152FLWVDSTPR   | 481   | 95    |
| >TP53-P152FLWVDSTPPP  | 467   | >TP53-P152FLWVDSTPRP  | 739   | 272   |
| >TP53-P152FLWVDSTPPPC | 485   | >TP53-P152FLWVDSTPRPC | 523   | 38    |
| >TP53-P152FQLWVDSTPP  | 21990 | >TP53-P152FQLWVDSTPR  | 96    | 21894 |
| >TP53-P152FQLWVDSTPP  | 37145 | >TP53-P152FQLWVDSTPR  | 343   | 36802 |
| >TP53-P152FQLWVDSTPP  | 31060 | >TP53-P152FQLWVDSTPR  | 184   | 30876 |
| >TP53-P152FVQLWVDSTP  | 34087 | >TP53-P152FVQLWVDSTP  | 381   | 33706 |
| >TP53-P152FVQLWVDSTP  | 35320 | >TP53-P152FVQLWVDSTP  | 276   | 35044 |
| >TP53-P152SPGTRVRAM   | 68    | >TP53-P152SPGTRVRAM   | 11    | 57    |
| >TP53-P152SPGTRVRAM   | 12122 | >TP53-P152SPGTRVRAM   | 450   | 11672 |
| >TP53-P152SPGTRVRAM   | 709   | >TP53-P152SPGTRVRAM   | 28    | 681   |
| >TP53-P152SPGTRVRAM   | 1110  | >TP53-P152SPGTRVRAM   | 74    | 1036  |
| >TP53-P152SPGTRVRAM   | 1167  | >TP53-P152SPGTRVRAM   | 79    | 1088  |
| >TP53-P152SPGTRVRAM   | 3088  | >TP53-P152SPGTRVRAM   | 444   | 2644  |
| >TP53-P152SPPGTRVRAM  | 370   | >TP53-P152SPSPGTRVRAM | 927   | 557   |
| >TP53-P152SPPGTRVRAM  | 450   | >TP53-P152SPSPGTRVRAM | 27690 | 27240 |
| >TP53-P152SPPGTRVRAM  | 7347  | >TP53-P152SPSPGTRVRAM | 115   | 7232  |
| >TP53-P152STPPPGTRVRA | 482   | >TP53-P152STPSPGTRVRA | 3810  | 3328  |
| >TP53-P152STPPPGTRV   | 1601  | >TP53-P152STPSPGTRV   | 329   | 1272  |
| >TP53-P152STPPPGTRVRA | 32    | >TP53-P152STPSPGTRVRA | 15    | 17    |
| >TP53-P152STPPPGTRVRA | 139   | >TP53-P152STPSPGTRVRA | 22    | 117   |
| >TP53-P152STPPPGTRVRA | 4024  | >TP53-P152STPSPGTRVRA | 277   | 3747  |
| >TP53-P152STPPPGTRV   | 273   | >TP53-P152STPSPGTRV   | 22852 | 22579 |
| >TP53-P152STPPPGTRV   | 136   | >TP53-P152STPSPGTRV   | 180   | 44    |
| >TP53-P152STPPPGTRV   | 116   | >TP53-P152STPSPGTRV   | 295   | 179   |
| >TP53-P152STPPPGTR    | 352   | >TP53-P152STPSPGTR    | 139   | 213   |
| >TP53-P152STPPPGTRVR  | 129   | >TP53-P152STPSPGTRVR  | 72    | 57    |
| >TP53-P152STPPPGTRV   | 18    | >TP53-P152STPSPGTRV   | 24    | 6     |
| >TP53-P152STPPPGTRVR  | 82    | >TP53-P152STPSPGTRVR  | 138   | 56    |
| >TP53-P152STPPPGTRV   | 512   | >TP53-P152STPSPGTRV   | 457   | 55    |
| >TP53-P152STPPPGTRV   | 4     | >TP53-P152STPSPGTRV   | 5     | 1     |
| >TP53-P152STPPPGTRVR  | 96    | >TP53-P152STPSPGTRVR  | 141   | 45    |
| >TP53-P152STPPPGTRVR  | 54    | >TP53-P152STPSPGTRVR  | 78    | 24    |
| >TP53-P152STPPPGTRV   | 259   | >TP53-P152STPSPGTRV   | 107   | 152   |
| >TP53-P152STPPPGTRV   | 311   | >TP53-P152STPSPGTRV   | 996   | 685   |
| >TP53-P152SDSTPPPGTR  | 203   | >TP53-P152SDSTPSPGTR  | 228   | 25    |
| >TP53-P152SDSTPPPGTRV | 372   | >TP53-P152SDSTPSPGTRV | 407   | 35    |

|                        |       |                        |       |       |
|------------------------|-------|------------------------|-------|-------|
| >TP53-P152S DSTPPPGTR  | 161   | >TP53-P152S DSTPSPGTR  | 44    | 117   |
| >TP53-P152S DSTPPPGTRV | 208   | >TP53-P152S DSTPSPGTRV | 93    | 115   |
| >TP53-P152S WVDSTPPPG  | 489   | >TP53-P152S WVDSTPSPG  | 611   | 122   |
| >TP53-P152S LWVDSTPP   | 386   | >TP53-P152S LWVDSTPS   | 503   | 117   |
| >TP53-P152S LWVDSTPPP  | 467   | >TP53-P152S LWVDSTPSP  | 297   | 170   |
| >TP53-P152S LWVDSTPPPC | 485   | >TP53-P152S LWVDSTPSPC | 599   | 114   |
| >TP53-P152T PPGTRVRAM  | 68    | >TP53-P152T TPGTRVRAM  | 22    | 46    |
| >TP53-P152T PPGTRVRAM  | 709   | >TP53-P152T TPGTRVRAM  | 122   | 587   |
| >TP53-P152T PPGTRVRAM  | 1110  | >TP53-P152T TPGTRVRAM  | 174   | 936   |
| >TP53-P152T PPGTRVRAM  | 1167  | >TP53-P152T TPGTRVRAM  | 189   | 978   |
| >TP53-P152T PPGTRVRAM  | 3088  | >TP53-P152T TPGTRVRAM  | 280   | 2808  |
| >TP53-P152T PPPGTRVRAM | 370   | >TP53-P152T PTPGTRVRAM | 4847  | 4477  |
| >TP53-P152T PPPGTRVRAM | 450   | >TP53-P152T PTPGTRVRAM | 31125 | 30675 |
| >TP53-P152T PPPGTRVRAM | 15410 | >TP53-P152T PTPGTRVRAM | 303   | 15107 |
| >TP53-P152T PPPGTRVRAM | 18189 | >TP53-P152T PTPGTRVRAM | 257   | 17932 |
| >TP53-P152T PPPGTRVRAM | 7347  | >TP53-P152T PTPGTRVRAM | 28    | 7319  |
| >TP53-P152T TPPPGRVRA  | 482   | >TP53-P152T TPTPGTRVRA | 1990  | 1508  |
| >TP53-P152T TPPPGRV    | 1601  | >TP53-P152T TPTPGTRV   | 497   | 1104  |
| >TP53-P152T TPPPGRVRA  | 32    | >TP53-P152T TPTPGTRVRA | 15    | 17    |
| >TP53-P152T TPPPGRVRA  | 139   | >TP53-P152T TPTPGTRVRA | 25    | 114   |
| >TP53-P152T TPPPGRV    | 273   | >TP53-P152T TPTPGTRV   | 18962 | 18689 |
| >TP53-P152T STPPPGTRV  | 136   | >TP53-P152T STPTPGTRV  | 443   | 307   |
| >TP53-P152T STPPPGTRV  | 116   | >TP53-P152T STPTPGTRV  | 486   | 370   |
| >TP53-P152T STPPPGTR   | 352   | >TP53-P152T STPTPGTR   | 203   | 149   |
| >TP53-P152T STPPPGTRVR | 129   | >TP53-P152T STPTPGTRVR | 122   | 7     |
| >TP53-P152T STPPPGTRV  | 18    | >TP53-P152T STPTPGTRV  | 25    | 7     |
| >TP53-P152T STPPPGTRVR | 82    | >TP53-P152T STPTPGTRVR | 128   | 46    |
| >TP53-P152T STPPPGTRV  | 4     | >TP53-P152T STPTPGTRV  | 7     | 3     |
| >TP53-P152T STPPPGTRVR | 96    | >TP53-P152T STPTPGTRVR | 257   | 161   |
| >TP53-P152T STPPPGTRVR | 54    | >TP53-P152T STPTPGTRVR | 139   | 85    |
| >TP53-P152T STPPPGTRV  | 259   | >TP53-P152T STPTPGTRV  | 334   | 75    |
| >TP53-P152T STPPPGTRV  | 311   | >TP53-P152T STPTPGTRV  | 1495  | 1184  |
| >TP53-P152T DSTPPPGTR  | 203   | >TP53-P152T DSTPTPGTR  | 223   | 20    |
| >TP53-P152T DSTPPPGTRV | 372   | >TP53-P152T DSTPTPGTRV | 401   | 29    |
| >TP53-P152T DSTPPPGTR  | 161   | >TP53-P152T DSTPTPGTR  | 50    | 111   |
| >TP53-P152T DSTPPPGTRV | 208   | >TP53-P152T DSTPTPGTRV | 105   | 103   |
| >TP53-P152T WVDSTPPPG  | 489   | >TP53-P152T WVDSTPTPG  | 443   | 46    |
| >TP53-P152T LWVDSTPP   | 386   | >TP53-P152T LWVDSTPT   | 411   | 25    |
| >TP53-P152T LWVDSTPPP  | 467   | >TP53-P152T LWVDSTPTP  | 371   | 96    |
| >TP53-P152T LWVDSTPPPC | 485   | >TP53-P152T LWVDSTPTPC | 620   | 135   |
| >TP53-P153A PGTRVRAMA  | 619   | >TP53-P153A AGTRVRAMA  | 108   | 511   |
| >TP53-P153A PGTRVRAMA  | 6722  | >TP53-P153A AGTRVRAMA  | 192   | 6530  |
| >TP53-P153A PGTRVRAMA  | 5004  | >TP53-P153A AGTRVRAMA  | 454   | 4550  |

|                         |       |                        |       |       |
|-------------------------|-------|------------------------|-------|-------|
| >TP53-P153A PPGTRVRAM   | 68    | >TP53-P153A PAGTRVRAM  | 12731 | 12663 |
| >TP53-P153A VQLWVDSTP   | 19615 | >TP53-P153A VQLWVDSTP  | 301   | 19314 |
| >TP53-P153A VQLWVDSTP   | 552   | >TP53-P153A VQLWVDSTP  | 12    | 540   |
| >TP53-P153A VQLWVDSTP   | 9929  | >TP53-P153A VQLWVDSTP  | 105   | 9824  |
| >TP53-P153A VQLWVDSTP   | 12149 | >TP53-P153A VQLWVDSTP  | 130   | 12019 |
| >TP53-P153A PPPGTRVRAM  | 370   | >TP53-P153A PPAGTRVRAM | 9763  | 9393  |
| >TP53-P153A PPPGTRVRAM  | 450   | >TP53-P153A PPAGTRVRAM | 2679  | 2229  |
| >TP53-P153A PPPGTRVRAM  | 8825  | >TP53-P153A PPAGTRVRAM | 442   | 8383  |
| >TP53-P153A TPPPAGTRV   | 763   | >TP53-P153A TPPAGTRV   | 123   | 640   |
| >TP53-P153A TPPPAGTRVRA | 482   | >TP53-P153A TPPAGTRVRA | 185   | 297   |
| >TP53-P153A TPPPAGTRVRA | 32    | >TP53-P153A TPPAGTRVRA | 30    | 2     |
| >TP53-P153A TPPPAGTRVRA | 139   | >TP53-P153A TPPAGTRVRA | 110   | 29    |
| >TP53-P153A TPPPAGTRV   | 273   | >TP53-P153A TPPAGTRV   | 1260  | 987   |
| >TP53-P153A STPPPAGTRV  | 136   | >TP53-P153A STPPAGTRV  | 416   | 280   |
| >TP53-P153A STPPPAGTRV  | 743   | >TP53-P153A STPPAGTRV  | 366   | 377   |
| >TP53-P153A STPPPAGTRV  | 116   | >TP53-P153A STPPAGTRV  | 97    | 19    |
| >TP53-P153A STPPPAGTR   | 352   | >TP53-P153A STPPAGTR   | 146   | 206   |
| >TP53-P153A STPPPAGTRVR | 129   | >TP53-P153A STPPAGTRVR | 140   | 11    |
| >TP53-P153A STPPPAGTRV  | 18    | >TP53-P153A STPPAGTRV  | 25    | 7     |
| >TP53-P153A STPPPAGTRVR | 82    | >TP53-P153A STPPAGTRVR | 115   | 33    |
| >TP53-P153A STPPPAGTRV  | 4     | >TP53-P153A STPPAGTRV  | 4     | 0     |
| >TP53-P153A STPPPAGTRVR | 96    | >TP53-P153A STPPAGTRVR | 114   | 18    |
| >TP53-P153A STPPPAGTRVR | 54    | >TP53-P153A STPPAGTRVR | 57    | 3     |
| >TP53-P153A STPPPAGTRV  | 259   | >TP53-P153A STPPAGTRV  | 817   | 558   |
| >TP53-P153A STPPPAGTRV  | 311   | >TP53-P153A STPPAGTRV  | 351   | 40    |
| >TP53-P153A DSTPPPAGTR  | 203   | >TP53-P153A DSTPPAGTR  | 437   | 234   |
| >TP53-P153A DSTPPPAGTRV | 372   | >TP53-P153A DSTPPAGTRV | 533   | 161   |
| >TP53-P153A DSTPPPAGTR  | 161   | >TP53-P153A DSTPPAGTR  | 84    | 77    |
| >TP53-P153A DSTPPPAGTRV | 208   | >TP53-P153A DSTPPAGTRV | 134   | 74    |
| >TP53-P153A WVDSTPPP    | 8757  | >TP53-P153A WVDSTPPA   | 108   | 8649  |
| >TP53-P153A WVDSTPPP    | 6070  | >TP53-P153A WVDSTPPA   | 65    | 6005  |
| >TP53-P153A WVDSTPPPG   | 489   | >TP53-P153A WVDSTPPAG  | 956   | 467   |
| >TP53-P153A LWVDSTPPP   | 10984 | >TP53-P153A LWVDSTPPA  | 467   | 10517 |
| >TP53-P153A LWVDSTPPP   | 467   | >TP53-P153A LWVDSTPPA  | 205   | 262   |
| >TP53-P153A LWVDSTPPG   | 485   | >TP53-P153A LWVDSTPPAG | 490   | 5     |
| >TP53-P153A QLWVDSTPPP  | 11689 | >TP53-P153A QLWVDSTPPA | 455   | 11234 |
| >TP53-P153A QLWVDSTPPP  | 11649 | >TP53-P153A QLWVDSTPPA | 266   | 11383 |
| >TP53-P153A QLWVDSTPPP  | 13293 | >TP53-P153A QLWVDSTPPA | 193   | 13100 |
| >TP53-P153A QLWVDSTPPP  | 14445 | >TP53-P153A QLWVDSTPPA | 296   | 14149 |
| >TP53-P153A QLWVDSTPPP  | 6561  | >TP53-P153A QLWVDSTPPA | 80    | 6481  |
| >TP53-P153A QLWVDSTPPP  | 9895  | >TP53-P153A QLWVDSTPPA | 95    | 9800  |
| >TP53-P153A QLWVDSTPPP  | 7554  | >TP53-P153A QLWVDSTPPA | 54    | 7500  |
| >TP53-P153A QLWVDSTPPP  | 14860 | >TP53-P153A QLWVDSTPPA | 83    | 14777 |

|                       |       |                       |       |       |
|-----------------------|-------|-----------------------|-------|-------|
| >TP53-P153AQLWVDSTPP  | 9133  | >TP53-P153AQLWVDSTPP  | 41    | 9092  |
| >TP53-P153AQLWVDSTPP  | 6554  | >TP53-P153AQLWVDSTPP  | 215   | 6339  |
| >TP53-P153FPGTRVRAMA  | 619   | >TP53-P153FPGTRVRAMA  | 366   | 253   |
| >TP53-P153FPGTRVRAMA  | 11907 | >TP53-P153FPGTRVRAMA  | 450   | 11457 |
| >TP53-P153FPGTRVRAMA  | 6722  | >TP53-P153FPGTRVRAMA  | 115   | 6607  |
| >TP53-P153FPPGTRVRAM  | 68    | >TP53-P153FPPGTRVRAM  | 22687 | 22619 |
| >TP53-P153FVQLWVDSTP  | 552   | >TP53-P153FVQLWVDSTP  | 35    | 517   |
| >TP53-P153FVQLWVDSTP  | 19338 | >TP53-P153FVQLWVDSTP  | 254   | 19084 |
| >TP53-P153FVQLWVDSTP  | 8306  | >TP53-P153FVQLWVDSTP  | 71    | 8235  |
| >TP53-P153FVQLWVDSTP  | 25912 | >TP53-P153FVQLWVDSTP  | 495   | 25417 |
| >TP53-P153FVQLWVDSTP  | 3502  | >TP53-P153FVQLWVDSTP  | 6     | 3496  |
| >TP53-P153FVQLWVDSTP  | 17032 | >TP53-P153FVQLWVDSTP  | 435   | 16597 |
| >TP53-P153FVQLWVDSTP  | 17216 | >TP53-P153FVQLWVDSTP  | 210   | 17006 |
| >TP53-P153FPPPGTRVRAM | 370   | >TP53-P153FPPPGTRVRAM | 21859 | 21489 |
| >TP53-P153FPPPGTRVRAM | 450   | >TP53-P153FPPPGTRVRAM | 82    | 368   |
| >TP53-P153FPPPGTRVRAM | 1897  | >TP53-P153FPPPGTRVRAM | 430   | 1467  |
| >TP53-P153FTPPPGTRVRA | 482   | >TP53-P153FTPPPGTRVRA | 2361  | 1879  |
| >TP53-P153FTPPPGTRVRA | 32    | >TP53-P153FTPPPGTRVRA | 40    | 8     |
| >TP53-P153FTPPPGTRVRA | 139   | >TP53-P153FTPPPGTRVRA | 161   | 22    |
| >TP53-P153FTPPPGTRV   | 273   | >TP53-P153FTPPPGTRV   | 1586  | 1313  |
| >TP53-P153FSTPPPGTRV  | 1710  | >TP53-P153FSTPPPGTRV  | 382   | 1328  |
| >TP53-P153FSTPPPGTRV  | 136   | >TP53-P153FSTPPPGTRV  | 89    | 47    |
| >TP53-P153FSTPPPGTRV  | 116   | >TP53-P153FSTPPPGTRV  | 69    | 47    |
| >TP53-P153FSTPPPGTRVR | 851   | >TP53-P153FSTPPPGTRVR | 393   | 458   |
| >TP53-P153FSTPPPGTR   | 925   | >TP53-P153FSTPPPGTR   | 192   | 733   |
| >TP53-P153FSTPPPGTRVR | 730   | >TP53-P153FSTPPPGTRVR | 212   | 518   |
| >TP53-P153FSTPPPGTR   | 352   | >TP53-P153FSTPPPGTR   | 78    | 274   |
| >TP53-P153FSTPPPGTRVR | 129   | >TP53-P153FSTPPPGTRVR | 80    | 49    |
| >TP53-P153FSTPPPGTRV  | 18    | >TP53-P153FSTPPPGTRV  | 21    | 3     |
| >TP53-P153FSTPPPGTRVR | 82    | >TP53-P153FSTPPPGTRVR | 82    | 0     |
| >TP53-P153FSTPPPGTRV  | 512   | >TP53-P153FSTPPPGTRV  | 370   | 142   |
| >TP53-P153FSTPPPGTRV  | 4     | >TP53-P153FSTPPPGTRV  | 3     | 1     |
| >TP53-P153FSTPPPGTRVR | 96    | >TP53-P153FSTPPPGTRVR | 81    | 15    |
| >TP53-P153FSTPPPGTRVR | 54    | >TP53-P153FSTPPPGTRVR | 31    | 23    |
| >TP53-P153FSTPPPGTRV  | 259   | >TP53-P153FSTPPPGTRV  | 267   | 8     |
| >TP53-P153FSTPPPGTR   | 1920  | >TP53-P153FSTPPPGTR   | 281   | 1639  |
| >TP53-P153FSTPPPGTR   | 4395  | >TP53-P153FSTPPPGTR   | 495   | 3900  |
| >TP53-P153FSTPPPGTRV  | 311   | >TP53-P153FSTPPPGTRV  | 230   | 81    |
| >TP53-P153FDSTPPPGTR  | 203   | >TP53-P153FDSTPPPGTR  | 46    | 157   |
| >TP53-P153FDSTPPPGTRV | 372   | >TP53-P153FDSTPPPGTRV | 162   | 210   |
| >TP53-P153FDSTPPPGTR  | 161   | >TP53-P153FDSTPPPGTR  | 64    | 97    |
| >TP53-P153FDSTPPPGTRV | 208   | >TP53-P153FDSTPPPGTRV | 114   | 94    |
| >TP53-P153FWVDSTPPPG  | 489   | >TP53-P153FWVDSTPPPG  | 379   | 110   |



|                        |       |                         |       |       |
|------------------------|-------|-------------------------|-------|-------|
| >TP53-P153F WVDSTPPP   | 27598 | >TP53-P153F WVDSTPPF    | 370   | 27228 |
| >TP53-P153F WVDSTPPP   | 13574 | >TP53-P153F WVDSTPPF    | 49    | 13525 |
| >TP53-P153F LWVDSTPPP  | 23985 | >TP53-P153F LWVDSTPPF   | 64    | 23921 |
| >TP53-P153F LWVDSTPPP  | 20348 | >TP53-P153F LWVDSTPPF   | 88    | 20260 |
| >TP53-P153F LWVDSTPPP  | 17669 | >TP53-P153F LWVDSTPPF   | 449   | 17220 |
| >TP53-P153F LWVDSTPPP  | 16432 | >TP53-P153F LWVDSTPPF   | 111   | 16321 |
| >TP53-P153F LWVDSTPPP  | 21108 | >TP53-P153F LWVDSTPPF   | 177   | 20931 |
| >TP53-P153F LWVDSTPPP  | 467   | >TP53-P153F LWVDSTPPF   | 234   | 233   |
| >TP53-P153F LWVDSTPP(C | 485   | >TP53-P153F LWVDSTPPFC  | 362   | 123   |
| >TP53-P153F QLWVDSTPP  | 6918  | >TP53-P153F QLWVDSTPP   | 50    | 6868  |
| >TP53-P153F QLWVDSTPP  | 10878 | >TP53-P153F QLWVDSTPP   | 76    | 10802 |
| >TP53-P153F QLWVDSTPP  | 18878 | >TP53-P153F QLWVDSTPP   | 84    | 18794 |
| >TP53-P153F QLWVDSTPP  | 5242  | >TP53-P153F QLWVDSTPP   | 8     | 5234  |
| >TP53-P153F QLWVDSTPP  | 27124 | >TP53-P153F QLWVDSTPP   | 258   | 26866 |
| >TP53-P153F PGTRVRAMA  | 619   | >TP53-P153F HGTRVRAMA   | 165   | 454   |
| >TP53-P153F PGTRVRAMA  | 6722  | >TP53-P153F HGTRVRAMA   | 321   | 6401  |
| >TP53-P153F PGTRVRAMA  | 5004  | >TP53-P153F HGTRVRAMA   | 193   | 4811  |
| >TP53-P153F PPGTRVRAM  | 68    | >TP53-P153F PHGTRVRAM   | 22305 | 22237 |
| >TP53-P153F PPPGTRVRAM | 370   | >TP53-P153F PPHGTRVRAI  | 22846 | 22476 |
| >TP53-P153F PPPGTRVRAM | 450   | >TP53-P153F PPHGTRVRAI  | 199   | 251   |
| >TP53-P153F TPPPGRVRA  | 583   | >TP53-P153F TPPHGTRVRA/ | 284   | 299   |
| >TP53-P153F TPPPGRVRA  | 482   | >TP53-P153F TPPHGTRVRA/ | 1522  | 1040  |
| >TP53-P153F TPPPGRVRA  | 32    | >TP53-P153F TPPHGTRVRA/ | 28    | 4     |
| >TP53-P153F TPPPGRVRA  | 139   | >TP53-P153F TPPHGTRVRA/ | 123   | 16    |
| >TP53-P153F TPPPGRV    | 273   | >TP53-P153F TPPHGTRV    | 1141  | 868   |
| >TP53-P153F STPPPGRV   | 1710  | >TP53-P153F STPPHGTRV   | 156   | 1554  |
| >TP53-P153F STPPPGRV   | 136   | >TP53-P153F STPPHGTRV   | 265   | 129   |
| >TP53-P153F STPPPGRV   | 116   | >TP53-P153F STPPHGTRV   | 118   | 2     |
| >TP53-P153F STPPPGR    | 925   | >TP53-P153F STPPHGTR    | 215   | 710   |
| >TP53-P153F STPPPGR    | 352   | >TP53-P153F STPPHGTR    | 184   | 168   |
| >TP53-P153F STPPPGRVR  | 129   | >TP53-P153F STPPHGTRVR  | 131   | 2     |
| >TP53-P153F STPPPGRV   | 18    | >TP53-P153F STPPHGTRV   | 57    | 39    |
| >TP53-P153F STPPPGRVR  | 82    | >TP53-P153F STPPHGTRVR  | 263   | 181   |
| >TP53-P153F STPPPGRV   | 4     | >TP53-P153F STPPHGTRV   | 5     | 1     |
| >TP53-P153F STPPPGRVR  | 96    | >TP53-P153F STPPHGTRVR  | 176   | 80    |
| >TP53-P153F STPPPGRVR  | 54    | >TP53-P153F STPPHGTRVR  | 70    | 16    |
| >TP53-P153F STPPPGRV   | 259   | >TP53-P153F STPPHGTRV   | 2309  | 2050  |
| >TP53-P153F STPPPGRV   | 311   | >TP53-P153F STPPHGTRV   | 526   | 215   |
| >TP53-P153F DSTPPPGR   | 203   | >TP53-P153F DSTPPHGTR   | 61    | 142   |
| >TP53-P153F DSTPPPGRV  | 372   | >TP53-P153F DSTPPHGTRV  | 191   | 181   |
| >TP53-P153F DSTPPPGR   | 161   | >TP53-P153F DSTPPHGTR   | 67    | 94    |
| >TP53-P153F DSTPPPGRV  | 208   | >TP53-P153F DSTPPHGTRV  | 132   | 76    |
| >TP53-P153F WVDSTPPPG  | 489   | >TP53-P153F WVDSTPPHG   | 493   | 4     |

|                        |       |                        |       |       |
|------------------------|-------|------------------------|-------|-------|
| >TP53-P153F LWVDSTPPP  | 467   | >TP53-P153F LWVDSTPPH  | 655   | 188   |
| >TP53-P153F LWVDSTPPP  | 485   | >TP53-P153F LWVDSTPPH  | 262   | 223   |
| >TP53-P153L PGTRVRAMA  | 619   | >TP53-P153L LGTRVRAMA  | 134   | 485   |
| >TP53-P153L PGTRVRAMA  | 6722  | >TP53-P153L LGTRVRAMA  | 92    | 6630  |
| >TP53-P153L PPGTRVRAM  | 68    | >TP53-P153L PLGTRVRAM  | 16743 | 16675 |
| >TP53-P153L VQLWVDSTP  | 19615 | >TP53-P153L VQLWVDSTP  | 108   | 19507 |
| >TP53-P153L VQLWVDSTP  | 552   | >TP53-P153L VQLWVDSTP  | 10    | 542   |
| >TP53-P153L VQLWVDSTP  | 9929  | >TP53-P153L VQLWVDSTP  | 31    | 9898  |
| >TP53-P153L VQLWVDSTP  | 12797 | >TP53-P153L VQLWVDSTP  | 253   | 12544 |
| >TP53-P153L VQLWVDSTP  | 12149 | >TP53-P153L VQLWVDSTP  | 49    | 12100 |
| >TP53-P153L VQLWVDSTP  | 3502  | >TP53-P153L VQLWVDSTP  | 100   | 3402  |
| >TP53-P153L VQLWVDSTP  | 19082 | >TP53-P153L VQLWVDSTP  | 86    | 18996 |
| >TP53-P153L VQLWVDSTP  | 11673 | >TP53-P153L VQLWVDSTP  | 254   | 11419 |
| >TP53-P153L VQLWVDSTP  | 10168 | >TP53-P153L VQLWVDSTP  | 113   | 10055 |
| >TP53-P153L PPPGTRVRAM | 370   | >TP53-P153L PPLGTRVRAM | 23869 | 23499 |
| >TP53-P153L PPPGTRVRAM | 450   | >TP53-P153L PPLGTRVRAM | 430   | 20    |
| >TP53-P153L TPPPGRVRA  | 482   | >TP53-P153L TPPLGTRVRA | 3015  | 2533  |
| >TP53-P153L TPPPGRVRA  | 32    | >TP53-P153L TPPLGTRVRA | 36    | 4     |
| >TP53-P153L TPPPGRVRA  | 139   | >TP53-P153L TPPLGTRVRA | 174   | 35    |
| >TP53-P153L TPPPGRV    | 273   | >TP53-P153L TPPLGTRV   | 1661  | 1388  |
| >TP53-P153L STPPPGRV   | 136   | >TP53-P153L STPPLGTRV  | 261   | 125   |
| >TP53-P153L STPPPGRV   | 743   | >TP53-P153L STPPLGTRV  | 398   | 345   |
| >TP53-P153L STPPPGRV   | 116   | >TP53-P153L STPPLGTRV  | 155   | 39    |
| >TP53-P153L STPPPGR    | 925   | >TP53-P153L STPPLGTR   | 385   | 540   |
| >TP53-P153L STPPPGRVR  | 730   | >TP53-P153L STPPLGTRVR | 467   | 263   |
| >TP53-P153L STPPPGR    | 352   | >TP53-P153L STPPLGTR   | 209   | 143   |
| >TP53-P153L STPPPGRVR  | 129   | >TP53-P153L STPPLGTRVR | 105   | 24    |
| >TP53-P153L STPPPGRV   | 18    | >TP53-P153L STPPLGTRV  | 22    | 4     |
| >TP53-P153L STPPPGRVR  | 82    | >TP53-P153L STPPLGTRVR | 111   | 29    |
| >TP53-P153L STPPPGRV   | 4     | >TP53-P153L STPPLGTRV  | 5     | 1     |
| >TP53-P153L STPPPGRVR  | 96    | >TP53-P153L STPPLGTRVR | 183   | 87    |
| >TP53-P153L STPPPGRVR  | 54    | >TP53-P153L STPPLGTRVR | 78    | 24    |
| >TP53-P153L STPPPGRV   | 259   | >TP53-P153L STPPLGTRV  | 246   | 13    |
| >TP53-P153L STPPPGRV   | 311   | >TP53-P153L STPPLGTRV  | 704   | 393   |
| >TP53-P153L DSTPPPGR   | 203   | >TP53-P153L DSTPPLGTR  | 117   | 86    |
| >TP53-P153L DSTPPPGRV  | 372   | >TP53-P153L DSTPPLGTRV | 258   | 114   |
| >TP53-P153L DSTPPPGR   | 161   | >TP53-P153L DSTPPLGTR  | 139   | 22    |
| >TP53-P153L DSTPPPGRV  | 208   | >TP53-P153L DSTPPLGTRV | 198   | 10    |
| >TP53-P153L WVDSTPPP   | 22157 | >TP53-P153L WVDSTPPL   | 297   | 21860 |
| >TP53-P153L WVDSTPPP   | 8757  | >TP53-P153L WVDSTPPL   | 61    | 8696  |
| >TP53-P153L WVDSTPPP   | 17874 | >TP53-P153L WVDSTPPL   | 176   | 17698 |
| >TP53-P153L WVDSTPPP   | 16463 | >TP53-P153L WVDSTPPL   | 207   | 16256 |
| >TP53-P153L WVDSTPPP   | 22218 | >TP53-P153L WVDSTPPL   | 302   | 21916 |

|                        |       |                        |       |       |
|------------------------|-------|------------------------|-------|-------|
| >TP53-P153L WVDSTPPP   | 29643 | >TP53-P153L WVDSTPPL   | 391   | 29252 |
| >TP53-P153L WVDSTPPP   | 6070  | >TP53-P153L WVDSTPPL   | 23    | 6047  |
| >TP53-P153L WVDSTPPPG  | 489   | >TP53-P153L WVDSTPPLG  | 1364  | 875   |
| >TP53-P153L WVDSTPPP   | 18069 | >TP53-P153L WVDSTPPL   | 82    | 17987 |
| >TP53-P153L LWVDSTPPP  | 10984 | >TP53-P153L LWVDSTPPL  | 323   | 10661 |
| >TP53-P153L LWVDSTPPP  | 467   | >TP53-P153L LWVDSTPPL  | 142   | 325   |
| >TP53-P153L LWVDSTPPPC | 485   | >TP53-P153L LWVDSTPPLC | 396   | 89    |
| >TP53-P153L QLWVDSTPPP | 11689 | >TP53-P153L QLWVDSTPPL | 196   | 11493 |
| >TP53-P153L QLWVDSTPPP | 11649 | >TP53-P153L QLWVDSTPPL | 55    | 11594 |
| >TP53-P153L QLWVDSTPPP | 13293 | >TP53-P153L QLWVDSTPPL | 160   | 13133 |
| >TP53-P153L QLWVDSTPPP | 14445 | >TP53-P153L QLWVDSTPPL | 266   | 14179 |
| >TP53-P153L QLWVDSTPPP | 6561  | >TP53-P153L QLWVDSTPPL | 26    | 6535  |
| >TP53-P153L QLWVDSTPPP | 9895  | >TP53-P153L QLWVDSTPPL | 28    | 9867  |
| >TP53-P153L QLWVDSTPPP | 7554  | >TP53-P153L QLWVDSTPPL | 23    | 7531  |
| >TP53-P153L QLWVDSTPPP | 14860 | >TP53-P153L QLWVDSTPPL | 12    | 14848 |
| >TP53-P153L QLWVDSTPPP | 9133  | >TP53-P153L QLWVDSTPPL | 14    | 9119  |
| >TP53-P153L QLWVDSTPPP | 6918  | >TP53-P153L QLWVDSTPPL | 211   | 6707  |
| >TP53-P153L QLWVDSTPPP | 6554  | >TP53-P153L QLWVDSTPPL | 82    | 6472  |
| >TP53-P153L QLWVDSTPPP | 5242  | >TP53-P153L QLWVDSTPPL | 219   | 5023  |
| >TP53-P153S PGTRVRAMA  | 619   | >TP53-P153S SGTRVRAMA  | 90    | 529   |
| >TP53-P153S PGTRVRAMA  | 6722  | >TP53-P153S SGTRVRAMA  | 68    | 6654  |
| >TP53-P153S PPGTRVRAM  | 68    | >TP53-P153S PSGTRVRAM  | 19471 | 19403 |
| >TP53-P153S VQLWVDSTP  | 552   | >TP53-P153S VQLWVDSTP  | 146   | 406   |
| >TP53-P153S PPPGTRVRAM | 370   | >TP53-P153S PPSGTRVRAM | 15578 | 15208 |
| >TP53-P153S PPPGTRVRAM | 450   | >TP53-P153S PPSGTRVRAM | 2298  | 1848  |
| >TP53-P153S TPPPGRVRA  | 583   | >TP53-P153S TPPSGTRVRA | 310   | 273   |
| >TP53-P153S TPPPGRV    | 763   | >TP53-P153S TPPSGTRV   | 196   | 567   |
| >TP53-P153S TPPPGRVRA  | 482   | >TP53-P153S TPPSGTRVRA | 169   | 313   |
| >TP53-P153S TPPPGRVRA  | 32    | >TP53-P153S TPPSGTRVRA | 31    | 1     |
| >TP53-P153S TPPPGRVRA  | 139   | >TP53-P153S TPPSGTRVRA | 109   | 30    |
| >TP53-P153S TPPPGRV    | 273   | >TP53-P153S TPPSGTRV   | 1007  | 734   |
| >TP53-P153S STPPPGRV   | 1710  | >TP53-P153S STPPSGTRV  | 440   | 1270  |
| >TP53-P153S STPPPGRV   | 136   | >TP53-P153S STPPSGTRV  | 386   | 250   |
| >TP53-P153S STPPPGRV   | 116   | >TP53-P153S STPPSGTRV  | 80    | 36    |
| >TP53-P153S STPPPGR    | 352   | >TP53-P153S STPPSGTR   | 142   | 210   |
| >TP53-P153S STPPPGRVR  | 129   | >TP53-P153S STPPSGTRVR | 212   | 83    |
| >TP53-P153S STPPPGRV   | 18    | >TP53-P153S STPPSGTRV  | 33    | 15    |
| >TP53-P153S STPPPGRVR  | 82    | >TP53-P153S STPPSGTRVR | 168   | 86    |
| >TP53-P153S STPPPGRV   | 1690  | >TP53-P153S STPPSGTRV  | 376   | 1314  |
| >TP53-P153S STPPPGRV   | 4     | >TP53-P153S STPPSGTRV  | 5     | 1     |
| >TP53-P153S STPPPGRVR  | 96    | >TP53-P153S STPPSGTRVR | 143   | 47    |
| >TP53-P153S STPPPGRVR  | 54    | >TP53-P153S STPPSGTRVR | 74    | 20    |
| >TP53-P153S STPPPGRV   | 259   | >TP53-P153S STPPSGTRV  | 542   | 283   |

|                         |       |                         |       |       |
|-------------------------|-------|-------------------------|-------|-------|
| >TP53-P153S STPPP GTRV  | 311   | >TP53-P153S STPPS GTRV  | 502   | 191   |
| >TP53-P153S DSTPPP GTR  | 203   | >TP53-P153S DSTPPS GTR  | 231   | 28    |
| >TP53-P153S DSTPPP GTRV | 372   | >TP53-P153S DSTPPS GTRV | 374   | 2     |
| >TP53-P153S DSTPPP GTR  | 161   | >TP53-P153S DSTPPS GTR  | 102   | 59    |
| >TP53-P153S DSTPPP GTRV | 208   | >TP53-P153S DSTPPS GTRV | 139   | 69    |
| >TP53-P153S WVDSTPPP G  | 489   | >TP53-P153S WVDSTPPS G  | 1830  | 1341  |
| >TP53-P153S LWVDSTPPP   | 467   | >TP53-P153S LWVDSTPPS   | 576   | 109   |
| >TP53-P153S LWVDSTPPP(C | 485   | >TP53-P153S LWVDSTPPS(C | 411   | 74    |
| >TP53-P153T PGTRVRAMA   | 619   | >TP53-P153T TGTRVRAMA   | 176   | 443   |
| >TP53-P153T PGTRVRAMA   | 6722  | >TP53-P153T TGTRVRAMA   | 252   | 6470  |
| >TP53-P153T PPGTRVRAM   | 19230 | >TP53-P153T PTGTRVRAM   | 415   | 18815 |
| >TP53-P153T PPGTRVRAM   | 19568 | >TP53-P153T PTGTRVRAM   | 322   | 19246 |
| >TP53-P153T PPGTRVRAM   | 68    | >TP53-P153T PTGTRVRAM   | 16867 | 16799 |
| >TP53-P153T VQLWVDSTP   | 552   | >TP53-P153T VQLWVDSTP   | 47    | 505   |
| >TP53-P153T PPPGTRVRAM  | 370   | >TP53-P153T PPTGTRVRAM  | 16054 | 15684 |
| >TP53-P153T PPPGTRVRAM  | 450   | >TP53-P153T PPTGTRVRAM  | 1368  | 918   |
| >TP53-P153T TPPP GTRV   | 763   | >TP53-P153T TPPTGTRV    | 365   | 398   |
| >TP53-P153T TPPP GTRVRA | 482   | >TP53-P153T TPPTGTRVRA  | 267   | 215   |
| >TP53-P153T TPPP GTRVRA | 32    | >TP53-P153T TPPTGTRVRA  | 39    | 7     |
| >TP53-P153T TPPP GTRVRA | 139   | >TP53-P153T TPPTGTRVRA  | 152   | 13    |
| >TP53-P153T TPPP GTRV   | 273   | >TP53-P153T TPPTGTRV    | 889   | 616   |
| >TP53-P153T STPPP GTRV  | 136   | >TP53-P153T STPPTGTRV   | 203   | 67    |
| >TP53-P153T STPPP GTRV  | 743   | >TP53-P153T STPPTGTRV   | 390   | 353   |
| >TP53-P153T STPPP GTRV  | 116   | >TP53-P153T STPPTGTRV   | 97    | 19    |
| >TP53-P153T STPPP GTR   | 352   | >TP53-P153T STPPTGTR    | 122   | 230   |
| >TP53-P153T STPPP GTRVR | 129   | >TP53-P153T STPPTGTRVR  | 197   | 68    |
| >TP53-P153T STPPP GTRV  | 18    | >TP53-P153T STPPTGTRV   | 60    | 42    |
| >TP53-P153T STPPP GTRVR | 82    | >TP53-P153T STPPTGTRVR  | 264   | 182   |
| >TP53-P153T STPPP GTRV  | 4     | >TP53-P153T STPPTGTRV   | 5     | 1     |
| >TP53-P153T STPPP GTRVR | 96    | >TP53-P153T STPPTGTRVR  | 158   | 62    |
| >TP53-P153T STPPP GTRVR | 54    | >TP53-P153T STPPTGTRVR  | 74    | 20    |
| >TP53-P153T STPPP GTRV  | 259   | >TP53-P153T STPPTGTRV   | 316   | 57    |
| >TP53-P153T STPPP GTRV  | 311   | >TP53-P153T STPPTGTRV   | 398   | 87    |
| >TP53-P153T DSTPPP GTR  | 203   | >TP53-P153T DSTPPTGTR   | 177   | 26    |
| >TP53-P153T DSTPPP GTRV | 372   | >TP53-P153T DSTPPTGTRV  | 362   | 10    |
| >TP53-P153T DSTPPP GTR  | 161   | >TP53-P153T DSTPPTGTR   | 63    | 98    |
| >TP53-P153T DSTPPP GTRV | 208   | >TP53-P153T DSTPPTGTRV  | 117   | 91    |
| >TP53-P153T WVDSTPPP G  | 489   | >TP53-P153T WVDSTPPTG   | 1591  | 1102  |
| >TP53-P153T LWVDSTPPP   | 467   | >TP53-P153T LWVDSTPPT   | 475   | 8     |
| >TP53-P153T LWVDSTPPP(C | 485   | >TP53-P153T LWVDSTPPT(C | 413   | 72    |
| >TP53-P153T QLWVDSTPP   | 6561  | >TP53-P153T QLWVDSTPP   | 481   | 6080  |
| >TP53-P153T QLWVDSTPP   | 9133  | >TP53-P153T QLWVDSTPP   | 230   | 8903  |
| >TP53-P177F RRC PHHER   | 405   | >TP53-P177F RRCHHHER    | 421   | 16    |

|                        |       |                         |      |       |
|------------------------|-------|-------------------------|------|-------|
| >TP53-P177F RRCPHHER   | 102   | >TP53-P177F RRCHHHER    | 77   | 25    |
| >TP53-P177F RRCPHHER   | 312   | >TP53-P177F RRCHHHER    | 1041 | 729   |
| >TP53-P177F RRCPHHERC  | 320   | >TP53-P177F RRCHHHERC   | 790  | 470   |
| >TP53-P177F RRCPHHER   | 87    | >TP53-P177F RRCHHHER    | 95   | 8     |
| >TP53-P177F VVRRCPHHEF | 145   | >TP53-P177F VVRRCHHHEI  | 56   | 89    |
| >TP53-P177F VVRRCPHHEF | 63    | >TP53-P177F VVRRCHHHEI  | 26   | 37    |
| >TP53-P177F VVRRCPHHEF | 534   | >TP53-P177F VVRRCHHHEI  | 175  | 359   |
| >TP53-P177F VVRRCPHHEF | 713   | >TP53-P177F VVRRCHHHEI  | 488  | 225   |
| >TP53-P177F EVVRRCPH   | 400   | >TP53-P177F EVVRRCHH    | 318  | 82    |
| >TP53-P177F EVVRRCPHH  | 98    | >TP53-P177F EVVRRCHHH   | 91   | 7     |
| >TP53-P177F EVVRRCPHHE | 428   | >TP53-P177F EVVRRCHHHI  | 301  | 127   |
| >TP53-P177F EVVRRCPHHE | 371   | >TP53-P177F EVVRRCHHHI  | 176  | 195   |
| >TP53-P177F EVVRRCPHHE | 53    | >TP53-P177F EVVRRCHHHI  | 38   | 15    |
| >TP53-P177F EVVRRCPHHE | 5     | >TP53-P177F EVVRRCHHHI  | 4    | 1     |
| >TP53-P177F EVVRRCPHHE | 1019  | >TP53-P177F EVVRRCHHHI  | 440  | 579   |
| >TP53-P177I QHMTEVVRR  | 25140 | >TP53-P177I QHMTEVVRR   | 424  | 24716 |
| >TP53-P177I QHMTEVVRR  | 14965 | >TP53-P177I QHMTEVVRR   | 480  | 14485 |
| >TP53-P177I RRCPHHER   | 405   | >TP53-P177I RRCIHHER    | 373  | 32    |
| >TP53-P177I RRCPHHER   | 729   | >TP53-P177I RRCIHHER    | 485  | 244   |
| >TP53-P177I RRCPHHER   | 102   | >TP53-P177I RRCIHHER    | 111  | 9     |
| >TP53-P177I RRCPHHERCS | 720   | >TP53-P177I RRCIHHHERCS | 359  | 361   |
| >TP53-P177I RRCPHHER   | 312   | >TP53-P177I RRCIHHER    | 378  | 66    |
| >TP53-P177I RRCPHHERC  | 320   | >TP53-P177I RRCIHHERC   | 460  | 140   |
| >TP53-P177I RRCPHHER   | 87    | >TP53-P177I RRCIHHER    | 94   | 7     |
| >TP53-P177I VVRRCPHHEF | 145   | >TP53-P177I VVRRCIHHER  | 136  | 9     |
| >TP53-P177I VVRRCPHHEF | 63    | >TP53-P177I VVRRCIHHER  | 10   | 53    |
| >TP53-P177I VVRRCPHHEF | 534   | >TP53-P177I VVRRCIHHER  | 62   | 472   |
| >TP53-P177I VVRRCPHHEF | 713   | >TP53-P177I VVRRCIHHER  | 418  | 295   |
| >TP53-P177I EVVRRCPH   | 400   | >TP53-P177I EVVRRCIH    | 930  | 530   |
| >TP53-P177I EVVRRCPHH  | 98    | >TP53-P177I EVVRRCIHH   | 263  | 165   |
| >TP53-P177I EVVRRCPHHE | 428   | >TP53-P177I EVVRRCIHHE  | 193  | 235   |
| >TP53-P177I EVVRRCPHHE | 371   | >TP53-P177I EVVRRCIHHE  | 230  | 141   |
| >TP53-P177I EVVRRCPHHE | 53    | >TP53-P177I EVVRRCIHHE  | 28   | 25    |
| >TP53-P177I EVVRRCPHHE | 5     | >TP53-P177I EVVRRCIHHE  | 4    | 1     |
| >TP53-P177I EVVRRCPHHE | 1019  | >TP53-P177I EVVRRCIHHE  | 440  | 579   |
| >TP53-P177I TEVVRRCP   | 1377  | >TP53-P177I TEVVRRCI    | 13   | 1364  |
| >TP53-P177I MTEVVRRCP  | 31342 | >TP53-P177I MTEVVRRCI   | 473  | 30869 |
| >TP53-P177I MTEVVRRCP  | 30186 | >TP53-P177I MTEVVRRCI   | 98   | 30088 |
| >TP53-P177I HMTEVVRRC  | 11254 | >TP53-P177I HMTEVVRRC   | 112  | 11142 |
| >TP53-P177I HMTEVVRRC  | 19862 | >TP53-P177I HMTEVVRRC   | 381  | 19481 |
| >TP53-P177I HMTEVVRRC  | 18007 | >TP53-P177I HMTEVVRRC   | 247  | 17760 |
| >TP53-P177L QHMTEVVRR  | 14965 | >TP53-P177L QHMTEVVRR   | 35   | 14930 |
| >TP53-P177L RRCPHHER   | 405   | >TP53-P177L RRCLHHER    | 553  | 148   |

|                        |       |                         |      |       |
|------------------------|-------|-------------------------|------|-------|
| >TP53-P177L RRCPHHER   | 729   | >TP53-P177L RRCLHHER    | 418  | 311   |
| >TP53-P177L RRCPHHER   | 102   | >TP53-P177L RRCLHHER    | 121  | 19    |
| >TP53-P177L RRCPHHERCS | 720   | >TP53-P177L RRCLHHERCS  | 379  | 341   |
| >TP53-P177L RRCPHHER   | 312   | >TP53-P177L RRCLHHER    | 353  | 41    |
| >TP53-P177L RRCPHHERC  | 320   | >TP53-P177L RRCLHHERC   | 391  | 71    |
| >TP53-P177L RRCPHHER   | 87    | >TP53-P177L RRCLHHER    | 92   | 5     |
| >TP53-P177L VVRRCPHHEF | 145   | >TP53-P177L VVRRCLHHEF  | 148  | 3     |
| >TP53-P177L VVRRCPHHEF | 63    | >TP53-P177L VVRRCLHHEF  | 16   | 47    |
| >TP53-P177L VVRRCPHHEF | 534   | >TP53-P177L VVRRCLHHEF  | 149  | 385   |
| >TP53-P177L EVVRRCPH   | 400   | >TP53-P177L EVVRRCLH    | 2045 | 1645  |
| >TP53-P177L EVVRRCPHH  | 98    | >TP53-P177L EVVRRCLHH   | 630  | 532   |
| >TP53-P177L EVVRRCPHHE | 428   | >TP53-P177L EVVRRCLHHE  | 181  | 247   |
| >TP53-P177L EVVRRCPHHE | 371   | >TP53-P177L EVVRRCLHHE  | 325  | 46    |
| >TP53-P177L EVVRRCPHHE | 53    | >TP53-P177L EVVRRCLHHE  | 37   | 16    |
| >TP53-P177L EVVRRCPHHE | 5     | >TP53-P177L EVVRRCLHHE  | 5    | 0     |
| >TP53-P177L EVVRRCPHHE | 1019  | >TP53-P177L EVVRRCLHHE  | 402  | 617   |
| >TP53-P177L TEVVRRCP   | 1377  | >TP53-P177L TEVVRRC     | 31   | 1346  |
| >TP53-P177L TEVVRRCP   | 8094  | >TP53-P177L TEVVRRC     | 254  | 7840  |
| >TP53-P177L HMTEVVRRC  | 11254 | >TP53-P177L HMTEVVRRC   | 120  | 11134 |
| >TP53-P177L HMTEVVRRC  | 19862 | >TP53-P177L HMTEVVRRC   | 351  | 19511 |
| >TP53-P177L HMTEVVRRC  | 18007 | >TP53-P177L HMTEVVRRC   | 195  | 17812 |
| >TP53-P177L HMTEVVRRC  | 25614 | >TP53-P177L HMTEVVRRC   | 120  | 25494 |
| >TP53-P177F RRCPHHER   | 405   | >TP53-P177F RRCRHHHER   | 307  | 98    |
| >TP53-P177F RRCPHHER   | 729   | >TP53-P177F RRCRHHHER   | 328  | 401   |
| >TP53-P177F RRCPHHER   | 102   | >TP53-P177F RRCRHHHER   | 42   | 60    |
| >TP53-P177F RRCPHHERC  | 689   | >TP53-P177F RRCRHHHERC  | 422  | 267   |
| >TP53-P177F RRCPHHERCS | 720   | >TP53-P177F RRCRHHHERCS | 220  | 500   |
| >TP53-P177F RRCPHHER   | 312   | >TP53-P177F RRCRHHHER   | 318  | 6     |
| >TP53-P177F RRCPHHERC  | 320   | >TP53-P177F RRCRHHHERC  | 415  | 95    |
| >TP53-P177F RRCPHHER   | 87    | >TP53-P177F RRCRHHHER   | 157  | 70    |
| >TP53-P177F VVRRCPHHEF | 145   | >TP53-P177F VVRRCRHHEF  | 63   | 82    |
| >TP53-P177F VVRRCPHHEF | 63    | >TP53-P177F VVRRCRHHEF  | 13   | 50    |
| >TP53-P177F VVRRCPHHEF | 534   | >TP53-P177F VVRRCRHHEF  | 106  | 428   |
| >TP53-P177F EVVRRCPH   | 400   | >TP53-P177F EVVRRCRH    | 753  | 353   |
| >TP53-P177F EVVRRCPHH  | 98    | >TP53-P177F EVVRRCRHH   | 400  | 302   |
| >TP53-P177F EVVRRCPHHE | 428   | >TP53-P177F EVVRRCRHHI  | 781  | 353   |
| >TP53-P177F EVVRRCPHHE | 371   | >TP53-P177F EVVRRCRHHI  | 290  | 81    |
| >TP53-P177F EVVRRCPHHE | 53    | >TP53-P177F EVVRRCRHHI  | 37   | 16    |
| >TP53-P177F EVVRRCPHHE | 5     | >TP53-P177F EVVRRCRHHI  | 7    | 2     |
| >TP53-P177F MTEVVRRCP  | 17111 | >TP53-P177F MTEVVRRCR   | 35   | 17076 |
| >TP53-P177F MTEVVRRCP  | 28410 | >TP53-P177F MTEVVRRCR   | 79   | 28331 |
| >TP53-P177F MTEVVRRCP  | 17766 | >TP53-P177F MTEVVRRCR   | 7    | 17759 |
| >TP53-P177F HMTEVVRRC  | 17971 | >TP53-P177F HMTEVVRRC   | 16   | 17955 |

|                        |       |                        |     |       |
|------------------------|-------|------------------------|-----|-------|
| >TP53-P177FHMTEVVRRRC  | 25272 | >TP53-P177FHMTEVVRRRC  | 155 | 25117 |
| >TP53-P177FHMTEVVRRRC  | 37931 | >TP53-P177FHMTEVVRRRC  | 467 | 37464 |
| >TP53-P177SRRCPHHER    | 405   | >TP53-P177SRRCSHHER    | 317 | 88    |
| >TP53-P177SRRCPHHER    | 729   | >TP53-P177SRRCSHHER    | 480 | 249   |
| >TP53-P177SRRCPHHER    | 102   | >TP53-P177SRRCSHHER    | 104 | 2     |
| >TP53-P177SRRCPHHER    | 312   | >TP53-P177SRRCSHHER    | 711 | 399   |
| >TP53-P177SRRCPHHERC   | 320   | >TP53-P177SRRCSHHERC   | 821 | 501   |
| >TP53-P177SRRCPHHER    | 87    | >TP53-P177SRRCSHHER    | 109 | 22    |
| >TP53-P177SVRRCPHHER   | 680   | >TP53-P177SVRRCSHHER   | 263 | 417   |
| >TP53-P177SVVRRCPHHEF  | 145   | >TP53-P177SVVRRCSHHEF  | 64  | 81    |
| >TP53-P177SVVRRCPHHEF  | 63    | >TP53-P177SVVRRCSHHEF  | 15  | 48    |
| >TP53-P177SVVRRCPHHEF  | 534   | >TP53-P177SVVRRCSHHEF  | 90  | 444   |
| >TP53-P177SEVVRRCPH    | 400   | >TP53-P177SEVVRRCSH    | 633 | 233   |
| >TP53-P177SEVVRRCPHH   | 98    | >TP53-P177SEVVRRCSHH   | 102 | 4     |
| >TP53-P177SEVVRRCPHHE  | 428   | >TP53-P177SEVVRRCSHHE  | 541 | 113   |
| >TP53-P177SEVVRRCPHHE  | 371   | >TP53-P177SEVVRRCSHHE  | 294 | 77    |
| >TP53-P177SEVVRRCPHHE  | 53    | >TP53-P177SEVVRRCSHHE  | 40  | 13    |
| >TP53-P177SEVVRRCPHHE  | 5     | >TP53-P177SEVVRRCSHHE  | 4   | 1     |
| >TP53-P177SMTEVVRRCPH  | 2160  | >TP53-P177SMTEVVRRCSI  | 184 | 1976  |
| >TP53-P177T RRCPHHER   | 405   | >TP53-P177T RRCTHHER   | 555 | 150   |
| >TP53-P177T RRCPHHER   | 102   | >TP53-P177T RRCTHHER   | 41  | 61    |
| >TP53-P177T RRCPHHERC  | 689   | >TP53-P177T RRCTHHERC  | 457 | 232   |
| >TP53-P177T RRCPHHERCS | 720   | >TP53-P177T RRCTHHERCS | 393 | 327   |
| >TP53-P177T RRCPHHER   | 312   | >TP53-P177T RRCTHHER   | 382 | 70    |
| >TP53-P177T RRCPHHERC  | 320   | >TP53-P177T RRCTHHERC  | 599 | 279   |
| >TP53-P177T RRCPHHER   | 87    | >TP53-P177T RRCTHHER   | 69  | 18    |
| >TP53-P177T VRRCPHHER  | 680   | >TP53-P177T VRRCTHHER  | 418 | 262   |
| >TP53-P177T VVRRCPHHEF | 145   | >TP53-P177T VVRRCTHHEF | 72  | 73    |
| >TP53-P177T VVRRCPHHEF | 63    | >TP53-P177T VVRRCTHHEF | 17  | 46    |
| >TP53-P177T VVRRCPHHEF | 534   | >TP53-P177T VVRRCTHHEF | 139 | 395   |
| >TP53-P177T VVRRCPHHEF | 713   | >TP53-P177T VVRRCTHHEF | 410 | 303   |
| >TP53-P177T EVVRRCPH   | 400   | >TP53-P177T EVVRRCTH   | 822 | 422   |
| >TP53-P177T EVVRRCPHH  | 98    | >TP53-P177T EVVRRCTHH  | 601 | 503   |
| >TP53-P177T EVVRRCPHHE | 428   | >TP53-P177T EVVRRCTHHE | 407 | 21    |
| >TP53-P177T EVVRRCPHHE | 371   | >TP53-P177T EVVRRCTHHE | 258 | 113   |
| >TP53-P177T EVVRRCPHHE | 53    | >TP53-P177T EVVRRCTHHE | 38  | 15    |
| >TP53-P177T EVVRRCPHHE | 5     | >TP53-P177T EVVRRCTHHE | 4   | 1     |
| >TP53-P177T TEVVRRCP   | 1377  | >TP53-P177T TEVVRRCT   | 486 | 891   |
| >TP53-P190A APPQHLIRV  | 15293 | >TP53-P190A AAPQHLIRV  | 379 | 14914 |
| >TP53-P190A APPQHLIRV  | 8353  | >TP53-P190A AAPQHLIRV  | 271 | 8082  |
| >TP53-P190A APPQHLIRV  | 9184  | >TP53-P190A AAPQHLIRV  | 103 | 9081  |
| >TP53-P190A APPQHLIRV  | 1104  | >TP53-P190A AAPQHLIRV  | 64  | 1040  |
| >TP53-P190A LAPPQHLI   | 5645  | >TP53-P190A LAAPQHLI   | 473 | 5172  |

|                        |       |                        |      |       |
|------------------------|-------|------------------------|------|-------|
| >TP53-P190A LAPPQHLIRV | 395   | >TP53-P190A LAAPQHLIRV | 381  | 14    |
| >TP53-P190A LAPPQHLIRV | 577   | >TP53-P190A LAAPQHLIRV | 385  | 192   |
| >TP53-P190A LAPPQHLIRV | 52    | >TP53-P190A LAAPQHLIRV | 22   | 30    |
| >TP53-P190A LAPPQHLIR  | 1307  | >TP53-P190A LAAPQHLIR  | 215  | 1092  |
| >TP53-P190A LAPPQHLIR  | 1385  | >TP53-P190A LAAPQHLIR  | 101  | 1284  |
| >TP53-P190A LAPPQHLI   | 898   | >TP53-P190A LAAPQHLI   | 212  | 686   |
| >TP53-P190A LAPPQHLI   | 8293  | >TP53-P190A LAAPQHLI   | 62   | 8231  |
| >TP53-P190A LAPPQHLI   | 5     | >TP53-P190A LAAPQHLI   | 169  | 164   |
| >TP53-P190A LAPPQHLIRV | 28    | >TP53-P190A LAAPQHLIRV | 2235 | 2207  |
| >TP53-P190A LAPPQHLI   | 70    | >TP53-P190A LAAPQHLI   | 30   | 40    |
| >TP53-P190A GLAPPQHL   | 285   | >TP53-P190A GLAAPQHL   | 169  | 116   |
| >TP53-P190A GLAPPQHLI  | 65    | >TP53-P190A GLAAPQHLI  | 50   | 15    |
| >TP53-P190A GLAPPQHLIR | 20    | >TP53-P190A GLAAPQHLIR | 17   | 3     |
| >TP53-P190A GLAPPQHL   | 22    | >TP53-P190A GLAAPQHL   | 12   | 10    |
| >TP53-P190A GLAPPQHLI  | 15    | >TP53-P190A GLAAPQHLI  | 10   | 5     |
| >TP53-P190A GLAPPQHLIR | 9     | >TP53-P190A GLAAPQHLIR | 7    | 2     |
| >TP53-P190A GLAPPQHL   | 61    | >TP53-P190A GLAAPQHL   | 41   | 20    |
| >TP53-P190A GLAPPQHLI  | 31    | >TP53-P190A GLAAPQHLI  | 27   | 4     |
| >TP53-P190A GLAPPQHLIR | 7     | >TP53-P190A GLAAPQHLIR | 6    | 1     |
| >TP53-P190A GLAPPQHLIR | 44    | >TP53-P190A GLAAPQHLIR | 67   | 23    |
| >TP53-P190A GLAPPQHL   | 16    | >TP53-P190A GLAAPQHL   | 19   | 3     |
| >TP53-P190A GLAPPQHLI  | 13    | >TP53-P190A GLAAPQHLI  | 13   | 0     |
| >TP53-P190A GLAPPQHLIR | 3     | >TP53-P190A GLAAPQHLIR | 3    | 0     |
| >TP53-P190A GLAPPQHL   | 26    | >TP53-P190A GLAAPQHL   | 29   | 3     |
| >TP53-P190A GLAPPQHLI  | 22    | >TP53-P190A GLAAPQHLI  | 32   | 10    |
| >TP53-P190A GLAPPQHLIR | 7     | >TP53-P190A GLAAPQHLIR | 8    | 1     |
| >TP53-P190A GLAPPQHL   | 11    | >TP53-P190A GLAAPQHL   | 11   | 0     |
| >TP53-P190A GLAPPQHLI  | 13    | >TP53-P190A GLAAPQHLI  | 18   | 5     |
| >TP53-P190A GLAPPQHLIR | 5     | >TP53-P190A GLAAPQHLIR | 6    | 1     |
| >TP53-P190A GLAPPQHL   | 175   | >TP53-P190A GLAAPQHL   | 188  | 13    |
| >TP53-P190A GLAPPQHLI  | 76    | >TP53-P190A GLAAPQHLI  | 156  | 80    |
| >TP53-P190A GLAPPQHLIR | 9     | >TP53-P190A GLAAPQHLIR | 9    | 0     |
| >TP53-P190A GLAPPQHL   | 5     | >TP53-P190A GLAAPQHL   | 6    | 1     |
| >TP53-P190A GLAPPQHLI  | 5     | >TP53-P190A GLAAPQHLI  | 8    | 3     |
| >TP53-P190A GLAPPQHLIR | 2     | >TP53-P190A GLAAPQHLIR | 2    | 0     |
| >TP53-P190A GLAPPQHLIR | 282   | >TP53-P190A GLAAPQHLIR | 264  | 18    |
| >TP53-P190A SDGLAPPQHI | 507   | >TP53-P190A SDGLAAPQHI | 198  | 309   |
| >TP53-P190A SDGLAPPQHI | 104   | >TP53-P190A SDGLAAPQHI | 57   | 47    |
| >TP53-P190A CSDSDGLAP  | 1532  | >TP53-P190A CSDSDGLAA  | 67   | 1465  |
| >TP53-P190F PPQHLIRVEG | 11406 | >TP53-P190F HPQHLIRVEG | 155  | 11251 |
| >TP53-P190F LAPPQHLIRV | 395   | >TP53-P190F LAHPQHLIRV | 1020 | 625   |
| >TP53-P190F LAPPQHLIRV | 577   | >TP53-P190F LAHPQHLIRV | 287  | 290   |
| >TP53-P190F LAPPQHLIRV | 52    | >TP53-P190F LAHPQHLIRV | 38   | 14    |



|                         |       |                         |      |       |
|-------------------------|-------|-------------------------|------|-------|
| >TP53-P190F LAPPQHLI    | 10583 | >TP53-P190F LAHPQHLI    | 187  | 10396 |
| >TP53-P190F LAPPQHILIR  | 11089 | >TP53-P190F LAHPQHILIR  | 155  | 10934 |
| >TP53-P190F LAPPQHILIRV | 11275 | >TP53-P190F LAHPQHILIRV | 238  | 11037 |
| >TP53-P190F LAPPQHILIR  | 1307  | >TP53-P190F LAHPQHILIR  | 86   | 1221  |
| >TP53-P190F LAPPQHILIR  | 1385  | >TP53-P190F LAHPQHILIR  | 469  | 916   |
| >TP53-P190F LAPPQHILI   | 7452  | >TP53-P190F LAHPQHILI   | 444  | 7008  |
| >TP53-P190F LAPPQHILI   | 5     | >TP53-P190F LAHPQHILI   | 1568 | 1563  |
| >TP53-P190F LAPPQHILIRV | 28    | >TP53-P190F LAHPQHILIRV | 7399 | 7371  |
| >TP53-P190F LAPPQHILIR  | 504   | >TP53-P190F LAHPQHILIR  | 440  | 64    |
| >TP53-P190F LAPPQHILI   | 70    | >TP53-P190F LAHPQHILI   | 41   | 29    |
| >TP53-P190F GLAPPQHL    | 285   | >TP53-P190F GLAHPQHL    | 353  | 68    |
| >TP53-P190F GLAPPQHILI  | 65    | >TP53-P190F GLAHPQHILI  | 111  | 46    |
| >TP53-P190F GLAPPQHILIR | 20    | >TP53-P190F GLAHPQHILIR | 27   | 7     |
| >TP53-P190F GLAPPQHL    | 22    | >TP53-P190F GLAHPQHL    | 20   | 2     |
| >TP53-P190F GLAPPQHILI  | 15    | >TP53-P190F GLAHPQHILI  | 21   | 6     |
| >TP53-P190F GLAPPQHILIR | 9     | >TP53-P190F GLAHPQHILIR | 12   | 3     |
| >TP53-P190F GLAPPQHL    | 61    | >TP53-P190F GLAHPQHL    | 45   | 16    |
| >TP53-P190F GLAPPQHILI  | 31    | >TP53-P190F GLAHPQHILI  | 39   | 8     |
| >TP53-P190F GLAPPQHILIR | 7     | >TP53-P190F GLAHPQHILIR | 8    | 1     |
| >TP53-P190F GLAPPQHILIR | 44    | >TP53-P190F GLAHPQHILIR | 103  | 59    |
| >TP53-P190F GLAPPQHL    | 16    | >TP53-P190F GLAHPQHL    | 35   | 19    |
| >TP53-P190F GLAPPQHILI  | 13    | >TP53-P190F GLAHPQHILI  | 28   | 15    |
| >TP53-P190F GLAPPQHILIR | 3     | >TP53-P190F GLAHPQHILIR | 4    | 1     |
| >TP53-P190F GLAPPQHL    | 26    | >TP53-P190F GLAHPQHL    | 32   | 6     |
| >TP53-P190F GLAPPQHILI  | 22    | >TP53-P190F GLAHPQHILI  | 35   | 13    |
| >TP53-P190F GLAPPQHILIR | 7     | >TP53-P190F GLAHPQHILIR | 9    | 2     |
| >TP53-P190F GLAPPQHL    | 11    | >TP53-P190F GLAHPQHL    | 19   | 8     |
| >TP53-P190F GLAPPQHILI  | 13    | >TP53-P190F GLAHPQHILI  | 30   | 17    |
| >TP53-P190F GLAPPQHILIR | 5     | >TP53-P190F GLAHPQHILIR | 6    | 1     |
| >TP53-P190F GLAPPQHL    | 175   | >TP53-P190F GLAHPQHL    | 958  | 783   |
| >TP53-P190F GLAPPQHILI  | 76    | >TP53-P190F GLAHPQHILI  | 817  | 741   |
| >TP53-P190F GLAPPQHILIR | 9     | >TP53-P190F GLAHPQHILIR | 20   | 11    |
| >TP53-P190F GLAPPQHL    | 5     | >TP53-P190F GLAHPQHL    | 9    | 4     |
| >TP53-P190F GLAPPQHILI  | 5     | >TP53-P190F GLAHPQHILI  | 13   | 8     |
| >TP53-P190F GLAPPQHILIR | 2     | >TP53-P190F GLAHPQHILIR | 2    | 0     |
| >TP53-P190F GLAPPQHILIR | 282   | >TP53-P190F GLAHPQHILIR | 476  | 194   |
| >TP53-P190F SDGLAPPQHL  | 104   | >TP53-P190F SDGLAHPQHL  | 162  | 58    |
| >TP53-P190F CSDSDGLAP   | 1532  | >TP53-P190F CSDSDGLAH   | 88   | 1444  |
| >TP53-P190L PPQHILIRV   | 6495  | >TP53-P190L LPQHILIRV   | 167  | 6328  |
| >TP53-P190L PPQHILIRVEG | 11406 | >TP53-P190L LPQHILIRVEG | 127  | 11279 |
| >TP53-P190L APPQHILIRV  | 21273 | >TP53-P190L ALPQHILIRV  | 28   | 21245 |
| >TP53-P190L APPQHILIRV  | 27065 | >TP53-P190L ALPQHILIRV  | 30   | 27035 |
| >TP53-P190L APPQHILIRV  | 18143 | >TP53-P190L ALPQHILIRV  | 5    | 18138 |

|                        |       |                        |      |       |
|------------------------|-------|------------------------|------|-------|
| >TP53-P190L APPQHLIRV  | 15293 | >TP53-P190L ALPQHLIRV  | 28   | 15265 |
| >TP53-P190L APPQHLIRV  | 8353  | >TP53-P190L ALPQHLIRV  | 3    | 8350  |
| >TP53-P190L APPQHLIRV  | 24740 | >TP53-P190L ALPQHLIRV  | 29   | 24711 |
| >TP53-P190L APPQHLIRV  | 19756 | >TP53-P190L ALPQHLIRV  | 10   | 19746 |
| >TP53-P190L APPQHLIRV  | 25989 | >TP53-P190L ALPQHLIRV  | 101  | 25888 |
| >TP53-P190L APPQHLIRV  | 9184  | >TP53-P190L ALPQHLIRV  | 2    | 9182  |
| >TP53-P190L ERCSDSGLA  | 17038 | >TP53-P190L ERCSDSGLA  | 85   | 16953 |
| >TP53-P190L LAPPQHLIRV | 5782  | >TP53-P190L LALPQHLIRV | 453  | 5329  |
| >TP53-P190L LAPPQHLIRV | 395   | >TP53-P190L LALPQHLIRV | 94   | 301   |
| >TP53-P190L LAPPQHLIRV | 577   | >TP53-P190L LALPQHLIRV | 75   | 502   |
| >TP53-P190L LAPPQHLIRV | 52    | >TP53-P190L LALPQHLIRV | 25   | 27    |
| >TP53-P190L LAPPQHLIR  | 1307  | >TP53-P190L LALPQHLIR  | 83   | 1224  |
| >TP53-P190L LAPPQHLIRV | 4786  | >TP53-P190L LALPQHLIRV | 249  | 4537  |
| >TP53-P190L LAPPQHLI   | 7452  | >TP53-P190L LALPQHLI   | 246  | 7206  |
| >TP53-P190L LAPPQHLIRV | 10209 | >TP53-P190L LALPQHLIRV | 432  | 9777  |
| >TP53-P190L LAPPQHLI   | 1132  | >TP53-P190L LALPQHLI   | 487  | 645   |
| >TP53-P190L LAPPQHLI   | 8293  | >TP53-P190L LALPQHLI   | 119  | 8174  |
| >TP53-P190L LAPPQHLI   | 5     | >TP53-P190L LALPQHLI   | 1544 | 1539  |
| >TP53-P190L LAPPQHLIRV | 28    | >TP53-P190L LALPQHLIRV | 9166 | 9138  |
| >TP53-P190L LAPPQHLIR  | 504   | >TP53-P190L LALPQHLIR  | 355  | 149   |
| >TP53-P190L LAPPQHLI   | 70    | >TP53-P190L LALPQHLI   | 45   | 25    |
| >TP53-P190L GLAPPQHL   | 285   | >TP53-P190L GLALPQHL   | 734  | 449   |
| >TP53-P190L GLAPPQHLI  | 65    | >TP53-P190L GLALPQHLI  | 340  | 275   |
| >TP53-P190L GLAPPQHLIR | 20    | >TP53-P190L GLALPQHLIR | 50   | 30    |
| >TP53-P190L GLAPPQHL   | 22    | >TP53-P190L GLALPQHL   | 30   | 8     |
| >TP53-P190L GLAPPQHLI  | 15    | >TP53-P190L GLALPQHLI  | 27   | 12    |
| >TP53-P190L GLAPPQHLIR | 9     | >TP53-P190L GLALPQHLIR | 16   | 7     |
| >TP53-P190L GLAPPQHL   | 61    | >TP53-P190L GLALPQHL   | 163  | 102   |
| >TP53-P190L GLAPPQHLI  | 31    | >TP53-P190L GLALPQHLI  | 146  | 115   |
| >TP53-P190L GLAPPQHLIR | 7     | >TP53-P190L GLALPQHLIR | 20   | 13    |
| >TP53-P190L GLAPPQHLIR | 44    | >TP53-P190L GLALPQHLIR | 271  | 227   |
| >TP53-P190L GLAPPQHL   | 16    | >TP53-P190L GLALPQHL   | 77   | 61    |
| >TP53-P190L GLAPPQHLI  | 13    | >TP53-P190L GLALPQHLI  | 75   | 62    |
| >TP53-P190L GLAPPQHLIR | 3     | >TP53-P190L GLALPQHLIR | 6    | 3     |
| >TP53-P190L GLAPPQHL   | 26    | >TP53-P190L GLALPQHL   | 78   | 52    |
| >TP53-P190L GLAPPQHLI  | 22    | >TP53-P190L GLALPQHLI  | 105  | 83    |
| >TP53-P190L GLAPPQHLIR | 7     | >TP53-P190L GLALPQHLIR | 16   | 9     |
| >TP53-P190L GLAPPQHL   | 11    | >TP53-P190L GLALPQHL   | 24   | 13    |
| >TP53-P190L GLAPPQHLI  | 13    | >TP53-P190L GLALPQHLI  | 61   | 48    |
| >TP53-P190L GLAPPQHLIR | 5     | >TP53-P190L GLALPQHLIR | 8    | 3     |
| >TP53-P190L GLAPPQHL   | 175   | >TP53-P190L GLALPQHL   | 473  | 298   |
| >TP53-P190L GLAPPQHLI  | 76    | >TP53-P190L GLALPQHLI  | 375  | 299   |
| >TP53-P190L GLAPPQHLIR | 9     | >TP53-P190L GLALPQHLIR | 14   | 5     |

|                         |       |                         |      |       |
|-------------------------|-------|-------------------------|------|-------|
| >TP53-P190L GLAPPQHL    | 5     | >TP53-P190L GLALPQHL    | 14   | 9     |
| >TP53-P190L GLAPPQHLI   | 5     | >TP53-P190L GLALPQHLI   | 24   | 19    |
| >TP53-P190L GLAPPQHLIR  | 2     | >TP53-P190L GLALPQHLIR  | 3    | 1     |
| >TP53-P190L GLAPPQHLIR  | 282   | >TP53-P190L GLALPQHLIR  | 738  | 456   |
| >TP53-P190L DGLAPPQHLI  | 968   | >TP53-P190L DGLALPQHLI  | 473  | 495   |
| >TP53-P190L SDGLAPPQHI  | 507   | >TP53-P190L SDGLALPQHL  | 180  | 327   |
| >TP53-P190L SDGLAPPQHI  | 104   | >TP53-P190L SDGLALPQHL  | 96   | 8     |
| >TP53-P190L CSDSDGLAP   | 1532  | >TP53-P190L CSDSDGLAL   | 127  | 1405  |
| >TP53-P190L CSDSDGLAP   | 21851 | >TP53-P190L CSDSDGLAL   | 293  | 21558 |
| >TP53-P190F PPQHILIRV   | 11496 | >TP53-P190F RPQHILIRV   | 138  | 11358 |
| >TP53-P190F APPQHILIRV  | 28924 | >TP53-P190F ARPQHILIRV  | 203  | 28721 |
| >TP53-P190F LAPPQHILIRV | 395   | >TP53-P190F LARPQHILIRV | 3251 | 2856  |
| >TP53-P190F LAPPQHILIRV | 52    | >TP53-P190F LARPQHILIRV | 97   | 45    |
| >TP53-P190F LAPPQHILI   | 10583 | >TP53-P190F LARPQHILI   | 23   | 10560 |
| >TP53-P190F LAPPQHILIR  | 11089 | >TP53-P190F LARPQHILIR  | 18   | 11071 |
| >TP53-P190F LAPPQHILIRV | 11275 | >TP53-P190F LARPQHILIRV | 28   | 11247 |
| >TP53-P190F LAPPQHILIR  | 1307  | >TP53-P190F LARPQHILIR  | 60   | 1247  |
| >TP53-P190F LAPPQHILI   | 7452  | >TP53-P190F LARPQHILI   | 99   | 7353  |
| >TP53-P190F LAPPQHILIRV | 10209 | >TP53-P190F LARPQHILIRV | 177  | 10032 |
| >TP53-P190F LAPPQHILI   | 5     | >TP53-P190F LARPQHILI   | 4411 | 4406  |
| >TP53-P190F LAPPQHILIRV | 28    | >TP53-P190F LARPQHILIRV | 9460 | 9432  |
| >TP53-P190F LAPPQHILI   | 70    | >TP53-P190F LARPQHILI   | 85   | 15    |
| >TP53-P190F GLAPPQHL    | 285   | >TP53-P190F GLARPQHL    | 853  | 568   |
| >TP53-P190F GLAPPQHILI  | 65    | >TP53-P190F GLARPQHILI  | 273  | 208   |
| >TP53-P190F GLAPPQHLIR  | 20    | >TP53-P190F GLARPQHLIR  | 42   | 22    |
| >TP53-P190F GLAPPQHL    | 22    | >TP53-P190F GLARPQHL    | 45   | 23    |
| >TP53-P190F GLAPPQHILI  | 15    | >TP53-P190F GLARPQHILI  | 51   | 36    |
| >TP53-P190F GLAPPQHLIR  | 9     | >TP53-P190F GLARPQHLIR  | 22   | 13    |
| >TP53-P190F GLAPPQHL    | 61    | >TP53-P190F GLARPQHL    | 130  | 69    |
| >TP53-P190F GLAPPQHILI  | 31    | >TP53-P190F GLARPQHILI  | 105  | 74    |
| >TP53-P190F GLAPPQHLIR  | 7     | >TP53-P190F GLARPQHLIR  | 13   | 6     |
| >TP53-P190F GLAPPQHLIR  | 44    | >TP53-P190F GLARPQHLIR  | 188  | 144   |
| >TP53-P190F GLAPPQHL    | 16    | >TP53-P190F GLARPQHL    | 36   | 20    |
| >TP53-P190F GLAPPQHILI  | 13    | >TP53-P190F GLARPQHILI  | 24   | 11    |
| >TP53-P190F GLAPPQHLIR  | 3     | >TP53-P190F GLARPQHLIR  | 4    | 1     |
| >TP53-P190F GLAPPQHL    | 26    | >TP53-P190F GLARPQHL    | 45   | 19    |
| >TP53-P190F GLAPPQHILI  | 22    | >TP53-P190F GLARPQHILI  | 46   | 24    |
| >TP53-P190F GLAPPQHLIR  | 7     | >TP53-P190F GLARPQHLIR  | 10   | 3     |
| >TP53-P190F GLAPPQHL    | 11    | >TP53-P190F GLARPQHL    | 19   | 8     |
| >TP53-P190F GLAPPQHILI  | 13    | >TP53-P190F GLARPQHILI  | 35   | 22    |
| >TP53-P190F GLAPPQHLIR  | 5     | >TP53-P190F GLARPQHLIR  | 7    | 2     |
| >TP53-P190F GLAPPQHL    | 175   | >TP53-P190F GLARPQHL    | 862  | 687   |
| >TP53-P190F GLAPPQHILI  | 76    | >TP53-P190F GLARPQHILI  | 591  | 515   |

|                        |       |                        |      |       |
|------------------------|-------|------------------------|------|-------|
| >TP53-P190FGLAPPQHLIR' | 9     | >TP53-P190FGLARPQHLIR' | 17   | 8     |
| >TP53-P190FGLAPPQHL    | 5     | >TP53-P190FGLARPQHL    | 8    | 3     |
| >TP53-P190FGLAPPQHLI   | 5     | >TP53-P190FGLARPQHLI   | 11   | 6     |
| >TP53-P190FGLAPPQHLIR' | 2     | >TP53-P190FGLARPQHLIR' | 2    | 0     |
| >TP53-P190FGLAPPQHLIR  | 282   | >TP53-P190FGLARPQHLIR  | 407  | 125   |
| >TP53-P190FSDGLAPPQHI  | 507   | >TP53-P190FSDGLARPQHI  | 281  | 226   |
| >TP53-P190FSDGLAPPQHI  | 104   | >TP53-P190FSDGLARPQHI  | 194  | 90    |
| >TP53-P190FRCSDSGLAF   | 32797 | >TP53-P190FRCSDSGLAF   | 358  | 32439 |
| >TP53-P190FRCSDSGLAF   | 31362 | >TP53-P190FRCSDSGLAF   | 159  | 31203 |
| >TP53-P190SPQHLIRVEG   | 11406 | >TP53-P190SPQHLIRVEG   | 434  | 10972 |
| >TP53-P190SAPPQHLIRV   | 1104  | >TP53-P190SAPPQHLIRV   | 12   | 1092  |
| >TP53-P190SAPPQHLIRVE  | 14349 | >TP53-P190SAPPQHLIRVE  | 449  | 13900 |
| >TP53-P190SAPPQHLIR    | 4109  | >TP53-P190SAPPQHLIR    | 388  | 3721  |
| >TP53-P190SLAPPQHLIRV  | 395   | >TP53-P190SLAPPQHLIRV  | 435  | 40    |
| >TP53-P190SLAPPQHLIRV  | 52    | >TP53-P190SLAPPQHLIRV  | 33   | 19    |
| >TP53-P190SLAPPQHLIR   | 1307  | >TP53-P190SLAPPQHLIR   | 215  | 1092  |
| >TP53-P190SLAPPQHLIR   | 1385  | >TP53-P190SLAPPQHLIR   | 291  | 1094  |
| >TP53-P190SLAPPQHLI    | 8293  | >TP53-P190SLAPPQHLI    | 90   | 8203  |
| >TP53-P190SLAPPQHLI    | 5     | >TP53-P190SLAPPQHLI    | 1365 | 1360  |
| >TP53-P190SLAPPQHLIRV  | 28    | >TP53-P190SLAPPQHLIRV  | 4012 | 3984  |
| >TP53-P190SLAPPQHLI    | 70    | >TP53-P190SLAPPQHLI    | 53   | 17    |
| >TP53-P190SGLAPPQHL    | 285   | >TP53-P190SGLAPPQHL    | 222  | 63    |
| >TP53-P190SGLAPPQHLI   | 65    | >TP53-P190SGLAPPQHLI   | 62   | 3     |
| >TP53-P190SGLAPPQHLIR' | 20    | >TP53-P190SGLAPPQHLIR' | 19   | 1     |
| >TP53-P190SGLAPPQHL    | 22    | >TP53-P190SGLAPPQHL    | 15   | 7     |
| >TP53-P190SGLAPPQHLI   | 15    | >TP53-P190SGLAPPQHLI   | 16   | 1     |
| >TP53-P190SGLAPPQHLIR' | 9     | >TP53-P190SGLAPPQHLIR' | 9    | 0     |
| >TP53-P190SGLAPPQHL    | 61    | >TP53-P190SGLAPPQHL    | 47   | 14    |
| >TP53-P190SGLAPPQHLI   | 31    | >TP53-P190SGLAPPQHLI   | 33   | 2     |
| >TP53-P190SGLAPPQHLIR' | 7     | >TP53-P190SGLAPPQHLIR' | 7    | 0     |
| >TP53-P190SGLAPPQHLIR' | 44    | >TP53-P190SGLAPPQHLIR' | 109  | 65    |
| >TP53-P190SGLAPPQHL    | 16    | >TP53-P190SGLAPPQHL    | 21   | 5     |
| >TP53-P190SGLAPPQHLI   | 13    | >TP53-P190SGLAPPQHLI   | 14   | 1     |
| >TP53-P190SGLAPPQHLIR' | 3     | >TP53-P190SGLAPPQHLIR' | 3    | 0     |
| >TP53-P190SGLAPPQHL    | 26    | >TP53-P190SGLAPPQHL    | 33   | 7     |
| >TP53-P190SGLAPPQHLI   | 22    | >TP53-P190SGLAPPQHLI   | 36   | 14    |
| >TP53-P190SGLAPPQHLIR' | 7     | >TP53-P190SGLAPPQHLIR' | 9    | 2     |
| >TP53-P190SGLAPPQHL    | 11    | >TP53-P190SGLAPPQHL    | 12   | 1     |
| >TP53-P190SGLAPPQHLI   | 13    | >TP53-P190SGLAPPQHLI   | 18   | 5     |
| >TP53-P190SGLAPPQHLIR' | 5     | >TP53-P190SGLAPPQHLIR' | 6    | 1     |
| >TP53-P190SGLAPPQHL    | 175   | >TP53-P190SGLAPPQHL    | 177  | 2     |
| >TP53-P190SGLAPPQHLI   | 76    | >TP53-P190SGLAPPQHLI   | 103  | 27    |
| >TP53-P190SGLAPPQHLIR' | 9     | >TP53-P190SGLAPPQHLIR' | 8    | 1     |

|                         |       |                         |      |       |
|-------------------------|-------|-------------------------|------|-------|
| >TP53-P190S GLAPPQHL    | 5     | >TP53-P190S GLASPQHL    | 6    | 1     |
| >TP53-P190S GLAPPQHLI   | 5     | >TP53-P190S GLASPQHLI   | 8    | 3     |
| >TP53-P190S GLAPPQHLIR' | 2     | >TP53-P190S GLASPQHLIR' | 2    | 0     |
| >TP53-P190S GLAPPQHLIR  | 282   | >TP53-P190S GLASPQHLIR  | 407  | 125   |
| >TP53-P190S SDGLAPPQHI  | 507   | >TP53-P190S SDGLASPQHL  | 251  | 256   |
| >TP53-P190S SDGLAPPQHI  | 104   | >TP53-P190S SDGLASPQHL  | 88   | 16    |
| >TP53-P190S CSDSDGLAP   | 1532  | >TP53-P190S CSDSDGLAS   | 254  | 1278  |
| >TP53-P190T APPQHLIRV   | 18143 | >TP53-P190T ATPQHLIRV   | 247  | 17896 |
| >TP53-P190T APPQHLIRV   | 15293 | >TP53-P190T ATPQHLIRV   | 228  | 15065 |
| >TP53-P190T APPQHLIRV   | 8353  | >TP53-P190T ATPQHLIRV   | 68   | 8285  |
| >TP53-P190T APPQHLIRV   | 9184  | >TP53-P190T ATPQHLIRV   | 81   | 9103  |
| >TP53-P190T APPQHLIRV   | 18982 | >TP53-P190T ATPQHLIRV   | 391  | 18591 |
| >TP53-P190T APPQHLIRV   | 1104  | >TP53-P190T ATPQHLIRV   | 8    | 1096  |
| >TP53-P190T APPQHLIRVE  | 14349 | >TP53-P190T ATPQHLIRVE  | 101  | 14248 |
| >TP53-P190T APPQHLIR    | 4109  | >TP53-P190T ATPQHLIR    | 257  | 3852  |
| >TP53-P190T LAPPQHLIRV  | 395   | >TP53-P190T LATPQHLIRV  | 691  | 296   |
| >TP53-P190T LAPPQHLIRV  | 52    | >TP53-P190T LATPQHLIRV  | 26   | 26    |
| >TP53-P190T LAPPQHLIR   | 1307  | >TP53-P190T LATPQHLIR   | 239  | 1068  |
| >TP53-P190T LAPPQHLIR   | 1385  | >TP53-P190T LATPQHLIR   | 298  | 1087  |
| >TP53-P190T LAPPQHLI    | 8293  | >TP53-P190T LATPQHLI    | 142  | 8151  |
| >TP53-P190T LAPPQHLI    | 5     | >TP53-P190T LATPQHLI    | 581  | 576   |
| >TP53-P190T LAPPQHLIRV  | 28    | >TP53-P190T LATPQHLIRV  | 1530 | 1502  |
| >TP53-P190T LAPPQHLI    | 70    | >TP53-P190T LATPQHLI    | 62   | 8     |
| >TP53-P190T GLAPPQHL    | 285   | >TP53-P190T GLATPQHL    | 354  | 69    |
| >TP53-P190T GLAPPQHLI   | 65    | >TP53-P190T GLATPQHLI   | 91   | 26    |
| >TP53-P190T GLAPPQHLIR' | 20    | >TP53-P190T GLATPQHLIR' | 23   | 3     |
| >TP53-P190T GLAPPQHL    | 22    | >TP53-P190T GLATPQHL    | 23   | 1     |
| >TP53-P190T GLAPPQHLI   | 15    | >TP53-P190T GLATPQHLI   | 23   | 8     |
| >TP53-P190T GLAPPQHLIR' | 9     | >TP53-P190T GLATPQHLIR' | 12   | 3     |
| >TP53-P190T GLAPPQHL    | 61    | >TP53-P190T GLATPQHL    | 76   | 15    |
| >TP53-P190T GLAPPQHLI   | 31    | >TP53-P190T GLATPQHLI   | 52   | 21    |
| >TP53-P190T GLAPPQHLIR' | 7     | >TP53-P190T GLATPQHLIR' | 9    | 2     |
| >TP53-P190T GLAPPQHLIR' | 44    | >TP53-P190T GLATPQHLIR' | 134  | 90    |
| >TP53-P190T GLAPPQHL    | 16    | >TP53-P190T GLATPQHL    | 37   | 21    |
| >TP53-P190T GLAPPQHLI   | 13    | >TP53-P190T GLATPQHLI   | 32   | 19    |
| >TP53-P190T GLAPPQHLIR' | 3     | >TP53-P190T GLATPQHLIR' | 4    | 1     |
| >TP53-P190T GLAPPQHL    | 26    | >TP53-P190T GLATPQHL    | 32   | 6     |
| >TP53-P190T GLAPPQHLI   | 22    | >TP53-P190T GLATPQHLI   | 42   | 20    |
| >TP53-P190T GLAPPQHLIR' | 7     | >TP53-P190T GLATPQHLIR' | 9    | 2     |
| >TP53-P190T GLAPPQHL    | 11    | >TP53-P190T GLATPQHL    | 17   | 6     |
| >TP53-P190T GLAPPQHLI   | 13    | >TP53-P190T GLATPQHLI   | 34   | 21    |
| >TP53-P190T GLAPPQHLIR' | 5     | >TP53-P190T GLATPQHLIR' | 7    | 2     |
| >TP53-P190T GLAPPQHL    | 175   | >TP53-P190T GLATPQHL    | 279  | 104   |

|                         |      |                         |     |      |
|-------------------------|------|-------------------------|-----|------|
| >TP53-P190T GLAPPQHLI   | 76   | >TP53-P190T GLATPQHLI   | 310 | 234  |
| >TP53-P190T GLAPPQHLIR' | 9    | >TP53-P190T GLATPQHLIR' | 12  | 3    |
| >TP53-P190T GLAPPQHL    | 5    | >TP53-P190T GLATPQHL    | 8   | 3    |
| >TP53-P190T GLAPPQHLI   | 5    | >TP53-P190T GLATPQHLI   | 12  | 7    |
| >TP53-P190T GLAPPQHLIR' | 2    | >TP53-P190T GLATPQHLIR' | 2   | 0    |
| >TP53-P190T GLAPPQHLIR  | 282  | >TP53-P190T GLATPQHLIR  | 635 | 353  |
| >TP53-P190T SDGLAPPQHI  | 507  | >TP53-P190T SDGLATPQHI  | 154 | 353  |
| >TP53-P190T SDGLAPPQHI  | 104  | >TP53-P190T SDGLATPQHI  | 72  | 32   |
| >TP53-P190T CSDSDGLAP   | 1532 | >TP53-P190T CSDSDGLAT   | 241 | 1291 |
| >TP53-P191F APPQHLIRV   | 759  | >TP53-P191F APHQHLIRV   | 90  | 669  |
| >TP53-P191F LAPPQHLIRV  | 395  | >TP53-P191F LAPHQHLIRV  | 986 | 591  |
| >TP53-P191F LAPPQHLIRV  | 52   | >TP53-P191F LAPHQHLIRV  | 294 | 242  |
| >TP53-P191F LAPPQHLI    | 5    | >TP53-P191F LAPHQHLI    | 20  | 15   |
| >TP53-P191F LAPPQHLIRV  | 28   | >TP53-P191F LAPHQHLIRV  | 193 | 165  |
| >TP53-P191F LAPPQHLI    | 70   | >TP53-P191F LAPHQHLI    | 264 | 194  |
| >TP53-P191F GLAPPQHL    | 285  | >TP53-P191F GLAPHQHL    | 262 | 23   |
| >TP53-P191F GLAPPQHLI   | 65   | >TP53-P191F GLAPHQHLI   | 27  | 38   |
| >TP53-P191F GLAPPQHLIR' | 20   | >TP53-P191F GLAPHQHLIR  | 14  | 6    |
| >TP53-P191F GLAPPQHL    | 22   | >TP53-P191F GLAPHQHL    | 11  | 11   |
| >TP53-P191F GLAPPQHLI   | 15   | >TP53-P191F GLAPHQHLI   | 5   | 10   |
| >TP53-P191F GLAPPQHLIR' | 9    | >TP53-P191F GLAPHQHLIR  | 4   | 5    |
| >TP53-P191F GLAPPQHL    | 61   | >TP53-P191F GLAPHQHL    | 28  | 33   |
| >TP53-P191F GLAPPQHLI   | 31   | >TP53-P191F GLAPHQHLI   | 6   | 25   |
| >TP53-P191F GLAPPQHLIR' | 7    | >TP53-P191F GLAPHQHLIR  | 3   | 4    |
| >TP53-P191F GLAPPQHL    | 755  | >TP53-P191F GLAPHQHL    | 347 | 408  |
| >TP53-P191F GLAPPQHLI   | 500  | >TP53-P191F GLAPHQHLI   | 203 | 297  |
| >TP53-P191F GLAPPQHLIR' | 44   | >TP53-P191F GLAPHQHLIR  | 28  | 16   |
| >TP53-P191F GLAPPQHL    | 16   | >TP53-P191F GLAPHQHL    | 31  | 15   |
| >TP53-P191F GLAPPQHLI   | 13   | >TP53-P191F GLAPHQHLI   | 27  | 14   |
| >TP53-P191F GLAPPQHLIR' | 3    | >TP53-P191F GLAPHQHLIR  | 4   | 1    |
| >TP53-P191F GLAPPQHL    | 26   | >TP53-P191F GLAPHQHL    | 38  | 12   |
| >TP53-P191F GLAPPQHLI   | 22   | >TP53-P191F GLAPHQHLI   | 16  | 6    |
| >TP53-P191F GLAPPQHLIR' | 7    | >TP53-P191F GLAPHQHLIR  | 6   | 1    |
| >TP53-P191F GLAPPQHL    | 11   | >TP53-P191F GLAPHQHL    | 16  | 5    |
| >TP53-P191F GLAPPQHLI   | 13   | >TP53-P191F GLAPHQHLI   | 19  | 6    |
| >TP53-P191F GLAPPQHLIR' | 5    | >TP53-P191F GLAPHQHLIR  | 6   | 1    |
| >TP53-P191F GLAPPQHL    | 175  | >TP53-P191F GLAPHQHL    | 512 | 337  |
| >TP53-P191F GLAPPQHLI   | 76   | >TP53-P191F GLAPHQHLI   | 157 | 81   |
| >TP53-P191F GLAPPQHLIR' | 9    | >TP53-P191F GLAPHQHLIR  | 12  | 3    |
| >TP53-P191F GLAPPQHL    | 5    | >TP53-P191F GLAPHQHL    | 4   | 1    |
| >TP53-P191F GLAPPQHLI   | 5    | >TP53-P191F GLAPHQHLI   | 4   | 1    |
| >TP53-P191F GLAPPQHLIR' | 2    | >TP53-P191F GLAPHQHLIR  | 2   | 0    |
| >TP53-P191F GLAPPQHLIR  | 282  | >TP53-P191F GLAPHQHLIR  | 236 | 46   |

|                         |       |                         |     |       |
|-------------------------|-------|-------------------------|-----|-------|
| >TP53-P191F SDGLAPPQHI  | 507   | >TP53-P191F SDGLAPHQHI  | 182 | 325   |
| >TP53-P191F SDGLAPPQHI  | 104   | >TP53-P191F SDGLAPHQHI  | 56  | 48    |
| >TP53-P191L PPQHLIRV    | 23285 | >TP53-P191L PLQHLIRV    | 38  | 23247 |
| >TP53-P191L PPQHLIRV    | 24643 | >TP53-P191L PLQHLIRV    | 381 | 24262 |
| >TP53-P191L PPQHLIRV    | 25095 | >TP53-P191L PLQHLIRV    | 258 | 24837 |
| >TP53-P191L PPQHLIRV    | 24618 | >TP53-P191L PLQHLIRV    | 377 | 24241 |
| >TP53-P191L PPQHLIRV    | 27384 | >TP53-P191L PLQHLIRV    | 11  | 27373 |
| >TP53-P191L APPQHLIRV   | 759   | >TP53-P191L APLQHLIRV   | 269 | 490   |
| >TP53-P191L LAPPQHLIRV  | 395   | >TP53-P191L LAPLQHLIRV  | 493 | 98    |
| >TP53-P191L LAPPQHLIRV  | 52    | >TP53-P191L LAPLQHLIRV  | 417 | 365   |
| >TP53-P191L LAPPQHLI    | 5     | >TP53-P191L LAPLQHLI    | 20  | 15    |
| >TP53-P191L LAPPQHLIRV  | 28    | >TP53-P191L LAPLQHLIRV  | 80  | 52    |
| >TP53-P191L LAPPQHLI    | 70    | >TP53-P191L LAPLQHLI    | 500 | 430   |
| >TP53-P191L GLAPPQHL    | 285   | >TP53-P191L GLAPLQHL    | 92  | 193   |
| >TP53-P191L GLAPPQHLI   | 65    | >TP53-P191L GLAPLQHLI   | 28  | 37    |
| >TP53-P191L GLAPPQHLIRV | 20    | >TP53-P191L GLAPLQHLIRV | 14  | 6     |
| >TP53-P191L GLAPPQHL    | 22    | >TP53-P191L GLAPLQHL    | 6   | 16    |
| >TP53-P191L GLAPPQHLI   | 15    | >TP53-P191L GLAPLQHLI   | 3   | 12    |
| >TP53-P191L GLAPPQHLIRV | 9     | >TP53-P191L GLAPLQHLIRV | 4   | 5     |
| >TP53-P191L GLAPPQHL    | 61    | >TP53-P191L GLAPLQHL    | 23  | 38    |
| >TP53-P191L GLAPPQHLI   | 31    | >TP53-P191L GLAPLQHLI   | 14  | 17    |
| >TP53-P191L GLAPPQHLIRV | 7     | >TP53-P191L GLAPLQHLIRV | 5   | 2     |
| >TP53-P191L GLAPPQHL    | 755   | >TP53-P191L GLAPLQHL    | 93  | 662   |
| >TP53-P191L GLAPPQHLI   | 500   | >TP53-P191L GLAPLQHLI   | 211 | 289   |
| >TP53-P191L GLAPPQHLIRV | 44    | >TP53-P191L GLAPLQHLIRV | 29  | 15    |
| >TP53-P191L GLAPPQHL    | 16    | >TP53-P191L GLAPLQHL    | 25  | 9     |
| >TP53-P191L GLAPPQHLI   | 13    | >TP53-P191L GLAPLQHLI   | 25  | 12    |
| >TP53-P191L GLAPPQHLIRV | 3     | >TP53-P191L GLAPLQHLIRV | 4   | 1     |
| >TP53-P191L GLAPPQHL    | 26    | >TP53-P191L GLAPLQHL    | 15  | 11    |
| >TP53-P191L GLAPPQHLI   | 22    | >TP53-P191L GLAPLQHLI   | 16  | 6     |
| >TP53-P191L GLAPPQHLIRV | 7     | >TP53-P191L GLAPLQHLIRV | 6   | 1     |
| >TP53-P191L GLAPPQHL    | 11    | >TP53-P191L GLAPLQHL    | 9   | 2     |
| >TP53-P191L GLAPPQHLI   | 13    | >TP53-P191L GLAPLQHLI   | 9   | 4     |
| >TP53-P191L GLAPPQHLIRV | 5     | >TP53-P191L GLAPLQHLIRV | 5   | 0     |
| >TP53-P191L GLAPPQHL    | 175   | >TP53-P191L GLAPLQHL    | 135 | 40    |
| >TP53-P191L GLAPPQHLI   | 76    | >TP53-P191L GLAPLQHLI   | 79  | 3     |
| >TP53-P191L GLAPPQHLIRV | 9     | >TP53-P191L GLAPLQHLIRV | 9   | 0     |
| >TP53-P191L GLAPPQHL    | 5     | >TP53-P191L GLAPLQHL    | 3   | 2     |
| >TP53-P191L GLAPPQHLI   | 5     | >TP53-P191L GLAPLQHLI   | 4   | 1     |
| >TP53-P191L GLAPPQHLIRV | 2     | >TP53-P191L GLAPLQHLIRV | 2   | 0     |
| >TP53-P191L GLAPPQHLIRV | 282   | >TP53-P191L GLAPLQHLIRV | 360 | 78    |
| >TP53-P191L SDGLAPPQHI  | 507   | >TP53-P191L SDGLAPLQHL  | 141 | 366   |
| >TP53-P191L SDGLAPPQHI  | 104   | >TP53-P191L SDGLAPLQHL  | 57  | 47    |

|                        |       |                        |      |       |
|------------------------|-------|------------------------|------|-------|
| >TP53-P191L DSDGLAPP   | 13598 | >TP53-P191L DSDGLAPL   | 337  | 13261 |
| >TP53-P191L CSDSDGLAPP | 24081 | >TP53-P191L CSDSDGLAPL | 470  | 23611 |
| >TP53-P191F PQHLIRVEGN | 3922  | >TP53-P191F RQHLIRVEGN | 256  | 3666  |
| >TP53-P191F PQHLIRVEGN | 13798 | >TP53-P191F RQHLIRVEGN | 421  | 13377 |
| >TP53-P191F PQHLIRVEGN | 4918  | >TP53-P191F RQHLIRVEGN | 107  | 4811  |
| >TP53-P191F PQHLIRVEGN | 15559 | >TP53-P191F RQHLIRVEGN | 233  | 15326 |
| >TP53-P191F RCSDSDGLAF | 21834 | >TP53-P191F RCSDSDGLAF | 157  | 21677 |
| >TP53-P191F RCSDSDGLAF | 29656 | >TP53-P191F RCSDSDGLAF | 73   | 29583 |
| >TP53-P191F APPQHLIRV  | 759   | >TP53-P191F APRQHLIRV  | 17   | 742   |
| >TP53-P191F LAPPQHLIRV | 395   | >TP53-P191F LAPRQHLIRV | 1253 | 858   |
| >TP53-P191F LAPPQHLIRV | 52    | >TP53-P191F LAPRQHLIRV | 132  | 80    |
| >TP53-P191F LAPPQHLI   | 5     | >TP53-P191F LAPRQHLI   | 25   | 20    |
| >TP53-P191F LAPPQHLIRV | 28    | >TP53-P191F LAPRQHLIRV | 187  | 159   |
| >TP53-P191F LAPPQHLI   | 70    | >TP53-P191F LAPRQHLI   | 275  | 205   |
| >TP53-P191F GLAPPQHL   | 285   | >TP53-P191F GLAPRQHL   | 565  | 280   |
| >TP53-P191F GLAPPQHLI  | 65    | >TP53-P191F GLAPRQHLI  | 51   | 14    |
| >TP53-P191F GLAPPQHLIR | 20    | >TP53-P191F GLAPRQHLIR | 18   | 2     |
| >TP53-P191F GLAPPQHL   | 22    | >TP53-P191F GLAPRQHL   | 22   | 0     |
| >TP53-P191F GLAPPQHLI  | 15    | >TP53-P191F GLAPRQHLI  | 8    | 7     |
| >TP53-P191F GLAPPQHLIR | 9     | >TP53-P191F GLAPRQHLIR | 6    | 3     |
| >TP53-P191F GLAPPQHL   | 61    | >TP53-P191F GLAPRQHL   | 78   | 17    |
| >TP53-P191F GLAPPQHLI  | 31    | >TP53-P191F GLAPRQHLI  | 14   | 17    |
| >TP53-P191F GLAPPQHLIR | 7     | >TP53-P191F GLAPRQHLIR | 5    | 2     |
| >TP53-P191F GLAPPQHLI  | 500   | >TP53-P191F GLAPRQHLI  | 467  | 33    |
| >TP53-P191F GLAPPQHLIR | 44    | >TP53-P191F GLAPRQHLIR | 41   | 3     |
| >TP53-P191F GLAPPQHL   | 16    | >TP53-P191F GLAPRQHL   | 131  | 115   |
| >TP53-P191F GLAPPQHLI  | 13    | >TP53-P191F GLAPRQHLI  | 52   | 39    |
| >TP53-P191F GLAPPQHLIR | 3     | >TP53-P191F GLAPRQHLIR | 5    | 2     |
| >TP53-P191F GLAPPQHL   | 26    | >TP53-P191F GLAPRQHL   | 99   | 73    |
| >TP53-P191F GLAPPQHLI  | 22    | >TP53-P191F GLAPRQHLI  | 26   | 4     |
| >TP53-P191F GLAPPQHLIR | 7     | >TP53-P191F GLAPRQHLIR | 8    | 1     |
| >TP53-P191F GLAPPQHL   | 11    | >TP53-P191F GLAPRQHL   | 24   | 13    |
| >TP53-P191F GLAPPQHLI  | 13    | >TP53-P191F GLAPRQHLI  | 17   | 4     |
| >TP53-P191F GLAPPQHLIR | 5     | >TP53-P191F GLAPRQHLIR | 6    | 1     |
| >TP53-P191F GLAPPQHL   | 175   | >TP53-P191F GLAPRQHL   | 1157 | 982   |
| >TP53-P191F GLAPPQHLI  | 76    | >TP53-P191F GLAPRQHLI  | 242  | 166   |
| >TP53-P191F GLAPPQHLIR | 9     | >TP53-P191F GLAPRQHLIR | 14   | 5     |
| >TP53-P191F GLAPPQHL   | 5     | >TP53-P191F GLAPRQHL   | 5    | 0     |
| >TP53-P191F GLAPPQHLI  | 5     | >TP53-P191F GLAPRQHLI  | 4    | 1     |
| >TP53-P191F GLAPPQHLIR | 2     | >TP53-P191F GLAPRQHLIR | 2    | 0     |
| >TP53-P191F GLAPPQHLIR | 282   | >TP53-P191F GLAPRQHLIR | 241  | 41    |
| >TP53-P191F SDGLAPPQHI | 507   | >TP53-P191F SDGLAPRQHI | 128  | 379   |
| >TP53-P191F SDGLAPPQHI | 104   | >TP53-P191F SDGLAPRQHI | 93   | 11    |



|                         |       |                         |     |       |
|-------------------------|-------|-------------------------|-----|-------|
| >TP53-P191F DSDGLAPP    | 31707 | >TP53-P191F DSDGLAPR    | 157 | 31550 |
| >TP53-P191F DSDGLAPP    | 38941 | >TP53-P191F DSDGLAPR    | 283 | 38658 |
| >TP53-P191F CSDSDGLAPP  | 38685 | >TP53-P191F CSDSDGLAPR  | 419 | 38266 |
| >TP53-P191S APPQHLIRV   | 759   | >TP53-P191S APSQHLIRV   | 132 | 627   |
| >TP53-P191S LAPPQHLIRV  | 395   | >TP53-P191S LAPSQHLIRV  | 619 | 224   |
| >TP53-P191S LAPPQHLIRV  | 52    | >TP53-P191S LAPSQHLIRV  | 133 | 81    |
| >TP53-P191S LAPPQHLI    | 5     | >TP53-P191S LAPSQHLI    | 29  | 24    |
| >TP53-P191S LAPPQHLIRV  | 28    | >TP53-P191S LAPSQHLIRV  | 36  | 8     |
| >TP53-P191S LAPPQHLI    | 70    | >TP53-P191S LAPSQHLI    | 190 | 120   |
| >TP53-P191S GLAPPQHL    | 285   | >TP53-P191S GLAPSQHL    | 201 | 84    |
| >TP53-P191S GLAPPQHLI   | 65    | >TP53-P191S GLAPSQHLI   | 42  | 23    |
| >TP53-P191S GLAPPQHLIR' | 20    | >TP53-P191S GLAPSQHLIR' | 17  | 3     |
| >TP53-P191S GLAPPQHL    | 22    | >TP53-P191S GLAPSQHL    | 9   | 13    |
| >TP53-P191S GLAPPQHLI   | 15    | >TP53-P191S GLAPSQHLI   | 5   | 10    |
| >TP53-P191S GLAPPQHLIR' | 9     | >TP53-P191S GLAPSQHLIR' | 5   | 4     |
| >TP53-P191S GLAPPQHL    | 61    | >TP53-P191S GLAPSQHL    | 29  | 32    |
| >TP53-P191S GLAPPQHLI   | 31    | >TP53-P191S GLAPSQHLI   | 11  | 20    |
| >TP53-P191S GLAPPQHLIR' | 7     | >TP53-P191S GLAPSQHLIR' | 4   | 3     |
| >TP53-P191S GLAPPQHL    | 755   | >TP53-P191S GLAPSQHL    | 262 | 493   |
| >TP53-P191S GLAPPQHLI   | 500   | >TP53-P191S GLAPSQHLI   | 257 | 243   |
| >TP53-P191S GLAPPQHLIR' | 44    | >TP53-P191S GLAPSQHLIR' | 31  | 13    |
| >TP53-P191S GLAPPQHL    | 16    | >TP53-P191S GLAPSQHL    | 41  | 25    |
| >TP53-P191S GLAPPQHLI   | 13    | >TP53-P191S GLAPSQHLI   | 34  | 21    |
| >TP53-P191S GLAPPQHLIR' | 3     | >TP53-P191S GLAPSQHLIR' | 4   | 1     |
| >TP53-P191S GLAPPQHL    | 26    | >TP53-P191S GLAPSQHL    | 15  | 11    |
| >TP53-P191S GLAPPQHLI   | 22    | >TP53-P191S GLAPSQHLI   | 13  | 9     |
| >TP53-P191S GLAPPQHLIR' | 7     | >TP53-P191S GLAPSQHLIR' | 6   | 1     |
| >TP53-P191S GLAPPQHL    | 11    | >TP53-P191S GLAPSQHL    | 10  | 1     |
| >TP53-P191S GLAPPQHLI   | 13    | >TP53-P191S GLAPSQHLI   | 12  | 1     |
| >TP53-P191S GLAPPQHLIR' | 5     | >TP53-P191S GLAPSQHLIR' | 5   | 0     |
| >TP53-P191S GLAPPQHL    | 175   | >TP53-P191S GLAPSQHL    | 119 | 56    |
| >TP53-P191S GLAPPQHLI   | 76    | >TP53-P191S GLAPSQHLI   | 52  | 24    |
| >TP53-P191S GLAPPQHLIR' | 9     | >TP53-P191S GLAPSQHLIR' | 10  | 1     |
| >TP53-P191S GLAPPQHL    | 5     | >TP53-P191S GLAPSQHL    | 4   | 1     |
| >TP53-P191S GLAPPQHLI   | 5     | >TP53-P191S GLAPSQHLI   | 4   | 1     |
| >TP53-P191S GLAPPQHLIR' | 2     | >TP53-P191S GLAPSQHLIR' | 2   | 0     |
| >TP53-P191S GLAPPQHLIR  | 282   | >TP53-P191S GLAPSQHLIR  | 161 | 121   |
| >TP53-P191S SDGLAPPQHI  | 507   | >TP53-P191S SDGLAPSQHL  | 149 | 358   |
| >TP53-P191S SDGLAPPQHI  | 104   | >TP53-P191S SDGLAPSQHL  | 59  | 45    |
| >TP53-P191T APPQHLIRV   | 759   | >TP53-P191T APTQHLIRV   | 225 | 534   |
| >TP53-P191T LAPPQHLIRV  | 395   | >TP53-P191T LAPTQHLIRV  | 568 | 173   |
| >TP53-P191T LAPPQHLIRV  | 52    | >TP53-P191T LAPTQHLIRV  | 213 | 161   |
| >TP53-P191T LAPPQHLI    | 5     | >TP53-P191T LAPTQHLI    | 13  | 8     |

|                         |      |                         |       |       |
|-------------------------|------|-------------------------|-------|-------|
| >TP53-P191T LAPPQHLIRV  | 28   | >TP53-P191T LAPTQHLIRV  | 60    | 32    |
| >TP53-P191T LAPPQHLIR   | 504  | >TP53-P191T LAPTQHLIR   | 377   | 127   |
| >TP53-P191T LAPPQHLI    | 70   | >TP53-P191T LAPTQHLI    | 297   | 227   |
| >TP53-P191T GLAPPQHL    | 285  | >TP53-P191T GLAPTQHL    | 171   | 114   |
| >TP53-P191T GLAPPQHLI   | 65   | >TP53-P191T GLAPTQHLI   | 47    | 18    |
| >TP53-P191T GLAPPQHLIR' | 20   | >TP53-P191T GLAPTQHLIR' | 17    | 3     |
| >TP53-P191T GLAPPQHL    | 22   | >TP53-P191T GLAPTQHL    | 9     | 13    |
| >TP53-P191T GLAPPQHLI   | 15   | >TP53-P191T GLAPTQHLI   | 6     | 9     |
| >TP53-P191T GLAPPQHLIR' | 9    | >TP53-P191T GLAPTQHLIR' | 6     | 3     |
| >TP53-P191T GLAPPQHL    | 61   | >TP53-P191T GLAPTQHL    | 30    | 31    |
| >TP53-P191T GLAPPQHLI   | 31   | >TP53-P191T GLAPTQHLI   | 16    | 15    |
| >TP53-P191T GLAPPQHLIR' | 7    | >TP53-P191T GLAPTQHLIR' | 5     | 2     |
| >TP53-P191T GLAPPQHL    | 755  | >TP53-P191T GLAPTQHL    | 221   | 534   |
| >TP53-P191T GLAPPQHLI   | 500  | >TP53-P191T GLAPTQHLI   | 314   | 186   |
| >TP53-P191T GLAPPQHLIR' | 44   | >TP53-P191T GLAPTQHLIR' | 33    | 11    |
| >TP53-P191T GLAPPQHL    | 16   | >TP53-P191T GLAPTQHL    | 26    | 10    |
| >TP53-P191T GLAPPQHLI   | 13   | >TP53-P191T GLAPTQHLI   | 19    | 6     |
| >TP53-P191T GLAPPQHLIR' | 3    | >TP53-P191T GLAPTQHLIR' | 3     | 0     |
| >TP53-P191T GLAPPQHL    | 26   | >TP53-P191T GLAPTQHL    | 11    | 15    |
| >TP53-P191T GLAPPQHLI   | 22   | >TP53-P191T GLAPTQHLI   | 9     | 13    |
| >TP53-P191T GLAPPQHLIR' | 7    | >TP53-P191T GLAPTQHLIR' | 5     | 2     |
| >TP53-P191T GLAPPQHL    | 11   | >TP53-P191T GLAPTQHL    | 9     | 2     |
| >TP53-P191T GLAPPQHLI   | 13   | >TP53-P191T GLAPTQHLI   | 9     | 4     |
| >TP53-P191T GLAPPQHLIR' | 5    | >TP53-P191T GLAPTQHLIR' | 5     | 0     |
| >TP53-P191T GLAPPQHL    | 175  | >TP53-P191T GLAPTQHL    | 69    | 106   |
| >TP53-P191T GLAPPQHLI   | 76   | >TP53-P191T GLAPTQHLI   | 30    | 46    |
| >TP53-P191T GLAPPQHLIR' | 9    | >TP53-P191T GLAPTQHLIR' | 7     | 2     |
| >TP53-P191T GLAPPQHL    | 5    | >TP53-P191T GLAPTQHL    | 3     | 2     |
| >TP53-P191T GLAPPQHLI   | 5    | >TP53-P191T GLAPTQHLI   | 3     | 2     |
| >TP53-P191T GLAPPQHLIR' | 2    | >TP53-P191T GLAPTQHLIR' | 2     | 0     |
| >TP53-P191T GLAPPQHLIR  | 282  | >TP53-P191T GLAPTQHLIR  | 210   | 72    |
| >TP53-P191T SDGLAPPQHI  | 507  | >TP53-P191T SDGLAPTQHI  | 158   | 349   |
| >TP53-P191T SDGLAPPQHI  | 104  | >TP53-P191T SDGLAPTQHI  | 58    | 46    |
| >TP53-P219C VPYEPPEV    | 184  | >TP53-P219C VCYEPPEV    | 39920 | 39736 |
| >TP53-P219C VPYEPPEV    | 139  | >TP53-P219C VCYEPPEV    | 8     | 131   |
| >TP53-P219C VPYEPPEV    | 1742 | >TP53-P219C VCYEPPEV    | 60    | 1682  |
| >TP53-P219C VPYEPPEV    | 2465 | >TP53-P219C VCYEPPEV    | 58    | 2407  |
| >TP53-P219C VPYEPPEV    | 266  | >TP53-P219C VCYEPPEV    | 368   | 102   |
| >TP53-P219C VPYEPPEV    | 48   | >TP53-P219C VCYEPPEV    | 16127 | 16079 |
| >TP53-P219C VPYEPPEV    | 205  | >TP53-P219C VCYEPPEV    | 25076 | 24871 |
| >TP53-P219C VVPYEPPEV   | 214  | >TP53-P219C VVCYEPPEV   | 153   | 61    |
| >TP53-P219C VVPYEPPEV   | 329  | >TP53-P219C VVCYEPPEV   | 1149  | 820   |
| >TP53-P219C VVPYEPPEV   | 56   | >TP53-P219C VVCYEPPEV   | 90    | 34    |

|                        |      |                        |       |       |
|------------------------|------|------------------------|-------|-------|
| >TP53-P219C VVVPYEPPEV | 390  | >TP53-P219C VVVCYEPPEV | 534   | 144   |
| >TP53-P219C VVVPYEPPEV | 136  | >TP53-P219C VVVCYEPPEV | 157   | 21    |
| >TP53-P219C VVVPYEPPEV | 28   | >TP53-P219C VVVCYEPPEV | 26    | 2     |
| >TP53-P219C VVVPYEPPEV | 828  | >TP53-P219C VVVCYEPPEV | 168   | 660   |
| >TP53-P219C VVVPYEPPEV | 72   | >TP53-P219C VVVCYEPPEV | 195   | 123   |
| >TP53-P219C VVVPYEPPEV | 9    | >TP53-P219C VVVCYEPPEV | 34    | 25    |
| >TP53-P219C VVVPYEPPEV | 353  | >TP53-P219C VVVCYEPPEV | 206   | 147   |
| >TP53-P219C SVVVPYEPPE | 1177 | >TP53-P219C SVVVCYEPPE | 307   | 870   |
| >TP53-P219C SVVVPYEPPE | 515  | >TP53-P219C SVVVCYEPPE | 242   | 273   |
| >TP53-P219C SVVVPYEPPE | 75   | >TP53-P219C SVVVCYEPPE | 39    | 36    |
| >TP53-P219C SVVVPYEPPE | 92   | >TP53-P219C SVVVCYEPPE | 304   | 212   |
| >TP53-P219C SVVVPYEPPE | 129  | >TP53-P219C SVVVCYEPPE | 145   | 16    |
| >TP53-P219C SVVVPYEPPE | 57   | >TP53-P219C SVVVCYEPPE | 48    | 9     |
| >TP53-P219C SVVVPYEPPE | 81   | >TP53-P219C SVVVCYEPPE | 98    | 17    |
| >TP53-P219C SVVVPYEPPE | 26   | >TP53-P219C SVVVCYEPPE | 110   | 84    |
| >TP53-P219C RHSVVVPY   | 23   | >TP53-P219C RHSVVVCY   | 54    | 31    |
| >TP53-P219C RHSVVVPY   | 2323 | >TP53-P219C RHSVVVCY   | 390   | 1933  |
| >TP53-P219C RHSVVVPY   | 413  | >TP53-P219C RHSVVVCY   | 1907  | 1494  |
| >TP53-P219C FRHSVVVPY  | 4    | >TP53-P219C FRHSVVVCY  | 8     | 4     |
| >TP53-P219C FRHSVVVPY  | 33   | >TP53-P219C FRHSVVVCY  | 65    | 32    |
| >TP53-P219C TFRHSVVVPY | 185  | >TP53-P219C TFRHSVVVCY | 188   | 3     |
| >TP53-P219C TFRHSVVVPY | 162  | >TP53-P219C TFRHSVVVCY | 1358  | 1196  |
| >TP53-P219C TFRHSVVVPY | 140  | >TP53-P219C TFRHSVVVCY | 735   | 595   |
| >TP53-P219C TFRHSVVVPY | 225  | >TP53-P219C TFRHSVVVCY | 812   | 587   |
| >TP53-P219C TFRHSVVVPY | 271  | >TP53-P219C TFRHSVVVCY | 573   | 302   |
| >TP53-P219C NTFRHSVVVF | 128  | >TP53-P219C NTFRHSVVVC | 378   | 250   |
| >TP53-P219C NTFRHSVVVF | 97   | >TP53-P219C NTFRHSVVVC | 1301  | 1204  |
| >TP53-P219C NTFRHSVVVF | 123  | >TP53-P219C NTFRHSVVVC | 164   | 41    |
| >TP53-P219C NTFRHSVVVF | 82   | >TP53-P219C NTFRHSVVVC | 148   | 66    |
| >TP53-P219C NTFRHSVVVF | 61   | >TP53-P219C NTFRHSVVVC | 832   | 771   |
| >TP53-P219C NTFRHSVVVF | 34   | >TP53-P219C NTFRHSVVVC | 41    | 7     |
| >TP53-P219C NTFRHSVVVF | 65   | >TP53-P219C NTFRHSVVVC | 196   | 131   |
| >TP53-P219C NTFRHSVVVF | 492  | >TP53-P219C NTFRHSVVVC | 1934  | 1442  |
| >TP53-P219C NTFRHSVVVF | 33   | >TP53-P219C NTFRHSVVVC | 85    | 52    |
| >TP53-P219C NTFRHSVVVF | 23   | >TP53-P219C NTFRHSVVVC | 220   | 197   |
| >TP53-P219C NTFRHSVVVF | 105  | >TP53-P219C NTFRHSVVVC | 577   | 472   |
| >TP53-P219C NTFRHSVVVF | 289  | >TP53-P219C NTFRHSVVVC | 275   | 14    |
| >TP53-P219C NTFRHSVVVF | 23   | >TP53-P219C NTFRHSVVVC | 189   | 166   |
| >TP53-P219F VPYEPPEV   | 184  | >TP53-P219F VHYPPEV    | 34269 | 34085 |
| >TP53-P219F VPYEPPEV   | 139  | >TP53-P219F VHYPPEV    | 66    | 73    |
| >TP53-P219F VPYEPPEV   | 266  | >TP53-P219F VHYPPEV    | 12875 | 12609 |
| >TP53-P219F VPYEPPEV   | 48   | >TP53-P219F VHYPPEV    | 7085  | 7037  |
| >TP53-P219F VPYEPPEV   | 205  | >TP53-P219F VHYPPEV    | 22594 | 22389 |

|                        |      |                        |      |      |
|------------------------|------|------------------------|------|------|
| >TP53-P219F VVPYEPPEV  | 662  | >TP53-P219F VVHYEPPEV  | 295  | 367  |
| >TP53-P219F VVPYEPPEV  | 214  | >TP53-P219F VVHYEPPEV  | 104  | 110  |
| >TP53-P219F VVPYEPPEV  | 329  | >TP53-P219F VVHYEPPEV  | 490  | 161  |
| >TP53-P219F VVPYEPPEV  | 56   | >TP53-P219F VVHYEPPEV  | 53   | 3    |
| >TP53-P219F VVVPYEPPEV | 390  | >TP53-P219F VVVHYEPPEV | 619  | 229  |
| >TP53-P219F VVVPYEPPEV | 136  | >TP53-P219F VVVHYEPPEV | 278  | 142  |
| >TP53-P219F VVVPYEPPEV | 28   | >TP53-P219F VVVHYEPPEV | 55   | 27   |
| >TP53-P219F VVVPYEPPEV | 72   | >TP53-P219F VVVHYEPPEV | 155  | 83   |
| >TP53-P219F VVVPYEPPEV | 9    | >TP53-P219F VVVHYEPPEV | 22   | 13   |
| >TP53-P219F VVVPYEPPEV | 353  | >TP53-P219F VVVHYEPPEV | 655  | 302  |
| >TP53-P219F SVVVPYEPPE | 515  | >TP53-P219F SVVVHYEPPE | 107  | 408  |
| >TP53-P219F SVVVPYEPPE | 75   | >TP53-P219F SVVVHYEPPE | 40   | 35   |
| >TP53-P219F SVVVPYEPPE | 92   | >TP53-P219F SVVVHYEPPE | 146  | 54   |
| >TP53-P219F SVVVPYEPPE | 129  | >TP53-P219F SVVVHYEPPE | 220  | 91   |
| >TP53-P219F SVVVPYEPPE | 57   | >TP53-P219F SVVVHYEPPE | 57   | 0    |
| >TP53-P219F SVVVPYEPPE | 81   | >TP53-P219F SVVVHYEPPE | 166  | 85   |
| >TP53-P219F SVVVPYEPPE | 26   | >TP53-P219F SVVVHYEPPE | 46   | 20   |
| >TP53-P219F RHSVVVPY   | 642  | >TP53-P219F RHSVVVHY   | 345  | 297  |
| >TP53-P219F RHSVVVPY   | 1776 | >TP53-P219F RHSVVVHY   | 366  | 1410 |
| >TP53-P219F RHSVVVPY   | 23   | >TP53-P219F RHSVVVHY   | 56   | 33   |
| >TP53-P219F RHSVVVPY   | 413  | >TP53-P219F RHSVVVHY   | 1634 | 1221 |
| >TP53-P219F FRHSVVVP   | 690  | >TP53-P219F FRHSVVVH   | 200  | 490  |
| >TP53-P219F FRHSVVVPY  | 4    | >TP53-P219F FRHSVVVHY  | 7    | 3    |
| >TP53-P219F FRHSVVVP   | 2374 | >TP53-P219F FRHSVVVH   | 188  | 2186 |
| >TP53-P219F FRHSVVVPY  | 33   | >TP53-P219F FRHSVVVHY  | 40   | 7    |
| >TP53-P219F TFRHSVVVPY | 185  | >TP53-P219F TFRHSVVVHY | 206  | 21   |
| >TP53-P219F TFRHSVVVPY | 162  | >TP53-P219F TFRHSVVVHY | 310  | 148  |
| >TP53-P219F TFRHSVVVPY | 140  | >TP53-P219F TFRHSVVVHY | 179  | 39   |
| >TP53-P219F TFRHSVVVPY | 225  | >TP53-P219F TFRHSVVVHY | 908  | 683  |
| >TP53-P219F TFRHSVVVPY | 271  | >TP53-P219F TFRHSVVVHY | 677  | 406  |
| >TP53-P219F NTFRHSVVVF | 128  | >TP53-P219F NTFRHSVVVF | 517  | 389  |
| >TP53-P219F NTFRHSVVVF | 97   | >TP53-P219F NTFRHSVVVF | 264  | 167  |
| >TP53-P219F NTFRHSVVVF | 123  | >TP53-P219F NTFRHSVVVF | 89   | 34   |
| >TP53-P219F NTFRHSVVVF | 82   | >TP53-P219F NTFRHSVVVF | 68   | 14   |
| >TP53-P219F NTFRHSVVVF | 61   | >TP53-P219F NTFRHSVVVF | 578  | 517  |
| >TP53-P219F NTFRHSVVVF | 34   | >TP53-P219F NTFRHSVVVF | 37   | 3    |
| >TP53-P219F NTFRHSVVVF | 766  | >TP53-P219F NTFRHSVVVF | 291  | 475  |
| >TP53-P219F NTFRHSVVVF | 65   | >TP53-P219F NTFRHSVVVF | 75   | 10   |
| >TP53-P219F NTFRHSVVVF | 492  | >TP53-P219F NTFRHSVVVF | 2031 | 1539 |
| >TP53-P219F NTFRHSVVVF | 33   | >TP53-P219F NTFRHSVVVF | 83   | 50   |
| >TP53-P219F NTFRHSVVVF | 23   | >TP53-P219F NTFRHSVVVF | 43   | 20   |
| >TP53-P219F NTFRHSVVVF | 105  | >TP53-P219F NTFRHSVVVF | 1909 | 1804 |
| >TP53-P219F NTFRHSVVVF | 289  | >TP53-P219F NTFRHSVVVF | 229  | 60   |

|                        |       |                         |       |       |
|------------------------|-------|-------------------------|-------|-------|
| >TP53-P219L NTFRHSVVVF | 23    | >TP53-P219L NTFRHSVVVF  | 244   | 221   |
| >TP53-P219L VPYEPPEV   | 184   | >TP53-P219L VLYEPPEV    | 35801 | 35617 |
| >TP53-P219L VPYEPPEV   | 13833 | >TP53-P219L VLYEPPEV    | 9     | 13824 |
| >TP53-P219L VPYEPPEV   | 24058 | >TP53-P219L VLYEPPEV    | 19    | 24039 |
| >TP53-P219L VPYEPPEV   | 13319 | >TP53-P219L VLYEPPEV    | 5     | 13314 |
| >TP53-P219L VPYEPPEV   | 6811  | >TP53-P219L VLYEPPEV    | 24    | 6787  |
| >TP53-P219L VPYEPPEV   | 139   | >TP53-P219L VLYEPPEV    | 1     | 138   |
| >TP53-P219L VPYEPPEVG  | 20941 | >TP53-P219L VLYEPPEVG   | 20    | 20921 |
| >TP53-P219L VPYEPPEVGS | 18675 | >TP53-P219L VLYEPPEVGS  | 12    | 18663 |
| >TP53-P219L VPYEPPEVGS | 26886 | >TP53-P219L VLYEPPEVGS  | 193   | 26693 |
| >TP53-P219L VPYEPPEV   | 12519 | >TP53-P219L VLYEPPEV    | 4     | 12515 |
| >TP53-P219L VPYEPPEV   | 1742  | >TP53-P219L VLYEPPEV    | 3     | 1739  |
| >TP53-P219L VPYEPPEV   | 17619 | >TP53-P219L VLYEPPEV    | 2     | 17617 |
| >TP53-P219L VPYEPPEV   | 2465  | >TP53-P219L VLYEPPEV    | 2     | 2463  |
| >TP53-P219L VPYEPPEVGS | 36626 | >TP53-P219L VLYEPPEVGS  | 126   | 36500 |
| >TP53-P219L VPYEPPEV   | 266   | >TP53-P219L VLYEPPEV    | 73    | 193   |
| >TP53-P219L VPYEPPEV   | 48    | >TP53-P219L VLYEPPEV    | 17834 | 17786 |
| >TP53-P219L VPYEPPEV   | 205   | >TP53-P219L VLYEPPEV    | 27919 | 27714 |
| >TP53-P219L RNTFRHSVV\ | 17143 | >TP53-P219L RNTFRHSVV\  | 425   | 16718 |
| >TP53-P219L VVPYEPPEV  | 923   | >TP53-P219L VVLYEPPEV   | 63    | 860   |
| >TP53-P219L VVPYEPPEV  | 507   | >TP53-P219L VVLYEPPEV   | 78    | 429   |
| >TP53-P219L VVPYEPPEV  | 214   | >TP53-P219L VVLYEPPEV   | 27    | 187   |
| >TP53-P219L VVPYEPPEV  | 2960  | >TP53-P219L VVLYEPPEV   | 217   | 2743  |
| >TP53-P219L VVPYEPPEV  | 329   | >TP53-P219L VVLYEPPEV   | 28    | 301   |
| >TP53-P219L VVPYEPPEV  | 2192  | >TP53-P219L VVLYEPPEV   | 44    | 2148  |
| >TP53-P219L VVPYEPPEV  | 56    | >TP53-P219L VVLYEPPEV   | 39    | 17    |
| >TP53-P219L VVPYEPPEV  | 4691  | >TP53-P219L VVLYEPPEV   | 181   | 4510  |
| >TP53-P219L VVVPYEPPEV | 390   | >TP53-P219L VVVLYEPPEV  | 459   | 69    |
| >TP53-P219L VVVPYEPPEV | 136   | >TP53-P219L VVVLYEPPEV  | 126   | 10    |
| >TP53-P219L VVVPYEPPEV | 28    | >TP53-P219L VVVLYEPPEV  | 126   | 98    |
| >TP53-P219L VVVPYEPPEV | 72    | >TP53-P219L VVVLYEPPEV  | 274   | 202   |
| >TP53-P219L VVVPYEPPEV | 9     | >TP53-P219L VVVLYEPPEV  | 35    | 26    |
| >TP53-P219L VVVPYEPPEV | 353   | >TP53-P219L VVVLYEPPEV  | 849   | 496   |
| >TP53-P219L SVVVPYEPPE | 515   | >TP53-P219L SVVVLYEPPE\ | 289   | 226   |
| >TP53-P219L SVVVPYEPPE | 75    | >TP53-P219L SVVVLYEPPE\ | 54    | 21    |
| >TP53-P219L SVVVPYEPPE | 92    | >TP53-P219L SVVVLYEPPE\ | 150   | 58    |
| >TP53-P219L SVVVPYEPPE | 129   | >TP53-P219L SVVVLYEPPE\ | 74    | 55    |
| >TP53-P219L SVVVPYEPPE | 57    | >TP53-P219L SVVVLYEPPE\ | 55    | 2     |
| >TP53-P219L SVVVPYEPPE | 81    | >TP53-P219L SVVVLYEPPE\ | 105   | 24    |
| >TP53-P219L SVVVPYEPPE | 26    | >TP53-P219L SVVVLYEPPE\ | 44    | 18    |
| >TP53-P219L RHSVVVPY   | 1776  | >TP53-P219L RHSVVVLY    | 157   | 1619  |
| >TP53-P219L RHSVVVPY   | 23    | >TP53-P219L RHSVVVLY    | 119   | 96    |
| >TP53-P219L RHSVVVPY   | 2323  | >TP53-P219L RHSVVVLY    | 341   | 1982  |

|                        |       |                        |       |       |
|------------------------|-------|------------------------|-------|-------|
| >TP53-P219L RHSVVVPY   | 413   | >TP53-P219L RHSVVVLY   | 412   | 1     |
| >TP53-P219L FRHSVVVPY  | 1048  | >TP53-P219L FRHSVVVLY  | 180   | 868   |
| >TP53-P219L FRHSVVVP   | 690   | >TP53-P219L FRHSVVVL   | 23    | 667   |
| >TP53-P219L FRHSVVVPY  | 4     | >TP53-P219L FRHSVVVLY  | 12    | 8     |
| >TP53-P219L FRHSVVVP   | 2374  | >TP53-P219L FRHSVVVL   | 53    | 2321  |
| >TP53-P219L FRHSVVVPY  | 33    | >TP53-P219L FRHSVVVLY  | 36    | 3     |
| >TP53-P219L FRHSVVVP   | 3483  | >TP53-P219L FRHSVVVL   | 8     | 3475  |
| >TP53-P219L TFRHSVVVPY | 185   | >TP53-P219L TFRHSVVVLY | 131   | 54    |
| >TP53-P219L TFRHSVVVP  | 2851  | >TP53-P219L TFRHSVVVL  | 242   | 2609  |
| >TP53-P219L TFRHSVVVPY | 162   | >TP53-P219L TFRHSVVVLY | 364   | 202   |
| >TP53-P219L TFRHSVVVPY | 687   | >TP53-P219L TFRHSVVVLY | 305   | 382   |
| >TP53-P219L TFRHSVVVPY | 140   | >TP53-P219L TFRHSVVVLY | 1122  | 982   |
| >TP53-P219L TFRHSVVVPY | 225   | >TP53-P219L TFRHSVVVLY | 710   | 485   |
| >TP53-P219L TFRHSVVVPY | 271   | >TP53-P219L TFRHSVVVLY | 1192  | 921   |
| >TP53-P219L NTFRHSVVVF | 562   | >TP53-P219L NTFRHSVVVL | 207   | 355   |
| >TP53-P219L NTFRHSVVVF | 647   | >TP53-P219L NTFRHSVVVL | 326   | 321   |
| >TP53-P219L NTFRHSVVVF | 128   | >TP53-P219L NTFRHSVVVL | 115   | 13    |
| >TP53-P219L NTFRHSVVVF | 97    | >TP53-P219L NTFRHSVVVL | 109   | 12    |
| >TP53-P219L NTFRHSVVVF | 123   | >TP53-P219L NTFRHSVVVL | 550   | 427   |
| >TP53-P219L NTFRHSVVVF | 82    | >TP53-P219L NTFRHSVVVL | 29    | 53    |
| >TP53-P219L NTFRHSVVVF | 5931  | >TP53-P219L NTFRHSVVVL | 91    | 5840  |
| >TP53-P219L NTFRHSVVVF | 61    | >TP53-P219L NTFRHSVVVL | 322   | 261   |
| >TP53-P219L NTFRHSVVVF | 34    | >TP53-P219L NTFRHSVVVL | 17    | 17    |
| >TP53-P219L NTFRHSVVVF | 21062 | >TP53-P219L NTFRHSVVVL | 129   | 20933 |
| >TP53-P219L NTFRHSVVVF | 16293 | >TP53-P219L NTFRHSVVVL | 434   | 15859 |
| >TP53-P219L NTFRHSVVVF | 766   | >TP53-P219L NTFRHSVVVL | 188   | 578   |
| >TP53-P219L NTFRHSVVVF | 65    | >TP53-P219L NTFRHSVVVL | 293   | 228   |
| >TP53-P219L NTFRHSVVVF | 492   | >TP53-P219L NTFRHSVVVL | 1734  | 1242  |
| >TP53-P219L NTFRHSVVVF | 6222  | >TP53-P219L NTFRHSVVVL | 232   | 5990  |
| >TP53-P219L NTFRHSVVVF | 33    | >TP53-P219L NTFRHSVVVL | 196   | 163   |
| >TP53-P219L NTFRHSVVVF | 18937 | >TP53-P219L NTFRHSVVVL | 126   | 18811 |
| >TP53-P219L NTFRHSVVVF | 23    | >TP53-P219L NTFRHSVVVL | 48    | 25    |
| >TP53-P219L NTFRHSVVVF | 105   | >TP53-P219L NTFRHSVVVL | 925   | 820   |
| >TP53-P219L NTFRHSVVVF | 23115 | >TP53-P219L NTFRHSVVVL | 206   | 22909 |
| >TP53-P219L NTFRHSVVVF | 289   | >TP53-P219L NTFRHSVVVL | 35    | 254   |
| >TP53-P219L NTFRHSVVVF | 23    | >TP53-P219L NTFRHSVVVL | 165   | 142   |
| >TP53-P219F VPYEPPEV   | 184   | >TP53-P219F VRYEPPEV   | 31953 | 31769 |
| >TP53-P219F VPYEPPEV   | 139   | >TP53-P219F VRYEPPEV   | 75    | 64    |
| >TP53-P219F VPYEPPEV   | 266   | >TP53-P219F VRYEPPEV   | 11134 | 10868 |
| >TP53-P219F VPYEPPEV   | 4735  | >TP53-P219F VRYEPPEV   | 246   | 4489  |
| >TP53-P219F VPYEPPEV   | 48    | >TP53-P219F VRYEPPEV   | 15560 | 15512 |
| >TP53-P219F VPYEPPEV   | 205   | >TP53-P219F VRYEPPEV   | 29284 | 29079 |
| >TP53-P219F RNTFRHSVV\ | 19987 | >TP53-P219F RNTFRHSVV\ | 114   | 19873 |

|                       |       |                       |      |       |
|-----------------------|-------|-----------------------|------|-------|
| >TP53-P219FRNTFRHSVV\ | 33720 | >TP53-P219FRNTFRHSVV\ | 287  | 33433 |
| >TP53-P219FVVPYEPPEV  | 214   | >TP53-P219FVVRYPPEV   | 1356 | 1142  |
| >TP53-P219FVVPYEPPEV  | 329   | >TP53-P219FVVRYPPEV   | 3247 | 2918  |
| >TP53-P219FVVPYEPPEV  | 56    | >TP53-P219FVVRYPPEV   | 113  | 57    |
| >TP53-P219FVVPYEPPEV  | 13942 | >TP53-P219FVVRYPPEV   | 93   | 13849 |
| >TP53-P219FVVVPYEPPEV | 390   | >TP53-P219FVVVRYPPEV  | 395  | 5     |
| >TP53-P219FVVVPYEPPEV | 136   | >TP53-P219FVVVRYPPEV  | 316  | 180   |
| >TP53-P219FVVVPYEPPEV | 28    | >TP53-P219FVVVRYPPEV  | 45   | 17    |
| >TP53-P219FVVVPYEPPEV | 72    | >TP53-P219FVVVRYPPEV  | 156  | 84    |
| >TP53-P219FVVVPYEPPEV | 9     | >TP53-P219FVVVRYPPEV  | 15   | 6     |
| >TP53-P219FVVVPYEPPEV | 353   | >TP53-P219FVVVRYPPEV  | 660  | 307   |
| >TP53-P219FSVVVPYEPPE | 515   | >TP53-P219FSVVRYPPE   | 247  | 268   |
| >TP53-P219FSVVVPYEPPE | 75    | >TP53-P219FSVVRYPPE   | 58   | 17    |
| >TP53-P219FSVVVPYEPPE | 92    | >TP53-P219FSVVRYPPE   | 267  | 175   |
| >TP53-P219FSVVVPYEPPE | 129   | >TP53-P219FSVVRYPPE   | 187  | 58    |
| >TP53-P219FSVVVPYEPPE | 57    | >TP53-P219FSVVRYPPE   | 54   | 3     |
| >TP53-P219FSVVVPYEPPE | 81    | >TP53-P219FSVVRYPPE   | 217  | 136   |
| >TP53-P219FSVVVPYEPPE | 26    | >TP53-P219FSVVRYPPE   | 130  | 104   |
| >TP53-P219FRHSVVVPY   | 23    | >TP53-P219FRHSVVRY    | 167  | 144   |
| >TP53-P219FRHSVVVPY   | 413   | >TP53-P219FRHSVVRY    | 1607 | 1194  |
| >TP53-P219FRHSVVVP    | 690   | >TP53-P219FRHSVVVR    | 217  | 473   |
| >TP53-P219FRHSVVVPY   | 4     | >TP53-P219FRHSVVRY    | 18   | 14    |
| >TP53-P219FRHSVVVP    | 2374  | >TP53-P219FRHSVVVR    | 70   | 2304  |
| >TP53-P219FRHSVVVPY   | 33    | >TP53-P219FRHSVVRY    | 45   | 12    |
| >TP53-P219FTFRHSVVVPY | 185   | >TP53-P219FTFRHSVVRY  | 247  | 62    |
| >TP53-P219FTFRHSVVVP  | 2851  | >TP53-P219FTFRHSVVVR  | 367  | 2484  |
| >TP53-P219FTFRHSVVVPY | 162   | >TP53-P219FTFRHSVVRY  | 868  | 706   |
| >TP53-P219FTFRHSVVVP  | 19816 | >TP53-P219FTFRHSVVVR  | 20   | 19796 |
| >TP53-P219FTFRHSVVVP  | 30445 | >TP53-P219FTFRHSVVVR  | 98   | 30347 |
| >TP53-P219FTFRHSVVVPY | 140   | >TP53-P219FTFRHSVVRY  | 745  | 605   |
| >TP53-P219FTFRHSVVVPY | 225   | >TP53-P219FTFRHSVVRY  | 771  | 546   |
| >TP53-P219FTFRHSVVVPY | 271   | >TP53-P219FTFRHSVVRY  | 1562 | 1291  |
| >TP53-P219FTFRHSVVVP  | 33051 | >TP53-P219FTFRHSVVVR  | 184  | 32867 |
| >TP53-P219FNTFRHSVVVF | 128   | >TP53-P219FNTFRHSVVVF | 368  | 240   |
| >TP53-P219FNTFRHSVVVF | 97    | >TP53-P219FNTFRHSVVVF | 140  | 43    |
| >TP53-P219FNTFRHSVVVF | 123   | >TP53-P219FNTFRHSVVVF | 182  | 59    |
| >TP53-P219FNTFRHSVVVF | 82    | >TP53-P219FNTFRHSVVVF | 88   | 6     |
| >TP53-P219FNTFRHSVVVF | 28803 | >TP53-P219FNTFRHSVVVF | 89   | 28714 |
| >TP53-P219FNTFRHSVVVF | 61    | >TP53-P219FNTFRHSVVVF | 291  | 230   |
| >TP53-P219FNTFRHSVVVF | 29351 | >TP53-P219FNTFRHSVVVF | 223  | 29128 |
| >TP53-P219FNTFRHSVVVF | 21147 | >TP53-P219FNTFRHSVVVF | 6    | 21141 |
| >TP53-P219FNTFRHSVVVF | 34    | >TP53-P219FNTFRHSVVVF | 42   | 8     |
| >TP53-P219FNTFRHSVVVF | 65    | >TP53-P219FNTFRHSVVVF | 209  | 144   |

|                       |       |                       |       |       |
|-----------------------|-------|-----------------------|-------|-------|
| >TP53-P219FNTFRHSVVVF | 492   | >TP53-P219FNTFRHSVVVF | 1868  | 1376  |
| >TP53-P219FNTFRHSVVVF | 33    | >TP53-P219FNTFRHSVVVF | 262   | 229   |
| >TP53-P219FNTFRHSVVVF | 23    | >TP53-P219FNTFRHSVVVF | 20    | 3     |
| >TP53-P219FNTFRHSVVVF | 105   | >TP53-P219FNTFRHSVVVF | 1046  | 941   |
| >TP53-P219FNTFRHSVVVF | 289   | >TP53-P219FNTFRHSVVVF | 62    | 227   |
| >TP53-P219FNTFRHSVVVF | 23    | >TP53-P219FNTFRHSVVVF | 119   | 96    |
| >TP53-P219FNTFRHSVVVF | 11937 | >TP53-P219FNTFRHSVVVF | 263   | 11674 |
| >TP53-P219FNTFRHSVVVF | 35245 | >TP53-P219FNTFRHSVVVF | 220   | 35025 |
| >TP53-P219SVPYEPPEV   | 6589  | >TP53-P219SVPYEPPEV   | 136   | 6453  |
| >TP53-P219SVPYEPPEV   | 184   | >TP53-P219SVPYEPPEV   | 28120 | 27936 |
| >TP53-P219SVPYEPPEV   | 6811  | >TP53-P219SVPYEPPEV   | 479   | 6332  |
| >TP53-P219SVPYEPPEV   | 139   | >TP53-P219SVPYEPPEV   | 13    | 126   |
| >TP53-P219SVPYEPPEV   | 1742  | >TP53-P219SVPYEPPEV   | 187   | 1555  |
| >TP53-P219SVPYEPPEV   | 2465  | >TP53-P219SVPYEPPEV   | 380   | 2085  |
| >TP53-P219SVPYEPPEV   | 266   | >TP53-P219SVPYEPPEV   | 134   | 132   |
| >TP53-P219SVPYEPPEV   | 21949 | >TP53-P219SVPYEPPEV   | 118   | 21831 |
| >TP53-P219SVPYEPPEV   | 48    | >TP53-P219SVPYEPPEV   | 10670 | 10622 |
| >TP53-P219SVPYEPPEV   | 205   | >TP53-P219SVPYEPPEV   | 25169 | 24964 |
| >TP53-P219SVVPYEPPEV  | 923   | >TP53-P219SVVPYEPPEV  | 318   | 605   |
| >TP53-P219SVVPYEPPEV  | 662   | >TP53-P219SVVPYEPPEV  | 208   | 454   |
| >TP53-P219SVVPYEPPEV  | 507   | >TP53-P219SVVPYEPPEV  | 436   | 71    |
| >TP53-P219SVVPYEPPEV  | 214   | >TP53-P219SVVPYEPPEV  | 260   | 46    |
| >TP53-P219SVVPYEPPEV  | 329   | >TP53-P219SVVPYEPPEV  | 245   | 84    |
| >TP53-P219SVVPYEPPEV  | 2192  | >TP53-P219SVVPYEPPEV  | 373   | 1819  |
| >TP53-P219SVVPYEPPEV  | 56    | >TP53-P219SVVPYEPPEV  | 48    | 8     |
| >TP53-P219SVVVPYEPPEV | 390   | >TP53-P219SVVVPYEPPEV | 217   | 173   |
| >TP53-P219SVVVPYEPPEV | 136   | >TP53-P219SVVVPYEPPEV | 184   | 48    |
| >TP53-P219SVVVPYEPPEV | 28    | >TP53-P219SVVVPYEPPEV | 30    | 2     |
| >TP53-P219SVVVPYEPPEV | 72    | >TP53-P219SVVVPYEPPEV | 93    | 21    |
| >TP53-P219SVVVPYEPPEV | 9     | >TP53-P219SVVVPYEPPEV | 13    | 4     |
| >TP53-P219SVVVPYEPPEV | 353   | >TP53-P219SVVVPYEPPEV | 303   | 50    |
| >TP53-P219SVVVVPYEPPE | 515   | >TP53-P219SVVVVPYEPPE | 209   | 306   |
| >TP53-P219SVVVVPYEPPE | 75    | >TP53-P219SVVVVPYEPPE | 53    | 22    |
| >TP53-P219SVVVVPYEPPE | 92    | >TP53-P219SVVVVPYEPPE | 189   | 97    |
| >TP53-P219SVVVVPYEPPE | 129   | >TP53-P219SVVVVPYEPPE | 109   | 20    |
| >TP53-P219SVVVVPYEPPE | 57    | >TP53-P219SVVVVPYEPPE | 42    | 15    |
| >TP53-P219SVVVVPYEPPE | 81    | >TP53-P219SVVVVPYEPPE | 120   | 39    |
| >TP53-P219SVVVVPYEPPE | 26    | >TP53-P219SVVVVPYEPPE | 54    | 28    |
| >TP53-P219SRHSVVVPY   | 642   | >TP53-P219SRHSVVVPY   | 309   | 333   |
| >TP53-P219SRHSVVVPY   | 23    | >TP53-P219SRHSVVVPY   | 22    | 1     |
| >TP53-P219SRHSVVVPY   | 413   | >TP53-P219SRHSVVVPY   | 674   | 261   |
| >TP53-P219FRHSVVVPY   | 4     | >TP53-P219FRHSVVVPY   | 4     | 0     |
| >TP53-P219FRHSVVVPY   | 33    | >TP53-P219FRHSVVVPY   | 40    | 7     |



|                        |       |                        |       |       |
|------------------------|-------|------------------------|-------|-------|
| >TP53-P219S TFRHSVVVPY | 185   | >TP53-P219S TFRHSVVVSY | 314   | 129   |
| >TP53-P219S TFRHSVVVPY | 162   | >TP53-P219S TFRHSVVVSY | 312   | 150   |
| >TP53-P219S TFRHSVVVPY | 687   | >TP53-P219S TFRHSVVVSY | 473   | 214   |
| >TP53-P219S TFRHSVVVPY | 140   | >TP53-P219S TFRHSVVVSY | 182   | 42    |
| >TP53-P219S TFRHSVVVPY | 225   | >TP53-P219S TFRHSVVVSY | 347   | 122   |
| >TP53-P219S TFRHSVVVPY | 271   | >TP53-P219S TFRHSVVVSY | 286   | 15    |
| >TP53-P219S NTFRHSVVVF | 128   | >TP53-P219S NTFRHSVVVS | 248   | 120   |
| >TP53-P219S NTFRHSVVVF | 845   | >TP53-P219S NTFRHSVVVS | 150   | 695   |
| >TP53-P219S NTFRHSVVVF | 97    | >TP53-P219S NTFRHSVVVS | 87    | 10    |
| >TP53-P219S NTFRHSVVVF | 123   | >TP53-P219S NTFRHSVVVS | 195   | 72    |
| >TP53-P219S NTFRHSVVVF | 82    | >TP53-P219S NTFRHSVVVS | 104   | 22    |
| >TP53-P219S NTFRHSVVVF | 61    | >TP53-P219S NTFRHSVVVS | 64    | 3     |
| >TP53-P219S NTFRHSVVVF | 34    | >TP53-P219S NTFRHSVVVS | 32    | 2     |
| >TP53-P219S NTFRHSVVVF | 65    | >TP53-P219S NTFRHSVVVS | 73    | 8     |
| >TP53-P219S NTFRHSVVVF | 492   | >TP53-P219S NTFRHSVVVS | 857   | 365   |
| >TP53-P219S NTFRHSVVVF | 33    | >TP53-P219S NTFRHSVVVS | 39    | 6     |
| >TP53-P219S NTFRHSVVVF | 23    | >TP53-P219S NTFRHSVVVS | 30    | 7     |
| >TP53-P219S NTFRHSVVVF | 105   | >TP53-P219S NTFRHSVVVS | 321   | 216   |
| >TP53-P219S NTFRHSVVVF | 289   | >TP53-P219S NTFRHSVVVS | 75    | 214   |
| >TP53-P219S NTFRHSVVVF | 23    | >TP53-P219S NTFRHSVVVS | 33    | 10    |
| >TP53-P219T VPYEPPEV   | 6589  | >TP53-P219T VTYEPPEV   | 422   | 6167  |
| >TP53-P219T VPYEPPEV   | 184   | >TP53-P219T VTYEPPEV   | 34029 | 33845 |
| >TP53-P219T VPYEPPEV   | 13833 | >TP53-P219T VTYEPPEV   | 86    | 13747 |
| >TP53-P219T VPYEPPEV   | 13319 | >TP53-P219T VTYEPPEV   | 73    | 13246 |
| >TP53-P219T VPYEPPEV   | 6811  | >TP53-P219T VTYEPPEV   | 62    | 6749  |
| >TP53-P219T VPYEPPEV   | 139   | >TP53-P219T VTYEPPEV   | 2     | 137   |
| >TP53-P219T VPYEPPEV   | 12519 | >TP53-P219T VTYEPPEV   | 121   | 12398 |
| >TP53-P219T VPYEPPEV   | 1742  | >TP53-P219T VTYEPPEV   | 12    | 1730  |
| >TP53-P219T VPYEPPEV   | 2465  | >TP53-P219T VTYEPPEV   | 18    | 2447  |
| >TP53-P219T VPYEPPEV   | 12206 | >TP53-P219T VTYEPPEV   | 148   | 12058 |
| >TP53-P219T VPYEPPEV   | 266   | >TP53-P219T VTYEPPEV   | 12    | 254   |
| >TP53-P219T VPYEPPEV   | 21949 | >TP53-P219T VTYEPPEV   | 79    | 21870 |
| >TP53-P219T VPYEPPEV   | 48    | >TP53-P219T VTYEPPEV   | 11474 | 11426 |
| >TP53-P219T VPYEPPEV   | 205   | >TP53-P219T VTYEPPEV   | 25588 | 25383 |
| >TP53-P219T VVPYEPPEV  | 507   | >TP53-P219T VVTYEPPEV  | 456   | 51    |
| >TP53-P219T VVPYEPPEV  | 214   | >TP53-P219T VVTYEPPEV  | 381   | 167   |
| >TP53-P219T VVPYEPPEV  | 329   | >TP53-P219T VVTYEPPEV  | 184   | 145   |
| >TP53-P219T VVPYEPPEV  | 56    | >TP53-P219T VVTYEPPEV  | 41    | 15    |
| >TP53-P219T VVVPYEPPEV | 390   | >TP53-P219T VVVTYEPPEV | 332   | 58    |
| >TP53-P219T VVVPYEPPEV | 136   | >TP53-P219T VVVTYEPPEV | 155   | 19    |
| >TP53-P219T VVVPYEPPEV | 28    | >TP53-P219T VVVTYEPPEV | 64    | 36    |
| >TP53-P219T VVVPYEPPEV | 72    | >TP53-P219T VVVTYEPPEV | 183   | 111   |
| >TP53-P219T VVVPYEPPEV | 9     | >TP53-P219T VVVTYEPPEV | 18    | 9     |

|                        |       |                         |     |       |
|------------------------|-------|-------------------------|-----|-------|
| >TP53-P219T VVVPYEPPEV | 353   | >TP53-P219T VVVTYEPPEV  | 623 | 270   |
| >TP53-P219T SVVVPYEPPE | 515   | >TP53-P219T SVVVTYEPPE' | 264 | 251   |
| >TP53-P219T SVVVPYEPPE | 75    | >TP53-P219T SVVVTYEPPE' | 63  | 12    |
| >TP53-P219T SVVVPYEPPE | 92    | >TP53-P219T SVVVTYEPPE' | 116 | 24    |
| >TP53-P219T SVVVPYEPPE | 129   | >TP53-P219T SVVVTYEPPE' | 69  | 60    |
| >TP53-P219T SVVVPYEPPE | 57    | >TP53-P219T SVVVTYEPPE' | 43  | 14    |
| >TP53-P219T SVVVPYEPPE | 81    | >TP53-P219T SVVVTYEPPE' | 186 | 105   |
| >TP53-P219T SVVVPYEPPE | 26    | >TP53-P219T SVVVTYEPPE' | 39  | 13    |
| >TP53-P219T RHSVVVPY   | 23    | >TP53-P219T RHSVVVTY    | 29  | 6     |
| >TP53-P219T RHSVVVPY   | 522   | >TP53-P219T RHSVVVTY    | 305 | 217   |
| >TP53-P219T RHSVVVPY   | 413   | >TP53-P219T RHSVVVTY    | 424 | 11    |
| >TP53-P219T FRHSVVVPY  | 4     | >TP53-P219T FRHSVVVTY   | 5   | 1     |
| >TP53-P219T FRHSVVVPY  | 33    | >TP53-P219T FRHSVVVTY   | 44  | 11    |
| >TP53-P219T FRHSVVVPY  | 946   | >TP53-P219T FRHSVVVTY   | 466 | 480   |
| >TP53-P219T TFRHSVVVPY | 185   | >TP53-P219T TFRHSVVVTY  | 277 | 92    |
| >TP53-P219T TFRHSVVVPY | 162   | >TP53-P219T TFRHSVVVTY  | 423 | 261   |
| >TP53-P219T TFRHSVVVPY | 140   | >TP53-P219T TFRHSVVVTY  | 283 | 143   |
| >TP53-P219T TFRHSVVVPY | 225   | >TP53-P219T TFRHSVVVTY  | 336 | 111   |
| >TP53-P219T TFRHSVVVPY | 271   | >TP53-P219T TFRHSVVVTY  | 406 | 135   |
| >TP53-P219T NTFRHSVVVF | 128   | >TP53-P219T NTFRHSVVVT  | 419 | 291   |
| >TP53-P219T NTFRHSVVVF | 845   | >TP53-P219T NTFRHSVVVT  | 347 | 498   |
| >TP53-P219T NTFRHSVVVF | 97    | >TP53-P219T NTFRHSVVVT  | 268 | 171   |
| >TP53-P219T NTFRHSVVVF | 123   | >TP53-P219T NTFRHSVVVT  | 213 | 90    |
| >TP53-P219T NTFRHSVVVF | 82    | >TP53-P219T NTFRHSVVVT  | 95  | 13    |
| >TP53-P219T NTFRHSVVVF | 61    | >TP53-P219T NTFRHSVVVT  | 37  | 24    |
| >TP53-P219T NTFRHSVVVF | 34    | >TP53-P219T NTFRHSVVVT  | 30  | 4     |
| >TP53-P219T NTFRHSVVVF | 21062 | >TP53-P219T NTFRHSVVVT  | 391 | 20671 |
| >TP53-P219T NTFRHSVVVF | 65    | >TP53-P219T NTFRHSVVVT  | 96  | 31    |
| >TP53-P219T NTFRHSVVVF | 492   | >TP53-P219T NTFRHSVVVT  | 801 | 309   |
| >TP53-P219T NTFRHSVVVF | 33    | >TP53-P219T NTFRHSVVVT  | 50  | 17    |
| >TP53-P219T NTFRHSVVVF | 23    | >TP53-P219T NTFRHSVVVT  | 16  | 7     |
| >TP53-P219T NTFRHSVVVF | 105   | >TP53-P219T NTFRHSVVVT  | 169 | 64    |
| >TP53-P219T NTFRHSVVVF | 289   | >TP53-P219T NTFRHSVVVT  | 39  | 250   |
| >TP53-P219T NTFRHSVVVF | 23    | >TP53-P219T NTFRHSVVVT  | 19  | 4     |
| >TP53-P222A FRHSVVVPYE | 1718  | >TP53-P222A FRHSVVVPYE  | 380 | 1338  |
| >TP53-P222A YEPPEVGSDC | 1359  | >TP53-P222A YEAPVGSDC   | 371 | 988   |
| >TP53-P222A VPYEPPEV   | 184   | >TP53-P222A VPYEAPEV    | 17  | 167   |
| >TP53-P222A VPYEPPEV   | 139   | >TP53-P222A VPYEAPEV    | 416 | 277   |
| >TP53-P222A VPYEPPEV   | 266   | >TP53-P222A VPYEAPEV    | 269 | 3     |
| >TP53-P222A VPYEPPEV   | 48    | >TP53-P222A VPYEAPEV    | 48  | 0     |
| >TP53-P222A VPYEPPEV   | 205   | >TP53-P222A VPYEAPEV    | 249 | 44    |
| >TP53-P222A VVPYEPPEV  | 507   | >TP53-P222A VVPYEAPEV   | 73  | 434   |
| >TP53-P222A VVPYEPPEV  | 214   | >TP53-P222A VVPYEAPEV   | 616 | 402   |

|                         |       |                         |      |       |
|-------------------------|-------|-------------------------|------|-------|
| >TP53-P222AVVPYEPPEV    | 329   | >TP53-P222AVVPYEAPEV    | 374  | 45    |
| >TP53-P222AVVPYEPPEV    | 56    | >TP53-P222AVVPYEAPEV    | 48   | 8     |
| >TP53-P222AVVVPYEPPEV   | 390   | >TP53-P222AVVVPYEAPEV   | 1354 | 964   |
| >TP53-P222AVVVPYEPPEV   | 136   | >TP53-P222AVVVPYEAPEV   | 254  | 118   |
| >TP53-P222AVVVPYEPPEV   | 28    | >TP53-P222AVVVPYEAPEV   | 49   | 21    |
| >TP53-P222AVVVPYEPPEV   | 72    | >TP53-P222AVVVPYEAPEV   | 157  | 85    |
| >TP53-P222AVVVPYEPPEV   | 9     | >TP53-P222AVVVPYEAPEV   | 8    | 1     |
| >TP53-P222AVVVPYEPPEV   | 353   | >TP53-P222AVVVPYEAPEV   | 327  | 26    |
| >TP53-P222ASVVPYEPPEV   | 75    | >TP53-P222ASVVPYEAPEV   | 32   | 43    |
| >TP53-P222ASVVPYEPPEV   | 92    | >TP53-P222ASVVPYEAPEV   | 154  | 62    |
| >TP53-P222ASVVPYEPPEV   | 129   | >TP53-P222ASVVPYEAPEV   | 169  | 40    |
| >TP53-P222ASVVPYEPPEV   | 57    | >TP53-P222ASVVPYEAPEV   | 55   | 2     |
| >TP53-P222ASVVPYEP      | 7528  | >TP53-P222ASVVPYEA      | 37   | 7491  |
| >TP53-P222ASVVPYEPPEV   | 81    | >TP53-P222ASVVPYEAPEV   | 83   | 2     |
| >TP53-P222ASVVPYEPPEV   | 26    | >TP53-P222ASVVPYEAPEV   | 21   | 5     |
| >TP53-P222ASVVPYEP      | 7319  | >TP53-P222ASVVPYEA      | 32   | 7287  |
| >TP53-P222L PPEVGS DCTT | 4109  | >TP53-P222L PPEVGS DCTT | 161  | 3948  |
| >TP53-P222L PPEVGS DCTT | 657   | >TP53-P222L PPEVGS DCTT | 73   | 584   |
| >TP53-P222L FRHSVVPYEV  | 1625  | >TP53-P222L FRHSVVPYEV  | 43   | 1582  |
| >TP53-P222L FRHSVVPYEV  | 1718  | >TP53-P222L FRHSVVPYEV  | 44   | 1674  |
| >TP53-P222L FRHSVVPYEV  | 5128  | >TP53-P222L FRHSVVPYEV  | 11   | 5117  |
| >TP53-P222L FRHSVVPYEV  | 7050  | >TP53-P222L FRHSVVPYEV  | 228  | 6822  |
| >TP53-P222L FRHSVVPYEV  | 19492 | >TP53-P222L FRHSVVPYEV  | 168  | 19324 |
| >TP53-P222L YEPPEVGS DC | 1359  | >TP53-P222L YELPEVGS DC | 167  | 1192  |
| >TP53-P222L VPYEPPEV    | 184   | >TP53-P222L VPYELPEV    | 123  | 61    |
| >TP53-P222L VPYEPPEV    | 139   | >TP53-P222L VPYELPEV    | 218  | 79    |
| >TP53-P222L VPYEPPEV    | 266   | >TP53-P222L VPYELPEV    | 327  | 61    |
| >TP53-P222L VPYEPPEV    | 48    | >TP53-P222L VPYELPEV    | 47   | 1     |
| >TP53-P222L VPYEPPEV    | 205   | >TP53-P222L VPYELPEV    | 161  | 44    |
| >TP53-P222L VVPYEPPEV   | 923   | >TP53-P222L VVPYELPEV   | 191  | 732   |
| >TP53-P222L VVPYEPPEV   | 662   | >TP53-P222L VVPYELPEV   | 206  | 456   |
| >TP53-P222L VVPYEPPEV   | 507   | >TP53-P222L VVPYELPEV   | 15   | 492   |
| >TP53-P222L VVPYEPPEV   | 214   | >TP53-P222L VVPYELPEV   | 223  | 9     |
| >TP53-P222L VVPYEPPEV   | 329   | >TP53-P222L VVPYELPEV   | 206  | 123   |
| >TP53-P222L VVPYEPPEV   | 56    | >TP53-P222L VVPYELPEV   | 25   | 31    |
| >TP53-P222L VVVPYEPPEV  | 797   | >TP53-P222L VVVPYELPEV  | 259  | 538   |
| >TP53-P222L VVVPYEPPEV  | 390   | >TP53-P222L VVVPYELPEV  | 250  | 140   |
| >TP53-P222L VVVPYEPPEV  | 136   | >TP53-P222L VVVPYELPEV  | 45   | 91    |
| >TP53-P222L VVVPYEPPEV  | 28    | >TP53-P222L VVVPYELPEV  | 35   | 7     |
| >TP53-P222L VVVPYEPPEV  | 72    | >TP53-P222L VVVPYELPEV  | 94   | 22    |
| >TP53-P222L VVVPYEPPEV  | 9     | >TP53-P222L VVVPYELPEV  | 6    | 3     |
| >TP53-P222L VVVPYEPPEV  | 353   | >TP53-P222L VVVPYELPEV  | 425  | 72    |
| >TP53-P222L SVVPYEPPEV  | 515   | >TP53-P222L SVVPYELPEV  | 335  | 180   |

|                        |       |                        |      |       |
|------------------------|-------|------------------------|------|-------|
| >TP53-P222L SVVVPYEPPE | 75    | >TP53-P222L SVVVPYELPE | 19   | 56    |
| >TP53-P222L SVVVPYEPPE | 92    | >TP53-P222L SVVVPYELPE | 106  | 14    |
| >TP53-P222L SVVVPYEPPE | 129   | >TP53-P222L SVVVPYELPE | 100  | 29    |
| >TP53-P222L SVVVPYEPPE | 57    | >TP53-P222L SVVVPYELPE | 36   | 21    |
| >TP53-P222L SVVVPYEP   | 24835 | >TP53-P222L SVVVPYEL   | 484  | 24351 |
| >TP53-P222L SVVVPYEP   | 7528  | >TP53-P222L SVVVPYEL   | 31   | 7497  |
| >TP53-P222L SVVVPYEPPE | 81    | >TP53-P222L SVVVPYELPE | 75   | 6     |
| >TP53-P222L SVVVPYEP   | 15693 | >TP53-P222L SVVVPYEL   | 387  | 15306 |
| >TP53-P222L SVVVPYEPPE | 26    | >TP53-P222L SVVVPYELPE | 23   | 3     |
| >TP53-P222L HSVVVPYEP  | 7319  | >TP53-P222L HSVVVPYEL  | 27   | 7292  |
| >TP53-P222L HSVVVPYEP  | 20989 | >TP53-P222L HSVVVPYEL  | 43   | 20946 |
| >TP53-P222L HSVVVPYEP  | 22502 | >TP53-P222L HSVVVPYEL  | 263  | 22239 |
| >TP53-P222L HSVVVPYEP  | 13677 | >TP53-P222L HSVVVPYEL  | 98   | 13579 |
| >TP53-P222L RHSVVPYEP  | 8589  | >TP53-P222L RHSVVPYEL  | 381  | 8208  |
| >TP53-P222L RHSVVPYEP  | 13061 | >TP53-P222L RHSVVPYEL  | 94   | 12967 |
| >TP53-P222C VPYEPPEV   | 184   | >TP53-P222C VPYEQPEV   | 96   | 88    |
| >TP53-P222C VPYEPPEV   | 139   | >TP53-P222C VPYEQPEV   | 467  | 328   |
| >TP53-P222C VPYEPPEV   | 266   | >TP53-P222C VPYEQPEV   | 827  | 561   |
| >TP53-P222C VPYEPPEV   | 48    | >TP53-P222C VPYEQPEV   | 50   | 2     |
| >TP53-P222C VPYEPPEV   | 205   | >TP53-P222C VPYEQPEV   | 418  | 213   |
| >TP53-P222C VVPYEPPEV  | 507   | >TP53-P222C VVPYEQPEV  | 259  | 248   |
| >TP53-P222C VVPYEPPEV  | 214   | >TP53-P222C VVPYEQPEV  | 671  | 457   |
| >TP53-P222C VVPYEPPEV  | 329   | >TP53-P222C VVPYEQPEV  | 315  | 14    |
| >TP53-P222C VVPYEPPEV  | 56    | >TP53-P222C VVPYEQPEV  | 38   | 18    |
| >TP53-P222C VVVPYEPPEV | 390   | >TP53-P222C VVVPYEQPEV | 2803 | 2413  |
| >TP53-P222C VVVPYEPPEV | 136   | >TP53-P222C VVVPYEQPEV | 441  | 305   |
| >TP53-P222C VVVPYEPPEV | 28    | >TP53-P222C VVVPYEQPEV | 55   | 27    |
| >TP53-P222C VVVPYEPPEV | 72    | >TP53-P222C VVVPYEQPEV | 123  | 51    |
| >TP53-P222C VVVPYEPPEV | 9     | >TP53-P222C VVVPYEQPEV | 7    | 2     |
| >TP53-P222C VVVPYEPPEV | 353   | >TP53-P222C VVVPYEQPEV | 813  | 460   |
| >TP53-P222C SVVVPYEPPE | 75    | >TP53-P222C SVVVPYEQPE | 63   | 12    |
| >TP53-P222C SVVVPYEPPE | 92    | >TP53-P222C SVVVPYEQPE | 160  | 68    |
| >TP53-P222C SVVVPYEPPE | 129   | >TP53-P222C SVVVPYEQPE | 130  | 1     |
| >TP53-P222C SVVVPYEPPE | 57    | >TP53-P222C SVVVPYEQPE | 40   | 17    |
| >TP53-P222C SVVVPYEPPE | 81    | >TP53-P222C SVVVPYEQPE | 70   | 11    |
| >TP53-P222C SVVVPYEPPE | 26    | >TP53-P222C SVVVPYEQPE | 34   | 8     |
| >TP53-P222S VPYEPPEV   | 184   | >TP53-P222S VPYESPEV   | 67   | 117   |
| >TP53-P222S VPYEPPEV   | 139   | >TP53-P222S VPYESPEV   | 356  | 217   |
| >TP53-P222S VPYEPPEV   | 266   | >TP53-P222S VPYESPEV   | 378  | 112   |
| >TP53-P222S VPYEPPEV   | 48    | >TP53-P222S VPYESPEV   | 53   | 5     |
| >TP53-P222S VPYEPPEV   | 205   | >TP53-P222S VPYESPEV   | 342  | 137   |
| >TP53-P222S VVPYEPPEV  | 507   | >TP53-P222S VVPYESPEV  | 66   | 441   |
| >TP53-P222S VVPYEPPEV  | 214   | >TP53-P222S VVPYESPEV  | 413  | 199   |

|                         |       |                         |     |       |
|-------------------------|-------|-------------------------|-----|-------|
| >TP53-P222S VVPYEPPEV   | 329   | >TP53-P222S VVPYESPEV   | 228 | 101   |
| >TP53-P222S VVPYEPPEV   | 56    | >TP53-P222S VVPYESPEV   | 45  | 11    |
| >TP53-P222S VVVPYEPPEV  | 390   | >TP53-P222S VVVPYESPEV  | 749 | 359   |
| >TP53-P222S VVVPYEPPEV  | 136   | >TP53-P222S VVVPYESPEV  | 126 | 10    |
| >TP53-P222S VVVPYEPPEV  | 28    | >TP53-P222S VVVPYESPEV  | 49  | 21    |
| >TP53-P222S VVVPYEPPEV  | 72    | >TP53-P222S VVVPYESPEV  | 128 | 56    |
| >TP53-P222S VVVPYEPPEV  | 9     | >TP53-P222S VVVPYESPEV  | 8   | 1     |
| >TP53-P222S VVVPYEPPEV  | 353   | >TP53-P222S VVVPYESPEV  | 444 | 91    |
| >TP53-P222S SVVVPYEPPE' | 75    | >TP53-P222S SVVVPYESPE' | 32  | 43    |
| >TP53-P222S SVVVPYEPPE' | 92    | >TP53-P222S SVVVPYESPE' | 132 | 40    |
| >TP53-P222S SVVVPYEPPE' | 129   | >TP53-P222S SVVVPYESPE' | 109 | 20    |
| >TP53-P222S SVVVPYEPPE' | 57    | >TP53-P222S SVVVPYESPE' | 42  | 15    |
| >TP53-P222S SVVVPYEPPE' | 81    | >TP53-P222S SVVVPYESPE' | 63  | 18    |
| >TP53-P222S SVVVPYEPPE' | 26    | >TP53-P222S SVVVPYESPE' | 22  | 4     |
| >TP53-P222T PPEVGS DCTT | 657   | >TP53-P222T TPEVGS DCTT | 431 | 226   |
| >TP53-P222T EPPEVGS DCT | 26579 | >TP53-P222T ETPEVGS DCT | 265 | 26314 |
| >TP53-P222T EPPEVGS DCT | 18309 | >TP53-P222T ETPEVGS DCT | 455 | 17854 |
| >TP53-P222T VPYEPPEV    | 184   | >TP53-P222T VPYETPEV    | 123 | 61    |
| >TP53-P222T VPYEPPEV    | 139   | >TP53-P222T VPYETPEV    | 230 | 91    |
| >TP53-P222T VPYEPPEV    | 266   | >TP53-P222T VPYETPEV    | 238 | 28    |
| >TP53-P222T VPYEPPEV    | 48    | >TP53-P222T VPYETPEV    | 51  | 3     |
| >TP53-P222T VPYEPPEV    | 205   | >TP53-P222T VPYETPEV    | 223 | 18    |
| >TP53-P222T VVPYEPPEV   | 662   | >TP53-P222T VVPYETPEV   | 428 | 234   |
| >TP53-P222T VVPYEPPEV   | 507   | >TP53-P222T VVPYETPEV   | 52  | 455   |
| >TP53-P222T VVPYEPPEV   | 214   | >TP53-P222T VVPYETPEV   | 409 | 195   |
| >TP53-P222T VVPYEPPEV   | 329   | >TP53-P222T VVPYETPEV   | 216 | 113   |
| >TP53-P222T VVPYEPPEV   | 56    | >TP53-P222T VVPYETPEV   | 33  | 23    |
| >TP53-P222T VVVPYEPPEV  | 390   | >TP53-P222T VVVPYETPEV  | 450 | 60    |
| >TP53-P222T VVVPYEPPEV  | 136   | >TP53-P222T VVVPYETPEV  | 118 | 18    |
| >TP53-P222T VVVPYEPPEV  | 28    | >TP53-P222T VVVPYETPEV  | 54  | 26    |
| >TP53-P222T VVVPYEPPEV  | 72    | >TP53-P222T VVVPYETPEV  | 110 | 38    |
| >TP53-P222T VVVPYEPPEV  | 9     | >TP53-P222T VVVPYETPEV  | 7   | 2     |
| >TP53-P222T VVVPYEPPEV  | 353   | >TP53-P222T VVVPYETPEV  | 341 | 12    |
| >TP53-P222T SVVVPYEPPE' | 515   | >TP53-P222T SVVVPYETPE' | 449 | 66    |
| >TP53-P222T SVVVPYEPPE' | 75    | >TP53-P222T SVVVPYETPE' | 32  | 43    |
| >TP53-P222T SVVVPYEPPE' | 92    | >TP53-P222T SVVVPYETPE' | 114 | 22    |
| >TP53-P222T SVVVPYEPPE' | 129   | >TP53-P222T SVVVPYETPE' | 92  | 37    |
| >TP53-P222T SVVVPYEPPE' | 57    | >TP53-P222T SVVVPYETPE' | 36  | 21    |
| >TP53-P222T SVVVPYEP    | 7528  | >TP53-P222T SVVVPYET    | 499 | 7029  |
| >TP53-P222T SVVVPYEPPE' | 81    | >TP53-P222T SVVVPYETPE' | 51  | 30    |
| >TP53-P222T SVVVPYEPPE' | 26    | >TP53-P222T SVVVPYETPE' | 19  | 7     |
| >TP53-P223A PEVGS DCTTI | 1029  | >TP53-P223A AEVGS DCTTI | 390 | 639   |
| >TP53-P223A PEVGS DCT   | 10640 | >TP53-P223A AEVGS DCT   | 318 | 10322 |

|                         |       |                         |      |       |
|-------------------------|-------|-------------------------|------|-------|
| >TP53-P223A PEVGSDCTT   | 9294  | >TP53-P223A AEVGSDCTT   | 218  | 9076  |
| >TP53-P223A PEVGSDCTTI  | 1090  | >TP53-P223A AEVGSDCTTI  | 209  | 881   |
| >TP53-P223A PEVGSDCTTI  | 15771 | >TP53-P223A AEVGSDCTTI  | 444  | 15327 |
| >TP53-P223A PEVGSDCTTI  | 11575 | >TP53-P223A AEVGSDCTTI  | 487  | 11088 |
| >TP53-P223A PEVGSDCTTII | 6826  | >TP53-P223A AEVGSDCTTII | 315  | 6511  |
| >TP53-P223A PEVGSDCT    | 3668  | >TP53-P223A AEVGSDCT    | 24   | 3644  |
| >TP53-P223A PEVGSDCTT   | 13628 | >TP53-P223A AEVGSDCTT   | 121  | 13507 |
| >TP53-P223A PEVGSDCTTI  | 342   | >TP53-P223A AEVGSDCTTI  | 9    | 333   |
| >TP53-P223A EPPEVGSDCT  | 1520  | >TP53-P223A EPAEVGSDCT  | 121  | 1399  |
| >TP53-P223A YEPPEVGSDC  | 1359  | >TP53-P223A YEPAEVGSDC  | 469  | 890   |
| >TP53-P223A VPYEPPEV    | 184   | >TP53-P223A VPYEPAEV    | 607  | 423   |
| >TP53-P223A VPYEPPEV    | 139   | >TP53-P223A VPYEPAEV    | 241  | 102   |
| >TP53-P223A VPYEPPEV    | 266   | >TP53-P223A VPYEPAEV    | 280  | 14    |
| >TP53-P223A VPYEPPEV    | 48    | >TP53-P223A VPYEPAEV    | 59   | 11    |
| >TP53-P223A VPYEPPEV    | 205   | >TP53-P223A VPYEPAEV    | 327  | 122   |
| >TP53-P223A VVPYEPPEV   | 662   | >TP53-P223A VVPYEPAEV   | 131  | 531   |
| >TP53-P223A VVPYEPPEV   | 214   | >TP53-P223A VVPYEPAEV   | 288  | 74    |
| >TP53-P223A VVPYEPPEV   | 329   | >TP53-P223A VVPYEPAEV   | 1620 | 1291  |
| >TP53-P223A VVPYEPPEV   | 56    | >TP53-P223A VVPYEPAEV   | 83   | 27    |
| >TP53-P223A VVPYEPPEV   | 2736  | >TP53-P223A VVPYEPAEV   | 133  | 2603  |
| >TP53-P223A VVVPYEPPEV  | 390   | >TP53-P223A VVVPYEPAEV  | 120  | 270   |
| >TP53-P223A VVVPYEPPEV  | 6646  | >TP53-P223A VVVPYEPAEV  | 57   | 6589  |
| >TP53-P223A VVVPYEPPEV  | 136   | >TP53-P223A VVVPYEPAEV  | 236  | 100   |
| >TP53-P223A VVVPYEPPEV  | 28    | >TP53-P223A VVVPYEPAEV  | 31   | 3     |
| >TP53-P223A VVVPYEPPEV  | 72    | >TP53-P223A VVVPYEPAEV  | 287  | 215   |
| >TP53-P223A VVVPYEPPEV  | 9     | >TP53-P223A VVVPYEPAEV  | 9    | 0     |
| >TP53-P223A VVVPYEPPEV  | 14007 | >TP53-P223A VVVPYEPAEV  | 329  | 13678 |
| >TP53-P223A VVVPYEPPEV  | 353   | >TP53-P223A VVVPYEPAEV  | 768  | 415   |
| >TP53-P223A SVVVPYEPPEV | 515   | >TP53-P223A SVVVPYEPAEV | 188  | 327   |
| >TP53-P223A SVVVPYEPPEV | 10454 | >TP53-P223A SVVVPYEPAEV | 289  | 10165 |
| >TP53-P223A SVVVPYEPPEV | 75    | >TP53-P223A SVVVPYEPAEV | 116  | 41    |
| >TP53-P223A SVVVPYEPPEV | 92    | >TP53-P223A SVVVPYEPAEV | 101  | 9     |
| >TP53-P223A SVVVPYEPPEV | 129   | >TP53-P223A SVVVPYEPAEV | 440  | 311   |
| >TP53-P223A SVVVPYEPPEV | 57    | >TP53-P223A SVVVPYEPAEV | 67   | 10    |
| >TP53-P223A SVVVPYEPPEV | 3901  | >TP53-P223A SVVVPYEPAEV | 17   | 3884  |
| >TP53-P223A SVVVPYEPPEV | 81    | >TP53-P223A SVVVPYEPAEV | 15   | 66    |
| >TP53-P223A SVVVPYEPPEV | 11174 | >TP53-P223A SVVVPYEPAEV | 243  | 10931 |
| >TP53-P223A SVVVPYEPPEV | 26    | >TP53-P223A SVVVPYEPAEV | 37   | 11    |
| >TP53-P223F PEVGSDCTTI  | 1029  | >TP53-P223F HEVGSDCTTI  | 76   | 953   |
| >TP53-P223F PEVGSDCT    | 10640 | >TP53-P223F HEVGSDCT    | 327  | 10313 |
| >TP53-P223F PEVGSDCTT   | 9294  | >TP53-P223F HEVGSDCTT   | 179  | 9115  |
| >TP53-P223F PEVGSDCTTI  | 1090  | >TP53-P223F HEVGSDCTTI  | 227  | 863   |
| >TP53-P223F PEVGSDCT    | 3668  | >TP53-P223F HEVGSDCT    | 183  | 3485  |

|                        |       |                        |      |       |
|------------------------|-------|------------------------|------|-------|
| >TP53-P223F PEVGSDCTTI | 342   | >TP53-P223F HEVGSDCTTI | 36   | 306   |
| >TP53-P223F EPPEVGSDCT | 1520  | >TP53-P223F EPHEVGSDCT | 447  | 1073  |
| >TP53-P223F VPYEPPEV   | 184   | >TP53-P223F VPYEPHEV   | 173  | 11    |
| >TP53-P223F VPYEPPEV   | 139   | >TP53-P223F VPYEPHEV   | 132  | 7     |
| >TP53-P223F VPYEPPEV   | 266   | >TP53-P223F VPYEPHEV   | 191  | 75    |
| >TP53-P223F VPYEPPEV   | 1481  | >TP53-P223F VPYEPHEV   | 353  | 1128  |
| >TP53-P223F VPYEPPEV   | 48    | >TP53-P223F VPYEPHEV   | 57   | 9     |
| >TP53-P223F VPYEPPEV   | 205   | >TP53-P223F VPYEPHEV   | 221  | 16    |
| >TP53-P223F VVPYEPPEV  | 662   | >TP53-P223F VVPYEPHEV  | 276  | 386   |
| >TP53-P223F VVPYEPPEV  | 214   | >TP53-P223F VVPYEPHEV  | 135  | 79    |
| >TP53-P223F VVPYEPPEV  | 329   | >TP53-P223F VVPYEPHEV  | 588  | 259   |
| >TP53-P223F VVPYEPPEV  | 56    | >TP53-P223F VVPYEPHEV  | 31   | 25    |
| >TP53-P223F VVPYEPPEV  | 2736  | >TP53-P223F VVPYEPHEV  | 117  | 2619  |
| >TP53-P223F VVVPYEPPEV | 390   | >TP53-P223F VVVPYEPHEV | 256  | 134   |
| >TP53-P223F VVVPYEPPEV | 136   | >TP53-P223F VVVPYEPHEV | 286  | 150   |
| >TP53-P223F VVVPYEPPEV | 28    | >TP53-P223F VVVPYEPHEV | 24   | 4     |
| >TP53-P223F VVVPYEPPEV | 828   | >TP53-P223F VVVPYEPHEV | 320  | 508   |
| >TP53-P223F VVVPYEPPEV | 72    | >TP53-P223F VVVPYEPHEV | 95   | 23    |
| >TP53-P223F VVVPYEPPEV | 9     | >TP53-P223F VVVPYEPHEV | 6    | 3     |
| >TP53-P223F VVVPYEPPEV | 353   | >TP53-P223F VVVPYEPHEV | 387  | 34    |
| >TP53-P223F SVVVPYEPPE | 515   | >TP53-P223F SVVVPYEPHE | 301  | 214   |
| >TP53-P223F SVVVPYEPPE | 75    | >TP53-P223F SVVVPYEPHE | 88   | 13    |
| >TP53-P223F SVVVPYEPPE | 92    | >TP53-P223F SVVVPYEPHE | 63   | 29    |
| >TP53-P223F SVVVPYEPPE | 129   | >TP53-P223F SVVVPYEPHE | 199  | 70    |
| >TP53-P223F SVVVPYEPPE | 57    | >TP53-P223F SVVVPYEPHE | 35   | 22    |
| >TP53-P223F SVVVPYEPPE | 81    | >TP53-P223F SVVVPYEPHE | 13   | 68    |
| >TP53-P223F SVVVPYEPPE | 26    | >TP53-P223F SVVVPYEPHE | 21   | 5     |
| >TP53-P223L PEVGSDCTTI | 1029  | >TP53-P223L LEVGSDCTTI | 100  | 929   |
| >TP53-P223L PEVGSDCTTI | 1090  | >TP53-P223L LEVGSDCTTI | 428  | 662   |
| >TP53-P223L PEVGSDCTTI | 342   | >TP53-P223L LEVGSDCTTI | 26   | 316   |
| >TP53-P223L RHSVVPYEP  | 4837  | >TP53-P223L RHSVVPYEP  | 177  | 4660  |
| >TP53-P223L RHSVVPYEP  | 16523 | >TP53-P223L RHSVVPYEP  | 170  | 16353 |
| >TP53-P223L EPPEVGSDCT | 1520  | >TP53-P223L EPLEVGSDCT | 244  | 1276  |
| >TP53-P223L YEPPEVGSDC | 1359  | >TP53-P223L YEPLEVGSDC | 373  | 986   |
| >TP53-P223L VPYEPPEV   | 184   | >TP53-P223L VPYEPLEV   | 414  | 230   |
| >TP53-P223L VPYEPPEV   | 139   | >TP53-P223L VPYEPLEV   | 232  | 93    |
| >TP53-P223L VPYEPPEV   | 266   | >TP53-P223L VPYEPLEV   | 390  | 124   |
| >TP53-P223L VPYEPPEV   | 48    | >TP53-P223L VPYEPLEV   | 52   | 4     |
| >TP53-P223L VPYEPPEV   | 205   | >TP53-P223L VPYEPLEV   | 355  | 150   |
| >TP53-P223L VVPYEPPEV  | 662   | >TP53-P223L VVPYEPLEV  | 485  | 177   |
| >TP53-P223L VVPYEPPEV  | 214   | >TP53-P223L VVPYEPLEV  | 568  | 354   |
| >TP53-P223L VVPYEPPEV  | 329   | >TP53-P223L VVPYEPLEV  | 1460 | 1131  |
| >TP53-P223L VVPYEPPEV  | 56    | >TP53-P223L VVPYEPLEV  | 198  | 142   |

|                        |       |                        |      |       |
|------------------------|-------|------------------------|------|-------|
| >TP53-P223L VVVPYEPP   | 13435 | >TP53-P223L VVVPYEPL   | 45   | 13390 |
| >TP53-P223L VVVPYEPPEV | 797   | >TP53-P223L VVVPYEPLEV | 446  | 351   |
| >TP53-P223L VVVPYEPP   | 18506 | >TP53-P223L VVVPYEPL   | 468  | 18038 |
| >TP53-P223L VVVPYEPPEV | 390   | >TP53-P223L VVVPYEPLEV | 133  | 257   |
| >TP53-P223L VVVPYEPP   | 6646  | >TP53-P223L VVVPYEPL   | 48   | 6598  |
| >TP53-P223L VVVPYEPPEV | 136   | >TP53-P223L VVVPYEPLEV | 99   | 37    |
| >TP53-P223L VVVPYEPPEV | 28    | >TP53-P223L VVVPYEPLEV | 53   | 25    |
| >TP53-P223L VVVPYEPPEV | 72    | >TP53-P223L VVVPYEPLEV | 201  | 129   |
| >TP53-P223L VVVPYEPP   | 29728 | >TP53-P223L VVVPYEPL   | 253  | 29475 |
| >TP53-P223L VVVPYEPPEV | 9     | >TP53-P223L VVVPYEPLEV | 13   | 4     |
| >TP53-P223L VVVPYEPP   | 14007 | >TP53-P223L VVVPYEPL   | 260  | 13747 |
| >TP53-P223L VVVPYEPPEV | 353   | >TP53-P223L VVVPYEPLEV | 1153 | 800   |
| >TP53-P223L VVVPYEPP   | 22708 | >TP53-P223L VVVPYEPL   | 292  | 22416 |
| >TP53-P223L SVVVPYEPP  | 27416 | >TP53-P223L SVVVPYEPL  | 402  | 27014 |
| >TP53-P223L SVVVPYEPP  | 5160  | >TP53-P223L SVVVPYEPL  | 157  | 5003  |
| >TP53-P223L SVVVPYEPPE | 515   | >TP53-P223L SVVVPYEPL\ | 442  | 73    |
| >TP53-P223L SVVVPYEPP  | 10454 | >TP53-P223L SVVVPYEPL  | 173  | 10281 |
| >TP53-P223L SVVVPYEPPE | 75    | >TP53-P223L SVVVPYEPL\ | 121  | 46    |
| >TP53-P223L SVVVPYEPPE | 92    | >TP53-P223L SVVVPYEPL\ | 162  | 70    |
| >TP53-P223L SVVVPYEPPE | 129   | >TP53-P223L SVVVPYEPL\ | 364  | 235   |
| >TP53-P223L SVVVPYEPPE | 57    | >TP53-P223L SVVVPYEPL\ | 111  | 54    |
| >TP53-P223L SVVVPYEPP  | 19750 | >TP53-P223L SVVVPYEPL  | 141  | 19609 |
| >TP53-P223L SVVVPYEPP  | 3901  | >TP53-P223L SVVVPYEPL  | 15   | 3886  |
| >TP53-P223L SVVVPYEPPE | 81    | >TP53-P223L SVVVPYEPL\ | 46   | 35    |
| >TP53-P223L SVVVPYEPP  | 11174 | >TP53-P223L SVVVPYEPL  | 74   | 11100 |
| >TP53-P223L SVVVPYEPPE | 26    | >TP53-P223L SVVVPYEPL\ | 59   | 33    |
| >TP53-P223L HSVVVPYEPP | 20690 | >TP53-P223L HSVVVPYEPL | 39   | 20651 |
| >TP53-P223L HSVVVPYEPP | 23760 | >TP53-P223L HSVVVPYEPL | 478  | 23282 |
| >TP53-P223F PEVGSDCTTI | 1029  | >TP53-P223F REVGSDCTTI | 318  | 711   |
| >TP53-P223F PEVGSDCTT  | 11826 | >TP53-P223F REVGSDCTT  | 320  | 11506 |
| >TP53-P223F PEVGSDCT   | 10640 | >TP53-P223F REVGSDCT   | 312  | 10328 |
| >TP53-P223F PEVGSDCTT  | 9294  | >TP53-P223F REVGSDCTT  | 174  | 9120  |
| >TP53-P223F PEVGSDCTTI | 1090  | >TP53-P223F REVGSDCTTI | 128  | 962   |
| >TP53-P223F PEVGSDCT   | 3668  | >TP53-P223F REVGSDCT   | 108  | 3560  |
| >TP53-P223F PEVGSDCTTI | 342   | >TP53-P223F REVGSDCTTI | 9    | 333   |
| >TP53-P223F RHSVVVPYEP | 22698 | >TP53-P223F RHSVVVPYEP | 197  | 22501 |
| >TP53-P223F RHSVVVPYEP | 35374 | >TP53-P223F RHSVVVPYEP | 399  | 34975 |
| >TP53-P223F VPYEPPEV   | 184   | >TP53-P223F VPYEPREV   | 1522 | 1338  |
| >TP53-P223F VPYEPPEV   | 139   | >TP53-P223F VPYEPREV   | 1286 | 1147  |
| >TP53-P223F VPYEPPEV   | 266   | >TP53-P223F VPYEPREV   | 1167 | 901   |
| >TP53-P223F VPYEPPEV   | 1481  | >TP53-P223F VPYEPREV   | 152  | 1329  |
| >TP53-P223F VPYEPPEV   | 48    | >TP53-P223F VPYEPREV   | 114  | 66    |
| >TP53-P223F VPYEPPEV   | 205   | >TP53-P223F VPYEPREV   | 478  | 273   |



|                       |       |                       |      |       |
|-----------------------|-------|-----------------------|------|-------|
| >TP53-P223FVVPYEPPEV  | 214   | >TP53-P223FVVPYEPREV  | 1405 | 1191  |
| >TP53-P223FVVPYEPPEV  | 329   | >TP53-P223FVVPYEPREV  | 6714 | 6385  |
| >TP53-P223FVVPYEPPEV  | 56    | >TP53-P223FVVPYEPREV  | 2100 | 2044  |
| >TP53-P223FVVVPYEPPEV | 390   | >TP53-P223FVVVPYEPREV | 356  | 34    |
| >TP53-P223FVVVPYEPPEV | 136   | >TP53-P223FVVVPYEPREV | 677  | 541   |
| >TP53-P223FVVVPYEPPEV | 28    | >TP53-P223FVVVPYEPREV | 89   | 61    |
| >TP53-P223FVVVPYEPPEV | 72    | >TP53-P223FVVVPYEPREV | 1055 | 983   |
| >TP53-P223FVVVPYEPPEV | 9     | >TP53-P223FVVVPYEPREV | 38   | 29    |
| >TP53-P223FVVVPYEPPEV | 26349 | >TP53-P223FVVVPYEPREV | 438  | 25911 |
| >TP53-P223FVVVPYEPPEV | 23501 | >TP53-P223FVVVPYEPREV | 80   | 23421 |
| >TP53-P223FVVVPYEPPEV | 32384 | >TP53-P223FVVVPYEPREV | 118  | 32266 |
| >TP53-P223FVVVPYEPPEV | 353   | >TP53-P223FVVVPYEPREV | 3382 | 3029  |
| >TP53-P223FVVVPYEPPEV | 75    | >TP53-P223FVVVPYEPREV | 554  | 479   |
| >TP53-P223FVVVPYEPPEV | 92    | >TP53-P223FVVVPYEPREV | 304  | 212   |
| >TP53-P223FVVVPYEPPEV | 129   | >TP53-P223FVVVPYEPREV | 1654 | 1525  |
| >TP53-P223FVVVPYEPPEV | 57    | >TP53-P223FVVVPYEPREV | 452  | 395   |
| >TP53-P223FVVVPYEPPEV | 22857 | >TP53-P223FVVVPYEPREV | 128  | 22729 |
| >TP53-P223FVVVPYEPPEV | 20801 | >TP53-P223FVVVPYEPREV | 35   | 20766 |
| >TP53-P223FVVVPYEPPEV | 29099 | >TP53-P223FVVVPYEPREV | 69   | 29030 |
| >TP53-P223FVVVPYEPPEV | 81    | >TP53-P223FVVVPYEPREV | 67   | 14    |
| >TP53-P223FVVVPYEPPEV | 26    | >TP53-P223FVVVPYEPREV | 190  | 164   |
| >TP53-P223FVVVPYEPPEV | 26067 | >TP53-P223FVVVPYEPREV | 7    | 26060 |
| >TP53-P223FVVVPYEPPEV | 9194  | >TP53-P223FVVVPYEPREV | 334  | 8860  |
| >TP53-P223FVVVPYEPPEV | 1029  | >TP53-P223FVVVPYEPREV | 72   | 957   |
| >TP53-P223FVVVPYEPPEV | 1090  | >TP53-P223FVVVPYEPREV | 274  | 816   |
| >TP53-P223FVVVPYEPPEV | 11575 | >TP53-P223FVVVPYEPREV | 497  | 11078 |
| >TP53-P223FVVVPYEPPEV | 3668  | >TP53-P223FVVVPYEPREV | 68   | 3600  |
| >TP53-P223FVVVPYEPPEV | 13628 | >TP53-P223FVVVPYEPREV | 475  | 13153 |
| >TP53-P223FVVVPYEPPEV | 342   | >TP53-P223FVVVPYEPREV | 28   | 314   |
| >TP53-P223FVVVPYEPPEV | 1520  | >TP53-P223FVVVPYEPREV | 159  | 1361  |
| >TP53-P223FVVVPYEPPEV | 1359  | >TP53-P223FVVVPYEPREV | 487  | 872   |
| >TP53-P223FVVVPYEPPEV | 184   | >TP53-P223FVVVPYEPREV | 431  | 247   |
| >TP53-P223FVVVPYEPPEV | 139   | >TP53-P223FVVVPYEPREV | 321  | 182   |
| >TP53-P223FVVVPYEPPEV | 266   | >TP53-P223FVVVPYEPREV | 466  | 200   |
| >TP53-P223FVVVPYEPPEV | 1481  | >TP53-P223FVVVPYEPREV | 316  | 1165  |
| >TP53-P223FVVVPYEPPEV | 48    | >TP53-P223FVVVPYEPREV | 55   | 7     |
| >TP53-P223FVVVPYEPPEV | 205   | >TP53-P223FVVVPYEPREV | 374  | 169   |
| >TP53-P223FVVVPYEPPEV | 662   | >TP53-P223FVVVPYEPREV | 118  | 544   |
| >TP53-P223FVVVPYEPPEV | 214   | >TP53-P223FVVVPYEPREV | 514  | 300   |
| >TP53-P223FVVVPYEPPEV | 329   | >TP53-P223FVVVPYEPREV | 1945 | 1616  |
| >TP53-P223FVVVPYEPPEV | 56    | >TP53-P223FVVVPYEPREV | 137  | 81    |
| >TP53-P223FVVVPYEPPEV | 2736  | >TP53-P223FVVVPYEPREV | 318  | 2418  |
| >TP53-P223FVVVPYEPPEV | 390   | >TP53-P223FVVVPYEPREV | 110  | 280   |

|                        |       |                         |       |       |
|------------------------|-------|-------------------------|-------|-------|
| >TP53-P223S VVVPYEPPEV | 136   | >TP53-P223S VVVPYEPSEV  | 235   | 99    |
| >TP53-P223S VVVPYEPPEV | 28    | >TP53-P223S VVVPYEPSEV  | 44    | 16    |
| >TP53-P223S VVVPYEPPEV | 72    | >TP53-P223S VVVPYEPSEV  | 315   | 243   |
| >TP53-P223S VVVPYEPPEV | 9     | >TP53-P223S VVVPYEPSEV  | 10    | 1     |
| >TP53-P223S VVVPYEPPEV | 353   | >TP53-P223S VVVPYEPSEV  | 1376  | 1023  |
| >TP53-P223S SVVVPYEPPE | 515   | >TP53-P223S SVVVPYEPSE' | 172   | 343   |
| >TP53-P223S SVVVPYEPPE | 75    | >TP53-P223S SVVVPYEPSE' | 166   | 91    |
| >TP53-P223S SVVVPYEPPE | 92    | >TP53-P223S SVVVPYEPSE' | 155   | 63    |
| >TP53-P223S SVVVPYEPPE | 129   | >TP53-P223S SVVVPYEPSE' | 533   | 404   |
| >TP53-P223S SVVVPYEPPE | 57    | >TP53-P223S SVVVPYEPSE' | 87    | 30    |
| >TP53-P223S SVVVPYEPPE | 3901  | >TP53-P223S SVVVPYEPS   | 158   | 3743  |
| >TP53-P223S SVVVPYEPPE | 81    | >TP53-P223S SVVVPYEPSE' | 22    | 59    |
| >TP53-P223S SVVVPYEPPE | 26    | >TP53-P223S SVVVPYEPSE' | 73    | 47    |
| >TP53-P250A PILTIITL   | 5272  | >TP53-P250A AILTIITL    | 88    | 5184  |
| >TP53-P250A PILTIITL   | 3480  | >TP53-P250A AILTIITL    | 453   | 3027  |
| >TP53-P250A PILTIITL   | 2805  | >TP53-P250A AILTIITL    | 65    | 2740  |
| >TP53-P250A PILTIITL   | 508   | >TP53-P250A AILTIITL    | 23    | 485   |
| >TP53-P250A PILTIITL   | 5502  | >TP53-P250A AILTIITL    | 189   | 5313  |
| >TP53-P250A PILTIITL   | 1435  | >TP53-P250A AILTIITL    | 58    | 1377  |
| >TP53-P250A PILTIITL   | 1459  | >TP53-P250A AILTIITL    | 168   | 1291  |
| >TP53-P250A PILTIITL   | 906   | >TP53-P250A AILTIITL    | 17    | 889   |
| >TP53-P250A PILTIITL   | 1347  | >TP53-P250A AILTIITL    | 66    | 1281  |
| >TP53-P250A RPILTIITL  | 104   | >TP53-P250A RAILTIITL   | 31837 | 31733 |
| >TP53-P250A RPILTIITL  | 15532 | >TP53-P250A RAILTIITL   | 451   | 15081 |
| >TP53-P250A RPILTIITL  | 5112  | >TP53-P250A RAILTIITL   | 272   | 4840  |
| >TP53-P250A RPILTIITL  | 34    | >TP53-P250A RAILTIITL   | 3803  | 3769  |
| >TP53-P250A RPILTIITL  | 1974  | >TP53-P250A RAILTIITL   | 472   | 1502  |
| >TP53-P250A RPILTIITL  | 3886  | >TP53-P250A RAILTIITL   | 6     | 3880  |
| >TP53-P250A RPILTIITL  | 391   | >TP53-P250A RAILTIITL   | 3373  | 2982  |
| >TP53-P250A RPILTIITL  | 66    | >TP53-P250A RAILTIITL   | 1015  | 949   |
| >TP53-P250A RPILTIITL  | 16034 | >TP53-P250A RAILTIITL   | 138   | 15896 |
| >TP53-P250A RPILTIITL  | 89    | >TP53-P250A RAILTIITL   | 4369  | 4280  |
| >TP53-P250A RRPILTII   | 1610  | >TP53-P250A RRAILTII    | 431   | 1179  |
| >TP53-P250A RRPILTIITL | 921   | >TP53-P250A RRAILTIITL  | 220   | 701   |
| >TP53-P250A RRPILTII   | 220   | >TP53-P250A RRAILTII    | 32    | 188   |
| >TP53-P250A RRPILTIIT  | 2370  | >TP53-P250A RRAILTIIT   | 291   | 2079  |
| >TP53-P250A RRPILTIITL | 14    | >TP53-P250A RRAILTIITL  | 8     | 6     |
| >TP53-P250A RRPILTIITL | 2464  | >TP53-P250A RRAILTIITL  | 356   | 2108  |
| >TP53-P250A RRPILTIITL | 2520  | >TP53-P250A RRAILTIITL  | 102   | 2418  |
| >TP53-P250A RRPILTIITL | 492   | >TP53-P250A RRAILTIITL  | 15501 | 15009 |
| >TP53-P250A RRPILTII   | 33    | >TP53-P250A RRAILTII    | 9     | 24    |
| >TP53-P250A RRPILTIIT  | 86    | >TP53-P250A RRAILTIIT   | 52    | 34    |
| >TP53-P250A RRPILTIITL | 16    | >TP53-P250A RRAILTIITL  | 17    | 1     |

|                          |      |                          |     |      |
|--------------------------|------|--------------------------|-----|------|
| >TP53-P250A RRPILTIITLE  | 129  | >TP53-P250A RRAILTIITLE  | 71  | 58   |
| >TP53-P250A RRPILTII     | 319  | >TP53-P250A RRAILTII     | 50  | 269  |
| >TP53-P250A RRPILTIIT    | 329  | >TP53-P250A RRAILTIIT    | 168 | 161  |
| >TP53-P250A RRPILTIITL   | 14   | >TP53-P250A RRAILTIITL   | 13  | 1    |
| >TP53-P250A RRPILTIITLE  | 467  | >TP53-P250A RRAILTIITLE  | 238 | 229  |
| >TP53-P250A RRPILTII     | 1621 | >TP53-P250A RRAILTII     | 478 | 1143 |
| >TP53-P250A NRRPILTIITL  | 701  | >TP53-P250A NRRAILTIITL  | 310 | 391  |
| >TP53-P250A NRRPILTII    | 281  | >TP53-P250A NRRAILTII    | 230 | 51   |
| >TP53-P250A NRRPILTIITL  | 50   | >TP53-P250A NRRAILTIITL  | 48  | 2    |
| >TP53-P250A NRRPILTII    | 224  | >TP53-P250A NRRAILTII    | 438 | 214  |
| >TP53-P250A NRRPILTIITL  | 12   | >TP53-P250A NRRAILTIITL  | 20  | 8    |
| >TP53-P250A MNRRRPILT    | 945  | >TP53-P250A MNRRRAILT    | 438 | 507  |
| >TP53-P250A MNRRRPILTI   | 35   | >TP53-P250A MNRRRAILTI   | 12  | 23   |
| >TP53-P250A MNRRRPILTII  | 200  | >TP53-P250A MNRRRAILTII  | 76  | 124  |
| >TP53-P250A MNRRRPILTIIT | 1029 | >TP53-P250A MNRRRAILTIIT | 324 | 705  |
| >TP53-P250A MNRRRPILTI   | 457  | >TP53-P250A MNRRRAILTI   | 639 | 182  |
| >TP53-P250A MNRRRPILTI   | 399  | >TP53-P250A MNRRRAILTI   | 567 | 168  |
| >TP53-P250A GMNRRRPIL    | 678  | >TP53-P250A GMNRRRAIL    | 241 | 437  |
| >TP53-P250A GMNRRRPILTI  | 185  | >TP53-P250A GMNRRRAILTI  | 267 | 82   |
| >TP53-P250A GMNRRRPILTI  | 168  | >TP53-P250A GMNRRRAILTI  | 168 | 0    |
| >TP53-P250A GMNRRRPIL    | 213  | >TP53-P250A GMNRRRAIL    | 115 | 98   |
| >TP53-P250A GMNRRRPILTI  | 61   | >TP53-P250A GMNRRRAILTI  | 73  | 12   |
| >TP53-P250A GMNRRRPILTI  | 13   | >TP53-P250A GMNRRRAILTI  | 19  | 6    |
| >TP53-P250A GMNRRRPIL    | 229  | >TP53-P250A GMNRRRAIL    | 372 | 143  |
| >TP53-P250A GMNRRRPILTI  | 10   | >TP53-P250A GMNRRRAILTI  | 21  | 11   |
| >TP53-P250A GMNRRRPILTI  | 93   | >TP53-P250A GMNRRRAILTI  | 159 | 66   |
| >TP53-P250A GMNRRRPIL    | 182  | >TP53-P250A GMNRRRAIL    | 130 | 52   |
| >TP53-P250A GMNRRRPILTI  | 21   | >TP53-P250A GMNRRRAILTI  | 20  | 1    |
| >TP53-P250A GMNRRRPILTI  | 53   | >TP53-P250A GMNRRRAILTI  | 65  | 12   |
| >TP53-P250A GMNRRRPIL    | 160  | >TP53-P250A GMNRRRAIL    | 563 | 403  |
| >TP53-P250A GMNRRRPILTI  | 66   | >TP53-P250A GMNRRRAILTI  | 57  | 9    |
| >TP53-P250A GMNRRRPILTI  | 192  | >TP53-P250A GMNRRRAILTI  | 238 | 46   |
| >TP53-P250A GMNRRRPIL    | 32   | >TP53-P250A GMNRRRAIL    | 35  | 3    |
| >TP53-P250A GMNRRRPILTI  | 43   | >TP53-P250A GMNRRRAILTI  | 34  | 9    |
| >TP53-P250A GMNRRRPILTI  | 102  | >TP53-P250A GMNRRRAILTI  | 112 | 10   |
| >TP53-P250A GMNRRRPILTI  | 147  | >TP53-P250A GMNRRRAILTI  | 175 | 28   |
| >TP53-P250A GGMNRRPIL    | 444  | >TP53-P250A GGMNRRRAIL   | 226 | 218  |
| >TP53-P250A CMGGMNRR     | 88   | >TP53-P250A CMGGMNRR     | 104 | 16   |
| >TP53-P250F PILTIITL     | 5272 | >TP53-P250F FILTIITL     | 19  | 5253 |
| >TP53-P250F PILTIITL     | 3480 | >TP53-P250F FILTIITL     | 60  | 3420 |
| >TP53-P250F PILTIITL     | 4960 | >TP53-P250F FILTIITL     | 93  | 4867 |
| >TP53-P250F PILTIITL     | 2805 | >TP53-P250F FILTIITL     | 11  | 2794 |
| >TP53-P250F PILTIITL     | 508  | >TP53-P250F FILTIITL     | 5   | 503  |

|                        |       |                        |       |       |
|------------------------|-------|------------------------|-------|-------|
| >TP53-P250F PILTIITL   | 5502  | >TP53-P250F FILTIITL   | 21    | 5481  |
| >TP53-P250F PILTIITL   | 1435  | >TP53-P250F FILTIITL   | 13    | 1422  |
| >TP53-P250F PILTIITL   | 1459  | >TP53-P250F FILTIITL   | 11    | 1448  |
| >TP53-P250F PILTIITL   | 906   | >TP53-P250F FILTIITL   | 4     | 902   |
| >TP53-P250F PILTIITL   | 6858  | >TP53-P250F FILTIITL   | 106   | 6752  |
| >TP53-P250F PILTIITL   | 13736 | >TP53-P250F FILTIITL   | 186   | 13550 |
| >TP53-P250F RPILTIITL  | 104   | >TP53-P250F RFILTIITL  | 40021 | 39917 |
| >TP53-P250F RPILTIITL  | 15738 | >TP53-P250F RFILTIITL  | 186   | 15552 |
| >TP53-P250F RPILTIITL  | 13263 | >TP53-P250F RFILTIITL  | 389   | 12874 |
| >TP53-P250F RPILTIITL  | 13996 | >TP53-P250F RFILTIITL  | 24    | 13972 |
| >TP53-P250F RPILTIITL  | 5112  | >TP53-P250F RFILTIITL  | 438   | 4674  |
| >TP53-P250F RPILTIITL  | 34    | >TP53-P250F RFILTIITL  | 18033 | 17999 |
| >TP53-P250F RPILTIITL  | 391   | >TP53-P250F RFILTIITL  | 13238 | 12847 |
| >TP53-P250F RPILTIITL  | 66    | >TP53-P250F RFILTIITL  | 4946  | 4880  |
| >TP53-P250F RPILTIITL  | 89    | >TP53-P250F RFILTIITL  | 8428  | 8339  |
| >TP53-P250F RPILTIITL  | 11999 | >TP53-P250F RFILTIITL  | 386   | 11613 |
| >TP53-P250F RPILTIITL  | 33431 | >TP53-P250F RFILTIITL  | 239   | 33192 |
| >TP53-P250F SSCMGGMNI  | 18095 | >TP53-P250F SSCMGGMNI  | 363   | 17732 |
| >TP53-P250F SSCMGGMNI  | 17877 | >TP53-P250F SSCMGGMNI  | 7     | 17870 |
| >TP53-P250F SSCMGGMNI  | 12396 | >TP53-P250F SSCMGGMNI  | 45    | 12351 |
| >TP53-P250F RRPILTII   | 5895  | >TP53-P250F RRFILTII   | 375   | 5520  |
| >TP53-P250F RRPILTIITL | 2856  | >TP53-P250F RRFILTIITL | 159   | 2697  |
| >TP53-P250F RRPILTII   | 1610  | >TP53-P250F RRFILTII   | 84    | 1526  |
| >TP53-P250F RRPILTIITL | 921   | >TP53-P250F RRFILTIITL | 43    | 878   |
| >TP53-P250F RRPILTII   | 220   | >TP53-P250F RRFILTII   | 11    | 209   |
| >TP53-P250F RRPILTIIT  | 2370  | >TP53-P250F RRFILTIIT  | 55    | 2315  |
| >TP53-P250F RRPILTIITL | 14    | >TP53-P250F RRFILTIITL | 6     | 8     |
| >TP53-P250F RRPILTIITL | 2464  | >TP53-P250F RRFILTIITL | 70    | 2394  |
| >TP53-P250F RRPILTIITL | 2520  | >TP53-P250F RRFILTIITL | 66    | 2454  |
| >TP53-P250F RRPILTIITL | 492   | >TP53-P250F RRFILTIITL | 17376 | 16884 |
| >TP53-P250F RRPILTII   | 33    | >TP53-P250F RRFILTII   | 10    | 23    |
| >TP53-P250F RRPILTIIT  | 86    | >TP53-P250F RRFILTIIT  | 40    | 46    |
| >TP53-P250F RRPILTIITL | 16    | >TP53-P250F RRFILTIITL | 12    | 4     |
| >TP53-P250F RRPILTIITL | 129   | >TP53-P250F RRFILTIITL | 53    | 76    |
| >TP53-P250F RRPILTIITL | 319   | >TP53-P250F RRFILTII   | 48    | 271   |
| >TP53-P250F RRPILTIIT  | 329   | >TP53-P250F RRFILTIIT  | 83    | 246   |
| >TP53-P250F RRPILTIITL | 14    | >TP53-P250F RRFILTIITL | 12    | 2     |
| >TP53-P250F RRPILTIITL | 467   | >TP53-P250F RRFILTIITL | 99    | 368   |
| >TP53-P250F RRPILTII   | 1621  | >TP53-P250F RRFILTII   | 203   | 1418  |
| >TP53-P250F RRPILTII   | 281   | >TP53-P250F RRFILTII   | 214   | 67    |
| >TP53-P250F RRPILTIITL | 50    | >TP53-P250F RRFILTIITL | 45    | 5     |
| >TP53-P250F RRPILTII   | 224   | >TP53-P250F RRFILTII   | 174   | 50    |
| >TP53-P250F RRPILTIITL | 12    | >TP53-P250F RRFILTIITL | 12    | 0     |

|                          |       |                           |     |       |
|--------------------------|-------|---------------------------|-----|-------|
| >TP53-P250F MNRRPILT     | 945   | >TP53-P250F MNRRFILT      | 448 | 497   |
| >TP53-P250F MNRRPILTI    | 35    | >TP53-P250F MNRRFILTII    | 14  | 21    |
| >TP53-P250F MNRRPILTIIT  | 200   | >TP53-P250F MNRRFILTIIIT  | 99  | 101   |
| >TP53-P250F MNRRPILTIIT  | 1029  | >TP53-P250F MNRRFILTIIIT  | 458 | 571   |
| >TP53-P250F MNRRPILTIIT  | 2118  | >TP53-P250F MNRRFILTIIIT  | 146 | 1972  |
| >TP53-P250F MNRRPILTIIT  | 457   | >TP53-P250F MNRRFILTIIIT  | 318 | 139   |
| >TP53-P250F MNRRPILTIIT  | 399   | >TP53-P250F MNRRFILTIIIT  | 250 | 149   |
| >TP53-P250F GMNRRPIL     | 678   | >TP53-P250F GMNRRFIL      | 75  | 603   |
| >TP53-P250F GMNRRPILTI   | 185   | >TP53-P250F GMNRRFILTII   | 194 | 9     |
| >TP53-P250F GMNRRPILTIIT | 168   | >TP53-P250F GMNRRFILTIIIT | 87  | 81    |
| >TP53-P250F GMNRRPILTIIT | 213   | >TP53-P250F GMNRRFILTIIIT | 132 | 81    |
| >TP53-P250F GMNRRPILTIIT | 728   | >TP53-P250F GMNRRFILTIIIT | 485 | 243   |
| >TP53-P250F GMNRRPILTIIT | 61    | >TP53-P250F GMNRRFILTIIIT | 63  | 2     |
| >TP53-P250F GMNRRPILTIIT | 13    | >TP53-P250F GMNRRFILTIIIT | 11  | 2     |
| >TP53-P250F GMNRRPILTIIT | 229   | >TP53-P250F GMNRRFILTIIIT | 166 | 63    |
| >TP53-P250F GMNRRPILTIIT | 10    | >TP53-P250F GMNRRFILTIIIT | 14  | 4     |
| >TP53-P250F GMNRRPILTIIT | 93    | >TP53-P250F GMNRRFILTIIIT | 138 | 45    |
| >TP53-P250F GMNRRPILTIIT | 182   | >TP53-P250F GMNRRFILTIIIT | 50  | 132   |
| >TP53-P250F GMNRRPILTIIT | 21    | >TP53-P250F GMNRRFILTIIIT | 17  | 4     |
| >TP53-P250F GMNRRPILTIIT | 53    | >TP53-P250F GMNRRFILTIIIT | 52  | 1     |
| >TP53-P250F GMNRRPILTIIT | 160   | >TP53-P250F GMNRRFILTIIIT | 119 | 41    |
| >TP53-P250F GMNRRPILTIIT | 66    | >TP53-P250F GMNRRFILTIIIT | 61  | 5     |
| >TP53-P250F GMNRRPILTIIT | 192   | >TP53-P250F GMNRRFILTIIIT | 225 | 33    |
| >TP53-P250F GMNRRPILTIIT | 32    | >TP53-P250F GMNRRFILTIIIT | 25  | 7     |
| >TP53-P250F GMNRRPILTIIT | 744   | >TP53-P250F GMNRRFILTIIIT | 454 | 290   |
| >TP53-P250F GMNRRPILTIIT | 43    | >TP53-P250F GMNRRFILTIIIT | 24  | 19    |
| >TP53-P250F GMNRRPILTIIT | 102   | >TP53-P250F GMNRRFILTIIIT | 114 | 12    |
| >TP53-P250F GMNRRPILTIIT | 147   | >TP53-P250F GMNRRFILTIIIT | 124 | 23    |
| >TP53-P250F GGMNRRPIL    | 444   | >TP53-P250F GGMNRRFIL     | 577 | 133   |
| >TP53-P250F GGMNRRPILTI  | 538   | >TP53-P250F GGMNRRFILTII  | 488 | 50    |
| >TP53-P250F MGGMNRRP     | 5248  | >TP53-P250F MGGMNRRF      | 495 | 4753  |
| >TP53-P250F CMGGMNRR     | 88    | >TP53-P250F CMGGMNRR      | 77  | 11    |
| >TP53-P250F SCMGGMNR     | 24508 | >TP53-P250F SCMGGMNR      | 272 | 24236 |
| >TP53-P250F PILTIITL     | 5272  | >TP53-P250F HILTIITL      | 220 | 5052  |
| >TP53-P250F PILTIITL     | 2805  | >TP53-P250F HILTIITL      | 110 | 2695  |
| >TP53-P250F PILTIITL     | 508   | >TP53-P250F HILTIITL      | 84  | 424   |
| >TP53-P250F PILTIITL     | 5502  | >TP53-P250F HILTIITL      | 220 | 5282  |
| >TP53-P250F PILTIITL     | 1435  | >TP53-P250F HILTIITL      | 214 | 1221  |
| >TP53-P250F PILTIITL     | 1459  | >TP53-P250F HILTIITL      | 485 | 974   |
| >TP53-P250F PILTIITL     | 906   | >TP53-P250F HILTIITL      | 78  | 828   |
| >TP53-P250F PILTIITL     | 1347  | >TP53-P250F HILTIITL      | 102 | 1245  |
| >TP53-P250F PILTIITL     | 6858  | >TP53-P250F HILTIITL      | 196 | 6662  |
| >TP53-P250F PILTIITL     | 13736 | >TP53-P250F HILTIITL      | 246 | 13490 |

|                         |      |                         |       |       |
|-------------------------|------|-------------------------|-------|-------|
| >TP53-P250F RPILTIITL   | 104  | >TP53-P250F RHILTIITL   | 36507 | 36403 |
| >TP53-P250F RPILTIITL   | 34   | >TP53-P250F RHILTIITL   | 16186 | 16152 |
| >TP53-P250F RPILTIITL   | 1974 | >TP53-P250F RHILTIITL   | 200   | 1774  |
| >TP53-P250F RPILTIITL   | 391  | >TP53-P250F RHILTIITL   | 17966 | 17575 |
| >TP53-P250F RPILTIITL   | 66   | >TP53-P250F RHILTIITL   | 20    | 46    |
| >TP53-P250F RPILTIITL   | 89   | >TP53-P250F RHILTIITL   | 12419 | 12330 |
| >TP53-P250F RPILTIITL   | 975  | >TP53-P250F RHILTIITL   | 235   | 740   |
| >TP53-P250F RPILTIITL   | 915  | >TP53-P250F RHILTIITL   | 142   | 773   |
| >TP53-P250F RRPILTII    | 1610 | >TP53-P250F RRHILTII    | 263   | 1347  |
| >TP53-P250F RRPILTIITL  | 921  | >TP53-P250F RRHILTIITL  | 127   | 794   |
| >TP53-P250F RRPILTII    | 220  | >TP53-P250F RRHILTII    | 36    | 184   |
| >TP53-P250F RRPILTIIT   | 2370 | >TP53-P250F RRHILTIIT   | 335   | 2035  |
| >TP53-P250F RRPILTIITL  | 14   | >TP53-P250F RRHILTIITL  | 8     | 6     |
| >TP53-P250F RRPILTIITL  | 2464 | >TP53-P250F RRHILTIITL  | 396   | 2068  |
| >TP53-P250F RRPILTIITL  | 2520 | >TP53-P250F RRHILTIITL  | 198   | 2322  |
| >TP53-P250F RRPILTIITL  | 492  | >TP53-P250F RRHILTIITL  | 22440 | 21948 |
| >TP53-P250F RRPILTII    | 33   | >TP53-P250F RRHILTII    | 11    | 22    |
| >TP53-P250F RRPILTIIT   | 86   | >TP53-P250F RRHILTIIT   | 65    | 21    |
| >TP53-P250F RRPILTIITL  | 16   | >TP53-P250F RRHILTIITL  | 12    | 4     |
| >TP53-P250F RRPILTIITL  | 129  | >TP53-P250F RRHILTIITL  | 88    | 41    |
| >TP53-P250F RRPILTIITL  | 319  | >TP53-P250F RRHILTIITL  | 65    | 254   |
| >TP53-P250F RRPILTIIT   | 329  | >TP53-P250F RRHILTIIT   | 257   | 72    |
| >TP53-P250F RRPILTIITL  | 14   | >TP53-P250F RRHILTIITL  | 11    | 3     |
| >TP53-P250F RRPILTIITL  | 467  | >TP53-P250F RRHILTIITL  | 319   | 148   |
| >TP53-P250F NRRPILTIITL | 710  | >TP53-P250F NRRHILTIITL | 355   | 355   |
| >TP53-P250F NRRPILTII   | 281  | >TP53-P250F NRRHILTII   | 295   | 14    |
| >TP53-P250F NRRPILTIITL | 50   | >TP53-P250F NRRHILTIITL | 54    | 4     |
| >TP53-P250F NRRPILTII   | 224  | >TP53-P250F NRRHILTII   | 644   | 420   |
| >TP53-P250F NRRPILTIITL | 12   | >TP53-P250F NRRHILTIITL | 25    | 13    |
| >TP53-P250F MNRRPILT    | 945  | >TP53-P250F MNRRHILT    | 307   | 638   |
| >TP53-P250F MNRRPILTI   | 35   | >TP53-P250F MNRRHILTI   | 19    | 16    |
| >TP53-P250F MNRRPILTII  | 200  | >TP53-P250F MNRRHILTII  | 120   | 80    |
| >TP53-P250F MNRRPILTI   | 2118 | >TP53-P250F MNRRHILTI   | 25    | 2093  |
| >TP53-P250F MNRRPILTI   | 457  | >TP53-P250F MNRRHILTI   | 564   | 107   |
| >TP53-P250F MNRRPILTI   | 399  | >TP53-P250F MNRRHILTI   | 731   | 332   |
| >TP53-P250F GMNRRPIL    | 678  | >TP53-P250F GMNRRHIL    | 193   | 485   |
| >TP53-P250F GMNRRPILTI  | 185  | >TP53-P250F GMNRRHILTI  | 326   | 141   |
| >TP53-P250F GMNRRPILTI  | 168  | >TP53-P250F GMNRRHILTI  | 183   | 15    |
| >TP53-P250F GMNRRPIL    | 213  | >TP53-P250F GMNRRHIL    | 216   | 3     |
| >TP53-P250F GMNRRPILTI  | 61   | >TP53-P250F GMNRRHILTI  | 102   | 41    |
| >TP53-P250F GMNRRPILTI  | 13   | >TP53-P250F GMNRRHILTI  | 22    | 9     |
| >TP53-P250F GMNRRPIL    | 229  | >TP53-P250F GMNRRHIL    | 210   | 19    |
| >TP53-P250F GMNRRPILTI  | 10   | >TP53-P250F GMNRRHILTI  | 16    | 6     |

|                         |       |                         |       |       |
|-------------------------|-------|-------------------------|-------|-------|
| >TP53-P250F GMNRRPILTI  | 93    | >TP53-P250F GMNRRHILTI  | 137   | 44    |
| >TP53-P250F GMNRRPIL    | 182   | >TP53-P250F GMNRRHIL    | 127   | 55    |
| >TP53-P250F GMNRRPILTI  | 21    | >TP53-P250F GMNRRHILTI  | 35    | 14    |
| >TP53-P250F GMNRRPILTI  | 53    | >TP53-P250F GMNRRHILTI  | 110   | 57    |
| >TP53-P250F GMNRRPIL    | 160   | >TP53-P250F GMNRRHIL    | 313   | 153   |
| >TP53-P250F GMNRRPILTI  | 66    | >TP53-P250F GMNRRHILTI  | 110   | 44    |
| >TP53-P250F GMNRRPILTI  | 192   | >TP53-P250F GMNRRHILTI  | 339   | 147   |
| >TP53-P250F GMNRRPIL    | 32    | >TP53-P250F GMNRRHIL    | 20    | 12    |
| >TP53-P250F GMNRRPILTI  | 43    | >TP53-P250F GMNRRHILTI  | 34    | 9     |
| >TP53-P250F GMNRRPILTI  | 102   | >TP53-P250F GMNRRHILTI  | 126   | 24    |
| >TP53-P250F GMNRRPILTI  | 147   | >TP53-P250F GMNRRHILTI  | 157   | 10    |
| >TP53-P250F GMNRRPIL    | 1241  | >TP53-P250F GMNRRHIL    | 398   | 843   |
| >TP53-P250F GGMNRRPIL   | 444   | >TP53-P250F GGMNRRHIL   | 170   | 274   |
| >TP53-P250F CMGGMNRR    | 88    | >TP53-P250F CMGGMNRR    | 50    | 38    |
| >TP53-P250L PILTIITL    | 5272  | >TP53-P250L LILTIITL    | 84    | 5188  |
| >TP53-P250L PILTIITL    | 2805  | >TP53-P250L LILTIITL    | 69    | 2736  |
| >TP53-P250L PILTIITL    | 508   | >TP53-P250L LILTIITL    | 20    | 488   |
| >TP53-P250L PILTIITL    | 5502  | >TP53-P250L LILTIITL    | 178   | 5324  |
| >TP53-P250L PILTIITL    | 1435  | >TP53-P250L LILTIITL    | 78    | 1357  |
| >TP53-P250L PILTIITL    | 1459  | >TP53-P250L LILTIITL    | 60    | 1399  |
| >TP53-P250L PILTIITL    | 906   | >TP53-P250L LILTIITL    | 12    | 894   |
| >TP53-P250L RPILTIITL   | 104   | >TP53-P250L RLILTIITL   | 35659 | 35555 |
| >TP53-P250L RPILTIITL   | 16388 | >TP53-P250L RLILTIITL   | 87    | 16301 |
| >TP53-P250L RPILTIITL   | 16682 | >TP53-P250L RLILTIITL   | 399   | 16283 |
| >TP53-P250L RPILTIITL   | 15393 | >TP53-P250L RLILTIITL   | 83    | 15310 |
| >TP53-P250L RPILTIITL   | 17648 | >TP53-P250L RLILTIITL   | 6     | 17642 |
| >TP53-P250L RPILTIITL   | 17121 | >TP53-P250L RLILTIITL   | 11    | 17110 |
| >TP53-P250L RPILTIITL   | 23439 | >TP53-P250L RLILTIITL   | 35    | 23404 |
| >TP53-P250L RPILTIITL   | 24659 | >TP53-P250L RLILTIITL   | 284   | 24375 |
| >TP53-P250L RPILTIITL   | 30088 | >TP53-P250L RLILTIITL   | 8     | 30080 |
| >TP53-P250L RPILTIITL   | 5112  | >TP53-P250L RLILTIITL   | 25    | 5087  |
| >TP53-P250L RPILTIITL   | 34    | >TP53-P250L RLILTIITL   | 10583 | 10549 |
| >TP53-P250L RPILTIITL   | 1974  | >TP53-P250L RLILTIITL   | 444   | 1530  |
| >TP53-P250L RPILTIITL   | 3886  | >TP53-P250L RLILTIITL   | 150   | 3736  |
| >TP53-P250L RPILTIITL   | 391   | >TP53-P250L RLILTIITL   | 14768 | 14377 |
| >TP53-P250L RPILTIITL   | 66    | >TP53-P250L RLILTIITL   | 1099  | 1033  |
| >TP53-P250L RPILTIITL   | 89    | >TP53-P250L RLILTIITL   | 5938  | 5849  |
| >TP53-P250L RPILTIITL   | 915   | >TP53-P250L RLILTIITL   | 222   | 693   |
| >TP53-P250L SSCMGGMNI   | 17877 | >TP53-P250L SSCMGGMNI   | 31    | 17846 |
| >TP53-P250L SSCMGGMNI   | 12396 | >TP53-P250L SSCMGGMNI   | 334   | 12062 |
| >TP53-P250L RRPILTII    | 1610  | >TP53-P250L RRLILTII    | 261   | 1349  |
| >TP53-P250L RRPILTIIITL | 921   | >TP53-P250L RRLILTIIITL | 126   | 795   |
| >TP53-P250L RRPILTII    | 220   | >TP53-P250L RRLILTII    | 19    | 201   |

|                         |      |                         |       |       |
|-------------------------|------|-------------------------|-------|-------|
| >TP53-P250L RRPILTIIT   | 2370 | >TP53-P250L RRLILTIIT   | 135   | 2235  |
| >TP53-P250L RRPILTIITL  | 14   | >TP53-P250L RRLILTIITL  | 7     | 7     |
| >TP53-P250L RRPILTIITLE | 2464 | >TP53-P250L RRLILTIITLE | 176   | 2288  |
| >TP53-P250L RRPILTIITL  | 2520 | >TP53-P250L RRLILTIITL  | 135   | 2385  |
| >TP53-P250L RRPILTIITL  | 492  | >TP53-P250L RRLILTIITL  | 25627 | 25135 |
| >TP53-P250L RRPILTII    | 33   | >TP53-P250L RRLILTII    | 13    | 20    |
| >TP53-P250L RRPILTIIT   | 86   | >TP53-P250L RRLILTIIT   | 44    | 42    |
| >TP53-P250L RRPILTIITL  | 16   | >TP53-P250L RRLILTIITL  | 11    | 5     |
| >TP53-P250L RRPILTIITLE | 129  | >TP53-P250L RRLILTIITLE | 59    | 70    |
| >TP53-P250L RRPILTII    | 319  | >TP53-P250L RRLILTII    | 48    | 271   |
| >TP53-P250L RRPILTIIT   | 329  | >TP53-P250L RRLILTIIT   | 181   | 148   |
| >TP53-P250L RRPILTIITL  | 14   | >TP53-P250L RRLILTIITL  | 10    | 4     |
| >TP53-P250L RRPILTIITLE | 467  | >TP53-P250L RRLILTIITLE | 230   | 237   |
| >TP53-P250L NRRPILTII   | 281  | >TP53-P250L NRRLILTII   | 337   | 56    |
| >TP53-P250L NRRPILTIITL | 50   | >TP53-P250L NRRLILTIITL | 59    | 9     |
| >TP53-P250L NRRPILTII   | 224  | >TP53-P250L NRRLILTII   | 317   | 93    |
| >TP53-P250L NRRPILTIITL | 12   | >TP53-P250L NRRLILTIITL | 17    | 5     |
| >TP53-P250L MNRRPILTI   | 35   | >TP53-P250L MNRRLILTI   | 30    | 5     |
| >TP53-P250L MNRRPILTII  | 200  | >TP53-P250L MNRRLILTII  | 210   | 10    |
| >TP53-P250L MNRRPILTI   | 2118 | >TP53-P250L MNRRLILTI   | 225   | 1893  |
| >TP53-P250L MNRRPILTI   | 457  | >TP53-P250L MNRRLILTI   | 1034  | 577   |
| >TP53-P250L MNRRPILTI   | 399  | >TP53-P250L MNRRLILTI   | 1078  | 679   |
| >TP53-P250L GMNRRPIL    | 678  | >TP53-P250L GMNRRLIL    | 265   | 413   |
| >TP53-P250L GMNRRPILTI  | 185  | >TP53-P250L GMNRRLILTI  | 207   | 22    |
| >TP53-P250L GMNRRPILTI  | 168  | >TP53-P250L GMNRRLILTII | 76    | 92    |
| >TP53-P250L GMNRRPIL    | 213  | >TP53-P250L GMNRRLIL    | 102   | 111   |
| >TP53-P250L GMNRRPILT   | 728  | >TP53-P250L GMNRRLILT   | 179   | 549   |
| >TP53-P250L GMNRRPILTI  | 61   | >TP53-P250L GMNRRLILTI  | 64    | 3     |
| >TP53-P250L GMNRRPILTI  | 13   | >TP53-P250L GMNRRLILTII | 9     | 4     |
| >TP53-P250L GMNRRPIL    | 229  | >TP53-P250L GMNRRLIL    | 349   | 120   |
| >TP53-P250L GMNRRPILTI  | 10   | >TP53-P250L GMNRRLILTI  | 12    | 2     |
| >TP53-P250L GMNRRPILTI  | 93   | >TP53-P250L GMNRRLILTII | 124   | 31    |
| >TP53-P250L GMNRRPIL    | 182  | >TP53-P250L GMNRRLIL    | 165   | 17    |
| >TP53-P250L GMNRRPILTI  | 21   | >TP53-P250L GMNRRLILTI  | 13    | 8     |
| >TP53-P250L GMNRRPILTI  | 53   | >TP53-P250L GMNRRLILTII | 38    | 15    |
| >TP53-P250L GMNRRPIL    | 160  | >TP53-P250L GMNRRLIL    | 355   | 195   |
| >TP53-P250L GMNRRPILTI  | 66   | >TP53-P250L GMNRRLILTI  | 47    | 19    |
| >TP53-P250L GMNRRPILTI  | 192  | >TP53-P250L GMNRRLILTII | 200   | 8     |
| >TP53-P250L GMNRRPIL    | 32   | >TP53-P250L GMNRRLIL    | 38    | 6     |
| >TP53-P250L GMNRRPILT   | 744  | >TP53-P250L GMNRRLILT   | 328   | 416   |
| >TP53-P250L GMNRRPILTI  | 43   | >TP53-P250L GMNRRLILTI  | 23    | 20    |
| >TP53-P250L GMNRRPILTI  | 102  | >TP53-P250L GMNRRLILTII | 103   | 1     |
| >TP53-P250L GMNRRPILTI  | 147  | >TP53-P250L GMNRRLILTI  | 173   | 26    |



|                          |       |                         |       |       |
|--------------------------|-------|-------------------------|-------|-------|
| >TP53-P250L GGMNRRPIL    | 444   | >TP53-P250L GGMNRRLIL   | 216   | 228   |
| >TP53-P250L CMGGMNRR     | 28867 | >TP53-P250L CMGGMNRR    | 147   | 28720 |
| >TP53-P250L CMGGMNRR     | 88    | >TP53-P250L CMGGMNRR    | 175   | 87    |
| >TP53-P250M PILTIITL     | 5272  | >TP53-P250M NILTIITL    | 327   | 4945  |
| >TP53-P250M PILTIITL     | 2805  | >TP53-P250M NILTIITL    | 132   | 2673  |
| >TP53-P250M PILTIITL     | 508   | >TP53-P250M NILTIITL    | 155   | 353   |
| >TP53-P250M PILTIITL     | 5502  | >TP53-P250M NILTIITL    | 452   | 5050  |
| >TP53-P250M PILTIITL     | 1459  | >TP53-P250M NILTIITL    | 238   | 1221  |
| >TP53-P250M PILTIITL     | 906   | >TP53-P250M NILTIITL    | 450   | 456   |
| >TP53-P250M PILTIITL     | 6858  | >TP53-P250M NILTIITL    | 129   | 6729  |
| >TP53-P250M RPILTIITL    | 104   | >TP53-P250M RNILTIITL   | 30771 | 30667 |
| >TP53-P250M RPILTIITL    | 34    | >TP53-P250M RNILTIITL   | 15506 | 15472 |
| >TP53-P250M RPILTIITL    | 391   | >TP53-P250M RNILTIITL   | 17162 | 16771 |
| >TP53-P250M RPILTIITL    | 66    | >TP53-P250M RNILTIITL   | 1160  | 1094  |
| >TP53-P250M RPILTIITL    | 89    | >TP53-P250M RNILTIITL   | 11334 | 11245 |
| >TP53-P250M RPILTIITL    | 975   | >TP53-P250M RNILTIITL   | 274   | 701   |
| >TP53-P250M RPILTIITL    | 915   | >TP53-P250M RNILTIITL   | 278   | 637   |
| >TP53-P250M RRPILTII     | 1610  | >TP53-P250M RRNILTII    | 476   | 1134  |
| >TP53-P250M RRPILTIITL   | 921   | >TP53-P250M RRNILTIITL  | 237   | 684   |
| >TP53-P250M RRPILTII     | 220   | >TP53-P250M RRNILTII    | 46    | 174   |
| >TP53-P250M RRPILTIIT    | 2370  | >TP53-P250M RRNILTIIT   | 455   | 1915  |
| >TP53-P250M RRPILTIITL   | 14    | >TP53-P250M RRNILTIITL  | 8     | 6     |
| >TP53-P250M RRPILTIITL   | 2520  | >TP53-P250M RRNILTIITL  | 301   | 2219  |
| >TP53-P250M RRPILTIITL   | 492   | >TP53-P250M RRNILTIITL  | 22319 | 21827 |
| >TP53-P250M RRPILTII     | 33    | >TP53-P250M RRNILTII    | 10    | 23    |
| >TP53-P250M RRPILTIIT    | 86    | >TP53-P250M RRNILTIIT   | 89    | 3     |
| >TP53-P250M RRPILTIITL   | 16    | >TP53-P250M RRNILTIITL  | 14    | 2     |
| >TP53-P250M RRPILTIITL   | 129   | >TP53-P250M RRNILTIITL  | 123   | 6     |
| >TP53-P250M RRPILTIITL   | 319   | >TP53-P250M RRNILTII    | 46    | 273   |
| >TP53-P250M RRPILTIIT    | 329   | >TP53-P250M RRNILTIIT   | 370   | 41    |
| >TP53-P250M RRPILTIITL   | 14    | >TP53-P250M RRNILTIITL  | 11    | 3     |
| >TP53-P250M RRPILTIITL   | 467   | >TP53-P250M RRNILTIITL  | 446   | 21    |
| >TP53-P250M RRPILTIITL   | 281   | >TP53-P250M RRRNILTII   | 365   | 84    |
| >TP53-P250M RRRPILTIITL  | 50    | >TP53-P250M RRRNILTIITL | 61    | 11    |
| >TP53-P250M RRRPILTIITL  | 224   | >TP53-P250M RRRNILTII   | 486   | 262   |
| >TP53-P250M RRRPILTIITL  | 12    | >TP53-P250M RRRNILTIITL | 20    | 8     |
| >TP53-P250M MNRRPILTI    | 35    | >TP53-P250M MNRRNILTI   | 19    | 16    |
| >TP53-P250M MNRRPILTIITL | 200   | >TP53-P250M MNRRNILTII  | 129   | 71    |
| >TP53-P250M MNRRPILTI    | 2118  | >TP53-P250M MNRRNILTI   | 265   | 1853  |
| >TP53-P250M MNRRPILTI    | 457   | >TP53-P250M MNRRNILTI   | 534   | 77    |
| >TP53-P250M MNRRPILTI    | 399   | >TP53-P250M MNRRNILTI   | 1256  | 857   |
| >TP53-P250M GMNRRPIL     | 678   | >TP53-P250M GMNRRNIL    | 181   | 497   |
| >TP53-P250M GMNRRPILTI   | 185   | >TP53-P250M GMNRRNILTI  | 313   | 128   |

|                         |       |                        |       |       |
|-------------------------|-------|------------------------|-------|-------|
| >TP53-P250MGMNRRPILTI   | 168   | >TP53-P250MGMNRRNILTI  | 124   | 44    |
| >TP53-P250MGMNRRPIL     | 213   | >TP53-P250MGMNRRNIL    | 260   | 47    |
| >TP53-P250MGMNRRPILTI   | 61    | >TP53-P250MGMNRRNILTI  | 82    | 21    |
| >TP53-P250MGMNRRPILTI   | 13    | >TP53-P250MGMNRRNILTI  | 23    | 10    |
| >TP53-P250MGMNRRPIL     | 229   | >TP53-P250MGMNRRNIL    | 936   | 707   |
| >TP53-P250MGMNRRPILTI   | 10    | >TP53-P250MGMNRRNILTI  | 20    | 10    |
| >TP53-P250MGMNRRPILTI   | 93    | >TP53-P250MGMNRRNILTI  | 173   | 80    |
| >TP53-P250MGMNRRPIL     | 182   | >TP53-P250MGMNRRNIL    | 265   | 83    |
| >TP53-P250MGMNRRPILTI   | 21    | >TP53-P250MGMNRRNILTI  | 17    | 4     |
| >TP53-P250MGMNRRPILTI   | 53    | >TP53-P250MGMNRRNILTI  | 64    | 11    |
| >TP53-P250MGMNRRPIL     | 160   | >TP53-P250MGMNRRNIL    | 998   | 838   |
| >TP53-P250MGMNRRPILTI   | 66    | >TP53-P250MGMNRRNILTI  | 87    | 21    |
| >TP53-P250MGMNRRPILTI   | 192   | >TP53-P250MGMNRRNILTI  | 284   | 92    |
| >TP53-P250MGMNRRPIL     | 32    | >TP53-P250MGMNRRNIL    | 76    | 44    |
| >TP53-P250MGMNRRPILTI   | 43    | >TP53-P250MGMNRRNILTI  | 34    | 9     |
| >TP53-P250MGMNRRPILTI   | 102   | >TP53-P250MGMNRRNILTI  | 130   | 28    |
| >TP53-P250MGMNRRPILTI   | 147   | >TP53-P250MGMNRRNILTI  | 137   | 10    |
| >TP53-P250MGMNRRPIL     | 444   | >TP53-P250MGMNRRNIL    | 311   | 133   |
| >TP53-P250MCMGGMNRR     | 88    | >TP53-P250MCMGGMNRR    | 280   | 192   |
| >TP53-P250C PILTIIITL   | 5272  | >TP53-P250C QILTIITL   | 425   | 4847  |
| >TP53-P250C PILTIIITL   | 2805  | >TP53-P250C QILTIITL   | 96    | 2709  |
| >TP53-P250C PILTIIITL   | 508   | >TP53-P250C QILTIITL   | 161   | 347   |
| >TP53-P250C PILTIIITL   | 906   | >TP53-P250C QILTIITL   | 262   | 644   |
| >TP53-P250C PILTIIITL   | 1347  | >TP53-P250C QILTIITL   | 88    | 1259  |
| >TP53-P250C PILTIIITL   | 6858  | >TP53-P250C QILTIITL   | 292   | 6566  |
| >TP53-P250C RPILTIIITL  | 104   | >TP53-P250C RQILTIITL  | 34222 | 34118 |
| >TP53-P250C RPILTIIITL  | 4789  | >TP53-P250C RQILTIITL  | 24    | 4765  |
| >TP53-P250C RPILTIIITL  | 17121 | >TP53-P250C RQILTIITL  | 233   | 16888 |
| >TP53-P250C RPILTIIITL  | 5112  | >TP53-P250C RQILTIITL  | 85    | 5027  |
| >TP53-P250C RPILTIIITL  | 34    | >TP53-P250C RQILTIITL  | 17259 | 17225 |
| >TP53-P250C RPILTIIITL  | 15069 | >TP53-P250C RQILTIITL  | 136   | 14933 |
| >TP53-P250C RPILTIIITL  | 1974  | >TP53-P250C RQILTIITL  | 19    | 1955  |
| >TP53-P250C RPILTIIITL  | 12186 | >TP53-P250C RQILTIITL  | 137   | 12049 |
| >TP53-P250C RPILTIIITL  | 391   | >TP53-P250C RQILTIITL  | 15053 | 14662 |
| >TP53-P250C RPILTIIITL  | 66    | >TP53-P250C RQILTIITL  | 34    | 32    |
| >TP53-P250C RPILTIIITL  | 10873 | >TP53-P250C RQILTIITL  | 69    | 10804 |
| >TP53-P250C RPILTIIITL  | 8094  | >TP53-P250C RQILTIITL  | 81    | 8013  |
| >TP53-P250C RPILTIIITL  | 8171  | >TP53-P250C RQILTIITL  | 490   | 7681  |
| >TP53-P250C RPILTIIITL  | 89    | >TP53-P250C RQILTIITL  | 19186 | 19097 |
| >TP53-P250C RPILTIIITL  | 975   | >TP53-P250C RQILTIITL  | 95    | 880   |
| >TP53-P250C RPILTIIITL  | 915   | >TP53-P250C RQILTIITL  | 15    | 900   |
| >TP53-P250C RRPILTIIITL | 921   | >TP53-P250C RRQILTIITL | 369   | 552   |
| >TP53-P250C RRPILTII    | 220   | >TP53-P250C RRQILTII   | 38    | 182   |

|                         |      |                         |       |       |
|-------------------------|------|-------------------------|-------|-------|
| >TP53-P250C RRPILTIIT   | 2370 | >TP53-P250C RRQILTIIT   | 280   | 2090  |
| >TP53-P250C RRPILTIITL  | 14   | >TP53-P250C RRQILTIITL  | 7     | 7     |
| >TP53-P250C RRPILTIITLE | 2464 | >TP53-P250C RRQILTIITLE | 344   | 2120  |
| >TP53-P250C RRPILTIITL  | 2520 | >TP53-P250C RRQILTIITL  | 446   | 2074  |
| >TP53-P250C RRPILTIITL  | 492  | >TP53-P250C RRQILTIITL  | 21837 | 21345 |
| >TP53-P250C RRPILTII    | 33   | >TP53-P250C RRQILTII    | 8     | 25    |
| >TP53-P250C RRPILTIIT   | 86   | >TP53-P250C RRQILTIIT   | 27    | 59    |
| >TP53-P250C RRPILTIITL  | 16   | >TP53-P250C RRQILTIITL  | 9     | 7     |
| >TP53-P250C RRPILTIITLE | 129  | >TP53-P250C RRQILTIITLE | 35    | 94    |
| >TP53-P250C RRPILTII    | 319  | >TP53-P250C RRQILTII    | 36    | 283   |
| >TP53-P250C RRPILTIIT   | 329  | >TP53-P250C RRQILTIIT   | 68    | 261   |
| >TP53-P250C RRPILTIITL  | 14   | >TP53-P250C RRQILTIITL  | 8     | 6     |
| >TP53-P250C RRPILTIITLE | 467  | >TP53-P250C RRQILTIITLE | 93    | 374   |
| >TP53-P250C NRRPILTI    | 674  | >TP53-P250C NRRQILTI    | 326   | 348   |
| >TP53-P250C NRRPILTII   | 281  | >TP53-P250C NRRQILTII   | 254   | 27    |
| >TP53-P250C NRRPILTIITL | 50   | >TP53-P250C NRRQILTIITL | 53    | 3     |
| >TP53-P250C NRRPILTII   | 224  | >TP53-P250C NRRQILTII   | 353   | 129   |
| >TP53-P250C NRRPILTIIT  | 876  | >TP53-P250C NRRQILTIIT  | 444   | 432   |
| >TP53-P250C NRRPILTIITL | 12   | >TP53-P250C NRRQILTIITL | 17    | 5     |
| >TP53-P250C MNRRPILTI   | 35   | >TP53-P250C MNRRQILTI   | 16    | 19    |
| >TP53-P250C MNRRPILTII  | 200  | >TP53-P250C MNRRQILTII  | 132   | 68    |
| >TP53-P250C MNRRPILTIIT | 1029 | >TP53-P250C MNRRQILTIIT | 476   | 553   |
| >TP53-P250C MNRRPILTI   | 2118 | >TP53-P250C MNRRQILTI   | 125   | 1993  |
| >TP53-P250C MNRRPILTI   | 457  | >TP53-P250C MNRRQILTI   | 1106  | 649   |
| >TP53-P250C MNRRPILTI   | 399  | >TP53-P250C MNRRQILTI   | 1162  | 763   |
| >TP53-P250C GMNRRPIL    | 678  | >TP53-P250C GMNRRQIL    | 346   | 332   |
| >TP53-P250C GMNRRPILTI  | 185  | >TP53-P250C GMNRRQILTI  | 447   | 262   |
| >TP53-P250C GMNRRPILTI  | 168  | >TP53-P250C GMNRRQILTI  | 139   | 29    |
| >TP53-P250C GMNRRPIL    | 213  | >TP53-P250C GMNRRQIL    | 296   | 83    |
| >TP53-P250C GMNRRPILTI  | 61   | >TP53-P250C GMNRRQILTI  | 111   | 50    |
| >TP53-P250C GMNRRPILTI  | 13   | >TP53-P250C GMNRRQILTI  | 23    | 10    |
| >TP53-P250C GMNRRPIL    | 229  | >TP53-P250C GMNRRQIL    | 439   | 210   |
| >TP53-P250C GMNRRPILTI  | 10   | >TP53-P250C GMNRRQILTI  | 21    | 11    |
| >TP53-P250C GMNRRPILTI  | 93   | >TP53-P250C GMNRRQILTI  | 158   | 65    |
| >TP53-P250C GMNRRPIL    | 182  | >TP53-P250C GMNRRQIL    | 223   | 41    |
| >TP53-P250C GMNRRPILTI  | 21   | >TP53-P250C GMNRRQILTI  | 22    | 1     |
| >TP53-P250C GMNRRPILTI  | 53   | >TP53-P250C GMNRRQILTI  | 75    | 22    |
| >TP53-P250C GMNRRPIL    | 160  | >TP53-P250C GMNRRQIL    | 473   | 313   |
| >TP53-P250C GMNRRPILTI  | 66   | >TP53-P250C GMNRRQILTI  | 65    | 1     |
| >TP53-P250C GMNRRPILTI  | 192  | >TP53-P250C GMNRRQILTI  | 224   | 32    |
| >TP53-P250C GMNRRPIL    | 32   | >TP53-P250C GMNRRQIL    | 30    | 2     |
| >TP53-P250C GMNRRPILT   | 744  | >TP53-P250C GMNRRQILT   | 472   | 272   |
| >TP53-P250C GMNRRPILTI  | 43   | >TP53-P250C GMNRRQILTI  | 30    | 13    |

|                        |       |                        |       |       |
|------------------------|-------|------------------------|-------|-------|
| >TP53-P250C GMNRRPILTI | 102   | >TP53-P250C GMNRRQILTI | 93    | 9     |
| >TP53-P250C GMNRRPILTI | 147   | >TP53-P250C GMNRRQILTI | 230   | 83    |
| >TP53-P250C GGMNRRPIL  | 444   | >TP53-P250C GGMNRRQIL  | 241   | 203   |
| >TP53-P250C CMGGMNRR   | 88    | >TP53-P250C CMGGMNRR   | 101   | 13    |
| >TP53-P250S PILTIITL   | 10961 | >TP53-P250S SILTIITL   | 413   | 10548 |
| >TP53-P250S PILTIITL   | 5272  | >TP53-P250S SILTIITL   | 79    | 5193  |
| >TP53-P250S PILTIITL   | 3480  | >TP53-P250S SILTIITL   | 468   | 3012  |
| >TP53-P250S PILTIITL   | 2805  | >TP53-P250S SILTIITL   | 80    | 2725  |
| >TP53-P250S PILTIITL   | 508   | >TP53-P250S SILTIITL   | 19    | 489   |
| >TP53-P250S PILTIITL   | 5502  | >TP53-P250S SILTIITL   | 140   | 5362  |
| >TP53-P250S PILTIITL   | 1435  | >TP53-P250S SILTIITL   | 26    | 1409  |
| >TP53-P250S PILTIITL   | 1459  | >TP53-P250S SILTIITL   | 329   | 1130  |
| >TP53-P250S PILTIITL   | 906   | >TP53-P250S SILTIITL   | 25    | 881   |
| >TP53-P250S PILTIITL   | 1347  | >TP53-P250S SILTIITL   | 97    | 1250  |
| >TP53-P250S PILTIITL   | 6858  | >TP53-P250S SILTIITL   | 356   | 6502  |
| >TP53-P250S RPILTIITL  | 104   | >TP53-P250S RSILTIITL  | 30428 | 30324 |
| >TP53-P250S RPILTIITL  | 15532 | >TP53-P250S RSILTIITL  | 144   | 15388 |
| >TP53-P250S RPILTIITL  | 5112  | >TP53-P250S RSILTIITL  | 40    | 5072  |
| >TP53-P250S RPILTIITL  | 34    | >TP53-P250S RSILTIITL  | 13625 | 13591 |
| >TP53-P250S RPILTIITL  | 1974  | >TP53-P250S RSILTIITL  | 267   | 1707  |
| >TP53-P250S RPILTIITL  | 3886  | >TP53-P250S RSILTIITL  | 4     | 3882  |
| >TP53-P250S RPILTIITL  | 391   | >TP53-P250S RSILTIITL  | 11379 | 10988 |
| >TP53-P250S RPILTIITL  | 66    | >TP53-P250S RSILTIITL  | 1366  | 1300  |
| >TP53-P250S RPILTIITL  | 16034 | >TP53-P250S RSILTIITL  | 71    | 15963 |
| >TP53-P250S RPILTIITL  | 5431  | >TP53-P250S RSILTIITL  | 197   | 5234  |
| >TP53-P250S RPILTIITL  | 7692  | >TP53-P250S RSILTIITL  | 472   | 7220  |
| >TP53-P250S RPILTIITL  | 89    | >TP53-P250S RSILTIITL  | 11332 | 11243 |
| >TP53-P250S RPILTIITL  | 975   | >TP53-P250S RSILTIITL  | 366   | 609   |
| >TP53-P250S RPILTIITL  | 915   | >TP53-P250S RSILTIITL  | 470   | 445   |
| >TP53-P250S RPILTIITL  | 6499  | >TP53-P250S RSILTIITL  | 149   | 6350  |
| >TP53-P250S RRPILTII   | 1610  | >TP53-P250S RRSILTII   | 439   | 1171  |
| >TP53-P250S RRPILTIITL | 921   | >TP53-P250S RRSILTIITL | 222   | 699   |
| >TP53-P250S RRPILTII   | 220   | >TP53-P250S RRSILTII   | 51    | 169   |
| >TP53-P250S RRPILTIITL | 14    | >TP53-P250S RRSILTIITL | 10    | 4     |
| >TP53-P250S RRPILTIITL | 2520  | >TP53-P250S RRSILTIITL | 154   | 2366  |
| >TP53-P250S RRPILTIITL | 492   | >TP53-P250S RRSILTIITL | 19143 | 18651 |
| >TP53-P250S RRPILTII   | 33    | >TP53-P250S RRSILTII   | 17    | 16    |
| >TP53-P250S RRPILTIIT  | 86    | >TP53-P250S RRSILTIIT  | 83    | 3     |
| >TP53-P250S RRPILTIITL | 16    | >TP53-P250S RRSILTIITL | 17    | 1     |
| >TP53-P250S RRPILTIITL | 129   | >TP53-P250S RRSILTIITL | 116   | 13    |
| >TP53-P250S RRPILTII   | 319   | >TP53-P250S RRSILTII   | 89    | 230   |
| >TP53-P250S RRPILTIIT  | 329   | >TP53-P250S RRSILTIIT  | 252   | 77    |
| >TP53-P250S RRPILTIITL | 14    | >TP53-P250S RRSILTIITL | 13    | 1     |

|                          |      |                          |     |      |
|--------------------------|------|--------------------------|-----|------|
| >TP53-P250S RRPILTIITLE  | 467  | >TP53-P250S RRSILTIITLE  | 342 | 125  |
| >TP53-P250S NRRPILTIITL  | 710  | >TP53-P250S NRRSILTIITL  | 435 | 275  |
| >TP53-P250S NRRPILTIITL  | 701  | >TP53-P250S NRRSILTIITL  | 459 | 242  |
| >TP53-P250S NRRPILTII    | 281  | >TP53-P250S NRRSILTII    | 328 | 47   |
| >TP53-P250S NRRPILTIITL  | 50   | >TP53-P250S NRRSILTIITL  | 56  | 6    |
| >TP53-P250S NRRPILTII    | 224  | >TP53-P250S NRRSILTII    | 731 | 507  |
| >TP53-P250S NRRPILTIITL  | 12   | >TP53-P250S NRRSILTIITL  | 28  | 16   |
| >TP53-P250S MNRRRPILT    | 945  | >TP53-P250S MNRRRSILT    | 291 | 654  |
| >TP53-P250S MNRRRPILTI   | 35   | >TP53-P250S MNRRRSILTI   | 15  | 20   |
| >TP53-P250S MNRRRPILTII  | 200  | >TP53-P250S MNRRRSILTII  | 103 | 97   |
| >TP53-P250S MNRRRPILTIIT | 1029 | >TP53-P250S MNRRRSILTIIT | 399 | 630  |
| >TP53-P250S MNRRRPILTI   | 2118 | >TP53-P250S MNRRRSILTI   | 297 | 1821 |
| >TP53-P250S MNRRRPILTI   | 457  | >TP53-P250S MNRRRSILTI   | 163 | 294  |
| >TP53-P250S MNRRRPILTII  | 821  | >TP53-P250S MNRRRSILTII  | 356 | 465  |
| >TP53-P250S MNRRRPILTI   | 399  | >TP53-P250S MNRRRSILTI   | 642 | 243  |
| >TP53-P250S GMNRRRPIL    | 678  | >TP53-P250S GMNRRRSIL    | 246 | 432  |
| >TP53-P250S GMNRRRPILTI  | 185  | >TP53-P250S GMNRRRSILTI  | 256 | 71   |
| >TP53-P250S GMNRRRPILTI  | 168  | >TP53-P250S GMNRRRSILTII | 103 | 65   |
| >TP53-P250S GMNRRRPIL    | 213  | >TP53-P250S GMNRRRSIL    | 82  | 131  |
| >TP53-P250S GMNRRRPILTI  | 61   | >TP53-P250S GMNRRRSILTI  | 54  | 7    |
| >TP53-P250S GMNRRRPILTI  | 13   | >TP53-P250S GMNRRRSILTII | 13  | 0    |
| >TP53-P250S GMNRRRPIL    | 229  | >TP53-P250S GMNRRRSIL    | 484 | 255  |
| >TP53-P250S GMNRRRPILTI  | 10   | >TP53-P250S GMNRRRSILTI  | 18  | 8    |
| >TP53-P250S GMNRRRPILTI  | 93   | >TP53-P250S GMNRRRSILTII | 136 | 43   |
| >TP53-P250S GMNRRRPIL    | 182  | >TP53-P250S GMNRRRSIL    | 161 | 21   |
| >TP53-P250S GMNRRRPILTI  | 21   | >TP53-P250S GMNRRRSILTI  | 14  | 7    |
| >TP53-P250S GMNRRRPILTI  | 53   | >TP53-P250S GMNRRRSILTII | 41  | 12   |
| >TP53-P250S GMNRRRPIL    | 160  | >TP53-P250S GMNRRRSIL    | 514 | 354  |
| >TP53-P250S GMNRRRPILTI  | 66   | >TP53-P250S GMNRRRSILTI  | 53  | 13   |
| >TP53-P250S GMNRRRPILTI  | 192  | >TP53-P250S GMNRRRSILTII | 169 | 23   |
| >TP53-P250S GMNRRRPIL    | 32   | >TP53-P250S GMNRRRSIL    | 40  | 8    |
| >TP53-P250S GMNRRRPILTI  | 43   | >TP53-P250S GMNRRRSILTI  | 30  | 13   |
| >TP53-P250S GMNRRRPILTI  | 102  | >TP53-P250S GMNRRRSILTII | 110 | 8    |
| >TP53-P250S GMNRRRPILTI  | 147  | >TP53-P250S GMNRRRSILTI  | 172 | 25   |
| >TP53-P250S GGMNRRPIL    | 444  | >TP53-P250S GGMNRRSIL    | 198 | 246  |
| >TP53-P250S GGMNRRPIL    | 2885 | >TP53-P250S GGMNRRSIL    | 65  | 2820 |
| >TP53-P250S CMGGMNRR     | 88   | >TP53-P250S CMGGMNRR     | 143 | 55   |
| >TP53-P250T PILTIITL     | 5272 | >TP53-P250T TILTIITL     | 174 | 5098 |
| >TP53-P250T PILTIITL     | 2805 | >TP53-P250T TILTIITL     | 127 | 2678 |
| >TP53-P250T PILTIITL     | 508  | >TP53-P250T TILTIITL     | 90  | 418  |
| >TP53-P250T PILTIITL     | 1435 | >TP53-P250T TILTIITL     | 229 | 1206 |
| >TP53-P250T PILTIITL     | 1459 | >TP53-P250T TILTIITL     | 349 | 1110 |
| >TP53-P250T PILTIITL     | 906  | >TP53-P250T TILTIITL     | 102 | 804  |

|                         |       |                         |       |       |
|-------------------------|-------|-------------------------|-------|-------|
| >TP53-P250T PILTIITL    | 1347  | >TP53-P250T TILTIITL    | 250   | 1097  |
| >TP53-P250T PILTIITL    | 6858  | >TP53-P250T TILTIITL    | 193   | 6665  |
| >TP53-P250T RPILTIITL   | 104   | >TP53-P250T RTILTIITL   | 33499 | 33395 |
| >TP53-P250T RPILTIITL   | 4789  | >TP53-P250T RTILTIITL   | 380   | 4409  |
| >TP53-P250T RPILTIITL   | 17457 | >TP53-P250T RTILTIITL   | 254   | 17203 |
| >TP53-P250T RPILTIITL   | 15532 | >TP53-P250T RTILTIITL   | 62    | 15470 |
| >TP53-P250T RPILTIITL   | 5112  | >TP53-P250T RTILTIITL   | 14    | 5098  |
| >TP53-P250T RPILTIITL   | 34    | >TP53-P250T RTILTIITL   | 10456 | 10422 |
| >TP53-P250T RPILTIITL   | 3886  | >TP53-P250T RTILTIITL   | 3     | 3883  |
| >TP53-P250T RPILTIITL   | 391   | >TP53-P250T RTILTIITL   | 14199 | 13808 |
| >TP53-P250T RPILTIITL   | 66    | >TP53-P250T RTILTIITL   | 2584  | 2518  |
| >TP53-P250T RPILTIITL   | 16034 | >TP53-P250T RTILTIITL   | 106   | 15928 |
| >TP53-P250T RPILTIITL   | 5431  | >TP53-P250T RTILTIITL   | 80    | 5351  |
| >TP53-P250T RPILTIITL   | 7692  | >TP53-P250T RTILTIITL   | 148   | 7544  |
| >TP53-P250T RPILTIITL   | 89    | >TP53-P250T RTILTIITL   | 6167  | 6078  |
| >TP53-P250T RPILTIITL   | 975   | >TP53-P250T RTILTIITL   | 387   | 588   |
| >TP53-P250T RPILTIITL   | 915   | >TP53-P250T RTILTIITL   | 416   | 499   |
| >TP53-P250T RPILTIITL   | 6499  | >TP53-P250T RTILTIITL   | 91    | 6408  |
| >TP53-P250T RRPILTIITL  | 921   | >TP53-P250T RRTILTIITL  | 421   | 500   |
| >TP53-P250T RRPILTII    | 220   | >TP53-P250T RRTILTII    | 36    | 184   |
| >TP53-P250T RRPILTIIT   | 2370  | >TP53-P250T RRTILTIIT   | 293   | 2077  |
| >TP53-P250T RRPILTIITL  | 14    | >TP53-P250T RRTILTIITL  | 8     | 6     |
| >TP53-P250T RRPILTIITL  | 2464  | >TP53-P250T RRTILTIITL  | 365   | 2099  |
| >TP53-P250T RRPILTIITL  | 492   | >TP53-P250T RRTILTIITL  | 10974 | 10482 |
| >TP53-P250T RRPILTII    | 33    | >TP53-P250T RRTILTII    | 12    | 21    |
| >TP53-P250T RRPILTIIT   | 86    | >TP53-P250T RRTILTIIT   | 54    | 32    |
| >TP53-P250T RRPILTIITL  | 16    | >TP53-P250T RRTILTIITL  | 15    | 1     |
| >TP53-P250T RRPILTIITL  | 129   | >TP53-P250T RRTILTIITL  | 76    | 53    |
| >TP53-P250T RRPILTII    | 319   | >TP53-P250T RRTILTII    | 49    | 270   |
| >TP53-P250T RRPILTIIT   | 329   | >TP53-P250T RRTILTIIT   | 240   | 89    |
| >TP53-P250T RRPILTIITL  | 14    | >TP53-P250T RRTILTIITL  | 11    | 3     |
| >TP53-P250T RRPILTIITL  | 467   | >TP53-P250T RRTILTIITL  | 338   | 129   |
| >TP53-P250T NRRPILTI    | 674   | >TP53-P250T NRRTILTI    | 203   | 471   |
| >TP53-P250T NRRPILTII   | 281   | >TP53-P250T NRRTILTII   | 185   | 96    |
| >TP53-P250T NRRPILTIITL | 50    | >TP53-P250T NRRTILTIITL | 42    | 8     |
| >TP53-P250T NRRPILTII   | 224   | >TP53-P250T NRRTILTII   | 486   | 262   |
| >TP53-P250T NRRPILTIITL | 12    | >TP53-P250T NRRTILTIITL | 20    | 8     |
| >TP53-P250T MNRRPILT    | 945   | >TP53-P250T MNRRTILT    | 293   | 652   |
| >TP53-P250T MNRRPILTI   | 35    | >TP53-P250T MNRRTILTI   | 12    | 23    |
| >TP53-P250T MNRRPILTII  | 200   | >TP53-P250T MNRRTILTII  | 85    | 115   |
| >TP53-P250T MNRRPILTIIT | 1029  | >TP53-P250T MNRRTILTIIT | 332   | 697   |
| >TP53-P250T MNRRPILTI   | 2118  | >TP53-P250T MNRRTILTI   | 285   | 1833  |
| >TP53-P250T MNRRPILTI   | 457   | >TP53-P250T MNRRTILTI   | 290   | 167   |

|                                    |      |                                    |     |      |
|------------------------------------|------|------------------------------------|-----|------|
| >TP53-P250T MNRRPILTI              | 399  | >TP53-P250T MNRRTILTI              | 557 | 158  |
| >TP53-P250T GMNRRPIL               | 678  | >TP53-P250T GMNRRTIL               | 147 | 531  |
| >TP53-P250T GMNRRPILTI             | 185  | >TP53-P250T GMNRRTILTI             | 231 | 46   |
| >TP53-P250T GMNRRPILTI             | 168  | >TP53-P250T GMNRRTILTI             | 82  | 86   |
| >TP53-P250T GMNRRPIL               | 213  | >TP53-P250T GMNRRTIL               | 59  | 154  |
| >TP53-P250T GMNRRPILT              | 728  | >TP53-P250T GMNRRTILT              | 421 | 307  |
| >TP53-P250T GMNRRPILTI             | 61   | >TP53-P250T GMNRRTILTI             | 52  | 9    |
| >TP53-P250T GMNRRPILTI             | 13   | >TP53-P250T GMNRRTILTI             | 10  | 3    |
| >TP53-P250T GMNRRPIL               | 229  | >TP53-P250T GMNRRTIL               | 532 | 303  |
| >TP53-P250T GMNRRPILTI             | 10   | >TP53-P250T GMNRRTILTI             | 15  | 5    |
| >TP53-P250T GMNRRPILTI             | 93   | >TP53-P250T GMNRRTILTI             | 145 | 52   |
| >TP53-P250T GMNRRPIL               | 182  | >TP53-P250T GMNRRTIL               | 224 | 42   |
| >TP53-P250T GMNRRPILTI             | 21   | >TP53-P250T GMNRRTILTI             | 12  | 9    |
| >TP53-P250T GMNRRPILTI             | 53   | >TP53-P250T GMNRRTILTI             | 39  | 14   |
| >TP53-P250T GMNRRPIL               | 160  | >TP53-P250T GMNRRTIL               | 438 | 278  |
| >TP53-P250T GMNRRPILTI             | 66   | >TP53-P250T GMNRRTILTI             | 48  | 18   |
| >TP53-P250T GMNRRPILTI             | 192  | >TP53-P250T GMNRRTILTI             | 190 | 2    |
| >TP53-P250T GMNRRPIL               | 32   | >TP53-P250T GMNRRTIL               | 33  | 1    |
| >TP53-P250T GMNRRPILT              | 744  | >TP53-P250T GMNRRTILT              | 442 | 302  |
| >TP53-P250T GMNRRPILTI             | 43   | >TP53-P250T GMNRRTILTI             | 24  | 19   |
| >TP53-P250T GMNRRPILTI             | 102  | >TP53-P250T GMNRRTILTI             | 100 | 2    |
| >TP53-P250T GMNRRPILTI             | 147  | >TP53-P250T GMNRRTILTI             | 90  | 57   |
| >TP53-P250T GMNRRPILTI             | 646  | >TP53-P250T GMNRRTILTI             | 356 | 290  |
| >TP53-P250T GGMNRRPIL              | 444  | >TP53-P250T GGMNRRTIL              | 279 | 165  |
| >TP53-P250T GGMNRRPIL              | 2885 | >TP53-P250T GGMNRRTIL              | 431 | 2454 |
| >TP53-P250T CMGGMNRR               | 88   | >TP53-P250T CMGGMNRR               | 131 | 43   |
| >TP53-P250T SCMGGMNR               | 994  | >TP53-P250T SCMGGMNR               | 464 | 530  |
| >TP53-P278 <sup>A</sup> NSFEVRVCAC | 7876 | >TP53-P278 <sup>A</sup> NSFEVRVCAC | 34  | 7842 |
| >TP53-P278 <sup>A</sup> CACPGRDRR  | 132  | >TP53-P278 <sup>A</sup> CACAGRDRR  | 104 | 28   |
| >TP53-P278 <sup>A</sup> RVCACPGR   | 367  | >TP53-P278 <sup>A</sup> RVCACAGR   | 413 | 46   |
| >TP53-P278 <sup>A</sup> RVCACPGRDI | 435  | >TP53-P278 <sup>A</sup> RVCACAGRDI | 496 | 61   |
| >TP53-P278 <sup>A</sup> RVCACPGR   | 40   | >TP53-P278 <sup>A</sup> RVCACAGR   | 29  | 11   |
| >TP53-P278 <sup>A</sup> RVCACPGRDI | 37   | >TP53-P278 <sup>A</sup> RVCACAGRDI | 17  | 20   |
| >TP53-P278 <sup>A</sup> RVCACPGRDI | 33   | >TP53-P278 <sup>A</sup> RVCACAGRDI | 41  | 8    |
| >TP53-P278 <sup>A</sup> RVCACPGR   | 481  | >TP53-P278 <sup>A</sup> RVCACAGR   | 190 | 291  |
| >TP53-P278 <sup>A</sup> RVCACPGRDI | 584  | >TP53-P278 <sup>A</sup> RVCACAGRDI | 322 | 262  |
| >TP53-P278 <sup>A</sup> RVCACPGRDI | 297  | >TP53-P278 <sup>A</sup> RVCACAGRDI | 277 | 20   |
| >TP53-P278 <sup>A</sup> RVCACPGR   | 66   | >TP53-P278 <sup>A</sup> RVCACAGR   | 60  | 6    |
| >TP53-P278 <sup>A</sup> RVCACPGRDI | 255  | >TP53-P278 <sup>A</sup> RVCACAGRDI | 214 | 41   |
| >TP53-P278 <sup>A</sup> RVCACPGRDI | 109  | >TP53-P278 <sup>A</sup> RVCACAGRDI | 93  | 16   |
| >TP53-P278 <sup>A</sup> EVRVCACPGF | 673  | >TP53-P278 <sup>A</sup> EVRVCACAGF | 141 | 532  |
| >TP53-P278 <sup>A</sup> EVRVCACPGF | 329  | >TP53-P278 <sup>A</sup> EVRVCACAGF | 71  | 258  |
| >TP53-P278 <sup>A</sup> EVRVCACPGF | 70   | >TP53-P278 <sup>A</sup> EVRVCACAGF | 20  | 50   |

|                        |       |                        |      |       |
|------------------------|-------|------------------------|------|-------|
| >TP53-P278A FEVRVCACP  | 1437  | >TP53-P278A FEVRVCACA  | 189  | 1248  |
| >TP53-P278A FEVRVCACPG | 370   | >TP53-P278A FEVRVCACAC | 220  | 150   |
| >TP53-P278A FEVRVCACP  | 8078  | >TP53-P278A FEVRVCACA  | 39   | 8039  |
| >TP53-P278F NSFVRCVAC  | 14774 | >TP53-P278F NSFVRCVAC  | 54   | 14720 |
| >TP53-P278F NSFVRCVAC  | 25444 | >TP53-P278F NSFVRCVAC  | 435  | 25009 |
| >TP53-P278F CACPGRDRR  | 545   | >TP53-P278F CACFGRDRR  | 319  | 226   |
| >TP53-P278F CACPGRDR   | 824   | >TP53-P278F CACFGRDR   | 326  | 498   |
| >TP53-P278F CACPGRDRR  | 132   | >TP53-P278F CACFGRDRR  | 67   | 65    |
| >TP53-P278F RVCACPGR   | 367   | >TP53-P278F RVCACFGR   | 75   | 292   |
| >TP53-P278F RVCACPGRDI | 435   | >TP53-P278F RVCACFGRDI | 248  | 187   |
| >TP53-P278F RVCACPGR   | 40    | >TP53-P278F RVCACFGR   | 13   | 27    |
| >TP53-P278F RVCACPGRDI | 37    | >TP53-P278F RVCACFGRDI | 8    | 29    |
| >TP53-P278F RVCACPGRDI | 33    | >TP53-P278F RVCACFGRDI | 21   | 12    |
| >TP53-P278F RVCACPGR   | 481   | >TP53-P278F RVCACFGR   | 136  | 345   |
| >TP53-P278F RVCACPGRDI | 584   | >TP53-P278F RVCACFGRDI | 280  | 304   |
| >TP53-P278F RVCACPGRDI | 297   | >TP53-P278F RVCACFGRDI | 1425 | 1128  |
| >TP53-P278F RVCACPGR   | 66    | >TP53-P278F RVCACFGR   | 39   | 27    |
| >TP53-P278F RVCACPGRDI | 255   | >TP53-P278F RVCACFGRDI | 76   | 179   |
| >TP53-P278F RVCACPGRDI | 109   | >TP53-P278F RVCACFGRDI | 73   | 36    |
| >TP53-P278F EVRVCACP   | 17679 | >TP53-P278F EVRVCACF   | 164  | 17515 |
| >TP53-P278F EVRVCACPGF | 673   | >TP53-P278F EVRVCACFGF | 70   | 603   |
| >TP53-P278F EVRVCACPGF | 329   | >TP53-P278F EVRVCACFGF | 40   | 289   |
| >TP53-P278F EVRVCACPGF | 70    | >TP53-P278F EVRVCACFGF | 23   | 47    |
| >TP53-P278F EVRVCACPGF | 744   | >TP53-P278F EVRVCACFGF | 396  | 348   |
| >TP53-P278F FEVRVCACP  | 1437  | >TP53-P278F FEVRVCACF  | 43   | 1394  |
| >TP53-P278F FEVRVCACPG | 1728  | >TP53-P278F FEVRVCACFG | 234  | 1494  |
| >TP53-P278F FEVRVCACPG | 370   | >TP53-P278F FEVRVCACFG | 135  | 235   |
| >TP53-P278F FEVRVCACP  | 12347 | >TP53-P278F FEVRVCACF  | 79   | 12268 |
| >TP53-P278F FEVRVCACP  | 11140 | >TP53-P278F FEVRVCACF  | 52   | 11088 |
| >TP53-P278F FEVRVCACP  | 4889  | >TP53-P278F FEVRVCACF  | 367  | 4522  |
| >TP53-P278F FEVRVCACP  | 9168  | >TP53-P278F FEVRVCACF  | 349  | 8819  |
| >TP53-P278F FEVRVCACP  | 10205 | >TP53-P278F FEVRVCACF  | 126  | 10079 |
| >TP53-P278F FEVRVCACP  | 2760  | >TP53-P278F FEVRVCACF  | 115  | 2645  |
| >TP53-P278F NSFVRCVAC  | 6215  | >TP53-P278F NSFVRCVAC  | 313  | 5902  |
| >TP53-P278F CACPGRDRR  | 545   | >TP53-P278F CACHGRDRR  | 379  | 166   |
| >TP53-P278F CACPGRDRR  | 132   | >TP53-P278F CACHGRDRR  | 194  | 62    |
| >TP53-P278F RVCACPGR   | 367   | >TP53-P278F RVCACHGR   | 236  | 131   |
| >TP53-P278F RVCACPGRDI | 435   | >TP53-P278F RVCACHGRD  | 494  | 59    |
| >TP53-P278F RVCACPGR   | 40    | >TP53-P278F RVCACHGR   | 17   | 23    |
| >TP53-P278F RVCACPGRDI | 37    | >TP53-P278F RVCACHGRD  | 20   | 17    |
| >TP53-P278F RVCACPGRDI | 33    | >TP53-P278F RVCACHGRD  | 20   | 13    |
| >TP53-P278F RVCACPGR   | 481   | >TP53-P278F RVCACHGR   | 169  | 312   |
| >TP53-P278F RVCACPGRDI | 584   | >TP53-P278F RVCACHGRD  | 326  | 258   |



|                        |       |                        |      |       |
|------------------------|-------|------------------------|------|-------|
| >TP53-P278F RVCACPGRDI | 297   | >TP53-P278F RVCACHGRD  | 1588 | 1291  |
| >TP53-P278F RVCACPGR   | 66    | >TP53-P278F RVCACHGR   | 37   | 29    |
| >TP53-P278F RVCACPGRDI | 255   | >TP53-P278F RVCACHGRD  | 163  | 92    |
| >TP53-P278F RVCACPGRDI | 109   | >TP53-P278F RVCACHGRD  | 90   | 19    |
| >TP53-P278F EVRVCACPGF | 673   | >TP53-P278F EVRVCACHGI | 147  | 526   |
| >TP53-P278F EVRVCACPGF | 329   | >TP53-P278F EVRVCACHGI | 95   | 234   |
| >TP53-P278F EVRVCACPGF | 70    | >TP53-P278F EVRVCACHGI | 55   | 15    |
| >TP53-P278F EVRVCACPGF | 744   | >TP53-P278F EVRVCACHGI | 338  | 406   |
| >TP53-P278F FEVRVCACPC | 370   | >TP53-P278F FEVRVCACHC | 180  | 190   |
| >TP53-P278L NSFVRCAC   | 7876  | >TP53-P278L NSFVRCAC   | 28   | 7848  |
| >TP53-P278L NSFVRCAC   | 23838 | >TP53-P278L NSFVRCAC   | 397  | 23441 |
| >TP53-P278L CACPGRDRR  | 545   | >TP53-P278L CACLGRDRR  | 361  | 184   |
| >TP53-P278L CACPGRDRR  | 132   | >TP53-P278L CACLGRDRR  | 225  | 93    |
| >TP53-P278L RVCACPGR   | 367   | >TP53-P278L RVCACLGR   | 187  | 180   |
| >TP53-P278L RVCACPGRDI | 435   | >TP53-P278L RVCACLGRDF | 474  | 39    |
| >TP53-P278L RVCACPGR   | 40    | >TP53-P278L RVCACLGR   | 41   | 1     |
| >TP53-P278L RVCACPGRDI | 37    | >TP53-P278L RVCACLGRDF | 13   | 24    |
| >TP53-P278L RVCACPGRDI | 33    | >TP53-P278L RVCACLGRDF | 27   | 6     |
| >TP53-P278L RVCACPGR   | 481   | >TP53-P278L RVCACLGR   | 552  | 71    |
| >TP53-P278L RVCACPGRDI | 297   | >TP53-P278L RVCACLGRDF | 1164 | 867   |
| >TP53-P278L RVCACPGR   | 66    | >TP53-P278L RVCACLGR   | 46   | 20    |
| >TP53-P278L RVCACPGRDI | 255   | >TP53-P278L RVCACLGRDF | 205  | 50    |
| >TP53-P278L RVCACPGRDI | 109   | >TP53-P278L RVCACLGRDF | 121  | 12    |
| >TP53-P278L EVRVCACPGF | 673   | >TP53-P278L EVRVCACLGF | 247  | 426   |
| >TP53-P278L EVRVCACPGF | 329   | >TP53-P278L EVRVCACLGF | 70   | 259   |
| >TP53-P278L EVRVCACPGF | 70    | >TP53-P278L EVRVCACLGF | 44   | 26    |
| >TP53-P278L EVRVCACPGF | 744   | >TP53-P278L EVRVCACLGF | 427  | 317   |
| >TP53-P278L FEVRVCACP  | 1437  | >TP53-P278L FEVRVCACL  | 21   | 1416  |
| >TP53-P278L FEVRVCACPC | 370   | >TP53-P278L FEVRVCACLG | 478  | 108   |
| >TP53-P278L FEVRVCACP  | 26793 | >TP53-P278L FEVRVCACL  | 476  | 26317 |
| >TP53-P278L FEVRVCACP  | 4889  | >TP53-P278L FEVRVCACL  | 36   | 4853  |
| >TP53-P278L FEVRVCACP  | 8845  | >TP53-P278L FEVRVCACL  | 462  | 8383  |
| >TP53-P278L FEVRVCACP  | 2760  | >TP53-P278L FEVRVCACL  | 33   | 2727  |
| >TP53-P278F NSFVRCAC   | 16291 | >TP53-P278F NSFVRCAC   | 55   | 16236 |
| >TP53-P278F NSFVRCAC   | 12979 | >TP53-P278F NSFVRCAC   | 13   | 12966 |
| >TP53-P278F NSFVRCAC   | 6215  | >TP53-P278F NSFVRCAC   | 3    | 6212  |
| >TP53-P278F CACPGRDRR  | 132   | >TP53-P278F CACRGRDRR  | 161  | 29    |
| >TP53-P278F RVCACPGR   | 367   | >TP53-P278F RVCACRGR   | 940  | 573   |
| >TP53-P278F RVCACPGRDI | 435   | >TP53-P278F RVCACRGRDI | 493  | 58    |
| >TP53-P278F RVCACPGR   | 40    | >TP53-P278F RVCACRGR   | 36   | 4     |
| >TP53-P278F RVCACPGRDI | 37    | >TP53-P278F RVCACRGRDI | 9    | 28    |
| >TP53-P278F RVCACPGRDI | 33    | >TP53-P278F RVCACRGRDI | 20   | 13    |
| >TP53-P278F RVCACPGR   | 481   | >TP53-P278F RVCACRGR   | 590  | 109   |

|                        |       |                        |     |       |
|------------------------|-------|------------------------|-----|-------|
| >TP53-P278F RVCACPGRDI | 584   | >TP53-P278F RVCACRGRDI | 330 | 254   |
| >TP53-P278F RVCACPGRDI | 297   | >TP53-P278F RVCACRGRDI | 424 | 127   |
| >TP53-P278F RVCACPGR   | 66    | >TP53-P278F RVCACRGR   | 98  | 32    |
| >TP53-P278F RVCACPGRDI | 255   | >TP53-P278F RVCACRGRDI | 212 | 43    |
| >TP53-P278F RVCACPGRDI | 109   | >TP53-P278F RVCACRGRDI | 111 | 2     |
| >TP53-P278F EVRVCACP   | 22659 | >TP53-P278F EVRVCACR   | 479 | 22180 |
| >TP53-P278F EVRVCACPGF | 673   | >TP53-P278F EVRVCACRGF | 201 | 472   |
| >TP53-P278F EVRVCACP   | 17888 | >TP53-P278F EVRVCACR   | 25  | 17863 |
| >TP53-P278F EVRVCACPGF | 329   | >TP53-P278F EVRVCACRGF | 189 | 140   |
| >TP53-P278F EVRVCACP   | 23153 | >TP53-P278F EVRVCACR   | 14  | 23139 |
| >TP53-P278F EVRVCACPGF | 70    | >TP53-P278F EVRVCACRGF | 225 | 155   |
| >TP53-P278F FEVRVCACP  | 36739 | >TP53-P278F FEVRVCACR  | 156 | 36583 |
| >TP53-P278F FEVRVCACPC | 370   | >TP53-P278F FEVRVCACRC | 792 | 422   |
| >TP53-P278F SFEVRVCACP | 23217 | >TP53-P278F SFEVRVCACR | 43  | 23174 |
| >TP53-P278F SFEVRVCACP | 12560 | >TP53-P278F SFEVRVCACR | 32  | 12528 |
| >TP53-P278F SFEVRVCACP | 30791 | >TP53-P278F SFEVRVCACR | 325 | 30466 |
| >TP53-P278S CACPGRDRR  | 545   | >TP53-P278S CACSGRDRR  | 494 | 51    |
| >TP53-P278S CACPGRDR   | 824   | >TP53-P278S CACSGRDR   | 484 | 340   |
| >TP53-P278S CACPGRDRR  | 132   | >TP53-P278S CACSGRDRR  | 73  | 59    |
| >TP53-P278S RVCACPGR   | 367   | >TP53-P278S RVCACSGR   | 297 | 70    |
| >TP53-P278S RVCACPGRDI | 435   | >TP53-P278S RVCACSGRDI | 425 | 10    |
| >TP53-P278S RVCACPGR   | 40    | >TP53-P278S RVCACSGR   | 34  | 6     |
| >TP53-P278S RVCACPGRDI | 37    | >TP53-P278S RVCACSGRDI | 12  | 25    |
| >TP53-P278S RVCACPGRDI | 33    | >TP53-P278S RVCACSGRDI | 32  | 1     |
| >TP53-P278S RVCACPGR   | 481   | >TP53-P278S RVCACSGR   | 225 | 256   |
| >TP53-P278S RVCACPGRDI | 584   | >TP53-P278S RVCACSGRDI | 351 | 233   |
| >TP53-P278S RVCACPGRDI | 297   | >TP53-P278S RVCACSGRDI | 422 | 125   |
| >TP53-P278S RVCACPGR   | 66    | >TP53-P278S RVCACSGR   | 98  | 32    |
| >TP53-P278S RVCACPGRDI | 255   | >TP53-P278S RVCACSGRDI | 253 | 2     |
| >TP53-P278S RVCACPGRDI | 109   | >TP53-P278S RVCACSGRDI | 112 | 3     |
| >TP53-P278S EVRVCACPGF | 673   | >TP53-P278S EVRVCACSGF | 246 | 427   |
| >TP53-P278S EVRVCACPGF | 329   | >TP53-P278S EVRVCACSGF | 87  | 242   |
| >TP53-P278S EVRVCACPGF | 70    | >TP53-P278S EVRVCACSGF | 29  | 41    |
| >TP53-P278S FEVRVCACPC | 370   | >TP53-P278S FEVRVCACSG | 226 | 144   |
| >TP53-P278T CACPGRDRR  | 132   | >TP53-P278T CACTGRDRR  | 134 | 2     |
| >TP53-P278T RVCACPGR   | 367   | >TP53-P278T RVCACTGR   | 322 | 45    |
| >TP53-P278T RVCACPGRDI | 435   | >TP53-P278T RVCACTGRDI | 343 | 92    |
| >TP53-P278T RVCACPGR   | 40    | >TP53-P278T RVCACTGR   | 29  | 11    |
| >TP53-P278T RVCACPGRDI | 37    | >TP53-P278T RVCACTGRDI | 13  | 24    |
| >TP53-P278T RVCACPGRDI | 33    | >TP53-P278T RVCACTGRDI | 33  | 0     |
| >TP53-P278T RVCACPGR   | 481   | >TP53-P278T RVCACTGR   | 229 | 252   |
| >TP53-P278T RVCACPGRDI | 584   | >TP53-P278T RVCACTGRDI | 290 | 294   |
| >TP53-P278T RVCACPGRDI | 297   | >TP53-P278T RVCACTGRDI | 948 | 651   |

|                        |       |                         |       |       |
|------------------------|-------|-------------------------|-------|-------|
| >TP53-P278T RVCACPGR   | 66    | >TP53-P278T RVCACTGR    | 52    | 14    |
| >TP53-P278T RVCACPGRDI | 255   | >TP53-P278T RVCACTGRDI  | 152   | 103   |
| >TP53-P278T RVCACPGRDI | 109   | >TP53-P278T RVCACTGRDI  | 74    | 35    |
| >TP53-P278T EVRVCACPGF | 673   | >TP53-P278T EVRVCACPGF  | 303   | 370   |
| >TP53-P278T EVRVCACPGF | 329   | >TP53-P278T EVRVCACPGF  | 129   | 200   |
| >TP53-P278T EVRVCACPGF | 70    | >TP53-P278T EVRVCACPGF  | 32    | 38    |
| >TP53-P278T FEVRVCACP  | 1437  | >TP53-P278T FEVRVCACP   | 195   | 1242  |
| >TP53-P278T FEVRVCACPC | 370   | >TP53-P278T FEVRVCACPC  | 292   | 78    |
| >TP53-P278T FEVRVCACP  | 8078  | >TP53-P278T FEVRVCACP   | 306   | 7772  |
| >TP53-P278T FEVRVCACP  | 2760  | >TP53-P278T FEVRVCACP   | 437   | 2323  |
| >TP53-P295F PHHELPPGST | 3379  | >TP53-P295F HHHHELPPGST | 455   | 2924  |
| >TP53-P295F GEPHHELPP  | 5505  | >TP53-P295F GEHHHELPP   | 448   | 5057  |
| >TP53-P295F GEPHHELPPC | 6261  | >TP53-P295F GEHHHELPPC  | 489   | 5772  |
| >TP53-P295F KKGEPHHEL  | 167   | >TP53-P295F KKGEHHHEL   | 219   | 52    |
| >TP53-P295F RKKGEPHHEL | 62    | >TP53-P295F RKKGEHHHEI  | 65    | 3     |
| >TP53-P295F LRKKGEPHHE | 405   | >TP53-P295F LRKKGEHHHEI | 493   | 88    |
| >TP53-P295F LRKKGEPHHE | 321   | >TP53-P295F LRKKGEHHHEI | 184   | 137   |
| >TP53-P295L EEENLRKKGE | 8856  | >TP53-P295L EEENLRKKGE  | 98    | 8758  |
| >TP53-P295L KKGEPHHEL  | 167   | >TP53-P295L KKGELHHEL   | 469   | 302   |
| >TP53-P295L RKKGEPHHEL | 62    | >TP53-P295L RKKGELHHEL  | 127   | 65    |
| >TP53-P295L LRKKGEPHHE | 405   | >TP53-P295L LRKKGELHHE  | 543   | 138   |
| >TP53-P295L LRKKGEPHHE | 824   | >TP53-P295L LRKKGELHHE  | 425   | 399   |
| >TP53-P295L LRKKGEPHHE | 321   | >TP53-P295L LRKKGELHHE  | 134   | 187   |
| >TP53-P295L NLRKKGEP   | 8345  | >TP53-P295L NLRKKGEL    | 95    | 8250  |
| >TP53-P295L EENLRKKGEP | 3755  | >TP53-P295L EENLRKKGEL  | 32    | 3723  |
| >TP53-P295L EENLRKKGEP | 4197  | >TP53-P295L EENLRKKGEL  | 460   | 3737  |
| >TP53-P295F PHHELPPGST | 9358  | >TP53-P295F RHHELPPGST  | 144   | 9214  |
| >TP53-P295F KKGEPHHEL  | 167   | >TP53-P295F KKKGERHHEL  | 414   | 247   |
| >TP53-P295F RKKGEPHHEL | 62    | >TP53-P295F RKKGERHHEL  | 102   | 40    |
| >TP53-P295F LRKKGEPHHE | 405   | >TP53-P295F LRKKGERHHE  | 631   | 226   |
| >TP53-P295F LRKKGEPHHE | 321   | >TP53-P295F LRKKGERHHE  | 171   | 150   |
| >TP53-P295F NLRKKGEP   | 36113 | >TP53-P295F NLRKKGER    | 303   | 35810 |
| >TP53-P295S KKGEPHHEL  | 167   | >TP53-P295S KKGESHHEL   | 76    | 91    |
| >TP53-P295S RKKGEPHHEL | 62    | >TP53-P295S RKKGESHHEL  | 47    | 15    |
| >TP53-P295S LRKKGEPHHE | 405   | >TP53-P295S LRKKGESHHE  | 230   | 175   |
| >TP53-P295S LRKKGEPHHE | 321   | >TP53-P295S LRKKGESHHE  | 268   | 53    |
| >TP53-P300A PPGSTKRAL  | 44    | >TP53-P300A APGSTKRAL   | 10    | 34    |
| >TP53-P300A LPPGSTKRAL | 296   | >TP53-P300A LAPGSTKRAL  | 33190 | 32894 |
| >TP53-P300A LPPGSTKR   | 5290  | >TP53-P300A LAPGSTKR    | 298   | 4992  |
| >TP53-P300A LPPGSTKRAL | 75    | >TP53-P300A LAPGSTKRAL  | 17892 | 17817 |
| >TP53-P300A LPPGSTKRA  | 99    | >TP53-P300A LAPGSTKRA   | 9519  | 9420  |
| >TP53-P300A LPPGSTKRAL | 592   | >TP53-P300A LAPGSTKRAL  | 22    | 570   |
| >TP53-P300A ELPPGSTKRA | 2891  | >TP53-P300A ELAPGSTKRA  | 385   | 2506  |

|                        |       |                         |       |       |
|------------------------|-------|-------------------------|-------|-------|
| >TP53-P300A ELPPGSTKRA | 98    | >TP53-P300A ELAPGSTKRA  | 36    | 62    |
| >TP53-P300A ELPPGSTKRA | 151   | >TP53-P300A ELAPGSTKRA  | 62    | 89    |
| >TP53-P300A ELPPGSTK   | 3265  | >TP53-P300A ELAPGSTK    | 391   | 2874  |
| >TP53-P300A ELPPGSTK   | 689   | >TP53-P300A ELAPGSTK    | 65    | 624   |
| >TP53-P300A ELPPGSTKR  | 321   | >TP53-P300A ELAPGSTKR   | 38    | 283   |
| >TP53-P300A HELPPGST   | 796   | >TP53-P300A HELAPGST    | 259   | 537   |
| >TP53-P300A HELPPGST   | 747   | >TP53-P300A HELAPGST    | 221   | 526   |
| >TP53-P300A HELPPGSTKR | 1160  | >TP53-P300A HELAPGSTKR  | 430   | 730   |
| >TP53-P300A HELPPGSTKR | 250   | >TP53-P300A HELAPGSTKR  | 103   | 147   |
| >TP53-P300A HELPPGSTKR | 437   | >TP53-P300A HELAPGSTKR  | 365   | 72    |
| >TP53-P300L PPGSTKRAL  | 44    | >TP53-P300L LPGSTKRAL   | 9     | 35    |
| >TP53-P300L PPGSTKRA   | 5832  | >TP53-P300L LPGSTKRA    | 257   | 5575  |
| >TP53-P300L LPPGSTKRAL | 296   | >TP53-P300L LLPGSTKRAL  | 37144 | 36848 |
| >TP53-P300L LPPGSTKRAL | 23596 | >TP53-P300L LLPGSTKRAL  | 193   | 23403 |
| >TP53-P300L LPPGSTKRA  | 22525 | >TP53-P300L LLPGSTKRA   | 108   | 22417 |
| >TP53-P300L LPPGSTKRAL | 25014 | >TP53-P300L LLPGSTKRAL  | 312   | 24702 |
| >TP53-P300L LPPGSTKRA  | 27888 | >TP53-P300L LLPGSTKRA   | 271   | 27617 |
| >TP53-P300L LPPGSTKRAL | 24903 | >TP53-P300L LLPGSTKRAL  | 67    | 24836 |
| >TP53-P300L LPPGSTKRA  | 31931 | >TP53-P300L LLPGSTKRA   | 9     | 31922 |
| >TP53-P300L LPPGSTKRAL | 29820 | >TP53-P300L LLPGSTKRAL  | 11    | 29809 |
| >TP53-P300L LPPGSTKRAL | 75    | >TP53-P300L LLPGSTKRAL  | 22686 | 22611 |
| >TP53-P300L LPPGSTKRA  | 99    | >TP53-P300L LLPGSTKRA   | 27103 | 27004 |
| >TP53-P300L LPPGSTKRAL | 592   | >TP53-P300L LLPGSTKRAL  | 186   | 406   |
| >TP53-P300L RKKGEPHHEL | 5503  | >TP53-P300L RKKGEPHHEL  | 155   | 5348  |
| >TP53-P300L ELPPGSTKRA | 3168  | >TP53-P300L ELLPGSTKRA  | 444   | 2724  |
| >TP53-P300L ELPPGSTKRA | 893   | >TP53-P300L ELLPGSTKRAI | 100   | 793   |
| >TP53-P300L ELPPGSTKRA | 2349  | >TP53-P300L ELLPGSTKRAI | 423   | 1926  |
| >TP53-P300L ELPPGSTKRA | 6420  | >TP53-P300L ELLPGSTKRA  | 215   | 6205  |
| >TP53-P300L ELPPGSTKRA | 3412  | >TP53-P300L ELLPGSTKRAI | 139   | 3273  |
| >TP53-P300L ELPPGSTKRA | 98    | >TP53-P300L ELLPGSTKRA  | 43    | 55    |
| >TP53-P300L ELPPGSTKRA | 151   | >TP53-P300L ELLPGSTKRAI | 67    | 84    |
| >TP53-P300L ELPPGSTKR  | 1982  | >TP53-P300L ELLPGSTKR   | 249   | 1733  |
| >TP53-P300L ELPPGSTKR  | 321   | >TP53-P300L ELLPGSTKR   | 215   | 106   |
| >TP53-P300L ELPPGSTKRA | 6911  | >TP53-P300L ELLPGSTKRAI | 260   | 6651  |
| >TP53-P300L HELPPGST   | 796   | >TP53-P300L HELLPGST    | 41    | 755   |
| >TP53-P300L HELPPGST   | 747   | >TP53-P300L HELLPGST    | 239   | 508   |
| >TP53-P300L HELPPGSTKR | 250   | >TP53-P300L HELLPGSTKR  | 171   | 79    |
| >TP53-P300L HELPPGSTKR | 437   | >TP53-P300L HELLPGSTKR  | 572   | 135   |
| >TP53-P300L GEPHHELP   | 13852 | >TP53-P300L GEPHHELL    | 297   | 13555 |
| >TP53-P300L KKGEPHHELP | 8523  | >TP53-P300L KKGEPHHELL  | 421   | 8102  |
| >TP53-P300F PPGSTKRAL  | 44    | >TP53-P300F RPGSTKRAL   | 6     | 38    |
| >TP53-P300F LPPGSTKRAL | 296   | >TP53-P300F LRPGSTKRAL  | 34255 | 33959 |
| >TP53-P300F LPPGSTKRAL | 75    | >TP53-P300F LRPGSTKRAL  | 23331 | 23256 |

|                         |       |                         |       |       |
|-------------------------|-------|-------------------------|-------|-------|
| >TP53-P300F LPPGSTKRA   | 99    | >TP53-P300F LRPGSTKRA   | 26666 | 26567 |
| >TP53-P300F RKKGEPHHEL  | 33839 | >TP53-P300F RKKGEPHHEL  | 199   | 33640 |
| >TP53-P300F ELPPGSTKRA  | 98    | >TP53-P300F ELRPGSTKRA  | 188   | 90    |
| >TP53-P300F ELPPGSTKRA  | 151   | >TP53-P300F ELRPGSTKRA  | 229   | 78    |
| >TP53-P300F ELPPGSTK    | 3265  | >TP53-P300F ELRPGSTK    | 401   | 2864  |
| >TP53-P300F ELPPGSTKR   | 1982  | >TP53-P300F ELRPGSTKR   | 180   | 1802  |
| >TP53-P300F ELPPGSTKR   | 321   | >TP53-P300F ELRPGSTKR   | 399   | 78    |
| >TP53-P300F HELPPGST    | 796   | >TP53-P300F HELRPGST    | 280   | 516   |
| >TP53-P300F HELPPGSTKR  | 250   | >TP53-P300F HELRPGSTKR  | 144   | 106   |
| >TP53-P300F HELPPGSTKR  | 437   | >TP53-P300F HELRPGSTKR  | 860   | 423   |
| >TP53-P300F KGEPHHEL    | 23242 | >TP53-P300F KGEPHHEL    | 53    | 23189 |
| >TP53-P300F KGEPHHEL    | 29786 | >TP53-P300F KGEPHHEL    | 121   | 29665 |
| >TP53-P300F KKGEPHHEL   | 28749 | >TP53-P300F KKGEPHHEL   | 185   | 28564 |
| >TP53-P300S PPGSTKRAL   | 44    | >TP53-P300S SPGSTKRAL   | 9     | 35    |
| >TP53-P300S LPPGSTKRAL  | 296   | >TP53-P300S LSPGSTKRAL  | 32941 | 32645 |
| >TP53-P300S LPPGSTKR    | 5290  | >TP53-P300S LSPGSTKR    | 387   | 4903  |
| >TP53-P300S LPPGSTKRAL  | 75    | >TP53-P300S LSPGSTKRAL  | 16141 | 16066 |
| >TP53-P300S LPPGSTKRA   | 99    | >TP53-P300S LSPGSTKRA   | 22467 | 22368 |
| >TP53-P300S LPPGSTKRAL  | 592   | >TP53-P300S LSPGSTKRAL  | 7     | 585   |
| >TP53-P300S LPPGSTKRALI | 8521  | >TP53-P300S LSPGSTKRALI | 171   | 8350  |
| >TP53-P300S ELPPGSTKRA  | 98    | >TP53-P300S ELSPGSTKRA  | 54    | 44    |
| >TP53-P300S ELPPGSTKRA  | 151   | >TP53-P300S ELSPGSTKRA  | 90    | 61    |
| >TP53-P300S ELPPGSTK    | 3265  | >TP53-P300S ELSPGSTK    | 412   | 2853  |
| >TP53-P300S ELPPGSTK    | 689   | >TP53-P300S ELSPGSTK    | 127   | 562   |
| >TP53-P300S ELPPGSTKR   | 321   | >TP53-P300S ELSPGSTKR   | 65    | 256   |
| >TP53-P300S HELPPGST    | 796   | >TP53-P300S HELSPGST    | 317   | 479   |
| >TP53-P300S HELPPGST    | 747   | >TP53-P300S HELSPGST    | 483   | 264   |
| >TP53-P300S HELPPGSTKR  | 250   | >TP53-P300S HELSPGSTKR  | 161   | 89    |
| >TP53-P300S HELPPGSTKR  | 437   | >TP53-P300S HELSPGSTKR  | 571   | 134   |
| >TP53-P301A PPGSTKRAL   | 44    | >TP53-P301A PAGSTKRAL   | 10186 | 10142 |
| >TP53-P301A LPPGSTKRAL  | 296   | >TP53-P301A LPAGSTKRAL  | 2660  | 2364  |
| >TP53-P301A LPPGSTKRA   | 3689  | >TP53-P301A LPAGSTKRA   | 280   | 3409  |
| >TP53-P301A LPPGSTKRAL  | 75    | >TP53-P301A LPAGSTKRAL  | 53    | 22    |
| >TP53-P301A LPPGSTKRAL  | 5206  | >TP53-P301A LPAGSTKRAL  | 306   | 4900  |
| >TP53-P301A LPPGSTKRA   | 99    | >TP53-P301A LPAGSTKRA   | 30    | 69    |
| >TP53-P301A LPPGSTKRALI | 1103  | >TP53-P301A LPAGSTKRALI | 320   | 783   |
| >TP53-P301A LPPGSTKRAL  | 8166  | >TP53-P301A LPAGSTKRAL  | 146   | 8020  |
| >TP53-P301A ELPPGSTKRA  | 98    | >TP53-P301A ELPAGSTKRA  | 228   | 130   |
| >TP53-P301A ELPPGSTKRA  | 151   | >TP53-P301A ELPAGSTKRA  | 300   | 149   |
| >TP53-P301A ELPPGSTK    | 689   | >TP53-P301A ELPAGSTK    | 381   | 308   |
| >TP53-P301A ELPPGSTKR   | 321   | >TP53-P301A ELPAGSTKR   | 185   | 136   |
| >TP53-P301A HELPPGST    | 796   | >TP53-P301A HELPAGST    | 172   | 624   |
| >TP53-P301A HELPPGST    | 747   | >TP53-P301A HELPAGST    | 429   | 318   |

|                         |       |                         |       |       |
|-------------------------|-------|-------------------------|-------|-------|
| >TP53-P301A HELPPGSTKR  | 250   | >TP53-P301A HELPAGSTKR  | 246   | 4     |
| >TP53-P301A HELPPGSTKR  | 437   | >TP53-P301A HELPAGSTKR  | 361   | 76    |
| >TP53-P301A EPHHELPP    | 7646  | >TP53-P301A EPHHELPA    | 270   | 7376  |
| >TP53-P301A GEPHHELPP   | 5505  | >TP53-P301A GEPHHELPA   | 394   | 5111  |
| >TP53-P301L PPGSTKRAL   | 44    | >TP53-P301L PLGSTKRAL   | 15778 | 15734 |
| >TP53-P301L KKGEPHHELP  | 2691  | >TP53-P301L KKGEPHHELP  | 77    | 2614  |
| >TP53-P301L LPPGSTKRAL  | 296   | >TP53-P301L LPLGSTKRAL  | 350   | 54    |
| >TP53-P301L LPPGSTKRAL  | 75    | >TP53-P301L LPLGSTKRAL  | 115   | 40    |
| >TP53-P301L LPPGSTKRAL  | 5206  | >TP53-P301L LPLGSTKRAL  | 326   | 4880  |
| >TP53-P301L LPPGSTKRA   | 99    | >TP53-P301L LPLGSTKRA   | 24    | 75    |
| >TP53-P301L LPPGSTKRALI | 1103  | >TP53-P301L LPLGSTKRALI | 303   | 800   |
| >TP53-P301L LPPGSTKRAL  | 4584  | >TP53-P301L LPLGSTKRAL  | 279   | 4305  |
| >TP53-P301L ELPPGSTKRA  | 98    | >TP53-P301L ELPLGSTKRA  | 968   | 870   |
| >TP53-P301L ELPPGSTKRA  | 151   | >TP53-P301L ELPLGSTKRAI | 979   | 828   |
| >TP53-P301L ELPPGSTKR   | 321   | >TP53-P301L ELPLGSTKR   | 387   | 66    |
| >TP53-P301L HELPPGST    | 747   | >TP53-P301L HELPLGST    | 145   | 602   |
| >TP53-P301L HELPPGSTKR  | 1160  | >TP53-P301L HELPLGSTKR  | 287   | 873   |
| >TP53-P301L HELPPGSTKR  | 250   | >TP53-P301L HELPLGSTKR  | 211   | 39    |
| >TP53-P301L HELPPGSTKR  | 437   | >TP53-P301L HELPLGSTKR  | 210   | 227   |
| >TP53-P301L EPHHELPP    | 23748 | >TP53-P301L EPHHELPL    | 330   | 23418 |
| >TP53-P301L EPHHELPP    | 4209  | >TP53-P301L EPHHELPL    | 118   | 4091  |
| >TP53-P301L GEPHHELPP   | 10837 | >TP53-P301L GEPHHELPL   | 411   | 10426 |
| >TP53-P301L GEPHHELPP   | 5505  | >TP53-P301L GEPHHELPL   | 93    | 5412  |
| >TP53-P301L GEPHHELPP   | 9403  | >TP53-P301L GEPHHELPL   | 68    | 9335  |
| >TP53-P301C PPGSTKRAL   | 44    | >TP53-P301C PQGSTKRAL   | 21431 | 21387 |
| >TP53-P301C LPPGSTKRAL  | 296   | >TP53-P301C LPQGSTKRAL  | 728   | 432   |
| >TP53-P301C LPPGSTKRAL  | 75    | >TP53-P301C LPQGSTKRAL  | 56    | 19    |
| >TP53-P301C LPPGSTKRA   | 99    | >TP53-P301C LPQGSTKRA   | 210   | 111   |
| >TP53-P301C ELPPGSTKRA  | 98    | >TP53-P301C ELPQGSTKRA  | 220   | 122   |
| >TP53-P301C ELPPGSTKRA  | 151   | >TP53-P301C ELPQGSTKRA  | 280   | 129   |
| >TP53-P301C ELPPGSTKR   | 321   | >TP53-P301C ELPQGSTKR   | 267   | 54    |
| >TP53-P301C HELPPGST    | 747   | >TP53-P301C HELPQGST    | 290   | 457   |
| >TP53-P301C HELPPGSTKR  | 250   | >TP53-P301C HELPQGSTKR  | 428   | 178   |
| >TP53-P301C HELPPGSTKR  | 437   | >TP53-P301C HELPQGSTKR  | 258   | 179   |
| >TP53-P301S PPGSTKRAL   | 44    | >TP53-P301S PSGSTKRAL   | 18865 | 18821 |
| >TP53-P301S LPPGSTKRAL  | 296   | >TP53-P301S LPSGSTKRAL  | 2316  | 2020  |
| >TP53-P301S LPPGSTKRAL  | 75    | >TP53-P301S LPSGSTKRAL  | 80    | 5     |
| >TP53-P301S LPPGSTKRAL  | 5206  | >TP53-P301S LPSGSTKRAL  | 452   | 4754  |
| >TP53-P301S LPPGSTKRA   | 99    | >TP53-P301S LPSGSTKRA   | 136   | 37    |
| >TP53-P301S LPPGSTKRAL  | 8166  | >TP53-P301S LPSGSTKRAL  | 263   | 7903  |
| >TP53-P301S ELPPGSTKRA  | 98    | >TP53-P301S ELPSGSTKRA  | 265   | 167   |
| >TP53-P301S ELPPGSTKRA  | 151   | >TP53-P301S ELPSGSTKRAI | 339   | 188   |
| >TP53-P301S ELPPGSTK    | 689   | >TP53-P301S ELPSGSTK    | 256   | 433   |

|                         |       |                         |       |       |
|-------------------------|-------|-------------------------|-------|-------|
| >TP53-P301S ELPPGSTKR   | 321   | >TP53-P301S ELPSGSTKR   | 145   | 176   |
| >TP53-P301S HELPPGST    | 796   | >TP53-P301S HELPSGST    | 481   | 315   |
| >TP53-P301S HELPPGST    | 747   | >TP53-P301S HELPSGST    | 323   | 424   |
| >TP53-P301S HELPPGSTKR  | 250   | >TP53-P301S HELPSGSTKR  | 173   | 77    |
| >TP53-P301S HELPPGSTKR  | 437   | >TP53-P301S HELPSGSTKR  | 446   | 9     |
| >TP53-P301T PPGSTKRAL   | 44    | >TP53-P301T PTGSTKRAL   | 16076 | 16032 |
| >TP53-P301T LPPGSTKRAL  | 296   | >TP53-P301T LPTGSTKRAL  | 1138  | 842   |
| >TP53-P301T LPPGSTKRAL  | 75    | >TP53-P301T LPTGSTKRAL  | 63    | 12    |
| >TP53-P301T LPPGSTKRA   | 99    | >TP53-P301T LPTGSTKRA   | 35    | 64    |
| >TP53-P301T LPPGSTKRALI | 1103  | >TP53-P301T LPTGSTKRALI | 363   | 740   |
| >TP53-P301T ELPPGSTKRA  | 98    | >TP53-P301T ELPTGSTKRA  | 462   | 364   |
| >TP53-P301T ELPPGSTKRA  | 151   | >TP53-P301T ELPTGSTKRA  | 528   | 377   |
| >TP53-P301T ELPPGSTK    | 689   | >TP53-P301T ELPTGSTK    | 428   | 261   |
| >TP53-P301T ELPPGSTKR   | 321   | >TP53-P301T ELPTGSTKR   | 223   | 98    |
| >TP53-P301T HELPPGST    | 747   | >TP53-P301T HELPTGST    | 384   | 363   |
| >TP53-P301T HELPPGSTKR  | 250   | >TP53-P301T HELPTGSTKR  | 217   | 33    |
| >TP53-P301T HELPPGSTKR  | 437   | >TP53-P301T HELPTGSTKR  | 292   | 145   |
| >TP53-P301T EPHHELPP    | 4209  | >TP53-P301T EPHHELPT    | 486   | 3723  |
| >TP53-P309F PNNTSSSPQF  | 3152  | >TP53-P309F RNNTSSSPQF  | 20    | 3132  |
| >TP53-P309F LPNNTSSSP   | 7279  | >TP53-P309F LRNNTSSSP   | 454   | 6825  |
| >TP53-P309F LPNNTSSSPQ  | 5386  | >TP53-P309F LRNNTSSSPQ  | 450   | 4936  |
| >TP53-P309F LPNNTSSS    | 383   | >TP53-P309F LRNNTSSS    | 25453 | 25070 |
| >TP53-P309F LPNNTSSS    | 301   | >TP53-P309F LRNNTSSS    | 30110 | 29809 |
| >TP53-P309F LPNNTSSSPQ  | 260   | >TP53-P309F LRNNTSSSPQ  | 29230 | 28970 |
| >TP53-P309F ALPNNTSSS   | 301   | >TP53-P309F ALRNNTSSS   | 734   | 433   |
| >TP53-P309F ALPNNTSSSP  | 111   | >TP53-P309F ALRNNTSSSP  | 238   | 127   |
| >TP53-P309F ALPNNTSSS   | 15979 | >TP53-P309F ALRNNTSSS   | 166   | 15813 |
| >TP53-P309F ALPNNTSSSP  | 16804 | >TP53-P309F ALRNNTSSSP  | 362   | 16442 |
| >TP53-P309F ALPNNTSSSP  | 13312 | >TP53-P309F ALRNNTSSSP  | 70    | 13242 |
| >TP53-P309F ALPNNTSSSP  | 4602  | >TP53-P309F ALRNNTSSSP  | 415   | 4187  |
| >TP53-P309F KRALPNNT    | 597   | >TP53-P309F KRALRNNT    | 128   | 469   |
| >TP53-P309F STKRALPN    | 100   | >TP53-P309F STKRALRN    | 575   | 475   |
| >TP53-P309F STKRALPNN   | 60    | >TP53-P309F STKRALRNN   | 246   | 186   |
| >TP53-P309F STKRALPNNT  | 89    | >TP53-P309F STKRALRNNT  | 85    | 4     |
| >TP53-P309F STKRALPNNT  | 46    | >TP53-P309F STKRALRNNT  | 46    | 0     |
| >TP53-P309F GSTKRALP    | 19470 | >TP53-P309F GSTKRALR    | 75    | 19395 |
| >TP53-P309F GSTKRALP    | 35886 | >TP53-P309F GSTKRALR    | 235   | 35651 |
| >TP53-P309S PNNTSSSPQF  | 15161 | >TP53-P309S SNNTSSSPQP  | 458   | 14703 |
| >TP53-P309S PNNTSSSPQF  | 3152  | >TP53-P309S SNNTSSSPQP  | 197   | 2955  |
| >TP53-P309S LPNNTSSS    | 383   | >TP53-P309S LSNNTSSS    | 15883 | 15500 |
| >TP53-P309S LPNNTSSS    | 301   | >TP53-P309S LSNNTSSS    | 26558 | 26257 |
| >TP53-P309S LPNNTSSSPQ  | 260   | >TP53-P309S LSNNTSSSPQ  | 25400 | 25140 |
| >TP53-P309S ALPNNTSSS   | 534   | >TP53-P309S ALSNNTSSS   | 153   | 381   |

|                        |       |                        |       |       |
|------------------------|-------|------------------------|-------|-------|
| >TP53-P309S ALPNNTSS   | 663   | >TP53-P309S ALSNNTSS   | 356   | 307   |
| >TP53-P309S ALPNNTSSS  | 301   | >TP53-P309S ALSNNTSSS  | 169   | 132   |
| >TP53-P309S ALPNNTSSSP | 111   | >TP53-P309S ALSNNTSSSP | 63    | 48    |
| >TP53-P309S KRALPNNT   | 597   | >TP53-P309S KRALSNT    | 399   | 198   |
| >TP53-P309S STKRALPN   | 100   | >TP53-P309S STKRALSN   | 231   | 131   |
| >TP53-P309S STKRALPNN  | 60    | >TP53-P309S STKRALSNN  | 242   | 182   |
| >TP53-P309S STKRALPNNT | 89    | >TP53-P309S STKRALSNT  | 95    | 6     |
| >TP53-P309S STKRALPNNT | 46    | >TP53-P309S STKRALSNT  | 42    | 4     |
| >TP53-P309S STKRALPNNT | 1170  | >TP53-P309S STKRALSNT  | 489   | 681   |
| >TP53-P316L SPQPKKKPL  | 28090 | >TP53-P316L SLQPKKKPL  | 396   | 27694 |
| >TP53-P316L SPQPKKKPL  | 30603 | >TP53-P316L SLQPKKKPL  | 23    | 30580 |
| >TP53-P316L SPQPKKKPL  | 13    | >TP53-P316L SLQPKKKPL  | 6296  | 6283  |
| >TP53-P316L SPQPKKKPL  | 67    | >TP53-P316L SLQPKKKPL  | 65    | 2     |
| >TP53-P316L RALPNNTSSS | 14532 | >TP53-P316L RALPNNTSSS | 375   | 14157 |
| >TP53-P316L RALPNNTSSS | 1877  | >TP53-P316L RALPNNTSSS | 151   | 1726  |
| >TP53-P316L RALPNNTSSS | 19815 | >TP53-P316L RALPNNTSSS | 67    | 19748 |
| >TP53-P316L RALPNNTSSS | 1519  | >TP53-P316L RALPNNTSSS | 47    | 1472  |
| >TP53-P316L RALPNNTSSS | 4252  | >TP53-P316L RALPNNTSSS | 4     | 4248  |
| >TP53-P316L RALPNNTSSS | 15429 | >TP53-P316L RALPNNTSSS | 181   | 15248 |
| >TP53-P316L RALPNNTSSS | 8542  | >TP53-P316L RALPNNTSSS | 129   | 8413  |
| >TP53-P316L RALPNNTSSS | 12814 | >TP53-P316L RALPNNTSSS | 60    | 12754 |
| >TP53-P316L SSPQPKKK   | 1497  | >TP53-P316L SSLQPKKK   | 109   | 1388  |
| >TP53-P316L SSPQPKKKPL | 1296  | >TP53-P316L SSLQPKKKPL | 22    | 1274  |
| >TP53-P316L SSPQPKKKPL | 40    | >TP53-P316L SSLQPKKKPL | 13914 | 13874 |
| >TP53-P316L SSPQPKKK   | 2045  | >TP53-P316L SSLQPKKK   | 193   | 1852  |
| >TP53-P316L SSSPQPKK   | 390   | >TP53-P316L SSSLQPKK   | 714   | 324   |
| >TP53-P316L SSSPQPKK   | 28    | >TP53-P316L SSSLQPKK   | 26    | 2     |
| >TP53-P316L SSSPQPKK   | 70    | >TP53-P316L SSSLQPKK   | 76    | 6     |
| >TP53-P316L SSSPQPKK   | 73    | >TP53-P316L SSSLQPKK   | 150   | 77    |
| >TP53-P316L SSSPQPKK   | 186   | >TP53-P316L SSSLQPKK   | 548   | 362   |
| >TP53-P316L SSSPQPKKPI | 16    | >TP53-P316L SSSLQPKKPI | 56    | 40    |
| >TP53-P316L SSSPQPKK   | 109   | >TP53-P316L SSSLQPKK   | 179   | 70    |
| >TP53-P316L SSSPQPKK   | 87    | >TP53-P316L SSSLQPKK   | 223   | 136   |
| >TP53-P316L TSSSPQPK   | 326   | >TP53-P316L TSSSLQPK   | 510   | 184   |
| >TP53-P316L TSSSPQPK   | 136   | >TP53-P316L TSSSLQPKK  | 245   | 109   |
| >TP53-P316L TSSSPQPK   | 20    | >TP53-P316L TSSSLQPK   | 18    | 2     |
| >TP53-P316L TSSSPQPKK  | 33    | >TP53-P316L TSSSLQPKK  | 25    | 8     |
| >TP53-P316L TSSSPQPKK  | 60    | >TP53-P316L TSSSLQPKK  | 49    | 11    |
| >TP53-P316L TSSSPQPK   | 262   | >TP53-P316L TSSSLQPK   | 238   | 24    |
| >TP53-P316L TSSSPQPK   | 121   | >TP53-P316L TSSSLQPK   | 67    | 54    |
| >TP53-P316L TSSSPQPKK  | 125   | >TP53-P316L TSSSLQPKK  | 49    | 76    |
| >TP53-P316L TSSSPQPKK  | 208   | >TP53-P316L TSSSLQPKK  | 138   | 70    |
| >TP53-P316L TSSSPQPKK  | 724   | >TP53-P316L TSSSLQPKK  | 301   | 423   |



|                        |       |                        |      |       |
|------------------------|-------|------------------------|------|-------|
| >TP53-P316L TSSSPQPKKK | 637   | >TP53-P316L TSSSLQPKKK | 403  | 234   |
| >TP53-P316L NTSSSPQPK  | 58    | >TP53-P316L NTSSSLQPK  | 46   | 12    |
| >TP53-P316L NTSSSPQPKK | 41    | >TP53-P316L NTSSSLQPKK | 27   | 14    |
| >TP53-P316L NTSSSPQPKK | 251   | >TP53-P316L NTSSSLQPKK | 239  | 12    |
| >TP53-P316L NTSSSPQPK  | 339   | >TP53-P316L NTSSSLQPK  | 388  | 49    |
| >TP53-P316L NTSSSPQPK  | 37    | >TP53-P316L NTSSSLQPK  | 23   | 14    |
| >TP53-P316L NTSSSPQPKK | 28    | >TP53-P316L NTSSSLQPKK | 24   | 4     |
| >TP53-P316L NTSSSPQPKK | 95    | >TP53-P316L NTSSSLQPKK | 78   | 17    |
| >TP53-P316L LPNNTSSSP  | 41183 | >TP53-P316L LPNNTSSSL  | 100  | 41083 |
| >TP53-P316L LPNNTSSSP  | 9562  | >TP53-P316L LPNNTSSSL  | 13   | 9549  |
| >TP53-P316L LPNNTSSSP  | 7279  | >TP53-P316L LPNNTSSSL  | 288  | 6991  |
| >TP53-P316L LPNNTSSSP  | 2942  | >TP53-P316L LPNNTSSSL  | 41   | 2901  |
| >TP53-P316L LPNNTSSSP  | 21269 | >TP53-P316L LPNNTSSSL  | 246  | 21023 |
| >TP53-P316L LPNNTSSSP  | 3529  | >TP53-P316L LPNNTSSSL  | 66   | 3463  |
| >TP53-P316L LPNNTSSSPQ | 260   | >TP53-P316L LPNNTSSSLQ | 913  | 653   |
| >TP53-P316L LPNNTSSSP  | 9753  | >TP53-P316L LPNNTSSSL  | 182  | 9571  |
| >TP53-P316L LPNNTSSSP  | 15155 | >TP53-P316L LPNNTSSSL  | 158  | 14997 |
| >TP53-P316L LPNNTSSSP  | 21441 | >TP53-P316L LPNNTSSSL  | 307  | 21134 |
| >TP53-P316L ALPNNTSSSP | 6955  | >TP53-P316L ALPNNTSSSL | 29   | 6926  |
| >TP53-P316L ALPNNTSSSP | 6163  | >TP53-P316L ALPNNTSSSL | 45   | 6118  |
| >TP53-P316L ALPNNTSSSP | 7826  | >TP53-P316L ALPNNTSSSL | 14   | 7812  |
| >TP53-P316L ALPNNTSSSP | 12748 | >TP53-P316L ALPNNTSSSL | 13   | 12735 |
| >TP53-P316L ALPNNTSSSP | 16158 | >TP53-P316L ALPNNTSSSL | 46   | 16112 |
| >TP53-P316L ALPNNTSSSP | 23227 | >TP53-P316L ALPNNTSSSL | 88   | 23139 |
| >TP53-P316L ALPNNTSSSP | 4181  | >TP53-P316L ALPNNTSSSL | 3    | 4178  |
| >TP53-P316L ALPNNTSSSP | 111   | >TP53-P316L ALPNNTSSSL | 97   | 14    |
| >TP53-P316L ALPNNTSSSP | 11029 | >TP53-P316L ALPNNTSSSL | 294  | 10735 |
| >TP53-P318A PKKKPLDGEY | 315   | >TP53-P318A AKKKPLDGEY | 100  | 215   |
| >TP53-P318A PKKKPLDGEY | 994   | >TP53-P318A AKKKPLDGEY | 79   | 915   |
| >TP53-P318A PKKKPLDGEY | 78    | >TP53-P318A AKKKPLDGEY | 7    | 71    |
| >TP53-P318A QPKKKPLDGE | 14782 | >TP53-P318A QAKKKPLDGE | 303  | 14479 |
| >TP53-P318A QPKKKPLDGE | 303   | >TP53-P318A QAKKKPLDGE | 1493 | 1190  |
| >TP53-P318A LPNNTSSSPQ | 4798  | >TP53-P318A LPNNTSSSPQ | 499  | 4299  |
| >TP53-P318A LPNNTSSSPQ | 260   | >TP53-P318A LPNNTSSSPQ | 13   | 247   |
| >TP53-P318A SPQPKKKPL  | 13    | >TP53-P318A SPQAKKKPL  | 15   | 2     |
| >TP53-P318A SPQPKKKPL  | 67    | >TP53-P318A SPQAKKKPL  | 28   | 39    |
| >TP53-P318A SSPQPKKKPL | 40    | >TP53-P318A SSPQAKKKPL | 46   | 6     |
| >TP53-P318A SSSPQPKK   | 390   | >TP53-P318A SSSPQAKK   | 359  | 31    |
| >TP53-P318A SSSPQPKK   | 28    | >TP53-P318A SSSPQAKK   | 30   | 2     |
| >TP53-P318A SSSPQPKK   | 70    | >TP53-P318A SSSPQAKKK  | 83   | 13    |
| >TP53-P318A SSSPQPKK   | 73    | >TP53-P318A SSSPQAKK   | 142  | 69    |
| >TP53-P318A SSSPQPKKK  | 186   | >TP53-P318A SSSPQAKKK  | 358  | 172   |
| >TP53-P318A SSSPQPKKKP | 16    | >TP53-P318A SSSPQAKKKP | 15   | 1     |

|                                    |       |                                    |      |       |
|------------------------------------|-------|------------------------------------|------|-------|
| >TP53-P318 <sup>A</sup> SSSPQPKK   | 109   | >TP53-P318 <sup>A</sup> SSSPQAKK   | 220  | 111   |
| >TP53-P318 <sup>A</sup> SSSPQPKKK  | 87    | >TP53-P318 <sup>A</sup> SSSPQAKKK  | 207  | 120   |
| >TP53-P318 <sup>A</sup> TSSSPQPK   | 326   | >TP53-P318 <sup>A</sup> TSSSPQAK   | 370  | 44    |
| >TP53-P318 <sup>A</sup> TSSSPQPKK  | 136   | >TP53-P318 <sup>A</sup> TSSSPQAKK  | 122  | 14    |
| >TP53-P318 <sup>A</sup> TSSSPQPK   | 20    | >TP53-P318 <sup>A</sup> TSSSPQAK   | 35   | 15    |
| >TP53-P318 <sup>A</sup> TSSSPQPKK  | 33    | >TP53-P318 <sup>A</sup> TSSSPQAKK  | 39   | 6     |
| >TP53-P318 <sup>A</sup> TSSSPQPKKK | 60    | >TP53-P318 <sup>A</sup> TSSSPQAKKK | 86   | 26    |
| >TP53-P318 <sup>A</sup> TSSSPQPK   | 262   | >TP53-P318 <sup>A</sup> TSSSPQAK   | 798  | 536   |
| >TP53-P318 <sup>A</sup> TSSSPQPK   | 121   | >TP53-P318 <sup>A</sup> TSSSPQAK   | 109  | 12    |
| >TP53-P318 <sup>A</sup> TSSSPQPKK  | 125   | >TP53-P318 <sup>A</sup> TSSSPQAKK  | 51   | 74    |
| >TP53-P318 <sup>A</sup> TSSSPQPKKK | 208   | >TP53-P318 <sup>A</sup> TSSSPQAKKK | 109  | 99    |
| >TP53-P318 <sup>A</sup> NTSSSPQPK  | 58    | >TP53-P318 <sup>A</sup> NTSSSPQAK  | 140  | 82    |
| >TP53-P318 <sup>A</sup> NTSSSPQPKK | 41    | >TP53-P318 <sup>A</sup> NTSSSPQAKK | 70   | 29    |
| >TP53-P318 <sup>A</sup> NTSSSPQPKK | 251   | >TP53-P318 <sup>A</sup> NTSSSPQAKK | 342  | 91    |
| >TP53-P318 <sup>A</sup> NTSSSPQPK  | 339   | >TP53-P318 <sup>A</sup> NTSSSPQAK  | 1117 | 778   |
| >TP53-P318 <sup>A</sup> NTSSSPQPK  | 37    | >TP53-P318 <sup>A</sup> NTSSSPQAK  | 35   | 2     |
| >TP53-P318 <sup>A</sup> NTSSSPQPKK | 28    | >TP53-P318 <sup>A</sup> NTSSSPQAKK | 11   | 17    |
| >TP53-P318 <sup>A</sup> NTSSSPQPKK | 95    | >TP53-P318 <sup>A</sup> NTSSSPQAKK | 55   | 40    |
| >TP53-P318 <sup>A</sup> NTSSSPQP   | 11818 | >TP53-P318 <sup>A</sup> NTSSSPQA   | 409  | 11409 |
| >TP53-P322L PLDGEYFT               | 10844 | >TP53-P322L LLDGEYFT               | 222  | 10622 |
| >TP53-P322L PLDGEYFTL              | 1391  | >TP53-P322L LLDGEYFTL              | 17   | 1374  |
| >TP53-P322L PLDGEYFTLQ             | 3494  | >TP53-P322L LLDGEYFTLQ             | 37   | 3457  |
| >TP53-P322L PLDGEYFT               | 4966  | >TP53-P322L LLDGEYFT               | 118  | 4848  |
| >TP53-P322L PLDGEYFTL              | 249   | >TP53-P322L LLDGEYFTL              | 15   | 234   |
| >TP53-P322L PLDGEYFTLQ             | 1235  | >TP53-P322L LLDGEYFTLQ             | 44   | 1191  |
| >TP53-P322L PLDGEYFTLQ             | 6078  | >TP53-P322L LLDGEYFTLQ             | 385  | 5693  |
| >TP53-P322L PLDGEYFTL              | 2655  | >TP53-P322L LLDGEYFTL              | 37   | 2618  |
| >TP53-P322L PLDGEYFTLQ             | 6380  | >TP53-P322L LLDGEYFTLQ             | 224  | 6156  |
| >TP53-P322L PLDGEYFT               | 1065  | >TP53-P322L LLDGEYFT               | 35   | 1030  |
| >TP53-P322L PLDGEYFTL              | 22    | >TP53-P322L LLDGEYFTL              | 3    | 19    |
| >TP53-P322L PLDGEYFTLQ             | 68    | >TP53-P322L LLDGEYFTLQ             | 6    | 62    |
| >TP53-P322L PLDGEYFT               | 10347 | >TP53-P322L LLDGEYFT               | 473  | 9874  |
| >TP53-P322L PLDGEYFTL              | 224   | >TP53-P322L LLDGEYFTL              | 5    | 219   |
| >TP53-P322L PLDGEYFTLQ             | 2258  | >TP53-P322L LLDGEYFTLQ             | 39   | 2219  |
| >TP53-P322L PLDGEYFT               | 1092  | >TP53-P322L LLDGEYFT               | 81   | 1011  |
| >TP53-P322L PLDGEYFTL              | 22    | >TP53-P322L LLDGEYFTL              | 6    | 16    |
| >TP53-P322L PLDGEYFTLQ             | 140   | >TP53-P322L LLDGEYFTLQ             | 16   | 124   |
| >TP53-P322L PLDGEYFT               | 2473  | >TP53-P322L LLDGEYFT               | 278  | 2195  |
| >TP53-P322L PLDGEYFTL              | 23    | >TP53-P322L LLDGEYFTL              | 4    | 19    |
| >TP53-P322L PLDGEYFTLQ             | 158   | >TP53-P322L LLDGEYFTLQ             | 14   | 144   |
| >TP53-P322L PLDGEYFT               | 1464  | >TP53-P322L LLDGEYFT               | 24   | 1440  |
| >TP53-P322L PLDGEYFTL              | 11    | >TP53-P322L LLDGEYFTL              | 2    | 9     |
| >TP53-P322L PLDGEYFTLQ             | 912   | >TP53-P322L LLDGEYFTLQ             | 23   | 889   |

|                        |       |                        |       |       |
|------------------------|-------|------------------------|-------|-------|
| >TP53-P322L PLDGEYFTLQ | 111   | >TP53-P322L LLDGEYFTLQ | 5     | 106   |
| >TP53-P322L KPLDGEYF   | 296   | >TP53-P322L KLLDGEYF   | 33441 | 33145 |
| >TP53-P322L KPLDGEYFTL | 212   | >TP53-P322L KLLDGEYFTL | 32875 | 32663 |
| >TP53-P322L KPLDGEYFT  | 20813 | >TP53-P322L KLLDGEYFT  | 13    | 20800 |
| >TP53-P322L KPLDGEYFTL | 6274  | >TP53-P322L KLLDGEYFTL | 10    | 6264  |
| >TP53-P322L KPLDGEYFTL | 23748 | >TP53-P322L KLLDGEYFTL | 475   | 23273 |
| >TP53-P322L KPLDGEYFT  | 28193 | >TP53-P322L KLLDGEYFT  | 141   | 28052 |
| >TP53-P322L KPLDGEYFTL | 2526  | >TP53-P322L KLLDGEYFTL | 8     | 2518  |
| >TP53-P322L KPLDGEYFTL | 31565 | >TP53-P322L KLLDGEYFTL | 339   | 31226 |
| >TP53-P322L KPLDGEYFTL | 17566 | >TP53-P322L KLLDGEYFTL | 103   | 17463 |
| >TP53-P322L KPLDGEYF   | 11988 | >TP53-P322L KLLDGEYF   | 37    | 11951 |
| >TP53-P322L KPLDGEYFT  | 8724  | >TP53-P322L KLLDGEYFT  | 24    | 8700  |
| >TP53-P322L KPLDGEYFTL | 2581  | >TP53-P322L KLLDGEYFTL | 55    | 2526  |
| >TP53-P322L KPLDGEYFTL | 16627 | >TP53-P322L KLLDGEYFTL | 148   | 16479 |
| >TP53-P322L KPLDGEYF   | 21215 | >TP53-P322L KLLDGEYF   | 22    | 21193 |
| >TP53-P322L KPLDGEYFT  | 16482 | >TP53-P322L KLLDGEYFT  | 7     | 16475 |
| >TP53-P322L KPLDGEYFTL | 4629  | >TP53-P322L KLLDGEYFTL | 2     | 4627  |
| >TP53-P322L KPLDGEYFTL | 26256 | >TP53-P322L KLLDGEYFTL | 148   | 26108 |
| >TP53-P322L KPLDGEYF   | 21380 | >TP53-P322L KLLDGEYF   | 274   | 21106 |
| >TP53-P322L KPLDGEYFT  | 16963 | >TP53-P322L KLLDGEYFT  | 12    | 16951 |
| >TP53-P322L KPLDGEYFTL | 7466  | >TP53-P322L KLLDGEYFTL | 3     | 7463  |
| >TP53-P322L KPLDGEYFT  | 15273 | >TP53-P322L KLLDGEYFT  | 11    | 15262 |
| >TP53-P322L KPLDGEYFTL | 5456  | >TP53-P322L KLLDGEYFTL | 4     | 5452  |
| >TP53-P322L KPLDGEYFTL | 22983 | >TP53-P322L KLLDGEYFTL | 171   | 22812 |
| >TP53-P322L KPLDGEYFT  | 15869 | >TP53-P322L KLLDGEYFT  | 16    | 15853 |
| >TP53-P322L KPLDGEYFTL | 13491 | >TP53-P322L KLLDGEYFTL | 2     | 13489 |
| >TP53-P322L KPLDGEYF   | 36806 | >TP53-P322L KLLDGEYF   | 405   | 36401 |
| >TP53-P322L KPLDGEYFT  | 32710 | >TP53-P322L KLLDGEYFT  | 10    | 32700 |
| >TP53-P322L KPLDGEYFTL | 15877 | >TP53-P322L KLLDGEYFTL | 2     | 15875 |
| >TP53-P322L KPLDGEYFTL | 32853 | >TP53-P322L KLLDGEYFTL | 18    | 32835 |
| >TP53-P322L KPLDGEYF   | 12546 | >TP53-P322L KLLDGEYF   | 188   | 12358 |
| >TP53-P322L KPLDGEYFTL | 5001  | >TP53-P322L KLLDGEYFTL | 30    | 4971  |
| >TP53-P322L KPLDGEYF   | 16148 | >TP53-P322L KLLDGEYF   | 430   | 15718 |
| >TP53-P322L KPLDGEYF   | 516   | >TP53-P322L KLLDGEYF   | 60    | 456   |
| >TP53-P322L KPLDGEYF   | 7589  | >TP53-P322L KLLDGEYF   | 271   | 7318  |
| >TP53-P322L KPLDGEYFTL | 321   | >TP53-P322L KLLDGEYFTL | 3500  | 3179  |
| >TP53-P322L KPLDGEYF   | 287   | >TP53-P322L KLLDGEYF   | 29332 | 29045 |
| >TP53-P322L KPLDGEYF   | 195   | >TP53-P322L KLLDGEYF   | 21493 | 21298 |
| >TP53-P322L KPLDGEYFTL | 306   | >TP53-P322L KLLDGEYFTL | 20292 | 19986 |
| >TP53-P322L TSSSPQPKKK | 21419 | >TP53-P322L TSSSPQPKKK | 212   | 21207 |
| >TP53-P322L TSSSPQPKKK | 16620 | >TP53-P322L TSSSPQPKKK | 469   | 16151 |
| >TP53-P322L KKPLDGEY   | 504   | >TP53-P322L KKLLDGEY   | 52    | 452   |
| >TP53-P322L KKPLDGEYF  | 31    | >TP53-P322L KKLLDGEYF  | 5     | 26    |

|                         |       |                         |     |       |
|-------------------------|-------|-------------------------|-----|-------|
| >TP53-P322L KKPLDGEYFT  | 611   | >TP53-P322L KKLLDGEYFTI | 40  | 571   |
| >TP53-P322L KKKPLDGEY   | 83    | >TP53-P322L KKKLLDGEY   | 256 | 173   |
| >TP53-P322L KKKPLDGEY   | 138   | >TP53-P322L KKKLLDGEY   | 465 | 327   |
| >TP53-P322L KKKPLDGEYF  | 14    | >TP53-P322L KKKLLDGEYF  | 28  | 14    |
| >TP53-P322L PKKKPLDGEY  | 315   | >TP53-P322L PKKKLLDGEY  | 833 | 518   |
| >TP53-P322L PKKKPLDGEY  | 78    | >TP53-P322L PKKKLLDGEYI | 134 | 56    |
| >TP53-P322L QPKKKPLDGE  | 303   | >TP53-P322L QPKKKLLDGE  | 400 | 97    |
| >TP53-P322L QPKKKPLDGE  | 812   | >TP53-P322L QPKKKLLDGE  | 200 | 612   |
| >TP53-P322L SPQPKKKKP   | 24241 | >TP53-P322L SPQPKKKL    | 138 | 24103 |
| >TP53-P322L SPQPKKKPL   | 13    | >TP53-P322L SPQPKKKLL   | 195 | 182   |
| >TP53-P322L SPQPKKKPL   | 67    | >TP53-P322L SPQPKKKLL   | 636 | 569   |
| >TP53-P322L SSPQPKKKKP  | 9656  | >TP53-P322L SSPQPKKKL   | 23  | 9633  |
| >TP53-P322L SSPQPKKKPL  | 40    | >TP53-P322L SSPQPKKKLL  | 9   | 31    |
| >TP53-P322L SSPQPKKKKP  | 27203 | >TP53-P322L SSPQPKKKL   | 464 | 26739 |
| >TP53-P322L SSSPQPKKKKP | 15744 | >TP53-P322L SSSPQPKKKL  | 28  | 15716 |
| >TP53-P322L SSSPQPKKKKP | 16    | >TP53-P322L SSSPQPKKKLI | 46  | 30    |
| >TP53-P322L SSSPQPKKKKP | 9479  | >TP53-P322L SSSPQPKKKL  | 127 | 9352  |
| >TP53-P322L SSSPQPKKKKP | 528   | >TP53-P322L SSSPQPKKKLI | 353 | 175   |
| >TP53-P322F PLDGEYFT    | 10844 | >TP53-P322F RLDGEYFT    | 323 | 10521 |
| >TP53-P322F PLDGEYFTL   | 1391  | >TP53-P322F RLDGEYFTL   | 20  | 1371  |
| >TP53-P322F PLDGEYFTLQ  | 3494  | >TP53-P322F RLDGEYFTLQ  | 47  | 3447  |
| >TP53-P322F PLDGEYFT    | 4966  | >TP53-P322F RLDGEYFT    | 397 | 4569  |
| >TP53-P322F PLDGEYFTL   | 249   | >TP53-P322F RLDGEYFTL   | 19  | 230   |
| >TP53-P322F PLDGEYFTLQ  | 1235  | >TP53-P322F RLDGEYFTLQ  | 85  | 1150  |
| >TP53-P322F PLDGEYFTLQ  | 6078  | >TP53-P322F RLDGEYFTLQ  | 349 | 5729  |
| >TP53-P322F PLDGEYFTL   | 2655  | >TP53-P322F RLDGEYFTL   | 45  | 2610  |
| >TP53-P322F PLDGEYFTLQ  | 6380  | >TP53-P322F RLDGEYFTLQ  | 298 | 6082  |
| >TP53-P322F PLDGEYFT    | 1065  | >TP53-P322F RLDGEYFT    | 38  | 1027  |
| >TP53-P322F PLDGEYFTL   | 22    | >TP53-P322F RLDGEYFTL   | 3   | 19    |
| >TP53-P322F PLDGEYFTLQ  | 68    | >TP53-P322F RLDGEYFTLQ  | 6   | 62    |
| >TP53-P322F PLDGEYFTL   | 224   | >TP53-P322F RLDGEYFTL   | 5   | 219   |
| >TP53-P322F PLDGEYFTLQ  | 2258  | >TP53-P322F RLDGEYFTLQ  | 44  | 2214  |
| >TP53-P322F PLDGEYFT    | 1092  | >TP53-P322F RLDGEYFT    | 99  | 993   |
| >TP53-P322F PLDGEYFTL   | 22    | >TP53-P322F RLDGEYFTL   | 7   | 15    |
| >TP53-P322F PLDGEYFTLQ  | 140   | >TP53-P322F RLDGEYFTLQ  | 18  | 122   |
| >TP53-P322F PLDGEYFTL   | 23    | >TP53-P322F RLDGEYFTL   | 10  | 13    |
| >TP53-P322F PLDGEYFTLQ  | 158   | >TP53-P322F RLDGEYFTLQ  | 36  | 122   |
| >TP53-P322F PLDGEYFT    | 1464  | >TP53-P322F RLDGEYFT    | 182 | 1282  |
| >TP53-P322F PLDGEYFTL   | 11    | >TP53-P322F RLDGEYFTL   | 3   | 8     |
| >TP53-P322F PLDGEYFTLQ  | 912   | >TP53-P322F RLDGEYFTLQ  | 133 | 779   |
| >TP53-P322F PLDGEYFTLQ  | 111   | >TP53-P322F RLDGEYFTLQ  | 14  | 97    |
| >TP53-P322F PLDGEYFTL   | 6545  | >TP53-P322F RLDGEYFTL   | 74  | 6471  |
| >TP53-P322F PLDGEYFTLQ  | 2291  | >TP53-P322F RLDGEYFTLQ  | 39  | 2252  |

|                         |       |                         |       |       |
|-------------------------|-------|-------------------------|-------|-------|
| >TP53-P322F KPLDGEYF    | 296   | >TP53-P322F KRLDGEYF    | 28788 | 28492 |
| >TP53-P322F KPLDGEYFTL  | 212   | >TP53-P322F KRLDGEYFTL  | 28149 | 27937 |
| >TP53-P322F KPLDGEYF    | 516   | >TP53-P322F KRLDGEYF    | 21    | 495   |
| >TP53-P322F KPLDGEYFTL  | 6009  | >TP53-P322F KRLDGEYFTL  | 329   | 5680  |
| >TP53-P322F KPLDGEYF    | 22806 | >TP53-P322F KRLDGEYF    | 336   | 22470 |
| >TP53-P322F KPLDGEYFTL  | 21924 | >TP53-P322F KRLDGEYFTL  | 32    | 21892 |
| >TP53-P322F KPLDGEYFTL  | 321   | >TP53-P322F KRLDGEYFTL  | 176   | 145   |
| >TP53-P322F KPLDGEYF    | 287   | >TP53-P322F KRLDGEYF    | 29020 | 28733 |
| >TP53-P322F KPLDGEYF    | 195   | >TP53-P322F KRLDGEYF    | 22048 | 21853 |
| >TP53-P322F KPLDGEYFTL  | 306   | >TP53-P322F KRLDGEYFTL  | 21996 | 21690 |
| >TP53-P322F KPLDGEYFTL  | 23411 | >TP53-P322F KRLDGEYFTL  | 145   | 23266 |
| >TP53-P322F KPLDGEYFTL  | 25948 | >TP53-P322F KRLDGEYFTL  | 115   | 25833 |
| >TP53-P322F TSSSPQPKKKI | 23209 | >TP53-P322F TSSSPQPKKKI | 407   | 22802 |
| >TP53-P322F TSSSPQPKKKI | 31635 | >TP53-P322F TSSSPQPKKKI | 107   | 31528 |
| >TP53-P322F KKPLDGEY    | 504   | >TP53-P322F KKRLDGEY    | 36    | 468   |
| >TP53-P322F KKPLDGEYF   | 31    | >TP53-P322F KKRLDGEYF   | 4     | 27    |
| >TP53-P322F KKPLDGEYFT  | 611   | >TP53-P322F KKRLDGEYFT  | 32    | 579   |
| >TP53-P322F KKKPLDGEY   | 83    | >TP53-P322F KKKRLDGEY   | 197   | 114   |
| >TP53-P322F KKKPLDGEY   | 138   | >TP53-P322F KKKRLDGEY   | 126   | 12    |
| >TP53-P322F KKKPLDGEYF  | 14    | >TP53-P322F KKKRLDGEYF  | 12    | 2     |
| >TP53-P322F PKKKPLDGEY  | 315   | >TP53-P322F PKKKRLDGEY  | 811   | 496   |
| >TP53-P322F PKKKPLDGEY  | 78    | >TP53-P322F PKKKRLDGEY  | 144   | 66    |
| >TP53-P322F QPKKKPLDG   | 913   | >TP53-P322F QPKKKRLDG   | 154   | 759   |
| >TP53-P322F QPKKKPLDGE  | 303   | >TP53-P322F QPKKKRLDGE  | 486   | 183   |
| >TP53-P322F QPKKKPLDGE  | 812   | >TP53-P322F QPKKKRLDGE  | 127   | 685   |
| >TP53-P322F SPQPKKKPL   | 13    | >TP53-P322F SPQPKKKRL   | 103   | 90    |
| >TP53-P322F SPQPKKKPL   | 67    | >TP53-P322F SPQPKKKRL   | 269   | 202   |
| >TP53-P322F SSPQPKKKPL  | 40    | >TP53-P322F SSPQPKKKRL  | 57    | 17    |
| >TP53-P322F SSSPQPKKKP  | 16    | >TP53-P322F SSSPQPKKKR  | 15    | 1     |
| >TP53-P322F SSSPQPKKKP  | 14083 | >TP53-P322F SSSPQPKKKR  | 320   | 13763 |
| >TP53-P34L-1 PLPSQAMDD  | 5062  | >TP53-P34L-1 LLPSQAMDD  | 139   | 4923  |
| >TP53-P34L-1 PLPSQAMDD  | 9689  | >TP53-P34L-1 LLPSQAMDD  | 496   | 9193  |
| >TP53-P34L-1 PLPSQAMDD  | 4006  | >TP53-P34L-1 LLPSQAMDD  | 487   | 3519  |
| >TP53-P34L-1 PLPSQAMDD  | 630   | >TP53-P34L-1 LLPSQAMDD  | 21    | 609   |
| >TP53-P34L-1 PLPSQAMDD  | 4962  | >TP53-P34L-1 LLPSQAMDD  | 240   | 4722  |
| >TP53-P34L-1 PLPSQAMDD  | 4697  | >TP53-P34L-1 LLPSQAMDD  | 300   | 4397  |
| >TP53-P34L-1 PLPSQAMDD  | 2450  | >TP53-P34L-1 LLPSQAMDD  | 132   | 2318  |
| >TP53-P34L-1 SPLPSQAM   | 35    | >TP53-P34L-1 SLLPSQAM   | 22500 | 22465 |
| >TP53-P34L-1 SPLPSQAMDI | 7     | >TP53-P34L-1 SLLPSQAMDI | 6735  | 6728  |
| >TP53-P34L-1 SPLPSQAM   | 23993 | >TP53-P34L-1 SLLPSQAM   | 266   | 23727 |
| >TP53-P34L-1 SPLPSQAMDI | 23526 | >TP53-P34L-1 SLLPSQAMDI | 196   | 23330 |
| >TP53-P34L-1 SPLPSQAMDI | 29420 | >TP53-P34L-1 SLLPSQAMDI | 76    | 29344 |
| >TP53-P34L-1 SPLPSQAM   | 17634 | >TP53-P34L-1 SLLPSQAM   | 375   | 17259 |

|                          |       |                          |       |       |
|--------------------------|-------|--------------------------|-------|-------|
| >TP53-P34L-1 SPLPSQAMDI  | 15713 | >TP53-P34L-1 SLLPSQAMDI  | 322   | 15391 |
| >TP53-P34L-1 SPLPSQAM    | 19021 | >TP53-P34L-1 SLLPSQAM    | 17    | 19004 |
| >TP53-P34L-1 SPLPSQAMDI  | 22813 | >TP53-P34L-1 SLLPSQAMDI  | 35    | 22778 |
| >TP53-P34L-1 SPLPSQAM    | 21684 | >TP53-P34L-1 SLLPSQAM    | 35    | 21649 |
| >TP53-P34L-1 SPLPSQAMDI  | 22535 | >TP53-P34L-1 SLLPSQAMDI  | 40    | 22495 |
| >TP53-P34L-1 SPLPSQAM    | 22232 | >TP53-P34L-1 SLLPSQAM    | 39    | 22193 |
| >TP53-P34L-1 SPLPSQAMDI  | 18834 | >TP53-P34L-1 SLLPSQAMDI  | 11    | 18823 |
| >TP53-P34L-1 SPLPSQAM    | 23718 | >TP53-P34L-1 SLLPSQAM    | 174   | 23544 |
| >TP53-P34L-1 SPLPSQAMDI  | 24213 | >TP53-P34L-1 SLLPSQAMDI  | 254   | 23959 |
| >TP53-P34L-1 SPLPSQAM    | 31658 | >TP53-P34L-1 SLLPSQAM    | 17    | 31641 |
| >TP53-P34L-1 SPLPSQAMDI  | 25605 | >TP53-P34L-1 SLLPSQAMDI  | 9     | 25596 |
| >TP53-P34L-1 SPLPSQAM    | 19    | >TP53-P34L-1 SLLPSQAM    | 5907  | 5888  |
| >TP53-P34L-1 SPLPSQAMDI  | 189   | >TP53-P34L-1 SLLPSQAMDI  | 19607 | 19418 |
| >TP53-P34L-1 SPLPSQAM    | 14847 | >TP53-P34L-1 SLLPSQAM    | 224   | 14623 |
| >TP53-P34L-1 SPLPSQAM    | 1821  | >TP53-P34L-1 SLLPSQAM    | 124   | 1697  |
| >TP53-P34L-1 SPLPSQAM    | 860   | >TP53-P34L-1 SLLPSQAM    | 101   | 759   |
| >TP53-P34L-1 SPLPSQAM    | 28    | >TP53-P34L-1 SLLPSQAM    | 962   | 934   |
| >TP53-P34L-1 SPLPSQAM    | 309   | >TP53-P34L-1 SLLPSQAM    | 3662  | 3353  |
| >TP53-P34L-1 KLLPENNVLSI | 14459 | >TP53-P34L-1 KLLPENNVLSI | 23    | 14436 |
| >TP53-P34L-1 KLLPENNVLSI | 4975  | >TP53-P34L-1 KLLPENNVLSI | 41    | 4934  |
| >TP53-P34L-1 KLLPENNVLSI | 11498 | >TP53-P34L-1 KLLPENNVLSI | 123   | 11375 |
| >TP53-P34L-1 KLLPENNVLSI | 4305  | >TP53-P34L-1 KLLPENNVLSI | 30    | 4275  |
| >TP53-P34L-1 KLLPENNVLSI | 2272  | >TP53-P34L-1 KLLPENNVLSI | 7     | 2265  |
| >TP53-P34L-1 KLLPENNVLSI | 4642  | >TP53-P34L-1 KLLPENNVLSI | 7     | 4635  |
| >TP53-P34L-1 KLLPENNVLSI | 6524  | >TP53-P34L-1 KLLPENNVLSI | 15    | 6509  |
| >TP53-P34L-1 KLLPENNVLSI | 19033 | >TP53-P34L-1 KLLPENNVLSI | 16    | 19017 |
| >TP53-P34L-1 KLLPENNVLSI | 7183  | >TP53-P34L-1 KLLPENNVLSI | 5     | 7178  |
| >TP53-P34L-1 KLLPENNVLSI | 2456  | >TP53-P34L-1 KLLPENNVLSI | 42    | 2414  |
| >TP53-P34L-1 KLLPENNVLSI | 3250  | >TP53-P34L-1 KLLPENNVLSI | 153   | 3097  |
| >TP53-P34L-1 KLLPENNVLSI | 21179 | >TP53-P34L-1 KLLPENNVLSI | 389   | 20790 |
| >TP53-P34L-1 LSPLPSQAM   | 1142  | >TP53-P34L-1 LSLLPSQAM   | 71    | 1071  |
| >TP53-P34L-1 LSPLPSQAM   | 264   | >TP53-P34L-1 LSLLPSQAM   | 8     | 256   |
| >TP53-P34L-1 LSPLPSQAM   | 1067  | >TP53-P34L-1 LSLLPSQAM   | 148   | 919   |
| >TP53-P34L-1 LSPLPSQAM   | 5     | >TP53-P34L-1 LSLLPSQAM   | 2942  | 2937  |
| >TP53-P34L-1 LSPLPSQAMC  | 398   | >TP53-P34L-1 LSLLPSQAMC  | 25468 | 25070 |
| >TP53-P34L-1 LSPLPSQAM   | 1657  | >TP53-P34L-1 LSLLPSQAM   | 74    | 1583  |
| >TP53-P34L-1 VLSPLPSQA   | 52    | >TP53-P34L-1 VLSLLPSQA   | 245   | 193   |
| >TP53-P34L-1 VLSPLPSQAM  | 255   | >TP53-P34L-1 VLSLLPSQAM  | 341   | 86    |
| >TP53-P34L-1 VLSPLPSQA   | 8     | >TP53-P34L-1 VLSLLPSQA   | 27    | 19    |
| >TP53-P34L-1 VLSPLPSQA   | 26    | >TP53-P34L-1 VLSLLPSQA   | 239   | 213   |
| >TP53-P34L-1 VLSPLPSQAM  | 76    | >TP53-P34L-1 VLSLLPSQAM  | 446   | 370   |
| >TP53-P34L-1 VLSPLPSQA   | 64    | >TP53-P34L-1 VLSLLPSQA   | 400   | 336   |
| >TP53-P34L-1 VLSPLPSQA   | 125   | >TP53-P34L-1 VLSLLPSQA   | 793   | 668   |

|                         |       |                         |      |       |
|-------------------------|-------|-------------------------|------|-------|
| >TP53-P34L-1VLSPLPSQAM  | 241   | >TP53-P34L-1VLSLLPSQAM  | 982  | 741   |
| >TP53-P34L-1VLSPLPSQ    | 28    | >TP53-P34L-1VLSLLPSQ    | 246  | 218   |
| >TP53-P34L-1VLSPLPSQA   | 6     | >TP53-P34L-1VLSLLPSQA   | 47   | 41    |
| >TP53-P34L-1VLSPLPSQAM  | 43    | >TP53-P34L-1VLSLLPSQAM  | 412  | 369   |
| >TP53-P34L-1VLSPLPSQAM  | 204   | >TP53-P34L-1VLSLLPSQAM  | 600  | 396   |
| >TP53-P34L-1VLSPLPSQAM  | 243   | >TP53-P34L-1VLSLLPSQAM  | 723  | 480   |
| >TP53-P34L-1VLSPLPSQAM  | 269   | >TP53-P34L-1VLSLLPSQAM  | 135  | 134   |
| >TP53-P34L-1NVLSPLPSQA  | 523   | >TP53-P34L-1NVLSLLPSQA  | 362  | 161   |
| >TP53-P34L-1NVLSPLPSQA  | 745   | >TP53-P34L-1NVLSLLPSQA  | 334  | 411   |
| >TP53-P34L-1NVLSPLPSQ   | 498   | >TP53-P34L-1NVLSLLPSQ   | 2213 | 1715  |
| >TP53-P34L-1NVLSPLPSQA  | 45    | >TP53-P34L-1NVLSLLPSQA  | 76   | 31    |
| >TP53-P34L-1NVLSPLPSQA  | 439   | >TP53-P34L-1NVLSLLPSQA  | 815  | 376   |
| >TP53-P34L-1NVLSPLPSQ   | 284   | >TP53-P34L-1NVLSLLPSQ   | 875  | 591   |
| >TP53-P34L-1NVLSPLPSQA  | 43    | >TP53-P34L-1NVLSLLPSQA  | 99   | 56    |
| >TP53-P34L-1NVLSPLPSQA  | 19    | >TP53-P34L-1NVLSLLPSQA  | 30   | 11    |
| >TP53-P34L-1NVLSPLPSQA  | 193   | >TP53-P34L-1NVLSLLPSQA  | 120  | 73    |
| >TP53-P34L-1PENNVLSPL   | 445   | >TP53-P34L-1PENNVLSLL   | 195  | 250   |
| >TP53-P34L-1PENNVLSPL   | 277   | >TP53-P34L-1PENNVLSLL   | 597  | 320   |
| >TP53-P34L-1PENNVLSP    | 9263  | >TP53-P34L-1PENNVLSL    | 406  | 8857  |
| >TP53-P34L-1PENNVLSPL   | 333   | >TP53-P34L-1PENNVLSLL   | 1621 | 1288  |
| >TP53-P34L-1PENNVLSPL   | 214   | >TP53-P34L-1PENNVLSLL   | 168  | 46    |
| >TP53-P34L-1LPENNVLSP   | 38800 | >TP53-P34L-1LPENNVLSL   | 34   | 38766 |
| >TP53-P34L-1LPENNVLSPL  | 455   | >TP53-P34L-1LPENNVLSLL  | 189  | 266   |
| >TP53-P34L-1LPENNVLSP   | 18457 | >TP53-P34L-1LPENNVLSL   | 50   | 18407 |
| >TP53-P34L-1LPENNVLSPL  | 59    | >TP53-P34L-1LPENNVLSLL  | 436  | 377   |
| >TP53-P34L-1LPENNVLSP   | 9143  | >TP53-P34L-1LPENNVLSL   | 199  | 8944  |
| >TP53-P34L-1LPENNVLSPL  | 327   | >TP53-P34L-1LPENNVLSLL  | 1049 | 722   |
| >TP53-P34L-1LPENNVLSP   | 5156  | >TP53-P34L-1LPENNVLSL   | 86   | 5070  |
| >TP53-P34L-1LPENNVLSP   | 12007 | >TP53-P34L-1LPENNVLSL   | 55   | 11952 |
| >TP53-P34L-1LPENNVLSPL  | 162   | >TP53-P34L-1LPENNVLSLL  | 154  | 8     |
| >TP53-P34L-1LLPENNVLSP  | 7985  | >TP53-P34L-1LLPENNVLSL  | 147  | 7838  |
| >TP53-P34L-1LLPENNVLSPI | 41    | >TP53-P34L-1LLPENNVLSLI | 56   | 15    |
| >TP53-P34L-1LLPENNVLSP  | 6745  | >TP53-P34L-1LLPENNVLSL  | 26   | 6719  |
| >TP53-P34L-1LLPENNVLSPI | 12    | >TP53-P34L-1LLPENNVLSLI | 10   | 2     |
| >TP53-P34L-1LLPENNVLSP  | 5813  | >TP53-P34L-1LLPENNVLSL  | 50   | 5763  |
| >TP53-P34L-1LLPENNVLSPI | 12    | >TP53-P34L-1LLPENNVLSLI | 18   | 6     |
| >TP53-P34L-1LLPENNVLSP  | 13758 | >TP53-P34L-1LLPENNVLSL  | 335  | 13423 |
| >TP53-P34L-1LLPENNVLSPI | 33    | >TP53-P34L-1LLPENNVLSLI | 58   | 25    |
| >TP53-P34L-1LLPENNVLSP  | 2127  | >TP53-P34L-1LLPENNVLSL  | 4    | 2123  |
| >TP53-P34L-1LLPENNVLSPI | 4     | >TP53-P34L-1LLPENNVLSLI | 6    | 2     |
| >TP53-P34L-1LLPENNVLSP  | 9882  | >TP53-P34L-1LLPENNVLSL  | 9    | 9873  |
| >TP53-P34L-1LLPENNVLSPI | 8     | >TP53-P34L-1LLPENNVLSLI | 16   | 8     |
| >TP53-P34L-1LLPENNVLSP  | 12594 | >TP53-P34L-1LLPENNVLSL  | 24   | 12570 |

|                         |       |                         |       |       |
|-------------------------|-------|-------------------------|-------|-------|
| >TP53-P34L-1LLPENNVLSPI | 27    | >TP53-P34L-1LLPENNVLSLI | 30    | 3     |
| >TP53-P34L-1LLPENNVLSP  | 21520 | >TP53-P34L-1LLPENNVLSL  | 24    | 21496 |
| >TP53-P34L-1LLPENNVLSPI | 45    | >TP53-P34L-1LLPENNVLSLI | 65    | 20    |
| >TP53-P34L-1LLPENNVLSP  | 1944  | >TP53-P34L-1LLPENNVLSL  | 2     | 1942  |
| >TP53-P34L-1LLPENNVLSPI | 3     | >TP53-P34L-1LLPENNVLSLI | 3     | 0     |
| >TP53-P34L-1LLPENNVLSP  | 15907 | >TP53-P34L-1LLPENNVLSL  | 96    | 15811 |
| >TP53-P34L-1LLPENNVLSPI | 63    | >TP53-P34L-1LLPENNVLSLI | 12    | 51    |
| >TP53-P359S EPGGSRAH    | 254   | >TP53-P359S ESGGSRAH    | 11644 | 11390 |
| >TP53-P359S KEPGGSRA    | 2493  | >TP53-P359S KESGGSRA    | 54    | 2439  |
| >TP53-P359S KEPGGSRAH   | 11400 | >TP53-P359S KESGGSRAHS  | 306   | 11094 |
| >TP53-P47L-1PDDIEQWFT   | 240   | >TP53-P47L-1LDDIEQWFT   | 369   | 129   |
| >TP53-P47L-1SPDDIEQWF1  | 25681 | >TP53-P47L-1SLDDIEQWFT  | 139   | 25542 |
| >TP53-P47L-1SPDDIEQWF   | 32207 | >TP53-P47L-1SLDDIEQWF   | 440   | 31767 |
| >TP53-P47L-1SPDDIEQWF1  | 23716 | >TP53-P47L-1SLDDIEQWFT  | 187   | 23529 |
| >TP53-P47L-1SPDDIEQWF   | 25660 | >TP53-P47L-1SLDDIEQWF   | 242   | 25418 |
| >TP53-P47L-1SPDDIEQWF1  | 15188 | >TP53-P47L-1SLDDIEQWFT  | 13    | 15175 |
| >TP53-P47L-1SPDDIEQWF1  | 22373 | >TP53-P47L-1SLDDIEQWFT  | 117   | 22256 |
| >TP53-P47L-1SPDDIEQWF1  | 16096 | >TP53-P47L-1SLDDIEQWFT  | 11    | 16085 |
| >TP53-P47L-1SPDDIEQWF1  | 21265 | >TP53-P47L-1SLDDIEQWFT  | 160   | 21105 |
| >TP53-P47L-1SPDDIEQWF   | 34012 | >TP53-P47L-1SLDDIEQWF   | 126   | 33886 |
| >TP53-P47L-1SPDDIEQWF1  | 28573 | >TP53-P47L-1SLDDIEQWFT  | 10    | 28563 |
| >TP53-P47L-1SPDDIEQWF   | 339   | >TP53-P47L-1SLDDIEQWF   | 7261  | 6922  |
| >TP53-P47L-1SPDDIEQW    | 46    | >TP53-P47L-1SLDDIEQW    | 15577 | 15531 |
| >TP53-P47L-1SPDDIEQW    | 12    | >TP53-P47L-1SLDDIEQW    | 3193  | 3181  |
| >TP53-P47L-1SQAMDDLMI   | 15515 | >TP53-P47L-1SQAMDDLMI   | 307   | 15208 |
| >TP53-P47L-1SQAMDDLMI   | 3680  | >TP53-P47L-1SQAMDDLMI   | 31    | 3649  |
| >TP53-P47L-1SQAMDDLMI   | 3327  | >TP53-P47L-1SQAMDDLMI   | 145   | 3182  |
| >TP53-P47L-1SQAMDDLMI   | 5283  | >TP53-P47L-1SQAMDDLMI   | 146   | 5137  |
| >TP53-P47L-1SQAMDDLMI   | 18744 | >TP53-P47L-1SQAMDDLMI   | 166   | 18578 |
| >TP53-P47L-1LSPDDIEQWF  | 1714  | >TP53-P47L-1LSLDDIEQWF  | 234   | 1480  |
| >TP53-P47L-1LSPDDIEQW   | 195   | >TP53-P47L-1LSLDDIEQW   | 14    | 181   |
| >TP53-P47L-1LSPDDIEQWF  | 180   | >TP53-P47L-1LSLDDIEQWF  | 8     | 172   |
| >TP53-P47L-1LSPDDIEQW   | 1345  | >TP53-P47L-1LSLDDIEQW   | 202   | 1143  |
| >TP53-P47L-1LSPDDIEQW   | 126   | >TP53-P47L-1LSLDDIEQW   | 44    | 82    |
| >TP53-P47L-1LSPDDIEQWF  | 3332  | >TP53-P47L-1LSLDDIEQWF  | 303   | 3029  |
| >TP53-P47L-1LSPDDIEQW   | 149   | >TP53-P47L-1LSLDDIEQW   | 11    | 138   |
| >TP53-P47L-1LSPDDIEQWF  | 10927 | >TP53-P47L-1LSLDDIEQWF  | 247   | 10680 |
| >TP53-P47L-1LSPDDIEQW   | 181   | >TP53-P47L-1LSLDDIEQW   | 23214 | 23033 |
| >TP53-P47L-1LSPDDIEQWF  | 10    | >TP53-P47L-1LSLDDIEQWF  | 7428  | 7418  |
| >TP53-P47L-1LSPDDIEQWF  | 190   | >TP53-P47L-1LSLDDIEQWF  | 20209 | 20019 |
| >TP53-P47L-1LSPDDIEQWF  | 84    | >TP53-P47L-1LSLDDIEQWF  | 69    | 15    |
| >TP53-P47L-1LSPDDIEQW   | 218   | >TP53-P47L-1LSLDDIEQW   | 20    | 198   |
| >TP53-P47L-1LSPDDIEQW   | 596   | >TP53-P47L-1LSLDDIEQW   | 181   | 415   |



|                         |       |                         |      |       |
|-------------------------|-------|-------------------------|------|-------|
| >TP53-P47L-1 MLSPDDIEQ  | 405   | >TP53-P47L-1 MLSLDDIEQ  | 1056 | 651   |
| >TP53-P47L-1 MLSPDDIEQV | 107   | >TP53-P47L-1 MLSLDDIEQV | 289  | 182   |
| >TP53-P47L-1 MLSPDDIEQ  | 21    | >TP53-P47L-1 MLSLDDIEQ  | 333  | 312   |
| >TP53-P47L-1 MLSPDDIEQV | 129   | >TP53-P47L-1 MLSLDDIEQV | 1226 | 1097  |
| >TP53-P47L-1 MLSPDDIEQV | 213   | >TP53-P47L-1 MLSLDDIEQV | 678  | 465   |
| >TP53-P47L-1 MLSPDDIEQV | 93    | >TP53-P47L-1 MLSLDDIEQV | 978  | 885   |
| >TP53-P47L-1 MLSPDDIEQV | 427   | >TP53-P47L-1 MLSLDDIEQV | 2419 | 1992  |
| >TP53-P47L-1 MLSPDDIEQV | 131   | >TP53-P47L-1 MLSLDDIEQV | 225  | 94    |
| >TP53-P47L-1 MLSPDDIEQV | 204   | >TP53-P47L-1 MLSLDDIEQV | 759  | 555   |
| >TP53-P47L-1 MLSPDDIEQV | 20    | >TP53-P47L-1 MLSLDDIEQV | 49   | 29    |
| >TP53-P47L-1 MLSPDDIEQV | 292   | >TP53-P47L-1 MLSLDDIEQV | 477  | 185   |
| >TP53-P47L-1 MLSPDDIEQV | 80    | >TP53-P47L-1 MLSLDDIEQV | 101  | 21    |
| >TP53-P47L-1 MLSPDDIEQV | 445   | >TP53-P47L-1 MLSLDDIEQV | 1804 | 1359  |
| >TP53-P47L-1 LMLSPDDI   | 584   | >TP53-P47L-1 LMLSLDDI   | 158  | 426   |
| >TP53-P47L-1 LMLSPDDI   | 1250  | >TP53-P47L-1 LMLSLDDI   | 259  | 991   |
| >TP53-P47L-1 LMLSPDDI   | 971   | >TP53-P47L-1 LMLSLDDI   | 318  | 653   |
| >TP53-P47L-1 LMLSPDDI   | 1501  | >TP53-P47L-1 LMLSLDDI   | 244  | 1257  |
| >TP53-P47L-1 LMLSPDDI   | 14    | >TP53-P47L-1 LMLSLDDI   | 19   | 5     |
| >TP53-P47L-1 LMLSPDDI   | 35    | >TP53-P47L-1 LMLSLDDI   | 24   | 11    |
| >TP53-P47L-1 LMLSPDDI   | 41    | >TP53-P47L-1 LMLSLDDI   | 25   | 16    |
| >TP53-P47L-1 LMLSPDDI   | 149   | >TP53-P47L-1 LMLSLDDI   | 102  | 47    |
| >TP53-P47L-1 LMLSPDDI   | 113   | >TP53-P47L-1 LMLSLDDI   | 70   | 43    |
| >TP53-P47L-1 LMLSPDDIEQ | 315   | >TP53-P47L-1 LMLSLDDIEQ | 629  | 314   |
| >TP53-P47L-1 LMLSPDDI   | 314   | >TP53-P47L-1 LMLSLDDI   | 632  | 318   |
| >TP53-P47L-1 LMLSPDDIEQ | 130   | >TP53-P47L-1 LMLSLDDIEQ | 232  | 102   |
| >TP53-P47L-1 LMLSPDDIEQ | 212   | >TP53-P47L-1 LMLSLDDIEQ | 198  | 14    |
| >TP53-P47L-1 LMLSPDDIEQ | 17    | >TP53-P47L-1 LMLSLDDIEQ | 15   | 2     |
| >TP53-P47L-1 LMLSPDDIEQ | 79    | >TP53-P47L-1 LMLSLDDIEQ | 51   | 28    |
| >TP53-P47L-1 LMLSPDDIEQ | 174   | >TP53-P47L-1 LMLSLDDIEQ | 117  | 57    |
| >TP53-P47L-1 DDLMLSPDDI | 436   | >TP53-P47L-1 DDLMLSLDDI | 126  | 310   |
| >TP53-P47L-1 DDLMLSPDDI | 237   | >TP53-P47L-1 DDLMLSLDDI | 165  | 72    |
| >TP53-P47L-1 MDDLMLSPC  | 520   | >TP53-P47L-1 MDDLMLSLD  | 184  | 336   |
| >TP53-P47L-1 MDDLMLSPC  | 277   | >TP53-P47L-1 MDDLMLSLD  | 117  | 160   |
| >TP53-P47L-1 MDDLMLSPC  | 762   | >TP53-P47L-1 MDDLMLSLD  | 182  | 580   |
| >TP53-P47L-1 MDDLMLSPC  | 107   | >TP53-P47L-1 MDDLMLSLD  | 82   | 25    |
| >TP53-P47L-1 AMDDLMLSP  | 10776 | >TP53-P47L-1 AMDDLMLSL  | 11   | 10765 |
| >TP53-P47L-1 AMDDLMLSP  | 2393  | >TP53-P47L-1 AMDDLMLSL  | 11   | 2382  |
| >TP53-P47L-1 AMDDLMLSP  | 9173  | >TP53-P47L-1 AMDDLMLSL  | 47   | 9126  |
| >TP53-P47L-1 AMDDLMLSP  | 2378  | >TP53-P47L-1 AMDDLMLSL  | 11   | 2367  |
| >TP53-P47L-1 AMDDLMLSP  | 1226  | >TP53-P47L-1 AMDDLMLSL  | 4    | 1222  |
| >TP53-P47L-1 AMDDLMLSP  | 8149  | >TP53-P47L-1 AMDDLMLSL  | 6    | 8143  |
| >TP53-P47L-1 AMDDLMLSP  | 4908  | >TP53-P47L-1 AMDDLMLSL  | 9    | 4899  |
| >TP53-P47L-1 AMDDLMLSP  | 20891 | >TP53-P47L-1 AMDDLMLSL  | 68   | 20823 |

|                        |       |                        |     |       |
|------------------------|-------|------------------------|-----|-------|
| >TP53-P47L-1AMDDLMLSP  | 4178  | >TP53-P47L-1AMDDLMLSL  | 3   | 4175  |
| >TP53-P47L-1AMDDLMLSP  | 9075  | >TP53-P47L-1AMDDLMLSL  | 422 | 8653  |
| >TP53-P47L-1AMDDLMLSP  | 18180 | >TP53-P47L-1AMDDLMLSL  | 109 | 18071 |
| >TP53-P47L-1QAMDDLML   | 7360  | >TP53-P47L-1QAMDDLML   | 117 | 7243  |
| >TP53-P47L-1QAMDDLML   | 11206 | >TP53-P47L-1QAMDDLML   | 47  | 11159 |
| >TP53-P47L-1QAMDDLML   | 11828 | >TP53-P47L-1QAMDDLML   | 147 | 11681 |
| >TP53-P47L-1QAMDDLML   | 6978  | >TP53-P47L-1QAMDDLML   | 67  | 6911  |
| >TP53-P47L-1QAMDDLML   | 8515  | >TP53-P47L-1QAMDDLML   | 77  | 8438  |
| >TP53-P47L-1QAMDDLML   | 19990 | >TP53-P47L-1QAMDDLML   | 80  | 19910 |
| >TP53-P58L-1PGPDEAPRM  | 3930  | >TP53-P58L-1LGPDEAPRM  | 295 | 3635  |
| >TP53-P58L-1PGPDEAPR   | 1406  | >TP53-P58L-1LGPDEAPR   | 480 | 926   |
| >TP53-P58L-1DPGPDEAPR  | 1293  | >TP53-P58L-1DLGPDEAPR  | 159 | 1134  |
| >TP53-P58L-1FTEDPGPDEA | 736   | >TP53-P58L-1FTEDLGPDEA | 321 | 415   |
| >TP53-P58L-1QWFTEDPG   | 275   | >TP53-P58L-1QWFTEDLG   | 283 | 8     |
| >TP53-P58L-1EQWFTEDP   | 6607  | >TP53-P58L-1EQWFTEDL   | 442 | 6165  |
| >TP53-P58L-1IEQWFTEDP  | 11843 | >TP53-P58L-1IEQWFTEDL  | 156 | 11687 |
| >TP53-P58L-1IEQWFTEDP  | 8056  | >TP53-P58L-1IEQWFTEDL  | 292 | 7764  |
| >TP53-P58L-1IEQWFTEDP  | 2576  | >TP53-P58L-1IEQWFTEDL  | 24  | 2552  |
| >TP53-P58L-1IEQWFTEDP  | 815   | >TP53-P58L-1IEQWFTEDL  | 19  | 796   |
| >TP53-P58Q- PGPDEAPR   | 1406  | >TP53-P58Q- QGPDEAPR   | 199 | 1207  |
| >TP53-P58Q- TEDPGPDEA  | 865   | >TP53-P58Q- TEDQGPDEA  | 345 | 520   |
| >TP53-P58Q- QWFTEDPG   | 275   | >TP53-P58Q- QWFTEDQG   | 403 | 128   |
| >TP53-P60A- PDEAPRMPE  | 6077  | >TP53-P60A- ADEAPRMPE  | 114 | 5963  |
| >TP53-P60A- IEQWFTEDPC | 5279  | >TP53-P60A- IEQWFTEDPC | 114 | 5165  |
| >TP53-P60A- IEQWFTEDPC | 1839  | >TP53-P60A- IEQWFTEDPC | 420 | 1419  |
| >TP53-P60A- TEDPGPDEA  | 865   | >TP53-P60A- TEDPGADEA  | 393 | 472   |
| >TP53-P60A- QWFTEDPGP  | 657   | >TP53-P60A- QWFTEDPGA  | 301 | 356   |
| >TP53-P60L-1GPDEAPRM   | 23841 | >TP53-P60L-1GLDEAPRM   | 429 | 23412 |
| >TP53-P60L-1GPDEAPRMP  | 22113 | >TP53-P60L-1GLDEAPRMP  | 80  | 22033 |
| >TP53-P60L-1GPDEAPRMP  | 23210 | >TP53-P60L-1GLDEAPRMP  | 289 | 22921 |
| >TP53-P60L-1GPDEAPRMP  | 17523 | >TP53-P60L-1GLDEAPRMP  | 293 | 17230 |
| >TP53-P60L-1GPDEAPRM   | 20121 | >TP53-P60L-1GLDEAPRM   | 31  | 20090 |
| >TP53-P60L-1GPDEAPRMP  | 17449 | >TP53-P60L-1GLDEAPRMP  | 11  | 17438 |
| >TP53-P60L-1GPDEAPRM   | 23283 | >TP53-P60L-1GLDEAPRM   | 133 | 23150 |
| >TP53-P60L-1GPDEAPRMP  | 21580 | >TP53-P60L-1GLDEAPRMP  | 51  | 21529 |
| >TP53-P60L-1GPDEAPRM   | 22443 | >TP53-P60L-1GLDEAPRM   | 49  | 22394 |
| >TP53-P60L-1GPDEAPRMP  | 17542 | >TP53-P60L-1GLDEAPRMP  | 13  | 17529 |
| >TP53-P60L-1GPDEAPRM   | 23798 | >TP53-P60L-1GLDEAPRM   | 423 | 23375 |
| >TP53-P60L-1GPDEAPRM   | 35104 | >TP53-P60L-1GLDEAPRM   | 122 | 34982 |
| >TP53-P60L-1GPDEAPRMP  | 31845 | >TP53-P60L-1GLDEAPRMP  | 30  | 31815 |
| >TP53-P60L-1IEQWFTEDPC | 6672  | >TP53-P60L-1IEQWFTEDPC | 279 | 6393  |
| >TP53-P60L-1IEQWFTEDPC | 2882  | >TP53-P60L-1IEQWFTEDPC | 38  | 2844  |
| >TP53-P60L-1IEQWFTEDPC | 1839  | >TP53-P60L-1IEQWFTEDPC | 34  | 1805  |

|                        |       |                        |       |       |
|------------------------|-------|------------------------|-------|-------|
| >TP53-P60L-1TEDPGPDEA  | 865   | >TP53-P60L-1TEDPGLDEA  | 456   | 409   |
| >TP53-P60L-1FTEDPGPDEA | 736   | >TP53-P60L-1FTEDPGLDEA | 154   | 582   |
| >TP53-P60L-1QWFTEDPGP  | 657   | >TP53-P60L-1QWFTEDPGL  | 212   | 445   |
| >TP53-P60L-1EQWFTEDPG  | 14893 | >TP53-P60L-1EQWFTEDPG  | 470   | 14423 |
| >TP53-P60Q-1PDEAPRMPE  | 6077  | >TP53-P60Q-1QDEAPRMPE  | 305   | 5772  |
| >TP53-P60Q-1GPDEAPRMP  | 17523 | >TP53-P60Q-1GQDEAPRMF  | 112   | 17411 |
| >TP53-P60Q-1TEDPGPDEA  | 865   | >TP53-P60Q-1TEDPGQDEA  | 384   | 481   |
| >TP53-P60Q-1QWFTEDPGP  | 8018  | >TP53-P60Q-1QWFTEDPGC  | 313   | 7705  |
| >TP53-P60R-1PDEAPRMPE  | 6077  | >TP53-P60R-1RDEAPRMPE  | 422   | 5655  |
| >TP53-P60R-1IEQWFTEDPC | 33372 | >TP53-P60R-1IEQWFTEDPC | 265   | 33107 |
| >TP53-P60R-1WFTEDPGP   | 35358 | >TP53-P60R-1WFTEDPGR   | 176   | 35182 |
| >TP53-P60R-1QWFTEDPGP  | 8018  | >TP53-P60R-1QWFTEDPGR  | 12    | 8006  |
| >TP53-P60R-1EQWFTEDPG  | 33399 | >TP53-P60R-1EQWFTEDPG  | 139   | 33260 |
| >TP53-P60S-1PDEAPRMPE  | 6077  | >TP53-P60S-1SDEAPRMPE  | 220   | 5857  |
| >TP53-P60S-1GPDEAPRM   | 21751 | >TP53-P60S-1GSDEAPRM   | 92    | 21659 |
| >TP53-P60S-1TEDPGPDEA  | 865   | >TP53-P60S-1TEDPGSDEA  | 474   | 391   |
| >TP53-P60T-1GPDEAPRM   | 21751 | >TP53-P60T-1GTDEAPRM   | 57    | 21694 |
| >TP53-P60T-1IEQWFTEDPC | 1839  | >TP53-P60T-1IEQWFTEDPC | 325   | 1514  |
| >TP53-P60T-1TEDPGPDEA  | 865   | >TP53-P60T-1TEDPGTDEA  | 425   | 440   |
| >TP53-P67L-1PEAAPRVAPA | 1052  | >TP53-P67L-1LEAAPRVAPA | 424   | 628   |
| >TP53-P67L-1PEAAPRVA   | 556   | >TP53-P67L-1LEAAPRVA   | 141   | 415   |
| >TP53-P67L-1PEAAPRVAPA | 591   | >TP53-P67L-1LEAAPRVAPA | 204   | 387   |
| >TP53-P67L-1MPEAAPRV   | 23    | >TP53-P67L-1MLEAAPRV   | 19648 | 19625 |
| >TP53-P67L-1MPEAAPRV   | 21967 | >TP53-P67L-1MLEAAPRV   | 99    | 21868 |
| >TP53-P67L-1MPEAAPRVA  | 23433 | >TP53-P67L-1MLEAAPRVA  | 287   | 23146 |
| >TP53-P67L-1MPEAAPRV   | 26578 | >TP53-P67L-1MLEAAPRV   | 29    | 26549 |
| >TP53-P67L-1MPEAAPRVA  | 25912 | >TP53-P67L-1MLEAAPRVA  | 54    | 25858 |
| >TP53-P67L-1MPEAAPRV   | 20617 | >TP53-P67L-1MLEAAPRV   | 41    | 20576 |
| >TP53-P67L-1MPEAAPRVA  | 22653 | >TP53-P67L-1MLEAAPRVA  | 472   | 22181 |
| >TP53-P67L-1MPEAAPRVA  | 17008 | >TP53-P67L-1MLEAAPRVA  | 22    | 16986 |
| >TP53-P67L-1MPEAAPRV   | 13884 | >TP53-P67L-1MLEAAPRV   | 211   | 13673 |
| >TP53-P67L-1MPEAAPRV   | 16477 | >TP53-P67L-1MLEAAPRV   | 7     | 16470 |
| >TP53-P67L-1MPEAAPRVA  | 26441 | >TP53-P67L-1MLEAAPRVA  | 132   | 26309 |
| >TP53-P67L-1MPEAAPRV   | 23514 | >TP53-P67L-1MLEAAPRV   | 53    | 23461 |
| >TP53-P67L-1MPEAAPRVA  | 23512 | >TP53-P67L-1MLEAAPRVA  | 353   | 23159 |
| >TP53-P67L-1MPEAAPRV   | 21661 | >TP53-P67L-1MLEAAPRV   | 29    | 21632 |
| >TP53-P67L-1MPEAAPRV   | 22700 | >TP53-P67L-1MLEAAPRV   | 55    | 22645 |
| >TP53-P67L-1MPEAAPRV   | 14231 | >TP53-P67L-1MLEAAPRV   | 3     | 14228 |
| >TP53-P67L-1MPEAAPRVA  | 36894 | >TP53-P67L-1MLEAAPRVA  | 370   | 36524 |
| >TP53-P67L-1MPEAAPRVA  | 33021 | >TP53-P67L-1MLEAAPRVA  | 29    | 32992 |
| >TP53-P67L-1MPEAAPRV   | 487   | >TP53-P67L-1MLEAAPRV   | 21383 | 20896 |
| >TP53-P67L-1MPEAAPRVA  | 177   | >TP53-P67L-1MLEAAPRVA  | 21162 | 20985 |
| >TP53-P67L-1MPEAAPRVA  | 65    | >TP53-P67L-1MLEAAPRVA  | 16487 | 16422 |

|                       |       |                        |       |       |
|-----------------------|-------|------------------------|-------|-------|
| >TP53-P67L-1MPEAAPRVA | 258   | >TP53-P67L-1MLEAAPRVA  | 15404 | 15146 |
| >TP53-P67L-1MPEAAPRVA | 76    | >TP53-P67L-1MLEAAPRVA  | 7487  | 7411  |
| >TP53-P67L-1MPEAAPRV  | 496   | >TP53-P67L-1MLEAAPRV   | 22783 | 22287 |
| >TP53-P67L-1MPEAAPRV  | 83    | >TP53-P67L-1MLEAAPRV   | 26911 | 26828 |
| >TP53-P67L-1MPEAAPRVA | 15    | >TP53-P67L-1MLEAAPRVA  | 20547 | 20532 |
| >TP53-P67L-1MPEAAPRVA | 10    | >TP53-P67L-1MLEAAPRVA  | 10573 | 10563 |
| >TP53-P67L-1RMPEAAPRV | 35    | >TP53-P67L-1RMLEAAPRV  | 9     | 26    |
| >TP53-P67L-1RMPEAAPRV | 6098  | >TP53-P67L-1RMLEAAPRV, | 399   | 5699  |
| >TP53-P67L-1RMPEAAPRV | 224   | >TP53-P67L-1RMLEAAPRV  | 97    | 127   |
| >TP53-P67L-1RMPEAAPRV | 15    | >TP53-P67L-1RMLEAAPRV  | 17    | 2     |
| >TP53-P67L-1RMPEAAPRV | 480   | >TP53-P67L-1RMLEAAPRV, | 135   | 345   |
| >TP53-P67L-1RMPEAAPRV | 12    | >TP53-P67L-1RMLEAAPRV  | 5     | 7     |
| >TP53-P67L-1RMPEAAPRV | 2     | >TP53-P67L-1RMLEAAPRV  | 1     | 1     |
| >TP53-P67L-1RMPEAAPRV | 39    | >TP53-P67L-1RMLEAAPRV, | 7     | 32    |
| >TP53-P67L-1RMPEAAPRV | 17    | >TP53-P67L-1RMLEAAPRV  | 4     | 13    |
| >TP53-P67L-1RMPEAAPRV | 1124  | >TP53-P67L-1RMLEAAPRV, | 61    | 1063  |
| >TP53-P67L-1RMPEAAPRV | 5     | >TP53-P67L-1RMLEAAPRV  | 4     | 1     |
| >TP53-P67L-1RMPEAAPRV | 356   | >TP53-P67L-1RMLEAAPRV, | 45    | 311   |
| >TP53-P67L-1RMPEAAPRV | 6     | >TP53-P67L-1RMLEAAPRV  | 2     | 4     |
| >TP53-P67L-1RMPEAAPRV | 2536  | >TP53-P67L-1RMLEAAPRV, | 114   | 2422  |
| >TP53-P67L-1RMPEAAPRV | 4     | >TP53-P67L-1RMLEAAPRV  | 2     | 2     |
| >TP53-P67L-1RMPEAAPRV | 318   | >TP53-P67L-1RMLEAAPRV, | 175   | 143   |
| >TP53-P67L-1RMPEAAPR  | 1567  | >TP53-P67L-1RMLEAAPR   | 236   | 1331  |
| >TP53-P67L-1RMPEAAPRV | 5315  | >TP53-P67L-1RMLEAAPRV  | 308   | 5007  |
| >TP53-P67L-1RMPEAAPRV | 4431  | >TP53-P67L-1RMLEAAPRV, | 205   | 4226  |
| >TP53-P67L-1RMPEAAPR  | 53    | >TP53-P67L-1RMLEAAPR   | 12    | 41    |
| >TP53-P67L-1RMPEAAPRV | 846   | >TP53-P67L-1RMLEAAPRV  | 29    | 817   |
| >TP53-P67L-1RMPEAAPR  | 2910  | >TP53-P67L-1RMLEAAPR   | 261   | 2649  |
| >TP53-P67L-1RMPEAAPRV | 4269  | >TP53-P67L-1RMLEAAPRV  | 461   | 3808  |
| >TP53-P67L-1RMPEAAPRV | 229   | >TP53-P67L-1RMLEAAPRV  | 23218 | 22989 |
| >TP53-P67L-1RMPEAAPR  | 26    | >TP53-P67L-1RMLEAAPR   | 19    | 7     |
| >TP53-P67L-1APRMPEAA  | 25    | >TP53-P67L-1APRMLEAA   | 34    | 9     |
| >TP53-P67L-1APRMPEAAP | 261   | >TP53-P67L-1APRMLEAAP  | 1520  | 1259  |
| >TP53-P67L-1APRMPEAAP | 38    | >TP53-P67L-1APRMLEAAPI | 55    | 17    |
| >TP53-P67L-1EAPRMPEAA | 30    | >TP53-P67L-1EAPRMLEAAI | 23    | 7     |
| >TP53-P67L-1EAPRMPEA  | 802   | >TP53-P67L-1EAPRMLEA   | 402   | 400   |
| >TP53-P67L-1EAPRMPEAA | 215   | >TP53-P67L-1EAPRMLEAA  | 146   | 69    |
| >TP53-P67L-1DEAPRMPE  | 449   | >TP53-P67L-1DEAPRMLE   | 2588  | 2139  |
| >TP53-P67L-1DEAPRMPEA | 493   | >TP53-P67L-1DEAPRMLEA  | 829   | 336   |
| >TP53-P67R-PEAAPRVAP  | 11176 | >TP53-P67R-REAAPRVAP   | 361   | 10815 |
| >TP53-P67R-PEAAPRVAP/ | 10172 | >TP53-P67R-REAAPRVAP/  | 291   | 9881  |
| >TP53-P67R-PEAAPRVAP/ | 1052  | >TP53-P67R-REAAPRVAP/  | 144   | 908   |
| >TP53-P67R-PEAAPRVA   | 556   | >TP53-P67R-REAAPRVA    | 26    | 530   |

|                        |       |                        |       |       |
|------------------------|-------|------------------------|-------|-------|
| >TP53-P67R- PEAAPRVAP/ | 591   | >TP53-P67R- REAAPRVAP/ | 39    | 552   |
| >TP53-P67R- MPEAAPRV   | 23    | >TP53-P67R- MREAAPRV   | 15482 | 15459 |
| >TP53-P67R- MPEAAPRV   | 487   | >TP53-P67R- MREAAPRV   | 25255 | 24768 |
| >TP53-P67R- MPEAAPRVA  | 177   | >TP53-P67R- MREAAPRVA  | 23696 | 23519 |
| >TP53-P67R- MPEAAPRVA  | 65    | >TP53-P67R- MREAAPRVA  | 21046 | 20981 |
| >TP53-P67R- MPEAAPRVA  | 258   | >TP53-P67R- MREAAPRVA  | 23272 | 23014 |
| >TP53-P67R- MPEAAPRVA  | 76    | >TP53-P67R- MREAAPRVA  | 18845 | 18769 |
| >TP53-P67R- MPEAAPRV   | 496   | >TP53-P67R- MREAAPRV   | 21599 | 21103 |
| >TP53-P67R- MPEAAPRV   | 83    | >TP53-P67R- MREAAPRV   | 27722 | 27639 |
| >TP53-P67R- MPEAAPRVA  | 15    | >TP53-P67R- MREAAPRVA  | 22839 | 22824 |
| >TP53-P67R- MPEAAPRVA  | 10    | >TP53-P67R- MREAAPRVA  | 14839 | 14829 |
| >TP53-P67R- RMPEAAPRV  | 35    | >TP53-P67R- RMREAAPRV  | 286   | 251   |
| >TP53-P67R- RMPEAAPRV  | 224   | >TP53-P67R- RMREAAPRV  | 1329  | 1105  |
| >TP53-P67R- RMPEAAPRV  | 15    | >TP53-P67R- RMREAAPRV  | 13    | 2     |
| >TP53-P67R- RMPEAAPRV  | 480   | >TP53-P67R- RMREAAPRV  | 538   | 58    |
| >TP53-P67R- RMPEAAPRV  | 12    | >TP53-P67R- RMREAAPRV  | 75    | 63    |
| >TP53-P67R- RMPEAAPRV  | 2     | >TP53-P67R- RMREAAPRV  | 4     | 2     |
| >TP53-P67R- RMPEAAPRV  | 39    | >TP53-P67R- RMREAAPRV  | 237   | 198   |
| >TP53-P67R- RMPEAAPRV  | 17    | >TP53-P67R- RMREAAPRV  | 37    | 20    |
| >TP53-P67R- RMPEAAPRV  | 5     | >TP53-P67R- RMREAAPRV  | 9     | 4     |
| >TP53-P67R- RMPEAAPRV  | 356   | >TP53-P67R- RMREAAPRV  | 2850  | 2494  |
| >TP53-P67R- RMPEAAPRV  | 6     | >TP53-P67R- RMREAAPRV  | 23    | 17    |
| >TP53-P67R- RMPEAAPRV  | 4     | >TP53-P67R- RMREAAPRV  | 4     | 0     |
| >TP53-P67R- RMPEAAPRV  | 318   | >TP53-P67R- RMREAAPRV  | 619   | 301   |
| >TP53-P67R- RMPEAAPR   | 1567  | >TP53-P67R- RMREAAPR   | 180   | 1387  |
| >TP53-P67R- RMPEAAPR   | 7061  | >TP53-P67R- RMREAAPR   | 9     | 7052  |
| >TP53-P67R- RMPEAAPRV  | 5315  | >TP53-P67R- RMREAAPRV  | 6     | 5309  |
| >TP53-P67R- RMPEAAPRV  | 4431  | >TP53-P67R- RMREAAPRV  | 6     | 4425  |
| >TP53-P67R- RMPEAAPRV  | 13039 | >TP53-P67R- RMREAAPRV  | 38    | 13001 |
| >TP53-P67R- RMPEAAPR   | 53    | >TP53-P67R- RMREAAPR   | 10    | 43    |
| >TP53-P67R- RMPEAAPRV  | 2940  | >TP53-P67R- RMREAAPRV  | 279   | 2661  |
| >TP53-P67R- RMPEAAPR   | 2910  | >TP53-P67R- RMREAAPR   | 165   | 2745  |
| >TP53-P67R- RMPEAAPRV  | 4269  | >TP53-P67R- RMREAAPRV  | 362   | 3907  |
| >TP53-P67R- RMPEAAPRV  | 5397  | >TP53-P67R- RMREAAPRV  | 350   | 5047  |
| >TP53-P67R- RMPEAAPRV  | 3232  | >TP53-P67R- RMREAAPRV  | 419   | 2813  |
| >TP53-P67R- RMPEAAPRV  | 12560 | >TP53-P67R- RMREAAPRV  | 211   | 12349 |
| >TP53-P67R- RMPEAAPRV  | 229   | >TP53-P67R- RMREAAPRV  | 20721 | 20492 |
| >TP53-P67R- RMPEAAPR   | 26    | >TP53-P67R- RMREAAPR   | 36    | 10    |
| >TP53-P67R- PRMPEAAPR  | 1421  | >TP53-P67R- PRMREAAPR  | 479   | 942   |
| >TP53-P67R- APRMPEAAP  | 837   | >TP53-P67R- APRMREAAP  | 496   | 341   |
| >TP53-P67R- APRMPEAA   | 25    | >TP53-P67R- APRMREAA   | 12    | 13    |
| >TP53-P67R- APRMPEAAP  | 261   | >TP53-P67R- APRMREAAP  | 233   | 28    |
| >TP53-P67R- APRMPEAAP  | 38    | >TP53-P67R- APRMREAAP  | 29    | 9     |

|                        |      |                        |       |       |
|------------------------|------|------------------------|-------|-------|
| >TP53-P67R- APRMPEAA   | 6793 | >TP53-P67R- APRMREAA   | 219   | 6574  |
| >TP53-P67R- APRMPEAAP  | 9237 | >TP53-P67R- APRMREAAP  | 446   | 8791  |
| >TP53-P67R- EAPRMPEAA  | 1076 | >TP53-P67R- EAPRMREAA  | 483   | 593   |
| >TP53-P67R- EAPRMPEAA  | 30   | >TP53-P67R- EAPRMREAA  | 18    | 12    |
| >TP53-P67R- EAPRMPEAA  | 215  | >TP53-P67R- EAPRMREAA  | 89    | 126   |
| >TP53-P67R- DEAPRMPE   | 449  | >TP53-P67R- DEAPRMRE   | 5078  | 4629  |
| >TP53-P67R- DEAPRMPEA  | 493  | >TP53-P67R- DEAPRMREA  | 1279  | 786   |
| >TP53-P67S-1PEAAPRVA   | 8065 | >TP53-P67S-1SEAAPRVA   | 258   | 7807  |
| >TP53-P67S-1PEAAPRVAPA | 1052 | >TP53-P67S-1SEAAPRVAPA | 287   | 765   |
| >TP53-P67S-1PEAAPRVA   | 556  | >TP53-P67S-1SEAAPRVA   | 18    | 538   |
| >TP53-P67S-1PEAAPRVAPA | 591  | >TP53-P67S-1SEAAPRVAPA | 25    | 566   |
| >TP53-P67S-1MPEAAPRV   | 23   | >TP53-P67S-1MSEAAPRV   | 13938 | 13915 |
| >TP53-P67S-1MPEAAPRV   | 487  | >TP53-P67S-1MSEAAPRV   | 23883 | 23396 |
| >TP53-P67S-1MPEAAPRVA  | 177  | >TP53-P67S-1MSEAAPRVA  | 22102 | 21925 |
| >TP53-P67S-1MPEAAPRVA  | 65   | >TP53-P67S-1MSEAAPRVA  | 18247 | 18182 |
| >TP53-P67S-1MPEAAPRVA  | 258  | >TP53-P67S-1MSEAAPRVA  | 12554 | 12296 |
| >TP53-P67S-1MPEAAPRVA  | 76   | >TP53-P67S-1MSEAAPRVA  | 5158  | 5082  |
| >TP53-P67S-1MPEAAPRV   | 496  | >TP53-P67S-1MSEAAPRV   | 18750 | 18254 |
| >TP53-P67S-1MPEAAPRV   | 83   | >TP53-P67S-1MSEAAPRV   | 23842 | 23759 |
| >TP53-P67S-1MPEAAPRVA  | 15   | >TP53-P67S-1MSEAAPRVA  | 16425 | 16410 |
| >TP53-P67S-1MPEAAPRVA  | 10   | >TP53-P67S-1MSEAAPRVA  | 8249  | 8239  |
| >TP53-P67S-1RMPEAAPRV  | 35   | >TP53-P67S-1RMSEAAPRV  | 20    | 15    |
| >TP53-P67S-1RMPEAAPRV  | 224  | >TP53-P67S-1RMSEAAPRV  | 37    | 187   |
| >TP53-P67S-1RMPEAAPRV  | 15   | >TP53-P67S-1RMSEAAPRV  | 8     | 7     |
| >TP53-P67S-1RMPEAAPRV  | 480  | >TP53-P67S-1RMSEAAPRV  | 156   | 324   |
| >TP53-P67S-1RMPEAAPRV  | 12   | >TP53-P67S-1RMSEAAPRV  | 11    | 1     |
| >TP53-P67S-1RMPEAAPRV  | 2    | >TP53-P67S-1RMSEAAPRV  | 2     | 0     |
| >TP53-P67S-1RMPEAAPRV  | 39   | >TP53-P67S-1RMSEAAPRV  | 44    | 5     |
| >TP53-P67S-1RMPEAAPRV  | 17   | >TP53-P67S-1RMSEAAPRV  | 8     | 9     |
| >TP53-P67S-1RMPEAAPRV  | 1124 | >TP53-P67S-1RMSEAAPRV  | 445   | 679   |
| >TP53-P67S-1RMPEAAPRV  | 5    | >TP53-P67S-1RMSEAAPRV  | 5     | 0     |
| >TP53-P67S-1RMPEAAPRV  | 356  | >TP53-P67S-1RMSEAAPRV  | 268   | 88    |
| >TP53-P67S-1RMPEAAPRV  | 6    | >TP53-P67S-1RMSEAAPRV  | 3     | 3     |
| >TP53-P67S-1RMPEAAPRV  | 4    | >TP53-P67S-1RMSEAAPRV  | 2     | 2     |
| >TP53-P67S-1RMPEAAPRV  | 318  | >TP53-P67S-1RMSEAAPRV  | 244   | 74    |
| >TP53-P67S-1RMPEAAPR   | 1567 | >TP53-P67S-1RMSEAAPR   | 186   | 1381  |
| >TP53-P67S-1RMPEAAPR   | 53   | >TP53-P67S-1RMSEAAPR   | 16    | 37    |
| >TP53-P67S-1RMPEAAPRV  | 846  | >TP53-P67S-1RMSEAAPRV  | 263   | 583   |
| >TP53-P67S-1RMPEAAPR   | 2910 | >TP53-P67S-1RMSEAAPR   | 475   | 2435  |
| >TP53-P67S-1RMPEAAPRV  | 229  | >TP53-P67S-1RMSEAAPRV  | 14155 | 13926 |
| >TP53-P67S-1RMPEAAPR   | 26   | >TP53-P67S-1RMSEAAPR   | 27    | 1     |
| >TP53-P67S-1APRMPEAA   | 25   | >TP53-P67S-1APRMSEAA   | 19    | 6     |
| >TP53-P67S-1APRMPEAAP  | 261  | >TP53-P67S-1APRMSEAAP  | 380   | 119   |

|                         |       |                         |       |       |
|-------------------------|-------|-------------------------|-------|-------|
| >TP53-P67S-1 APRMPEAAP  | 38    | >TP53-P67S-1 APRMSEAAPI | 41    | 3     |
| >TP53-P67S-1 EAPRMPEAA  | 30    | >TP53-P67S-1 EAPRMSEAAI | 19    | 11    |
| >TP53-P67S-1 EAPRMPEA   | 802   | >TP53-P67S-1 EAPRMSEA   | 134   | 668   |
| >TP53-P67S-1 EAPRMPEAA  | 215   | >TP53-P67S-1 EAPRMSEAA  | 102   | 113   |
| >TP53-P67S-1 DEAPRMPE   | 449   | >TP53-P67S-1 DEAPRMSE   | 846   | 397   |
| >TP53-P67S-1 DEAPRMPEA  | 493   | >TP53-P67S-1 DEAPRMSEA  | 1414  | 921   |
| >TP53-P75R- APAPAAPT    | 45    | >TP53-P75R- ARAPAAPT    | 19371 | 19326 |
| >TP53-P75R- APAPAAPTPA  | 238   | >TP53-P75R- ARAPAAPTPA  | 30670 | 30432 |
| >TP53-P75R- APAPAAPTPA  | 27    | >TP53-P75R- ARAPAAPTPA  | 15106 | 15079 |
| >TP53-P75R- APAPAAPT    | 458   | >TP53-P75R- ARAPAAPT    | 22760 | 22302 |
| >TP53-P75R- APAPAAPTPA  | 203   | >TP53-P75R- ARAPAAPTPA  | 21254 | 21051 |
| >TP53-P75R- APAPAAPTPA  | 376   | >TP53-P75R- ARAPAAPTPA  | 32385 | 32009 |
| >TP53-P75R- APAPAAPTPA  | 46    | >TP53-P75R- ARAPAAPTPA  | 25217 | 25171 |
| >TP53-P75R- RMPEAAPRV   | 17221 | >TP53-P75R- RMPEAAPRV   | 58    | 17163 |
| >TP53-P75R- RMPEAAPRV   | 30753 | >TP53-P75R- RMPEAAPRV   | 47    | 30706 |
| >TP53-P75R- VAPAPAAPTF  | 13659 | >TP53-P75R- VARAPAAPTF  | 71    | 13588 |
| >TP53-P75R- VAPAPAAPTF  | 14522 | >TP53-P75R- VARAPAAPTF  | 290   | 14232 |
| >TP53-P75R- VAPAPAAPT   | 12017 | >TP53-P75R- VARAPAAPT   | 450   | 11567 |
| >TP53-P75R- VAPAPAAPT   | 125   | >TP53-P75R- VARAPAAPT   | 18965 | 18840 |
| >TP53-P75R- VAPAPAAPTF  | 412   | >TP53-P75R- VARAPAAPTF  | 21557 | 21145 |
| >TP53-P75R- VAPAPAAPTF  | 498   | >TP53-P75R- VARAPAAPTF  | 23272 | 22774 |
| >TP53-P75R- RVAPAPAA    | 259   | >TP53-P75R- RVARAPAA    | 523   | 264   |
| >TP53-P75R- RVAPAPAA    | 79    | >TP53-P75R- RVARAPAA    | 289   | 210   |
| >TP53-P75R- RVAPAPAA    | 77    | >TP53-P75R- RVARAPAA    | 43    | 34    |
| >TP53-P75R- RVAPAPAAP1  | 570   | >TP53-P75R- RVARAPAAP1  | 307   | 263   |
| >TP53-P75R- RVAPAPAA    | 432   | >TP53-P75R- RVARAPAA    | 620   | 188   |
| >TP53-P75R- APRVAPAP    | 1707  | >TP53-P75R- APRVARAP    | 230   | 1477  |
| >TP53-P75R- APRVAPAPA   | 22    | >TP53-P75R- APRVARAPA   | 7     | 15    |
| >TP53-P75R- APRVAPAPA/  | 334   | >TP53-P75R- APRVARAPA/  | 202   | 132   |
| >TP53-P75R- APRVAPAPA/  | 1042  | >TP53-P75R- APRVARAPA/  | 223   | 819   |
| >TP53-P75R- APRVAPAPA   | 61    | >TP53-P75R- APRVARAPA   | 59    | 2     |
| >TP53-P75R- APRVAPAPA/  | 432   | >TP53-P75R- APRVARAPA/  | 379   | 53    |
| >TP53-P75R- EAAPRVAP    | 26495 | >TP53-P75R- EAAPRVAR    | 69    | 26426 |
| >TP53-P75R- EAAPRVAP    | 11111 | >TP53-P75R- EAAPRVAR    | 6     | 11105 |
| >TP53-P75R- EAAPRVAPA   | 8     | >TP53-P75R- EAAPRVARA   | 18    | 10    |
| >TP53-P75R- EAAPRVAPAF  | 9     | >TP53-P75R- EAAPRVARAF  | 9     | 0     |
| >TP53-P75R- EAAPRVAPA   | 130   | >TP53-P75R- EAAPRVARA   | 1366  | 1236  |
| >TP53-P75R- EAAPRVAPAF  | 96    | >TP53-P75R- EAAPRVARAF  | 213   | 117   |
| >TP53-P75R- MPEAAPRVA   | 65    | >TP53-P75R- MPEAAPRVA   | 679   | 614   |
| >TP53-P75R- MPEAAPRVA   | 76    | >TP53-P75R- MPEAAPRVA   | 775   | 699   |
| >TP53-P75R- MPEAAPRVA   | 10    | >TP53-P75R- MPEAAPRVA   | 34    | 24    |
| >TP53-P75S-1 PAPAAPTPA  | 10043 | >TP53-P75S-1 SAPAAPTPA  | 158   | 9885  |
| >TP53-P75S-1 APAPAAPTPA | 17452 | >TP53-P75S-1 ASAPAAPTPA | 388   | 17064 |

|                         |       |                          |       |       |
|-------------------------|-------|--------------------------|-------|-------|
| >TP53-P75S-1 APAPAAPT   | 45    | >TP53-P75S-1 ASAPAAPT    | 14848 | 14803 |
| >TP53-P75S-1 APAPAAPTPA | 238   | >TP53-P75S-1 ASAPAAPTPA  | 24860 | 24622 |
| >TP53-P75S-1 APAPAAPTPA | 27    | >TP53-P75S-1 ASAPAAPTPA  | 9042  | 9015  |
| >TP53-P75S-1 APAPAAPT   | 23985 | >TP53-P75S-1 ASAPAAPT    | 353   | 23632 |
| >TP53-P75S-1 APAPAAPT   | 458   | >TP53-P75S-1 ASAPAAPT    | 11407 | 10949 |
| >TP53-P75S-1 APAPAAPTPA | 203   | >TP53-P75S-1 ASAPAAPTPA  | 9141  | 8938  |
| >TP53-P75S-1 APAPAAPTPA | 376   | >TP53-P75S-1 ASAPAAPTPA  | 27257 | 26881 |
| >TP53-P75S-1 APAPAAPTPA | 46    | >TP53-P75S-1 ASAPAAPTPA  | 19733 | 19687 |
| >TP53-P75S-1 VAPAPAAPT  | 125   | >TP53-P75S-1 VASAPAAPT   | 13068 | 12943 |
| >TP53-P75S-1 VAPAPAAPTF | 412   | >TP53-P75S-1 VASAPAAPTF  | 16451 | 16039 |
| >TP53-P75S-1 VAPAPAAPTF | 498   | >TP53-P75S-1 VASAPAAPTF  | 17846 | 17348 |
| >TP53-P75S-1 RVAPAPAA   | 259   | >TP53-P75S-1 RVASAPAA    | 198   | 61    |
| >TP53-P75S-1 RVAPAPAA   | 79    | >TP53-P75S-1 RVASAPAA    | 158   | 79    |
| >TP53-P75S-1 RVAPAPAA   | 77    | >TP53-P75S-1 RVASAPAA    | 94    | 17    |
| >TP53-P75S-1 RVAPAPAAPT | 570   | >TP53-P75S-1 RVASAPAAPT  | 189   | 381   |
| >TP53-P75S-1 RVAPAPAA   | 432   | >TP53-P75S-1 RVASAPAA    | 689   | 257   |
| >TP53-P75S-1 APRVAPAP   | 1707  | >TP53-P75S-1 APRVASAP    | 377   | 1330  |
| >TP53-P75S-1 APRVAPAPA  | 22    | >TP53-P75S-1 APRVASAPA   | 10    | 12    |
| >TP53-P75S-1 APRVAPAPA/ | 334   | >TP53-P75S-1 APRVASAPA/  | 363   | 29    |
| >TP53-P75S-1 APRVAPAPA/ | 1042  | >TP53-P75S-1 APRVASAPA/  | 481   | 561   |
| >TP53-P75S-1 APRVAPAPA  | 61    | >TP53-P75S-1 APRVASAPA   | 49    | 12    |
| >TP53-P75S-1 APRVAPAPA/ | 432   | >TP53-P75S-1 APRVASAPA/  | 739   | 307   |
| >TP53-P75S-1 EAAPRVAP   | 5181  | >TP53-P75S-1 EAAPRVAS    | 275   | 4906  |
| >TP53-P75S-1 EAAPRVAPA  | 8     | >TP53-P75S-1 EAAPRVASA   | 17    | 9     |
| >TP53-P75S-1 EAAPRVAPAF | 9     | >TP53-P75S-1 EAAPRVASAF  | 9     | 0     |
| >TP53-P75S-1 EAAPRVAPA  | 130   | >TP53-P75S-1 EAAPRVASA   | 572   | 442   |
| >TP53-P75S-1 EAAPRVAPAF | 96    | >TP53-P75S-1 EAAPRVASAF  | 86    | 10    |
| >TP53-P75S-1 PEAAPRVAP/ | 591   | >TP53-P75S-1 PEAAPRVASA/ | 435   | 156   |
| >TP53-P75S-1 MPEAAPRVA  | 65    | >TP53-P75S-1 MPEAAPRVA   | 103   | 38    |
| >TP53-P75S-1 MPEAAPRVA  | 76    | >TP53-P75S-1 MPEAAPRVA   | 229   | 153   |
| >TP53-P75S-1 MPEAAPRVA  | 10    | >TP53-P75S-1 MPEAAPRVA   | 18    | 8     |
| >TP53-P77A- APAAPTPAA   | 14561 | >TP53-P77A- AAAAPTPAA    | 286   | 14275 |
| >TP53-P77A- APAAPTPAAF  | 15670 | >TP53-P77A- AAAAPTPAAF   | 376   | 15294 |
| >TP53-P77A- APAAPTPA    | 9443  | >TP53-P77A- AAAAPTPA     | 360   | 9083  |
| >TP53-P77A- APAAPTPAAF  | 5369  | >TP53-P77A- AAAAPTPAAF   | 131   | 5238  |
| >TP53-P77A- APAAPTPAA   | 1180  | >TP53-P77A- AAAAPTPAA    | 485   | 695   |
| >TP53-P77A- APAAPTPAAF  | 967   | >TP53-P77A- AAAAPTPAAF   | 422   | 545   |
| >TP53-P77A- APAAPTPA    | 26    | >TP53-P77A- AAAAPTPA     | 1359  | 1333  |
| >TP53-P77A- APAAPTPAA   | 28    | >TP53-P77A- AAAAPTPAA    | 349   | 321   |
| >TP53-P77A- APAAPTPAAF  | 18    | >TP53-P77A- AAAAPTPAAF   | 331   | 313   |
| >TP53-P77A- APAAPTPAA   | 276   | >TP53-P77A- AAAAPTPAA    | 3016  | 2740  |
| >TP53-P77A- APAAPTPA    | 66    | >TP53-P77A- AAAAPTPA     | 7703  | 7637  |
| >TP53-P77A- APAAPTPAA   | 25    | >TP53-P77A- AAAAPTPAA    | 2749  | 2724  |



|                        |       |                        |      |       |
|------------------------|-------|------------------------|------|-------|
| >TP53-P77A- APAAPTPAAF | 33    | >TP53-P77A- AAAAPTPAAF | 4551 | 4518  |
| >TP53-P77A- PEAAPRVAP/ | 11732 | >TP53-P77A- PEAAPRVAP/ | 132  | 11600 |
| >TP53-P77A- APAPAAPT   | 45    | >TP53-P77A- APAAAAPT   | 49   | 4     |
| >TP53-P77A- APAPAAPTP/ | 238   | >TP53-P77A- APAAAAPTP/ | 101  | 137   |
| >TP53-P77A- APAPAAPTP/ | 27    | >TP53-P77A- APAAAAPTP/ | 36   | 9     |
| >TP53-P77A- APAPAAPT   | 458   | >TP53-P77A- APAAAAPT   | 421  | 37    |
| >TP53-P77A- APAPAAPTP/ | 203   | >TP53-P77A- APAAAAPTP/ | 215  | 12    |
| >TP53-P77A- APAPAAPTP/ | 376   | >TP53-P77A- APAAAAPTP/ | 1027 | 651   |
| >TP53-P77A- APAPAAPTP/ | 46    | >TP53-P77A- APAAAAPTP/ | 35   | 11    |
| >TP53-P77A- APAPAAPTP/ | 705   | >TP53-P77A- APAAAAPTP/ | 452  | 253   |
| >TP53-P77A- VAPAPAAPT  | 125   | >TP53-P77A- VAPAAAAPT  | 145  | 20    |
| >TP53-P77A- VAPAPAAPTF | 412   | >TP53-P77A- VAPAAAAPTF | 483  | 71    |
| >TP53-P77A- VAPAPAAPTF | 498   | >TP53-P77A- VAPAAAAPTF | 540  | 42    |
| >TP53-P77A- RVAPAPAA   | 259   | >TP53-P77A- RVAPAAAA   | 140  | 119   |
| >TP53-P77A- RVAPAPAA   | 79    | >TP53-P77A- RVAPAAAA   | 43   | 36    |
| >TP53-P77A- RVAPAPAA   | 77    | >TP53-P77A- RVAPAAAA   | 154  | 77    |
| >TP53-P77A- RVAPAPAA   | 1765  | >TP53-P77A- RVAPAAAA   | 281  | 1484  |
| >TP53-P77A- RVAPAPAA   | 432   | >TP53-P77A- RVAPAAAA   | 153  | 279   |
| >TP53-P77A- APRVAPAP   | 1707  | >TP53-P77A- APRVAPAA   | 37   | 1670  |
| >TP53-P77A- APRVAPAPA  | 22    | >TP53-P77A- APRVAPAAA  | 32   | 10    |
| >TP53-P77A- APRVAPAPA/ | 334   | >TP53-P77A- APRVAPAAA/ | 138  | 196   |
| >TP53-P77A- APRVAPAP   | 4313  | >TP53-P77A- APRVAPAA   | 96   | 4217  |
| >TP53-P77A- APRVAPAPA  | 61    | >TP53-P77A- APRVAPAAA  | 75   | 14    |
| >TP53-P77A- APRVAPAPA/ | 432   | >TP53-P77A- APRVAPAAA/ | 138  | 294   |
| >TP53-P77A- EAAPRVAPAF | 9     | >TP53-P77A- EAAPRVAPA/ | 17   | 8     |
| >TP53-P77A- EAAPRVAPAF | 8124  | >TP53-P77A- EAAPRVAPA/ | 119  | 8005  |
| >TP53-P77A- EAAPRVAPAF | 96    | >TP53-P77A- EAAPRVAPA/ | 256  | 160   |
| >TP53-P80L-1PTPAAPAPA  | 7873  | >TP53-P80L-1LTPAAPAPA  | 233  | 7640  |
| >TP53-P80L-1PTPAAPAPA  | 786   | >TP53-P80L-1LTPAAPAPA  | 19   | 767   |
| >TP53-P80L-1PTPAAPAPAF | 8374  | >TP53-P80L-1LTPAAPAPAP | 356  | 8018  |
| >TP53-P80L-1PTPAAPAPA  | 441   | >TP53-P80L-1LTPAAPAPA  | 26   | 415   |
| >TP53-P80L-1PTPAAPAPAF | 1234  | >TP53-P80L-1LTPAAPAPAP | 84   | 1150  |
| >TP53-P80L-1PTPAAPAPAF | 603   | >TP53-P80L-1LTPAAPAPAP | 41   | 562   |
| >TP53-P80L-1APTPAAPA   | 24154 | >TP53-P80L-1ALTPAAPA   | 443  | 23711 |
| >TP53-P80L-1APTPAAPA   | 30206 | >TP53-P80L-1ALTPAAPA   | 172  | 30034 |
| >TP53-P80L-1APTPAAPAPA | 23760 | >TP53-P80L-1ALTPAAPAPA | 148  | 23612 |
| >TP53-P80L-1APTPAAPA   | 19885 | >TP53-P80L-1ALTPAAPA   | 33   | 19852 |
| >TP53-P80L-1APTPAAPAPA | 18140 | >TP53-P80L-1ALTPAAPAPA | 69   | 18071 |
| >TP53-P80L-1APTPAAPA   | 14803 | >TP53-P80L-1ALTPAAPA   | 67   | 14736 |
| >TP53-P80L-1APTPAAPA   | 27144 | >TP53-P80L-1ALTPAAPA   | 128  | 27016 |
| >TP53-P80L-1APTPAAPAPA | 26171 | >TP53-P80L-1ALTPAAPAPA | 87   | 26084 |
| >TP53-P80L-1APTPAAPA   | 23556 | >TP53-P80L-1ALTPAAPA   | 222  | 23334 |
| >TP53-P80L-1APTPAAPAPA | 22975 | >TP53-P80L-1ALTPAAPAPA | 135  | 22840 |

|                         |       |                          |       |       |
|-------------------------|-------|--------------------------|-------|-------|
| >TP53-P80L-1 APTPAAPA   | 23709 | >TP53-P80L-1 ALTPAAPA    | 58    | 23651 |
| >TP53-P80L-1 APTPAAPAPA | 22978 | >TP53-P80L-1 ALTPAAPAPA  | 39    | 22939 |
| >TP53-P80L-1 APTPAAPA   | 29066 | >TP53-P80L-1 ALTPAAPA    | 6     | 29060 |
| >TP53-P80L-1 APTPAAPAPA | 29309 | >TP53-P80L-1 ALTPAAPAPA  | 7     | 29302 |
| >TP53-P80L-1 APTPAAPA   | 74    | >TP53-P80L-1 ALTPAAPA    | 15414 | 15340 |
| >TP53-P80L-1 APTPAAPAPA | 433   | >TP53-P80L-1 ALTPAAPAPA  | 33896 | 33463 |
| >TP53-P80L-1 APTPAAPA   | 122   | >TP53-P80L-1 ALTPAAPA    | 29503 | 29381 |
| >TP53-P80L-1 APTPAAPAPA | 157   | >TP53-P80L-1 ALTPAAPAPA  | 30566 | 30409 |
| >TP53-P80L-1 APRVAPAPA/ | 1042  | >TP53-P80L-1 APRVAPAPA/  | 11    | 1031  |
| >TP53-P80L-1 AAPTPAAPAF | 5269  | >TP53-P80L-1 AALTPAAPAF  | 332   | 4937  |
| >TP53-P80L-1 AAPTPAAPA  | 10546 | >TP53-P80L-1 AALTPAAPA   | 449   | 10097 |
| >TP53-P80L-1 AAPTPAAPA  | 298   | >TP53-P80L-1 AALTPAAPA   | 23129 | 22831 |
| >TP53-P80L-1 APAAPTPA   | 26    | >TP53-P80L-1 APAALTPA    | 35    | 9     |
| >TP53-P80L-1 APAAPTPAA  | 28    | >TP53-P80L-1 APAALTPAA   | 41    | 13    |
| >TP53-P80L-1 APAAPTPAAF | 18    | >TP53-P80L-1 APAALTPAAF  | 25    | 7     |
| >TP53-P80L-1 APAAPTPAA  | 276   | >TP53-P80L-1 APAALTPAA   | 115   | 161   |
| >TP53-P80L-1 APAAPTPAAF | 576   | >TP53-P80L-1 APAALTPAAF  | 323   | 253   |
| >TP53-P80L-1 APAAPTPA   | 66    | >TP53-P80L-1 APAALTPA    | 56    | 10    |
| >TP53-P80L-1 APAAPTPAA  | 25    | >TP53-P80L-1 APAALTPAA   | 29    | 4     |
| >TP53-P80L-1 APAAPTPAAF | 33    | >TP53-P80L-1 APAALTPAAF  | 40    | 7     |
| >TP53-P80L-1 APAAPTPAA  | 518   | >TP53-P80L-1 APAALTPAA   | 300   | 218   |
| >TP53-P80L-1 APAPAAPT   | 45    | >TP53-P80L-1 APAPAAALT   | 389   | 344   |
| >TP53-P80L-1 APAPAAPTPA | 238   | >TP53-P80L-1 APAPAAALTPA | 114   | 124   |
| >TP53-P80L-1 APAPAAPTPA | 27    | >TP53-P80L-1 APAPAAALTPA | 26    | 1     |
| >TP53-P80L-1 APAPAAPT   | 458   | >TP53-P80L-1 APAPAAALT   | 3072  | 2614  |
| >TP53-P80L-1 APAPAAPTPA | 203   | >TP53-P80L-1 APAPAAALTPA | 127   | 76    |
| >TP53-P80L-1 APAPAAPTPA | 376   | >TP53-P80L-1 APAPAAALTPA | 235   | 141   |
| >TP53-P80L-1 APAPAAPTPA | 46    | >TP53-P80L-1 APAPAAALTPA | 98    | 52    |
| >TP53-P80L-1 APAPAAPTPA | 705   | >TP53-P80L-1 APAPAAALTPA | 465   | 240   |
| >TP53-P80L-1 VAPAPAAP   | 4121  | >TP53-P80L-1 VAPAPAAL    | 7     | 4114  |
| >TP53-P80L-1 VAPAPAAPT  | 125   | >TP53-P80L-1 VAPAPAALT   | 14    | 111   |
| >TP53-P80L-1 VAPAPAAPTF | 412   | >TP53-P80L-1 VAPAPAALTP  | 235   | 177   |
| >TP53-P80L-1 VAPAPAAPTF | 498   | >TP53-P80L-1 VAPAPAALTP  | 101   | 397   |
| >TP53-P80L-1 RVAPAPAAP  | 11639 | >TP53-P80L-1 RVAPAPAAL   | 67    | 11572 |
| >TP53-P80L-1 RVAPAPAAP  | 9133  | >TP53-P80L-1 RVAPAPAAL   | 51    | 9082  |
| >TP53-P80L-1 RVAPAPAAP  | 11870 | >TP53-P80L-1 RVAPAPAAL   | 87    | 11783 |
| >TP53-P80L-1 RVAPAPAAP  | 22480 | >TP53-P80L-1 RVAPAPAAL   | 470   | 22010 |
| >TP53-P80L-1 RVAPAPAAP  | 1743  | >TP53-P80L-1 RVAPAPAAL   | 97    | 1646  |
| >TP53-P80L-1 RVAPAPAAP  | 10198 | >TP53-P80L-1 RVAPAPAAL   | 176   | 10022 |
| >TP53-P80L-1 RVAPAPAAP  | 16991 | >TP53-P80L-1 RVAPAPAAL   | 158   | 16833 |
| >TP53-P80L-1 RVAPAPAAP  | 6436  | >TP53-P80L-1 RVAPAPAAL   | 13    | 6423  |
| >TP53-P80L-1 RVAPAPAAP  | 7877  | >TP53-P80L-1 RVAPAPAAL   | 438   | 7439  |
| >TP53-P80L-1 RVAPAPAAP  | 14928 | >TP53-P80L-1 RVAPAPAAL   | 14    | 14914 |

|                        |       |                        |       |       |
|------------------------|-------|------------------------|-------|-------|
| >TP53-P80L-1RVAPAPAAP  | 19738 | >TP53-P80L-1RVAPAPAAL  | 431   | 19307 |
| >TP53-P80L-1RVAPAPAAP  | 17888 | >TP53-P80L-1RVAPAPAAL  | 453   | 17435 |
| >TP53-P80L-1RVAPAPAAP  | 24750 | >TP53-P80L-1RVAPAPAAL  | 308   | 24442 |
| >TP53-P80L-1PRVAPAPAAF | 19317 | >TP53-P80L-1PRVAPAPAAI | 207   | 19110 |
| >TP53-P82L-1PAAPAPAPSV | 123   | >TP53-P82L-1LAAPAPAPSV | 6     | 117   |
| >TP53-P82L-1PAAPAPAPS  | 7785  | >TP53-P82L-1LAAPAPAPS  | 329   | 7456  |
| >TP53-P82L-1PAAPAPAPSV | 188   | >TP53-P82L-1LAAPAPAPSV | 34    | 154   |
| >TP53-P82L-1PAAPAPAPSV | 256   | >TP53-P82L-1LAAPAPAPSV | 9     | 247   |
| >TP53-P82L-1PAAPAPAPSV | 3448  | >TP53-P82L-1LAAPAPAPSV | 261   | 3187  |
| >TP53-P82L-1TPAAPAPA   | 23511 | >TP53-P82L-1TLAAPAPA   | 150   | 23361 |
| >TP53-P82L-1TPAAPAPA   | 26195 | >TP53-P82L-1TLAAPAPA   | 64    | 26131 |
| >TP53-P82L-1TPAAPAPA   | 16620 | >TP53-P82L-1TLAAPAPA   | 13    | 16607 |
| >TP53-P82L-1TPAAPAPA   | 21137 | >TP53-P82L-1TLAAPAPA   | 274   | 20863 |
| >TP53-P82L-1TPAAPAPA   | 26613 | >TP53-P82L-1TLAAPAPA   | 82    | 26531 |
| >TP53-P82L-1TPAAPAPA   | 25192 | >TP53-P82L-1TLAAPAPA   | 178   | 25014 |
| >TP53-P82L-1TPAAPAPA   | 34645 | >TP53-P82L-1TLAAPAPA   | 29    | 34616 |
| >TP53-P82L-1TPAAPAPA   | 537   | >TP53-P82L-1TLAAPAPA   | 50    | 487   |
| >TP53-P82L-1TPAAPAPA   | 460   | >TP53-P82L-1TLAAPAPA   | 249   | 211   |
| >TP53-P82L-1TPAAPAPA   | 121   | >TP53-P82L-1TLAAPAPA   | 17835 | 17714 |
| >TP53-P82L-1TPAAPAPAPS | 296   | >TP53-P82L-1TLAAPAPAPS | 13473 | 13177 |
| >TP53-P82L-1TPAAPAPAPS | 4458  | >TP53-P82L-1TLAAPAPAPS | 319   | 4139  |
| >TP53-P82L-1TPAAPAPA   | 352   | >TP53-P82L-1TLAAPAPA   | 14217 | 13865 |
| >TP53-P82L-1TPAAPAPAPS | 437   | >TP53-P82L-1TLAAPAPAPS | 11924 | 11487 |
| >TP53-P82L-1TPAAPAPAPS | 33    | >TP53-P82L-1TLAAPAPAPS | 16884 | 16851 |
| >TP53-P82L-1TPAAPAPA   | 25    | >TP53-P82L-1TLAAPAPA   | 21048 | 21023 |
| >TP53-P82L-1TPAAPAPAPS | 4615  | >TP53-P82L-1TLAAPAPAPS | 138   | 4477  |
| >TP53-P82L-1TPAAPAPAPS | 16    | >TP53-P82L-1TLAAPAPAPS | 6357  | 6341  |
| >TP53-P82L-1RVAPAPAAP1 | 18015 | >TP53-P82L-1RVAPAPAAP1 | 349   | 17666 |
| >TP53-P82L-1RVAPAPAAP1 | 14370 | >TP53-P82L-1RVAPAPAAP1 | 251   | 14119 |
| >TP53-P82L-1RVAPAPAAP1 | 8856  | >TP53-P82L-1RVAPAPAAP1 | 44    | 8812  |
| >TP53-P82L-1RVAPAPAAP1 | 20500 | >TP53-P82L-1RVAPAPAAP1 | 426   | 20074 |
| >TP53-P82L-1RVAPAPAAP1 | 26971 | >TP53-P82L-1RVAPAPAAP1 | 116   | 26855 |
| >TP53-P82L-1RVAPAPAAP1 | 1393  | >TP53-P82L-1RVAPAPAAP1 | 76    | 1317  |
| >TP53-P82L-1RVAPAPAAP1 | 8178  | >TP53-P82L-1RVAPAPAAP1 | 141   | 8037  |
| >TP53-P82L-1RVAPAPAAP1 | 15685 | >TP53-P82L-1RVAPAPAAP1 | 64    | 15621 |
| >TP53-P82L-1RVAPAPAAP1 | 9691  | >TP53-P82L-1RVAPAPAAP1 | 8     | 9683  |
| >TP53-P82L-1RVAPAPAAP1 | 13947 | >TP53-P82L-1RVAPAPAAP1 | 125   | 13822 |
| >TP53-P82L-1RVAPAPAAP1 | 21130 | >TP53-P82L-1RVAPAPAAP1 | 114   | 21016 |
| >TP53-P82L-1PTPAAPAPA  | 4821  | >TP53-P82L-1PTLAAPAPA  | 341   | 4480  |
| >TP53-P82L-1PTPAAPAPA  | 9331  | >TP53-P82L-1PTLAAPAPA  | 482   | 8849  |
| >TP53-P82L-1PTPAAPAPA  | 441   | >TP53-P82L-1PTLAAPAPA  | 24152 | 23711 |
| >TP53-P82L-1APTPAAPA   | 74    | >TP53-P82L-1APTLAAPA   | 132   | 58    |
| >TP53-P82L-1APTPAAPAPA | 433   | >TP53-P82L-1APTLAAPAPA | 241   | 192   |

|                        |       |                        |      |       |
|------------------------|-------|------------------------|------|-------|
| >TP53-P82L-1APTPAAPA   | 122   | >TP53-P82L-1APTLAAPA   | 86   | 36    |
| >TP53-P82L-1APTPAAPAPA | 157   | >TP53-P82L-1APTLAAPAPA | 147  | 10    |
| >TP53-P82L-1AAPTPAAPA  | 298   | >TP53-P82L-1AAPTLAAPA  | 667  | 369   |
| >TP53-P82L-1APAAPTPA   | 26    | >TP53-P82L-1APAAPTLA   | 154  | 128   |
| >TP53-P82L-1APAAPTPAA  | 28    | >TP53-P82L-1APAAPTLAA  | 16   | 12    |
| >TP53-P82L-1APAAPTPAAF | 18    | >TP53-P82L-1APAAPTLAAF | 19   | 1     |
| >TP53-P82L-1APAAPTPAA  | 276   | >TP53-P82L-1APAAPTLAA  | 246  | 30    |
| >TP53-P82L-1APAAPTPAAF | 576   | >TP53-P82L-1APAAPTLAAF | 415  | 161   |
| >TP53-P82L-1APAAPTPA   | 66    | >TP53-P82L-1APAAPTLA   | 205  | 139   |
| >TP53-P82L-1APAAPTPAA  | 25    | >TP53-P82L-1APAAPTLAA  | 125  | 100   |
| >TP53-P82L-1APAAPTPAAF | 33    | >TP53-P82L-1APAAPTLAAF | 64   | 31    |
| >TP53-P82L-1APAAPTPAA  | 518   | >TP53-P82L-1APAAPTLAA  | 263  | 255   |
| >TP53-P82L-1APAPAAPTP  | 20595 | >TP53-P82L-1APAPAAPTL  | 5    | 20590 |
| >TP53-P82L-1APAPAAPTP  | 5783  | >TP53-P82L-1APAPAAPTL  | 30   | 5753  |
| >TP53-P82L-1APAPAAPTPA | 238   | >TP53-P82L-1APAPAAPTLA | 1585 | 1347  |
| >TP53-P82L-1APAPAAPTPA | 27    | >TP53-P82L-1APAPAAPTLA | 21   | 6     |
| >TP53-P82L-1APAPAAPTP  | 3579  | >TP53-P82L-1APAPAAPTL  | 159  | 3420  |
| >TP53-P82L-1APAPAAPTPA | 203   | >TP53-P82L-1APAPAAPTLA | 175  | 28    |
| >TP53-P82L-1APAPAAPTP  | 17128 | >TP53-P82L-1APAPAAPTL  | 45   | 17083 |
| >TP53-P82L-1APAPAAPTPA | 376   | >TP53-P82L-1APAPAAPTLA | 398  | 22    |
| >TP53-P82L-1APAPAAPTPA | 46    | >TP53-P82L-1APAPAAPTLA | 155  | 109   |
| >TP53-P82L-1APAPAAPTP  | 12797 | >TP53-P82L-1APAPAAPTL  | 91   | 12706 |
| >TP53-P82L-1APAPAAPTPA | 705   | >TP53-P82L-1APAPAAPTLA | 469  | 236   |
| >TP53-P82L-1VAPAPAAPTF | 19729 | >TP53-P82L-1VAPAPAAPTL | 186  | 19543 |
| >TP53-P82L-1VAPAPAAPTF | 412   | >TP53-P82L-1VAPAPAAPTL | 3    | 409   |
| >TP53-P82L-1VAPAPAAPTF | 498   | >TP53-P82L-1VAPAPAAPTL | 73   | 425   |
| >TP53-P85L-1PAPAPSWPL  | 5095  | >TP53-P85L-1LAPAPSWPL  | 59   | 5036  |
| >TP53-P85L-1PAPAPSWPL  | 5550  | >TP53-P85L-1LAPAPSWPL  | 318  | 5232  |
| >TP53-P85L-1PAPAPSWPL  | 1185  | >TP53-P85L-1LAPAPSWPL  | 32   | 1153  |
| >TP53-P85L-1PAPAPSWPL  | 3044  | >TP53-P85L-1LAPAPSWPL  | 274  | 2770  |
| >TP53-P85L-1PAPAPSWPL  | 9     | >TP53-P85L-1LAPAPSWPL  | 2    | 7     |
| >TP53-P85L-1PAPAPSWPLS | 932   | >TP53-P85L-1LAPAPSWPLS | 58   | 874   |
| >TP53-P85L-1APAPAPSWP  | 17776 | >TP53-P85L-1ALAPAPSWPI | 32   | 17744 |
| >TP53-P85L-1APAPAPSWP  | 35560 | >TP53-P85L-1ALAPAPSWP  | 481  | 35079 |
| >TP53-P85L-1APAPAPSWP  | 5741  | >TP53-P85L-1ALAPAPSWPI | 12   | 5729  |
| >TP53-P85L-1APAPAPSWP  | 33854 | >TP53-P85L-1ALAPAPSWPI | 381  | 33473 |
| >TP53-P85L-1APAPAPSWP  | 18660 | >TP53-P85L-1ALAPAPSWPI | 102  | 18558 |
| >TP53-P85L-1APAPAPSWP  | 8100  | >TP53-P85L-1ALAPAPSWPI | 228  | 7872  |
| >TP53-P85L-1APAPAPSWP  | 12741 | >TP53-P85L-1ALAPAPSWPI | 4    | 12737 |
| >TP53-P85L-1APAPAPSWP  | 16007 | >TP53-P85L-1ALAPAPSWPI | 9    | 15998 |
| >TP53-P85L-1APAPAPSWP  | 14131 | >TP53-P85L-1ALAPAPSWPI | 7    | 14124 |
| >TP53-P85L-1APAPAPSWP  | 20853 | >TP53-P85L-1ALAPAPSWPI | 9    | 20844 |
| >TP53-P85L-1APAPAPSWP  | 16548 | >TP53-P85L-1ALAPAPSWPI | 2    | 16546 |

|                        |       |                        |       |       |
|------------------------|-------|------------------------|-------|-------|
| >TP53-P85L-1APAPAPSWP  | 35435 | >TP53-P85L-1ALAPAPSWPI | 137   | 35298 |
| >TP53-P85L-1APAPAPSW   | 91    | >TP53-P85L-1ALAPAPSW   | 11225 | 11134 |
| >TP53-P85L-1APAPAPSWP  | 73    | >TP53-P85L-1ALAPAPSWPI | 25736 | 25663 |
| >TP53-P85L-1APAPAPSWP  | 2855  | >TP53-P85L-1ALAPAPSWPI | 488   | 2367  |
| >TP53-P85L-1APAPAPSW   | 745   | >TP53-P85L-1ALAPAPSW   | 24    | 721   |
| >TP53-P85L-1APAPAPSWP  | 41    | >TP53-P85L-1ALAPAPSWPI | 332   | 291   |
| >TP53-P85L-1APAPAPSW   | 51    | >TP53-P85L-1ALAPAPSW   | 20909 | 20858 |
| >TP53-P85L-1APAPAPSW   | 3812  | >TP53-P85L-1ALAPAPSW   | 138   | 3674  |
| >TP53-P85L-1APAPAPSWP  | 390   | >TP53-P85L-1ALAPAPSWPI | 9085  | 8695  |
| >TP53-P85L-1APAPAPSW   | 20    | >TP53-P85L-1ALAPAPSW   | 7991  | 7971  |
| >TP53-P85L-1PAPAAPTPAA | 15453 | >TP53-P85L-1PAPAAPTPAA | 82    | 15371 |
| >TP53-P85L-1AAPAPAPSW  | 136   | >TP53-P85L-1AALAPAPSWI | 26    | 110   |
| >TP53-P85L-1AAPAPAPSW  | 859   | >TP53-P85L-1AALAPAPSWI | 90    | 769   |
| >TP53-P85L-1AAPAPAPSW  | 380   | >TP53-P85L-1AALAPAPSWI | 2046  | 1666  |
| >TP53-P85L-1AAPAPAPSW  | 1180  | >TP53-P85L-1AALAPAPSWI | 27    | 1153  |
| >TP53-P85L-1AAPAPAPSW  | 3713  | >TP53-P85L-1AALAPAPSWI | 292   | 3421  |
| >TP53-P85L-1AAPAPAPSW  | 62    | >TP53-P85L-1AALAPAPSW  | 5     | 57    |
| >TP53-P85L-1AAPAPAPSW  | 774   | >TP53-P85L-1AALAPAPSWI | 14    | 760   |
| >TP53-P85L-1AAPAPAPSW  | 3492  | >TP53-P85L-1AALAPAPSWI | 189   | 3303  |
| >TP53-P85L-1AAPAPAPSW  | 617   | >TP53-P85L-1AALAPAPSW  | 83    | 534   |
| >TP53-P85L-1AAPAPAPSW  | 1323  | >TP53-P85L-1AALAPAPSW  | 15    | 1308  |
| >TP53-P85L-1AAPAPAPSW  | 124   | >TP53-P85L-1AALAPAPSW  | 12484 | 12360 |
| >TP53-P85L-1AAPAPAPSW  | 4     | >TP53-P85L-1AALAPAPSWI | 1218  | 1214  |
| >TP53-P85L-1PAAPAPAPSV | 123   | >TP53-P85L-1PAALAPAPSV | 894   | 771   |
| >TP53-P85L-1PAAPAPAPSV | 188   | >TP53-P85L-1PAALAPAPSV | 680   | 492   |
| >TP53-P85L-1PAAPAPAPSV | 256   | >TP53-P85L-1PAALAPAPSV | 776   | 520   |
| >TP53-P85L-1TPAAPAPA   | 460   | >TP53-P85L-1TPAALAPA   | 574   | 114   |
| >TP53-P85L-1TPAAPAPA   | 121   | >TP53-P85L-1TPAALAPA   | 182   | 61    |
| >TP53-P85L-1TPAAPAPAPS | 296   | >TP53-P85L-1TPAALAPAPS | 617   | 321   |
| >TP53-P85L-1TPAAPAPA   | 352   | >TP53-P85L-1TPAALAPA   | 214   | 138   |
| >TP53-P85L-1TPAAPAPAPS | 437   | >TP53-P85L-1TPAALAPAPS | 229   | 208   |
| >TP53-P85L-1TPAAPAPAPS | 33    | >TP53-P85L-1TPAALAPAPS | 21    | 12    |
| >TP53-P85L-1TPAAPAPA   | 25    | >TP53-P85L-1TPAALAPA   | 21    | 4     |
| >TP53-P85L-1TPAAPAPAPS | 16    | >TP53-P85L-1TPAALAPAPS | 11    | 5     |
| >TP53-P85L-1PTPAAPAPA  | 441   | >TP53-P85L-1PTPAALAPA  | 36    | 405   |
| >TP53-P85L-1PTPAAPAPAF | 1234  | >TP53-P85L-1PTPAALAPAP | 463   | 771   |
| >TP53-P85L-1PTPAAPAPAF | 603   | >TP53-P85L-1PTPAALAPAP | 217   | 386   |
| >TP53-P85L-1APTPAAPA   | 74    | >TP53-P85L-1APTPAALA   | 880   | 806   |
| >TP53-P85L-1APTPAAPAPA | 433   | >TP53-P85L-1APTPAALAPA | 203   | 230   |
| >TP53-P85L-1APTPAAPA   | 122   | >TP53-P85L-1APTPAALA   | 374   | 252   |
| >TP53-P85L-1APTPAAPAPA | 157   | >TP53-P85L-1APTPAALAPA | 107   | 50    |
| >TP53-P85L-1AAPTPAAP   | 8577  | >TP53-P85L-1AAPTPAAL   | 11    | 8566  |
| >TP53-P85L-1AAPTPAAPA  | 298   | >TP53-P85L-1AAPTPAALA  | 27    | 271   |

|                         |       |                         |       |       |
|-------------------------|-------|-------------------------|-------|-------|
| >TP53-P85L-1 AAPTPAAPAF | 692   | >TP53-P85L-1 AAPTPAALAP | 118   | 574   |
| >TP53-P85L-1 APAAPTPAAF | 3984  | >TP53-P85L-1 APAAPTPAAL | 43    | 3941  |
| >TP53-P85L-1 APAAPTPAAF | 18    | >TP53-P85L-1 APAAPTPAAL | 89    | 71    |
| >TP53-P85L-1 APAAPTPAAF | 9175  | >TP53-P85L-1 APAAPTPAAL | 15    | 9160  |
| >TP53-P85L-1 APAAPTPAAF | 33    | >TP53-P85L-1 APAAPTPAAL | 70    | 37    |
| >TP53-P85L-1 APAAPTPAAF | 11027 | >TP53-P85L-1 APAAPTPAAL | 144   | 10883 |
| >TP53-P85S-1 PAPAPSWPL  | 23509 | >TP53-P85S-1 SAPAPSWPL  | 471   | 23038 |
| >TP53-P85S-1 PAPAPSWPL  | 5095  | >TP53-P85S-1 SAPAPSWPL  | 52    | 5043  |
| >TP53-P85S-1 PAPAPSWPL  | 5550  | >TP53-P85S-1 SAPAPSWPL  | 250   | 5300  |
| >TP53-P85S-1 PAPAPSWPL  | 1185  | >TP53-P85S-1 SAPAPSWPL  | 15    | 1170  |
| >TP53-P85S-1 PAPAPSWPL  | 3044  | >TP53-P85S-1 SAPAPSWPL  | 62    | 2982  |
| >TP53-P85S-1 PAPAPSWPL  | 9     | >TP53-P85S-1 SAPAPSWPL  | 3     | 6     |
| >TP53-P85S-1 PAPAPSWPLS | 932   | >TP53-P85S-1 SAPAPSWPLS | 66    | 866   |
| >TP53-P85S-1 APAPAPSW   | 91    | >TP53-P85S-1 ASAPAPSW   | 12917 | 12826 |
| >TP53-P85S-1 APAPAPSWP  | 73    | >TP53-P85S-1 ASAPAPSWPI | 18694 | 18621 |
| >TP53-P85S-1 APAPAPSWP  | 2855  | >TP53-P85S-1 ASAPAPSWPI | 336   | 2519  |
| >TP53-P85S-1 APAPAPSW   | 745   | >TP53-P85S-1 ASAPAPSW   | 3     | 742   |
| >TP53-P85S-1 APAPAPSWP  | 10845 | >TP53-P85S-1 ASAPAPSWPI | 7     | 10838 |
| >TP53-P85S-1 APAPAPSWP  | 41    | >TP53-P85S-1 ASAPAPSWPI | 403   | 362   |
| >TP53-P85S-1 APAPAPSW   | 51    | >TP53-P85S-1 ASAPAPSW   | 6862  | 6811  |
| >TP53-P85S-1 APAPAPSW   | 6093  | >TP53-P85S-1 ASAPAPSW   | 46    | 6047  |
| >TP53-P85S-1 APAPAPSW   | 3812  | >TP53-P85S-1 ASAPAPSW   | 11    | 3801  |
| >TP53-P85S-1 APAPAPSWP  | 2856  | >TP53-P85S-1 ASAPAPSWPI | 33    | 2823  |
| >TP53-P85S-1 APAPAPSWP  | 17905 | >TP53-P85S-1 ASAPAPSWPI | 267   | 17638 |
| >TP53-P85S-1 APAPAPSWP  | 390   | >TP53-P85S-1 ASAPAPSWPI | 13173 | 12783 |
| >TP53-P85S-1 APAPAPSW   | 20    | >TP53-P85S-1 ASAPAPSW   | 3373  | 3353  |
| >TP53-P85S-1 AAPAPAPSW  | 136   | >TP53-P85S-1 AASAPAPSW  | 111   | 25    |
| >TP53-P85S-1 AAPAPAPSW  | 380   | >TP53-P85S-1 AASAPAPSW  | 386   | 6     |
| >TP53-P85S-1 AAPAPAPSW  | 1180  | >TP53-P85S-1 AASAPAPSW  | 245   | 935   |
| >TP53-P85S-1 AAPAPAPSW  | 3713  | >TP53-P85S-1 AASAPAPSW  | 496   | 3217  |
| >TP53-P85S-1 AAPAPAPSW  | 62    | >TP53-P85S-1 AASAPAPSW  | 6     | 56    |
| >TP53-P85S-1 AAPAPAPSW  | 774   | >TP53-P85S-1 AASAPAPSW  | 28    | 746   |
| >TP53-P85S-1 AAPAPAPSW  | 3492  | >TP53-P85S-1 AASAPAPSW  | 230   | 3262  |
| >TP53-P85S-1 AAPAPAPSW  | 3454  | >TP53-P85S-1 AASAPAPSW  | 332   | 3122  |
| >TP53-P85S-1 AAPAPAPSW  | 617   | >TP53-P85S-1 AASAPAPSW  | 124   | 493   |
| >TP53-P85S-1 AAPAPAPSW  | 1323  | >TP53-P85S-1 AASAPAPSW  | 14    | 1309  |
| >TP53-P85S-1 AAPAPAPSW  | 124   | >TP53-P85S-1 AASAPAPSW  | 6718  | 6594  |
| >TP53-P85S-1 AAPAPAPSW  | 4     | >TP53-P85S-1 AASAPAPSW  | 210   | 206   |
| >TP53-P85S-1 PAAPAPAPSV | 123   | >TP53-P85S-1 PAASAPAPSV | 780   | 657   |
| >TP53-P85S-1 PAAPAPAPSV | 188   | >TP53-P85S-1 PAASAPAPSV | 485   | 297   |
| >TP53-P85S-1 PAAPAPAPSV | 256   | >TP53-P85S-1 PAASAPAPSV | 458   | 202   |
| >TP53-P85S-1 TPAAPAPA   | 460   | >TP53-P85S-1 TPAASAPA   | 717   | 257   |
| >TP53-P85S-1 TPAAPAPA   | 121   | >TP53-P85S-1 TPAASAPA   | 81    | 40    |

|                       |       |                       |       |       |
|-----------------------|-------|-----------------------|-------|-------|
| >TP53-P85S-TPAAPAPAPS | 296   | >TP53-P85S-TPAASAPAPS | 351   | 55    |
| >TP53-P85S-TPAAPAPA   | 352   | >TP53-P85S-TPAASAPA   | 155   | 197   |
| >TP53-P85S-TPAAPAPAPS | 437   | >TP53-P85S-TPAASAPAPS | 300   | 137   |
| >TP53-P85S-TPAAPAPAPS | 33    | >TP53-P85S-TPAASAPAPS | 22    | 11    |
| >TP53-P85S-TPAAPAPA   | 25    | >TP53-P85S-TPAASAPA   | 38    | 13    |
| >TP53-P85S-TPAAPAPAPS | 16    | >TP53-P85S-TPAASAPAPS | 12    | 4     |
| >TP53-P85S-PTPAAPAPA  | 786   | >TP53-P85S-PTPAASAPA  | 352   | 434   |
| >TP53-P85S-PTPAAPAPA  | 441   | >TP53-P85S-PTPAASAPA  | 87    | 354   |
| >TP53-P85S-PTPAAPAPAF | 603   | >TP53-P85S-PTPAASAPAP | 301   | 302   |
| >TP53-P85S-APTPAAPA   | 74    | >TP53-P85S-APTPAASA   | 89    | 15    |
| >TP53-P85S-APTPAAPAPA | 433   | >TP53-P85S-APTPAASAPA | 298   | 135   |
| >TP53-P85S-APTPAAPA   | 122   | >TP53-P85S-APTPAASA   | 642   | 520   |
| >TP53-P85S-APTPAAPAPA | 157   | >TP53-P85S-APTPAASAPA | 201   | 44    |
| >TP53-P85S-AAPTPAAPA  | 298   | >TP53-P85S-AAPTPAASA  | 438   | 140   |
| >TP53-P85S-AAPTPAAPAF | 692   | >TP53-P85S-AAPTPAASAF | 336   | 356   |
| >TP53-P85S-APAAPTPAAF | 18    | >TP53-P85S-APAAPTPAAS | 25    | 7     |
| >TP53-P85S-APAAPTPAAF | 33    | >TP53-P85S-APAAPTPAAS | 124   | 91    |
| >TP53-P87Q-PAPSWPLSSS | 4700  | >TP53-P87Q-QAPSWPLSSS | 77    | 4623  |
| >TP53-P87Q-PAPSWPLSSS | 4427  | >TP53-P87Q-QAPSWPLSSS | 231   | 4196  |
| >TP53-P87Q-PAPSWPLSSS | 961   | >TP53-P87Q-QAPSWPLSSS | 144   | 817   |
| >TP53-P87Q-APAPSWPL   | 19019 | >TP53-P87Q-AQAPSWPL   | 75    | 18944 |
| >TP53-P87Q-APAPSWPL   | 8748  | >TP53-P87Q-AQAPSWPL   | 54    | 8694  |
| >TP53-P87Q-APAPSWPL   | 18771 | >TP53-P87Q-AQAPSWPL   | 226   | 18545 |
| >TP53-P87Q-APAPSWPL   | 3445  | >TP53-P87Q-AQAPSWPL   | 5     | 3440  |
| >TP53-P87Q-APAPSWPLS  | 21319 | >TP53-P87Q-AQAPSWPLS  | 125   | 21194 |
| >TP53-P87Q-APAPSWPLSS | 22482 | >TP53-P87Q-AQAPSWPLS  | 136   | 22346 |
| >TP53-P87Q-APAPSWPL   | 13368 | >TP53-P87Q-AQAPSWPL   | 305   | 13063 |
| >TP53-P87Q-APAPSWPL   | 17011 | >TP53-P87Q-AQAPSWPL   | 371   | 16640 |
| >TP53-P87Q-APAPSWPL   | 13852 | >TP53-P87Q-AQAPSWPL   | 301   | 13551 |
| >TP53-P87Q-APAPSWPL   | 12    | >TP53-P87Q-AQAPSWPL   | 7162  | 7150  |
| >TP53-P87Q-APAPSWPLSS | 292   | >TP53-P87Q-AQAPSWPLS  | 22409 | 22117 |
| >TP53-P87Q-APAPSWPL   | 16626 | >TP53-P87Q-AQAPSWPL   | 111   | 16515 |
| >TP53-P87Q-APAPSWPL   | 2776  | >TP53-P87Q-AQAPSWPL   | 19    | 2757  |
| >TP53-P87Q-APAPSWPL   | 196   | >TP53-P87Q-AQAPSWPL   | 7866  | 7670  |
| >TP53-P87Q-APAPSWPL   | 49    | >TP53-P87Q-AQAPSWPL   | 23    | 26    |
| >TP53-P87Q-APAPSWPL   | 16354 | >TP53-P87Q-AQAPSWPL   | 443   | 15911 |
| >TP53-P87Q-APAPSWPL   | 87    | >TP53-P87Q-AQAPSWPL   | 19696 | 19609 |
| >TP53-P87Q-PAPAPSWPL  | 9     | >TP53-P87Q-PAQAPSWPL  | 3624  | 3615  |
| >TP53-P87Q-APAPAPSW   | 91    | >TP53-P87Q-APAQAPSW   | 91    | 0     |
| >TP53-P87Q-APAPAPSWP  | 73    | >TP53-P87Q-APAQAPSWP  | 64    | 9     |
| >TP53-P87Q-APAPAPSWP  | 41    | >TP53-P87Q-APAQAPSWP  | 40    | 1     |
| >TP53-P87Q-APAPAPSW   | 51    | >TP53-P87Q-APAQAPSW   | 33    | 18    |
| >TP53-P87Q-APAPAPSWP  | 390   | >TP53-P87Q-APAQAPSWP  | 343   | 47    |

|                         |       |                         |      |       |
|-------------------------|-------|-------------------------|------|-------|
| >TP53-P87Q- APAPAPSW    | 20    | >TP53-P87Q- APAQAPSW    | 17   | 3     |
| >TP53-P87Q- AAPAPAPSW   | 136   | >TP53-P87Q- AAPAQAPSW   | 147  | 11    |
| >TP53-P87Q- AAPAPAPSW   | 380   | >TP53-P87Q- AAPAQAPSW   | 961  | 581   |
| >TP53-P87Q- AAPAPAPSW   | 62    | >TP53-P87Q- AAPAQAPSW   | 68   | 6     |
| >TP53-P87Q- AAPAPAPSW   | 617   | >TP53-P87Q- AAPAQAPSW   | 426  | 191   |
| >TP53-P87Q- AAPAPAPSW   | 124   | >TP53-P87Q- AAPAQAPSW   | 1244 | 1120  |
| >TP53-P87Q- AAPAPAPSW   | 4     | >TP53-P87Q- AAPAQAPSW   | 11   | 7     |
| >TP53-P87Q- PAAPAPAPSV  | 123   | >TP53-P87Q- PAAPAQAPSV  | 156  | 33    |
| >TP53-P87Q- PAAPAPAPSV  | 188   | >TP53-P87Q- PAAPAQAPSV  | 190  | 2     |
| >TP53-P87Q- PAAPAPAPSV  | 256   | >TP53-P87Q- PAAPAQAPSV  | 164  | 92    |
| >TP53-P87Q- TPAAPAPA    | 460   | >TP53-P87Q- TPAAPAQA    | 1129 | 669   |
| >TP53-P87Q- TPAAPAPA    | 121   | >TP53-P87Q- TPAAPAQA    | 604  | 483   |
| >TP53-P87Q- TPAAPAPAPS  | 915   | >TP53-P87Q- TPAAPAQAP   | 487  | 428   |
| >TP53-P87Q- TPAAPAPAPS  | 296   | >TP53-P87Q- TPAAPAQAP   | 376  | 80    |
| >TP53-P87Q- TPAAPAPA    | 352   | >TP53-P87Q- TPAAPAQA    | 2596 | 2244  |
| >TP53-P87Q- TPAAPAPAPS  | 437   | >TP53-P87Q- TPAAPAQAP   | 394  | 43    |
| >TP53-P87Q- TPAAPAPAPS  | 33    | >TP53-P87Q- TPAAPAQAP   | 32   | 1     |
| >TP53-P87Q- TPAAPAPA    | 25    | >TP53-P87Q- TPAAPAQA    | 93   | 68    |
| >TP53-P87Q- TPAAPAPAPS  | 16    | >TP53-P87Q- TPAAPAQAP   | 14   | 2     |
| >TP53-P87Q- PTPAAPAPA   | 441   | >TP53-P87Q- PTPAAPAQA   | 722  | 281   |
| >TP53-P87Q- APTPAAPAP   | 20530 | >TP53-P87Q- APTPAAPAQ   | 242  | 20288 |
| >TP53-P87Q- APTPAAPAPA  | 433   | >TP53-P87Q- APTPAAPAQ   | 2518 | 2085  |
| >TP53-P87Q- APTPAAPAP   | 2822  | >TP53-P87Q- APTPAAPAQ   | 460  | 2362  |
| >TP53-P87Q- APTPAAPAPA  | 157   | >TP53-P87Q- APTPAAPAQ   | 168  | 11    |
| >TP53-P89L-1 PSWPLSSSV  | 3723  | >TP53-P89L-1 LSWPLSSSV  | 346  | 3377  |
| >TP53-P89L-1 PSWPLSSSV  | 6677  | >TP53-P89L-1 LSWPLSSSV  | 231  | 6446  |
| >TP53-P89L-1 PSWPLSSSV  | 3690  | >TP53-P89L-1 LSWPLSSSV  | 194  | 3496  |
| >TP53-P89L-1 PSWPLSSSV  | 7815  | >TP53-P89L-1 LSWPLSSSV  | 348  | 7467  |
| >TP53-P89L-1 PSWPLSSSV  | 3297  | >TP53-P89L-1 LSWPLSSSV  | 147  | 3150  |
| >TP53-P89L-1 PSWPLSSSV  | 2011  | >TP53-P89L-1 LSWPLSSSV  | 205  | 1806  |
| >TP53-P89L-1 PSWPLSSSV  | 831   | >TP53-P89L-1 LSWPLSSSV  | 67   | 764   |
| >TP53-P89L-1 PSWPLSSSV  | 2768  | >TP53-P89L-1 LSWPLSSSV  | 16   | 2752  |
| >TP53-P89L-1 PSWPLSSSV  | 9819  | >TP53-P89L-1 LSWPLSSSV  | 302  | 9517  |
| >TP53-P89L-1 PSWPLSSSV  | 1891  | >TP53-P89L-1 LSWPLSSSV  | 17   | 1874  |
| >TP53-P89L-1 PSWPLSSSV  | 613   | >TP53-P89L-1 LSWPLSSSV  | 46   | 567   |
| >TP53-P89L-1 APSWPLSSSV | 23171 | >TP53-P89L-1 ALSWPLSSSV | 115  | 23056 |
| >TP53-P89L-1 APSWPLSSSV | 8289  | >TP53-P89L-1 ALSWPLSSSV | 22   | 8267  |
| >TP53-P89L-1 APSWPLSSS  | 22321 | >TP53-P89L-1 ALSWPLSSS  | 151  | 22170 |
| >TP53-P89L-1 APSWPLSSSV | 4875  | >TP53-P89L-1 ALSWPLSSSV | 10   | 4865  |
| >TP53-P89L-1 APSWPLSSSV | 6617  | >TP53-P89L-1 ALSWPLSSSV | 143  | 6474  |
| >TP53-P89L-1 APSWPLSS   | 29096 | >TP53-P89L-1 ALSWPLSS   | 324  | 28772 |
| >TP53-P89L-1 APSWPLSSS  | 28679 | >TP53-P89L-1 ALSWPLSSS  | 247  | 28432 |
| >TP53-P89L-1 APSWPLSSSV | 5675  | >TP53-P89L-1 ALSWPLSSSV | 2    | 5673  |



|                        |       |                        |       |       |
|------------------------|-------|------------------------|-------|-------|
| >TP53-P89L-1APSWPLSSSV | 19952 | >TP53-P89L-1ALSWPLSSSV | 8     | 19944 |
| >TP53-P89L-1APSWPLSSSV | 15441 | >TP53-P89L-1ALSWPLSSSV | 7     | 15434 |
| >TP53-P89L-1APSWPLSSSV | 21250 | >TP53-P89L-1ALSWPLSSSV | 4     | 21246 |
| >TP53-P89L-1APSWPLSS   | 36319 | >TP53-P89L-1ALSWPLSS   | 130   | 36189 |
| >TP53-P89L-1APSWPLSS   | 35337 | >TP53-P89L-1ALSWPLSS   | 56    | 35281 |
| >TP53-P89L-1APSWPLSSSV | 5260  | >TP53-P89L-1ALSWPLSSSV | 2     | 5258  |
| >TP53-P89L-1APSWPLSS   | 328   | >TP53-P89L-1ALSWPLSS   | 24059 | 23731 |
| >TP53-P89L-1APSWPLSSSV | 286   | >TP53-P89L-1ALSWPLSSSV | 29511 | 29225 |
| >TP53-P89L-1APTPAAPAPA | 25676 | >TP53-P89L-1APTPAAPAPA | 11    | 25665 |
| >TP53-P89L-1APTPAAPAPA | 5964  | >TP53-P89L-1APTPAAPAPA | 25    | 5939  |
| >TP53-P89L-1APTPAAPAPA | 3925  | >TP53-P89L-1APTPAAPAPA | 120   | 3805  |
| >TP53-P89L-1APTPAAPAPA | 20251 | >TP53-P89L-1APTPAAPAPA | 79    | 20172 |
| >TP53-P89L-1PAPSWPLSS  | 2120  | >TP53-P89L-1PAPSWPLSS  | 282   | 1838  |
| >TP53-P89L-1PAPSWPLSS  | 4427  | >TP53-P89L-1PAPSWPLSS  | 167   | 4260  |
| >TP53-P89L-1APAPSWPL   | 12    | >TP53-P89L-1APALSWPL   | 17    | 5     |
| >TP53-P89L-1APAPSWPLSS | 292   | >TP53-P89L-1APALSWPLSS | 397   | 105   |
| >TP53-P89L-1APAPSWPL   | 196   | >TP53-P89L-1APALSWPL   | 233   | 37    |
| >TP53-P89L-1APAPSWPL   | 49    | >TP53-P89L-1APALSWPL   | 72    | 23    |
| >TP53-P89L-1APAPSWPL   | 87    | >TP53-P89L-1APALSWPL   | 166   | 79    |
| >TP53-P89L-1PAPAPSWPL  | 9     | >TP53-P89L-1PAPALSWPL  | 17    | 8     |
| >TP53-P89L-1APAPAPSW   | 91    | >TP53-P89L-1APAPALSW   | 39    | 52    |
| >TP53-P89L-1APAPAPSWP  | 73    | >TP53-P89L-1APAPALSWPI | 89    | 16    |
| >TP53-P89L-1APAPAPSW   | 745   | >TP53-P89L-1APAPALSW   | 406   | 339   |
| >TP53-P89L-1APAPAPSWP  | 41    | >TP53-P89L-1APAPALSWPI | 63    | 22    |
| >TP53-P89L-1APAPAPSW   | 51    | >TP53-P89L-1APAPALSW   | 37    | 14    |
| >TP53-P89L-1APAPAPSWP  | 390   | >TP53-P89L-1APAPALSWPI | 60    | 330   |
| >TP53-P89L-1APAPAPSW   | 20    | >TP53-P89L-1APAPALSW   | 9     | 11    |
| >TP53-P89L-1AAPAPAPSW  | 136   | >TP53-P89L-1AAPAPALSWI | 132   | 4     |
| >TP53-P89L-1AAPAPAPSW  | 380   | >TP53-P89L-1AAPAPALSWI | 410   | 30    |
| >TP53-P89L-1AAPAPAPSW  | 62    | >TP53-P89L-1AAPAPALSW  | 37    | 25    |
| >TP53-P89L-1AAPAPAPSW  | 617   | >TP53-P89L-1AAPAPALSW  | 452   | 165   |
| >TP53-P89L-1AAPAPAPSW  | 124   | >TP53-P89L-1AAPAPALSW  | 82    | 42    |
| >TP53-P89L-1AAPAPAPSW  | 1357  | >TP53-P89L-1AAPAPALSWI | 376   | 981   |
| >TP53-P89L-1AAPAPAPSW  | 4     | >TP53-P89L-1AAPAPALSWI | 4     | 0     |
| >TP53-P89L-1PAAPAPAPSV | 123   | >TP53-P89L-1PAAPAPALSV | 96    | 27    |
| >TP53-P89L-1PAAPAPAPSV | 188   | >TP53-P89L-1PAAPAPALSV | 153   | 35    |
| >TP53-P89L-1PAAPAPAPSV | 256   | >TP53-P89L-1PAAPAPALSV | 143   | 113   |
| >TP53-P89L-1TPAAPAPAP  | 41037 | >TP53-P89L-1TPAAPAPAL  | 94    | 40943 |
| >TP53-P89L-1TPAAPAPAP  | 6122  | >TP53-P89L-1TPAAPAPAL  | 114   | 6008  |
| >TP53-P89L-1TPAAPAPAP  | 4498  | >TP53-P89L-1TPAAPAPAL  | 31    | 4467  |
| >TP53-P89L-1TPAAPAPAPS | 296   | >TP53-P89L-1TPAAPAPALS | 114   | 182   |
| >TP53-P89L-1TPAAPAPAP  | 1868  | >TP53-P89L-1TPAAPAPAL  | 49    | 1819  |
| >TP53-P89L-1TPAAPAPAPS | 437   | >TP53-P89L-1TPAAPAPALS | 343   | 94    |

|                         |       |                         |       |       |
|-------------------------|-------|-------------------------|-------|-------|
| >TP53-P89L-1 TPAAPAPAP  | 4898  | >TP53-P89L-1 TPAAPAPAL  | 9     | 4889  |
| >TP53-P89L-1 TPAAPAPAPS | 33    | >TP53-P89L-1 TPAAPAPALS | 23    | 10    |
| >TP53-P89L-1 TPAAPAPAPS | 16    | >TP53-P89L-1 TPAAPAPALS | 12    | 4     |
| >TP53-P89L-1 PTPAAPAPAF | 1234  | >TP53-P89L-1 PTPAAPAPAL | 5     | 1229  |
| >TP53-P89L-1 PTPAAPAPAF | 603   | >TP53-P89L-1 PTPAAPAPAL | 104   | 499   |
| >TP53-P89S-1 PSWPLSSSV  | 12212 | >TP53-P89S-1 SSWPLSSSV  | 472   | 11740 |
| >TP53-P89S-1 PSWPLSSSV  | 6677  | >TP53-P89S-1 SSWPLSSSV  | 204   | 6473  |
| >TP53-P89S-1 PSWPLSSSV  | 3690  | >TP53-P89S-1 SSWPLSSSV  | 173   | 3517  |
| >TP53-P89S-1 PSWPLSSSV  | 5857  | >TP53-P89S-1 SSWPLSSSV  | 210   | 5647  |
| >TP53-P89S-1 PSWPLSSSV  | 3297  | >TP53-P89S-1 SSWPLSSSV  | 51    | 3246  |
| >TP53-P89S-1 PSWPLSSSV  | 2011  | >TP53-P89S-1 SSWPLSSSV  | 56    | 1955  |
| >TP53-P89S-1 PSWPLSSSV  | 831   | >TP53-P89S-1 SSWPLSSSV  | 210   | 621   |
| >TP53-P89S-1 PSWPLSSSV  | 2768  | >TP53-P89S-1 SSWPLSSSV  | 24    | 2744  |
| >TP53-P89S-1 PSWPLSSSV  | 1891  | >TP53-P89S-1 SSWPLSSSV  | 15    | 1876  |
| >TP53-P89S-1 PSWPLSSSV  | 613   | >TP53-P89S-1 SSWPLSSSV  | 34    | 579   |
| >TP53-P89S-1 APSWPLSSSV | 12669 | >TP53-P89S-1 ASSWPLSSSV | 307   | 12362 |
| >TP53-P89S-1 APSWPLSSS  | 328   | >TP53-P89S-1 ASSWPLSSS  | 25153 | 24825 |
| >TP53-P89S-1 APSWPLSSSV | 286   | >TP53-P89S-1 ASSWPLSSSV | 22913 | 22627 |
| >TP53-P89S-1 APSWPLSSSV | 16471 | >TP53-P89S-1 ASSWPLSSSV | 129   | 16342 |
| >TP53-P89S-1 APSWPLSSS  | 7265  | >TP53-P89S-1 ASSWPLSSS  | 353   | 6912  |
| >TP53-P89S-1 APSWPLSSSV | 11021 | >TP53-P89S-1 ASSWPLSSSV | 71    | 10950 |
| >TP53-P89S-1 APSWPLSSSV | 20847 | >TP53-P89S-1 ASSWPLSSSV | 208   | 20639 |
| >TP53-P89S-1 APAPSWPL   | 12    | >TP53-P89S-1 APASSWPL   | 14    | 2     |
| >TP53-P89S-1 APAPSWPLSS | 292   | >TP53-P89S-1 APASSWPLSS | 319   | 27    |
| >TP53-P89S-1 APAPSWPL   | 196   | >TP53-P89S-1 APASSWPL   | 161   | 35    |
| >TP53-P89S-1 APAPSWPL   | 49    | >TP53-P89S-1 APASSWPL   | 32    | 17    |
| >TP53-P89S-1 APAPSWPL   | 87    | >TP53-P89S-1 APASSWPL   | 72    | 15    |
| >TP53-P89S-1 PAPAPSWPL  | 9     | >TP53-P89S-1 PAPASSWPL  | 13    | 4     |
| >TP53-P89S-1 APAPAPSWP  | 576   | >TP53-P89S-1 APAPASSWPI | 391   | 185   |
| >TP53-P89S-1 APAPAPSW   | 91    | >TP53-P89S-1 APAPASSW   | 29    | 62    |
| >TP53-P89S-1 APAPAPSWP  | 73    | >TP53-P89S-1 APAPASSWPI | 80    | 7     |
| >TP53-P89S-1 APAPAPSW   | 745   | >TP53-P89S-1 APAPASSW   | 414   | 331   |
| >TP53-P89S-1 APAPAPSWP  | 41    | >TP53-P89S-1 APAPASSWPI | 32    | 9     |
| >TP53-P89S-1 APAPAPSW   | 51    | >TP53-P89S-1 APAPASSW   | 53    | 2     |
| >TP53-P89S-1 APAPAPSWP  | 390   | >TP53-P89S-1 APAPASSWPI | 44    | 346   |
| >TP53-P89S-1 APAPAPSW   | 20    | >TP53-P89S-1 APAPASSW   | 10    | 10    |
| >TP53-P89S-1 AAPAPAPSW  | 1323  | >TP53-P89S-1 AAPAPASSW  | 366   | 957   |
| >TP53-P89S-1 AAPAPAPSW  | 136   | >TP53-P89S-1 AAPAPASSW  | 178   | 42    |
| >TP53-P89S-1 AAPAPAPSW  | 380   | >TP53-P89S-1 AAPAPASSW  | 314   | 66    |
| >TP53-P89S-1 AAPAPAPSW  | 62    | >TP53-P89S-1 AAPAPASSW  | 54    | 8     |
| >TP53-P89S-1 AAPAPAPSW  | 774   | >TP53-P89S-1 AAPAPASSW  | 427   | 347   |
| >TP53-P89S-1 AAPAPAPSW  | 617   | >TP53-P89S-1 AAPAPASSW  | 442   | 175   |
| >TP53-P89S-1 AAPAPAPSW  | 124   | >TP53-P89S-1 AAPAPASSW  | 131   | 7     |

|                        |       |                        |      |      |
|------------------------|-------|------------------------|------|------|
| >TP53-P89S- AAPAPAPSW  | 4     | >TP53-P89S- AAPAPASSW  | 4    | 0    |
| >TP53-P89S- PAAPAPAPSV | 123   | >TP53-P89S- PAAPAPASSV | 111  | 12   |
| >TP53-P89S- PAAPAPAPSV | 188   | >TP53-P89S- PAAPAPASSV | 165  | 23   |
| >TP53-P89S- PAAPAPAPSV | 256   | >TP53-P89S- PAAPAPASSV | 304  | 48   |
| >TP53-P89S- TPAAPAPAPS | 296   | >TP53-P89S- TPAAPAPASS | 104  | 192  |
| >TP53-P89S- TPAAPAPAP  | 1868  | >TP53-P89S- TPAAPAPAS  | 221  | 1647 |
| >TP53-P89S- TPAAPAPAPS | 437   | >TP53-P89S- TPAAPAPASS | 373  | 64   |
| >TP53-P89S- TPAAPAPAPS | 33    | >TP53-P89S- TPAAPAPASS | 35   | 2    |
| >TP53-P89S- TPAAPAPAP  | 656   | >TP53-P89S- TPAAPAPAS  | 366  | 290  |
| >TP53-P89S- TPAAPAPAPS | 16    | >TP53-P89S- TPAAPAPASS | 13   | 3    |
| >TP53-P92A- PLSSSVPS   | 6118  | >TP53-P92A- ALSSSVPS   | 234  | 5884 |
| >TP53-P92A- PLSSSVPSQ  | 7908  | >TP53-P92A- ALSSSVPSQ  | 429  | 7479 |
| >TP53-P92A- PLSSSVPS   | 10107 | >TP53-P92A- ALSSSVPS   | 377  | 9730 |
| >TP53-P92A- PLSSSVPSQK | 7435  | >TP53-P92A- ALSSSVPSQK | 237  | 7198 |
| >TP53-P92A- PLSSSVPSQ  | 530   | >TP53-P92A- ALSSSVPSQ  | 13   | 517  |
| >TP53-P92A- PLSSSVPSQK | 1650  | >TP53-P92A- ALSSSVPSQK | 31   | 1619 |
| >TP53-P92A- PLSSSVPSQK | 472   | >TP53-P92A- ALSSSVPSQK | 25   | 447  |
| >TP53-P92A- PLSSSVPSQK | 382   | >TP53-P92A- ALSSSVPSQK | 18   | 364  |
| >TP53-P92A- PLSSSVPSQK | 5977  | >TP53-P92A- ALSSSVPSQK | 392  | 5585 |
| >TP53-P92A- WPLSSSVPS  | 5367  | >TP53-P92A- WALSSSVPS  | 223  | 5144 |
| >TP53-P92A- WPLSSSVPS  | 27    | >TP53-P92A- WALSSSVPS  | 160  | 133  |
| >TP53-P92A- WPLSSSVPS  | 159   | >TP53-P92A- WALSSSVPS  | 6918 | 6759 |
| >TP53-P92A- SWPLSSSV   | 9629  | >TP53-P92A- SWALSSSV   | 478  | 9151 |
| >TP53-P92A- SWPLSSSV   | 157   | >TP53-P92A- SWALSSSV   | 118  | 39   |
| >TP53-P92A- SWPLSSSVPS | 447   | >TP53-P92A- SWALSSSVPS | 342  | 105  |
| >TP53-P92A- APSWPLSSS  | 328   | >TP53-P92A- APSWALSSS  | 660  | 332  |
| >TP53-P92A- APSWPLSSSV | 286   | >TP53-P92A- APSWALSSSV | 214  | 72   |
| >TP53-P92A- PAPSWPLSSS | 961   | >TP53-P92A- PAPSWALSSS | 486  | 475  |
| >TP53-P92A- APAPSWPL   | 12    | >TP53-P92A- APAPSWAL   | 11   | 1    |
| >TP53-P92A- APAPSWPLSS | 292   | >TP53-P92A- APAPSWALSS | 243  | 49   |
| >TP53-P92A- APAPSWPL   | 196   | >TP53-P92A- APAPSWAL   | 145  | 51   |
| >TP53-P92A- APAPSWPL   | 49    | >TP53-P92A- APAPSWAL   | 30   | 19   |
| >TP53-P92A- APAPSWPL   | 87    | >TP53-P92A- APAPSWAL   | 30   | 57   |
| >TP53-P92A- PAPAPSWPL  | 9     | >TP53-P92A- PAPAPSWAL  | 12   | 3    |
| >TP53-P92A- APAPAPSWP  | 576   | >TP53-P92A- APAPAPSWA  | 265  | 311  |
| >TP53-P92A- APAPAPSWP  | 9634  | >TP53-P92A- APAPAPSWA  | 112  | 9522 |
| >TP53-P92A- APAPAPSWP  | 73    | >TP53-P92A- APAPAPSWA  | 172  | 99   |
| >TP53-P92A- APAPAPSWP  | 41    | >TP53-P92A- APAPAPSWA  | 30   | 11   |
| >TP53-P92A- APAPAPSWP  | 390   | >TP53-P92A- APAPAPSWA  | 174  | 216  |
| >TP53-P92A- AAPAPAPSW  | 136   | >TP53-P92A- AAPAPAPSW  | 162  | 26   |
| >TP53-P92A- AAPAPAPSW  | 380   | >TP53-P92A- AAPAPAPSW  | 1359 | 979  |
| >TP53-P92A- AAPAPAPSW  | 1357  | >TP53-P92A- AAPAPAPSW  | 477  | 880  |
| >TP53-P92A- AAPAPAPSW  | 4     | >TP53-P92A- AAPAPAPSW  | 4    | 0    |

|                          |       |                          |       |       |
|--------------------------|-------|--------------------------|-------|-------|
| >TP53-P92L-1 PLSSSVPS    | 6118  | >TP53-P92L-1 LLSSSVPS    | 169   | 5949  |
| >TP53-P92L-1 PLSSSVPSQ   | 7908  | >TP53-P92L-1 LLSSSVPSQ   | 382   | 7526  |
| >TP53-P92L-1 PLSSSVPSQK  | 9888  | >TP53-P92L-1 LLSSSVPSQK  | 459   | 9429  |
| >TP53-P92L-1 PLSSSVPS    | 10107 | >TP53-P92L-1 LLSSSVPS    | 318   | 9789  |
| >TP53-P92L-1 PLSSSVPSQK  | 7435  | >TP53-P92L-1 LLSSSVPSQK  | 214   | 7221  |
| >TP53-P92L-1 PLSSSVPS    | 10173 | >TP53-P92L-1 LLSSSVPS    | 416   | 9757  |
| >TP53-P92L-1 PLSSSVPSQ   | 530   | >TP53-P92L-1 LLSSSVPSQ   | 12    | 518   |
| >TP53-P92L-1 PLSSSVPSQK  | 8825  | >TP53-P92L-1 LLSSSVPSQK  | 387   | 8438  |
| >TP53-P92L-1 PLSSSVPSQK  | 1650  | >TP53-P92L-1 LLSSSVPSQK  | 26    | 1624  |
| >TP53-P92L-1 PLSSSVPSQK  | 472   | >TP53-P92L-1 LLSSSVPSQK  | 47    | 425   |
| >TP53-P92L-1 PLSSSVPSQK  | 382   | >TP53-P92L-1 LLSSSVPSQK  | 39    | 343   |
| >TP53-P92L-1 PLSSSVPSQK  | 6031  | >TP53-P92L-1 LLSSSVPSQK  | 344   | 5687  |
| >TP53-P92L-1 WPLSSSVPS   | 22787 | >TP53-P92L-1 WLLSSSVPS   | 192   | 22595 |
| >TP53-P92L-1 WPLSSSVPS   | 28270 | >TP53-P92L-1 WLLSSSVPS   | 334   | 27936 |
| >TP53-P92L-1 WPLSSSVPSC  | 26675 | >TP53-P92L-1 WLLSSSVPSQ  | 165   | 26510 |
| >TP53-P92L-1 WPLSSSVPSC  | 24257 | >TP53-P92L-1 WLLSSSVPSQ  | 215   | 24042 |
| >TP53-P92L-1 WPLSSSVPSC  | 32668 | >TP53-P92L-1 WLLSSSVPSQ  | 27    | 32641 |
| >TP53-P92L-1 WPLSSSVPSC  | 16667 | >TP53-P92L-1 WLLSSSVPSQ  | 138   | 16529 |
| >TP53-P92L-1 WPLSSSVPS   | 2639  | >TP53-P92L-1 WLLSSSVPS   | 369   | 2270  |
| >TP53-P92L-1 WPLSSSVPS   | 27    | >TP53-P92L-1 WLLSSSVPS   | 2428  | 2401  |
| >TP53-P92L-1 WPLSSSVPS   | 159   | >TP53-P92L-1 WLLSSSVPS   | 22840 | 22681 |
| >TP53-P92L-1 SWPLSSSV    | 157   | >TP53-P92L-1 SWLLSSSV    | 56    | 101   |
| >TP53-P92L-1 SWPLSSSV    | 920   | >TP53-P92L-1 SWLLSSSV    | 371   | 549   |
| >TP53-P92L-1 SWPLSSSVPS  | 447   | >TP53-P92L-1 SWLLSSSVPS  | 162   | 285   |
| >TP53-P92L-1 APSWPLSSS   | 328   | >TP53-P92L-1 APSWLLSSS   | 3235  | 2907  |
| >TP53-P92L-1 APSWPLSSSV  | 286   | >TP53-P92L-1 APSWLLSSSV  | 378   | 92    |
| >TP53-P92L-1 PAPS WPLSSS | 961   | >TP53-P92L-1 PAPS WLLSSS | 435   | 526   |
| >TP53-P92L-1 APAPSWPL    | 12    | >TP53-P92L-1 APAPSWLL    | 35    | 23    |
| >TP53-P92L-1 APAPSWPLSS  | 292   | >TP53-P92L-1 APAPSWLLSS  | 403   | 111   |
| >TP53-P92L-1 APAPSWPL    | 196   | >TP53-P92L-1 APAPSWLL    | 1387  | 1191  |
| >TP53-P92L-1 APAPSWPL    | 49    | >TP53-P92L-1 APAPSWLL    | 142   | 93    |
| >TP53-P92L-1 APAPSWPL    | 1317  | >TP53-P92L-1 APAPSWLL    | 460   | 857   |
| >TP53-P92L-1 APAPSWPL    | 87    | >TP53-P92L-1 APAPSWLL    | 633   | 546   |
| >TP53-P92L-1 PAPAPSWP    | 25397 | >TP53-P92L-1 PAPAPSWL    | 255   | 25142 |
| >TP53-P92L-1 PAPAPSWPL   | 9     | >TP53-P92L-1 PAPAPSWLL   | 3     | 6     |
| >TP53-P92L-1 APAPAPSWP   | 32646 | >TP53-P92L-1 APAPAPSWL   | 15    | 32631 |
| >TP53-P92L-1 APAPAPSWP   | 576   | >TP53-P92L-1 APAPAPSWLI  | 367   | 209   |
| >TP53-P92L-1 APAPAPSWP   | 9634  | >TP53-P92L-1 APAPAPSWL   | 32    | 9602  |
| >TP53-P92L-1 APAPAPSWP   | 73    | >TP53-P92L-1 APAPAPSWLI  | 532   | 459   |
| >TP53-P92L-1 APAPAPSWP   | 41    | >TP53-P92L-1 APAPAPSWLI  | 117   | 76    |
| >TP53-P92L-1 APAPAPSWP   | 390   | >TP53-P92L-1 APAPAPSWLI  | 2601  | 2211  |
| >TP53-P92L-1 AAPAPAPSW   | 136   | >TP53-P92L-1 AAPAPAPSW   | 279   | 143   |
| >TP53-P92L-1 AAPAPAPSW   | 380   | >TP53-P92L-1 AAPAPAPSW   | 1114  | 734   |

|                         |       |                         |       |       |
|-------------------------|-------|-------------------------|-------|-------|
| >TP53-P92L-1 AAPAPAPSW  | 1357  | >TP53-P92L-1 AAPAPAPSW  | 5     | 1352  |
| >TP53-P92L-1 AAPAPAPSW  | 4     | >TP53-P92L-1 AAPAPAPSW  | 2     | 2     |
| >TP53-P98L-1 PSQKTYQGSY | 513   | >TP53-P98L-1 LSQKTYQGSY | 127   | 386   |
| >TP53-P98L-1 PSQKTYQGSY | 71    | >TP53-P98L-1 LSQKTYQGSY | 32    | 39    |
| >TP53-P98L-1 PSQKTYQGSY | 3731  | >TP53-P98L-1 LSQKTYQGSY | 69    | 3662  |
| >TP53-P98L-1 PSQKTYQGSY | 1929  | >TP53-P98L-1 LSQKTYQGSY | 157   | 1772  |
| >TP53-P98L-1 PSQKTYQGSY | 3845  | >TP53-P98L-1 LSQKTYQGSY | 20    | 3825  |
| >TP53-P98L-1 PSQKTYQGSY | 16558 | >TP53-P98L-1 LSQKTYQGSY | 289   | 16269 |
| >TP53-P98L-1 PSQKTYQGSY | 228   | >TP53-P98L-1 LSQKTYQGSY | 24    | 204   |
| >TP53-P98L-1 VPSQKTYQ   | 35468 | >TP53-P98L-1 VLSQKTYQ   | 70    | 35398 |
| >TP53-P98L-1 VPSQKTYQG  | 1683  | >TP53-P98L-1 VLSQKTYQG  | 83    | 1600  |
| >TP53-P98L-1 VPSQKTYQG  | 92    | >TP53-P98L-1 VLSQKTYQG  | 11    | 81    |
| >TP53-P98L-1 VPSQKTYQG  | 2998  | >TP53-P98L-1 VLSQKTYQG  | 44    | 2954  |
| >TP53-P98L-1 VPSQKTYQG  | 8312  | >TP53-P98L-1 VLSQKTYQG  | 95    | 8217  |
| >TP53-P98L-1 VPSQKTYQG  | 5163  | >TP53-P98L-1 VLSQKTYQG  | 366   | 4797  |
| >TP53-P98L-1 VPSQKTYQG  | 19    | >TP53-P98L-1 VLSQKTYQG  | 2328  | 2309  |
| >TP53-P98L-1 VPSQKTYQG  | 254   | >TP53-P98L-1 VLSQKTYQG  | 27647 | 27393 |
| >TP53-P98L-1 VPSQKTYQG  | 15    | >TP53-P98L-1 VLSQKTYQG  | 723   | 708   |
| >TP53-P98L-1 APSWPLSSSV | 2296  | >TP53-P98L-1 APSWPLSSSV | 11    | 2285  |
| >TP53-P98L-1 APSWPLSSSV | 14312 | >TP53-P98L-1 APSWPLSSSV | 108   | 14204 |
| >TP53-P98L-1 APSWPLSSSV | 13777 | >TP53-P98L-1 APSWPLSSSV | 318   | 13459 |
| >TP53-P98L-1 SVPSQKTY   | 183   | >TP53-P98L-1 SVLSQKTY   | 142   | 41    |
| >TP53-P98L-1 SVPSQKTY   | 1228  | >TP53-P98L-1 SVLSQKTY   | 145   | 1083  |
| >TP53-P98L-1 SVPSQKTY   | 442   | >TP53-P98L-1 SVLSQKTY   | 171   | 271   |
| >TP53-P98L-1 SVPSQKTY   | 3413  | >TP53-P98L-1 SVLSQKTY   | 382   | 3031  |
| >TP53-P98L-1 SVPSQKTY   | 1370  | >TP53-P98L-1 SVLSQKTY   | 448   | 922   |
| >TP53-P98L-1 SVPSQKTY   | 4085  | >TP53-P98L-1 SVLSQKTY   | 162   | 3923  |
| >TP53-P98L-1 SVPSQKTY   | 3448  | >TP53-P98L-1 SVLSQKTY   | 471   | 2977  |
| >TP53-P98L-1 SSVPSQKTY  | 122   | >TP53-P98L-1 SSVLSQKTY  | 135   | 13    |
| >TP53-P98L-1 SSVPSQKTY  | 146   | >TP53-P98L-1 SSVLSQKTY  | 495   | 349   |
| >TP53-P98L-1 SSVPSQKTY  | 227   | >TP53-P98L-1 SSVLSQKTY  | 941   | 714   |
| >TP53-P98L-1 SSVPSQKTY  | 40    | >TP53-P98L-1 SSVLSQKTY  | 150   | 110   |
| >TP53-P98L-1 SSVPSQKTY  | 2     | >TP53-P98L-1 SSVLSQKTY  | 3     | 1     |
| >TP53-P98L-1 SSVPSQKTY  | 119   | >TP53-P98L-1 SSVLSQKTY  | 1044  | 925   |
| >TP53-P98L-1 SSVPSQKTY  | 195   | >TP53-P98L-1 SSVLSQKTY  | 1982  | 1787  |
| >TP53-P98L-1 SSVPSQKTY  | 23    | >TP53-P98L-1 SSVLSQKTY  | 51    | 28    |
| >TP53-P98L-1 SSVPSQKTY  | 188   | >TP53-P98L-1 SSVLSQKTY  | 496   | 308   |
| >TP53-P98L-1 SSSVPSQKTY | 415   | >TP53-P98L-1 SSSVLSQKTY | 527   | 112   |
| >TP53-P98L-1 SSSVPSQK   | 230   | >TP53-P98L-1 SSSVLSQK   | 345   | 115   |
| >TP53-P98L-1 SSSVPSQK   | 20    | >TP53-P98L-1 SSSVLSQK   | 14    | 6     |
| >TP53-P98L-1 SSSVPSQKTY | 514   | >TP53-P98L-1 SSSVLSQKTY | 487   | 27    |
| >TP53-P98L-1 SSSVPSQK   | 223   | >TP53-P98L-1 SSSVLSQK   | 203   | 20    |
| >TP53-P98L-1 SSSVPSQKTY | 105   | >TP53-P98L-1 SSSVLSQKTY | 235   | 130   |

|                         |       |                          |     |       |
|-------------------------|-------|--------------------------|-----|-------|
| >TP53-P98L-1 SSSVPSQK   | 226   | >TP53-P98L-1 SSSVLSQK    | 106 | 120   |
| >TP53-P98L-1 SSSVPSQKTY | 317   | >TP53-P98L-1 SSSVLSQKTY  | 343 | 26    |
| >TP53-P98L-1 SSSVPSQKTY | 112   | >TP53-P98L-1 SSSVLSQKTY  | 231 | 119   |
| >TP53-P98L-1 SSSVPSQKTY | 4     | >TP53-P98L-1 SSSVLSQKTY  | 6   | 2     |
| >TP53-P98L-1 SSSVPSQKTY | 27    | >TP53-P98L-1 SSSVLSQKTY  | 19  | 8     |
| >TP53-P98L-1 SSSVPSQKTY | 457   | >TP53-P98L-1 SSSVLSQKTY  | 372 | 85    |
| >TP53-P98L-1 SSSVPSQK   | 286   | >TP53-P98L-1 SSSVLSQK    | 216 | 70    |
| >TP53-P98L-1 LSSSVPSQKT | 164   | >TP53-P98L-1 LSSSVLSQKTY | 177 | 13    |
| >TP53-P98L-1 LSSSVPSQK  | 103   | >TP53-P98L-1 LSSSVLSQK   | 106 | 3     |
| >TP53-P98L-1 LSSSVPSQK  | 23    | >TP53-P98L-1 LSSSVLSQK   | 22  | 1     |
| >TP53-P98L-1 LSSSVPSQKT | 450   | >TP53-P98L-1 LSSSVLSQKTY | 636 | 186   |
| >TP53-P98L-1 LSSSVPSQKT | 50    | >TP53-P98L-1 LSSSVLSQKTY | 45  | 5     |
| >TP53-P98L-1 LSSSVPSQK  | 34    | >TP53-P98L-1 LSSSVLSQK   | 24  | 10    |
| >TP53-P98L-1 LSSSVPSQKT | 149   | >TP53-P98L-1 LSSSVLSQKTY | 133 | 16    |
| >TP53-P98L-1 LSSSVPSQKT | 32    | >TP53-P98L-1 LSSSVLSQKTY | 59  | 27    |
| >TP53-P98L-1 LSSSVPSQKT | 6     | >TP53-P98L-1 LSSSVLSQKTY | 7   | 1     |
| >TP53-P98L-1 LSSSVPSQKT | 229   | >TP53-P98L-1 LSSSVLSQKTY | 371 | 142   |
| >TP53-P98L-1 LSSSVPSQKT | 204   | >TP53-P98L-1 LSSSVLSQKTY | 359 | 155   |
| >TP53-P98L-1 LSSSVPSQKT | 32    | >TP53-P98L-1 LSSSVLSQKTY | 50  | 18    |
| >TP53-P98L-1 LSSSVPSQK  | 189   | >TP53-P98L-1 LSSSVLSQK   | 77  | 112   |
| >TP53-P98L-1 LSSSVPSQKT | 8     | >TP53-P98L-1 LSSSVLSQKTY | 8   | 0     |
| >TP53-P98L-1 LSSSVPSQKT | 1112  | >TP53-P98L-1 LSSSVLSQKTY | 245 | 867   |
| >TP53-P98L-1 PLSSSVPSQK | 472   | >TP53-P98L-1 PLSSSVLSQK  | 192 | 280   |
| >TP53-P98L-1 PLSSSVPSQK | 382   | >TP53-P98L-1 PLSSSVLSQK  | 238 | 144   |
| >TP53-P98L-1 WPLSSSVP   | 40369 | >TP53-P98L-1 WPLSSSVL    | 235 | 40134 |
| >TP53-P98L-1 WPLSSSVP   | 14615 | >TP53-P98L-1 WPLSSSVL    | 31  | 14584 |
| >TP53-P98L-1 WPLSSSVP   | 5664  | >TP53-P98L-1 WPLSSSVL    | 262 | 5402  |
| >TP53-P98L-1 WPLSSSVP   | 706   | >TP53-P98L-1 WPLSSSVL    | 24  | 682   |
| >TP53-P98L-1 WPLSSSVPS  | 27    | >TP53-P98L-1 WPLSSSVLS   | 233 | 206   |
| >TP53-P98L-1 WPLSSSVP   | 5849  | >TP53-P98L-1 WPLSSSVL    | 11  | 5838  |
| >TP53-P98L-1 WPLSSSVP   | 11142 | >TP53-P98L-1 WPLSSSVL    | 197 | 10945 |
| >TP53-P98L-1 WPLSSSVPS  | 159   | >TP53-P98L-1 WPLSSSVLS   | 265 | 106   |
| >TP53-P98L-1 WPLSSSVP   | 13443 | >TP53-P98L-1 WPLSSSVL    | 84  | 13359 |
| >TP53-P98L-1 SWPLSSSVP  | 9014  | >TP53-P98L-1 SWPLSSSVL   | 87  | 8927  |
| >TP53-P98L-1 SWPLSSSVP  | 23474 | >TP53-P98L-1 SWPLSSSVL   | 204 | 23270 |
| >TP53-P98L-1 SWPLSSSVP  | 920   | >TP53-P98L-1 SWPLSSSVL   | 278 | 642   |
| >TP53-P98L-1 SWPLSSSVPS | 447   | >TP53-P98L-1 SWPLSSSVLS  | 425 | 22    |
| >TP53-P98L-1 PSWPLSSSVP | 15628 | >TP53-P98L-1 PSWPLSSSVL  | 108 | 15520 |
| >TP53-P98L-1 PSWPLSSSVP | 30024 | >TP53-P98L-1 PSWPLSSSVL  | 126 | 29898 |
| >TP53-P98S-1 PSQKTYQGSY | 513   | >TP53-P98S-1 SSQKTYQGSY  | 166 | 347   |
| >TP53-P98S-1 PSQKTYQGSY | 71    | >TP53-P98S-1 SSQKTYQGSY  | 33  | 38    |
| >TP53-P98S-1 PSQKTYQGSY | 3731  | >TP53-P98S-1 SSQKTYQGSY  | 113 | 3618  |
| >TP53-P98S-1 PSQKTYQGSY | 1929  | >TP53-P98S-1 SSQKTYQGSY  | 375 | 1554  |

|                         |       |                         |       |       |
|-------------------------|-------|-------------------------|-------|-------|
| >TP53-P98S-1 PSQKTYQGSY | 3845  | >TP53-P98S-1 SSQKTYQGSY | 45    | 3800  |
| >TP53-P98S-1 PSQKTYQGSY | 228   | >TP53-P98S-1 SSQKTYQGSY | 28    | 200   |
| >TP53-P98S-1 VPSQKTYQGS | 17155 | >TP53-P98S-1 VSSQKTYQGS | 83    | 17072 |
| >TP53-P98S-1 VPSQKTYQGS | 1683  | >TP53-P98S-1 VSSQKTYQGS | 253   | 1430  |
| >TP53-P98S-1 VPSQKTYQGS | 92    | >TP53-P98S-1 VSSQKTYQGS | 9     | 83    |
| >TP53-P98S-1 VPSQKTYQGS | 8312  | >TP53-P98S-1 VSSQKTYQGS | 184   | 8128  |
| >TP53-P98S-1 VPSQKTYQGS | 11508 | >TP53-P98S-1 VSSQKTYQGS | 8     | 11500 |
| >TP53-P98S-1 VPSQKTYQGS | 19    | >TP53-P98S-1 VSSQKTYQGS | 1166  | 1147  |
| >TP53-P98S-1 VPSQKTYQGS | 254   | >TP53-P98S-1 VSSQKTYQGS | 16649 | 16395 |
| >TP53-P98S-1 VPSQKTYQGS | 19649 | >TP53-P98S-1 VSSQKTYQGS | 203   | 19446 |
| >TP53-P98S-1 VPSQKTYQGS | 2185  | >TP53-P98S-1 VSSQKTYQGS | 81    | 2104  |
| >TP53-P98S-1 VPSQKTYQGS | 15    | >TP53-P98S-1 VSSQKTYQGS | 1310  | 1295  |
| >TP53-P98S-1 SVPSQKTY   | 183   | >TP53-P98S-1 SVSSQKTY   | 377   | 194   |
| >TP53-P98S-1 SVPSQKTY   | 1228  | >TP53-P98S-1 SVSSQKTY   | 229   | 999   |
| >TP53-P98S-1 SVPSQKTY   | 442   | >TP53-P98S-1 SVSSQKTY   | 61    | 381   |
| >TP53-P98S-1 SVPSQKTY   | 2647  | >TP53-P98S-1 SVSSQKTY   | 383   | 2264  |
| >TP53-P98S-1 SVPSQKTY   | 4085  | >TP53-P98S-1 SVSSQKTY   | 403   | 3682  |
| >TP53-P98S-1 SVPSQKTY   | 3448  | >TP53-P98S-1 SVSSQKTY   | 97    | 3351  |
| >TP53-P98S-1 SSVPSQKTY  | 122   | >TP53-P98S-1 SSVSSQKTY  | 34    | 88    |
| >TP53-P98S-1 SSVPSQKTY  | 146   | >TP53-P98S-1 SSVSSQKTY  | 81    | 65    |
| >TP53-P98S-1 SSVPSQKTY  | 227   | >TP53-P98S-1 SSVSSQKTY  | 216   | 11    |
| >TP53-P98S-1 SSVPSQKTY  | 40    | >TP53-P98S-1 SSVSSQKTY  | 22    | 18    |
| >TP53-P98S-1 SSVPSQKTY  | 2     | >TP53-P98S-1 SSVSSQKTY  | 3     | 1     |
| >TP53-P98S-1 SSVPSQKTY  | 119   | >TP53-P98S-1 SSVSSQKTY  | 498   | 379   |
| >TP53-P98S-1 SSVPSQKTY  | 195   | >TP53-P98S-1 SSVSSQKTY  | 642   | 447   |
| >TP53-P98S-1 SSVPSQKTY  | 23    | >TP53-P98S-1 SSVSSQKTY  | 12    | 11    |
| >TP53-P98S-1 SSVPSQKTY  | 188   | >TP53-P98S-1 SSVSSQKTY  | 132   | 56    |
| >TP53-P98S-1 SSSVPSQKTY | 415   | >TP53-P98S-1 SSSVSSQKTY | 241   | 174   |
| >TP53-P98S-1 SSSVPSQK   | 230   | >TP53-P98S-1 SSSVSSQK   | 182   | 48    |
| >TP53-P98S-1 SSSVPSQK   | 20    | >TP53-P98S-1 SSSVSSQK   | 14    | 6     |
| >TP53-P98S-1 SSSVPSQKTY | 514   | >TP53-P98S-1 SSSVSSQKTY | 492   | 22    |
| >TP53-P98S-1 SSSVPSQKTY | 817   | >TP53-P98S-1 SSSVSSQKTY | 463   | 354   |
| >TP53-P98S-1 SSSVPSQK   | 223   | >TP53-P98S-1 SSSVSSQK   | 67    | 156   |
| >TP53-P98S-1 SSSVPSQKTY | 105   | >TP53-P98S-1 SSSVSSQKTY | 151   | 46    |
| >TP53-P98S-1 SSSVPSQK   | 226   | >TP53-P98S-1 SSSVSSQK   | 87    | 139   |
| >TP53-P98S-1 SSSVPSQKTY | 317   | >TP53-P98S-1 SSSVSSQKTY | 188   | 129   |
| >TP53-P98S-1 SSSVPSQKTY | 112   | >TP53-P98S-1 SSSVSSQKTY | 47    | 65    |
| >TP53-P98S-1 SSSVPSQKTY | 4     | >TP53-P98S-1 SSSVSSQKTY | 3     | 1     |
| >TP53-P98S-1 SSSVPSQKTY | 27    | >TP53-P98S-1 SSSVSSQKTY | 24    | 3     |
| >TP53-P98S-1 SSSVPSQKTY | 457   | >TP53-P98S-1 SSSVSSQKTY | 280   | 177   |
| >TP53-P98S-1 SSSVPSQK   | 286   | >TP53-P98S-1 SSSVSSQK   | 225   | 61    |
| >TP53-P98S-1 LSSVPSQKTY | 164   | >TP53-P98S-1 LSSVSSQKTY | 162   | 2     |
| >TP53-P98S-1 LSSVPSQK   | 103   | >TP53-P98S-1 LSSVSSQK   | 72    | 31    |

|                          |      |                          |       |       |
|--------------------------|------|--------------------------|-------|-------|
| >TP53-P98S-I LSSSVPSQK   | 23   | >TP53-P98S-I LSSSVSSQK   | 23    | 0     |
| >TP53-P98S-I LSSSVPSQKT\ | 450  | >TP53-P98S-I LSSSVSSQKT\ | 521   | 71    |
| >TP53-P98S-I LSSSVPSQK   | 945  | >TP53-P98S-I LSSSVSSQK   | 377   | 568   |
| >TP53-P98S-I LSSSVPSQKT\ | 50   | >TP53-P98S-I LSSSVSSQKT\ | 33    | 17    |
| >TP53-P98S-I LSSSVPSQK   | 34   | >TP53-P98S-I LSSSVSSQK   | 17    | 17    |
| >TP53-P98S-I LSSSVPSQKT\ | 149  | >TP53-P98S-I LSSSVSSQKT\ | 79    | 70    |
| >TP53-P98S-I LSSSVPSQKT\ | 32   | >TP53-P98S-I LSSSVSSQKT\ | 27    | 5     |
| >TP53-P98S-I LSSSVPSQKT\ | 6    | >TP53-P98S-I LSSSVSSQKT\ | 6     | 0     |
| >TP53-P98S-I LSSSVPSQKT\ | 229  | >TP53-P98S-I LSSSVSSQKT\ | 135   | 94    |
| >TP53-P98S-I LSSSVPSQKT\ | 204  | >TP53-P98S-I LSSSVSSQKT\ | 322   | 118   |
| >TP53-P98S-I LSSSVPSQKT\ | 32   | >TP53-P98S-I LSSSVSSQKT\ | 39    | 7     |
| >TP53-P98S-I LSSSVPSQK   | 189  | >TP53-P98S-I LSSSVSSQK   | 71    | 118   |
| >TP53-P98S-I LSSSVPSQKT\ | 8    | >TP53-P98S-I LSSSVSSQKT\ | 6     | 2     |
| >TP53-P98S-I LSSSVPSQKT\ | 1112 | >TP53-P98S-I LSSSVSSQKT\ | 106   | 1006  |
| >TP53-P98S-I PLSSSVPSQK  | 472  | >TP53-P98S-I PLSSSVSSQK  | 219   | 253   |
| >TP53-P98S-I PLSSSVPSQK  | 382  | >TP53-P98S-I PLSSSVSSQK  | 311   | 71    |
| >TP53-P98S-I WPLSSVPS    | 706  | >TP53-P98S-I WPLSSVPS    | 78    | 628   |
| >TP53-P98S-I WPLSSVPS    | 27   | >TP53-P98S-I WPLSSVPS    | 72    | 45    |
| >TP53-P98S-I WPLSSVPS    | 159  | >TP53-P98S-I WPLSSVPS    | 633   | 474   |
| >TP53-P98S-I SWPLSSVPS   | 447  | >TP53-P98S-I SWPLSSVPS   | 392   | 55    |
| >TP53-Q104-I QGSYGFRLGF  | 278  | >TP53-Q104-I HGSYGFRLGF  | 612   | 334   |
| >TP53-Q104-I YQGSYGFRL   | 30   | >TP53-Q104-I YHGSYGFRL   | 15582 | 15552 |
| >TP53-Q104-I YQGSYGFRL   | 36   | >TP53-Q104-I YHGSYGFRL   | 2706  | 2670  |
| >TP53-Q104-I YQGSYGFRL   | 15   | >TP53-Q104-I YHGSYGFRL   | 16705 | 16690 |
| >TP53-Q104-I YQGSYGFRLC  | 189  | >TP53-Q104-I YHGSYGFRLC  | 21736 | 21547 |
| >TP53-Q104-I YQGSYGFRL   | 32   | >TP53-Q104-I YHGSYGFRL   | 3337  | 3305  |
| >TP53-Q104-I YQGSYGFRL   | 167  | >TP53-Q104-I YHGSYGFRL   | 15012 | 14845 |
| >TP53-Q104-I YQGSYGFRL   | 54   | >TP53-Q104-I YHGSYGFRL   | 2699  | 2645  |
| >TP53-Q104-I YQGSYGFRL   | 476  | >TP53-Q104-I YHGSYGFRL   | 891   | 415   |
| >TP53-Q104-I YQGSYGFRL   | 211  | >TP53-Q104-I YHGSYGFRL   | 20244 | 20033 |
| >TP53-Q104-I YQGSYGFRLC  | 32   | >TP53-Q104-I YHGSYGFRLC  | 7648  | 7616  |
| >TP53-Q104-I YQGSYGFRLC  | 158  | >TP53-Q104-I YHGSYGFRLC  | 4240  | 4082  |
| >TP53-Q104-I YQGSYGFRL   | 77   | >TP53-Q104-I YHGSYGFRL   | 1384  | 1307  |
| >TP53-Q104-I YQGSYGFRLC  | 6    | >TP53-Q104-I YHGSYGFRLC  | 45    | 39    |
| >TP53-Q104-I YQGSYGFRL   | 145  | >TP53-Q104-I YHGSYGFRL   | 77    | 68    |
| >TP53-Q104-I YQGSYGFRL   | 223  | >TP53-Q104-I YHGSYGFRL   | 469   | 246   |
| >TP53-Q104-I SSSVPSQKTY\ | 2005 | >TP53-Q104-I SSSVPSQKTY\ | 237   | 1768  |
| >TP53-Q104-I TYQGSYGFRL  | 141  | >TP53-Q104-I TYHGSYGFRL  | 217   | 76    |
| >TP53-Q104-I TYQGSYGF    | 28   | >TP53-Q104-I TYHGSYGF    | 74    | 46    |
| >TP53-Q104-I TYQGSYGFRL  | 316  | >TP53-Q104-I TYHGSYGFRL  | 489   | 173   |
| >TP53-Q104-I TYQGSYGF    | 93   | >TP53-Q104-I TYHGSYGF    | 137   | 44    |
| >TP53-Q104-I TYQGSYGFRL  | 163  | >TP53-Q104-I TYHGSYGFRL  | 358   | 195   |
| >TP53-Q104-I TYQGSYGF    | 5    | >TP53-Q104-I TYHGSYGF    | 5     | 0     |



|                         |      |                         |      |      |
|-------------------------|------|-------------------------|------|------|
| >TP53-Q104I TYQGSGYFR   | 255  | >TP53-Q104I TYHGSGYFR   | 343  | 88   |
| >TP53-Q104I TYQGSGYFR L | 7    | >TP53-Q104I TYHGSGYFR L | 8    | 1    |
| >TP53-Q104I TYQGSGYFR   | 4993 | >TP53-Q104I TYHGSGYFR   | 190  | 4803 |
| >TP53-Q104I TYQGSGYFR   | 19   | >TP53-Q104I TYHGSGYFR   | 17   | 2    |
| >TP53-Q104I TYQGSGYFR   | 25   | >TP53-Q104I TYHGSGYFR   | 30   | 5    |
| >TP53-Q104I TYQGSGYFR   | 154  | >TP53-Q104I TYHGSGYFR   | 51   | 103  |
| >TP53-Q104I TYQGSGYFR   | 53   | >TP53-Q104I TYHGSGYFR   | 31   | 22   |
| >TP53-Q104I KTYQGSGYFR  | 220  | >TP53-Q104I KTYHGSGYFR  | 194  | 26   |
| >TP53-Q104I KTYQGSGYFR  | 169  | >TP53-Q104I KTYHGSGYFR  | 116  | 53   |
| >TP53-Q104I KTYQGSGYFR  | 260  | >TP53-Q104I KTYHGSGYFR  | 178  | 82   |
| >TP53-Q104I KTYQGSGYF   | 391  | >TP53-Q104I KTYHGSGYF   | 266  | 125  |
| >TP53-Q104I KTYQGSGYFR  | 77   | >TP53-Q104I KTYHGSGYFR  | 53   | 24   |
| >TP53-Q104I KTYQGSGYFR  | 23   | >TP53-Q104I KTYHGSGYFR  | 39   | 16   |
| >TP53-Q104I KTYQGSGYFR  | 854  | >TP53-Q104I KTYHGSGYFR  | 423  | 431  |
| >TP53-Q104I KTYQGSGYFR  | 175  | >TP53-Q104I KTYHGSGYFR  | 278  | 103  |
| >TP53-Q104I KTYQGSGYFR  | 50   | >TP53-Q104I KTYHGSGYFR  | 35   | 15   |
| >TP53-Q104I KTYQGSGYFR  | 57   | >TP53-Q104I KTYHGSGYFR  | 68   | 11   |
| >TP53-Q104I KTYQGSGYF   | 481  | >TP53-Q104I KTYHGSGYF   | 946  | 465  |
| >TP53-Q104I KTYQGSGYF   | 192  | >TP53-Q104I KTYHGSGYF   | 1827 | 1635 |
| >TP53-Q104I KTYQGSGYF   | 294  | >TP53-Q104I KTYHGSGYF   | 167  | 127  |
| >TP53-Q104I KTYQGSGY    | 773  | >TP53-Q104I KTYHGSGY    | 236  | 537  |
| >TP53-Q104I KTYQGSGYFR  | 96   | >TP53-Q104I KTYHGSGYFR  | 30   | 66   |
| >TP53-Q104I KTYQGSGYFR  | 795  | >TP53-Q104I KTYHGSGYFR  | 198  | 597  |
| >TP53-Q104I KTYQGSGYF   | 325  | >TP53-Q104I KTYHGSGYF   | 243  | 82   |
| >TP53-Q104I KTYQGSGYFR  | 10   | >TP53-Q104I KTYHGSGYFR  | 7    | 3    |
| >TP53-Q104I KTYQGSGYFR  | 643  | >TP53-Q104I KTYHGSGYFR  | 240  | 403  |
| >TP53-Q104I KTYQGSGYF   | 4    | >TP53-Q104I KTYHGSGYF   | 4    | 0    |
| >TP53-Q104I KTYQGSGYFR  | 21   | >TP53-Q104I KTYHGSGYFR  | 24   | 3    |
| >TP53-Q104I KTYQGSGYFR  | 407  | >TP53-Q104I KTYHGSGYFR  | 252  | 155  |
| >TP53-Q104I KTYQGSGYFR  | 57   | >TP53-Q104I KTYHGSGYFR  | 64   | 7    |
| >TP53-Q104I KTYQGSGYFR  | 402  | >TP53-Q104I KTYHGSGYFR  | 659  | 257  |
| >TP53-Q104I KTYQGSGYF   | 55   | >TP53-Q104I KTYHGSGYF   | 57   | 2    |
| >TP53-Q104I KTYQGSGYF   | 36   | >TP53-Q104I KTYHGSGYF   | 15   | 21   |
| >TP53-Q104I KTYQGSGYFR  | 1124 | >TP53-Q104I KTYHGSGYFR  | 439  | 685  |
| >TP53-Q104I KTYQGSGY    | 249  | >TP53-Q104I KTYHGSGY    | 270  | 21   |
| >TP53-Q104I KTYQGSGYF   | 2    | >TP53-Q104I KTYHGSGYF   | 2    | 0    |
| >TP53-Q104I KTYQGSGYFR  | 465  | >TP53-Q104I KTYHGSGYFR  | 455  | 10   |
| >TP53-Q104I KTYQGSGYFR  | 3    | >TP53-Q104I KTYHGSGYFR  | 2    | 1    |
| >TP53-Q104I KTYQGSGYF   | 101  | >TP53-Q104I KTYHGSGYF   | 123  | 22   |
| >TP53-Q104I KTYQGSGYFR  | 439  | >TP53-Q104I KTYHGSGYFR  | 598  | 159  |
| >TP53-Q104I KTYQGSGYF   | 15   | >TP53-Q104I KTYHGSGYF   | 16   | 1    |
| >TP53-Q104I KTYQGSGYFR  | 35   | >TP53-Q104I KTYHGSGYFR  | 36   | 1    |
| >TP53-Q104I KTYQGSGYFR  | 151  | >TP53-Q104I KTYHGSGYFR  | 319  | 168  |

|                        |      |                        |      |      |
|------------------------|------|------------------------|------|------|
| >TP53-Q104I KTYQGSYGF  | 25   | >TP53-Q104I KTYHGSYGF  | 28   | 3    |
| >TP53-Q104I KTYQGSYGFR | 28   | >TP53-Q104I KTYHGSYGFR | 33   | 5    |
| >TP53-Q104I KTYQGSYGF  | 345  | >TP53-Q104I KTYHGSYGF  | 249  | 96   |
| >TP53-Q104I KTYQGSYGF  | 370  | >TP53-Q104I KTYHGSYGF  | 323  | 47   |
| >TP53-Q104I KTYQGSYGF  | 25   | >TP53-Q104I KTYHGSYGF  | 34   | 9    |
| >TP53-Q104I KTYQGSYGF  | 43   | >TP53-Q104I KTYHGSYGF  | 52   | 9    |
| >TP53-Q104I QKTYQGSY   | 308  | >TP53-Q104I QKTYHGSY   | 725  | 417  |
| >TP53-Q104I QKTYQGSY   | 40   | >TP53-Q104I QKTYHGSY   | 22   | 18   |
| >TP53-Q104I QKTYQGSYGI | 10   | >TP53-Q104I QKTYHGSYGI | 7    | 3    |
| >TP53-Q104I SQKTYQGSY  | 15   | >TP53-Q104I SQKTYHGSY  | 30   | 15   |
| >TP53-Q104I SQKTYQGSY  | 38   | >TP53-Q104I SQKTYHGSY  | 30   | 8    |
| >TP53-Q104I SQKTYQGSY  | 36   | >TP53-Q104I SQKTYHGSY  | 31   | 5    |
| >TP53-Q104I SQKTYQGSY  | 198  | >TP53-Q104I SQKTYHGSY  | 128  | 70   |
| >TP53-Q104I SQKTYQGSY  | 268  | >TP53-Q104I SQKTYHGSY  | 218  | 50   |
| >TP53-Q104I SQKTYQGSY  | 19   | >TP53-Q104I SQKTYHGSY  | 11   | 8    |
| >TP53-Q104I SQKTYQGSY  | 9    | >TP53-Q104I SQKTYHGSY  | 7    | 2    |
| >TP53-Q104I PSQKTYQGSY | 513  | >TP53-Q104I PSQKTYHGSY | 296  | 217  |
| >TP53-Q104I PSQKTYQGSY | 71   | >TP53-Q104I PSQKTYHGSY | 63   | 8    |
| >TP53-Q104I PSQKTYQGSY | 228  | >TP53-Q104I PSQKTYHGSY | 501  | 273  |
| >TP53-Q104I VPSQKTYQG  | 92   | >TP53-Q104I VPSQKTYHG  | 126  | 34   |
| >TP53-Q104I VPSQKTYQG  | 19   | >TP53-Q104I VPSQKTYHG  | 20   | 1    |
| >TP53-Q104I VPSQKTYQG  | 254  | >TP53-Q104I VPSQKTYHG  | 381  | 127  |
| >TP53-Q104I VPSQKTYQG  | 15   | >TP53-Q104I VPSQKTYHG  | 36   | 21   |
| >TP53-Q104I SSVPSQKTYQ | 1514 | >TP53-Q104I SSVPSQKTYH | 281  | 1233 |
| >TP53-Q136I QLAKTCPV   | 58   | >TP53-Q136I ELAKTCPV   | 749  | 691  |
| >TP53-Q136I QLAKTCPV   | 13   | >TP53-Q136I ELAKTCPV   | 73   | 60   |
| >TP53-Q136I QLAKTCPVQL | 315  | >TP53-Q136I ELAKTCPVQL | 1054 | 739  |
| >TP53-Q136I QLAKTCPV   | 10   | >TP53-Q136I ELAKTCPV   | 61   | 51   |
| >TP53-Q136I QLAKTCPVQL | 383  | >TP53-Q136I ELAKTCPVQL | 958  | 575  |
| >TP53-Q136I QLAKTCPV   | 37   | >TP53-Q136I ELAKTCPV   | 365  | 328  |
| >TP53-Q136I QLAKTCPV   | 14   | >TP53-Q136I ELAKTCPV   | 21   | 7    |
| >TP53-Q136I QLAKTCPVQL | 323  | >TP53-Q136I ELAKTCPVQL | 560  | 237  |
| >TP53-Q136I QLAKTCPV   | 30   | >TP53-Q136I ELAKTCPV   | 77   | 47   |
| >TP53-Q136I QLAKTCPV   | 10   | >TP53-Q136I ELAKTCPV   | 11   | 1    |
| >TP53-Q136I QLAKTCPVQL | 177  | >TP53-Q136I ELAKTCPVQL | 180  | 3    |
| >TP53-Q136I QLAKTCPV   | 10   | >TP53-Q136I ELAKTCPV   | 7    | 3    |
| >TP53-Q136I QLAKTCPVQL | 117  | >TP53-Q136I ELAKTCPVQL | 74   | 43   |
| >TP53-Q136I QLAKTCPV   | 3    | >TP53-Q136I ELAKTCPV   | 5    | 2    |
| >TP53-Q136I QLAKTCPVQL | 20   | >TP53-Q136I ELAKTCPVQL | 36   | 16   |
| >TP53-Q136I QLAKTCPV   | 217  | >TP53-Q136I ELAKTCPV   | 55   | 162  |
| >TP53-Q136I QLAKTCPV   | 60   | >TP53-Q136I ELAKTCPV   | 9    | 51   |
| >TP53-Q136I QLAKTCPVQL | 3162 | >TP53-Q136I ELAKTCPVQL | 334  | 2828 |
| >TP53-Q136I QLAKTCPVQL | 343  | >TP53-Q136I ELAKTCPVQL | 2355 | 2012 |

|                       |       |                       |       |       |
|-----------------------|-------|-----------------------|-------|-------|
| >TP53-Q136fCQLAKTCPV  | 3581  | >TP53-Q136fCELAKTCPV  | 75    | 3506  |
| >TP53-Q136fCQLAKTCPV  | 121   | >TP53-Q136fCELAKTCPV  | 13849 | 13728 |
| >TP53-Q136fCQLAKTCPV  | 173   | >TP53-Q136fCELAKTCPV  | 7461  | 7288  |
| >TP53-Q136fCQLAKTCPV  | 22    | >TP53-Q136fCELAKTCPV  | 1879  | 1857  |
| >TP53-Q136fCQLAKTCPVC | 463   | >TP53-Q136fCELAKTCPVQ | 14247 | 13784 |
| >TP53-Q136fCQLAKTCPV  | 136   | >TP53-Q136fCELAKTCPV  | 6363  | 6227  |
| >TP53-Q136fCQLAKTCPV  | 77    | >TP53-Q136fCELAKTCPV  | 8723  | 8646  |
| >TP53-Q136fCQLAKTCPV  | 457   | >TP53-Q136fCELAKTCPV  | 9001  | 8544  |
| >TP53-Q136fCQLAKTCPV  | 268   | >TP53-Q136fCELAKTCPV  | 5626  | 5358  |
| >TP53-Q136fCQLAKTCPVC | 155   | >TP53-Q136fCELAKTCPVQ | 4216  | 4061  |
| >TP53-Q136fCQLAKTCPVC | 231   | >TP53-Q136fCELAKTCPVQ | 1840  | 1609  |
| >TP53-Q136fCQLAKTCPVC | 10013 | >TP53-Q136fCELAKTCPVQ | 406   | 9607  |
| >TP53-Q136fCQLAKTCPV  | 7117  | >TP53-Q136fCELAKTCPV  | 51    | 7066  |
| >TP53-Q136fCQLAKTCPVC | 8645  | >TP53-Q136fCELAKTCPVQ | 113   | 8532  |
| >TP53-Q136fCQLAKTCPVC | 15306 | >TP53-Q136fCELAKTCPVQ | 433   | 14873 |
| >TP53-Q136fCQLAKTCPV  | 23597 | >TP53-Q136fCELAKTCPV  | 497   | 23100 |
| >TP53-Q136fCQLAKTCPV  | 4207  | >TP53-Q136fCELAKTCPV  | 20    | 4187  |
| >TP53-Q136fCQLAKTCPVC | 4776  | >TP53-Q136fCELAKTCPVQ | 30    | 4746  |
| >TP53-Q136fYSPALNKMFC | 124   | >TP53-Q136fYSPALNKMFC | 267   | 143   |
| >TP53-Q136fFCQLAKTCPV | 443   | >TP53-Q136fFCELAKTCPV | 1066  | 623   |
| >TP53-Q136fMFCQLAKTCI | 1152  | >TP53-Q136fMFCELAKTCF | 412   | 740   |
| >TP53-Q136fMFCQLAKTCI | 924   | >TP53-Q136fMFCELAKTCF | 199   | 725   |
| >TP53-Q136fMFCQLAKTCI | 679   | >TP53-Q136fMFCELAKTCF | 272   | 407   |
| >TP53-Q136fMFCQLAKTC  | 450   | >TP53-Q136fMFCELAKTC  | 705   | 255   |
| >TP53-Q136fKMFCQLAKT  | 89    | >TP53-Q136fKMFCELAKT  | 83    | 6     |
| >TP53-Q136fKMFCQLAKT  | 102   | >TP53-Q136fKMFCELAKT  | 66    | 36    |
| >TP53-Q136fKMFCQLAKT  | 19    | >TP53-Q136fKMFCELAKT  | 22    | 3     |
| >TP53-Q136fKMFCQLAKT  | 199   | >TP53-Q136fKMFCELAKT  | 155   | 44    |
| >TP53-Q136fKMFCQLAKT  | 19    | >TP53-Q136fKMFCELAKT  | 21    | 2     |
| >TP53-Q136fKMFCQLAKT  | 23    | >TP53-Q136fKMFCELAKTC | 17    | 6     |
| >TP53-Q136fKMFCQLAKT  | 55    | >TP53-Q136fKMFCELAKT  | 60    | 5     |
| >TP53-Q136fKMFCQLAKT  | 61    | >TP53-Q136fKMFCELAKTC | 37    | 24    |
| >TP53-Q136fKMFCQLAK   | 26    | >TP53-Q136fKMFCELAK   | 30    | 4     |
| >TP53-Q136fKMFCQLAK   | 12    | >TP53-Q136fKMFCELAK   | 15    | 3     |
| >TP53-Q136fKMFCQLAK   | 8     | >TP53-Q136fKMFCELAK   | 21    | 13    |
| >TP53-Q136fKMFCQLAK   | 35    | >TP53-Q136fKMFCELAK   | 114   | 79    |
| >TP53-Q136fKMFCQLAK   | 371   | >TP53-Q136fKMFCELAK   | 553   | 182   |
| >TP53-Q136fKMFCQLAKT  | 81    | >TP53-Q136fKMFCELAKTC | 103   | 22    |
| >TP53-Q136fKMFCQLAK   | 58    | >TP53-Q136fKMFCELAK   | 65    | 7     |
| >TP53-Q136fKMFCQLAKT  | 491   | >TP53-Q136fKMFCELAKTC | 459   | 32    |
| >TP53-Q136fKMFCQLAK   | 39    | >TP53-Q136fKMFCELAK   | 39    | 0     |
| >TP53-Q136fLNKMFCQL   | 100   | >TP53-Q136fLNKMFCEL   | 349   | 249   |
| >TP53-Q136fLNKMFCQLA  | 161   | >TP53-Q136fLNKMFCELAK | 776   | 615   |

|                       |      |                        |      |      |
|-----------------------|------|------------------------|------|------|
| >TP53-Q136fLNKMFCQL   | 153  | >TP53-Q136fLNKMFCCEL   | 298  | 145  |
| >TP53-Q136fALNKMFCQL  | 238  | >TP53-Q136fALNKMFCCEL  | 77   | 161  |
| >TP53-Q136fALNKMFCQL  | 17   | >TP53-Q136fALNKMFCCEL  | 11   | 6    |
| >TP53-Q136fALNKMFCQL  | 30   | >TP53-Q136fALNKMFCCEL  | 28   | 2    |
| >TP53-Q136fALNKMFCQL  | 442  | >TP53-Q136fALNKMFCCEL/ | 334  | 108  |
| >TP53-Q136fALNKMFCQL  | 297  | >TP53-Q136fALNKMFCCEL  | 133  | 164  |
| >TP53-Q136fALNKMFCQL  | 22   | >TP53-Q136fALNKMFCCEL  | 18   | 4    |
| >TP53-Q136fALNKMFCQL  | 255  | >TP53-Q136fALNKMFCCEL/ | 240  | 15   |
| >TP53-Q136fALNKMFCQL  | 198  | >TP53-Q136fALNKMFCCEL  | 66   | 132  |
| >TP53-Q136fALNKMFCQL  | 21   | >TP53-Q136fALNKMFCCEL  | 18   | 3    |
| >TP53-Q136fALNKMFCQL  | 256  | >TP53-Q136fALNKMFCCEL/ | 319  | 63   |
| >TP53-Q136fALNKMFCQL  | 66   | >TP53-Q136fALNKMFCCEL  | 155  | 89   |
| >TP53-Q136fALNKMFCQ   | 245  | >TP53-Q136fALNKMFCCE   | 7897 | 7652 |
| >TP53-Q136fALNKMFCQL  | 3    | >TP53-Q136fALNKMFCCEL  | 3    | 0    |
| >TP53-Q136fALNKMFCQL  | 11   | >TP53-Q136fALNKMFCCEL/ | 21   | 10   |
| >TP53-Q136fALNKMFCQL  | 37   | >TP53-Q136fALNKMFCCEL/ | 48   | 11   |
| >TP53-Q136fALNKMFCQL  | 25   | >TP53-Q136fALNKMFCCEL/ | 28   | 3    |
| >TP53-Q136fALNKMFCQL  | 113  | >TP53-Q136fALNKMFCCEL/ | 266  | 153  |
| >TP53-Q136fALNKMFCQL  | 431  | >TP53-Q136fALNKMFCCEL/ | 758  | 327  |
| >TP53-Q136fALNKMFCQL  | 288  | >TP53-Q136fALNKMFCCEL  | 470  | 182  |
| >TP53-Q136fALNKMFCQL  | 416  | >TP53-Q136fALNKMFCCEL  | 359  | 57   |
| >TP53-Q136fSPALNKMFCQ | 432  | >TP53-Q136fSPALNKMFCCE | 541  | 109  |
| >TP53-Q136fSPALNKMFCQ | 41   | >TP53-Q136fSPALNKMFCCE | 33   | 8    |
| >TP53-Q136fSPALNKMFCQ | 372  | >TP53-Q136fSPALNKMFCCE | 524  | 152  |
| >TP53-Q136fQLAKTCPV   | 58   | >TP53-Q136fHLAKTCPV    | 31   | 27   |
| >TP53-Q136fQLAKTCPV   | 13   | >TP53-Q136fHLAKTCPV    | 9    | 4    |
| >TP53-Q136fQLAKTCPVQL | 315  | >TP53-Q136fHLAKTCPVQL  | 267  | 48   |
| >TP53-Q136fQLAKTCPV   | 10   | >TP53-Q136fHLAKTCPV    | 7    | 3    |
| >TP53-Q136fQLAKTCPVQL | 383  | >TP53-Q136fHLAKTCPVQL  | 441  | 58   |
| >TP53-Q136fQLAKTCPV   | 37   | >TP53-Q136fHLAKTCPV    | 36   | 1    |
| >TP53-Q136fQLAKTCPV   | 14   | >TP53-Q136fHLAKTCPV    | 9    | 5    |
| >TP53-Q136fQLAKTCPVQL | 323  | >TP53-Q136fHLAKTCPVQL  | 175  | 148  |
| >TP53-Q136fQLAKTCPV   | 30   | >TP53-Q136fHLAKTCPV    | 10   | 20   |
| >TP53-Q136fQLAKTCPVQL | 1584 | >TP53-Q136fHLAKTCPVQL  | 352  | 1232 |
| >TP53-Q136fQLAKTCPV   | 10   | >TP53-Q136fHLAKTCPV    | 7    | 3    |
| >TP53-Q136fQLAKTCPVQL | 177  | >TP53-Q136fHLAKTCPVQL  | 46   | 131  |
| >TP53-Q136fQLAKTCPV   | 10   | >TP53-Q136fHLAKTCPV    | 9    | 1    |
| >TP53-Q136fQLAKTCPVQL | 117  | >TP53-Q136fHLAKTCPVQL  | 95   | 22   |
| >TP53-Q136fQLAKTCPV   | 3    | >TP53-Q136fHLAKTCPV    | 3    | 0    |
| >TP53-Q136fQLAKTCPVQL | 20   | >TP53-Q136fHLAKTCPVQL  | 11   | 9    |
| >TP53-Q136fQLAKTCPV   | 217  | >TP53-Q136fHLAKTCPV    | 138  | 79   |
| >TP53-Q136fQLAKTCPV   | 60   | >TP53-Q136fHLAKTCPV    | 41   | 19   |
| >TP53-Q136fQLAKTCPVQL | 3303 | >TP53-Q136fHLAKTCPVQL  | 379  | 2924 |

|                       |     |                       |       |       |
|-----------------------|-----|-----------------------|-------|-------|
| >TP53-Q136IQLAKTCPVQL | 343 | >TP53-Q136IHLAKTCPVQL | 115   | 228   |
| >TP53-Q136ICQLAKTCPV  | 121 | >TP53-Q136IHLAKTCPV   | 15210 | 15089 |
| >TP53-Q136ICQLAKTCPV  | 173 | >TP53-Q136IHLAKTCPV   | 11070 | 10897 |
| >TP53-Q136ICQLAKTCPV  | 22  | >TP53-Q136IHLAKTCPV   | 7772  | 7750  |
| >TP53-Q136ICQLAKTCPVC | 463 | >TP53-Q136IHLAKTCPVC  | 21650 | 21187 |
| >TP53-Q136ICQLAKTCPV  | 136 | >TP53-Q136IHLAKTCPV   | 8317  | 8181  |
| >TP53-Q136ICQLAKTCPV  | 77  | >TP53-Q136IHLAKTCPV   | 13558 | 13481 |
| >TP53-Q136ICQLAKTCPV  | 457 | >TP53-Q136IHLAKTCPV   | 12610 | 12153 |
| >TP53-Q136ICQLAKTCPV  | 268 | >TP53-Q136IHLAKTCPV   | 3066  | 2798  |
| >TP53-Q136ICQLAKTCPVC | 155 | >TP53-Q136IHLAKTCPVC  | 1930  | 1775  |
| >TP53-Q136ICQLAKTCPVC | 231 | >TP53-Q136IHLAKTCPVC  | 111   | 120   |
| >TP53-Q136IYSPALNKMFC | 124 | >TP53-Q136IYSPALNKMFC | 249   | 125   |
| >TP53-Q136IFCQLAKTCPV | 443 | >TP53-Q136IFCHLAKTCPV | 319   | 124   |
| >TP53-Q136IMFCQLAKTC  | 450 | >TP53-Q136IMFCHLAKTC  | 899   | 449   |
| >TP53-Q136IKMFCQLAKT  | 89  | >TP53-Q136IKMFCHLAKT  | 54    | 35    |
| >TP53-Q136IKMFCQLAKT  | 102 | >TP53-Q136IKMFCHLAKT  | 49    | 53    |
| >TP53-Q136IKMFCQLAKT  | 19  | >TP53-Q136IKMFCHLAKT  | 7     | 12    |
| >TP53-Q136IKMFCQLAKT  | 199 | >TP53-Q136IKMFCHLAKT  | 90    | 109   |
| >TP53-Q136IKMFCQLAKT  | 19  | >TP53-Q136IKMFCHLAKT  | 14    | 5     |
| >TP53-Q136IKMFCQLAKT  | 23  | >TP53-Q136IKMFCHLAKT  | 20    | 3     |
| >TP53-Q136IKMFCQLAKT  | 55  | >TP53-Q136IKMFCHLAKT  | 61    | 6     |
| >TP53-Q136IKMFCQLAKT  | 61  | >TP53-Q136IKMFCHLAKT  | 54    | 7     |
| >TP53-Q136IKMFCQLAK   | 26  | >TP53-Q136IKMFCHLAK   | 24    | 2     |
| >TP53-Q136IKMFCQLAK   | 12  | >TP53-Q136IKMFCHLAK   | 10    | 2     |
| >TP53-Q136IKMFCQLAK   | 8   | >TP53-Q136IKMFCHLAK   | 7     | 1     |
| >TP53-Q136IKMFCQLAK   | 35  | >TP53-Q136IKMFCHLAK   | 24    | 11    |
| >TP53-Q136IKMFCQLAK   | 371 | >TP53-Q136IKMFCHLAK   | 252   | 119   |
| >TP53-Q136IKMFCQLAKT  | 81  | >TP53-Q136IKMFCHLAKT  | 64    | 17    |
| >TP53-Q136IKMFCQLAK   | 58  | >TP53-Q136IKMFCHLAK   | 37    | 21    |
| >TP53-Q136IKMFCQLAKT  | 491 | >TP53-Q136IKMFCHLAKT  | 355   | 136   |
| >TP53-Q136IKMFCQLAK   | 802 | >TP53-Q136IKMFCHLAK   | 356   | 446   |
| >TP53-Q136IKMFCQLAK   | 39  | >TP53-Q136IKMFCHLAK   | 33    | 6     |
| >TP53-Q136INKMFCQLAK  | 646 | >TP53-Q136INKMFCHLAK  | 384   | 262   |
| >TP53-Q136LNKMFCQL    | 100 | >TP53-Q136LNKMFCHL    | 71    | 29    |
| >TP53-Q136LNKMFCQLAI  | 161 | >TP53-Q136LNKMFCHLAI  | 94    | 67    |
| >TP53-Q136LNKMFCQL    | 153 | >TP53-Q136LNKMFCHL    | 129   | 24    |
| >TP53-Q136ALNKMFCQL   | 238 | >TP53-Q136ALNKMFCCHL  | 233   | 5     |
| >TP53-Q136ALNKMFCQL   | 17  | >TP53-Q136ALNKMFCCHL  | 20    | 3     |
| >TP53-Q136ALNKMFCQL   | 30  | >TP53-Q136ALNKMFCCHL  | 34    | 4     |
| >TP53-Q136ALNKMFCQL   | 442 | >TP53-Q136ALNKMFCCHL  | 253   | 189   |
| >TP53-Q136ALNKMFCQL   | 297 | >TP53-Q136ALNKMFCCHL  | 70    | 227   |
| >TP53-Q136ALNKMFCQL   | 22  | >TP53-Q136ALNKMFCCHL  | 41    | 19    |
| >TP53-Q136ALNKMFCQL   | 255 | >TP53-Q136ALNKMFCCHL  | 162   | 93    |

|                        |      |                        |       |       |
|------------------------|------|------------------------|-------|-------|
| >TP53-Q136I ALNKMFCQL  | 198  | >TP53-Q136I ALNKMFCCHL | 53    | 145   |
| >TP53-Q136I ALNKMFCQL  | 21   | >TP53-Q136I ALNKMFCCHL | 19    | 2     |
| >TP53-Q136I ALNKMFCQL  | 256  | >TP53-Q136I ALNKMFCCHL | 122   | 134   |
| >TP53-Q136I ALNKMFCQL  | 66   | >TP53-Q136I ALNKMFCCHL | 357   | 291   |
| >TP53-Q136I ALNKMFCQ   | 245  | >TP53-Q136I ALNKMFCCH  | 11081 | 10836 |
| >TP53-Q136I ALNKMFCQL  | 3    | >TP53-Q136I ALNKMFCCHL | 3     | 0     |
| >TP53-Q136I ALNKMFCQL  | 11   | >TP53-Q136I ALNKMFCCHL | 7     | 4     |
| >TP53-Q136I ALNKMFCQL  | 37   | >TP53-Q136I ALNKMFCCHL | 37    | 0     |
| >TP53-Q136I ALNKMFCQL  | 25   | >TP53-Q136I ALNKMFCCHL | 22    | 3     |
| >TP53-Q136I ALNKMFCQL  | 113  | >TP53-Q136I ALNKMFCCHL | 52    | 61    |
| >TP53-Q136I ALNKMFCQL  | 431  | >TP53-Q136I ALNKMFCCHL | 214   | 217   |
| >TP53-Q136I ALNKMFCQL  | 288  | >TP53-Q136I ALNKMFCCHL | 246   | 42    |
| >TP53-Q136I ALNKMFCQL  | 416  | >TP53-Q136I ALNKMFCCHL | 114   | 302   |
| >TP53-Q136I ALNKMFCQL  | 981  | >TP53-Q136I ALNKMFCCHL | 483   | 498   |
| >TP53-Q136I SPALNKMFCI | 432  | >TP53-Q136I SPALNKMFCI | 664   | 232   |
| >TP53-Q136I SPALNKMFCI | 41   | >TP53-Q136I SPALNKMFCI | 50    | 9     |
| >TP53-Q136I SPALNKMFCI | 372  | >TP53-Q136I SPALNKMFCI | 324   | 48    |
| >TP53-Q136I QLAKTCPV   | 58   | >TP53-Q136I KLAKTCPV   | 12    | 46    |
| >TP53-Q136I QLAKTCPV   | 13   | >TP53-Q136I KLAKTCPV   | 7     | 6     |
| >TP53-Q136I QLAKTCPVQL | 315  | >TP53-Q136I KLAKTCPVQL | 142   | 173   |
| >TP53-Q136I QLAKTCPV   | 10   | >TP53-Q136I KLAKTCPV   | 5     | 5     |
| >TP53-Q136I QLAKTCPVQL | 383  | >TP53-Q136I KLAKTCPVQL | 180   | 203   |
| >TP53-Q136I QLAKTCPV   | 37   | >TP53-Q136I KLAKTCPV   | 11    | 26    |
| >TP53-Q136I QLAKTCPV   | 14   | >TP53-Q136I KLAKTCPV   | 4     | 10    |
| >TP53-Q136I QLAKTCPVQL | 323  | >TP53-Q136I KLAKTCPVQL | 40    | 283   |
| >TP53-Q136I QLAKTCPV   | 30   | >TP53-Q136I KLAKTCPV   | 7     | 23    |
| >TP53-Q136I QLAKTCPVQL | 1584 | >TP53-Q136I KLAKTCPVQL | 123   | 1461  |
| >TP53-Q136I QLAKTCPV   | 10   | >TP53-Q136I KLAKTCPV   | 5     | 5     |
| >TP53-Q136I QLAKTCPVQL | 177  | >TP53-Q136I KLAKTCPVQL | 17    | 160   |
| >TP53-Q136I QLAKTCPV   | 10   | >TP53-Q136I KLAKTCPV   | 5     | 5     |
| >TP53-Q136I QLAKTCPVQL | 117  | >TP53-Q136I KLAKTCPVQL | 32    | 85    |
| >TP53-Q136I QLAKTCPV   | 3    | >TP53-Q136I KLAKTCPV   | 3     | 0     |
| >TP53-Q136I QLAKTCPVQL | 20   | >TP53-Q136I KLAKTCPVQL | 11    | 9     |
| >TP53-Q136I QLAKTCPVQL | 2246 | >TP53-Q136I KLAKTCPVQL | 219   | 2027  |
| >TP53-Q136I QLAKTCPV   | 217  | >TP53-Q136I KLAKTCPV   | 2971  | 2754  |
| >TP53-Q136I QLAKTCPV   | 60   | >TP53-Q136I KLAKTCPV   | 1158  | 1098  |
| >TP53-Q136I QLAKTCPVQL | 1062 | >TP53-Q136I KLAKTCPVQL | 450   | 612   |
| >TP53-Q136I QLAKTCPVQL | 967  | >TP53-Q136I KLAKTCPVQL | 214   | 753   |
| >TP53-Q136I QLAKTCPVQL | 4075 | >TP53-Q136I KLAKTCPVQL | 183   | 3892  |
| >TP53-Q136I QLAKTCPVQL | 343  | >TP53-Q136I KLAKTCPVQL | 24    | 319   |
| >TP53-Q136I CQLAKTCPV  | 121  | >TP53-Q136I CKLAKTCPV  | 12724 | 12603 |
| >TP53-Q136I CQLAKTCPV  | 173  | >TP53-Q136I CKLAKTCPV  | 6728  | 6555  |
| >TP53-Q136I CQLAKTCPV  | 22   | >TP53-Q136I CKLAKTCPV  | 2483  | 2461  |

|                        |       |                         |       |       |
|------------------------|-------|-------------------------|-------|-------|
| >TP53-Q136I CQLAKTCPVC | 463   | >TP53-Q136I CKLAKTCPVQ  | 15557 | 15094 |
| >TP53-Q136I CQLAKTCPV  | 136   | >TP53-Q136I CKLAKTCPV   | 4632  | 4496  |
| >TP53-Q136I CQLAKTCPV  | 77    | >TP53-Q136I CKLAKTCPV   | 8017  | 7940  |
| >TP53-Q136I CQLAKTCPV  | 457   | >TP53-Q136I CKLAKTCPV   | 8555  | 8098  |
| >TP53-Q136I CQLAKTCPV  | 268   | >TP53-Q136I CKLAKTCPV   | 261   | 7     |
| >TP53-Q136I CQLAKTCPVC | 155   | >TP53-Q136I CKLAKTCPVQ  | 139   | 16    |
| >TP53-Q136I CQLAKTCPVC | 231   | >TP53-Q136I CKLAKTCPVQ  | 825   | 594   |
| >TP53-Q136I YSPALNKMFC | 23065 | >TP53-Q136I YSPALNKMFC  | 192   | 22873 |
| >TP53-Q136I YSPALNKMFC | 10340 | >TP53-Q136I YSPALNKMFC  | 249   | 10091 |
| >TP53-Q136I YSPALNKMFC | 124   | >TP53-Q136I YSPALNKMFC  | 501   | 377   |
| >TP53-Q136I FCQLAKTCPV | 443   | >TP53-Q136I FCKLAKTCPV  | 1286  | 843   |
| >TP53-Q136I MFCQLAKTC  | 450   | >TP53-Q136I MFCKLAKTC   | 852   | 402   |
| >TP53-Q136I KMFCQLAKT  | 89    | >TP53-Q136I KMFCKLAKT   | 93    | 4     |
| >TP53-Q136I KMFCQLAKT  | 102   | >TP53-Q136I KMFCKLAKT   | 137   | 35    |
| >TP53-Q136I KMFCQLAKT  | 19    | >TP53-Q136I KMFCKLAKT   | 15    | 4     |
| >TP53-Q136I KMFCQLAKT  | 199   | >TP53-Q136I KMFCKLAKT   | 278   | 79    |
| >TP53-Q136I KMFCQLAKT  | 19    | >TP53-Q136I KMFCKLAKT   | 20    | 1     |
| >TP53-Q136I KMFCQLAKT  | 23    | >TP53-Q136I KMFCKLAKTC  | 25    | 2     |
| >TP53-Q136I KMFCQLAKT  | 55    | >TP53-Q136I KMFCKLAKT   | 69    | 14    |
| >TP53-Q136I KMFCQLAKT  | 61    | >TP53-Q136I KMFCKLAKTC  | 69    | 8     |
| >TP53-Q136I KMFCQLAK   | 26    | >TP53-Q136I KMFCKLAK    | 26    | 0     |
| >TP53-Q136I KMFCQLAK   | 12    | >TP53-Q136I KMFCKLAK    | 13    | 1     |
| >TP53-Q136I KMFCQLAK   | 8     | >TP53-Q136I KMFCKLAK    | 11    | 3     |
| >TP53-Q136I KMFCQLAK   | 35    | >TP53-Q136I KMFCKLAK    | 27    | 8     |
| >TP53-Q136I KMFCQLAK   | 371   | >TP53-Q136I KMFCKLAK    | 532   | 161   |
| >TP53-Q136I KMFCQLAKT  | 81    | >TP53-Q136I KMFCKLAKTC  | 89    | 8     |
| >TP53-Q136I KMFCQLAK   | 58    | >TP53-Q136I KMFCKLAK    | 124   | 66    |
| >TP53-Q136I KMFCQLAKT  | 491   | >TP53-Q136I KMFCKLAKTC  | 760   | 269   |
| >TP53-Q136I KMFCQLAK   | 39    | >TP53-Q136I KMFCKLAK    | 42    | 3     |
| >TP53-Q136I LNKMFQCQL  | 100   | >TP53-Q136I LNKMFCKL    | 151   | 51    |
| >TP53-Q136I LNKMFQCQLA | 161   | >TP53-Q136I LNKMFCKLA   | 332   | 171   |
| >TP53-Q136I LNKMFQCQL  | 153   | >TP53-Q136I LNKMFCKL    | 234   | 81    |
| >TP53-Q136I ALNKMFCQL  | 238   | >TP53-Q136I ALNKMFCCKL  | 406   | 168   |
| >TP53-Q136I ALNKMFCQL  | 17    | >TP53-Q136I ALNKMFCCKL  | 25    | 8     |
| >TP53-Q136I ALNKMFCQL  | 30    | >TP53-Q136I ALNKMFCCKL  | 45    | 15    |
| >TP53-Q136I ALNKMFCQL  | 442   | >TP53-Q136I ALNKMFCCKL/ | 489   | 47    |
| >TP53-Q136I ALNKMFCQL  | 297   | >TP53-Q136I ALNKMFCCKL  | 488   | 191   |
| >TP53-Q136I ALNKMFCQL  | 22    | >TP53-Q136I ALNKMFCCKL  | 41    | 19    |
| >TP53-Q136I ALNKMFCQL  | 255   | >TP53-Q136I ALNKMFCCKL/ | 787   | 532   |
| >TP53-Q136I ALNKMFCQL  | 198   | >TP53-Q136I ALNKMFCCKL  | 204   | 6     |
| >TP53-Q136I ALNKMFCQL  | 21    | >TP53-Q136I ALNKMFCCKL  | 24    | 3     |
| >TP53-Q136I ALNKMFCQL  | 256   | >TP53-Q136I ALNKMFCCKL/ | 1055  | 799   |
| >TP53-Q136I ALNKMFCQL  | 66    | >TP53-Q136I ALNKMFCCKL  | 241   | 175   |

|                       |       |                        |       |       |
|-----------------------|-------|------------------------|-------|-------|
| >TP53-Q136fALNKMFCQ   | 245   | >TP53-Q136fALNKMFCCK   | 2455  | 2210  |
| >TP53-Q136fALNKMFCQL  | 3     | >TP53-Q136fALNKMFCCKL  | 3     | 0     |
| >TP53-Q136fALNKMFCQL  | 11    | >TP53-Q136fALNKMFCCKL/ | 48    | 37    |
| >TP53-Q136fALNKMFCQ   | 15512 | >TP53-Q136fALNKMFCCK   | 46    | 15466 |
| >TP53-Q136fALNKMFCQL  | 37    | >TP53-Q136fALNKMFCCKL/ | 40    | 3     |
| >TP53-Q136fALNKMFCQ   | 15216 | >TP53-Q136fALNKMFCCK   | 17    | 15199 |
| >TP53-Q136fALNKMFCQL  | 25    | >TP53-Q136fALNKMFCCKL/ | 27    | 2     |
| >TP53-Q136fALNKMFCQL  | 113   | >TP53-Q136fALNKMFCCKL/ | 185   | 72    |
| >TP53-Q136fALNKMFCQ   | 5719  | >TP53-Q136fALNKMFCCK   | 115   | 5604  |
| >TP53-Q136fALNKMFCQL  | 431   | >TP53-Q136fALNKMFCCKL/ | 346   | 85    |
| >TP53-Q136fALNKMFCQL  | 288   | >TP53-Q136fALNKMFCCKL  | 460   | 172   |
| >TP53-Q136fALNKMFCQL  | 416   | >TP53-Q136fALNKMFCCKL  | 2115  | 1699  |
| >TP53-Q136fPALNKMFCQ  | 24913 | >TP53-Q136fPALNKMFCCK  | 455   | 24458 |
| >TP53-Q136fSPALNKMFCQ | 432   | >TP53-Q136fSPALNKMFCCK | 1563  | 1131  |
| >TP53-Q136fSPALNKMFCQ | 41    | >TP53-Q136fSPALNKMFCCK | 58    | 17    |
| >TP53-Q136fSPALNKMFCQ | 372   | >TP53-Q136fSPALNKMFCCK | 502   | 130   |
| >TP53-Q136fQLAKTCPV   | 58    | >TP53-Q136fPLAKTCPV    | 1299  | 1241  |
| >TP53-Q136fQLAKTCPV   | 13    | >TP53-Q136fPLAKTCPV    | 141   | 128   |
| >TP53-Q136fQLAKTCPVQL | 315   | >TP53-Q136fPLAKTCPVQL  | 3435  | 3120  |
| >TP53-Q136fQLAKTCPV   | 10    | >TP53-Q136fPLAKTCPV    | 129   | 119   |
| >TP53-Q136fQLAKTCPVQL | 383   | >TP53-Q136fPLAKTCPVQL  | 3823  | 3440  |
| >TP53-Q136fQLAKTCPV   | 37    | >TP53-Q136fPLAKTCPV    | 1880  | 1843  |
| >TP53-Q136fQLAKTCPV   | 14    | >TP53-Q136fPLAKTCPV    | 36    | 22    |
| >TP53-Q136fQLAKTCPVQL | 323   | >TP53-Q136fPLAKTCPVQL  | 964   | 641   |
| >TP53-Q136fQLAKTCPV   | 30    | >TP53-Q136fPLAKTCPV    | 316   | 286   |
| >TP53-Q136fQLAKTCPV   | 10    | >TP53-Q136fPLAKTCPV    | 13    | 3     |
| >TP53-Q136fQLAKTCPVQL | 177   | >TP53-Q136fPLAKTCPVQL  | 272   | 95    |
| >TP53-Q136fQLAKTCPV   | 10    | >TP53-Q136fPLAKTCPV    | 18    | 8     |
| >TP53-Q136fQLAKTCPVQL | 117   | >TP53-Q136fPLAKTCPVQL  | 281   | 164   |
| >TP53-Q136fQLAKTCPV   | 3     | >TP53-Q136fPLAKTCPV    | 7     | 4     |
| >TP53-Q136fQLAKTCPVQL | 20    | >TP53-Q136fPLAKTCPVQL  | 47    | 27    |
| >TP53-Q136fQLAKTCPV   | 217   | >TP53-Q136fPLAKTCPV    | 5205  | 4988  |
| >TP53-Q136fQLAKTCPV   | 60    | >TP53-Q136fPLAKTCPV    | 1937  | 1877  |
| >TP53-Q136fQLAKTCPVQL | 343   | >TP53-Q136fPLAKTCPVQL  | 7405  | 7062  |
| >TP53-Q136fCQLAKTCPVC | 21151 | >TP53-Q136fCPLAKTCPVC  | 218   | 20933 |
| >TP53-Q136fCQLAKTCPV  | 121   | >TP53-Q136fCPLAKTCPV   | 16572 | 16451 |
| >TP53-Q136fCQLAKTCPV  | 173   | >TP53-Q136fCPLAKTCPV   | 12498 | 12325 |
| >TP53-Q136fCQLAKTCPV  | 22    | >TP53-Q136fCPLAKTCPV   | 8560  | 8538  |
| >TP53-Q136fCQLAKTCPVC | 463   | >TP53-Q136fCPLAKTCPVC  | 22191 | 21728 |
| >TP53-Q136fCQLAKTCPV  | 136   | >TP53-Q136fCPLAKTCPV   | 11550 | 11414 |
| >TP53-Q136fCQLAKTCPV  | 77    | >TP53-Q136fCPLAKTCPV   | 16416 | 16339 |
| >TP53-Q136fCQLAKTCPV  | 457   | >TP53-Q136fCPLAKTCPV   | 16904 | 16447 |
| >TP53-Q136fCQLAKTCPV  | 23272 | >TP53-Q136fCPLAKTCPV   | 69    | 23203 |



|                       |       |                       |       |       |
|-----------------------|-------|-----------------------|-------|-------|
| >TP53-Q136FCQLAKTCPVC | 21851 | >TP53-Q136FCPLAKTCPVQ | 233   | 21618 |
| >TP53-Q136FCQLAKTCPV  | 2033  | >TP53-Q136FCPLAKTCPV  | 128   | 1905  |
| >TP53-Q136FCQLAKTCPV  | 268   | >TP53-Q136FCPLAKTCPV  | 11981 | 11713 |
| >TP53-Q136FCQLAKTCPVC | 155   | >TP53-Q136FCPLAKTCPVQ | 8812  | 8657  |
| >TP53-Q136FCQLAKTCPVC | 231   | >TP53-Q136FCPLAKTCPVQ | 605   | 374   |
| >TP53-Q136FCQLAKTCPVC | 24597 | >TP53-Q136FCPLAKTCPVQ | 402   | 24195 |
| >TP53-Q136FCQLAKTCPV  | 16770 | >TP53-Q136FCPLAKTCPV  | 18    | 16752 |
| >TP53-Q136FYSPALNKMFC | 124   | >TP53-Q136FYSPALNKMFC | 301   | 177   |
| >TP53-Q136FCQLAKTCPV  | 443   | >TP53-Q136FCPLAKTCPV  | 418   | 25    |
| >TP53-Q136FMFCQLAKTCI | 679   | >TP53-Q136FMFCPLAKTCF | 299   | 380   |
| >TP53-Q136FMFCQLAKTC  | 450   | >TP53-Q136FMFCPLAKTC  | 304   | 146   |
| >TP53-Q136FMFCQLAKTCI | 721   | >TP53-Q136FMFCPLAKTCF | 443   | 278   |
| >TP53-Q136FMFCQLAKT   | 89    | >TP53-Q136FMFCPLAKT   | 117   | 28    |
| >TP53-Q136FMFCQLAKT   | 102   | >TP53-Q136FMFCPLAKT   | 350   | 248   |
| >TP53-Q136FMFCQLAKT   | 19    | >TP53-Q136FMFCPLAKT   | 35    | 16    |
| >TP53-Q136FMFCQLAKT   | 199   | >TP53-Q136FMFCPLAKT   | 257   | 58    |
| >TP53-Q136FMFCQLAK    | 1003  | >TP53-Q136FMFCPLAK    | 307   | 696   |
| >TP53-Q136FMFCQLAKT   | 19    | >TP53-Q136FMFCPLAKT   | 8     | 11    |
| >TP53-Q136FMFCQLAKTC  | 23    | >TP53-Q136FMFCPLAKTC  | 13    | 10    |
| >TP53-Q136FMFCQLAKT   | 55    | >TP53-Q136FMFCPLAKT   | 78    | 23    |
| >TP53-Q136FMFCQLAKTC  | 61    | >TP53-Q136FMFCPLAKTC  | 59    | 2     |
| >TP53-Q136FMFCQLAK    | 26    | >TP53-Q136FMFCPLAK    | 25    | 1     |
| >TP53-Q136FMFCQLAK    | 12    | >TP53-Q136FMFCPLAK    | 10    | 2     |
| >TP53-Q136FMFCQLAK    | 8     | >TP53-Q136FMFCPLAK    | 10    | 2     |
| >TP53-Q136FMFCQLAK    | 35    | >TP53-Q136FMFCPLAK    | 48    | 13    |
| >TP53-Q136FMFCQLAK    | 371   | >TP53-Q136FMFCPLAK    | 254   | 117   |
| >TP53-Q136FMFCQLAKTC  | 81    | >TP53-Q136FMFCPLAKTC  | 86    | 5     |
| >TP53-Q136FMFCQLAK    | 58    | >TP53-Q136FMFCPLAK    | 41    | 17    |
| >TP53-Q136FMFCQLAKTC  | 491   | >TP53-Q136FMFCPLAKTC  | 344   | 147   |
| >TP53-Q136FMFCQLAK    | 39    | >TP53-Q136FMFCPLAK    | 44    | 5     |
| >TP53-Q136FNKMFCQLAK  | 646   | >TP53-Q136FNKMFCPLAK  | 455   | 191   |
| >TP53-Q136LNKMFCQL    | 100   | >TP53-Q136LNKMFCPL    | 81    | 19    |
| >TP53-Q136LNKMFCQLA   | 161   | >TP53-Q136LNKMFCPLA   | 104   | 57    |
| >TP53-Q136LNKMFCQL    | 153   | >TP53-Q136LNKMFCPL    | 96    | 57    |
| >TP53-Q136ALNKMFCQL   | 238   | >TP53-Q136ALNKMFCPL   | 58    | 180   |
| >TP53-Q136ALNKMFCQL   | 17    | >TP53-Q136ALNKMFCPL   | 11    | 6     |
| >TP53-Q136ALNKMFCQL   | 30    | >TP53-Q136ALNKMFCPL   | 12    | 18    |
| >TP53-Q136ALNKMFCQL   | 442   | >TP53-Q136ALNKMFCPL   | 400   | 42    |
| >TP53-Q136ALNKMFCQL   | 297   | >TP53-Q136ALNKMFCPL   | 41    | 256   |
| >TP53-Q136ALNKMFCQL   | 22    | >TP53-Q136ALNKMFCPL   | 22    | 0     |
| >TP53-Q136ALNKMFCQL   | 255   | >TP53-Q136ALNKMFCPL   | 202   | 53    |
| >TP53-Q136ALNKMFCQL   | 198   | >TP53-Q136ALNKMFCPL   | 31    | 167   |
| >TP53-Q136ALNKMFCQL   | 21    | >TP53-Q136ALNKMFCPL   | 22    | 1     |

|                        |      |                        |       |       |
|------------------------|------|------------------------|-------|-------|
| >TP53-Q136F ALNKMFCQL  | 256  | >TP53-Q136F ALNKMFCPL/ | 82    | 174   |
| >TP53-Q136F ALNKMFCQL  | 66   | >TP53-Q136F ALNKMFCPL  | 347   | 281   |
| >TP53-Q136F ALNKMFCQ   | 245  | >TP53-Q136F ALNKMFCP   | 9154  | 8909  |
| >TP53-Q136F ALNKMFCQL  | 3    | >TP53-Q136F ALNKMFCPL  | 3     | 0     |
| >TP53-Q136F ALNKMFCQL  | 11   | >TP53-Q136F ALNKMFCPL/ | 13    | 2     |
| >TP53-Q136F ALNKMFCQL  | 37   | >TP53-Q136F ALNKMFCPL/ | 38    | 1     |
| >TP53-Q136F ALNKMFCQL  | 25   | >TP53-Q136F ALNKMFCPL/ | 20    | 5     |
| >TP53-Q136F ALNKMFCQL  | 113  | >TP53-Q136F ALNKMFCPL/ | 88    | 25    |
| >TP53-Q136F ALNKMFCQL  | 431  | >TP53-Q136F ALNKMFCPL/ | 559   | 128   |
| >TP53-Q136F ALNKMFCQL  | 860  | >TP53-Q136F ALNKMFCPL  | 264   | 596   |
| >TP53-Q136F ALNKMFCQL  | 288  | >TP53-Q136F ALNKMFCPL  | 108   | 180   |
| >TP53-Q136F ALNKMFCQL  | 416  | >TP53-Q136F ALNKMFCPL  | 78    | 338   |
| >TP53-Q136F ALNKMFCQL  | 1551 | >TP53-Q136F ALNKMFCPL  | 456   | 1095  |
| >TP53-Q136F SPALNKMFCQ | 432  | >TP53-Q136F SPALNKMFCF | 3313  | 2881  |
| >TP53-Q136F SPALNKMFCQ | 41   | >TP53-Q136F SPALNKMFCF | 15    | 26    |
| >TP53-Q136F SPALNKMFCQ | 372  | >TP53-Q136F SPALNKMFCF | 167   | 205   |
| >TP53-Q136F SPALNKMFCQ | 1632 | >TP53-Q136F SPALNKMFCF | 312   | 1320  |
| >TP53-Q136F QLAKTCPV   | 58   | >TP53-Q136F RLAKTCPV   | 18    | 40    |
| >TP53-Q136F QLAKTCPV   | 13   | >TP53-Q136F RLAKTCPV   | 10    | 3     |
| >TP53-Q136F QLAKTCPVQL | 315  | >TP53-Q136F RLAKTCPVQL | 197   | 118   |
| >TP53-Q136F QLAKTCPV   | 10   | >TP53-Q136F RLAKTCPV   | 4     | 6     |
| >TP53-Q136F QLAKTCPVQL | 383  | >TP53-Q136F RLAKTCPVQL | 195   | 188   |
| >TP53-Q136F QLAKTCPV   | 37   | >TP53-Q136F RLAKTCPV   | 15    | 22    |
| >TP53-Q136F QLAKTCPV   | 14   | >TP53-Q136F RLAKTCPV   | 4     | 10    |
| >TP53-Q136F QLAKTCPVQL | 323  | >TP53-Q136F RLAKTCPVQL | 42    | 281   |
| >TP53-Q136F QLAKTCPV   | 30   | >TP53-Q136F RLAKTCPV   | 9     | 21    |
| >TP53-Q136F QLAKTCPVQL | 1584 | >TP53-Q136F RLAKTCPVQL | 269   | 1315  |
| >TP53-Q136F QLAKTCPV   | 10   | >TP53-Q136F RLAKTCPV   | 6     | 4     |
| >TP53-Q136F QLAKTCPVQL | 177  | >TP53-Q136F RLAKTCPVQL | 27    | 150   |
| >TP53-Q136F QLAKTCPV   | 10   | >TP53-Q136F RLAKTCPV   | 6     | 4     |
| >TP53-Q136F QLAKTCPVQL | 117  | >TP53-Q136F RLAKTCPVQL | 49    | 68    |
| >TP53-Q136F QLAKTCPV   | 3    | >TP53-Q136F RLAKTCPV   | 3     | 0     |
| >TP53-Q136F QLAKTCPVQL | 20   | >TP53-Q136F RLAKTCPVQL | 13    | 7     |
| >TP53-Q136F QLAKTCPVQL | 2246 | >TP53-Q136F RLAKTCPVQL | 252   | 1994  |
| >TP53-Q136F QLAKTCPV   | 217  | >TP53-Q136F RLAKTCPV   | 2335  | 2118  |
| >TP53-Q136F QLAKTCPV   | 60   | >TP53-Q136F RLAKTCPV   | 869   | 809   |
| >TP53-Q136F QLAKTCPV   | 1790 | >TP53-Q136F RLAKTCPV   | 357   | 1433  |
| >TP53-Q136F QLAKTCPVQL | 1062 | >TP53-Q136F RLAKTCPVQL | 293   | 769   |
| >TP53-Q136F QLAKTCPVQL | 967  | >TP53-Q136F RLAKTCPVQL | 85    | 882   |
| >TP53-Q136F QLAKTCPVQL | 4075 | >TP53-Q136F RLAKTCPVQL | 198   | 3877  |
| >TP53-Q136F QLAKTCPVQL | 343  | >TP53-Q136F RLAKTCPVQL | 22    | 321   |
| >TP53-Q136F QLAKTCPVQL | 3164 | >TP53-Q136F RLAKTCPVQL | 416   | 2748  |
| >TP53-Q136F CQLAKTCPV  | 121  | >TP53-Q136F CRLAKTCPV  | 15746 | 15625 |

|                       |       |                       |       |       |
|-----------------------|-------|-----------------------|-------|-------|
| >TP53-Q136fCQLAKTCPV  | 173   | >TP53-Q136fCRLAKTCPV  | 10452 | 10279 |
| >TP53-Q136fCQLAKTCPV  | 22    | >TP53-Q136fCRLAKTCPV  | 6560  | 6538  |
| >TP53-Q136fCQLAKTCPVC | 463   | >TP53-Q136fCRLAKTCPVC | 21489 | 21026 |
| >TP53-Q136fCQLAKTCPV  | 136   | >TP53-Q136fCRLAKTCPV  | 8871  | 8735  |
| >TP53-Q136fCQLAKTCPV  | 77    | >TP53-Q136fCRLAKTCPV  | 13411 | 13334 |
| >TP53-Q136fCQLAKTCPV  | 457   | >TP53-Q136fCRLAKTCPV  | 13420 | 12963 |
| >TP53-Q136fCQLAKTCPV  | 268   | >TP53-Q136fCRLAKTCPV  | 951   | 683   |
| >TP53-Q136fCQLAKTCPVC | 155   | >TP53-Q136fCRLAKTCPVC | 760   | 605   |
| >TP53-Q136fCQLAKTCPVC | 6226  | >TP53-Q136fCRLAKTCPVC | 397   | 5829  |
| >TP53-Q136fCQLAKTCPVC | 231   | >TP53-Q136fCRLAKTCPVC | 365   | 134   |
| >TP53-Q136fCQLAKTCPVC | 7434  | >TP53-Q136fCRLAKTCPVC | 161   | 7273  |
| >TP53-Q136fYSPALNKMFC | 16485 | >TP53-Q136fYSPALNKMFC | 369   | 16116 |
| >TP53-Q136fYSPALNKMFC | 10340 | >TP53-Q136fYSPALNKMFC | 69    | 10271 |
| >TP53-Q136fYSPALNKMFC | 124   | >TP53-Q136fYSPALNKMFC | 414   | 290   |
| >TP53-Q136fFCQLAKTCPV | 443   | >TP53-Q136fFCRLAKTCPV | 908   | 465   |
| >TP53-Q136fMFCQLAKTC  | 450   | >TP53-Q136fMFCRLAKTC  | 660   | 210   |
| >TP53-Q136fKMFCQLAKT  | 89    | >TP53-Q136fKMFCRLAKT  | 86    | 3     |
| >TP53-Q136fKMFCQLAKT  | 102   | >TP53-Q136fKMFCRLAKT  | 150   | 48    |
| >TP53-Q136fKMFCQLAKT  | 19    | >TP53-Q136fKMFCRLAKT  | 15    | 4     |
| >TP53-Q136fKMFCQLAKT  | 199   | >TP53-Q136fKMFCRLAKT  | 147   | 52    |
| >TP53-Q136fKMFCQLAKT  | 19    | >TP53-Q136fKMFCRLAKT  | 23    | 4     |
| >TP53-Q136fKMFCQLAKT  | 23    | >TP53-Q136fKMFCRLAKTC | 27    | 4     |
| >TP53-Q136fKMFCQLAKT  | 55    | >TP53-Q136fKMFCRLAKT  | 86    | 31    |
| >TP53-Q136fKMFCQLAKT  | 61    | >TP53-Q136fKMFCRLAKTC | 75    | 14    |
| >TP53-Q136fKMFCQLAK   | 26    | >TP53-Q136fKMFCRLAK   | 24    | 2     |
| >TP53-Q136fKMFCQLAK   | 12    | >TP53-Q136fKMFCRLAK   | 11    | 1     |
| >TP53-Q136fKMFCQLAK   | 8     | >TP53-Q136fKMFCRLAK   | 7     | 1     |
| >TP53-Q136fKMFCQLAK   | 35    | >TP53-Q136fKMFCRLAK   | 19    | 16    |
| >TP53-Q136fKMFCQLAK   | 371   | >TP53-Q136fKMFCRLAK   | 353   | 18    |
| >TP53-Q136fKMFCQLAKTC | 81    | >TP53-Q136fKMFCRLAKTC | 72    | 9     |
| >TP53-Q136fKMFCQLAK   | 58    | >TP53-Q136fKMFCRLAK   | 67    | 9     |
| >TP53-Q136fKMFCQLAKTC | 491   | >TP53-Q136fKMFCRLAKTC | 533   | 42    |
| >TP53-Q136fKMFCQLAK   | 39    | >TP53-Q136fKMFCRLAK   | 37    | 2     |
| >TP53-Q136fNKMFCQLAK  | 646   | >TP53-Q136fNKMFCRLAK  | 453   | 193   |
| >TP53-Q136fLNKMFCQL   | 100   | >TP53-Q136fLNKMFCRL   | 59    | 41    |
| >TP53-Q136fLNKMFCQLAI | 161   | >TP53-Q136fLNKMFCRLAI | 118   | 43    |
| >TP53-Q136fLNKMFCQL   | 153   | >TP53-Q136fLNKMFCRL   | 204   | 51    |
| >TP53-Q136fALNKMFCQL  | 238   | >TP53-Q136fALNKMFCRL  | 243   | 5     |
| >TP53-Q136fALNKMFCQL  | 17    | >TP53-Q136fALNKMFCRL  | 25    | 8     |
| >TP53-Q136fALNKMFCQL  | 30    | >TP53-Q136fALNKMFCRL  | 45    | 15    |
| >TP53-Q136fALNKMFCQL  | 442   | >TP53-Q136fALNKMFCRL  | 348   | 94    |
| >TP53-Q136fALNKMFCQL  | 297   | >TP53-Q136fALNKMFCRL  | 506   | 209   |
| >TP53-Q136fALNKMFCQL  | 22    | >TP53-Q136fALNKMFCRL  | 26    | 4     |

|                        |       |                        |       |       |
|------------------------|-------|------------------------|-------|-------|
| >TP53-Q136F ALNKMFCQL  | 255   | >TP53-Q136F ALNKMFCRL  | 594   | 339   |
| >TP53-Q136F ALNKMFCQL  | 198   | >TP53-Q136F ALNKMFCRL  | 219   | 21    |
| >TP53-Q136F ALNKMFCQL  | 21    | >TP53-Q136F ALNKMFCRL  | 34    | 13    |
| >TP53-Q136F ALNKMFCQL  | 256   | >TP53-Q136F ALNKMFCRL  | 1263  | 1007  |
| >TP53-Q136F ALNKMFCQL  | 66    | >TP53-Q136F ALNKMFCRL  | 255   | 189   |
| >TP53-Q136F ALNKMFCQ   | 245   | >TP53-Q136F ALNKMFCR   | 7054  | 6809  |
| >TP53-Q136F ALNKMFCQL  | 3     | >TP53-Q136F ALNKMFCRL  | 3     | 0     |
| >TP53-Q136F ALNKMFCQL  | 11    | >TP53-Q136F ALNKMFCRL  | 67    | 56    |
| >TP53-Q136F ALNKMFCQ   | 15512 | >TP53-Q136F ALNKMFCR   | 436   | 15076 |
| >TP53-Q136F ALNKMFCQL  | 37    | >TP53-Q136F ALNKMFCRL  | 37    | 0     |
| >TP53-Q136F ALNKMFCQ   | 15216 | >TP53-Q136F ALNKMFCR   | 202   | 15014 |
| >TP53-Q136F ALNKMFCQL  | 25    | >TP53-Q136F ALNKMFCRL  | 22    | 3     |
| >TP53-Q136F ALNKMFCQL  | 113   | >TP53-Q136F ALNKMFCRL  | 75    | 38    |
| >TP53-Q136F ALNKMFCQ   | 5719  | >TP53-Q136F ALNKMFCR   | 12    | 5707  |
| >TP53-Q136F ALNKMFCQL  | 431   | >TP53-Q136F ALNKMFCRL  | 260   | 171   |
| >TP53-Q136F ALNKMFCQL  | 288   | >TP53-Q136F ALNKMFCRL  | 365   | 77    |
| >TP53-Q136F ALNKMFCQL  | 416   | >TP53-Q136F ALNKMFCRL  | 693   | 277   |
| >TP53-Q136F PALNKMFCQ  | 17003 | >TP53-Q136F PALNKMFCR  | 103   | 16900 |
| >TP53-Q136F PALNKMFCQ  | 23781 | >TP53-Q136F PALNKMFCR  | 390   | 23391 |
| >TP53-Q136F SPALNKMFCQ | 432   | >TP53-Q136F SPALNKMFCR | 1649  | 1217  |
| >TP53-Q136F SPALNKMFCQ | 21822 | >TP53-Q136F SPALNKMFCR | 217   | 21605 |
| >TP53-Q136F SPALNKMFCQ | 41    | >TP53-Q136F SPALNKMFCR | 47    | 6     |
| >TP53-Q136F SPALNKMFCQ | 372   | >TP53-Q136F SPALNKMFCR | 435   | 63    |
| >TP53-Q144F VQLWVDST   | 120   | >TP53-Q144F VHLWVDST   | 20209 | 20089 |
| >TP53-Q144F CPVQLWVDS  | 635   | >TP53-Q144F CPVHLWVDS  | 496   | 139   |
| >TP53-Q144F KTCPVQLWV  | 125   | >TP53-Q144F KTCPVHLWV  | 127   | 2     |
| >TP53-Q144F KTCPVQLWV  | 53    | >TP53-Q144F KTCPVHLWV  | 31    | 22    |
| >TP53-Q144F KTCPVQLWV  | 338   | >TP53-Q144F KTCPVHLWV  | 774   | 436   |
| >TP53-Q144F KTCPVQLWV  | 202   | >TP53-Q144F KTCPVHLWV  | 277   | 75    |
| >TP53-Q144F KTCPVQLWV  | 224   | >TP53-Q144F KTCPVHLWV  | 50    | 174   |
| >TP53-Q144F KTCPVQLW   | 165   | >TP53-Q144F KTCPVHLW   | 89    | 76    |
| >TP53-Q144F KTCPVQLW   | 4     | >TP53-Q144F KTCPVHLW   | 4     | 0     |
| >TP53-Q144F KTCPVQLWV  | 118   | >TP53-Q144F KTCPVHLWV  | 50    | 68    |
| >TP53-Q144F KTCPVQLW   | 34    | >TP53-Q144F KTCPVHLW   | 31    | 3     |
| >TP53-Q144F KTCPVQLW   | 10    | >TP53-Q144F KTCPVHLW   | 9     | 1     |
| >TP53-Q144F KTCPVQLWV  | 1070  | >TP53-Q144F KTCPVHLWV  | 144   | 926   |
| >TP53-Q144F KTCPVQLWV  | 254   | >TP53-Q144F KTCPVHLWV  | 112   | 142   |
| >TP53-Q144F KTCPVQLWV  | 272   | >TP53-Q144F KTCPVHLWV  | 304   | 32    |
| >TP53-Q144F AKTCPVQL   | 41    | >TP53-Q144F AKTCPVHL   | 36    | 5     |
| >TP53-Q144F AKTCPVQLW  | 192   | >TP53-Q144F AKTCPVHLW  | 521   | 329   |
| >TP53-Q144F LAKTCPVQLW | 482   | >TP53-Q144F LAKTCPVHLW | 657   | 175   |
| >TP53-Q144F LAKTCPVQL  | 417   | >TP53-Q144F LAKTCPVHL  | 261   | 156   |
| >TP53-Q144F LAKTCPVQL  | 405   | >TP53-Q144F LAKTCPVHL  | 1987  | 1582  |

|                        |       |                        |       |       |
|------------------------|-------|------------------------|-------|-------|
| >TP53-Q144I LAKTCPVQLV | 45    | >TP53-Q144I LAKTCPVHLV | 59    | 14    |
| >TP53-Q144I LAKTCPVQLV | 42    | >TP53-Q144I LAKTCPVHLV | 39    | 3     |
| >TP53-Q144I LAKTCPVQLV | 42    | >TP53-Q144I LAKTCPVHLV | 25    | 17    |
| >TP53-Q144I LAKTCPVQLV | 689   | >TP53-Q144I LAKTCPVHLV | 345   | 344   |
| >TP53-Q144I QLAKTCPVQL | 315   | >TP53-Q144I QLAKTCPVHL | 264   | 51    |
| >TP53-Q144I QLAKTCPVQL | 383   | >TP53-Q144I QLAKTCPVHL | 279   | 104   |
| >TP53-Q144I QLAKTCPVQL | 323   | >TP53-Q144I QLAKTCPVHL | 531   | 208   |
| >TP53-Q144I QLAKTCPVQL | 177   | >TP53-Q144I QLAKTCPVHL | 110   | 67    |
| >TP53-Q144I QLAKTCPVQL | 117   | >TP53-Q144I QLAKTCPVHL | 411   | 294   |
| >TP53-Q144I QLAKTCPVQL | 20    | >TP53-Q144I QLAKTCPVHL | 33    | 13    |
| >TP53-Q144I QLAKTCPVQL | 343   | >TP53-Q144I QLAKTCPVHL | 117   | 226   |
| >TP53-Q144I CQLAKTCPVC | 463   | >TP53-Q144I CQLAKTCPVH | 195   | 268   |
| >TP53-Q144I CQLAKTCPVC | 155   | >TP53-Q144I CQLAKTCPVH | 102   | 53    |
| >TP53-Q144I CQLAKTCPVC | 231   | >TP53-Q144I CQLAKTCPVH | 609   | 378   |
| >TP53-Q144I VQLWVDST   | 120   | >TP53-Q144I VKLWVDST   | 11793 | 11673 |
| >TP53-Q144I KTCPVQLWV  | 125   | >TP53-Q144I KTCPVKLWV  | 329   | 204   |
| >TP53-Q144I KTCPVQLWV  | 53    | >TP53-Q144I KTCPVKLWV  | 94    | 41    |
| >TP53-Q144I KTCPVQLWV  | 338   | >TP53-Q144I KTCPVKLWV  | 1093  | 755   |
| >TP53-Q144I KTCPVQLWV  | 202   | >TP53-Q144I KTCPVKLWV  | 492   | 290   |
| >TP53-Q144I KTCPVQLWV  | 224   | >TP53-Q144I KTCPVKLWV  | 538   | 314   |
| >TP53-Q144I KTCPVQLW   | 165   | >TP53-Q144I KTCPVKLW   | 334   | 169   |
| >TP53-Q144I KTCPVQLW   | 4     | >TP53-Q144I KTCPVKLW   | 4     | 0     |
| >TP53-Q144I KTCPVQLWV  | 118   | >TP53-Q144I KTCPVKLWV  | 189   | 71    |
| >TP53-Q144I KTCPVQLW   | 34    | >TP53-Q144I KTCPVKLW   | 34    | 0     |
| >TP53-Q144I KTCPVQLW   | 10    | >TP53-Q144I KTCPVKLW   | 13    | 3     |
| >TP53-Q144I KTCPVQLWV  | 254   | >TP53-Q144I KTCPVKLWV  | 208   | 46    |
| >TP53-Q144I KTCPVQLWV  | 272   | >TP53-Q144I KTCPVKLWV  | 538   | 266   |
| >TP53-Q144I AKTCPVQL   | 41    | >TP53-Q144I AKTCPVKL   | 50    | 9     |
| >TP53-Q144I AKTCPVQLW  | 192   | >TP53-Q144I AKTCPVKLW  | 366   | 174   |
| >TP53-Q144I LAKTCPVQLV | 482   | >TP53-Q144I LAKTCPVKLV | 857   | 375   |
| >TP53-Q144I LAKTCPVQ   | 4885  | >TP53-Q144I LAKTCPVK   | 33    | 4852  |
| >TP53-Q144I LAKTCPVQL  | 417   | >TP53-Q144I LAKTCPVKL  | 502   | 85    |
| >TP53-Q144I LAKTCPVQL  | 405   | >TP53-Q144I LAKTCPVKL  | 1102  | 697   |
| >TP53-Q144I LAKTCPVQLV | 45    | >TP53-Q144I LAKTCPVKLV | 64    | 19    |
| >TP53-Q144I LAKTCPVQLV | 42    | >TP53-Q144I LAKTCPVKLV | 45    | 3     |
| >TP53-Q144I LAKTCPVQLV | 42    | >TP53-Q144I LAKTCPVKLV | 120   | 78    |
| >TP53-Q144I QLAKTCPVQL | 315   | >TP53-Q144I QLAKTCPVKL | 266   | 49    |
| >TP53-Q144I QLAKTCPVQL | 383   | >TP53-Q144I QLAKTCPVKL | 310   | 73    |
| >TP53-Q144I QLAKTCPVQL | 323   | >TP53-Q144I QLAKTCPVKL | 633   | 310   |
| >TP53-Q144I QLAKTCPVQL | 177   | >TP53-Q144I QLAKTCPVKL | 243   | 66    |
| >TP53-Q144I QLAKTCPVQL | 117   | >TP53-Q144I QLAKTCPVKL | 299   | 182   |
| >TP53-Q144I QLAKTCPVQL | 20    | >TP53-Q144I QLAKTCPVKL | 35    | 15    |
| >TP53-Q144I QLAKTCPVQ  | 18273 | >TP53-Q144I QLAKTCPVK  | 184   | 18089 |

|                        |       |                        |      |       |
|------------------------|-------|------------------------|------|-------|
| >TP53-Q144IQLAKTCPVQL  | 343   | >TP53-Q144IQLAKTCPVKL  | 934  | 591   |
| >TP53-Q144I CQLAKTCPVC | 463   | >TP53-Q144I CQLAKTCPVK | 806  | 343   |
| >TP53-Q144I CQLAKTCPVC | 27784 | >TP53-Q144I CQLAKTCPVK | 431  | 27353 |
| >TP53-Q144I CQLAKTCPVC | 33869 | >TP53-Q144I CQLAKTCPVK | 310  | 33559 |
| >TP53-Q144I CQLAKTCPVC | 155   | >TP53-Q144I CQLAKTCPVK | 179  | 24    |
| >TP53-Q144I CQLAKTCPVC | 231   | >TP53-Q144I CQLAKTCPVK | 672  | 441   |
| >TP53-Q144I VQLWVDST   | 120   | >TP53-Q144I VLLWVDST   | 847  | 727   |
| >TP53-Q144I VQLWVDST   | 835   | >TP53-Q144I VLLWVDST   | 9    | 826   |
| >TP53-Q144I VQLWVDSTP  | 12174 | >TP53-Q144I VLLWVDSTP  | 324  | 11850 |
| >TP53-Q144I VQLWVDSTP  | 9929  | >TP53-Q144I VLLWVDSTPF | 260  | 9669  |
| >TP53-Q144I VQLWVDST   | 3159  | >TP53-Q144I VLLWVDST   | 40   | 3119  |
| >TP53-Q144I VQLWVDST   | 12210 | >TP53-Q144I VLLWVDST   | 137  | 12073 |
| >TP53-Q144I VQLWVDST   | 24719 | >TP53-Q144I VLLWVDST   | 34   | 24685 |
| >TP53-Q144I CPVQLWVD   | 706   | >TP53-Q144I CPVLLWVD   | 363  | 343   |
| >TP53-Q144I CPVQLWVDS  | 675   | >TP53-Q144I CPVLLWVDS  | 318  | 357   |
| >TP53-Q144I CPVQLWVDS  | 635   | >TP53-Q144I CPVLLWVDS  | 332  | 303   |
| >TP53-Q144I KTCPVQLWV  | 575   | >TP53-Q144I KTCPVLLWV  | 117  | 458   |
| >TP53-Q144I KTCPVQLWV  | 923   | >TP53-Q144I KTCPVLLWV  | 425  | 498   |
| >TP53-Q144I KTCPVQLWV  | 1227  | >TP53-Q144I KTCPVLLWV  | 129  | 1098  |
| >TP53-Q144I KTCPVQLWV  | 125   | >TP53-Q144I KTCPVLLWV  | 13   | 112   |
| >TP53-Q144I KTCPVQLWV  | 53    | >TP53-Q144I KTCPVLLWV  | 18   | 35    |
| >TP53-Q144I KTCPVQLWV  | 338   | >TP53-Q144I KTCPVLLWV  | 170  | 168   |
| >TP53-Q144I KTCPVQLWV  | 202   | >TP53-Q144I KTCPVLLWV  | 141  | 61    |
| >TP53-Q144I KTCPVQLWV  | 224   | >TP53-Q144I KTCPVLLWV  | 248  | 24    |
| >TP53-Q144I KTCPVQLW   | 165   | >TP53-Q144I KTCPVLLW   | 97   | 68    |
| >TP53-Q144I KTCPVQLW   | 4     | >TP53-Q144I KTCPVLLW   | 4    | 0     |
| >TP53-Q144I KTCPVQLWV  | 118   | >TP53-Q144I KTCPVLLWV  | 87   | 31    |
| >TP53-Q144I KTCPVQLW   | 34    | >TP53-Q144I KTCPVLLW   | 37   | 3     |
| >TP53-Q144I KTCPVQLW   | 10    | >TP53-Q144I KTCPVLLW   | 10   | 0     |
| >TP53-Q144I KTCPVQLWV  | 1070  | >TP53-Q144I KTCPVLLWV  | 414  | 656   |
| >TP53-Q144I KTCPVQLWV  | 254   | >TP53-Q144I KTCPVLLWV  | 141  | 113   |
| >TP53-Q144I KTCPVQLWV  | 272   | >TP53-Q144I KTCPVLLWV  | 242  | 30    |
| >TP53-Q144I AKTCPVQL   | 41    | >TP53-Q144I AKTCPVLL   | 61   | 20    |
| >TP53-Q144I AKTCPVQLW  | 192   | >TP53-Q144I AKTCPVLLW  | 321  | 129   |
| >TP53-Q144I AKTCPVQLW  | 3665  | >TP53-Q144I AKTCPVLLW  | 426  | 3239  |
| >TP53-Q144I LAKTCPVQLV | 830   | >TP53-Q144I LAKTCPVLLW | 266  | 564   |
| >TP53-Q144I LAKTCPVQLV | 482   | >TP53-Q144I LAKTCPVLLW | 445  | 37    |
| >TP53-Q144I LAKTCPVQ   | 8919  | >TP53-Q144I LAKTCPVL   | 408  | 8511  |
| >TP53-Q144I LAKTCPVQL  | 417   | >TP53-Q144I LAKTCPVLL  | 504  | 87    |
| >TP53-Q144I LAKTCPVQL  | 405   | >TP53-Q144I LAKTCPVLL  | 2685 | 2280  |
| >TP53-Q144I LAKTCPVQLV | 45    | >TP53-Q144I LAKTCPVLLW | 47   | 2     |
| >TP53-Q144I LAKTCPVQLV | 42    | >TP53-Q144I LAKTCPVLLW | 50   | 8     |
| >TP53-Q144I LAKTCPVQLV | 42    | >TP53-Q144I LAKTCPVLLW | 27   | 15    |

|                        |       |                         |       |       |
|------------------------|-------|-------------------------|-------|-------|
| >TP53-Q144I LAKTCPVQLV | 689   | >TP53-Q144I LAKTCPVLLW  | 417   | 272   |
| >TP53-Q144I QLAKTCPVQ  | 8794  | >TP53-Q144I QLAKTCPVL   | 112   | 8682  |
| >TP53-Q144I QLAKTCPVQL | 315   | >TP53-Q144I QLAKTCPVLL  | 110   | 205   |
| >TP53-Q144I QLAKTCPVQL | 383   | >TP53-Q144I QLAKTCPVLL  | 189   | 194   |
| >TP53-Q144I QLAKTCPVQL | 323   | >TP53-Q144I QLAKTCPVLL  | 630   | 307   |
| >TP53-Q144I QLAKTCPVQ  | 9391  | >TP53-Q144I QLAKTCPVL   | 142   | 9249  |
| >TP53-Q144I QLAKTCPVQL | 177   | >TP53-Q144I QLAKTCPVLL  | 249   | 72    |
| >TP53-Q144I QLAKTCPVQ  | 19408 | >TP53-Q144I QLAKTCPVL   | 312   | 19096 |
| >TP53-Q144I QLAKTCPVQL | 117   | >TP53-Q144I QLAKTCPVLL  | 530   | 413   |
| >TP53-Q144I QLAKTCPVQ  | 2094  | >TP53-Q144I QLAKTCPVL   | 32    | 2062  |
| >TP53-Q144I QLAKTCPVQL | 20    | >TP53-Q144I QLAKTCPVLL  | 34    | 14    |
| >TP53-Q144I QLAKTCPVQL | 343   | >TP53-Q144I QLAKTCPVLL' | 129   | 214   |
| >TP53-Q144I CQLAKTCPVC | 1090  | >TP53-Q144I CQLAKTCPVL  | 448   | 642   |
| >TP53-Q144I CQLAKTCPVC | 463   | >TP53-Q144I CQLAKTCPVL  | 199   | 264   |
| >TP53-Q144I CQLAKTCPVC | 3628  | >TP53-Q144I CQLAKTCPVL  | 113   | 3515  |
| >TP53-Q144I CQLAKTCPVC | 155   | >TP53-Q144I CQLAKTCPVL  | 209   | 54    |
| >TP53-Q144I CQLAKTCPVC | 18084 | >TP53-Q144I CQLAKTCPVL  | 158   | 17926 |
| >TP53-Q144I CQLAKTCPVC | 231   | >TP53-Q144I CQLAKTCPVL  | 204   | 27    |
| >TP53-Q144I VQLWVDST   | 120   | >TP53-Q144I VPLWVDST    | 17737 | 17617 |
| >TP53-Q144I VQLWVDST   | 31003 | >TP53-Q144I VPLWVDST    | 425   | 30578 |
| >TP53-Q144I VQLWVDSTP  | 24729 | >TP53-Q144I VPLWVDSTPI  | 329   | 24400 |
| >TP53-Q144I KTCPVQLWV  | 575   | >TP53-Q144I KTCPVPLWV   | 381   | 194   |
| >TP53-Q144I KTCPVQLWV  | 1227  | >TP53-Q144I KTCPVPLWV   | 429   | 798   |
| >TP53-Q144I KTCPVQLWV  | 125   | >TP53-Q144I KTCPVPLWV   | 239   | 114   |
| >TP53-Q144I KTCPVQLWV  | 53    | >TP53-Q144I KTCPVPLWV   | 18    | 35    |
| >TP53-Q144I KTCPVQLWV  | 338   | >TP53-Q144I KTCPVPLWV   | 328   | 10    |
| >TP53-Q144I KTCPVQLWV  | 202   | >TP53-Q144I KTCPVPLWV   | 419   | 217   |
| >TP53-Q144I KTCPVQLWV  | 224   | >TP53-Q144I KTCPVPLWV   | 210   | 14    |
| >TP53-Q144I KTCPVQLW   | 165   | >TP53-Q144I KTCPVPLW    | 141   | 24    |
| >TP53-Q144I KTCPVQLW   | 4     | >TP53-Q144I KTCPVPLW    | 4     | 0     |
| >TP53-Q144I KTCPVQLWV  | 118   | >TP53-Q144I KTCPVPLWV   | 92    | 26    |
| >TP53-Q144I KTCPVQLW   | 34    | >TP53-Q144I KTCPVPLW    | 37    | 3     |
| >TP53-Q144I KTCPVQLW   | 10    | >TP53-Q144I KTCPVPLW    | 10    | 0     |
| >TP53-Q144I KTCPVQLWV  | 254   | >TP53-Q144I KTCPVPLWV   | 331   | 77    |
| >TP53-Q144I KTCPVQLWV  | 272   | >TP53-Q144I KTCPVPLWV   | 242   | 30    |
| >TP53-Q144I AKTCPVQL   | 41    | >TP53-Q144I AKTCPVPL    | 17    | 24    |
| >TP53-Q144I AKTCPVQLW  | 192   | >TP53-Q144I AKTCPVPLW   | 418   | 226   |
| >TP53-Q144I LAKTCPVQLV | 830   | >TP53-Q144I LAKTCPVPLV  | 422   | 408   |
| >TP53-Q144I LAKTCPVQLV | 482   | >TP53-Q144I LAKTCPVPLV  | 869   | 387   |
| >TP53-Q144I LAKTCPVQL  | 417   | >TP53-Q144I LAKTCPVPL   | 76    | 341   |
| >TP53-Q144I LAKTCPVQL  | 405   | >TP53-Q144I LAKTCPVPL   | 825   | 420   |
| >TP53-Q144I LAKTCPVQLV | 45    | >TP53-Q144I LAKTCPVPLV  | 61    | 16    |
| >TP53-Q144I LAKTCPVQLV | 42    | >TP53-Q144I LAKTCPVPLV  | 57    | 15    |

|                        |       |                        |       |       |
|------------------------|-------|------------------------|-------|-------|
| >TP53-Q144f LAKTCPVQLV | 42    | >TP53-Q144f LAKTCPVPLM | 41    | 1     |
| >TP53-Q144f QLAKTCPVQL | 1834  | >TP53-Q144f QLAKTCPVPL | 424   | 1410  |
| >TP53-Q144f QLAKTCPVQL | 315   | >TP53-Q144f QLAKTCPVPL | 73    | 242   |
| >TP53-Q144f QLAKTCPVQL | 383   | >TP53-Q144f QLAKTCPVPL | 109   | 274   |
| >TP53-Q144f QLAKTCPVQL | 323   | >TP53-Q144f QLAKTCPVPL | 336   | 13    |
| >TP53-Q144f QLAKTCPVQL | 1584  | >TP53-Q144f QLAKTCPVPL | 379   | 1205  |
| >TP53-Q144f QLAKTCPVQL | 177   | >TP53-Q144f QLAKTCPVPL | 163   | 14    |
| >TP53-Q144f QLAKTCPVQL | 117   | >TP53-Q144f QLAKTCPVPL | 340   | 223   |
| >TP53-Q144f QLAKTCPVQL | 20    | >TP53-Q144f QLAKTCPVPL | 37    | 17    |
| >TP53-Q144f QLAKTCPVQL | 1062  | >TP53-Q144f QLAKTCPVPL | 317   | 745   |
| >TP53-Q144f QLAKTCPVQL | 343   | >TP53-Q144f QLAKTCPVPL | 200   | 143   |
| >TP53-Q144f CQLAKTCPVC | 1090  | >TP53-Q144f CQLAKTCPVP | 292   | 798   |
| >TP53-Q144f CQLAKTCPVC | 463   | >TP53-Q144f CQLAKTCPVP | 102   | 361   |
| >TP53-Q144f CQLAKTCPVC | 155   | >TP53-Q144f CQLAKTCPVP | 42    | 113   |
| >TP53-Q144f CQLAKTCPVC | 231   | >TP53-Q144f CQLAKTCPVP | 55    | 176   |
| >TP53-Q144f CQLAKTCPVC | 762   | >TP53-Q144f CQLAKTCPVP | 454   | 308   |
| >TP53-Q144f VQLWVDST   | 120   | >TP53-Q144f VRLWVDST   | 18934 | 18814 |
| >TP53-Q144f KTCPVQLWV  | 125   | >TP53-Q144f KTCPVRLWV  | 311   | 186   |
| >TP53-Q144f KTCPVQLWV  | 53    | >TP53-Q144f KTCPVRLWV  | 332   | 279   |
| >TP53-Q144f KTCPVQLWV  | 338   | >TP53-Q144f KTCPVRLWV  | 2534  | 2196  |
| >TP53-Q144f KTCPVQLWV  | 202   | >TP53-Q144f KTCPVRLWV  | 363   | 161   |
| >TP53-Q144f KTCPVQLWV  | 224   | >TP53-Q144f KTCPVRLWV  | 77    | 147   |
| >TP53-Q144f KTCPVQLW   | 165   | >TP53-Q144f KTCPVRLW   | 192   | 27    |
| >TP53-Q144f KTCPVQLW   | 4     | >TP53-Q144f KTCPVRLW   | 6     | 2     |
| >TP53-Q144f KTCPVQLWV  | 118   | >TP53-Q144f KTCPVRLWV  | 173   | 55    |
| >TP53-Q144f KTCPVQLW   | 34    | >TP53-Q144f KTCPVRLW   | 34    | 0     |
| >TP53-Q144f KTCPVQLW   | 10    | >TP53-Q144f KTCPVRLW   | 15    | 5     |
| >TP53-Q144f KTCPVQLWV  | 254   | >TP53-Q144f KTCPVRLWV  | 203   | 51    |
| >TP53-Q144f KTCPVQLWV  | 272   | >TP53-Q144f KTCPVRLWV  | 380   | 108   |
| >TP53-Q144f AKTCPVQL   | 41    | >TP53-Q144f AKTCPVRL   | 86    | 45    |
| >TP53-Q144f AKTCPVQLW  | 192   | >TP53-Q144f AKTCPVRLW  | 661   | 469   |
| >TP53-Q144f LAKTCPVQLV | 482   | >TP53-Q144f LAKTCPVRLM | 674   | 192   |
| >TP53-Q144f LAKTCPVQ   | 14570 | >TP53-Q144f LAKTCPVR   | 71    | 14499 |
| >TP53-Q144f LAKTCPVQ   | 20785 | >TP53-Q144f LAKTCPVR   | 417   | 20368 |
| >TP53-Q144f LAKTCPVQL  | 417   | >TP53-Q144f LAKTCPVRL  | 755   | 338   |
| >TP53-Q144f LAKTCPVQL  | 405   | >TP53-Q144f LAKTCPVRL  | 659   | 254   |
| >TP53-Q144f LAKTCPVQLV | 45    | >TP53-Q144f LAKTCPVRLM | 93    | 48    |
| >TP53-Q144f LAKTCPVQLV | 42    | >TP53-Q144f LAKTCPVRLM | 44    | 2     |
| >TP53-Q144f LAKTCPVQLV | 42    | >TP53-Q144f LAKTCPVRLM | 160   | 118   |
| >TP53-Q144f QLAKTCPVQL | 315   | >TP53-Q144f QLAKTCPVRL | 270   | 45    |
| >TP53-Q144f QLAKTCPVQL | 383   | >TP53-Q144f QLAKTCPVRL | 417   | 34    |
| >TP53-Q144f QLAKTCPVQL | 323   | >TP53-Q144f QLAKTCPVRL | 414   | 91    |
| >TP53-Q144f QLAKTCPVQL | 177   | >TP53-Q144f QLAKTCPVRL | 361   | 184   |



|                       |       |                       |       |       |
|-----------------------|-------|-----------------------|-------|-------|
| >TP53-Q144fQLAKTCPVQL | 117   | >TP53-Q144fQLAKTCPVRL | 321   | 204   |
| >TP53-Q144fQLAKTCPVQL | 20    | >TP53-Q144fQLAKTCPVRL | 25    | 5     |
| >TP53-Q144fQLAKTCPVQ  | 15427 | >TP53-Q144fQLAKTCPVR  | 162   | 15265 |
| >TP53-Q144fQLAKTCPVQL | 343   | >TP53-Q144fQLAKTCPVRL | 1184  | 841   |
| >TP53-Q144fQLAKTCPVQ  | 24979 | >TP53-Q144fQLAKTCPVR  | 479   | 24500 |
| >TP53-Q144fCQLAKTCPVC | 463   | >TP53-Q144fCQLAKTCPVR | 669   | 206   |
| >TP53-Q144fCQLAKTCPVC | 155   | >TP53-Q144fCQLAKTCPVR | 291   | 136   |
| >TP53-Q144fCQLAKTCPVC | 231   | >TP53-Q144fCQLAKTCPVR | 478   | 247   |
| >TP53-Q144fCQLAKTCPVC | 10343 | >TP53-Q144fCQLAKTCPVR | 131   | 10212 |
| >TP53-Q165fQSQHMTEVV  | 230   | >TP53-Q165fESQHMTEVV  | 858   | 628   |
| >TP53-Q165fQSQHMTEVV  | 321   | >TP53-Q165fESQHMTEVV  | 1836  | 1515  |
| >TP53-Q165fQSQHMTEVV  | 973   | >TP53-Q165fESQHMTEVV  | 259   | 714   |
| >TP53-Q165fQSQHMTEVV  | 185   | >TP53-Q165fESQHMTEVV  | 17    | 168   |
| >TP53-Q165fQSQHMTEV   | 206   | >TP53-Q165fESQHMTEV   | 29    | 177   |
| >TP53-Q165fQSQHMTEVV  | 303   | >TP53-Q165fESQHMTEVV  | 37    | 266   |
| >TP53-Q165fQSQHMTEV   | 2899  | >TP53-Q165fESQHMTEV   | 451   | 2448  |
| >TP53-Q165fQSQHMTEVV  | 306   | >TP53-Q165fESQHMTEVV  | 1252  | 946   |
| >TP53-Q165fKQSQHMTEV  | 9738  | >TP53-Q165fKESQHMTEV  | 447   | 9291  |
| >TP53-Q165fKQSQHMTEV  | 8178  | >TP53-Q165fKESQHMTEV  | 320   | 7858  |
| >TP53-Q165fKQSQHMTEV  | 82    | >TP53-Q165fKESQHMTEV  | 16196 | 16114 |
| >TP53-Q165fKQSQHMTEV  | 51    | >TP53-Q165fKESQHMTEV  | 2349  | 2298  |
| >TP53-Q165fKQSQHMTEV  | 298   | >TP53-Q165fKESQHMTEV  | 8783  | 8485  |
| >TP53-Q165fKQSQHMTEV  | 9     | >TP53-Q165fKESQHMTEV  | 1323  | 1314  |
| >TP53-Q165fKQSQHMTEV  | 273   | >TP53-Q165fKESQHMTEV  | 8631  | 8358  |
| >TP53-Q165fKQSQHMTEV  | 10    | >TP53-Q165fKESQHMTEV  | 913   | 903   |
| >TP53-Q165fKQSQHMTEV  | 426   | >TP53-Q165fKESQHMTEV  | 10133 | 9707  |
| >TP53-Q165fKQSQHMTEV  | 35    | >TP53-Q165fKESQHMTEV  | 2709  | 2674  |
| >TP53-Q165fKQSQHMTEV  | 222   | >TP53-Q165fKESQHMTEV  | 8276  | 8054  |
| >TP53-Q165fKQSQHMTEV  | 86    | >TP53-Q165fKESQHMTEV  | 3129  | 3043  |
| >TP53-Q165fKQSQHMTEV  | 110   | >TP53-Q165fKESQHMTEV  | 3043  | 2933  |
| >TP53-Q165fKQSQHMTEV  | 185   | >TP53-Q165fKESQHMTEV  | 6908  | 6723  |
| >TP53-Q165fKQSQHMTEV  | 6872  | >TP53-Q165fKESQHMTEV  | 343   | 6529  |
| >TP53-Q165fKQSQHMTEV  | 5678  | >TP53-Q165fKESQHMTEV  | 36    | 5642  |
| >TP53-Q165fKQSQHMTEV  | 24577 | >TP53-Q165fKESQHMTEV  | 338   | 24239 |
| >TP53-Q165fKQSQHMTEV  | 11457 | >TP53-Q165fKESQHMTEV  | 60    | 11397 |
| >TP53-Q165fKQSQHMTEV  | 863   | >TP53-Q165fKESQHMTEV  | 6     | 857   |
| >TP53-Q165fKQSQHMTEV  | 2130  | >TP53-Q165fKESQHMTEV  | 12    | 2118  |
| >TP53-Q165fKQSQHMTEV  | 60    | >TP53-Q165fKESQHMTEV  | 106   | 46    |
| >TP53-Q165fYKQSQHMTE  | 467   | >TP53-Q165fYKESQHMTE  | 1261  | 794   |
| >TP53-Q165fYKQSQHMTE  | 30    | >TP53-Q165fYKESQHMTE  | 217   | 187   |
| >TP53-Q165fYKQSQHMTE  | 42    | >TP53-Q165fYKESQHMTE  | 274   | 232   |
| >TP53-Q165fIYKQSQHMTI | 402   | >TP53-Q165fIYKESQHMTI | 664   | 262   |
| >TP53-Q165fIYKQSQHMTI | 727   | >TP53-Q165fIYKESQHMTI | 302   | 425   |

|                        |      |                        |       |       |
|------------------------|------|------------------------|-------|-------|
| >TP53-Q165I IYKQSQHM   | 394  | >TP53-Q165I IYKESQHM   | 331   | 63    |
| >TP53-Q165I AIYKQSQHM  | 91   | >TP53-Q165I AIYKESQHM  | 240   | 149   |
| >TP53-Q165I AIYKQSQH   | 349  | >TP53-Q165I AIYKESQH   | 1216  | 867   |
| >TP53-Q165I AIYKQSQHM  | 62   | >TP53-Q165I AIYKESQHM  | 80    | 18    |
| >TP53-Q165I AIYKQSQHM  | 198  | >TP53-Q165I AIYKESQHM  | 196   | 2     |
| >TP53-Q165I MAIYKQSQH  | 226  | >TP53-Q165I MAIYKESQH  | 396   | 170   |
| >TP53-Q165I MAIYKQSQH  | 205  | >TP53-Q165I MAIYKESQH  | 242   | 37    |
| >TP53-Q165I MAIYKQSQH  | 20   | >TP53-Q165I MAIYKESQH  | 29    | 9     |
| >TP53-Q165I MAIYKQSQH  | 151  | >TP53-Q165I MAIYKESQH  | 335   | 184   |
| >TP53-Q165I AMAIYKQSQ  | 221  | >TP53-Q165I AMAIYKESQ  | 426   | 205   |
| >TP53-Q165I AMAIYKQSQ  | 161  | >TP53-Q165I AMAIYKESQ  | 106   | 55    |
| >TP53-Q165I AMAIYKQSQ  | 199  | >TP53-Q165I AMAIYKESQ  | 203   | 4     |
| >TP53-Q165I AMAIYKQSQ  | 283  | >TP53-Q165I AMAIYKESQ  | 361   | 78    |
| >TP53-Q165I AMAIYKQSQ  | 69   | >TP53-Q165I AMAIYKESQ  | 286   | 217   |
| >TP53-Q165I AMAIYKQSQ  | 49   | >TP53-Q165I AMAIYKESQ  | 86    | 37    |
| >TP53-Q165I AMAIYKQSQ  | 55   | >TP53-Q165I AMAIYKESQ  | 59    | 4     |
| >TP53-Q165I AMAIYKQSQ  | 69   | >TP53-Q165I AMAIYKESQ  | 102   | 33    |
| >TP53-Q165I RAMAIYKQSC | 354  | >TP53-Q165I RAMAIYKESC | 492   | 138   |
| >TP53-Q165I RAMAIYKQSC | 375  | >TP53-Q165I RAMAIYKESC | 527   | 152   |
| >TP53-Q165I RVRAMAIYKC | 10   | >TP53-Q165I RVRAMAIYKE | 56    | 46    |
| >TP53-Q165I RVRAMAIYKC | 9    | >TP53-Q165I RVRAMAIYKE | 8     | 1     |
| >TP53-Q165I QSQHMTEVV  | 230  | >TP53-Q165I HSQHMTEVV  | 158   | 72    |
| >TP53-Q165I QSQHMTEVV  | 321  | >TP53-Q165I HSQHMTEVV  | 49    | 272   |
| >TP53-Q165I QSQHMTEVV  | 973  | >TP53-Q165I HSQHMTEVV  | 325   | 648   |
| >TP53-Q165I QSQHMTEVV  | 185  | >TP53-Q165I HSQHMTEVV  | 70    | 115   |
| >TP53-Q165I QSQHMTEV   | 206  | >TP53-Q165I HSQHMTEV   | 91    | 115   |
| >TP53-Q165I QSQHMTEVV  | 303  | >TP53-Q165I HSQHMTEVV  | 127   | 176   |
| >TP53-Q165I QSQHMTEVV  | 306  | >TP53-Q165I HSQHMTEVV  | 1246  | 940   |
| >TP53-Q165I QSQHMTEVV  | 1113 | >TP53-Q165I HSQHMTEVV  | 317   | 796   |
| >TP53-Q165I KQSQHMTEV  | 82   | >TP53-Q165I KHSQHMTEV  | 18029 | 17947 |
| >TP53-Q165I KQSQHMTEV  | 51   | >TP53-Q165I KHSQHMTEV  | 2098  | 2047  |
| >TP53-Q165I KQSQHMTEV  | 298  | >TP53-Q165I KHSQHMTEV  | 11677 | 11379 |
| >TP53-Q165I KQSQHMTEV  | 9    | >TP53-Q165I KHSQHMTEV  | 5736  | 5727  |
| >TP53-Q165I KQSQHMTEV  | 273  | >TP53-Q165I KHSQHMTEV  | 10967 | 10694 |
| >TP53-Q165I KQSQHMTEV  | 10   | >TP53-Q165I KHSQHMTEV  | 5765  | 5755  |
| >TP53-Q165I KQSQHMTEV  | 426  | >TP53-Q165I KHSQHMTEV  | 13184 | 12758 |
| >TP53-Q165I KQSQHMTEV  | 35   | >TP53-Q165I KHSQHMTEV  | 1809  | 1774  |
| >TP53-Q165I KQSQHMTEV  | 222  | >TP53-Q165I KHSQHMTEV  | 20184 | 19962 |
| >TP53-Q165I KQSQHMTEV  | 86   | >TP53-Q165I KHSQHMTEV  | 1324  | 1238  |
| >TP53-Q165I KQSQHMTEV  | 110  | >TP53-Q165I KHSQHMTEV  | 1364  | 1254  |
| >TP53-Q165I KQSQHMTEV  | 185  | >TP53-Q165I KHSQHMTEV  | 3036  | 2851  |
| >TP53-Q165I KQSQHMTEV  | 60   | >TP53-Q165I KHSQHMTEV  | 96    | 36    |
| >TP53-Q165I TRVRAMAIYK | 2274 | >TP53-Q165I TRVRAMAIYK | 365   | 1909  |

|                        |      |                        |      |      |
|------------------------|------|------------------------|------|------|
| >TP53-Q165IYKQSQHMTE   | 467  | >TP53-Q165IYKHSQHMTE   | 325  | 142  |
| >TP53-Q165IYKQSQHMTE   | 1075 | >TP53-Q165IYKHSQHMTE   | 350  | 725  |
| >TP53-Q165IYKQSQHMTE   | 30   | >TP53-Q165IYKHSQHMTE   | 14   | 16   |
| >TP53-Q165IYKQSQHMTE   | 42   | >TP53-Q165IYKHSQHMTE   | 15   | 27   |
| >TP53-Q165IYKQSQHMTE   | 945  | >TP53-Q165IYKHSQHMTE   | 423  | 522  |
| >TP53-Q165IYKQSQHMTE   | 402  | >TP53-Q165IYKHSQHMTE   | 1228 | 826  |
| >TP53-Q165IYKQSQHM     | 394  | >TP53-Q165IYKHSQHM     | 106  | 288  |
| >TP53-Q165IYKQSQHMTE   | 1709 | >TP53-Q165IYKHSQHMTE   | 454  | 1255 |
| >TP53-Q165IAYKQSQHM    | 91   | >TP53-Q165IAYKHSQHM    | 32   | 59   |
| >TP53-Q165IAYKQSQHM    | 2067 | >TP53-Q165IAYKHSQHM    | 462  | 1605 |
| >TP53-Q165IAYKQSQH     | 349  | >TP53-Q165IAYKHSQH     | 227  | 122  |
| >TP53-Q165IAYKQSQHM    | 804  | >TP53-Q165IAYKHSQHM    | 174  | 630  |
| >TP53-Q165IAYKQSQHM    | 3022 | >TP53-Q165IAYKHSQHM    | 329  | 2693 |
| >TP53-Q165IAYKQSQHM    | 62   | >TP53-Q165IAYKHSQHM    | 40   | 22   |
| >TP53-Q165IAYKQSQHM    | 198  | >TP53-Q165IAYKHSQHM    | 120  | 78   |
| >TP53-Q165I MAIYKQSQHI | 633  | >TP53-Q165I MAIYKHSQHI | 345  | 288  |
| >TP53-Q165I MAIYKQSQ   | 841  | >TP53-Q165I MAIYKHSQ   | 235  | 606  |
| >TP53-Q165I MAIYKQSQH  | 526  | >TP53-Q165I MAIYKHSQH  | 378  | 148  |
| >TP53-Q165I MAIYKQSQHI | 226  | >TP53-Q165I MAIYKHSQHI | 130  | 96   |
| >TP53-Q165I MAIYKQSQHI | 205  | >TP53-Q165I MAIYKHSQHI | 129  | 76   |
| >TP53-Q165I MAIYKQSQH  | 911  | >TP53-Q165I MAIYKHSQH  | 367  | 544  |
| >TP53-Q165I MAIYKQSQHI | 20   | >TP53-Q165I MAIYKHSQHI | 14   | 6    |
| >TP53-Q165I MAIYKQSQHI | 151  | >TP53-Q165I MAIYKHSQHI | 301  | 150  |
| >TP53-Q165I MAIYKQSQH  | 894  | >TP53-Q165I MAIYKHSQH  | 414  | 480  |
| >TP53-Q165I MAIYKQSQHI | 583  | >TP53-Q165I MAIYKHSQHI | 330  | 253  |
| >TP53-Q165I AMAIYKQSQI | 221  | >TP53-Q165I AMAIYKHSQI | 194  | 27   |
| >TP53-Q165I AMAIYKQSQI | 161  | >TP53-Q165I AMAIYKHSQI | 77   | 84   |
| >TP53-Q165I AMAIYKQSQI | 732  | >TP53-Q165I AMAIYKHSQI | 335  | 397  |
| >TP53-Q165I AMAIYKQSQI | 199  | >TP53-Q165I AMAIYKHSQI | 129  | 70   |
| >TP53-Q165I AMAIYKQSQI | 283  | >TP53-Q165I AMAIYKHSQI | 280  | 3    |
| >TP53-Q165I AMAIYKQSQ  | 69   | >TP53-Q165I AMAIYKHSQ  | 20   | 49   |
| >TP53-Q165I AMAIYKQSQI | 49   | >TP53-Q165I AMAIYKHSQI | 38   | 11   |
| >TP53-Q165I AMAIYKQSQI | 55   | >TP53-Q165I AMAIYKHSQI | 56   | 1    |
| >TP53-Q165I AMAIYKQSQI | 69   | >TP53-Q165I AMAIYKHSQI | 83   | 14   |
| >TP53-Q165I RAMAIYKQ   | 1487 | >TP53-Q165I RAMAIYKH   | 281  | 1206 |
| >TP53-Q165I RAMAIYKQSC | 809  | >TP53-Q165I RAMAIYKHSC | 430  | 379  |
| >TP53-Q165I RAMAIYKQSC | 354  | >TP53-Q165I RAMAIYKHSC | 320  | 34   |
| >TP53-Q165I RAMAIYKQSC | 375  | >TP53-Q165I RAMAIYKHSC | 309  | 66   |
| >TP53-Q165I VRAMAIYKQ  | 1352 | >TP53-Q165I VRAMAIYKH  | 181  | 1171 |
| >TP53-Q165I RVRAMAIYKC | 10   | >TP53-Q165I RVRAMAIYKH | 24   | 14   |
| >TP53-Q165I RVRAMAIYKC | 9    | >TP53-Q165I RVRAMAIYKH | 6    | 3    |
| >TP53-Q165I QSQHMTEVV  | 230  | >TP53-Q165I LSQHMTEVV  | 121  | 109  |
| >TP53-Q165I QSQHMTEVV  | 321  | >TP53-Q165I LSQHMTEVV  | 125  | 196  |

|                        |       |                        |      |       |
|------------------------|-------|------------------------|------|-------|
| >TP53-Q165I QSQHMTEVV  | 185   | >TP53-Q165I LSQHMTEVV  | 282  | 97    |
| >TP53-Q165I QSQHMTEV   | 206   | >TP53-Q165I LSQHMTEV   | 957  | 751   |
| >TP53-Q165I QSQHMTEVV  | 303   | >TP53-Q165I LSQHMTEVV  | 1267 | 964   |
| >TP53-Q165I QSQHMTEVV  | 306   | >TP53-Q165I LSQHMTEVV  | 802  | 496   |
| >TP53-Q165I KQSQHMTEV  | 82    | >TP53-Q165I KLSQHMTEV  | 13   | 69    |
| >TP53-Q165I KQSQHMTEV  | 2845  | >TP53-Q165I KLSQHMTEV  | 142  | 2703  |
| >TP53-Q165I KQSQHMTEV  | 51    | >TP53-Q165I KLSQHMTEV  | 3    | 48    |
| >TP53-Q165I KQSQHMTEV  | 298   | >TP53-Q165I KLSQHMTEV  | 29   | 269   |
| >TP53-Q165I KQSQHMTEV  | 9     | >TP53-Q165I KLSQHMTEV  | 3    | 6     |
| >TP53-Q165I KQSQHMTEV  | 273   | >TP53-Q165I KLSQHMTEV  | 30   | 243   |
| >TP53-Q165I KQSQHMTEV  | 10    | >TP53-Q165I KLSQHMTEV  | 12   | 2     |
| >TP53-Q165I KQSQHMTEV  | 426   | >TP53-Q165I KLSQHMTEV  | 4    | 422   |
| >TP53-Q165I KQSQHMTEV  | 718   | >TP53-Q165I KLSQHMTEV  | 6    | 712   |
| >TP53-Q165I KQSQHMTEV  | 2400  | >TP53-Q165I KLSQHMTEV  | 21   | 2379  |
| >TP53-Q165I KQSQHMTEV  | 1427  | >TP53-Q165I KLSQHMTEV  | 14   | 1413  |
| >TP53-Q165I KQSQHMTEV  | 1212  | >TP53-Q165I KLSQHMTEV  | 9    | 1203  |
| >TP53-Q165I KQSQHMTEV  | 1654  | >TP53-Q165I KLSQHMTEV  | 14   | 1640  |
| >TP53-Q165I KQSQHMTEV  | 15833 | >TP53-Q165I KLSQHMTEV  | 205  | 15628 |
| >TP53-Q165I KQSQHMTEV  | 7287  | >TP53-Q165I KLSQHMTEV  | 38   | 7249  |
| >TP53-Q165I KQSQHMTEV  | 1607  | >TP53-Q165I KLSQHMTEV  | 2    | 1605  |
| >TP53-Q165I KQSQHMTEV  | 3833  | >TP53-Q165I KLSQHMTEV  | 4    | 3829  |
| >TP53-Q165I KQSQHMTEV  | 4432  | >TP53-Q165I KLSQHMTEV  | 372  | 4060  |
| >TP53-Q165I KQSQHMTEV  | 35    | >TP53-Q165I KLSQHMTEV  | 51   | 16    |
| >TP53-Q165I KQSQHMTEV  | 222   | >TP53-Q165I KLSQHMTEV  | 1142 | 920   |
| >TP53-Q165I KQSQHMTEV  | 86    | >TP53-Q165I KLSQHMTEV  | 2100 | 2014  |
| >TP53-Q165I KQSQHMTEV  | 110   | >TP53-Q165I KLSQHMTEV  | 2043 | 1933  |
| >TP53-Q165I KQSQHMTEV  | 185   | >TP53-Q165I KLSQHMTEV  | 3710 | 3525  |
| >TP53-Q165I KQSQHMTEV  | 60    | >TP53-Q165I KLSQHMTEV  | 46   | 14    |
| >TP53-Q165I TRVRAMAIYK | 2274  | >TP53-Q165I TRVRAMAIYK | 127  | 2147  |
| >TP53-Q165I TRVRAMAIYK | 20263 | >TP53-Q165I TRVRAMAIYK | 257  | 20006 |
| >TP53-Q165I TRVRAMAIYK | 18650 | >TP53-Q165I TRVRAMAIYK | 487  | 18163 |
| >TP53-Q165I YKQSQHMTE  | 1636  | >TP53-Q165I YKLSQHMTE  | 167  | 1469  |
| >TP53-Q165I YKQSQHMTE  | 2428  | >TP53-Q165I YKLSQHMTE  | 313  | 2115  |
| >TP53-Q165I YKQSQHMTE  | 467   | >TP53-Q165I YKLSQHMTE  | 176  | 291   |
| >TP53-Q165I YKQSQHMTE  | 1856  | >TP53-Q165I YKLSQHMTE  | 470  | 1386  |
| >TP53-Q165I YKQSQHMTE  | 1075  | >TP53-Q165I YKLSQHMTE  | 268  | 807   |
| >TP53-Q165I YKQSQHMTE  | 30    | >TP53-Q165I YKLSQHMTE  | 13   | 17    |
| >TP53-Q165I YKQSQHMTE  | 42    | >TP53-Q165I YKLSQHMTE  | 14   | 28    |
| >TP53-Q165I YKQSQHMTE  | 945   | >TP53-Q165I YKLSQHMTE  | 265  | 680   |
| >TP53-Q165I IYKQSQHMTE | 402   | >TP53-Q165I IYKLSQHMTE | 563  | 161   |
| >TP53-Q165I IYKQSQHM   | 394   | >TP53-Q165I IYKLSQHM   | 256  | 138   |
| >TP53-Q165I AIYKQSQHM  | 91    | >TP53-Q165I AIYKLSQHM  | 40   | 51    |
| >TP53-Q165I AIYKQSQH   | 349   | >TP53-Q165I AIYKLSQH   | 366  | 17    |

|                        |       |                        |       |       |
|------------------------|-------|------------------------|-------|-------|
| >TP53-Q165I AIYKQSQHM  | 62    | >TP53-Q165I AIYKLSQHM  | 51    | 11    |
| >TP53-Q165I AIYKQSQHM  | 198   | >TP53-Q165I AIYKLSQHM  | 194   | 4     |
| >TP53-Q165I MAIYKQSQH  | 633   | >TP53-Q165I MAIYKLSQHM | 233   | 400   |
| >TP53-Q165I MAIYKQSQH  | 226   | >TP53-Q165I MAIYKLSQHM | 170   | 56    |
| >TP53-Q165I MAIYKQSQH  | 205   | >TP53-Q165I MAIYKLSQHM | 240   | 35    |
| >TP53-Q165I MAIYKQSQH  | 20    | >TP53-Q165I MAIYKLSQHM | 18    | 2     |
| >TP53-Q165I MAIYKQSQH  | 151   | >TP53-Q165I MAIYKLSQHM | 224   | 73    |
| >TP53-Q165I MAIYKQSQH  | 583   | >TP53-Q165I MAIYKLSQHM | 453   | 130   |
| >TP53-Q165I AMAIYKQSQI | 221   | >TP53-Q165I AMAIYKLSQF | 232   | 11    |
| >TP53-Q165I AMAIYKQSQI | 161   | >TP53-Q165I AMAIYKLSQF | 123   | 38    |
| >TP53-Q165I AMAIYKQSQI | 199   | >TP53-Q165I AMAIYKLSQF | 186   | 13    |
| >TP53-Q165I AMAIYKQSQI | 283   | >TP53-Q165I AMAIYKLSQF | 219   | 64    |
| >TP53-Q165I AMAIYKQSQ  | 69    | >TP53-Q165I AMAIYKLSQ  | 200   | 131   |
| >TP53-Q165I AMAIYKQSQI | 49    | >TP53-Q165I AMAIYKLSQF | 74    | 25    |
| >TP53-Q165I AMAIYKQSQI | 55    | >TP53-Q165I AMAIYKLSQF | 49    | 6     |
| >TP53-Q165I AMAIYKQSQI | 69    | >TP53-Q165I AMAIYKLSQF | 90    | 21    |
| >TP53-Q165I RAMAIYKQ   | 18971 | >TP53-Q165I RAMAIYKL   | 437   | 18534 |
| >TP53-Q165I RAMAIYKQ   | 7532  | >TP53-Q165I RAMAIYKL   | 87    | 7445  |
| >TP53-Q165I RAMAIYKQ   | 11683 | >TP53-Q165I RAMAIYKL   | 202   | 11481 |
| >TP53-Q165I RAMAIYKQ   | 4444  | >TP53-Q165I RAMAIYKL   | 154   | 4290  |
| >TP53-Q165I RAMAIYKQ   | 16126 | >TP53-Q165I RAMAIYKL   | 448   | 15678 |
| >TP53-Q165I RAMAIYKQ   | 10721 | >TP53-Q165I RAMAIYKL   | 481   | 10240 |
| >TP53-Q165I RAMAIYKQ   | 4323  | >TP53-Q165I RAMAIYKL   | 19    | 4304  |
| >TP53-Q165I RAMAIYKQSC | 354   | >TP53-Q165I RAMAIYKLSC | 332   | 22    |
| >TP53-Q165I RAMAIYKQ   | 10048 | >TP53-Q165I RAMAIYKL   | 177   | 9871  |
| >TP53-Q165I RAMAIYKQ   | 5198  | >TP53-Q165I RAMAIYKL   | 280   | 4918  |
| >TP53-Q165I RAMAIYKQ   | 6644  | >TP53-Q165I RAMAIYKL   | 90    | 6554  |
| >TP53-Q165I RAMAIYKQSC | 375   | >TP53-Q165I RAMAIYKLSC | 245   | 130   |
| >TP53-Q165I RAMAIYKQ   | 36853 | >TP53-Q165I RAMAIYKL   | 363   | 36490 |
| >TP53-Q165I VRAMAIYKQ  | 1352  | >TP53-Q165I VRAMAIYKL  | 69    | 1283  |
| >TP53-Q165I VRAMAIYKQ  | 20931 | >TP53-Q165I VRAMAIYKL  | 482   | 20449 |
| >TP53-Q165I RVRAMAIYKC | 10    | >TP53-Q165I RVRAMAIYKL | 5     | 5     |
| >TP53-Q165I RVRAMAIYKC | 9     | >TP53-Q165I RVRAMAIYKL | 6     | 3     |
| >TP53-Q165I RVRAMAIYKC | 6525  | >TP53-Q165I RVRAMAIYKL | 210   | 6315  |
| >TP53-Q165I RVRAMAIYKC | 4903  | >TP53-Q165I RVRAMAIYKL | 20    | 4883  |
| >TP53-Q165I QSQHMTEVV  | 230   | >TP53-Q165I PSQHMTEVV  | 1719  | 1489  |
| >TP53-Q165I QSQHMTEVV  | 321   | >TP53-Q165I PSQHMTEVV  | 3110  | 2789  |
| >TP53-Q165I QSQHMTEVV  | 185   | >TP53-Q165I PSQHMTEVV  | 5478  | 5293  |
| >TP53-Q165I QSQHMTEV   | 206   | >TP53-Q165I PSQHMTEV   | 10683 | 10477 |
| >TP53-Q165I QSQHMTEVV  | 303   | >TP53-Q165I PSQHMTEVV  | 11270 | 10967 |
| >TP53-Q165I QSQHMTEVV  | 306   | >TP53-Q165I PSQHMTEVV  | 3594  | 3288  |
| >TP53-Q165I KQSQHMTEV  | 82    | >TP53-Q165I KPSQHMTEV  | 18747 | 18665 |
| >TP53-Q165I KQSQHMTEV  | 51    | >TP53-Q165I KPSQHMTEV  | 8345  | 8294  |

|                       |       |                       |       |       |
|-----------------------|-------|-----------------------|-------|-------|
| >TP53-Q165FKQSQHMTEV  | 298   | >TP53-Q165FKPSQHMTEV  | 14134 | 13836 |
| >TP53-Q165FKQSQHMTEV  | 9     | >TP53-Q165FKPSQHMTEV  | 7327  | 7318  |
| >TP53-Q165FKQSQHMTEV  | 273   | >TP53-Q165FKPSQHMTEV  | 12031 | 11758 |
| >TP53-Q165FKQSQHMTEV  | 10    | >TP53-Q165FKPSQHMTEV  | 6483  | 6473  |
| >TP53-Q165FKQSQHMTEV  | 426   | >TP53-Q165FKPSQHMTEV  | 15774 | 15348 |
| >TP53-Q165FKQSQHMTEV  | 35    | >TP53-Q165FKPSQHMTEV  | 2690  | 2655  |
| >TP53-Q165FKQSQHMTEV  | 20881 | >TP53-Q165FKPSQHMTEV  | 20    | 20861 |
| >TP53-Q165FKQSQHMTEV  | 30917 | >TP53-Q165FKPSQHMTEV  | 287   | 30630 |
| >TP53-Q165FKQSQHMTEV  | 222   | >TP53-Q165FKPSQHMTEV  | 19953 | 19731 |
| >TP53-Q165FKQSQHMTEV  | 86    | >TP53-Q165FKPSQHMTEV  | 7109  | 7023  |
| >TP53-Q165FKQSQHMTEV  | 110   | >TP53-Q165FKPSQHMTEV  | 6863  | 6753  |
| >TP53-Q165FKQSQHMTEV  | 185   | >TP53-Q165FKPSQHMTEV  | 11059 | 10874 |
| >TP53-Q165FKQSQHMTEV  | 60    | >TP53-Q165FKPSQHMTEV  | 109   | 49    |
| >TP53-Q165FYKQSQHMTE  | 467   | >TP53-Q165FYKPSQHMTE' | 510   | 43    |
| >TP53-Q165FYKQSQHMTE  | 30    | >TP53-Q165FYKPSQHMTE' | 81    | 51    |
| >TP53-Q165FYKQSQHMTE  | 42    | >TP53-Q165FYKPSQHMTE' | 100   | 58    |
| >TP53-Q165FIYKQSQHM   | 510   | >TP53-Q165FIYKPSQHM   | 286   | 224   |
| >TP53-Q165FIYKQSQHMTI | 402   | >TP53-Q165FIYKPSQHMTE | 160   | 242   |
| >TP53-Q165FIYKQSQHMTI | 727   | >TP53-Q165FIYKPSQHMTE | 322   | 405   |
| >TP53-Q165FIYKQSQHM   | 394   | >TP53-Q165FIYKPSQHM   | 111   | 283   |
| >TP53-Q165FIYKQSQHMTI | 1709  | >TP53-Q165FIYKPSQHMTE | 407   | 1302  |
| >TP53-Q165FAIYKQSQHM  | 91    | >TP53-Q165FAIYKPSQHM  | 173   | 82    |
| >TP53-Q165FAIYKQSQHM  | 1225  | >TP53-Q165FAIYKPSQHM  | 472   | 753   |
| >TP53-Q165FAIYKQSQH   | 349   | >TP53-Q165FAIYKPSQH   | 243   | 106   |
| >TP53-Q165FAIYKQSQHM  | 804   | >TP53-Q165FAIYKPSQHM  | 328   | 476   |
| >TP53-Q165FAIYKQSQHM  | 62    | >TP53-Q165FAIYKPSQHM  | 66    | 4     |
| >TP53-Q165FAIYKQSQHM  | 198   | >TP53-Q165FAIYKPSQHM  | 115   | 83    |
| >TP53-Q165FAIYKQSQHM  | 514   | >TP53-Q165FAIYKPSQHM  | 269   | 245   |
| >TP53-Q165FMAIYKQSQH  | 226   | >TP53-Q165FMAIYKPSQH  | 318   | 92    |
| >TP53-Q165FMAIYKQSQH  | 205   | >TP53-Q165FMAIYKPSQH  | 122   | 83    |
| >TP53-Q165FMAIYKQSQH  | 20    | >TP53-Q165FMAIYKPSQH  | 15    | 5     |
| >TP53-Q165FMAIYKQSQH  | 151   | >TP53-Q165FMAIYKPSQH  | 218   | 67    |
| >TP53-Q165FMAIYKQSQH  | 583   | >TP53-Q165FMAIYKPSQH  | 318   | 265   |
| >TP53-Q165FAMAIYKQSQ  | 221   | >TP53-Q165FAMAIYKPSQ  | 293   | 72    |
| >TP53-Q165FAMAIYKQSQ  | 161   | >TP53-Q165FAMAIYKPSQ  | 311   | 150   |
| >TP53-Q165FAMAIYKQSQ  | 199   | >TP53-Q165FAMAIYKPSQ  | 119   | 80    |
| >TP53-Q165FAMAIYKQSQ  | 283   | >TP53-Q165FAMAIYKPSQ  | 192   | 91    |
| >TP53-Q165FAMAIYKQSQ  | 69    | >TP53-Q165FAMAIYKPSQ  | 69    | 0     |
| >TP53-Q165FAMAIYKQSQ  | 49    | >TP53-Q165FAMAIYKPSQ  | 54    | 5     |
| >TP53-Q165FAMAIYKQSQ  | 55    | >TP53-Q165FAMAIYKPSQ  | 61    | 6     |
| >TP53-Q165FAMAIYKQSQ  | 69    | >TP53-Q165FAMAIYKPSQ  | 73    | 4     |
| >TP53-Q165FRAMAIYKQSC | 354   | >TP53-Q165FRAMAIYKPSC | 343   | 11    |
| >TP53-Q165FRAMAIYKQSC | 375   | >TP53-Q165FRAMAIYKPSC | 572   | 197   |

|                        |      |                        |       |       |
|------------------------|------|------------------------|-------|-------|
| >TP53-Q165F RVRAMAIYKC | 10   | >TP53-Q165F RVRAMAIYKF | 22    | 12    |
| >TP53-Q165F RVRAMAIYKC | 9    | >TP53-Q165F RVRAMAIYKF | 5     | 4     |
| >TP53-Q165F QSQHMTEVV  | 230  | >TP53-Q165F RSQHMTEVV  | 26    | 204   |
| >TP53-Q165F QSQHMTEVV  | 321  | >TP53-Q165F RSQHMTEVV  | 18    | 303   |
| >TP53-Q165F QSQHMTEVV  | 1104 | >TP53-Q165F RSQHMTEVV  | 136   | 968   |
| >TP53-Q165F QSQHMTEVV  | 185  | >TP53-Q165F RSQHMTEVV  | 972   | 787   |
| >TP53-Q165F QSQHMTEV   | 206  | >TP53-Q165F RSQHMTEV   | 4532  | 4326  |
| >TP53-Q165F QSQHMTEVV  | 303  | >TP53-Q165F RSQHMTEVV  | 5130  | 4827  |
| >TP53-Q165F QSQHMTEV   | 3316 | >TP53-Q165F RSQHMTEV   | 102   | 3214  |
| >TP53-Q165F QSQHMTEV   | 3181 | >TP53-Q165F RSQHMTEV   | 246   | 2935  |
| >TP53-Q165F QSQHMTEVV  | 1944 | >TP53-Q165F RSQHMTEVV  | 463   | 1481  |
| >TP53-Q165F QSQHMTEVV  | 306  | >TP53-Q165F RSQHMTEVV  | 554   | 248   |
| >TP53-Q165F QSQHMTEVV  | 1755 | >TP53-Q165F RSQHMTEVV  | 479   | 1276  |
| >TP53-Q165F QSQHMTEVV  | 1113 | >TP53-Q165F RSQHMTEVV  | 302   | 811   |
| >TP53-Q165F KQSQHMTEV  | 82   | >TP53-Q165F KRSQHMTEV  | 18549 | 18467 |
| >TP53-Q165F KQSQHMTEV  | 51   | >TP53-Q165F KRSQHMTEV  | 4527  | 4476  |
| >TP53-Q165F KQSQHMTEV  | 298  | >TP53-Q165F KRSQHMTEV  | 9906  | 9608  |
| >TP53-Q165F KQSQHMTEV  | 9    | >TP53-Q165F KRSQHMTEV  | 5109  | 5100  |
| >TP53-Q165F KQSQHMTEV  | 273  | >TP53-Q165F KRSQHMTEV  | 9271  | 8998  |
| >TP53-Q165F KQSQHMTEV  | 10   | >TP53-Q165F KRSQHMTEV  | 4965  | 4955  |
| >TP53-Q165F KQSQHMTEV  | 426  | >TP53-Q165F KRSQHMTEV  | 13557 | 13131 |
| >TP53-Q165F KQSQHMTEV  | 35   | >TP53-Q165F KRSQHMTEV  | 6982  | 6947  |
| >TP53-Q165F KQSQHMTEV  | 222  | >TP53-Q165F KRSQHMTEV  | 20263 | 20041 |
| >TP53-Q165F KQSQHMTEV  | 86   | >TP53-Q165F KRSQHMTEV  | 684   | 598   |
| >TP53-Q165F KQSQHMTEV  | 110  | >TP53-Q165F KRSQHMTEV  | 648   | 538   |
| >TP53-Q165F KQSQHMTEV  | 185  | >TP53-Q165F KRSQHMTEV  | 1155  | 970   |
| >TP53-Q165F KQSQHMTEV  | 6324 | >TP53-Q165F KRSQHMTEV  | 422   | 5902  |
| >TP53-Q165F KQSQHMTEV  | 4156 | >TP53-Q165F KRSQHMTEV  | 170   | 3986  |
| >TP53-Q165F KQSQHMTEV  | 5656 | >TP53-Q165F KRSQHMTEV  | 310   | 5346  |
| >TP53-Q165F KQSQHMTEV  | 60   | >TP53-Q165F KRSQHMTEV  | 103   | 43    |
| >TP53-Q165F TRVRAMAIYK | 2274 | >TP53-Q165F TRVRAMAIYK | 160   | 2114  |
| >TP53-Q165F YKQSQHMTE  | 467  | >TP53-Q165F YKRSQHMTE' | 1044  | 577   |
| >TP53-Q165F YKQSQHMTE  | 1856 | >TP53-Q165F YKRSQHMTE  | 283   | 1573  |
| >TP53-Q165F YKQSQHMTE  | 1075 | >TP53-Q165F YKRSQHMTE  | 197   | 878   |
| >TP53-Q165F YKQSQHMTE  | 30   | >TP53-Q165F YKRSQHMTE' | 10    | 20    |
| >TP53-Q165F YKQSQHMTE  | 42   | >TP53-Q165F YKRSQHMTE' | 11    | 31    |
| >TP53-Q165F IYKQSQHM   | 510  | >TP53-Q165F IYKRSQHM   | 381   | 129   |
| >TP53-Q165F IYKQSQHMTE | 402  | >TP53-Q165F IYKRSQHMTE | 335   | 67    |
| >TP53-Q165F IYKQSQHM   | 394  | >TP53-Q165F IYKRSQHM   | 63    | 331   |
| >TP53-Q165F IYKQSQHMTE | 1709 | >TP53-Q165F IYKRSQHMTE | 263   | 1446  |
| >TP53-Q165F AIYKQSQHM  | 91   | >TP53-Q165F AIYKRSQHM  | 25    | 66    |
| >TP53-Q165F AIYKQSQH   | 349  | >TP53-Q165F AIYKRSQH   | 210   | 139   |
| >TP53-Q165F AIYKQSQHM  | 3022 | >TP53-Q165F AIYKRSQHM  | 112   | 2910  |

|                        |       |                        |       |       |
|------------------------|-------|------------------------|-------|-------|
| >TP53-Q165F AIYKQSQHM  | 62    | >TP53-Q165F AIYKRSQHM  | 67    | 5     |
| >TP53-Q165F AIYKQSQHM  | 198   | >TP53-Q165F AIYKRSQHM  | 263   | 65    |
| >TP53-Q165F AIYKQSQHM  | 514   | >TP53-Q165F AIYKRSQHM  | 384   | 130   |
| >TP53-Q165F MAIYKQSQH  | 526   | >TP53-Q165F MAIYKRSQH  | 390   | 136   |
| >TP53-Q165F MAIYKQSQH  | 226   | >TP53-Q165F MAIYKRSQH  | 230   | 4     |
| >TP53-Q165F MAIYKQSQH  | 205   | >TP53-Q165F MAIYKRSQH  | 195   | 10    |
| >TP53-Q165F MAIYKQSQH  | 20    | >TP53-Q165F MAIYKRSQH  | 26    | 6     |
| >TP53-Q165F MAIYKQSQH  | 151   | >TP53-Q165F MAIYKRSQH  | 605   | 454   |
| >TP53-Q165F AMAIYKQSQ  | 221   | >TP53-Q165F AMAIYKRSQ  | 161   | 60    |
| >TP53-Q165F AMAIYKQSQ  | 161   | >TP53-Q165F AMAIYKRSQ  | 344   | 183   |
| >TP53-Q165F AMAIYKQSQ  | 199   | >TP53-Q165F AMAIYKRSQ  | 314   | 115   |
| >TP53-Q165F AMAIYKQSQ  | 283   | >TP53-Q165F AMAIYKRSQ  | 672   | 389   |
| >TP53-Q165F AMAIYKQSQ  | 69    | >TP53-Q165F AMAIYKRSQ  | 2823  | 2754  |
| >TP53-Q165F AMAIYKQSQ  | 49    | >TP53-Q165F AMAIYKRSQ  | 173   | 124   |
| >TP53-Q165F AMAIYKQSQ  | 55    | >TP53-Q165F AMAIYKRSQ  | 71    | 16    |
| >TP53-Q165F AMAIYKQSQ  | 69    | >TP53-Q165F AMAIYKRSQ  | 99    | 30    |
| >TP53-Q165F RAMAIYKQ   | 12306 | >TP53-Q165F RAMAIYKR   | 68    | 12238 |
| >TP53-Q165F RAMAIYKQ   | 1487  | >TP53-Q165F RAMAIYKR   | 7     | 1480  |
| >TP53-Q165F RAMAIYKQSC | 809   | >TP53-Q165F RAMAIYKRSC | 499   | 310   |
| >TP53-Q165F RAMAIYKQ   | 8887  | >TP53-Q165F RAMAIYKR   | 60    | 8827  |
| >TP53-Q165F RAMAIYKQSC | 354   | >TP53-Q165F RAMAIYKRSC | 529   | 175   |
| >TP53-Q165F RAMAIYKQSC | 375   | >TP53-Q165F RAMAIYKRSC | 345   | 30    |
| >TP53-Q165F RAMAIYKQ   | 5365  | >TP53-Q165F RAMAIYKR   | 32    | 5333  |
| >TP53-Q165F VRAMAIYKQ  | 1352  | >TP53-Q165F VRAMAIYKR  | 78    | 1274  |
| >TP53-Q165F VRAMAIYKQ  | 23387 | >TP53-Q165F VRAMAIYKR  | 396   | 22991 |
| >TP53-Q165F RVRAMAIYK  | 10    | >TP53-Q165F RVRAMAIYK  | 6     | 4     |
| >TP53-Q165F RVRAMAIYK  | 9     | >TP53-Q165F RVRAMAIYK  | 10    | 1     |
| >TP53-Q165F RVRAMAIYK  | 3094  | >TP53-Q165F RVRAMAIYK  | 9     | 3085  |
| >TP53-Q165F RVRAMAIYK  | 27700 | >TP53-Q165F RVRAMAIYK  | 107   | 27593 |
| >TP53-Q165F RVRAMAIYK  | 5541  | >TP53-Q165F RVRAMAIYK  | 77    | 5464  |
| >TP53-Q165F RVRAMAIYK  | 5077  | >TP53-Q165F RVRAMAIYK  | 45    | 5032  |
| >TP53-Q167F QHMTEVVR   | 2953  | >TP53-Q167F EHMTEVVR   | 259   | 2694  |
| >TP53-Q167F QHMTEVVR   | 2161  | >TP53-Q167F EHMTEVVR   | 207   | 1954  |
| >TP53-Q167F QHMTEVVR   | 269   | >TP53-Q167F EHMTEVVR   | 401   | 132   |
| >TP53-Q167F QHMTEVVR   | 195   | >TP53-Q167F EHMTEVVR   | 311   | 116   |
| >TP53-Q167F SQHMTEVV   | 2781  | >TP53-Q167F SEHMTEVV   | 20    | 2761  |
| >TP53-Q167F SQHMTEVV   | 115   | >TP53-Q167F SEHMTEVV   | 10355 | 10240 |
| >TP53-Q167F SQHMTEVV   | 256   | >TP53-Q167F SEHMTEVV   | 8306  | 8050  |
| >TP53-Q167F SQHMTEVVR  | 115   | >TP53-Q167F SEHMTEVVR  | 7335  | 7220  |
| >TP53-Q167F SQHMTEVV   | 88    | >TP53-Q167F SEHMTEVV   | 5143  | 5055  |
| >TP53-Q167F SQHMTEVVR  | 162   | >TP53-Q167F SEHMTEVVR  | 5936  | 5774  |
| >TP53-Q167F SQHMTEVV   | 8623  | >TP53-Q167F SEHMTEVV   | 193   | 8430  |
| >TP53-Q167F SQHMTEVV   | 8118  | >TP53-Q167F SEHMTEVV   | 121   | 7997  |



|                       |       |                       |      |       |
|-----------------------|-------|-----------------------|------|-------|
| >TP53-Q167fSQHMTEVV   | 3480  | >TP53-Q167fSEHMTEVV   | 26   | 3454  |
| >TP53-Q167fSQHMTEVVR  | 14416 | >TP53-Q167fSEHMTEVVRI | 236  | 14180 |
| >TP53-Q167fSQHMTEVVR  | 434   | >TP53-Q167fSEHMTEVVR  | 959  | 525   |
| >TP53-Q167fSQHMTEVVR  | 363   | >TP53-Q167fSEHMTEVVRI | 766  | 403   |
| >TP53-Q167fQSQHMTEVV  | 230   | >TP53-Q167fQSEHMTEVV  | 1516 | 1286  |
| >TP53-Q167fQSQHMTEVV  | 321   | >TP53-Q167fQSEHMTEVV  | 1519 | 1198  |
| >TP53-Q167fQSQHMTEVV  | 185   | >TP53-Q167fQSEHMTEVV  | 195  | 10    |
| >TP53-Q167fQSQHMTEV   | 206   | >TP53-Q167fQSEHMTEV   | 630  | 424   |
| >TP53-Q167fQSQHMTEVV  | 303   | >TP53-Q167fQSEHMTEVV  | 828  | 525   |
| >TP53-Q167fQSQHMTEVV  | 306   | >TP53-Q167fQSEHMTEVV  | 558  | 252   |
| >TP53-Q167fKQSQHMTEV  | 82    | >TP53-Q167fKQSEHMTEV  | 18   | 64    |
| >TP53-Q167fKQSQHMTEV  | 51    | >TP53-Q167fKQSEHMTEV  | 21   | 30    |
| >TP53-Q167fKQSQHMTEV  | 298   | >TP53-Q167fKQSEHMTEV  | 157  | 141   |
| >TP53-Q167fKQSQHMTEV  | 9     | >TP53-Q167fKQSEHMTEV  | 5    | 4     |
| >TP53-Q167fKQSQHMTEV  | 273   | >TP53-Q167fKQSEHMTEV  | 233  | 40    |
| >TP53-Q167fKQSQHMTEV  | 10    | >TP53-Q167fKQSEHMTEV  | 6    | 4     |
| >TP53-Q167fKQSQHMTEV  | 993   | >TP53-Q167fKQSEHMTEV  | 456  | 537   |
| >TP53-Q167fKQSQHMTEV  | 426   | >TP53-Q167fKQSEHMTEV  | 59   | 367   |
| >TP53-Q167fKQSQHMTEV  | 718   | >TP53-Q167fKQSEHMTEV  | 144  | 574   |
| >TP53-Q167fKQSQHMTEV  | 2400  | >TP53-Q167fKQSEHMTEV  | 138  | 2262  |
| >TP53-Q167fKQSQHMTEV  | 1427  | >TP53-Q167fKQSEHMTEV  | 141  | 1286  |
| >TP53-Q167fKQSQHMTEV  | 1212  | >TP53-Q167fKQSEHMTEV  | 250  | 962   |
| >TP53-Q167fKQSQHMTEV  | 1654  | >TP53-Q167fKQSEHMTEV  | 442  | 1212  |
| >TP53-Q167fKQSQHMTEV  | 1607  | >TP53-Q167fKQSEHMTEV  | 462  | 1145  |
| >TP53-Q167fKQSQHMTEV  | 35    | >TP53-Q167fKQSEHMTEV  | 25   | 10    |
| >TP53-Q167fKQSQHMTEV  | 222   | >TP53-Q167fKQSEHMTEV  | 340  | 118   |
| >TP53-Q167fKQSQHMTEV  | 86    | >TP53-Q167fKQSEHMTEV  | 64   | 22    |
| >TP53-Q167fKQSQHMTEV  | 110   | >TP53-Q167fKQSEHMTEV  | 77   | 33    |
| >TP53-Q167fKQSQHMTEV  | 185   | >TP53-Q167fKQSEHMTEV  | 169  | 16    |
| >TP53-Q167fKQSQHMTEV  | 60    | >TP53-Q167fKQSEHMTEV  | 94   | 34    |
| >TP53-Q167fYKQSQHMTE  | 467   | >TP53-Q167fYKQSEHMTE  | 496  | 29    |
| >TP53-Q167fYKQSQHMTE  | 30    | >TP53-Q167fYKQSEHMTE  | 27   | 3     |
| >TP53-Q167fYKQSQHMTE  | 42    | >TP53-Q167fYKQSEHMTE  | 39   | 3     |
| >TP53-Q167fIYKQSQHMTI | 402   | >TP53-Q167fIYKQSEHMTE | 667  | 265   |
| >TP53-Q167fIYKQSQHM   | 394   | >TP53-Q167fIYKQSEHM   | 2695 | 2301  |
| >TP53-Q167fAIYKQSQHM  | 91    | >TP53-Q167fAIYKQSEHM  | 275  | 184   |
| >TP53-Q167fAIYKQSQH   | 349   | >TP53-Q167fAIYKQSEH   | 733  | 384   |
| >TP53-Q167fAIYKQSQHM  | 62    | >TP53-Q167fAIYKQSEHM  | 65   | 3     |
| >TP53-Q167fAIYKQSQHM  | 198   | >TP53-Q167fAIYKQSEHM  | 551  | 353   |
| >TP53-Q167fMAIYKQSQH  | 633   | >TP53-Q167fMAIYKQSEHM | 467  | 166   |
| >TP53-Q167fMAIYKQSQH  | 226   | >TP53-Q167fMAIYKQSEHM | 229  | 3     |
| >TP53-Q167fMAIYKQSQH  | 205   | >TP53-Q167fMAIYKQSEHM | 381  | 176   |
| >TP53-Q167fMAIYKQSQH  | 20    | >TP53-Q167fMAIYKQSEHM | 47   | 27    |

|                       |      |                       |       |       |
|-----------------------|------|-----------------------|-------|-------|
| >TP53-Q167fMAIYKQSQHf | 151  | >TP53-Q167fMAIYKQSEHf | 121   | 30    |
| >TP53-Q167fMAIYKQSQHf | 583  | >TP53-Q167fMAIYKQSEHf | 451   | 132   |
| >TP53-Q167fAMAIYKQSQf | 221  | >TP53-Q167fAMAIYKQSEf | 452   | 231   |
| >TP53-Q167fAMAIYKQSQf | 161  | >TP53-Q167fAMAIYKQSEf | 96    | 65    |
| >TP53-Q167fAMAIYKQSQf | 199  | >TP53-Q167fAMAIYKQSEf | 202   | 3     |
| >TP53-Q167fAMAIYKQSQf | 283  | >TP53-Q167fAMAIYKQSEf | 381   | 98    |
| >TP53-Q167fAMAIYKQSQ  | 69   | >TP53-Q167fAMAIYKQSE  | 6897  | 6828  |
| >TP53-Q167fAMAIYKQSQf | 49   | >TP53-Q167fAMAIYKQSEf | 117   | 68    |
| >TP53-Q167fAMAIYKQSQf | 55   | >TP53-Q167fAMAIYKQSEf | 56    | 1     |
| >TP53-Q167fAMAIYKQSQf | 69   | >TP53-Q167fAMAIYKQSEf | 136   | 67    |
| >TP53-Q167fRAMAIYKQSC | 354  | >TP53-Q167fRAMAIYKQSE | 750   | 396   |
| >TP53-Q167fRAMAIYKQSC | 375  | >TP53-Q167fRAMAIYKQSE | 696   | 321   |
| >TP53-Q167fQHMTEVVR   | 3546 | >TP53-Q167fHHMTEVVR   | 441   | 3105  |
| >TP53-Q167fQHMTEVVR   | 269  | >TP53-Q167fHHMTEVVR   | 78    | 191   |
| >TP53-Q167fQHMTEVRRR  | 195  | >TP53-Q167fHHMTEVRRR  | 58    | 137   |
| >TP53-Q167fSQHMTEVV   | 115  | >TP53-Q167fSHHMTEVV   | 19683 | 19568 |
| >TP53-Q167fSQHMTEVV   | 256  | >TP53-Q167fSHHMTEVV   | 11042 | 10786 |
| >TP53-Q167fSQHMTEVVR  | 115  | >TP53-Q167fSHHMTEVVR  | 5303  | 5188  |
| >TP53-Q167fSQHMTEVV   | 88   | >TP53-Q167fSHHMTEVV   | 1903  | 1815  |
| >TP53-Q167fSQHMTEVVR  | 162  | >TP53-Q167fSHHMTEVVR  | 2154  | 1992  |
| >TP53-Q167fSQHMTEVV   | 8500 | >TP53-Q167fSHHMTEVV   | 460   | 8040  |
| >TP53-Q167fSQHMTEVVR  | 434  | >TP53-Q167fSHHMTEVVR  | 925   | 491   |
| >TP53-Q167fSQHMTEVVR  | 363  | >TP53-Q167fSHHMTEVVR  | 757   | 394   |
| >TP53-Q167fQSQHMTEVV  | 230  | >TP53-Q167fQSHHMTEVV  | 438   | 208   |
| >TP53-Q167fQSQHMTEVV  | 321  | >TP53-Q167fQSHHMTEVV  | 244   | 77    |
| >TP53-Q167fQSQHMTEVV  | 973  | >TP53-Q167fQSHHMTEVV  | 420   | 553   |
| >TP53-Q167fQSQHMTEVV  | 185  | >TP53-Q167fQSHHMTEVV  | 67    | 118   |
| >TP53-Q167fQSQHMTEV   | 206  | >TP53-Q167fQSHHMTEV   | 40    | 166   |
| >TP53-Q167fQSQHMTEVV  | 303  | >TP53-Q167fQSHHMTEVV  | 54    | 249   |
| >TP53-Q167fQSQHMTEVV  | 306  | >TP53-Q167fQSHHMTEVV  | 429   | 123   |
| >TP53-Q167fQSQHMTEVV  | 1113 | >TP53-Q167fQSHHMTEVV  | 468   | 645   |
| >TP53-Q167fKQSQHMTEV  | 82   | >TP53-Q167fKQSHHMTEV  | 60    | 22    |
| >TP53-Q167fKQSQHMTEV  | 51   | >TP53-Q167fKQSHHMTEV  | 42    | 9     |
| >TP53-Q167fKQSQHMTEV  | 298  | >TP53-Q167fKQSHHMTEV  | 778   | 480   |
| >TP53-Q167fKQSQHMTEV  | 9    | >TP53-Q167fKQSHHMTEV  | 6     | 3     |
| >TP53-Q167fKQSQHMTEV  | 273  | >TP53-Q167fKQSHHMTEV  | 463   | 190   |
| >TP53-Q167fKQSQHMTEV  | 10   | >TP53-Q167fKQSHHMTEV  | 9     | 1     |
| >TP53-Q167fKQSQHMTEV  | 426  | >TP53-Q167fKQSHHMTEV  | 806   | 380   |
| >TP53-Q167fKQSQHMTEV  | 35   | >TP53-Q167fKQSHHMTEV  | 18    | 17    |
| >TP53-Q167fKQSQHMTEV  | 222  | >TP53-Q167fKQSHHMTEV  | 233   | 11    |
| >TP53-Q167fKQSQHMTEV  | 86   | >TP53-Q167fKQSHHMTEV  | 23    | 63    |
| >TP53-Q167fKQSQHMTEV  | 110  | >TP53-Q167fKQSHHMTEV  | 31    | 79    |
| >TP53-Q167fKQSQHMTEV  | 185  | >TP53-Q167fKQSHHMTEV  | 57    | 128   |

|                       |      |                       |       |       |
|-----------------------|------|-----------------------|-------|-------|
| >TP53-Q167fKQSQHMTEV  | 60   | >TP53-Q167fKQSHHMTEV  | 85    | 25    |
| >TP53-Q167fYKQSQHMTE  | 467  | >TP53-Q167fYKQSHHMTE  | 715   | 248   |
| >TP53-Q167fYKQSQHMTE  | 30   | >TP53-Q167fYKQSHHMTE  | 19    | 11    |
| >TP53-Q167fYKQSQHMTE  | 42   | >TP53-Q167fYKQSHHMTE  | 30    | 12    |
| >TP53-Q167fIYKQSQHMTE | 402  | >TP53-Q167fIYKQSHHMTE | 871   | 469   |
| >TP53-Q167fIYKQSQHM   | 561  | >TP53-Q167fIYKQSHHM   | 335   | 226   |
| >TP53-Q167fIYKQSQHM   | 394  | >TP53-Q167fIYKQSHHM   | 238   | 156   |
| >TP53-Q167fAIYKQSQHM  | 91   | >TP53-Q167fAIYKQSHHM  | 234   | 143   |
| >TP53-Q167fAIYKQSQHM  | 1358 | >TP53-Q167fAIYKQSHHM  | 485   | 873   |
| >TP53-Q167fAIYKQSQHM  | 1683 | >TP53-Q167fAIYKQSHHM  | 346   | 1337  |
| >TP53-Q167fAIYKQSQHM  | 662  | >TP53-Q167fAIYKQSHHM  | 478   | 184   |
| >TP53-Q167fAIYKQSQH   | 349  | >TP53-Q167fAIYKQSHH   | 294   | 55    |
| >TP53-Q167fAIYKQSQHM  | 804  | >TP53-Q167fAIYKQSHHM  | 265   | 539   |
| >TP53-Q167fAIYKQSQHM  | 62   | >TP53-Q167fAIYKQSHHM  | 81    | 19    |
| >TP53-Q167fAIYKQSQHM  | 198  | >TP53-Q167fAIYKQSHHM  | 497   | 299   |
| >TP53-Q167fMAIYKQSQH  | 633  | >TP53-Q167fMAIYKQSHH  | 231   | 402   |
| >TP53-Q167fMAIYKQSQH  | 226  | >TP53-Q167fMAIYKQSHH  | 219   | 7     |
| >TP53-Q167fMAIYKQSQH  | 205  | >TP53-Q167fMAIYKQSHH  | 360   | 155   |
| >TP53-Q167fMAIYKQSQH  | 20   | >TP53-Q167fMAIYKQSHH  | 26    | 6     |
| >TP53-Q167fMAIYKQSQH  | 151  | >TP53-Q167fMAIYKQSHH  | 61    | 90    |
| >TP53-Q167fAMAIYKQSQ  | 221  | >TP53-Q167fAMAIYKQSH  | 397   | 176   |
| >TP53-Q167fAMAIYKQSQ  | 161  | >TP53-Q167fAMAIYKQSH  | 71    | 90    |
| >TP53-Q167fAMAIYKQSQ  | 732  | >TP53-Q167fAMAIYKQSH  | 499   | 233   |
| >TP53-Q167fAMAIYKQSQ  | 199  | >TP53-Q167fAMAIYKQSH  | 118   | 81    |
| >TP53-Q167fAMAIYKQSQ  | 1607 | >TP53-Q167fAMAIYKQSH  | 490   | 1117  |
| >TP53-Q167fAMAIYKQSQ  | 283  | >TP53-Q167fAMAIYKQSH  | 167   | 116   |
| >TP53-Q167fAMAIYKQSQ  | 69   | >TP53-Q167fAMAIYKQSH  | 9905  | 9836  |
| >TP53-Q167fAMAIYKQSQ  | 49   | >TP53-Q167fAMAIYKQSH  | 23    | 26    |
| >TP53-Q167fAMAIYKQSQ  | 55   | >TP53-Q167fAMAIYKQSH  | 62    | 7     |
| >TP53-Q167fAMAIYKQSQ  | 69   | >TP53-Q167fAMAIYKQSH  | 121   | 52    |
| >TP53-Q167fRAMAIYKQSC | 809  | >TP53-Q167fRAMAIYKQSF | 363   | 446   |
| >TP53-Q167fRAMAIYKQSC | 354  | >TP53-Q167fRAMAIYKQSF | 1190  | 836   |
| >TP53-Q167fRAMAIYKQSC | 375  | >TP53-Q167fRAMAIYKQSF | 1388  | 1013  |
| >TP53-Q167fQHMTEVVR   | 269  | >TP53-Q167fKHMTEVVR   | 44    | 225   |
| >TP53-Q167fQHMTEVVR   | 195  | >TP53-Q167fKHMTEVVR   | 31    | 164   |
| >TP53-Q167fSQHMTEVV   | 115  | >TP53-Q167fSKHMTEVV   | 12197 | 12082 |
| >TP53-Q167fSQHMTEVV   | 256  | >TP53-Q167fSKHMTEVV   | 6933  | 6677  |
| >TP53-Q167fSQHMTEVVR  | 115  | >TP53-Q167fSKHMTEVVR  | 8584  | 8469  |
| >TP53-Q167fSQHMTEVV   | 88   | >TP53-Q167fSKHMTEVV   | 86    | 2     |
| >TP53-Q167fSQHMTEVVR  | 162  | >TP53-Q167fSKHMTEVVR  | 162   | 0     |
| >TP53-Q167fSQHMTEVVR  | 434  | >TP53-Q167fSKHMTEVVR  | 1474  | 1040  |
| >TP53-Q167fSQHMTEVVR  | 363  | >TP53-Q167fSKHMTEVVR  | 1088  | 725   |
| >TP53-Q167fVRAMAIYKQ  | 3651 | >TP53-Q167fVRAMAIYKQ  | 120   | 3531  |

|                        |       |                        |      |       |
|------------------------|-------|------------------------|------|-------|
| >TP53-Q167I QSQHMTEVV  | 230   | >TP53-Q167I QSKHMTEVV  | 136  | 94    |
| >TP53-Q167I QSQHMTEVV  | 321   | >TP53-Q167I QSKHMTEVV  | 81   | 240   |
| >TP53-Q167I QSQHMTEVV  | 185   | >TP53-Q167I QSKHMTEVV  | 132  | 53    |
| >TP53-Q167I QSQHMTEV   | 206   | >TP53-Q167I QSKHMTEV   | 408  | 202   |
| >TP53-Q167I QSQHMTEVV  | 303   | >TP53-Q167I QSKHMTEVV  | 569  | 266   |
| >TP53-Q167I QSQHMTEVV  | 306   | >TP53-Q167I QSKHMTEVV  | 653  | 347   |
| >TP53-Q167I KQSQHMTEV  | 82    | >TP53-Q167I KQSKHMTEV  | 77   | 5     |
| >TP53-Q167I KQSQHMTEV  | 51    | >TP53-Q167I KQSKHMTEV  | 54   | 3     |
| >TP53-Q167I KQSQHMTEV  | 298   | >TP53-Q167I KQSKHMTEV  | 580  | 282   |
| >TP53-Q167I KQSQHMTEV  | 9     | >TP53-Q167I KQSKHMTEV  | 9    | 0     |
| >TP53-Q167I KQSQHMTEV  | 273   | >TP53-Q167I KQSKHMTEV  | 361  | 88    |
| >TP53-Q167I KQSQHMTEV  | 10    | >TP53-Q167I KQSKHMTEV  | 11   | 1     |
| >TP53-Q167I KQSQHMTEV  | 426   | >TP53-Q167I KQSKHMTEV  | 867  | 441   |
| >TP53-Q167I KQSQHMTEV  | 35    | >TP53-Q167I KQSKHMTEV  | 19   | 16    |
| >TP53-Q167I KQSQHMTEV  | 222   | >TP53-Q167I KQSKHMTEV  | 313  | 91    |
| >TP53-Q167I KQSQHMTEV  | 86    | >TP53-Q167I KQSKHMTEV  | 47   | 39    |
| >TP53-Q167I KQSQHMTEV  | 110   | >TP53-Q167I KQSKHMTEV  | 60   | 50    |
| >TP53-Q167I KQSQHMTEV  | 185   | >TP53-Q167I KQSKHMTEV  | 108  | 77    |
| >TP53-Q167I KQSQHMTEV  | 60    | >TP53-Q167I KQSKHMTEV  | 70   | 10    |
| >TP53-Q167I YKQSQHMTE  | 467   | >TP53-Q167I YKQSKHMTE' | 844  | 377   |
| >TP53-Q167I YKQSQHMTE  | 30    | >TP53-Q167I YKQSKHMTE' | 43   | 13    |
| >TP53-Q167I YKQSQHMTE  | 42    | >TP53-Q167I YKQSKHMTE' | 66   | 24    |
| >TP53-Q167I IYKQSQHMTE | 402   | >TP53-Q167I IYKQSKHMTE | 443  | 41    |
| >TP53-Q167I IYKQSQHM   | 394   | >TP53-Q167I IYKQSKHM   | 837  | 443   |
| >TP53-Q167I AIYKQSQHM  | 91    | >TP53-Q167I AIYKQSKHM  | 224  | 133   |
| >TP53-Q167I AIYKQSQH   | 349   | >TP53-Q167I AIYKQSKH   | 401  | 52    |
| >TP53-Q167I AIYKQSQHM  | 62    | >TP53-Q167I AIYKQSKHM  | 149  | 87    |
| >TP53-Q167I AIYKQSQHM  | 198   | >TP53-Q167I AIYKQSKHM  | 329  | 131   |
| >TP53-Q167I MAIYKQSQ   | 26346 | >TP53-Q167I MAIYKQSK   | 157  | 26189 |
| >TP53-Q167I MAIYKQSQ   | 9210  | >TP53-Q167I MAIYKQSK   | 155  | 9055  |
| >TP53-Q167I MAIYKQSQ   | 12583 | >TP53-Q167I MAIYKQSK   | 444  | 12139 |
| >TP53-Q167I MAIYKQSQ   | 841   | >TP53-Q167I MAIYKQSK   | 13   | 828   |
| >TP53-Q167I MAIYKQSQH  | 226   | >TP53-Q167I MAIYKQSKH  | 562  | 336   |
| >TP53-Q167I MAIYKQSQH  | 205   | >TP53-Q167I MAIYKQSKH  | 300  | 95    |
| >TP53-Q167I MAIYKQSQH  | 20    | >TP53-Q167I MAIYKQSKH  | 23   | 3     |
| >TP53-Q167I MAIYKQSQH  | 151   | >TP53-Q167I MAIYKQSKH  | 628  | 477   |
| >TP53-Q167I AMAIYKQSQI | 221   | >TP53-Q167I AMAIYKQSKI | 418  | 197   |
| >TP53-Q167I AMAIYKQSQI | 161   | >TP53-Q167I AMAIYKQSKI | 609  | 448   |
| >TP53-Q167I AMAIYKQSQI | 199   | >TP53-Q167I AMAIYKQSKI | 509  | 310   |
| >TP53-Q167I AMAIYKQSQI | 283   | >TP53-Q167I AMAIYKQSKI | 1337 | 1054  |
| >TP53-Q167I AMAIYKQSQ  | 69    | >TP53-Q167I AMAIYKQSK  | 1337 | 1268  |
| >TP53-Q167I AMAIYKQSQI | 49    | >TP53-Q167I AMAIYKQSKI | 300  | 251   |
| >TP53-Q167I AMAIYKQSQ  | 19721 | >TP53-Q167I AMAIYKQSK  | 150  | 19571 |

|                        |       |                        |      |       |
|------------------------|-------|------------------------|------|-------|
| >TP53-Q167I AMAIYKQSQ  | 22646 | >TP53-Q167I AMAIYKQSK  | 97   | 22549 |
| >TP53-Q167I AMAIYKQSQ  | 10142 | >TP53-Q167I AMAIYKQSK  | 317  | 9825  |
| >TP53-Q167I AMAIYKQSQI | 55    | >TP53-Q167I AMAIYKQSKI | 88   | 33    |
| >TP53-Q167I AMAIYKQSQI | 69    | >TP53-Q167I AMAIYKQSKI | 94   | 25    |
| >TP53-Q167I RAMAIYKQSC | 19525 | >TP53-Q167I RAMAIYKQSK | 53   | 19472 |
| >TP53-Q167I RAMAIYKQSC | 29886 | >TP53-Q167I RAMAIYKQSK | 29   | 29857 |
| >TP53-Q167I RAMAIYKQSC | 1651  | >TP53-Q167I RAMAIYKQSK | 10   | 1641  |
| >TP53-Q167I RAMAIYKQSC | 4708  | >TP53-Q167I RAMAIYKQSK | 168  | 4540  |
| >TP53-Q167I RAMAIYKQSC | 28377 | >TP53-Q167I RAMAIYKQSK | 201  | 28176 |
| >TP53-Q167I RAMAIYKQSC | 354   | >TP53-Q167I RAMAIYKQSK | 681  | 327   |
| >TP53-Q167I RAMAIYKQSC | 375   | >TP53-Q167I RAMAIYKQSK | 508  | 133   |
| >TP53-Q167I QHMTEVVR   | 269   | >TP53-Q167I LHMTEVVR   | 658  | 389   |
| >TP53-Q167I QHMTEVVR   | 195   | >TP53-Q167I LHMTEVVR   | 589  | 394   |
| >TP53-Q167I SQHMTEVV   | 3869  | >TP53-Q167I SLHMTEVV   | 249  | 3620  |
| >TP53-Q167I SQHMTEVV   | 2993  | >TP53-Q167I SLHMTEVV   | 114  | 2879  |
| >TP53-Q167I SQHMTEVV   | 670   | >TP53-Q167I SLHMTEVV   | 32   | 638   |
| >TP53-Q167I SQHMTEVV   | 115   | >TP53-Q167I SLHMTEVV   | 1262 | 1147  |
| >TP53-Q167I SQHMTEVV   | 256   | >TP53-Q167I SLHMTEVV   | 4    | 252   |
| >TP53-Q167I SQHMTEVVR  | 6148  | >TP53-Q167I SLHMTEVVR  | 132  | 6016  |
| >TP53-Q167I SQHMTEVV   | 1833  | >TP53-Q167I SLHMTEVV   | 18   | 1815  |
| >TP53-Q167I SQHMTEVV   | 543   | >TP53-Q167I SLHMTEVV   | 10   | 533   |
| >TP53-Q167I SQHMTEVV   | 13335 | >TP53-Q167I SLHMTEVV   | 240  | 13095 |
| >TP53-Q167I SQHMTEVV   | 1694  | >TP53-Q167I SLHMTEVV   | 3    | 1691  |
| >TP53-Q167I SQHMTEVVR  | 29311 | >TP53-Q167I SLHMTEVVR  | 224  | 29087 |
| >TP53-Q167I SQHMTEVVR  | 115   | >TP53-Q167I SLHMTEVVR  | 158  | 43    |
| >TP53-Q167I SQHMTEVVR  | 504   | >TP53-Q167I SLHMTEVVR  | 207  | 297   |
| >TP53-Q167I SQHMTEVVR  | 1468  | >TP53-Q167I SLHMTEVVR  | 171  | 1297  |
| >TP53-Q167I SQHMTEVVR  | 1038  | >TP53-Q167I SLHMTEVVR  | 382  | 656   |
| >TP53-Q167I SQHMTEVV   | 88    | >TP53-Q167I SLHMTEVV   | 2654 | 2566  |
| >TP53-Q167I SQHMTEVVR  | 162   | >TP53-Q167I SLHMTEVVR  | 3683 | 3521  |
| >TP53-Q167I SQHMTEVVR  | 434   | >TP53-Q167I SLHMTEVVR  | 268  | 166   |
| >TP53-Q167I SQHMTEVVR  | 363   | >TP53-Q167I SLHMTEVVR  | 193  | 170   |
| >TP53-Q167I VRAMAIYKQ  | 4314  | >TP53-Q167I VRAMAIYKQ  | 289  | 4025  |
| >TP53-Q167I VRAMAIYKQ  | 3651  | >TP53-Q167I VRAMAIYKQ  | 221  | 3430  |
| >TP53-Q167I VRAMAIYKQ  | 20320 | >TP53-Q167I VRAMAIYKQ  | 442  | 19878 |
| >TP53-Q167I QSQHMTEVV  | 230   | >TP53-Q167I QSLHMTEVV  | 117  | 113   |
| >TP53-Q167I QSQHMTEVV  | 321   | >TP53-Q167I QSLHMTEVV  | 242  | 79    |
| >TP53-Q167I QSQHMTEVV  | 973   | >TP53-Q167I QSLHMTEVV  | 393  | 580   |
| >TP53-Q167I QSQHMTEVV  | 185   | >TP53-Q167I QSLHMTEVV  | 161  | 24    |
| >TP53-Q167I QSQHMTEV   | 206   | >TP53-Q167I QSLHMTEV   | 150  | 56    |
| >TP53-Q167I QSQHMTEVV  | 303   | >TP53-Q167I QSLHMTEVV  | 205  | 98    |
| >TP53-Q167I QSQHMTEV   | 2899  | >TP53-Q167I QSLHMTEV   | 173  | 2726  |
| >TP53-Q167I QSQHMTEVV  | 1149  | >TP53-Q167I QSLHMTEVV  | 421  | 728   |

|                        |       |                        |      |       |
|------------------------|-------|------------------------|------|-------|
| >TP53-Q167I QSQHMTEVV  | 306   | >TP53-Q167I QSLHMTEVV  | 139  | 167   |
| >TP53-Q167I QSQHMTEVV  | 1755  | >TP53-Q167I QSLHMTEVV  | 413  | 1342  |
| >TP53-Q167I QSQHMTEVV  | 1113  | >TP53-Q167I QSLHMTEVV  | 286  | 827   |
| >TP53-Q167I KQSQHMTEV  | 82    | >TP53-Q167I KQSLHMTEV  | 104  | 22    |
| >TP53-Q167I KQSQHMTEV  | 51    | >TP53-Q167I KQSLHMTEV  | 47   | 4     |
| >TP53-Q167I KQSQHMTEV  | 298   | >TP53-Q167I KQSLHMTEV  | 346  | 48    |
| >TP53-Q167I KQSQHMTEV  | 9     | >TP53-Q167I KQSLHMTEV  | 9    | 0     |
| >TP53-Q167I KQSQHMTEV  | 273   | >TP53-Q167I KQSLHMTEV  | 318  | 45    |
| >TP53-Q167I KQSQHMTEV  | 10    | >TP53-Q167I KQSLHMTEV  | 7    | 3     |
| >TP53-Q167I KQSQHMTEV  | 426   | >TP53-Q167I KQSLHMTEV  | 1948 | 1522  |
| >TP53-Q167I KQSQHMTEV  | 35    | >TP53-Q167I KQSLHMTEV  | 21   | 14    |
| >TP53-Q167I KQSQHMTEV  | 222   | >TP53-Q167I KQSLHMTEV  | 665  | 443   |
| >TP53-Q167I KQSQHMTEV  | 86    | >TP53-Q167I KQSLHMTEV  | 163  | 77    |
| >TP53-Q167I KQSQHMTEV  | 110   | >TP53-Q167I KQSLHMTEV  | 179  | 69    |
| >TP53-Q167I KQSQHMTEV  | 185   | >TP53-Q167I KQSLHMTEV  | 340  | 155   |
| >TP53-Q167I KQSQHMTEV  | 60    | >TP53-Q167I KQSLHMTEV  | 93   | 33    |
| >TP53-Q167I YKQSQHMTE  | 467   | >TP53-Q167I YKQSLHMTE  | 773  | 306   |
| >TP53-Q167I YKQSQHMTE  | 30    | >TP53-Q167I YKQSLHMTE  | 39   | 9     |
| >TP53-Q167I YKQSQHMTE  | 42    | >TP53-Q167I YKQSLHMTE  | 47   | 5     |
| >TP53-Q167I IYKQSQHMTE | 402   | >TP53-Q167I IYKQSLHMTE | 498  | 96    |
| >TP53-Q167I IYKQSQHM   | 561   | >TP53-Q167I IYKQSLHM   | 356  | 205   |
| >TP53-Q167I IYKQSQHM   | 394   | >TP53-Q167I IYKQSLHM   | 266  | 128   |
| >TP53-Q167I AIYKQSQHM  | 91    | >TP53-Q167I AIYKQSLHM  | 103  | 12    |
| >TP53-Q167I AIYKQSQHM  | 3739  | >TP53-Q167I AIYKQSLHMT | 367  | 3372  |
| >TP53-Q167I AIYKQSQH   | 349   | >TP53-Q167I AIYKQSLH   | 125  | 224   |
| >TP53-Q167I AIYKQSQHM  | 750   | >TP53-Q167I AIYKQSLHM  | 347  | 403   |
| >TP53-Q167I AIYKQSQHM  | 62    | >TP53-Q167I AIYKQSLHM  | 54   | 8     |
| >TP53-Q167I AIYKQSQHM  | 198   | >TP53-Q167I AIYKQSLHM  | 307  | 109   |
| >TP53-Q167I AIYKQSQHM  | 514   | >TP53-Q167I AIYKQSLHM  | 236  | 278   |
| >TP53-Q167I MAIYKQSQH  | 526   | >TP53-Q167I MAIYKQSLH  | 225  | 301   |
| >TP53-Q167I MAIYKQSQ   | 7829  | >TP53-Q167I MAIYKQSL   | 86   | 7743  |
| >TP53-Q167I MAIYKQSQ   | 5115  | >TP53-Q167I MAIYKQSL   | 51   | 5064  |
| >TP53-Q167I MAIYKQSQH  | 226   | >TP53-Q167I MAIYKQSLHM | 225  | 1     |
| >TP53-Q167I MAIYKQSQ   | 6340  | >TP53-Q167I MAIYKQSL   | 286  | 6054  |
| >TP53-Q167I MAIYKQSQH  | 205   | >TP53-Q167I MAIYKQSLHM | 293  | 88    |
| >TP53-Q167I MAIYKQSQ   | 10234 | >TP53-Q167I MAIYKQSL   | 42   | 10192 |
| >TP53-Q167I MAIYKQSQH  | 20    | >TP53-Q167I MAIYKQSLHM | 18   | 2     |
| >TP53-Q167I MAIYKQSQH  | 151   | >TP53-Q167I MAIYKQSLHM | 66   | 85    |
| >TP53-Q167I MAIYKQSQH  | 894   | >TP53-Q167I MAIYKQSLH  | 476  | 418   |
| >TP53-Q167I MAIYKQSQH  | 583   | >TP53-Q167I MAIYKQSLHM | 199  | 384   |
| >TP53-Q167I AMAIYKQSQ  | 17053 | >TP53-Q167I AMAIYKQSL  | 330  | 16723 |
| >TP53-Q167I AMAIYKQSQ  | 221   | >TP53-Q167I AMAIYKQSLF | 299  | 78    |
| >TP53-Q167I AMAIYKQSQ  | 19337 | >TP53-Q167I AMAIYKQSL  | 250  | 19087 |

|                         |       |                         |       |       |
|-------------------------|-------|-------------------------|-------|-------|
| >TP53-Q167I AMAIYKQSQ   | 2444  | >TP53-Q167I AMAIYKQSL   | 13    | 2431  |
| >TP53-Q167I AMAIYKQSQI  | 161   | >TP53-Q167I AMAIYKQSLF  | 211   | 50    |
| >TP53-Q167I AMAIYKQSQ   | 8144  | >TP53-Q167I AMAIYKQSL   | 68    | 8076  |
| >TP53-Q167I AMAIYKQSQ   | 1796  | >TP53-Q167I AMAIYKQSL   | 16    | 1780  |
| >TP53-Q167I AMAIYKQSQI  | 199   | >TP53-Q167I AMAIYKQSLF  | 244   | 45    |
| >TP53-Q167I AMAIYKQSQ   | 18736 | >TP53-Q167I AMAIYKQSL   | 438   | 18298 |
| >TP53-Q167I AMAIYKQSQ   | 6596  | >TP53-Q167I AMAIYKQSL   | 82    | 6514  |
| >TP53-Q167I AMAIYKQSQI  | 283   | >TP53-Q167I AMAIYKQSLF  | 274   | 9     |
| >TP53-Q167I AMAIYKQSQ   | 69    | >TP53-Q167I AMAIYKQSL   | 4     | 65    |
| >TP53-Q167I AMAIYKQSQI  | 49    | >TP53-Q167I AMAIYKQSLF  | 92    | 43    |
| >TP53-Q167I AMAIYKQSQ   | 12017 | >TP53-Q167I AMAIYKQSL   | 189   | 11828 |
| >TP53-Q167I AMAIYKQSQ   | 4075  | >TP53-Q167I AMAIYKQSL   | 495   | 3580  |
| >TP53-Q167I AMAIYKQSQI  | 55    | >TP53-Q167I AMAIYKQSLF  | 50    | 5     |
| >TP53-Q167I AMAIYKQSQ   | 2989  | >TP53-Q167I AMAIYKQSL   | 133   | 2856  |
| >TP53-Q167I AMAIYKQSQI  | 69    | >TP53-Q167I AMAIYKQSLF  | 89    | 20    |
| >TP53-Q167I RAMAIYKQSC  | 22708 | >TP53-Q167I RAMAIYKQSL  | 336   | 22372 |
| >TP53-Q167I RAMAIYKQSC  | 1651  | >TP53-Q167I RAMAIYKQSL  | 491   | 1160  |
| >TP53-Q167I RAMAIYKQSC  | 809   | >TP53-Q167I RAMAIYKQSL  | 461   | 348   |
| >TP53-Q167I RAMAIYKQSC  | 9013  | >TP53-Q167I RAMAIYKQSL  | 402   | 8611  |
| >TP53-Q167I RAMAIYKQSC  | 28510 | >TP53-Q167I RAMAIYKQSL  | 350   | 28160 |
| >TP53-Q167I RAMAIYKQSC  | 4662  | >TP53-Q167I RAMAIYKQSL  | 133   | 4529  |
| >TP53-Q167I RAMAIYKQSC  | 3990  | >TP53-Q167I RAMAIYKQSL  | 15    | 3975  |
| >TP53-Q167I RAMAIYKQSC  | 354   | >TP53-Q167I RAMAIYKQSL  | 1504  | 1150  |
| >TP53-Q167I RAMAIYKQSC  | 9540  | >TP53-Q167I RAMAIYKQSL  | 181   | 9359  |
| >TP53-Q167I RAMAIYKQSC  | 7201  | >TP53-Q167I RAMAIYKQSL  | 442   | 6759  |
| >TP53-Q167I RAMAIYKQSC  | 10282 | >TP53-Q167I RAMAIYKQSL  | 230   | 10052 |
| >TP53-Q167I RAMAIYKQSC  | 375   | >TP53-Q167I RAMAIYKQSL  | 196   | 179   |
| >TP53-Q167I QHMTEVVR    | 2199  | >TP53-Q167I RHMTEVVR    | 468   | 1731  |
| >TP53-Q167I QHMTEVVR    | 269   | >TP53-Q167I RHMTEVVR    | 89    | 180   |
| >TP53-Q167I QHMTEVVR    | 195   | >TP53-Q167I RHMTEVVR    | 62    | 133   |
| >TP53-Q167I SQHMTEVV    | 115   | >TP53-Q167I SRHMTEVV    | 18707 | 18592 |
| >TP53-Q167I SQHMTEVV    | 256   | >TP53-Q167I SRHMTEVV    | 11571 | 11315 |
| >TP53-Q167I SQHMTEVVR   | 115   | >TP53-Q167I SRHMTEVVR   | 12054 | 11939 |
| >TP53-Q167I SQHMTEVV    | 88    | >TP53-Q167I SRHMTEVV    | 600   | 512   |
| >TP53-Q167I SQHMTEVVR   | 162   | >TP53-Q167I SRHMTEVVR   | 965   | 803   |
| >TP53-Q167I SQHMTEVVR   | 18738 | >TP53-Q167I SRHMTEVVR   | 486   | 18252 |
| >TP53-Q167I SQHMTEVVR   | 434   | >TP53-Q167I SRHMTEVVR   | 983   | 549   |
| >TP53-Q167I SQHMTEVVR   | 363   | >TP53-Q167I SRHMTEVVR   | 752   | 389   |
| >TP53-Q167I VRAMAIYKQSC | 3651  | >TP53-Q167I VRAMAIYKQSC | 247   | 3404  |
| >TP53-Q167I QSQHMTEV    | 11250 | >TP53-Q167I QSRHMTEV    | 223   | 11027 |
| >TP53-Q167I QSQHMTEVV   | 13241 | >TP53-Q167I QSRHMTEVV   | 463   | 12778 |
| >TP53-Q167I QSQHMTEVV   | 230   | >TP53-Q167I QSRHMTEVV   | 125   | 105   |
| >TP53-Q167I QSQHMTEVV   | 321   | >TP53-Q167I QSRHMTEVV   | 161   | 160   |

|                        |       |                        |      |       |
|------------------------|-------|------------------------|------|-------|
| >TP53-Q167f QSQHMTEVV  | 185   | >TP53-Q167f QSRHMTEVV  | 381  | 196   |
| >TP53-Q167f QSQHMTEV   | 206   | >TP53-Q167f QSRHMTEV   | 1292 | 1086  |
| >TP53-Q167f QSQHMTEVV  | 303   | >TP53-Q167f QSRHMTEVV  | 1691 | 1388  |
| >TP53-Q167f QSQHMTEV   | 3316  | >TP53-Q167f QSRHMTEV   | 270  | 3046  |
| >TP53-Q167f QSQHMTEVV  | 1944  | >TP53-Q167f QSRHMTEVV  | 416  | 1528  |
| >TP53-Q167f QSQHMTEVV  | 306   | >TP53-Q167f QSRHMTEVV  | 705  | 399   |
| >TP53-Q167f KQSQHMTEV  | 82    | >TP53-Q167f KQSRHMTEV  | 128  | 46    |
| >TP53-Q167f KQSQHMTEV  | 51    | >TP53-Q167f KQSRHMTEV  | 84   | 33    |
| >TP53-Q167f KQSQHMTEV  | 298   | >TP53-Q167f KQSRHMTEV  | 595  | 297   |
| >TP53-Q167f KQSQHMTEV  | 9     | >TP53-Q167f KQSRHMTEV  | 10   | 1     |
| >TP53-Q167f KQSQHMTEV  | 273   | >TP53-Q167f KQSRHMTEV  | 316  | 43    |
| >TP53-Q167f KQSQHMTEV  | 10    | >TP53-Q167f KQSRHMTEV  | 11   | 1     |
| >TP53-Q167f KQSQHMTEV  | 426   | >TP53-Q167f KQSRHMTEV  | 637  | 211   |
| >TP53-Q167f KQSQHMTEV  | 35    | >TP53-Q167f KQSRHMTEV  | 15   | 20    |
| >TP53-Q167f KQSQHMTEV  | 222   | >TP53-Q167f KQSRHMTEV  | 380  | 158   |
| >TP53-Q167f KQSQHMTEV  | 86    | >TP53-Q167f KQSRHMTEV  | 44   | 42    |
| >TP53-Q167f KQSQHMTEV  | 110   | >TP53-Q167f KQSRHMTEV  | 59   | 51    |
| >TP53-Q167f KQSQHMTEV  | 185   | >TP53-Q167f KQSRHMTEV  | 103  | 82    |
| >TP53-Q167f KQSQHMTEV  | 60    | >TP53-Q167f KQSRHMTEV  | 128  | 68    |
| >TP53-Q167f YKQSQHMTE  | 467   | >TP53-Q167f YKQSRHMTE' | 601  | 134   |
| >TP53-Q167f YKQSQHMTE  | 30    | >TP53-Q167f YKQSRHMTE' | 32   | 2     |
| >TP53-Q167f YKQSQHMTE  | 42    | >TP53-Q167f YKQSRHMTE' | 48   | 6     |
| >TP53-Q167f IYKQSQHMTE | 402   | >TP53-Q167f IYKQSRHMTE | 272  | 130   |
| >TP53-Q167f IYKQSQHM   | 394   | >TP53-Q167f IYKQSRHM   | 309  | 85    |
| >TP53-Q167f AIYKQSQHM  | 91    | >TP53-Q167f AIYKQSRHM  | 190  | 99    |
| >TP53-Q167f AIYKQSQH   | 349   | >TP53-Q167f AIYKQSRH   | 352  | 3     |
| >TP53-Q167f AIYKQSQHM  | 62    | >TP53-Q167f AIYKQSRHM  | 107  | 45    |
| >TP53-Q167f AIYKQSQHM  | 198   | >TP53-Q167f AIYKQSRHM  | 555  | 357   |
| >TP53-Q167f MAIYKQSQ   | 12583 | >TP53-Q167f MAIYKQSR   | 23   | 12560 |
| >TP53-Q167f MAIYKQSQ   | 17301 | >TP53-Q167f MAIYKQSR   | 91   | 17210 |
| >TP53-Q167f MAIYKQSQ   | 841   | >TP53-Q167f MAIYKQSR   | 6    | 835   |
| >TP53-Q167f MAIYKQSQH  | 226   | >TP53-Q167f MAIYKQSRHf | 382  | 156   |
| >TP53-Q167f MAIYKQSQH  | 205   | >TP53-Q167f MAIYKQSRHf | 463  | 258   |
| >TP53-Q167f MAIYKQSQH  | 20    | >TP53-Q167f MAIYKQSRHf | 33   | 13    |
| >TP53-Q167f MAIYKQSQH  | 151   | >TP53-Q167f MAIYKQSRHf | 867  | 716   |
| >TP53-Q167f AMAIYKQSQf | 221   | >TP53-Q167f AMAIYKQSRf | 339  | 118   |
| >TP53-Q167f AMAIYKQSQf | 161   | >TP53-Q167f AMAIYKQSRf | 551  | 390   |
| >TP53-Q167f AMAIYKQSQf | 199   | >TP53-Q167f AMAIYKQSRf | 408  | 209   |
| >TP53-Q167f AMAIYKQSQf | 283   | >TP53-Q167f AMAIYKQSRf | 1504 | 1221  |
| >TP53-Q167f AMAIYKQSQ  | 69    | >TP53-Q167f AMAIYKQSR  | 5843 | 5774  |
| >TP53-Q167f AMAIYKQSQf | 49    | >TP53-Q167f AMAIYKQSRf | 467  | 418   |
| >TP53-Q167f AMAIYKQSQ  | 10142 | >TP53-Q167f AMAIYKQSR  | 26   | 10116 |
| >TP53-Q167f AMAIYKQSQf | 55    | >TP53-Q167f AMAIYKQSRf | 73   | 18    |



|                        |       |                        |      |       |
|------------------------|-------|------------------------|------|-------|
| >TP53-Q167F AMAIYKQSQI | 69    | >TP53-Q167F AMAIYKQSRI | 141  | 72    |
| >TP53-Q167F RAMAIYKQSC | 29886 | >TP53-Q167F RAMAIYKQSF | 335  | 29551 |
| >TP53-Q167F RAMAIYKQSC | 4708  | >TP53-Q167F RAMAIYKQSF | 12   | 4696  |
| >TP53-Q167F RAMAIYKQSC | 28377 | >TP53-Q167F RAMAIYKQSF | 58   | 28319 |
| >TP53-Q167F RAMAIYKQSC | 354   | >TP53-Q167F RAMAIYKQSF | 513  | 159   |
| >TP53-Q167F RAMAIYKQSC | 375   | >TP53-Q167F RAMAIYKQSF | 345  | 30    |
| >TP53-Q167F RAMAIYKQSC | 17507 | >TP53-Q167F RAMAIYKQSF | 132  | 17375 |
| >TP53-Q16L- QETFSDLW   | 415   | >TP53-Q16L- LETFSDLW   | 2090 | 1675  |
| >TP53-Q16L- QETFSDLWKL | 103   | >TP53-Q16L- LETFSDLWKL | 87   | 16    |
| >TP53-Q16L- QETFSDLWKL | 362   | >TP53-Q16L- LETFSDLWKL | 394  | 32    |
| >TP53-Q16L- QETFSDLWKL | 35    | >TP53-Q16L- LETFSDLWKL | 24   | 11    |
| >TP53-Q16L- QETFSDLWKL | 93    | >TP53-Q16L- LETFSDLWKL | 177  | 84    |
| >TP53-Q16L- QETFSDLWKL | 413   | >TP53-Q16L- LETFSDLWKL | 239  | 174   |
| >TP53-Q16L- QETFSDLW   | 105   | >TP53-Q16L- LETFSDLW   | 105  | 0     |
| >TP53-Q16L- QETFSDLWKL | 467   | >TP53-Q16L- LETFSDLWKL | 4250 | 3783  |
| >TP53-Q16L- QETFSDLW   | 34    | >TP53-Q16L- LETFSDLW   | 45   | 11    |
| >TP53-Q16L- QETFSDLWKL | 211   | >TP53-Q16L- LETFSDLWKL | 298  | 87    |
| >TP53-Q16L- QETFSDLWKL | 152   | >TP53-Q16L- LETFSDLWKL | 105  | 47    |
| >TP53-Q16L- QETFSDLWKL | 388   | >TP53-Q16L- LETFSDLWKL | 320  | 68    |
| >TP53-Q16L- QETFSDLW   | 1732  | >TP53-Q16L- LETFSDLW   | 291  | 1441  |
| >TP53-Q16L- QETFSDLW   | 1528  | >TP53-Q16L- LETFSDLW   | 46   | 1482  |
| >TP53-Q16L- SQETFSDLWk | 2047  | >TP53-Q16L- SLETFSDLWK | 134  | 1913  |
| >TP53-Q16L- SQETFSDL   | 4720  | >TP53-Q16L- SLETFSDL   | 84   | 4636  |
| >TP53-Q16L- SQETFSDLWk | 484   | >TP53-Q16L- SLETFSDLWK | 9    | 475   |
| >TP53-Q16L- SQETFSDLWk | 74    | >TP53-Q16L- SLETFSDLWK | 474  | 400   |
| >TP53-Q16L- SQETFSDLWk | 4170  | >TP53-Q16L- SLETFSDLWK | 48   | 4122  |
| >TP53-Q16L- SQETFSDLWk | 2496  | >TP53-Q16L- SLETFSDLWK | 39   | 2457  |
| >TP53-Q16L- SQETFSDLWk | 7454  | >TP53-Q16L- SLETFSDLWK | 93   | 7361  |
| >TP53-Q16L- SQETFSDL   | 20715 | >TP53-Q16L- SLETFSDL   | 25   | 20690 |
| >TP53-Q16L- SQETFSDLWk | 8842  | >TP53-Q16L- SLETFSDLWK | 8    | 8834  |
| >TP53-Q16L- SQETFSDLWk | 398   | >TP53-Q16L- SLETFSDLWK | 68   | 330   |
| >TP53-Q16L- SQETFSDLWk | 45    | >TP53-Q16L- SLETFSDLWK | 29   | 16    |
| >TP53-Q16L- SQETFSDL   | 406   | >TP53-Q16L- SLETFSDL   | 6065 | 5659  |
| >TP53-Q16L- SQETFSDLWk | 394   | >TP53-Q16L- SLETFSDLWK | 6306 | 5912  |
| >TP53-Q16L- SQETFSDLW  | 418   | >TP53-Q16L- SLETFSDLW  | 1147 | 729   |
| >TP53-Q16L- SQETFSDLW  | 276   | >TP53-Q16L- SLETFSDLW  | 2826 | 2550  |
| >TP53-Q16L- SQETFSDLWk | 3733  | >TP53-Q16L- SLETFSDLWK | 134  | 3599  |
| >TP53-Q16L- LSQETFSDL  | 2328  | >TP53-Q16L- LSLETFSDL  | 409  | 1919  |
| >TP53-Q16L- LSQETFSDLW | 1886  | >TP53-Q16L- LSLETFSDLW | 449  | 1437  |
| >TP53-Q16L- LSQETFSDLW | 68    | >TP53-Q16L- LSLETFSDLW | 58   | 10    |
| >TP53-Q16L- LSQETFSDLW | 925   | >TP53-Q16L- LSLETFSDLW | 227  | 698   |
| >TP53-Q16L- LSQETFSDL  | 304   | >TP53-Q16L- LSLETFSDL  | 84   | 220   |
| >TP53-Q16L- LSQETFSDL  | 175   | >TP53-Q16L- LSLETFSDL  | 54   | 121   |

|                         |       |                         |     |       |
|-------------------------|-------|-------------------------|-----|-------|
| >TP53-Q16L- LSQETFSDLW  | 15    | >TP53-Q16L- LSLETFSDLW  | 7   | 8     |
| >TP53-Q16L- LSQETFSDLW  | 54    | >TP53-Q16L- LSLETFSDLW  | 40  | 14    |
| >TP53-Q16L- LSQETFSDLW  | 14    | >TP53-Q16L- LSLETFSDLW  | 11  | 3     |
| >TP53-Q16L- LSQETFSDL   | 381   | >TP53-Q16L- LSLETFSDL   | 965 | 584   |
| >TP53-Q16L- LSQETFSDL   | 189   | >TP53-Q16L- LSLETFSDL   | 100 | 89    |
| >TP53-Q16L- LSQETFSDLW  | 100   | >TP53-Q16L- LSLETFSDLW  | 30  | 70    |
| >TP53-Q16L- LSQETFSDLW  | 59    | >TP53-Q16L- LSLETFSDLW  | 71  | 12    |
| >TP53-Q16L- LSQETFSDLW  | 334   | >TP53-Q16L- LSLETFSDLW  | 182 | 152   |
| >TP53-Q16L- LSQETFSDL   | 382   | >TP53-Q16L- LSLETFSDL   | 376 | 6     |
| >TP53-Q16L- PLSQETFSDL  | 51    | >TP53-Q16L- PLSLETFSDL  | 184 | 133   |
| >TP53-Q16L- PPLSQETF    | 56    | >TP53-Q16L- PPLSLETF    | 86  | 30    |
| >TP53-Q16L- PPLSQETFSDI | 11    | >TP53-Q16L- PPLSLETFSDL | 11  | 0     |
| >TP53-Q16L- PPLSQETF    | 276   | >TP53-Q16L- PPLSLETF    | 271 | 5     |
| >TP53-Q16L- PPLSQETF    | 135   | >TP53-Q16L- PPLSLETF    | 147 | 12    |
| >TP53-Q16L- PPLSQETF    | 231   | >TP53-Q16L- PPLSLETF    | 145 | 86    |
| >TP53-Q16L- EPPLSQETF   | 229   | >TP53-Q16L- EPPLSLETF   | 237 | 8     |
| >TP53-Q16L- SVEPPLSQETI | 936   | >TP53-Q16L- SVEPPLSLETF | 362 | 574   |
| >TP53-Q16L- SVEPPLSQETI | 68    | >TP53-Q16L- SVEPPLSLETF | 64  | 4     |
| >TP53-Q16L- SVEPPLSQETI | 35    | >TP53-Q16L- SVEPPLSLETF | 26  | 9     |
| >TP53-Q16L- PSVEPPLSQ   | 14846 | >TP53-Q16L- PSVEPPLSL   | 454 | 14392 |
| >TP53-Q192†QHILIRVEGNL  | 3884  | >TP53-Q192†HHLIRVEGNL   | 298 | 3586  |
| >TP53-Q192†QHILIRVEGNL  | 709   | >TP53-Q192†HHLIRVEGNL   | 250 | 459   |
| >TP53-Q192†LAPPQHILIRV  | 395   | >TP53-Q192†LAPPHHLIRV   | 328 | 67    |
| >TP53-Q192†LAPPQHILIRV  | 577   | >TP53-Q192†LAPPHHLIRV   | 452 | 125   |
| >TP53-Q192†LAPPQHILIRV  | 52    | >TP53-Q192†LAPPHHLIRV   | 77  | 25    |
| >TP53-Q192†LAPPQHILI    | 5     | >TP53-Q192†LAPPHHLI     | 3   | 2     |
| >TP53-Q192†LAPPQHILIR   | 959   | >TP53-Q192†LAPPHHLIR    | 99  | 860   |
| >TP53-Q192†LAPPQHILIRV  | 28    | >TP53-Q192†LAPPHHLIRV   | 11  | 17    |
| >TP53-Q192†LAPPQHILIRV  | 865   | >TP53-Q192†LAPPHHLIRVI  | 205 | 660   |
| >TP53-Q192†LAPPQHILIR   | 504   | >TP53-Q192†LAPPHHLIR    | 490 | 14    |
| >TP53-Q192†LAPPQHILI    | 70    | >TP53-Q192†LAPPHHLI     | 61  | 9     |
| >TP53-Q192†GLAPPQHL     | 285   | >TP53-Q192†GLAPPHHL     | 163 | 122   |
| >TP53-Q192†GLAPPQHILI   | 65    | >TP53-Q192†GLAPPHHLI    | 183 | 118   |
| >TP53-Q192†GLAPPQHILIR  | 20    | >TP53-Q192†GLAPPHHLIR   | 30  | 10    |
| >TP53-Q192†GLAPPQHL     | 22    | >TP53-Q192†GLAPPHHL     | 14  | 8     |
| >TP53-Q192†GLAPPQHILI   | 15    | >TP53-Q192†GLAPPHHLI    | 19  | 4     |
| >TP53-Q192†GLAPPQHILIR  | 9     | >TP53-Q192†GLAPPHHLIR   | 10  | 1     |
| >TP53-Q192†GLAPPQHL     | 61    | >TP53-Q192†GLAPPHHL     | 45  | 16    |
| >TP53-Q192†GLAPPQHILI   | 31    | >TP53-Q192†GLAPPHHLI    | 32  | 1     |
| >TP53-Q192†GLAPPQHILIR  | 7     | >TP53-Q192†GLAPPHHLIR   | 7   | 0     |
| >TP53-Q192†GLAPPQHL     | 755   | >TP53-Q192†GLAPPHHL     | 343 | 412   |
| >TP53-Q192†GLAPPQHILI   | 500   | >TP53-Q192†GLAPPHHLI    | 425 | 75    |
| >TP53-Q192†GLAPPQHILIR  | 44    | >TP53-Q192†GLAPPHHLIR   | 40  | 4     |

|                         |       |                         |      |       |
|-------------------------|-------|-------------------------|------|-------|
| >TP53-Q192f GLAPPQHL    | 16    | >TP53-Q192f GLAPPHHL    | 9    | 7     |
| >TP53-Q192f GLAPPQHLI   | 13    | >TP53-Q192f GLAPPHHLI   | 9    | 4     |
| >TP53-Q192f GLAPPQHLIR' | 3     | >TP53-Q192f GLAPPHHLIR' | 3    | 0     |
| >TP53-Q192f GLAPPQHL    | 26    | >TP53-Q192f GLAPPHHL    | 16   | 10    |
| >TP53-Q192f GLAPPQHLI   | 22    | >TP53-Q192f GLAPPHHLI   | 50   | 28    |
| >TP53-Q192f GLAPPQHLIR' | 7     | >TP53-Q192f GLAPPHHLIR' | 8    | 1     |
| >TP53-Q192f GLAPPQHL    | 11    | >TP53-Q192f GLAPPHHL    | 10   | 1     |
| >TP53-Q192f GLAPPQHLI   | 13    | >TP53-Q192f GLAPPHHLI   | 19   | 6     |
| >TP53-Q192f GLAPPQHLIR' | 5     | >TP53-Q192f GLAPPHHLIR' | 6    | 1     |
| >TP53-Q192f GLAPPQHL    | 175   | >TP53-Q192f GLAPPHHL    | 113  | 62    |
| >TP53-Q192f GLAPPQHLI   | 76    | >TP53-Q192f GLAPPHHLI   | 605  | 529   |
| >TP53-Q192f GLAPPQHLIR' | 9     | >TP53-Q192f GLAPPHHLIR' | 16   | 7     |
| >TP53-Q192f GLAPPQHL    | 5     | >TP53-Q192f GLAPPHHL    | 4    | 1     |
| >TP53-Q192f GLAPPQHLI   | 5     | >TP53-Q192f GLAPPHHLI   | 4    | 1     |
| >TP53-Q192f GLAPPQHLIR' | 2     | >TP53-Q192f GLAPPHHLIR' | 2    | 0     |
| >TP53-Q192f GLAPPQHLI   | 2635  | >TP53-Q192f GLAPPHHLI   | 340  | 2295  |
| >TP53-Q192f GLAPPQHLIR  | 282   | >TP53-Q192f GLAPPHHLIR  | 1403 | 1121  |
| >TP53-Q192f SDGLAPPQHI  | 104   | >TP53-Q192f SDGLAPPHHL  | 242  | 138   |
| >TP53-Q192f DSDGLAPPQI  | 1128  | >TP53-Q192f DSDGLAPPHI  | 298  | 830   |
| >TP53-Q192f QHLIRVEGNL  | 709   | >TP53-Q192f KHLIRVEGNLI | 115  | 594   |
| >TP53-Q192f CSDSDGLAPP  | 26348 | >TP53-Q192f CSDSDGLAPP  | 165  | 26183 |
| >TP53-Q192f LAPPQHILIRV | 395   | >TP53-Q192f LAPPKHLIRV  | 465  | 70    |
| >TP53-Q192f LAPPQHILIRV | 52    | >TP53-Q192f LAPPKHLIRV  | 83   | 31    |
| >TP53-Q192f LAPPQHILI   | 5     | >TP53-Q192f LAPPKHLI    | 5    | 0     |
| >TP53-Q192f LAPPQHILIRV | 28    | >TP53-Q192f LAPPKHLIRV  | 28   | 0     |
| >TP53-Q192f LAPPQHILI   | 70    | >TP53-Q192f LAPPKHLI    | 96   | 26    |
| >TP53-Q192f GLAPPQHL    | 285   | >TP53-Q192f GLAPPKHL    | 2225 | 1940  |
| >TP53-Q192f GLAPPQHLI   | 65    | >TP53-Q192f GLAPPKHLI   | 509  | 444   |
| >TP53-Q192f GLAPPQHLIR' | 20    | >TP53-Q192f GLAPPKHLIR\ | 46   | 26    |
| >TP53-Q192f GLAPPQHL    | 22    | >TP53-Q192f GLAPPKHL    | 110  | 88    |
| >TP53-Q192f GLAPPQHLI   | 15    | >TP53-Q192f GLAPPKHLI   | 77   | 62    |
| >TP53-Q192f GLAPPQHLIR' | 9     | >TP53-Q192f GLAPPKHLIR\ | 19   | 10    |
| >TP53-Q192f GLAPPQHL    | 61    | >TP53-Q192f GLAPPKHL    | 203  | 142   |
| >TP53-Q192f GLAPPQHLI   | 31    | >TP53-Q192f GLAPPKHLI   | 124  | 93    |
| >TP53-Q192f GLAPPQHLIR' | 7     | >TP53-Q192f GLAPPKHLIR\ | 13   | 6     |
| >TP53-Q192f GLAPPQHLIR' | 44    | >TP53-Q192f GLAPPKHLIR\ | 74   | 30    |
| >TP53-Q192f GLAPPQHL    | 16    | >TP53-Q192f GLAPPKHL    | 46   | 30    |
| >TP53-Q192f GLAPPQHLI   | 13    | >TP53-Q192f GLAPPKHLI   | 20   | 7     |
| >TP53-Q192f GLAPPQHLIR' | 3     | >TP53-Q192f GLAPPKHLIR\ | 3    | 0     |
| >TP53-Q192f GLAPPQHL    | 26    | >TP53-Q192f GLAPPKHL    | 141  | 115   |
| >TP53-Q192f GLAPPQHLI   | 22    | >TP53-Q192f GLAPPKHLI   | 77   | 55    |
| >TP53-Q192f GLAPPQHLIR' | 7     | >TP53-Q192f GLAPPKHLIR\ | 10   | 3     |
| >TP53-Q192f GLAPPQHL    | 11    | >TP53-Q192f GLAPPKHL    | 41   | 30    |

|                         |      |                         |      |      |
|-------------------------|------|-------------------------|------|------|
| >TP53-Q192f GLAPPQHLI   | 13   | >TP53-Q192f GLAPPKHLI   | 30   | 17   |
| >TP53-Q192f GLAPPQHLIR  | 5    | >TP53-Q192f GLAPPKHLIR\ | 6    | 1    |
| >TP53-Q192f GLAPPQHL    | 175  | >TP53-Q192f GLAPPKHL    | 1527 | 1352 |
| >TP53-Q192f GLAPPQHLI   | 76   | >TP53-Q192f GLAPPKHLI   | 918  | 842  |
| >TP53-Q192f GLAPPQHLIR  | 9    | >TP53-Q192f GLAPPKHLIR\ | 22   | 13   |
| >TP53-Q192f GLAPPQHL    | 5    | >TP53-Q192f GLAPPKHL    | 12   | 7    |
| >TP53-Q192f GLAPPQHLI   | 5    | >TP53-Q192f GLAPPKHLI   | 7    | 2    |
| >TP53-Q192f GLAPPQHLIR  | 2    | >TP53-Q192f GLAPPKHLIR\ | 2    | 0    |
| >TP53-Q192f GLAPPQHLIR  | 282  | >TP53-Q192f GLAPPKHLIR  | 762  | 480  |
| >TP53-Q192f SDGLAPPQHI  | 507  | >TP53-Q192f SDGLAPPKHL  | 423  | 84   |
| >TP53-Q192f SDGLAPPQHI  | 104  | >TP53-Q192f SDGLAPPKHL  | 157  | 53   |
| >TP53-Q192f QHLIRVEGNL  | 3884 | >TP53-Q192f RHLIRVEGNL  | 113  | 3771 |
| >TP53-Q192f QHLIRVEGNL  | 709  | >TP53-Q192f RHLIRVEGNL\ | 211  | 498  |
| >TP53-Q192f LAPPQHILIRV | 395  | >TP53-Q192f LAPPRHLIRV  | 572  | 177  |
| >TP53-Q192f LAPPQHILIRV | 52   | >TP53-Q192f LAPPRHLIRV  | 63   | 11   |
| >TP53-Q192f LAPPQHILIR  | 1307 | >TP53-Q192f LAPPRHLIR   | 491  | 816  |
| >TP53-Q192f LAPPQHILI   | 5    | >TP53-Q192f LAPPRHLI    | 8    | 3    |
| >TP53-Q192f LAPPQHILIRV | 28   | >TP53-Q192f LAPPRHLIRV  | 26   | 2    |
| >TP53-Q192f LAPPQHILI   | 70   | >TP53-Q192f LAPPRHLI    | 67   | 3    |
| >TP53-Q192f GLAPPQHL    | 285  | >TP53-Q192f GLAPPRHL    | 1872 | 1587 |
| >TP53-Q192f GLAPPQHILI  | 65   | >TP53-Q192f GLAPPRHLI   | 444  | 379  |
| >TP53-Q192f GLAPPQHLIR  | 20   | >TP53-Q192f GLAPPRHLIR\ | 44   | 24   |
| >TP53-Q192f GLAPPQHL    | 22   | >TP53-Q192f GLAPPRHL    | 91   | 69   |
| >TP53-Q192f GLAPPQHILI  | 15   | >TP53-Q192f GLAPPRHLI   | 61   | 46   |
| >TP53-Q192f GLAPPQHLIR  | 9    | >TP53-Q192f GLAPPRHLIR\ | 18   | 9    |
| >TP53-Q192f GLAPPQHL    | 61   | >TP53-Q192f GLAPPRHL    | 146  | 85   |
| >TP53-Q192f GLAPPQHILI  | 31   | >TP53-Q192f GLAPPRHLI   | 86   | 55   |
| >TP53-Q192f GLAPPQHLIR  | 7    | >TP53-Q192f GLAPPRHLIR\ | 11   | 4    |
| >TP53-Q192f GLAPPQHLIR  | 44   | >TP53-Q192f GLAPPRHLIR\ | 69   | 25   |
| >TP53-Q192f GLAPPQHL    | 16   | >TP53-Q192f GLAPPRHL    | 64   | 48   |
| >TP53-Q192f GLAPPQHILI  | 13   | >TP53-Q192f GLAPPRHLI   | 73   | 60   |
| >TP53-Q192f GLAPPQHLIR  | 3    | >TP53-Q192f GLAPPRHLIR\ | 5    | 2    |
| >TP53-Q192f GLAPPQHL    | 26   | >TP53-Q192f GLAPPRHL    | 231  | 205  |
| >TP53-Q192f GLAPPQHILI  | 22   | >TP53-Q192f GLAPPRHLI   | 285  | 263  |
| >TP53-Q192f GLAPPQHLIR  | 7    | >TP53-Q192f GLAPPRHLIR\ | 17   | 10   |
| >TP53-Q192f GLAPPQHL    | 11   | >TP53-Q192f GLAPPRHL    | 65   | 54   |
| >TP53-Q192f GLAPPQHILI  | 13   | >TP53-Q192f GLAPPRHLI   | 70   | 57   |
| >TP53-Q192f GLAPPQHLIR  | 5    | >TP53-Q192f GLAPPRHLIR\ | 8    | 3    |
| >TP53-Q192f GLAPPQHL    | 175  | >TP53-Q192f GLAPPRHL    | 3102 | 2927 |
| >TP53-Q192f GLAPPQHILI  | 76   | >TP53-Q192f GLAPPRHLI   | 3768 | 3692 |
| >TP53-Q192f GLAPPQHLIR  | 9    | >TP53-Q192f GLAPPRHLIR\ | 41   | 32   |
| >TP53-Q192f GLAPPQHL    | 5    | >TP53-Q192f GLAPPRHL    | 15   | 10   |
| >TP53-Q192f GLAPPQHILI  | 5    | >TP53-Q192f GLAPPRHLI   | 7    | 2    |

|                       |       |                        |      |       |
|-----------------------|-------|------------------------|------|-------|
| >TP53-Q192FGLAPPQHLIR | 2     | >TP53-Q192FGLAPPRHLIR  | 2    | 0     |
| >TP53-Q192FGLAPPQHLIR | 282   | >TP53-Q192FGLAPPRHLIR  | 341  | 59    |
| >TP53-Q192FSDGLAPPQHI | 104   | >TP53-Q192FSDGLAPPRHL  | 256  | 152   |
| >TP53-Q192FSDGLAPPQ   | 20743 | >TP53-Q192FSDGLAPPR    | 363  | 20380 |
| >TP53-Q317FQPKKKPLDGE | 303   | >TP53-Q317FKPKKKPLDGE  | 1233 | 930   |
| >TP53-Q317FALPNNTSSSP | 111   | >TP53-Q317FALPNNTSSSP  | 1378 | 1267  |
| >TP53-Q317FALPNNTSSSP | 18966 | >TP53-Q317FALPNNTSSSP  | 82   | 18884 |
| >TP53-Q317FALPNNTSSSP | 25724 | >TP53-Q317FALPNNTSSSP  | 157  | 25567 |
| >TP53-Q317FSPQPKKKPL  | 13    | >TP53-Q317FSPKPKKKPL   | 16   | 3     |
| >TP53-Q317FSPQPKKKPL  | 67    | >TP53-Q317FSPKPKKKPL   | 17   | 50    |
| >TP53-Q317FSSPQPKKKPL | 40    | >TP53-Q317FSSPKPKKKPL  | 40   | 0     |
| >TP53-Q317FSSSPQPKK   | 390   | >TP53-Q317FSSSPKPKK    | 514  | 124   |
| >TP53-Q317FSSSPQPKK   | 28    | >TP53-Q317FSSSPKPKK    | 37   | 9     |
| >TP53-Q317FSSSPQPKK   | 70    | >TP53-Q317FSSSPKPKK    | 99   | 29    |
| >TP53-Q317FSSSPQPKK   | 73    | >TP53-Q317FSSSPKPKK    | 157  | 84    |
| >TP53-Q317FSSSPQPKK   | 186   | >TP53-Q317FSSSPKPKK    | 403  | 217   |
| >TP53-Q317FSSSPQPKKK  | 16    | >TP53-Q317FSSSPKPKKKPL | 13   | 3     |
| >TP53-Q317FSSSPQPKK   | 109   | >TP53-Q317FSSSPKPKK    | 151  | 42    |
| >TP53-Q317FSSSPQPKK   | 87    | >TP53-Q317FSSSPKPKK    | 111  | 24    |
| >TP53-Q317FTSSSPQPK   | 326   | >TP53-Q317FTSSSPKPK    | 580  | 254   |
| >TP53-Q317FTSSSPQPK   | 136   | >TP53-Q317FTSSSPKPK    | 267  | 131   |
| >TP53-Q317FTSSSPQPK   | 20    | >TP53-Q317FTSSSPKPK    | 30   | 10    |
| >TP53-Q317FTSSSPQPK   | 33    | >TP53-Q317FTSSSPKPK    | 51   | 18    |
| >TP53-Q317FTSSSPQPKK  | 60    | >TP53-Q317FTSSSPKPKK   | 65   | 5     |
| >TP53-Q317FTSSSPQPK   | 262   | >TP53-Q317FTSSSPKPK    | 682  | 420   |
| >TP53-Q317FTSSSPQPK   | 121   | >TP53-Q317FTSSSPKPK    | 210  | 89    |
| >TP53-Q317FTSSSPQPK   | 125   | >TP53-Q317FTSSSPKPK    | 189  | 64    |
| >TP53-Q317FTSSSPQPKK  | 208   | >TP53-Q317FTSSSPKPKK   | 452  | 244   |
| >TP53-Q317FNTSSSPQPK  | 58    | >TP53-Q317FNTSSSPKPK   | 111  | 53    |
| >TP53-Q317FNTSSSPQPK  | 41    | >TP53-Q317FNTSSSPKPK   | 49   | 8     |
| >TP53-Q317FNTSSSPQPK  | 251   | >TP53-Q317FNTSSSPKPKI  | 361  | 110   |
| >TP53-Q317FNTSSSPQPK  | 339   | >TP53-Q317FNTSSSPKPK   | 893  | 554   |
| >TP53-Q317FNTSSSPQPK  | 37    | >TP53-Q317FNTSSSPKPK   | 69   | 32    |
| >TP53-Q317FNTSSSPQPK  | 28    | >TP53-Q317FNTSSSPKPK   | 31   | 3     |
| >TP53-Q317FNTSSSPQPK  | 95    | >TP53-Q317FNTSSSPKPKI  | 123  | 28    |
| >TP53-Q317FNTSSSPQPK  | 839   | >TP53-Q317FNTSSSPKPK   | 393  | 446   |
| >TP53-Q317FLPNNTSSSPQ | 260   | >TP53-Q317FLPNNTSSSPKI | 796  | 536   |
| >TP53-Q317FQPKKKPLDGE | 303   | >TP53-Q317FPPKKKPLDGE  | 2468 | 2165  |
| >TP53-Q317FALPNNTSSSP | 111   | >TP53-Q317FALPNNTSSSP  | 6305 | 6194  |
| >TP53-Q317FSPQPKKKPL  | 23847 | >TP53-Q317FSPPPKKKPL   | 481  | 23366 |
| >TP53-Q317FSPQPKKKPL  | 13    | >TP53-Q317FSPPPKKKPL   | 41   | 28    |
| >TP53-Q317FSPQPKKKPL  | 67    | >TP53-Q317FSPPPKKKPL   | 272  | 205   |
| >TP53-Q317FSSPQPKKKPL | 1296  | >TP53-Q317FSSPPPKKKPL  | 472  | 824   |

|                       |      |                        |      |      |
|-----------------------|------|------------------------|------|------|
| >TP53-Q317fSSPQPKKKPL | 40   | >TP53-Q317fSSPPPKKKPL  | 16   | 24   |
| >TP53-Q317fSSSPQPKK   | 390  | >TP53-Q317fSSSPPPKK    | 265  | 125  |
| >TP53-Q317fSSSPQPKK   | 28   | >TP53-Q317fSSSPPPKK    | 23   | 5    |
| >TP53-Q317fSSSPQPKKK  | 70   | >TP53-Q317fSSSPPPKK    | 52   | 18   |
| >TP53-Q317fSSSPQPKK   | 73   | >TP53-Q317fSSSPPPKK    | 147  | 74   |
| >TP53-Q317fSSSPQPKKK  | 186  | >TP53-Q317fSSSPPPKK    | 656  | 470  |
| >TP53-Q317fSSSPQPKKKP | 16   | >TP53-Q317fSSSPPPKKKPL | 13   | 3    |
| >TP53-Q317fSSSPQPKK   | 109  | >TP53-Q317fSSSPPPKK    | 129  | 20   |
| >TP53-Q317fSSSPQPKKK  | 87   | >TP53-Q317fSSSPPPKK    | 152  | 65   |
| >TP53-Q317fSSSPQPKKKP | 528  | >TP53-Q317fSSSPPPKKKPL | 226  | 302  |
| >TP53-Q317fTSSSPQPK   | 326  | >TP53-Q317fTSSSPPPK    | 196  | 130  |
| >TP53-Q317fTSSSPQPKK  | 136  | >TP53-Q317fTSSSPPPK    | 149  | 13   |
| >TP53-Q317fTSSSPQPK   | 20   | >TP53-Q317fTSSSPPPK    | 14   | 6    |
| >TP53-Q317fTSSSPQPKK  | 33   | >TP53-Q317fTSSSPPPK    | 27   | 6    |
| >TP53-Q317fTSSSPQPKKK | 60   | >TP53-Q317fTSSSPPPKK   | 39   | 21   |
| >TP53-Q317fTSSSPQPK   | 262  | >TP53-Q317fTSSSPPPK    | 119  | 143  |
| >TP53-Q317fTSSSPQPK   | 121  | >TP53-Q317fTSSSPPPK    | 121  | 0    |
| >TP53-Q317fTSSSPQPKK  | 125  | >TP53-Q317fTSSSPPPK    | 250  | 125  |
| >TP53-Q317fTSSSPQPKKK | 208  | >TP53-Q317fTSSSPPPKK   | 171  | 37   |
| >TP53-Q317fTSSSPQPK   | 794  | >TP53-Q317fTSSSPPPK    | 310  | 484  |
| >TP53-Q317fNTSSSPQPK  | 1176 | >TP53-Q317fNTSSSPPPK   | 438  | 738  |
| >TP53-Q317fNTSSSPQPK  | 58   | >TP53-Q317fNTSSSPPPK   | 30   | 28   |
| >TP53-Q317fNTSSSPQPKK | 41   | >TP53-Q317fNTSSSPPPK   | 27   | 14   |
| >TP53-Q317fNTSSSPQPKK | 251  | >TP53-Q317fNTSSSPPPKK  | 164  | 87   |
| >TP53-Q317fNTSSSPQPK  | 339  | >TP53-Q317fNTSSSPPPK   | 85   | 254  |
| >TP53-Q317fNTSSSPQPK  | 37   | >TP53-Q317fNTSSSPPPK   | 25   | 12   |
| >TP53-Q317fNTSSSPQPKK | 28   | >TP53-Q317fNTSSSPPPK   | 25   | 3    |
| >TP53-Q317fNTSSSPQPKK | 95   | >TP53-Q317fNTSSSPPPKK  | 79   | 16   |
| >TP53-Q317fNTSSSPQPK  | 839  | >TP53-Q317fNTSSSPPPK   | 259  | 580  |
| >TP53-Q317fLPNNTSSSPQ | 260  | >TP53-Q317fLPNNTSSSPK  | 93   | 167  |
| >TP53-Q317fQPKKKPLDGE | 2284 | >TP53-Q317fRPKKKPLDGE  | 466  | 1818 |
| >TP53-Q317fQPKKKPLDGE | 303  | >TP53-Q317fRPKKKPLDGE  | 743  | 440  |
| >TP53-Q317fQPKKKPLDGE | 812  | >TP53-Q317fRPKKKPLDGE  | 434  | 378  |
| >TP53-Q317fALPNNTSSSP | 111  | >TP53-Q317fALPNNTSSSP  | 4336 | 4225 |
| >TP53-Q317fSPQPKKKPL  | 13   | >TP53-Q317fSPRPKKKPL   | 6    | 7    |
| >TP53-Q317fSPQPKKKPL  | 67   | >TP53-Q317fSPRPKKKPL   | 17   | 50   |
| >TP53-Q317fSSPQPKKKPL | 40   | >TP53-Q317fSSRPKKKPL   | 84   | 44   |
| >TP53-Q317fSSSPQPKK   | 390  | >TP53-Q317fSSSRPKK     | 230  | 160  |
| >TP53-Q317fSSSPQPKKK  | 1215 | >TP53-Q317fSSSRPKK     | 434  | 781  |
| >TP53-Q317fSSSPQPKK   | 28   | >TP53-Q317fSSSRPKK     | 24   | 4    |
| >TP53-Q317fSSSPQPKKK  | 70   | >TP53-Q317fSSSRPKK     | 58   | 12   |
| >TP53-Q317fSSSPQPKK   | 73   | >TP53-Q317fSSSRPKK     | 49   | 24   |
| >TP53-Q317fSSSPQPKKK  | 186  | >TP53-Q317fSSSRPKK     | 188  | 2    |

|                        |       |                        |       |       |
|------------------------|-------|------------------------|-------|-------|
| >TP53-Q317fSSSPQPKKKP  | 16    | >TP53-Q317fSSSPRPKKKPI | 14    | 2     |
| >TP53-Q317fSSSPQPKK    | 109   | >TP53-Q317fSSSPRPKK    | 162   | 53    |
| >TP53-Q317fSSSPQPKKK   | 87    | >TP53-Q317fSSSPRPKKK   | 78    | 9     |
| >TP53-Q317fSSSPQPKKKP  | 528   | >TP53-Q317fSSSPRPKKKPI | 390   | 138   |
| >TP53-Q317fTSSSPQPK    | 326   | >TP53-Q317fTSSSPRPK    | 302   | 24    |
| >TP53-Q317fTSSSPQPKK   | 136   | >TP53-Q317fTSSSPRPKK   | 152   | 16    |
| >TP53-Q317fTSSSPQPK    | 20    | >TP53-Q317fTSSSPRPK    | 22    | 2     |
| >TP53-Q317fTSSSPQPKK   | 33    | >TP53-Q317fTSSSPRPKK   | 30    | 3     |
| >TP53-Q317fTSSSPQPKKK  | 60    | >TP53-Q317fTSSSPRPKKK  | 52    | 8     |
| >TP53-Q317fTSSSPQPK    | 262   | >TP53-Q317fTSSSPRPK    | 198   | 64    |
| >TP53-Q317fTSSSPQPKK   | 733   | >TP53-Q317fTSSSPRPKK   | 237   | 496   |
| >TP53-Q317fTSSSPQPK    | 121   | >TP53-Q317fTSSSPRPK    | 155   | 34    |
| >TP53-Q317fTSSSPQPKK   | 125   | >TP53-Q317fTSSSPRPKK   | 96    | 29    |
| >TP53-Q317fTSSSPQPKKK  | 208   | >TP53-Q317fTSSSPRPKKK  | 193   | 15    |
| >TP53-Q317fNTSSSPQPK   | 58    | >TP53-Q317fNTSSSPRPK   | 81    | 23    |
| >TP53-Q317fNTSSSPQPKK  | 41    | >TP53-Q317fNTSSSPRPKK  | 46    | 5     |
| >TP53-Q317fNTSSSPQPKK  | 251   | >TP53-Q317fNTSSSPRPKK  | 268   | 17    |
| >TP53-Q317fNTSSSPQPK   | 339   | >TP53-Q317fNTSSSPRPK   | 471   | 132   |
| >TP53-Q317fNTSSSPQPK   | 37    | >TP53-Q317fNTSSSPRPK   | 69    | 32    |
| >TP53-Q317fNTSSSPQPKK  | 28    | >TP53-Q317fNTSSSPRPKK  | 24    | 4     |
| >TP53-Q317fNTSSSPQPKK  | 95    | >TP53-Q317fNTSSSPRPKK  | 102   | 7     |
| >TP53-Q317fNTSSSPQPK   | 839   | >TP53-Q317fNTSSSPRPK   | 333   | 506   |
| >TP53-Q317fNTSSSPQPKK  | 721   | >TP53-Q317fNTSSSPRPKK  | 452   | 269   |
| >TP53-Q317fNNTSSSPQ    | 12589 | >TP53-Q317fNNTSSSPR    | 115   | 12474 |
| >TP53-Q317fLPNNTSSSPQ  | 260   | >TP53-Q317fLPNNTSSSPR  | 762   | 502   |
| >TP53-Q331fQIRGRERFEM  | 435   | >TP53-Q331fPIRGRERFEM  | 1926  | 1491  |
| >TP53-Q331fLQIRGRERF   | 14696 | >TP53-Q331fLPIRGRERF   | 16    | 14680 |
| >TP53-Q331fLQIRGRERFEI | 3224  | >TP53-Q331fLPIRGRERFEM | 6     | 3218  |
| >TP53-Q331fLQIRGRERFEI | 192   | >TP53-Q331fLPIRGRERFEM | 22641 | 22449 |
| >TP53-Q331fLQIRGRER    | 138   | >TP53-Q331fLPIRGRER    | 6332  | 6194  |
| >TP53-Q331fLQIRGRERF   | 21112 | >TP53-Q331fLPIRGRERF   | 113   | 20999 |
| >TP53-Q331fLQIRGRERFEI | 17462 | >TP53-Q331fLPIRGRERFEM | 20    | 17442 |
| >TP53-Q331fLQIRGRERF   | 54    | >TP53-Q331fLPIRGRERF   | 10255 | 10201 |
| >TP53-Q331fLQIRGRERFEI | 105   | >TP53-Q331fLPIRGRERFEM | 16879 | 16774 |
| >TP53-Q331fLQIRGRER    | 495   | >TP53-Q331fLPIRGRER    | 15256 | 14761 |
| >TP53-Q331fLQIRGRERF   | 12    | >TP53-Q331fLPIRGRERF   | 1441  | 1429  |
| >TP53-Q331fLQIRGRERFEI | 34    | >TP53-Q331fLPIRGRERFEM | 4738  | 4704  |
| >TP53-Q331fLQIRGRERF   | 14791 | >TP53-Q331fLPIRGRERF   | 176   | 14615 |
| >TP53-Q331fLQIRGRERFEI | 6015  | >TP53-Q331fLPIRGRERFEM | 29    | 5986  |
| >TP53-Q331fLQIRGRERF   | 21811 | >TP53-Q331fLPIRGRERF   | 132   | 21679 |
| >TP53-Q331fLQIRGRERFEI | 14832 | >TP53-Q331fLPIRGRERFEM | 77    | 14755 |
| >TP53-Q331fLQIRGRERF   | 15671 | >TP53-Q331fLPIRGRERF   | 76    | 15595 |
| >TP53-Q331fTLQIRGRER   | 238   | >TP53-Q331fTLPIRGRER   | 2530  | 2292  |

|                         |      |                         |      |      |
|-------------------------|------|-------------------------|------|------|
| >TP53-Q331F FTLQIRGRERI | 169  | >TP53-Q331F FTLPIRGRERF | 102  | 67   |
| >TP53-Q331F FTLQIRGRERI | 289  | >TP53-Q331F FTLPIRGRERF | 754  | 465  |
| >TP53-Q331F FTLQIRGRERI | 946  | >TP53-Q331F FTLPIRGRERF | 357  | 589  |
| >TP53-Q331F FTLQIRGR    | 873  | >TP53-Q331F FTLPIRGR    | 306  | 567  |
| >TP53-Q331F FTLQIRGRER  | 50   | >TP53-Q331F FTLPIRGRER  | 43   | 7    |
| >TP53-Q331F FTLQIRGR    | 174  | >TP53-Q331F FTLPIRGR    | 137  | 37   |
| >TP53-Q331F FTLQIRGRER  | 431  | >TP53-Q331F FTLPIRGRER  | 467  | 36   |
| >TP53-Q331F FTLQIRGR    | 25   | >TP53-Q331F FTLPIRGR    | 22   | 3    |
| >TP53-Q331F FTLQIRGRER  | 86   | >TP53-Q331F FTLPIRGRER  | 39   | 47   |
| >TP53-Q331F FTLQIRGRERI | 585  | >TP53-Q331F FTLPIRGRERF | 367  | 218  |
| >TP53-Q331F FTLQIRGRERI | 8    | >TP53-Q331F FTLPIRGRERF | 6    | 2    |
| >TP53-Q331F FTLQIRGRERI | 289  | >TP53-Q331F FTLPIRGRERF | 141  | 148  |
| >TP53-Q331F FTLQIRGRERI | 8    | >TP53-Q331F FTLPIRGRERF | 9    | 1    |
| >TP53-Q331F FTLQIRGR    | 422  | >TP53-Q331F FTLPIRGR    | 657  | 235  |
| >TP53-Q331F YFTLQIRGREF | 337  | >TP53-Q331F YFTLPIRGREF | 412  | 75   |
| >TP53-Q331F YFTLQIRGR   | 129  | >TP53-Q331F YFTLPIRGR   | 108  | 21   |
| >TP53-Q331F YFTLQIRGREF | 126  | >TP53-Q331F YFTLPIRGREF | 115  | 11   |
| >TP53-Q331F YFTLQIRGR   | 152  | >TP53-Q331F YFTLPIRGR   | 231  | 79   |
| >TP53-Q331F EYFTLQIR    | 335  | >TP53-Q331F EYFTLPIR    | 457  | 122  |
| >TP53-Q331F EYFTLQIR    | 31   | >TP53-Q331F EYFTLPIR    | 42   | 11   |
| >TP53-Q331F EYFTLQIRGR  | 315  | >TP53-Q331F EYFTLPIRGR  | 1060 | 745  |
| >TP53-Q331F EYFTLQIR    | 26   | >TP53-Q331F EYFTLPIR    | 24   | 2    |
| >TP53-Q331F EYFTLQIR    | 19   | >TP53-Q331F EYFTLPIR    | 19   | 0    |
| >TP53-Q331F EYFTLQIRGR  | 20   | >TP53-Q331F EYFTLPIRGR  | 19   | 1    |
| >TP53-Q331F GEYFTLQI    | 102  | >TP53-Q331F GEYFTLPI    | 79   | 23   |
| >TP53-Q331F GEYFTLQI    | 44   | >TP53-Q331F GEYFTLPI    | 19   | 25   |
| >TP53-Q331F GEYFTLQI    | 43   | >TP53-Q331F GEYFTLPI    | 16   | 27   |
| >TP53-Q331F GEYFTLQI    | 807  | >TP53-Q331F GEYFTLPI    | 154  | 653  |
| >TP53-Q331F GEYFTLQI    | 11   | >TP53-Q331F GEYFTLPI    | 7    | 4    |
| >TP53-Q331F GEYFTLQIR   | 190  | >TP53-Q331F GEYFTLPIR   | 50   | 140  |
| >TP53-Q331F GEYFTLQIRGI | 512  | >TP53-Q331F GEYFTLPIRGF | 290  | 222  |
| >TP53-Q331F LDGEYFTLQI  | 87   | >TP53-Q331F LDGEYFTLPI  | 124  | 37   |
| >TP53-Q331F LDGEYFTLQI  | 94   | >TP53-Q331F LDGEYFTLPI  | 104  | 10   |
| >TP53-Q331F PLDGEYFTLQ  | 68   | >TP53-Q331F PLDGEYFTLPI | 68   | 0    |
| >TP53-Q331F PLDGEYFTLQ  | 140  | >TP53-Q331F PLDGEYFTLPI | 136  | 4    |
| >TP53-Q331F PLDGEYFTLQ  | 158  | >TP53-Q331F PLDGEYFTLPI | 383  | 225  |
| >TP53-Q331F PLDGEYFTLQ  | 111  | >TP53-Q331F PLDGEYFTLPI | 226  | 115  |
| >TP53-Q331F QIRGRERFE   | 4745 | >TP53-Q331F RIRGRERFE   | 209  | 4536 |
| >TP53-Q331F QIRGRERFEM  | 435  | >TP53-Q331F RIRGRERFEM  | 14   | 421  |
| >TP53-Q331F QIRGRERFEM  | 4581 | >TP53-Q331F RIRGRERFEM  | 481  | 4100 |
| >TP53-Q331F QIRGRERF    | 1843 | >TP53-Q331F RIRGRERF    | 346  | 1497 |
| >TP53-Q331F QIRGRERFEM  | 1057 | >TP53-Q331F RIRGRERFEM  | 243  | 814  |
| >TP53-Q331F QIRGRERFEM  | 1348 | >TP53-Q331F RIRGRERFEM  | 340  | 1008 |



|                        |       |                        |       |       |
|------------------------|-------|------------------------|-------|-------|
| >TP53-Q331FQIRGRERF    | 1423  | >TP53-Q331FRIRGRERF    | 72    | 1351  |
| >TP53-Q331FQIRGRERFEM  | 5081  | >TP53-Q331FRIRGRERFEM  | 287   | 4794  |
| >TP53-Q331FQIRGRERFEM  | 2745  | >TP53-Q331FRIRGRERFEM  | 139   | 2606  |
| >TP53-Q331FQIRGRERFEM  | 524   | >TP53-Q331FRIRGRERFEM  | 131   | 393   |
| >TP53-Q331FQIRGRERFEM  | 628   | >TP53-Q331FRIRGRERFEM  | 125   | 503   |
| >TP53-Q331FLQIRGRERFEI | 192   | >TP53-Q331FLRIRGRERFEM | 22913 | 22721 |
| >TP53-Q331FLQIRGRER    | 138   | >TP53-Q331FLRIRGRER    | 11845 | 11707 |
| >TP53-Q331FLQIRGRERF   | 54    | >TP53-Q331FLRIRGRERF   | 11310 | 11256 |
| >TP53-Q331FLQIRGRERFEI | 105   | >TP53-Q331FLRIRGRERFEM | 17551 | 17446 |
| >TP53-Q331FLQIRGRER    | 495   | >TP53-Q331FLRIRGRER    | 2295  | 1800  |
| >TP53-Q331FLQIRGRERF   | 12    | >TP53-Q331FLRIRGRERF   | 112   | 100   |
| >TP53-Q331FLQIRGRERFEI | 34    | >TP53-Q331FLRIRGRERFEM | 304   | 270   |
| >TP53-Q331FLQIRGRER    | 5061  | >TP53-Q331FLRIRGRER    | 240   | 4821  |
| >TP53-Q331FLQIRGRERF   | 4628  | >TP53-Q331FLRIRGRERF   | 244   | 4384  |
| >TP53-Q331FLQIRGRERFEI | 2016  | >TP53-Q331FLRIRGRERFEM | 70    | 1946  |
| >TP53-Q331FLQIRGRERF   | 11168 | >TP53-Q331FLRIRGRERF   | 371   | 10797 |
| >TP53-Q331FKPLDGEYFTLI | 14863 | >TP53-Q331FKPLDGEYFTLI | 209   | 14654 |
| >TP53-Q331FKPLDGEYFTLI | 3264  | >TP53-Q331FKPLDGEYFTLI | 48    | 3216  |
| >TP53-Q331FTLQIRGRER   | 238   | >TP53-Q331FTLRIRGRER   | 124   | 114   |
| >TP53-Q331FTLQIRGRERF  | 974   | >TP53-Q331FTLRIRGRERF  | 444   | 530   |
| >TP53-Q331FTLQIRGRERF  | 517   | >TP53-Q331FTLRIRGRERF  | 394   | 123   |
| >TP53-Q331FTLQIRGRERI  | 169   | >TP53-Q331FTLRIRGRERF  | 251   | 82    |
| >TP53-Q331FTLQIRGRERI  | 289   | >TP53-Q331FTLRIRGRERF  | 302   | 13    |
| >TP53-Q331FTLQIRGR     | 873   | >TP53-Q331FTLRIRGR     | 205   | 668   |
| >TP53-Q331FTLQIRGRER   | 50    | >TP53-Q331FTLRIRGRER   | 35    | 15    |
| >TP53-Q331FTLQIRGR     | 174   | >TP53-Q331FTLRIRGR     | 102   | 72    |
| >TP53-Q331FTLQIRGRER   | 431   | >TP53-Q331FTLRIRGRER   | 216   | 215   |
| >TP53-Q331FTLQIRGR     | 25    | >TP53-Q331FTLRIRGR     | 25    | 0     |
| >TP53-Q331FTLQIRGRER   | 86    | >TP53-Q331FTLRIRGRER   | 132   | 46    |
| >TP53-Q331FTLQIRGRERI  | 585   | >TP53-Q331FTLRIRGRERF  | 388   | 197   |
| >TP53-Q331FTLQIRGRERI  | 8     | >TP53-Q331FTLRIRGRERF  | 16    | 8     |
| >TP53-Q331FTLQIRGRERI  | 289   | >TP53-Q331FTLRIRGRERF  | 172   | 117   |
| >TP53-Q331FTLQIRGRERI  | 8     | >TP53-Q331FTLRIRGRERF  | 10    | 2     |
| >TP53-Q331FTLQIRGR     | 422   | >TP53-Q331FTLRIRGR     | 993   | 571   |
| >TP53-Q331FYFTLQIRGR   | 680   | >TP53-Q331FYFTLRIRGR   | 227   | 453   |
| >TP53-Q331FYFTLQIRGREF | 337   | >TP53-Q331FYFTLRIRGREF | 168   | 169   |
| >TP53-Q331FYFTLQIRGR   | 129   | >TP53-Q331FYFTLRIRGR   | 31    | 98    |
| >TP53-Q331FYFTLQIRGREF | 126   | >TP53-Q331FYFTLRIRGREF | 50    | 76    |
| >TP53-Q331FYFTLQIRGR   | 152   | >TP53-Q331FYFTLRIRGR   | 172   | 20    |
| >TP53-Q331FEYFTLQIR    | 335   | >TP53-Q331FEYFTLRIR    | 290   | 45    |
| >TP53-Q331FEYFTLQIRGR  | 546   | >TP53-Q331FEYFTLRIRGR  | 151   | 395   |
| >TP53-Q331FEYFTLQIR    | 31    | >TP53-Q331FEYFTLRIR    | 32    | 1     |
| >TP53-Q331FEYFTLQIRGR  | 315   | >TP53-Q331FEYFTLRIRGR  | 287   | 28    |

|                        |       |                         |      |       |
|------------------------|-------|-------------------------|------|-------|
| >TP53-Q331F EYFTLQIR   | 26    | >TP53-Q331F EYFTLRIR    | 34   | 8     |
| >TP53-Q331F EYFTLQIR   | 19    | >TP53-Q331F EYFTLRIR    | 22   | 3     |
| >TP53-Q331F EYFTLQIRGR | 20    | >TP53-Q331F EYFTLRIRGR  | 20   | 0     |
| >TP53-Q331F GEYFTLQI   | 102   | >TP53-Q331F GEYFTLRI    | 120  | 18    |
| >TP53-Q331F GEYFTLQI   | 44    | >TP53-Q331F GEYFTLRI    | 55   | 11    |
| >TP53-Q331F GEYFTLQI   | 43    | >TP53-Q331F GEYFTLRI    | 90   | 47    |
| >TP53-Q331F GEYFTLQI   | 11    | >TP53-Q331F GEYFTLRI    | 20   | 9     |
| >TP53-Q331F GEYFTLQIR  | 190   | >TP53-Q331F GEYFTLRIR   | 549  | 359   |
| >TP53-Q331F DGEYFTLQ   | 17519 | >TP53-Q331F DGEYFTLR    | 143  | 17376 |
| >TP53-Q331F LDGEYFTLQI | 87    | >TP53-Q331F LDGEYFTLRI  | 329  | 242   |
| >TP53-Q331F LDGEYFTLQI | 94    | >TP53-Q331F LDGEYFTLRI  | 104  | 10    |
| >TP53-Q331F PLDGEYFTLQ | 68    | >TP53-Q331F PLDGEYFTLRI | 85   | 17    |
| >TP53-Q331F PLDGEYFTLQ | 140   | >TP53-Q331F PLDGEYFTLRI | 291  | 151   |
| >TP53-Q331F PLDGEYFTLQ | 158   | >TP53-Q331F PLDGEYFTLRI | 450  | 292   |
| >TP53-Q331F PLDGEYFTLQ | 111   | >TP53-Q331F PLDGEYFTLRI | 143  | 32    |
| >TP53-Q354F QAGKEPGGS  | 3009  | >TP53-Q354F KAGKEPGGS   | 492  | 2517  |
| >TP53-Q354F ELKDAQAGK  | 136   | >TP53-Q354F ELKDAKAGK   | 221  | 85    |
| >TP53-Q354F ALELKDAQA  | 144   | >TP53-Q354F ALELKDAKA   | 332  | 188   |
| >TP53-Q354F EALELKDAQ  | 8459  | >TP53-Q354F EALELKDAK   | 101  | 8358  |
| >TP53-Q354F EALELKDAQA | 161   | >TP53-Q354F EALELKDAKA  | 330  | 169   |
| >TP53-Q354F NEALELKDAC | 461   | >TP53-Q354F NEALELKDAK  | 319  | 142   |
| >TP53-Q354F AQAGKEPGG  | 6819  | >TP53-Q354F ARAGKEPGG   | 432  | 6387  |
| >TP53-Q354F ELKDAQAGK  | 136   | >TP53-Q354F ELKDARAGK   | 95   | 41    |
| >TP53-Q354F ALELKDAQA  | 144   | >TP53-Q354F ALELKDARA   | 179  | 35    |
| >TP53-Q354F EALELKDAQ  | 20888 | >TP53-Q354F EALELKDAR   | 82   | 20806 |
| >TP53-Q354F EALELKDAQ  | 8459  | >TP53-Q354F EALELKDAR   | 31   | 8428  |
| >TP53-Q354F EALELKDAQA | 161   | >TP53-Q354F EALELKDARA  | 377  | 216   |
| >TP53-Q354F NEALELKDAC | 461   | >TP53-Q354F NEALELKDAR  | 256  | 205   |
| >TP53-Q52H·QWFTEDPG    | 275   | >TP53-Q52H·HWFTEDPG     | 350  | 75    |
| >TP53-Q52H·PDDIEQWFT   | 240   | >TP53-Q52H·PDDIEHWFT    | 1182 | 942   |
| >TP53-Q52H·SPDDIEQWF   | 4455  | >TP53-Q52H·SPDDIEHWF    | 497  | 3958  |
| >TP53-Q52H·SPDDIEQWF   | 339   | >TP53-Q52H·SPDDIEHWF    | 241  | 98    |
| >TP53-Q52H·SPDDIEQW    | 46    | >TP53-Q52H·SPDDIEHW     | 41   | 5     |
| >TP53-Q52H·SPDDIEQW    | 12    | >TP53-Q52H·SPDDIEHW     | 13   | 1     |
| >TP53-Q52H·LSPDDIEQWF  | 916   | >TP53-Q52H·LSPDDIEHWF   | 406  | 510   |
| >TP53-Q52H·LSPDDIEQW   | 195   | >TP53-Q52H·LSPDDIEHW    | 444  | 249   |
| >TP53-Q52H·LSPDDIEQWF  | 180   | >TP53-Q52H·LSPDDIEHWF   | 244  | 64    |
| >TP53-Q52H·LSPDDIEQW   | 126   | >TP53-Q52H·LSPDDIEHW    | 132  | 6     |
| >TP53-Q52H·LSPDDIEQW   | 149   | >TP53-Q52H·LSPDDIEHW    | 118  | 31    |
| >TP53-Q52H·LSPDDIEQW   | 181   | >TP53-Q52H·LSPDDIEHW    | 196  | 15    |
| >TP53-Q52H·LSPDDIEQWF  | 10    | >TP53-Q52H·LSPDDIEHWF   | 5    | 5     |
| >TP53-Q52H·LSPDDIEQWF  | 190   | >TP53-Q52H·LSPDDIEHWF   | 74   | 116   |
| >TP53-Q52H·LSPDDIEQWF  | 84    | >TP53-Q52H·LSPDDIEHWF   | 194  | 110   |

|                         |      |                         |       |       |
|-------------------------|------|-------------------------|-------|-------|
| >TP53-Q52H·LSPDDIEQW    | 218  | >TP53-Q52H·LSPDDIEHW    | 331   | 113   |
| >TP53-Q52H·LSPDDIEQW    | 596  | >TP53-Q52H·LSPDDIEHW    | 262   | 334   |
| >TP53-Q52H·MLSPDDIEQ    | 405  | >TP53-Q52H·MLSPDDIEH    | 5801  | 5396  |
| >TP53-Q52H·MLSPDDIEQV   | 107  | >TP53-Q52H·MLSPDDIEHV   | 47    | 60    |
| >TP53-Q52H·MLSPDDIEQ    | 21   | >TP53-Q52H·MLSPDDIEH    | 3587  | 3566  |
| >TP53-Q52H·MLSPDDIEQV   | 129  | >TP53-Q52H·MLSPDDIEHV   | 57    | 72    |
| >TP53-Q52H·MLSPDDIEQV   | 213  | >TP53-Q52H·MLSPDDIEHV   | 360   | 147   |
| >TP53-Q52H·MLSPDDIEQV   | 93   | >TP53-Q52H·MLSPDDIEHV   | 177   | 84    |
| >TP53-Q52H·MLSPDDIEQV   | 427  | >TP53-Q52H·MLSPDDIEHV   | 512   | 85    |
| >TP53-Q52H·MLSPDDIEQ    | 2227 | >TP53-Q52H·MLSPDDIEH    | 226   | 2001  |
| >TP53-Q52H·MLSPDDIEQV   | 131  | >TP53-Q52H·MLSPDDIEHV   | 115   | 16    |
| >TP53-Q52H·MLSPDDIEQV   | 204  | >TP53-Q52H·MLSPDDIEHV   | 206   | 2     |
| >TP53-Q52H·MLSPDDIEQV   | 20   | >TP53-Q52H·MLSPDDIEHV   | 20    | 0     |
| >TP53-Q52H·MLSPDDIEQV   | 292  | >TP53-Q52H·MLSPDDIEHV   | 401   | 109   |
| >TP53-Q52H·MLSPDDIEQV   | 80   | >TP53-Q52H·MLSPDDIEHV   | 70    | 10    |
| >TP53-Q52H·MLSPDDIEQV   | 445  | >TP53-Q52H·MLSPDDIEHV   | 501   | 56    |
| >TP53-Q52H·LMLSPDDIEQ   | 315  | >TP53-Q52H·LMLSPDDIEH   | 13875 | 13560 |
| >TP53-Q52H·LMLSPDDIEQ   | 130  | >TP53-Q52H·LMLSPDDIEH   | 229   | 99    |
| >TP53-Q52H·LMLSPDDIEQ   | 212  | >TP53-Q52H·LMLSPDDIEH   | 214   | 2     |
| >TP53-Q52H·LMLSPDDIEQ   | 17   | >TP53-Q52H·LMLSPDDIEH   | 19    | 2     |
| >TP53-Q52H·LMLSPDDIEQ   | 79   | >TP53-Q52H·LMLSPDDIEH   | 111   | 32    |
| >TP53-Q52H·LMLSPDDIEQ   | 174  | >TP53-Q52H·LMLSPDDIEH   | 89    | 85    |
| >TP53-Q5H·v·QSDPSVEPPL  | 39   | >TP53-Q5H·r·HSDPSVEPPL  | 20    | 19    |
| >TP53-Q5H·v·QSDPSVEPPL  | 2353 | >TP53-Q5H·r·HSDPSVEPPL  | 244   | 2109  |
| >TP53-Q5H·v·MEEPQSDPS\  | 108  | >TP53-Q5H·r·MEEPHSDPS\  | 164   | 56    |
| >TP53-Q5H·v·MEEPQSDPS\  | 477  | >TP53-Q5H·r·MEEPHSDPS\  | 525   | 48    |
| >TP53-Q5H·v·MEEPQSDPS\  | 195  | >TP53-Q5H·r·MEEPHSDPS\  | 152   | 43    |
| >TP53-Q5H·v·MEEPQSDPS\  | 82   | >TP53-Q5H·r·MEEPHSDPS\  | 38    | 44    |
| >TP53-R110C·RLGFLHSGTA  | 326  | >TP53-R110C·CLGFLHSGTA  | 932   | 606   |
| >TP53-R110C·RLGFLHSGTA  | 162  | >TP53-R110C·CLGFLHSGTA  | 1693  | 1531  |
| >TP53-R110C·RLGFLHSGTA  | 43   | >TP53-R110C·CLGFLHSGTA  | 202   | 159   |
| >TP53-R110C·RLGFLHSGTA  | 125  | >TP53-R110C·CLGFLHSGTA  | 616   | 491   |
| >TP53-R110C·RLGFLHSGTA  | 384  | >TP53-R110C·CLGFLHSGTA  | 8796  | 8412  |
| >TP53-R110C·RLGFLHSGTA  | 262  | >TP53-R110C·CLGFLHSGTA  | 4031  | 3769  |
| >TP53-R110C·FRLGFLHSGT  | 716  | >TP53-R110C·FCLGFLHSGT  | 437   | 279   |
| >TP53-R110C·FRLGFLHSGT, | 2991 | >TP53-R110C·FCLGFLHSGT, | 358   | 2633  |
| >TP53-R110C·FRLGFLHS    | 142  | >TP53-R110C·FCLGFLHS    | 21848 | 21706 |
| >TP53-R110C·FRLGFLHSG   | 306  | >TP53-R110C·FCLGFLHSG   | 22481 | 22175 |
| >TP53-R110C·FRLGFLHSGT  | 412  | >TP53-R110C·FCLGFLHSGT  | 32443 | 32031 |
| >TP53-R110C·FRLGFLHSGT, | 174  | >TP53-R110C·FCLGFLHSGT, | 22318 | 22144 |
| >TP53-R110C·GFRLGFLH    | 561  | >TP53-R110C·GFCLGFLH    | 296   | 265   |
| >TP53-R110C·YGFRLGFL    | 116  | >TP53-R110C·YGFCLGFL    | 502   | 386   |
| >TP53-R110C·YGFRLGFL    | 486  | >TP53-R110C·YGFCLGFL    | 162   | 324   |

|                       |       |                        |     |       |
|-----------------------|-------|------------------------|-----|-------|
| >TP53-R110CYGFRLGFL   | 443   | >TP53-R110C YGFCLGFL   | 194 | 249   |
| >TP53-R110CYGFRLGFLH  | 1068  | >TP53-R110C YGFCLGFLH  | 355 | 713   |
| >TP53-R110CYGFRLGFLH  | 89    | >TP53-R110C YGFCLGFLH  | 81  | 8     |
| >TP53-R110CSYGFRLGFL  | 95    | >TP53-R110C SYGFCLGFL  | 556 | 461   |
| >TP53-R110CSYGFRLGF   | 356   | >TP53-R110C SYGFCLGF   | 81  | 275   |
| >TP53-R110CSYGFRLGF   | 232   | >TP53-R110C SYGFCLGF   | 124 | 108   |
| >TP53-R110CSYGFRLGFL  | 319   | >TP53-R110C SYGFCLGFL  | 273 | 46    |
| >TP53-R110CSYGFRLGF   | 7     | >TP53-R110C SYGFCLGF   | 7   | 0     |
| >TP53-R110CSYGFRLGFL  | 12    | >TP53-R110C SYGFCLGFL  | 12  | 0     |
| >TP53-R110CSYGFRLGF   | 338   | >TP53-R110C SYGFCLGF   | 297 | 41    |
| >TP53-R110CSYGFRLGFL  | 139   | >TP53-R110C SYGFCLGFL  | 133 | 6     |
| >TP53-R110CSYGFRLGFL  | 222   | >TP53-R110C SYGFCLGFL  | 253 | 31    |
| >TP53-R110CGSYGFRLGF  | 78    | >TP53-R110C GSYGFCLGF  | 112 | 34    |
| >TP53-R110CGSYGFRLGFL | 227   | >TP53-R110C GSYGFCLGFL | 369 | 142   |
| >TP53-R110CGSYGFRLGFL | 237   | >TP53-R110C GSYGFCLGFL | 175 | 62    |
| >TP53-R110CGSYGFRLGFL | 549   | >TP53-R110C GSYGFCLGFL | 363 | 186   |
| >TP53-R110CGSYGFRLGFL | 491   | >TP53-R110C GSYGFCLGFL | 641 | 150   |
| >TP53-R110CGSYGFRLGFL | 98    | >TP53-R110C GSYGFCLGFL | 124 | 26    |
| >TP53-R110CGSYGFRLGF  | 631   | >TP53-R110C GSYGFCLGF  | 279 | 352   |
| >TP53-R110CGSYGFRLGFL | 706   | >TP53-R110C GSYGFCLGFL | 417 | 289   |
| >TP53-R110CGSYGFRLGF  | 61    | >TP53-R110C GSYGFCLGF  | 67  | 6     |
| >TP53-R110CGSYGFRLGFL | 621   | >TP53-R110C GSYGFCLGFL | 352 | 269   |
| >TP53-R110CGSYGFRLGF  | 365   | >TP53-R110C GSYGFCLGF  | 210 | 155   |
| >TP53-R110CGSYGFRLGF  | 111   | >TP53-R110C GSYGFCLGF  | 117 | 6     |
| >TP53-R110CGSYGFRLGF  | 4     | >TP53-R110C GSYGFCLGF  | 4   | 0     |
| >TP53-R110CGSYGFRLGFL | 31    | >TP53-R110C GSYGFCLGFL | 30  | 1     |
| >TP53-R110CGSYGFRLGF  | 222   | >TP53-R110C GSYGFCLGF  | 863 | 641   |
| >TP53-R110CGSYGFRLGF  | 264   | >TP53-R110C GSYGFCLGF  | 430 | 166   |
| >TP53-R110CGSYGFRLGFL | 802   | >TP53-R110C GSYGFCLGFL | 492 | 310   |
| >TP53-R110CGSYGFRLGF  | 44    | >TP53-R110C GSYGFCLGF  | 22  | 22    |
| >TP53-R110CGSYGFRLGFL | 70    | >TP53-R110C GSYGFCLGFL | 46  | 24    |
| >TP53-R110CGSYGFRLGFL | 63    | >TP53-R110C GSYGFCLGFL | 43  | 20    |
| >TP53-R110CGSYGFRLGFL | 651   | >TP53-R110C GSYGFCLGFL | 398 | 253   |
| >TP53-R110CGSYGFRLGFL | 1593  | >TP53-R110C GSYGFCLGFL | 271 | 1322  |
| >TP53-R110CQGSYGFRLGF | 278   | >TP53-R110C QGSYGFCLGF | 726 | 448   |
| >TP53-R110CYQGSYGFRL  | 30    | >TP53-R110C YQGSYGFCL  | 32  | 2     |
| >TP53-R110CYQGSYGFRL  | 36    | >TP53-R110C YQGSYGFCL  | 39  | 3     |
| >TP53-R110CYQGSYGFRL  | 10668 | >TP53-R110C YQGSYGFCL  | 276 | 10392 |
| >TP53-R110CYQGSYGFRL  | 15    | >TP53-R110C YQGSYGFCL  | 17  | 2     |
| >TP53-R110CYQGSYGFRLC | 189   | >TP53-R110C YQGSYGFCLC | 93  | 96    |
| >TP53-R110CYQGSYGFRL  | 32    | >TP53-R110C YQGSYGFCL  | 117 | 85    |
| >TP53-R110CYQGSYGFRL  | 167   | >TP53-R110C YQGSYGFCL  | 64  | 103   |
| >TP53-R110CYQGSYGFRL  | 632   | >TP53-R110C YQGSYGFCL  | 183 | 449   |

|                     |      |                      |       |       |
|---------------------|------|----------------------|-------|-------|
| >TP53-R110CYQGSYGFR | 993  | >TP53-R110CYQGSYGFC  | 439   | 554   |
| >TP53-R110CYQGSYGR  | 54   | >TP53-R110CYQGSYFCL  | 21637 | 21583 |
| >TP53-R110CYQGSYGR  | 476  | >TP53-R110CYQGSYFCL  | 42670 | 42194 |
| >TP53-R110CYQGSYGR  | 211  | >TP53-R110CYQGSYFCL  | 194   | 17    |
| >TP53-R110CYQGSYGR  | 32   | >TP53-R110CYQGSYFCL  | 28    | 4     |
| >TP53-R110CYQGSYGR  | 158  | >TP53-R110CYQGSYFCL  | 156   | 2     |
| >TP53-R110CYQGSYGR  | 77   | >TP53-R110CYQGSYFCL  | 27    | 50    |
| >TP53-R110CYQGSYGR  | 6    | >TP53-R110CYQGSYFCL  | 6     | 0     |
| >TP53-R110CYQGSYGR  | 145  | >TP53-R110CYQGSYFCL  | 42    | 103   |
| >TP53-R110CYQGSYGR  | 223  | >TP53-R110CYQGSYFCL  | 36135 | 35912 |
| >TP53-R110CTYQGSYGR | 141  | >TP53-R110CTYQGSYFCL | 395   | 254   |
| >TP53-R110CTYQGSYGR | 316  | >TP53-R110CTYQGSYFCL | 103   | 213   |
| >TP53-R110CTYQGSYGR | 163  | >TP53-R110CTYQGSYFCL | 85    | 78    |
| >TP53-R110CTYQGSYGR | 255  | >TP53-R110CTYQGSYFCL | 182   | 73    |
| >TP53-R110CTYQGSYGR | 7    | >TP53-R110CTYQGSYFCL | 15    | 8     |
| >TP53-R110CTYQGSYGR | 19   | >TP53-R110CTYQGSYFCL | 20827 | 20808 |
| >TP53-R110CTYQGSYGR | 25   | >TP53-R110CTYQGSYFCL | 25834 | 25809 |
| >TP53-R110CTYQGSYGR | 154  | >TP53-R110CTYQGSYFCL | 39886 | 39732 |
| >TP53-R110CTYQGSYGR | 53   | >TP53-R110CTYQGSYFCL | 33710 | 33657 |
| >TP53-R110CTYQGSYGR | 580  | >TP53-R110CTYQGSYFCL | 313   | 267   |
| >TP53-R110CTYQGSYGR | 598  | >TP53-R110CTYQGSYFCL | 313   | 285   |
| >TP53-R110CTYQGSYGR | 220  | >TP53-R110CTYQGSYFCL | 1198  | 978   |
| >TP53-R110CTYQGSYGR | 169  | >TP53-R110CTYQGSYFCL | 187   | 18    |
| >TP53-R110CTYQGSYGR | 260  | >TP53-R110CTYQGSYFCL | 296   | 36    |
| >TP53-R110CTYQGSYGR | 77   | >TP53-R110CTYQGSYFCL | 92    | 15    |
| >TP53-R110CTYQGSYGR | 23   | >TP53-R110CTYQGSYFCL | 73    | 50    |
| >TP53-R110CTYQGSYGR | 854  | >TP53-R110CTYQGSYFCL | 424   | 430   |
| >TP53-R110CTYQGSYGR | 175  | >TP53-R110CTYQGSYFCL | 79    | 96    |
| >TP53-R110CTYQGSYGR | 50   | >TP53-R110CTYQGSYFCL | 13109 | 13059 |
| >TP53-R110CTYQGSYGR | 57   | >TP53-R110CTYQGSYFCL | 31121 | 31064 |
| >TP53-R110CTYQGSYGR | 96   | >TP53-R110CTYQGSYFCL | 1205  | 1109  |
| >TP53-R110CTYQGSYGR | 10   | >TP53-R110CTYQGSYFCL | 9442  | 9432  |
| >TP53-R110CTYQGSYGR | 21   | >TP53-R110CTYQGSYFCL | 55    | 34    |
| >TP53-R110CTYQGSYGR | 407  | >TP53-R110CTYQGSYFCL | 27022 | 26615 |
| >TP53-R110CTYQGSYGR | 57   | >TP53-R110CTYQGSYFCL | 36034 | 35977 |
| >TP53-R110CTYQGSYGR | 402  | >TP53-R110CTYQGSYFCL | 1218  | 816   |
| >TP53-R110CTYQGSYGR | 1124 | >TP53-R110CTYQGSYFCL | 395   | 729   |
| >TP53-R110CTYQGSYGR | 465  | >TP53-R110CTYQGSYFCL | 256   | 209   |
| >TP53-R110CTYQGSYGR | 3    | >TP53-R110CTYQGSYFCL | 4     | 1     |
| >TP53-R110CTYQGSYGR | 439  | >TP53-R110CTYQGSYFCL | 2008  | 1569  |
| >TP53-R110CTYQGSYGR | 35   | >TP53-R110CTYQGSYFCL | 103   | 68    |
| >TP53-R110CTYQGSYGR | 151  | >TP53-R110CTYQGSYFCL | 291   | 140   |
| >TP53-R110CTYQGSYGR | 28   | >TP53-R110CTYQGSYFCL | 127   | 99    |

|                         |      |                        |       |       |
|-------------------------|------|------------------------|-------|-------|
| >TP53-R110C KTYQGSYGFR  | 345  | >TP53-R110C KTYQGSYGFC | 33045 | 32700 |
| >TP53-R110C KTYQGSYGFR  | 370  | >TP53-R110C KTYQGSYGFC | 15666 | 15296 |
| >TP53-R110C KTYQGSYGFR  | 25   | >TP53-R110C KTYQGSYGFC | 28095 | 28070 |
| >TP53-R110C KTYQGSYGFR  | 43   | >TP53-R110C KTYQGSYGFC | 44    | 1     |
| >TP53-R110F RLGFLHSGTA  | 326  | >TP53-R110F HLGFLHSGTA | 742   | 416   |
| >TP53-R110F RLGFLHSGTA  | 162  | >TP53-R110F HLGFLHSGTA | 801   | 639   |
| >TP53-R110F RLGFLHSGTA  | 43   | >TP53-R110F HLGFLHSGTA | 73    | 30    |
| >TP53-R110F RLGFLHSGTA  | 125  | >TP53-R110F HLGFLHSGTA | 864   | 739   |
| >TP53-R110F RLGFLHSGTA  | 384  | >TP53-R110F HLGFLHSGTA | 1376  | 992   |
| >TP53-R110F RLGFLHSGTA  | 262  | >TP53-R110F HLGFLHSGTA | 1165  | 903   |
| >TP53-R110F FRLGFLHS    | 142  | >TP53-R110F FHLGFLHS   | 12723 | 12581 |
| >TP53-R110F FRLGFLHSG   | 306  | >TP53-R110F FHLGFLHSG  | 14067 | 13761 |
| >TP53-R110F FRLGFLHSGT  | 412  | >TP53-R110F FHLGFLHSGT | 16065 | 15653 |
| >TP53-R110F FRLGFLHSGT, | 174  | >TP53-R110F FHLGFLHSGT | 13743 | 13569 |
| >TP53-R110F FRLGFLHSGT, | 2744 | >TP53-R110F FHLGFLHSGT | 381   | 2363  |
| >TP53-R110F GFRLGFLH    | 561  | >TP53-R110F GFHLGFLH   | 308   | 253   |
| >TP53-R110F YGFRLGFL    | 116  | >TP53-R110F YGFHLGFL   | 588   | 472   |
| >TP53-R110F YGFRLGFL    | 486  | >TP53-R110F YGFHLGFL   | 192   | 294   |
| >TP53-R110F YGFRLGFL    | 443  | >TP53-R110F YGFHLGFL   | 242   | 201   |
| >TP53-R110F YGFRLGFLH   | 1068 | >TP53-R110F YGFHLGFLH  | 246   | 822   |
| >TP53-R110F YGFRLGFLH   | 89   | >TP53-R110F YGFHLGFLH  | 96    | 7     |
| >TP53-R110F SYGFRLGFL   | 95   | >TP53-R110F SYGFHLGFL  | 1647  | 1552  |
| >TP53-R110F SYGFRLGF    | 356  | >TP53-R110F SYGFHLGF   | 229   | 127   |
| >TP53-R110F SYGFRLGF    | 232  | >TP53-R110F SYGFHLGF   | 126   | 106   |
| >TP53-R110F SYGFRLGFL   | 319  | >TP53-R110F SYGFHLGFL  | 371   | 52    |
| >TP53-R110F SYGFRLGF    | 7    | >TP53-R110F SYGFHLGF   | 7     | 0     |
| >TP53-R110F SYGFRLGFL   | 12   | >TP53-R110F SYGFHLGFL  | 10    | 2     |
| >TP53-R110F SYGFRLGF    | 1694 | >TP53-R110F SYGFHLGF   | 443   | 1251  |
| >TP53-R110F SYGFRLGF    | 338  | >TP53-R110F SYGFHLGF   | 276   | 62    |
| >TP53-R110F SYGFRLGFL   | 139  | >TP53-R110F SYGFHLGFL  | 145   | 6     |
| >TP53-R110F SYGFRLGFL   | 222  | >TP53-R110F SYGFHLGFL  | 298   | 76    |
| >TP53-R110F GSYGFRLGF   | 78   | >TP53-R110F GSYGFHLGF  | 67    | 11    |
| >TP53-R110F GSYGFRLGFL  | 227  | >TP53-R110F GSYGFHLGFL | 330   | 103   |
| >TP53-R110F GSYGFRLGFL  | 237  | >TP53-R110F GSYGFHLGFL | 159   | 78    |
| >TP53-R110F GSYGFRLGFL  | 549  | >TP53-R110F GSYGFHLGFL | 498   | 51    |
| >TP53-R110F GSYGFRLGFL  | 491  | >TP53-R110F GSYGFHLGFL | 569   | 78    |
| >TP53-R110F GSYGFRLGFL  | 98   | >TP53-R110F GSYGFHLGFL | 101   | 3     |
| >TP53-R110F GSYGFRLGF   | 631  | >TP53-R110F GSYGFHLGF  | 128   | 503   |
| >TP53-R110F GSYGFRLGFL  | 706  | >TP53-R110F GSYGFHLGFL | 287   | 419   |
| >TP53-R110F GSYGFRLGF   | 61   | >TP53-R110F GSYGFHLGF  | 33    | 28    |
| >TP53-R110F GSYGFRLGF   | 365  | >TP53-R110F GSYGFHLGF  | 163   | 202   |
| >TP53-R110F GSYGFRLGF   | 111  | >TP53-R110F GSYGFHLGF  | 81    | 30    |
| >TP53-R110F GSYGFRLGF   | 4    | >TP53-R110F GSYGFHLGF  | 3     | 1     |

|                         |      |                         |       |       |
|-------------------------|------|-------------------------|-------|-------|
| >TP53-R110F GSYGFRLGFL  | 31   | >TP53-R110F GSYGFHLGFL  | 19    | 12    |
| >TP53-R110F GSYGFRLGF   | 222  | >TP53-R110F GSYGFHLGF   | 137   | 85    |
| >TP53-R110F GSYGFRLGF   | 264  | >TP53-R110F GSYGFHLGF   | 120   | 144   |
| >TP53-R110F GSYGFRLGF   | 2461 | >TP53-R110F GSYGFHLGF   | 463   | 1998  |
| >TP53-R110F GSYGFRLGFL  | 802  | >TP53-R110F GSYGFHLGFL  | 230   | 572   |
| >TP53-R110F GSYGFRLGF   | 44   | >TP53-R110F GSYGFHLGF   | 24    | 20    |
| >TP53-R110F GSYGFRLGFL  | 70   | >TP53-R110F GSYGFHLGFL  | 56    | 14    |
| >TP53-R110F GSYGFRLGFL  | 63   | >TP53-R110F GSYGFHLGFL  | 46    | 17    |
| >TP53-R110F GSYGFRLGFL  | 651  | >TP53-R110F GSYGFHLGFL  | 365   | 286   |
| >TP53-R110F GSYGFRLGFL  | 1593 | >TP53-R110F GSYGFHLGFL  | 279   | 1314  |
| >TP53-R110F QGSYGFRLGF  | 278  | >TP53-R110F QGSYGFHLGF  | 311   | 33    |
| >TP53-R110F YQGSYGFRL   | 30   | >TP53-R110F YQGSYGFHL   | 27    | 3     |
| >TP53-R110F YQGSYGFRL   | 36   | >TP53-R110F YQGSYGFHL   | 35    | 1     |
| >TP53-R110F YQGSYGFRL   | 15   | >TP53-R110F YQGSYGFHL   | 7     | 8     |
| >TP53-R110F YQGSYGFRLC  | 189  | >TP53-R110F YQGSYGFHLC  | 108   | 81    |
| >TP53-R110F YQGSYGFRL   | 32   | >TP53-R110F YQGSYGFHL   | 44    | 12    |
| >TP53-R110F YQGSYGFRL   | 167  | >TP53-R110F YQGSYGFHL   | 34    | 133   |
| >TP53-R110F YQGSYGFRL   | 632  | >TP53-R110F YQGSYGFHL   | 113   | 519   |
| >TP53-R110F YQGSYGFRLC  | 1223 | >TP53-R110F YQGSYGFHLC  | 485   | 738   |
| >TP53-R110F YQGSYGFRL   | 54   | >TP53-R110F YQGSYGFH    | 8848  | 8794  |
| >TP53-R110F YQGSYGFRL   | 476  | >TP53-R110F YQGSYGFH    | 26368 | 25892 |
| >TP53-R110F YQGSYGFRL   | 211  | >TP53-R110F YQGSYGFHL   | 55    | 156   |
| >TP53-R110F YQGSYGFRLC  | 32   | >TP53-R110F YQGSYGFHLC  | 27    | 5     |
| >TP53-R110F YQGSYGFRLC  | 158  | >TP53-R110F YQGSYGFHLC  | 111   | 47    |
| >TP53-R110F YQGSYGFRL   | 77   | >TP53-R110F YQGSYGFHL   | 24    | 53    |
| >TP53-R110F YQGSYGFRLC  | 6    | >TP53-R110F YQGSYGFHLC  | 5     | 1     |
| >TP53-R110F YQGSYGFRL   | 145  | >TP53-R110F YQGSYGFHL   | 202   | 57    |
| >TP53-R110F YQGSYGFRL   | 223  | >TP53-R110F YQGSYGFH    | 23555 | 23332 |
| >TP53-R110F TYQGSYGFRL  | 141  | >TP53-R110F TYQGSYGFHL  | 74    | 67    |
| >TP53-R110F TYQGSYGFRL  | 316  | >TP53-R110F TYQGSYGFHL  | 61    | 255   |
| >TP53-R110F TYQGSYGFRL  | 163  | >TP53-R110F TYQGSYGFHL  | 74    | 89    |
| >TP53-R110F TYQGSYGFRL  | 255  | >TP53-R110F TYQGSYGFH   | 776   | 521   |
| >TP53-R110F TYQGSYGFRL  | 7    | >TP53-R110F TYQGSYGFHL  | 6     | 1     |
| >TP53-R110F TYQGSYGFRL  | 19   | >TP53-R110F TYQGSYGFH   | 5570  | 5551  |
| >TP53-R110F TYQGSYGFRL  | 25   | >TP53-R110F TYQGSYGFH   | 11133 | 11108 |
| >TP53-R110F TYQGSYGFRL  | 154  | >TP53-R110F TYQGSYGFH   | 18581 | 18427 |
| >TP53-R110F TYQGSYGFRL  | 53   | >TP53-R110F TYQGSYGFH   | 21493 | 21440 |
| >TP53-R110F TYQGSYGFRL  | 598  | >TP53-R110F TYQGSYGFHL  | 64    | 534   |
| >TP53-R110F KTYQGSYGFRL | 220  | >TP53-R110F KTYQGSYGFHL | 199   | 21    |
| >TP53-R110F KTYQGSYGFRL | 169  | >TP53-R110F KTYQGSYGFHL | 156   | 13    |
| >TP53-R110F KTYQGSYGFRL | 260  | >TP53-R110F KTYQGSYGFHL | 216   | 44    |
| >TP53-R110F KTYQGSYGFRL | 77   | >TP53-R110F KTYQGSYGFHL | 25    | 52    |
| >TP53-R110F KTYQGSYGFRL | 23   | >TP53-R110F KTYQGSYGFHL | 31    | 8     |

|                         |       |                         |       |       |
|-------------------------|-------|-------------------------|-------|-------|
| >TP53-R110F KTYQGSYGFR  | 854   | >TP53-R110F KTYQGSYGFF  | 281   | 573   |
| >TP53-R110F KTYQGSYGFR  | 175   | >TP53-R110F KTYQGSYGFF  | 51    | 124   |
| >TP53-R110F KTYQGSYGFR  | 50    | >TP53-R110F KTYQGSYGFF  | 801   | 751   |
| >TP53-R110F KTYQGSYGFR  | 57    | >TP53-R110F KTYQGSYGFF  | 5686  | 5629  |
| >TP53-R110F KTYQGSYGFR  | 96    | >TP53-R110F KTYQGSYGFF  | 876   | 780   |
| >TP53-R110F KTYQGSYGFR  | 795   | >TP53-R110F KTYQGSYGFF  | 276   | 519   |
| >TP53-R110F KTYQGSYGFR  | 10    | >TP53-R110F KTYQGSYGFF  | 1328  | 1318  |
| >TP53-R110F KTYQGSYGFR  | 643   | >TP53-R110F KTYQGSYGFF  | 292   | 351   |
| >TP53-R110F KTYQGSYGFR  | 21    | >TP53-R110F KTYQGSYGFF  | 37    | 16    |
| >TP53-R110F KTYQGSYGFR  | 407   | >TP53-R110F KTYQGSYGFF  | 15465 | 15058 |
| >TP53-R110F KTYQGSYGFR  | 57    | >TP53-R110F KTYQGSYGFF  | 13843 | 13786 |
| >TP53-R110F KTYQGSYGFR  | 402   | >TP53-R110F KTYQGSYGFF  | 261   | 141   |
| >TP53-R110F KTYQGSYGFR  | 2004  | >TP53-R110F KTYQGSYGFF  | 465   | 1539  |
| >TP53-R110F KTYQGSYGFR  | 1124  | >TP53-R110F KTYQGSYGFF  | 446   | 678   |
| >TP53-R110F KTYQGSYGFR  | 465   | >TP53-R110F KTYQGSYGFF  | 23    | 442   |
| >TP53-R110F KTYQGSYGFR  | 3     | >TP53-R110F KTYQGSYGFF  | 3     | 0     |
| >TP53-R110F KTYQGSYGFR  | 439   | >TP53-R110F KTYQGSYGFF  | 358   | 81    |
| >TP53-R110F KTYQGSYGFR  | 35    | >TP53-R110F KTYQGSYGFF  | 24    | 11    |
| >TP53-R110F KTYQGSYGFR  | 151   | >TP53-R110F KTYQGSYGFF  | 134   | 17    |
| >TP53-R110F KTYQGSYGFR  | 28    | >TP53-R110F KTYQGSYGFF  | 112   | 84    |
| >TP53-R110F KTYQGSYGFR  | 345   | >TP53-R110F KTYQGSYGFF  | 22549 | 22204 |
| >TP53-R110F KTYQGSYGFR  | 370   | >TP53-R110F KTYQGSYGFF  | 1582  | 1212  |
| >TP53-R110F KTYQGSYGFR  | 25    | >TP53-R110F KTYQGSYGFF  | 8689  | 8664  |
| >TP53-R110F KTYQGSYGFR  | 43    | >TP53-R110F KTYQGSYGFF  | 24    | 19    |
| >TP53-R110L RLGFLHSGTA  | 326   | >TP53-R110L LLGFLHSGTA  | 207   | 119   |
| >TP53-R110L RLGFLHSGTA  | 162   | >TP53-R110L LLGFLHSGTA  | 158   | 4     |
| >TP53-R110L RLGFLHSGT   | 2002  | >TP53-R110L LLGFLHSGT   | 301   | 1701  |
| >TP53-R110L RLGFLHSGTA  | 554   | >TP53-R110L LLGFLHSGTA  | 81    | 473   |
| >TP53-R110L RLGFLHSGTA  | 43    | >TP53-R110L LLGFLHSGTA  | 125   | 82    |
| >TP53-R110L RLGFLHSGTA  | 125   | >TP53-R110L LLGFLHSGTA  | 689   | 564   |
| >TP53-R110L RLGFLHSGTA  | 384   | >TP53-R110L LLGFLHSGTA  | 6437  | 6053  |
| >TP53-R110L RLGFLHSGTA  | 262   | >TP53-R110L LLGFLHSGTA  | 2819  | 2557  |
| >TP53-R110L FRLGFLHS    | 21521 | >TP53-R110L FLLGFLHS    | 99    | 21422 |
| >TP53-R110L FRLGFLHSG   | 22701 | >TP53-R110L FLLGFLHSG   | 156   | 22545 |
| >TP53-R110L FRLGFLHSGT  | 12174 | >TP53-R110L FLLGFLHSGT  | 27    | 12147 |
| >TP53-R110L FRLGFLHSGT, | 13756 | >TP53-R110L FLLGFLHSGT/ | 24    | 13732 |
| >TP53-R110L FRLGFLHS    | 18540 | >TP53-R110L FLLGFLHS    | 101   | 18439 |
| >TP53-R110L FRLGFLHSG   | 8655  | >TP53-R110L FLLGFLHSG   | 19    | 8636  |
| >TP53-R110L FRLGFLHSGT  | 6068  | >TP53-R110L FLLGFLHSGT  | 19    | 6049  |
| >TP53-R110L FRLGFLHSGT, | 4637  | >TP53-R110L FLLGFLHSGT/ | 22    | 4615  |
| >TP53-R110L FRLGFLHSG   | 22066 | >TP53-R110L FLLGFLHSG   | 257   | 21809 |
| >TP53-R110L FRLGFLHSGT  | 4597  | >TP53-R110L FLLGFLHSGT  | 17    | 4580  |
| >TP53-R110L FRLGFLHSGT, | 9093  | >TP53-R110L FLLGFLHSGT/ | 6     | 9087  |



|                         |       |                         |       |       |
|-------------------------|-------|-------------------------|-------|-------|
| >TP53-R110L FRLGFLHS    | 7585  | >TP53-R110L FLLGFLHS    | 46    | 7539  |
| >TP53-R110L FRLGFLHSG   | 8454  | >TP53-R110L FLLGFLHSG   | 189   | 8265  |
| >TP53-R110L FRLGFLHSGT  | 716   | >TP53-R110L FLLGFLHSGT  | 36    | 680   |
| >TP53-R110L FRLGFLHSGT, | 1440  | >TP53-R110L FLLGFLHSGT/ | 28    | 1412  |
| >TP53-R110L FRLGFLHS    | 16065 | >TP53-R110L FLLGFLHS    | 20    | 16045 |
| >TP53-R110L FRLGFLHSG   | 10221 | >TP53-R110L FLLGFLHSG   | 8     | 10213 |
| >TP53-R110L FRLGFLHSGT  | 7187  | >TP53-R110L FLLGFLHSGT  | 3     | 7184  |
| >TP53-R110L FRLGFLHSGT, | 2991  | >TP53-R110L FLLGFLHSGT/ | 3     | 2988  |
| >TP53-R110L FRLGFLHSG   | 12986 | >TP53-R110L FLLGFLHSG   | 156   | 12830 |
| >TP53-R110L FRLGFLHSGT  | 16386 | >TP53-R110L FLLGFLHSGT  | 60    | 16326 |
| >TP53-R110L FRLGFLHSGT, | 11457 | >TP53-R110L FLLGFLHSGT/ | 9     | 11448 |
| >TP53-R110L FRLGFLHS    | 17939 | >TP53-R110L FLLGFLHS    | 93    | 17846 |
| >TP53-R110L FRLGFLHSG   | 20327 | >TP53-R110L FLLGFLHSG   | 167   | 20160 |
| >TP53-R110L FRLGFLHSGT  | 15541 | >TP53-R110L FLLGFLHSGT  | 23    | 15518 |
| >TP53-R110L FRLGFLHSGT, | 13430 | >TP53-R110L FLLGFLHSGT/ | 10    | 13420 |
| >TP53-R110L FRLGFLHSGT  | 19070 | >TP53-R110L FLLGFLHSGT  | 29    | 19041 |
| >TP53-R110L FRLGFLHSGT, | 15968 | >TP53-R110L FLLGFLHSGT/ | 15    | 15953 |
| >TP53-R110L FRLGFLHS    | 25094 | >TP53-R110L FLLGFLHS    | 14    | 25080 |
| >TP53-R110L FRLGFLHSG   | 19924 | >TP53-R110L FLLGFLHSG   | 8     | 19916 |
| >TP53-R110L FRLGFLHSGT  | 11739 | >TP53-R110L FLLGFLHSGT  | 4     | 11735 |
| >TP53-R110L FRLGFLHSGT, | 6714  | >TP53-R110L FLLGFLHSGT/ | 3     | 6711  |
| >TP53-R110L FRLGFLHSGT, | 11766 | >TP53-R110L FLLGFLHSGT/ | 300   | 11466 |
| >TP53-R110L FRLGFLHS    | 142   | >TP53-R110L FLLGFLHS    | 14518 | 14376 |
| >TP53-R110L FRLGFLHSG   | 306   | >TP53-R110L FLLGFLHSG   | 15683 | 15377 |
| >TP53-R110L FRLGFLHSGT  | 412   | >TP53-R110L FLLGFLHSGT  | 29857 | 29445 |
| >TP53-R110L FRLGFLHSGT, | 174   | >TP53-R110L FLLGFLHSGT/ | 15593 | 15419 |
| >TP53-R110L QKTYQGSYGI  | 2449  | >TP53-R110L QKTYQGSYGI  | 403   | 2046  |
| >TP53-R110L GFRLGFLH    | 561   | >TP53-R110L GFLLGFLH    | 134   | 427   |
| >TP53-R110L YGFRLGFL    | 116   | >TP53-R110L YGFLLGFL    | 304   | 188   |
| >TP53-R110L YGFRLGFL    | 486   | >TP53-R110L YGFLLGFL    | 330   | 156   |
| >TP53-R110L YGFRLGFL    | 443   | >TP53-R110L YGFLLGFL    | 379   | 64    |
| >TP53-R110L YGFRLGFLH   | 89    | >TP53-R110L YGFLLGFLH   | 192   | 103   |
| >TP53-R110L SYGFRLGFL   | 95    | >TP53-R110L SYGFLLGFL   | 46    | 49    |
| >TP53-R110L SYGFRLGF    | 356   | >TP53-R110L SYGFLLGF    | 225   | 131   |
| >TP53-R110L SYGFRLGF    | 232   | >TP53-R110L SYGFLLGF    | 164   | 68    |
| >TP53-R110L SYGFRLGFL   | 319   | >TP53-R110L SYGFLLGFL   | 463   | 144   |
| >TP53-R110L SYGFRLGF    | 7     | >TP53-R110L SYGFLLGF    | 6     | 1     |
| >TP53-R110L SYGFRLGFL   | 12    | >TP53-R110L SYGFLLGFL   | 9     | 3     |
| >TP53-R110L SYGFRLGF    | 338   | >TP53-R110L SYGFLLGF    | 212   | 126   |
| >TP53-R110L SYGFRLGFL   | 139   | >TP53-R110L SYGFLLGFL   | 134   | 5     |
| >TP53-R110L SYGFRLGFL   | 222   | >TP53-R110L SYGFLLGFL   | 115   | 107   |
| >TP53-R110L GSYGFRLGF   | 78    | >TP53-R110L GSYGFLLGF   | 77    | 1     |
| >TP53-R110L GSYGFRLGFL  | 227   | >TP53-R110L GSYGFLLGFL  | 260   | 33    |

|                         |       |                         |       |       |
|-------------------------|-------|-------------------------|-------|-------|
| >TP53-R110L GSYGFRLGFL  | 237   | >TP53-R110L GSYGFLLGFL  | 101   | 136   |
| >TP53-R110L GSYGFRLGFL  | 549   | >TP53-R110L GSYGFLLGFL  | 308   | 241   |
| >TP53-R110L GSYGFRLGFL  | 491   | >TP53-R110L GSYGFLLGFLI | 611   | 120   |
| >TP53-R110L GSYGFRLGFL  | 98    | >TP53-R110L GSYGFLLGFLI | 99    | 1     |
| >TP53-R110L GSYGFRLGF   | 631   | >TP53-R110L GSYGFLLGF   | 315   | 316   |
| >TP53-R110L GSYGFRLGFL  | 706   | >TP53-R110L GSYGFLLGFLI | 489   | 217   |
| >TP53-R110L GSYGFRLGF   | 61    | >TP53-R110L GSYGFLLGF   | 52    | 9     |
| >TP53-R110L GSYGFRLGF   | 365   | >TP53-R110L GSYGFLLGF   | 247   | 118   |
| >TP53-R110L GSYGFRLGF   | 111   | >TP53-R110L GSYGFLLGF   | 158   | 47    |
| >TP53-R110L GSYGFRLGF   | 4     | >TP53-R110L GSYGFLLGF   | 3     | 1     |
| >TP53-R110L GSYGFRLGFL  | 31    | >TP53-R110L GSYGFLLGFL  | 24    | 7     |
| >TP53-R110L GSYGFRLGF   | 222   | >TP53-R110L GSYGFLLGF   | 292   | 70    |
| >TP53-R110L GSYGFRLGF   | 264   | >TP53-R110L GSYGFLLGF   | 109   | 155   |
| >TP53-R110L GSYGFRLGFL  | 802   | >TP53-R110L GSYGFLLGFL  | 402   | 400   |
| >TP53-R110L GSYGFRLGF   | 44    | >TP53-R110L GSYGFLLGF   | 28    | 16    |
| >TP53-R110L GSYGFRLGFL  | 70    | >TP53-R110L GSYGFLLGFL  | 69    | 1     |
| >TP53-R110L GSYGFRLGFL  | 63    | >TP53-R110L GSYGFLLGFLI | 58    | 5     |
| >TP53-R110L GSYGFRLGFLI | 651   | >TP53-R110L GSYGFLLGFLI | 422   | 229   |
| >TP53-R110L GSYGFRLGFL  | 1593  | >TP53-R110L GSYGFLLGFL  | 364   | 1229  |
| >TP53-R110L QGSYGFRLGF  | 278   | >TP53-R110L QGSYGFLLGF  | 155   | 123   |
| >TP53-R110L YQGSYGFR    | 21058 | >TP53-R110L YQGSYGFL    | 185   | 20873 |
| >TP53-R110L YQGSYGFRL   | 30    | >TP53-R110L YQGSYGFLL   | 16    | 14    |
| >TP53-R110L YQGSYGFR    | 19863 | >TP53-R110L YQGSYGFL    | 41    | 19822 |
| >TP53-R110L YQGSYGFRL   | 36    | >TP53-R110L YQGSYGFLL   | 12    | 24    |
| >TP53-R110L YQGSYGFR    | 18605 | >TP53-R110L YQGSYGFL    | 328   | 18277 |
| >TP53-R110L YQGSYGFR    | 10668 | >TP53-R110L YQGSYGFL    | 16    | 10652 |
| >TP53-R110L YQGSYGFRL   | 15    | >TP53-R110L YQGSYGFLL   | 7     | 8     |
| >TP53-R110L YQGSYGFRLC  | 189   | >TP53-R110L YQGSYGFLLG  | 41    | 148   |
| >TP53-R110L YQGSYGFR    | 18439 | >TP53-R110L YQGSYGFL    | 114   | 18325 |
| >TP53-R110L YQGSYGFRL   | 32    | >TP53-R110L YQGSYGFLL   | 45    | 13    |
| >TP53-R110L YQGSYGFR    | 20261 | >TP53-R110L YQGSYGFL    | 361   | 19900 |
| >TP53-R110L YQGSYGFRL   | 167   | >TP53-R110L YQGSYGFLL   | 84    | 83    |
| >TP53-R110L YQGSYGFRL   | 632   | >TP53-R110L YQGSYGFLL   | 275   | 357   |
| >TP53-R110L YQGSYGFR    | 54    | >TP53-R110L YQGSYGFL    | 14973 | 14919 |
| >TP53-R110L YQGSYGFR    | 476   | >TP53-R110L YQGSYGFL    | 36115 | 35639 |
| >TP53-R110L YQGSYGFR    | 10242 | >TP53-R110L YQGSYGFL    | 286   | 9956  |
| >TP53-R110L YQGSYGFRL   | 211   | >TP53-R110L YQGSYGFLL   | 298   | 87    |
| >TP53-R110L YQGSYGFRLC  | 32    | >TP53-R110L YQGSYGFLLG  | 31    | 1     |
| >TP53-R110L YQGSYGFRLC  | 158   | >TP53-R110L YQGSYGFLLG  | 151   | 7     |
| >TP53-R110L YQGSYGFR    | 1093  | >TP53-R110L YQGSYGFL    | 122   | 971   |
| >TP53-R110L YQGSYGFRL   | 77    | >TP53-R110L YQGSYGFLL   | 47    | 30    |
| >TP53-R110L YQGSYGFRLC  | 6     | >TP53-R110L YQGSYGFLLG  | 6     | 0     |
| >TP53-R110L YQGSYGFR    | 145   | >TP53-R110L YQGSYGFLL   | 56    | 89    |

|                       |       |                       |       |       |
|-----------------------|-------|-----------------------|-------|-------|
| >TP53-R110L YQGSYGFR  | 223   | >TP53-R110L YQGSYGFL  | 29783 | 29560 |
| >TP53-R110L TYQGSYGFR | 12698 | >TP53-R110L TYQGSYGFL | 7     | 12691 |
| >TP53-R110L TYQGSYGFR | 141   | >TP53-R110L TYQGSYGFL | 308   | 167   |
| >TP53-R110L TYQGSYGFR | 3160  | >TP53-R110L TYQGSYGFL | 268   | 2892  |
| >TP53-R110L TYQGSYGFR | 316   | >TP53-R110L TYQGSYGFL | 50    | 266   |
| >TP53-R110L TYQGSYGFR | 3430  | >TP53-R110L TYQGSYGFL | 187   | 3243  |
| >TP53-R110L TYQGSYGFR | 163   | >TP53-R110L TYQGSYGFL | 69    | 94    |
| >TP53-R110L TYQGSYGFR | 255   | >TP53-R110L TYQGSYGFL | 5     | 250   |
| >TP53-R110L TYQGSYGFR | 7     | >TP53-R110L TYQGSYGFL | 7     | 0     |
| >TP53-R110L TYQGSYGFR | 19    | >TP53-R110L TYQGSYGFL | 11155 | 11136 |
| >TP53-R110L TYQGSYGFR | 25    | >TP53-R110L TYQGSYGFL | 8520  | 8495  |
| >TP53-R110L TYQGSYGFR | 154   | >TP53-R110L TYQGSYGFL | 30567 | 30413 |
| >TP53-R110L TYQGSYGFR | 53    | >TP53-R110L TYQGSYGFL | 25854 | 25801 |
| >TP53-R110L TYQGSYGFR | 580   | >TP53-R110L TYQGSYGFL | 123   | 457   |
| >TP53-R110L TYQGSYGFR | 598   | >TP53-R110L TYQGSYGFL | 143   | 455   |
| >TP53-R110L TYQGSYGFR | 220   | >TP53-R110L TYQGSYGFL | 268   | 48    |
| >TP53-R110L TYQGSYGFR | 169   | >TP53-R110L TYQGSYGFL | 73    | 96    |
| >TP53-R110L TYQGSYGFR | 9785  | >TP53-R110L TYQGSYGFL | 96    | 9689  |
| >TP53-R110L TYQGSYGFR | 260   | >TP53-R110L TYQGSYGFL | 90    | 170   |
| >TP53-R110L TYQGSYGFR | 9967  | >TP53-R110L TYQGSYGFL | 120   | 9847  |
| >TP53-R110L TYQGSYGFR | 77    | >TP53-R110L TYQGSYGFL | 24    | 53    |
| >TP53-R110L TYQGSYGFR | 17698 | >TP53-R110L TYQGSYGFL | 71    | 17627 |
| >TP53-R110L TYQGSYGFR | 23    | >TP53-R110L TYQGSYGFL | 30    | 7     |
| >TP53-R110L TYQGSYGFR | 20755 | >TP53-R110L TYQGSYGFL | 234   | 20521 |
| >TP53-R110L TYQGSYGFR | 175   | >TP53-R110L TYQGSYGFL | 105   | 70    |
| >TP53-R110L TYQGSYGFR | 50    | >TP53-R110L TYQGSYGFL | 5372  | 5322  |
| >TP53-R110L TYQGSYGFR | 57    | >TP53-R110L TYQGSYGFL | 23475 | 23418 |
| >TP53-R110L TYQGSYGFR | 96    | >TP53-R110L TYQGSYGFL | 61    | 35    |
| >TP53-R110L TYQGSYGFR | 795   | >TP53-R110L TYQGSYGFL | 316   | 479   |
| >TP53-R110L TYQGSYGFR | 2063  | >TP53-R110L TYQGSYGFL | 369   | 1694  |
| >TP53-R110L TYQGSYGFR | 10    | >TP53-R110L TYQGSYGFL | 2896  | 2886  |
| >TP53-R110L TYQGSYGFR | 643   | >TP53-R110L TYQGSYGFL | 381   | 262   |
| >TP53-R110L TYQGSYGFR | 4409  | >TP53-R110L TYQGSYGFL | 285   | 4124  |
| >TP53-R110L TYQGSYGFR | 21    | >TP53-R110L TYQGSYGFL | 22    | 1     |
| >TP53-R110L TYQGSYGFR | 407   | >TP53-R110L TYQGSYGFL | 21954 | 21547 |
| >TP53-R110L TYQGSYGFR | 57    | >TP53-R110L TYQGSYGFL | 28716 | 28659 |
| >TP53-R110L TYQGSYGFR | 22379 | >TP53-R110L TYQGSYGFL | 460   | 21919 |
| >TP53-R110L TYQGSYGFR | 14522 | >TP53-R110L TYQGSYGFL | 338   | 14184 |
| >TP53-R110L TYQGSYGFR | 402   | >TP53-R110L TYQGSYGFL | 242   | 160   |
| >TP53-R110L TYQGSYGFR | 465   | >TP53-R110L TYQGSYGFL | 3     | 462   |
| >TP53-R110L TYQGSYGFR | 3     | >TP53-R110L TYQGSYGFL | 3     | 0     |
| >TP53-R110L TYQGSYGFR | 439   | >TP53-R110L TYQGSYGFL | 427   | 12    |
| >TP53-R110L TYQGSYGFR | 12127 | >TP53-R110L TYQGSYGFL | 71    | 12056 |

|                         |       |                         |       |       |
|-------------------------|-------|-------------------------|-------|-------|
| >TP53-R110L KTYQGSYGFR  | 35    | >TP53-R110L KTYQGSYGFL  | 29    | 6     |
| >TP53-R110L KTYQGSYGFR  | 11452 | >TP53-R110L KTYQGSYGFL  | 118   | 11334 |
| >TP53-R110L KTYQGSYGFR  | 151   | >TP53-R110L KTYQGSYGFL  | 31    | 120   |
| >TP53-R110L KTYQGSYGFR  | 4823  | >TP53-R110L KTYQGSYGFL  | 72    | 4751  |
| >TP53-R110L KTYQGSYGFR  | 28    | >TP53-R110L KTYQGSYGFL  | 18    | 10    |
| >TP53-R110L KTYQGSYGFR  | 345   | >TP53-R110L KTYQGSYGFL  | 29989 | 29644 |
| >TP53-R110L KTYQGSYGFR  | 370   | >TP53-R110L KTYQGSYGFL  | 4699  | 4329  |
| >TP53-R110L KTYQGSYGFR  | 25    | >TP53-R110L KTYQGSYGFL  | 14566 | 14541 |
| >TP53-R110L KTYQGSYGFR  | 29244 | >TP53-R110L KTYQGSYGFL  | 134   | 29110 |
| >TP53-R110L KTYQGSYGFR  | 43    | >TP53-R110L KTYQGSYGFL  | 26    | 17    |
| >TP53-R110F RLGFLHSGTA  | 326   | >TP53-R110F PLGFLHSGTA  | 5846  | 5520  |
| >TP53-R110F RLGFLHSGTA  | 162   | >TP53-R110F PLGFLHSGTA  | 3842  | 3680  |
| >TP53-R110F RLGFLHSGTA  | 43    | >TP53-R110F PLGFLHSGTA  | 2070  | 2027  |
| >TP53-R110F RLGFLHSGTA  | 125   | >TP53-R110F PLGFLHSGTA  | 7171  | 7046  |
| >TP53-R110F RLGFLHSGTA  | 384   | >TP53-R110F PLGFLHSGTA  | 12520 | 12136 |
| >TP53-R110F RLGFLHSGTA  | 262   | >TP53-R110F PLGFLHSGTA  | 11848 | 11586 |
| >TP53-R110F FRLGFLHSGT, | 11766 | >TP53-R110F FPLGFLHSGT, | 383   | 11383 |
| >TP53-R110F FRLGFLHS    | 142   | >TP53-R110F FPLGFLHS    | 20741 | 20599 |
| >TP53-R110F FRLGFLHSG   | 306   | >TP53-R110F FPLGFLHSG   | 21113 | 20807 |
| >TP53-R110F FRLGFLHSGT  | 412   | >TP53-R110F FPLGFLHSGT  | 31722 | 31310 |
| >TP53-R110F FRLGFLHSGT, | 174   | >TP53-R110F FPLGFLHSGT, | 21200 | 21026 |
| >TP53-R110F FRLGFLHSGT, | 22216 | >TP53-R110F FPLGFLHSGT, | 137   | 22079 |
| >TP53-R110F FRLGFLHS    | 17290 | >TP53-R110F FPLGFLHS    | 28    | 17262 |
| >TP53-R110F FRLGFLHSG   | 12578 | >TP53-R110F FPLGFLHSG   | 16    | 12562 |
| >TP53-R110F FRLGFLHSGT  | 15587 | >TP53-R110F FPLGFLHSGT  | 14    | 15573 |
| >TP53-R110F FRLGFLHSGT, | 2744  | >TP53-R110F FPLGFLHSGT, | 5     | 2739  |
| >TP53-R110F FRLGFLHSGT, | 25536 | >TP53-R110F FPLGFLHSGT, | 386   | 25150 |
| >TP53-R110F YGFRLGFL    | 116   | >TP53-R110F YGFPLGFL    | 849   | 733   |
| >TP53-R110F YGFRLGFL    | 486   | >TP53-R110F YGFPLGFL    | 239   | 247   |
| >TP53-R110F YGFRLGFL    | 443   | >TP53-R110F YGFPLGFL    | 118   | 325   |
| >TP53-R110F YGFRLGFL    | 1247  | >TP53-R110F YGFPLGFL    | 499   | 748   |
| >TP53-R110F YGFRLGFLH   | 1068  | >TP53-R110F YGFPLGFLH   | 176   | 892   |
| >TP53-R110F YGFRLGFL    | 4335  | >TP53-R110F YGFPLGFL    | 426   | 3909  |
| >TP53-R110F YGFRLGFLH   | 89    | >TP53-R110F YGFPLGFLH   | 69    | 20    |
| >TP53-R110F YGFRLGFL    | 2188  | >TP53-R110F YGFPLGFL    | 468   | 1720  |
| >TP53-R110F SYGFRLGFL   | 95    | >TP53-R110F SYGFPLGFL   | 2250  | 2155  |
| >TP53-R110F SYGFRLGF    | 356   | >TP53-R110F SYGFPLGF    | 454   | 98    |
| >TP53-R110F SYGFRLGF    | 232   | >TP53-R110F SYGFPLGF    | 231   | 1     |
| >TP53-R110F SYGFRLGFL   | 319   | >TP53-R110F SYGFPLGFL   | 1215  | 896   |
| >TP53-R110F SYGFRLGF    | 7     | >TP53-R110F SYGFPLGF    | 8     | 1     |
| >TP53-R110F SYGFRLGFL   | 12    | >TP53-R110F SYGFPLGFL   | 11    | 1     |
| >TP53-R110F SYGFRLGF    | 338   | >TP53-R110F SYGFPLGF    | 326   | 12    |
| >TP53-R110F SYGFRLGFL   | 139   | >TP53-R110F SYGFPLGFL   | 123   | 16    |

|                        |      |                        |       |       |
|------------------------|------|------------------------|-------|-------|
| >TP53-R110F SYGFRLGFL  | 222  | >TP53-R110F SYGFPLGFL  | 202   | 20    |
| >TP53-R110F GSYGFRLGF  | 78   | >TP53-R110F GSYGFPLGF  | 244   | 166   |
| >TP53-R110F GSYGFRLGFL | 227  | >TP53-R110F GSYGFPLGFL | 240   | 13    |
| >TP53-R110F GSYGFRLGFL | 237  | >TP53-R110F GSYGFPLGFL | 92    | 145   |
| >TP53-R110F GSYGFRLGFL | 549  | >TP53-R110F GSYGFPLGFL | 299   | 250   |
| >TP53-R110F GSYGFRLGFL | 491  | >TP53-R110F GSYGFPLGFL | 476   | 15    |
| >TP53-R110F GSYGFRLGFL | 98   | >TP53-R110F GSYGFPLGFL | 97    | 1     |
| >TP53-R110F GSYGFRLGF  | 631  | >TP53-R110F GSYGFPLGF  | 220   | 411   |
| >TP53-R110F GSYGFRLGFL | 706  | >TP53-R110F GSYGFPLGFL | 334   | 372   |
| >TP53-R110F GSYGFRLGF  | 61   | >TP53-R110F GSYGFPLGF  | 28    | 33    |
| >TP53-R110F GSYGFRLGFL | 621  | >TP53-R110F GSYGFPLGFL | 331   | 290   |
| >TP53-R110F GSYGFRLGF  | 365  | >TP53-R110F GSYGFPLGF  | 706   | 341   |
| >TP53-R110F GSYGFRLGF  | 111  | >TP53-R110F GSYGFPLGF  | 78    | 33    |
| >TP53-R110F GSYGFRLGF  | 4    | >TP53-R110F GSYGFPLGF  | 3     | 1     |
| >TP53-R110F GSYGFRLGFL | 31   | >TP53-R110F GSYGFPLGFL | 20    | 11    |
| >TP53-R110F GSYGFRLGF  | 222  | >TP53-R110F GSYGFPLGF  | 187   | 35    |
| >TP53-R110F GSYGFRLGF  | 264  | >TP53-R110F GSYGFPLGF  | 65    | 199   |
| >TP53-R110F GSYGFRLGF  | 44   | >TP53-R110F GSYGFPLGF  | 61    | 17    |
| >TP53-R110F GSYGFRLGFL | 70   | >TP53-R110F GSYGFPLGFL | 53    | 17    |
| >TP53-R110F GSYGFRLGFL | 63   | >TP53-R110F GSYGFPLGFL | 74    | 11    |
| >TP53-R110F GSYGFRLGFL | 651  | >TP53-R110F GSYGFPLGFL | 283   | 368   |
| >TP53-R110F GSYGFRLGFL | 1593 | >TP53-R110F GSYGFPLGFL | 230   | 1363  |
| >TP53-R110F QGSYGFRLGF | 278  | >TP53-R110F QGSYGFPLGF | 74    | 204   |
| >TP53-R110F YQGSYGFRL  | 30   | >TP53-R110F YQGSYGFPL  | 13    | 17    |
| >TP53-R110F YQGSYGFRL  | 36   | >TP53-R110F YQGSYGFPL  | 16    | 20    |
| >TP53-R110F YQGSYGFRL  | 1457 | >TP53-R110F YQGSYGFPL  | 294   | 1163  |
| >TP53-R110F YQGSYGFRL  | 15   | >TP53-R110F YQGSYGFPL  | 5     | 10    |
| >TP53-R110F YQGSYGFRLC | 189  | >TP53-R110F YQGSYGFPLC | 134   | 55    |
| >TP53-R110F YQGSYGFRL  | 32   | >TP53-R110F YQGSYGFPL  | 25    | 7     |
| >TP53-R110F YQGSYGFRL  | 167  | >TP53-R110F YQGSYGFPL  | 24    | 143   |
| >TP53-R110F YQGSYGFRL  | 632  | >TP53-R110F YQGSYGFPL  | 226   | 406   |
| >TP53-R110F YQGSYGFRL  | 54   | >TP53-R110F YQGSYGFPL  | 21187 | 21133 |
| >TP53-R110F YQGSYGFRL  | 476  | >TP53-R110F YQGSYGFPL  | 40411 | 39935 |
| >TP53-R110F YQGSYGFRL  | 211  | >TP53-R110F YQGSYGFPL  | 47    | 164   |
| >TP53-R110F YQGSYGFRLC | 32   | >TP53-R110F YQGSYGFPLC | 33    | 1     |
| >TP53-R110F YQGSYGFRLC | 158  | >TP53-R110F YQGSYGFPLC | 105   | 53    |
| >TP53-R110F YQGSYGFRL  | 77   | >TP53-R110F YQGSYGFPL  | 10    | 67    |
| >TP53-R110F YQGSYGFRLC | 6    | >TP53-R110F YQGSYGFPLC | 4     | 2     |
| >TP53-R110F YQGSYGFRL  | 145  | >TP53-R110F YQGSYGFPL  | 16    | 129   |
| >TP53-R110F YQGSYGFRL  | 223  | >TP53-R110F YQGSYGFPL  | 35203 | 34980 |
| >TP53-R110F TYQGSYGFRL | 141  | >TP53-R110F TYQGSYGFPL | 62    | 79    |
| >TP53-R110F TYQGSYGFRL | 316  | >TP53-R110F TYQGSYGFPL | 261   | 55    |
| >TP53-R110F TYQGSYGFRL | 163  | >TP53-R110F TYQGSYGFPL | 94    | 69    |

|                        |      |                        |       |       |
|------------------------|------|------------------------|-------|-------|
| >TP53-R110F TYQGSYGFR  | 255  | >TP53-R110F TYQGSYGFP  | 738   | 483   |
| >TP53-R110F TYQGSYGFR  | 7    | >TP53-R110F TYQGSYGFP  | 9     | 2     |
| >TP53-R110F TYQGSYGFR  | 19   | >TP53-R110F TYQGSYGFP  | 21114 | 21095 |
| >TP53-R110F TYQGSYGFR  | 25   | >TP53-R110F TYQGSYGFP  | 24315 | 24290 |
| >TP53-R110F TYQGSYGFR  | 154  | >TP53-R110F TYQGSYGFP  | 36318 | 36164 |
| >TP53-R110F TYQGSYGFR  | 53   | >TP53-R110F TYQGSYGFP  | 31367 | 31314 |
| >TP53-R110F TYQGSYGFR  | 598  | >TP53-R110F TYQGSYGFP  | 131   | 467   |
| >TP53-R110F KTYQGSYGFR | 220  | >TP53-R110F KTYQGSYGFP | 194   | 26    |
| >TP53-R110F KTYQGSYGFR | 169  | >TP53-R110F KTYQGSYGFP | 56    | 113   |
| >TP53-R110F KTYQGSYGFR | 260  | >TP53-R110F KTYQGSYGFP | 104   | 156   |
| >TP53-R110F KTYQGSYGFR | 1496 | >TP53-R110F KTYQGSYGFP | 394   | 1102  |
| >TP53-R110F KTYQGSYGFR | 77   | >TP53-R110F KTYQGSYGFP | 16    | 61    |
| >TP53-R110F KTYQGSYGFR | 23   | >TP53-R110F KTYQGSYGFP | 19    | 4     |
| >TP53-R110F KTYQGSYGFR | 854  | >TP53-R110F KTYQGSYGFP | 165   | 689   |
| >TP53-R110F KTYQGSYGFR | 175  | >TP53-R110F KTYQGSYGFP | 71    | 104   |
| >TP53-R110F KTYQGSYGFR | 50   | >TP53-R110F KTYQGSYGFP | 8490  | 8440  |
| >TP53-R110F KTYQGSYGFR | 57   | >TP53-R110F KTYQGSYGFP | 26940 | 26883 |
| >TP53-R110F KTYQGSYGFR | 96   | >TP53-R110F KTYQGSYGFP | 758   | 662   |
| >TP53-R110F KTYQGSYGFR | 795  | >TP53-R110F KTYQGSYGFP | 141   | 654   |
| >TP53-R110F KTYQGSYGFR | 10   | >TP53-R110F KTYQGSYGFP | 12082 | 12072 |
| >TP53-R110F KTYQGSYGFR | 643  | >TP53-R110F KTYQGSYGFP | 291   | 352   |
| >TP53-R110F KTYQGSYGFR | 21   | >TP53-R110F KTYQGSYGFP | 8     | 13    |
| >TP53-R110F KTYQGSYGFR | 407  | >TP53-R110F KTYQGSYGFP | 29565 | 29158 |
| >TP53-R110F KTYQGSYGFR | 57   | >TP53-R110F KTYQGSYGFP | 34125 | 34068 |
| >TP53-R110F KTYQGSYGFR | 402  | >TP53-R110F KTYQGSYGFP | 61    | 341   |
| >TP53-R110F KTYQGSYGFR | 2004 | >TP53-R110F KTYQGSYGFP | 302   | 1702  |
| >TP53-R110F KTYQGSYGFR | 1124 | >TP53-R110F KTYQGSYGFP | 179   | 945   |
| >TP53-R110F KTYQGSYGFR | 465  | >TP53-R110F KTYQGSYGFP | 2478  | 2013  |
| >TP53-R110F KTYQGSYGFR | 3    | >TP53-R110F KTYQGSYGFP | 3     | 0     |
| >TP53-R110F KTYQGSYGFR | 439  | >TP53-R110F KTYQGSYGFP | 563   | 124   |
| >TP53-R110F KTYQGSYGFR | 35   | >TP53-R110F KTYQGSYGFP | 59    | 24    |
| >TP53-R110F KTYQGSYGFR | 151  | >TP53-R110F KTYQGSYGFP | 89    | 62    |
| >TP53-R110F KTYQGSYGFR | 28   | >TP53-R110F KTYQGSYGFP | 137   | 109   |
| >TP53-R110F KTYQGSYGFR | 345  | >TP53-R110F KTYQGSYGFP | 28588 | 28243 |
| >TP53-R110F KTYQGSYGFR | 370  | >TP53-R110F KTYQGSYGFP | 14981 | 14611 |
| >TP53-R110F KTYQGSYGFR | 25   | >TP53-R110F KTYQGSYGFP | 22768 | 22743 |
| >TP53-R110F KTYQGSYGFR | 43   | >TP53-R110F KTYQGSYGFP | 36    | 7     |
| >TP53-R110S RLGFLHSGTA | 326  | >TP53-R110S SLGFLHSGTA | 179   | 147   |
| >TP53-R110S RLGFLHSGTA | 162  | >TP53-R110S SLGFLHSGTA | 135   | 27    |
| >TP53-R110S RLGFLHSGTA | 1633 | >TP53-R110S SLGFLHSGTA | 305   | 1328  |
| >TP53-R110S RLGFLHSGTA | 554  | >TP53-R110S SLGFLHSGTA | 173   | 381   |
| >TP53-R110S RLGFLHSGTA | 43   | >TP53-R110S SLGFLHSGTA | 104   | 61    |
| >TP53-R110S RLGFLHSGTA | 125  | >TP53-R110S SLGFLHSGTA | 71    | 54    |

|                         |       |                         |       |       |
|-------------------------|-------|-------------------------|-------|-------|
| >TP53-R110S RLGFLHSGTA  | 384   | >TP53-R110S SLGFLHSGTA  | 3906  | 3522  |
| >TP53-R110S RLGFLHSGTA  | 262   | >TP53-R110S SLGFLHSGTA  | 2120  | 1858  |
| >TP53-R110S FRLGFLHSGT  | 716   | >TP53-R110S FSLGFLHSGT  | 156   | 560   |
| >TP53-R110S FRLGFLHSGT, | 1440  | >TP53-R110S FSLGFLHSGT/ | 95    | 1345  |
| >TP53-R110S FRLGFLHSGT, | 11766 | >TP53-R110S FSLGFLHSGT/ | 346   | 11420 |
| >TP53-R110S FRLGFLHS    | 142   | >TP53-R110S FSLGFLHS    | 15027 | 14885 |
| >TP53-R110S FRLGFLHSG   | 306   | >TP53-R110S FSLGFLHSG   | 16025 | 15719 |
| >TP53-R110S FRLGFLHSGT  | 412   | >TP53-R110S FSLGFLHSGT  | 29297 | 28885 |
| >TP53-R110S FRLGFLHSGT, | 174   | >TP53-R110S FSLGFLHSGT/ | 15864 | 15690 |
| >TP53-R110S GFRLGFLH    | 561   | >TP53-R110S GFSLGFLH    | 182   | 379   |
| >TP53-R110S YGFRLGFL    | 116   | >TP53-R110S YGFSLGFL    | 246   | 130   |
| >TP53-R110S YGFRLGFL    | 486   | >TP53-R110S YGFSLGFL    | 143   | 343   |
| >TP53-R110S YGFRLGFL    | 443   | >TP53-R110S YGFSLGFL    | 276   | 167   |
| >TP53-R110S YGFRLGFLH   | 1068  | >TP53-R110S YGFSLGFLH   | 234   | 834   |
| >TP53-R110S YGFRLGFLH   | 89    | >TP53-R110S YGFSLGFLH   | 32    | 57    |
| >TP53-R110S SYGFRLGFL   | 95    | >TP53-R110S SYGFSLGFL   | 26    | 69    |
| >TP53-R110S SYGFRLGF    | 356   | >TP53-R110S SYGFSLGF    | 228   | 128   |
| >TP53-R110S SYGFRLGF    | 232   | >TP53-R110S SYGFSLGF    | 189   | 43    |
| >TP53-R110S SYGFRLGFL   | 319   | >TP53-R110S SYGFSLGFL   | 605   | 286   |
| >TP53-R110S SYGFRLGF    | 7     | >TP53-R110S SYGFSLGF    | 7     | 0     |
| >TP53-R110S SYGFRLGFL   | 12    | >TP53-R110S SYGFSLGFL   | 10    | 2     |
| >TP53-R110S SYGFRLGF    | 338   | >TP53-R110S SYGFSLGF    | 510   | 172   |
| >TP53-R110S SYGFRLGFL   | 139   | >TP53-R110S SYGFSLGFL   | 164   | 25    |
| >TP53-R110S SYGFRLGFL   | 222   | >TP53-R110S SYGFSLGFL   | 116   | 106   |
| >TP53-R110S GSYGFRLGF   | 78    | >TP53-R110S GSYGFSLGF   | 96    | 18    |
| >TP53-R110S GSYGFRLGFL  | 227   | >TP53-R110S GSYGFSLGFL  | 224   | 3     |
| >TP53-R110S GSYGFRLGFL  | 237   | >TP53-R110S GSYGFSLGFL  | 128   | 109   |
| >TP53-R110S GSYGFRLGFL  | 549   | >TP53-R110S GSYGFSLGFL  | 271   | 278   |
| >TP53-R110S GSYGFRLGFL  | 491   | >TP53-R110S GSYGFSLGFLI | 376   | 115   |
| >TP53-R110S GSYGFRLGFLI | 98    | >TP53-R110S GSYGFSLGFLI | 82    | 16    |
| >TP53-R110S GSYGFRLGF   | 631   | >TP53-R110S GSYGFSLGF   | 279   | 352   |
| >TP53-R110S GSYGFRLGFL  | 706   | >TP53-R110S GSYGFSLGFLI | 400   | 306   |
| >TP53-R110S GSYGFRLGFL  | 760   | >TP53-R110S GSYGFSLGFL  | 378   | 382   |
| >TP53-R110S GSYGFRLGF   | 61    | >TP53-R110S GSYGFSLGF   | 25    | 36    |
| >TP53-R110S GSYGFRLGFL  | 621   | >TP53-R110S GSYGFSLGFL  | 330   | 291   |
| >TP53-R110S GSYGFRLGF   | 365   | >TP53-R110S GSYGFSLGF   | 81    | 284   |
| >TP53-R110S GSYGFRLGF   | 111   | >TP53-R110S GSYGFSLGF   | 74    | 37    |
| >TP53-R110S GSYGFRLGF   | 4     | >TP53-R110S GSYGFSLGF   | 3     | 1     |
| >TP53-R110S GSYGFRLGFL  | 31    | >TP53-R110S GSYGFSLGFL  | 12    | 19    |
| >TP53-R110S GSYGFRLGF   | 222   | >TP53-R110S GSYGFSLGF   | 305   | 83    |
| >TP53-R110S GSYGFRLGF   | 264   | >TP53-R110S GSYGFSLGF   | 82    | 182   |
| >TP53-R110S GSYGFRLGFL  | 802   | >TP53-R110S GSYGFSLGFL  | 289   | 513   |
| >TP53-R110S GSYGFRLGF   | 44    | >TP53-R110S GSYGFSLGF   | 27    | 17    |

|                         |      |                         |       |       |
|-------------------------|------|-------------------------|-------|-------|
| >TP53-R110S GSYGFRLGFL  | 70   | >TP53-R110S GSYGFSLGFL  | 52    | 18    |
| >TP53-R110S GSYGFRLGFLI | 63   | >TP53-R110S GSYGFSLGFLI | 43    | 20    |
| >TP53-R110S GSYGFRLGFL  | 651  | >TP53-R110S GSYGFSLGFLI | 432   | 219   |
| >TP53-R110S GSYGFRLGFL  | 1593 | >TP53-R110S GSYGFSLGFL  | 165   | 1428  |
| >TP53-R110S QGSYGFRLGF  | 278  | >TP53-R110S QGSYGFSLGF  | 102   | 176   |
| >TP53-R110S YQGSYGFRL   | 30   | >TP53-R110S YQGSYGFSL   | 20    | 10    |
| >TP53-R110S YQGSYGFRL   | 36   | >TP53-R110S YQGSYGFSL   | 16    | 20    |
| >TP53-R110S YQGSYGFRL   | 1457 | >TP53-R110S YQGSYGFSL   | 400   | 1057  |
| >TP53-R110S YQGSYGFRL   | 15   | >TP53-R110S YQGSYGFSL   | 6     | 9     |
| >TP53-R110S YQGSYGFRLC  | 189  | >TP53-R110S YQGSYGFSLG  | 60    | 129   |
| >TP53-R110S YQGSYGFRL   | 32   | >TP53-R110S YQGSYGFSL   | 28    | 4     |
| >TP53-R110S YQGSYGFRL   | 167  | >TP53-R110S YQGSYGFSL   | 48    | 119   |
| >TP53-R110S YQGSYGFRL   | 632  | >TP53-R110S YQGSYGFSL   | 289   | 343   |
| >TP53-R110S YQGSYGFRL   | 993  | >TP53-R110S YQGSYGFSL   | 463   | 530   |
| >TP53-R110S YQGSYGFRL   | 54   | >TP53-R110S YQGSYGFSL   | 16889 | 16835 |
| >TP53-R110S YQGSYGFRL   | 476  | >TP53-R110S YQGSYGFSL   | 35824 | 35348 |
| >TP53-R110S YQGSYGFRL   | 211  | >TP53-R110S YQGSYGFSL   | 58    | 153   |
| >TP53-R110S YQGSYGFRLC  | 1485 | >TP53-R110S YQGSYGFSLG  | 468   | 1017  |
| >TP53-R110S YQGSYGFRLC  | 32   | >TP53-R110S YQGSYGFSLG  | 25    | 7     |
| >TP53-R110S YQGSYGFRLC  | 158  | >TP53-R110S YQGSYGFSLG  | 70    | 88    |
| >TP53-R110S YQGSYGFRL   | 77   | >TP53-R110S YQGSYGFSL   | 11    | 66    |
| >TP53-R110S YQGSYGFRLC  | 6    | >TP53-R110S YQGSYGFSLG  | 4     | 2     |
| >TP53-R110S YQGSYGFRL   | 145  | >TP53-R110S YQGSYGFSL   | 28    | 117   |
| >TP53-R110S YQGSYGFRL   | 223  | >TP53-R110S YQGSYGFSL   | 27615 | 27392 |
| >TP53-R110S TYQGSYGFRL  | 141  | >TP53-R110S TYQGSYGFSL  | 46    | 95    |
| >TP53-R110S TYQGSYGFRL  | 316  | >TP53-R110S TYQGSYGFSL  | 151   | 165   |
| >TP53-R110S TYQGSYGFRL  | 163  | >TP53-R110S TYQGSYGFSL  | 94    | 69    |
| >TP53-R110S TYQGSYGFRL  | 255  | >TP53-R110S TYQGSYGFSL  | 517   | 262   |
| >TP53-R110S TYQGSYGFRL  | 7    | >TP53-R110S TYQGSYGFSL  | 6     | 1     |
| >TP53-R110S TYQGSYGFRL  | 19   | >TP53-R110S TYQGSYGFSL  | 16079 | 16060 |
| >TP53-R110S TYQGSYGFRL  | 25   | >TP53-R110S TYQGSYGFSL  | 16686 | 16661 |
| >TP53-R110S TYQGSYGFRL  | 154  | >TP53-R110S TYQGSYGFSL  | 29858 | 29704 |
| >TP53-R110S TYQGSYGFRL  | 53   | >TP53-R110S TYQGSYGFSL  | 26012 | 25959 |
| >TP53-R110S TYQGSYGFRL  | 598  | >TP53-R110S TYQGSYGFSL  | 212   | 386   |
| >TP53-R110S KTYQGSYGFRL | 220  | >TP53-R110S KTYQGSYGFSL | 465   | 245   |
| >TP53-R110S KTYQGSYGFRL | 169  | >TP53-R110S KTYQGSYGFSL | 97    | 72    |
| >TP53-R110S KTYQGSYGFRL | 260  | >TP53-R110S KTYQGSYGFSL | 132   | 128   |
| >TP53-R110S KTYQGSYGFRL | 77   | >TP53-R110S KTYQGSYGFSL | 20    | 57    |
| >TP53-R110S KTYQGSYGFRL | 23   | >TP53-R110S KTYQGSYGFSL | 20    | 3     |
| >TP53-R110S KTYQGSYGFRL | 854  | >TP53-R110S KTYQGSYGFSL | 293   | 561   |
| >TP53-R110S KTYQGSYGFRL | 175  | >TP53-R110S KTYQGSYGFSL | 97    | 78    |
| >TP53-R110S KTYQGSYGFRL | 50   | >TP53-R110S KTYQGSYGFSL | 7043  | 6993  |
| >TP53-R110S KTYQGSYGFRL | 57   | >TP53-R110S KTYQGSYGFSL | 24938 | 24881 |



|                        |      |                        |       |       |
|------------------------|------|------------------------|-------|-------|
| >TP53-R110S KTYQGSYGFR | 96   | >TP53-R110S KTYQGSYGFS | 261   | 165   |
| >TP53-R110S KTYQGSYGFR | 795  | >TP53-R110S KTYQGSYGFS | 256   | 539   |
| >TP53-R110S KTYQGSYGFR | 10   | >TP53-R110S KTYQGSYGFS | 7071  | 7061  |
| >TP53-R110S KTYQGSYGFR | 21   | >TP53-R110S KTYQGSYGFS | 7     | 14    |
| >TP53-R110S KTYQGSYGFR | 407  | >TP53-R110S KTYQGSYGFS | 26141 | 25734 |
| >TP53-R110S KTYQGSYGFR | 57   | >TP53-R110S KTYQGSYGFS | 32034 | 31977 |
| >TP53-R110S KTYQGSYGFR | 402  | >TP53-R110S KTYQGSYGFS | 170   | 232   |
| >TP53-R110S KTYQGSYGFR | 2004 | >TP53-R110S KTYQGSYGFS | 428   | 1576  |
| >TP53-R110S KTYQGSYGFR | 1124 | >TP53-R110S KTYQGSYGFS | 206   | 918   |
| >TP53-R110S KTYQGSYGFR | 465  | >TP53-R110S KTYQGSYGFS | 258   | 207   |
| >TP53-R110S KTYQGSYGFR | 3    | >TP53-R110S KTYQGSYGFS | 3     | 0     |
| >TP53-R110S KTYQGSYGFR | 439  | >TP53-R110S KTYQGSYGFS | 395   | 44    |
| >TP53-R110S KTYQGSYGFR | 35   | >TP53-R110S KTYQGSYGFS | 33    | 2     |
| >TP53-R110S KTYQGSYGFR | 151  | >TP53-R110S KTYQGSYGFS | 88    | 63    |
| >TP53-R110S KTYQGSYGFR | 28   | >TP53-R110S KTYQGSYGFS | 33    | 5     |
| >TP53-R110S KTYQGSYGFR | 345  | >TP53-R110S KTYQGSYGFS | 21912 | 21567 |
| >TP53-R110S KTYQGSYGFR | 370  | >TP53-R110S KTYQGSYGFS | 6137  | 5767  |
| >TP53-R110S KTYQGSYGFR | 25   | >TP53-R110S KTYQGSYGFS | 14231 | 14206 |
| >TP53-R110S KTYQGSYGFR | 43   | >TP53-R110S KTYQGSYGFS | 23    | 20    |
| >TP53-R156C RVRAMAIY   | 205  | >TP53-R156C CVRAMAIY   | 2360  | 2155  |
| >TP53-R156C RVRAMAIYK  | 28   | >TP53-R156C CVRAMAIYK  | 49    | 21    |
| >TP53-R156C RVRAMAIYK  | 20   | >TP53-R156C CVRAMAIYK  | 48    | 28    |
| >TP53-R156C RVRAMAIY   | 241  | >TP53-R156C CVRAMAIY   | 135   | 106   |
| >TP53-R156C RVRAMAIY   | 398  | >TP53-R156C CVRAMAIY   | 273   | 125   |
| >TP53-R156C RVRAMAIY   | 5    | >TP53-R156C CVRAMAIY   | 111   | 106   |
| >TP53-R156C RVRAMAIYK  | 3    | >TP53-R156C CVRAMAIYK  | 4     | 1     |
| >TP53-R156C RVRAMAIYKC | 10   | >TP53-R156C CVRAMAIYKC | 418   | 408   |
| >TP53-R156C RVRAMAIYKC | 9    | >TP53-R156C CVRAMAIYKC | 389   | 380   |
| >TP53-R156C RVRAMAIY   | 107  | >TP53-R156C CVRAMAIY   | 189   | 82    |
| >TP53-R156C RVRAMAIYK  | 18   | >TP53-R156C CVRAMAIYK  | 242   | 224   |
| >TP53-R156C RVRAMAIYK  | 588  | >TP53-R156C CVRAMAIYK  | 113   | 475   |
| >TP53-R156C RVRAMAIY   | 26   | >TP53-R156C CVRAMAIY   | 224   | 198   |
| >TP53-R156C RVRAMAIY   | 85   | >TP53-R156C CVRAMAIY   | 615   | 530   |
| >TP53-R156C RVRAMAIY   | 311  | >TP53-R156C CVRAMAIY   | 2325  | 2014  |
| >TP53-R156C RVRAMAIY   | 7    | >TP53-R156C CVRAMAIY   | 217   | 210   |
| >TP53-R156C RVRAMAIY   | 211  | >TP53-R156C CVRAMAIY   | 4790  | 4579  |
| >TP53-R156C RVRAMAIY   | 1386 | >TP53-R156C CVRAMAIY   | 399   | 987   |
| >TP53-R156C RVRAMAIYK  | 156  | >TP53-R156C CVRAMAIYK  | 735   | 579   |
| >TP53-R156C TRVRAMAIY  | 62   | >TP53-R156C TCVRAMAIY  | 5     | 57    |
| >TP53-R156C TRVRAMAIY  | 278  | >TP53-R156C TCVRAMAIY  | 4073  | 3795  |
| >TP53-R156C TRVRAMAI   | 215  | >TP53-R156C TCVRAMAI   | 12366 | 12151 |
| >TP53-R156C TRVRAMAIY  | 2598 | >TP53-R156C TCVRAMAIY  | 199   | 2399  |
| >TP53-R156C GTRVRAMAI  | 269  | >TP53-R156C GTCVRAMAI  | 652   | 383   |

|                        |      |                         |       |       |
|------------------------|------|-------------------------|-------|-------|
| >TP53-R156C GTRVRAMAI  | 50   | >TP53-R156C GTCVRAMAI   | 88    | 38    |
| >TP53-R156C GTRVRAMAI  | 39   | >TP53-R156C GTCVRAMAI   | 9     | 30    |
| >TP53-R156C GTRVRAMAI  | 715  | >TP53-R156C GTCVRAMAI   | 396   | 319   |
| >TP53-R156C GTRVRAMA   | 18   | >TP53-R156C GTCVRAMA    | 3751  | 3733  |
| >TP53-R156C GTRVRAMAI  | 9    | >TP53-R156C GTCVRAMAI   | 1860  | 1851  |
| >TP53-R156C GTRVRAMAI  | 30   | >TP53-R156C GTCVRAMAI   | 4926  | 4896  |
| >TP53-R156C GTRVRAMAI  | 3    | >TP53-R156C GTCVRAMAI   | 46    | 43    |
| >TP53-R156C GTRVRAMAI  | 130  | >TP53-R156C GTCVRAMAI   | 204   | 74    |
| >TP53-R156C GTRVRAMAI  | 115  | >TP53-R156C GTCVRAMAI   | 254   | 139   |
| >TP53-R156C GTRVRAMAI  | 671  | >TP53-R156C GTCVRAMAI   | 120   | 551   |
| >TP53-R156C GTRVRAMAI  | 405  | >TP53-R156C GTCVRAMAI   | 825   | 420   |
| >TP53-R156C GTRVRAMAI  | 40   | >TP53-R156C GTCVRAMAI   | 248   | 208   |
| >TP53-R156C GTRVRAMAI  | 4    | >TP53-R156C GTCVRAMAI   | 10    | 6     |
| >TP53-R156C GTRVRAMAI  | 122  | >TP53-R156C GTCVRAMAI   | 1087  | 965   |
| >TP53-R156C GTRVRAMAI  | 21   | >TP53-R156C GTCVRAMAI   | 29    | 8     |
| >TP53-R156C GTRVRAMAI  | 269  | >TP53-R156C GTCVRAMAI   | 167   | 102   |
| >TP53-R156C GTRVRAMAI  | 387  | >TP53-R156C GTCVRAMAI   | 100   | 287   |
| >TP53-R156C PPGTRVRAM  | 68   | >TP53-R156C PPGTCVRAM   | 149   | 81    |
| >TP53-R156C PPPGTRVRAM | 370  | >TP53-R156C PPPGTCVRAM  | 354   | 16    |
| >TP53-R156C PPPGTRVRAM | 450  | >TP53-R156C PPPGTCVRAM  | 285   | 165   |
| >TP53-R156C TPPPGRVRA  | 482  | >TP53-R156C TPPPGTVCRA  | 162   | 320   |
| >TP53-R156C TPPPGRVRA  | 32   | >TP53-R156C TPPPGTVCRA  | 53    | 21    |
| >TP53-R156C TPPPGRVRA  | 139  | >TP53-R156C TPPPGTVCRA  | 53    | 86    |
| >TP53-R156C TPPPGRV    | 273  | >TP53-R156C TPPPGTVCV   | 253   | 20    |
| >TP53-R156C STPPPGRV   | 136  | >TP53-R156C STPPPGTVCV  | 509   | 373   |
| >TP53-R156C STPPPGRV   | 743  | >TP53-R156C STPPPGTVCV  | 419   | 324   |
| >TP53-R156C STPPPGRV   | 116  | >TP53-R156C STPPPGTVCV  | 321   | 205   |
| >TP53-R156C STPPPGRVVR | 851  | >TP53-R156C STPPPGTVCVR | 312   | 539   |
| >TP53-R156C STPPPGRVVR | 730  | >TP53-R156C STPPPGTVCVR | 434   | 296   |
| >TP53-R156C STPPPGR    | 352  | >TP53-R156C STPPPGTC    | 38161 | 37809 |
| >TP53-R156C STPPPGRVVR | 129  | >TP53-R156C STPPPGTVCVR | 26    | 103   |
| >TP53-R156C STPPPGRV   | 18   | >TP53-R156C STPPPGTVCV  | 33    | 15    |
| >TP53-R156C STPPPGRVVR | 82   | >TP53-R156C STPPPGTVCVR | 152   | 70    |
| >TP53-R156C STPPPGR    | 7371 | >TP53-R156C STPPPGTC    | 308   | 7063  |
| >TP53-R156C STPPPGRV   | 4    | >TP53-R156C STPPPGTVCV  | 5     | 1     |
| >TP53-R156C STPPPGRVVR | 96   | >TP53-R156C STPPPGTVCVR | 171   | 75    |
| >TP53-R156C STPPPGRVVR | 54   | >TP53-R156C STPPPGTVCVR | 35    | 19    |
| >TP53-R156C STPPPGRV   | 259  | >TP53-R156C STPPPGTVCV  | 1622  | 1363  |
| >TP53-R156C STPPPGRV   | 311  | >TP53-R156C STPPPGTVCV  | 344   | 33    |
| >TP53-R156C DSTPPPGR   | 203  | >TP53-R156C DSTPPPGTC   | 35127 | 34924 |
| >TP53-R156C DSTPPPGRV  | 372  | >TP53-R156C DSTPPPGTVCV | 154   | 218   |
| >TP53-R156C DSTPPPGR   | 161  | >TP53-R156C DSTPPPGTC   | 36923 | 36762 |
| >TP53-R156C DSTPPPGRV  | 208  | >TP53-R156C DSTPPPGTVCV | 80    | 128   |

|                        |      |                        |       |       |
|------------------------|------|------------------------|-------|-------|
| >TP53-R156C RVRAMAIY   | 205  | >TP53-R156C GVRAMAIY   | 1635  | 1430  |
| >TP53-R156C RVRAMAIYK  | 28   | >TP53-R156C GVRAMAIYK  | 41    | 13    |
| >TP53-R156C RVRAMAIYK  | 20   | >TP53-R156C GVRAMAIYK  | 22    | 2     |
| >TP53-R156C RVRAMAIY   | 241  | >TP53-R156C GVRAMAIY   | 624   | 383   |
| >TP53-R156C RVRAMAIY   | 398  | >TP53-R156C GVRAMAIY   | 133   | 265   |
| >TP53-R156C RVRAMAIY   | 5    | >TP53-R156C GVRAMAIY   | 99    | 94    |
| >TP53-R156C RVRAMAIYK  | 3    | >TP53-R156C GVRAMAIYK  | 4     | 1     |
| >TP53-R156C RVRAMAIYKC | 10   | >TP53-R156C GVRAMAIYKC | 384   | 374   |
| >TP53-R156C RVRAMAIYKC | 9    | >TP53-R156C GVRAMAIYKC | 340   | 331   |
| >TP53-R156C RVRAMAIY   | 107  | >TP53-R156C GVRAMAIY   | 243   | 136   |
| >TP53-R156C RVRAMAIYK  | 18   | >TP53-R156C GVRAMAIYK  | 188   | 170   |
| >TP53-R156C RVRAMAIY   | 26   | >TP53-R156C GVRAMAIY   | 1415  | 1389  |
| >TP53-R156C RVRAMAIY   | 85   | >TP53-R156C GVRAMAIY   | 220   | 135   |
| >TP53-R156C RVRAMAIY   | 311  | >TP53-R156C GVRAMAIY   | 3706  | 3395  |
| >TP53-R156C RVRAMAIY   | 7    | >TP53-R156C GVRAMAIY   | 94    | 87    |
| >TP53-R156C RVRAMAIY   | 211  | >TP53-R156C GVRAMAIY   | 7333  | 7122  |
| >TP53-R156C RVRAMAIYK  | 156  | >TP53-R156C GVRAMAIYK  | 8056  | 7900  |
| >TP53-R156C TRVRAMAIY  | 62   | >TP53-R156C TGVRAMAIY  | 177   | 115   |
| >TP53-R156C TRVRAMAIY  | 1130 | >TP53-R156C TGVRAMAIY  | 347   | 783   |
| >TP53-R156C TRVRAMAIY  | 278  | >TP53-R156C TGVRAMAIY  | 4476  | 4198  |
| >TP53-R156C TRVRAMAI   | 215  | >TP53-R156C TGVRAMAI   | 12352 | 12137 |
| >TP53-R156C TRVRAMAIY  | 2598 | >TP53-R156C TGVRAMAIY  | 426   | 2172  |
| >TP53-R156C GTRVRAMAI' | 269  | >TP53-R156C GTGVRAMAI' | 146   | 123   |
| >TP53-R156C GTRVRAMAI' | 50   | >TP53-R156C GTGVRAMAI' | 95    | 45    |
| >TP53-R156C GTRVRAMAI' | 39   | >TP53-R156C GTGVRAMAI' | 13    | 26    |
| >TP53-R156C GTRVRAMA   | 18   | >TP53-R156C GTGVRAMA   | 7850  | 7832  |
| >TP53-R156C GTRVRAMAI  | 9    | >TP53-R156C GTGVRAMAI  | 5075  | 5066  |
| >TP53-R156C GTRVRAMAI' | 30   | >TP53-R156C GTGVRAMAI' | 9487  | 9457  |
| >TP53-R156C GTRVRAMAI' | 3    | >TP53-R156C GTGVRAMAI' | 174   | 171   |
| >TP53-R156C GTRVRAMAI' | 130  | >TP53-R156C GTGVRAMAI' | 77    | 53    |
| >TP53-R156C GTRVRAMAI' | 115  | >TP53-R156C GTGVRAMAI' | 944   | 829   |
| >TP53-R156C GTRVRAMAI' | 671  | >TP53-R156C GTGVRAMAI' | 468   | 203   |
| >TP53-R156C GTRVRAMAI' | 405  | >TP53-R156C GTGVRAMAI' | 1294  | 889   |
| >TP53-R156C GTRVRAMAI  | 40   | >TP53-R156C GTGVRAMAI  | 1291  | 1251  |
| >TP53-R156C GTRVRAMAI' | 4    | >TP53-R156C GTGVRAMAI' | 25    | 21    |
| >TP53-R156C GTRVRAMAI  | 122  | >TP53-R156C GTGVRAMAI  | 2139  | 2017  |
| >TP53-R156C GTRVRAMAI' | 21   | >TP53-R156C GTGVRAMAI' | 31    | 10    |
| >TP53-R156C GTRVRAMAI' | 269  | >TP53-R156C GTGVRAMAI' | 227   | 42    |
| >TP53-R156C GTRVRAMAI  | 387  | >TP53-R156C GTGVRAMAI  | 291   | 96    |
| >TP53-R156C PGTRVRAMA  | 619  | >TP53-R156C PGTGVRAMA  | 444   | 175   |
| >TP53-R156C PPGTRVRAM  | 68   | >TP53-R156C PPGTGVRAM  | 168   | 100   |
| >TP53-R156C PPPGTRVRAM | 370  | >TP53-R156C PPPGTGVRAM | 1131  | 761   |
| >TP53-R156C PPPGTRVRAM | 450  | >TP53-R156C PPPGTGVRAM | 482   | 32    |

|                         |      |                         |       |       |
|-------------------------|------|-------------------------|-------|-------|
| >TP53-R156C TPPP GTRVRA | 482  | >TP53-R156C TPPP GTGVR/ | 132   | 350   |
| >TP53-R156C TPPP GTRVRA | 32   | >TP53-R156C TPPP GTGVR/ | 42    | 10    |
| >TP53-R156C TPPP GTRVRA | 139  | >TP53-R156C TPPP GTGVR/ | 67    | 72    |
| >TP53-R156C TPPP GTRV   | 273  | >TP53-R156C TPPP GTGV   | 1167  | 894   |
| >TP53-R156C STPPP GTRV  | 1981 | >TP53-R156C STPPP GTGV  | 339   | 1642  |
| >TP53-R156C STPPP GTRV  | 136  | >TP53-R156C STPPP GTGV  | 77    | 59    |
| >TP53-R156C STPPP GTRV  | 743  | >TP53-R156C STPPP GTGV  | 257   | 486   |
| >TP53-R156C STPPP GTRV  | 116  | >TP53-R156C STPPP GTGV  | 141   | 25    |
| >TP53-R156C STPPP GTR   | 352  | >TP53-R156C STPPP GTG   | 36057 | 35705 |
| >TP53-R156C STPPP GTRVR | 129  | >TP53-R156C STPPP GTGVR | 103   | 26    |
| >TP53-R156C STPPP GTRV  | 18   | >TP53-R156C STPPP GTGV  | 12    | 6     |
| >TP53-R156C STPPP GTRVR | 82   | >TP53-R156C STPPP GTGVR | 187   | 105   |
| >TP53-R156C STPPP GTRV  | 512  | >TP53-R156C STPPP GTGV  | 96    | 416   |
| >TP53-R156C STPPP GTRV  | 4    | >TP53-R156C STPPP GTGV  | 5     | 1     |
| >TP53-R156C STPPP GTRVR | 96   | >TP53-R156C STPPP GTGVR | 199   | 103   |
| >TP53-R156C STPPP GTRVR | 54   | >TP53-R156C STPPP GTGVR | 38    | 16    |
| >TP53-R156C STPPP GTRV  | 259  | >TP53-R156C STPPP GTGV  | 1383  | 1124  |
| >TP53-R156C STPPP GTRV  | 311  | >TP53-R156C STPPP GTGV  | 456   | 145   |
| >TP53-R156C DSTPPP GTR  | 203  | >TP53-R156C DSTPPP GTG  | 34372 | 34169 |
| >TP53-R156C DSTPPP GTRV | 372  | >TP53-R156C DSTPPP GTGV | 320   | 52    |
| >TP53-R156C DSTPPP GTR  | 161  | >TP53-R156C DSTPPP GTG  | 35199 | 35038 |
| >TP53-R156C DSTPPP GTRV | 208  | >TP53-R156C DSTPPP GTGV | 142   | 66    |
| >TP53-R156C DSTPPP GTRV | 1466 | >TP53-R156C DSTPPP GTGV | 373   | 1093  |
| >TP53-R156F RVRAMAIY    | 205  | >TP53-R156F HVRAMAIY    | 569   | 364   |
| >TP53-R156F RVRAMAIYK   | 28   | >TP53-R156F HVRAMAIYK   | 33    | 5     |
| >TP53-R156F RVRAMAIYK   | 20   | >TP53-R156F HVRAMAIYK   | 53    | 33    |
| >TP53-R156F RVRAMAIY    | 8400 | >TP53-R156F HVRAMAIY    | 276   | 8124  |
| >TP53-R156F RVRAMAIY    | 241  | >TP53-R156F HVRAMAIY    | 61    | 180   |
| >TP53-R156F RVRAMAIY    | 2338 | >TP53-R156F HVRAMAIY    | 282   | 2056  |
| >TP53-R156F RVRAMAIY    | 398  | >TP53-R156F HVRAMAIY    | 191   | 207   |
| >TP53-R156F RVRAMAIY    | 5    | >TP53-R156F HVRAMAIY    | 9     | 4     |
| >TP53-R156F RVRAMAIYK   | 3    | >TP53-R156F HVRAMAIYK   | 3     | 0     |
| >TP53-R156F RVRAMAIYKC  | 10   | >TP53-R156F HVRAMAIYKC  | 23    | 13    |
| >TP53-R156F RVRAMAIYKC  | 9    | >TP53-R156F HVRAMAIYKC  | 19    | 10    |
| >TP53-R156F RVRAMAIY    | 107  | >TP53-R156F HVRAMAIY    | 213   | 106   |
| >TP53-R156F RVRAMAIYK   | 18   | >TP53-R156F HVRAMAIYK   | 49    | 31    |
| >TP53-R156F RVRAMAIYK   | 588  | >TP53-R156F HVRAMAIYK   | 34    | 554   |
| >TP53-R156F RVRAMAIY    | 26   | >TP53-R156F HVRAMAIY    | 65    | 39    |
| >TP53-R156F RVRAMAIY    | 85   | >TP53-R156F HVRAMAIY    | 156   | 71    |
| >TP53-R156F RVRAMAIY    | 1402 | >TP53-R156F HVRAMAIY    | 191   | 1211  |
| >TP53-R156F RVRAMAIY    | 311  | >TP53-R156F HVRAMAIY    | 1185  | 874   |
| >TP53-R156F RVRAMAIY    | 7    | >TP53-R156F HVRAMAIY    | 27    | 20    |
| >TP53-R156F RVRAMAIY    | 2702 | >TP53-R156F HVRAMAIY    | 212   | 2490  |

|                         |      |                         |       |       |
|-------------------------|------|-------------------------|-------|-------|
| >TP53-R156F RVRAMAIY    | 211  | >TP53-R156F HVRAMAIY    | 2519  | 2308  |
| >TP53-R156F RVRAMAIYK   | 156  | >TP53-R156F HVRAMAIYK   | 204   | 48    |
| >TP53-R156F TRVRAMAIY   | 62   | >TP53-R156F THVRAMAIY   | 92    | 30    |
| >TP53-R156F TRVRAMAIY   | 278  | >TP53-R156F THVRAMAIY   | 671   | 393   |
| >TP53-R156F TRVRAMAI    | 215  | >TP53-R156F THVRAMAI    | 99    | 116   |
| >TP53-R156F GTRVRAMAI\  | 269  | >TP53-R156F GTHVRAMAI'  | 440   | 171   |
| >TP53-R156F GTRVRAMAI\  | 50   | >TP53-R156F GTHVRAMAI'  | 54    | 4     |
| >TP53-R156F GTRVRAMAI\  | 39   | >TP53-R156F GTHVRAMAI'  | 11    | 28    |
| >TP53-R156F GTRVRAMAI\  | 715  | >TP53-R156F GTHVRAMAI'  | 469   | 246   |
| >TP53-R156F GTRVRAMA    | 18   | >TP53-R156F GTHVRAMA    | 152   | 134   |
| >TP53-R156F GTRVRAMAI   | 9    | >TP53-R156F GTHVRAMAI   | 51    | 42    |
| >TP53-R156F GTRVRAMAI\  | 30   | >TP53-R156F GTHVRAMAI'  | 288   | 258   |
| >TP53-R156F GTRVRAMAI\  | 3    | >TP53-R156F GTHVRAMAI'  | 6     | 3     |
| >TP53-R156F GTRVRAMAI\  | 130  | >TP53-R156F GTHVRAMAI'  | 121   | 9     |
| >TP53-R156F GTRVRAMAI\  | 115  | >TP53-R156F GTHVRAMAI'  | 192   | 77    |
| >TP53-R156F GTRVRAMAI   | 2287 | >TP53-R156F GTHVRAMAI   | 434   | 1853  |
| >TP53-R156F GTRVRAMAI\  | 671  | >TP53-R156F GTHVRAMAI'  | 111   | 560   |
| >TP53-R156F GTRVRAMAI\  | 405  | >TP53-R156F GTHVRAMAI'  | 755   | 350   |
| >TP53-R156F GTRVRAMAI   | 40   | >TP53-R156F GTHVRAMAI   | 130   | 90    |
| >TP53-R156F GTRVRAMAI\  | 4    | >TP53-R156F GTHVRAMAI'  | 7     | 3     |
| >TP53-R156F GTRVRAMAI   | 122  | >TP53-R156F GTHVRAMAI   | 1129  | 1007  |
| >TP53-R156F GTRVRAMAI\  | 21   | >TP53-R156F GTHVRAMAI'  | 25    | 4     |
| >TP53-R156F GTRVRAMAI\  | 269  | >TP53-R156F GTHVRAMAI'  | 193   | 76    |
| >TP53-R156F GTRVRAMAI   | 387  | >TP53-R156F GTHVRAMAI   | 114   | 273   |
| >TP53-R156F PGTRVRAMA   | 619  | >TP53-R156F PGTHVRAMA   | 285   | 334   |
| >TP53-R156F PPGTRVRAM   | 68   | >TP53-R156F PPGTHVRAM   | 83    | 15    |
| >TP53-R156F PPPGTRVRAM  | 370  | >TP53-R156F PPPGTHVRAI' | 925   | 555   |
| >TP53-R156F PPPGTRVRAM  | 450  | >TP53-R156F PPPGTHVRAI' | 811   | 361   |
| >TP53-R156F TPPPGTRV    | 763  | >TP53-R156F TPPPGTHV    | 208   | 555   |
| >TP53-R156F TPPPGTRVRA  | 482  | >TP53-R156F TPPPGTHVRA' | 253   | 229   |
| >TP53-R156F TPPPGTRVRA  | 32   | >TP53-R156F TPPPGTHVRA' | 39    | 7     |
| >TP53-R156F TPPPGTRVRA  | 139  | >TP53-R156F TPPPGTHVRA' | 53    | 86    |
| >TP53-R156F TPPPGTRV    | 273  | >TP53-R156F TPPPGTHV    | 242   | 31    |
| >TP53-R156F TPPPGTRVRA  | 727  | >TP53-R156F TPPPGTHVRA' | 192   | 535   |
| >TP53-R156F STPPP GTRV  | 1981 | >TP53-R156F STPPP GTHV  | 412   | 1569  |
| >TP53-R156F STPPP GTRV  | 136  | >TP53-R156F STPPP GTHV  | 196   | 60    |
| >TP53-R156F STPPP GTRV  | 743  | >TP53-R156F STPPP GTHV  | 258   | 485   |
| >TP53-R156F STPPP GTRV  | 116  | >TP53-R156F STPPP GTHV  | 172   | 56    |
| >TP53-R156F STPPP GTRVR | 851  | >TP53-R156F STPPP GTHVR | 304   | 547   |
| >TP53-R156F STPPP GTRVR | 730  | >TP53-R156F STPPP GTHVR | 494   | 236   |
| >TP53-R156F STPPP GTR   | 352  | >TP53-R156F STPPP GTH   | 17256 | 16904 |
| >TP53-R156F STPPP GTRVR | 129  | >TP53-R156F STPPP GTHVR | 35    | 94    |
| >TP53-R156F STPPP GTRV  | 18   | >TP53-R156F STPPP GTHV  | 16    | 2     |

|                        |       |                        |       |       |
|------------------------|-------|------------------------|-------|-------|
| >TP53-R156F-STPPPGTRVR | 82    | >TP53-R156F-STPPPGTHVR | 104   | 22    |
| >TP53-R156F-STPPPGTRV  | 512   | >TP53-R156F-STPPPGTHV  | 329   | 183   |
| >TP53-R156F-STPPPGTRV  | 4     | >TP53-R156F-STPPPGTHV  | 4     | 0     |
| >TP53-R156F-STPPPGTRVR | 96    | >TP53-R156F-STPPPGTHVR | 33    | 63    |
| >TP53-R156F-STPPPGTRVR | 54    | >TP53-R156F-STPPPGTHVR | 21    | 33    |
| >TP53-R156F-STPPPGTRV  | 259   | >TP53-R156F-STPPPGTHV  | 1530  | 1271  |
| >TP53-R156F-STPPPGTRV  | 311   | >TP53-R156F-STPPPGTHV  | 194   | 117   |
| >TP53-R156F-DSTPPPGTR  | 203   | >TP53-R156F-DSTPPPGTH  | 25423 | 25220 |
| >TP53-R156F-DSTPPPGTRV | 372   | >TP53-R156F-DSTPPPGTHV | 170   | 202   |
| >TP53-R156F-DSTPPPGTR  | 161   | >TP53-R156F-DSTPPPGTH  | 14382 | 14221 |
| >TP53-R156F-DSTPPPGTRV | 208   | >TP53-R156F-DSTPPPGTHV | 61    | 147   |
| >TP53-R156L-RVRAMAIY   | 205   | >TP53-R156L-LVRAMAIY   | 1489  | 1284  |
| >TP53-R156L-RVRAMAIYK  | 28    | >TP53-R156L-LVRAMAIYK  | 39    | 11    |
| >TP53-R156L-RVRAMAIYK  | 20    | >TP53-R156L-LVRAMAIYK  | 45    | 25    |
| >TP53-R156L-RVRAMAIY   | 241   | >TP53-R156L-LVRAMAIY   | 215   | 26    |
| >TP53-R156L-RVRAMAIY   | 398   | >TP53-R156L-LVRAMAIY   | 109   | 289   |
| >TP53-R156L-RVRAMAIY   | 5     | >TP53-R156L-LVRAMAIY   | 46    | 41    |
| >TP53-R156L-RVRAMAIYK  | 3     | >TP53-R156L-LVRAMAIYK  | 3     | 0     |
| >TP53-R156L-RVRAMAIYKC | 10    | >TP53-R156L-LVRAMAIYKC | 178   | 168   |
| >TP53-R156L-RVRAMAIYKC | 9     | >TP53-R156L-LVRAMAIYKC | 154   | 145   |
| >TP53-R156L-RVRAMAIY   | 107   | >TP53-R156L-LVRAMAIY   | 174   | 67    |
| >TP53-R156L-RVRAMAIYK  | 18    | >TP53-R156L-LVRAMAIYK  | 113   | 95    |
| >TP53-R156L-RVRAMAIYK  | 588   | >TP53-R156L-LVRAMAIYK  | 133   | 455   |
| >TP53-R156L-RVRAMAIY   | 26    | >TP53-R156L-LVRAMAIY   | 303   | 277   |
| >TP53-R156L-RVRAMAIY   | 85    | >TP53-R156L-LVRAMAIY   | 86    | 1     |
| >TP53-R156L-RVRAMAIY   | 311   | >TP53-R156L-LVRAMAIY   | 680   | 369   |
| >TP53-R156L-RVRAMAIY   | 7     | >TP53-R156L-LVRAMAIY   | 27    | 20    |
| >TP53-R156L-RVRAMAIY   | 2702  | >TP53-R156L-LVRAMAIY   | 324   | 2378  |
| >TP53-R156L-RVRAMAIY   | 211   | >TP53-R156L-LVRAMAIY   | 2507  | 2296  |
| >TP53-R156L-RVRAMAIYK  | 156   | >TP53-R156L-LVRAMAIYK  | 2033  | 1877  |
| >TP53-R156L-TRVRAMAI   | 26743 | >TP53-R156L-TLVRAMAI   | 207   | 26536 |
| >TP53-R156L-TRVRAMAI   | 18871 | >TP53-R156L-TLVRAMAI   | 30    | 18841 |
| >TP53-R156L-TRVRAMAI   | 16766 | >TP53-R156L-TLVRAMAI   | 205   | 16561 |
| >TP53-R156L-TRVRAMAI   | 26624 | >TP53-R156L-TLVRAMAI   | 202   | 26422 |
| >TP53-R156L-TRVRAMAI   | 23924 | >TP53-R156L-TLVRAMAI   | 185   | 23739 |
| >TP53-R156L-TRVRAMAI   | 32467 | >TP53-R156L-TLVRAMAI   | 73    | 32394 |
| >TP53-R156L-TRVRAMAIYK | 1127  | >TP53-R156L-TLVRAMAIYK | 20    | 1107  |
| >TP53-R156L-TRVRAMAIYK | 1520  | >TP53-R156L-TLVRAMAIYK | 23    | 1497  |
| >TP53-R156L-TRVRAMAIY  | 11493 | >TP53-R156L-TLVRAMAIY  | 207   | 11286 |
| >TP53-R156L-TRVRAMAIY  | 62    | >TP53-R156L-TLVRAMAIY  | 6     | 56    |
| >TP53-R156L-TRVRAMAIY  | 6243  | >TP53-R156L-TLVRAMAIY  | 301   | 5942  |
| >TP53-R156L-TRVRAMAIYK | 4443  | >TP53-R156L-TLVRAMAIYK | 332   | 4111  |
| >TP53-R156L-TRVRAMAIY  | 1130  | >TP53-R156L-TLVRAMAIY  | 166   | 964   |

|                         |       |                         |      |       |
|-------------------------|-------|-------------------------|------|-------|
| >TP53-R156L TRVRAMAIYK  | 765   | >TP53-R156L TLVRAMAIYK  | 38   | 727   |
| >TP53-R156L TRVRAMAI    | 8627  | >TP53-R156L TLVRAMAI    | 433  | 8194  |
| >TP53-R156L TRVRAMAIY   | 4338  | >TP53-R156L TLVRAMAIY   | 186  | 4152  |
| >TP53-R156L TRVRAMAIY   | 11614 | >TP53-R156L TLVRAMAIY   | 198  | 11416 |
| >TP53-R156L TRVRAMAIY   | 8532  | >TP53-R156L TLVRAMAIY   | 196  | 8336  |
| >TP53-R156L TRVRAMAIY   | 278   | >TP53-R156L TLVRAMAIY   | 758  | 480   |
| >TP53-R156L TRVRAMAI    | 215   | >TP53-R156L TLVRAMAI    | 4366 | 4151  |
| >TP53-R156L TRVRAMAIY   | 6003  | >TP53-R156L TLVRAMAIY   | 484  | 5519  |
| >TP53-R156L TRVRAMAIYK  | 8738  | >TP53-R156L TLVRAMAIYK  | 304  | 8434  |
| >TP53-R156L WVDSTPPPG   | 20491 | >TP53-R156L WVDSTPPPG   | 135  | 20356 |
| >TP53-R156L WVDSTPPPG   | 13960 | >TP53-R156L WVDSTPPPG   | 129  | 13831 |
| >TP53-R156L WVDSTPPPG   | 17574 | >TP53-R156L WVDSTPPPG   | 287  | 17287 |
| >TP53-R156L WVDSTPPPG   | 9015  | >TP53-R156L WVDSTPPPG   | 468  | 8547  |
| >TP53-R156L GTRVRAMAI\  | 269   | >TP53-R156L GTLVRAMAIY  | 266  | 3     |
| >TP53-R156L GTRVRAMAI\  | 50    | >TP53-R156L GTLVRAMAIY  | 63   | 13    |
| >TP53-R156L GTRVRAMAI\  | 39    | >TP53-R156L GTLVRAMAIY  | 9    | 30    |
| >TP53-R156L GTRVRAMA    | 18    | >TP53-R156L GTLVRAMA    | 1726 | 1708  |
| >TP53-R156L GTRVRAMAI   | 9     | >TP53-R156L GTLVRAMAI   | 649  | 640   |
| >TP53-R156L GTRVRAMAI\  | 30    | >TP53-R156L GTLVRAMAIY  | 2691 | 2661  |
| >TP53-R156L GTRVRAMAI\  | 3     | >TP53-R156L GTLVRAMAIY  | 17   | 14    |
| >TP53-R156L GTRVRAMAI\  | 130   | >TP53-R156L GTLVRAMAIY  | 56   | 74    |
| >TP53-R156L GTRVRAMAI\  | 115   | >TP53-R156L GTLVRAMAIY  | 176  | 61    |
| >TP53-R156L GTRVRAMAI   | 2287  | >TP53-R156L GTLVRAMAI   | 132  | 2155  |
| >TP53-R156L GTRVRAMAI\  | 671   | >TP53-R156L GTLVRAMAIY  | 270  | 401   |
| >TP53-R156L GTRVRAMAI\  | 405   | >TP53-R156L GTLVRAMAIY  | 2135 | 1730  |
| >TP53-R156L GTRVRAMAI   | 40    | >TP53-R156L GTLVRAMAI   | 80   | 40    |
| >TP53-R156L GTRVRAMAI\  | 4     | >TP53-R156L GTLVRAMAIY  | 5    | 1     |
| >TP53-R156L GTRVRAMAI   | 122   | >TP53-R156L GTLVRAMAI   | 395  | 273   |
| >TP53-R156L GTRVRAMAI\  | 21    | >TP53-R156L GTLVRAMAIY  | 28   | 7     |
| >TP53-R156L GTRVRAMAI\  | 269   | >TP53-R156L GTLVRAMAIY  | 83   | 186   |
| >TP53-R156L GTRVRAMAI   | 387   | >TP53-R156L GTLVRAMAI   | 147  | 240   |
| >TP53-R156L PPGTRVRAM   | 68    | >TP53-R156L PPGTLVRAM   | 540  | 472   |
| >TP53-R156L PPPGTRVRAM  | 370   | >TP53-R156L PPPGTLVRAM  | 685  | 315   |
| >TP53-R156L PPPGTRVRAM  | 450   | >TP53-R156L PPPGTLVRAM  | 775  | 325   |
| >TP53-R156L TPPPGLTRVRA | 482   | >TP53-R156L TPPPGLTRVRA | 213  | 269   |
| >TP53-R156L TPPPGLTRVRA | 32    | >TP53-R156L TPPPGLTRVRA | 60   | 28    |
| >TP53-R156L TPPPGLTRVRA | 139   | >TP53-R156L TPPPGLTRVRA | 53   | 86    |
| >TP53-R156L TPPPGLTRV   | 273   | >TP53-R156L TPPPGLTV    | 25   | 248   |
| >TP53-R156L TPPPGLTRVRA | 727   | >TP53-R156L TPPPGLTRVRA | 286  | 441   |
| >TP53-R156L STPPPGLTRV  | 1981  | >TP53-R156L STPPPGLTV   | 431  | 1550  |
| >TP53-R156L STPPPGLTRV  | 136   | >TP53-R156L STPPPGLTV   | 198  | 62    |
| >TP53-R156L STPPPGLTRV  | 116   | >TP53-R156L STPPPGLTV   | 129  | 13    |
| >TP53-R156L STPPPGLTRVR | 851   | >TP53-R156L STPPPGLTVR  | 78   | 773   |

|                        |       |                        |       |       |
|------------------------|-------|------------------------|-------|-------|
| >TP53-R156L STPPPGR    | 352   | >TP53-R156L STPPPGL    | 27878 | 27526 |
| >TP53-R156L STPPPGRVR  | 129   | >TP53-R156L STPPPGLVR  | 32    | 97    |
| >TP53-R156L STPPPGR    | 18270 | >TP53-R156L STPPPGL    | 132   | 18138 |
| >TP53-R156L STPPPGRV   | 18    | >TP53-R156L STPPPGLV   | 15    | 3     |
| >TP53-R156L STPPPGRVR  | 82    | >TP53-R156L STPPPGLVR  | 94    | 12    |
| >TP53-R156L STPPPGRV   | 512   | >TP53-R156L STPPPGLV   | 317   | 195   |
| >TP53-R156L STPPPGR    | 13662 | >TP53-R156L STPPPGL    | 164   | 13498 |
| >TP53-R156L STPPPGR    | 7371  | >TP53-R156L STPPPGL    | 8     | 7363  |
| >TP53-R156L STPPPGRV   | 4     | >TP53-R156L STPPPGLV   | 2     | 2     |
| >TP53-R156L STPPPGRVR  | 96    | >TP53-R156L STPPPGLVR  | 41    | 55    |
| >TP53-R156L STPPPGRVR  | 54    | >TP53-R156L STPPPGLVR  | 16    | 38    |
| >TP53-R156L STPPPGRV   | 259   | >TP53-R156L STPPPGLV   | 132   | 127   |
| >TP53-R156L STPPPGR    | 26274 | >TP53-R156L STPPPGL    | 38    | 26236 |
| >TP53-R156L STPPPGRV   | 311   | >TP53-R156L STPPPGLV   | 217   | 94    |
| >TP53-R156L DSTPPPGR   | 203   | >TP53-R156L DSTPPPGL   | 24127 | 23924 |
| >TP53-R156L DSTPPPGRV  | 372   | >TP53-R156L DSTPPPGLV  | 310   | 62    |
| >TP53-R156L DSTPPPGR   | 161   | >TP53-R156L DSTPPPGL   | 25904 | 25743 |
| >TP53-R156L DSTPPPGRV  | 208   | >TP53-R156L DSTPPPGLV  | 132   | 76    |
| >TP53-R156L DSTPPPGR   | 19651 | >TP53-R156L DSTPPPGL   | 469   | 19182 |
| >TP53-R156F RVRAMAIY   | 205   | >TP53-R156F PVRAMAIY   | 10499 | 10294 |
| >TP53-R156F RVRAMAIYK  | 28    | >TP53-R156F PVRAMAIYK  | 201   | 173   |
| >TP53-R156F RVRAMAIYK  | 20    | >TP53-R156F PVRAMAIYK  | 576   | 556   |
| >TP53-R156F RVRAMAIY   | 241   | >TP53-R156F PVRAMAIY   | 223   | 18    |
| >TP53-R156F RVRAMAIY   | 398   | >TP53-R156F PVRAMAIY   | 509   | 111   |
| >TP53-R156F RVRAMAIY   | 5     | >TP53-R156F PVRAMAIY   | 390   | 385   |
| >TP53-R156F RVRAMAIYK  | 3     | >TP53-R156F PVRAMAIYK  | 4     | 1     |
| >TP53-R156F RVRAMAIYKC | 10    | >TP53-R156F PVRAMAIYKC | 1298  | 1288  |
| >TP53-R156F RVRAMAIYKC | 9     | >TP53-R156F PVRAMAIYKC | 1189  | 1180  |
| >TP53-R156F RVRAMAIY   | 107   | >TP53-R156F PVRAMAIY   | 764   | 657   |
| >TP53-R156F RVRAMAIYK  | 18    | >TP53-R156F PVRAMAIYK  | 3468  | 3450  |
| >TP53-R156F RVRAMAIY   | 26    | >TP53-R156F PVRAMAIY   | 1792  | 1766  |
| >TP53-R156F RVRAMAIY   | 85    | >TP53-R156F PVRAMAIY   | 3185  | 3100  |
| >TP53-R156F RVRAMAIY   | 311   | >TP53-R156F PVRAMAIY   | 6062  | 5751  |
| >TP53-R156F RVRAMAIY   | 7     | >TP53-R156F PVRAMAIY   | 3717  | 3710  |
| >TP53-R156F RVRAMAIY   | 211   | >TP53-R156F PVRAMAIY   | 14076 | 13865 |
| >TP53-R156F RVRAMAIYK  | 156   | >TP53-R156F PVRAMAIYK  | 4908  | 4752  |
| >TP53-R156F TRVRAMAI   | 27641 | >TP53-R156F TPVRAMAI   | 127   | 27514 |
| >TP53-R156F TRVRAMAIY  | 62    | >TP53-R156F TPVRAMAIY  | 13    | 49    |
| >TP53-R156F TRVRAMAIYK | 765   | >TP53-R156F TPVRAMAIYK | 244   | 521   |
| >TP53-R156F TRVRAMAI   | 26058 | >TP53-R156F TPVRAMAI   | 99    | 25959 |
| >TP53-R156F TRVRAMAIY  | 278   | >TP53-R156F TPVRAMAIY  | 3617  | 3339  |
| >TP53-R156F TRVRAMAIY  | 11099 | >TP53-R156F TPVRAMAIY  | 20    | 11079 |
| >TP53-R156F TRVRAMAI   | 215   | >TP53-R156F TPVRAMAI   | 420   | 205   |



|                        |       |                        |       |       |
|------------------------|-------|------------------------|-------|-------|
| >TP53-R156F TRVRAMAIY  | 30475 | >TP53-R156F TPVRAMAIY  | 358   | 30117 |
| >TP53-R156F TRVRAMAIY  | 6003  | >TP53-R156F TPVRAMAIY  | 12    | 5991  |
| >TP53-R156F TRVRAMAIY  | 25416 | >TP53-R156F TPVRAMAIY  | 383   | 25033 |
| >TP53-R156F GTRVRAMAI  | 16851 | >TP53-R156F GTPVRAMAI  | 402   | 16449 |
| >TP53-R156F GTRVRAMAI\ | 269   | >TP53-R156F GTPVRAMAI\ | 176   | 93    |
| >TP53-R156F GTRVRAMAI\ | 50    | >TP53-R156F GTPVRAMAI\ | 179   | 129   |
| >TP53-R156F GTRVRAMAI\ | 39    | >TP53-R156F GTPVRAMAI\ | 22    | 17    |
| >TP53-R156F GTRVRAMA   | 18    | >TP53-R156F GTPVRAMA   | 10322 | 10304 |
| >TP53-R156F GTRVRAMAI  | 9     | >TP53-R156F GTPVRAMAI  | 7426  | 7417  |
| >TP53-R156F GTRVRAMAI\ | 30    | >TP53-R156F GTPVRAMAI\ | 11765 | 11735 |
| >TP53-R156F GTRVRAMAI\ | 3     | >TP53-R156F GTPVRAMAI\ | 323   | 320   |
| >TP53-R156F GTRVRAMAI\ | 130   | >TP53-R156F GTPVRAMAI\ | 117   | 13    |
| >TP53-R156F GTRVRAMAI\ | 115   | >TP53-R156F GTPVRAMAI\ | 2615  | 2500  |
| >TP53-R156F GTRVRAMAI\ | 671   | >TP53-R156F GTPVRAMAI\ | 388   | 283   |
| >TP53-R156F GTRVRAMAI\ | 405   | >TP53-R156F GTPVRAMAI\ | 4118  | 3713  |
| >TP53-R156F GTRVRAMAI  | 40    | >TP53-R156F GTPVRAMAI  | 4811  | 4771  |
| >TP53-R156F GTRVRAMAI\ | 4     | >TP53-R156F GTPVRAMAI\ | 96    | 92    |
| >TP53-R156F GTRVRAMAI  | 12123 | >TP53-R156F GTPVRAMAI  | 42    | 12081 |
| >TP53-R156F GTRVRAMAI\ | 13023 | >TP53-R156F GTPVRAMAI\ | 77    | 12946 |
| >TP53-R156F GTRVRAMAI  | 122   | >TP53-R156F GTPVRAMAI  | 6314  | 6192  |
| >TP53-R156F GTRVRAMAI\ | 21    | >TP53-R156F GTPVRAMAI\ | 27    | 6     |
| >TP53-R156F GTRVRAMAI\ | 269   | >TP53-R156F GTPVRAMAI\ | 568   | 299   |
| >TP53-R156F GTRVRAMAI  | 387   | >TP53-R156F GTPVRAMAI  | 346   | 41    |
| >TP53-R156F PGTRVRAMA  | 619   | >TP53-R156F PGTPVRAMA  | 324   | 295   |
| >TP53-R156F PPGTRVRAM  | 68    | >TP53-R156F PPGTPVRAM  | 113   | 45    |
| >TP53-R156F PPPGTRVRAM | 370   | >TP53-R156F PPPGTPVRAM | 762   | 392   |
| >TP53-R156F PPPGTRVRAM | 450   | >TP53-R156F PPPGTPVRAM | 920   | 470   |
| >TP53-R156F TPPPGRVRA  | 482   | >TP53-R156F TPPPGRVRA  | 202   | 280   |
| >TP53-R156F TPPPGRV    | 1601  | >TP53-R156F TPPPGRV    | 241   | 1360  |
| >TP53-R156F TPPPGRVRA  | 32    | >TP53-R156F TPPPGRVRA  | 52    | 20    |
| >TP53-R156F TPPPGRVRA  | 139   | >TP53-R156F TPPPGRVRA  | 80    | 59    |
| >TP53-R156F TPPPGRV    | 273   | >TP53-R156F TPPPGRV    | 141   | 132   |
| >TP53-R156F TPPPGRVRA  | 727   | >TP53-R156F TPPPGRVRA  | 199   | 528   |
| >TP53-R156F STPPPGRV   | 1710  | >TP53-R156F STPPPGRV   | 339   | 1371  |
| >TP53-R156F STPPPGRV   | 1981  | >TP53-R156F STPPPGRV   | 189   | 1792  |
| >TP53-R156F STPPPGRV   | 136   | >TP53-R156F STPPPGRV   | 89    | 47    |
| >TP53-R156F STPPPGRV   | 743   | >TP53-R156F STPPPGRV   | 352   | 391   |
| >TP53-R156F STPPPGRV   | 116   | >TP53-R156F STPPPGRV   | 218   | 102   |
| >TP53-R156F STPPPGRVR  | 851   | >TP53-R156F STPPPGRVR  | 255   | 596   |
| >TP53-R156F STPPPGR    | 352   | >TP53-R156F STPPPGR    | 33075 | 32723 |
| >TP53-R156F STPPPGRVR  | 129   | >TP53-R156F STPPPGRVR  | 42    | 87    |
| >TP53-R156F STPPPGRV   | 18    | >TP53-R156F STPPPGRV   | 8     | 10    |
| >TP53-R156F STPPPGRVR  | 82    | >TP53-R156F STPPPGRVR  | 94    | 12    |

|                        |       |                        |       |       |
|------------------------|-------|------------------------|-------|-------|
| >TP53-R156F STPPPGRV   | 512   | >TP53-R156F STPPPGRV   | 53    | 459   |
| >TP53-R156F STPPPGRV   | 4     | >TP53-R156F STPPPGRV   | 3     | 1     |
| >TP53-R156F STPPPGRVR  | 96    | >TP53-R156F STPPPGRVR  | 63    | 33    |
| >TP53-R156F STPPPGRVR  | 54    | >TP53-R156F STPPPGRVR  | 60    | 6     |
| >TP53-R156F STPPPGRV   | 259   | >TP53-R156F STPPPGRV   | 1832  | 1573  |
| >TP53-R156F STPPPGRV   | 311   | >TP53-R156F STPPPGRV   | 344   | 33    |
| >TP53-R156F DSTPPPGR   | 203   | >TP53-R156F DSTPPPGR   | 34833 | 34630 |
| >TP53-R156F DSTPPPGRV  | 372   | >TP53-R156F DSTPPPGRV  | 395   | 23    |
| >TP53-R156F DSTPPPGR   | 161   | >TP53-R156F DSTPPPGR   | 32390 | 32229 |
| >TP53-R156F DSTPPPGRV  | 208   | >TP53-R156F DSTPPPGRV  | 115   | 93    |
| >TP53-R156F DSTPPPGRV  | 866   | >TP53-R156F DSTPPPGRV  | 453   | 413   |
| >TP53-R156F DSTPPPGRV  | 1466  | >TP53-R156F DSTPPPGRV  | 219   | 1247  |
| >TP53-R156S RVRAMAIY   | 205   | >TP53-R156S RVRAMAIY   | 1177  | 972   |
| >TP53-R156S RVRAMAIYK  | 28    | >TP53-R156S RVRAMAIYK  | 37    | 9     |
| >TP53-R156S RVRAMAIYK  | 20    | >TP53-R156S RVRAMAIYK  | 14    | 6     |
| >TP53-R156S RVRAMAIY   | 241   | >TP53-R156S RVRAMAIY   | 59    | 182   |
| >TP53-R156S RVRAMAIY   | 398   | >TP53-R156S RVRAMAIY   | 137   | 261   |
| >TP53-R156S RVRAMAIY   | 5     | >TP53-R156S RVRAMAIY   | 21    | 16    |
| >TP53-R156S RVRAMAIYK  | 3     | >TP53-R156S RVRAMAIYK  | 3     | 0     |
| >TP53-R156S RVRAMAIYKC | 10    | >TP53-R156S RVRAMAIYKC | 72    | 62    |
| >TP53-R156S RVRAMAIYKC | 9     | >TP53-R156S RVRAMAIYKC | 61    | 52    |
| >TP53-R156S RVRAMAIY   | 107   | >TP53-R156S RVRAMAIY   | 121   | 14    |
| >TP53-R156S RVRAMAIYK  | 18    | >TP53-R156S RVRAMAIYK  | 83    | 65    |
| >TP53-R156S RVRAMAIYK  | 588   | >TP53-R156S RVRAMAIYK  | 78    | 510   |
| >TP53-R156S RVRAMAIY   | 26    | >TP53-R156S RVRAMAIY   | 54    | 28    |
| >TP53-R156S RVRAMAIY   | 85    | >TP53-R156S RVRAMAIY   | 130   | 45    |
| >TP53-R156S RVRAMAIY   | 1402  | >TP53-R156S RVRAMAIY   | 272   | 1130  |
| >TP53-R156S RVRAMAIY   | 311   | >TP53-R156S RVRAMAIY   | 1677  | 1366  |
| >TP53-R156S RVRAMAIY   | 7     | >TP53-R156S RVRAMAIY   | 66    | 59    |
| >TP53-R156S RVRAMAIY   | 211   | >TP53-R156S RVRAMAIY   | 4662  | 4451  |
| >TP53-R156S RVRAMAIYK  | 156   | >TP53-R156S RVRAMAIYK  | 1367  | 1211  |
| >TP53-R156S TRVRAMAIYK | 1127  | >TP53-R156S TRVRAMAIYK | 50    | 1077  |
| >TP53-R156S TRVRAMAIYK | 1520  | >TP53-R156S TRVRAMAIYK | 11    | 1509  |
| >TP53-R156S TRVRAMAIY  | 11493 | >TP53-R156S TRVRAMAIY  | 286   | 11207 |
| >TP53-R156S TRVRAMAIY  | 62    | >TP53-R156S TRVRAMAIY  | 2     | 60    |
| >TP53-R156S TRVRAMAIYK | 4443  | >TP53-R156S TRVRAMAIYK | 45    | 4398  |
| >TP53-R156S TRVRAMAIY  | 1130  | >TP53-R156S TRVRAMAIY  | 94    | 1036  |
| >TP53-R156S TRVRAMAIYK | 765   | >TP53-R156S TRVRAMAIYK | 8     | 757   |
| >TP53-R156S TRVRAMAI   | 8627  | >TP53-R156S TRVRAMAI   | 85    | 8542  |
| >TP53-R156S TRVRAMAIY  | 11614 | >TP53-R156S TRVRAMAIY  | 393   | 11221 |
| >TP53-R156S TRVRAMAIY  | 278   | >TP53-R156S TRVRAMAIY  | 570   | 292   |
| >TP53-R156S TRVRAMAI   | 26203 | >TP53-R156S TRVRAMAI   | 213   | 25990 |
| >TP53-R156S TRVRAMAIY  | 21516 | >TP53-R156S TRVRAMAIY  | 6     | 21510 |

|                       |       |                       |       |       |
|-----------------------|-------|-----------------------|-------|-------|
| >TP53-R156STRVRAMAI   | 215   | >TP53-R156STSVRAMAI   | 5433  | 5218  |
| >TP53-R156STRVRAMAIY  | 23373 | >TP53-R156STSVRAMAIY  | 243   | 23130 |
| >TP53-R156STRVRAMAIY  | 21408 | >TP53-R156STSVRAMAIY  | 215   | 21193 |
| >TP53-R156STRVRAMAI   | 16701 | >TP53-R156STSVRAMAI   | 253   | 16448 |
| >TP53-R156STRVRAMAIY  | 2598  | >TP53-R156STSVRAMAIY  | 29    | 2569  |
| >TP53-R156STRVRAMAIYK | 9137  | >TP53-R156STSVRAMAIYK | 453   | 8684  |
| >TP53-R156STRVRAMAI   | 13473 | >TP53-R156STSVRAMAI   | 319   | 13154 |
| >TP53-R156SGTRVRAMAI\ | 269   | >TP53-R156SGTSVRAMAI\ | 54    | 215   |
| >TP53-R156SGTRVRAMAI\ | 50    | >TP53-R156SGTSVRAMAI\ | 53    | 3     |
| >TP53-R156SGTRVRAMAI\ | 39    | >TP53-R156SGTSVRAMAI\ | 8     | 31    |
| >TP53-R156SGTRVRAMAI\ | 2243  | >TP53-R156SGTSVRAMAI\ | 362   | 1881  |
| >TP53-R156SGTRVRAMA   | 18    | >TP53-R156SGTSVRAMA   | 3692  | 3674  |
| >TP53-R156SGTRVRAMAI  | 9     | >TP53-R156SGTSVRAMAI  | 1746  | 1737  |
| >TP53-R156SGTRVRAMAI\ | 30    | >TP53-R156SGTSVRAMAI\ | 5681  | 5651  |
| >TP53-R156SGTRVRAMAI\ | 3     | >TP53-R156SGTSVRAMAI\ | 31    | 28    |
| >TP53-R156SGTRVRAMAI\ | 130   | >TP53-R156SGTSVRAMAI\ | 44    | 86    |
| >TP53-R156SGTRVRAMAI\ | 115   | >TP53-R156SGTSVRAMAI\ | 476   | 361   |
| >TP53-R156SGTRVRAMAI\ | 671   | >TP53-R156SGTSVRAMAI\ | 71    | 600   |
| >TP53-R156SGTRVRAMAI\ | 405   | >TP53-R156SGTSVRAMAI\ | 797   | 392   |
| >TP53-R156SGTRVRAMAI  | 40    | >TP53-R156SGTSVRAMAI  | 173   | 133   |
| >TP53-R156SGTRVRAMAI\ | 4     | >TP53-R156SGTSVRAMAI\ | 7     | 3     |
| >TP53-R156SGTRVRAMAI  | 122   | >TP53-R156SGTSVRAMAI  | 447   | 325   |
| >TP53-R156SGTRVRAMAI\ | 21    | >TP53-R156SGTSVRAMAI\ | 17    | 4     |
| >TP53-R156SGTRVRAMAI\ | 269   | >TP53-R156SGTSVRAMAI\ | 109   | 160   |
| >TP53-R156SGTRVRAMAI  | 387   | >TP53-R156SGTSVRAMAI  | 148   | 239   |
| >TP53-R156SPGTRVRAMA  | 619   | >TP53-R156SPGTSVRAMA  | 180   | 439   |
| >TP53-R156SPPGTRVRAM  | 68    | >TP53-R156SPPGTSVRAM  | 182   | 114   |
| >TP53-R156SPPPGTRVRAM | 370   | >TP53-R156SPPPGTSVRAM | 655   | 285   |
| >TP53-R156SPPPGTRVRAM | 450   | >TP53-R156SPPPGTSVRAM | 432   | 18    |
| >TP53-R156STPPPGTRV   | 763   | >TP53-R156STPPPGTSV   | 270   | 493   |
| >TP53-R156STPPPGTRVRA | 482   | >TP53-R156STPPPGTSVRA | 131   | 351   |
| >TP53-R156STPPPGTRV   | 1601  | >TP53-R156STPPPGTSV   | 278   | 1323  |
| >TP53-R156STPPPGTRVRA | 32    | >TP53-R156STPPPGTSVRA | 42    | 10    |
| >TP53-R156STPPPGTRVRA | 139   | >TP53-R156STPPPGTSVRA | 63    | 76    |
| >TP53-R156STPPPGTRV   | 273   | >TP53-R156STPPPGTSV   | 375   | 102   |
| >TP53-R156STPPPGTRVRA | 727   | >TP53-R156STPPPGTSVRA | 328   | 399   |
| >TP53-R156STPPPGTRV   | 1710  | >TP53-R156STPPPGTSV   | 482   | 1228  |
| >TP53-R156STPPPGTRV   | 1981  | >TP53-R156STPPPGTSV   | 332   | 1649  |
| >TP53-R156STPPPGTRV   | 136   | >TP53-R156STPPPGTSV   | 108   | 28    |
| >TP53-R156STPPPGTRV   | 743   | >TP53-R156STPPPGTSV   | 486   | 257   |
| >TP53-R156STPPPGTRV   | 116   | >TP53-R156STPPPGTSV   | 112   | 4     |
| >TP53-R156STPPPGTRVR  | 851   | >TP53-R156STPPPGTSVR  | 274   | 577   |
| >TP53-R156STPPPGTR    | 352   | >TP53-R156STPPPGTS    | 27180 | 26828 |

|                        |      |                        |       |       |
|------------------------|------|------------------------|-------|-------|
| >TP53-R156SSTPPPGTRVR  | 129  | >TP53-R156SSTPPPGTSVR  | 25    | 104   |
| >TP53-R156SSTPPPGTRV   | 18   | >TP53-R156SSTPPPGTSV   | 18    | 0     |
| >TP53-R156SSTPPPGTRVR  | 82   | >TP53-R156SSTPPPGTSVR  | 83    | 1     |
| >TP53-R156SSTPPPGTRV   | 512  | >TP53-R156SSTPPPGTSV   | 200   | 312   |
| >TP53-R156SSTPPPGTRV   | 4    | >TP53-R156SSTPPPGTSV   | 4     | 0     |
| >TP53-R156SSTPPPGTRVR  | 96   | >TP53-R156SSTPPPGTSVR  | 77    | 19    |
| >TP53-R156SSTPPPGTRVR  | 54   | >TP53-R156SSTPPPGTSVR  | 29    | 25    |
| >TP53-R156SSTPPPGTRV   | 259  | >TP53-R156SSTPPPGTSV   | 302   | 43    |
| >TP53-R156SSTPPPGTRV   | 311  | >TP53-R156SSTPPPGTSV   | 102   | 209   |
| >TP53-R156SDSTPPPGTR   | 203  | >TP53-R156SDSTPPPGTS   | 30172 | 29969 |
| >TP53-R156SDSTPPPGTRV  | 372  | >TP53-R156SDSTPPPGTSV  | 181   | 191   |
| >TP53-R156SDSTPPPGTR   | 161  | >TP53-R156SDSTPPPGTS   | 25749 | 25588 |
| >TP53-R156SDSTPPPGTRV  | 208  | >TP53-R156SDSTPPPGTSV  | 65    | 143   |
| >TP53-R158C RAMAIYKQSC | 354  | >TP53-R158C CAMAIYKQSC | 10309 | 9955  |
| >TP53-R158C RAMAIYKQSC | 375  | >TP53-R158C CAMAIYKQSC | 4590  | 4215  |
| >TP53-R158C VRAMAIYK   | 159  | >TP53-R158C VCAMAIYK   | 26361 | 26202 |
| >TP53-R158C DSTPPPGTRV | 372  | >TP53-R158C DSTPPPGTRV | 37205 | 36833 |
| >TP53-R158C DSTPPPGTRV | 208  | >TP53-R158C DSTPPPGTRV | 38726 | 38518 |
| >TP53-R158C RVRAMAIY   | 205  | >TP53-R158C RVCAMAIY   | 564   | 359   |
| >TP53-R158C RVRAMAIYK  | 28   | >TP53-R158C RVCAMAIYK  | 34    | 6     |
| >TP53-R158C RVRAMAIY   | 3205 | >TP53-R158C RVCAMAIY   | 160   | 3045  |
| >TP53-R158C RVRAMAIYK  | 20   | >TP53-R158C RVCAMAIYK  | 8     | 12    |
| >TP53-R158C RVRAMAIY   | 241  | >TP53-R158C RVCAMAIY   | 104   | 137   |
| >TP53-R158C RVRAMAIY   | 398  | >TP53-R158C RVCAMAIY   | 228   | 170   |
| >TP53-R158C RVRAMAIY   | 5    | >TP53-R158C RVCAMAIY   | 531   | 526   |
| >TP53-R158C RVRAMAIYK  | 3    | >TP53-R158C RVCAMAIYK  | 5     | 2     |
| >TP53-R158C RVRAMAIYKC | 10   | >TP53-R158C RVCAMAIYKC | 1484  | 1474  |
| >TP53-R158C RVRAMAIYKC | 9    | >TP53-R158C RVCAMAIYKC | 1580  | 1571  |
| >TP53-R158C RVRAMAIY   | 107  | >TP53-R158C RVCAMAIY   | 67    | 40    |
| >TP53-R158C RVRAMAIYK  | 18   | >TP53-R158C RVCAMAIYK  | 25    | 7     |
| >TP53-R158C RVRAMAIYK  | 588  | >TP53-R158C RVCAMAIYK  | 97    | 491   |
| >TP53-R158C RVRAMAIY   | 26   | >TP53-R158C RVCAMAIY   | 13    | 13    |
| >TP53-R158C RVRAMAIY   | 85   | >TP53-R158C RVCAMAIY   | 124   | 39    |
| >TP53-R158C RVRAMAIY   | 311  | >TP53-R158C RVCAMAIY   | 1297  | 986   |
| >TP53-R158C RVRAMAIY   | 7    | >TP53-R158C RVCAMAIY   | 21    | 14    |
| >TP53-R158C RVRAMAIY   | 211  | >TP53-R158C RVCAMAIY   | 455   | 244   |
| >TP53-R158C RVRAMAIYK  | 156  | >TP53-R158C RVCAMAIYK  | 78    | 78    |
| >TP53-R158C TRVRAMAIY  | 62   | >TP53-R158C TRVCAMAIY  | 133   | 71    |
| >TP53-R158C TRVRAMAIYK | 765  | >TP53-R158C TRVCAMAIYK | 143   | 622   |
| >TP53-R158C TRVRAMAI   | 746  | >TP53-R158C TRVCAMAI   | 442   | 304   |
| >TP53-R158C TRVRAMAIY  | 278  | >TP53-R158C TRVCAMAIY  | 204   | 74    |
| >TP53-R158C TRVRAMAI   | 215  | >TP53-R158C TRVCAMAI   | 198   | 17    |
| >TP53-R158C GTRVRAMAI  | 269  | >TP53-R158C GTRVCAMAI  | 445   | 176   |

|                        |       |                        |       |       |
|------------------------|-------|------------------------|-------|-------|
| >TP53-R158CGTRVRAMAI   | 50    | >TP53-R158CGTRVCAMAI   | 62    | 12    |
| >TP53-R158CGTRVRAMAI   | 39    | >TP53-R158CGTRVCAMAI   | 39    | 0     |
| >TP53-R158CGTRVRAMA    | 18    | >TP53-R158CGTRVCAMA    | 87    | 69    |
| >TP53-R158CGTRVRAMAI   | 9     | >TP53-R158CGTRVCAMAI   | 22    | 13    |
| >TP53-R158CGTRVRAMAI   | 30    | >TP53-R158CGTRVCAMAI   | 98    | 68    |
| >TP53-R158CGTRVRAMAI   | 3     | >TP53-R158CGTRVCAMAI   | 4     | 1     |
| >TP53-R158CGTRVRAMAI   | 130   | >TP53-R158CGTRVCAMAI   | 195   | 65    |
| >TP53-R158CGTRVRAMAI   | 115   | >TP53-R158CGTRVCAMAI   | 154   | 39    |
| >TP53-R158CGTRVRAMAI   | 405   | >TP53-R158CGTRVCAMAI   | 359   | 46    |
| >TP53-R158CGTRVRAMAI   | 40    | >TP53-R158CGTRVCAMAI   | 58    | 18    |
| >TP53-R158CGTRVRAMAI   | 4     | >TP53-R158CGTRVCAMAI   | 5     | 1     |
| >TP53-R158CGTRVRAMAI   | 122   | >TP53-R158CGTRVCAMAI   | 31    | 91    |
| >TP53-R158CGTRVRAMAI   | 21    | >TP53-R158CGTRVCAMAI   | 31    | 10    |
| >TP53-R158CGTRVRAMAI   | 269   | >TP53-R158CGTRVCAMAI   | 259   | 10    |
| >TP53-R158CGTRVRAMAI   | 387   | >TP53-R158CGTRVCAMAI   | 230   | 157   |
| >TP53-R158C PPGTRVRAM  | 68    | >TP53-R158C PPGTRVCAM  | 455   | 387   |
| >TP53-R158C PPPGTRVRAM | 370   | >TP53-R158C PPPGTRVCAM | 684   | 314   |
| >TP53-R158C PPPGTRVRAM | 450   | >TP53-R158C PPPGTRVCAM | 248   | 202   |
| >TP53-R158C TPPPGRVRA  | 482   | >TP53-R158C TPPPGRVCA  | 220   | 262   |
| >TP53-R158C TPPPGRVRA  | 32    | >TP53-R158C TPPPGRVCA  | 75    | 43    |
| >TP53-R158C TPPPGRVRA  | 139   | >TP53-R158C TPPPGRVCA  | 94    | 45    |
| >TP53-R158C STPPPGRVVR | 129   | >TP53-R158C STPPPGRVVC | 37561 | 37432 |
| >TP53-R158C STPPPGRVVR | 82    | >TP53-R158C STPPPGRVVC | 175   | 93    |
| >TP53-R158C STPPPGRVVR | 96    | >TP53-R158C STPPPGRVVC | 10    | 86    |
| >TP53-R158C STPPPGRVVR | 54    | >TP53-R158C STPPPGRVVC | 93    | 39    |
| >TP53-R158F RAMAIYKQ   | 7532  | >TP53-R158F FAMIYKQ    | 300   | 7232  |
| >TP53-R158F RAMAIYKQ   | 8887  | >TP53-R158F FAMIYKQ    | 435   | 8452  |
| >TP53-R158F RAMAIYKQSC | 354   | >TP53-R158F FAMIYKQSC  | 3787  | 3433  |
| >TP53-R158F RAMAIYKQS  | 19669 | >TP53-R158F FAMIYKQS   | 241   | 19428 |
| >TP53-R158F RAMAIYKQSC | 375   | >TP53-R158F FAMIYKQSC  | 588   | 213   |
| >TP53-R158F VRAMAIYK   | 3864  | >TP53-R158F VFAMAIYK   | 98    | 3766  |
| >TP53-R158F VRAMAIYK   | 18296 | >TP53-R158F VFAMAIYK   | 322   | 17974 |
| >TP53-R158F VRAMAIYK   | 3568  | >TP53-R158F VFAMAIYK   | 258   | 3310  |
| >TP53-R158F VRAMAIYK   | 159   | >TP53-R158F VFAMAIYK   | 25643 | 25484 |
| >TP53-R158F VRAMAIYK   | 5173  | >TP53-R158F VFAMAIYK   | 238   | 4935  |
| >TP53-R158F DSTPPPGRV  | 25838 | >TP53-R158F DSTPPPGRV  | 424   | 25414 |
| >TP53-R158F DSTPPPGRV  | 372   | >TP53-R158F DSTPPPGRV  | 31329 | 30957 |
| >TP53-R158F DSTPPPGRV  | 208   | >TP53-R158F DSTPPPGRV  | 22675 | 22467 |
| >TP53-R158F DSTPPPGRV  | 22940 | >TP53-R158F DSTPPPGRV  | 70    | 22870 |
| >TP53-R158F RVRAMAIY   | 205   | >TP53-R158F RVFAMAIY   | 72    | 133   |
| >TP53-R158F RVRAMAIYK  | 28    | >TP53-R158F RVFAMAIYK  | 24    | 4     |
| >TP53-R158F RVRAMAIY   | 3205  | >TP53-R158F RVFAMAIY   | 48    | 3157  |
| >TP53-R158F RVRAMAIYK  | 20    | >TP53-R158F RVFAMAIYK  | 7     | 13    |

|                        |      |                        |     |      |
|------------------------|------|------------------------|-----|------|
| >TP53-R158F RVRAMAIY   | 241  | >TP53-R158F RVFAMAIY   | 533 | 292  |
| >TP53-R158F RVRAMAIY   | 398  | >TP53-R158F RVFAMAIY   | 40  | 358  |
| >TP53-R158F RVRAMAIY   | 5    | >TP53-R158F RVFAMAIY   | 75  | 70   |
| >TP53-R158F RVRAMAIYK  | 3    | >TP53-R158F RVFAMAIYK  | 3   | 0    |
| >TP53-R158F RVRAMAIYKC | 10   | >TP53-R158F RVFAMAIYKC | 297 | 287  |
| >TP53-R158F RVRAMAIYKC | 9    | >TP53-R158F RVFAMAIYKC | 276 | 267  |
| >TP53-R158F RVRAMAIY   | 107  | >TP53-R158F RVFAMAIY   | 34  | 73   |
| >TP53-R158F RVRAMAIYK  | 18   | >TP53-R158F RVFAMAIYK  | 12  | 6    |
| >TP53-R158F RVRAMAIY   | 2608 | >TP53-R158F RVFAMAIY   | 63  | 2545 |
| >TP53-R158F RVRAMAIYKC | 6525 | >TP53-R158F RVFAMAIYKC | 205 | 6320 |
| >TP53-R158F RVRAMAIYK  | 588  | >TP53-R158F RVFAMAIYK  | 10  | 578  |
| >TP53-R158F RVRAMAIY   | 26   | >TP53-R158F RVFAMAIY   | 10  | 16   |
| >TP53-R158F RVRAMAIY   | 85   | >TP53-R158F RVFAMAIY   | 80  | 5    |
| >TP53-R158F RVRAMAIY   | 311  | >TP53-R158F RVFAMAIY   | 86  | 225  |
| >TP53-R158F RVRAMAIY   | 7    | >TP53-R158F RVFAMAIY   | 7   | 0    |
| >TP53-R158F RVRAMAIY   | 2702 | >TP53-R158F RVFAMAIY   | 343 | 2359 |
| >TP53-R158F RVRAMAIY   | 5014 | >TP53-R158F RVFAMAIY   | 100 | 4914 |
| >TP53-R158F RVRAMAIY   | 211  | >TP53-R158F RVFAMAIY   | 431 | 220  |
| >TP53-R158F RVRAMAIY   | 1555 | >TP53-R158F RVFAMAIY   | 181 | 1374 |
| >TP53-R158F RVRAMAIY   | 1386 | >TP53-R158F RVFAMAIY   | 348 | 1038 |
| >TP53-R158F RVRAMAIYK  | 156  | >TP53-R158F RVFAMAIYK  | 28  | 128  |
| >TP53-R158F RVRAMAIYKC | 5077 | >TP53-R158F RVFAMAIYKC | 421 | 4656 |
| >TP53-R158F TRVRAMAIYK | 1127 | >TP53-R158F TRVFAMAIYK | 261 | 866  |
| >TP53-R158F TRVRAMAIYK | 1520 | >TP53-R158F TRVFAMAIYK | 220 | 1300 |
| >TP53-R158F TRVRAMAIY  | 62   | >TP53-R158F TRVFAMAIY  | 96  | 34   |
| >TP53-R158F TRVRAMAIY  | 1130 | >TP53-R158F TRVFAMAIY  | 332 | 798  |
| >TP53-R158F TRVRAMAIYK | 765  | >TP53-R158F TRVFAMAIYK | 59  | 706  |
| >TP53-R158F TRVRAMAIY  | 278  | >TP53-R158F TRVFAMAIY  | 682 | 404  |
| >TP53-R158F TRVRAMAI   | 215  | >TP53-R158F TRVFAMAI   | 244 | 29   |
| >TP53-R158F GTRVRAMAI\ | 269  | >TP53-R158F GTRVFAMAI\ | 478 | 209  |
| >TP53-R158F GTRVRAMAI\ | 50   | >TP53-R158F GTRVFAMAI\ | 57  | 7    |
| >TP53-R158F GTRVRAMAI\ | 39   | >TP53-R158F GTRVFAMAI\ | 20  | 19   |
| >TP53-R158F GTRVRAMA   | 18   | >TP53-R158F GTRVFAMA   | 22  | 4    |
| >TP53-R158F GTRVRAMAI  | 9    | >TP53-R158F GTRVFAMAI  | 9   | 0    |
| >TP53-R158F GTRVRAMAI\ | 30   | >TP53-R158F GTRVFAMAI\ | 32  | 2    |
| >TP53-R158F GTRVRAMAI\ | 3    | >TP53-R158F GTRVFAMAI\ | 3   | 0    |
| >TP53-R158F GTRVRAMAI\ | 130  | >TP53-R158F GTRVFAMAI\ | 77  | 53   |
| >TP53-R158F GTRVRAMAI\ | 115  | >TP53-R158F GTRVFAMAI\ | 108 | 7    |
| >TP53-R158F GTRVRAMAI  | 2287 | >TP53-R158F GTRVFAMAI  | 379 | 1908 |
| >TP53-R158F GTRVRAMAI\ | 671  | >TP53-R158F GTRVFAMAI\ | 295 | 376  |
| >TP53-R158F GTRVRAMAI\ | 405  | >TP53-R158F GTRVFAMAI\ | 380 | 25   |
| >TP53-R158F GTRVRAMAI\ | 1212 | >TP53-R158F GTRVFAMAI\ | 454 | 758  |
| >TP53-R158F GTRVRAMAI  | 40   | >TP53-R158F GTRVFAMAI  | 59  | 19   |

|                        |       |                        |       |       |
|------------------------|-------|------------------------|-------|-------|
| >TP53-R158FGTRVRAMAI   | 4     | >TP53-R158FGTRVFAMAI   | 5     | 1     |
| >TP53-R158FGTRVRAMAI   | 122   | >TP53-R158FGTRVFAMAI   | 35    | 87    |
| >TP53-R158FGTRVRAMAI   | 21    | >TP53-R158FGTRVFAMAI   | 20    | 1     |
| >TP53-R158FGTRVRAMAI   | 269   | >TP53-R158FGTRVFAMAI   | 162   | 107   |
| >TP53-R158FGTRVRAMAI   | 387   | >TP53-R158FGTRVFAMAI   | 151   | 236   |
| >TP53-R158FPPGTRVRAM   | 8998  | >TP53-R158FPPGTRVFAM   | 79    | 8919  |
| >TP53-R158FPPGTRVRAM   | 68    | >TP53-R158FPPGTRVFAM   | 288   | 220   |
| >TP53-R158FPPPGTRVR    | 6345  | >TP53-R158FPPPGTRVF    | 280   | 6065  |
| >TP53-R158FPPPGTRVRAM  | 370   | >TP53-R158FPPPGTRVFAM  | 432   | 62    |
| >TP53-R158FPPPGTRVRAM  | 450   | >TP53-R158FPPPGTRVFAM  | 16    | 434   |
| >TP53-R158FTPPPGRTRVR  | 10706 | >TP53-R158FTPPPGRTRVF  | 275   | 10431 |
| >TP53-R158FTPPPGRTRVRA | 482   | >TP53-R158FTPPPGRTRVFA | 35    | 447   |
| >TP53-R158FTPPPGRTRVR  | 13757 | >TP53-R158FTPPPGRTRVF  | 159   | 13598 |
| >TP53-R158FTPPPGRTRVRA | 32    | >TP53-R158FTPPPGRTRVFA | 77    | 45    |
| >TP53-R158FTPPPGRTRVR  | 10012 | >TP53-R158FTPPPGRTRVF  | 134   | 9878  |
| >TP53-R158FTPPPGRTRVRA | 139   | >TP53-R158FTPPPGRTRVFA | 50    | 89    |
| >TP53-R158FTPPPGRTRVR  | 23398 | >TP53-R158FTPPPGRTRVF  | 461   | 22937 |
| >TP53-R158FTPPPGRTRVRA | 727   | >TP53-R158FTPPPGRTRVFA | 189   | 538   |
| >TP53-R158FSTPPPGRTRVR | 16541 | >TP53-R158FSTPPPGRTRVF | 392   | 16149 |
| >TP53-R158FSTPPPGRTRVR | 23896 | >TP53-R158FSTPPPGRTRVF | 345   | 23551 |
| >TP53-R158FSTPPPGRTRVR | 129   | >TP53-R158FSTPPPGRTRVF | 35407 | 35278 |
| >TP53-R158FSTPPPGRTRVR | 82    | >TP53-R158FSTPPPGRTRVF | 31    | 51    |
| >TP53-R158FSTPPPGRTRVR | 15003 | >TP53-R158FSTPPPGRTRVF | 16    | 14987 |
| >TP53-R158FSTPPPGRTRVR | 96    | >TP53-R158FSTPPPGRTRVF | 2     | 94    |
| >TP53-R158FSTPPPGRTRVR | 54    | >TP53-R158FSTPPPGRTRVF | 12    | 42    |
| >TP53-R158FSTPPPGRTRVR | 9991  | >TP53-R158FSTPPPGRTRVF | 72    | 9919  |
| >TP53-R158CRAMAIYKQSC  | 354   | >TP53-R158CGAMAIYKQSC  | 6995  | 6641  |
| >TP53-R158CRAMAIYKQSC  | 375   | >TP53-R158CGAMAIYKQSC  | 472   | 97    |
| >TP53-R158CVRAMAIYK    | 3864  | >TP53-R158CVGAMAIYK    | 118   | 3746  |
| >TP53-R158CVRAMAIYK    | 159   | >TP53-R158CVGAMAIYK    | 25223 | 25064 |
| >TP53-R158CDSTPPPGRTRV | 372   | >TP53-R158CDSTPPPGRTRV | 36451 | 36079 |
| >TP53-R158CDSTPPPGRTRV | 208   | >TP53-R158CDSTPPPGRTRV | 37052 | 36844 |
| >TP53-R158CRVRAMAIY    | 205   | >TP53-R158CRVGAMAIY    | 635   | 430   |
| >TP53-R158CRVRAMAIYK   | 28    | >TP53-R158CRVGAMAIYK   | 35    | 7     |
| >TP53-R158CRVRAMAIYK   | 20    | >TP53-R158CRVGAMAIYK   | 9     | 11    |
| >TP53-R158CRVRAMAIY    | 241   | >TP53-R158CRVGAMAIY    | 354   | 113   |
| >TP53-R158CRVRAMAIY    | 398   | >TP53-R158CRVGAMAIY    | 199   | 199   |
| >TP53-R158CRVRAMAIY    | 5     | >TP53-R158CRVGAMAIY    | 2193  | 2188  |
| >TP53-R158CRVRAMAIYK   | 3     | >TP53-R158CRVGAMAIYK   | 7     | 4     |
| >TP53-R158CRVRAMAIYKC  | 10    | >TP53-R158CRVGAMAIYKC  | 4082  | 4072  |
| >TP53-R158CRVRAMAIYKC  | 9     | >TP53-R158CRVGAMAIYKC  | 4346  | 4337  |
| >TP53-R158CRVRAMAIY    | 107   | >TP53-R158CRVGAMAIY    | 88    | 19    |
| >TP53-R158CRVRAMAIYK   | 18    | >TP53-R158CRVGAMAIYK   | 64    | 46    |

|                        |     |                        |       |       |
|------------------------|-----|------------------------|-------|-------|
| >TP53-R158C RVRAMAIYK  | 588 | >TP53-R158C RVGAMAIYK  | 413   | 175   |
| >TP53-R158C RVRAMAIY   | 26  | >TP53-R158C RVGAMAIY   | 9     | 17    |
| >TP53-R158C RVRAMAIY   | 85  | >TP53-R158C RVGAMAIY   | 162   | 77    |
| >TP53-R158C RVRAMAIY   | 311 | >TP53-R158C RVGAMAIY   | 3279  | 2968  |
| >TP53-R158C RVRAMAIY   | 7   | >TP53-R158C RVGAMAIY   | 125   | 118   |
| >TP53-R158C RVRAMAIY   | 211 | >TP53-R158C RVGAMAIY   | 365   | 154   |
| >TP53-R158C RVRAMAIYK  | 156 | >TP53-R158C RVGAMAIYK  | 86    | 70    |
| >TP53-R158C TRVRAMAIY  | 62  | >TP53-R158C TRVGAMAIY  | 29    | 33    |
| >TP53-R158C TRVRAMAIYK | 765 | >TP53-R158C TRVGAMAIYK | 157   | 608   |
| >TP53-R158C TRVRAMAIY  | 278 | >TP53-R158C TRVGAMAIY  | 933   | 655   |
| >TP53-R158C TRVRAMAI   | 215 | >TP53-R158C TRVGAMAI   | 57    | 158   |
| >TP53-R158C GTRVRAMAI' | 269 | >TP53-R158C GTRVGAMAI' | 454   | 185   |
| >TP53-R158C GTRVRAMAI' | 50  | >TP53-R158C GTRVGAMAI' | 62    | 12    |
| >TP53-R158C GTRVRAMAI' | 39  | >TP53-R158C GTRVGAMAI' | 46    | 7     |
| >TP53-R158C GTRVRAMAI' | 715 | >TP53-R158C GTRVGAMAI' | 365   | 350   |
| >TP53-R158C GTRVRAMA   | 18  | >TP53-R158C GTRVGAMA   | 41    | 23    |
| >TP53-R158C GTRVRAMAI  | 9   | >TP53-R158C GTRVGAMAI  | 13    | 4     |
| >TP53-R158C GTRVRAMAI' | 30  | >TP53-R158C GTRVGAMAI' | 54    | 24    |
| >TP53-R158C GTRVRAMAI' | 3   | >TP53-R158C GTRVGAMAI' | 4     | 1     |
| >TP53-R158C GTRVRAMAI' | 130 | >TP53-R158C GTRVGAMAI' | 102   | 28    |
| >TP53-R158C GTRVRAMAI' | 115 | >TP53-R158C GTRVGAMAI' | 306   | 191   |
| >TP53-R158C GTRVRAMAI' | 405 | >TP53-R158C GTRVGAMAI' | 244   | 161   |
| >TP53-R158C GTRVRAMAI  | 40  | >TP53-R158C GTRVGAMAI  | 26    | 14    |
| >TP53-R158C GTRVRAMAI' | 4   | >TP53-R158C GTRVGAMAI' | 4     | 0     |
| >TP53-R158C GTRVRAMAI  | 122 | >TP53-R158C GTRVGAMAI  | 55    | 67    |
| >TP53-R158C GTRVRAMAI' | 21  | >TP53-R158C GTRVGAMAI' | 27    | 6     |
| >TP53-R158C GTRVRAMAI' | 269 | >TP53-R158C GTRVGAMAI' | 335   | 66    |
| >TP53-R158C GTRVRAMAI  | 387 | >TP53-R158C GTRVGAMAI  | 277   | 110   |
| >TP53-R158C PPGTRVRAM  | 68  | >TP53-R158C PPGTRVGAM  | 88    | 20    |
| >TP53-R158C PPPGTRVRAM | 370 | >TP53-R158C PPPGTRVGAI | 339   | 31    |
| >TP53-R158C PPPGTRVRAM | 450 | >TP53-R158C PPPGTRVGAI | 94    | 356   |
| >TP53-R158C TPPPGRVRA  | 482 | >TP53-R158C TPPPGRVGA/ | 101   | 381   |
| >TP53-R158C TPPPGRVRA  | 32  | >TP53-R158C TPPPGRVGA/ | 41    | 9     |
| >TP53-R158C TPPPGRVRA  | 139 | >TP53-R158C TPPPGRVGA/ | 114   | 25    |
| >TP53-R158C STPPPGRVVR | 129 | >TP53-R158C STPPPGRVVG | 36951 | 36822 |
| >TP53-R158C STPPPGRVVR | 82  | >TP53-R158C STPPPGRVVG | 50    | 32    |
| >TP53-R158C STPPPGRVVR | 96  | >TP53-R158C STPPPGRVVG | 47    | 49    |
| >TP53-R158C STPPPGRVVR | 54  | >TP53-R158C STPPPGRVVG | 77    | 23    |
| >TP53-R158F RAMAIYKQSC | 354 | >TP53-R158F HAMAIYKQSC | 2163  | 1809  |
| >TP53-R158F RAMAIYKQSC | 375 | >TP53-R158F HAMAIYKQSC | 1542  | 1167  |
| >TP53-R158F VRAMAIYK   | 159 | >TP53-R158F VHAMAIYK   | 20368 | 20209 |
| >TP53-R158F DSTPPPGRV  | 372 | >TP53-R158F DSTPPPGRV  | 29066 | 28694 |
| >TP53-R158F DSTPPPGRV  | 208 | >TP53-R158F DSTPPPGRV  | 17045 | 16837 |



|                        |      |                        |     |      |
|------------------------|------|------------------------|-----|------|
| >TP53-R158F RVRAMAIY   | 205  | >TP53-R158F RVHAMAIY   | 225 | 20   |
| >TP53-R158F RVRAMAIYK  | 28   | >TP53-R158F RVHAMAIYK  | 29  | 1    |
| >TP53-R158F RVRAMAIY   | 3205 | >TP53-R158F RVHAMAIY   | 272 | 2933 |
| >TP53-R158F RVRAMAIYK  | 20   | >TP53-R158F RVHAMAIYK  | 9   | 11   |
| >TP53-R158F RVRAMAIY   | 241  | >TP53-R158F RVHAMAIY   | 133 | 108  |
| >TP53-R158F RVRAMAIY   | 398  | >TP53-R158F RVHAMAIY   | 175 | 223  |
| >TP53-R158F RVRAMAIY   | 5    | >TP53-R158F RVHAMAIY   | 16  | 11   |
| >TP53-R158F RVRAMAIYK  | 3    | >TP53-R158F RVHAMAIYK  | 3   | 0    |
| >TP53-R158F RVRAMAIYKC | 10   | >TP53-R158F RVHAMAIYKC | 52  | 42   |
| >TP53-R158F RVRAMAIYKC | 9    | >TP53-R158F RVHAMAIYKC | 46  | 37   |
| >TP53-R158F RVRAMAIY   | 107  | >TP53-R158F RVHAMAIY   | 66  | 41   |
| >TP53-R158F RVRAMAIYK  | 18   | >TP53-R158F RVHAMAIYK  | 22  | 4    |
| >TP53-R158F RVRAMAIYK  | 588  | >TP53-R158F RVHAMAIYK  | 77  | 511  |
| >TP53-R158F RVRAMAIY   | 26   | >TP53-R158F RVHAMAIY   | 13  | 13   |
| >TP53-R158F RVRAMAIY   | 85   | >TP53-R158F RVHAMAIY   | 117 | 32   |
| >TP53-R158F RVRAMAIY   | 311  | >TP53-R158F RVHAMAIY   | 604 | 293  |
| >TP53-R158F RVRAMAIY   | 7    | >TP53-R158F RVHAMAIY   | 14  | 7    |
| >TP53-R158F RVRAMAIY   | 211  | >TP53-R158F RVHAMAIY   | 213 | 2    |
| >TP53-R158F RVRAMAIYK  | 156  | >TP53-R158F RVHAMAIYK  | 62  | 94   |
| >TP53-R158F TRVRAMAIY  | 62   | >TP53-R158F TRVHAMAIY  | 89  | 27   |
| >TP53-R158F TRVRAMAIY  | 1130 | >TP53-R158F TRVHAMAIY  | 378 | 752  |
| >TP53-R158F TRVRAMAIYK | 765  | >TP53-R158F TRVHAMAIYK | 459 | 306  |
| >TP53-R158F TRVRAMAI   | 746  | >TP53-R158F TRVHAMAI   | 364 | 382  |
| >TP53-R158F TRVRAMAIY  | 278  | >TP53-R158F TRVHAMAIY  | 111 | 167  |
| >TP53-R158F TRVRAMAI   | 215  | >TP53-R158F TRVHAMAI   | 121 | 94   |
| >TP53-R158F GTRVRAMAI' | 269  | >TP53-R158F GTRVHAMAI' | 284 | 15   |
| >TP53-R158F GTRVRAMAI' | 50   | >TP53-R158F GTRVHAMAI' | 49  | 1    |
| >TP53-R158F GTRVRAMAI' | 39   | >TP53-R158F GTRVHAMAI' | 37  | 2    |
| >TP53-R158F GTRVRAMAI' | 715  | >TP53-R158F GTRVHAMAI' | 213 | 502  |
| >TP53-R158F GTRVRAMA   | 18   | >TP53-R158F GTRVHAMA   | 18  | 0    |
| >TP53-R158F GTRVRAMAI  | 9    | >TP53-R158F GTRVHAMAI  | 10  | 1    |
| >TP53-R158F GTRVRAMAI' | 30   | >TP53-R158F GTRVHAMAI' | 37  | 7    |
| >TP53-R158F GTRVRAMAI' | 3    | >TP53-R158F GTRVHAMAI' | 3   | 0    |
| >TP53-R158F GTRVRAMAI' | 130  | >TP53-R158F GTRVHAMAI' | 205 | 75   |
| >TP53-R158F GTRVRAMAI' | 115  | >TP53-R158F GTRVHAMAI' | 124 | 9    |
| >TP53-R158F GTRVRAMAI' | 405  | >TP53-R158F GTRVHAMAI' | 222 | 183  |
| >TP53-R158F GTRVRAMAI  | 40   | >TP53-R158F GTRVHAMAI  | 48  | 8    |
| >TP53-R158F GTRVRAMAI' | 4    | >TP53-R158F GTRVHAMAI' | 4   | 0    |
| >TP53-R158F GTRVRAMAI  | 122  | >TP53-R158F GTRVHAMAI  | 352 | 230  |
| >TP53-R158F GTRVRAMAI' | 21   | >TP53-R158F GTRVHAMAI' | 27  | 6    |
| >TP53-R158F GTRVRAMAI' | 269  | >TP53-R158F GTRVHAMAI' | 174 | 95   |
| >TP53-R158F GTRVRAMAI  | 387  | >TP53-R158F GTRVHAMAI  | 441 | 54   |
| >TP53-R158F PPGTRVRAM  | 8998 | >TP53-R158F PPGTRVHAM  | 152 | 8846 |

|                        |       |                        |       |       |
|------------------------|-------|------------------------|-------|-------|
| >TP53-R158F PPGTRVRAM  | 68    | >TP53-R158F PPGTRVHAM  | 103   | 35    |
| >TP53-R158F PPPGTRVRAM | 370   | >TP53-R158F PPPGTRVHAM | 642   | 272   |
| >TP53-R158F PPPGTRVRAM | 450   | >TP53-R158F PPPGTRVHAM | 27    | 423   |
| >TP53-R158F TPPPGRVRA  | 482   | >TP53-R158F TPPPGRVHA  | 45    | 437   |
| >TP53-R158F TPPPGRVRA  | 32    | >TP53-R158F TPPPGRVHA  | 44    | 12    |
| >TP53-R158F TPPPGRVRA  | 139   | >TP53-R158F TPPPGRVHA  | 81    | 58    |
| >TP53-R158F TPPPGRVRA  | 727   | >TP53-R158F TPPPGRVHA  | 201   | 526   |
| >TP53-R158F STPPPGRVRA | 129   | >TP53-R158F STPPPGRVH  | 20502 | 20373 |
| >TP53-R158F STPPPGRVRA | 82    | >TP53-R158F STPPPGRVH  | 64    | 18    |
| >TP53-R158F STPPPGRVRA | 96    | >TP53-R158F STPPPGRVH  | 57    | 39    |
| >TP53-R158F STPPPGRVRA | 54    | >TP53-R158F STPPPGRVH  | 42    | 12    |
| >TP53-R158L RAMAIYKQSC | 354   | >TP53-R158L LAMAIYKQSC | 2713  | 2359  |
| >TP53-R158L RAMAIYKQSC | 375   | >TP53-R158L LAMAIYKQSC | 610   | 235   |
| >TP53-R158L VRAMAIYKQ  | 26023 | >TP53-R158L VLAMAIYKQ  | 233   | 25790 |
| >TP53-R158L VRAMAIYK   | 36610 | >TP53-R158L VLAMAIYK   | 359   | 36251 |
| >TP53-R158L VRAMAIYKQ  | 32932 | >TP53-R158L VLAMAIYKQ  | 30    | 32902 |
| >TP53-R158L VRAMAIYKQ  | 33105 | >TP53-R158L VLAMAIYKQ  | 28    | 33077 |
| >TP53-R158L VRAMAIYK   | 14186 | >TP53-R158L VLAMAIYK   | 38    | 14148 |
| >TP53-R158L VRAMAIYK   | 3864  | >TP53-R158L VLAMAIYK   | 21    | 3843  |
| >TP53-R158L VRAMAIYK   | 3568  | >TP53-R158L VLAMAIYK   | 138   | 3430  |
| >TP53-R158L VRAMAIYK   | 159   | >TP53-R158L VLAMAIYK   | 21067 | 20908 |
| >TP53-R158L DSTPPPGRV  | 372   | >TP53-R158L DSTPPPGRV  | 27891 | 27519 |
| >TP53-R158L DSTPPPGRV  | 208   | >TP53-R158L DSTPPPGRV  | 28697 | 28489 |
| >TP53-R158L RVRAMAIY   | 205   | >TP53-R158L RVLAMAIY   | 294   | 89    |
| >TP53-R158L RVRAMAIYK  | 28    | >TP53-R158L RVLAMAIYK  | 30    | 2     |
| >TP53-R158L RVRAMAIY   | 3205  | >TP53-R158L RVLAMAIY   | 152   | 3053  |
| >TP53-R158L RVRAMAIYK  | 20    | >TP53-R158L RVLAMAIYK  | 7     | 13    |
| >TP53-R158L RVRAMAIY   | 241   | >TP53-R158L RVLAMAIY   | 146   | 95    |
| >TP53-R158L RVRAMAIY   | 398   | >TP53-R158L RVLAMAIY   | 86    | 312   |
| >TP53-R158L RVRAMAIY   | 5     | >TP53-R158L RVLAMAIY   | 147   | 142   |
| >TP53-R158L RVRAMAIYK  | 3     | >TP53-R158L RVLAMAIYK  | 4     | 1     |
| >TP53-R158L RVRAMAIYKC | 10    | >TP53-R158L RVLAMAIYKC | 572   | 562   |
| >TP53-R158L RVRAMAIYKC | 9     | >TP53-R158L RVLAMAIYKC | 564   | 555   |
| >TP53-R158L RVRAMAIY   | 107   | >TP53-R158L RVLAMAIY   | 81    | 26    |
| >TP53-R158L RVRAMAIYK  | 18    | >TP53-R158L RVLAMAIYK  | 20    | 2     |
| >TP53-R158L RVRAMAIY   | 2608  | >TP53-R158L RVLAMAIY   | 244   | 2364  |
| >TP53-R158L RVRAMAIYK  | 588   | >TP53-R158L RVLAMAIYK  | 243   | 345   |
| >TP53-R158L RVRAMAIY   | 26    | >TP53-R158L RVLAMAIY   | 11    | 15    |
| >TP53-R158L RVRAMAIY   | 85    | >TP53-R158L RVLAMAIY   | 263   | 178   |
| >TP53-R158L RVRAMAIY   | 311   | >TP53-R158L RVLAMAIY   | 548   | 237   |
| >TP53-R158L RVRAMAIY   | 7     | >TP53-R158L RVLAMAIY   | 11    | 4     |
| >TP53-R158L RVRAMAIY   | 5014  | >TP53-R158L RVLAMAIY   | 163   | 4851  |
| >TP53-R158L RVRAMAIY   | 211   | >TP53-R158L RVLAMAIY   | 302   | 91    |

|                        |       |                        |       |       |
|------------------------|-------|------------------------|-------|-------|
| >TP53-R158L RVRAMAIYK  | 156   | >TP53-R158L RVLAMAIYK  | 45    | 111   |
| >TP53-R158L TRVRAMAIYK | 1520  | >TP53-R158L TRVLAMAIYK | 428   | 1092  |
| >TP53-R158L TRVRAMAIY  | 62    | >TP53-R158L TRVLAMAIY  | 202   | 140   |
| >TP53-R158L TRVRAMAIYK | 765   | >TP53-R158L TRVLAMAIYK | 234   | 531   |
| >TP53-R158L TRVRAMAIY  | 278   | >TP53-R158L TRVLAMAIY  | 810   | 532   |
| >TP53-R158L TRVRAMAI   | 215   | >TP53-R158L TRVLAMAI   | 160   | 55    |
| >TP53-R158L GTRVRAMAI\ | 269   | >TP53-R158L GTRVLAMAIY | 382   | 113   |
| >TP53-R158L GTRVRAMAI\ | 50    | >TP53-R158L GTRVLAMAIY | 70    | 20    |
| >TP53-R158L GTRVRAMAI\ | 39    | >TP53-R158L GTRVLAMAIY | 30    | 9     |
| >TP53-R158L GTRVRAMA   | 18    | >TP53-R158L GTRVLAMA   | 36    | 18    |
| >TP53-R158L GTRVRAMAI  | 9     | >TP53-R158L GTRVLAMAI  | 14    | 5     |
| >TP53-R158L GTRVRAMAI\ | 30    | >TP53-R158L GTRVLAMAIY | 61    | 31    |
| >TP53-R158L GTRVRAMAI\ | 3     | >TP53-R158L GTRVLAMAIY | 4     | 1     |
| >TP53-R158L GTRVRAMAI\ | 130   | >TP53-R158L GTRVLAMAIY | 162   | 32    |
| >TP53-R158L GTRVRAMAI\ | 115   | >TP53-R158L GTRVLAMAIY | 156   | 41    |
| >TP53-R158L GTRVRAMAI\ | 405   | >TP53-R158L GTRVLAMAIY | 383   | 22    |
| >TP53-R158L GTRVRAMAI  | 40    | >TP53-R158L GTRVLAMAI  | 66    | 26    |
| >TP53-R158L GTRVRAMAI\ | 4     | >TP53-R158L GTRVLAMAIY | 5     | 1     |
| >TP53-R158L GTRVRAMAI  | 122   | >TP53-R158L GTRVLAMAI  | 33    | 89    |
| >TP53-R158L GTRVRAMAI\ | 21    | >TP53-R158L GTRVLAMAIY | 22    | 1     |
| >TP53-R158L GTRVRAMAI\ | 269   | >TP53-R158L GTRVLAMAIY | 276   | 7     |
| >TP53-R158L GTRVRAMAI  | 387   | >TP53-R158L GTRVLAMAI  | 701   | 314   |
| >TP53-R158L PPGTRVRAM  | 68    | >TP53-R158L PPGTRVLAM  | 122   | 54    |
| >TP53-R158L PPPGTRVRAM | 370   | >TP53-R158L PPPGTRVLAM | 387   | 17    |
| >TP53-R158L PPPGTRVRAM | 450   | >TP53-R158L PPPGTRVLAM | 59    | 391   |
| >TP53-R158L PPPGTRVR   | 23447 | >TP53-R158L PPPGTRVL   | 322   | 23125 |
| >TP53-R158L PPPGTRVRA  | 2027  | >TP53-R158L PPPGTRVLA  | 389   | 1638  |
| >TP53-R158L TPPPGRVRA  | 482   | >TP53-R158L TPPPGRVLA  | 75    | 407   |
| >TP53-R158L TPPPGRVVR  | 13757 | >TP53-R158L TPPPGRVL   | 52    | 13705 |
| >TP53-R158L TPPPGRVRA  | 32    | >TP53-R158L TPPPGRVLA  | 42    | 10    |
| >TP53-R158L TPPPGRVRA  | 139   | >TP53-R158L TPPPGRVLA  | 60    | 79    |
| >TP53-R158L TPPPGRVVR  | 23398 | >TP53-R158L TPPPGRVL   | 186   | 23212 |
| >TP53-R158L TPPPGRVRA  | 727   | >TP53-R158L TPPPGRVLA  | 365   | 362   |
| >TP53-R158L STPPPGRVVR | 129   | >TP53-R158L STPPPGRVL  | 31569 | 31440 |
| >TP53-R158L STPPPGRVVR | 82    | >TP53-R158L STPPPGRVL  | 57    | 25    |
| >TP53-R158L STPPPGRVVR | 15003 | >TP53-R158L STPPPGRVL  | 218   | 14785 |
| >TP53-R158L STPPPGRVVR | 96    | >TP53-R158L STPPPGRVL  | 2     | 94    |
| >TP53-R158L STPPPGRVVR | 54    | >TP53-R158L STPPPGRVL  | 9     | 45    |
| >TP53-R158L STPPPGRVVR | 9991  | >TP53-R158L STPPPGRVL  | 352   | 9639  |
| >TP53-R158F RAMAIYKQSC | 354   | >TP53-R158F PAMAIYKQSC | 18777 | 18423 |
| >TP53-R158F RAMAIYKQSC | 375   | >TP53-R158F PAMAIYKQSC | 14517 | 14142 |
| >TP53-R158F VRAMAIYK   | 159   | >TP53-R158F VPAMAIYK   | 25985 | 25826 |
| >TP53-R158F DSTPPPGRV  | 372   | >TP53-R158F DSTPPPGRV  | 36757 | 36385 |

|                        |      |                        |       |       |
|------------------------|------|------------------------|-------|-------|
| >TP53-R158F DSTPPPGTRV | 208  | >TP53-R158F DSTPPPGTRV | 34801 | 34593 |
| >TP53-R158F RVRAMAIY   | 205  | >TP53-R158F RVPAMAIY   | 1635  | 1430  |
| >TP53-R158F RVRAMAIYK  | 28   | >TP53-R158F RVPAMAIYK  | 44    | 16    |
| >TP53-R158F RVRAMAIYK  | 20   | >TP53-R158F RVPAMAIYK  | 13    | 7     |
| >TP53-R158F RVRAMAIY   | 241  | >TP53-R158F RVPAMAIY   | 205   | 36    |
| >TP53-R158F RVRAMAIY   | 398  | >TP53-R158F RVPAMAIY   | 662   | 264   |
| >TP53-R158F RVRAMAIY   | 5    | >TP53-R158F RVPAMAIY   | 3493  | 3488  |
| >TP53-R158F RVRAMAIYK  | 3    | >TP53-R158F RVPAMAIYK  | 10    | 7     |
| >TP53-R158F RVRAMAIYKC | 10   | >TP53-R158F RVPAMAIYKC | 6246  | 6236  |
| >TP53-R158F RVRAMAIYKC | 9    | >TP53-R158F RVPAMAIYKC | 6394  | 6385  |
| >TP53-R158F RVRAMAIY   | 107  | >TP53-R158F RVPAMAIY   | 204   | 97    |
| >TP53-R158F RVRAMAIYK  | 18   | >TP53-R158F RVPAMAIYK  | 188   | 170   |
| >TP53-R158F RVRAMAIYK  | 588  | >TP53-R158F RVPAMAIYK  | 356   | 232   |
| >TP53-R158F RVRAMAIY   | 26   | >TP53-R158F RVPAMAIY   | 52    | 26    |
| >TP53-R158F RVRAMAIY   | 85   | >TP53-R158F RVPAMAIY   | 490   | 405   |
| >TP53-R158F RVRAMAIY   | 311  | >TP53-R158F RVPAMAIY   | 3649  | 3338  |
| >TP53-R158F RVRAMAIY   | 7    | >TP53-R158F RVPAMAIY   | 613   | 606   |
| >TP53-R158F RVRAMAIY   | 211  | >TP53-R158F RVPAMAIY   | 1017  | 806   |
| >TP53-R158F RVRAMAIYK  | 156  | >TP53-R158F RVPAMAIYK  | 105   | 51    |
| >TP53-R158F TRVRAMAIY  | 62   | >TP53-R158F TRVPAMAIY  | 153   | 91    |
| >TP53-R158F TRVRAMAIY  | 1130 | >TP53-R158F TRVPAMAIY  | 449   | 681   |
| >TP53-R158F TRVRAMAIYK | 765  | >TP53-R158F TRVPAMAIYK | 212   | 553   |
| >TP53-R158F TRVRAMAIY  | 278  | >TP53-R158F TRVPAMAIY  | 299   | 21    |
| >TP53-R158F TRVRAMAI   | 215  | >TP53-R158F TRVPAMAI   | 104   | 111   |
| >TP53-R158F GTRVRAMAI\ | 269  | >TP53-R158F GTRVPAMAI\ | 344   | 75    |
| >TP53-R158F GTRVRAMAI\ | 50   | >TP53-R158F GTRVPAMAI\ | 57    | 7     |
| >TP53-R158F GTRVRAMAI\ | 39   | >TP53-R158F GTRVPAMAI\ | 33    | 6     |
| >TP53-R158F GTRVRAMAI\ | 715  | >TP53-R158F GTRVPAMAI\ | 331   | 384   |
| >TP53-R158F GTRVRAMA   | 18   | >TP53-R158F GTRVPAMA   | 40    | 22    |
| >TP53-R158F GTRVRAMAI  | 9    | >TP53-R158F GTRVPAMAI  | 17    | 8     |
| >TP53-R158F GTRVRAMAI\ | 30   | >TP53-R158F GTRVPAMAI\ | 61    | 31    |
| >TP53-R158F GTRVRAMAI\ | 3    | >TP53-R158F GTRVPAMAI\ | 4     | 1     |
| >TP53-R158F GTRVRAMAI\ | 130  | >TP53-R158F GTRVPAMAI\ | 70    | 60    |
| >TP53-R158F GTRVRAMAI\ | 115  | >TP53-R158F GTRVPAMAI\ | 278   | 163   |
| >TP53-R158F GTRVRAMAI\ | 405  | >TP53-R158F GTRVPAMAI\ | 356   | 49    |
| >TP53-R158F GTRVRAMAI  | 40   | >TP53-R158F GTRVPAMAI  | 34    | 6     |
| >TP53-R158F GTRVRAMAI\ | 4    | >TP53-R158F GTRVPAMAI\ | 4     | 0     |
| >TP53-R158F GTRVRAMAI  | 122  | >TP53-R158F GTRVPAMAI  | 31    | 91    |
| >TP53-R158F GTRVRAMAI\ | 21   | >TP53-R158F GTRVPAMAI\ | 27    | 6     |
| >TP53-R158F GTRVRAMAI\ | 269  | >TP53-R158F GTRVPAMAI\ | 461   | 192   |
| >TP53-R158F GTRVRAMAI  | 387  | >TP53-R158F GTRVPAMAI  | 179   | 208   |
| >TP53-R158F PPGTRVRAM  | 8998 | >TP53-R158F PPGTRVPAM  | 101   | 8897  |
| >TP53-R158F PPGTRVRAM  | 68   | >TP53-R158F PPGTRVPAM  | 594   | 526   |

|                        |      |                        |       |       |
|------------------------|------|------------------------|-------|-------|
| >TP53-R158F PPPGTRVRAM | 370  | >TP53-R158F PPPGTRVPAM | 285   | 85    |
| >TP53-R158F PPPGTRVRAM | 450  | >TP53-R158F PPPGTRVPAM | 28    | 422   |
| >TP53-R158F PPPGTRVRA  | 2027 | >TP53-R158F PPPGTRVPA  | 201   | 1826  |
| >TP53-R158F TPPPGRVRA  | 583  | >TP53-R158F TPPPGRVPA  | 444   | 139   |
| >TP53-R158F TPPPGRVRA  | 482  | >TP53-R158F TPPPGRVPA  | 39    | 443   |
| >TP53-R158F TPPPGRVRA  | 2932 | >TP53-R158F TPPPGRVPA  | 133   | 2799  |
| >TP53-R158F TPPPGRVRA  | 32   | >TP53-R158F TPPPGRVPA  | 79    | 47    |
| >TP53-R158F TPPPGRVRA  | 139  | >TP53-R158F TPPPGRVPA  | 74    | 65    |
| >TP53-R158F TPPPGRVRA  | 727  | >TP53-R158F TPPPGRVPA  | 370   | 357   |
| >TP53-R158F STPPPGRVRR | 129  | >TP53-R158F STPPPGRVVP | 35973 | 35844 |
| >TP53-R158F STPPPGRVRR | 82   | >TP53-R158F STPPPGRVVP | 26    | 56    |
| >TP53-R158F STPPPGRVRR | 96   | >TP53-R158F STPPPGRVVP | 72    | 24    |
| >TP53-R158F STPPPGRVRR | 54   | >TP53-R158F STPPPGRVVP | 34    | 20    |
| >TP53-R174C RRCPPHER   | 405  | >TP53-R174C GRCPPHER   | 5588  | 5183  |
| >TP53-R174C RRCPPHER   | 102  | >TP53-R174C GRCPPHER   | 6888  | 6786  |
| >TP53-R174C RRCPPHER   | 312  | >TP53-R174C GRCPPHER   | 6516  | 6204  |
| >TP53-R174C RRCPPHERC  | 320  | >TP53-R174C GRCPPHERC  | 1274  | 954   |
| >TP53-R174C RRCPPHER   | 87   | >TP53-R174C GRCPPHER   | 3957  | 3870  |
| >TP53-R174C VRRCPHER   | 4924 | >TP53-R174C VGRCPPHER  | 133   | 4791  |
| >TP53-R174C KQSQHMTEV  | 35   | >TP53-R174C KQSQHMTEV  | 18078 | 18043 |
| >TP53-R174C KQSQHMTEV  | 185  | >TP53-R174C KQSQHMTEV  | 2713  | 2528  |
| >TP53-R174C KQSQHMTEV  | 60   | >TP53-R174C KQSQHMTEV  | 26349 | 26289 |
| >TP53-R174C VVRRCPHHEI | 145  | >TP53-R174C VVGRCPHHEI | 13847 | 13702 |
| >TP53-R174C VVRRCPHHEI | 63   | >TP53-R174C VVGRCPHHEI | 266   | 203   |
| >TP53-R174C VVRRCPHHEI | 713  | >TP53-R174C VVGRCPHHEI | 258   | 455   |
| >TP53-R174C EVVRRCPH   | 1432 | >TP53-R174C EVVGRCPH   | 395   | 1037  |
| >TP53-R174C EVVRRCPH   | 400  | >TP53-R174C EVVGRCPH   | 199   | 201   |
| >TP53-R174C EVVRRCPHH  | 98   | >TP53-R174C EVVGRCPHH  | 51    | 47    |
| >TP53-R174C EVVRRCPHHE | 428  | >TP53-R174C EVVGRCPHHI | 299   | 129   |
| >TP53-R174C EVVRRCPHHE | 371  | >TP53-R174C EVVGRCPHHI | 861   | 490   |
| >TP53-R174C EVVRRCPHHE | 53   | >TP53-R174C EVVGRCPHHI | 47    | 6     |
| >TP53-R174C EVVRRCPHHE | 5    | >TP53-R174C EVVGRCPHHI | 5     | 0     |
| >TP53-R174C TEVVRRCP   | 1377 | >TP53-R174C TEVVGRCP   | 46    | 1331  |
| >TP53-R174C HMTEVVRR   | 38   | >TP53-R174C HMTEVVGRC  | 30    | 8     |
| >TP53-R174C HMTEVVRR   | 579  | >TP53-R174C HMTEVVGRC  | 460   | 119   |
| >TP53-R174C HMTEVVRR   | 38   | >TP53-R174C HMTEVVGR   | 59    | 21    |
| >TP53-R174C HMTEVVRR   | 65   | >TP53-R174C HMTEVVGR   | 59    | 6     |
| >TP53-R174C HMTEVVRR   | 35   | >TP53-R174C HMTEVVGR   | 31    | 4     |
| >TP53-R174C HMTEVVRR   | 64   | >TP53-R174C HMTEVVGR   | 75    | 11    |
| >TP53-R174C QHMTEVVR   | 269  | >TP53-R174C QHMTEVVG   | 34382 | 34113 |
| >TP53-R174C QHMTEVVR   | 195  | >TP53-R174C QHMTEVVG   | 211   | 16    |
| >TP53-R174C SQHMTEVVR  | 115  | >TP53-R174C SQHMTEVVG  | 21306 | 21191 |
| >TP53-R174C SQHMTEVVR  | 162  | >TP53-R174C SQHMTEVVG  | 2414  | 2252  |

|                       |      |                       |       |       |
|-----------------------|------|-----------------------|-------|-------|
| >TP53-R174C SQHMTEVV  | 572  | >TP53-R174C SQHMTEVVG | 409   | 163   |
| >TP53-R174C SQHMTEVV  | 434  | >TP53-R174C SQHMTEVVG | 35655 | 35221 |
| >TP53-R174C SQHMTEVV  | 363  | >TP53-R174C SQHMTEVVG | 272   | 91    |
| >TP53-R174C QSQHMTEVV | 230  | >TP53-R174C QSQHMTEVV | 30622 | 30392 |
| >TP53-R174C QSQHMTEVV | 321  | >TP53-R174C QSQHMTEVV | 625   | 304   |
| >TP53-R174C QSQHMTEVV | 185  | >TP53-R174C QSQHMTEVV | 160   | 25    |
| >TP53-R174C QSQHMTEVV | 306  | >TP53-R174C QSQHMTEVV | 551   | 245   |
| >TP53-R174K RRCPPHER  | 405  | >TP53-R174K RRCPPHER  | 459   | 54    |
| >TP53-R174K RRCPPHER  | 102  | >TP53-R174K RRCPPHER  | 345   | 243   |
| >TP53-R174K RRCPPHER  | 312  | >TP53-R174K RRCPPHER  | 1478  | 1166  |
| >TP53-R174K RRCPPHERC | 320  | >TP53-R174K RRCPPHERC | 1445  | 1125  |
| >TP53-R174K RRCPPHER  | 87   | >TP53-R174K RRCPPHER  | 56    | 31    |
| >TP53-R174K VRRCPHER  | 680  | >TP53-R174K VRRCPHER  | 174   | 506   |
| >TP53-R174K KQSQHMTEV | 4432 | >TP53-R174K KQSQHMTEV | 311   | 4121  |
| >TP53-R174K KQSQHMTEV | 4377 | >TP53-R174K KQSQHMTEV | 157   | 4220  |
| >TP53-R174K KQSQHMTEV | 35   | >TP53-R174K KQSQHMTEV | 727   | 692   |
| >TP53-R174K KQSQHMTEV | 185  | >TP53-R174K KQSQHMTEV | 226   | 41    |
| >TP53-R174K KQSQHMTEV | 60   | >TP53-R174K KQSQHMTEV | 740   | 680   |
| >TP53-R174K VRRCPHHEF | 145  | >TP53-R174K VRRCPHHEF | 985   | 840   |
| >TP53-R174K VRRCPHHEF | 63   | >TP53-R174K VRRCPHHEF | 72    | 9     |
| >TP53-R174K VRRCPHHEF | 713  | >TP53-R174K VRRCPHHEF | 477   | 236   |
| >TP53-R174K EVRRCPH   | 400  | >TP53-R174K EVRRCPH   | 638   | 238   |
| >TP53-R174K EVRRCPHH  | 98   | >TP53-R174K EVRRCPHH  | 199   | 101   |
| >TP53-R174K EVRRCPHHE | 428  | >TP53-R174K EVRRCPHHE | 752   | 324   |
| >TP53-R174K EVRRCPHHE | 371  | >TP53-R174K EVRRCPHHE | 562   | 191   |
| >TP53-R174K EVRRCPHHE | 53   | >TP53-R174K EVRRCPHHE | 63    | 10    |
| >TP53-R174K EVRRCPHHE | 5    | >TP53-R174K EVRRCPHHE | 5     | 0     |
| >TP53-R174K EVRRCPHHE | 1019 | >TP53-R174K EVRRCPHHE | 473   | 546   |
| >TP53-R174K HMTEVVRC  | 38   | >TP53-R174K HMTEVVRC  | 51    | 13    |
| >TP53-R174K HMTEVVRC  | 579  | >TP53-R174K HMTEVVRC  | 290   | 289   |
| >TP53-R174K HMTEVVRR  | 38   | >TP53-R174K HMTEVVRR  | 41    | 3     |
| >TP53-R174K HMTEVVRR  | 65   | >TP53-R174K HMTEVVRR  | 79    | 14    |
| >TP53-R174K HMTEVVRR  | 35   | >TP53-R174K HMTEVVRR  | 37    | 2     |
| >TP53-R174K HMTEVVRR  | 64   | >TP53-R174K HMTEVVRR  | 48    | 16    |
| >TP53-R174K QHMTEVV   | 269  | >TP53-R174K QHMTEVV   | 5357  | 5088  |
| >TP53-R174K QHMTEVV   | 195  | >TP53-R174K QHMTEVV   | 165   | 30    |
| >TP53-R174K SQHMTEVV  | 2821 | >TP53-R174K SQHMTEVV  | 98    | 2723  |
| >TP53-R174K SQHMTEVV  | 6280 | >TP53-R174K SQHMTEVV  | 97    | 6183  |
| >TP53-R174K SQHMTEVV  | 115  | >TP53-R174K SQHMTEVV  | 3025  | 2910  |
| >TP53-R174K SQHMTEVV  | 162  | >TP53-R174K SQHMTEVV  | 209   | 47    |
| >TP53-R174K SQHMTEVV  | 572  | >TP53-R174K SQHMTEVV  | 382   | 190   |
| >TP53-R174K SQHMTEVV  | 434  | >TP53-R174K SQHMTEVV  | 5384  | 4950  |
| >TP53-R174K SQHMTEVV  | 363  | >TP53-R174K SQHMTEVV  | 317   | 46    |

|                      |       |                      |       |       |
|----------------------|-------|----------------------|-------|-------|
| >TP53-R174KQSQHMTEVV | 2282  | >TP53-R174KQSQHMTEVV | 157   | 2125  |
| >TP53-R174KQSQHMTEVV | 230   | >TP53-R174KQSQHMTEVV | 3884  | 3654  |
| >TP53-R174KQSQHMTEVV | 321   | >TP53-R174KQSQHMTEVV | 333   | 12    |
| >TP53-R174KQSQHMTEVV | 185   | >TP53-R174KQSQHMTEVV | 171   | 14    |
| >TP53-R174KQSQHMTEVV | 306   | >TP53-R174KQSQHMTEVV | 451   | 145   |
| >TP53-R174MRRCPHHER  | 405   | >TP53-R174MRRCPHHER  | 856   | 451   |
| >TP53-R174MRRCPHHER  | 102   | >TP53-R174MRRCPHHER  | 6228  | 6126  |
| >TP53-R174MRRCPHHER  | 312   | >TP53-R174MRRCPHHER  | 4888  | 4576  |
| >TP53-R174MRRCPHHERC | 320   | >TP53-R174MRRCPHHERC | 5420  | 5100  |
| >TP53-R174MRRCPHHER  | 87    | >TP53-R174MRRCPHHER  | 285   | 198   |
| >TP53-R174MRRCPHHERC | 28247 | >TP53-R174MRRCPHHERC | 237   | 28010 |
| >TP53-R174MRRCPHHER  | 4924  | >TP53-R174MRRCPHHER  | 8     | 4916  |
| >TP53-R174MRRCPHHER  | 6204  | >TP53-R174MRRCPHHER  | 77    | 6127  |
| >TP53-R174MRRCPHHER  | 680   | >TP53-R174MRRCPHHER  | 312   | 368   |
| >TP53-R174MRRCPHHER  | 2805  | >TP53-R174MRRCPHHER  | 280   | 2525  |
| >TP53-R174MKQSQHMTEV | 35    | >TP53-R174MKQSQHMTEV | 13770 | 13735 |
| >TP53-R174MKQSQHMTEV | 7235  | >TP53-R174MKQSQHMTEV | 57    | 7178  |
| >TP53-R174MKQSQHMTEV | 185   | >TP53-R174MKQSQHMTEV | 12    | 173   |
| >TP53-R174MKQSQHMTEV | 60    | >TP53-R174MKQSQHMTEV | 18470 | 18410 |
| >TP53-R174MRRCPHHEI  | 8553  | >TP53-R174MRRCPHHEI  | 318   | 8235  |
| >TP53-R174MRRCPHHEI  | 145   | >TP53-R174MRRCPHHEI  | 6702  | 6557  |
| >TP53-R174MRRCPHHEI  | 63    | >TP53-R174MRRCPHHEI  | 30    | 33    |
| >TP53-R174MRRCPHHEI  | 534   | >TP53-R174MRRCPHHEI  | 203   | 331   |
| >TP53-R174MRRCPHHEI  | 3715  | >TP53-R174MRRCPHHEI  | 170   | 3545  |
| >TP53-R174MRRCPHHEI  | 713   | >TP53-R174MRRCPHHEI  | 252   | 461   |
| >TP53-R174MEVRRCPH   | 400   | >TP53-R174MEVRRCPH   | 799   | 399   |
| >TP53-R174MEVRRCPHH  | 98    | >TP53-R174MEVRRCPHH  | 275   | 177   |
| >TP53-R174MEVRRCPHHE | 428   | >TP53-R174MEVRRCPHHE | 1024  | 596   |
| >TP53-R174MEVRRCPHHE | 371   | >TP53-R174MEVRRCPHHE | 403   | 32    |
| >TP53-R174MEVRRCPHHE | 53    | >TP53-R174MEVRRCPHHE | 34    | 19    |
| >TP53-R174MEVRRCPHHE | 5     | >TP53-R174MEVRRCPHHE | 5     | 0     |
| >TP53-R174MTEVRRCP   | 1377  | >TP53-R174MTEVRRCP   | 409   | 968   |
| >TP53-R174MTEVRRCPH  | 2407  | >TP53-R174MTEVRRCPH  | 415   | 1992  |
| >TP53-R174MHMTEVRRRC | 38    | >TP53-R174MHMTEVRRRC | 13    | 25    |
| >TP53-R174MHMTEVRRRC | 2818  | >TP53-R174MHMTEVRRRC | 255   | 2563  |
| >TP53-R174MHMTEVRRRC | 4120  | >TP53-R174MHMTEVRRRC | 312   | 3808  |
| >TP53-R174MHMTEVRRRC | 579   | >TP53-R174MHMTEVRRRC | 24    | 555   |
| >TP53-R174MHMTEVRRR  | 38    | >TP53-R174MHMTEVRRR  | 36    | 2     |
| >TP53-R174MHMTEVRRR  | 65    | >TP53-R174MHMTEVRRR  | 34    | 31    |
| >TP53-R174MHMTEVRRR  | 35    | >TP53-R174MHMTEVRRR  | 17    | 18    |
| >TP53-R174MHMTEVRRR  | 64    | >TP53-R174MHMTEVRRR  | 81    | 17    |
| >TP53-R174MQHMTEVVR  | 2199  | >TP53-R174MQHMTEVVR  | 126   | 2073  |
| >TP53-R174MQHMTEVVR  | 3546  | >TP53-R174MQHMTEVVR  | 19    | 3527  |

|                        |       |                         |       |       |
|------------------------|-------|-------------------------|-------|-------|
| >TP53-R174M QHMTEVVRR  | 269   | >TP53-R174M QHMTEVVMM   | 27435 | 27166 |
| >TP53-R174M QHMTEVVRRR | 195   | >TP53-R174M QHMTEVVMMI  | 309   | 114   |
| >TP53-R174M SQHMTEVVRR | 115   | >TP53-R174M SQHMTEVVMM  | 18601 | 18486 |
| >TP53-R174M SQHMTEVVRR | 504   | >TP53-R174M SQHMTEVVMM  | 443   | 61    |
| >TP53-R174M SQHMTEVVRR | 1038  | >TP53-R174M SQHMTEVVMM  | 489   | 549   |
| >TP53-R174M SQHMTEVVRR | 9470  | >TP53-R174M SQHMTEVVMM  | 62    | 9408  |
| >TP53-R174M SQHMTEVVRR | 162   | >TP53-R174M SQHMTEVVMM  | 9     | 153   |
| >TP53-R174M SQHMTEVVRR | 572   | >TP53-R174M SQHMTEVVMM  | 207   | 365   |
| >TP53-R174M SQHMTEVVRR | 10061 | >TP53-R174M SQHMTEVVMM  | 110   | 9951  |
| >TP53-R174M SQHMTEVVRR | 434   | >TP53-R174M SQHMTEVVMM  | 31979 | 31545 |
| >TP53-R174M SQHMTEVVRR | 363   | >TP53-R174M SQHMTEVVMM  | 392   | 29    |
| >TP53-R174M QSQHMTEVV  | 230   | >TP53-R174M QSQHMTEVV   | 24363 | 24133 |
| >TP53-R174M QSQHMTEVV  | 321   | >TP53-R174M QSQHMTEVV   | 381   | 60    |
| >TP53-R174M QSQHMTEVV  | 185   | >TP53-R174M QSQHMTEVV   | 103   | 82    |
| >TP53-R174M QSQHMTEVV  | 20265 | >TP53-R174M QSQHMTEVV   | 189   | 20076 |
| >TP53-R174M QSQHMTEVV  | 15775 | >TP53-R174M QSQHMTEVV   | 52    | 15723 |
| >TP53-R174M QSQHMTEVV  | 306   | >TP53-R174M QSQHMTEVV   | 385   | 79    |
| >TP53-R174S RRCPPHHER  | 405   | >TP53-R174S SRCPPHHER   | 3142  | 2737  |
| >TP53-R174S RRCPPHHER  | 102   | >TP53-R174S SRCPPHHER   | 8215  | 8113  |
| >TP53-R174S RRCPPHHER  | 312   | >TP53-R174S SRCPPHHER   | 4737  | 4425  |
| >TP53-R174S RRCPPHHERC | 320   | >TP53-R174S SRCPPHHERC  | 2502  | 2182  |
| >TP53-R174S RRCPPHHER  | 87    | >TP53-R174S SRCPPHHER   | 658   | 571   |
| >TP53-R174S VRRCPHHER  | 8576  | >TP53-R174S VSRCPPHHER  | 192   | 8384  |
| >TP53-R174S VRRCPHHER  | 4924  | >TP53-R174S VSRCPPHHER  | 14    | 4910  |
| >TP53-R174S VRRCPHHER  | 6204  | >TP53-R174S VSRCPPHHER  | 276   | 5928  |
| >TP53-R174S KQSQHMTEV  | 35    | >TP53-R174S KQSQHMTEV   | 15210 | 15175 |
| >TP53-R174S KQSQHMTEV  | 185   | >TP53-R174S KQSQHMTEV   | 989   | 804   |
| >TP53-R174S KQSQHMTEV  | 60    | >TP53-R174S KQSQHMTEV   | 19060 | 19000 |
| >TP53-R174S VVRRCPHHEF | 145   | >TP53-R174S VVSRCPPHHEF | 10155 | 10010 |
| >TP53-R174S VVRRCPHHEF | 63    | >TP53-R174S VVSRCPPHHEF | 66    | 3     |
| >TP53-R174S VVRRCPHHEF | 3715  | >TP53-R174S VVSRCPPHHEF | 437   | 3278  |
| >TP53-R174S VVRRCPHHEF | 713   | >TP53-R174S VVSRCPPHHEF | 447   | 266   |
| >TP53-R174S EVVRRCPH   | 400   | >TP53-R174S EVVSRCPH    | 288   | 112   |
| >TP53-R174S EVVRRCPHH  | 98    | >TP53-R174S EVVSRCPHH   | 78    | 20    |
| >TP53-R174S EVVRRCPHHE | 428   | >TP53-R174S EVVSRCPHHE  | 366   | 62    |
| >TP53-R174S EVVRRCPHHE | 371   | >TP53-R174S EVVSRCPHHE  | 326   | 45    |
| >TP53-R174S EVVRRCPHHE | 53    | >TP53-R174S EVVSRCPHHE  | 49    | 4     |
| >TP53-R174S EVVRRCPHHE | 5     | >TP53-R174S EVVSRCPHHE  | 4     | 1     |
| >TP53-R174S TEVVRRCP   | 1377  | >TP53-R174S TEVVSRCP    | 222   | 1155  |
| >TP53-R174S HMTEVVRRRC | 38    | >TP53-R174S HMTEVVSRRC  | 14    | 24    |
| >TP53-R174S HMTEVVRRRC | 2818  | >TP53-R174S HMTEVVSRRC  | 351   | 2467  |
| >TP53-R174S HMTEVVRRRC | 579   | >TP53-R174S HMTEVVSRRC  | 35    | 544   |
| >TP53-R174S HMTEVVRR   | 38    | >TP53-R174S HMTEVVSR    | 36    | 2     |



|                       |       |                       |       |       |
|-----------------------|-------|-----------------------|-------|-------|
| >TP53-R174SHMTEVVRR   | 65    | >TP53-R174SHMTEVVSR   | 33    | 32    |
| >TP53-R174SHMTEVVRR   | 35    | >TP53-R174SHMTEVVSR   | 25    | 10    |
| >TP53-R174SHMTEVVRR   | 64    | >TP53-R174SHMTEVVSR   | 79    | 15    |
| >TP53-R174SQHMTEVVR   | 269   | >TP53-R174SQHMTEVVS   | 30343 | 30074 |
| >TP53-R174SQHMTEVVRR  | 195   | >TP53-R174SQHMTEVVSR  | 303   | 108   |
| >TP53-R174SSQHMTEVVR  | 115   | >TP53-R174SSQHMTEVVS  | 19454 | 19339 |
| >TP53-R174SSQHMTEVVR  | 162   | >TP53-R174SSQHMTEVVS  | 936   | 774   |
| >TP53-R174SSQHMTEVVR  | 572   | >TP53-R174SSQHMTEVVS  | 98    | 474   |
| >TP53-R174SSQHMTEVVR  | 434   | >TP53-R174SSQHMTEVVS  | 32648 | 32214 |
| >TP53-R174SSQHMTEVVR  | 363   | >TP53-R174SSQHMTEVVS  | 417   | 54    |
| >TP53-R174SQSQHMTEVV  | 230   | >TP53-R174SQSQHMTEVV  | 26622 | 26392 |
| >TP53-R174SQSQHMTEVV  | 321   | >TP53-R174SQSQHMTEVV  | 392   | 71    |
| >TP53-R174SQSQHMTEVV  | 185   | >TP53-R174SQSQHMTEVV  | 174   | 11    |
| >TP53-R174SQSQHMTEVV  | 306   | >TP53-R174SQSQHMTEVV  | 443   | 137   |
| >TP53-R174VRRCPHHER   | 405   | >TP53-R174VRRCPHHER   | 10921 | 10516 |
| >TP53-R174VRRCPHHER   | 102   | >TP53-R174VRRCPHHER   | 1066  | 964   |
| >TP53-R174VRRCPHHER   | 312   | >TP53-R174VRRCPHHER   | 3612  | 3300  |
| >TP53-R174VRRCPHHERC  | 320   | >TP53-R174VRRCPHHERC  | 1494  | 1174  |
| >TP53-R174VRRCPHHER   | 87    | >TP53-R174VRRCPHHER   | 474   | 387   |
| >TP53-R174VRRCPHHER   | 4924  | >TP53-R174VRRCPHHER   | 46    | 4878  |
| >TP53-R174VRRCPHHER   | 2805  | >TP53-R174VRRCPHHER   | 22    | 2783  |
| >TP53-R174VKQSQHMTEV  | 35    | >TP53-R174VKQSQHMTEV  | 15816 | 15781 |
| >TP53-R174VKQSQHMTEV  | 7235  | >TP53-R174VKQSQHMTEV  | 233   | 7002  |
| >TP53-R174VKQSQHMTEV  | 185   | >TP53-R174VKQSQHMTEV  | 70    | 115   |
| >TP53-R174VKQSQHMTEV  | 22161 | >TP53-R174VKQSQHMTEV  | 57    | 22104 |
| >TP53-R174VKQSQHMTEV  | 60    | >TP53-R174VKQSQHMTEV  | 23249 | 23189 |
| >TP53-R174VVRRCPHHEI  | 145   | >TP53-R174VVRRCPHHEI  | 11605 | 11460 |
| >TP53-R174VVRRCPHHEI  | 63    | >TP53-R174VVRRCPHHEI  | 103   | 40    |
| >TP53-R174VVRRCPHHEI  | 534   | >TP53-R174VVRRCPHHEI  | 495   | 39    |
| >TP53-R174VVRRCPHHEI  | 1513  | >TP53-R174VVRRCPHHEI  | 488   | 1025  |
| >TP53-R174VVRRCPHHEI  | 713   | >TP53-R174VVRRCPHHEI  | 79    | 634   |
| >TP53-R174VEVVRRCPH   | 400   | >TP53-R174VEVVRRCPH   | 482   | 82    |
| >TP53-R174VEVVRRCPHH  | 98    | >TP53-R174VEVVRRCPHH  | 195   | 97    |
| >TP53-R174VEVVRRCPHHE | 428   | >TP53-R174VEVVRRCPHHE | 790   | 362   |
| >TP53-R174VEVVRRCPHHE | 371   | >TP53-R174VEVVRRCPHHE | 364   | 7     |
| >TP53-R174VEVVRRCPHHE | 53    | >TP53-R174VEVVRRCPHHE | 34    | 19    |
| >TP53-R174VEVVRRCPHHE | 5     | >TP53-R174VEVVRRCPHHE | 3     | 2     |
| >TP53-R174VEVVRRCPHHE | 1019  | >TP53-R174VEVVRRCPHHE | 262   | 757   |
| >TP53-R174VHMTEVVRRRC | 12611 | >TP53-R174VHMTEVVRRRC | 361   | 12250 |
| >TP53-R174VHMTEVVRRRC | 38    | >TP53-R174VHMTEVVRRRC | 3     | 35    |
| >TP53-R174VHMTEVVRRRC | 2818  | >TP53-R174VHMTEVVRRRC | 20    | 2798  |
| >TP53-R174VHMTEVVRRRC | 4120  | >TP53-R174VHMTEVVRRRC | 30    | 4090  |
| >TP53-R174VHMTEVVRRRC | 6679  | >TP53-R174VHMTEVVRRRC | 91    | 6588  |

|                       |       |                       |       |       |
|-----------------------|-------|-----------------------|-------|-------|
| >TP53-R174\HMTEVVRR   | 579   | >TP53-R174\HMTEVVWR   | 7     | 572   |
| >TP53-R174\HMTEVVRR   | 38    | >TP53-R174\HMTEVVWR   | 24    | 14    |
| >TP53-R174\HMTEVVRR   | 65    | >TP53-R174\HMTEVVWR   | 23    | 42    |
| >TP53-R174\HMTEVVRR   | 35    | >TP53-R174\HMTEVVWR   | 15    | 20    |
| >TP53-R174\HMTEVVRR   | 64    | >TP53-R174\HMTEVVWR   | 55    | 9     |
| >TP53-R174\QHMTEVVR   | 269   | >TP53-R174\QHMTEVVW   | 30016 | 29747 |
| >TP53-R174\QHMTEVVR   | 195   | >TP53-R174\QHMTEVVW   | 164   | 31    |
| >TP53-R174\SQHMTEVVR  | 115   | >TP53-R174\SQHMTEVVV  | 19882 | 19767 |
| >TP53-R174\SQHMTEVVR  | 504   | >TP53-R174\SQHMTEVVV  | 152   | 352   |
| >TP53-R174\SQHMTEVVR  | 1038  | >TP53-R174\SQHMTEVVV  | 311   | 727   |
| >TP53-R174\SQHMTEVVR  | 9470  | >TP53-R174\SQHMTEVVV  | 356   | 9114  |
| >TP53-R174\SQHMTEVVR  | 162   | >TP53-R174\SQHMTEVVV  | 42    | 120   |
| >TP53-R174\SQHMTEVVR  | 434   | >TP53-R174\SQHMTEVVV  | 34235 | 33801 |
| >TP53-R174\SQHMTEVVR  | 363   | >TP53-R174\SQHMTEVVV  | 179   | 184   |
| >TP53-R174\QSQHMTEVV  | 230   | >TP53-R174\QSQHMTEVV  | 30114 | 29884 |
| >TP53-R174\QSQHMTEVV  | 321   | >TP53-R174\QSQHMTEVV  | 229   | 92    |
| >TP53-R174\QSQHMTEVV  | 13127 | >TP53-R174\QSQHMTEVV  | 287   | 12840 |
| >TP53-R174\QSQHMTEVV  | 185   | >TP53-R174\QSQHMTEVV  | 91    | 94    |
| >TP53-R174\QSQHMTEVV  | 20265 | >TP53-R174\QSQHMTEVV  | 21    | 20244 |
| >TP53-R174\QSQHMTEVV  | 25294 | >TP53-R174\QSQHMTEVV  | 296   | 24998 |
| >TP53-R174\QSQHMTEVV  | 21992 | >TP53-R174\QSQHMTEVV  | 15    | 21977 |
| >TP53-R174\QSQHMTEVV  | 32943 | >TP53-R174\QSQHMTEVV  | 355   | 32588 |
| >TP53-R174\QSQHMTEVV  | 306   | >TP53-R174\QSQHMTEVV  | 219   | 87    |
| >TP53-R175C\RRCPPHER  | 405   | >TP53-R175C\RRCPPHER  | 20    | 385   |
| >TP53-R175C\RRCPPHER  | 102   | >TP53-R175C\RRCPPHER  | 16453 | 16351 |
| >TP53-R175C\RRCPPHER  | 312   | >TP53-R175C\RRCPPHER  | 12145 | 11833 |
| >TP53-R175C\RRCPPHERC | 320   | >TP53-R175C\RRCPPHERC | 27570 | 27250 |
| >TP53-R175C\RRCPPHER  | 87    | >TP53-R175C\RRCPPHER  | 40    | 47    |
| >TP53-R175C\QSQHMTEVV | 321   | >TP53-R175C\QSQHMTEVV | 23221 | 22900 |
| >TP53-R175C\QSQHMTEVV | 185   | >TP53-R175C\QSQHMTEVV | 40869 | 40684 |
| >TP53-R175C\QSQHMTEVV | 306   | >TP53-R175C\QSQHMTEVV | 19620 | 19314 |
| >TP53-R175C\VRRCPHHEF | 145   | >TP53-R175C\VRRCPHHEF | 375   | 230   |
| >TP53-R175C\VRRCPHHEF | 63    | >TP53-R175C\VRRCPHHEF | 49    | 14    |
| >TP53-R175C\VRRCPHHEF | 713   | >TP53-R175C\VRRCPHHEF | 328   | 385   |
| >TP53-R175C\EVRRCPH   | 400   | >TP53-R175C\EVRRCPH   | 333   | 67    |
| >TP53-R175C\EVRRCPHH  | 98    | >TP53-R175C\EVRRCPHH  | 49    | 49    |
| >TP53-R175C\EVRRCPHHE | 428   | >TP53-R175C\EVRRCPHHE | 312   | 116   |
| >TP53-R175C\EVRRCPHHE | 371   | >TP53-R175C\EVRRCPHHE | 437   | 66    |
| >TP53-R175C\EVRRCPHHE | 53    | >TP53-R175C\EVRRCPHHE | 73    | 20    |
| >TP53-R175C\EVRRCPHHE | 5     | >TP53-R175C\EVRRCPHHE | 5     | 0     |
| >TP53-R175C\EVRRCPHHE | 1019  | >TP53-R175C\EVRRCPHHE | 370   | 649   |
| >TP53-R175C\HMTEVVRR  | 5899  | >TP53-R175C\HMTEVVRC  | 51    | 5848  |
| >TP53-R175C\HMTEVVRR  | 38    | >TP53-R175C\HMTEVVRC  | 159   | 121   |

|                        |      |                        |       |       |
|------------------------|------|------------------------|-------|-------|
| >TP53-R175C HMTEVVRR   | 7299 | >TP53-R175C HMTEVVRC   | 67    | 7232  |
| >TP53-R175C HMTEVVRR   | 38   | >TP53-R175C HMTEVVRC   | 16288 | 16250 |
| >TP53-R175C HMTEVVRR   | 65   | >TP53-R175C HMTEVVRC   | 29719 | 29654 |
| >TP53-R175C HMTEVVRR   | 35   | >TP53-R175C HMTEVVRC   | 33493 | 33458 |
| >TP53-R175C HMTEVVRR   | 64   | >TP53-R175C HMTEVVRC   | 35371 | 35307 |
| >TP53-R175C QHMTEVVRR  | 195  | >TP53-R175C QHMTEVVRC  | 35514 | 35319 |
| >TP53-R175C SQHMTEVVRR | 363  | >TP53-R175C SQHMTEVVRC | 36320 | 35957 |
| >TP53-R175C RRCPPHER   | 405  | >TP53-R175C RGCPHHER   | 16    | 389   |
| >TP53-R175C RRCPPHER   | 102  | >TP53-R175C RGCPHHER   | 19301 | 19199 |
| >TP53-R175C RRCPPHER   | 312  | >TP53-R175C RGCPHHER   | 14430 | 14118 |
| >TP53-R175C RRCPPHERC  | 320  | >TP53-R175C RGCPHHERC  | 21855 | 21535 |
| >TP53-R175C RRCPPHER   | 87   | >TP53-R175C RGCPHHER   | 75    | 12    |
| >TP53-R175C QSQHMTEVV  | 321  | >TP53-R175C QSQHMTEVV  | 23200 | 22879 |
| >TP53-R175C QSQHMTEVV  | 185  | >TP53-R175C QSQHMTEVV  | 39082 | 38897 |
| >TP53-R175C QSQHMTEVV  | 306  | >TP53-R175C QSQHMTEVV  | 16576 | 16270 |
| >TP53-R175C VVRRCPHHEI | 145  | >TP53-R175C VVRGCPHHEI | 519   | 374   |
| >TP53-R175C VVRRCPHHEI | 63   | >TP53-R175C VVRGCPHHEI | 43    | 20    |
| >TP53-R175C VVRRCPHHEI | 713  | >TP53-R175C VVRGCPHHEI | 430   | 283   |
| >TP53-R175C EVVRRCPH   | 400  | >TP53-R175C EVVRGCPH   | 183   | 217   |
| >TP53-R175C EVVRRCPHH  | 98   | >TP53-R175C EVVRGCPHH  | 30    | 68    |
| >TP53-R175C EVVRRCPHHE | 428  | >TP53-R175C EVVRGCPHHE | 151   | 277   |
| >TP53-R175C EVVRRCPHHE | 912  | >TP53-R175C EVVRGCPHHE | 433   | 479   |
| >TP53-R175C EVVRRCPHHE | 371  | >TP53-R175C EVVRGCPHHE | 765   | 394   |
| >TP53-R175C EVVRRCPHHE | 53   | >TP53-R175C EVVRGCPHHE | 93    | 40    |
| >TP53-R175C EVVRRCPHHE | 5    | >TP53-R175C EVVRGCPHHE | 5     | 0     |
| >TP53-R175C HMTEVVRRRC | 38   | >TP53-R175C HMTEVVRRGC | 29    | 9     |
| >TP53-R175C HMTEVVRR   | 38   | >TP53-R175C HMTEVVRRG  | 15997 | 15959 |
| >TP53-R175C HMTEVVRR   | 65   | >TP53-R175C HMTEVVRRG  | 27423 | 27358 |
| >TP53-R175C HMTEVVRR   | 35   | >TP53-R175C HMTEVVRRG  | 30694 | 30659 |
| >TP53-R175C HMTEVVRR   | 64   | >TP53-R175C HMTEVVRRG  | 33586 | 33522 |
| >TP53-R175C QHMTEVVRR  | 195  | >TP53-R175C QHMTEVVRC  | 33902 | 33707 |
| >TP53-R175C SQHMTEVVRR | 363  | >TP53-R175C SQHMTEVVRC | 34652 | 34289 |
| >TP53-R175F RRCPPHER   | 405  | >TP53-R175F RHCPHHER   | 63    | 342   |
| >TP53-R175F RRCPPHER   | 102  | >TP53-R175F RHCPHHER   | 9303  | 9201  |
| >TP53-R175F RRCPPHER   | 312  | >TP53-R175F RHCPHHER   | 8064  | 7752  |
| >TP53-R175F RRCPPHERC  | 320  | >TP53-R175F RHCPHHERC  | 12351 | 12031 |
| >TP53-R175F RRCPPHER   | 87   | >TP53-R175F RHCPHHER   | 105   | 18    |
| >TP53-R175F QSQHMTEVV  | 321  | >TP53-R175F QSQHMTEVV  | 14398 | 14077 |
| >TP53-R175F QSQHMTEVV  | 185  | >TP53-R175F QSQHMTEVV  | 21822 | 21637 |
| >TP53-R175F QSQHMTEVV  | 306  | >TP53-R175F QSQHMTEVV  | 2507  | 2201  |
| >TP53-R175F VVRRCPHHEI | 145  | >TP53-R175F VVRHCPHHEI | 254   | 109   |
| >TP53-R175F VVRRCPHHEI | 63   | >TP53-R175F VVRHCPHHEI | 57    | 6     |
| >TP53-R175F VVRRCPHHEI | 713  | >TP53-R175F VVRHCPHHEI | 474   | 239   |

|                        |       |                        |       |       |
|------------------------|-------|------------------------|-------|-------|
| >TP53-R175F EVVRRCPH   | 400   | >TP53-R175F EVVRHCPH   | 70    | 330   |
| >TP53-R175F EVVRRCPHH  | 98    | >TP53-R175F EVVRHCPHH  | 10    | 88    |
| >TP53-R175F EVVRRCPHHE | 428   | >TP53-R175F EVVRHCPHHE | 93    | 335   |
| >TP53-R175F EVVRRCPHHE | 912   | >TP53-R175F EVVRHCPHHE | 215   | 697   |
| >TP53-R175F EVVRRCPHHE | 371   | >TP53-R175F EVVRHCPHHE | 432   | 61    |
| >TP53-R175F EVVRRCPHHE | 53    | >TP53-R175F EVVRHCPHHE | 118   | 65    |
| >TP53-R175F EVVRRCPHHE | 5     | >TP53-R175F EVVRHCPHHE | 5     | 0     |
| >TP53-R175F HMTEVVRRC  | 38    | >TP53-R175F HMTEVVRHC  | 58    | 20    |
| >TP53-R175F HMTEVVR    | 38    | >TP53-R175F HMTEVVRH   | 5527  | 5489  |
| >TP53-R175F HMTEVVR    | 65    | >TP53-R175F HMTEVVRH   | 16797 | 16732 |
| >TP53-R175F HMTEVVR    | 35    | >TP53-R175F HMTEVVRH   | 9835  | 9800  |
| >TP53-R175F HMTEVVR    | 64    | >TP53-R175F HMTEVVRH   | 24081 | 24017 |
| >TP53-R175F QHMTEVVR   | 195   | >TP53-R175F QHMTEVVRH  | 25613 | 25418 |
| >TP53-R175F SQHMTEVVR  | 572   | >TP53-R175F SQHMTEVVR  | 476   | 96    |
| >TP53-R175F SQHMTEVVR  | 363   | >TP53-R175F SQHMTEVVR  | 28354 | 27991 |
| >TP53-R175L RRCPHHERC  | 23368 | >TP53-R175L RLCPHHERC  | 140   | 23228 |
| >TP53-R175L RRCPHHERC  | 35487 | >TP53-R175L RLCPHHERC  | 177   | 35310 |
| >TP53-R175L RRCPHHER   | 405   | >TP53-R175L RLCPHHER   | 7     | 398   |
| >TP53-R175L RRCPHHER   | 102   | >TP53-R175L RLCPHHER   | 10201 | 10099 |
| >TP53-R175L RRCPHHER   | 312   | >TP53-R175L RLCPHHER   | 11222 | 10910 |
| >TP53-R175L RRCPHHERC  | 320   | >TP53-R175L RLCPHHERC  | 13770 | 13450 |
| >TP53-R175L RRCPHHER   | 87    | >TP53-R175L RLCPHHER   | 50    | 37    |
| >TP53-R175L QSQHMTEVV  | 321   | >TP53-R175L QSQHMTEVV  | 18204 | 17883 |
| >TP53-R175L QSQHMTEVV  | 13841 | >TP53-R175L QSQHMTEVV  | 410   | 13431 |
| >TP53-R175L QSQHMTEVV  | 185   | >TP53-R175L QSQHMTEVV  | 32454 | 32269 |
| >TP53-R175L QSQHMTEVV  | 15822 | >TP53-R175L QSQHMTEVV  | 81    | 15741 |
| >TP53-R175L QSQHMTEVV  | 306   | >TP53-R175L QSQHMTEVV  | 8008  | 7702  |
| >TP53-R175L VVRRCPHHEF | 145   | >TP53-R175L VVRLCPHHEF | 528   | 383   |
| >TP53-R175L VVRRCPHHEF | 63    | >TP53-R175L VVRLCPHHEF | 47    | 16    |
| >TP53-R175L VVRRCPHHEF | 713   | >TP53-R175L VVRLCPHHEF | 487   | 226   |
| >TP53-R175L EVVRRCPH   | 400   | >TP53-R175L EVVRLCPH   | 89    | 311   |
| >TP53-R175L EVVRRCPHH  | 98    | >TP53-R175L EVVRLCPHH  | 56    | 42    |
| >TP53-R175L EVVRRCPHHE | 428   | >TP53-R175L EVVRLCPHHE | 381   | 47    |
| >TP53-R175L EVVRRCPHHE | 371   | >TP53-R175L EVVRLCPHHE | 450   | 79    |
| >TP53-R175L EVVRRCPHHE | 53    | >TP53-R175L EVVRLCPHHE | 72    | 19    |
| >TP53-R175L EVVRRCPHHE | 5     | >TP53-R175L EVVRLCPHHE | 4     | 1     |
| >TP53-R175L HMTEVVR    | 21392 | >TP53-R175L HMTEVVRL   | 100   | 21292 |
| >TP53-R175L HMTEVVR    | 10332 | >TP53-R175L HMTEVVRL   | 23    | 10309 |
| >TP53-R175L HMTEVVR    | 16054 | >TP53-R175L HMTEVVRL   | 72    | 15982 |
| >TP53-R175L HMTEVVR    | 24323 | >TP53-R175L HMTEVVRL   | 334   | 23989 |
| >TP53-R175L HMTEVVR    | 5899  | >TP53-R175L HMTEVVRL   | 8     | 5891  |
| >TP53-R175L HMTEVVRRC  | 38    | >TP53-R175L HMTEVVRLC  | 61    | 23    |
| >TP53-R175L HMTEVVR    | 18256 | >TP53-R175L HMTEVVRL   | 22    | 18234 |

|                        |       |                        |       |       |
|------------------------|-------|------------------------|-------|-------|
| >TP53-R175L HMTEVVRR   | 15599 | >TP53-R175L HMTEVVRL   | 23    | 15576 |
| >TP53-R175L HMTEVVRR   | 23380 | >TP53-R175L HMTEVVRL   | 123   | 23257 |
| >TP53-R175L HMTEVVRR   | 7299  | >TP53-R175L HMTEVVRL   | 5     | 7294  |
| >TP53-R175L HMTEVVRR   | 38    | >TP53-R175L HMTEVVRL   | 9048  | 9010  |
| >TP53-R175L HMTEVVRR   | 65    | >TP53-R175L HMTEVVRL   | 14739 | 14674 |
| >TP53-R175L HMTEVVRR   | 35    | >TP53-R175L HMTEVVRL   | 21960 | 21925 |
| >TP53-R175L HMTEVVRR   | 21750 | >TP53-R175L HMTEVVRL   | 446   | 21304 |
| >TP53-R175L HMTEVVRR   | 64    | >TP53-R175L HMTEVVRL   | 29286 | 29222 |
| >TP53-R175L QHMTEVVRR  | 9831  | >TP53-R175L QHMTEVVRL  | 21    | 9810  |
| >TP53-R175L QHMTEVVRR  | 195   | >TP53-R175L QHMTEVVRL  | 29885 | 29690 |
| >TP53-R175L SQHMTEVVR  | 572   | >TP53-R175L SQHMTEVVR  | 44    | 528   |
| >TP53-R175L SQHMTEVVR  | 17051 | >TP53-R175L SQHMTEVVR  | 206   | 16845 |
| >TP53-R175L SQHMTEVVR  | 363   | >TP53-R175L SQHMTEVVR  | 31579 | 31216 |
| >TP53-R175F RRCPPHER   | 405   | >TP53-R175F RPCPPHER   | 104   | 301   |
| >TP53-R175F RRCPPHER   | 102   | >TP53-R175F RPCPPHER   | 14670 | 14568 |
| >TP53-R175F RRCPPHER   | 312   | >TP53-R175F RPCPPHER   | 11929 | 11617 |
| >TP53-R175F RRCPPHERC  | 320   | >TP53-R175F RPCPPHERC  | 21770 | 21450 |
| >TP53-R175F RRCPPHER   | 87    | >TP53-R175F RPCPPHER   | 107   | 20    |
| >TP53-R175F QSQHMTEVV  | 321   | >TP53-R175F QSQHMTEVV  | 23776 | 23455 |
| >TP53-R175F QSQHMTEVV  | 185   | >TP53-R175F QSQHMTEVV  | 37948 | 37763 |
| >TP53-R175F QSQHMTEVV  | 306   | >TP53-R175F QSQHMTEVV  | 15488 | 15182 |
| >TP53-R175F VVRRCPHHEF | 145   | >TP53-R175F VVRPCPHHEF | 225   | 80    |
| >TP53-R175F VVRRCPHHEF | 63    | >TP53-R175F VVRPCPHHEF | 83    | 20    |
| >TP53-R175F VVRRCPHHEF | 713   | >TP53-R175F VVRPCPHHEF | 442   | 271   |
| >TP53-R175F EVVRRCPH   | 400   | >TP53-R175F EVVRPCPH   | 115   | 285   |
| >TP53-R175F EVVRRCPHH  | 98    | >TP53-R175F EVVRPCPHH  | 21    | 77    |
| >TP53-R175F EVVRRCPHHE | 428   | >TP53-R175F EVVRPCPHHE | 140   | 288   |
| >TP53-R175F EVVRRCPHHE | 912   | >TP53-R175F EVVRPCPHHE | 326   | 586   |
| >TP53-R175F EVVRRCPHHE | 371   | >TP53-R175F EVVRPCPHHE | 754   | 383   |
| >TP53-R175F EVVRRCPHHE | 53    | >TP53-R175F EVVRPCPHHE | 114   | 61    |
| >TP53-R175F EVVRRCPHHE | 5     | >TP53-R175F EVVRPCPHHE | 6     | 1     |
| >TP53-R175F HMTEVVRRRC | 38    | >TP53-R175F HMTEVVRRPC | 33    | 5     |
| >TP53-R175F HMTEVVRRRC | 2818  | >TP53-R175F HMTEVVRRPC | 416   | 2402  |
| >TP53-R175F HMTEVVRR   | 38    | >TP53-R175F HMTEVVRRP  | 17623 | 17585 |
| >TP53-R175F HMTEVVRR   | 65    | >TP53-R175F HMTEVVRRP  | 27898 | 27833 |
| >TP53-R175F HMTEVVRR   | 35    | >TP53-R175F HMTEVVRRP  | 27976 | 27941 |
| >TP53-R175F HMTEVVRR   | 64    | >TP53-R175F HMTEVVRRP  | 33550 | 33486 |
| >TP53-R175F QHMTEVVRR  | 195   | >TP53-R175F QHMTEVVRRP | 33213 | 33018 |
| >TP53-R175F SQHMTEVVR  | 363   | >TP53-R175F SQHMTEVVR  | 34337 | 33974 |
| >TP53-R175S RRCPPHER   | 22306 | >TP53-R175S RSCPPHER   | 219   | 22087 |
| >TP53-R175S RRCPPHER   | 405   | >TP53-R175S RSCPPHER   | 6     | 399   |
| >TP53-R175S RRCPPHER   | 12895 | >TP53-R175S RSCPPHER   | 438   | 12457 |
| >TP53-R175S RRCPPHER   | 102   | >TP53-R175S RSCPPHER   | 12835 | 12733 |

|                        |       |                        |       |       |
|------------------------|-------|------------------------|-------|-------|
| >TP53-R175S RRCPPHER   | 312   | >TP53-R175S RSCPPHER   | 11608 | 11296 |
| >TP53-R175S RRCPPHERC  | 320   | >TP53-R175S RSCPPHERC  | 17619 | 17299 |
| >TP53-R175S RRCPPHER   | 10242 | >TP53-R175S RSCPPHER   | 349   | 9893  |
| >TP53-R175S RRCPPHER   | 87    | >TP53-R175S RSCPPHER   | 149   | 62    |
| >TP53-R175S QSQHMTEVV  | 321   | >TP53-R175S QSQHMTEVV  | 21301 | 20980 |
| >TP53-R175S QSQHMTEVV  | 185   | >TP53-R175S QSQHMTEVV  | 31933 | 31748 |
| >TP53-R175S QSQHMTEVV  | 306   | >TP53-R175S QSQHMTEVV  | 8744  | 8438  |
| >TP53-R175S VVRRCPHHEF | 145   | >TP53-R175S VVRSCPHHEF | 388   | 243   |
| >TP53-R175S VVRRCPHHEF | 63    | >TP53-R175S VVRSCPHHEF | 68    | 5     |
| >TP53-R175S EVVRRCPH   | 400   | >TP53-R175S EVVRSCPH   | 225   | 175   |
| >TP53-R175S EVVRRCPHH  | 98    | >TP53-R175S EVVRSCPHH  | 28    | 70    |
| >TP53-R175S EVVRRCPHHE | 428   | >TP53-R175S EVVRSCPHHE | 194   | 234   |
| >TP53-R175S EVVRRCPHHE | 371   | >TP53-R175S EVVRSCPHHE | 645   | 274   |
| >TP53-R175S EVVRRCPHHE | 53    | >TP53-R175S EVVRSCPHHE | 119   | 66    |
| >TP53-R175S EVVRRCPHHE | 5     | >TP53-R175S EVVRSCPHHE | 4     | 1     |
| >TP53-R175S HMTEVVRR   | 38    | >TP53-R175S HMTEVVRR   | 37    | 1     |
| >TP53-R175S HMTEVVRR   | 38    | >TP53-R175S HMTEVVRS   | 13153 | 13115 |
| >TP53-R175S HMTEVVRR   | 65    | >TP53-R175S HMTEVVRS   | 22399 | 22334 |
| >TP53-R175S HMTEVVRR   | 35    | >TP53-R175S HMTEVVRS   | 20722 | 20687 |
| >TP53-R175S HMTEVVRR   | 64    | >TP53-R175S HMTEVVRS   | 28465 | 28401 |
| >TP53-R175S QHMTEVVRR  | 195   | >TP53-R175S QHMTEVVRS  | 29051 | 28856 |
| >TP53-R175S SQHMTEVVRR | 363   | >TP53-R175S SQHMTEVVRR | 30684 | 30321 |
| >TP53-R181C EVVRRCPHHE | 371   | >TP53-R181C EVVRRCPHHE | 24791 | 24420 |
| >TP53-R181C EVVRRCPHHE | 53    | >TP53-R181C EVVRRCPHHE | 28341 | 28288 |
| >TP53-R181C EVVRRCPHHE | 5     | >TP53-R181C EVVRRCPHHE | 13347 | 13342 |
| >TP53-R181C HERCSDSDGL | 602   | >TP53-R181C HECCSDSDGL | 373   | 229   |
| >TP53-R181C HERCSDSDGL | 422   | >TP53-R181C HECCSDSDGL | 414   | 8     |
| >TP53-R181C HHERCSDSDC | 126   | >TP53-R181C HHECCSDSDC | 115   | 11    |
| >TP53-R181C RRCPPHER   | 405   | >TP53-R181C RRCPPHEC   | 24063 | 23658 |
| >TP53-R181C RRCPPHER   | 102   | >TP53-R181C RRCPPHEC   | 78    | 24    |
| >TP53-R181C RRCPPHER   | 312   | >TP53-R181C RRCPPHEC   | 146   | 166   |
| >TP53-R181C RRCPPHERC  | 320   | >TP53-R181C RRCPPHECC  | 486   | 166   |
| >TP53-R181C RRCPPHER   | 87    | >TP53-R181C RRCPPHEC   | 34479 | 34392 |
| >TP53-R181C VVRRCPHHEF | 145   | >TP53-R181C VVRRCPHHEC | 1986  | 1841  |
| >TP53-R181C VVRRCPHHEF | 63    | >TP53-R181C VVRRCPHHEC | 20318 | 20255 |
| >TP53-R181C EVVRRCPHHE | 371   | >TP53-R181C EVVRRCPHHE | 24599 | 24228 |
| >TP53-R181C EVVRRCPHHE | 53    | >TP53-R181C EVVRRCPHHE | 25569 | 25516 |
| >TP53-R181C EVVRRCPHHE | 5     | >TP53-R181C EVVRRCPHHE | 10530 | 10525 |
| >TP53-R181C HERCSDSDGL | 602   | >TP53-R181C HEGCSDSDGI | 238   | 364   |
| >TP53-R181C HERCSDSDGL | 422   | >TP53-R181C HEGCSDSDGI | 735   | 313   |
| >TP53-R181C HHERCSDSDC | 126   | >TP53-R181C HHEGCSDSDC | 34    | 92    |
| >TP53-R181C HHERCSDSDC | 1161  | >TP53-R181C HHEGCSDSDC | 497   | 664   |
| >TP53-R181C RRCPPHER   | 405   | >TP53-R181C RRCPPHEG   | 23761 | 23356 |

|                        |       |                         |       |       |
|------------------------|-------|-------------------------|-------|-------|
| >TP53-R181C RRCPPHER   | 102   | >TP53-R181C RRCPPHEG    | 82    | 20    |
| >TP53-R181C RRCPPHER   | 312   | >TP53-R181C RRCPPHEG    | 494   | 182   |
| >TP53-R181C RRCPPHERC  | 320   | >TP53-R181C RRCPPHEGC   | 158   | 162   |
| >TP53-R181C RRCPPHERCS | 717   | >TP53-R181C RRCPPHEGCS  | 401   | 316   |
| >TP53-R181C RRCPPHER   | 87    | >TP53-R181C RRCPPHEG    | 33514 | 33427 |
| >TP53-R181C VVRRCPHHEF | 145   | >TP53-R181C VVRRCPHHEC  | 441   | 296   |
| >TP53-R181C VVRRCPHHEF | 63    | >TP53-R181C VVRRCPHHEC  | 22926 | 22863 |
| >TP53-R181F EVVRRCPHHE | 912   | >TP53-R181F EVVRRCPHHE  | 70    | 842   |
| >TP53-R181F EVVRRCPHHE | 371   | >TP53-R181F EVVRRCPHHE  | 14956 | 14585 |
| >TP53-R181F EVVRRCPHHE | 53    | >TP53-R181F EVVRRCPHHE  | 15838 | 15785 |
| >TP53-R181F EVVRRCPHHE | 5     | >TP53-R181F EVVRRCPHHE  | 712   | 707   |
| >TP53-R181F HERCSDSDGL | 602   | >TP53-R181F HEHCSDSDGI  | 88    | 514   |
| >TP53-R181F HERCSDSDGL | 422   | >TP53-R181F HEHCSDSDGI  | 2011  | 1589  |
| >TP53-R181F HHERCSDSDC | 126   | >TP53-R181F HHEHCSDSDC  | 63    | 63    |
| >TP53-R181F RRCPPHER   | 405   | >TP53-R181F RRCPPHEH    | 16941 | 16536 |
| >TP53-R181F RRCPPHER   | 102   | >TP53-R181F RRCPPHEH    | 180   | 78    |
| >TP53-R181F RRCPPHER   | 312   | >TP53-R181F RRCPPHEH    | 210   | 102   |
| >TP53-R181F RRCPPHERC  | 320   | >TP53-R181F RRCPPHEHC   | 199   | 121   |
| >TP53-R181F RRCPPHERCS | 717   | >TP53-R181F RRCPPHEHCS  | 468   | 249   |
| >TP53-R181F RRCPPHER   | 87    | >TP53-R181F RRCPPHEH    | 27142 | 27055 |
| >TP53-R181F VVRRCPHHEF | 145   | >TP53-R181F VVRRCPHHEF  | 1552  | 1407  |
| >TP53-R181F VVRRCPHHEF | 63    | >TP53-R181F VVRRCPHHEF  | 6301  | 6238  |
| >TP53-R181L ERCSDSDGL  | 28857 | >TP53-R181L ELCSDSGDGL  | 336   | 28521 |
| >TP53-R181L ERCSDSDGL  | 29577 | >TP53-R181L ELCSDSGDGL  | 450   | 29127 |
| >TP53-R181L ERCSDSDGL  | 34955 | >TP53-R181L ELCSDSGDGL  | 358   | 34597 |
| >TP53-R181L EVVRRCPHHE | 912   | >TP53-R181L EVVRRCPHHE  | 17    | 895   |
| >TP53-R181L EVVRRCPHHE | 371   | >TP53-R181L EVVRRCPHHE  | 19263 | 18892 |
| >TP53-R181L EVVRRCPHHE | 53    | >TP53-R181L EVVRRCPHHE  | 13359 | 13306 |
| >TP53-R181L EVVRRCPHHE | 5     | >TP53-R181L EVVRRCPHHE  | 4008  | 4003  |
| >TP53-R181L EVVRRCPHHE | 9500  | >TP53-R181L EVVRRCPHHE  | 78    | 9422  |
| >TP53-R181L EVVRRCPHHE | 10440 | >TP53-R181L EVVRRCPHHE  | 75    | 10365 |
| >TP53-R181L HERCSDSDGL | 602   | >TP53-R181L HELCSDSDGL  | 261   | 341   |
| >TP53-R181L HERCSDSDGL | 422   | >TP53-R181L HELCSDSDGL  | 186   | 236   |
| >TP53-R181L HHERCSDSDC | 126   | >TP53-R181L HHELCSDDSDC | 88    | 38    |
| >TP53-R181L RRCPPHER   | 405   | >TP53-R181L RRCPPHEL    | 20394 | 19989 |
| >TP53-R181L RRCPPHER   | 1819  | >TP53-R181L RRCPPHEL    | 335   | 1484  |
| >TP53-R181L RRCPPHER   | 102   | >TP53-R181L RRCPPHEL    | 15    | 87    |
| >TP53-R181L RRCPPHERC  | 689   | >TP53-R181L RRCPPHELC   | 283   | 406   |
| >TP53-R181L RRCPPHERCS | 720   | >TP53-R181L RRCPPHELCS  | 261   | 459   |
| >TP53-R181L RRCPPHER   | 312   | >TP53-R181L RRCPPHEL    | 24    | 288   |
| >TP53-R181L RRCPPHERC  | 320   | >TP53-R181L RRCPPHELC   | 121   | 199   |
| >TP53-R181L RRCPPHERCS | 717   | >TP53-R181L RRCPPHELCS  | 231   | 486   |
| >TP53-R181L RRCPPHER   | 87    | >TP53-R181L RRCPPHEL    | 29847 | 29760 |

|                         |       |                         |       |       |
|-------------------------|-------|-------------------------|-------|-------|
| >TP53-R181L VRRCPHHER   | 680   | >TP53-R181L VRRCPHHEL   | 62    | 618   |
| >TP53-R181L VRRCPHHER   | 5974  | >TP53-R181L VRRCPHHEL   | 285   | 5689  |
| >TP53-R181L VRRCPHHER   | 9059  | >TP53-R181L VRRCPHHEL   | 388   | 8671  |
| >TP53-R181L VVRRCPHHEF  | 27986 | >TP53-R181L VVRRCPHHEL  | 215   | 27771 |
| >TP53-R181L VVRRCPHHEF  | 145   | >TP53-R181L VVRRCPHHEL  | 94    | 51    |
| >TP53-R181L VVRRCPHHEF  | 63    | >TP53-R181L VVRRCPHHEL  | 11328 | 11265 |
| >TP53-R181F ERCSDSDGL   | 20513 | >TP53-R181F EPCSDSDGL   | 372   | 20141 |
| >TP53-R181F EVVRRCPHHE  | 371   | >TP53-R181F EVVRRCPHHE  | 24864 | 24493 |
| >TP53-R181F EVVRRCPHHE  | 53    | >TP53-R181F EVVRRCPHHE  | 27101 | 27048 |
| >TP53-R181F EVVRRCPHHE  | 5     | >TP53-R181F EVVRRCPHHE  | 8876  | 8871  |
| >TP53-R181F HERCSDSDGL  | 422   | >TP53-R181F HEPSCSDSDGL | 2444  | 2022  |
| >TP53-R181F HHERCSDSDC  | 126   | >TP53-R181F HHEPCSDSDC  | 53    | 73    |
| >TP53-R181F RRCPPHER    | 405   | >TP53-R181F RRCPPHEP    | 24251 | 23846 |
| >TP53-R181F RRCPPHER    | 102   | >TP53-R181F RRCPPHEP    | 188   | 86    |
| >TP53-R181F RRCPPHER    | 312   | >TP53-R181F RRCPPHEP    | 444   | 132   |
| >TP53-R181F RRCPPHERC   | 320   | >TP53-R181F RRCPPHEPC   | 443   | 123   |
| >TP53-R181F RRCPPHER    | 87    | >TP53-R181F RRCPPHEP    | 32780 | 32693 |
| >TP53-R181F VVRRCPHHEF  | 145   | >TP53-R181F VVRRCPHHEF  | 1326  | 1181  |
| >TP53-R181F VVRRCPHHEF  | 63    | >TP53-R181F VVRRCPHHEF  | 23816 | 23753 |
| >TP53-R196L RVEGNLRVEY  | 844   | >TP53-R196L LVEGNLRVEY  | 364   | 480   |
| >TP53-R196L RVEGNLRV    | 54    | >TP53-R196L LVEGNLRV    | 11    | 43    |
| >TP53-R196L RVEGNLRVEY  | 1524  | >TP53-R196L LVEGNLRVEY  | 249   | 1275  |
| >TP53-R196L RVEGNLRVEY  | 224   | >TP53-R196L LVEGNLRVEY  | 782   | 558   |
| >TP53-R196L RVEGNLRVEY  | 301   | >TP53-R196L LVEGNLRVEY  | 2186  | 1885  |
| >TP53-R196L RVEGNLRVEY  | 400   | >TP53-R196L LVEGNLRVEY  | 694   | 294   |
| >TP53-R196L IRVEGNLRV   | 15759 | >TP53-R196L ILVEGNLRV   | 22    | 15737 |
| >TP53-R196L IRVEGNLRV   | 15702 | >TP53-R196L ILVEGNLRV   | 29    | 15673 |
| >TP53-R196L IRVEGNLRV   | 14561 | >TP53-R196L ILVEGNLRV   | 8     | 14553 |
| >TP53-R196L IRVEGNLRV   | 5591  | >TP53-R196L ILVEGNLRV   | 10    | 5581  |
| >TP53-R196L IRVEGNLRV   | 5423  | >TP53-R196L ILVEGNLRV   | 2     | 5421  |
| >TP53-R196L IRVEGNLRV   | 18506 | >TP53-R196L ILVEGNLRV   | 9     | 18497 |
| >TP53-R196L IRVEGNLRV   | 14435 | >TP53-R196L ILVEGNLRV   | 7     | 14428 |
| >TP53-R196L IRVEGNLRV   | 18832 | >TP53-R196L ILVEGNLRV   | 5     | 18827 |
| >TP53-R196L IRVEGNLRV   | 3633  | >TP53-R196L ILVEGNLRV   | 2     | 3631  |
| >TP53-R196L IRVEGNLRVE' | 1106  | >TP53-R196L ILVEGNLRVE' | 45    | 1061  |
| >TP53-R196L IRVEGNLRVE' | 1260  | >TP53-R196L ILVEGNLRVE' | 167   | 1093  |
| >TP53-R196L IRVEGNLR    | 3649  | >TP53-R196L ILVEGNLR    | 184   | 3465  |
| >TP53-R196L IRVEGNLRVE' | 2901  | >TP53-R196L ILVEGNLRVE' | 180   | 2721  |
| >TP53-R196L IRVEGNLRVE' | 10307 | >TP53-R196L ILVEGNLRVE' | 126   | 10181 |
| >TP53-R196L IRVEGNLRVE' | 5000  | >TP53-R196L ILVEGNLRVE' | 192   | 4808  |
| >TP53-R196L IRVEGNLRVE' | 53    | >TP53-R196L ILVEGNLRVE' | 145   | 92    |
| >TP53-R196L IRVEGNLRVE' | 12989 | >TP53-R196L ILVEGNLRVE' | 241   | 12748 |
| >TP53-R196L IRVEGNLRVE' | 5226  | >TP53-R196L ILVEGNLRVE' | 392   | 4834  |



|                         |       |                         |      |       |
|-------------------------|-------|-------------------------|------|-------|
| >TP53-R196L LIRVEGNLRV  | 5683  | >TP53-R196L LILVEGNLRV  | 228  | 5455  |
| >TP53-R196L LIRVEGNLRV  | 2070  | >TP53-R196L LILVEGNLRV  | 425  | 1645  |
| >TP53-R196L LIRVEGNLRV  | 555   | >TP53-R196L LILVEGNLRV  | 179  | 376   |
| >TP53-R196L LIRVEGNLRV  | 2785  | >TP53-R196L LILVEGNLRV  | 98   | 2687  |
| >TP53-R196L LIRVEGNLRV  | 1834  | >TP53-R196L LILVEGNLRV  | 52   | 1782  |
| >TP53-R196L LIRVEGNLRV  | 9171  | >TP53-R196L LILVEGNLRV  | 497  | 8674  |
| >TP53-R196L LIRVEGNLRV  | 5793  | >TP53-R196L LILVEGNLRV  | 98   | 5695  |
| >TP53-R196L LIRVEGNLRV  | 11414 | >TP53-R196L LILVEGNLRV  | 216  | 11198 |
| >TP53-R196L LIRVEGNLRV  | 35    | >TP53-R196L LILVEGNLRV  | 14   | 21    |
| >TP53-R196L LIRVEGNLRV  | 296   | >TP53-R196L LILVEGNLRV  | 8675 | 8379  |
| >TP53-R196L HLIRVEGNLR' | 156   | >TP53-R196L HLILVEGNLR\ | 169  | 13    |
| >TP53-R196L HLIRVEGNL   | 226   | >TP53-R196L HLILVEGNL   | 326  | 100   |
| >TP53-R196L HLIRVEGNLR' | 111   | >TP53-R196L HLILVEGNLR\ | 128  | 17    |
| >TP53-R196L HLIRVEGNLR' | 41    | >TP53-R196L HLILVEGNLR\ | 67   | 26    |
| >TP53-R196L HLIRVEGNLR' | 322   | >TP53-R196L HLILVEGNLR\ | 371  | 49    |
| >TP53-R196L HLIRVEGNL   | 327   | >TP53-R196L HLILVEGNL   | 1127 | 800   |
| >TP53-R196L HLIRVEGNLR' | 9     | >TP53-R196L HLILVEGNLR\ | 21   | 12    |
| >TP53-R196L HLIRVEGNLR' | 27    | >TP53-R196L HLILVEGNLR\ | 49   | 22    |
| >TP53-R196L HLIRVEGNLR' | 27    | >TP53-R196L HLILVEGNLR\ | 36   | 9     |
| >TP53-R196L HLIRVEGNL   | 153   | >TP53-R196L HLILVEGNL   | 603  | 450   |
| >TP53-R196L HLIRVEGNLR' | 4     | >TP53-R196L HLILVEGNLR\ | 7    | 3     |
| >TP53-R196L HLIRVEGNLR  | 241   | >TP53-R196L HLILVEGNLR  | 212  | 29    |
| >TP53-R196L HLIRVEGNLR  | 381   | >TP53-R196L HLILVEGNLR  | 380  | 1     |
| >TP53-R196L HLIRVEGNLR  | 24    | >TP53-R196L HLILVEGNLR  | 15   | 9     |
| >TP53-R196L HLIRVEGNLR' | 398   | >TP53-R196L HLILVEGNLR\ | 443  | 45    |
| >TP53-R196L HLIRVEGNLR  | 478   | >TP53-R196L HLILVEGNLR  | 334  | 144   |
| >TP53-R196L QHLIRVEGNL  | 709   | >TP53-R196L QHLILVEGNL  | 489  | 220   |
| >TP53-R196L APPQHLIR    | 20904 | >TP53-R196L APPQHLIL    | 73   | 20831 |
| >TP53-R196L APPQHLIR    | 17491 | >TP53-R196L APPQHLIL    | 144  | 17347 |
| >TP53-R196L APPQHLIRV   | 1104  | >TP53-R196L APPQHLILV   | 75   | 1029  |
| >TP53-R196L LAPPQHLIRV  | 395   | >TP53-R196L LAPPQHLILV  | 161  | 234   |
| >TP53-R196L LAPPQHLIRV  | 52    | >TP53-R196L LAPPQHLILV  | 69   | 17    |
| >TP53-R196L LAPPQHLIR   | 959   | >TP53-R196L LAPPQHLIL   | 4    | 955   |
| >TP53-R196L LAPPQHLIRV  | 28    | >TP53-R196L LAPPQHLILV  | 6    | 22    |
| >TP53-R196L GLAPPQHLIR' | 20    | >TP53-R196L GLAPPQHLIL\ | 15   | 5     |
| >TP53-R196L GLAPPQHLIR  | 15450 | >TP53-R196L GLAPPQHLIL  | 108  | 15342 |
| >TP53-R196L GLAPPQHLIR' | 9     | >TP53-R196L GLAPPQHLIL\ | 5    | 4     |
| >TP53-R196L GLAPPQHLIR' | 7     | >TP53-R196L GLAPPQHLIL\ | 5    | 2     |
| >TP53-R196L GLAPPQHLIR' | 44    | >TP53-R196L GLAPPQHLIL\ | 22   | 22    |
| >TP53-R196L GLAPPQHLIR  | 18124 | >TP53-R196L GLAPPQHLIL  | 97   | 18027 |
| >TP53-R196L GLAPPQHLIR' | 3     | >TP53-R196L GLAPPQHLIL\ | 3    | 0     |
| >TP53-R196L GLAPPQHLIR  | 24411 | >TP53-R196L GLAPPQHLIL  | 106  | 24305 |
| >TP53-R196L GLAPPQHLIR' | 7     | >TP53-R196L GLAPPQHLIL\ | 6    | 1     |

|                         |       |                         |       |       |
|-------------------------|-------|-------------------------|-------|-------|
| >TP53-R196L GLAPPQHLIR  | 16002 | >TP53-R196L GLAPPQHLIL  | 31    | 15971 |
| >TP53-R196L GLAPPQHLIR' | 5     | >TP53-R196L GLAPPQHLIL\ | 5     | 0     |
| >TP53-R196L GLAPPQHLIR' | 9     | >TP53-R196L GLAPPQHLIL\ | 10    | 1     |
| >TP53-R196L GLAPPQHLIR  | 3789  | >TP53-R196L GLAPPQHLIL  | 6     | 3783  |
| >TP53-R196L GLAPPQHLIR' | 2     | >TP53-R196L GLAPPQHLIL\ | 2     | 0     |
| >TP53-R196L GLAPPQHLIR  | 282   | >TP53-R196L GLAPPQHLIL  | 30328 | 30046 |
| >TP53-R196L GLAPPQHLIR  | 16556 | >TP53-R196L GLAPPQHLIL  | 497   | 16059 |
| >TP53-R196F RVEGNLRV    | 54    | >TP53-R196F PVEGNLRV    | 578   | 524   |
| >TP53-R196F RVEGNLRVEY  | 224   | >TP53-R196F PVEGNLRVEY  | 2385  | 2161  |
| >TP53-R196F RVEGNLRVEY  | 301   | >TP53-R196F PVEGNLRVEY  | 18481 | 18180 |
| >TP53-R196F RVEGNLRVEY  | 400   | >TP53-R196F PVEGNLRVEY  | 10156 | 9756  |
| >TP53-R196F IRVEGNLRV   | 25002 | >TP53-R196F IPVEGNLRV   | 411   | 24591 |
| >TP53-R196F IRVEGNLRVE' | 53    | >TP53-R196F IPVEGNLRVE' | 1015  | 962   |
| >TP53-R196F IRVEGNLRVE' | 5226  | >TP53-R196F IPVEGNLRVE' | 9     | 5217  |
| >TP53-R196F IRVEGNLRV   | 20116 | >TP53-R196F IPVEGNLRV   | 365   | 19751 |
| >TP53-R196F IRVEGNLRV   | 28803 | >TP53-R196F IPVEGNLRV   | 302   | 28501 |
| >TP53-R196F IRVEGNLRVE' | 14168 | >TP53-R196F IPVEGNLRVE' | 22    | 14146 |
| >TP53-R196F IRVEGNLRVE' | 3011  | >TP53-R196F IPVEGNLRVE' | 17    | 2994  |
| >TP53-R196F IRVEGNLRVE' | 18297 | >TP53-R196F IPVEGNLRVE' | 53    | 18244 |
| >TP53-R196F LIRVEGNLRV  | 2785  | >TP53-R196F LIPVEGNLRV  | 348   | 2437  |
| >TP53-R196F LIRVEGNLRV  | 1834  | >TP53-R196F LIPVEGNLRV  | 392   | 1442  |
| >TP53-R196F LIRVEGNLRV  | 35    | >TP53-R196F LIPVEGNLRV  | 22    | 13    |
| >TP53-R196F LIRVEGNLRV  | 296   | >TP53-R196F LIPVEGNLRV  | 16127 | 15831 |
| >TP53-R196F HLIRVEGNLR' | 156   | >TP53-R196F HLIPVEGNLR' | 68    | 88    |
| >TP53-R196F HLIRVEGNL   | 226   | >TP53-R196F HLIPVEGNL   | 97    | 129   |
| >TP53-R196F HLIRVEGNLR' | 111   | >TP53-R196F HLIPVEGNLR' | 48    | 63    |
| >TP53-R196F HLIRVEGNL   | 690   | >TP53-R196F HLIPVEGNL   | 195   | 495   |
| >TP53-R196F HLIRVEGNLR' | 41    | >TP53-R196F HLIPVEGNLR' | 18    | 23    |
| >TP53-R196F HLIRVEGNLR' | 322   | >TP53-R196F HLIPVEGNLR' | 81    | 241   |
| >TP53-R196F HLIRVEGNL   | 327   | >TP53-R196F HLIPVEGNL   | 151   | 176   |
| >TP53-R196F HLIRVEGNLR' | 9     | >TP53-R196F HLIPVEGNLR' | 7     | 2     |
| >TP53-R196F HLIRVEGNL   | 806   | >TP53-R196F HLIPVEGNL   | 294   | 512   |
| >TP53-R196F HLIRVEGNLR' | 27    | >TP53-R196F HLIPVEGNLR' | 15    | 12    |
| >TP53-R196F HLIRVEGNL   | 878   | >TP53-R196F HLIPVEGNL   | 281   | 597   |
| >TP53-R196F HLIRVEGNLR' | 27    | >TP53-R196F HLIPVEGNLR' | 14    | 13    |
| >TP53-R196F HLIRVEGNLR' | 701   | >TP53-R196F HLIPVEGNLR' | 322   | 379   |
| >TP53-R196F HLIRVEGNL   | 153   | >TP53-R196F HLIPVEGNL   | 47    | 106   |
| >TP53-R196F HLIRVEGNLR' | 4     | >TP53-R196F HLIPVEGNLR' | 3     | 1     |
| >TP53-R196F HLIRVEGNLR  | 241   | >TP53-R196F HLIPVEGNLR  | 276   | 35    |
| >TP53-R196F HLIRVEGNLR  | 381   | >TP53-R196F HLIPVEGNLR  | 820   | 439   |
| >TP53-R196F HLIRVEGNLR  | 24    | >TP53-R196F HLIPVEGNLR  | 11    | 13    |
| >TP53-R196F HLIRVEGNLR' | 398   | >TP53-R196F HLIPVEGNLR' | 122   | 276   |
| >TP53-R196F HLIRVEGNLR  | 478   | >TP53-R196F HLIPVEGNLR  | 300   | 178   |

|                         |       |                         |       |       |
|-------------------------|-------|-------------------------|-------|-------|
| >TP53-R196F APPQHLIRV   | 759   | >TP53-R196F APPQHLIPV   | 48    | 711   |
| >TP53-R196F LAPPQHLIRV  | 395   | >TP53-R196F LAPPQHLIPV  | 90    | 305   |
| >TP53-R196F LAPPQHLIRV  | 577   | >TP53-R196F LAPPQHLIPV  | 478   | 99    |
| >TP53-R196F LAPPQHLIRV  | 52    | >TP53-R196F LAPPQHLIPV  | 86    | 34    |
| >TP53-R196F LAPPQHLIRV  | 28    | >TP53-R196F LAPPQHLIPV  | 20    | 8     |
| >TP53-R196F GLAPPQHLIR' | 20    | >TP53-R196F GLAPPQHLIP' | 12    | 8     |
| >TP53-R196F GLAPPQHLIR' | 9     | >TP53-R196F GLAPPQHLIP' | 6     | 3     |
| >TP53-R196F GLAPPQHLIR' | 7     | >TP53-R196F GLAPPQHLIP' | 4     | 3     |
| >TP53-R196F GLAPPQHLIR' | 44    | >TP53-R196F GLAPPQHLIP' | 13    | 31    |
| >TP53-R196F GLAPPQHLIR' | 3     | >TP53-R196F GLAPPQHLIP' | 3     | 0     |
| >TP53-R196F GLAPPQHLIR' | 7     | >TP53-R196F GLAPPQHLIP' | 4     | 3     |
| >TP53-R196F GLAPPQHLIR' | 5     | >TP53-R196F GLAPPQHLIP' | 5     | 0     |
| >TP53-R196F GLAPPQHLIR' | 9     | >TP53-R196F GLAPPQHLIP' | 8     | 1     |
| >TP53-R196F GLAPPQHLIR' | 2     | >TP53-R196F GLAPPQHLIP' | 2     | 0     |
| >TP53-R196F GLAPPQHLIR' | 1739  | >TP53-R196F GLAPPQHLIP' | 492   | 1247  |
| >TP53-R196F GLAPPQHLIR  | 282   | >TP53-R196F GLAPPQHLIP  | 28500 | 28218 |
| >TP53-R196C RVEGNLRV    | 54    | >TP53-R196C QVEGNLRV    | 163   | 109   |
| >TP53-R196C RVEGNLRVE\  | 1642  | >TP53-R196C QVEGNLRVE\  | 458   | 1184  |
| >TP53-R196C RVEGNLRVE\  | 224   | >TP53-R196C QVEGNLRVE\  | 1439  | 1215  |
| >TP53-R196C RVEGNLRVE\  | 301   | >TP53-R196C QVEGNLRVE\  | 4870  | 4569  |
| >TP53-R196C RVEGNLRVE\  | 400   | >TP53-R196C QVEGNLRVE\  | 2300  | 1900  |
| >TP53-R196C IRVEGNLRV   | 15759 | >TP53-R196C IQVEGNLRV   | 136   | 15623 |
| >TP53-R196C IRVEGNLRV   | 14561 | >TP53-R196C IQVEGNLRV   | 141   | 14420 |
| >TP53-R196C IRVEGNLRV   | 5591  | >TP53-R196C IQVEGNLRV   | 7     | 5584  |
| >TP53-R196C IRVEGNLRV   | 5423  | >TP53-R196C IQVEGNLRV   | 50    | 5373  |
| >TP53-R196C IRVEGNLRV   | 3633  | >TP53-R196C IQVEGNLRV   | 158   | 3475  |
| >TP53-R196C IRVEGNLRVE' | 1106  | >TP53-R196C IQVEGNLRVE  | 359   | 747   |
| >TP53-R196C IRVEGNLRVE' | 1260  | >TP53-R196C IQVEGNLRVE  | 247   | 1013  |
| >TP53-R196C IRVEGNLRVE' | 10307 | >TP53-R196C IQVEGNLRVE  | 69    | 10238 |
| >TP53-R196C IRVEGNLRVE' | 5000  | >TP53-R196C IQVEGNLRVE  | 302   | 4698  |
| >TP53-R196C IRVEGNLRV   | 1548  | >TP53-R196C IQVEGNLRV   | 413   | 1135  |
| >TP53-R196C IRVEGNLRVE' | 53    | >TP53-R196C IQVEGNLRVE  | 8     | 45    |
| >TP53-R196C IRVEGNLRVE' | 7125  | >TP53-R196C IQVEGNLRVE  | 322   | 6803  |
| >TP53-R196C LIRVEGNLRV  | 35    | >TP53-R196C LIQVEGNLRV  | 21    | 14    |
| >TP53-R196C LIRVEGNLRV  | 296   | >TP53-R196C LIQVEGNLRV  | 11918 | 11622 |
| >TP53-R196C HLIRVEGNLR' | 156   | >TP53-R196C HLIQVEGNLR  | 114   | 42    |
| >TP53-R196C HLIRVEGNL   | 226   | >TP53-R196C HLIQVEGNL   | 162   | 64    |
| >TP53-R196C HLIRVEGNLR' | 111   | >TP53-R196C HLIQVEGNLR  | 84    | 27    |
| >TP53-R196C HLIRVEGNLR' | 41    | >TP53-R196C HLIQVEGNLR  | 38    | 3     |
| >TP53-R196C HLIRVEGNLR' | 322   | >TP53-R196C HLIQVEGNLR  | 254   | 68    |
| >TP53-R196C HLIRVEGNL   | 327   | >TP53-R196C HLIQVEGNL   | 213   | 114   |
| >TP53-R196C HLIRVEGNLR' | 9     | >TP53-R196C HLIQVEGNLR  | 7     | 2     |
| >TP53-R196C HLIRVEGNLR' | 27    | >TP53-R196C HLIQVEGNLR  | 35    | 8     |

|                          |      |                         |       |       |
|--------------------------|------|-------------------------|-------|-------|
| >TP53-R196C HLIQVEGNL    | 878  | >TP53-R196C HLIQVEGNL   | 404   | 474   |
| >TP53-R196C HLIQVEGNLR'  | 27   | >TP53-R196C HLIQVEGNLR  | 19    | 8     |
| >TP53-R196C HLIQVEGNL    | 153  | >TP53-R196C HLIQVEGNL   | 97    | 56    |
| >TP53-R196C HLIQVEGNLR'  | 4    | >TP53-R196C HLIQVEGNLR  | 3     | 1     |
| >TP53-R196C HLIQVEGNLR   | 241  | >TP53-R196C HLIQVEGNLR  | 356   | 115   |
| >TP53-R196C HLIQVEGNLR   | 381  | >TP53-R196C HLIQVEGNLR  | 801   | 420   |
| >TP53-R196C HLIQVEGNLR   | 24   | >TP53-R196C HLIQVEGNLR  | 18    | 6     |
| >TP53-R196C HLIQVEGNLR'  | 398  | >TP53-R196C HLIQVEGNLR  | 470   | 72    |
| >TP53-R196C HLIQVEGNLR   | 478  | >TP53-R196C HLIQVEGNLR  | 224   | 254   |
| >TP53-R196C APPQHILIRV   | 2001 | >TP53-R196C APPQHILIQV  | 494   | 1507  |
| >TP53-R196C APPQHILIRV   | 759  | >TP53-R196C APPQHILIQV  | 376   | 383   |
| >TP53-R196C LAPPQHILIRV  | 395  | >TP53-R196C LAPPQHILIQV | 237   | 158   |
| >TP53-R196C LAPPQHILIRV  | 577  | >TP53-R196C LAPPQHILIQV | 470   | 107   |
| >TP53-R196C LAPPQHILIRV  | 52   | >TP53-R196C LAPPQHILIQV | 40    | 12    |
| >TP53-R196C LAPPQHILIR   | 959  | >TP53-R196C LAPPQHILIQ  | 280   | 679   |
| >TP53-R196C LAPPQHILIRV  | 28   | >TP53-R196C LAPPQHILIQV | 24    | 4     |
| >TP53-R196C GLAPPQHILIR' | 20   | >TP53-R196C GLAPPQHILIQ | 21    | 1     |
| >TP53-R196C GLAPPQHILIR' | 9    | >TP53-R196C GLAPPQHILIQ | 7     | 2     |
| >TP53-R196C GLAPPQHILIR' | 7    | >TP53-R196C GLAPPQHILIQ | 6     | 1     |
| >TP53-R196C GLAPPQHILIR' | 44   | >TP53-R196C GLAPPQHILIQ | 32    | 12    |
| >TP53-R196C GLAPPQHILIR' | 3    | >TP53-R196C GLAPPQHILIQ | 3     | 0     |
| >TP53-R196C GLAPPQHILIR' | 7    | >TP53-R196C GLAPPQHILIQ | 7     | 0     |
| >TP53-R196C GLAPPQHILIR' | 5    | >TP53-R196C GLAPPQHILIQ | 5     | 0     |
| >TP53-R196C GLAPPQHILIR' | 9    | >TP53-R196C GLAPPQHILIQ | 5     | 4     |
| >TP53-R196C GLAPPQHILIR  | 3789 | >TP53-R196C GLAPPQHILIQ | 126   | 3663  |
| >TP53-R196C GLAPPQHILIR' | 2    | >TP53-R196C GLAPPQHILIQ | 2     | 0     |
| >TP53-R196C GLAPPQHILIR  | 282  | >TP53-R196C GLAPPQHILIQ | 13820 | 13538 |
| >TP53-R202C RVEYLDDR     | 433  | >TP53-R202C CVEYLDDR    | 5878  | 5445  |
| >TP53-R202C RVEYLDDRNT   | 40   | >TP53-R202C CVEYLDDRNT  | 3164  | 3124  |
| >TP53-R202C RVEYLDDR     | 652  | >TP53-R202C CVEYLDDR    | 158   | 494   |
| >TP53-R202C RVEYLDDRNT   | 78   | >TP53-R202C CVEYLDDRNT  | 1240  | 1162  |
| >TP53-R202C EGNLRVEYL    | 2216 | >TP53-R202C EGNLCVEYL   | 279   | 1937  |
| >TP53-R202C EGNLRVEY     | 1669 | >TP53-R202C EGNLCVEY    | 392   | 1277  |
| >TP53-R202C VEGNLRVEYL   | 312  | >TP53-R202C VEGNLCVEYL  | 294   | 18    |
| >TP53-R202C VEGNLRVEY    | 67   | >TP53-R202C VEGNLCVEY   | 134   | 67    |
| >TP53-R202C VEGNLRVEYL   | 472  | >TP53-R202C VEGNLCVEYL  | 680   | 208   |
| >TP53-R202C VEGNLRVEY    | 338  | >TP53-R202C VEGNLCVEY   | 233   | 105   |
| >TP53-R202C VEGNLRVEYL   | 278  | >TP53-R202C VEGNLCVEYL  | 602   | 324   |
| >TP53-R202C RVEGNLRVEY   | 844  | >TP53-R202C RVEGNLCVEY  | 416   | 428   |
| >TP53-R202C RVEGNLRV     | 732  | >TP53-R202C RVEGNLCV    | 456   | 276   |
| >TP53-R202C RVEGNLRVEY   | 946  | >TP53-R202C RVEGNLCVEY  | 338   | 608   |
| >TP53-R202C RVEGNLRV     | 54   | >TP53-R202C RVEGNLCV    | 106   | 52    |
| >TP53-R202C RVEGNLRVEY   | 1524 | >TP53-R202C RVEGNLCVEY  | 446   | 1078  |

|                         |      |                         |       |       |
|-------------------------|------|-------------------------|-------|-------|
| >TP53-R202C RVEGNLRVEY  | 224  | >TP53-R202C RVEGNLCVEY  | 72    | 152   |
| >TP53-R202C RVEGNLRVEY  | 301  | >TP53-R202C RVEGNLCVEY  | 209   | 92    |
| >TP53-R202C RVEGNLRVEY  | 400  | >TP53-R202C RVEGNLCVEY  | 1085  | 685   |
| >TP53-R202C IRVEGNLRVE' | 53   | >TP53-R202C IRVEGNLCVE' | 41    | 12    |
| >TP53-R202C LIRVEGNLRV  | 35   | >TP53-R202C LIRVEGNLCV  | 101   | 66    |
| >TP53-R202C LIRVEGNLRV  | 296  | >TP53-R202C LIRVEGNLCV  | 499   | 203   |
| >TP53-R202C HLIRVEGNLR' | 156  | >TP53-R202C HLIRVEGNLC' | 172   | 16    |
| >TP53-R202C HLIRVEGNLR' | 111  | >TP53-R202C HLIRVEGNLC' | 140   | 29    |
| >TP53-R202C HLIRVEGNLR' | 41   | >TP53-R202C HLIRVEGNLC' | 127   | 86    |
| >TP53-R202C HLIRVEGNLR' | 322  | >TP53-R202C HLIRVEGNLC' | 346   | 24    |
| >TP53-R202C HLIRVEGNLR' | 9    | >TP53-R202C HLIRVEGNLC' | 23    | 14    |
| >TP53-R202C HLIRVEGNLR' | 27   | >TP53-R202C HLIRVEGNLC' | 18    | 9     |
| >TP53-R202C HLIRVEGNLR' | 27   | >TP53-R202C HLIRVEGNLC' | 22    | 5     |
| >TP53-R202C HLIRVEGNLR' | 701  | >TP53-R202C HLIRVEGNLC' | 410   | 291   |
| >TP53-R202C HLIRVEGNLR' | 4    | >TP53-R202C HLIRVEGNLC' | 8     | 4     |
| >TP53-R202C HLIRVEGNLR  | 241  | >TP53-R202C HLIRVEGNLC  | 26682 | 26441 |
| >TP53-R202C HLIRVEGNLR  | 381  | >TP53-R202C HLIRVEGNLC  | 27444 | 27063 |
| >TP53-R202C HLIRVEGNLR  | 24   | >TP53-R202C HLIRVEGNLC  | 32321 | 32297 |
| >TP53-R202C HLIRVEGNLR' | 398  | >TP53-R202C HLIRVEGNLC' | 933   | 535   |
| >TP53-R202C HLIRVEGNLR  | 478  | >TP53-R202C HLIRVEGNLC  | 37337 | 36859 |
| >TP53-R202C RVEYLDDR    | 433  | >TP53-R202C GVEYLDDR    | 5705  | 5272  |
| >TP53-R202C RVEYLDDRNT  | 40   | >TP53-R202C GVEYLDDRNT  | 866   | 826   |
| >TP53-R202C RVEYLDDRNT  | 78   | >TP53-R202C GVEYLDDRNT  | 104   | 26    |
| >TP53-R202C VEGNLRVEYL  | 312  | >TP53-R202C VEGNLGVEYL  | 1075  | 763   |
| >TP53-R202C VEGNLRVEY   | 67   | >TP53-R202C VEGNLGVEY   | 85    | 18    |
| >TP53-R202C VEGNLRVEYL  | 472  | >TP53-R202C VEGNLGVEYL  | 1037  | 565   |
| >TP53-R202C VEGNLRVEY   | 338  | >TP53-R202C VEGNLGVEY   | 131   | 207   |
| >TP53-R202C VEGNLRVEYL  | 278  | >TP53-R202C VEGNLGVEYL  | 84    | 194   |
| >TP53-R202C RVEGNLRV    | 732  | >TP53-R202C RVEGNLGV    | 146   | 586   |
| >TP53-R202C RVEGNLRV    | 604  | >TP53-R202C RVEGNLGV    | 417   | 187   |
| >TP53-R202C RVEGNLRV    | 54   | >TP53-R202C RVEGNLGV    | 47    | 7     |
| >TP53-R202C RVEGNLRVEY  | 224  | >TP53-R202C RVEGNLGVEY  | 118   | 106   |
| >TP53-R202C RVEGNLRVEY  | 1157 | >TP53-R202C RVEGNLGVEY  | 273   | 884   |
| >TP53-R202C RVEGNLRVEY  | 301  | >TP53-R202C RVEGNLGVEY  | 141   | 160   |
| >TP53-R202C RVEGNLRVEY  | 400  | >TP53-R202C RVEGNLGVEY  | 336   | 64    |
| >TP53-R202C IRVEGNLRVE' | 53   | >TP53-R202C IRVEGNLGVE' | 37    | 16    |
| >TP53-R202C LIRVEGNLRV  | 555  | >TP53-R202C LIRVEGNLGV  | 151   | 404   |
| >TP53-R202C LIRVEGNLRV  | 35   | >TP53-R202C LIRVEGNLGV  | 36    | 1     |
| >TP53-R202C LIRVEGNLRV  | 296  | >TP53-R202C LIRVEGNLGV  | 357   | 61    |
| >TP53-R202C HLIRVEGNLR' | 156  | >TP53-R202C HLIRVEGNLG' | 141   | 15    |
| >TP53-R202C HLIRVEGNLR' | 111  | >TP53-R202C HLIRVEGNLG' | 72    | 39    |
| >TP53-R202C HLIRVEGNLR' | 41   | >TP53-R202C HLIRVEGNLG' | 23    | 18    |
| >TP53-R202C HLIRVEGNLR' | 322  | >TP53-R202C HLIRVEGNLG' | 88    | 234   |

|                         |      |                        |       |       |
|-------------------------|------|------------------------|-------|-------|
| >TP53-R202C HLIRVEGNLR' | 9    | >TP53-R202C HLIRVEGNLG | 7     | 2     |
| >TP53-R202C HLIRVEGNLR' | 27   | >TP53-R202C HLIRVEGNLG | 11    | 16    |
| >TP53-R202C HLIRVEGNLR' | 27   | >TP53-R202C HLIRVEGNLG | 17    | 10    |
| >TP53-R202C HLIRVEGNLR' | 701  | >TP53-R202C HLIRVEGNLG | 277   | 424   |
| >TP53-R202C HLIRVEGNLR' | 4    | >TP53-R202C HLIRVEGNLG | 4     | 0     |
| >TP53-R202C HLIRVEGNLR  | 241  | >TP53-R202C HLIRVEGNLG | 29911 | 29670 |
| >TP53-R202C HLIRVEGNLR  | 381  | >TP53-R202C HLIRVEGNLG | 28645 | 28264 |
| >TP53-R202C HLIRVEGNLR  | 24   | >TP53-R202C HLIRVEGNLG | 30576 | 30552 |
| >TP53-R202C HLIRVEGNLR' | 398  | >TP53-R202C HLIRVEGNLG | 292   | 106   |
| >TP53-R202C HLIRVEGNLR' | 1132 | >TP53-R202C HLIRVEGNLG | 366   | 766   |
| >TP53-R202C HLIRVEGNLR  | 478  | >TP53-R202C HLIRVEGNLG | 36866 | 36388 |
| >TP53-R202F RVEYLDDR    | 433  | >TP53-R202F HVEYLDDR   | 1944  | 1511  |
| >TP53-R202F RVEYLDDRNT  | 40   | >TP53-R202F HVEYLDDRNT | 365   | 325   |
| >TP53-R202F RVEYLDDR    | 652  | >TP53-R202F HVEYLDDR   | 46    | 606   |
| >TP53-R202F RVEYLDDRNT  | 1584 | >TP53-R202F HVEYLDDRNT | 134   | 1450  |
| >TP53-R202F RVEYLDDRNT  | 78   | >TP53-R202F HVEYLDDRNT | 375   | 297   |
| >TP53-R202F EGNLRVEY    | 1669 | >TP53-R202F EGNLHVEY   | 432   | 1237  |
| >TP53-R202F VEGNLRVEYL  | 312  | >TP53-R202F VEGNLHVEYL | 1081  | 769   |
| >TP53-R202F VEGNLRVEY   | 2675 | >TP53-R202F VEGNLHVEY  | 414   | 2261  |
| >TP53-R202F VEGNLRVEY   | 67   | >TP53-R202F VEGNLHVEY  | 43    | 24    |
| >TP53-R202F VEGNLRVEYL  | 472  | >TP53-R202F VEGNLHVEYL | 833   | 361   |
| >TP53-R202F VEGNLRVEY   | 338  | >TP53-R202F VEGNLHVEY  | 205   | 133   |
| >TP53-R202F VEGNLRVEYL  | 278  | >TP53-R202F VEGNLHVEYL | 123   | 155   |
| >TP53-R202F RVEGNLRVEY  | 844  | >TP53-R202F RVEGNLHVEY | 287   | 557   |
| >TP53-R202F RVEGNLRV    | 732  | >TP53-R202F RVEGNLHV   | 106   | 626   |
| >TP53-R202F RVEGNLRVEY  | 946  | >TP53-R202F RVEGNLHVEY | 293   | 653   |
| >TP53-R202F RVEGNLRVEY  | 974  | >TP53-R202F RVEGNLHVEY | 414   | 560   |
| >TP53-R202F RVEGNLRV    | 54   | >TP53-R202F RVEGNLHV   | 38    | 16    |
| >TP53-R202F RVEGNLRVEY  | 1524 | >TP53-R202F RVEGNLHVEY | 368   | 1156  |
| >TP53-R202F RVEGNLRVEY  | 224  | >TP53-R202F RVEGNLHVEY | 134   | 90    |
| >TP53-R202F RVEGNLRVEY  | 810  | >TP53-R202F RVEGNLHVEY | 452   | 358   |
| >TP53-R202F RVEGNLRVEY  | 1157 | >TP53-R202F RVEGNLHVEY | 161   | 996   |
| >TP53-R202F RVEGNLRVEY  | 301  | >TP53-R202F RVEGNLHVEY | 94    | 207   |
| >TP53-R202F RVEGNLRVEY  | 400  | >TP53-R202F RVEGNLHVEY | 444   | 44    |
| >TP53-R202F IRVEGNLRVE' | 53   | >TP53-R202F IRVEGNLHVE | 36    | 17    |
| >TP53-R202F LIRVEGNLRV  | 555  | >TP53-R202F LIRVEGNLHV | 364   | 191   |
| >TP53-R202F LIRVEGNLRV  | 35   | >TP53-R202F LIRVEGNLHV | 50    | 15    |
| >TP53-R202F LIRVEGNLRV  | 296  | >TP53-R202F LIRVEGNLHV | 111   | 185   |
| >TP53-R202F HLIRVEGNLR' | 156  | >TP53-R202F HLIRVEGNLH | 160   | 4     |
| >TP53-R202F HLIRVEGNLR' | 111  | >TP53-R202F HLIRVEGNLH | 88    | 23    |
| >TP53-R202F HLIRVEGNLR' | 41   | >TP53-R202F HLIRVEGNLH | 34    | 7     |
| >TP53-R202F HLIRVEGNLR' | 322  | >TP53-R202F HLIRVEGNLH | 90    | 232   |
| >TP53-R202F HLIRVEGNLR' | 9    | >TP53-R202F HLIRVEGNLH | 12    | 3     |

|                         |       |                         |       |       |
|-------------------------|-------|-------------------------|-------|-------|
| >TP53-R202F HLIRVEGNLR' | 27    | >TP53-R202F HLIRVEGNLH  | 13    | 14    |
| >TP53-R202F HLIRVEGNLR' | 27    | >TP53-R202F HLIRVEGNLH  | 17    | 10    |
| >TP53-R202F HLIRVEGNLR' | 4     | >TP53-R202F HLIRVEGNLH  | 5     | 1     |
| >TP53-R202F HLIRVEGNLR  | 241   | >TP53-R202F HLIRVEGNLH  | 15117 | 14876 |
| >TP53-R202F HLIRVEGNLR  | 381   | >TP53-R202F HLIRVEGNLH  | 14845 | 14464 |
| >TP53-R202F HLIRVEGNLR  | 24    | >TP53-R202F HLIRVEGNLH  | 8731  | 8707  |
| >TP53-R202F HLIRVEGNLR' | 398   | >TP53-R202F HLIRVEGNLH  | 309   | 89    |
| >TP53-R202F HLIRVEGNLR  | 478   | >TP53-R202F HLIRVEGNLH  | 32531 | 32053 |
| >TP53-R202L RVEYLDDR    | 433   | >TP53-R202L LVEYLDDR    | 4190  | 3757  |
| >TP53-R202L RVEYLDDRNT  | 40    | >TP53-R202L LVEYLDDRNT  | 1095  | 1055  |
| >TP53-R202L RVEYLDDR    | 652   | >TP53-R202L LVEYLDDR    | 172   | 480   |
| >TP53-R202L RVEYLDDRNT  | 1584  | >TP53-R202L LVEYLDDRNT  | 234   | 1350  |
| >TP53-R202L RVEYLDDRNT  | 78    | >TP53-R202L LVEYLDDRNT  | 136   | 58    |
| >TP53-R202L LRVEYLDDRNT | 20644 | >TP53-R202L LLVEYLDDRNT | 407   | 20237 |
| >TP53-R202L LRVEYLDDRNT | 28017 | >TP53-R202L LLVEYLDDRNT | 453   | 27564 |
| >TP53-R202L LRVEYLDDRNT | 35018 | >TP53-R202L LLVEYLDDRNT | 324   | 34694 |
| >TP53-R202L EGNLRVEYL   | 2216  | >TP53-R202L EGNLLVEYL   | 371   | 1845  |
| >TP53-R202L VEGNLRVEYL  | 312   | >TP53-R202L VEGNLLVEYL  | 236   | 76    |
| >TP53-R202L VEGNLRVEY   | 2675  | >TP53-R202L VEGNLLVEY   | 338   | 2337  |
| >TP53-R202L VEGNLRVEY   | 67    | >TP53-R202L VEGNLLVEY   | 62    | 5     |
| >TP53-R202L VEGNLRVEYL  | 472   | >TP53-R202L VEGNLLVEYL  | 551   | 79    |
| >TP53-R202L VEGNLRVEY   | 338   | >TP53-R202L VEGNLLVEY   | 155   | 183   |
| >TP53-R202L VEGNLRVEYL  | 278   | >TP53-R202L VEGNLLVEYL  | 104   | 174   |
| >TP53-R202L RVEGNLRV    | 732   | >TP53-R202L RVEGNLLV    | 137   | 595   |
| >TP53-R202L RVEGNLRVEY  | 946   | >TP53-R202L RVEGNLLVEY  | 376   | 570   |
| >TP53-R202L RVEGNLRV    | 54    | >TP53-R202L RVEGNLLV    | 57    | 3     |
| >TP53-R202L RVEGNLRVEY  | 224   | >TP53-R202L RVEGNLLVEY  | 104   | 120   |
| >TP53-R202L RVEGNLRVEY  | 1157  | >TP53-R202L RVEGNLLVEY  | 92    | 1065  |
| >TP53-R202L RVEGNLRVEY  | 301   | >TP53-R202L RVEGNLLVEY  | 78    | 223   |
| >TP53-R202L RVEGNLRVEY  | 400   | >TP53-R202L RVEGNLLVEY  | 251   | 149   |
| >TP53-R202L IRVEGNLR    | 3379  | >TP53-R202L IRVEGNLL    | 469   | 2910  |
| >TP53-R202L IRVEGNLRVE' | 53    | >TP53-R202L IRVEGNLLVE' | 64    | 11    |
| >TP53-R202L IRVEGNLR    | 20676 | >TP53-R202L IRVEGNLL    | 290   | 20386 |
| >TP53-R202L IRVEGNLRV   | 1782  | >TP53-R202L IRVEGNLLV   | 432   | 1350  |
| >TP53-R202L LIRVEGNLRV  | 555   | >TP53-R202L LIRVEGNLLV  | 240   | 315   |
| >TP53-R202L LIRVEGNLRV  | 35    | >TP53-R202L LIRVEGNLLV  | 46    | 11    |
| >TP53-R202L LIRVEGNLRV  | 296   | >TP53-R202L LIRVEGNLLV  | 127   | 169   |
| >TP53-R202L HLIRVEGNLR' | 156   | >TP53-R202L HLIRVEGNLL' | 95    | 61    |
| >TP53-R202L HLIRVEGNLR  | 11962 | >TP53-R202L HLIRVEGNLL  | 195   | 11767 |
| >TP53-R202L HLIRVEGNLR' | 111   | >TP53-R202L HLIRVEGNLL' | 53    | 58    |
| >TP53-R202L HLIRVEGNLR' | 41    | >TP53-R202L HLIRVEGNLL' | 26    | 15    |
| >TP53-R202L HLIRVEGNLR' | 322   | >TP53-R202L HLIRVEGNLL' | 136   | 186   |
| >TP53-R202L HLIRVEGNLR  | 24483 | >TP53-R202L HLIRVEGNLL  | 450   | 24033 |

|                         |       |                         |       |       |
|-------------------------|-------|-------------------------|-------|-------|
| >TP53-R202L HLIRVEGNLR' | 9     | >TP53-R202L HLIRVEGNLL\ | 12    | 3     |
| >TP53-R202L HLIRVEGNLR  | 25341 | >TP53-R202L HLIRVEGNLL  | 251   | 25090 |
| >TP53-R202L HLIRVEGNLR' | 27    | >TP53-R202L HLIRVEGNLL\ | 22    | 5     |
| >TP53-R202L HLIRVEGNLR' | 27    | >TP53-R202L HLIRVEGNLL\ | 24    | 3     |
| >TP53-R202L HLIRVEGNLR  | 21154 | >TP53-R202L HLIRVEGNLL  | 82    | 21072 |
| >TP53-R202L HLIRVEGNLR' | 4     | >TP53-R202L HLIRVEGNLL\ | 5     | 1     |
| >TP53-R202L HLIRVEGNLR  | 241   | >TP53-R202L HLIRVEGNLL  | 16799 | 16558 |
| >TP53-R202L HLIRVEGNLR  | 381   | >TP53-R202L HLIRVEGNLL  | 22780 | 22399 |
| >TP53-R202L HLIRVEGNLR  | 24    | >TP53-R202L HLIRVEGNLL  | 22574 | 22550 |
| >TP53-R202L HLIRVEGNLR' | 398   | >TP53-R202L HLIRVEGNLL\ | 316   | 82    |
| >TP53-R202L HLIRVEGNLR  | 478   | >TP53-R202L HLIRVEGNLL  | 34814 | 34336 |
| >TP53-R202F RVEYLDDR    | 433   | >TP53-R202F PVEYLDDR    | 12918 | 12485 |
| >TP53-R202F RVEYLDDRNT  | 40    | >TP53-R202F PVEYLDDRNT  | 2414  | 2374  |
| >TP53-R202F RVEYLDDRNT  | 78    | >TP53-R202F PVEYLDDRNT  | 5850  | 5772  |
| >TP53-R202F EGNLRVEYL   | 2216  | >TP53-R202F EGNLPVEYL   | 191   | 2025  |
| >TP53-R202F VEGNLRVEYL  | 312   | >TP53-R202F VEGNLPVEYL  | 1701  | 1389  |
| >TP53-R202F VEGNLRVEY   | 2675  | >TP53-R202F VEGNLPVEY   | 268   | 2407  |
| >TP53-R202F VEGNLRVEY   | 67    | >TP53-R202F VEGNLPVEY   | 268   | 201   |
| >TP53-R202F VEGNLRVEYL  | 472   | >TP53-R202F VEGNLPVEYL  | 595   | 123   |
| >TP53-R202F VEGNLRVEY   | 338   | >TP53-R202F VEGNLPVEY   | 170   | 168   |
| >TP53-R202F VEGNLRVEYL  | 278   | >TP53-R202F VEGNLPVEYL  | 69    | 209   |
| >TP53-R202F RVEGNLRV    | 732   | >TP53-R202F RVEGNLPV    | 61    | 671   |
| >TP53-R202F RVEGNLRVEY  | 946   | >TP53-R202F RVEGNLPVEY  | 382   | 564   |
| >TP53-R202F RVEGNLRV    | 604   | >TP53-R202F RVEGNLPV    | 346   | 258   |
| >TP53-R202F RVEGNLRVEY  | 974   | >TP53-R202F RVEGNLPVEY  | 398   | 576   |
| >TP53-R202F RVEGNLRV    | 54    | >TP53-R202F RVEGNLPV    | 47    | 7     |
| >TP53-R202F RVEGNLRVEY  | 224   | >TP53-R202F RVEGNLPVEY  | 193   | 31    |
| >TP53-R202F RVEGNLRVEY  | 810   | >TP53-R202F RVEGNLPVEY  | 494   | 316   |
| >TP53-R202F RVEGNLRVEY  | 1157  | >TP53-R202F RVEGNLPVEY  | 324   | 833   |
| >TP53-R202F RVEGNLRVEY  | 301   | >TP53-R202F RVEGNLPVEY  | 120   | 181   |
| >TP53-R202F RVEGNLRVEY  | 400   | >TP53-R202F RVEGNLPVEY  | 85    | 315   |
| >TP53-R202F IRVEGNLRV   | 1548  | >TP53-R202F IRVEGNLPV   | 239   | 1309  |
| >TP53-R202F IRVEGNLRVE' | 53    | >TP53-R202F IRVEGNLPVE' | 30    | 23    |
| >TP53-R202F IRVEGNLRV   | 4404  | >TP53-R202F IRVEGNLPV   | 310   | 4094  |
| >TP53-R202F LIRVEGNLRV  | 555   | >TP53-R202F LIRVEGNLPV  | 140   | 415   |
| >TP53-R202F LIRVEGNLRV  | 35    | >TP53-R202F LIRVEGNLPV  | 54    | 19    |
| >TP53-R202F LIRVEGNLRV  | 296   | >TP53-R202F LIRVEGNLPV  | 64    | 232   |
| >TP53-R202F HLIRVEGNLR' | 156   | >TP53-R202F HLIRVEGNLP' | 76    | 80    |
| >TP53-R202F HLIRVEGNLR' | 111   | >TP53-R202F HLIRVEGNLP' | 51    | 60    |
| >TP53-R202F HLIRVEGNLR' | 41    | >TP53-R202F HLIRVEGNLP' | 15    | 26    |
| >TP53-R202F HLIRVEGNLR' | 322   | >TP53-R202F HLIRVEGNLP' | 65    | 257   |
| >TP53-R202F HLIRVEGNLR' | 9     | >TP53-R202F HLIRVEGNLP' | 8     | 1     |
| >TP53-R202F HLIRVEGNLR' | 27    | >TP53-R202F HLIRVEGNLP' | 11    | 16    |



|                         |      |                         |       |       |
|-------------------------|------|-------------------------|-------|-------|
| >TP53-R202F HLIRVEGNLR' | 27   | >TP53-R202F HLIRVEGNLP' | 19    | 8     |
| >TP53-R202F HLIRVEGNLR' | 4    | >TP53-R202F HLIRVEGNLP' | 5     | 1     |
| >TP53-R202F HLIRVEGNLR  | 241  | >TP53-R202F HLIRVEGNLP  | 30514 | 30273 |
| >TP53-R202F HLIRVEGNLR  | 381  | >TP53-R202F HLIRVEGNLP  | 28874 | 28493 |
| >TP53-R202F HLIRVEGNLR  | 24   | >TP53-R202F HLIRVEGNLP  | 29029 | 29005 |
| >TP53-R202F HLIRVEGNLR' | 398  | >TP53-R202F HLIRVEGNLP' | 113   | 285   |
| >TP53-R202F HLIRVEGNLR' | 1132 | >TP53-R202F HLIRVEGNLP' | 239   | 893   |
| >TP53-R202F HLIRVEGNLR  | 478  | >TP53-R202F HLIRVEGNLP  | 36558 | 36080 |
| >TP53-R202S RVEYLDDR    | 433  | >TP53-R202S SVEYLDDR    | 3491  | 3058  |
| >TP53-R202S RVEYLDDRNT  | 40   | >TP53-R202S SVEYLDDRNT  | 302   | 262   |
| >TP53-R202S RVEYLDDR    | 652  | >TP53-R202S SVEYLDDR    | 91    | 561   |
| >TP53-R202S RVEYLDDRNT  | 78   | >TP53-R202S SVEYLDDRNT  | 107   | 29    |
| >TP53-R202S LRVEYLDDR   | 6375 | >TP53-R202S LSVEYLDDR   | 154   | 6221  |
| >TP53-R202S NLRVEYLDDR  | 3077 | >TP53-R202S NLSVEYLDDR  | 479   | 2598  |
| >TP53-R202S EGNLRVEY    | 1669 | >TP53-R202S EGNLSVEY    | 334   | 1335  |
| >TP53-R202S VEGNLRVEYL  | 312  | >TP53-R202S VEGNLSVEYL  | 320   | 8     |
| >TP53-R202S VEGNLRVEY   | 2675 | >TP53-R202S VEGNLSVEY   | 400   | 2275  |
| >TP53-R202S VEGNLRVEY   | 2344 | >TP53-R202S VEGNLSVEY   | 474   | 1870  |
| >TP53-R202S VEGNLRVEY   | 67   | >TP53-R202S VEGNLSVEY   | 117   | 50    |
| >TP53-R202S VEGNLRVEYL  | 472  | >TP53-R202S VEGNLSVEYL  | 483   | 11    |
| >TP53-R202S VEGNLRVEY   | 1466 | >TP53-R202S VEGNLSVEY   | 471   | 995   |
| >TP53-R202S VEGNLRVEY   | 338  | >TP53-R202S VEGNLSVEY   | 156   | 182   |
| >TP53-R202S VEGNLRVEYL  | 278  | >TP53-R202S VEGNLSVEYL  | 68    | 210   |
| >TP53-R202S RVEGNLRVEY  | 844  | >TP53-R202S RVEGNLSVEY  | 459   | 385   |
| >TP53-R202S RVEGNLRV    | 732  | >TP53-R202S RVEGNLSV    | 122   | 610   |
| >TP53-R202S RVEGNLRVEY  | 946  | >TP53-R202S RVEGNLSVEY  | 474   | 472   |
| >TP53-R202S RVEGNLRV    | 604  | >TP53-R202S RVEGNLSV    | 446   | 158   |
| >TP53-R202S RVEGNLRV    | 54   | >TP53-R202S RVEGNLSV    | 25    | 29    |
| >TP53-R202S RVEGNLRVEY  | 224  | >TP53-R202S RVEGNLSVEY  | 135   | 89    |
| >TP53-R202S RVEGNLRVEY  | 1157 | >TP53-R202S RVEGNLSVEY  | 278   | 879   |
| >TP53-R202S RVEGNLRVEY  | 301  | >TP53-R202S RVEGNLSVEY  | 54    | 247   |
| >TP53-R202S RVEGNLRVEY  | 400  | >TP53-R202S RVEGNLSVEY  | 107   | 293   |
| >TP53-R202S IRVEGNLRV   | 1548 | >TP53-R202S IRVEGNLSV   | 272   | 1276  |
| >TP53-R202S IRVEGNLRVE' | 53   | >TP53-R202S IRVEGNLSVE' | 27    | 26    |
| >TP53-R202S LIRVEGNLRV  | 555  | >TP53-R202S LIRVEGNLSV  | 107   | 448   |
| >TP53-R202S LIRVEGNLRV  | 35   | >TP53-R202S LIRVEGNLSV  | 32    | 3     |
| >TP53-R202S LIRVEGNLRV  | 296  | >TP53-R202S LIRVEGNLSV  | 107   | 189   |
| >TP53-R202S HLIRVEGNLR' | 156  | >TP53-R202S HLIRVEGNLS' | 105   | 51    |
| >TP53-R202S HLIRVEGNLR' | 111  | >TP53-R202S HLIRVEGNLS' | 58    | 53    |
| >TP53-R202S HLIRVEGNLR' | 41   | >TP53-R202S HLIRVEGNLS' | 19    | 22    |
| >TP53-R202S HLIRVEGNLR' | 322  | >TP53-R202S HLIRVEGNLS' | 106   | 216   |
| >TP53-R202S HLIRVEGNLR' | 9    | >TP53-R202S HLIRVEGNLS' | 8     | 1     |
| >TP53-R202S HLIRVEGNLR' | 27   | >TP53-R202S HLIRVEGNLS' | 14    | 13    |

|                         |       |                         |       |       |
|-------------------------|-------|-------------------------|-------|-------|
| >TP53-R202S HLIRVEGNLR' | 27    | >TP53-R202S HLIRVEGNLS\ | 24    | 3     |
| >TP53-R202S HLIRVEGNLR' | 701   | >TP53-R202S HLIRVEGNLS\ | 465   | 236   |
| >TP53-R202S HLIRVEGNLR' | 4     | >TP53-R202S HLIRVEGNLS\ | 4     | 0     |
| >TP53-R202S HLIRVEGNLR  | 241   | >TP53-R202S HLIRVEGNLS  | 26072 | 25831 |
| >TP53-R202S HLIRVEGNLR  | 381   | >TP53-R202S HLIRVEGNLS  | 26334 | 25953 |
| >TP53-R202S HLIRVEGNLR  | 24    | >TP53-R202S HLIRVEGNLS  | 26702 | 26678 |
| >TP53-R202S HLIRVEGNLR' | 398   | >TP53-R202S HLIRVEGNLS\ | 391   | 7     |
| >TP53-R202S HLIRVEGNLR  | 478   | >TP53-R202S HLIRVEGNLS  | 34633 | 34155 |
| >TP53-R209I·RNTFRHSVV   | 224   | >TP53-R209I·INTFRHSVV   | 255   | 31    |
| >TP53-R209I·DRNTFRHSV   | 20496 | >TP53-R209I·DINTFRHSV   | 88    | 20408 |
| >TP53-R209I·DRNTFRHSV\  | 24129 | >TP53-R209I·DINTFRHSVV  | 496   | 23633 |
| >TP53-R209I·DRNTFRHSV   | 2182  | >TP53-R209I·DINTFRHSV   | 19    | 2163  |
| >TP53-R209I·DRNTFRHSV\  | 14248 | >TP53-R209I·DINTFRHSVV  | 314   | 13934 |
| >TP53-R209I·DRNTFRHSV\  | 6394  | >TP53-R209I·DINTFRHSVV  | 73    | 6321  |
| >TP53-R209I·DRNTFRHSV   | 10265 | >TP53-R209I·DINTFRHSV   | 23    | 10242 |
| >TP53-R209I·DRNTFRHSV\  | 18004 | >TP53-R209I·DINTFRHSVV  | 403   | 17601 |
| >TP53-R209I·DRNTFRHSV\  | 16289 | >TP53-R209I·DINTFRHSVV  | 147   | 16142 |
| >TP53-R209I·LDDRNTFRHS' | 482   | >TP53-R209I·LDDINTFRHS' | 257   | 225   |
| >TP53-R209I·YLDDRNTF    | 2206  | >TP53-R209I·YLDDINTF    | 287   | 1919  |
| >TP53-R209I·YLDDRNTF    | 708   | >TP53-R209I·YLDDINTF    | 66    | 642   |
| >TP53-R209I·YLDDRNTFR   | 789   | >TP53-R209I·YLDDINTFR   | 52    | 737   |
| >TP53-R209I·YLDDRNTFR+  | 1276  | >TP53-R209I·YLDDINTFRH: | 265   | 1011  |
| >TP53-R209I·YLDDRNTF    | 187   | >TP53-R209I·YLDDINTF    | 72    | 115   |
| >TP53-R209I·YLDDRNTFR+  | 333   | >TP53-R209I·YLDDINTFRH: | 208   | 125   |
| >TP53-R209I·YLDDRNTF    | 149   | >TP53-R209I·YLDDINTF    | 17    | 132   |
| >TP53-R209I·YLDDRNTFR   | 1191  | >TP53-R209I·YLDDINTFR   | 421   | 770   |
| >TP53-R209I·YLDDRNTFR+  | 800   | >TP53-R209I·YLDDINTFRH  | 381   | 419   |
| >TP53-R209I·YLDDRNTFR+  | 155   | >TP53-R209I·YLDDINTFRH: | 77    | 78    |
| >TP53-R209I·YLDDRNTF    | 367   | >TP53-R209I·YLDDINTF    | 58    | 309   |
| >TP53-R209I·YLDDRNTF    | 2259  | >TP53-R209I·YLDDINTF    | 426   | 1833  |
| >TP53-R209I·YLDDRNTFR+  | 648   | >TP53-R209I·YLDDINTFRH: | 322   | 326   |
| >TP53-R209I·YLDDRNTF    | 4575  | >TP53-R209I·YLDDINTF    | 267   | 4308  |
| >TP53-R209I·YLDDRNTF    | 87    | >TP53-R209I·YLDDINTF    | 40    | 47    |
| >TP53-R209I·YLDDRNTFR   | 189   | >TP53-R209I·YLDDINTFR   | 131   | 58    |
| >TP53-R209I·YLDDRNTFR+  | 187   | >TP53-R209I·YLDDINTFRH  | 160   | 27    |
| >TP53-R209I·YLDDRNTFR+  | 171   | >TP53-R209I·YLDDINTFRH: | 135   | 36    |
| >TP53-R209I·YLDDRNTFR   | 282   | >TP53-R209I·YLDDINTFR   | 314   | 32    |
| >TP53-R209I·YLDDRNTFR   | 55    | >TP53-R209I·YLDDINTFR   | 71    | 16    |
| >TP53-R209I·YLDDRNTFR   | 68    | >TP53-R209I·YLDDINTFR   | 14    | 54    |
| >TP53-R209I·YLDDRNTF    | 255   | >TP53-R209I·YLDDINTF    | 334   | 79    |
| >TP53-R209I·YLDDRNTF    | 1013  | >TP53-R209I·YLDDINTF    | 266   | 747   |
| >TP53-R209I·YLDDRNTFR   | 336   | >TP53-R209I·YLDDINTFR   | 191   | 145   |
| >TP53-R209I·EYLDDRNTF   | 103   | >TP53-R209I·EYLDDINTF   | 63    | 40    |

|                        |       |                         |       |       |
|------------------------|-------|-------------------------|-------|-------|
| >TP53-R209I·EYLDDRNTF  | 667   | >TP53-R209I·EYLDDINTF   | 220   | 447   |
| >TP53-R209I·EYLDDRNTF  | 18    | >TP53-R209I·EYLDDINTF   | 10    | 8     |
| >TP53-R209I·EYLDDRNTF  | 381   | >TP53-R209I·EYLDDINTF   | 101   | 280   |
| >TP53-R209I·EYLDDRNTF  | 301   | >TP53-R209I·EYLDDINTF   | 20    | 281   |
| >TP53-R209I·EYLDDRNTFR | 328   | >TP53-R209I·EYLDDINTFR  | 249   | 79    |
| >TP53-R209I·EYLDDRNTFR | 88    | >TP53-R209I·EYLDDINTFR  | 57    | 31    |
| >TP53-R209I·EYLDDRNTFR | 508   | >TP53-R209I·EYLDDINTFR  | 115   | 393   |
| >TP53-R209I·EYLDDRNTFR | 19    | >TP53-R209I·EYLDDINTFR  | 17    | 2     |
| >TP53-R209I·VEYLDDRNTF | 124   | >TP53-R209I·VEYLDDINTF  | 117   | 7     |
| >TP53-R209I·VEYLDDRNTF | 555   | >TP53-R209I·VEYLDDINTF  | 249   | 306   |
| >TP53-R209I·VEYLDDRNTF | 524   | >TP53-R209I·VEYLDDINTFI | 244   | 280   |
| >TP53-R209I·RVEYLDDR   | 433   | >TP53-R209I·RVEYLDDI    | 22754 | 22321 |
| >TP53-R209I·RVEYLDDR   | 14695 | >TP53-R209I·RVEYLDDI    | 202   | 14493 |
| >TP53-R209I·RVEYLDDRNT | 40    | >TP53-R209I·RVEYLDDINTI | 31    | 9     |
| >TP53-R209I·RVEYLDDRNT | 78    | >TP53-R209I·RVEYLDDINTI | 81    | 3     |
| >TP53-R209I·LRVEYLDDR  | 34418 | >TP53-R209I·LRVEYLDDI   | 457   | 33961 |
| >TP53-R209I·LRVEYLDDR  | 8524  | >TP53-R209I·LRVEYLDDI   | 367   | 8157  |
| >TP53-R209K·RNTFRHSVV  | 224   | >TP53-R209K·KNTFRHSVV   | 388   | 164   |
| >TP53-R209K·LDDRNTFRHS | 482   | >TP53-R209K·LDDKNTFRHS  | 488   | 6     |
| >TP53-R209K·YLDDRNTF   | 187   | >TP53-R209K·YLDDKNTF    | 267   | 80    |
| >TP53-R209K·YLDDRNTFR- | 333   | >TP53-R209K·YLDDKNTFR-  | 526   | 193   |
| >TP53-R209K·YLDDRNTF   | 149   | >TP53-R209K·YLDDKNTF    | 73    | 76    |
| >TP53-R209K·YLDDRNTFR- | 155   | >TP53-R209K·YLDDKNTFR-  | 125   | 30    |
| >TP53-R209K·YLDDRNTF   | 367   | >TP53-R209K·YLDDKNTF    | 173   | 194   |
| >TP53-R209K·YLDDRNTF   | 87    | >TP53-R209K·YLDDKNTF    | 113   | 26    |
| >TP53-R209K·YLDDRNTFR  | 189   | >TP53-R209K·YLDDKNTFR   | 267   | 78    |
| >TP53-R209K·YLDDRNTFR- | 187   | >TP53-R209K·YLDDKNTFR-  | 273   | 86    |
| >TP53-R209K·YLDDRNTFR- | 171   | >TP53-R209K·YLDDKNTFR-  | 211   | 40    |
| >TP53-R209K·YLDDRNTFR  | 282   | >TP53-R209K·YLDDKNTFR   | 472   | 190   |
| >TP53-R209K·YLDDRNTFR  | 55    | >TP53-R209K·YLDDKNTFR   | 147   | 92    |
| >TP53-R209K·YLDDRNTFR  | 68    | >TP53-R209K·YLDDKNTFR   | 122   | 54    |
| >TP53-R209K·YLDDRNTF   | 255   | >TP53-R209K·YLDDKNTF    | 414   | 159   |
| >TP53-R209K·YLDDRNTFR  | 336   | >TP53-R209K·YLDDKNTFR   | 420   | 84    |
| >TP53-R209K·EYLDDRNTF  | 103   | >TP53-R209K·EYLDDKNTF   | 180   | 77    |
| >TP53-R209K·EYLDDRNTF  | 667   | >TP53-R209K·EYLDDKNTF   | 498   | 169   |
| >TP53-R209K·EYLDDRNTF  | 18    | >TP53-R209K·EYLDDKNTF   | 27    | 9     |
| >TP53-R209K·EYLDDRNTF  | 381   | >TP53-R209K·EYLDDKNTF   | 509   | 128   |
| >TP53-R209K·EYLDDRNTF  | 301   | >TP53-R209K·EYLDDKNTF   | 620   | 319   |
| >TP53-R209K·EYLDDRNTFR | 328   | >TP53-R209K·EYLDDKNTFR  | 461   | 133   |
| >TP53-R209K·EYLDDRNTFR | 88    | >TP53-R209K·EYLDDKNTFR  | 122   | 34    |
| >TP53-R209K·EYLDDRNTFR | 19    | >TP53-R209K·EYLDDKNTFR  | 19    | 0     |
| >TP53-R209K·VEYLDDRNTF | 622   | >TP53-R209K·VEYLDDKNTF  | 349   | 273   |
| >TP53-R209K·VEYLDDRNTF | 124   | >TP53-R209K·VEYLDDKNTF  | 180   | 56    |

|                        |       |                        |      |       |
|------------------------|-------|------------------------|------|-------|
| >TP53-R209K VEYLDDRNTF | 524   | >TP53-R209K VEYLDDKNTF | 402  | 122   |
| >TP53-R209K RVEYLDDR   | 433   | >TP53-R209K RVEYLDDK   | 6955 | 6522  |
| >TP53-R209K RVEYLDDRNT | 40    | >TP53-R209K RVEYLDDKNT | 53   | 13    |
| >TP53-R209K RVEYLDDRNT | 78    | >TP53-R209K RVEYLDDKNT | 84   | 6     |
| >TP53-R209S RNTFRHSVV  | 224   | >TP53-R209S SNTFRHSVV  | 287  | 63    |
| >TP53-R209S DRNTFRHSV  | 2182  | >TP53-R209S DSNTFRHSV  | 19   | 2163  |
| >TP53-R209S DRNTFRHSV\ | 14248 | >TP53-R209S DSNTFRHSV\ | 257  | 13991 |
| >TP53-R209S DRNTFRHSV\ | 6394  | >TP53-R209S DSNTFRHSV\ | 95   | 6299  |
| >TP53-R209S DRNTFRHSV  | 10265 | >TP53-R209S DSNTFRHSV  | 98   | 10167 |
| >TP53-R209S LDDRNTFRHS | 482   | >TP53-R209S LDDSNTFRHS | 322  | 160   |
| >TP53-R209S YLDDRNTF   | 708   | >TP53-R209S YLDDSNTF   | 230  | 478   |
| >TP53-R209S YLDDRNTFR  | 789   | >TP53-R209S YLDDSNTFR  | 472  | 317   |
| >TP53-R209S YLDDRNTF   | 187   | >TP53-R209S YLDDSNTF   | 85   | 102   |
| >TP53-R209S YLDDRNTFR\ | 333   | >TP53-R209S YLDDSNTFRH | 255  | 78    |
| >TP53-R209S YLDDRNTF   | 149   | >TP53-R209S YLDDSNTF   | 41   | 108   |
| >TP53-R209S YLDDRNTFR\ | 800   | >TP53-R209S YLDDSNTFRH | 496  | 304   |
| >TP53-R209S YLDDRNTFR\ | 155   | >TP53-R209S YLDDSNTFRH | 108  | 47    |
| >TP53-R209S YLDDRNTF   | 367   | >TP53-R209S YLDDSNTF   | 58   | 309   |
| >TP53-R209S YLDDRNTFR\ | 648   | >TP53-R209S YLDDSNTFRH | 418  | 230   |
| >TP53-R209S YLDDRNTF   | 87    | >TP53-R209S YLDDSNTF   | 64   | 23    |
| >TP53-R209S YLDDRNTFR  | 189   | >TP53-R209S YLDDSNTFR  | 131  | 58    |
| >TP53-R209S YLDDRNTFR\ | 187   | >TP53-R209S YLDDSNTFRH | 147  | 40    |
| >TP53-R209S YLDDRNTFR\ | 171   | >TP53-R209S YLDDSNTFRH | 130  | 41    |
| >TP53-R209S YLDDRNTFR  | 282   | >TP53-R209S YLDDSNTFR  | 814  | 532   |
| >TP53-R209S YLDDRNTFR  | 55    | >TP53-R209S YLDDSNTFR  | 216  | 161   |
| >TP53-R209S YLDDRNTFR  | 68    | >TP53-R209S YLDDSNTFR  | 31   | 37    |
| >TP53-R209S YLDDRNTF   | 847   | >TP53-R209S YLDDSNTF   | 216  | 631   |
| >TP53-R209S YLDDRNTF   | 255   | >TP53-R209S YLDDSNTF   | 80   | 175   |
| >TP53-R209S YLDDRNTF   | 1092  | >TP53-R209S YLDDSNTF   | 274  | 818   |
| >TP53-R209S YLDDRNTF   | 1811  | >TP53-R209S YLDDSNTF   | 380  | 1431  |
| >TP53-R209S YLDDRNTF   | 1013  | >TP53-R209S YLDDSNTF   | 174  | 839   |
| >TP53-R209S YLDDRNTF   | 1311  | >TP53-R209S YLDDSNTF   | 474  | 837   |
| >TP53-R209S YLDDRNTFR  | 336   | >TP53-R209S YLDDSNTFR  | 463  | 127   |
| >TP53-R209S EYLDDRNTF  | 103   | >TP53-R209S EYLDDSNTF  | 110  | 7     |
| >TP53-R209S EYLDDRNTF  | 667   | >TP53-R209S EYLDDSNTF  | 171  | 496   |
| >TP53-R209S EYLDDRNTF  | 18    | >TP53-R209S EYLDDSNTF  | 14   | 4     |
| >TP53-R209S EYLDDRNTF  | 381   | >TP53-R209S EYLDDSNTF  | 365  | 16    |
| >TP53-R209S EYLDDRNTF  | 301   | >TP53-R209S EYLDDSNTF  | 355  | 54    |
| >TP53-R209S EYLDDRNTFR | 328   | >TP53-R209S EYLDDSNTFR | 415  | 87    |
| >TP53-R209S EYLDDRNTFR | 88    | >TP53-R209S EYLDDSNTFR | 82   | 6     |
| >TP53-R209S EYLDDRNTFR | 508   | >TP53-R209S EYLDDSNTFR | 263  | 245   |
| >TP53-R209S EYLDDRNTFR | 19    | >TP53-R209S EYLDDSNTFR | 19   | 0     |
| >TP53-R209S VEYLDDRNTF | 124   | >TP53-R209S VEYLDDSNTF | 68   | 56    |

|                        |       |                        |       |       |
|------------------------|-------|------------------------|-------|-------|
| >TP53-R209S RVEYLDDR   | 433   | >TP53-R209S RVEYLDDS   | 22289 | 21856 |
| >TP53-R209S RVEYLDDRNT | 40    | >TP53-R209S RVEYLDDSNT | 21    | 19    |
| >TP53-R209S RVEYLDDRNT | 1271  | >TP53-R209S RVEYLDDSNT | 402   | 869   |
| >TP53-R209S RVEYLDDRNT | 1584  | >TP53-R209S RVEYLDDSNT | 482   | 1102  |
| >TP53-R209S RVEYLDDRNT | 78    | >TP53-R209S RVEYLDDSNT | 63    | 15    |
| >TP53-R209T RNTFRHSV   | 7354  | >TP53-R209T TNTFRHSV   | 262   | 7092  |
| >TP53-R209T RNTFRHSVV  | 224   | >TP53-R209T TNTFRHSVV  | 1025  | 801   |
| >TP53-R209T DRNTFRHSV  | 2182  | >TP53-R209T DTNTFRHSV  | 7     | 2175  |
| >TP53-R209T DRNTFRHSV\ | 14248 | >TP53-R209T DTNTFRHSV\ | 49    | 14199 |
| >TP53-R209T DRNTFRHSV\ | 6394  | >TP53-R209T DTNTFRHSV\ | 16    | 6378  |
| >TP53-R209T DRNTFRHSV  | 10265 | >TP53-R209T DTNTFRHSV  | 9     | 10256 |
| >TP53-R209T DRNTFRHSV\ | 18004 | >TP53-R209T DTNTFRHSV\ | 123   | 17881 |
| >TP53-R209T DRNTFRHSV\ | 16289 | >TP53-R209T DTNTFRHSV\ | 42    | 16247 |
| >TP53-R209T LDDRNTFRHS | 482   | >TP53-R209T LDDTNTFRHS | 382   | 100   |
| >TP53-R209T YLDDRNTF   | 708   | >TP53-R209T YLDDTNTF   | 264   | 444   |
| >TP53-R209T YLDDRNTF   | 187   | >TP53-R209T YLDDTNTF   | 111   | 76    |
| >TP53-R209T YLDDRNTFRH | 333   | >TP53-R209T YLDDTNTFRH | 268   | 65    |
| >TP53-R209T YLDDRNTF   | 149   | >TP53-R209T YLDDTNTF   | 27    | 122   |
| >TP53-R209T YLDDRNTFR  | 1191  | >TP53-R209T YLDDTNTFR  | 386   | 805   |
| >TP53-R209T YLDDRNTFRH | 800   | >TP53-R209T YLDDTNTFRH | 407   | 393   |
| >TP53-R209T YLDDRNTFRH | 155   | >TP53-R209T YLDDTNTFRH | 74    | 81    |
| >TP53-R209T YLDDRNTF   | 367   | >TP53-R209T YLDDTNTF   | 43    | 324   |
| >TP53-R209T YLDDRNTFRH | 1022  | >TP53-R209T YLDDTNTFRH | 416   | 606   |
| >TP53-R209T YLDDRNTFRH | 648   | >TP53-R209T YLDDTNTFRH | 318   | 330   |
| >TP53-R209T YLDDRNTF   | 4575  | >TP53-R209T YLDDTNTF   | 425   | 4150  |
| >TP53-R209T YLDDRNTF   | 87    | >TP53-R209T YLDDTNTF   | 55    | 32    |
| >TP53-R209T YLDDRNTFR  | 189   | >TP53-R209T YLDDTNTFR  | 140   | 49    |
| >TP53-R209T YLDDRNTFRH | 187   | >TP53-R209T YLDDTNTFRH | 171   | 16    |
| >TP53-R209T YLDDRNTFRH | 171   | >TP53-R209T YLDDTNTFRH | 139   | 32    |
| >TP53-R209T YLDDRNTFR  | 282   | >TP53-R209T YLDDTNTFR  | 736   | 454   |
| >TP53-R209T YLDDRNTFR  | 55    | >TP53-R209T YLDDTNTFR  | 228   | 173   |
| >TP53-R209T YLDDRNTFR  | 68    | >TP53-R209T YLDDTNTFR  | 41    | 27    |
| >TP53-R209T YLDDRNTF   | 847   | >TP53-R209T YLDDTNTF   | 369   | 478   |
| >TP53-R209T YLDDRNTF   | 255   | >TP53-R209T YLDDTNTF   | 125   | 130   |
| >TP53-R209T YLDDRNTF   | 1092  | >TP53-R209T YLDDTNTF   | 384   | 708   |
| >TP53-R209T YLDDRNTF   | 1013  | >TP53-R209T YLDDTNTF   | 223   | 790   |
| >TP53-R209T YLDDRNTF   | 1311  | >TP53-R209T YLDDTNTF   | 323   | 988   |
| >TP53-R209T YLDDRNTFR  | 336   | >TP53-R209T YLDDTNTFR  | 330   | 6     |
| >TP53-R209T EYLDDRNTF  | 103   | >TP53-R209T EYLDDTNTF  | 67    | 36    |
| >TP53-R209T EYLDDRNTF  | 667   | >TP53-R209T EYLDDTNTF  | 198   | 469   |
| >TP53-R209T EYLDDRNTF  | 18    | >TP53-R209T EYLDDTNTF  | 11    | 7     |
| >TP53-R209T EYLDDRNTF  | 381   | >TP53-R209T EYLDDTNTF  | 148   | 233   |
| >TP53-R209T EYLDDRNTF  | 301   | >TP53-R209T EYLDDTNTF  | 61    | 240   |

|                        |      |                        |       |       |
|------------------------|------|------------------------|-------|-------|
| >TP53-R209T EYLDDRNTF  | 1315 | >TP53-R209T EYLDDTNTF  | 254   | 1061  |
| >TP53-R209T EYLDDRNTFR | 328  | >TP53-R209T EYLDDTNTFR | 563   | 235   |
| >TP53-R209T EYLDDRNTFR | 88   | >TP53-R209T EYLDDTNTFR | 120   | 32    |
| >TP53-R209T EYLDDRNTFR | 508  | >TP53-R209T EYLDDTNTFR | 435   | 73    |
| >TP53-R209T EYLDDRNTFR | 19   | >TP53-R209T EYLDDTNTFR | 16    | 3     |
| >TP53-R209T VEYLDDRNTF | 622  | >TP53-R209T VEYLDDTNTF | 498   | 124   |
| >TP53-R209T VEYLDDRNTF | 124  | >TP53-R209T VEYLDDTNTF | 81    | 43    |
| >TP53-R209T VEYLDDRNTF | 555  | >TP53-R209T VEYLDDTNTF | 352   | 203   |
| >TP53-R209T VEYLDDRNTF | 524  | >TP53-R209T VEYLDDTNTF | 398   | 126   |
| >TP53-R209T RVEYLDDR   | 433  | >TP53-R209T RVEYLDDT   | 23418 | 22985 |
| >TP53-R209T RVEYLDDRNT | 40   | >TP53-R209T RVEYLDDTNT | 15    | 25    |
| >TP53-R209T RVEYLDDRNT | 1584 | >TP53-R209T RVEYLDDTNT | 424   | 1160  |
| >TP53-R209T RVEYLDDRNT | 78   | >TP53-R209T RVEYLDDTNT | 81    | 3     |
| >TP53-R213C RHSVVPY    | 23   | >TP53-R213C GHSVVPY    | 422   | 399   |
| >TP53-R213C RHSVVPY    | 413  | >TP53-R213C GHSVVPY    | 7485  | 7072  |
| >TP53-R213C FRHSVVPY   | 1164 | >TP53-R213C FGHSVVPY   | 73    | 1091  |
| >TP53-R213C FRHSVVPY   | 894  | >TP53-R213C FGHSVVPY   | 335   | 559   |
| >TP53-R213C FRHSVVPY   | 4    | >TP53-R213C FGHSVVPY   | 41    | 37    |
| >TP53-R213C FRHSVVPY   | 33   | >TP53-R213C FGHSVVPY   | 17282 | 17249 |
| >TP53-R213C FRHSVVPY   | 1057 | >TP53-R213C FGHSVVPY   | 42    | 1015  |
| >TP53-R213C FRHSVVPY   | 4634 | >TP53-R213C FGHSVVPY   | 313   | 4321  |
| >TP53-R213C FRHSVVPY   | 946  | >TP53-R213C FGHSVVPY   | 102   | 844   |
| >TP53-R213C TFRHSVVPY  | 185  | >TP53-R213C TFGHSVVPY  | 86    | 99    |
| >TP53-R213C TFRHSVVPY  | 139  | >TP53-R213C TFGHSVVPY  | 14768 | 14629 |
| >TP53-R213C TFRHSVVPY  | 162  | >TP53-R213C TFGHSVVPY  | 14180 | 14018 |
| >TP53-R213C TFRHSVVPY  | 687  | >TP53-R213C TFGHSVVPY  | 362   | 325   |
| >TP53-R213C TFRHSVVPY  | 140  | >TP53-R213C TFGHSVVPY  | 390   | 250   |
| >TP53-R213C TFRHSVVPY  | 225  | >TP53-R213C TFGHSVVPY  | 875   | 650   |
| >TP53-R213C TFRHSVVPY  | 271  | >TP53-R213C TFGHSVVPY  | 2735  | 2464  |
| >TP53-R213C NTFRHSVV   | 1371 | >TP53-R213C NTFGHSVV   | 345   | 1026  |
| >TP53-R213C NTFRHSVV   | 872  | >TP53-R213C NTFGHSVV   | 151   | 721   |
| >TP53-R213C NTFRHSVV   | 382  | >TP53-R213C NTFGHSVV   | 185   | 197   |
| >TP53-R213C NTFRHSVV   | 581  | >TP53-R213C NTFGHSVV   | 258   | 323   |
| >TP53-R213C NTFRHSVV   | 680  | >TP53-R213C NTFGHSVV   | 225   | 455   |
| >TP53-R213C NTFRHSVV   | 309  | >TP53-R213C NTFGHSVV   | 96    | 213   |
| >TP53-R213C NTFRHSVV   | 265  | >TP53-R213C NTFGHSVV   | 80    | 185   |
| >TP53-R213C NTFRHSVV   | 1246 | >TP53-R213C NTFGHSVV   | 392   | 854   |
| >TP53-R213C NTFRHSVV   | 1108 | >TP53-R213C NTFGHSVV   | 337   | 771   |
| >TP53-R213C NTFRHSVVV  | 128  | >TP53-R213C NTFGHSVVV  | 161   | 33    |
| >TP53-R213C NTFRHSVVV  | 845  | >TP53-R213C NTFGHSVVV  | 283   | 562   |
| >TP53-R213C NTFRHSVVV  | 97   | >TP53-R213C NTFGHSVVV  | 30    | 67    |
| >TP53-R213C NTFRHSVVV  | 123  | >TP53-R213C NTFGHSVVV  | 72    | 51    |
| >TP53-R213C NTFRHSVVV  | 678  | >TP53-R213C NTFGHSVVV  | 238   | 440   |

|                       |       |                       |       |       |
|-----------------------|-------|-----------------------|-------|-------|
| >TP53-R213CNTFRHSVVVF | 82    | >TP53-R213CNTFGHSVVVF | 30    | 52    |
| >TP53-R213CNTFRHSVVV  | 412   | >TP53-R213CNTFGHSVVV  | 166   | 246   |
| >TP53-R213CNTFRHSVVVF | 61    | >TP53-R213CNTFGHSVVVF | 30    | 31    |
| >TP53-R213CNTFRHSVVVF | 34    | >TP53-R213CNTFGHSVVVF | 22    | 12    |
| >TP53-R213CNTFRHSVV   | 11    | >TP53-R213CNTFGHSVV   | 8     | 3     |
| >TP53-R213CNTFRHSVVV  | 8     | >TP53-R213CNTFGHSVVV  | 6     | 2     |
| >TP53-R213CNTFRHSVV   | 50    | >TP53-R213CNTFGHSVV   | 26    | 24    |
| >TP53-R213CNTFRHSVVV  | 25    | >TP53-R213CNTFGHSVVV  | 17    | 8     |
| >TP53-R213CNTFRHSVVVF | 65    | >TP53-R213CNTFGHSVVVF | 63    | 2     |
| >TP53-R213CNTFRHSVVVF | 492   | >TP53-R213CNTFGHSVVVF | 222   | 270   |
| >TP53-R213CNTFRHSVVVF | 33    | >TP53-R213CNTFGHSVVVF | 146   | 113   |
| >TP53-R213CNTFRHSVVVF | 23    | >TP53-R213CNTFGHSVVVF | 11    | 12    |
| >TP53-R213CNTFRHSVVVF | 609   | >TP53-R213CNTFGHSVVVF | 250   | 359   |
| >TP53-R213CNTFRHSVVVF | 105   | >TP53-R213CNTFGHSVVVF | 58    | 47    |
| >TP53-R213CNTFRHSVVVF | 289   | >TP53-R213CNTFGHSVVVF | 270   | 19    |
| >TP53-R213CNTFRHSVVVF | 23    | >TP53-R213CNTFGHSVVVF | 55    | 32    |
| >TP53-R213CRNTRFRHSVV | 224   | >TP53-R213CRNTRFRHSVV | 92    | 132   |
| >TP53-R213CLDDRNTFRHS | 482   | >TP53-R213CLDDRNTFRHS | 331   | 151   |
| >TP53-R213CYLDDRNTFR  | 789   | >TP53-R213CYLDDRNTFR  | 144   | 645   |
| >TP53-R213CYLDDRNTFR  | 333   | >TP53-R213CYLDDRNTFR  | 193   | 140   |
| >TP53-R213CYLDDRNTFR  | 1191  | >TP53-R213CYLDDRNTFR  | 160   | 1031  |
| >TP53-R213CYLDDRNTFR  | 155   | >TP53-R213CYLDDRNTFR  | 146   | 9     |
| >TP53-R213CYLDDRNTFR  | 3126  | >TP53-R213CYLDDRNTFR  | 473   | 2653  |
| >TP53-R213CYLDDRNTFR  | 648   | >TP53-R213CYLDDRNTFR  | 452   | 196   |
| >TP53-R213CYLDDRNTFR  | 189   | >TP53-R213CYLDDRNTFR  | 153   | 36    |
| >TP53-R213CYLDDRNTFR  | 187   | >TP53-R213CYLDDRNTFR  | 201   | 14    |
| >TP53-R213CYLDDRNTFR  | 171   | >TP53-R213CYLDDRNTFR  | 125   | 46    |
| >TP53-R213CYLDDRNTFR  | 282   | >TP53-R213CYLDDRNTFR  | 23061 | 22779 |
| >TP53-R213CYLDDRNTFR  | 55    | >TP53-R213CYLDDRNTFR  | 19753 | 19698 |
| >TP53-R213CYLDDRNTFR  | 68    | >TP53-R213CYLDDRNTFR  | 32173 | 32105 |
| >TP53-R213CYLDDRNTFR  | 336   | >TP53-R213CYLDDRNTFR  | 34748 | 34412 |
| >TP53-R213CEYLDDRNTFR | 328   | >TP53-R213CEYLDDRNTFR | 34317 | 33989 |
| >TP53-R213CEYLDDRNTFR | 88    | >TP53-R213CEYLDDRNTFR | 13084 | 12996 |
| >TP53-R213CEYLDDRNTFR | 19    | >TP53-R213CEYLDDRNTFR | 19205 | 19186 |
| >TP53-R213L RHSVVPY   | 23    | >TP53-R213L RHSVVPY   | 60    | 37    |
| >TP53-R213L RHSVVPY   | 413   | >TP53-R213L RHSVVPY   | 242   | 171   |
| >TP53-R213L FRHSVVPY  | 24345 | >TP53-R213L FLHSVVPY  | 281   | 24064 |
| >TP53-R213L FRHSVVPY  | 18376 | >TP53-R213L FLHSVVPY  | 202   | 18174 |
| >TP53-R213L FRHSVVPYE | 15868 | >TP53-R213L FLHSVVPYE | 57    | 15811 |
| >TP53-R213L FRHSVVPY  | 20554 | >TP53-R213L FLHSVVPY  | 237   | 20317 |
| >TP53-R213L FRHSVVPY  | 25968 | >TP53-R213L FLHSVVPY  | 398   | 25570 |
| >TP53-R213L FRHSVVPY  | 19914 | >TP53-R213L FLHSVVPY  | 29    | 19885 |
| >TP53-R213L FRHSVVPYE | 20487 | >TP53-R213L FLHSVVPYE | 39    | 20448 |

|                        |       |                        |       |       |
|------------------------|-------|------------------------|-------|-------|
| >TP53-R213L FRHSVVPYE  | 21421 | >TP53-R213L FLHSVVPYE  | 55    | 21366 |
| >TP53-R213L FRHSVVPY   | 32004 | >TP53-R213L FLHSVVPY   | 176   | 31828 |
| >TP53-R213L FRHSVVPYE  | 32474 | >TP53-R213L FLHSVVPYE  | 313   | 32161 |
| >TP53-R213L FRHSVVPY   | 4728  | >TP53-R213L FLHSVVPY   | 497   | 4231  |
| >TP53-R213L FRHSVVPY   | 1048  | >TP53-R213L FLHSVVPY   | 37    | 1011  |
| >TP53-R213L FRHSVVPY   | 6838  | >TP53-R213L FLHSVVPY   | 335   | 6503  |
| >TP53-R213L FRHSVVPY   | 1164  | >TP53-R213L FLHSVVPY   | 30    | 1134  |
| >TP53-R213L FRHSVVPY   | 894   | >TP53-R213L FLHSVVPY   | 28    | 866   |
| >TP53-R213L FRHSVVPY   | 4     | >TP53-R213L FLHSVVPY   | 6     | 2     |
| >TP53-R213L FRHSVVPY   | 33    | >TP53-R213L FLHSVVPY   | 12519 | 12486 |
| >TP53-R213L FRHSVVPY   | 1057  | >TP53-R213L FLHSVVPY   | 93    | 964   |
| >TP53-R213L FRHSVVPY   | 946   | >TP53-R213L FLHSVVPY   | 77    | 869   |
| >TP53-R213L VEYLDDRNTF | 4617  | >TP53-R213L VEYLDDRNTF | 34    | 4583  |
| >TP53-R213L VEYLDDRNTF | 16973 | >TP53-R213L VEYLDDRNTF | 95    | 16878 |
| >TP53-R213L VEYLDDRNTF | 8103  | >TP53-R213L VEYLDDRNTF | 201   | 7902  |
| >TP53-R213L VEYLDDRNTF | 6271  | >TP53-R213L VEYLDDRNTF | 96    | 6175  |
| >TP53-R213L TFRHSVVPY  | 185   | >TP53-R213L TFLHSVVPY  | 60    | 125   |
| >TP53-R213L TFRHSVVV   | 139   | >TP53-R213L TFLHSVVV   | 8022  | 7883  |
| >TP53-R213L TFRHSVVPY  | 162   | >TP53-R213L TFLHSVVPY  | 6956  | 6794  |
| >TP53-R213L TFRHSVVPY  | 687   | >TP53-R213L TFLHSVVPY  | 251   | 436   |
| >TP53-R213L TFRHSVVPY  | 140   | >TP53-R213L TFLHSVVPY  | 688   | 548   |
| >TP53-R213L TFRHSVVPY  | 225   | >TP53-R213L TFLHSVVPY  | 300   | 75    |
| >TP53-R213L TFRHSVVPY  | 271   | >TP53-R213L TFLHSVVPY  | 365   | 94    |
| >TP53-R213L NTFRHSVV   | 382   | >TP53-R213L NTFLHSVV   | 386   | 4     |
| >TP53-R213L NTFRHSVVV  | 680   | >TP53-R213L NTFLHSVVV  | 460   | 220   |
| >TP53-R213L NTFRHSVV   | 309   | >TP53-R213L NTFLHSVV   | 672   | 363   |
| >TP53-R213L NTFRHSVVV  | 265   | >TP53-R213L NTFLHSVVV  | 872   | 607   |
| >TP53-R213L NTFRHSVVVF | 128   | >TP53-R213L NTFLHSVVVP | 167   | 39    |
| >TP53-R213L NTFRHSVVVF | 97    | >TP53-R213L NTFLHSVVVP | 337   | 240   |
| >TP53-R213L NTFRHSVVVF | 123   | >TP53-R213L NTFLHSVVVP | 317   | 194   |
| >TP53-R213L NTFRHSVVVF | 82    | >TP53-R213L NTFLHSVVVP | 53    | 29    |
| >TP53-R213L NTFRHSVVV  | 412   | >TP53-R213L NTFLHSVVV  | 624   | 212   |
| >TP53-R213L NTFRHSVVVF | 61    | >TP53-R213L NTFLHSVVVP | 94    | 33    |
| >TP53-R213L NTFRHSVVVF | 34    | >TP53-R213L NTFLHSVVVP | 37    | 3     |
| >TP53-R213L NTFRHSVV   | 11    | >TP53-R213L NTFLHSVV   | 11    | 0     |
| >TP53-R213L NTFRHSVVV  | 8     | >TP53-R213L NTFLHSVVV  | 9     | 1     |
| >TP53-R213L NTFRHSVV   | 50    | >TP53-R213L NTFLHSVV   | 43    | 7     |
| >TP53-R213L NTFRHSVVV  | 25    | >TP53-R213L NTFLHSVVV  | 32    | 7     |
| >TP53-R213L NTFRHSVVVF | 65    | >TP53-R213L NTFLHSVVVP | 90    | 25    |
| >TP53-R213L NTFRHSVVVF | 492   | >TP53-R213L NTFLHSVVVP | 740   | 248   |
| >TP53-R213L NTFRHSVVVF | 33    | >TP53-R213L NTFLHSVVVP | 111   | 78    |
| >TP53-R213L NTFRHSVVVF | 23    | >TP53-R213L NTFLHSVVVP | 12    | 11    |
| >TP53-R213L NTFRHSVVVF | 609   | >TP53-R213L NTFLHSVVVP | 279   | 330   |



|                        |       |                        |       |       |
|------------------------|-------|------------------------|-------|-------|
| >TP53-R213L NTFRHSVVVF | 105   | >TP53-R213L NTFLHSVVVP | 85    | 20    |
| >TP53-R213L NTFRHSVVVF | 289   | >TP53-R213L NTFLHSVVVP | 398   | 109   |
| >TP53-R213L NTFRHSVVVF | 23    | >TP53-R213L NTFLHSVVVP | 64    | 41    |
| >TP53-R213L RNTFRHSVV  | 224   | >TP53-R213L RNTFLHSVV  | 65    | 159   |
| >TP53-R213L LDDRNTFRHS | 482   | >TP53-R213L LDDRNTFLHS | 223   | 259   |
| >TP53-R213L YLDDRNTFR  | 5615  | >TP53-R213L YLDDRNTFL  | 7     | 5608  |
| >TP53-R213L YLDDRNTFRH | 1704  | >TP53-R213L YLDDRNTFLH | 239   | 1465  |
| >TP53-R213L YLDDRNTFR  | 789   | >TP53-R213L YLDDRNTFL  | 2     | 787   |
| >TP53-R213L YLDDRNTFR  | 9299  | >TP53-R213L YLDDRNTFL  | 13    | 9286  |
| >TP53-R213L YLDDRNTFR  | 3926  | >TP53-R213L YLDDRNTFL  | 6     | 3920  |
| >TP53-R213L YLDDRNTFRH | 333   | >TP53-R213L YLDDRNTFLH | 95    | 238   |
| >TP53-R213L YLDDRNTFR  | 1191  | >TP53-R213L YLDDRNTFL  | 3     | 1188  |
| >TP53-R213L YLDDRNTFRH | 155   | >TP53-R213L YLDDRNTFLH | 94    | 61    |
| >TP53-R213L YLDDRNTFR  | 7766  | >TP53-R213L YLDDRNTFL  | 4     | 7762  |
| >TP53-R213L YLDDRNTFRH | 1022  | >TP53-R213L YLDDRNTFLH | 368   | 654   |
| >TP53-R213L YLDDRNTFR  | 3126  | >TP53-R213L YLDDRNTFL  | 5     | 3121  |
| >TP53-R213L YLDDRNTFRH | 648   | >TP53-R213L YLDDRNTFLH | 181   | 467   |
| >TP53-R213L YLDDRNTFR  | 13204 | >TP53-R213L YLDDRNTFL  | 5     | 13199 |
| >TP53-R213L YLDDRNTFR  | 189   | >TP53-R213L YLDDRNTFL  | 2     | 187   |
| >TP53-R213L YLDDRNTFRH | 187   | >TP53-R213L YLDDRNTFLH | 243   | 56    |
| >TP53-R213L YLDDRNTFRH | 171   | >TP53-R213L YLDDRNTFLH | 35    | 136   |
| >TP53-R213L YLDDRNTFR  | 282   | >TP53-R213L YLDDRNTFL  | 19955 | 19673 |
| >TP53-R213L YLDDRNTFR  | 55    | >TP53-R213L YLDDRNTFL  | 10682 | 10627 |
| >TP53-R213L YLDDRNTFR  | 68    | >TP53-R213L YLDDRNTFL  | 24686 | 24618 |
| >TP53-R213L YLDDRNTFR  | 336   | >TP53-R213L YLDDRNTFL  | 30816 | 30480 |
| >TP53-R213L EYLDDRNTFR | 32169 | >TP53-R213L EYLDDRNTFL | 460   | 31709 |
| >TP53-R213L EYLDDRNTFR | 20505 | >TP53-R213L EYLDDRNTFL | 221   | 20284 |
| >TP53-R213L EYLDDRNTFR | 7009  | >TP53-R213L EYLDDRNTFL | 144   | 6865  |
| >TP53-R213L EYLDDRNTFR | 328   | >TP53-R213L EYLDDRNTFL | 24281 | 23953 |
| >TP53-R213L EYLDDRNTFR | 88    | >TP53-R213L EYLDDRNTFL | 6978  | 6890  |
| >TP53-R213L EYLDDRNTFR | 19    | >TP53-R213L EYLDDRNTFL | 10424 | 10405 |
| >TP53-R213L EYLDDRNTFR | 15201 | >TP53-R213L EYLDDRNTFL | 373   | 14828 |
| >TP53-R213F RHSVVPY    | 23    | >TP53-R213F PHSVVPY    | 831   | 808   |
| >TP53-R213F RHSVVPY    | 413   | >TP53-R213F PHSVVPY    | 12399 | 11986 |
| >TP53-R213F FRHSVVPY   | 894   | >TP53-R213F FPHSVVPY   | 271   | 623   |
| >TP53-R213F FRHSVVPY   | 4     | >TP53-R213F FPHSVVPY   | 27    | 23    |
| >TP53-R213F FRHSVVPY   | 3893  | >TP53-R213F FPHSVVPY   | 288   | 3605  |
| >TP53-R213F FRHSVVPY   | 33    | >TP53-R213F FPHSVVPY   | 17887 | 17854 |
| >TP53-R213F FRHSVVPY   | 1057  | >TP53-R213F FPHSVVPY   | 6     | 1051  |
| >TP53-R213F FRHSVVPY   | 12930 | >TP53-R213F FPHSVVPY   | 25    | 12905 |
| >TP53-R213F FRHSVVP    | 22182 | >TP53-R213F FPHSVVP    | 64    | 22118 |
| >TP53-R213F FRHSVVPY   | 23102 | >TP53-R213F FPHSVVPY   | 60    | 23042 |
| >TP53-R213F FRHSVVPYE  | 18603 | >TP53-R213F FPHSVVPYE  | 30    | 18573 |

|                        |       |                        |       |       |
|------------------------|-------|------------------------|-------|-------|
| >TP53-R213F FRHSVVVPYE | 19670 | >TP53-R213F FPHSVVVPYE | 75    | 19595 |
| >TP53-R213F FRHSVVVPY  | 946   | >TP53-R213F FPHSVVVPY  | 6     | 940   |
| >TP53-R213F FRHSVVVPY  | 7027  | >TP53-R213F FPHSVVVPY  | 8     | 7019  |
| >TP53-R213F TFRHSVVVPY | 185   | >TP53-R213F TFPHSVVVPY | 72    | 113   |
| >TP53-R213F TFRHSVVV   | 139   | >TP53-R213F TFPHSVVV   | 15797 | 15658 |
| >TP53-R213F TFRHSVVVPY | 162   | >TP53-R213F TFPHSVVVPY | 15259 | 15097 |
| >TP53-R213F TFRHSVVVPY | 140   | >TP53-R213F TFPHSVVVPY | 1460  | 1320  |
| >TP53-R213F TFRHSVVVPY | 225   | >TP53-R213F TFPHSVVVPY | 823   | 598   |
| >TP53-R213F TFRHSVVVPY | 271   | >TP53-R213F TFPHSVVVPY | 2748  | 2477  |
| >TP53-R213F NTFRHSVV   | 1371  | >TP53-R213F NTFPHSVV   | 410   | 961   |
| >TP53-R213F NTFRHSVVV  | 872   | >TP53-R213F NTFPHSVVV  | 158   | 714   |
| >TP53-R213F NTFRHSVV   | 382   | >TP53-R213F NTFPHSVV   | 170   | 212   |
| >TP53-R213F NTFRHSVVV  | 581   | >TP53-R213F NTFPHSVVV  | 163   | 418   |
| >TP53-R213F NTFRHSVV   | 1308  | >TP53-R213F NTFPHSVV   | 389   | 919   |
| >TP53-R213F NTFRHSVVV  | 680   | >TP53-R213F NTFPHSVVV  | 131   | 549   |
| >TP53-R213F NTFRHSVV   | 309   | >TP53-R213F NTFPHSVV   | 122   | 187   |
| >TP53-R213F NTFRHSVVV  | 265   | >TP53-R213F NTFPHSVVV  | 125   | 140   |
| >TP53-R213F NTFRHSVV   | 1246  | >TP53-R213F NTFPHSVV   | 494   | 752   |
| >TP53-R213F NTFRHSVVV  | 1108  | >TP53-R213F NTFPHSVVV  | 374   | 734   |
| >TP53-R213F NTFRHSVVVF | 128   | >TP53-R213F NTFPHSVVVF | 97    | 31    |
| >TP53-R213F NTFRHSVVVF | 845   | >TP53-R213F NTFPHSVVVF | 357   | 488   |
| >TP53-R213F NTFRHSVVVF | 97    | >TP53-R213F NTFPHSVVVF | 79    | 18    |
| >TP53-R213F NTFRHSVVVF | 123   | >TP53-R213F NTFPHSVVVF | 270   | 147   |
| >TP53-R213F NTFRHSVVVF | 82    | >TP53-R213F NTFPHSVVVF | 27    | 55    |
| >TP53-R213F NTFRHSVVV  | 412   | >TP53-R213F NTFPHSVVV  | 738   | 326   |
| >TP53-R213F NTFRHSVVVF | 61    | >TP53-R213F NTFPHSVVVF | 98    | 37    |
| >TP53-R213F NTFRHSVVVF | 34    | >TP53-R213F NTFPHSVVVF | 21    | 13    |
| >TP53-R213F NTFRHSVV   | 11    | >TP53-R213F NTFPHSVV   | 7     | 4     |
| >TP53-R213F NTFRHSVVV  | 8     | >TP53-R213F NTFPHSVVV  | 6     | 2     |
| >TP53-R213F NTFRHSVVVF | 1311  | >TP53-R213F NTFPHSVVVF | 425   | 886   |
| >TP53-R213F NTFRHSVV   | 50    | >TP53-R213F NTFPHSVV   | 17    | 33    |
| >TP53-R213F NTFRHSVVV  | 25    | >TP53-R213F NTFPHSVVV  | 13    | 12    |
| >TP53-R213F NTFRHSVVVF | 65    | >TP53-R213F NTFPHSVVVF | 50    | 15    |
| >TP53-R213F NTFRHSVVVF | 492   | >TP53-R213F NTFPHSVVVF | 320   | 172   |
| >TP53-R213F NTFRHSVVVF | 33    | >TP53-R213F NTFPHSVVVF | 33    | 0     |
| >TP53-R213F NTFRHSVVVF | 23    | >TP53-R213F NTFPHSVVVF | 7     | 16    |
| >TP53-R213F NTFRHSVVVF | 609   | >TP53-R213F NTFPHSVVVF | 380   | 229   |
| >TP53-R213F NTFRHSVVVF | 105   | >TP53-R213F NTFPHSVVVF | 50    | 55    |
| >TP53-R213F NTFRHSVVVF | 289   | >TP53-R213F NTFPHSVVVF | 209   | 80    |
| >TP53-R213F NTFRHSVVVF | 23    | >TP53-R213F NTFPHSVVVF | 27    | 4     |
| >TP53-R213F NTFRHSVV   | 1488  | >TP53-R213F NTFPHSVV   | 413   | 1075  |
| >TP53-R213F NTFRHSVVV  | 1558  | >TP53-R213F NTFPHSVVV  | 355   | 1203  |
| >TP53-R213F RNTFRHSVV  | 224   | >TP53-R213F RNTFPHSVV  | 63    | 161   |

|                       |       |                       |       |       |
|-----------------------|-------|-----------------------|-------|-------|
| >TP53-R213FLDDRNTFRHS | 482   | >TP53-R213FLDDRNTFPHS | 262   | 220   |
| >TP53-R213FYLDDRNTFRH | 1704  | >TP53-R213FYLDDRNTFPH | 169   | 1535  |
| >TP53-R213FYLDDRNTFR  | 789   | >TP53-R213FYLDDRNTFP  | 226   | 563   |
| >TP53-R213FYLDDRNTFRH | 333   | >TP53-R213FYLDDRNTFPH | 59    | 274   |
| >TP53-R213FYLDDRNTFR  | 1191  | >TP53-R213FYLDDRNTFP  | 492   | 699   |
| >TP53-R213FYLDDRNTFRH | 155   | >TP53-R213FYLDDRNTFPH | 57    | 98    |
| >TP53-R213FYLDDRNTFRH | 1022  | >TP53-R213FYLDDRNTFPH | 228   | 794   |
| >TP53-R213FYLDDRNTFRH | 648   | >TP53-R213FYLDDRNTFPH | 75    | 573   |
| >TP53-R213FYLDDRNTFR  | 189   | >TP53-R213FYLDDRNTFP  | 274   | 85    |
| >TP53-R213FYLDDRNTFRH | 187   | >TP53-R213FYLDDRNTFPH | 294   | 107   |
| >TP53-R213FYLDDRNTFRH | 171   | >TP53-R213FYLDDRNTFPH | 19    | 152   |
| >TP53-R213FYLDDRNTFR  | 282   | >TP53-R213FYLDDRNTFP  | 23471 | 23189 |
| >TP53-R213FYLDDRNTFR  | 55    | >TP53-R213FYLDDRNTFP  | 22112 | 22057 |
| >TP53-R213FYLDDRNTFR  | 68    | >TP53-R213FYLDDRNTFP  | 30993 | 30925 |
| >TP53-R213FYLDDRNTFR  | 336   | >TP53-R213FYLDDRNTFP  | 34286 | 33950 |
| >TP53-R213FEYLDDRNTFR | 328   | >TP53-R213FEYLDDRNTFP | 35381 | 35053 |
| >TP53-R213FEYLDDRNTFR | 88    | >TP53-R213FEYLDDRNTFP | 14596 | 14508 |
| >TP53-R213FEYLDDRNTFR | 19    | >TP53-R213FEYLDDRNTFP | 17993 | 17974 |
| >TP53-R213CRHSVVVPY   | 23    | >TP53-R213CQHSVVVPY   | 125   | 102   |
| >TP53-R213CRHSVVVPY   | 413   | >TP53-R213CQHSVVVPY   | 9025  | 8612  |
| >TP53-R213CFRHSVVVPY  | 15467 | >TP53-R213CFQHSVVVPY  | 286   | 15181 |
| >TP53-R213CFRHSVVVPY  | 1048  | >TP53-R213CFQHSVVVPY  | 276   | 772   |
| >TP53-R213CFRHSVVVPY  | 1164  | >TP53-R213CFQHSVVVPY  | 27    | 1137  |
| >TP53-R213CFRHSVVVPY  | 894   | >TP53-R213CFQHSVVVPY  | 42    | 852   |
| >TP53-R213CFRHSVVVP   | 690   | >TP53-R213CFQHSVVVP   | 137   | 553   |
| >TP53-R213CFRHSVVVPY  | 4     | >TP53-R213CFQHSVVVPY  | 2     | 2     |
| >TP53-R213CFRHSVVVPYE | 1625  | >TP53-R213CFQHSVVVPYE | 349   | 1276  |
| >TP53-R213CFRHSVVVPY  | 3893  | >TP53-R213CFQHSVVVPY  | 163   | 3730  |
| >TP53-R213CFRHSVVVPY  | 33    | >TP53-R213CFQHSVVVPY  | 936   | 903   |
| >TP53-R213CFRHSVVVPY  | 1057  | >TP53-R213CFQHSVVVPY  | 105   | 952   |
| >TP53-R213CTFRHSVVVPY | 185   | >TP53-R213CTFQHSVVVPY | 88    | 97    |
| >TP53-R213CTFRHSVVV   | 139   | >TP53-R213CTFQHSVVV   | 11814 | 11675 |
| >TP53-R213CTFRHSVVVPY | 162   | >TP53-R213CTFQHSVVVPY | 11389 | 11227 |
| >TP53-R213CTFRHSVVVPY | 687   | >TP53-R213CTFQHSVVVPY | 173   | 514   |
| >TP53-R213CTFRHSVVVPY | 140   | >TP53-R213CTFQHSVVVPY | 227   | 87    |
| >TP53-R213CTFRHSVVVPY | 225   | >TP53-R213CTFQHSVVVPY | 267   | 42    |
| >TP53-R213CTFRHSVVVPY | 271   | >TP53-R213CTFQHSVVVPY | 1243  | 972   |
| >TP53-R213CTFRHSVVVPY | 3154  | >TP53-R213CTFQHSVVVPY | 450   | 2704  |
| >TP53-R213CNTFRHSVV   | 382   | >TP53-R213CNTFQHSVV   | 370   | 12    |
| >TP53-R213CNTFRHSVV   | 309   | >TP53-R213CNTFQHSVV   | 202   | 107   |
| >TP53-R213CNTFRHSVVV  | 265   | >TP53-R213CNTFQHSVVV  | 167   | 98    |
| >TP53-R213CNTFRHSVVVF | 128   | >TP53-R213CNTFQHSVVVI | 274   | 146   |
| >TP53-R213CNTFRHSVVVF | 845   | >TP53-R213CNTFQHSVVVI | 213   | 632   |

|                        |      |                        |       |       |
|------------------------|------|------------------------|-------|-------|
| >TP53-R213CNTFRHSVVVF  | 97   | >TP53-R213CNTFQHSVVVI  | 65    | 32    |
| >TP53-R213CNTFRHSVVVF  | 123  | >TP53-R213CNTFQHSVVVI  | 117   | 6     |
| >TP53-R213CNTFRHSVVVF  | 678  | >TP53-R213CNTFQHSVVVI  | 175   | 503   |
| >TP53-R213CNTFRHSVVVF  | 82   | >TP53-R213CNTFQHSVVVI  | 49    | 33    |
| >TP53-R213CNTFRHSVVV   | 412  | >TP53-R213CNTFQHSVVV   | 401   | 11    |
| >TP53-R213CNTFRHSVVVF  | 61   | >TP53-R213CNTFQHSVVVI  | 65    | 4     |
| >TP53-R213CNTFRHSVVVF  | 34   | >TP53-R213CNTFQHSVVVI  | 29    | 5     |
| >TP53-R213CNTFRHSVV    | 11   | >TP53-R213CNTFQHSVV    | 12    | 1     |
| >TP53-R213CNTFRHSVVV   | 8    | >TP53-R213CNTFQHSVVV   | 9     | 1     |
| >TP53-R213CNTFRHSVV    | 50   | >TP53-R213CNTFQHSVV    | 26    | 24    |
| >TP53-R213CNTFRHSVVV   | 25   | >TP53-R213CNTFQHSVVV   | 15    | 10    |
| >TP53-R213CNTFRHSVVVF  | 65   | >TP53-R213CNTFQHSVVVI  | 49    | 16    |
| >TP53-R213CNTFRHSVVVF  | 492  | >TP53-R213CNTFQHSVVVI  | 268   | 224   |
| >TP53-R213CNTFRHSVVVF  | 33   | >TP53-R213CNTFQHSVVVI  | 49    | 16    |
| >TP53-R213CNTFRHSVVVF  | 23   | >TP53-R213CNTFQHSVVVI  | 11    | 12    |
| >TP53-R213CNTFRHSVVVF  | 609  | >TP53-R213CNTFQHSVVVI  | 377   | 232   |
| >TP53-R213CNTFRHSVVVF  | 105  | >TP53-R213CNTFQHSVVVI  | 53    | 52    |
| >TP53-R213CNTFRHSVVVF  | 289  | >TP53-R213CNTFQHSVVVI  | 228   | 61    |
| >TP53-R213CNTFRHSVVVF  | 23   | >TP53-R213CNTFQHSVVVI  | 24    | 1     |
| >TP53-R213C RNTFRHSVV  | 224  | >TP53-R213C RNTFQHSVV  | 396   | 172   |
| >TP53-R213C LDDRNTFRHS | 482  | >TP53-R213C LDDRNTFQH! | 162   | 320   |
| >TP53-R213C YLDDRNTFR  | 789  | >TP53-R213C YLDDRNTFQ  | 66    | 723   |
| >TP53-R213C YLDDRNTFR  | 3926 | >TP53-R213C YLDDRNTFQ  | 304   | 3622  |
| >TP53-R213C YLDDRNTFR! | 333  | >TP53-R213C YLDDRNTFQ! | 107   | 226   |
| >TP53-R213C YLDDRNTFR  | 1191 | >TP53-R213C YLDDRNTFQ  | 112   | 1079  |
| >TP53-R213C YLDDRNTFR! | 155  | >TP53-R213C YLDDRNTFQ! | 71    | 84    |
| >TP53-R213C YLDDRNTFR! | 1022 | >TP53-R213C YLDDRNTFQ! | 218   | 804   |
| >TP53-R213C YLDDRNTFR  | 3126 | >TP53-R213C YLDDRNTFQ  | 63    | 3063  |
| >TP53-R213C YLDDRNTFR! | 648  | >TP53-R213C YLDDRNTFQ! | 165   | 483   |
| >TP53-R213C YLDDRNTFR  | 189  | >TP53-R213C YLDDRNTFQ  | 6     | 183   |
| >TP53-R213C YLDDRNTFR! | 187  | >TP53-R213C YLDDRNTFQ! | 146   | 41    |
| >TP53-R213C YLDDRNTFR! | 171  | >TP53-R213C YLDDRNTFQ! | 20    | 151   |
| >TP53-R213C YLDDRNTFR  | 282  | >TP53-R213C YLDDRNTFQ  | 19508 | 19226 |
| >TP53-R213C YLDDRNTFR  | 55   | >TP53-R213C YLDDRNTFQ  | 9421  | 9366  |
| >TP53-R213C YLDDRNTFR  | 68   | >TP53-R213C YLDDRNTFQ  | 9872  | 9804  |
| >TP53-R213C YLDDRNTFR  | 336  | >TP53-R213C YLDDRNTFQ  | 22017 | 21681 |
| >TP53-R213C EYLDDRNTFR | 328  | >TP53-R213C EYLDDRNTFC | 27277 | 26949 |
| >TP53-R213C EYLDDRNTFR | 88   | >TP53-R213C EYLDDRNTFC | 7459  | 7371  |
| >TP53-R213C EYLDDRNTFR | 19   | >TP53-R213C EYLDDRNTFC | 1263  | 1244  |
| >TP53-R213V RHSVVVPY   | 23   | >TP53-R213V WHSVVVPY   | 48    | 25    |
| >TP53-R213V RHSVVVPY   | 4377 | >TP53-R213V WHSVVVPY   | 233   | 4144  |
| >TP53-R213V RHSVVVPY   | 413  | >TP53-R213V WHSVVVPY   | 1787  | 1374  |
| >TP53-R213V FRHSVVVPY  | 1048 | >TP53-R213V FWHSVVVPY  | 40    | 1008  |

|                       |       |                       |       |       |
|-----------------------|-------|-----------------------|-------|-------|
| >TP53-R213\FRHSVVVPY  | 4     | >TP53-R213\FWHSVVVPY  | 79    | 75    |
| >TP53-R213\FRHSVVVPY  | 33    | >TP53-R213\FWHSVVVPY  | 9980  | 9947  |
| >TP53-R213\FRHSVVVPY  | 1057  | >TP53-R213\FWHSVVVPY  | 283   | 774   |
| >TP53-R213\FRHSVVVPY  | 946   | >TP53-R213\FWHSVVVPY  | 215   | 731   |
| >TP53-R213\FRHSVVVPY  | 37020 | >TP53-R213\FWHSVVVPY  | 325   | 36695 |
| >TP53-R213\VEYLDDRNTF | 4617  | >TP53-R213\VEYLDDRNTF | 113   | 4504  |
| >TP53-R213\VEYLDDRNTF | 8575  | >TP53-R213\VEYLDDRNTF | 112   | 8463  |
| >TP53-R213\VEYLDDRNTF | 6083  | >TP53-R213\VEYLDDRNTF | 110   | 5973  |
| >TP53-R213\TFRHSVVVPY | 185   | >TP53-R213\TFWHSVVVP' | 57    | 128   |
| >TP53-R213\TFRHSVVV   | 139   | >TP53-R213\TFWHSVVV   | 12161 | 12022 |
| >TP53-R213\TFRHSVVVPY | 162   | >TP53-R213\TFWHSVVVP' | 10942 | 10780 |
| >TP53-R213\TFRHSVVVPY | 687   | >TP53-R213\TFWHSVVVP' | 108   | 579   |
| >TP53-R213\TFRHSVVVPY | 140   | >TP53-R213\TFWHSVVVP' | 432   | 292   |
| >TP53-R213\TFRHSVVVPY | 225   | >TP53-R213\TFWHSVVVP' | 243   | 18    |
| >TP53-R213\TFRHSVVVPY | 271   | >TP53-R213\TFWHSVVVP' | 202   | 69    |
| >TP53-R213\NTFRHSVVV  | 872   | >TP53-R213\NTFWHSVVV  | 366   | 506   |
| >TP53-R213\NTFRHSVV   | 382   | >TP53-R213\NTFWHSVV   | 134   | 248   |
| >TP53-R213\NTFRHSVVV  | 581   | >TP53-R213\NTFWHSVVV  | 197   | 384   |
| >TP53-R213\NTFRHSVV   | 1308  | >TP53-R213\NTFWHSVV   | 281   | 1027  |
| >TP53-R213\NTFRHSVVV  | 680   | >TP53-R213\NTFWHSVVV  | 120   | 560   |
| >TP53-R213\NTFRHSVV   | 309   | >TP53-R213\NTFWHSVV   | 26    | 283   |
| >TP53-R213\NTFRHSVVV  | 265   | >TP53-R213\NTFWHSVVV  | 29    | 236   |
| >TP53-R213\NTFRHSVVV  | 3077  | >TP53-R213\NTFWHSVVV  | 367   | 2710  |
| >TP53-R213\NTFRHSVV   | 1246  | >TP53-R213\NTFWHSVV   | 323   | 923   |
| >TP53-R213\NTFRHSVVV  | 1108  | >TP53-R213\NTFWHSVVV  | 366   | 742   |
| >TP53-R213\NTFRHSVVVF | 128   | >TP53-R213\NTFWHSVVV  | 80    | 48    |
| >TP53-R213\NTFRHSVVVF | 97    | >TP53-R213\NTFWHSVVV  | 149   | 52    |
| >TP53-R213\NTFRHSVVVF | 123   | >TP53-R213\NTFWHSVVV  | 199   | 76    |
| >TP53-R213\NTFRHSVVVF | 678   | >TP53-R213\NTFWHSVVV  | 487   | 191   |
| >TP53-R213\NTFRHSVVVF | 82    | >TP53-R213\NTFWHSVVV  | 34    | 48    |
| >TP53-R213\NTFRHSVVVF | 1274  | >TP53-R213\NTFWHSVVV  | 407   | 867   |
| >TP53-R213\NTFRHSVVV  | 412   | >TP53-R213\NTFWHSVVV  | 134   | 278   |
| >TP53-R213\NTFRHSVVVF | 61    | >TP53-R213\NTFWHSVVV  | 26    | 35    |
| >TP53-R213\NTFRHSVVVF | 34    | >TP53-R213\NTFWHSVVV  | 16    | 18    |
| >TP53-R213\NTFRHSVV   | 11    | >TP53-R213\NTFWHSVV   | 8     | 3     |
| >TP53-R213\NTFRHSVVV  | 8     | >TP53-R213\NTFWHSVVV  | 7     | 1     |
| >TP53-R213\NTFRHSVV   | 50    | >TP53-R213\NTFWHSVV   | 7     | 43    |
| >TP53-R213\NTFRHSVVV  | 25    | >TP53-R213\NTFWHSVVV  | 6     | 19    |
| >TP53-R213\NTFRHSVVVF | 65    | >TP53-R213\NTFWHSVVV  | 92    | 27    |
| >TP53-R213\NTFRHSVVVF | 492   | >TP53-R213\NTFWHSVVV  | 823   | 331   |
| >TP53-R213\NTFRHSVVVF | 33    | >TP53-R213\NTFWHSVVV  | 147   | 114   |
| >TP53-R213\NTFRHSVVVF | 23    | >TP53-R213\NTFWHSVVV  | 12    | 11    |
| >TP53-R213\NTFRHSVVVF | 609   | >TP53-R213\NTFWHSVVV  | 174   | 435   |

|                        |       |                       |       |       |
|------------------------|-------|-----------------------|-------|-------|
| >TP53-R213VNTFRHSVVVF  | 105   | >TP53-R213VNTFWHSVVV  | 33    | 72    |
| >TP53-R213VNTFRHSVVVF  | 289   | >TP53-R213VNTFWHSVVV  | 258   | 31    |
| >TP53-R213VNTFRHSVVVF  | 23    | >TP53-R213VNTFWHSVVV  | 204   | 181   |
| >TP53-R213VRNTFRHSVV   | 224   | >TP53-R213VRNTFWHSVV  | 74    | 150   |
| >TP53-R213VLDDRNTFRHS  | 482   | >TP53-R213VLDDRNTFWH  | 276   | 206   |
| >TP53-R213VYLDDRNTFRH  | 1704  | >TP53-R213VYLDDRNTFW  | 62    | 1642  |
| >TP53-R213VYLDDRNTFR   | 789   | >TP53-R213VYLDDRNTFW  | 462   | 327   |
| >TP53-R213VYLDDRNTFRH  | 1276  | >TP53-R213VYLDDRNTFW  | 147   | 1129  |
| >TP53-R213VYLDDRNTFRH  | 333   | >TP53-R213VYLDDRNTFW  | 29    | 304   |
| >TP53-R213VYLDDRNTFRH  | 155   | >TP53-R213VYLDDRNTFW  | 20    | 135   |
| >TP53-R213VYLDDRNTFRH  | 1022  | >TP53-R213VYLDDRNTFW  | 42    | 980   |
| >TP53-R213VYLDDRNTFRH  | 648   | >TP53-R213VYLDDRNTFW  | 49    | 599   |
| >TP53-R213VYLDDRNTFR   | 189   | >TP53-R213VYLDDRNTFW  | 300   | 111   |
| >TP53-R213VYLDDRNTFRH  | 187   | >TP53-R213VYLDDRNTFW  | 125   | 62    |
| >TP53-R213VYLDDRNTFRH  | 171   | >TP53-R213VYLDDRNTFW  | 9     | 162   |
| >TP53-R213VYLDDRNTFR   | 282   | >TP53-R213VYLDDRNTFW  | 22724 | 22442 |
| >TP53-R213VYLDDRNTFR   | 55    | >TP53-R213VYLDDRNTFW  | 20348 | 20293 |
| >TP53-R213VYLDDRNTFR   | 68    | >TP53-R213VYLDDRNTFW  | 23300 | 23232 |
| >TP53-R213VYLDDRNTFR   | 336   | >TP53-R213VYLDDRNTFW  | 30759 | 30423 |
| >TP53-R213VEYLDDRNTFR  | 20505 | >TP53-R213VEYLDDRNTFV | 77    | 20428 |
| >TP53-R213VEYLDDRNTFR  | 20766 | >TP53-R213VEYLDDRNTFV | 170   | 20596 |
| >TP53-R213VEYLDDRNTFR  | 7009  | >TP53-R213VEYLDDRNTFV | 240   | 6769  |
| >TP53-R213VEYLDDRNTFR  | 328   | >TP53-R213VEYLDDRNTFV | 32465 | 32137 |
| >TP53-R213VEYLDDRNTFR  | 88    | >TP53-R213VEYLDDRNTFV | 12211 | 12123 |
| >TP53-R213VEYLDDRNTFR  | 19    | >TP53-R213VEYLDDRNTFV | 10458 | 10439 |
| >TP53-R248CRRPILTII    | 220   | >TP53-R248CRPILTII    | 5194  | 4974  |
| >TP53-R248CRRPILTIITL  | 14    | >TP53-R248CRPILTIITL  | 114   | 100   |
| >TP53-R248CRRPILTIITL  | 492   | >TP53-R248CRPILTIITL  | 1069  | 577   |
| >TP53-R248CRRPILTII    | 33    | >TP53-R248CRPILTII    | 2175  | 2142  |
| >TP53-R248CRRPILTIIT   | 86    | >TP53-R248CRPILTIIT   | 10846 | 10760 |
| >TP53-R248CRRPILTIITL  | 16    | >TP53-R248CRPILTIITL  | 195   | 179   |
| >TP53-R248CRRPILTIITLE | 129   | >TP53-R248CRPILTIITLE | 12696 | 12567 |
| >TP53-R248CRRPILTII    | 319   | >TP53-R248CRPILTII    | 1230  | 911   |
| >TP53-R248CRRPILTIIT   | 329   | >TP53-R248CRPILTIIT   | 10063 | 9734  |
| >TP53-R248CRRPILTIITL  | 14    | >TP53-R248CRPILTIITL  | 72    | 58    |
| >TP53-R248CRRPILTIITLE | 467   | >TP53-R248CRPILTIITLE | 10882 | 10415 |
| >TP53-R248CNRRPILTII   | 281   | >TP53-R248NCRPILTII   | 29414 | 29133 |
| >TP53-R248CNRRPILTIITL | 50    | >TP53-R248NCRPILTIITL | 15860 | 15810 |
| >TP53-R248CNRRPILTII   | 224   | >TP53-R248NCRPILTII   | 35291 | 35067 |
| >TP53-R248CNRRPILTIITL | 12    | >TP53-R248NCRPILTIITL | 23398 | 23386 |
| >TP53-R248CMNRRPILTI   | 35    | >TP53-R248MNCRPILTI   | 6773  | 6738  |
| >TP53-R248CMNRRPILTII  | 200   | >TP53-R248MNCRPILTII  | 10900 | 10700 |
| >TP53-R248CMNRRPILTI   | 457   | >TP53-R248MNCRPILTI   | 2198  | 1741  |

|                       |      |                        |       |       |
|-----------------------|------|------------------------|-------|-------|
| >TP53-R248CMNRRPILTI  | 399  | >TP53-R248C MNCRPILTI  | 95    | 304   |
| >TP53-R248CGMNRPPILTI | 972  | >TP53-R248C GMNCRPILTI | 369   | 603   |
| >TP53-R248CGMNRPPILTI | 755  | >TP53-R248C GMNCRPILTI | 230   | 525   |
| >TP53-R248CGMNRPPIL   | 678  | >TP53-R248C GMNCRPIL   | 247   | 431   |
| >TP53-R248CGMNRPPILTI | 185  | >TP53-R248C GMNCRPILTI | 99    | 86    |
| >TP53-R248CGMNRPPILTI | 168  | >TP53-R248C GMNCRPILTI | 85    | 83    |
| >TP53-R248CGMNRPPIL   | 213  | >TP53-R248C GMNCRPIL   | 76    | 137   |
| >TP53-R248CGMNRPPILT  | 728  | >TP53-R248C GMNCRPILT  | 221   | 507   |
| >TP53-R248CGMNRPPILTI | 61   | >TP53-R248C GMNCRPILTI | 78    | 17    |
| >TP53-R248CGMNRPPILTI | 13   | >TP53-R248C GMNCRPILTI | 7     | 6     |
| >TP53-R248CGMNRPPIL   | 229  | >TP53-R248C GMNCRPIL   | 137   | 92    |
| >TP53-R248CGMNRPPILT  | 822  | >TP53-R248C GMNCRPILT  | 384   | 438   |
| >TP53-R248CGMNRPPILTI | 10   | >TP53-R248C GMNCRPILTI | 7     | 3     |
| >TP53-R248CGMNRPPILTI | 93   | >TP53-R248C GMNCRPILTI | 55    | 38    |
| >TP53-R248CGMNRPPIL   | 182  | >TP53-R248C GMNCRPIL   | 34    | 148   |
| >TP53-R248CGMNRPPILTI | 21   | >TP53-R248C GMNCRPILTI | 9     | 12    |
| >TP53-R248CGMNRPPILTI | 53   | >TP53-R248C GMNCRPILTI | 14    | 39    |
| >TP53-R248CGMNRPPIL   | 160  | >TP53-R248C GMNCRPIL   | 163   | 3     |
| >TP53-R248CGMNRPPILTI | 66   | >TP53-R248C GMNCRPILTI | 74    | 8     |
| >TP53-R248CGMNRPPILTI | 192  | >TP53-R248C GMNCRPILTI | 200   | 8     |
| >TP53-R248CGMNRPPIL   | 32   | >TP53-R248C GMNCRPIL   | 100   | 68    |
| >TP53-R248CGMNRPPILTI | 43   | >TP53-R248C GMNCRPILTI | 141   | 98    |
| >TP53-R248CGMNRPPILTI | 102  | >TP53-R248C GMNCRPILTI | 366   | 264   |
| >TP53-R248CGMNRPPILTI | 147  | >TP53-R248C GMNCRPILTI | 141   | 6     |
| >TP53-R248CGGMNRPPIL  | 444  | >TP53-R248C GGMNCRPIL  | 11364 | 10920 |
| >TP53-R248CGGMNRPPIL  | 538  | >TP53-R248C GGMNCRPIL  | 392   | 146   |
| >TP53-R248CCMGGMNRR   | 984  | >TP53-R248C CMGGMNCR   | 311   | 673   |
| >TP53-R248CCMGGMNRR   | 2155 | >TP53-R248C CMGGMNCR   | 427   | 1728  |
| >TP53-R248CCMGGMNRR   | 88   | >TP53-R248C CMGGMNCR   | 28    | 60    |
| >TP53-R248CCMGGMNRR   | 314  | >TP53-R248C CMGGMNCR   | 280   | 34    |
| >TP53-R248CCMGGMNRR   | 117  | >TP53-R248C CMGGMNCR   | 157   | 40    |
| >TP53-R248CSMGGMNR    | 464  | >TP53-R248C SCMGGMNC   | 35606 | 35142 |
| >TP53-R248CSSCMGGMNI  | 58   | >TP53-R248C SSCMGGMNI  | 21292 | 21234 |
| >TP53-R248CSSCMGGMNI  | 192  | >TP53-R248C SSCMGGMNI  | 259   | 67    |
| >TP53-R248CSSCMGGMNI  | 110  | >TP53-R248C SSCMGGMNI  | 21973 | 21863 |
| >TP53-R248CSSCMGGMNI  | 56   | >TP53-R248C SSCMGGMNI  | 37    | 19    |
| >TP53-R248CSSCMGGMNI  | 2693 | >TP53-R248C SSCMGGMNI  | 366   | 2327  |
| >TP53-R248CSSCMGGMNI  | 220  | >TP53-R248C SSCMGGMNI  | 38577 | 38357 |
| >TP53-R248CSSCMGGMNI  | 361  | >TP53-R248C SSCMGGMNI  | 618   | 257   |
| >TP53-R248CSSCMGGMNI  | 398  | >TP53-R248C SSCMGGMNI  | 20372 | 19974 |
| >TP53-R248CSSCMGGMNI  | 460  | >TP53-R248C SSCMGGMNI  | 676   | 216   |
| >TP53-R248CNSSCMGGMI  | 111  | >TP53-R248C NSSCMGGMI  | 32847 | 32736 |
| >TP53-R248CNSSCMGGMI  | 55   | >TP53-R248C NSSCMGGMI  | 20121 | 20066 |

|                        |     |                         |       |       |
|------------------------|-----|-------------------------|-------|-------|
| >TP53-R248C NSSCMGGMI  | 365 | >TP53-R248C NSSCMGGMI   | 27327 | 26962 |
| >TP53-R248C NSSCMGGMI  | 12  | >TP53-R248C NSSCMGGMI   | 27157 | 27145 |
| >TP53-R248C NSSCMGGMI  | 39  | >TP53-R248C NSSCMGGMI   | 46    | 7     |
| >TP53-R248C RRPILTII   | 220 | >TP53-R248C GRPILTII    | 1982  | 1762  |
| >TP53-R248C RRPILTIITL | 14  | >TP53-R248C GRPILTIITL  | 66    | 52    |
| >TP53-R248C RRPILTIITL | 492 | >TP53-R248C GRPILTIITL  | 1892  | 1400  |
| >TP53-R248C RRPILTII   | 33  | >TP53-R248C GRPILTII    | 4681  | 4648  |
| >TP53-R248C RRPILTIIT  | 86  | >TP53-R248C GRPILTIIT   | 1899  | 1813  |
| >TP53-R248C RRPILTIITL | 16  | >TP53-R248C GRPILTIITL  | 219   | 203   |
| >TP53-R248C RRPILTIITL | 129 | >TP53-R248C GRPILTIITL  | 2786  | 2657  |
| >TP53-R248C RRPILTII   | 319 | >TP53-R248C GRPILTII    | 9092  | 8773  |
| >TP53-R248C RRPILTIIT  | 329 | >TP53-R248C GRPILTIIT   | 1859  | 1530  |
| >TP53-R248C RRPILTIITL | 14  | >TP53-R248C GRPILTIITL  | 99    | 85    |
| >TP53-R248C RRPILTIITL | 467 | >TP53-R248C GRPILTIITL  | 2332  | 1865  |
| >TP53-R248C RRPILTII   | 281 | >TP53-R248C NGRPILTII   | 26768 | 26487 |
| >TP53-R248C RRPILTIITL | 50  | >TP53-R248C NGRPILTIITL | 12036 | 11986 |
| >TP53-R248C RRPILTII   | 224 | >TP53-R248C NGRPILTII   | 31112 | 30888 |
| >TP53-R248C RRPILTIITL | 12  | >TP53-R248C NGRPILTIITL | 15770 | 15758 |
| >TP53-R248C MNRRPILTI  | 35  | >TP53-R248C MNGRPILTI   | 11302 | 11267 |
| >TP53-R248C MNRRPILTII | 200 | >TP53-R248C MNGRPILTII  | 14442 | 14242 |
| >TP53-R248C MNRRPILTI  | 457 | >TP53-R248C MNGRPILTI   | 4918  | 4461  |
| >TP53-R248C MNRRPILTI  | 399 | >TP53-R248C MNGRPILTI   | 247   | 152   |
| >TP53-R248C GMNRRPILTI | 972 | >TP53-R248C GMNGRPILTI  | 321   | 651   |
| >TP53-R248C GMNRRPILTI | 755 | >TP53-R248C GMNGRPILTI  | 260   | 495   |
| >TP53-R248C GMNRRPIL   | 678 | >TP53-R248C GMNGRPIL    | 194   | 484   |
| >TP53-R248C GMNRRPILTI | 185 | >TP53-R248C GMNGRPILTI  | 64    | 121   |
| >TP53-R248C GMNRRPILTI | 168 | >TP53-R248C GMNGRPILTI  | 47    | 121   |
| >TP53-R248C GMNRRPIL   | 213 | >TP53-R248C GMNGRPIL    | 107   | 106   |
| >TP53-R248C GMNRRPILT  | 728 | >TP53-R248C GMNGRPILT   | 323   | 405   |
| >TP53-R248C GMNRRPILTI | 61  | >TP53-R248C GMNGRPILTI  | 43    | 18    |
| >TP53-R248C GMNRRPILTI | 13  | >TP53-R248C GMNGRPILTI  | 8     | 5     |
| >TP53-R248C GMNRRPIL   | 229 | >TP53-R248C GMNGRPIL    | 80    | 149   |
| >TP53-R248C GMNRRPILT  | 822 | >TP53-R248C GMNGRPILT   | 223   | 599   |
| >TP53-R248C GMNRRPILTI | 10  | >TP53-R248C GMNGRPILTI  | 6     | 4     |
| >TP53-R248C GMNRRPILTI | 93  | >TP53-R248C GMNGRPILTI  | 39    | 54    |
| >TP53-R248C GMNRRPIL   | 182 | >TP53-R248C GMNGRPIL    | 156   | 26    |
| >TP53-R248C GMNRRPILTI | 21  | >TP53-R248C GMNGRPILTI  | 20    | 1     |
| >TP53-R248C GMNRRPILTI | 53  | >TP53-R248C GMNGRPILTI  | 51    | 2     |
| >TP53-R248C GMNRRPIL   | 160 | >TP53-R248C GMNGRPIL    | 42    | 118   |
| >TP53-R248C GMNRRPILTI | 66  | >TP53-R248C GMNGRPILTI  | 26    | 40    |
| >TP53-R248C GMNRRPILTI | 192 | >TP53-R248C GMNGRPILTI  | 60    | 132   |
| >TP53-R248C GMNRRPIL   | 32  | >TP53-R248C GMNGRPIL    | 15    | 17    |
| >TP53-R248C GMNRRPILT  | 744 | >TP53-R248C GMNGRPILT   | 314   | 430   |



|                       |       |                       |       |       |
|-----------------------|-------|-----------------------|-------|-------|
| >TP53-R248CGMNRPPILTI | 43    | >TP53-R248CGMNGRPILTI | 17    | 26    |
| >TP53-R248CGMNRPPILTI | 102   | >TP53-R248CGMNGRPILTI | 41    | 61    |
| >TP53-R248CGMNRPPILTI | 147   | >TP53-R248CGMNGRPILTI | 70    | 77    |
| >TP53-R248CGMNRPPILTI | 646   | >TP53-R248CGMNGRPILTI | 277   | 369   |
| >TP53-R248CGGMNRRPIL  | 444   | >TP53-R248CGGMNRRPIL  | 13159 | 12715 |
| >TP53-R248CGGMNRRPIL  | 538   | >TP53-R248CGGMNRRPIL  | 463   | 75    |
| >TP53-R248CMGGMNRRP   | 803   | >TP53-R248CMGGMNRRP   | 201   | 602   |
| >TP53-R248CMGGMNRR    | 984   | >TP53-R248CMGGMNRR    | 320   | 664   |
| >TP53-R248CMGGMNRR    | 88    | >TP53-R248CMGGMNRR    | 60    | 28    |
| >TP53-R248CMGGMNRR    | 314   | >TP53-R248CMGGMNRR    | 710   | 396   |
| >TP53-R248CMGGMNRR    | 117   | >TP53-R248CMGGMNRR    | 117   | 0     |
| >TP53-R248SCMGGMNR    | 464   | >TP53-R248SCMGGMNR    | 34841 | 34377 |
| >TP53-R248SSCMGGMNI   | 58    | >TP53-R248SSCMGGMNI   | 20929 | 20871 |
| >TP53-R248SSCMGGMNI   | 192   | >TP53-R248SSCMGGMNI   | 225   | 33    |
| >TP53-R248SSCMGGMNI   | 110   | >TP53-R248SSCMGGMNI   | 21192 | 21082 |
| >TP53-R248SSCMGGMNI   | 56    | >TP53-R248SSCMGGMNI   | 59    | 3     |
| >TP53-R248SSCMGGMNI   | 220   | >TP53-R248SSCMGGMNI   | 36617 | 36397 |
| >TP53-R248SSCMGGMNI   | 361   | >TP53-R248SSCMGGMNI   | 224   | 137   |
| >TP53-R248SSCMGGMNI   | 398   | >TP53-R248SSCMGGMNI   | 16568 | 16170 |
| >TP53-R248SSCMGGMNI   | 460   | >TP53-R248SSCMGGMNI   | 802   | 342   |
| >TP53-R248NSSCMGGMI   | 111   | >TP53-R248NSSCMGGMI   | 31816 | 31705 |
| >TP53-R248NSSCMGGMI   | 55    | >TP53-R248NSSCMGGMI   | 23558 | 23503 |
| >TP53-R248NSSCMGGMI   | 365   | >TP53-R248NSSCMGGMI   | 28673 | 28308 |
| >TP53-R248NSSCMGGMI   | 12    | >TP53-R248NSSCMGGMI   | 25574 | 25562 |
| >TP53-R248NSSCMGGMI   | 39    | >TP53-R248NSSCMGGMI   | 42    | 3     |
| >TP53-R248LRPILTI     | 220   | >TP53-R248LRPILTI     | 2585  | 2365  |
| >TP53-R248LRPILTIITL  | 14    | >TP53-R248LRPILTIITL  | 192   | 178   |
| >TP53-R248LRPILTIITL  | 492   | >TP53-R248LRPILTIITL  | 470   | 22    |
| >TP53-R248LRPILTI     | 33    | >TP53-R248LRPILTI     | 5854  | 5821  |
| >TP53-R248LRPILTIIT   | 86    | >TP53-R248LRPILTIIT   | 6005  | 5919  |
| >TP53-R248LRPILTIITL  | 16    | >TP53-R248LRPILTIITL  | 515   | 499   |
| >TP53-R248LRPILTIITL  | 129   | >TP53-R248LRPILTIITL  | 7765  | 7636  |
| >TP53-R248LRPILTI     | 319   | >TP53-R248LRPILTI     | 6398  | 6079  |
| >TP53-R248LRPILTIIT   | 329   | >TP53-R248LRPILTIIT   | 10254 | 9925  |
| >TP53-R248LRPILTIITL  | 14    | >TP53-R248LRPILTIITL  | 115   | 101   |
| >TP53-R248LRPILTIITL  | 467   | >TP53-R248LRPILTIITL  | 10970 | 10503 |
| >TP53-R248LRPILTI     | 17317 | >TP53-R248LRPILTI     | 175   | 17142 |
| >TP53-R248LRPILTIITL  | 14069 | >TP53-R248LRPILTIITL  | 262   | 13807 |
| >TP53-R248LRPILTI     | 15719 | >TP53-R248LRPILTI     | 35    | 15684 |
| >TP53-R248LRPILTI     | 13082 | >TP53-R248LRPILTI     | 10    | 13072 |
| >TP53-R248LRPILTIITL  | 16105 | >TP53-R248LRPILTIITL  | 65    | 16040 |
| >TP53-R248LRPILTI     | 27112 | >TP53-R248LRPILTI     | 216   | 26896 |
| >TP53-R248LRPILTIITL  | 27181 | >TP53-R248LRPILTIITL  | 239   | 26942 |

|                         |       |                         |       |       |
|-------------------------|-------|-------------------------|-------|-------|
| >TP53-R248L NRRPILTIITL | 24711 | >TP53-R248L NLRPILTIITL | 221   | 24490 |
| >TP53-R248L NRRPILTI    | 30963 | >TP53-R248L NLRPILTI    | 55    | 30908 |
| >TP53-R248L NRRPILTII   | 31686 | >TP53-R248L NLRPILTII   | 168   | 31518 |
| >TP53-R248L NRRPILTIITL | 25064 | >TP53-R248L NLRPILTIITL | 15    | 25049 |
| >TP53-R248L NRRPILTII   | 281   | >TP53-R248L NLRPILTII   | 20691 | 20410 |
| >TP53-R248L NRRPILTIITL | 50    | >TP53-R248L NLRPILTIITL | 7217  | 7167  |
| >TP53-R248L NRRPILTII   | 224   | >TP53-R248L NLRPILTII   | 21669 | 21445 |
| >TP53-R248L NRRPILTIITL | 12    | >TP53-R248L NLRPILTIITL | 8259  | 8247  |
| >TP53-R248L MNRRPILTI   | 35    | >TP53-R248L MNLRPILTI   | 3342  | 3307  |
| >TP53-R248L MNRRPILTII  | 200   | >TP53-R248L MNLRPILTII  | 7584  | 7384  |
| >TP53-R248L MNRRPILTI   | 457   | >TP53-R248L MNLRPILTI   | 681   | 224   |
| >TP53-R248L MNRRPILTI   | 399   | >TP53-R248L MNLRPILTI   | 145   | 254   |
| >TP53-R248L GMNRRPILTI  | 972   | >TP53-R248L GMNLRPILTI  | 387   | 585   |
| >TP53-R248L GMNRRPIL    | 678   | >TP53-R248L GMNLRPIL    | 476   | 202   |
| >TP53-R248L GMNRRPILTI  | 185   | >TP53-R248L GMNLRPILTI  | 113   | 72    |
| >TP53-R248L GMNRRPILTI  | 168   | >TP53-R248L GMNLRPILTII | 154   | 14    |
| >TP53-R248L GMNRRPIL    | 213   | >TP53-R248L GMNLRPIL    | 261   | 48    |
| >TP53-R248L GMNRRPILTI  | 61    | >TP53-R248L GMNLRPILTI  | 75    | 14    |
| >TP53-R248L GMNRRPILTI  | 13    | >TP53-R248L GMNLRPILTII | 17    | 4     |
| >TP53-R248L GMNRRPIL    | 229   | >TP53-R248L GMNLRPIL    | 491   | 262   |
| >TP53-R248L GMNRRPILTI  | 10    | >TP53-R248L GMNLRPILTI  | 22    | 12    |
| >TP53-R248L GMNRRPILTI  | 93    | >TP53-R248L GMNLRPILTII | 234   | 141   |
| >TP53-R248L GMNRRPIL    | 182   | >TP53-R248L GMNLRPIL    | 262   | 80    |
| >TP53-R248L GMNRRPILTI  | 21    | >TP53-R248L GMNLRPILTI  | 42    | 21    |
| >TP53-R248L GMNRRPILTI  | 53    | >TP53-R248L GMNLRPILTII | 93    | 40    |
| >TP53-R248L GMNRRPIL    | 160   | >TP53-R248L GMNLRPIL    | 177   | 17    |
| >TP53-R248L GMNRRPILTI  | 66    | >TP53-R248L GMNLRPILTI  | 97    | 31    |
| >TP53-R248L GMNRRPILTI  | 192   | >TP53-R248L GMNLRPILTII | 268   | 76    |
| >TP53-R248L GMNRRPIL    | 32    | >TP53-R248L GMNLRPIL    | 70    | 38    |
| >TP53-R248L GMNRRPILTI  | 43    | >TP53-R248L GMNLRPILTI  | 117   | 74    |
| >TP53-R248L GMNRRPILTI  | 102   | >TP53-R248L GMNLRPILTII | 296   | 194   |
| >TP53-R248L GMNRRPILTI  | 147   | >TP53-R248L GMNLRPILTI  | 194   | 47    |
| >TP53-R248L GGMNRRPIL   | 444   | >TP53-R248L GGMNLRPIL   | 9167  | 8723  |
| >TP53-R248L GGMNRRPI    | 2924  | >TP53-R248L GGMNLRPI    | 420   | 2504  |
| >TP53-R248L MGGMNRRP    | 803   | >TP53-R248L MGGMNLRPI   | 321   | 482   |
| >TP53-R248L CMGGMNRR    | 1556  | >TP53-R248L CMGGMNLRPI  | 312   | 1244  |
| >TP53-R248L CMGGMNRR    | 1329  | >TP53-R248L CMGGMNLRPI  | 177   | 1152  |
| >TP53-R248L CMGGMNRR    | 984   | >TP53-R248L CMGGMNLRPI  | 156   | 828   |
| >TP53-R248L CMGGMNRR    | 3061  | >TP53-R248L CMGGMNLRPI  | 381   | 2680  |
| >TP53-R248L CMGGMNRR    | 88    | >TP53-R248L CMGGMNLRPI  | 45    | 43    |
| >TP53-R248L CMGGMNRR    | 314   | >TP53-R248L CMGGMNLR    | 157   | 157   |
| >TP53-R248L CMGGMNRR    | 1022  | >TP53-R248L CMGGMNLR    | 417   | 605   |
| >TP53-R248L CMGGMNRR    | 117   | >TP53-R248L CMGGMNLR    | 67    | 50    |

|                         |       |                         |       |       |
|-------------------------|-------|-------------------------|-------|-------|
| >TP53-R248L SCMGGMNR    | 464   | >TP53-R248L SCMGGMNL    | 32185 | 31721 |
| >TP53-R248L SSCMGGMNI   | 58    | >TP53-R248L SSCMGGMNI   | 13875 | 13817 |
| >TP53-R248L SSCMGGMNI   | 192   | >TP53-R248L SSCMGGMNI   | 86    | 106   |
| >TP53-R248L SSCMGGMNI   | 110   | >TP53-R248L SSCMGGMNI   | 16655 | 16545 |
| >TP53-R248L SSCMGGMNI   | 56    | >TP53-R248L SSCMGGMNI   | 41    | 15    |
| >TP53-R248L SSCMGGMNI   | 220   | >TP53-R248L SSCMGGMNI   | 29096 | 28876 |
| >TP53-R248L SSCMGGMNI   | 361   | >TP53-R248L SSCMGGMNI   | 72    | 289   |
| >TP53-R248L SSCMGGMNI   | 11434 | >TP53-R248L SSCMGGMNI   | 24    | 11410 |
| >TP53-R248L SSCMGGMNI   | 398   | >TP53-R248L SSCMGGMNI   | 8260  | 7862  |
| >TP53-R248L SSCMGGMNI   | 460   | >TP53-R248L SSCMGGMNI   | 475   | 15    |
| >TP53-R248L NSSCMGGMI   | 111   | >TP53-R248L NSSCMGGMI   | 27996 | 27885 |
| >TP53-R248L NSSCMGGMI   | 55    | >TP53-R248L NSSCMGGMI   | 11967 | 11912 |
| >TP53-R248L NSSCMGGMI   | 365   | >TP53-R248L NSSCMGGMI   | 23050 | 22685 |
| >TP53-R248L NSSCMGGMI   | 1183  | >TP53-R248L NSSCMGGMI   | 466   | 717   |
| >TP53-R248L NSSCMGGMI   | 12    | >TP53-R248L NSSCMGGMI   | 15398 | 15386 |
| >TP53-R248L NSSCMGGMI   | 39    | >TP53-R248L NSSCMGGMI   | 22    | 17    |
| >TP53-R248L NSSCMGGMI   | 28615 | >TP53-R248L NSSCMGGMI   | 428   | 28187 |
| >TP53-R248F RRPILTII    | 220   | >TP53-R248F PRPILTII    | 11840 | 11620 |
| >TP53-R248F RRPILTIITL  | 14    | >TP53-R248F PRPILTIITL  | 3562  | 3548  |
| >TP53-R248F RRPILTIITL  | 492   | >TP53-R248F PRPILTIITL  | 5517  | 5025  |
| >TP53-R248F RRPILTII    | 33    | >TP53-R248F PRPILTII    | 17112 | 17079 |
| >TP53-R248F RRPILTIIT   | 86    | >TP53-R248F PRPILTIIT   | 10202 | 10116 |
| >TP53-R248F RRPILTIITL  | 16    | >TP53-R248F PRPILTIITL  | 734   | 718   |
| >TP53-R248F RRPILTIITLE | 129   | >TP53-R248F PRPILTIITLE | 11976 | 11847 |
| >TP53-R248F RRPILTII    | 319   | >TP53-R248F PRPILTII    | 22669 | 22350 |
| >TP53-R248F RRPILTIIT   | 329   | >TP53-R248F PRPILTIIT   | 20114 | 19785 |
| >TP53-R248F RRPILTIITL  | 14    | >TP53-R248F PRPILTIITL  | 344   | 330   |
| >TP53-R248F RRPILTIITLE | 467   | >TP53-R248F PRPILTIITLE | 20192 | 19725 |
| >TP53-R248F NRRPILTI    | 20026 | >TP53-R248F NPRPILTI    | 46    | 19980 |
| >TP53-R248F NRRPILTII   | 20859 | >TP53-R248F NPRPILTII   | 50    | 20809 |
| >TP53-R248F NRRPILTIITL | 15665 | >TP53-R248F NPRPILTIITL | 23    | 15642 |
| >TP53-R248F NRRPILTII   | 23139 | >TP53-R248F NPRPILTII   | 328   | 22811 |
| >TP53-R248F NRRPILTII   | 281   | >TP53-R248F NPRPILTII   | 25883 | 25602 |
| >TP53-R248F NRRPILTIITL | 50    | >TP53-R248F NPRPILTIITL | 10493 | 10443 |
| >TP53-R248F NRRPILTII   | 224   | >TP53-R248F NPRPILTII   | 30422 | 30198 |
| >TP53-R248F NRRPILTIITL | 12    | >TP53-R248F NPRPILTIITL | 15644 | 15632 |
| >TP53-R248F MNRRPILTI   | 35    | >TP53-R248F MNPRPILTI   | 12775 | 12740 |
| >TP53-R248F MNRRPILTII  | 200   | >TP53-R248F MNPRPILTII  | 15515 | 15315 |
| >TP53-R248F MNRRPILTI   | 457   | >TP53-R248F MNPRPILTI   | 5595  | 5138  |
| >TP53-R248F MNRRPILTI   | 23625 | >TP53-R248F MNPRPILTI   | 413   | 23212 |
| >TP53-R248F MNRRPILTII  | 21974 | >TP53-R248F MNPRPILTII  | 311   | 21663 |
| >TP53-R248F MNRRPILTI   | 399   | >TP53-R248F MNPRPILTI   | 221   | 178   |
| >TP53-R248F GMNRRPILTI  | 972   | >TP53-R248F GMNPRPILTI  | 370   | 602   |

|                       |      |                       |       |       |
|-----------------------|------|-----------------------|-------|-------|
| >TP53-R248FGMNRRPILTI | 755  | >TP53-R248FGMNPRPILTI | 253   | 502   |
| >TP53-R248FGMNRRPIL   | 678  | >TP53-R248FGMNPRPIL   | 262   | 416   |
| >TP53-R248FGMNRRPILTI | 185  | >TP53-R248FGMNPRPILTI | 100   | 85    |
| >TP53-R248FGMNRRPILTI | 168  | >TP53-R248FGMNPRPILTI | 54    | 114   |
| >TP53-R248FGMNRRPIL   | 213  | >TP53-R248FGMNPRPIL   | 108   | 105   |
| >TP53-R248FGMNRRPILT  | 728  | >TP53-R248FGMNPRPILT  | 209   | 519   |
| >TP53-R248FGMNRRPILTI | 61   | >TP53-R248FGMNPRPILTI | 60    | 1     |
| >TP53-R248FGMNRRPILTI | 13   | >TP53-R248FGMNPRPILTI | 7     | 6     |
| >TP53-R248FGMNRRPIL   | 229  | >TP53-R248FGMNPRPIL   | 100   | 129   |
| >TP53-R248FGMNRRPILT  | 822  | >TP53-R248FGMNPRPILT  | 371   | 451   |
| >TP53-R248FGMNRRPILTI | 10   | >TP53-R248FGMNPRPILTI | 7     | 3     |
| >TP53-R248FGMNRRPILTI | 93   | >TP53-R248FGMNPRPILTI | 55    | 38    |
| >TP53-R248FGMNRRPIL   | 182  | >TP53-R248FGMNPRPIL   | 110   | 72    |
| >TP53-R248FGMNRRPILTI | 21   | >TP53-R248FGMNPRPILTI | 13    | 8     |
| >TP53-R248FGMNRRPILTI | 53   | >TP53-R248FGMNPRPILTI | 30    | 23    |
| >TP53-R248FGMNRRPIL   | 160  | >TP53-R248FGMNPRPIL   | 60    | 100   |
| >TP53-R248FGMNRRPILTI | 66   | >TP53-R248FGMNPRPILTI | 25    | 41    |
| >TP53-R248FGMNRRPILTI | 192  | >TP53-R248FGMNPRPILTI | 64    | 128   |
| >TP53-R248FGMNRRPIL   | 32   | >TP53-R248FGMNPRPIL   | 18    | 14    |
| >TP53-R248FGMNRRPILT  | 744  | >TP53-R248FGMNPRPILT  | 296   | 448   |
| >TP53-R248FGMNRRPILTI | 43   | >TP53-R248FGMNPRPILTI | 19    | 24    |
| >TP53-R248FGMNRRPILTI | 102  | >TP53-R248FGMNPRPILTI | 45    | 57    |
| >TP53-R248FGMNRRPILTI | 147  | >TP53-R248FGMNPRPILTI | 219   | 72    |
| >TP53-R248FGGMNRRPIL  | 444  | >TP53-R248FGGMNPRPIL  | 15956 | 15512 |
| >TP53-R248FGGMNRRPIL  | 538  | >TP53-R248FGGMNPRPIL  | 380   | 158   |
| >TP53-R248FMGGMNRRP   | 803  | >TP53-R248FMGGMNPRP   | 362   | 441   |
| >TP53-R248FCMGGMNRR   | 1329 | >TP53-R248FCMGGMNPR   | 292   | 1037  |
| >TP53-R248FCMGGMNRR   | 984  | >TP53-R248FCMGGMNPR   | 114   | 870   |
| >TP53-R248FCMGGMNRR   | 2155 | >TP53-R248FCMGGMNPR   | 461   | 1694  |
| >TP53-R248FCMGGMNRR   | 88   | >TP53-R248FCMGGMNPR   | 33    | 55    |
| >TP53-R248FCMGGMNRR   | 314  | >TP53-R248FCMGGMNPR   | 98    | 216   |
| >TP53-R248FCMGGMNRR   | 117  | >TP53-R248FCMGGMNPR   | 57    | 60    |
| >TP53-R248FSCMGGMNR   | 1568 | >TP53-R248FSCMGGMNP   | 496   | 1072  |
| >TP53-R248FSCMGGMNR   | 994  | >TP53-R248FSCMGGMNP   | 449   | 545   |
| >TP53-R248FSCMGGMNR   | 464  | >TP53-R248FSCMGGMNP   | 34546 | 34082 |
| >TP53-R248FSCMGGMNR   | 1578 | >TP53-R248FSCMGGMNP   | 319   | 1259  |
| >TP53-R248FSSCMGGMNI  | 58   | >TP53-R248FSSCMGGMNI  | 18682 | 18624 |
| >TP53-R248FSSCMGGMNI  | 192  | >TP53-R248FSSCMGGMNI  | 95    | 97    |
| >TP53-R248FSSCMGGMNI  | 110  | >TP53-R248FSSCMGGMNI  | 21404 | 21294 |
| >TP53-R248FSSCMGGMNI  | 56   | >TP53-R248FSSCMGGMNI  | 41    | 15    |
| >TP53-R248FSSCMGGMNI  | 220  | >TP53-R248FSSCMGGMNI  | 33803 | 33583 |
| >TP53-R248FSSCMGGMNI  | 361  | >TP53-R248FSSCMGGMNI  | 118   | 243   |
| >TP53-R248FSSCMGGMNI  | 398  | >TP53-R248FSSCMGGMNI  | 15248 | 14850 |

|                        |       |                        |       |       |
|------------------------|-------|------------------------|-------|-------|
| >TP53-R248FSSCMGGMNI   | 460   | >TP53-R248FSSCMGGMNI   | 580   | 120   |
| >TP53-R248FNSSCMGGMI   | 111   | >TP53-R248FNSSCMGGMI   | 29980 | 29869 |
| >TP53-R248FNSSCMGGMI   | 55    | >TP53-R248FNSSCMGGMI   | 23514 | 23459 |
| >TP53-R248FNSSCMGGMI   | 365   | >TP53-R248FNSSCMGGMI   | 29043 | 28678 |
| >TP53-R248FNSSCMGGMI   | 12    | >TP53-R248FNSSCMGGMI   | 23289 | 23277 |
| >TP53-R248FNSSCMGGMI   | 39    | >TP53-R248FNSSCMGGMI   | 43    | 4     |
| >TP53-R248CRRPILTII    | 220   | >TP53-R248CRRPILTII    | 2685  | 2465  |
| >TP53-R248CRRPILTIITL  | 14    | >TP53-R248CRRPILTIITL  | 162   | 148   |
| >TP53-R248CRRPILTIITL  | 492   | >TP53-R248CRRPILTIITL  | 1352  | 860   |
| >TP53-R248CRRPILTII    | 33    | >TP53-R248CRRPILTII    | 4996  | 4963  |
| >TP53-R248CRRPILTIIT   | 86    | >TP53-R248CRRPILTIIT   | 1892  | 1806  |
| >TP53-R248CRRPILTIITL  | 16    | >TP53-R248CRRPILTIITL  | 199   | 183   |
| >TP53-R248CRRPILTIITLE | 129   | >TP53-R248CRRPILTIITLE | 2854  | 2725  |
| >TP53-R248CRRPILTII    | 319   | >TP53-R248CRRPILTII    | 5451  | 5132  |
| >TP53-R248CRRPILTIIT   | 329   | >TP53-R248CRRPILTIIT   | 5552  | 5223  |
| >TP53-R248CRRPILTIITL  | 14    | >TP53-R248CRRPILTIITL  | 89    | 75    |
| >TP53-R248CRRPILTIITLE | 467   | >TP53-R248CRRPILTIITLE | 6414  | 5947  |
| >TP53-R248CNRRPILTII   | 1242  | >TP53-R248CNRRPILTII   | 391   | 851   |
| >TP53-R248CNRRPILTI    | 15719 | >TP53-R248CNRRPILTI    | 489   | 15230 |
| >TP53-R248CNRRPILTII   | 13082 | >TP53-R248CNRRPILTII   | 143   | 12939 |
| >TP53-R248CNRRPILTI    | 21126 | >TP53-R248CNRRPILTI    | 165   | 20961 |
| >TP53-R248CNRRPILTII   | 19575 | >TP53-R248CNRRPILTII   | 301   | 19274 |
| >TP53-R248CNRRPILTIITL | 17916 | >TP53-R248CNRRPILTIITL | 146   | 17770 |
| >TP53-R248CNRRPILTI    | 1113  | >TP53-R248CNRRPILTI    | 299   | 814   |
| >TP53-R248CNRRPILTII   | 1273  | >TP53-R248CNRRPILTII   | 385   | 888   |
| >TP53-R248CNRRPILTIITL | 710   | >TP53-R248CNRRPILTIITL | 182   | 528   |
| >TP53-R248CNRRPILTII   | 281   | >TP53-R248CNRRPILTII   | 6351  | 6070  |
| >TP53-R248CNRRPILTIITL | 50    | >TP53-R248CNRRPILTIITL | 938   | 888   |
| >TP53-R248CNRRPILTII   | 224   | >TP53-R248CNRRPILTII   | 5937  | 5713  |
| >TP53-R248CNRRPILTIITL | 12    | >TP53-R248CNRRPILTIITL | 487   | 475   |
| >TP53-R248CMNRRPILTI   | 35    | >TP53-R248CMNRRPILTI   | 7571  | 7536  |
| >TP53-R248CMNRRPILTII  | 200   | >TP53-R248CMNRRPILTII  | 11642 | 11442 |
| >TP53-R248CMNRRPILTI   | 457   | >TP53-R248CMNRRPILTI   | 2862  | 2405  |
| >TP53-R248CMNRRPILTI   | 399   | >TP53-R248CMNRRPILTI   | 133   | 266   |
| >TP53-R248CGMNRRPILTI  | 972   | >TP53-R248CGMNRRPILTI  | 484   | 488   |
| >TP53-R248CGMNRRPIL    | 678   | >TP53-R248CGMNRRPIL    | 379   | 299   |
| >TP53-R248CGMNRRPILTI  | 185   | >TP53-R248CGMNRRPILTI  | 104   | 81    |
| >TP53-R248CGMNRRPILTI  | 168   | >TP53-R248CGMNRRPILTI  | 101   | 67    |
| >TP53-R248CGMNRRPIL    | 213   | >TP53-R248CGMNRRPIL    | 213   | 0     |
| >TP53-R248CGMNRRPILTI  | 61    | >TP53-R248CGMNRRPILTI  | 57    | 4     |
| >TP53-R248CGMNRRPILTI  | 13    | >TP53-R248CGMNRRPILTI  | 11    | 2     |
| >TP53-R248CGMNRRPIL    | 229   | >TP53-R248CGMNRRPIL    | 150   | 79    |
| >TP53-R248CGMNRRPILTI  | 10    | >TP53-R248CGMNRRPILTI  | 8     | 2     |

|                        |      |                        |       |       |
|------------------------|------|------------------------|-------|-------|
| >TP53-R248CGMNRRPILTI  | 93   | >TP53-R248CGMNQRPILTI  | 63    | 30    |
| >TP53-R248CGMNRRPIL    | 182  | >TP53-R248CGMNQRPIL    | 219   | 37    |
| >TP53-R248CGMNRRPILTI  | 21   | >TP53-R248CGMNQRPILTI  | 26    | 5     |
| >TP53-R248CGMNRRPILTI  | 53   | >TP53-R248CGMNQRPILTI  | 71    | 18    |
| >TP53-R248CGMNRRPIL    | 160  | >TP53-R248CGMNQRPIL    | 74    | 86    |
| >TP53-R248CGMNRRPILTI  | 66   | >TP53-R248CGMNQRPILTI  | 38    | 28    |
| >TP53-R248CGMNRRPILTI  | 192  | >TP53-R248CGMNQRPILTI  | 99    | 93    |
| >TP53-R248CGMNRRPIL    | 32   | >TP53-R248CGMNQRPIL    | 25    | 7     |
| >TP53-R248CGMNRRPILTI  | 43   | >TP53-R248CGMNQRPILTI  | 31    | 12    |
| >TP53-R248CGMNRRPILTI  | 102  | >TP53-R248CGMNQRPILTI  | 82    | 20    |
| >TP53-R248CGMNRRPILTI  | 147  | >TP53-R248CGMNQRPILTI  | 136   | 11    |
| >TP53-R248CGGMNRRPIL   | 444  | >TP53-R248CGGMNQRPI    | 6868  | 6424  |
| >TP53-R248CCMGGMNRR    | 984  | >TP53-R248CCMGGMNQR    | 242   | 742   |
| >TP53-R248CCMGGMNRR    | 1849 | >TP53-R248CCMGGMNQR    | 455   | 1394  |
| >TP53-R248CCMGGMNRR    | 88   | >TP53-R248CCMGGMNQR    | 31    | 57    |
| >TP53-R248CCMGGMNRR    | 314  | >TP53-R248CCMGGMNQR    | 273   | 41    |
| >TP53-R248CCMGGMNRR    | 117  | >TP53-R248CCMGGMNQR    | 139   | 22    |
| >TP53-R248CCMGGMNR     | 464  | >TP53-R248CCMGGMNQ     | 24046 | 23582 |
| >TP53-R248CSSCMGGMNI   | 58   | >TP53-R248CSSCMGGMNI   | 13434 | 13376 |
| >TP53-R248CSSCMGGMNI   | 192  | >TP53-R248CSSCMGGMNI   | 159   | 33    |
| >TP53-R248CSSCMGGMNI   | 110  | >TP53-R248CSSCMGGMNI   | 16386 | 16276 |
| >TP53-R248CSSCMGGMNI   | 56   | >TP53-R248CSSCMGGMNI   | 92    | 36    |
| >TP53-R248CSSCMGGMNI   | 220  | >TP53-R248CSSCMGGMNI   | 13688 | 13468 |
| >TP53-R248CSSCMGGMNI   | 361  | >TP53-R248CSSCMGGMNI   | 295   | 66    |
| >TP53-R248CSSCMGGMNI   | 398  | >TP53-R248CSSCMGGMNI   | 4975  | 4577  |
| >TP53-R248CSSCMGGMNI   | 460  | >TP53-R248CSSCMGGMNI   | 464   | 4     |
| >TP53-R248CNSSCMGGMI   | 111  | >TP53-R248CNSSCMGGMI   | 25411 | 25300 |
| >TP53-R248CNSSCMGGMI   | 55   | >TP53-R248CNSSCMGGMI   | 15981 | 15926 |
| >TP53-R248CNSSCMGGMI   | 365  | >TP53-R248CNSSCMGGMI   | 23534 | 23169 |
| >TP53-R248CNSSCMGGMI   | 12   | >TP53-R248CNSSCMGGMI   | 15556 | 15544 |
| >TP53-R248CNSSCMGGMI   | 39   | >TP53-R248CNSSCMGGMI   | 28    | 11    |
| >TP53-R248VRRPILTI     | 220  | >TP53-R248VWRPILTI     | 1444  | 1224  |
| >TP53-R248VRRPILTIITL  | 14   | >TP53-R248VWRPILTIITL  | 35    | 21    |
| >TP53-R248VRRPILTIITL  | 2520 | >TP53-R248VWRPILTIITL  | 197   | 2323  |
| >TP53-R248VRRPILTIITL  | 492  | >TP53-R248VWRPILTIITL  | 2155  | 1663  |
| >TP53-R248VRRPILTI     | 33   | >TP53-R248VWRPILTI     | 841   | 808   |
| >TP53-R248VRRPILTIIT   | 86   | >TP53-R248VWRPILTIIT   | 4411  | 4325  |
| >TP53-R248VRRPILTIITL  | 16   | >TP53-R248VWRPILTIITL  | 49    | 33    |
| >TP53-R248VRRPILTIITLE | 129  | >TP53-R248VWRPILTIITLE | 5859  | 5730  |
| >TP53-R248VRRPILTI     | 319  | >TP53-R248VWRPILTI     | 5594  | 5275  |
| >TP53-R248VRRPILTIIT   | 329  | >TP53-R248VWRPILTIIT   | 2941  | 2612  |
| >TP53-R248VRRPILTIITL  | 14   | >TP53-R248VWRPILTIITL  | 29    | 15    |
| >TP53-R248VRRPILTIITLE | 467  | >TP53-R248VWRPILTIITLE | 3590  | 3123  |

|                        |       |                        |       |       |
|------------------------|-------|------------------------|-------|-------|
| >TP53-R248VNRRPILTII   | 281   | >TP53-R248VNWRPILTII   | 18559 | 18278 |
| >TP53-R248VNRRPILTIITL | 50    | >TP53-R248VNWRPILTIITL | 5566  | 5516  |
| >TP53-R248VNRRPILTII   | 224   | >TP53-R248VNWRPILTII   | 24366 | 24142 |
| >TP53-R248VNRRPILTIITL | 12    | >TP53-R248VNWRPILTIITL | 10668 | 10656 |
| >TP53-R248VNRRPILTI    | 30742 | >TP53-R248VNWRPILTI    | 182   | 30560 |
| >TP53-R248VNRRPILTII   | 33517 | >TP53-R248VNWRPILTII   | 214   | 33303 |
| >TP53-R248VNRRPILTIITL | 27698 | >TP53-R248VNWRPILTIITL | 149   | 27549 |
| >TP53-R248VCNSSCMGGM   | 30562 | >TP53-R248VCNSSCMGGM   | 146   | 30416 |
| >TP53-R248VMNRRPILTI   | 35    | >TP53-R248VMNWRPILTI   | 7448  | 7413  |
| >TP53-R248VMNRRPILTII  | 200   | >TP53-R248VMNWRPILTII  | 11750 | 11550 |
| >TP53-R248VMNRRPILTI   | 457   | >TP53-R248VMNWRPILTI   | 381   | 76    |
| >TP53-R248VMNRRPILTI   | 399   | >TP53-R248VMNWRPILTI   | 35    | 364   |
| >TP53-R248VGMNRRPIL    | 2183  | >TP53-R248VGMNWRPIL    | 324   | 1859  |
| >TP53-R248VGMNRRPILTI  | 972   | >TP53-R248VGMNWRPILT   | 252   | 720   |
| >TP53-R248VGMNRRPILTI  | 755   | >TP53-R248VGMNWRPILT   | 171   | 584   |
| >TP53-R248VGMNRRPIL    | 678   | >TP53-R248VGMNWRPIL    | 382   | 296   |
| >TP53-R248VGMNRRPILTI  | 185   | >TP53-R248VGMNWRPILT   | 109   | 76    |
| >TP53-R248VGMNRRPILTI  | 168   | >TP53-R248VGMNWRPILT   | 99    | 69    |
| >TP53-R248VGMNRRPIL    | 213   | >TP53-R248VGMNWRPIL    | 79    | 134   |
| >TP53-R248VGMNRRPILT   | 728   | >TP53-R248VGMNWRPILT   | 302   | 426   |
| >TP53-R248VGMNRRPILTI  | 61    | >TP53-R248VGMNWRPILT   | 64    | 3     |
| >TP53-R248VGMNRRPILTI  | 13    | >TP53-R248VGMNWRPILT   | 8     | 5     |
| >TP53-R248VGMNRRPIL    | 229   | >TP53-R248VGMNWRPIL    | 24    | 205   |
| >TP53-R248VGMNRRPILT   | 822   | >TP53-R248VGMNWRPILT   | 85    | 737   |
| >TP53-R248VGMNRRPILTI  | 10    | >TP53-R248VGMNWRPILT   | 4     | 6     |
| >TP53-R248VGMNRRPILTI  | 93    | >TP53-R248VGMNWRPILT   | 21    | 72    |
| >TP53-R248VGMNRRPIL    | 182   | >TP53-R248VGMNWRPIL    | 132   | 50    |
| >TP53-R248VGMNRRPILTI  | 21    | >TP53-R248VGMNWRPILT   | 24    | 3     |
| >TP53-R248VGMNRRPILTI  | 53    | >TP53-R248VGMNWRPILT   | 57    | 4     |
| >TP53-R248VGMNRRPIL    | 160   | >TP53-R248VGMNWRPIL    | 24    | 136   |
| >TP53-R248VGMNRRPILTI  | 66    | >TP53-R248VGMNWRPILT   | 22    | 44    |
| >TP53-R248VGMNRRPILTI  | 192   | >TP53-R248VGMNWRPILT   | 43    | 149   |
| >TP53-R248VGMNRRPIL    | 32    | >TP53-R248VGMNWRPIL    | 12    | 20    |
| >TP53-R248VGMNRRPILT   | 744   | >TP53-R248VGMNWRPILT   | 334   | 410   |
| >TP53-R248VGMNRRPILTI  | 43    | >TP53-R248VGMNWRPILT   | 15    | 28    |
| >TP53-R248VGMNRRPILTI  | 102   | >TP53-R248VGMNWRPILT   | 33    | 69    |
| >TP53-R248VGMNRRPILTI  | 147   | >TP53-R248VGMNWRPILT   | 54    | 93    |
| >TP53-R248VGMNRRPILTI  | 646   | >TP53-R248VGMNWRPILT   | 210   | 436   |
| >TP53-R248VGMNRRPIL    | 1607  | >TP53-R248VGMNWRPIL    | 362   | 1245  |
| >TP53-R248VGGMNRPPIL   | 444   | >TP53-R248VGGMNRPPIL   | 11254 | 10810 |
| >TP53-R248VGGMNRPPIL   | 538   | >TP53-R248VGGMNRPPIL   | 461   | 77    |
| >TP53-R248VMGGMNRPP    | 803   | >TP53-R248VMGGMNRPP    | 370   | 433   |
| >TP53-R248VCMGGMNR     | 984   | >TP53-R248VCMGGMNR     | 72    | 912   |

|                        |       |                        |       |       |
|------------------------|-------|------------------------|-------|-------|
| >TP53-R248\CMGGMNRR    | 2150  | >TP53-R248\CMGGMNWI    | 225   | 1925  |
| >TP53-R248\CMGGMNRR    | 3061  | >TP53-R248\CMGGMNWI    | 354   | 2707  |
| >TP53-R248\CMGGMNRR    | 3411  | >TP53-R248\CMGGMNWI    | 411   | 3000  |
| >TP53-R248\CMGGMNRR    | 3560  | >TP53-R248\CMGGMNWI    | 386   | 3174  |
| >TP53-R248\CMGGMNRR    | 2155  | >TP53-R248\CMGGMNWI    | 118   | 2037  |
| >TP53-R248\CMGGMNRR    | 1849  | >TP53-R248\CMGGMNWI    | 370   | 1479  |
| >TP53-R248\CMGGMNRR    | 88    | >TP53-R248\CMGGMNWI    | 13    | 75    |
| >TP53-R248\CMGGMNRR    | 314   | >TP53-R248\CMGGMNWI    | 147   | 167   |
| >TP53-R248\CMGGMNRR    | 1022  | >TP53-R248\CMGGMNWI    | 458   | 564   |
| >TP53-R248\CMGGMNRR    | 117   | >TP53-R248\CMGGMNWI    | 78    | 39    |
| >TP53-R248\SCMGGMNR    | 464   | >TP53-R248\SCMGGMNV    | 33454 | 32990 |
| >TP53-R248\SSCMGGMNI   | 58    | >TP53-R248\SSCMGGMN\   | 21135 | 21077 |
| >TP53-R248\SSCMGGMNI   | 192   | >TP53-R248\SSCMGGMN\   | 82    | 110   |
| >TP53-R248\SSCMGGMNI   | 110   | >TP53-R248\SSCMGGMN\   | 20074 | 19964 |
| >TP53-R248\SSCMGGMNI   | 56    | >TP53-R248\SSCMGGMN\   | 23    | 33    |
| >TP53-R248\SSCMGGMNI   | 220   | >TP53-R248\SSCMGGMN\   | 31490 | 31270 |
| >TP53-R248\SSCMGGMNI   | 361   | >TP53-R248\SSCMGGMN\   | 86    | 275   |
| >TP53-R248\SSCMGGMNI   | 11434 | >TP53-R248\SSCMGGMN\   | 6     | 11428 |
| >TP53-R248\SSCMGGMNI   | 22444 | >TP53-R248\SSCMGGMN\   | 105   | 22339 |
| >TP53-R248\SSCMGGMNI   | 398   | >TP53-R248\SSCMGGMN\   | 11094 | 10696 |
| >TP53-R248\SSCMGGMNI   | 460   | >TP53-R248\SSCMGGMN\   | 309   | 151   |
| >TP53-R248\NSSCMGGMI   | 111   | >TP53-R248\NSSCMGGMI   | 29320 | 29209 |
| >TP53-R248\NSSCMGGMI   | 55    | >TP53-R248\NSSCMGGMI   | 20726 | 20671 |
| >TP53-R248\NSSCMGGMI   | 365   | >TP53-R248\NSSCMGGMI   | 27348 | 26983 |
| >TP53-R248\NSSCMGGMI   | 12    | >TP53-R248\NSSCMGGMI   | 21928 | 21916 |
| >TP53-R248\NSSCMGGMI   | 39    | >TP53-R248\NSSCMGGMI   | 25    | 14    |
| >TP53-R248\NSSCMGGMI   | 20139 | >TP53-R248\NSSCMGGMI   | 77    | 20062 |
| >TP53-R248\NSSCMGGMI   | 22481 | >TP53-R248\NSSCMGGMI   | 333   | 22148 |
| >TP53-R249\RPILTIITL   | 104   | >TP53-R249\GPILTIITL   | 679   | 575   |
| >TP53-R249\RPILTIITL   | 34    | >TP53-R249\GPILTIITL   | 711   | 677   |
| >TP53-R249\RPILTIITL   | 391   | >TP53-R249\GPILTIITL   | 808   | 417   |
| >TP53-R249\RPILTIITL   | 66    | >TP53-R249\GPILTIITL   | 182   | 116   |
| >TP53-R249\RPILTIITL   | 89    | >TP53-R249\GPILTIITL   | 279   | 190   |
| >TP53-R249\RRPILTIITL  | 21821 | >TP53-R249\RGPILTIITL  | 433   | 21388 |
| >TP53-R249\RRPILTII    | 220   | >TP53-R249\RGPILTII    | 18485 | 18265 |
| >TP53-R249\RRPILTIITL  | 14    | >TP53-R249\RGPILTIITL  | 11844 | 11830 |
| >TP53-R249\RRPILTIITL  | 492   | >TP53-R249\RGPILTIITL  | 12    | 480   |
| >TP53-R249\RRPILTII    | 33    | >TP53-R249\RGPILTII    | 15503 | 15470 |
| >TP53-R249\RRPILTIIT   | 86    | >TP53-R249\RGPILTIIT   | 17817 | 17731 |
| >TP53-R249\RRPILTIITL  | 16    | >TP53-R249\RGPILTIITL  | 4655  | 4639  |
| >TP53-R249\RRPILTIITLE | 129   | >TP53-R249\RGPILTIITLE | 19156 | 19027 |
| >TP53-R249\RRPILTII    | 319   | >TP53-R249\RGPILTII    | 18922 | 18603 |
| >TP53-R249\RRPILTIIT   | 329   | >TP53-R249\RGPILTIIT   | 30123 | 29794 |



|                        |      |                        |       |       |
|------------------------|------|------------------------|-------|-------|
| >TP53-R249CRRPILTIITL  | 14   | >TP53-R249CRGPILTIITL  | 5354  | 5340  |
| >TP53-R249CRRPILTIITLE | 467  | >TP53-R249CRGPILTIITLE | 27133 | 26666 |
| >TP53-R249CRRPILTII    | 1621 | >TP53-R249CRGPILTII    | 353   | 1268  |
| >TP53-R249CNSSCMGGMI   | 39   | >TP53-R249CNSSCMGGMI   | 29830 | 29791 |
| >TP53-R249CNRRPILTIITL | 701  | >TP53-R249CNRGPILTIITL | 487   | 214   |
| >TP53-R249CNRRPILTII   | 281  | >TP53-R249CNRGPILTII   | 2322  | 2041  |
| >TP53-R249CNRRPILTIITL | 50   | >TP53-R249CNRGPILTIITL | 299   | 249   |
| >TP53-R249CNRRPILTII   | 224  | >TP53-R249CNRGPILTII   | 1075  | 851   |
| >TP53-R249CNRRPILTIITL | 12   | >TP53-R249CNRGPILTIITL | 51    | 39    |
| >TP53-R249CMNRRPILTI   | 35   | >TP53-R249CMNRGPILTI   | 144   | 109   |
| >TP53-R249CMNRRPILTII  | 200  | >TP53-R249CMNRGPILTII  | 681   | 481   |
| >TP53-R249CMNRRPILTI   | 457  | >TP53-R249CMNRGPILTI   | 2645  | 2188  |
| >TP53-R249CMNRRPILTI   | 399  | >TP53-R249CMNRGPILTI   | 519   | 120   |
| >TP53-R249CGMNRRPILTI  | 972  | >TP53-R249CGMNRGPILTI  | 327   | 645   |
| >TP53-R249CGMNRRPIL    | 678  | >TP53-R249CGMNRGPIL    | 491   | 187   |
| >TP53-R249CGMNRRPILTI  | 185  | >TP53-R249CGMNRGPILTI  | 66    | 119   |
| >TP53-R249CGMNRRPILTI  | 168  | >TP53-R249CGMNRGPILTI  | 165   | 3     |
| >TP53-R249CGMNRRPIL    | 213  | >TP53-R249CGMNRGPIL    | 100   | 113   |
| >TP53-R249CGMNRRPILTI  | 61   | >TP53-R249CGMNRGPILTI  | 43    | 18    |
| >TP53-R249CGMNRRPILTI  | 13   | >TP53-R249CGMNRGPILTI  | 10    | 3     |
| >TP53-R249CGMNRRPIL    | 229  | >TP53-R249CGMNRGPIL    | 52    | 177   |
| >TP53-R249CGMNRRPILT   | 822  | >TP53-R249CGMNRGPILT   | 288   | 534   |
| >TP53-R249CGMNRRPILTI  | 10   | >TP53-R249CGMNRGPILTI  | 6     | 4     |
| >TP53-R249CGMNRRPILTI  | 93   | >TP53-R249CGMNRGPILTI  | 47    | 46    |
| >TP53-R249CGMNRRPIL    | 182  | >TP53-R249CGMNRGPIL    | 41    | 141   |
| >TP53-R249CGMNRRPILTI  | 21   | >TP53-R249CGMNRGPILTI  | 13    | 8     |
| >TP53-R249CGMNRRPILTI  | 53   | >TP53-R249CGMNRGPILTI  | 29    | 24    |
| >TP53-R249CGMNRRPIL    | 160  | >TP53-R249CGMNRGPIL    | 31    | 129   |
| >TP53-R249CGMNRRPILTI  | 66   | >TP53-R249CGMNRGPILTI  | 26    | 40    |
| >TP53-R249CGMNRRPILTI  | 192  | >TP53-R249CGMNRGPILTI  | 67    | 125   |
| >TP53-R249CGMNRRPILTI  | 2202 | >TP53-R249CGMNRGPILTI  | 487   | 1715  |
| >TP53-R249CGMNRRPIL    | 32   | >TP53-R249CGMNRGPIL    | 22    | 10    |
| >TP53-R249CGMNRRPILT   | 744  | >TP53-R249CGMNRGPILT   | 399   | 345   |
| >TP53-R249CGMNRRPILTI  | 43   | >TP53-R249CGMNRGPILTI  | 19    | 24    |
| >TP53-R249CGMNRRPILTI  | 102  | >TP53-R249CGMNRGPILTI  | 61    | 41    |
| >TP53-R249CGMNRRPILTI  | 147  | >TP53-R249CGMNRGPILTI  | 149   | 2     |
| >TP53-R249CGGMNRRPIL   | 444  | >TP53-R249CGGMNRRGPIL  | 3718  | 3274  |
| >TP53-R249CGGMNRRPIL   | 538  | >TP53-R249CGGMNRRGPIL  | 489   | 49    |
| >TP53-R249CCMGGMNRR    | 88   | >TP53-R249CCMGGMNRRG   | 101   | 13    |
| >TP53-R249CCMGGMNRR    | 314  | >TP53-R249CCMGGMNRRG   | 25000 | 24686 |
| >TP53-R249CCMGGMNRR    | 117  | >TP53-R249CCMGGMNRRG   | 34894 | 34777 |
| >TP53-R249CSMGGMNRR    | 1031 | >TP53-R249CSMGGMNRR    | 311   | 720   |
| >TP53-R249CSSCMGGMNI   | 192  | >TP53-R249CSSCMGGMNI   | 33293 | 33101 |

|                         |      |                         |       |       |
|-------------------------|------|-------------------------|-------|-------|
| >TP53-R249C SSCMGGMNI   | 56   | >TP53-R249C SSCMGGMNI   | 27553 | 27497 |
| >TP53-R249C SSCMGGMNI   | 361  | >TP53-R249C SSCMGGMNI   | 37803 | 37442 |
| >TP53-R249C SSCMGGMNI   | 460  | >TP53-R249C SSCMGGMNI   | 16049 | 15589 |
| >TP53-R249K RPILTIITL   | 104  | >TP53-R249K KPILTIITL   | 559   | 455   |
| >TP53-R249K RPILTIITL   | 34   | >TP53-R249K KPILTIITL   | 64    | 30    |
| >TP53-R249K RPILTIITL   | 391  | >TP53-R249K KPILTIITL   | 639   | 248   |
| >TP53-R249K RPILTIITL   | 66   | >TP53-R249K KPILTIITL   | 143   | 77    |
| >TP53-R249K RPILTIITL   | 89   | >TP53-R249K KPILTIITL   | 126   | 37    |
| >TP53-R249K RPILTIITL   | 671  | >TP53-R249K KPILTIITL   | 356   | 315   |
| >TP53-R249K RRPILTII    | 1610 | >TP53-R249K RKPILTII    | 447   | 1163  |
| >TP53-R249K RRPILTIITL  | 921  | >TP53-R249K RKPILTIITL  | 204   | 717   |
| >TP53-R249K RRPILTII    | 220  | >TP53-R249K RKPILTII    | 6301  | 6081  |
| >TP53-R249K RRPILTIITL  | 14   | >TP53-R249K RKPILTIITL  | 842   | 828   |
| >TP53-R249K RRPILTIITL  | 492  | >TP53-R249K RKPILTIITL  | 287   | 205   |
| >TP53-R249K RRPILTII    | 33   | >TP53-R249K RKPILTII    | 2303  | 2270  |
| >TP53-R249K RRPILTIIT   | 86   | >TP53-R249K RKPILTIIT   | 2451  | 2365  |
| >TP53-R249K RRPILTIITL  | 16   | >TP53-R249K RKPILTIITL  | 173   | 157   |
| >TP53-R249K RRPILTIITL  | 129  | >TP53-R249K RKPILTIITL  | 3545  | 3416  |
| >TP53-R249K RRPILTII    | 319  | >TP53-R249K RKPILTII    | 6578  | 6259  |
| >TP53-R249K RRPILTIIT   | 329  | >TP53-R249K RKPILTIIT   | 8324  | 7995  |
| >TP53-R249K RRPILTIITL  | 14   | >TP53-R249K RKPILTIITL  | 237   | 223   |
| >TP53-R249K RRPILTIITL  | 467  | >TP53-R249K RKPILTIITL  | 7432  | 6965  |
| >TP53-R249K NSSCMGGMI   | 7205 | >TP53-R249K NSSCMGGMI   | 371   | 6834  |
| >TP53-R249K NSSCMGGMI   | 39   | >TP53-R249K NSSCMGGMI   | 129   | 90    |
| >TP53-R249K NRRPILTII   | 281  | >TP53-R249K NRKPILTII   | 755   | 474   |
| >TP53-R249K NRRPILTIITL | 50   | >TP53-R249K NRKPILTIITL | 107   | 57    |
| >TP53-R249K NRRPILTII   | 224  | >TP53-R249K NRKPILTII   | 419   | 195   |
| >TP53-R249K NRRPILTIITL | 12   | >TP53-R249K NRKPILTIITL | 27    | 15    |
| >TP53-R249K MNRRPILTI   | 35   | >TP53-R249K MNRKPILTI   | 74    | 39    |
| >TP53-R249K MNRRPILTII  | 200  | >TP53-R249K MNRKPILTII  | 402   | 202   |
| >TP53-R249K MNRRPILTI   | 457  | >TP53-R249K MNRKPILTI   | 484   | 27    |
| >TP53-R249K MNRRPILTI   | 399  | >TP53-R249K MNRKPILTI   | 362   | 37    |
| >TP53-R249K GMNRRPILTI  | 185  | >TP53-R249K GMNRKPILTI  | 184   | 1     |
| >TP53-R249K GMNRRPILTI  | 168  | >TP53-R249K GMNRKPILTII | 174   | 6     |
| >TP53-R249K GMNRRPIL    | 213  | >TP53-R249K GMNRKPIL    | 271   | 58    |
| >TP53-R249K GMNRRPILTI  | 61   | >TP53-R249K GMNRKPILTI  | 51    | 10    |
| >TP53-R249K GMNRRPILTI  | 13   | >TP53-R249K GMNRKPILTII | 13    | 0     |
| >TP53-R249K GMNRRPIL    | 229  | >TP53-R249K GMNRKPIL    | 120   | 109   |
| >TP53-R249K GMNRRPILTI  | 10   | >TP53-R249K GMNRKPILTI  | 9     | 1     |
| >TP53-R249K GMNRRPILTI  | 93   | >TP53-R249K GMNRKPILTII | 78    | 15    |
| >TP53-R249K GMNRRPIL    | 182  | >TP53-R249K GMNRKPIL    | 97    | 85    |
| >TP53-R249K GMNRRPILTI  | 21   | >TP53-R249K GMNRKPILTI  | 17    | 4     |
| >TP53-R249K GMNRRPILTI  | 53   | >TP53-R249K GMNRKPILTII | 39    | 14    |

|                        |       |                        |      |       |
|------------------------|-------|------------------------|------|-------|
| >TP53-R249KGMNRRPIL    | 160   | >TP53-R249KGMNRKPIL    | 101  | 59    |
| >TP53-R249KGMNRRPILTI  | 66    | >TP53-R249KGMNRKPILTI  | 62   | 4     |
| >TP53-R249KGMNRRPILTI  | 192   | >TP53-R249KGMNRKPILTI  | 188  | 4     |
| >TP53-R249KGMNRRPIL    | 32    | >TP53-R249KGMNRKPIL    | 33   | 1     |
| >TP53-R249KGMNRRPILTI  | 43    | >TP53-R249KGMNRKPILTI  | 52   | 9     |
| >TP53-R249KGMNRRPILTI  | 102   | >TP53-R249KGMNRKPILTI  | 116  | 14    |
| >TP53-R249KGMNRRPILTI  | 147   | >TP53-R249KGMNRKPILTI  | 181  | 34    |
| >TP53-R249KGGMNRKPIL   | 444   | >TP53-R249KGGMNRKPIL   | 1175 | 731   |
| >TP53-R249KCMGGMNRR    | 88    | >TP53-R249KCMGGMNRR    | 108  | 20    |
| >TP53-R249KCMGGMNRR    | 6751  | >TP53-R249KCMGGMNRR    | 343  | 6408  |
| >TP53-R249KCMGGMNRR    | 8069  | >TP53-R249KCMGGMNRR    | 405  | 7664  |
| >TP53-R249KCMGGMNRR    | 314   | >TP53-R249KCMGGMNRR    | 5965 | 5651  |
| >TP53-R249KCMGGMNRR    | 117   | >TP53-R249KCMGGMNRR    | 3876 | 3759  |
| >TP53-R249KSSCMGGMNI   | 3062  | >TP53-R249KSSCMGGMNI   | 132  | 2930  |
| >TP53-R249KSSCMGGMNI   | 192   | >TP53-R249KSSCMGGMNI   | 21   | 171   |
| >TP53-R249KSSCMGGMNI   | 7496  | >TP53-R249KSSCMGGMNI   | 214  | 7282  |
| >TP53-R249KSSCMGGMNI   | 56    | >TP53-R249KSSCMGGMNI   | 1328 | 1272  |
| >TP53-R249KSSCMGGMNI   | 361   | >TP53-R249KSSCMGGMNI   | 1199 | 838   |
| >TP53-R249KSSCMGGMNI   | 460   | >TP53-R249KSSCMGGMNI   | 298  | 162   |
| >TP53-R249MRPILTIITL   | 104   | >TP53-R249MRPILTIITL   | 30   | 74    |
| >TP53-R249MRPILTIITL   | 34    | >TP53-R249MRPILTIITL   | 69   | 35    |
| >TP53-R249MRPILTIIT    | 2349  | >TP53-R249MRPILTIIT    | 59   | 2290  |
| >TP53-R249MRPILTIITL   | 391   | >TP53-R249MRPILTIITL   | 13   | 378   |
| >TP53-R249MRPILTIITLED | 7691  | >TP53-R249MRPILTIITLED | 407  | 7284  |
| >TP53-R249MRPILTIITL   | 66    | >TP53-R249MRPILTIITL   | 14   | 52    |
| >TP53-R249MRPILTIITL   | 8594  | >TP53-R249MRPILTIITL   | 336  | 8258  |
| >TP53-R249MRPILTIIT    | 10899 | >TP53-R249MRPILTIIT    | 474  | 10425 |
| >TP53-R249MRPILTIITL   | 1363  | >TP53-R249MRPILTIITL   | 28   | 1335  |
| >TP53-R249MRPILTIIT    | 1102  | >TP53-R249MRPILTIIT    | 9    | 1093  |
| >TP53-R249MRPILTIITL   | 10279 | >TP53-R249MRPILTIITL   | 79   | 10200 |
| >TP53-R249MRPILTIITLE  | 1945  | >TP53-R249MRPILTIITLE  | 90   | 1855  |
| >TP53-R249MRPILTIITLED | 4104  | >TP53-R249MRPILTIITLED | 171  | 3933  |
| >TP53-R249MRPILTIITL   | 89    | >TP53-R249MRPILTIITL   | 46   | 43    |
| >TP53-R249MRPILTIITL   | 671   | >TP53-R249MRPILTIITL   | 75   | 596   |
| >TP53-R249MRPILTIITL   | 11610 | >TP53-R249MRPILTIITL   | 104  | 11506 |
| >TP53-R249MRPILTIITL   | 23127 | >TP53-R249MRPILTIITL   | 305  | 22822 |
| >TP53-R249MRPILTIITL   | 5598  | >TP53-R249MRPILTIITL   | 66   | 5532  |
| >TP53-R249MRPILTIITL   | 18295 | >TP53-R249MRPILTIITL   | 36   | 18259 |
| >TP53-R249MRPILTIITL   | 12859 | >TP53-R249MRPILTIITL   | 111  | 12748 |
| >TP53-R249MRPILTIITL   | 21913 | >TP53-R249MRPILTIITL   | 360  | 21553 |
| >TP53-R249MRPILTIITL   | 3483  | >TP53-R249MRPILTIITL   | 106  | 3377  |
| >TP53-R249MRPILTIITL   | 26048 | >TP53-R249MRPILTIITL   | 71   | 25977 |
| >TP53-R249MRPILTIITL   | 17151 | >TP53-R249MRPILTIITL   | 12   | 17139 |

|                        |       |                        |       |       |
|------------------------|-------|------------------------|-------|-------|
| >TP53-R249MRRPILTIITL  | 23763 | >TP53-R249MRMPILTIITL  | 85    | 23678 |
| >TP53-R249MRRPILTII    | 24681 | >TP53-R249MRMPILTII    | 187   | 24494 |
| >TP53-R249MRRPILTIITL  | 22049 | >TP53-R249MRMPILTIITL  | 25    | 22024 |
| >TP53-R249MRRPILTII    | 33772 | >TP53-R249MRMPILTII    | 261   | 33511 |
| >TP53-R249MRRPILTIITL  | 26823 | >TP53-R249MRMPILTIITL  | 20    | 26803 |
| >TP53-R249MRRPILTIITL  | 8754  | >TP53-R249MRMPILTIITL  | 259   | 8495  |
| >TP53-R249MRRPILTII    | 5895  | >TP53-R249MRMPILTII    | 55    | 5840  |
| >TP53-R249MRRPILTIITL  | 2856  | >TP53-R249MRMPILTIITL  | 31    | 2825  |
| >TP53-R249MRRPILTII    | 220   | >TP53-R249MRMPILTII    | 7599  | 7379  |
| >TP53-R249MRRPILTIITL  | 14    | >TP53-R249MRMPILTIITL  | 8700  | 8686  |
| >TP53-R249MRRPILTIITL  | 2410  | >TP53-R249MRMPILTIITL  | 227   | 2183  |
| >TP53-R249MRRPILTIITL  | 492   | >TP53-R249MRMPILTIITL  | 13    | 479   |
| >TP53-R249MRRPILTII    | 33    | >TP53-R249MRMPILTII    | 7596  | 7563  |
| >TP53-R249MRRPILTIIT   | 86    | >TP53-R249MRMPILTIIT   | 6615  | 6529  |
| >TP53-R249MRRPILTIITL  | 16    | >TP53-R249MRMPILTIITL  | 1964  | 1948  |
| >TP53-R249MRRPILTIITL  | 129   | >TP53-R249MRMPILTIITL  | 8191  | 8062  |
| >TP53-R249MRRPILTII    | 319   | >TP53-R249MRMPILTII    | 14117 | 13798 |
| >TP53-R249MRRPILTIIT   | 329   | >TP53-R249MRMPILTIIT   | 14357 | 14028 |
| >TP53-R249MRRPILTIITL  | 14    | >TP53-R249MRMPILTIITL  | 2783  | 2769  |
| >TP53-R249MRRPILTIITL  | 467   | >TP53-R249MRMPILTIITL  | 12308 | 11841 |
| >TP53-R249MRRPILTIITL  | 467   | >TP53-R249MRMPILTIITL  | 12308 | 11841 |
| >TP53-R249MNSSCMGGMI   | 39    | >TP53-R249MNSSCMGGMI   | 19761 | 19722 |
| >TP53-R249MNSSCMGGMI   | 7484  | >TP53-R249MNSSCMGGMI   | 42    | 7442  |
| >TP53-R249MNRRPILTII   | 1242  | >TP53-R249MNRRPILTII   | 234   | 1008  |
| >TP53-R249MNRRPILTI    | 1481  | >TP53-R249MNRRPILTI    | 110   | 1371  |
| >TP53-R249MNRRPILTII   | 2535  | >TP53-R249MNRRPILTII   | 203   | 2332  |
| >TP53-R249MNRRPILTIITL | 1047  | >TP53-R249MNRRPILTIITL | 75    | 972   |
| >TP53-R249MNRRPILTI    | 8918  | >TP53-R249MNRRPILTI    | 186   | 8732  |
| >TP53-R249MNRRPILTII   | 12896 | >TP53-R249MNRRPILTII   | 349   | 12547 |
| >TP53-R249MNRRPILTIITL | 701   | >TP53-R249MNRRPILTIITL | 14    | 687   |
| >TP53-R249MNRRPILTII   | 281   | >TP53-R249MNRRPILTII   | 464   | 183   |
| >TP53-R249MNRRPILTIITL | 50    | >TP53-R249MNRRPILTIITL | 67    | 17    |
| >TP53-R249MNRRPILTII   | 224   | >TP53-R249MNRRPILTII   | 114   | 110   |
| >TP53-R249MNRRPILTIITL | 12    | >TP53-R249MNRRPILTIITL | 9     | 3     |
| >TP53-R249MNRMPILTI    | 35    | >TP53-R249MNRMPILTI    | 77    | 42    |
| >TP53-R249MNRMPILTII   | 200   | >TP53-R249MNRMPILTII   | 398   | 198   |
| >TP53-R249MNRMPILTI    | 457   | >TP53-R249MNRMPILTI    | 614   | 157   |
| >TP53-R249MNRMPILTI    | 399   | >TP53-R249MNRMPILTI    | 354   | 45    |
| >TP53-R249GMNRRPILTI   | 972   | >TP53-R249GMNRRMPILT   | 323   | 649   |
| >TP53-R249GMNRRPILTI   | 755   | >TP53-R249GMNRRMPILT   | 476   | 279   |
| >TP53-R249GMNRRPIL     | 678   | >TP53-R249GMNRRMPIL    | 167   | 511   |
| >TP53-R249GMNRRPILTI   | 185   | >TP53-R249GMNRRMPILT   | 139   | 46    |
| >TP53-R249GMNRRPILTI   | 168   | >TP53-R249GMNRRMPILT   | 98    | 70    |
| >TP53-R249GMNRRPIL     | 213   | >TP53-R249GMNRRMPIL    | 56    | 157   |

|                       |       |                       |       |       |
|-----------------------|-------|-----------------------|-------|-------|
| >TP53-R249MGMNRRPILTI | 61    | >TP53-R249MGMNRRMPILT | 42    | 19    |
| >TP53-R249MGMNRRPILTI | 13    | >TP53-R249MGMNRRMPILT | 11    | 2     |
| >TP53-R249MGMNRRPIL   | 229   | >TP53-R249MGMNRRMPIL  | 94    | 135   |
| >TP53-R249MGMNRRPILTI | 10    | >TP53-R249MGMNRRMPILT | 10    | 0     |
| >TP53-R249MGMNRRPILTI | 93    | >TP53-R249MGMNRRMPILT | 87    | 6     |
| >TP53-R249MGMNRRPIL   | 182   | >TP53-R249MGMNRRMPIL  | 48    | 134   |
| >TP53-R249MGMNRRPILTI | 21    | >TP53-R249MGMNRRMPILT | 21    | 0     |
| >TP53-R249MGMNRRPILTI | 53    | >TP53-R249MGMNRRMPILT | 45    | 8     |
| >TP53-R249MGMNRRPIL   | 160   | >TP53-R249MGMNRRMPIL  | 56    | 104   |
| >TP53-R249MGMNRRPILTI | 66    | >TP53-R249MGMNRRMPILT | 50    | 16    |
| >TP53-R249MGMNRRPILTI | 192   | >TP53-R249MGMNRRMPILT | 131   | 61    |
| >TP53-R249MGMNRRPIL   | 32    | >TP53-R249MGMNRRMPIL  | 24    | 8     |
| >TP53-R249MGMNRRPILTI | 43    | >TP53-R249MGMNRRMPILT | 33    | 10    |
| >TP53-R249MGMNRRPILTI | 102   | >TP53-R249MGMNRRMPILT | 82    | 20    |
| >TP53-R249MGMNRRPILTI | 147   | >TP53-R249MGMNRRMPILT | 91    | 56    |
| >TP53-R249MGMNRRPILTI | 646   | >TP53-R249MGMNRRMPILT | 342   | 304   |
| >TP53-R249MGGMNRMPIL  | 444   | >TP53-R249MGGMNRMPIL  | 2440  | 1996  |
| >TP53-R249MGGMNRMPIL  | 538   | >TP53-R249MGGMNRMPIL  | 487   | 51    |
| >TP53-R249MGGMNRMP    | 803   | >TP53-R249MGGMNRMP    | 296   | 507   |
| >TP53-R249MCMGGMNRR   | 1556  | >TP53-R249MCMGGMNRR   | 165   | 1391  |
| >TP53-R249MCMGGMNRR   | 1329  | >TP53-R249MCMGGMNRR   | 357   | 972   |
| >TP53-R249MCMGGMNRR   | 984   | >TP53-R249MCMGGMNRR   | 471   | 513   |
| >TP53-R249MCMGGMNRR   | 1849  | >TP53-R249MCMGGMNRR   | 282   | 1567  |
| >TP53-R249MCMGGMNRR   | 88    | >TP53-R249MCMGGMNRR   | 98    | 10    |
| >TP53-R249MCMGGMNRR   | 314   | >TP53-R249MCMGGMNRR   | 21670 | 21356 |
| >TP53-R249MCMGGMNRR   | 117   | >TP53-R249MCMGGMNRR   | 29815 | 29698 |
| >TP53-R249MSCMGGMNR   | 5557  | >TP53-R249MSCMGGMNR   | 24    | 5533  |
| >TP53-R249MSCMGGMNR   | 1031  | >TP53-R249MSCMGGMNR   | 124   | 907   |
| >TP53-R249MSCMGGMNR   | 5155  | >TP53-R249MSCMGGMNR   | 31    | 5124  |
| >TP53-R249SSCMGGMNI   | 192   | >TP53-R249SSCMGGMNI   | 32004 | 31812 |
| >TP53-R249SSCMGGMNI   | 12350 | >TP53-R249SSCMGGMNI   | 174   | 12176 |
| >TP53-R249SSCMGGMNI   | 56    | >TP53-R249SSCMGGMNI   | 20637 | 20581 |
| >TP53-R249SSCMGGMNI   | 361   | >TP53-R249SSCMGGMNI   | 36168 | 35807 |
| >TP53-R249SSCMGGMNI   | 10272 | >TP53-R249SSCMGGMNI   | 18    | 10254 |
| >TP53-R249SSCMGGMNI   | 18659 | >TP53-R249SSCMGGMNI   | 86    | 18573 |
| >TP53-R249SSCMGGMNI   | 460   | >TP53-R249SSCMGGMNI   | 7255  | 6795  |
| >TP53-R249SRPILTIITL  | 104   | >TP53-R249SRPILTIITL  | 34    | 70    |
| >TP53-R249SRPILTIITL  | 34    | >TP53-R249SRPILTIITL  | 135   | 101   |
| >TP53-R249SRPILTIITL  | 391   | >TP53-R249SRPILTIITL  | 179   | 212   |
| >TP53-R249SRPILTIITL  | 66    | >TP53-R249SRPILTIITL  | 32    | 34    |
| >TP53-R249SRPILTIITL  | 1363  | >TP53-R249SRPILTIITL  | 409   | 954   |
| >TP53-R249SRPILTIITL  | 89    | >TP53-R249SRPILTIITL  | 121   | 32    |
| >TP53-R249SRPILTIITL  | 671   | >TP53-R249SRPILTIITL  | 326   | 345   |

|                         |       |                         |       |       |
|-------------------------|-------|-------------------------|-------|-------|
| >TP53-R249S RRPILTII    | 5895  | >TP53-R249S RSPILTII    | 118   | 5777  |
| >TP53-R249S RRPILTIITL  | 2856  | >TP53-R249S RSPILTIITL  | 59    | 2797  |
| >TP53-R249S RRPILTIITL  | 12813 | >TP53-R249S RSPILTIITL  | 313   | 12500 |
| >TP53-R249S RRPILTIITL  | 22966 | >TP53-R249S RSPILTIITL  | 23    | 22943 |
| >TP53-R249S RRPILTII    | 220   | >TP53-R249S RSPILTII    | 14100 | 13880 |
| >TP53-R249S RRPILTIITL  | 14    | >TP53-R249S RSPILTIITL  | 7181  | 7167  |
| >TP53-R249S RRPILTII    | 27928 | >TP53-R249S RSPILTII    | 424   | 27504 |
| >TP53-R249S RRPILTIIT   | 24842 | >TP53-R249S RSPILTIIT   | 38    | 24804 |
| >TP53-R249S RRPILTIITL  | 492   | >TP53-R249S RSPILTIITL  | 2     | 490   |
| >TP53-R249S RRPILTIITL  | 17185 | >TP53-R249S RSPILTIITL  | 26    | 17159 |
| >TP53-R249S RRPILTIITL  | 6791  | >TP53-R249S RSPILTIITL  | 50    | 6741  |
| >TP53-R249S RRPILTII    | 33    | >TP53-R249S RSPILTII    | 8789  | 8756  |
| >TP53-R249S RRPILTIIT   | 86    | >TP53-R249S RSPILTIIT   | 9916  | 9830  |
| >TP53-R249S RRPILTIITL  | 16    | >TP53-R249S RSPILTIITL  | 1612  | 1596  |
| >TP53-R249S RRPILTIITL  | 129   | >TP53-R249S RSPILTIITL  | 11487 | 11358 |
| >TP53-R249S RRPILTIITL  | 319   | >TP53-R249S RSPILTIITL  | 15478 | 15159 |
| >TP53-R249S RRPILTIIT   | 329   | >TP53-R249S RSPILTIIT   | 25447 | 25118 |
| >TP53-R249S RRPILTIITL  | 14    | >TP53-R249S RSPILTIITL  | 2079  | 2065  |
| >TP53-R249S RRPILTIITL  | 467   | >TP53-R249S RSPILTIITL  | 22567 | 22100 |
| >TP53-R249S RRPILTII    | 1621  | >TP53-R249S RSPILTII    | 24    | 1597  |
| >TP53-R249S NSSCMGGMI   | 39    | >TP53-R249S NSSCMGGMI   | 19016 | 18977 |
| >TP53-R249S NRRPILTIITL | 701   | >TP53-R249S NRSPILTIITL | 41    | 660   |
| >TP53-R249S NRRPILTII   | 281   | >TP53-R249S NRSPILTII   | 1202  | 921   |
| >TP53-R249S NRRPILTIITL | 50    | >TP53-R249S NRSPILTIITL | 171   | 121   |
| >TP53-R249S NRRPILTII   | 224   | >TP53-R249S NRSPILTII   | 336   | 112   |
| >TP53-R249S NRRPILTIITL | 12    | >TP53-R249S NRSPILTIITL | 21    | 9     |
| >TP53-R249S MNRRPILTI   | 35    | >TP53-R249S MNRSPILTI   | 107   | 72    |
| >TP53-R249S MNRRPILTII  | 200   | >TP53-R249S MNRSPILTII  | 512   | 312   |
| >TP53-R249S MNRRPILTI   | 457   | >TP53-R249S MNRSPILTI   | 264   | 193   |
| >TP53-R249S MNRRPILTII  | 821   | >TP53-R249S MNRSPILTII  | 489   | 332   |
| >TP53-R249S MNRRPILTI   | 1235  | >TP53-R249S MNRSPILTI   | 442   | 793   |
| >TP53-R249S MNRRPILTI   | 399   | >TP53-R249S MNRSPILTI   | 197   | 202   |
| >TP53-R249S GMNRRPILTI  | 972   | >TP53-R249S GMNRSPIITI  | 381   | 591   |
| >TP53-R249S GMNRRPIL    | 678   | >TP53-R249S GMNRSPII    | 192   | 486   |
| >TP53-R249S GMNRRPILTI  | 185   | >TP53-R249S GMNRSPIITI  | 79    | 106   |
| >TP53-R249S GMNRRPILTI  | 168   | >TP53-R249S GMNRSPIITI  | 105   | 63    |
| >TP53-R249S GMNRRPIL    | 213   | >TP53-R249S GMNRSPII    | 78    | 135   |
| >TP53-R249S GMNRRPILTI  | 61    | >TP53-R249S GMNRSPIITI  | 37    | 24    |
| >TP53-R249S GMNRRPILTI  | 13    | >TP53-R249S GMNRSPIITI  | 11    | 2     |
| >TP53-R249S GMNRRPIL    | 229   | >TP53-R249S GMNRSPII    | 71    | 158   |
| >TP53-R249S GMNRRPILTI  | 822   | >TP53-R249S GMNRSPIITI  | 483   | 339   |
| >TP53-R249S GMNRRPILTI  | 10    | >TP53-R249S GMNRSPIITI  | 8     | 2     |
| >TP53-R249S GMNRRPILTI  | 93    | >TP53-R249S GMNRSPIITI  | 69    | 24    |

|                        |       |                         |       |       |
|------------------------|-------|-------------------------|-------|-------|
| >TP53-R249S GMNRRPIL   | 182   | >TP53-R249S GMNRSPIL    | 29    | 153   |
| >TP53-R249S GMNRRPILTI | 21    | >TP53-R249S GMNRSPILTI  | 12    | 9     |
| >TP53-R249S GMNRRPILTI | 53    | >TP53-R249S GMNRSPILTII | 29    | 24    |
| >TP53-R249S GMNRRPIL   | 160   | >TP53-R249S GMNRSPIL    | 46    | 114   |
| >TP53-R249S GMNRRPILTI | 66    | >TP53-R249S GMNRSPILTI  | 45    | 21    |
| >TP53-R249S GMNRRPILTI | 192   | >TP53-R249S GMNRSPILTII | 124   | 68    |
| >TP53-R249S GMNRRPIL   | 32    | >TP53-R249S GMNRSPIL    | 24    | 8     |
| >TP53-R249S GMNRRPILTI | 43    | >TP53-R249S GMNRSPILTI  | 33    | 10    |
| >TP53-R249S GMNRRPILTI | 102   | >TP53-R249S GMNRSPILTII | 84    | 18    |
| >TP53-R249S GMNRRPILTI | 147   | >TP53-R249S GMNRSPILTI  | 228   | 81    |
| >TP53-R249S GMNRRPIL   | 976   | >TP53-R249S GMNRSPIL    | 271   | 705   |
| >TP53-R249S GMNRRPILTI | 844   | >TP53-R249S GMNRSPILTI  | 261   | 583   |
| >TP53-R249S GGMNRRPIL  | 444   | >TP53-R249S GGMNRRPIL   | 1154  | 710   |
| >TP53-R249S GGMNRRPIL  | 538   | >TP53-R249S GGMNRRPIL   | 363   | 175   |
| >TP53-R249S MGGMNRSP   | 803   | >TP53-R249S MGGMNRSP    | 154   | 649   |
| >TP53-R249S CMGGMNRR   | 1556  | >TP53-R249S CMGGMNRR    | 325   | 1231  |
| >TP53-R249S CMGGMNRR   | 1329  | >TP53-R249S CMGGMNRR    | 411   | 918   |
| >TP53-R249S CMGGMNRR   | 2155  | >TP53-R249S CMGGMNRR    | 342   | 1813  |
| >TP53-R249S CMGGMNRR   | 1849  | >TP53-R249S CMGGMNRR    | 318   | 1531  |
| >TP53-R249S CMGGMNRR   | 88    | >TP53-R249S CMGGMNRR    | 79    | 9     |
| >TP53-R249S CMGGMNRR   | 314   | >TP53-R249S CMGGMNRR    | 23538 | 23224 |
| >TP53-R249S CMGGMNRR   | 117   | >TP53-R249S CMGGMNRR    | 31462 | 31345 |
| >TP53-R249S SCMGGMNR   | 1031  | >TP53-R249S SCMGGMNR    | 217   | 814   |
| >TP53-R249S SSCMGGMNI  | 192   | >TP53-R249S SSCMGGMNI   | 30768 | 30576 |
| >TP53-R249S SSCMGGMNI  | 56    | >TP53-R249S SSCMGGMNI   | 23625 | 23569 |
| >TP53-R249S SSCMGGMNI  | 361   | >TP53-R249S SSCMGGMNI   | 36191 | 35830 |
| >TP53-R249S SSCMGGMNI  | 460   | >TP53-R249S SSCMGGMNI   | 8749  | 8289  |
| >TP53-R249T RPILTIITL  | 104   | >TP53-R249T TPILTIITL   | 57    | 47    |
| >TP53-R249T RPILTIITL  | 34    | >TP53-R249T TPILTIITL   | 872   | 838   |
| >TP53-R249T RPILTIITL  | 391   | >TP53-R249T TPILTIITL   | 114   | 277   |
| >TP53-R249T RPILTIITL  | 66    | >TP53-R249T TPILTIITL   | 17    | 49    |
| >TP53-R249T RPILTIITL  | 1363  | >TP53-R249T TPILTIITL   | 226   | 1137  |
| >TP53-R249T RPILTIITL  | 89    | >TP53-R249T TPILTIITL   | 346   | 257   |
| >TP53-R249T RPILTIITL  | 671   | >TP53-R249T TPILTIITL   | 143   | 528   |
| >TP53-R249T RRPILTIITL | 3483  | >TP53-R249T RTPILTIITL  | 160   | 3323  |
| >TP53-R249T RRPILTII   | 5895  | >TP53-R249T RTPILTII    | 37    | 5858  |
| >TP53-R249T RRPILTIITL | 2856  | >TP53-R249T RTPILTIITL  | 21    | 2835  |
| >TP53-R249T RRPILTIITL | 12813 | >TP53-R249T RTPILTIITL  | 100   | 12713 |
| >TP53-R249T RRPILTIITL | 22966 | >TP53-R249T RTPILTIITL  | 17    | 22949 |
| >TP53-R249T RRPILTII   | 220   | >TP53-R249T RTPILTII    | 15024 | 14804 |
| >TP53-R249T RRPILTIITL | 14    | >TP53-R249T RTPILTIITL  | 7675  | 7661  |
| >TP53-R249T RRPILTII   | 27928 | >TP53-R249T RTPILTII    | 185   | 27743 |
| >TP53-R249T RRPILTIIT  | 24842 | >TP53-R249T RTPILTIIT   | 14    | 24828 |

|                        |       |                        |       |       |
|------------------------|-------|------------------------|-------|-------|
| >TP53-R249TRRPILTIITL  | 492   | >TP53-R249TRTPILTIITL  | 2     | 490   |
| >TP53-R249TRRPILTIITLE | 17185 | >TP53-R249TRTPILTIITLE | 9     | 17176 |
| >TP53-R249TRRPILTIITL  | 6791  | >TP53-R249TRTPILTIITL  | 30    | 6761  |
| >TP53-R249TRRPILTII    | 33    | >TP53-R249TRTPILTII    | 8779  | 8746  |
| >TP53-R249TRRPILTIIT   | 86    | >TP53-R249TRTPILTIIT   | 9829  | 9743  |
| >TP53-R249TRRPILTIITL  | 16    | >TP53-R249TRTPILTIITL  | 1741  | 1725  |
| >TP53-R249TRRPILTIITLE | 129   | >TP53-R249TRTPILTIITLE | 11302 | 11173 |
| >TP53-R249TRRPILTII    | 319   | >TP53-R249TRTPILTII    | 16268 | 15949 |
| >TP53-R249TRRPILTIIT   | 329   | >TP53-R249TRTPILTIIT   | 24424 | 24095 |
| >TP53-R249TRRPILTIITL  | 14    | >TP53-R249TRTPILTIITL  | 2371  | 2357  |
| >TP53-R249TRRPILTIITLE | 467   | >TP53-R249TRTPILTIITLE | 21406 | 20939 |
| >TP53-R249TRRPILTII    | 1621  | >TP53-R249TRTPILTII    | 18    | 1603  |
| >TP53-R249TNSSCMGGMI   | 39    | >TP53-R249TNSSCMGGMI   | 21506 | 21467 |
| >TP53-R249TNRRPILTII   | 1242  | >TP53-R249TNRTPILTII   | 423   | 819   |
| >TP53-R249TNRRPILTIITL | 1047  | >TP53-R249TNRTPILTIITL | 354   | 693   |
| >TP53-R249TNRRPILTIITL | 701   | >TP53-R249TNRTPILTIITL | 160   | 541   |
| >TP53-R249TNRRPILTII   | 281   | >TP53-R249TNRTPILTII   | 722   | 441   |
| >TP53-R249TNRRPILTIITL | 50    | >TP53-R249TNRTPILTIITL | 109   | 59    |
| >TP53-R249TNRRPILTII   | 224   | >TP53-R249TNRTPILTII   | 325   | 101   |
| >TP53-R249TNRRPILTIITL | 12    | >TP53-R249TNRTPILTIITL | 19    | 7     |
| >TP53-R249TMNRRPILTI   | 35    | >TP53-R249TMNRTPILTI   | 87    | 52    |
| >TP53-R249TMNRRPILTII  | 200   | >TP53-R249TMNRTPILTII  | 444   | 244   |
| >TP53-R249TMNRRPILTI   | 457   | >TP53-R249TMNRTPILTI   | 504   | 47    |
| >TP53-R249TMNRRPILTI   | 399   | >TP53-R249TMNRTPILTI   | 389   | 10    |
| >TP53-R249TGMNRRPILTI  | 972   | >TP53-R249TGMNRTPILTI  | 436   | 536   |
| >TP53-R249TGMNRRPIL    | 678   | >TP53-R249TGMNRTPIL    | 189   | 489   |
| >TP53-R249TGMNRRPILTI  | 185   | >TP53-R249TGMNRTPILTI  | 101   | 84    |
| >TP53-R249TGMNRRPILTI  | 168   | >TP53-R249TGMNRTPILTII | 128   | 40    |
| >TP53-R249TGMNRRPIL    | 213   | >TP53-R249TGMNRTPIL    | 80    | 133   |
| >TP53-R249TGMNRRPILTI  | 61    | >TP53-R249TGMNRTPILTI  | 36    | 25    |
| >TP53-R249TGMNRRPILTI  | 13    | >TP53-R249TGMNRTPILTII | 15    | 2     |
| >TP53-R249TGMNRRPIL    | 229   | >TP53-R249TGMNRTPIL    | 46    | 183   |
| >TP53-R249TGMNRRPILT   | 822   | >TP53-R249TGMNRTPILT   | 263   | 559   |
| >TP53-R249TGMNRRPILTI  | 10    | >TP53-R249TGMNRTPILTI  | 6     | 4     |
| >TP53-R249TGMNRRPILTI  | 93    | >TP53-R249TGMNRTPILTII | 48    | 45    |
| >TP53-R249TGMNRRPIL    | 182   | >TP53-R249TGMNRTPIL    | 21    | 161   |
| >TP53-R249TGMNRRPILTI  | 21    | >TP53-R249TGMNRTPILTI  | 10    | 11    |
| >TP53-R249TGMNRRPILTI  | 53    | >TP53-R249TGMNRTPILTII | 22    | 31    |
| >TP53-R249TGMNRRPIL    | 160   | >TP53-R249TGMNRTPIL    | 34    | 126   |
| >TP53-R249TGMNRRPILTI  | 66    | >TP53-R249TGMNRTPILTI  | 37    | 29    |
| >TP53-R249TGMNRRPILTI  | 192   | >TP53-R249TGMNRTPILTII | 85    | 107   |
| >TP53-R249TGMNRRPIL    | 32    | >TP53-R249TGMNRTPIL    | 24    | 8     |
| >TP53-R249TGMNRRPILTI  | 43    | >TP53-R249TGMNRTPILTI  | 39    | 4     |



|                        |       |                        |       |       |
|------------------------|-------|------------------------|-------|-------|
| >TP53-R249TGMNRRPILTI  | 102   | >TP53-R249TGMNRRTPILTI | 95    | 7     |
| >TP53-R249TGMNRRPILTI  | 147   | >TP53-R249TGMNRRTPILTI | 140   | 7     |
| >TP53-R249TGMNRRPIL    | 976   | >TP53-R249TGMNRRTPIL   | 464   | 512   |
| >TP53-R249TGMNRRPILTI  | 844   | >TP53-R249TGMNRRTPILTI | 434   | 410   |
| >TP53-R249TGGMNRRPIL   | 444   | >TP53-R249TGGMNRRTPIL  | 1298  | 854   |
| >TP53-R249TGGMNRRPIL   | 538   | >TP53-R249TGGMNRRTPIL  | 339   | 199   |
| >TP53-R249TMGGMNRRP    | 803   | >TP53-R249TMGGMNRRTP   | 21    | 782   |
| >TP53-R249TCMGGMNRR    | 1556  | >TP53-R249TCMGGMNRRTP  | 383   | 1173  |
| >TP53-R249TCMGGMNRR    | 2155  | >TP53-R249TCMGGMNRRTP  | 218   | 1937  |
| >TP53-R249TCMGGMNRR    | 1849  | >TP53-R249TCMGGMNRRTP  | 291   | 1558  |
| >TP53-R249TCMGGMNRR    | 88    | >TP53-R249TCMGGMNRRTP  | 62    | 26    |
| >TP53-R249TCMGGMNRR    | 314   | >TP53-R249TCMGGMNRRTP  | 24465 | 24151 |
| >TP53-R249TCMGGMNRR    | 117   | >TP53-R249TCMGGMNRRTP  | 32165 | 32048 |
| >TP53-R249TSCMGGMNR    | 1031  | >TP53-R249TSCMGGMNRTP  | 226   | 805   |
| >TP53-R249TSSCMGGMNI   | 192   | >TP53-R249TSSCMGGMNI   | 31390 | 31198 |
| >TP53-R249TSSCMGGMNI   | 56    | >TP53-R249TSSCMGGMNI   | 22780 | 22724 |
| >TP53-R249TSSCMGGMNI   | 361   | >TP53-R249TSSCMGGMNI   | 36246 | 35885 |
| >TP53-R249TSSCMGGMNI   | 460   | >TP53-R249TSSCMGGMNI   | 10308 | 9848  |
| >TP53-R249V RPILTIITL  | 104   | >TP53-R249V WPILTIITL  | 1271  | 1167  |
| >TP53-R249V RPILTIITL  | 34    | >TP53-R249V WPILTIITL  | 171   | 137   |
| >TP53-R249V RPILTIIT   | 2349  | >TP53-R249V WPILTIIT   | 112   | 2237  |
| >TP53-R249V RPILTIITL  | 391   | >TP53-R249V WPILTIITL  | 19    | 372   |
| >TP53-R249V RPILTIITL  | 66    | >TP53-R249V WPILTIITL  | 13    | 53    |
| >TP53-R249V RPILTIITL  | 1363  | >TP53-R249V WPILTIITL  | 60    | 1303  |
| >TP53-R249V RPILTIIT   | 1102  | >TP53-R249V WPILTIIT   | 54    | 1048  |
| >TP53-R249V RPILTIITL  | 89    | >TP53-R249V WPILTIITL  | 197   | 108   |
| >TP53-R249V RPILTIITL  | 671   | >TP53-R249V WPILTIITL  | 83    | 588   |
| >TP53-R249V RRPILTIITL | 16720 | >TP53-R249V RWPILTIITL | 64    | 16656 |
| >TP53-R249V RRPILTII   | 10535 | >TP53-R249V RWPILTII   | 134   | 10401 |
| >TP53-R249V RRPILTIITL | 19844 | >TP53-R249V RWPILTIITL | 111   | 19733 |
| >TP53-R249V RRPILTII   | 12659 | >TP53-R249V RWPILTII   | 23    | 12636 |
| >TP53-R249V RRPILTIITL | 8754  | >TP53-R249V RWPILTIITL | 9     | 8745  |
| >TP53-R249V RRPILTII   | 220   | >TP53-R249V RWPILTII   | 11263 | 11043 |
| >TP53-R249V RRPILTIITL | 14    | >TP53-R249V RWPILTIITL | 1012  | 998   |
| >TP53-R249V RRPILTIITL | 492   | >TP53-R249V RWPILTIITL | 40    | 452   |
| >TP53-R249V RRPILTII   | 33    | >TP53-R249V RWPILTII   | 9139  | 9106  |
| >TP53-R249V RRPILTIIT  | 86    | >TP53-R249V RWPILTIIT  | 9059  | 8973  |
| >TP53-R249V RRPILTIITL | 16    | >TP53-R249V RWPILTIITL | 327   | 311   |
| >TP53-R249V RRPILTIITL | 129   | >TP53-R249V RWPILTIITL | 10794 | 10665 |
| >TP53-R249V RRPILTII   | 319   | >TP53-R249V RWPILTII   | 14818 | 14499 |
| >TP53-R249V RRPILTIIT  | 329   | >TP53-R249V RWPILTIIT  | 24743 | 24414 |
| >TP53-R249V RRPILTIITL | 14    | >TP53-R249V RWPILTIITL | 371   | 357   |
| >TP53-R249V RRPILTIITL | 467   | >TP53-R249V RWPILTIITL | 22825 | 22358 |

|                         |       |                         |       |       |
|-------------------------|-------|-------------------------|-------|-------|
| >TP53-R249V RRPILTII    | 34305 | >TP53-R249V RWPILTII    | 137   | 34168 |
| >TP53-R249V RRPILTIITL  | 22600 | >TP53-R249V RWPILTIITL  | 93    | 22507 |
| >TP53-R249V RRPILTIITLE | 35535 | >TP53-R249V RWPILTIITLE | 453   | 35082 |
| >TP53-R249V NSSCMGGMI   | 39    | >TP53-R249V NSSCMGGMI   | 21020 | 20981 |
| >TP53-R249V NSSCMGGMI   | 19394 | >TP53-R249V NSSCMGGMI   | 95    | 19299 |
| >TP53-R249V NRRPILTII   | 1242  | >TP53-R249V NRWPILTII   | 101   | 1141  |
| >TP53-R249V NRRPILTIITL | 710   | >TP53-R249V NRWPILTIITL | 485   | 225   |
| >TP53-R249V NRRPILTI    | 1481  | >TP53-R249V NRWPILTI    | 66    | 1415  |
| >TP53-R249V NRRPILTII   | 2535  | >TP53-R249V NRWPILTII   | 102   | 2433  |
| >TP53-R249V NRRPILTIITL | 1047  | >TP53-R249V NRWPILTIITL | 57    | 990   |
| >TP53-R249V NRRPILTIITL | 701   | >TP53-R249V NRWPILTIITL | 87    | 614   |
| >TP53-R249V NRRPILTI    | 3837  | >TP53-R249V NRWPILTI    | 195   | 3642  |
| >TP53-R249V NRRPILTII   | 4269  | >TP53-R249V NRWPILTII   | 206   | 4063  |
| >TP53-R249V NRRPILTIIT  | 3821  | >TP53-R249V NRWPILTIIT  | 187   | 3634  |
| >TP53-R249V NRRPILTIITL | 6408  | >TP53-R249V NRWPILTIITL | 371   | 6037  |
| >TP53-R249V NRRPILTI    | 674   | >TP53-R249V NRWPILTI    | 143   | 531   |
| >TP53-R249V NRRPILTII   | 281   | >TP53-R249V NRWPILTII   | 146   | 135   |
| >TP53-R249V NRRPILTIITL | 50    | >TP53-R249V NRWPILTIITL | 32    | 18    |
| >TP53-R249V NRRPILTI    | 1150  | >TP53-R249V NRWPILTI    | 427   | 723   |
| >TP53-R249V NRRPILTII   | 224   | >TP53-R249V NRWPILTII   | 36    | 188   |
| >TP53-R249V NRRPILTIITL | 12    | >TP53-R249V NRWPILTIITL | 5     | 7     |
| >TP53-R249V NRRPILTI    | 4077  | >TP53-R249V NRWPILTI    | 397   | 3680  |
| >TP53-R249V MNRRPILTI   | 35    | >TP53-R249V MNRWPILTI   | 268   | 233   |
| >TP53-R249V MNRRPILTII  | 200   | >TP53-R249V MNRWPILTII  | 1034  | 834   |
| >TP53-R249V MNRRPILTI   | 457   | >TP53-R249V MNRWPILTI   | 2949  | 2492  |
| >TP53-R249V MNRRPILTI   | 399   | >TP53-R249V MNRWPILTI   | 140   | 259   |
| >TP53-R249V GMNRRPIL    | 2183  | >TP53-R249V GMNRWPIL    | 188   | 1995  |
| >TP53-R249V GMNRRPILTI  | 972   | >TP53-R249V GMNRWPILT   | 113   | 859   |
| >TP53-R249V GMNRRPILTI  | 755   | >TP53-R249V GMNRWPILT   | 135   | 620   |
| >TP53-R249V GMNRRPIL    | 678   | >TP53-R249V GMNRWPIL    | 341   | 337   |
| >TP53-R249V GMNRRPILTI  | 185   | >TP53-R249V GMNRWPILT   | 41    | 144   |
| >TP53-R249V GMNRRPILTI  | 168   | >TP53-R249V GMNRWPILT   | 120   | 48    |
| >TP53-R249V GMNRRPIL    | 213   | >TP53-R249V GMNRWPIL    | 73    | 140   |
| >TP53-R249V GMNRRPILT   | 728   | >TP53-R249V GMNRWPILT   | 374   | 354   |
| >TP53-R249V GMNRRPILTI  | 61    | >TP53-R249V GMNRWPILT   | 20    | 41    |
| >TP53-R249V GMNRRPILTI  | 13    | >TP53-R249V GMNRWPILT   | 9     | 4     |
| >TP53-R249V GMNRRPIL    | 229   | >TP53-R249V GMNRWPIL    | 17    | 212   |
| >TP53-R249V GMNRRPILT   | 822   | >TP53-R249V GMNRWPILT   | 31    | 791   |
| >TP53-R249V GMNRRPILTI  | 10    | >TP53-R249V GMNRWPILT   | 3     | 7     |
| >TP53-R249V GMNRRPILTI  | 93    | >TP53-R249V GMNRWPILT   | 17    | 76    |
| >TP53-R249V GMNRRPIL    | 182   | >TP53-R249V GMNRWPIL    | 33    | 149   |
| >TP53-R249V GMNRRPILTI  | 21    | >TP53-R249V GMNRWPILT   | 8     | 13    |
| >TP53-R249V GMNRRPILTI  | 53    | >TP53-R249V GMNRWPILT   | 14    | 39    |

|                       |       |                      |       |       |
|-----------------------|-------|----------------------|-------|-------|
| >TP53-R249\GMNRRPIL   | 160   | >TP53-R249\GMNRWPIL  | 20    | 140   |
| >TP53-R249\GMNRRPILT  | 4760  | >TP53-R249\GMNRWPILT | 316   | 4444  |
| >TP53-R249\GMNRRPILTI | 66    | >TP53-R249\GMNRWPILT | 19    | 47    |
| >TP53-R249\GMNRRPILTI | 192   | >TP53-R249\GMNRWPILT | 41    | 151   |
| >TP53-R249\GMNRRPIL   | 5904  | >TP53-R249\GMNRWPIL  | 346   | 5558  |
| >TP53-R249\GMNRRPILTI | 2202  | >TP53-R249\GMNRWPILT | 150   | 2052  |
| >TP53-R249\GMNRRPIL   | 32    | >TP53-R249\GMNRWPIL  | 15    | 17    |
| >TP53-R249\GMNRRPILT  | 744   | >TP53-R249\GMNRWPILT | 141   | 603   |
| >TP53-R249\GMNRRPILTI | 43    | >TP53-R249\GMNRWPILT | 11    | 32    |
| >TP53-R249\GMNRRPILTI | 102   | >TP53-R249\GMNRWPILT | 30    | 72    |
| >TP53-R249\GMNRRPILTI | 147   | >TP53-R249\GMNRWPILT | 79    | 68    |
| >TP53-R249\GMNRRPILTI | 646   | >TP53-R249\GMNRWPILT | 359   | 287   |
| >TP53-R249\GGMNRWPIL  | 444   | >TP53-R249\GGMNRWPIL | 1878  | 1434  |
| >TP53-R249\GGMNRWPI   | 2924  | >TP53-R249\GGMNRWPI  | 394   | 2530  |
| >TP53-R249\GGMNRWPIL  | 538   | >TP53-R249\GGMNRWPIL | 341   | 197   |
| >TP53-R249\MGGMNRWP   | 803   | >TP53-R249\MGGMNRWI  | 213   | 590   |
| >TP53-R249\CMGGMNRV   | 635   | >TP53-R249\CMGGMNRV  | 409   | 226   |
| >TP53-R249\CMGGMNRV   | 7745  | >TP53-R249\CMGGMNRV  | 394   | 7351  |
| >TP53-R249\CMGGMNRV   | 1556  | >TP53-R249\CMGGMNRV  | 246   | 1310  |
| >TP53-R249\CMGGMNRV   | 984   | >TP53-R249\CMGGMNRV  | 80    | 904   |
| >TP53-R249\CMGGMNRV   | 3061  | >TP53-R249\CMGGMNRV  | 148   | 2913  |
| >TP53-R249\CMGGMNRV   | 6204  | >TP53-R249\CMGGMNRV  | 440   | 5764  |
| >TP53-R249\CMGGMNRV   | 1849  | >TP53-R249\CMGGMNRV  | 69    | 1780  |
| >TP53-R249\CMGGMNRV   | 88    | >TP53-R249\CMGGMNRV  | 88    | 0     |
| >TP53-R249\CMGGMNRV   | 314   | >TP53-R249\CMGGMNRV  | 23991 | 23677 |
| >TP53-R249\CMGGMNRV   | 117   | >TP53-R249\CMGGMNRV  | 30076 | 29959 |
| >TP53-R249\SCMGGMNR   | 1031  | >TP53-R249\SCMGGMNR  | 119   | 912   |
| >TP53-R249\SCMGGMNR   | 2519  | >TP53-R249\SCMGGMNR  | 325   | 2194  |
| >TP53-R249\SCMGGMNR   | 5155  | >TP53-R249\SCMGGMNR  | 338   | 4817  |
| >TP53-R249\SSCMGGMNI  | 192   | >TP53-R249\SSCMGGMNI | 31379 | 31187 |
| >TP53-R249\SSCMGGMNI  | 56    | >TP53-R249\SSCMGGMNI | 25850 | 25794 |
| >TP53-R249\SSCMGGMNI  | 361   | >TP53-R249\SSCMGGMNI | 35993 | 35632 |
| >TP53-R249\SSCMGGMNI  | 10272 | >TP53-R249\SSCMGGMNI | 7     | 10265 |
| >TP53-R249\SSCMGGMNI  | 22877 | >TP53-R249\SSCMGGMNI | 202   | 22675 |
| >TP53-R249\SSCMGGMNI  | 460   | >TP53-R249\SSCMGGMNI | 11048 | 10588 |
| >TP53-R267\GRNSFEVR   | 7479  | >TP53-R267\GGNSFEVR  | 408   | 7071  |
| >TP53-R267\GRNSFEVR   | 405   | >TP53-R267\GGNSFEVR  | 23746 | 23341 |
| >TP53-R267\LLGRNSFEVR | 286   | >TP53-R267\LLGNSFEVR | 1565  | 1279  |
| >TP53-R267\LLGRNSFEV  | 26    | >TP53-R267\LLGNSFEV  | 15    | 11    |
| >TP53-R267\LLGRNSFEVR | 137   | >TP53-R267\LLGNSFEVR | 65    | 72    |
| >TP53-R267\LLGRNSFEV  | 16    | >TP53-R267\LLGNSFEV  | 6     | 10    |
| >TP53-R267\LLGRNSFEVR | 62    | >TP53-R267\LLGNSFEVR | 24    | 38    |
| >TP53-R267\LLGRNSFEV  | 47    | >TP53-R267\LLGNSFEV  | 26    | 21    |

|                        |       |                        |       |       |
|------------------------|-------|------------------------|-------|-------|
| >TP53-R267C LLGRNSFEVR | 214   | >TP53-R267C LLGGNSFEVR | 134   | 80    |
| >TP53-R267C LLGRNSFEV  | 39    | >TP53-R267C LLGGNSFEV  | 23    | 16    |
| >TP53-R267C LLGRNSFEVR | 582   | >TP53-R267C LLGGNSFEVR | 338   | 244   |
| >TP53-R267C LLGRNSFEV  | 2     | >TP53-R267C LLGGNSFEV  | 2     | 0     |
| >TP53-R267C LLGRNSFEVR | 3     | >TP53-R267C LLGGNSFEVR | 2     | 1     |
| >TP53-R267C LLGRNSFEV  | 2     | >TP53-R267C LLGGNSFEV  | 2     | 0     |
| >TP53-R267C LLGRNSFEVR | 7     | >TP53-R267C LLGGNSFEVR | 7     | 0     |
| >TP53-R267C LLGRNSFEV  | 5     | >TP53-R267C LLGGNSFEV  | 4     | 1     |
| >TP53-R267C LLGRNSFEVR | 9     | >TP53-R267C LLGGNSFEVR | 7     | 2     |
| >TP53-R267C LLGRNSFEV  | 2     | >TP53-R267C LLGGNSFEV  | 2     | 0     |
| >TP53-R267C LLGRNSFEVR | 6     | >TP53-R267C LLGGNSFEVR | 4     | 2     |
| >TP53-R267C LLGRNSFEV  | 2     | >TP53-R267C LLGGNSFEV  | 1     | 1     |
| >TP53-R267C LLGRNSFEVR | 2     | >TP53-R267C LLGGNSFEVR | 2     | 0     |
| >TP53-R267C LLGRNSFEVR | 429   | >TP53-R267C LLGGNSFEVR | 229   | 200   |
| >TP53-R267C LLGRNSFEV  | 425   | >TP53-R267C LLGGNSFEV  | 304   | 121   |
| >TP53-R267C LLGRNSFEVR | 773   | >TP53-R267C LLGGNSFEVR | 445   | 328   |
| >TP53-R267C NLLGRNSFEV | 29    | >TP53-R267C NLLGGNSFEV | 16    | 13    |
| >TP53-R267C NLLGRNSFEV | 89    | >TP53-R267C NLLGGNSFEV | 30    | 59    |
| >TP53-R267C NLLGRNSFEV | 94    | >TP53-R267C NLLGGNSFEV | 58    | 36    |
| >TP53-R267C NLLGRNSFEV | 137   | >TP53-R267C NLLGGNSFEV | 84    | 53    |
| >TP53-R267C NLLGRNSFEV | 3     | >TP53-R267C NLLGGNSFEV | 2     | 1     |
| >TP53-R267C NLLGRNSFEV | 5     | >TP53-R267C NLLGGNSFEV | 4     | 1     |
| >TP53-R267C NLLGRNSFEV | 7     | >TP53-R267C NLLGGNSFEV | 5     | 2     |
| >TP53-R267C NLLGRNSFEV | 3     | >TP53-R267C NLLGGNSFEV | 2     | 1     |
| >TP53-R267C NLLGRNSFEV | 3     | >TP53-R267C NLLGGNSFEV | 2     | 1     |
| >TP53-R267C NLLGRNSFEV | 109   | >TP53-R267C NLLGGNSFEV | 190   | 81    |
| >TP53-R267C NLLGRNSFEV | 309   | >TP53-R267C NLLGGNSFEV | 324   | 15    |
| >TP53-R267C NLLGRNSFEV | 52    | >TP53-R267C NLLGGNSFEV | 15    | 37    |
| >TP53-R267C NLLGRNSF   | 968   | >TP53-R267C NLLGGNSF   | 352   | 616   |
| >TP53-R267C NLLGRNSF   | 65    | >TP53-R267C NLLGGNSF   | 22    | 43    |
| >TP53-R267C NLLGRNSF   | 418   | >TP53-R267C NLLGGNSF   | 274   | 144   |
| >TP53-R267C NLLGRNSFEV | 195   | >TP53-R267C NLLGGNSFEV | 420   | 225   |
| >TP53-R267C GNLLGRNSF  | 525   | >TP53-R267C GNLLGGNSF  | 270   | 255   |
| >TP53-R267C SGNLLGRNSF | 311   | >TP53-R267C SGNLLGGNSF | 251   | 60    |
| >TP53-R267C SSGNLLGRNS | 245   | >TP53-R267C SSGNLLGGNS | 140   | 105   |
| >TP53-R267C SSGNLLGRNS | 701   | >TP53-R267C SSGNLLGGNS | 461   | 240   |
| >TP53-R267C SSGNLLGRNS | 390   | >TP53-R267C SSGNLLGGNS | 179   | 211   |
| >TP53-R267C SSGNLLGRNS | 32    | >TP53-R267C SSGNLLGGNS | 29    | 3     |
| >TP53-R267C SSGNLLGR   | 357   | >TP53-R267C SSGNLLGG   | 17362 | 17005 |
| >TP53-R267C DSSGNLLGR  | 68    | >TP53-R267C DSSGNLLGG  | 34819 | 34751 |
| >TP53-R267L GRNSFEVRV  | 22458 | >TP53-R267L GLNSFEVRV  | 41    | 22417 |
| >TP53-R267L GRNSFEVRV  | 15725 | >TP53-R267L GLNSFEVRV  | 11    | 15714 |
| >TP53-R267L GRNSFEVRVC | 27136 | >TP53-R267L GLNSFEVRVC | 133   | 27003 |

|                        |       |                        |       |       |
|------------------------|-------|------------------------|-------|-------|
| >TP53-R267L GRNSFEVRV  | 19259 | >TP53-R267L GLNSFEVRV  | 27    | 19232 |
| >TP53-R267L GRNSFEVRV  | 8897  | >TP53-R267L GLNSFEVRV  | 4     | 8893  |
| >TP53-R267L GRNSFEVRVC | 26954 | >TP53-R267L GLNSFEVRVC | 278   | 26676 |
| >TP53-R267L GRNSFEVRV  | 20042 | >TP53-R267L GLNSFEVRV  | 14    | 20028 |
| >TP53-R267L GRNSFEVRV  | 15795 | >TP53-R267L GLNSFEVRV  | 8     | 15787 |
| >TP53-R267L GRNSFEVRVC | 24048 | >TP53-R267L GLNSFEVRVC | 101   | 23947 |
| >TP53-R267L GRNSFEVRV  | 22123 | >TP53-R267L GLNSFEVRV  | 37    | 22086 |
| >TP53-R267L GRNSFEVRV  | 9565  | >TP53-R267L GLNSFEVRV  | 2     | 9563  |
| >TP53-R267L GRNSFEVRVC | 31920 | >TP53-R267L GLNSFEVRVC | 61    | 31859 |
| >TP53-R267L GRNSFEVR   | 7479  | >TP53-R267L GLNSFEVR   | 58    | 7421  |
| >TP53-R267L GRNSFEVR   | 405   | >TP53-R267L GLNSFEVR   | 19438 | 19033 |
| >TP53-R267L LEDSSGNLLG | 10336 | >TP53-R267L LEDSSGNLLG | 15    | 10321 |
| >TP53-R267L LEDSSGNLLG | 11392 | >TP53-R267L LEDSSGNLLG | 483   | 10909 |
| >TP53-R267L LGRNSFEV   | 3827  | >TP53-R267L LGLNSFEV   | 114   | 3713  |
| >TP53-R267L LGRNSFEV   | 7800  | >TP53-R267L LGLNSFEV   | 357   | 7443  |
| >TP53-R267L LGRNSFEV   | 12366 | >TP53-R267L LGLNSFEV   | 387   | 11979 |
| >TP53-R267L LGRNSFEVR  | 286   | >TP53-R267L LGLNSFEVR  | 475   | 189   |
| >TP53-R267L LLGRNSFEV  | 26    | >TP53-R267L LLGLNSFEV  | 28    | 2     |
| >TP53-R267L LLGRNSFEVR | 137   | >TP53-R267L LLGLNSFEVR | 146   | 9     |
| >TP53-R267L LLGRNSFEV  | 16    | >TP53-R267L LLGLNSFEV  | 19    | 3     |
| >TP53-R267L LLGRNSFEVR | 62    | >TP53-R267L LLGLNSFEVR | 72    | 10    |
| >TP53-R267L LLGRNSFEV  | 47    | >TP53-R267L LLGLNSFEV  | 100   | 53    |
| >TP53-R267L LLGRNSFEVR | 214   | >TP53-R267L LLGLNSFEVR | 340   | 126   |
| >TP53-R267L LLGRNSFEV  | 39    | >TP53-R267L LLGLNSFEV  | 68    | 29    |
| >TP53-R267L LLGRNSFEV  | 2     | >TP53-R267L LLGLNSFEV  | 3     | 1     |
| >TP53-R267L LLGRNSFEVR | 3     | >TP53-R267L LLGLNSFEVR | 5     | 2     |
| >TP53-R267L LLGRNSFEV  | 2     | >TP53-R267L LLGLNSFEV  | 3     | 1     |
| >TP53-R267L LLGRNSFEVR | 7     | >TP53-R267L LLGLNSFEVR | 10    | 3     |
| >TP53-R267L LLGRNSFEV  | 5     | >TP53-R267L LLGLNSFEV  | 6     | 1     |
| >TP53-R267L LLGRNSFEVR | 9     | >TP53-R267L LLGLNSFEVR | 11    | 2     |
| >TP53-R267L LLGRNSFEV  | 2     | >TP53-R267L LLGLNSFEV  | 2     | 0     |
| >TP53-R267L LLGRNSFEVR | 6     | >TP53-R267L LLGLNSFEVR | 5     | 1     |
| >TP53-R267L LLGRNSFEV  | 2     | >TP53-R267L LLGLNSFEV  | 2     | 0     |
| >TP53-R267L LLGRNSFEVR | 2     | >TP53-R267L LLGLNSFEVR | 2     | 0     |
| >TP53-R267L LLGRNSFEVR | 429   | >TP53-R267L LLGLNSFEVR | 321   | 108   |
| >TP53-R267L LLGRNSFEV  | 425   | >TP53-R267L LLGLNSFEV  | 563   | 138   |
| >TP53-R267L LLGRNSFEVR | 773   | >TP53-R267L LLGLNSFEVR | 495   | 278   |
| >TP53-R267L NLLGRNSFEV | 29    | >TP53-R267L NLLGLNSFEV | 17    | 12    |
| >TP53-R267L NLLGRNSFEV | 89    | >TP53-R267L NLLGLNSFEV | 41    | 48    |
| >TP53-R267L NLLGRNSFEV | 94    | >TP53-R267L NLLGLNSFEV | 53    | 41    |
| >TP53-R267L NLLGRNSFEV | 137   | >TP53-R267L NLLGLNSFEV | 51    | 86    |
| >TP53-R267L NLLGRNSFEV | 3     | >TP53-R267L NLLGLNSFEV | 3     | 0     |
| >TP53-R267L NLLGRNSFEV | 5     | >TP53-R267L NLLGLNSFEV | 5     | 0     |

|                         |       |                         |       |       |
|-------------------------|-------|-------------------------|-------|-------|
| >TP53-R267L NLLGRNSFEV  | 7     | >TP53-R267L NLLGLNSFEV  | 6     | 1     |
| >TP53-R267L NLLGRNSFEV  | 3     | >TP53-R267L NLLGLNSFEV  | 2     | 1     |
| >TP53-R267L NLLGRNSFEV  | 3     | >TP53-R267L NLLGLNSFEV  | 3     | 0     |
| >TP53-R267L NLLGRNSF    | 826   | >TP53-R267L NLLGLNSF    | 401   | 425   |
| >TP53-R267L NLLGRNSFEV  | 109   | >TP53-R267L NLLGLNSFEV  | 158   | 49    |
| >TP53-R267L NLLGRNSFEV  | 309   | >TP53-R267L NLLGLNSFEV  | 228   | 81    |
| >TP53-R267L NLLGRNSFEV  | 52    | >TP53-R267L NLLGLNSFEV  | 20    | 32    |
| >TP53-R267L NLLGRNSF    | 65    | >TP53-R267L NLLGLNSF    | 95    | 30    |
| >TP53-R267L NLLGRNSF    | 418   | >TP53-R267L NLLGLNSF    | 449   | 31    |
| >TP53-R267L NLLGRNSFEV  | 195   | >TP53-R267L NLLGLNSFEV  | 130   | 65    |
| >TP53-R267L GNLLGRNSF   | 525   | >TP53-R267L GNLLGLNSF   | 394   | 131   |
| >TP53-R267L SGNLLGRNSF  | 311   | >TP53-R267L SGNLLGLNSF  | 172   | 139   |
| >TP53-R267L SSGNLLGRNS  | 245   | >TP53-R267L SSGNLLGLNS  | 216   | 29    |
| >TP53-R267L SSGNLLGR    | 19270 | >TP53-R267L SSGNLLGL    | 424   | 18846 |
| >TP53-R267L SSGNLLGRNS  | 390   | >TP53-R267L SSGNLLGLNS  | 234   | 156   |
| >TP53-R267L SSGNLLGRNS  | 32    | >TP53-R267L SSGNLLGLNS  | 22    | 10    |
| >TP53-R267L SSGNLLGR    | 357   | >TP53-R267L SSGNLLGL    | 8033  | 7676  |
| >TP53-R267L DSSGNLLGR   | 68    | >TP53-R267L DSSGNLLGL   | 26620 | 26552 |
| >TP53-R267F GRNSFEVR    | 405   | >TP53-R267F GPNSFEVR    | 24797 | 24392 |
| >TP53-R267F LGRNSFEVR   | 286   | >TP53-R267F LGPNSFEVR   | 3321  | 3035  |
| >TP53-R267F LLGRNSFEV   | 26    | >TP53-R267F LLGPNSFEV   | 14    | 12    |
| >TP53-R267F LLGRNSFEVR' | 137   | >TP53-R267F LLGPNSFEVR' | 60    | 77    |
| >TP53-R267F LLGRNSFEV   | 16    | >TP53-R267F LLGPNSFEV   | 6     | 10    |
| >TP53-R267F LLGRNSFEVR' | 62    | >TP53-R267F LLGPNSFEVR' | 22    | 40    |
| >TP53-R267F LLGRNSFEV   | 47    | >TP53-R267F LLGPNSFEV   | 18    | 29    |
| >TP53-R267F LLGRNSFEVR' | 214   | >TP53-R267F LLGPNSFEVR' | 96    | 118   |
| >TP53-R267F LLGRNSFEV   | 39    | >TP53-R267F LLGPNSFEV   | 10    | 29    |
| >TP53-R267F LLGRNSFEVR' | 582   | >TP53-R267F LLGPNSFEVR' | 173   | 409   |
| >TP53-R267F LLGRNSFEV   | 2     | >TP53-R267F LLGPNSFEV   | 2     | 0     |
| >TP53-R267F LLGRNSFEVR' | 3     | >TP53-R267F LLGPNSFEVR' | 3     | 0     |
| >TP53-R267F LLGRNSFEV   | 2     | >TP53-R267F LLGPNSFEV   | 2     | 0     |
| >TP53-R267F LLGRNSFEVR' | 7     | >TP53-R267F LLGPNSFEVR' | 6     | 1     |
| >TP53-R267F LLGRNSFEV   | 5     | >TP53-R267F LLGPNSFEV   | 4     | 1     |
| >TP53-R267F LLGRNSFEVR' | 9     | >TP53-R267F LLGPNSFEVR' | 7     | 2     |
| >TP53-R267F LLGRNSFEV   | 2     | >TP53-R267F LLGPNSFEV   | 2     | 0     |
| >TP53-R267F LLGRNSFEVR' | 6     | >TP53-R267F LLGPNSFEVR' | 4     | 2     |
| >TP53-R267F LLGRNSFEV   | 2     | >TP53-R267F LLGPNSFEV   | 1     | 1     |
| >TP53-R267F LLGRNSFEVR' | 2     | >TP53-R267F LLGPNSFEVR' | 2     | 0     |
| >TP53-R267F LLGRNSFEVR  | 429   | >TP53-R267F LLGPNSFEVR  | 425   | 4     |
| >TP53-R267F LLGRNSFEV   | 425   | >TP53-R267F LLGPNSFEV   | 227   | 198   |
| >TP53-R267F LLGRNSFEVR  | 773   | >TP53-R267F LLGPNSFEVR  | 488   | 285   |
| >TP53-R267F NLLGRNSFEV  | 29    | >TP53-R267F NLLGPNSFEV  | 27    | 2     |
| >TP53-R267F NLLGRNSFEV  | 89    | >TP53-R267F NLLGPNSFEV  | 61    | 28    |

|                        |       |                        |       |       |
|------------------------|-------|------------------------|-------|-------|
| >TP53-R267F NLLGRNSFEV | 94    | >TP53-R267F NLLGPNSFEV | 57    | 37    |
| >TP53-R267F NLLGRNSFEV | 137   | >TP53-R267F NLLGPNSFEV | 71    | 66    |
| >TP53-R267F NLLGRNSFEV | 3     | >TP53-R267F NLLGPNSFEV | 2     | 1     |
| >TP53-R267F NLLGRNSFEV | 5     | >TP53-R267F NLLGPNSFEV | 5     | 0     |
| >TP53-R267F NLLGRNSFEV | 7     | >TP53-R267F NLLGPNSFEV | 6     | 1     |
| >TP53-R267F NLLGRNSFEV | 3     | >TP53-R267F NLLGPNSFEV | 3     | 0     |
| >TP53-R267F NLLGRNSFEV | 3     | >TP53-R267F NLLGPNSFEV | 3     | 0     |
| >TP53-R267F NLLGRNSFEV | 109   | >TP53-R267F NLLGPNSFEV | 218   | 109   |
| >TP53-R267F NLLGRNSFEV | 309   | >TP53-R267F NLLGPNSFEV | 289   | 20    |
| >TP53-R267F NLLGRNSFEV | 52    | >TP53-R267F NLLGPNSFEV | 10    | 42    |
| >TP53-R267F NLLGRNSF   | 65    | >TP53-R267F NLLGPNSF   | 35    | 30    |
| >TP53-R267F NLLGRNSF   | 418   | >TP53-R267F NLLGPNSF   | 212   | 206   |
| >TP53-R267F NLLGRNSFEV | 195   | >TP53-R267F NLLGPNSFEV | 282   | 87    |
| >TP53-R267F SGNLLGRNSF | 311   | >TP53-R267F SGNLLGPNSF | 72    | 239   |
| >TP53-R267F SSGNLLGRNS | 974   | >TP53-R267F SSGNLLGPNS | 479   | 495   |
| >TP53-R267F SSGNLLGRNS | 245   | >TP53-R267F SSGNLLGPNS | 221   | 24    |
| >TP53-R267F SSGNLLGRNS | 701   | >TP53-R267F SSGNLLGPNS | 458   | 243   |
| >TP53-R267F SSGNLLGRNS | 390   | >TP53-R267F SSGNLLGPNS | 220   | 170   |
| >TP53-R267F SSGNLLGRNS | 32    | >TP53-R267F SSGNLLGPNS | 52    | 20    |
| >TP53-R267F SSGNLLGR   | 357   | >TP53-R267F SSGNLLGP   | 15905 | 15548 |
| >TP53-R267F DSSGNLLGR  | 68    | >TP53-R267F DSSGNLLGP  | 33902 | 33834 |
| >TP53-R267C GRNSFEVRV  | 15725 | >TP53-R267C GQNSFEVRV  | 494   | 15231 |
| >TP53-R267C GRNSFEVRV  | 8897  | >TP53-R267C GQNSFEVRV  | 171   | 8726  |
| >TP53-R267C GRNSFEVR   | 7479  | >TP53-R267C GQNSFEVR   | 42    | 7437  |
| >TP53-R267C GRNSFEVR   | 405   | >TP53-R267C GQNSFEVR   | 6999  | 6594  |
| >TP53-R267C LGRNSFEVR  | 286   | >TP53-R267C LGQNSFEVR  | 597   | 311   |
| >TP53-R267C LLGRNSFEV  | 26    | >TP53-R267C LLGQNSFEV  | 20    | 6     |
| >TP53-R267C LLGRNSFEVR | 137   | >TP53-R267C LLGQNSFEVR | 99    | 38    |
| >TP53-R267C LLGRNSFEV  | 16    | >TP53-R267C LLGQNSFEV  | 12    | 4     |
| >TP53-R267C LLGRNSFEVR | 62    | >TP53-R267C LLGQNSFEVR | 45    | 17    |
| >TP53-R267C LLGRNSFEV  | 47    | >TP53-R267C LLGQNSFEV  | 44    | 3     |
| >TP53-R267C LLGRNSFEVR | 214   | >TP53-R267C LLGQNSFEVR | 204   | 10    |
| >TP53-R267C LLGRNSFEV  | 39    | >TP53-R267C LLGQNSFEV  | 30    | 9     |
| >TP53-R267C LLGRNSFEVR | 582   | >TP53-R267C LLGQNSFEVR | 479   | 103   |
| >TP53-R267C LLGRNSFEV  | 2     | >TP53-R267C LLGQNSFEV  | 2     | 0     |
| >TP53-R267C LLGRNSFEVR | 3     | >TP53-R267C LLGQNSFEVR | 3     | 0     |
| >TP53-R267C LLGRNSFEV  | 2     | >TP53-R267C LLGQNSFEV  | 2     | 0     |
| >TP53-R267C LLGRNSFEVR | 7     | >TP53-R267C LLGQNSFEVR | 9     | 2     |
| >TP53-R267C LLGRNSFEV  | 5     | >TP53-R267C LLGQNSFEV  | 5     | 0     |
| >TP53-R267C LLGRNSFEVR | 9     | >TP53-R267C LLGQNSFEVR | 7     | 2     |
| >TP53-R267C LLGRNSFEV  | 2     | >TP53-R267C LLGQNSFEV  | 2     | 0     |
| >TP53-R267C LLGRNSFEVR | 6     | >TP53-R267C LLGQNSFEVR | 5     | 1     |
| >TP53-R267C LLGRNSFEV  | 2     | >TP53-R267C LLGQNSFEV  | 1     | 1     |

|                        |       |                        |       |       |
|------------------------|-------|------------------------|-------|-------|
| >TP53-R267C LLGRNSFEVR | 2     | >TP53-R267C LLGQNSFEVR | 2     | 0     |
| >TP53-R267C LLGRNSFEVR | 429   | >TP53-R267C LLGQNSFEVR | 559   | 130   |
| >TP53-R267C LLGRNSFEV  | 425   | >TP53-R267C LLGQNSFEV  | 263   | 162   |
| >TP53-R267C LLGRNSFEVR | 773   | >TP53-R267C LLGQNSFEVR | 357   | 416   |
| >TP53-R267C NLLGRNSFEV | 29    | >TP53-R267C NLLGQNSFEV | 24    | 5     |
| >TP53-R267C NLLGRNSFEV | 89    | >TP53-R267C NLLGQNSFEV | 83    | 6     |
| >TP53-R267C NLLGRNSFEV | 94    | >TP53-R267C NLLGQNSFEV | 81    | 13    |
| >TP53-R267C NLLGRNSFEV | 137   | >TP53-R267C NLLGQNSFEV | 98    | 39    |
| >TP53-R267C NLLGRNSFEV | 3     | >TP53-R267C NLLGQNSFEV | 3     | 0     |
| >TP53-R267C NLLGRNSFEV | 5     | >TP53-R267C NLLGQNSFEV | 4     | 1     |
| >TP53-R267C NLLGRNSFEV | 7     | >TP53-R267C NLLGQNSFEV | 6     | 1     |
| >TP53-R267C NLLGRNSFEV | 3     | >TP53-R267C NLLGQNSFEV | 3     | 0     |
| >TP53-R267C NLLGRNSFEV | 3     | >TP53-R267C NLLGQNSFEV | 3     | 0     |
| >TP53-R267C NLLGRNSFEV | 109   | >TP53-R267C NLLGQNSFEV | 288   | 179   |
| >TP53-R267C NLLGRNSFEV | 309   | >TP53-R267C NLLGQNSFEV | 395   | 86    |
| >TP53-R267C NLLGRNSFEV | 52    | >TP53-R267C NLLGQNSFEV | 27    | 25    |
| >TP53-R267C NLLGRNSF   | 65    | >TP53-R267C NLLGQNSF   | 63    | 2     |
| >TP53-R267C NLLGRNSF   | 418   | >TP53-R267C NLLGQNSF   | 376   | 42    |
| >TP53-R267C NLLGRNSFEV | 195   | >TP53-R267C NLLGQNSFEV | 174   | 21    |
| >TP53-R267C SGNLLGRNSF | 311   | >TP53-R267C SGNLLGQNSF | 137   | 174   |
| >TP53-R267C SSGNLLGRNS | 245   | >TP53-R267C SSGNLLGQNS | 232   | 13    |
| >TP53-R267C SSGNLLGRNS | 390   | >TP53-R267C SSGNLLGQNS | 266   | 124   |
| >TP53-R267C SSGNLLGRNS | 32    | >TP53-R267C SSGNLLGQNS | 35    | 3     |
| >TP53-R267C SSGNLLGR   | 357   | >TP53-R267C SSGNLLGQ   | 5321  | 4964  |
| >TP53-R267C DSSGNLLGR  | 68    | >TP53-R267C DSSGNLLGQ  | 11480 | 11412 |
| >TP53-R267V GRNSFEVR   | 7479  | >TP53-R267V GWNSFEVR   | 154   | 7325  |
| >TP53-R267V GRNSFEVR   | 405   | >TP53-R267V GWNSFEVR   | 17305 | 16900 |
| >TP53-R267V GRNSFEVR   | 4432  | >TP53-R267V GWNSFEVR   | 56    | 4376  |
| >TP53-R267V LEDSSGNLLG | 10576 | >TP53-R267V LEDSSGNLLG | 159   | 10417 |
| >TP53-R267V LEDSSGNLLG | 9927  | >TP53-R267V LEDSSGNLLG | 91    | 9836  |
| >TP53-R267V LGRNSFEV   | 3827  | >TP53-R267V LGWNSFEV   | 171   | 3656  |
| >TP53-R267V LGRNSFEV   | 7800  | >TP53-R267V LGWNSFEV   | 128   | 7672  |
| >TP53-R267V LGRNSFEVRV | 12048 | >TP53-R267V LGWNSFEVR' | 446   | 11602 |
| >TP53-R267V LGRNSFEV   | 12366 | >TP53-R267V LGWNSFEV   | 151   | 12215 |
| >TP53-R267V LGRNSFEV   | 3319  | >TP53-R267V LGWNSFEV   | 202   | 3117  |
| >TP53-R267V LGRNSFEVR  | 286   | >TP53-R267V LGWNSFEVR  | 128   | 158   |
| >TP53-R267V LGRNSFEVR  | 3056  | >TP53-R267V LGWNSFEVR  | 319   | 2737  |
| >TP53-R267V LLGRNSFEV  | 26    | >TP53-R267V LLGWNSFEV  | 12    | 14    |
| >TP53-R267V LLGRNSFEVR | 137   | >TP53-R267V LLGWNSFEVF | 45    | 92    |
| >TP53-R267V LLGRNSFEV  | 16    | >TP53-R267V LLGWNSFEV  | 9     | 7     |
| >TP53-R267V LLGRNSFEVR | 62    | >TP53-R267V LLGWNSFEVF | 35    | 27    |
| >TP53-R267V LLGRNSFEV  | 47    | >TP53-R267V LLGWNSFEV  | 25    | 22    |
| >TP53-R267V LLGRNSFEVR | 214   | >TP53-R267V LLGWNSFEVF | 120   | 94    |



|                        |       |                        |       |       |
|------------------------|-------|------------------------|-------|-------|
| >TP53-R267V LLGRNSFEV  | 39    | >TP53-R267V LLGWNSFEV  | 20    | 19    |
| >TP53-R267V LLGRNSFEVR | 582   | >TP53-R267V LLGWNSFEVF | 277   | 305   |
| >TP53-R267V LLGRNSFEV  | 2     | >TP53-R267V LLGWNSFEV  | 1     | 1     |
| >TP53-R267V LLGRNSFEVR | 3     | >TP53-R267V LLGWNSFEVF | 2     | 1     |
| >TP53-R267V LLGRNSFEV  | 2     | >TP53-R267V LLGWNSFEV  | 3     | 1     |
| >TP53-R267V LLGRNSFEVR | 7     | >TP53-R267V LLGWNSFEVF | 9     | 2     |
| >TP53-R267V LLGRNSFEV  | 5     | >TP53-R267V LLGWNSFEV  | 4     | 1     |
| >TP53-R267V LLGRNSFEVR | 9     | >TP53-R267V LLGWNSFEVF | 6     | 3     |
| >TP53-R267V LLGRNSFEV  | 2     | >TP53-R267V LLGWNSFEV  | 2     | 0     |
| >TP53-R267V LLGRNSFEVR | 6     | >TP53-R267V LLGWNSFEVF | 3     | 3     |
| >TP53-R267V LLGRNSFEV  | 2     | >TP53-R267V LLGWNSFEV  | 1     | 1     |
| >TP53-R267V LLGRNSFEVR | 2     | >TP53-R267V LLGWNSFEVF | 2     | 0     |
| >TP53-R267V LLGRNSFEVR | 429   | >TP53-R267V LLGWNSFEVF | 195   | 234   |
| >TP53-R267V LLGRNSFEV  | 425   | >TP53-R267V LLGWNSFEV  | 89    | 336   |
| >TP53-R267V LLGRNSFEVR | 773   | >TP53-R267V LLGWNSFEVF | 248   | 525   |
| >TP53-R267V NLLGRNSFEV | 29    | >TP53-R267V NLLGWNSFEV | 11    | 18    |
| >TP53-R267V NLLGRNSFEV | 89    | >TP53-R267V NLLGWNSFEV | 21    | 68    |
| >TP53-R267V NLLGRNSFEV | 94    | >TP53-R267V NLLGWNSFEV | 27    | 67    |
| >TP53-R267V NLLGRNSFEV | 137   | >TP53-R267V NLLGWNSFEV | 40    | 97    |
| >TP53-R267V NLLGRNSFEV | 3     | >TP53-R267V NLLGWNSFEV | 2     | 1     |
| >TP53-R267V NLLGRNSFEV | 5     | >TP53-R267V NLLGWNSFEV | 3     | 2     |
| >TP53-R267V NLLGRNSFEV | 7     | >TP53-R267V NLLGWNSFEV | 4     | 3     |
| >TP53-R267V NLLGRNSFEV | 3     | >TP53-R267V NLLGWNSFEV | 2     | 1     |
| >TP53-R267V NLLGRNSFEV | 3     | >TP53-R267V NLLGWNSFEV | 2     | 1     |
| >TP53-R267V NLLGRNSFEV | 502   | >TP53-R267V NLLGWNSFEV | 461   | 41    |
| >TP53-R267V NLLGRNSFEV | 109   | >TP53-R267V NLLGWNSFEV | 73    | 36    |
| >TP53-R267V NLLGRNSFEV | 309   | >TP53-R267V NLLGWNSFEV | 208   | 101   |
| >TP53-R267V NLLGRNSFEV | 52    | >TP53-R267V NLLGWNSFEV | 7     | 45    |
| >TP53-R267V NLLGRNSF   | 968   | >TP53-R267V NLLGWNSF   | 427   | 541   |
| >TP53-R267V NLLGRNSF   | 65    | >TP53-R267V NLLGWNSF   | 51    | 14    |
| >TP53-R267V NLLGRNSF   | 418   | >TP53-R267V NLLGWNSF   | 382   | 36    |
| >TP53-R267V NLLGRNSFEV | 195   | >TP53-R267V NLLGWNSFEV | 151   | 44    |
| >TP53-R267V SGNLLGRNSF | 311   | >TP53-R267V SGNLLGWNS  | 262   | 49    |
| >TP53-R267V SSGNLLGRNS | 245   | >TP53-R267V SSGNLLGWN  | 224   | 21    |
| >TP53-R267V SSGNLLGR   | 19270 | >TP53-R267V SSGNLLGW   | 41    | 19229 |
| >TP53-R267V SSGNLLGRNS | 390   | >TP53-R267V SSGNLLGWN  | 239   | 151   |
| >TP53-R267V SSGNLLGR   | 25923 | >TP53-R267V SSGNLLGW   | 384   | 25539 |
| >TP53-R267V SSGNLLGR   | 22238 | >TP53-R267V SSGNLLGW   | 69    | 22169 |
| >TP53-R267V SSGNLLGRNS | 32    | >TP53-R267V SSGNLLGWN  | 28    | 4     |
| >TP53-R267V SSGNLLGR   | 357   | >TP53-R267V SSGNLLGW   | 11292 | 10935 |
| >TP53-R267V DSSGNLLGR  | 68    | >TP53-R267V DSSGNLLGW  | 25628 | 25560 |
| >TP53-R267V DSSGNLLGR  | 15814 | >TP53-R267V DSSGNLLGW  | 48    | 15766 |
| >TP53-R267V DSSGNLLGR  | 25638 | >TP53-R267V DSSGNLLGW  | 400   | 25238 |

|                        |       |                        |       |       |
|------------------------|-------|------------------------|-------|-------|
| >TP53-R267V DSSGNLLGR  | 22293 | >TP53-R267V DSSGNLLGW  | 356   | 21937 |
| >TP53-R273C RVCACPGR   | 367   | >TP53-R273C CVCACPGR   | 1456  | 1089  |
| >TP53-R273C RVCACPGRDI | 435   | >TP53-R273C CVCACPGRDI | 1994  | 1559  |
| >TP53-R273C RVCACPGR   | 40    | >TP53-R273C CVCACPGR   | 710   | 670   |
| >TP53-R273C RVCACPGRDI | 37    | >TP53-R273C CVCACPGRDI | 225   | 188   |
| >TP53-R273C RVCACPGRDI | 33    | >TP53-R273C CVCACPGRDI | 540   | 507   |
| >TP53-R273C RVCACPGR   | 481   | >TP53-R273C CVCACPGR   | 143   | 338   |
| >TP53-R273C RVCACPGRDI | 584   | >TP53-R273C CVCACPGRDI | 179   | 405   |
| >TP53-R273C RVCACPGRDI | 297   | >TP53-R273C CVCACPGRDI | 1467  | 1170  |
| >TP53-R273C RVCACPGR   | 66    | >TP53-R273C CVCACPGR   | 187   | 121   |
| >TP53-R273C RVCACPGRDI | 255   | >TP53-R273C CVCACPGRDI | 933   | 678   |
| >TP53-R273C RVCACPGRDI | 109   | >TP53-R273C CVCACPGRDI | 380   | 271   |
| >TP53-R273C NLLGRNSFEV | 13723 | >TP53-R273C NLLGRNSFEV | 405   | 13318 |
| >TP53-R273C NLLGRNSFEV | 109   | >TP53-R273C NLLGRNSFEV | 29786 | 29677 |
| >TP53-R273C NLLGRNSFEV | 309   | >TP53-R273C NLLGRNSFEV | 40311 | 40002 |
| >TP53-R273C NLLGRNSFEV | 195   | >TP53-R273C NLLGRNSFEV | 36164 | 35969 |
| >TP53-R273C EVRVCACPGF | 329   | >TP53-R273C EVCVCACPGF | 167   | 162   |
| >TP53-R273C EVRVCACPGF | 70    | >TP53-R273C EVCVCACPGF | 32    | 38    |
| >TP53-R273C EVRVCACPGF | 744   | >TP53-R273C EVCVCACPGF | 373   | 371   |
| >TP53-R273C FEVRVCAC   | 822   | >TP53-R273C FEVCVCAC   | 485   | 337   |
| >TP53-R273C FEVRVCACPC | 370   | >TP53-R273C FEVCVCACPC | 283   | 87    |
| >TP53-R273C NSFVVRVCA  | 21    | >TP53-R273C NSFVVCVCA  | 43    | 22    |
| >TP53-R273C GRNSFEVR   | 405   | >TP53-R273C GRNSFEVC   | 8740  | 8335  |
| >TP53-R273C LGRNSFEVR  | 286   | >TP53-R273C LGRNSFEVC  | 22188 | 21902 |
| >TP53-R273C LLGRNSFEVR | 137   | >TP53-R273C LLGRNSFEVC | 153   | 16    |
| >TP53-R273C LLGRNSFEVR | 62    | >TP53-R273C LLGRNSFEVC | 75    | 13    |
| >TP53-R273C LLGRNSFEVR | 214   | >TP53-R273C LLGRNSFEVC | 609   | 395   |
| >TP53-R273C LLGRNSFEVR | 11008 | >TP53-R273C LLGRNSFEVC | 169   | 10839 |
| >TP53-R273C LLGRNSFEVR | 3     | >TP53-R273C LLGRNSFEVC | 6     | 3     |
| >TP53-R273C LLGRNSFEVR | 17155 | >TP53-R273C LLGRNSFEVC | 361   | 16794 |
| >TP53-R273C LLGRNSFEVR | 7     | >TP53-R273C LLGRNSFEVC | 5     | 2     |
| >TP53-R273C LLGRNSFEVR | 9     | >TP53-R273C LLGRNSFEVC | 8     | 1     |
| >TP53-R273C LLGRNSFEVR | 6     | >TP53-R273C LLGRNSFEVC | 5     | 1     |
| >TP53-R273C LLGRNSFEVR | 6142  | >TP53-R273C LLGRNSFEVC | 46    | 6096  |
| >TP53-R273C LLGRNSFEVR | 2     | >TP53-R273C LLGRNSFEVC | 3     | 1     |
| >TP53-R273C LLGRNSFEVR | 429   | >TP53-R273C LLGRNSFEVC | 31655 | 31226 |
| >TP53-R273C RVCACPGR   | 367   | >TP53-R273C GVCACPGR   | 628   | 261   |
| >TP53-R273C RVCACPGRDI | 435   | >TP53-R273C GVCACPGRDI | 819   | 384   |
| >TP53-R273C RVCACPGR   | 40    | >TP53-R273C GVCACPGR   | 578   | 538   |
| >TP53-R273C RVCACPGRDI | 37    | >TP53-R273C GVCACPGRDI | 586   | 549   |
| >TP53-R273C RVCACPGRDI | 33    | >TP53-R273C GVCACPGRDI | 424   | 391   |
| >TP53-R273C RVCACPGR   | 481   | >TP53-R273C GVCACPGR   | 602   | 121   |
| >TP53-R273C RVCACPGRDI | 297   | >TP53-R273C GVCACPGRDI | 2682  | 2385  |

|                        |      |                        |       |       |
|------------------------|------|------------------------|-------|-------|
| >TP53-R273C RVCACPGR   | 66   | >TP53-R273C GVCACPGR   | 1069  | 1003  |
| >TP53-R273C RVCACPGRDI | 255  | >TP53-R273C GVCACPGRDI | 5363  | 5108  |
| >TP53-R273C RVCACPGRDI | 109  | >TP53-R273C GVCACPGRDI | 2622  | 2513  |
| >TP53-R273C NLLGRNSFEV | 109  | >TP53-R273C NLLGRNSFEV | 27515 | 27406 |
| >TP53-R273C NLLGRNSFEV | 309  | >TP53-R273C NLLGRNSFEV | 38595 | 38286 |
| >TP53-R273C NLLGRNSFEV | 195  | >TP53-R273C NLLGRNSFEV | 35331 | 35136 |
| >TP53-R273C EVRVCACPGF | 329  | >TP53-R273C EVGVCACPGI | 849   | 520   |
| >TP53-R273C EVRVCACPGF | 70   | >TP53-R273C EVGVCACPGI | 68    | 2     |
| >TP53-R273C EVRVCACPGF | 744  | >TP53-R273C EVGVCACPGI | 376   | 368   |
| >TP53-R273C FEVRVCACPC | 370  | >TP53-R273C FEVGVACPC  | 311   | 59    |
| >TP53-R273C FEVRVCAC   | 1153 | >TP53-R273C FEVGVAC    | 269   | 884   |
| >TP53-R273C NSFVVRVCA  | 21   | >TP53-R273C NSFVGVCA   | 118   | 97    |
| >TP53-R273C GRNSFEVR   | 405  | >TP53-R273C GRNSFEVG   | 9687  | 9282  |
| >TP53-R273C GRNSFEVRV  | 631  | >TP53-R273C GRNSFEVGV  | 450   | 181   |
| >TP53-R273C LGRNSFEVR  | 286  | >TP53-R273C LGRNSFEVG  | 22408 | 22122 |
| >TP53-R273C LLGRNSFEVR | 137  | >TP53-R273C LLGRNSFEVG | 126   | 11    |
| >TP53-R273C LLGRNSFEVR | 62   | >TP53-R273C LLGRNSFEVG | 42    | 20    |
| >TP53-R273C LLGRNSFEVR | 214  | >TP53-R273C LLGRNSFEVG | 110   | 104   |
| >TP53-R273C LLGRNSFEVR | 582  | >TP53-R273C LLGRNSFEVG | 174   | 408   |
| >TP53-R273C LLGRNSFEVR | 3    | >TP53-R273C LLGRNSFEVG | 3     | 0     |
| >TP53-R273C LLGRNSFEVR | 7    | >TP53-R273C LLGRNSFEVG | 4     | 3     |
| >TP53-R273C LLGRNSFEVR | 9    | >TP53-R273C LLGRNSFEVG | 6     | 3     |
| >TP53-R273C LLGRNSFEVR | 6    | >TP53-R273C LLGRNSFEVG | 3     | 3     |
| >TP53-R273C LLGRNSFEVR | 2    | >TP53-R273C LLGRNSFEVG | 2     | 0     |
| >TP53-R273C LLGRNSFEVR | 429  | >TP53-R273C LLGRNSFEVG | 34307 | 33878 |
| >TP53-R273F RVCACPGR   | 367  | >TP53-R273F HVCACPGR   | 2138  | 1771  |
| >TP53-R273F RVCACPGRDI | 435  | >TP53-R273F HVCACPGRDI | 2434  | 1999  |
| >TP53-R273F RVCACPGR   | 40   | >TP53-R273F HVCACPGR   | 123   | 83    |
| >TP53-R273F RVCACPGRDI | 37   | >TP53-R273F HVCACPGRDI | 219   | 182   |
| >TP53-R273F RVCACPGRDI | 33   | >TP53-R273F HVCACPGRDI | 95    | 62    |
| >TP53-R273F RVCACPGR   | 4623 | >TP53-R273F HVCACPGR   | 205   | 4418  |
| >TP53-R273F RVCACPGRDI | 4416 | >TP53-R273F HVCACPGRDI | 223   | 4193  |
| >TP53-R273F RVCACPGR   | 481  | >TP53-R273F HVCACPGR   | 38    | 443   |
| >TP53-R273F RVCACPGRDI | 1118 | >TP53-R273F HVCACPGRDI | 140   | 978   |
| >TP53-R273F RVCACPGRDI | 584  | >TP53-R273F HVCACPGRDI | 45    | 539   |
| >TP53-R273F RVCACPGRDI | 297  | >TP53-R273F HVCACPGRDI | 1366  | 1069  |
| >TP53-R273F RVCACPGR   | 66   | >TP53-R273F HVCACPGR   | 74    | 8     |
| >TP53-R273F RVCACPGRDI | 255  | >TP53-R273F HVCACPGRDI | 320   | 65    |
| >TP53-R273F RVCACPGRDI | 109  | >TP53-R273F HVCACPGRDI | 136   | 27    |
| >TP53-R273F NLLGRNSFEV | 109  | >TP53-R273F NLLGRNSFEV | 17310 | 17201 |
| >TP53-R273F NLLGRNSFEV | 309  | >TP53-R273F NLLGRNSFEV | 20978 | 20669 |
| >TP53-R273F NLLGRNSFEV | 195  | >TP53-R273F NLLGRNSFEV | 29327 | 29132 |
| >TP53-R273F EVRVCACPGF | 329  | >TP53-R273F EVHVCACPGI | 384   | 55    |

|                        |       |                        |       |       |
|------------------------|-------|------------------------|-------|-------|
| >TP53-R273F EVRVCACPGF | 70    | >TP53-R273F EVHVCACPGI | 33    | 37    |
| >TP53-R273F EVRVCACPGF | 744   | >TP53-R273F EVHVCACPGI | 378   | 366   |
| >TP53-R273F FEVRVCAC   | 822   | >TP53-R273F FEVHVCAC   | 439   | 383   |
| >TP53-R273F FEVRVCACPC | 370   | >TP53-R273F FEVHVCACPC | 377   | 7     |
| >TP53-R273F NSFVVRVCA  | 21    | >TP53-R273F NSFVHVCA   | 34    | 13    |
| >TP53-R273F GRNSFEVR   | 405   | >TP53-R273F GRNSFEVH   | 1017  | 612   |
| >TP53-R273F GRNSFEVRV  | 631   | >TP53-R273F GRNSFEVHV  | 443   | 188   |
| >TP53-R273F LGRNSFEVR  | 286   | >TP53-R273F LGRNSFEVH  | 15088 | 14802 |
| >TP53-R273F LGRNSFEVR  | 5777  | >TP53-R273F LGRNSFEVH  | 455   | 5322  |
| >TP53-R273F LLGRNSFEVR | 137   | >TP53-R273F LLGRNSFEVH | 140   | 3     |
| >TP53-R273F LLGRNSFEVR | 62    | >TP53-R273F LLGRNSFEVH | 48    | 14    |
| >TP53-R273F LLGRNSFEVR | 214   | >TP53-R273F LLGRNSFEVH | 156   | 58    |
| >TP53-R273F LLGRNSFEVR | 582   | >TP53-R273F LLGRNSFEVH | 187   | 395   |
| >TP53-R273F LLGRNSFEVR | 3     | >TP53-R273F LLGRNSFEVH | 4     | 1     |
| >TP53-R273F LLGRNSFEVR | 7     | >TP53-R273F LLGRNSFEVH | 4     | 3     |
| >TP53-R273F LLGRNSFEVR | 9     | >TP53-R273F LLGRNSFEVH | 7     | 2     |
| >TP53-R273F LLGRNSFEVR | 6     | >TP53-R273F LLGRNSFEVH | 8     | 2     |
| >TP53-R273F LLGRNSFEVR | 2     | >TP53-R273F LLGRNSFEVH | 2     | 0     |
| >TP53-R273F LLGRNSFEVR | 429   | >TP53-R273F LLGRNSFEVH | 20448 | 20019 |
| >TP53-R273L RVCACPGR   | 367   | >TP53-R273L LVCACPGR   | 1683  | 1316  |
| >TP53-R273L RVCACPGRDI | 435   | >TP53-R273L LVCACPGRDF | 2185  | 1750  |
| >TP53-R273L RVCACPGR   | 40    | >TP53-R273L LVCACPGR   | 392   | 352   |
| >TP53-R273L RVCACPGRDI | 37    | >TP53-R273L LVCACPGRDF | 168   | 131   |
| >TP53-R273L RVCACPGRDI | 33    | >TP53-R273L LVCACPGRDF | 295   | 262   |
| >TP53-R273L RVCACPGR   | 481   | >TP53-R273L LVCACPGR   | 141   | 340   |
| >TP53-R273L RVCACPGRDI | 584   | >TP53-R273L LVCACPGRDF | 179   | 405   |
| >TP53-R273L RVCACPGRDI | 297   | >TP53-R273L LVCACPGRDF | 3199  | 2902  |
| >TP53-R273L RVCACPGR   | 66    | >TP53-R273L LVCACPGR   | 353   | 287   |
| >TP53-R273L RVCACPGRDI | 255   | >TP53-R273L LVCACPGRDF | 1776  | 1521  |
| >TP53-R273L RVCACPGRDI | 109   | >TP53-R273L LVCACPGRDF | 779   | 670   |
| >TP53-R273L VRVCACPGR  | 7994  | >TP53-R273L VLVCACPGR  | 494   | 7500  |
| >TP53-R273L NLLGRNSFEV | 14526 | >TP53-R273L NLLGRNSFEV | 112   | 14414 |
| >TP53-R273L NLLGRNSFEV | 19770 | >TP53-R273L NLLGRNSFEV | 295   | 19475 |
| >TP53-R273L NLLGRNSFEV | 13723 | >TP53-R273L NLLGRNSFEV | 43    | 13680 |
| >TP53-R273L NLLGRNSFEV | 22238 | >TP53-R273L NLLGRNSFEV | 87    | 22151 |
| >TP53-R273L NLLGRNSFEV | 20142 | >TP53-R273L NLLGRNSFEV | 171   | 19971 |
| >TP53-R273L NLLGRNSFEV | 18956 | >TP53-R273L NLLGRNSFEV | 46    | 18910 |
| >TP53-R273L NLLGRNSFEV | 15646 | >TP53-R273L NLLGRNSFEV | 26    | 15620 |
| >TP53-R273L NLLGRNSFEV | 109   | >TP53-R273L NLLGRNSFEV | 15377 | 15268 |
| >TP53-R273L NLLGRNSFEV | 309   | >TP53-R273L NLLGRNSFEV | 31760 | 31451 |
| >TP53-R273L NLLGRNSFEV | 12572 | >TP53-R273L NLLGRNSFEV | 213   | 12359 |
| >TP53-R273L NLLGRNSFEV | 195   | >TP53-R273L NLLGRNSFEV | 32072 | 31877 |
| >TP53-R273L EVRVCACPGF | 329   | >TP53-R273L EVLVCACPGF | 299   | 30    |

|                        |       |                        |       |       |
|------------------------|-------|------------------------|-------|-------|
| >TP53-R273L EVRVCACPGF | 70    | >TP53-R273L EVLVCACPGF | 35    | 35    |
| >TP53-R273L EVRVCACPGF | 744   | >TP53-R273L EVLVCACPGF | 252   | 492   |
| >TP53-R273L FEVRVCAC   | 822   | >TP53-R273L FEVLVCAC   | 140   | 682   |
| >TP53-R273L FEVRVCACPG | 370   | >TP53-R273L FEVLVCACPG | 459   | 89    |
| >TP53-R273L NSFVLRVCA  | 21    | >TP53-R273L NSFVLRVCA  | 30    | 9     |
| >TP53-R273L GRNSFEVR   | 405   | >TP53-R273L GRNSFEVL   | 274   | 131   |
| >TP53-R273L GRNSFEVRV  | 631   | >TP53-R273L GRNSFEVLV  | 424   | 207   |
| >TP53-R273L GRNSFEVRV  | 1117  | >TP53-R273L GRNSFEVLV  | 360   | 757   |
| >TP53-R273L LGRNSFEVR  | 286   | >TP53-R273L LGRNSFEVL  | 17366 | 17080 |
| >TP53-R273L LGRNSFEVR  | 11974 | >TP53-R273L LGRNSFEVL  | 330   | 11644 |
| >TP53-R273L LGRNSFEVR  | 2836  | >TP53-R273L LGRNSFEVL  | 267   | 2569  |
| >TP53-R273L LGRNSFEVR  | 5777  | >TP53-R273L LGRNSFEVL  | 206   | 5571  |
| >TP53-R273L LLGRNSFEVR | 137   | >TP53-R273L LLGRNSFEVL | 74    | 63    |
| >TP53-R273L LLGRNSFEVR | 12989 | >TP53-R273L LLGRNSFEVL | 122   | 12867 |
| >TP53-R273L LLGRNSFEVR | 62    | >TP53-R273L LLGRNSFEVL | 27    | 35    |
| >TP53-R273L LLGRNSFEVR | 12019 | >TP53-R273L LLGRNSFEVL | 182   | 11837 |
| >TP53-R273L LLGRNSFEVR | 214   | >TP53-R273L LLGRNSFEVL | 127   | 87    |
| >TP53-R273L LLGRNSFEVR | 582   | >TP53-R273L LLGRNSFEVL | 259   | 323   |
| >TP53-R273L LLGRNSFEVR | 11008 | >TP53-R273L LLGRNSFEVL | 20    | 10988 |
| >TP53-R273L LLGRNSFEVR | 3     | >TP53-R273L LLGRNSFEVL | 4     | 1     |
| >TP53-R273L LLGRNSFEVR | 17155 | >TP53-R273L LLGRNSFEVL | 15    | 17140 |
| >TP53-R273L LLGRNSFEVR | 7     | >TP53-R273L LLGRNSFEVL | 6     | 1     |
| >TP53-R273L LLGRNSFEVR | 20012 | >TP53-R273L LLGRNSFEVL | 113   | 19899 |
| >TP53-R273L LLGRNSFEVR | 9     | >TP53-R273L LLGRNSFEVL | 8     | 1     |
| >TP53-R273L LLGRNSFEVR | 23501 | >TP53-R273L LLGRNSFEVL | 39    | 23462 |
| >TP53-R273L LLGRNSFEVR | 6     | >TP53-R273L LLGRNSFEVL | 8     | 2     |
| >TP53-R273L LLGRNSFEVR | 6142  | >TP53-R273L LLGRNSFEVL | 6     | 6136  |
| >TP53-R273L LLGRNSFEVR | 2     | >TP53-R273L LLGRNSFEVL | 2     | 0     |
| >TP53-R273L LLGRNSFEVR | 429   | >TP53-R273L LLGRNSFEVL | 23647 | 23218 |
| >TP53-R273L LLGRNSFEVR | 10464 | >TP53-R273L LLGRNSFEVL | 276   | 10188 |
| >TP53-R273F RVCACPGR   | 367   | >TP53-R273F PVCACPGR   | 11370 | 11003 |
| >TP53-R273F RVCACPGRDI | 435   | >TP53-R273F PVCACPGRDI | 12559 | 12124 |
| >TP53-R273F RVCACPGR   | 40    | >TP53-R273F PVCACPGR   | 4740  | 4700  |
| >TP53-R273F RVCACPGRDI | 37    | >TP53-R273F PVCACPGRDI | 1922  | 1885  |
| >TP53-R273F RVCACPGRDI | 33    | >TP53-R273F PVCACPGRDI | 3916  | 3883  |
| >TP53-R273F RVCACPGR   | 481   | >TP53-R273F PVCACPGR   | 3059  | 2578  |
| >TP53-R273F RVCACPGRDI | 297   | >TP53-R273F PVCACPGRDI | 5646  | 5349  |
| >TP53-R273F RVCACPGR   | 66    | >TP53-R273F PVCACPGR   | 596   | 530   |
| >TP53-R273F RVCACPGRDI | 255   | >TP53-R273F PVCACPGRDI | 3234  | 2979  |
| >TP53-R273F RVCACPGRDI | 109   | >TP53-R273F PVCACPGRDI | 1623  | 1514  |
| >TP53-R273F VRVCACPG   | 25377 | >TP53-R273F VPVCACPG   | 353   | 25024 |
| >TP53-R273F VRVCACPG   | 28174 | >TP53-R273F VPVCACPG   | 341   | 27833 |
| >TP53-R273F NLLGRNSFEV | 109   | >TP53-R273F NLLGRNSFEV | 28801 | 28692 |

|                         |      |                         |       |       |
|-------------------------|------|-------------------------|-------|-------|
| >TP53-R273F NLLGRNSFEV  | 309  | >TP53-R273F NLLGRNSFEV  | 37363 | 37054 |
| >TP53-R273F NLLGRNSFEV  | 195  | >TP53-R273F NLLGRNSFEV  | 34997 | 34802 |
| >TP53-R273F EVRVCACPGF  | 329  | >TP53-R273F EVPVCACPGF  | 647   | 318   |
| >TP53-R273F EVRVCACPGF  | 70   | >TP53-R273F EVPVCACPGF  | 18    | 52    |
| >TP53-R273F EVRVCACPGF  | 744  | >TP53-R273F EVPVCACPGF  | 429   | 315   |
| >TP53-R273F FEVRVCACPC  | 370  | >TP53-R273F FEVPVCACPC  | 355   | 15    |
| >TP53-R273F NSFVVRVCA   | 21   | >TP53-R273F NSFVVPVCA   | 39    | 18    |
| >TP53-R273F GRNSFEVRV   | 1849 | >TP53-R273F GRNSFEVPV   | 401   | 1448  |
| >TP53-R273F GRNSFEVR    | 405  | >TP53-R273F GRNSFEVP    | 7306  | 6901  |
| >TP53-R273F GRNSFEVRV   | 631  | >TP53-R273F GRNSFEVPV   | 348   | 283   |
| >TP53-R273F LGRNSFEVR   | 286  | >TP53-R273F LGRNSFEVP   | 23532 | 23246 |
| >TP53-R273F LGRNSFEVRV  | 2611 | >TP53-R273F LGRNSFEVPV  | 431   | 2180  |
| >TP53-R273F LLGRNSFEVR' | 137  | >TP53-R273F LLGRNSFEVP' | 59    | 78    |
| >TP53-R273F LLGRNSFEVR' | 62   | >TP53-R273F LLGRNSFEVP' | 31    | 31    |
| >TP53-R273F LLGRNSFEVR' | 214  | >TP53-R273F LLGRNSFEVP' | 62    | 152   |
| >TP53-R273F LLGRNSFEVR' | 582  | >TP53-R273F LLGRNSFEVP' | 125   | 457   |
| >TP53-R273F LLGRNSFEVR' | 3    | >TP53-R273F LLGRNSFEVP' | 3     | 0     |
| >TP53-R273F LLGRNSFEVR' | 7    | >TP53-R273F LLGRNSFEVP' | 4     | 3     |
| >TP53-R273F LLGRNSFEVR' | 9    | >TP53-R273F LLGRNSFEVP' | 7     | 2     |
| >TP53-R273F LLGRNSFEVR' | 6    | >TP53-R273F LLGRNSFEVP' | 6     | 0     |
| >TP53-R273F LLGRNSFEVR' | 2    | >TP53-R273F LLGRNSFEVP' | 2     | 0     |
| >TP53-R273F LLGRNSFEVR  | 429  | >TP53-R273F LLGRNSFEVP  | 34705 | 34276 |
| >TP53-R273S RVCACPGR    | 367  | >TP53-R273S SVCACPGR    | 183   | 184   |
| >TP53-R273S RVCACPGRDI  | 435  | >TP53-R273S SVCACPGRDI  | 215   | 220   |
| >TP53-R273S RVCACPGR    | 40   | >TP53-R273S SVCACPGR    | 211   | 171   |
| >TP53-R273S RVCACPGRDI  | 37   | >TP53-R273S SVCACPGRDI  | 154   | 117   |
| >TP53-R273S RVCACPGRDI  | 33   | >TP53-R273S SVCACPGRDI  | 155   | 122   |
| >TP53-R273S RVCACPGR    | 481  | >TP53-R273S SVCACPGR    | 78    | 403   |
| >TP53-R273S RVCACPGRDI  | 1118 | >TP53-R273S SVCACPGRDI  | 220   | 898   |
| >TP53-R273S RVCACPGRDI  | 584  | >TP53-R273S SVCACPGRDI  | 89    | 495   |
| >TP53-R273S RVCACPGRDI  | 297  | >TP53-R273S SVCACPGRDI  | 625   | 328   |
| >TP53-R273S RVCACPGR    | 66   | >TP53-R273S SVCACPGR    | 212   | 146   |
| >TP53-R273S RVCACPGRDI  | 255  | >TP53-R273S SVCACPGRDI  | 1247  | 992   |
| >TP53-R273S RVCACPGRDI  | 109  | >TP53-R273S SVCACPGRDI  | 517   | 408   |
| >TP53-R273S VRVCACPGR   | 7994 | >TP53-R273S VSVCACPGR   | 162   | 7832  |
| >TP53-R273S NLLGRNSFEV  | 109  | >TP53-R273S NLLGRNSFEV  | 22849 | 22740 |
| >TP53-R273S NLLGRNSFEV  | 309  | >TP53-R273S NLLGRNSFEV  | 31473 | 31164 |
| >TP53-R273S NLLGRNSFEV  | 195  | >TP53-R273S NLLGRNSFEV  | 31951 | 31756 |
| >TP53-R273S EVRVCACPGF  | 329  | >TP53-R273S EVSVCACPGF  | 352   | 23    |
| >TP53-R273S EVRVCACPGF  | 70   | >TP53-R273S EVSVCACPGF  | 11    | 59    |
| >TP53-R273S FEVRVCACPC  | 370  | >TP53-R273S FEVSVCACPC  | 207   | 163   |
| >TP53-R273S NSFVVRVCA   | 21   | >TP53-R273S NSFVSVCA    | 23    | 2     |
| >TP53-R273S GRNSFEVRV   | 1849 | >TP53-R273S GRNSFEVSV   | 434   | 1415  |

|                        |       |                         |       |       |
|------------------------|-------|-------------------------|-------|-------|
| >TP53-R273S GRNSFEVR   | 405   | >TP53-R273S GRNSFEVS    | 4240  | 3835  |
| >TP53-R273S GRNSFEVRV  | 631   | >TP53-R273S GRNSFEVSV   | 499   | 132   |
| >TP53-R273S LGRNSFEVR  | 286   | >TP53-R273S LGRNSFEVS   | 20863 | 20577 |
| >TP53-R273S LGRNSFEVRV | 2611  | >TP53-R273S LGRNSFEVSV  | 473   | 2138  |
| >TP53-R273S LLGRNSFEVR | 137   | >TP53-R273S LLGRNSFEVS' | 84    | 53    |
| >TP53-R273S LLGRNSFEVR | 62    | >TP53-R273S LLGRNSFEVS' | 35    | 27    |
| >TP53-R273S LLGRNSFEVR | 214   | >TP53-R273S LLGRNSFEVS' | 86    | 128   |
| >TP53-R273S LLGRNSFEVR | 582   | >TP53-R273S LLGRNSFEVS' | 198   | 384   |
| >TP53-R273S LLGRNSFEVR | 3     | >TP53-R273S LLGRNSFEVS' | 3     | 0     |
| >TP53-R273S LLGRNSFEVR | 7     | >TP53-R273S LLGRNSFEVS' | 4     | 3     |
| >TP53-R273S LLGRNSFEVR | 9     | >TP53-R273S LLGRNSFEVS' | 8     | 1     |
| >TP53-R273S LLGRNSFEVR | 6     | >TP53-R273S LLGRNSFEVS' | 4     | 2     |
| >TP53-R273S LLGRNSFEVR | 2     | >TP53-R273S LLGRNSFEVS' | 2     | 0     |
| >TP53-R273S LLGRNSFEVR | 429   | >TP53-R273S LLGRNSFEVS  | 31077 | 30648 |
| >TP53-R280C GRDRRTEEN  | 446   | >TP53-R280C GGDRRTEEN   | 23466 | 23020 |
| >TP53-R280C FEVRVCACPC | 370   | >TP53-R280C FEVRVCACPC  | 41248 | 40878 |
| >TP53-R280C CACPGRDRR  | 132   | >TP53-R280C CACPGDRR    | 397   | 265   |
| >TP53-R280C RVCACPCR   | 367   | >TP53-R280C RVCACPCGG   | 23102 | 22735 |
| >TP53-R280C RVCACPCRDI | 435   | >TP53-R280C RVCACPCGGD  | 550   | 115   |
| >TP53-R280C RVCACPCR   | 40    | >TP53-R280C RVCACPCGG   | 16577 | 16537 |
| >TP53-R280C RVCACPCRDI | 37    | >TP53-R280C RVCACPCGGD  | 101   | 64    |
| >TP53-R280C RVCACPCRDI | 33    | >TP53-R280C RVCACPCGGD  | 64    | 31    |
| >TP53-R280C RVCACPCR   | 481   | >TP53-R280C RVCACPCGG   | 42302 | 41821 |
| >TP53-R280C RVCACPCRDI | 297   | >TP53-R280C RVCACPCGGD  | 773   | 476   |
| >TP53-R280C RVCACPCR   | 66    | >TP53-R280C RVCACPCGG   | 28033 | 27967 |
| >TP53-R280C RVCACPCRDI | 255   | >TP53-R280C RVCACPCGGD  | 237   | 18    |
| >TP53-R280C RVCACPCRDI | 109   | >TP53-R280C RVCACPCGGD  | 167   | 58    |
| >TP53-R280C EVRVCACPCF | 329   | >TP53-R280C EVRVCACPCG  | 29445 | 29116 |
| >TP53-R280C EVRVCACPCF | 70    | >TP53-R280C EVRVCACPCG  | 35690 | 35620 |
| >TP53-R280I GRDRRTEEN  | 446   | >TP53-R280I GIDRRTEEN   | 21506 | 21060 |
| >TP53-R280I FEVRVCACPC | 8557  | >TP53-R280I FEVRVCACPC  | 9     | 8548  |
| >TP53-R280I FEVRVCACPC | 23272 | >TP53-R280I FEVRVCACPC  | 285   | 22987 |
| >TP53-R280I FEVRVCACPC | 370   | >TP53-R280I FEVRVCACPC  | 39173 | 38803 |
| >TP53-R280I FEVRVCACPC | 7812  | >TP53-R280I FEVRVCACPC  | 61    | 7751  |
| >TP53-R280I FEVRVCACPC | 1619  | >TP53-R280I FEVRVCACPC  | 5     | 1614  |
| >TP53-R280I CACPGRDR   | 824   | >TP53-R280I CACPGIDR    | 396   | 428   |
| >TP53-R280I CACPGRDRR  | 132   | >TP53-R280I CACPGIDRR   | 112   | 20    |
| >TP53-R280I RVCACPCR   | 25588 | >TP53-R280I RVCACPCI    | 354   | 25234 |
| >TP53-R280I RVCACPCR   | 367   | >TP53-R280I RVCACPCI    | 19220 | 18853 |
| >TP53-R280I RVCACPCRDI | 2818  | >TP53-R280I RVCACPGIDR  | 388   | 2430  |
| >TP53-R280I RVCACPCRDI | 435   | >TP53-R280I RVCACPGIDR  | 340   | 95    |
| >TP53-R280I RVCACPCR   | 1754  | >TP53-R280I RVCACPCI    | 480   | 1274  |
| >TP53-R280I RVCACPCR   | 40    | >TP53-R280I RVCACPCI    | 12430 | 12390 |

|                        |       |                        |       |       |
|------------------------|-------|------------------------|-------|-------|
| >TP53-R280I·RVCACPGRDI | 37    | >TP53-R280I·RVCACPGIDR | 42    | 5     |
| >TP53-R280I·RVCACPGRDI | 33    | >TP53-R280I·RVCACPGIDR | 42    | 9     |
| >TP53-R280I·RVCACPGR   | 481   | >TP53-R280I·RVCACPGI   | 40390 | 39909 |
| >TP53-R280I·RVCACPGRDI | 1118  | >TP53-R280I·RVCACPGIDR | 115   | 1003  |
| >TP53-R280I·RVCACPGRDI | 297   | >TP53-R280I·RVCACPGIDR | 238   | 59    |
| >TP53-R280I·RVCACPGR   | 66    | >TP53-R280I·RVCACPGI   | 25740 | 25674 |
| >TP53-R280I·RVCACPGRDI | 255   | >TP53-R280I·RVCACPGIDR | 98    | 157   |
| >TP53-R280I·RVCACPGRDI | 109   | >TP53-R280I·RVCACPGIDR | 91    | 18    |
| >TP53-R280I·RVCACPGR   | 39793 | >TP53-R280I·RVCACPGI   | 131   | 39662 |
| >TP53-R280I·EVRVCACPGF | 329   | >TP53-R280I·EVRVCACPGI | 28898 | 28569 |
| >TP53-R280I·EVRVCACPGF | 70    | >TP53-R280I·EVRVCACPGI | 31234 | 31164 |
| >TP53-R280I·EVRVCACPGF | 18021 | >TP53-R280I·EVRVCACPGI | 476   | 17545 |
| >TP53-R280K·GRDRRTEEN  | 446   | >TP53-R280K·GKDRRTEEN  | 7774  | 7328  |
| >TP53-R280K·FEVRVCACPC | 370   | >TP53-R280K·FEVRVCACPC | 1602  | 1232  |
| >TP53-R280K·CACPGRDRR  | 132   | >TP53-R280K·CACPGKDRR  | 271   | 139   |
| >TP53-R280K·RVCACPGR   | 1309  | >TP53-R280K·RVCACPGK   | 102   | 1207  |
| >TP53-R280K·RVCACPGR   | 367   | >TP53-R280K·RVCACPGK   | 40    | 327   |
| >TP53-R280K·RVCACPGRDI | 435   | >TP53-R280K·RVCACPGKDI | 656   | 221   |
| >TP53-R280K·RVCACPGR   | 1754  | >TP53-R280K·RVCACPGK   | 25    | 1729  |
| >TP53-R280K·RVCACPGR   | 40    | >TP53-R280K·RVCACPGK   | 578   | 538   |
| >TP53-R280K·RVCACPGRDI | 37    | >TP53-R280K·RVCACPGKDI | 87    | 50    |
| >TP53-R280K·RVCACPGRDI | 33    | >TP53-R280K·RVCACPGKDI | 37    | 4     |
| >TP53-R280K·RVCACPGR   | 481   | >TP53-R280K·RVCACPGK   | 1772  | 1291  |
| >TP53-R280K·RVCACPGRDI | 297   | >TP53-R280K·RVCACPGKDI | 682   | 385   |
| >TP53-R280K·RVCACPGR   | 66    | >TP53-R280K·RVCACPGK   | 898   | 832   |
| >TP53-R280K·RVCACPGRDI | 255   | >TP53-R280K·RVCACPGKDI | 137   | 118   |
| >TP53-R280K·RVCACPGRDI | 109   | >TP53-R280K·RVCACPGKDI | 111   | 2     |
| >TP53-R280K·EVRVCACPGF | 5897  | >TP53-R280K·EVRVCACPGK | 143   | 5754  |
| >TP53-R280K·EVRVCACPGF | 329   | >TP53-R280K·EVRVCACPGK | 7936  | 7607  |
| >TP53-R280K·EVRVCACPGF | 70    | >TP53-R280K·EVRVCACPGK | 227   | 157   |
| >TP53-R280S·GRDRRTEEN  | 446   | >TP53-R280S·GSDRRTEEN  | 20484 | 20038 |
| >TP53-R280S·FEVRVCACPC | 370   | >TP53-R280S·FEVRVCACPC | 35751 | 35381 |
| >TP53-R280S·CACPGRDR   | 824   | >TP53-R280S·CACPGSDR   | 368   | 456   |
| >TP53-R280S·CACPGRDRR  | 132   | >TP53-R280S·CACPGSDRR  | 165   | 33    |
| >TP53-R280S·RVCACPGRDI | 1179  | >TP53-R280S·RVCACPGSDF | 448   | 731   |
| >TP53-R280S·RVCACPGR   | 367   | >TP53-R280S·RVCACPGS   | 16941 | 16574 |
| >TP53-R280S·RVCACPGRDI | 435   | >TP53-R280S·RVCACPGSDF | 362   | 73    |
| >TP53-R280S·RVCACPGR   | 40    | >TP53-R280S·RVCACPGS   | 12660 | 12620 |
| >TP53-R280S·RVCACPGRDI | 37    | >TP53-R280S·RVCACPGSDF | 53    | 16    |
| >TP53-R280S·RVCACPGRDI | 33    | >TP53-R280S·RVCACPGSDF | 56    | 23    |
| >TP53-R280S·RVCACPGR   | 481   | >TP53-R280S·RVCACPGS   | 36832 | 36351 |
| >TP53-R280S·RVCACPGRDI | 1118  | >TP53-R280S·RVCACPGSDF | 127   | 991   |
| >TP53-R280S·RVCACPGRDI | 297   | >TP53-R280S·RVCACPGSDF | 305   | 8     |



|                        |      |                        |       |       |
|------------------------|------|------------------------|-------|-------|
| >TP53-R280S RVCACPGR   | 66   | >TP53-R280S RVCACPGS   | 21132 | 21066 |
| >TP53-R280S RVCACPGRDI | 255  | >TP53-R280S RVCACPGSDF | 257   | 2     |
| >TP53-R280S RVCACPGRDI | 109  | >TP53-R280S RVCACPGSDF | 122   | 13    |
| >TP53-R280S EVRVCACPGF | 329  | >TP53-R280S EVRVCACPGS | 27507 | 27178 |
| >TP53-R280S EVRVCACPGF | 70   | >TP53-R280S EVRVCACPGS | 33135 | 33065 |
| >TP53-R280T GRDRRTEEN  | 446  | >TP53-R280T GTDRRTEEN  | 19032 | 18586 |
| >TP53-R280T FEVRVCACPC | 370  | >TP53-R280T FEVRVCACPC | 37128 | 36758 |
| >TP53-R280T FEVRVCACPC | 1619 | >TP53-R280T FEVRVCACPC | 231   | 1388  |
| >TP53-R280T CACPGRDR   | 824  | >TP53-R280T CACPGTDR   | 362   | 462   |
| >TP53-R280T CACPGRDRR  | 132  | >TP53-R280T CACPGTDRR  | 101   | 31    |
| >TP53-R280T RVCACPGR   | 367  | >TP53-R280T RVCACPGT   | 21189 | 20822 |
| >TP53-R280T RVCACPGRDI | 435  | >TP53-R280T RVCACPGTDF | 311   | 124   |
| >TP53-R280T RVCACPGR   | 40   | >TP53-R280T RVCACPGT   | 14796 | 14756 |
| >TP53-R280T RVCACPGRDI | 37   | >TP53-R280T RVCACPGTDF | 63    | 26    |
| >TP53-R280T RVCACPGRDI | 33   | >TP53-R280T RVCACPGTDF | 49    | 16    |
| >TP53-R280T RVCACPGR   | 481  | >TP53-R280T RVCACPGT   | 38406 | 37925 |
| >TP53-R280T RVCACPGRDI | 1118 | >TP53-R280T RVCACPGTDF | 145   | 973   |
| >TP53-R280T RVCACPGRDI | 297  | >TP53-R280T RVCACPGTDF | 349   | 52    |
| >TP53-R280T RVCACPGR   | 66   | >TP53-R280T RVCACPGT   | 22863 | 22797 |
| >TP53-R280T RVCACPGRDI | 255  | >TP53-R280T RVCACPGTDF | 146   | 109   |
| >TP53-R280T RVCACPGRDI | 109  | >TP53-R280T RVCACPGTDF | 76    | 33    |
| >TP53-R280T EVRVCACPGF | 329  | >TP53-R280T EVRVCACPGT | 27819 | 27490 |
| >TP53-R280T EVRVCACPGF | 70   | >TP53-R280T EVRVCACPGT | 33310 | 33240 |
| >TP53-R282C RRTEENL    | 171  | >TP53-R282C GRTEENL    | 1393  | 1222  |
| >TP53-R282C RRTEENLR   | 424  | >TP53-R282C GRTEENLR   | 3059  | 2635  |
| >TP53-R282C RRTEENLRK  | 34   | >TP53-R282C GRTEENLRK  | 259   | 225   |
| >TP53-R282C RRTEENLRK  | 71   | >TP53-R282C GRTEENLRK  | 362   | 291   |
| >TP53-R282C RRTEENL    | 66   | >TP53-R282C GRTEENL    | 8092  | 8026  |
| >TP53-R282C RRTEENLRK  | 383  | >TP53-R282C GRTEENLRK  | 10259 | 9876  |
| >TP53-R282C RRTEENL    | 94   | >TP53-R282C GRTEENL    | 3267  | 3173  |
| >TP53-R282C RRTEENLRK  | 163  | >TP53-R282C GRTEENLRK  | 3513  | 3350  |
| >TP53-R282C GRDRRTEEN  | 446  | >TP53-R282C GRDGRTEEN  | 1261  | 815   |
| >TP53-R282C CACPGRDRR  | 132  | >TP53-R282C CACPGRDGR  | 139   | 7     |
| >TP53-R282C RVCACPGRDI | 435  | >TP53-R282C RVCACPGRDG | 524   | 89    |
| >TP53-R282C RVCACPGRDI | 37   | >TP53-R282C RVCACPGRDG | 20308 | 20271 |
| >TP53-R282C RVCACPGRDI | 33   | >TP53-R282C RVCACPGRDG | 48    | 15    |
| >TP53-R282C RVCACPGRDI | 297  | >TP53-R282C RVCACPGRDG | 29558 | 29261 |
| >TP53-R282C RVCACPGRDI | 255  | >TP53-R282C RVCACPGRDG | 34440 | 34185 |
| >TP53-R282C RVCACPGRDI | 109  | >TP53-R282C RVCACPGRDG | 101   | 8     |
| >TP53-R282F RRTEENL    | 171  | >TP53-R282F HRTEENL    | 716   | 545   |
| >TP53-R282F RRTEENLR   | 424  | >TP53-R282F HRTEENLR   | 1783  | 1359  |
| >TP53-R282F RRTEENLRK  | 34   | >TP53-R282F HRTEENLRK  | 69    | 35    |
| >TP53-R282F RRTEENLRK  | 71   | >TP53-R282F HRTEENLRK  | 185   | 114   |

|                         |       |                         |       |       |
|-------------------------|-------|-------------------------|-------|-------|
| >TP53-R282F RRTEENL     | 66    | >TP53-R282F HRTEENL     | 5007  | 4941  |
| >TP53-R282F RRTEENLRK   | 383   | >TP53-R282F HRTEENLRK   | 5661  | 5278  |
| >TP53-R282F RRTEENL     | 94    | >TP53-R282F HRTEENL     | 2325  | 2231  |
| >TP53-R282F RRTEENLRK   | 163   | >TP53-R282F HRTEENLRK   | 3417  | 3254  |
| >TP53-R282F GRDRRTEEN   | 446   | >TP53-R282F GRDHRTEEN   | 612   | 166   |
| >TP53-R282F CACPGRDRR   | 921   | >TP53-R282F CACPGRDHR   | 322   | 599   |
| >TP53-R282F CACPGRDRR   | 545   | >TP53-R282F CACPGRDHR   | 173   | 372   |
| >TP53-R282F CACPGRDRR   | 132   | >TP53-R282F CACPGRDHR   | 151   | 19    |
| >TP53-R282F RVCACPGRDI  | 435   | >TP53-R282F RVCACPGRDI  | 596   | 161   |
| >TP53-R282F RVCACPGRDI  | 37    | >TP53-R282F RVCACPGRDI  | 5017  | 4980  |
| >TP53-R282F RVCACPGRDI  | 33    | >TP53-R282F RVCACPGRDI  | 20    | 13    |
| >TP53-R282F RVCACPGRDI  | 297   | >TP53-R282F RVCACPGRDI  | 23972 | 23675 |
| >TP53-R282F RVCACPGRDI  | 255   | >TP53-R282F RVCACPGRDI  | 26163 | 25908 |
| >TP53-R282F RVCACPGRDI  | 109   | >TP53-R282F RVCACPGRDI  | 63    | 46    |
| >TP53-R282L RRTEENL     | 171   | >TP53-R282L LRTEENL     | 1702  | 1531  |
| >TP53-R282L RRTEENLR    | 424   | >TP53-R282L LRTEENLR    | 3450  | 3026  |
| >TP53-R282L RRTEENLRK   | 34    | >TP53-R282L LRTEENLRK   | 858   | 824   |
| >TP53-R282L RRTEENLRK   | 71    | >TP53-R282L LRTEENLRKI  | 374   | 303   |
| >TP53-R282L RRTEENL     | 66    | >TP53-R282L LRTEENL     | 8830  | 8764  |
| >TP53-R282L RRTEENLRK   | 383   | >TP53-R282L LRTEENLRK   | 15159 | 14776 |
| >TP53-R282L RRTEENL     | 94    | >TP53-R282L LRTEENL     | 1888  | 1794  |
| >TP53-R282L RRTEENLRK   | 163   | >TP53-R282L LRTEENLRK   | 4361  | 4198  |
| >TP53-R282L VRVCACPGRDI | 2664  | >TP53-R282L VRVCACPGRDI | 375   | 2289  |
| >TP53-R282L RDRRTEENL   | 1285  | >TP53-R282L RDLRTEENL   | 375   | 910   |
| >TP53-R282L GRDRRTEEN   | 446   | >TP53-R282L GRDLRTEEN   | 396   | 50    |
| >TP53-R282L CACPGRDRR   | 921   | >TP53-R282L CACPGRDLR   | 380   | 541   |
| >TP53-R282L CACPGRDRR   | 545   | >TP53-R282L CACPGRDLR   | 187   | 358   |
| >TP53-R282L CACPGRDRR   | 132   | >TP53-R282L CACPGRDLR   | 53    | 79    |
| >TP53-R282L CACPGRDR    | 35549 | >TP53-R282L CACPGRDL    | 256   | 35293 |
| >TP53-R282L RVCACPGRDI  | 435   | >TP53-R282L RVCACPGRDI  | 175   | 260   |
| >TP53-R282L RVCACPGRDI  | 37    | >TP53-R282L RVCACPGRDI  | 8647  | 8610  |
| >TP53-R282L RVCACPGRDI  | 33    | >TP53-R282L RVCACPGRDI  | 24    | 9     |
| >TP53-R282L RVCACPGRDI  | 584   | >TP53-R282L RVCACPGRDI  | 246   | 338   |
| >TP53-R282L RVCACPGRDI  | 297   | >TP53-R282L RVCACPGRDI  | 30491 | 30194 |
| >TP53-R282L RVCACPGRDI  | 255   | >TP53-R282L RVCACPGRDI  | 30447 | 30192 |
| >TP53-R282L RVCACPGRDI  | 109   | >TP53-R282L RVCACPGRDI  | 81    | 28    |
| >TP53-R282F RRTEENL     | 171   | >TP53-R282F PRTEENL     | 10053 | 9882  |
| >TP53-R282F RRTEENLR    | 424   | >TP53-R282F PRTEENLR    | 12234 | 11810 |
| >TP53-R282F RRTEENLRK   | 34    | >TP53-R282F PRTEENLRK   | 9629  | 9595  |
| >TP53-R282F RRTEENLRK   | 71    | >TP53-R282F PRTEENLRKI  | 3093  | 3022  |
| >TP53-R282F RRTEENL     | 66    | >TP53-R282F PRTEENL     | 20464 | 20398 |
| >TP53-R282F RRTEENLRK   | 383   | >TP53-R282F PRTEENLRK   | 17618 | 17235 |
| >TP53-R282F RRTEENL     | 94    | >TP53-R282F PRTEENL     | 12982 | 12888 |

|                        |      |                        |       |       |
|------------------------|------|------------------------|-------|-------|
| >TP53-R282F RRTEENLRK  | 163  | >TP53-R282F PRTEENLRK  | 9057  | 8894  |
| >TP53-R282F GRDRRTEEN  | 446  | >TP53-R282F GRDPRTEEN  | 350   | 96    |
| >TP53-R282F CACPGRDRR  | 921  | >TP53-R282F CACPGRDPR  | 252   | 669   |
| >TP53-R282F CACPGRDRR  | 545  | >TP53-R282F CACPGRDPR  | 154   | 391   |
| >TP53-R282F CACPGRDRR  | 132  | >TP53-R282F CACPGRDPR  | 153   | 21    |
| >TP53-R282F RVCACPGRDI | 435  | >TP53-R282F RVCACPGRDI | 172   | 263   |
| >TP53-R282F RVCACPGRDI | 37   | >TP53-R282F RVCACPGRDI | 21378 | 21341 |
| >TP53-R282F RVCACPGRDI | 33   | >TP53-R282F RVCACPGRDI | 18    | 15    |
| >TP53-R282F RVCACPGRDI | 297  | >TP53-R282F RVCACPGRDI | 28707 | 28410 |
| >TP53-R282F RVCACPGRDI | 255  | >TP53-R282F RVCACPGRDI | 34730 | 34475 |
| >TP53-R282F RVCACPGRDI | 109  | >TP53-R282F RVCACPGRDI | 56    | 53    |
| >TP53-R282C RRTEENL    | 171  | >TP53-R282C QRTEENL    | 1858  | 1687  |
| >TP53-R282C RRTEENLR   | 424  | >TP53-R282C QRTEENLR   | 3822  | 3398  |
| >TP53-R282C RRTEENLRK  | 34   | >TP53-R282C QRTEENLRK  | 792   | 758   |
| >TP53-R282C RRTEENLRK  | 71   | >TP53-R282C QRTEENLRK  | 436   | 365   |
| >TP53-R282C RRTEENL    | 66   | >TP53-R282C QRTEENL    | 7655  | 7589  |
| >TP53-R282C RRTEENLRK  | 383  | >TP53-R282C QRTEENLRK  | 10259 | 9876  |
| >TP53-R282C RRTEENL    | 94   | >TP53-R282C QRTEENL    | 1596  | 1502  |
| >TP53-R282C RRTEENLRK  | 163  | >TP53-R282C QRTEENLRK  | 3284  | 3121  |
| >TP53-R282C GRDRRTEEN  | 446  | >TP53-R282C GRDQRTEEN  | 457   | 11    |
| >TP53-R282C CACPGRDRR  | 545  | >TP53-R282C CACPGRDQR  | 442   | 103   |
| >TP53-R282C CACPGRDRR  | 132  | >TP53-R282C CACPGRDQR  | 91    | 41    |
| >TP53-R282C RVCACPGRDI | 435  | >TP53-R282C RVCACPGRDI | 319   | 116   |
| >TP53-R282C RVCACPGRDI | 37   | >TP53-R282C RVCACPGRDI | 12260 | 12223 |
| >TP53-R282C RVCACPGRDI | 33   | >TP53-R282C RVCACPGRDI | 30    | 3     |
| >TP53-R282C RVCACPGRDI | 584  | >TP53-R282C RVCACPGRDI | 375   | 209   |
| >TP53-R282C RVCACPGRDI | 297  | >TP53-R282C RVCACPGRDI | 14108 | 13811 |
| >TP53-R282C RVCACPGRDI | 255  | >TP53-R282C RVCACPGRDI | 16490 | 16235 |
| >TP53-R282C RVCACPGRDI | 109  | >TP53-R282C RVCACPGRDI | 144   | 35    |
| >TP53-R282V RRTEENL    | 171  | >TP53-R282V WRTEENL    | 980   | 809   |
| >TP53-R282V RRTEENLR   | 424  | >TP53-R282V WRTEENLR   | 1983  | 1559  |
| >TP53-R282V RRTEENLRK  | 34   | >TP53-R282V WRTEENLRK  | 120   | 86    |
| >TP53-R282V RRTEENLRK  | 71   | >TP53-R282V WRTEENLRK  | 223   | 152   |
| >TP53-R282V RRTEENL    | 66   | >TP53-R282V WRTEENL    | 1892  | 1826  |
| >TP53-R282V RRTEENLRK  | 383  | >TP53-R282V WRTEENLRK  | 2990  | 2607  |
| >TP53-R282V RRTEENL    | 94   | >TP53-R282V WRTEENL    | 1696  | 1602  |
| >TP53-R282V RRTEENLRK  | 163  | >TP53-R282V WRTEENLRK  | 650   | 487   |
| >TP53-R282V DRRTEENLR  | 8642 | >TP53-R282V DWRTTEENLI | 99    | 8543  |
| >TP53-R282V RDRRTEENL  | 955  | >TP53-R282V RDWRTEEN   | 366   | 589   |
| >TP53-R282V RDRRTEENL  | 4800 | >TP53-R282V RDWRTEEN   | 361   | 4439  |
| >TP53-R282V GRDRRTEEN  | 446  | >TP53-R282V GRDWRTEEE  | 297   | 149   |
| >TP53-R282V CACPGRDRR  | 545  | >TP53-R282V CACPGRDWR  | 235   | 310   |
| >TP53-R282V CACPGRDRR  | 132  | >TP53-R282V CACPGRDWR  | 78    | 54    |

|                       |       |                       |       |       |
|-----------------------|-------|-----------------------|-------|-------|
| >TP53-R282\CACPGRDR   | 28223 | >TP53-R282\CACPGRDW   | 118   | 28105 |
| >TP53-R282\CACPGRDR   | 24416 | >TP53-R282\CACPGRDW   | 479   | 23937 |
| >TP53-R282\RVCACPGRDI | 435   | >TP53-R282\RVCACPGRDI | 486   | 51    |
| >TP53-R282\RVCACPGRDI | 37    | >TP53-R282\RVCACPGRDI | 17444 | 17407 |
| >TP53-R282\RVCACPGRDI | 33    | >TP53-R282\RVCACPGRDI | 26    | 7     |
| >TP53-R282\RVCACPGRDI | 584   | >TP53-R282\RVCACPGRDI | 270   | 314   |
| >TP53-R282\RVCACPGRDI | 21909 | >TP53-R282\RVCACPGRDI | 169   | 21740 |
| >TP53-R282\RVCACPGRDI | 24173 | >TP53-R282\RVCACPGRDI | 374   | 23799 |
| >TP53-R282\RVCACPGRDI | 297   | >TP53-R282\RVCACPGRDI | 32478 | 32181 |
| >TP53-R282\RVCACPGRDI | 255   | >TP53-R282\RVCACPGRDI | 26015 | 25760 |
| >TP53-R282\RVCACPGRDI | 109   | >TP53-R282\RVCACPGRDI | 101   | 8     |
| >TP53-R283\CTEEENLRK  | 88    | >TP53-R283\CTEEENLRK  | 372   | 284   |
| >TP53-R283\CTEEENLRK  | 126   | >TP53-R283\CTEEENLRK  | 5413  | 5287  |
| >TP53-R283\CTEEENLRKK | 174   | >TP53-R283\CTEEENLRKK | 6493  | 6319  |
| >TP53-R283\CTEEENLR   | 242   | >TP53-R283\CTEEENLR   | 4039  | 3797  |
| >TP53-R283\CTEEENLR   | 188   | >TP53-R283\CTEEENLR   | 52    | 136   |
| >TP53-R283\CTEEENLR   | 456   | >TP53-R283\CTEEENLR   | 1678  | 1222  |
| >TP53-R283\CTEEENL    | 171   | >TP53-R283\CTEEENL    | 21601 | 21430 |
| >TP53-R283\CTEEENLR   | 424   | >TP53-R283\CTEEENLR   | 19225 | 18801 |
| >TP53-R283\CTEEENLRK  | 34    | >TP53-R283\CTEEENLRK  | 21568 | 21534 |
| >TP53-R283\CTEEENLRK  | 71    | >TP53-R283\CTEEENLRK  | 17679 | 17608 |
| >TP53-R283\CTEEENL    | 66    | >TP53-R283\CTEEENL    | 14466 | 14400 |
| >TP53-R283\CTEEENLRK  | 383   | >TP53-R283\CTEEENLRK  | 29308 | 28925 |
| >TP53-R283\CTEEENL    | 94    | >TP53-R283\CTEEENL    | 7932  | 7838  |
| >TP53-R283\CTEEENLRK  | 163   | >TP53-R283\CTEEENLRK  | 29057 | 28894 |
| >TP53-R283\CTEEENLR   | 993   | >TP53-R283\CTEEENLR   | 345   | 648   |
| >TP53-R283\RVCACPGRDI | 435   | >TP53-R283\RVCACPGRDI | 24549 | 24114 |
| >TP53-R283\RVCACPGRDI | 33    | >TP53-R283\RVCACPGRDI | 15582 | 15549 |
| >TP53-R283\RVCACPGRDI | 109   | >TP53-R283\RVCACPGRDI | 34772 | 34663 |
| >TP53-R283\GRDRCTEEEN | 446   | >TP53-R283\GRDRCTEEEN | 529   | 83    |
| >TP53-R283\CACPGRDRR  | 132   | >TP53-R283\CACPGRDRR  | 35723 | 35591 |
| >TP53-R283\CTEEENLRK  | 88    | >TP53-R283\CTEEENLRK  | 145   | 57    |
| >TP53-R283\CTEEENLRK  | 126   | >TP53-R283\CTEEENLRK  | 5187  | 5061  |
| >TP53-R283\CTEEENLRKK | 174   | >TP53-R283\CTEEENLRKK | 6323  | 6149  |
| >TP53-R283\CTEEENLR   | 242   | >TP53-R283\CTEEENLR   | 3726  | 3484  |
| >TP53-R283\CTEEENLR   | 188   | >TP53-R283\CTEEENLR   | 256   | 68    |
| >TP53-R283\CTEEENLRK  | 1433  | >TP53-R283\CTEEENLRK  | 462   | 971   |
| >TP53-R283\CTEEENLR   | 456   | >TP53-R283\CTEEENLR   | 8739  | 8283  |
| >TP53-R283\CTEEENL    | 171   | >TP53-R283\CTEEENL    | 20430 | 20259 |
| >TP53-R283\CTEEENLR   | 424   | >TP53-R283\CTEEENLR   | 18097 | 17673 |
| >TP53-R283\CTEEENLRK  | 34    | >TP53-R283\CTEEENLRK  | 19415 | 19381 |
| >TP53-R283\CTEEENLRK  | 71    | >TP53-R283\CTEEENLRK  | 15120 | 15049 |
| >TP53-R283\CTEEENL    | 66    | >TP53-R283\CTEEENL    | 18165 | 18099 |

|                        |       |                        |       |       |
|------------------------|-------|------------------------|-------|-------|
| >TP53-R283CRRTEENLRK   | 383   | >TP53-R283C RGTEENLRK  | 27812 | 27429 |
| >TP53-R283CRRTEENL     | 94    | >TP53-R283C RGTEENL    | 9835  | 9741  |
| >TP53-R283CRRTEENLRK   | 163   | >TP53-R283C RGTEENLRK  | 25934 | 25771 |
| >TP53-R283C RVCACPGRDI | 435   | >TP53-R283C RVCACPGRDI | 24435 | 24000 |
| >TP53-R283C RVCACPGRDI | 33    | >TP53-R283C RVCACPGRDI | 15147 | 15114 |
| >TP53-R283C RVCACPGRDI | 109   | >TP53-R283C RVCACPGRDI | 33114 | 33005 |
| >TP53-R283C GRDRRTEEN  | 446   | >TP53-R283C GRDRGTEEN  | 622   | 176   |
| >TP53-R283C CACPGRDRR  | 132   | >TP53-R283C CACPGRDRG  | 33886 | 33754 |
| >TP53-R283F RTEENLRK   | 88    | >TP53-R283F HTEENLRK   | 587   | 499   |
| >TP53-R283F RTEENLRK   | 126   | >TP53-R283F HTEENLRK   | 490   | 364   |
| >TP53-R283F RTEENLRKK  | 174   | >TP53-R283F HTEENLRKK  | 683   | 509   |
| >TP53-R283F RTEENLR    | 242   | >TP53-R283F HTEENLR    | 1135  | 893   |
| >TP53-R283F RTEENLR    | 5269  | >TP53-R283F HTEENLR    | 304   | 4965  |
| >TP53-R283F RTEENLR    | 188   | >TP53-R283F HTEENLR    | 17    | 171   |
| >TP53-R283F RTEENLRK   | 3325  | >TP53-R283F HTEENLRK   | 253   | 3072  |
| >TP53-R283F RTEENLR    | 456   | >TP53-R283F HTEENLR    | 555   | 99    |
| >TP53-R283F RRTEENL    | 171   | >TP53-R283F RHTEENL    | 15541 | 15370 |
| >TP53-R283F RRTEENLR   | 424   | >TP53-R283F RHTEENLR   | 15170 | 14746 |
| >TP53-R283F RRTEENLRK  | 34    | >TP53-R283F RHTEENLRK  | 3091  | 3057  |
| >TP53-R283F RRTEENLRK  | 71    | >TP53-R283F RHTEENLRK  | 6408  | 6337  |
| >TP53-R283F RRTEENL    | 66    | >TP53-R283F RHTEENL    | 9238  | 9172  |
| >TP53-R283F RRTEENLRK  | 383   | >TP53-R283F RHTEENLRK  | 20670 | 20287 |
| >TP53-R283F RRTEENL    | 94    | >TP53-R283F RHTEENL    | 4647  | 4553  |
| >TP53-R283F RRTEENLRK  | 163   | >TP53-R283F RHTEENLRK  | 18267 | 18104 |
| >TP53-R283F RVCACPGRDI | 435   | >TP53-R283F RVCACPGRDI | 4232  | 3797  |
| >TP53-R283F RVCACPGRDI | 33    | >TP53-R283F RVCACPGRDI | 3968  | 3935  |
| >TP53-R283F RVCACPGRDI | 109   | >TP53-R283F RVCACPGRDI | 24281 | 24172 |
| >TP53-R283F GRDRRTEEN  | 446   | >TP53-R283F GRDRHTEEN  | 425   | 21    |
| >TP53-R283F CACPGRDRR  | 132   | >TP53-R283F CACPGRDRH  | 13524 | 13392 |
| >TP53-R283L RTEENLRK   | 88    | >TP53-R283L LTEENLRK   | 400   | 312   |
| >TP53-R283L RTEENLRK   | 126   | >TP53-R283L LTEENLRK   | 3323  | 3197  |
| >TP53-R283L RTEENLRKK  | 174   | >TP53-R283L LTEENLRKK  | 4331  | 4157  |
| >TP53-R283L RTEENLR    | 242   | >TP53-R283L LTEENLR    | 2605  | 2363  |
| >TP53-R283L RTEENLR    | 188   | >TP53-R283L LTEENLR    | 50    | 138   |
| >TP53-R283L RTEENLR    | 456   | >TP53-R283L LTEENLR    | 3748  | 3292  |
| >TP53-R283L RRTEENL    | 23962 | >TP53-R283L RLTEENL    | 22    | 23940 |
| >TP53-R283L RRTEENL    | 24635 | >TP53-R283L RLTEENL    | 52    | 24583 |
| >TP53-R283L RRTEENL    | 23758 | >TP53-R283L RLTEENL    | 104   | 23654 |
| >TP53-R283L RRTEENL    | 22816 | >TP53-R283L RLTEENL    | 50    | 22766 |
| >TP53-R283L RRTEENL    | 27958 | >TP53-R283L RLTEENL    | 11    | 27947 |
| >TP53-R283L RRTEENLRK  | 13479 | >TP53-R283L RLTEENLRK  | 424   | 13055 |
| >TP53-R283L RRTEENLRK  | 20706 | >TP53-R283L RLTEENLRKI | 245   | 20461 |
| >TP53-R283L RRTEENLRK  | 8557  | >TP53-R283L RLTEENLRK  | 203   | 8354  |

|                         |       |                          |       |       |
|-------------------------|-------|--------------------------|-------|-------|
| >TP53-R283L RRTEEEENL   | 171   | >TP53-R283L RLTEEEENL    | 14639 | 14468 |
| >TP53-R283L RRTEEEENLR  | 424   | >TP53-R283L RLTEEEENLR   | 12429 | 12005 |
| >TP53-R283L RRTEEEENLRK | 34    | >TP53-R283L RLTEEEENLRK  | 17648 | 17614 |
| >TP53-R283L RRTEEEENLRK | 71    | >TP53-R283L RLTEEEENLRKI | 8216  | 8145  |
| >TP53-R283L RRTEEEENL   | 66    | >TP53-R283L RLTEEEENL    | 9477  | 9411  |
| >TP53-R283L RRTEEEENLRK | 383   | >TP53-R283L RLTEEEENLRK  | 25319 | 24936 |
| >TP53-R283L RRTEEEENL   | 94    | >TP53-R283L RLTEEEENL    | 6790  | 6696  |
| >TP53-R283L RRTEEEENLRK | 163   | >TP53-R283L RLTEEEENLRK  | 22039 | 21876 |
| >TP53-R283L RRTEEEENLR  | 993   | >TP53-R283L RLTEEEENLR   | 294   | 699   |
| >TP53-R283L RVCACPGRDI  | 435   | >TP53-R283L RVCACPGRDI   | 18914 | 18479 |
| >TP53-R283L RVCACPGRDI  | 33    | >TP53-R283L RVCACPGRDI   | 7286  | 7253  |
| >TP53-R283L RVCACPGRDI  | 109   | >TP53-R283L RVCACPGRDI   | 28749 | 28640 |
| >TP53-R283L GRDRRTEEEEN | 446   | >TP53-R283L GRDRLTEEEEN  | 413   | 33    |
| >TP53-R283L CACPGRDRR   | 132   | >TP53-R283L CACPGRDRL    | 24603 | 24471 |
| >TP53-R283L CACPGRDRR   | 29292 | >TP53-R283L CACPGRDRL    | 194   | 29098 |
| >TP53-R283F RTEEEENLRK  | 88    | >TP53-R283F PTEEEENLRK   | 5284  | 5196  |
| >TP53-R283F RTEEEENLRK  | 126   | >TP53-R283F PTEEEENLRK   | 9867  | 9741  |
| >TP53-R283F RTEEEENLRKK | 174   | >TP53-R283F PTEEEENLRKK  | 10839 | 10665 |
| >TP53-R283F RTEEEENLR   | 242   | >TP53-R283F PTEEEENLR    | 11012 | 10770 |
| >TP53-R283F RTEEEENLR   | 188   | >TP53-R283F PTEEEENLR    | 1306  | 1118  |
| >TP53-R283F RTEEEENLR   | 456   | >TP53-R283F PTEEEENLR    | 5612  | 5156  |
| >TP53-R283F RRTEEEENL   | 171   | >TP53-R283F RPTEEEENL    | 21761 | 21590 |
| >TP53-R283F RRTEEEENLR  | 424   | >TP53-R283F RPTEEEENLR   | 20048 | 19624 |
| >TP53-R283F RRTEEEENLRK | 34    | >TP53-R283F RPTEEEENLRK  | 20280 | 20246 |
| >TP53-R283F RRTEEEENLRK | 71    | >TP53-R283F RPTEEEENLRKI | 17088 | 17017 |
| >TP53-R283F RRTEEEENL   | 66    | >TP53-R283F RPTEEEENL    | 12669 | 12603 |
| >TP53-R283F RRTEEEENLRK | 383   | >TP53-R283F RPTEEEENLRK  | 27251 | 26868 |
| >TP53-R283F RRTEEEENL   | 94    | >TP53-R283F RPTEEEENL    | 7216  | 7122  |
| >TP53-R283F RRTEEEENLRK | 163   | >TP53-R283F RPTEEEENLRK  | 26254 | 26091 |
| >TP53-R283F RVCACPGRDI  | 435   | >TP53-R283F RVCACPGRDI   | 23344 | 22909 |
| >TP53-R283F RVCACPGRDI  | 33    | >TP53-R283F RVCACPGRDI   | 16343 | 16310 |
| >TP53-R283F RVCACPGRDI  | 109   | >TP53-R283F RVCACPGRDI   | 33241 | 33132 |
| >TP53-R283F GRDRRTEEEEN | 446   | >TP53-R283F GRDRPTEEEEN  | 1021  | 575   |
| >TP53-R283F CACPGRDRR   | 132   | >TP53-R283F CACPGRDRP    | 31400 | 31268 |
| >TP53-R283S RTEEEENLRK  | 88    | >TP53-R283S STEEEENLRK   | 51    | 37    |
| >TP53-R283S RTEEEENLRKK | 674   | >TP53-R283S STEEEENLRKK  | 268   | 406   |
| >TP53-R283S RTEEEENLRK  | 126   | >TP53-R283S STEEEENLRK   | 1675  | 1549  |
| >TP53-R283S RTEEEENLRKK | 174   | >TP53-R283S STEEEENLRKK  | 2286  | 2112  |
| >TP53-R283S RTEEEENLR   | 242   | >TP53-R283S STEEEENLR    | 1952  | 1710  |
| >TP53-R283S RTEEEENLR   | 188   | >TP53-R283S STEEEENLR    | 29    | 159   |
| >TP53-R283S RTEEEENLRK  | 1433  | >TP53-R283S STEEEENLRK   | 281   | 1152  |
| >TP53-R283S RTEEEENLRKK | 1702  | >TP53-R283S STEEEENLRKK  | 415   | 1287  |
| >TP53-R283S RTEEEENLR   | 456   | >TP53-R283S STEEEENLR    | 2505  | 2049  |

|                        |       |                         |       |       |
|------------------------|-------|-------------------------|-------|-------|
| >TP53-R283S RRTEENLRK  | 8557  | >TP53-R283S RSTEEENLRK  | 68    | 8489  |
| >TP53-R283S RRTEENLRK  | 24173 | >TP53-R283S RSTEEENLRKI | 467   | 23706 |
| >TP53-R283S RRTEENLRK  | 7891  | >TP53-R283S RSTEEENLRK  | 211   | 7680  |
| >TP53-R283S RRTEENLRK  | 9212  | >TP53-R283S RSTEEENLRKI | 295   | 8917  |
| >TP53-R283S RRTEENLR   | 12328 | >TP53-R283S RSTEEENLR   | 302   | 12026 |
| >TP53-R283S RRTEENL    | 24727 | >TP53-R283S RSTEEENL    | 41    | 24686 |
| >TP53-R283S RRTEENL    | 171   | >TP53-R283S RSTEEENL    | 16466 | 16295 |
| >TP53-R283S RRTEENLR   | 424   | >TP53-R283S RSTEEENLR   | 14591 | 14167 |
| >TP53-R283S RRTEENLRK  | 34    | >TP53-R283S RSTEEENLRK  | 14711 | 14677 |
| >TP53-R283S RRTEENLRK  | 71    | >TP53-R283S RSTEEENLRKI | 9742  | 9671  |
| >TP53-R283S RRTEENL    | 66    | >TP53-R283S RSTEEENL    | 11359 | 11293 |
| >TP53-R283S RRTEENLRK  | 383   | >TP53-R283S RSTEEENLRK  | 22007 | 21624 |
| >TP53-R283S RRTEENL    | 94    | >TP53-R283S RSTEEENL    | 6969  | 6875  |
| >TP53-R283S RRTEENLRK  | 163   | >TP53-R283S RSTEEENLRK  | 19621 | 19458 |
| >TP53-R283S RVCACPGRDI | 435   | >TP53-R283S RVCACPGRDI  | 18919 | 18484 |
| >TP53-R283S RVCACPGRDI | 33    | >TP53-R283S RVCACPGRDI  | 11469 | 11436 |
| >TP53-R283S RVCACPGRDI | 109   | >TP53-R283S RVCACPGRDI  | 28526 | 28417 |
| >TP53-R283S GRDRRTEEN  | 446   | >TP53-R283S GRDRRTEEN   | 925   | 479   |
| >TP53-R283S CACPGRDRR  | 132   | >TP53-R283S CACPGRDRS   | 24038 | 23906 |
| >TP53-R290C RKKGEPHHEL | 62    | >TP53-R290C CKKGEPHHEL  | 771   | 709   |
| >TP53-R290C LRKKGEPHHE | 405   | >TP53-R290C LCKKGEPHHE  | 6644  | 6239  |
| >TP53-R290C LRKKGEPHHE | 321   | >TP53-R290C LCKKGEPHHE  | 38231 | 37910 |
| >TP53-R290C TEEENLRK   | 2199  | >TP53-R290C TEEENLCK    | 464   | 1735  |
| >TP53-R290C RTEENLRK   | 88    | >TP53-R290C RTEENLCK    | 123   | 35    |
| >TP53-R290C RTEENLRKK  | 674   | >TP53-R290C RTEENLCKK   | 220   | 454   |
| >TP53-R290C RTEENLRK   | 126   | >TP53-R290C RTEENLCK    | 223   | 97    |
| >TP53-R290C RTEENLRKK  | 174   | >TP53-R290C RTEENLCKK   | 104   | 70    |
| >TP53-R290C RTEENLR    | 242   | >TP53-R290C RTEENLC     | 22477 | 22235 |
| >TP53-R290C RTEENLR    | 188   | >TP53-R290C RTEENLC     | 41400 | 41212 |
| >TP53-R290C RTEENLR    | 456   | >TP53-R290C RTEENLC     | 36550 | 36094 |
| >TP53-R290C RRTEENLR   | 424   | >TP53-R290C RRTEENLC    | 5056  | 4632  |
| >TP53-R290C RRTEENLRK  | 34    | >TP53-R290C RRTEENLCK   | 32    | 2     |
| >TP53-R290C RRTEENLRK  | 71    | >TP53-R290C RRTEENLCK   | 87    | 16    |
| >TP53-R290C RRTEENLRK  | 383   | >TP53-R290C RRTEENLCK   | 310   | 73    |
| >TP53-R290C RRTEENLRK  | 163   | >TP53-R290C RRTEENLCK   | 137   | 26    |
| >TP53-R290F RKKGEPHHEL | 62    | >TP53-R290F HKKGEPHHEI  | 317   | 255   |
| >TP53-R290F LRKKGEPHHE | 405   | >TP53-R290F LHKKGEPHHE  | 880   | 475   |
| >TP53-R290F LRKKGEPHHE | 321   | >TP53-R290F LHKKGEPHHE  | 26301 | 25980 |
| >TP53-R290F RTEENLRK   | 88    | >TP53-R290F RTEENLHK    | 125   | 37    |
| >TP53-R290F RTEENLRKK  | 674   | >TP53-R290F RTEENLHKK   | 214   | 460   |
| >TP53-R290F RTEENLRK   | 126   | >TP53-R290F RTEENLHK    | 36    | 90    |
| >TP53-R290F RTEENLRKK  | 174   | >TP53-R290F RTEENLHKK   | 124   | 50    |
| >TP53-R290F RTEENLR    | 242   | >TP53-R290F RTEENLH     | 12852 | 12610 |

|                         |       |                         |       |       |
|-------------------------|-------|-------------------------|-------|-------|
| >TP53-R290F RTEEENLR    | 188   | >TP53-R290F RTEEENLH    | 23015 | 22827 |
| >TP53-R290F RTEEENLR    | 456   | >TP53-R290F RTEEENLH    | 31146 | 30690 |
| >TP53-R290F RRTEEENLR   | 424   | >TP53-R290F RRTEEENLH   | 900   | 476   |
| >TP53-R290F RRTEEENLRK  | 34    | >TP53-R290F RRTEEENLHK  | 35    | 1     |
| >TP53-R290F RRTEEENLRK  | 71    | >TP53-R290F RRTEEENLHK  | 53    | 18    |
| >TP53-R290F RRTEEENLRK  | 383   | >TP53-R290F RRTEEENLHK  | 211   | 172   |
| >TP53-R290F RRTEEENLRK  | 163   | >TP53-R290F RRTEEENLHK  | 110   | 53    |
| >TP53-R290L RKKKGEPHHEL | 62    | >TP53-R290L LKKKGEPHHEL | 176   | 114   |
| >TP53-R290L LRKKGEPHHE  | 26466 | >TP53-R290L LLKKGEPHHE  | 204   | 26262 |
| >TP53-R290L LRKKGEPHHE  | 21050 | >TP53-R290L LLKKGEPHHE  | 282   | 20768 |
| >TP53-R290L LRKKGEPHHE  | 24998 | >TP53-R290L LLKKGEPHHE  | 164   | 24834 |
| >TP53-R290L LRKKGEPHHE  | 24632 | >TP53-R290L LLKKGEPHHE  | 491   | 24141 |
| >TP53-R290L LRKKGEPHHE  | 16835 | >TP53-R290L LLKKGEPHHE  | 4     | 16831 |
| >TP53-R290L LRKKGEPHHE  | 405   | >TP53-R290L LLKKGEPHHE  | 1224  | 819   |
| >TP53-R290L LRKKGEPHHE  | 321   | >TP53-R290L LLKKGEPHHE  | 26939 | 26618 |
| >TP53-R290L TEEENLRK    | 2199  | >TP53-R290L TEEENLLK    | 219   | 1980  |
| >TP53-R290L RTEEENLRK   | 882   | >TP53-R290L RTEEENLLK   | 406   | 476   |
| >TP53-R290L RTEEENLRKK  | 1962  | >TP53-R290L RTEEENLLKK  | 419   | 1543  |
| >TP53-R290L RTEEENLRK   | 88    | >TP53-R290L RTEEENLLK   | 39    | 49    |
| >TP53-R290L RTEEENLRKK  | 674   | >TP53-R290L RTEEENLLKK  | 53    | 621   |
| >TP53-R290L RTEEENLRK   | 126   | >TP53-R290L RTEEENLLK   | 42    | 84    |
| >TP53-R290L RTEEENLRKK  | 174   | >TP53-R290L RTEEENLLKK  | 74    | 100   |
| >TP53-R290L RTEEENLR    | 242   | >TP53-R290L RTEEENLL    | 17529 | 17287 |
| >TP53-R290L RTEEENLR    | 188   | >TP53-R290L RTEEENLL    | 34299 | 34111 |
| >TP53-R290L RTEEENLR    | 13075 | >TP53-R290L RTEEENLL    | 82    | 12993 |
| >TP53-R290L RTEEENLR    | 456   | >TP53-R290L RTEEENLL    | 33305 | 32849 |
| >TP53-R290L RRTEEENLR   | 424   | >TP53-R290L RRTEEENLL   | 277   | 147   |
| >TP53-R290L RRTEEENLRK  | 34    | >TP53-R290L RRTEEENLLK  | 33    | 1     |
| >TP53-R290L RRTEEENLRK  | 71    | >TP53-R290L RRTEEENLLKI | 60    | 11    |
| >TP53-R290L RRTEEENLR   | 1692  | >TP53-R290L RRTEEENLL   | 78    | 1614  |
| >TP53-R290L RRTEEENLRK  | 383   | >TP53-R290L RRTEEENLLK  | 168   | 215   |
| >TP53-R290L RRTEEENLR   | 2790  | >TP53-R290L RRTEEENLL   | 76    | 2714  |
| >TP53-R290L RRTEEENLRK  | 163   | >TP53-R290L RRTEEENLLK  | 106   | 57    |
| >TP53-R290L RRTEEENLRK  | 634   | >TP53-R290L RRTEEENLLKI | 434   | 200   |
| >TP53-R290S RKKKGEPHHEL | 62    | >TP53-R290S SKKGEPHHEL  | 370   | 308   |
| >TP53-R290S LRKKGEPHHE  | 10915 | >TP53-R290S LSKKGEPHHE  | 492   | 10423 |
| >TP53-R290S LRKKGEPHHE  | 405   | >TP53-R290S LSKKGEPHHE  | 923   | 518   |
| >TP53-R290S LRKKGEPHHE  | 25524 | >TP53-R290S LSKKGEPHHE  | 47    | 25477 |
| >TP53-R290S LRKKGEPHHE  | 321   | >TP53-R290S LSKKGEPHHE  | 32281 | 31960 |
| >TP53-R290S RTEEENLRK   | 88    | >TP53-R290S RTEEENLSK   | 72    | 16    |
| >TP53-R290S RTEEENLRKK  | 674   | >TP53-R290S RTEEENLSKK  | 192   | 482   |
| >TP53-R290S RTEEENLRK   | 126   | >TP53-R290S RTEEENLSK   | 34    | 92    |
| >TP53-R290S RTEEENLRKK  | 174   | >TP53-R290S RTEEENLSKK  | 141   | 33    |



|                         |       |                         |       |       |
|-------------------------|-------|-------------------------|-------|-------|
| >TP53-R290S RTEEENLR    | 242   | >TP53-R290S RTEEENLS    | 19963 | 19721 |
| >TP53-R290S RTEEENLR    | 188   | >TP53-R290S RTEEENLS    | 33273 | 33085 |
| >TP53-R290S RTEEENLR    | 456   | >TP53-R290S RTEEENLS    | 32939 | 32483 |
| >TP53-R290S RRTEEENLR   | 424   | >TP53-R290S RRTEEENLS   | 2333  | 1909  |
| >TP53-R290S RRTEEENLRK  | 34    | >TP53-R290S RRTEEENLSK  | 44    | 10    |
| >TP53-R290S RRTEEENLRK  | 71    | >TP53-R290S RRTEEENLSKI | 75    | 4     |
| >TP53-R290S RRTEEENLRK  | 383   | >TP53-R290S RRTEEENLSK  | 297   | 86    |
| >TP53-R290S RRTEEENLRK  | 163   | >TP53-R290S RRTEEENLSK  | 168   | 5     |
| >TP53-R335L RERFEMFR    | 166   | >TP53-R335L LERFEMFR    | 1896  | 1730  |
| >TP53-R335L RERFEMFREL  | 48    | >TP53-R335L LERFEMFREL  | 106   | 58    |
| >TP53-R335L RERFEMFREL  | 142   | >TP53-R335L LERFEMFREL  | 691   | 549   |
| >TP53-R335L RERFEMFREL  | 29    | >TP53-R335L LERFEMFREL  | 110   | 81    |
| >TP53-R335L RERFEMFR    | 144   | >TP53-R335L LERFEMFR    | 853   | 709   |
| >TP53-R335L GRERFEMFRE  | 26775 | >TP53-R335L GLERFEMFRE  | 267   | 26508 |
| >TP53-R335L GRERFEMFRE  | 28269 | >TP53-R335L GLERFEMFRE  | 31    | 28238 |
| >TP53-R335L GRERFEMFR   | 11300 | >TP53-R335L GLERFEMFR   | 137   | 11163 |
| >TP53-R335L GRERFEMFR   | 4119  | >TP53-R335L GLERFEMFR   | 177   | 3942  |
| >TP53-R335L GRERFEMFRE  | 71    | >TP53-R335L GLERFEMFRE  | 10125 | 10054 |
| >TP53-R335L GRERFEMFRE  | 11    | >TP53-R335L GLERFEMFRE  | 1689  | 1678  |
| >TP53-R335L GRERFEMFR   | 1179  | >TP53-R335L GLERFEMFR   | 479   | 700   |
| >TP53-R335L GEYFTLQIRGI | 13296 | >TP53-R335L GEYFTLQIRGI | 93    | 13203 |
| >TP53-R335L GEYFTLQIRGI | 7911  | >TP53-R335L GEYFTLQIRGI | 22    | 7889  |
| >TP53-R335L GEYFTLQIRGI | 3433  | >TP53-R335L GEYFTLQIRGI | 48    | 3385  |
| >TP53-R335L GEYFTLQIRGI | 512   | >TP53-R335L GEYFTLQIRGI | 10    | 502   |
| >TP53-R335L RGRERFEM    | 90    | >TP53-R335L RGLERFEM    | 5751  | 5661  |
| >TP53-R335L RGRERFEMFI  | 35    | >TP53-R335L RGLERFEMFF  | 1611  | 1576  |
| >TP53-R335L RGRERFEMFI  | 39    | >TP53-R335L RGLERFEMFF  | 40    | 1     |
| >TP53-R335L RGRERFEMF   | 226   | >TP53-R335L RGLERFEMF   | 1475  | 1249  |
| >TP53-R335L RGRERFEMF   | 118   | >TP53-R335L RGLERFEMF   | 214   | 96    |
| >TP53-R335L RGRERFEM    | 226   | >TP53-R335L RGLERFEM    | 635   | 409   |
| >TP53-R335L RGRERFEMF   | 85    | >TP53-R335L RGLERFEMF   | 210   | 125   |
| >TP53-R335L RGRERFEMF   | 108   | >TP53-R335L RGLERFEMF   | 313   | 205   |
| >TP53-R335L RGRERFEMFI  | 95    | >TP53-R335L RGLERFEMFF  | 39    | 56    |
| >TP53-R335L IRGRERFEMF  | 126   | >TP53-R335L IRGLERFEMF  | 365   | 239   |
| >TP53-R335L IRGRERFEMF  | 187   | >TP53-R335L IRGLERFEMFI | 130   | 57    |
| >TP53-R335L QIRGRERFEM  | 435   | >TP53-R335L QIRGLERFEM  | 965   | 530   |
| >TP53-R335L QIRGRERFEM  | 628   | >TP53-R335L QIRGLERFEM  | 253   | 375   |
| >TP53-R335L LQIRGRERF   | 2043  | >TP53-R335L LQIRGLERF   | 79    | 1964  |
| >TP53-R335L LQIRGRERFEI | 192   | >TP53-R335L LQIRGLERFEM | 41    | 151   |
| >TP53-R335L LQIRGRERF   | 766   | >TP53-R335L LQIRGLERF   | 361   | 405   |
| >TP53-R335L LQIRGRERF   | 4673  | >TP53-R335L LQIRGLERF   | 158   | 4515  |
| >TP53-R335L LQIRGRER    | 138   | >TP53-R335L LQIRGLER    | 188   | 50    |
| >TP53-R335L LQIRGRERF   | 54    | >TP53-R335L LQIRGLERF   | 46    | 8     |

|                         |       |                         |       |       |
|-------------------------|-------|-------------------------|-------|-------|
| >TP53-R335L LQIRGRERFEI | 105   | >TP53-R335L LQIRGLERFEN | 102   | 3     |
| >TP53-R335L LQIRGRER    | 495   | >TP53-R335L LQIRGLER    | 402   | 93    |
| >TP53-R335L LQIRGRERF   | 12    | >TP53-R335L LQIRGLERF   | 16    | 4     |
| >TP53-R335L LQIRGRERFEI | 34    | >TP53-R335L LQIRGLERFEN | 53    | 19    |
| >TP53-R335L TLQIRGRER   | 238   | >TP53-R335L TLQIRGLER   | 233   | 5     |
| >TP53-R335L TLQIRGRERF  | 517   | >TP53-R335L TLQIRGLERF  | 498   | 19    |
| >TP53-R335L FTLQIRGR    | 19765 | >TP53-R335L FTLQIRGL    | 148   | 19617 |
| >TP53-R335L FTLQIRGR    | 17447 | >TP53-R335L FTLQIRGL    | 100   | 17347 |
| >TP53-R335L FTLQIRGRER  | 1535  | >TP53-R335L FTLQIRGLER  | 138   | 1397  |
| >TP53-R335L FTLQIRGRERI | 169   | >TP53-R335L FTLQIRGLERF | 91    | 78    |
| >TP53-R335L FTLQIRGRERI | 289   | >TP53-R335L FTLQIRGLERF | 82    | 207   |
| >TP53-R335L FTLQIRGRERI | 946   | >TP53-R335L FTLQIRGLERF | 457   | 489   |
| >TP53-R335L FTLQIRGRER  | 50    | >TP53-R335L FTLQIRGLER  | 81    | 31    |
| >TP53-R335L FTLQIRGR    | 174   | >TP53-R335L FTLQIRGL    | 18164 | 17990 |
| >TP53-R335L FTLQIRGRER  | 431   | >TP53-R335L FTLQIRGLER  | 168   | 263   |
| >TP53-R335L FTLQIRGR    | 25    | >TP53-R335L FTLQIRGL    | 15224 | 15199 |
| >TP53-R335L FTLQIRGRER  | 86    | >TP53-R335L FTLQIRGLER  | 16    | 70    |
| >TP53-R335L FTLQIRGR    | 17836 | >TP53-R335L FTLQIRGL    | 277   | 17559 |
| >TP53-R335L FTLQIRGR    | 10030 | >TP53-R335L FTLQIRGL    | 78    | 9952  |
| >TP53-R335L FTLQIRGR    | 12775 | >TP53-R335L FTLQIRGL    | 45    | 12730 |
| >TP53-R335L FTLQIRGRERI | 8     | >TP53-R335L FTLQIRGLERF | 8     | 0     |
| >TP53-R335L FTLQIRGRERI | 289   | >TP53-R335L FTLQIRGLERF | 170   | 119   |
| >TP53-R335L FTLQIRGRERI | 8     | >TP53-R335L FTLQIRGLERF | 7     | 1     |
| >TP53-R335L FTLQIRGR    | 422   | >TP53-R335L FTLQIRGL    | 34100 | 33678 |
| >TP53-R335L FTLQIRGRER  | 1841  | >TP53-R335L FTLQIRGLER  | 498   | 1343  |
| >TP53-R335L YFTLQIRGR   | 12407 | >TP53-R335L YFTLQIRGL   | 328   | 12079 |
| >TP53-R335L YFTLQIRGREF | 337   | >TP53-R335L YFTLQIRGLEF | 325   | 12    |
| >TP53-R335L YFTLQIRGR   | 129   | >TP53-R335L YFTLQIRGL   | 24238 | 24109 |
| >TP53-R335L YFTLQIRGREF | 126   | >TP53-R335L YFTLQIRGLEF | 110   | 16    |
| >TP53-R335L YFTLQIRGR   | 152   | >TP53-R335L YFTLQIRGL   | 31402 | 31250 |
| >TP53-R335L YFTLQIRGREF | 524   | >TP53-R335L YFTLQIRGLEF | 138   | 386   |
| >TP53-R335L EYFTLQIRGR  | 25578 | >TP53-R335L EYFTLQIRGL  | 383   | 25195 |
| >TP53-R335L EYFTLQIRGR  | 9335  | >TP53-R335L EYFTLQIRGL  | 172   | 9163  |
| >TP53-R335L EYFTLQIRGR  | 315   | >TP53-R335L EYFTLQIRGL  | 20651 | 20336 |
| >TP53-R335L EYFTLQIRGR  | 20    | >TP53-R335L EYFTLQIRGL  | 7384  | 7364  |
| >TP53-R335L EYFTLQIRGR  | 10896 | >TP53-R335L EYFTLQIRGL  | 269   | 10627 |
| >TP53-R337C RFEMFREL    | 253   | >TP53-R337C CFEMFREL    | 378   | 125   |
| >TP53-R337C RFEMFREL    | 308   | >TP53-R337C CFEMFREL    | 1153  | 845   |
| >TP53-R337C ERFEMFREL   | 1246  | >TP53-R337C ECFEMFREL   | 408   | 838   |
| >TP53-R337C ERFEMFREL   | 4243  | >TP53-R337C ECFEMFREL   | 218   | 4025  |
| >TP53-R337C ERFEMFREL   | 185   | >TP53-R337C ECFEMFREL   | 25305 | 25120 |
| >TP53-R337C ERFEMFREL   | 421   | >TP53-R337C ECFEMFREL   | 16991 | 16570 |
| >TP53-R337C ERFEMFREL   | 172   | >TP53-R337C ECFEMFREL   | 25403 | 25231 |

|                        |      |                         |       |       |
|------------------------|------|-------------------------|-------|-------|
| >TP53-R337CERFEMFREL   | 10   | >TP53-R337CECFEMFREL    | 25888 | 25878 |
| >TP53-R337CYFTLQIRGREI | 337  | >TP53-R337CYFTLQIRGREC  | 24045 | 23708 |
| >TP53-R337CYFTLQIRGREI | 126  | >TP53-R337CYFTLQIRGREC  | 35760 | 35634 |
| >TP53-R337CERFEMFR     | 166  | >TP53-R337CRECFEMFR     | 274   | 108   |
| >TP53-R337CERFEMFREL   | 48   | >TP53-R337CRECFEMFREL   | 48    | 0     |
| >TP53-R337CERFEMFREL   | 142  | >TP53-R337CRECFEMFREL   | 135   | 7     |
| >TP53-R337CERFEMFREL   | 919  | >TP53-R337CRECFEMFREL   | 384   | 535   |
| >TP53-R337CERFEMFREL   | 29   | >TP53-R337CRECFEMFREL   | 29    | 0     |
| >TP53-R337CERFEMFR     | 144  | >TP53-R337CRECFEMFR     | 62    | 82    |
| >TP53-R337CGRERFEMF    | 846  | >TP53-R337CGRECFEMF     | 495   | 351   |
| >TP53-R337CGRERFEMFRI  | 71   | >TP53-R337CGRECFEMFRI   | 92    | 21    |
| >TP53-R337CGRERFEMFRI  | 11   | >TP53-R337CGRECFEMFRI   | 21    | 10    |
| >TP53-R337CGRERFEMFR   | 1179 | >TP53-R337CGRECFEMFR    | 407   | 772   |
| >TP53-R337CGRERFEM     | 90   | >TP53-R337CGRECFEM      | 619   | 529   |
| >TP53-R337CGRERFEMFI   | 35   | >TP53-R337CGRECFEMFI    | 84    | 49    |
| >TP53-R337CGRERFEMFI   | 39   | >TP53-R337CGRECFEMFI    | 28    | 11    |
| >TP53-R337CGRERFEMF    | 226  | >TP53-R337CGRECFEMF     | 195   | 31    |
| >TP53-R337CGRERFEMF    | 118  | >TP53-R337CGRECFEMF     | 58    | 60    |
| >TP53-R337CGRERFEM     | 226  | >TP53-R337CGRECFEM      | 279   | 53    |
| >TP53-R337CGRERFEMF    | 85   | >TP53-R337CGRECFEMF     | 222   | 137   |
| >TP53-R337CGRERFEMF    | 108  | >TP53-R337CGRECFEMF     | 27    | 81    |
| >TP53-R337CGRERFEMFI   | 95   | >TP53-R337CGRECFEMFI    | 39    | 56    |
| >TP53-R337CIRGRERFEMF  | 126  | >TP53-R337CIRGRECFEMF   | 109   | 17    |
| >TP53-R337CIRGRERFEMF  | 187  | >TP53-R337CIRGRECFEMF   | 209   | 22    |
| >TP53-R337CQIRGRERFEM  | 435  | >TP53-R337CQIRGRECFEM   | 970   | 535   |
| >TP53-R337CQIRGRERFEM  | 628  | >TP53-R337CQIRGRECFEM   | 470   | 158   |
| >TP53-R337CQIRGRERFEI  | 192  | >TP53-R337CQIRGRECFEI   | 94    | 98    |
| >TP53-R337CQIRGRER     | 138  | >TP53-R337CQIRGRECFEI   | 22115 | 21977 |
| >TP53-R337CQIRGRER     | 54   | >TP53-R337CQIRGRECFEI   | 44    | 10    |
| >TP53-R337CQIRGRERFEI  | 105  | >TP53-R337CQIRGRECFEI   | 84    | 21    |
| >TP53-R337CQIRGRER     | 495  | >TP53-R337CQIRGRECFEI   | 2257  | 1762  |
| >TP53-R337CQIRGRER     | 12   | >TP53-R337CQIRGRECFEI   | 6     | 6     |
| >TP53-R337CQIRGRERFEI  | 34   | >TP53-R337CQIRGRECFEI   | 32    | 2     |
| >TP53-R337CTLQIRGRER   | 238  | >TP53-R337CTLQIRGRECFEI | 23258 | 23020 |
| >TP53-R337CTLQIRGRER   | 169  | >TP53-R337CTLQIRGRECFEI | 569   | 400   |
| >TP53-R337CTLQIRGRER   | 289  | >TP53-R337CTLQIRGRECFEI | 254   | 35    |
| >TP53-R337CTLQIRGRER   | 50   | >TP53-R337CTLQIRGRECFEI | 18149 | 18099 |
| >TP53-R337CTLQIRGRER   | 431  | >TP53-R337CTLQIRGRECFEI | 27756 | 27325 |
| >TP53-R337CTLQIRGRER   | 86   | >TP53-R337CTLQIRGRECFEI | 35817 | 35731 |
| >TP53-R337CTLQIRGRER   | 585  | >TP53-R337CTLQIRGRECFEI | 203   | 382   |
| >TP53-R337CTLQIRGRER   | 8    | >TP53-R337CTLQIRGRECFEI | 63    | 55    |
| >TP53-R337CTLQIRGRER   | 289  | >TP53-R337CTLQIRGRECFEI | 1091  | 802   |
| >TP53-R337CTLQIRGRER   | 8    | >TP53-R337CTLQIRGRECFEI | 29    | 21    |

|                         |      |                         |       |       |
|-------------------------|------|-------------------------|-------|-------|
| >TP53-R337F RFEMFREL    | 253  | >TP53-R337F HFEMFREL    | 784   | 531   |
| >TP53-R337F RFEMFREL    | 308  | >TP53-R337F HFEMFREL    | 747   | 439   |
| >TP53-R337F ERFEMFREL   | 185  | >TP53-R337F EHFEMFREL   | 20889 | 20704 |
| >TP53-R337F ERFEMFREL   | 421  | >TP53-R337F EHFEMFREL   | 164   | 257   |
| >TP53-R337F ERFEMFREL   | 172  | >TP53-R337F EHFEMFREL   | 9218  | 9046  |
| >TP53-R337F ERFEMFREL   | 10   | >TP53-R337F EHFEMFREL   | 9306  | 9296  |
| >TP53-R337F ERFEMFREL   | 2747 | >TP53-R337F EHFEMFREL   | 460   | 2287  |
| >TP53-R337F YFTLQIRGREF | 337  | >TP53-R337F YFTLQIRGREF | 16585 | 16248 |
| >TP53-R337F YFTLQIRGREF | 126  | >TP53-R337F YFTLQIRGREF | 25308 | 25182 |
| >TP53-R337F RERFEMFR    | 166  | >TP53-R337F REHFEMFR    | 255   | 89    |
| >TP53-R337F RERFEMFREL  | 48   | >TP53-R337F REHFEMFREL  | 40    | 8     |
| >TP53-R337F RERFEMFREL  | 142  | >TP53-R337F REHFEMFREL  | 78    | 64    |
| >TP53-R337F RERFEMFREL  | 919  | >TP53-R337F REHFEMFREL  | 329   | 590   |
| >TP53-R337F RERFEMFREL  | 29   | >TP53-R337F REHFEMFREL  | 77    | 48    |
| >TP53-R337F RERFEMFR    | 144  | >TP53-R337F REHFEMFR    | 64    | 80    |
| >TP53-R337F GRERFEMF    | 846  | >TP53-R337F GREHFEMF    | 382   | 464   |
| >TP53-R337F GRERFEMFR   | 71   | >TP53-R337F GREHFEMFR   | 101   | 30    |
| >TP53-R337F GRERFEMFR   | 11   | >TP53-R337F GREHFEMFR   | 14    | 3     |
| >TP53-R337F RGRERFEM    | 90   | >TP53-R337F RGREHFEM    | 88    | 2     |
| >TP53-R337F RGRERFEMFI  | 35   | >TP53-R337F RGREHFEMFI  | 41    | 6     |
| >TP53-R337F RGRERFEMFI  | 39   | >TP53-R337F RGREHFEMFI  | 44    | 5     |
| >TP53-R337F RGRERFEMF   | 226  | >TP53-R337F RGREHFEMF   | 111   | 115   |
| >TP53-R337F RGRERFEMF   | 118  | >TP53-R337F RGREHFEMF   | 50    | 68    |
| >TP53-R337F RGRERFEM    | 226  | >TP53-R337F RGREHFEM    | 140   | 86    |
| >TP53-R337F RGRERFEMF   | 85   | >TP53-R337F RGREHFEMF   | 143   | 58    |
| >TP53-R337F RGRERFEMF   | 108  | >TP53-R337F RGREHFEMF   | 309   | 201   |
| >TP53-R337F RGRERFEMFI  | 95   | >TP53-R337F RGREHFEMFI  | 83    | 12    |
| >TP53-R337F IRGRERFEMF  | 126  | >TP53-R337F IRGREHFEMF  | 92    | 34    |
| >TP53-R337F IRGRERFEMF  | 187  | >TP53-R337F IRGREHFEMF  | 159   | 28    |
| >TP53-R337F QIRGRERFEM  | 435  | >TP53-R337F QIRGREHFEM  | 337   | 98    |
| >TP53-R337F QIRGRERF    | 1843 | >TP53-R337F QIRGREHF    | 374   | 1469  |
| >TP53-R337F LQIRGRERFEI | 192  | >TP53-R337F LQIRGREHFEI | 100   | 92    |
| >TP53-R337F LQIRGRERF   | 766  | >TP53-R337F LQIRGREHF   | 417   | 349   |
| >TP53-R337F LQIRGRER    | 138  | >TP53-R337F LQIRGREH    | 12399 | 12261 |
| >TP53-R337F LQIRGRERF   | 54   | >TP53-R337F LQIRGREHF   | 27    | 27    |
| >TP53-R337F LQIRGRERFEI | 105  | >TP53-R337F LQIRGREHFEI | 72    | 33    |
| >TP53-R337F LQIRGRER    | 495  | >TP53-R337F LQIRGREH    | 441   | 54    |
| >TP53-R337F LQIRGRERF   | 12   | >TP53-R337F LQIRGREHF   | 5     | 7     |
| >TP53-R337F LQIRGRERFEI | 34   | >TP53-R337F LQIRGREHFEI | 23    | 11    |
| >TP53-R337F TLQIRGRER   | 238  | >TP53-R337F TLQIRGREH   | 14450 | 14212 |
| >TP53-R337F TLQIRGRERF  | 974  | >TP53-R337F TLQIRGREHF  | 213   | 761   |
| >TP53-R337F FTLQIRGRERI | 169  | >TP53-R337F FTLQIRGREHI | 83    | 86    |
| >TP53-R337F FTLQIRGRERI | 289  | >TP53-R337F FTLQIRGREHI | 126   | 163   |

|                         |       |                         |       |       |
|-------------------------|-------|-------------------------|-------|-------|
| >TP53-R337F FTLQIRGRER  | 50    | >TP53-R337F FTLQIRGREH  | 6426  | 6376  |
| >TP53-R337F FTLQIRGRER  | 431   | >TP53-R337F FTLQIRGREH  | 14467 | 14036 |
| >TP53-R337F FTLQIRGRER  | 86    | >TP53-R337F FTLQIRGREH  | 15668 | 15582 |
| >TP53-R337F FTLQIRGRERI | 1910  | >TP53-R337F FTLQIRGREHI | 392   | 1518  |
| >TP53-R337F FTLQIRGRERI | 585   | >TP53-R337F FTLQIRGREHI | 220   | 365   |
| >TP53-R337F FTLQIRGRERI | 8     | >TP53-R337F FTLQIRGREHI | 14    | 6     |
| >TP53-R337F FTLQIRGRERI | 289   | >TP53-R337F FTLQIRGREHI | 130   | 159   |
| >TP53-R337F FTLQIRGRERI | 8     | >TP53-R337F FTLQIRGREHI | 24    | 16    |
| >TP53-R337L RFEMFREL    | 253   | >TP53-R337L LFEMFREL    | 856   | 603   |
| >TP53-R337L RFEMFREL    | 308   | >TP53-R337L LFEMFREL    | 694   | 386   |
| >TP53-R337L ERFEMFREL   | 14052 | >TP53-R337L ELFEMFREL   | 187   | 13865 |
| >TP53-R337L ERFEMFREL   | 19166 | >TP53-R337L ELFEMFREL   | 14    | 19152 |
| >TP53-R337L ERFEMFREL   | 24557 | >TP53-R337L ELFEMFREL   | 434   | 24123 |
| >TP53-R337L ERFEMFREL   | 24039 | >TP53-R337L ELFEMFREL   | 126   | 23913 |
| >TP53-R337L ERFEMFREL   | 23958 | >TP53-R337L ELFEMFREL   | 464   | 23494 |
| >TP53-R337L ERFEMFREL   | 27775 | >TP53-R337L ELFEMFREL   | 13    | 27762 |
| >TP53-R337L ERFEMFREL   | 1246  | >TP53-R337L ELFEMFREL   | 261   | 985   |
| >TP53-R337L ERFEMFREL   | 4243  | >TP53-R337L ELFEMFREL   | 123   | 4120  |
| >TP53-R337L ERFEMFREL   | 11999 | >TP53-R337L ELFEMFREL   | 102   | 11897 |
| >TP53-R337L ERFEMFREL   | 185   | >TP53-R337L ELFEMFREL   | 20676 | 20491 |
| >TP53-R337L ERFEMFREL   | 421   | >TP53-R337L ELFEMFREL   | 9157  | 8736  |
| >TP53-R337L ERFEMFREL   | 172   | >TP53-R337L ELFEMFREL   | 17503 | 17331 |
| >TP53-R337L ERFEMFREL   | 10    | >TP53-R337L ELFEMFREL   | 11289 | 11279 |
| >TP53-R337L ERFEMFREL   | 2747  | >TP53-R337L ELFEMFREL   | 446   | 2301  |
| >TP53-R337L YFTLQIRGREF | 8711  | >TP53-R337L YFTLQIRGREL | 157   | 8554  |
| >TP53-R337L YFTLQIRGREF | 337   | >TP53-R337L YFTLQIRGREL | 19315 | 18978 |
| >TP53-R337L YFTLQIRGREF | 126   | >TP53-R337L YFTLQIRGREL | 22860 | 22734 |
| >TP53-R337L RERFEMFREL  | 1910  | >TP53-R337L RELFEMFREL  | 411   | 1499  |
| >TP53-R337L RERFEMFR    | 166   | >TP53-R337L RELFEMFR    | 238   | 72    |
| >TP53-R337L RERFEMFREL  | 48    | >TP53-R337L RELFEMFREL  | 40    | 8     |
| >TP53-R337L RERFEMFREL  | 142   | >TP53-R337L RELFEMFREL  | 132   | 10    |
| >TP53-R337L RERFEMFREL  | 919   | >TP53-R337L RELFEMFREL  | 245   | 674   |
| >TP53-R337L RERFEMFREL  | 29    | >TP53-R337L RELFEMFREL  | 17    | 12    |
| >TP53-R337L RERFEMFR    | 144   | >TP53-R337L RELFEMFR    | 58    | 86    |
| >TP53-R337L GRERFEMFRI  | 71    | >TP53-R337L GRELFEMFRE  | 115   | 44    |
| >TP53-R337L GRERFEMFR   | 521   | >TP53-R337L GRELFEMFR   | 497   | 24    |
| >TP53-R337L GRERFEMFRI  | 11    | >TP53-R337L GRELFEMFRE  | 10    | 1     |
| >TP53-R337L RGRERFEM    | 90    | >TP53-R337L RGRELFEM    | 240   | 150   |
| >TP53-R337L RGRERFEMFI  | 35    | >TP53-R337L RGRELFEMFF  | 60    | 25    |
| >TP53-R337L RGRERFEMFI  | 39    | >TP53-R337L RGRELFEMFF  | 49    | 10    |
| >TP53-R337L RGRERFEMF   | 226   | >TP53-R337L RGRELFEMF   | 157   | 69    |
| >TP53-R337L RGRERFEMF   | 118   | >TP53-R337L RGRELFEMF   | 140   | 22    |
| >TP53-R337L RGRERFEM    | 226   | >TP53-R337L RGRELFEM    | 201   | 25    |

|                         |       |                          |       |       |
|-------------------------|-------|--------------------------|-------|-------|
| >TP53-R337L RGRERFEMF   | 85    | >TP53-R337L RGRELFEMF    | 191   | 106   |
| >TP53-R337L RGRERFEMF   | 108   | >TP53-R337L RGRELFEMF    | 31    | 77    |
| >TP53-R337L RGRERFEMFI  | 95    | >TP53-R337L RGRELFEMFF   | 63    | 32    |
| >TP53-R337L IRGRERFEMF  | 126   | >TP53-R337L IRGRELFFEMF  | 160   | 34    |
| >TP53-R337L IRGRERFEMF  | 187   | >TP53-R337L IRGRELFFEMFI | 250   | 63    |
| >TP53-R337L QIRGRERFEM  | 435   | >TP53-R337L QIRGRELFFEM  | 554   | 119   |
| >TP53-R337L QIRGRERFEM  | 524   | >TP53-R337L QIRGRELFFEM  | 352   | 172   |
| >TP53-R337L QIRGRERFEM  | 628   | >TP53-R337L QIRGRELFFEM  | 363   | 265   |
| >TP53-R337L LQIRGRER    | 19456 | >TP53-R337L LQIRGREL     | 250   | 19206 |
| >TP53-R337L LQIRGRERF   | 2043  | >TP53-R337L LQIRGRELF    | 495   | 1548  |
| >TP53-R337L LQIRGRERFEI | 192   | >TP53-R337L LQIRGRELFFEM | 44    | 148   |
| >TP53-R337L LQIRGRER    | 138   | >TP53-R337L LQIRGREL     | 16324 | 16186 |
| >TP53-R337L LQIRGRER    | 9367  | >TP53-R337L LQIRGREL     | 198   | 9169  |
| >TP53-R337L LQIRGRERF   | 54    | >TP53-R337L LQIRGRELF    | 52    | 2     |
| >TP53-R337L LQIRGRERFEI | 105   | >TP53-R337L LQIRGRELFFEM | 90    | 15    |
| >TP53-R337L LQIRGRER    | 495   | >TP53-R337L LQIRGREL     | 42    | 453   |
| >TP53-R337L LQIRGRERF   | 12    | >TP53-R337L LQIRGRELF    | 8     | 4     |
| >TP53-R337L LQIRGRERFEI | 34    | >TP53-R337L LQIRGRELFFEM | 41    | 7     |
| >TP53-R337L TLQIRGRER   | 26812 | >TP53-R337L TLQIRGREL    | 305   | 26507 |
| >TP53-R337L TLQIRGRER   | 238   | >TP53-R337L TLQIRGREL    | 18989 | 18751 |
| >TP53-R337L TLQIRGRERF  | 517   | >TP53-R337L TLQIRGRELF   | 451   | 66    |
| >TP53-R337L TLQIRGRERF  | 1044  | >TP53-R337L TLQIRGRELF   | 358   | 686   |
| >TP53-R337L FTLQIRGRER  | 7742  | >TP53-R337L FTLQIRGREL   | 121   | 7621  |
| >TP53-R337L FTLQIRGRER  | 23786 | >TP53-R337L FTLQIRGREL   | 454   | 23332 |
| >TP53-R337L FTLQIRGRERI | 169   | >TP53-R337L FTLQIRGRELF  | 123   | 46    |
| >TP53-R337L FTLQIRGRERI | 289   | >TP53-R337L FTLQIRGRELF  | 960   | 671   |
| >TP53-R337L FTLQIRGRERI | 946   | >TP53-R337L FTLQIRGRELF  | 232   | 714   |
| >TP53-R337L FTLQIRGRER  | 50    | >TP53-R337L FTLQIRGREL   | 8682  | 8632  |
| >TP53-R337L FTLQIRGRER  | 431   | >TP53-R337L FTLQIRGREL   | 22001 | 21570 |
| >TP53-R337L FTLQIRGRER  | 86    | >TP53-R337L FTLQIRGREL   | 27977 | 27891 |
| >TP53-R337L FTLQIRGRER  | 14986 | >TP53-R337L FTLQIRGREL   | 452   | 14534 |
| >TP53-R337L FTLQIRGRERI | 585   | >TP53-R337L FTLQIRGRELF  | 381   | 204   |
| >TP53-R337L FTLQIRGRER  | 13038 | >TP53-R337L FTLQIRGREL   | 51    | 12987 |
| >TP53-R337L FTLQIRGRERI | 8     | >TP53-R337L FTLQIRGRELF  | 15    | 7     |
| >TP53-R337L FTLQIRGRERI | 289   | >TP53-R337L FTLQIRGRELF  | 172   | 117   |
| >TP53-R337L FTLQIRGRERI | 8     | >TP53-R337L FTLQIRGRELF  | 6     | 2     |
| >TP53-R342F RELNEALEL   | 390   | >TP53-R342F PELNEALEL    | 7027  | 6637  |
| >TP53-R342F RELNEALEL   | 14    | >TP53-R342F PELNEALEL    | 863   | 849   |
| >TP53-R342F RELNEALEL   | 18    | >TP53-R342F PELNEALEL    | 1451  | 1433  |
| >TP53-R342F RELNEALEL   | 222   | >TP53-R342F PELNEALEL    | 1688  | 1466  |
| >TP53-R342F RELNEALEL   | 19    | >TP53-R342F PELNEALEL    | 1998  | 1979  |
| >TP53-R342F FRELNEAL    | 22465 | >TP53-R342F FPENLEAL     | 75    | 22390 |
| >TP53-R342F FRELNEALEL  | 379   | >TP53-R342F FPENLEALEL   | 30662 | 30283 |

|                        |       |                        |       |       |
|------------------------|-------|------------------------|-------|-------|
| >TP53-R342F FRELNEAL   | 16897 | >TP53-R342F FPELNEAL   | 40    | 16857 |
| >TP53-R342F FRELNEALEL | 29920 | >TP53-R342F FPELNEALEL | 44    | 29876 |
| >TP53-R342F FRELNEAL   | 31    | >TP53-R342F FPELNEAL   | 78    | 47    |
| >TP53-R342F FRELNEALEL | 65    | >TP53-R342F FPELNEALEL | 188   | 123   |
| >TP53-R342F FRELNEAL   | 27738 | >TP53-R342F FPELNEAL   | 143   | 27595 |
| >TP53-R342F FRELNEALEL | 14483 | >TP53-R342F FPELNEALEL | 98    | 14385 |
| >TP53-R342F FRELNEALE  | 32437 | >TP53-R342F FPELNEALE  | 316   | 32121 |
| >TP53-R342F FRELNEAL   | 21321 | >TP53-R342F FPELNEAL   | 106   | 21215 |
| >TP53-R342F FRELNEALEL | 22920 | >TP53-R342F FPELNEALEL | 93    | 22827 |
| >TP53-R342F FRELNEALEL | 471   | >TP53-R342F FPELNEALEL | 31429 | 30958 |
| >TP53-R342F IRGRERFEMF | 187   | >TP53-R342F IRGRERFEMF | 34437 | 34250 |
| >TP53-R342F MFRELNEAL  | 659   | >TP53-R342F MFPELNEAL  | 97    | 562   |
| >TP53-R342F MFRELNEALE | 1785  | >TP53-R342F MFPELNEALE | 359   | 1426  |
| >TP53-R342F MFRELNEAL  | 851   | >TP53-R342F MFPELNEAL  | 27    | 824   |
| >TP53-R342F MFRELNEALE | 200   | >TP53-R342F MFPELNEALE | 12    | 188   |
| >TP53-R342F MFRELNEA   | 62    | >TP53-R342F MFPELNEA   | 14061 | 13999 |
| >TP53-R342F MFRELNEALE | 217   | >TP53-R342F MFPELNEALE | 15445 | 15228 |
| >TP53-R342F MFRELNEAL  | 152   | >TP53-R342F MFPELNEAL  | 221   | 69    |
| >TP53-R342F MFRELNEALE | 467   | >TP53-R342F MFPELNEALE | 650   | 183   |
| >TP53-R342F EMFRELNEAL | 806   | >TP53-R342F EMFPELNEAL | 270   | 536   |
| >TP53-R342F EMFRELNEA  | 133   | >TP53-R342F EMFPELNEA  | 35    | 98    |
| >TP53-R342F EMFRELNEAL | 89    | >TP53-R342F EMFPELNEAL | 48    | 41    |
| >TP53-R342F EMFRELNEA  | 401   | >TP53-R342F EMFPELNEA  | 103   | 298   |
| >TP53-R342F EMFRELNEAL | 360   | >TP53-R342F EMFPELNEAL | 339   | 21    |
| >TP53-R342F EMFRELNEA  | 878   | >TP53-R342F EMFPELNEA  | 150   | 728   |
| >TP53-R342F EMFRELNEAL | 1298  | >TP53-R342F EMFPELNEAL | 419   | 879   |
| >TP53-R342F EMFRELNEA  | 161   | >TP53-R342F EMFPELNEA  | 66    | 95    |
| >TP53-R342F EMFRELNEAL | 24    | >TP53-R342F EMFPELNEAL | 13    | 11    |
| >TP53-R342F EMFRELNEA  | 809   | >TP53-R342F EMFPELNEA  | 484   | 325   |
| >TP53-R342F EMFRELNEAL | 169   | >TP53-R342F EMFPELNEAL | 103   | 66    |
| >TP53-R342F EMFRELNEA  | 812   | >TP53-R342F EMFPELNEA  | 251   | 561   |
| >TP53-R342F EMFRELNEAL | 431   | >TP53-R342F EMFPELNEAL | 138   | 293   |
| >TP53-R342F EMFRELNEAL | 431   | >TP53-R342F EMFPELNEAL | 106   | 325   |
| >TP53-R342F EMFRELNEA  | 119   | >TP53-R342F EMFPELNEA  | 37    | 82    |
| >TP53-R342F EMFRELNEAL | 72    | >TP53-R342F EMFPELNEAL | 30    | 42    |
| >TP53-R342F EMFRELNEAL | 272   | >TP53-R342F EMFPELNEAL | 386   | 114   |
| >TP53-R342F EMFRELNEA  | 1685  | >TP53-R342F EMFPELNEA  | 366   | 1319  |
| >TP53-R342F EMFRELNEAL | 291   | >TP53-R342F EMFPELNEAL | 146   | 145   |
| >TP53-R342F EMFRELNEAL | 98    | >TP53-R342F EMFPELNEAL | 106   | 8     |
| >TP53-R342F EMFRELNEAL | 495   | >TP53-R342F EMFPELNEAL | 215   | 280   |
| >TP53-R342F FEMFRELNEA | 301   | >TP53-R342F FEMFPELNEA | 1964  | 1663  |
| >TP53-R342F FEMFRELNEA | 394   | >TP53-R342F FEMFPELNEA | 586   | 192   |
| >TP53-R342F FEMFRELNEA | 949   | >TP53-R342F FEMFPELNEA | 434   | 515   |

|                         |       |                         |       |       |
|-------------------------|-------|-------------------------|-------|-------|
| >TP53-R342F FEMFRELNEA  | 724   | >TP53-R342F FEMFPELNEA  | 426   | 298   |
| >TP53-R342F FEMFRELNEA  | 253   | >TP53-R342F FEMFPELNEA  | 243   | 10    |
| >TP53-R342F FEMFRELNEA  | 94    | >TP53-R342F FEMFPELNEA  | 92    | 2     |
| >TP53-R342F FEMFRELNEA  | 18    | >TP53-R342F FEMFPELNEA  | 11    | 7     |
| >TP53-R342F FEMFRELNEA  | 47    | >TP53-R342F FEMFPELNEA  | 45    | 2     |
| >TP53-R342F FEMFRELNEA  | 671   | >TP53-R342F FEMFPELNEA  | 404   | 267   |
| >TP53-R342F FEMFRELNEA  | 29    | >TP53-R342F FEMFPELNEA  | 36    | 7     |
| >TP53-R342F RFEMFREL    | 253   | >TP53-R342F RFEMFPEL    | 164   | 89    |
| >TP53-R342F RFEMFREL    | 308   | >TP53-R342F RFEMFPEL    | 415   | 107   |
| >TP53-R342F ERFEMFREL   | 666   | >TP53-R342F ERFEMFPEL   | 477   | 189   |
| >TP53-R342F ERFEMFREL   | 185   | >TP53-R342F ERFEMFPEL   | 316   | 131   |
| >TP53-R342F ERFEMFREL   | 421   | >TP53-R342F ERFEMFPEL   | 109   | 312   |
| >TP53-R342F ERFEMFREL   | 172   | >TP53-R342F ERFEMFPEL   | 152   | 20    |
| >TP53-R342F ERFEMFREL   | 10    | >TP53-R342F ERFEMFPEL   | 12    | 2     |
| >TP53-R342F RERFEMFR    | 166   | >TP53-R342F RERFEMFP    | 21820 | 21654 |
| >TP53-R342F RERFEMFREL  | 48    | >TP53-R342F RERFEMFPEL  | 44    | 4     |
| >TP53-R342F RERFEMFREL  | 142   | >TP53-R342F RERFEMFPEL  | 383   | 241   |
| >TP53-R342F RERFEMFREL  | 29    | >TP53-R342F RERFEMFPEL  | 27    | 2     |
| >TP53-R342F RERFEMFR    | 144   | >TP53-R342F RERFEMFP    | 30395 | 30251 |
| >TP53-R342F GRERFEMFR   | 71    | >TP53-R342F GRERFEMFPEL | 67    | 4     |
| >TP53-R342F GRERFEMFR   | 11    | >TP53-R342F GRERFEMFPEL | 11    | 0     |
| >TP53-R342F RGRERFEMFI  | 35    | >TP53-R342F RGRERFEMFI  | 170   | 135   |
| >TP53-R342F RGRERFEMFI  | 39    | >TP53-R342F RGRERFEMFI  | 18152 | 18113 |
| >TP53-R342F RGRERFEMFI  | 95    | >TP53-R342F RGRERFEMFI  | 29300 | 29205 |
| >TP53-R342C RELNEALEL   | 906   | >TP53-R342C QELNEALEL   | 250   | 656   |
| >TP53-R342C RELNEALEL   | 390   | >TP53-R342C QELNEALEL   | 2424  | 2034  |
| >TP53-R342C RELNEALEL   | 14    | >TP53-R342C QELNEALEL   | 91    | 77    |
| >TP53-R342C RELNEALEL   | 18    | >TP53-R342C QELNEALEL   | 97    | 79    |
| >TP53-R342C RELNEALEL   | 222   | >TP53-R342C QELNEALEL   | 224   | 2     |
| >TP53-R342C RELNEALEL   | 19    | >TP53-R342C QELNEALEL   | 168   | 149   |
| >TP53-R342C FRELNEAL    | 9963  | >TP53-R342C FQELNEAL    | 253   | 9710  |
| >TP53-R342C FRELNEAL    | 16956 | >TP53-R342C FQELNEAL    | 54    | 16902 |
| >TP53-R342C FRELNEALEL  | 12033 | >TP53-R342C FQELNEALEL  | 394   | 11639 |
| >TP53-R342C FRELNEALEL  | 379   | >TP53-R342C FQELNEALEL  | 15876 | 15497 |
| >TP53-R342C FRELNEAL    | 31    | >TP53-R342C FQELNEAL    | 27    | 4     |
| >TP53-R342C FRELNEALEL  | 65    | >TP53-R342C FQELNEALEL  | 55    | 10    |
| >TP53-R342C FRELNEALEL  | 471   | >TP53-R342C FQELNEALEL  | 11552 | 11081 |
| >TP53-R342C IRGRERFEMF  | 187   | >TP53-R342C IRGRERFEMF  | 17227 | 17040 |
| >TP53-R342C MFRELNEAL   | 659   | >TP53-R342C MFQELNEAL   | 137   | 522   |
| >TP53-R342C MFRELNEALEL | 2303  | >TP53-R342C MFQELNEALEL | 481   | 1822  |
| >TP53-R342C MFRELNEAL   | 851   | >TP53-R342C MFQELNEAL   | 70    | 781   |
| >TP53-R342C MFRELNEALEL | 200   | >TP53-R342C MFQELNEALEL | 23    | 177   |
| >TP53-R342C MFRELNEA    | 62    | >TP53-R342C MFQELNEA    | 9210  | 9148  |



|                       |      |                        |       |       |
|-----------------------|------|------------------------|-------|-------|
| >TP53-R342CMFRELNEALE | 217  | >TP53-R342C MFQELNEALI | 11491 | 11274 |
| >TP53-R342CMFRELNEA   | 514  | >TP53-R342C MFQELNEA   | 366   | 148   |
| >TP53-R342CMFRELNEAL  | 152  | >TP53-R342C MFQELNEAL  | 105   | 47    |
| >TP53-R342CMFRELNEALE | 467  | >TP53-R342C MFQELNEALI | 350   | 117   |
| >TP53-R342CEMFRELNEAL | 806  | >TP53-R342C EMFQELNEAI | 380   | 426   |
| >TP53-R342CEMFRELNEA  | 133  | >TP53-R342C EMFQELNEA  | 82    | 51    |
| >TP53-R342CEMFRELNEAL | 89   | >TP53-R342C EMFQELNEAI | 50    | 39    |
| >TP53-R342CEMFRELNEA  | 401  | >TP53-R342C EMFQELNEA  | 359   | 42    |
| >TP53-R342CEMFRELNEAL | 360  | >TP53-R342C EMFQELNEAI | 317   | 43    |
| >TP53-R342CEMFRELNEA  | 161  | >TP53-R342C EMFQELNEA  | 92    | 69    |
| >TP53-R342CEMFRELNEAL | 24   | >TP53-R342C EMFQELNEAI | 15    | 9     |
| >TP53-R342CEMFRELNEAL | 169  | >TP53-R342C EMFQELNEAI | 206   | 37    |
| >TP53-R342CEMFRELNEA  | 812  | >TP53-R342C EMFQELNEA  | 382   | 430   |
| >TP53-R342CEMFRELNEAL | 431  | >TP53-R342C EMFQELNEAI | 215   | 216   |
| >TP53-R342CEMFRELNEAL | 431  | >TP53-R342C EMFQELNEAI | 266   | 165   |
| >TP53-R342CEMFRELNEA  | 119  | >TP53-R342C EMFQELNEA  | 89    | 30    |
| >TP53-R342CEMFRELNEAL | 72   | >TP53-R342C EMFQELNEAI | 57    | 15    |
| >TP53-R342CEMFRELNEAL | 272  | >TP53-R342C EMFQELNEAI | 252   | 20    |
| >TP53-R342CEMFRELNEAL | 291  | >TP53-R342C EMFQELNEAI | 166   | 125   |
| >TP53-R342CEMFRELNEAL | 98   | >TP53-R342C EMFQELNEAI | 172   | 74    |
| >TP53-R342CEMFRELNEAL | 495  | >TP53-R342C EMFQELNEAI | 188   | 307   |
| >TP53-R342CFEMFRELNEA | 301  | >TP53-R342C FEMFQELNEA | 459   | 158   |
| >TP53-R342CFEMFRELNEA | 394  | >TP53-R342C FEMFQELNEA | 315   | 79    |
| >TP53-R342CFEMFRELNEA | 253  | >TP53-R342C FEMFQELNEA | 167   | 86    |
| >TP53-R342CFEMFRELNEA | 94   | >TP53-R342C FEMFQELNEA | 82    | 12    |
| >TP53-R342CFEMFRELNEA | 18   | >TP53-R342C FEMFQELNEA | 14    | 4     |
| >TP53-R342CFEMFRELNEA | 47   | >TP53-R342C FEMFQELNEA | 31    | 16    |
| >TP53-R342CFEMFRELNEA | 671  | >TP53-R342C FEMFQELNEA | 430   | 241   |
| >TP53-R342CFEMFRELNEA | 29   | >TP53-R342C FEMFQELNEA | 27    | 2     |
| >TP53-R342CRFEMFREL   | 253  | >TP53-R342C RFEMFQEL   | 98    | 155   |
| >TP53-R342CRFEMFREL   | 308  | >TP53-R342C RFEMFQEL   | 650   | 342   |
| >TP53-R342CERFEMFREL  | 666  | >TP53-R342C ERFEMFQEL  | 263   | 403   |
| >TP53-R342CERFEMFREL  | 185  | >TP53-R342C ERFEMFQEL  | 339   | 154   |
| >TP53-R342CERFEMFREL  | 421  | >TP53-R342C ERFEMFQEL  | 111   | 310   |
| >TP53-R342CERFEMFREL  | 172  | >TP53-R342C ERFEMFQEL  | 277   | 105   |
| >TP53-R342CERFEMFREL  | 10   | >TP53-R342C ERFEMFQEL  | 20    | 10    |
| >TP53-R342CERFEMFR    | 166  | >TP53-R342C RERFEMFQ   | 18081 | 17915 |
| >TP53-R342CERFEMFREL  | 48   | >TP53-R342C RERFEMFQEL | 52    | 4     |
| >TP53-R342CERFEMFREL  | 142  | >TP53-R342C RERFEMFQEL | 295   | 153   |
| >TP53-R342CERFEMFRE   | 1074 | >TP53-R342C RERFEMFQE  | 480   | 594   |
| >TP53-R342CERFEMFREL  | 29   | >TP53-R342C RERFEMFQEL | 19    | 10    |
| >TP53-R342CERFEMFR    | 144  | >TP53-R342C RERFEMFQ   | 10884 | 10740 |
| >TP53-R342CGRERFEMFR  | 71   | >TP53-R342C GRERFEMFQ  | 87    | 16    |

|                        |      |                        |       |       |
|------------------------|------|------------------------|-------|-------|
| >TP53-R342C GRERFEMFRI | 11   | >TP53-R342C GRERFEMFQ  | 14    | 3     |
| >TP53-R342C RGRERFEMFI | 35   | >TP53-R342C RGRERFEMFC | 73    | 38    |
| >TP53-R342C RGRERFEMFI | 39   | >TP53-R342C RGRERFEMFC | 10261 | 10222 |
| >TP53-R342C RGRERFEMFI | 95   | >TP53-R342C RGRERFEMFC | 8350  | 8255  |
| >TP53-R379F RHKKLMFK   | 13   | >TP53-R379F HHKKLMFK   | 28    | 15    |
| >TP53-R379F RHKKLMFK   | 356  | >TP53-R379F HHKKLMFK   | 1647  | 1291  |
| >TP53-R379F SRHKKLMFK  | 20   | >TP53-R379F SHHKKLMFK  | 34    | 14    |
| >TP53-R379F SRHKKLMF   | 78   | >TP53-R379F SHHKKLMF   | 176   | 98    |
| >TP53-R379F SRHKKLMF   | 405  | >TP53-R379F SHHKKLMF   | 18074 | 17669 |
| >TP53-R379F SRHKKLMFK  | 283  | >TP53-R379F SHHKKLMFK  | 17904 | 17621 |
| >TP53-R379F LKSKKGQSTS | 207  | >TP53-R379F LKSKKGQSTS | 176   | 31    |
| >TP53-R379F TSRHKKLMFK | 23   | >TP53-R379F TSHHKKLMFK | 25    | 2     |
| >TP53-R379F TSRHKKLMFK | 30   | >TP53-R379F TSHHKKLMFK | 21    | 9     |
| >TP53-R379F TSRHKKLM   | 263  | >TP53-R379F TSHHKKLM   | 2182  | 1919  |
| >TP53-R379F TSRHKKLMFK | 4    | >TP53-R379F TSHHKKLMFK | 8     | 4     |
| >TP53-R379F TSRHKKLMFK | 86   | >TP53-R379F TSHHKKLMFK | 276   | 190   |
| >TP53-R379F TSRHKKLMFK | 798  | >TP53-R379F TSHHKKLMFK | 270   | 528   |
| >TP53-R379F TSRHKKLMF  | 198  | >TP53-R379F TSHHKKLMF  | 421   | 223   |
| >TP53-R379F TSRHKKLM   | 40   | >TP53-R379F TSHHKKLM   | 198   | 158   |
| >TP53-R379F TSRHKKLMF  | 4    | >TP53-R379F TSHHKKLMF  | 8     | 4     |
| >TP53-R379F TSRHKKLM   | 116  | >TP53-R379F TSHHKKLM   | 115   | 1     |
| >TP53-R379F TSRHKKLMF  | 58   | >TP53-R379F TSHHKKLMF  | 479   | 421   |
| >TP53-R379F STSRHKKLMF | 53   | >TP53-R379F STSHHKKLMF | 51    | 2     |
| >TP53-R379F STSRHKKLMF | 10   | >TP53-R379F STSHHKKLMF | 9     | 1     |
| >TP53-R379F STSRHKKLMF | 9    | >TP53-R379F STSHHKKLMF | 12    | 3     |
| >TP53-R379F STSRHKKLMF | 83   | >TP53-R379F STSHHKKLMF | 111   | 28    |
| >TP53-R379F STSRHKKLMF | 31   | >TP53-R379F STSHHKKLMF | 29    | 2     |
| >TP53-R379F STSRHKKLMF | 663  | >TP53-R379F STSHHKKLMF | 306   | 357   |
| >TP53-R379F STSRHKKL   | 171  | >TP53-R379F STSHHKKL   | 44    | 127   |
| >TP53-R379F STSRHKKLM  | 865  | >TP53-R379F STSHHKKLM  | 137   | 728   |
| >TP53-R379F STSRHKKLMF | 24   | >TP53-R379F STSHHKKLMF | 9     | 15    |
| >TP53-R379F STSRHKKLM  | 48   | >TP53-R379F STSHHKKLM  | 39    | 9     |
| >TP53-R379F STSRHKKLMF | 22   | >TP53-R379F STSHHKKLMF | 28    | 6     |
| >TP53-R379F STSRHKKLMF | 86   | >TP53-R379F STSHHKKLMF | 70    | 16    |
| >TP53-R379F STSRHKKL   | 734  | >TP53-R379F STSHHKKL   | 490   | 244   |
| >TP53-R379F QSTSRHKK   | 199  | >TP53-R379F QSTSHHKK   | 143   | 56    |
| >TP53-R379F QSTSRHKK   | 125  | >TP53-R379F QSTSHHKK   | 116   | 9     |
| >TP53-R379F QSTSRHKKLM | 180  | >TP53-R379F QSTSHHKKLM | 117   | 63    |
| >TP53-R379F QSTSRHKKL  | 62   | >TP53-R379F QSTSHHKKL  | 79    | 17    |
| >TP53-R379F QSTSRHKKLM | 272  | >TP53-R379F QSTSHHKKLM | 249   | 23    |
| >TP53-R379F QSTSRHKKLM | 11   | >TP53-R379F QSTSHHKKLM | 13    | 2     |
| >TP53-R379F QSTSRHKKL  | 1023 | >TP53-R379F QSTSHHKKL  | 184   | 839   |
| >TP53-R379F QSTSRHKKLM | 724  | >TP53-R379F QSTSHHKKLM | 252   | 472   |

|                         |      |                        |       |       |
|-------------------------|------|------------------------|-------|-------|
| >TP53-R379F-QSTSRHKKLM  | 1393 | >TP53-R379F-QSTSHHKKLM | 495   | 898   |
| >TP53-R379F-QSTSRHKKLM  | 49   | >TP53-R379F-QSTSHHKKLM | 62    | 13    |
| >TP53-R379F-QSTSRHKKLM  | 61   | >TP53-R379F-QSTSHHKKLM | 99    | 38    |
| >TP53-R379F-QSTSRHKK    | 439  | >TP53-R379F-QSTSHHKK   | 180   | 259   |
| >TP53-R379F-GQSTSRHK    | 268  | >TP53-R379F-GQSTSHHK   | 63    | 205   |
| >TP53-R379F-GQSTSRHKK   | 39   | >TP53-R379F-GQSTSHHKK  | 35    | 4     |
| >TP53-R379F-GQSTSRHKKL  | 229  | >TP53-R379F-GQSTSHHKKL | 134   | 95    |
| >TP53-R379F-GQSTSRHKKL  | 256  | >TP53-R379F-GQSTSHHKKL | 178   | 78    |
| >TP53-R379F-KGQSTSRHK   | 33   | >TP53-R379F-KGQSTSHHK  | 28    | 5     |
| >TP53-R379F-KGQSTSRHKK  | 80   | >TP53-R379F-KGQSTSHHKK | 62    | 18    |
| >TP53-R379F-KGQSTSRHK   | 2658 | >TP53-R379F-KGQSTSHHK  | 396   | 2262  |
| >TP53-R379F-KKGQSTSR    | 357  | >TP53-R379F-KKGQSTSH   | 345   | 12    |
| >TP53-R379F-KKGQSTSRH   | 1080 | >TP53-R379F-KKGQSTSHH  | 325   | 755   |
| >TP53-R379F-KKGQSTSR    | 104  | >TP53-R379F-KKGQSTSH   | 24389 | 24285 |
| >TP53-R379F-SKKKGQSTSRH | 91   | >TP53-R379F-SKKKGQSTSH | 80    | 11    |
| >TP53-R379F-KSKKGQSTSR  | 18   | >TP53-R379F-KSKKGQSTSH | 170   | 152   |
| >TP53-R379F-KSKKGQSTSR  | 313  | >TP53-R379F-KSKKGQSTSH | 106   | 207   |
| >TP53-R379F-KSKKGQSTSR  | 90   | >TP53-R379F-KSKKGQSTSH | 10844 | 10754 |
| >TP53-R379F-KSKKGQSTSR  | 5275 | >TP53-R379F-KSKKGQSTSH | 344   | 4931  |
| >TP53-R379F-KSKKGQSTSR  | 131  | >TP53-R379F-KSKKGQSTSH | 317   | 186   |
| >TP53-R379F-KSKKGQSTSR  | 32   | >TP53-R379F-KSKKGQSTSH | 133   | 101   |
| >TP53-R72C-RVAPAPAA     | 259  | >TP53-R72C-CVAPAPAA    | 846   | 587   |
| >TP53-R72C-RVAPAPAA     | 79   | >TP53-R72C-CVAPAPAA    | 652   | 573   |
| >TP53-R72C-RVAPAPAA     | 77   | >TP53-R72C-CVAPAPAA    | 5078  | 5001  |
| >TP53-R72C-RVAPAPAA     | 1765 | >TP53-R72C-CVAPAPAA    | 197   | 1568  |
| >TP53-R72C-RVAPAPAA     | 432  | >TP53-R72C-CVAPAPAA    | 10919 | 10487 |
| >TP53-R72C-EAPRMPEAA    | 30   | >TP53-R72C-EAPRMPEAA   | 32217 | 32187 |
| >TP53-R72C-APRVAPAPA    | 22   | >TP53-R72C-APCVAPAPA   | 2059  | 2037  |
| >TP53-R72C-APRVAPAPA/   | 334  | >TP53-R72C-APCVAPAPA/  | 4146  | 3812  |
| >TP53-R72C-APRVAPAPA    | 61   | >TP53-R72C-APCVAPAPA   | 129   | 68    |
| >TP53-R72C-APRVAPAPA/   | 432  | >TP53-R72C-APCVAPAPA/  | 1478  | 1046  |
| >TP53-R72C-AAPRVAPA     | 2376 | >TP53-R72C-AAPCVAPA    | 481   | 1895  |
| >TP53-R72C-EAAPRVAPA    | 8    | >TP53-R72C-EAAPCVAPA   | 5     | 3     |
| >TP53-R72C-EAAPRVAPAF   | 9    | >TP53-R72C-EAAPCVAPAF  | 6     | 3     |
| >TP53-R72C-EAAPRVAPA    | 130  | >TP53-R72C-EAAPCVAPA   | 103   | 27    |
| >TP53-R72C-EAAPRVAPAF   | 96   | >TP53-R72C-EAAPCVAPAF  | 82    | 14    |
| >TP53-R72C-EAAPRVAPA    | 3120 | >TP53-R72C-EAAPCVAPA   | 351   | 2769  |
| >TP53-R72C-EAAPRVAPAF   | 1801 | >TP53-R72C-EAAPCVAPAF  | 434   | 1367  |
| >TP53-R72C-PEAAPRVAPA/  | 591  | >TP53-R72C-PEAAPCVAPA/ | 252   | 339   |
| >TP53-R72C-MPEAAPRV     | 23   | >TP53-R72C-MPEAAPCV    | 68    | 45    |
| >TP53-R72C-MPEAAPRV     | 487  | >TP53-R72C-MPEAAPCV    | 1153  | 666   |
| >TP53-R72C-MPEAAPRVA    | 177  | >TP53-R72C-MPEAAPCVA   | 806   | 629   |
| >TP53-R72C-MPEAAPRVA    | 65   | >TP53-R72C-MPEAAPCVA   | 133   | 68    |

|                       |       |                       |       |       |
|-----------------------|-------|-----------------------|-------|-------|
| >TP53-R72C- MPEAAPRV  | 678   | >TP53-R72C- MPEAAPCV  | 364   | 314   |
| >TP53-R72C- MPEAAPRVA | 258   | >TP53-R72C- MPEAAPCVA | 113   | 145   |
| >TP53-R72C- MPEAAPRVA | 76    | >TP53-R72C- MPEAAPCVA | 35    | 41    |
| >TP53-R72C- MPEAAPRV  | 496   | >TP53-R72C- MPEAAPCV  | 500   | 4     |
| >TP53-R72C- MPEAAPRV  | 677   | >TP53-R72C- MPEAAPCV  | 385   | 292   |
| >TP53-R72C- MPEAAPRV  | 83    | >TP53-R72C- MPEAAPCV  | 61    | 22    |
| >TP53-R72C- MPEAAPRVA | 15    | >TP53-R72C- MPEAAPCVA | 10    | 5     |
| >TP53-R72C- MPEAAPRVA | 10    | >TP53-R72C- MPEAAPCVA | 7     | 3     |
| >TP53-R72C- RMPEAAPRV | 35    | >TP53-R72C- RMPEAAPCV | 38    | 3     |
| >TP53-R72C- RMPEAAPRV | 224   | >TP53-R72C- RMPEAAPCV | 251   | 27    |
| >TP53-R72C- RMPEAAPRV | 15    | >TP53-R72C- RMPEAAPCV | 39    | 24    |
| >TP53-R72C- RMPEAAPRV | 480   | >TP53-R72C- RMPEAAPCV | 247   | 233   |
| >TP53-R72C- RMPEAAPR  | 10025 | >TP53-R72C- RMPEAAPC  | 207   | 9818  |
| >TP53-R72C- RMPEAAPRV | 12    | >TP53-R72C- RMPEAAPCV | 13    | 1     |
| >TP53-R72C- RMPEAAPR  | 4325  | >TP53-R72C- RMPEAAPC  | 36    | 4289  |
| >TP53-R72C- RMPEAAPRV | 2     | >TP53-R72C- RMPEAAPCV | 3     | 1     |
| >TP53-R72C- RMPEAAPRV | 39    | >TP53-R72C- RMPEAAPCV | 18    | 21    |
| >TP53-R72C- RMPEAAPR  | 15901 | >TP53-R72C- RMPEAAPC  | 337   | 15564 |
| >TP53-R72C- RMPEAAPRV | 17    | >TP53-R72C- RMPEAAPCV | 9     | 8     |
| >TP53-R72C- RMPEAAPRV | 1124  | >TP53-R72C- RMPEAAPCV | 170   | 954   |
| >TP53-R72C- RMPEAAPRV | 5     | >TP53-R72C- RMPEAAPCV | 4     | 1     |
| >TP53-R72C- RMPEAAPRV | 356   | >TP53-R72C- RMPEAAPCV | 29    | 327   |
| >TP53-R72C- RMPEAAPRV | 6     | >TP53-R72C- RMPEAAPCV | 4     | 2     |
| >TP53-R72C- RMPEAAPRV | 2536  | >TP53-R72C- RMPEAAPCV | 364   | 2172  |
| >TP53-R72C- RMPEAAPR  | 10932 | >TP53-R72C- RMPEAAPC  | 182   | 10750 |
| >TP53-R72C- RMPEAAPRV | 4     | >TP53-R72C- RMPEAAPCV | 7     | 3     |
| >TP53-R72C- RMPEAAPRV | 318   | >TP53-R72C- RMPEAAPCV | 42    | 276   |
| >TP53-R72C- RMPEAAPR  | 53    | >TP53-R72C- RMPEAAPC  | 19016 | 18963 |
| >TP53-R72C- RMPEAAPRV | 229   | >TP53-R72C- RMPEAAPCV | 432   | 203   |
| >TP53-R72C- RMPEAAPR  | 26    | >TP53-R72C- RMPEAAPC  | 30389 | 30363 |
| >TP53-R72C- APRMPEAAP | 674   | >TP53-R72C- APRMPEAAP | 473   | 201   |
| >TP53-R72C- APRMPEAAP | 38    | >TP53-R72C- APRMPEAAP | 51    | 13    |
| >TP53-R72H- RVAPAPAA  | 259   | >TP53-R72H- HVAPAPAA  | 578   | 319   |
| >TP53-R72H- RVAPAPAA  | 79    | >TP53-R72H- HVAPAPAA  | 276   | 197   |
| >TP53-R72H- RVAPAPAA  | 77    | >TP53-R72H- HVAPAPAA  | 318   | 241   |
| >TP53-R72H- RVAPAPAA  | 1765  | >TP53-R72H- HVAPAPAA  | 43    | 1722  |
| >TP53-R72H- RVAPAPAA  | 2554  | >TP53-R72H- HVAPAPAA  | 127   | 2427  |
| >TP53-R72H- RVAPAPAAP | 4949  | >TP53-R72H- HVAPAPAAP | 312   | 4637  |
| >TP53-R72H- RVAPAPAA  | 432   | >TP53-R72H- HVAPAPAA  | 2214  | 1782  |
| >TP53-R72H- EAPRMPEAA | 30    | >TP53-R72H- EAPRMPEAA | 9462  | 9432  |
| >TP53-R72H- APRVAPAPA | 22    | >TP53-R72H- APHVAPAPA | 137   | 115   |
| >TP53-R72H- APRVAPAPA | 334   | >TP53-R72H- APHVAPAPA | 1068  | 734   |
| >TP53-R72H- APRVAPAPA | 61    | >TP53-R72H- APHVAPAPA | 88    | 27    |

|                        |      |                        |       |       |
|------------------------|------|------------------------|-------|-------|
| >TP53-R72H- APRVAPAPA/ | 432  | >TP53-R72H- APHVAPAPA/ | 149   | 283   |
| >TP53-R72H- EAAPRVAPA  | 8    | >TP53-R72H- EAAPHVAPA  | 7     | 1     |
| >TP53-R72H- EAAPRVAPAF | 9    | >TP53-R72H- EAAPHVAPAF | 8     | 1     |
| >TP53-R72H- EAAPRVAPA  | 130  | >TP53-R72H- EAAPHVAPA  | 24    | 106   |
| >TP53-R72H- EAAPRVAPAF | 96   | >TP53-R72H- EAAPHVAPAF | 30    | 66    |
| >TP53-R72H- EAAPRVAPA  | 3120 | >TP53-R72H- EAAPHVAPA  | 392   | 2728  |
| >TP53-R72H- EAAPRVAPAF | 1801 | >TP53-R72H- EAAPHVAPAF | 464   | 1337  |
| >TP53-R72H- PEAAPRVA   | 556  | >TP53-R72H- PEAAPHVA   | 184   | 372   |
| >TP53-R72H- MPEAAPRV   | 23   | >TP53-R72H- MPEAAPHV   | 9     | 14    |
| >TP53-R72H- MPEAAPRV   | 487  | >TP53-R72H- MPEAAPHV   | 698   | 211   |
| >TP53-R72H- MPEAAPRVA  | 177  | >TP53-R72H- MPEAAPHVA  | 288   | 111   |
| >TP53-R72H- MPEAAPRVA  | 65   | >TP53-R72H- MPEAAPHVA  | 79    | 14    |
| >TP53-R72H- MPEAAPRVA  | 258  | >TP53-R72H- MPEAAPHVA  | 85    | 173   |
| >TP53-R72H- MPEAAPRVA  | 76   | >TP53-R72H- MPEAAPHVA  | 34    | 42    |
| >TP53-R72H- MPEAAPRV   | 496  | >TP53-R72H- MPEAAPHV   | 242   | 254   |
| >TP53-R72H- MPEAAPRV   | 677  | >TP53-R72H- MPEAAPHV   | 468   | 209   |
| >TP53-R72H- MPEAAPRV   | 83   | >TP53-R72H- MPEAAPHV   | 48    | 35    |
| >TP53-R72H- MPEAAPRVA  | 15   | >TP53-R72H- MPEAAPHVA  | 8     | 7     |
| >TP53-R72H- MPEAAPRVA  | 10   | >TP53-R72H- MPEAAPHVA  | 8     | 2     |
| >TP53-R72H- RMPEAAPRV  | 35   | >TP53-R72H- RMPEAAPHV  | 33    | 2     |
| >TP53-R72H- RMPEAAPRV  | 224  | >TP53-R72H- RMPEAAPHV  | 196   | 28    |
| >TP53-R72H- RMPEAAPRV  | 15   | >TP53-R72H- RMPEAAPHV  | 12    | 3     |
| >TP53-R72H- RMPEAAPRV  | 480  | >TP53-R72H- RMPEAAPHV  | 338   | 142   |
| >TP53-R72H- RMPEAAPRV  | 12   | >TP53-R72H- RMPEAAPHV  | 7     | 5     |
| >TP53-R72H- RMPEAAPRV  | 2    | >TP53-R72H- RMPEAAPHV  | 2     | 0     |
| >TP53-R72H- RMPEAAPRV  | 39   | >TP53-R72H- RMPEAAPHV  | 13    | 26    |
| >TP53-R72H- RMPEAAPRV  | 17   | >TP53-R72H- RMPEAAPHV  | 7     | 10    |
| >TP53-R72H- RMPEAAPRV  | 1124 | >TP53-R72H- RMPEAAPHV  | 80    | 1044  |
| >TP53-R72H- RMPEAAPRV  | 5    | >TP53-R72H- RMPEAAPHV  | 4     | 1     |
| >TP53-R72H- RMPEAAPRV  | 356  | >TP53-R72H- RMPEAAPHV  | 29    | 327   |
| >TP53-R72H- RMPEAAPRV  | 6    | >TP53-R72H- RMPEAAPHV  | 7     | 1     |
| >TP53-R72H- RMPEAAPRV  | 2536 | >TP53-R72H- RMPEAAPHV  | 221   | 2315  |
| >TP53-R72H- RMPEAAPRV  | 4    | >TP53-R72H- RMPEAAPHV  | 4     | 0     |
| >TP53-R72H- RMPEAAPRV  | 318  | >TP53-R72H- RMPEAAPHV  | 28    | 290   |
| >TP53-R72H- RMPEAAPR   | 53   | >TP53-R72H- RMPEAAPH   | 5338  | 5285  |
| >TP53-R72H- RMPEAAPRV  | 229  | >TP53-R72H- RMPEAAPHV  | 186   | 43    |
| >TP53-R72H- RMPEAAPR   | 26   | >TP53-R72H- RMPEAAPH   | 11949 | 11923 |
| >TP53-R72H- APRMPEAAP  | 38   | >TP53-R72H- APRMPEAAP  | 44    | 6     |
| >TP53-S106RSYGFRLGFL   | 95   | >TP53-S106RRYGFRLGFL   | 1087  | 992   |
| >TP53-S106RSYGFRLGF    | 356  | >TP53-S106RRYGFRLGF    | 108   | 248   |
| >TP53-S106RSYGFRLGF    | 232  | >TP53-S106RRYGFRLGF    | 85    | 147   |
| >TP53-S106RSYGFRLGFL   | 319  | >TP53-S106RRYGFRLGFL   | 98    | 221   |
| >TP53-S106RSYGFRLGF    | 7    | >TP53-S106RRYGFRLGF    | 5     | 2     |

|                       |       |                       |       |       |
|-----------------------|-------|-----------------------|-------|-------|
| >TP53-S106RSYGFRLGFL  | 12    | >TP53-S106RRYGFRLGFL  | 7     | 5     |
| >TP53-S106RSYGFRLGF   | 338   | >TP53-S106R RYGFRLGF  | 805   | 467   |
| >TP53-S106RSYGFRLGFL  | 139   | >TP53-S106R RYGFRLGFL | 268   | 129   |
| >TP53-S106RSYGFRLGFL  | 222   | >TP53-S106R RYGFRLGFL | 193   | 29    |
| >TP53-S106RGSYGFRLGF  | 78    | >TP53-S106RGRYGFRLGF  | 1326  | 1248  |
| >TP53-S106RGSYGFRLGFL | 227   | >TP53-S106RGRYGFRLGFL | 671   | 444   |
| >TP53-S106RGSYGFRLGFL | 237   | >TP53-S106RGRYGFRLGFL | 1182  | 945   |
| >TP53-S106RGSYGFRLGFL | 491   | >TP53-S106RGRYGFRLGFL | 20190 | 19699 |
| >TP53-S106RGSYGFRLGFL | 98    | >TP53-S106RGRYGFRLGFL | 14978 | 14880 |
| >TP53-S106RGSYGFRLGF  | 61    | >TP53-S106RGRYGFRLGF  | 5494  | 5433  |
| >TP53-S106RGSYGFRLGF  | 365   | >TP53-S106RGRYGFRLGF  | 14251 | 13886 |
| >TP53-S106RGSYGFRLGF  | 111   | >TP53-S106RGRYGFRLGF  | 96    | 15    |
| >TP53-S106RGSYGFRLGF  | 4     | >TP53-S106RGRYGFRLGF  | 16715 | 16711 |
| >TP53-S106RGSYGFRLGFL | 31    | >TP53-S106RGRYGFRLGFL | 24477 | 24446 |
| >TP53-S106RGSYGFRLGF  | 9076  | >TP53-S106RGRYGFRLGF  | 16    | 9060  |
| >TP53-S106RGSYGFRLGFL | 3970  | >TP53-S106RGRYGFRLGFL | 12    | 3958  |
| >TP53-S106RGSYGFRLGFL | 12011 | >TP53-S106RGRYGFRLGFL | 26    | 11985 |
| >TP53-S106RGSYGFRLGF  | 222   | >TP53-S106RGRYGFRLGF  | 22267 | 22045 |
| >TP53-S106RGSYGFRLGF  | 264   | >TP53-S106RGRYGFRLGF  | 20847 | 20583 |
| >TP53-S106RGSYGFRLGF  | 44    | >TP53-S106RGRYGFRLGF  | 2586  | 2542  |
| >TP53-S106RGSYGFRLGFL | 70    | >TP53-S106RGRYGFRLGFL | 9359  | 9289  |
| >TP53-S106RGSYGFRLGFL | 63    | >TP53-S106RGRYGFRLGFL | 4083  | 4020  |
| >TP53-S106RGSYGFRLGF  | 4767  | >TP53-S106RGRYGFRLGF  | 54    | 4713  |
| >TP53-S106RGSYGFRLGFL | 17786 | >TP53-S106RGRYGFRLGFL | 134   | 17652 |
| >TP53-S106RGSYGFRLGFL | 12169 | >TP53-S106RGRYGFRLGFL | 154   | 12015 |
| >TP53-S106RGSYGFRLGF  | 2627  | >TP53-S106RGRYGFRLGF  | 6     | 2621  |
| >TP53-S106RGSYGFRLGFL | 7771  | >TP53-S106RGRYGFRLGFL | 31    | 7740  |
| >TP53-S106RGSYGFRLGFL | 14806 | >TP53-S106RGRYGFRLGFL | 87    | 14719 |
| >TP53-S106RSVPSQKTYQC | 19986 | >TP53-S106RSVPSQKTYQC | 289   | 19697 |
| >TP53-S106RSVPSQKTYQC | 31010 | >TP53-S106RSVPSQKTYQC | 286   | 30724 |
| >TP53-S106RQGSYGFRLGF | 1171  | >TP53-S106RQGRYGFRLGF | 484   | 687   |
| >TP53-S106RQGSYGFRLGF | 278   | >TP53-S106RQGRYGFRLGF | 602   | 324   |
| >TP53-S106RYQGSGYFRL  | 30    | >TP53-S106RYQGRYGFRL  | 123   | 93    |
| >TP53-S106RYQGSGYFRL  | 36    | >TP53-S106RYQGRYGFRL  | 178   | 142   |
| >TP53-S106RYQGSGYFRL  | 15    | >TP53-S106RYQGRYGFRL  | 23    | 8     |
| >TP53-S106RYQGSGYFRLC | 189   | >TP53-S106RYQGRYGFRLC | 320   | 131   |
| >TP53-S106RYQGSGYFRL  | 32    | >TP53-S106RYQGRYGFRL  | 51    | 19    |
| >TP53-S106RYQGSGYFRL  | 167   | >TP53-S106RYQGRYGFRL  | 219   | 52    |
| >TP53-S106RYQGSGYFRL  | 54    | >TP53-S106RYQGRYGFRL  | 46    | 8     |
| >TP53-S106RYQGSGYFRL  | 476   | >TP53-S106RYQGRYGFRL  | 1060  | 584   |
| >TP53-S106RYQGSGYFRL  | 211   | >TP53-S106RYQGRYGFRL  | 355   | 144   |
| >TP53-S106RYQGSGYFRLC | 32    | >TP53-S106RYQGRYGFRLC | 40    | 8     |
| >TP53-S106RYQGSGYFRLC | 158   | >TP53-S106RYQGRYGFRLC | 259   | 101   |

|                       |     |                        |      |      |
|-----------------------|-----|------------------------|------|------|
| >TP53-S106RYQGSYGFR   | 77  | >TP53-S106RYQGGRYGFRL  | 171  | 94   |
| >TP53-S106RYQGSYGFRLC | 6   | >TP53-S106RYQGGRYGFRLC | 8    | 2    |
| >TP53-S106RYQGSYGFR   | 145 | >TP53-S106RYQGGRYGFRL  | 819  | 674  |
| >TP53-S106RYQGSYGF    | 223 | >TP53-S106RYQGGRYGF    | 272  | 49   |
| >TP53-S106RTYQGSYGFR  | 141 | >TP53-S106RTYQGGRYGFRL | 308  | 167  |
| >TP53-S106RTYQGSYGF   | 28  | >TP53-S106RTYQGGRYGF   | 37   | 9    |
| >TP53-S106RTYQGSYGFRL | 316 | >TP53-S106RTYQGGRYGFRL | 1031 | 715  |
| >TP53-S106RTYQGSYGF   | 93  | >TP53-S106RTYQGGRYGF   | 111  | 18   |
| >TP53-S106RTYQGSYGFRL | 163 | >TP53-S106RTYQGGRYGFRL | 234  | 71   |
| >TP53-S106RTYQGSYGF   | 5   | >TP53-S106RTYQGGRYGF   | 5    | 0    |
| >TP53-S106RTYQGSYGF   | 255 | >TP53-S106RTYQGGRYGF   | 315  | 60   |
| >TP53-S106RTYQGSYGFRL | 7   | >TP53-S106RTYQGGRYGFRL | 7    | 0    |
| >TP53-S106RTYQGSYGF   | 19  | >TP53-S106RTYQGGRYGF   | 14   | 5    |
| >TP53-S106RTYQGSYGF   | 25  | >TP53-S106RTYQGGRYGF   | 11   | 14   |
| >TP53-S106RTYQGSYGF   | 154 | >TP53-S106RTYQGGRYGF   | 401  | 247  |
| >TP53-S106RTYQGSYGF   | 53  | >TP53-S106RTYQGGRYGF   | 44   | 9    |
| >TP53-S106RKYQGSYGF   | 220 | >TP53-S106RKYQGGRYGF   | 182  | 38   |
| >TP53-S106RKYQGSYGF   | 169 | >TP53-S106RKYQGGRYGF   | 734  | 565  |
| >TP53-S106RKYQGSYGF   | 260 | >TP53-S106RKYQGGRYGF   | 886  | 626  |
| >TP53-S106RKYQGSYGF   | 391 | >TP53-S106RKYQGGRYGF   | 2403 | 2012 |
| >TP53-S106RKYQGSYGF   | 77  | >TP53-S106RKYQGGRYGF   | 256  | 179  |
| >TP53-S106RKYQGSYGF   | 23  | >TP53-S106RKYQGGRYGF   | 83   | 60   |
| >TP53-S106RKYQGSYGF   | 175 | >TP53-S106RKYQGGRYGF   | 693  | 518  |
| >TP53-S106RKYQGSYGF   | 50  | >TP53-S106RKYQGGRYGF   | 56   | 6    |
| >TP53-S106RKYQGSYGF   | 57  | >TP53-S106RKYQGGRYGF   | 81   | 24   |
| >TP53-S106RKYQGSYGF   | 481 | >TP53-S106RKYQGGRYGF   | 451  | 30   |
| >TP53-S106RKYQGSYGF   | 192 | >TP53-S106RKYQGGRYGF   | 143  | 49   |
| >TP53-S106RKYQGSYGF   | 294 | >TP53-S106RKYQGGRYGF   | 728  | 434  |
| >TP53-S106RKYQGSYGF   | 96  | >TP53-S106RKYQGGRYGF   | 94   | 2    |
| >TP53-S106RKYQGSYGF   | 325 | >TP53-S106RKYQGGRYGF   | 210  | 115  |
| >TP53-S106RKYQGSYGF   | 10  | >TP53-S106RKYQGGRYGF   | 8    | 2    |
| >TP53-S106RKYQGSYGF   | 643 | >TP53-S106RKYQGGRYGF   | 353  | 290  |
| >TP53-S106RKYQGSYGF   | 4   | >TP53-S106RKYQGGRYGF   | 6    | 2    |
| >TP53-S106RKYQGSYGF   | 21  | >TP53-S106RKYQGGRYGF   | 30   | 9    |
| >TP53-S106RKYQGSYGF   | 407 | >TP53-S106RKYQGGRYGF   | 593  | 186  |
| >TP53-S106RKYQGSYGF   | 57  | >TP53-S106RKYQGGRYGF   | 132  | 75   |
| >TP53-S106RKYQGSYGF   | 402 | >TP53-S106RKYQGGRYGF   | 1075 | 673  |
| >TP53-S106RKYQGSYGF   | 55  | >TP53-S106RKYQGGRYGF   | 166  | 111  |
| >TP53-S106RKYQGSYGF   | 36  | >TP53-S106RKYQGGRYGF   | 56   | 20   |
| >TP53-S106RKYQGSYGF   | 249 | >TP53-S106RKYQGGRYGF   | 1130 | 881  |
| >TP53-S106RKYQGSYGF   | 2   | >TP53-S106RKYQGGRYGF   | 3    | 1    |
| >TP53-S106RKYQGSYGF   | 465 | >TP53-S106RKYQGGRYGF   | 2003 | 1538 |
| >TP53-S106RKYQGSYGF   | 3   | >TP53-S106RKYQGGRYGF   | 3    | 0    |

|                        |       |                         |     |       |
|------------------------|-------|-------------------------|-----|-------|
| >TP53-S106RKTYQGSYGF   | 101   | >TP53-S106RKTYQGGRYGF   | 83  | 18    |
| >TP53-S106RKTYQGSYGFR  | 439   | >TP53-S106RKTYQGGRYGFF  | 300 | 139   |
| >TP53-S106RKTYQGSYGF   | 15    | >TP53-S106RKTYQGGRYGF   | 23  | 8     |
| >TP53-S106RKTYQGSYGFR  | 35    | >TP53-S106RKTYQGGRYGFF  | 52  | 17    |
| >TP53-S106RKTYQGSYGF   | 151   | >TP53-S106RKTYQGGRYGFF  | 357 | 206   |
| >TP53-S106RKTYQGSYGF   | 25    | >TP53-S106RKTYQGGRYGF   | 42  | 17    |
| >TP53-S106RKTYQGSYGFR  | 28    | >TP53-S106RKTYQGGRYGFF  | 42  | 14    |
| >TP53-S106RKTYQGSYGF   | 345   | >TP53-S106RKTYQGGRYGFF  | 387 | 42    |
| >TP53-S106RKTYQGSYGFR  | 370   | >TP53-S106RKTYQGGRYGFF  | 506 | 136   |
| >TP53-S106RKTYQGSYGF   | 25    | >TP53-S106RKTYQGGRYGFF  | 26  | 1     |
| >TP53-S106RKTYQGSYGFR  | 43    | >TP53-S106RKTYQGGRYGFF  | 69  | 26    |
| >TP53-S106RQKTYQGSY    | 308   | >TP53-S106RQKTYQGGRY    | 705 | 397   |
| >TP53-S106RQKTYQGSY    | 40    | >TP53-S106RQKTYQGGRY    | 258 | 218   |
| >TP53-S106RQKTYQGSYGI  | 10    | >TP53-S106RQKTYQGGRYGI  | 16  | 6     |
| >TP53-S106RSQKTYQGSY   | 15    | >TP53-S106RSQKTYQGGRY   | 21  | 6     |
| >TP53-S106RSQKTYQGS    | 16614 | >TP53-S106RSQKTYQGR     | 32  | 16582 |
| >TP53-S106RSQKTYQGSY   | 38    | >TP53-S106RSQKTYQGGRY   | 76  | 38    |
| >TP53-S106RSQKTYQGSYCG | 36    | >TP53-S106RSQKTYQGGRYCG | 52  | 16    |
| >TP53-S106RSQKTYQGSY   | 198   | >TP53-S106RSQKTYQGGRY   | 513 | 315   |
| >TP53-S106RSQKTYQGSYCG | 268   | >TP53-S106RSQKTYQGGRYCG | 671 | 403   |
| >TP53-S106RSQKTYQGSY   | 19    | >TP53-S106RSQKTYQGGRY   | 157 | 138   |
| >TP53-S106RSQKTYQGSYCG | 9     | >TP53-S106RSQKTYQGGRYCG | 14  | 5     |
| >TP53-S106RSQKTYQGS    | 32733 | >TP53-S106RSQKTYQGR     | 499 | 32234 |
| >TP53-S106RPSQKTYQGSY  | 513   | >TP53-S106RPSQKTYQGRY   | 442 | 71    |
| >TP53-S106RPSQKTYQGSY  | 71    | >TP53-S106RPSQKTYQGRY   | 70  | 1     |
| >TP53-S106RPSQKTYQGSY  | 228   | >TP53-S106RPSQKTYQGRY   | 502 | 274   |
| >TP53-S106RVPSQKTYQGS  | 92    | >TP53-S106RVPSQKTYQGR   | 157 | 65    |
| >TP53-S106RVPSQKTYQGS  | 19    | >TP53-S106RVPSQKTYQGR   | 39  | 20    |
| >TP53-S106RVPSQKTYQGS  | 254   | >TP53-S106RVPSQKTYQGR   | 387 | 133   |
| >TP53-S106RVPSQKTYQGS  | 15    | >TP53-S106RVPSQKTYQGR   | 41  | 26    |
| >TP53-S116CSGTAKSVTCT  | 585   | >TP53-S116CSGTAKSVTCT   | 391 | 194   |
| >TP53-S116CSGTAKSVTCT  | 374   | >TP53-S116CSGTAKSVTCT   | 573 | 199   |
| >TP53-S116CSYGFRLGFLH  | 1519  | >TP53-S116CSYGFRLGFLH   | 447 | 1072  |
| >TP53-S116CFLHSGTAKSV  | 122   | >TP53-S116CFLHCGTAKSV   | 114 | 8     |
| >TP53-S116CFLHSGTAKS   | 179   | >TP53-S116CFLHCGTAKS    | 362 | 183   |
| >TP53-S116CFLHSGTAKSV  | 13    | >TP53-S116CFLHCGTAKSV   | 24  | 11    |
| >TP53-S116CFLHSGTAKSV  | 413   | >TP53-S116CFLHCGTAKSV   | 567 | 154   |
| >TP53-S116CFLHSGTAKS   | 26    | >TP53-S116CFLHCGTAKS    | 25  | 1     |
| >TP53-S116CFLHSGTAKSV  | 11    | >TP53-S116CFLHCGTAKSV   | 17  | 6     |
| >TP53-S116CFLHSGTAKSV  | 27    | >TP53-S116CFLHCGTAKSV   | 28  | 1     |
| >TP53-S116CFLHSGTAKSV  | 504   | >TP53-S116CFLHCGTAKSV   | 404 | 100   |
| >TP53-S116CFLHSGTAKS   | 188   | >TP53-S116CFLHCGTAKS    | 154 | 34    |
| >TP53-S116CFLHSGTAKSV  | 2     | >TP53-S116CFLHCGTAKSV   | 2   | 0     |



|                         |       |                        |     |       |
|-------------------------|-------|------------------------|-----|-------|
| >TP53-S116C FLHSGTAKSV  | 116   | >TP53-S116C FLHCGTAKSV | 105 | 11    |
| >TP53-S116C FLHSGTAKSV  | 5     | >TP53-S116C FLHCGTAKSV | 3   | 2     |
| >TP53-S116C FLHSGTAKSV  | 1427  | >TP53-S116C FLHCGTAKSV | 336 | 1091  |
| >TP53-S116C FLHSGTAKSV  | 7     | >TP53-S116C FLHCGTAKSV | 10  | 3     |
| >TP53-S116C FLHSGTAKSV  | 7     | >TP53-S116C FLHCGTAKSV | 10  | 3     |
| >TP53-S116C FLHSGTAK    | 124   | >TP53-S116C FLHCGTAK   | 605 | 481   |
| >TP53-S116C FLHSGTAKS   | 31    | >TP53-S116C FLHCGTAKS  | 149 | 118   |
| >TP53-S116C FLHSGTAKSV  | 2     | >TP53-S116C FLHCGTAKSV | 2   | 0     |
| >TP53-S116C FLHSGTAKSV  | 13    | >TP53-S116C FLHCGTAKSV | 40  | 27    |
| >TP53-S116C FLHSGTAK    | 114   | >TP53-S116C FLHCGTAK   | 192 | 78    |
| >TP53-S116C FLHSGTAK    | 256   | >TP53-S116C FLHCGTAK   | 394 | 138   |
| >TP53-S116C FLHSGTAKSV  | 283   | >TP53-S116C FLHCGTAKSV | 384 | 101   |
| >TP53-S116C FLHSGTAKSV  | 261   | >TP53-S116C FLHCGTAKSV | 369 | 108   |
| >TP53-S116C RLGFLHSGTA  | 326   | >TP53-S116C RLGFLHCGTA | 325 | 1     |
| >TP53-S116C RLGFLHSGT   | 719   | >TP53-S116C RLGFLHCGT  | 207 | 512   |
| >TP53-S116C RLGFLHSGTA  | 162   | >TP53-S116C RLGFLHCGTA | 254 | 92    |
| >TP53-S116C RLGFLHSGTA  | 554   | >TP53-S116C RLGFLHCGTA | 434 | 120   |
| >TP53-S116C RLGFLHSGTA  | 43    | >TP53-S116C RLGFLHCGTA | 54  | 11    |
| >TP53-S116C RLGFLHSGTA  | 125   | >TP53-S116C RLGFLHCGTA | 176 | 51    |
| >TP53-S116C RLGFLHSGTA  | 384   | >TP53-S116C RLGFLHCGTA | 509 | 125   |
| >TP53-S116C RLGFLHSGTA  | 262   | >TP53-S116C RLGFLHCGTA | 203 | 59    |
| >TP53-S116C FRLGFLHS    | 142   | >TP53-S116C FRLGFLHC   | 528 | 386   |
| >TP53-S116C FRLGFLHSG   | 306   | >TP53-S116C FRLGFLHCG  | 412 | 106   |
| >TP53-S116C FRLGFLHSGT  | 412   | >TP53-S116C FRLGFLHCGT | 972 | 560   |
| >TP53-S116C FRLGFLHSGT  | 174   | >TP53-S116C FRLGFLHCGT | 381 | 207   |
| >TP53-S116F SGTAKSVTCT  | 1421  | >TP53-S116F FGTAKSVTCT | 384 | 1037  |
| >TP53-S116F SGTAKSVTCT  | 585   | >TP53-S116F FGTAKSVTCT | 52  | 533   |
| >TP53-S116F SGTAKSVTCT  | 374   | >TP53-S116F FGTAKSVTCT | 269 | 105   |
| >TP53-S116F SYGFRLGFLH: | 17696 | >TP53-S116F SYGFRLGFLH | 44  | 17652 |
| >TP53-S116F SYGFRLGFLH: | 8493  | >TP53-S116F SYGFRLGFLH | 39  | 8454  |
| >TP53-S116F SYGFRLGFLH: | 1998  | >TP53-S116F SYGFRLGFLH | 6   | 1992  |
| >TP53-S116F SYGFRLGFLH: | 8652  | >TP53-S116F SYGFRLGFLH | 273 | 8379  |
| >TP53-S116F SYGFRLGFLH: | 1519  | >TP53-S116F SYGFRLGFLH | 101 | 1418  |
| >TP53-S116F LHSGTAKSV   | 1632  | >TP53-S116F LHFGTAKSV  | 193 | 1439  |
| >TP53-S116F LHSGTAKSV   | 884   | >TP53-S116F LHFGTAKSV  | 294 | 590   |
| >TP53-S116F FLHSGTAKSV  | 122   | >TP53-S116F FLHFGTAKSV | 141 | 19    |
| >TP53-S116F FLHSGTAKS   | 179   | >TP53-S116F FLHFGTAKS  | 263 | 84    |
| >TP53-S116F FLHSGTAKSV  | 13    | >TP53-S116F FLHFGTAKSV | 33  | 20    |
| >TP53-S116F FLHSGTAKSV  | 413   | >TP53-S116F FLHFGTAKSV | 482 | 69    |
| >TP53-S116F FLHSGTAKS   | 26    | >TP53-S116F FLHFGTAKS  | 34  | 8     |
| >TP53-S116F FLHSGTAKSV  | 11    | >TP53-S116F FLHFGTAKSV | 20  | 9     |
| >TP53-S116F FLHSGTAKSV  | 27    | >TP53-S116F FLHFGTAKSV | 34  | 7     |
| >TP53-S116F FLHSGTAKS   | 188   | >TP53-S116F FLHFGTAKS  | 394 | 206   |

|                         |       |                         |      |       |
|-------------------------|-------|-------------------------|------|-------|
| >TP53-S116F FLHSGTAKSV  | 2     | >TP53-S116F FLHFGTAKSV  | 2    | 0     |
| >TP53-S116F FLHSGTAKSV  | 116   | >TP53-S116F FLHFGTAKSV  | 212  | 96    |
| >TP53-S116F FLHSGTAKSV  | 5     | >TP53-S116F FLHFGTAKSV  | 5    | 0     |
| >TP53-S116F FLHSGTAKSV  | 7     | >TP53-S116F FLHFGTAKSV  | 9    | 2     |
| >TP53-S116F FLHSGTAKSV  | 7     | >TP53-S116F FLHFGTAKSV  | 8    | 1     |
| >TP53-S116F FLHSGTAK    | 124   | >TP53-S116F FLHFGTAK    | 334  | 210   |
| >TP53-S116F FLHSGTAKS   | 31    | >TP53-S116F FLHFGTAKS   | 103  | 72    |
| >TP53-S116F FLHSGTAKSV  | 2     | >TP53-S116F FLHFGTAKSV  | 2    | 0     |
| >TP53-S116F FLHSGTAKSV  | 13    | >TP53-S116F FLHFGTAKSV  | 28   | 15    |
| >TP53-S116F FLHSGTAK    | 114   | >TP53-S116F FLHFGTAK    | 116  | 2     |
| >TP53-S116F FLHSGTAK    | 256   | >TP53-S116F FLHFGTAK    | 158  | 98    |
| >TP53-S116F FLHSGTAKSV  | 283   | >TP53-S116F FLHFGTAKSV  | 537  | 254   |
| >TP53-S116F FLHSGTAKSV  | 261   | >TP53-S116F FLHFGTAKSV  | 1097 | 836   |
| >TP53-S116F GFLHSGTAK   | 1163  | >TP53-S116F GFLHFGTAK   | 451  | 712   |
| >TP53-S116F RLGFLHSGTA  | 326   | >TP53-S116F RLGFLHFGTA  | 190  | 136   |
| >TP53-S116F RLGFLHSGT   | 719   | >TP53-S116F RLGFLHFGT   | 119  | 600   |
| >TP53-S116F RLGFLHSGTA  | 162   | >TP53-S116F RLGFLHFGTA  | 92   | 70    |
| >TP53-S116F RLGFLHSGTA  | 554   | >TP53-S116F RLGFLHFGTA  | 304  | 250   |
| >TP53-S116F RLGFLHSGTA  | 43    | >TP53-S116F RLGFLHFGTA  | 43   | 0     |
| >TP53-S116F RLGFLHSGTA  | 125   | >TP53-S116F RLGFLHFGTA  | 63   | 62    |
| >TP53-S116F RLGFLHSGTA  | 384   | >TP53-S116F RLGFLHFGTA  | 358  | 26    |
| >TP53-S116F RLGFLHSGTA  | 262   | >TP53-S116F RLGFLHFGTA  | 99   | 163   |
| >TP53-S116F FRLGFLHSGT  | 716   | >TP53-S116F FRLGFLHFGT  | 253  | 463   |
| >TP53-S116F FRLGFLHS    | 5211  | >TP53-S116F FRLGFLHF    | 23   | 5188  |
| >TP53-S116F FRLGFLHS    | 142   | >TP53-S116F FRLGFLHF    | 18   | 124   |
| >TP53-S116F FRLGFLHSG   | 306   | >TP53-S116F FRLGFLHFG   | 311  | 5     |
| >TP53-S116F FRLGFLHSGT  | 412   | >TP53-S116F FRLGFLHFGT  | 476  | 64    |
| >TP53-S116F FRLGFLHSGT, | 174   | >TP53-S116F FRLGFLHFGT, | 128  | 46    |
| >TP53-S116F GFRLGFLHS   | 28277 | >TP53-S116F GFRLGFLHF   | 66   | 28211 |
| >TP53-S116F GFRLGFLHS   | 18510 | >TP53-S116F GFRLGFLHF   | 47   | 18463 |
| >TP53-S116F GFRLGFLHS   | 6236  | >TP53-S116F GFRLGFLHF   | 72   | 6164  |
| >TP53-S116F GFRLGFLHSG  | 1432  | >TP53-S116F GFRLGFLHFG  | 469  | 963   |
| >TP53-S116F GFRLGFLHS   | 17668 | >TP53-S116F GFRLGFLHF   | 284  | 17384 |
| >TP53-S116F YGFRLGFLHS  | 18768 | >TP53-S116F YGFRLGFLHF  | 337  | 18431 |
| >TP53-S116F YGFRLGFLHS  | 9633  | >TP53-S116F YGFRLGFLHF  | 65   | 9568  |
| >TP53-S116F YGFRLGFLHS  | 11194 | >TP53-S116F YGFRLGFLHF  | 18   | 11176 |
| >TP53-S116F YGFRLGFLHS  | 22670 | >TP53-S116F YGFRLGFLHF  | 198  | 22472 |
| >TP53-S116F YGFRLGFLHS  | 20542 | >TP53-S116F YGFRLGFLHF  | 250  | 20292 |
| >TP53-S121F SVTCTYSPA   | 4731  | >TP53-S121F FVTCTYSPA   | 224  | 4507  |
| >TP53-S121F SVTCTYSPAL  | 874   | >TP53-S121F FVTCTYSPAL  | 132  | 742   |
| >TP53-S121F SVTCTYSPA   | 118   | >TP53-S121F FVTCTYSPA   | 10   | 108   |
| >TP53-S121F SVTCTYSPAL  | 1772  | >TP53-S121F FVTCTYSPAL  | 492  | 1280  |
| >TP53-S121F SVTCTYSPA   | 468   | >TP53-S121F FVTCTYSPA   | 31   | 437   |

|                         |       |                         |       |       |
|-------------------------|-------|-------------------------|-------|-------|
| >TP53-S121F SVTCTYSPAL  | 268   | >TP53-S121F FVTCTYSPAL  | 52    | 216   |
| >TP53-S121F SVTCTYSPAL  | 923   | >TP53-S121F FVTCTYSPAL  | 142   | 781   |
| >TP53-S121F SVTCTYSPAL  | 877   | >TP53-S121F FVTCTYSPAL  | 82    | 795   |
| >TP53-S121F SVTCTYSPAL  | 1003  | >TP53-S121F FVTCTYSPAL  | 89    | 914   |
| >TP53-S121F SVTCTYSPA   | 241   | >TP53-S121F FVTCTYSPA   | 6073  | 5832  |
| >TP53-S121F SVTCTYSPA   | 45    | >TP53-S121F FVTCTYSPA   | 18    | 27    |
| >TP53-S121F SVTCTYSPA   | 583   | >TP53-S121F FVTCTYSPA   | 204   | 379   |
| >TP53-S121F SVTCTYSPAL  | 149   | >TP53-S121F FVTCTYSPAL  | 63    | 86    |
| >TP53-S121F SVTCTYSPAL  | 1647  | >TP53-S121F FVTCTYSPAL  | 369   | 1278  |
| >TP53-S121F SVTCTYSPAL  | 1709  | >TP53-S121F FVTCTYSPAL  | 312   | 1397  |
| >TP53-S121F SVTCTYSPA   | 6246  | >TP53-S121F FVTCTYSPA   | 69    | 6177  |
| >TP53-S121F KSVTCTYSPA  | 821   | >TP53-S121F KFVTCTYSPA  | 471   | 350   |
| >TP53-S121F KSVTCTYSPA  | 396   | >TP53-S121F KFVTCTYSPA  | 2009  | 1613  |
| >TP53-S121F KSVTCTYSPA  | 10502 | >TP53-S121F KFVTCTYSPA  | 471   | 10031 |
| >TP53-S121F KSVTCTYSPA  | 149   | >TP53-S121F KFVTCTYSPA  | 464   | 315   |
| >TP53-S121F KSVTCTYSPA  | 488   | >TP53-S121F KFVTCTYSPA  | 1461  | 973   |
| >TP53-S121F KSVTCTYSPA  | 107   | >TP53-S121F KFVTCTYSPA  | 1261  | 1154  |
| >TP53-S121F KSVTCTYSPA  | 349   | >TP53-S121F KFVTCTYSPA  | 5728  | 5379  |
| >TP53-S121F KSVTCTYSPA  | 89    | >TP53-S121F KFVTCTYSPA  | 2085  | 1996  |
| >TP53-S121F KSVTCTYSPA  | 6     | >TP53-S121F KFVTCTYSPA  | 20689 | 20683 |
| >TP53-S121F KSVTCTYSPA  | 113   | >TP53-S121F KFVTCTYSPA  | 11672 | 11559 |
| >TP53-S121F KSVTCTYSPA  | 198   | >TP53-S121F KFVTCTYSPA  | 10642 | 10444 |
| >TP53-S121F KSVTCTYSPA  | 20849 | >TP53-S121F KFVTCTYSPA  | 171   | 20678 |
| >TP53-S121F LGFLHSGTAK  | 18869 | >TP53-S121F LGFLHSGTAK  | 353   | 18516 |
| >TP53-S121F LGFLHSGTAK  | 20778 | >TP53-S121F LGFLHSGTAK  | 293   | 20485 |
| >TP53-S121F LGFLHSGTAK  | 19335 | >TP53-S121F LGFLHSGTAK  | 53    | 19282 |
| >TP53-S121F LGFLHSGTAK  | 14375 | >TP53-S121F LGFLHSGTAK  | 378   | 13997 |
| >TP53-S121F LGFLHSGTAK  | 16487 | >TP53-S121F LGFLHSGTAK  | 302   | 16185 |
| >TP53-S121F AKSVTCTY    | 8     | >TP53-S121F AKFVTCTY    | 3     | 5     |
| >TP53-S121F AKSVTCTYS   | 640   | >TP53-S121F AKFVTCTYS   | 113   | 527   |
| >TP53-S121F AKSVTCTYSP  | 483   | >TP53-S121F AKFVTCTYSP  | 79    | 404   |
| >TP53-S121F AKSVTCTYSP, | 56    | >TP53-S121F AKFVTCTYSP, | 13    | 43    |
| >TP53-S121F TAKSVTCTY   | 312   | >TP53-S121F TAKFVTCTY   | 454   | 142   |
| >TP53-S121F TAKSVTCTY   | 247   | >TP53-S121F TAKFVTCTY   | 205   | 42    |
| >TP53-S121F TAKSVTCTY   | 78    | >TP53-S121F TAKFVTCTY   | 102   | 24    |
| >TP53-S121F TAKSVTCTY   | 430   | >TP53-S121F TAKFVTCTY   | 1264  | 834   |
| >TP53-S121F TAKSVTCTY   | 265   | >TP53-S121F TAKFVTCTY   | 288   | 23    |
| >TP53-S121F TAKSVTCTY   | 100   | >TP53-S121F TAKFVTCTY   | 141   | 41    |
| >TP53-S121F TAKSVTCTY   | 336   | >TP53-S121F TAKFVTCTY   | 683   | 347   |
| >TP53-S121F GTAKSVTCTY  | 466   | >TP53-S121F GTAKFVTCTY  | 260   | 206   |
| >TP53-S121F GTAKSVTCTY  | 518   | >TP53-S121F GTAKFVTCTY  | 380   | 138   |
| >TP53-S121F GTAKSVTCTY  | 122   | >TP53-S121F GTAKFVTCTY  | 78    | 44    |
| >TP53-S121F GTAKSVTCTY  | 69    | >TP53-S121F GTAKFVTCTY  | 53    | 16    |

|                        |       |                        |      |       |
|------------------------|-------|------------------------|------|-------|
| >TP53-S121F GTAKSVTCTY | 1215  | >TP53-S121F GTAKFVTCTY | 306  | 909   |
| >TP53-S121F GTAKSVTCTY | 71    | >TP53-S121F GTAKFVTCTY | 130  | 59    |
| >TP53-S121F GTAKSVTCTY | 461   | >TP53-S121F GTAKFVTCTY | 771  | 310   |
| >TP53-S121F GTAKSVTCTY | 8     | >TP53-S121F GTAKFVTCTY | 18   | 10    |
| >TP53-S121F GTAKSVTCTY | 296   | >TP53-S121F GTAKFVTCTY | 416  | 120   |
| >TP53-S121F GTAKSVTCTY | 39    | >TP53-S121F GTAKFVTCTY | 29   | 10    |
| >TP53-S121F GTAKSVTCTY | 672   | >TP53-S121F GTAKFVTCTY | 474  | 198   |
| >TP53-S121F GTAKSVTCTY | 143   | >TP53-S121F GTAKFVTCTY | 172  | 29    |
| >TP53-S121F SGTAKSVTCT | 374   | >TP53-S121F SGTAKFVTCT | 771  | 397   |
| >TP53-S121F LHSGTAKSV  | 2890  | >TP53-S121F LHSGTAKFV  | 198  | 2692  |
| >TP53-S121F LHSGTAKS   | 19587 | >TP53-S121F LHSGTAKF   | 164  | 19423 |
| >TP53-S121F LHSGTAKS   | 3281  | >TP53-S121F LHSGTAKF   | 38   | 3243  |
| >TP53-S121F FLHSGTAKSV | 122   | >TP53-S121F FLHSGTAKFV | 62   | 60    |
| >TP53-S121F FLHSGTAKSV | 1619  | >TP53-S121F FLHSGTAKFV | 229  | 1390  |
| >TP53-S121F FLHSGTAKS  | 179   | >TP53-S121F FLHSGTAKF  | 122  | 57    |
| >TP53-S121F FLHSGTAKSV | 13    | >TP53-S121F FLHSGTAKFV | 11   | 2     |
| >TP53-S121F FLHSGTAKSV | 413   | >TP53-S121F FLHSGTAKFV | 156  | 257   |
| >TP53-S121F FLHSGTAKS  | 26    | >TP53-S121F FLHSGTAKF  | 77   | 51    |
| >TP53-S121F FLHSGTAKSV | 11    | >TP53-S121F FLHSGTAKFV | 13   | 2     |
| >TP53-S121F FLHSGTAKSV | 27    | >TP53-S121F FLHSGTAKFV | 60   | 33    |
| >TP53-S121F FLHSGTAKSV | 504   | >TP53-S121F FLHSGTAKFV | 398  | 106   |
| >TP53-S121F FLHSGTAKSV | 2478  | >TP53-S121F FLHSGTAKFV | 483  | 1995  |
| >TP53-S121F FLHSGTAKS  | 188   | >TP53-S121F FLHSGTAKF  | 138  | 50    |
| >TP53-S121F FLHSGTAKSV | 2     | >TP53-S121F FLHSGTAKFV | 2    | 0     |
| >TP53-S121F FLHSGTAKSV | 116   | >TP53-S121F FLHSGTAKFV | 37   | 79    |
| >TP53-S121F FLHSGTAKSV | 5     | >TP53-S121F FLHSGTAKFV | 4    | 1     |
| >TP53-S121F FLHSGTAKSV | 1427  | >TP53-S121F FLHSGTAKFV | 447  | 980   |
| >TP53-S121F FLHSGTAKSV | 7     | >TP53-S121F FLHSGTAKFV | 5    | 2     |
| >TP53-S121F FLHSGTAKSV | 920   | >TP53-S121F FLHSGTAKFV | 205  | 715   |
| >TP53-S121F FLHSGTAKSV | 7     | >TP53-S121F FLHSGTAKFV | 4    | 3     |
| >TP53-S121F FLHSGTAKS  | 31    | >TP53-S121F FLHSGTAKF  | 43   | 12    |
| >TP53-S121F FLHSGTAKSV | 2     | >TP53-S121F FLHSGTAKFV | 2    | 0     |
| >TP53-S121F FLHSGTAKSV | 13    | >TP53-S121F FLHSGTAKFV | 7    | 6     |
| >TP53-S121F FLHSGTAKS  | 21078 | >TP53-S121F FLHSGTAKF  | 206  | 20872 |
| >TP53-S121F FLHSGTAKS  | 11409 | >TP53-S121F FLHSGTAKF  | 213  | 11196 |
| >TP53-S121F FLHSGTAKS  | 12093 | >TP53-S121F FLHSGTAKF  | 61   | 12032 |
| >TP53-S121F FLHSGTAKS  | 2842  | >TP53-S121F FLHSGTAKF  | 16   | 2826  |
| >TP53-S121F FLHSGTAKSV | 283   | >TP53-S121F FLHSGTAKFV | 729  | 446   |
| >TP53-S121F FLHSGTAKS  | 13116 | >TP53-S121F FLHSGTAKF  | 15   | 13101 |
| >TP53-S121F FLHSGTAKSV | 261   | >TP53-S121F FLHSGTAKFV | 1117 | 856   |
| >TP53-S121F FLHSGTAKS  | 23329 | >TP53-S121F FLHSGTAKF  | 181  | 23148 |
| >TP53-S121F GFLHSGTAKS | 38557 | >TP53-S121F GFLHSGTAKF | 330  | 38227 |
| >TP53-S121F GFLHSGTAKS | 11701 | >TP53-S121F GFLHSGTAKF | 33   | 11668 |

|                         |       |                          |       |       |
|-------------------------|-------|--------------------------|-------|-------|
| >TP53-S121F GFLHSGTAKS  | 17120 | >TP53-S121F GFLHSGTAKF   | 164   | 16956 |
| >TP53-S121F GFLHSGTAKS  | 21729 | >TP53-S121F GFLHSGTAKF   | 380   | 21349 |
| >TP53-S127C SPALNKMFC   | 432   | >TP53-S127C CPALNKMFC    | 5954  | 5522  |
| >TP53-S127C SPALNKMFC   | 100   | >TP53-S127C CPALNKMFC    | 600   | 500   |
| >TP53-S127C SPALNKMFC   | 41    | >TP53-S127C CPALNKMFC    | 127   | 86    |
| >TP53-S127C SPALNKMFC   | 372   | >TP53-S127C CPALNKMFC    | 1075  | 703   |
| >TP53-S127C SPALNKMFC   | 326   | >TP53-S127C CPALNKMFC    | 126   | 200   |
| >TP53-S127C SPALNKMFC   | 1312  | >TP53-S127C CPALNKMFC    | 250   | 1062  |
| >TP53-S127C SPALNKMFC   | 1556  | >TP53-S127C CPALNKMFC    | 387   | 1169  |
| >TP53-S127C SPALNKMFC   | 2488  | >TP53-S127C CPALNKMFC    | 465   | 2023  |
| >TP53-S127C SPALNKMFC   | 450   | >TP53-S127C CPALNKMFC    | 1301  | 851   |
| >TP53-S127C SPALNKMFC   | 677   | >TP53-S127C CPALNKMFC    | 304   | 373   |
| >TP53-S127C SPALNKMFC   | 384   | >TP53-S127C YCPALNKMFC   | 704   | 320   |
| >TP53-S127C YSPALNKMFC  | 104   | >TP53-S127C YCPALNKMFC   | 1271  | 1167  |
| >TP53-S127C YSPALNKMFC  | 43    | >TP53-S127C YCPALNKMFC   | 17985 | 17942 |
| >TP53-S127C YSPALNKMFC  | 40    | >TP53-S127C YCPALNKMFC   | 8854  | 8814  |
| >TP53-S127C YSPALNKMFC  | 3     | >TP53-S127C YCPALNKMFC   | 126   | 123   |
| >TP53-S127C YSPALNKMFC  | 22    | >TP53-S127C YCPALNKMFC   | 3353  | 3331  |
| >TP53-S127C YSPALNKMFC  | 124   | >TP53-S127C YCPALNKMFC   | 12413 | 12289 |
| >TP53-S127C YSPALNKMFC  | 67    | >TP53-S127C YCPALNKMFC   | 4216  | 4149  |
| >TP53-S127C YSPALNKMFC  | 103   | >TP53-S127C YCPALNKMFC   | 704   | 601   |
| >TP53-S127C TYSPALNKMFC | 136   | >TP53-S127C TYCPALNKMFC  | 73    | 63    |
| >TP53-S127C TYSPALNKMFC | 220   | >TP53-S127C TYCPALNKMFC  | 258   | 38    |
| >TP53-S127C TYSPALNKMFC | 179   | >TP53-S127C TYCPALNKMFC  | 159   | 20    |
| >TP53-S127C TYSPALNKMFC | 64    | >TP53-S127C TYCPALNKMFC  | 82    | 18    |
| >TP53-S127C TYSPALNKMFC | 27    | >TP53-S127C TYCPALNKMFC  | 22    | 5     |
| >TP53-S127C TYSPALNKMFC | 5     | >TP53-S127C TYCPALNKMFC  | 5     | 0     |
| >TP53-S127C TYSPALNKMFC | 222   | >TP53-S127C TYCPALNKMFC  | 279   | 57    |
| >TP53-S127C TYSPALNKMFC | 674   | >TP53-S127C TYCPALNKMFC  | 394   | 280   |
| >TP53-S127C TYSPALNKMFC | 439   | >TP53-S127C TYCPALNKMFC  | 1097  | 658   |
| >TP53-S127C TYSPALNKMFC | 30    | >TP53-S127C CTYCPALNKMFC | 36    | 6     |
| >TP53-S127C TYSPALNKMFC | 11    | >TP53-S127C CTYCPALNKMFC | 14    | 3     |
| >TP53-S127C TYSPALNKMFC | 343   | >TP53-S127C CTYCPALNKMFC | 623   | 280   |
| >TP53-S127C TYSPALNKMFC | 63    | >TP53-S127C CTYCPALNKMFC | 137   | 74    |
| >TP53-S127C TYSPALNKMFC | 380   | >TP53-S127C CTYCPALNKMFC | 1024  | 644   |
| >TP53-S127C TYSPALNKMFC | 246   | >TP53-S127C CTYCPALNKMFC | 107   | 139   |
| >TP53-S127C TYSPALNKMFC | 215   | >TP53-S127C CTYCPALNKMFC | 212   | 3     |
| >TP53-S127C TYSPALNKMFC | 30    | >TP53-S127C CTYCPALNKMFC | 52    | 22    |
| >TP53-S127C TYSPALNKMFC | 488   | >TP53-S127C CTYCPALNKMFC | 362   | 126   |
| >TP53-S127C TYSPALNKMFC | 23    | >TP53-S127C CTYCPALNKMFC | 38    | 15    |
| >TP53-S127C TYSPALNKMFC | 24    | >TP53-S127C CTYCPALNKMFC | 27    | 3     |
| >TP53-S127C TYSPALNKMFC | 5     | >TP53-S127C CTYCPALNKMFC | 5     | 0     |
| >TP53-S127C TYSPALNKMFC | 76    | >TP53-S127C CTYCPALNKMFC | 357   | 281   |

|                        |       |                        |      |       |
|------------------------|-------|------------------------|------|-------|
| >TP53-S127C CTYSPALNKM | 146   | >TP53-S127C CTYCPALNKM | 561  | 415   |
| >TP53-S127C CTYSPALNKM | 30    | >TP53-S127C CTYCPALNKM | 53   | 23    |
| >TP53-S127C CTYSPALNKM | 13    | >TP53-S127C CTYCPALNKM | 21   | 8     |
| >TP53-S127C CTYSPALNK  | 572   | >TP53-S127C CTYCPALNK  | 404  | 168   |
| >TP53-S127C CTYSPALNKM | 358   | >TP53-S127C CTYCPALNKM | 428  | 70    |
| >TP53-S127C TCTYSPALNK | 453   | >TP53-S127C TCTYCPALNK | 260  | 193   |
| >TP53-S127C VTCTYSPA   | 415   | >TP53-S127C VTCTYCPA   | 606  | 191   |
| >TP53-S127C VTCTYSPAL  | 397   | >TP53-S127C VTCTYCPAL  | 567  | 170   |
| >TP53-S127C VTCTYSPALN | 80    | >TP53-S127C VTCTYCPALN | 118  | 38    |
| >TP53-S127C VTCTYSPALN | 14    | >TP53-S127C VTCTYCPALN | 18   | 4     |
| >TP53-S127C VTCTYSPALN | 146   | >TP53-S127C VTCTYCPALN | 433  | 287   |
| >TP53-S127C VTCTYSPALN | 490   | >TP53-S127C VTCTYCPALN | 397  | 93    |
| >TP53-S127C VTCTYSPAL  | 12    | >TP53-S127C VTCTYCPAL  | 47   | 35    |
| >TP53-S127C VTCTYSPAL  | 66    | >TP53-S127C VTCTYCPAL  | 150  | 84    |
| >TP53-S127C SVTCTYSPA  | 118   | >TP53-S127C SVTCTYCPA  | 550  | 432   |
| >TP53-S127C SVTCTYSPA  | 468   | >TP53-S127C SVTCTYCPA  | 311  | 157   |
| >TP53-S127C SVTCTYSPAL | 268   | >TP53-S127C SVTCTYCPAL | 242  | 26    |
| >TP53-S127C SVTCTYSPA  | 241   | >TP53-S127C SVTCTYCPA  | 96   | 145   |
| >TP53-S127C SVTCTYSPA  | 45    | >TP53-S127C SVTCTYCPA  | 74   | 29    |
| >TP53-S127C SVTCTYSPA  | 583   | >TP53-S127C SVTCTYCPA  | 340  | 243   |
| >TP53-S127C SVTCTYSPAL | 149   | >TP53-S127C SVTCTYCPAL | 258  | 109   |
| >TP53-S127C KSVTCTYSPA | 396   | >TP53-S127C KSVTCTYCPA | 647  | 251   |
| >TP53-S127C KSVTCTYSPA | 149   | >TP53-S127C KSVTCTYCPA | 118  | 31    |
| >TP53-S127C KSVTCTYSPA | 488   | >TP53-S127C KSVTCTYCPA | 1828 | 1340  |
| >TP53-S127C KSVTCTYSPA | 107   | >TP53-S127C KSVTCTYCPA | 371  | 264   |
| >TP53-S127C KSVTCTYSPA | 349   | >TP53-S127C KSVTCTYCPA | 857  | 508   |
| >TP53-S127C KSVTCTYSPA | 89    | >TP53-S127C KSVTCTYCPA | 130  | 41    |
| >TP53-S127C KSVTCTYSPA | 6     | >TP53-S127C KSVTCTYCPA | 15   | 9     |
| >TP53-S127C KSVTCTYSPA | 113   | >TP53-S127C KSVTCTYCPA | 327  | 214   |
| >TP53-S127C KSVTCTYSPA | 198   | >TP53-S127C KSVTCTYCPA | 332  | 134   |
| >TP53-S127C AKSVTCTYSP | 483   | >TP53-S127C AKSVTCTYCP | 1274 | 791   |
| >TP53-S127C AKSVTCTYSP | 56    | >TP53-S127C AKSVTCTYCP | 99   | 43    |
| >TP53-S127F SPALNKMFC  | 432   | >TP53-S127F FPALNKMFC  | 518  | 86    |
| >TP53-S127F SPALNKMFC  | 100   | >TP53-S127F FPALNKMFC  | 90   | 10    |
| >TP53-S127F SPALNKMFC  | 41    | >TP53-S127F FPALNKMFC  | 40   | 1     |
| >TP53-S127F SPALNKMFC  | 372   | >TP53-S127F FPALNKMFC  | 171  | 201   |
| >TP53-S127F SPALNKMFC  | 326   | >TP53-S127F FPALNKMFC  | 21   | 305   |
| >TP53-S127F SPALNKMFC  | 6832  | >TP53-S127F FPALNKMFC  | 317  | 6515  |
| >TP53-S127F SPALNKMFC  | 2976  | >TP53-S127F FPALNKMFC  | 232  | 2744  |
| >TP53-S127F SPALNKMFC  | 1632  | >TP53-S127F FPALNKMFC  | 240  | 1392  |
| >TP53-S127F SPALNKMFC  | 1312  | >TP53-S127F FPALNKMFC  | 51   | 1261  |
| >TP53-S127F SPALNKMFC  | 1556  | >TP53-S127F FPALNKMFC  | 91   | 1465  |
| >TP53-S127F SPALNKMFC  | 10644 | >TP53-S127F FPALNKMFC  | 289  | 10355 |

|                        |       |                        |       |       |
|------------------------|-------|------------------------|-------|-------|
| >TP53-S127F SPALNKMFC  | 2488  | >TP53-S127F FPALNKMFC  | 67    | 2421  |
| >TP53-S127F SPALNKMF   | 450   | >TP53-S127F FPALNKMF   | 394   | 56    |
| >TP53-S127F SPALNKMF   | 677   | >TP53-S127F FPALNKMF   | 25    | 652   |
| >TP53-S127F SPALNKMFC  | 3117  | >TP53-S127F FPALNKMFC  | 178   | 2939  |
| >TP53-S127F YSPALNKMF  | 6359  | >TP53-S127F YFPALNKMF  | 251   | 6108  |
| >TP53-S127F YSPALNKMF  | 2228  | >TP53-S127F YFPALNKMF  | 152   | 2076  |
| >TP53-S127F YSPALNKM   | 12700 | >TP53-S127F YFPALNKM   | 83    | 12617 |
| >TP53-S127F YSPALNKMF  | 384   | >TP53-S127F YFPALNKMF  | 4     | 380   |
| >TP53-S127F YSPALNKMF  | 3198  | >TP53-S127F YFPALNKMF  | 347   | 2851  |
| >TP53-S127F YSPALNKMF  | 104   | >TP53-S127F YFPALNKMF  | 2843  | 2739  |
| >TP53-S127F YSPALNKMF  | 43    | >TP53-S127F YFPALNKMF  | 25348 | 25305 |
| >TP53-S127F YSPALNKM   | 40    | >TP53-S127F YFPALNKM   | 5371  | 5331  |
| >TP53-S127F YSPALNKMF  | 3     | >TP53-S127F YFPALNKMF  | 122   | 119   |
| >TP53-S127F YSPALNKMFC | 22    | >TP53-S127F YFPALNKMFC | 3511  | 3489  |
| >TP53-S127F YSPALNKMFC | 124   | >TP53-S127F YFPALNKMFC | 12294 | 12170 |
| >TP53-S127F YSPALNKM   | 67    | >TP53-S127F YFPALNKM   | 6933  | 6866  |
| >TP53-S127F YSPALNKMF  | 103   | >TP53-S127F YFPALNKMF  | 3268  | 3165  |
| >TP53-S127F GTAKSVTCTY | 16051 | >TP53-S127F GTAKSVTCTY | 218   | 15833 |
| >TP53-S127F GTAKSVTCTY | 19414 | >TP53-S127F GTAKSVTCTY | 101   | 19313 |
| >TP53-S127F GTAKSVTCTY | 11986 | >TP53-S127F GTAKSVTCTY | 8     | 11978 |
| >TP53-S127F GTAKSVTCTY | 18691 | >TP53-S127F GTAKSVTCTY | 234   | 18457 |
| >TP53-S127F GTAKSVTCTY | 7855  | >TP53-S127F GTAKSVTCTY | 175   | 7680  |
| >TP53-S127F GTAKSVTCTY | 672   | >TP53-S127F GTAKSVTCTY | 5     | 667   |
| >TP53-S127F TYSPALNKM  | 8408  | >TP53-S127F TYFPALNKM  | 393   | 8015  |
| >TP53-S127F TYSPALNKM  | 136   | >TP53-S127F TYFPALNKM  | 79    | 57    |
| >TP53-S127F TYSPALNK   | 220   | >TP53-S127F TYFPALNK   | 67    | 153   |
| >TP53-S127F TYSPALNK   | 1483  | >TP53-S127F TYFPALNK   | 294   | 1189  |
| >TP53-S127F TYSPALNKM  | 1702  | >TP53-S127F TYFPALNKM  | 260   | 1442  |
| >TP53-S127F TYSPALNKMF | 179   | >TP53-S127F TYFPALNKMF | 45    | 134   |
| >TP53-S127F TYSPALNKMF | 64    | >TP53-S127F TYFPALNKMF | 35    | 29    |
| >TP53-S127F TYSPALNKM  | 27    | >TP53-S127F TYFPALNKM  | 14    | 13    |
| >TP53-S127F TYSPALNKMF | 5     | >TP53-S127F TYFPALNKMF | 4     | 1     |
| >TP53-S127F TYSPALNKMF | 551   | >TP53-S127F TYFPALNKMF | 177   | 374   |
| >TP53-S127F TYSPALNKMF | 586   | >TP53-S127F TYFPALNKMF | 216   | 370   |
| >TP53-S127F TYSPALNK   | 222   | >TP53-S127F TYFPALNK   | 40    | 182   |
| >TP53-S127F TYSPALNK   | 1077  | >TP53-S127F TYFPALNK   | 205   | 872   |
| >TP53-S127F TYSPALNKMF | 1792  | >TP53-S127F TYFPALNKMF | 241   | 1551  |
| >TP53-S127F TYSPALNK   | 674   | >TP53-S127F TYFPALNK   | 113   | 561   |
| >TP53-S127F TYSPALNKMF | 439   | >TP53-S127F TYFPALNKMF | 324   | 115   |
| >TP53-S127F CTYSPALNK  | 30    | >TP53-S127F CTYFPALNK  | 32    | 2     |
| >TP53-S127F CTYSPALNK  | 11    | >TP53-S127F CTYFPALNK  | 11    | 0     |
| >TP53-S127F CTYSPALNKM | 343   | >TP53-S127F CTYFPALNKM | 842   | 499   |
| >TP53-S127F CTYSPALNKM | 63    | >TP53-S127F CTYFPALNKM | 128   | 65    |

|                        |      |                        |      |      |
|------------------------|------|------------------------|------|------|
| >TP53-S127F CTYSPALNKM | 380  | >TP53-S127F CTYFPALNKM | 859  | 479  |
| >TP53-S127F CTYSPALNKM | 246  | >TP53-S127F CTYFPALNKM | 1083 | 837  |
| >TP53-S127F CTYSPALNK  | 215  | >TP53-S127F CTYFPALNK  | 152  | 63   |
| >TP53-S127F CTYSPALNKM | 767  | >TP53-S127F CTYFPALNKM | 423  | 344  |
| >TP53-S127F CTYSPALNK  | 30   | >TP53-S127F CTYFPALNK  | 30   | 0    |
| >TP53-S127F CTYSPALNKM | 488  | >TP53-S127F CTYFPALNKM | 602  | 114  |
| >TP53-S127F CTYSPALNKM | 23   | >TP53-S127F CTYFPALNKM | 75   | 52   |
| >TP53-S127F CTYSPALNKM | 24   | >TP53-S127F CTYFPALNKM | 20   | 4    |
| >TP53-S127F CTYSPALNKM | 5    | >TP53-S127F CTYFPALNKM | 4    | 1    |
| >TP53-S127F CTYSPALNKM | 76   | >TP53-S127F CTYFPALNKM | 248  | 172  |
| >TP53-S127F CTYSPALNKM | 146  | >TP53-S127F CTYFPALNKM | 409  | 263  |
| >TP53-S127F CTYSPALNKM | 30   | >TP53-S127F CTYFPALNKM | 24   | 6    |
| >TP53-S127F CTYSPALNKM | 13   | >TP53-S127F CTYFPALNKM | 19   | 6    |
| >TP53-S127F CTYSPALNK  | 572  | >TP53-S127F CTYFPALNK  | 372  | 200  |
| >TP53-S127F CTYSPALNKM | 358  | >TP53-S127F CTYFPALNKM | 437  | 79   |
| >TP53-S127F TCTYSPALNK | 1144 | >TP53-S127F TCTYFPALNK | 363  | 781  |
| >TP53-S127F TCTYSPALNK | 807  | >TP53-S127F TCTYFPALNK | 409  | 398  |
| >TP53-S127F TCTYSPALNK | 453  | >TP53-S127F TCTYFPALNK | 284  | 169  |
| >TP53-S127F VTCTYSPA   | 415  | >TP53-S127F VTCTYFPA   | 871  | 456  |
| >TP53-S127F VTCTYSPAL  | 981  | >TP53-S127F VTCTYFPAL  | 207  | 774  |
| >TP53-S127F VTCTYSPA   | 1839 | >TP53-S127F VTCTYFPA   | 163  | 1676 |
| >TP53-S127F VTCTYSPAL  | 397  | >TP53-S127F VTCTYFPAL  | 39   | 358  |
| >TP53-S127F VTCTYSPALN | 80   | >TP53-S127F VTCTYFPALN | 75   | 5    |
| >TP53-S127F VTCTYSPALN | 14   | >TP53-S127F VTCTYFPALN | 11   | 3    |
| >TP53-S127F VTCTYSPAL  | 720  | >TP53-S127F VTCTYFPAL  | 137  | 583  |
| >TP53-S127F VTCTYSPALN | 146  | >TP53-S127F VTCTYFPALN | 188  | 42   |
| >TP53-S127F VTCTYSPALN | 490  | >TP53-S127F VTCTYFPALN | 371  | 119  |
| >TP53-S127F VTCTYSPAL  | 12   | >TP53-S127F VTCTYFPAL  | 53   | 41   |
| >TP53-S127F VTCTYSPAL  | 66   | >TP53-S127F VTCTYFPAL  | 35   | 31   |
| >TP53-S127F VTCTYSPALN | 859  | >TP53-S127F VTCTYFPALN | 342  | 517  |
| >TP53-S127F SVTCTYSPA  | 118  | >TP53-S127F SVTCTYFPA  | 422  | 304  |
| >TP53-S127F SVTCTYSPA  | 468  | >TP53-S127F SVTCTYFPA  | 53   | 415  |
| >TP53-S127F SVTCTYSPAL | 268  | >TP53-S127F SVTCTYFPAL | 87   | 181  |
| >TP53-S127F SVTCTYSPA  | 241  | >TP53-S127F SVTCTYFPA  | 155  | 86   |
| >TP53-S127F SVTCTYSPA  | 45   | >TP53-S127F SVTCTYFPA  | 15   | 30   |
| >TP53-S127F SVTCTYSPAL | 1417 | >TP53-S127F SVTCTYFPAL | 371  | 1046 |
| >TP53-S127F SVTCTYSPA  | 583  | >TP53-S127F SVTCTYFPA  | 63   | 520  |
| >TP53-S127F SVTCTYSPAL | 149  | >TP53-S127F SVTCTYFPAL | 66   | 83   |
| >TP53-S127F KSVTCTYSPA | 710  | >TP53-S127F KSVTCTYFPA | 304  | 406  |
| >TP53-S127F KSVTCTYSPA | 1687 | >TP53-S127F KSVTCTYFPA | 477  | 1210 |
| >TP53-S127F KSVTCTYSPA | 396  | >TP53-S127F KSVTCTYFPA | 125  | 271  |
| >TP53-S127F KSVTCTYSPA | 149  | >TP53-S127F KSVTCTYFPA | 96   | 53   |
| >TP53-S127F KSVTCTYSPA | 488  | >TP53-S127F KSVTCTYFPA | 566  | 78   |



|                         |       |                         |       |       |
|-------------------------|-------|-------------------------|-------|-------|
| >TP53-S127F KSVTCTYS    | 16140 | >TP53-S127F KSVTCTYF    | 296   | 15844 |
| >TP53-S127F KSVTCTYSPAI | 107   | >TP53-S127F KSVTCTYFPAI | 266   | 159   |
| >TP53-S127F KSVTCTYS    | 6519  | >TP53-S127F KSVTCTYF    | 15    | 6504  |
| >TP53-S127F KSVTCTYSPA  | 349   | >TP53-S127F KSVTCTYFPA  | 975   | 626   |
| >TP53-S127F KSVTCTYSPAI | 89    | >TP53-S127F KSVTCTYFPAI | 86    | 3     |
| >TP53-S127F KSVTCTYS    | 4057  | >TP53-S127F KSVTCTYF    | 4     | 4053  |
| >TP53-S127F KSVTCTYSPAI | 6     | >TP53-S127F KSVTCTYFPAI | 11    | 5     |
| >TP53-S127F KSVTCTYS    | 8759  | >TP53-S127F KSVTCTYF    | 118   | 8641  |
| >TP53-S127F KSVTCTYS    | 7684  | >TP53-S127F KSVTCTYF    | 12    | 7672  |
| >TP53-S127F KSVTCTYSPAI | 113   | >TP53-S127F KSVTCTYFPAI | 149   | 36    |
| >TP53-S127F KSVTCTYSPAI | 198   | >TP53-S127F KSVTCTYFPAI | 85    | 113   |
| >TP53-S127F KSVTCTYS    | 20263 | >TP53-S127F KSVTCTYF    | 273   | 19990 |
| >TP53-S127F AKSVTCTYS   | 640   | >TP53-S127F AKSVTCTYF   | 4     | 636   |
| >TP53-S127F AKSVTCTYSP  | 483   | >TP53-S127F AKSVTCTYFP  | 1281  | 798   |
| >TP53-S127F AKSVTCTYSP, | 56    | >TP53-S127F AKSVTCTYFP, | 110   | 54    |
| >TP53-S127F AKSVTCTYSP, | 1921  | >TP53-S127F AKSVTCTYFP, | 442   | 1479  |
| >TP53-S127F TAKSVTCTYS  | 17440 | >TP53-S127F TAKSVTCTYF  | 269   | 17171 |
| >TP53-S127F TAKSVTCTYS  | 17000 | >TP53-S127F TAKSVTCTYF  | 93    | 16907 |
| >TP53-S127F TAKSVTCTYS  | 25471 | >TP53-S127F TAKSVTCTYF  | 308   | 25163 |
| >TP53-S127P SPALNKMFC   | 432   | >TP53-S127P PPALNKMFC   | 2000  | 1568  |
| >TP53-S127P SPALNKMF    | 100   | >TP53-S127P PPALNKMF    | 2519  | 2419  |
| >TP53-S127P SPALNKMFC   | 41    | >TP53-S127P PPALNKMFC   | 551   | 510   |
| >TP53-S127P SPALNKMFC   | 372   | >TP53-S127P PPALNKMFC   | 2868  | 2496  |
| >TP53-S127P SPALNKMF    | 326   | >TP53-S127P PPALNKMF    | 1647  | 1321  |
| >TP53-S127P SPALNKMF    | 450   | >TP53-S127P PPALNKMF    | 3551  | 3101  |
| >TP53-S127P YSPALNKMF   | 1122  | >TP53-S127P YPPALNKMF   | 358   | 764   |
| >TP53-S127P YSPALNKM    | 16987 | >TP53-S127P YPPALNKM    | 35    | 16952 |
| >TP53-S127P YSPALNKMF   | 30125 | >TP53-S127P YPPALNKMF   | 286   | 29839 |
| >TP53-S127P YSPALNKMF   | 384   | >TP53-S127P YPPALNKMF   | 3115  | 2731  |
| >TP53-S127P YSPALNKM    | 21798 | >TP53-S127P YPPALNKM    | 328   | 21470 |
| >TP53-S127P YSPALNKMF   | 104   | >TP53-S127P YPPALNKMF   | 1421  | 1317  |
| >TP53-S127P YSPALNKMF   | 43    | >TP53-S127P YPPALNKMF   | 19516 | 19473 |
| >TP53-S127P YSPALNKM    | 3893  | >TP53-S127P YPPALNKM    | 108   | 3785  |
| >TP53-S127P YSPALNKMF   | 4736  | >TP53-S127P YPPALNKMF   | 141   | 4595  |
| >TP53-S127P YSPALNKM    | 40    | >TP53-S127P YPPALNKM    | 811   | 771   |
| >TP53-S127P YSPALNKMF   | 3     | >TP53-S127P YPPALNKMF   | 54    | 51    |
| >TP53-S127P YSPALNKMFC  | 22    | >TP53-S127P YPPALNKMFC  | 1797  | 1775  |
| >TP53-S127P YSPALNKMFC  | 124   | >TP53-S127P YPPALNKMFC  | 8074  | 7950  |
| >TP53-S127P YSPALNKM    | 67    | >TP53-S127P YPPALNKM    | 5938  | 5871  |
| >TP53-S127P YSPALNKMF   | 103   | >TP53-S127P YPPALNKMF   | 2792  | 2689  |
| >TP53-S127P YSPALNKMF   | 16796 | >TP53-S127P YPPALNKMF   | 400   | 16396 |
| >TP53-S127P TYSPALNKM   | 136   | >TP53-S127P TYPPALNKM   | 4268  | 4132  |
| >TP53-S127P TYSPALNK    | 220   | >TP53-S127P TYPPALNK    | 2405  | 2185  |

|                       |       |                       |      |       |
|-----------------------|-------|-----------------------|------|-------|
| >TP53-S127PTYSPALNKMF | 179   | >TP53-S127PTYPPALNKMI | 99   | 80    |
| >TP53-S127PTYSPALNKM  | 1122  | >TP53-S127PTYPPALNKM  | 414  | 708   |
| >TP53-S127PTYSPALNKMF | 64    | >TP53-S127PTYPPALNKMI | 34   | 30    |
| >TP53-S127PTYSPALNK   | 1599  | >TP53-S127PTYPPALNK   | 360  | 1239  |
| >TP53-S127PTYSPALNKM  | 27    | >TP53-S127PTYPPALNKM  | 9    | 18    |
| >TP53-S127PTYSPALNKMF | 5     | >TP53-S127PTYPPALNKMI | 4    | 1     |
| >TP53-S127PTYSPALNKMF | 551   | >TP53-S127PTYPPALNKMI | 82   | 469   |
| >TP53-S127PTYSPALNK   | 222   | >TP53-S127PTYPPALNK   | 2071 | 1849  |
| >TP53-S127PTYSPALNKM  | 11313 | >TP53-S127PTYPPALNKM  | 46   | 11267 |
| >TP53-S127PTYSPALNKMF | 13100 | >TP53-S127PTYPPALNKMI | 151  | 12949 |
| >TP53-S127PTYSPALNK   | 674   | >TP53-S127PTYPPALNK   | 409  | 265   |
| >TP53-S127PTYSPALNKMF | 439   | >TP53-S127PTYPPALNKMI | 1132 | 693   |
| >TP53-S127PCTYSPALNK  | 30    | >TP53-S127PCTYPPALNK  | 32   | 2     |
| >TP53-S127PCTYSPALNK  | 11    | >TP53-S127PCTYPPALNK  | 11   | 0     |
| >TP53-S127PCTYSPALNKM | 343   | >TP53-S127PCTYPPALNKM | 179  | 164   |
| >TP53-S127PCTYSPALNKM | 63    | >TP53-S127PCTYPPALNKM | 178  | 115   |
| >TP53-S127PCTYSPALNKM | 380   | >TP53-S127PCTYPPALNKM | 1096 | 716   |
| >TP53-S127PCTYSPALNKM | 246   | >TP53-S127PCTYPPALNKM | 673  | 427   |
| >TP53-S127PCTYSPALNK  | 215   | >TP53-S127PCTYPPALNK  | 112  | 103   |
| >TP53-S127PCTYSPALNK  | 30    | >TP53-S127PCTYPPALNK  | 47   | 17    |
| >TP53-S127PCTYSPALNKM | 488   | >TP53-S127PCTYPPALNKM | 589  | 101   |
| >TP53-S127PCTYSPALNKM | 23    | >TP53-S127PCTYPPALNKM | 32   | 9     |
| >TP53-S127PCTYSPALNKM | 24    | >TP53-S127PCTYPPALNKM | 14   | 10    |
| >TP53-S127PCTYSPALNKM | 5     | >TP53-S127PCTYPPALNKM | 4    | 1     |
| >TP53-S127PCTYSPALNKM | 1345  | >TP53-S127PCTYPPALNKM | 441  | 904   |
| >TP53-S127PCTYSPALNKM | 627   | >TP53-S127PCTYPPALNKM | 331  | 296   |
| >TP53-S127PCTYSPALNKM | 76    | >TP53-S127PCTYPPALNKM | 66   | 10    |
| >TP53-S127PCTYSPALNKM | 146   | >TP53-S127PCTYPPALNKM | 121  | 25    |
| >TP53-S127PCTYSPALNKM | 30    | >TP53-S127PCTYPPALNKM | 36   | 6     |
| >TP53-S127PCTYSPALNKM | 13    | >TP53-S127PCTYPPALNKM | 22   | 9     |
| >TP53-S127PCTYSPALNK  | 572   | >TP53-S127PCTYPPALNK  | 442  | 130   |
| >TP53-S127PCTYSPALNKM | 358   | >TP53-S127PCTYPPALNKM | 180  | 178   |
| >TP53-S127PTCTYSPALNK | 453   | >TP53-S127PTCTYPPALNK | 279  | 174   |
| >TP53-S127PVTCTYSPA   | 415   | >TP53-S127PVTCTYPPA   | 922  | 507   |
| >TP53-S127PVTCTYSPAL  | 397   | >TP53-S127PVTCTYPPAL  | 2407 | 2010  |
| >TP53-S127PVTCTYSPAL  | 766   | >TP53-S127PVTCTYPPAL  | 293  | 473   |
| >TP53-S127PVTCTYSPALN | 80    | >TP53-S127PVTCTYPPALN | 96   | 16    |
| >TP53-S127PVTCTYSPALN | 14    | >TP53-S127PVTCTYPPALN | 14   | 0     |
| >TP53-S127PVTCTYSPAL  | 720   | >TP53-S127PVTCTYPPAL  | 466  | 254   |
| >TP53-S127PVTCTYSPALN | 146   | >TP53-S127PVTCTYPPALN | 190  | 44    |
| >TP53-S127PVTCTYSPALN | 490   | >TP53-S127PVTCTYPPALN | 785  | 295   |
| >TP53-S127PVTCTYSPAL  | 12    | >TP53-S127PVTCTYPPAL  | 25   | 13    |
| >TP53-S127PVTCTYSPAL  | 66    | >TP53-S127PVTCTYPPAL  | 274  | 208   |

|                        |       |                        |       |       |
|------------------------|-------|------------------------|-------|-------|
| >TP53-S127P SVTCTYSPA  | 118   | >TP53-S127P SVTCTYPPA  | 756   | 638   |
| >TP53-S127P SVTCTYSPA  | 468   | >TP53-S127P SVTCTYPPA  | 153   | 315   |
| >TP53-S127P SVTCTYSPAL | 268   | >TP53-S127P SVTCTYPPAL | 306   | 38    |
| >TP53-S127P SVTCTYSPA  | 241   | >TP53-S127P SVTCTYPPA  | 45    | 196   |
| >TP53-S127P SVTCTYSPA  | 45    | >TP53-S127P SVTCTYPPA  | 425   | 380   |
| >TP53-S127P SVTCTYSPA  | 583   | >TP53-S127P SVTCTYPPA  | 102   | 481   |
| >TP53-S127P SVTCTYSPAL | 149   | >TP53-S127P SVTCTYPPAL | 130   | 19    |
| >TP53-S127P KSVTCTYSPA | 396   | >TP53-S127P KSVTCTYPPA | 888   | 492   |
| >TP53-S127P KSVTCTYSPA | 149   | >TP53-S127P KSVTCTYPPA | 57    | 92    |
| >TP53-S127P KSVTCTYSPA | 488   | >TP53-S127P KSVTCTYPPA | 669   | 181   |
| >TP53-S127P KSVTCTYSPA | 107   | >TP53-S127P KSVTCTYPPA | 121   | 14    |
| >TP53-S127P KSVTCTYSPA | 349   | >TP53-S127P KSVTCTYPPA | 691   | 342   |
| >TP53-S127P KSVTCTYSPA | 89    | >TP53-S127P KSVTCTYPPA | 89    | 0     |
| >TP53-S127P KSVTCTYSPA | 6     | >TP53-S127P KSVTCTYPPA | 8     | 2     |
| >TP53-S127P KSVTCTYSPA | 113   | >TP53-S127P KSVTCTYPPA | 115   | 2     |
| >TP53-S127P KSVTCTYSPA | 198   | >TP53-S127P KSVTCTYPPA | 382   | 184   |
| >TP53-S127P AKSVTCTYSP | 483   | >TP53-S127P AKSVTCTYPP | 459   | 24    |
| >TP53-S127P AKSVTCTYSP | 56    | >TP53-S127P AKSVTCTYPP | 94    | 38    |
| >TP53-S127Y SPALNKMFC  | 432   | >TP53-S127Y YPALNKMFC  | 627   | 195   |
| >TP53-S127Y SPALNKMFC  | 100   | >TP53-S127Y YPALNKMFC  | 54    | 46    |
| >TP53-S127Y SPALNKMFC  | 41    | >TP53-S127Y YPALNKMFC  | 29    | 12    |
| >TP53-S127Y SPALNKMFC  | 372   | >TP53-S127Y YPALNKMFC  | 172   | 200   |
| >TP53-S127Y SPALNKMFC  | 326   | >TP53-S127Y YPALNKMFC  | 20    | 306   |
| >TP53-S127Y SPALNKMFC  | 2976  | >TP53-S127Y YPALNKMFC  | 214   | 2762  |
| >TP53-S127Y SPALNKMFC  | 1632  | >TP53-S127Y YPALNKMFC  | 221   | 1411  |
| >TP53-S127Y SPALNKMFC  | 1312  | >TP53-S127Y YPALNKMFC  | 199   | 1113  |
| >TP53-S127Y SPALNKMFC  | 1556  | >TP53-S127Y YPALNKMFC  | 253   | 1303  |
| >TP53-S127Y SPALNKMFC  | 2488  | >TP53-S127Y YPALNKMFC  | 460   | 2028  |
| >TP53-S127Y SPALNKMFC  | 450   | >TP53-S127Y YPALNKMFC  | 78    | 372   |
| >TP53-S127Y SPALNKMFC  | 677   | >TP53-S127Y YPALNKMFC  | 105   | 572   |
| >TP53-S127Y YSPALNKMFC | 6359  | >TP53-S127Y YYPALNKMFC | 153   | 6206  |
| >TP53-S127Y YSPALNKMFC | 17095 | >TP53-S127Y YYPALNKMFC | 411   | 16684 |
| >TP53-S127Y YSPALNKMFC | 2228  | >TP53-S127Y YYPALNKMFC | 42    | 2186  |
| >TP53-S127Y YSPALNKMFC | 12700 | >TP53-S127Y YYPALNKMFC | 7     | 12693 |
| >TP53-S127Y YSPALNKMFC | 384   | >TP53-S127Y YYPALNKMFC | 3     | 381   |
| >TP53-S127Y YSPALNKMFC | 14735 | >TP53-S127Y YYPALNKMFC | 34    | 14701 |
| >TP53-S127Y YSPALNKMFC | 104   | >TP53-S127Y YYPALNKMFC | 1914  | 1810  |
| >TP53-S127Y YSPALNKMFC | 43    | >TP53-S127Y YYPALNKMFC | 23290 | 23247 |
| >TP53-S127Y YSPALNKMFC | 40    | >TP53-S127Y YYPALNKMFC | 1345  | 1305  |
| >TP53-S127Y YSPALNKMFC | 3     | >TP53-S127Y YYPALNKMFC | 128   | 125   |
| >TP53-S127Y YSPALNKMFC | 22    | >TP53-S127Y YYPALNKMFC | 3647  | 3625  |
| >TP53-S127Y YSPALNKMFC | 124   | >TP53-S127Y YYPALNKMFC | 13706 | 13582 |
| >TP53-S127Y YSPALNKMFC | 67    | >TP53-S127Y YYPALNKMFC | 8422  | 8355  |

|                        |       |                        |      |       |
|------------------------|-------|------------------------|------|-------|
| >TP53-S127Y YSPALNKMF  | 103   | >TP53-S127Y YYPALNKMF  | 4650 | 4547  |
| >TP53-S127Y GTAKSVTCTY | 15865 | >TP53-S127Y GTAKSVTCTY | 145  | 15720 |
| >TP53-S127Y GTAKSVTCTY | 30248 | >TP53-S127Y GTAKSVTCTY | 499  | 29749 |
| >TP53-S127Y GTAKSVTCTY | 19950 | >TP53-S127Y GTAKSVTCTY | 84   | 19866 |
| >TP53-S127Y GTAKSVTCTY | 24729 | >TP53-S127Y GTAKSVTCTY | 103  | 24626 |
| >TP53-S127Y GTAKSVTCTY | 7872  | >TP53-S127Y GTAKSVTCTY | 326  | 7546  |
| >TP53-S127Y GTAKSVTCTY | 16051 | >TP53-S127Y GTAKSVTCTY | 182  | 15869 |
| >TP53-S127Y GTAKSVTCTY | 11986 | >TP53-S127Y GTAKSVTCTY | 11   | 11975 |
| >TP53-S127Y GTAKSVTCTY | 672   | >TP53-S127Y GTAKSVTCTY | 4    | 668   |
| >TP53-S127Y GTAKSVTCTY | 34487 | >TP53-S127Y GTAKSVTCTY | 227  | 34260 |
| >TP53-S127Y TYSPALNKM  | 8408  | >TP53-S127Y TYYPALNKM  | 152  | 8256  |
| >TP53-S127Y TYSPALNKM  | 136   | >TP53-S127Y TYYPALNKM  | 187  | 51    |
| >TP53-S127Y TYSPALNK   | 3681  | >TP53-S127Y TYYPALNK   | 496  | 3185  |
| >TP53-S127Y TYSPALNK   | 220   | >TP53-S127Y TYYPALNK   | 83   | 137   |
| >TP53-S127Y TYSPALNK   | 1483  | >TP53-S127Y TYYPALNK   | 154  | 1329  |
| >TP53-S127Y TYSPALNKM  | 1702  | >TP53-S127Y TYYPALNKM  | 119  | 1583  |
| >TP53-S127Y TYSPALNKMF | 179   | >TP53-S127Y TYYPALNKMF | 77   | 102   |
| >TP53-S127Y TYSPALNKMF | 64    | >TP53-S127Y TYYPALNKMF | 55   | 9     |
| >TP53-S127Y TYSPALNKM  | 27    | >TP53-S127Y TYYPALNKM  | 20   | 7     |
| >TP53-S127Y TYSPALNKMF | 5     | >TP53-S127Y TYYPALNKMF | 5    | 0     |
| >TP53-S127Y TYSPALNKMF | 551   | >TP53-S127Y TYYPALNKMF | 278  | 273   |
| >TP53-S127Y TYSPALNKMF | 586   | >TP53-S127Y TYYPALNKMF | 471  | 115   |
| >TP53-S127Y TYSPALNK   | 222   | >TP53-S127Y TYYPALNK   | 90   | 132   |
| >TP53-S127Y TYSPALNK   | 1077  | >TP53-S127Y TYYPALNK   | 407  | 670   |
| >TP53-S127Y TYSPALNKMF | 1792  | >TP53-S127Y TYYPALNKMF | 308  | 1484  |
| >TP53-S127Y TYSPALNK   | 674   | >TP53-S127Y TYYPALNK   | 152  | 522   |
| >TP53-S127Y TYSPALNKMF | 439   | >TP53-S127Y TYYPALNKMF | 381  | 58    |
| >TP53-S127Y CTYSPALNK  | 30    | >TP53-S127Y CTYYPALNK  | 35   | 5     |
| >TP53-S127Y CTYSPALNK  | 11    | >TP53-S127Y CTYYPALNK  | 13   | 2     |
| >TP53-S127Y CTYSPALNKN | 343   | >TP53-S127Y CTYYPALNKN | 827  | 484   |
| >TP53-S127Y CTYSPALNKN | 63    | >TP53-S127Y CTYYPALNKN | 77   | 14    |
| >TP53-S127Y CTYSPALNKN | 380   | >TP53-S127Y CTYYPALNKN | 489  | 109   |
| >TP53-S127Y CTYSPALNKN | 246   | >TP53-S127Y CTYYPALNKN | 565  | 319   |
| >TP53-S127Y CTYSPALNK  | 215   | >TP53-S127Y CTYYPALNK  | 172  | 43    |
| >TP53-S127Y CTYSPALNKN | 767   | >TP53-S127Y CTYYPALNKN | 261  | 506   |
| >TP53-S127Y CTYSPALNK  | 30    | >TP53-S127Y CTYYPALNK  | 25   | 5     |
| >TP53-S127Y CTYSPALNKN | 488   | >TP53-S127Y CTYYPALNKN | 798  | 310   |
| >TP53-S127Y CTYSPALNKN | 23    | >TP53-S127Y CTYYPALNKN | 33   | 10    |
| >TP53-S127Y CTYSPALNKN | 24    | >TP53-S127Y CTYYPALNKN | 21   | 3     |
| >TP53-S127Y CTYSPALNKN | 5     | >TP53-S127Y CTYYPALNKN | 4    | 1     |
| >TP53-S127Y CTYSPALNKN | 76    | >TP53-S127Y CTYYPALNKN | 183  | 107   |
| >TP53-S127Y CTYSPALNKN | 146   | >TP53-S127Y CTYYPALNKN | 293  | 147   |
| >TP53-S127Y CTYSPALNKN | 30    | >TP53-S127Y CTYYPALNKN | 23   | 7     |

|                        |       |                         |     |       |
|------------------------|-------|-------------------------|-----|-------|
| >TP53-S127Y CTYSPALNKN | 13    | >TP53-S127Y CTYYPALNKN  | 18  | 5     |
| >TP53-S127Y CTYSPALNKN | 358   | >TP53-S127Y CTYYPALNKN  | 322 | 36    |
| >TP53-S127Y TCTYSPALNK | 1144  | >TP53-S127Y TCTYYPALNK  | 481 | 663   |
| >TP53-S127Y TCTYSPALNK | 453   | >TP53-S127Y TCTYYPALNK  | 415 | 38    |
| >TP53-S127Y VTCTYSPA   | 415   | >TP53-S127Y VTCTYYPAL   | 467 | 52    |
| >TP53-S127Y VTCTYSPAL  | 981   | >TP53-S127Y VTCTYYPAL   | 112 | 869   |
| >TP53-S127Y VTCTYSPAL  | 397   | >TP53-S127Y VTCTYYPAL   | 400 | 3     |
| >TP53-S127Y VTCTYSPALN | 80    | >TP53-S127Y VTCTYYPALN  | 103 | 23    |
| >TP53-S127Y VTCTYSPALN | 14    | >TP53-S127Y VTCTYYPALN  | 12  | 2     |
| >TP53-S127Y VTCTYSPAL  | 720   | >TP53-S127Y VTCTYYPAL   | 263 | 457   |
| >TP53-S127Y VTCTYSPALN | 146   | >TP53-S127Y VTCTYYPALN  | 143 | 3     |
| >TP53-S127Y VTCTYSPALN | 490   | >TP53-S127Y VTCTYYPALN  | 433 | 57    |
| >TP53-S127Y VTCTYSPAL  | 12    | >TP53-S127Y VTCTYYPAL   | 39  | 27    |
| >TP53-S127Y VTCTYSPAL  | 66    | >TP53-S127Y VTCTYYPAL   | 88  | 22    |
| >TP53-S127Y SVTCTYSPA  | 118   | >TP53-S127Y SVTCTYYPAL  | 418 | 300   |
| >TP53-S127Y SVTCTYSPA  | 468   | >TP53-S127Y SVTCTYYPAL  | 207 | 261   |
| >TP53-S127Y SVTCTYSPAL | 268   | >TP53-S127Y SVTCTYYPAL  | 225 | 43    |
| >TP53-S127Y SVTCTYSPA  | 241   | >TP53-S127Y SVTCTYYPAL  | 270 | 29    |
| >TP53-S127Y SVTCTYSPA  | 45    | >TP53-S127Y SVTCTYYPAL  | 11  | 34    |
| >TP53-S127Y SVTCTYSPA  | 583   | >TP53-S127Y SVTCTYYPAL  | 193 | 390   |
| >TP53-S127Y SVTCTYSPAL | 149   | >TP53-S127Y SVTCTYYPAL  | 120 | 29    |
| >TP53-S127Y KSVTCTYSPA | 710   | >TP53-S127Y KSVTCTYYPAL | 209 | 501   |
| >TP53-S127Y KSVTCTYSPA | 1687  | >TP53-S127Y KSVTCTYYPAL | 387 | 1300  |
| >TP53-S127Y KSVTCTYSPA | 396   | >TP53-S127Y KSVTCTYYPAL | 389 | 7     |
| >TP53-S127Y KSVTCTYS   | 17506 | >TP53-S127Y KSVTCTYY    | 259 | 17247 |
| >TP53-S127Y KSVTCTYS   | 27265 | >TP53-S127Y KSVTCTYY    | 248 | 27017 |
| >TP53-S127Y KSVTCTYS   | 20842 | >TP53-S127Y KSVTCTYY    | 140 | 20702 |
| >TP53-S127Y KSVTCTYSPA | 149   | >TP53-S127Y KSVTCTYYPAL | 144 | 5     |
| >TP53-S127Y KSVTCTYSPA | 488   | >TP53-S127Y KSVTCTYYPAL | 422 | 66    |
| >TP53-S127Y KSVTCTYS   | 7913  | >TP53-S127Y KSVTCTYY    | 17  | 7896  |
| >TP53-S127Y KSVTCTYSPA | 107   | >TP53-S127Y KSVTCTYYPAL | 403 | 296   |
| >TP53-S127Y KSVTCTYS   | 25896 | >TP53-S127Y KSVTCTYY    | 493 | 25403 |
| >TP53-S127Y KSVTCTYS   | 18077 | >TP53-S127Y KSVTCTYY    | 441 | 17636 |
| >TP53-S127Y KSVTCTYS   | 6519  | >TP53-S127Y KSVTCTYY    | 43  | 6476  |
| >TP53-S127Y KSVTCTYSPA | 349   | >TP53-S127Y KSVTCTYYPAL | 672 | 323   |
| >TP53-S127Y KSVTCTYSPA | 89    | >TP53-S127Y KSVTCTYYPAL | 94  | 5     |
| >TP53-S127Y KSVTCTYS   | 4057  | >TP53-S127Y KSVTCTYY    | 5   | 4052  |
| >TP53-S127Y KSVTCTYSPA | 6     | >TP53-S127Y KSVTCTYYPAL | 9   | 3     |
| >TP53-S127Y KSVTCTYS   | 8759  | >TP53-S127Y KSVTCTYY    | 164 | 8595  |
| >TP53-S127Y KSVTCTYS   | 7684  | >TP53-S127Y KSVTCTYY    | 18  | 7666  |
| >TP53-S127Y KSVTCTYSPA | 113   | >TP53-S127Y KSVTCTYYPAL | 92  | 21    |
| >TP53-S127Y KSVTCTYSPA | 198   | >TP53-S127Y KSVTCTYYPAL | 155 | 43    |
| >TP53-S127Y KSVTCTYS   | 20263 | >TP53-S127Y KSVTCTYY    | 325 | 19938 |

|                         |       |                         |      |       |
|-------------------------|-------|-------------------------|------|-------|
| >TP53-S127Y KSVTCTYS    | 35177 | >TP53-S127Y KSVTCTYY    | 348  | 34829 |
| >TP53-S127Y AKSVTCTYS   | 31395 | >TP53-S127Y AKSVTCTYY   | 370  | 31025 |
| >TP53-S127Y AKSVTCTYS   | 640   | >TP53-S127Y AKSVTCTYY   | 7    | 633   |
| >TP53-S127Y AKSVTCTYSP  | 483   | >TP53-S127Y AKSVTCTYYP  | 960  | 477   |
| >TP53-S127Y AKSVTCTYSP, | 56    | >TP53-S127Y AKSVTCTYYP, | 83   | 27    |
| >TP53-S127Y TAKSVTCTYS  | 28747 | >TP53-S127Y TAKSVTCTYY  | 222  | 28525 |
| >TP53-S127Y TAKSVTCTYS  | 21772 | >TP53-S127Y TAKSVTCTYY  | 127  | 21645 |
| >TP53-S127Y TAKSVTCTYS  | 18700 | >TP53-S127Y TAKSVTCTYY  | 173  | 18527 |
| >TP53-S127Y TAKSVTCTYS  | 17440 | >TP53-S127Y TAKSVTCTYY  | 228  | 17212 |
| >TP53-S127Y TAKSVTCTYS  | 17000 | >TP53-S127Y TAKSVTCTYY  | 383  | 16617 |
| >TP53-S127Y TAKSVTCTYS  | 25471 | >TP53-S127Y TAKSVTCTYY  | 420  | 25051 |
| >TP53-S149F STPPPGRV    | 1710  | >TP53-S149F FTPPPGRV    | 107  | 1603  |
| >TP53-S149F STPPPGRV    | 1981  | >TP53-S149F FTPPPGRV    | 93   | 1888  |
| >TP53-S149F STPPPGRV    | 136   | >TP53-S149F FTPPPGRV    | 19   | 117   |
| >TP53-S149F STPPPGRV    | 743   | >TP53-S149F FTPPPGRV    | 353  | 390   |
| >TP53-S149F STPPPGRV    | 116   | >TP53-S149F FTPPPGRV    | 15   | 101   |
| >TP53-S149F STPPPGR     | 352   | >TP53-S149F FTPPPGR     | 116  | 236   |
| >TP53-S149F STPPPGRVR   | 129   | >TP53-S149F FTPPPGRVR   | 44   | 85    |
| >TP53-S149F STPPPGRV    | 18    | >TP53-S149F FTPPPGRV    | 9    | 9     |
| >TP53-S149F STPPPGRVR   | 82    | >TP53-S149F FTPPPGRVR   | 24   | 58    |
| >TP53-S149F STPPPGRV    | 512   | >TP53-S149F FTPPPGRV    | 167  | 345   |
| >TP53-S149F STPPPGRV    | 4     | >TP53-S149F FTPPPGRV    | 4    | 0     |
| >TP53-S149F STPPPGRVR   | 96    | >TP53-S149F FTPPPGRVR   | 82   | 14    |
| >TP53-S149F STPPPGRVR   | 54    | >TP53-S149F FTPPPGRVR   | 51   | 3     |
| >TP53-S149F STPPPGRV    | 259   | >TP53-S149F FTPPPGRV    | 367  | 108   |
| >TP53-S149F STPPPGRV    | 311   | >TP53-S149F FTPPPGRV    | 340  | 29    |
| >TP53-S149F DSTPPPGR    | 203   | >TP53-S149F DFTPPPGR    | 36   | 167   |
| >TP53-S149F DSTPPPGRV   | 372   | >TP53-S149F DFTPPPGRV   | 58   | 314   |
| >TP53-S149F DSTPPPGR    | 161   | >TP53-S149F DFTPPPGR    | 1071 | 910   |
| >TP53-S149F DSTPPPGRV   | 208   | >TP53-S149F DFTPPPGRV   | 1160 | 952   |
| >TP53-S149F KTCPVQLWV   | 6364  | >TP53-S149F KTCPVQLWV   | 39   | 6325  |
| >TP53-S149F KTCPVQLWV   | 6385  | >TP53-S149F KTCPVQLWV   | 8    | 6377  |
| >TP53-S149F KTCPVQLWV   | 12738 | >TP53-S149F KTCPVQLWV   | 269  | 12469 |
| >TP53-S149F KTCPVQLWV   | 11759 | >TP53-S149F KTCPVQLWV   | 74   | 11685 |
| >TP53-S149F KTCPVQLWV   | 9023  | >TP53-S149F KTCPVQLWV   | 198  | 8825  |
| >TP53-S149F WVDSTPPPG   | 489   | >TP53-S149F WVDFTPPPG   | 643  | 154   |
| >TP53-S149F LWVDSTPP    | 386   | >TP53-S149F LWVDFTPP    | 183  | 203   |
| >TP53-S149F LWVDSTPPP   | 467   | >TP53-S149F LWVDFTPPP   | 224  | 243   |
| >TP53-S149F LWVDSTPPPC  | 485   | >TP53-S149F LWVDFTPPPC  | 294  | 191   |
| >TP53-S149F VQLWVDST    | 120   | >TP53-S149F VQLWVDFT    | 39   | 81    |
| >TP53-S149F VQLWVDSTP   | 552   | >TP53-S149F VQLWVDFTP   | 242  | 310   |
| >TP53-S149F VQLWVDST    | 835   | >TP53-S149F VQLWVDFT    | 345  | 490   |
| >TP53-S149F CPVQLWVDS   | 31164 | >TP53-S149F CPVQLWVDF   | 54   | 31110 |

|                        |       |                        |       |       |
|------------------------|-------|------------------------|-------|-------|
| >TP53-S149F CPVQLWVDS  | 841   | >TP53-S149F CPVQLWVDF  | 14    | 827   |
| >TP53-S149F CPVQLWVDS  | 8895  | >TP53-S149F CPVQLWVDF  | 60    | 8835  |
| >TP53-S149F CPVQLWVDS  | 635   | >TP53-S149F CPVQLWVDF  | 355   | 280   |
| >TP53-S149F CPVQLWVDS  | 5668  | >TP53-S149F CPVQLWVDF  | 60    | 5608  |
| >TP53-S149F CPVQLWVDS  | 13172 | >TP53-S149F CPVQLWVDF  | 45    | 13127 |
| >TP53-S149P STPPPGRV   | 136   | >TP53-S149P PTPPPGRV   | 3512  | 3376  |
| >TP53-S149P STPPPGRV   | 116   | >TP53-S149P PTPPPGRV   | 1973  | 1857  |
| >TP53-S149P STPPPGR    | 352   | >TP53-S149P PTPPPGR    | 5516  | 5164  |
| >TP53-S149P STPPPGRVR  | 129   | >TP53-S149P PTPPPGRVR  | 6325  | 6196  |
| >TP53-S149P STPPPGRV   | 18    | >TP53-S149P PTPPPGRV   | 1139  | 1121  |
| >TP53-S149P STPPPGRVR  | 82    | >TP53-S149P PTPPPGRVR  | 5499  | 5417  |
| >TP53-S149P STPPPGRV   | 4     | >TP53-S149P PTPPPGRV   | 21    | 17    |
| >TP53-S149P STPPPGRVR  | 96    | >TP53-S149P PTPPPGRVR  | 1462  | 1366  |
| >TP53-S149P STPPPGRVR  | 54    | >TP53-S149P PTPPPGRVR  | 934   | 880   |
| >TP53-S149P STPPPGRV   | 259   | >TP53-S149P PTPPPGRV   | 12757 | 12498 |
| >TP53-S149P STPPPGRV   | 311   | >TP53-S149P PTPPPGRV   | 4683  | 4372  |
| >TP53-S149P DSTPPPGR   | 203   | >TP53-S149P DTPPPPGR   | 1251  | 1048  |
| >TP53-S149P DSTPPPGRV  | 372   | >TP53-S149P DTPPPPGRV  | 2201  | 1829  |
| >TP53-S149P DSTPPPGR   | 161   | >TP53-S149P DTPPPPGR   | 3101  | 2940  |
| >TP53-S149P DSTPPPGRV  | 208   | >TP53-S149P DTPPPPGRV  | 3579  | 3371  |
| >TP53-S149P WVDSTPPPG  | 489   | >TP53-S149P WVDPTPPPG  | 505   | 16    |
| >TP53-S149P LWVDSTPP   | 386   | >TP53-S149P LWVDPTPP   | 419   | 33    |
| >TP53-S149P LWVDSTPPP  | 467   | >TP53-S149P LWVDPTPPP  | 763   | 296   |
| >TP53-S149P LWVDSTPPPC | 485   | >TP53-S149P LWVDPTPPPC | 699   | 214   |
| >TP53-S149P VQLWVDST   | 120   | >TP53-S149P VQLWVDPT   | 55    | 65    |
| >TP53-S149P VQLWVDSTP  | 552   | >TP53-S149P VQLWVDPTP  | 485   | 67    |
| >TP53-S149P CPVQLWVDS  | 635   | >TP53-S149P CPVQLWVDP  | 409   | 226   |
| >TP53-S149T STPPPGRV   | 136   | >TP53-S149T TTPPPPGRV  | 795   | 659   |
| >TP53-S149T STPPPGRV   | 116   | >TP53-S149T TTPPPPGRV  | 403   | 287   |
| >TP53-S149T STPPPGR    | 352   | >TP53-S149T TTPPPPGR   | 121   | 231   |
| >TP53-S149T STPPPGRVR  | 129   | >TP53-S149T TTPPPPGRVR | 67    | 62    |
| >TP53-S149T STPPPGRV   | 18    | >TP53-S149T TTPPPPGRV  | 10    | 8     |
| >TP53-S149T STPPPGRVR  | 82    | >TP53-S149T TTPPPPGRVR | 27    | 55    |
| >TP53-S149T STPPPGRV   | 512   | >TP53-S149T TTPPPPGRV  | 345   | 167   |
| >TP53-S149T STPPPGRV   | 4     | >TP53-S149T TTPPPPGRV  | 4     | 0     |
| >TP53-S149T STPPPGRVR  | 96    | >TP53-S149T TTPPPPGRVR | 118   | 22    |
| >TP53-S149T STPPPGRVR  | 54    | >TP53-S149T TTPPPPGRVR | 65    | 11    |
| >TP53-S149T STPPPGRV   | 259   | >TP53-S149T TTPPPPGRV  | 916   | 657   |
| >TP53-S149T STPPPGRV   | 311   | >TP53-S149T TTPPPPGRV  | 1132  | 821   |
| >TP53-S149T DSTPPPGR   | 203   | >TP53-S149T DTTPPPGR   | 66    | 137   |
| >TP53-S149T DSTPPPGRV  | 372   | >TP53-S149T DTTPPPGRV  | 111   | 261   |
| >TP53-S149T DSTPPPGR   | 161   | >TP53-S149T DTTPPPGR   | 37    | 124   |
| >TP53-S149T DSTPPPGRV  | 208   | >TP53-S149T DTTPPPGRV  | 46    | 162   |

|                        |      |                        |      |      |
|------------------------|------|------------------------|------|------|
| >TP53-S149T DSTPPPGTRV | 866  | >TP53-S149T DTTPPPGTRV | 160  | 706  |
| >TP53-S149T DSTPPPGTRV | 1466 | >TP53-S149T DTTPPPGTRV | 67   | 1399 |
| >TP53-S149T WVDSTPPPG  | 489  | >TP53-S149T WVDTTPPPG  | 928  | 439  |
| >TP53-S149T LWVDSTPP   | 386  | >TP53-S149T LWVDTTPP   | 318  | 68   |
| >TP53-S149T LWVDSTPPP  | 467  | >TP53-S149T LWVDTTPPP  | 331  | 136  |
| >TP53-S149T LWVDSTPPPC | 485  | >TP53-S149T LWVDTTPPPC | 383  | 102  |
| >TP53-S149T VQLWVDST   | 120  | >TP53-S149T VQLWVDTT   | 130  | 10   |
| >TP53-S149T VQLWVDSTP  | 552  | >TP53-S149T VQLWVDTTP  | 451  | 101  |
| >TP53-S149T CPVQLWVDS  | 675  | >TP53-S149T CPVQLWVDT  | 388  | 287  |
| >TP53-S166A SQHMTEVV   | 115  | >TP53-S166A AQHMTEVV   | 110  | 5    |
| >TP53-S166A SQHMTEVV   | 256  | >TP53-S166A AQHMTEVV   | 346  | 90   |
| >TP53-S166A SQHMTEVVR  | 115  | >TP53-S166A AQHMTEVVR  | 127  | 12   |
| >TP53-S166A SQHMTEVV   | 504  | >TP53-S166A AQHMTEVV   | 431  | 73   |
| >TP53-S166A SQHMTEVV   | 88   | >TP53-S166A AQHMTEVV   | 47   | 41   |
| >TP53-S166A SQHMTEVVR  | 162  | >TP53-S166A AQHMTEVVR  | 84   | 78   |
| >TP53-S166A SQHMTEVVR  | 572  | >TP53-S166A AQHMTEVVR  | 291  | 281  |
| >TP53-S166A SQHMTEVVR  | 434  | >TP53-S166A AQHMTEVVR  | 1876 | 1442 |
| >TP53-S166A SQHMTEVVR  | 363  | >TP53-S166A AQHMTEVVR  | 1587 | 1224 |
| >TP53-S166A QSQHMTEVV  | 230  | >TP53-S166A QAQHMTEV\  | 549  | 319  |
| >TP53-S166A QSQHMTEVV  | 321  | >TP53-S166A QAQHMTEV\  | 583  | 262  |
| >TP53-S166A QSQHMTEVV  | 185  | >TP53-S166A QAQHMTEV\  | 139  | 46   |
| >TP53-S166A QSQHMTEV   | 206  | >TP53-S166A QAQHMTEV   | 177  | 29   |
| >TP53-S166A QSQHMTEVV  | 303  | >TP53-S166A QAQHMTEV\  | 249  | 54   |
| >TP53-S166A QSQHMTEVV  | 306  | >TP53-S166A QAQHMTEV\  | 1437 | 1131 |
| >TP53-S166A RVRAMAIYKC | 9    | >TP53-S166A RVRAMAIYKC | 4    | 5    |
| >TP53-S166A KQSQHMTEV  | 82   | >TP53-S166A KQAQHMTEV  | 34   | 48   |
| >TP53-S166A KQSQHMTEV  | 51   | >TP53-S166A KQAQHMTEV  | 25   | 26   |
| >TP53-S166A KQSQHMTEV  | 298  | >TP53-S166A KQAQHMTEV  | 305  | 7    |
| >TP53-S166A KQSQHMTEV  | 9    | >TP53-S166A KQAQHMTEV  | 7    | 2    |
| >TP53-S166A KQSQHMTEV  | 273  | >TP53-S166A KQAQHMTEV  | 328  | 55   |
| >TP53-S166A KQSQHMTEV  | 10   | >TP53-S166A KQAQHMTEV  | 7    | 3    |
| >TP53-S166A KQSQHMTEV  | 426  | >TP53-S166A KQAQHMTEV  | 220  | 206  |
| >TP53-S166A KQSQHMTEV  | 718  | >TP53-S166A KQAQHMTEV  | 398  | 320  |
| >TP53-S166A KQSQHMTEV  | 1212 | >TP53-S166A KQAQHMTEV  | 395  | 817  |
| >TP53-S166A KQSQHMTEV  | 35   | >TP53-S166A KQAQHMTEV  | 37   | 2    |
| >TP53-S166A KQSQHMTEV  | 541  | >TP53-S166A KQAQHMTEV  | 458  | 83   |
| >TP53-S166A KQSQHMTEV  | 222  | >TP53-S166A KQAQHMTEV  | 189  | 33   |
| >TP53-S166A KQSQHMTEV  | 86   | >TP53-S166A KQAQHMTEV  | 87   | 1    |
| >TP53-S166A KQSQHMTEV  | 110  | >TP53-S166A KQAQHMTEV  | 110  | 0    |
| >TP53-S166A KQSQHMTEV  | 185  | >TP53-S166A KQAQHMTEV  | 187  | 2    |
| >TP53-S166A KQSQHMTEV  | 60   | >TP53-S166A KQAQHMTEV  | 53   | 7    |
| >TP53-S166A YKQSQHMTE  | 467  | >TP53-S166A YKQAQHMTE  | 388  | 79   |
| >TP53-S166A YKQSQHMTE  | 30   | >TP53-S166A YKQAQHMTE  | 59   | 29   |



|                       |       |                       |      |       |
|-----------------------|-------|-----------------------|------|-------|
| >TP53-S166AYKQSQHMTE  | 42    | >TP53-S166AYKQAQHMTE  | 82   | 40    |
| >TP53-S166AIYKQSQHMTI | 402   | >TP53-S166AIYKQAQHMTI | 943  | 541   |
| >TP53-S166AIYKQSQHM   | 561   | >TP53-S166AIYKQAQHM   | 330  | 231   |
| >TP53-S166AIYKQSQHM   | 394   | >TP53-S166AIYKQAQHM   | 565  | 171   |
| >TP53-S166AIIYKQSQHM  | 91    | >TP53-S166AIIYKQAQHM  | 142  | 51    |
| >TP53-S166AIIYKQSQH   | 349   | >TP53-S166AIIYKQAQH   | 507  | 158   |
| >TP53-S166AIIYKQSQHM  | 804   | >TP53-S166AIIYKQAQHM  | 395  | 409   |
| >TP53-S166AIIYKQSQHM  | 62    | >TP53-S166AIIYKQAQHM  | 184  | 122   |
| >TP53-S166AIIYKQSQHM  | 198   | >TP53-S166AIIYKQAQHM  | 343  | 145   |
| >TP53-S166AIIYKQSQHM  | 514   | >TP53-S166AIIYKQAQHM  | 400  | 114   |
| >TP53-S166AMAIYKQSQH  | 633   | >TP53-S166AMAIYKQAQH  | 435  | 198   |
| >TP53-S166AMAIYKQSQH  | 672   | >TP53-S166AMAIYKQAQH  | 425  | 247   |
| >TP53-S166AMAIYKQSQH  | 226   | >TP53-S166AMAIYKQAQH  | 393  | 167   |
| >TP53-S166AMAIYKQSQH  | 205   | >TP53-S166AMAIYKQAQH  | 395  | 190   |
| >TP53-S166AMAIYKQSQH  | 20    | >TP53-S166AMAIYKQAQH  | 17   | 3     |
| >TP53-S166AMAIYKQSQH  | 151   | >TP53-S166AMAIYKQAQH  | 127  | 24    |
| >TP53-S166AMAIYKQSQI  | 221   | >TP53-S166AMAIYKQAQ   | 265  | 44    |
| >TP53-S166AMAIYKQS    | 3226  | >TP53-S166AMAIYKQA    | 118  | 3108  |
| >TP53-S166AMAIYKQSQI  | 161   | >TP53-S166AMAIYKQAQ   | 265  | 104   |
| >TP53-S166AMAIYKQS    | 3937  | >TP53-S166AMAIYKQA    | 44   | 3893  |
| >TP53-S166AMAIYKQS    | 2603  | >TP53-S166AMAIYKQA    | 82   | 2521  |
| >TP53-S166AMAIYKQSQI  | 199   | >TP53-S166AMAIYKQAQ   | 222  | 23    |
| >TP53-S166AMAIYKQS    | 12388 | >TP53-S166AMAIYKQA    | 305  | 12083 |
| >TP53-S166AMAIYKQSQI  | 283   | >TP53-S166AMAIYKQAQ   | 425  | 142   |
| >TP53-S166AMAIYKQS    | 2825  | >TP53-S166AMAIYKQA    | 21   | 2804  |
| >TP53-S166AMAIYKQSQ   | 69    | >TP53-S166AMAIYKQAQ   | 227  | 158   |
| >TP53-S166AMAIYKQSQI  | 49    | >TP53-S166AMAIYKQAQ   | 65   | 16    |
| >TP53-S166AMAIYKQSQI  | 55    | >TP53-S166AMAIYKQAQ   | 75   | 20    |
| >TP53-S166AMAIYKQSQI  | 69    | >TP53-S166AMAIYKQAQ   | 84   | 15    |
| >TP53-S166ARAMAIYKQS  | 2875  | >TP53-S166ARAMAIYKQA  | 249  | 2626  |
| >TP53-S166ARAMAIYKQSC | 809   | >TP53-S166ARAMAIYKQA  | 468  | 341   |
| >TP53-S166ARAMAIYKQSC | 354   | >TP53-S166ARAMAIYKQA  | 273  | 81    |
| >TP53-S166ARAMAIYKQSC | 375   | >TP53-S166ARAMAIYKQA  | 1967 | 1592  |
| >TP53-S166CSQHMTEVV   | 115   | >TP53-S166CSQHMTEVV   | 372  | 257   |
| >TP53-S166CSQHMTEVV   | 256   | >TP53-S166CSQHMTEVV   | 592  | 336   |
| >TP53-S166CSQHMTEVVR  | 115   | >TP53-S166CSQHMTEVVF  | 252  | 137   |
| >TP53-S166CSQHMTEVV   | 88    | >TP53-S166CSQHMTEVV   | 286  | 198   |
| >TP53-S166CSQHMTEVVR  | 162   | >TP53-S166CSQHMTEVVF  | 434  | 272   |
| >TP53-S166CSQHMTEVVR  | 434   | >TP53-S166CSQHMTEVVF  | 2240 | 1806  |
| >TP53-S166CSQHMTEVVR  | 363   | >TP53-S166CSQHMTEVVF  | 1731 | 1368  |
| >TP53-S166CSQHMTEVV   | 230   | >TP53-S166CSQHMTEV\   | 3021 | 2791  |
| >TP53-S166CSQHMTEVV   | 321   | >TP53-S166CSQHMTEV\   | 3604 | 3283  |
| >TP53-S166CSQHMTEVV   | 185   | >TP53-S166CSQHMTEV\   | 2775 | 2590  |

|                        |      |                        |      |      |
|------------------------|------|------------------------|------|------|
| >TP53-S166C QSQHMTEV   | 206  | >TP53-S166C QGQHMTEV   | 3703 | 3497 |
| >TP53-S166C QSQHMTEVV  | 303  | >TP53-S166C QGQHMTEV\  | 4226 | 3923 |
| >TP53-S166C QSQHMTEVV  | 306  | >TP53-S166C QGQHMTEV\  | 3913 | 3607 |
| >TP53-S166C RVRAMAIYKC | 9    | >TP53-S166C RVRAMAIYKC | 9    | 0    |
| >TP53-S166C KQSQHMTEV  | 82   | >TP53-S166C KQGQHMTE\  | 234  | 152  |
| >TP53-S166C KQSQHMTEV  | 51   | >TP53-S166C KQGQHMTE\  | 220  | 169  |
| >TP53-S166C KQSQHMTEV  | 298  | >TP53-S166C KQGQHMTE\  | 1018 | 720  |
| >TP53-S166C KQSQHMTEV  | 9    | >TP53-S166C KQGQHMTE\  | 35   | 26   |
| >TP53-S166C KQSQHMTEV  | 273  | >TP53-S166C KQGQHMTE\  | 771  | 498  |
| >TP53-S166C KQSQHMTEV  | 10   | >TP53-S166C KQGQHMTE\  | 17   | 7    |
| >TP53-S166C KQSQHMTEV  | 426  | >TP53-S166C KQGQHMTE\  | 270  | 156  |
| >TP53-S166C KQSQHMTEV  | 718  | >TP53-S166C KQGQHMTE\  | 481  | 237  |
| >TP53-S166C KQSQHMTEV  | 35   | >TP53-S166C KQGQHMTE\  | 60   | 25   |
| >TP53-S166C KQSQHMTEV  | 222  | >TP53-S166C KQGQHMTE\  | 311  | 89   |
| >TP53-S166C KQSQHMTEV  | 86   | >TP53-S166C KQGQHMTE\  | 463  | 377  |
| >TP53-S166C KQSQHMTEV  | 110  | >TP53-S166C KQGQHMTE\  | 558  | 448  |
| >TP53-S166C KQSQHMTEV  | 185  | >TP53-S166C KQGQHMTE\  | 1189 | 1004 |
| >TP53-S166C KQSQHMTEV  | 60   | >TP53-S166C KQGQHMTE\  | 37   | 23   |
| >TP53-S166C YKQSQHMTE  | 467  | >TP53-S166C YKQGQHMTE  | 105  | 362  |
| >TP53-S166C YKQSQHMTE  | 1555 | >TP53-S166C YKQGQHMTE  | 424  | 1131 |
| >TP53-S166C YKQSQHMTE  | 30   | >TP53-S166C YKQGQHMTE  | 208  | 178  |
| >TP53-S166C YKQSQHMTE  | 42   | >TP53-S166C YKQGQHMTE  | 280  | 238  |
| >TP53-S166C IYKQSQHMTI | 402  | >TP53-S166C IYKQGQHMT  | 592  | 190  |
| >TP53-S166C IYKQSQHMTI | 727  | >TP53-S166C IYKQGQHMT  | 466  | 261  |
| >TP53-S166C IYKQSQHM   | 394  | >TP53-S166C IYKQGQHM   | 1152 | 758  |
| >TP53-S166C AIYKQSQHM  | 91   | >TP53-S166C AIYKQGQHM  | 260  | 169  |
| >TP53-S166C AIYKQSQH   | 349  | >TP53-S166C AIYKQGQH   | 762  | 413  |
| >TP53-S166C AIYKQSQHM  | 62   | >TP53-S166C AIYKQGQHM  | 89   | 27   |
| >TP53-S166C AIYKQSQHM  | 198  | >TP53-S166C AIYKQGQHM  | 166  | 32   |
| >TP53-S166C MAIYKQSQHI | 226  | >TP53-S166C MAIYKQGQH  | 376  | 150  |
| >TP53-S166C MAIYKQSQHI | 205  | >TP53-S166C MAIYKQGQH  | 483  | 278  |
| >TP53-S166C MAIYKQSQHI | 20   | >TP53-S166C MAIYKQGQH  | 38   | 18   |
| >TP53-S166C MAIYKQSQHI | 151  | >TP53-S166C MAIYKQGQH  | 394  | 243  |
| >TP53-S166C AMAIYKQSQI | 221  | >TP53-S166C AMAIYKQGQ  | 286  | 65   |
| >TP53-S166C AMAIYKQSQI | 161  | >TP53-S166C AMAIYKQGQ  | 317  | 156  |
| >TP53-S166C AMAIYKQSQI | 199  | >TP53-S166C AMAIYKQGQ  | 199  | 0    |
| >TP53-S166C AMAIYKQSQI | 283  | >TP53-S166C AMAIYKQGQ  | 361  | 78   |
| >TP53-S166C AMAIYKQSQ  | 69   | >TP53-S166C AMAIYKQGQ  | 92   | 23   |
| >TP53-S166C AMAIYKQSQI | 49   | >TP53-S166C AMAIYKQGQ  | 70   | 21   |
| >TP53-S166C AMAIYKQSQI | 55   | >TP53-S166C AMAIYKQGQ  | 76   | 21   |
| >TP53-S166C AMAIYKQSQI | 69   | >TP53-S166C AMAIYKQGQ  | 86   | 17   |
| >TP53-S166C RAMAIYKQSC | 354  | >TP53-S166C RAMAIYKQGI | 942  | 588  |
| >TP53-S166C RAMAIYKQSC | 375  | >TP53-S166C RAMAIYKQGI | 1845 | 1470 |

|                        |       |                        |      |       |
|------------------------|-------|------------------------|------|-------|
| >TP53-S166L SQHMTEVV   | 115   | >TP53-S166L LQHMTEVV   | 122  | 7     |
| >TP53-S166L SQHMTEVV   | 256   | >TP53-S166L LQHMTEVV   | 312  | 56    |
| >TP53-S166L SQHMTEVVVR | 115   | >TP53-S166L LQHMTEVVVR | 159  | 44    |
| >TP53-S166L SQHMTEVV   | 504   | >TP53-S166L LQHMTEVV   | 253  | 251   |
| >TP53-S166L SQHMTEVV   | 88    | >TP53-S166L LQHMTEVV   | 43   | 45    |
| >TP53-S166L SQHMTEVVVR | 162   | >TP53-S166L LQHMTEVVVR | 80   | 82    |
| >TP53-S166L SQHMTEVVVR | 572   | >TP53-S166L LQHMTEVVVR | 305  | 267   |
| >TP53-S166L SQHMTEVVVR | 434   | >TP53-S166L LQHMTEVVVR | 737  | 303   |
| >TP53-S166L SQHMTEVVVR | 363   | >TP53-S166L LQHMTEVVVR | 637  | 274   |
| >TP53-S166L QSQHMTEV   | 10734 | >TP53-S166L QLQHMTEV   | 115  | 10619 |
| >TP53-S166L QSQHMTEV   | 4712  | >TP53-S166L QLQHMTEV   | 27   | 4685  |
| >TP53-S166L QSQHMTEVV  | 8233  | >TP53-S166L QLQHMTEVV  | 93   | 8140  |
| >TP53-S166L QSQHMTEV   | 3901  | >TP53-S166L QLQHMTEV   | 19   | 3882  |
| >TP53-S166L QSQHMTEVV  | 9033  | >TP53-S166L QLQHMTEVV  | 107  | 8926  |
| >TP53-S166L QSQHMTEV   | 3156  | >TP53-S166L QLQHMTEV   | 219  | 2937  |
| >TP53-S166L QSQHMTEV   | 15078 | >TP53-S166L QLQHMTEV   | 47   | 15031 |
| >TP53-S166L QSQHMTEVV  | 17948 | >TP53-S166L QLQHMTEVV  | 96   | 17852 |
| >TP53-S166L QSQHMTEV   | 16655 | >TP53-S166L QLQHMTEV   | 34   | 16621 |
| >TP53-S166L QSQHMTEVV  | 15337 | >TP53-S166L QLQHMTEVV  | 32   | 15305 |
| >TP53-S166L QSQHMTEV   | 20273 | >TP53-S166L QLQHMTEV   | 170  | 20103 |
| >TP53-S166L QSQHMTEVV  | 22785 | >TP53-S166L QLQHMTEVV  | 369  | 22416 |
| >TP53-S166L QSQHMTEV   | 21660 | >TP53-S166L QLQHMTEV   | 206  | 21454 |
| >TP53-S166L QSQHMTEVV  | 19306 | >TP53-S166L QLQHMTEVV  | 36   | 19270 |
| >TP53-S166L QSQHMTEV   | 17799 | >TP53-S166L QLQHMTEV   | 4    | 17795 |
| >TP53-S166L QSQHMTEVV  | 23300 | >TP53-S166L QLQHMTEVV  | 10   | 23290 |
| >TP53-S166L QSQHMTEVV  | 230   | >TP53-S166L QLQHMTEVV  | 258  | 28    |
| >TP53-S166L QSQHMTEVV  | 321   | >TP53-S166L QLQHMTEVV  | 566  | 245   |
| >TP53-S166L QSQHMTEVV  | 185   | >TP53-S166L QLQHMTEVV  | 691  | 506   |
| >TP53-S166L QSQHMTEV   | 206   | >TP53-S166L QLQHMTEV   | 954  | 748   |
| >TP53-S166L QSQHMTEVV  | 303   | >TP53-S166L QLQHMTEVV  | 1269 | 966   |
| >TP53-S166L QSQHMTEVV  | 306   | >TP53-S166L QLQHMTEVV  | 7159 | 6853  |
| >TP53-S166L QSQHMTEVV  | 1113  | >TP53-S166L QLQHMTEVV  | 321  | 792   |
| >TP53-S166L RVRAMAIYKC | 9     | >TP53-S166L RVRAMAIYKC | 5    | 4     |
| >TP53-S166L RVRAMAIYKC | 13121 | >TP53-S166L RVRAMAIYKC | 73   | 13048 |
| >TP53-S166L RVRAMAIYKC | 4141  | >TP53-S166L RVRAMAIYKC | 21   | 4120  |
| >TP53-S166L RVRAMAIYKC | 4883  | >TP53-S166L RVRAMAIYKC | 200  | 4683  |
| >TP53-S166L KQSQHMTEV  | 82    | >TP53-S166L KQLQHMTEV  | 21   | 61    |
| >TP53-S166L KQSQHMTEV  | 2845  | >TP53-S166L KQLQHMTEV  | 496  | 2349  |
| >TP53-S166L KQSQHMTEV  | 51    | >TP53-S166L KQLQHMTEV  | 117  | 66    |
| >TP53-S166L KQSQHMTEV  | 298   | >TP53-S166L KQLQHMTEV  | 460  | 162   |
| >TP53-S166L KQSQHMTEV  | 9     | >TP53-S166L KQLQHMTEV  | 22   | 13    |
| >TP53-S166L KQSQHMTEV  | 273   | >TP53-S166L KQLQHMTEV  | 237  | 36    |
| >TP53-S166L KQSQHMTEV  | 10    | >TP53-S166L KQLQHMTEV  | 5    | 5     |

|                        |       |                        |      |       |
|------------------------|-------|------------------------|------|-------|
| >TP53-S166L KQSQHMTEV  | 993   | >TP53-S166L KQLQHMTEV  | 177  | 816   |
| >TP53-S166L KQSQHMTEV  | 426   | >TP53-S166L KQLQHMTEV  | 38   | 388   |
| >TP53-S166L KQSQHMTEV  | 718   | >TP53-S166L KQLQHMTEV  | 70   | 648   |
| >TP53-S166L KQSQHMTEV  | 2400  | >TP53-S166L KQLQHMTEV  | 250  | 2150  |
| >TP53-S166L KQSQHMTEV  | 1427  | >TP53-S166L KQLQHMTEV  | 151  | 1276  |
| >TP53-S166L KQSQHMTEV  | 1212  | >TP53-S166L KQLQHMTEV  | 130  | 1082  |
| >TP53-S166L KQSQHMTEV  | 1654  | >TP53-S166L KQLQHMTEV  | 190  | 1464  |
| >TP53-S166L KQSQHMTEV  | 35    | >TP53-S166L KQLQHMTEV  | 20   | 15    |
| >TP53-S166L KQSQHMTEV  | 222   | >TP53-S166L KQLQHMTEV  | 649  | 427   |
| >TP53-S166L KQSQHMTEV  | 86    | >TP53-S166L KQLQHMTEV  | 45   | 41    |
| >TP53-S166L KQSQHMTEV  | 110   | >TP53-S166L KQLQHMTEV  | 57   | 53    |
| >TP53-S166L KQSQHMTEV  | 185   | >TP53-S166L KQLQHMTEV  | 92   | 93    |
| >TP53-S166L KQSQHMTEV  | 863   | >TP53-S166L KQLQHMTEV  | 311  | 552   |
| >TP53-S166L KQSQHMTEV  | 60    | >TP53-S166L KQLQHMTEV  | 37   | 23    |
| >TP53-S166L YKQSQHMTE  | 467   | >TP53-S166L YKQLQHMTE  | 1814 | 1347  |
| >TP53-S166L YKQSQHMTE  | 30    | >TP53-S166L YKQLQHMTE  | 145  | 115   |
| >TP53-S166L YKQSQHMTE  | 42    | >TP53-S166L YKQLQHMTE  | 207  | 165   |
| >TP53-S166L IYKQSQHMTI | 402   | >TP53-S166L IYKQLQHMTI | 536  | 134   |
| >TP53-S166L IYKQSQHM   | 561   | >TP53-S166L IYKQLQHM   | 251  | 310   |
| >TP53-S166L IYKQSQHM   | 394   | >TP53-S166L IYKQLQHM   | 1080 | 686   |
| >TP53-S166L AIYKQSQHM  | 91    | >TP53-S166L AIYKQLQHM  | 67   | 24    |
| >TP53-S166L AIYKQSQHM  | 3214  | >TP53-S166L AIYKQLQHM  | 493  | 2721  |
| >TP53-S166L AIYKQSQH   | 349   | >TP53-S166L AIYKQLQH   | 320  | 29    |
| >TP53-S166L AIYKQSQHM  | 804   | >TP53-S166L AIYKQLQHM  | 23   | 781   |
| >TP53-S166L AIYKQSQHM  | 62    | >TP53-S166L AIYKQLQHM  | 152  | 90    |
| >TP53-S166L AIYKQSQHM  | 198   | >TP53-S166L AIYKQLQHM  | 420  | 222   |
| >TP53-S166L MAIYKQSQHI | 633   | >TP53-S166L MAIYKQLQHI | 200  | 433   |
| >TP53-S166L MAIYKQSQ   | 841   | >TP53-S166L MAIYKQLQ   | 462  | 379   |
| >TP53-S166L MAIYKQSQHI | 226   | >TP53-S166L MAIYKQLQHI | 383  | 157   |
| >TP53-S166L MAIYKQSQHI | 205   | >TP53-S166L MAIYKQLQHI | 451  | 246   |
| >TP53-S166L MAIYKQSQHI | 20    | >TP53-S166L MAIYKQLQHI | 30   | 10    |
| >TP53-S166L MAIYKQSQHI | 151   | >TP53-S166L MAIYKQLQHI | 111  | 40    |
| >TP53-S166L AMAIYKQSQI | 221   | >TP53-S166L AMAIYKQLQI | 166  | 55    |
| >TP53-S166L AMAIYKQS   | 3226  | >TP53-S166L AMAIYKQL   | 18   | 3208  |
| >TP53-S166L AMAIYKQSQI | 161   | >TP53-S166L AMAIYKQLQI | 96   | 65    |
| >TP53-S166L AMAIYKQS   | 3937  | >TP53-S166L AMAIYKQL   | 62   | 3875  |
| >TP53-S166L AMAIYKQSQI | 732   | >TP53-S166L AMAIYKQLQI | 402  | 330   |
| >TP53-S166L AMAIYKQS   | 2603  | >TP53-S166L AMAIYKQL   | 26   | 2577  |
| >TP53-S166L AMAIYKQSQI | 199   | >TP53-S166L AMAIYKQLQI | 152  | 47    |
| >TP53-S166L AMAIYKQS   | 12388 | >TP53-S166L AMAIYKQL   | 94   | 12294 |
| >TP53-S166L AMAIYKQSQI | 283   | >TP53-S166L AMAIYKQLQI | 288  | 5     |
| >TP53-S166L AMAIYKQS   | 20374 | >TP53-S166L AMAIYKQL   | 458  | 19916 |
| >TP53-S166L AMAIYKQS   | 2825  | >TP53-S166L AMAIYKQL   | 7    | 2818  |

|                        |       |                        |       |       |
|------------------------|-------|------------------------|-------|-------|
| >TP53-S166L AMAIYKQSQ  | 69    | >TP53-S166L AMAIYKQLQ  | 161   | 92    |
| >TP53-S166L AMAIYKQSQI | 49    | >TP53-S166L AMAIYKQLQI | 38    | 11    |
| >TP53-S166L AMAIYKQSQI | 55    | >TP53-S166L AMAIYKQLQI | 103   | 48    |
| >TP53-S166L AMAIYKQS   | 6943  | >TP53-S166L AMAIYKQL   | 428   | 6515  |
| >TP53-S166L AMAIYKQSQI | 69    | >TP53-S166L AMAIYKQLQI | 153   | 84    |
| >TP53-S166L RAMAIYKQS  | 17850 | >TP53-S166L RAMAIYKQL  | 475   | 17375 |
| >TP53-S166L RAMAIYKQS  | 7606  | >TP53-S166L RAMAIYKQL  | 286   | 7320  |
| >TP53-S166L RAMAIYKQS  | 3477  | >TP53-S166L RAMAIYKQL  | 14    | 3463  |
| >TP53-S166L RAMAIYKQSC | 354   | >TP53-S166L RAMAIYKQLC | 304   | 50    |
| >TP53-S166L RAMAIYKQS  | 8336  | >TP53-S166L RAMAIYKQL  | 113   | 8223  |
| >TP53-S166L RAMAIYKQS  | 6649  | >TP53-S166L RAMAIYKQL  | 295   | 6354  |
| >TP53-S166L RAMAIYKQS  | 10917 | >TP53-S166L RAMAIYKQL  | 173   | 10744 |
| >TP53-S166L RAMAIYKQSC | 1142  | >TP53-S166L RAMAIYKQLC | 328   | 814   |
| >TP53-S166L RAMAIYKQSC | 375   | >TP53-S166L RAMAIYKQLC | 2802  | 2427  |
| >TP53-S166L RAMAIYKQS  | 21646 | >TP53-S166L RAMAIYKQL  | 204   | 21442 |
| >TP53-S166L VRAMAIYKQI | 6018  | >TP53-S166L VRAMAIYKQI | 90    | 5928  |
| >TP53-S166L VRAMAIYKQI | 5842  | >TP53-S166L VRAMAIYKQI | 329   | 5513  |
| >TP53-S166P SQHMTEVV   | 115   | >TP53-S166P PQHMTEVV   | 7001  | 6886  |
| >TP53-S166P SQHMTEVV   | 256   | >TP53-S166P PQHMTEVV   | 5160  | 4904  |
| >TP53-S166P SQHMTEVVR  | 115   | >TP53-S166P PQHMTEVVR  | 2829  | 2714  |
| >TP53-S166P SQHMTEVV   | 88    | >TP53-S166P PQHMTEVV   | 1173  | 1085  |
| >TP53-S166P SQHMTEVVR  | 162   | >TP53-S166P PQHMTEVVR  | 1127  | 965   |
| >TP53-S166P SQHMTEVVR  | 434   | >TP53-S166P PQHMTEVVR  | 1118  | 684   |
| >TP53-S166P SQHMTEVVR  | 363   | >TP53-S166P PQHMTEVVR  | 764   | 401   |
| >TP53-S166P QSQHMTEVV  | 230   | >TP53-S166P QPQHMTEV\  | 3100  | 2870  |
| >TP53-S166P QSQHMTEVV  | 321   | >TP53-S166P QPQHMTEV\  | 10215 | 9894  |
| >TP53-S166P QSQHMTEVV  | 185   | >TP53-S166P QPQHMTEV\  | 3553  | 3368  |
| >TP53-S166P QSQHMTEV   | 206   | >TP53-S166P QPQHMTEV   | 6533  | 6327  |
| >TP53-S166P QSQHMTEVV  | 303   | >TP53-S166P QPQHMTEV\  | 7134  | 6831  |
| >TP53-S166P QSQHMTEVV  | 25018 | >TP53-S166P QPQHMTEV\  | 474   | 24544 |
| >TP53-S166P QSQHMTEVV  | 306   | >TP53-S166P QPQHMTEV\  | 6496  | 6190  |
| >TP53-S166P RVRAMAIYKC | 9     | >TP53-S166P RVRAMAIYKC | 18    | 9     |
| >TP53-S166P KQSQHMTEV  | 82    | >TP53-S166P KQPQHMTEV  | 232   | 150   |
| >TP53-S166P KQSQHMTEV  | 51    | >TP53-S166P KQPQHMTEV  | 282   | 231   |
| >TP53-S166P KQSQHMTEV  | 298   | >TP53-S166P KQPQHMTEV  | 1066  | 768   |
| >TP53-S166P KQSQHMTEV  | 9     | >TP53-S166P KQPQHMTEV  | 18    | 9     |
| >TP53-S166P KQSQHMTEV  | 273   | >TP53-S166P KQPQHMTEV  | 805   | 532   |
| >TP53-S166P KQSQHMTEV  | 10    | >TP53-S166P KQPQHMTEV  | 12    | 2     |
| >TP53-S166P KQSQHMTEV  | 426   | >TP53-S166P KQPQHMTEV  | 358   | 68    |
| >TP53-S166P KQSQHMTEV  | 35    | >TP53-S166P KQPQHMTEV  | 177   | 142   |
| >TP53-S166P KQSQHMTEV  | 222   | >TP53-S166P KQPQHMTEV  | 1459  | 1237  |
| >TP53-S166P KQSQHMTEV  | 86    | >TP53-S166P KQPQHMTEV  | 603   | 517   |
| >TP53-S166P KQSQHMTEV  | 110   | >TP53-S166P KQPQHMTEV  | 694   | 584   |

|                        |      |                        |      |      |
|------------------------|------|------------------------|------|------|
| >TP53-S166P KQSQHMTEV  | 185  | >TP53-S166P KQPQHMTEV  | 1122 | 937  |
| >TP53-S166P KQSQHMTEV  | 60   | >TP53-S166P KQPQHMTEV  | 43   | 17   |
| >TP53-S166P YKQSQHMTE  | 467  | >TP53-S166P YKQPQHMTE  | 145  | 322  |
| >TP53-S166P YKQSQHMTE  | 30   | >TP53-S166P YKQPQHMTE  | 57   | 27   |
| >TP53-S166P YKQSQHMTE  | 42   | >TP53-S166P YKQPQHMTE  | 82   | 40   |
| >TP53-S166P IYKQSQHMTI | 402  | >TP53-S166P IYKQPQHMTI | 4303 | 3901 |
| >TP53-S166P IYKQSQHM   | 394  | >TP53-S166P IYKQPQHM   | 1158 | 764  |
| >TP53-S166P AIYKQSQHM  | 91   | >TP53-S166P AIYKQPQHM  | 232  | 141  |
| >TP53-S166P AIYKQSQH   | 349  | >TP53-S166P AIYKQPQH   | 551  | 202  |
| >TP53-S166P AIYKQSQHM  | 62   | >TP53-S166P AIYKQPQHM  | 418  | 356  |
| >TP53-S166P AIYKQSQHM  | 198  | >TP53-S166P AIYKQPQHM  | 234  | 36   |
| >TP53-S166P MAIYKQSQHI | 633  | >TP53-S166P MAIYKQPQH  | 494  | 139  |
| >TP53-S166P MAIYKQSQHI | 226  | >TP53-S166P MAIYKQPQH  | 775  | 549  |
| >TP53-S166P MAIYKQSQHI | 205  | >TP53-S166P MAIYKQPQH  | 333  | 128  |
| >TP53-S166P MAIYKQSQHI | 20   | >TP53-S166P MAIYKQPQH  | 35   | 15   |
| >TP53-S166P MAIYKQSQHI | 151  | >TP53-S166P MAIYKQPQH  | 106  | 45   |
| >TP53-S166P MAIYKQSQHI | 583  | >TP53-S166P MAIYKQPQH  | 414  | 169  |
| >TP53-S166P AMAIYKQSQI | 221  | >TP53-S166P AMAIYKQPQI | 293  | 72   |
| >TP53-S166P AMAIYKQSQI | 161  | >TP53-S166P AMAIYKQPQI | 250  | 89   |
| >TP53-S166P AMAIYKQSQI | 199  | >TP53-S166P AMAIYKQPQI | 132  | 67   |
| >TP53-S166P AMAIYKQSQI | 283  | >TP53-S166P AMAIYKQPQI | 325  | 42   |
| >TP53-S166P AMAIYKQSQ  | 69   | >TP53-S166P AMAIYKQPQ  | 170  | 101  |
| >TP53-S166P AMAIYKQSQI | 49   | >TP53-S166P AMAIYKQPQI | 78   | 29   |
| >TP53-S166P AMAIYKQSQI | 55   | >TP53-S166P AMAIYKQPQI | 96   | 41   |
| >TP53-S166P AMAIYKQSQI | 69   | >TP53-S166P AMAIYKQPQI | 72   | 3    |
| >TP53-S166P RAMAIYKQSC | 354  | >TP53-S166P RAMAIYKQPC | 490  | 136  |
| >TP53-S166P RAMAIYKQSC | 375  | >TP53-S166P RAMAIYKQPC | 3245 | 2870 |
| >TP53-S166T SQHMTEVV   | 115  | >TP53-S166T TQHMTEVV   | 308  | 193  |
| >TP53-S166T SQHMTEVV   | 256  | >TP53-S166T TQHMTEVV   | 1515 | 1259 |
| >TP53-S166T SQHMTEVVR  | 115  | >TP53-S166T TQHMTEVVR  | 178  | 63   |
| >TP53-S166T SQHMTEVVR  | 1468 | >TP53-S166T TQHMTEVVR  | 453  | 1015 |
| >TP53-S166T SQHMTEVV   | 88   | >TP53-S166T TQHMTEVV   | 271  | 183  |
| >TP53-S166T SQHMTEVVR  | 162  | >TP53-S166T TQHMTEVVR  | 491  | 329  |
| >TP53-S166T SQHMTEVVR  | 434  | >TP53-S166T TQHMTEVVR  | 505  | 71   |
| >TP53-S166T SQHMTEVVR  | 363  | >TP53-S166T TQHMTEVVR  | 431  | 68   |
| >TP53-S166T QSQHMTEVV  | 230  | >TP53-S166T QTQHMTEVV  | 253  | 23   |
| >TP53-S166T QSQHMTEVV  | 321  | >TP53-S166T QTQHMTEVV  | 181  | 140  |
| >TP53-S166T QSQHMTEVV  | 1104 | >TP53-S166T QTQHMTEVV  | 343  | 761  |
| >TP53-S166T QSQHMTEVV  | 973  | >TP53-S166T QTQHMTEVV  | 283  | 690  |
| >TP53-S166T QSQHMTEVV  | 185  | >TP53-S166T QTQHMTEVV  | 44   | 141  |
| >TP53-S166T QSQHMTEV   | 206  | >TP53-S166T QTQHMTEV   | 22   | 184  |
| >TP53-S166T QSQHMTEVV  | 303  | >TP53-S166T QTQHMTEVV  | 28   | 275  |
| >TP53-S166T QSQHMTEV   | 2899 | >TP53-S166T QTQHMTEV   | 256  | 2643 |

|                        |      |                        |      |      |
|------------------------|------|------------------------|------|------|
| >TP53-S166T QSQHMTEVV  | 306  | >TP53-S166T QTQHMTEVV  | 199  | 107  |
| >TP53-S166T RVRAMAIYKC | 9    | >TP53-S166T RVRAMAIYKC | 13   | 4    |
| >TP53-S166T KQSQHMTEV  | 82   | >TP53-S166T KQTQHMTEV  | 155  | 73   |
| >TP53-S166T KQSQHMTEV  | 51   | >TP53-S166T KQTQHMTEV  | 184  | 133  |
| >TP53-S166T KQSQHMTEV  | 298  | >TP53-S166T KQTQHMTEV  | 999  | 701  |
| >TP53-S166T KQSQHMTEV  | 9    | >TP53-S166T KQTQHMTEV  | 22   | 13   |
| >TP53-S166T KQSQHMTEV  | 273  | >TP53-S166T KQTQHMTEV  | 616  | 343  |
| >TP53-S166T KQSQHMTEV  | 10   | >TP53-S166T KQTQHMTEV  | 9    | 1    |
| >TP53-S166T KQSQHMTEV  | 426  | >TP53-S166T KQTQHMTEV  | 624  | 198  |
| >TP53-S166T KQSQHMTEV  | 35   | >TP53-S166T KQTQHMTEV  | 41   | 6    |
| >TP53-S166T KQSQHMTEV  | 222  | >TP53-S166T KQTQHMTEV  | 2019 | 1797 |
| >TP53-S166T KQSQHMTEV  | 86   | >TP53-S166T KQTQHMTEV  | 244  | 158  |
| >TP53-S166T KQSQHMTEV  | 110  | >TP53-S166T KQTQHMTEV  | 283  | 173  |
| >TP53-S166T KQSQHMTEV  | 185  | >TP53-S166T KQTQHMTEV  | 471  | 286  |
| >TP53-S166T KQSQHMTEV  | 60   | >TP53-S166T KQTQHMTEV  | 61   | 1    |
| >TP53-S166T YKQSQHMTE  | 467  | >TP53-S166T YKQTQHMTE  | 847  | 380  |
| >TP53-S166T YKQSQHMTE  | 30   | >TP53-S166T YKQTQHMTE  | 48   | 18   |
| >TP53-S166T YKQSQHMTE  | 42   | >TP53-S166T YKQTQHMTE  | 70   | 28   |
| >TP53-S166T IYKQSQHM   | 510  | >TP53-S166T IYKQTQHM   | 441  | 69   |
| >TP53-S166T IYKQSQHMTI | 402  | >TP53-S166T IYKQTQHMTI | 413  | 11   |
| >TP53-S166T IYKQSQHM   | 561  | >TP53-S166T IYKQTQHM   | 288  | 273  |
| >TP53-S166T IYKQSQHM   | 394  | >TP53-S166T IYKQTQHM   | 388  | 6    |
| >TP53-S166T AIYKQSQHM  | 91   | >TP53-S166T AIYKQTQHM  | 100  | 9    |
| >TP53-S166T AIYKQSQH   | 349  | >TP53-S166T AIYKQTQH   | 367  | 18   |
| >TP53-S166T AIYKQSQHM  | 804  | >TP53-S166T AIYKQTQHM  | 129  | 675  |
| >TP53-S166T AIYKQSQHM  | 62   | >TP53-S166T AIYKQTQHM  | 106  | 44   |
| >TP53-S166T AIYKQSQHM  | 198  | >TP53-S166T AIYKQTQHM  | 247  | 49   |
| >TP53-S166T MAIYKQSQH  | 633  | >TP53-S166T MAIYKQTQH  | 430  | 203  |
| >TP53-S166T MAIYKQSQH  | 226  | >TP53-S166T MAIYKQTQH  | 339  | 113  |
| >TP53-S166T MAIYKQSQH  | 205  | >TP53-S166T MAIYKQTQH  | 253  | 48   |
| >TP53-S166T MAIYKQSQH  | 20   | >TP53-S166T MAIYKQTQH  | 35   | 15   |
| >TP53-S166T MAIYKQSQH  | 151  | >TP53-S166T MAIYKQTQH  | 110  | 41   |
| >TP53-S166T AMAIYKQSQI | 221  | >TP53-S166T AMAIYKQTQI | 222  | 1    |
| >TP53-S166T AMAIYKQSQI | 161  | >TP53-S166T AMAIYKQTQI | 146  | 15   |
| >TP53-S166T AMAIYKQSQI | 199  | >TP53-S166T AMAIYKQTQI | 168  | 31   |
| >TP53-S166T AMAIYKQSQI | 283  | >TP53-S166T AMAIYKQTQI | 251  | 32   |
| >TP53-S166T AMAIYKQS   | 2825 | >TP53-S166T AMAIYKQT   | 167  | 2658 |
| >TP53-S166T AMAIYKQSQ  | 69   | >TP53-S166T AMAIYKQTQ  | 61   | 8    |
| >TP53-S166T AMAIYKQSQI | 49   | >TP53-S166T AMAIYKQTQI | 38   | 11   |
| >TP53-S166T AMAIYKQSQI | 55   | >TP53-S166T AMAIYKQTQI | 72   | 17   |
| >TP53-S166T AMAIYKQSQI | 69   | >TP53-S166T AMAIYKQTQI | 82   | 13   |
| >TP53-S166T RAMAIYKQSC | 354  | >TP53-S166T RAMAIYKQTC | 488  | 134  |
| >TP53-S166T RAMAIYKQSC | 375  | >TP53-S166T RAMAIYKQTC | 1149 | 774  |

|                         |       |                         |       |       |
|-------------------------|-------|-------------------------|-------|-------|
| >TP53-S183L CSDSDGLA    | 178   | >TP53-S183L CLDSDGLA    | 2739  | 2561  |
| >TP53-S183L VRRCPHHERC  | 2972  | >TP53-S183L VRRCPHHERC  | 174   | 2798  |
| >TP53-S183L HERCSDSDGL  | 422   | >TP53-S183L HERCLDSDGL  | 284   | 138   |
| >TP53-S183L HHERCSDSDC  | 126   | >TP53-S183L HHERCLDSDC  | 377   | 251   |
| >TP53-S183L RRCPPHHERCS | 5556  | >TP53-S183L RRCPPHHERCL | 447   | 5109  |
| >TP53-S183L RRCPPHHERCS | 1695  | >TP53-S183L RRCPPHHERCL | 40    | 1655  |
| >TP53-S183L RRCPPHHERCS | 720   | >TP53-S183L RRCPPHHERCL | 47    | 673   |
| >TP53-S183L RRCPPHHERCS | 717   | >TP53-S183L RRCPPHHERCL | 62    | 655   |
| >TP53-S183P CSDSDGLA    | 178   | >TP53-S183P CPDSDGLA    | 19624 | 19446 |
| >TP53-S183P CSDSDGLA    | 29477 | >TP53-S183P CPDSDGLA    | 274   | 29203 |
| >TP53-S183P HERCSDSDGL  | 422   | >TP53-S183P HERCPDSDGL  | 651   | 229   |
| >TP53-S183P HHERCSDSDC  | 126   | >TP53-S183P HHERCPDSDC  | 148   | 22    |
| >TP53-S185C SDGLAPPQHI  | 104   | >TP53-S185C CDGLAPPQHI  | 54    | 50    |
| >TP53-S185C CSDSDGLA    | 178   | >TP53-S185C CSDCDGLA    | 459   | 281   |
| >TP53-S185C HERCSDSDGL  | 422   | >TP53-S185C HERCSDCDGL  | 113   | 309   |
| >TP53-S185C HHERCSDSDC  | 126   | >TP53-S185C HHERCSDCDC  | 393   | 267   |
| >TP53-S185C SDGLAPPQHI  | 104   | >TP53-S185C GDGLAPPQH   | 173   | 69    |
| >TP53-S185C CSDSDGLA    | 178   | >TP53-S185C CSDGDGLA    | 344   | 166   |
| >TP53-S185C HERCSDSDGL  | 422   | >TP53-S185C HERCSDGDGL  | 243   | 179   |
| >TP53-S185C HHERCSDSDC  | 126   | >TP53-S185C HHERCSDGD   | 311   | 185   |
| >TP53-S185I- SDGLAPPQHI | 104   | >TP53-S185I- IDGLAPPQHL | 115   | 11    |
| >TP53-S185I- DSDGLAPPQI | 1128  | >TP53-S185I- DIDGLAPPQH | 282   | 846   |
| >TP53-S185I- CSDSDGLA   | 178   | >TP53-S185I- CSDIDGLA   | 268   | 90    |
| >TP53-S185I- HERCSDSDGL | 602   | >TP53-S185I- HERCSDIDGL | 478   | 124   |
| >TP53-S185I- HERCSDSDGL | 422   | >TP53-S185I- HERCSDIDGL | 67    | 355   |
| >TP53-S185I- HHERCSDSDC | 126   | >TP53-S185I- HHERCSDIDG | 198   | 72    |
| >TP53-S185N SDGLAPPQHI  | 507   | >TP53-S185N NDGLAPPQH   | 472   | 35    |
| >TP53-S185N SDGLAPPQHI  | 104   | >TP53-S185N NDGLAPPQH   | 257   | 153   |
| >TP53-S185N CSDSDGLA    | 178   | >TP53-S185N CSDNDGLA    | 212   | 34    |
| >TP53-S185N HERCSDSDGL  | 422   | >TP53-S185N HERCSDNDGL  | 245   | 177   |
| >TP53-S185N HHERCSDSDC  | 126   | >TP53-S185N HHERCSDND   | 226   | 100   |
| >TP53-S185R SDGLAPPQHI  | 1651  | >TP53-S185R RDGLAPPQHI  | 334   | 1317  |
| >TP53-S185R SDGLAPPQHI  | 104   | >TP53-S185R RDGLAPPQHI  | 118   | 14    |
| >TP53-S185R CSDSDGLA    | 178   | >TP53-S185R CSDRDGLA    | 289   | 111   |
| >TP53-S185R HERCSDSDGL  | 422   | >TP53-S185R HERCSDRDGL  | 305   | 117   |
| >TP53-S185R HHERCSDSDC  | 126   | >TP53-S185R HHERCSDRD   | 255   | 129   |
| >TP53-S185T SDGLAPPQHI  | 104   | >TP53-S185T TDGLAPPQHI  | 84    | 20    |
| >TP53-S185T DSDGLAPPQI  | 1128  | >TP53-S185T DTDGLAPPQI  | 69    | 1059  |
| >TP53-S185T CSDSDGLA    | 178   | >TP53-S185T CSDTDGLA    | 150   | 28    |
| >TP53-S185T HERCSDSDGL  | 422   | >TP53-S185T HERCSDTDGL  | 139   | 283   |
| >TP53-S185T HHERCSDSDC  | 126   | >TP53-S185T HHERCSDTD   | 129   | 3     |
| >TP53-S215C SVVVPYEPPE  | 75    | >TP53-S215C CVVVPYEPPE  | 427   | 352   |
| >TP53-S215C SVVVPYEPPE  | 92    | >TP53-S215C CVVVPYEPPE  | 1081  | 989   |



|                        |      |                        |      |      |
|------------------------|------|------------------------|------|------|
| >TP53-S215C SVVVPYEPPE | 129  | >TP53-S215C CVVVPYEPPE | 4250 | 4121 |
| >TP53-S215C SVVVPYEPPE | 57   | >TP53-S215C CVVVPYEPPE | 451  | 394  |
| >TP53-S215C SVVVPYEPPE | 81   | >TP53-S215C CVVVPYEPPE | 118  | 37   |
| >TP53-S215C SVVVPYEPPE | 26   | >TP53-S215C CVVVPYEPPE | 257  | 231  |
| >TP53-S215C YLDDRNTFRF | 333  | >TP53-S215C YLDDRNTFRF | 148  | 185  |
| >TP53-S215C YLDDRNTFRF | 155  | >TP53-S215C YLDDRNTFRF | 20   | 135  |
| >TP53-S215C YLDDRNTFRF | 1022 | >TP53-S215C YLDDRNTFRF | 41   | 981  |
| >TP53-S215C YLDDRNTFRF | 648  | >TP53-S215C YLDDRNTFRF | 147  | 501  |
| >TP53-S215C YLDDRNTFRF | 7630 | >TP53-S215C YLDDRNTFRF | 393  | 7237 |
| >TP53-S215C YLDDRNTFRF | 171  | >TP53-S215C YLDDRNTFRF | 11   | 160  |
| >TP53-S215C RHSVVPY    | 23   | >TP53-S215C RHCVVPY    | 64   | 41   |
| >TP53-S215C RHSVVPY    | 413  | >TP53-S215C RHCVVPY    | 2197 | 1784 |
| >TP53-S215C FRHSVVPY   | 4    | >TP53-S215C FRHCVVPY   | 4    | 0    |
| >TP53-S215C FRHSVVPY   | 33   | >TP53-S215C FRHCVVPY   | 33   | 0    |
| >TP53-S215C TFRHSVVPY  | 185  | >TP53-S215C TFRHCVVPY  | 119  | 66   |
| >TP53-S215C TFRHSVVV   | 139  | >TP53-S215C TFRHCVVV   | 1154 | 1015 |
| >TP53-S215C TFRHSVVPY  | 162  | >TP53-S215C TFRHCVVPY  | 559  | 397  |
| >TP53-S215C TFRHSVVPY  | 140  | >TP53-S215C TFRHCVVPY  | 217  | 77   |
| >TP53-S215C TFRHSVVPY  | 225  | >TP53-S215C TFRHCVVPY  | 845  | 620  |
| >TP53-S215C TFRHSVVPY  | 271  | >TP53-S215C TFRHCVVPY  | 473  | 202  |
| >TP53-S215C NTFRHSVV   | 382  | >TP53-S215C NTFRHCVV   | 1010 | 628  |
| >TP53-S215C NTFRHSVV   | 309  | >TP53-S215C NTFRHCVV   | 272  | 37   |
| >TP53-S215C NTFRHSVVV  | 265  | >TP53-S215C NTFRHCVV   | 1025 | 760  |
| >TP53-S215C NTFRHSVVV  | 128  | >TP53-S215C NTFRHCVV   | 220  | 92   |
| >TP53-S215C NTFRHSVVV  | 97   | >TP53-S215C NTFRHCVV   | 359  | 262  |
| >TP53-S215C NTFRHSVVV  | 123  | >TP53-S215C NTFRHCVV   | 160  | 37   |
| >TP53-S215C NTFRHSVVV  | 82   | >TP53-S215C NTFRHCVV   | 90   | 8    |
| >TP53-S215C NTFRHSVVV  | 412  | >TP53-S215C NTFRHCVV   | 1390 | 978  |
| >TP53-S215C NTFRHSVVV  | 61   | >TP53-S215C NTFRHCVV   | 118  | 57   |
| >TP53-S215C NTFRHSVVV  | 34   | >TP53-S215C NTFRHCVV   | 32   | 2    |
| >TP53-S215C NTFRHSVV   | 11   | >TP53-S215C NTFRHCVV   | 17   | 6    |
| >TP53-S215C NTFRHSVV   | 8    | >TP53-S215C NTFRHCVV   | 12   | 4    |
| >TP53-S215C NTFRHSVV   | 50   | >TP53-S215C NTFRHCVV   | 58   | 8    |
| >TP53-S215C NTFRHSVV   | 25   | >TP53-S215C NTFRHCVV   | 91   | 66   |
| >TP53-S215C NTFRHSVVV  | 65   | >TP53-S215C NTFRHCVV   | 82   | 17   |
| >TP53-S215C NTFRHSVVV  | 492  | >TP53-S215C NTFRHCVV   | 1123 | 631  |
| >TP53-S215C NTFRHSVVV  | 33   | >TP53-S215C NTFRHCVV   | 45   | 12   |
| >TP53-S215C NTFRHSVVV  | 23   | >TP53-S215C NTFRHCVV   | 57   | 34   |
| >TP53-S215C NTFRHSVVV  | 105  | >TP53-S215C NTFRHCVV   | 167  | 62   |
| >TP53-S215C NTFRHSVVV  | 289  | >TP53-S215C NTFRHCVV   | 298  | 9    |
| >TP53-S215C NTFRHSVVV  | 23   | >TP53-S215C NTFRHCVV   | 44   | 21   |
| >TP53-S215C RNTFRHSVV  | 224  | >TP53-S215C RNTFRHCVV  | 8835 | 8611 |
| >TP53-S215C LDDRNTFRHS | 482  | >TP53-S215C LDDRNTFRHC | 660  | 178  |

|                        |     |                        |      |      |
|------------------------|-----|------------------------|------|------|
| >TP53-S215C SVVVPYEPPE | 75  | >TP53-S215C GVVVPYEPPE | 184  | 109  |
| >TP53-S215C SVVVPYEPPE | 92  | >TP53-S215C GVVVPYEPPE | 243  | 151  |
| >TP53-S215C SVVVPYEPPE | 129 | >TP53-S215C GVVVPYEPPE | 313  | 184  |
| >TP53-S215C SVVVPYEPPE | 57  | >TP53-S215C GVVVPYEPPE | 100  | 43   |
| >TP53-S215C SVVVPYEPPE | 81  | >TP53-S215C GVVVPYEPPE | 1134 | 1053 |
| >TP53-S215C SVVVPYEPPE | 26  | >TP53-S215C GVVVPYEPPE | 767  | 741  |
| >TP53-S215C YLDDRNTFRF | 333 | >TP53-S215C YLDDRNTFRF | 1268 | 935  |
| >TP53-S215C YLDDRNTFRF | 155 | >TP53-S215C YLDDRNTFRF | 360  | 205  |
| >TP53-S215C YLDDRNTFRF | 171 | >TP53-S215C YLDDRNTFRF | 1002 | 831  |
| >TP53-S215C RHSVVVPY   | 23  | >TP53-S215C RHGVVVPY   | 135  | 112  |
| >TP53-S215C RHSVVVPY   | 413 | >TP53-S215C RHGVVVPY   | 7311 | 6898 |
| >TP53-S215C FRHSVVVPY  | 4   | >TP53-S215C FRHGVVVPY  | 18   | 14   |
| >TP53-S215C FRHSVVVPY  | 33  | >TP53-S215C FRHGVVVPY  | 26   | 7    |
| >TP53-S215C TFRHSVVVPY | 185 | >TP53-S215C TFRHGVVVPY | 476  | 291  |
| >TP53-S215C TFRHSVVV   | 139 | >TP53-S215C TFRHGVVV   | 469  | 330  |
| >TP53-S215C TFRHSVVVPY | 162 | >TP53-S215C TFRHGVVVPY | 311  | 149  |
| >TP53-S215C TFRHSVVVPY | 140 | >TP53-S215C TFRHGVVVPY | 165  | 25   |
| >TP53-S215C TFRHSVVVPY | 225 | >TP53-S215C TFRHGVVVPY | 163  | 62   |
| >TP53-S215C TFRHSVVVPY | 271 | >TP53-S215C TFRHGVVVPY | 1098 | 827  |
| >TP53-S215C NTFRHSVV   | 382 | >TP53-S215C NTFRHGVV   | 915  | 533  |
| >TP53-S215C NTFRHSVV   | 309 | >TP53-S215C NTFRHGVV   | 532  | 223  |
| >TP53-S215C NTFRHSVVV  | 265 | >TP53-S215C NTFRHGVVV  | 298  | 33   |
| >TP53-S215C NTFRHSVVVF | 128 | >TP53-S215C NTFRHGVVVI | 189  | 61   |
| >TP53-S215C NTFRHSVVVF | 97  | >TP53-S215C NTFRHGVVVI | 161  | 64   |
| >TP53-S215C NTFRHSVVVF | 123 | >TP53-S215C NTFRHGVVVI | 113  | 10   |
| >TP53-S215C NTFRHSVVVF | 678 | >TP53-S215C NTFRHGVVVI | 348  | 330  |
| >TP53-S215C NTFRHSVVVF | 82  | >TP53-S215C NTFRHGVVVI | 82   | 0    |
| >TP53-S215C NTFRHSVVV  | 412 | >TP53-S215C NTFRHGVVV  | 2043 | 1631 |
| >TP53-S215C NTFRHSVVVF | 61  | >TP53-S215C NTFRHGVVVI | 149  | 88   |
| >TP53-S215C NTFRHSVVVF | 34  | >TP53-S215C NTFRHGVVVI | 52   | 18   |
| >TP53-S215C NTFRHSVV   | 11  | >TP53-S215C NTFRHGVV   | 17   | 6    |
| >TP53-S215C NTFRHSVVV  | 8   | >TP53-S215C NTFRHGVVV  | 20   | 12   |
| >TP53-S215C NTFRHSVV   | 50  | >TP53-S215C NTFRHGVV   | 86   | 36   |
| >TP53-S215C NTFRHSVVV  | 25  | >TP53-S215C NTFRHGVVV  | 94   | 69   |
| >TP53-S215C NTFRHSVVVF | 65  | >TP53-S215C NTFRHGVVVI | 78   | 13   |
| >TP53-S215C NTFRHSVVVF | 492 | >TP53-S215C NTFRHGVVVI | 363  | 129  |
| >TP53-S215C NTFRHSVVVF | 33  | >TP53-S215C NTFRHGVVVI | 47   | 14   |
| >TP53-S215C NTFRHSVVVF | 23  | >TP53-S215C NTFRHGVVVI | 26   | 3    |
| >TP53-S215C NTFRHSVVVF | 609 | >TP53-S215C NTFRHGVVVI | 488  | 121  |
| >TP53-S215C NTFRHSVVVF | 105 | >TP53-S215C NTFRHGVVVI | 183  | 78   |
| >TP53-S215C NTFRHSVVVF | 289 | >TP53-S215C NTFRHGVVVI | 309  | 20   |
| >TP53-S215C NTFRHSVVVF | 23  | >TP53-S215C NTFRHGVVVI | 38   | 15   |
| >TP53-S215C RNTFRHSVV  | 224 | >TP53-S215C RNTFRHGVV  | 2787 | 2563 |

|                          |      |                           |      |      |
|--------------------------|------|---------------------------|------|------|
| >TP53-S215C LDDRNTFRHC   | 482  | >TP53-S215C LDDRNTFRHC    | 427  | 55   |
| >TP53-S215I- SVVVVPYEPPE | 75   | >TP53-S215I- IVVVVPYEPPE\ | 61   | 14   |
| >TP53-S215I- SVVVVPYEPPE | 92   | >TP53-S215I- IVVVVPYEPPE\ | 105  | 13   |
| >TP53-S215I- SVVVVPYEPPE | 129  | >TP53-S215I- IVVVVPYEPPE\ | 773  | 644  |
| >TP53-S215I- SVVVVPYEPPE | 57   | >TP53-S215I- IVVVVPYEPPE\ | 60   | 3    |
| >TP53-S215I- SVVVVPYEPPE | 81   | >TP53-S215I- IVVVVPYEPPE\ | 218  | 137  |
| >TP53-S215I- SVVVVPYEPPE | 26   | >TP53-S215I- IVVVVPYEPPE\ | 177  | 151  |
| >TP53-S215I- YLDDRNTFRH  | 1704 | >TP53-S215I- YLDDRNTFRH   | 24   | 1680 |
| >TP53-S215I- YLDDRNTFRH  | 1276 | >TP53-S215I- YLDDRNTFRH   | 38   | 1238 |
| >TP53-S215I- YLDDRNTFRH  | 3101 | >TP53-S215I- YLDDRNTFRH   | 34   | 3067 |
| >TP53-S215I- YLDDRNTFRH  | 333  | >TP53-S215I- YLDDRNTFRH   | 14   | 319  |
| >TP53-S215I- YLDDRNTFRH  | 155  | >TP53-S215I- YLDDRNTFRH   | 4    | 151  |
| >TP53-S215I- YLDDRNTFRH  | 1022 | >TP53-S215I- YLDDRNTFRH   | 4    | 1018 |
| >TP53-S215I- YLDDRNTFRH  | 648  | >TP53-S215I- YLDDRNTFRH   | 10   | 638  |
| >TP53-S215I- YLDDRNTFRH  | 7630 | >TP53-S215I- YLDDRNTFRH   | 32   | 7598 |
| >TP53-S215I- YLDDRNTFRH  | 171  | >TP53-S215I- YLDDRNTFRH   | 4    | 167  |
| >TP53-S215I- RHSVVVPY    | 23   | >TP53-S215I- RHIVVVPY     | 15   | 8    |
| >TP53-S215I- RHSVVVPY    | 413  | >TP53-S215I- RHIVVVPY     | 2169 | 1756 |
| >TP53-S215I- FRHSVVVPY   | 4    | >TP53-S215I- FRHIVVVPY    | 9    | 5    |
| >TP53-S215I- FRHSVVVPY   | 33   | >TP53-S215I- FRHIVVVPY    | 42   | 9    |
| >TP53-S215I- TFRHSVVVPY  | 185  | >TP53-S215I- TFRHIVVVPY   | 158  | 27   |
| >TP53-S215I- TFRHSVVV    | 139  | >TP53-S215I- TFRHIVVV     | 410  | 271  |
| >TP53-S215I- TFRHSVVVPY  | 162  | >TP53-S215I- TFRHIVVVPY   | 327  | 165  |
| >TP53-S215I- TFRHSVVVPY  | 140  | >TP53-S215I- TFRHIVVVPY   | 313  | 173  |
| >TP53-S215I- TFRHSVVVPY  | 225  | >TP53-S215I- TFRHIVVVPY   | 634  | 409  |
| >TP53-S215I- TFRHSVVVPY  | 271  | >TP53-S215I- TFRHIVVVPY   | 1200 | 929  |
| >TP53-S215I- NTFRHSVV    | 382  | >TP53-S215I- NTFRHIVV     | 533  | 151  |
| >TP53-S215I- NTFRHSVVV   | 581  | >TP53-S215I- NTFRHIVVV    | 139  | 442  |
| >TP53-S215I- NTFRHSVV    | 1308 | >TP53-S215I- NTFRHIVV     | 493  | 815  |
| >TP53-S215I- NTFRHSVVV   | 680  | >TP53-S215I- NTFRHIVVV    | 169  | 511  |
| >TP53-S215I- NTFRHSVV    | 309  | >TP53-S215I- NTFRHIVV     | 105  | 204  |
| >TP53-S215I- NTFRHSVVV   | 265  | >TP53-S215I- NTFRHIVVV    | 48   | 217  |
| >TP53-S215I- NTFRHSVVV   | 1108 | >TP53-S215I- NTFRHIVVV    | 274  | 834  |
| >TP53-S215I- NTFRHSVVVF  | 128  | >TP53-S215I- NTFRHIVVVP   | 150  | 22   |
| >TP53-S215I- NTFRHSVVVF  | 845  | >TP53-S215I- NTFRHIVVVP   | 418  | 427  |
| >TP53-S215I- NTFRHSVVVF  | 97   | >TP53-S215I- NTFRHIVVVP   | 86   | 11   |
| >TP53-S215I- NTFRHSVVVF  | 123  | >TP53-S215I- NTFRHIVVVP   | 47   | 76   |
| >TP53-S215I- NTFRHSVVVF  | 82   | >TP53-S215I- NTFRHIVVVP   | 129  | 47   |
| >TP53-S215I- NTFRHSVVV   | 412  | >TP53-S215I- NTFRHIVVV    | 890  | 478  |
| >TP53-S215I- NTFRHSVVVF  | 61   | >TP53-S215I- NTFRHIVVVP   | 115  | 54   |
| >TP53-S215I- NTFRHSVVVF  | 34   | >TP53-S215I- NTFRHIVVVP   | 34   | 0    |
| >TP53-S215I- NTFRHSVV    | 11   | >TP53-S215I- NTFRHIVV     | 11   | 0    |
| >TP53-S215I- NTFRHSVVV   | 8    | >TP53-S215I- NTFRHIVVV    | 6    | 2    |

|                         |       |                        |      |       |
|-------------------------|-------|------------------------|------|-------|
| >TP53-S215I-NTFRHSVV    | 50    | >TP53-S215I-NTFRHIVV   | 32   | 18    |
| >TP53-S215I-NTFRHSVVV   | 25    | >TP53-S215I-NTFRHIVVV  | 31   | 6     |
| >TP53-S215I-NTFRHSVVVF  | 65    | >TP53-S215I-NTFRHIVVVP | 93   | 28    |
| >TP53-S215I-NTFRHSVVVVF | 492   | >TP53-S215I-NTFRHIVVVP | 1024 | 532   |
| >TP53-S215I-NTFRHSVVVVF | 33    | >TP53-S215I-NTFRHIVVVP | 60   | 27    |
| >TP53-S215I-NTFRHSVVVVF | 23    | >TP53-S215I-NTFRHIVVVP | 25   | 2     |
| >TP53-S215I-NTFRHSVVVVF | 609   | >TP53-S215I-NTFRHIVVVP | 405  | 204   |
| >TP53-S215I-NTFRHSVVVVF | 105   | >TP53-S215I-NTFRHIVVVP | 205  | 100   |
| >TP53-S215I-NTFRHSVVVVF | 289   | >TP53-S215I-NTFRHIVVVP | 612  | 323   |
| >TP53-S215I-NTFRHSVVVVF | 23    | >TP53-S215I-NTFRHIVVVP | 35   | 12    |
| >TP53-S215I-RNTFRHSVV   | 224   | >TP53-S215I-RNTFRHIVV  | 5938 | 5714  |
| >TP53-S215I-LDDRNTFRHS  | 18048 | >TP53-S215I-LDDRNTFRHI | 171  | 17877 |
| >TP53-S215I-LDDRNTFRHS  | 482   | >TP53-S215I-LDDRNTFRHI | 234  | 248   |
| >TP53-S215I-SVVVPYEPPE  | 75    | >TP53-S215I-NVVVPYEPPE | 201  | 126   |
| >TP53-S215I-SVVVPYEPPE  | 92    | >TP53-S215I-NVVVPYEPPE | 907  | 815   |
| >TP53-S215I-SVVVPYEPPE  | 129   | >TP53-S215I-NVVVPYEPPE | 2887 | 2758  |
| >TP53-S215I-SVVVPYEPPE  | 57    | >TP53-S215I-NVVVPYEPPE | 550  | 493   |
| >TP53-S215I-SVVVPYEPPE  | 81    | >TP53-S215I-NVVVPYEPPE | 42   | 39    |
| >TP53-S215I-SVVVPYEPPE  | 26    | >TP53-S215I-NVVVPYEPPE | 17   | 9     |
| >TP53-S215I-YLDDRNTFRH  | 333   | >TP53-S215I-YLDDRNTFRH | 4608 | 4275  |
| >TP53-S215I-YLDDRNTFRH  | 155   | >TP53-S215I-YLDDRNTFRH | 700  | 545   |
| >TP53-S215I-YLDDRNTFRH  | 171   | >TP53-S215I-YLDDRNTFRH | 1429 | 1258  |
| >TP53-S215I-RHSVVVPY    | 23    | >TP53-S215I-RHNVVVPY   | 23   | 0     |
| >TP53-S215I-RHSVVVPY    | 413   | >TP53-S215I-RHNVVVPY   | 1939 | 1526  |
| >TP53-S215I-FRHSVVVPY   | 4     | >TP53-S215I-FRHNVVVPY  | 5    | 1     |
| >TP53-S215I-FRHSVVVPY   | 33    | >TP53-S215I-FRHNVVVPY  | 27   | 6     |
| >TP53-S215I-TFRHSVVVPY  | 185   | >TP53-S215I-TFRHNVVVPY | 214  | 29    |
| >TP53-S215I-TFRHSVVV    | 139   | >TP53-S215I-TFRHNVVV   | 256  | 117   |
| >TP53-S215I-TFRHSVVVPY  | 162   | >TP53-S215I-TFRHNVVVPY | 216  | 54    |
| >TP53-S215I-TFRHSVVVPY  | 140   | >TP53-S215I-TFRHNVVVPY | 211  | 71    |
| >TP53-S215I-TFRHSVVVPY  | 225   | >TP53-S215I-TFRHNVVVPY | 287  | 62    |
| >TP53-S215I-TFRHSVVVPY  | 271   | >TP53-S215I-TFRHNVVVPY | 615  | 344   |
| >TP53-S215I-NTFRHSVVVF  | 562   | >TP53-S215I-NTFRHNVVVI | 439  | 123   |
| >TP53-S215I-NTFRHSVV    | 382   | >TP53-S215I-NTFRHNVV   | 1067 | 685   |
| >TP53-S215I-NTFRHSVV    | 309   | >TP53-S215I-NTFRHNVV   | 641  | 332   |
| >TP53-S215I-NTFRHSVVV   | 265   | >TP53-S215I-NTFRHNVVV  | 481  | 216   |
| >TP53-S215I-NTFRHSVVVVF | 128   | >TP53-S215I-NTFRHNVVVI | 169  | 41    |
| >TP53-S215I-NTFRHSVVVVF | 97    | >TP53-S215I-NTFRHNVVVI | 158  | 61    |
| >TP53-S215I-NTFRHSVVVVF | 123   | >TP53-S215I-NTFRHNVVVI | 117  | 6     |
| >TP53-S215I-NTFRHSVVVVF | 678   | >TP53-S215I-NTFRHNVVVI | 462  | 216   |
| >TP53-S215I-NTFRHSVVVVF | 82    | >TP53-S215I-NTFRHNVVVI | 117  | 35    |
| >TP53-S215I-NTFRHSVVV   | 412   | >TP53-S215I-NTFRHNVVV  | 521  | 109   |
| >TP53-S215I-NTFRHSVVVVF | 61    | >TP53-S215I-NTFRHNVVVI | 63   | 2     |

|                        |       |                       |      |       |
|------------------------|-------|-----------------------|------|-------|
| >TP53-S215\NNTFRHSVVVF | 34    | >TP53-S215\NNTFRHNVVV | 31   | 3     |
| >TP53-S215\NNTFRHSVV   | 11    | >TP53-S215\NNTFRHNVV  | 10   | 1     |
| >TP53-S215\NNTFRHSVVV  | 8     | >TP53-S215\NNTFRHNVVV | 8    | 0     |
| >TP53-S215\NNTFRHSVV   | 50    | >TP53-S215\NNTFRHNVV  | 53   | 3     |
| >TP53-S215\NNTFRHSVVV  | 25    | >TP53-S215\NNTFRHNVVV | 35   | 10    |
| >TP53-S215\NNTFRHSVVVF | 65    | >TP53-S215\NNTFRHNVVV | 83   | 18    |
| >TP53-S215\NNTFRHSVVVF | 492   | >TP53-S215\NNTFRHNVVV | 527  | 35    |
| >TP53-S215\NNTFRHSVVVF | 33    | >TP53-S215\NNTFRHNVVV | 39   | 6     |
| >TP53-S215\NNTFRHSVVVF | 23    | >TP53-S215\NNTFRHNVVV | 39   | 16    |
| >TP53-S215\NNTFRHSVVVF | 105   | >TP53-S215\NNTFRHNVVV | 155  | 50    |
| >TP53-S215\NNTFRHSVVVF | 289   | >TP53-S215\NNTFRHNVVV | 335  | 46    |
| >TP53-S215\NNTFRHSVVVF | 23    | >TP53-S215\NNTFRHNVVV | 39   | 16    |
| >TP53-S215\NNTFRHSVV   | 224   | >TP53-S215\NNTFRHNVV  | 2510 | 2286  |
| >TP53-S215\NNTFRHSV    | 482   | >TP53-S215\NNTFRHN    | 417  | 65    |
| >TP53-S215\NNTFRHSV    | 75    | >TP53-S215\NNTFRHN    | 59   | 16    |
| >TP53-S215\NNTFRHSV    | 92    | >TP53-S215\NNTFRHN    | 112  | 20    |
| >TP53-S215\NNTFRHSV    | 129   | >TP53-S215\NNTFRHN    | 612  | 483   |
| >TP53-S215\NNTFRHSV    | 57    | >TP53-S215\NNTFRHN    | 122  | 65    |
| >TP53-S215\NNTFRHSV    | 81    | >TP53-S215\NNTFRHN    | 579  | 498   |
| >TP53-S215\NNTFRHSV    | 26    | >TP53-S215\NNTFRHN    | 226  | 200   |
| >TP53-S215\NNTFRHSV    | 333   | >TP53-S215\NNTFRHN    | 6852 | 6519  |
| >TP53-S215\NNTFRHSV    | 155   | >TP53-S215\NNTFRHN    | 2304 | 2149  |
| >TP53-S215\NNTFRHSV    | 171   | >TP53-S215\NNTFRHN    | 1114 | 943   |
| >TP53-S215\NNTFRHSV    | 25238 | >TP53-S215\NNTFRHN    | 291  | 24947 |
| >TP53-S215\NNTFRHSV    | 33237 | >TP53-S215\NNTFRHN    | 465  | 32772 |
| >TP53-S215\NNTFRHSV    | 12204 | >TP53-S215\NNTFRHN    | 434  | 11770 |
| >TP53-S215\NNTFRHSV    | 23    | >TP53-S215\NNTFRHN    | 10   | 13    |
| >TP53-S215\NNTFRHSV    | 413   | >TP53-S215\NNTFRHN    | 1781 | 1368  |
| >TP53-S215\NNTFRHSV    | 4     | >TP53-S215\NNTFRHN    | 5    | 1     |
| >TP53-S215\NNTFRHSV    | 33    | >TP53-S215\NNTFRHN    | 26   | 7     |
| >TP53-S215\NNTFRHSV    | 185   | >TP53-S215\NNTFRHN    | 457  | 272   |
| >TP53-S215\NNTFRHSV    | 139   | >TP53-S215\NNTFRHN    | 153  | 14    |
| >TP53-S215\NNTFRHSV    | 162   | >TP53-S215\NNTFRHN    | 153  | 9     |
| >TP53-S215\NNTFRHSV    | 140   | >TP53-S215\NNTFRHN    | 244  | 104   |
| >TP53-S215\NNTFRHSV    | 225   | >TP53-S215\NNTFRHN    | 393  | 168   |
| >TP53-S215\NNTFRHSV    | 271   | >TP53-S215\NNTFRHN    | 962  | 691   |
| >TP53-S215\NNTFRHSV    | 382   | >TP53-S215\NNTFRHN    | 2358 | 1976  |
| >TP53-S215\NNTFRHSV    | 309   | >TP53-S215\NNTFRHN    | 1263 | 954   |
| >TP53-S215\NNTFRHSV    | 265   | >TP53-S215\NNTFRHN    | 2167 | 1902  |
| >TP53-S215\NNTFRHSV    | 128   | >TP53-S215\NNTFRHN    | 157  | 29    |
| >TP53-S215\NNTFRHSV    | 97    | >TP53-S215\NNTFRHN    | 223  | 126   |
| >TP53-S215\NNTFRHSV    | 123   | >TP53-S215\NNTFRHN    | 119  | 4     |
| >TP53-S215\NNTFRHSV    | 82    | >TP53-S215\NNTFRHN    | 152  | 70    |

|                        |      |                        |      |      |
|------------------------|------|------------------------|------|------|
| >TP53-S215RNTFRHSVVV   | 412  | >TP53-S215RNTFRHRVVV   | 1306 | 894  |
| >TP53-S215RNTFRHSVVVF  | 61   | >TP53-S215RNTFRHRVVVF  | 115  | 54   |
| >TP53-S215RNTFRHSVVVF  | 34   | >TP53-S215RNTFRHRVVVF  | 33   | 1    |
| >TP53-S215RNTFRHSVV    | 11   | >TP53-S215RNTFRHRVV    | 26   | 15   |
| >TP53-S215RNTFRHSVVV   | 8    | >TP53-S215RNTFRHRVVV   | 8    | 0    |
| >TP53-S215RNTFRHSVV    | 50   | >TP53-S215RNTFRHRVV    | 239  | 189  |
| >TP53-S215RNTFRHSVVV   | 25   | >TP53-S215RNTFRHRVVV   | 126  | 101  |
| >TP53-S215RNTFRHSVVVF  | 65   | >TP53-S215RNTFRHRVVVF  | 100  | 35   |
| >TP53-S215RNTFRHSVVVF  | 492  | >TP53-S215RNTFRHRVVVF  | 1168 | 676  |
| >TP53-S215RNTFRHSVVVF  | 33   | >TP53-S215RNTFRHRVVVF  | 44   | 11   |
| >TP53-S215RNTFRHSVVVF  | 23   | >TP53-S215RNTFRHRVVVF  | 72   | 49   |
| >TP53-S215RNTFRHSVVVF  | 105  | >TP53-S215RNTFRHRVVVF  | 284  | 179  |
| >TP53-S215RNTFRHSVVVF  | 289  | >TP53-S215RNTFRHRVVVF  | 463  | 174  |
| >TP53-S215RNTFRHSVVVF  | 23   | >TP53-S215RNTFRHRVVVF  | 32   | 9    |
| >TP53-S215RNTFRHSVV    | 224  | >TP53-S215RNTFRHRVV    | 5833 | 5609 |
| >TP53-S215RLDDRNTFRHS  | 482  | >TP53-S215RLDDRNTFRHF  | 475  | 7    |
| >TP53-S215T SVVVPYEPPE | 75   | >TP53-S215T TVVVPYEPPE | 151  | 76   |
| >TP53-S215T SVVVPYEPPE | 92   | >TP53-S215T TVVVPYEPPE | 554  | 462  |
| >TP53-S215T SVVVPYEPPE | 129  | >TP53-S215T TVVVPYEPPE | 1294 | 1165 |
| >TP53-S215T SVVVPYEPPE | 57   | >TP53-S215T TVVVPYEPPE | 175  | 118  |
| >TP53-S215T SVVVPYEPPE | 81   | >TP53-S215T TVVVPYEPPE | 32   | 49   |
| >TP53-S215T SVVVPYEPPE | 26   | >TP53-S215T TVVVPYEPPE | 18   | 8    |
| >TP53-S215T YLDDRNTFRH | 1704 | >TP53-S215T YLDDRNTFRH | 276  | 1428 |
| >TP53-S215T YLDDRNTFRH | 333  | >TP53-S215T YLDDRNTFRH | 89   | 244  |
| >TP53-S215T YLDDRNTFRH | 155  | >TP53-S215T YLDDRNTFRH | 30   | 125  |
| >TP53-S215T YLDDRNTFRH | 1022 | >TP53-S215T YLDDRNTFRH | 118  | 904  |
| >TP53-S215T YLDDRNTFRH | 648  | >TP53-S215T YLDDRNTFRH | 81   | 567  |
| >TP53-S215T YLDDRNTFRH | 171  | >TP53-S215T YLDDRNTFRH | 16   | 155  |
| >TP53-S215T RHSVVVPY   | 23   | >TP53-S215T RHTVVVPY   | 59   | 36   |
| >TP53-S215T RHSVVVPY   | 413  | >TP53-S215T RHTVVVPY   | 344  | 69   |
| >TP53-S215T FRHSVVVPY  | 4    | >TP53-S215T FRHTVVVPY  | 6    | 2    |
| >TP53-S215T FRHSVVVPY  | 33   | >TP53-S215T FRHTVVVPY  | 35   | 2    |
| >TP53-S215T TFRHSVVVPY | 185  | >TP53-S215T TFRHTVVVPY | 151  | 34   |
| >TP53-S215T TFRHSVVV   | 139  | >TP53-S215T TFRHTVVV   | 142  | 3    |
| >TP53-S215T TFRHSVVVPY | 162  | >TP53-S215T TFRHTVVVPY | 132  | 30   |
| >TP53-S215T TFRHSVVVPY | 140  | >TP53-S215T TFRHTVVVPY | 186  | 46   |
| >TP53-S215T TFRHSVVVPY | 225  | >TP53-S215T TFRHTVVVPY | 321  | 96   |
| >TP53-S215T TFRHSVVVPY | 271  | >TP53-S215T TFRHTVVVPY | 385  | 114  |
| >TP53-S215T NTFRHSVVVF | 562  | >TP53-S215T NTFRHTVVVF | 401  | 161  |
| >TP53-S215T NTFRHSVV   | 382  | >TP53-S215T NTFRHTVV   | 314  | 68   |
| >TP53-S215T NTFRHSVVV  | 581  | >TP53-S215T NTFRHTVVV  | 297  | 284  |
| >TP53-S215T NTFRHSVV   | 309  | >TP53-S215T NTFRHTVV   | 358  | 49   |
| >TP53-S215T NTFRHSVVV  | 265  | >TP53-S215T NTFRHTVVV  | 234  | 31   |

|                        |      |                        |       |       |
|------------------------|------|------------------------|-------|-------|
| >TP53-S215T NTFRHSVVVF | 128  | >TP53-S215T NTFRHTVVVF | 114   | 14    |
| >TP53-S215T NTFRHSVVVF | 97   | >TP53-S215T NTFRHTVVVF | 81    | 16    |
| >TP53-S215T NTFRHSVVVF | 123  | >TP53-S215T NTFRHTVVVF | 56    | 67    |
| >TP53-S215T NTFRHSVVVF | 678  | >TP53-S215T NTFRHTVVVF | 269   | 409   |
| >TP53-S215T NTFRHSVVVF | 82   | >TP53-S215T NTFRHTVVVF | 82    | 0     |
| >TP53-S215T NTFRHSVVV  | 412  | >TP53-S215T NTFRHTVVV  | 173   | 239   |
| >TP53-S215T NTFRHSVVVF | 61   | >TP53-S215T NTFRHTVVVF | 41    | 20    |
| >TP53-S215T NTFRHSVVVF | 34   | >TP53-S215T NTFRHTVVVF | 27    | 7     |
| >TP53-S215T NTFRHSVV   | 11   | >TP53-S215T NTFRHTVV   | 10    | 1     |
| >TP53-S215T NTFRHSVVV  | 8    | >TP53-S215T NTFRHTVVV  | 6     | 2     |
| >TP53-S215T NTFRHSVV   | 50   | >TP53-S215T NTFRHTVV   | 40    | 10    |
| >TP53-S215T NTFRHSVVV  | 25   | >TP53-S215T NTFRHTVVV  | 17    | 8     |
| >TP53-S215T NTFRHSVVVF | 766  | >TP53-S215T NTFRHTVVVF | 467   | 299   |
| >TP53-S215T NTFRHSVVVF | 65   | >TP53-S215T NTFRHTVVVF | 77    | 12    |
| >TP53-S215T NTFRHSVVVF | 492  | >TP53-S215T NTFRHTVVVF | 666   | 174   |
| >TP53-S215T NTFRHSVVVF | 33   | >TP53-S215T NTFRHTVVVF | 38    | 5     |
| >TP53-S215T NTFRHSVVVF | 23   | >TP53-S215T NTFRHTVVVF | 35    | 12    |
| >TP53-S215T NTFRHSVVVF | 105  | >TP53-S215T NTFRHTVVVF | 113   | 8     |
| >TP53-S215T NTFRHSVVVF | 289  | >TP53-S215T NTFRHTVVVF | 546   | 257   |
| >TP53-S215T NTFRHSVVVF | 23   | >TP53-S215T NTFRHTVVVF | 31    | 8     |
| >TP53-S215T RNTFRHSVV  | 224  | >TP53-S215T RNTFRHTVV  | 1298  | 1074  |
| >TP53-S215T LDDRNTFRHS | 482  | >TP53-S215T LDDRNTFRHT | 206   | 276   |
| >TP53-S227F SDCTTIHY   | 1951 | >TP53-S227F FDCTTIHY   | 404   | 1547  |
| >TP53-S227F SDCTTIHYNY | 400  | >TP53-S227F FDCTTIHYNY | 229   | 171   |
| >TP53-S227F GSDCTTIHY  | 18   | >TP53-S227F GFDCTTIHY  | 7354  | 7336  |
| >TP53-S227F GSDCTTIHYN | 34   | >TP53-S227F GFDCTTIHYN | 10403 | 10369 |
| >TP53-S227F GSDCTTIHY  | 659  | >TP53-S227F GFDCTTIHY  | 70    | 589   |
| >TP53-S227F GSDCTTIHYN | 174  | >TP53-S227F GFDCTTIHYN | 32    | 142   |
| >TP53-S227F GSDCTTIHY  | 68   | >TP53-S227F GFDCTTIHY  | 24672 | 24604 |
| >TP53-S227F GSDCTTIHYN | 99   | >TP53-S227F GFDCTTIHYN | 24893 | 24794 |
| >TP53-S227F GSDCTTIHYN | 247  | >TP53-S227F GFDCTTIHYN | 5310  | 5063  |
| >TP53-S227F GSDCTTIHY  | 242  | >TP53-S227F GFDCTTIHY  | 96    | 146   |
| >TP53-S227F GSDCTTIHYN | 97   | >TP53-S227F GFDCTTIHYN | 37    | 60    |
| >TP53-S227F VGSDCTTIHY | 353  | >TP53-S227F VGFDCTTIHY | 975   | 622   |
| >TP53-S227F VGSDCTTIHY | 184  | >TP53-S227F VGFDCTTIHY | 88    | 96    |
| >TP53-S227F VGSDCTTIHY | 642  | >TP53-S227F VGFDCTTIHY | 297   | 345   |
| >TP53-S227F VGSDCTTIHY | 377  | >TP53-S227F VGFDCTTIHY | 151   | 226   |
| >TP53-S227F VGSDCTTIHY | 2195 | >TP53-S227F VGFDCTTIHY | 275   | 1920  |
| >TP53-S227F VGSDCTTIHY | 1948 | >TP53-S227F VGFDCTTIHY | 273   | 1675  |
| >TP53-S227F VGSDCTTIH  | 1591 | >TP53-S227F VGFDCTTIH  | 281   | 1310  |
| >TP53-S227F VGSDCTTIHY | 449  | >TP53-S227F VGFDCTTIHY | 2396  | 1947  |
| >TP53-S227F VGSDCTTI   | 605  | >TP53-S227F VGFDCTTI   | 102   | 503   |
| >TP53-S227F EVGSDCTTIH | 11   | >TP53-S227F EVGFDCTTIH | 16    | 5     |

|                         |       |                         |      |       |
|-------------------------|-------|-------------------------|------|-------|
| >TP53-S227F EVGSDCTTIH' | 75    | >TP53-S227F EVGFDCTTIH' | 333  | 258   |
| >TP53-S227F EVGSDCTTIH' | 387   | >TP53-S227F EVGFDCTTIH' | 252  | 135   |
| >TP53-S227F EVGSDCTTIH' | 612   | >TP53-S227F EVGFDCTTIH' | 421  | 191   |
| >TP53-S227F EVGSDCTTI   | 1082  | >TP53-S227F EVGFDCTTI   | 363  | 719   |
| >TP53-S227F EVGSDCTTIH' | 326   | >TP53-S227F EVGFDCTTIH' | 273  | 53    |
| >TP53-S227F PEVGSDCTTI  | 342   | >TP53-S227F PEVGFDCCTI  | 346  | 4     |
| >TP53-S227F PPEVGSDCTT  | 657   | >TP53-S227F PPEVGFDCCT  | 469  | 188   |
| >TP53-S227F PYEPPEVGS   | 12616 | >TP53-S227F PYEPPEVGF   | 87   | 12529 |
| >TP53-S227F VPYEPPEVGS  | 37430 | >TP53-S227F VPYEPPEVGF  | 376  | 37054 |
| >TP53-S227F VPYEPPEVGS  | 19954 | >TP53-S227F VPYEPPEVGF  | 145  | 19809 |
| >TP53-S227F VPYEPPEVGS  | 17702 | >TP53-S227F VPYEPPEVGF  | 319  | 17383 |
| >TP53-S240C SSCMGGMNI   | 58    | >TP53-S240C CSCMGGMNI   | 468  | 410   |
| >TP53-S240C SSCMGGMNI   | 192   | >TP53-S240C CSCMGGMNI   | 1633 | 1441  |
| >TP53-S240C SSCMGGMNI   | 110   | >TP53-S240C CSCMGGMNI   | 222  | 112   |
| >TP53-S240C SSCMGGMNI   | 56    | >TP53-S240C CSCMGGMNI   | 114  | 58    |
| >TP53-S240C SSCMGGMNI   | 1403  | >TP53-S240C CSCMGGMNI   | 461  | 942   |
| >TP53-S240C SSCMGGMNI   | 220   | >TP53-S240C CSCMGGMNI   | 329  | 109   |
| >TP53-S240C SSCMGGMNI   | 361   | >TP53-S240C CSCMGGMNI   | 936  | 575   |
| >TP53-S240C SSCMGGMNI   | 398   | >TP53-S240C CSCMGGMNI   | 3061 | 2663  |
| >TP53-S240C SSCMGGMNI   | 460   | >TP53-S240C CSCMGGMNI   | 3425 | 2965  |
| >TP53-S240C NSSCMGGMI   | 111   | >TP53-S240C NCSCMGGMI   | 9942 | 9831  |
| >TP53-S240C NSSCMGGMI   | 55    | >TP53-S240C NCSCMGGMI   | 373  | 318   |
| >TP53-S240C NSSCMGGMI   | 365   | >TP53-S240C NCSCMGGMI   | 906  | 541   |
| >TP53-S240C NSSCMGGMI   | 12    | >TP53-S240C NCSCMGGMI   | 649  | 637   |
| >TP53-S240C NSSCMGGMI   | 39    | >TP53-S240C NCSCMGGMI   | 1926 | 1887  |
| >TP53-S240C TTIHYNMCM   | 102   | >TP53-S240C TTIHYNMCM   | 435  | 333   |
| >TP53-S240C CNSSCMGGM   | 639   | >TP53-S240C CNCSCMGGM   | 334  | 305   |
| >TP53-S240C YMCNSSCM    | 262   | >TP53-S240C YMCNCSCM    | 116  | 146   |
| >TP53-S240C YMCNSSCMC   | 252   | >TP53-S240C YMCNCSCMC   | 98   | 154   |
| >TP53-S240C YMCNSSCM    | 205   | >TP53-S240C YMCNCSCM    | 143  | 62    |
| >TP53-S240C YMCNSSCMC   | 167   | >TP53-S240C YMCNCSCMC   | 90   | 77    |
| >TP53-S240C YMCNSSCM    | 283   | >TP53-S240C YMCNCSCM    | 372  | 89    |
| >TP53-S240C YMCNSSCMC   | 41    | >TP53-S240C YMCNCSCMC   | 44   | 3     |
| >TP53-S240C YMCNSSCMC   | 143   | >TP53-S240C YMCNCSCMC   | 108  | 35    |
| >TP53-S240C YMCNSSCM    | 24    | >TP53-S240C YMCNCSCM    | 63   | 39    |
| >TP53-S240C YMCNSSCMC   | 92    | >TP53-S240C YMCNCSCMC   | 211  | 119   |
| >TP53-S240C YMCNSSCMC   | 399   | >TP53-S240C YMCNCSCMC   | 651  | 252   |
| >TP53-S240C YMCNSSCMC   | 16    | >TP53-S240C YMCNCSCMC   | 24   | 8     |
| >TP53-S240C YMCNSSCM    | 92    | >TP53-S240C YMCNCSCM    | 167  | 75    |
| >TP53-S240C YMCNSSCMC   | 197   | >TP53-S240C YMCNCSCMC   | 163  | 34    |
| >TP53-S240C YMCNSSCM    | 150   | >TP53-S240C YMCNCSCM    | 285  | 135   |
| >TP53-S240C YMCNSSCMC   | 421   | >TP53-S240C YMCNCSCMC   | 521  | 100   |
| >TP53-S240C YMCNSSCM    | 67    | >TP53-S240C YMCNCSCM    | 80   | 13    |



|                        |     |                       |       |       |
|------------------------|-----|-----------------------|-------|-------|
| >TP53-S240C YMCNSSCMC  | 332 | >TP53-S240C YMCNCSCMC | 233   | 99    |
| >TP53-S240C YMCNSSCM   | 33  | >TP53-S240C YMCNCSCM  | 47    | 14    |
| >TP53-S240C YMCNSSCMC  | 53  | >TP53-S240C YMCNCSCMC | 62    | 9     |
| >TP53-S240C YMCNSSCM   | 33  | >TP53-S240C YMCNCSCM  | 49    | 16    |
| >TP53-S240C YMCNSSCMC  | 127 | >TP53-S240C YMCNCSCMC | 234   | 107   |
| >TP53-S240C YMCNSSCMC  | 292 | >TP53-S240C YMCNCSCMC | 450   | 158   |
| >TP53-S240C YMCNSSCMC  | 44  | >TP53-S240C YMCNCSCMC | 55    | 11    |
| >TP53-S240C YMCNSSCM   | 98  | >TP53-S240C YMCNCSCM  | 649   | 551   |
| >TP53-S240C YMCNSSCMC  | 145 | >TP53-S240C YMCNCSCMC | 600   | 455   |
| >TP53-S240C YMCNSSCM   | 20  | >TP53-S240C YMCNCSCM  | 39    | 19    |
| >TP53-S240C YMCNSSCMC  | 160 | >TP53-S240C YMCNCSCMC | 370   | 210   |
| >TP53-S240C YMCNSSCMC  | 294 | >TP53-S240C YMCNCSCMC | 906   | 612   |
| >TP53-S240C YMCNSSCM   | 310 | >TP53-S240C YMCNCSCM  | 453   | 143   |
| >TP53-S240C YMCNSSCM   | 346 | >TP53-S240C YMCNCSCM  | 940   | 594   |
| >TP53-S240C NYMCNSSCM  | 53  | >TP53-S240C NYMCNCSCM | 19    | 34    |
| >TP53-S240C NYMCNSSCM  | 924 | >TP53-S240C NYMCNCSCM | 312   | 612   |
| >TP53-S240C YNYMCNSSCI | 429 | >TP53-S240C YNYMCNCSC | 719   | 290   |
| >TP53-S240C YNYMCNSSCI | 31  | >TP53-S240C YNYMCNCSC | 59    | 28    |
| >TP53-S240C HNYMCNSS   | 70  | >TP53-S240C HNYMCNCS  | 54    | 16    |
| >TP53-S240C IHNYMCNS   | 840 | >TP53-S240C IHNYMCNC  | 349   | 491   |
| >TP53-S240C SSSCMGGMNI | 58  | >TP53-S240C GSCMGGMN  | 181   | 123   |
| >TP53-S240C SSSCMGGMNI | 192 | >TP53-S240C GSCMGGMN  | 867   | 675   |
| >TP53-S240C SSSCMGGMNI | 110 | >TP53-S240C GSCMGGMN  | 174   | 64    |
| >TP53-S240C SSSCMGGMNI | 56  | >TP53-S240C GSCMGGMN  | 296   | 240   |
| >TP53-S240C SSSCMGGMNI | 220 | >TP53-S240C GSCMGGMN  | 1467  | 1247  |
| >TP53-S240C SSSCMGGMNI | 361 | >TP53-S240C GSCMGGMN  | 2750  | 2389  |
| >TP53-S240C SSSCMGGMNI | 398 | >TP53-S240C GSCMGGMN  | 647   | 249   |
| >TP53-S240C SSSCMGGMNI | 460 | >TP53-S240C GSCMGGMN  | 766   | 306   |
| >TP53-S240C NSSCMGGMI  | 111 | >TP53-S240C NGSCMGGM  | 20424 | 20313 |
| >TP53-S240C NSSCMGGMI  | 55  | >TP53-S240C NGSCMGGM  | 1141  | 1086  |
| >TP53-S240C NSSCMGGMI  | 365 | >TP53-S240C NGSCMGGM  | 1561  | 1196  |
| >TP53-S240C NSSCMGGMI  | 12  | >TP53-S240C NGSCMGGM  | 1467  | 1455  |
| >TP53-S240C NSSCMGGMI  | 39  | >TP53-S240C NGSCMGGM  | 791   | 752   |
| >TP53-S240C TTIHNYMCM  | 102 | >TP53-S240C TTIHNYMCM | 873   | 771   |
| >TP53-S240C CNSSCMGGM  | 639 | >TP53-S240C CNGSCMGGM | 374   | 265   |
| >TP53-S240C YMCNSSCM   | 262 | >TP53-S240C YMCNGSCM  | 438   | 176   |
| >TP53-S240C YMCNSSCMC  | 252 | >TP53-S240C YMCNGSCMC | 223   | 29    |
| >TP53-S240C YMCNSSCM   | 205 | >TP53-S240C YMCNGSCM  | 529   | 324   |
| >TP53-S240C YMCNSSCMC  | 167 | >TP53-S240C YMCNGSCMC | 274   | 107   |
| >TP53-S240C YMCNSSCM   | 283 | >TP53-S240C YMCNGSCM  | 349   | 66    |
| >TP53-S240C YMCNSSCMC  | 41  | >TP53-S240C YMCNGSCMC | 37    | 4     |
| >TP53-S240C YMCNSSCMC  | 143 | >TP53-S240C YMCNGSCMC | 86    | 57    |
| >TP53-S240C YMCNSSCM   | 24  | >TP53-S240C YMCNGSCM  | 18    | 6     |

|                         |      |                         |      |      |
|-------------------------|------|-------------------------|------|------|
| >TP53-S240C YMCNSSCMC   | 92   | >TP53-S240C YMCNGSCMC   | 63   | 29   |
| >TP53-S240C YMCNSSCMC   | 399  | >TP53-S240C YMCNGSCMC   | 256  | 143  |
| >TP53-S240C YMCNSSCMC   | 16   | >TP53-S240C YMCNGSCMC   | 12   | 4    |
| >TP53-S240C YMCNSSCM    | 92   | >TP53-S240C YMCNGSCM    | 118  | 26   |
| >TP53-S240C YMCNSSCMC   | 197  | >TP53-S240C YMCNGSCMC   | 172  | 25   |
| >TP53-S240C YMCNSSCM    | 150  | >TP53-S240C YMCNGSCM    | 117  | 33   |
| >TP53-S240C YMCNSSCMC   | 421  | >TP53-S240C YMCNGSCMC   | 237  | 184  |
| >TP53-S240C YMCNSSCM    | 67   | >TP53-S240C YMCNGSCM    | 96   | 29   |
| >TP53-S240C YMCNSSCMC   | 332  | >TP53-S240C YMCNGSCMC   | 237  | 95   |
| >TP53-S240C YMCNSSCM    | 33   | >TP53-S240C YMCNGSCM    | 28   | 5    |
| >TP53-S240C YMCNSSCMC   | 903  | >TP53-S240C YMCNGSCMC   | 331  | 572  |
| >TP53-S240C YMCNSSCMC   | 53   | >TP53-S240C YMCNGSCMC   | 40   | 13   |
| >TP53-S240C YMCNSSCM    | 33   | >TP53-S240C YMCNGSCM    | 39   | 6    |
| >TP53-S240C YMCNSSCMC   | 127  | >TP53-S240C YMCNGSCMC   | 152  | 25   |
| >TP53-S240C YMCNSSCMC   | 292  | >TP53-S240C YMCNGSCMC   | 341  | 49   |
| >TP53-S240C YMCNSSCMC   | 44   | >TP53-S240C YMCNGSCMC   | 49   | 5    |
| >TP53-S240C YMCNSSCM    | 98   | >TP53-S240C YMCNGSCM    | 64   | 34   |
| >TP53-S240C YMCNSSCMC   | 145  | >TP53-S240C YMCNGSCMC   | 114  | 31   |
| >TP53-S240C YMCNSSCM    | 20   | >TP53-S240C YMCNGSCM    | 37   | 17   |
| >TP53-S240C YMCNSSCMC   | 160  | >TP53-S240C YMCNGSCMC   | 408  | 248  |
| >TP53-S240C YMCNSSCMC   | 294  | >TP53-S240C YMCNGSCMC   | 509  | 215  |
| >TP53-S240C YMCNSSCM    | 310  | >TP53-S240C YMCNGSCM    | 468  | 158  |
| >TP53-S240C YMCNSSCM    | 346  | >TP53-S240C YMCNGSCM    | 497  | 151  |
| >TP53-S240C NYMCNSSCM   | 726  | >TP53-S240C NYMCNGSCM   | 380  | 346  |
| >TP53-S240C NYMCNSSCM   | 53   | >TP53-S240C NYMCNGSCM   | 103  | 50   |
| >TP53-S240C YNYMCNSSCI  | 429  | >TP53-S240C YNYMCNGSC   | 746  | 317  |
| >TP53-S240C YNYMCNSSCI  | 31   | >TP53-S240C YNYMCNGSC   | 84   | 53   |
| >TP53-S240C HNYMCNSS    | 70   | >TP53-S240C HNYMCNGS    | 133  | 63   |
| >TP53-S240I- SSCMGGMNI  | 58   | >TP53-S240I- ISCMGGMNF  | 251  | 193  |
| >TP53-S240I- SSCMGGMNI  | 192  | >TP53-S240I- ISCMGGMNF  | 911  | 719  |
| >TP53-S240I- SSCMGGMNI  | 110  | >TP53-S240I- ISCMGGMNF  | 93   | 17   |
| >TP53-S240I- SSCMGGMNI  | 56   | >TP53-S240I- ISCMGGMNF  | 93   | 37   |
| >TP53-S240I- SSCMGGMNI  | 1403 | >TP53-S240I- ISCMGGMNF  | 287  | 1116 |
| >TP53-S240I- SSCMGGMNI  | 220  | >TP53-S240I- ISCMGGMNF  | 243  | 23   |
| >TP53-S240I- SSCMGGMNI  | 361  | >TP53-S240I- ISCMGGMNF  | 662  | 301  |
| >TP53-S240I- SSCMGGMNI  | 398  | >TP53-S240I- ISCMGGMNF  | 1536 | 1138 |
| >TP53-S240I- SSCMGGMNI  | 460  | >TP53-S240I- ISCMGGMNF  | 1781 | 1321 |
| >TP53-S240I- NSSCMGGMI  | 111  | >TP53-S240I- NISCMGGMN  | 184  | 73   |
| >TP53-S240I- NSSCMGGMI  | 55   | >TP53-S240I- NISCMGGMN  | 62   | 7    |
| >TP53-S240I- NSSCMGGMI  | 365  | >TP53-S240I- NISCMGGMN  | 175  | 190  |
| >TP53-S240I- NSSCMGGMI  | 12   | >TP53-S240I- NISCMGGMN  | 11   | 1    |
| >TP53-S240I- NSSCMGGMI  | 39   | >TP53-S240I- NISCMGGMN  | 50   | 11   |
| >TP53-S240I- TTIHNYMCMN | 1485 | >TP53-S240I- TTIHNYMCMN | 154  | 1331 |

|                        |       |                        |      |       |
|------------------------|-------|------------------------|------|-------|
| >TP53-S240I-TTIHYNMCM  | 19316 | >TP53-S240I-TTIHYNMCM  | 485  | 18831 |
| >TP53-S240I-TTIHYNMCM  | 102   | >TP53-S240I-TTIHYNMCM  | 8    | 94    |
| >TP53-S240I-TTIHYNMCM  | 5157  | >TP53-S240I-TTIHYNMCM  | 25   | 5132  |
| >TP53-S240I-TTIHYNMCM  | 3205  | >TP53-S240I-TTIHYNMCM  | 29   | 3176  |
| >TP53-S240I-TTIHYNMCM  | 34143 | >TP53-S240I-TTIHYNMCM  | 325  | 33818 |
| >TP53-S240I-CNSSCMGGM  | 8994  | >TP53-S240I-CNISCMGGM  | 174  | 8820  |
| >TP53-S240I-CNSSCMGGM  | 876   | >TP53-S240I-CNISCMGGM  | 458  | 418   |
| >TP53-S240I-CNSSCMGGM  | 639   | >TP53-S240I-CNISCMGGM  | 426  | 213   |
| >TP53-S240I-YMCNSSCM   | 262   | >TP53-S240I-YMCNISCM   | 77   | 185   |
| >TP53-S240I-YMCNSSCM   | 252   | >TP53-S240I-YMCNISCMG  | 123  | 129   |
| >TP53-S240I-YMCNSSCM   | 205   | >TP53-S240I-YMCNISCM   | 49   | 156   |
| >TP53-S240I-YMCNSSCM   | 167   | >TP53-S240I-YMCNISCMG  | 47   | 120   |
| >TP53-S240I-YMCNSSCM   | 283   | >TP53-S240I-YMCNISCM   | 142  | 141   |
| >TP53-S240I-YMCNSSCM   | 41    | >TP53-S240I-YMCNISCMG  | 33   | 8     |
| >TP53-S240I-YMCNSSCM   | 676   | >TP53-S240I-YMCNISCM   | 347  | 329   |
| >TP53-S240I-YMCNSSCM   | 143   | >TP53-S240I-YMCNISCMG  | 124  | 19    |
| >TP53-S240I-YMCNSSCM   | 24    | >TP53-S240I-YMCNISCM   | 11   | 13    |
| >TP53-S240I-YMCNSSCM   | 92    | >TP53-S240I-YMCNISCMG  | 64   | 28    |
| >TP53-S240I-YMCNSSCM   | 399   | >TP53-S240I-YMCNISCMG  | 313  | 86    |
| >TP53-S240I-YMCNSSCM   | 16    | >TP53-S240I-YMCNISCMG  | 13   | 3     |
| >TP53-S240I-YMCNSSCM   | 92    | >TP53-S240I-YMCNISCM   | 89   | 3     |
| >TP53-S240I-YMCNSSCM   | 197   | >TP53-S240I-YMCNISCMG  | 202  | 5     |
| >TP53-S240I-YMCNSSCM   | 150   | >TP53-S240I-YMCNISCM   | 82   | 68    |
| >TP53-S240I-YMCNSSCM   | 421   | >TP53-S240I-YMCNISCMG  | 290  | 131   |
| >TP53-S240I-YMCNSSCM   | 67    | >TP53-S240I-YMCNISCM   | 31   | 36    |
| >TP53-S240I-YMCNSSCM   | 332   | >TP53-S240I-YMCNISCMG  | 186  | 146   |
| >TP53-S240I-YMCNSSCM   | 33    | >TP53-S240I-YMCNISCM   | 21   | 12    |
| >TP53-S240I-YMCNSSCM   | 53    | >TP53-S240I-YMCNISCMG  | 58   | 5     |
| >TP53-S240I-YMCNSSCM   | 33    | >TP53-S240I-YMCNISCM   | 50   | 17    |
| >TP53-S240I-YMCNSSCM   | 127   | >TP53-S240I-YMCNISCMG  | 283  | 156   |
| >TP53-S240I-YMCNSSCM   | 292   | >TP53-S240I-YMCNISCMG  | 598  | 306   |
| >TP53-S240I-YMCNSSCM   | 44    | >TP53-S240I-YMCNISCMG  | 61   | 17    |
| >TP53-S240I-YMCNSSCM   | 98    | >TP53-S240I-YMCNISCM   | 395  | 297   |
| >TP53-S240I-YMCNSSCM   | 145   | >TP53-S240I-YMCNISCMG  | 378  | 233   |
| >TP53-S240I-YMCNSSCM   | 20    | >TP53-S240I-YMCNISCM   | 52   | 32    |
| >TP53-S240I-YMCNSSCM   | 160   | >TP53-S240I-YMCNISCMG  | 545  | 385   |
| >TP53-S240I-YMCNSSCM   | 294   | >TP53-S240I-YMCNISCMG  | 1098 | 804   |
| >TP53-S240I-YMCNSSCM   | 310   | >TP53-S240I-YMCNISCM   | 508  | 198   |
| >TP53-S240I-YMCNSSCM   | 346   | >TP53-S240I-YMCNISCM   | 706  | 360   |
| >TP53-S240I-NYMCNSSCN  | 53    | >TP53-S240I-NYMCNISCM  | 37   | 16    |
| >TP53-S240I-NYMCNSSCN  | 650   | >TP53-S240I-NYMCNISCM  | 362  | 288   |
| >TP53-S240I-NYMCNSSCN  | 4667  | >TP53-S240I-NYMCNISCM  | 365  | 4302  |
| >TP53-S240I-YNYMCNSSCN | 429   | >TP53-S240I-YNYMCNISCM | 951  | 522   |

|                         |       |                         |       |       |
|-------------------------|-------|-------------------------|-------|-------|
| >TP53-S240I- YNYMCNSSCI | 31    | >TP53-S240I- YNYMCNISCN | 49    | 18    |
| >TP53-S240I- HNYMYCNS   | 12438 | >TP53-S240I- HNYMYCNI   | 42    | 12396 |
| >TP53-S240I- HNYMYCNSS  | 70    | >TP53-S240I- HNYMYCNISK | 71    | 1     |
| >TP53-S240I- HNYMYCNS   | 21470 | >TP53-S240I- HNYMYCNI   | 477   | 20993 |
| >TP53-S240I- HNYMYCNS   | 13090 | >TP53-S240I- HNYMYCNI   | 72    | 13018 |
| >TP53-S240I- HNYMYCNS   | 3880  | >TP53-S240I- HNYMYCNI   | 470   | 3410  |
| >TP53-S240I- IHYNYMCNS  | 840   | >TP53-S240I- IHYNYMCNI  | 44    | 796   |
| >TP53-S240I- IHYNYMCNS  | 13934 | >TP53-S240I- IHYNYMCNI  | 66    | 13868 |
| >TP53-S240I- IHYNYMCNS  | 1897  | >TP53-S240I- IHYNYMCNI  | 92    | 1805  |
| >TP53-S240I- IHYNYMCNS  | 24346 | >TP53-S240I- IHYNYMCNI  | 483   | 23863 |
| >TP53-S240I- IHYNYMCNS  | 5106  | >TP53-S240I- IHYNYMCNI  | 85    | 5021  |
| >TP53-S240I- TIHNYMYCNS | 10282 | >TP53-S240I- TIHNYMYCNI | 225   | 10057 |
| >TP53-S240I- TIHNYMYCNS | 2418  | >TP53-S240I- TIHNYMYCNI | 266   | 2152  |
| >TP53-S240I- TIHNYMYCNS | 17688 | >TP53-S240I- TIHNYMYCNI | 385   | 17303 |
| >TP53-S240P SSCMGGMNI   | 58    | >TP53-S240P PSCMGGMNI   | 7255  | 7197  |
| >TP53-S240P SSCMGGMNI   | 192   | >TP53-S240P PSCMGGMNI   | 7082  | 6890  |
| >TP53-S240P SSCMGGMNI   | 110   | >TP53-S240P PSCMGGMNI   | 3162  | 3052  |
| >TP53-S240P SSCMGGMNI   | 56    | >TP53-S240P PSCMGGMNI   | 1247  | 1191  |
| >TP53-S240P SSCMGGMNI   | 220   | >TP53-S240P PSCMGGMNI   | 5609  | 5389  |
| >TP53-S240P SSCMGGMNI   | 361   | >TP53-S240P PSCMGGMNI   | 9288  | 8927  |
| >TP53-S240P SSCMGGMNI   | 398   | >TP53-S240P PSCMGGMNI   | 8559  | 8161  |
| >TP53-S240P SSCMGGMNI   | 460   | >TP53-S240P PSCMGGMNI   | 8560  | 8100  |
| >TP53-S240P NSSCMGGMI   | 111   | >TP53-S240P NPSCMGGMI   | 11826 | 11715 |
| >TP53-S240P NSSCMGGMI   | 55    | >TP53-S240P NPSCMGGMI   | 1125  | 1070  |
| >TP53-S240P NSSCMGGMI   | 365   | >TP53-S240P NPSCMGGMI   | 1334  | 969   |
| >TP53-S240P NSSCMGGMI   | 12    | >TP53-S240P NPSCMGGMI   | 146   | 134   |
| >TP53-S240P NSSCMGGMI   | 39    | >TP53-S240P NPSCMGGMI   | 918   | 879   |
| >TP53-S240P NSSCMGGM    | 21930 | >TP53-S240P NPSCMGGM    | 53    | 21877 |
| >TP53-S240P NSSCMGGM    | 2064  | >TP53-S240P NPSCMGGM    | 45    | 2019  |
| >TP53-S240P TTIHNYMYCNI | 102   | >TP53-S240P TTIHNYMYCNI | 2817  | 2715  |
| >TP53-S240P CNSSCMGGM   | 12162 | >TP53-S240P CNPSCMGGM   | 220   | 11942 |
| >TP53-S240P CNSSCMGGM   | 639   | >TP53-S240P CNPSCMGGM   | 439   | 200   |
| >TP53-S240P YMCNSSCM    | 262   | >TP53-S240P YMCNPSCM    | 392   | 130   |
| >TP53-S240P YMCNSSCM    | 252   | >TP53-S240P YMCNPSCM    | 360   | 108   |
| >TP53-S240P YMCNSSCM    | 205   | >TP53-S240P YMCNPSCM    | 805   | 600   |
| >TP53-S240P YMCNSSCM    | 167   | >TP53-S240P YMCNPSCM    | 503   | 336   |
| >TP53-S240P YMCNSSCM    | 283   | >TP53-S240P YMCNPSCM    | 561   | 278   |
| >TP53-S240P YMCNSSCM    | 41    | >TP53-S240P YMCNPSCM    | 102   | 61    |
| >TP53-S240P YMCNSSCM    | 143   | >TP53-S240P YMCNPSCM    | 233   | 90    |
| >TP53-S240P YMCNSSCM    | 24    | >TP53-S240P YMCNPSCM    | 11    | 13    |
| >TP53-S240P YMCNSSCM    | 92    | >TP53-S240P YMCNPSCM    | 46    | 46    |
| >TP53-S240P YMCNSSCM    | 399   | >TP53-S240P YMCNPSCM    | 214   | 185   |
| >TP53-S240P YMCNSSCM    | 16    | >TP53-S240P YMCNPSCM    | 11    | 5     |

|                       |       |                      |       |       |
|-----------------------|-------|----------------------|-------|-------|
| >TP53-S240PYMCNSSCM   | 92    | >TP53-S240PYMCNPSCM  | 148   | 56    |
| >TP53-S240PYMCNSSCMC  | 197   | >TP53-S240PYMCNPSCMC | 275   | 78    |
| >TP53-S240PYMCNSSCM   | 150   | >TP53-S240PYMCNPSCM  | 198   | 48    |
| >TP53-S240PYMCNSSCMC  | 421   | >TP53-S240PYMCNPSCMC | 458   | 37    |
| >TP53-S240PYMCNSSCM   | 67    | >TP53-S240PYMCNPSCM  | 94    | 27    |
| >TP53-S240PYMCNSSCMC  | 332   | >TP53-S240PYMCNPSCMC | 439   | 107   |
| >TP53-S240PYMCNSSCM   | 33    | >TP53-S240PYMCNPSCM  | 61    | 28    |
| >TP53-S240PYMCNSSCMC  | 53    | >TP53-S240PYMCNPSCMC | 63    | 10    |
| >TP53-S240PYMCNSSCMC  | 591   | >TP53-S240PYMCNPSCMC | 435   | 156   |
| >TP53-S240PYMCNSSCM   | 33    | >TP53-S240PYMCNPSCM  | 70    | 37    |
| >TP53-S240PYMCNSSCMC  | 127   | >TP53-S240PYMCNPSCMC | 231   | 104   |
| >TP53-S240PYMCNSSCMC  | 292   | >TP53-S240PYMCNPSCMC | 451   | 159   |
| >TP53-S240PYMCNSSCMC  | 44    | >TP53-S240PYMCNPSCMC | 57    | 13    |
| >TP53-S240PYMCNSSCM   | 98    | >TP53-S240PYMCNPSCM  | 129   | 31    |
| >TP53-S240PYMCNSSCMC  | 145   | >TP53-S240PYMCNPSCMC | 119   | 26    |
| >TP53-S240PYMCNSSCM   | 20    | >TP53-S240PYMCNPSCM  | 32    | 12    |
| >TP53-S240PYMCNSSCMC  | 160   | >TP53-S240PYMCNPSCMC | 280   | 120   |
| >TP53-S240PYMCNSSCMC  | 294   | >TP53-S240PYMCNPSCMC | 553   | 259   |
| >TP53-S240PYMCNSSCM   | 310   | >TP53-S240PYMCNPSCM  | 747   | 437   |
| >TP53-S240PYMCNSSCM   | 346   | >TP53-S240PYMCNPSCM  | 735   | 389   |
| >TP53-S240PYMCNSSCM   | 53    | >TP53-S240PYMCNPSCM  | 136   | 83    |
| >TP53-S240PYMCNSSCM   | 924   | >TP53-S240PYMCNPSCM  | 354   | 570   |
| >TP53-S240PYNYMCNSSCI | 429   | >TP53-S240PYNYMCNPSC | 1495  | 1066  |
| >TP53-S240PYNYMCNSSCI | 31    | >TP53-S240PYNYMCNPSC | 46    | 15    |
| >TP53-S240PHYNYMCNSS  | 70    | >TP53-S240PHYNYMCNPS | 108   | 38    |
| >TP53-S240RSSCMGGMNI  | 58    | >TP53-S240RSCMGGMNI  | 95    | 37    |
| >TP53-S240RSSCMGGMNI  | 192   | >TP53-S240RSCMGGMNI  | 528   | 336   |
| >TP53-S240RSSCMGGMNI  | 3944  | >TP53-S240RSCMGGMNI  | 455   | 3489  |
| >TP53-S240RSSCMGGMNI  | 110   | >TP53-S240RSCMGGMNI  | 20    | 90    |
| >TP53-S240RSSCMGGMNI  | 56    | >TP53-S240RSCMGGMNI  | 18    | 38    |
| >TP53-S240RSSCMGGMNI  | 220   | >TP53-S240RSCMGGMNI  | 1294  | 1074  |
| >TP53-S240RSSCMGGMNI  | 361   | >TP53-S240RSCMGGMNI  | 1617  | 1256  |
| >TP53-S240RSSCMGGMNI  | 398   | >TP53-S240RSCMGGMNI  | 1746  | 1348  |
| >TP53-S240RSSCMGGMNI  | 460   | >TP53-S240RSCMGGMNI  | 1880  | 1420  |
| >TP53-S240RNSSCMGGMI  | 111   | >TP53-S240NRSCMGGMI  | 11898 | 11787 |
| >TP53-S240RNSSCMGGMI  | 55    | >TP53-S240NRSCMGGMI  | 637   | 582   |
| >TP53-S240RNSSCMGGMI  | 365   | >TP53-S240NRSCMGGMI  | 955   | 590   |
| >TP53-S240RNSSCMGGMI  | 12    | >TP53-S240NRSCMGGMI  | 498   | 486   |
| >TP53-S240RNSSCMGGMI  | 39    | >TP53-S240NRSCMGGMI  | 2864  | 2825  |
| >TP53-S240RTTIHYNMCM  | 10091 | >TP53-S240RTTIHYNMCM | 31    | 10060 |
| >TP53-S240RTTIHYNMCM  | 10260 | >TP53-S240RTTIHYNMCM | 12    | 10248 |
| >TP53-S240RTTIHYNMCM  | 16166 | >TP53-S240RTTIHYNMCM | 35    | 16131 |
| >TP53-S240RTTIHYNMCM  | 2396  | >TP53-S240RTTIHYNMCM | 3     | 2393  |

|                       |       |                       |      |       |
|-----------------------|-------|-----------------------|------|-------|
| >TP53-S240RTTIHYNMCM  | 102   | >TP53-S240RTTIHYNMCM  | 3996 | 3894  |
| >TP53-S240RTTIHYNMCM  | 2127  | >TP53-S240RTTIHYNMCM  | 137  | 1990  |
| >TP53-S240RTTIHYNMCM  | 30161 | >TP53-S240RTTIHYNMCM  | 197  | 29964 |
| >TP53-S240RYMCNSSCM   | 262   | >TP53-S240RYMCNRSCM   | 725  | 463   |
| >TP53-S240RYMCNSSCMC  | 252   | >TP53-S240RYMCNRSCM   | 295  | 43    |
| >TP53-S240RYMCNSSCM   | 205   | >TP53-S240RYMCNRSCM   | 702  | 497   |
| >TP53-S240RYMCNSSCMC  | 167   | >TP53-S240RYMCNRSCM   | 272  | 105   |
| >TP53-S240RYMCNSSCM   | 283   | >TP53-S240RYMCNRSCM   | 665  | 382   |
| >TP53-S240RYMCNSSCMC  | 41    | >TP53-S240RYMCNRSCM   | 49   | 8     |
| >TP53-S240RYMCNSSCMC  | 143   | >TP53-S240RYMCNRSCM   | 197  | 54    |
| >TP53-S240RYMCNSSCM   | 24    | >TP53-S240RYMCNRSCM   | 73   | 49    |
| >TP53-S240RYMCNSSCMC  | 92    | >TP53-S240RYMCNRSCM   | 158  | 66    |
| >TP53-S240RYMCNSSCMC  | 399   | >TP53-S240RYMCNRSCM   | 621  | 222   |
| >TP53-S240RYMCNSSCMC  | 16    | >TP53-S240RYMCNRSCM   | 19   | 3     |
| >TP53-S240RYMCNSSCM   | 92    | >TP53-S240RYMCNRSCM   | 431  | 339   |
| >TP53-S240RYMCNSSCMC  | 197   | >TP53-S240RYMCNRSCM   | 286  | 89    |
| >TP53-S240RYMCNSSCM   | 150   | >TP53-S240RYMCNRSCM   | 574  | 424   |
| >TP53-S240RYMCNSSCMC  | 421   | >TP53-S240RYMCNRSCM   | 635  | 214   |
| >TP53-S240RYMCNSSCM   | 67    | >TP53-S240RYMCNRSCM   | 738  | 671   |
| >TP53-S240RYMCNSSCMC  | 332   | >TP53-S240RYMCNRSCM   | 752  | 420   |
| >TP53-S240RYMCNSSCM   | 33    | >TP53-S240RYMCNRSCM   | 50   | 17    |
| >TP53-S240RYMCNSSCMC  | 53    | >TP53-S240RYMCNRSCM   | 64   | 11    |
| >TP53-S240RYMCNSSCM   | 3169  | >TP53-S240RYMCNRSCM   | 237  | 2932  |
| >TP53-S240RYMCNSSCM   | 33    | >TP53-S240RYMCNRSCM   | 57   | 24    |
| >TP53-S240RYMCNSSCMC  | 127   | >TP53-S240RYMCNRSCM   | 246  | 119   |
| >TP53-S240RYMCNSSCMC  | 292   | >TP53-S240RYMCNRSCM   | 514  | 222   |
| >TP53-S240RYMCNSSCMC  | 44    | >TP53-S240RYMCNRSCM   | 57   | 13    |
| >TP53-S240RYMCNSSCM   | 98    | >TP53-S240RYMCNRSCM   | 285  | 187   |
| >TP53-S240RYMCNSSCMC  | 145   | >TP53-S240RYMCNRSCM   | 237  | 92    |
| >TP53-S240RYMCNSSCM   | 20    | >TP53-S240RYMCNRSCM   | 49   | 29    |
| >TP53-S240RYMCNSSCMC  | 160   | >TP53-S240RYMCNRSCM   | 511  | 351   |
| >TP53-S240RYMCNSSCMC  | 294   | >TP53-S240RYMCNRSCM   | 637  | 343   |
| >TP53-S240RYMCNSSCM   | 310   | >TP53-S240RYMCNRSCM   | 1734 | 1424  |
| >TP53-S240RYMCNSSCM   | 346   | >TP53-S240RYMCNRSCM   | 1000 | 654   |
| >TP53-S240RYNYMCNSSCM | 53    | >TP53-S240RYNYMCNRSCM | 16   | 37    |
| >TP53-S240RYNYMCNSSCM | 429   | >TP53-S240RYNYMCNRSC  | 1493 | 1064  |
| >TP53-S240RYNYMCNSSCM | 31    | >TP53-S240RYNYMCNRSC  | 58   | 27    |
| >TP53-S240RYNYMCNSS   | 70    | >TP53-S240RYNYMCNRSC  | 39   | 31    |
| >TP53-S240RYNYMCNS    | 7572  | >TP53-S240RYNYMCNR    | 9    | 7563  |
| >TP53-S240RYNYMCNS    | 8979  | >TP53-S240RYNYMCNR    | 13   | 8966  |
| >TP53-S240RYNYMCNS    | 28637 | >TP53-S240RYNYMCNR    | 101  | 28536 |
| >TP53-S240RYNYMCNS    | 12434 | >TP53-S240RYNYMCNR    | 18   | 12416 |
| >TP53-S240RIHYNMCMNS  | 20680 | >TP53-S240RIHYNMCMNR  | 140  | 20540 |

|                         |       |                        |      |       |
|-------------------------|-------|------------------------|------|-------|
| >TP53-S240RIHYNMYMCNS   | 23177 | >TP53-S240RIHYNMYMCNR  | 171  | 23006 |
| >TP53-S240RTIHYNMYMCN\$ | 16587 | >TP53-S240RTIHYNMYMCNf | 465  | 16122 |
| >TP53-S240RTIHYNMYMCN\$ | 31944 | >TP53-S240RTIHYNMYMCNf | 369  | 31575 |
| >TP53-S240RTIHYNMYMCN\$ | 19330 | >TP53-S240RTIHYNMYMCNf | 57   | 19273 |
| >TP53-S240RTIHYNMYMCN\$ | 21821 | >TP53-S240RTIHYNMYMCNf | 193  | 21628 |
| >TP53-S240RTIHYNMYMCN\$ | 26901 | >TP53-S240RTIHYNMYMCNf | 33   | 26868 |
| >TP53-S240RTIHYNMYMCN\$ | 24656 | >TP53-S240RTIHYNMYMCNf | 356  | 24300 |
| >TP53-S240RTIHYNMYMCN\$ | 26817 | >TP53-S240RTIHYNMYMCNf | 122  | 26695 |
| >TP53-S240TSSCMGGMNI    | 58    | >TP53-S240TSSCMGGMNI   | 92   | 34    |
| >TP53-S240TSSCMGGMNI    | 192   | >TP53-S240TSSCMGGMNI   | 540  | 348   |
| >TP53-S240TSSCMGGMNI    | 110   | >TP53-S240TSSCMGGMNI   | 137  | 27    |
| >TP53-S240TSSCMGGMNI    | 56    | >TP53-S240TSSCMGGMNI   | 117  | 61    |
| >TP53-S240TSSCMGGMNI    | 1403  | >TP53-S240TSSCMGGMNI   | 417  | 986   |
| >TP53-S240TSSCMGGMNI    | 220   | >TP53-S240TSSCMGGMNI   | 79   | 141   |
| >TP53-S240TSSCMGGMNI    | 361   | >TP53-S240TSSCMGGMNI   | 180  | 181   |
| >TP53-S240TSSCMGGMNI    | 398   | >TP53-S240TSSCMGGMNI   | 1286 | 888   |
| >TP53-S240TSSCMGGMNI    | 460   | >TP53-S240TSSCMGGMNI   | 1484 | 1024  |
| >TP53-S240TNSSCMGGMI    | 111   | >TP53-S240TNSSCMGGMI   | 55   | 56    |
| >TP53-S240TNSSCMGGMI    | 6549  | >TP53-S240TNSSCMGGMI   | 402  | 6147  |
| >TP53-S240TNSSCMGGMI    | 2415  | >TP53-S240TNSSCMGGMI   | 416  | 1999  |
| >TP53-S240TNSSCMGGMI    | 2560  | >TP53-S240TNSSCMGGMI   | 386  | 2174  |
| >TP53-S240TNSSCMGGMI    | 55    | >TP53-S240TNSSCMGGMI   | 63   | 8     |
| >TP53-S240TNSSCMGGMI    | 365   | >TP53-S240TNSSCMGGMI   | 264  | 101   |
| >TP53-S240TNSSCMGGMI    | 1183  | >TP53-S240TNSSCMGGMI   | 278  | 905   |
| >TP53-S240TNSSCMGGMI    | 12    | >TP53-S240TNSSCMGGMI   | 7    | 5     |
| >TP53-S240TNSSCMGGMI    | 39    | >TP53-S240TNSSCMGGMI   | 12   | 27    |
| >TP53-S240TNSSCMGGMI    | 2429  | >TP53-S240TNSSCMGGMI   | 199  | 2230  |
| >TP53-S240TTIHYNMYMCN   | 102   | >TP53-S240TTIHYNMYMCN  | 102  | 0     |
| >TP53-S240TYMCNSSCM     | 262   | >TP53-S240TYMCNTSCM    | 215  | 47    |
| >TP53-S240TYMCNSSCMC    | 252   | >TP53-S240TYMCNTSCMC   | 250  | 2     |
| >TP53-S240TYMCNSSCM     | 205   | >TP53-S240TYMCNTSCM    | 204  | 1     |
| >TP53-S240TYMCNSSCMC    | 167   | >TP53-S240TYMCNTSCMC   | 220  | 53    |
| >TP53-S240TYMCNSSCM     | 283   | >TP53-S240TYMCNTSCM    | 267  | 16    |
| >TP53-S240TYMCNSSCMC    | 41    | >TP53-S240TYMCNTSCMC   | 56   | 15    |
| >TP53-S240TYMCNSSCMC    | 143   | >TP53-S240TYMCNTSCMC   | 180  | 37    |
| >TP53-S240TYMCNSSCM     | 24    | >TP53-S240TYMCNTSCM    | 16   | 8     |
| >TP53-S240TYMCNSSCMC    | 92    | >TP53-S240TYMCNTSCMC   | 58   | 34    |
| >TP53-S240TYMCNSSCMC    | 399   | >TP53-S240TYMCNTSCMC   | 319  | 80    |
| >TP53-S240TYMCNSSCMC    | 16    | >TP53-S240TYMCNTSCMC   | 12   | 4     |
| >TP53-S240TYMCNSSCM     | 92    | >TP53-S240TYMCNTSCM    | 69   | 23    |
| >TP53-S240TYMCNSSCMC    | 197   | >TP53-S240TYMCNTSCMC   | 146  | 51    |
| >TP53-S240TYMCNSSCM     | 150   | >TP53-S240TYMCNTSCM    | 116  | 34    |
| >TP53-S240TYMCNSSCMC    | 421   | >TP53-S240TYMCNTSCMC   | 275  | 146   |

|                       |      |                       |      |      |
|-----------------------|------|-----------------------|------|------|
| >TP53-S240T YMCNSSCM  | 67   | >TP53-S240T YMCNTSCM  | 39   | 28   |
| >TP53-S240T YMCNSSCMC | 332  | >TP53-S240T YMCNTSCMC | 262  | 70   |
| >TP53-S240T YMCNSSCM  | 33   | >TP53-S240T YMCNTSCM  | 27   | 6    |
| >TP53-S240T YMCNSSCMC | 53   | >TP53-S240T YMCNTSCMC | 57   | 4    |
| >TP53-S240T YMCNSSCM  | 33   | >TP53-S240T YMCNTSCM  | 40   | 7    |
| >TP53-S240T YMCNSSCMC | 127  | >TP53-S240T YMCNTSCMC | 165  | 38   |
| >TP53-S240T YMCNSSCMC | 292  | >TP53-S240T YMCNTSCMC | 408  | 116  |
| >TP53-S240T YMCNSSCMC | 44   | >TP53-S240T YMCNTSCMC | 49   | 5    |
| >TP53-S240T YMCNSSCM  | 98   | >TP53-S240T YMCNTSCM  | 147  | 49   |
| >TP53-S240T YMCNSSCMC | 145  | >TP53-S240T YMCNTSCMC | 189  | 44   |
| >TP53-S240T YMCNSSCM  | 20   | >TP53-S240T YMCNTSCM  | 25   | 5    |
| >TP53-S240T YMCNSSCMC | 160  | >TP53-S240T YMCNTSCMC | 225  | 65   |
| >TP53-S240T YMCNSSCMC | 294  | >TP53-S240T YMCNTSCMC | 505  | 211  |
| >TP53-S240T YMCNSSCM  | 310  | >TP53-S240T YMCNTSCM  | 412  | 102  |
| >TP53-S240T YMCNSSCM  | 346  | >TP53-S240T YMCNTSCM  | 259  | 87   |
| >TP53-S240T NYMCNSSCM | 726  | >TP53-S240T NYMCNTSCM | 482  | 244  |
| >TP53-S240T NYMCNSSCM | 53   | >TP53-S240T NYMCNTSCM | 41   | 12   |
| >TP53-S240T NYMCNSSCM | 924  | >TP53-S240T NYMCNTSCM | 467  | 457  |
| >TP53-S240T NYMCNSSCM | 650  | >TP53-S240T NYMCNTSCM | 273  | 377  |
| >TP53-S240T YNYMCNSSC | 429  | >TP53-S240T YNYMCNTSC | 701  | 272  |
| >TP53-S240T YNYMCNSSC | 31   | >TP53-S240T YNYMCNTSC | 36   | 5    |
| >TP53-S240T HNYMCNSS  | 919  | >TP53-S240T HNYMCNTS  | 370  | 549  |
| >TP53-S240T HNYMCNSS  | 70   | >TP53-S240T HNYMCNTS  | 52   | 18   |
| >TP53-S240T IHNYMCNS  | 840  | >TP53-S240T IHNYMCNT  | 330  | 510  |
| >TP53-S241A SCMGGMNR  | 464  | >TP53-S241A ACMGGMNR  | 2375 | 1911 |
| >TP53-S241A SSCMGGMNI | 58   | >TP53-S241A SACMGGMN  | 251  | 193  |
| >TP53-S241A SSCMGGMNI | 192  | >TP53-S241A SACMGGMN  | 635  | 443  |
| >TP53-S241A SSCMGGMNI | 110  | >TP53-S241A SACMGGMN  | 164  | 54   |
| >TP53-S241A SSCMGGMNI | 56   | >TP53-S241A SACMGGMN  | 154  | 98   |
| >TP53-S241A SSCMGGMNI | 220  | >TP53-S241A SACMGGMN  | 172  | 48   |
| >TP53-S241A SSCMGGMNI | 361  | >TP53-S241A SACMGGMN  | 395  | 34   |
| >TP53-S241A SSCMGGMNI | 398  | >TP53-S241A SACMGGMN  | 1718 | 1320 |
| >TP53-S241A SSCMGGMNI | 460  | >TP53-S241A SACMGGMN  | 1960 | 1500 |
| >TP53-S241A TIHNYMCNS | 3160 | >TP53-S241A TIHNYMCNS | 426  | 2734 |
| >TP53-S241A TIHNYMCNS | 2304 | >TP53-S241A TIHNYMCNS | 161  | 2143 |
| >TP53-S241A NSSCMGGMI | 111  | >TP53-S241A NSACMGGM  | 330  | 219  |
| >TP53-S241A NSSCMGGMI | 55   | >TP53-S241A NSACMGGM  | 182  | 127  |
| >TP53-S241A NSSCMGGMI | 365  | >TP53-S241A NSACMGGM  | 646  | 281  |
| >TP53-S241A NSSCMGGMI | 12   | >TP53-S241A NSACMGGM  | 7    | 5    |
| >TP53-S241A NSSCMGGMI | 39   | >TP53-S241A NSACMGGM  | 20   | 19   |
| >TP53-S241A CNSSCMGGM | 639  | >TP53-S241A CNSACMGGM | 448  | 191  |
| >TP53-S241A YMCNSSCM  | 262  | >TP53-S241A YMCNSACM  | 165  | 97   |
| >TP53-S241A YMCNSSCMC | 252  | >TP53-S241A YMCNSACMC | 401  | 149  |



|                      |      |                      |       |       |
|----------------------|------|----------------------|-------|-------|
| >TP53-S241AYMCNSSCM  | 205  | >TP53-S241AYMCNSACM  | 232   | 27    |
| >TP53-S241AYMCNSSCMC | 167  | >TP53-S241AYMCNSACMC | 286   | 119   |
| >TP53-S241AYMCNSSCM  | 283  | >TP53-S241AYMCNSACM  | 371   | 88    |
| >TP53-S241AYMCNSSCMC | 41   | >TP53-S241AYMCNSACMC | 56    | 15    |
| >TP53-S241AYMCNSSCM  | 676  | >TP53-S241AYMCNSACM  | 463   | 213   |
| >TP53-S241AYMCNSSCMC | 143  | >TP53-S241AYMCNSACMC | 138   | 5     |
| >TP53-S241AYMCNSSCM  | 24   | >TP53-S241AYMCNSACM  | 20    | 4     |
| >TP53-S241AYMCNSSCMC | 92   | >TP53-S241AYMCNSACMC | 127   | 35    |
| >TP53-S241AYMCNSSCMC | 399  | >TP53-S241AYMCNSACMC | 484   | 85    |
| >TP53-S241AYMCNSSCMC | 16   | >TP53-S241AYMCNSACMC | 17    | 1     |
| >TP53-S241AYMCNSSCM  | 92   | >TP53-S241AYMCNSACM  | 76    | 16    |
| >TP53-S241AYMCNSSCMC | 197  | >TP53-S241AYMCNSACMC | 256   | 59    |
| >TP53-S241AYMCNSSCM  | 150  | >TP53-S241AYMCNSACM  | 152   | 2     |
| >TP53-S241AYMCNSSCMC | 421  | >TP53-S241AYMCNSACMC | 538   | 117   |
| >TP53-S241AYMCNSSCM  | 67   | >TP53-S241AYMCNSACM  | 46    | 21    |
| >TP53-S241AYMCNSSCMC | 332  | >TP53-S241AYMCNSACMC | 449   | 117   |
| >TP53-S241AYMCNSSCM  | 33   | >TP53-S241AYMCNSACM  | 26    | 7     |
| >TP53-S241AYMCNSSCMC | 53   | >TP53-S241AYMCNSACMC | 54    | 1     |
| >TP53-S241AYMCNSSCM  | 33   | >TP53-S241AYMCNSACM  | 41    | 8     |
| >TP53-S241AYMCNSSCMC | 127  | >TP53-S241AYMCNSACMC | 338   | 211   |
| >TP53-S241AYMCNSSCMC | 292  | >TP53-S241AYMCNSACMC | 495   | 203   |
| >TP53-S241AYMCNSSCMC | 44   | >TP53-S241AYMCNSACMC | 53    | 9     |
| >TP53-S241AYMCNSSCM  | 98   | >TP53-S241AYMCNSACM  | 239   | 141   |
| >TP53-S241AYMCNSSCMC | 145  | >TP53-S241AYMCNSACMC | 180   | 35    |
| >TP53-S241AYMCNSSCM  | 20   | >TP53-S241AYMCNSACM  | 39    | 19    |
| >TP53-S241AYMCNSSCMC | 160  | >TP53-S241AYMCNSACMC | 224   | 64    |
| >TP53-S241AYMCNSSCMC | 294  | >TP53-S241AYMCNSACMC | 264   | 30    |
| >TP53-S241AYMCNSSCM  | 310  | >TP53-S241AYMCNSACM  | 379   | 69    |
| >TP53-S241AYMCNSSCM  | 346  | >TP53-S241AYMCNSACM  | 240   | 106   |
| >TP53-S241ANYMCNSSCN | 53   | >TP53-S241ANYMCNSACN | 1852  | 1799  |
| >TP53-S241ANYMCNSSCI | 429  | >TP53-S241ANYMCNSAC  | 419   | 10    |
| >TP53-S241ANYMCNSSCI | 31   | >TP53-S241ANYMCNSAC  | 58    | 27    |
| >TP53-S241AHYNYMCNSS | 919  | >TP53-S241AHYNYMCNSA | 306   | 613   |
| >TP53-S241AHYNYMCNSS | 70   | >TP53-S241AHYNYMCNSA | 622   | 552   |
| >TP53-S241AHYNYMCNSS | 1117 | >TP53-S241AHYNYMCNSA | 212   | 905   |
| >TP53-S241AIHNYMCNSS | 1688 | >TP53-S241AIHNYMCNSA | 355   | 1333  |
| >TP53-S241AIHNYMCNSS | 575  | >TP53-S241AIHNYMCNSA | 451   | 124   |
| >TP53-S241CSCMGGMNR  | 464  | >TP53-S241CCMGGMNR   | 279   | 185   |
| >TP53-S241CSSCMGGMNI | 58   | >TP53-S241SCCMGGMNI  | 12861 | 12803 |
| >TP53-S241CSSCMGGMNI | 192  | >TP53-S241SCCMGGMNI  | 11934 | 11742 |
| >TP53-S241CSSCMGGMNI | 110  | >TP53-S241SCCMGGMNI  | 2016  | 1906  |
| >TP53-S241CSSCMGGMNI | 56   | >TP53-S241SCCMGGMNI  | 446   | 390   |
| >TP53-S241CSSCMGGMNI | 220  | >TP53-S241SCCMGGMNI  | 6442  | 6222  |

|                        |      |                        |       |       |
|------------------------|------|------------------------|-------|-------|
| >TP53-S241C SSCMGGMNI  | 361  | >TP53-S241C SCCMGGMNI  | 12720 | 12359 |
| >TP53-S241C SSCMGGMNI  | 398  | >TP53-S241C SCCMGGMNI  | 6343  | 5945  |
| >TP53-S241C SSCMGGMNI  | 460  | >TP53-S241C SCCMGGMNI  | 6455  | 5995  |
| >TP53-S241C NSSCMGGMI  | 111  | >TP53-S241C NSCCMGGMI  | 263   | 152   |
| >TP53-S241C NSSCMGGMI  | 55   | >TP53-S241C NSCCMGGMI  | 39    | 16    |
| >TP53-S241C NSSCMGGMI  | 365  | >TP53-S241C NSCCMGGMI  | 157   | 208   |
| >TP53-S241C NSSCMGGMI  | 1183 | >TP53-S241C NSCCMGGMI  | 480   | 703   |
| >TP53-S241C NSSCMGGMI  | 12   | >TP53-S241C NSCCMGGMI  | 24    | 12    |
| >TP53-S241C NSSCMGGMI  | 39   | >TP53-S241C NSCCMGGMI  | 68    | 29    |
| >TP53-S241C CNSSCMGGN  | 639  | >TP53-S241C CNSSCMGGN  | 438   | 201   |
| >TP53-S241C YMCNSSCM   | 262  | >TP53-S241C YMCNSSCM   | 190   | 72    |
| >TP53-S241C YMCNSSCMC  | 988  | >TP53-S241C YMCNSSCMC  | 448   | 540   |
| >TP53-S241C YMCNSSCMC  | 252  | >TP53-S241C YMCNSSCMC  | 272   | 20    |
| >TP53-S241C YMCNSSCM   | 205  | >TP53-S241C YMCNSSCM   | 322   | 117   |
| >TP53-S241C YMCNSSCMC  | 167  | >TP53-S241C YMCNSSCMC  | 231   | 64    |
| >TP53-S241C YMCNSSCM   | 283  | >TP53-S241C YMCNSSCM   | 880   | 597   |
| >TP53-S241C YMCNSSCMC  | 41   | >TP53-S241C YMCNSSCMC  | 51    | 10    |
| >TP53-S241C YMCNSSCMC  | 143  | >TP53-S241C YMCNSSCMC  | 168   | 25    |
| >TP53-S241C YMCNSSCM   | 24   | >TP53-S241C YMCNSSCM   | 24    | 0     |
| >TP53-S241C YMCNSSCMC  | 92   | >TP53-S241C YMCNSSCMC  | 382   | 290   |
| >TP53-S241C YMCNSSCMC  | 399  | >TP53-S241C YMCNSSCMC  | 1019  | 620   |
| >TP53-S241C YMCNSSCMC  | 16   | >TP53-S241C YMCNSSCMC  | 25    | 9     |
| >TP53-S241C YMCNSSCM   | 92   | >TP53-S241C YMCNSSCM   | 139   | 47    |
| >TP53-S241C YMCNSSCMC  | 197  | >TP53-S241C YMCNSSCMC  | 382   | 185   |
| >TP53-S241C YMCNSSCM   | 150  | >TP53-S241C YMCNSSCM   | 110   | 40    |
| >TP53-S241C YMCNSSCMC  | 421  | >TP53-S241C YMCNSSCMC  | 791   | 370   |
| >TP53-S241C YMCNSSCM   | 67   | >TP53-S241C YMCNSSCM   | 55    | 12    |
| >TP53-S241C YMCNSSCMC  | 332  | >TP53-S241C YMCNSSCMC  | 593   | 261   |
| >TP53-S241C YMCNSSCM   | 33   | >TP53-S241C YMCNSSCM   | 21    | 12    |
| >TP53-S241C YMCNSSCMC  | 53   | >TP53-S241C YMCNSSCMC  | 79    | 26    |
| >TP53-S241C YMCNSSCM   | 33   | >TP53-S241C YMCNSSCM   | 37    | 4     |
| >TP53-S241C YMCNSSCMC  | 127  | >TP53-S241C YMCNSSCMC  | 260   | 133   |
| >TP53-S241C YMCNSSCMC  | 292  | >TP53-S241C YMCNSSCMC  | 550   | 258   |
| >TP53-S241C YMCNSSCMC  | 44   | >TP53-S241C YMCNSSCMC  | 51    | 7     |
| >TP53-S241C YMCNSSCM   | 98   | >TP53-S241C YMCNSSCM   | 468   | 370   |
| >TP53-S241C YMCNSSCMC  | 145  | >TP53-S241C YMCNSSCMC  | 302   | 157   |
| >TP53-S241C YMCNSSCM   | 20   | >TP53-S241C YMCNSSCM   | 45    | 25    |
| >TP53-S241C YMCNSSCMC  | 160  | >TP53-S241C YMCNSSCMC  | 226   | 66    |
| >TP53-S241C YMCNSSCMC  | 294  | >TP53-S241C YMCNSSCMC  | 608   | 314   |
| >TP53-S241C YMCNSSCM   | 310  | >TP53-S241C YMCNSSCM   | 804   | 494   |
| >TP53-S241C YMCNSSCM   | 346  | >TP53-S241C YMCNSSCM   | 1148  | 802   |
| >TP53-S241C NYMCNSSCN  | 53   | >TP53-S241C NYMCNSSCN  | 782   | 729   |
| >TP53-S241C YNYMCNSSCI | 429  | >TP53-S241C YNYMCNSSCI | 503   | 74    |

|                        |       |                       |      |       |
|------------------------|-------|-----------------------|------|-------|
| >TP53-S241C YNYMCNSSCI | 31    | >TP53-S241C YNYMCNSSC | 73   | 42    |
| >TP53-S241C HNYMCNSS   | 70    | >TP53-S241C HNYMCNSC  | 381  | 311   |
| >TP53-S241C HNYMCNSS   | 1117  | >TP53-S241C HNYMCNSC  | 325  | 792   |
| >TP53-S241F SCMGGMNR   | 1031  | >TP53-S241F FCMGGMNR  | 245  | 786   |
| >TP53-S241F SCMGGMNR   | 464   | >TP53-S241F FCMGGMNR  | 685  | 221   |
| >TP53-S241F SSCMGGMNI  | 58    | >TP53-S241F SFCMGGMNI | 2879 | 2821  |
| >TP53-S241F SSCMGGMNI  | 192   | >TP53-S241F SFCMGGMNI | 2392 | 2200  |
| >TP53-S241F SSCMGGMNI  | 110   | >TP53-S241F SFCMGGMNI | 43   | 67    |
| >TP53-S241F SSCMGGMNI  | 56    | >TP53-S241F SFCMGGMNI | 42   | 14    |
| >TP53-S241F SSCMGGMNI  | 1403  | >TP53-S241F SFCMGGMNI | 179  | 1224  |
| >TP53-S241F SSCMGGMNI  | 2693  | >TP53-S241F SFCMGGMNI | 273  | 2420  |
| >TP53-S241F SSCMGGMNI  | 220   | >TP53-S241F SFCMGGMNI | 1378 | 1158  |
| >TP53-S241F SSCMGGMNI  | 361   | >TP53-S241F SFCMGGMNI | 794  | 433   |
| >TP53-S241F SSCMGGMNI  | 398   | >TP53-S241F SFCMGGMNI | 4819 | 4421  |
| >TP53-S241F SSCMGGMNI  | 460   | >TP53-S241F SFCMGGMNI | 5033 | 4573  |
| >TP53-S241F SSCMGGMNI  | 3470  | >TP53-S241F SFCMGGMNI | 151  | 3319  |
| >TP53-S241F SSCMGGMNI  | 4846  | >TP53-S241F SFCMGGMNI | 320  | 4526  |
| >TP53-S241F TIHNYMCNS  | 22643 | >TP53-S241F TIHNYMCNS | 404  | 22239 |
| >TP53-S241F TIHNYMCNS  | 17523 | >TP53-S241F TIHNYMCNS | 237  | 17286 |
| >TP53-S241F TIHNYMCNS  | 18378 | >TP53-S241F TIHNYMCNS | 77   | 18301 |
| >TP53-S241F NSSCMGGMI  | 111   | >TP53-S241F NSFCMGGMI | 144  | 33    |
| >TP53-S241F NSSCMGGMI  | 55    | >TP53-S241F NSFCMGGMI | 44   | 11    |
| >TP53-S241F NSSCMGGMI  | 1517  | >TP53-S241F NSFCMGGMI | 225  | 1292  |
| >TP53-S241F NSSCMGGMI  | 365   | >TP53-S241F NSFCMGGMI | 201  | 164   |
| >TP53-S241F NSSCMGGMI  | 1183  | >TP53-S241F NSFCMGGMI | 267  | 916   |
| >TP53-S241F NSSCMGGMI  | 12    | >TP53-S241F NSFCMGGMI | 6    | 6     |
| >TP53-S241F NSSCMGGMI  | 39    | >TP53-S241F NSFCMGGMI | 11   | 28    |
| >TP53-S241F NSSCMGGM   | 848   | >TP53-S241F NSFCMGGM  | 129  | 719   |
| >TP53-S241F YMCNSSCM   | 262   | >TP53-S241F YMCNSFCM  | 37   | 225   |
| >TP53-S241F YMCNSSCM   | 988   | >TP53-S241F YMCNSFCM  | 320  | 668   |
| >TP53-S241F YMCNSSCM   | 252   | >TP53-S241F YMCNSFCM  | 200  | 52    |
| >TP53-S241F YMCNSSCM   | 205   | >TP53-S241F YMCNSFCM  | 67   | 138   |
| >TP53-S241F YMCNSSCM   | 167   | >TP53-S241F YMCNSFCM  | 149  | 18    |
| >TP53-S241F YMCNSSCM   | 283   | >TP53-S241F YMCNSFCM  | 511  | 228   |
| >TP53-S241F YMCNSSCM   | 41    | >TP53-S241F YMCNSFCM  | 35   | 6     |
| >TP53-S241F YMCNSSCM   | 676   | >TP53-S241F YMCNSFCM  | 48   | 628   |
| >TP53-S241F YMCNSSCM   | 143   | >TP53-S241F YMCNSFCM  | 60   | 83    |
| >TP53-S241F YMCNSSCM   | 24    | >TP53-S241F YMCNSFCM  | 11   | 13    |
| >TP53-S241F YMCNSSCM   | 92    | >TP53-S241F YMCNSFCM  | 97   | 5     |
| >TP53-S241F YMCNSSCM   | 399   | >TP53-S241F YMCNSFCM  | 261  | 138   |
| >TP53-S241F YMCNSSCM   | 16    | >TP53-S241F YMCNSFCM  | 18   | 2     |
| >TP53-S241F YMCNSSCM   | 92    | >TP53-S241F YMCNSFCM  | 46   | 46    |
| >TP53-S241F YMCNSSCM   | 197   | >TP53-S241F YMCNSFCM  | 277  | 80    |

|                       |       |                       |       |       |
|-----------------------|-------|-----------------------|-------|-------|
| >TP53-S241F YMCNSSCM  | 150   | >TP53-S241F YMCNSFCM  | 54    | 96    |
| >TP53-S241F YMCNSSCMC | 421   | >TP53-S241F YMCNSFCMC | 515   | 94    |
| >TP53-S241F YMCNSSCM  | 67    | >TP53-S241F YMCNSFCM  | 30    | 37    |
| >TP53-S241F YMCNSSCMC | 332   | >TP53-S241F YMCNSFCMC | 527   | 195   |
| >TP53-S241F YMCNSSCM  | 33    | >TP53-S241F YMCNSFCM  | 16    | 17    |
| >TP53-S241F YMCNSSCMC | 53    | >TP53-S241F YMCNSFCMC | 58    | 5     |
| >TP53-S241F YMCNSSCMC | 591   | >TP53-S241F YMCNSFCMC | 387   | 204   |
| >TP53-S241F YMCNSSCM  | 33    | >TP53-S241F YMCNSFCM  | 44    | 11    |
| >TP53-S241F YMCNSSCMC | 127   | >TP53-S241F YMCNSFCMC | 134   | 7     |
| >TP53-S241F YMCNSSCMC | 292   | >TP53-S241F YMCNSFCMC | 392   | 100   |
| >TP53-S241F YMCNSSCMC | 44    | >TP53-S241F YMCNSFCMC | 45    | 1     |
| >TP53-S241F YMCNSSCM  | 98    | >TP53-S241F YMCNSFCM  | 408   | 310   |
| >TP53-S241F YMCNSSCMC | 145   | >TP53-S241F YMCNSFCMC | 277   | 132   |
| >TP53-S241F YMCNSSCM  | 20    | >TP53-S241F YMCNSFCM  | 33    | 13    |
| >TP53-S241F YMCNSSCMC | 160   | >TP53-S241F YMCNSFCMC | 169   | 9     |
| >TP53-S241F YMCNSSCMC | 294   | >TP53-S241F YMCNSFCMC | 620   | 326   |
| >TP53-S241F YMCNSSCM  | 310   | >TP53-S241F YMCNSFCM  | 345   | 35    |
| >TP53-S241F YMCNSSCM  | 346   | >TP53-S241F YMCNSFCM  | 336   | 10    |
| >TP53-S241F NYMCNSSCM | 53    | >TP53-S241F NYMCNSFCM | 3105  | 3052  |
| >TP53-S241F NYMCNSSCM | 924   | >TP53-S241F NYMCNSFCM | 162   | 762   |
| >TP53-S241F NYMCNSSCM | 942   | >TP53-S241F NYMCNSFCM | 208   | 734   |
| >TP53-S241F NYMCNSSCM | 650   | >TP53-S241F NYMCNSFCM | 148   | 502   |
| >TP53-S241F YNYMCNSS  | 13779 | >TP53-S241F YNYMCNSF  | 113   | 13666 |
| >TP53-S241F YNYMCNSSC | 429   | >TP53-S241F YNYMCNSFC | 1181  | 752   |
| >TP53-S241F YNYMCNSS  | 5404  | >TP53-S241F YNYMCNSF  | 8     | 5396  |
| >TP53-S241F YNYMCNSSC | 31    | >TP53-S241F YNYMCNSFC | 94    | 63    |
| >TP53-S241F YNYMCNSS  | 16247 | >TP53-S241F YNYMCNSF  | 384   | 15863 |
| >TP53-S241F YNYMCNSS  | 13650 | >TP53-S241F YNYMCNSF  | 187   | 13463 |
| >TP53-S241F HNYMCNSS  | 919   | >TP53-S241F HNYMCNSF  | 50    | 869   |
| >TP53-S241F HNYMCNSS  | 70    | >TP53-S241F HNYMCNSF  | 836   | 766   |
| >TP53-S241F HNYMCNSS  | 21705 | >TP53-S241F HNYMCNSF  | 63    | 21642 |
| >TP53-S241F HNYMCNSS  | 18110 | >TP53-S241F HNYMCNSF  | 219   | 17891 |
| >TP53-S241F HNYMCNSS  | 9928  | >TP53-S241F HNYMCNSF  | 10    | 9918  |
| >TP53-S241F HNYMCNSS  | 17718 | >TP53-S241F HNYMCNSF  | 253   | 17465 |
| >TP53-S241F HNYMCNSS  | 23513 | >TP53-S241F HNYMCNSF  | 338   | 23175 |
| >TP53-S241F HNYMCNSS  | 7698  | >TP53-S241F HNYMCNSF  | 406   | 7292  |
| >TP53-S241F IHNYMCNSS | 40554 | >TP53-S241F IHNYMCNSF | 422   | 40132 |
| >TP53-S241F IHNYMCNSS | 1688  | >TP53-S241F IHNYMCNSF | 4     | 1684  |
| >TP53-S241P SPCMGGMNR | 464   | >TP53-S241P SPCMGGMNR | 1438  | 974   |
| >TP53-S241P SPCMGGMNI | 58    | >TP53-S241P SPCMGGMNI | 14535 | 14477 |
| >TP53-S241P SPCMGGMNI | 192   | >TP53-S241P SPCMGGMNI | 13862 | 13670 |
| >TP53-S241P SPCMGGMNI | 110   | >TP53-S241P SPCMGGMNI | 7008  | 6898  |
| >TP53-S241P SPCMGGMNI | 56    | >TP53-S241P SPCMGGMNI | 1235  | 1179  |

|                       |     |                      |      |      |
|-----------------------|-----|----------------------|------|------|
| >TP53-S241PSSCMGGMNI  | 220 | >TP53-S241PSPCMGGMNI | 3749 | 3529 |
| >TP53-S241PSSCMGGMNI  | 361 | >TP53-S241PSPCMGGMNI | 6739 | 6378 |
| >TP53-S241PSSCMGGMNI  | 398 | >TP53-S241PSPCMGGMNI | 6210 | 5812 |
| >TP53-S241PSSCMGGMNI  | 460 | >TP53-S241PSPCMGGMNI | 6564 | 6104 |
| >TP53-S241PNSSCMGGMI  | 111 | >TP53-S241PNSPCMGGMI | 480  | 369  |
| >TP53-S241PNSSCMGGMI  | 55  | >TP53-S241PNSPCMGGMI | 255  | 200  |
| >TP53-S241PNSSCMGGMI  | 365 | >TP53-S241PNSPCMGGMI | 630  | 265  |
| >TP53-S241PNSSCMGGMI  | 12  | >TP53-S241PNSPCMGGMI | 15   | 3    |
| >TP53-S241PNSSCMGGMI  | 39  | >TP53-S241PNSPCMGGMI | 267  | 228  |
| >TP53-S241PYMCNSSCM   | 262 | >TP53-S241PYMCNSPCM  | 92   | 170  |
| >TP53-S241PYMCNSSCMC  | 252 | >TP53-S241PYMCNSPCM  | 272  | 20   |
| >TP53-S241PYMCNSSCM   | 205 | >TP53-S241PYMCNSPCM  | 574  | 369  |
| >TP53-S241PYMCNSSCMC  | 167 | >TP53-S241PYMCNSPCM  | 288  | 121  |
| >TP53-S241PYMCNSSCM   | 283 | >TP53-S241PYMCNSPCM  | 730  | 447  |
| >TP53-S241PYMCNSSCMC  | 41  | >TP53-S241PYMCNSPCM  | 38   | 3    |
| >TP53-S241PYMCNSSCMC  | 143 | >TP53-S241PYMCNSPCM  | 302  | 159  |
| >TP53-S241PYMCNSSCM   | 24  | >TP53-S241PYMCNSPCM  | 14   | 10   |
| >TP53-S241PYMCNSSCMC  | 92  | >TP53-S241PYMCNSPCM  | 54   | 38   |
| >TP53-S241PYMCNSSCMC  | 399 | >TP53-S241PYMCNSPCM  | 213  | 186  |
| >TP53-S241PYMCNSSCMC  | 16  | >TP53-S241PYMCNSPCM  | 13   | 3    |
| >TP53-S241PYMCNSSCM   | 92  | >TP53-S241PYMCNSPCM  | 104  | 12   |
| >TP53-S241PYMCNSSCMC  | 197 | >TP53-S241PYMCNSPCM  | 218  | 21   |
| >TP53-S241PYMCNSSCM   | 150 | >TP53-S241PYMCNSPCM  | 59   | 91   |
| >TP53-S241PYMCNSSCMC  | 421 | >TP53-S241PYMCNSPCM  | 451  | 30   |
| >TP53-S241PYMCNSSCM   | 67  | >TP53-S241PYMCNSPCM  | 36   | 31   |
| >TP53-S241PYMCNSSCMC  | 332 | >TP53-S241PYMCNSPCM  | 365  | 33   |
| >TP53-S241PYMCNSSCM   | 33  | >TP53-S241PYMCNSPCM  | 30   | 3    |
| >TP53-S241PYMCNSSCMC  | 53  | >TP53-S241PYMCNSPCM  | 54   | 1    |
| >TP53-S241PYMCNSSCM   | 33  | >TP53-S241PYMCNSPCM  | 62   | 29   |
| >TP53-S241PYMCNSSCMC  | 127 | >TP53-S241PYMCNSPCM  | 747  | 620  |
| >TP53-S241PYMCNSSCMC  | 292 | >TP53-S241PYMCNSPCM  | 951  | 659  |
| >TP53-S241PYMCNSSCMC  | 44  | >TP53-S241PYMCNSPCM  | 66   | 22   |
| >TP53-S241PYMCNSSCM   | 98  | >TP53-S241PYMCNSPCM  | 585  | 487  |
| >TP53-S241PYMCNSSCMC  | 145 | >TP53-S241PYMCNSPCM  | 251  | 106  |
| >TP53-S241PYMCNSSCM   | 20  | >TP53-S241PYMCNSPCM  | 30   | 10   |
| >TP53-S241PYMCNSSCMC  | 160 | >TP53-S241PYMCNSPCM  | 192  | 32   |
| >TP53-S241PYMCNSSCMC  | 294 | >TP53-S241PYMCNSPCM  | 322  | 28   |
| >TP53-S241PYMCNSSCM   | 310 | >TP53-S241PYMCNSPCM  | 557  | 247  |
| >TP53-S241PYMCNSSCM   | 346 | >TP53-S241PYMCNSPCM  | 428  | 82   |
| >TP53-S241PNYMCNSSCN  | 53  | >TP53-S241PNYMCNSPCN | 6668 | 6615 |
| >TP53-S241PYNYMCNSSCI | 429 | >TP53-S241PYNYMCNSPC | 635  | 206  |
| >TP53-S241PYNYMCNSSCI | 31  | >TP53-S241PYNYMCNSPC | 57   | 26   |
| >TP53-S241PHNYMCNSS   | 70  | >TP53-S241PHNYMCNSP  | 1180 | 1110 |

|                       |      |                        |     |      |
|-----------------------|------|------------------------|-----|------|
| >TP53-S241PIHYNMNCNSF | 1151 | >TP53-S241P IHYNMNCNSF | 436 | 715  |
| >TP53-S241T SCMGGMNR  | 1031 | >TP53-S241T TCMGGMNR   | 262 | 769  |
| >TP53-S241T SCMGGMNR  | 464  | >TP53-S241T TCMGGMNR   | 526 | 62   |
| >TP53-S241T SSCMGGMNI | 58   | >TP53-S241T STCMGGMNI  | 30  | 28   |
| >TP53-S241T SSCMGGMNI | 192  | >TP53-S241T STCMGGMNI  | 84  | 108  |
| >TP53-S241T SSCMGGMNI | 110  | >TP53-S241T STCMGGMNI  | 58  | 52   |
| >TP53-S241T SSCMGGMNI | 56   | >TP53-S241T STCMGGMNI  | 78  | 22   |
| >TP53-S241T SSCMGGMNI | 1403 | >TP53-S241T STCMGGMNI  | 252 | 1151 |
| >TP53-S241T SSCMGGMNI | 220  | >TP53-S241T STCMGGMNI  | 49  | 171  |
| >TP53-S241T SSCMGGMNI | 361  | >TP53-S241T STCMGGMNI  | 103 | 258  |
| >TP53-S241T SSCMGGMNI | 398  | >TP53-S241T STCMGGMNI  | 273 | 125  |
| >TP53-S241T SSCMGGMNI | 460  | >TP53-S241T STCMGGMNI  | 292 | 168  |
| >TP53-S241T NSSCMGGMI | 111  | >TP53-S241T NSTCMGGMI  | 312 | 201  |
| >TP53-S241T NSSCMGGMI | 55   | >TP53-S241T NSTCMGGMI  | 132 | 77   |
| >TP53-S241T NSSCMGGMI | 365  | >TP53-S241T NSTCMGGMI  | 429 | 64   |
| >TP53-S241T NSSCMGGMI | 12   | >TP53-S241T NSTCMGGMI  | 16  | 4    |
| >TP53-S241T NSSCMGGMI | 39   | >TP53-S241T NSTCMGGMI  | 41  | 2    |
| >TP53-S241T NSSCMGGM  | 851  | >TP53-S241T NSTCMGGM   | 377 | 474  |
| >TP53-S241T CNSSCMGGN | 639  | >TP53-S241T CNSTCMGGN  | 455 | 184  |
| >TP53-S241T YMCNSSCM  | 262  | >TP53-S241T YMCNSTCM   | 133 | 129  |
| >TP53-S241T YMCNSSCMC | 252  | >TP53-S241T YMCNSTCMC  | 221 | 31   |
| >TP53-S241T YMCNSSCM  | 205  | >TP53-S241T YMCNSTCM   | 113 | 92   |
| >TP53-S241T YMCNSSCMC | 167  | >TP53-S241T YMCNSTCMC  | 137 | 30   |
| >TP53-S241T YMCNSSCM  | 283  | >TP53-S241T YMCNSTCM   | 222 | 61   |
| >TP53-S241T YMCNSSCMC | 41   | >TP53-S241T YMCNSTCMC  | 32  | 9    |
| >TP53-S241T YMCNSSCM  | 676  | >TP53-S241T YMCNSTCM   | 373 | 303  |
| >TP53-S241T YMCNSSCMC | 143  | >TP53-S241T YMCNSTCMC  | 126 | 17   |
| >TP53-S241T YMCNSSCM  | 24   | >TP53-S241T YMCNSTCM   | 26  | 2    |
| >TP53-S241T YMCNSSCMC | 92   | >TP53-S241T YMCNSTCMC  | 85  | 7    |
| >TP53-S241T YMCNSSCMC | 399  | >TP53-S241T YMCNSTCMC  | 311 | 88   |
| >TP53-S241T YMCNSSCMC | 16   | >TP53-S241T YMCNSTCMC  | 17  | 1    |
| >TP53-S241T YMCNSSCM  | 92   | >TP53-S241T YMCNSTCM   | 126 | 34   |
| >TP53-S241T YMCNSSCMC | 197  | >TP53-S241T YMCNSTCMC  | 203 | 6    |
| >TP53-S241T YMCNSSCM  | 150  | >TP53-S241T YMCNSTCM   | 128 | 22   |
| >TP53-S241T YMCNSSCMC | 421  | >TP53-S241T YMCNSTCMC  | 448 | 27   |
| >TP53-S241T YMCNSSCM  | 67   | >TP53-S241T YMCNSTCM   | 62  | 5    |
| >TP53-S241T YMCNSSCMC | 332  | >TP53-S241T YMCNSTCMC  | 277 | 55   |
| >TP53-S241T YMCNSSCM  | 33   | >TP53-S241T YMCNSTCM   | 26  | 7    |
| >TP53-S241T YMCNSSCMC | 53   | >TP53-S241T YMCNSTCMC  | 51  | 2    |
| >TP53-S241T YMCNSSCMC | 591  | >TP53-S241T YMCNSTCMC  | 340 | 251  |
| >TP53-S241T YMCNSSCM  | 33   | >TP53-S241T YMCNSTCM   | 38  | 5    |
| >TP53-S241T YMCNSSCMC | 127  | >TP53-S241T YMCNSTCMC  | 197 | 70   |
| >TP53-S241T YMCNSSCMC | 292  | >TP53-S241T YMCNSTCMC  | 414 | 122  |

|                       |       |                       |       |       |
|-----------------------|-------|-----------------------|-------|-------|
| >TP53-S241T YMCNSSCMC | 44    | >TP53-S241T YMCNSTCMC | 55    | 11    |
| >TP53-S241T YMCNSSCM  | 98    | >TP53-S241T YMCNSTCM  | 220   | 122   |
| >TP53-S241T YMCNSSCMC | 145   | >TP53-S241T YMCNSTCMC | 193   | 48    |
| >TP53-S241T YMCNSSCM  | 20    | >TP53-S241T YMCNSTCM  | 25    | 5     |
| >TP53-S241T YMCNSSCMC | 160   | >TP53-S241T YMCNSTCMC | 209   | 49    |
| >TP53-S241T YMCNSSCMC | 294   | >TP53-S241T YMCNSTCMC | 415   | 121   |
| >TP53-S241T YMCNSSCM  | 310   | >TP53-S241T YMCNSTCM  | 363   | 53    |
| >TP53-S241T YMCNSSCM  | 346   | >TP53-S241T YMCNSTCM  | 577   | 231   |
| >TP53-S241T NYMCNSSCM | 726   | >TP53-S241T NYMCNSTCM | 228   | 498   |
| >TP53-S241T NYMCNSSCM | 53    | >TP53-S241T NYMCNSTCM | 62    | 9     |
| >TP53-S241T YNYMCNSSC | 429   | >TP53-S241T YNYMCNSTC | 583   | 154   |
| >TP53-S241T YNYMCNSSC | 31    | >TP53-S241T YNYMCNSTC | 40    | 9     |
| >TP53-S241T HNYMCNSS  | 919   | >TP53-S241T HNYMCNST  | 195   | 724   |
| >TP53-S241T HNYMCNSS  | 70    | >TP53-S241T HNYMCNST  | 75    | 5     |
| >TP53-S241Y SCMGGMNR  | 2439  | >TP53-S241Y YCMGGMNR  | 442   | 1997  |
| >TP53-S241Y SCMGGMNR  | 464   | >TP53-S241Y YCMGGMNR  | 382   | 82    |
| >TP53-S241Y SSCMGGMNI | 58    | >TP53-S241Y SYCMGGMNI | 2554  | 2496  |
| >TP53-S241Y SSCMGGMNI | 192   | >TP53-S241Y SYCMGGMNI | 12865 | 12673 |
| >TP53-S241Y SSCMGGMNI | 110   | >TP53-S241Y SYCMGGMNI | 58    | 52    |
| >TP53-S241Y SSCMGGMNI | 56    | >TP53-S241Y SYCMGGMNI | 104   | 48    |
| >TP53-S241Y SSCMGGMNI | 1403  | >TP53-S241Y SYCMGGMNI | 155   | 1248  |
| >TP53-S241Y SSCMGGMNI | 220   | >TP53-S241Y SYCMGGMNI | 1787  | 1567  |
| >TP53-S241Y SSCMGGMNI | 361   | >TP53-S241Y SYCMGGMNI | 5217  | 4856  |
| >TP53-S241Y SSCMGGMNI | 398   | >TP53-S241Y SYCMGGMNI | 2573  | 2175  |
| >TP53-S241Y SSCMGGMNI | 460   | >TP53-S241Y SYCMGGMNI | 2753  | 2293  |
| >TP53-S241Y SSCMGGMNI | 3470  | >TP53-S241Y SYCMGGMNI | 71    | 3399  |
| >TP53-S241Y SSCMGGMNI | 4846  | >TP53-S241Y SYCMGGMNI | 142   | 4704  |
| >TP53-S241Y TIHYNMYCN | 20857 | >TP53-S241Y TIHYNMYCN | 474   | 20383 |
| >TP53-S241Y TIHYNMYCN | 30530 | >TP53-S241Y TIHYNMYCN | 291   | 30239 |
| >TP53-S241Y TIHYNMYCN | 20645 | >TP53-S241Y TIHYNMYCN | 70    | 20575 |
| >TP53-S241Y TIHYNMYCN | 23176 | >TP53-S241Y TIHYNMYCN | 77    | 23099 |
| >TP53-S241Y TIHYNMYCN | 17523 | >TP53-S241Y TIHYNMYCN | 199   | 17324 |
| >TP53-S241Y TIHYNMYCN | 18378 | >TP53-S241Y TIHYNMYCN | 394   | 17984 |
| >TP53-S241Y NSSCMGGMI | 1185  | >TP53-S241Y NSYCMGGMI | 270   | 915   |
| >TP53-S241Y NSSCMGGMI | 111   | >TP53-S241Y NSYCMGGMI | 102   | 9     |
| >TP53-S241Y NSSCMGGMI | 55    | >TP53-S241Y NSYCMGGMI | 29    | 26    |
| >TP53-S241Y NSSCMGGMI | 1517  | >TP53-S241Y NSYCMGGMI | 267   | 1250  |
| >TP53-S241Y NSSCMGGMI | 365   | >TP53-S241Y NSYCMGGMI | 130   | 235   |
| >TP53-S241Y NSSCMGGMI | 1183  | >TP53-S241Y NSYCMGGMI | 363   | 820   |
| >TP53-S241Y NSSCMGGMI | 12    | >TP53-S241Y NSYCMGGMI | 6     | 6     |
| >TP53-S241Y NSSCMGGMI | 39    | >TP53-S241Y NSYCMGGMI | 21    | 18    |
| >TP53-S241Y NSSCMGGM  | 848   | >TP53-S241Y NSYCMGGM  | 80    | 768   |
| >TP53-S241Y YMCNSSCM  | 262   | >TP53-S241Y YMCNSYCM  | 55    | 207   |

|                       |       |                       |      |       |
|-----------------------|-------|-----------------------|------|-------|
| >TP53-S241Y YMCNSSCMC | 252   | >TP53-S241Y YMCNSYCMC | 277  | 25    |
| >TP53-S241Y YMCNSSCM  | 205   | >TP53-S241Y YMCNSYCM  | 71   | 134   |
| >TP53-S241Y YMCNSSCMC | 167   | >TP53-S241Y YMCNSYCMC | 182  | 15    |
| >TP53-S241Y YMCNSSCM  | 283   | >TP53-S241Y YMCNSYCM  | 533  | 250   |
| >TP53-S241Y YMCNSSCMC | 41    | >TP53-S241Y YMCNSYCMC | 39   | 2     |
| >TP53-S241Y YMCNSSCM  | 676   | >TP53-S241Y YMCNSYCM  | 315  | 361   |
| >TP53-S241Y YMCNSSCMC | 143   | >TP53-S241Y YMCNSYCMC | 149  | 6     |
| >TP53-S241Y YMCNSSCM  | 24    | >TP53-S241Y YMCNSYCM  | 12   | 12    |
| >TP53-S241Y YMCNSSCMC | 92    | >TP53-S241Y YMCNSYCMC | 95   | 3     |
| >TP53-S241Y YMCNSSCMC | 399   | >TP53-S241Y YMCNSYCMC | 250  | 149   |
| >TP53-S241Y YMCNSSCMC | 16    | >TP53-S241Y YMCNSYCMC | 21   | 5     |
| >TP53-S241Y YMCNSSCM  | 92    | >TP53-S241Y YMCNSYCM  | 37   | 55    |
| >TP53-S241Y YMCNSSCMC | 197   | >TP53-S241Y YMCNSYCMC | 318  | 121   |
| >TP53-S241Y YMCNSSCM  | 150   | >TP53-S241Y YMCNSYCM  | 89   | 61    |
| >TP53-S241Y YMCNSSCMC | 421   | >TP53-S241Y YMCNSYCMC | 535  | 114   |
| >TP53-S241Y YMCNSSCM  | 67    | >TP53-S241Y YMCNSYCM  | 38   | 29    |
| >TP53-S241Y YMCNSSCMC | 332   | >TP53-S241Y YMCNSYCMC | 701  | 369   |
| >TP53-S241Y YMCNSSCM  | 33    | >TP53-S241Y YMCNSYCM  | 29   | 4     |
| >TP53-S241Y YMCNSSCMC | 53    | >TP53-S241Y YMCNSYCMC | 72   | 19    |
| >TP53-S241Y YMCNSSCMC | 591   | >TP53-S241Y YMCNSYCMC | 466  | 125   |
| >TP53-S241Y YMCNSSCM  | 33    | >TP53-S241Y YMCNSYCM  | 50   | 17    |
| >TP53-S241Y YMCNSSCMC | 127   | >TP53-S241Y YMCNSYCMC | 296  | 169   |
| >TP53-S241Y YMCNSSCMC | 292   | >TP53-S241Y YMCNSYCMC | 506  | 214   |
| >TP53-S241Y YMCNSSCMC | 44    | >TP53-S241Y YMCNSYCMC | 53   | 9     |
| >TP53-S241Y YMCNSSCM  | 98    | >TP53-S241Y YMCNSYCM  | 452  | 354   |
| >TP53-S241Y YMCNSSCMC | 145   | >TP53-S241Y YMCNSYCMC | 272  | 127   |
| >TP53-S241Y YMCNSSCM  | 20    | >TP53-S241Y YMCNSYCM  | 30   | 10    |
| >TP53-S241Y YMCNSSCMC | 160   | >TP53-S241Y YMCNSYCMC | 149  | 11    |
| >TP53-S241Y YMCNSSCMC | 294   | >TP53-S241Y YMCNSYCMC | 540  | 246   |
| >TP53-S241Y YMCNSSCM  | 310   | >TP53-S241Y YMCNSYCM  | 318  | 8     |
| >TP53-S241Y YMCNSSCM  | 346   | >TP53-S241Y YMCNSYCM  | 318  | 28    |
| >TP53-S241Y NYMCNSSCN | 726   | >TP53-S241Y NYMCNSYCN | 314  | 412   |
| >TP53-S241Y NYMCNSSCN | 53    | >TP53-S241Y NYMCNSYCN | 3283 | 3230  |
| >TP53-S241Y NYMCNSSCN | 924   | >TP53-S241Y NYMCNSYCN | 102  | 822   |
| >TP53-S241Y NYMCNSSCN | 942   | >TP53-S241Y NYMCNSYCN | 298  | 644   |
| >TP53-S241Y NYMCNSSCN | 650   | >TP53-S241Y NYMCNSYCN | 322  | 328   |
| >TP53-S241Y YNYMCNSS  | 20819 | >TP53-S241Y YNYMCNSY  | 60   | 20759 |
| >TP53-S241Y YNYMCNSS  | 25990 | >TP53-S241Y YNYMCNSY  | 221  | 25769 |
| >TP53-S241Y YNYMCNSS  | 13779 | >TP53-S241Y YNYMCNSY  | 110  | 13669 |
| >TP53-S241Y YNYMCNSSC | 429   | >TP53-S241Y YNYMCNSYC | 871  | 442   |
| >TP53-S241Y YNYMCNSS  | 23320 | >TP53-S241Y YNYMCNSY  | 180  | 23140 |
| >TP53-S241Y YNYMCNSS  | 5404  | >TP53-S241Y YNYMCNSY  | 21   | 5383  |
| >TP53-S241Y YNYMCNSSC | 31    | >TP53-S241Y YNYMCNSYC | 62   | 31    |



|                         |       |                         |     |       |
|-------------------------|-------|-------------------------|-----|-------|
| >TP53-S241Y YNYMCNSS    | 16247 | >TP53-S241Y YNYMCNSY    | 142 | 16105 |
| >TP53-S241Y YNYMCNSS    | 13650 | >TP53-S241Y YNYMCNSY    | 194 | 13456 |
| >TP53-S241Y HNYMCNSS    | 70    | >TP53-S241Y HNYMCNSY    | 878 | 808   |
| >TP53-S241Y HNYMCNSS    | 18870 | >TP53-S241Y HNYMCNSY    | 102 | 18768 |
| >TP53-S241Y HNYMCNSS    | 16235 | >TP53-S241Y HNYMCNSY    | 66  | 16169 |
| >TP53-S241Y HNYMCNSS    | 9161  | >TP53-S241Y HNYMCNSY    | 15  | 9146  |
| >TP53-S241Y HNYMCNSS    | 26929 | >TP53-S241Y HNYMCNSY    | 167 | 26762 |
| >TP53-S241Y HNYMCNSS    | 24465 | >TP53-S241Y HNYMCNSY    | 77  | 24388 |
| >TP53-S241Y IHNYMCNSS   | 30934 | >TP53-S241Y IHNYMCNSY   | 485 | 30449 |
| >TP53-S241Y IHNYMCNSS   | 24143 | >TP53-S241Y IHNYMCNSY   | 99  | 24044 |
| >TP53-S241Y IHNYMCNSS   | 1688  | >TP53-S241Y IHNYMCNSY   | 8   | 1680  |
| >TP53-S260A SSGNLLGRNS  | 245   | >TP53-S260A ASGNLLGRNS  | 228 | 17    |
| >TP53-S260A SSGNLLGRNS  | 701   | >TP53-S260A ASGNLLGRNS  | 360 | 341   |
| >TP53-S260A SSGNLLGRNS  | 390   | >TP53-S260A ASGNLLGRNS  | 117 | 273   |
| >TP53-S260A SSGNLLGRNS  | 32    | >TP53-S260A ASGNLLGRNS  | 77  | 45    |
| >TP53-S260A SSGNLLGR    | 357   | >TP53-S260A ASGNLLGR    | 299 | 58    |
| >TP53-S260A DSSGNLLGR   | 664   | >TP53-S260A DASGNLLGR   | 390 | 274   |
| >TP53-S260A DSSGNLLGR   | 68    | >TP53-S260A DASGNLLGR   | 57  | 11    |
| >TP53-S260A EDSSGNLL    | 273   | >TP53-S260A EDASGNLL    | 245 | 28    |
| >TP53-S260A LEDSSGNL    | 727   | >TP53-S260A LEDASGNL    | 496 | 231   |
| >TP53-S260A LEDSSGNL    | 33    | >TP53-S260A LEDASGNL    | 25  | 8     |
| >TP53-S260A LEDSSGNLL   | 20    | >TP53-S260A LEDASGNLL   | 17  | 3     |
| >TP53-S260A TLEDSSGNL   | 62    | >TP53-S260A TLEDASGNL   | 49  | 13    |
| >TP53-S260A TLEDSSGNLL  | 133   | >TP53-S260A TLEDASGNLL  | 131 | 2     |
| >TP53-S260A TLEDSSGNL   | 24    | >TP53-S260A TLEDASGNL   | 27  | 3     |
| >TP53-S260A TLEDSSGNLL  | 23    | >TP53-S260A TLEDASGNLL  | 23  | 0     |
| >TP53-S260A ITLEDSSGNL  | 495   | >TP53-S260A ITLEDASGNL  | 558 | 63    |
| >TP53-S260A ITLEDSSGNL  | 471   | >TP53-S260A ITLEDASGNL  | 658 | 187   |
| >TP53-S260A ITLEDSSGNL  | 371   | >TP53-S260A ITLEDASGNL  | 305 | 66    |
| >TP53-S260A ITLEDSSGNLL | 270   | >TP53-S260A ITLEDASGNLL | 269 | 1     |
| >TP53-S260A ITLEDSSGNL  | 302   | >TP53-S260A ITLEDASGNL  | 374 | 72    |
| >TP53-S260A ITLEDSSGNLL | 339   | >TP53-S260A ITLEDASGNLL | 404 | 65    |
| >TP53-S260A ITLEDSSGNL  | 137   | >TP53-S260A ITLEDASGNL  | 114 | 23    |
| >TP53-S260A ITLEDSSGNLL | 354   | >TP53-S260A ITLEDASGNLL | 349 | 5     |
| >TP53-S260A ITLEDSSGNL  | 6     | >TP53-S260A ITLEDASGNL  | 7   | 1     |
| >TP53-S260A ITLEDSSGNLL | 18    | >TP53-S260A ITLEDASGNLL | 16  | 2     |
| >TP53-S260A ITLEDSSGNLL | 259   | >TP53-S260A ITLEDASGNLL | 304 | 45    |
| >TP53-S260A ITLEDSSGNL  | 341   | >TP53-S260A ITLEDASGNL  | 346 | 5     |
| >TP53-S260A ITLEDSSGNLL | 30    | >TP53-S260A ITLEDASGNLL | 32  | 2     |
| >TP53-S260A ILTIITLEDS  | 5660  | >TP53-S260A ILTIITLEDA  | 414 | 5246  |
| >TP53-S260A ILTIITLEDS  | 4784  | >TP53-S260A ILTIITLEDA  | 217 | 4567  |
| >TP53-S260A ILTIITLEDS  | 13321 | >TP53-S260A ILTIITLEDA  | 416 | 12905 |
| >TP53-S260A ILTIITLEDS  | 3891  | >TP53-S260A ILTIITLEDA  | 29  | 3862  |

|                         |      |                         |      |      |
|-------------------------|------|-------------------------|------|------|
| >TP53-S260C SSGNLLGRNS  | 245  | >TP53-S260C CSGNLLGRNS  | 1810 | 1565 |
| >TP53-S260C SSGNLLGRNS  | 390  | >TP53-S260C CSGNLLGRNS  | 1657 | 1267 |
| >TP53-S260C SSGNLLGRNS  | 32   | >TP53-S260C CSGNLLGRNS  | 458  | 426  |
| >TP53-S260C SSGNLLGR    | 357  | >TP53-S260C CSGNLLGR    | 3078 | 2721 |
| >TP53-S260C DSSGNLLGR   | 68   | >TP53-S260C DCSGNLLGR   | 3688 | 3620 |
| >TP53-S260C EDSSGNLL    | 273  | >TP53-S260C EDCSGNLL    | 506  | 233  |
| >TP53-S260C LEDSSGNL    | 727  | >TP53-S260C LEDCSGNL    | 194  | 533  |
| >TP53-S260C LEDSSGNL    | 33   | >TP53-S260C LEDCSGNL    | 41   | 8    |
| >TP53-S260C LEDSSGNL    | 20   | >TP53-S260C LEDCSGNL    | 24   | 4    |
| >TP53-S260C TLEDSSGNL   | 62   | >TP53-S260C TLEDCSGNL   | 30   | 32   |
| >TP53-S260C TLEDSSGNLL  | 133  | >TP53-S260C TLEDCSGNLL  | 65   | 68   |
| >TP53-S260C TLEDSSGNLL  | 736  | >TP53-S260C TLEDCSGNLL  | 390  | 346  |
| >TP53-S260C TLEDSSGNL   | 24   | >TP53-S260C TLEDCSGNL   | 30   | 6    |
| >TP53-S260C TLEDSSGNLL  | 23   | >TP53-S260C TLEDCSGNLL  | 34   | 11   |
| >TP53-S260C ITLEDSSGNL  | 495  | >TP53-S260C ITLEDCSGNL  | 618  | 123  |
| >TP53-S260C ITLEDSSGNL  | 471  | >TP53-S260C ITLEDCSGNL  | 605  | 134  |
| >TP53-S260C ITLEDSSGNL  | 371  | >TP53-S260C ITLEDCSGNL  | 150  | 221  |
| >TP53-S260C ITLEDSSGNLL | 270  | >TP53-S260C ITLEDCSGNLL | 295  | 25   |
| >TP53-S260C ITLEDSSGNL  | 302  | >TP53-S260C ITLEDCSGNL  | 768  | 466  |
| >TP53-S260C ITLEDSSGNLL | 339  | >TP53-S260C ITLEDCSGNLL | 688  | 349  |
| >TP53-S260C ITLEDSSGNL  | 137  | >TP53-S260C ITLEDCSGNL  | 418  | 281  |
| >TP53-S260C ITLEDSSGNLL | 354  | >TP53-S260C ITLEDCSGNLL | 654  | 300  |
| >TP53-S260C ITLEDSSGNL  | 6    | >TP53-S260C ITLEDCSGNL  | 12   | 6    |
| >TP53-S260C ITLEDSSGNLL | 18   | >TP53-S260C ITLEDCSGNLL | 35   | 17   |
| >TP53-S260C ITLEDSSGNLL | 259  | >TP53-S260C ITLEDCSGNLL | 480  | 221  |
| >TP53-S260C ITLEDSSGNL  | 341  | >TP53-S260C ITLEDCSGNL  | 272  | 69   |
| >TP53-S260C ITLEDSSGNLL | 30   | >TP53-S260C ITLEDCSGNLL | 30   | 0    |
| >TP53-S260C ILTIITLEDS  | 3891 | >TP53-S260C ILTIITLEDC  | 154  | 3737 |
| >TP53-S260F SSGNLLGR    | 744  | >TP53-S260F FSGNLLGR    | 284  | 460  |
| >TP53-S260F SSGNLLGRNS  | 245  | >TP53-S260F FSGNLLGRNS  | 133  | 112  |
| >TP53-S260F SSGNLLGRNS  | 701  | >TP53-S260F FSGNLLGRNS  | 153  | 548  |
| >TP53-S260F SSGNLLGRNS  | 390  | >TP53-S260F FSGNLLGRNS  | 159  | 231  |
| >TP53-S260F SSGNLLGRNS  | 32   | >TP53-S260F FSGNLLGRNS  | 50   | 18   |
| >TP53-S260F SSGNLLGR    | 357  | >TP53-S260F FSGNLLGR    | 4974 | 4617 |
| >TP53-S260F DSSGNLLGR   | 664  | >TP53-S260F DFSGNLLGR   | 72   | 592  |
| >TP53-S260F DSSGNLLGR   | 68   | >TP53-S260F DFSGNLLGR   | 439  | 371  |
| >TP53-S260F DSSGNLLGR   | 4109 | >TP53-S260F DFSGNLLGR   | 145  | 3964 |
| >TP53-S260F EDSSGNLL    | 273  | >TP53-S260F EDFSGNLL    | 152  | 121  |
| >TP53-S260F LEDSSGNL    | 727  | >TP53-S260F LEDFSGNL    | 132  | 595  |
| >TP53-S260F LEDSSGNL    | 33   | >TP53-S260F LEDFSGNL    | 29   | 4    |
| >TP53-S260F LEDSSGNLL   | 20   | >TP53-S260F LEDFSGNLL   | 19   | 1    |
| >TP53-S260F TLEDSSGNL   | 62   | >TP53-S260F TLEDFSGNL   | 22   | 40   |
| >TP53-S260F TLEDSSGNLL  | 133  | >TP53-S260F TLEDFSGNLL  | 54   | 79   |

|                         |       |                         |      |       |
|-------------------------|-------|-------------------------|------|-------|
| >TP53-S260F TLEDSSGNL   | 513   | >TP53-S260F TLEDFSGNL   | 423  | 90    |
| >TP53-S260F TLEDSSGNLL  | 977   | >TP53-S260F TLEDFSGNLL  | 426  | 551   |
| >TP53-S260F TLEDSSGNL   | 1522  | >TP53-S260F TLEDFSGNL   | 379  | 1143  |
| >TP53-S260F TLEDSSGNL   | 24    | >TP53-S260F TLEDFSGNL   | 21   | 3     |
| >TP53-S260F TLEDSSGNLL  | 23    | >TP53-S260F TLEDFSGNLL  | 22   | 1     |
| >TP53-S260F ITLEDSSGNL  | 495   | >TP53-S260F ITLEDFSGNL  | 386  | 109   |
| >TP53-S260F ITLEDSSGNL  | 471   | >TP53-S260F ITLEDFSGNL  | 487  | 16    |
| >TP53-S260F ITLEDSSGNL  | 371   | >TP53-S260F ITLEDFSGNL  | 111  | 260   |
| >TP53-S260F ITLEDSSGNLL | 270   | >TP53-S260F ITLEDFSGNLL | 116  | 154   |
| >TP53-S260F ITLEDSSGNL  | 302   | >TP53-S260F ITLEDFSGNL  | 171  | 131   |
| >TP53-S260F ITLEDSSGNLL | 339   | >TP53-S260F ITLEDFSGNLL | 357  | 18    |
| >TP53-S260F ITLEDSSGNLL | 1180  | >TP53-S260F ITLEDFSGNLL | 438  | 742   |
| >TP53-S260F ITLEDSSGNL  | 137   | >TP53-S260F ITLEDFSGNL  | 75   | 62    |
| >TP53-S260F ITLEDSSGNLL | 354   | >TP53-S260F ITLEDFSGNLL | 287  | 67    |
| >TP53-S260F ITLEDSSGNL  | 6     | >TP53-S260F ITLEDFSGNL  | 14   | 8     |
| >TP53-S260F ITLEDSSGNLL | 18    | >TP53-S260F ITLEDFSGNLL | 38   | 20    |
| >TP53-S260F ITLEDSSGNLL | 259   | >TP53-S260F ITLEDFSGNLL | 180  | 79    |
| >TP53-S260F ITLEDSSGNL  | 341   | >TP53-S260F ITLEDFSGNL  | 551  | 210   |
| >TP53-S260F ITLEDSSGNLL | 30    | >TP53-S260F ITLEDFSGNLL | 29   | 1     |
| >TP53-S260F TIITLEDS    | 7475  | >TP53-S260F TIITLEDF    | 34   | 7441  |
| >TP53-S260F LTIITLEDS   | 8155  | >TP53-S260F LTIITLEDF   | 58   | 8097  |
| >TP53-S260F LTIITLEDS   | 18595 | >TP53-S260F LTIITLEDF   | 402  | 18193 |
| >TP53-S260F LTIITLEDS   | 20355 | >TP53-S260F LTIITLEDF   | 373  | 19982 |
| >TP53-S260F LTIITLEDS   | 9874  | >TP53-S260F LTIITLEDF   | 7    | 9867  |
| >TP53-S260F LTIITLEDS   | 19366 | >TP53-S260F LTIITLEDF   | 100  | 19266 |
| >TP53-S260F LTIITLEDS   | 14010 | >TP53-S260F LTIITLEDF   | 225  | 13785 |
| >TP53-S260F ILTIITLEDS  | 20405 | >TP53-S260F ILTIITLEDF  | 360  | 20045 |
| >TP53-S260P SSGNLLGRNS  | 245   | >TP53-S260P PSGNLLGRNS  | 7163 | 6918  |
| >TP53-S260P SSGNLLGRNS  | 390   | >TP53-S260P PSGNLLGRNS  | 9055 | 8665  |
| >TP53-S260P SSGNLLGRNS  | 32    | >TP53-S260P PSGNLLGRNS  | 3483 | 3451  |
| >TP53-S260P SSGNLLGR    | 357   | >TP53-S260P PSGNLLGR    | 9455 | 9098  |
| >TP53-S260P DSSGNLLGR   | 68    | >TP53-S260P DPSGNLLGR   | 1413 | 1345  |
| >TP53-S260P EDSSGNLL    | 273   | >TP53-S260P EDPSGNLL    | 1113 | 840   |
| >TP53-S260P LEDSSGNLL   | 745   | >TP53-S260P LEDPSGNLL   | 323  | 422   |
| >TP53-S260P LEDSSGNL    | 33    | >TP53-S260P LEDPSGNL    | 64   | 31    |
| >TP53-S260P LEDSSGNLL   | 20    | >TP53-S260P LEDPSGNLL   | 43   | 23    |
| >TP53-S260P TLEDSSGNL   | 62    | >TP53-S260P TLEDPSGNL   | 293  | 231   |
| >TP53-S260P TLEDSSGNLL  | 133   | >TP53-S260P TLEDPSGNLL  | 245  | 112   |
| >TP53-S260P TLEDSSGNL   | 24    | >TP53-S260P TLEDPSGNL   | 39   | 15    |
| >TP53-S260P TLEDSSGNLL  | 23    | >TP53-S260P TLEDPSGNLL  | 25   | 2     |
| >TP53-S260P ITLEDSSGNL  | 495   | >TP53-S260P ITLEDPSGNL  | 361  | 134   |
| >TP53-S260P ITLEDSSGNL  | 471   | >TP53-S260P ITLEDPSGNL  | 553  | 82    |
| >TP53-S260P ITLEDSSGNL  | 371   | >TP53-S260P ITLEDPSGNL  | 438  | 67    |

|                         |       |                         |      |       |
|-------------------------|-------|-------------------------|------|-------|
| >TP53-S260P ITLEDSSGNLL | 270   | >TP53-S260P ITLEDPSGNLL | 550  | 280   |
| >TP53-S260P ITLEDSSGNL  | 302   | >TP53-S260P ITLEDPSGNL  | 134  | 168   |
| >TP53-S260P ITLEDSSGNLL | 339   | >TP53-S260P ITLEDPSGNLL | 214  | 125   |
| >TP53-S260P ITLEDSSGNL  | 137   | >TP53-S260P ITLEDPSGNL  | 150  | 13    |
| >TP53-S260P ITLEDSSGNLL | 354   | >TP53-S260P ITLEDPSGNLL | 558  | 204   |
| >TP53-S260P ITLEDSSGNL  | 6     | >TP53-S260P ITLEDPSGNL  | 9    | 3     |
| >TP53-S260P ITLEDSSGNLL | 18    | >TP53-S260P ITLEDPSGNLL | 23   | 5     |
| >TP53-S260P ITLEDSSGNLL | 259   | >TP53-S260P ITLEDPSGNLL | 442  | 183   |
| >TP53-S260P ITLEDSSGNL  | 341   | >TP53-S260P ITLEDPSGNL  | 306  | 35    |
| >TP53-S260P ITLEDSSGNLL | 30    | >TP53-S260P ITLEDPSGNLL | 51   | 21    |
| >TP53-S260Y SSGNLLGRNS  | 2774  | >TP53-S260Y YSGNLLGRNS  | 251  | 2523  |
| >TP53-S260Y SSGNLLGR    | 744   | >TP53-S260Y YSGNLLGR    | 200  | 544   |
| >TP53-S260Y SSGNLLGRNS  | 245   | >TP53-S260Y YSGNLLGRNS  | 88   | 157   |
| >TP53-S260Y SSGNLLGRNS  | 701   | >TP53-S260Y YSGNLLGRNS  | 126  | 575   |
| >TP53-S260Y SSGNLLGRNS  | 390   | >TP53-S260Y YSGNLLGRNS  | 48   | 342   |
| >TP53-S260Y SSGNLLGRNS  | 32    | >TP53-S260Y YSGNLLGRNS  | 18   | 14    |
| >TP53-S260Y SSGNLLGR    | 357   | >TP53-S260Y YSGNLLGR    | 2072 | 1715  |
| >TP53-S260Y DSSGNLLGR   | 664   | >TP53-S260Y DYSGNLLGR   | 67   | 597   |
| >TP53-S260Y DSSGNLLGR   | 68    | >TP53-S260Y DYSGNLLGR   | 526  | 458   |
| >TP53-S260Y DSSGNLLGR   | 4109  | >TP53-S260Y DYSGNLLGR   | 64   | 4045  |
| >TP53-S260Y PILTIITLED  | 22858 | >TP53-S260Y PILTIITLEDY | 231  | 22627 |
| >TP53-S260Y EDSSGNLL    | 273   | >TP53-S260Y EDYSGNLL    | 81   | 192   |
| >TP53-S260Y LEDSSGNL    | 727   | >TP53-S260Y LEDYSGNL    | 67   | 660   |
| >TP53-S260Y LEDSSGNLL   | 745   | >TP53-S260Y LEDYSGNLL   | 235  | 510   |
| >TP53-S260Y LEDSSGNL    | 33    | >TP53-S260Y LEDYSGNL    | 25   | 8     |
| >TP53-S260Y LEDSSGNLL   | 20    | >TP53-S260Y LEDYSGNLL   | 14   | 6     |
| >TP53-S260Y TLEDSSGNL   | 62    | >TP53-S260Y TLEDYSGNL   | 17   | 45    |
| >TP53-S260Y TLEDSSGNLL  | 133   | >TP53-S260Y TLEDYSGNLL  | 107  | 26    |
| >TP53-S260Y TLEDSSGNL   | 513   | >TP53-S260Y TLEDYSGNL   | 283  | 230   |
| >TP53-S260Y TLEDSSGNL   | 1522  | >TP53-S260Y TLEDYSGNL   | 383  | 1139  |
| >TP53-S260Y TLEDSSGNL   | 24    | >TP53-S260Y TLEDYSGNL   | 15   | 9     |
| >TP53-S260Y TLEDSSGNLL  | 23    | >TP53-S260Y TLEDYSGNLL  | 22   | 1     |
| >TP53-S260Y ITLEDSSGNL  | 495   | >TP53-S260Y ITLEDYSGNL  | 310  | 185   |
| >TP53-S260Y ITLEDSSGNL  | 471   | >TP53-S260Y ITLEDYSGNL  | 569  | 98    |
| >TP53-S260Y ITLEDSSGNL  | 371   | >TP53-S260Y ITLEDYSGNL  | 243  | 128   |
| >TP53-S260Y ITLEDSSGNLL | 270   | >TP53-S260Y ITLEDYSGNLL | 289  | 19    |
| >TP53-S260Y ITLEDSSGNL  | 302   | >TP53-S260Y ITLEDYSGNL  | 164  | 138   |
| >TP53-S260Y ITLEDSSGNLL | 339   | >TP53-S260Y ITLEDYSGNLL | 375  | 36    |
| >TP53-S260Y ITLEDSSGNL  | 137   | >TP53-S260Y ITLEDYSGNL  | 104  | 33    |
| >TP53-S260Y ITLEDSSGNLL | 354   | >TP53-S260Y ITLEDYSGNLL | 361  | 7     |
| >TP53-S260Y ITLEDSSGNL  | 6     | >TP53-S260Y ITLEDYSGNL  | 10   | 4     |
| >TP53-S260Y ITLEDSSGNLL | 18    | >TP53-S260Y ITLEDYSGNLL | 31   | 13    |
| >TP53-S260Y ITLEDSSGNLL | 259   | >TP53-S260Y ITLEDYSGNLL | 316  | 57    |

|                         |       |                         |       |       |
|-------------------------|-------|-------------------------|-------|-------|
| >TP53-S260Y ITLEDSSGNL  | 341   | >TP53-S260Y ITLEDYSGNL  | 556   | 215   |
| >TP53-S260Y ITLEDSSGNLL | 30    | >TP53-S260Y ITLEDYSGNLL | 39    | 9     |
| >TP53-S260Y IITLEDSSGNL | 1406  | >TP53-S260Y IITLEDYSGNL | 482   | 924   |
| >TP53-S260Y TIITLEDS    | 7475  | >TP53-S260Y TIITLEDY    | 14    | 7461  |
| >TP53-S260Y TIITLEDS    | 21619 | >TP53-S260Y TIITLEDY    | 87    | 21532 |
| >TP53-S260Y TIITLEDS    | 25329 | >TP53-S260Y TIITLEDY    | 446   | 24883 |
| >TP53-S260Y LTIITLEDS   | 8155  | >TP53-S260Y LTIITLEDY   | 19    | 8136  |
| >TP53-S260Y LTIITLEDS   | 20633 | >TP53-S260Y LTIITLEDY   | 31    | 20602 |
| >TP53-S260Y LTIITLEDS   | 25830 | >TP53-S260Y LTIITLEDY   | 247   | 25583 |
| >TP53-S260Y LTIITLEDS   | 18595 | >TP53-S260Y LTIITLEDY   | 339   | 18256 |
| >TP53-S260Y LTIITLEDS   | 9874  | >TP53-S260Y LTIITLEDY   | 8     | 9866  |
| >TP53-S260Y LTIITLEDS   | 19366 | >TP53-S260Y LTIITLEDY   | 466   | 18900 |
| >TP53-S260Y LTIITLEDS   | 14010 | >TP53-S260Y LTIITLEDY   | 157   | 13853 |
| >TP53-S260Y ILTIITLEDS  | 28482 | >TP53-S260Y ILTIITLEDY  | 243   | 28239 |
| >TP53-S260Y ILTIITLEDS  | 18116 | >TP53-S260Y ILTIITLEDY  | 30    | 18086 |
| >TP53-S261C SGNLLGRNSF  | 311   | >TP53-S261C CGNLLGRNSF  | 2735  | 2424  |
| >TP53-S261C SSGNLLGRNS  | 245   | >TP53-S261C SCGNLLGRNS  | 10018 | 9773  |
| >TP53-S261C SSGNLLGRNS  | 390   | >TP53-S261C SCGNLLGRNS  | 21465 | 21075 |
| >TP53-S261C SSGNLLGRNS  | 32    | >TP53-S261C SCGNLLGRNS  | 192   | 160   |
| >TP53-S261C SSGNLLGR    | 357   | >TP53-S261C SCGNLLGR    | 7048  | 6691  |
| >TP53-S261C SSGNLLGR    | 1198  | >TP53-S261C SCGNLLGR    | 298   | 900   |
| >TP53-S261C ILTIITLEDSS | 4003  | >TP53-S261C ILTIITLEDSC | 209   | 3794  |
| >TP53-S261C DSSGNLLGR   | 664   | >TP53-S261C DSCGNLLGR   | 262   | 402   |
| >TP53-S261C DSSGNLLGR   | 68    | >TP53-S261C DSCGNLLGR   | 114   | 46    |
| >TP53-S261C EDSSGNLL    | 273   | >TP53-S261C EDSCGNLL    | 133   | 140   |
| >TP53-S261C LEDSSGNL    | 33    | >TP53-S261C LEDSCGNL    | 50    | 17    |
| >TP53-S261C LEDSSGNLL   | 20    | >TP53-S261C LEDSCGNLL   | 33    | 13    |
| >TP53-S261C TLEDSSGNL   | 62    | >TP53-S261C TLEDSCGNL   | 112   | 50    |
| >TP53-S261C TLEDSSGNLL  | 133   | >TP53-S261C TLEDSCGNLL  | 199   | 66    |
| >TP53-S261C TLEDSSGNL   | 24    | >TP53-S261C TLEDSCGNL   | 34    | 10    |
| >TP53-S261C TLEDSSGNLL  | 23    | >TP53-S261C TLEDSCGNLL  | 29    | 6     |
| >TP53-S261C ITLEDSSGNL  | 495   | >TP53-S261C ITLEDSCGNL  | 720   | 225   |
| >TP53-S261C ITLEDSSGNLL | 536   | >TP53-S261C ITLEDSCGNLL | 459   | 77    |
| >TP53-S261C ITLEDSSGNL  | 471   | >TP53-S261C ITLEDSCGNL  | 435   | 36    |
| >TP53-S261C ITLEDSSGNL  | 371   | >TP53-S261C ITLEDSCGNL  | 304   | 67    |
| >TP53-S261C ITLEDSSGNLL | 270   | >TP53-S261C ITLEDSCGNLL | 208   | 62    |
| >TP53-S261C ITLEDSSGNL  | 302   | >TP53-S261C ITLEDSCGNL  | 398   | 96    |
| >TP53-S261C ITLEDSSGNLL | 339   | >TP53-S261C ITLEDSCGNLL | 293   | 46    |
| >TP53-S261C ITLEDSSGNL  | 137   | >TP53-S261C ITLEDSCGNL  | 230   | 93    |
| >TP53-S261C ITLEDSSGNLL | 354   | >TP53-S261C ITLEDSCGNLL | 449   | 95    |
| >TP53-S261C ITLEDSSGNL  | 6     | >TP53-S261C ITLEDSCGNL  | 10    | 4     |
| >TP53-S261C ITLEDSSGNLL | 18    | >TP53-S261C ITLEDSCGNLL | 33    | 15    |
| >TP53-S261C ITLEDSSGNLL | 259   | >TP53-S261C ITLEDSCGNLL | 412   | 153   |

|                        |     |                        |       |       |
|------------------------|-----|------------------------|-------|-------|
| >TP53-S261CITLEDSSGNL  | 341 | >TP53-S261CITLEDSCGNL  | 3707  | 3366  |
| >TP53-S261CITLEDSSGNLL | 30  | >TP53-S261CITLEDSCGNLL | 99    | 69    |
| >TP53-S261CSGNLLGRNSF  | 311 | >TP53-S261CGGNLLGRNSF  | 1324  | 1013  |
| >TP53-S261CSSGNLLGRNS  | 245 | >TP53-S261CSGGNLLGRNS  | 1429  | 1184  |
| >TP53-S261CSSGNLLGRNS  | 390 | >TP53-S261CSGGNLLGRNS  | 13402 | 13012 |
| >TP53-S261CSSGNLLGRNS  | 32  | >TP53-S261CSGGNLLGRNS  | 400   | 368   |
| >TP53-S261CSSGNLLGR    | 357 | >TP53-S261CSGGNLLGR    | 4418  | 4061  |
| >TP53-S261CDSSGNLLGR   | 68  | >TP53-S261CDSGGNLLGR   | 458   | 390   |
| >TP53-S261CEDSSGNLL    | 273 | >TP53-S261CEDSGGNLL    | 331   | 58    |
| >TP53-S261CEDSSGNL     | 727 | >TP53-S261CEDSGGNL     | 139   | 588   |
| >TP53-S261CEDSSGNL     | 33  | >TP53-S261CEDSGGNL     | 22    | 11    |
| >TP53-S261CEDSSGNLL    | 20  | >TP53-S261CEDSGGNLL    | 17    | 3     |
| >TP53-S261CTLEDSSGNL   | 62  | >TP53-S261CTLEDSSGNL   | 265   | 203   |
| >TP53-S261CTLEDSSGNLL  | 133 | >TP53-S261CTLEDSSGNLL  | 203   | 70    |
| >TP53-S261CTLEDSSGNL   | 24  | >TP53-S261CTLEDSSGNL   | 43    | 19    |
| >TP53-S261CTLEDSSGNLL  | 23  | >TP53-S261CTLEDSSGNLL  | 24    | 1     |
| >TP53-S261CITLEDSSGNL  | 495 | >TP53-S261CITLEDSSGNL  | 809   | 314   |
| >TP53-S261CITLEDSSGNL  | 471 | >TP53-S261CITLEDSSGNL  | 992   | 521   |
| >TP53-S261CITLEDSSGNL  | 371 | >TP53-S261CITLEDSSGNL  | 357   | 14    |
| >TP53-S261CITLEDSSGNLL | 270 | >TP53-S261CITLEDSSGNLI | 300   | 30    |
| >TP53-S261CITLEDSSGNL  | 302 | >TP53-S261CITLEDSSGNL  | 436   | 134   |
| >TP53-S261CITLEDSSGNLL | 339 | >TP53-S261CITLEDSSGNLI | 398   | 59    |
| >TP53-S261CITLEDSSGNL  | 137 | >TP53-S261CITLEDSSGNL  | 284   | 147   |
| >TP53-S261CITLEDSSGNLL | 354 | >TP53-S261CITLEDSSGNLI | 318   | 36    |
| >TP53-S261CITLEDSSGNL  | 6   | >TP53-S261CITLEDSSGNL  | 10    | 4     |
| >TP53-S261CITLEDSSGNLL | 18  | >TP53-S261CITLEDSSGNLI | 32    | 14    |
| >TP53-S261CITLEDSSGNLL | 259 | >TP53-S261CITLEDSSGNLI | 660   | 401   |
| >TP53-S261CITLEDSSGNL  | 341 | >TP53-S261CITLEDSSGNL  | 1147  | 806   |
| >TP53-S261CITLEDSSGNLL | 30  | >TP53-S261CITLEDSSGNLI | 68    | 38    |
| >TP53-S261NSGNLLGRNSF  | 311 | >TP53-S261NSGNLLGRNSF  | 4717  | 4406  |
| >TP53-S261NSSGNLLGRNS  | 245 | >TP53-S261NSGNLLGRNS   | 2113  | 1868  |
| >TP53-S261NSSGNLLGRNS  | 390 | >TP53-S261NSGNLLGRNS   | 22069 | 21679 |
| >TP53-S261NSSGNLLGRNS  | 32  | >TP53-S261NSGNLLGRNS   | 554   | 522   |
| >TP53-S261NSSGNLLGR    | 357 | >TP53-S261NSGNLLGR     | 6236  | 5879  |
| >TP53-S261NDSSGNLLGR   | 68  | >TP53-S261NDSGNLLGR    | 109   | 41    |
| >TP53-S261NEDSSGNLL    | 273 | >TP53-S261NEDSNGNLL    | 207   | 66    |
| >TP53-S261NLEDSSGNL    | 727 | >TP53-S261NLEDSSGNL    | 382   | 345   |
| >TP53-S261NLEDSSGNL    | 33  | >TP53-S261NLEDSSGNL    | 31    | 2     |
| >TP53-S261NLEDSSGNLL   | 20  | >TP53-S261NLEDSSGNLL   | 27    | 7     |
| >TP53-S261NTLEDSSGNL   | 62  | >TP53-S261NTLEDSSGNL   | 107   | 45    |
| >TP53-S261NTLEDSSGNLL  | 133 | >TP53-S261NTLEDSSGNLL  | 156   | 23    |
| >TP53-S261NTLEDSSGNL   | 24  | >TP53-S261NTLEDSSGNL   | 37    | 13    |
| >TP53-S261NTLEDSSGNLL  | 23  | >TP53-S261NTLEDSSGNLL  | 25    | 2     |

|                        |       |                        |       |       |
|------------------------|-------|------------------------|-------|-------|
| >TP53-S261NITLEDSSGNL  | 495   | >TP53-S261NITLEDSSGNL  | 470   | 25    |
| >TP53-S261NITLEDSSGNLL | 536   | >TP53-S261NITLEDSSGNLI | 469   | 67    |
| >TP53-S261NITLEDSSGNL  | 471   | >TP53-S261NITLEDSSGNL  | 743   | 272   |
| >TP53-S261NITLEDSSGNL  | 371   | >TP53-S261NITLEDSSGNL  | 387   | 16    |
| >TP53-S261NITLEDSSGNLL | 270   | >TP53-S261NITLEDSSGNLI | 290   | 20    |
| >TP53-S261NITLEDSSGNL  | 302   | >TP53-S261NITLEDSSGNL  | 534   | 232   |
| >TP53-S261NITLEDSSGNLL | 339   | >TP53-S261NITLEDSSGNLI | 345   | 6     |
| >TP53-S261NITLEDSSGNL  | 137   | >TP53-S261NITLEDSSGNL  | 161   | 24    |
| >TP53-S261NITLEDSSGNLL | 354   | >TP53-S261NITLEDSSGNLI | 341   | 13    |
| >TP53-S261NITLEDSSGNL  | 6     | >TP53-S261NITLEDSSGNL  | 13    | 7     |
| >TP53-S261NITLEDSSGNLL | 18    | >TP53-S261NITLEDSSGNLI | 47    | 29    |
| >TP53-S261NITLEDSSGNLL | 259   | >TP53-S261NITLEDSSGNLI | 326   | 67    |
| >TP53-S261NITLEDSSGNL  | 341   | >TP53-S261NITLEDSSGNL  | 1019  | 678   |
| >TP53-S261NITLEDSSGNLL | 30    | >TP53-S261NITLEDSSGNLI | 94    | 64    |
| >TP53-S261RSGNLLGRNSF  | 1928  | >TP53-S261RSGNLLGRNSF  | 449   | 1479  |
| >TP53-S261RSGNLLGRNSF  | 311   | >TP53-S261RSGNLLGRNSF  | 170   | 141   |
| >TP53-S261RSSGNLLGRNS  | 245   | >TP53-S261RSSGNLLGRNS  | 12254 | 12009 |
| >TP53-S261RSSGNLLGRNS  | 701   | >TP53-S261RSSGNLLGRNS  | 359   | 342   |
| >TP53-S261RSSGNLLGRNS  | 390   | >TP53-S261RSSGNLLGRNS  | 26591 | 26201 |
| >TP53-S261RSSGNLLGR    | 21462 | >TP53-S261RSSGNLLGR    | 467   | 20995 |
| >TP53-S261RSSGNLLGRNS  | 32    | >TP53-S261RSSGNLLGRNS  | 2009  | 1977  |
| >TP53-S261RSSGNLLGRNS  | 26184 | >TP53-S261RSSGNLLGRNS  | 261   | 25923 |
| >TP53-S261RSSGNLLGR    | 357   | >TP53-S261RSSGNLLGR    | 12184 | 11827 |
| >TP53-S261RILTIITLEDSS | 26836 | >TP53-S261RILTIITLEDSS | 96    | 26740 |
| >TP53-S261RILTIITLEDSS | 31955 | >TP53-S261RILTIITLEDSS | 496   | 31459 |
| >TP53-S261RDSSGNLLGR   | 664   | >TP53-S261RDSSGNLLGR   | 165   | 499   |
| >TP53-S261RDSSGNLLGR   | 68    | >TP53-S261RDSSGNLLGR   | 546   | 478   |
| >TP53-S261REDSSGNLL    | 273   | >TP53-S261REDSSGNLL    | 235   | 38    |
| >TP53-S261REDSSGNL     | 745   | >TP53-S261REDSSGNL     | 363   | 382   |
| >TP53-S261REDSSGNL     | 33    | >TP53-S261REDSSGNL     | 116   | 83    |
| >TP53-S261REDSSGNLL    | 20    | >TP53-S261REDSSGNLL    | 128   | 108   |
| >TP53-S261RTLEDSSGNL   | 62    | >TP53-S261RTLEDSSGNL   | 734   | 672   |
| >TP53-S261RTLEDSSGNLL  | 133   | >TP53-S261RTLEDSSGNLL  | 310   | 177   |
| >TP53-S261RTLEDSSGNL   | 24    | >TP53-S261RTLEDSSGNL   | 33    | 9     |
| >TP53-S261RTLEDSSGNLL  | 23    | >TP53-S261RTLEDSSGNLL  | 31    | 8     |
| >TP53-S261RITLEDSSGNL  | 495   | >TP53-S261RITLEDSSGNL  | 826   | 331   |
| >TP53-S261RITLEDSSGNL  | 471   | >TP53-S261RITLEDSSGNL  | 996   | 525   |
| >TP53-S261RITLEDSSGNL  | 371   | >TP53-S261RITLEDSSGNL  | 880   | 509   |
| >TP53-S261RITLEDSSGNLL | 270   | >TP53-S261RITLEDSSGNLL | 489   | 219   |
| >TP53-S261RITLEDSSGNL  | 302   | >TP53-S261RITLEDSSGNL  | 1166  | 864   |
| >TP53-S261RITLEDSSGNLL | 339   | >TP53-S261RITLEDSSGNLL | 573   | 234   |
| >TP53-S261RITLEDSSGNL  | 137   | >TP53-S261RITLEDSSGNL  | 473   | 336   |
| >TP53-S261RITLEDSSGNLL | 354   | >TP53-S261RITLEDSSGNLL | 854   | 500   |

|                        |       |                        |      |       |
|------------------------|-------|------------------------|------|-------|
| >TP53-S261RITLEDSSGNL  | 6     | >TP53-S261RITLEDSSGNL  | 12   | 6     |
| >TP53-S261RITLEDSSGNLL | 18    | >TP53-S261RITLEDSSGNLL | 35   | 17    |
| >TP53-S261RITLEDSSGNLL | 259   | >TP53-S261RITLEDSSGNLL | 515  | 256   |
| >TP53-S261RITLEDSSGNL  | 341   | >TP53-S261RITLEDSSGNL  | 1466 | 1125  |
| >TP53-S261RITLEDSSGNLL | 30    | >TP53-S261RITLEDSSGNLL | 105  | 75    |
| >TP53-S261RIITLEDSS    | 28510 | >TP53-S261RIITLEDSS    | 90   | 28420 |
| >TP53-S261RTIITLEDSS   | 16011 | >TP53-S261RTIITLEDSS   | 15   | 15996 |
| >TP53-S261RLTIITLEDSS  | 24834 | >TP53-S261RLTIITLEDSS  | 36   | 24798 |
| >TP53-S261TSGNLLGRNSF  | 311   | >TP53-S261TSGNLLGRNSF  | 1388 | 1077  |
| >TP53-S261TSSGNLLGR    | 627   | >TP53-S261TSSGNLLGR    | 202  | 425   |
| >TP53-S261TSSGNLLGRNS  | 2774  | >TP53-S261TSSGNLLGRNS  | 465  | 2309  |
| >TP53-S261TSSGNLLGRNS  | 2212  | >TP53-S261TSSGNLLGRNS  | 280  | 1932  |
| >TP53-S261TSSGNLLGR    | 554   | >TP53-S261TSSGNLLGR    | 265  | 289   |
| >TP53-S261TSSGNLLGRNS  | 974   | >TP53-S261TSSGNLLGRNS  | 285  | 689   |
| >TP53-S261TSSGNLLGR    | 744   | >TP53-S261TSSGNLLGR    | 163  | 581   |
| >TP53-S261TSSGNLLGRNS  | 245   | >TP53-S261TSSGNLLGRNS  | 338  | 93    |
| >TP53-S261TSSGNLLGRNS  | 390   | >TP53-S261TSSGNLLGRNS  | 279  | 111   |
| >TP53-S261TSSGNLLGRNS  | 32    | >TP53-S261TSSGNLLGRNS  | 14   | 18    |
| >TP53-S261TSSGNLLGR    | 357   | >TP53-S261TSSGNLLGR    | 238  | 119   |
| >TP53-S261TILTIITLEDSS | 4003  | >TP53-S261TILTIITLEDSS | 343  | 3660  |
| >TP53-S261TDSSGNLLGR   | 68    | >TP53-S261TDSSGNLLGR   | 80   | 12    |
| >TP53-S261TEDSSGNLL    | 273   | >TP53-S261TEDSSGNLL    | 184  | 89    |
| >TP53-S261TLEDSSGNL    | 33    | >TP53-S261TLEDSSGNL    | 33   | 0     |
| >TP53-S261TLEDSSGNLL   | 20    | >TP53-S261TLEDSSGNLL   | 22   | 2     |
| >TP53-S261TLEDSSGNL    | 62    | >TP53-S261TLEDSSGNL    | 37   | 25    |
| >TP53-S261TLEDSSGNLL   | 133   | >TP53-S261TLEDSSGNLL   | 115  | 18    |
| >TP53-S261TLEDSSGNL    | 513   | >TP53-S261TLEDSSGNL    | 244  | 269   |
| >TP53-S261TLEDSSGNL    | 24    | >TP53-S261TLEDSSGNL    | 14   | 10    |
| >TP53-S261TLEDSSGNLL   | 23    | >TP53-S261TLEDSSGNLL   | 19   | 4     |
| >TP53-S261TITLEDSSGNL  | 495   | >TP53-S261TITLEDSSGNL  | 401  | 94    |
| >TP53-S261TITLEDSSGNLL | 536   | >TP53-S261TITLEDSSGNLL | 486  | 50    |
| >TP53-S261TITLEDSSGNL  | 471   | >TP53-S261TITLEDSSGNL  | 259  | 212   |
| >TP53-S261TITLEDSSGNL  | 371   | >TP53-S261TITLEDSSGNL  | 339  | 32    |
| >TP53-S261TITLEDSSGNLL | 270   | >TP53-S261TITLEDSSGNLL | 199  | 71    |
| >TP53-S261TITLEDSSGNL  | 302   | >TP53-S261TITLEDSSGNL  | 320  | 18    |
| >TP53-S261TITLEDSSGNLL | 339   | >TP53-S261TITLEDSSGNLL | 311  | 28    |
| >TP53-S261TITLEDSSGNL  | 137   | >TP53-S261TITLEDSSGNL  | 107  | 30    |
| >TP53-S261TITLEDSSGNLL | 354   | >TP53-S261TITLEDSSGNLL | 282  | 72    |
| >TP53-S261TITLEDSSGNL  | 6     | >TP53-S261TITLEDSSGNL  | 8    | 2     |
| >TP53-S261TITLEDSSGNLL | 18    | >TP53-S261TITLEDSSGNLL | 29   | 11    |
| >TP53-S261TITLEDSSGNLL | 259   | >TP53-S261TITLEDSSGNLL | 292  | 33    |
| >TP53-S261TITLEDSSGNL  | 341   | >TP53-S261TITLEDSSGNL  | 663  | 322   |
| >TP53-S261TITLEDSSGNLL | 30    | >TP53-S261TITLEDSSGNLL | 46   | 16    |



|                        |      |                        |      |      |
|------------------------|------|------------------------|------|------|
| >TP53-S261T LTIITLEDSS | 4476 | >TP53-S261T LTIITLEDST | 462  | 4014 |
| >TP53-S269C NSFVVRVCA  | 21   | >TP53-S269C NCFVVRVCA  | 176  | 155  |
| >TP53-S269C GRNSFEVR   | 405  | >TP53-S269C GRNCFEVR   | 403  | 2    |
| >TP53-S269C LGRNSFEVR  | 286  | >TP53-S269C LGRNCFEVR  | 161  | 125  |
| >TP53-S269C LGRNSFEVR  | 3056 | >TP53-S269C LGRNCFEVR  | 498  | 2558 |
| >TP53-S269C LLGRNSFEV  | 26   | >TP53-S269C LLGRNCFEV  | 31   | 5    |
| >TP53-S269C LLGRNSFEVR | 137  | >TP53-S269C LLGRNCFEVR | 151  | 14   |
| >TP53-S269C LLGRNSFEV  | 16   | >TP53-S269C LLGRNCFEV  | 26   | 10   |
| >TP53-S269C LLGRNSFEVR | 62   | >TP53-S269C LLGRNCFEVR | 85   | 23   |
| >TP53-S269C LLGRNSFEV  | 47   | >TP53-S269C LLGRNCFEV  | 83   | 36   |
| >TP53-S269C LLGRNSFEVR | 214  | >TP53-S269C LLGRNCFEVR | 290  | 76   |
| >TP53-S269C LLGRNSFEV  | 39   | >TP53-S269C LLGRNCFEV  | 49   | 10   |
| >TP53-S269C LLGRNSFEV  | 2    | >TP53-S269C LLGRNCFEV  | 3    | 1    |
| >TP53-S269C LLGRNSFEVR | 3    | >TP53-S269C LLGRNCFEVR | 4    | 1    |
| >TP53-S269C LLGRNSFEV  | 2    | >TP53-S269C LLGRNCFEV  | 4    | 2    |
| >TP53-S269C LLGRNSFEVR | 7    | >TP53-S269C LLGRNCFEVR | 9    | 2    |
| >TP53-S269C LLGRNSFEV  | 5    | >TP53-S269C LLGRNCFEV  | 6    | 1    |
| >TP53-S269C LLGRNSFEVR | 9    | >TP53-S269C LLGRNCFEVR | 12   | 3    |
| >TP53-S269C LLGRNSFEV  | 2    | >TP53-S269C LLGRNCFEV  | 3    | 1    |
| >TP53-S269C LLGRNSFEVR | 6    | >TP53-S269C LLGRNCFEVR | 8    | 2    |
| >TP53-S269C LLGRNSFEV  | 2    | >TP53-S269C LLGRNCFEV  | 2    | 0    |
| >TP53-S269C LLGRNSFEVR | 2    | >TP53-S269C LLGRNCFEVR | 2    | 0    |
| >TP53-S269C LLGRNSFEVR | 429  | >TP53-S269C LLGRNCFEVR | 397  | 32   |
| >TP53-S269C LLGRNSFEV  | 425  | >TP53-S269C LLGRNCFEV  | 1070 | 645  |
| >TP53-S269C LLGRNSFEVR | 773  | >TP53-S269C LLGRNCFEVR | 489  | 284  |
| >TP53-S269C NLLGRNSFEV | 29   | >TP53-S269C NLLGRNCFEV | 21   | 8    |
| >TP53-S269C NLLGRNSFEV | 89   | >TP53-S269C NLLGRNCFEV | 136  | 47   |
| >TP53-S269C NLLGRNSFEV | 94   | >TP53-S269C NLLGRNCFEV | 90   | 4    |
| >TP53-S269C NLLGRNSFEV | 137  | >TP53-S269C NLLGRNCFEV | 125  | 12   |
| >TP53-S269C NLLGRNSFEV | 3    | >TP53-S269C NLLGRNCFEV | 4    | 1    |
| >TP53-S269C NLLGRNSFEV | 5    | >TP53-S269C NLLGRNCFEV | 6    | 1    |
| >TP53-S269C NLLGRNSFEV | 7    | >TP53-S269C NLLGRNCFEV | 6    | 1    |
| >TP53-S269C NLLGRNSFEV | 3    | >TP53-S269C NLLGRNCFEV | 3    | 0    |
| >TP53-S269C NLLGRNSFEV | 3    | >TP53-S269C NLLGRNCFEV | 3    | 0    |
| >TP53-S269C NLLGRNSFEV | 502  | >TP53-S269C NLLGRNCFEV | 408  | 94   |
| >TP53-S269C NLLGRNSFEV | 109  | >TP53-S269C NLLGRNCFEV | 92   | 17   |
| >TP53-S269C NLLGRNSFEV | 309  | >TP53-S269C NLLGRNCFEV | 462  | 153  |
| >TP53-S269C NLLGRNSFEV | 52   | >TP53-S269C NLLGRNCFEV | 74   | 22   |
| >TP53-S269C NLLGRNSF   | 65   | >TP53-S269C NLLGRNCF   | 185  | 120  |
| >TP53-S269C NLLGRNSF   | 418  | >TP53-S269C NLLGRNCF   | 1270 | 852  |
| >TP53-S269C NLLGRNSFEV | 195  | >TP53-S269C NLLGRNCFEV | 66   | 129  |
| >TP53-S269C SGNLLGRNSF | 311  | >TP53-S269C SGNLLGRNCF | 1433 | 1122 |
| >TP53-S269C SSGNLLGRNS | 245  | >TP53-S269C SSGNLLGRNC | 1213 | 968  |

|                        |     |                        |      |      |
|------------------------|-----|------------------------|------|------|
| >TP53-S269C SSGNLLGRNS | 390 | >TP53-S269C SSGNLLGRNC | 1847 | 1457 |
| >TP53-S269C SSGNLLGRNS | 32  | >TP53-S269C SSGNLLGRNC | 114  | 82   |
| >TP53-S269C NSFVCA     | 21  | >TP53-S269C NGFVCA     | 386  | 365  |
| >TP53-S269C GRNSFEVR   | 405 | >TP53-S269C GRNGFEVR   | 310  | 95   |
| >TP53-S269C GRNSFEVRV  | 631 | >TP53-S269C GRNGFEVRV  | 447  | 184  |
| >TP53-S269C LGRNSFEVR  | 286 | >TP53-S269C LGRNGFEVR  | 496  | 210  |
| >TP53-S269C LLGRNSFEV  | 26  | >TP53-S269C LLGRNGFEV  | 83   | 57   |
| >TP53-S269C LLGRNSFEVR | 137 | >TP53-S269C LLGRNGFEVR | 280  | 143  |
| >TP53-S269C LLGRNSFEV  | 16  | >TP53-S269C LLGRNGFEV  | 46   | 30   |
| >TP53-S269C LLGRNSFEVR | 62  | >TP53-S269C LLGRNGFEVR | 113  | 51   |
| >TP53-S269C LLGRNSFEV  | 47  | >TP53-S269C LLGRNGFEV  | 95   | 48   |
| >TP53-S269C LLGRNSFEVR | 214 | >TP53-S269C LLGRNGFEVR | 334  | 120  |
| >TP53-S269C LLGRNSFEV  | 39  | >TP53-S269C LLGRNGFEV  | 96   | 57   |
| >TP53-S269C LLGRNSFEV  | 2   | >TP53-S269C LLGRNGFEV  | 2    | 0    |
| >TP53-S269C LLGRNSFEVR | 3   | >TP53-S269C LLGRNGFEVR | 3    | 0    |
| >TP53-S269C LLGRNSFEV  | 2   | >TP53-S269C LLGRNGFEV  | 3    | 1    |
| >TP53-S269C LLGRNSFEVR | 7   | >TP53-S269C LLGRNGFEVR | 9    | 2    |
| >TP53-S269C LLGRNSFEV  | 5   | >TP53-S269C LLGRNGFEV  | 6    | 1    |
| >TP53-S269C LLGRNSFEVR | 9   | >TP53-S269C LLGRNGFEVR | 10   | 1    |
| >TP53-S269C LLGRNSFEV  | 2   | >TP53-S269C LLGRNGFEV  | 3    | 1    |
| >TP53-S269C LLGRNSFEVR | 6   | >TP53-S269C LLGRNGFEVR | 8    | 2    |
| >TP53-S269C LLGRNSFEV  | 2   | >TP53-S269C LLGRNGFEV  | 2    | 0    |
| >TP53-S269C LLGRNSFEVR | 2   | >TP53-S269C LLGRNGFEVR | 2    | 0    |
| >TP53-S269C LLGRNSFEVR | 429 | >TP53-S269C LLGRNGFEVR | 1472 | 1043 |
| >TP53-S269C LLGRNSFEV  | 425 | >TP53-S269C LLGRNGFEV  | 1094 | 669  |
| >TP53-S269C NLLGRNSFEV | 29  | >TP53-S269C NLLGRNGFEV | 42   | 13   |
| >TP53-S269C NLLGRNSFEV | 89  | >TP53-S269C NLLGRNGFEV | 152  | 63   |
| >TP53-S269C NLLGRNSFEV | 94  | >TP53-S269C NLLGRNGFEV | 185  | 91   |
| >TP53-S269C NLLGRNSFEV | 137 | >TP53-S269C NLLGRNGFEV | 139  | 2    |
| >TP53-S269C NLLGRNSFEV | 3   | >TP53-S269C NLLGRNGFEV | 4    | 1    |
| >TP53-S269C NLLGRNSFEV | 5   | >TP53-S269C NLLGRNGFEV | 9    | 4    |
| >TP53-S269C NLLGRNSFEV | 7   | >TP53-S269C NLLGRNGFEV | 9    | 2    |
| >TP53-S269C NLLGRNSFEV | 3   | >TP53-S269C NLLGRNGFEV | 7    | 4    |
| >TP53-S269C NLLGRNSFEV | 3   | >TP53-S269C NLLGRNGFEV | 3    | 0    |
| >TP53-S269C NLLGRNSFEV | 109 | >TP53-S269C NLLGRNGFEV | 118  | 9    |
| >TP53-S269C NLLGRNSFEV | 309 | >TP53-S269C NLLGRNGFEV | 611  | 302  |
| >TP53-S269C NLLGRNSFEV | 52  | >TP53-S269C NLLGRNGFEV | 88   | 36   |
| >TP53-S269C NLLGRNSF   | 65  | >TP53-S269C NLLGRNGF   | 75   | 10   |
| >TP53-S269C NLLGRNSF   | 418 | >TP53-S269C NLLGRNGF   | 2355 | 1937 |
| >TP53-S269C NLLGRNSFEV | 195 | >TP53-S269C NLLGRNGFEV | 241  | 46   |
| >TP53-S269C SGNLLGRNSF | 311 | >TP53-S269C SGNLLGRNGI | 668  | 357  |
| >TP53-S269C SSGNLLGRNS | 245 | >TP53-S269C SSGNLLGRNC | 855  | 610  |
| >TP53-S269C SSGNLLGRNS | 390 | >TP53-S269C SSGNLLGRNC | 325  | 65   |

|                        |     |                        |      |      |
|------------------------|-----|------------------------|------|------|
| >TP53-S269C SSGNLLGRNS | 32  | >TP53-S269C SSGNLLGRNC | 95   | 63   |
| >TP53-S269N NSFEVRVCA  | 21  | >TP53-S269N NNFEVRVCA  | 231  | 210  |
| >TP53-S269N GRNSFEVR   | 405 | >TP53-S269N GRNNFEVR   | 327  | 78   |
| >TP53-S269N LGRNSFEVR  | 286 | >TP53-S269N LGRNNFEVR  | 445  | 159  |
| >TP53-S269N LLGRNSFEV  | 26  | >TP53-S269N LLGRNNFEV  | 28   | 2    |
| >TP53-S269N LLGRNSFEVR | 137 | >TP53-S269N LLGRNNFEVR | 148  | 11   |
| >TP53-S269N LLGRNSFEV  | 16  | >TP53-S269N LLGRNNFEV  | 17   | 1    |
| >TP53-S269N LLGRNSFEVR | 62  | >TP53-S269N LLGRNNFEVR | 72   | 10   |
| >TP53-S269N LLGRNSFEV  | 47  | >TP53-S269N LLGRNNFEV  | 104  | 57   |
| >TP53-S269N LLGRNSFEVR | 214 | >TP53-S269N LLGRNNFEVR | 329  | 115  |
| >TP53-S269N LLGRNSFEV  | 39  | >TP53-S269N LLGRNNFEV  | 61   | 22   |
| >TP53-S269N LLGRNSFEV  | 2   | >TP53-S269N LLGRNNFEV  | 2    | 0    |
| >TP53-S269N LLGRNSFEVR | 3   | >TP53-S269N LLGRNNFEVR | 3    | 0    |
| >TP53-S269N LLGRNSFEV  | 2   | >TP53-S269N LLGRNNFEV  | 3    | 1    |
| >TP53-S269N LLGRNSFEVR | 7   | >TP53-S269N LLGRNNFEVR | 8    | 1    |
| >TP53-S269N LLGRNSFEV  | 5   | >TP53-S269N LLGRNNFEV  | 6    | 1    |
| >TP53-S269N LLGRNSFEVR | 9   | >TP53-S269N LLGRNNFEVR | 11   | 2    |
| >TP53-S269N LLGRNSFEV  | 2   | >TP53-S269N LLGRNNFEV  | 3    | 1    |
| >TP53-S269N LLGRNSFEVR | 6   | >TP53-S269N LLGRNNFEVR | 7    | 1    |
| >TP53-S269N LLGRNSFEV  | 2   | >TP53-S269N LLGRNNFEV  | 2    | 0    |
| >TP53-S269N LLGRNSFEVR | 2   | >TP53-S269N LLGRNNFEVR | 2    | 0    |
| >TP53-S269N LLGRNSFEVR | 429 | >TP53-S269N LLGRNNFEVR | 988  | 559  |
| >TP53-S269N LLGRNSFEV  | 425 | >TP53-S269N LLGRNNFEV  | 565  | 140  |
| >TP53-S269N NLLGRNSFEV | 29  | >TP53-S269N NLLGRNNFEV | 29   | 0    |
| >TP53-S269N NLLGRNSFEV | 89  | >TP53-S269N NLLGRNNFEV | 80   | 9    |
| >TP53-S269N NLLGRNSFEV | 94  | >TP53-S269N NLLGRNNFEV | 147  | 53   |
| >TP53-S269N NLLGRNSFEV | 137 | >TP53-S269N NLLGRNNFEV | 153  | 16   |
| >TP53-S269N NLLGRNSFEV | 3   | >TP53-S269N NLLGRNNFEV | 4    | 1    |
| >TP53-S269N NLLGRNSFEV | 5   | >TP53-S269N NLLGRNNFEV | 6    | 1    |
| >TP53-S269N NLLGRNSFEV | 7   | >TP53-S269N NLLGRNNFEV | 8    | 1    |
| >TP53-S269N NLLGRNSFEV | 3   | >TP53-S269N NLLGRNNFEV | 4    | 1    |
| >TP53-S269N NLLGRNSFEV | 3   | >TP53-S269N NLLGRNNFEV | 3    | 0    |
| >TP53-S269N NLLGRNSFEV | 109 | >TP53-S269N NLLGRNNFEV | 171  | 62   |
| >TP53-S269N NLLGRNSFEV | 309 | >TP53-S269N NLLGRNNFEV | 422  | 113  |
| >TP53-S269N NLLGRNSFEV | 52  | >TP53-S269N NLLGRNNFEV | 58   | 6    |
| >TP53-S269N NLLGRNSF   | 65  | >TP53-S269N NLLGRNNF   | 134  | 69   |
| >TP53-S269N NLLGRNSF   | 418 | >TP53-S269N NLLGRNNF   | 863  | 445  |
| >TP53-S269N NLLGRNSFEV | 195 | >TP53-S269N NLLGRNNFEV | 123  | 72   |
| >TP53-S269N SGNLLGRNSF | 311 | >TP53-S269N SGNLLGRNNI | 662  | 351  |
| >TP53-S269N SSGNLLGRNS | 245 | >TP53-S269N SSGNLLGRNN | 1595 | 1350 |
| >TP53-S269N SSGNLLGRNS | 390 | >TP53-S269N SSGNLLGRNN | 416  | 26   |
| >TP53-S269N SSGNLLGRNS | 32  | >TP53-S269N SSGNLLGRNN | 76   | 44   |
| >TP53-S269R NSFEVRVCA  | 21  | >TP53-S269R NRFEVRVCA  | 3218 | 3197 |

|                       |       |                       |      |       |
|-----------------------|-------|-----------------------|------|-------|
| >TP53-S269RNSFEVRVCA  | 23689 | >TP53-S269RNRFEVRVCA  | 361  | 23328 |
| >TP53-S269RNSFEVRVC   | 7707  | >TP53-S269RNRFEVRVC   | 97   | 7610  |
| >TP53-S269RNSFEVRVCA  | 2896  | >TP53-S269RNRFEVRVCA  | 47   | 2849  |
| >TP53-S269RNSFEVRVCAC | 10571 | >TP53-S269RNRFEVRVCAC | 239  | 10332 |
| >TP53-S269RNSFEVRVCAC | 7981  | >TP53-S269RNRFEVRVCAC | 104  | 7877  |
| >TP53-S269RDSSGNLLGRN | 34541 | >TP53-S269RDSSGNLLGRN | 462  | 34079 |
| >TP53-S269RDSSGNLLGRN | 30515 | >TP53-S269RDSSGNLLGRN | 134  | 30381 |
| >TP53-S269RRNSFEVRV   | 11489 | >TP53-S269RRNRFEVRV   | 333  | 11156 |
| >TP53-S269RRNSFEVRVCA | 7573  | >TP53-S269RRNRFEVRVCA | 118  | 7455  |
| >TP53-S269RGRNSFEVR   | 405   | >TP53-S269RGRNRFEVR   | 244  | 161   |
| >TP53-S269RGRNSFEVRV  | 631   | >TP53-S269RGRNRFEVRV  | 393  | 238   |
| >TP53-S269RLGRNSFEVR  | 286   | >TP53-S269RLGRNRFEVR  | 120  | 166   |
| >TP53-S269RLLGRNSFEV  | 26    | >TP53-S269RLLGRNRFEV  | 141  | 115   |
| >TP53-S269RLLGRNSFEVR | 137   | >TP53-S269RLLGRNRFEVR | 440  | 303   |
| >TP53-S269RLLGRNSFEV  | 16    | >TP53-S269RLLGRNRFEV  | 64   | 48    |
| >TP53-S269RLLGRNSFEVR | 62    | >TP53-S269RLLGRNRFEVR | 166  | 104   |
| >TP53-S269RLLGRNSFEV  | 47    | >TP53-S269RLLGRNRFEV  | 306  | 259   |
| >TP53-S269RLLGRNSFEVR | 214   | >TP53-S269RLLGRNRFEVR | 640  | 426   |
| >TP53-S269RLLGRNSFEV  | 39    | >TP53-S269RLLGRNRFEV  | 238  | 199   |
| >TP53-S269RLLGRNSFEV  | 2     | >TP53-S269RLLGRNRFEV  | 4    | 2     |
| >TP53-S269RLLGRNSFEVR | 3     | >TP53-S269RLLGRNRFEVR | 6    | 3     |
| >TP53-S269RLLGRNSFEV  | 2     | >TP53-S269RLLGRNRFEV  | 8    | 6     |
| >TP53-S269RLLGRNSFEVR | 7     | >TP53-S269RLLGRNRFEVR | 19   | 12    |
| >TP53-S269RLLGRNSFEV  | 5     | >TP53-S269RLLGRNRFEV  | 10   | 5     |
| >TP53-S269RLLGRNSFEVR | 9     | >TP53-S269RLLGRNRFEVR | 17   | 8     |
| >TP53-S269RLLGRNSFEV  | 2     | >TP53-S269RLLGRNRFEV  | 9    | 7     |
| >TP53-S269RLLGRNSFEVR | 6     | >TP53-S269RLLGRNRFEVR | 20   | 14    |
| >TP53-S269RLLGRNSFEV  | 2     | >TP53-S269RLLGRNRFEV  | 2    | 0     |
| >TP53-S269RLLGRNSFEVR | 2     | >TP53-S269RLLGRNRFEVR | 2    | 0     |
| >TP53-S269RLLGRNSFEVR | 429   | >TP53-S269RLLGRNRFEVR | 430  | 1     |
| >TP53-S269RLLGRNSFEV  | 425   | >TP53-S269RLLGRNRFEV  | 1302 | 877   |
| >TP53-S269RNLLGRNSFEV | 29    | >TP53-S269RNLLGRNRFEV | 51   | 22    |
| >TP53-S269RNLLGRNSFEV | 89    | >TP53-S269RNLLGRNRFEV | 130  | 41    |
| >TP53-S269RNLLGRNSFEV | 94    | >TP53-S269RNLLGRNRFEV | 169  | 75    |
| >TP53-S269RNLLGRNSFEV | 137   | >TP53-S269RNLLGRNRFEV | 273  | 136   |
| >TP53-S269RNLLGRNSFEV | 3     | >TP53-S269RNLLGRNRFEV | 6    | 3     |
| >TP53-S269RNLLGRNSFEV | 5     | >TP53-S269RNLLGRNRFEV | 18   | 13    |
| >TP53-S269RNLLGRNSFEV | 7     | >TP53-S269RNLLGRNRFEV | 14   | 7     |
| >TP53-S269RNLLGRNSFEV | 3     | >TP53-S269RNLLGRNRFEV | 9    | 6     |
| >TP53-S269RNLLGRNSFEV | 3     | >TP53-S269RNLLGRNRFEV | 4    | 1     |
| >TP53-S269RNLLGRNSFEV | 502   | >TP53-S269RNLLGRNRFEV | 487  | 15    |
| >TP53-S269RNLLGRNSFEV | 109   | >TP53-S269RNLLGRNRFEV | 92   | 17    |
| >TP53-S269RNLLGRNSFEV | 309   | >TP53-S269RNLLGRNRFEV | 756  | 447   |

|                        |       |                        |      |       |
|------------------------|-------|------------------------|------|-------|
| >TP53-S269R NLLGRNSFEV | 52    | >TP53-S269R NLLGRNRFEV | 160  | 108   |
| >TP53-S269R NLLGRNSF   | 65    | >TP53-S269R NLLGRNRF   | 174  | 109   |
| >TP53-S269R NLLGRNSF   | 418   | >TP53-S269R NLLGRNRF   | 2794 | 2376  |
| >TP53-S269R NLLGRNSFEV | 195   | >TP53-S269R NLLGRNRFEV | 174  | 21    |
| >TP53-S269R GNLLGRNSF  | 525   | >TP53-S269R GNLLGRNRF  | 411  | 114   |
| >TP53-S269R SGNLLGRNSF | 311   | >TP53-S269R SGNLLGRNRF | 1047 | 736   |
| >TP53-S269R SSGNLLGRNS | 22850 | >TP53-S269R SSGNLLGRNF | 85   | 22765 |
| >TP53-S269R SSGNLLGRNS | 245   | >TP53-S269R SSGNLLGRNF | 1295 | 1050  |
| >TP53-S269R SSGNLLGRNS | 390   | >TP53-S269R SSGNLLGRNF | 284  | 106   |
| >TP53-S269R SSGNLLGRNS | 32    | >TP53-S269R SSGNLLGRNF | 25   | 7     |
| >TP53-S269T NSFVCA     | 21    | >TP53-S269T NTFVCA     | 7    | 14    |
| >TP53-S269T GRNSFEVR   | 405   | >TP53-S269T GRNTFEVR   | 416  | 11    |
| >TP53-S269T LGRNSFEVR  | 286   | >TP53-S269T LGRNTFEVR  | 262  | 24    |
| >TP53-S269T LLGRNSFEV  | 26    | >TP53-S269T LLGRNTFEV  | 19   | 7     |
| >TP53-S269T LLGRNSFEVR | 137   | >TP53-S269T LLGRNTFEVR | 122  | 15    |
| >TP53-S269T LLGRNSFEV  | 16    | >TP53-S269T LLGRNTFEV  | 14   | 2     |
| >TP53-S269T LLGRNSFEVR | 62    | >TP53-S269T LLGRNTFEVR | 61   | 1     |
| >TP53-S269T LLGRNSFEV  | 47    | >TP53-S269T LLGRNTFEV  | 30   | 17    |
| >TP53-S269T LLGRNSFEVR | 214   | >TP53-S269T LLGRNTFEVR | 178  | 36    |
| >TP53-S269T LLGRNSFEV  | 39    | >TP53-S269T LLGRNTFEV  | 33   | 6     |
| >TP53-S269T LLGRNSFEV  | 2     | >TP53-S269T LLGRNTFEV  | 2    | 0     |
| >TP53-S269T LLGRNSFEVR | 3     | >TP53-S269T LLGRNTFEVR | 3    | 0     |
| >TP53-S269T LLGRNSFEV  | 2     | >TP53-S269T LLGRNTFEV  | 2    | 0     |
| >TP53-S269T LLGRNSFEVR | 7     | >TP53-S269T LLGRNTFEVR | 7    | 0     |
| >TP53-S269T LLGRNSFEV  | 5     | >TP53-S269T LLGRNTFEV  | 5    | 0     |
| >TP53-S269T LLGRNSFEVR | 9     | >TP53-S269T LLGRNTFEVR | 10   | 1     |
| >TP53-S269T LLGRNSFEV  | 2     | >TP53-S269T LLGRNTFEV  | 2    | 0     |
| >TP53-S269T LLGRNSFEVR | 6     | >TP53-S269T LLGRNTFEVR | 6    | 0     |
| >TP53-S269T LLGRNSFEV  | 2     | >TP53-S269T LLGRNTFEV  | 1    | 1     |
| >TP53-S269T LLGRNSFEVR | 2     | >TP53-S269T LLGRNTFEVR | 2    | 0     |
| >TP53-S269T LLGRNSFEVR | 429   | >TP53-S269T LLGRNTFEVR | 578  | 149   |
| >TP53-S269T LLGRNSFEV  | 425   | >TP53-S269T LLGRNTFEV  | 286  | 139   |
| >TP53-S269T LLGRNSFEVR | 773   | >TP53-S269T LLGRNTFEVR | 499  | 274   |
| >TP53-S269T NLLGRNSFEV | 29    | >TP53-S269T NLLGRNTFEV | 27   | 2     |
| >TP53-S269T NLLGRNSFEV | 89    | >TP53-S269T NLLGRNTFEV | 72   | 17    |
| >TP53-S269T NLLGRNSFEV | 94    | >TP53-S269T NLLGRNTFEV | 62   | 32    |
| >TP53-S269T NLLGRNSFEV | 137   | >TP53-S269T NLLGRNTFEV | 129  | 8     |
| >TP53-S269T NLLGRNSFEV | 3     | >TP53-S269T NLLGRNTFEV | 3    | 0     |
| >TP53-S269T NLLGRNSFEV | 5     | >TP53-S269T NLLGRNTFEV | 6    | 1     |
| >TP53-S269T NLLGRNSFEV | 7     | >TP53-S269T NLLGRNTFEV | 6    | 1     |
| >TP53-S269T NLLGRNSFEV | 3     | >TP53-S269T NLLGRNTFEV | 3    | 0     |
| >TP53-S269T NLLGRNSFEV | 3     | >TP53-S269T NLLGRNTFEV | 2    | 1     |
| >TP53-S269T NLLGRNSFEV | 502   | >TP53-S269T NLLGRNTFEV | 440  | 62    |

|                         |      |                         |      |      |
|-------------------------|------|-------------------------|------|------|
| >TP53-S269T NLLGRNSF    | 826  | >TP53-S269T NLLGRNTF    | 296  | 530  |
| >TP53-S269T NLLGRNSFEV  | 109  | >TP53-S269T NLLGRNTFEV  | 108  | 1    |
| >TP53-S269T NLLGRNSFEV  | 309  | >TP53-S269T NLLGRNTFEV  | 360  | 51   |
| >TP53-S269T NLLGRNSFEV  | 52   | >TP53-S269T NLLGRNTFEV  | 46   | 6    |
| >TP53-S269T NLLGRNSF    | 65   | >TP53-S269T NLLGRNTF    | 77   | 12   |
| >TP53-S269T NLLGRNSF    | 418  | >TP53-S269T NLLGRNTF    | 554  | 136  |
| >TP53-S269T NLLGRNSFEV  | 195  | >TP53-S269T NLLGRNTFEV  | 134  | 61   |
| >TP53-S269T GNLLGRNSF   | 525  | >TP53-S269T GNLLGRNTF   | 242  | 283  |
| >TP53-S269T SGNLLGRNSF  | 311  | >TP53-S269T SGNLLGRNTF  | 412  | 101  |
| >TP53-S269T SSGNLLGRNS  | 245  | >TP53-S269T SSGNLLGRNT  | 424  | 179  |
| >TP53-S269T SSGNLLGRNS  | 390  | >TP53-S269T SSGNLLGRNT  | 198  | 192  |
| >TP53-S269T SSGNLLGRNS  | 32   | >TP53-S269T SSGNLLGRNT  | 17   | 15   |
| >TP53-S303C STKRALPN    | 100  | >TP53-S303C CTKRALPN    | 587  | 487  |
| >TP53-S303C STKRALPNN   | 60   | >TP53-S303C CTKRALPNN   | 335  | 275  |
| >TP53-S303C STKRALPNNT  | 89   | >TP53-S303C CTKRALPNNNT | 536  | 447  |
| >TP53-S303C STKRALPNNT  | 46   | >TP53-S303C CTKRALPNNNT | 258  | 212  |
| >TP53-S303C PPGSTKRAL   | 44   | >TP53-S303C PPGCTKRAL   | 66   | 22   |
| >TP53-S303C LPPGSTKRAL  | 619  | >TP53-S303C LPPGCTKRAL  | 365  | 254  |
| >TP53-S303C LPPGSTKRAL  | 296  | >TP53-S303C LPPGCTKRAL  | 344  | 48   |
| >TP53-S303C LPPGSTKRAL  | 75   | >TP53-S303C LPPGCTKRAL  | 357  | 282  |
| >TP53-S303C LPPGSTKRA   | 99   | >TP53-S303C LPPGCTKRA   | 17   | 82   |
| >TP53-S303C LPPGSTKRALI | 1103 | >TP53-S303C LPPGCTKRAL  | 306  | 797  |
| >TP53-S303C ELPPGSTKRA  | 98   | >TP53-S303C ELPPGCTKRA  | 122  | 24   |
| >TP53-S303C ELPPGSTKRA  | 151  | >TP53-S303C ELPPGCTKRA  | 200  | 49   |
| >TP53-S303C ELPPGSTKR   | 321  | >TP53-S303C ELPPGCTKR   | 357  | 36   |
| >TP53-S303C HELPPGST    | 796  | >TP53-S303C HELPPGCT    | 292  | 504  |
| >TP53-S303C HELPPGSTKR  | 250  | >TP53-S303C HELPPGCTKR  | 586  | 336  |
| >TP53-S303C HELPPGSTKR  | 437  | >TP53-S303C HELPPGCTKR  | 296  | 141  |
| >TP53-S303N STKRALPN    | 100  | >TP53-S303N NTKRALPN    | 2459 | 2359 |
| >TP53-S303N STKRALPNN   | 60   | >TP53-S303N NTKRALPNN   | 1545 | 1485 |
| >TP53-S303N STKRALPNNT  | 89   | >TP53-S303N NTKRALPNNNT | 2562 | 2473 |
| >TP53-S303N STKRALPNNT  | 46   | >TP53-S303N NTKRALPNNNT | 1596 | 1550 |
| >TP53-S303N PPGSTKRAL   | 44   | >TP53-S303N PPGNTKRAL   | 68   | 24   |
| >TP53-S303N LPPGSTKRAL  | 296  | >TP53-S303N LPPGNTKRAL  | 305  | 9    |
| >TP53-S303N LPPGSTKRAL  | 75   | >TP53-S303N LPPGNTKRAL  | 171  | 96   |
| >TP53-S303N LPPGSTKRA   | 99   | >TP53-S303N LPPGNTKRA   | 60   | 39   |
| >TP53-S303N ELPPGSTKRA  | 98   | >TP53-S303N ELPPGNTKRA  | 113  | 15   |
| >TP53-S303N ELPPGSTKRA  | 151  | >TP53-S303N ELPPGNTKRA  | 181  | 30   |
| >TP53-S303N ELPPGSTKR   | 321  | >TP53-S303N ELPPGNTKR   | 259  | 62   |
| >TP53-S303N HELPPGSTKR  | 250  | >TP53-S303N HELPPGNTKR  | 334  | 84   |
| >TP53-S303N HELPPGSTKR  | 437  | >TP53-S303N HELPPGNTKR  | 312  | 125  |
| >TP53-S303T STKRALPN    | 100  | >TP53-S303T TTKRALPN    | 472  | 372  |
| >TP53-S303T STKRALPNN   | 60   | >TP53-S303T TTKRALPNN   | 266  | 206  |

|                        |     |                        |       |       |
|------------------------|-----|------------------------|-------|-------|
| >TP53-S303T STKRALPNNT | 89  | >TP53-S303T TTKRALPNNT | 436   | 347   |
| >TP53-S303T STKRALPNNT | 46  | >TP53-S303T TTKRALPNNT | 209   | 163   |
| >TP53-S303T PPGSTKRAL  | 44  | >TP53-S303T PPGTTKRAL  | 65    | 21    |
| >TP53-S303T LPPGSTKRAL | 296 | >TP53-S303T LPPGTTKRAL | 661   | 365   |
| >TP53-S303T LPPGSTKRAL | 75  | >TP53-S303T LPPGTTKRAL | 73    | 2     |
| >TP53-S303T LPPGSTKRA  | 99  | >TP53-S303T LPPGTTKRA  | 52    | 47    |
| >TP53-S303T ELPPGSTKRA | 98  | >TP53-S303T ELPPGTTKRA | 82    | 16    |
| >TP53-S303T ELPPGSTKRA | 151 | >TP53-S303T ELPPGTTKRA | 129   | 22    |
| >TP53-S303T ELPPGSTKR  | 321 | >TP53-S303T ELPPGTTKR  | 187   | 134   |
| >TP53-S303T HELPPGSTKR | 250 | >TP53-S303T HELPPGTTKR | 250   | 0     |
| >TP53-S303T HELPPGSTKR | 437 | >TP53-S303T HELPPGTTKR | 215   | 222   |
| >TP53-S313C SSSPQPKK   | 390 | >TP53-S313C CSSPQPKK   | 785   | 395   |
| >TP53-S313C SSSPQPKK   | 28  | >TP53-S313C CSSPQPKK   | 126   | 98    |
| >TP53-S313C SSSPQPKKK  | 70  | >TP53-S313C CSSPQPKKK  | 466   | 396   |
| >TP53-S313C SSSPQPKK   | 73  | >TP53-S313C CSSPQPKK   | 515   | 442   |
| >TP53-S313C SSSPQPKKK  | 186 | >TP53-S313C CSSPQPKKK  | 1377  | 1191  |
| >TP53-S313C SSSPQPKKKP | 16  | >TP53-S313C CSSPQPKKKP | 85    | 69    |
| >TP53-S313C SSSPQPKK   | 109 | >TP53-S313C CSSPQPKK   | 742   | 633   |
| >TP53-S313C SSSPQPKKK  | 87  | >TP53-S313C CSSPQPKKK  | 686   | 599   |
| >TP53-S313C SSSPQPKKKP | 528 | >TP53-S313C CSSPQPKKKP | 174   | 354   |
| >TP53-S313C TSSSPQPK   | 326 | >TP53-S313C TCSSPQPK   | 6346  | 6020  |
| >TP53-S313C TSSSPQPKK  | 136 | >TP53-S313C TCSSPQPKK  | 3728  | 3592  |
| >TP53-S313C TSSSPQPK   | 20  | >TP53-S313C TCSSPQPK   | 5359  | 5339  |
| >TP53-S313C TSSSPQPKK  | 33  | >TP53-S313C TCSSPQPKK  | 7695  | 7662  |
| >TP53-S313C TSSSPQPKKK | 60  | >TP53-S313C TCSSPQPKKK | 5163  | 5103  |
| >TP53-S313C TSSSPQPK   | 262 | >TP53-S313C TCSSPQPK   | 3162  | 2900  |
| >TP53-S313C TSSSPQPK   | 121 | >TP53-S313C TCSSPQPK   | 5092  | 4971  |
| >TP53-S313C TSSSPQPKK  | 125 | >TP53-S313C TCSSPQPKK  | 4394  | 4269  |
| >TP53-S313C TSSSPQPKKK | 208 | >TP53-S313C TCSSPQPKKK | 13584 | 13376 |
| >TP53-S313C STKRALPNNT | 46  | >TP53-S313C STKRALPNNT | 232   | 186   |
| >TP53-S313C NTSSSPQPK  | 58  | >TP53-S313C NTCSSPQPK  | 66    | 8     |
| >TP53-S313C NTSSSPQPKK | 41  | >TP53-S313C NTCSSPQPKK | 71    | 30    |
| >TP53-S313C NTSSSPQPKK | 251 | >TP53-S313C NTCSSPQPKK | 308   | 57    |
| >TP53-S313C NTSSSPQPK  | 339 | >TP53-S313C NTCSSPQPK  | 429   | 90    |
| >TP53-S313C NTSSSPQPK  | 37  | >TP53-S313C NTCSSPQPK  | 68    | 31    |
| >TP53-S313C NTSSSPQPKK | 28  | >TP53-S313C NTCSSPQPKK | 91    | 63    |
| >TP53-S313C NTSSSPQPKK | 95  | >TP53-S313C NTCSSPQPKK | 174   | 79    |
| >TP53-S313C LPNNTSSS   | 383 | >TP53-S313C LPNNTCSS   | 948   | 565   |
| >TP53-S313C LPNNTSSS   | 301 | >TP53-S313C LPNNTCSS   | 200   | 101   |
| >TP53-S313C LPNNTSSSPQ | 260 | >TP53-S313C LPNNTCSSPQ | 292   | 32    |
| >TP53-S313C ALPNNTSSS  | 301 | >TP53-S313C ALPNNTCSS  | 61    | 240   |
| >TP53-S313C ALPNNTSSSP | 111 | >TP53-S313C ALPNNTCSSP | 82    | 29    |
| >TP53-S313C SSSPQPKK   | 390 | >TP53-S313C NSSPQPKK   | 2728  | 2338  |

|                        |       |                        |       |       |
|------------------------|-------|------------------------|-------|-------|
| >TP53-S313N SSSPQPKK   | 28    | >TP53-S313N NSSPQPKK   | 422   | 394   |
| >TP53-S313N SSSPQPKKK  | 70    | >TP53-S313N NSSPQPKKK  | 1625  | 1555  |
| >TP53-S313N SSSPQPKK   | 73    | >TP53-S313N NSSPQPKK   | 3141  | 3068  |
| >TP53-S313N SSSPQPKKK  | 186   | >TP53-S313N NSSPQPKKK  | 6111  | 5925  |
| >TP53-S313N SSSPQPKK   | 1264  | >TP53-S313N NSSPQPKK   | 458   | 806   |
| >TP53-S313N SSSPQPKKKP | 16    | >TP53-S313N NSSPQPKKKP | 238   | 222   |
| >TP53-S313N SSSPQPKK   | 109   | >TP53-S313N NSSPQPKK   | 1013  | 904   |
| >TP53-S313N SSSPQPKKK  | 87    | >TP53-S313N NSSPQPKKK  | 952   | 865   |
| >TP53-S313N TSSSPQPK   | 326   | >TP53-S313N TNSSPQPK   | 10744 | 10418 |
| >TP53-S313N TSSSPQPKK  | 136   | >TP53-S313N TNSSPQPKK  | 7730  | 7594  |
| >TP53-S313N TSSSPQPK   | 20    | >TP53-S313N TNSSPQPK   | 1735  | 1715  |
| >TP53-S313N TSSSPQPKK  | 33    | >TP53-S313N TNSSPQPKK  | 3132  | 3099  |
| >TP53-S313N TSSSPQPKKK | 60    | >TP53-S313N TNSSPQPKKK | 8276  | 8216  |
| >TP53-S313N TSSSPQPK   | 262   | >TP53-S313N TNSSPQPK   | 5956  | 5694  |
| >TP53-S313N TSSSPQPK   | 121   | >TP53-S313N TNSSPQPK   | 1694  | 1573  |
| >TP53-S313N TSSSPQPKK  | 125   | >TP53-S313N TNSSPQPKK  | 1564  | 1439  |
| >TP53-S313N TSSSPQPKKK | 208   | >TP53-S313N TNSSPQPKKK | 9601  | 9393  |
| >TP53-S313N STKRALPNNT | 46    | >TP53-S313N STKRALPNNT | 198   | 152   |
| >TP53-S313N NTSSSPQPK  | 58    | >TP53-S313N NTNSSPQPK  | 54    | 4     |
| >TP53-S313N NTSSSPQPKK | 41    | >TP53-S313N NTNSSPQPKK | 80    | 39    |
| >TP53-S313N NTSSSPQPKK | 251   | >TP53-S313N NTNSSPQPKK | 220   | 31    |
| >TP53-S313N NTSSSPQPK  | 339   | >TP53-S313N NTNSSPQPK  | 156   | 183   |
| >TP53-S313N NTSSSPQPK  | 37    | >TP53-S313N NTNSSPQPK  | 63    | 26    |
| >TP53-S313N NTSSSPQPKK | 28    | >TP53-S313N NTNSSPQPKK | 103   | 75    |
| >TP53-S313N NTSSSPQPKK | 95    | >TP53-S313N NTNSSPQPKK | 159   | 64    |
| >TP53-S313N LPNNTSSS   | 383   | >TP53-S313N LPNNTNSS   | 574   | 191   |
| >TP53-S313N LPNNTSSS   | 301   | >TP53-S313N LPNNTNSS   | 138   | 163   |
| >TP53-S313N LPNNTSSSPQ | 260   | >TP53-S313N LPNNTNSSPC | 293   | 33    |
| >TP53-S313N ALPNNTSSS  | 301   | >TP53-S313N ALPNNTNSS  | 1025  | 724   |
| >TP53-S313N ALPNNTSSSP | 111   | >TP53-S313N ALPNNTNSSF | 146   | 35    |
| >TP53-S313N KRALPNNTS  | 869   | >TP53-S313N KRALPNNTN  | 487   | 382   |
| >TP53-S314F SSPQPKKKPL | 40    | >TP53-S314F FSPQPKKKPL | 27    | 13    |
| >TP53-S314F SSSPQPKK   | 390   | >TP53-S314F SFSPQPKK   | 3872  | 3482  |
| >TP53-S314F SSSPQPKK   | 28    | >TP53-S314F SFSPQPKK   | 821   | 793   |
| >TP53-S314F SSSPQPKKK  | 70    | >TP53-S314F SFSPQPKKK  | 2904  | 2834  |
| >TP53-S314F SSSPQPKK   | 73    | >TP53-S314F SFSPQPKK   | 254   | 181   |
| >TP53-S314F SSSPQPKKK  | 186   | >TP53-S314F SFSPQPKKK  | 684   | 498   |
| >TP53-S314F SSSPQPKKKP | 16    | >TP53-S314F SFSPQPKKKP | 23299 | 23283 |
| >TP53-S314F SSSPQPKK   | 109   | >TP53-S314F SFSPQPKK   | 1171  | 1062  |
| >TP53-S314F SSSPQPKKK  | 87    | >TP53-S314F SFSPQPKKK  | 1176  | 1089  |
| >TP53-S314F SSSPQPKKKP | 24534 | >TP53-S314F SFSPQPKKKP | 231   | 24303 |
| >TP53-S314F TKRALPNNTS | 1843  | >TP53-S314F TKRALPNNTS | 4     | 1839  |
| >TP53-S314F TSSSPQPK   | 326   | >TP53-S314F TSFSPQPK   | 86    | 240   |



|                        |       |                        |      |       |
|------------------------|-------|------------------------|------|-------|
| >TP53-S314F TSSSPQPKK  | 136   | >TP53-S314F TSFSPQPKK  | 50   | 86    |
| >TP53-S314F TSSSPQPK   | 20    | >TP53-S314F TSFSPQPK   | 9    | 11    |
| >TP53-S314F TSSSPQPKK  | 33    | >TP53-S314F TSFSPQPKK  | 12   | 21    |
| >TP53-S314F TSSSPQPKKK | 60    | >TP53-S314F TSFSPQPKKK | 66   | 6     |
| >TP53-S314F TSSSPQPK   | 262   | >TP53-S314F TSFSPQPK   | 46   | 216   |
| >TP53-S314F TSSSPQPKK  | 733   | >TP53-S314F TSFSPQPKK  | 116  | 617   |
| >TP53-S314F TSSSPQPKKK | 1717  | >TP53-S314F TSFSPQPKKK | 320  | 1397  |
| >TP53-S314F TSSSPQPK   | 2222  | >TP53-S314F TSFSPQPK   | 325  | 1897  |
| >TP53-S314F TSSSPQPK   | 121   | >TP53-S314F TSFSPQPK   | 25   | 96    |
| >TP53-S314F TSSSPQPKK  | 125   | >TP53-S314F TSFSPQPKK  | 36   | 89    |
| >TP53-S314F TSSSPQPKKK | 208   | >TP53-S314F TSFSPQPKKK | 80   | 128   |
| >TP53-S314F TSSSPQPK   | 794   | >TP53-S314F TSFSPQPK   | 210  | 584   |
| >TP53-S314F TSSSPQPKK  | 724   | >TP53-S314F TSFSPQPKK  | 215  | 509   |
| >TP53-S314F TSSSPQPKKK | 637   | >TP53-S314F TSFSPQPKKK | 188  | 449   |
| >TP53-S314F NTSSSPQPKK | 1342  | >TP53-S314F NTSFSPQPKK | 370  | 972   |
| >TP53-S314F NTSSSPQPK  | 58    | >TP53-S314F NTSFSPQPK  | 38   | 20    |
| >TP53-S314F NTSSSPQPKK | 41    | >TP53-S314F NTSFSPQPKK | 25   | 16    |
| >TP53-S314F NTSSSPQPKK | 251   | >TP53-S314F NTSFSPQPKK | 179  | 72    |
| >TP53-S314F NTSSSPQPK  | 339   | >TP53-S314F NTSFSPQPK  | 210  | 129   |
| >TP53-S314F NTSSSPQPK  | 37    | >TP53-S314F NTSFSPQPK  | 27   | 10    |
| >TP53-S314F NTSSSPQPKK | 28    | >TP53-S314F NTSFSPQPKK | 14   | 14    |
| >TP53-S314F NTSSSPQPKK | 95    | >TP53-S314F NTSFSPQPKK | 76   | 19    |
| >TP53-S314F NTSSSPQPKK | 721   | >TP53-S314F NTSFSPQPKK | 493  | 228   |
| >TP53-S314F LPNNTSSS   | 383   | >TP53-S314F LPNNTSFS   | 1241 | 858   |
| >TP53-S314F LPNNTSSS   | 301   | >TP53-S314F LPNNTSFS   | 315  | 14    |
| >TP53-S314F LPNNTSSSP  | 568   | >TP53-S314F LPNNTSFSP  | 154  | 414   |
| >TP53-S314F LPNNTSSSPQ | 260   | >TP53-S314F LPNNTSFSPQ | 149  | 111   |
| >TP53-S314F ALPNNTSSS  | 301   | >TP53-S314F ALPNNTSFS  | 517  | 216   |
| >TP53-S314F ALPNNTSSSP | 111   | >TP53-S314F ALPNNTSFSP | 98   | 13    |
| >TP53-S314F ALPNNTSS   | 8216  | >TP53-S314F ALPNNTSF   | 61   | 8155  |
| >TP53-S314F ALPNNTSS   | 16004 | >TP53-S314F ALPNNTSF   | 141  | 15863 |
| >TP53-S314F ALPNNTSS   | 22622 | >TP53-S314F ALPNNTSF   | 372  | 22250 |
| >TP53-S314F ALPNNTSS   | 15902 | >TP53-S314F ALPNNTSF   | 55   | 15847 |
| >TP53-S314F RALPNNTSS  | 17087 | >TP53-S314F RALPNNTSF  | 232  | 16855 |
| >TP53-S314F RALPNNTSSS | 1092  | >TP53-S314F RALPNNTSFS | 358  | 734   |
| >TP53-S314F RALPNNTSS  | 11415 | >TP53-S314F RALPNNTSF  | 53   | 11362 |
| >TP53-S314F RALPNNTSS  | 15416 | >TP53-S314F RALPNNTSF  | 116  | 15300 |
| >TP53-S314F RALPNNTSS  | 2724  | >TP53-S314F RALPNNTSF  | 9    | 2715  |
| >TP53-S314F RALPNNTSS  | 1481  | >TP53-S314F RALPNNTSF  | 3    | 1478  |
| >TP53-S314F RALPNNTSS  | 12265 | >TP53-S314F RALPNNTSF  | 253  | 12012 |
| >TP53-S314F RALPNNTSS  | 13654 | >TP53-S314F RALPNNTSF  | 130  | 13524 |
| >TP53-S314F RALPNNTSS  | 13130 | >TP53-S314F RALPNNTSF  | 16   | 13114 |
| >TP53-S314F RALPNNTSS  | 13597 | >TP53-S314F RALPNNTSF  | 135  | 13462 |

|                        |       |                        |      |       |
|------------------------|-------|------------------------|------|-------|
| >TP53-S314F KRALPNNTSS | 5384  | >TP53-S314F KRALPNNTSF | 9    | 5375  |
| >TP53-S314F KRALPNNTSS | 3488  | >TP53-S314F KRALPNNTSF | 80   | 3408  |
| >TP53-S314F KRALPNNTSS | 1055  | >TP53-S314F KRALPNNTSF | 311  | 744   |
| >TP53-S314F KRALPNNTSS | 1665  | >TP53-S314F KRALPNNTSF | 428  | 1237  |
| >TP53-S315C SPQPKKKPL  | 13    | >TP53-S315C CPQPKKKPL  | 45   | 32    |
| >TP53-S315C SPQPKKKPL  | 67    | >TP53-S315C CPQPKKKPL  | 223  | 156   |
| >TP53-S315C SSPQPKKKPL | 40    | >TP53-S315C SCPQPKKKPL | 7179 | 7139  |
| >TP53-S315C SSSPQPQPK  | 390   | >TP53-S315C SSCPQPQPK  | 1011 | 621   |
| >TP53-S315C SSSPQPQPK  | 28    | >TP53-S315C SSCPQPQPK  | 28   | 0     |
| >TP53-S315C SSSPQPQKK  | 70    | >TP53-S315C SSCPQPQKK  | 72   | 2     |
| >TP53-S315C SSSPQPQPK  | 73    | >TP53-S315C SSCPQPQPK  | 98   | 25    |
| >TP53-S315C SSSPQPQKK  | 186   | >TP53-S315C SSCPQPQKK  | 234  | 48    |
| >TP53-S315C SSSPQPQKKP | 16    | >TP53-S315C SSCPQPQKKP | 22   | 6     |
| >TP53-S315C SSSPQPQPK  | 109   | >TP53-S315C SSCPQPQPK  | 177  | 68    |
| >TP53-S315C SSSPQPQKK  | 87    | >TP53-S315C SSCPQPQKK  | 166  | 79    |
| >TP53-S315C SSSPQPQKKP | 528   | >TP53-S315C SSCPQPQKKP | 221  | 307   |
| >TP53-S315C TSSSPQPK   | 326   | >TP53-S315C TSSCPQPK   | 607  | 281   |
| >TP53-S315C TSSSPQPKK  | 136   | >TP53-S315C TSSCPQPKK  | 226  | 90    |
| >TP53-S315C TSSSPQPK   | 20    | >TP53-S315C TSSCPQPK   | 29   | 9     |
| >TP53-S315C TSSSPQPKK  | 33    | >TP53-S315C TSSCPQPKK  | 42   | 9     |
| >TP53-S315C TSSSPQPKKK | 60    | >TP53-S315C TSSCPQPKKK | 77   | 17    |
| >TP53-S315C TSSSPQPK   | 262   | >TP53-S315C TSSCPQPK   | 369  | 107   |
| >TP53-S315C TSSSPQPK   | 121   | >TP53-S315C TSSCPQPK   | 232  | 111   |
| >TP53-S315C TSSSPQPKK  | 125   | >TP53-S315C TSSCPQPKK  | 218  | 93    |
| >TP53-S315C TSSSPQPKKK | 208   | >TP53-S315C TSSCPQPKKK | 328  | 120   |
| >TP53-S315C NTSSSPQPK  | 58    | >TP53-S315C NTSSCPQPK  | 111  | 53    |
| >TP53-S315C NTSSSPQPKK | 41    | >TP53-S315C NTSSCPQPKK | 45   | 4     |
| >TP53-S315C NTSSSPQPKK | 251   | >TP53-S315C NTSSCPQPKK | 354  | 103   |
| >TP53-S315C NTSSSPQPK  | 339   | >TP53-S315C NTSSCPQPK  | 2052 | 1713  |
| >TP53-S315C NTSSSPQPK  | 37    | >TP53-S315C NTSSCPQPK  | 73   | 36    |
| >TP53-S315C NTSSSPQPKK | 28    | >TP53-S315C NTSSCPQPKK | 15   | 13    |
| >TP53-S315C NTSSSPQPKK | 95    | >TP53-S315C NTSSCPQPKK | 142  | 47    |
| >TP53-S315C LPNNTSSS   | 383   | >TP53-S315C LPNNTSSC   | 939  | 556   |
| >TP53-S315C LPNNTSSS   | 301   | >TP53-S315C LPNNTSSC   | 1310 | 1009  |
| >TP53-S315C LPNNTSSSPQ | 260   | >TP53-S315C LPNNTSSCPQ | 344  | 84    |
| >TP53-S315C ALPNNTSSS  | 1876  | >TP53-S315C ALPNNTSSC  | 112  | 1764  |
| >TP53-S315C ALPNNTSSS  | 5787  | >TP53-S315C ALPNNTSSC  | 340  | 5447  |
| >TP53-S315C ALPNNTSSS  | 301   | >TP53-S315C ALPNNTSSC  | 12   | 289   |
| >TP53-S315C ALPNNTSSSP | 111   | >TP53-S315C ALPNNTSSCP | 41   | 70    |
| >TP53-S315P SPQPKKKPL  | 13    | >TP53-S315P PPQPKKKPL  | 241  | 228   |
| >TP53-S315P SPQPKKKPL  | 67    | >TP53-S315P PPQPKKKPL  | 1124 | 1057  |
| >TP53-S315P SSPQPKKKPL | 13096 | >TP53-S315P SPPQPKKKPL | 46   | 13050 |
| >TP53-S315P SSPQPKKKPL | 40    | >TP53-S315P SPPQPKKKPL | 3911 | 3871  |

|                        |      |                        |      |      |
|------------------------|------|------------------------|------|------|
| >TP53-S315P SSSPQPKK   | 390  | >TP53-S315P SSPPQPKK   | 2811 | 2421 |
| >TP53-S315P SSSPQPKK   | 28   | >TP53-S315P SSPPQPKK   | 201  | 173  |
| >TP53-S315P SSSPQPKKK  | 70   | >TP53-S315P SSPPQPKKK  | 763  | 693  |
| >TP53-S315P SSSPQPKK   | 73   | >TP53-S315P SSPPQPKK   | 779  | 706  |
| >TP53-S315P SSSPQPKKK  | 186  | >TP53-S315P SSPPQPKKK  | 1875 | 1689 |
| >TP53-S315P SSSPQPKKKP | 16   | >TP53-S315P SSPPQPKKKP | 369  | 353  |
| >TP53-S315P SSSPQPKKKP | 9175 | >TP53-S315P SSPPQPKKKP | 50   | 9125 |
| >TP53-S315P SSSPQPKK   | 109  | >TP53-S315P SSPPQPKK   | 596  | 487  |
| >TP53-S315P SSSPQPKKK  | 87   | >TP53-S315P SSPPQPKKK  | 628  | 541  |
| >TP53-S315P SSSPQPKKKP | 528  | >TP53-S315P SSPPQPKKKP | 459  | 69   |
| >TP53-S315P TSSSPQPK   | 326  | >TP53-S315P TSSPPQPK   | 384  | 58   |
| >TP53-S315P TSSSPQPKK  | 136  | >TP53-S315P TSSPPQPKK  | 156  | 20   |
| >TP53-S315P TSSSPQPK   | 20   | >TP53-S315P TSSPPQPK   | 18   | 2    |
| >TP53-S315P TSSSPQPKK  | 33   | >TP53-S315P TSSPPQPKK  | 29   | 4    |
| >TP53-S315P TSSSPQPKKK | 60   | >TP53-S315P TSSPPQPKKK | 92   | 32   |
| >TP53-S315P TSSSPQPK   | 262  | >TP53-S315P TSSPPQPK   | 201  | 61   |
| >TP53-S315P TSSSPQPKK  | 733  | >TP53-S315P TSSPPQPKK  | 382  | 351  |
| >TP53-S315P TSSSPQPK   | 121  | >TP53-S315P TSSPPQPK   | 328  | 207  |
| >TP53-S315P TSSSPQPKK  | 125  | >TP53-S315P TSSPPQPKK  | 345  | 220  |
| >TP53-S315P TSSSPQPKKK | 208  | >TP53-S315P TSSPPQPKKK | 417  | 209  |
| >TP53-S315P TSSSPQPKKK | 637  | >TP53-S315P TSSPPQPKKK | 457  | 180  |
| >TP53-S315P NTSSSPQPK  | 58   | >TP53-S315P NTSSPPQPK  | 71   | 13   |
| >TP53-S315P NTSSSPQPKK | 41   | >TP53-S315P NTSSPPQPKK | 40   | 1    |
| >TP53-S315P NTSSSPQPKK | 251  | >TP53-S315P NTSSPPQPKK | 316  | 65   |
| >TP53-S315P NTSSSPQPK  | 339  | >TP53-S315P NTSSPPQPK  | 1304 | 965  |
| >TP53-S315P NTSSSPQPK  | 37   | >TP53-S315P NTSSPPQPK  | 97   | 60   |
| >TP53-S315P NTSSSPQPKK | 28   | >TP53-S315P NTSSPPQPKK | 19   | 9    |
| >TP53-S315P NTSSSPQPKK | 95   | >TP53-S315P NTSSPPQPKK | 191  | 96   |
| >TP53-S315P LPNNTSSS   | 383  | >TP53-S315P LPNNTSSP   | 3585 | 3202 |
| >TP53-S315P LPNNTSSS   | 301  | >TP53-S315P LPNNTSSP   | 560  | 259  |
| >TP53-S315P LPNNTSSSP  | 568  | >TP53-S315P LPNNTSSPP  | 92   | 476  |
| >TP53-S315P LPNNTSSSPQ | 260  | >TP53-S315P LPNNTSSPPQ | 207  | 53   |
| >TP53-S315P ALPNNTSSS  | 301  | >TP53-S315P ALPNNTSSP  | 3431 | 3130 |
| >TP53-S315P ALPNNTSSSP | 111  | >TP53-S315P ALPNNTSSPP | 63   | 48   |
| >TP53-S33T-1 SPLPSQAM  | 35   | >TP53-S33T-1 TPLPSQAM  | 51   | 16   |
| >TP53-S33T-1 SPLPSQAMD | 7    | >TP53-S33T-1 TPLPSQAMD | 9    | 2    |
| >TP53-S33T-1 SPLPSQAM  | 19   | >TP53-S33T-1 TPLPSQAM  | 51   | 32   |
| >TP53-S33T-1 SPLPSQAMD | 189  | >TP53-S33T-1 TPLPSQAMD | 1044 | 855  |
| >TP53-S33T-1 SPLPSQAM  | 28   | >TP53-S33T-1 TPLPSQAM  | 23   | 5    |
| >TP53-S33T-1 SPLPSQAM  | 309  | >TP53-S33T-1 TPLPSQAM  | 119  | 190  |
| >TP53-S33T-1 LSPLPSQAM | 264  | >TP53-S33T-1 LTPLPSQAM | 152  | 112  |
| >TP53-S33T-1 LSPLPSQA  | 1356 | >TP53-S33T-1 LTPLPSQA  | 452  | 904  |
| >TP53-S33T-1 LSPLPSQAM | 5    | >TP53-S33T-1 LTPLPSQAM | 3    | 2    |

|                          |     |                          |      |      |
|--------------------------|-----|--------------------------|------|------|
| >TP53-S33T-1 LSPLPSQAME  | 398 | >TP53-S33T-1 LTPLPSQAME  | 104  | 294  |
| >TP53-S33T-1 VLSPLPSQA   | 52  | >TP53-S33T-1 VLTPLPSQA   | 306  | 254  |
| >TP53-S33T-1 VLSPLPSQAM  | 255 | >TP53-S33T-1 VLTPLPSQAM  | 886  | 631  |
| >TP53-S33T-1 VLSPLPSQA   | 8   | >TP53-S33T-1 VLTPLPSQA   | 21   | 13   |
| >TP53-S33T-1 VLSPLPSQA   | 26  | >TP53-S33T-1 VLTPLPSQA   | 41   | 15   |
| >TP53-S33T-1 VLSPLPSQAM  | 76  | >TP53-S33T-1 VLTPLPSQAM  | 111  | 35   |
| >TP53-S33T-1 VLSPLPSQA   | 64  | >TP53-S33T-1 VLTPLPSQA   | 52   | 12   |
| >TP53-S33T-1 VLSPLPSQA   | 125 | >TP53-S33T-1 VLTPLPSQA   | 708  | 583  |
| >TP53-S33T-1 VLSPLPSQAM  | 241 | >TP53-S33T-1 VLTPLPSQAM  | 1094 | 853  |
| >TP53-S33T-1 VLSPLPSQ    | 28  | >TP53-S33T-1 VLTPLPSQ    | 23   | 5    |
| >TP53-S33T-1 VLSPLPSQA   | 6   | >TP53-S33T-1 VLTPLPSQA   | 5    | 1    |
| >TP53-S33T-1 VLSPLPSQAM  | 43  | >TP53-S33T-1 VLTPLPSQAM  | 34   | 9    |
| >TP53-S33T-1 VLSPLPSQAM  | 204 | >TP53-S33T-1 VLTPLPSQAM  | 1683 | 1479 |
| >TP53-S33T-1 VLSPLPSQAM  | 243 | >TP53-S33T-1 VLTPLPSQAM  | 599  | 356  |
| >TP53-S33T-1 VLSPLPSQAM  | 269 | >TP53-S33T-1 VLTPLPSQAM  | 395  | 126  |
| >TP53-S33T-1 NVLSPLPSQ   | 498 | >TP53-S33T-1 NVLTPLPSQ   | 628  | 130  |
| >TP53-S33T-1 NVLSPLPSQA  | 45  | >TP53-S33T-1 NVLTPLPSQA  | 43   | 2    |
| >TP53-S33T-1 NVLSPLPSQA  | 439 | >TP53-S33T-1 NVLTPLPSQA  | 350  | 89   |
| >TP53-S33T-1 NVLSPLPSQ   | 284 | >TP53-S33T-1 NVLTPLPSQ   | 762  | 478  |
| >TP53-S33T-1 NVLSPLPSQA  | 43  | >TP53-S33T-1 NVLTPLPSQA  | 84   | 41   |
| >TP53-S33T-1 NVLSPLPSQA  | 19  | >TP53-S33T-1 NVLTPLPSQA  | 32   | 13   |
| >TP53-S33T-1 NVLSPLPSQA  | 193 | >TP53-S33T-1 NVLTPLPSQA  | 221  | 28   |
| >TP53-S33T-1 PENNVLSPL   | 445 | >TP53-S33T-1 PENNVLTPL   | 859  | 414  |
| >TP53-S33T-1 PENNVLSPL   | 277 | >TP53-S33T-1 PENNVLTPL   | 252  | 25   |
| >TP53-S33T-1 PENNVLSPL   | 333 | >TP53-S33T-1 PENNVLTPL   | 245  | 88   |
| >TP53-S33T-1 PENNVLSPL   | 214 | >TP53-S33T-1 PENNVLTPL   | 241  | 27   |
| >TP53-S33T-1 LPENNVLSPL  | 455 | >TP53-S33T-1 LPENNVLTPL  | 370  | 85   |
| >TP53-S33T-1 LPENNVLSPL  | 59  | >TP53-S33T-1 LPENNVLTPL  | 48   | 11   |
| >TP53-S33T-1 LPENNVLSPL  | 327 | >TP53-S33T-1 LPENNVLTPL  | 303  | 24   |
| >TP53-S33T-1 LPENNVLS    | 901 | >TP53-S33T-1 LPENNVLT    | 445  | 456  |
| >TP53-S33T-1 LPENNVLSPL  | 162 | >TP53-S33T-1 LPENNVLTPL  | 176  | 14   |
| >TP53-S33T-1 LLPENNVLSPI | 41  | >TP53-S33T-1 LLPENNVLTPI | 30   | 11   |
| >TP53-S33T-1 LLPENNVLSPI | 12  | >TP53-S33T-1 LLPENNVLTPI | 9    | 3    |
| >TP53-S33T-1 LLPENNVLSPI | 12  | >TP53-S33T-1 LLPENNVLTPI | 12   | 0    |
| >TP53-S33T-1 LLPENNVLSPI | 33  | >TP53-S33T-1 LLPENNVLTPI | 23   | 10   |
| >TP53-S33T-1 LLPENNVLS   | 846 | >TP53-S33T-1 LLPENNVLT   | 136  | 710  |
| >TP53-S33T-1 LLPENNVLSPI | 4   | >TP53-S33T-1 LLPENNVLTPI | 5    | 1    |
| >TP53-S33T-1 LLPENNVLSPI | 8   | >TP53-S33T-1 LLPENNVLTPI | 10   | 2    |
| >TP53-S33T-1 LLPENNVLSPI | 27  | >TP53-S33T-1 LLPENNVLTPI | 23   | 4    |
| >TP53-S33T-1 LLPENNVLSPI | 45  | >TP53-S33T-1 LLPENNVLTPI | 60   | 15   |
| >TP53-S33T-1 LLPENNVLS   | 243 | >TP53-S33T-1 LLPENNVLT   | 23   | 220  |
| >TP53-S33T-1 LLPENNVLSPI | 3   | >TP53-S33T-1 LLPENNVLTPI | 3    | 0    |
| >TP53-S33T-1 LLPENNVLSPI | 63  | >TP53-S33T-1 LLPENNVLTPI | 71   | 8    |

|                         |      |                         |      |      |
|-------------------------|------|-------------------------|------|------|
| >TP53-S33T-1 KLLPENNVLS | 2397 | >TP53-S33T-1 KLLPENNVLT | 285  | 2112 |
| >TP53-S33T-1 KLLPENNVLS | 3037 | >TP53-S33T-1 KLLPENNVLT | 401  | 2636 |
| >TP53-S33T-1 KLLPENNVLS | 1190 | >TP53-S33T-1 KLLPENNVLT | 229  | 961  |
| >TP53-S33T-1 KLLPENNVLS | 2582 | >TP53-S33T-1 KLLPENNVLT | 445  | 2137 |
| >TP53-S33T-1 KLLPENNVLS | 3290 | >TP53-S33T-1 KLLPENNVLT | 432  | 2858 |
| >TP53-S33T-1 KLLPENNVLS | 1588 | >TP53-S33T-1 KLLPENNVLT | 150  | 1438 |
| >TP53-S366A SSHLKSCK    | 601  | >TP53-S366A ASHLKSCK    | 485  | 116  |
| >TP53-S366A SSHLKSCK    | 63   | >TP53-S366A ASHLKSCK    | 109  | 46   |
| >TP53-S366A SSHLKSCK    | 20   | >TP53-S366A ASHLKSCK    | 14   | 6    |
| >TP53-S366A HSSHLKSK    | 278  | >TP53-S366A HASHLKSCK   | 860  | 582  |
| >TP53-S366A HSSHLKSCK   | 133  | >TP53-S366A HASHLKSCK   | 331  | 198  |
| >TP53-S366A HSSHLKSK    | 410  | >TP53-S366A HASHLKSCK   | 1740 | 1330 |
| >TP53-S366A HSSHLKSCK   | 234  | >TP53-S366A HASHLKSCK   | 1138 | 904  |
| >TP53-S366A HSSHLKSK    | 48   | >TP53-S366A HASHLKSCK   | 139  | 91   |
| >TP53-S366A HSSHLKSCK   | 172  | >TP53-S366A HASHLKSCK   | 524  | 352  |
| >TP53-S366A HSSHLKSCK   | 499  | >TP53-S366A HASHLKSCK   | 887  | 388  |
| >TP53-S366A HSSHLKSK    | 289  | >TP53-S366A HASHLKSCK   | 229  | 60   |
| >TP53-S366A HSSHLKSCK   | 93   | >TP53-S366A HASHLKSCK   | 72   | 21   |
| >TP53-S366A RAHSSHLK    | 80   | >TP53-S366A RAHASHLK    | 73   | 7    |
| >TP53-S366A RAHSSHLKSK  | 307  | >TP53-S366A RAHASHLKSCK | 293  | 14   |
| >TP53-S366A RAHSSHLKSK  | 101  | >TP53-S366A RAHASHLKSCK | 84   | 17   |
| >TP53-S366A RAHSSHLK    | 27   | >TP53-S366A RAHASHLK    | 24   | 3    |
| >TP53-S366A RAHSSHLKSK  | 92   | >TP53-S366A RAHASHLKSCK | 69   | 23   |
| >TP53-S366A RAHSSHLK    | 4    | >TP53-S366A RAHASHLK    | 3    | 1    |
| >TP53-S366A RAHSSHLKS   | 31   | >TP53-S366A RAHASHLKS   | 18   | 13   |
| >TP53-S366A RAHSSHLKSK  | 4    | >TP53-S366A RAHASHLKSCK | 4    | 0    |
| >TP53-S366A RAHSSHLKSK  | 6    | >TP53-S366A RAHASHLKSCK | 5    | 1    |
| >TP53-S366A RAHSSHLK    | 50   | >TP53-S366A RAHASHLK    | 71   | 21   |
| >TP53-S366A RAHSSHLKSK  | 72   | >TP53-S366A RAHASHLKSCK | 98   | 26   |
| >TP53-S366A RAHSSHLK    | 249  | >TP53-S366A RAHASHLK    | 381  | 132  |
| >TP53-S366A SRAHSSHL    | 60   | >TP53-S366A SRAHASHL    | 177  | 117  |
| >TP53-S366A SRAHSSHL    | 553  | >TP53-S366A SRAHASHL    | 273  | 280  |
| >TP53-S366A SRAHSSHLK   | 168  | >TP53-S366A SRAHASHLK   | 97   | 71   |
| >TP53-S366A SRAHSSHLKS  | 221  | >TP53-S366A SRAHASHLKS  | 149  | 72   |
| >TP53-S366A SRAHSSHL    | 220  | >TP53-S366A SRAHASHL    | 224  | 4    |
| >TP53-S366A GSRAHSSHLK  | 61   | >TP53-S366A GSRAHASHLK  | 81   | 20   |
| >TP53-S366A GSRAHSSHLK  | 90   | >TP53-S366A GSRAHASHLK  | 119  | 29   |
| >TP53-S366A GSRAHSSH    | 401  | >TP53-S366A GSRAHASH    | 387  | 14   |
| >TP53-S366A GSRAHSSHL   | 23   | >TP53-S366A GSRAHASHL   | 81   | 58   |
| >TP53-S366A GSRAHSSHLK  | 4    | >TP53-S366A GSRAHASHLK  | 5    | 1    |
| >TP53-S366A GSRAHSSHLK  | 96   | >TP53-S366A GSRAHASHLK  | 171  | 75   |
| >TP53-S366A GSRAHSSHL   | 141  | >TP53-S366A GSRAHASHL   | 489  | 348  |
| >TP53-S366A GSRAHSSHL   | 471  | >TP53-S366A GSRAHASHL   | 794  | 323  |

|                        |      |                         |      |      |
|------------------------|------|-------------------------|------|------|
| >TP53-S366A GSRAHSSH   | 441  | >TP53-S366A GSRAHASH    | 334  | 107  |
| >TP53-S366A GSRAHSSHL  | 8    | >TP53-S366A GSRAHASHL   | 7    | 1    |
| >TP53-S366A GSRAHSSHL  | 78   | >TP53-S366A GSRAHASHL   | 63   | 15   |
| >TP53-S366A GSRAHSSHLK | 281  | >TP53-S366A GSRAHASHLK  | 392  | 111  |
| >TP53-S366A GGSRAHSSHI | 286  | >TP53-S366A GGSRAHASHI  | 369  | 83   |
| >TP53-S366A GGSRAHSSHI | 586  | >TP53-S366A GGSRAHASHI  | 400  | 186  |
| >TP53-S366A GGSRAHSSH  | 291  | >TP53-S366A GGSRAHASH   | 4432 | 4141 |
| >TP53-S376A STSRHKKLMF | 53   | >TP53-S376A ATSRHKKLMF  | 51   | 2    |
| >TP53-S376A STSRHKKLMF | 10   | >TP53-S376A ATSRHKKLMF  | 13   | 3    |
| >TP53-S376A STSRHKKLMF | 9    | >TP53-S376A ATSRHKKLMF  | 8    | 1    |
| >TP53-S376A STSRHKKLMF | 83   | >TP53-S376A ATSRHKKLMF  | 90   | 7    |
| >TP53-S376A STSRHKKLMF | 31   | >TP53-S376A ATSRHKKLMF  | 191  | 160  |
| >TP53-S376A STSRHKKLMF | 663  | >TP53-S376A ATSRHKKLMF  | 351  | 312  |
| >TP53-S376A STSRHKKL   | 171  | >TP53-S376A ATSRHKKL    | 74   | 97   |
| >TP53-S376A STSRHKKLM  | 865  | >TP53-S376A ATSRHKKLM   | 385  | 480  |
| >TP53-S376A STSRHKKLMF | 24   | >TP53-S376A ATSRHKKLMF  | 11   | 13   |
| >TP53-S376A STSRHKKLM  | 48   | >TP53-S376A ATSRHKKLM   | 111  | 63   |
| >TP53-S376A STSRHKKLMF | 22   | >TP53-S376A ATSRHKKLMF  | 28   | 6    |
| >TP53-S376A STSRHKKLMF | 86   | >TP53-S376A ATSRHKKLMF  | 75   | 11   |
| >TP53-S376A QSTSRHKK   | 199  | >TP53-S376A QATSRHKK    | 733  | 534  |
| >TP53-S376A QSTSRHKK   | 125  | >TP53-S376A QATSRHKK    | 104  | 21   |
| >TP53-S376A QSTSRHKKLM | 180  | >TP53-S376A QATSRHKKLM  | 352  | 172  |
| >TP53-S376A QSTSRHKKL  | 62   | >TP53-S376A QATSRHKKL   | 585  | 523  |
| >TP53-S376A QSTSRHKKLM | 272  | >TP53-S376A QATSRHKKLM  | 1936 | 1664 |
| >TP53-S376A QSTSRHKKLM | 11   | >TP53-S376A QATSRHKKLM  | 80   | 69   |
| >TP53-S376A QSTSRHKKLM | 49   | >TP53-S376A QATSRHKKLM  | 390  | 341  |
| >TP53-S376A QSTSRHKKLM | 61   | >TP53-S376A QATSRHKKLM  | 509  | 448  |
| >TP53-S376A QSTSRHKK   | 439  | >TP53-S376A QATSRHKK    | 1721 | 1282 |
| >TP53-S376A SSHLKSCKGQ | 3608 | >TP53-S376A SSHLKSCKGQ  | 445  | 3163 |
| >TP53-S376A GQSTSRHKK  | 515  | >TP53-S376A GQATSRHKK   | 489  | 26   |
| >TP53-S376A GQSTSRHK   | 268  | >TP53-S376A GQATSRHK    | 414  | 146  |
| >TP53-S376A GQSTSRHKK  | 39   | >TP53-S376A GQATSRHKK   | 57   | 18   |
| >TP53-S376A GQSTSRHKKL | 229  | >TP53-S376A GQATSRHKKI  | 232  | 3    |
| >TP53-S376A GQSTSRHKKL | 256  | >TP53-S376A GQATSRHKKI  | 261  | 5    |
| >TP53-S376A KGQSTSRHK  | 33   | >TP53-S376A KGQATSRHK   | 19   | 14   |
| >TP53-S376A KGQSTSRHKK | 80   | >TP53-S376A KGQATSRHKKI | 47   | 33   |
| >TP53-S376A KKGQSTSR   | 357  | >TP53-S376A KKGQATSR    | 1028 | 671  |
| >TP53-S376A KKGQSTSR   | 104  | >TP53-S376A KKGQATSR    | 99   | 5    |
| >TP53-S376A SKKGQSTSRH | 91   | >TP53-S376A SKKGQATSRH  | 174  | 83   |
| >TP53-S376A KSKKGQST   | 105  | >TP53-S376A KSKKGQAT    | 123  | 18   |
| >TP53-S376A KSKKGQSTS  | 47   | >TP53-S376A KSKKGQATS   | 22   | 25   |
| >TP53-S376A KSKKGQSTSR | 18   | >TP53-S376A KSKKGQATSR  | 27   | 9    |
| >TP53-S376A KSKKGQSTSR | 313  | >TP53-S376A KSKKGQATSR  | 210  | 103  |

|                        |      |                        |      |      |
|------------------------|------|------------------------|------|------|
| >TP53-S376A KSKKGQSTSR | 90   | >TP53-S376A KSKKGQATSF | 95   | 5    |
| >TP53-S376A KSKKGQSTSR | 131  | >TP53-S376A KSKKGQATSF | 194  | 63   |
| >TP53-S376A KSKKGQSTS  | 236  | >TP53-S376A KSKKGQATS  | 2304 | 2068 |
| >TP53-S376A KSKKGQSTSR | 32   | >TP53-S376A KSKKGQATSF | 80   | 48   |
| >TP53-S376A LKSKKGQSTS | 207  | >TP53-S376A LKSKKGQATS | 260  | 53   |
| >TP53-S376A HLKSKKGQS  | 4591 | >TP53-S376A HLKSKKGQA  | 441  | 4150 |
| >TP53-S376T STSRHKKLMF | 53   | >TP53-S376T TTSRHKKLMF | 56   | 3    |
| >TP53-S376T STSRHKKLMF | 10   | >TP53-S376T TTSRHKKLMF | 12   | 2    |
| >TP53-S376T STSRHKKLMF | 9    | >TP53-S376T TTSRHKKLMF | 23   | 14   |
| >TP53-S376T STSRHKKLMF | 83   | >TP53-S376T TTSRHKKLMF | 118  | 35   |
| >TP53-S376T STSRHKKLMF | 31   | >TP53-S376T TTSRHKKLMF | 14   | 17   |
| >TP53-S376T STSRHKKL   | 171  | >TP53-S376T TTSRHKKL   | 326  | 155  |
| >TP53-S376T STSRHKKLMF | 24   | >TP53-S376T TTSRHKKLMF | 35   | 11   |
| >TP53-S376T STSRHKKLM  | 48   | >TP53-S376T TTSRHKKLM  | 148  | 100  |
| >TP53-S376T STSRHKKLMF | 22   | >TP53-S376T TTSRHKKLMF | 34   | 12   |
| >TP53-S376T STSRHKKLMF | 86   | >TP53-S376T TTSRHKKLMF | 158  | 72   |
| >TP53-S376T QSTSRHKK   | 199  | >TP53-S376T QTTSRHKK   | 96   | 103  |
| >TP53-S376T QSTSRHKK   | 655  | >TP53-S376T QTTSRHKK   | 289  | 366  |
| >TP53-S376T QSTSRHKK   | 125  | >TP53-S376T QTTSRHKK   | 23   | 102  |
| >TP53-S376T QSTSRHKKLM | 180  | >TP53-S376T QTTSRHKKLM | 517  | 337  |
| >TP53-S376T QSTSRHKKL  | 62   | >TP53-S376T QTTSRHKKL  | 38   | 24   |
| >TP53-S376T QSTSRHKKLM | 272  | >TP53-S376T QTTSRHKKLM | 167  | 105  |
| >TP53-S376T QSTSRHKKLM | 11   | >TP53-S376T QTTSRHKKLM | 9    | 2    |
| >TP53-S376T QSTSRHKKL  | 1023 | >TP53-S376T QTTSRHKKL  | 269  | 754  |
| >TP53-S376T QSTSRHKKLM | 724  | >TP53-S376T QTTSRHKKLM | 231  | 493  |
| >TP53-S376T QSTSRHKKLM | 1393 | >TP53-S376T QTTSRHKKLM | 472  | 921  |
| >TP53-S376T QSTSRHKKL  | 665  | >TP53-S376T QTTSRHKKL  | 196  | 469  |
| >TP53-S376T QSTSRHKKLM | 49   | >TP53-S376T QTTSRHKKLM | 31   | 18   |
| >TP53-S376T QSTSRHKKLM | 61   | >TP53-S376T QTTSRHKKLM | 24   | 37   |
| >TP53-S376T QSTSRHKK   | 439  | >TP53-S376T QTTSRHKK   | 277  | 162  |
| >TP53-S376T GQSTSRHK   | 268  | >TP53-S376T GQTTSRHK   | 763  | 495  |
| >TP53-S376T GQSTSRHKK  | 39   | >TP53-S376T GQTTSRHKK  | 93   | 54   |
| >TP53-S376T GQSTSRHKKL | 229  | >TP53-S376T GQTTSRHKKL | 585  | 356  |
| >TP53-S376T GQSTSRHKKL | 256  | >TP53-S376T GQTTSRHKKL | 637  | 381  |
| >TP53-S376T KGQSTSRHK  | 33   | >TP53-S376T KGQTTSRHK  | 27   | 6    |
| >TP53-S376T KGQSTSRHKK | 80   | >TP53-S376T KGQTTSRHKK | 68   | 12   |
| >TP53-S376T KKGQSTSR   | 357  | >TP53-S376T KKGQTTSR   | 548  | 191  |
| >TP53-S376T KKGQSTSR   | 104  | >TP53-S376T KKGQTTSR   | 60   | 44   |
| >TP53-S376T SKKGQSTSRH | 91   | >TP53-S376T SKKGQTTSRH | 109  | 18   |
| >TP53-S376T KSKKGQST   | 105  | >TP53-S376T KSKKGQTT   | 186  | 81   |
| >TP53-S376T KSKKGQSTS  | 47   | >TP53-S376T KSKKGQTTS  | 156  | 109  |
| >TP53-S376T KSKKGQSTSR | 18   | >TP53-S376T KSKKGQTTSR | 28   | 10   |
| >TP53-S376T KSKKGQSTSR | 313  | >TP53-S376T KSKKGQTTSR | 417  | 104  |

|                         |      |                         |      |     |
|-------------------------|------|-------------------------|------|-----|
| >TP53-S376T KSKKGQSTSR  | 90   | >TP53-S376T KSKKGQTTSR  | 69   | 21  |
| >TP53-S376T KSKKGQSTSR  | 131  | >TP53-S376T KSKKGQTTSR  | 245  | 114 |
| >TP53-S376T KSKKGQSTS   | 236  | >TP53-S376T KSKKGQTTS   | 1210 | 974 |
| >TP53-S376T KSKKGQSTSR  | 32   | >TP53-S376T KSKKGQTTSR  | 49   | 17  |
| >TP53-S376T KSKKGQSTSR  | 856  | >TP53-S376T KSKKGQTTSR  | 489  | 367 |
| >TP53-S376T LSKKKGQSTS  | 207  | >TP53-S376T LSKKKGQTTS  | 252  | 45  |
| >TP53-S37T-1 SQAMDDLMI  | 155  | >TP53-S37T-1 TQAMDDLMI  | 465  | 310 |
| >TP53-S37T-1 SQAMDDLMI  | 463  | >TP53-S37T-1 TQAMDDLMI  | 1203 | 740 |
| >TP53-S37T-1 SQAMDDLMI  | 473  | >TP53-S37T-1 TQAMDDLMI  | 834  | 361 |
| >TP53-S37T-1 LPSQAMDDL  | 8    | >TP53-S37T-1 LPTQAMDDL  | 6    | 2   |
| >TP53-S37T-1 LPSQAMDDL  | 42   | >TP53-S37T-1 LPTQAMDDL  | 24   | 18  |
| >TP53-S37T-1 LPSQAMDDL  | 173  | >TP53-S37T-1 LPTQAMDDL  | 112  | 61  |
| >TP53-S37T-1 LPSQAMDDL  | 95   | >TP53-S37T-1 LPTQAMDDL  | 117  | 22  |
| >TP53-S37T-1 LPSQAMDDL  | 86   | >TP53-S37T-1 LPTQAMDDL  | 110  | 24  |
| >TP53-S37T-1 LPSQAMDDL  | 114  | >TP53-S37T-1 LPTQAMDDL  | 198  | 84  |
| >TP53-S37T-1 LPSQAMDDL  | 125  | >TP53-S37T-1 LPTQAMDDL  | 104  | 21  |
| >TP53-S37T-1 LPSQAMDDL  | 57   | >TP53-S37T-1 LPTQAMDDL  | 82   | 25  |
| >TP53-S37T-1 LPSQAMDDL  | 90   | >TP53-S37T-1 LPTQAMDDL  | 93   | 3   |
| >TP53-S37T-1 LPSQAMDDL  | 273  | >TP53-S37T-1 LPTQAMDDL  | 262  | 11  |
| >TP53-S37T-1 SPLPSQAM   | 35   | >TP53-S37T-1 SPLPTQAM   | 61   | 26  |
| >TP53-S37T-1 SPLPSQAMDI | 7    | >TP53-S37T-1 SPLPTQAMDI | 10   | 3   |
| >TP53-S37T-1 SPLPSQAM   | 19   | >TP53-S37T-1 SPLPTQAM   | 20   | 1   |
| >TP53-S37T-1 SPLPSQAMDI | 189  | >TP53-S37T-1 SPLPTQAMDI | 216  | 27  |
| >TP53-S37T-1 SPLPSQAM   | 28   | >TP53-S37T-1 SPLPTQAM   | 24   | 4   |
| >TP53-S37T-1 SPLPSQAM   | 309  | >TP53-S37T-1 SPLPTQAM   | 239  | 70  |
| >TP53-S37T-1 LSPLPSQAM  | 264  | >TP53-S37T-1 LSPLPTQAM  | 559  | 295 |
| >TP53-S37T-1 LSPLPSQAM  | 5    | >TP53-S37T-1 LSPLPTQAM  | 4    | 1   |
| >TP53-S37T-1 LSPLPSQAM  | 398  | >TP53-S37T-1 LSPLPTQAM  | 372  | 26  |
| >TP53-S37T-1 VLSPLPSQA  | 1151 | >TP53-S37T-1 VLSPLPTQA  | 485  | 666 |
| >TP53-S37T-1 VLSPLPSQA  | 52   | >TP53-S37T-1 VLSPLPTQA  | 28   | 24  |
| >TP53-S37T-1 VLSPLPSQAM | 255  | >TP53-S37T-1 VLSPLPTQAM | 186  | 69  |
| >TP53-S37T-1 VLSPLPSQA  | 8    | >TP53-S37T-1 VLSPLPTQA  | 7    | 1   |
| >TP53-S37T-1 VLSPLPSQA  | 26   | >TP53-S37T-1 VLSPLPTQA  | 37   | 11  |
| >TP53-S37T-1 VLSPLPSQAM | 76   | >TP53-S37T-1 VLSPLPTQAM | 80   | 4   |
| >TP53-S37T-1 VLSPLPSQA  | 64   | >TP53-S37T-1 VLSPLPTQA  | 53   | 11  |
| >TP53-S37T-1 VLSPLPSQA  | 125  | >TP53-S37T-1 VLSPLPTQA  | 182  | 57  |
| >TP53-S37T-1 VLSPLPSQAM | 241  | >TP53-S37T-1 VLSPLPTQAM | 191  | 50  |
| >TP53-S37T-1 VLSPLPSQ   | 28   | >TP53-S37T-1 VLSPLPTQ   | 25   | 3   |
| >TP53-S37T-1 VLSPLPSQA  | 6    | >TP53-S37T-1 VLSPLPTQA  | 6    | 0   |
| >TP53-S37T-1 VLSPLPSQAM | 43   | >TP53-S37T-1 VLSPLPTQAM | 33   | 10  |
| >TP53-S37T-1 VLSPLPSQAM | 204  | >TP53-S37T-1 VLSPLPTQAM | 311  | 107 |
| >TP53-S37T-1 VLSPLPSQAM | 243  | >TP53-S37T-1 VLSPLPTQAM | 325  | 82  |
| >TP53-S37T-1 VLSPLPSQAM | 269  | >TP53-S37T-1 VLSPLPTQAM | 499  | 230 |



|                         |       |                         |       |       |
|-------------------------|-------|-------------------------|-------|-------|
| >TP53-S37T-1 NVLSPLPSQ  | 498   | >TP53-S37T-1 NVLSPLPTQ  | 491   | 7     |
| >TP53-S37T-1 NVLSPLPSQA | 45    | >TP53-S37T-1 NVLSPLPTQA | 20    | 25    |
| >TP53-S37T-1 NVLSPLPSQA | 439   | >TP53-S37T-1 NVLSPLPTQA | 172   | 267   |
| >TP53-S37T-1 NVLSPLPS   | 1626  | >TP53-S37T-1 NVLSPLPT   | 170   | 1456  |
| >TP53-S37T-1 NVLSPLPSQ  | 284   | >TP53-S37T-1 NVLSPLPTQ  | 354   | 70    |
| >TP53-S37T-1 NVLSPLPSQA | 43    | >TP53-S37T-1 NVLSPLPTQA | 40    | 3     |
| >TP53-S37T-1 NVLSPLPSQA | 19    | >TP53-S37T-1 NVLSPLPTQA | 16    | 3     |
| >TP53-S37T-1 NVLSPLPSQA | 193   | >TP53-S37T-1 NVLSPLPTQA | 170   | 23    |
| >TP53-S392L KLMFKTEGPE  | 6539  | >TP53-S392L KLMFKTEGPE  | 49    | 6490  |
| >TP53-S392L KLMFKTEGPE  | 3363  | >TP53-S392L KLMFKTEGPE  | 28    | 3335  |
| >TP53-S392L KLMFKTEGPE  | 2507  | >TP53-S392L KLMFKTEGPE  | 49    | 2458  |
| >TP53-S392L KLMFKTEGPE  | 7678  | >TP53-S392L KLMFKTEGPE  | 270   | 7408  |
| >TP53-S392L KLMFKTEGPE  | 6814  | >TP53-S392L KLMFKTEGPE  | 90    | 6724  |
| >TP53-S392L KLMFKTEGPE  | 6548  | >TP53-S392L KLMFKTEGPE  | 37    | 6511  |
| >TP53-S392L KLMFKTEGPE  | 10129 | >TP53-S392L KLMFKTEGPE  | 80    | 10049 |
| >TP53-S392L KLMFKTEGPE  | 7715  | >TP53-S392L KLMFKTEGPE  | 37    | 7678  |
| >TP53-S392L KLMFKTEGPE  | 9116  | >TP53-S392L KLMFKTEGPE  | 32    | 9084  |
| >TP53-S392L KLMFKTEGPE  | 3243  | >TP53-S392L KLMFKTEGPE  | 80    | 3163  |
| >TP53-S392L FKTEGPDS    | 7380  | >TP53-S392L FKTEGPDL    | 182   | 7198  |
| >TP53-S392L LMFKTEGPD9  | 11382 | >TP53-S392L LMFKTEGPD1  | 155   | 11227 |
| >TP53-S392L LMFKTEGPD9  | 8656  | >TP53-S392L LMFKTEGPD1  | 319   | 8337  |
| >TP53-S392L LMFKTEGPD9  | 8997  | >TP53-S392L LMFKTEGPD1  | 375   | 8622  |
| >TP53-S392L LMFKTEGPD9  | 2865  | >TP53-S392L LMFKTEGPD1  | 25    | 2840  |
| >TP53-S392L LMFKTEGPD9  | 10905 | >TP53-S392L LMFKTEGPD1  | 148   | 10757 |
| >TP53-S392L LMFKTEGPD9  | 4749  | >TP53-S392L LMFKTEGPD1  | 22    | 4727  |
| >TP53-S392L LMFKTEGPD9  | 3282  | >TP53-S392L LMFKTEGPD1  | 17    | 3265  |
| >TP53-S392L LMFKTEGPD9  | 5899  | >TP53-S392L LMFKTEGPD1  | 366   | 5533  |
| >TP53-S392L LMFKTEGPD9  | 935   | >TP53-S392L LMFKTEGPD1  | 20    | 915   |
| >TP53-S46F-1 SPDDIEQW   | 4256  | >TP53-S46F-1 FPDDIEQW   | 317   | 3939  |
| >TP53-S46F-1 SPDDIEQWF  | 339   | >TP53-S46F-1 FPDDIEQWF  | 21    | 318   |
| >TP53-S46F-1 SPDDIEQWF1 | 2588  | >TP53-S46F-1 FPDDIEQWF1 | 206   | 2382  |
| >TP53-S46F-1 SPDDIEQW   | 46    | >TP53-S46F-1 FPDDIEQW   | 9     | 37    |
| >TP53-S46F-1 SPDDIEQWF  | 1856  | >TP53-S46F-1 FPDDIEQWF  | 105   | 1751  |
| >TP53-S46F-1 SPDDIEQW   | 12    | >TP53-S46F-1 FPDDIEQW   | 4     | 8     |
| >TP53-S46F-1 SPDDIEQWF  | 1875  | >TP53-S46F-1 FPDDIEQWF  | 82    | 1793  |
| >TP53-S46F-1 LSPDDIEQW  | 6132  | >TP53-S46F-1 LFPDDIEQW  | 33    | 6099  |
| >TP53-S46F-1 LSPDDIEQWF | 1455  | >TP53-S46F-1 LFPDDIEQWF | 8     | 1447  |
| >TP53-S46F-1 LSPDDIEQW  | 195   | >TP53-S46F-1 LFPDDIEQW  | 16217 | 16022 |
| >TP53-S46F-1 LSPDDIEQWF | 180   | >TP53-S46F-1 LFPDDIEQWF | 27212 | 27032 |
| >TP53-S46F-1 LSPDDIEQW  | 126   | >TP53-S46F-1 LFPDDIEQW  | 19439 | 19313 |
| >TP53-S46F-1 LSPDDIEQW  | 149   | >TP53-S46F-1 LFPDDIEQW  | 10104 | 9955  |
| >TP53-S46F-1 LSPDDIEQW  | 181   | >TP53-S46F-1 LFPDDIEQW  | 15884 | 15703 |
| >TP53-S46F-1 LSPDDIEQWF | 10    | >TP53-S46F-1 LFPDDIEQWF | 1795  | 1785  |

|                         |      |                         |       |       |
|-------------------------|------|-------------------------|-------|-------|
| >TP53-S46F-1 LSPDDIEQWF | 190  | >TP53-S46F-1 LFPDDIEQWF | 14802 | 14612 |
| >TP53-S46F-1 LSPDDIEQWF | 84   | >TP53-S46F-1 LFPDDIEQWF | 4580  | 4496  |
| >TP53-S46F-1 LSPDDIEQW  | 218  | >TP53-S46F-1 LFPDDIEQW  | 1421  | 1203  |
| >TP53-S46F-1 MLSPDDIEQ  | 405  | >TP53-S46F-1 MLFPDDIEQ  | 206   | 199   |
| >TP53-S46F-1 MLSPDDIEQ\ | 107  | >TP53-S46F-1 MLFPDDIEQ\ | 123   | 16    |
| >TP53-S46F-1 MLSPDDIEQ\ | 1389 | >TP53-S46F-1 MLFPDDIEQ\ | 228   | 1161  |
| >TP53-S46F-1 MLSPDDIEQ  | 3081 | >TP53-S46F-1 MLFPDDIEQ  | 341   | 2740  |
| >TP53-S46F-1 MLSPDDIEQ\ | 2338 | >TP53-S46F-1 MLFPDDIEQ\ | 152   | 2186  |
| >TP53-S46F-1 MLSPDDIEQ  | 2031 | >TP53-S46F-1 MLFPDDIEQ  | 277   | 1754  |
| >TP53-S46F-1 MLSPDDIEQ  | 21   | >TP53-S46F-1 MLFPDDIEQ  | 14    | 7     |
| >TP53-S46F-1 MLSPDDIEQ\ | 909  | >TP53-S46F-1 MLFPDDIEQ\ | 311   | 598   |
| >TP53-S46F-1 MLSPDDIEQ\ | 129  | >TP53-S46F-1 MLFPDDIEQ\ | 44    | 85    |
| >TP53-S46F-1 MLSPDDIEQ\ | 951  | >TP53-S46F-1 MLFPDDIEQ\ | 344   | 607   |
| >TP53-S46F-1 MLSPDDIEQ\ | 7264 | >TP53-S46F-1 MLFPDDIEQ\ | 478   | 6786  |
| >TP53-S46F-1 MLSPDDIEQ\ | 7138 | >TP53-S46F-1 MLFPDDIEQ\ | 446   | 6692  |
| >TP53-S46F-1 MLSPDDIEQ\ | 716  | >TP53-S46F-1 MLFPDDIEQ\ | 249   | 467   |
| >TP53-S46F-1 MLSPDDIEQ\ | 1870 | >TP53-S46F-1 MLFPDDIEQ\ | 334   | 1536  |
| >TP53-S46F-1 MLSPDDIEQ\ | 213  | >TP53-S46F-1 MLFPDDIEQ\ | 25    | 188   |
| >TP53-S46F-1 MLSPDDIEQ\ | 93   | >TP53-S46F-1 MLFPDDIEQ\ | 29    | 64    |
| >TP53-S46F-1 MLSPDDIEQ\ | 427  | >TP53-S46F-1 MLFPDDIEQ\ | 85    | 342   |
| >TP53-S46F-1 MLSPDDIEQ\ | 131  | >TP53-S46F-1 MLFPDDIEQ\ | 95    | 36    |
| >TP53-S46F-1 MLSPDDIEQ\ | 204  | >TP53-S46F-1 MLFPDDIEQ\ | 82    | 122   |
| >TP53-S46F-1 MLSPDDIEQ\ | 20   | >TP53-S46F-1 MLFPDDIEQ\ | 17    | 3     |
| >TP53-S46F-1 MLSPDDIEQ\ | 1855 | >TP53-S46F-1 MLFPDDIEQ\ | 427   | 1428  |
| >TP53-S46F-1 MLSPDDIEQ\ | 292  | >TP53-S46F-1 MLFPDDIEQ\ | 122   | 170   |
| >TP53-S46F-1 MLSPDDIEQ\ | 80   | >TP53-S46F-1 MLFPDDIEQ\ | 50    | 30    |
| >TP53-S46F-1 MLSPDDIEQ\ | 445  | >TP53-S46F-1 MLFPDDIEQ\ | 107   | 338   |
| >TP53-S46F-1 LMLSPDDI   | 14   | >TP53-S46F-1 LMLFPDDI   | 19    | 5     |
| >TP53-S46F-1 LMLSPDDI   | 35   | >TP53-S46F-1 LMLFPDDI   | 52    | 17    |
| >TP53-S46F-1 LMLSPDDI   | 41   | >TP53-S46F-1 LMLFPDDI   | 74    | 33    |
| >TP53-S46F-1 LMLSPDDI   | 149  | >TP53-S46F-1 LMLFPDDI   | 183   | 34    |
| >TP53-S46F-1 LMLSPDDI   | 113  | >TP53-S46F-1 LMLFPDDI   | 309   | 196   |
| >TP53-S46F-1 LMLSPDDIEQ | 315  | >TP53-S46F-1 LMLFPDDIEQ | 900   | 585   |
| >TP53-S46F-1 LMLSPDDI   | 314  | >TP53-S46F-1 LMLFPDDI   | 1295  | 981   |
| >TP53-S46F-1 LMLSPDDIEQ | 130  | >TP53-S46F-1 LMLFPDDIEQ | 216   | 86    |
| >TP53-S46F-1 LMLSPDDIEQ | 212  | >TP53-S46F-1 LMLFPDDIEQ | 297   | 85    |
| >TP53-S46F-1 LMLSPDDIEQ | 17   | >TP53-S46F-1 LMLFPDDIEQ | 21    | 4     |
| >TP53-S46F-1 LMLSPDDIEQ | 79   | >TP53-S46F-1 LMLFPDDIEQ | 193   | 114   |
| >TP53-S46F-1 LMLSPDDIEQ | 174  | >TP53-S46F-1 LMLFPDDIEQ | 198   | 24    |
| >TP53-S46F-1 DDLMLSPDDI | 436  | >TP53-S46F-1 DDLMLFPDDI | 285   | 151   |
| >TP53-S46F-1 DDLMLSPDDI | 237  | >TP53-S46F-1 DDLMLFPDDI | 217   | 20    |
| >TP53-S46F-1 MDDLMLSPD  | 520  | >TP53-S46F-1 MDDLMLFPD  | 421   | 99    |
| >TP53-S46F-1 MDDLMLSPD  | 277  | >TP53-S46F-1 MDDLMLFPD  | 185   | 92    |

|                         |       |                         |       |       |
|-------------------------|-------|-------------------------|-------|-------|
| >TP53-S46F-1 MDDLMLSPD  | 762   | >TP53-S46F-1 MDDLMLFPD  | 321   | 441   |
| >TP53-S46F-1 MDDLMLSPD  | 107   | >TP53-S46F-1 MDDLMLFPD  | 81    | 26    |
| >TP53-S46F-1 AMDDLMLS   | 808   | >TP53-S46F-1 AMDDLMLF   | 233   | 575   |
| >TP53-S46F-1 AMDDLMLS   | 255   | >TP53-S46F-1 AMDDLMLF   | 207   | 48    |
| >TP53-S46F-1 AMDDLMLS   | 463   | >TP53-S46F-1 AMDDLMLF   | 592   | 129   |
| >TP53-S46F-1 QAMDDLMLS  | 1712  | >TP53-S46F-1 QAMDDLMLI  | 263   | 1449  |
| >TP53-S46F-1 QAMDDLMLS  | 20158 | >TP53-S46F-1 QAMDDLMLI  | 205   | 19953 |
| >TP53-S46F-1 QAMDDLMLS  | 22830 | >TP53-S46F-1 QAMDDLMLI  | 77    | 22753 |
| >TP53-S46F-1 QAMDDLMLS  | 15918 | >TP53-S46F-1 QAMDDLMLI  | 372   | 15546 |
| >TP53-S46F-1 QAMDDLMLS  | 20448 | >TP53-S46F-1 QAMDDLMLI  | 203   | 20245 |
| >TP53-S46F-1 QAMDDLMLS  | 17503 | >TP53-S46F-1 QAMDDLMLI  | 427   | 17076 |
| >TP53-S46F-1 SQAMDDLMI  | 11689 | >TP53-S46F-1 SQAMDDLMI  | 68    | 11621 |
| >TP53-S46F-1 SQAMDDLMI  | 8602  | >TP53-S46F-1 SQAMDDLMI  | 15    | 8587  |
| >TP53-S46P-1 SPDDIEQWF  | 339   | >TP53-S46P-1 PPDDIEQWF  | 1755  | 1416  |
| >TP53-S46P-1 SPDDIEQW   | 46    | >TP53-S46P-1 PPDDIEQW   | 42    | 4     |
| >TP53-S46P-1 SPDDIEQW   | 12    | >TP53-S46P-1 PPDDIEQW   | 19    | 7     |
| >TP53-S46P-1 LSPDDIEQW  | 195   | >TP53-S46P-1 LPPDDIEQW  | 14127 | 13932 |
| >TP53-S46P-1 LSPDDIEQWF | 180   | >TP53-S46P-1 LPPDDIEQWF | 24183 | 24003 |
| >TP53-S46P-1 LSPDDIEQWF | 24639 | >TP53-S46P-1 LPPDDIEQWF | 278   | 24361 |
| >TP53-S46P-1 LSPDDIEQW  | 1345  | >TP53-S46P-1 LPPDDIEQW  | 16    | 1329  |
| >TP53-S46P-1 LSPDDIEQWF | 6949  | >TP53-S46P-1 LPPDDIEQWF | 148   | 6801  |
| >TP53-S46P-1 LSPDDIEQW  | 126   | >TP53-S46P-1 LPPDDIEQW  | 14586 | 14460 |
| >TP53-S46P-1 LSPDDIEQW  | 149   | >TP53-S46P-1 LPPDDIEQW  | 15954 | 15805 |
| >TP53-S46P-1 LSPDDIEQW  | 181   | >TP53-S46P-1 LPPDDIEQW  | 9741  | 9560  |
| >TP53-S46P-1 LSPDDIEQWF | 10    | >TP53-S46P-1 LPPDDIEQWF | 812   | 802   |
| >TP53-S46P-1 LSPDDIEQWF | 190   | >TP53-S46P-1 LPPDDIEQWF | 9774  | 9584  |
| >TP53-S46P-1 LSPDDIEQWF | 84    | >TP53-S46P-1 LPPDDIEQWF | 5826  | 5742  |
| >TP53-S46P-1 LSPDDIEQW  | 218   | >TP53-S46P-1 LPPDDIEQW  | 7     | 211   |
| >TP53-S46P-1 LSPDDIEQWF | 18159 | >TP53-S46P-1 LPPDDIEQWF | 418   | 17741 |
| >TP53-S46P-1 LSPDDIEQW  | 596   | >TP53-S46P-1 LPPDDIEQW  | 356   | 240   |
| >TP53-S46P-1 MLSPDDIEQ  | 405   | >TP53-S46P-1 MLPPDDIEQ  | 3441  | 3036  |
| >TP53-S46P-1 MLSPDDIEQ  | 107   | >TP53-S46P-1 MLPPDDIEQ  | 917   | 810   |
| >TP53-S46P-1 MLSPDDIEQ  | 21    | >TP53-S46P-1 MLPPDDIEQ  | 36    | 15    |
| >TP53-S46P-1 MLSPDDIEQ  | 129   | >TP53-S46P-1 MLPPDDIEQ  | 201   | 72    |
| >TP53-S46P-1 MLSPDDIEQ  | 951   | >TP53-S46P-1 MLPPDDIEQ  | 149   | 802   |
| >TP53-S46P-1 MLSPDDIEQ  | 213   | >TP53-S46P-1 MLPPDDIEQ  | 1059  | 846   |
| >TP53-S46P-1 MLSPDDIEQ  | 93    | >TP53-S46P-1 MLPPDDIEQ  | 2076  | 1983  |
| >TP53-S46P-1 MLSPDDIEQ  | 427   | >TP53-S46P-1 MLPPDDIEQ  | 6250  | 5823  |
| >TP53-S46P-1 MLSPDDIEQ  | 131   | >TP53-S46P-1 MLPPDDIEQ  | 827   | 696   |
| >TP53-S46P-1 MLSPDDIEQ  | 204   | >TP53-S46P-1 MLPPDDIEQ  | 865   | 661   |
| >TP53-S46P-1 MLSPDDIEQ  | 20    | >TP53-S46P-1 MLPPDDIEQ  | 2007  | 1987  |
| >TP53-S46P-1 MLSPDDIEQ  | 292   | >TP53-S46P-1 MLPPDDIEQ  | 1990  | 1698  |
| >TP53-S46P-1 MLSPDDIEQ  | 80    | >TP53-S46P-1 MLPPDDIEQ  | 71    | 9     |

|                         |       |                         |      |       |
|-------------------------|-------|-------------------------|------|-------|
| >TP53-S46P-1 MLSPDDIEQ\ | 445   | >TP53-S46P-1 MLPPDDIEQ\ | 2975 | 2530  |
| >TP53-S46P-1 LMLSPDDI   | 14    | >TP53-S46P-1 LMLPPDDI   | 12   | 2     |
| >TP53-S46P-1 LMLSPDDI   | 35    | >TP53-S46P-1 LMLPPDDI   | 26   | 9     |
| >TP53-S46P-1 LMLSPDDI   | 41    | >TP53-S46P-1 LMLPPDDI   | 35   | 6     |
| >TP53-S46P-1 LMLSPDDI   | 149   | >TP53-S46P-1 LMLPPDDI   | 170  | 21    |
| >TP53-S46P-1 LMLSPDDI   | 113   | >TP53-S46P-1 LMLPPDDI   | 56   | 57    |
| >TP53-S46P-1 LMLSPDDIEQ | 315   | >TP53-S46P-1 LMLPPDDIEC | 119  | 196   |
| >TP53-S46P-1 LMLSPDDI   | 314   | >TP53-S46P-1 LMLPPDDI   | 687  | 373   |
| >TP53-S46P-1 LMLSPDDIEQ | 130   | >TP53-S46P-1 LMLPPDDIEC | 28   | 102   |
| >TP53-S46P-1 LMLSPDDIEQ | 212   | >TP53-S46P-1 LMLPPDDIEC | 95   | 117   |
| >TP53-S46P-1 LMLSPDDIEQ | 17    | >TP53-S46P-1 LMLPPDDIEC | 13   | 4     |
| >TP53-S46P-1 LMLSPDDIEQ | 79    | >TP53-S46P-1 LMLPPDDIEC | 109  | 30    |
| >TP53-S46P-1 LMLSPDDIEQ | 174   | >TP53-S46P-1 LMLPPDDIEC | 66   | 108   |
| >TP53-S46P-1 DDLMLSPDDI | 436   | >TP53-S46P-1 DDLMLPPDD  | 1859 | 1423  |
| >TP53-S46P-1 DDLMLSPDDI | 237   | >TP53-S46P-1 DDLMLPPDD  | 491  | 254   |
| >TP53-S46P-1 MDDLMLSPD  | 277   | >TP53-S46P-1 MDDLMLPPE  | 318  | 41    |
| >TP53-S46P-1 MDDLMLSPD  | 107   | >TP53-S46P-1 MDDLMLPPE  | 211  | 104   |
| >TP53-S46P-1 AMDDLMLS   | 255   | >TP53-S46P-1 AMDDLMLP   | 1770 | 1515  |
| >TP53-S46P-1 AMDDLMLS   | 463   | >TP53-S46P-1 AMDDLMLP   | 3299 | 2836  |
| >TP53-S90F-1 SWPLSSSV   | 3721  | >TP53-S90F-1 FWPLSSSV   | 305  | 3416  |
| >TP53-S90F-1 SWPLSSSV   | 157   | >TP53-S90F-1 FWPLSSSV   | 383  | 226   |
| >TP53-S90F-1 SWPLSSSVPS | 447   | >TP53-S90F-1 FWPLSSSVPS | 910  | 463   |
| >TP53-S90F-1 PTPAAPAPAF | 21767 | >TP53-S90F-1 PTPAAPAPAF | 348  | 21419 |
| >TP53-S90F-1 PTPAAPAPAF | 603   | >TP53-S90F-1 PTPAAPAPAF | 7    | 596   |
| >TP53-S90F-1 APSWPLSSSV | 1448  | >TP53-S90F-1 APFWPLSSSV | 307  | 1141  |
| >TP53-S90F-1 APSWPLSSS  | 328   | >TP53-S90F-1 APFWPLSSS  | 1759 | 1431  |
| >TP53-S90F-1 APSWPLSSSV | 286   | >TP53-S90F-1 APFWPLSSSV | 460  | 174   |
| >TP53-S90F-1 APAPSWPL   | 12    | >TP53-S90F-1 APAPFWPL   | 16   | 4     |
| >TP53-S90F-1 APAPSWPLS  | 292   | >TP53-S90F-1 APAPFWPLS  | 609  | 317   |
| >TP53-S90F-1 APAPSWPL   | 196   | >TP53-S90F-1 APAPFWPL   | 202  | 6     |
| >TP53-S90F-1 APAPSWPL   | 49    | >TP53-S90F-1 APAPFWPL   | 68   | 19    |
| >TP53-S90F-1 APAPSWPL   | 87    | >TP53-S90F-1 APAPFWPL   | 119  | 32    |
| >TP53-S90F-1 PAPAPSWPL  | 1185  | >TP53-S90F-1 PAPAPFWPL  | 436  | 749   |
| >TP53-S90F-1 PAPAPSWPL  | 9     | >TP53-S90F-1 PAPAPFWPL  | 3    | 6     |
| >TP53-S90F-1 PAPAPSWPLS | 932   | >TP53-S90F-1 PAPAPFWPLS | 151  | 781   |
| >TP53-S90F-1 APAPAPSWP  | 576   | >TP53-S90F-1 APAPAPFWP  | 235  | 341   |
| >TP53-S90F-1 APAPAPSWP  | 999   | >TP53-S90F-1 APAPAPFWP  | 490  | 509   |
| >TP53-S90F-1 APAPAPSW   | 91    | >TP53-S90F-1 APAPAPFW   | 857  | 766   |
| >TP53-S90F-1 APAPAPSWP  | 73    | >TP53-S90F-1 APAPAPFWP  | 104  | 31    |
| >TP53-S90F-1 APAPAPSWP  | 41    | >TP53-S90F-1 APAPAPFWP  | 45   | 4     |
| >TP53-S90F-1 APAPAPSW   | 51    | >TP53-S90F-1 APAPAPFW   | 82   | 31    |
| >TP53-S90F-1 APAPAPSWP  | 390   | >TP53-S90F-1 APAPAPFWP  | 502  | 112   |
| >TP53-S90F-1 APAPAPSW   | 20    | >TP53-S90F-1 APAPAPFW   | 26   | 6     |

|                         |       |                         |      |       |
|-------------------------|-------|-------------------------|------|-------|
| >TP53-S90F-1 APAPAPSWP  | 2686  | >TP53-S90F-1 APAPAPFWP  | 144  | 2542  |
| >TP53-S90F-1 AAPAPAPSW  | 136   | >TP53-S90F-1 AAPAPAPFW  | 50   | 86    |
| >TP53-S90F-1 AAPAPAPSW  | 380   | >TP53-S90F-1 AAPAPAPFW  | 226  | 154   |
| >TP53-S90F-1 AAPAPAPS   | 20499 | >TP53-S90F-1 AAPAPAPF   | 193  | 20306 |
| >TP53-S90F-1 AAPAPAPS   | 17462 | >TP53-S90F-1 AAPAPAPF   | 94   | 17368 |
| >TP53-S90F-1 AAPAPAPSW  | 62    | >TP53-S90F-1 AAPAPAPFW  | 137  | 75    |
| >TP53-S90F-1 AAPAPAPSW  | 617   | >TP53-S90F-1 AAPAPAPFW  | 444  | 173   |
| >TP53-S90F-1 AAPAPAPS   | 19558 | >TP53-S90F-1 AAPAPAPF   | 49   | 19509 |
| >TP53-S90F-1 AAPAPAPSW  | 124   | >TP53-S90F-1 AAPAPAPFW  | 22   | 102   |
| >TP53-S90F-1 AAPAPAPSW  | 1357  | >TP53-S90F-1 AAPAPAPFW  | 412  | 945   |
| >TP53-S90F-1 AAPAPAPSW  | 4     | >TP53-S90F-1 AAPAPAPFW  | 3    | 1     |
| >TP53-S90F-1 PAAPAPAPS  | 22927 | >TP53-S90F-1 PAAPAPAPF  | 229  | 22698 |
| >TP53-S90F-1 PAAPAPAPS  | 22234 | >TP53-S90F-1 PAAPAPAPF  | 140  | 22094 |
| >TP53-S90F-1 PAAPAPAPSV | 123   | >TP53-S90F-1 PAAPAPAPFV | 199  | 76    |
| >TP53-S90F-1 PAAPAPAPS  | 7785  | >TP53-S90F-1 PAAPAPAPF  | 84   | 7701  |
| >TP53-S90F-1 PAAPAPAPSV | 188   | >TP53-S90F-1 PAAPAPAPFV | 130  | 58    |
| >TP53-S90F-1 PAAPAPAPSV | 256   | >TP53-S90F-1 PAAPAPAPFV | 247  | 9     |
| >TP53-S90F-1 TPAAPAPAPS | 38205 | >TP53-S90F-1 TPAAPAPAPF | 371  | 37834 |
| >TP53-S90F-1 TPAAPAPAPS | 915   | >TP53-S90F-1 TPAAPAPAPF | 31   | 884   |
| >TP53-S90F-1 TPAAPAPAPS | 296   | >TP53-S90F-1 TPAAPAPAPF | 2568 | 2272  |
| >TP53-S90F-1 TPAAPAPAPS | 22588 | >TP53-S90F-1 TPAAPAPAPF | 460  | 22128 |
| >TP53-S90F-1 TPAAPAPAPS | 7114  | >TP53-S90F-1 TPAAPAPAPF | 83   | 7031  |
| >TP53-S90F-1 TPAAPAPAPS | 437   | >TP53-S90F-1 TPAAPAPAPF | 1152 | 715   |
| >TP53-S90F-1 TPAAPAPAPS | 4320  | >TP53-S90F-1 TPAAPAPAPF | 178  | 4142  |
| >TP53-S90F-1 TPAAPAPAPS | 33    | >TP53-S90F-1 TPAAPAPAPF | 64   | 31    |
| >TP53-S90F-1 TPAAPAPAPS | 13002 | >TP53-S90F-1 TPAAPAPAPF | 131  | 12871 |
| >TP53-S90F-1 TPAAPAPAPS | 16    | >TP53-S90F-1 TPAAPAPAPF | 23   | 7     |
| >TP53-S94T-1 SSSVPSQKTY | 415   | >TP53-S94T-1 TSSVPSQKTY | 305  | 110   |
| >TP53-S94T-1 SSSVPSQK   | 230   | >TP53-S94T-1 TSSVPSQK   | 254  | 24    |
| >TP53-S94T-1 SSSVPSQK   | 20    | >TP53-S94T-1 TSSVPSQK   | 27   | 7     |
| >TP53-S94T-1 SSSVPSQK   | 223   | >TP53-S94T-1 TSSVPSQK   | 1272 | 1049  |
| >TP53-S94T-1 SSSVPSQKTY | 105   | >TP53-S94T-1 TSSVPSQKTY | 128  | 23    |
| >TP53-S94T-1 SSSVPSQK   | 226   | >TP53-S94T-1 TSSVPSQK   | 83   | 143   |
| >TP53-S94T-1 SSSVPSQKTY | 317   | >TP53-S94T-1 TSSVPSQKTY | 726  | 409   |
| >TP53-S94T-1 SSSVPSQKTY | 112   | >TP53-S94T-1 TSSVPSQKTY | 275  | 163   |
| >TP53-S94T-1 SSSVPSQKTY | 4     | >TP53-S94T-1 TSSVPSQKTY | 5    | 1     |
| >TP53-S94T-1 SSSVPSQKTY | 1101  | >TP53-S94T-1 TSSVPSQKTY | 389  | 712   |
| >TP53-S94T-1 SSSVPSQKTY | 27    | >TP53-S94T-1 TSSVPSQKTY | 44   | 17    |
| >TP53-S94T-1 SSSVPSQKTY | 457   | >TP53-S94T-1 TSSVPSQKTY | 931  | 474   |
| >TP53-S94T-1 SSSVPSQK   | 286   | >TP53-S94T-1 TSSVPSQK   | 868  | 582   |
| >TP53-S94T-1 LSSSVPSQKT | 164   | >TP53-S94T-1 LTSSVPSQKT | 89   | 75    |
| >TP53-S94T-1 LSSSVPSQK  | 103   | >TP53-S94T-1 LTSSVPSQK  | 71   | 32    |
| >TP53-S94T-1 LSSSVPSQK  | 23    | >TP53-S94T-1 LTSSVPSQK  | 18   | 5     |

|                         |      |                          |      |      |
|-------------------------|------|--------------------------|------|------|
| >TP53-S94T-1 LSSSVPSQKT | 450  | >TP53-S94T-1 LTSSVPSQKT  | 103  | 347  |
| >TP53-S94T-1 LSSSVPSQK  | 945  | >TP53-S94T-1 LTSSVPSQK   | 409  | 536  |
| >TP53-S94T-1 LSSSVPSQKT | 50   | >TP53-S94T-1 LTSSVPSQKT  | 45   | 5    |
| >TP53-S94T-1 LSSSVPSQK  | 34   | >TP53-S94T-1 LTSSVPSQK   | 11   | 23   |
| >TP53-S94T-1 LSSSVPSQKT | 149  | >TP53-S94T-1 LTSSVPSQKT  | 176  | 27   |
| >TP53-S94T-1 LSSSVPSQKT | 32   | >TP53-S94T-1 LTSSVPSQKT  | 103  | 71   |
| >TP53-S94T-1 LSSSVPSQKT | 6    | >TP53-S94T-1 LTSSVPSQKT  | 5    | 1    |
| >TP53-S94T-1 LSSSVPSQKT | 229  | >TP53-S94T-1 LTSSVPSQKT  | 489  | 260  |
| >TP53-S94T-1 LSSSVPSQKT | 204  | >TP53-S94T-1 LTSSVPSQKT  | 225  | 21   |
| >TP53-S94T-1 LSSSVPSQKT | 32   | >TP53-S94T-1 LTSSVPSQKT  | 54   | 22   |
| >TP53-S94T-1 LSSSVPSQK  | 189  | >TP53-S94T-1 LTSSVPSQK   | 61   | 128  |
| >TP53-S94T-1 LSSSVPSQKT | 971  | >TP53-S94T-1 LTSSVPSQKT  | 336  | 635  |
| >TP53-S94T-1 LSSSVPSQKT | 8    | >TP53-S94T-1 LTSSVPSQKT  | 5    | 3    |
| >TP53-S94T-1 LSSSVPSQKT | 743  | >TP53-S94T-1 LTSSVPSQKT  | 427  | 316  |
| >TP53-S94T-1 PLSSSVPSQ  | 530  | >TP53-S94T-1 PLTSSVPSQ   | 370  | 160  |
| >TP53-S94T-1 PLSSSVPSQK | 472  | >TP53-S94T-1 PLTSSVPSQK  | 1162 | 690  |
| >TP53-S94T-1 PLSSSVPSQK | 382  | >TP53-S94T-1 PLTSSVPSQK  | 964  | 582  |
| >TP53-S94T-1 WPLSSSVPS  | 27   | >TP53-S94T-1 WPLTSSVPS   | 36   | 9    |
| >TP53-S94T-1 WPLSSSVPS  | 159  | >TP53-S94T-1 WPLTSSVPS   | 139  | 20   |
| >TP53-S94T-1 SWPLSSSV   | 157  | >TP53-S94T-1 SWPLTSSV    | 142  | 15   |
| >TP53-S94T-1 SWPLSSSVPS | 447  | >TP53-S94T-1 SWPLTSSVPS  | 383  | 64   |
| >TP53-S94T-1 APSWPLSSS  | 328  | >TP53-S94T-1 APSWPLTSS   | 492  | 164  |
| >TP53-S94T-1 APSWPLSSSV | 286  | >TP53-S94T-1 APSWPLTSSV  | 237  | 49   |
| >TP53-S94T-1 APAPSWPLSS | 292  | >TP53-S94T-1 APAPSWPLTSS | 351  | 59   |
| >TP53-S95F-1 SSVPSQKTY  | 1152 | >TP53-S95F-1 FSVPSQKTY   | 376  | 776  |
| >TP53-S95F-1 SSVPSQKTY  | 122  | >TP53-S95F-1 FSVPSQKTY   | 172  | 50   |
| >TP53-S95F-1 SSVPSQKTY  | 963  | >TP53-S95F-1 FSVPSQKTY   | 135  | 828  |
| >TP53-S95F-1 SSVPSQKTY  | 146  | >TP53-S95F-1 FSVPSQKTY   | 596  | 450  |
| >TP53-S95F-1 SSVPSQKTY  | 227  | >TP53-S95F-1 FSVPSQKTY   | 123  | 104  |
| >TP53-S95F-1 SSVPSQKTY  | 40   | >TP53-S95F-1 FSVPSQKTY   | 9    | 31   |
| >TP53-S95F-1 SSVPSQKT   | 742  | >TP53-S95F-1 FSVPSQKT    | 323  | 419  |
| >TP53-S95F-1 SSVPSQKTY  | 2    | >TP53-S95F-1 FSVPSQKTY   | 3    | 1    |
| >TP53-S95F-1 SSVPSQKTY  | 1268 | >TP53-S95F-1 FSVPSQKTY   | 79   | 1189 |
| >TP53-S95F-1 SSVPSQKTY  | 119  | >TP53-S95F-1 FSVPSQKTY   | 159  | 40   |
| >TP53-S95F-1 SSVPSQKTY  | 195  | >TP53-S95F-1 FSVPSQKTY   | 38   | 157  |
| >TP53-S95F-1 SSVPSQKTY  | 23   | >TP53-S95F-1 FSVPSQKTY   | 40   | 17   |
| >TP53-S95F-1 SSVPSQKTY  | 188  | >TP53-S95F-1 FSVPSQKTY   | 156  | 32   |
| >TP53-S95F-1 SSSVPSQKTY | 415  | >TP53-S95F-1 SFSVPSQKTY  | 2824 | 2409 |
| >TP53-S95F-1 SSSVPSQK   | 230  | >TP53-S95F-1 SFSVPSQK    | 2451 | 2221 |
| >TP53-S95F-1 SSSVPSQK   | 20   | >TP53-S95F-1 SFSVPSQK    | 388  | 368  |
| >TP53-S95F-1 SSSVPSQKTY | 817  | >TP53-S95F-1 SFSVPSQKTY  | 180  | 637  |
| >TP53-S95F-1 SSSVPSQK   | 223  | >TP53-S95F-1 SFSVPSQK    | 820  | 597  |
| >TP53-S95F-1 SSSVPSQKTY | 105  | >TP53-S95F-1 SFSVPSQKTY  | 331  | 226  |

|                         |      |                         |       |       |
|-------------------------|------|-------------------------|-------|-------|
| >TP53-S95F-1 SSSVPSQK   | 226  | >TP53-S95F-1 SFSVPSQK   | 1292  | 1066  |
| >TP53-S95F-1 SSSVPSQKTY | 317  | >TP53-S95F-1 SFSVPSQKTY | 2505  | 2188  |
| >TP53-S95F-1 SSSVPSQKTY | 1015 | >TP53-S95F-1 SFSVPSQKTY | 148   | 867   |
| >TP53-S95F-1 SSSVPSQKTY | 112  | >TP53-S95F-1 SFSVPSQKTY | 2805  | 2693  |
| >TP53-S95F-1 SSSVPSQKTY | 4    | >TP53-S95F-1 SFSVPSQKTY | 10933 | 10929 |
| >TP53-S95F-1 SSSVPSQKTY | 27   | >TP53-S95F-1 SFSVPSQKTY | 688   | 661   |
| >TP53-S95F-1 SSSVPSQKTY | 457  | >TP53-S95F-1 SFSVPSQKTY | 339   | 118   |
| >TP53-S95F-1 SSSVPSQK   | 286  | >TP53-S95F-1 SFSVPSQK   | 3091  | 2805  |
| >TP53-S95F-1 PAPAPSWPLS | 6139 | >TP53-S95F-1 PAPAPSWPLS | 79    | 6060  |
| >TP53-S95F-1 LSSSVPSQKT | 164  | >TP53-S95F-1 LFSVPSQKT  | 1230  | 1066  |
| >TP53-S95F-1 LSSSVPSQK  | 103  | >TP53-S95F-1 LFSVPSQK   | 44    | 59    |
| >TP53-S95F-1 LSSSVPSQK  | 23   | >TP53-S95F-1 LFSVPSQK   | 13    | 10    |
| >TP53-S95F-1 LSSSVPSQKT | 450  | >TP53-S95F-1 LFSVPSQKT  | 121   | 329   |
| >TP53-S95F-1 LSSSVPSQK  | 945  | >TP53-S95F-1 LFSVPSQK   | 138   | 807   |
| >TP53-S95F-1 LSSSVPSQKT | 50   | >TP53-S95F-1 LFSVPSQKT  | 44    | 6     |
| >TP53-S95F-1 LSSSVPSQK  | 2167 | >TP53-S95F-1 LFSVPSQK   | 310   | 1857  |
| >TP53-S95F-1 LSSSVPSQK  | 34   | >TP53-S95F-1 LFSVPSQK   | 9     | 25    |
| >TP53-S95F-1 LSSSVPSQKT | 2498 | >TP53-S95F-1 LFSVPSQKT  | 454   | 2044  |
| >TP53-S95F-1 LSSSVPSQKT | 149  | >TP53-S95F-1 LFSVPSQKT  | 75    | 74    |
| >TP53-S95F-1 LSSSVPSQKT | 32   | >TP53-S95F-1 LFSVPSQKT  | 5     | 27    |
| >TP53-S95F-1 LSSSVPSQKT | 6    | >TP53-S95F-1 LFSVPSQKT  | 4     | 2     |
| >TP53-S95F-1 LSSSVPSQKT | 229  | >TP53-S95F-1 LFSVPSQKT  | 187   | 42    |
| >TP53-S95F-1 LSSSVPSQKT | 204  | >TP53-S95F-1 LFSVPSQKT  | 63    | 141   |
| >TP53-S95F-1 LSSSVPSQKT | 32   | >TP53-S95F-1 LFSVPSQKT  | 31    | 1     |
| >TP53-S95F-1 LSSSVPSQK  | 189  | >TP53-S95F-1 LFSVPSQK   | 36    | 153   |
| >TP53-S95F-1 LSSSVPSQKT | 8    | >TP53-S95F-1 LFSVPSQKT  | 4     | 4     |
| >TP53-S95F-1 LSSSVPSQKT | 743  | >TP53-S95F-1 LFSVPSQKT  | 493   | 250   |
| >TP53-S95F-1 LSSSVPSQK  | 1156 | >TP53-S95F-1 LFSVPSQK   | 299   | 857   |
| >TP53-S95F-1 PLSSSVPSQK | 472  | >TP53-S95F-1 PLFSVPSQK  | 143   | 329   |
| >TP53-S95F-1 PLSSSVPSQK | 382  | >TP53-S95F-1 PLFSVPSQK  | 223   | 159   |
| >TP53-S95F-1 WPLSSSVPS  | 27   | >TP53-S95F-1 WPLFSVPS   | 29    | 2     |
| >TP53-S95F-1 WPLSSSVPS  | 829  | >TP53-S95F-1 WPLFSVPS   | 323   | 506   |
| >TP53-S95F-1 WPLSSSVPS  | 159  | >TP53-S95F-1 WPLFSVPS   | 109   | 50    |
| >TP53-S95F-1 SWPLSSSV   | 3721 | >TP53-S95F-1 SWPLFSV    | 399   | 3322  |
| >TP53-S95F-1 SWPLSSSV   | 157  | >TP53-S95F-1 SWPLFSV    | 105   | 52    |
| >TP53-S95F-1 SWPLSSSVPS | 920  | >TP53-S95F-1 SWPLFSVPS  | 481   | 439   |
| >TP53-S95F-1 SWPLSSSVPS | 447  | >TP53-S95F-1 SWPLFSVPS  | 322   | 125   |
| >TP53-S95F-1 PSWPLSSSV  | 2011 | >TP53-S95F-1 PSWPLFSV   | 239   | 1772  |
| >TP53-S95F-1 APSWPLSSSV | 1448 | >TP53-S95F-1 APSWPLFSV  | 375   | 1073  |
| >TP53-S95F-1 APSWPLSS   | 2819 | >TP53-S95F-1 APSWPLSF   | 27    | 2792  |
| >TP53-S95F-1 APSWPLSSS  | 328  | >TP53-S95F-1 APSWPLSFS  | 3859  | 3531  |
| >TP53-S95F-1 APSWPLSSSV | 286  | >TP53-S95F-1 APSWPLFSV  | 446   | 160   |
| >TP53-S95F-1 APSWPLSS   | 3604 | >TP53-S95F-1 APSWPLSF   | 68    | 3536  |

|                         |       |                          |       |       |
|-------------------------|-------|--------------------------|-------|-------|
| >TP53-S95F-1 APSWPLSS   | 15054 | >TP53-S95F-1 APSWPLSF    | 126   | 14928 |
| >TP53-S95F-1 PAPSWPLSS  | 2403  | >TP53-S95F-1 PAPSWPLSF   | 90    | 2313  |
| >TP53-S95F-1 PAPSWPLSS  | 13726 | >TP53-S95F-1 PAPSWPLSF   | 319   | 13407 |
| >TP53-S95F-1 PAPSWPLSSS | 961   | >TP53-S95F-1 PAPSWPLSFS  | 292   | 669   |
| >TP53-S95F-1 APAPSWPLSS | 27241 | >TP53-S95F-1 APAPSWPLSF  | 144   | 27097 |
| >TP53-S95F-1 APAPSWPLSS | 292   | >TP53-S95F-1 APAPSWPLSF  | 3092  | 2800  |
| >TP53-S95F-1 APAPSWPLSS | 13955 | >TP53-S95F-1 APAPSWPLSF  | 76    | 13879 |
| >TP53-S95F-1 APAPSWPLSS | 14803 | >TP53-S95F-1 APAPSWPLSF  | 277   | 14526 |
| >TP53-S95F-1 APAPSWPLSS | 8373  | >TP53-S95F-1 APAPSWPLSF  | 149   | 8224  |
| >TP53-S95F-1 APAPSWPLSS | 23538 | >TP53-S95F-1 APAPSWPLSF  | 297   | 23241 |
| >TP53-S96C-1 SVPSQKTY   | 183   | >TP53-S96C-1 CVPSQKTY    | 568   | 385   |
| >TP53-S96C-1 SVPSQKTY   | 442   | >TP53-S96C-1 CVPSQKTY    | 664   | 222   |
| >TP53-S96C-1 SSVPSQKTY  | 122   | >TP53-S96C-1 SCVPSQKTY   | 773   | 651   |
| >TP53-S96C-1 SSVPSQKTY  | 146   | >TP53-S96C-1 SCVPSQKTY   | 1881  | 1735  |
| >TP53-S96C-1 SSVPSQKTY  | 227   | >TP53-S96C-1 SCVPSQKTY   | 8819  | 8592  |
| >TP53-S96C-1 SSVPSQKTY  | 40    | >TP53-S96C-1 SCVPSQKTY   | 448   | 408   |
| >TP53-S96C-1 SSVPSQKTY  | 2     | >TP53-S96C-1 SCVPSQKTY   | 117   | 115   |
| >TP53-S96C-1 SSVPSQKTY  | 119   | >TP53-S96C-1 SCVPSQKTY   | 14305 | 14186 |
| >TP53-S96C-1 SSVPSQKTY  | 195   | >TP53-S96C-1 SCVPSQKTY   | 16673 | 16478 |
| >TP53-S96C-1 SSVPSQKTY  | 23    | >TP53-S96C-1 SCVPSQKTY   | 141   | 118   |
| >TP53-S96C-1 SSVPSQKTY  | 188   | >TP53-S96C-1 SCVPSQKTY   | 119   | 69    |
| >TP53-S96C-1 APAPSWPLSS | 292   | >TP53-S96C-1 APAPSWPLSS  | 95    | 197   |
| >TP53-S96C-1 SSSVPSQKTY | 415   | >TP53-S96C-1 SSCVPSQKTY  | 4577  | 4162  |
| >TP53-S96C-1 SSSVPSQK   | 230   | >TP53-S96C-1 SSCVPSQK    | 580   | 350   |
| >TP53-S96C-1 SSSVPSQK   | 20    | >TP53-S96C-1 SSCVPSQK    | 20    | 0     |
| >TP53-S96C-1 SSSVPSQK   | 223   | >TP53-S96C-1 SSCVPSQK    | 289   | 66    |
| >TP53-S96C-1 SSSVPSQKTY | 105   | >TP53-S96C-1 SSCVPSQKTY  | 523   | 418   |
| >TP53-S96C-1 SSSVPSQK   | 226   | >TP53-S96C-1 SSCVPSQK    | 419   | 193   |
| >TP53-S96C-1 SSSVPSQKTY | 317   | >TP53-S96C-1 SSCVPSQKTY  | 347   | 30    |
| >TP53-S96C-1 SSSVPSQKTY | 112   | >TP53-S96C-1 SSCVPSQKTY  | 262   | 150   |
| >TP53-S96C-1 SSSVPSQKTY | 4     | >TP53-S96C-1 SSCVPSQKTY  | 4     | 0     |
| >TP53-S96C-1 SSSVPSQKTY | 27    | >TP53-S96C-1 SSCVPSQKTY  | 66    | 39    |
| >TP53-S96C-1 SSSVPSQKTY | 457   | >TP53-S96C-1 SSCVPSQKTY  | 7896  | 7439  |
| >TP53-S96C-1 SSSVPSQK   | 286   | >TP53-S96C-1 SSCVPSQK    | 544   | 258   |
| >TP53-S96C-1 LSSVPSQKTY | 164   | >TP53-S96C-1 LSSCVPSQKTY | 433   | 269   |
| >TP53-S96C-1 LSSVPSQK   | 103   | >TP53-S96C-1 LSSCVPSQK   | 145   | 42    |
| >TP53-S96C-1 LSSVPSQK   | 23    | >TP53-S96C-1 LSSCVPSQK   | 30    | 7     |
| >TP53-S96C-1 LSSVPSQKTY | 450   | >TP53-S96C-1 LSSCVPSQKTY | 660   | 210   |
| >TP53-S96C-1 LSSVPSQKTY | 50    | >TP53-S96C-1 LSSCVPSQKTY | 294   | 244   |
| >TP53-S96C-1 LSSVPSQK   | 34    | >TP53-S96C-1 LSSCVPSQK   | 58    | 24    |
| >TP53-S96C-1 LSSVPSQKTY | 149   | >TP53-S96C-1 LSSCVPSQKTY | 155   | 6     |
| >TP53-S96C-1 LSSVPSQKTY | 32    | >TP53-S96C-1 LSSCVPSQKTY | 50    | 18    |
| >TP53-S96C-1 LSSVPSQKTY | 6     | >TP53-S96C-1 LSSCVPSQKTY | 8     | 2     |



|                         |       |                         |       |       |
|-------------------------|-------|-------------------------|-------|-------|
| >TP53-S96C-1 LSSSVPSQKT | 229   | >TP53-S96C-1 LSSCVPSQKT | 147   | 82    |
| >TP53-S96C-1 LSSSVPSQKT | 204   | >TP53-S96C-1 LSSCVPSQKT | 625   | 421   |
| >TP53-S96C-1 LSSSVPSQKT | 32    | >TP53-S96C-1 LSSCVPSQKT | 82    | 50    |
| >TP53-S96C-1 LSSSVPSQK  | 189   | >TP53-S96C-1 LSSCVPSQK  | 380   | 191   |
| >TP53-S96C-1 LSSSVPSQKT | 8     | >TP53-S96C-1 LSSCVPSQKT | 12    | 4     |
| >TP53-S96C-1 PLSSSVPSQK | 472   | >TP53-S96C-1 PLSSCVPSQK | 223   | 249   |
| >TP53-S96C-1 PLSSSVPSQK | 382   | >TP53-S96C-1 PLSSCVPSQK | 452   | 70    |
| >TP53-S96C-1 WPLSSSVPS  | 27    | >TP53-S96C-1 WPLSSCVPS  | 54    | 27    |
| >TP53-S96C-1 WPLSSSVPS  | 159   | >TP53-S96C-1 WPLSSCVPS  | 218   | 59    |
| >TP53-S96C-1 SWPLSSSV   | 157   | >TP53-S96C-1 SWPLSSCV   | 310   | 153   |
| >TP53-S96C-1 SWPLSSSVPS | 447   | >TP53-S96C-1 SWPLSSCVPS | 562   | 115   |
| >TP53-S96C-1 APSWPLSSS  | 328   | >TP53-S96C-1 APSWPLSSC  | 84    | 244   |
| >TP53-S96C-1 APSWPLSSSV | 286   | >TP53-S96C-1 APSWPLSSCV | 1062  | 776   |
| >TP53-S96F-1 SVPSQKTY   | 1199  | >TP53-S96F-1 FVPSQKTY   | 317   | 882   |
| >TP53-S96F-1 SVPSQKTY   | 183   | >TP53-S96F-1 FVPSQKTY   | 241   | 58    |
| >TP53-S96F-1 SVPSQKTY   | 1228  | >TP53-S96F-1 FVPSQKTY   | 203   | 1025  |
| >TP53-S96F-1 SVPSQKTY   | 442   | >TP53-S96F-1 FVPSQKTY   | 1561  | 1119  |
| >TP53-S96F-1 SVPSQKTY   | 1370  | >TP53-S96F-1 FVPSQKTY   | 361   | 1009  |
| >TP53-S96F-1 SVPSQKTY   | 3319  | >TP53-S96F-1 FVPSQKTY   | 361   | 2958  |
| >TP53-S96F-1 SSVPSQKTY  | 122   | >TP53-S96F-1 SFVPSQKTY  | 2626  | 2504  |
| >TP53-S96F-1 SSVPSQKTY  | 963   | >TP53-S96F-1 SFVPSQKTY  | 73    | 890   |
| >TP53-S96F-1 SSVPSQKTY  | 146   | >TP53-S96F-1 SFVPSQKTY  | 636   | 490   |
| >TP53-S96F-1 SSVPSQKTY  | 227   | >TP53-S96F-1 SFVPSQKTY  | 1989  | 1762  |
| >TP53-S96F-1 SSVPSQKTY  | 2144  | >TP53-S96F-1 SFVPSQKTY  | 241   | 1903  |
| >TP53-S96F-1 SSVPSQKTY  | 40    | >TP53-S96F-1 SFVPSQKTY  | 1252  | 1212  |
| >TP53-S96F-1 SSVPSQKTY  | 2     | >TP53-S96F-1 SFVPSQKTY  | 3543  | 3541  |
| >TP53-S96F-1 SSVPSQKTY  | 119   | >TP53-S96F-1 SFVPSQKTY  | 20971 | 20852 |
| >TP53-S96F-1 SSVPSQKTY  | 195   | >TP53-S96F-1 SFVPSQKTY  | 15044 | 14849 |
| >TP53-S96F-1 SSVPSQKTY  | 23    | >TP53-S96F-1 SFVPSQKTY  | 828   | 805   |
| >TP53-S96F-1 SSVPSQKTY  | 188   | >TP53-S96F-1 SFVPSQKTY  | 136   | 52    |
| >TP53-S96F-1 APAPSWPLSS | 28548 | >TP53-S96F-1 APAPSWPLSS | 176   | 28372 |
| >TP53-S96F-1 APAPSWPLSS | 292   | >TP53-S96F-1 APAPSWPLSS | 18    | 274   |
| >TP53-S96F-1 APAPSWPLSS | 13489 | >TP53-S96F-1 APAPSWPLSS | 87    | 13402 |
| >TP53-S96F-1 APAPSWPLSS | 3075  | >TP53-S96F-1 APAPSWPLSS | 46    | 3029  |
| >TP53-S96F-1 APAPSWPLSS | 12171 | >TP53-S96F-1 APAPSWPLSS | 228   | 11943 |
| >TP53-S96F-1 APAPSWPLSS | 3871  | >TP53-S96F-1 APAPSWPLSS | 26    | 3845  |
| >TP53-S96F-1 APAPSWPLSS | 23823 | >TP53-S96F-1 APAPSWPLSS | 324   | 23499 |
| >TP53-S96F-1 SSSVPSQKTY | 415   | >TP53-S96F-1 SSFVPSQKTY | 1029  | 614   |
| >TP53-S96F-1 SSSVPSQK   | 230   | >TP53-S96F-1 SSFVPSQK   | 71    | 159   |
| >TP53-S96F-1 SSSVPSQK   | 20    | >TP53-S96F-1 SSFVPSQK   | 10    | 10    |
| >TP53-S96F-1 SSSVPSQKTY | 817   | >TP53-S96F-1 SSFVPSQKTY | 345   | 472   |
| >TP53-S96F-1 SSSVPSQK   | 223   | >TP53-S96F-1 SSFVPSQK   | 39    | 184   |
| >TP53-S96F-1 SSSVPSQKTY | 105   | >TP53-S96F-1 SSFVPSQKTY | 40    | 65    |

|                          |       |                          |      |       |
|--------------------------|-------|--------------------------|------|-------|
| >TP53-S96F-1 SSSVPSQK    | 226   | >TP53-S96F-1 SSFVPSQK    | 55   | 171   |
| >TP53-S96F-1 SSSVPSQKTY  | 317   | >TP53-S96F-1 SSFVPSQKTY  | 132  | 185   |
| >TP53-S96F-1 SSSVPSQKTY  | 1015  | >TP53-S96F-1 SSFVPSQKTY  | 182  | 833   |
| >TP53-S96F-1 SSSVPSQKTY  | 112   | >TP53-S96F-1 SSFVPSQKTY  | 13   | 99    |
| >TP53-S96F-1 SSSVPSQKTY  | 4     | >TP53-S96F-1 SSFVPSQKTY  | 3    | 1     |
| >TP53-S96F-1 SSSVPSQKTY  | 1101  | >TP53-S96F-1 SSFVPSQKTY  | 192  | 909   |
| >TP53-S96F-1 SSSVPSQKTY  | 27    | >TP53-S96F-1 SSFVPSQKTY  | 45   | 18    |
| >TP53-S96F-1 SSSVPSQKTY  | 2005  | >TP53-S96F-1 SSFVPSQKTY  | 392  | 1613  |
| >TP53-S96F-1 SSSVPSQKTY  | 457   | >TP53-S96F-1 SSFVPSQKTY  | 430  | 27    |
| >TP53-S96F-1 SSSVPSQK    | 286   | >TP53-S96F-1 SSFVPSQK    | 99   | 187   |
| >TP53-S96F-1 LSSSVPSQKTY | 164   | >TP53-S96F-1 LSSFVPSQKTY | 197  | 33    |
| >TP53-S96F-1 LSSSVPSQK   | 103   | >TP53-S96F-1 LSSFVPSQK   | 90   | 13    |
| >TP53-S96F-1 LSSSVPSQK   | 23    | >TP53-S96F-1 LSSFVPSQK   | 18   | 5     |
| >TP53-S96F-1 LSSSVPSQKTY | 450   | >TP53-S96F-1 LSSFVPSQKTY | 349  | 101   |
| >TP53-S96F-1 LSSSVPSQKTY | 50    | >TP53-S96F-1 LSSFVPSQKTY | 74   | 24    |
| >TP53-S96F-1 LSSSVPSQK   | 34    | >TP53-S96F-1 LSSFVPSQK   | 27   | 7     |
| >TP53-S96F-1 LSSSVPSQKTY | 149   | >TP53-S96F-1 LSSFVPSQKTY | 216  | 67    |
| >TP53-S96F-1 LSSSVPSQKTY | 32    | >TP53-S96F-1 LSSFVPSQKTY | 129  | 97    |
| >TP53-S96F-1 LSSSVPSQKTY | 6     | >TP53-S96F-1 LSSFVPSQKTY | 6    | 0     |
| >TP53-S96F-1 LSSSVPSQKTY | 229   | >TP53-S96F-1 LSSFVPSQKTY | 324  | 95    |
| >TP53-S96F-1 LSSSVPSQKTY | 204   | >TP53-S96F-1 LSSFVPSQKTY | 386  | 182   |
| >TP53-S96F-1 LSSSVPSQKTY | 32    | >TP53-S96F-1 LSSFVPSQKTY | 61   | 29    |
| >TP53-S96F-1 LSSSVPSQK   | 189   | >TP53-S96F-1 LSSFVPSQK   | 370  | 181   |
| >TP53-S96F-1 LSSSVPSQKTY | 8     | >TP53-S96F-1 LSSFVPSQKTY | 11   | 3     |
| >TP53-S96F-1 LSSSVPSQKTY | 743   | >TP53-S96F-1 LSSFVPSQKTY | 395  | 348   |
| >TP53-S96F-1 PLSSSVPSQK  | 472   | >TP53-S96F-1 PLSSFVPSQK  | 151  | 321   |
| >TP53-S96F-1 PLSSSVPSQK  | 382   | >TP53-S96F-1 PLSSFVPSQK  | 222  | 160   |
| >TP53-S96F-1 WPLSSSVPS   | 27    | >TP53-S96F-1 WPLSSFVPS   | 56   | 29    |
| >TP53-S96F-1 WPLSSSVP    | 829   | >TP53-S96F-1 WPLSSFVP    | 213  | 616   |
| >TP53-S96F-1 WPLSSSVPS   | 159   | >TP53-S96F-1 WPLSSFVPS   | 14   | 145   |
| >TP53-S96F-1 WPLSSSVPSC  | 1804  | >TP53-S96F-1 WPLSSFVPSC  | 484  | 1320  |
| >TP53-S96F-1 SWPLSSSV    | 157   | >TP53-S96F-1 SWPLSSFV    | 56   | 101   |
| >TP53-S96F-1 SWPLSSSVPS  | 447   | >TP53-S96F-1 SWPLSSFVPS  | 338  | 109   |
| >TP53-S96F-1 PSWPLSSS    | 9683  | >TP53-S96F-1 PSWPLSSF    | 56   | 9627  |
| >TP53-S96F-1 PSWPLSSS    | 13533 | >TP53-S96F-1 PSWPLSSF    | 15   | 13518 |
| >TP53-S96F-1 APSWPLSSS   | 328   | >TP53-S96F-1 APSWPLSSF   | 12   | 316   |
| >TP53-S96F-1 APSWPLSSSV  | 286   | >TP53-S96F-1 APSWPLSSFV  | 1166 | 880   |
| >TP53-S96F-1 APSWPLSSS   | 20603 | >TP53-S96F-1 APSWPLSSF   | 329  | 20274 |
| >TP53-S96F-1 APSWPLSSS   | 4612  | >TP53-S96F-1 APSWPLSSF   | 86   | 4526  |
| >TP53-S96F-1 APSWPLSSS   | 20624 | >TP53-S96F-1 APSWPLSSF   | 460  | 20164 |
| >TP53-S96F-1 APSWPLSSS   | 7265  | >TP53-S96F-1 APSWPLSSF   | 50   | 7215  |
| >TP53-S96F-1 APSWPLSSS   | 19716 | >TP53-S96F-1 APSWPLSSF   | 397  | 19319 |
| >TP53-S96F-1 PPSWPLSSS   | 5143  | >TP53-S96F-1 PPSWPLSSF   | 299  | 4844  |

|                          |       |                          |       |       |
|--------------------------|-------|--------------------------|-------|-------|
| >TP53-S96F-1 PAPSWPLSSS  | 8543  | >TP53-S96F-1 PAPSWPLSSF  | 146   | 8397  |
| >TP53-S96F-1 PAPSWPLSSS  | 961   | >TP53-S96F-1 PAPSWPLSSF  | 185   | 776   |
| >TP53-S96P-1 SVPSQKTY    | 183   | >TP53-S96P-1 PVPSQKTY    | 1153  | 970   |
| >TP53-S96P-1 SVPSQKTY    | 442   | >TP53-S96P-1 PVPSQKTY    | 2179  | 1737  |
| >TP53-S96P-1 SSVPSQKTY   | 122   | >TP53-S96P-1 SPVPSQKTY   | 2342  | 2220  |
| >TP53-S96P-1 SSVPSQKTY   | 146   | >TP53-S96P-1 SPVPSQKTY   | 3715  | 3569  |
| >TP53-S96P-1 SSVPSQKTY   | 227   | >TP53-S96P-1 SPVPSQKTY   | 9893  | 9666  |
| >TP53-S96P-1 SSVPSQKTY   | 40    | >TP53-S96P-1 SPVPSQKTY   | 529   | 489   |
| >TP53-S96P-1 SSVPSQKTY   | 2     | >TP53-S96P-1 SPVPSQKTY   | 563   | 561   |
| >TP53-S96P-1 SSVPSQKTY   | 1268  | >TP53-S96P-1 SPVPSQKTY   | 27    | 1241  |
| >TP53-S96P-1 SSVPSQKTY   | 21251 | >TP53-S96P-1 SPVPSQKTY   | 483   | 20768 |
| >TP53-S96P-1 SSVPSQKTY   | 119   | >TP53-S96P-1 SPVPSQKTY   | 17848 | 17729 |
| >TP53-S96P-1 SSVPSQKTY   | 195   | >TP53-S96P-1 SPVPSQKTY   | 20206 | 20011 |
| >TP53-S96P-1 SSVPSQKTY   | 23    | >TP53-S96P-1 SPVPSQKTY   | 730   | 707   |
| >TP53-S96P-1 SSVPSQKTY   | 188   | >TP53-S96P-1 SPVPSQKTY   | 7     | 181   |
| >TP53-S96P-1 APAPSWPLSS  | 292   | >TP53-S96P-1 APAPSWPLSS  | 827   | 535   |
| >TP53-S96P-1 SSSVPSQKTY  | 415   | >TP53-S96P-1 SSPVPSQKTY  | 1380  | 965   |
| >TP53-S96P-1 SSSVPSQK    | 230   | >TP53-S96P-1 SSPVPSQK    | 1699  | 1469  |
| >TP53-S96P-1 SSSVPSQK    | 20    | >TP53-S96P-1 SSPVPSQK    | 115   | 95    |
| >TP53-S96P-1 SSSVPSQK    | 223   | >TP53-S96P-1 SSPVPSQK    | 2100  | 1877  |
| >TP53-S96P-1 SSSVPSQKTY  | 105   | >TP53-S96P-1 SSPVPSQKTY  | 267   | 162   |
| >TP53-S96P-1 SSSVPSQK    | 226   | >TP53-S96P-1 SSPVPSQK    | 1375  | 1149  |
| >TP53-S96P-1 SSSVPSQKTY  | 317   | >TP53-S96P-1 SSPVPSQKTY  | 1875  | 1558  |
| >TP53-S96P-1 SSSVPSQKTY  | 112   | >TP53-S96P-1 SSPVPSQKTY  | 908   | 796   |
| >TP53-S96P-1 SSSVPSQKTY  | 4     | >TP53-S96P-1 SSPVPSQKTY  | 26    | 22    |
| >TP53-S96P-1 SSSVPSQKTY  | 20040 | >TP53-S96P-1 SSPVPSQKTY  | 440   | 19600 |
| >TP53-S96P-1 SSSVPSQKTY  | 27    | >TP53-S96P-1 SSPVPSQKTY  | 58    | 31    |
| >TP53-S96P-1 SSSVPSQKTY  | 457   | >TP53-S96P-1 SSPVPSQKTY  | 9198  | 8741  |
| >TP53-S96P-1 SSSVPSQK    | 286   | >TP53-S96P-1 SSPVPSQK    | 1791  | 1505  |
| >TP53-S96P-1 LSSSVPSQKTY | 164   | >TP53-S96P-1 LSSPVPSQKTY | 315   | 151   |
| >TP53-S96P-1 LSSSVPSQK   | 103   | >TP53-S96P-1 LSSPVPSQK   | 114   | 11    |
| >TP53-S96P-1 LSSSVPSQK   | 23    | >TP53-S96P-1 LSSPVPSQK   | 22    | 1     |
| >TP53-S96P-1 LSSSVPSQKTY | 450   | >TP53-S96P-1 LSSPVPSQKTY | 355   | 95    |
| >TP53-S96P-1 LSSSVPSQK   | 945   | >TP53-S96P-1 LSSPVPSQK   | 469   | 476   |
| >TP53-S96P-1 LSSSVPSQKTY | 50    | >TP53-S96P-1 LSSPVPSQKTY | 77    | 27    |
| >TP53-S96P-1 LSSSVPSQK   | 34    | >TP53-S96P-1 LSSPVPSQK   | 71    | 37    |
| >TP53-S96P-1 LSSSVPSQKTY | 149   | >TP53-S96P-1 LSSPVPSQKTY | 141   | 8     |
| >TP53-S96P-1 LSSSVPSQKTY | 32    | >TP53-S96P-1 LSSPVPSQKTY | 51    | 19    |
| >TP53-S96P-1 LSSSVPSQKTY | 6     | >TP53-S96P-1 LSSPVPSQKTY | 4     | 2     |
| >TP53-S96P-1 LSSSVPSQKTY | 229   | >TP53-S96P-1 LSSPVPSQKTY | 197   | 32    |
| >TP53-S96P-1 LSSSVPSQKTY | 204   | >TP53-S96P-1 LSSPVPSQKTY | 73    | 131   |
| >TP53-S96P-1 LSSSVPSQKTY | 32    | >TP53-S96P-1 LSSPVPSQKTY | 19    | 13    |
| >TP53-S96P-1 LSSSVPSQK   | 189   | >TP53-S96P-1 LSSPVPSQK   | 438   | 249   |

|                         |       |                         |       |       |
|-------------------------|-------|-------------------------|-------|-------|
| >TP53-S96P-1 LSSSVPSQKT | 8     | >TP53-S96P-1 LSSPVPSQKT | 12    | 4     |
| >TP53-S96P-1 PLSSSVPSQK | 472   | >TP53-S96P-1 PLSSPVPSQK | 362   | 110   |
| >TP53-S96P-1 PLSSSVPSQK | 382   | >TP53-S96P-1 PLSSPVPSQK | 410   | 28    |
| >TP53-S96P-1 WPLSSSVPS  | 27    | >TP53-S96P-1 WPLSSPVPS  | 64    | 37    |
| >TP53-S96P-1 WPLSSSVPS  | 159   | >TP53-S96P-1 WPLSSPVPS  | 187   | 28    |
| >TP53-S96P-1 SWPLSSSV   | 157   | >TP53-S96P-1 SWPLSSPV   | 239   | 82    |
| >TP53-S96P-1 SWPLSSSVPS | 447   | >TP53-S96P-1 SWPLSSPVPS | 605   | 158   |
| >TP53-S96P-1 APSWPLSSS  | 328   | >TP53-S96P-1 APSWPLSSP  | 1347  | 1019  |
| >TP53-S96P-1 APSWPLSSSV | 286   | >TP53-S96P-1 APSWPLSSPV | 107   | 179   |
| >TP53-S99F-1 SQKTYQGSYC | 2503  | >TP53-S99F-1 FQKTYQGSYC | 172   | 2331  |
| >TP53-S99F-1 SQKTYQGSY  | 15    | >TP53-S99F-1 FQKTYQGSY  | 38    | 23    |
| >TP53-S99F-1 SQKTYQGSY  | 38    | >TP53-S99F-1 FQKTYQGSY  | 37    | 1     |
| >TP53-S99F-1 SQKTYQGSYC | 36    | >TP53-S99F-1 FQKTYQGSYC | 33    | 3     |
| >TP53-S99F-1 SQKTYQGSY  | 198   | >TP53-S99F-1 FQKTYQGSY  | 67    | 131   |
| >TP53-S99F-1 SQKTYQGSYC | 268   | >TP53-S99F-1 FQKTYQGSYC | 90    | 178   |
| >TP53-S99F-1 SQKTYQGSY  | 19    | >TP53-S99F-1 FQKTYQGSY  | 6     | 13    |
| >TP53-S99F-1 SQKTYQGSYC | 9     | >TP53-S99F-1 FQKTYQGSYC | 4     | 5     |
| >TP53-S99F-1 PSQKTYQGSY | 71    | >TP53-S99F-1 PFQKTYQGSY | 208   | 137   |
| >TP53-S99F-1 PSQKTYQGSY | 228   | >TP53-S99F-1 PFQKTYQGSY | 11114 | 10886 |
| >TP53-S99F-1 PSWPLSSSVP | 16531 | >TP53-S99F-1 PSWPLSSSVP | 152   | 16379 |
| >TP53-S99F-1 PSWPLSSSVP | 4639  | >TP53-S99F-1 PSWPLSSSVP | 19    | 4620  |
| >TP53-S99F-1 PSWPLSSSVP | 9819  | >TP53-S99F-1 PSWPLSSSVP | 9     | 9810  |
| >TP53-S99F-1 PSWPLSSSVP | 11720 | >TP53-S99F-1 PSWPLSSSVP | 162   | 11558 |
| >TP53-S99F-1 VPSQKTYQG  | 92    | >TP53-S99F-1 VPFQKTYQG  | 97    | 5     |
| >TP53-S99F-1 VPSQKTYQG  | 19    | >TP53-S99F-1 VPFQKTYQG  | 17    | 2     |
| >TP53-S99F-1 VPSQKTYQG  | 254   | >TP53-S99F-1 VPFQKTYQG  | 420   | 166   |
| >TP53-S99F-1 VPSQKTYQG  | 15    | >TP53-S99F-1 VPFQKTYQG  | 14    | 1     |
| >TP53-S99F-1 SVPSQKTY   | 183   | >TP53-S99F-1 SVPFQKTY   | 359   | 176   |
| >TP53-S99F-1 SVPSQKTY   | 442   | >TP53-S99F-1 SVPFQKTY   | 550   | 108   |
| >TP53-S99F-1 SSVPSQKTY  | 122   | >TP53-S99F-1 SSVPFQKTY  | 151   | 29    |
| >TP53-S99F-1 SSVPSQKTY  | 963   | >TP53-S99F-1 SSVPFQKTY  | 281   | 682   |
| >TP53-S99F-1 SSVPSQKTY  | 146   | >TP53-S99F-1 SSVPFQKTY  | 94    | 52    |
| >TP53-S99F-1 SSVPSQKTY  | 227   | >TP53-S99F-1 SSVPFQKTY  | 572   | 345   |
| >TP53-S99F-1 SSVPSQKTY  | 40    | >TP53-S99F-1 SSVPFQKTY  | 91    | 51    |
| >TP53-S99F-1 SSVPSQKTY  | 2     | >TP53-S99F-1 SSVPFQKTY  | 3     | 1     |
| >TP53-S99F-1 SSVPSQKTY  | 119   | >TP53-S99F-1 SSVPFQKTY  | 67    | 52    |
| >TP53-S99F-1 SSVPSQKTY  | 195   | >TP53-S99F-1 SSVPFQKTY  | 267   | 72    |
| >TP53-S99F-1 SSVPSQKTY  | 23    | >TP53-S99F-1 SSVPFQKTY  | 14    | 9     |
| >TP53-S99F-1 SSVPSQKTY  | 188   | >TP53-S99F-1 SSVPFQKTY  | 176   | 12    |
| >TP53-S99F-1 SSVPSQKTY  | 947   | >TP53-S99F-1 SSVPFQKTY  | 422   | 525   |
| >TP53-S99F-1 SSSVPSQKTY | 415   | >TP53-S99F-1 SSSVPFQKTY | 485   | 70    |
| >TP53-S99F-1 SSSVPSQK   | 230   | >TP53-S99F-1 SSSVPFQK   | 197   | 33    |
| >TP53-S99F-1 SSSVPSQK   | 20    | >TP53-S99F-1 SSSVPFQK   | 10    | 10    |

|                          |       |                           |      |       |
|--------------------------|-------|---------------------------|------|-------|
| >TP53-S99F-1 SSSVPSQKTY  | 514   | >TP53-S99F-1 SSSVVPFQKTY  | 380  | 134   |
| >TP53-S99F-1 SSSVPSQKTY  | 817   | >TP53-S99F-1 SSSVVPFQKTY  | 246  | 571   |
| >TP53-S99F-1 SSSVPSQK    | 223   | >TP53-S99F-1 SSSVVPFQK    | 226  | 3     |
| >TP53-S99F-1 SSSVPSQKTY  | 105   | >TP53-S99F-1 SSSVVPFQKTY  | 102  | 3     |
| >TP53-S99F-1 SSSVPSQK    | 226   | >TP53-S99F-1 SSSVVPFQK    | 135  | 91    |
| >TP53-S99F-1 SSSVPSQKTY  | 317   | >TP53-S99F-1 SSSVVPFQKTY  | 466  | 149   |
| >TP53-S99F-1 SSSVPSQKTY  | 112   | >TP53-S99F-1 SSSVVPFQKTY  | 103  | 9     |
| >TP53-S99F-1 SSSVPSQKTY  | 4     | >TP53-S99F-1 SSSVVPFQKTY  | 7    | 3     |
| >TP53-S99F-1 SSSVPSQKTY  | 27    | >TP53-S99F-1 SSSVVPFQKTY  | 29   | 2     |
| >TP53-S99F-1 SSSVPSQKTY  | 457   | >TP53-S99F-1 SSSVVPFQKTY  | 895  | 438   |
| >TP53-S99F-1 SSSVPSQK    | 286   | >TP53-S99F-1 SSSVVPFQK    | 79   | 207   |
| >TP53-S99F-1 LSSSVPSQKT\ | 164   | >TP53-S99F-1 LSSSVVPFQKT\ | 114  | 50    |
| >TP53-S99F-1 LSSSVPSQK   | 103   | >TP53-S99F-1 LSSSVVPFQK   | 94   | 9     |
| >TP53-S99F-1 LSSSVPSQK   | 23    | >TP53-S99F-1 LSSSVVPFQK   | 9    | 14    |
| >TP53-S99F-1 LSSSVPSQKT\ | 450   | >TP53-S99F-1 LSSSVVPFQKT\ | 183  | 267   |
| >TP53-S99F-1 LSSSVPSQKT\ | 50    | >TP53-S99F-1 LSSSVVPFQKT\ | 41   | 9     |
| >TP53-S99F-1 LSSSVPSQK   | 2167  | >TP53-S99F-1 LSSSVVPFQK   | 227  | 1940  |
| >TP53-S99F-1 LSSSVPSQK   | 34    | >TP53-S99F-1 LSSSVVPFQK   | 20   | 14    |
| >TP53-S99F-1 LSSSVPSQKT\ | 149   | >TP53-S99F-1 LSSSVVPFQKT\ | 243  | 94    |
| >TP53-S99F-1 LSSSVPSQKT\ | 32    | >TP53-S99F-1 LSSSVVPFQKT\ | 64   | 32    |
| >TP53-S99F-1 LSSSVPSQKT\ | 6     | >TP53-S99F-1 LSSSVVPFQKT\ | 7    | 1     |
| >TP53-S99F-1 LSSSVPSQKT\ | 229   | >TP53-S99F-1 LSSSVVPFQKT\ | 189  | 40    |
| >TP53-S99F-1 LSSSVPSQKT\ | 204   | >TP53-S99F-1 LSSSVVPFQKT\ | 123  | 81    |
| >TP53-S99F-1 LSSSVPSQKT\ | 32    | >TP53-S99F-1 LSSSVVPFQKT\ | 28   | 4     |
| >TP53-S99F-1 LSSSVPSQK   | 189   | >TP53-S99F-1 LSSSVVPFQK   | 4318 | 4129  |
| >TP53-S99F-1 LSSSVPSQKT\ | 8     | >TP53-S99F-1 LSSSVVPFQKT\ | 12   | 4     |
| >TP53-S99F-1 LSSSVPSQKT\ | 743   | >TP53-S99F-1 LSSSVVPFQKT\ | 403  | 340   |
| >TP53-S99F-1 LSSSVPSQK   | 1156  | >TP53-S99F-1 LSSSVVPFQK   | 159  | 997   |
| >TP53-S99F-1 PLSSSVPSQK  | 472   | >TP53-S99F-1 PLSSSVVPFQK  | 720  | 248   |
| >TP53-S99F-1 PLSSSVPSQK  | 382   | >TP53-S99F-1 PLSSSVVPFQK  | 120  | 262   |
| >TP53-S99F-1 PLSSSVPS    | 17535 | >TP53-S99F-1 PLSSSVVPF    | 307  | 17228 |
| >TP53-S99F-1 PLSSSVPS    | 10921 | >TP53-S99F-1 PLSSSVVPF    | 40   | 10881 |
| >TP53-S99F-1 WPLSSSVPS   | 36164 | >TP53-S99F-1 WPLSSSVVPF   | 172  | 35992 |
| >TP53-S99F-1 WPLSSSVPS   | 3642  | >TP53-S99F-1 WPLSSSVVPF   | 20   | 3622  |
| >TP53-S99F-1 WPLSSSVPS   | 16471 | >TP53-S99F-1 WPLSSSVVPF   | 129  | 16342 |
| >TP53-S99F-1 WPLSSSVPS   | 2639  | >TP53-S99F-1 WPLSSSVVPF   | 6    | 2633  |
| >TP53-S99F-1 WPLSSSVPS   | 12347 | >TP53-S99F-1 WPLSSSVVPF   | 380  | 11967 |
| >TP53-S99F-1 WPLSSSVPS   | 27    | >TP53-S99F-1 WPLSSSVVPF   | 7    | 20    |
| >TP53-S99F-1 WPLSSSVPS   | 2058  | >TP53-S99F-1 WPLSSSVVPF   | 60   | 1998  |
| >TP53-S99F-1 WPLSSSVPS   | 13846 | >TP53-S99F-1 WPLSSSVVPF   | 67   | 13779 |
| >TP53-S99F-1 WPLSSSVPS   | 159   | >TP53-S99F-1 WPLSSSVVPF   | 1098 | 939   |
| >TP53-S99F-1 WPLSSSVPS   | 4161  | >TP53-S99F-1 WPLSSSVVPF   | 23   | 4138  |
| >TP53-S99F-1 WPLSSSVPS   | 3372  | >TP53-S99F-1 WPLSSSVVPF   | 9    | 3363  |

|                         |       |                         |       |       |
|-------------------------|-------|-------------------------|-------|-------|
| >TP53-S99F-1 SWPLSSSVPS | 19031 | >TP53-S99F-1 SWPLSSSVPF | 21    | 19010 |
| >TP53-S99F-1 SWPLSSSVPS | 7366  | >TP53-S99F-1 SWPLSSSVPF | 25    | 7341  |
| >TP53-S99F-1 SWPLSSSVPS | 10254 | >TP53-S99F-1 SWPLSSSVPF | 15    | 10239 |
| >TP53-S99F-1 SWPLSSSVPS | 20033 | >TP53-S99F-1 SWPLSSSVPF | 267   | 19766 |
| >TP53-S99F-1 SWPLSSSVPS | 16310 | >TP53-S99F-1 SWPLSSSVPF | 463   | 15847 |
| >TP53-S99F-1 SWPLSSSVPS | 2163  | >TP53-S99F-1 SWPLSSSVPF | 247   | 1916  |
| >TP53-S99F-1 SWPLSSSVPS | 447   | >TP53-S99F-1 SWPLSSSVPF | 140   | 307   |
| >TP53-S99P-1 SQKTYQGSY  | 15    | >TP53-S99P-1 PQKTYQGSY  | 75    | 60    |
| >TP53-S99P-1 SQKTYQGSY  | 38    | >TP53-S99P-1 PQKTYQGSY  | 388   | 350   |
| >TP53-S99P-1 SQKTYQGSYC | 36    | >TP53-S99P-1 PQKTYQGSYC | 445   | 409   |
| >TP53-S99P-1 SQKTYQGSY  | 198   | >TP53-S99P-1 PQKTYQGSY  | 2151  | 1953  |
| >TP53-S99P-1 SQKTYQGSYC | 268   | >TP53-S99P-1 PQKTYQGSYC | 2683  | 2415  |
| >TP53-S99P-1 SQKTYQGSY  | 19    | >TP53-S99P-1 PQKTYQGSY  | 176   | 157   |
| >TP53-S99P-1 SQKTYQGSYC | 9     | >TP53-S99P-1 PQKTYQGSYC | 66    | 57    |
| >TP53-S99P-1 PSQKTYQGSY | 71    | >TP53-S99P-1 PPQKTYQGSY | 1555  | 1484  |
| >TP53-S99P-1 PSQKTYQGSY | 228   | >TP53-S99P-1 PPQKTYQGSY | 12404 | 12176 |
| >TP53-S99P-1 PSQKTYQGSY | 9538  | >TP53-S99P-1 PPQKTYQGSY | 145   | 9393  |
| >TP53-S99P-1 VPSQKTYQG  | 92    | >TP53-S99P-1 VPPQKTYQG  | 635   | 543   |
| >TP53-S99P-1 VPSQKTYQG  | 19    | >TP53-S99P-1 VPPQKTYQG  | 139   | 120   |
| >TP53-S99P-1 VPSQKTYQG  | 254   | >TP53-S99P-1 VPPQKTYQG  | 1827  | 1573  |
| >TP53-S99P-1 VPSQKTYQG  | 15    | >TP53-S99P-1 VPPQKTYQG  | 454   | 439   |
| >TP53-S99P-1 SVPSQKTY   | 183   | >TP53-S99P-1 SVPPQKTY   | 442   | 259   |
| >TP53-S99P-1 SVPSQKTY   | 442   | >TP53-S99P-1 SVPPQKTY   | 785   | 343   |
| >TP53-S99P-1 SSVPSQKTY  | 122   | >TP53-S99P-1 SSVPPQKTY  | 54    | 68    |
| >TP53-S99P-1 SSVPSQKTY  | 146   | >TP53-S99P-1 SSVPPQKTY  | 237   | 91    |
| >TP53-S99P-1 SSVPSQKTY  | 227   | >TP53-S99P-1 SSVPPQKTY  | 582   | 355   |
| >TP53-S99P-1 SSVPSQKTY  | 40    | >TP53-S99P-1 SSVPPQKTY  | 108   | 68    |
| >TP53-S99P-1 SSVPSQKTY  | 2     | >TP53-S99P-1 SSVPPQKTY  | 3     | 1     |
| >TP53-S99P-1 SSVPSQKTY  | 119   | >TP53-S99P-1 SSVPPQKTY  | 242   | 123   |
| >TP53-S99P-1 SSVPSQKTY  | 195   | >TP53-S99P-1 SSVPPQKTY  | 967   | 772   |
| >TP53-S99P-1 SSVPSQKTY  | 23    | >TP53-S99P-1 SSVPPQKTY  | 14    | 9     |
| >TP53-S99P-1 SSVPSQKTY  | 188   | >TP53-S99P-1 SSVPPQKTY  | 411   | 223   |
| >TP53-S99P-1 SSSVPSQKTY | 415   | >TP53-S99P-1 SSSVPPQKTY | 1298  | 883   |
| >TP53-S99P-1 SSSVPSQK   | 230   | >TP53-S99P-1 SSSVPPQK   | 374   | 144   |
| >TP53-S99P-1 SSSVPSQK   | 20    | >TP53-S99P-1 SSSVPPQK   | 22    | 2     |
| >TP53-S99P-1 SSSVPSQK   | 223   | >TP53-S99P-1 SSSVPPQK   | 120   | 103   |
| >TP53-S99P-1 SSSVPSQKTY | 105   | >TP53-S99P-1 SSSVPPQKTY | 143   | 38    |
| >TP53-S99P-1 SSSVPSQK   | 226   | >TP53-S99P-1 SSSVPPQK   | 512   | 286   |
| >TP53-S99P-1 SSSVPSQKTY | 317   | >TP53-S99P-1 SSSVPPQKTY | 1287  | 970   |
| >TP53-S99P-1 SSSVPSQKTY | 112   | >TP53-S99P-1 SSSVPPQKTY | 181   | 69    |
| >TP53-S99P-1 SSSVPSQKTY | 4     | >TP53-S99P-1 SSSVPPQKTY | 5     | 1     |
| >TP53-S99P-1 SSSVPSQKTY | 27    | >TP53-S99P-1 SSSVPPQKTY | 26    | 1     |
| >TP53-S99P-1 SSSVPSQKTY | 457   | >TP53-S99P-1 SSSVPPQKTY | 2936  | 2479  |

|                         |      |                         |      |      |
|-------------------------|------|-------------------------|------|------|
| >TP53-S99P-I SSSVPSQK   | 286  | >TP53-S99P-I SSSVPPQK   | 165  | 121  |
| >TP53-S99P-I LSSSVPSQKT | 164  | >TP53-S99P-I LSSSVPPQKT | 314  | 150  |
| >TP53-S99P-I LSSSVPSQK  | 103  | >TP53-S99P-I LSSSVPPQK  | 148  | 45   |
| >TP53-S99P-I LSSSVPSQK  | 23   | >TP53-S99P-I LSSSVPPQK  | 26   | 3    |
| >TP53-S99P-I LSSSVPSQKT | 450  | >TP53-S99P-I LSSSVPPQKT | 349  | 101  |
| >TP53-S99P-I LSSSVPSQK  | 945  | >TP53-S99P-I LSSSVPPQK  | 161  | 784  |
| >TP53-S99P-I LSSSVPSQKT | 50   | >TP53-S99P-I LSSSVPPQKT | 52   | 2    |
| >TP53-S99P-I LSSSVPSQK  | 34   | >TP53-S99P-I LSSSVPPQK  | 88   | 54   |
| >TP53-S99P-I LSSSVPSQKT | 149  | >TP53-S99P-I LSSSVPPQKT | 223  | 74   |
| >TP53-S99P-I LSSSVPSQKT | 32   | >TP53-S99P-I LSSSVPPQKT | 59   | 27   |
| >TP53-S99P-I LSSSVPSQKT | 6    | >TP53-S99P-I LSSSVPPQKT | 8    | 2    |
| >TP53-S99P-I LSSSVPSQKT | 229  | >TP53-S99P-I LSSSVPPQKT | 303  | 74   |
| >TP53-S99P-I LSSSVPSQKT | 204  | >TP53-S99P-I LSSSVPPQKT | 295  | 91   |
| >TP53-S99P-I LSSSVPSQKT | 32   | >TP53-S99P-I LSSSVPPQKT | 41   | 9    |
| >TP53-S99P-I LSSSVPSQK  | 189  | >TP53-S99P-I LSSSVPPQK  | 5524 | 5335 |
| >TP53-S99P-I LSSSVPSQKT | 8    | >TP53-S99P-I LSSSVPPQKT | 12   | 4    |
| >TP53-S99P-I PLSSSVPSQK | 472  | >TP53-S99P-I PLSSSVPPQK | 1737 | 1265 |
| >TP53-S99P-I PLSSSVPSQK | 382  | >TP53-S99P-I PLSSSVPPQK | 415  | 33   |
| >TP53-S99P-I WPLSSSVPS  | 27   | >TP53-S99P-I WPLSSSVPP  | 119  | 92   |
| >TP53-S99P-I WPLSSSVPS  | 159  | >TP53-S99P-I WPLSSSVPP  | 274  | 115  |
| >TP53-S99P-I SWPLSSSVPS | 447  | >TP53-S99P-I SWPLSSSVPP | 622  | 175  |
| >TP53-T102I-TYQGSYGFR   | 141  | >TP53-T102I-IYQGSYGFR   | 283  | 142  |
| >TP53-T102I-TYQGSYGF    | 28   | >TP53-T102I-IYQGSYGF    | 30   | 2    |
| >TP53-T102I-TYQGSYGFR   | 316  | >TP53-T102I-IYQGSYGFR   | 383  | 67   |
| >TP53-T102I-TYQGSYGF    | 93   | >TP53-T102I-IYQGSYGF    | 57   | 36   |
| >TP53-T102I-TYQGSYGFR   | 163  | >TP53-T102I-IYQGSYGFR   | 193  | 30   |
| >TP53-T102I-TYQGSYGF    | 5    | >TP53-T102I-IYQGSYGF    | 5    | 0    |
| >TP53-T102I-TYQGSYGFR   | 255  | >TP53-T102I-IYQGSYGFR   | 380  | 125  |
| >TP53-T102I-TYQGSYGFR   | 7    | >TP53-T102I-IYQGSYGFR   | 8    | 1    |
| >TP53-T102I-TYQGSYGF    | 19   | >TP53-T102I-IYQGSYGF    | 18   | 1    |
| >TP53-T102I-TYQGSYGF    | 25   | >TP53-T102I-IYQGSYGF    | 23   | 2    |
| >TP53-T102I-TYQGSYGF    | 154  | >TP53-T102I-IYQGSYGF    | 506  | 352  |
| >TP53-T102I-TYQGSYGF    | 53   | >TP53-T102I-IYQGSYGF    | 38   | 15   |
| >TP53-T102I-KTYQGSYGF   | 220  | >TP53-T102I-KIYQGSYGF   | 204  | 16   |
| >TP53-T102I-KTYQGSYGF   | 169  | >TP53-T102I-KIYQGSYGF   | 39   | 130  |
| >TP53-T102I-KTYQGSYGF   | 260  | >TP53-T102I-KIYQGSYGF   | 76   | 184  |
| >TP53-T102I-KTYQGSYGF   | 1496 | >TP53-T102I-KIYQGSYGF   | 174  | 1322 |
| >TP53-T102I-KTYQGSYGF   | 391  | >TP53-T102I-KIYQGSYGF   | 147  | 244  |
| >TP53-T102I-KTYQGSYGF   | 77   | >TP53-T102I-KIYQGSYGF   | 27   | 50   |
| >TP53-T102I-KTYQGSYGF   | 23   | >TP53-T102I-KIYQGSYGF   | 7    | 16   |
| >TP53-T102I-KTYQGSYGF   | 854  | >TP53-T102I-KIYQGSYGF   | 136  | 718  |
| >TP53-T102I-KTYQGSYGF   | 175  | >TP53-T102I-KIYQGSYGF   | 29   | 146  |
| >TP53-T102I-KTYQGSYGF   | 638  | >TP53-T102I-KIYQGSYGF   | 14   | 624  |

|                        |      |                         |       |       |
|------------------------|------|-------------------------|-------|-------|
| >TP53-T102I-KTYQGSGYFR | 50   | >TP53-T102I-KIYQGSGYFR  | 36    | 14    |
| >TP53-T102I-KTYQGSGYFR | 57   | >TP53-T102I-KIYQGSGYFR  | 155   | 98    |
| >TP53-T102I-KTYQGSGYGF | 481  | >TP53-T102I-KIYQGSGYGF  | 3917  | 3436  |
| >TP53-T102I-KTYQGSGYGF | 192  | >TP53-T102I-KIYQGSGYGF  | 2083  | 1891  |
| >TP53-T102I-KTYQGSGYGF | 294  | >TP53-T102I-KIYQGSGYGF  | 505   | 211   |
| >TP53-T102I-KTYQGSGYFR | 96   | >TP53-T102I-KIYQGSGYFR  | 498   | 402   |
| >TP53-T102I-KTYQGSGYGF | 325  | >TP53-T102I-KIYQGSGYGF  | 659   | 334   |
| >TP53-T102I-KTYQGSGYFR | 10   | >TP53-T102I-KIYQGSGYFR  | 8     | 2     |
| >TP53-T102I-KTYQGSGYGF | 4    | >TP53-T102I-KIYQGSGYGF  | 5     | 1     |
| >TP53-T102I-KTYQGSGYFR | 21   | >TP53-T102I-KIYQGSGYFR  | 48    | 27    |
| >TP53-T102I-KTYQGSGYFR | 407  | >TP53-T102I-KIYQGSGYFR  | 293   | 114   |
| >TP53-T102I-KTYQGSGYFR | 57   | >TP53-T102I-KIYQGSGYFR  | 190   | 133   |
| >TP53-T102I-KTYQGSGYFR | 402  | >TP53-T102I-KIYQGSGYFR  | 1758  | 1356  |
| >TP53-T102I-KTYQGSGYGF | 55   | >TP53-T102I-KIYQGSGYGF  | 47    | 8     |
| >TP53-T102I-KTYQGSGYGF | 819  | >TP53-T102I-KIYQGSGYGF  | 193   | 626   |
| >TP53-T102I-KTYQGSGYGF | 36   | >TP53-T102I-KIYQGSGYGF  | 75    | 39    |
| >TP53-T102I-KTYQGSGY   | 249  | >TP53-T102I-KIYQGSGY    | 13325 | 13076 |
| >TP53-T102I-KTYQGSGYGF | 2    | >TP53-T102I-KIYQGSGYGF  | 6     | 4     |
| >TP53-T102I-KTYQGSGYFR | 465  | >TP53-T102I-KIYQGSGYFR  | 15882 | 15417 |
| >TP53-T102I-KTYQGSGYFR | 3    | >TP53-T102I-KIYQGSGYFR  | 15    | 12    |
| >TP53-T102I-KTYQGSGYGF | 101  | >TP53-T102I-KIYQGSGYGF  | 2190  | 2089  |
| >TP53-T102I-KTYQGSGYFR | 439  | >TP53-T102I-KIYQGSGYFR  | 8850  | 8411  |
| >TP53-T102I-KTYQGSGYGF | 15   | >TP53-T102I-KIYQGSGYGF  | 63    | 48    |
| >TP53-T102I-KTYQGSGYFR | 35   | >TP53-T102I-KIYQGSGYFR  | 528   | 493   |
| >TP53-T102I-KTYQGSGYFR | 151  | >TP53-T102I-KIYQGSGYFR  | 10393 | 10242 |
| >TP53-T102I-KTYQGSGYGF | 25   | >TP53-T102I-KIYQGSGYGF  | 1154  | 1129  |
| >TP53-T102I-KTYQGSGYFR | 28   | >TP53-T102I-KIYQGSGYFR  | 1396  | 1368  |
| >TP53-T102I-KTYQGSGYFR | 345  | >TP53-T102I-KIYQGSGYFR  | 89    | 256   |
| >TP53-T102I-KTYQGSGYFR | 370  | >TP53-T102I-KIYQGSGYFR  | 6054  | 5684  |
| >TP53-T102I-KTYQGSGYFR | 25   | >TP53-T102I-KIYQGSGYFR  | 16    | 9     |
| >TP53-T102I-KTYQGSGYFR | 43   | >TP53-T102I-KIYQGSGYFR  | 2638  | 2595  |
| >TP53-T102I-PLSSSVPSQK | 8318 | >TP53-T102I-PLSSSVPSQKI | 411   | 7907  |
| >TP53-T102I-PLSSSVPSQK | 1650 | >TP53-T102I-PLSSSVPSQKI | 147   | 1503  |
| >TP53-T102I-QKTYQGSY   | 308  | >TP53-T102I-QKIYQGSY    | 308   | 0     |
| >TP53-T102I-QKTYQGSYGI | 814  | >TP53-T102I-QKIYQGSYGF  | 480   | 334   |
| >TP53-T102I-QKTYQGSY   | 40   | >TP53-T102I-QKIYQGSY    | 12    | 28    |
| >TP53-T102I-QKTYQGSYGI | 10   | >TP53-T102I-QKIYQGSYGF  | 4     | 6     |
| >TP53-T102I-SQKTYQGSY  | 15   | >TP53-T102I-SQKIYQGSY   | 14    | 1     |
| >TP53-T102I-SQKTYQGSY  | 38   | >TP53-T102I-SQKIYQGSY   | 44    | 6     |
| >TP53-T102I-SQKTYQGSYC | 36   | >TP53-T102I-SQKIYQGSYG  | 39    | 3     |
| >TP53-T102I-SQKTYQGSY  | 198  | >TP53-T102I-SQKIYQGSY   | 228   | 30    |
| >TP53-T102I-SQKTYQGSYC | 268  | >TP53-T102I-SQKIYQGSYG  | 298   | 30    |
| >TP53-T102I-SQKTYQGSY  | 19   | >TP53-T102I-SQKIYQGSY   | 53    | 34    |



|                         |       |                         |      |       |
|-------------------------|-------|-------------------------|------|-------|
| >TP53-T102I-SQKTYQGSYG  | 9     | >TP53-T102I-SQKIYQGSYG  | 16   | 7     |
| >TP53-T102I-PSQKTYQGSY  | 71    | >TP53-T102I-PSQKIYQGSY  | 86   | 15    |
| >TP53-T102I-PSQKTYQGSY  | 228   | >TP53-T102I-PSQKIYQGSY  | 225  | 3     |
| >TP53-T102I-VPSQKTYQGS  | 92    | >TP53-T102I-VPSQKIYQGS  | 94   | 2     |
| >TP53-T102I-VPSQKTYQGS  | 19    | >TP53-T102I-VPSQKIYQGS  | 32   | 13    |
| >TP53-T102I-VPSQKTYQGS  | 254   | >TP53-T102I-VPSQKIYQGS  | 261  | 7     |
| >TP53-T102I-VPSQKTYQGS  | 15    | >TP53-T102I-VPSQKIYQGS  | 16   | 1     |
| >TP53-T102I-SVPSQKTY    | 183   | >TP53-T102I-SVPSQKIY    | 243  | 60    |
| >TP53-T102I-SVPSQKTY    | 442   | >TP53-T102I-SVPSQKIY    | 493  | 51    |
| >TP53-T102I-SSVPSQKTY   | 122   | >TP53-T102I-SSVPSQKIY   | 168  | 46    |
| >TP53-T102I-SSVPSQKTY   | 146   | >TP53-T102I-SSVPSQKIY   | 156  | 10    |
| >TP53-T102I-SSVPSQKTY   | 227   | >TP53-T102I-SSVPSQKIY   | 707  | 480   |
| >TP53-T102I-SSVPSQKTY   | 40    | >TP53-T102I-SSVPSQKIY   | 38   | 2     |
| >TP53-T102I-SSVPSQKT    | 742   | >TP53-T102I-SSVPSQKI    | 15   | 727   |
| >TP53-T102I-SSVPSQKTY   | 2     | >TP53-T102I-SSVPSQKIY   | 3    | 1     |
| >TP53-T102I-SSVPSQKTY   | 119   | >TP53-T102I-SSVPSQKIY   | 323  | 204   |
| >TP53-T102I-SSVPSQKTY   | 195   | >TP53-T102I-SSVPSQKIY   | 265  | 70    |
| >TP53-T102I-SSVPSQKTY   | 23    | >TP53-T102I-SSVPSQKIY   | 27   | 4     |
| >TP53-T102I-SSVPSQKTY   | 188   | >TP53-T102I-SSVPSQKIY   | 1923 | 1735  |
| >TP53-T102I-SSVPSQKT    | 24527 | >TP53-T102I-SSVPSQKI    | 20   | 24507 |
| >TP53-T102I-SSSVPSQKTY  | 415   | >TP53-T102I-SSSVPSQKIY  | 178  | 237   |
| >TP53-T102I-SSSVPSQKTY  | 105   | >TP53-T102I-SSSVPSQKIY  | 64   | 41    |
| >TP53-T102I-SSSVPSQKTY  | 317   | >TP53-T102I-SSSVPSQKIY  | 756  | 439   |
| >TP53-T102I-SSSVPSQKTY  | 112   | >TP53-T102I-SSSVPSQKIY  | 145  | 33    |
| >TP53-T102I-SSSVPSQKT   | 4564  | >TP53-T102I-SSSVPSQKI   | 85   | 4479  |
| >TP53-T102I-SSSVPSQKTY  | 4     | >TP53-T102I-SSSVPSQKIY  | 7    | 3     |
| >TP53-T102I-SSSVPSQKT   | 4388  | >TP53-T102I-SSSVPSQKI   | 476  | 3912  |
| >TP53-T102I-SSSVPSQKTY  | 27    | >TP53-T102I-SSSVPSQKIY  | 24   | 3     |
| >TP53-T102I-SSSVPSQKTY  | 457   | >TP53-T102I-SSSVPSQKIY  | 2556 | 2099  |
| >TP53-T102I-SSSVPSQKT   | 25963 | >TP53-T102I-SSSVPSQKI   | 22   | 25941 |
| >TP53-T102I-LSSSVPSQKTY | 164   | >TP53-T102I-LSSSVPSQKIY | 163  | 1     |
| >TP53-T102I-LSSSVPSQKTY | 450   | >TP53-T102I-LSSSVPSQKIY | 757  | 307   |
| >TP53-T102I-LSSSVPSQKTY | 50    | >TP53-T102I-LSSSVPSQKIY | 53   | 3     |
| >TP53-T102I-LSSSVPSQKTY | 149   | >TP53-T102I-LSSSVPSQKIY | 340  | 191   |
| >TP53-T102I-LSSSVPSQKTY | 32    | >TP53-T102I-LSSSVPSQKIY | 42   | 10    |
| >TP53-T102I-LSSSVPSQKT  | 6702  | >TP53-T102I-LSSSVPSQKI  | 243  | 6459  |
| >TP53-T102I-LSSSVPSQKTY | 6     | >TP53-T102I-LSSSVPSQKIY | 17   | 11    |
| >TP53-T102I-LSSSVPSQKTY | 229   | >TP53-T102I-LSSSVPSQKIY | 701  | 472   |
| >TP53-T102I-LSSSVPSQKTY | 204   | >TP53-T102I-LSSSVPSQKIY | 452  | 248   |
| >TP53-T102I-LSSSVPSQKT  | 12832 | >TP53-T102I-LSSSVPSQKI  | 122  | 12710 |
| >TP53-T102I-LSSSVPSQKTY | 32    | >TP53-T102I-LSSSVPSQKIY | 36   | 4     |
| >TP53-T102I-LSSSVPSQKT  | 971   | >TP53-T102I-LSSSVPSQKI  | 106  | 865   |
| >TP53-T102I-LSSSVPSQKTY | 8     | >TP53-T102I-LSSSVPSQKIY | 8    | 0     |

|                         |       |                         |      |       |
|-------------------------|-------|-------------------------|------|-------|
| >TP53-T102I- LSSSVPSQKT | 18746 | >TP53-T102I- LSSSVPSQKI | 46   | 18700 |
| >TP53-T118A TAKSVTCTY   | 1756  | >TP53-T118A AAKSVTCTY   | 212  | 1544  |
| >TP53-T118A TAKSVTCTY   | 312   | >TP53-T118A AAKSVTCTY   | 199  | 113   |
| >TP53-T118A TAKSVTCTY   | 247   | >TP53-T118A AAKSVTCTY   | 4265 | 4018  |
| >TP53-T118A TAKSVTCTY   | 78    | >TP53-T118A AAKSVTCTY   | 51   | 27    |
| >TP53-T118A TAKSVTCTY   | 430   | >TP53-T118A AAKSVTCTY   | 99   | 331   |
| >TP53-T118A TAKSVTCTY   | 265   | >TP53-T118A AAKSVTCTY   | 34   | 231   |
| >TP53-T118A TAKSVTCTY   | 100   | >TP53-T118A AAKSVTCTY   | 421  | 321   |
| >TP53-T118A TAKSVTCTY   | 336   | >TP53-T118A AAKSVTCTY   | 256  | 80    |
| >TP53-T118A TAKSVTCTY   | 1427  | >TP53-T118A AAKSVTCTY   | 414  | 1013  |
| >TP53-T118A GTAKSVTCTY  | 466   | >TP53-T118A GAAKSVTCTY  | 2602 | 2136  |
| >TP53-T118A GTAKSVTCTY  | 122   | >TP53-T118A GAAKSVTCTY  | 400  | 278   |
| >TP53-T118A GTAKSVTCTY  | 69    | >TP53-T118A GAAKSVTCTY  | 250  | 181   |
| >TP53-T118A GTAKSVTCTY  | 71    | >TP53-T118A GAAKSVTCTY  | 97   | 26    |
| >TP53-T118A GTAKSVTCTY  | 461   | >TP53-T118A GAAKSVTCTY  | 271  | 190   |
| >TP53-T118A GTAKSVTCTY  | 8     | >TP53-T118A GAAKSVTCTY  | 50   | 42    |
| >TP53-T118A GTAKSVTCTY  | 296   | >TP53-T118A GAAKSVTCTY  | 408  | 112   |
| >TP53-T118A GTAKSVTCTY  | 39    | >TP53-T118A GAAKSVTCTY  | 1458 | 1419  |
| >TP53-T118A GTAKSVTCTY  | 143   | >TP53-T118A GAAKSVTCTY  | 130  | 13    |
| >TP53-T118A GFRLGFLHSG  | 4197  | >TP53-T118A GFRLGFLHSG  | 227  | 3970  |
| >TP53-T118A SGTAKSVTCT  | 624   | >TP53-T118A SGAAKSVTCT  | 278  | 346   |
| >TP53-T118A SGTAKSVTCT  | 1509  | >TP53-T118A SGAAKSVTCT  | 154  | 1355  |
| >TP53-T118A SGTAKSVTCT  | 585   | >TP53-T118A SGAAKSVTCT  | 310  | 275   |
| >TP53-T118A SGTAKSVTCT  | 374   | >TP53-T118A SGAAKSVTCT  | 105  | 269   |
| >TP53-T118A FLHSGTAKSV  | 122   | >TP53-T118A FLHSGAAKSV  | 131  | 9     |
| >TP53-T118A FLHSGTAKS   | 179   | >TP53-T118A FLHSGAAKS   | 1064 | 885   |
| >TP53-T118A FLHSGTAKSV  | 13    | >TP53-T118A FLHSGAAKSV  | 15   | 2     |
| >TP53-T118A FLHSGTAKSV  | 413   | >TP53-T118A FLHSGAAKSV  | 818  | 405   |
| >TP53-T118A FLHSGTAKS   | 26    | >TP53-T118A FLHSGAAKS   | 107  | 81    |
| >TP53-T118A FLHSGTAKSV  | 11    | >TP53-T118A FLHSGAAKSV  | 14   | 3     |
| >TP53-T118A FLHSGTAKSV  | 27    | >TP53-T118A FLHSGAAKSV  | 39   | 12    |
| >TP53-T118A FLHSGTAKS   | 188   | >TP53-T118A FLHSGAAKS   | 314  | 126   |
| >TP53-T118A FLHSGTAKSV  | 2     | >TP53-T118A FLHSGAAKSV  | 2    | 0     |
| >TP53-T118A FLHSGTAKSV  | 116   | >TP53-T118A FLHSGAAKSV  | 123  | 7     |
| >TP53-T118A FLHSGTAKSV  | 5     | >TP53-T118A FLHSGAAKSV  | 6    | 1     |
| >TP53-T118A FLHSGTAKSV  | 7     | >TP53-T118A FLHSGAAKSV  | 8    | 1     |
| >TP53-T118A FLHSGTAKSV  | 7     | >TP53-T118A FLHSGAAKSV  | 8    | 1     |
| >TP53-T118A FLHSGTAK    | 124   | >TP53-T118A FLHSGAAK    | 121  | 3     |
| >TP53-T118A FLHSGTAKS   | 31    | >TP53-T118A FLHSGAAKS   | 51   | 20    |
| >TP53-T118A FLHSGTAKSV  | 2     | >TP53-T118A FLHSGAAKSV  | 2    | 0     |
| >TP53-T118A FLHSGTAKSV  | 13    | >TP53-T118A FLHSGAAKSV  | 13   | 0     |
| >TP53-T118A FLHSGTAK    | 114   | >TP53-T118A FLHSGAAK    | 141  | 27    |
| >TP53-T118A FLHSGTAK    | 256   | >TP53-T118A FLHSGAAK    | 225  | 31    |

|                        |      |                         |      |      |
|------------------------|------|-------------------------|------|------|
| >TP53-T118A FLHSGTAKSV | 283  | >TP53-T118A FLHSGAAKSV  | 361  | 78   |
| >TP53-T118A FLHSGTAKSV | 261  | >TP53-T118A FLHSGAAKSV  | 393  | 132  |
| >TP53-T118A GFLHSGTAK  | 1580 | >TP53-T118A GFLHSGAAK   | 212  | 1368 |
| >TP53-T118A RLGFLHSGT  | 1194 | >TP53-T118A RLGFLHSGA   | 99   | 1095 |
| >TP53-T118A RLGFLHSGTA | 326  | >TP53-T118A RLGFLHSGAA  | 420  | 94   |
| >TP53-T118A RLGFLHSGT  | 719  | >TP53-T118A RLGFLHSGA   | 78   | 641  |
| >TP53-T118A RLGFLHSGTA | 162  | >TP53-T118A RLGFLHSGAA  | 229  | 67   |
| >TP53-T118A RLGFLHSGT  | 2002 | >TP53-T118A RLGFLHSGA   | 154  | 1848 |
| >TP53-T118A RLGFLHSGTA | 43   | >TP53-T118A RLGFLHSGAA  | 44   | 1    |
| >TP53-T118A RLGFLHSGTA | 125  | >TP53-T118A RLGFLHSGAA  | 114  | 11   |
| >TP53-T118A RLGFLHSGTA | 384  | >TP53-T118A RLGFLHSGAA  | 102  | 282  |
| >TP53-T118A RLGFLHSGTA | 262  | >TP53-T118A RLGFLHSGAA  | 190  | 72   |
| >TP53-T118A FRLGFLHSGT | 716  | >TP53-T118A FRLGFLHSGA  | 203  | 513  |
| >TP53-T118A FRLGFLHSGT | 412  | >TP53-T118A FRLGFLHSGA  | 279  | 133  |
| >TP53-T118A FRLGFLHSGT | 174  | >TP53-T118A FRLGFLHSGA  | 189  | 15   |
| >TP53-T118I TAKSVTCTY  | 312  | >TP53-T118I IAKSVTCTY   | 133  | 179  |
| >TP53-T118I TAKSVTCTY  | 247  | >TP53-T118I IAKSVTCTY   | 683  | 436  |
| >TP53-T118I TAKSVTCTY  | 78   | >TP53-T118I IAKSVTCTY   | 57   | 21   |
| >TP53-T118I TAKSVTCTY  | 430  | >TP53-T118I IAKSVTCTY   | 60   | 370  |
| >TP53-T118I TAKSVTCTY  | 265  | >TP53-T118I IAKSVTCTY   | 34   | 231  |
| >TP53-T118I TAKSVTCTY  | 100  | >TP53-T118I IAKSVTCTY   | 80   | 20   |
| >TP53-T118I TAKSVTCTY  | 746  | >TP53-T118I IAKSVTCTY   | 187  | 559  |
| >TP53-T118I TAKSVTCTY  | 2180 | >TP53-T118I IAKSVTCTY   | 274  | 1906 |
| >TP53-T118I TAKSVTCTY  | 336  | >TP53-T118I IAKSVTCTY   | 94   | 242  |
| >TP53-T118I GTAKSVTCTY | 466  | >TP53-T118I GIAKSVTCTY  | 1453 | 987  |
| >TP53-T118I GTAKSVTCTY | 122  | >TP53-T118I GIAKSVTCTY  | 325  | 203  |
| >TP53-T118I GTAKSVTCTY | 69   | >TP53-T118I GIAKSVTCTY  | 312  | 243  |
| >TP53-T118I GTAKSVTCTY | 71   | >TP53-T118I GIAKSVTCTY  | 68   | 3    |
| >TP53-T118I GTAKSVTCTY | 461  | >TP53-T118I GIAKSVTCTY  | 942  | 481  |
| >TP53-T118I GTAKSVTCTY | 8    | >TP53-T118I GIAKSVTCTY  | 1180 | 1172 |
| >TP53-T118I GTAKSVTCTY | 296  | >TP53-T118I GIAKSVTCTY  | 4413 | 4117 |
| >TP53-T118I GTAKSVTCTY | 39   | >TP53-T118I GIAKSVTCTY  | 1020 | 981  |
| >TP53-T118I GTAKSVTCTY | 143  | >TP53-T118I GIAKSVTCTY  | 65   | 78   |
| >TP53-T118I GFRLGFLHSG | 4197 | >TP53-T118I GFRLGFLHSG  | 251  | 3946 |
| >TP53-T118I SGTAKSVTCT | 1509 | >TP53-T118I SGIKSVTCTY  | 116  | 1393 |
| >TP53-T118I SGTAKSVTCT | 1319 | >TP53-T118I SGIKSVTCTY  | 257  | 1062 |
| >TP53-T118I SGTAKSVTCT | 585  | >TP53-T118I SGIKSVTCTY  | 414  | 171  |
| >TP53-T118I SGTAKSVTCT | 374  | >TP53-T118I SGIKSVTCTY  | 131  | 243  |
| >TP53-T118I FLHSGTAKSV | 122  | >TP53-T118I FLHSGIAKSV  | 76   | 46   |
| >TP53-T118I FLHSGTAKS  | 179  | >TP53-T118I FLHSGIAKS   | 118  | 61   |
| >TP53-T118I FLHSGTAKSV | 13   | >TP53-T118I FLHSGIAKSV  | 11   | 2    |
| >TP53-T118I FLHSGTAKSV | 413  | >TP53-T118I FLHSGIAKSVI | 343  | 70   |
| >TP53-T118I FLHSGTAKS  | 26   | >TP53-T118I FLHSGIAKS   | 18   | 8    |

|                         |       |                          |      |       |
|-------------------------|-------|--------------------------|------|-------|
| >TP53-T118I·FLHSGTAKSV  | 11    | >TP53-T118I·FLHSGIAKSV   | 10   | 1     |
| >TP53-T118I·FLHSGTAKSV  | 27    | >TP53-T118I·FLHSGIAKSVI  | 28   | 1     |
| >TP53-T118I·FLHSGTAKSV  | 504   | >TP53-T118I·FLHSGIAKSV   | 463  | 41    |
| >TP53-T118I·FLHSGTAK    | 1218  | >TP53-T118I·FLHSGIAK     | 397  | 821   |
| >TP53-T118I·FLHSGTAKS   | 188   | >TP53-T118I·FLHSGIAKS    | 34   | 154   |
| >TP53-T118I·FLHSGTAKSV  | 2     | >TP53-T118I·FLHSGIAKSV   | 2    | 0     |
| >TP53-T118I·FLHSGTAKSV  | 116   | >TP53-T118I·FLHSGIAKSVI  | 55   | 61    |
| >TP53-T118I·FLHSGTAKSV  | 5     | >TP53-T118I·FLHSGIAKSV   | 5    | 0     |
| >TP53-T118I·FLHSGTAKSV  | 7     | >TP53-T118I·FLHSGIAKSV   | 7    | 0     |
| >TP53-T118I·FLHSGTAKSV  | 7     | >TP53-T118I·FLHSGIAKSV   | 6    | 1     |
| >TP53-T118I·FLHSGTAK    | 124   | >TP53-T118I·FLHSGIAK     | 101  | 23    |
| >TP53-T118I·FLHSGTAKS   | 31    | >TP53-T118I·FLHSGIAKS    | 12   | 19    |
| >TP53-T118I·FLHSGTAKSV  | 2     | >TP53-T118I·FLHSGIAKSV   | 1    | 1     |
| >TP53-T118I·FLHSGTAKSV  | 13    | >TP53-T118I·FLHSGIAKSVI  | 10   | 3     |
| >TP53-T118I·FLHSGTAK    | 114   | >TP53-T118I·FLHSGIAK     | 100  | 14    |
| >TP53-T118I·FLHSGTAK    | 1030  | >TP53-T118I·FLHSGIAK     | 456  | 574   |
| >TP53-T118I·FLHSGTAK    | 256   | >TP53-T118I·FLHSGIAK     | 322  | 66    |
| >TP53-T118I·FLHSGTAKSV  | 283   | >TP53-T118I·FLHSGIAKSV   | 618  | 335   |
| >TP53-T118I·FLHSGTAKSV  | 261   | >TP53-T118I·FLHSGIAKSV   | 469  | 208   |
| >TP53-T118I·GFLHSGTAK   | 1580  | >TP53-T118I·GFLHSGIAK    | 134  | 1446  |
| >TP53-T118I·LGFLHSGT    | 4970  | >TP53-T118I·LGFLHSGI     | 499  | 4471  |
| >TP53-T118I·LGFLHSGT    | 32615 | >TP53-T118I·LGFLHSGI     | 112  | 32503 |
| >TP53-T118I·RLGFLHSGT   | 3725  | >TP53-T118I·RLGFLHSGI    | 328  | 3397  |
| >TP53-T118I·RLGFLHSGT   | 1194  | >TP53-T118I·RLGFLHSGI    | 77   | 1117  |
| >TP53-T118I·RLGFLHSGTA  | 326   | >TP53-T118I·RLGFLHSGIA   | 922  | 596   |
| >TP53-T118I·RLGFLHSGT   | 719   | >TP53-T118I·RLGFLHSGI    | 19   | 700   |
| >TP53-T118I·RLGFLHSGTA  | 162   | >TP53-T118I·RLGFLHSGIA   | 1267 | 1105  |
| >TP53-T118I·RLGFLHSGT   | 6695  | >TP53-T118I·RLGFLHSGI    | 257  | 6438  |
| >TP53-T118I·RLGFLHSGT   | 5187  | >TP53-T118I·RLGFLHSGI    | 384  | 4803  |
| >TP53-T118I·RLGFLHSGT   | 2002  | >TP53-T118I·RLGFLHSGI    | 140  | 1862  |
| >TP53-T118I·RLGFLHSGTA  | 43    | >TP53-T118I·RLGFLHSGIAI  | 41   | 2     |
| >TP53-T118I·RLGFLHSGTA  | 125   | >TP53-T118I·RLGFLHSGIAI  | 59   | 66    |
| >TP53-T118I·RLGFLHSGTA  | 384   | >TP53-T118I·RLGFLHSGIAI  | 77   | 307   |
| >TP53-T118I·RLGFLHSGTA  | 262   | >TP53-T118I·RLGFLHSGIAI  | 358  | 96    |
| >TP53-T118I·RLGFLHSGT   | 9121  | >TP53-T118I·RLGFLHSGI    | 82   | 9039  |
| >TP53-T118I·FRLGFLHSGT  | 716   | >TP53-T118I·FRLGFLHSGI   | 153  | 563   |
| >TP53-T118I·FRLGFLHSGT  | 412   | >TP53-T118I·FRLGFLHSGI   | 83   | 329   |
| >TP53-T118I·FRLGFLHSGT, | 174   | >TP53-T118I·FRLGFLHSGIA/ | 276  | 102   |
| >TP53-T118I·FRLGFLHSGT  | 5229  | >TP53-T118I·FRLGFLHSGI   | 322  | 4907  |
| >TP53-T118I·FRLGFLHSGT  | 1498  | >TP53-T118I·FRLGFLHSGI   | 468  | 1030  |
| >TP53-T118RTAKSVTCTY    | 1756  | >TP53-T118RRAKSVTCTY     | 25   | 1731  |
| >TP53-T118RTAKSVTCTYS   | 4646  | >TP53-T118RRAKSVTCTYS    | 123  | 4523  |
| >TP53-T118RTAKSVTCTYSI  | 7526  | >TP53-T118RRAKSVTCTYSI   | 305  | 7221  |

|                       |       |                       |       |       |
|-----------------------|-------|-----------------------|-------|-------|
| >TP53-T118RTAKSVTCTY  | 312   | >TP53-T118RRAKSVTCTY  | 155   | 157   |
| >TP53-T118RTAKSVTCTY  | 247   | >TP53-T118RRAKSVTCTY  | 5135  | 4888  |
| >TP53-T118RTAKSVTCTY  | 78    | >TP53-T118RRAKSVTCTY  | 43    | 35    |
| >TP53-T118RTAKSVTCTY  | 430   | >TP53-T118RRAKSVTCTY  | 65    | 365   |
| >TP53-T118RTAKSVTCTY  | 265   | >TP53-T118RRAKSVTCTY  | 14    | 251   |
| >TP53-T118RTAKSVTCTY  | 100   | >TP53-T118RRAKSVTCTY  | 346   | 246   |
| >TP53-T118RTAKSVTCTY  | 746   | >TP53-T118RRAKSVTCTY  | 119   | 627   |
| >TP53-T118RTAKSVTCTY  | 2180  | >TP53-T118RRAKSVTCTY  | 54    | 2126  |
| >TP53-T118RTAKSVTCTY  | 336   | >TP53-T118RRAKSVTCTY  | 84    | 252   |
| >TP53-T118RTAKSVTCTY  | 1427  | >TP53-T118RRAKSVTCTY  | 409   | 1018  |
| >TP53-T118RGTAKSVTCTY | 466   | >TP53-T118RGRAKSVTCTY | 21315 | 20849 |
| >TP53-T118RGTAKSVTCTY | 122   | >TP53-T118RGRAKSVTCTY | 1045  | 923   |
| >TP53-T118RGTAKSVTCTY | 69    | >TP53-T118RGRAKSVTCTY | 1321  | 1252  |
| >TP53-T118RGTAKSVTCTY | 71    | >TP53-T118RGRAKSVTCTY | 4539  | 4468  |
| >TP53-T118RGTAKSVTCTY | 461   | >TP53-T118RGRAKSVTCTY | 67    | 394   |
| >TP53-T118RGTAKSVTCTY | 8     | >TP53-T118RGRAKSVTCTY | 20837 | 20829 |
| >TP53-T118RGTAKSVTCTY | 25797 | >TP53-T118RGRAKSVTCTY | 112   | 25685 |
| >TP53-T118RGTAKSVTCTY | 296   | >TP53-T118RGRAKSVTCTY | 20220 | 19924 |
| >TP53-T118RGTAKSVTCTY | 39    | >TP53-T118RGRAKSVTCTY | 8044  | 8005  |
| >TP53-T118RGTAKSVTCTY | 143   | >TP53-T118RGRAKSVTCTY | 1302  | 1159  |
| >TP53-T118RGFRLGFLHSG | 19509 | >TP53-T118RGFRLGFLHSG | 30    | 19479 |
| >TP53-T118RGFRLGFLHSG | 28030 | >TP53-T118RGFRLGFLHSG | 97    | 27933 |
| >TP53-T118RSGTAKSVTCT | 12383 | >TP53-T118RSGRAKSVTCT | 215   | 12168 |
| >TP53-T118RSGTAKSVTCT | 1509  | >TP53-T118RSGRAKSVTCT | 110   | 1399  |
| >TP53-T118RSGTAKSVTCT | 1319  | >TP53-T118RSGRAKSVTCT | 186   | 1133  |
| >TP53-T118RSGTAKSVTCT | 917   | >TP53-T118RSGRAKSVTCT | 302   | 615   |
| >TP53-T118RSGTAKSVTCT | 374   | >TP53-T118RSGRAKSVTCT | 1064  | 690   |
| >TP53-T118RFLHSGTAKSV | 122   | >TP53-T118RFLHSGRAKSV | 336   | 214   |
| >TP53-T118RFLHSGTAKS  | 179   | >TP53-T118RFLHSGRAKS  | 2489  | 2310  |
| >TP53-T118RFLHSGTAKSV | 13    | >TP53-T118RFLHSGRAKSV | 25    | 12    |
| >TP53-T118RFLHSGTAKSV | 413   | >TP53-T118RFLHSGRAKSV | 1817  | 1404  |
| >TP53-T118RFLHSGTAKS  | 26    | >TP53-T118RFLHSGRAKS  | 430   | 404   |
| >TP53-T118RFLHSGTAKSV | 11    | >TP53-T118RFLHSGRAKSV | 19    | 8     |
| >TP53-T118RFLHSGTAKSV | 27    | >TP53-T118RFLHSGRAKSV | 84    | 57    |
| >TP53-T118RFLHSGTAKS  | 188   | >TP53-T118RFLHSGRAKS  | 2354  | 2166  |
| >TP53-T118RFLHSGTAKSV | 2     | >TP53-T118RFLHSGRAKSV | 3     | 1     |
| >TP53-T118RFLHSGTAKSV | 116   | >TP53-T118RFLHSGRAKSV | 414   | 298   |
| >TP53-T118RFLHSGTAKSV | 5     | >TP53-T118RFLHSGRAKSV | 18    | 13    |
| >TP53-T118RFLHSGTAKSV | 7     | >TP53-T118RFLHSGRAKSV | 14    | 7     |
| >TP53-T118RFLHSGTAKSV | 7     | >TP53-T118RFLHSGRAKSV | 46    | 39    |
| >TP53-T118RFLHSGTAK   | 124   | >TP53-T118RFLHSGRAK   | 761   | 637   |
| >TP53-T118RFLHSGTAKS  | 31    | >TP53-T118RFLHSGRAKS  | 58    | 27    |
| >TP53-T118RFLHSGTAKSV | 2     | >TP53-T118RFLHSGRAKSV | 2     | 0     |

|                         |       |                          |      |       |
|-------------------------|-------|--------------------------|------|-------|
| >TP53-T118R FLHSGTAKSV  | 13    | >TP53-T118R FLHSGRAKSV   | 15   | 2     |
| >TP53-T118R FLHSGTAK    | 114   | >TP53-T118R FLHSGRAK     | 240  | 126   |
| >TP53-T118R FLHSGTAK    | 256   | >TP53-T118R FLHSGRAK     | 751  | 495   |
| >TP53-T118R FLHSGTAKSV  | 283   | >TP53-T118R FLHSGRAKSV   | 565  | 282   |
| >TP53-T118R FLHSGTAKSV  | 261   | >TP53-T118R FLHSGRAKSV   | 489  | 228   |
| >TP53-T118R LGFLHSGT    | 22913 | >TP53-T118R LGFLHSGR     | 426  | 22487 |
| >TP53-T118R LGFLHSGT    | 35407 | >TP53-T118R LGFLHSGR     | 362  | 35045 |
| >TP53-T118R LGFLHSGT    | 33829 | >TP53-T118R LGFLHSGR     | 477  | 33352 |
| >TP53-T118R RLGFLHSGTA  | 326   | >TP53-T118R RLGFLHSGRA   | 1289 | 963   |
| >TP53-T118R RLGFLHSGTA  | 162   | >TP53-T118R RLGFLHSGRA   | 307  | 145   |
| >TP53-T118R RLGFLHSGT   | 17465 | >TP53-T118R RLGFLHSGR    | 427  | 17038 |
| >TP53-T118R RLGFLHSGTA  | 43    | >TP53-T118R RLGFLHSGRA   | 57   | 14    |
| >TP53-T118R RLGFLHSGTA  | 125   | >TP53-T118R RLGFLHSGRA   | 320  | 195   |
| >TP53-T118R RLGFLHSGTA  | 384   | >TP53-T118R RLGFLHSGRA   | 179  | 205   |
| >TP53-T118R RLGFLHSGT   | 14752 | >TP53-T118R RLGFLHSGR    | 19   | 14733 |
| >TP53-T118R RLGFLHSGTA  | 262   | >TP53-T118R RLGFLHSGRA   | 601  | 339   |
| >TP53-T118R RLGFLHSGT   | 27040 | >TP53-T118R RLGFLHSGR    | 103  | 26937 |
| >TP53-T118R FRLGFLHSGT  | 16399 | >TP53-T118R FRLGFLHSGR   | 84   | 16315 |
| >TP53-T118R FRLGFLHSGT  | 16838 | >TP53-T118R FRLGFLHSGR   | 186  | 16652 |
| >TP53-T118R FRLGFLHSGT  | 412   | >TP53-T118R FRLGFLHSGR   | 73   | 339   |
| >TP53-T118R FRLGFLHSGT  | 174   | >TP53-T118R FRLGFLHSGR   | 173  | 1     |
| >TP53-T118R FRLGFLHSGT  | 31066 | >TP53-T118R FRLGFLHSGR   | 303  | 30763 |
| >TP53-T123I- TCTYSPALNK | 453   | >TP53-T123I- ICTYSPALNK  | 117  | 336   |
| >TP53-T123I- VTCTYSPA   | 415   | >TP53-T123I- VICTYSPA    | 283  | 132   |
| >TP53-T123I- VTCTYSPAL  | 2470  | >TP53-T123I- VICTYSPAL   | 385  | 2085  |
| >TP53-T123I- VTCTYSPA   | 1658  | >TP53-T123I- VICTYSPA    | 259  | 1399  |
| >TP53-T123I- VTCTYSPAL  | 397   | >TP53-T123I- VICTYSPAL   | 107  | 290   |
| >TP53-T123I- VTCTYSPAL  | 766   | >TP53-T123I- VICTYSPAL   | 132  | 634   |
| >TP53-T123I- VTCTYSPAL  | 6296  | >TP53-T123I- VICTYSPAL   | 203  | 6093  |
| >TP53-T123I- VTCTYSPALN | 80    | >TP53-T123I- VICTYSPALNK | 66   | 14    |
| >TP53-T123I- VTCTYSPALN | 14    | >TP53-T123I- VICTYSPALNK | 22   | 8     |
| >TP53-T123I- VTCTYSPALN | 146   | >TP53-T123I- VICTYSPALNK | 665  | 519   |
| >TP53-T123I- VTCTYSPALN | 490   | >TP53-T123I- VICTYSPALNK | 2112 | 1622  |
| >TP53-T123I- VTCTYSPAL  | 12    | >TP53-T123I- VICTYSPAL   | 4024 | 4012  |
| >TP53-T123I- VTCTYSPAL  | 66    | >TP53-T123I- VICTYSPAL   | 7103 | 7037  |
| >TP53-T123I- FLHSGTAKSV | 1619  | >TP53-T123I- FLHSGTAKSV  | 127  | 1492  |
| >TP53-T123I- FLHSGTAKSV | 413   | >TP53-T123I- FLHSGTAKSV  | 25   | 388   |
| >TP53-T123I- FLHSGTAKSV | 27    | >TP53-T123I- FLHSGTAKSV  | 5    | 22    |
| >TP53-T123I- FLHSGTAKSV | 2478  | >TP53-T123I- FLHSGTAKSV  | 312  | 2166  |
| >TP53-T123I- FLHSGTAKSV | 116   | >TP53-T123I- FLHSGTAKSV  | 6    | 110   |
| >TP53-T123I- FLHSGTAKSV | 1427  | >TP53-T123I- FLHSGTAKSV  | 18   | 1409  |
| >TP53-T123I- FLHSGTAKSV | 920   | >TP53-T123I- FLHSGTAKSV  | 41   | 879   |
| >TP53-T123I- FLHSGTAKSV | 3383  | >TP53-T123I- FLHSGTAKSV  | 143  | 3240  |

|                         |      |                         |      |      |
|-------------------------|------|-------------------------|------|------|
| >TP53-T123I-FLHSGTAKSV  | 13   | >TP53-T123I-FLHSGTAKSV  | 4    | 9    |
| >TP53-T123I-FLHSGTAKSV  | 1707 | >TP53-T123I-FLHSGTAKSV  | 314  | 1393 |
| >TP53-T123I-FLHSGTAKSV  | 7323 | >TP53-T123I-FLHSGTAKSV  | 284  | 7039 |
| >TP53-T123I-SVTCTYSPAL  | 874  | >TP53-T123I-SVICTYSPAL  | 293  | 581  |
| >TP53-T123I-SVTCTYSPA   | 118  | >TP53-T123I-SVICTYSPA   | 23   | 95   |
| >TP53-T123I-SVTCTYSPA   | 468  | >TP53-T123I-SVICTYSPA   | 101  | 367  |
| >TP53-T123I-SVTCTYSPAL  | 268  | >TP53-T123I-SVICTYSPAL  | 70   | 198  |
| >TP53-T123I-SVTCTYSPAL  | 923  | >TP53-T123I-SVICTYSPAL  | 334  | 589  |
| >TP53-T123I-SVTCTYSPAL  | 877  | >TP53-T123I-SVICTYSPAL  | 165  | 712  |
| >TP53-T123I-SVTCTYSPAL  | 1465 | >TP53-T123I-SVICTYSPAL  | 36   | 1429 |
| >TP53-T123I-SVTCTYSPA   | 241  | >TP53-T123I-SVICTYSPA   | 168  | 73   |
| >TP53-T123I-SVTCTYSPA   | 45   | >TP53-T123I-SVICTYSPA   | 23   | 22   |
| >TP53-T123I-SVTCTYSPA   | 583  | >TP53-T123I-SVICTYSPA   | 133  | 450  |
| >TP53-T123I-SVTCTYSPAL  | 149  | >TP53-T123I-SVICTYSPAL  | 35   | 114  |
| >TP53-T123I-SVTCTYSPAL  | 4988 | >TP53-T123I-SVICTYSPAL  | 372  | 4616 |
| >TP53-T123I-SVTCTYSPAL  | 1647 | >TP53-T123I-SVICTYSPAL  | 461  | 1186 |
| >TP53-T123I-SVTCTYSPAL  | 1709 | >TP53-T123I-SVICTYSPAL  | 283  | 1426 |
| >TP53-T123I-KSVTCTYSPAI | 396  | >TP53-T123I-KSVICTYSPAL | 531  | 135  |
| >TP53-T123I-KSVTCTYSPA  | 149  | >TP53-T123I-KSVICTYSPA  | 211  | 62   |
| >TP53-T123I-KSVTCTYSPAI | 488  | >TP53-T123I-KSVICTYSPAL | 674  | 186  |
| >TP53-T123I-KSVTCTYSPAI | 107  | >TP53-T123I-KSVICTYSPAL | 198  | 91   |
| >TP53-T123I-KSVTCTYSPA  | 349  | >TP53-T123I-KSVICTYSPA  | 822  | 473  |
| >TP53-T123I-KSVTCTYSPAI | 89   | >TP53-T123I-KSVICTYSPAL | 251  | 162  |
| >TP53-T123I-KSVTCTYSPA  | 1612 | >TP53-T123I-KSVICTYSPA  | 462  | 1150 |
| >TP53-T123I-KSVTCTYSPAI | 6    | >TP53-T123I-KSVICTYSPAL | 4    | 2    |
| >TP53-T123I-KSVTCTYSPAI | 113  | >TP53-T123I-KSVICTYSPAL | 149  | 36   |
| >TP53-T123I-KSVTCTYSPAI | 198  | >TP53-T123I-KSVICTYSPAL | 192  | 6    |
| >TP53-T123I-AKSVTCTY    | 8    | >TP53-T123I-AKSVICTY    | 14   | 6    |
| >TP53-T123I-AKSVTCTYSP  | 483  | >TP53-T123I-AKSVICTYSP  | 1200 | 717  |
| >TP53-T123I-AKSVTCTYSP, | 56   | >TP53-T123I-AKSVICTYSPA | 119  | 63   |
| >TP53-T123I-TAKSVTCTY   | 312  | >TP53-T123I-TAKSVICTY   | 374  | 62   |
| >TP53-T123I-TAKSVTCTY   | 247  | >TP53-T123I-TAKSVICTY   | 348  | 101  |
| >TP53-T123I-TAKSVTCTY   | 78   | >TP53-T123I-TAKSVICTY   | 99   | 21   |
| >TP53-T123I-TAKSVTCTY   | 430  | >TP53-T123I-TAKSVICTY   | 473  | 43   |
| >TP53-T123I-TAKSVTCTY   | 265  | >TP53-T123I-TAKSVICTY   | 190  | 75   |
| >TP53-T123I-TAKSVTCTY   | 100  | >TP53-T123I-TAKSVICTY   | 370  | 270  |
| >TP53-T123I-TAKSVTCTY   | 336  | >TP53-T123I-TAKSVICTY   | 331  | 5    |
| >TP53-T123I-GTAKSVTCTY  | 466  | >TP53-T123I-GTAKSVICTY  | 597  | 131  |
| >TP53-T123I-GTAKSVTCTY  | 521  | >TP53-T123I-GTAKSVICTY  | 234  | 287  |
| >TP53-T123I-GTAKSVTCTY  | 122  | >TP53-T123I-GTAKSVICTY  | 316  | 194  |
| >TP53-T123I-GTAKSVTCTY  | 69   | >TP53-T123I-GTAKSVICTY  | 73   | 4    |
| >TP53-T123I-GTAKSVTCTY  | 71   | >TP53-T123I-GTAKSVICTY  | 99   | 28   |
| >TP53-T123I-GTAKSVTCTY  | 461  | >TP53-T123I-GTAKSVICTY  | 611  | 150  |

|                        |       |                         |       |       |
|------------------------|-------|-------------------------|-------|-------|
| >TP53-T123I-GTAKSVTCTY | 8     | >TP53-T123I-GTAKSVICTY  | 9     | 1     |
| >TP53-T123I-GTAKSVTCTY | 296   | >TP53-T123I-GTAKSVICTY  | 402   | 106   |
| >TP53-T123I-GTAKSVTCTY | 39    | >TP53-T123I-GTAKSVICTY  | 48    | 9     |
| >TP53-T123I-GTAKSVTCTY | 143   | >TP53-T123I-GTAKSVICTY  | 135   | 8     |
| >TP53-T123I-SGTAKSVTCT | 374   | >TP53-T123I-SGTAKSVICTY | 534   | 160   |
| >TP53-T123I-HSGTAKSVT  | 4291  | >TP53-T123I-HSGTAKSVI   | 478   | 3813  |
| >TP53-T123I-HSGTAKSVT  | 30619 | >TP53-T123I-HSGTAKSVI   | 49    | 30570 |
| >TP53-T123I-LHSGTAKSVT | 7321  | >TP53-T123I-LHSGTAKSVI  | 255   | 7066  |
| >TP53-T125A TYSPALNKM  | 136   | >TP53-T125A AYSPALNKM   | 266   | 130   |
| >TP53-T125A TYSPALNK   | 220   | >TP53-T125A AYSPALNK    | 257   | 37    |
| >TP53-T125A TYSPALNKMF | 179   | >TP53-T125A AYSPALNKMI  | 278   | 99    |
| >TP53-T125A TYSPALNKMF | 64    | >TP53-T125A AYSPALNKMI  | 92    | 28    |
| >TP53-T125A TYSPALNKM  | 27    | >TP53-T125A AYSPALNKM   | 21    | 6     |
| >TP53-T125A TYSPALNKMF | 5     | >TP53-T125A AYSPALNKMI  | 4     | 1     |
| >TP53-T125A TYSPALNKMF | 551   | >TP53-T125A AYSPALNKMI  | 388   | 163   |
| >TP53-T125A TYSPALNK   | 222   | >TP53-T125A AYSPALNK    | 28    | 194   |
| >TP53-T125A TYSPALNK   | 1692  | >TP53-T125A AYSPALNK    | 364   | 1328  |
| >TP53-T125A TYSPALNKM  | 866   | >TP53-T125A AYSPALNKM   | 302   | 564   |
| >TP53-T125A TYSPALNKMF | 439   | >TP53-T125A AYSPALNKMI  | 394   | 45    |
| >TP53-T125A CTYSPALNK  | 30    | >TP53-T125A CAYSPALNK   | 43    | 13    |
| >TP53-T125A CTYSPALNK  | 11    | >TP53-T125A CAYSPALNK   | 29    | 18    |
| >TP53-T125A CTYSPALNKM | 343   | >TP53-T125A CAYSPALNKM  | 1250  | 907   |
| >TP53-T125A CTYSPALNKM | 63    | >TP53-T125A CAYSPALNKM  | 2447  | 2384  |
| >TP53-T125A CTYSPALNKM | 380   | >TP53-T125A CAYSPALNKM  | 12094 | 11714 |
| >TP53-T125A CTYSPALNKM | 246   | >TP53-T125A CAYSPALNKM  | 5048  | 4802  |
| >TP53-T125A CTYSPALNK  | 215   | >TP53-T125A CAYSPALNK   | 1180  | 965   |
| >TP53-T125A CTYSPALNK  | 30    | >TP53-T125A CAYSPALNK   | 100   | 70    |
| >TP53-T125A CTYSPALNKM | 488   | >TP53-T125A CAYSPALNKM  | 2835  | 2347  |
| >TP53-T125A CTYSPALNKM | 610   | >TP53-T125A CAYSPALNKM  | 335   | 275   |
| >TP53-T125A CTYSPALNKM | 23    | >TP53-T125A CAYSPALNKM  | 17    | 6     |
| >TP53-T125A CTYSPALNKM | 24    | >TP53-T125A CAYSPALNKM  | 120   | 96    |
| >TP53-T125A CTYSPALNKM | 5     | >TP53-T125A CAYSPALNKM  | 12    | 7     |
| >TP53-T125A CTYSPALNKM | 6455  | >TP53-T125A CAYSPALNKM  | 436   | 6019  |
| >TP53-T125A CTYSPALNKM | 76    | >TP53-T125A CAYSPALNKM  | 1036  | 960   |
| >TP53-T125A CTYSPALNKM | 146   | >TP53-T125A CAYSPALNKM  | 1621  | 1475  |
| >TP53-T125A CTYSPALNKM | 30    | >TP53-T125A CAYSPALNKM  | 676   | 646   |
| >TP53-T125A CTYSPALNKM | 13    | >TP53-T125A CAYSPALNKM  | 205   | 192   |
| >TP53-T125A CTYSPALNKM | 358   | >TP53-T125A CAYSPALNKM  | 1137  | 779   |
| >TP53-T125A TCTYSPALNK | 453   | >TP53-T125A TCAYSPALNK  | 462   | 9     |
| >TP53-T125A VTCTYSPA   | 415   | >TP53-T125A VTCAYSPA    | 594   | 179   |
| >TP53-T125A VTCTYSPAL  | 397   | >TP53-T125A VTCAYSPAL   | 135   | 262   |
| >TP53-T125A VTCTYSPAL  | 766   | >TP53-T125A VTCAYSPAL   | 223   | 543   |
| >TP53-T125A VTCTYSPALN | 80    | >TP53-T125A VTCAYSPALN  | 68    | 12    |



|                        |     |                        |      |      |
|------------------------|-----|------------------------|------|------|
| >TP53-T125A VTCTYSPALN | 14  | >TP53-T125A VTCAYSPALN | 12   | 2    |
| >TP53-T125A VTCTYSPALN | 146 | >TP53-T125A VTCAYSPALN | 111  | 35   |
| >TP53-T125A VTCTYSPALN | 490 | >TP53-T125A VTCAYSPALN | 488  | 2    |
| >TP53-T125A VTCTYSPAL  | 12  | >TP53-T125A VTCAYSPAL  | 8    | 4    |
| >TP53-T125A VTCTYSPAL  | 66  | >TP53-T125A VTCAYSPAL  | 51   | 15   |
| >TP53-T125A SVTCTYSPA  | 118 | >TP53-T125A SVTCAYSPA  | 90   | 28   |
| >TP53-T125A SVTCTYSPA  | 468 | >TP53-T125A SVTCAYSPA  | 265  | 203  |
| >TP53-T125A SVTCTYSPAL | 268 | >TP53-T125A SVTCAYSPAL | 468  | 200  |
| >TP53-T125A SVTCTYSPA  | 241 | >TP53-T125A SVTCAYSPA  | 233  | 8    |
| >TP53-T125A SVTCTYSPA  | 45  | >TP53-T125A SVTCAYSPA  | 18   | 27   |
| >TP53-T125A SVTCTYSPA  | 583 | >TP53-T125A SVTCAYSPA  | 481  | 102  |
| >TP53-T125A SVTCTYSPAL | 149 | >TP53-T125A SVTCAYSPAL | 109  | 40   |
| >TP53-T125A KSVTCTYSPA | 396 | >TP53-T125A KSVTCAYSPA | 391  | 5    |
| >TP53-T125A KSVTCTYSPA | 149 | >TP53-T125A KSVTCAYSPA | 244  | 95   |
| >TP53-T125A KSVTCTYSPA | 488 | >TP53-T125A KSVTCAYSPA | 675  | 187  |
| >TP53-T125A KSVTCTYSPA | 107 | >TP53-T125A KSVTCAYSPA | 165  | 58   |
| >TP53-T125A KSVTCTYSPA | 349 | >TP53-T125A KSVTCAYSPA | 531  | 182  |
| >TP53-T125A KSVTCTYSPA | 89  | >TP53-T125A KSVTCAYSPA | 106  | 17   |
| >TP53-T125A KSVTCTYSPA | 6   | >TP53-T125A KSVTCAYSPA | 5    | 1    |
| >TP53-T125A KSVTCTYSPA | 669 | >TP53-T125A KSVTCAYSPA | 463  | 206  |
| >TP53-T125A KSVTCTYSPA | 113 | >TP53-T125A KSVTCAYSPA | 121  | 8    |
| >TP53-T125A KSVTCTYSPA | 198 | >TP53-T125A KSVTCAYSPA | 197  | 1    |
| >TP53-T125A AKSVTCTY   | 8   | >TP53-T125A AKSVTCAY   | 7    | 1    |
| >TP53-T125A AKSVTCTYSP | 483 | >TP53-T125A AKSVTCAYSP | 687  | 204  |
| >TP53-T125A AKSVTCTYSP | 56  | >TP53-T125A AKSVTCAYSP | 81   | 25   |
| >TP53-T125A TAKSVTCTY  | 312 | >TP53-T125A TAKSVTCAY  | 302  | 10   |
| >TP53-T125A TAKSVTCTY  | 247 | >TP53-T125A TAKSVTCAY  | 586  | 339  |
| >TP53-T125A TAKSVTCTY  | 78  | >TP53-T125A TAKSVTCAY  | 64   | 14   |
| >TP53-T125A TAKSVTCTY  | 430 | >TP53-T125A TAKSVTCAY  | 240  | 190  |
| >TP53-T125A TAKSVTCTY  | 265 | >TP53-T125A TAKSVTCAY  | 1078 | 813  |
| >TP53-T125A TAKSVTCTY  | 100 | >TP53-T125A TAKSVTCAY  | 47   | 53   |
| >TP53-T125A TAKSVTCTY  | 336 | >TP53-T125A TAKSVTCAY  | 1543 | 1207 |
| >TP53-T125A GTAKSVTCTY | 682 | >TP53-T125A GTAKSVTCAY | 328  | 354  |
| >TP53-T125A GTAKSVTCTY | 466 | >TP53-T125A GTAKSVTCAY | 799  | 333  |
| >TP53-T125A GTAKSVTCTY | 521 | >TP53-T125A GTAKSVTCAY | 222  | 299  |
| >TP53-T125A GTAKSVTCTY | 122 | >TP53-T125A GTAKSVTCAY | 59   | 63   |
| >TP53-T125A GTAKSVTCTY | 69  | >TP53-T125A GTAKSVTCAY | 63   | 6    |
| >TP53-T125A GTAKSVTCTY | 71  | >TP53-T125A GTAKSVTCAY | 55   | 16   |
| >TP53-T125A GTAKSVTCTY | 461 | >TP53-T125A GTAKSVTCAY | 306  | 155  |
| >TP53-T125A GTAKSVTCTY | 8   | >TP53-T125A GTAKSVTCAY | 19   | 11   |
| >TP53-T125A GTAKSVTCTY | 296 | >TP53-T125A GTAKSVTCAY | 1419 | 1123 |
| >TP53-T125A GTAKSVTCTY | 39  | >TP53-T125A GTAKSVTCAY | 74   | 35   |
| >TP53-T125A GTAKSVTCTY | 143 | >TP53-T125A GTAKSVTCAY | 115  | 28   |

|                        |       |                        |       |       |
|------------------------|-------|------------------------|-------|-------|
| >TP53-T125A SGTAKSVTCT | 585   | >TP53-T125A SGTAKSVTCA | 305   | 280   |
| >TP53-T125A SGTAKSVTCT | 374   | >TP53-T125A SGTAKSVTCA | 313   | 61    |
| >TP53-T125K TYSPALNKM  | 136   | >TP53-T125K KYSPALNKM  | 51    | 85    |
| >TP53-T125K TYSPALNK   | 220   | >TP53-T125K KYSPALNK   | 303   | 83    |
| >TP53-T125K TYSPALNKMF | 179   | >TP53-T125K KYSPALNKMF | 320   | 141   |
| >TP53-T125K TYSPALNKMF | 64    | >TP53-T125K KYSPALNKMF | 121   | 57    |
| >TP53-T125K TYSPALNKM  | 27    | >TP53-T125K KYSPALNKM  | 19    | 8     |
| >TP53-T125K TYSPALNKMF | 5     | >TP53-T125K KYSPALNKMF | 4     | 1     |
| >TP53-T125K TYSPALNKMF | 551   | >TP53-T125K KYSPALNKMF | 348   | 203   |
| >TP53-T125K TYSPALNK   | 222   | >TP53-T125K KYSPALNK   | 8     | 214   |
| >TP53-T125K TYSPALNKM  | 8331  | >TP53-T125K KYSPALNKM  | 317   | 8014  |
| >TP53-T125K TYSPALNK   | 4258  | >TP53-T125K KYSPALNK   | 470   | 3788  |
| >TP53-T125K TYSPALNKMF | 1792  | >TP53-T125K KYSPALNKMF | 360   | 1432  |
| >TP53-T125K TYSPALNK   | 674   | >TP53-T125K KYSPALNK   | 72    | 602   |
| >TP53-T125K TYSPALNKM  | 1354  | >TP53-T125K KYSPALNKM  | 256   | 1098  |
| >TP53-T125K TYSPALNKMF | 439   | >TP53-T125K KYSPALNKMF | 77    | 362   |
| >TP53-T125K CTYSPALNK  | 30    | >TP53-T125K CKYSPALNK  | 3979  | 3949  |
| >TP53-T125K CTYSPALNK  | 11    | >TP53-T125K CKYSPALNK  | 4491  | 4480  |
| >TP53-T125K CTYSPALNKM | 343   | >TP53-T125K CKYSPALNKM | 6562  | 6219  |
| >TP53-T125K CTYSPALNKM | 63    | >TP53-T125K CKYSPALNKM | 9488  | 9425  |
| >TP53-T125K CTYSPALNKM | 380   | >TP53-T125K CKYSPALNKM | 24049 | 23669 |
| >TP53-T125K CTYSPALNKM | 246   | >TP53-T125K CKYSPALNKM | 7439  | 7193  |
| >TP53-T125K CTYSPALNK  | 215   | >TP53-T125K CKYSPALNK  | 10207 | 9992  |
| >TP53-T125K CTYSPALNK  | 30    | >TP53-T125K CKYSPALNK  | 4219  | 4189  |
| >TP53-T125K CTYSPALNKM | 488   | >TP53-T125K CKYSPALNKM | 18834 | 18346 |
| >TP53-T125K CTYSPALNK  | 3428  | >TP53-T125K CKYSPALNK  | 102   | 3326  |
| >TP53-T125K CTYSPALNKM | 610   | >TP53-T125K CKYSPALNKM | 17    | 593   |
| >TP53-T125K CTYSPALNKM | 23    | >TP53-T125K CKYSPALNKM | 3     | 20    |
| >TP53-T125K CTYSPALNKM | 24    | >TP53-T125K CKYSPALNKM | 19563 | 19539 |
| >TP53-T125K CTYSPALNKM | 5     | >TP53-T125K CKYSPALNKM | 9435  | 9430  |
| >TP53-T125K CTYSPALNKM | 76    | >TP53-T125K CKYSPALNKM | 23903 | 23827 |
| >TP53-T125K CTYSPALNKM | 146   | >TP53-T125K CKYSPALNKM | 26034 | 25888 |
| >TP53-T125K CTYSPALNKM | 30    | >TP53-T125K CKYSPALNKM | 3073  | 3043  |
| >TP53-T125K CTYSPALNKM | 13    | >TP53-T125K CKYSPALNKM | 1771  | 1758  |
| >TP53-T125K CTYSPALNKM | 358   | >TP53-T125K CKYSPALNKM | 9995  | 9637  |
| >TP53-T125K HSGTAKSVTC | 28702 | >TP53-T125K HSGTAKSVTC | 296   | 28406 |
| >TP53-T125K TCTYSPALNK | 3671  | >TP53-T125K TCKYSPALNK | 51    | 3620  |
| >TP53-T125K TCTYSPALNK | 453   | >TP53-T125K TCKYSPALNK | 503   | 50    |
| >TP53-T125K VTCTYSPA   | 415   | >TP53-T125K VTCKYSPA   | 598   | 183   |
| >TP53-T125K VTCTYSPAL  | 397   | >TP53-T125K VTCKYSPAL  | 491   | 94    |
| >TP53-T125K VTCTYSPALN | 80    | >TP53-T125K VTCKYSPALN | 79    | 1     |
| >TP53-T125K VTCTYSPALN | 14    | >TP53-T125K VTCKYSPALN | 16    | 2     |
| >TP53-T125K VTCTYSPALN | 146   | >TP53-T125K VTCKYSPALN | 137   | 9     |

|                        |       |                        |      |       |
|------------------------|-------|------------------------|------|-------|
| >TP53-T125KVTCTYSPALN  | 490   | >TP53-T125KVTCKYSPALN  | 622  | 132   |
| >TP53-T125KVTCTYSPAL   | 12    | >TP53-T125KVTCKYSPAL   | 14   | 2     |
| >TP53-T125KVTCTYSPAL   | 66    | >TP53-T125KVTCKYSPAL   | 107  | 41    |
| >TP53-T125KSVTCTYSPA   | 118   | >TP53-T125KSVTCKYSPA   | 112  | 6     |
| >TP53-T125KSVTCTYSPA   | 468   | >TP53-T125KSVTCKYSPA   | 1132 | 664   |
| >TP53-T125KSVTCTYSPAL  | 268   | >TP53-T125KSVTCKYSPAL  | 918  | 650   |
| >TP53-T125KSVTCTYSPA   | 241   | >TP53-T125KSVTCKYSPA   | 844  | 603   |
| >TP53-T125KSVTCTYSPA   | 45    | >TP53-T125KSVTCKYSPA   | 48   | 3     |
| >TP53-T125KSVTCTYSPAL  | 149   | >TP53-T125KSVTCKYSPAL  | 522  | 373   |
| >TP53-T125K KSVTCTYSPA | 396   | >TP53-T125K KSVTCKYSPA | 1042 | 646   |
| >TP53-T125K KSVTCTYSPA | 149   | >TP53-T125K KSVTCKYSPA | 407  | 258   |
| >TP53-T125K KSVTCTYSPA | 488   | >TP53-T125K KSVTCKYSPA | 799  | 311   |
| >TP53-T125K KSVTCTYSPA | 107   | >TP53-T125K KSVTCKYSPA | 477  | 370   |
| >TP53-T125K KSVTCTYSPA | 349   | >TP53-T125K KSVTCKYSPA | 1274 | 925   |
| >TP53-T125K KSVTCTYSPA | 89    | >TP53-T125K KSVTCKYSPA | 184  | 95    |
| >TP53-T125K KSVTCTYSPA | 6     | >TP53-T125K KSVTCKYSPA | 10   | 4     |
| >TP53-T125K KSVTCTYSPA | 113   | >TP53-T125K KSVTCKYSPA | 306  | 193   |
| >TP53-T125K KSVTCTYSPA | 198   | >TP53-T125K KSVTCKYSPA | 600  | 402   |
| >TP53-T125KAKSVTCTY    | 8     | >TP53-T125KAKSVTCKY    | 16   | 8     |
| >TP53-T125KAKSVTCTYSP  | 483   | >TP53-T125KAKSVTCKYSP  | 1034 | 551   |
| >TP53-T125KAKSVTCTYSP, | 56    | >TP53-T125KAKSVTCKYSP, | 104  | 48    |
| >TP53-T125K TAKSVTCT   | 25054 | >TP53-T125K TAKSVTCK   | 230  | 24824 |
| >TP53-T125K TAKSVTCT   | 12041 | >TP53-T125K TAKSVTCK   | 226  | 11815 |
| >TP53-T125K TAKSVTCTY  | 312   | >TP53-T125K TAKSVTCKY  | 372  | 60    |
| >TP53-T125K TAKSVTCT   | 16264 | >TP53-T125K TAKSVTCK   | 33   | 16231 |
| >TP53-T125K TAKSVTCTY  | 247   | >TP53-T125K TAKSVTCKY  | 450  | 203   |
| >TP53-T125K TAKSVTCTY  | 78    | >TP53-T125K TAKSVTCKY  | 605  | 527   |
| >TP53-T125K TAKSVTCTY  | 430   | >TP53-T125K TAKSVTCKY  | 1212 | 782   |
| >TP53-T125K TAKSVTCTY  | 265   | >TP53-T125K TAKSVTCKY  | 524  | 259   |
| >TP53-T125K TAKSVTCTY  | 100   | >TP53-T125K TAKSVTCKY  | 1126 | 1026  |
| >TP53-T125K TAKSVTCTY  | 336   | >TP53-T125K TAKSVTCKY  | 883  | 547   |
| >TP53-T125KGTAKSVTCTY  | 682   | >TP53-T125KGTAKSVTCKY  | 340  | 342   |
| >TP53-T125KGTAKSVTCT   | 21567 | >TP53-T125KGTAKSVTCK   | 141  | 21426 |
| >TP53-T125KGTAKSVTCT   | 21180 | >TP53-T125KGTAKSVTCK   | 16   | 21164 |
| >TP53-T125KGTAKSVTCTY  | 466   | >TP53-T125KGTAKSVTCKY  | 784  | 318   |
| >TP53-T125KGTAKSVTCTY  | 775   | >TP53-T125KGTAKSVTCKY  | 377  | 398   |
| >TP53-T125KGTAKSVTCTY  | 122   | >TP53-T125KGTAKSVTCKY  | 75   | 47    |
| >TP53-T125KGTAKSVTCTY  | 69    | >TP53-T125KGTAKSVTCKY  | 42   | 27    |
| >TP53-T125KGTAKSVTCT   | 16717 | >TP53-T125KGTAKSVTCK   | 40   | 16677 |
| >TP53-T125KGTAKSVTCTY  | 71    | >TP53-T125KGTAKSVTCKY  | 393  | 322   |
| >TP53-T125KGTAKSVTCTY  | 461   | >TP53-T125KGTAKSVTCKY  | 1176 | 715   |
| >TP53-T125KGTAKSVTCTY  | 8     | >TP53-T125KGTAKSVTCKY  | 12   | 4     |
| >TP53-T125KGTAKSVTCTY  | 296   | >TP53-T125KGTAKSVTCKY  | 702  | 406   |

|                       |      |                       |       |       |
|-----------------------|------|-----------------------|-------|-------|
| >TP53-T125KGTAKSVTCTY | 39   | >TP53-T125KGTAKSVTCKY | 40    | 1     |
| >TP53-T125KGTAKSVTCTY | 143  | >TP53-T125KGTAKSVTCKY | 1054  | 911   |
| >TP53-T125KGTAKSVTCT  | 4907 | >TP53-T125KGTAKSVTCK  | 97    | 4810  |
| >TP53-T125KSGTAKSVTCT | 374  | >TP53-T125KSGTAKSVTCK | 1873  | 1499  |
| >TP53-T125\TYSPALNKM  | 136  | >TP53-T125\MYSPALNKM  | 840   | 704   |
| >TP53-T125\TYSPALNK   | 220  | >TP53-T125\MYSPALNK   | 193   | 27    |
| >TP53-T125\TYSPALNKM  | 179  | >TP53-T125\MYSPALNKM  | 94    | 85    |
| >TP53-T125\TYSPALNKM  | 64   | >TP53-T125\MYSPALNKM  | 48    | 16    |
| >TP53-T125\TYSPALNK   | 1599 | >TP53-T125\MYSPALNK   | 483   | 1116  |
| >TP53-T125\TYSPALNKM  | 27   | >TP53-T125\MYSPALNKM  | 11    | 16    |
| >TP53-T125\TYSPALNKM  | 5    | >TP53-T125\MYSPALNKM  | 4     | 1     |
| >TP53-T125\TYSPALNKM  | 551  | >TP53-T125\MYSPALNKM  | 143   | 408   |
| >TP53-T125\TYSPALNKM  | 586  | >TP53-T125\MYSPALNKM  | 450   | 136   |
| >TP53-T125\TYSPALNK   | 222  | >TP53-T125\MYSPALNK   | 18    | 204   |
| >TP53-T125\TYSPALNK   | 1077 | >TP53-T125\MYSPALNK   | 457   | 620   |
| >TP53-T125\TYSPALNKM  | 1792 | >TP53-T125\MYSPALNKM  | 267   | 1525  |
| >TP53-T125\TYSPALNK   | 674  | >TP53-T125\MYSPALNK   | 271   | 403   |
| >TP53-T125\TYSPALNKM  | 1354 | >TP53-T125\MYSPALNKM  | 301   | 1053  |
| >TP53-T125\TYSPALNKM  | 439  | >TP53-T125\MYSPALNKM  | 100   | 339   |
| >TP53-T125\CTYSPALNKN | 1314 | >TP53-T125\CMYSPALNKI | 425   | 889   |
| >TP53-T125\CTYSPALNKN | 1199 | >TP53-T125\CMYSPALNKI | 69    | 1130  |
| >TP53-T125\CTYSPALNKN | 2550 | >TP53-T125\CMYSPALNKI | 213   | 2337  |
| >TP53-T125\CTYSPALNKN | 9862 | >TP53-T125\CMYSPALNKI | 104   | 9758  |
| >TP53-T125\CTYSPALNK  | 30   | >TP53-T125\CMYSPALNK  | 24    | 6     |
| >TP53-T125\CTYSPALNK  | 11   | >TP53-T125\CMYSPALNK  | 14    | 3     |
| >TP53-T125\CTYSPALNKN | 343  | >TP53-T125\CMYSPALNKI | 127   | 216   |
| >TP53-T125\CTYSPALNKN | 63   | >TP53-T125\CMYSPALNKI | 2053  | 1990  |
| >TP53-T125\CTYSPALNKN | 380  | >TP53-T125\CMYSPALNKI | 10849 | 10469 |
| >TP53-T125\CTYSPALNKN | 246  | >TP53-T125\CMYSPALNKI | 5174  | 4928  |
| >TP53-T125\CTYSPALNKN | 1390 | >TP53-T125\CMYSPALNKI | 374   | 1016  |
| >TP53-T125\CTYSPALNK  | 215  | >TP53-T125\CMYSPALNK  | 1585  | 1370  |
| >TP53-T125\CTYSPALNK  | 30   | >TP53-T125\CMYSPALNK  | 344   | 314   |
| >TP53-T125\CTYSPALNKN | 488  | >TP53-T125\CMYSPALNKI | 3354  | 2866  |
| >TP53-T125\CTYSPALNKN | 2170 | >TP53-T125\CMYSPALNKI | 160   | 2010  |
| >TP53-T125\CTYSPALNKN | 2628 | >TP53-T125\CMYSPALNKI | 93    | 2535  |
| >TP53-T125\CTYSPALNK  | 3428 | >TP53-T125\CMYSPALNK  | 185   | 3243  |
| >TP53-T125\CTYSPALNKN | 610  | >TP53-T125\CMYSPALNKI | 27    | 583   |
| >TP53-T125\CTYSPALNKN | 23   | >TP53-T125\CMYSPALNKI | 3     | 20    |
| >TP53-T125\CTYSPALNKN | 24   | >TP53-T125\CMYSPALNKI | 1285  | 1261  |
| >TP53-T125\CTYSPALNKN | 5    | >TP53-T125\CMYSPALNKI | 125   | 120   |
| >TP53-T125\CTYSPALNKN | 76   | >TP53-T125\CMYSPALNKI | 6401  | 6325  |
| >TP53-T125\CTYSPALNKN | 146  | >TP53-T125\CMYSPALNKI | 8796  | 8650  |
| >TP53-T125\CTYSPALNKN | 30   | >TP53-T125\CMYSPALNKI | 611   | 581   |

|                         |       |                         |      |       |
|-------------------------|-------|-------------------------|------|-------|
| >TP53-T125NCTYSPALNKM   | 13    | >TP53-T125N CMYSPALNKI  | 908  | 895   |
| >TP53-T125NCTYSPALNK    | 3222  | >TP53-T125N CMYSPALNK   | 304  | 2918  |
| >TP53-T125NCTYSPALNKM   | 358   | >TP53-T125N CMYSPALNKI  | 6506 | 6148  |
| >TP53-T125NTCTYSPALNK   | 1144  | >TP53-T125N TCMYSPALN†  | 90   | 1054  |
| >TP53-T125NTCTYSPALNK   | 807   | >TP53-T125N TCMYSPALN†  | 107  | 700   |
| >TP53-T125NTCTYSPAL     | 4667  | >TP53-T125N TCMYSPAL    | 280  | 4387  |
| >TP53-T125NTCTYSPALNK   | 453   | >TP53-T125N TCMYSPALN†  | 309  | 144   |
| >TP53-T125NVTCTYSPA     | 415   | >TP53-T125N VTCMYSPA    | 268  | 147   |
| >TP53-T125NVTCTYSPAL    | 397   | >TP53-T125N VTCMYSPAL   | 324  | 73    |
| >TP53-T125NVTCTYSPAL    | 766   | >TP53-T125N VTCMYSPAL   | 485  | 281   |
| >TP53-T125NVTCTYSPALN   | 80    | >TP53-T125N VTCMYSPALN  | 102  | 22    |
| >TP53-T125NVTCTYSPALN   | 14    | >TP53-T125N VTCMYSPALN  | 14   | 0     |
| >TP53-T125NVTCTYSPALN   | 146   | >TP53-T125N VTCMYSPALN  | 137  | 9     |
| >TP53-T125NVTCTYSPALN   | 490   | >TP53-T125N VTCMYSPALN  | 426  | 64    |
| >TP53-T125NVTCTYSPAL    | 12    | >TP53-T125N VTCMYSPAL   | 9    | 3     |
| >TP53-T125NVTCTYSPAL    | 66    | >TP53-T125N VTCMYSPAL   | 53   | 13    |
| >TP53-T125NSVTCTYSPA    | 118   | >TP53-T125N SVTCMYSPA   | 79   | 39    |
| >TP53-T125NSVTCTYSPA    | 468   | >TP53-T125N SVTCMYSPA   | 543  | 75    |
| >TP53-T125NSVTCTYSPAL   | 268   | >TP53-T125N SVTCMYSPAL  | 380  | 112   |
| >TP53-T125NSVTCTYSPA    | 241   | >TP53-T125N SVTCMYSPA   | 673  | 432   |
| >TP53-T125NSVTCTYSPA    | 45    | >TP53-T125N SVTCMYSPA   | 23   | 22    |
| >TP53-T125NSVTCTYSPAL   | 149   | >TP53-T125N SVTCMYSPAL  | 275  | 126   |
| >TP53-T125N KSVTCTYSPA† | 396   | >TP53-T125N KSVTCMYSPA† | 311  | 85    |
| >TP53-T125N KSVTCTYSPA† | 1648  | >TP53-T125N KSVTCMYSPA† | 425  | 1223  |
| >TP53-T125N KSVTCTYSPA  | 149   | >TP53-T125N KSVTCMYSPA† | 273  | 124   |
| >TP53-T125N KSVTCTYSPA† | 488   | >TP53-T125N KSVTCMYSPA† | 618  | 130   |
| >TP53-T125N KSVTCTYSPA† | 107   | >TP53-T125N KSVTCMYSPA† | 299  | 192   |
| >TP53-T125N KSVTCTYSPA  | 349   | >TP53-T125N KSVTCMYSPA† | 768  | 419   |
| >TP53-T125N KSVTCTYSPA† | 89    | >TP53-T125N KSVTCMYSPA† | 128  | 39    |
| >TP53-T125N KSVTCTYSPA† | 6     | >TP53-T125N KSVTCMYSPA† | 4    | 2     |
| >TP53-T125N KSVTCTYSPA† | 113   | >TP53-T125N KSVTCMYSPA† | 206  | 93    |
| >TP53-T125N KSVTCTYSPA† | 198   | >TP53-T125N KSVTCMYSPA† | 153  | 45    |
| >TP53-T125NAKSVTCTY     | 8     | >TP53-T125N AKSVTCMY    | 10   | 2     |
| >TP53-T125NAKSVTCTYSP   | 483   | >TP53-T125N AKSVTCMYSF  | 603  | 120   |
| >TP53-T125NAKSVTCTYSP,  | 56    | >TP53-T125N AKSVTCMYSF  | 75   | 19    |
| >TP53-T125N TAKSVTCTY   | 312   | >TP53-T125N TAKSVTCMY   | 344  | 32    |
| >TP53-T125N TAKSVTCTY   | 247   | >TP53-T125N TAKSVTCMY   | 188  | 59    |
| >TP53-T125N TAKSVTCTY   | 78    | >TP53-T125N TAKSVTCMY   | 149  | 71    |
| >TP53-T125N TAKSVTCTY   | 430   | >TP53-T125N TAKSVTCMY   | 592  | 162   |
| >TP53-T125N TAKSVTCTY   | 265   | >TP53-T125N TAKSVTCMY   | 814  | 549   |
| >TP53-T125N TAKSVTCTY   | 100   | >TP53-T125N TAKSVTCMY   | 752  | 652   |
| >TP53-T125N TAKSVTCT    | 12157 | >TP53-T125N TAKSVTCM    | 319  | 11838 |
| >TP53-T125N TAKSVTCTY   | 336   | >TP53-T125N TAKSVTCMY   | 233  | 103   |

|                       |       |                        |       |       |
|-----------------------|-------|------------------------|-------|-------|
| >TP53-T125\GTAKSVTCTY | 682   | >TP53-T125\GTAKSVTCM'  | 274   | 408   |
| >TP53-T125\GTAKSVTCTY | 466   | >TP53-T125\GTAKSVTCM'  | 488   | 22    |
| >TP53-T125\GTAKSVTCT  | 24361 | >TP53-T125\GTAKSVTCM'  | 397   | 23964 |
| >TP53-T125\GTAKSVTCTY | 122   | >TP53-T125\GTAKSVTCM'  | 74    | 48    |
| >TP53-T125\GTAKSVTCTY | 69    | >TP53-T125\GTAKSVTCM'  | 39    | 30    |
| >TP53-T125\GTAKSVTCTY | 71    | >TP53-T125\GTAKSVTCM'  | 118   | 47    |
| >TP53-T125\GTAKSVTCTY | 461   | >TP53-T125\GTAKSVTCM'  | 710   | 249   |
| >TP53-T125\GTAKSVTCT  | 12536 | >TP53-T125\GTAKSVTCM'  | 97    | 12439 |
| >TP53-T125\GTAKSVTCTY | 8     | >TP53-T125\GTAKSVTCM'  | 15    | 7     |
| >TP53-T125\GTAKSVTCTY | 296   | >TP53-T125\GTAKSVTCM'  | 941   | 645   |
| >TP53-T125\GTAKSVTCT  | 3065  | >TP53-T125\GTAKSVTCM'  | 21    | 3044  |
| >TP53-T125\GTAKSVTCTY | 39    | >TP53-T125\GTAKSVTCM'  | 31    | 8     |
| >TP53-T125\GTAKSVTCTY | 143   | >TP53-T125\GTAKSVTCM'  | 967   | 824   |
| >TP53-T125\SGTAKSVTCT | 19654 | >TP53-T125\SGTAKSVTCM' | 299   | 19355 |
| >TP53-T125\SGTAKSVTCT | 374   | >TP53-T125\SGTAKSVTCM' | 1557  | 1183  |
| >TP53-T125PTYSPALNKM  | 136   | >TP53-T125PTYSPALNKM   | 4360  | 4224  |
| >TP53-T125PTYSPALNK   | 220   | >TP53-T125PTYSPALNK    | 9695  | 9475  |
| >TP53-T125PTYSPALNKMF | 179   | >TP53-T125PTYSPALNKMF  | 205   | 26    |
| >TP53-T125PTYSPALNKMF | 64    | >TP53-T125PTYSPALNKMF  | 89    | 25    |
| >TP53-T125PTYSPALNKM  | 27    | >TP53-T125PTYSPALNKM   | 192   | 165   |
| >TP53-T125PTYSPALNKMF | 5     | >TP53-T125PTYSPALNKMF  | 12    | 7     |
| >TP53-T125PTYSPALNK   | 222   | >TP53-T125PTYSPALNK    | 923   | 701   |
| >TP53-T125PTYSPALNKMF | 439   | >TP53-T125PTYSPALNKMF  | 1576  | 1137  |
| >TP53-T125PTYSPALNKN  | 18757 | >TP53-T125PTYSPALNKN   | 54    | 18703 |
| >TP53-T125PTYSPALNKN  | 32682 | >TP53-T125PTYSPALNKN   | 435   | 32247 |
| >TP53-T125PTYSPALNK   | 30    | >TP53-T125PTYSPALNK    | 1659  | 1629  |
| >TP53-T125PTYSPALNK   | 11    | >TP53-T125PTYSPALNK    | 2860  | 2849  |
| >TP53-T125PTYSPALNKN  | 343   | >TP53-T125PTYSPALNKN   | 6568  | 6225  |
| >TP53-T125PTYSPALNKN  | 63    | >TP53-T125PTYSPALNKN   | 4994  | 4931  |
| >TP53-T125PTYSPALNKN  | 380   | >TP53-T125PTYSPALNKN   | 17533 | 17153 |
| >TP53-T125PTYSPALNKN  | 246   | >TP53-T125PTYSPALNKN   | 13285 | 13039 |
| >TP53-T125PTYSPALNK   | 215   | >TP53-T125PTYSPALNK    | 16811 | 16596 |
| >TP53-T125PTYSPALNK   | 30    | >TP53-T125PTYSPALNK    | 2531  | 2501  |
| >TP53-T125PTYSPALNKN  | 488   | >TP53-T125PTYSPALNKN   | 4834  | 4346  |
| >TP53-T125PTYSPALNKN  | 24052 | >TP53-T125PTYSPALNKN   | 238   | 23814 |
| >TP53-T125PTYSPALNKN  | 23    | >TP53-T125PTYSPALNKN   | 83    | 60    |
| >TP53-T125PTYSPALNKN  | 24    | >TP53-T125PTYSPALNKN   | 15419 | 15395 |
| >TP53-T125PTYSPALNKN  | 5     | >TP53-T125PTYSPALNKN   | 5892  | 5887  |
| >TP53-T125PTYSPALNKN  | 6455  | >TP53-T125PTYSPALNKN   | 59    | 6396  |
| >TP53-T125PTYSPALNKN  | 13020 | >TP53-T125PTYSPALNKN   | 67    | 12953 |
| >TP53-T125PTYSPALN    | 26743 | >TP53-T125PTYSPALN     | 401   | 26342 |
| >TP53-T125PTYSPALNKN  | 76    | >TP53-T125PTYSPALNKN   | 8323  | 8247  |
| >TP53-T125PTYSPALNKN  | 146   | >TP53-T125PTYSPALNKN   | 10665 | 10519 |

|                         |      |                         |      |      |
|-------------------------|------|-------------------------|------|------|
| >TP53-T125P CTYSPALNKN  | 30   | >TP53-T125P CPYSPALNKN  | 6144 | 6114 |
| >TP53-T125P CTYSPALNKN  | 13   | >TP53-T125P CPYSPALNKN  | 756  | 743  |
| >TP53-T125P CTYSPALNKN  | 7210 | >TP53-T125P CPYSPALNKN  | 35   | 7175 |
| >TP53-T125P CTYSPALNKN  | 358  | >TP53-T125P CPYSPALNKN  | 8318 | 7960 |
| >TP53-T125P TCTYSPALNK  | 8681 | >TP53-T125P TCPYSPALNK  | 266  | 8415 |
| >TP53-T125P TCTYSPALNK  | 453  | >TP53-T125P TCPYSPALNK  | 5734 | 5281 |
| >TP53-T125P VTCTYSPA    | 415  | >TP53-T125P VTCPYSPA    | 1509 | 1094 |
| >TP53-T125P VTCTYSPAL   | 397  | >TP53-T125P VTCPYSPAL   | 106  | 291  |
| >TP53-T125P VTCTYSPAL   | 766  | >TP53-T125P VTCPYSPAL   | 205  | 561  |
| >TP53-T125P VTCTYSPALN  | 80   | >TP53-T125P VTCPYSPALN  | 87   | 7    |
| >TP53-T125P VTCTYSPALN  | 14   | >TP53-T125P VTCPYSPALN  | 13   | 1    |
| >TP53-T125P VTCTYSPALN  | 146  | >TP53-T125P VTCPYSPALN  | 106  | 40   |
| >TP53-T125P VTCTYSPALN  | 490  | >TP53-T125P VTCPYSPALN  | 580  | 90   |
| >TP53-T125P VTCTYSPAL   | 12   | >TP53-T125P VTCPYSPAL   | 6    | 6    |
| >TP53-T125P VTCTYSPAL   | 66   | >TP53-T125P VTCPYSPAL   | 31   | 35   |
| >TP53-T125P VTCTYSPAL   | 862  | >TP53-T125P VTCPYSPAL   | 93   | 769  |
| >TP53-T125P SVTCTYSPA   | 118  | >TP53-T125P SVTCPYSPA   | 324  | 206  |
| >TP53-T125P SVTCTYSPA   | 468  | >TP53-T125P SVTCPYSPA   | 707  | 239  |
| >TP53-T125P SVTCTYSPAL  | 268  | >TP53-T125P SVTCPYSPAL  | 472  | 204  |
| >TP53-T125P SVTCTYSPA   | 241  | >TP53-T125P SVTCPYSPA   | 1330 | 1089 |
| >TP53-T125P SVTCTYSPA   | 45   | >TP53-T125P SVTCPYSPA   | 13   | 32   |
| >TP53-T125P SVTCTYSPA   | 583  | >TP53-T125P SVTCPYSPA   | 247  | 336  |
| >TP53-T125P SVTCTYSPAL  | 149  | >TP53-T125P SVTCPYSPAL  | 77   | 72   |
| >TP53-T125P KSVTCTYSPA  | 396  | >TP53-T125P KSVTCPYSPA  | 794  | 398  |
| >TP53-T125P KSVTCTYSPA  | 149  | >TP53-T125P KSVTCPYSPA  | 315  | 166  |
| >TP53-T125P KSVTCTYSPA  | 488  | >TP53-T125P KSVTCPYSPA  | 561  | 73   |
| >TP53-T125P KSVTCTYSPA  | 107  | >TP53-T125P KSVTCPYSPA  | 186  | 79   |
| >TP53-T125P KSVTCTYSPA  | 349  | >TP53-T125P KSVTCPYSPA  | 412  | 63   |
| >TP53-T125P KSVTCTYSPA  | 89   | >TP53-T125P KSVTCPYSPA  | 93   | 4    |
| >TP53-T125P KSVTCTYSPA  | 6    | >TP53-T125P KSVTCPYSPA  | 6    | 0    |
| >TP53-T125P KSVTCTYSPA  | 113  | >TP53-T125P KSVTCPYSPA  | 98   | 15   |
| >TP53-T125P KSVTCTYSPA  | 198  | >TP53-T125P KSVTCPYSPA  | 338  | 140  |
| >TP53-T125P AKSVTCTY    | 8    | >TP53-T125P AKSVTCPY    | 7    | 1    |
| >TP53-T125P AKSVTCTYSP  | 483  | >TP53-T125P AKSVTCPYSP  | 545  | 62   |
| >TP53-T125P AKSVTCTYSP  | 56   | >TP53-T125P AKSVTCPYSP  | 75   | 19   |
| >TP53-T125P TAKSVTCTY   | 312  | >TP53-T125P TAKSVTCPY   | 667  | 355  |
| >TP53-T125P TAKSVTCTY   | 247  | >TP53-T125P TAKSVTCPY   | 448  | 201  |
| >TP53-T125P TAKSVTCTY   | 78   | >TP53-T125P TAKSVTCPY   | 47   | 31   |
| >TP53-T125P TAKSVTCTY   | 430  | >TP53-T125P TAKSVTCPY   | 246  | 184  |
| >TP53-T125P TAKSVTCTY   | 265  | >TP53-T125P TAKSVTCPY   | 411  | 146  |
| >TP53-T125P TAKSVTCTY   | 100  | >TP53-T125P TAKSVTCPY   | 50   | 50   |
| >TP53-T125P TAKSVTCTY   | 336  | >TP53-T125P TAKSVTCPY   | 3022 | 2686 |
| >TP53-T125P GTA KSVTCTY | 682  | >TP53-T125P GTA KSVTCPY | 447  | 235  |

|                        |       |                        |       |       |
|------------------------|-------|------------------------|-------|-------|
| >TP53-T125P GTAKSVTCTY | 466   | >TP53-T125P GTAKSVTCPY | 495   | 29    |
| >TP53-T125P GTAKSVTCTY | 521   | >TP53-T125P GTAKSVTCPY | 289   | 232   |
| >TP53-T125P GTAKSVTCTY | 122   | >TP53-T125P GTAKSVTCPY | 80    | 42    |
| >TP53-T125P GTAKSVTCTY | 69    | >TP53-T125P GTAKSVTCPY | 70    | 1     |
| >TP53-T125P GTAKSVTCTY | 71    | >TP53-T125P GTAKSVTCPY | 46    | 25    |
| >TP53-T125P GTAKSVTCTY | 461   | >TP53-T125P GTAKSVTCPY | 332   | 129   |
| >TP53-T125P GTAKSVTCTY | 8     | >TP53-T125P GTAKSVTCPY | 11    | 3     |
| >TP53-T125P GTAKSVTCTY | 296   | >TP53-T125P GTAKSVTCPY | 1127  | 831   |
| >TP53-T125P GTAKSVTCTY | 39    | >TP53-T125P GTAKSVTCPY | 68    | 29    |
| >TP53-T125P GTAKSVTCTY | 143   | >TP53-T125P GTAKSVTCPY | 268   | 125   |
| >TP53-T125P SGTAKSVTCT | 585   | >TP53-T125P SGTAKSVTCP | 351   | 234   |
| >TP53-T125P SGTAKSVTCT | 374   | >TP53-T125P SGTAKSVTCP | 656   | 282   |
| >TP53-T125R TYSPALNKM  | 136   | >TP53-T125R RYSPALNKM  | 304   | 168   |
| >TP53-T125R TYSPALNK   | 220   | >TP53-T125R RYSPALNK   | 240   | 20    |
| >TP53-T125R TYSPALNKMF | 179   | >TP53-T125R RYSPALNKMF | 73    | 106   |
| >TP53-T125R TYSPALNKMF | 64    | >TP53-T125R RYSPALNKMF | 45    | 19    |
| >TP53-T125R TYSPALNK   | 1599  | >TP53-T125R RYSPALNK   | 273   | 1326  |
| >TP53-T125R TYSPALNKM  | 27    | >TP53-T125R RYSPALNKM  | 8     | 19    |
| >TP53-T125R TYSPALNKMF | 5     | >TP53-T125R RYSPALNKMF | 4     | 1     |
| >TP53-T125R TYSPALNKMF | 551   | >TP53-T125R RYSPALNKMF | 77    | 474   |
| >TP53-T125R TYSPALNK   | 222   | >TP53-T125R RYSPALNK   | 8     | 214   |
| >TP53-T125R TYSPALNKM  | 8331  | >TP53-T125R RYSPALNKM  | 275   | 8056  |
| >TP53-T125R TYSPALNK   | 4258  | >TP53-T125R RYSPALNK   | 389   | 3869  |
| >TP53-T125R TYSPALNKMF | 1792  | >TP53-T125R RYSPALNKMF | 261   | 1531  |
| >TP53-T125R TYSPALNK   | 674   | >TP53-T125R RYSPALNK   | 85    | 589   |
| >TP53-T125R TYSPALNKMF | 439   | >TP53-T125R RYSPALNKMF | 143   | 296   |
| >TP53-T125R CTYSPALNK  | 30    | >TP53-T125R CRYSPALNK  | 5352  | 5322  |
| >TP53-T125R CTYSPALNK  | 11    | >TP53-T125R CRYSPALNK  | 5170  | 5159  |
| >TP53-T125R CTYSPALNKN | 343   | >TP53-T125R CRYSPALNKN | 6662  | 6319  |
| >TP53-T125R CTYSPALNKN | 63    | >TP53-T125R CRYSPALNKN | 12077 | 12014 |
| >TP53-T125R CTYSPALNKN | 380   | >TP53-T125R CRYSPALNKN | 25328 | 24948 |
| >TP53-T125R CTYSPALNKN | 246   | >TP53-T125R CRYSPALNKN | 6696  | 6450  |
| >TP53-T125R CTYSPALNK  | 215   | >TP53-T125R CRYSPALNK  | 10564 | 10349 |
| >TP53-T125R CTYSPALNK  | 30    | >TP53-T125R CRYSPALNK  | 6004  | 5974  |
| >TP53-T125R CTYSPALNKN | 488   | >TP53-T125R CRYSPALNKN | 19938 | 19450 |
| >TP53-T125R CTYSPALNKN | 610   | >TP53-T125R CRYSPALNKN | 104   | 506   |
| >TP53-T125R CTYSPALNKN | 23    | >TP53-T125R CRYSPALNKN | 8     | 15    |
| >TP53-T125R CTYSPALNKN | 24    | >TP53-T125R CRYSPALNKN | 23071 | 23047 |
| >TP53-T125R CTYSPALNKN | 5     | >TP53-T125R CRYSPALNKN | 14964 | 14959 |
| >TP53-T125R CTYSPALNK  | 21014 | >TP53-T125R CRYSPALNK  | 125   | 20889 |
| >TP53-T125R CTYSPALNKN | 25458 | >TP53-T125R CRYSPALNKN | 120   | 25338 |
| >TP53-T125R CTYSPALNKN | 19664 | >TP53-T125R CRYSPALNKN | 234   | 19430 |
| >TP53-T125R CTYSPALNKN | 76    | >TP53-T125R CRYSPALNKN | 25807 | 25731 |



|                       |       |                       |       |       |
|-----------------------|-------|-----------------------|-------|-------|
| >TP53-T125RCTYSPALNKN | 146   | >TP53-T125RCRYSPALNKN | 28303 | 28157 |
| >TP53-T125RCTYSPALNKN | 30    | >TP53-T125RCRYSPALNKN | 4521  | 4491  |
| >TP53-T125RCTYSPALNKN | 13    | >TP53-T125RCRYSPALNKN | 1734  | 1721  |
| >TP53-T125RCTYSPALNK  | 34399 | >TP53-T125RCRYSPALNK  | 497   | 33902 |
| >TP53-T125RCTYSPALNKN | 27782 | >TP53-T125RCRYSPALNKN | 374   | 27408 |
| >TP53-T125RCTYSPALNKN | 27208 | >TP53-T125RCRYSPALNKN | 146   | 27062 |
| >TP53-T125RCTYSPALNKN | 358   | >TP53-T125RCRYSPALNKN | 12773 | 12415 |
| >TP53-T125RHSGTAKSVTC | 21073 | >TP53-T125RHSGTAKSVTC | 174   | 20899 |
| >TP53-T125RHSGTAKSVTC | 28702 | >TP53-T125RHSGTAKSVTC | 99    | 28603 |
| >TP53-T125RTCTYSPAL   | 13497 | >TP53-T125RTCRYSPAL   | 321   | 13176 |
| >TP53-T125RTCTYSPALNK | 3671  | >TP53-T125RTCRYSPALNK | 13    | 3658  |
| >TP53-T125RTCTYSPALNK | 453   | >TP53-T125RTCRYSPALNK | 143   | 310   |
| >TP53-T125RVTCTYSPA   | 415   | >TP53-T125RVTCRYSPA   | 338   | 77    |
| >TP53-T125RVTCTYSPAL  | 397   | >TP53-T125RVTCRYSPAL  | 583   | 186   |
| >TP53-T125RVTCTYSPALN | 80    | >TP53-T125RVTCRYSPALN | 75    | 5     |
| >TP53-T125RVTCTYSPALN | 14    | >TP53-T125RVTCRYSPALN | 15    | 1     |
| >TP53-T125RVTCTYSPALN | 146   | >TP53-T125RVTCRYSPALN | 72    | 74    |
| >TP53-T125RVTCTYSPALN | 490   | >TP53-T125RVTCRYSPALN | 741   | 251   |
| >TP53-T125RVTCTYSPAL  | 12    | >TP53-T125RVTCRYSPAL  | 18    | 6     |
| >TP53-T125RVTCTYSPAL  | 66    | >TP53-T125RVTCRYSPAL  | 206   | 140   |
| >TP53-T125RSVTCTYSPA  | 118   | >TP53-T125RSVTCRYSPA  | 101   | 17    |
| >TP53-T125RSVTCTYSPA  | 468   | >TP53-T125RSVTCRYSPA  | 492   | 24    |
| >TP53-T125RSVTCTYSPAL | 268   | >TP53-T125RSVTCRYSPAL | 1145  | 877   |
| >TP53-T125RSVTCTYSPA  | 241   | >TP53-T125RSVTCRYSPA  | 430   | 189   |
| >TP53-T125RSVTCTYSPA  | 45    | >TP53-T125RSVTCRYSPA  | 64    | 19    |
| >TP53-T125RSVTCTYSPAL | 149   | >TP53-T125RSVTCRYSPAL | 546   | 397   |
| >TP53-T125RSVTCTYSPA  | 9763  | >TP53-T125RSVTCRYSPA  | 340   | 9423  |
| >TP53-T125RKSVTCTYSPA | 396   | >TP53-T125RKSVTCRYSPA | 1040  | 644   |
| >TP53-T125RKSVTCTYSPA | 149   | >TP53-T125RKSVTCRYSPA | 131   | 18    |
| >TP53-T125RKSVTCTYSPA | 488   | >TP53-T125RKSVTCRYSPA | 344   | 144   |
| >TP53-T125RKSVTCTYSPA | 107   | >TP53-T125RKSVTCRYSPA | 292   | 185   |
| >TP53-T125RKSVTCTYSPA | 349   | >TP53-T125RKSVTCRYSPA | 603   | 254   |
| >TP53-T125RKSVTCTYSPA | 89    | >TP53-T125RKSVTCRYSPA | 114   | 25    |
| >TP53-T125RKSVTCTYSPA | 6     | >TP53-T125RKSVTCRYSPA | 10    | 4     |
| >TP53-T125RKSVTCTYSPA | 113   | >TP53-T125RKSVTCRYSPA | 215   | 102   |
| >TP53-T125RKSVTCTYSPA | 198   | >TP53-T125RKSVTCRYSPA | 416   | 218   |
| >TP53-T125RAKSVTCTY   | 8     | >TP53-T125RAKSVTCRY   | 26    | 18    |
| >TP53-T125RAKSVTCTYSP | 483   | >TP53-T125RAKSVTCRYSP | 710   | 227   |
| >TP53-T125RAKSVTCTYSP | 56    | >TP53-T125RAKSVTCRYSP | 103   | 47    |
| >TP53-T125RTAKSVTCTY  | 312   | >TP53-T125RTAKSVTCRY  | 421   | 109   |
| >TP53-T125RTAKSVTCT   | 18164 | >TP53-T125RTAKSVTCR   | 31    | 18133 |
| >TP53-T125RTAKSVTCT   | 26610 | >TP53-T125RTAKSVTCR   | 107   | 26503 |
| >TP53-T125RTAKSVTCT   | 16264 | >TP53-T125RTAKSVTCR   | 12    | 16252 |

|                        |       |                        |       |       |
|------------------------|-------|------------------------|-------|-------|
| >TP53-T125RTAKSVTCTY   | 247   | >TP53-T125RTAKSVTCRY   | 466   | 219   |
| >TP53-T125RTAKSVTCTY   | 78    | >TP53-T125RTAKSVTCRY   | 201   | 123   |
| >TP53-T125RTAKSVTCTY   | 430   | >TP53-T125RTAKSVTCRY   | 1803  | 1373  |
| >TP53-T125RTAKSVTCTY   | 265   | >TP53-T125RTAKSVTCRY   | 383   | 118   |
| >TP53-T125RTAKSVTCTY   | 100   | >TP53-T125RTAKSVTCRY   | 1366  | 1266  |
| >TP53-T125RTAKSVTCTY   | 336   | >TP53-T125RTAKSVTCRY   | 553   | 217   |
| >TP53-T125RGTAKSVTCTY  | 682   | >TP53-T125RGTAKSVTCRY  | 450   | 232   |
| >TP53-T125RGTAKSVTCT   | 21180 | >TP53-T125RGTAKSVTCR   | 266   | 20914 |
| >TP53-T125RGTAKSVTCTY  | 466   | >TP53-T125RGTAKSVTCRY  | 1049  | 583   |
| >TP53-T125RGTAKSVTCTY  | 521   | >TP53-T125RGTAKSVTCRY  | 395   | 126   |
| >TP53-T125RGTAKSVTCTY  | 122   | >TP53-T125RGTAKSVTCRY  | 104   | 18    |
| >TP53-T125RGTAKSVTCTY  | 69    | >TP53-T125RGTAKSVTCRY  | 50    | 19    |
| >TP53-T125RGTAKSVTCT   | 21152 | >TP53-T125RGTAKSVTCR   | 111   | 21041 |
| >TP53-T125RGTAKSVTCT   | 16717 | >TP53-T125RGTAKSVTCR   | 19    | 16698 |
| >TP53-T125RGTAKSVTCTY  | 71    | >TP53-T125RGTAKSVTCRY  | 153   | 82    |
| >TP53-T125RGTAKSVTCTY  | 461   | >TP53-T125RGTAKSVTCRY  | 1664  | 1203  |
| >TP53-T125RGTAKSVTCTY  | 8     | >TP53-T125RGTAKSVTCRY  | 10    | 2     |
| >TP53-T125RGTAKSVTCTY  | 296   | >TP53-T125RGTAKSVTCRY  | 598   | 302   |
| >TP53-T125RGTAKSVTCTY  | 39    | >TP53-T125RGTAKSVTCRY  | 63    | 24    |
| >TP53-T125RGTAKSVTCTY  | 143   | >TP53-T125RGTAKSVTCRY  | 1489  | 1346  |
| >TP53-T125RGTAKSVTCT   | 4907  | >TP53-T125RGTAKSVTCR   | 134   | 4773  |
| >TP53-T125RSGTAKSVTCT  | 374   | >TP53-T125RSGTAKSVTCR  | 2502  | 2128  |
| >TP53-T140I-KTCPVQLWV  | 575   | >TP53-T140I-KICPVQLWV  | 118   | 457   |
| >TP53-T140I-KTCPVQLWV  | 923   | >TP53-T140I-KICPVQLWV  | 277   | 646   |
| >TP53-T140I-KTCPVQLWV  | 1227  | >TP53-T140I-KICPVQLWV  | 161   | 1066  |
| >TP53-T140I-KTCPVQLWV  | 125   | >TP53-T140I-KICPVQLWV  | 36    | 89    |
| >TP53-T140I-KTCPVQLWV  | 53    | >TP53-T140I-KICPVQLWV  | 14    | 39    |
| >TP53-T140I-KTCPVQLWV  | 338   | >TP53-T140I-KICPVQLWV  | 44    | 294   |
| >TP53-T140I-KTCPVQLWV  | 202   | >TP53-T140I-KICPVQLWV  | 10    | 192   |
| >TP53-T140I-KTCPVQLWV  | 224   | >TP53-T140I-KICPVQLWV  | 1232  | 1008  |
| >TP53-T140I-KTCPVQLW   | 165   | >TP53-T140I-KICPVQLW   | 519   | 354   |
| >TP53-T140I-KTCPVQLW   | 4     | >TP53-T140I-KICPVQLW   | 55    | 51    |
| >TP53-T140I-KTCPVQLWV  | 118   | >TP53-T140I-KICPVQLWV  | 7095  | 6977  |
| >TP53-T140I-KTCPVQLW   | 34    | >TP53-T140I-KICPVQLW   | 123   | 89    |
| >TP53-T140I-KTCPVQLW   | 10    | >TP53-T140I-KICPVQLW   | 18    | 8     |
| >TP53-T140I-KTCPVQLWV  | 254   | >TP53-T140I-KICPVQLWV  | 6269  | 6015  |
| >TP53-T140I-KTCPVQLWV  | 272   | >TP53-T140I-KICPVQLWV  | 11634 | 11362 |
| >TP53-T140I-AKTCPVQL   | 41    | >TP53-T140I-AKICPVQL   | 14    | 27    |
| >TP53-T140I-AKTCPVQLW  | 192   | >TP53-T140I-AKICPVQLW  | 52    | 140   |
| >TP53-T140I-AKTCPVQLW  | 503   | >TP53-T140I-AKICPVQLW\ | 133   | 370   |
| >TP53-T140I-LAKTCPVQLW | 482   | >TP53-T140I-LAKICPVQLW | 457   | 25    |
| >TP53-T140I-LAKTCPVQL  | 417   | >TP53-T140I-LAKICPVQL  | 1342  | 925   |
| >TP53-T140I-LAKTCPVQL  | 405   | >TP53-T140I-LAKICPVQL  | 92    | 313   |

|                         |      |                         |     |      |
|-------------------------|------|-------------------------|-----|------|
| >TP53-T140I- LAKTCPVQLV | 45   | >TP53-T140I- LAKICPVQLW | 19  | 26   |
| >TP53-T140I- LAKTCPVQLV | 42   | >TP53-T140I- LAKICPVQLW | 40  | 2    |
| >TP53-T140I- LAKTCPVQLV | 42   | >TP53-T140I- LAKICPVQLW | 47  | 5    |
| >TP53-T140I- QLAKTCPV   | 58   | >TP53-T140I- QLAKICPV   | 25  | 33   |
| >TP53-T140I- QLAKTCPV   | 13   | >TP53-T140I- QLAKICPV   | 6   | 7    |
| >TP53-T140I- QLAKTCPVQL | 315  | >TP53-T140I- QLAKICPVQL | 260 | 55   |
| >TP53-T140I- QLAKTCPV   | 10   | >TP53-T140I- QLAKICPV   | 7   | 3    |
| >TP53-T140I- QLAKTCPVQL | 383  | >TP53-T140I- QLAKICPVQL | 418 | 35   |
| >TP53-T140I- QLAKTCPV   | 37   | >TP53-T140I- QLAKICPV   | 19  | 18   |
| >TP53-T140I- QLAKTCPV   | 14   | >TP53-T140I- QLAKICPV   | 11  | 3    |
| >TP53-T140I- QLAKTCPVQL | 323  | >TP53-T140I- QLAKICPVQL | 321 | 2    |
| >TP53-T140I- QLAKTCPV   | 30   | >TP53-T140I- QLAKICPV   | 36  | 6    |
| >TP53-T140I- QLAKTCPV   | 10   | >TP53-T140I- QLAKICPV   | 10  | 0    |
| >TP53-T140I- QLAKTCPVQL | 177  | >TP53-T140I- QLAKICPVQL | 197 | 20   |
| >TP53-T140I- QLAKTCPV   | 10   | >TP53-T140I- QLAKICPV   | 7   | 3    |
| >TP53-T140I- QLAKTCPVQL | 117  | >TP53-T140I- QLAKICPVQL | 85  | 32   |
| >TP53-T140I- QLAKTCPV   | 3    | >TP53-T140I- QLAKICPV   | 3   | 0    |
| >TP53-T140I- QLAKTCPVQL | 20   | >TP53-T140I- QLAKICPVQL | 21  | 1    |
| >TP53-T140I- QLAKTCPV   | 217  | >TP53-T140I- QLAKICPV   | 67  | 150  |
| >TP53-T140I- QLAKTCPV   | 60   | >TP53-T140I- QLAKICPV   | 73  | 13   |
| >TP53-T140I- QLAKTCPVQL | 343  | >TP53-T140I- QLAKICPVQL | 510 | 167  |
| >TP53-T140I- CQLAKTCPV  | 121  | >TP53-T140I- CQLAKICPV  | 52  | 69   |
| >TP53-T140I- CQLAKTCPV  | 173  | >TP53-T140I- CQLAKICPV  | 93  | 80   |
| >TP53-T140I- CQLAKTCPV  | 22   | >TP53-T140I- CQLAKICPV  | 11  | 11   |
| >TP53-T140I- CQLAKTCPVC | 463  | >TP53-T140I- CQLAKICPVQ | 271 | 192  |
| >TP53-T140I- CQLAKTCPV  | 136  | >TP53-T140I- CQLAKICPV  | 35  | 101  |
| >TP53-T140I- CQLAKTCPV  | 77   | >TP53-T140I- CQLAKICPV  | 57  | 20   |
| >TP53-T140I- CQLAKTCPV  | 457  | >TP53-T140I- CQLAKICPV  | 216 | 241  |
| >TP53-T140I- CQLAKTCPV  | 268  | >TP53-T140I- CQLAKICPV  | 302 | 34   |
| >TP53-T140I- CQLAKTCPVC | 155  | >TP53-T140I- CQLAKICPVQ | 209 | 54   |
| >TP53-T140I- CQLAKTCPVC | 231  | >TP53-T140I- CQLAKICPVQ | 441 | 210  |
| >TP53-T140I- FCQLAKTCPV | 443  | >TP53-T140I- FCQLAKICPV | 277 | 166  |
| >TP53-T140I- MFCQLAKTCI | 679  | >TP53-T140I- MFCQLAKICP | 445 | 234  |
| >TP53-T140I- MFCQLAKT   | 8048 | >TP53-T140I- MFCQLAKI   | 70  | 7978 |
| >TP53-T140I- MFCQLAKTC  | 450  | >TP53-T140I- MFCQLAKIC  | 837 | 387  |
| >TP53-T140I- KMFCQLAKT  | 4286 | >TP53-T140I- KMFCQLAKI  | 494 | 3792 |
| >TP53-T140I- KMFCQLAKT  | 89   | >TP53-T140I- KMFCQLAKI  | 18  | 71   |
| >TP53-T140I- KMFCQLAKT  | 102  | >TP53-T140I- KMFCQLAKI  | 11  | 91   |
| >TP53-T140I- KMFCQLAKT  | 19   | >TP53-T140I- KMFCQLAKI  | 5   | 14   |
| >TP53-T140I- KMFCQLAKT  | 199  | >TP53-T140I- KMFCQLAKI  | 33  | 166  |
| >TP53-T140I- KMFCQLAKT  | 19   | >TP53-T140I- KMFCQLAKI  | 3   | 16   |
| >TP53-T140I- KMFCQLAKTC | 23   | >TP53-T140I- KMFCQLAKIC | 136 | 113  |
| >TP53-T140I- KMFCQLAKT  | 55   | >TP53-T140I- KMFCQLAKI  | 5   | 50   |

|                        |       |                        |       |       |
|------------------------|-------|------------------------|-------|-------|
| >TP53-T140I-KMFCQLAKT  | 61    | >TP53-T140I-KMFCQLAKIC | 229   | 168   |
| >TP53-T140I-KMFCQLAKT  | 673   | >TP53-T140I-KMFCQLAKI  | 24    | 649   |
| >TP53-T140I-KMFCQLAKT  | 3078  | >TP53-T140I-KMFCQLAKI  | 110   | 2968  |
| >TP53-T140I-KMFCQLAKT  | 518   | >TP53-T140I-KMFCQLAKI  | 32    | 486   |
| >TP53-T140I-KMFCQLAKT  | 3480  | >TP53-T140I-KMFCQLAKI  | 121   | 3359  |
| >TP53-T140I-KMFCQLAKT  | 1105  | >TP53-T140I-KMFCQLAKI  | 17    | 1088  |
| >TP53-T140I-KMFCQLAKT  | 81    | >TP53-T140I-KMFCQLAKIC | 472   | 391   |
| >TP53-T140I-KMFCQLAKT  | 1350  | >TP53-T140I-KMFCQLAKI  | 38    | 1312  |
| >TP53-T140I-KMFCQLAKT  | 491   | >TP53-T140I-KMFCQLAKIC | 547   | 56    |
| >TP53-T140I-KMFCQLAKT  | 8468  | >TP53-T140I-KMFCQLAKI  | 385   | 8083  |
| >TP53-T140I-KMFCQLAKT  | 9768  | >TP53-T140I-KMFCQLAKI  | 320   | 9448  |
| >TP53-T140I-KMFCQLAKT  | 35209 | >TP53-T140I-KMFCQLAKI  | 225   | 34984 |
| >TP53-T140N-KTCPVQLWV  | 125   | >TP53-T140N-KNCPVQLWV  | 7576  | 7451  |
| >TP53-T140N-KTCPVQLWV  | 53    | >TP53-T140N-KNCPVQLWV  | 3844  | 3791  |
| >TP53-T140N-KTCPVQLWV  | 338   | >TP53-T140N-KNCPVQLWV  | 11820 | 11482 |
| >TP53-T140N-KTCPVQLWV  | 202   | >TP53-T140N-KNCPVQLWV  | 12559 | 12357 |
| >TP53-T140N-KTCPVQLWV  | 224   | >TP53-T140N-KNCPVQLWV  | 7303  | 7079  |
| >TP53-T140N-KTCPVQLW   | 165   | >TP53-T140N-KNCPVQLW   | 12007 | 11842 |
| >TP53-T140N-KTCPVQLW   | 4     | >TP53-T140N-KNCPVQLW   | 819   | 815   |
| >TP53-T140N-KTCPVQLWV  | 118   | >TP53-T140N-KNCPVQLWV  | 21825 | 21707 |
| >TP53-T140N-KTCPVQLW   | 34    | >TP53-T140N-KNCPVQLW   | 613   | 579   |
| >TP53-T140N-KTCPVQLW   | 10    | >TP53-T140N-KNCPVQLW   | 62    | 52    |
| >TP53-T140N-KTCPVQLWV  | 254   | >TP53-T140N-KNCPVQLWV  | 7330  | 7076  |
| >TP53-T140N-KTCPVQLWV  | 272   | >TP53-T140N-KNCPVQLWV  | 4776  | 4504  |
| >TP53-T140N-AKTCPVQL   | 41    | >TP53-T140N-AKNCPVQL   | 20    | 21    |
| >TP53-T140N-AKTCPVQLW  | 192   | >TP53-T140N-AKNCPVQLW  | 82    | 110   |
| >TP53-T140N-AKTCPVQLW  | 503   | >TP53-T140N-AKNCPVQLW  | 234   | 269   |
| >TP53-T140N-LAKTCPVQLV | 482   | >TP53-T140N-LAKNCPVQLV | 289   | 193   |
| >TP53-T140N-LAKTCPVQL  | 417   | >TP53-T140N-LAKNCPVQL  | 402   | 15    |
| >TP53-T140N-LAKTCPVQL  | 405   | >TP53-T140N-LAKNCPVQL  | 415   | 10    |
| >TP53-T140N-LAKTCPVQLV | 45    | >TP53-T140N-LAKNCPVQLV | 37    | 8     |
| >TP53-T140N-LAKTCPVQLV | 42    | >TP53-T140N-LAKNCPVQLV | 43    | 1     |
| >TP53-T140N-LAKTCPVQLV | 42    | >TP53-T140N-LAKNCPVQLV | 56    | 14    |
| >TP53-T140N-LAKTCPVQLV | 1046  | >TP53-T140N-LAKNCPVQLV | 453   | 593   |
| >TP53-T140N-QLAKTCPV   | 58    | >TP53-T140N-QLAKNCPV   | 88    | 30    |
| >TP53-T140N-QLAKTCPV   | 13    | >TP53-T140N-QLAKNCPV   | 19    | 6     |
| >TP53-T140N-QLAKTCPVQL | 315   | >TP53-T140N-QLAKNCPVQL | 407   | 92    |
| >TP53-T140N-QLAKTCPV   | 10    | >TP53-T140N-QLAKNCPV   | 16    | 6     |
| >TP53-T140N-QLAKTCPVQL | 383   | >TP53-T140N-QLAKNCPVQL | 444   | 61    |
| >TP53-T140N-QLAKTCPV   | 37    | >TP53-T140N-QLAKNCPV   | 79    | 42    |
| >TP53-T140N-QLAKTCPV   | 14    | >TP53-T140N-QLAKNCPV   | 16    | 2     |
| >TP53-T140N-QLAKTCPVQL | 323   | >TP53-T140N-QLAKNCPVQL | 231   | 92    |
| >TP53-T140N-QLAKTCPV   | 30    | >TP53-T140N-QLAKNCPV   | 35    | 5     |

|                        |      |                         |      |      |
|------------------------|------|-------------------------|------|------|
| >TP53-T140M QLAKTCPV   | 10   | >TP53-T140M QLAKNCPV    | 15   | 5    |
| >TP53-T140M QLAKTCPVQL | 177  | >TP53-T140M QLAKNCPVQI  | 276  | 99   |
| >TP53-T140M QLAKTCPV   | 10   | >TP53-T140M QLAKNCPV    | 15   | 5    |
| >TP53-T140M QLAKTCPVQL | 117  | >TP53-T140M QLAKNCPVQI  | 81   | 36   |
| >TP53-T140M QLAKTCPV   | 3    | >TP53-T140M QLAKNCPV    | 4    | 1    |
| >TP53-T140M QLAKTCPVQL | 20   | >TP53-T140M QLAKNCPVQI  | 16   | 4    |
| >TP53-T140M QLAKTCPV   | 217  | >TP53-T140M QLAKNCPV    | 179  | 38   |
| >TP53-T140M QLAKTCPV   | 60   | >TP53-T140M QLAKNCPV    | 106  | 46   |
| >TP53-T140M QLAKTCPVQL | 343  | >TP53-T140M QLAKNCPVQI  | 701  | 358  |
| >TP53-T140M CQLAKTCPV  | 121  | >TP53-T140M CQLAKNCPV   | 218  | 97   |
| >TP53-T140M CQLAKTCPV  | 173  | >TP53-T140M CQLAKNCPV   | 781  | 608  |
| >TP53-T140M CQLAKTCPV  | 22   | >TP53-T140M CQLAKNCPV   | 45   | 23   |
| >TP53-T140M CQLAKTCPVC | 463  | >TP53-T140M CQLAKNCPVC  | 685  | 222  |
| >TP53-T140M CQLAKTCPV  | 136  | >TP53-T140M CQLAKNCPV   | 269  | 133  |
| >TP53-T140M CQLAKTCPV  | 77   | >TP53-T140M CQLAKNCPV   | 256  | 179  |
| >TP53-T140M CQLAKTCPV  | 457  | >TP53-T140M CQLAKNCPV   | 1156 | 699  |
| >TP53-T140M CQLAKTCPV  | 268  | >TP53-T140M CQLAKNCPV   | 330  | 62   |
| >TP53-T140M CQLAKTCPVC | 155  | >TP53-T140M CQLAKNCPVC  | 162  | 7    |
| >TP53-T140M CQLAKTCPVC | 231  | >TP53-T140M CQLAKNCPVC  | 312  | 81   |
| >TP53-T140M FCQLAKTCPV | 443  | >TP53-T140M FCQLAKNCPV  | 1022 | 579  |
| >TP53-T140M MFCQLAKTC  | 450  | >TP53-T140M MFCQLAKNC   | 1256 | 806  |
| >TP53-T140M KMFCQLAKT  | 89   | >TP53-T140M KMFCQLAKN   | 9399 | 9310 |
| >TP53-T140M KMFCQLAKT  | 102  | >TP53-T140M KMFCQLAKN   | 3601 | 3499 |
| >TP53-T140M KMFCQLAKT  | 19   | >TP53-T140M KMFCQLAKN   | 2696 | 2677 |
| >TP53-T140M KMFCQLAKT  | 199  | >TP53-T140M KMFCQLAKN   | 5538 | 5339 |
| >TP53-T140M KMFCQLAKT  | 19   | >TP53-T140M KMFCQLAKN   | 537  | 518  |
| >TP53-T140M KMFCQLAKT( | 23   | >TP53-T140M KMFCQLAKN   | 56   | 33   |
| >TP53-T140M KMFCQLAKT  | 55   | >TP53-T140M KMFCQLAKN   | 2166 | 2111 |
| >TP53-T140M KMFCQLAKT( | 61   | >TP53-T140M KMFCQLAKN   | 194  | 133  |
| >TP53-T140M KMFCQLAKT( | 81   | >TP53-T140M KMFCQLAKN   | 387  | 306  |
| >TP53-T140M KMFCQLAKT( | 491  | >TP53-T140M KMFCQLAKN   | 619  | 128  |
| >TP53-T150I- TPPPGRV   | 763  | >TP53-T150I- IPPPGTRV   | 465  | 298  |
| >TP53-T150I- TPPPGRVRA | 482  | >TP53-T150I- IPPPGTRVRA | 287  | 195  |
| >TP53-T150I- TPPPGRV   | 1601 | >TP53-T150I- IPPPGTRV   | 298  | 1303 |
| >TP53-T150I- TPPPGRVRA | 32   | >TP53-T150I- IPPPGTRVRA | 17   | 15   |
| >TP53-T150I- TPPPGRVRA | 139  | >TP53-T150I- IPPPGTRVRA | 81   | 58   |
| >TP53-T150I- TPPPGRV   | 273  | >TP53-T150I- IPPPGTRV   | 186  | 87   |
| >TP53-T150I- TPPPGRVRA | 727  | >TP53-T150I- IPPPGTRVRA | 417  | 310  |
| >TP53-T150I- STPPPGRV  | 1710 | >TP53-T150I- SIPPPGRV   | 172  | 1538 |
| >TP53-T150I- STPPPGRV  | 136  | >TP53-T150I- SIPPPGRV   | 33   | 103  |
| >TP53-T150I- STPPPGRV  | 743  | >TP53-T150I- SIPPPGRV   | 162  | 581  |
| >TP53-T150I- STPPPGRV  | 116  | >TP53-T150I- SIPPPGRV   | 11   | 105  |
| >TP53-T150I- STPPPGRVR | 5691 | >TP53-T150I- SIPPPGRVR/ | 344  | 5347 |

|                        |       |                        |       |       |
|------------------------|-------|------------------------|-------|-------|
| >TP53-T150I-STPPPGTR   | 352   | >TP53-T150I-SIPPPGTR   | 1570  | 1218  |
| >TP53-T150I-STPPPGTRVR | 129   | >TP53-T150I-SIPPPGTRVR | 408   | 279   |
| >TP53-T150I-STPPPGTRV  | 18    | >TP53-T150I-SIPPPGTRV  | 99    | 81    |
| >TP53-T150I-STPPPGTRVR | 82    | >TP53-T150I-SIPPPGTRVR | 783   | 701   |
| >TP53-T150I-STPPPGTRV  | 4     | >TP53-T150I-SIPPPGTRV  | 521   | 517   |
| >TP53-T150I-STPPPGTRVR | 96    | >TP53-T150I-SIPPPGTRVR | 12127 | 12031 |
| >TP53-T150I-STPPPGTRVR | 54    | >TP53-T150I-SIPPPGTRVR | 10918 | 10864 |
| >TP53-T150I-STPPPGTRV  | 259   | >TP53-T150I-SIPPPGTRV  | 7681  | 7422  |
| >TP53-T150I-STPPPGTRVR | 1826  | >TP53-T150I-SIPPPGTRVR | 439   | 1387  |
| >TP53-T150I-STPPPGTRV  | 311   | >TP53-T150I-SIPPPGTRV  | 11609 | 11298 |
| >TP53-T150I-DSTPPPGTR  | 203   | >TP53-T150I-DSIPPPGTR  | 155   | 48    |
| >TP53-T150I-DSTPPPGTRV | 372   | >TP53-T150I-DSIPPPGTRV | 292   | 80    |
| >TP53-T150I-DSTPPPGTR  | 161   | >TP53-T150I-DSIPPPGTR  | 100   | 61    |
| >TP53-T150I-DSTPPPGTRV | 208   | >TP53-T150I-DSIPPPGTRV | 123   | 85    |
| >TP53-T150I-DSTPPPGTRV | 866   | >TP53-T150I-DSIPPPGTRV | 316   | 550   |
| >TP53-T150I-DSTPPPGTRV | 1466  | >TP53-T150I-DSIPPPGTRV | 367   | 1099  |
| >TP53-T150I-WVDSTPPPG  | 489   | >TP53-T150I-WVDSIPPPG  | 476   | 13    |
| >TP53-T150I-LWVDSTPP   | 386   | >TP53-T150I-LWVDSIPP   | 297   | 89    |
| >TP53-T150I-LWVDSTPPP  | 467   | >TP53-T150I-LWVDSIPPP  | 222   | 245   |
| >TP53-T150I-LWVDSTPPPG | 485   | >TP53-T150I-LWVDSIPPPG | 349   | 136   |
| >TP53-T150I-VQLWVDST   | 120   | >TP53-T150I-VQLWVDSI   | 17    | 103   |
| >TP53-T150I-VQLWVDSTP  | 552   | >TP53-T150I-VQLWVDSIPF | 444   | 108   |
| >TP53-T150I-VQLWVDST   | 835   | >TP53-T150I-VQLWVDSI   | 38    | 797   |
| >TP53-T150I-VQLWVDST   | 3159  | >TP53-T150I-VQLWVDSI   | 184   | 2975  |
| >TP53-T150I-VQLWVDST   | 17944 | >TP53-T150I-VQLWVDSI   | 400   | 17544 |
| >TP53-T150I-VQLWVDST   | 27423 | >TP53-T150I-VQLWVDSI   | 342   | 27081 |
| >TP53-T150I-CPVQLWVDS  | 635   | >TP53-T150I-CPVQLWVDS  | 444   | 191   |
| >TP53-T150KTPPPGTRVRA  | 482   | >TP53-T150KTPPPGTRVRA  | 3214  | 2732  |
| >TP53-T150KTPPPGTRV    | 1601  | >TP53-T150KTPPPGTRV    | 174   | 1427  |
| >TP53-T150KTPPPGTRVRA  | 32    | >TP53-T150KTPPPGTRVRA  | 16    | 16    |
| >TP53-T150KTPPPGTRVRA  | 139   | >TP53-T150KTPPPGTRVRA  | 646   | 507   |
| >TP53-T150KTPPPGTRV    | 273   | >TP53-T150KTPPPGTRV    | 711   | 438   |
| >TP53-T150KTPPPGTRVR   | 4145  | >TP53-T150KTPPPGTRVR   | 389   | 3756  |
| >TP53-T150KSTPPPGTRV   | 136   | >TP53-T150KSKPPPGTRV   | 4525  | 4389  |
| >TP53-T150KSTPPPGTRV   | 116   | >TP53-T150KSKPPPGTRV   | 2882  | 2766  |
| >TP53-T150KSTPPPGTR    | 352   | >TP53-T150KSKPPPGTR    | 14570 | 14218 |
| >TP53-T150KSTPPPGTRVR  | 129   | >TP53-T150KSKPPPGTRVR  | 19304 | 19175 |
| >TP53-T150KSTPPPGTRV   | 18    | >TP53-T150KSKPPPGTRV   | 8992  | 8974  |
| >TP53-T150KSTPPPGTRVR  | 82    | >TP53-T150KSKPPPGTRVR  | 16378 | 16296 |
| >TP53-T150KSTPPPGTRV   | 4     | >TP53-T150KSKPPPGTRV   | 7838  | 7834  |
| >TP53-T150KSTPPPGTRVR  | 96    | >TP53-T150KSKPPPGTRVR  | 29637 | 29541 |
| >TP53-T150KSTPPPGTRVR  | 54    | >TP53-T150KSKPPPGTRVR  | 28236 | 28182 |
| >TP53-T150KSTPPPGTRV   | 259   | >TP53-T150KSKPPPGTRV   | 16402 | 16143 |

|                        |       |                        |       |       |
|------------------------|-------|------------------------|-------|-------|
| >TP53-T150KSTPPPGTRV   | 311   | >TP53-T150KSKPPPGTRV   | 13237 | 12926 |
| >TP53-T150KDSTPPPGTR   | 203   | >TP53-T150KDSKPPPGTR   | 103   | 100   |
| >TP53-T150KDSTPPPGTRV  | 372   | >TP53-T150KDSKPPPGTRV  | 195   | 177   |
| >TP53-T150KDSTPPPGTR   | 161   | >TP53-T150KDSKPPPGTR   | 464   | 303   |
| >TP53-T150KDSTPPPGTRV  | 208   | >TP53-T150KDSKPPPGTRV  | 627   | 419   |
| >TP53-T150KWVDSTPPPG   | 489   | >TP53-T150KWVDSKPPPG   | 1433  | 944   |
| >TP53-T150KLWVDSTPP    | 386   | >TP53-T150KLWVDSKPP    | 378   | 8     |
| >TP53-T150KLWVDSTPPP   | 467   | >TP53-T150KLWVDSKPPP   | 400   | 67    |
| >TP53-T150KLWVDSTPPPC  | 485   | >TP53-T150KLWVDSKPPPC  | 472   | 13    |
| >TP53-T150KVQLWVDST    | 120   | >TP53-T150KVQLWVDSK    | 4132  | 4012  |
| >TP53-T150KVQLWVDST    | 28349 | >TP53-T150KVQLWVDSK    | 84    | 28265 |
| >TP53-T150RTPPPGTRVRA  | 482   | >TP53-T150RPPPGTRVRA   | 900   | 418   |
| >TP53-T150RTPPPGTRV    | 1601  | >TP53-T150RPPPGTRV     | 66    | 1535  |
| >TP53-T150RTPPPGTRVRA  | 32    | >TP53-T150RPPPGTRVRA   | 12    | 20    |
| >TP53-T150RTPPPGTRVRA  | 139   | >TP53-T150RPPPGTRVRA   | 302   | 163   |
| >TP53-T150RTPPPGTRV    | 273   | >TP53-T150RPPPGTRV     | 1086  | 813   |
| >TP53-T150RSTPPPGTRV   | 136   | >TP53-T150SRPPPGTRV    | 8606  | 8470  |
| >TP53-T150RSTPPPGTRV   | 116   | >TP53-T150SRPPPGTRV    | 4354  | 4238  |
| >TP53-T150RSTPPPGTR    | 352   | >TP53-T150SRPPPGTR     | 17102 | 16750 |
| >TP53-T150RSTPPPGTRVR  | 129   | >TP53-T150SRPPPGTRVR   | 15162 | 15033 |
| >TP53-T150RSTPPPGTRV   | 18    | >TP53-T150SRPPPGTRV    | 10714 | 10696 |
| >TP53-T150RSTPPPGTRVR  | 82    | >TP53-T150SRPPPGTRVR   | 17769 | 17687 |
| >TP53-T150RSTPPPGTRV   | 4     | >TP53-T150SRPPPGTRV    | 9868  | 9864  |
| >TP53-T150RSTPPPGTRVR  | 96    | >TP53-T150SRPPPGTRVR   | 31141 | 31045 |
| >TP53-T150RSTPPPGTRVR  | 54    | >TP53-T150SRPPPGTRVR   | 30229 | 30175 |
| >TP53-T150RSTPPPGTRV   | 259   | >TP53-T150SRPPPGTRV    | 15867 | 15608 |
| >TP53-T150RSTPPPGTRV   | 311   | >TP53-T150SRPPPGTRV    | 16580 | 16269 |
| >TP53-T150RDSTPPPGTR   | 203   | >TP53-T150DSRPPPGTR    | 79    | 124   |
| >TP53-T150RDSTPPPGTRV  | 372   | >TP53-T150DSRPPPGTRV   | 149   | 223   |
| >TP53-T150RDSTPPPGTR   | 161   | >TP53-T150DSRPPPGTR    | 1249  | 1088  |
| >TP53-T150RDSTPPPGTRV  | 208   | >TP53-T150DSRPPPGTRV   | 1587  | 1379  |
| >TP53-T150RWVDSTPPPG   | 489   | >TP53-T150WVDSRPPPG    | 1418  | 929   |
| >TP53-T150RLWVDSTPP    | 386   | >TP53-T150RLWVDSRPP    | 300   | 86    |
| >TP53-T150RLWVDSTPPP   | 467   | >TP53-T150RLWVDSRPPP   | 256   | 211   |
| >TP53-T150RLWVDSTPPPC  | 485   | >TP53-T150RLWVDSRPPPC  | 367   | 118   |
| >TP53-T150RVQLWVDST    | 120   | >TP53-T150RVQLWVDSR    | 5363  | 5243  |
| >TP53-T150RVQLWVDST    | 21734 | >TP53-T150RVQLWVDSR    | 245   | 21489 |
| >TP53-T150RCPVQLWVDS   | 31425 | >TP53-T150RCPVQLWVDS   | 344   | 31081 |
| >TP53-T155A TRVRAMAIYK | 1127  | >TP53-T155A ARVRAMAIYK | 411   | 716   |
| >TP53-T155A TRVRAMAIY  | 62    | >TP53-T155A ARVRAMAIY  | 75    | 13    |
| >TP53-T155A TRVRAMAI   | 746   | >TP53-T155A ARVRAMAI   | 202   | 544   |
| >TP53-T155A TRVRAMAIY  | 278   | >TP53-T155A ARVRAMAIY  | 72    | 206   |
| >TP53-T155A TRVRAMAI   | 542   | >TP53-T155A ARVRAMAI   | 165   | 377   |

|                        |      |                         |      |      |
|------------------------|------|-------------------------|------|------|
| >TP53-T155A TRVRAMAIY  | 1249 | >TP53-T155A ARVRAMAIY   | 394  | 855  |
| >TP53-T155A TRVRAMAIYK | 733  | >TP53-T155A ARVRAMAIYK  | 169  | 564  |
| >TP53-T155A TRVRAMAI   | 215  | >TP53-T155A ARVRAMAI    | 627  | 412  |
| >TP53-T155A GTRVRAMAI\ | 269  | >TP53-T155A GARVRAMAI'  | 6444 | 6175 |
| >TP53-T155A GTRVRAMAI\ | 50   | >TP53-T155A GARVRAMAI'  | 123  | 73   |
| >TP53-T155A GTRVRAMAI\ | 39   | >TP53-T155A GARVRAMAI'  | 182  | 143  |
| >TP53-T155A GTRVRAMA   | 18   | >TP53-T155A GARVRAMA    | 76   | 58   |
| >TP53-T155A GTRVRAMAI  | 9    | >TP53-T155A GARVRAMAI   | 27   | 18   |
| >TP53-T155A GTRVRAMAI\ | 30   | >TP53-T155A GARVRAMAI'  | 172  | 142  |
| >TP53-T155A GTRVRAMAI\ | 3    | >TP53-T155A GARVRAMAI'  | 4    | 1    |
| >TP53-T155A GTRVRAMAI\ | 130  | >TP53-T155A GARVRAMAI'  | 616  | 486  |
| >TP53-T155A GTRVRAMAI\ | 115  | >TP53-T155A GARVRAMAI'  | 448  | 333  |
| >TP53-T155A GTRVRAMAI  | 687  | >TP53-T155A GARVRAMAI   | 128  | 559  |
| >TP53-T155A GTRVRAMAI\ | 405  | >TP53-T155A GARVRAMAI'  | 560  | 155  |
| >TP53-T155A GTRVRAMAI  | 40   | >TP53-T155A GARVRAMAI   | 367  | 327  |
| >TP53-T155A GTRVRAMAI\ | 4    | >TP53-T155A GARVRAMAI'  | 13   | 9    |
| >TP53-T155A GTRVRAMAI  | 122  | >TP53-T155A GARVRAMAI   | 2905 | 2783 |
| >TP53-T155A GTRVRAMAI\ | 21   | >TP53-T155A GARVRAMAI'  | 201  | 180  |
| >TP53-T155A GTRVRAMAI\ | 269  | >TP53-T155A GARVRAMAI'  | 1592 | 1323 |
| >TP53-T155A GTRVRAMAI  | 387  | >TP53-T155A GARVRAMAI   | 3159 | 2772 |
| >TP53-T155A LWVDSTPPPK | 485  | >TP53-T155A LWVDSTPPPK  | 213  | 272  |
| >TP53-T155A PGTRVRAMA  | 619  | >TP53-T155A PGARVRAMA   | 271  | 348  |
| >TP53-T155A PPGTRVRAM  | 68   | >TP53-T155A PPGARVRAM   | 58   | 10   |
| >TP53-T155A PPPGTRVRAM | 370  | >TP53-T155A PPPGARVRAI' | 730  | 360  |
| >TP53-T155A PPPGTRVRAM | 450  | >TP53-T155A PPPGARVRAI' | 62   | 388  |
| >TP53-T155A TPPPGRVRA  | 482  | >TP53-T155A TPPPGARVRA' | 375  | 107  |
| >TP53-T155A TPPPGRVRA  | 32   | >TP53-T155A TPPPGARVRA' | 39   | 7    |
| >TP53-T155A TPPPGRVRA  | 139  | >TP53-T155A TPPPGARVRA' | 175  | 36   |
| >TP53-T155A TPPPGRV    | 273  | >TP53-T155A TPPPGARV    | 99   | 174  |
| >TP53-T155A STPPPGRV   | 136  | >TP53-T155A STPPPGARV   | 54   | 82   |
| >TP53-T155A STPPPGRV   | 116  | >TP53-T155A STPPPGARV   | 87   | 29   |
| >TP53-T155A STPPPGR    | 352  | >TP53-T155A STPPPGAR    | 367  | 15   |
| >TP53-T155A STPPPGRVVR | 129  | >TP53-T155A STPPPGARVR  | 162  | 33   |
| >TP53-T155A STPPPGRV   | 18   | >TP53-T155A STPPPGARV   | 10   | 8    |
| >TP53-T155A STPPPGRVVR | 82   | >TP53-T155A STPPPGARVR  | 43   | 39   |
| >TP53-T155A STPPPGRV   | 512  | >TP53-T155A STPPPGARV   | 207  | 305  |
| >TP53-T155A STPPPGRV   | 4    | >TP53-T155A STPPPGARV   | 2    | 2    |
| >TP53-T155A STPPPGRVVR | 96   | >TP53-T155A STPPPGARVR  | 62   | 34   |
| >TP53-T155A STPPPGRVVR | 54   | >TP53-T155A STPPPGARVR  | 33   | 21   |
| >TP53-T155A STPPPGRV   | 259  | >TP53-T155A STPPPGARV   | 674  | 415  |
| >TP53-T155A STPPPGRV   | 311  | >TP53-T155A STPPPGARV   | 292  | 19   |
| >TP53-T155A DSTPPPGR   | 203  | >TP53-T155A DSTPPPGAR   | 142  | 61   |
| >TP53-T155A DSTPPPGRV  | 372  | >TP53-T155A DSTPPPGARV  | 567  | 195  |



|                         |      |                         |       |       |
|-------------------------|------|-------------------------|-------|-------|
| >TP53-T155A DSTPPPGTR   | 161  | >TP53-T155A DSTPPPGAR   | 247   | 86    |
| >TP53-T155A DSTPPPGTRV  | 208  | >TP53-T155A DSTPPPGARV  | 271   | 63    |
| >TP53-T155A DSTPPPGTRV  | 866  | >TP53-T155A DSTPPPGARV  | 357   | 509   |
| >TP53-T155A WVDSTPPPG   | 1880 | >TP53-T155A WVDSTPPPG   | 280   | 1600  |
| >TP53-T155A WVDSTPPPG   | 489  | >TP53-T155A WVDSTPPPG   | 58    | 431   |
| >TP53-T155I- TRVRAMAIY  | 62   | >TP53-T155I- IRVRAMAIY  | 437   | 375   |
| >TP53-T155I- TRVRAMAIY  | 1130 | >TP53-T155I- IRVRAMAIY  | 443   | 687   |
| >TP53-T155I- TRVRAMAI   | 746  | >TP53-T155I- IRVRAMAI   | 149   | 597   |
| >TP53-T155I- TRVRAMAIY  | 278  | >TP53-T155I- IRVRAMAIY  | 64    | 214   |
| >TP53-T155I- TRVRAMAI   | 542  | >TP53-T155I- IRVRAMAI   | 381   | 161   |
| >TP53-T155I- TRVRAMAIYK | 733  | >TP53-T155I- IRVRAMAIYK | 193   | 540   |
| >TP53-T155I- TRVRAMAI   | 215  | >TP53-T155I- IRVRAMAI   | 1806  | 1591  |
| >TP53-T155I- TRVRAMAIYK | 1215 | >TP53-T155I- IRVRAMAIYK | 361   | 854   |
| >TP53-T155I- GTRVRAMAIY | 269  | >TP53-T155I- GIRVRAMAIY | 4123  | 3854  |
| >TP53-T155I- GTRVRAMAIY | 50   | >TP53-T155I- GIRVRAMAIY | 44    | 6     |
| >TP53-T155I- GTRVRAMAIY | 39   | >TP53-T155I- GIRVRAMAIY | 81    | 42    |
| >TP53-T155I- GTRVRAMA   | 18   | >TP53-T155I- GIRVRAMA   | 73    | 55    |
| >TP53-T155I- GTRVRAMAI  | 9    | >TP53-T155I- GIRVRAMAI  | 26    | 17    |
| >TP53-T155I- GTRVRAMAIY | 30   | >TP53-T155I- GIRVRAMAIY | 161   | 131   |
| >TP53-T155I- GTRVRAMAIY | 3    | >TP53-T155I- GIRVRAMAIY | 4     | 1     |
| >TP53-T155I- GTRVRAMAIY | 130  | >TP53-T155I- GIRVRAMAIY | 699   | 569   |
| >TP53-T155I- GTRVRAMAIY | 115  | >TP53-T155I- GIRVRAMAIY | 432   | 317   |
| >TP53-T155I- GTRVRAMAI  | 687  | >TP53-T155I- GIRVRAMAI  | 83    | 604   |
| >TP53-T155I- GTRVRAMAIY | 405  | >TP53-T155I- GIRVRAMAIY | 337   | 68    |
| >TP53-T155I- GTRVRAMAI  | 40   | >TP53-T155I- GIRVRAMAI  | 6998  | 6958  |
| >TP53-T155I- GTRVRAMAIY | 4    | >TP53-T155I- GIRVRAMAIY | 360   | 356   |
| >TP53-T155I- GTRVRAMAI  | 122  | >TP53-T155I- GIRVRAMAI  | 5262  | 5140  |
| >TP53-T155I- GTRVRAMAIY | 21   | >TP53-T155I- GIRVRAMAIY | 159   | 138   |
| >TP53-T155I- GTRVRAMAIY | 269  | >TP53-T155I- GIRVRAMAIY | 3238  | 2969  |
| >TP53-T155I- GTRVRAMAI  | 387  | >TP53-T155I- GIRVRAMAI  | 17413 | 17026 |
| >TP53-T155I- LWVDSTPPPG | 485  | >TP53-T155I- LWVDSTPPPG | 172   | 313   |
| >TP53-T155I- PPGTRVRAM  | 68   | >TP53-T155I- PPGTRVRAM  | 80    | 12    |
| >TP53-T155I- PPPGTRVRAM | 370  | >TP53-T155I- PPPGTRVRAM | 434   | 64    |
| >TP53-T155I- PPPGTRVRAM | 450  | >TP53-T155I- PPPGTRVRAM | 683   | 233   |
| >TP53-T155I- TPPPGRV    | 763  | >TP53-T155I- TPPPGRV    | 435   | 328   |
| >TP53-T155I- TPPPGRVRA  | 482  | >TP53-T155I- TPPPGRVRA  | 619   | 137   |
| >TP53-T155I- TPPPGRVRA  | 32   | >TP53-T155I- TPPPGRVRA  | 54    | 22    |
| >TP53-T155I- TPPPGRVRA  | 139  | >TP53-T155I- TPPPGRVRA  | 245   | 106   |
| >TP53-T155I- TPPPGRV    | 273  | >TP53-T155I- TPPPGRV    | 85    | 188   |
| >TP53-T155I- TPPPGRVRA  | 727  | >TP53-T155I- TPPPGRVRA  | 336   | 391   |
| >TP53-T155I- STPPPGRV   | 136  | >TP53-T155I- STPPPGRV   | 54    | 82    |
| >TP53-T155I- STPPPGRV   | 743  | >TP53-T155I- STPPPGRV   | 417   | 326   |
| >TP53-T155I- STPPPGRV   | 116  | >TP53-T155I- STPPPGRV   | 130   | 14    |

|                        |       |                        |       |       |
|------------------------|-------|------------------------|-------|-------|
| >TP53-T155I-STPPPGTR   | 352   | >TP53-T155I-STPPPGIR   | 501   | 149   |
| >TP53-T155I-STPPPGTRVR | 129   | >TP53-T155I-STPPPGIRVR | 232   | 103   |
| >TP53-T155I-STPPPGTRV  | 18    | >TP53-T155I-STPPPGIRV  | 21    | 3     |
| >TP53-T155I-STPPPGTRVR | 82    | >TP53-T155I-STPPPGIRVR | 44    | 38    |
| >TP53-T155I-STPPPGTRV  | 512   | >TP53-T155I-STPPPGIRV  | 250   | 262   |
| >TP53-T155I-STPPPGTRV  | 4     | >TP53-T155I-STPPPGIRV  | 3     | 1     |
| >TP53-T155I-STPPPGTRVR | 96    | >TP53-T155I-STPPPGIRVR | 42    | 54    |
| >TP53-T155I-STPPPGTRVR | 54    | >TP53-T155I-STPPPGIRVR | 41    | 13    |
| >TP53-T155I-STPPPGTRV  | 259   | >TP53-T155I-STPPPGIRV  | 1474  | 1215  |
| >TP53-T155I-STPPPGTRV  | 311   | >TP53-T155I-STPPPGIRV  | 450   | 139   |
| >TP53-T155I-DSTPPPGTR  | 203   | >TP53-T155I-DSTPPPGIR  | 662   | 459   |
| >TP53-T155I-DSTPPPGTRV | 372   | >TP53-T155I-DSTPPPGIRV | 319   | 53    |
| >TP53-T155I-DSTPPPGTR  | 161   | >TP53-T155I-DSTPPPGIR  | 282   | 121   |
| >TP53-T155I-DSTPPPGTRV | 208   | >TP53-T155I-DSTPPPGIRV | 265   | 57    |
| >TP53-T155I-DSTPPPGTRV | 866   | >TP53-T155I-DSTPPPGIRV | 404   | 462   |
| >TP53-T155I-DSTPPPGT   | 34363 | >TP53-T155I-DSTPPPGI   | 357   | 34006 |
| >TP53-T155I-WVDSTPPPG  | 1880  | >TP53-T155I-WVDSTPPPG  | 54    | 1826  |
| >TP53-T155I-WVDSTPPPG  | 4877  | >TP53-T155I-WVDSTPPPG  | 339   | 4538  |
| >TP53-T155I-WVDSTPPPG  | 6733  | >TP53-T155I-WVDSTPPPG  | 249   | 6484  |
| >TP53-T155I-WVDSTPPPG  | 489   | >TP53-T155I-WVDSTPPPG  | 13    | 476   |
| >TP53-T155I-WVDSTPPPG  | 28778 | >TP53-T155I-WVDSTPPPG  | 155   | 28623 |
| >TP53-T155N TRVRAMAIY  | 62    | >TP53-T155N NRVRAMAIY  | 171   | 109   |
| >TP53-T155N TRVRAMAIY  | 278   | >TP53-T155N NRVRAMAIY  | 372   | 94    |
| >TP53-T155N TRVRAMAI   | 215   | >TP53-T155N NRVRAMAI   | 220   | 5     |
| >TP53-T155N GTRVRAMAI  | 269   | >TP53-T155N GNRVRAMAI  | 14747 | 14478 |
| >TP53-T155N GTRVRAMAI  | 50    | >TP53-T155N GNRVRAMAI  | 3126  | 3076  |
| >TP53-T155N GTRVRAMAI  | 39    | >TP53-T155N GNRVRAMAI  | 4935  | 4896  |
| >TP53-T155N GTRVRAMA   | 18    | >TP53-T155N GNRVRAMA   | 1201  | 1183  |
| >TP53-T155N GTRVRAMAI  | 9     | >TP53-T155N GNRVRAMAI  | 442   | 433   |
| >TP53-T155N GTRVRAMAI  | 30    | >TP53-T155N GNRVRAMAI  | 2560  | 2530  |
| >TP53-T155N GTRVRAMAI  | 3     | >TP53-T155N GNRVRAMAI  | 12    | 9     |
| >TP53-T155N GTRVRAMAI  | 130   | >TP53-T155N GNRVRAMAI  | 1578  | 1448  |
| >TP53-T155N GTRVRAMAI  | 115   | >TP53-T155N GNRVRAMAI  | 5221  | 5106  |
| >TP53-T155N GTRVRAMAI  | 687   | >TP53-T155N GNRVRAMAI  | 358   | 329   |
| >TP53-T155N GTRVRAMAI  | 405   | >TP53-T155N GNRVRAMAI  | 2022  | 1617  |
| >TP53-T155N GTRVRAMAI  | 40    | >TP53-T155N GNRVRAMAI  | 20929 | 20889 |
| >TP53-T155N GTRVRAMAI  | 4     | >TP53-T155N GNRVRAMAI  | 7494  | 7490  |
| >TP53-T155N GTRVRAMAI  | 122   | >TP53-T155N GNRVRAMAI  | 5611  | 5489  |
| >TP53-T155N GTRVRAMAI  | 21    | >TP53-T155N GNRVRAMAI  | 763   | 742   |
| >TP53-T155N GTRVRAMAI  | 269   | >TP53-T155N GNRVRAMAI  | 5290  | 5021  |
| >TP53-T155N GTRVRAMAI  | 387   | >TP53-T155N GNRVRAMAI  | 8268  | 7881  |
| >TP53-T155N LWVDSTPPPG | 485   | >TP53-T155N LWVDSTPPPG | 749   | 264   |
| >TP53-T155N PGTRVRAMA  | 619   | >TP53-T155N PGNRVRAMA  | 304   | 315   |

|                        |       |                        |       |       |
|------------------------|-------|------------------------|-------|-------|
| >TP53-T155N PPGTRVRAM  | 68    | >TP53-T155N PPGNRVRAM  | 81    | 13    |
| >TP53-T155N PPPGTRVRAM | 370   | >TP53-T155N PPPGNRVRAI | 470   | 100   |
| >TP53-T155N PPPGTRVRAM | 450   | >TP53-T155N PPPGNRVRAI | 236   | 214   |
| >TP53-T155N TPPPGRVRA  | 482   | >TP53-T155N TPPPGNRVR/ | 501   | 19    |
| >TP53-T155N TPPPGRVRA  | 32    | >TP53-T155N TPPPGNRVR/ | 44    | 12    |
| >TP53-T155N TPPPGRVRA  | 139   | >TP53-T155N TPPPGNRVR/ | 226   | 87    |
| >TP53-T155N TPPPGRV    | 273   | >TP53-T155N TPPPGNRV   | 224   | 49    |
| >TP53-T155N STPPPGRV   | 136   | >TP53-T155N STPPPGNRV  | 228   | 92    |
| >TP53-T155N STPPPGRV   | 116   | >TP53-T155N STPPPGNRV  | 321   | 205   |
| >TP53-T155N STPPPGR    | 352   | >TP53-T155N STPPPGNR   | 410   | 58    |
| >TP53-T155N STPPPGRV   | 129   | >TP53-T155N STPPPGNRVF | 161   | 32    |
| >TP53-T155N STPPPGRV   | 18    | >TP53-T155N STPPPGNRV  | 14    | 4     |
| >TP53-T155N STPPPGRV   | 82    | >TP53-T155N STPPPGNRVF | 60    | 22    |
| >TP53-T155N STPPPGRV   | 4     | >TP53-T155N STPPPGNRV  | 3     | 1     |
| >TP53-T155N STPPPGRV   | 96    | >TP53-T155N STPPPGNRVF | 104   | 8     |
| >TP53-T155N STPPPGRV   | 54    | >TP53-T155N STPPPGNRVF | 66    | 12    |
| >TP53-T155N STPPPGRV   | 259   | >TP53-T155N STPPPGNRV  | 568   | 309   |
| >TP53-T155N STPPPGRV   | 311   | >TP53-T155N STPPPGNRV  | 566   | 255   |
| >TP53-T155N DSTPPPGR   | 203   | >TP53-T155N DSTPPPGNR  | 206   | 3     |
| >TP53-T155N DSTPPPGRV  | 372   | >TP53-T155N DSTPPPGNR\ | 349   | 23    |
| >TP53-T155N DSTPPPGR   | 161   | >TP53-T155N DSTPPPGNR  | 234   | 73    |
| >TP53-T155N DSTPPPGRV  | 208   | >TP53-T155N DSTPPPGNR\ | 260   | 52    |
| >TP53-T155N WVDSTPPP   | 489   | >TP53-T155N WVDSTPPP   | 7686  | 7197  |
| >TP53-T155P TRVRAMAIY  | 62    | >TP53-T155P PRVRAMAIY  | 395   | 333   |
| >TP53-T155P TRVRAMAIY  | 278   | >TP53-T155P PRVRAMAIY  | 852   | 574   |
| >TP53-T155P TRVRAMAI   | 215   | >TP53-T155P PRVRAMAI   | 9621  | 9406  |
| >TP53-T155P GTRVRAMAI\ | 269   | >TP53-T155P GPRVRAMAI\ | 24741 | 24472 |
| >TP53-T155P GTRVRAMAI\ | 50    | >TP53-T155P GPRVRAMAI\ | 6470  | 6420  |
| >TP53-T155P GTRVRAMAI\ | 39    | >TP53-T155P GPRVRAMAI\ | 11342 | 11303 |
| >TP53-T155P GTRVRAMA   | 18    | >TP53-T155P GPRVRAMA   | 12997 | 12979 |
| >TP53-T155P GTRVRAMAI  | 9     | >TP53-T155P GPRVRAMAI  | 11068 | 11059 |
| >TP53-T155P GTRVRAMAI\ | 30    | >TP53-T155P GPRVRAMAI\ | 14499 | 14469 |
| >TP53-T155P GTRVRAMAI\ | 3     | >TP53-T155P GPRVRAMAI\ | 1262  | 1259  |
| >TP53-T155P GTRVRAMAI\ | 130   | >TP53-T155P GPRVRAMAI\ | 5047  | 4917  |
| >TP53-T155P GTRVRAMAI\ | 115   | >TP53-T155P GPRVRAMAI\ | 10232 | 10117 |
| >TP53-T155P GTRVRAMA   | 16954 | >TP53-T155P GPRVRAMA   | 63    | 16891 |
| >TP53-T155P GTRVRAMAI  | 4512  | >TP53-T155P GPRVRAMAI  | 10    | 4502  |
| >TP53-T155P GTRVRAMAI  | 687   | >TP53-T155P GPRVRAMAI  | 53    | 634   |
| >TP53-T155P GTRVRAMAI\ | 405   | >TP53-T155P GPRVRAMAI\ | 9163  | 8758  |
| >TP53-T155P GTRVRAMAI  | 40    | >TP53-T155P GPRVRAMAI  | 18101 | 18061 |
| >TP53-T155P GTRVRAMAI\ | 4     | >TP53-T155P GPRVRAMAI\ | 7798  | 7794  |
| >TP53-T155P GTRVRAMAI  | 122   | >TP53-T155P GPRVRAMAI  | 7703  | 7581  |
| >TP53-T155P GTRVRAMAI\ | 21    | >TP53-T155P GPRVRAMAI\ | 2155  | 2134  |

|                         |       |                         |       |       |
|-------------------------|-------|-------------------------|-------|-------|
| >TP53-T155P GTRVRAMAI\  | 269   | >TP53-T155P GPRVRAMAI\  | 5458  | 5189  |
| >TP53-T155P GTRVRAMAI   | 387   | >TP53-T155P GPRVRAMAI   | 12555 | 12168 |
| >TP53-T155P LWVDSTPPPK  | 485   | >TP53-T155P LWVDSTPPPK  | 468   | 17    |
| >TP53-T155P PGTRVRAM    | 11563 | >TP53-T155P PGPRVRAM    | 176   | 11387 |
| >TP53-T155P PGTRVRAMA   | 5996  | >TP53-T155P PGPRVRAMA   | 82    | 5914  |
| >TP53-T155P PGTRVRAMA   | 17881 | >TP53-T155P PGPRVRAMA   | 310   | 17571 |
| >TP53-T155P PPGTRVRAM   | 68    | >TP53-T155P PPGPRVRAM   | 58    | 10    |
| >TP53-T155P PPPGTRVRAM  | 370   | >TP53-T155P PPPGPRVRAM  | 389   | 19    |
| >TP53-T155P PPPGTRVRAM  | 450   | >TP53-T155P PPPGPRVRAM  | 886   | 436   |
| >TP53-T155P TPPP GTRV   | 763   | >TP53-T155P TPPP GPRV   | 341   | 422   |
| >TP53-T155P TPPP GTRVRA | 482   | >TP53-T155P TPPP GPRVRA | 591   | 109   |
| >TP53-T155P TPPP GTRVRA | 32    | >TP53-T155P TPPP GPRVRA | 61    | 29    |
| >TP53-T155P TPPP GTRVRA | 139   | >TP53-T155P TPPP GPRVRA | 225   | 86    |
| >TP53-T155P TPPP GTRV   | 273   | >TP53-T155P TPPP GPRV   | 175   | 98    |
| >TP53-T155P STPPP GTRV  | 136   | >TP53-T155P STPPP GPRV  | 52    | 84    |
| >TP53-T155P STPPP GTRV  | 743   | >TP53-T155P STPPP GPRV  | 155   | 588   |
| >TP53-T155P STPPP GTRV  | 116   | >TP53-T155P STPPP GPRV  | 64    | 52    |
| >TP53-T155P STPPP GTR   | 352   | >TP53-T155P STPPP GPR   | 477   | 125   |
| >TP53-T155P STPPP GTRVR | 129   | >TP53-T155P STPPP GPRVR | 292   | 163   |
| >TP53-T155P STPPP GTRV  | 18    | >TP53-T155P STPPP GPRV  | 109   | 91    |
| >TP53-T155P STPPP GTRVR | 82    | >TP53-T155P STPPP GPRVR | 117   | 35    |
| >TP53-T155P STPPP GTRV  | 512   | >TP53-T155P STPPP GPRV  | 90    | 422   |
| >TP53-T155P STPPP GTRV  | 4     | >TP53-T155P STPPP GPRV  | 4     | 0     |
| >TP53-T155P STPPP GTRVR | 96    | >TP53-T155P STPPP GPRVR | 190   | 94    |
| >TP53-T155P STPPP GTRVR | 54    | >TP53-T155P STPPP GPRVR | 42    | 12    |
| >TP53-T155P STPPP GTRV  | 259   | >TP53-T155P STPPP GPRV  | 1579  | 1320  |
| >TP53-T155P STPPP GTRV  | 311   | >TP53-T155P STPPP GPRV  | 296   | 15    |
| >TP53-T155P DSTPPP GTR  | 203   | >TP53-T155P DSTPPP GPR  | 129   | 74    |
| >TP53-T155P DSTPPP GTRV | 372   | >TP53-T155P DSTPPP GPRV | 386   | 14    |
| >TP53-T155P DSTPPP GTR  | 161   | >TP53-T155P DSTPPP GPR  | 247   | 86    |
| >TP53-T155P DSTPPP GTRV | 208   | >TP53-T155P DSTPPP GPRV | 401   | 193   |
| >TP53-T155P DSTPPP GTRV | 1466  | >TP53-T155P DSTPPP GPRV | 365   | 1101  |
| >TP53-T155P WVDSTPPPG   | 489   | >TP53-T155P WVDSTPPPG   | 6455  | 5966  |
| >TP53-T155S TRVRAMAIY   | 62    | >TP53-T155S SRVRAMAIY   | 69    | 7     |
| >TP53-T155S TRVRAMAI    | 746   | >TP53-T155S SRVRAMAI    | 370   | 376   |
| >TP53-T155S TRVRAMAIY   | 278   | >TP53-T155S SRVRAMAIY   | 131   | 147   |
| >TP53-T155S TRVRAMAI    | 542   | >TP53-T155S SRVRAMAI    | 290   | 252   |
| >TP53-T155S TRVRAMAIYk  | 733   | >TP53-T155S SRVRAMAIYk  | 175   | 558   |
| >TP53-T155S TRVRAMAI    | 215   | >TP53-T155S SRVRAMAI    | 460   | 245   |
| >TP53-T155S GTRVRAMAI\  | 269   | >TP53-T155S GSRVRAMAI\  | 524   | 255   |
| >TP53-T155S GTRVRAMAI\  | 50    | >TP53-T155S GSRVRAMAI\  | 64    | 14    |
| >TP53-T155S GTRVRAMAI\  | 39    | >TP53-T155S GSRVRAMAI\  | 56    | 17    |
| >TP53-T155S GTRVRAMA    | 18    | >TP53-T155S GSRVRAMA    | 32    | 14    |

|                        |      |                        |      |      |
|------------------------|------|------------------------|------|------|
| >TP53-T155S GTRVRAMAI  | 9    | >TP53-T155S GSRVRAMAI  | 13   | 4    |
| >TP53-T155S GTRVRAMAI  | 30   | >TP53-T155S GSRVRAMAI  | 57   | 27   |
| >TP53-T155S GTRVRAMAI  | 3    | >TP53-T155S GSRVRAMAI  | 4    | 1    |
| >TP53-T155S GTRVRAMAI  | 130  | >TP53-T155S GSRVRAMAI  | 116  | 14   |
| >TP53-T155S GTRVRAMAI  | 115  | >TP53-T155S GSRVRAMAI  | 223  | 108  |
| >TP53-T155S GTRVRAMAI  | 405  | >TP53-T155S GSRVRAMAI  | 306  | 99   |
| >TP53-T155S GTRVRAMAI  | 1212 | >TP53-T155S GSRVRAMAI  | 378  | 834  |
| >TP53-T155S GTRVRAMAI  | 40   | >TP53-T155S GSRVRAMAI  | 53   | 13   |
| >TP53-T155S GTRVRAMAI  | 4    | >TP53-T155S GSRVRAMAI  | 5    | 1    |
| >TP53-T155S GTRVRAMAI  | 122  | >TP53-T155S GSRVRAMAI  | 395  | 273  |
| >TP53-T155S GTRVRAMAI  | 21   | >TP53-T155S GSRVRAMAI  | 30   | 9    |
| >TP53-T155S GTRVRAMAI  | 269  | >TP53-T155S GSRVRAMAI  | 435  | 166  |
| >TP53-T155S GTRVRAMAI  | 387  | >TP53-T155S GSRVRAMAI  | 611  | 224  |
| >TP53-T155S LWVDSTPPPG | 485  | >TP53-T155S LWVDSTPPPG | 589  | 104  |
| >TP53-T155S PGTRVRAMA  | 619  | >TP53-T155S PGSRVRAMA  | 286  | 333  |
| >TP53-T155S PPGTRVRAM  | 68   | >TP53-T155S PPGSRVRAM  | 50   | 18   |
| >TP53-T155S PPPGTRVRAM | 370  | >TP53-T155S PPPGSRVRAM | 465  | 95   |
| >TP53-T155S PPPGTRVRAM | 450  | >TP53-T155S PPPGSRVRAM | 222  | 228  |
| >TP53-T155S TPPPGRVRA  | 482  | >TP53-T155S TPPPGRVRA  | 382  | 100  |
| >TP53-T155S TPPPGRVRA  | 32   | >TP53-T155S TPPPGRVRA  | 36   | 4    |
| >TP53-T155S TPPPGRVRA  | 139  | >TP53-T155S TPPPGRVRA  | 145  | 6    |
| >TP53-T155S TPPPGRV    | 273  | >TP53-T155S TPPPGRV    | 307  | 34   |
| >TP53-T155S STPPPGRV   | 136  | >TP53-T155S STPPPGRV   | 98   | 38   |
| >TP53-T155S STPPPGRV   | 116  | >TP53-T155S STPPPGRV   | 130  | 14   |
| >TP53-T155S STPPPGR    | 352  | >TP53-T155S STPPPGR    | 389  | 37   |
| >TP53-T155S STPPPGRVR  | 129  | >TP53-T155S STPPPGRVR  | 111  | 18   |
| >TP53-T155S STPPPGRV   | 18   | >TP53-T155S STPPPGRV   | 17   | 1    |
| >TP53-T155S STPPPGRVR  | 82   | >TP53-T155S STPPPGRVR  | 70   | 12   |
| >TP53-T155S STPPPGRV   | 4    | >TP53-T155S STPPPGRV   | 4    | 0    |
| >TP53-T155S STPPPGRVR  | 96   | >TP53-T155S STPPPGRVR  | 98   | 2    |
| >TP53-T155S STPPPGRVR  | 54   | >TP53-T155S STPPPGRVR  | 51   | 3    |
| >TP53-T155S STPPPGRV   | 259  | >TP53-T155S STPPPGRV   | 47   | 212  |
| >TP53-T155S STPPPGRV   | 311  | >TP53-T155S STPPPGRV   | 180  | 131  |
| >TP53-T155S DSTPPPGR   | 203  | >TP53-T155S DSTPPPGR   | 200  | 3    |
| >TP53-T155S DSTPPPGRV  | 372  | >TP53-T155S DSTPPPGRV  | 426  | 54   |
| >TP53-T155S DSTPPPGR   | 161  | >TP53-T155S DSTPPPGR   | 236  | 75   |
| >TP53-T155S DSTPPPGRV  | 208  | >TP53-T155S DSTPPPGRV  | 293  | 85   |
| >TP53-T155S WVDSTPPPG  | 489  | >TP53-T155S WVDSTPPPG  | 3553 | 3064 |
| >TP53-T170A MAIYKQSQHI | 672  | >TP53-T170A MAIYKQSQHI | 37   | 635  |
| >TP53-T170A MAIYKQSQHI | 3519 | >TP53-T170A MAIYKQSQHI | 187  | 3332 |
| >TP53-T170A HMTEVVRR   | 38   | >TP53-T170A HMAEVRRC   | 15   | 23   |
| >TP53-T170A HMTEVVRR   | 1236 | >TP53-T170A HMAEVRRC   | 350  | 886  |
| >TP53-T170A HMTEVVRR   | 38   | >TP53-T170A HMAEVRRC   | 35   | 3    |

|                        |      |                        |      |      |
|------------------------|------|------------------------|------|------|
| >TP53-T170A HMTEVVRR   | 65   | >TP53-T170A HMAEVVRR   | 115  | 50   |
| >TP53-T170A HMTEVVRR   | 35   | >TP53-T170A HMAEVVRR   | 21   | 14   |
| >TP53-T170A HMTEVVRR   | 64   | >TP53-T170A HMAEVVRR   | 63   | 1    |
| >TP53-T170A QHMTEVVR   | 269  | >TP53-T170A QHMAEVVR   | 277  | 8    |
| >TP53-T170A QHMTEVVR   | 195  | >TP53-T170A QHMAEVVRF  | 205  | 10   |
| >TP53-T170A SQHMTEVV   | 115  | >TP53-T170A SQHMAEVV   | 109  | 6    |
| >TP53-T170A SQHMTEVV   | 256  | >TP53-T170A SQHMAEVV   | 462  | 206  |
| >TP53-T170A SQHMTEVVR  | 115  | >TP53-T170A SQHMAEVVR  | 267  | 152  |
| >TP53-T170A SQHMTEVVR  | 504  | >TP53-T170A SQHMAEVVR  | 406  | 98   |
| >TP53-T170A SQHMTEVV   | 88   | >TP53-T170A SQHMAEVV   | 186  | 98   |
| >TP53-T170A SQHMTEVVR  | 162  | >TP53-T170A SQHMAEVVR  | 386  | 224  |
| >TP53-T170A SQHMTEVVR  | 434  | >TP53-T170A SQHMAEVVR  | 593  | 159  |
| >TP53-T170A SQHMTEVVR  | 363  | >TP53-T170A SQHMAEVVR  | 435  | 72   |
| >TP53-T170A QSQHMTEVV  | 230  | >TP53-T170A QSQHMAEV\  | 320  | 90   |
| >TP53-T170A QSQHMTEVV  | 321  | >TP53-T170A QSQHMAEV\  | 570  | 249  |
| >TP53-T170A QSQHMTEVV  | 185  | >TP53-T170A QSQHMAEV\  | 219  | 34   |
| >TP53-T170A QSQHMTEV   | 206  | >TP53-T170A QSQHMAEV   | 192  | 14   |
| >TP53-T170A QSQHMTEVV  | 303  | >TP53-T170A QSQHMAEV\  | 1092 | 789  |
| >TP53-T170A QSQHMTEVV  | 306  | >TP53-T170A QSQHMAEV\  | 445  | 139  |
| >TP53-T170A KQSQHMTEV  | 82   | >TP53-T170A KQSQHMAEV  | 48   | 34   |
| >TP53-T170A KQSQHMTEV  | 51   | >TP53-T170A KQSQHMAEV  | 33   | 18   |
| >TP53-T170A KQSQHMTEV  | 298  | >TP53-T170A KQSQHMAEV  | 539  | 241  |
| >TP53-T170A KQSQHMTEV  | 9    | >TP53-T170A KQSQHMAEV  | 11   | 2    |
| >TP53-T170A KQSQHMTEV  | 273  | >TP53-T170A KQSQHMAEV  | 795  | 522  |
| >TP53-T170A KQSQHMTEV  | 10   | >TP53-T170A KQSQHMAEV  | 8    | 2    |
| >TP53-T170A KQSQHMTEV  | 426  | >TP53-T170A KQSQHMAEV  | 160  | 266  |
| >TP53-T170A KQSQHMTEV  | 35   | >TP53-T170A KQSQHMAEV  | 42   | 7    |
| >TP53-T170A KQSQHMTEV  | 541  | >TP53-T170A KQSQHMAEV  | 355  | 186  |
| >TP53-T170A KQSQHMTEV  | 222  | >TP53-T170A KQSQHMAEV  | 264  | 42   |
| >TP53-T170A KQSQHMTEV  | 86   | >TP53-T170A KQSQHMAEV  | 185  | 99   |
| >TP53-T170A KQSQHMTEV  | 110  | >TP53-T170A KQSQHMAEV  | 164  | 54   |
| >TP53-T170A KQSQHMTEV  | 185  | >TP53-T170A KQSQHMAEV  | 327  | 142  |
| >TP53-T170A KQSQHMTEV  | 60   | >TP53-T170A KQSQHMAEV  | 60   | 0    |
| >TP53-T170A YKQSQHMTE  | 467  | >TP53-T170A YKQSQHMAE  | 432  | 35   |
| >TP53-T170A YKQSQHMT   | 1856 | >TP53-T170A YKQSQHMA   | 399  | 1457 |
| >TP53-T170A YKQSQHMTE  | 30   | >TP53-T170A YKQSQHMAE  | 45   | 15   |
| >TP53-T170A YKQSQHMTE  | 42   | >TP53-T170A YKQSQHMAE  | 45   | 3    |
| >TP53-T170A IYKQSQHMTI | 402  | >TP53-T170A IYKQSQHMAI | 2451 | 2049 |
| >TP53-T170A IYKQSQHMT  | 5834 | >TP53-T170A IYKQSQHMA  | 389  | 5445 |
| >TP53-T170A AIYKQSQHM' | 1331 | >TP53-T170A AIYKQSQHM, | 216  | 1115 |
| >TP53-T170A AIYKQSQHM' | 3687 | >TP53-T170A AIYKQSQHM, | 270  | 3417 |
| >TP53-T170A AIYKQSQHM' | 662  | >TP53-T170A AIYKQSQHM, | 67   | 595  |
| >TP53-T170N MAIYKQSQHI | 4990 | >TP53-T170N MAIYKQSQHI | 364  | 4626 |

|                       |       |                       |     |       |
|-----------------------|-------|-----------------------|-----|-------|
| >TP53-T170N MAIYKQSQH | 672   | >TP53-T170N MAIYKQSQH | 254 | 418   |
| >TP53-T170N MAIYKQSQH | 13188 | >TP53-T170N MAIYKQSQH | 361 | 12827 |
| >TP53-T170N MAIYKQSQH | 5430  | >TP53-T170N MAIYKQSQH | 19  | 5411  |
| >TP53-T170N MAIYKQSQH | 3942  | >TP53-T170N MAIYKQSQH | 63  | 3879  |
| >TP53-T170N MAIYKQSQH | 10054 | >TP53-T170N MAIYKQSQH | 77  | 9977  |
| >TP53-T170N MAIYKQSQH | 9709  | >TP53-T170N MAIYKQSQH | 229 | 9480  |
| >TP53-T170N HMTEVRRRC | 4723  | >TP53-T170N HMMEVRRRC | 400 | 4323  |
| >TP53-T170N HMTEVRRRC | 38    | >TP53-T170N HMMEVRRRC | 9   | 29    |
| >TP53-T170N HMTEVRRRC | 2818  | >TP53-T170N HMMEVRRRC | 194 | 2624  |
| >TP53-T170N HMTEVRRRC | 6679  | >TP53-T170N HMMEVRRRC | 197 | 6482  |
| >TP53-T170N HMTEVRRR  | 1236  | >TP53-T170N HMMEVRRR  | 151 | 1085  |
| >TP53-T170N HMTEVRRRC | 2711  | >TP53-T170N HMMEVRRRC | 371 | 2340  |
| >TP53-T170N HMTEVRRR  | 38    | >TP53-T170N HMMEVRRR  | 17  | 21    |
| >TP53-T170N HMTEVRRRC | 1361  | >TP53-T170N HMMEVRRRC | 455 | 906   |
| >TP53-T170N HMTEVRRR  | 65    | >TP53-T170N HMMEVRRR  | 32  | 33    |
| >TP53-T170N HMTEVRRR  | 35    | >TP53-T170N HMMEVRRR  | 25  | 10    |
| >TP53-T170N HMTEVRRRC | 3938  | >TP53-T170N HMMEVRRRC | 275 | 3663  |
| >TP53-T170N HMTEVRRR  | 64    | >TP53-T170N HMMEVRRR  | 49  | 15    |
| >TP53-T170N QHMTEVVR  | 269   | >TP53-T170N QHMMEVVR  | 415 | 146   |
| >TP53-T170N QHMTEVRR  | 195   | >TP53-T170N QHMMEVVR  | 340 | 145   |
| >TP53-T170N SQHMTEVV  | 670   | >TP53-T170N SQHMMEVV  | 492 | 178   |
| >TP53-T170N SQHMTEVV  | 115   | >TP53-T170N SQHMMEVV  | 117 | 2     |
| >TP53-T170N SQHMTEVV  | 256   | >TP53-T170N SQHMMEVV  | 519 | 263   |
| >TP53-T170N SQHMTEVVR | 115   | >TP53-T170N SQHMMEVVI | 73  | 42    |
| >TP53-T170N SQHMTEVVR | 504   | >TP53-T170N SQHMMEVVI | 168 | 336   |
| >TP53-T170N SQHMTEVV  | 88    | >TP53-T170N SQHMMEVV  | 303 | 215   |
| >TP53-T170N SQHMTEVVR | 162   | >TP53-T170N SQHMMEVVI | 692 | 530   |
| >TP53-T170N SQHMTEVVR | 434   | >TP53-T170N SQHMMEVVI | 427 | 7     |
| >TP53-T170N SQHMTEVVR | 363   | >TP53-T170N SQHMMEVVI | 387 | 24    |
| >TP53-T170N QSQHMTEVV | 230   | >TP53-T170N QSQHMMEV  | 132 | 98    |
| >TP53-T170N QSQHMTEVV | 321   | >TP53-T170N QSQHMMEV  | 215 | 106   |
| >TP53-T170N QSQHMTEVV | 973   | >TP53-T170N QSQHMMEV  | 346 | 627   |
| >TP53-T170N QSQHMTEVV | 185   | >TP53-T170N QSQHMMEV  | 253 | 68    |
| >TP53-T170N QSQHMTEV  | 206   | >TP53-T170N QSQHMMEV  | 109 | 97    |
| >TP53-T170N QSQHMTEVV | 303   | >TP53-T170N QSQHMMEV  | 282 | 21    |
| >TP53-T170N QSQHMTEVV | 306   | >TP53-T170N QSQHMMEV  | 203 | 103   |
| >TP53-T170N KQSQHMTEV | 82    | >TP53-T170N KQSQHMME' | 55  | 27    |
| >TP53-T170N KQSQHMTEV | 51    | >TP53-T170N KQSQHMME' | 74  | 23    |
| >TP53-T170N KQSQHMTEV | 298   | >TP53-T170N KQSQHMME' | 319 | 21    |
| >TP53-T170N KQSQHMTEV | 9     | >TP53-T170N KQSQHMME' | 10  | 1     |
| >TP53-T170N KQSQHMTEV | 273   | >TP53-T170N KQSQHMME' | 279 | 6     |
| >TP53-T170N KQSQHMTEV | 10    | >TP53-T170N KQSQHMME' | 9   | 1     |
| >TP53-T170N KQSQHMTEV | 426   | >TP53-T170N KQSQHMME' | 251 | 175   |

|                        |       |                        |      |       |
|------------------------|-------|------------------------|------|-------|
| >TP53-T170N KQSQHMTEV  | 35    | >TP53-T170N KQSQHMMME' | 34   | 1     |
| >TP53-T170N KQSQHMTEV  | 222   | >TP53-T170N KQSQHMMME' | 280  | 58    |
| >TP53-T170N KQSQHMTEV  | 86    | >TP53-T170N KQSQHMMME' | 60   | 26    |
| >TP53-T170N KQSQHMTEV  | 110   | >TP53-T170N KQSQHMMME' | 130  | 20    |
| >TP53-T170N KQSQHMTEV  | 185   | >TP53-T170N KQSQHMMME' | 273  | 88    |
| >TP53-T170N KQSQHMTEV  | 863   | >TP53-T170N KQSQHMMME' | 490  | 373   |
| >TP53-T170N KQSQHMTEV  | 60    | >TP53-T170N KQSQHMMME' | 43   | 17    |
| >TP53-T170N YKQSQHMT   | 467   | >TP53-T170N YKQSQHMM   | 464  | 3     |
| >TP53-T170N YKQSQHMT   | 1856  | >TP53-T170N YKQSQHMM   | 17   | 1839  |
| >TP53-T170N YKQSQHMT   | 30    | >TP53-T170N YKQSQHMM   | 27   | 3     |
| >TP53-T170N YKQSQHMT   | 42    | >TP53-T170N YKQSQHMM   | 56   | 14    |
| >TP53-T170N IYKQSQHMTI | 402   | >TP53-T170N IYKQSQHMM  | 2345 | 1943  |
| >TP53-T170N IYKQSQHMT  | 3820  | >TP53-T170N IYKQSQHMM  | 186  | 3634  |
| >TP53-T170N IYKQSQHMTI | 864   | >TP53-T170N IYKQSQHMM  | 182  | 682   |
| >TP53-T170N IYKQSQHMTI | 1709  | >TP53-T170N IYKQSQHMM  | 289  | 1420  |
| >TP53-T170N AIYKQSQHM' | 1331  | >TP53-T170N AIYKQSQHM  | 421  | 910   |
| >TP53-T170N AIYKQSQHM' | 662   | >TP53-T170N AIYKQSQHM  | 422  | 240   |
| >TP53-T170N AIYKQSQHM' | 13754 | >TP53-T170N AIYKQSQHM  | 406  | 13348 |
| >TP53-T170N AIYKQSQHM' | 10848 | >TP53-T170N AIYKQSQHM  | 346  | 10502 |
| >TP53-T170N AIYKQSQHM' | 18350 | >TP53-T170N AIYKQSQHM  | 369  | 17981 |
| >TP53-T170P HMTEVVRR   | 38    | >TP53-T170P HMPEVVRR   | 21   | 17    |
| >TP53-T170P HMTEVVRR   | 38    | >TP53-T170P HMPEVVRR   | 152  | 114   |
| >TP53-T170P HMTEVVRR   | 65    | >TP53-T170P HMPEVVRR   | 301  | 236   |
| >TP53-T170P HMTEVVRR   | 35    | >TP53-T170P HMPEVVRR   | 177  | 142   |
| >TP53-T170P HMTEVVRR   | 64    | >TP53-T170P HMPEVVRR   | 54   | 10    |
| >TP53-T170P QHMTEVVR   | 269   | >TP53-T170P QHMPEVVR   | 398  | 129   |
| >TP53-T170P QHMTEVVR   | 195   | >TP53-T170P QHMPEVVR   | 295  | 100   |
| >TP53-T170P SQHMTEVV   | 115   | >TP53-T170P SQHMPEVV   | 403  | 288   |
| >TP53-T170P SQHMTEVV   | 256   | >TP53-T170P SQHMPEVV   | 162  | 94    |
| >TP53-T170P SQHMTEVVR  | 115   | >TP53-T170P SQHMPEVVR  | 231  | 116   |
| >TP53-T170P SQHMTEVVR  | 504   | >TP53-T170P SQHMPEVVR  | 346  | 158   |
| >TP53-T170P SQHMTEVV   | 88    | >TP53-T170P SQHMPEVV   | 125  | 37    |
| >TP53-T170P SQHMTEVVR  | 162   | >TP53-T170P SQHMPEVVR  | 279  | 117   |
| >TP53-T170P SQHMTEVVR  | 434   | >TP53-T170P SQHMPEVVR  | 679  | 245   |
| >TP53-T170P SQHMTEVVR  | 363   | >TP53-T170P SQHMPEVVR  | 491  | 128   |
| >TP53-T170P QSQHMTEVV  | 230   | >TP53-T170P QSQHMPEVV  | 1113 | 883   |
| >TP53-T170P QSQHMTEVV  | 321   | >TP53-T170P QSQHMPEVV  | 450  | 129   |
| >TP53-T170P QSQHMTEVV  | 185   | >TP53-T170P QSQHMPEVV  | 396  | 211   |
| >TP53-T170P QSQHMTEV   | 206   | >TP53-T170P QSQHMPEV   | 1512 | 1306  |
| >TP53-T170P QSQHMTEVV  | 303   | >TP53-T170P QSQHMPEVV  | 1302 | 999   |
| >TP53-T170P QSQHMTEVV  | 306   | >TP53-T170P QSQHMPEVV  | 225  | 81    |
| >TP53-T170P KQSQHMTEV  | 82    | >TP53-T170P KQSQHMPEV  | 35   | 47    |
| >TP53-T170P KQSQHMTEV  | 51    | >TP53-T170P KQSQHMPEV  | 191  | 140   |



|                        |      |                         |      |      |
|------------------------|------|-------------------------|------|------|
| >TP53-T170P KQSQHMTEV  | 298  | >TP53-T170P KQSQHMPEV   | 355  | 57   |
| >TP53-T170P KQSQHMTEV  | 9    | >TP53-T170P KQSQHMPEV   | 27   | 18   |
| >TP53-T170P KQSQHMTEV  | 273  | >TP53-T170P KQSQHMPEV   | 248  | 25   |
| >TP53-T170P KQSQHMTEV  | 10   | >TP53-T170P KQSQHMPEV   | 9    | 1    |
| >TP53-T170P KQSQHMTEV  | 426  | >TP53-T170P KQSQHMPEV   | 137  | 289  |
| >TP53-T170P KQSQHMTEV  | 718  | >TP53-T170P KQSQHMPEV   | 354  | 364  |
| >TP53-T170P KQSQHMTEV  | 1212 | >TP53-T170P KQSQHMPEV   | 166  | 1046 |
| >TP53-T170P KQSQHMTEV  | 35   | >TP53-T170P KQSQHMPEV   | 51   | 16   |
| >TP53-T170P KQSQHMTEV  | 222  | >TP53-T170P KQSQHMPEV   | 502  | 280  |
| >TP53-T170P KQSQHMTEV  | 86   | >TP53-T170P KQSQHMPEV   | 174  | 88   |
| >TP53-T170P KQSQHMTEV  | 110  | >TP53-T170P KQSQHMPEV   | 128  | 18   |
| >TP53-T170P KQSQHMTEV  | 185  | >TP53-T170P KQSQHMPEV   | 295  | 110  |
| >TP53-T170P KQSQHMTEV  | 60   | >TP53-T170P KQSQHMPEV   | 65   | 5    |
| >TP53-T170P YKQSQHMTE  | 467  | >TP53-T170P YKQSQHMPE   | 352  | 115  |
| >TP53-T170P YKQSQHMTE  | 30   | >TP53-T170P YKQSQHMPE   | 46   | 16   |
| >TP53-T170P YKQSQHMTE  | 42   | >TP53-T170P YKQSQHMPE   | 37   | 5    |
| >TP53-T170P IYKQSQHMTI | 402  | >TP53-T170P IYKQSQHMPPI | 4806 | 4404 |
| >TP53-T170P IYKQSQHMTI | 727  | >TP53-T170P IYKQSQHMPPI | 455  | 272  |
| >TP53-T170P IYKQSQHMTI | 1709 | >TP53-T170P IYKQSQHMPPI | 314  | 1395 |
| >TP53-T170S HMTEVVRR   | 38   | >TP53-T170S HMSEVVRR    | 24   | 14   |
| >TP53-T170S HMTEVVRR   | 1236 | >TP53-T170S HMSEVVRR    | 362  | 874  |
| >TP53-T170S HMTEVVRR   | 38   | >TP53-T170S HMSEVVRR    | 31   | 7    |
| >TP53-T170S HMTEVVRR   | 65   | >TP53-T170S HMSEVVRR    | 77   | 12   |
| >TP53-T170S HMTEVVRR   | 35   | >TP53-T170S HMSEVVRR    | 34   | 1    |
| >TP53-T170S HMTEVVRR   | 64   | >TP53-T170S HMSEVVRR    | 60   | 4    |
| >TP53-T170S QHMTEVVR   | 269  | >TP53-T170S QHMSEVVR    | 447  | 178  |
| >TP53-T170S QHMTEVVR   | 195  | >TP53-T170S QHMSEVVR    | 326  | 131  |
| >TP53-T170S SQHMTEVV   | 115  | >TP53-T170S SQHMSEVV    | 144  | 29   |
| >TP53-T170S SQHMTEVV   | 256  | >TP53-T170S SQHMSEVV    | 386  | 130  |
| >TP53-T170S SQHMTEVVR  | 115  | >TP53-T170S SQHMSEVVR   | 130  | 15   |
| >TP53-T170S SQHMTEVVR  | 504  | >TP53-T170S SQHMSEVVR   | 411  | 93   |
| >TP53-T170S SQHMTEVV   | 504  | >TP53-T170S SQHMSEVV    | 337  | 167  |
| >TP53-T170S SQHMTEVV   | 88   | >TP53-T170S SQHMSEVV    | 60   | 28   |
| >TP53-T170S SQHMTEVVR  | 162  | >TP53-T170S SQHMSEVVR   | 117  | 45   |
| >TP53-T170S SQHMTEVVR  | 572  | >TP53-T170S SQHMSEVVR   | 387  | 185  |
| >TP53-T170S SQHMTEVVR  | 434  | >TP53-T170S SQHMSEVVR   | 639  | 205  |
| >TP53-T170S SQHMTEVVR  | 363  | >TP53-T170S SQHMSEVVR   | 507  | 144  |
| >TP53-T170S QSQHMTEVV  | 230  | >TP53-T170S QSQHMSEVV   | 192  | 38   |
| >TP53-T170S QSQHMTEVV  | 321  | >TP53-T170S QSQHMSEVV   | 362  | 41   |
| >TP53-T170S QSQHMTEVV  | 185  | >TP53-T170S QSQHMSEVV   | 239  | 54   |
| >TP53-T170S QSQHMTEV   | 206  | >TP53-T170S QSQHMSEV    | 265  | 59   |
| >TP53-T170S QSQHMTEVV  | 303  | >TP53-T170S QSQHMSEVV   | 589  | 286  |
| >TP53-T170S QSQHMTEVV  | 306  | >TP53-T170S QSQHMSEVV   | 360  | 54   |

|                        |      |                        |      |      |
|------------------------|------|------------------------|------|------|
| >TP53-T170S KQSQHMTEV  | 82   | >TP53-T170S KQSQHMSEV  | 185  | 103  |
| >TP53-T170S KQSQHMTEV  | 51   | >TP53-T170S KQSQHMSEV  | 69   | 18   |
| >TP53-T170S KQSQHMTEV  | 298  | >TP53-T170S KQSQHMSEV  | 407  | 109  |
| >TP53-T170S KQSQHMTEV  | 9    | >TP53-T170S KQSQHMSEV  | 10   | 1    |
| >TP53-T170S KQSQHMTEV  | 273  | >TP53-T170S KQSQHMSEV  | 479  | 206  |
| >TP53-T170S KQSQHMTEV  | 10   | >TP53-T170S KQSQHMSEV  | 15   | 5    |
| >TP53-T170S KQSQHMTEV  | 426  | >TP53-T170S KQSQHMSEV  | 313  | 113  |
| >TP53-T170S KQSQHMTEV  | 35   | >TP53-T170S KQSQHMSEV  | 40   | 5    |
| >TP53-T170S KQSQHMTEV  | 541  | >TP53-T170S KQSQHMSEV  | 370  | 171  |
| >TP53-T170S KQSQHMTEV  | 222  | >TP53-T170S KQSQHMSEV  | 152  | 70   |
| >TP53-T170S KQSQHMTEV  | 86   | >TP53-T170S KQSQHMSEV  | 54   | 32   |
| >TP53-T170S KQSQHMTEV  | 110  | >TP53-T170S KQSQHMSEV  | 80   | 30   |
| >TP53-T170S KQSQHMTEV  | 185  | >TP53-T170S KQSQHMSEV  | 145  | 40   |
| >TP53-T170S KQSQHMTEV  | 60   | >TP53-T170S KQSQHMSEV  | 80   | 20   |
| >TP53-T170S YKQSQHMTE  | 467  | >TP53-T170S YKQSQHMSE  | 515  | 48   |
| >TP53-T170S YKQSQHMTE  | 30   | >TP53-T170S YKQSQHMSE  | 23   | 7    |
| >TP53-T170S YKQSQHMTE  | 42   | >TP53-T170S YKQSQHMSE  | 33   | 9    |
| >TP53-T170S IYKQSQHMTI | 402  | >TP53-T170S IYKQSQHMSI | 385  | 17   |
| >TP53-T211A TFRHSVVVPY | 185  | >TP53-T211A AFRHSVVVPY | 175  | 10   |
| >TP53-T211A TFRHSVVV   | 139  | >TP53-T211A AFRHSVVV   | 20   | 119  |
| >TP53-T211A TFRHSVVVP  | 2851 | >TP53-T211A AFRHSVVVP  | 390  | 2461 |
| >TP53-T211A TFRHSVVVPY | 162  | >TP53-T211A AFRHSVVVPY | 24   | 138  |
| >TP53-T211A TFRHSVVVPY | 1278 | >TP53-T211A AFRHSVVVPY | 176  | 1102 |
| >TP53-T211A TFRHSVVVPY | 140  | >TP53-T211A AFRHSVVVPY | 84   | 56   |
| >TP53-T211A TFRHSVVVPY | 225  | >TP53-T211A AFRHSVVVPY | 403  | 178  |
| >TP53-T211A TFRHSVVVPY | 271  | >TP53-T211A AFRHSVVVPY | 63   | 208  |
| >TP53-T211A NTFRHSVV   | 382  | >TP53-T211A NAFRHSVV   | 1109 | 727  |
| >TP53-T211A NTFRHSVV   | 309  | >TP53-T211A NAFRHSVV   | 1209 | 900  |
| >TP53-T211A NTFRHSVVV  | 265  | >TP53-T211A NAFRHSVVV  | 1014 | 749  |
| >TP53-T211A NTFRHSVVVF | 128  | >TP53-T211A NAFRHSVVVF | 1206 | 1078 |
| >TP53-T211A NTFRHSVVVF | 97   | >TP53-T211A NAFRHSVVVF | 4119 | 4022 |
| >TP53-T211A NTFRHSVVVF | 123  | >TP53-T211A NAFRHSVVVF | 3553 | 3430 |
| >TP53-T211A NTFRHSVVVF | 82   | >TP53-T211A NAFRHSVVVF | 605  | 523  |
| >TP53-T211A NTFRHSVVV  | 412  | >TP53-T211A NAFRHSVVV  | 6886 | 6474 |
| >TP53-T211A NTFRHSVVVF | 61   | >TP53-T211A NAFRHSVVVF | 2629 | 2568 |
| >TP53-T211A NTFRHSVVVF | 34   | >TP53-T211A NAFRHSVVVF | 125  | 91   |
| >TP53-T211A NTFRHSVV   | 11   | >TP53-T211A NAFRHSVV   | 52   | 41   |
| >TP53-T211A NTFRHSVVV  | 8    | >TP53-T211A NAFRHSVVV  | 31   | 23   |
| >TP53-T211A NTFRHSVV   | 50   | >TP53-T211A NAFRHSVV   | 303  | 253  |
| >TP53-T211A NTFRHSVVV  | 25   | >TP53-T211A NAFRHSVVV  | 133  | 108  |
| >TP53-T211A NTFRHSVVVF | 65   | >TP53-T211A NAFRHSVVVF | 83   | 18   |
| >TP53-T211A NTFRHSVVVF | 492  | >TP53-T211A NAFRHSVVVF | 496  | 4    |
| >TP53-T211A NTFRHSVVVF | 33   | >TP53-T211A NAFRHSVVVF | 19   | 14   |

|                         |      |                         |      |      |
|-------------------------|------|-------------------------|------|------|
| >TP53-T211ANTFRHSVVVF   | 23   | >TP53-T211ANAFRHSVVVF   | 289  | 266  |
| >TP53-T211ANTFRHSVVVF   | 105  | >TP53-T211ANAFRHSVVVF   | 16   | 89   |
| >TP53-T211ANTFRHSVVVF   | 289  | >TP53-T211ANAFRHSVVVF   | 4124 | 3835 |
| >TP53-T211ANTFRHSVVVF   | 23   | >TP53-T211ANAFRHSVVVF   | 28   | 5    |
| >TP53-T211ARNTRHSVV     | 224  | >TP53-T211ARNAFRHSVV    | 232  | 8    |
| >TP53-T211ALDDRNTFRHS   | 482  | >TP53-T211ALDDRNAFRHS   | 357  | 125  |
| >TP53-T211AYLDDRNTF     | 708  | >TP53-T211AYLDDRNAF     | 384  | 324  |
| >TP53-T211AYLDDRNTF     | 187  | >TP53-T211AYLDDRNAF     | 102  | 85   |
| >TP53-T211AYLDDRNTFR+   | 333  | >TP53-T211AYLDDRNAFR+   | 265  | 68   |
| >TP53-T211AYLDDRNTF     | 149  | >TP53-T211AYLDDRNAF     | 162  | 13   |
| >TP53-T211AYLDDRNTFR    | 1191 | >TP53-T211AYLDDRNAFR    | 481  | 710  |
| >TP53-T211AYLDDRNTFR+   | 155  | >TP53-T211AYLDDRNAFR+   | 146  | 9    |
| >TP53-T211AYLDDRNTF     | 367  | >TP53-T211AYLDDRNAF     | 424  | 57   |
| >TP53-T211AYLDDRNTF     | 87   | >TP53-T211AYLDDRNAF     | 208  | 121  |
| >TP53-T211AYLDDRNTFR    | 189  | >TP53-T211AYLDDRNAFR    | 124  | 65   |
| >TP53-T211AYLDDRNTFR+   | 187  | >TP53-T211AYLDDRNAFR+   | 216  | 29   |
| >TP53-T211AYLDDRNTFR+   | 171  | >TP53-T211AYLDDRNAFR+   | 159  | 12   |
| >TP53-T211AYLDDRNTFR    | 282  | >TP53-T211AYLDDRNAFR    | 174  | 108  |
| >TP53-T211AYLDDRNTFR    | 55   | >TP53-T211AYLDDRNAFR    | 40   | 15   |
| >TP53-T211AYLDDRNTFR    | 68   | >TP53-T211AYLDDRNAFR    | 46   | 22   |
| >TP53-T211AYLDDRNTF     | 847  | >TP53-T211AYLDDRNAF     | 444  | 403  |
| >TP53-T211AYLDDRNTF     | 255  | >TP53-T211AYLDDRNAF     | 156  | 99   |
| >TP53-T211AYLDDRNTF     | 1013 | >TP53-T211AYLDDRNAF     | 417  | 596  |
| >TP53-T211AYLDDRNTFR    | 336  | >TP53-T211AYLDDRNAFR    | 314  | 22   |
| >TP53-T211A EYLDDRNTF   | 103  | >TP53-T211A EYLDDRNAF   | 370  | 267  |
| >TP53-T211A EYLDDRNTF   | 18   | >TP53-T211A EYLDDRNAF   | 27   | 9    |
| >TP53-T211A EYLDDRNTF   | 381  | >TP53-T211A EYLDDRNAF   | 378  | 3    |
| >TP53-T211A EYLDDRNTF   | 301  | >TP53-T211A EYLDDRNAF   | 105  | 196  |
| >TP53-T211A EYLDDRNTFR  | 328  | >TP53-T211A EYLDDRNAFR  | 144  | 184  |
| >TP53-T211A EYLDDRNTFR  | 88   | >TP53-T211A EYLDDRNAFR  | 61   | 27   |
| >TP53-T211A EYLDDRNTFR  | 508  | >TP53-T211A EYLDDRNAFR  | 354  | 154  |
| >TP53-T211A EYLDDRNTFR  | 19   | >TP53-T211A EYLDDRNAFR  | 19   | 0    |
| >TP53-T211AVEYLDDRNTF   | 124  | >TP53-T211AVEYLDDRNAF   | 79   | 45   |
| >TP53-T211ARVEYLDDRNT   | 40   | >TP53-T211ARVEYLDDRNA   | 68   | 28   |
| >TP53-T211ARVEYLDDRNT   | 78   | >TP53-T211ARVEYLDDRNA   | 313  | 235  |
| >TP53-T211I- TFRHSVVVPY | 185  | >TP53-T211I- IFRHSVVVPY | 154  | 31   |
| >TP53-T211I- TFRHSVVV   | 139  | >TP53-T211I- IFRHSVVV   | 72   | 67   |
| >TP53-T211I- TFRHSVVVPY | 162  | >TP53-T211I- IFRHSVVVPY | 86   | 76   |
| >TP53-T211I- TFRHSVVVPY | 687  | >TP53-T211I- IFRHSVVVPY | 484  | 203  |
| >TP53-T211I- TFRHSVVVPY | 140  | >TP53-T211I- IFRHSVVVPY | 94   | 46   |
| >TP53-T211I- TFRHSVVVPY | 225  | >TP53-T211I- IFRHSVVVPY | 264  | 39   |
| >TP53-T211I- TFRHSVVVPY | 271  | >TP53-T211I- IFRHSVVVPY | 40   | 231  |
| >TP53-T211I- NTFRHSVV   | 1371 | >TP53-T211I- NIFRHSVV   | 328  | 1043 |

|                        |      |                        |      |      |
|------------------------|------|------------------------|------|------|
| >TP53-T211I·NTFRHSVVV  | 872  | >TP53-T211I·NIFRHSVVV  | 171  | 701  |
| >TP53-T211I·NTFRHSVV   | 382  | >TP53-T211I·NIFRHSVV   | 53   | 329  |
| >TP53-T211I·NTFRHSVVV  | 581  | >TP53-T211I·NIFRHSVVV  | 67   | 514  |
| >TP53-T211I·NTFRHSVV   | 1308 | >TP53-T211I·NIFRHSVV   | 490  | 818  |
| >TP53-T211I·NTFRHSVVV  | 680  | >TP53-T211I·NIFRHSVVV  | 183  | 497  |
| >TP53-T211I·NTFRHSVV   | 309  | >TP53-T211I·NIFRHSVV   | 73   | 236  |
| >TP53-T211I·NTFRHSVVV  | 265  | >TP53-T211I·NIFRHSVVV  | 64   | 201  |
| >TP53-T211I·NTFRHSVVV  | 1835 | >TP53-T211I·NIFRHSVVV  | 323  | 1512 |
| >TP53-T211I·NTFRHSVVV  | 3077 | >TP53-T211I·NIFRHSVVV  | 403  | 2674 |
| >TP53-T211I·NTFRHSVV   | 1246 | >TP53-T211I·NIFRHSVV   | 50   | 1196 |
| >TP53-T211I·NTFRHSVVV  | 1108 | >TP53-T211I·NIFRHSVVV  | 52   | 1056 |
| >TP53-T211I·NTFRHSVVVF | 647  | >TP53-T211I·NIFRHSVVVP | 457  | 190  |
| >TP53-T211I·NTFRHSVVVF | 128  | >TP53-T211I·NIFRHSVVVP | 441  | 313  |
| >TP53-T211I·NTFRHSVVVF | 97   | >TP53-T211I·NIFRHSVVVP | 911  | 814  |
| >TP53-T211I·NTFRHSVVVF | 123  | >TP53-T211I·NIFRHSVVVP | 772  | 649  |
| >TP53-T211I·NTFRHSVVVF | 82   | >TP53-T211I·NIFRHSVVVP | 163  | 81   |
| >TP53-T211I·NTFRHSVVV  | 412  | >TP53-T211I·NIFRHSVVV  | 1255 | 843  |
| >TP53-T211I·NTFRHSVVVF | 61   | >TP53-T211I·NIFRHSVVVP | 207  | 146  |
| >TP53-T211I·NTFRHSVVVF | 34   | >TP53-T211I·NIFRHSVVVP | 210  | 176  |
| >TP53-T211I·NTFRHSVV   | 11   | >TP53-T211I·NIFRHSVV   | 53   | 42   |
| >TP53-T211I·NTFRHSVVV  | 8    | >TP53-T211I·NIFRHSVVV  | 31   | 23   |
| >TP53-T211I·NTFRHSVV   | 50   | >TP53-T211I·NIFRHSVV   | 207  | 157  |
| >TP53-T211I·NTFRHSVVV  | 25   | >TP53-T211I·NIFRHSVVV  | 92   | 67   |
| >TP53-T211I·NTFRHSVV   | 2415 | >TP53-T211I·NIFRHSVV   | 330  | 2085 |
| >TP53-T211I·NTFRHSVVV  | 2599 | >TP53-T211I·NIFRHSVVV  | 337  | 2262 |
| >TP53-T211I·NTFRHSVVVF | 65   | >TP53-T211I·NIFRHSVVVP | 66   | 1    |
| >TP53-T211I·NTFRHSVVVF | 492  | >TP53-T211I·NIFRHSVVVP | 140  | 352  |
| >TP53-T211I·NTFRHSVVVF | 33   | >TP53-T211I·NIFRHSVVVP | 76   | 43   |
| >TP53-T211I·NTFRHSVVVF | 23   | >TP53-T211I·NIFRHSVVVP | 6494 | 6471 |
| >TP53-T211I·NTFRHSVVVF | 105  | >TP53-T211I·NIFRHSVVVP | 96   | 9    |
| >TP53-T211I·NTFRHSVVVF | 289  | >TP53-T211I·NIFRHSVVVP | 6226 | 5937 |
| >TP53-T211I·NTFRHSVVVF | 23   | >TP53-T211I·NIFRHSVVVP | 17   | 6    |
| >TP53-T211I·RNTFRHSVV  | 224  | >TP53-T211I·RNIFRHSVV  | 426  | 202  |
| >TP53-T211I·LDDRNTFRHS | 482  | >TP53-T211I·LDDRNIFRHS | 513  | 31   |
| >TP53-T211I·YLDDRNTF   | 187  | >TP53-T211I·YLDDRNIF   | 402  | 215  |
| >TP53-T211I·YLDDRNTFRH | 333  | >TP53-T211I·YLDDRNIFRH | 274  | 59   |
| >TP53-T211I·YLDDRNTF   | 149  | >TP53-T211I·YLDDRNIF   | 769  | 620  |
| >TP53-T211I·YLDDRNTFR  | 1191 | >TP53-T211I·YLDDRNIFR  | 471  | 720  |
| >TP53-T211I·YLDDRNTFRH | 800  | >TP53-T211I·YLDDRNIFRH | 292  | 508  |
| >TP53-T211I·YLDDRNTFRH | 155  | >TP53-T211I·YLDDRNIFRH | 117  | 38   |
| >TP53-T211I·YLDDRNTF   | 367  | >TP53-T211I·YLDDRNIF   | 1307 | 940  |
| >TP53-T211I·YLDDRNTF   | 87   | >TP53-T211I·YLDDRNIF   | 326  | 239  |
| >TP53-T211I·YLDDRNTFR  | 189  | >TP53-T211I·YLDDRNIFR  | 238  | 49   |

|                        |       |                         |       |       |
|------------------------|-------|-------------------------|-------|-------|
| >TP53-T211I·YLDDRNTFRH | 187   | >TP53-T211I·YLDDRNI FRH | 137   | 50    |
| >TP53-T211I·YLDDRNTFRH | 171   | >TP53-T211I·YLDDRNI FRH | 183   | 12    |
| >TP53-T211I·YLDDRNTFR  | 282   | >TP53-T211I·YLDDRNI FR  | 540   | 258   |
| >TP53-T211I·YLDDRNTFR  | 55    | >TP53-T211I·YLDDRNI FR  | 59    | 4     |
| >TP53-T211I·YLDDRNTFR  | 68    | >TP53-T211I·YLDDRNI FR  | 60    | 8     |
| >TP53-T211I·YLDDRNTF   | 255   | >TP53-T211I·YLDDRNI F   | 383   | 128   |
| >TP53-T211I·YLDDRNTFR  | 336   | >TP53-T211I·YLDDRNI FR  | 175   | 161   |
| >TP53-T211I·EYLDDRNTF  | 103   | >TP53-T211I·EYLDDRNI F  | 226   | 123   |
| >TP53-T211I·EYLDDRNT   | 9548  | >TP53-T211I·EYLDDRNI    | 298   | 9250  |
| >TP53-T211I·EYLDDRNTF  | 18    | >TP53-T211I·EYLDDRNI F  | 36    | 18    |
| >TP53-T211I·EYLDDRNTF  | 381   | >TP53-T211I·EYLDDRNI F  | 3176  | 2795  |
| >TP53-T211I·EYLDDRNTF  | 301   | >TP53-T211I·EYLDDRNI F  | 460   | 159   |
| >TP53-T211I·EYLDDRNTFR | 328   | >TP53-T211I·EYLDDRNI FR | 232   | 96    |
| >TP53-T211I·EYLDDRNTFR | 88    | >TP53-T211I·EYLDDRNI FR | 61    | 27    |
| >TP53-T211I·EYLDDRNTFR | 508   | >TP53-T211I·EYLDDRNI FR | 333   | 175   |
| >TP53-T211I·EYLDDRNTFR | 19    | >TP53-T211I·EYLDDRNI FR | 17    | 2     |
| >TP53-T211I·VEYLDDRNT  | 6578  | >TP53-T211I·VEYLDDRNI   | 35    | 6543  |
| >TP53-T211I·VEYLDDRNTF | 124   | >TP53-T211I·VEYLDDRNI F | 162   | 38    |
| >TP53-T211I·VEYLDDRNT  | 3531  | >TP53-T211I·VEYLDDRNI   | 119   | 3412  |
| >TP53-T211I·VEYLDDRNTF | 524   | >TP53-T211I·VEYLDDRNI F | 324   | 200   |
| >TP53-T211I·RVEYLDDRNT | 15175 | >TP53-T211I·RVEYLDDRNI  | 358   | 14817 |
| >TP53-T211I·RVEYLDDRNT | 40    | >TP53-T211I·RVEYLDDRNI  | 199   | 159   |
| >TP53-T211I·RVEYLDDRNT | 78    | >TP53-T211I·RVEYLDDRNI  | 100   | 22    |
| >TP53-T211I·TFRHSVVPY  | 185   | >TP53-T211I·NFRHSVVPY   | 319   | 134   |
| >TP53-T211I·TFRHSVVV   | 139   | >TP53-T211I·NFRHSVVV    | 1418  | 1279  |
| >TP53-T211I·TFRHSVVPY  | 162   | >TP53-T211I·NFRHSVVPY   | 1329  | 1167  |
| >TP53-T211I·TFRHSVVPY  | 140   | >TP53-T211I·NFRHSVVPY   | 199   | 59    |
| >TP53-T211I·TFRHSVVPY  | 225   | >TP53-T211I·NFRHSVVPY   | 184   | 41    |
| >TP53-T211I·TFRHSVVPY  | 271   | >TP53-T211I·NFRHSVVPY   | 397   | 126   |
| >TP53-T211I·NTFRHSVV   | 382   | >TP53-T211I·NNFRHSVV    | 12886 | 12504 |
| >TP53-T211I·NTFRHSVV   | 309   | >TP53-T211I·NNFRHSVV    | 12017 | 11708 |
| >TP53-T211I·NTFRHSVVV  | 265   | >TP53-T211I·NNFRHSVVV   | 11517 | 11252 |
| >TP53-T211I·NTFRHSVVVF | 128   | >TP53-T211I·NNFRHSVVVI  | 12548 | 12420 |
| >TP53-T211I·NTFRHSVVVF | 97    | >TP53-T211I·NNFRHSVVVI  | 14573 | 14476 |
| >TP53-T211I·NTFRHSVVVF | 123   | >TP53-T211I·NNFRHSVVVI  | 11253 | 11130 |
| >TP53-T211I·NTFRHSVVVF | 82    | >TP53-T211I·NNFRHSVVVI  | 1062  | 980   |
| >TP53-T211I·NTFRHSVVV  | 412   | >TP53-T211I·NNFRHSVVV   | 15124 | 14712 |
| >TP53-T211I·NTFRHSVVVF | 61    | >TP53-T211I·NNFRHSVVVI  | 7128  | 7067  |
| >TP53-T211I·NTFRHSVVVF | 34    | >TP53-T211I·NNFRHSVVVI  | 1667  | 1633  |
| >TP53-T211I·NTFRHSVV   | 11    | >TP53-T211I·NNFRHSVV    | 956   | 945   |
| >TP53-T211I·NTFRHSVVV  | 8     | >TP53-T211I·NNFRHSVVV   | 582   | 574   |
| >TP53-T211I·NTFRHSVV   | 50    | >TP53-T211I·NNFRHSVV    | 8609  | 8559  |
| >TP53-T211I·NTFRHSVVV  | 25    | >TP53-T211I·NNFRHSVVV   | 6799  | 6774  |

|                       |     |                       |       |       |
|-----------------------|-----|-----------------------|-------|-------|
| >TP53-T211MNTFRHSVVVF | 65  | >TP53-T211MNNFRHSVVVI | 171   | 106   |
| >TP53-T211MNTFRHSVVVF | 492 | >TP53-T211MNNFRHSVVVI | 439   | 53    |
| >TP53-T211MNTFRHSVVVF | 33  | >TP53-T211MNNFRHSVVVI | 66    | 33    |
| >TP53-T211MNTFRHSVVVF | 23  | >TP53-T211MNNFRHSVVVI | 18843 | 18820 |
| >TP53-T211MNTFRHSVVVF | 609 | >TP53-T211MNNFRHSVVVI | 398   | 211   |
| >TP53-T211MNTFRHSVVVF | 105 | >TP53-T211MNNFRHSVVVI | 338   | 233   |
| >TP53-T211MNTFRHSVVVF | 289 | >TP53-T211MNNFRHSVVVI | 7610  | 7321  |
| >TP53-T211MNTFRHSVVVF | 23  | >TP53-T211MNNFRHSVVVI | 51    | 28    |
| >TP53-T211MRNTFRHSVV  | 224 | >TP53-T211MRNNFRHSVV  | 446   | 222   |
| >TP53-T211MLDDRNTFRHS | 482 | >TP53-T211MLDDRNNFRHS | 823   | 341   |
| >TP53-T211MYLDDRNTF   | 708 | >TP53-T211MYLDDRNNF   | 444   | 264   |
| >TP53-T211MYLDDRNTF   | 187 | >TP53-T211MYLDDRNNF   | 320   | 133   |
| >TP53-T211MYLDDRNTFRF | 333 | >TP53-T211MYLDDRNNFRF | 477   | 144   |
| >TP53-T211MYLDDRNTF   | 149 | >TP53-T211MYLDDRNNF   | 469   | 320   |
| >TP53-T211MYLDDRNTFRF | 155 | >TP53-T211MYLDDRNNFRF | 170   | 15    |
| >TP53-T211MYLDDRNTF   | 367 | >TP53-T211MYLDDRNNF   | 1054  | 687   |
| >TP53-T211MYLDDRNTF   | 87  | >TP53-T211MYLDDRNNF   | 237   | 150   |
| >TP53-T211MYLDDRNTFR  | 189 | >TP53-T211MYLDDRNNFR  | 673   | 484   |
| >TP53-T211MYLDDRNTFRF | 187 | >TP53-T211MYLDDRNNFRF | 426   | 239   |
| >TP53-T211MYLDDRNTFRF | 171 | >TP53-T211MYLDDRNNFRF | 229   | 58    |
| >TP53-T211MYLDDRNTFR  | 282 | >TP53-T211MYLDDRNNFR  | 673   | 391   |
| >TP53-T211MYLDDRNTFR  | 55  | >TP53-T211MYLDDRNNFR  | 73    | 18    |
| >TP53-T211MYLDDRNTFR  | 68  | >TP53-T211MYLDDRNNFR  | 84    | 16    |
| >TP53-T211MYLDDRNTF   | 255 | >TP53-T211MYLDDRNNF   | 487   | 232   |
| >TP53-T211MYLDDRNTFR  | 336 | >TP53-T211MYLDDRNNFR  | 390   | 54    |
| >TP53-T211MEYLDDRNTF  | 103 | >TP53-T211MEYLDDRNNF  | 114   | 11    |
| >TP53-T211MEYLDDRNTF  | 18  | >TP53-T211MEYLDDRNNF  | 26    | 8     |
| >TP53-T211MEYLDDRNTF  | 381 | >TP53-T211MEYLDDRNNF  | 2495  | 2114  |
| >TP53-T211MEYLDDRNTF  | 301 | >TP53-T211MEYLDDRNNF  | 184   | 117   |
| >TP53-T211MEYLDDRNTFR | 328 | >TP53-T211MEYLDDRNNFF | 317   | 11    |
| >TP53-T211MEYLDDRNTFR | 88  | >TP53-T211MEYLDDRNNFF | 106   | 18    |
| >TP53-T211MEYLDDRNTFR | 19  | >TP53-T211MEYLDDRNNFF | 18    | 1     |
| >TP53-T211MVEYLDDRNTF | 124 | >TP53-T211MVEYLDDRNNF | 162   | 38    |
| >TP53-T211MRVEYLDDRNT | 40  | >TP53-T211MRVEYLDDRNN | 183   | 143   |
| >TP53-T211MRVEYLDDRNT | 78  | >TP53-T211MRVEYLDDRNN | 363   | 285   |
| >TP53-T211PFRHSVVVPY  | 185 | >TP53-T211PPFRHSVVVPY | 454   | 269   |
| >TP53-T211PFRHSVVV    | 139 | >TP53-T211PPFRHSVVV   | 617   | 478   |
| >TP53-T211PFRHSVVVPY  | 162 | >TP53-T211PPFRHSVVVPY | 619   | 457   |
| >TP53-T211PFRHSVVVPY  | 140 | >TP53-T211PPFRHSVVVPY | 1929  | 1789  |
| >TP53-T211PFRHSVVVPY  | 225 | >TP53-T211PPFRHSVVVPY | 1460  | 1235  |
| >TP53-T211PFRHSVVVPY  | 271 | >TP53-T211PPFRHSVVVPY | 849   | 578   |
| >TP53-T211PNTFRHSVV   | 382 | >TP53-T211PNPFRHSVV   | 16148 | 15766 |
| >TP53-T211PNTFRHSVV   | 309 | >TP53-T211PNPFRHSVV   | 14300 | 13991 |

|                       |       |                        |       |       |
|-----------------------|-------|------------------------|-------|-------|
| >TP53-T211PNTFRHSVVV  | 265   | >TP53-T211P NPFRHSVVV  | 13671 | 13406 |
| >TP53-T211PNTFRHSVVVF | 128   | >TP53-T211P NPFRHSVVVF | 18823 | 18695 |
| >TP53-T211PNTFRHSVVVF | 97    | >TP53-T211P NPFRHSVVVF | 15609 | 15512 |
| >TP53-T211PNTFRHSVVVF | 123   | >TP53-T211P NPFRHSVVVF | 5773  | 5650  |
| >TP53-T211PNTFRHSVVVF | 82    | >TP53-T211P NPFRHSVVVF | 2844  | 2762  |
| >TP53-T211PNTFRHSVVV  | 412   | >TP53-T211P NPFRHSVVV  | 23520 | 23108 |
| >TP53-T211PNTFRHSVVVF | 61    | >TP53-T211P NPFRHSVVVF | 15260 | 15199 |
| >TP53-T211PNTFRHSVVVF | 34    | >TP53-T211P NPFRHSVVVF | 3044  | 3010  |
| >TP53-T211PNTFRHSVV   | 11    | >TP53-T211P NPFRHSVV   | 3015  | 3004  |
| >TP53-T211PNTFRHSVVV  | 8     | >TP53-T211P NPFRHSVVV  | 2149  | 2141  |
| >TP53-T211PNTFRHSVV   | 50    | >TP53-T211P NPFRHSVV   | 1634  | 1584  |
| >TP53-T211PNTFRHSVVV  | 25    | >TP53-T211P NPFRHSVVV  | 1014  | 989   |
| >TP53-T211PNTFRHSVV   | 20324 | >TP53-T211P NPFRHSVV   | 124   | 20200 |
| >TP53-T211PNTFRHSVVV  | 19343 | >TP53-T211P NPFRHSVVV  | 107   | 19236 |
| >TP53-T211PNTFRHSVV   | 2415  | >TP53-T211P NPFRHSVV   | 168   | 2247  |
| >TP53-T211PNTFRHSVVV  | 2599  | >TP53-T211P NPFRHSVVV  | 175   | 2424  |
| >TP53-T211PNTFRHSVVVF | 65    | >TP53-T211P NPFRHSVVVF | 1851  | 1786  |
| >TP53-T211PNTFRHSVVVF | 492   | >TP53-T211P NPFRHSVVVF | 366   | 126   |
| >TP53-T211PNTFRHSVVVF | 33    | >TP53-T211P NPFRHSVVVF | 136   | 103   |
| >TP53-T211PNTFRHSVVVF | 23    | >TP53-T211P NPFRHSVVVF | 20990 | 20967 |
| >TP53-T211PNTFRHSVVVF | 609   | >TP53-T211P NPFRHSVVVF | 108   | 501   |
| >TP53-T211PNTFRHSVVV  | 13331 | >TP53-T211P NPFRHSVVV  | 476   | 12855 |
| >TP53-T211PNTFRHSVVVF | 105   | >TP53-T211P NPFRHSVVVF | 8     | 97    |
| >TP53-T211PNTFRHSVVV  | 4839  | >TP53-T211P NPFRHSVVV  | 137   | 4702  |
| >TP53-T211PNTFRHSVVVF | 21778 | >TP53-T211P NPFRHSVVVF | 225   | 21553 |
| >TP53-T211PNTFRHSVVV  | 24898 | >TP53-T211P NPFRHSVVV  | 226   | 24672 |
| >TP53-T211PNTFRHSVVVF | 289   | >TP53-T211P NPFRHSVVVF | 9273  | 8984  |
| >TP53-T211PNTFRHSVVV  | 11225 | >TP53-T211P NPFRHSVVV  | 149   | 11076 |
| >TP53-T211PNTFRHSVVVF | 23    | >TP53-T211P NPFRHSVVVF | 5     | 18    |
| >TP53-T211PNTFRHSVVVF | 9540  | >TP53-T211P NPFRHSVVVF | 39    | 9501  |
| >TP53-T211PRNTRFRHSV  | 224   | >TP53-T211P RNPFRRHSV  | 3591  | 3367  |
| >TP53-T211PLDDRNTFRHS | 482   | >TP53-T211P LDDRNPFRHS | 711   | 229   |
| >TP53-T211PYLDDRNTF   | 708   | >TP53-T211PYLDDRNP     | 423   | 285   |
| >TP53-T211PYLDDRNTF   | 187   | >TP53-T211PYLDDRNP     | 62    | 125   |
| >TP53-T211PYLDDRNTFRF | 333   | >TP53-T211PYLDDRNPFRF  | 347   | 14    |
| >TP53-T211PYLDDRNTF   | 149   | >TP53-T211PYLDDRNP     | 172   | 23    |
| >TP53-T211PYLDDRNTFR  | 1191  | >TP53-T211PYLDDRNPFR   | 422   | 769   |
| >TP53-T211PYLDDRNTFRF | 800   | >TP53-T211PYLDDRNPFRF  | 432   | 368   |
| >TP53-T211PYLDDRNTFRF | 155   | >TP53-T211PYLDDRNPFRF  | 100   | 55    |
| >TP53-T211PYLDDRNTF   | 367   | >TP53-T211PYLDDRNP     | 453   | 86    |
| >TP53-T211PYLDDRNTF   | 87    | >TP53-T211PYLDDRNP     | 163   | 76    |
| >TP53-T211PYLDDRNTFR  | 189   | >TP53-T211PYLDDRNPFR   | 106   | 83    |
| >TP53-T211PYLDDRNTFRF | 187   | >TP53-T211PYLDDRNPFRF  | 248   | 61    |

|                       |      |                       |      |      |
|-----------------------|------|-----------------------|------|------|
| >TP53-T211PYLDDRNTFR  | 171  | >TP53-T211PYLDDRNPFR  | 174  | 3    |
| >TP53-T211PYLDDRNTFR  | 282  | >TP53-T211PYLDDRNPFR  | 676  | 394  |
| >TP53-T211PYLDDRNTFR  | 55   | >TP53-T211PYLDDRNPFR  | 147  | 92   |
| >TP53-T211PYLDDRNTFR  | 68   | >TP53-T211PYLDDRNPFR  | 99   | 31   |
| >TP53-T211PYLDDRNTF   | 847  | >TP53-T211PYLDDRNPFR  | 339  | 508  |
| >TP53-T211PYLDDRNTF   | 255  | >TP53-T211PYLDDRNPFR  | 191  | 64   |
| >TP53-T211PYLDDRNTFR  | 336  | >TP53-T211PYLDDRNPFR  | 333  | 3    |
| >TP53-T211PEYLDDRNTF  | 103  | >TP53-T211PEYLDDRNPFR | 516  | 413  |
| >TP53-T211PEYLDDRNTF  | 18   | >TP53-T211PEYLDDRNPFR | 52   | 34   |
| >TP53-T211PEYLDDRNTF  | 381  | >TP53-T211PEYLDDRNPFR | 1336 | 955  |
| >TP53-T211PEYLDDRNTF  | 301  | >TP53-T211PEYLDDRNPFR | 134  | 167  |
| >TP53-T211PEYLDDRNTFR | 328  | >TP53-T211PEYLDDRNPFR | 756  | 428  |
| >TP53-T211PEYLDDRNTFR | 88   | >TP53-T211PEYLDDRNPFR | 270  | 182  |
| >TP53-T211PEYLDDRNTFR | 19   | >TP53-T211PEYLDDRNPFR | 17   | 2    |
| >TP53-T211PEYLDDRNTF  | 124  | >TP53-T211PEYLDDRNPFR | 81   | 43   |
| >TP53-T211PRVEYLDDRNT | 40   | >TP53-T211PRVEYLDRNF  | 70   | 30   |
| >TP53-T211PRVEYLDDRNT | 78   | >TP53-T211PRVEYLDRNF  | 577  | 499  |
| >TP53-T211SFRHSVVVPY  | 185  | >TP53-T211SFRHSVVVPY  | 196  | 11   |
| >TP53-T211SFRHSVVV    | 139  | >TP53-T211SFRHSVVV    | 28   | 111  |
| >TP53-T211SFRHSVVVPY  | 162  | >TP53-T211SFRHSVVVPY  | 34   | 128  |
| >TP53-T211SFRHSVVVPY  | 1278 | >TP53-T211SFRHSVVVPY  | 290  | 988  |
| >TP53-T211SFRHSVVVPY  | 140  | >TP53-T211SFRHSVVVPY  | 83   | 57   |
| >TP53-T211SFRHSVVVPY  | 225  | >TP53-T211SFRHSVVVPY  | 164  | 61   |
| >TP53-T211SFRHSVVVPY  | 271  | >TP53-T211SFRHSVVVPY  | 127  | 144  |
| >TP53-T211SNTFRHSVV   | 382  | >TP53-T211SNTFRHSVV   | 3396 | 3014 |
| >TP53-T211SNTFRHSVV   | 309  | >TP53-T211SNTFRHSVV   | 5190 | 4881 |
| >TP53-T211SNTFRHSVVV  | 265  | >TP53-T211SNTFRHSVVV  | 4762 | 4497 |
| >TP53-T211SNTFRHSVVVF | 128  | >TP53-T211SNTFRHSVVVF | 313  | 185  |
| >TP53-T211SNTFRHSVVVF | 97   | >TP53-T211SNTFRHSVVVF | 4260 | 4163 |
| >TP53-T211SNTFRHSVVVF | 123  | >TP53-T211SNTFRHSVVVF | 869  | 746  |
| >TP53-T211SNTFRHSVVVF | 82   | >TP53-T211SNTFRHSVVVF | 363  | 281  |
| >TP53-T211SNTFRHSVVV  | 412  | >TP53-T211SNTFRHSVVV  | 1528 | 1116 |
| >TP53-T211SNTFRHSVVVF | 61   | >TP53-T211SNTFRHSVVVF | 248  | 187  |
| >TP53-T211SNTFRHSVVVF | 34   | >TP53-T211SNTFRHSVVVF | 139  | 105  |
| >TP53-T211SNTFRHSVV   | 11   | >TP53-T211SNTFRHSVV   | 65   | 54   |
| >TP53-T211SNTFRHSVVV  | 8    | >TP53-T211SNTFRHSVVV  | 37   | 29   |
| >TP53-T211SNTFRHSVV   | 50   | >TP53-T211SNTFRHSVV   | 1068 | 1018 |
| >TP53-T211SNTFRHSVVV  | 25   | >TP53-T211SNTFRHSVVV  | 551  | 526  |
| >TP53-T211SNTFRHSVVVF | 65   | >TP53-T211SNTFRHSVVVF | 57   | 8    |
| >TP53-T211SNTFRHSVVVF | 492  | >TP53-T211SNTFRHSVVVF | 791  | 299  |
| >TP53-T211SNTFRHSVVV  | 798  | >TP53-T211SNTFRHSVVV  | 262  | 536  |
| >TP53-T211SNTFRHSVVVF | 33   | >TP53-T211SNTFRHSVVVF | 12   | 21   |
| >TP53-T211SNTFRHSVVVF | 23   | >TP53-T211SNTFRHSVVVF | 32   | 9    |



|                        |      |                        |      |      |
|------------------------|------|------------------------|------|------|
| >TP53-T211S NTFRHSVVVF | 105  | >TP53-T211S NSFRHSVVVF | 55   | 50   |
| >TP53-T211S NTFRHSVVVF | 289  | >TP53-T211S NSFRHSVVVF | 820  | 531  |
| >TP53-T211S NTFRHSVVVF | 23   | >TP53-T211S NSFRHSVVVF | 40   | 17   |
| >TP53-T211S RNTFRHSVV  | 224  | >TP53-T211S RNSFRHSVV  | 218  | 6    |
| >TP53-T211S LDDRNTFRHS | 482  | >TP53-T211S LDDRNSFRHS | 595  | 113  |
| >TP53-T211S YLDDRNTF   | 708  | >TP53-T211S YLDDRNSF   | 439  | 269  |
| >TP53-T211S YLDDRNTF   | 187  | >TP53-T211S YLDDRNSF   | 131  | 56   |
| >TP53-T211S YLDDRNTFRH | 333  | >TP53-T211S YLDDRNSFRH | 421  | 88   |
| >TP53-T211S YLDDRNTF   | 149  | >TP53-T211S YLDDRNSF   | 212  | 63   |
| >TP53-T211S YLDDRNTFRH | 155  | >TP53-T211S YLDDRNSFRH | 165  | 10   |
| >TP53-T211S YLDDRNTF   | 367  | >TP53-T211S YLDDRNSF   | 637  | 270  |
| >TP53-T211S YLDDRNTF   | 87   | >TP53-T211S YLDDRNSF   | 102  | 15   |
| >TP53-T211S YLDDRNTFR  | 189  | >TP53-T211S YLDDRNSFR  | 198  | 9    |
| >TP53-T211S YLDDRNTFRH | 187  | >TP53-T211S YLDDRNSFRH | 237  | 50   |
| >TP53-T211S YLDDRNTFRH | 171  | >TP53-T211S YLDDRNSFRH | 173  | 2    |
| >TP53-T211S YLDDRNTFR  | 282  | >TP53-T211S YLDDRNSFR  | 452  | 170  |
| >TP53-T211S YLDDRNTFR  | 55   | >TP53-T211S YLDDRNSFR  | 54   | 1    |
| >TP53-T211S YLDDRNTFR  | 68   | >TP53-T211S YLDDRNSFR  | 49   | 19   |
| >TP53-T211S YLDDRNTF   | 847  | >TP53-T211S YLDDRNSF   | 450  | 397  |
| >TP53-T211S YLDDRNTF   | 255  | >TP53-T211S YLDDRNSF   | 222  | 33   |
| >TP53-T211S YLDDRNTFR  | 336  | >TP53-T211S YLDDRNSFR  | 694  | 358  |
| >TP53-T211S EYLDDRNTF  | 103  | >TP53-T211S EYLDDRNSF  | 340  | 237  |
| >TP53-T211S EYLDDRNTF  | 18   | >TP53-T211S EYLDDRNSF  | 25   | 7    |
| >TP53-T211S EYLDDRNTF  | 381  | >TP53-T211S EYLDDRNSF  | 150  | 231  |
| >TP53-T211S EYLDDRNTF  | 301  | >TP53-T211S EYLDDRNSF  | 265  | 36   |
| >TP53-T211S EYLDDRNTFR | 328  | >TP53-T211S EYLDDRNSFR | 262  | 66   |
| >TP53-T211S EYLDDRNTFR | 88   | >TP53-T211S EYLDDRNSFR | 55   | 33   |
| >TP53-T211S EYLDDRNTFR | 508  | >TP53-T211S EYLDDRNSFR | 422  | 86   |
| >TP53-T211S EYLDDRNTFR | 19   | >TP53-T211S EYLDDRNSFR | 24   | 5    |
| >TP53-T211S VEYLDDRNTF | 622  | >TP53-T211S VEYLDDRNSF | 339  | 283  |
| >TP53-T211S VEYLDDRNTF | 124  | >TP53-T211S VEYLDDRNSF | 93   | 31   |
| >TP53-T211S RVEYLDDRNT | 40   | >TP53-T211S RVEYLDDRNS | 71   | 31   |
| >TP53-T211S RVEYLDDRNT | 78   | >TP53-T211S RVEYLDDRNS | 155  | 77   |
| >TP53-T230A TTIHYNM    | 46   | >TP53-T230A ATIHYNM    | 61   | 15   |
| >TP53-T230A TTIHYNM    | 1038 | >TP53-T230A ATIHYNM    | 375  | 663  |
| >TP53-T230A TTIHYNM    | 1118 | >TP53-T230A ATIHYNM    | 396  | 722  |
| >TP53-T230A TTIHYNM    | 46   | >TP53-T230A ATIHYNM    | 385  | 339  |
| >TP53-T230A TTIHYNM    | 5    | >TP53-T230A ATIHYNM    | 5    | 0    |
| >TP53-T230A TTIHYNM    | 135  | >TP53-T230A ATIHYNM    | 458  | 323  |
| >TP53-T230A TTIHYNM    | 17   | >TP53-T230A ATIHYNM    | 418  | 401  |
| >TP53-T230A TTIHYNMCM  | 120  | >TP53-T230A ATIHYNMCM  | 3043 | 2923 |
| >TP53-T230A TTIHYNMCM  | 102  | >TP53-T230A ATIHYNMCM  | 2593 | 2491 |
| >TP53-T230A TTIHYNM    | 69   | >TP53-T230A ATIHYNM    | 1069 | 1000 |

|                         |      |                        |      |      |
|-------------------------|------|------------------------|------|------|
| >TP53-T230A TTIHYNYM    | 1287 | >TP53-T230A ATIHYNYM   | 264  | 1023 |
| >TP53-T230A TTIHYNYM    | 61   | >TP53-T230A ATIHYNYM   | 23   | 38   |
| >TP53-T230A TTIHYNYM    | 260  | >TP53-T230A ATIHYNYM   | 861  | 601  |
| >TP53-T230A CTTIHYNYM   | 116  | >TP53-T230A CATIHYNYM  | 114  | 2    |
| >TP53-T230A CTTIHYN     | 117  | >TP53-T230A CATIHYN    | 5376 | 5259 |
| >TP53-T230A CTTIHYN     | 161  | >TP53-T230A CATIHYN    | 6753 | 6592 |
| >TP53-T230A CTTIHYNM    | 207  | >TP53-T230A CATIHYNM   | 5984 | 5777 |
| >TP53-T230A CTTIHYN     | 35   | >TP53-T230A CATIHYN    | 166  | 131  |
| >TP53-T230A CTTIHYN     | 130  | >TP53-T230A CATIHYN    | 355  | 225  |
| >TP53-T230A CTTIHYN     | 355  | >TP53-T230A CATIHYN    | 2184 | 1829 |
| >TP53-T230A CTTIHYN     | 50   | >TP53-T230A CATIHYN    | 684  | 634  |
| >TP53-T230A CTTIHYN     | 3855 | >TP53-T230A CATIHYN    | 122  | 3733 |
| >TP53-T230A CTTIHYNM    | 11   | >TP53-T230A CATIHYNM   | 116  | 105  |
| >TP53-T230A CTTIHYNM(C  | 184  | >TP53-T230A CATIHYNM(C | 1913 | 1729 |
| >TP53-T230A CTTIHYN     | 68   | >TP53-T230A CATIHYN    | 228  | 160  |
| >TP53-T230A CTTIHYNM    | 405  | >TP53-T230A CATIHYNM   | 2094 | 1689 |
| >TP53-T230A DCTTIHYN    | 521  | >TP53-T230A DCATIHYN   | 203  | 318  |
| >TP53-T230A DCTTIHYNM   | 585  | >TP53-T230A DCATIHYNM  | 270  | 315  |
| >TP53-T230A DCTTIHYN    | 287  | >TP53-T230A DCATIHYN   | 111  | 176  |
| >TP53-T230A DCTTIHYN    | 787  | >TP53-T230A DCATIHYN   | 443  | 344  |
| >TP53-T230A SDCTTIHYN   | 400  | >TP53-T230A SDCATIHYN  | 441  | 41   |
| >TP53-T230A SDCTTIHYN   | 1285 | >TP53-T230A SDCATIHYN  | 471  | 814  |
| >TP53-T230A GSDCTTIH    | 18   | >TP53-T230A GSDCATIH   | 27   | 9    |
| >TP53-T230A GSDCTTIHYN  | 34   | >TP53-T230A GSDCATIHYN | 50   | 16   |
| >TP53-T230A GSDCTTIHYN  | 174  | >TP53-T230A GSDCATIHYN | 207  | 33   |
| >TP53-T230A GSDCTTIH    | 68   | >TP53-T230A GSDCATIH   | 109  | 41   |
| >TP53-T230A GSDCTTIHYN  | 99   | >TP53-T230A GSDCATIHYN | 144  | 45   |
| >TP53-T230A GSDCTTIHYN  | 247  | >TP53-T230A GSDCATIHYN | 413  | 166  |
| >TP53-T230A GSDCTTIH    | 242  | >TP53-T230A GSDCATIH   | 274  | 32   |
| >TP53-T230A GSDCTTIHYN  | 97   | >TP53-T230A GSDCATIHYN | 107  | 10   |
| >TP53-T230A VGSDCTTIH   | 353  | >TP53-T230A VGSDCATIH  | 381  | 28   |
| >TP53-T230A VGSDCTTIH   | 184  | >TP53-T230A VGSDCATIH  | 250  | 66   |
| >TP53-T230A VGSDCTTIH   | 377  | >TP53-T230A VGSDCATIH  | 513  | 136  |
| >TP53-T230A VGSDCTTIH   | 449  | >TP53-T230A VGSDCATIH  | 291  | 158  |
| >TP53-T230A EVGSDCTTIH' | 11   | >TP53-T230A EVGSDCATIH | 7    | 4    |
| >TP53-T230A EVGSDCTTIH' | 75   | >TP53-T230A EVGSDCATIH | 61   | 14   |
| >TP53-T230A EVGSDCTTIH' | 387  | >TP53-T230A EVGSDCATIH | 328  | 59   |
| >TP53-T230A EVGSDCTTI   | 1082 | >TP53-T230A EVGSDCATI  | 378  | 704  |
| >TP53-T230A EVGSDCTTI   | 504  | >TP53-T230A EVGSDCATI  | 168  | 336  |
| >TP53-T230A EVGSDCTTIH' | 326  | >TP53-T230A EVGSDCATIH | 444  | 118  |
| >TP53-T230A PEVGSDCTTI  | 342  | >TP53-T230A PEVGSDCATI | 678  | 336  |
| >TP53-T230I- TTIHYNYM   | 46   | >TP53-T230I- ITIHYNYM  | 8    | 38   |
| >TP53-T230I- TTIHYNYM   | 1038 | >TP53-T230I- ITIHYNYM  | 397  | 641  |

|                        |      |                        |       |       |
|------------------------|------|------------------------|-------|-------|
| >TP53-T230I-TTIHYNM    | 1118 | >TP53-T230I-ITIHYNM    | 462   | 656   |
| >TP53-T230I-TTIHYNM    | 46   | >TP53-T230I-ITIHYNM    | 1216  | 1170  |
| >TP53-T230I-TTIHYNM    | 5    | >TP53-T230I-ITIHYNM    | 14    | 9     |
| >TP53-T230I-TTIHYNM    | 135  | >TP53-T230I-ITIHYNM    | 413   | 278   |
| >TP53-T230I-TTIHYNM    | 17   | >TP53-T230I-ITIHYNM    | 211   | 194   |
| >TP53-T230I-TTIHYNMC   | 120  | >TP53-T230I-ITIHYNMC   | 1947  | 1827  |
| >TP53-T230I-TTIHYNMCN  | 102  | >TP53-T230I-ITIHYNMCN  | 1505  | 1403  |
| >TP53-T230I-TTIHYNM    | 69   | >TP53-T230I-ITIHYNM    | 959   | 890   |
| >TP53-T230I-TTIHYNM    | 1287 | >TP53-T230I-ITIHYNM    | 173   | 1114  |
| >TP53-T230I-TTIHYNM    | 61   | >TP53-T230I-ITIHYNM    | 12    | 49    |
| >TP53-T230I-TTIHYNM    | 838  | >TP53-T230I-ITIHYNM    | 93    | 745   |
| >TP53-T230I-TTIHYNM    | 260  | >TP53-T230I-ITIHYNM    | 819   | 559   |
| >TP53-T230I-CTTIHYNM   | 116  | >TP53-T230I-CITIHYNM   | 84    | 32    |
| >TP53-T230I-CTTIHYN    | 117  | >TP53-T230I-CITIHYN    | 5780  | 5663  |
| >TP53-T230I-CTTIHYN    | 161  | >TP53-T230I-CITIHYN    | 1080  | 919   |
| >TP53-T230I-CTTIHYNM   | 207  | >TP53-T230I-CITIHYNM   | 1266  | 1059  |
| >TP53-T230I-CTTIHYN    | 35   | >TP53-T230I-CITIHYN    | 52    | 17    |
| >TP53-T230I-CTTIHYN    | 130  | >TP53-T230I-CITIHYN    | 209   | 79    |
| >TP53-T230I-CTTIHYN    | 355  | >TP53-T230I-CITIHYN    | 487   | 132   |
| >TP53-T230I-CTTIHYN    | 50   | >TP53-T230I-CITIHYN    | 9534  | 9484  |
| >TP53-T230I-CTTIHYNM   | 11   | >TP53-T230I-CITIHYNM   | 1505  | 1494  |
| >TP53-T230I-CTTIHYNMC  | 184  | >TP53-T230I-CITIHYNMC  | 12244 | 12060 |
| >TP53-T230I-CTTIHYN    | 68   | >TP53-T230I-CITIHYN    | 60    | 8     |
| >TP53-T230I-CTTIHYNM   | 405  | >TP53-T230I-CITIHYNM   | 9448  | 9043  |
| >TP53-T230I-YEPPEVGSDC | 2994 | >TP53-T230I-YEPPEVGSDC | 11    | 2983  |
| >TP53-T230I-YEPPEVGSDC | 1359 | >TP53-T230I-YEPPEVGSDC | 18    | 1341  |
| >TP53-T230I-DCTTIHYN   | 521  | >TP53-T230I-DCITIHYN   | 22    | 499   |
| >TP53-T230I-DCTTIHYNM  | 585  | >TP53-T230I-DCITIHYNM  | 24    | 561   |
| >TP53-T230I-DCTTIHYN   | 2300 | >TP53-T230I-DCITIHYN   | 166   | 2134  |
| >TP53-T230I-DCTTIHYN   | 287  | >TP53-T230I-DCITIHYN   | 80    | 207   |
| >TP53-T230I-SDCTTIHYN  | 400  | >TP53-T230I-SDCITIHYN  | 447   | 47    |
| >TP53-T230I-GSDCTTIHY  | 18   | >TP53-T230I-GSDCITIH   | 16    | 2     |
| >TP53-T230I-GSDCTTIHYN | 34   | >TP53-T230I-GSDCITIHYN | 30    | 4     |
| >TP53-T230I-GSDCTTIHY  | 659  | >TP53-T230I-GSDCITIH   | 319   | 340   |
| >TP53-T230I-GSDCTTIHYN | 174  | >TP53-T230I-GSDCITIHYN | 113   | 61    |
| >TP53-T230I-GSDCTTIHYN | 582  | >TP53-T230I-GSDCITIHYN | 440   | 142   |
| >TP53-T230I-GSDCTTIHY  | 68   | >TP53-T230I-GSDCITIH   | 368   | 300   |
| >TP53-T230I-GSDCTTIHYN | 99   | >TP53-T230I-GSDCITIHYN | 329   | 230   |
| >TP53-T230I-GSDCTTIHY  | 535  | >TP53-T230I-GSDCITIH   | 407   | 128   |
| >TP53-T230I-GSDCTTIHYN | 247  | >TP53-T230I-GSDCITIHYN | 208   | 39    |
| >TP53-T230I-GSDCTTIHY  | 242  | >TP53-T230I-GSDCITIH   | 422   | 180   |
| >TP53-T230I-GSDCTTIHYN | 97   | >TP53-T230I-GSDCITIHYN | 127   | 30    |
| >TP53-T230I-VGSDCTTIHY | 353  | >TP53-T230I-VGSDCITIH  | 570   | 217   |

|                         |     |                         |       |       |
|-------------------------|-----|-------------------------|-------|-------|
| >TP53-T230I-VGSDCTTIHY  | 184 | >TP53-T230I-VGSDCITIHY  | 120   | 64    |
| >TP53-T230I-VGSDCTTIHY  | 377 | >TP53-T230I-VGSDCITIHY  | 586   | 209   |
| >TP53-T230I-VGSDCTTIHY  | 449 | >TP53-T230I-VGSDCITIHY  | 299   | 150   |
| >TP53-T230I-EVGSDCTTIH' | 11  | >TP53-T230I-EVGSDCITIHY | 10    | 1     |
| >TP53-T230I-EVGSDCTTIH' | 75  | >TP53-T230I-EVGSDCITIHY | 61    | 14    |
| >TP53-T230I-EVGSDCTTIH' | 387 | >TP53-T230I-EVGSDCITIHY | 238   | 149   |
| >TP53-T230I-EVGSDCTTIH' | 612 | >TP53-T230I-EVGSDCITIHY | 450   | 162   |
| >TP53-T230I-EVGSDCTTI   | 504 | >TP53-T230I-EVGSDCITI   | 233   | 271   |
| >TP53-T230I-EVGSDCTTIH' | 326 | >TP53-T230I-EVGSDCITIHY | 212   | 114   |
| >TP53-T230I-PEVGSDCTTI  | 342 | >TP53-T230I-PEVGSDCITI  | 447   | 105   |
| >TP53-T230M TTIHYNM     | 46  | >TP53-T230M NTIHYNYM    | 718   | 672   |
| >TP53-T230M TTIHYNM     | 46  | >TP53-T230M NTIHYNYM    | 65    | 19    |
| >TP53-T230M TTIHYNM     | 5   | >TP53-T230M NTIHYNYM    | 10    | 5     |
| >TP53-T230M TTIHYNM     | 135 | >TP53-T230M NTIHYNYM    | 200   | 65    |
| >TP53-T230M TTIHYNM     | 17  | >TP53-T230M NTIHYNYM    | 23    | 6     |
| >TP53-T230M TTIHYNMCM   | 120 | >TP53-T230M NTIHYNYMCM  | 182   | 62    |
| >TP53-T230M TTIHYNMCM   | 102 | >TP53-T230M NTIHYNYMCI  | 149   | 47    |
| >TP53-T230M TTIHYNM     | 69  | >TP53-T230M NTIHYNYM    | 52    | 17    |
| >TP53-T230M TTIHYNM     | 61  | >TP53-T230M NTIHYNYM    | 543   | 482   |
| >TP53-T230M TTIHYNM     | 260 | >TP53-T230M NTIHYNYM    | 1862  | 1602  |
| >TP53-T230M CTTIHYNYM   | 116 | >TP53-T230M CNTIHYNYM   | 108   | 8     |
| >TP53-T230M CTTIHYNY    | 117 | >TP53-T230M CNTIHYNY    | 14307 | 14190 |
| >TP53-T230M CTTIHYNY    | 161 | >TP53-T230M CNTIHYNY    | 19439 | 19278 |
| >TP53-T230M CTTIHYNYM   | 207 | >TP53-T230M CNTIHYNYM   | 21372 | 21165 |
| >TP53-T230M CTTIHYNY    | 35  | >TP53-T230M CNTIHYNY    | 295   | 260   |
| >TP53-T230M CTTIHYNY    | 130 | >TP53-T230M CNTIHYNY    | 1240  | 1110  |
| >TP53-T230M CTTIHYNY    | 355 | >TP53-T230M CNTIHYNY    | 3581  | 3226  |
| >TP53-T230M CTTIHYNY    | 50  | >TP53-T230M CNTIHYNY    | 21515 | 21465 |
| >TP53-T230M CTTIHYNYM   | 11  | >TP53-T230M CNTIHYNYM   | 3144  | 3133  |
| >TP53-T230M CTTIHYNYMCM | 184 | >TP53-T230M CNTIHYNYMCM | 18000 | 17816 |
| >TP53-T230M CTTIHYNY    | 68  | >TP53-T230M CNTIHYNY    | 388   | 320   |
| >TP53-T230M CTTIHYNYM   | 405 | >TP53-T230M CNTIHYNYM   | 5897  | 5492  |
| >TP53-T230M DCTTIHYNY   | 287 | >TP53-T230M DCNTIHYNY   | 335   | 48    |
| >TP53-T230M SDCTTIHYNY  | 400 | >TP53-T230M SDCNTIHYNY  | 652   | 252   |
| >TP53-T230M GSDCTTIHY   | 18  | >TP53-T230M GSDCNTIHY   | 15    | 3     |
| >TP53-T230M GSDCTTIHYN  | 34  | >TP53-T230M GSDCNTIHYN  | 30    | 4     |
| >TP53-T230M GSDCTTIHY   | 659 | >TP53-T230M GSDCNTIHY   | 433   | 226   |
| >TP53-T230M GSDCTTIHYN  | 174 | >TP53-T230M GSDCNTIHYN  | 139   | 35    |
| >TP53-T230M GSDCTTIHY   | 68  | >TP53-T230M GSDCNTIHY   | 114   | 46    |
| >TP53-T230M GSDCTTIHYN  | 99  | >TP53-T230M GSDCNTIHYN  | 148   | 49    |
| >TP53-T230M GSDCTTIHYN  | 247 | >TP53-T230M GSDCNTIHYN  | 758   | 511   |
| >TP53-T230M GSDCTTIHY   | 242 | >TP53-T230M GSDCNTIHY   | 259   | 17    |
| >TP53-T230M GSDCTTIHYN  | 97  | >TP53-T230M GSDCNTIHYN  | 103   | 6     |

|                         |       |                        |       |       |
|-------------------------|-------|------------------------|-------|-------|
| >TP53-T230N VGSDCTTIHY  | 353   | >TP53-T230N VGSDCNTIHY | 393   | 40    |
| >TP53-T230N VGSDCTTIHY  | 184   | >TP53-T230N VGSDCNTIHY | 208   | 24    |
| >TP53-T230N VGSDCTTIHY  | 377   | >TP53-T230N VGSDCNTIHY | 533   | 156   |
| >TP53-T230N VGSDCTTIHY  | 449   | >TP53-T230N VGSDCNTIHY | 425   | 24    |
| >TP53-T230N EVGSDCTTIH' | 11    | >TP53-T230N EVGSDCNTIH | 7     | 4     |
| >TP53-T230N EVGSDCTTIH' | 75    | >TP53-T230N EVGSDCNTIH | 40    | 35    |
| >TP53-T230N EVGSDCTTIH' | 387   | >TP53-T230N EVGSDCNTIH | 346   | 41    |
| >TP53-T230N EVGSDCTTIH' | 326   | >TP53-T230N EVGSDCNTIH | 410   | 84    |
| >TP53-T230N PEVGSDCTTI  | 342   | >TP53-T230N PEVGSDCNTI | 497   | 155   |
| >TP53-T230P TTIHYNM     | 46    | >TP53-T230P PTIHYNM    | 2729  | 2683  |
| >TP53-T230P TTIHYNM     | 46    | >TP53-T230P PTIHYNM    | 1551  | 1505  |
| >TP53-T230P TTIHYNM     | 5     | >TP53-T230P PTIHYNM    | 13    | 8     |
| >TP53-T230P TTIHYNM     | 135   | >TP53-T230P PTIHYNM    | 832   | 697   |
| >TP53-T230P TTIHYNM     | 17    | >TP53-T230P PTIHYNM    | 3820  | 3803  |
| >TP53-T230P TTIHYNMCM   | 120   | >TP53-T230P PTIHYNMCM  | 11761 | 11641 |
| >TP53-T230P TTIHYNMCM   | 102   | >TP53-T230P PTIHYNMCM  | 10194 | 10092 |
| >TP53-T230P TTIHYNM     | 69    | >TP53-T230P PTIHYNM    | 2980  | 2911  |
| >TP53-T230P TTIHYNM     | 61    | >TP53-T230P PTIHYNM    | 3119  | 3058  |
| >TP53-T230P TTIHYNM     | 260   | >TP53-T230P PTIHYNM    | 5023  | 4763  |
| >TP53-T230P CTTIHYNM    | 116   | >TP53-T230P CPTIHYNM   | 2285  | 2169  |
| >TP53-T230P CTTIHYN     | 117   | >TP53-T230P CPTIHYN    | 19476 | 19359 |
| >TP53-T230P CTTIHYN     | 161   | >TP53-T230P CPTIHYN    | 12135 | 11974 |
| >TP53-T230P CTTIHYNM    | 207   | >TP53-T230P CPTIHYNM   | 13369 | 13162 |
| >TP53-T230P CTTIHYN     | 35    | >TP53-T230P CPTIHYN    | 802   | 767   |
| >TP53-T230P CTTIHYN     | 130   | >TP53-T230P CPTIHYN    | 2237  | 2107  |
| >TP53-T230P CTTIHYN     | 355   | >TP53-T230P CPTIHYN    | 4490  | 4135  |
| >TP53-T230P CTTIHYN     | 50    | >TP53-T230P CPTIHYN    | 20632 | 20582 |
| >TP53-T230P CTTIHYN     | 3855  | >TP53-T230P CPTIHYN    | 21    | 3834  |
| >TP53-T230P CTTIHYNM    | 9193  | >TP53-T230P CPTIHYNM   | 205   | 8988  |
| >TP53-T230P CTTIHYN     | 8076  | >TP53-T230P CPTIHYN    | 51    | 8025  |
| >TP53-T230P CTTIHYNM    | 21077 | >TP53-T230P CPTIHYNM   | 295   | 20782 |
| >TP53-T230P CTTIHYNM    | 11    | >TP53-T230P CPTIHYNM   | 1425  | 1414  |
| >TP53-T230P CTTIHYNMCM  | 184   | >TP53-T230P CPTIHYNMCM | 13395 | 13211 |
| >TP53-T230P CTTIHYN     | 8836  | >TP53-T230P CPTIHYN    | 294   | 8542  |
| >TP53-T230P CTTIHYN     | 17953 | >TP53-T230P CPTIHYN    | 349   | 17604 |
| >TP53-T230P CTTIHYN     | 68    | >TP53-T230P CPTIHYN    | 993   | 925   |
| >TP53-T230P CTTIHYNM    | 405   | >TP53-T230P CPTIHYNM   | 8493  | 8088  |
| >TP53-T230P DCTTIHYN    | 287   | >TP53-T230P DCPTIHYN   | 1100  | 813   |
| >TP53-T230P SDCTTIHYN   | 400   | >TP53-T230P SDCPTIHYN  | 613   | 213   |
| >TP53-T230P GSDCTTIHY   | 18    | >TP53-T230P GSDCPTIHY  | 53    | 35    |
| >TP53-T230P GSDCTTIHYN  | 34    | >TP53-T230P GSDCPTIHYN | 102   | 68    |
| >TP53-T230P GSDCTTIHYN  | 174   | >TP53-T230P GSDCPTIHYN | 213   | 39    |
| >TP53-T230P GSDCTTIHY   | 68    | >TP53-T230P GSDCPTIHY  | 86    | 18    |

|                         |      |                         |      |      |
|-------------------------|------|-------------------------|------|------|
| >TP53-T230P GSDCTTIHYN  | 99   | >TP53-T230P GSDCPTIHYN  | 116  | 17   |
| >TP53-T230P GSDCTTIHY   | 535  | >TP53-T230P GSDCPTIHY   | 454  | 81   |
| >TP53-T230P GSDCTTIHYN  | 247  | >TP53-T230P GSDCPTIHYN  | 219  | 28   |
| >TP53-T230P GSDCTTIHY   | 242  | >TP53-T230P GSDCPTIHY   | 229  | 13   |
| >TP53-T230P GSDCTTIHYN  | 97   | >TP53-T230P GSDCPTIHYN  | 93   | 4    |
| >TP53-T230P VGSDCTTIHY  | 353  | >TP53-T230P VGSDCPTIHY  | 840  | 487  |
| >TP53-T230P VGSDCTTIHY  | 184  | >TP53-T230P VGSDCPTIHY  | 190  | 6    |
| >TP53-T230P VGSDCTTIHY  | 377  | >TP53-T230P VGSDCPTIHY  | 987  | 610  |
| >TP53-T230P VGSDCTTIHY  | 449  | >TP53-T230P VGSDCPTIHY  | 283  | 166  |
| >TP53-T230P EVGSDCTTIH' | 11   | >TP53-T230P EVGSDCPTIH' | 7    | 4    |
| >TP53-T230P EVGSDCTTIH' | 75   | >TP53-T230P EVGSDCPTIH' | 76   | 1    |
| >TP53-T230P EVGSDCTTIH' | 387  | >TP53-T230P EVGSDCPTIH' | 301  | 86   |
| >TP53-T230P EVGSDCTTI   | 504  | >TP53-T230P EVGSDCPTI   | 81   | 423  |
| >TP53-T230P EVGSDCTTIH' | 326  | >TP53-T230P EVGSDCPTIH' | 521  | 195  |
| >TP53-T230P PEVGSDCTTI  | 342  | >TP53-T230P PEVGSDCPTI  | 438  | 96   |
| >TP53-T230S TTIHYNM     | 46   | >TP53-T230S STIHYNM     | 23   | 23   |
| >TP53-T230S TTIHYNM     | 1038 | >TP53-T230S STIHYNM     | 425  | 613  |
| >TP53-T230S TTIHYNM     | 1118 | >TP53-T230S STIHYNM     | 448  | 670  |
| >TP53-T230S TTIHYNM     | 46   | >TP53-T230S STIHYNM     | 57   | 11   |
| >TP53-T230S TTIHYNM     | 5    | >TP53-T230S STIHYNM     | 5    | 0    |
| >TP53-T230S TTIHYNM     | 135  | >TP53-T230S STIHYNM     | 274  | 139  |
| >TP53-T230S TTIHYNM     | 17   | >TP53-T230S STIHYNM     | 49   | 32   |
| >TP53-T230S TTIHYNMCM   | 120  | >TP53-T230S STIHYNMCM   | 472  | 352  |
| >TP53-T230S TTIHYNMCM   | 102  | >TP53-T230S STIHYNMCM   | 379  | 277  |
| >TP53-T230S TTIHYNM     | 69   | >TP53-T230S STIHYNM     | 119  | 50   |
| >TP53-T230S TTIHYNM     | 61   | >TP53-T230S STIHYNM     | 36   | 25   |
| >TP53-T230S TTIHYNM     | 260  | >TP53-T230S STIHYNM     | 1059 | 799  |
| >TP53-T230S CTTIHYNM    | 116  | >TP53-T230S CSTIHYNM    | 82   | 34   |
| >TP53-T230S CTTIHYN     | 117  | >TP53-T230S CSTIHYN     | 260  | 143  |
| >TP53-T230S CTTIHYN     | 161  | >TP53-T230S CSTIHYN     | 1506 | 1345 |
| >TP53-T230S CTTIHYNM    | 207  | >TP53-T230S CSTIHYNM    | 1387 | 1180 |
| >TP53-T230S CTTIHYN     | 35   | >TP53-T230S CSTIHYN     | 118  | 83   |
| >TP53-T230S CTTIHYN     | 130  | >TP53-T230S CSTIHYN     | 137  | 7    |
| >TP53-T230S CTTIHYN     | 355  | >TP53-T230S CSTIHYN     | 1766 | 1411 |
| >TP53-T230S CTTIHYN     | 50   | >TP53-T230S CSTIHYN     | 68   | 18   |
| >TP53-T230S CTTIHYNM    | 11   | >TP53-T230S CSTIHYNM    | 25   | 14   |
| >TP53-T230S CTTIHYNMCM  | 184  | >TP53-T230S CSTIHYNMCM  | 647  | 463  |
| >TP53-T230S CTTIHYN     | 68   | >TP53-T230S CSTIHYN     | 113  | 45   |
| >TP53-T230S CTTIHYNM    | 405  | >TP53-T230S CSTIHYNM    | 501  | 96   |
| >TP53-T230S DCTTIHYN    | 287  | >TP53-T230S DCSTIHYN    | 184  | 103  |
| >TP53-T230S SDCTTIHYN   | 400  | >TP53-T230S SDCSTIHYN   | 413  | 13   |
| >TP53-T230S GSDCTTIHY   | 18   | >TP53-T230S GSDCSTIHY   | 18   | 0    |
| >TP53-T230S GSDCTTIHYN  | 34   | >TP53-T230S GSDCSTIHYN  | 34   | 0    |

|                         |      |                         |      |      |
|-------------------------|------|-------------------------|------|------|
| >TP53-T230S GSDCTTIHYN  | 174  | >TP53-T230S GSDCSTIHYN  | 240  | 66   |
| >TP53-T230S GSDCTTIHY   | 68   | >TP53-T230S GSDCSTIHY   | 27   | 41   |
| >TP53-T230S GSDCTTIHYN  | 99   | >TP53-T230S GSDCSTIHYN  | 55   | 44   |
| >TP53-T230S GSDCTTIHYN  | 247  | >TP53-T230S GSDCSTIHYN  | 340  | 93   |
| >TP53-T230S GSDCTTIHY   | 242  | >TP53-T230S GSDCSTIHY   | 371  | 129  |
| >TP53-T230S GSDCTTIHYN  | 97   | >TP53-T230S GSDCSTIHYN  | 125  | 28   |
| >TP53-T230S VGSDCTTIHY  | 353  | >TP53-T230S VGSDCSTIHY  | 368  | 15   |
| >TP53-T230S VGSDCTTIHY  | 184  | >TP53-T230S VGSDCSTIHY  | 211  | 27   |
| >TP53-T230S VGSDCTTIHY  | 377  | >TP53-T230S VGSDCSTIHY  | 250  | 127  |
| >TP53-T230S VGSDCTTIHY  | 449  | >TP53-T230S VGSDCSTIHY  | 298  | 151  |
| >TP53-T230S VGSDCTTI    | 605  | >TP53-T230S VGSDCSTI    | 439  | 166  |
| >TP53-T230S EVGSDCTTIH' | 11   | >TP53-T230S EVGSDCSTIH' | 7    | 4    |
| >TP53-T230S EVGSDCTTIH' | 75   | >TP53-T230S EVGSDCSTIH' | 48   | 27   |
| >TP53-T230S EVGSDCTTIH' | 387  | >TP53-T230S EVGSDCSTIH' | 415  | 28   |
| >TP53-T230S EVGSDCTTIH' | 612  | >TP53-T230S EVGSDCSTIH' | 452  | 160  |
| >TP53-T230S EVGSDCTTIH' | 326  | >TP53-T230S EVGSDCSTIH' | 364  | 38   |
| >TP53-T230S PEVGSDCTTI  | 342  | >TP53-T230S PEVGSDCSTI  | 337  | 5    |
| >TP53-T231A TTIHYNMCMN' | 2418 | >TP53-T231A TTIHYNMCMN' | 384  | 2034 |
| >TP53-T231A TTIHYNM     | 46   | >TP53-T231A TAIHYNM     | 98   | 52   |
| >TP53-T231A TTIHYNM     | 46   | >TP53-T231A TAIHYNM     | 1337 | 1291 |
| >TP53-T231A TTIHYNM     | 5    | >TP53-T231A TAIHYNM     | 109  | 104  |
| >TP53-T231A TTIHYNM     | 135  | >TP53-T231A TAIHYNM     | 4730 | 4595 |
| >TP53-T231A TTIHYNM     | 17   | >TP53-T231A TAIHYNM     | 126  | 109  |
| >TP53-T231A TTIHYNMCM   | 120  | >TP53-T231A TAIHYNMCM   | 1225 | 1105 |
| >TP53-T231A TTIHYNMCMN  | 102  | >TP53-T231A TAIHYNMCMN  | 1035 | 933  |
| >TP53-T231A TTIHYNM     | 69   | >TP53-T231A TAIHYNM     | 454  | 385  |
| >TP53-T231A TTIHYNM     | 61   | >TP53-T231A TAIHYNM     | 833  | 772  |
| >TP53-T231A TTIHYNM     | 3817 | >TP53-T231A TAIHYNM     | 340  | 3477 |
| >TP53-T231A TTIHYNM     | 260  | >TP53-T231A TAIHYNM     | 3395 | 3135 |
| >TP53-T231A EPPEVGSDCT  | 7517 | >TP53-T231A EPPEVGSDCT  | 491  | 7026 |
| >TP53-T231A CTTIHYNM    | 116  | >TP53-T231A CTAIHYNM    | 93   | 23   |
| >TP53-T231A CTTIHYN     | 117  | >TP53-T231A CTAIHYN     | 38   | 79   |
| >TP53-T231A CTTIHYNM    | 754  | >TP53-T231A CTAIHYNM    | 145  | 609  |
| >TP53-T231A CTTIHYN     | 161  | >TP53-T231A CTAIHYN     | 66   | 95   |
| >TP53-T231A CTTIHYNM    | 207  | >TP53-T231A CTAIHYNM    | 84   | 123  |
| >TP53-T231A CTTIHYN     | 35   | >TP53-T231A CTAIHYN     | 19   | 16   |
| >TP53-T231A CTTIHYN     | 130  | >TP53-T231A CTAIHYN     | 64   | 66   |
| >TP53-T231A CTTIHYN     | 767  | >TP53-T231A CTAIHYN     | 229  | 538  |
| >TP53-T231A CTTIHYNM    | 1337 | >TP53-T231A CTAIHYNM    | 165  | 1172 |
| >TP53-T231A CTTIHYN     | 355  | >TP53-T231A CTAIHYN     | 268  | 87   |
| >TP53-T231A CTTIHYN     | 50   | >TP53-T231A CTAIHYN     | 33   | 17   |
| >TP53-T231A CTTIHYNM    | 11   | >TP53-T231A CTAIHYNM    | 12   | 1    |
| >TP53-T231A CTTIHYNMCM  | 184  | >TP53-T231A CTAIHYNMCM  | 355  | 171  |

|                          |      |                          |       |       |
|--------------------------|------|--------------------------|-------|-------|
| >TP53-T231A CTTIHYN Y    | 68   | >TP53-T231A CTAIHYN Y    | 50    | 18    |
| >TP53-T231A CTTIHYN YM   | 405  | >TP53-T231A CTAIHYN YM   | 144   | 261   |
| >TP53-T231A DCTTIHYN Y   | 287  | >TP53-T231A DCTAIHYN Y   | 240   | 47    |
| >TP53-T231A DCTTIHYN Y   | 902  | >TP53-T231A DCTAIHYN Y   | 270   | 632   |
| >TP53-T231A SDCTTIHYN Y  | 4518 | >TP53-T231A SDCTAIHYN Y  | 489   | 4029  |
| >TP53-T231A SDCTTIHYN Y  | 400  | >TP53-T231A SDCTAIHYN Y  | 512   | 112   |
| >TP53-T231A GSDCTTIH Y   | 18   | >TP53-T231A GSDCTAIH Y   | 24    | 6     |
| >TP53-T231A GSDCTTIH YN  | 34   | >TP53-T231A GSDCTAIH YN  | 45    | 11    |
| >TP53-T231A GSDCTTIH YN  | 174  | >TP53-T231A GSDCTAIH YN  | 158   | 16    |
| >TP53-T231A GSDCTTIH Y   | 68   | >TP53-T231A GSDCTAIH Y   | 25    | 43    |
| >TP53-T231A GSDCTTIH YN  | 99   | >TP53-T231A GSDCTAIH YN  | 56    | 43    |
| >TP53-T231A GSDCTTIH Y   | 535  | >TP53-T231A GSDCTAIH Y   | 183   | 352   |
| >TP53-T231A GSDCTTIH YN  | 247  | >TP53-T231A GSDCTAIH YN  | 155   | 92    |
| >TP53-T231A GSDCTTIH Y   | 242  | >TP53-T231A GSDCTAIH Y   | 102   | 140   |
| >TP53-T231A GSDCTTIH YN  | 97   | >TP53-T231A GSDCTAIH YN  | 65    | 32    |
| >TP53-T231A VGSDCTTIH Y  | 353  | >TP53-T231A VGSDCTAIH Y  | 397   | 44    |
| >TP53-T231A VGSDCTTIH Y  | 184  | >TP53-T231A VGSDCTAIH Y  | 250   | 66    |
| >TP53-T231A VGSDCTTIH Y  | 377  | >TP53-T231A VGSDCTAIH Y  | 476   | 99    |
| >TP53-T231A VGSDCTTIH Y  | 449  | >TP53-T231A VGSDCTAIH Y  | 824   | 375   |
| >TP53-T231A EVGSDCTTIH'  | 11   | >TP53-T231A EVGSDCTAIH   | 13    | 2     |
| >TP53-T231A EVGSDCTTIH'  | 75   | >TP53-T231A EVGSDCTAIH   | 158   | 83    |
| >TP53-T231A EVGSDCTTIH'  | 387  | >TP53-T231A EVGSDCTAIH   | 382   | 5     |
| >TP53-T231A EVGSDCTTI    | 504  | >TP53-T231A EVGSDCTAI    | 384   | 120   |
| >TP53-T231A EVGSDCTTIH'  | 326  | >TP53-T231A EVGSDCTAIH   | 603   | 277   |
| >TP53-T231A PEVGSDCTTI   | 342  | >TP53-T231A PEVGSDCTAI   | 278   | 64    |
| >TP53-T231I- TTIHYN YM   | 46   | >TP53-T231I- TIIHYN YM   | 52    | 6     |
| >TP53-T231I- TTIHYN YM   | 1038 | >TP53-T231I- TIIHYN YM   | 210   | 828   |
| >TP53-T231I- TTIHYN YM   | 1118 | >TP53-T231I- TIIHYN YM   | 377   | 741   |
| >TP53-T231I- TTIHYN YM   | 46   | >TP53-T231I- TIIHYN YM   | 228   | 182   |
| >TP53-T231I- TTIHYN YM   | 5    | >TP53-T231I- TIIHYN YM   | 17    | 12    |
| >TP53-T231I- TTIHYN YM   | 135  | >TP53-T231I- TIIHYN YM   | 1881  | 1746  |
| >TP53-T231I- TTIHYN YM   | 17   | >TP53-T231I- TIIHYN YM   | 115   | 98    |
| >TP53-T231I- TTIHYN YMC  | 120  | >TP53-T231I- TIIHYN YMC  | 1028  | 908   |
| >TP53-T231I- TTIHYN YMCN | 102  | >TP53-T231I- TIIHYN YMCN | 803   | 701   |
| >TP53-T231I- TTIHYN YM   | 69   | >TP53-T231I- TIIHYN YM   | 303   | 234   |
| >TP53-T231I- TTIHYN YM   | 61   | >TP53-T231I- TIIHYN YM   | 11096 | 11035 |
| >TP53-T231I- TTIHYN YM   | 260  | >TP53-T231I- TIIHYN YM   | 5397  | 5137  |
| >TP53-T231I- CTTIHYN YM  | 116  | >TP53-T231I- CTIIHYN YM  | 27    | 89    |
| >TP53-T231I- CTTIHYN Y   | 117  | >TP53-T231I- CTIIHYN Y   | 842   | 725   |
| >TP53-T231I- CTTIHYN Y   | 1373 | >TP53-T231I- CTIIHYN Y   | 426   | 947   |
| >TP53-T231I- CTTIHYN Y   | 2641 | >TP53-T231I- CTIIHYN Y   | 274   | 2367  |
| >TP53-T231I- CTTIHYN YM  | 754  | >TP53-T231I- CTIIHYN YM  | 45    | 709   |
| >TP53-T231I- CTTIHYN Y   | 161  | >TP53-T231I- CTIIHYN Y   | 11    | 150   |



|                         |       |                          |       |       |
|-------------------------|-------|--------------------------|-------|-------|
| >TP53-T231I-CTTIHNYM    | 207   | >TP53-T231I-CTIIHNYM     | 10    | 197   |
| >TP53-T231I-CTTIHNY     | 3262  | >TP53-T231I-CTIIHNY      | 236   | 3026  |
| >TP53-T231I-CTTIHNY     | 35    | >TP53-T231I-CTIIHNY      | 14    | 21    |
| >TP53-T231I-CTTIHNY     | 130   | >TP53-T231I-CTIIHNY      | 102   | 28    |
| >TP53-T231I-CTTIHNY     | 767   | >TP53-T231I-CTIIHNY      | 254   | 513   |
| >TP53-T231I-CTTIHNYM    | 1337  | >TP53-T231I-CTIIHNYM     | 358   | 979   |
| >TP53-T231I-CTTIHNY     | 355   | >TP53-T231I-CTIIHNY      | 316   | 39    |
| >TP53-T231I-CTTIHNY     | 50    | >TP53-T231I-CTIIHNY      | 16    | 34    |
| >TP53-T231I-CTTIHNYM    | 1487  | >TP53-T231I-CTIIHNYM     | 412   | 1075  |
| >TP53-T231I-CTTIHNYM    | 11    | >TP53-T231I-CTIIHNYM     | 81    | 70    |
| >TP53-T231I-CTTIHNYMC   | 184   | >TP53-T231I-CTIIHNYMC    | 1369  | 1185  |
| >TP53-T231I-CTTIHNY     | 68    | >TP53-T231I-CTIIHNY      | 167   | 99    |
| >TP53-T231I-CTTIHNYM    | 405   | >TP53-T231I-CTIIHNYM     | 278   | 127   |
| >TP53-T231I-DCTTIHNY    | 287   | >TP53-T231I-DCTIIHNY     | 285   | 2     |
| >TP53-T231I-SDCTTIHNY   | 400   | >TP53-T231I-SDCTIIHNY    | 423   | 23    |
| >TP53-T231I-SDCTTIHNY   | 1285  | >TP53-T231I-SDCTIIHNY    | 467   | 818   |
| >TP53-T231I-GSDCTTIHY   | 18    | >TP53-T231I-GSDCTIIHY    | 34    | 16    |
| >TP53-T231I-GSDCTTIHYN  | 34    | >TP53-T231I-GSDCTIIHYN\  | 58    | 24    |
| >TP53-T231I-GSDCTTIHYN  | 174   | >TP53-T231I-GSDCTIIHYN\  | 252   | 78    |
| >TP53-T231I-GSDCTTIHY   | 68    | >TP53-T231I-GSDCTIIHY    | 51    | 17    |
| >TP53-T231I-GSDCTTIHYN  | 99    | >TP53-T231I-GSDCTIIHYN\  | 68    | 31    |
| >TP53-T231I-GSDCTTIHYN  | 247   | >TP53-T231I-GSDCTIIHYN\  | 274   | 27    |
| >TP53-T231I-GSDCTTIHY   | 242   | >TP53-T231I-GSDCTIIHY    | 317   | 75    |
| >TP53-T231I-GSDCTTIHYN  | 97    | >TP53-T231I-GSDCTIIHYN\  | 112   | 15    |
| >TP53-T231I-VGSDCTTIHY  | 353   | >TP53-T231I-VGSDCTIIHY   | 455   | 102   |
| >TP53-T231I-VGSDCTTIHY  | 184   | >TP53-T231I-VGSDCTIIHY   | 480   | 296   |
| >TP53-T231I-VGSDCTTIHY  | 377   | >TP53-T231I-VGSDCTIIHY   | 543   | 166   |
| >TP53-T231I-VGSDCTTIHY  | 449   | >TP53-T231I-VGSDCTIIHY   | 721   | 272   |
| >TP53-T231I-EVGSDCCTIHY | 11    | >TP53-T231I-EVGSDCCTIIHY | 9     | 2     |
| >TP53-T231I-EVGSDCCTIHY | 75    | >TP53-T231I-EVGSDCCTIIHY | 201   | 126   |
| >TP53-T231I-EVGSDCCTIHY | 387   | >TP53-T231I-EVGSDCCTIIHY | 635   | 248   |
| >TP53-T231I-EVGSDCCTIHY | 326   | >TP53-T231I-EVGSDCCTIIHY | 865   | 539   |
| >TP53-T231I-PEVGSDCCTI  | 11826 | >TP53-T231I-PEVGSDCCTI   | 250   | 11576 |
| >TP53-T231I-PEVGSDCCTI  | 342   | >TP53-T231I-PEVGSDCCTII  | 339   | 3     |
| >TP53-T231I\TTIIHNYM    | 46    | >TP53-T231I\TNIHNYM      | 36    | 10    |
| >TP53-T231I\TTIIHNYM    | 46    | >TP53-T231I\TNIHNYM      | 8828  | 8782  |
| >TP53-T231I\TTIIHNYM    | 5     | >TP53-T231I\TNIHNYM      | 1012  | 1007  |
| >TP53-T231I\TTIIHNYM    | 135   | >TP53-T231I\TNIHNYM      | 5190  | 5055  |
| >TP53-T231I\TTIIHNYM    | 17    | >TP53-T231I\TNIHNYM      | 1982  | 1965  |
| >TP53-T231I\TTIIHNYMC   | 120   | >TP53-T231I\TNIHNYMC     | 8406  | 8286  |
| >TP53-T231I\TTIIHNYMCI  | 102   | >TP53-T231I\TNIHNYMCI    | 6588  | 6486  |
| >TP53-T231I\TTIIHNYM    | 69    | >TP53-T231I\TNIHNYM      | 8756  | 8687  |
| >TP53-T231I\TTIIHNYM    | 61    | >TP53-T231I\TNIHNYM      | 21443 | 21382 |

|                         |      |                        |      |      |
|-------------------------|------|------------------------|------|------|
| >TP53-T231N TTIHYNYM    | 260  | >TP53-T231N TNIHYNYM   | 4708 | 4448 |
| >TP53-T231N CTTIHYNYM   | 116  | >TP53-T231N CTNIHYNYM  | 101  | 15   |
| >TP53-T231N CTTIHYNY    | 117  | >TP53-T231N CTNIHYNY   | 48   | 69   |
| >TP53-T231N CTTIHYNY    | 1373 | >TP53-T231N CTNIHYNY   | 420  | 953  |
| >TP53-T231N CTTIHYNY    | 161  | >TP53-T231N CTNIHYNY   | 416  | 255  |
| >TP53-T231N CTTIHYNYM   | 207  | >TP53-T231N CTNIHYNYM  | 510  | 303  |
| >TP53-T231N CTTIHYNY    | 35   | >TP53-T231N CTNIHYNY   | 41   | 6    |
| >TP53-T231N CTTIHYNY    | 130  | >TP53-T231N CTNIHYNY   | 69   | 61   |
| >TP53-T231N CTTIHYNY    | 355  | >TP53-T231N CTNIHYNY   | 292  | 63   |
| >TP53-T231N CTTIHYNY    | 50   | >TP53-T231N CTNIHYNY   | 51   | 1    |
| >TP53-T231N CTTIHYNYM   | 11   | >TP53-T231N CTNIHYNYM  | 61   | 50   |
| >TP53-T231N CTTIHYNYM   | 184  | >TP53-T231N CTNIHYNYM  | 1382 | 1198 |
| >TP53-T231N CTTIHYNY    | 68   | >TP53-T231N CTNIHYNY   | 64   | 4    |
| >TP53-T231N CTTIHYNYM   | 405  | >TP53-T231N CTNIHYNYM  | 527  | 122  |
| >TP53-T231N DCTTIHYN    | 287  | >TP53-T231N DCTNIHYN   | 279  | 8    |
| >TP53-T231N SDCTTIHYN   | 400  | >TP53-T231N SDCTNIHYN  | 568  | 168  |
| >TP53-T231N GSDCTTIHY   | 18   | >TP53-T231N GSDCTNIHY  | 17   | 1    |
| >TP53-T231N GSDCTTIHYN  | 34   | >TP53-T231N GSDCTNIHYN | 34   | 0    |
| >TP53-T231N GSDCTTIHYN  | 174  | >TP53-T231N GSDCTNIHYN | 240  | 66   |
| >TP53-T231N GSDCTTIHY   | 68   | >TP53-T231N GSDCTNIHY  | 83   | 15   |
| >TP53-T231N GSDCTTIHYN  | 99   | >TP53-T231N GSDCTNIHYN | 108  | 9    |
| >TP53-T231N GSDCTTIHY   | 535  | >TP53-T231N GSDCTNIHY  | 279  | 256  |
| >TP53-T231N GSDCTTIHYN  | 247  | >TP53-T231N GSDCTNIHYN | 155  | 92   |
| >TP53-T231N GSDCTTIHY   | 242  | >TP53-T231N GSDCTNIHY  | 272  | 30   |
| >TP53-T231N GSDCTTIHYN  | 97   | >TP53-T231N GSDCTNIHYN | 108  | 11   |
| >TP53-T231N VGSDCTTIHY  | 353  | >TP53-T231N VGSDCTNIHY | 524  | 171  |
| >TP53-T231N VGSDCTTIHY  | 184  | >TP53-T231N VGSDCTNIHY | 319  | 135  |
| >TP53-T231N VGSDCTTIHY  | 642  | >TP53-T231N VGSDCTNIHY | 325  | 317  |
| >TP53-T231N VGSDCTTIHY  | 377  | >TP53-T231N VGSDCTNIHY | 565  | 188  |
| >TP53-T231N VGSDCTTIHY  | 449  | >TP53-T231N VGSDCTNIHY | 679  | 230  |
| >TP53-T231N EVGSDCTTIH' | 11   | >TP53-T231N EVGSDCTNIH | 14   | 3    |
| >TP53-T231N EVGSDCTTIH' | 75   | >TP53-T231N EVGSDCTNIH | 99   | 24   |
| >TP53-T231N EVGSDCTTIH' | 387  | >TP53-T231N EVGSDCTNIH | 595  | 208  |
| >TP53-T231N EVGSDCTTI   | 504  | >TP53-T231N EVGSDCTNI  | 366  | 138  |
| >TP53-T231N EVGSDCTTIH' | 326  | >TP53-T231N EVGSDCTNIH | 927  | 601  |
| >TP53-T231N PEVSDCTTI   | 342  | >TP53-T231N PEVSDCTNI  | 529  | 187  |
| >TP53-T231S TTIHYNYM    | 46   | >TP53-T231S TSIHYNYM   | 16   | 30   |
| >TP53-T231S TTIHYNYM    | 46   | >TP53-T231S TSIHYNYM   | 1513 | 1467 |
| >TP53-T231S TTIHYNYM    | 5    | >TP53-T231S TSIHYNYM   | 18   | 13   |
| >TP53-T231S TTIHYNYM    | 135  | >TP53-T231S TSIHYNYM   | 1432 | 1297 |
| >TP53-T231S TTIHYNYM    | 17   | >TP53-T231S TSIHYNYM   | 146  | 129  |
| >TP53-T231S TTIHYNYM    | 120  | >TP53-T231S TSIHYNYM   | 1447 | 1327 |
| >TP53-T231S TTIHYNYM    | 102  | >TP53-T231S TSIHYNYM   | 1192 | 1090 |

|                         |      |                         |      |      |
|-------------------------|------|-------------------------|------|------|
| >TP53-T231S TTIHYNYM    | 69   | >TP53-T231S TSIHYNYM    | 1486 | 1417 |
| >TP53-T231S TTIHYNYM    | 1287 | >TP53-T231S TSIHYNYM    | 399  | 888  |
| >TP53-T231S TTIHYNYM    | 61   | >TP53-T231S TSIHYNYM    | 103  | 42   |
| >TP53-T231S TTIHYNYM    | 838  | >TP53-T231S TSIHYNYM    | 398  | 440  |
| >TP53-T231S TTIHYNYM    | 260  | >TP53-T231S TSIHYNYM    | 190  | 70   |
| >TP53-T231S CTTIHYNYM   | 116  | >TP53-T231S CTSIHYNYM   | 176  | 60   |
| >TP53-T231S CTTIHYN     | 117  | >TP53-T231S CTSIHYN     | 29   | 88   |
| >TP53-T231S CTTIHYN     | 1373 | >TP53-T231S CTSIHYN     | 445  | 928  |
| >TP53-T231S CTTIHYN     | 161  | >TP53-T231S CTSIHYN     | 482  | 321  |
| >TP53-T231S CTTIHYNYM   | 207  | >TP53-T231S CTSIHYNYM   | 570  | 363  |
| >TP53-T231S CTTIHYN     | 35   | >TP53-T231S CTSIHYN     | 29   | 6    |
| >TP53-T231S CTTIHYN     | 130  | >TP53-T231S CTSIHYN     | 69   | 61   |
| >TP53-T231S CTTIHYN     | 355  | >TP53-T231S CTSIHYN     | 444  | 89   |
| >TP53-T231S CTTIHYN     | 50   | >TP53-T231S CTSIHYN     | 38   | 12   |
| >TP53-T231S CTTIHYNYM   | 11   | >TP53-T231S CTSIHYNYM   | 30   | 19   |
| >TP53-T231S CTTIHYNMCMC | 184  | >TP53-T231S CTSIHYNMCMC | 680  | 496  |
| >TP53-T231S CTTIHYN     | 68   | >TP53-T231S CTSIHYN     | 56   | 12   |
| >TP53-T231S CTTIHYNYM   | 405  | >TP53-T231S CTSIHYNYM   | 310  | 95   |
| >TP53-T231S DCTTIHYN    | 521  | >TP53-T231S DCTSIHYN    | 481  | 40   |
| >TP53-T231S DCTTIHYN    | 287  | >TP53-T231S DCTSIHYN    | 164  | 123  |
| >TP53-T231S SDCTTIHYN   | 400  | >TP53-T231S SDCTSIHYN   | 471  | 71   |
| >TP53-T231S GSDCTTIH    | 18   | >TP53-T231S GSDCTSIH    | 23   | 5    |
| >TP53-T231S GSDCTTIHYN  | 34   | >TP53-T231S GSDCTSIHYN  | 41   | 7    |
| >TP53-T231S GSDCTTIHYN  | 174  | >TP53-T231S GSDCTSIHYN  | 174  | 0    |
| >TP53-T231S GSDCTTIH    | 68   | >TP53-T231S GSDCTSIH    | 29   | 39   |
| >TP53-T231S GSDCTTIHYN  | 99   | >TP53-T231S GSDCTSIHYN  | 63   | 36   |
| >TP53-T231S GSDCTTIH    | 535  | >TP53-T231S GSDCTSIH    | 239  | 296  |
| >TP53-T231S GSDCTTIHYN  | 247  | >TP53-T231S GSDCTSIHYN  | 136  | 111  |
| >TP53-T231S GSDCTTIH    | 242  | >TP53-T231S GSDCTSIH    | 217  | 25   |
| >TP53-T231S GSDCTTIHYN  | 97   | >TP53-T231S GSDCTSIHYN  | 92   | 5    |
| >TP53-T231S VGSDCTTIH   | 353  | >TP53-T231S VGSDCTSIH   | 454  | 101  |
| >TP53-T231S VGSDCTTIH   | 184  | >TP53-T231S VGSDCTSIH   | 297  | 113  |
| >TP53-T231S VGSDCTTIH   | 377  | >TP53-T231S VGSDCTSIH   | 262  | 115  |
| >TP53-T231S VGSDCTTIH   | 1591 | >TP53-T231S VGSDCTSIH   | 232  | 1359 |
| >TP53-T231S VGSDCTTIH   | 449  | >TP53-T231S VGSDCTSIH   | 233  | 216  |
| >TP53-T231S EVGSDCTTIH' | 11   | >TP53-T231S EVGSDCTSIH' | 17   | 6    |
| >TP53-T231S EVGSDCTTIH' | 75   | >TP53-T231S EVGSDCTSIH' | 156  | 81   |
| >TP53-T231S EVGSDCTTIH' | 387  | >TP53-T231S EVGSDCTSIH' | 468  | 81   |
| >TP53-T231S EVGSDCTTI   | 504  | >TP53-T231S EVGSDCTSI   | 442  | 62   |
| >TP53-T231S EVGSDCTTIH' | 326  | >TP53-T231S EVGSDCTSIH' | 577  | 251  |
| >TP53-T231S PEVGSDCTTI  | 342  | >TP53-T231S PEVGSDCTSI  | 251  | 91   |
| >TP53-T253A ILTIITILE   | 2676 | >TP53-T253A ILAIITILE   | 417  | 2259 |
| >TP53-T253A ILTIITLEDSS | 1325 | >TP53-T253A ILAIITLEDSS | 181  | 1144 |

|                         |      |                         |      |      |
|-------------------------|------|-------------------------|------|------|
| >TP53-T253A PILTIITL    | 508  | >TP53-T253A PILAIITL    | 254  | 254  |
| >TP53-T253A PILTIITL    | 906  | >TP53-T253A PILAIITL    | 494  | 412  |
| >TP53-T253A RPILTIITL   | 104  | >TP53-T253A RPILAIITL   | 5    | 99   |
| >TP53-T253A RPILTIITL   | 34   | >TP53-T253A RPILAIITL   | 32   | 2    |
| >TP53-T253A RPILTIITL   | 391  | >TP53-T253A RPILAIITL   | 187  | 204  |
| >TP53-T253A RPILTIITL   | 66   | >TP53-T253A RPILAIITL   | 122  | 56   |
| >TP53-T253A RPILTIITL   | 89   | >TP53-T253A RPILAIITL   | 52   | 37   |
| >TP53-T253A RRPILTII    | 220  | >TP53-T253A RRPILAI     | 191  | 29   |
| >TP53-T253A RRPILTIITL  | 14   | >TP53-T253A RRPILAIITL  | 25   | 11   |
| >TP53-T253A RRPILTIITL  | 492  | >TP53-T253A RRPILAIITL  | 457  | 35   |
| >TP53-T253A RRPILTII    | 33   | >TP53-T253A RRPILAI     | 57   | 24   |
| >TP53-T253A RRPILTIIT   | 86   | >TP53-T253A RRPILAIIT   | 99   | 13   |
| >TP53-T253A RRPILTIITL  | 16   | >TP53-T253A RRPILAIITL  | 18   | 2    |
| >TP53-T253A RRPILTIITL  | 129  | >TP53-T253A RRPILAIITL  | 144  | 15   |
| >TP53-T253A RRPILTII    | 319  | >TP53-T253A RRPILAI     | 583  | 264  |
| >TP53-T253A RRPILTIIT   | 329  | >TP53-T253A RRPILAIIT   | 472  | 143  |
| >TP53-T253A RRPILTIITL  | 14   | >TP53-T253A RRPILAIITL  | 18   | 4    |
| >TP53-T253A RRPILTIITL  | 467  | >TP53-T253A RRPILAIITL  | 547  | 80   |
| >TP53-T253A NRRPILTII   | 281  | >TP53-T253A NRRPILAI    | 414  | 133  |
| >TP53-T253A NRRPILTIITL | 50   | >TP53-T253A NRRPILAIITL | 64   | 14   |
| >TP53-T253A NRRPILTII   | 224  | >TP53-T253A NRRPILAI    | 193  | 31   |
| >TP53-T253A NRRPILTIITL | 12   | >TP53-T253A NRRPILAIITL | 12   | 0    |
| >TP53-T253A MNRRPILT    | 945  | >TP53-T253A MNRRPILA    | 32   | 913  |
| >TP53-T253A MNRRPILTI   | 35   | >TP53-T253A MNRRPILAI   | 37   | 2    |
| >TP53-T253A MNRRPILTII  | 200  | >TP53-T253A MNRRPILAI   | 50   | 150  |
| >TP53-T253A MNRRPILTI   | 457  | >TP53-T253A MNRRPILAI   | 205  | 252  |
| >TP53-T253A MNRRPILTI   | 399  | >TP53-T253A MNRRPILAI   | 1079 | 680  |
| >TP53-T253A GMNRRPILTI  | 185  | >TP53-T253A GMNRRPILAI  | 254  | 69   |
| >TP53-T253A GMNRRPILTI  | 168  | >TP53-T253A GMNRRPILAI  | 170  | 2    |
| >TP53-T253A GMNRRPILT   | 728  | >TP53-T253A GMNRRPILA   | 44   | 684  |
| >TP53-T253A GMNRRPILTI  | 61   | >TP53-T253A GMNRRPILAI  | 76   | 15   |
| >TP53-T253A GMNRRPILTI  | 13   | >TP53-T253A GMNRRPILAI  | 14   | 1    |
| >TP53-T253A GMNRRPILT   | 822  | >TP53-T253A GMNRRPILA   | 116  | 706  |
| >TP53-T253A GMNRRPILTI  | 10   | >TP53-T253A GMNRRPILAI  | 13   | 3    |
| >TP53-T253A GMNRRPILTI  | 93   | >TP53-T253A GMNRRPILAI  | 55   | 38   |
| >TP53-T253A GMNRRPILTI  | 21   | >TP53-T253A GMNRRPILAI  | 28   | 7    |
| >TP53-T253A GMNRRPILTI  | 53   | >TP53-T253A GMNRRPILAI  | 24   | 29   |
| >TP53-T253A GMNRRPILT   | 4760 | >TP53-T253A GMNRRPILA   | 468  | 4292 |
| >TP53-T253A GMNRRPILTI  | 66   | >TP53-T253A GMNRRPILAI  | 168  | 102  |
| >TP53-T253A GMNRRPILTI  | 192  | >TP53-T253A GMNRRPILAI  | 208  | 16   |
| >TP53-T253A GMNRRPILT   | 744  | >TP53-T253A GMNRRPILA   | 125  | 619  |
| >TP53-T253A GMNRRPILTI  | 43   | >TP53-T253A GMNRRPILAI  | 95   | 52   |
| >TP53-T253A GMNRRPILTI  | 102  | >TP53-T253A GMNRRPILAI  | 83   | 19   |

|                          |      |                          |     |      |
|--------------------------|------|--------------------------|-----|------|
| >TP53-T253A GMNRRPILTI   | 147  | >TP53-T253A GMNRRPILAI   | 290 | 143  |
| >TP53-T253A GMNRRPILTI   | 844  | >TP53-T253A GMNRRPILAI   | 494 | 350  |
| >TP53-T253I- PILTIITL    | 508  | >TP53-T253I- PILIITL     | 352 | 156  |
| >TP53-T253I- RPILTIITL   | 104  | >TP53-T253I- RPILIIITL   | 138 | 34   |
| >TP53-T253I- RPILTIITL   | 34   | >TP53-T253I- RPILIIITL   | 61  | 27   |
| >TP53-T253I- RPILTIITL   | 391  | >TP53-T253I- RPILIIITL   | 251 | 140  |
| >TP53-T253I- RPILTIITL   | 66   | >TP53-T253I- RPILIIITL   | 160 | 94   |
| >TP53-T253I- RPILTIITL   | 89   | >TP53-T253I- RPILIIITL   | 79  | 10   |
| >TP53-T253I- RPILTIITL   | 671  | >TP53-T253I- RPILIIITL   | 390 | 281  |
| >TP53-T253I- RRPILTII    | 220  | >TP53-T253I- RRPILIII    | 142 | 78   |
| >TP53-T253I- RRPILTIITL  | 14   | >TP53-T253I- RRPILIIITL  | 14  | 0    |
| >TP53-T253I- RRPILTIITL  | 492  | >TP53-T253I- RRPILIIITL  | 290 | 202  |
| >TP53-T253I- RRPILTII    | 33   | >TP53-T253I- RRPILIII    | 45  | 12   |
| >TP53-T253I- RRPILTIIT   | 86   | >TP53-T253I- RRPILIIIT   | 76  | 10   |
| >TP53-T253I- RRPILTIITL  | 16   | >TP53-T253I- RRPILIIITL  | 16  | 0    |
| >TP53-T253I- RRPILTIITLE | 129  | >TP53-T253I- RRPILIIITLE | 122 | 7    |
| >TP53-T253I- RRPILTII    | 319  | >TP53-T253I- RRPILIII    | 313 | 6    |
| >TP53-T253I- RRPILTIIT   | 329  | >TP53-T253I- RRPILIIIT   | 199 | 130  |
| >TP53-T253I- RRPILTIITL  | 14   | >TP53-T253I- RRPILIIITL  | 13  | 1    |
| >TP53-T253I- RRPILTIITLE | 467  | >TP53-T253I- RRPILIIITLE | 339 | 128  |
| >TP53-T253I- NRRPILTII   | 281  | >TP53-T253I- NRRPILIII   | 191 | 90   |
| >TP53-T253I- NRRPILTIITL | 50   | >TP53-T253I- NRRPILIIITL | 43  | 7    |
| >TP53-T253I- NRRPILTII   | 224  | >TP53-T253I- NRRPILIII   | 103 | 121  |
| >TP53-T253I- NRRPILTIITL | 12   | >TP53-T253I- NRRPILIIITL | 8   | 4    |
| >TP53-T253I- MNRRPILT    | 945  | >TP53-T253I- MNRRPILI    | 33  | 912  |
| >TP53-T253I- MNRRPILTI   | 35   | >TP53-T253I- MNRRPILII   | 49  | 14   |
| >TP53-T253I- MNRRPILTII  | 200  | >TP53-T253I- MNRRPILIII  | 41  | 159  |
| >TP53-T253I- MNRRPILTI   | 457  | >TP53-T253I- MNRRPILII   | 706 | 249  |
| >TP53-T253I- MNRRPILTI   | 399  | >TP53-T253I- MNRRPILII   | 825 | 426  |
| >TP53-T253I- GMNRRPILT   | 6990 | >TP53-T253I- GMNRRPILI   | 472 | 6518 |
| >TP53-T253I- GMNRRPILTI  | 185  | >TP53-T253I- GMNRRPILII  | 548 | 363  |
| >TP53-T253I- GMNRRPILTI  | 168  | >TP53-T253I- GMNRRPILIII | 313 | 145  |
| >TP53-T253I- GMNRRPILT   | 728  | >TP53-T253I- GMNRRPILI   | 34  | 694  |
| >TP53-T253I- GMNRRPILTI  | 61   | >TP53-T253I- GMNRRPILII  | 164 | 103  |
| >TP53-T253I- GMNRRPILTI  | 13   | >TP53-T253I- GMNRRPILIII | 27  | 14   |
| >TP53-T253I- GMNRRPILT   | 822  | >TP53-T253I- GMNRRPILI   | 31  | 791  |
| >TP53-T253I- GMNRRPILTI  | 10   | >TP53-T253I- GMNRRPILII  | 50  | 40   |
| >TP53-T253I- GMNRRPILTI  | 93   | >TP53-T253I- GMNRRPILIII | 55  | 38   |
| >TP53-T253I- GMNRRPILT   | 7282 | >TP53-T253I- GMNRRPILI   | 80  | 7202 |
| >TP53-T253I- GMNRRPILTI  | 21   | >TP53-T253I- GMNRRPILII  | 72  | 51   |
| >TP53-T253I- GMNRRPILTI  | 53   | >TP53-T253I- GMNRRPILIII | 31  | 22   |
| >TP53-T253I- GMNRRPILT   | 4760 | >TP53-T253I- GMNRRPILI   | 165 | 4595 |
| >TP53-T253I- GMNRRPILTI  | 66   | >TP53-T253I- GMNRRPILII  | 207 | 141  |

|                        |     |                         |      |     |
|------------------------|-----|-------------------------|------|-----|
| >TP53-T253I-GMNRRPILTI | 192 | >TP53-T253I-GMNRRPILIII | 140  | 52  |
| >TP53-T253I-GMNRRPILT  | 744 | >TP53-T253I-GMNRRPILI   | 119  | 625 |
| >TP53-T253I-GMNRRPILTI | 43  | >TP53-T253I-GMNRRPILII  | 131  | 88  |
| >TP53-T253I-GMNRRPILTI | 102 | >TP53-T253I-GMNRRPILIII | 115  | 13  |
| >TP53-T253I-GMNRRPILTI | 147 | >TP53-T253I-GMNRRPILII  | 970  | 823 |
| >TP53-T253N P ILTIITL  | 508 | >TP53-T253N PILNIITL    | 178  | 330 |
| >TP53-T253N RPILTIITL  | 104 | >TP53-T253N RPILNIITL   | 33   | 71  |
| >TP53-T253N RPILTIITL  | 34  | >TP53-T253N RPILNIITL   | 31   | 3   |
| >TP53-T253N RPILTIITL  | 391 | >TP53-T253N RPILNIITL   | 478  | 87  |
| >TP53-T253N RPILTIITL  | 66  | >TP53-T253N RPILNIITL   | 154  | 88  |
| >TP53-T253N RPILTIITL  | 89  | >TP53-T253N RPILNIITL   | 288  | 199 |
| >TP53-T253N RRPILTII   | 220 | >TP53-T253N RRPILNII    | 458  | 238 |
| >TP53-T253N RRPILTIITL | 14  | >TP53-T253N RRPILNIITL  | 18   | 4   |
| >TP53-T253N RRPILTIITL | 492 | >TP53-T253N RRPILNIITL  | 1105 | 613 |
| >TP53-T253N RRPILTII   | 33  | >TP53-T253N RRPILNII    | 110  | 77  |
| >TP53-T253N RRPILTIIT  | 86  | >TP53-T253N RRPILNIIT   | 104  | 18  |
| >TP53-T253N RRPILTIITL | 16  | >TP53-T253N RRPILNIITL  | 16   | 0   |
| >TP53-T253N RRPILTIITL | 129 | >TP53-T253N RRPILNIITL  | 162  | 33  |
| >TP53-T253N RRPILTII   | 319 | >TP53-T253N RRPILNII    | 824  | 505 |
| >TP53-T253N RRPILTIIT  | 329 | >TP53-T253N RRPILNIIT   | 718  | 389 |
| >TP53-T253N RRPILTIITL | 14  | >TP53-T253N RRPILNIITL  | 16   | 2   |
| >TP53-T253N RRPILTIITL | 467 | >TP53-T253N RRPILNIITL  | 671  | 204 |
| >TP53-T253N RRPILTII   | 281 | >TP53-T253N RRPILNII    | 412  | 131 |
| >TP53-T253N RRPILTIITL | 50  | >TP53-T253N RRPILNIITL  | 62   | 12  |
| >TP53-T253N RRPILTII   | 224 | >TP53-T253N RRPILNII    | 130  | 94  |
| >TP53-T253N RRPILTIITL | 12  | >TP53-T253N RRPILNIITL  | 11   | 1   |
| >TP53-T253N MNRRPILTI  | 35  | >TP53-T253N MNRRPILNI   | 39   | 4   |
| >TP53-T253N MNRRPILTII | 200 | >TP53-T253N MNRRPILNII  | 70   | 130 |
| >TP53-T253N MNRRPILTI  | 457 | >TP53-T253N MNRRPILNI   | 662  | 205 |
| >TP53-T253N MNRRPILTI  | 399 | >TP53-T253N MNRRPILNI   | 1372 | 973 |
| >TP53-T253N GMNRRPILTI | 185 | >TP53-T253N GMNRRPILNI  | 336  | 151 |
| >TP53-T253N GMNRRPILTI | 168 | >TP53-T253N GMNRRPILNI  | 157  | 11  |
| >TP53-T253N GMNRRPILTI | 61  | >TP53-T253N GMNRRPILNI  | 94   | 33  |
| >TP53-T253N GMNRRPILTI | 13  | >TP53-T253N GMNRRPILNI  | 19   | 6   |
| >TP53-T253N GMNRRPILTI | 10  | >TP53-T253N GMNRRPILNI  | 23   | 13  |
| >TP53-T253N GMNRRPILTI | 93  | >TP53-T253N GMNRRPILNI  | 127  | 34  |
| >TP53-T253N GMNRRPILTI | 21  | >TP53-T253N GMNRRPILNI  | 57   | 36  |
| >TP53-T253N GMNRRPILTI | 53  | >TP53-T253N GMNRRPILNI  | 38   | 15  |
| >TP53-T253N GMNRRPILTI | 66  | >TP53-T253N GMNRRPILNI  | 99   | 33  |
| >TP53-T253N GMNRRPILTI | 192 | >TP53-T253N GMNRRPILNI  | 317  | 125 |
| >TP53-T253N GMNRRPILTI | 43  | >TP53-T253N GMNRRPILNI  | 84   | 41  |
| >TP53-T253N GMNRRPILTI | 102 | >TP53-T253N GMNRRPILNI  | 198  | 96  |
| >TP53-T253N GMNRRPILTI | 147 | >TP53-T253N GMNRRPILNI  | 760  | 613 |

|                         |       |                         |      |       |
|-------------------------|-------|-------------------------|------|-------|
| >TP53-T253P LTIITLEDSS  | 27733 | >TP53-T253P LPIITLEDSS  | 454  | 27279 |
| >TP53-T253P LTIITLEDSSG | 24458 | >TP53-T253P LPIITLEDSSG | 404  | 24054 |
| >TP53-T253P PILTIITL    | 508   | >TP53-T253P PILPIITL    | 190  | 318   |
| >TP53-T253P PILTIITL    | 906   | >TP53-T253P PILPIITL    | 228  | 678   |
| >TP53-T253P RPILTIITL   | 104   | >TP53-T253P RPILPIITL   | 336  | 232   |
| >TP53-T253P RPILTIITL   | 34    | >TP53-T253P RPILPIITL   | 21   | 13    |
| >TP53-T253P RPILTIITL   | 391   | >TP53-T253P RPILPIITL   | 813  | 422   |
| >TP53-T253P RPILTIITL   | 66    | >TP53-T253P RPILPIITL   | 289  | 223   |
| >TP53-T253P RPILTIITL   | 89    | >TP53-T253P RPILPIITL   | 108  | 19    |
| >TP53-T253P RRPILTII    | 220   | >TP53-T253P RRPILPII    | 335  | 115   |
| >TP53-T253P RRPILTIITL  | 14    | >TP53-T253P RRPILPIITL  | 17   | 3     |
| >TP53-T253P RRPILTIITL  | 492   | >TP53-T253P RRPILPIITL  | 891  | 399   |
| >TP53-T253P RRPILTII    | 33    | >TP53-T253P RRPILPII    | 63   | 30    |
| >TP53-T253P RRPILTIIT   | 86    | >TP53-T253P RRPILPIIT   | 101  | 15    |
| >TP53-T253P RRPILTIITL  | 16    | >TP53-T253P RRPILPIITL  | 17   | 1     |
| >TP53-T253P RRPILTIITLE | 129   | >TP53-T253P RRPILPIITLE | 148  | 19    |
| >TP53-T253P RRPILTII    | 319   | >TP53-T253P RRPILPII    | 921  | 602   |
| >TP53-T253P RRPILTIIT   | 329   | >TP53-T253P RRPILPIIT   | 367  | 38    |
| >TP53-T253P RRPILTIITL  | 14    | >TP53-T253P RRPILPIITL  | 18   | 4     |
| >TP53-T253P RRPILTIITLE | 467   | >TP53-T253P RRPILPIITLE | 430  | 37    |
| >TP53-T253P NRRPILTI    | 674   | >TP53-T253P NRRPILPI    | 210  | 464   |
| >TP53-T253P NRRPILTII   | 281   | >TP53-T253P NRRPILPII   | 269  | 12    |
| >TP53-T253P NRRPILTIITL | 50    | >TP53-T253P NRRPILPIITL | 50   | 0     |
| >TP53-T253P NRRPILTI    | 1150  | >TP53-T253P NRRPILPI    | 375  | 775   |
| >TP53-T253P NRRPILTII   | 224   | >TP53-T253P NRRPILPII   | 114  | 110   |
| >TP53-T253P NRRPILTIIT  | 876   | >TP53-T253P NRRPILPIIT  | 464  | 412   |
| >TP53-T253P NRRPILTIITL | 12    | >TP53-T253P NRRPILPIITL | 13   | 1     |
| >TP53-T253P MNRRPILTI   | 35    | >TP53-T253P MNRRPILPI   | 16   | 19    |
| >TP53-T253P MNRRPILTII  | 200   | >TP53-T253P MNRRPILPII  | 28   | 172   |
| >TP53-T253P MNRRPILTI   | 457   | >TP53-T253P MNRRPILPI   | 246  | 211   |
| >TP53-T253P MNRRPILTI   | 399   | >TP53-T253P MNRRPILPI   | 1008 | 609   |
| >TP53-T253P GMNRRPILTI  | 755   | >TP53-T253P GMNRRPILPI  | 398  | 357   |
| >TP53-T253P GMNRRPILTI  | 185   | >TP53-T253P GMNRRPILPI  | 137  | 48    |
| >TP53-T253P GMNRRPILTI  | 168   | >TP53-T253P GMNRRPILPI  | 388  | 220   |
| >TP53-T253P GMNRRPILTI  | 61    | >TP53-T253P GMNRRPILPI  | 70   | 9     |
| >TP53-T253P GMNRRPILTI  | 13    | >TP53-T253P GMNRRPILPI  | 25   | 12    |
| >TP53-T253P GMNRRPILTI  | 10    | >TP53-T253P GMNRRPILPI  | 13   | 3     |
| >TP53-T253P GMNRRPILTI  | 93    | >TP53-T253P GMNRRPILPI  | 46   | 47    |
| >TP53-T253P GMNRRPILTI  | 21    | >TP53-T253P GMNRRPILPI  | 24   | 3     |
| >TP53-T253P GMNRRPILTI  | 53    | >TP53-T253P GMNRRPILPI  | 37   | 16    |
| >TP53-T253P GMNRRPILTI  | 66    | >TP53-T253P GMNRRPILPI  | 76   | 10    |
| >TP53-T253P GMNRRPILTI  | 192   | >TP53-T253P GMNRRPILPI  | 75   | 117   |
| >TP53-T253P GMNRRPILTI  | 43    | >TP53-T253P GMNRRPILPI  | 88   | 45    |

|                         |      |                         |     |      |
|-------------------------|------|-------------------------|-----|------|
| >TP53-T253P GMNRRPILTI  | 102  | >TP53-T253P GMNRRPILPI  | 70  | 32   |
| >TP53-T253P GMNRRPILTI  | 147  | >TP53-T253P GMNRRPILPI  | 251 | 104  |
| >TP53-T253S ILTIITLEDSS | 1325 | >TP53-T253S ILSIITLEDSS | 294 | 1031 |
| >TP53-T253S PILTIITL    | 508  | >TP53-T253S PILSIITL    | 278 | 230  |
| >TP53-T253S RPILTIITL   | 104  | >TP53-T253S RPILSIITL   | 37  | 67   |
| >TP53-T253S RPILTIITL   | 34   | >TP53-T253S RPILSIITL   | 27  | 7    |
| >TP53-T253S RPILTIITL   | 391  | >TP53-T253S RPILSIITL   | 376 | 15   |
| >TP53-T253S RPILTIITL   | 66   | >TP53-T253S RPILSIITL   | 101 | 35   |
| >TP53-T253S RPILTIITL   | 89   | >TP53-T253S RPILSIITL   | 71  | 18   |
| >TP53-T253S RRPILTII    | 220  | >TP53-T253S RRPILSII    | 284 | 64   |
| >TP53-T253S RRPILTIITL  | 14   | >TP53-T253S RRPILSIITL  | 19  | 5    |
| >TP53-T253S RRPILTIITL  | 492  | >TP53-T253S RRPILSIITL  | 541 | 49   |
| >TP53-T253S RRPILTII    | 33   | >TP53-T253S RRPILSII    | 112 | 79   |
| >TP53-T253S RRPILTIIT   | 86   | >TP53-T253S RRPILSIIT   | 152 | 66   |
| >TP53-T253S RRPILTIITL  | 16   | >TP53-T253S RRPILSIITL  | 16  | 0    |
| >TP53-T253S RRPILTIITL  | 129  | >TP53-T253S RRPILSIITL  | 188 | 59   |
| >TP53-T253S RRPILTII    | 319  | >TP53-T253S RRPILSII    | 609 | 290  |
| >TP53-T253S RRPILTIIT   | 329  | >TP53-T253S RRPILSIIT   | 811 | 482  |
| >TP53-T253S RRPILTIITL  | 14   | >TP53-T253S RRPILSIITL  | 18  | 4    |
| >TP53-T253S RRPILTIITL  | 467  | >TP53-T253S RRPILSIITL  | 755 | 288  |
| >TP53-T253S NRRPILTII   | 281  | >TP53-T253S NRRPILSII   | 256 | 25   |
| >TP53-T253S NRRPILTIITL | 50   | >TP53-T253S NRRPILSIITL | 57  | 7    |
| >TP53-T253S NRRPILTII   | 224  | >TP53-T253S NRRPILSII   | 81  | 143  |
| >TP53-T253S NRRPILTIITL | 12   | >TP53-T253S NRRPILSIITL | 11  | 1    |
| >TP53-T253S MNRRPILT    | 945  | >TP53-T253S MNRRPILS    | 424 | 521  |
| >TP53-T253S MNRRPILTI   | 35   | >TP53-T253S MNRRPILSI   | 27  | 8    |
| >TP53-T253S MNRRPILTII  | 200  | >TP53-T253S MNRRPILSII  | 84  | 116  |
| >TP53-T253S MNRRPILTI   | 457  | >TP53-T253S MNRRPILSI   | 263 | 194  |
| >TP53-T253S MNRRPILTI   | 399  | >TP53-T253S MNRRPILSI   | 407 | 8    |
| >TP53-T253S GMNRRPILTI  | 185  | >TP53-T253S GMNRRPILSI  | 175 | 10   |
| >TP53-T253S GMNRRPILTI  | 168  | >TP53-T253S GMNRRPILSII | 222 | 54   |
| >TP53-T253S GMNRRPILTI  | 61   | >TP53-T253S GMNRRPILSI  | 54  | 7    |
| >TP53-T253S GMNRRPILTI  | 13   | >TP53-T253S GMNRRPILSII | 13  | 0    |
| >TP53-T253S GMNRRPILTI  | 10   | >TP53-T253S GMNRRPILSI  | 14  | 4    |
| >TP53-T253S GMNRRPILTI  | 93   | >TP53-T253S GMNRRPILSII | 73  | 20   |
| >TP53-T253S GMNRRPILTI  | 21   | >TP53-T253S GMNRRPILSI  | 36  | 15   |
| >TP53-T253S GMNRRPILTI  | 53   | >TP53-T253S GMNRRPILSII | 38  | 15   |
| >TP53-T253S GMNRRPILTI  | 66   | >TP53-T253S GMNRRPILSI  | 102 | 36   |
| >TP53-T253S GMNRRPILTI  | 192  | >TP53-T253S GMNRRPILSII | 232 | 40   |
| >TP53-T253S GMNRRPILTI  | 43   | >TP53-T253S GMNRRPILSI  | 47  | 4    |
| >TP53-T253S GMNRRPILTI  | 102  | >TP53-T253S GMNRRPILSII | 107 | 5    |
| >TP53-T253S GMNRRPILTI  | 147  | >TP53-T253S GMNRRPILSI  | 268 | 121  |
| >TP53-T256A TLEDSSGNL   | 62   | >TP53-T256A ALEDSSGNL   | 31  | 31   |



|                         |      |                         |       |       |
|-------------------------|------|-------------------------|-------|-------|
| >TP53-T256A TLEDSSGNLL  | 133  | >TP53-T256A ALEDSSGNLL  | 87    | 46    |
| >TP53-T256A TLEDSSGNL   | 513  | >TP53-T256A ALEDSSGNL   | 213   | 300   |
| >TP53-T256A TLEDSSGNL   | 1522 | >TP53-T256A ALEDSSGNL   | 373   | 1149  |
| >TP53-T256A TLEDSSGNLL  | 1674 | >TP53-T256A ALEDSSGNLL  | 437   | 1237  |
| >TP53-T256A TLEDSSGNL   | 947  | >TP53-T256A ALEDSSGNL   | 230   | 717   |
| >TP53-T256A TLEDSSGNLL  | 736  | >TP53-T256A ALEDSSGNLL  | 205   | 531   |
| >TP53-T256A TLEDSSGNL   | 24   | >TP53-T256A ALEDSSGNL   | 6     | 18    |
| >TP53-T256A TLEDSSGNLL  | 23   | >TP53-T256A ALEDSSGNLL  | 7     | 16    |
| >TP53-T256A ITLEDSSGNL  | 495  | >TP53-T256A IALEDSSGNL  | 1061  | 566   |
| >TP53-T256A ITLEDSSGNL  | 471  | >TP53-T256A IALEDSSGNL  | 1166  | 695   |
| >TP53-T256A ITLEDSSGNL  | 371  | >TP53-T256A IALEDSSGNL  | 883   | 512   |
| >TP53-T256A ITLEDSSGNLL | 270  | >TP53-T256A IALEDSSGNLL | 420   | 150   |
| >TP53-T256A ITLEDSSGNL  | 302  | >TP53-T256A IALEDSSGNL  | 1177  | 875   |
| >TP53-T256A ITLEDSSGNLL | 339  | >TP53-T256A IALEDSSGNLL | 1294  | 955   |
| >TP53-T256A ITLEDSSGNL  | 137  | >TP53-T256A IALEDSSGNL  | 701   | 564   |
| >TP53-T256A ITLEDSSGNLL | 354  | >TP53-T256A IALEDSSGNLL | 1646  | 1292  |
| >TP53-T256A ITLEDSSGNL  | 6    | >TP53-T256A IALEDSSGNL  | 24    | 18    |
| >TP53-T256A ITLEDSSGNLL | 18   | >TP53-T256A IALEDSSGNLL | 153   | 135   |
| >TP53-T256A ITLEDSSGNLL | 259  | >TP53-T256A IALEDSSGNLL | 2528  | 2269  |
| >TP53-T256A ITLEDSSGNL  | 341  | >TP53-T256A IALEDSSGNL  | 14546 | 14205 |
| >TP53-T256A ITLEDSSGNLL | 30   | >TP53-T256A IALEDSSGNLL | 548   | 518   |
| >TP53-T256A MNRRPILTIIT | 1029 | >TP53-T256A MNRRPILTIIA | 33    | 996   |
| >TP53-T256A IITLEDSSGNL | 1406 | >TP53-T256A IIALEDSSGNL | 146   | 1260  |
| >TP53-T256A RPILTIITL   | 104  | >TP53-T256A RPILTIIAL   | 196   | 92    |
| >TP53-T256A RPILTIIT    | 1023 | >TP53-T256A RPILTIIA    | 373   | 650   |
| >TP53-T256A RPILTIITL   | 34   | >TP53-T256A RPILTIIAL   | 12    | 22    |
| >TP53-T256A RPILTIITL   | 391  | >TP53-T256A RPILTIIAL   | 120   | 271   |
| >TP53-T256A RPILTIITL   | 66   | >TP53-T256A RPILTIIAL   | 25    | 41    |
| >TP53-T256A RPILTIIT    | 1102 | >TP53-T256A RPILTIIA    | 57    | 1045  |
| >TP53-T256A RPILTIITL   | 89   | >TP53-T256A RPILTIIAL   | 72    | 17    |
| >TP53-T256A RRPILTIITL  | 14   | >TP53-T256A RRPILTIIAL  | 14    | 0     |
| >TP53-T256A RRPILTIITL  | 492  | >TP53-T256A RRPILTIIAL  | 703   | 211   |
| >TP53-T256A RRPILTIIT   | 86   | >TP53-T256A RRPILTIIA   | 116   | 30    |
| >TP53-T256A RRPILTIITL  | 16   | >TP53-T256A RRPILTIIAL  | 18    | 2     |
| >TP53-T256A RRPILTIITL  | 129  | >TP53-T256A RRPILTIIALE | 172   | 43    |
| >TP53-T256A RRPILTIIT   | 329  | >TP53-T256A RRPILTIIA   | 139   | 190   |
| >TP53-T256A RRPILTIITL  | 14   | >TP53-T256A RRPILTIIAL  | 15    | 1     |
| >TP53-T256A RRPILTIITL  | 467  | >TP53-T256A RRPILTIIALE | 413   | 54    |
| >TP53-T256A NRRPILTIITL | 701  | >TP53-T256A NRRPILTIIAL | 272   | 429   |
| >TP53-T256A NRRPILTIITL | 50   | >TP53-T256A NRRPILTIIAL | 83    | 33    |
| >TP53-T256A NRRPILTIITL | 12   | >TP53-T256A NRRPILTIIAL | 16    | 4     |
| >TP53-T256I TLEDSSGNL   | 62   | >TP53-T256I ILEDSSGNL   | 29    | 33    |
| >TP53-T256I TLEDSSGNLL  | 133  | >TP53-T256I ILEDSSGNLL  | 71    | 62    |

|                         |       |                         |       |       |
|-------------------------|-------|-------------------------|-------|-------|
| >TP53-T256I·TLEDSSGNL   | 513   | >TP53-T256I·ILEDSSGNL   | 223   | 290   |
| >TP53-T256I·TLEDSSGNL   | 1522  | >TP53-T256I·ILEDSSGNL   | 335   | 1187  |
| >TP53-T256I·TLEDSSGNLL  | 1674  | >TP53-T256I·ILEDSSGNLL  | 405   | 1269  |
| >TP53-T256I·TLEDSSGNL   | 947   | >TP53-T256I·ILEDSSGNL   | 396   | 551   |
| >TP53-T256I·TLEDSSGNLL  | 736   | >TP53-T256I·ILEDSSGNLL  | 321   | 415   |
| >TP53-T256I·TLEDSSGNL   | 24    | >TP53-T256I·ILEDSSGNL   | 9     | 15    |
| >TP53-T256I·TLEDSSGNLL  | 23    | >TP53-T256I·ILEDSSGNLL  | 9     | 14    |
| >TP53-T256I·ITLEDSSGNLL | 1773  | >TP53-T256I·IILEDSSGNLL | 321   | 1452  |
| >TP53-T256I·ITLEDSSGNL  | 495   | >TP53-T256I·IILEDSSGNL  | 252   | 243   |
| >TP53-T256I·ITLEDSSGNLL | 536   | >TP53-T256I·IILEDSSGNLL | 149   | 387   |
| >TP53-T256I·ITLEDSSGNL  | 471   | >TP53-T256I·IILEDSSGNL  | 168   | 303   |
| >TP53-T256I·ITLEDSSGNL  | 371   | >TP53-T256I·IILEDSSGNL  | 361   | 10    |
| >TP53-T256I·ITLEDSSGNLL | 270   | >TP53-T256I·IILEDSSGNLL | 92    | 178   |
| >TP53-T256I·ITLEDSSGNL  | 302   | >TP53-T256I·IILEDSSGNL  | 68    | 234   |
| >TP53-T256I·ITLEDSSGNLL | 339   | >TP53-T256I·IILEDSSGNLL | 76    | 263   |
| >TP53-T256I·ITLEDSSGNL  | 1372  | >TP53-T256I·IILEDSSGNL  | 237   | 1135  |
| >TP53-T256I·ITLEDSSGNLL | 1053  | >TP53-T256I·IILEDSSGNLL | 205   | 848   |
| >TP53-T256I·ITLEDSSGNL  | 1829  | >TP53-T256I·IILEDSSGNL  | 387   | 1442  |
| >TP53-T256I·ITLEDSSGNLL | 1648  | >TP53-T256I·IILEDSSGNLL | 290   | 1358  |
| >TP53-T256I·ITLEDSSGNL  | 3672  | >TP53-T256I·IILEDSSGNL  | 121   | 3551  |
| >TP53-T256I·ITLEDSSGNLL | 3520  | >TP53-T256I·IILEDSSGNLL | 225   | 3295  |
| >TP53-T256I·ITLEDSSGNL  | 3363  | >TP53-T256I·IILEDSSGNL  | 111   | 3252  |
| >TP53-T256I·ITLEDSSGNLL | 2830  | >TP53-T256I·IILEDSSGNLL | 88    | 2742  |
| >TP53-T256I·ITLEDSSGNL  | 137   | >TP53-T256I·IILEDSSGNL  | 553   | 416   |
| >TP53-T256I·ITLEDSSGNLL | 354   | >TP53-T256I·IILEDSSGNLL | 1449  | 1095  |
| >TP53-T256I·ITLEDSSGNL  | 6     | >TP53-T256I·IILEDSSGNL  | 984   | 978   |
| >TP53-T256I·ITLEDSSGNLL | 18    | >TP53-T256I·IILEDSSGNLL | 3448  | 3430  |
| >TP53-T256I·ITLEDSSGNLL | 259   | >TP53-T256I·IILEDSSGNLL | 12132 | 11873 |
| >TP53-T256I·ITLEDSSGNL  | 341   | >TP53-T256I·IILEDSSGNL  | 13331 | 12990 |
| >TP53-T256I·ITLEDSSGNLL | 30    | >TP53-T256I·IILEDSSGNLL | 1181  | 1151  |
| >TP53-T256I·MNRRPILTIIT | 1029  | >TP53-T256I·MNRRPILTIIT | 35    | 994   |
| >TP53-T256I·RPILTIITL   | 104   | >TP53-T256I·RPILTIITL   | 422   | 318   |
| >TP53-T256I·RPILTIIT    | 1023  | >TP53-T256I·RPILTIIT    | 73    | 950   |
| >TP53-T256I·RPILTIITL   | 34    | >TP53-T256I·RPILTIITL   | 36    | 2     |
| >TP53-T256I·RPILTIITL   | 391   | >TP53-T256I·RPILTIITL   | 1137  | 746   |
| >TP53-T256I·RPILTIITL   | 66    | >TP53-T256I·RPILTIITL   | 74    | 8     |
| >TP53-T256I·RPILTIIT    | 28722 | >TP53-T256I·RPILTIIT    | 187   | 28535 |
| >TP53-T256I·RPILTIITL   | 89    | >TP53-T256I·RPILTIITL   | 909   | 820   |
| >TP53-T256I·RRPILTIIT   | 2370  | >TP53-T256I·RRPILTIIT   | 228   | 2142  |
| >TP53-T256I·RRPILTIITL  | 14    | >TP53-T256I·RRPILTIITL  | 14    | 0     |
| >TP53-T256I·RRPILTIITL  | 492   | >TP53-T256I·RRPILTIITL  | 201   | 291   |
| >TP53-T256I·RRPILTIIT   | 86    | >TP53-T256I·RRPILTIIT   | 30    | 56    |
| >TP53-T256I·RRPILTIITL  | 16    | >TP53-T256I·RRPILTIITL  | 16    | 0     |

|                         |      |                         |       |       |
|-------------------------|------|-------------------------|-------|-------|
| >TP53-T256I-RRPILTIITLE | 129  | >TP53-T256I-RRPILTIIILE | 112   | 17    |
| >TP53-T256I-RRPILTIIT   | 329  | >TP53-T256I-RRPILTIIII  | 14    | 315   |
| >TP53-T256I-RRPILTIITL  | 14   | >TP53-T256I-RRPILTIIIL  | 13    | 1     |
| >TP53-T256I-RRPILTIITLE | 467  | >TP53-T256I-RRPILTIIILE | 308   | 159   |
| >TP53-T256I-NRRPILTIITL | 50   | >TP53-T256I-NRRPILTIIIL | 65    | 15    |
| >TP53-T256I-NRRPILTIIT  | 876  | >TP53-T256I-NRRPILTIIII | 235   | 641   |
| >TP53-T256I-NRRPILTIITL | 12   | >TP53-T256I-NRRPILTIIIL | 17    | 5     |
| >TP53-T256K TLEDSSGNL   | 62   | >TP53-T256K KLEDSSGNL   | 30    | 32    |
| >TP53-T256K TLEDSSGNLL  | 133  | >TP53-T256K KLEDSSGNLL  | 74    | 59    |
| >TP53-T256K TLEDSSGNL   | 513  | >TP53-T256K KLEDSSGNL   | 220   | 293   |
| >TP53-T256K TLEDSSGNL   | 1522 | >TP53-T256K KLEDSSGNL   | 320   | 1202  |
| >TP53-T256K TLEDSSGNLL  | 1674 | >TP53-T256K KLEDSSGNLL  | 392   | 1282  |
| >TP53-T256K TLEDSSGNL   | 947  | >TP53-T256K KLEDSSGNL   | 104   | 843   |
| >TP53-T256K TLEDSSGNLL  | 736  | >TP53-T256K KLEDSSGNLL  | 97    | 639   |
| >TP53-T256K TLEDSSGNL   | 24   | >TP53-T256K KLEDSSGNL   | 15    | 9     |
| >TP53-T256K TLEDSSGNLL  | 23   | >TP53-T256K KLEDSSGNLL  | 17    | 6     |
| >TP53-T256K ITLEDSSGNL  | 495  | >TP53-T256K IKLEDSSGNL  | 8902  | 8407  |
| >TP53-T256K ITLEDSSGNL  | 471  | >TP53-T256K IKLEDSSGNL  | 12202 | 11731 |
| >TP53-T256K ITLEDSSGNL  | 371  | >TP53-T256K IKLEDSSGNL  | 7246  | 6875  |
| >TP53-T256K ITLEDSSGNLL | 270  | >TP53-T256K IKLEDSSGNLL | 2862  | 2592  |
| >TP53-T256K ITLEDSSGNL  | 302  | >TP53-T256K IKLEDSSGNL  | 7386  | 7084  |
| >TP53-T256K ITLEDSSGNLL | 339  | >TP53-T256K IKLEDSSGNLL | 7516  | 7177  |
| >TP53-T256K ITLEDSSGNL  | 137  | >TP53-T256K IKLEDSSGNL  | 16522 | 16385 |
| >TP53-T256K ITLEDSSGNLL | 354  | >TP53-T256K IKLEDSSGNLL | 18515 | 18161 |
| >TP53-T256K ITLEDSSGNL  | 2256 | >TP53-T256K IKLEDSSGNL  | 47    | 2209  |
| >TP53-T256K ITLEDSSGNLL | 1117 | >TP53-T256K IKLEDSSGNLL | 23    | 1094  |
| >TP53-T256K ITLEDSSGNL  | 6    | >TP53-T256K IKLEDSSGNL  | 14629 | 14623 |
| >TP53-T256K ITLEDSSGNLL | 18   | >TP53-T256K IKLEDSSGNLL | 18044 | 18026 |
| >TP53-T256K ITLEDSSGNL  | 259  | >TP53-T256K IKLEDSSGNL  | 27126 | 26867 |
| >TP53-T256K ITLEDSSGNL  | 341  | >TP53-T256K IKLEDSSGNL  | 21933 | 21592 |
| >TP53-T256K ITLEDSSGNLL | 30   | >TP53-T256K IKLEDSSGNLL | 3669  | 3639  |
| >TP53-T256K MNRRPILTIIT | 1029 | >TP53-T256K MNRRPILTIIK | 6     | 1023  |
| >TP53-T256K RPILTIITL   | 104  | >TP53-T256K RPILTIIKL   | 185   | 81    |
| >TP53-T256K RPILTIITL   | 34   | >TP53-T256K RPILTIIKL   | 115   | 81    |
| >TP53-T256K RPILTIITL   | 391  | >TP53-T256K RPILTIIKL   | 2744  | 2353  |
| >TP53-T256K RPILTIITL   | 66   | >TP53-T256K RPILTIIKL   | 854   | 788   |
| >TP53-T256K RPILTIITL   | 89   | >TP53-T256K RPILTIIKL   | 1056  | 967   |
| >TP53-T256K RRPILTIIT   | 2370 | >TP53-T256K RRPILTIIK   | 148   | 2222  |
| >TP53-T256K RRPILTIITL  | 14   | >TP53-T256K RRPILTIIKL  | 13    | 1     |
| >TP53-T256K RRPILTIITL  | 492  | >TP53-T256K RRPILTIIKL  | 660   | 168   |
| >TP53-T256K RRPILTIIT   | 86   | >TP53-T256K RRPILTIIK   | 106   | 20    |
| >TP53-T256K RRPILTIITL  | 16   | >TP53-T256K RRPILTIIKL  | 21    | 5     |
| >TP53-T256K RRPILTIITLE | 129  | >TP53-T256K RRPILTIIKLE | 211   | 82    |

|                         |       |                         |       |       |
|-------------------------|-------|-------------------------|-------|-------|
| >TP53-T256K RRPILTIIT   | 329   | >TP53-T256K RRPILTIIK   | 24    | 305   |
| >TP53-T256K RRPILTIITL  | 14    | >TP53-T256K RRPILTIIKL  | 17    | 3     |
| >TP53-T256K RRPILTIITLE | 467   | >TP53-T256K RRPILTIIKLE | 634   | 167   |
| >TP53-T256K NRRPILTIITL | 50    | >TP53-T256K NRRPILTIIKL | 90    | 40    |
| >TP53-T256K NRRPILTIITL | 12    | >TP53-T256K NRRPILTIIKL | 21    | 9     |
| >TP53-T256P TLEDSSGNL   | 62    | >TP53-T256P PLEDSSGNL   | 1365  | 1303  |
| >TP53-T256P TLEDSSGNLL  | 133   | >TP53-T256P PLEDSSGNLL  | 2597  | 2464  |
| >TP53-T256P TLEDSSGNL   | 24    | >TP53-T256P PLEDSSGNL   | 213   | 189   |
| >TP53-T256P TLEDSSGNLL  | 23    | >TP53-T256P PLEDSSGNLL  | 137   | 114   |
| >TP53-T256P ITLEDSSGNL  | 28745 | >TP53-T256P IPLEDSSGNL  | 221   | 28524 |
| >TP53-T256P ITLEDSSGNL  | 495   | >TP53-T256P IPLEDSSGNL  | 12187 | 11692 |
| >TP53-T256P ITLEDSSGNL  | 471   | >TP53-T256P IPLEDSSGNL  | 15843 | 15372 |
| >TP53-T256P ITLEDSSGNL  | 371   | >TP53-T256P IPLEDSSGNL  | 9769  | 9398  |
| >TP53-T256P ITLEDSSGNLL | 270   | >TP53-T256P IPLEDSSGNLL | 8901  | 8631  |
| >TP53-T256P ITLEDSSGNL  | 302   | >TP53-T256P IPLEDSSGNL  | 14446 | 14144 |
| >TP53-T256P ITLEDSSGNLL | 339   | >TP53-T256P IPLEDSSGNLL | 14832 | 14493 |
| >TP53-T256P ITLEDSSGNL  | 137   | >TP53-T256P IPLEDSSGNL  | 1592  | 1455  |
| >TP53-T256P ITLEDSSGNLL | 354   | >TP53-T256P IPLEDSSGNLL | 2815  | 2461  |
| >TP53-T256P ITLEDSSGNLL | 17563 | >TP53-T256P IPLEDSSGNLL | 193   | 17370 |
| >TP53-T256P ITLEDSSGNL  | 6     | >TP53-T256P IPLEDSSGNL  | 12257 | 12251 |
| >TP53-T256P ITLEDSSGNLL | 18    | >TP53-T256P IPLEDSSGNLL | 14453 | 14435 |
| >TP53-T256P ITLEDSSGNLL | 11833 | >TP53-T256P IPLEDSSGNLL | 435   | 11398 |
| >TP53-T256P ITLEDSSGNLL | 17941 | >TP53-T256P IPLEDSSGNLL | 423   | 17518 |
| >TP53-T256P ITLEDSSGNLL | 20872 | >TP53-T256P IPLEDSSGNLL | 251   | 20621 |
| >TP53-T256P ITLEDSSGNLL | 259   | >TP53-T256P IPLEDSSGNLL | 12871 | 12612 |
| >TP53-T256P ITLEDSSGNL  | 341   | >TP53-T256P IPLEDSSGNL  | 25222 | 24881 |
| >TP53-T256P ITLEDSSGNLL | 30    | >TP53-T256P IPLEDSSGNLL | 1962  | 1932  |
| >TP53-T256P ITLEDSSGNL  | 15715 | >TP53-T256P IPLEDSSGNL  | 498   | 15217 |
| >TP53-T256P RPILTIITL   | 104   | >TP53-T256P RPILTIIPL   | 898   | 794   |
| >TP53-T256P RPILTIITL   | 34    | >TP53-T256P RPILTIIPL   | 13    | 21    |
| >TP53-T256P RPILTIITL   | 391   | >TP53-T256P RPILTIIPL   | 191   | 200   |
| >TP53-T256P RPILTIITL   | 66    | >TP53-T256P RPILTIIPL   | 40    | 26    |
| >TP53-T256P RPILTIITL   | 89    | >TP53-T256P RPILTIIPL   | 174   | 85    |
| >TP53-T256P RRPILTIITL  | 14    | >TP53-T256P RRPILTIIPL  | 17    | 3     |
| >TP53-T256P RRPILTIITL  | 492   | >TP53-T256P RRPILTIIPL  | 499   | 7     |
| >TP53-T256P RRPILTIIT   | 86    | >TP53-T256P RRPILTIIP   | 209   | 123   |
| >TP53-T256P RRPILTIITL  | 16    | >TP53-T256P RRPILTIIPL  | 21    | 5     |
| >TP53-T256P RRPILTIITLE | 129   | >TP53-T256P RRPILTIIPLE | 128   | 1     |
| >TP53-T256P RRPILTIIT   | 329   | >TP53-T256P RRPILTIIP   | 561   | 232   |
| >TP53-T256P RRPILTIITL  | 14    | >TP53-T256P RRPILTIIPL  | 18    | 4     |
| >TP53-T256P RRPILTIITLE | 467   | >TP53-T256P RRPILTIIPLE | 306   | 161   |
| >TP53-T256P NRRPILTIITL | 701   | >TP53-T256P NRRPILTIIPL | 447   | 254   |
| >TP53-T256P NRRPILTIITL | 50    | >TP53-T256P NRRPILTIIPL | 85    | 35    |

|                         |      |                         |      |      |
|-------------------------|------|-------------------------|------|------|
| >TP53-T256P NRRPILTIITL | 12   | >TP53-T256P NRRPILTIIPL | 23   | 11   |
| >TP53-T256S TLEDSSGNL   | 62   | >TP53-T256S SLEDSSGNL   | 34   | 28   |
| >TP53-T256S TLEDSSGNLL  | 133  | >TP53-T256S SLEDSSGNLL  | 61   | 72   |
| >TP53-T256S TLEDSSGNL   | 513  | >TP53-T256S SLEDSSGNL   | 257  | 256  |
| >TP53-T256S TLEDSSGNL   | 1522 | >TP53-T256S SLEDSSGNL   | 284  | 1238 |
| >TP53-T256S TLEDSSGNLL  | 1674 | >TP53-T256S SLEDSSGNLL  | 331  | 1343 |
| >TP53-T256S TLEDSSGNL   | 947  | >TP53-T256S SLEDSSGNL   | 188  | 759  |
| >TP53-T256S TLEDSSGNLL  | 736  | >TP53-T256S SLEDSSGNLL  | 167  | 569  |
| >TP53-T256S TLEDSSGNL   | 3341 | >TP53-T256S SLEDSSGNL   | 456  | 2885 |
| >TP53-T256S TLEDSSGNLL  | 3638 | >TP53-T256S SLEDSSGNLL  | 458  | 3180 |
| >TP53-T256S TLEDSSGNL   | 24   | >TP53-T256S SLEDSSGNL   | 8    | 16   |
| >TP53-T256S TLEDSSGNLL  | 23   | >TP53-T256S SLEDSSGNLL  | 9    | 14   |
| >TP53-T256S ITLEDSSGNL  | 495  | >TP53-T256S ISLEDSSGNL  | 2640 | 2145 |
| >TP53-T256S ITLEDSSGNL  | 471  | >TP53-T256S ISLEDSSGNL  | 4835 | 4364 |
| >TP53-T256S ITLEDSSGNL  | 371  | >TP53-T256S ISLEDSSGNL  | 2962 | 2591 |
| >TP53-T256S ITLEDSSGNLL | 270  | >TP53-T256S ISLEDSSGNLL | 1109 | 839  |
| >TP53-T256S ITLEDSSGNL  | 302  | >TP53-T256S ISLEDSSGNL  | 4851 | 4549 |
| >TP53-T256S ITLEDSSGNLL | 339  | >TP53-T256S ISLEDSSGNLL | 5130 | 4791 |
| >TP53-T256S ITLEDSSGNL  | 137  | >TP53-T256S ISLEDSSGNL  | 1852 | 1715 |
| >TP53-T256S ITLEDSSGNLL | 354  | >TP53-T256S ISLEDSSGNLL | 3608 | 3254 |
| >TP53-T256S ITLEDSSGNLL | 1117 | >TP53-T256S ISLEDSSGNLL | 392  | 725  |
| >TP53-T256S ITLEDSSGNL  | 6    | >TP53-T256S ISLEDSSGNL  | 8    | 2    |
| >TP53-T256S ITLEDSSGNLL | 18   | >TP53-T256S ISLEDSSGNLL | 27   | 9    |
| >TP53-T256S ITLEDSSGNLL | 259  | >TP53-T256S ISLEDSSGNLL | 792  | 533  |
| >TP53-T256S ITLEDSSGNL  | 341  | >TP53-T256S ISLEDSSGNL  | 1165 | 824  |
| >TP53-T256S ITLEDSSGNLL | 30   | >TP53-T256S ISLEDSSGNLL | 76   | 46   |
| >TP53-T256S MNRRPILTIIT | 1029 | >TP53-T256S MNRRPILTIIS | 468  | 561  |
| >TP53-T256S IITLEDSSGNL | 1406 | >TP53-T256S IISLEDSSGNL | 267  | 1139 |
| >TP53-T256S RPILTIITL   | 104  | >TP53-T256S RPILTIISL   | 77   | 27   |
| >TP53-T256S RPILTIITL   | 34   | >TP53-T256S RPILTIISL   | 18   | 16   |
| >TP53-T256S RPILTIITL   | 391  | >TP53-T256S RPILTIISL   | 905  | 514  |
| >TP53-T256S RPILTIITL   | 66   | >TP53-T256S RPILTIISL   | 75   | 9    |
| >TP53-T256S RPILTIITL   | 89   | >TP53-T256S RPILTIISL   | 307  | 218  |
| >TP53-T256S RRPILTIITL  | 14   | >TP53-T256S RRPILTIISL  | 16   | 2    |
| >TP53-T256S RRPILTIITL  | 492  | >TP53-T256S RRPILTIISL  | 653  | 161  |
| >TP53-T256S RRPILTIIT   | 86   | >TP53-T256S RRPILTIIS   | 133  | 47   |
| >TP53-T256S RRPILTIITL  | 16   | >TP53-T256S RRPILTIISL  | 21   | 5    |
| >TP53-T256S RRPILTIITL  | 129  | >TP53-T256S RRPILTIISLE | 131  | 2    |
| >TP53-T256S RRPILTIIT   | 329  | >TP53-T256S RRPILTIIS   | 260  | 69   |
| >TP53-T256S RRPILTIITL  | 14   | >TP53-T256S RRPILTIISL  | 17   | 3    |
| >TP53-T256S RRPILTIITL  | 467  | >TP53-T256S RRPILTIISLE | 264  | 203  |
| >TP53-T256S NRRPILTIITL | 50   | >TP53-T256S NRRPILTIISL | 107  | 57   |
| >TP53-T256S NRRPILTIITL | 12   | >TP53-T256S NRRPILTIISL | 21   | 9    |

|                        |      |                         |       |       |
|------------------------|------|-------------------------|-------|-------|
| >TP53-T284ATEEENLRKKG  | 5020 | >TP53-T284A AEEENLRKKG  | 450   | 4570  |
| >TP53-T284ARTEEENLRK   | 88   | >TP53-T284A RAEENLRK    | 885   | 797   |
| >TP53-T284ARTEEENLRK   | 126  | >TP53-T284A RAEENLRK    | 742   | 616   |
| >TP53-T284ARTEEENLRKK  | 174  | >TP53-T284A RAEENLRKK   | 1029  | 855   |
| >TP53-T284ARTEEENLR    | 242  | >TP53-T284A RAEENLR     | 825   | 583   |
| >TP53-T284ARTEEENLR    | 188  | >TP53-T284A RAEENLR     | 986   | 798   |
| >TP53-T284ARTEEENLR    | 456  | >TP53-T284A RAEENLR     | 714   | 258   |
| >TP53-T284ARRTEEENL    | 791  | >TP53-T284A RRAEEENL    | 441   | 350   |
| >TP53-T284ARRTEEENL    | 171  | >TP53-T284A RRAEEENL    | 150   | 21    |
| >TP53-T284ARRTEEENLR   | 424  | >TP53-T284A RRAEEENLR   | 330   | 94    |
| >TP53-T284ARRTEEENLRK  | 34   | >TP53-T284A RRAEEENLRK  | 38    | 4     |
| >TP53-T284ARRTEEENLRK  | 71   | >TP53-T284A RRAEEENLRK  | 60    | 11    |
| >TP53-T284ARRTEEENL    | 66   | >TP53-T284A RRAEEENL    | 39    | 27    |
| >TP53-T284ARRTEEENLRK  | 383  | >TP53-T284A RRAEEENLRK  | 567   | 184   |
| >TP53-T284ARRTEEENL    | 94   | >TP53-T284A RRAEEENL    | 91    | 3     |
| >TP53-T284ARRTEEENLRK  | 163  | >TP53-T284A RRAEEENLRK  | 233   | 70    |
| >TP53-T284ARRTEEENLRK  | 634  | >TP53-T284A RRAEEENLRK  | 402   | 232   |
| >TP53-T284AGRDRRTEEEN  | 446  | >TP53-T284A GRDRRAEEEN  | 523   | 77    |
| >TP53-T284I RTEEENLRK  | 88   | >TP53-T284I RIEEENLRK   | 236   | 148   |
| >TP53-T284I RTEEENLRK  | 126  | >TP53-T284I RIEEENLRK   | 654   | 528   |
| >TP53-T284I RTEEENLRKK | 174  | >TP53-T284I RIEEENLRKK  | 943   | 769   |
| >TP53-T284I RTEEENLR   | 242  | >TP53-T284I RIEEENLR    | 817   | 575   |
| >TP53-T284I RTEEENLR   | 188  | >TP53-T284I RIEEENLR    | 1026  | 838   |
| >TP53-T284I RTEEENLR   | 456  | >TP53-T284I RIEEENLR    | 131   | 325   |
| >TP53-T284I RRTEEENL   | 791  | >TP53-T284I RRIEEENL    | 321   | 470   |
| >TP53-T284I RRTEEENL   | 171  | >TP53-T284I RRIEEENL    | 98    | 73    |
| >TP53-T284I RRTEEENLR  | 424  | >TP53-T284I RRIEEENLR   | 204   | 220   |
| >TP53-T284I RRTEEENLRK | 34   | >TP53-T284I RRIEEENLRK  | 17    | 17    |
| >TP53-T284I RRTEEENLRK | 71   | >TP53-T284I RRIEEENLRKK | 47    | 24    |
| >TP53-T284I RRTEEENL   | 66   | >TP53-T284I RRIEEENL    | 34    | 32    |
| >TP53-T284I RRTEEENLRK | 383  | >TP53-T284I RRIEEENLRK  | 159   | 224   |
| >TP53-T284I RRTEEENL   | 94   | >TP53-T284I RRIEEENL    | 96    | 2     |
| >TP53-T284I RRTEEENLRK | 163  | >TP53-T284I RRIEEENLRK  | 102   | 61    |
| >TP53-T284I RRTEEENLRK | 634  | >TP53-T284I RRIEEENLRKK | 396   | 238   |
| >TP53-T284I GRDRRTEEEN | 446  | >TP53-T284I GRDRRIEEEN  | 306   | 140   |
| >TP53-T284P RTEEENLRK  | 88   | >TP53-T284P RPEEENLRK   | 18089 | 18001 |
| >TP53-T284P RTEEENLRK  | 126  | >TP53-T284P RPEEENLRK   | 16139 | 16013 |
| >TP53-T284P RTEEENLRKK | 174  | >TP53-T284P RPEEENLRKK  | 16733 | 16559 |
| >TP53-T284P RTEEENLR   | 242  | >TP53-T284P RPEEENLR    | 12299 | 12057 |
| >TP53-T284P RTEEENLR   | 188  | >TP53-T284P RPEEENLR    | 11937 | 11749 |
| >TP53-T284P RTEEENLR   | 456  | >TP53-T284P RPEEENLR    | 546   | 90    |
| >TP53-T284P RRTEEENL   | 171  | >TP53-T284P RRPEEENL    | 1323  | 1152  |
| >TP53-T284P RRTEEENLR  | 424  | >TP53-T284P RRPEEENLR   | 2541  | 2117  |

|                         |      |                         |     |      |
|-------------------------|------|-------------------------|-----|------|
| >TP53-T284P RRTEEEENLRK | 34   | >TP53-T284P RRPEEEENLRK | 142 | 108  |
| >TP53-T284P RRTEEEENLRK | 71   | >TP53-T284P RRPEEEENLRK | 355 | 284  |
| >TP53-T284P RRTEEEENL   | 66   | >TP53-T284P RRPEEEENL   | 395 | 329  |
| >TP53-T284P RRTEEEENLRK | 383  | >TP53-T284P RRPEEEENLRK | 431 | 48   |
| >TP53-T284P RRTEEEENL   | 94   | >TP53-T284P RRPEEEENL   | 664 | 570  |
| >TP53-T284P RRTEEEENLRK | 163  | >TP53-T284P RRPEEEENLRK | 305 | 142  |
| >TP53-T284P GRDRRTEEEEN | 446  | >TP53-T284P GRDRRPEEEEN | 403 | 43   |
| >TP53-T304A TKRALPNNTS  | 1843 | >TP53-T304A AKRALPNNTS  | 370 | 1473 |
| >TP53-T304A STKRALPN    | 100  | >TP53-T304A SAKRALPN    | 549 | 449  |
| >TP53-T304A STKRALPNN   | 60   | >TP53-T304A SAKRALPNN   | 309 | 249  |
| >TP53-T304A STKRALPNNT  | 89   | >TP53-T304A SAKRALPNNT  | 529 | 440  |
| >TP53-T304A STKRALPNNT  | 46   | >TP53-T304A SAKRALPNNT  | 247 | 201  |
| >TP53-T304A EPHHELPPGS  | 3337 | >TP53-T304A EPHHELPPGS  | 307 | 3030 |
| >TP53-T304A PPGSTKRAL   | 8435 | >TP53-T304A PPGSAKRAL   | 120 | 8315 |
| >TP53-T304A PPGSTKRAL   | 44   | >TP53-T304A PPGSAKRAL   | 46  | 2    |
| >TP53-T304A LPPGSTKRAL  | 296  | >TP53-T304A LPPGSAKRAL  | 74  | 222  |
| >TP53-T304A LPPGSTKRAL  | 75   | >TP53-T304A LPPGSAKRAL  | 86  | 11   |
| >TP53-T304A LPPGSTKRA   | 99   | >TP53-T304A LPPGSAKRA   | 120 | 21   |
| >TP53-T304A ELPPGSTKRA  | 98   | >TP53-T304A ELPPGSAKRA  | 127 | 29   |
| >TP53-T304A ELPPGSTKRA  | 151  | >TP53-T304A ELPPGSAKRA  | 142 | 9    |
| >TP53-T304A ELPPGSTKR   | 321  | >TP53-T304A ELPPGSAKR   | 218 | 103  |
| >TP53-T304A HELPPGST    | 2170 | >TP53-T304A HELPPGSA    | 306 | 1864 |
| >TP53-T304A HELPPGSTKR  | 250  | >TP53-T304A HELPPGSAKR  | 190 | 60   |
| >TP53-T304A HELPPGSTKR  | 437  | >TP53-T304A HELPPGSAKR  | 433 | 4    |
| >TP53-T304I TKRALPNNTS  | 1843 | >TP53-T304I IKRALPNNTS! | 261 | 1582 |
| >TP53-T304I STKRALPN    | 100  | >TP53-T304I SIKRALPN    | 522 | 422  |
| >TP53-T304I STKRALPNN   | 60   | >TP53-T304I SIKRALPNN   | 286 | 226  |
| >TP53-T304I STKRALPNNT  | 89   | >TP53-T304I SIKRALPNNT  | 492 | 403  |
| >TP53-T304I STKRALPNNT  | 46   | >TP53-T304I SIKRALPNNT! | 230 | 184  |
| >TP53-T304I PPGSTKRAL   | 44   | >TP53-T304I PPGSIKRAL   | 125 | 81   |
| >TP53-T304I LPPGSTKRAL  | 296  | >TP53-T304I LPPGSIKRAL  | 258 | 38   |
| >TP53-T304I LPPGSTKRAL  | 75   | >TP53-T304I LPPGSIKRAL  | 71  | 4    |
| >TP53-T304I LPPGSTKRA   | 99   | >TP53-T304I LPPGSIKRA   | 80  | 19   |
| >TP53-T304I LPPGSTKRAL  | 592  | >TP53-T304I LPPGSIKRAL  | 273 | 319  |
| >TP53-T304I ELPPGSTKRA  | 98   | >TP53-T304I ELPPGSIKRA  | 67  | 31   |
| >TP53-T304I ELPPGSTKRA  | 151  | >TP53-T304I ELPPGSIKRAL | 157 | 6    |
| >TP53-T304I ELPPGSTKR   | 321  | >TP53-T304I ELPPGSIKR   | 328 | 7    |
| >TP53-T304I HELPPGST    | 796  | >TP53-T304I HELPPGSI    | 15  | 781  |
| >TP53-T304I HELPPGST    | 8746 | >TP53-T304I HELPPGSI    | 133 | 8613 |
| >TP53-T304I HELPPGST    | 747  | >TP53-T304I HELPPGSI    | 315 | 432  |
| >TP53-T304I HELPPGSTKR  | 250  | >TP53-T304I HELPPGSIKR/ | 196 | 54   |
| >TP53-T304I HELPPGST    | 9258 | >TP53-T304I HELPPGSI    | 30  | 9228 |
| >TP53-T304I HELPPGSTKR  | 437  | >TP53-T304I HELPPGSIKR  | 260 | 177  |

|                        |       |                        |      |       |
|------------------------|-------|------------------------|------|-------|
| >TP53-T304I-HELPPGST   | 36597 | >TP53-T304I-HELPPGSI   | 334  | 36263 |
| >TP53-T304MSTKRALPN    | 100   | >TP53-T304MSTKRALPN    | 4483 | 4383  |
| >TP53-T304MSTKRALPNN   | 60    | >TP53-T304MSTKRALPNN   | 2925 | 2865  |
| >TP53-T304MSTKRALPNNT  | 89    | >TP53-T304MSTKRALPNNT  | 4465 | 4376  |
| >TP53-T304MSTKRALPNNT  | 46    | >TP53-T304MSTKRALPNNT  | 2929 | 2883  |
| >TP53-T304MPPGSTKRAL   | 44    | >TP53-T304MPPGSNKRAL   | 51   | 7     |
| >TP53-T304MLPPGSTKRAL  | 296   | >TP53-T304MLPPGSNKRAL  | 188  | 108   |
| >TP53-T304MLPPGSTKRAL  | 75    | >TP53-T304MLPPGSNKRAL  | 102  | 27    |
| >TP53-T304MLPPGSTKRA   | 99    | >TP53-T304MLPPGSNKRA   | 119  | 20    |
| >TP53-T304MELPPGSTKRA  | 98    | >TP53-T304MELPPGSNKRA  | 248  | 150   |
| >TP53-T304MELPPGSTKRA  | 151   | >TP53-T304MELPPGSNKRA  | 189  | 38    |
| >TP53-T304MELPPGSTKR   | 321   | >TP53-T304MELPPGSNKR   | 378  | 57    |
| >TP53-T304MHELPPGSTKR  | 250   | >TP53-T304MHELPPGSNKR  | 294  | 44    |
| >TP53-T304MHELPPGSTKR  | 437   | >TP53-T304MHELPPGSNKR  | 477  | 40    |
| >TP53-T312ATSSSPQPK    | 326   | >TP53-T312ATSSSPQPK    | 244  | 82    |
| >TP53-T312ATSSSPQPKK   | 136   | >TP53-T312ATSSSPQPKK   | 109  | 27    |
| >TP53-T312ATSSSPQPK    | 20    | >TP53-T312ATSSSPQPK    | 22   | 2     |
| >TP53-T312ATSSSPQPKK   | 33    | >TP53-T312ATSSSPQPKK   | 36   | 3     |
| >TP53-T312ATSSSPQPKKK  | 60    | >TP53-T312ATSSSPQPKKK  | 35   | 25    |
| >TP53-T312ATSSSPQPK    | 262   | >TP53-T312ATSSSPQPK    | 31   | 231   |
| >TP53-T312ATSSSPQPKK   | 733   | >TP53-T312ATSSSPQPKK   | 74   | 659   |
| >TP53-T312ATSSSPQPKKK  | 1717  | >TP53-T312ATSSSPQPKKK  | 201  | 1516  |
| >TP53-T312ATSSSPQPK    | 121   | >TP53-T312ATSSSPQPK    | 2242 | 2121  |
| >TP53-T312ATSSSPQPKK   | 125   | >TP53-T312ATSSSPQPKK   | 2066 | 1941  |
| >TP53-T312ATSSSPQPKKK  | 208   | >TP53-T312ATSSSPQPKKK  | 1483 | 1275  |
| >TP53-T312ATSSSPQPK    | 794   | >TP53-T312ATSSSPQPK    | 198  | 596   |
| >TP53-T312ATSSSPQPKK   | 724   | >TP53-T312ATSSSPQPKK   | 169  | 555   |
| >TP53-T312ATSSSPQPKKK  | 637   | >TP53-T312ATSSSPQPKKK  | 154  | 483   |
| >TP53-T312ANTSSSPQPK   | 58    | >TP53-T312ANTSSSPQPK   | 444  | 386   |
| >TP53-T312ANTSSSPQPKK  | 41    | >TP53-T312ANTSSSPQPKK  | 259  | 218   |
| >TP53-T312ANTSSSPQPKK  | 251   | >TP53-T312ANTSSSPQPKK  | 2313 | 2062  |
| >TP53-T312ANTSSSPQPK   | 339   | >TP53-T312ANTSSSPQPK   | 2061 | 1722  |
| >TP53-T312ANTSSSPQPK   | 37    | >TP53-T312ANTSSSPQPK   | 136  | 99    |
| >TP53-T312ANTSSSPQPKK  | 28    | >TP53-T312ANTSSSPQPKK  | 119  | 91    |
| >TP53-T312ANTSSSPQPKK  | 95    | >TP53-T312ANTSSSPQPKK  | 334  | 239   |
| >TP53-T312ANNNTSSSPQPK | 1038  | >TP53-T312ANNNTSSSPQPK | 494  | 544   |
| >TP53-T312ALPNNTSSS    | 383   | >TP53-T312ALPNNTSSS    | 277  | 106   |
| >TP53-T312ALPNNTSSS    | 301   | >TP53-T312ALPNNTSSS    | 363  | 62    |
| >TP53-T312ALPNNTSSSPQ  | 260   | >TP53-T312ALPNNTSSSPQ  | 262  | 2     |
| >TP53-T312ALPNNTSSS    | 301   | >TP53-T312ALPNNTSSS    | 681  | 380   |
| >TP53-T312ALPNNTSSSP   | 111   | >TP53-T312ALPNNTSSSP   | 147  | 36    |
| >TP53-T312ARALPNNTSS   | 2264  | >TP53-T312ARALPNNTSS   | 342  | 1922  |
| >TP53-T312ARALPNNTSSS  | 1169  | >TP53-T312ARALPNNTSSS  | 477  | 692   |



|                         |       |                          |      |       |
|-------------------------|-------|--------------------------|------|-------|
| >TP53-T312A STKRALPNNT  | 89    | >TP53-T312A STKRALPNNA   | 9    | 80    |
| >TP53-T312A STKRALPNNT  | 46    | >TP53-T312A STKRALPNNA   | 47   | 1     |
| >TP53-T312I- TSSSPQPK   | 326   | >TP53-T312I- ISSSPQPK    | 157  | 169   |
| >TP53-T312I- TSSSPQPKK  | 136   | >TP53-T312I- ISSSPQPKK   | 79   | 57    |
| >TP53-T312I- TSSSPQPK   | 20    | >TP53-T312I- ISSSPQPK    | 30   | 10    |
| >TP53-T312I- TSSSPQPKK  | 33    | >TP53-T312I- ISSSPQPKK   | 60   | 27    |
| >TP53-T312I- TSSSPQPKKK | 60    | >TP53-T312I- ISSSPQPKKK  | 92   | 32    |
| >TP53-T312I- TSSSPQPK   | 262   | >TP53-T312I- ISSSPQPK    | 125  | 137   |
| >TP53-T312I- TSSSPQPKK  | 733   | >TP53-T312I- ISSSPQPKK   | 340  | 393   |
| >TP53-T312I- TSSSPQPK   | 121   | >TP53-T312I- ISSSPQPK    | 421  | 300   |
| >TP53-T312I- TSSSPQPKK  | 125   | >TP53-T312I- ISSSPQPKK   | 413  | 288   |
| >TP53-T312I- TSSSPQPKKK | 208   | >TP53-T312I- ISSSPQPKKK  | 813  | 605   |
| >TP53-T312I- NTSSSPQPK  | 58    | >TP53-T312I- NISSSPQPK   | 137  | 79    |
| >TP53-T312I- NTSSSPQPKK | 41    | >TP53-T312I- NISSSPQPKK  | 105  | 64    |
| >TP53-T312I- NTSSSPQPKK | 251   | >TP53-T312I- NISSSPQPKKI | 765  | 514   |
| >TP53-T312I- NTSSSPQPK  | 339   | >TP53-T312I- NISSSPQPK   | 1927 | 1588  |
| >TP53-T312I- NTSSSPQPK  | 37    | >TP53-T312I- NISSSPQPK   | 218  | 181   |
| >TP53-T312I- NTSSSPQPKK | 28    | >TP53-T312I- NISSSPQPKK  | 71   | 43    |
| >TP53-T312I- NTSSSPQPKK | 95    | >TP53-T312I- NISSSPQPKKI | 543  | 448   |
| >TP53-T312I- GSTKRALPNN | 36821 | >TP53-T312I- GSTKRALPNN  | 438  | 36383 |
| >TP53-T312I- LPNNTSSS   | 383   | >TP53-T312I- LPNNISSS    | 485  | 102   |
| >TP53-T312I- LPNNTSSS   | 301   | >TP53-T312I- LPNNISSS    | 206  | 95    |
| >TP53-T312I- LPNNTSSSP  | 568   | >TP53-T312I- LPNNISSSP   | 344  | 224   |
| >TP53-T312I- LPNNTSSSPQ | 260   | >TP53-T312I- LPNNISSSPQI | 201  | 59    |
| >TP53-T312I- ALPNNTSSS  | 534   | >TP53-T312I- ALPNNISSS   | 315  | 219   |
| >TP53-T312I- ALPNNTSSS  | 1876  | >TP53-T312I- ALPNNISSS   | 371  | 1505  |
| >TP53-T312I- ALPNNTSS   | 663   | >TP53-T312I- ALPNNISS    | 490  | 173   |
| >TP53-T312I- ALPNNTSSS  | 301   | >TP53-T312I- ALPNNISSS   | 99   | 202   |
| >TP53-T312I- ALPNNTSSSP | 111   | >TP53-T312I- ALPNNISSSPC | 73   | 38    |
| >TP53-T312I- RALPNNTSS  | 2264  | >TP53-T312I- RALPNNISS   | 217  | 2047  |
| >TP53-T312I- KRALPNNT   | 4271  | >TP53-T312I- KRALPNNI    | 478  | 3793  |
| >TP53-T312I- KRALPNNT   | 597   | >TP53-T312I- KRALPNNI    | 122  | 475   |
| >TP53-T312I- TKRALPNNT  | 4892  | >TP53-T312I- TKRALPNNI   | 259  | 4633  |
| >TP53-T312I- STKRALPNNT | 89    | >TP53-T312I- STKRALPNNI  | 9    | 80    |
| >TP53-T312I- STKRALPNNT | 46    | >TP53-T312I- STKRALPNNI! | 62   | 16    |
| >TP53-T312I- STKRALPNNT | 1231  | >TP53-T312I- STKRALPNNI  | 114  | 1117  |
| >TP53-T312S TSSSPQPK    | 326   | >TP53-T312S SSSSPQPK     | 295  | 31    |
| >TP53-T312S TSSSPQPKK   | 136   | >TP53-T312S SSSSPQPKK    | 127  | 9     |
| >TP53-T312S TSSSPQPK    | 20    | >TP53-T312S SSSSPQPK     | 15   | 5     |
| >TP53-T312S TSSSPQPKK   | 33    | >TP53-T312S SSSSPQPKK    | 24   | 9     |
| >TP53-T312S TSSSPQPKKK  | 60    | >TP53-T312S SSSSPQPKKK   | 32   | 28    |
| >TP53-T312S TSSSPQPK    | 262   | >TP53-T312S SSSSPQPK     | 49   | 213   |
| >TP53-T312S TSSSPQPKK   | 733   | >TP53-T312S SSSSPQPKK    | 125  | 608   |

|                         |      |                         |      |      |
|-------------------------|------|-------------------------|------|------|
| >TP53-T312S TSSSPQPKKK  | 1717 | >TP53-T312S SSSSPQPKKK  | 347  | 1370 |
| >TP53-T312S TSSSPQPK    | 121  | >TP53-T312S SSSSPQPK    | 394  | 273  |
| >TP53-T312S TSSSPQPKK   | 125  | >TP53-T312S SSSSPQPKK   | 423  | 298  |
| >TP53-T312S TSSSPQPKKK  | 208  | >TP53-T312S SSSSPQPKKK  | 408  | 200  |
| >TP53-T312S TSSSPQPK    | 794  | >TP53-T312S SSSSPQPK    | 255  | 539  |
| >TP53-T312S TSSSPQPKK   | 724  | >TP53-T312S SSSSPQPKK   | 215  | 509  |
| >TP53-T312S TSSSPQPKKK  | 637  | >TP53-T312S SSSSPQPKKK  | 186  | 451  |
| >TP53-T312S NTSSSPQPK   | 58   | >TP53-T312S NSSSPQPK    | 96   | 38   |
| >TP53-T312S NTSSSPQPKK  | 41   | >TP53-T312S NSSSPQPKK   | 73   | 32   |
| >TP53-T312S NTSSSPQPKK  | 251  | >TP53-T312S NSSSPQPKK   | 617  | 366  |
| >TP53-T312S NTSSSPQPK   | 339  | >TP53-T312S NSSSPQPK    | 789  | 450  |
| >TP53-T312S NTSSSPQPK   | 37   | >TP53-T312S NSSSPQPK    | 174  | 137  |
| >TP53-T312S NTSSSPQPKK  | 28   | >TP53-T312S NSSSPQPKK   | 91   | 63   |
| >TP53-T312S NTSSSPQPKK  | 95   | >TP53-T312S NSSSPQPKK   | 435  | 340  |
| >TP53-T312S LPNNTSSS    | 383  | >TP53-T312S LPNNTSSS    | 329  | 54   |
| >TP53-T312S LPNNTSSS    | 301  | >TP53-T312S LPNNTSSS    | 495  | 194  |
| >TP53-T312S LPNNTSSSPQ  | 260  | >TP53-T312S LPNNTSSSPQ  | 433  | 173  |
| >TP53-T312S ALPNNTSSS   | 301  | >TP53-T312S ALPNNTSSS   | 533  | 232  |
| >TP53-T312S ALPNNTSSSP  | 111  | >TP53-T312S ALPNNTSSSP  | 136  | 25   |
| >TP53-T312S STKRALPNNT  | 89   | >TP53-T312S STKRALPNNS  | 44   | 45   |
| >TP53-T312S STKRALPNNT  | 46   | >TP53-T312S STKRALPNNS  | 36   | 10   |
| >TP53-T329I TLQIRGRER   | 238  | >TP53-T329I ILQIRGRER   | 176  | 62   |
| >TP53-T329I TLQIRGRERF  | 974  | >TP53-T329I ILQIRGRERF  | 401  | 573  |
| >TP53-T329I FTLQIRGRERI | 169  | >TP53-T329I FILQIRGRERF | 971  | 802  |
| >TP53-T329I FTLQIRGRERI | 289  | >TP53-T329I FILQIRGRERF | 1992 | 1703 |
| >TP53-T329I FTLQIRGRER  | 50   | >TP53-T329I FILQIRGRER  | 48   | 2    |
| >TP53-T329I FTLQIRGR    | 174  | >TP53-T329I FILQIRGR    | 455  | 281  |
| >TP53-T329I FTLQIRGRER  | 431  | >TP53-T329I FILQIRGRER  | 303  | 128  |
| >TP53-T329I FTLQIRGR    | 25   | >TP53-T329I FILQIRGR    | 96   | 71   |
| >TP53-T329I FTLQIRGRER  | 86   | >TP53-T329I FILQIRGRER  | 310  | 224  |
| >TP53-T329I FTLQIRGRERI | 8    | >TP53-T329I FILQIRGRERF | 2564 | 2556 |
| >TP53-T329I FTLQIRGRERI | 289  | >TP53-T329I FILQIRGRERF | 5389 | 5100 |
| >TP53-T329I FTLQIRGRERI | 8    | >TP53-T329I FILQIRGRERF | 240  | 232  |
| >TP53-T329I FTLQIRGR    | 422  | >TP53-T329I FILQIRGR    | 156  | 266  |
| >TP53-T329I FTLQIRGRER  | 1841 | >TP53-T329I FILQIRGRER  | 459  | 1382 |
| >TP53-T329I YFTLQIRGR   | 680  | >TP53-T329I YFILQIRGR   | 414  | 266  |
| >TP53-T329I YFTLQIRGREF | 337  | >TP53-T329I YFILQIRGRER | 201  | 136  |
| >TP53-T329I YFTLQIRGR   | 129  | >TP53-T329I YFILQIRGR   | 113  | 16   |
| >TP53-T329I YFTLQIRGREF | 126  | >TP53-T329I YFILQIRGRER | 115  | 11   |
| >TP53-T329I YFTLQIRGR   | 788  | >TP53-T329I YFILQIRGR   | 483  | 305  |
| >TP53-T329I YFTLQIRGR   | 152  | >TP53-T329I YFILQIRGR   | 130  | 22   |
| >TP53-T329I YFTLQIRGREF | 524  | >TP53-T329I YFILQIRGRER | 369  | 155  |
| >TP53-T329I EYFTLQIR    | 335  | >TP53-T329I EYFILQIR    | 231  | 104  |

|                         |       |                          |      |       |
|-------------------------|-------|--------------------------|------|-------|
| >TP53-T329I-EYFTLQIRGR  | 546   | >TP53-T329I-EYFILQIRGR   | 442  | 104   |
| >TP53-T329I-EYFTLQIR    | 31    | >TP53-T329I-EYFILQIR     | 25   | 6     |
| >TP53-T329I-EYFTLQIRGR  | 315   | >TP53-T329I-EYFILQIRGR   | 191  | 124   |
| >TP53-T329I-EYFTLQIR    | 26    | >TP53-T329I-EYFILQIR     | 41   | 15    |
| >TP53-T329I-EYFTLQIR    | 19    | >TP53-T329I-EYFILQIR     | 21   | 2     |
| >TP53-T329I-EYFTLQIRGR  | 20    | >TP53-T329I-EYFILQIRGR   | 24   | 4     |
| >TP53-T329I-GEYFTLQI    | 102   | >TP53-T329I-GEYFILQI     | 148  | 46    |
| >TP53-T329I-GEYFTLQI    | 44    | >TP53-T329I-GEYFILQI     | 32   | 12    |
| >TP53-T329I-GEYFTLQI    | 43    | >TP53-T329I-GEYFILQI     | 32   | 11    |
| >TP53-T329I-GEYFTLQI    | 744   | >TP53-T329I-GEYFILQI     | 448  | 296   |
| >TP53-T329I-GEYFTLQI    | 11    | >TP53-T329I-GEYFILQI     | 5    | 6     |
| >TP53-T329I-GEYFTLQIR   | 190   | >TP53-T329I-GEYFILQIR    | 82   | 108   |
| >TP53-T329I-GEYFTLQIRGI | 512   | >TP53-T329I-GEYFILQIRGR  | 270  | 242   |
| >TP53-T329I-LDGEYFTLQI  | 87    | >TP53-T329I-LDGEYFILQI   | 157  | 70    |
| >TP53-T329I-LDGEYFTL    | 344   | >TP53-T329I-LDGEYFIL     | 432  | 88    |
| >TP53-T329I-LDGEYFTLQI  | 94    | >TP53-T329I-LDGEYFILQI   | 110  | 16    |
| >TP53-T329I-PLDGEYFT    | 4966  | >TP53-T329I-PLDGEYFI     | 341  | 4625  |
| >TP53-T329I-PLDGEYFTL   | 249   | >TP53-T329I-PLDGEYFIL    | 372  | 123   |
| >TP53-T329I-PLDGEYFT    | 1065  | >TP53-T329I-PLDGEYFI     | 38   | 1027  |
| >TP53-T329I-PLDGEYFTL   | 22    | >TP53-T329I-PLDGEYFIL    | 230  | 208   |
| >TP53-T329I-PLDGEYFTLQ  | 68    | >TP53-T329I-PLDGEYFILQI  | 48   | 20    |
| >TP53-T329I-PLDGEYFT    | 10347 | >TP53-T329I-PLDGEYFI     | 495  | 9852  |
| >TP53-T329I-PLDGEYFTL   | 224   | >TP53-T329I-PLDGEYFIL    | 1264 | 1040  |
| >TP53-T329I-PLDGEYFT    | 1092  | >TP53-T329I-PLDGEYFI     | 43   | 1049  |
| >TP53-T329I-PLDGEYFTL   | 22    | >TP53-T329I-PLDGEYFIL    | 75   | 53    |
| >TP53-T329I-PLDGEYFTLQ  | 140   | >TP53-T329I-PLDGEYFILQI  | 124  | 16    |
| >TP53-T329I-PLDGEYFT    | 2473  | >TP53-T329I-PLDGEYFI     | 68   | 2405  |
| >TP53-T329I-PLDGEYFTL   | 23    | >TP53-T329I-PLDGEYFIL    | 143  | 120   |
| >TP53-T329I-PLDGEYFTLQ  | 158   | >TP53-T329I-PLDGEYFILQI  | 224  | 66    |
| >TP53-T329I-PLDGEYFT    | 1464  | >TP53-T329I-PLDGEYFI     | 169  | 1295  |
| >TP53-T329I-PLDGEYFTL   | 11    | >TP53-T329I-PLDGEYFIL    | 47   | 36    |
| >TP53-T329I-PLDGEYFTLQ  | 111   | >TP53-T329I-PLDGEYFILQI  | 93   | 18    |
| >TP53-T329I-KPLDGEYFT   | 17003 | >TP53-T329I-KPLDGEYFI    | 166  | 16837 |
| >TP53-T329I-KPLDGEYFTL  | 212   | >TP53-T329I-KPLDGEYFIL   | 488  | 276   |
| >TP53-T329I-KPLDGEYFTL  | 526   | >TP53-T329I-KPLDGEYFIL   | 305  | 221   |
| >TP53-T329I-KPLDGEYFTL  | 321   | >TP53-T329I-KPLDGEYFIL   | 356  | 35    |
| >TP53-T329I-KPLDGEYFT   | 9062  | >TP53-T329I-KPLDGEYFI    | 158  | 8904  |
| >TP53-T329I-KPLDGEYFTL  | 306   | >TP53-T329I-KPLDGEYFIL   | 566  | 260   |
| >TP53-T81I-v TPAAPAPA   | 460   | >TP53-T81I-r IPAAPAPA    | 2238 | 1778  |
| >TP53-T81I-v TPAAPAPA   | 121   | >TP53-T81I-r IPAAPAPA    | 43   | 78    |
| >TP53-T81I-v TPAAPAPAPS | 296   | >TP53-T81I-r IPAAPAPAPS' | 78   | 218   |
| >TP53-T81I-v TPAAPAPA   | 352   | >TP53-T81I-r IPAAPAPA    | 272  | 80    |
| >TP53-T81I-v TPAAPAPAPS | 437   | >TP53-T81I-r IPAAPAPAPS' | 261  | 176   |

|                         |       |                          |       |       |
|-------------------------|-------|--------------------------|-------|-------|
| >TP53-T81I-v TPAAPAPAPS | 1769  | >TP53-T81I-r IPAAPAPAPS' | 387   | 1382  |
| >TP53-T81I-v TPAAPAPAPS | 33    | >TP53-T81I-r IPAAPAPAPS' | 19    | 14    |
| >TP53-T81I-v TPAAPAPA   | 25    | >TP53-T81I-r IPAAPAPA    | 8     | 17    |
| >TP53-T81I-v TPAAPAPAP  | 656   | >TP53-T81I-r IPAAPAPAP   | 56    | 600   |
| >TP53-T81I-v TPAAPAPAPS | 3104  | >TP53-T81I-r IPAAPAPAPS' | 395   | 2709  |
| >TP53-T81I-v TPAAPAPAPS | 16    | >TP53-T81I-r IPAAPAPAPS' | 9     | 7     |
| >TP53-T81I-v PTPAAPAPA  | 441   | >TP53-T81I-r PIPAAPAPA   | 22258 | 21817 |
| >TP53-T81I-v APTPAAPA   | 74    | >TP53-T81I-r APIPAAPA    | 57    | 17    |
| >TP53-T81I-v APTPAAPAPA | 433   | >TP53-T81I-r APIPAAPAPA  | 361   | 72    |
| >TP53-T81I-v APTPAAPA   | 122   | >TP53-T81I-r APIPAAPA    | 48    | 74    |
| >TP53-T81I-v APTPAAPAPA | 157   | >TP53-T81I-r APIPAAPAPA  | 63    | 94    |
| >TP53-T81I-v AAPTPAAPA  | 298   | >TP53-T81I-r AAPIPAAPA   | 226   | 72    |
| >TP53-T81I-v APAAPTPA   | 26    | >TP53-T81I-r APAAPIPA    | 49    | 23    |
| >TP53-T81I-v APAAPTPAA  | 28    | >TP53-T81I-r APAAPIPAA   | 59    | 31    |
| >TP53-T81I-v APAAPTPAAF | 18    | >TP53-T81I-r APAAPIPAAP  | 27    | 9     |
| >TP53-T81I-v APAAPTPAA  | 276   | >TP53-T81I-r APAAPIPAA   | 1713  | 1437  |
| >TP53-T81I-v APAAPTPA   | 66    | >TP53-T81I-r APAAPIPA    | 45    | 21    |
| >TP53-T81I-v APAAPTPAA  | 25    | >TP53-T81I-r APAAPIPAA   | 23    | 2     |
| >TP53-T81I-v APAAPTPAAF | 33    | >TP53-T81I-r APAAPIPAAP  | 30    | 3     |
| >TP53-T81I-v APAAPTPAA  | 518   | >TP53-T81I-r APAAPIPAA   | 485   | 33    |
| >TP53-T81I-v APAPAAPT   | 45    | >TP53-T81I-r APAPAAPI    | 20    | 25    |
| >TP53-T81I-v APAPAAPTPA | 238   | >TP53-T81I-r APAPAAPIPA  | 561   | 323   |
| >TP53-T81I-v APAPAAPTPA | 27    | >TP53-T81I-r APAPAAPIPA  | 39    | 12    |
| >TP53-T81I-v APAPAAPT   | 458   | >TP53-T81I-r APAPAAPI    | 787   | 329   |
| >TP53-T81I-v APAPAAPTPA | 203   | >TP53-T81I-r APAPAAPIPA  | 558   | 355   |
| >TP53-T81I-v APAPAAPTPA | 376   | >TP53-T81I-r APAPAAPIPA  | 475   | 99    |
| >TP53-T81I-v APAPAAPTPA | 46    | >TP53-T81I-r APAPAAPIPA  | 42    | 4     |
| >TP53-T81I-v APAPAAPT   | 23913 | >TP53-T81I-r APAPAAPI    | 60    | 23853 |
| >TP53-T81I-v APAPAAPT   | 37193 | >TP53-T81I-r APAPAAPI    | 271   | 36922 |
| >TP53-T81I-v VAPAPAAPT  | 26464 | >TP53-T81I-r VAPAPAAPI   | 140   | 26324 |
| >TP53-T81I-v VAPAPAAPT  | 4724  | >TP53-T81I-r VAPAPAAPI   | 81    | 4643  |
| >TP53-T81I-v VAPAPAAPT  | 125   | >TP53-T81I-r VAPAPAAPI   | 4     | 121   |
| >TP53-T81I-v VAPAPAAPTF | 412   | >TP53-T81I-r VAPAPAAPIP  | 130   | 282   |
| >TP53-T81I-v VAPAPAAPTF | 498   | >TP53-T81I-r VAPAPAAPIP  | 263   | 235   |
| >TP53-T81I-v VAPAPAAPT  | 35504 | >TP53-T81I-r VAPAPAAPI   | 355   | 35149 |
| >TP53-T81I-v RVAPAPAAPI | 3487  | >TP53-T81I-r RVAPAPAAPI  | 415   | 3072  |
| >TP53-T81I-v RVAPAPAAPI | 8008  | >TP53-T81I-r RVAPAPAAPI  | 495   | 7513  |
| >TP53-T81I-v RVAPAPAAPI | 999   | >TP53-T81I-r RVAPAPAAPI  | 36    | 963   |
| >TP53-T81I-v RVAPAPAAPI | 7383  | >TP53-T81I-r RVAPAPAAPI  | 51    | 7332  |
| >TP53-T81I-v RVAPAPAAPI | 570   | >TP53-T81I-r RVAPAPAAPI  | 90    | 480   |
| >TP53-T81I-v RVAPAPAAPI | 4949  | >TP53-T81I-r RVAPAPAAPI  | 155   | 4794  |
| >TP53-T81I-v RVAPAPAAPI | 2051  | >TP53-T81I-r RVAPAPAAPI  | 26    | 2025  |
| >TP53-T81I-v RVAPAPAAPI | 14706 | >TP53-T81I-r RVAPAPAAPI  | 227   | 14479 |

|                          |       |                          |      |       |
|--------------------------|-------|--------------------------|------|-------|
| >TP53-T81I-v RVAPAPAAP1  | 29174 | >TP53-T81I-r RVAPAPAAPI  | 134  | 29040 |
| >TP53-V10I-v VEPPLSQETF  | 617   | >TP53-V10I-r IEPPLSQETF  | 274  | 343   |
| >TP53-V10I-v SVEPPLSQETI | 68    | >TP53-V10I-r SIEPPLSQETF | 287  | 219   |
| >TP53-V10I-v SVEPPLSQETI | 35    | >TP53-V10I-r SIEPPLSQETF | 112  | 77    |
| >TP53-V10I-v DPSVEPPL    | 266   | >TP53-V10I-r DPSIEPPL    | 252  | 14    |
| >TP53-V10I-v QSDPSVEPPL  | 39    | >TP53-V10I-r QSDPSIEPPL  | 35   | 4     |
| >TP53-V10I-v EPQSDPSV    | 1826  | >TP53-V10I-r EPQSDPSI    | 142  | 1684  |
| >TP53-V10I-v EEPQSDPSV   | 759   | >TP53-V10I-r EEPQSDPSI   | 85   | 674   |
| >TP53-V10I-v EEPQSDPSV   | 1570  | >TP53-V10I-r EEPQSDPSI   | 475  | 1095  |
| >TP53-V10I-v MEEPQSDPS'  | 108   | >TP53-V10I-r MEEPQSDPSI  | 23   | 85    |
| >TP53-V10I-v MEEPQSDPS'  | 477   | >TP53-V10I-r MEEPQSDPSI  | 483  | 6     |
| >TP53-V10I-v MEEPQSDPS'  | 610   | >TP53-V10I-r MEEPQSDPSI  | 415  | 195   |
| >TP53-V10I-v MEEPQSDPS'  | 195   | >TP53-V10I-r MEEPQSDPSI  | 338  | 143   |
| >TP53-V10I-v MEEPQSDPS'  | 82    | >TP53-V10I-r MEEPQSDPSI  | 15   | 67    |
| >TP53-V122L VTCTYSPA     | 415   | >TP53-V122L LTCTYSPA     | 3665 | 3250  |
| >TP53-V122L VTCTYSPAL    | 397   | >TP53-V122L LTCTYSPAL    | 286  | 111   |
| >TP53-V122L VTCTYSPALN   | 80    | >TP53-V122L LTCTYSPALNI  | 110  | 30    |
| >TP53-V122L VTCTYSPALN   | 14    | >TP53-V122L LTCTYSPALNI  | 23   | 9     |
| >TP53-V122L VTCTYSPALN   | 146   | >TP53-V122L LTCTYSPALNI  | 58   | 88    |
| >TP53-V122L VTCTYSPALN   | 490   | >TP53-V122L LTCTYSPALNI  | 156  | 334   |
| >TP53-V122L VTCTYSPAL    | 12    | >TP53-V122L LTCTYSPAL    | 13   | 1     |
| >TP53-V122L VTCTYSPAL    | 66    | >TP53-V122L LTCTYSPAL    | 75   | 9     |
| >TP53-V122L VTCTYSPAL    | 862   | >TP53-V122L LTCTYSPAL    | 162  | 700   |
| >TP53-V122L SVTCTYSPAL   | 5742  | >TP53-V122L SLTCTYSPAL   | 281  | 5461  |
| >TP53-V122L SVTCTYSPA    | 4731  | >TP53-V122L SLTCTYSPA    | 145  | 4586  |
| >TP53-V122L SVTCTYSPAL   | 874   | >TP53-V122L SLTCTYSPAL   | 51   | 823   |
| >TP53-V122L SVTCTYSPA    | 118   | >TP53-V122L SLTCTYSPA    | 10   | 108   |
| >TP53-V122L SVTCTYSPAL   | 1772  | >TP53-V122L SLTCTYSPAL   | 220  | 1552  |
| >TP53-V122L SVTCTYSPA    | 468   | >TP53-V122L SLTCTYSPA    | 634  | 166   |
| >TP53-V122L SVTCTYSPAL   | 268   | >TP53-V122L SLTCTYSPAL   | 205  | 63    |
| >TP53-V122L SVTCTYSPA    | 4503  | >TP53-V122L SLTCTYSPA    | 68   | 4435  |
| >TP53-V122L SVTCTYSPAL   | 923   | >TP53-V122L SLTCTYSPAL   | 13   | 910   |
| >TP53-V122L SVTCTYSPA    | 3002  | >TP53-V122L SLTCTYSPA    | 36   | 2966  |
| >TP53-V122L SVTCTYSPAL   | 877   | >TP53-V122L SLTCTYSPAL   | 10   | 867   |
| >TP53-V122L SVTCTYSPA    | 5667  | >TP53-V122L SLTCTYSPA    | 56   | 5611  |
| >TP53-V122L SVTCTYSPAL   | 1635  | >TP53-V122L SLTCTYSPAL   | 17   | 1618  |
| >TP53-V122L SVTCTYSPA    | 5164  | >TP53-V122L SLTCTYSPA    | 50   | 5114  |
| >TP53-V122L SVTCTYSPAL   | 1003  | >TP53-V122L SLTCTYSPAL   | 8    | 995   |
| >TP53-V122L SVTCTYSPA    | 241   | >TP53-V122L SLTCTYSPA    | 1991 | 1750  |
| >TP53-V122L SVTCTYSPA    | 45    | >TP53-V122L SLTCTYSPA    | 1483 | 1438  |
| >TP53-V122L SVTCTYSPAL   | 149   | >TP53-V122L SLTCTYSPAL   | 872  | 723   |
| >TP53-V122L SVTCTYSPAL   | 1647  | >TP53-V122L SLTCTYSPAL   | 315  | 1332  |
| >TP53-V122L KSVTCTYSPA   | 2900  | >TP53-V122L KSLTCTYSPAL  | 463  | 2437  |

|                         |      |                         |      |      |
|-------------------------|------|-------------------------|------|------|
| >TP53-V122L KSVTCTYSPA  | 396  | >TP53-V122L KSLTCTYSPAL | 279  | 117  |
| >TP53-V122L KSVTCTYSPA  | 149  | >TP53-V122L KSLTCTYSPA  | 31   | 118  |
| >TP53-V122L KSVTCTYSPA  | 488  | >TP53-V122L KSLTCTYSPAL | 87   | 401  |
| >TP53-V122L KSVTCTYSP   | 1211 | >TP53-V122L KSLTCTYSP   | 352  | 859  |
| >TP53-V122L KSVTCTYSPA  | 107  | >TP53-V122L KSLTCTYSPAL | 35   | 72   |
| >TP53-V122L KSVTCTYSPA  | 349  | >TP53-V122L KSLTCTYSPA  | 214  | 135  |
| >TP53-V122L KSVTCTYSPA  | 89   | >TP53-V122L KSLTCTYSPAL | 54   | 35   |
| >TP53-V122L KSVTCTYSPA  | 6    | >TP53-V122L KSLTCTYSPAL | 7    | 1    |
| >TP53-V122L KSVTCTYSPA  | 113  | >TP53-V122L KSLTCTYSPAL | 131  | 18   |
| >TP53-V122L KSVTCTYSPA  | 198  | >TP53-V122L KSLTCTYSPAL | 1065 | 867  |
| >TP53-V122L KSVTCTYSPA  | 766  | >TP53-V122L KSLTCTYSPAL | 334  | 432  |
| >TP53-V122L AKSVTCTY    | 8    | >TP53-V122L AKSLTCTY    | 14   | 6    |
| >TP53-V122L AKSVTCTYSP  | 483  | >TP53-V122L AKSLTCTYSP  | 1028 | 545  |
| >TP53-V122L AKSVTCTYSP, | 56   | >TP53-V122L AKSLTCTYSP/ | 110  | 54   |
| >TP53-V122L TAKSVTCTY   | 312  | >TP53-V122L TAKSLTCTY   | 409  | 97   |
| >TP53-V122L TAKSVTCTY   | 247  | >TP53-V122L TAKSLTCTY   | 732  | 485  |
| >TP53-V122L TAKSVTCTY   | 78   | >TP53-V122L TAKSLTCTY   | 73   | 5    |
| >TP53-V122L TAKSVTCTY   | 430  | >TP53-V122L TAKSLTCTY   | 454  | 24   |
| >TP53-V122L TAKSVTCTY   | 265  | >TP53-V122L TAKSLTCTY   | 123  | 142  |
| >TP53-V122L TAKSVTCTY   | 100  | >TP53-V122L TAKSLTCTY   | 83   | 17   |
| >TP53-V122L TAKSVTCTY   | 336  | >TP53-V122L TAKSLTCTY   | 334  | 2    |
| >TP53-V122L GTAKSVTCTY  | 466  | >TP53-V122L GTAKSLTCTY  | 577  | 111  |
| >TP53-V122L GTAKSVTCTY  | 518  | >TP53-V122L GTAKSLTCTY  | 416  | 102  |
| >TP53-V122L GTAKSVTCTY  | 521  | >TP53-V122L GTAKSLTCTY  | 324  | 197  |
| >TP53-V122L GTAKSVTCTY  | 122  | >TP53-V122L GTAKSLTCTY  | 201  | 79   |
| >TP53-V122L GTAKSVTCTY  | 69   | >TP53-V122L GTAKSLTCTY  | 132  | 63   |
| >TP53-V122L GTAKSVTCTY  | 71   | >TP53-V122L GTAKSLTCTY  | 94   | 23   |
| >TP53-V122L GTAKSVTCTY  | 461  | >TP53-V122L GTAKSLTCTY  | 756  | 295  |
| >TP53-V122L GTAKSVTCTY  | 8    | >TP53-V122L GTAKSLTCTY  | 8    | 0    |
| >TP53-V122L GTAKSVTCTY  | 296  | >TP53-V122L GTAKSLTCTY  | 564  | 268  |
| >TP53-V122L GTAKSVTCTY  | 39   | >TP53-V122L GTAKSLTCTY  | 42   | 3    |
| >TP53-V122L GTAKSVTCTY  | 143  | >TP53-V122L GTAKSLTCTY  | 266  | 123  |
| >TP53-V122L SGTAKSVTCT  | 374  | >TP53-V122L SGTAKSLTCT  | 628  | 254  |
| >TP53-V122L HSGTAKSV    | 4145 | >TP53-V122L HSGTAKSL    | 197  | 3948 |
| >TP53-V122L LHSGTAKSV   | 884  | >TP53-V122L LHSGTAKSL   | 42   | 842  |
| >TP53-V122L FLHSGTAKSV  | 122  | >TP53-V122L FLHSGTAKSL  | 572  | 450  |
| >TP53-V122L FLHSGTAKSV  | 13   | >TP53-V122L FLHSGTAKSL  | 13   | 0    |
| >TP53-V122L FLHSGTAKSV  | 413  | >TP53-V122L FLHSGTAKSL  | 106  | 307  |
| >TP53-V122L FLHSGTAKSV  | 11   | >TP53-V122L FLHSGTAKSL  | 30   | 19   |
| >TP53-V122L FLHSGTAKSV  | 27   | >TP53-V122L FLHSGTAKSL  | 15   | 12   |
| >TP53-V122L FLHSGTAKSV  | 2    | >TP53-V122L FLHSGTAKSL  | 5    | 3    |
| >TP53-V122L FLHSGTAKSV  | 116  | >TP53-V122L FLHSGTAKSL  | 111  | 5    |
| >TP53-V122L FLHSGTAKSV  | 5    | >TP53-V122L FLHSGTAKSL  | 16   | 11   |

|                        |      |                        |      |      |
|------------------------|------|------------------------|------|------|
| >TP53-V122L FLHSGTAKSV | 7    | >TP53-V122L FLHSGTAKSL | 34   | 27   |
| >TP53-V122L FLHSGTAKSV | 7    | >TP53-V122L FLHSGTAKSL | 59   | 52   |
| >TP53-V122L FLHSGTAKSV | 2    | >TP53-V122L FLHSGTAKSL | 2    | 0    |
| >TP53-V122L FLHSGTAKSV | 13   | >TP53-V122L FLHSGTAKSL | 9    | 4    |
| >TP53-V122L FLHSGTAKSV | 283  | >TP53-V122L FLHSGTAKSL | 173  | 110  |
| >TP53-V122L FLHSGTAKSV | 261  | >TP53-V122L FLHSGTAKSL | 103  | 158  |
| >TP53-V122L FLHSGTAKSV | 2882 | >TP53-V122L FLHSGTAKSL | 165  | 2717 |
| >TP53-V143/VQLWVDST    | 120  | >TP53-V143/AQLWVDST    | 81   | 39   |
| >TP53-V143/VQLWVDSTP   | 552  | >TP53-V143/AQLWVDSTP   | 426  | 126  |
| >TP53-V143/KTCPVQLWV   | 125  | >TP53-V143/KTCPAQLWV   | 172  | 47   |
| >TP53-V143/KTCPVQLWV   | 53   | >TP53-V143/KTCPAQLWV   | 283  | 230  |
| >TP53-V143/KTCPVQLWV   | 338  | >TP53-V143/KTCPAQLWV   | 912  | 574  |
| >TP53-V143/KTCPVQLWV   | 202  | >TP53-V143/KTCPAQLWV   | 142  | 60   |
| >TP53-V143/KTCPVQLWV   | 224  | >TP53-V143/KTCPAQLWV   | 56   | 168  |
| >TP53-V143/KTCPVQLW    | 165  | >TP53-V143/KTCPAQLW    | 466  | 301  |
| >TP53-V143/KTCPVQLW    | 4    | >TP53-V143/KTCPAQLW    | 4    | 0    |
| >TP53-V143/KTCPVQLWV   | 118  | >TP53-V143/KTCPAQLWV   | 52   | 66   |
| >TP53-V143/KTCPVQLW    | 34   | >TP53-V143/KTCPAQLW    | 35   | 1    |
| >TP53-V143/KTCPVQLW    | 10   | >TP53-V143/KTCPAQLW    | 12   | 2    |
| >TP53-V143/KTCPVQLWV   | 1070 | >TP53-V143/KTCPAQLWV   | 496  | 574  |
| >TP53-V143/KTCPVQLWV   | 254  | >TP53-V143/KTCPAQLWV   | 620  | 366  |
| >TP53-V143/KTCPVQLWV   | 272  | >TP53-V143/KTCPAQLWV   | 277  | 5    |
| >TP53-V143/AKTCPVQL    | 41   | >TP53-V143/AKTCPAQL    | 88   | 47   |
| >TP53-V143/AKTCPVQLW   | 192  | >TP53-V143/AKTCPAQLW   | 389  | 197  |
| >TP53-V143/LAKTCPVQLV  | 482  | >TP53-V143/LAKTCPAQLV  | 375  | 107  |
| >TP53-V143/LAKTCPVQL   | 417  | >TP53-V143/LAKTCPAQL   | 1099 | 682  |
| >TP53-V143/LAKTCPVQL   | 405  | >TP53-V143/LAKTCPAQL   | 111  | 294  |
| >TP53-V143/LAKTCPVQLV  | 45   | >TP53-V143/LAKTCPAQLV  | 28   | 17   |
| >TP53-V143/LAKTCPVQLV  | 42   | >TP53-V143/LAKTCPAQLV  | 40   | 2    |
| >TP53-V143/LAKTCPVQLV  | 42   | >TP53-V143/LAKTCPAQLV  | 48   | 6    |
| >TP53-V143/QLAKTCPV    | 58   | >TP53-V143/QLAKTCPA    | 994  | 936  |
| >TP53-V143/QLAKTCPV    | 13   | >TP53-V143/QLAKTCPA    | 101  | 88   |
| >TP53-V143/QLAKTCPVQL  | 315  | >TP53-V143/QLAKTCPAQL  | 200  | 115  |
| >TP53-V143/QLAKTCPV    | 10   | >TP53-V143/QLAKTCPA    | 55   | 45   |
| >TP53-V143/QLAKTCPVQL  | 383  | >TP53-V143/QLAKTCPAQL  | 151  | 232  |
| >TP53-V143/QLAKTCPV    | 37   | >TP53-V143/QLAKTCPA    | 327  | 290  |
| >TP53-V143/QLAKTCPV    | 14   | >TP53-V143/QLAKTCPA    | 660  | 646  |
| >TP53-V143/QLAKTCPVQL  | 323  | >TP53-V143/QLAKTCPAQL  | 242  | 81   |
| >TP53-V143/QLAKTCPV    | 30   | >TP53-V143/QLAKTCPA    | 1157 | 1127 |
| >TP53-V143/QLAKTCPV    | 10   | >TP53-V143/QLAKTCPA    | 259  | 249  |
| >TP53-V143/QLAKTCPVQL  | 177  | >TP53-V143/QLAKTCPAQL  | 253  | 76   |
| >TP53-V143/QLAKTCPV    | 10   | >TP53-V143/QLAKTCPA    | 1654 | 1644 |
| >TP53-V143/QLAKTCPVQL  | 117  | >TP53-V143/QLAKTCPAQL  | 66   | 51   |

|                        |     |                        |       |       |
|------------------------|-----|------------------------|-------|-------|
| >TP53-V143/QLAKTCPV    | 3   | >TP53-V143/QLAKTCPA    | 54    | 51    |
| >TP53-V143/QLAKTCPVQL  | 20  | >TP53-V143/QLAKTCPAQL  | 17    | 3     |
| >TP53-V143/QLAKTCPV    | 217 | >TP53-V143/QLAKTCPA    | 1533  | 1316  |
| >TP53-V143/QLAKTCPV    | 60  | >TP53-V143/QLAKTCPA    | 2856  | 2796  |
| >TP53-V143/QLAKTCPVQL  | 343 | >TP53-V143/QLAKTCPAQL  | 667   | 324   |
| >TP53-V143/CQLAKTCPV   | 121 | >TP53-V143/CQLAKTCPA   | 2127  | 2006  |
| >TP53-V143/CQLAKTCPV   | 173 | >TP53-V143/CQLAKTCPA   | 1133  | 960   |
| >TP53-V143/CQLAKTCPV   | 22  | >TP53-V143/CQLAKTCPA   | 86    | 64    |
| >TP53-V143/CQLAKTCPVC  | 463 | >TP53-V143/CQLAKTCPAC  | 487   | 24    |
| >TP53-V143/CQLAKTCPV   | 136 | >TP53-V143/CQLAKTCPA   | 5124  | 4988  |
| >TP53-V143/CQLAKTCPV   | 77  | >TP53-V143/CQLAKTCPA   | 3610  | 3533  |
| >TP53-V143/CQLAKTCPV   | 457 | >TP53-V143/CQLAKTCPA   | 9319  | 8862  |
| >TP53-V143/CQLAKTCPV   | 268 | >TP53-V143/CQLAKTCPA   | 1192  | 924   |
| >TP53-V143/CQLAKTCPVC  | 155 | >TP53-V143/CQLAKTCPAC  | 302   | 147   |
| >TP53-V143/CQLAKTCPVC  | 231 | >TP53-V143/CQLAKTCPAC  | 276   | 45    |
| >TP53-V143/FCQLAKTCPV  | 443 | >TP53-V143/FCQLAKTCPA  | 17823 | 17380 |
| >TP53-V143E VQLWVDST   | 120 | >TP53-V143E EQLWVDST   | 1837  | 1717  |
| >TP53-V143E KTCPVQLWV  | 125 | >TP53-V143E KTCPEQLWV  | 452   | 327   |
| >TP53-V143E KTCPVQLWV  | 53  | >TP53-V143E KTCPEQLWV  | 341   | 288   |
| >TP53-V143E KTCPVQLWV  | 338 | >TP53-V143E KTCPEQLWV  | 1733  | 1395  |
| >TP53-V143E KTCPVQLWV  | 202 | >TP53-V143E KTCPEQLWV  | 168   | 34    |
| >TP53-V143E KTCPVQLWV  | 224 | >TP53-V143E KTCPEQLWV  | 531   | 307   |
| >TP53-V143E KTCPVQLW   | 165 | >TP53-V143E KTCPEQLW   | 892   | 727   |
| >TP53-V143E KTCPVQLW   | 4   | >TP53-V143E KTCPEQLW   | 5     | 1     |
| >TP53-V143E KTCPVQLWV  | 118 | >TP53-V143E KTCPEQLWV  | 71    | 47    |
| >TP53-V143E KTCPVQLW   | 34  | >TP53-V143E KTCPEQLW   | 37    | 3     |
| >TP53-V143E KTCPVQLW   | 10  | >TP53-V143E KTCPEQLW   | 13    | 3     |
| >TP53-V143E KTCPVQLWV  | 254 | >TP53-V143E KTCPEQLWV  | 1538  | 1284  |
| >TP53-V143E KTCPVQLWV  | 272 | >TP53-V143E KTCPEQLWV  | 513   | 241   |
| >TP53-V143E AKTCPVQL   | 41  | >TP53-V143E AKTCPEQL   | 127   | 86    |
| >TP53-V143E AKTCPVQLW  | 192 | >TP53-V143E AKTCPEQLW  | 594   | 402   |
| >TP53-V143E LAKTCPVQLV | 482 | >TP53-V143E LAKTCPEQLV | 598   | 116   |
| >TP53-V143E LAKTCPVQL  | 417 | >TP53-V143E LAKTCPEQL  | 1590  | 1173  |
| >TP53-V143E LAKTCPVQL  | 405 | >TP53-V143E LAKTCPEQL  | 1222  | 817   |
| >TP53-V143E LAKTCPVQLV | 45  | >TP53-V143E LAKTCPEQLV | 100   | 55    |
| >TP53-V143E LAKTCPVQLV | 42  | >TP53-V143E LAKTCPEQLV | 43    | 1     |
| >TP53-V143E LAKTCPVQLV | 42  | >TP53-V143E LAKTCPEQLV | 59    | 17    |
| >TP53-V143E QLAKTCPV   | 58  | >TP53-V143E QLAKTCPE   | 23387 | 23329 |
| >TP53-V143E QLAKTCPV   | 13  | >TP53-V143E QLAKTCPE   | 8231  | 8218  |
| >TP53-V143E QLAKTCPVQL | 315 | >TP53-V143E QLAKTCPEQL | 192   | 123   |
| >TP53-V143E QLAKTCPV   | 10  | >TP53-V143E QLAKTCPE   | 15235 | 15225 |
| >TP53-V143E QLAKTCPVQL | 383 | >TP53-V143E QLAKTCPEQL | 427   | 44    |
| >TP53-V143E QLAKTCPV   | 37  | >TP53-V143E QLAKTCPE   | 19408 | 19371 |



|                       |      |                       |       |       |
|-----------------------|------|-----------------------|-------|-------|
| >TP53-V143EQLAKTCPV   | 14   | >TP53-V143EQLAKTCPE   | 21988 | 21974 |
| >TP53-V143EQLAKTCPVQL | 323  | >TP53-V143EQLAKTCPEQL | 270   | 53    |
| >TP53-V143EQLAKTCPV   | 30   | >TP53-V143EQLAKTCPE   | 22122 | 22092 |
| >TP53-V143EQLAKTCPV   | 10   | >TP53-V143EQLAKTCPE   | 19771 | 19761 |
| >TP53-V143EQLAKTCPVQL | 177  | >TP53-V143EQLAKTCPEQL | 281   | 104   |
| >TP53-V143EQLAKTCPV   | 10   | >TP53-V143EQLAKTCPE   | 24344 | 24334 |
| >TP53-V143EQLAKTCPVQL | 117  | >TP53-V143EQLAKTCPEQL | 92    | 25    |
| >TP53-V143EQLAKTCPV   | 3    | >TP53-V143EQLAKTCPE   | 16617 | 16614 |
| >TP53-V143EQLAKTCPVQL | 20   | >TP53-V143EQLAKTCPEQL | 27    | 7     |
| >TP53-V143EQLAKTCPV   | 217  | >TP53-V143EQLAKTCPE   | 21039 | 20822 |
| >TP53-V143EQLAKTCPV   | 60   | >TP53-V143EQLAKTCPE   | 20642 | 20582 |
| >TP53-V143EQLAKTCPVQL | 343  | >TP53-V143EQLAKTCPEQL | 653   | 310   |
| >TP53-V143EQQLAKTCPV  | 121  | >TP53-V143EQQLAKTCPE  | 22092 | 21971 |
| >TP53-V143EQQLAKTCPV  | 173  | >TP53-V143EQQLAKTCPE  | 20770 | 20597 |
| >TP53-V143EQQLAKTCPV  | 22   | >TP53-V143EQQLAKTCPE  | 9921  | 9899  |
| >TP53-V143EQQLAKTCPVC | 463  | >TP53-V143EQQLAKTCPEC | 673   | 210   |
| >TP53-V143EQQLAKTCPV  | 136  | >TP53-V143EQQLAKTCPE  | 27120 | 26984 |
| >TP53-V143EQQLAKTCPV  | 77   | >TP53-V143EQQLAKTCPE  | 15671 | 15594 |
| >TP53-V143EQQLAKTCPV  | 457  | >TP53-V143EQQLAKTCPE  | 23637 | 23180 |
| >TP53-V143EQQLAKTCPV  | 268  | >TP53-V143EQQLAKTCPE  | 10152 | 9884  |
| >TP53-V143EQQLAKTCPVC | 155  | >TP53-V143EQQLAKTCPEC | 429   | 274   |
| >TP53-V143EQQLAKTCPVC | 231  | >TP53-V143EQQLAKTCPEC | 846   | 615   |
| >TP53-V143EFCQLAKTCPV | 443  | >TP53-V143EFCQLAKTCPE | 36478 | 36035 |
| >TP53-V143(VQLWVDST   | 120  | >TP53-V143(VQLWVDST   | 218   | 98    |
| >TP53-V143(TCPVQLWV   | 2730 | >TP53-V143(TCPGQLWV   | 483   | 2247  |
| >TP53-V143(KTCPVQLWV  | 125  | >TP53-V143(KTCPGQLWV  | 129   | 4     |
| >TP53-V143(KTCPVQLWV  | 53   | >TP53-V143(KTCPGQLWV  | 141   | 88    |
| >TP53-V143(KTCPVQLWV  | 338  | >TP53-V143(KTCPGQLWV  | 643   | 305   |
| >TP53-V143(KTCPVQLWV  | 202  | >TP53-V143(KTCPGQLWV  | 64    | 138   |
| >TP53-V143(KTCPVQLWV  | 224  | >TP53-V143(KTCPGQLWV  | 177   | 47    |
| >TP53-V143(KTCPVQLW   | 165  | >TP53-V143(KTCPGQLW   | 855   | 690   |
| >TP53-V143(KTCPVQLW   | 4    | >TP53-V143(KTCPGQLW   | 4     | 0     |
| >TP53-V143(KTCPVQLWV  | 118  | >TP53-V143(KTCPGQLWV  | 36    | 82    |
| >TP53-V143(KTCPVQLW   | 34   | >TP53-V143(KTCPGQLW   | 42    | 8     |
| >TP53-V143(KTCPVQLW   | 10   | >TP53-V143(KTCPGQLW   | 14    | 4     |
| >TP53-V143(KTCPVQLWV  | 254  | >TP53-V143(KTCPGQLWV  | 345   | 91    |
| >TP53-V143(KTCPVQLWV  | 272  | >TP53-V143(KTCPGQLWV  | 258   | 14    |
| >TP53-V143(AKTCPVQL   | 41   | >TP53-V143(AKTCPGQL   | 242   | 201   |
| >TP53-V143(AKTCPVQLW  | 192  | >TP53-V143(AKTCPGQLW  | 172   | 20    |
| >TP53-V143(AKTCPVQLW  | 503  | >TP53-V143(AKTCPGQLW  | 486   | 17    |
| >TP53-V143(LAKTCPVQLW | 482  | >TP53-V143(LAKTCPGQLV | 647   | 165   |
| >TP53-V143(LAKTCPVQL  | 417  | >TP53-V143(LAKTCPGQL  | 4545  | 4128  |
| >TP53-V143(LAKTCPVQL  | 405  | >TP53-V143(LAKTCPGQL  | 856   | 451   |

|                        |      |                        |       |       |
|------------------------|------|------------------------|-------|-------|
| >TP53-V143C LAKTCPVQLV | 45   | >TP53-V143C LAKTCPGQLV | 68    | 23    |
| >TP53-V143C LAKTCPVQLV | 42   | >TP53-V143C LAKTCPGQLV | 47    | 5     |
| >TP53-V143C LAKTCPVQLV | 42   | >TP53-V143C LAKTCPGQLV | 131   | 89    |
| >TP53-V143C QLAKTCPV   | 58   | >TP53-V143C QLAKTCPG   | 21307 | 21249 |
| >TP53-V143C QLAKTCPV   | 13   | >TP53-V143C QLAKTCPG   | 3150  | 3137  |
| >TP53-V143C QLAKTCPVQL | 315  | >TP53-V143C QLAKTCPGQI | 594   | 279   |
| >TP53-V143C QLAKTCPV   | 10   | >TP53-V143C QLAKTCPG   | 8417  | 8407  |
| >TP53-V143C QLAKTCPVQL | 383  | >TP53-V143C QLAKTCPGQI | 216   | 167   |
| >TP53-V143C QLAKTCPV   | 37   | >TP53-V143C QLAKTCPG   | 13015 | 12978 |
| >TP53-V143C QLAKTCPV   | 14   | >TP53-V143C QLAKTCPG   | 13915 | 13901 |
| >TP53-V143C QLAKTCPVQL | 323  | >TP53-V143C QLAKTCPGQI | 620   | 297   |
| >TP53-V143C QLAKTCPV   | 30   | >TP53-V143C QLAKTCPG   | 16604 | 16574 |
| >TP53-V143C QLAKTCPV   | 10   | >TP53-V143C QLAKTCPG   | 14714 | 14704 |
| >TP53-V143C QLAKTCPVQL | 177  | >TP53-V143C QLAKTCPGQI | 545   | 368   |
| >TP53-V143C QLAKTCPV   | 10   | >TP53-V143C QLAKTCPG   | 21708 | 21698 |
| >TP53-V143C QLAKTCPVQL | 117  | >TP53-V143C QLAKTCPGQI | 600   | 483   |
| >TP53-V143C QLAKTCPV   | 3    | >TP53-V143C QLAKTCPG   | 15420 | 15417 |
| >TP53-V143C QLAKTCPVQL | 20   | >TP53-V143C QLAKTCPGQI | 69    | 49    |
| >TP53-V143C QLAKTCPV   | 217  | >TP53-V143C QLAKTCPG   | 13638 | 13421 |
| >TP53-V143C QLAKTCPV   | 60   | >TP53-V143C QLAKTCPG   | 18693 | 18633 |
| >TP53-V143C QLAKTCPVQL | 343  | >TP53-V143C QLAKTCPGQI | 951   | 608   |
| >TP53-V143C CQLAKTCPV  | 121  | >TP53-V143C CQLAKTCPG  | 20763 | 20642 |
| >TP53-V143C CQLAKTCPV  | 173  | >TP53-V143C CQLAKTCPG  | 16969 | 16796 |
| >TP53-V143C CQLAKTCPV  | 22   | >TP53-V143C CQLAKTCPG  | 5096  | 5074  |
| >TP53-V143C CQLAKTCPVC | 463  | >TP53-V143C CQLAKTCPGC | 1557  | 1094  |
| >TP53-V143C CQLAKTCPV  | 136  | >TP53-V143C CQLAKTCPG  | 21522 | 21386 |
| >TP53-V143C CQLAKTCPV  | 77   | >TP53-V143C CQLAKTCPG  | 12736 | 12659 |
| >TP53-V143C CQLAKTCPV  | 457  | >TP53-V143C CQLAKTCPG  | 22270 | 21813 |
| >TP53-V143C CQLAKTCPV  | 268  | >TP53-V143C CQLAKTCPG  | 6545  | 6277  |
| >TP53-V143C CQLAKTCPVC | 155  | >TP53-V143C CQLAKTCPGC | 1020  | 865   |
| >TP53-V143C CQLAKTCPVC | 231  | >TP53-V143C CQLAKTCPGC | 997   | 766   |
| >TP53-V143C FCQLAKTCPV | 443  | >TP53-V143C FCQLAKTCPG | 36146 | 35703 |
| >TP53-V143L VQLWVDST   | 120  | >TP53-V143L LQLWVDST   | 84    | 36    |
| >TP53-V143L VQLWVDSTP  | 552  | >TP53-V143L LQLWVDSTPI | 411   | 141   |
| >TP53-V143L MFCQLAKTCI | 6521 | >TP53-V143L MFCQLAKTCI | 289   | 6232  |
| >TP53-V143L MFCQLAKTCI | 721  | >TP53-V143L MFCQLAKTCI | 471   | 250   |
| >TP53-V143L KTCPVQLWV  | 125  | >TP53-V143L KTCPLQLWV  | 238   | 113   |
| >TP53-V143L KTCPVQLWV  | 53   | >TP53-V143L KTCPLQLWV  | 189   | 136   |
| >TP53-V143L KTCPVQLWV  | 338  | >TP53-V143L KTCPLQLWV  | 881   | 543   |
| >TP53-V143L KTCPVQLWV  | 202  | >TP53-V143L KTCPLQLWV  | 221   | 19    |
| >TP53-V143L KTCPVQLWV  | 224  | >TP53-V143L KTCPLQLWV  | 223   | 1     |
| >TP53-V143L KTCPVQLW   | 165  | >TP53-V143L KTCPLQLW   | 250   | 85    |
| >TP53-V143L KTCPVQLW   | 4    | >TP53-V143L KTCPLQLW   | 4     | 0     |

|                        |      |                        |      |      |
|------------------------|------|------------------------|------|------|
| >TP53-V143L KTCPVQLWV  | 118  | >TP53-V143L KTCPLQLWV  | 49   | 69   |
| >TP53-V143L KTCPVQLW   | 34   | >TP53-V143L KTCPLQLW   | 37   | 3    |
| >TP53-V143L KTCPVQLW   | 10   | >TP53-V143L KTCPLQLW   | 13   | 3    |
| >TP53-V143L KTCPVQLWV  | 254  | >TP53-V143L KTCPLQLWV  | 242  | 12   |
| >TP53-V143L KTCPVQLWV  | 272  | >TP53-V143L KTCPLQLWV  | 437  | 165  |
| >TP53-V143L AKTCPVQL   | 41   | >TP53-V143L AKTCPLQL   | 81   | 40   |
| >TP53-V143L AKTCPVQLW  | 192  | >TP53-V143L AKTCPLQLW  | 500  | 308  |
| >TP53-V143L LAKTCPVQLW | 482  | >TP53-V143L LAKTCPLQLW | 617  | 135  |
| >TP53-V143L LAKTCPVQL  | 417  | >TP53-V143L LAKTCPLQL  | 855  | 438  |
| >TP53-V143L LAKTCPVQL  | 405  | >TP53-V143L LAKTCPLQL  | 146  | 259  |
| >TP53-V143L LAKTCPVQLW | 45   | >TP53-V143L LAKTCPLQLW | 39   | 6    |
| >TP53-V143L LAKTCPVQLW | 42   | >TP53-V143L LAKTCPLQLW | 45   | 3    |
| >TP53-V143L LAKTCPVQLW | 42   | >TP53-V143L LAKTCPLQLW | 50   | 8    |
| >TP53-V143L QLAKTCPV   | 58   | >TP53-V143L QLAKTCPL   | 243  | 185  |
| >TP53-V143L QLAKTCPV   | 13   | >TP53-V143L QLAKTCPL   | 15   | 2    |
| >TP53-V143L QLAKTCPVQL | 315  | >TP53-V143L QLAKTCPLQL | 161  | 154  |
| >TP53-V143L QLAKTCPV   | 10   | >TP53-V143L QLAKTCPL   | 78   | 68   |
| >TP53-V143L QLAKTCPVQL | 383  | >TP53-V143L QLAKTCPLQL | 180  | 203  |
| >TP53-V143L QLAKTCPV   | 37   | >TP53-V143L QLAKTCPL   | 268  | 231  |
| >TP53-V143L QLAKTCPV   | 14   | >TP53-V143L QLAKTCPL   | 167  | 153  |
| >TP53-V143L QLAKTCPVQL | 323  | >TP53-V143L QLAKTCPLQL | 433  | 110  |
| >TP53-V143L QLAKTCPV   | 30   | >TP53-V143L QLAKTCPL   | 239  | 209  |
| >TP53-V143L QLAKTCPV   | 10   | >TP53-V143L QLAKTCPL   | 82   | 72   |
| >TP53-V143L QLAKTCPVQL | 177  | >TP53-V143L QLAKTCPLQL | 214  | 37   |
| >TP53-V143L QLAKTCPV   | 10   | >TP53-V143L QLAKTCPL   | 193  | 183  |
| >TP53-V143L QLAKTCPVQL | 117  | >TP53-V143L QLAKTCPLQL | 228  | 111  |
| >TP53-V143L QLAKTCPV   | 3    | >TP53-V143L QLAKTCPL   | 14   | 11   |
| >TP53-V143L QLAKTCPVQL | 20   | >TP53-V143L QLAKTCPLQL | 24   | 4    |
| >TP53-V143L QLAKTCPV   | 217  | >TP53-V143L QLAKTCPL   | 1265 | 1048 |
| >TP53-V143L QLAKTCPV   | 60   | >TP53-V143L QLAKTCPL   | 978  | 918  |
| >TP53-V143L QLAKTCPVQL | 343  | >TP53-V143L QLAKTCPLQL | 559  | 216  |
| >TP53-V143L CQLAKTCPV  | 121  | >TP53-V143L CQLAKTCPL  | 637  | 516  |
| >TP53-V143L CQLAKTCPV  | 173  | >TP53-V143L CQLAKTCPL  | 1605 | 1432 |
| >TP53-V143L CQLAKTCPV  | 22   | >TP53-V143L CQLAKTCPL  | 79   | 57   |
| >TP53-V143L CQLAKTCPVC | 463  | >TP53-V143L CQLAKTCPLQ | 463  | 0    |
| >TP53-V143L CQLAKTCPV  | 136  | >TP53-V143L CQLAKTCPL  | 2290 | 2154 |
| >TP53-V143L CQLAKTCPV  | 77   | >TP53-V143L CQLAKTCPL  | 1036 | 959  |
| >TP53-V143L CQLAKTCPV  | 457  | >TP53-V143L CQLAKTCPL  | 6070 | 5613 |
| >TP53-V143L CQLAKTCPV  | 268  | >TP53-V143L CQLAKTCPL  | 141  | 127  |
| >TP53-V143L CQLAKTCPVC | 155  | >TP53-V143L CQLAKTCPLQ | 250  | 95   |
| >TP53-V143L CQLAKTCPV  | 2778 | >TP53-V143L CQLAKTCPL  | 184  | 2594 |
| >TP53-V143L CQLAKTCPVC | 231  | >TP53-V143L CQLAKTCPLQ | 338  | 107  |
| >TP53-V143L FCQLAKTCPV | 443  | >TP53-V143L FCQLAKTCPL | 7912 | 7469 |

|                        |       |                        |      |       |
|------------------------|-------|------------------------|------|-------|
| >TP53-V143M VQLWVDST   | 120   | >TP53-V143M MQLWVDST   | 28   | 92    |
| >TP53-V143M VQLWVDSTP  | 552   | >TP53-V143M MQLWVDSTF  | 147  | 405   |
| >TP53-V143M VQLWVDST   | 835   | >TP53-V143M MQLWVDST   | 421  | 414   |
| >TP53-V143M MFCQLAKTCI | 10917 | >TP53-V143M MFCQLAKTCI | 189  | 10728 |
| >TP53-V143M KTCPVQLWV  | 125   | >TP53-V143M KTCPMQLW\  | 392  | 267   |
| >TP53-V143M KTCPVQLWV  | 53    | >TP53-V143M KTCPMQLW\  | 351  | 298   |
| >TP53-V143M KTCPVQLWV  | 338   | >TP53-V143M KTCPMQLW\  | 1582 | 1244  |
| >TP53-V143M KTCPVQLWV  | 202   | >TP53-V143M KTCPMQLW\  | 104  | 98    |
| >TP53-V143M KTCPVQLWV  | 224   | >TP53-V143M KTCPMQLW\  | 148  | 76    |
| >TP53-V143M KTCPVQLW   | 165   | >TP53-V143M KTCPMQLW   | 277  | 112   |
| >TP53-V143M KTCPVQLW   | 4     | >TP53-V143M KTCPMQLW   | 4    | 0     |
| >TP53-V143M KTCPVQLWV  | 118   | >TP53-V143M KTCPMQLW\  | 45   | 73    |
| >TP53-V143M KTCPVQLW   | 34    | >TP53-V143M KTCPMQLW   | 38   | 4     |
| >TP53-V143M KTCPVQLW   | 10    | >TP53-V143M KTCPMQLW   | 13   | 3     |
| >TP53-V143M KTCPVQLWV  | 254   | >TP53-V143M KTCPMQLW\  | 285  | 31    |
| >TP53-V143M KTCPVQLWV  | 272   | >TP53-V143M KTCPMQLW\  | 409  | 137   |
| >TP53-V143M AKTCPVQL   | 41    | >TP53-V143M AKTCPMQL   | 52   | 11    |
| >TP53-V143M AKTCPVQLW  | 192   | >TP53-V143M AKTCPMQL\  | 431  | 239   |
| >TP53-V143M LAKTCPVQLW | 482   | >TP53-V143M LAKTCPMQL\ | 349  | 133   |
| >TP53-V143M LAKTCPVQL  | 417   | >TP53-V143M LAKTCPMQL  | 424  | 7     |
| >TP53-V143M LAKTCPVQL  | 405   | >TP53-V143M LAKTCPMQL  | 496  | 91    |
| >TP53-V143M LAKTCPVQLV | 45    | >TP53-V143M LAKTCPMQL\ | 31   | 14    |
| >TP53-V143M LAKTCPVQLV | 42    | >TP53-V143M LAKTCPMQL\ | 41   | 1     |
| >TP53-V143M LAKTCPVQLV | 42    | >TP53-V143M LAKTCPMQL\ | 59   | 17    |
| >TP53-V143M QLAKTCPV   | 58    | >TP53-V143M QLAKTCPM   | 1849 | 1791  |
| >TP53-V143M QLAKTCPV   | 13    | >TP53-V143M QLAKTCPM   | 161  | 148   |
| >TP53-V143M QLAKTCPVQL | 315   | >TP53-V143M QLAKTCPMQ  | 100  | 215   |
| >TP53-V143M QLAKTCPV   | 10    | >TP53-V143M QLAKTCPM   | 653  | 643   |
| >TP53-V143M QLAKTCPVQL | 383   | >TP53-V143M QLAKTCPMQ  | 149  | 234   |
| >TP53-V143M QLAKTCPV   | 37    | >TP53-V143M QLAKTCPM   | 1299 | 1262  |
| >TP53-V143M QLAKTCPV   | 14    | >TP53-V143M QLAKTCPM   | 1425 | 1411  |
| >TP53-V143M QLAKTCPVQL | 323   | >TP53-V143M QLAKTCPMQ  | 341  | 18    |
| >TP53-V143M QLAKTCPV   | 30    | >TP53-V143M QLAKTCPM   | 2257 | 2227  |
| >TP53-V143M QLAKTCPV   | 10    | >TP53-V143M QLAKTCPM   | 1377 | 1367  |
| >TP53-V143M QLAKTCPVQL | 177   | >TP53-V143M QLAKTCPMQ  | 177  | 0     |
| >TP53-V143M QLAKTCPV   | 10    | >TP53-V143M QLAKTCPM   | 1536 | 1526  |
| >TP53-V143M QLAKTCPVQL | 117   | >TP53-V143M QLAKTCPMQ  | 116  | 1     |
| >TP53-V143M QLAKTCPV   | 3     | >TP53-V143M QLAKTCPM   | 380  | 377   |
| >TP53-V143M QLAKTCPVQL | 20    | >TP53-V143M QLAKTCPMQ  | 16   | 4     |
| >TP53-V143M QLAKTCPV   | 217   | >TP53-V143M QLAKTCPM   | 5212 | 4995  |
| >TP53-V143M QLAKTCPV   | 60    | >TP53-V143M QLAKTCPM   | 1357 | 1297  |
| >TP53-V143M QLAKTCPV   | 1790  | >TP53-V143M QLAKTCPM   | 151  | 1639  |
| >TP53-V143M QLAKTCPVQL | 343   | >TP53-V143M QLAKTCPMQ  | 738  | 395   |

|                        |       |                        |       |       |
|------------------------|-------|------------------------|-------|-------|
| >TP53-V143M CQLAKTCPV  | 121   | >TP53-V143M CQLAKTCPM  | 3842  | 3721  |
| >TP53-V143M CQLAKTCPV  | 173   | >TP53-V143M CQLAKTCPM  | 5832  | 5659  |
| >TP53-V143M CQLAKTCPV  | 22    | >TP53-V143M CQLAKTCPM  | 297   | 275   |
| >TP53-V143M CQLAKTCPVC | 463   | >TP53-V143M CQLAKTCPM  | 519   | 56    |
| >TP53-V143M CQLAKTCPV  | 136   | >TP53-V143M CQLAKTCPM  | 7603  | 7467  |
| >TP53-V143M CQLAKTCPV  | 77    | >TP53-V143M CQLAKTCPM  | 4536  | 4459  |
| >TP53-V143M CQLAKTCPV  | 457   | >TP53-V143M CQLAKTCPM  | 14833 | 14376 |
| >TP53-V143M CQLAKTCPV  | 1648  | >TP53-V143M CQLAKTCPM  | 127   | 1521  |
| >TP53-V143M CQLAKTCPV  | 268   | >TP53-V143M CQLAKTCPM  | 71    | 197   |
| >TP53-V143M CQLAKTCPVC | 155   | >TP53-V143M CQLAKTCPM  | 149   | 6     |
| >TP53-V143M CQLAKTCPVC | 231   | >TP53-V143M CQLAKTCPM  | 276   | 45    |
| >TP53-V143M FCQLAKTCPV | 443   | >TP53-V143M FCQLAKTCPM | 25706 | 25263 |
| >TP53-V147F WVDSTPPPG  | 489   | >TP53-V147F WADSTPPPG  | 1262  | 773   |
| >TP53-V147F LAKTCPVQLV | 482   | >TP53-V147F LAKTCPVQLV | 15399 | 14917 |
| >TP53-V147F LWVDSTPP   | 386   | >TP53-V147F LWADSTPP   | 690   | 304   |
| >TP53-V147F LWVDSTPPP  | 467   | >TP53-V147F LWADSTPPP  | 785   | 318   |
| >TP53-V147F LWVDSTPPPC | 485   | >TP53-V147F LWADSTPPPC | 858   | 373   |
| >TP53-V147F VQLWVDST   | 120   | >TP53-V147F VQLWADST   | 142   | 22    |
| >TP53-V147F CPVQLWVD   | 706   | >TP53-V147F CPVQLWAD   | 477   | 229   |
| >TP53-V147F KTCPVQLWV  | 125   | >TP53-V147F KTCPVQLWA  | 1752  | 1627  |
| >TP53-V147F KTCPVQLWV  | 53    | >TP53-V147F KTCPVQLWA  | 2132  | 2079  |
| >TP53-V147F KTCPVQLWV  | 338   | >TP53-V147F KTCPVQLWA  | 10095 | 9757  |
| >TP53-V147F KTCPVQLWV  | 202   | >TP53-V147F KTCPVQLWA  | 12068 | 11866 |
| >TP53-V147F KTCPVQLWV  | 224   | >TP53-V147F KTCPVQLWA  | 109   | 115   |
| >TP53-V147F KTCPVQLWV  | 118   | >TP53-V147F KTCPVQLWA  | 736   | 618   |
| >TP53-V147F KTCPVQLWV  | 254   | >TP53-V147F KTCPVQLWA  | 1605  | 1351  |
| >TP53-V147F KTCPVQLWV  | 272   | >TP53-V147F KTCPVQLWA  | 1590  | 1318  |
| >TP53-V147L WVDSTPPPG  | 489   | >TP53-V147L WDDSTPPPG  | 15995 | 15506 |
| >TP53-V147L LAKTCPVQLV | 482   | >TP53-V147L LAKTCPVQLV | 36372 | 35890 |
| >TP53-V147L LWVDSTPP   | 386   | >TP53-V147L LWDDSTPP   | 1204  | 818   |
| >TP53-V147L LWVDSTPPP  | 467   | >TP53-V147L LWDDSTPPP  | 1328  | 861   |
| >TP53-V147L LWVDSTPPPC | 485   | >TP53-V147L LWDDSTPPPC | 1400  | 915   |
| >TP53-V147L VQLWVDST   | 120   | >TP53-V147L VQLWDDST   | 319   | 199   |
| >TP53-V147L KTCPVQLWV  | 125   | >TP53-V147L KTCPVQLWD  | 28668 | 28543 |
| >TP53-V147L KTCPVQLWV  | 53    | >TP53-V147L KTCPVQLWD  | 25007 | 24954 |
| >TP53-V147L KTCPVQLWV  | 338   | >TP53-V147L KTCPVQLWD  | 25810 | 25472 |
| >TP53-V147L KTCPVQLWV  | 202   | >TP53-V147L KTCPVQLWD  | 35447 | 35245 |
| >TP53-V147L KTCPVQLWV  | 224   | >TP53-V147L KTCPVQLWD  | 3082  | 2858  |
| >TP53-V147L KTCPVQLWV  | 118   | >TP53-V147L KTCPVQLWD  | 4933  | 4815  |
| >TP53-V147L KTCPVQLWV  | 254   | >TP53-V147L KTCPVQLWD  | 6084  | 5830  |
| >TP53-V147L KTCPVQLWV  | 272   | >TP53-V147L KTCPVQLWD  | 27186 | 26914 |
| >TP53-V147E WVDSTPPPG  | 489   | >TP53-V147E WEDSTPPPG  | 16885 | 16396 |
| >TP53-V147E WVDSTPPPG  | 31684 | >TP53-V147E WEDSTPPPG  | 63    | 31621 |

|                        |      |                        |       |       |
|------------------------|------|------------------------|-------|-------|
| >TP53-V147E LAKTCPVQLV | 482  | >TP53-V147E LAKTCPVQLV | 35126 | 34644 |
| >TP53-V147E LWVDSTPP   | 386  | >TP53-V147E LWEDSTPP   | 939   | 553   |
| >TP53-V147E LWVDSTPPP  | 467  | >TP53-V147E LWEDSTPPP  | 1014  | 547   |
| >TP53-V147E LWVDSTPPPC | 485  | >TP53-V147E LWEDSTPPPC | 1079  | 594   |
| >TP53-V147E QLWVDSTPP  | 3314 | >TP53-V147E QLWEDSTPPI | 346   | 2968  |
| >TP53-V147E VQLWVDST   | 120  | >TP53-V147E VQLWEDST   | 519   | 399   |
| >TP53-V147E KTCPVQLWV  | 125  | >TP53-V147E KTCPVQLWE  | 26201 | 26076 |
| >TP53-V147E KTCPVQLWV  | 53   | >TP53-V147E KTCPVQLWE  | 26125 | 26072 |
| >TP53-V147E KTCPVQLWV  | 338  | >TP53-V147E KTCPVQLWE  | 25127 | 24789 |
| >TP53-V147E KTCPVQLWV  | 202  | >TP53-V147E KTCPVQLWE  | 33952 | 33750 |
| >TP53-V147E KTCPVQLWV  | 224  | >TP53-V147E KTCPVQLWE  | 4515  | 4291  |
| >TP53-V147E KTCPVQLWV  | 118  | >TP53-V147E KTCPVQLWE  | 2264  | 2146  |
| >TP53-V147E KTCPVQLWV  | 254  | >TP53-V147E KTCPVQLWE  | 3298  | 3044  |
| >TP53-V147E KTCPVQLWV  | 272  | >TP53-V147E KTCPVQLWE  | 28453 | 28181 |
| >TP53-V147C WVDSTPPPG  | 489  | >TP53-V147C WGDSTPPPG  | 12580 | 12091 |
| >TP53-V147C LAKTCPVQLV | 482  | >TP53-V147C LAKTCPVQLV | 34717 | 34235 |
| >TP53-V147C LWVDSTPP   | 386  | >TP53-V147C LWGDSTPP   | 1217  | 831   |
| >TP53-V147C LWVDSTPPP  | 467  | >TP53-V147C LWGDSTPPP  | 1299  | 832   |
| >TP53-V147C LWVDSTPPPC | 485  | >TP53-V147C LWGDSTPPPC | 1380  | 895   |
| >TP53-V147C VQLWVDST   | 120  | >TP53-V147C VQLWGDST   | 183   | 63    |
| >TP53-V147C KTCPVQLWV  | 125  | >TP53-V147C KTCPVQLWG  | 21536 | 21411 |
| >TP53-V147C KTCPVQLWV  | 53   | >TP53-V147C KTCPVQLWG  | 16434 | 16381 |
| >TP53-V147C KTCPVQLWV  | 338  | >TP53-V147C KTCPVQLWG  | 24850 | 24512 |
| >TP53-V147C KTCPVQLWV  | 202  | >TP53-V147C KTCPVQLWG  | 33691 | 33489 |
| >TP53-V147C KTCPVQLWV  | 224  | >TP53-V147C KTCPVQLWG  | 1441  | 1217  |
| >TP53-V147C KTCPVQLWV  | 118  | >TP53-V147C KTCPVQLWG  | 2092  | 1974  |
| >TP53-V147C KTCPVQLWV  | 254  | >TP53-V147C KTCPVQLWG  | 3704  | 3450  |
| >TP53-V147C KTCPVQLWV  | 272  | >TP53-V147C KTCPVQLWG  | 7975  | 7703  |
| >TP53-V147I WVDSTPPPG  | 489  | >TP53-V147I WIDSTPPPGT | 980   | 491   |
| >TP53-V147I LAKTCPVQLV | 482  | >TP53-V147I LAKTCPVQLV | 14088 | 13606 |
| >TP53-V147I LAKTCPVQLV | 9936 | >TP53-V147I LAKTCPVQLV | 254   | 9682  |
| >TP53-V147I LWVDSTPP   | 386  | >TP53-V147I LWIDSTPP   | 637   | 251   |
| >TP53-V147I LWVDSTPPP  | 467  | >TP53-V147I LWIDSTPPP  | 724   | 257   |
| >TP53-V147I LWVDSTPPPC | 485  | >TP53-V147I LWIDSTPPPG | 721   | 236   |
| >TP53-V147I VQLWVDST   | 120  | >TP53-V147I VQLWIDST   | 102   | 18    |
| >TP53-V147I CPVQLWVDS  | 841  | >TP53-V147I CPVQLWIDS  | 498   | 343   |
| >TP53-V147I KTCPVQLWV  | 125  | >TP53-V147I KTCPVQLWI  | 856   | 731   |
| >TP53-V147I KTCPVQLWV  | 53   | >TP53-V147I KTCPVQLWI  | 636   | 583   |
| >TP53-V147I KTCPVQLWV  | 338  | >TP53-V147I KTCPVQLWI  | 6533  | 6195  |
| >TP53-V147I KTCPVQLWV  | 202  | >TP53-V147I KTCPVQLWI  | 10664 | 10462 |
| >TP53-V147I KTCPVQLWV  | 224  | >TP53-V147I KTCPVQLWI  | 122   | 102   |
| >TP53-V147I KTCPVQLWV  | 1821 | >TP53-V147I KTCPVQLWI  | 133   | 1688  |
| >TP53-V147I KTCPVQLWV  | 118  | >TP53-V147I KTCPVQLWI  | 27    | 91    |

|                        |      |                        |      |      |
|------------------------|------|------------------------|------|------|
| >TP53-V147I·KTCVPQLWV  | 554  | >TP53-V147I·KTCVPQLWI  | 31   | 523  |
| >TP53-V147I·KTCVPQLWV  | 254  | >TP53-V147I·KTCVPQLWI  | 185  | 69   |
| >TP53-V147I·KTCVPQLWV  | 272  | >TP53-V147I·KTCVPQLWI  | 13   | 259  |
| >TP53-V147I·AKTCVPQLW  | 503  | >TP53-V147I·AKTCVPQLW  | 341  | 162  |
| >TP53-V157A VRAMAIYK   | 159  | >TP53-V157A ARAMAIYK   | 67   | 92   |
| >TP53-V157A VRAMAIYKQ  | 1352 | >TP53-V157A ARAMAIYKQ  | 443  | 909  |
| >TP53-V157A RVRAMAIY   | 205  | >TP53-V157A RARAMAIY   | 1784 | 1579 |
| >TP53-V157A RVRAMAIYK  | 28   | >TP53-V157A RARAMAIYK  | 38   | 10   |
| >TP53-V157A RVRAMAIYK  | 20   | >TP53-V157A RARAMAIYK  | 41   | 21   |
| >TP53-V157A RVRAMAIY   | 241  | >TP53-V157A RARAMAIY   | 3811 | 3570 |
| >TP53-V157A RVRAMAIY   | 398  | >TP53-V157A RARAMAIY   | 2754 | 2356 |
| >TP53-V157A RVRAMAIY   | 5    | >TP53-V157A RARAMAIY   | 9    | 4    |
| >TP53-V157A RVRAMAIYK  | 3    | >TP53-V157A RARAMAIYK  | 3    | 0    |
| >TP53-V157A RVRAMAIYKC | 10   | >TP53-V157A RARAMAIYKC | 23   | 13   |
| >TP53-V157A RVRAMAIYKC | 9    | >TP53-V157A RARAMAIYKC | 18   | 9    |
| >TP53-V157A RVRAMAIY   | 107  | >TP53-V157A RARAMAIY   | 208  | 101  |
| >TP53-V157A RVRAMAIYK  | 18   | >TP53-V157A RARAMAIYK  | 37   | 19   |
| >TP53-V157A RVRAMAIY   | 26   | >TP53-V157A RARAMAIY   | 392  | 366  |
| >TP53-V157A RVRAMAIY   | 85   | >TP53-V157A RARAMAIY   | 111  | 26   |
| >TP53-V157A RVRAMAIY   | 311  | >TP53-V157A RARAMAIY   | 69   | 242  |
| >TP53-V157A RVRAMAIY   | 7    | >TP53-V157A RARAMAIY   | 3    | 4    |
| >TP53-V157A RVRAMAIY   | 2067 | >TP53-V157A RARAMAIY   | 148  | 1919 |
| >TP53-V157A RVRAMAIY   | 211  | >TP53-V157A RARAMAIY   | 122  | 89   |
| >TP53-V157A RVRAMAIYK  | 156  | >TP53-V157A RARAMAIYK  | 413  | 257  |
| >TP53-V157A TRVRAMAIY  | 62   | >TP53-V157A TRARAMAIY  | 316  | 254  |
| >TP53-V157A TRVRAMAIY  | 1130 | >TP53-V157A TRARAMAIY  | 336  | 794  |
| >TP53-V157A TRVRAMAIYK | 765  | >TP53-V157A TRARAMAIYK | 346  | 419  |
| >TP53-V157A TRVRAMAIY  | 278  | >TP53-V157A TRARAMAIY  | 323  | 45   |
| >TP53-V157A TRVRAMAI   | 542  | >TP53-V157A TRARAMAI   | 470  | 72   |
| >TP53-V157A TRVRAMAI   | 215  | >TP53-V157A TRARAMAI   | 201  | 14   |
| >TP53-V157A GTRVRAMAI\ | 269  | >TP53-V157A GTRARAMAI\ | 181  | 88   |
| >TP53-V157A GTRVRAMAI\ | 50   | >TP53-V157A GTRARAMAI\ | 37   | 13   |
| >TP53-V157A GTRVRAMAI\ | 39   | >TP53-V157A GTRARAMAI\ | 26   | 13   |
| >TP53-V157A GTRVRAMAI\ | 715  | >TP53-V157A GTRARAMAI\ | 390  | 325  |
| >TP53-V157A GTRVRAMA   | 18   | >TP53-V157A GTRARAMA   | 12   | 6    |
| >TP53-V157A GTRVRAMAI  | 9    | >TP53-V157A GTRARAMAI  | 7    | 2    |
| >TP53-V157A GTRVRAMAI\ | 30   | >TP53-V157A GTRARAMAI\ | 22   | 8    |
| >TP53-V157A GTRVRAMAI\ | 3    | >TP53-V157A GTRARAMAI\ | 3    | 0    |
| >TP53-V157A GTRVRAMAI\ | 130  | >TP53-V157A GTRARAMAI\ | 110  | 20   |
| >TP53-V157A GTRVRAMAI\ | 115  | >TP53-V157A GTRARAMAI\ | 116  | 1    |
| >TP53-V157A GTRVRAMAI\ | 405  | >TP53-V157A GTRARAMAI\ | 196  | 209  |
| >TP53-V157A GTRVRAMAI  | 40   | >TP53-V157A GTRARAMAI  | 28   | 12   |
| >TP53-V157A GTRVRAMAI\ | 4    | >TP53-V157A GTRARAMAI\ | 4    | 0    |

|                        |     |                        |       |       |
|------------------------|-----|------------------------|-------|-------|
| >TP53-V157#GTRVRAMAI   | 122 | >TP53-V157#GTRARAMAI   | 120   | 2     |
| >TP53-V157#GTRVRAMAI   | 21  | >TP53-V157#GTRARAMAI   | 23    | 2     |
| >TP53-V157#GTRVRAMAI   | 269 | >TP53-V157#GTRARAMAI   | 386   | 117   |
| >TP53-V157#GTRVRAMAI   | 387 | >TP53-V157#GTRARAMAI   | 609   | 222   |
| >TP53-V157#PPGTRVRAM   | 68  | >TP53-V157#PPGTRARAM   | 38    | 30    |
| >TP53-V157#PPGTRVRAM   | 709 | >TP53-V157#PPGTRARAM   | 431   | 278   |
| >TP53-V157#PPPGRTRVRAM | 370 | >TP53-V157#PPPGRTRARAM | 419   | 49    |
| >TP53-V157#PPPGRTRVRAM | 450 | >TP53-V157#PPPGRTRARAM | 745   | 295   |
| >TP53-V157#TPPPGRTRVRA | 482 | >TP53-V157#TPPPGRTRARA | 534   | 52    |
| >TP53-V157#TPPPGRTRVRA | 32  | >TP53-V157#TPPPGRTRARA | 23    | 9     |
| >TP53-V157#TPPPGRTRVRA | 139 | >TP53-V157#TPPPGRTRARA | 96    | 43    |
| >TP53-V157#TPPPGRTRV   | 273 | >TP53-V157#TPPPGRTRA   | 11326 | 11053 |
| >TP53-V157#STPPPGTRV   | 136 | >TP53-V157#STPPPGTRA   | 4853  | 4717  |
| >TP53-V157#STPPPGTRV   | 116 | >TP53-V157#STPPPGTRA   | 6556  | 6440  |
| >TP53-V157#STPPPGTRVR  | 730 | >TP53-V157#STPPPGTRAR  | 320   | 410   |
| >TP53-V157#STPPPGTRVR  | 129 | >TP53-V157#STPPPGTRAR  | 80    | 49    |
| >TP53-V157#STPPPGTRV   | 18  | >TP53-V157#STPPPGTRA   | 165   | 147   |
| >TP53-V157#STPPPGTRVR  | 82  | >TP53-V157#STPPPGTRAR  | 71    | 11    |
| >TP53-V157#STPPPGTRV   | 4   | >TP53-V157#STPPPGTRA   | 32    | 28    |
| >TP53-V157#STPPPGTRVR  | 96  | >TP53-V157#STPPPGTRAR  | 204   | 108   |
| >TP53-V157#STPPPGTRVR  | 54  | >TP53-V157#STPPPGTRAR  | 30    | 24    |
| >TP53-V157#STPPPGTRV   | 259 | >TP53-V157#STPPPGTRA   | 2075  | 1816  |
| >TP53-V157#STPPPGTRV   | 311 | >TP53-V157#STPPPGTRA   | 2071  | 1760  |
| >TP53-V157#DSTPPPGTRV  | 372 | >TP53-V157#DSTPPPGTRA  | 151   | 221   |
| >TP53-V157#DSTPPPGTRV  | 208 | >TP53-V157#DSTPPPGTRA  | 188   | 20    |
| >TP53-V157[VRAMAIYK    | 159 | >TP53-V157[DRAMAIYK    | 854   | 695   |
| >TP53-V157[RVRAMAIY    | 205 | >TP53-V157[RDRAMAIY    | 17585 | 17380 |
| >TP53-V157[RVRAMAIYK   | 28  | >TP53-V157[RDRAMAIYK   | 1198  | 1170  |
| >TP53-V157[RVRAMAIYK   | 20  | >TP53-V157[RDRAMAIYK   | 6461  | 6441  |
| >TP53-V157[RVRAMAIY    | 241 | >TP53-V157[RDRAMAIY    | 17811 | 17570 |
| >TP53-V157[RVRAMAIY    | 398 | >TP53-V157[RDRAMAIY    | 7619  | 7221  |
| >TP53-V157[RVRAMAIY    | 5   | >TP53-V157[RDRAMAIY    | 1436  | 1431  |
| >TP53-V157[RVRAMAIYK   | 3   | >TP53-V157[RDRAMAIYK   | 7     | 4     |
| >TP53-V157[RVRAMAIYK   | 10  | >TP53-V157[RDRAMAIYK   | 3256  | 3246  |
| >TP53-V157[RVRAMAIYK   | 9   | >TP53-V157[RDRAMAIYK   | 3354  | 3345  |
| >TP53-V157[RVRAMAIY    | 107 | >TP53-V157[RDRAMAIY    | 2462  | 2355  |
| >TP53-V157[RVRAMAIYK   | 18  | >TP53-V157[RDRAMAIYK   | 4435  | 4417  |
| >TP53-V157[RVRAMAIY    | 26  | >TP53-V157[RDRAMAIY    | 3106  | 3080  |
| >TP53-V157[RVRAMAIY    | 85  | >TP53-V157[RDRAMAIY    | 1660  | 1575  |
| >TP53-V157[RVRAMAIY    | 311 | >TP53-V157[RDRAMAIY    | 1106  | 795   |
| >TP53-V157[RVRAMAIY    | 7   | >TP53-V157[RDRAMAIY    | 2375  | 2368  |
| >TP53-V157[RVRAMAIY    | 211 | >TP53-V157[RDRAMAIY    | 1135  | 924   |
| >TP53-V157[RVRAMAIYK   | 156 | >TP53-V157[RDRAMAIYK   | 1582  | 1426  |



|                        |      |                        |       |       |
|------------------------|------|------------------------|-------|-------|
| >TP53-V157L TRVRAMAIY  | 62   | >TP53-V157L TRDRAMAIY  | 10608 | 10546 |
| >TP53-V157L TRVRAMAIY  | 278  | >TP53-V157L TRDRAMAIY  | 2107  | 1829  |
| >TP53-V157L TRVRAMAI   | 215  | >TP53-V157L TRDRAMAI   | 219   | 4     |
| >TP53-V157L GTRVRAMAI' | 269  | >TP53-V157L GTRDRAMAI' | 76    | 193   |
| >TP53-V157L GTRVRAMAI' | 50   | >TP53-V157L GTRDRAMAI' | 59    | 9     |
| >TP53-V157L GTRVRAMAI' | 39   | >TP53-V157L GTRDRAMAI' | 28    | 11    |
| >TP53-V157L GTRVRAMAI' | 715  | >TP53-V157L GTRDRAMAI' | 369   | 346   |
| >TP53-V157L GTRVRAMA   | 18   | >TP53-V157L GTRDRAMA   | 29    | 11    |
| >TP53-V157L GTRVRAMAI  | 9    | >TP53-V157L GTRDRAMAI  | 11    | 2     |
| >TP53-V157L GTRVRAMAI' | 30   | >TP53-V157L GTRDRAMAI' | 39    | 9     |
| >TP53-V157L GTRVRAMAI' | 3    | >TP53-V157L GTRDRAMAI' | 4     | 1     |
| >TP53-V157L GTRVRAMAI' | 130  | >TP53-V157L GTRDRAMAI' | 111   | 19    |
| >TP53-V157L GTRVRAMAI' | 115  | >TP53-V157L GTRDRAMAI' | 181   | 66    |
| >TP53-V157L GTRVRAMAI' | 671  | >TP53-V157L GTRDRAMAI' | 373   | 298   |
| >TP53-V157L GTRVRAMAI' | 405  | >TP53-V157L GTRDRAMAI' | 250   | 155   |
| >TP53-V157L GTRVRAMAI  | 40   | >TP53-V157L GTRDRAMAI  | 28    | 12    |
| >TP53-V157L GTRVRAMAI' | 4    | >TP53-V157L GTRDRAMAI' | 4     | 0     |
| >TP53-V157L GTRVRAMAI  | 122  | >TP53-V157L GTRDRAMAI  | 84    | 38    |
| >TP53-V157L GTRVRAMAI' | 21   | >TP53-V157L GTRDRAMAI' | 22    | 1     |
| >TP53-V157L GTRVRAMAI' | 269  | >TP53-V157L GTRDRAMAI' | 283   | 14    |
| >TP53-V157L GTRVRAMAI  | 387  | >TP53-V157L GTRDRAMAI  | 529   | 142   |
| >TP53-V157L PPGTRVRAM  | 68   | >TP53-V157L PPGTRDRAM  | 138   | 70    |
| >TP53-V157L PPPGTRVRAM | 370  | >TP53-V157L PPPGTRDRAM | 496   | 126   |
| >TP53-V157L PPPGTRVRAM | 450  | >TP53-V157L PPPGTRDRAM | 545   | 95    |
| >TP53-V157L TPPPGRVRA  | 482  | >TP53-V157L TPPPGRDRA  | 356   | 126   |
| >TP53-V157L TPPPGRVRA  | 32   | >TP53-V157L TPPPGRDRA  | 54    | 22    |
| >TP53-V157L TPPPGRVRA  | 139  | >TP53-V157L TPPPGRDRA  | 113   | 26    |
| >TP53-V157L TPPPGRV    | 273  | >TP53-V157L TPPPGRD    | 18274 | 18001 |
| >TP53-V157L STPPPGRV   | 136  | >TP53-V157L STPPPGRD   | 27988 | 27852 |
| >TP53-V157L STPPPGRV   | 116  | >TP53-V157L STPPPGRD   | 33712 | 33596 |
| >TP53-V157L STPPPGRVVR | 129  | >TP53-V157L STPPPGRDR  | 236   | 107   |
| >TP53-V157L STPPPGRV   | 18   | >TP53-V157L STPPPGRD   | 14742 | 14724 |
| >TP53-V157L STPPPGRVVR | 82   | >TP53-V157L STPPPGRDR  | 132   | 50    |
| >TP53-V157L STPPPGRV   | 4    | >TP53-V157L STPPPGRD   | 291   | 287   |
| >TP53-V157L STPPPGRVVR | 96   | >TP53-V157L STPPPGRDR  | 576   | 480   |
| >TP53-V157L STPPPGRVVR | 54   | >TP53-V157L STPPPGRDR  | 99    | 45    |
| >TP53-V157L STPPPGRV   | 259  | >TP53-V157L STPPPGRD   | 6388  | 6129  |
| >TP53-V157L STPPPGRV   | 311  | >TP53-V157L STPPPGRD   | 31485 | 31174 |
| >TP53-V157L DSTPPPGRV  | 372  | >TP53-V157L DSTPPPGRD  | 523   | 151   |
| >TP53-V157L DSTPPPGRV  | 208  | >TP53-V157L DSTPPPGRD  | 345   | 137   |
| >TP53-V157F VRAMAIYK   | 3568 | >TP53-V157F FRAMAIYK   | 335   | 3233  |
| >TP53-V157F VRAMAIYK   | 159  | >TP53-V157F FRAMAIYK   | 38    | 121   |
| >TP53-V157F VRAMAIYKQ  | 1352 | >TP53-V157F FRAMAIYKQ  | 254   | 1098  |

|                        |      |                        |      |      |
|------------------------|------|------------------------|------|------|
| >TP53-V157F RVRAMAIY   | 205  | >TP53-V157F RFRAMAIY   | 5227 | 5022 |
| >TP53-V157F RVRAMAIYK  | 28   | >TP53-V157F RFRAMAIYK  | 71   | 43   |
| >TP53-V157F RVRAMAIYK  | 20   | >TP53-V157F RFRAMAIYK  | 349  | 329  |
| >TP53-V157F RVRAMAIY   | 241  | >TP53-V157F RFRAMAIY   | 6365 | 6124 |
| >TP53-V157F RVRAMAIY   | 398  | >TP53-V157F RFRAMAIY   | 127  | 271  |
| >TP53-V157F RVRAMAIY   | 5    | >TP53-V157F RFRAMAIY   | 10   | 5    |
| >TP53-V157F RVRAMAIYK  | 3    | >TP53-V157F RFRAMAIYK  | 3    | 0    |
| >TP53-V157F RVRAMAIYKC | 10   | >TP53-V157F RFRAMAIYKC | 25   | 15   |
| >TP53-V157F RVRAMAIYKC | 9    | >TP53-V157F RFRAMAIYKC | 20   | 11   |
| >TP53-V157F RVRAMAIY   | 107  | >TP53-V157F RFRAMAIY   | 307  | 200  |
| >TP53-V157F RVRAMAIYK  | 18   | >TP53-V157F RFRAMAIYK  | 12   | 6    |
| >TP53-V157F RVRAMAIY   | 26   | >TP53-V157F RFRAMAIY   | 133  | 107  |
| >TP53-V157F RVRAMAIY   | 85   | >TP53-V157F RFRAMAIY   | 349  | 264  |
| >TP53-V157F RVRAMAIY   | 311  | >TP53-V157F RFRAMAIY   | 1278 | 967  |
| >TP53-V157F RVRAMAIY   | 7    | >TP53-V157F RFRAMAIY   | 3406 | 3399 |
| >TP53-V157F RVRAMAIY   | 211  | >TP53-V157F RFRAMAIY   | 1972 | 1761 |
| >TP53-V157F RVRAMAIYK  | 156  | >TP53-V157F RFRAMAIYK  | 25   | 131  |
| >TP53-V157F TRVRAMAIYK | 1127 | >TP53-V157F TRFRAMAIYK | 375  | 752  |
| >TP53-V157F TRVRAMAIY  | 62   | >TP53-V157F TRFRAMAIY  | 2304 | 2242 |
| >TP53-V157F TRVRAMAIY  | 1130 | >TP53-V157F TRFRAMAIY  | 348  | 782  |
| >TP53-V157F TRVRAMAIYK | 765  | >TP53-V157F TRFRAMAIYK | 276  | 489  |
| >TP53-V157F TRVRAMAI   | 746  | >TP53-V157F TRFRAMAI   | 162  | 584  |
| >TP53-V157F TRVRAMAIY  | 278  | >TP53-V157F TRFRAMAIY  | 57   | 221  |
| >TP53-V157F TRVRAMAI   | 542  | >TP53-V157F TRFRAMAI   | 78   | 464  |
| >TP53-V157F TRVRAMAIY  | 1249 | >TP53-V157F TRFRAMAIY  | 194  | 1055 |
| >TP53-V157F TRVRAMAIYK | 733  | >TP53-V157F TRFRAMAIYK | 219  | 514  |
| >TP53-V157F TRVRAMAIYK | 2274 | >TP53-V157F TRFRAMAIYK | 446  | 1828 |
| >TP53-V157F TRVRAMAI   | 215  | >TP53-V157F TRFRAMAI   | 125  | 90   |
| >TP53-V157F GTRVRAMAI  | 269  | >TP53-V157F GTRFRAMAI  | 244  | 25   |
| >TP53-V157F GTRVRAMAI  | 1539 | >TP53-V157F GTRFRAMAI  | 300  | 1239 |
| >TP53-V157F GTRVRAMAI  | 50   | >TP53-V157F GTRFRAMAI  | 40   | 10   |
| >TP53-V157F GTRVRAMAI  | 39   | >TP53-V157F GTRFRAMAI  | 25   | 14   |
| >TP53-V157F GTRVRAMAI  | 715  | >TP53-V157F GTRFRAMAI  | 414  | 301  |
| >TP53-V157F GTRVRAMA   | 18   | >TP53-V157F GTRFRAMA   | 14   | 4    |
| >TP53-V157F GTRVRAMAI  | 9    | >TP53-V157F GTRFRAMAI  | 8    | 1    |
| >TP53-V157F GTRVRAMAI  | 30   | >TP53-V157F GTRFRAMAI  | 25   | 5    |
| >TP53-V157F GTRVRAMAI  | 3    | >TP53-V157F GTRFRAMAI  | 3    | 0    |
| >TP53-V157F GTRVRAMAI  | 130  | >TP53-V157F GTRFRAMAI  | 92   | 38   |
| >TP53-V157F GTRVRAMAI  | 115  | >TP53-V157F GTRFRAMAI  | 108  | 7    |
| >TP53-V157F GTRVRAMAI  | 2287 | >TP53-V157F GTRFRAMAI  | 349  | 1938 |
| >TP53-V157F GTRVRAMAI  | 671  | >TP53-V157F GTRFRAMAI  | 239  | 432  |
| >TP53-V157F GTRVRAMAI  | 405  | >TP53-V157F GTRFRAMAI  | 323  | 82   |
| >TP53-V157F GTRVRAMAI  | 40   | >TP53-V157F GTRFRAMAI  | 36   | 4    |

|                       |       |                       |       |       |
|-----------------------|-------|-----------------------|-------|-------|
| >TP53-V157FGTRVRAMAI  | 4     | >TP53-V157FGTRFRAMAI  | 4     | 0     |
| >TP53-V157FGTRVRAMAI  | 122   | >TP53-V157FGTRFRAMAI  | 56    | 66    |
| >TP53-V157FGTRVRAMAI  | 21    | >TP53-V157FGTRFRAMAI  | 19    | 2     |
| >TP53-V157FGTRVRAMAI  | 269   | >TP53-V157FGTRFRAMAI  | 218   | 51    |
| >TP53-V157FGTRVRAMAI  | 387   | >TP53-V157FGTRFRAMAI  | 679   | 292   |
| >TP53-V157FPPGTRVRAM  | 68    | >TP53-V157FPPGTRFRAM  | 46    | 22    |
| >TP53-V157FPPGTRVRAM  | 1110  | >TP53-V157FPPGTRFRAM  | 170   | 940   |
| >TP53-V157FPPGTRVRAM  | 1167  | >TP53-V157FPPGTRFRAM  | 450   | 717   |
| >TP53-V157FPPPGTRVRAM | 370   | >TP53-V157FPPPGTRFRAM | 497   | 127   |
| >TP53-V157FPPPGTRVRAM | 450   | >TP53-V157FPPPGTRFRAM | 213   | 237   |
| >TP53-V157FTPPPGTRV   | 763   | >TP53-V157FTPPPGTRF   | 159   | 604   |
| >TP53-V157FTPPPGTRVRA | 482   | >TP53-V157FTPPPGTRFRA | 219   | 263   |
| >TP53-V157FTPPPGTRVRA | 32    | >TP53-V157FTPPPGTRFRA | 39    | 7     |
| >TP53-V157FTPPPGTRV   | 10664 | >TP53-V157FTPPPGTRF   | 397   | 10267 |
| >TP53-V157FTPPPGTRVRA | 139   | >TP53-V157FTPPPGTRFRA | 155   | 16    |
| >TP53-V157FTPPPGTRV   | 273   | >TP53-V157FTPPPGTRF   | 85    | 188   |
| >TP53-V157FTPPPGTRVRA | 727   | >TP53-V157FTPPPGTRFRA | 217   | 510   |
| >TP53-V157FSTPPPGTRV  | 136   | >TP53-V157FSTPPPGTRF  | 18926 | 18790 |
| >TP53-V157FSTPPPGTRV  | 116   | >TP53-V157FSTPPPGTRF  | 26185 | 26069 |
| >TP53-V157FSTPPPGTRVR | 851   | >TP53-V157FSTPPPGTRFR | 158   | 693   |
| >TP53-V157FSTPPPGTRVR | 730   | >TP53-V157FSTPPPGTRFR | 75    | 655   |
| >TP53-V157FSTPPPGTRVR | 129   | >TP53-V157FSTPPPGTRFR | 19    | 110   |
| >TP53-V157FSTPPPGTRV  | 18    | >TP53-V157FSTPPPGTRF  | 12734 | 12716 |
| >TP53-V157FSTPPPGTRVR | 82    | >TP53-V157FSTPPPGTRFR | 56    | 26    |
| >TP53-V157FSTPPPGTRV  | 1690  | >TP53-V157FSTPPPGTRF  | 7     | 1683  |
| >TP53-V157FSTPPPGTRV  | 4     | >TP53-V157FSTPPPGTRF  | 3     | 1     |
| >TP53-V157FSTPPPGTRVR | 96    | >TP53-V157FSTPPPGTRFR | 37    | 59    |
| >TP53-V157FSTPPPGTRVR | 54    | >TP53-V157FSTPPPGTRFR | 29    | 25    |
| >TP53-V157FSTPPPGTRV  | 259   | >TP53-V157FSTPPPGTRF  | 14    | 245   |
| >TP53-V157FSTPPPGTRVR | 1826  | >TP53-V157FSTPPPGTRFR | 344   | 1482  |
| >TP53-V157FSTPPPGTRV  | 311   | >TP53-V157FSTPPPGTRF  | 1019  | 708   |
| >TP53-V157FDSTPPPGTRV | 372   | >TP53-V157FDSTPPPGTRF | 58    | 314   |
| >TP53-V157FDSTPPPGTRV | 208   | >TP53-V157FDSTPPPGTRF | 39    | 169   |
| >TP53-V157FDSTPPPGTRV | 6868  | >TP53-V157FDSTPPPGTRF | 19    | 6849  |
| >TP53-V157FDSTPPPGTRV | 3923  | >TP53-V157FDSTPPPGTRF | 447   | 3476  |
| >TP53-V157CVRAMAIYK   | 159   | >TP53-V157CGRAMAIYK   | 86    | 73    |
| >TP53-V157CVRAMAIYKQ  | 1352  | >TP53-V157CGRAMAIYKQ  | 470   | 882   |
| >TP53-V157CRVRAMAIY   | 205   | >TP53-V157CRGRAMAIY   | 7195  | 6990  |
| >TP53-V157CRVRAMAIYK  | 28    | >TP53-V157CRGRAMAIYK  | 77    | 49    |
| >TP53-V157CRVRAMAIYK  | 20    | >TP53-V157CRGRAMAIYK  | 431   | 411   |
| >TP53-V157CRVRAMAIY   | 241   | >TP53-V157CRGRAMAIY   | 19079 | 18838 |
| >TP53-V157CRVRAMAIY   | 398   | >TP53-V157CRGRAMAIY   | 5898  | 5500  |
| >TP53-V157CRVRAMAIY   | 5     | >TP53-V157CRGRAMAIY   | 38    | 33    |

|                        |      |                        |       |       |
|------------------------|------|------------------------|-------|-------|
| >TP53-V157C RVRAMAIYK  | 3    | >TP53-V157C RGRAMAIYK  | 3     | 0     |
| >TP53-V157C RVRAMAIYKC | 10   | >TP53-V157C RGRAMAIYKC | 138   | 128   |
| >TP53-V157C RVRAMAIYKC | 9    | >TP53-V157C RGRAMAIYKC | 117   | 108   |
| >TP53-V157C RVRAMAIY   | 107  | >TP53-V157C RGRAMAIY   | 235   | 128   |
| >TP53-V157C RVRAMAIYK  | 18   | >TP53-V157C RGRAMAIYK  | 240   | 222   |
| >TP53-V157C RVRAMAIY   | 26   | >TP53-V157C RGRAMAIY   | 1773  | 1747  |
| >TP53-V157C RVRAMAIY   | 85   | >TP53-V157C RGRAMAIY   | 203   | 118   |
| >TP53-V157C RVRAMAIY   | 311  | >TP53-V157C RGRAMAIY   | 614   | 303   |
| >TP53-V157C RVRAMAIY   | 7    | >TP53-V157C RGRAMAIY   | 21    | 14    |
| >TP53-V157C RVRAMAIY   | 211  | >TP53-V157C RGRAMAIY   | 592   | 381   |
| >TP53-V157C RVRAMAIYK  | 156  | >TP53-V157C RGRAMAIYK  | 228   | 72    |
| >TP53-V157C TRVRAMAIY  | 62   | >TP53-V157C TRGRAMAIY  | 1596  | 1534  |
| >TP53-V157C TRVRAMAIY  | 278  | >TP53-V157C TRGRAMAIY  | 1253  | 975   |
| >TP53-V157C TRVRAMAI   | 215  | >TP53-V157C TRGRAMAI   | 2833  | 2618  |
| >TP53-V157C GTRVRAMAI' | 269  | >TP53-V157C GTRGRAMAI' | 279   | 10    |
| >TP53-V157C GTRVRAMAI' | 50   | >TP53-V157C GTRGRAMAI' | 44    | 6     |
| >TP53-V157C GTRVRAMAI' | 39   | >TP53-V157C GTRGRAMAI' | 39    | 0     |
| >TP53-V157C GTRVRAMAI' | 715  | >TP53-V157C GTRGRAMAI' | 206   | 509   |
| >TP53-V157C GTRVRAMA   | 18   | >TP53-V157C GTRGRAMA   | 25    | 7     |
| >TP53-V157C GTRVRAMAI  | 9    | >TP53-V157C GTRGRAMAI  | 12    | 3     |
| >TP53-V157C GTRVRAMAI' | 30   | >TP53-V157C GTRGRAMAI' | 44    | 14    |
| >TP53-V157C GTRVRAMAI' | 3    | >TP53-V157C GTRGRAMAI' | 4     | 1     |
| >TP53-V157C GTRVRAMAI' | 130  | >TP53-V157C GTRGRAMAI' | 91    | 39    |
| >TP53-V157C GTRVRAMAI' | 115  | >TP53-V157C GTRGRAMAI' | 250   | 135   |
| >TP53-V157C GTRVRAMAI  | 2287 | >TP53-V157C GTRGRAMAI  | 287   | 2000  |
| >TP53-V157C GTRVRAMAI' | 405  | >TP53-V157C GTRGRAMAI' | 329   | 76    |
| >TP53-V157C GTRVRAMAI  | 40   | >TP53-V157C GTRGRAMAI  | 29    | 11    |
| >TP53-V157C GTRVRAMAI' | 4    | >TP53-V157C GTRGRAMAI' | 5     | 1     |
| >TP53-V157C GTRVRAMAI  | 122  | >TP53-V157C GTRGRAMAI  | 70    | 52    |
| >TP53-V157C GTRVRAMAI' | 21   | >TP53-V157C GTRGRAMAI' | 23    | 2     |
| >TP53-V157C GTRVRAMAI' | 269  | >TP53-V157C GTRGRAMAI' | 378   | 109   |
| >TP53-V157C GTRVRAMAI  | 387  | >TP53-V157C GTRGRAMAI  | 873   | 486   |
| >TP53-V157C PGTRVRAMA  | 619  | >TP53-V157C PGTRGRAMA  | 492   | 127   |
| >TP53-V157C PPGTRVRAM  | 68   | >TP53-V157C PPGTRGRAM  | 17    | 51    |
| >TP53-V157C PPGTRVRAM  | 709  | >TP53-V157C PPGTRGRAM  | 205   | 504   |
| >TP53-V157C PPPGTRVRAM | 370  | >TP53-V157C PPPGTRGRAM | 397   | 27    |
| >TP53-V157C PPPGTRVRAM | 450  | >TP53-V157C PPPGTRGRAM | 759   | 309   |
| >TP53-V157C PPPGTRVRAM | 1827 | >TP53-V157C PPPGTRGRAM | 316   | 1511  |
| >TP53-V157C TPPPGRVRA  | 482  | >TP53-V157C TPPPGRGRA  | 842   | 360   |
| >TP53-V157C TPPPGRVRA  | 32   | >TP53-V157C TPPPGRGRA  | 26    | 6     |
| >TP53-V157C TPPPGRVRA  | 139  | >TP53-V157C TPPPGRGRA  | 191   | 52    |
| >TP53-V157C TPPPGRV    | 273  | >TP53-V157C TPPPGRG    | 14699 | 14426 |
| >TP53-V157C STPPPGRV   | 136  | >TP53-V157C STPPPGRG   | 23212 | 23076 |

|                        |     |                        |       |       |
|------------------------|-----|------------------------|-------|-------|
| >TP53-V157C-STPPPGRV   | 116 | >TP53-V157C-STPPPGRG   | 31074 | 30958 |
| >TP53-V157C-STPPPGRVR  | 730 | >TP53-V157C-STPPPGRGR  | 349   | 381   |
| >TP53-V157C-STPPPGRV   | 129 | >TP53-V157C-STPPPGRGR  | 96    | 33    |
| >TP53-V157C-STPPPGRV   | 18  | >TP53-V157C-STPPPGRG   | 8292  | 8274  |
| >TP53-V157C-STPPPGRVR  | 82  | >TP53-V157C-STPPPGRGR  | 168   | 86    |
| >TP53-V157C-STPPPGRV   | 4   | >TP53-V157C-STPPPGRG   | 69    | 65    |
| >TP53-V157C-STPPPGRVR  | 96  | >TP53-V157C-STPPPGRGR  | 347   | 251   |
| >TP53-V157C-STPPPGRV   | 54  | >TP53-V157C-STPPPGRGR  | 152   | 98    |
| >TP53-V157C-STPPPGRV   | 259 | >TP53-V157C-STPPPGRG   | 4218  | 3959  |
| >TP53-V157C-STPPPGRV   | 311 | >TP53-V157C-STPPPGRG   | 10141 | 9830  |
| >TP53-V157C-DSTPPPGRV  | 372 | >TP53-V157C-DSTPPPGRG  | 379   | 7     |
| >TP53-V157C-DSTPPPGRV  | 208 | >TP53-V157C-DSTPPPGRG  | 175   | 33    |
| >TP53-V157I·VRAMAIYK   | 159 | >TP53-V157I·IRAMAIYK   | 137   | 22    |
| >TP53-V157I·RVRAMAIY   | 205 | >TP53-V157I·RIRAMAIY   | 212   | 7     |
| >TP53-V157I·RVRAMAIYK  | 28  | >TP53-V157I·RIRAMAIYK  | 26    | 2     |
| >TP53-V157I·RVRAMAIYK  | 20  | >TP53-V157I·RIRAMAIYK  | 22    | 2     |
| >TP53-V157I·RVRAMAIY   | 241 | >TP53-V157I·RIRAMAIY   | 776   | 535   |
| >TP53-V157I·RVRAMAIY   | 398 | >TP53-V157I·RIRAMAIY   | 670   | 272   |
| >TP53-V157I·RVRAMAIY   | 5   | >TP53-V157I·RIRAMAIY   | 8     | 3     |
| >TP53-V157I·RVRAMAIYK  | 3   | >TP53-V157I·RIRAMAIYK  | 3     | 0     |
| >TP53-V157I·RVRAMAIYK  | 10  | >TP53-V157I·RIRAMAIYKQ | 22    | 12    |
| >TP53-V157I·RVRAMAIYK  | 9   | >TP53-V157I·RIRAMAIYKQ | 18    | 9     |
| >TP53-V157I·RVRAMAIY   | 107 | >TP53-V157I·RIRAMAIY   | 135   | 28    |
| >TP53-V157I·RVRAMAIYK  | 18  | >TP53-V157I·RIRAMAIYK  | 29    | 11    |
| >TP53-V157I·RVRAMAIY   | 26  | >TP53-V157I·RIRAMAIY   | 65    | 39    |
| >TP53-V157I·RVRAMAIY   | 85  | >TP53-V157I·RIRAMAIY   | 84    | 1     |
| >TP53-V157I·RVRAMAIY   | 311 | >TP53-V157I·RIRAMAIY   | 230   | 81    |
| >TP53-V157I·RVRAMAIY   | 7   | >TP53-V157I·RIRAMAIY   | 22    | 15    |
| >TP53-V157I·RVRAMAIY   | 211 | >TP53-V157I·RIRAMAIY   | 299   | 88    |
| >TP53-V157I·RVRAMAIYK  | 156 | >TP53-V157I·RIRAMAIYK  | 62    | 94    |
| >TP53-V157I·TRVRAMAIY  | 62  | >TP53-V157I·TRIRAMAIY  | 33    | 29    |
| >TP53-V157I·TRVRAMAIYK | 765 | >TP53-V157I·TRIRAMAIYK | 326   | 439   |
| >TP53-V157I·TRVRAMAIY  | 278 | >TP53-V157I·TRIRAMAIY  | 213   | 65    |
| >TP53-V157I·TRVRAMAI   | 542 | >TP53-V157I·TRIRAMAI   | 352   | 190   |
| >TP53-V157I·TRVRAMAIYK | 733 | >TP53-V157I·TRIRAMAIYK | 305   | 428   |
| >TP53-V157I·TRVRAMAI   | 215 | >TP53-V157I·TRIRAMAI   | 151   | 64    |
| >TP53-V157I·GTRVRAMAI  | 269 | >TP53-V157I·GTRIRAMAIY | 221   | 48    |
| >TP53-V157I·GTRVRAMAI  | 50  | >TP53-V157I·GTRIRAMAIY | 53    | 3     |
| >TP53-V157I·GTRVRAMAI  | 39  | >TP53-V157I·GTRIRAMAIY | 45    | 6     |
| >TP53-V157I·GTRVRAMA   | 18  | >TP53-V157I·GTRIRAMA   | 22    | 4     |
| >TP53-V157I·GTRVRAMAI  | 9   | >TP53-V157I·GTRIRAMAI  | 11    | 2     |
| >TP53-V157I·GTRVRAMAI  | 30  | >TP53-V157I·GTRIRAMAIY | 40    | 10    |
| >TP53-V157I·GTRVRAMAI  | 3   | >TP53-V157I·GTRIRAMAIY | 4     | 1     |

|                         |      |                         |      |      |
|-------------------------|------|-------------------------|------|------|
| >TP53-V157I·GTRVRAMAI   | 130  | >TP53-V157I·GTRIRAMAIY  | 127  | 3    |
| >TP53-V157I·GTRVRAMAI   | 115  | >TP53-V157I·GTRIRAMAIY  | 137  | 22   |
| >TP53-V157I·GTRVRAMAI   | 405  | >TP53-V157I·GTRIRAMAIY  | 502  | 97   |
| >TP53-V157I·GTRVRAMAI   | 40   | >TP53-V157I·GTRIRAMAI   | 19   | 21   |
| >TP53-V157I·GTRVRAMAI   | 4    | >TP53-V157I·GTRIRAMAIY  | 4    | 0    |
| >TP53-V157I·GTRVRAMAI   | 122  | >TP53-V157I·GTRIRAMAI   | 167  | 45   |
| >TP53-V157I·GTRVRAMAI   | 21   | >TP53-V157I·GTRIRAMAIY  | 19   | 2    |
| >TP53-V157I·GTRVRAMAI   | 269  | >TP53-V157I·GTRIRAMAIY  | 214  | 55   |
| >TP53-V157I·GTRVRAMAI   | 387  | >TP53-V157I·GTRIRAMAI   | 322  | 65   |
| >TP53-V157I·PGTRVRAMA   | 619  | >TP53-V157I·PGTRIRAMAI  | 412  | 207  |
| >TP53-V157I·PPGTRVRAM   | 68   | >TP53-V157I·PPGTRIRAM   | 90   | 22   |
| >TP53-V157I·PPPGRTRVRAM | 370  | >TP53-V157I·PPPGRTRIRAM | 399  | 29   |
| >TP53-V157I·PPPGRTRVRAM | 450  | >TP53-V157I·PPPGRTRIRAM | 435  | 15   |
| >TP53-V157I·TPPPGTRV    | 763  | >TP53-V157I·TPPPGTRI    | 388  | 375  |
| >TP53-V157I·TPPPGTRVRA  | 482  | >TP53-V157I·TPPPGTRIRAI | 554  | 72   |
| >TP53-V157I·TPPPGTRVRA  | 32   | >TP53-V157I·TPPPGTRIRAI | 38   | 6    |
| >TP53-V157I·TPPPGTRVRA  | 139  | >TP53-V157I·TPPPGTRIRAI | 187  | 48   |
| >TP53-V157I·TPPPGTRV    | 273  | >TP53-V157I·TPPPGTRI    | 85   | 188  |
| >TP53-V157I·TPPPGTRVRA  | 727  | >TP53-V157I·TPPPGTRIRAI | 380  | 347  |
| >TP53-V157I·STPPPGTRV   | 136  | >TP53-V157I·STPPPGTRI   | 1706 | 1570 |
| >TP53-V157I·STPPPGTRV   | 116  | >TP53-V157I·STPPPGTRI   | 5980 | 5864 |
| >TP53-V157I·STPPPGTRVR  | 129  | >TP53-V157I·STPPPGTRIR  | 98   | 31   |
| >TP53-V157I·STPPPGTRV   | 18   | >TP53-V157I·STPPPGTRI   | 57   | 39   |
| >TP53-V157I·STPPPGTRVR  | 82   | >TP53-V157I·STPPPGTRIR/ | 145  | 63   |
| >TP53-V157I·STPPPGTRV   | 1690 | >TP53-V157I·STPPPGTRI   | 291  | 1399 |
| >TP53-V157I·STPPPGTRV   | 4    | >TP53-V157I·STPPPGTRI   | 3    | 1    |
| >TP53-V157I·STPPPGTRVR  | 96   | >TP53-V157I·STPPPGTRIR  | 56   | 40   |
| >TP53-V157I·STPPPGTRVR  | 54   | >TP53-V157I·STPPPGTRIR/ | 41   | 13   |
| >TP53-V157I·STPPPGTRV   | 259  | >TP53-V157I·STPPPGTRI   | 183  | 76   |
| >TP53-V157I·STPPPGTRV   | 311  | >TP53-V157I·STPPPGTRI   | 13   | 298  |
| >TP53-V157I·DSTPPPGTRV  | 372  | >TP53-V157I·DSTPPPGTRII | 526  | 154  |
| >TP53-V157I·DSTPPPGTRV  | 208  | >TP53-V157I·DSTPPPGTRII | 226  | 18   |
| >TP53-V157I·DSTPPPGTRV  | 4239 | >TP53-V157I·DSTPPPGTRI  | 72   | 4167 |
| >TP53-V157L·VRAMAIYK    | 159  | >TP53-V157L·LRAMAIYK    | 82   | 77   |
| >TP53-V157L·RVRAMAIY    | 205  | >TP53-V157L·RLRAMAIY    | 99   | 106  |
| >TP53-V157L·RVRAMAIYK   | 28   | >TP53-V157L·RLRAMAIYK   | 24   | 4    |
| >TP53-V157L·RVRAMAIYK   | 20   | >TP53-V157L·RLRAMAIYK   | 44   | 24   |
| >TP53-V157L·RVRAMAIY    | 241  | >TP53-V157L·RLRAMAIY    | 3973 | 3732 |
| >TP53-V157L·RVRAMAIY    | 398  | >TP53-V157L·RLRAMAIY    | 507  | 109  |
| >TP53-V157L·RVRAMAIY    | 5    | >TP53-V157L·RLRAMAIY    | 15   | 10   |
| >TP53-V157L·RVRAMAIYK   | 3    | >TP53-V157L·RLRAMAIYK   | 3    | 0    |
| >TP53-V157L·RVRAMAIYKC  | 10   | >TP53-V157L·RLRAMAIYKC  | 49   | 39   |
| >TP53-V157L·RVRAMAIYKC  | 9    | >TP53-V157L·RLRAMAIYKC  | 40   | 31   |

|                        |      |                        |      |      |
|------------------------|------|------------------------|------|------|
| >TP53-V157L RVRAMAIY   | 107  | >TP53-V157L RLRAMAIY   | 114  | 7    |
| >TP53-V157L RVRAMAIYK  | 18   | >TP53-V157L RLRAMAIYK  | 32   | 14   |
| >TP53-V157L RVRAMAIY   | 26   | >TP53-V157L RLRAMAIY   | 26   | 0    |
| >TP53-V157L RVRAMAIY   | 85   | >TP53-V157L RLRAMAIY   | 57   | 28   |
| >TP53-V157L RVRAMAIY   | 1402 | >TP53-V157L RLRAMAIY   | 207  | 1195 |
| >TP53-V157L RVRAMAIY   | 311  | >TP53-V157L RLRAMAIY   | 45   | 266  |
| >TP53-V157L RVRAMAIY   | 7    | >TP53-V157L RLRAMAIY   | 21   | 14   |
| >TP53-V157L RVRAMAIY   | 211  | >TP53-V157L RLRAMAIY   | 887  | 676  |
| >TP53-V157L RVRAMAIYK  | 156  | >TP53-V157L RLRAMAIYK  | 84   | 72   |
| >TP53-V157L TRVRAMAIYK | 1127 | >TP53-V157L TRLRAMAIYK | 405  | 722  |
| >TP53-V157L TRVRAMAIY  | 62   | >TP53-V157L TRLRAMAIY  | 665  | 603  |
| >TP53-V157L TRVRAMAIY  | 278  | >TP53-V157L TRLRAMAIY  | 223  | 55   |
| >TP53-V157L TRVRAMAI   | 542  | >TP53-V157L TRLRAMAI   | 202  | 340  |
| >TP53-V157L TRVRAMAIY  | 1249 | >TP53-V157L TRLRAMAIY  | 490  | 759  |
| >TP53-V157L TRVRAMAIYK | 733  | >TP53-V157L TRLRAMAIYK | 467  | 266  |
| >TP53-V157L TRVRAMAI   | 215  | >TP53-V157L TRLRAMAI   | 242  | 27   |
| >TP53-V157L GTRVRAMAI  | 269  | >TP53-V157L GTRLRAMAIY | 239  | 30   |
| >TP53-V157L GTRVRAMAI  | 50   | >TP53-V157L GTRLRAMAIY | 53   | 3    |
| >TP53-V157L GTRVRAMAI  | 39   | >TP53-V157L GTRLRAMAIY | 36   | 3    |
| >TP53-V157L GTRVRAMA   | 18   | >TP53-V157L GTRLRAMA   | 24   | 6    |
| >TP53-V157L GTRVRAMAI  | 9    | >TP53-V157L GTRLRAMAI  | 11   | 2    |
| >TP53-V157L GTRVRAMAI  | 30   | >TP53-V157L GTRLRAMAIY | 44   | 14   |
| >TP53-V157L GTRVRAMAI  | 3    | >TP53-V157L GTRLRAMAIY | 4    | 1    |
| >TP53-V157L GTRVRAMAI  | 130  | >TP53-V157L GTRLRAMAIY | 110  | 20   |
| >TP53-V157L GTRVRAMAI  | 115  | >TP53-V157L GTRLRAMAIY | 192  | 77   |
| >TP53-V157L GTRVRAMAI  | 405  | >TP53-V157L GTRLRAMAIY | 670  | 265  |
| >TP53-V157L GTRVRAMAI  | 40   | >TP53-V157L GTRLRAMAI  | 48   | 8    |
| >TP53-V157L GTRVRAMAI  | 4    | >TP53-V157L GTRLRAMAIY | 5    | 1    |
| >TP53-V157L GTRVRAMAI  | 122  | >TP53-V157L GTRLRAMAI  | 157  | 35   |
| >TP53-V157L GTRVRAMAI  | 21   | >TP53-V157L GTRLRAMAIY | 18   | 3    |
| >TP53-V157L GTRVRAMAI  | 269  | >TP53-V157L GTRLRAMAIY | 424  | 155  |
| >TP53-V157L GTRVRAMAI  | 387  | >TP53-V157L GTRLRAMAI  | 858  | 471  |
| >TP53-V157L PPGTRVRAM  | 68   | >TP53-V157L PPGTRLRAM  | 53   | 15   |
| >TP53-V157L PPPGTRVRAM | 370  | >TP53-V157L PPPGTRLRAM | 496  | 126  |
| >TP53-V157L PPPGTRVRAM | 450  | >TP53-V157L PPPGTRLRAM | 599  | 149  |
| >TP53-V157L TPPPGRV    | 763  | >TP53-V157L TPPPGTRL   | 202  | 561  |
| >TP53-V157L TPPPGRVRA  | 482  | >TP53-V157L TPPPGTRLRA | 627  | 145  |
| >TP53-V157L TPPPGRV    | 1601 | >TP53-V157L TPPPGTRL   | 247  | 1354 |
| >TP53-V157L TPPPGRVRA  | 32   | >TP53-V157L TPPPGTRLRA | 41   | 9    |
| >TP53-V157L TPPPGRVRA  | 139  | >TP53-V157L TPPPGTRLRA | 205  | 66   |
| >TP53-V157L TPPPGRV    | 273  | >TP53-V157L TPPPGTRL   | 30   | 243  |
| >TP53-V157L TPPPGRVRA  | 727  | >TP53-V157L TPPPGTRLRA | 466  | 261  |
| >TP53-V157L STPPPGRV   | 136  | >TP53-V157L STPPPGTRL  | 2054 | 1918 |

|                       |      |                       |      |      |
|-----------------------|------|-----------------------|------|------|
| >TP53-V157L STPPPGRV  | 116  | >TP53-V157L STPPPGRV  | 2032 | 1916 |
| >TP53-V157L STPPPGRVR | 851  | >TP53-V157L STPPPGRVR | 354  | 497  |
| >TP53-V157L STPPPGRV  | 730  | >TP53-V157L STPPPGRV  | 254  | 476  |
| >TP53-V157L STPPPGRVR | 129  | >TP53-V157L STPPPGRVR | 27   | 102  |
| >TP53-V157L STPPPGRV  | 18   | >TP53-V157L STPPPGRV  | 107  | 89   |
| >TP53-V157L STPPPGRVR | 82   | >TP53-V157L STPPPGRVR | 359  | 277  |
| >TP53-V157L STPPPGRV  | 1690 | >TP53-V157L STPPPGRV  | 59   | 1631 |
| >TP53-V157L STPPPGRV  | 4    | >TP53-V157L STPPPGRV  | 2    | 2    |
| >TP53-V157L STPPPGRVR | 96   | >TP53-V157L STPPPGRVR | 28   | 68   |
| >TP53-V157L STPPPGRVR | 54   | >TP53-V157L STPPPGRVR | 48   | 6    |
| >TP53-V157L STPPPGRV  | 259  | >TP53-V157L STPPPGRV  | 81   | 178  |
| >TP53-V157L STPPPGRV  | 311  | >TP53-V157L STPPPGRV  | 62   | 249  |
| >TP53-V157L DSTPPPGRV | 372  | >TP53-V157L DSTPPPGRV | 130  | 242  |
| >TP53-V157L DSTPPPGRV | 208  | >TP53-V157L DSTPPPGRV | 83   | 125  |
| >TP53-V157L DSTPPPGRV | 6868 | >TP53-V157L DSTPPPGRV | 301  | 6567 |
| >TP53-V172/VVRRCPHH   | 1099 | >TP53-V172/VVRRCPHH   | 104  | 995  |
| >TP53-V172/VVRRCPHHE  | 2903 | >TP53-V172/VVRRCPHHE  | 350  | 2553 |
| >TP53-V172/VVRRCPHHEI | 145  | >TP53-V172/VVRRCPHHEI | 17   | 128  |
| >TP53-V172/VVRRCPHHEI | 63   | >TP53-V172/VVRRCPHHEI | 35   | 28   |
| >TP53-V172/VVRRCPHHEI | 4041 | >TP53-V172/VVRRCPHHEI | 461  | 3580 |
| >TP53-V172/EVRRCPH    | 400  | >TP53-V172/EVRRCPH    | 8297 | 7897 |
| >TP53-V172/EVRRCPHH   | 98   | >TP53-V172/EVRRCPHH   | 3556 | 3458 |
| >TP53-V172/EVRRCPHHE  | 428  | >TP53-V172/EVRRCPHHE  | 8838 | 8410 |
| >TP53-V172/EVRRCPHHEI | 371  | >TP53-V172/EVRRCPHHEI | 682  | 311  |
| >TP53-V172/EVRRCPHHEI | 53   | >TP53-V172/EVRRCPHHEI | 92   | 39   |
| >TP53-V172/EVRRCPHHEI | 5    | >TP53-V172/EVRRCPHHEI | 7    | 2    |
| >TP53-V172/IYKQSQHMTI | 402  | >TP53-V172/IYKQSQHMTI | 9013 | 8611 |
| >TP53-V172/HMTEVRRRC  | 38   | >TP53-V172/HMTEVRRRC  | 217  | 179  |
| >TP53-V172/HMTEVRRRC  | 579  | >TP53-V172/HMTEVRRRC  | 312  | 267  |
| >TP53-V172/HMTEVRRR   | 38   | >TP53-V172/HMTEVRRR   | 92   | 54   |
| >TP53-V172/HMTEVRRR   | 65   | >TP53-V172/HMTEVRRR   | 218  | 153  |
| >TP53-V172/HMTEVRRR   | 35   | >TP53-V172/HMTEVRRR   | 60   | 25   |
| >TP53-V172/HMTEVRRR   | 64   | >TP53-V172/HMTEVRRR   | 46   | 18   |
| >TP53-V172/QHMTEVVR   | 269  | >TP53-V172/QHMTEVVR   | 379  | 110  |
| >TP53-V172/QHMTEVVR   | 195  | >TP53-V172/QHMTEVVR   | 142  | 53   |
| >TP53-V172/SQHMTEVV   | 670  | >TP53-V172/SQHMTEVV   | 190  | 480  |
| >TP53-V172/SQHMTEVV   | 115  | >TP53-V172/SQHMTEVV   | 33   | 82   |
| >TP53-V172/SQHMTEVV   | 256  | >TP53-V172/SQHMTEVV   | 119  | 137  |
| >TP53-V172/SQHMTEVVR  | 115  | >TP53-V172/SQHMTEVVR  | 76   | 39   |
| >TP53-V172/SQHMTEVV   | 504  | >TP53-V172/SQHMTEVV   | 499  | 5    |
| >TP53-V172/SQHMTEVV   | 88   | >TP53-V172/SQHMTEVV   | 69   | 19   |
| >TP53-V172/SQHMTEVVR  | 162  | >TP53-V172/SQHMTEVVR  | 389  | 227  |
| >TP53-V172/SQHMTEVVR  | 434  | >TP53-V172/SQHMTEVVR  | 1040 | 606  |



|                        |      |                        |       |       |
|------------------------|------|------------------------|-------|-------|
| >TP53-V172/SQHMTEVVR   | 363  | >TP53-V172/SQHMTEAVR   | 433   | 70    |
| >TP53-V172/QSQHMTEVV   | 230  | >TP53-V172/QSQHMTEAV   | 173   | 57    |
| >TP53-V172/QSQHMTEVV   | 321  | >TP53-V172/QSQHMTEAV   | 444   | 123   |
| >TP53-V172/QSQHMTEVV   | 1104 | >TP53-V172/QSQHMTEAV   | 394   | 710   |
| >TP53-V172/QSQHMTEVV   | 185  | >TP53-V172/QSQHMTEAV   | 183   | 2     |
| >TP53-V172/QSQHMTEV    | 206  | >TP53-V172/QSQHMTEA    | 3007  | 2801  |
| >TP53-V172/QSQHMTEVV   | 303  | >TP53-V172/QSQHMTEAV   | 95    | 208   |
| >TP53-V172/QSQHMTEVV   | 306  | >TP53-V172/QSQHMTEAV   | 437   | 131   |
| >TP53-V172/KSQSQHMTEV  | 82   | >TP53-V172/KSQSQHMTEA  | 1830  | 1748  |
| >TP53-V172/KSQSQHMTEV  | 51   | >TP53-V172/KSQSQHMTEA  | 278   | 227   |
| >TP53-V172/KSQSQHMTEV  | 298  | >TP53-V172/KSQSQHMTEA  | 146   | 152   |
| >TP53-V172/KSQSQHMTEV  | 9    | >TP53-V172/KSQSQHMTEA  | 51    | 42    |
| >TP53-V172/KSQSQHMTEV  | 273  | >TP53-V172/KSQSQHMTEA  | 132   | 141   |
| >TP53-V172/KSQSQHMTEV  | 10   | >TP53-V172/KSQSQHMTEA  | 36    | 26    |
| >TP53-V172/KSQSQHMTEV  | 993  | >TP53-V172/KSQSQHMTEA  | 355   | 638   |
| >TP53-V172/KSQSQHMTEV  | 426  | >TP53-V172/KSQSQHMTEA  | 10078 | 9652  |
| >TP53-V172/KSQSQHMTEV  | 718  | >TP53-V172/KSQSQHMTEA  | 351   | 367   |
| >TP53-V172/KSQSQHMTEV  | 35   | >TP53-V172/KSQSQHMTEA  | 28    | 7     |
| >TP53-V172/KSQSQHMTEV  | 222  | >TP53-V172/KSQSQHMTEA  | 229   | 7     |
| >TP53-V172/KSQSQHMTEV  | 86   | >TP53-V172/KSQSQHMTEA  | 440   | 354   |
| >TP53-V172/KSQSQHMTEV  | 110  | >TP53-V172/KSQSQHMTEA  | 70    | 40    |
| >TP53-V172/KSQSQHMTEV  | 185  | >TP53-V172/KSQSQHMTEA  | 345   | 160   |
| >TP53-V172/KSQSQHMTEV  | 60   | >TP53-V172/KSQSQHMTEA  | 99    | 39    |
| >TP53-V172/YKQSQHMTE   | 467  | >TP53-V172/YKQSQHMTE   | 15229 | 14762 |
| >TP53-V172/YKQSQHMTE   | 30   | >TP53-V172/YKQSQHMTE   | 146   | 116   |
| >TP53-V172/YKQSQHMTE   | 42   | >TP53-V172/YKQSQHMTE   | 28    | 14    |
| >TP53-V172[VVRRCPHHEI  | 145  | >TP53-V172[VVRRCPHHEI  | 3542  | 3397  |
| >TP53-V172[VVRRCPHHEI  | 63   | >TP53-V172[VVRRCPHHEI  | 166   | 103   |
| >TP53-V172[VVRRCPHHEI  | 534  | >TP53-V172[VVRRCPHHEI  | 67    | 467   |
| >TP53-V172[EVVRRCPH    | 400  | >TP53-V172[EDVRRCPH    | 25224 | 24824 |
| >TP53-V172[EVVRRCPHH   | 98   | >TP53-V172[EDVRRCPHH   | 21555 | 21457 |
| >TP53-V172[EVVRRCPHHE  | 428  | >TP53-V172[EDVRRCPHHE  | 25932 | 25504 |
| >TP53-V172[EVVRRCPHHE  | 371  | >TP53-V172[EDVRRCPHHE  | 14328 | 13957 |
| >TP53-V172[EVVRRCPHHE  | 53   | >TP53-V172[EDVRRCPHHE  | 5834  | 5781  |
| >TP53-V172[EVVRRCPHHE  | 5    | >TP53-V172[EDVRRCPHHE  | 257   | 252   |
| >TP53-V172[IYKQSQHMTEI | 402  | >TP53-V172[IYKQSQHMTEI | 18104 | 17702 |
| >TP53-V172[HMTEVVRRRC  | 38   | >TP53-V172[HMTEVVRRRC  | 195   | 157   |
| >TP53-V172[HMTEVVRRRC  | 579  | >TP53-V172[HMTEVVRRRC  | 308   | 271   |
| >TP53-V172[HMTEVVRR    | 38   | >TP53-V172[HMTEVVRR    | 147   | 109   |
| >TP53-V172[HMTEVVRR    | 65   | >TP53-V172[HMTEVVRR    | 253   | 188   |
| >TP53-V172[HMTEVVRR    | 35   | >TP53-V172[HMTEVVRR    | 115   | 80    |
| >TP53-V172[HMTEVVRR    | 64   | >TP53-V172[HMTEVVRR    | 56    | 8     |
| >TP53-V172[QHMTEVVR    | 269  | >TP53-V172[QHMTEVVR    | 610   | 341   |

|                        |      |                        |       |       |
|------------------------|------|------------------------|-------|-------|
| >TP53-V172[ QHMTEVRR   | 195  | >TP53-V172[ QHMTEDVRF  | 140   | 55    |
| >TP53-V172[ SQHMTEVV   | 115  | >TP53-V172[ SQHMTEDV   | 415   | 300   |
| >TP53-V172[ SQHMTEVV   | 256  | >TP53-V172[ SQHMTEDV   | 1237  | 981   |
| >TP53-V172[ SQHMTEVVR  | 115  | >TP53-V172[ SQHMTEDVR  | 1662  | 1547  |
| >TP53-V172[ SQHMTEVV   | 88   | >TP53-V172[ SQHMTEDV   | 384   | 296   |
| >TP53-V172[ SQHMTEVVR  | 162  | >TP53-V172[ SQHMTEDVR  | 1571  | 1409  |
| >TP53-V172[ SQHMTEVVR  | 434  | >TP53-V172[ SQHMTEDVR  | 1983  | 1549  |
| >TP53-V172[ SQHMTEVVR  | 363  | >TP53-V172[ SQHMTEDVR  | 509   | 146   |
| >TP53-V172[ QSQHMTEVV  | 230  | >TP53-V172[ QSQHMTEDV  | 1430  | 1200  |
| >TP53-V172[ QSQHMTEVV  | 321  | >TP53-V172[ QSQHMTEDV  | 644   | 323   |
| >TP53-V172[ QSQHMTEVV  | 185  | >TP53-V172[ QSQHMTEDV  | 244   | 59    |
| >TP53-V172[ QSQHMTEV   | 206  | >TP53-V172[ QSQHMTEDE  | 22075 | 21869 |
| >TP53-V172[ QSQHMTEVV  | 303  | >TP53-V172[ QSQHMTEDV  | 958   | 655   |
| >TP53-V172[ QSQHMTEVV  | 306  | >TP53-V172[ QSQHMTEDV  | 615   | 309   |
| >TP53-V172[ KQSQHMTEV  | 82   | >TP53-V172[ KQSQHMTEDE | 22866 | 22784 |
| >TP53-V172[ KQSQHMTEV  | 51   | >TP53-V172[ KQSQHMTEDE | 11213 | 11162 |
| >TP53-V172[ KQSQHMTEV  | 298  | >TP53-V172[ KQSQHMTEDE | 579   | 281   |
| >TP53-V172[ KQSQHMTEV  | 9    | >TP53-V172[ KQSQHMTEDE | 13357 | 13348 |
| >TP53-V172[ KQSQHMTEV  | 273  | >TP53-V172[ KQSQHMTEDE | 427   | 154   |
| >TP53-V172[ KQSQHMTEV  | 10   | >TP53-V172[ KQSQHMTEDE | 10915 | 10905 |
| >TP53-V172[ KQSQHMTEV  | 426  | >TP53-V172[ KQSQHMTEDE | 30242 | 29816 |
| >TP53-V172[ KQSQHMTEV  | 35   | >TP53-V172[ KQSQHMTEDE | 175   | 140   |
| >TP53-V172[ KQSQHMTEV  | 222  | >TP53-V172[ KQSQHMTEDE | 1761  | 1539  |
| >TP53-V172[ KQSQHMTEV  | 86   | >TP53-V172[ KQSQHMTEDE | 9067  | 8981  |
| >TP53-V172[ KQSQHMTEV  | 110  | >TP53-V172[ KQSQHMTEDE | 262   | 152   |
| >TP53-V172[ KQSQHMTEV  | 185  | >TP53-V172[ KQSQHMTEDE | 943   | 758   |
| >TP53-V172[ KQSQHMTEV  | 60   | >TP53-V172[ KQSQHMTEDE | 179   | 119   |
| >TP53-V172[ YKQSQHMTE  | 467  | >TP53-V172[ YKQSQHMTE  | 35968 | 35501 |
| >TP53-V172[ YKQSQHMTE  | 30   | >TP53-V172[ YKQSQHMTE  | 5490  | 5460  |
| >TP53-V172[ YKQSQHMTE  | 42   | >TP53-V172[ YKQSQHMTE  | 90    | 48    |
| >TP53-V172F VVRRCPHHEF | 145  | >TP53-V172F FVRRCPHHEF | 1387  | 1242  |
| >TP53-V172F VVRRCPHHEF | 63   | >TP53-V172F FVRRCPHHEF | 72    | 9     |
| >TP53-V172F VVRRCPHHEF | 534  | >TP53-V172F FVRRCPHHEF | 139   | 395   |
| >TP53-V172F VVRRCPHHEF | 3715 | >TP53-V172F FVRRCPHHEF | 326   | 3389  |
| >TP53-V172F EVVRRCPH   | 400  | >TP53-V172F EFVRRCPH   | 10723 | 10323 |
| >TP53-V172F EVVRRCPHH  | 98   | >TP53-V172F EFVRRCPHH  | 6879  | 6781  |
| >TP53-V172F EVVRRCPHHE | 428  | >TP53-V172F EFVRRCPHHE | 10943 | 10515 |
| >TP53-V172F EVVRRCPHHE | 371  | >TP53-V172F EFVRRCPHHE | 185   | 186   |
| >TP53-V172F EVVRRCPHHE | 53   | >TP53-V172F EFVRRCPHHE | 25    | 28    |
| >TP53-V172F EVVRRCPHHE | 5    | >TP53-V172F EFVRRCPHHE | 37    | 32    |
| >TP53-V172F EVVRRCPHHE | 1019 | >TP53-V172F EFVRRCPHHE | 152   | 867   |
| >TP53-V172F IYKQSQHMTI | 402  | >TP53-V172F IYKQSQHMTI | 3127  | 2725  |
| >TP53-V172F IYKQSQHMTI | 3844 | >TP53-V172F IYKQSQHMTI | 51    | 3793  |

|                       |       |                       |       |       |
|-----------------------|-------|-----------------------|-------|-------|
| >TP53-V172FIYKQSQHMTI | 2087  | >TP53-V172FIYKQSQHMTI | 166   | 1921  |
| >TP53-V172FIYKQSQHMTI | 864   | >TP53-V172FIYKQSQHMTI | 9     | 855   |
| >TP53-V172FIYKQSQHMTI | 4882  | >TP53-V172FIYKQSQHMTI | 103   | 4779  |
| >TP53-V172FHMTEVRRRC  | 38    | >TP53-V172FHMTEFVRRRC | 62    | 24    |
| >TP53-V172FHMTEVRRRC  | 579   | >TP53-V172FHMTEFVRRRC | 293   | 286   |
| >TP53-V172FHMTEVRRR   | 38    | >TP53-V172FHMTEFVRRR  | 21    | 17    |
| >TP53-V172FHMTEVRRR   | 65    | >TP53-V172FHMTEFVRRR  | 43    | 22    |
| >TP53-V172FHMTEVRRR   | 35    | >TP53-V172FHMTEFVRRR  | 34    | 1     |
| >TP53-V172FHMTEVRRR   | 64    | >TP53-V172FHMTEFVRRR  | 20    | 44    |
| >TP53-V172FQHMTEVVR   | 269   | >TP53-V172FQHMTEFVR   | 183   | 86    |
| >TP53-V172FQHMTEVRRR  | 195   | >TP53-V172FQHMTEFVRRR | 53    | 142   |
| >TP53-V172FSQHMTEVV   | 2993  | >TP53-V172FSQHMTEFV   | 368   | 2625  |
| >TP53-V172FSQHMTEVV   | 670   | >TP53-V172FSQHMTEFV   | 204   | 466   |
| >TP53-V172FSQHMTEVV   | 115   | >TP53-V172FSQHMTEFV   | 14    | 101   |
| >TP53-V172FSQHMTEVV   | 256   | >TP53-V172FSQHMTEFV   | 61    | 195   |
| >TP53-V172FSQHMTEVV   | 543   | >TP53-V172FSQHMTEFV   | 68    | 475   |
| >TP53-V172FSQHMTEVVR  | 115   | >TP53-V172FSQHMTEFVR  | 23    | 92    |
| >TP53-V172FSQHMTEVVR  | 504   | >TP53-V172FSQHMTEFVR  | 143   | 361   |
| >TP53-V172FSQHMTEVV   | 88    | >TP53-V172FSQHMTEFV   | 295   | 207   |
| >TP53-V172FSQHMTEVVR  | 162   | >TP53-V172FSQHMTEFVR  | 592   | 430   |
| >TP53-V172FSQHMTEVVR  | 434   | >TP53-V172FSQHMTEFVR  | 486   | 52    |
| >TP53-V172FSQHMTEVVR  | 363   | >TP53-V172FSQHMTEFVR  | 194   | 169   |
| >TP53-V172FQSQHMTEVV  | 230   | >TP53-V172FQSQHMTEFV  | 92    | 138   |
| >TP53-V172FQSQHMTEVV  | 321   | >TP53-V172FQSQHMTEFV  | 100   | 221   |
| >TP53-V172FQSQHMTEV   | 3315  | >TP53-V172FQSQHMTEF   | 240   | 3075  |
| >TP53-V172FQSQHMTEVV  | 185   | >TP53-V172FQSQHMTEFV  | 118   | 67    |
| >TP53-V172FQSQHMTEV   | 206   | >TP53-V172FQSQHMTEF   | 20972 | 20766 |
| >TP53-V172FQSQHMTEVV  | 303   | >TP53-V172FQSQHMTEFV  | 34    | 269   |
| >TP53-V172FQSQHMTEV   | 11294 | >TP53-V172FQSQHMTEF   | 327   | 10967 |
| >TP53-V172FQSQHMTEV   | 3719  | >TP53-V172FQSQHMTEF   | 72    | 3647  |
| >TP53-V172FQSQHMTEV   | 3316  | >TP53-V172FQSQHMTEF   | 11    | 3305  |
| >TP53-V172FQSQHMTEV   | 3181  | >TP53-V172FQSQHMTEF   | 207   | 2974  |
| >TP53-V172FQSQHMTEVV  | 1149  | >TP53-V172FQSQHMTEFV  | 460   | 689   |
| >TP53-V172FQSQHMTEVV  | 306   | >TP53-V172FQSQHMTEFV  | 151   | 155   |
| >TP53-V172FQSQHMTEVV  | 1113  | >TP53-V172FQSQHMTEFV  | 466   | 647   |
| >TP53-V172FKQSQHMTEV  | 82    | >TP53-V172FKQSQHMTEF  | 18109 | 18027 |
| >TP53-V172FKQSQHMTEV  | 51    | >TP53-V172FKQSQHMTEF  | 4298  | 4247  |
| >TP53-V172FKQSQHMTEV  | 298   | >TP53-V172FKQSQHMTEF  | 73    | 225   |
| >TP53-V172FKQSQHMTEV  | 9     | >TP53-V172FKQSQHMTEF  | 3545  | 3536  |
| >TP53-V172FKQSQHMTEV  | 273   | >TP53-V172FKQSQHMTEF  | 122   | 151   |
| >TP53-V172FKQSQHMTEV  | 10    | >TP53-V172FKQSQHMTEF  | 120   | 110   |
| >TP53-V172FKQSQHMTEV  | 993   | >TP53-V172FKQSQHMTEF  | 310   | 683   |
| >TP53-V172FKQSQHMTEV  | 426   | >TP53-V172FKQSQHMTEF  | 23241 | 22815 |

|                       |       |                       |       |       |
|-----------------------|-------|-----------------------|-------|-------|
| >TP53-V172FKQSQHMTEV  | 718   | >TP53-V172FKQSQHMTEF  | 227   | 491   |
| >TP53-V172FKQSQHMTEV  | 1654  | >TP53-V172FKQSQHMTEF  | 240   | 1414  |
| >TP53-V172FKQSQHMTEV  | 35    | >TP53-V172FKQSQHMTEF  | 15    | 20    |
| >TP53-V172FKQSQHMTEV  | 6826  | >TP53-V172FKQSQHMTEF  | 362   | 6464  |
| >TP53-V172FKQSQHMTEV  | 541   | >TP53-V172FKQSQHMTEF  | 36    | 505   |
| >TP53-V172FKQSQHMTEV  | 222   | >TP53-V172FKQSQHMTEF  | 961   | 739   |
| >TP53-V172FKQSQHMTEV  | 86    | >TP53-V172FKQSQHMTEF  | 4     | 82    |
| >TP53-V172FKQSQHMTEV  | 110   | >TP53-V172FKQSQHMTEF  | 218   | 108   |
| >TP53-V172FKQSQHMTEV  | 185   | >TP53-V172FKQSQHMTEF  | 545   | 360   |
| >TP53-V172FKQSQHMTEV  | 18010 | >TP53-V172FKQSQHMTEF  | 381   | 17629 |
| >TP53-V172FKQSQHMTEV  | 60    | >TP53-V172FKQSQHMTEF  | 58    | 2     |
| >TP53-V172FYKQSQHMTE  | 467   | >TP53-V172FYKQSQHMTE  | 32534 | 32067 |
| >TP53-V172FYKQSQHMTE  | 30    | >TP53-V172FYKQSQHMTE  | 3     | 27    |
| >TP53-V172FYKQSQHMTE  | 42    | >TP53-V172FYKQSQHMTE  | 89    | 47    |
| >TP53-V172FYKQSQHMTE  | 6037  | >TP53-V172FYKQSQHMTE  | 340   | 5697  |
| >TP53-V172CVVRRCPHHEI | 145   | >TP53-V172CVVRRCPHHEI | 119   | 26    |
| >TP53-V172CVVRRCPHHEI | 63    | >TP53-V172CVVRRCPHHEI | 102   | 39    |
| >TP53-V172CEVVRRCPH   | 400   | >TP53-V172CEGVRRCPH   | 26538 | 26138 |
| >TP53-V172CEVVRRCPHH  | 98    | >TP53-V172CEGVRRCPHH  | 23070 | 22972 |
| >TP53-V172CEVVRRCPHHE | 428   | >TP53-V172CEGVRRCPHHE | 27358 | 26930 |
| >TP53-V172CEVVRRCPHHE | 371   | >TP53-V172CEGVRRCPHHE | 4319  | 3948  |
| >TP53-V172CEVVRRCPHHE | 53    | >TP53-V172CEGVRRCPHHE | 4546  | 4493  |
| >TP53-V172CEVVRRCPHHE | 5     | >TP53-V172CEGVRRCPHHE | 101   | 96    |
| >TP53-V172CIYKQSQHMTI | 402   | >TP53-V172CIYKQSQHMTI | 18997 | 18595 |
| >TP53-V172CHMTEVVRR   | 38    | >TP53-V172CHMTEGVRR   | 110   | 72    |
| >TP53-V172CHMTEVVRR   | 579   | >TP53-V172CHMTEGVRR   | 136   | 443   |
| >TP53-V172CHMTEVVRR   | 38    | >TP53-V172CHMTEGVRR   | 67    | 29    |
| >TP53-V172CHMTEVVRR   | 65    | >TP53-V172CHMTEGVRR   | 139   | 74    |
| >TP53-V172CHMTEVVRR   | 35    | >TP53-V172CHMTEGVRR   | 159   | 124   |
| >TP53-V172CHMTEVVRR   | 64    | >TP53-V172CHMTEGVRR   | 93    | 29    |
| >TP53-V172CQHMTEVVR   | 269   | >TP53-V172CQHMTEGVR   | 863   | 594   |
| >TP53-V172CQHMTEVVR   | 195   | >TP53-V172CQHMTEGVR   | 301   | 106   |
| >TP53-V172CSQHMTEVV   | 670   | >TP53-V172CSQHMTEGV   | 220   | 450   |
| >TP53-V172CSQHMTEVV   | 115   | >TP53-V172CSQHMTEGV   | 58    | 57    |
| >TP53-V172CSQHMTEVV   | 256   | >TP53-V172CSQHMTEGV   | 145   | 111   |
| >TP53-V172CSQHMTEVV   | 543   | >TP53-V172CSQHMTEGV   | 370   | 173   |
| >TP53-V172CSQHMTEVVR  | 115   | >TP53-V172CSQHMTEGVR  | 683   | 568   |
| >TP53-V172CSQHMTEVV   | 88    | >TP53-V172CSQHMTEGV   | 599   | 511   |
| >TP53-V172CSQHMTEVVR  | 162   | >TP53-V172CSQHMTEGVR  | 2171  | 2009  |
| >TP53-V172CSQHMTEVVR  | 434   | >TP53-V172CSQHMTEGVR  | 2282  | 1848  |
| >TP53-V172CSQHMTEVVR  | 363   | >TP53-V172CSQHMTEGVR  | 817   | 454   |
| >TP53-V172CQSQHMTEVV  | 230   | >TP53-V172CQSQHMTEGV  | 1032  | 802   |
| >TP53-V172CQSQHMTEVV  | 321   | >TP53-V172CQSQHMTEGV  | 450   | 129   |

|                        |      |                        |       |       |
|------------------------|------|------------------------|-------|-------|
| >TP53-V172C QSQHMTEVV  | 185  | >TP53-V172C QSQHMTEGV  | 326   | 141   |
| >TP53-V172C QSQHMTEV   | 206  | >TP53-V172C QSQHMTEG   | 18344 | 18138 |
| >TP53-V172C QSQHMTEVV  | 303  | >TP53-V172C QSQHMTEGV  | 58    | 245   |
| >TP53-V172C QSQHMTEVV  | 306  | >TP53-V172C QSQHMTEGV  | 562   | 256   |
| >TP53-V172C KQSQHMTEV  | 82   | >TP53-V172C KQSQHMTEC  | 20940 | 20858 |
| >TP53-V172C KQSQHMTEV  | 51   | >TP53-V172C KQSQHMTEC  | 5693  | 5642  |
| >TP53-V172C KQSQHMTEV  | 298  | >TP53-V172C KQSQHMTEC  | 176   | 122   |
| >TP53-V172C KQSQHMTEV  | 9    | >TP53-V172C KQSQHMTEC  | 4925  | 4916  |
| >TP53-V172C KQSQHMTEV  | 273  | >TP53-V172C KQSQHMTEC  | 124   | 149   |
| >TP53-V172C KQSQHMTEV  | 10   | >TP53-V172C KQSQHMTEC  | 3235  | 3225  |
| >TP53-V172C KQSQHMTEV  | 993  | >TP53-V172C KQSQHMTEC  | 406   | 587   |
| >TP53-V172C KQSQHMTEV  | 426  | >TP53-V172C KQSQHMTEC  | 26658 | 26232 |
| >TP53-V172C KQSQHMTEV  | 718  | >TP53-V172C KQSQHMTEC  | 324   | 394   |
| >TP53-V172C KQSQHMTEV  | 35   | >TP53-V172C KQSQHMTEC  | 100   | 65    |
| >TP53-V172C KQSQHMTEV  | 222  | >TP53-V172C KQSQHMTEC  | 729   | 507   |
| >TP53-V172C KQSQHMTEV  | 86   | >TP53-V172C KQSQHMTEC  | 4653  | 4567  |
| >TP53-V172C KQSQHMTEV  | 110  | >TP53-V172C KQSQHMTEC  | 349   | 239   |
| >TP53-V172C KQSQHMTEV  | 185  | >TP53-V172C KQSQHMTEC  | 1219  | 1034  |
| >TP53-V172C KQSQHMTEV  | 60   | >TP53-V172C KQSQHMTEC  | 158   | 98    |
| >TP53-V172C YKQSQHMTE  | 467  | >TP53-V172C YKQSQHMTE  | 34141 | 33674 |
| >TP53-V172C YKQSQHMTE  | 30   | >TP53-V172C YKQSQHMTE  | 2010  | 1980  |
| >TP53-V172C YKQSQHMTE  | 42   | >TP53-V172C YKQSQHMTE  | 123   | 81    |
| >TP53-V172I VVRRCPHH   | 1099 | >TP53-V172I IVRRCPHH   | 395   | 704   |
| >TP53-V172I VVRRCPHHEI | 145  | >TP53-V172I IVRRCPHHER | 55    | 90    |
| >TP53-V172I VVRRCPHHEI | 63   | >TP53-V172I IVRRCPHHER | 53    | 10    |
| >TP53-V172I VVRRCPHHEI | 534  | >TP53-V172I IVRRCPHHER | 317   | 217   |
| >TP53-V172I VVRRCPHHEI | 713  | >TP53-V172I IVRRCPHHER | 278   | 435   |
| >TP53-V172I EVVRRCPH   | 400  | >TP53-V172I EIVRRCPH   | 1583  | 1183  |
| >TP53-V172I EVVRRCPHH  | 98   | >TP53-V172I EIVRRCPHH  | 473   | 375   |
| >TP53-V172I EVVRRCPHHE | 428  | >TP53-V172I EIVRRCPHHE | 1701  | 1273  |
| >TP53-V172I EVVRRCPHHE | 371  | >TP53-V172I EIVRRCPHHE | 689   | 318   |
| >TP53-V172I EVVRRCPHHE | 53   | >TP53-V172I EIVRRCPHHE | 70    | 17    |
| >TP53-V172I EVVRRCPHHE | 5    | >TP53-V172I EIVRRCPHHE | 9     | 4     |
| >TP53-V172I EVVRRCPHHE | 1019 | >TP53-V172I EIVRRCPHHE | 392   | 627   |
| >TP53-V172I IYKQSQHMTI | 402  | >TP53-V172I IYKQSQHMTI | 39    | 363   |
| >TP53-V172I IYKQSQHMTI | 3844 | >TP53-V172I IYKQSQHMTI | 259   | 3585  |
| >TP53-V172I IYKQSQHMTI | 2087 | >TP53-V172I IYKQSQHMTI | 278   | 1809  |
| >TP53-V172I IYKQSQHMTI | 864  | >TP53-V172I IYKQSQHMTI | 32    | 832   |
| >TP53-V172I HMTEVVRR   | 38   | >TP53-V172I HMTEIVRR   | 114   | 76    |
| >TP53-V172I HMTEVVRR   | 579  | >TP53-V172I HMTEIVRR   | 318   | 261   |
| >TP53-V172I HMTEVVRR   | 38   | >TP53-V172I HMTEIVRR   | 28    | 10    |
| >TP53-V172I HMTEVVRR   | 65   | >TP53-V172I HMTEIVRR   | 53    | 12    |
| >TP53-V172I HMTEVVRR   | 35   | >TP53-V172I HMTEIVRR   | 29    | 6     |

|                        |      |                        |       |       |
|------------------------|------|------------------------|-------|-------|
| >TP53-V172I·HMTEVVRR   | 64   | >TP53-V172I·HMTEIVRR   | 28    | 36    |
| >TP53-V172I·QHMTEVVRR  | 269  | >TP53-V172I·QHMTEIVRR  | 254   | 15    |
| >TP53-V172I·QHMTEVVRR  | 195  | >TP53-V172I·QHMTEIVRR  | 130   | 65    |
| >TP53-V172I·SQHMTEVV   | 115  | >TP53-V172I·SQHMTEIV   | 127   | 12    |
| >TP53-V172I·SQHMTEVV   | 256  | >TP53-V172I·SQHMTEIV   | 640   | 384   |
| >TP53-V172I·SQHMTEVVRR | 115  | >TP53-V172I·SQHMTEIVR  | 246   | 131   |
| >TP53-V172I·SQHMTEVV   | 88   | >TP53-V172I·SQHMTEIV   | 135   | 47    |
| >TP53-V172I·SQHMTEVVRR | 162  | >TP53-V172I·SQHMTEIVR  | 367   | 205   |
| >TP53-V172I·SQHMTEVVRR | 434  | >TP53-V172I·SQHMTEIVR  | 506   | 72    |
| >TP53-V172I·SQHMTEVVRR | 363  | >TP53-V172I·SQHMTEIVRF | 330   | 33    |
| >TP53-V172I·QSQHMTEVV  | 230  | >TP53-V172I·QSQHMTEIVI | 261   | 31    |
| >TP53-V172I·QSQHMTEVV  | 321  | >TP53-V172I·QSQHMTEIVI | 242   | 79    |
| >TP53-V172I·QSQHMTEV   | 3315 | >TP53-V172I·QSQHMTEI   | 371   | 2944  |
| >TP53-V172I·QSQHMTEVV  | 185  | >TP53-V172I·QSQHMTEIVI | 172   | 13    |
| >TP53-V172I·QSQHMTEV   | 206  | >TP53-V172I·QSQHMTEI   | 1203  | 997   |
| >TP53-V172I·QSQHMTEVV  | 303  | >TP53-V172I·QSQHMTEIV  | 542   | 239   |
| >TP53-V172I·QSQHMTEV   | 3316 | >TP53-V172I·QSQHMTEI   | 456   | 2860  |
| >TP53-V172I·QSQHMTEVV  | 306  | >TP53-V172I·QSQHMTEIVI | 254   | 52    |
| >TP53-V172I·QSQHMTEV   | 6387 | >TP53-V172I·QSQHMTEI   | 113   | 6274  |
| >TP53-V172I·KQSQHMTEV  | 82   | >TP53-V172I·KQSQHMTEI  | 608   | 526   |
| >TP53-V172I·KQSQHMTEV  | 51   | >TP53-V172I·KQSQHMTEI  | 137   | 86    |
| >TP53-V172I·KQSQHMTEV  | 298  | >TP53-V172I·KQSQHMTEI\ | 349   | 51    |
| >TP53-V172I·KQSQHMTEV  | 9    | >TP53-V172I·KQSQHMTEI  | 38    | 29    |
| >TP53-V172I·KQSQHMTEV  | 273  | >TP53-V172I·KQSQHMTEI\ | 301   | 28    |
| >TP53-V172I·KQSQHMTEV  | 10   | >TP53-V172I·KQSQHMTEI  | 22    | 12    |
| >TP53-V172I·KQSQHMTEV  | 426  | >TP53-V172I·KQSQHMTEI  | 4400  | 3974  |
| >TP53-V172I·KQSQHMTEV  | 35   | >TP53-V172I·KQSQHMTEI\ | 55    | 20    |
| >TP53-V172I·KQSQHMTEV  | 6826 | >TP53-V172I·KQSQHMTEI  | 478   | 6348  |
| >TP53-V172I·KQSQHMTEV  | 541  | >TP53-V172I·KQSQHMTEI  | 477   | 64    |
| >TP53-V172I·KQSQHMTEV  | 222  | >TP53-V172I·KQSQHMTEI\ | 973   | 751   |
| >TP53-V172I·KQSQHMTEV  | 86   | >TP53-V172I·KQSQHMTEI  | 71    | 15    |
| >TP53-V172I·KQSQHMTEV  | 110  | >TP53-V172I·KQSQHMTEI\ | 130   | 20    |
| >TP53-V172I·KQSQHMTEV  | 185  | >TP53-V172I·KQSQHMTEI\ | 351   | 166   |
| >TP53-V172I·KQSQHMTEV  | 863  | >TP53-V172I·KQSQHMTEI  | 240   | 623   |
| >TP53-V172I·KQSQHMTEV  | 60   | >TP53-V172I·KQSQHMTEI\ | 62    | 2     |
| >TP53-V172I·YKQSQHMTE  | 467  | >TP53-V172I·YKQSQHMTE  | 14611 | 14144 |
| >TP53-V172I·YKQSQHMTE  | 30   | >TP53-V172I·YKQSQHMTE  | 23    | 7     |
| >TP53-V172I·YKQSQHMTE  | 42   | >TP53-V172I·YKQSQHMTE  | 51    | 9     |
| >TP53-V173A·VRRCPHHER  | 680  | >TP53-V173A·ARRCPHHER  | 475   | 205   |
| >TP53-V173A·VVRRCPPHEI | 145  | >TP53-V173A·VARRCPHHEI | 539   | 394   |
| >TP53-V173A·VVRRCPPHEI | 63   | >TP53-V173A·VARRCPHHEI | 166   | 103   |
| >TP53-V173A·YKQSQHMTE  | 42   | >TP53-V173A·YKQSQHMTE  | 202   | 160   |
| >TP53-V173A·EVVRRCPH   | 400  | >TP53-V173A·EVARRCPH   | 1505  | 1105  |

|                        |     |                       |       |       |
|------------------------|-----|-----------------------|-------|-------|
| >TP53-V173#EVVRRCPHH   | 98  | >TP53-V173#EVARRCPHH  | 519   | 421   |
| >TP53-V173#EVVRRCPHHE  | 428 | >TP53-V173#EVARRCPHHE | 1781  | 1353  |
| >TP53-V173#EVVRRCPHHE  | 371 | >TP53-V173#EVARRCPHHE | 372   | 1     |
| >TP53-V173#EVVRRCPHHE  | 53  | >TP53-V173#EVARRCPHHE | 67    | 14    |
| >TP53-V173#EVVRRCPHHE  | 5   | >TP53-V173#EVARRCPHHE | 4     | 1     |
| >TP53-V173#HMTEVVRRC   | 38  | >TP53-V173#HMTEVARRC  | 199   | 161   |
| >TP53-V173#HMTEVVRR    | 38  | >TP53-V173#HMTEVARR   | 47    | 9     |
| >TP53-V173#HMTEVVRR    | 65  | >TP53-V173#HMTEVARR   | 63    | 2     |
| >TP53-V173#HMTEVVRR    | 35  | >TP53-V173#HMTEVARR   | 31    | 4     |
| >TP53-V173#HMTEVVRR    | 64  | >TP53-V173#HMTEVARR   | 95    | 31    |
| >TP53-V173#QHMTEVVR    | 269 | >TP53-V173#QHMTEVAR   | 362   | 93    |
| >TP53-V173#QHMTEVVRR   | 195 | >TP53-V173#QHMTEVARR  | 438   | 243   |
| >TP53-V173#SQHMTEVV    | 115 | >TP53-V173#SQHMTEVA   | 1341  | 1226  |
| >TP53-V173#SQHMTEVV    | 256 | >TP53-V173#SQHMTEVA   | 8015  | 7759  |
| >TP53-V173#SQHMTEVVR   | 115 | >TP53-V173#SQHMTEVAR  | 61    | 54    |
| >TP53-V173#SQHMTEVVR   | 504 | >TP53-V173#SQHMTEVAR  | 396   | 108   |
| >TP53-V173#SQHMTEVV    | 88  | >TP53-V173#SQHMTEVA   | 532   | 444   |
| >TP53-V173#SQHMTEVVR   | 162 | >TP53-V173#SQHMTEVAR  | 88    | 74    |
| >TP53-V173#SQHMTEVVR   | 434 | >TP53-V173#SQHMTEVAR  | 528   | 94    |
| >TP53-V173#SQHMTEVVR   | 363 | >TP53-V173#SQHMTEVAR  | 599   | 236   |
| >TP53-V173#QSQHMTEVV   | 230 | >TP53-V173#QSQHMTEVA  | 96    | 134   |
| >TP53-V173#QSQHMTEVV   | 321 | >TP53-V173#QSQHMTEVA  | 258   | 63    |
| >TP53-V173#QSQHMTEVV   | 973 | >TP53-V173#QSQHMTEVA  | 430   | 543   |
| >TP53-V173#QSQHMTEVV   | 185 | >TP53-V173#QSQHMTEVA  | 152   | 33    |
| >TP53-V173#QSQHMTEVV   | 303 | >TP53-V173#QSQHMTEVA  | 3669  | 3366  |
| >TP53-V173#QSQHMTEVV   | 306 | >TP53-V173#QSQHMTEVA  | 666   | 360   |
| >TP53-V173#KQSQHMTEV   | 298 | >TP53-V173#KQSQHMTEV  | 1828  | 1530  |
| >TP53-V173#KQSQHMTEV   | 273 | >TP53-V173#KQSQHMTEV  | 1712  | 1439  |
| >TP53-V173#KQSQHMTEV   | 35  | >TP53-V173#KQSQHMTEV  | 21    | 14    |
| >TP53-V173#KQSQHMTEV   | 222 | >TP53-V173#KQSQHMTEV  | 259   | 37    |
| >TP53-V173#KQSQHMTEV   | 110 | >TP53-V173#KQSQHMTEV  | 525   | 415   |
| >TP53-V173#KQSQHMTEV   | 185 | >TP53-V173#KQSQHMTEV  | 108   | 77    |
| >TP53-V173#KQSQHMTEV   | 60  | >TP53-V173#KQSQHMTEV  | 72    | 12    |
| >TP53-V173#EVVRRCPHHEF | 145 | >TP53-V173#VERRCPHHEF | 12686 | 12541 |
| >TP53-V173#EVVRRCPHHEF | 63  | >TP53-V173#VERRCPHHEF | 1583  | 1520  |
| >TP53-V173#YKQSQHMTE   | 42  | >TP53-V173#YKQSQHMTE  | 2481  | 2439  |
| >TP53-V173#EVVRRCPH    | 400 | >TP53-V173#EVERRCPH   | 14117 | 13717 |
| >TP53-V173#EVVRRCPHH   | 98  | >TP53-V173#EVERRCPHH  | 9232  | 9134  |
| >TP53-V173#EVVRRCPHHE  | 428 | >TP53-V173#EVERRCPHHE | 15147 | 14719 |
| >TP53-V173#EVVRRCPHHE  | 371 | >TP53-V173#EVERRCPHHE | 841   | 470   |
| >TP53-V173#EVVRRCPHHE  | 53  | >TP53-V173#EVERRCPHHE | 76    | 23    |
| >TP53-V173#EVVRRCPHHE  | 5   | >TP53-V173#EVERRCPHHE | 12    | 7     |
| >TP53-V173#HMTEVVRRC   | 38  | >TP53-V173#HMTEVERRC  | 339   | 301   |

|                        |     |                        |       |       |
|------------------------|-----|------------------------|-------|-------|
| >TP53-V173E HMTEVVRR   | 38  | >TP53-V173E HMTEVERR   | 114   | 76    |
| >TP53-V173E HMTEVVRR   | 65  | >TP53-V173E HMTEVERR   | 106   | 41    |
| >TP53-V173E HMTEVVRR   | 35  | >TP53-V173E HMTEVERR   | 43    | 8     |
| >TP53-V173E HMTEVVRR   | 64  | >TP53-V173E HMTEVERR   | 184   | 120   |
| >TP53-V173E QHMTEVVR   | 269 | >TP53-V173E QHMTEVER   | 487   | 218   |
| >TP53-V173E QHMTEVVRR  | 195 | >TP53-V173E QHMTEVERR  | 822   | 627   |
| >TP53-V173E SQHMTEVV   | 115 | >TP53-V173E SQHMTEVE   | 21573 | 21458 |
| >TP53-V173E SQHMTEVV   | 256 | >TP53-V173E SQHMTEVE   | 30081 | 29825 |
| >TP53-V173E SQHMTEVVR  | 115 | >TP53-V173E SQHMTEVER  | 72    | 43    |
| >TP53-V173E SQHMTEVV   | 88  | >TP53-V173E SQHMTEVE   | 6649  | 6561  |
| >TP53-V173E SQHMTEVVR  | 162 | >TP53-V173E SQHMTEVER  | 237   | 75    |
| >TP53-V173E SQHMTEVVR  | 434 | >TP53-V173E SQHMTEVER  | 757   | 323   |
| >TP53-V173E SQHMTEVVR  | 363 | >TP53-V173E SQHMTEVER  | 874   | 511   |
| >TP53-V173E QSQHMTEVV  | 230 | >TP53-V173E QSQHMTEVE  | 134   | 96    |
| >TP53-V173E QSQHMTEVV  | 321 | >TP53-V173E QSQHMTEVE  | 759   | 438   |
| >TP53-V173E QSQHMTEVV  | 973 | >TP53-V173E QSQHMTEVE  | 359   | 614   |
| >TP53-V173E QSQHMTEVV  | 185 | >TP53-V173E QSQHMTEVE  | 196   | 11    |
| >TP53-V173E QSQHMTEVV  | 303 | >TP53-V173E QSQHMTEVE  | 24368 | 24065 |
| >TP53-V173E QSQHMTEVV  | 306 | >TP53-V173E QSQHMTEVE  | 489   | 183   |
| >TP53-V173E KQSQHMTEV  | 298 | >TP53-V173E KQSQHMTEV  | 23410 | 23112 |
| >TP53-V173E KQSQHMTEV  | 273 | >TP53-V173E KQSQHMTEV  | 25440 | 25167 |
| >TP53-V173E KQSQHMTEV  | 35  | >TP53-V173E KQSQHMTEV  | 25    | 10    |
| >TP53-V173E KQSQHMTEV  | 222 | >TP53-V173E KQSQHMTEV  | 2460  | 2238  |
| >TP53-V173E KQSQHMTEV  | 110 | >TP53-V173E KQSQHMTEV  | 5195  | 5085  |
| >TP53-V173E KQSQHMTEV  | 185 | >TP53-V173E KQSQHMTEV  | 225   | 40    |
| >TP53-V173E KQSQHMTEV  | 60  | >TP53-V173E KQSQHMTEV  | 75    | 15    |
| >TP53-V173C VVRRCPHHEI | 145 | >TP53-V173C VGRRCPHHEI | 3156  | 3011  |
| >TP53-V173C VVRRCPHHEI | 63  | >TP53-V173C VGRRCPHHEI | 1092  | 1029  |
| >TP53-V173C YKQSQHMTE  | 42  | >TP53-V173C YKQSQHMTE  | 2347  | 2305  |
| >TP53-V173C EVVRRCPH   | 400 | >TP53-V173C EVGRRCPH   | 6385  | 5985  |
| >TP53-V173C EVVRRCPHH  | 98  | >TP53-V173C EVGRRCPHH  | 3356  | 3258  |
| >TP53-V173C EVVRRCPHHE | 428 | >TP53-V173C EVGRRCPHHE | 6987  | 6559  |
| >TP53-V173C EVVRRCPHHE | 371 | >TP53-V173C EVGRRCPHHE | 650   | 279   |
| >TP53-V173C EVVRRCPHHE | 53  | >TP53-V173C EVGRRCPHHE | 98    | 45    |
| >TP53-V173C EVVRRCPHHE | 5   | >TP53-V173C EVGRRCPHHE | 22    | 17    |
| >TP53-V173C HMTEVVRR   | 38  | >TP53-V173C HMTEVGRR   | 162   | 124   |
| >TP53-V173C HMTEVVRR   | 38  | >TP53-V173C HMTEVGRR   | 102   | 64    |
| >TP53-V173C HMTEVVRR   | 65  | >TP53-V173C HMTEVGRR   | 117   | 52    |
| >TP53-V173C HMTEVVRR   | 35  | >TP53-V173C HMTEVGRR   | 98    | 63    |
| >TP53-V173C HMTEVVRR   | 64  | >TP53-V173C HMTEVGRR   | 235   | 171   |
| >TP53-V173C QHMTEVVR   | 269 | >TP53-V173C QHMTEVGR   | 357   | 88    |
| >TP53-V173C QHMTEVVRR  | 195 | >TP53-V173C QHMTEVGRF  | 1006  | 811   |
| >TP53-V173C SQHMTEVV   | 115 | >TP53-V173C SQHMTEVG   | 16624 | 16509 |



|                        |       |                        |       |       |
|------------------------|-------|------------------------|-------|-------|
| >TP53-V173C(SQHMTEVV   | 256   | >TP53-V173C(SQHMTEVG   | 26079 | 25823 |
| >TP53-V173C(SQHMTEVVRR | 115   | >TP53-V173C(SQHMTEVGR  | 215   | 100   |
| >TP53-V173C(SQHMTEVV   | 88    | >TP53-V173C(SQHMTEVG   | 6160  | 6072  |
| >TP53-V173C(SQHMTEVVRR | 162   | >TP53-V173C(SQHMTEVGR  | 613   | 451   |
| >TP53-V173C(SQHMTEVVRR | 434   | >TP53-V173C(SQHMTEVGR  | 355   | 79    |
| >TP53-V173C(SQHMTEVVRR | 363   | >TP53-V173C(SQHMTEVGR  | 864   | 501   |
| >TP53-V173C(QSQHMTEVV  | 230   | >TP53-V173C(QSQHMTEVC  | 126   | 104   |
| >TP53-V173C(QSQHMTEVV  | 321   | >TP53-V173C(QSQHMTEVC  | 910   | 589   |
| >TP53-V173C(QSQHMTEVV  | 973   | >TP53-V173C(QSQHMTEVC  | 479   | 494   |
| >TP53-V173C(QSQHMTEVV  | 185   | >TP53-V173C(QSQHMTEVC  | 342   | 157   |
| >TP53-V173C(QSQHMTEVV  | 303   | >TP53-V173C(QSQHMTEVC  | 19281 | 18978 |
| >TP53-V173C(QSQHMTEVV  | 306   | >TP53-V173C(QSQHMTEVC  | 558   | 252   |
| >TP53-V173C(KQSQHMTEV  | 298   | >TP53-V173C(KQSQHMTEV  | 19034 | 18736 |
| >TP53-V173C(KQSQHMTEV  | 273   | >TP53-V173C(KQSQHMTEV  | 22743 | 22470 |
| >TP53-V173C(KQSQHMTEV  | 35    | >TP53-V173C(KQSQHMTEV  | 50    | 15    |
| >TP53-V173C(KQSQHMTEV  | 222   | >TP53-V173C(KQSQHMTEV  | 420   | 198   |
| >TP53-V173C(KQSQHMTEV  | 110   | >TP53-V173C(KQSQHMTEV  | 4573  | 4463  |
| >TP53-V173C(KQSQHMTEV  | 185   | >TP53-V173C(KQSQHMTEV  | 574   | 389   |
| >TP53-V173C(KQSQHMTEV  | 60    | >TP53-V173C(KQSQHMTEV  | 61    | 1     |
| >TP53-V173L(VRRCPHHER  | 680   | >TP53-V173L(LRRCPHHER  | 417   | 263   |
| >TP53-V173L(VVRRCPHHEF | 13433 | >TP53-V173L(VLRRCPHHEF | 120   | 13313 |
| >TP53-V173L(VVRRCPHHEF | 145   | >TP53-V173L(VLRRCPHHEF | 1267  | 1122  |
| >TP53-V173L(VVRRCPHHEF | 63    | >TP53-V173L(VLRRCPHHEF | 72    | 9     |
| >TP53-V173L(VVRRCPHHEF | 1513  | >TP53-V173L(VLRRCPHHEF | 340   | 1173  |
| >TP53-V173L(VVRRCPHHEF | 713   | >TP53-V173L(VLRRCPHHEF | 445   | 268   |
| >TP53-V173L(YKQSQHMTE  | 42    | >TP53-V173L(YKQSQHMTE  | 18    | 24    |
| >TP53-V173L(YKQSQHMTE  | 945   | >TP53-V173L(YKQSQHMTE  | 51    | 894   |
| >TP53-V173L(EVRRCPH    | 400   | >TP53-V173L(EVLRRCPH   | 2964  | 2564  |
| >TP53-V173L(EVRRCPHH   | 98    | >TP53-V173L(EVLRRCPHH  | 1089  | 991   |
| >TP53-V173L(EVRRCPHHE  | 428   | >TP53-V173L(EVLRRCPHHE | 3113  | 2685  |
| >TP53-V173L(EVRRCPHHE  | 371   | >TP53-V173L(EVLRRCPHHE | 148   | 223   |
| >TP53-V173L(EVRRCPHHE  | 53    | >TP53-V173L(EVLRRCPHHE | 26    | 27    |
| >TP53-V173L(EVRRCPHHE  | 5     | >TP53-V173L(EVLRRCPHHE | 13    | 8     |
| >TP53-V173L(TEVRRCP    | 1377  | >TP53-V173L(TEVLRRCP   | 393   | 984   |
| >TP53-V173L(HMTEVVRR   | 38    | >TP53-V173L(HMTEVLRR   | 70    | 32    |
| >TP53-V173L(HMTEVVRR   | 38    | >TP53-V173L(HMTEVLRR   | 68    | 30    |
| >TP53-V173L(HMTEVVRR   | 65    | >TP53-V173L(HMTEVLRR   | 80    | 15    |
| >TP53-V173L(HMTEVVRR   | 35    | >TP53-V173L(HMTEVLRR   | 68    | 33    |
| >TP53-V173L(HMTEVVRR   | 64    | >TP53-V173L(HMTEVLRR   | 75    | 11    |
| >TP53-V173L(QHMTEVVRR  | 269   | >TP53-V173L(QHMTEVLR   | 178   | 91    |
| >TP53-V173L(QHMTEVVRR  | 195   | >TP53-V173L(QHMTEVLR   | 167   | 28    |
| >TP53-V173L(SQHMTEVV   | 115   | >TP53-V173L(SQHMTEVL   | 820   | 705   |
| >TP53-V173L(SQHMTEVV   | 256   | >TP53-V173L(SQHMTEVL   | 3722  | 3466  |

|                        |       |                       |      |       |
|------------------------|-------|-----------------------|------|-------|
| >TP53-V173L SQHMTEVVR  | 115   | >TP53-V173L SQHMTEVLR | 42   | 73    |
| >TP53-V173L SQHMTEVVR  | 1468  | >TP53-V173L SQHMTEVLR | 444  | 1024  |
| >TP53-V173L SQHMTEVV   | 504   | >TP53-V173L SQHMTEVL  | 198  | 306   |
| >TP53-V173L SQHMTEVV   | 88    | >TP53-V173L SQHMTEVL  | 39   | 49    |
| >TP53-V173L SQHMTEVVR  | 162   | >TP53-V173L SQHMTEVLR | 599  | 437   |
| >TP53-V173L SQHMTEVV   | 1657  | >TP53-V173L SQHMTEVL  | 95   | 1562  |
| >TP53-V173L SQHMTEVVR  | 434   | >TP53-V173L SQHMTEVLR | 290  | 144   |
| >TP53-V173L SQHMTEVVR  | 363   | >TP53-V173L SQHMTEVLR | 324  | 39    |
| >TP53-V173L QSQHMTEVV  | 230   | >TP53-V173L QSQHMTEVL | 77   | 153   |
| >TP53-V173L QSQHMTEVV  | 321   | >TP53-V173L QSQHMTEVL | 816  | 495   |
| >TP53-V173L QSQHMTEVV  | 1104  | >TP53-V173L QSQHMTEVL | 154  | 950   |
| >TP53-V173L QSQHMTEVV  | 973   | >TP53-V173L QSQHMTEVL | 176  | 797   |
| >TP53-V173L QSQHMTEVV  | 185   | >TP53-V173L QSQHMTEVL | 362  | 177   |
| >TP53-V173L QSQHMTEVV  | 303   | >TP53-V173L QSQHMTEVL | 2980 | 2677  |
| >TP53-V173L QSQHMTEVV  | 306   | >TP53-V173L QSQHMTEVL | 262  | 44    |
| >TP53-V173L KQSQHMTEV  | 298   | >TP53-V173L KQSQHMTEV | 326  | 28    |
| >TP53-V173L KQSQHMTEV  | 273   | >TP53-V173L KQSQHMTEV | 1415 | 1142  |
| >TP53-V173L KQSQHMTEV  | 35    | >TP53-V173L KQSQHMTEV | 19   | 16    |
| >TP53-V173L KQSQHMTEV  | 1845  | >TP53-V173L KQSQHMTEV | 336  | 1509  |
| >TP53-V173L KQSQHMTEV  | 222   | >TP53-V173L KQSQHMTEV | 102  | 120   |
| >TP53-V173L KQSQHMTEV  | 110   | >TP53-V173L KQSQHMTEV | 51   | 59    |
| >TP53-V173L KQSQHMTEV  | 185   | >TP53-V173L KQSQHMTEV | 636  | 451   |
| >TP53-V173L KQSQHMTEV  | 4774  | >TP53-V173L KQSQHMTEV | 271  | 4503  |
| >TP53-V173L KQSQHMTEV  | 60    | >TP53-V173L KQSQHMTEV | 49   | 11    |
| >TP53-V173M VRRCPHHER  | 680   | >TP53-V173M MRRCPHHER | 255  | 425   |
| >TP53-V173M VRRCPHHEI  | 13433 | >TP53-V173M VMRRCPHHE | 245  | 13188 |
| >TP53-V173M VRRCPHHEI  | 145   | >TP53-V173M VMRRCPHHE | 689  | 544   |
| >TP53-V173M VRRCPHHEI  | 63    | >TP53-V173M VMRRCPHHE | 33   | 30    |
| >TP53-V173M VRRCPHHEI  | 534   | >TP53-V173M VMRRCPHHE | 313  | 221   |
| >TP53-V173M VRRCPHHEI  | 11393 | >TP53-V173M VMRRCPHHE | 488  | 10905 |
| >TP53-V173M VRRCPHHEI  | 1513  | >TP53-V173M VMRRCPHHE | 238  | 1275  |
| >TP53-V173M VRRCPHHEI  | 713   | >TP53-V173M VMRRCPHHE | 181  | 532   |
| >TP53-V173M YKQSQHMTE  | 42    | >TP53-V173M YKQSQHMTE | 13   | 29    |
| >TP53-V173M YKQSQHMTE  | 945   | >TP53-V173M YKQSQHMTE | 230  | 715   |
| >TP53-V173M EVVRRCPH   | 400   | >TP53-V173M EVMRRCPH  | 1112 | 712   |
| >TP53-V173M EVVRRCPHH  | 98    | >TP53-V173M EVMRRCPHH | 359  | 261   |
| >TP53-V173M EVVRRCPHHE | 428   | >TP53-V173M EVMRRCPHH | 1215 | 787   |
| >TP53-V173M EVVRRCPHHE | 371   | >TP53-V173M EVMRRCPHH | 129  | 242   |
| >TP53-V173M EVVRRCPHHE | 53    | >TP53-V173M EVMRRCPHH | 23   | 30    |
| >TP53-V173M EVVRRCPHHE | 5     | >TP53-V173M EVMRRCPHH | 5    | 0     |
| >TP53-V173M HMTEVVRR   | 38    | >TP53-V173M HMTEVMRR  | 173  | 135   |
| >TP53-V173M HMTEVVRR   | 38    | >TP53-V173M HMTEVMRR  | 39   | 1     |
| >TP53-V173M HMTEVVRR   | 65    | >TP53-V173M HMTEVMRR  | 38   | 27    |

|                        |       |                       |       |       |
|------------------------|-------|-----------------------|-------|-------|
| >TP53-V173M HMTEVVRR   | 35    | >TP53-V173M HMTEVMRR  | 33    | 2     |
| >TP53-V173M HMTEVVRR   | 64    | >TP53-V173M HMTEVMRR  | 75    | 11    |
| >TP53-V173M QHMTEVVR   | 269   | >TP53-V173M QHMTEVMR  | 369   | 100   |
| >TP53-V173M QHMTEVRR   | 195   | >TP53-V173M QHMTEVMRI | 216   | 21    |
| >TP53-V173M SQHMTEVV   | 115   | >TP53-V173M SQHMTEVM  | 2976  | 2861  |
| >TP53-V173M SQHMTEVV   | 256   | >TP53-V173M SQHMTEVM  | 10235 | 9979  |
| >TP53-V173M SQHMTEVVR  | 115   | >TP53-V173M SQHMTEVMF | 113   | 2     |
| >TP53-V173M SQHMTEVVR  | 504   | >TP53-V173M SQHMTEVMF | 393   | 111   |
| >TP53-V173M SQHMTEVV   | 504   | >TP53-V173M SQHMTEVM  | 59    | 445   |
| >TP53-V173M SQHMTEVV   | 88    | >TP53-V173M SQHMTEVM  | 23    | 65    |
| >TP53-V173M SQHMTEVVR  | 162   | >TP53-V173M SQHMTEVMF | 270   | 108   |
| >TP53-V173M SQHMTEVV   | 1657  | >TP53-V173M SQHMTEVM  | 473   | 1184  |
| >TP53-V173M SQHMTEVVR  | 434   | >TP53-V173M SQHMTEVMF | 575   | 141   |
| >TP53-V173M SQHMTEVVR  | 363   | >TP53-V173M SQHMTEVMF | 398   | 35    |
| >TP53-V173M QSQHMTEVV  | 230   | >TP53-V173M QSQHMTEVM | 100   | 130   |
| >TP53-V173M QSQHMTEVV  | 321   | >TP53-V173M QSQHMTEVM | 485   | 164   |
| >TP53-V173M QSQHMTEVV  | 973   | >TP53-V173M QSQHMTEVM | 287   | 686   |
| >TP53-V173M QSQHMTEVV  | 185   | >TP53-V173M QSQHMTEVM | 168   | 17    |
| >TP53-V173M QSQHMTEVV  | 303   | >TP53-V173M QSQHMTEVM | 10654 | 10351 |
| >TP53-V173M QSQHMTEVV  | 5223  | >TP53-V173M QSQHMTEVM | 370   | 4853  |
| >TP53-V173M QSQHMTEVV  | 10991 | >TP53-V173M QSQHMTEVM | 264   | 10727 |
| >TP53-V173M QSQHMTEVV  | 1944  | >TP53-V173M QSQHMTEVM | 102   | 1842  |
| >TP53-V173M QSQHMTEVV  | 306   | >TP53-V173M QSQHMTEVM | 271   | 35    |
| >TP53-V173M KQSQHMTEV  | 298   | >TP53-V173M KQSQHMTEV | 1591  | 1293  |
| >TP53-V173M KQSQHMTEV  | 273   | >TP53-V173M KQSQHMTEV | 5240  | 4967  |
| >TP53-V173M KQSQHMTEV  | 35    | >TP53-V173M KQSQHMTEV | 33    | 2     |
| >TP53-V173M KQSQHMTEV  | 222   | >TP53-V173M KQSQHMTEV | 43    | 179   |
| >TP53-V173M KQSQHMTEV  | 110   | >TP53-V173M KQSQHMTEV | 25    | 85    |
| >TP53-V173M KQSQHMTEV  | 185   | >TP53-V173M KQSQHMTEV | 281   | 96    |
| >TP53-V173M KQSQHMTEV  | 60    | >TP53-V173M KQSQHMTEV | 68    | 8     |
| >TP53-V173M VRRCPHHER  | 680   | >TP53-V173M VRRCPHHER | 442   | 238   |
| >TP53-V173M VVRRCPHHEI | 145   | >TP53-V173M VWRRCPHHE | 1815  | 1670  |
| >TP53-V173M VVRRCPHHEI | 63    | >TP53-V173M VWRRCPHHE | 168   | 105   |
| >TP53-V173M VVRRCPHHEI | 713   | >TP53-V173M VWRRCPHHE | 25    | 688   |
| >TP53-V173M YKQSQHMTE  | 42    | >TP53-V173M YKQSQHMTE | 76    | 34    |
| >TP53-V173M YKQSQHMTE  | 26030 | >TP53-V173M YKQSQHMTE | 174   | 25856 |
| >TP53-V173M EVVRRCPH   | 400   | >TP53-V173M EVVRRCPH  | 3084  | 2684  |
| >TP53-V173M EVVRRCPHH  | 98    | >TP53-V173M EVVRRCPHH | 1936  | 1838  |
| >TP53-V173M EVVRRCPHHE | 428   | >TP53-V173M EVVRRCPHH | 3288  | 2860  |
| >TP53-V173M EVVRRCPHHE | 371   | >TP53-V173M EVVRRCPHH | 42    | 329   |
| >TP53-V173M EVVRRCPHHE | 53    | >TP53-V173M EVVRRCPHH | 16    | 37    |
| >TP53-V173M EVVRRCPHHE | 5     | >TP53-V173M EVVRRCPHH | 11    | 6     |
| >TP53-V173M EVVRRCPHHE | 1019  | >TP53-V173M EVVRRCPHH | 211   | 808   |

|                       |       |                       |       |       |
|-----------------------|-------|-----------------------|-------|-------|
| >TP53-V173\TEVVRRCPH  | 2407  | >TP53-V173\TEVWRRCPH  | 447   | 1960  |
| >TP53-V173\HMTEVRRRC  | 38    | >TP53-V173\HMTEVWRRRC | 112   | 74    |
| >TP53-V173\HMTEVVRR   | 38    | >TP53-V173\HMTEVWRR   | 28    | 10    |
| >TP53-V173\HMTEVVRR   | 65    | >TP53-V173\HMTEVWRR   | 20    | 45    |
| >TP53-V173\HMTEVVRR   | 35    | >TP53-V173\HMTEVWRR   | 43    | 8     |
| >TP53-V173\HMTEVVRR   | 64    | >TP53-V173\HMTEVWRR   | 46    | 18    |
| >TP53-V173\QHMTEVVR   | 269   | >TP53-V173\QHMTEVWR   | 188   | 81    |
| >TP53-V173\QHMTEVRR   | 195   | >TP53-V173\QHMTEVWR   | 115   | 80    |
| >TP53-V173\SQHMTEVV   | 115   | >TP53-V173\SQHMTEVW   | 20051 | 19936 |
| >TP53-V173\SQHMTEVV   | 256   | >TP53-V173\SQHMTEVW   | 29460 | 29204 |
| >TP53-V173\SQHMTEVVR  | 115   | >TP53-V173\SQHMTEVWI  | 60    | 55    |
| >TP53-V173\SQHMTEVVR  | 504   | >TP53-V173\SQHMTEVWI  | 181   | 323   |
| >TP53-V173\SQHMTEVV   | 504   | >TP53-V173\SQHMTEVW   | 277   | 227   |
| >TP53-V173\SQHMTEVV   | 88    | >TP53-V173\SQHMTEVW   | 156   | 68    |
| >TP53-V173\SQHMTEVVR  | 162   | >TP53-V173\SQHMTEVWI  | 858   | 696   |
| >TP53-V173\SQHMTEVVR  | 434   | >TP53-V173\SQHMTEVWI  | 203   | 231   |
| >TP53-V173\SQHMTEVVR  | 363   | >TP53-V173\SQHMTEVWI  | 215   | 148   |
| >TP53-V173\QSQHMTEVV  | 230   | >TP53-V173\QSQHMTEVV  | 37    | 193   |
| >TP53-V173\QSQHMTEVV  | 321   | >TP53-V173\QSQHMTEVV  | 253   | 68    |
| >TP53-V173\QSQHMTEVV  | 1104  | >TP53-V173\QSQHMTEVV  | 107   | 997   |
| >TP53-V173\QSQHMTEVV  | 973   | >TP53-V173\QSQHMTEVV  | 165   | 808   |
| >TP53-V173\QSQHMTEVV  | 185   | >TP53-V173\QSQHMTEVV  | 208   | 23    |
| >TP53-V173\QSQHMTEVV  | 303   | >TP53-V173\QSQHMTEVV  | 25208 | 24905 |
| >TP53-V173\QSQHMTEVV  | 10991 | >TP53-V173\QSQHMTEVV  | 32    | 10959 |
| >TP53-V173\QSQHMTEVV  | 24534 | >TP53-V173\QSQHMTEVV  | 251   | 24283 |
| >TP53-V173\QSQHMTEVV  | 15085 | >TP53-V173\QSQHMTEVV  | 13    | 15072 |
| >TP53-V173\QSQHMTEVV  | 27843 | >TP53-V173\QSQHMTEVV  | 204   | 27639 |
| >TP53-V173\QSQHMTEVV  | 1149  | >TP53-V173\QSQHMTEVV  | 368   | 781   |
| >TP53-V173\QSQHMTEVV  | 306   | >TP53-V173\QSQHMTEVV  | 277   | 29    |
| >TP53-V173\KQSQHMTEV  | 298   | >TP53-V173\KQSQHMTEV  | 23733 | 23435 |
| >TP53-V173\KQSQHMTEV  | 273   | >TP53-V173\KQSQHMTEV  | 28226 | 27953 |
| >TP53-V173\KQSQHMTEV  | 35    | >TP53-V173\KQSQHMTEV  | 22    | 13    |
| >TP53-V173\KQSQHMTEV  | 1845  | >TP53-V173\KQSQHMTEV  | 248   | 1597  |
| >TP53-V173\KQSQHMTEV  | 222   | >TP53-V173\KQSQHMTEV  | 132   | 90    |
| >TP53-V173\KQSQHMTEV  | 110   | >TP53-V173\KQSQHMTEV  | 173   | 63    |
| >TP53-V173\KQSQHMTEV  | 185   | >TP53-V173\KQSQHMTEV  | 979   | 794   |
| >TP53-V173\KQSQHMTEV  | 18168 | >TP53-V173\KQSQHMTEV  | 42    | 18126 |
| >TP53-V173\KQSQHMTEV  | 60    | >TP53-V173\KQSQHMTEV  | 46    | 14    |
| >TP53-V197\VEGNLRVEYL | 312   | >TP53-V197\VEGNLRVEYL | 839   | 527   |
| >TP53-V197\VEGNLRVEY  | 67    | >TP53-V197\VEGNLRVEY  | 594   | 527   |
| >TP53-V197\VEGNLRVEYL | 799   | >TP53-V197\VEGNLRVEYL | 497   | 302   |
| >TP53-V197\VEGNLRVEYL | 472   | >TP53-V197\VEGNLRVEYL | 209   | 263   |
| >TP53-V197\VEGNLRVEY  | 1466  | >TP53-V197\VEGNLRVEY  | 376   | 1090  |

|                        |      |                        |      |      |
|------------------------|------|------------------------|------|------|
| >TP53-V197#VEGNLRVEYL  | 3876 | >TP53-V197#AEGNLRVEYL  | 153  | 3723 |
| >TP53-V197#VEGNLRVEY   | 338  | >TP53-V197#AEGNLRVEY   | 68   | 270  |
| >TP53-V197#VEGNLRVEY   | 5427 | >TP53-V197#AEGNLRVEY   | 143  | 5284 |
| >TP53-V197#VEGNLRVEYL  | 278  | >TP53-V197#AEGNLRVEYL  | 44   | 234  |
| >TP53-V197#RVEGNLRV    | 54   | >TP53-V197#RAEGNLRV    | 840  | 786  |
| >TP53-V197#RVEGNLRVEY  | 224  | >TP53-V197#RAEGNLRVEY  | 239  | 15   |
| >TP53-V197#RVEGNLRVEY  | 301  | >TP53-V197#RAEGNLRVEY  | 38   | 263  |
| >TP53-V197#RVEGNLRVEY  | 1887 | >TP53-V197#RAEGNLRVEY  | 149  | 1738 |
| >TP53-V197#RVEGNLRVEY  | 400  | >TP53-V197#RAEGNLRVEY  | 727  | 327  |
| >TP53-V197#GLAPPQHLIR  | 20   | >TP53-V197#GLAPPQHLIR  | 181  | 161  |
| >TP53-V197#GLAPPQHLIR  | 9    | >TP53-V197#GLAPPQHLIR  | 48   | 39   |
| >TP53-V197#GLAPPQHLIR  | 7    | >TP53-V197#GLAPPQHLIR  | 32   | 25   |
| >TP53-V197#GLAPPQHLIR  | 44   | >TP53-V197#GLAPPQHLIR  | 520  | 476  |
| >TP53-V197#GLAPPQHLIR  | 3    | >TP53-V197#GLAPPQHLIR  | 36   | 33   |
| >TP53-V197#GLAPPQHLIR  | 7    | >TP53-V197#GLAPPQHLIR  | 216  | 209  |
| >TP53-V197#GLAPPQHLIR  | 5    | >TP53-V197#GLAPPQHLIR  | 55   | 50   |
| >TP53-V197#GLAPPQHLIR  | 9    | >TP53-V197#GLAPPQHLIR  | 1691 | 1682 |
| >TP53-V197#GLAPPQHLIR  | 2    | >TP53-V197#GLAPPQHLIR  | 6    | 4    |
| >TP53-V197#IRVEGNLRVE' | 1260 | >TP53-V197#IRAEGNLRVE' | 437  | 823  |
| >TP53-V197#IRVEGNLRVE' | 53   | >TP53-V197#IRAEGNLRVE' | 64   | 11   |
| >TP53-V197#IRVEGNLRVE' | 1131 | >TP53-V197#IRAEGNLRVE' | 496  | 635  |
| >TP53-V197#LIRVEGNLRV  | 555  | >TP53-V197#LIRAEGNLRV  | 250  | 305  |
| >TP53-V197#LIRVEGNLRV  | 35   | >TP53-V197#LIRAEGNLRV  | 16   | 19   |
| >TP53-V197#LIRVEGNLRV  | 296  | >TP53-V197#LIRAEGNLRV  | 209  | 87   |
| >TP53-V197#HLIRVEGNLR' | 156  | >TP53-V197#HLIRAEGNLR' | 209  | 53   |
| >TP53-V197#HLIRVEGNL   | 226  | >TP53-V197#HLIRAEGNL   | 220  | 6    |
| >TP53-V197#HLIRVEGNLR' | 111  | >TP53-V197#HLIRAEGNLR' | 118  | 7    |
| >TP53-V197#HLIRVEGNLR' | 41   | >TP53-V197#HLIRAEGNLR' | 45   | 4    |
| >TP53-V197#HLIRVEGNLR' | 322  | >TP53-V197#HLIRAEGNLR' | 321  | 1    |
| >TP53-V197#HLIRVEGNL   | 327  | >TP53-V197#HLIRAEGNL   | 1861 | 1534 |
| >TP53-V197#HLIRVEGNLR' | 9    | >TP53-V197#HLIRAEGNLR' | 26   | 17   |
| >TP53-V197#HLIRVEGNLR' | 27   | >TP53-V197#HLIRAEGNLR' | 33   | 6    |
| >TP53-V197#HLIRVEGNLR' | 27   | >TP53-V197#HLIRAEGNLR' | 37   | 10   |
| >TP53-V197#HLIRVEGNL   | 153  | >TP53-V197#HLIRAEGNL   | 116  | 37   |
| >TP53-V197#HLIRVEGNLR' | 4    | >TP53-V197#HLIRAEGNLR' | 4    | 0    |
| >TP53-V197#HLIRVEGNLR  | 241  | >TP53-V197#HLIRAEGNLR  | 357  | 116  |
| >TP53-V197#HLIRVEGNLR  | 381  | >TP53-V197#HLIRAEGNLR  | 941  | 560  |
| >TP53-V197#HLIRVEGNLR  | 24   | >TP53-V197#HLIRAEGNLR  | 36   | 12   |
| >TP53-V197#HLIRVEGNLR' | 398  | >TP53-V197#HLIRAEGNLR' | 765  | 367  |
| >TP53-V197#HLIRVEGNLR  | 478  | >TP53-V197#HLIRAEGNLR  | 340  | 138  |
| >TP53-V197#LAPPQHLIRV  | 395  | >TP53-V197#LAPPQHLIRA  | 2389 | 1994 |
| >TP53-V197#LAPPQHLIRV  | 52   | >TP53-V197#LAPPQHLIRA  | 6682 | 6630 |
| >TP53-V197#LAPPQHLIRV  | 28   | >TP53-V197#LAPPQHLIRA  | 518  | 490  |

|                        |       |                        |       |       |
|------------------------|-------|------------------------|-------|-------|
| >TP53-V197E VEGNLRVEYL | 312   | >TP53-V197E EEGNLRVEYL | 236   | 76    |
| >TP53-V197E VEGNLRVEY  | 67    | >TP53-V197E EEGNLRVEY  | 128   | 61    |
| >TP53-V197E VEGNLRVEYL | 472   | >TP53-V197E EEGNLRVEYL | 446   | 26    |
| >TP53-V197E VEGNLRVEY  | 338   | >TP53-V197E EEGNLRVEY  | 102   | 236   |
| >TP53-V197E VEGNLRVEY  | 5427  | >TP53-V197E EEGNLRVEY  | 490   | 4937  |
| >TP53-V197E VEGNLRVEYL | 278   | >TP53-V197E EEGNLRVEYL | 1163  | 885   |
| >TP53-V197E RVEGNLRV   | 54    | >TP53-V197E REEGNLRV   | 12911 | 12857 |
| >TP53-V197E RVEGNLRVEY | 224   | >TP53-V197E REEGNLRVEY | 724   | 500   |
| >TP53-V197E RVEGNLRVEY | 301   | >TP53-V197E REEGNLRVEY | 16746 | 16445 |
| >TP53-V197E RVEGNLRVEY | 27912 | >TP53-V197E REEGNLRVEY | 148   | 27764 |
| >TP53-V197E RVEGNLRV   | 20892 | >TP53-V197E REEGNLRV   | 29    | 20863 |
| >TP53-V197E RVEGNLRVEY | 17084 | >TP53-V197E REEGNLRVEY | 9     | 17075 |
| >TP53-V197E RVEGNLRVEY | 39512 | >TP53-V197E REEGNLRVEY | 421   | 39091 |
| >TP53-V197E RVEGNLRVEY | 16474 | >TP53-V197E REEGNLRVEY | 68    | 16406 |
| >TP53-V197E RVEGNLRVEY | 21257 | >TP53-V197E REEGNLRVEY | 86    | 21171 |
| >TP53-V197E RVEGNLRV   | 40379 | >TP53-V197E REEGNLRV   | 319   | 40060 |
| >TP53-V197E RVEGNLRVEY | 400   | >TP53-V197E REEGNLRVEY | 3170  | 2770  |
| >TP53-V197E RVEGNLRVEY | 27260 | >TP53-V197E REEGNLRVEY | 64    | 27196 |
| >TP53-V197E GLAPPQHLIR | 20    | >TP53-V197E GLAPPQHLIR | 20017 | 19997 |
| >TP53-V197E GLAPPQHLIR | 9     | >TP53-V197E GLAPPQHLIR | 5373  | 5364  |
| >TP53-V197E GLAPPQHLIR | 7     | >TP53-V197E GLAPPQHLIR | 13166 | 13159 |
| >TP53-V197E GLAPPQHLIR | 44    | >TP53-V197E GLAPPQHLIR | 21040 | 20996 |
| >TP53-V197E GLAPPQHLIR | 3     | >TP53-V197E GLAPPQHLIR | 9344  | 9341  |
| >TP53-V197E GLAPPQHLIR | 7     | >TP53-V197E GLAPPQHLIR | 18407 | 18400 |
| >TP53-V197E GLAPPQHLIR | 5     | >TP53-V197E GLAPPQHLIR | 13785 | 13780 |
| >TP53-V197E GLAPPQHLIR | 9     | >TP53-V197E GLAPPQHLIR | 24526 | 24517 |
| >TP53-V197E GLAPPQHLIR | 2     | >TP53-V197E GLAPPQHLIR | 1627  | 1625  |
| >TP53-V197E IRVEGNLRVE | 53    | >TP53-V197E IREEGNLRVE | 712   | 659   |
| >TP53-V197E LIRVEGNLRV | 555   | >TP53-V197E LIREEGNLRV | 355   | 200   |
| >TP53-V197E LIRVEGNLRV | 1834  | >TP53-V197E LIREEGNLRV | 154   | 1680  |
| >TP53-V197E LIRVEGNLRV | 35    | >TP53-V197E LIREEGNLRV | 8     | 27    |
| >TP53-V197E LIRVEGNLRV | 296   | >TP53-V197E LIREEGNLRV | 498   | 202   |
| >TP53-V197E HLIRVEGNLR | 156   | >TP53-V197E HLIREEGNLR | 287   | 131   |
| >TP53-V197E HLIRVEGNL  | 226   | >TP53-V197E HLIREEGNL  | 242   | 16    |
| >TP53-V197E HLIRVEGNLR | 111   | >TP53-V197E HLIREEGNLR | 133   | 22    |
| >TP53-V197E HLIRVEGNLR | 41    | >TP53-V197E HLIREEGNLR | 77    | 36    |
| >TP53-V197E HLIRVEGNLR | 322   | >TP53-V197E HLIREEGNLR | 558   | 236   |
| >TP53-V197E HLIRVEGNL  | 327   | >TP53-V197E HLIREEGNL  | 2130  | 1803  |
| >TP53-V197E HLIRVEGNLR | 9     | >TP53-V197E HLIREEGNLR | 31    | 22    |
| >TP53-V197E HLIRVEGNLR | 27    | >TP53-V197E HLIREEGNLR | 38    | 11    |
| >TP53-V197E HLIRVEGNLR | 27    | >TP53-V197E HLIREEGNLR | 66    | 39    |
| >TP53-V197E HLIRVEGNL  | 153   | >TP53-V197E HLIREEGNL  | 156   | 3     |
| >TP53-V197E HLIRVEGNLR | 4     | >TP53-V197E HLIREEGNLR | 5     | 1     |

|                        |      |                        |       |       |
|------------------------|------|------------------------|-------|-------|
| >TP53-V197EHLIRVEGNLR  | 241  | >TP53-V197EHLIREEGNLR  | 1089  | 848   |
| >TP53-V197EHLIRVEGNLR  | 381  | >TP53-V197EHLIREEGNLR  | 1616  | 1235  |
| >TP53-V197EHLIRVEGNLR  | 24   | >TP53-V197EHLIREEGNLR  | 95    | 71    |
| >TP53-V197EHLIRVEGNLR' | 398  | >TP53-V197EHLIREEGNLR\ | 2205  | 1807  |
| >TP53-V197EHLIRVEGNLR  | 478  | >TP53-V197EHLIREEGNLR  | 296   | 182   |
| >TP53-V197ELAPPQHLIRV  | 395  | >TP53-V197ELAPPQHLIRE  | 24422 | 24027 |
| >TP53-V197ELAPPQHLIRV  | 52   | >TP53-V197ELAPPQHLIRE  | 32383 | 32331 |
| >TP53-V197ELAPPQHLIRV  | 28   | >TP53-V197ELAPPQHLIRE  | 1171  | 1143  |
| >TP53-V197CVEGNLRVEYL  | 312  | >TP53-V197CGEGNLRVEYL  | 646   | 334   |
| >TP53-V197CVEGNLRVEY   | 67   | >TP53-V197CGEGNLRVEY   | 728   | 661   |
| >TP53-V197CVEGNLRVEYL  | 472  | >TP53-V197CGEGNLRVEYL  | 351   | 121   |
| >TP53-V197CVEGNLRVEY   | 338  | >TP53-V197CGEGNLRVEY   | 193   | 145   |
| >TP53-V197CVEGNLRVEYL  | 278  | >TP53-V197CGEGNLRVEYL  | 206   | 72    |
| >TP53-V197CRVEGNLRV    | 54   | >TP53-V197CRGEGNLRV    | 9119  | 9065  |
| >TP53-V197CRVEGNLRVEY  | 224  | >TP53-V197CRGEGNLRVEY  | 490   | 266   |
| >TP53-V197CRVEGNLRVEY  | 301  | >TP53-V197CRGEGNLRVEY  | 1827  | 1526  |
| >TP53-V197CRVEGNLRVEY  | 400  | >TP53-V197CRGEGNLRVEY  | 495   | 95    |
| >TP53-V197CGLAPPQHLIR  | 20   | >TP53-V197CGLAPPQHLIR\ | 15275 | 15255 |
| >TP53-V197CGLAPPQHLIR  | 9    | >TP53-V197CGLAPPQHLIR\ | 1660  | 1651  |
| >TP53-V197CGLAPPQHLIR  | 7    | >TP53-V197CGLAPPQHLIR\ | 5594  | 5587  |
| >TP53-V197CGLAPPQHLIR  | 44   | >TP53-V197CGLAPPQHLIR\ | 15473 | 15429 |
| >TP53-V197CGLAPPQHLIR  | 3    | >TP53-V197CGLAPPQHLIR\ | 2649  | 2646  |
| >TP53-V197CGLAPPQHLIR  | 7    | >TP53-V197CGLAPPQHLIR\ | 11597 | 11590 |
| >TP53-V197CGLAPPQHLIR  | 5    | >TP53-V197CGLAPPQHLIR\ | 8249  | 8244  |
| >TP53-V197CGLAPPQHLIR  | 9    | >TP53-V197CGLAPPQHLIR\ | 22768 | 22759 |
| >TP53-V197CGLAPPQHLIR  | 2    | >TP53-V197CGLAPPQHLIR\ | 1256  | 1254  |
| >TP53-V197CIRVEGNLRVE' | 53   | >TP53-V197CIRGEGNLRVE  | 312   | 259   |
| >TP53-V197CLIRVEGNLRV  | 555  | >TP53-V197CLIRGEGNLRV  | 317   | 238   |
| >TP53-V197CLIRVEGNLRV  | 1834 | >TP53-V197CLIRGEGNLRV  | 461   | 1373  |
| >TP53-V197CLIRVEGNLRV  | 35   | >TP53-V197CLIRGEGNLRV  | 7     | 28    |
| >TP53-V197CLIRVEGNLRV  | 296  | >TP53-V197CLIRGEGNLRV  | 434   | 138   |
| >TP53-V197CHLIRVEGNLR' | 156  | >TP53-V197CHLIRGEGNLR  | 217   | 61    |
| >TP53-V197CHLIRVEGNL   | 226  | >TP53-V197CHLIRGEGNL   | 549   | 323   |
| >TP53-V197CHLIRVEGNLR' | 111  | >TP53-V197CHLIRGEGNLR  | 209   | 98    |
| >TP53-V197CHLIRVEGNLR' | 41   | >TP53-V197CHLIRGEGNLR  | 36    | 5     |
| >TP53-V197CHLIRVEGNLR' | 322  | >TP53-V197CHLIRGEGNLR  | 267   | 55    |
| >TP53-V197CHLIRVEGNL   | 327  | >TP53-V197CHLIRGEGNL   | 1106  | 779   |
| >TP53-V197CHLIRVEGNLR' | 9    | >TP53-V197CHLIRGEGNLR  | 17    | 8     |
| >TP53-V197CHLIRVEGNLR' | 27   | >TP53-V197CHLIRGEGNLR  | 29    | 2     |
| >TP53-V197CHLIRVEGNLR' | 27   | >TP53-V197CHLIRGEGNLR  | 33    | 6     |
| >TP53-V197CHLIRVEGNL   | 153  | >TP53-V197CHLIRGEGNL   | 47    | 106   |
| >TP53-V197CHLIRVEGNLR' | 4    | >TP53-V197CHLIRGEGNLR  | 3     | 1     |
| >TP53-V197CHLIRVEGNLR  | 241  | >TP53-V197CHLIRGEGNLR  | 505   | 264   |

|                         |       |                         |       |       |
|-------------------------|-------|-------------------------|-------|-------|
| >TP53-V197C HLIRVEGNLR  | 381   | >TP53-V197C HLIRGEGNLR  | 1388  | 1007  |
| >TP53-V197C HLIRVEGNLR  | 24    | >TP53-V197C HLIRGEGNLR  | 49    | 25    |
| >TP53-V197C HLIRVEGNLR' | 398   | >TP53-V197C HLIRGEGNLR' | 1157  | 759   |
| >TP53-V197C HLIRVEGNLR  | 478   | >TP53-V197C HLIRGEGNLR  | 630   | 152   |
| >TP53-V197C LAPPQHLIRV  | 395   | >TP53-V197C LAPPQHLIRG  | 21769 | 21374 |
| >TP53-V197C LAPPQHLIRV  | 52    | >TP53-V197C LAPPQHLIRG  | 31864 | 31812 |
| >TP53-V197C LAPPQHLIRV  | 28    | >TP53-V197C LAPPQHLIRG  | 930   | 902   |
| >TP53-V197L VEGNLRVEYL  | 312   | >TP53-V197L LEGNLRVEYL  | 142   | 170   |
| >TP53-V197L VEGNLRVEY   | 67    | >TP53-V197L LEGNLRVEY   | 26    | 41    |
| >TP53-V197L VEGNLRVEYL  | 472   | >TP53-V197L LEGNLRVEYL  | 452   | 20    |
| >TP53-V197L VEGNLRVEY   | 338   | >TP53-V197L LEGNLRVEY   | 355   | 17    |
| >TP53-V197L VEGNLRVEYL  | 278   | >TP53-V197L LEGNLRVEYL  | 344   | 66    |
| >TP53-V197L RVEGNLRV    | 6266  | >TP53-V197L RLEGNLRV    | 269   | 5997  |
| >TP53-V197L RVEGNLRVEY  | 844   | >TP53-V197L RLEGNLRVEY  | 35    | 809   |
| >TP53-V197L RVEGNLRV    | 3341  | >TP53-V197L RLEGNLRV    | 215   | 3126  |
| >TP53-V197L RVEGNLRV    | 604   | >TP53-V197L RLEGNLRV    | 9     | 595   |
| >TP53-V197L RVEGNLRVEY  | 974   | >TP53-V197L RLEGNLRVEY  | 17    | 957   |
| >TP53-V197L RVEGNLRV    | 5276  | >TP53-V197L RLEGNLRV    | 49    | 5227  |
| >TP53-V197L RVEGNLRVEY  | 6978  | >TP53-V197L RLEGNLRVEY  | 61    | 6917  |
| >TP53-V197L RVEGNLRV    | 7814  | >TP53-V197L RLEGNLRV    | 125   | 7689  |
| >TP53-V197L RVEGNLRV    | 10610 | >TP53-V197L RLEGNLRV    | 471   | 10139 |
| >TP53-V197L RVEGNLRVEY  | 9874  | >TP53-V197L RLEGNLRVEY  | 445   | 9429  |
| >TP53-V197L RVEGNLRV    | 54    | >TP53-V197L RLEGNLRV    | 3     | 51    |
| >TP53-V197L RVEGNLRVEY  | 1524  | >TP53-V197L RLEGNLRVEY  | 12    | 1512  |
| >TP53-V197L RVEGNLRVEY  | 224   | >TP53-V197L RLEGNLRVEY  | 192   | 32    |
| >TP53-V197L RVEGNLRVEY  | 301   | >TP53-V197L RLEGNLRVEY  | 1765  | 1464  |
| >TP53-V197L RVEGNLRVEY  | 400   | >TP53-V197L RLEGNLRVEY  | 530   | 130   |
| >TP53-V197L GLAPPQHLIR  | 20    | >TP53-V197L GLAPPQHLIR  | 61    | 41    |
| >TP53-V197L GLAPPQHLIR  | 9     | >TP53-V197L GLAPPQHLIR  | 10    | 1     |
| >TP53-V197L GLAPPQHLIR  | 7     | >TP53-V197L GLAPPQHLIR  | 40    | 33    |
| >TP53-V197L GLAPPQHLIR  | 44    | >TP53-V197L GLAPPQHLIR  | 299   | 255   |
| >TP53-V197L GLAPPQHLIR  | 3     | >TP53-V197L GLAPPQHLIR  | 12    | 9     |
| >TP53-V197L GLAPPQHLIR  | 7     | >TP53-V197L GLAPPQHLIR  | 32    | 25    |
| >TP53-V197L GLAPPQHLIR  | 5     | >TP53-V197L GLAPPQHLIR  | 19    | 14    |
| >TP53-V197L GLAPPQHLIR  | 9     | >TP53-V197L GLAPPQHLIR  | 132   | 123   |
| >TP53-V197L GLAPPQHLIR  | 2     | >TP53-V197L GLAPPQHLIR  | 3     | 1     |
| >TP53-V197L IRVEGNLRVE' | 53    | >TP53-V197L IRLEGNLRVE\ | 34    | 19    |
| >TP53-V197L IRVEGNLRV   | 1217  | >TP53-V197L IRLEGNLRV   | 467   | 750   |
| >TP53-V197L IRVEGNLRVE' | 668   | >TP53-V197L IRLEGNLRVE\ | 271   | 397   |
| >TP53-V197L LIRVEGNLRV  | 555   | >TP53-V197L LIRLEGNLRV  | 492   | 63    |
| >TP53-V197L LIRVEGNLRV  | 35    | >TP53-V197L LIRLEGNLRV  | 52    | 17    |
| >TP53-V197L LIRVEGNLRV  | 296   | >TP53-V197L LIRLEGNLRV  | 440   | 144   |
| >TP53-V197L HLIRVEGNLR' | 156   | >TP53-V197L HLIRLEGNLR\ | 185   | 29    |



|                         |       |                         |      |       |
|-------------------------|-------|-------------------------|------|-------|
| >TP53-V197L HLIRVEGNL   | 226   | >TP53-V197L HLIRLEGNL   | 273  | 47    |
| >TP53-V197L HLIRVEGNLR' | 111   | >TP53-V197L HLIRLEGNLR\ | 133  | 22    |
| >TP53-V197L HLIRVEGNLR' | 41    | >TP53-V197L HLIRLEGNLR\ | 57   | 16    |
| >TP53-V197L HLIRVEGNLR' | 322   | >TP53-V197L HLIRLEGNLR\ | 411  | 89    |
| >TP53-V197L HLIRVEGNL   | 327   | >TP53-V197L HLIRLEGNL   | 1302 | 975   |
| >TP53-V197L HLIRVEGNLR' | 9     | >TP53-V197L HLIRLEGNLR\ | 19   | 10    |
| >TP53-V197L HLIRVEGNLR' | 27    | >TP53-V197L HLIRLEGNLR\ | 35   | 8     |
| >TP53-V197L HLIRVEGNLR' | 27    | >TP53-V197L HLIRLEGNLR\ | 40   | 13    |
| >TP53-V197L HLIRVEGNL   | 153   | >TP53-V197L HLIRLEGNL   | 168  | 15    |
| >TP53-V197L HLIRVEGNLR' | 4     | >TP53-V197L HLIRLEGNLR\ | 4    | 0     |
| >TP53-V197L HLIRVEGNLR  | 241   | >TP53-V197L HLIRLEGNLR  | 242  | 1     |
| >TP53-V197L HLIRVEGNLR  | 381   | >TP53-V197L HLIRLEGNLR  | 506  | 125   |
| >TP53-V197L HLIRVEGNLR  | 24    | >TP53-V197L HLIRLEGNLR  | 33   | 9     |
| >TP53-V197L HLIRVEGNLR' | 398   | >TP53-V197L HLIRLEGNLR\ | 804  | 406   |
| >TP53-V197L HLIRVEGNLR  | 478   | >TP53-V197L HLIRLEGNLR  | 198  | 280   |
| >TP53-V197L APPQHLIRV   | 2001  | >TP53-V197L APPQHLIRL   | 359  | 1642  |
| >TP53-V197L APPQHLIRV   | 759   | >TP53-V197L APPQHLIRL   | 128  | 631   |
| >TP53-V197L APPQHLIRV   | 1104  | >TP53-V197L APPQHLIRL   | 131  | 973   |
| >TP53-V197L LAPPQHLIRV  | 395   | >TP53-V197L LAPPQHLIRL  | 2121 | 1726  |
| >TP53-V197L LAPPQHLIRV  | 52    | >TP53-V197L LAPPQHLIRL  | 1702 | 1650  |
| >TP53-V197L LAPPQHLIRV  | 28    | >TP53-V197L LAPPQHLIRL  | 6    | 22    |
| >TP53-V197L LAPPQHLIRV  | 865   | >TP53-V197L LAPPQHLIRLE | 207  | 658   |
| >TP53-V197M VEGNLRVEYL  | 312   | >TP53-V197M MEGNLRVEY   | 131  | 181   |
| >TP53-V197M VEGNLRVEY   | 1192  | >TP53-V197M MEGNLRVEY   | 421  | 771   |
| >TP53-V197M VEGNLRVEY   | 67    | >TP53-V197M MEGNLRVEY   | 18   | 49    |
| >TP53-V197M VEGNLRVEYL  | 799   | >TP53-V197M MEGNLRVEY   | 456  | 343   |
| >TP53-V197M VEGNLRVEYL  | 472   | >TP53-V197M MEGNLRVEY   | 235  | 237   |
| >TP53-V197M VEGNLRVEY   | 338   | >TP53-V197M MEGNLRVEY   | 77   | 261   |
| >TP53-V197M VEGNLRVEY   | 5427  | >TP53-V197M MEGNLRVEY   | 381  | 5046  |
| >TP53-V197M VEGNLRVEYL  | 278   | >TP53-V197M MEGNLRVEY   | 113  | 165   |
| >TP53-V197M RVEGNLRV    | 6671  | >TP53-V197M RMEGNLRV    | 497  | 6174  |
| >TP53-V197M RVEGNLRV    | 6266  | >TP53-V197M RMEGNLRV    | 306  | 5960  |
| >TP53-V197M RVEGNLRVEY  | 844   | >TP53-V197M RMEGNLRVE   | 35   | 809   |
| >TP53-V197M RVEGNLRV    | 3341  | >TP53-V197M RMEGNLRV    | 154  | 3187  |
| >TP53-V197M RVEGNLRVEY  | 5750  | >TP53-V197M RMEGNLRVE   | 466  | 5284  |
| >TP53-V197M RVEGNLRV    | 732   | >TP53-V197M RMEGNLRV    | 366  | 366   |
| >TP53-V197M RVEGNLRV    | 604   | >TP53-V197M RMEGNLRV    | 7    | 597   |
| >TP53-V197M RVEGNLRVEY  | 974   | >TP53-V197M RMEGNLRVE   | 13   | 961   |
| >TP53-V197M RVEGNLRV    | 5276  | >TP53-V197M RMEGNLRV    | 34   | 5242  |
| >TP53-V197M RVEGNLRVEY  | 6978  | >TP53-V197M RMEGNLRVE   | 44   | 6934  |
| >TP53-V197M RVEGNLRV    | 7814  | >TP53-V197M RMEGNLRV    | 112  | 7702  |
| >TP53-V197M RVEGNLRV    | 10610 | >TP53-V197M RMEGNLRV    | 349  | 10261 |
| >TP53-V197M RVEGNLRVEY  | 9874  | >TP53-V197M RMEGNLRVE   | 342  | 9532  |

|                        |      |                        |      |      |
|------------------------|------|------------------------|------|------|
| >TP53-V197M RVEGNLRV   | 54   | >TP53-V197M RMEGNLRV   | 3    | 51   |
| >TP53-V197M RVEGNLRVEY | 1524 | >TP53-V197M RMEGNLRVE  | 18   | 1506 |
| >TP53-V197M RVEGNLRVEY | 1211 | >TP53-V197M RMEGNLRVE  | 323  | 888  |
| >TP53-V197M RVEGNLRVEY | 224  | >TP53-V197M RMEGNLRVE  | 105  | 119  |
| >TP53-V197M RVEGNLRVEY | 810  | >TP53-V197M RMEGNLRVE  | 451  | 359  |
| >TP53-V197M RVEGNLRVEY | 2230 | >TP53-V197M RMEGNLRVE  | 183  | 2047 |
| >TP53-V197M RVEGNLRVEY | 5600 | >TP53-V197M RMEGNLRVE  | 441  | 5159 |
| >TP53-V197M RVEGNLRVEY | 301  | >TP53-V197M RMEGNLRVE  | 584  | 283  |
| >TP53-V197M RVEGNLRVEY | 400  | >TP53-V197M RMEGNLRVE  | 741  | 341  |
| >TP53-V197M GLAPPQHLIR | 20   | >TP53-V197M GLAPPQHLIR | 356  | 336  |
| >TP53-V197M GLAPPQHLIR | 9    | >TP53-V197M GLAPPQHLIR | 76   | 67   |
| >TP53-V197M GLAPPQHLIR | 7    | >TP53-V197M GLAPPQHLIR | 342  | 335  |
| >TP53-V197M GLAPPQHLIR | 44   | >TP53-V197M GLAPPQHLIR | 1580 | 1536 |
| >TP53-V197M GLAPPQHLIR | 3    | >TP53-V197M GLAPPQHLIR | 73   | 70   |
| >TP53-V197M GLAPPQHLIR | 7    | >TP53-V197M GLAPPQHLIR | 450  | 443  |
| >TP53-V197M GLAPPQHLIR | 5    | >TP53-V197M GLAPPQHLIR | 254  | 249  |
| >TP53-V197M GLAPPQHLIR | 9    | >TP53-V197M GLAPPQHLIR | 1340 | 1331 |
| >TP53-V197M GLAPPQHLIR | 2    | >TP53-V197M GLAPPQHLIR | 16   | 14   |
| >TP53-V197M IRVEGNLRVE | 53   | >TP53-V197M IRMEGNLRVE | 22   | 31   |
| >TP53-V197M IRVEGNLR   | 1338 | >TP53-V197M IRMEGNLR   | 181  | 1157 |
| >TP53-V197M IRVEGNLRV  | 1217 | >TP53-V197M IRMEGNLRV  | 154  | 1063 |
| >TP53-V197M IRVEGNLRVE | 668  | >TP53-V197M IRMEGNLRVE | 104  | 564  |
| >TP53-V197M IRVEGNLRV  | 1782 | >TP53-V197M IRMEGNLRV  | 433  | 1349 |
| >TP53-V197M IRVEGNLRVE | 1131 | >TP53-V197M IRMEGNLRVE | 267  | 864  |
| >TP53-V197M LIRVEGNLRV | 555  | >TP53-V197M LIRMEGNLRV | 422  | 133  |
| >TP53-V197M LIRVEGNLRV | 35   | >TP53-V197M LIRMEGNLRV | 21   | 14   |
| >TP53-V197M LIRVEGNLRV | 296  | >TP53-V197M LIRMEGNLRV | 262  | 34   |
| >TP53-V197M HLIRVEGNLR | 156  | >TP53-V197M HLIRMEGNLF | 203  | 47   |
| >TP53-V197M HLIRVEGNL  | 226  | >TP53-V197M HLIRMEGNL  | 405  | 179  |
| >TP53-V197M HLIRVEGNLR | 111  | >TP53-V197M HLIRMEGNLF | 180  | 69   |
| >TP53-V197M HLIRVEGNLR | 41   | >TP53-V197M HLIRMEGNLF | 47   | 6    |
| >TP53-V197M HLIRVEGNLR | 322  | >TP53-V197M HLIRMEGNLF | 515  | 193  |
| >TP53-V197M HLIRVEGNL  | 327  | >TP53-V197M HLIRMEGNL  | 2377 | 2050 |
| >TP53-V197M HLIRVEGNLR | 9    | >TP53-V197M HLIRMEGNLF | 33   | 24   |
| >TP53-V197M HLIRVEGNLR | 27   | >TP53-V197M HLIRMEGNLF | 44   | 17   |
| >TP53-V197M HLIRVEGNLR | 27   | >TP53-V197M HLIRMEGNLF | 56   | 29   |
| >TP53-V197M HLIRVEGNL  | 153  | >TP53-V197M HLIRMEGNL  | 90   | 63   |
| >TP53-V197M HLIRVEGNLR | 4    | >TP53-V197M HLIRMEGNLF | 4    | 0    |
| >TP53-V197M HLIRVEGNLR | 241  | >TP53-V197M HLIRMEGNLF | 166  | 75   |
| >TP53-V197M HLIRVEGNLR | 381  | >TP53-V197M HLIRMEGNLF | 493  | 112  |
| >TP53-V197M HLIRVEGNLR | 24   | >TP53-V197M HLIRMEGNLF | 31   | 7    |
| >TP53-V197M HLIRVEGNLR | 398  | >TP53-V197M HLIRMEGNLF | 1042 | 644  |
| >TP53-V197M HLIRVEGNLR | 478  | >TP53-V197M HLIRMEGNLF | 301  | 177  |

|                         |      |                         |       |       |
|-------------------------|------|-------------------------|-------|-------|
| >TP53-V197M APPQHLIRV   | 2001 | >TP53-V197M APPQHLIRM   | 170   | 1831  |
| >TP53-V197M APPQHLIRV   | 759  | >TP53-V197M APPQHLIRM   | 118   | 641   |
| >TP53-V197M APPQHLIRV   | 1104 | >TP53-V197M APPQHLIRM   | 243   | 861   |
| >TP53-V197M LAPPQHLIRV  | 395  | >TP53-V197M LAPPQHLIRM  | 6065  | 5670  |
| >TP53-V197M LAPPQHLIRV  | 52   | >TP53-V197M LAPPQHLIRM  | 14615 | 14563 |
| >TP53-V197M LAPPQHLIRV  | 28   | >TP53-V197M LAPPQHLIRM  | 8     | 20    |
| >TP53-V197M LAPPQHLIRV  | 8032 | >TP53-V197M LAPPQHLIRM  | 318   | 7714  |
| >TP53-V203A VEYLDDRNTF  | 124  | >TP53-V203A AEYLDDRNTF  | 76    | 48    |
| >TP53-V203A VEYLDDRNTF  | 594  | >TP53-V203A AEYLDDRNTF  | 283   | 311   |
| >TP53-V203A VEYLDDRNTF  | 1119 | >TP53-V203A AEYLDDRNTF  | 74    | 1045  |
| >TP53-V203A VEYLDDRNTF  | 870  | >TP53-V203A AEYLDDRNTF  | 101   | 769   |
| >TP53-V203A VEYLDDRNT   | 7002 | >TP53-V203A AEYLDDRNT   | 295   | 6707  |
| >TP53-V203A VEYLDDRNTF  | 3529 | >TP53-V203A AEYLDDRNTF  | 314   | 3215  |
| >TP53-V203A VEYLDDRNTF  | 2225 | >TP53-V203A AEYLDDRNTF  | 466   | 1759  |
| >TP53-V203A RVEYLDDR    | 433  | >TP53-V203A RAEYLDDR    | 887   | 454   |
| >TP53-V203A RVEYLDDRNT  | 40   | >TP53-V203A RAEYLDDRNT  | 346   | 306   |
| >TP53-V203A RVEYLDDRNT  | 1271 | >TP53-V203A RAEYLDDRNT  | 150   | 1121  |
| >TP53-V203A RVEYLDDRNT  | 1584 | >TP53-V203A RAEYLDDRNT  | 446   | 1138  |
| >TP53-V203A RVEYLDDRNT  | 78   | >TP53-V203A RAEYLDDRNT  | 153   | 75    |
| >TP53-V203A HLIRVEGNLR' | 156  | >TP53-V203A HLIRVEGNLR, | 1451  | 1295  |
| >TP53-V203A HLIRVEGNLR' | 111  | >TP53-V203A HLIRVEGNLR, | 852   | 741   |
| >TP53-V203A HLIRVEGNLR' | 41   | >TP53-V203A HLIRVEGNLR, | 407   | 366   |
| >TP53-V203A HLIRVEGNLR' | 322  | >TP53-V203A HLIRVEGNLR, | 2845  | 2523  |
| >TP53-V203A HLIRVEGNLR' | 9    | >TP53-V203A HLIRVEGNLR, | 415   | 406   |
| >TP53-V203A HLIRVEGNLR' | 27   | >TP53-V203A HLIRVEGNLR, | 1388  | 1361  |
| >TP53-V203A HLIRVEGNLR' | 27   | >TP53-V203A HLIRVEGNLR, | 1516  | 1489  |
| >TP53-V203A HLIRVEGNLR' | 4    | >TP53-V203A HLIRVEGNLR, | 94    | 90    |
| >TP53-V203A HLIRVEGNLR' | 398  | >TP53-V203A HLIRVEGNLR, | 4357  | 3959  |
| >TP53-V203A VEGNLRVEYL  | 312  | >TP53-V203A VEGNLRAEYL  | 185   | 127   |
| >TP53-V203A VEGNLRVEY   | 2056 | >TP53-V203A VEGNLRAEY   | 394   | 1662  |
| >TP53-V203A VEGNLRVEY   | 67   | >TP53-V203A VEGNLRAEY   | 79    | 12    |
| >TP53-V203A VEGNLRVEYL  | 472  | >TP53-V203A VEGNLRAEYL  | 548   | 76    |
| >TP53-V203A VEGNLRVEY   | 338  | >TP53-V203A VEGNLRAEY   | 466   | 128   |
| >TP53-V203A VEGNLRVEYL  | 278  | >TP53-V203A VEGNLRAEYL  | 365   | 87    |
| >TP53-V203A RVEGNLRV    | 54   | >TP53-V203A RVEGNLRA    | 6299  | 6245  |
| >TP53-V203A RVEGNLRVEY  | 224  | >TP53-V203A RVEGNLRAEY  | 73    | 151   |
| >TP53-V203A RVEGNLRVEY  | 301  | >TP53-V203A RVEGNLRAEY  | 147   | 154   |
| >TP53-V203A RVEGNLRVEY  | 400  | >TP53-V203A RVEGNLRAEY  | 523   | 123   |
| >TP53-V203A IRVEGNLRVE' | 1260 | >TP53-V203A IRVEGNLRAE' | 425   | 835   |
| >TP53-V203A IRVEGNLRVE' | 53   | >TP53-V203A IRVEGNLRAE' | 98    | 45    |
| >TP53-V203A LIRVEGNLRV  | 35   | >TP53-V203A LIRVEGNLRA  | 4103  | 4068  |
| >TP53-V203A LIRVEGNLRV  | 296  | >TP53-V203A LIRVEGNLRA  | 159   | 137   |
| >TP53-V203E VEYLDDRNTF  | 1728 | >TP53-V203E EEYLDDRNTF  | 406   | 1322  |

|                         |       |                          |       |       |
|-------------------------|-------|--------------------------|-------|-------|
| >TP53-V203E VEYLDDRNTF  | 2593  | >TP53-V203E EEYLDDRNTF   | 134   | 2459  |
| >TP53-V203E VEYLDDRNTF  | 124   | >TP53-V203E EEYLDDRNTF   | 677   | 553   |
| >TP53-V203E VEYLDDRNTF  | 1119  | >TP53-V203E EEYLDDRNTF   | 271   | 848   |
| >TP53-V203E VEYLDDRNTF  | 870   | >TP53-V203E EEYLDDRNTF   | 202   | 668   |
| >TP53-V203E VEYLDDRNTF  | 524   | >TP53-V203E EEYLDDRNTF   | 263   | 261   |
| >TP53-V203E RVEYLDDR    | 433   | >TP53-V203E REEYLDDR     | 13300 | 12867 |
| >TP53-V203E RVEYLDDRNT  | 40    | >TP53-V203E REEYLDDRNT   | 1025  | 985   |
| >TP53-V203E RVEYLDDRNT  | 19496 | >TP53-V203E REEYLDDRNT   | 29    | 19467 |
| >TP53-V203E RVEYLDDRNT  | 22964 | >TP53-V203E REEYLDDRNT   | 202   | 22762 |
| >TP53-V203E RVEYLDDRNT  | 78    | >TP53-V203E REEYLDDRNT   | 1519  | 1441  |
| >TP53-V203E RVEYLDDRNT  | 35182 | >TP53-V203E REEYLDDRNT   | 424   | 34758 |
| >TP53-V203E HLIRVEGNLR' | 156   | >TP53-V203E HLIRVEGNLR   | 23217 | 23061 |
| >TP53-V203E HLIRVEGNLR' | 111   | >TP53-V203E HLIRVEGNLR   | 17797 | 17686 |
| >TP53-V203E HLIRVEGNLR' | 41    | >TP53-V203E HLIRVEGNLR   | 20971 | 20930 |
| >TP53-V203E HLIRVEGNLR' | 322   | >TP53-V203E HLIRVEGNLR   | 25835 | 25513 |
| >TP53-V203E HLIRVEGNLR' | 9     | >TP53-V203E HLIRVEGNLR   | 19193 | 19184 |
| >TP53-V203E HLIRVEGNLR' | 27    | >TP53-V203E HLIRVEGNLR   | 21463 | 21436 |
| >TP53-V203E HLIRVEGNLR' | 27    | >TP53-V203E HLIRVEGNLR   | 22270 | 22243 |
| >TP53-V203E HLIRVEGNLR' | 4     | >TP53-V203E HLIRVEGNLR   | 14738 | 14734 |
| >TP53-V203E HLIRVEGNLR' | 398   | >TP53-V203E HLIRVEGNLR   | 23610 | 23212 |
| >TP53-V203E VEGNLRVEYL  | 312   | >TP53-V203E VEGNLRREEYL  | 452   | 140   |
| >TP53-V203E VEGNLRVEY   | 67    | >TP53-V203E VEGNLRREEY   | 147   | 80    |
| >TP53-V203E VEGNLRVEYL  | 472   | >TP53-V203E VEGNLRREEYL  | 779   | 307   |
| >TP53-V203E VEGNLRVEY   | 338   | >TP53-V203E VEGNLRREEY   | 576   | 238   |
| >TP53-V203E VEGNLRVEYL  | 278   | >TP53-V203E VEGNLRREEYL  | 773   | 495   |
| >TP53-V203E RVEGNLRV    | 54    | >TP53-V203E RVEGNLRRE    | 33021 | 32967 |
| >TP53-V203E RVEGNLRVEY  | 224   | >TP53-V203E RVEGNLRREEY  | 295   | 71    |
| >TP53-V203E RVEGNLRVEY  | 301   | >TP53-V203E RVEGNLRREEY  | 566   | 265   |
| >TP53-V203E RVEGNLRVEY  | 400   | >TP53-V203E RVEGNLRREEY  | 1086  | 686   |
| >TP53-V203E IRVEGNLRVE' | 53    | >TP53-V203E IRVEGNLRREE' | 123   | 70    |
| >TP53-V203E LIRVEGNLRV  | 35    | >TP53-V203E LIRVEGNLRRE  | 31735 | 31700 |
| >TP53-V203E LIRVEGNLRV  | 296   | >TP53-V203E LIRVEGNLRRE  | 5847  | 5551  |
| >TP53-V203L VEYLDDRNTF  | 622   | >TP53-V203L LEYLDDRNTF   | 259   | 363   |
| >TP53-V203L VEYLDDRNTF  | 124   | >TP53-V203L LEYLDDRNTF   | 78    | 46    |
| >TP53-V203L VEYLDDRNTF  | 524   | >TP53-V203L LEYLDDRNTF   | 424   | 100   |
| >TP53-V203L RVEYLDDR    | 433   | >TP53-V203L RLEYLDDR     | 845   | 412   |
| >TP53-V203L RVEYLDDRNT  | 40    | >TP53-V203L RLEYLDDRNT   | 39    | 1     |
| >TP53-V203L RVEYLDDRNT  | 78    | >TP53-V203L RLEYLDDRNT   | 449   | 371   |
| >TP53-V203L HLIRVEGNLR' | 156   | >TP53-V203L HLIRVEGNLR   | 519   | 363   |
| >TP53-V203L HLIRVEGNLR' | 111   | >TP53-V203L HLIRVEGNLR   | 141   | 30    |
| >TP53-V203L HLIRVEGNLR' | 41    | >TP53-V203L HLIRVEGNLR   | 506   | 465   |
| >TP53-V203L HLIRVEGNLR' | 322   | >TP53-V203L HLIRVEGNLR   | 1835  | 1513  |
| >TP53-V203L HLIRVEGNLR' | 9     | >TP53-V203L HLIRVEGNLR   | 103   | 94    |

|                         |      |                         |      |      |
|-------------------------|------|-------------------------|------|------|
| >TP53-V203L HLIRVEGNLR' | 27   | >TP53-V203L HLIRVEGNLR  | 268  | 241  |
| >TP53-V203L HLIRVEGNLR' | 27   | >TP53-V203L HLIRVEGNLR  | 435  | 408  |
| >TP53-V203L HLIRVEGNLR' | 4    | >TP53-V203L HLIRVEGNLR  | 21   | 17   |
| >TP53-V203L HLIRVEGNLR' | 398  | >TP53-V203L HLIRVEGNLR  | 3576 | 3178 |
| >TP53-V203L VEGNLRVEYL  | 312  | >TP53-V203L VEGNLRLEYL  | 229  | 83   |
| >TP53-V203L VEGNLRVEY   | 2675 | >TP53-V203L VEGNLRLEY   | 35   | 2640 |
| >TP53-V203L VEGNLRVEY   | 67   | >TP53-V203L VEGNLRLEY   | 54   | 13   |
| >TP53-V203L VEGNLRVEYL  | 472  | >TP53-V203L VEGNLRLEYL  | 451  | 21   |
| >TP53-V203L VEGNLRVEY   | 338  | >TP53-V203L VEGNLRLEY   | 215  | 123  |
| >TP53-V203L VEGNLRVEYL  | 278  | >TP53-V203L VEGNLRLEYL  | 407  | 129  |
| >TP53-V203L RVEGNLRVEY  | 946  | >TP53-V203L RVEGNLRLEY  | 410  | 536  |
| >TP53-V203L RVEGNLRV    | 54   | >TP53-V203L RVEGNLRL    | 1655 | 1601 |
| >TP53-V203L RVEGNLRVEY  | 224  | >TP53-V203L RVEGNLRLEY  | 367  | 143  |
| >TP53-V203L RVEGNLRVEY  | 1157 | >TP53-V203L RVEGNLRLEY  | 52   | 1105 |
| >TP53-V203L RVEGNLRV    | 6981 | >TP53-V203L RVEGNLRL    | 334  | 6647 |
| >TP53-V203L RVEGNLRVEY  | 301  | >TP53-V203L RVEGNLRLEY  | 158  | 143  |
| >TP53-V203L RVEGNLRVEY  | 400  | >TP53-V203L RVEGNLRLEY  | 459  | 59   |
| >TP53-V203L IRVEGNLRVE' | 1106 | >TP53-V203L IRVEGNLRLEY | 229  | 877  |
| >TP53-V203L IRVEGNLRVE' | 2901 | >TP53-V203L IRVEGNLRLEY | 337  | 2564 |
| >TP53-V203L IRVEGNLRVE' | 53   | >TP53-V203L IRVEGNLRLEY | 74   | 21   |
| >TP53-V203L IRVEGNLRV   | 1217 | >TP53-V203L IRVEGNLRL   | 453  | 764  |
| >TP53-V203L IRVEGNLRV   | 4404 | >TP53-V203L IRVEGNLRL   | 299  | 4105 |
| >TP53-V203L IRVEGNLRV   | 1782 | >TP53-V203L IRVEGNLRL   | 77   | 1705 |
| >TP53-V203L LIRVEGNLRV  | 35   | >TP53-V203L LIRVEGNLRL  | 859  | 824  |
| >TP53-V203L LIRVEGNLRV  | 296  | >TP53-V203L LIRVEGNLRL  | 505  | 209  |
| >TP53-V203M VEYLDDRNTF  | 622  | >TP53-V203M MEYLDDRNT   | 225  | 397  |
| >TP53-V203M VEYLDDRNTF  | 1728 | >TP53-V203M MEYLDDRNT   | 457  | 1271 |
| >TP53-V203M VEYLDDRNTF  | 2593 | >TP53-V203M MEYLDDRNT   | 152  | 2441 |
| >TP53-V203M VEYLDDRNTF  | 124  | >TP53-V203M MEYLDDRNT   | 45   | 79   |
| >TP53-V203M VEYLDDRNTF  | 594  | >TP53-V203M MEYLDDRNT   | 314  | 280  |
| >TP53-V203M VEYLDDRNTF  | 1119 | >TP53-V203M MEYLDDRNT   | 240  | 879  |
| >TP53-V203M VEYLDDRNTF  | 870  | >TP53-V203M MEYLDDRNT   | 236  | 634  |
| >TP53-V203M VEYLDDRNTF  | 524  | >TP53-V203M MEYLDDRNT   | 130  | 394  |
| >TP53-V203M RVEYLDDR    | 433  | >TP53-V203M RMEYLDDR    | 114  | 319  |
| >TP53-V203M RVEYLDDRNT  | 40   | >TP53-V203M RMEYLDDRNT  | 31   | 9    |
| >TP53-V203M RVEYLDDRNT  | 2758 | >TP53-V203M RMEYLDDRNT  | 223  | 2535 |
| >TP53-V203M RVEYLDDRNT  | 2406 | >TP53-V203M RMEYLDDRNT  | 74   | 2332 |
| >TP53-V203M RVEYLDDRNT  | 78   | >TP53-V203M RMEYLDDRNT  | 697  | 619  |
| >TP53-V203M RVEYLDDR    | 1045 | >TP53-V203M RMEYLDDR    | 232  | 813  |
| >TP53-V203M HLIRVEGNLR' | 156  | >TP53-V203M HLIRVEGNLR  | 2285 | 2129 |
| >TP53-V203M HLIRVEGNLR' | 111  | >TP53-V203M HLIRVEGNLR  | 1398 | 1287 |
| >TP53-V203M HLIRVEGNLR' | 41   | >TP53-V203M HLIRVEGNLR  | 3417 | 3376 |
| >TP53-V203M HLIRVEGNLR' | 322  | >TP53-V203M HLIRVEGNLR  | 5260 | 4938 |

|                        |      |                        |       |       |
|------------------------|------|------------------------|-------|-------|
| >TP53-V203MHLIRVEGNLR' | 9    | >TP53-V203MHLIRVEGNLR' | 855   | 846   |
| >TP53-V203MHLIRVEGNLR' | 27   | >TP53-V203MHLIRVEGNLR' | 2456  | 2429  |
| >TP53-V203MHLIRVEGNLR' | 27   | >TP53-V203MHLIRVEGNLR' | 5222  | 5195  |
| >TP53-V203MHLIRVEGNLR' | 4    | >TP53-V203MHLIRVEGNLR' | 490   | 486   |
| >TP53-V203MHLIRVEGNLR' | 398  | >TP53-V203MHLIRVEGNLR' | 10875 | 10477 |
| >TP53-V203MLRVEYLDDR   | 1926 | >TP53-V203MLRMEYLDDR   | 313   | 1613  |
| >TP53-V203MVEGNLRVEYL  | 312  | >TP53-V203MVEGNLRMEY'  | 276   | 36    |
| >TP53-V203MVEGNLRVEY   | 2675 | >TP53-V203MVEGNLRMEY   | 143   | 2532  |
| >TP53-V203MVEGNLRVEY   | 67   | >TP53-V203MVEGNLRMEY   | 52    | 15    |
| >TP53-V203MVEGNLRVEYL  | 472  | >TP53-V203MVEGNLRMEY'  | 426   | 46    |
| >TP53-V203MVEGNLRVEY   | 338  | >TP53-V203MVEGNLRMEY   | 316   | 22    |
| >TP53-V203MVEGNLRVEYL  | 278  | >TP53-V203MVEGNLRMEY'  | 164   | 114   |
| >TP53-V203MRVEGNLRV    | 54   | >TP53-V203MRVEGNLRM    | 14294 | 14240 |
| >TP53-V203MRVEGNLRVEY  | 224  | >TP53-V203MRVEGNLRME'  | 224   | 0     |
| >TP53-V203MRVEGNLRVEY  | 1157 | >TP53-V203MRVEGNLRME'  | 132   | 1025  |
| >TP53-V203MRVEGNLRV    | 6981 | >TP53-V203MRVEGNLRM    | 181   | 6800  |
| >TP53-V203MRVEGNLRVEY  | 301  | >TP53-V203MRVEGNLRME'  | 260   | 41    |
| >TP53-V203MRVEGNLRVEY  | 400  | >TP53-V203MRVEGNLRME'  | 382   | 18    |
| >TP53-V203MRVEGNLRVE'  | 53   | >TP53-V203MRVEGNLRME'  | 53    | 0     |
| >TP53-V203MRVEGNLRV    | 1217 | >TP53-V203MRVEGNLRM    | 270   | 947   |
| >TP53-V203MLIRVEGNLRV  | 35   | >TP53-V203MLIRVEGNLRM  | 11371 | 11336 |
| >TP53-V203MLIRVEGNLRV  | 296  | >TP53-V203MLIRVEGNLRM  | 471   | 175   |
| >TP53-V203MLIRVEGNLRV  | 6414 | >TP53-V203MLIRVEGNLRM  | 204   | 6210  |
| >TP53-V216/VVVPYEPPEV  | 390  | >TP53-V216/AVVPYEPPEV  | 186   | 204   |
| >TP53-V216/VVVPYEPPEV  | 136  | >TP53-V216/AVVPYEPPEV  | 121   | 15    |
| >TP53-V216/VVVPYEPPEV  | 28   | >TP53-V216/AVVPYEPPEV  | 37    | 9     |
| >TP53-V216/VVVPYEPPEV  | 72   | >TP53-V216/AVVPYEPPEV  | 72    | 0     |
| >TP53-V216/VVVPYEPPEV  | 9    | >TP53-V216/AVVPYEPPEV  | 9     | 0     |
| >TP53-V216/VVVPYEPPEV  | 353  | >TP53-V216/AVVPYEPPEV  | 294   | 59    |
| >TP53-V216/SVVVPYEPPE' | 75   | >TP53-V216/SAVVPYEPPE' | 324   | 249   |
| >TP53-V216/SVVVPYEPPE' | 92   | >TP53-V216/SAVVPYEPPE' | 515   | 423   |
| >TP53-V216/SVVVPYEPPE' | 129  | >TP53-V216/SAVVPYEPPE' | 1296  | 1167  |
| >TP53-V216/SVVVPYEPPE' | 57   | >TP53-V216/SAVVPYEPPE' | 595   | 538   |
| >TP53-V216/SVVVPYEPPE' | 81   | >TP53-V216/SAVVPYEPPE' | 245   | 164   |
| >TP53-V216/SVVVPYEPPE' | 26   | >TP53-V216/SAVVPYEPPE' | 60    | 34    |
| >TP53-V216/LDDRNTFRHS  | 482  | >TP53-V216/LDDRNTFRHS  | 7808  | 7326  |
| >TP53-V216/RHSVVVPY    | 23   | >TP53-V216/RHSAVVVPY   | 15    | 8     |
| >TP53-V216/RHSVVVPY    | 522  | >TP53-V216/RHSAVVVPY   | 288   | 234   |
| >TP53-V216/RHSVVVPY    | 413  | >TP53-V216/RHSAVVVPY   | 364   | 49    |
| >TP53-V216/FRHSVVVPY   | 894  | >TP53-V216/FRHSAVVVPY  | 471   | 423   |
| >TP53-V216/FRHSVVVPY   | 4    | >TP53-V216/FRHSAVVVPY  | 3     | 1     |
| >TP53-V216/FRHSVVVPY   | 33   | >TP53-V216/FRHSAVVVPY  | 31    | 2     |
| >TP53-V216/FRHSVVVPY   | 1057 | >TP53-V216/FRHSAVVVPY  | 457   | 600   |

|                        |       |                        |      |       |
|------------------------|-------|------------------------|------|-------|
| >TP53-V216/TFRHSVVVPY  | 185   | >TP53-V216/TFRHSAVVPY  | 214  | 29    |
| >TP53-V216/TFRHSVVV    | 139   | >TP53-V216/TFRHSAVV    | 114  | 25    |
| >TP53-V216/TFRHSVVVPY  | 162   | >TP53-V216/TFRHSAVVPY  | 113  | 49    |
| >TP53-V216/TFRHSVVVPY  | 140   | >TP53-V216/TFRHSAVVPY  | 174  | 34    |
| >TP53-V216/TFRHSVVVPY  | 225   | >TP53-V216/TFRHSAVVPY  | 165  | 60    |
| >TP53-V216/TFRHSVVVPY  | 271   | >TP53-V216/TFRHSAVVPY  | 294  | 23    |
| >TP53-V216/NFRHSVV     | 1371  | >TP53-V216/NFRHSAV     | 363  | 1008  |
| >TP53-V216/NFRHSVVV    | 872   | >TP53-V216/NFRHSAVV    | 461  | 411   |
| >TP53-V216/NFRHSVV     | 382   | >TP53-V216/NFRHSAV     | 116  | 266   |
| >TP53-V216/NFRHSVVV    | 581   | >TP53-V216/NFRHSAVV    | 140  | 441   |
| >TP53-V216/NFRHSVV     | 1308  | >TP53-V216/NFRHSAV     | 332  | 976   |
| >TP53-V216/NFRHSVV     | 309   | >TP53-V216/NFRHSAV     | 143  | 166   |
| >TP53-V216/NFRHSVVV    | 265   | >TP53-V216/NFRHSAVV    | 230  | 35    |
| >TP53-V216/NFRHSVVVF   | 128   | >TP53-V216/NFRHSAVVF   | 209  | 81    |
| >TP53-V216/NFRHSVVVF   | 97    | >TP53-V216/NFRHSAVVF   | 69   | 28    |
| >TP53-V216/NFRHSVVVF   | 123   | >TP53-V216/NFRHSAVVF   | 53   | 70    |
| >TP53-V216/NFRHSVVVF   | 82    | >TP53-V216/NFRHSAVVF   | 76   | 6     |
| >TP53-V216/NFRHSVVV    | 412   | >TP53-V216/NFRHSAVV    | 2037 | 1625  |
| >TP53-V216/NFRHSVVVF   | 61    | >TP53-V216/NFRHSAVVF   | 179  | 118   |
| >TP53-V216/NFRHSVVVF   | 34    | >TP53-V216/NFRHSAVVF   | 37   | 3     |
| >TP53-V216/NFRHSVV     | 11    | >TP53-V216/NFRHSAV     | 7    | 4     |
| >TP53-V216/NFRHSVVV    | 8     | >TP53-V216/NFRHSAVV    | 7    | 1     |
| >TP53-V216/NFRHSVV     | 50    | >TP53-V216/NFRHSAV     | 13   | 37    |
| >TP53-V216/NFRHSVVV    | 25    | >TP53-V216/NFRHSAVV    | 14   | 11    |
| >TP53-V216/NFRHSVVVF   | 65    | >TP53-V216/NFRHSAVVF   | 55   | 10    |
| >TP53-V216/NFRHSVVVF   | 492   | >TP53-V216/NFRHSAVVF   | 321  | 171   |
| >TP53-V216/NFRHSVVVF   | 33    | >TP53-V216/NFRHSAVVF   | 36   | 3     |
| >TP53-V216/NFRHSVVVF   | 23    | >TP53-V216/NFRHSAVVF   | 13   | 10    |
| >TP53-V216/NFRHSVVVF   | 105   | >TP53-V216/NFRHSAVVF   | 85   | 20    |
| >TP53-V216/NFRHSVVVF   | 289   | >TP53-V216/NFRHSAVVF   | 283  | 6     |
| >TP53-V216/NFRHSVVVF   | 23    | >TP53-V216/NFRHSAVVF   | 26   | 3     |
| >TP53-V216/RNFRHSVV    | 224   | >TP53-V216/RNFRHSAV    | 1030 | 806   |
| >TP53-V216E VVVPYEPPEV | 390   | >TP53-V216E EVVPYEPPEV | 968  | 578   |
| >TP53-V216E VVVPYEPPEV | 136   | >TP53-V216E EVVPYEPPEV | 370  | 234   |
| >TP53-V216E VVVPYEPPEV | 28    | >TP53-V216E EVVPYEPPEV | 544  | 516   |
| >TP53-V216E VVVPYEPPEV | 72    | >TP53-V216E EVVPYEPPEV | 1089 | 1017  |
| >TP53-V216E VVVPYEPPEV | 9     | >TP53-V216E EVVPYEPPEV | 81   | 72    |
| >TP53-V216E VVVPYEPPE  | 11709 | >TP53-V216E EVVPYEPPE  | 382  | 11327 |
| >TP53-V216E VVVPYEPPEV | 7635  | >TP53-V216E EVVPYEPPEV | 180  | 7455  |
| >TP53-V216E VVVPYEPPEV | 353   | >TP53-V216E EVVPYEPPEV | 8    | 345   |
| >TP53-V216E SVVVPYEPPE | 75    | >TP53-V216E SEVVPYEPPE | 2191 | 2116  |
| >TP53-V216E SVVVPYEPPE | 92    | >TP53-V216E SEVVPYEPPE | 5990 | 5898  |
| >TP53-V216E SVVVPYEPPE | 129   | >TP53-V216E SEVVPYEPPE | 6345 | 6216  |

|                         |       |                         |       |       |
|-------------------------|-------|-------------------------|-------|-------|
| >TP53-V216E SVVVPYEPPE' | 57    | >TP53-V216E SEVVPYEPPE' | 11030 | 10973 |
| >TP53-V216E SVVVPYEPPE' | 81    | >TP53-V216E SEVVPYEPPE' | 7537  | 7456  |
| >TP53-V216E SVVVPYEPPE' | 26    | >TP53-V216E SEVVPYEPPE' | 6834  | 6808  |
| >TP53-V216E SVVVPYEPPE' | 34355 | >TP53-V216E SEVVPYEPPE' | 73    | 34282 |
| >TP53-V216E SVVVPYEPPE' | 25067 | >TP53-V216E SEVVPYEPPE' | 35    | 25032 |
| >TP53-V216E LDDRNTFRHS  | 482   | >TP53-V216E LDDRNTFRHS  | 23229 | 22747 |
| >TP53-V216E RHSVVVPY    | 23    | >TP53-V216E RHSEVVPY    | 23    | 0     |
| >TP53-V216E RHSVVVPY    | 522   | >TP53-V216E RHSEVVPY    | 252   | 270   |
| >TP53-V216E RHSVVVPY    | 413   | >TP53-V216E RHSEVVPY    | 454   | 41    |
| >TP53-V216E FRHSVVVPY   | 4     | >TP53-V216E FRHSEVVPY   | 3     | 1     |
| >TP53-V216E FRHSVVVPY   | 33    | >TP53-V216E FRHSEVVPY   | 83    | 50    |
| >TP53-V216E TFRHSVVVPY  | 185   | >TP53-V216E TFRHSEVVPY  | 324   | 139   |
| >TP53-V216E TFRHSVVV    | 139   | >TP53-V216E TFRHSEVV    | 1418  | 1279  |
| >TP53-V216E TFRHSVVVPY  | 162   | >TP53-V216E TFRHSEVVPY  | 459   | 297   |
| >TP53-V216E TFRHSVVVPY  | 140   | >TP53-V216E TFRHSEVVPY  | 379   | 239   |
| >TP53-V216E TFRHSVVVPY  | 225   | >TP53-V216E TFRHSEVVPY  | 320   | 95    |
| >TP53-V216E TFRHSVVVPY  | 271   | >TP53-V216E TFRHSEVVPY  | 420   | 149   |
| >TP53-V216E NTFRHSVV    | 1371  | >TP53-V216E NTFRHSEV    | 283   | 1088  |
| >TP53-V216E NTFRHSVV    | 382   | >TP53-V216E NTFRHSEV    | 224   | 158   |
| >TP53-V216E NTFRHSVV    | 1308  | >TP53-V216E NTFRHSEV    | 481   | 827   |
| >TP53-V216E NTFRHSVV    | 309   | >TP53-V216E NTFRHSEV    | 137   | 172   |
| >TP53-V216E NTFRHSVVV   | 265   | >TP53-V216E NTFRHSEVV   | 278   | 13    |
| >TP53-V216E NTFRHSVVVF  | 128   | >TP53-V216E NTFRHSEVVP  | 336   | 208   |
| >TP53-V216E NTFRHSVVVF  | 97    | >TP53-V216E NTFRHSEVVP  | 125   | 28    |
| >TP53-V216E NTFRHSVVVF  | 123   | >TP53-V216E NTFRHSEVVP  | 67    | 56    |
| >TP53-V216E NTFRHSVVVF  | 82    | >TP53-V216E NTFRHSEVVP  | 102   | 20    |
| >TP53-V216E NTFRHSVVV   | 412   | >TP53-V216E NTFRHSEVV   | 1363  | 951   |
| >TP53-V216E NTFRHSVVVF  | 61    | >TP53-V216E NTFRHSEVVP  | 148   | 87    |
| >TP53-V216E NTFRHSVVVF  | 34    | >TP53-V216E NTFRHSEVVP  | 55    | 21    |
| >TP53-V216E NTFRHSVV    | 11    | >TP53-V216E NTFRHSEV    | 7     | 4     |
| >TP53-V216E NTFRHSVVV   | 8     | >TP53-V216E NTFRHSEVV   | 9     | 1     |
| >TP53-V216E NTFRHSVV    | 50    | >TP53-V216E NTFRHSEV    | 18    | 32    |
| >TP53-V216E NTFRHSVVV   | 25    | >TP53-V216E NTFRHSEVV   | 38    | 13    |
| >TP53-V216E NTFRHSVVVF  | 65    | >TP53-V216E NTFRHSEVVP  | 66    | 1     |
| >TP53-V216E NTFRHSVVVF  | 492   | >TP53-V216E NTFRHSEVVP  | 592   | 100   |
| >TP53-V216E NTFRHSVVVF  | 33    | >TP53-V216E NTFRHSEVVP  | 48    | 15    |
| >TP53-V216E NTFRHSVVVF  | 23    | >TP53-V216E NTFRHSEVVP  | 24    | 1     |
| >TP53-V216E NTFRHSVVVF  | 105   | >TP53-V216E NTFRHSEVVP  | 151   | 46    |
| >TP53-V216E NTFRHSVVVF  | 289   | >TP53-V216E NTFRHSEVVP  | 422   | 133   |
| >TP53-V216E NTFRHSVVVF  | 23    | >TP53-V216E NTFRHSEVVP  | 52    | 29    |
| >TP53-V216E RNTFRHSVV   | 224   | >TP53-V216E RNTFRHSEV   | 788   | 564   |
| >TP53-V216C VVVPYEPPEV  | 390   | >TP53-V216C GVVPYEPPEV  | 322   | 68    |
| >TP53-V216C VVVPYEPPEV  | 136   | >TP53-V216C GVVPYEPPEV  | 179   | 43    |



|                        |      |                         |       |       |
|------------------------|------|-------------------------|-------|-------|
| >TP53-V216C VVVPYEPPEV | 28   | >TP53-V216C GVVVPYEPPEV | 73    | 45    |
| >TP53-V216C VVVPYEPPEV | 828  | >TP53-V216C GVVVPYEPPEV | 463   | 365   |
| >TP53-V216C VVVPYEPPEV | 72   | >TP53-V216C GVVVPYEPPEV | 63    | 9     |
| >TP53-V216C VVVPYEPPEV | 9    | >TP53-V216C GVVVPYEPPEV | 18    | 9     |
| >TP53-V216C VVVPYEPPEV | 353  | >TP53-V216C GVVVPYEPPEV | 1127  | 774   |
| >TP53-V216C SVVVPYEPPE | 75   | >TP53-V216C SGVVVPYEPPE | 2665  | 2590  |
| >TP53-V216C SVVVPYEPPE | 92   | >TP53-V216C SGVVVPYEPPE | 4506  | 4414  |
| >TP53-V216C SVVVPYEPPE | 129  | >TP53-V216C SGVVVPYEPPE | 4369  | 4240  |
| >TP53-V216C SVVVPYEPPE | 57   | >TP53-V216C SGVVVPYEPPE | 7195  | 7138  |
| >TP53-V216C SVVVPYEPPE | 81   | >TP53-V216C SGVVVPYEPPE | 2091  | 2010  |
| >TP53-V216C SVVVPYEPPE | 26   | >TP53-V216C SGVVVPYEPPE | 2527  | 2501  |
| >TP53-V216C LDDRNTFRHS | 482  | >TP53-V216C LDDRNTFRHS  | 24309 | 23827 |
| >TP53-V216C RHSVVVPY   | 23   | >TP53-V216C RHSGVVVPY   | 56    | 33    |
| >TP53-V216C RHSVVVPY   | 413  | >TP53-V216C RHSGVVVPY   | 172   | 241   |
| >TP53-V216C FRHSVVVPY  | 1048 | >TP53-V216C FRHSGVVVPY  | 373   | 675   |
| >TP53-V216C FRHSVVVPY  | 894  | >TP53-V216C FRHSGVVVPY  | 147   | 747   |
| >TP53-V216C FRHSVVVPY  | 4    | >TP53-V216C FRHSGVVVPY  | 4     | 0     |
| >TP53-V216C FRHSVVVPY  | 33   | >TP53-V216C FRHSGVVVPY  | 58    | 25    |
| >TP53-V216C TFRHSVVVPY | 185  | >TP53-V216C TFRHSGVVVPY | 135   | 50    |
| >TP53-V216C TFRHSVVV   | 139  | >TP53-V216C TFRHSGVV    | 250   | 111   |
| >TP53-V216C TFRHSVVVPY | 162  | >TP53-V216C TFRHSGVVVPY | 179   | 17    |
| >TP53-V216C TFRHSVVVPY | 140  | >TP53-V216C TFRHSGVVVPY | 127   | 13    |
| >TP53-V216C TFRHSVVVPY | 225  | >TP53-V216C TFRHSGVVVPY | 73    | 152   |
| >TP53-V216C TFRHSVVVPY | 271  | >TP53-V216C TFRHSGVVVPY | 246   | 25    |
| >TP53-V216C NTFRHSVV   | 382  | >TP53-V216C NTFRHSGV    | 132   | 250   |
| >TP53-V216C NTFRHSVV   | 581  | >TP53-V216C NTFRHSGVV   | 347   | 234   |
| >TP53-V216C NTFRHSVV   | 309  | >TP53-V216C NTFRHSGV    | 169   | 140   |
| >TP53-V216C NTFRHSVV   | 265  | >TP53-V216C NTFRHSGVV   | 866   | 601   |
| >TP53-V216C NTFRHSVVVF | 128  | >TP53-V216C NTFRHSGVVF  | 314   | 186   |
| >TP53-V216C NTFRHSVVVF | 97   | >TP53-V216C NTFRHSGVVF  | 52    | 45    |
| >TP53-V216C NTFRHSVVVF | 123  | >TP53-V216C NTFRHSGVVF  | 60    | 63    |
| >TP53-V216C NTFRHSVVVF | 678  | >TP53-V216C NTFRHSGVVF  | 473   | 205   |
| >TP53-V216C NTFRHSVVVF | 82   | >TP53-V216C NTFRHSGVVF  | 60    | 22    |
| >TP53-V216C NTFRHSVV   | 412  | >TP53-V216C NTFRHSGVV   | 7900  | 7488  |
| >TP53-V216C NTFRHSVVVF | 61   | >TP53-V216C NTFRHSGVVF  | 334   | 273   |
| >TP53-V216C NTFRHSVVVF | 34   | >TP53-V216C NTFRHSGVVF  | 67    | 33    |
| >TP53-V216C NTFRHSVV   | 11   | >TP53-V216C NTFRHSGV    | 7     | 4     |
| >TP53-V216C NTFRHSVV   | 8    | >TP53-V216C NTFRHSGVV   | 13    | 5     |
| >TP53-V216C NTFRHSVV   | 50   | >TP53-V216C NTFRHSGV    | 11    | 39    |
| >TP53-V216C NTFRHSVV   | 25   | >TP53-V216C NTFRHSGVV   | 44    | 19    |
| >TP53-V216C NTFRHSVVVF | 65   | >TP53-V216C NTFRHSGVVF  | 60    | 5     |
| >TP53-V216C NTFRHSVVVF | 492  | >TP53-V216C NTFRHSGVVF  | 204   | 288   |
| >TP53-V216C NTFRHSVVVF | 33   | >TP53-V216C NTFRHSGVVF  | 85    | 52    |

|                       |      |                       |      |      |
|-----------------------|------|-----------------------|------|------|
| >TP53-V216CNTFRHSVVVF | 23   | >TP53-V216CNTFRHSGVVF | 18   | 5    |
| >TP53-V216CNTFRHSVVVF | 105  | >TP53-V216CNTFRHSGVVF | 128  | 23   |
| >TP53-V216CNTFRHSVVVF | 289  | >TP53-V216CNTFRHSGVVF | 221  | 68   |
| >TP53-V216CNTFRHSVVVF | 23   | >TP53-V216CNTFRHSGVVF | 61   | 38   |
| >TP53-V216CRNTRFRHSVV | 224  | >TP53-V216CRNTRFRHSGV | 1898 | 1674 |
| >TP53-V216CRNTRFRHSVV | 642  | >TP53-V216CRNTRFRHSGV | 479  | 163  |
| >TP53-V216LVVVPYEPPEV | 797  | >TP53-V216LVVVPYEPPEV | 467  | 330  |
| >TP53-V216LVVVPYEPPEV | 390  | >TP53-V216LVVVPYEPPEV | 149  | 241  |
| >TP53-V216LVVVPYEPPEV | 136  | >TP53-V216LVVVPYEPPEV | 56   | 80   |
| >TP53-V216LVVVPYEPPEV | 28   | >TP53-V216LVVVPYEPPEV | 35   | 7    |
| >TP53-V216LVVVPYEPPEV | 72   | >TP53-V216LVVVPYEPPEV | 109  | 37   |
| >TP53-V216LVVVPYEPPEV | 9    | >TP53-V216LVVVPYEPPEV | 8    | 1    |
| >TP53-V216LVVVPYEPPEV | 353  | >TP53-V216LVVVPYEPPEV | 120  | 233  |
| >TP53-V216LVVVPYEPPEV | 1177 | >TP53-V216LVVVPYEPPEV | 63   | 1114 |
| >TP53-V216LVVVPYEPPEV | 2169 | >TP53-V216LVVVPYEPPEV | 63   | 2106 |
| >TP53-V216LVVVPYEPPEV | 515  | >TP53-V216LVVVPYEPPEV | 31   | 484  |
| >TP53-V216LVVVPYEPPEV | 75   | >TP53-V216LVVVPYEPPEV | 125  | 50   |
| >TP53-V216LVVVPYEPPEV | 92   | >TP53-V216LVVVPYEPPEV | 4    | 88   |
| >TP53-V216LVVVPYEPPEV | 1760 | >TP53-V216LVVVPYEPPEV | 31   | 1729 |
| >TP53-V216LVVVPYEPPEV | 129  | >TP53-V216LVVVPYEPPEV | 7    | 122  |
| >TP53-V216LVVVPYEPPEV | 5164 | >TP53-V216LVVVPYEPPEV | 110  | 5054 |
| >TP53-V216LVVVPYEPPEV | 57   | >TP53-V216LVVVPYEPPEV | 5    | 52   |
| >TP53-V216LVVVPYEPPEV | 81   | >TP53-V216LVVVPYEPPEV | 852  | 771  |
| >TP53-V216LVVVPYEPPEV | 26   | >TP53-V216LVVVPYEPPEV | 127  | 101  |
| >TP53-V216LDDRNTFRHS  | 482  | >TP53-V216LDDRNTFRHS  | 2239 | 1757 |
| >TP53-V216RHSVVVPY    | 23   | >TP53-V216RHSLVVPY    | 49   | 26   |
| >TP53-V216RHSVVVPY    | 413  | >TP53-V216RHSLVVPY    | 894  | 481  |
| >TP53-V216FRHSVVVPY   | 4    | >TP53-V216FRHSLVVPY   | 4    | 0    |
| >TP53-V216FRHSVVVPY   | 33   | >TP53-V216FRHSLVVPY   | 21   | 12   |
| >TP53-V216TFRHSVVVPY  | 185  | >TP53-V216TFRHSLVVPY  | 302  | 117  |
| >TP53-V216TFRHSVVV    | 139  | >TP53-V216TFRHSLV     | 85   | 54   |
| >TP53-V216TFRHSVVVPY  | 162  | >TP53-V216TFRHSLVVPY  | 155  | 7    |
| >TP53-V216TFRHSVVVPY  | 140  | >TP53-V216TFRHSLVVPY  | 187  | 47   |
| >TP53-V216TFRHSVVVPY  | 225  | >TP53-V216TFRHSLVVPY  | 283  | 58   |
| >TP53-V216TFRHSVVVPY  | 271  | >TP53-V216TFRHSLVVPY  | 412  | 141  |
| >TP53-V216NTFRHSVVVF  | 562  | >TP53-V216NTFRHSLVVP  | 226  | 336  |
| >TP53-V216NTFRHSVV    | 1371 | >TP53-V216NTFRHSLV    | 388  | 983  |
| >TP53-V216NTFRHSVV    | 382  | >TP53-V216NTFRHSLV    | 156  | 226  |
| >TP53-V216NTFRHSVVV   | 581  | >TP53-V216NTFRHSLV    | 428  | 153  |
| >TP53-V216NTFRHSVV    | 1308 | >TP53-V216NTFRHSLV    | 473  | 835  |
| >TP53-V216NTFRHSVV    | 309  | >TP53-V216NTFRHSLV    | 313  | 4    |
| >TP53-V216NTFRHSVVV   | 265  | >TP53-V216NTFRHSLV    | 389  | 124  |
| >TP53-V216NTFRHSVVVF  | 128  | >TP53-V216NTFRHSLVVP  | 109  | 19   |

|                        |      |                        |      |      |
|------------------------|------|------------------------|------|------|
| >TP53-V216L NTFRHSVVVF | 97   | >TP53-V216L NTFRHSLVVP | 113  | 16   |
| >TP53-V216L NTFRHSVVVF | 123  | >TP53-V216L NTFRHSLVVP | 129  | 6    |
| >TP53-V216L NTFRHSVVVF | 678  | >TP53-V216L NTFRHSLVVP | 491  | 187  |
| >TP53-V216L NTFRHSVVVF | 82   | >TP53-V216L NTFRHSLVVP | 41   | 41   |
| >TP53-V216L NTFRHSVVV  | 412  | >TP53-V216L NTFRHSLVV  | 986  | 574  |
| >TP53-V216L NTFRHSVVVF | 61   | >TP53-V216L NTFRHSLVVP | 92   | 31   |
| >TP53-V216L NTFRHSVVVF | 34   | >TP53-V216L NTFRHSLVVP | 65   | 31   |
| >TP53-V216L NTFRHSVV   | 11   | >TP53-V216L NTFRHSLV   | 9    | 2    |
| >TP53-V216L NTFRHSVVV  | 8    | >TP53-V216L NTFRHSLVV  | 25   | 17   |
| >TP53-V216L NTFRHSVV   | 50   | >TP53-V216L NTFRHSLV   | 19   | 31   |
| >TP53-V216L NTFRHSVVV  | 25   | >TP53-V216L NTFRHSLVV  | 28   | 3    |
| >TP53-V216L NTFRHSVVVF | 766  | >TP53-V216L NTFRHSLVVP | 208  | 558  |
| >TP53-V216L NTFRHSVVVF | 65   | >TP53-V216L NTFRHSLVVP | 58   | 7    |
| >TP53-V216L NTFRHSVVVF | 492  | >TP53-V216L NTFRHSLVVP | 523  | 31   |
| >TP53-V216L NTFRHSVVVF | 33   | >TP53-V216L NTFRHSLVVP | 43   | 10   |
| >TP53-V216L NTFRHSVVVF | 23   | >TP53-V216L NTFRHSLVVP | 13   | 10   |
| >TP53-V216L NTFRHSVVVF | 105  | >TP53-V216L NTFRHSLVVP | 103  | 2    |
| >TP53-V216L NTFRHSVVVF | 289  | >TP53-V216L NTFRHSLVVP | 228  | 61   |
| >TP53-V216L NTFRHSVVVF | 23   | >TP53-V216L NTFRHSLVVP | 34   | 11   |
| >TP53-V216L RNTFRHSVV  | 224  | >TP53-V216L RNTFRHSLV  | 141  | 83   |
| >TP53-V216L RNTFRHSV   | 3375 | >TP53-V216L RNTFRHSL   | 435  | 2940 |
| >TP53-V216L DRNTFRHSV  | 2649 | >TP53-V216L DRNTFRHSL  | 223  | 2426 |
| >TP53-V216L DRNTFRHSV  | 4488 | >TP53-V216L DRNTFRHSL  | 242  | 4246 |
| >TP53-V216L VVVPYEPPEV | 797  | >TP53-V216L MVVPYEPPE\ | 154  | 643  |
| >TP53-V216L VVVPYEPPEV | 390  | >TP53-V216L MVVPYEPPE\ | 96   | 294  |
| >TP53-V216L VVVPYEPPEV | 136  | >TP53-V216L MVVPYEPPE\ | 47   | 89   |
| >TP53-V216L VVVPYEPPEV | 28   | >TP53-V216L MVVPYEPPE\ | 17   | 11   |
| >TP53-V216L VVVPYEPPEV | 828  | >TP53-V216L MVVPYEPPE\ | 484  | 344  |
| >TP53-V216L VVVPYEPPEV | 72   | >TP53-V216L MVVPYEPPE\ | 70   | 2    |
| >TP53-V216L VVVPYEPPEV | 9    | >TP53-V216L MVVPYEPPE\ | 6    | 3    |
| >TP53-V216L VVVPYEPPEV | 353  | >TP53-V216L MVVPYEPPE\ | 17   | 336  |
| >TP53-V216L SVVVPYEPPE | 1177 | >TP53-V216L SMVVPYEPPE | 51   | 1126 |
| >TP53-V216L SVVVPYEPPE | 2169 | >TP53-V216L SMVVPYEPPE | 69   | 2100 |
| >TP53-V216L SVVVPYEPPE | 515  | >TP53-V216L SMVVPYEPPE | 23   | 492  |
| >TP53-V216L SVVVPYEPPE | 75   | >TP53-V216L SMVVPYEPPE | 63   | 12   |
| >TP53-V216L SVVVPYEPPE | 92   | >TP53-V216L SMVVPYEPPE | 3    | 89   |
| >TP53-V216L SVVVPYEPPE | 1760 | >TP53-V216L SMVVPYEPPE | 20   | 1740 |
| >TP53-V216L SVVVPYEPPE | 129  | >TP53-V216L SMVVPYEPPE | 7    | 122  |
| >TP53-V216L SVVVPYEPPE | 5164 | >TP53-V216L SMVVPYEPPE | 61   | 5103 |
| >TP53-V216L SVVVPYEPPE | 57   | >TP53-V216L SMVVPYEPPE | 6    | 51   |
| >TP53-V216L SVVVPYEPPE | 81   | >TP53-V216L SMVVPYEPPE | 1076 | 995  |
| >TP53-V216L SVVVPYEPPE | 26   | >TP53-V216L SMVVPYEPPE | 103  | 77   |
| >TP53-V216L SVVVPYEPPE | 8841 | >TP53-V216L SMVVPYEPPE | 285  | 8556 |

|                        |      |                        |      |      |
|------------------------|------|------------------------|------|------|
| >TP53-V216M LDDRNTFRHS | 482  | >TP53-V216M LDDRNTFRHS | 4505 | 4023 |
| >TP53-V216M RHSVVVPY   | 23   | >TP53-V216M RHSMVVPY   | 17   | 6    |
| >TP53-V216M RHSVVVPY   | 413  | >TP53-V216M RHSMVVPY   | 423  | 10   |
| >TP53-V216M FRHSVVVPY  | 1048 | >TP53-V216M FRHSMVVPY  | 433  | 615  |
| >TP53-V216M FRHSVVVPY  | 4    | >TP53-V216M FRHSMVVPY  | 5    | 1    |
| >TP53-V216M FRHSVVVPY  | 33   | >TP53-V216M FRHSMVVPY  | 32   | 1    |
| >TP53-V216M TFRHSVVVPY | 185  | >TP53-V216M TFRHSMVVP` | 97   | 88   |
| >TP53-V216M TFRHSVVV   | 139  | >TP53-V216M TFRHSMVV   | 59   | 80   |
| >TP53-V216M TFRHSVVVPY | 162  | >TP53-V216M TFRHSMVVP` | 133  | 29   |
| >TP53-V216M TFRHSVVVPY | 140  | >TP53-V216M TFRHSMVVP` | 182  | 42   |
| >TP53-V216M TFRHSVVVPY | 225  | >TP53-V216M TFRHSMVVP` | 218  | 7    |
| >TP53-V216M TFRHSVVVPY | 271  | >TP53-V216M TFRHSMVVP` | 403  | 132  |
| >TP53-V216M NTFRHSVVVF | 562  | >TP53-V216M NTFRHSMVV  | 343  | 219  |
| >TP53-V216M NTFRHSVV   | 382  | >TP53-V216M NTFRHSMV   | 185  | 197  |
| >TP53-V216M NTFRHSVVV  | 581  | >TP53-V216M NTFRHSMVV  | 168  | 413  |
| >TP53-V216M NTFRHSVV   | 309  | >TP53-V216M NTFRHSMV   | 150  | 159  |
| >TP53-V216M NTFRHSVVV  | 265  | >TP53-V216M NTFRHSMVV  | 333  | 68   |
| >TP53-V216M NTFRHSVVVF | 128  | >TP53-V216M NTFRHSMVV  | 92   | 36   |
| >TP53-V216M NTFRHSVVVF | 97   | >TP53-V216M NTFRHSMVV  | 79   | 18   |
| >TP53-V216M NTFRHSVVVF | 123  | >TP53-V216M NTFRHSMVV  | 119  | 4    |
| >TP53-V216M NTFRHSVVVF | 82   | >TP53-V216M NTFRHSMVV  | 52   | 30   |
| >TP53-V216M NTFRHSVVV  | 412  | >TP53-V216M NTFRHSMVV  | 1066 | 654  |
| >TP53-V216M NTFRHSVVVF | 61   | >TP53-V216M NTFRHSMVV  | 101  | 40   |
| >TP53-V216M NTFRHSVVVF | 34   | >TP53-V216M NTFRHSMVV  | 38   | 4    |
| >TP53-V216M NTFRHSVV   | 11   | >TP53-V216M NTFRHSMV   | 8    | 3    |
| >TP53-V216M NTFRHSVVV  | 8    | >TP53-V216M NTFRHSMVV  | 7    | 1    |
| >TP53-V216M NTFRHSVV   | 50   | >TP53-V216M NTFRHSMV   | 11   | 39   |
| >TP53-V216M NTFRHSVVV  | 25   | >TP53-V216M NTFRHSMVV  | 15   | 10   |
| >TP53-V216M NTFRHSVVVF | 766  | >TP53-V216M NTFRHSMVV  | 322  | 444  |
| >TP53-V216M NTFRHSVVVF | 65   | >TP53-V216M NTFRHSMVV  | 62   | 3    |
| >TP53-V216M NTFRHSVVVF | 492  | >TP53-V216M NTFRHSMVV  | 497  | 5    |
| >TP53-V216M NTFRHSVVVF | 33   | >TP53-V216M NTFRHSMVV  | 34   | 1    |
| >TP53-V216M NTFRHSVVVF | 23   | >TP53-V216M NTFRHSMVV  | 15   | 8    |
| >TP53-V216M NTFRHSVVVF | 105  | >TP53-V216M NTFRHSMVV  | 114  | 9    |
| >TP53-V216M NTFRHSVVVF | 289  | >TP53-V216M NTFRHSMVV  | 210  | 79   |
| >TP53-V216M NTFRHSVVVF | 23   | >TP53-V216M NTFRHSMVV  | 29   | 6    |
| >TP53-V216M RNTFRHSV   | 3791 | >TP53-V216M RNTFRHSM   | 211  | 3580 |
| >TP53-V216M RNTFRHSVV  | 224  | >TP53-V216M RNTFRHSMV  | 116  | 108  |
| >TP53-V216M DRNTFRHSV  | 1236 | >TP53-V216M DRNTFRHSM  | 298  | 938  |
| >TP53-V217A VVPYEPPEV  | 662  | >TP53-V217A AVPYEPPEV  | 448  | 214  |
| >TP53-V217A VVPYEPPEV  | 507  | >TP53-V217A AVPYEPPEV  | 348  | 159  |
| >TP53-V217A VVPYEPPEV  | 214  | >TP53-V217A AVPYEPPEV  | 285  | 71   |
| >TP53-V217A VVPYEPPEV  | 329  | >TP53-V217A AVPYEPPEV  | 326  | 3    |

|                       |      |                       |      |      |
|-----------------------|------|-----------------------|------|------|
| >TP53-V217/VVPYEPPEV  | 56   | >TP53-V217/AVPYEPPEV  | 62   | 6    |
| >TP53-V217/VVVPYEPPEV | 390  | >TP53-V217/VAVPYEPPEV | 1199 | 809  |
| >TP53-V217/VVVPYEPPEV | 136  | >TP53-V217/VAVPYEPPEV | 268  | 132  |
| >TP53-V217/VVVPYEPPEV | 28   | >TP53-V217/VAVPYEPPEV | 138  | 110  |
| >TP53-V217/VVVPYEPPEV | 72   | >TP53-V217/VAVPYEPPEV | 773  | 701  |
| >TP53-V217/VVVPYEPPEV | 9    | >TP53-V217/VAVPYEPPEV | 52   | 43   |
| >TP53-V217/VVVPYEPPEV | 353  | >TP53-V217/VAVPYEPPEV | 929  | 576  |
| >TP53-V217/SVVVPYEPPE | 1177 | >TP53-V217/SVAVPYEPPE | 351  | 826  |
| >TP53-V217/SVVVPYEPPE | 2169 | >TP53-V217/SVAVPYEPPE | 398  | 1771 |
| >TP53-V217/SVVVPYEPPE | 515  | >TP53-V217/SVAVPYEPPE | 179  | 336  |
| >TP53-V217/SVVVPYEPPE | 75   | >TP53-V217/SVAVPYEPPE | 82   | 7    |
| >TP53-V217/SVVVPYEPPE | 92   | >TP53-V217/SVAVPYEPPE | 73   | 19   |
| >TP53-V217/SVVVPYEPPE | 129  | >TP53-V217/SVAVPYEPPE | 35   | 94   |
| >TP53-V217/SVVVPYEPPE | 57   | >TP53-V217/SVAVPYEPPE | 33   | 24   |
| >TP53-V217/SVVVPYEPPE | 81   | >TP53-V217/SVAVPYEPPE | 34   | 47   |
| >TP53-V217/SVVVPYEPPE | 26   | >TP53-V217/SVAVPYEPPE | 16   | 10   |
| >TP53-V217/RHSVVVPY   | 23   | >TP53-V217/RHSVAVPY   | 20   | 3    |
| >TP53-V217/RHSVVVPY   | 413  | >TP53-V217/RHSVAVPY   | 343  | 70   |
| >TP53-V217/FRHSVVVPY  | 1048 | >TP53-V217/FRHSVAVPY  | 427  | 621  |
| >TP53-V217/FRHSVVVPY  | 4    | >TP53-V217/FRHSVAVPY  | 6    | 2    |
| >TP53-V217/FRHSVVVPY  | 33   | >TP53-V217/FRHSVAVPY  | 39   | 6    |
| >TP53-V217/TFRHSVVVPY | 185  | >TP53-V217/TFRHSVAVPY | 106  | 79   |
| >TP53-V217/TFRHSVVV   | 139  | >TP53-V217/TFRHSVAV   | 81   | 58   |
| >TP53-V217/TFRHSVVVPY | 162  | >TP53-V217/TFRHSVAVPY | 157  | 5    |
| >TP53-V217/TFRHSVVVPY | 140  | >TP53-V217/TFRHSVAVPY | 184  | 44   |
| >TP53-V217/TFRHSVVVPY | 225  | >TP53-V217/TFRHSVAVPY | 163  | 62   |
| >TP53-V217/TFRHSVVVPY | 271  | >TP53-V217/TFRHSVAVPY | 476  | 205  |
| >TP53-V217/NFRHSVVVF  | 562  | >TP53-V217/NFRHSVAVF  | 345  | 217  |
| >TP53-V217/NFRHSVVV   | 872  | >TP53-V217/NFRHSVAV   | 162  | 710  |
| >TP53-V217/NFRHSVV    | 382  | >TP53-V217/NFRHSVA    | 2306 | 1924 |
| >TP53-V217/NFRHSVVV   | 581  | >TP53-V217/NFRHSVAV   | 178  | 403  |
| >TP53-V217/NFRHSVVV   | 680  | >TP53-V217/NFRHSVAV   | 95   | 585  |
| >TP53-V217/NFRHSVV    | 309  | >TP53-V217/NFRHSVA    | 8283 | 7974 |
| >TP53-V217/NFRHSVVV   | 265  | >TP53-V217/NFRHSVAV   | 105  | 160  |
| >TP53-V217/NFRHSVVVF  | 128  | >TP53-V217/NFRHSVAVF  | 150  | 22   |
| >TP53-V217/NFRHSVVVF  | 97   | >TP53-V217/NFRHSVAVF  | 130  | 33   |
| >TP53-V217/NFRHSVVVF  | 123  | >TP53-V217/NFRHSVAVF  | 314  | 191  |
| >TP53-V217/NFRHSVVVF  | 82   | >TP53-V217/NFRHSVAVF  | 49   | 33   |
| >TP53-V217/NFRHSVVV   | 412  | >TP53-V217/NFRHSVAV   | 137  | 275  |
| >TP53-V217/NFRHSVVVF  | 61   | >TP53-V217/NFRHSVAVF  | 61   | 0    |
| >TP53-V217/NFRHSVVVF  | 34   | >TP53-V217/NFRHSVAVF  | 31   | 3    |
| >TP53-V217/NFRHSVV    | 11   | >TP53-V217/NFRHSVA    | 71   | 60   |
| >TP53-V217/NFRHSVVV   | 8    | >TP53-V217/NFRHSVAV   | 6    | 2    |

|                        |       |                         |       |       |
|------------------------|-------|-------------------------|-------|-------|
| >TP53-V217/NTFRHSVV    | 50    | >TP53-V217/NTFRHSVA     | 1739  | 1689  |
| >TP53-V217/NTFRHSVVV   | 25    | >TP53-V217/NTFRHSVAV    | 8     | 17    |
| >TP53-V217/NTFRHSVVVF  | 65    | >TP53-V217/NTFRHSVAVF   | 87    | 22    |
| >TP53-V217/NTFRHSVVVF  | 492   | >TP53-V217/NTFRHSVAVF   | 362   | 130   |
| >TP53-V217/NTFRHSVVV   | 798   | >TP53-V217/NTFRHSVAV    | 463   | 335   |
| >TP53-V217/NTFRHSVVVF  | 33    | >TP53-V217/NTFRHSVAVF   | 37    | 4     |
| >TP53-V217/NTFRHSVVVF  | 23    | >TP53-V217/NTFRHSVAVF   | 18    | 5     |
| >TP53-V217/NTFRHSVVVF  | 105   | >TP53-V217/NTFRHSVAVF   | 75    | 30    |
| >TP53-V217/NTFRHSVVVF  | 289   | >TP53-V217/NTFRHSVAVF   | 227   | 62    |
| >TP53-V217/NTFRHSVVVF  | 23    | >TP53-V217/NTFRHSVAVF   | 33    | 10    |
| >TP53-V217/RNTFRHSVV   | 224   | >TP53-V217/RNTFRHSVA    | 1857  | 1633  |
| >TP53-V217E VVPYEPPEV  | 214   | >TP53-V217E EVPYEPPEV   | 2938  | 2724  |
| >TP53-V217E VVPYEPPEV  | 329   | >TP53-V217E EVPYEPPEV   | 2655  | 2326  |
| >TP53-V217E VVPYEPPEV  | 56    | >TP53-V217E EVPYEPPEV   | 1042  | 986   |
| >TP53-V217E VVPYEPPEV  | 2736  | >TP53-V217E EVPYEPPEV   | 44    | 2692  |
| >TP53-V217E VVPYEPPEV  | 4691  | >TP53-V217E EVPYEPPEV   | 75    | 4616  |
| >TP53-V217E VVVPYEPPEV | 390   | >TP53-V217E VEVPYEPPEV  | 11357 | 10967 |
| >TP53-V217E VVVPYEPPEV | 136   | >TP53-V217E VEVPYEPPEV  | 3132  | 2996  |
| >TP53-V217E VVVPYEPPEV | 28    | >TP53-V217E VEVPYEPPEV  | 2552  | 2524  |
| >TP53-V217E VVVPYEPPEV | 72    | >TP53-V217E VEVPYEPPEV  | 4990  | 4918  |
| >TP53-V217E VVVPYEPPEV | 9     | >TP53-V217E VEVPYEPPEV  | 2288  | 2279  |
| >TP53-V217E VVVPYEPPEV | 353   | >TP53-V217E VEVPYEPPEV  | 17056 | 16703 |
| >TP53-V217E VVVPYEPPEV | 35760 | >TP53-V217E VEVPYEPPEV  | 293   | 35467 |
| >TP53-V217E SVVVPYEPPE | 75    | >TP53-V217E SVEVPYEPPE' | 1202  | 1127  |
| >TP53-V217E SVVVPYEPPE | 92    | >TP53-V217E SVEVPYEPPE' | 855   | 763   |
| >TP53-V217E SVVVPYEPPE | 129   | >TP53-V217E SVEVPYEPPE' | 1389  | 1260  |
| >TP53-V217E SVVVPYEPPE | 57    | >TP53-V217E SVEVPYEPPE' | 129   | 72    |
| >TP53-V217E SVVVPYEPPE | 81    | >TP53-V217E SVEVPYEPPE' | 869   | 788   |
| >TP53-V217E SVVVPYEPPE | 26    | >TP53-V217E SVEVPYEPPE' | 225   | 199   |
| >TP53-V217E RHSVVVPY   | 23    | >TP53-V217E RHSVEVPY    | 33    | 10    |
| >TP53-V217E RHSVVVPY   | 413   | >TP53-V217E RHSVEVPY    | 197   | 216   |
| >TP53-V217E FRHSVVVPY  | 4     | >TP53-V217E FRHSVEVPY   | 9     | 5     |
| >TP53-V217E FRHSVVVPY  | 33    | >TP53-V217E FRHSVEVPY   | 104   | 71    |
| >TP53-V217E TFRHSVVVPY | 185   | >TP53-V217E TFRHSVEVPY  | 191   | 6     |
| >TP53-V217E TFRHSVVV   | 139   | >TP53-V217E TFRHSVEV    | 246   | 107   |
| >TP53-V217E TFRHSVVVPY | 162   | >TP53-V217E TFRHSVEVPY  | 818   | 656   |
| >TP53-V217E TFRHSVVVPY | 140   | >TP53-V217E TFRHSVEVPY  | 343   | 203   |
| >TP53-V217E TFRHSVVVPY | 225   | >TP53-V217E TFRHSVEVPY  | 267   | 42    |
| >TP53-V217E TFRHSVVVPY | 271   | >TP53-V217E TFRHSVEVPY  | 632   | 361   |
| >TP53-V217E NTFRHSVVV  | 872   | >TP53-V217E NTFRHSVEV   | 108   | 764   |
| >TP53-V217E NTFRHSVV   | 382   | >TP53-V217E NTFRHSVE    | 23113 | 22731 |
| >TP53-V217E NTFRHSVVV  | 581   | >TP53-V217E NTFRHSVEV   | 268   | 313   |
| >TP53-V217E NTFRHSVVV  | 680   | >TP53-V217E NTFRHSVEV   | 142   | 538   |

|                       |      |                        |       |       |
|-----------------------|------|------------------------|-------|-------|
| >TP53-V217ENTFRHSVV   | 309  | >TP53-V217ENTFRHSVE    | 30316 | 30007 |
| >TP53-V217ENTFRHSVVV  | 265  | >TP53-V217ENTFRHSVEV   | 96    | 169   |
| >TP53-V217ENTFRHSVVV  | 1108 | >TP53-V217ENTFRHSVEV   | 407   | 701   |
| >TP53-V217ENTFRHSVVVF | 128  | >TP53-V217ENTFRHSVEVP  | 224   | 96    |
| >TP53-V217ENTFRHSVVVF | 97   | >TP53-V217ENTFRHSVEVP  | 304   | 207   |
| >TP53-V217ENTFRHSVVVF | 123  | >TP53-V217ENTFRHSVEVP  | 388   | 265   |
| >TP53-V217ENTFRHSVVVF | 82   | >TP53-V217ENTFRHSVEVP  | 103   | 21    |
| >TP53-V217ENTFRHSVVV  | 412  | >TP53-V217ENTFRHSVEV   | 576   | 164   |
| >TP53-V217ENTFRHSVVVF | 61   | >TP53-V217ENTFRHSVEVP  | 162   | 101   |
| >TP53-V217ENTFRHSVVVF | 34   | >TP53-V217ENTFRHSVEVP  | 37    | 3     |
| >TP53-V217ENTFRHSVV   | 11   | >TP53-V217ENTFRHSVE    | 17704 | 17693 |
| >TP53-V217ENTFRHSVVV  | 8    | >TP53-V217ENTFRHSVEV   | 5     | 3     |
| >TP53-V217ENTFRHSVV   | 50   | >TP53-V217ENTFRHSVE    | 18463 | 18413 |
| >TP53-V217ENTFRHSVVV  | 25   | >TP53-V217ENTFRHSVEV   | 10    | 15    |
| >TP53-V217ENTFRHSVVVF | 65   | >TP53-V217ENTFRHSVEVP  | 140   | 75    |
| >TP53-V217ENTFRHSVVVF | 492  | >TP53-V217ENTFRHSVEVP  | 700   | 208   |
| >TP53-V217ENTFRHSVVVF | 33   | >TP53-V217ENTFRHSVEVP  | 62    | 29    |
| >TP53-V217ENTFRHSVVVF | 23   | >TP53-V217ENTFRHSVEVP  | 46    | 23    |
| >TP53-V217ENTFRHSVVVF | 105  | >TP53-V217ENTFRHSVEVP  | 91    | 14    |
| >TP53-V217ENTFRHSVVVF | 289  | >TP53-V217ENTFRHSVEVP  | 451   | 162   |
| >TP53-V217ENTFRHSVVVF | 23   | >TP53-V217ENTFRHSVEVP  | 48    | 25    |
| >TP53-V217ENTFRHSVV   | 224  | >TP53-V217ENTFRHSVE    | 4396  | 4172  |
| >TP53-V217CVVPYEPPEV  | 214  | >TP53-V217CVGVPYEPPEV  | 537   | 323   |
| >TP53-V217CVVPYEPPEV  | 329  | >TP53-V217CVGVPYEPPEV  | 306   | 23    |
| >TP53-V217CVVPYEPPEV  | 56   | >TP53-V217CVGVPYEPPEV  | 133   | 77    |
| >TP53-V217CVVVPYEPPEV | 390  | >TP53-V217CVGVVPYEPPEV | 13005 | 12615 |
| >TP53-V217CVVVPYEPPEV | 136  | >TP53-V217CVGVVPYEPPEV | 4260  | 4124  |
| >TP53-V217CVVVPYEPPEV | 28   | >TP53-V217CVGVVPYEPPEV | 1765  | 1737  |
| >TP53-V217CVVVPYEPPEV | 72   | >TP53-V217CVGVVPYEPPEV | 2962  | 2890  |
| >TP53-V217CVVVPYEPPEV | 9    | >TP53-V217CVGVVPYEPPEV | 1267  | 1258  |
| >TP53-V217CVVVPYEPPEV | 353  | >TP53-V217CVGVVPYEPPEV | 11882 | 11529 |
| >TP53-V217CSVVVPYEPPE | 75   | >TP53-V217CSVGVVPYEPPE | 862   | 787   |
| >TP53-V217CSVVVPYEPPE | 92   | >TP53-V217CSVGVVPYEPPE | 87    | 5     |
| >TP53-V217CSVVVPYEPPE | 129  | >TP53-V217CSVGVVPYEPPE | 73    | 56    |
| >TP53-V217CSVVVPYEPPE | 57   | >TP53-V217CSVGVVPYEPPE | 65    | 8     |
| >TP53-V217CSVVVPYEPPE | 81   | >TP53-V217CSVGVVPYEPPE | 551   | 470   |
| >TP53-V217CSVVVPYEPPE | 26   | >TP53-V217CSVGVVPYEPPE | 71    | 45    |
| >TP53-V217CRHSVVVPY   | 642  | >TP53-V217CRHSVGVVPY   | 424   | 218   |
| >TP53-V217CRHSVVVPY   | 23   | >TP53-V217CRHSVGVVPY   | 21    | 2     |
| >TP53-V217CRHSVVVPY   | 413  | >TP53-V217CRHSVGVVPY   | 330   | 83    |
| >TP53-V217CFRHSVVVPY  | 894  | >TP53-V217CFRHSVGVVPY  | 151   | 743   |
| >TP53-V217CFRHSVVVPY  | 4    | >TP53-V217CFRHSVGVVPY  | 4     | 0     |
| >TP53-V217CFRHSVVVPY  | 33   | >TP53-V217CFRHSVGVVPY  | 54    | 21    |

|                        |      |                        |       |       |
|------------------------|------|------------------------|-------|-------|
| >TP53-V217C TFRHSVVPY  | 185  | >TP53-V217C TFRHSVGPY  | 127   | 58    |
| >TP53-V217C TFRHSVVV   | 139  | >TP53-V217C TFRHSVGV   | 272   | 133   |
| >TP53-V217C TFRHSVVPY  | 162  | >TP53-V217C TFRHSVGPY  | 239   | 77    |
| >TP53-V217C TFRHSVVPY  | 140  | >TP53-V217C TFRHSVGPY  | 150   | 10    |
| >TP53-V217C TFRHSVVPY  | 225  | >TP53-V217C TFRHSVGPY  | 89    | 136   |
| >TP53-V217C TFRHSVVPY  | 271  | >TP53-V217C TFRHSVGPY  | 627   | 356   |
| >TP53-V217C NTFRHSVVV  | 562  | >TP53-V217C NTFRHSVGV  | 403   | 159   |
| >TP53-V217C NTFRHSVVV  | 872  | >TP53-V217C NTFRHSVGV  | 249   | 623   |
| >TP53-V217C NTFRHSVV   | 382  | >TP53-V217C NTFRHSVG   | 20219 | 19837 |
| >TP53-V217C NTFRHSVVV  | 581  | >TP53-V217C NTFRHSVGV  | 160   | 421   |
| >TP53-V217C NTFRHSVVV  | 680  | >TP53-V217C NTFRHSVGV  | 124   | 556   |
| >TP53-V217C NTFRHSVV   | 309  | >TP53-V217C NTFRHSVG   | 26757 | 26448 |
| >TP53-V217C NTFRHSVVV  | 265  | >TP53-V217C NTFRHSVGV  | 90    | 175   |
| >TP53-V217C NTFRHSVVV  | 128  | >TP53-V217C NTFRHSVGV  | 166   | 38    |
| >TP53-V217C NTFRHSVVV  | 97   | >TP53-V217C NTFRHSVGV  | 126   | 29    |
| >TP53-V217C NTFRHSVVV  | 123  | >TP53-V217C NTFRHSVGV  | 432   | 309   |
| >TP53-V217C NTFRHSVVV  | 678  | >TP53-V217C NTFRHSVGV  | 375   | 303   |
| >TP53-V217C NTFRHSVVV  | 82   | >TP53-V217C NTFRHSVGV  | 61    | 21    |
| >TP53-V217C NTFRHSVVV  | 412  | >TP53-V217C NTFRHSVGV  | 700   | 288   |
| >TP53-V217C NTFRHSVVV  | 61   | >TP53-V217C NTFRHSVGV  | 189   | 128   |
| >TP53-V217C NTFRHSVVV  | 34   | >TP53-V217C NTFRHSVGV  | 50    | 16    |
| >TP53-V217C NTFRHSVV   | 11   | >TP53-V217C NTFRHSVG   | 6086  | 6075  |
| >TP53-V217C NTFRHSVVV  | 8    | >TP53-V217C NTFRHSVGV  | 5     | 3     |
| >TP53-V217C NTFRHSVV   | 50   | >TP53-V217C NTFRHSVG   | 15711 | 15661 |
| >TP53-V217C NTFRHSVVV  | 25   | >TP53-V217C NTFRHSVGV  | 6     | 19    |
| >TP53-V217C NTFRHSVVV  | 65   | >TP53-V217C NTFRHSVGV  | 77    | 12    |
| >TP53-V217C NTFRHSVVV  | 492  | >TP53-V217C NTFRHSVGV  | 210   | 282   |
| >TP53-V217C NTFRHSVVV  | 33   | >TP53-V217C NTFRHSVGV  | 43    | 10    |
| >TP53-V217C NTFRHSVVV  | 23   | >TP53-V217C NTFRHSVGV  | 23    | 0     |
| >TP53-V217C NTFRHSVVV  | 105  | >TP53-V217C NTFRHSVGV  | 137   | 32    |
| >TP53-V217C NTFRHSVVV  | 289  | >TP53-V217C NTFRHSVGV  | 246   | 43    |
| >TP53-V217C NTFRHSVVV  | 23   | >TP53-V217C NTFRHSVGV  | 54    | 31    |
| >TP53-V217C RNTFRHSVV  | 224  | >TP53-V217C RNTFRHSVG  | 4776  | 4552  |
| >TP53-V217L VVPYEPPEV  | 662  | >TP53-V217L LVPYEPPEV  | 430   | 232   |
| >TP53-V217L VVPYEPPEV  | 507  | >TP53-V217L LVPYEPPEV  | 346   | 161   |
| >TP53-V217L VVPYEPPEV  | 214  | >TP53-V217L LVPYEPPEV  | 250   | 36    |
| >TP53-V217L VVPYEPPEV  | 329  | >TP53-V217L LVPYEPPEV  | 519   | 190   |
| >TP53-V217L VVPYEPPEV  | 56   | >TP53-V217L LVPYEPPEV  | 43    | 13    |
| >TP53-V217L VVVPYEPPEV | 797  | >TP53-V217L VLVPYEPPEV | 36    | 761   |
| >TP53-V217L VVVPYEPPEV | 2498 | >TP53-V217L VLVPYEPPEV | 209   | 2289  |
| >TP53-V217L VVVPYEPPEV | 390  | >TP53-V217L VLVPYEPPEV | 52    | 338   |
| >TP53-V217L VVVPYEPPEV | 136  | >TP53-V217L VLVPYEPPEV | 111   | 25    |
| >TP53-V217L VVVPYEPPEV | 28   | >TP53-V217L VLVPYEPPEV | 2     | 26    |



|                        |      |                         |      |      |
|------------------------|------|-------------------------|------|------|
| >TP53-V217L VVVPYEPPEV | 828  | >TP53-V217L VLVPYEPPEV  | 10   | 818  |
| >TP53-V217L VVVPYEPPEV | 72   | >TP53-V217L VLVPYEPPEV  | 5    | 67   |
| >TP53-V217L VVVPYEPPEV | 955  | >TP53-V217L VLVPYEPPEV  | 7    | 948  |
| >TP53-V217L VVVPYEPPEV | 9    | >TP53-V217L VLVPYEPPEV  | 2    | 7    |
| >TP53-V217L VVVPYEPPEV | 353  | >TP53-V217L VLVPYEPPEV  | 1320 | 967  |
| >TP53-V217L SVVVPYEPPE | 1177 | >TP53-V217L SVLVPYEPPE\ | 186  | 991  |
| >TP53-V217L SVVVPYEPPE | 75   | >TP53-V217L SVLVPYEPPE\ | 47   | 28   |
| >TP53-V217L SVVVPYEPPE | 92   | >TP53-V217L SVLVPYEPPE\ | 15   | 77   |
| >TP53-V217L SVVVPYEPPE | 1760 | >TP53-V217L SVLVPYEPPE\ | 357  | 1403 |
| >TP53-V217L SVVVPYEPPE | 129  | >TP53-V217L SVLVPYEPPE\ | 15   | 114  |
| >TP53-V217L SVVVPYEPPE | 5164 | >TP53-V217L SVLVPYEPPE\ | 430  | 4734 |
| >TP53-V217L SVVVPYEPPE | 57   | >TP53-V217L SVLVPYEPPE\ | 35   | 22   |
| >TP53-V217L SVVVPYEPPE | 81   | >TP53-V217L SVLVPYEPPE\ | 322  | 241  |
| >TP53-V217L SVVVPYEPPE | 26   | >TP53-V217L SVLVPYEPPE\ | 10   | 16   |
| >TP53-V217L RHSVVVPY   | 23   | >TP53-V217L RHSVLVPY    | 34   | 11   |
| >TP53-V217L RHSVVVPY   | 413  | >TP53-V217L RHSVLVPY    | 437  | 24   |
| >TP53-V217L FRHSVVVPY  | 4    | >TP53-V217L FRHSVLVPY   | 7    | 3    |
| >TP53-V217L FRHSVVVPY  | 33   | >TP53-V217L FRHSVLVPY   | 37   | 4    |
| >TP53-V217L TFRHSVVVPY | 185  | >TP53-V217L TFRHSVLVPY  | 196  | 11   |
| >TP53-V217L TFRHSVVV   | 139  | >TP53-V217L TFRHSVLV    | 67   | 72   |
| >TP53-V217L TFRHSVVVPY | 162  | >TP53-V217L TFRHSVLVPY  | 120  | 42   |
| >TP53-V217L TFRHSVVVPY | 140  | >TP53-V217L TFRHSVLVPY  | 180  | 40   |
| >TP53-V217L TFRHSVVVPY | 225  | >TP53-V217L TFRHSVLVPY  | 239  | 14   |
| >TP53-V217L TFRHSVVVPY | 271  | >TP53-V217L TFRHSVLVPY  | 498  | 227  |
| >TP53-V217L NTFRHSVVVF | 562  | >TP53-V217L NTFRHSVLVP  | 304  | 258  |
| >TP53-V217L NTFRHSVVV  | 872  | >TP53-V217L NTFRHSVLV   | 108  | 764  |
| >TP53-V217L NTFRHSVV   | 382  | >TP53-V217L NTFRHSVL    | 3220 | 2838 |
| >TP53-V217L NTFRHSVVV  | 581  | >TP53-V217L NTFRHSVLV   | 188  | 393  |
| >TP53-V217L NTFRHSVVV  | 680  | >TP53-V217L NTFRHSVLV   | 149  | 531  |
| >TP53-V217L NTFRHSVV   | 309  | >TP53-V217L NTFRHSVL    | 3865 | 3556 |
| >TP53-V217L NTFRHSVVV  | 265  | >TP53-V217L NTFRHSVLV   | 236  | 29   |
| >TP53-V217L NTFRHSVVVF | 128  | >TP53-V217L NTFRHSVLVP  | 108  | 20   |
| >TP53-V217L NTFRHSVVVF | 97   | >TP53-V217L NTFRHSVLVP  | 65   | 32   |
| >TP53-V217L NTFRHSVVVF | 123  | >TP53-V217L NTFRHSVLVP  | 106  | 17   |
| >TP53-V217L NTFRHSVVVF | 82   | >TP53-V217L NTFRHSVLVP  | 46   | 36   |
| >TP53-V217L NTFRHSVVV  | 412  | >TP53-V217L NTFRHSVLV   | 1038 | 626  |
| >TP53-V217L NTFRHSVVVF | 61   | >TP53-V217L NTFRHSVLVP  | 125  | 64   |
| >TP53-V217L NTFRHSVVVF | 34   | >TP53-V217L NTFRHSVLVP  | 37   | 3    |
| >TP53-V217L NTFRHSVV   | 11   | >TP53-V217L NTFRHSVL    | 52   | 41   |
| >TP53-V217L NTFRHSVVV  | 8    | >TP53-V217L NTFRHSVLV   | 6    | 2    |
| >TP53-V217L NTFRHSVV   | 50   | >TP53-V217L NTFRHSVL    | 660  | 610  |
| >TP53-V217L NTFRHSVVV  | 25   | >TP53-V217L NTFRHSVLV   | 9    | 16   |
| >TP53-V217L NTFRHSVVVF | 766  | >TP53-V217L NTFRHSVLVP  | 482  | 284  |

|                        |      |                        |      |      |
|------------------------|------|------------------------|------|------|
| >TP53-V217L NTFRHSVVVF | 65   | >TP53-V217L NTFRHSVLVP | 104  | 39   |
| >TP53-V217L NTFRHSVVVF | 492  | >TP53-V217L NTFRHSVLVP | 642  | 150  |
| >TP53-V217L NTFRHSVVVF | 33   | >TP53-V217L NTFRHSVLVP | 68   | 35   |
| >TP53-V217L NTFRHSVV   | 4902 | >TP53-V217L NTFRHSVL   | 162  | 4740 |
| >TP53-V217L NTFRHSVVVF | 23   | >TP53-V217L NTFRHSVLVP | 30   | 7    |
| >TP53-V217L NTFRHSVVVF | 105  | >TP53-V217L NTFRHSVLVP | 174  | 69   |
| >TP53-V217L NTFRHSVVVF | 289  | >TP53-V217L NTFRHSVLVP | 210  | 79   |
| >TP53-V217L NTFRHSVVVF | 23   | >TP53-V217L NTFRHSVLVP | 42   | 19   |
| >TP53-V217L NTFRHSVV   | 1488 | >TP53-V217L NTFRHSVL   | 290  | 1198 |
| >TP53-V217L RNTFRHSVV  | 224  | >TP53-V217L RNTFRHSVL  | 73   | 151  |
| >TP53-V217L RNTFRHSV\  | 642  | >TP53-V217L RNTFRHSVLV | 401  | 241  |
| >TP53-V217L RNTFRHSVV  | 2022 | >TP53-V217L RNTFRHSVL  | 200  | 1822 |
| >TP53-V217L DRNTFRHSV\ | 3881 | >TP53-V217L DRNTFRHSVL | 347  | 3534 |
| >TP53-V217L DRNTFRHSV\ | 3714 | >TP53-V217L DRNTFRHSVL | 380  | 3334 |
| >TP53-V218\VPYEPPEV    | 184  | >TP53-V218\APYEPPEV    | 218  | 34   |
| >TP53-V218\VPYEPPEV    | 139  | >TP53-V218\APYEPPEV    | 198  | 59   |
| >TP53-V218\VPYEPPEV    | 266  | >TP53-V218\APYEPPEV    | 208  | 58   |
| >TP53-V218\VPYEPPEV    | 48   | >TP53-V218\APYEPPEV    | 186  | 138  |
| >TP53-V218\VPYEPPEV    | 205  | >TP53-V218\APYEPPEV    | 1024 | 819  |
| >TP53-V218\VVVPYEPPEV  | 214  | >TP53-V218\VAPYEPPEV   | 1240 | 1026 |
| >TP53-V218\VVVPYEPPEV  | 329  | >TP53-V218\VAPYEPPEV   | 2407 | 2078 |
| >TP53-V218\VVVPYEPPEV  | 56   | >TP53-V218\VAPYEPPEV   | 780  | 724  |
| >TP53-V218\VVVPYEPPEV  | 390  | >TP53-V218\VVAPYEPPEV  | 376  | 14   |
| >TP53-V218\VVVPYEPPEV  | 136  | >TP53-V218\VVAPYEPPEV  | 233  | 97   |
| >TP53-V218\VVVPYEPPEV  | 28   | >TP53-V218\VVAPYEPPEV  | 21   | 7    |
| >TP53-V218\VVVPYEPPEV  | 72   | >TP53-V218\VVAPYEPPEV  | 21   | 51   |
| >TP53-V218\VVVPYEPPEV  | 955  | >TP53-V218\VVAPYEPPEV  | 75   | 880  |
| >TP53-V218\VVVPYEPPEV  | 9    | >TP53-V218\VVAPYEPPEV  | 6    | 3    |
| >TP53-V218\VVVPYEPPEV  | 353  | >TP53-V218\VVAPYEPPEV  | 208  | 145  |
| >TP53-V218\SVVVPYEPPE  | 1177 | >TP53-V218\SVVAPYEPPE  | 305  | 872  |
| >TP53-V218\SVVVPYEPPE  | 515  | >TP53-V218\SVVAPYEPPE  | 137  | 378  |
| >TP53-V218\SVVVPYEPPE  | 75   | >TP53-V218\SVVAPYEPPE  | 32   | 43   |
| >TP53-V218\SVVVPYEPPE  | 92   | >TP53-V218\SVVAPYEPPE  | 27   | 65   |
| >TP53-V218\SVVVPYEPPE  | 129  | >TP53-V218\SVVAPYEPPE  | 62   | 67   |
| >TP53-V218\SVVVPYEPPE  | 57   | >TP53-V218\SVVAPYEPPE  | 26   | 31   |
| >TP53-V218\SVVVPYEPPE  | 81   | >TP53-V218\SVVAPYEPPE  | 39   | 42   |
| >TP53-V218\SVVVPYEPPE  | 26   | >TP53-V218\SVVAPYEPPE  | 15   | 11   |
| >TP53-V218\RHSSVVVPY   | 642  | >TP53-V218\RHSSVVAPY   | 211  | 431  |
| >TP53-V218\RHSSVVVPY   | 23   | >TP53-V218\RHSSVVAPY   | 45   | 22   |
| >TP53-V218\RHSSVVVPY   | 413  | >TP53-V218\RHSSVVAPY   | 102  | 311  |
| >TP53-V218\FRHSVVVP    | 690  | >TP53-V218\FRHSVVAP    | 492  | 198  |
| >TP53-V218\FRHSVVVPY   | 4    | >TP53-V218\FRHSVVAPY   | 7    | 3    |
| >TP53-V218\FRHSVVVPY   | 33   | >TP53-V218\FRHSVVAPY   | 56   | 23   |

|                       |       |                       |       |       |
|-----------------------|-------|-----------------------|-------|-------|
| >TP53-V218/TFRHSVVVPY | 185   | >TP53-V218/TFRHSVVAPY | 232   | 47    |
| >TP53-V218/TFRHSVVV   | 139   | >TP53-V218/TFRHSVVA   | 74    | 65    |
| >TP53-V218/TFRHSVVVPY | 162   | >TP53-V218/TFRHSVVAPY | 100   | 62    |
| >TP53-V218/TFRHSVVVPY | 687   | >TP53-V218/TFRHSVVAPY | 199   | 488   |
| >TP53-V218/TFRHSVVVPY | 140   | >TP53-V218/TFRHSVVAPY | 106   | 34    |
| >TP53-V218/TFRHSVVVPY | 225   | >TP53-V218/TFRHSVVAPY | 142   | 83    |
| >TP53-V218/TFRHSVVVPY | 271   | >TP53-V218/TFRHSVVAPY | 420   | 149   |
| >TP53-V218/NFRHSVVV   | 265   | >TP53-V218/NFRHSVVA   | 7828  | 7563  |
| >TP53-V218/NFRHSVVVF  | 128   | >TP53-V218/NFRHSVAAF  | 195   | 67    |
| >TP53-V218/NFRHSVVVF  | 845   | >TP53-V218/NFRHSVAAF  | 347   | 498   |
| >TP53-V218/NFRHSVVVF  | 97    | >TP53-V218/NFRHSVAAF  | 38    | 59    |
| >TP53-V218/NFRHSVVVF  | 123   | >TP53-V218/NFRHSVAAF  | 50    | 73    |
| >TP53-V218/NFRHSVVVF  | 678   | >TP53-V218/NFRHSVAAF  | 432   | 246   |
| >TP53-V218/NFRHSVVVF  | 82    | >TP53-V218/NFRHSVAAF  | 65    | 17    |
| >TP53-V218/NFRHSVVVF  | 1274  | >TP53-V218/NFRHSVAAF  | 468   | 806   |
| >TP53-V218/NFRHSVVV   | 412   | >TP53-V218/NFRHSVVA   | 2792  | 2380  |
| >TP53-V218/NFRHSVVVF  | 61    | >TP53-V218/NFRHSVAAF  | 193   | 132   |
| >TP53-V218/NFRHSVVVF  | 34    | >TP53-V218/NFRHSVAAF  | 28    | 6     |
| >TP53-V218/NFRHSVVV   | 8     | >TP53-V218/NFRHSVVA   | 39    | 31    |
| >TP53-V218/NFRHSVVV   | 25    | >TP53-V218/NFRHSVVA   | 1074  | 1049  |
| >TP53-V218/NFRHSVVVF  | 65    | >TP53-V218/NFRHSVAAF  | 54    | 11    |
| >TP53-V218/NFRHSVVVF  | 492   | >TP53-V218/NFRHSVAAF  | 330   | 162   |
| >TP53-V218/NFRHSVVVF  | 33    | >TP53-V218/NFRHSVAAF  | 58    | 25    |
| >TP53-V218/NFRHSVVVF  | 23    | >TP53-V218/NFRHSVAAF  | 15    | 8     |
| >TP53-V218/NFRHSVVVF  | 105   | >TP53-V218/NFRHSVAAF  | 102   | 3     |
| >TP53-V218/NFRHSVVVF  | 289   | >TP53-V218/NFRHSVAAF  | 138   | 151   |
| >TP53-V218/NFRHSVVVF  | 23    | >TP53-V218/NFRHSVAAF  | 26    | 3     |
| >TP53-V218/VPYEPPEV   | 184   | >TP53-V218/EPYEPPEV   | 3518  | 3334  |
| >TP53-V218/VPYEPPEV   | 139   | >TP53-V218/EPYEPPEV   | 2013  | 1874  |
| >TP53-V218/VPYEPPEV   | 266   | >TP53-V218/EPYEPPEV   | 9     | 257   |
| >TP53-V218/VPYEPPEV   | 48    | >TP53-V218/EPYEPPEV   | 76    | 28    |
| >TP53-V218/VPYEPPEV   | 205   | >TP53-V218/EPYEPPEV   | 384   | 179   |
| >TP53-V218/VVPYEPPEV  | 214   | >TP53-V218/VEPYEPPEV  | 10151 | 9937  |
| >TP53-V218/VVPYEPPEV  | 329   | >TP53-V218/VEPYEPPEV  | 9209  | 8880  |
| >TP53-V218/VVPYEPPEV  | 56    | >TP53-V218/VEPYEPPEV  | 15133 | 15077 |
| >TP53-V218/VVPYEPPEV  | 31565 | >TP53-V218/VEPYEPPEV  | 151   | 31414 |
| >TP53-V218/VVVPYEPPEV | 390   | >TP53-V218/VVEPYEPPEV | 2254  | 1864  |
| >TP53-V218/VVVPYEPPEV | 136   | >TP53-V218/VVEPYEPPEV | 883   | 747   |
| >TP53-V218/VVVPYEPPEV | 28    | >TP53-V218/VVEPYEPPEV | 248   | 220   |
| >TP53-V218/VVVPYEPPEV | 72    | >TP53-V218/VVEPYEPPEV | 832   | 760   |
| >TP53-V218/VVVPYEPPEV | 9     | >TP53-V218/VVEPYEPPEV | 16    | 7     |
| >TP53-V218/VVVPYEPPEV | 353   | >TP53-V218/VVEPYEPPEV | 2569  | 2216  |
| >TP53-V218/SVVVPYEPPE | 1177  | >TP53-V218/SVVEPYEPPE | 154   | 1023  |

|                        |       |                        |       |       |
|------------------------|-------|------------------------|-------|-------|
| >TP53-V218ESVVVPYEPPE' | 515   | >TP53-V218ESVVEPYEPPE' | 93    | 422   |
| >TP53-V218ESVVVPYEPPE' | 75    | >TP53-V218ESVVEPYEPPE' | 19    | 56    |
| >TP53-V218ESVVVPYEPPE' | 92    | >TP53-V218ESVVEPYEPPE' | 10    | 82    |
| >TP53-V218ESVVVPYEPPE' | 1760  | >TP53-V218ESVVEPYEPPE' | 239   | 1521  |
| >TP53-V218ESVVVPYEPPE' | 129   | >TP53-V218ESVVEPYEPPE' | 25    | 104   |
| >TP53-V218ESVVVPYEPPE' | 57    | >TP53-V218ESVVEPYEPPE' | 14    | 43    |
| >TP53-V218ESVVVPYEPPE' | 81    | >TP53-V218ESVVEPYEPPE' | 46    | 35    |
| >TP53-V218ESVVVPYEPPE' | 26    | >TP53-V218ESVVEPYEPPE' | 9     | 17    |
| >TP53-V218ERHSVVVPY    | 23    | >TP53-V218ERHSVVEPY    | 77    | 54    |
| >TP53-V218ERHSVVVPY    | 413   | >TP53-V218ERHSVVEPY    | 120   | 293   |
| >TP53-V218ERHSVVVPY    | 4     | >TP53-V218ERHSVVEPY    | 10    | 6     |
| >TP53-V218ERHSVVVPY    | 33    | >TP53-V218ERHSVVEPY    | 75    | 42    |
| >TP53-V218ETFRHSVVVPY  | 185   | >TP53-V218ETFRHSVVEPY  | 423   | 238   |
| >TP53-V218ETFRHSVVV    | 139   | >TP53-V218ETFRHSVVE    | 5423  | 5284  |
| >TP53-V218ETFRHSVVVPY  | 162   | >TP53-V218ETFRHSVVEPY  | 914   | 752   |
| >TP53-V218ETFRHSVVVPY  | 140   | >TP53-V218ETFRHSVVEPY  | 159   | 19    |
| >TP53-V218ETFRHSVVVPY  | 225   | >TP53-V218ETFRHSVVEPY  | 236   | 11    |
| >TP53-V218ETFRHSVVVPY  | 271   | >TP53-V218ETFRHSVVEPY  | 614   | 343   |
| >TP53-V218ENTFRHSVVVF  | 562   | >TP53-V218ENTFRHSVVEP  | 480   | 82    |
| >TP53-V218ENTFRHSVVV   | 265   | >TP53-V218ENTFRHSVVE   | 30254 | 29989 |
| >TP53-V218ENTFRHSVVVF  | 128   | >TP53-V218ENTFRHSVVEP  | 345   | 217   |
| >TP53-V218ENTFRHSVVVF  | 97    | >TP53-V218ENTFRHSVVEP  | 113   | 16    |
| >TP53-V218ENTFRHSVVVF  | 123   | >TP53-V218ENTFRHSVVEP  | 78    | 45    |
| >TP53-V218ENTFRHSVVVF  | 82    | >TP53-V218ENTFRHSVVEP  | 99    | 17    |
| >TP53-V218ENTFRHSVVV   | 412   | >TP53-V218ENTFRHSVVE   | 4982  | 4570  |
| >TP53-V218ENTFRHSVVVF  | 61    | >TP53-V218ENTFRHSVVEP  | 125   | 64    |
| >TP53-V218ENTFRHSVVVF  | 34    | >TP53-V218ENTFRHSVVEP  | 37    | 3     |
| >TP53-V218ENTFRHSVVV   | 8     | >TP53-V218ENTFRHSVVE   | 16447 | 16439 |
| >TP53-V218ENTFRHSVVV   | 25    | >TP53-V218ENTFRHSVVE   | 17800 | 17775 |
| >TP53-V218ENTFRHSVVVF  | 65    | >TP53-V218ENTFRHSVVEP  | 59    | 6     |
| >TP53-V218ENTFRHSVVVF  | 492   | >TP53-V218ENTFRHSVVEP  | 486   | 6     |
| >TP53-V218ENTFRHSVVVF  | 33    | >TP53-V218ENTFRHSVVEP  | 79    | 46    |
| >TP53-V218ENTFRHSVVVF  | 23    | >TP53-V218ENTFRHSVVEP  | 43    | 20    |
| >TP53-V218ENTFRHSVVVF  | 105   | >TP53-V218ENTFRHSVVEP  | 205   | 100   |
| >TP53-V218ENTFRHSVVVF  | 289   | >TP53-V218ENTFRHSVVEP  | 169   | 120   |
| >TP53-V218ENTFRHSVVVF  | 23    | >TP53-V218ENTFRHSVVEP  | 54    | 31    |
| >TP53-V218CVPYEPPEV    | 184   | >TP53-V218CGPYEPPEV    | 1902  | 1718  |
| >TP53-V218CVPYEPPEV    | 139   | >TP53-V218CGPYEPPEV    | 331   | 192   |
| >TP53-V218CVPYEPPEV    | 266   | >TP53-V218CGPYEPPEV    | 1146  | 880   |
| >TP53-V218CVPYEPPEV    | 48    | >TP53-V218CGPYEPPEV    | 338   | 290   |
| >TP53-V218CVPYEPPEV    | 205   | >TP53-V218CGPYEPPEV    | 982   | 777   |
| >TP53-V218CVVPYEPPE    | 18222 | >TP53-V218CVGPYEPPE    | 417   | 17805 |
| >TP53-V218CVVPYEPPEV   | 12223 | >TP53-V218CVGPYEPPEV   | 207   | 12016 |

|                        |       |                        |       |       |
|------------------------|-------|------------------------|-------|-------|
| >TP53-V218C VVPYEPPEVG | 19176 | >TP53-V218C VGPYEPPEVC | 496   | 18680 |
| >TP53-V218C VVPYEPPEV  | 214   | >TP53-V218C VGPYEPPEV  | 7330  | 7116  |
| >TP53-V218C VVPYEPPEV  | 329   | >TP53-V218C VGPYEPPEV  | 6159  | 5830  |
| >TP53-V218C VVPYEPPEV  | 56    | >TP53-V218C VGPYEPPEV  | 10704 | 10648 |
| >TP53-V218C VVVPYEPPEV | 390   | >TP53-V218C VVGPYEPPEV | 858   | 468   |
| >TP53-V218C VVVPYEPPEV | 136   | >TP53-V218C VVGPYEPPEV | 526   | 390   |
| >TP53-V218C VVVPYEPPEV | 28    | >TP53-V218C VVGPYEPPEV | 25    | 3     |
| >TP53-V218C VVVPYEPPEV | 72    | >TP53-V218C VVGPYEPPEV | 43    | 29    |
| >TP53-V218C VVVPYEPPEV | 955   | >TP53-V218C VVGPYEPPEV | 194   | 761   |
| >TP53-V218C VVVPYEPPEV | 9     | >TP53-V218C VVGPYEPPEV | 9     | 0     |
| >TP53-V218C VVVPYEPPEV | 353   | >TP53-V218C VVGPYEPPEV | 968   | 615   |
| >TP53-V218C SVVVPYEPPE | 1177  | >TP53-V218C SVVGPYEPPE | 482   | 695   |
| >TP53-V218C SVVVPYEPPE | 515   | >TP53-V218C SVVGPYEPPE | 241   | 274   |
| >TP53-V218C SVVVPYEPPE | 75    | >TP53-V218C SVVGPYEPPE | 48    | 27    |
| >TP53-V218C SVVVPYEPPE | 92    | >TP53-V218C SVVGPYEPPE | 20    | 72    |
| >TP53-V218C SVVVPYEPPE | 129   | >TP53-V218C SVVGPYEPPE | 48    | 81    |
| >TP53-V218C SVVVPYEPPE | 57    | >TP53-V218C SVVGPYEPPE | 13    | 44    |
| >TP53-V218C SVVVPYEPPE | 2224  | >TP53-V218C SVVGPYEPPE | 450   | 1774  |
| >TP53-V218C SVVVPYEPPE | 81    | >TP53-V218C SVVGPYEPPE | 48    | 33    |
| >TP53-V218C SVVVPYEPPE | 26    | >TP53-V218C SVVGPYEPPE | 21    | 5     |
| >TP53-V218C RHSVVVPY   | 642   | >TP53-V218C RHSVVGPY   | 163   | 479   |
| >TP53-V218C RHSVVVPY   | 23    | >TP53-V218C RHSVVGPY   | 128   | 105   |
| >TP53-V218C RHSVVVPY   | 413   | >TP53-V218C RHSVVGPY   | 112   | 301   |
| >TP53-V218C FRHSVVVPY  | 894   | >TP53-V218C FRHSVVGPY  | 375   | 519   |
| >TP53-V218C FRHSVVVPY  | 4     | >TP53-V218C FRHSVVGPY  | 27    | 23    |
| >TP53-V218C FRHSVVVPY  | 33    | >TP53-V218C FRHSVVGPY  | 52    | 19    |
| >TP53-V218C TFRHSVVVPY | 185   | >TP53-V218C TFRHSVVGPY | 371   | 186   |
| >TP53-V218C TFRHSVVV   | 139   | >TP53-V218C TFRHSVVG   | 1205  | 1066  |
| >TP53-V218C TFRHSVVVPY | 162   | >TP53-V218C TFRHSVVGPY | 268   | 106   |
| >TP53-V218C TFRHSVVVPY | 687   | >TP53-V218C TFRHSVVGPY | 128   | 559   |
| >TP53-V218C TFRHSVVVPY | 140   | >TP53-V218C TFRHSVVGPY | 186   | 46    |
| >TP53-V218C TFRHSVVVPY | 225   | >TP53-V218C TFRHSVVGPY | 134   | 91    |
| >TP53-V218C TFRHSVVVPY | 271   | >TP53-V218C TFRHSVVGPY | 1725  | 1454  |
| >TP53-V218C NTFRHSVVVF | 562   | >TP53-V218C NTFRHSVVGf | 495   | 67    |
| >TP53-V218C NTFRHSVVV  | 265   | >TP53-V218C NTFRHSVVG  | 26434 | 26169 |
| >TP53-V218C NTFRHSVVVF | 128   | >TP53-V218C NTFRHSVVGf | 381   | 253   |
| >TP53-V218C NTFRHSVVVF | 97    | >TP53-V218C NTFRHSVVGf | 29    | 68    |
| >TP53-V218C NTFRHSVVVF | 123   | >TP53-V218C NTFRHSVVGf | 72    | 51    |
| >TP53-V218C NTFRHSVVVF | 82    | >TP53-V218C NTFRHSVVGf | 73    | 9     |
| >TP53-V218C NTFRHSVVVF | 1274  | >TP53-V218C NTFRHSVVGf | 358   | 916   |
| >TP53-V218C NTFRHSVVV  | 412   | >TP53-V218C NTFRHSVVG  | 4726  | 4314  |
| >TP53-V218C NTFRHSVVVF | 61    | >TP53-V218C NTFRHSVVGf | 835   | 774   |
| >TP53-V218C NTFRHSVVVF | 34    | >TP53-V218C NTFRHSVVGf | 50    | 16    |

|                        |      |                         |       |       |
|------------------------|------|-------------------------|-------|-------|
| >TP53-V218C NTFRHSVVV  | 8    | >TP53-V218C NTFRHSVVG   | 5340  | 5332  |
| >TP53-V218C NTFRHSVVV  | 25   | >TP53-V218C NTFRHSVVG   | 14799 | 14774 |
| >TP53-V218C NTFRHSVVVF | 766  | >TP53-V218C NTFRHSVVGF  | 403   | 363   |
| >TP53-V218C NTFRHSVVVF | 65   | >TP53-V218C NTFRHSVVGF  | 63    | 2     |
| >TP53-V218C NTFRHSVVVF | 492  | >TP53-V218C NTFRHSVVGF  | 280   | 212   |
| >TP53-V218C NTFRHSVVVF | 33   | >TP53-V218C NTFRHSVVGF  | 260   | 227   |
| >TP53-V218C NTFRHSVVVF | 23   | >TP53-V218C NTFRHSVVGF  | 42    | 19    |
| >TP53-V218C NTFRHSVVVF | 105  | >TP53-V218C NTFRHSVVGF  | 179   | 74    |
| >TP53-V218C NTFRHSVVVF | 289  | >TP53-V218C NTFRHSVVGF  | 133   | 156   |
| >TP53-V218C NTFRHSVVVF | 23   | >TP53-V218C NTFRHSVVGF  | 40    | 17    |
| >TP53-V218L VPYEPPEV   | 184  | >TP53-V218L LPYEPPEV    | 222   | 38    |
| >TP53-V218L VPYEPPEV   | 139  | >TP53-V218L LPYEPPEV    | 175   | 36    |
| >TP53-V218L VPYEPPEV   | 266  | >TP53-V218L LPYEPPEV    | 104   | 162   |
| >TP53-V218L VPYEPPEV   | 48   | >TP53-V218L LPYEPPEV    | 26    | 22    |
| >TP53-V218L VPYEPPEV   | 1825 | >TP53-V218L LPYEPPEV    | 319   | 1506  |
| >TP53-V218L VPYEPPEV   | 205  | >TP53-V218L LPYEPPEV    | 20    | 185   |
| >TP53-V218L VPYEPPEVG  | 1696 | >TP53-V218L LPYEPPEVG   | 224   | 1472  |
| >TP53-V218L VVPYEPPEV  | 923  | >TP53-V218L VLPYEPPEV   | 32    | 891   |
| >TP53-V218L VVPYEPPEV  | 6162 | >TP53-V218L VLPYEPPEV   | 176   | 5986  |
| >TP53-V218L VVPYEPPEV  | 662  | >TP53-V218L VLPYEPPEV   | 35    | 627   |
| >TP53-V218L VVPYEPPEV  | 507  | >TP53-V218L VLPYEPPEV   | 322   | 185   |
| >TP53-V218L VVPYEPPEV  | 214  | >TP53-V218L VLPYEPPEV   | 6     | 208   |
| >TP53-V218L VVPYEPPEV  | 2960 | >TP53-V218L VLPYEPPEV   | 41    | 2919  |
| >TP53-V218L VVPYEPPEV  | 329  | >TP53-V218L VLPYEPPEV   | 8     | 321   |
| >TP53-V218L VVPYEPPEV  | 2192 | >TP53-V218L VLPYEPPEV   | 22    | 2170  |
| >TP53-V218L VVPYEPPEV  | 56   | >TP53-V218L VLPYEPPEV   | 7     | 49    |
| >TP53-V218L DRNTFRHSV\ | 1923 | >TP53-V218L DRNTFRHSV\  | 136   | 1787  |
| >TP53-V218L DRNTFRHSV\ | 5415 | >TP53-V218L DRNTFRHSV\  | 408   | 5007  |
| >TP53-V218L VVVPYEPPEV | 797  | >TP53-V218L VVLPYEPPEV  | 115   | 682   |
| >TP53-V218L VVVPYEPPEV | 390  | >TP53-V218L VVLPYEPPEV  | 269   | 121   |
| >TP53-V218L VVVPYEPPEV | 136  | >TP53-V218L VVLPYEPPEV  | 72    | 64    |
| >TP53-V218L VVVPYEPPEV | 28   | >TP53-V218L VVLPYEPPEV  | 7     | 21    |
| >TP53-V218L VVVPYEPPEV | 828  | >TP53-V218L VVLPYEPPEV  | 115   | 713   |
| >TP53-V218L VVVPYEPPEV | 72   | >TP53-V218L VVLPYEPPEV  | 12    | 60    |
| >TP53-V218L VVVPYEPPEV | 955  | >TP53-V218L VVLPYEPPEV  | 25    | 930   |
| >TP53-V218L VVVPYEPPEV | 9    | >TP53-V218L VVLPYEPPEV  | 7     | 2     |
| >TP53-V218L VVVPYEPPEV | 353  | >TP53-V218L VVLPYEPPEV  | 76    | 277   |
| >TP53-V218L SVVVPYEPPE | 515  | >TP53-V218L SVVLPYEPPE\ | 469   | 46    |
| >TP53-V218L SVVVPYEPPE | 75   | >TP53-V218L SVVLPYEPPE\ | 92    | 17    |
| >TP53-V218L SVVVPYEPPE | 92   | >TP53-V218L SVVLPYEPPE\ | 120   | 28    |
| >TP53-V218L SVVVPYEPPE | 129  | >TP53-V218L SVVLPYEPPE\ | 178   | 49    |
| >TP53-V218L SVVVPYEPPE | 57   | >TP53-V218L SVVLPYEPPE\ | 75    | 18    |
| >TP53-V218L SVVVPYEPPE | 81   | >TP53-V218L SVVLPYEPPE\ | 88    | 7     |

|                        |      |                        |      |      |
|------------------------|------|------------------------|------|------|
| >TP53-V218L SVVVPYEPPE | 26   | >TP53-V218L SVVLPYEPPE | 30   | 4    |
| >TP53-V218L RHSVVVPY   | 642  | >TP53-V218L RHSVVLPY   | 425  | 217  |
| >TP53-V218L RHSVVVPY   | 1776 | >TP53-V218L RHSVVLPY   | 154  | 1622 |
| >TP53-V218L RHSVVVPY   | 23   | >TP53-V218L RHSVVLPY   | 47   | 24   |
| >TP53-V218L RHSVVVPY   | 413  | >TP53-V218L RHSVVLPY   | 211  | 202  |
| >TP53-V218L FRHSVVVPY  | 1048 | >TP53-V218L FRHSVVLPY  | 76   | 972  |
| >TP53-V218L FRHSVVVPY  | 6838 | >TP53-V218L FRHSVVLPY  | 136  | 6702 |
| >TP53-V218L FRHSVVVPY  | 4    | >TP53-V218L FRHSVVLPY  | 5    | 1    |
| >TP53-V218L FRHSVVVPY  | 33   | >TP53-V218L FRHSVVLPY  | 30   | 3    |
| >TP53-V218L TFRHSVVVPY | 185  | >TP53-V218L TFRHSVVLPY | 104  | 81   |
| >TP53-V218L TFRHSVVV   | 139  | >TP53-V218L TFRHSVVL   | 250  | 111  |
| >TP53-V218L TFRHSVVVPY | 162  | >TP53-V218L TFRHSVVLPY | 85   | 77   |
| >TP53-V218L TFRHSVVVPY | 4377 | >TP53-V218L TFRHSVVLPY | 294  | 4083 |
| >TP53-V218L TFRHSVVVPY | 140  | >TP53-V218L TFRHSVVLPY | 161  | 21   |
| >TP53-V218L TFRHSVVVPY | 225  | >TP53-V218L TFRHSVVLPY | 229  | 4    |
| >TP53-V218L TFRHSVVVPY | 271  | >TP53-V218L TFRHSVVLPY | 519  | 248  |
| >TP53-V218L NTFRHSVVVF | 562  | >TP53-V218L NTFRHSVVLP | 108  | 454  |
| >TP53-V218L NTFRHSVVV  | 265  | >TP53-V218L NTFRHSVVL  | 3516 | 3251 |
| >TP53-V218L NTFRHSVVVF | 647  | >TP53-V218L NTFRHSVVLP | 327  | 320  |
| >TP53-V218L NTFRHSVVVF | 128  | >TP53-V218L NTFRHSVVLP | 78   | 50   |
| >TP53-V218L NTFRHSVVVF | 97   | >TP53-V218L NTFRHSVVLP | 62   | 35   |
| >TP53-V218L NTFRHSVVVF | 123  | >TP53-V218L NTFRHSVVLP | 177  | 54   |
| >TP53-V218L NTFRHSVVVF | 82   | >TP53-V218L NTFRHSVVLP | 27   | 55   |
| >TP53-V218L NTFRHSVVV  | 412  | >TP53-V218L NTFRHSVVL  | 66   | 346  |
| >TP53-V218L NTFRHSVVVF | 61   | >TP53-V218L NTFRHSVVLP | 126  | 65   |
| >TP53-V218L NTFRHSVVVF | 34   | >TP53-V218L NTFRHSVVLP | 61   | 27   |
| >TP53-V218L NTFRHSVVV  | 8    | >TP53-V218L NTFRHSVVL  | 29   | 21   |
| >TP53-V218L NTFRHSVVV  | 25   | >TP53-V218L NTFRHSVVL  | 349  | 324  |
| >TP53-V218L NTFRHSVVVF | 766  | >TP53-V218L NTFRHSVVLP | 94   | 672  |
| >TP53-V218L NTFRHSVVVF | 65   | >TP53-V218L NTFRHSVVLP | 54   | 11   |
| >TP53-V218L NTFRHSVVVF | 492  | >TP53-V218L NTFRHSVVLP | 442  | 50   |
| >TP53-V218L NTFRHSVVV  | 798  | >TP53-V218L NTFRHSVVL  | 373  | 425  |
| >TP53-V218L NTFRHSVVVF | 33   | >TP53-V218L NTFRHSVVLP | 51   | 18   |
| >TP53-V218L NTFRHSVVV  | 6172 | >TP53-V218L NTFRHSVVL  | 260  | 5912 |
| >TP53-V218L NTFRHSVVVF | 23   | >TP53-V218L NTFRHSVVLP | 14   | 9    |
| >TP53-V218L NTFRHSVVVF | 105  | >TP53-V218L NTFRHSVVLP | 111  | 6    |
| >TP53-V218L NTFRHSVVV  | 4839 | >TP53-V218L NTFRHSVVL  | 228  | 4611 |
| >TP53-V218L NTFRHSVVVF | 289  | >TP53-V218L NTFRHSVVLP | 189  | 100  |
| >TP53-V218L NTFRHSVVVF | 23   | >TP53-V218L NTFRHSVVLP | 41   | 18   |
| >TP53-V218L NTFRHSVVV  | 1558 | >TP53-V218L NTFRHSVVL  | 373  | 1185 |
| >TP53-V218L RNTFRHSVVL | 642  | >TP53-V218L RNTFRHSVVL | 351  | 291  |
| >TP53-V218L MPYEPPEV   | 184  | >TP53-V218L MPYEPPEV   | 137  | 47   |
| >TP53-V218L MPYEPPEV   | 139  | >TP53-V218L MPYEPPEV   | 75   | 64   |

|                       |      |                       |     |      |
|-----------------------|------|-----------------------|-----|------|
| >TP53-V218MVPYEPPEV   | 266  | >TP53-V218MMPYEPPEV   | 22  | 244  |
| >TP53-V218MVPYEPPEV   | 1481 | >TP53-V218MMPYEPPEV   | 434 | 1047 |
| >TP53-V218MVPYEPPEV   | 1888 | >TP53-V218MMPYEPPEV   | 104 | 1784 |
| >TP53-V218MVPYEPPEVG  | 3739 | >TP53-V218MMPYEPPEVG  | 210 | 3529 |
| >TP53-V218MVPYEPPEV   | 48   | >TP53-V218MMPYEPPEV   | 25  | 23   |
| >TP53-V218MVPYEPPEV   | 1825 | >TP53-V218MMPYEPPEV   | 107 | 1718 |
| >TP53-V218MVPYEPPEV   | 205  | >TP53-V218MMPYEPPEV   | 10  | 195  |
| >TP53-V218MVPYEPPEVG  | 1696 | >TP53-V218MMPYEPPEVG  | 77  | 1619 |
| >TP53-V218MVPYEPPEVGS | 2184 | >TP53-V218MMPYEPPEVG! | 421 | 1763 |
| >TP53-V218MVPYEPPEVGS | 3513 | >TP53-V218MMPYEPPEVG! | 300 | 3213 |
| >TP53-V218MVVPYEPPEV  | 923  | >TP53-V218MVMPYEPPEV  | 31  | 892  |
| >TP53-V218MVVPYEPPEV  | 6162 | >TP53-V218MVMPYEPPEV  | 226 | 5936 |
| >TP53-V218MVVPYEPPEV  | 662  | >TP53-V218MVMPYEPPEV  | 27  | 635  |
| >TP53-V218MVVPYEPPEV  | 507  | >TP53-V218MVMPYEPPEV  | 176 | 331  |
| >TP53-V218MVVPYEPPEV  | 214  | >TP53-V218MVMPYEPPEV  | 4   | 210  |
| >TP53-V218MVVPYEPPEV  | 2960 | >TP53-V218MVMPYEPPEV  | 25  | 2935 |
| >TP53-V218MVVPYEPPEV  | 329  | >TP53-V218MVMPYEPPEV  | 8   | 321  |
| >TP53-V218MVVPYEPPEV  | 2192 | >TP53-V218MVMPYEPPEV  | 16  | 2176 |
| >TP53-V218MVVPYEPPEV  | 56   | >TP53-V218MVMPYEPPEV  | 9   | 47   |
| >TP53-V218MDRNTFRHSVA | 1923 | >TP53-V218MDRNTFRHSVA | 462 | 1461 |
| >TP53-V218MVVVPYEPPEV | 797  | >TP53-V218MVVMPYEPPEV | 47  | 750  |
| >TP53-V218MVVVPYEPPEV | 2498 | >TP53-V218MVVMPYEPPEV | 346 | 2152 |
| >TP53-V218MVVVPYEPPEV | 390  | >TP53-V218MVVMPYEPPEV | 62  | 328  |
| >TP53-V218MVVVPYEPPEV | 136  | >TP53-V218MVVMPYEPPEV | 58  | 78   |
| >TP53-V218MVVVPYEPPEV | 28   | >TP53-V218MVVMPYEPPEV | 11  | 17   |
| >TP53-V218MVVVPYEPPEV | 828  | >TP53-V218MVVMPYEPPEV | 95  | 733  |
| >TP53-V218MVVVPYEPPEV | 72   | >TP53-V218MVVMPYEPPEV | 30  | 42   |
| >TP53-V218MVVVPYEPPEV | 955  | >TP53-V218MVVMPYEPPEV | 15  | 940  |
| >TP53-V218MVVVPYEPPEV | 9    | >TP53-V218MVVMPYEPPEV | 6   | 3    |
| >TP53-V218MVVVPYEPPEV | 353  | >TP53-V218MVVMPYEPPEV | 81  | 272  |
| >TP53-V218MSVVVPYEPPE | 515  | >TP53-V218MSVMPYEPPE  | 255 | 260  |
| >TP53-V218MSVVVPYEPPE | 75   | >TP53-V218MSVMPYEPPE  | 66  | 9    |
| >TP53-V218MSVVVPYEPPE | 92   | >TP53-V218MSVMPYEPPE  | 43  | 49   |
| >TP53-V218MSVVVPYEPPE | 129  | >TP53-V218MSVMPYEPPE  | 93  | 36   |
| >TP53-V218MSVVVPYEPPE | 57   | >TP53-V218MSVMPYEPPE  | 34  | 23   |
| >TP53-V218MSVVVPYEPPE | 81   | >TP53-V218MSVMPYEPPE  | 88  | 7    |
| >TP53-V218MSVVVPYEPPE | 26   | >TP53-V218MSVMPYEPPE  | 32  | 6    |
| >TP53-V218MRHSVVVPY   | 642  | >TP53-V218MRHSVMPY    | 402 | 240  |
| >TP53-V218MRHSVVVPY   | 1776 | >TP53-V218MRHSVMPY    | 201 | 1575 |
| >TP53-V218MRHSVVVPY   | 23   | >TP53-V218MRHSVMPY    | 31  | 8    |
| >TP53-V218MRHSVVVPY   | 413  | >TP53-V218MRHSVMPY    | 75  | 338  |
| >TP53-V218FRHSVVVPY   | 1048 | >TP53-V218FRHSVMPY    | 385 | 663  |
| >TP53-V218FRHSVVVPY   | 4    | >TP53-V218FRHSVMPY    | 4   | 0    |



|                        |      |                        |       |      |
|------------------------|------|------------------------|-------|------|
| >TP53-V218MFRHSVVVPY   | 33   | >TP53-V218MFRHSVVMPI   | 63    | 30   |
| >TP53-V218MFRHSVVVPY   | 185  | >TP53-V218MFRHSVVMPI   | 158   | 27   |
| >TP53-V218MFRHSVVV     | 139  | >TP53-V218MFRHSVVM     | 233   | 94   |
| >TP53-V218MFRHSVVVPY   | 162  | >TP53-V218MFRHSVVMPI   | 66    | 96   |
| >TP53-V218MFRHSVVVPY   | 140  | >TP53-V218MFRHSVVMPI   | 167   | 27   |
| >TP53-V218MFRHSVVVPY   | 225  | >TP53-V218MFRHSVVMPI   | 206   | 19   |
| >TP53-V218MFRHSVVVPY   | 271  | >TP53-V218MFRHSVVMPI   | 277   | 6    |
| >TP53-V218MNTFRHSVVVF  | 562  | >TP53-V218MNTFRHSVVM   | 233   | 329  |
| >TP53-V218MNTFRHSVVV   | 265  | >TP53-V218MNTFRHSVVM   | 10031 | 9766 |
| >TP53-V218MNTFRHSVVVF  | 647  | >TP53-V218MNTFRHSVVM   | 296   | 351  |
| >TP53-V218MNTFRHSVVVF  | 128  | >TP53-V218MNTFRHSVVM   | 63    | 65   |
| >TP53-V218MNTFRHSVVVF  | 97   | >TP53-V218MNTFRHSVVM   | 52    | 45   |
| >TP53-V218MNTFRHSVVVF  | 123  | >TP53-V218MNTFRHSVVM   | 164   | 41   |
| >TP53-V218MNTFRHSVVVF  | 82   | >TP53-V218MNTFRHSVVM   | 50    | 32   |
| >TP53-V218MNTFRHSVVV   | 412  | >TP53-V218MNTFRHSVVM   | 323   | 89   |
| >TP53-V218MNTFRHSVVVF  | 61   | >TP53-V218MNTFRHSVVM   | 146   | 85   |
| >TP53-V218MNTFRHSVVVF  | 34   | >TP53-V218MNTFRHSVVM   | 32    | 2    |
| >TP53-V218MNTFRHSVVV   | 8    | >TP53-V218MNTFRHSVVM   | 332   | 324  |
| >TP53-V218MNTFRHSVVV   | 25   | >TP53-V218MNTFRHSVVM   | 454   | 429  |
| >TP53-V218MNTFRHSVVVF  | 766  | >TP53-V218MNTFRHSVVM   | 156   | 610  |
| >TP53-V218MNTFRHSVVV   | 2212 | >TP53-V218MNTFRHSVVM   | 153   | 2059 |
| >TP53-V218MNTFRHSVVVF  | 65   | >TP53-V218MNTFRHSVVM   | 61    | 4    |
| >TP53-V218MNTFRHSVVVF  | 492  | >TP53-V218MNTFRHSVVM   | 439   | 53   |
| >TP53-V218MNTFRHSVVV   | 798  | >TP53-V218MNTFRHSVVM   | 227   | 571  |
| >TP53-V218MNTFRHSVVVF  | 33   | >TP53-V218MNTFRHSVVM   | 32    | 1    |
| >TP53-V218MNTFRHSVVV   | 6172 | >TP53-V218MNTFRHSVVM   | 175   | 5997 |
| >TP53-V218MNTFRHSVVVF  | 23   | >TP53-V218MNTFRHSVVM   | 24    | 1    |
| >TP53-V218MNTFRHSVVVF  | 609  | >TP53-V218MNTFRHSVVM   | 487   | 122  |
| >TP53-V218MNTFRHSVVVF  | 105  | >TP53-V218MNTFRHSVVM   | 152   | 47   |
| >TP53-V218MNTFRHSVVV   | 2753 | >TP53-V218MNTFRHSVVM   | 108   | 2645 |
| >TP53-V218MNTFRHSVVVF  | 289  | >TP53-V218MNTFRHSVVM   | 136   | 153  |
| >TP53-V218MNTFRHSVVVF  | 23   | >TP53-V218MNTFRHSVVM   | 33    | 10   |
| >TP53-V218MNTFRHSVV    | 642  | >TP53-V218MNTFRHSVVM   | 41    | 601  |
| >TP53-V225AVGSDCTTIHY  | 353  | >TP53-V225AVGSDCTTIHY  | 590   | 237  |
| >TP53-V225AVGSDCTTIHY  | 184  | >TP53-V225AVGSDCTTIHY  | 153   | 31   |
| >TP53-V225AVGSDCTTIHY  | 377  | >TP53-V225AVGSDCTTIHY  | 248   | 129  |
| >TP53-V225AVGSDCTTIHY  | 449  | >TP53-V225AVGSDCTTIHY  | 426   | 23   |
| >TP53-V225AVGSDCTTI    | 605  | >TP53-V225AVGSDCTTI    | 349   | 256  |
| >TP53-V225AEVGSDCCTIHY | 11   | >TP53-V225AEVGSDCCTIHY | 176   | 165  |
| >TP53-V225AEVGSDCCTIHY | 75   | >TP53-V225AEVGSDCCTIHY | 623   | 548  |
| >TP53-V225AEVGSDCCTIHY | 387  | >TP53-V225AEVGSDCCTIHY | 2133  | 1746 |
| >TP53-V225AEVGSDCCTIHY | 326  | >TP53-V225AEVGSDCCTIHY | 2580  | 2254 |
| >TP53-V225AEVGSDCCTIHY | 1160 | >TP53-V225AEVGSDCCTIHY | 208   | 952  |

|                        |       |                        |       |       |
|------------------------|-------|------------------------|-------|-------|
| >TP53-V225/SVVVPYEPPE  | 75    | >TP53-V225/SVVVPYEPPE  | 1313  | 1238  |
| >TP53-V225/SVVVPYEPPE  | 92    | >TP53-V225/SVVVPYEPPE  | 4615  | 4523  |
| >TP53-V225/SVVVPYEPPE  | 129   | >TP53-V225/SVVVPYEPPE  | 6018  | 5889  |
| >TP53-V225/SVVVPYEPPE  | 57    | >TP53-V225/SVVVPYEPPE  | 5232  | 5175  |
| >TP53-V225/SVVVPYEPPE  | 81    | >TP53-V225/SVVVPYEPPE  | 531   | 450   |
| >TP53-V225/SVVVPYEPPE  | 26    | >TP53-V225/SVVVPYEPPE  | 700   | 674   |
| >TP53-V225/PEVGS DCTTI | 1029  | >TP53-V225/PEVGS DCTTI | 369   | 660   |
| >TP53-V225/PEVGS DCTTI | 342   | >TP53-V225/PEVGS DCTTI | 314   | 28    |
| >TP53-V225/VPYEPPEV    | 184   | >TP53-V225/VPYEPPEA    | 11792 | 11608 |
| >TP53-V225/VPYEPPEV    | 139   | >TP53-V225/VPYEPPEA    | 4614  | 4475  |
| >TP53-V225/VPYEPPEV    | 266   | >TP53-V225/VPYEPPEA    | 2860  | 2594  |
| >TP53-V225/VPYEPPEV    | 48    | >TP53-V225/VPYEPPEA    | 426   | 378   |
| >TP53-V225/VPYEPPEV    | 205   | >TP53-V225/VPYEPPEA    | 50    | 155   |
| >TP53-V225/VVPYEPPEV   | 214   | >TP53-V225/VVPYEPPEA   | 7760  | 7546  |
| >TP53-V225/VVPYEPPEV   | 329   | >TP53-V225/VVPYEPPEA   | 8277  | 7948  |
| >TP53-V225/VVPYEPPEV   | 56    | >TP53-V225/VVPYEPPEA   | 7755  | 7699  |
| >TP53-V225/VVVPYEPPEV  | 390   | >TP53-V225/VVVPYEPPEA  | 2719  | 2329  |
| >TP53-V225/VVVPYEPPEV  | 136   | >TP53-V225/VVVPYEPPEA  | 625   | 489   |
| >TP53-V225/VVVPYEPPEV  | 28    | >TP53-V225/VVVPYEPPEA  | 1670  | 1642  |
| >TP53-V225/VVVPYEPPEV  | 72    | >TP53-V225/VVVPYEPPEA  | 4546  | 4474  |
| >TP53-V225/VVVPYEPPEV  | 9     | >TP53-V225/VVVPYEPPEA  | 516   | 507   |
| >TP53-V225/VVVPYEPPEV  | 353   | >TP53-V225/VVVPYEPPEA  | 6823  | 6470  |
| >TP53-V225[VGS DCTTIHY | 353   | >TP53-V225[VGS DCTTIHY | 955   | 602   |
| >TP53-V225[VGS DCTTIHY | 184   | >TP53-V225[VGS DCTTIHY | 274   | 90    |
| >TP53-V225[VGS DCTTIHY | 377   | >TP53-V225[VGS DCTTIHY | 8051  | 7674  |
| >TP53-V225[VGS DCTTIHY | 449   | >TP53-V225[VGS DCTTIHY | 2241  | 1792  |
| >TP53-V225[VGS DCTTIH' | 11    | >TP53-V225[VGS DCTTIH' | 4843  | 4832  |
| >TP53-V225[VGS DCTTIH' | 75    | >TP53-V225[VGS DCTTIH' | 1348  | 1273  |
| >TP53-V225[VGS DCTTIH' | 387   | >TP53-V225[VGS DCTTIH' | 6121  | 5734  |
| >TP53-V225[VGS DCTTIH' | 326   | >TP53-V225[VGS DCTTIH' | 9614  | 9288  |
| >TP53-V225[VGS DCTTI   | 24655 | >TP53-V225[VGS DCTTI   | 406   | 24249 |
| >TP53-V225[SVVVPYEPPE  | 75    | >TP53-V225[SVVVPYEPPE  | 24737 | 24662 |
| >TP53-V225[SVVVPYEPPE  | 92    | >TP53-V225[SVVVPYEPPE  | 28252 | 28160 |
| >TP53-V225[SVVVPYEPPE  | 129   | >TP53-V225[SVVVPYEPPE  | 23823 | 23694 |
| >TP53-V225[SVVVPYEPPE  | 57    | >TP53-V225[SVVVPYEPPE  | 34044 | 33987 |
| >TP53-V225[SVVVPYEPPE  | 81    | >TP53-V225[SVVVPYEPPE  | 13274 | 13193 |
| >TP53-V225[SVVVPYEPPE  | 26    | >TP53-V225[SVVVPYEPPE  | 17439 | 17413 |
| >TP53-V225[PEVGS DCTTI | 342   | >TP53-V225[PEVGS DCTTI | 274   | 68    |
| >TP53-V225[VPYEPPEV    | 184   | >TP53-V225[VPYEPPEV    | 37411 | 37227 |
| >TP53-V225[VPYEPPEV    | 139   | >TP53-V225[VPYEPPEV    | 25739 | 25600 |
| >TP53-V225[VPYEPPEV    | 266   | >TP53-V225[VPYEPPEV    | 18318 | 18052 |
| >TP53-V225[VPYEPPEV    | 48    | >TP53-V225[VPYEPPEV    | 6292  | 6244  |
| >TP53-V225[VPYEPPEV    | 205   | >TP53-V225[VPYEPPEV    | 2697  | 2492  |

|                         |       |                         |       |       |
|-------------------------|-------|-------------------------|-------|-------|
| >TP53-V225[VVPYEPPEV    | 214   | >TP53-V225[VVPYEPPEV    | 29914 | 29700 |
| >TP53-V225[VVPYEPPEV    | 329   | >TP53-V225[VVPYEPPEV    | 25353 | 25024 |
| >TP53-V225[VVPYEPPEV    | 56    | >TP53-V225[VVPYEPPEV    | 35596 | 35540 |
| >TP53-V225[VVPYEPPEV    | 390   | >TP53-V225[VVPYEPPEV    | 27089 | 26699 |
| >TP53-V225[VVPYEPPEV    | 136   | >TP53-V225[VVPYEPPEV    | 17691 | 17555 |
| >TP53-V225[VVPYEPPEV    | 28    | >TP53-V225[VVPYEPPEV    | 24200 | 24172 |
| >TP53-V225[VVPYEPPEV    | 72    | >TP53-V225[VVPYEPPEV    | 23402 | 23330 |
| >TP53-V225[VVPYEPPEV    | 9     | >TP53-V225[VVPYEPPEV    | 28191 | 28182 |
| >TP53-V225[VVPYEPPEV    | 353   | >TP53-V225[VVPYEPPEV    | 21580 | 21227 |
| >TP53-V225FVGSDCCTTIHY  | 353   | >TP53-V225FVGSDCCTTIHY  | 210   | 143   |
| >TP53-V225FVGSDCCTTI    | 4423  | >TP53-V225FVGSDCCTTI    | 132   | 4291  |
| >TP53-V225FVGSDCCTTI    | 5950  | >TP53-V225FVGSDCCTTI    | 283   | 5667  |
| >TP53-V225FVGSDCCTTIHY  | 184   | >TP53-V225FVGSDCCTTIHY  | 107   | 77    |
| >TP53-V225FVGSDCCTTIHY  | 377   | >TP53-V225FVGSDCCTTIHY  | 157   | 220   |
| >TP53-V225FVGSDCCTTIHY  | 449   | >TP53-V225FVGSDCCTTIHY  | 257   | 192   |
| >TP53-V225FVGSDCCTTI    | 605   | >TP53-V225FVGSDCCTTI    | 191   | 414   |
| >TP53-V225FEVGSDCCTTIH' | 11    | >TP53-V225FEVGSDCCTTIH' | 616   | 605   |
| >TP53-V225FEVGSDCCTTIH' | 75    | >TP53-V225FEVGSDCCTTIH' | 681   | 606   |
| >TP53-V225FEVGSDCCTTIH' | 387   | >TP53-V225FEVGSDCCTTIH' | 119   | 268   |
| >TP53-V225FEVGSDCCTTIH' | 326   | >TP53-V225FEVGSDCCTTIH' | 1133  | 807   |
| >TP53-V225FSVVVPYEPPE   | 75    | >TP53-V225FSVVVPYEPPE   | 5400  | 5325  |
| >TP53-V225FSVVVPYEPPE   | 92    | >TP53-V225FSVVVPYEPPE   | 18858 | 18766 |
| >TP53-V225FSVVVPYEPPE   | 129   | >TP53-V225FSVVVPYEPPE   | 20719 | 20590 |
| >TP53-V225FSVVVPYEPPE   | 57    | >TP53-V225FSVVVPYEPPE   | 26329 | 26272 |
| >TP53-V225FSVVVPYEPPE   | 2224  | >TP53-V225FSVVVPYEPPE   | 28    | 2196  |
| >TP53-V225FSVVVPYEPPE   | 81    | >TP53-V225FSVVVPYEPPE   | 10627 | 10546 |
| >TP53-V225FSVVVPYEPPE   | 26    | >TP53-V225FSVVVPYEPPE   | 9947  | 9921  |
| >TP53-V225FSVVVPYEPPE   | 8841  | >TP53-V225FSVVVPYEPPE   | 325   | 8516  |
| >TP53-V225FSVVVPYEPPE   | 15954 | >TP53-V225FSVVVPYEPPE   | 240   | 15714 |
| >TP53-V225FPEVGSDCCTTI  | 1029  | >TP53-V225FPEVGSDCCTTI  | 236   | 793   |
| >TP53-V225FPEVGSDCCTTI  | 342   | >TP53-V225FPEVGSDCCTTI  | 96    | 246   |
| >TP53-V225FVPYEPPEV     | 184   | >TP53-V225FVPYEPPEF     | 35    | 149   |
| >TP53-V225FVPYEPPEV     | 139   | >TP53-V225FVPYEPPEF     | 16675 | 16536 |
| >TP53-V225FVPYEPPEV     | 266   | >TP53-V225FVPYEPPEF     | 11609 | 11343 |
| >TP53-V225FVPYEPPEV     | 4735  | >TP53-V225FVPYEPPEF     | 119   | 4616  |
| >TP53-V225FVPYEPPEV     | 1888  | >TP53-V225FVPYEPPEF     | 22    | 1866  |
| >TP53-V225FVPYEPPEV     | 48    | >TP53-V225FVPYEPPEF     | 195   | 147   |
| >TP53-V225FVPYEPPEV     | 1825  | >TP53-V225FVPYEPPEF     | 83    | 1742  |
| >TP53-V225FVPYEPPEV     | 205   | >TP53-V225FVPYEPPEF     | 11010 | 10805 |
| >TP53-V225FVPYEPPEV     | 9510  | >TP53-V225FVPYEPPEF     | 253   | 9257  |
| >TP53-V225FVVPYEPPEV    | 214   | >TP53-V225FVVPYEPPEF    | 22052 | 21838 |
| >TP53-V225FVVPYEPPEV    | 329   | >TP53-V225FVVPYEPPEF    | 21921 | 21592 |
| >TP53-V225FVVPYEPPEV    | 56    | >TP53-V225FVVPYEPPEF    | 30372 | 30316 |

|                         |       |                         |       |       |
|-------------------------|-------|-------------------------|-------|-------|
| >TP53-V225F VVVPYEPPEV  | 390   | >TP53-V225F VVVPYEPPEF  | 23284 | 22894 |
| >TP53-V225F VVVPYEPPEV  | 136   | >TP53-V225F VVVPYEPPEF  | 13355 | 13219 |
| >TP53-V225F VVVPYEPPEV  | 28    | >TP53-V225F VVVPYEPPEF  | 12522 | 12494 |
| >TP53-V225F VVVPYEPPEV  | 72    | >TP53-V225F VVVPYEPPEF  | 19679 | 19607 |
| >TP53-V225F VVVPYEPPEV  | 9     | >TP53-V225F VVVPYEPPEF  | 17239 | 17230 |
| >TP53-V225F VVVPYEPPEV  | 7635  | >TP53-V225F VVVPYEPPEF  | 99    | 7536  |
| >TP53-V225F VVVPYEPPEV  | 353   | >TP53-V225F VVVPYEPPEF  | 17731 | 17378 |
| >TP53-V225F VVVPYEPPEV  | 6559  | >TP53-V225F VVVPYEPPEF  | 237   | 6322  |
| >TP53-V225F VVVPYEPPEV  | 4113  | >TP53-V225F VVVPYEPPEF  | 16    | 4097  |
| >TP53-V225F VVVPYEPPEV  | 16861 | >TP53-V225F VVVPYEPPEF  | 341   | 16520 |
| >TP53-V225I VGSDCTTIHY  | 353   | >TP53-V225I IGSDCTTIHY  | 662   | 309   |
| >TP53-V225I VGSDCTTIHY  | 184   | >TP53-V225I IGSDCTTIHY  | 128   | 56    |
| >TP53-V225I VGSDCTTIHY  | 377   | >TP53-V225I IGSDCTTIHY  | 282   | 95    |
| >TP53-V225I VGSDCTTIHY  | 449   | >TP53-V225I IGSDCTTIHY  | 1007  | 558   |
| >TP53-V225I VGSDCTTI    | 605   | >TP53-V225I IGSDCTTI    | 360   | 245   |
| >TP53-V225I EVGSDCTTIH' | 11    | >TP53-V225I EIGSDCTTIHY | 30    | 19    |
| >TP53-V225I EVGSDCTTIH' | 75    | >TP53-V225I EIGSDCTTIHY | 214   | 139   |
| >TP53-V225I EVGSDCTTIH' | 387   | >TP53-V225I EIGSDCTTIHY | 642   | 255   |
| >TP53-V225I EVGSDCTTIH' | 326   | >TP53-V225I EIGSDCTTIHY | 644   | 318   |
| >TP53-V225I SVVVPYEPPE  | 75    | >TP53-V225I SVVVPYEPPE  | 736   | 661   |
| >TP53-V225I SVVVPYEPPE  | 92    | >TP53-V225I SVVVPYEPPE  | 1489  | 1397  |
| >TP53-V225I SVVVPYEPPE  | 129   | >TP53-V225I SVVVPYEPPE  | 3304  | 3175  |
| >TP53-V225I SVVVPYEPPE  | 57    | >TP53-V225I SVVVPYEPPE  | 4474  | 4417  |
| >TP53-V225I SVVVPYEPPE  | 81    | >TP53-V225I SVVVPYEPPE  | 255   | 174   |
| >TP53-V225I SVVVPYEPPE  | 26    | >TP53-V225I SVVVPYEPPE  | 134   | 108   |
| >TP53-V225I SVVVPYEPPE  | 15663 | >TP53-V225I SVVVPYEPPE  | 472   | 15191 |
| >TP53-V225I PEVGSDCTTI  | 342   | >TP53-V225I PEIGSDCTTI  | 66    | 276   |
| >TP53-V225I VPYEPPEV    | 184   | >TP53-V225I VPYEPPEI    | 98    | 86    |
| >TP53-V225I VPYEPPEV    | 139   | >TP53-V225I VPYEPPEI    | 1720  | 1581  |
| >TP53-V225I VPYEPPEV    | 266   | >TP53-V225I VPYEPPEI    | 934   | 668   |
| >TP53-V225I VPYEPPEV    | 48    | >TP53-V225I VPYEPPEI    | 33    | 15    |
| >TP53-V225I VPYEPPEV    | 1825  | >TP53-V225I VPYEPPEI    | 151   | 1674  |
| >TP53-V225I VPYEPPEV    | 205   | >TP53-V225I VPYEPPEI    | 1094  | 889   |
| >TP53-V225I VVPYEPPEV   | 214   | >TP53-V225I VVPYEPPEI   | 3265  | 3051  |
| >TP53-V225I VVPYEPPEV   | 329   | >TP53-V225I VVPYEPPEI   | 5310  | 4981  |
| >TP53-V225I VVPYEPPEV   | 56    | >TP53-V225I VVPYEPPEI   | 7255  | 7199  |
| >TP53-V225I VVVPYEPPEV  | 390   | >TP53-V225I VVVPYEPPEI  | 1588  | 1198  |
| >TP53-V225I VVVPYEPPEV  | 136   | >TP53-V225I VVVPYEPPEI  | 475   | 339   |
| >TP53-V225I VVVPYEPPEV  | 28    | >TP53-V225I VVVPYEPPEI  | 409   | 381   |
| >TP53-V225I VVVPYEPPEV  | 72    | >TP53-V225I VVVPYEPPEI  | 2545  | 2473  |
| >TP53-V225I VVVPYEPPEV  | 9     | >TP53-V225I VVVPYEPPEI  | 482   | 473   |
| >TP53-V225I VVVPYEPPEV  | 353   | >TP53-V225I VVVPYEPPEI  | 2321  | 1968  |
| >TP53-V272A EVRVCACPGF  | 329   | >TP53-V272A EARVCACPGF  | 1155  | 826   |

|                        |      |                         |       |       |
|------------------------|------|-------------------------|-------|-------|
| >TP53-V272/EVRVCACPGF  | 70   | >TP53-V272/EARVCACPGF   | 161   | 91    |
| >TP53-V272/FEVRVCACP   | 1437 | >TP53-V272/FEARVCACP    | 386   | 1051  |
| >TP53-V272/FEVRVCACPC  | 370  | >TP53-V272/FEARVCACPC   | 177   | 193   |
| >TP53-V272/NSFEVRVCA   | 21   | >TP53-V272/NSFEARVCA    | 52    | 31    |
| >TP53-V272/GRNSFEVR    | 405  | >TP53-V272/GRNSFEAR     | 400   | 5     |
| >TP53-V272/LGRNSFEV    | 820  | >TP53-V272/LGRNSFEA     | 449   | 371   |
| >TP53-V272/LGRNSFEVR   | 286  | >TP53-V272/LGRNSFEAR    | 174   | 112   |
| >TP53-V272/LLGRNSFEV   | 26   | >TP53-V272/LLGRNSFEA    | 220   | 194   |
| >TP53-V272/LLGRNSFEVR  | 137  | >TP53-V272/LLGRNSFEAR   | 122   | 15    |
| >TP53-V272/LLGRNSFEV   | 16   | >TP53-V272/LLGRNSFEA    | 112   | 96    |
| >TP53-V272/LLGRNSFEVR  | 62   | >TP53-V272/LLGRNSFEAR   | 51    | 11    |
| >TP53-V272/LLGRNSFEV   | 47   | >TP53-V272/LLGRNSFEA    | 520   | 473   |
| >TP53-V272/LLGRNSFEVR  | 214  | >TP53-V272/LLGRNSFEAR   | 83    | 131   |
| >TP53-V272/LLGRNSFEV   | 39   | >TP53-V272/LLGRNSFEA    | 638   | 599   |
| >TP53-V272/LLGRNSFEV   | 2    | >TP53-V272/LLGRNSFEA    | 12    | 10    |
| >TP53-V272/LLGRNSFEVR  | 3    | >TP53-V272/LLGRNSFEAR   | 3     | 0     |
| >TP53-V272/LLGRNSFEV   | 2    | >TP53-V272/LLGRNSFEA    | 9     | 7     |
| >TP53-V272/LLGRNSFEVR  | 7    | >TP53-V272/LLGRNSFEAR   | 6     | 1     |
| >TP53-V272/LLGRNSFEV   | 5    | >TP53-V272/LLGRNSFEA    | 37    | 32    |
| >TP53-V272/LLGRNSFEVR  | 9    | >TP53-V272/LLGRNSFEAR   | 11    | 2     |
| >TP53-V272/LLGRNSFEV   | 2    | >TP53-V272/LLGRNSFEA    | 28    | 26    |
| >TP53-V272/LLGRNSFEVR  | 6    | >TP53-V272/LLGRNSFEAR   | 4     | 2     |
| >TP53-V272/LLGRNSFEV   | 2    | >TP53-V272/LLGRNSFEA    | 4     | 2     |
| >TP53-V272/LLGRNSFEVR  | 2    | >TP53-V272/LLGRNSFEAR   | 2     | 0     |
| >TP53-V272/LLGRNSFEVR  | 429  | >TP53-V272/LLGRNSFEAR   | 168   | 261   |
| >TP53-V272/LLGRNSFEVR  | 1284 | >TP53-V272/LLGRNSFEAR   | 349   | 935   |
| >TP53-V272/LLGRNSFEV   | 425  | >TP53-V272/LLGRNSFEA    | 5739  | 5314  |
| >TP53-V272/NLLGRNSFEV  | 29   | >TP53-V272/NLLGRNSFEA   | 230   | 201   |
| >TP53-V272/NLLGRNSFEV  | 89   | >TP53-V272/NLLGRNSFEA   | 355   | 266   |
| >TP53-V272/NLLGRNSFEV  | 94   | >TP53-V272/NLLGRNSFEA   | 473   | 379   |
| >TP53-V272/NLLGRNSFEV  | 137  | >TP53-V272/NLLGRNSFEA   | 538   | 401   |
| >TP53-V272/NLLGRNSFEV  | 3    | >TP53-V272/NLLGRNSFEA   | 33    | 30    |
| >TP53-V272/NLLGRNSFEV  | 5    | >TP53-V272/NLLGRNSFEA   | 49    | 44    |
| >TP53-V272/NLLGRNSFEV  | 7    | >TP53-V272/NLLGRNSFEA   | 62    | 55    |
| >TP53-V272/NLLGRNSFEV  | 3    | >TP53-V272/NLLGRNSFEA   | 47    | 44    |
| >TP53-V272/NLLGRNSFEV  | 3    | >TP53-V272/NLLGRNSFEA   | 17    | 14    |
| >TP53-V272/NLLGRNSFEV  | 502  | >TP53-V272/NLLGRNSFEA   | 253   | 249   |
| >TP53-V272/NLLGRNSFEV  | 109  | >TP53-V272/NLLGRNSFEA   | 47    | 62    |
| >TP53-V272/NLLGRNSFEV  | 309  | >TP53-V272/NLLGRNSFEA   | 294   | 15    |
| >TP53-V272/NLLGRNSFEV  | 52   | >TP53-V272/NLLGRNSFEA   | 857   | 805   |
| >TP53-V272/NLLGRNSFEV  | 195  | >TP53-V272/NLLGRNSFEA   | 209   | 14    |
| >TP53-V272E EVRVCACPGF | 329  | >TP53-V272E EERVVCACPGF | 8058  | 7729  |
| >TP53-V272E EVRVCACPGF | 70   | >TP53-V272E EERVVCACPGF | 16571 | 16501 |

|                         |     |                         |       |       |
|-------------------------|-----|-------------------------|-------|-------|
| >TP53-V272E FEVRVCACPC  | 370 | >TP53-V272E FEERVACCPG  | 1437  | 1067  |
| >TP53-V272E NSFVCA      | 21  | >TP53-V272E NSFVCA      | 492   | 471   |
| >TP53-V272E GRNSFEVR    | 405 | >TP53-V272E GRNSFEER    | 568   | 163   |
| >TP53-V272E LGRNSFEVR   | 286 | >TP53-V272E LGRNSFEER   | 217   | 69    |
| >TP53-V272E LLGRNSFEV   | 26  | >TP53-V272E LLGRNSFEE   | 20346 | 20320 |
| >TP53-V272E LLGRNSFEVR' | 137 | >TP53-V272E LLGRNSFEER' | 258   | 121   |
| >TP53-V272E LLGRNSFEV   | 16  | >TP53-V272E LLGRNSFEE   | 9904  | 9888  |
| >TP53-V272E LLGRNSFEVR' | 62  | >TP53-V272E LLGRNSFEER' | 53    | 9     |
| >TP53-V272E LLGRNSFEV   | 47  | >TP53-V272E LLGRNSFEE   | 23305 | 23258 |
| >TP53-V272E LLGRNSFEVR' | 214 | >TP53-V272E LLGRNSFEER' | 267   | 53    |
| >TP53-V272E LLGRNSFEV   | 39  | >TP53-V272E LLGRNSFEE   | 22106 | 22067 |
| >TP53-V272E LLGRNSFEV   | 2   | >TP53-V272E LLGRNSFEE   | 5938  | 5936  |
| >TP53-V272E LLGRNSFEVR' | 3   | >TP53-V272E LLGRNSFEER' | 3     | 0     |
| >TP53-V272E LLGRNSFEV   | 2   | >TP53-V272E LLGRNSFEE   | 4711  | 4709  |
| >TP53-V272E LLGRNSFEVR' | 7   | >TP53-V272E LLGRNSFEER' | 12    | 5     |
| >TP53-V272E LLGRNSFEV   | 5   | >TP53-V272E LLGRNSFEE   | 14428 | 14423 |
| >TP53-V272E LLGRNSFEVR' | 9   | >TP53-V272E LLGRNSFEER' | 13    | 4     |
| >TP53-V272E LLGRNSFEV   | 2   | >TP53-V272E LLGRNSFEE   | 19645 | 19643 |
| >TP53-V272E LLGRNSFEVR' | 6   | >TP53-V272E LLGRNSFEER' | 6     | 0     |
| >TP53-V272E LLGRNSFEV   | 2   | >TP53-V272E LLGRNSFEE   | 1655  | 1653  |
| >TP53-V272E LLGRNSFEVR' | 2   | >TP53-V272E LLGRNSFEER' | 2     | 0     |
| >TP53-V272E LLGRNSFEVR  | 429 | >TP53-V272E LLGRNSFEER  | 215   | 214   |
| >TP53-V272E LLGRNSFEV   | 425 | >TP53-V272E LLGRNSFEE   | 22564 | 22139 |
| >TP53-V272E NLLGRNSFEV  | 29  | >TP53-V272E NLLGRNSFEE  | 9821  | 9792  |
| >TP53-V272E NLLGRNSFEV  | 89  | >TP53-V272E NLLGRNSFEE  | 11855 | 11766 |
| >TP53-V272E NLLGRNSFEV  | 94  | >TP53-V272E NLLGRNSFEE  | 16937 | 16843 |
| >TP53-V272E NLLGRNSFEV  | 137 | >TP53-V272E NLLGRNSFEE  | 17435 | 17298 |
| >TP53-V272E NLLGRNSFEV  | 3   | >TP53-V272E NLLGRNSFEE  | 7005  | 7002  |
| >TP53-V272E NLLGRNSFEV  | 5   | >TP53-V272E NLLGRNSFEE  | 7457  | 7452  |
| >TP53-V272E NLLGRNSFEV  | 7   | >TP53-V272E NLLGRNSFEE  | 14220 | 14213 |
| >TP53-V272E NLLGRNSFEV  | 3   | >TP53-V272E NLLGRNSFEE  | 15394 | 15391 |
| >TP53-V272E NLLGRNSFEV  | 3   | >TP53-V272E NLLGRNSFEE  | 8055  | 8052  |
| >TP53-V272E NLLGRNSFEV  | 502 | >TP53-V272E NLLGRNSFEE  | 382   | 120   |
| >TP53-V272E NLLGRNSFEV  | 109 | >TP53-V272E NLLGRNSFEE  | 67    | 42    |
| >TP53-V272E NLLGRNSFEV  | 309 | >TP53-V272E NLLGRNSFEE  | 184   | 125   |
| >TP53-V272E NLLGRNSFEV  | 52  | >TP53-V272E NLLGRNSFEE  | 14907 | 14855 |
| >TP53-V272E NLLGRNSFEV  | 195 | >TP53-V272E NLLGRNSFEE  | 326   | 131   |
| >TP53-V272C(EVRVCACPGF  | 329 | >TP53-V272C(EGRVCACPGF  | 7008  | 6679  |
| >TP53-V272C(EVRVCACPGF  | 70  | >TP53-V272C(EGRVCACPGF  | 17878 | 17808 |
| >TP53-V272C(FEVRVCACPC  | 370 | >TP53-V272C(FEGRVCACPC  | 1999  | 1629  |
| >TP53-V272C(NSFEVRVCA   | 21  | >TP53-V272C(NSFEGRVCA   | 126   | 105   |
| >TP53-V272C(GRNSFEVR    | 405 | >TP53-V272C(GRNSFEGR    | 307   | 98    |
| >TP53-V272C(LGRNSFEVR   | 286 | >TP53-V272C(LGRNSFEGR   | 692   | 406   |

|                        |      |                        |       |       |
|------------------------|------|------------------------|-------|-------|
| >TP53-V272C LLGRNSFEV  | 26   | >TP53-V272C LLGRNSFEG  | 16984 | 16958 |
| >TP53-V272C LLGRNSFEVR | 137  | >TP53-V272C LLGRNSFEGR | 630   | 493   |
| >TP53-V272C LLGRNSFEV  | 16   | >TP53-V272C LLGRNSFEG  | 3532  | 3516  |
| >TP53-V272C LLGRNSFEVR | 62   | >TP53-V272C LLGRNSFEGR | 181   | 119   |
| >TP53-V272C LLGRNSFEV  | 47   | >TP53-V272C LLGRNSFEG  | 18210 | 18163 |
| >TP53-V272C LLGRNSFEVR | 214  | >TP53-V272C LLGRNSFEGR | 156   | 58    |
| >TP53-V272C LLGRNSFEV  | 39   | >TP53-V272C LLGRNSFEG  | 17061 | 17022 |
| >TP53-V272C LLGRNSFEV  | 2    | >TP53-V272C LLGRNSFEG  | 1250  | 1248  |
| >TP53-V272C LLGRNSFEVR | 3    | >TP53-V272C LLGRNSFEGR | 5     | 2     |
| >TP53-V272C LLGRNSFEV  | 2    | >TP53-V272C LLGRNSFEG  | 1500  | 1498  |
| >TP53-V272C LLGRNSFEVR | 7    | >TP53-V272C LLGRNSFEGR | 26    | 19    |
| >TP53-V272C LLGRNSFEV  | 5    | >TP53-V272C LLGRNSFEG  | 8005  | 8000  |
| >TP53-V272C LLGRNSFEVR | 9    | >TP53-V272C LLGRNSFEGR | 27    | 18    |
| >TP53-V272C LLGRNSFEV  | 2    | >TP53-V272C LLGRNSFEG  | 14606 | 14604 |
| >TP53-V272C LLGRNSFEVR | 6    | >TP53-V272C LLGRNSFEGR | 39    | 33    |
| >TP53-V272C LLGRNSFEV  | 2    | >TP53-V272C LLGRNSFEG  | 1114  | 1112  |
| >TP53-V272C LLGRNSFEVR | 2    | >TP53-V272C LLGRNSFEGR | 2     | 0     |
| >TP53-V272C LLGRNSFEVR | 429  | >TP53-V272C LLGRNSFEGR | 199   | 230   |
| >TP53-V272C LLGRNSFEV  | 425  | >TP53-V272C LLGRNSFEG  | 21671 | 21246 |
| >TP53-V272C NLLGRNSFEV | 29   | >TP53-V272C NLLGRNSFEG | 6491  | 6462  |
| >TP53-V272C NLLGRNSFEV | 89   | >TP53-V272C NLLGRNSFEG | 8078  | 7989  |
| >TP53-V272C NLLGRNSFEV | 94   | >TP53-V272C NLLGRNSFEG | 13965 | 13871 |
| >TP53-V272C NLLGRNSFEV | 137  | >TP53-V272C NLLGRNSFEG | 13782 | 13645 |
| >TP53-V272C NLLGRNSFEV | 3    | >TP53-V272C NLLGRNSFEG | 2158  | 2155  |
| >TP53-V272C NLLGRNSFEV | 5    | >TP53-V272C NLLGRNSFEG | 3142  | 3137  |
| >TP53-V272C NLLGRNSFEV | 7    | >TP53-V272C NLLGRNSFEG | 9039  | 9032  |
| >TP53-V272C NLLGRNSFEV | 3    | >TP53-V272C NLLGRNSFEG | 10559 | 10556 |
| >TP53-V272C NLLGRNSFEV | 3    | >TP53-V272C NLLGRNSFEG | 7099  | 7096  |
| >TP53-V272C NLLGRNSFEV | 109  | >TP53-V272C NLLGRNSFEG | 105   | 4     |
| >TP53-V272C NLLGRNSFEV | 309  | >TP53-V272C NLLGRNSFEG | 251   | 58    |
| >TP53-V272C NLLGRNSFEV | 52   | >TP53-V272C NLLGRNSFEG | 13340 | 13288 |
| >TP53-V272C NLLGRNSFEV | 195  | >TP53-V272C NLLGRNSFEG | 183   | 12    |
| >TP53-V272L EVRVCACPGF | 329  | >TP53-V272L ELRVCACPGR | 483   | 154   |
| >TP53-V272L EVRVCACPGF | 70   | >TP53-V272L ELRVCACPGR | 750   | 680   |
| >TP53-V272L EVRVCACPGF | 744  | >TP53-V272L ELRVCACPGR | 479   | 265   |
| >TP53-V272L FEVRVCACP  | 1437 | >TP53-V272L FELRVCACP  | 420   | 1017  |
| >TP53-V272L FEVRVCACPC | 370  | >TP53-V272L FELRVCACPG | 1715  | 1345  |
| >TP53-V272L NSFELRVCA  | 21   | >TP53-V272L NSFELRVCA  | 51    | 30    |
| >TP53-V272L GRNSFEVR   | 405  | >TP53-V272L GRNSFELR   | 226   | 179   |
| >TP53-V272L LGRNSFEVR  | 286  | >TP53-V272L LGRNSFELR  | 113   | 173   |
| >TP53-V272L LLGRNSFEV  | 26   | >TP53-V272L LLGRNSFEL  | 68    | 42    |
| >TP53-V272L LLGRNSFEVR | 137  | >TP53-V272L LLGRNSFELR | 134   | 3     |
| >TP53-V272L LLGRNSFEV  | 16   | >TP53-V272L LLGRNSFEL  | 28    | 12    |

|                        |      |                         |      |      |
|------------------------|------|-------------------------|------|------|
| >TP53-V272L LLGRNSFEVR | 62   | >TP53-V272L LLGRNSFELR\ | 127  | 65   |
| >TP53-V272L LLGRNSFEV  | 47   | >TP53-V272L LLGRNSFEL   | 687  | 640  |
| >TP53-V272L LLGRNSFEVR | 214  | >TP53-V272L LLGRNSFELR\ | 190  | 24   |
| >TP53-V272L LLGRNSFEV  | 39   | >TP53-V272L LLGRNSFEL   | 342  | 303  |
| >TP53-V272L LLGRNSFEV  | 2    | >TP53-V272L LLGRNSFEL   | 6    | 4    |
| >TP53-V272L LLGRNSFEVR | 3    | >TP53-V272L LLGRNSFELR\ | 3    | 0    |
| >TP53-V272L LLGRNSFEV  | 2    | >TP53-V272L LLGRNSFEL   | 4    | 2    |
| >TP53-V272L LLGRNSFEVR | 7    | >TP53-V272L LLGRNSFELR\ | 12   | 5    |
| >TP53-V272L LLGRNSFEV  | 5    | >TP53-V272L LLGRNSFEL   | 14   | 9    |
| >TP53-V272L LLGRNSFEVR | 9    | >TP53-V272L LLGRNSFELR\ | 10   | 1    |
| >TP53-V272L LLGRNSFEV  | 2    | >TP53-V272L LLGRNSFEL   | 5    | 3    |
| >TP53-V272L LLGRNSFEVR | 6    | >TP53-V272L LLGRNSFELR\ | 10   | 4    |
| >TP53-V272L LLGRNSFEV  | 2    | >TP53-V272L LLGRNSFEL   | 2    | 0    |
| >TP53-V272L LLGRNSFEVR | 2    | >TP53-V272L LLGRNSFELR\ | 2    | 0    |
| >TP53-V272L LLGRNSFEVR | 429  | >TP53-V272L LLGRNSFELR  | 153  | 276  |
| >TP53-V272L LLGRNSFEVR | 1284 | >TP53-V272L LLGRNSFELR  | 226  | 1058 |
| >TP53-V272L LLGRNSFEV  | 425  | >TP53-V272L LLGRNSFEL   | 3076 | 2651 |
| >TP53-V272L NLLGRNSFEV | 29   | >TP53-V272L NLLGRNSFEL  | 84   | 55   |
| >TP53-V272L NLLGRNSFEV | 89   | >TP53-V272L NLLGRNSFEL  | 78   | 11   |
| >TP53-V272L NLLGRNSFEV | 94   | >TP53-V272L NLLGRNSFEL  | 394  | 300  |
| >TP53-V272L NLLGRNSFEV | 137  | >TP53-V272L NLLGRNSFEL  | 493  | 356  |
| >TP53-V272L NLLGRNSFEV | 3    | >TP53-V272L NLLGRNSFEL  | 13   | 10   |
| >TP53-V272L NLLGRNSFEV | 5    | >TP53-V272L NLLGRNSFEL  | 15   | 10   |
| >TP53-V272L NLLGRNSFEV | 7    | >TP53-V272L NLLGRNSFEL  | 25   | 18   |
| >TP53-V272L NLLGRNSFEV | 3    | >TP53-V272L NLLGRNSFEL  | 10   | 7    |
| >TP53-V272L NLLGRNSFEV | 3    | >TP53-V272L NLLGRNSFEL  | 6    | 3    |
| >TP53-V272L NLLGRNSFEV | 502  | >TP53-V272L NLLGRNSFEL\ | 229  | 273  |
| >TP53-V272L NLLGRNSFEV | 109  | >TP53-V272L NLLGRNSFEL\ | 40   | 69   |
| >TP53-V272L NLLGRNSFEV | 309  | >TP53-V272L NLLGRNSFEL\ | 107  | 202  |
| >TP53-V272L NLLGRNSFEV | 52   | >TP53-V272L NLLGRNSFEL  | 369  | 317  |
| >TP53-V272L NLLGRNSFEV | 195  | >TP53-V272L NLLGRNSFEL\ | 140  | 55   |
| >TP53-V272L EVRVCACPGF | 673  | >TP53-V272L EMRVCACPG   | 356  | 317  |
| >TP53-V272L EVRVCACPGF | 329  | >TP53-V272L EMRVCACPG   | 225  | 104  |
| >TP53-V272L EVRVCACPGF | 70   | >TP53-V272L EMRVCACPG   | 296  | 226  |
| >TP53-V272L EVRVCACPGF | 2254 | >TP53-V272L EMRVCACPG   | 386  | 1868 |
| >TP53-V272L EVRVCACPGF | 744  | >TP53-V272L EMRVCACPG   | 225  | 519  |
| >TP53-V272L FEVRVCACP  | 1437 | >TP53-V272L FEMRVCACP   | 489  | 948  |
| >TP53-V272L FEVRVCACPG | 370  | >TP53-V272L FEMRVCACP\  | 331  | 39   |
| >TP53-V272L FEVRVCAC   | 1213 | >TP53-V272L FEMRVCAC    | 448  | 765  |
| >TP53-V272L FEVRVCACPG | 1619 | >TP53-V272L FEMRVCACP\  | 232  | 1387 |
| >TP53-V272L NSFVCA     | 21   | >TP53-V272L NSFEMRCA    | 78   | 57   |
| >TP53-V272L GRNSFEVR   | 405  | >TP53-V272L GRNSFEMR    | 325  | 80   |
| >TP53-V272L LGRNSFEVR  | 286  | >TP53-V272L LGRNSFEMR   | 324  | 38   |



|                        |      |                        |      |      |
|------------------------|------|------------------------|------|------|
| >TP53-V272M LLGRNSFEV  | 26   | >TP53-V272M LLGRNSFEM  | 395  | 369  |
| >TP53-V272M LLGRNSFEVR | 137  | >TP53-V272M LLGRNSFEMF | 142  | 5    |
| >TP53-V272M LLGRNSFEV  | 16   | >TP53-V272M LLGRNSFEM  | 246  | 230  |
| >TP53-V272M LLGRNSFEVR | 62   | >TP53-V272M LLGRNSFEMF | 79   | 17   |
| >TP53-V272M LLGRNSFEV  | 47   | >TP53-V272M LLGRNSFEM  | 4611 | 4564 |
| >TP53-V272M LLGRNSFEVR | 214  | >TP53-V272M LLGRNSFEMF | 96   | 118  |
| >TP53-V272M LLGRNSFEV  | 39   | >TP53-V272M LLGRNSFEM  | 1893 | 1854 |
| >TP53-V272M LLGRNSFEV  | 2    | >TP53-V272M LLGRNSFEM  | 26   | 24   |
| >TP53-V272M LLGRNSFEVR | 3    | >TP53-V272M LLGRNSFEMF | 3    | 0    |
| >TP53-V272M LLGRNSFEV  | 2    | >TP53-V272M LLGRNSFEM  | 14   | 12   |
| >TP53-V272M LLGRNSFEVR | 7    | >TP53-V272M LLGRNSFEMF | 8    | 1    |
| >TP53-V272M LLGRNSFEV  | 5    | >TP53-V272M LLGRNSFEM  | 156  | 151  |
| >TP53-V272M LLGRNSFEVR | 9    | >TP53-V272M LLGRNSFEMF | 10   | 1    |
| >TP53-V272M LLGRNSFEV  | 2    | >TP53-V272M LLGRNSFEM  | 26   | 24   |
| >TP53-V272M LLGRNSFEVR | 6    | >TP53-V272M LLGRNSFEMF | 6    | 0    |
| >TP53-V272M LLGRNSFEV  | 2    | >TP53-V272M LLGRNSFEM  | 8    | 6    |
| >TP53-V272M LLGRNSFEVR | 2    | >TP53-V272M LLGRNSFEMF | 2    | 0    |
| >TP53-V272M LLGRNSFEVR | 429  | >TP53-V272M LLGRNSFEMF | 183  | 246  |
| >TP53-V272M LLGRNSFEVR | 1284 | >TP53-V272M LLGRNSFEMF | 326  | 958  |
| >TP53-V272M LLGRNSFEV  | 425  | >TP53-V272M LLGRNSFEM  | 4005 | 3580 |
| >TP53-V272M LLGRNSFEV  | 4543 | >TP53-V272M LLGRNSFEM  | 278  | 4265 |
| >TP53-V272M NLLGRNSFEV | 29   | >TP53-V272M NLLGRNSFEN | 361  | 332  |
| >TP53-V272M NLLGRNSFEV | 89   | >TP53-V272M NLLGRNSFEN | 318  | 229  |
| >TP53-V272M NLLGRNSFEV | 94   | >TP53-V272M NLLGRNSFEN | 1562 | 1468 |
| >TP53-V272M NLLGRNSFEV | 137  | >TP53-V272M NLLGRNSFEN | 1595 | 1458 |
| >TP53-V272M NLLGRNSFEV | 3    | >TP53-V272M NLLGRNSFEN | 67   | 64   |
| >TP53-V272M NLLGRNSFEV | 5    | >TP53-V272M NLLGRNSFEN | 86   | 81   |
| >TP53-V272M NLLGRNSFEV | 7    | >TP53-V272M NLLGRNSFEN | 281  | 274  |
| >TP53-V272M NLLGRNSFEV | 3    | >TP53-V272M NLLGRNSFEN | 46   | 43   |
| >TP53-V272M NLLGRNSFEV | 3    | >TP53-V272M NLLGRNSFEN | 76   | 73   |
| >TP53-V272M NLLGRNSFEV | 502  | >TP53-V272M NLLGRNSFEN | 423  | 79   |
| >TP53-V272M NLLGRNSFEV | 109  | >TP53-V272M NLLGRNSFEN | 62   | 47   |
| >TP53-V272M NLLGRNSFEV | 309  | >TP53-V272M NLLGRNSFEN | 163  | 146  |
| >TP53-V272M NLLGRNSFEV | 52   | >TP53-V272M NLLGRNSFEN | 402  | 350  |
| >TP53-V272M NLLGRNSFEV | 2436 | >TP53-V272M NLLGRNSFEN | 389  | 2047 |
| >TP53-V272M NLLGRNSFEV | 195  | >TP53-V272M NLLGRNSFEN | 308  | 113  |
| >TP53-V274# RVCACPGR   | 367  | >TP53-V274# RACACPGR   | 2721 | 2354 |
| >TP53-V274# RVCACPGRDI | 435  | >TP53-V274# RACACPGRDI | 3745 | 3310 |
| >TP53-V274# RVCACPGR   | 40   | >TP53-V274# RACACPGR   | 50   | 10   |
| >TP53-V274# RVCACPGRDI | 37   | >TP53-V274# RACACPGRDI | 73   | 36   |
| >TP53-V274# RVCACPGRDI | 33   | >TP53-V274# RACACPGRDI | 41   | 8    |
| >TP53-V274# RVCACPGR   | 481  | >TP53-V274# RACACPGR   | 958  | 477  |
| >TP53-V274# RVCACPGRDI | 297  | >TP53-V274# RACACPGRDI | 1841 | 1544 |

|                        |     |                        |       |       |
|------------------------|-----|------------------------|-------|-------|
| >TP53-V274# RVCACPGR   | 66  | >TP53-V274# RACACPGR   | 107   | 41    |
| >TP53-V274# RVCACPGRDI | 255 | >TP53-V274# RACACPGRDI | 535   | 280   |
| >TP53-V274# RVCACPGRDI | 109 | >TP53-V274# RACACPGRDI | 233   | 124   |
| >TP53-V274# LLGRNSFEVR | 137 | >TP53-V274# LLGRNSFEVR | 1482  | 1345  |
| >TP53-V274# LLGRNSFEVR | 62  | >TP53-V274# LLGRNSFEVR | 511   | 449   |
| >TP53-V274# LLGRNSFEVR | 214 | >TP53-V274# LLGRNSFEVR | 1856  | 1642  |
| >TP53-V274# LLGRNSFEVR | 3   | >TP53-V274# LLGRNSFEVR | 44    | 41    |
| >TP53-V274# LLGRNSFEVR | 7   | >TP53-V274# LLGRNSFEVR | 149   | 142   |
| >TP53-V274# LLGRNSFEVR | 9   | >TP53-V274# LLGRNSFEVR | 259   | 250   |
| >TP53-V274# LLGRNSFEVR | 6   | >TP53-V274# LLGRNSFEVR | 557   | 551   |
| >TP53-V274# LLGRNSFEVR | 2   | >TP53-V274# LLGRNSFEVR | 6     | 4     |
| >TP53-V274# EVRVCACPGF | 673 | >TP53-V274# EVRACACPGF | 487   | 186   |
| >TP53-V274# EVRVCACPGF | 329 | >TP53-V274# EVRACACPGF | 312   | 17    |
| >TP53-V274# EVRVCACPGF | 70  | >TP53-V274# EVRACACPGF | 43    | 27    |
| >TP53-V274# EVRVCACPGF | 744 | >TP53-V274# EVRACACPGF | 297   | 447   |
| >TP53-V274# FEVRVCAC   | 822 | >TP53-V274# FEVRACAC   | 439   | 383   |
| >TP53-V274# FEVRVCACPC | 370 | >TP53-V274# FEVRACACPC | 835   | 465   |
| >TP53-V274# NSFVVRVCA  | 21  | >TP53-V274# NSFVVRACA  | 21    | 0     |
| >TP53-V274[ RVCACPGR   | 367 | >TP53-V274[ RDCACPGR   | 24270 | 23903 |
| >TP53-V274[ RVCACPGRDI | 435 | >TP53-V274[ RDCACPGRDI | 24899 | 24464 |
| >TP53-V274[ RVCACPGR   | 40  | >TP53-V274[ RDCACPGR   | 4215  | 4175  |
| >TP53-V274[ RVCACPGRDI | 37  | >TP53-V274[ RDCACPGRDI | 1032  | 995   |
| >TP53-V274[ RVCACPGRDI | 33  | >TP53-V274[ RDCACPGRDI | 3545  | 3512  |
| >TP53-V274[ RVCACPGR   | 481 | >TP53-V274[ RDCACPGR   | 17643 | 17162 |
| >TP53-V274[ RVCACPGRDI | 297 | >TP53-V274[ RDCACPGRDI | 8189  | 7892  |
| >TP53-V274[ RVCACPGR   | 66  | >TP53-V274[ RDCACPGR   | 208   | 142   |
| >TP53-V274[ RVCACPGRDI | 255 | >TP53-V274[ RDCACPGRDI | 1329  | 1074  |
| >TP53-V274[ RVCACPGRDI | 109 | >TP53-V274[ RDCACPGRDI | 498   | 389   |
| >TP53-V274[ LLGRNSFEVR | 137 | >TP53-V274[ LLGRNSFEVR | 23667 | 23530 |
| >TP53-V274[ LLGRNSFEVR | 62  | >TP53-V274[ LLGRNSFEVR | 14786 | 14724 |
| >TP53-V274[ LLGRNSFEVR | 214 | >TP53-V274[ LLGRNSFEVR | 25428 | 25214 |
| >TP53-V274[ LLGRNSFEVR | 3   | >TP53-V274[ LLGRNSFEVR | 10070 | 10067 |
| >TP53-V274[ LLGRNSFEVR | 7   | >TP53-V274[ LLGRNSFEVR | 14628 | 14621 |
| >TP53-V274[ LLGRNSFEVR | 9   | >TP53-V274[ LLGRNSFEVR | 19546 | 19537 |
| >TP53-V274[ LLGRNSFEVR | 6   | >TP53-V274[ LLGRNSFEVR | 23938 | 23932 |
| >TP53-V274[ LLGRNSFEVR | 2   | >TP53-V274[ LLGRNSFEVR | 6947  | 6945  |
| >TP53-V274[ EVRVCACPGF | 673 | >TP53-V274[ EVRDCACPGF | 482   | 191   |
| >TP53-V274[ EVRVCACPGF | 329 | >TP53-V274[ EVRDCACPGF | 188   | 141   |
| >TP53-V274[ EVRVCACPGF | 70  | >TP53-V274[ EVRDCACPGF | 64    | 6     |
| >TP53-V274[ EVRVCACPGF | 744 | >TP53-V274[ EVRDCACPGF | 294   | 450   |
| >TP53-V274[ FEVRVCACPC | 370 | >TP53-V274[ FEVRDCACPC | 1398  | 1028  |
| >TP53-V274[ NSFVVRVCA  | 21  | >TP53-V274[ NSFVVRDCA  | 36    | 15    |
| >TP53-V274F RVCACPGR   | 367 | >TP53-V274F RFCACPGR   | 11701 | 11334 |

|                        |       |                        |       |       |
|------------------------|-------|------------------------|-------|-------|
| >TP53-V274F RVCACPGRDI | 435   | >TP53-V274F RFCACPGRDF | 14147 | 13712 |
| >TP53-V274F RVCACPGR   | 40    | >TP53-V274F RFCACPGR   | 25    | 15    |
| >TP53-V274F RVCACPGRDI | 37    | >TP53-V274F RFCACPGRDF | 20    | 17    |
| >TP53-V274F RVCACPGRDI | 33    | >TP53-V274F RFCACPGRDF | 20    | 13    |
| >TP53-V274F RVCACPGR   | 481   | >TP53-V274F RFCACPGR   | 5571  | 5090  |
| >TP53-V274F RVCACPGRDI | 297   | >TP53-V274F RFCACPGRDF | 83    | 214   |
| >TP53-V274F RVCACPGR   | 66    | >TP53-V274F RFCACPGR   | 22    | 44    |
| >TP53-V274F RVCACPGRDI | 255   | >TP53-V274F RFCACPGRDF | 49    | 206   |
| >TP53-V274F RVCACPGRDI | 109   | >TP53-V274F RFCACPGRDF | 29    | 80    |
| >TP53-V274F LLGRNSFEVR | 137   | >TP53-V274F LLGRNSFEVR | 15709 | 15572 |
| >TP53-V274F LLGRNSFEVR | 62    | >TP53-V274F LLGRNSFEVR | 4272  | 4210  |
| >TP53-V274F LLGRNSFEVR | 214   | >TP53-V274F LLGRNSFEVR | 19399 | 19185 |
| >TP53-V274F LLGRNSFEVR | 3     | >TP53-V274F LLGRNSFEVR | 1536  | 1533  |
| >TP53-V274F LLGRNSFEVR | 7     | >TP53-V274F LLGRNSFEVR | 5518  | 5511  |
| >TP53-V274F LLGRNSFEVR | 9     | >TP53-V274F LLGRNSFEVR | 13457 | 13448 |
| >TP53-V274F LLGRNSFEVR | 6     | >TP53-V274F LLGRNSFEVR | 13145 | 13139 |
| >TP53-V274F LLGRNSFEVR | 2     | >TP53-V274F LLGRNSFEVR | 805   | 803   |
| >TP53-V274F LLGRNSFEVR | 8506  | >TP53-V274F LLGRNSFEVR | 225   | 8281  |
| >TP53-V274F LLGRNSFEVR | 8116  | >TP53-V274F LLGRNSFEVR | 317   | 7799  |
| >TP53-V274F VRVCACPGR  | 2911  | >TP53-V274F VRFCACPGR  | 437   | 2474  |
| >TP53-V274F EVRVCACPGF | 673   | >TP53-V274F EVRFCACPGF | 150   | 523   |
| >TP53-V274F EVRVCACPGF | 329   | >TP53-V274F EVRFCACPGF | 145   | 184   |
| >TP53-V274F EVRVCACPGF | 70    | >TP53-V274F EVRFCACPGF | 22    | 48    |
| >TP53-V274F EVRVCACPGF | 744   | >TP53-V274F EVRFCACPGF | 432   | 312   |
| >TP53-V274F FEVRVCACPC | 370   | >TP53-V274F FEVRFCACPG | 331   | 39    |
| >TP53-V274F FEVRVCAC   | 1213  | >TP53-V274F FEVRFCAC   | 432   | 781   |
| >TP53-V274F NSFVCA     | 21    | >TP53-V274F NSFVCA     | 14    | 7     |
| >TP53-V274F RNSFEVRV   | 8931  | >TP53-V274F RNSFEVRF   | 380   | 8551  |
| >TP53-V274F GRNSFEVRV  | 1849  | >TP53-V274F GRNSFEVRF  | 102   | 1747  |
| >TP53-V274F GRNSFEVRV  | 631   | >TP53-V274F GRNSFEVRF  | 192   | 439   |
| >TP53-V274F GRNSFEVRV  | 1117  | >TP53-V274F GRNSFEVRF  | 360   | 757   |
| >TP53-V274F LGRNSFEVRV | 7686  | >TP53-V274F LGRNSFEVRF | 350   | 7336  |
| >TP53-V274F LGRNSFEVRV | 2611  | >TP53-V274F LGRNSFEVRF | 51    | 2560  |
| >TP53-V274F LGRNSFEVRV | 15669 | >TP53-V274F LGRNSFEVRF | 301   | 15368 |
| >TP53-V274F LGRNSFEVRV | 9083  | >TP53-V274F LGRNSFEVRF | 495   | 8588  |
| >TP53-V274C RVCACPGR   | 367   | >TP53-V274C RGCACPGR   | 13553 | 13186 |
| >TP53-V274C RVCACPGRDI | 435   | >TP53-V274C RGCACPGRDI | 15109 | 14674 |
| >TP53-V274C RVCACPGR   | 40    | >TP53-V274C RGCACPGR   | 342   | 302   |
| >TP53-V274C RVCACPGRDI | 37    | >TP53-V274C RGCACPGRDI | 443   | 406   |
| >TP53-V274C RVCACPGRDI | 33    | >TP53-V274C RGCACPGRDI | 253   | 220   |
| >TP53-V274C RVCACPGR   | 481   | >TP53-V274C RGCACPGR   | 11424 | 10943 |
| >TP53-V274C RVCACPGRDI | 297   | >TP53-V274C RGCACPGRDI | 6751  | 6454  |
| >TP53-V274C RVCACPGR   | 66    | >TP53-V274C RGCACPGR   | 63    | 3     |

|                        |      |                         |       |       |
|------------------------|------|-------------------------|-------|-------|
| >TP53-V274C RVCACPGRDI | 255  | >TP53-V274C RGCACPGRDI  | 299   | 44    |
| >TP53-V274C RVCACPGRDI | 109  | >TP53-V274C RGCACPGRDI  | 144   | 35    |
| >TP53-V274C LLGRNSFEVR | 137  | >TP53-V274C LLGRNSFEVR  | 21104 | 20967 |
| >TP53-V274C LLGRNSFEVR | 62   | >TP53-V274C LLGRNSFEVR  | 7658  | 7596  |
| >TP53-V274C LLGRNSFEVR | 214  | >TP53-V274C LLGRNSFEVR  | 21166 | 20952 |
| >TP53-V274C LLGRNSFEVR | 3    | >TP53-V274C LLGRNSFEVR  | 3498  | 3495  |
| >TP53-V274C LLGRNSFEVR | 7    | >TP53-V274C LLGRNSFEVR  | 7088  | 7081  |
| >TP53-V274C LLGRNSFEVR | 9    | >TP53-V274C LLGRNSFEVR  | 13706 | 13697 |
| >TP53-V274C LLGRNSFEVR | 6    | >TP53-V274C LLGRNSFEVR  | 19801 | 19795 |
| >TP53-V274C LLGRNSFEVR | 2    | >TP53-V274C LLGRNSFEVR  | 2755  | 2753  |
| >TP53-V274C EVRVCACPGF | 673  | >TP53-V274C EVRGCACPGI  | 307   | 366   |
| >TP53-V274C EVRVCACPGF | 329  | >TP53-V274C EVRGCACPGI  | 261   | 68    |
| >TP53-V274C EVRVCACPGF | 70   | >TP53-V274C EVRGCACPGI  | 54    | 16    |
| >TP53-V274C EVRVCACPGF | 744  | >TP53-V274C EVRGCACPGI  | 366   | 378   |
| >TP53-V274C FEVRVCAC   | 822  | >TP53-V274C FEVRGCAC    | 375   | 447   |
| >TP53-V274C FEVRVCACPC | 370  | >TP53-V274C FEVRGCACPC  | 1157  | 787   |
| >TP53-V274C NSFVVRVCA  | 21   | >TP53-V274C NSFVVRGCA   | 50    | 29    |
| >TP53-V274I RVCACPGR   | 367  | >TP53-V274I RICACPGR    | 861   | 494   |
| >TP53-V274I RVCACPGRDI | 435  | >TP53-V274I RICACPGRDR  | 1124  | 689   |
| >TP53-V274I RVCACPGR   | 40   | >TP53-V274I RICACPGR    | 61    | 21    |
| >TP53-V274I RVCACPGRDI | 37   | >TP53-V274I RICACPGRDR  | 31    | 6     |
| >TP53-V274I RVCACPGRDI | 33   | >TP53-V274I RICACPGRDR  | 45    | 12    |
| >TP53-V274I RVCACPGR   | 481  | >TP53-V274I RICACPGR    | 1200  | 719   |
| >TP53-V274I RVCACPGRDI | 297  | >TP53-V274I RICACPGRDR  | 223   | 74    |
| >TP53-V274I RVCACPGR   | 66   | >TP53-V274I RICACPGR    | 34    | 32    |
| >TP53-V274I RVCACPGRDI | 255  | >TP53-V274I RICACPGRDR  | 108   | 147   |
| >TP53-V274I RVCACPGRDI | 109  | >TP53-V274I RICACPGRDR  | 53    | 56    |
| >TP53-V274I LLGRNSFEVR | 137  | >TP53-V274I LLGRNSFEVR  | 619   | 482   |
| >TP53-V274I LLGRNSFEVR | 62   | >TP53-V274I LLGRNSFEVR  | 278   | 216   |
| >TP53-V274I LLGRNSFEVR | 214  | >TP53-V274I LLGRNSFEVR  | 1318  | 1104  |
| >TP53-V274I LLGRNSFEVR | 3    | >TP53-V274I LLGRNSFEVR  | 14    | 11    |
| >TP53-V274I LLGRNSFEVR | 7    | >TP53-V274I LLGRNSFEVR  | 32    | 25    |
| >TP53-V274I LLGRNSFEVR | 9    | >TP53-V274I LLGRNSFEVR  | 116   | 107   |
| >TP53-V274I LLGRNSFEVR | 6    | >TP53-V274I LLGRNSFEVR  | 125   | 119   |
| >TP53-V274I LLGRNSFEVR | 2    | >TP53-V274I LLGRNSFEVR  | 6     | 4     |
| >TP53-V274I EVRVCACPGF | 673  | >TP53-V274I EVRICACPGR  | 352   | 321   |
| >TP53-V274I EVRVCACPGF | 329  | >TP53-V274I EVRICACPGR  | 163   | 166   |
| >TP53-V274I EVRVCACPGF | 70   | >TP53-V274I EVRICACPGR  | 44    | 26    |
| >TP53-V274I EVRVCACPGF | 744  | >TP53-V274I EVRICACPGR  | 425   | 319   |
| >TP53-V274I FEVRVCACPC | 370  | >TP53-V274I FEVRICACPGI | 330   | 40    |
| >TP53-V274I NSFVVRVCA  | 21   | >TP53-V274I NSFVVRICA   | 40    | 19    |
| >TP53-V274I GRNSFEVRV  | 631  | >TP53-V274I GRNSFEVRI   | 279   | 352   |
| >TP53-V274L RVCACPGR   | 1309 | >TP53-V274L RLCACPGR    | 427   | 882   |

|                         |      |                         |      |      |
|-------------------------|------|-------------------------|------|------|
| >TP53-V274L RVCACPGR    | 367  | >TP53-V274L RLCACPGR    | 2679 | 2312 |
| >TP53-V274L RVCACPGRDI  | 435  | >TP53-V274L RLCACPGRDF  | 3312 | 2877 |
| >TP53-V274L RVCACPGR    | 40   | >TP53-V274L RLCACPGR    | 62   | 22   |
| >TP53-V274L RVCACPGRDI  | 37   | >TP53-V274L RLCACPGRDF  | 47   | 10   |
| >TP53-V274L RVCACPGRDI  | 33   | >TP53-V274L RLCACPGRDF  | 44   | 11   |
| >TP53-V274L RVCACPGR    | 481  | >TP53-V274L RLCACPGR    | 3800 | 3319 |
| >TP53-V274L RVCACPGRDI  | 297  | >TP53-V274L RLCACPGRDF  | 84   | 213  |
| >TP53-V274L RVCACPGR    | 66   | >TP53-V274L RLCACPGR    | 48   | 18   |
| >TP53-V274L RVCACPGRDI  | 255  | >TP53-V274L RLCACPGRDF  | 157  | 98   |
| >TP53-V274L RVCACPGRDI  | 109  | >TP53-V274L RLCACPGRDF  | 72   | 37   |
| >TP53-V274L LLGRNSFEVR  | 137  | >TP53-V274L LLGRNSFEVR  | 486  | 349  |
| >TP53-V274L LLGRNSFEVR  | 62   | >TP53-V274L LLGRNSFEVR  | 104  | 42   |
| >TP53-V274L LLGRNSFEVR  | 214  | >TP53-V274L LLGRNSFEVR  | 2224 | 2010 |
| >TP53-V274L LLGRNSFEVR  | 3    | >TP53-V274L LLGRNSFEVR  | 15   | 12   |
| >TP53-V274L LLGRNSFEVR  | 7    | >TP53-V274L LLGRNSFEVR  | 33   | 26   |
| >TP53-V274L LLGRNSFEVR  | 9    | >TP53-V274L LLGRNSFEVR  | 82   | 73   |
| >TP53-V274L LLGRNSFEVR  | 6    | >TP53-V274L LLGRNSFEVR  | 63   | 57   |
| >TP53-V274L LLGRNSFEVR  | 2    | >TP53-V274L LLGRNSFEVR  | 3    | 1    |
| >TP53-V274L EVRVCACPGF  | 673  | >TP53-V274L EVRLCACPGR  | 354  | 319  |
| >TP53-V274L EVRVCACPGF  | 329  | >TP53-V274L EVRLCACPGR  | 176  | 153  |
| >TP53-V274L EVRVCACPGF  | 70   | >TP53-V274L EVRLCACPGR  | 91   | 21   |
| >TP53-V274L EVRVCACPGF  | 744  | >TP53-V274L EVRLCACPGR  | 416  | 328  |
| >TP53-V274L FEVRVCACPG  | 370  | >TP53-V274L FEVRLCACPG  | 865  | 495  |
| >TP53-V274L NSFVRLCA    | 21   | >TP53-V274L NSFVRLCA    | 132  | 111  |
| >TP53-V274L GRNSFEVRV   | 631  | >TP53-V274L GRNSFEVRL   | 149  | 482  |
| >TP53-V274L GRNSFEVRV   | 1254 | >TP53-V274L GRNSFEVRL   | 232  | 1022 |
| >TP53-V274L GRNSFEVRV   | 1117 | >TP53-V274L GRNSFEVRL   | 107  | 1010 |
| >TP53-V31I-v VLSPLPSQA  | 52   | >TP53-V31I-r ILSPLPSQA  | 26   | 26   |
| >TP53-V31I-v VLSPLPSQAM | 255  | >TP53-V31I-r ILSPLPSQAM | 93   | 162  |
| >TP53-V31I-v VLSPLPSQA  | 8    | >TP53-V31I-r ILSPLPSQA  | 6    | 2    |
| >TP53-V31I-v VLSPLPSQAM | 909  | >TP53-V31I-r ILSPLPSQAM | 325  | 584  |
| >TP53-V31I-v VLSPLPSQA  | 26   | >TP53-V31I-r ILSPLPSQA  | 32   | 6    |
| >TP53-V31I-v VLSPLPSQAM | 76   | >TP53-V31I-r ILSPLPSQAM | 98   | 22   |
| >TP53-V31I-v VLSPLPSQA  | 64   | >TP53-V31I-r ILSPLPSQA  | 130  | 66   |
| >TP53-V31I-v VLSPLPSQA  | 125  | >TP53-V31I-r ILSPLPSQA  | 143  | 18   |
| >TP53-V31I-v VLSPLPSQAM | 241  | >TP53-V31I-r ILSPLPSQAM | 290  | 49   |
| >TP53-V31I-v VLSPLPSQ   | 28   | >TP53-V31I-r ILSPLPSQ   | 39   | 11   |
| >TP53-V31I-v VLSPLPSQA  | 6    | >TP53-V31I-r ILSPLPSQA  | 7    | 1    |
| >TP53-V31I-v VLSPLPSQAM | 43   | >TP53-V31I-r ILSPLPSQAM | 59   | 16   |
| >TP53-V31I-v VLSPLPSQAM | 204  | >TP53-V31I-r ILSPLPSQAM | 158  | 46   |
| >TP53-V31I-v VLSPLPSQAM | 243  | >TP53-V31I-r ILSPLPSQAM | 99   | 144  |
| >TP53-V31I-v VLSPLPSQAM | 269  | >TP53-V31I-r ILSPLPSQAM | 549  | 280  |
| >TP53-V31I-v NVLSPLPSQA | 523  | >TP53-V31I-r NILSPLPSQA | 270  | 253  |

|                         |     |                          |      |      |
|-------------------------|-----|--------------------------|------|------|
| >TP53-V31I-v NVLSPLPSQ  | 498 | >TP53-V31I-r NILSPLPSQ   | 1827 | 1329 |
| >TP53-V31I-v NVLSPLPSQA | 45  | >TP53-V31I-r NILSPLPSQA  | 156  | 111  |
| >TP53-V31I-v NVLSPLPSQA | 439 | >TP53-V31I-r NILSPLPSQA  | 1270 | 831  |
| >TP53-V31I-v NVLSPLPSQ  | 284 | >TP53-V31I-r NILSPLPSQ   | 628  | 344  |
| >TP53-V31I-v NVLSPLPSQA | 43  | >TP53-V31I-r NILSPLPSQA  | 77   | 34   |
| >TP53-V31I-v NVLSPLPSQA | 19  | >TP53-V31I-r NILSPLPSQA  | 29   | 10   |
| >TP53-V31I-v NVLSPLPSQA | 193 | >TP53-V31I-r NILSPLPSQA  | 728  | 535  |
| >TP53-V31I-v DLWKLLPEN  | 27  | >TP53-V31I-r DLWKLLPEN   | 313  | 286  |
| >TP53-V31I-v DLWKLLPEN  | 283 | >TP53-V31I-r DLWKLLPEN   | 1968 | 1685 |
| >TP53-V31I-v DLWKLLPEN  | 14  | >TP53-V31I-r DLWKLLPEN   | 163  | 149  |
| >TP53-V31I-v DLWKLLPEN  | 23  | >TP53-V31I-r DLWKLLPEN   | 513  | 490  |
| >TP53-V31I-v DLWKLLPEN  | 19  | >TP53-V31I-r DLWKLLPEN   | 843  | 824  |
| >TP53-V31I-v DLWKLLPEN  | 73  | >TP53-V31I-r DLWKLLPEN   | 343  | 270  |
| >TP53-V31I-v PENNVLSPL  | 445 | >TP53-V31I-r PENNILSPL   | 461  | 16   |
| >TP53-V31I-v PENNVLSPL  | 277 | >TP53-V31I-r PENNILSPL   | 261  | 16   |
| >TP53-V31I-v PENNVLSPL  | 333 | >TP53-V31I-r PENNILSPL   | 215  | 118  |
| >TP53-V31I-v PENNVLSPL  | 214 | >TP53-V31I-r PENNILSPL   | 200  | 14   |
| >TP53-V31I-v LPENNVLSPL | 455 | >TP53-V31I-r LPENNILSPL  | 616  | 161  |
| >TP53-V31I-v LPENNVLSPL | 59  | >TP53-V31I-r LPENNILSPL  | 65   | 6    |
| >TP53-V31I-v LPENNVLSPL | 327 | >TP53-V31I-r LPENNILSPL  | 446  | 119  |
| >TP53-V31I-v LPENNVLSPL | 526 | >TP53-V31I-r LPENNILSPL  | 480  | 46   |
| >TP53-V31I-v LPENNVLSPL | 162 | >TP53-V31I-r LPENNILSPL  | 155  | 7    |
| >TP53-V31I-v LLPENNVL   | 483 | >TP53-V31I-r LLPENNIL    | 463  | 20   |
| >TP53-V31I-v LLPENNVLSP | 41  | >TP53-V31I-r LLPENNILSPL | 36   | 5    |
| >TP53-V31I-v LLPENNVL   | 36  | >TP53-V31I-r LLPENNIL    | 38   | 2    |
| >TP53-V31I-v LLPENNVLSP | 12  | >TP53-V31I-r LLPENNILSPL | 12   | 0    |
| >TP53-V31I-v LLPENNVL   | 168 | >TP53-V31I-r LLPENNIL    | 153  | 15   |
| >TP53-V31I-v LLPENNVLSP | 12  | >TP53-V31I-r LLPENNILSPL | 12   | 0    |
| >TP53-V31I-v LLPENNVLSP | 33  | >TP53-V31I-r LLPENNILSPL | 34   | 1    |
| >TP53-V31I-v LLPENNVL   | 25  | >TP53-V31I-r LLPENNIL    | 56   | 31   |
| >TP53-V31I-v LLPENNVLSP | 4   | >TP53-V31I-r LLPENNILSPL | 5    | 1    |
| >TP53-V31I-v LLPENNVL   | 32  | >TP53-V31I-r LLPENNIL    | 40   | 8    |
| >TP53-V31I-v LLPENNVLSP | 8   | >TP53-V31I-r LLPENNILSPL | 8    | 0    |
| >TP53-V31I-v LLPENNVL   | 142 | >TP53-V31I-r LLPENNIL    | 174  | 32   |
| >TP53-V31I-v LLPENNVLSP | 27  | >TP53-V31I-r LLPENNILSPL | 31   | 4    |
| >TP53-V31I-v LLPENNVL   | 200 | >TP53-V31I-r LLPENNIL    | 376  | 176  |
| >TP53-V31I-v LLPENNVLSP | 45  | >TP53-V31I-r LLPENNILSPL | 34   | 11   |
| >TP53-V31I-v LLPENNVL   | 6   | >TP53-V31I-r LLPENNIL    | 8    | 2    |
| >TP53-V31I-v LLPENNVL   | 243 | >TP53-V31I-r LLPENNILS   | 381  | 138  |
| >TP53-V31I-v LLPENNVLSP | 3   | >TP53-V31I-r LLPENNILSPL | 3    | 0    |
| >TP53-V31I-v LLPENNVLSP | 63  | >TP53-V31I-r LLPENNILSPL | 54   | 9    |
| >TP53-V31I-v KLLPENNV   | 23  | >TP53-V31I-r KLLPENNI    | 71   | 48   |
| >TP53-V31I-v KLLPENNV   | 109 | >TP53-V31I-r KLLPENNIL   | 117  | 8    |

|                         |       |                         |       |       |
|-------------------------|-------|-------------------------|-------|-------|
| >TP53-V31I-v KLLPENNV   | 25    | >TP53-V31I-r KLLPENNI   | 94    | 69    |
| >TP53-V31I-v KLLPENNVL  | 42    | >TP53-V31I-r KLLPENNIL  | 36    | 6     |
| >TP53-V31I-v KLLPENNV   | 53    | >TP53-V31I-r KLLPENNI   | 360   | 307   |
| >TP53-V31I-v KLLPENNV   | 45    | >TP53-V31I-r KLLPENNI   | 184   | 139   |
| >TP53-V31I-v KLLPENNVL  | 244   | >TP53-V31I-r KLLPENNIL  | 267   | 23    |
| >TP53-V31I-v KLLPENNV   | 4     | >TP53-V31I-r KLLPENNI   | 18    | 14    |
| >TP53-V31I-v KLLPENNVL  | 35    | >TP53-V31I-r KLLPENNIL  | 122   | 87    |
| >TP53-V31I-v KLLPENNV   | 5     | >TP53-V31I-r KLLPENNI   | 15    | 10    |
| >TP53-V31I-v KLLPENNVL  | 11    | >TP53-V31I-r KLLPENNIL  | 13    | 2     |
| >TP53-V31I-v KLLPENNV   | 6     | >TP53-V31I-r KLLPENNI   | 28    | 22    |
| >TP53-V31I-v KLLPENNVL  | 52    | >TP53-V31I-r KLLPENNIL  | 62    | 10    |
| >TP53-V31I-v KLLPENNV   | 7     | >TP53-V31I-r KLLPENNI   | 110   | 103   |
| >TP53-V31I-v KLLPENNVL  | 67    | >TP53-V31I-r KLLPENNIL  | 157   | 90    |
| >TP53-V31I-v KLLPENNV   | 4     | >TP53-V31I-r KLLPENNI   | 40    | 36    |
| >TP53-V31I-v KLLPENNVL  | 21    | >TP53-V31I-r KLLPENNIL  | 26    | 5     |
| >TP53-V31I-v KLLPENNV   | 2166  | >TP53-V31I-r KLLPENNI   | 171   | 1995  |
| >TP53-V31I-v KLLPENNVL  | 275   | >TP53-V31I-r KLLPENNIL  | 427   | 152   |
| >TP53-V31I-v KLLPENNVL  | 316   | >TP53-V31I-r KLLPENNIL  | 381   | 65    |
| >TP53-V31I-v WKLLPENNV  | 202   | >TP53-V31I-r WKLLPENNI  | 151   | 51    |
| >TP53-V31I-v WKLLPENNV  | 54    | >TP53-V31I-r WKLLPENNIL | 71    | 17    |
| >TP53-V31I-v WKLLPENNV  | 90    | >TP53-V31I-r WKLLPENNIL | 177   | 87    |
| >TP53-V31I-v LWKLLPENNV | 152   | >TP53-V31I-r LWKLLPENNI | 260   | 108   |
| >TP53-V31I-v LWKLLPENNV | 232   | >TP53-V31I-r LWKLLPENNI | 221   | 11    |
| >TP53-V73E- VAPAPAPT    | 4724  | >TP53-V73E- EAPAPAPT    | 57    | 4667  |
| >TP53-V73E- VAPAPAPTF   | 735   | >TP53-V73E- EAPAPAPTF   | 16    | 719   |
| >TP53-V73E- VAPAPAPTF   | 10204 | >TP53-V73E- EAPAPAPTF   | 303   | 9901  |
| >TP53-V73E- VAPAPAPT    | 125   | >TP53-V73E- EAPAPAPT    | 3142  | 3017  |
| >TP53-V73E- VAPAPAPTF   | 412   | >TP53-V73E- EAPAPAPTF   | 5759  | 5347  |
| >TP53-V73E- VAPAPAPTF   | 498   | >TP53-V73E- EAPAPAPTF   | 6100  | 5602  |
| >TP53-V73E- RVAPAPAA    | 259   | >TP53-V73E- REAPAPAA    | 11504 | 11245 |
| >TP53-V73E- RVAPAPAA    | 79    | >TP53-V73E- REAPAPAA    | 2953  | 2874  |
| >TP53-V73E- RVAPAPAA    | 77    | >TP53-V73E- REAPAPAA    | 12410 | 12333 |
| >TP53-V73E- RVAPAPAA    | 432   | >TP53-V73E- REAPAPAA    | 16090 | 15658 |
| >TP53-V73E- RVAPAPAAP   | 36428 | >TP53-V73E- REAPAPAAP   | 396   | 36032 |
| >TP53-V73E- RVAPAPAA    | 25402 | >TP53-V73E- REAPAPAA    | 17    | 25385 |
| >TP53-V73E- RVAPAPAAP   | 28226 | >TP53-V73E- REAPAPAAP   | 278   | 27948 |
| >TP53-V73E- APRMPEAAP   | 38    | >TP53-V73E- APRMPEAAP   | 1226  | 1188  |
| >TP53-V73E- APRVAPAPA   | 22    | >TP53-V73E- APREAPAPA   | 16    | 6     |
| >TP53-V73E- APRVAPAPA   | 334   | >TP53-V73E- APREAPAPA   | 791   | 457   |
| >TP53-V73E- APRVAPAPA   | 61    | >TP53-V73E- APREAPAPA   | 92    | 31    |
| >TP53-V73E- APRVAPAPA   | 432   | >TP53-V73E- APREAPAPA   | 964   | 532   |
| >TP53-V73E- EAAPRVAPA   | 8     | >TP53-V73E- EAAPREAPA   | 26    | 18    |
| >TP53-V73E- EAAPRVAPAF  | 9     | >TP53-V73E- EAAPREAPAF  | 15    | 6     |

|                        |      |                        |       |       |
|------------------------|------|------------------------|-------|-------|
| >TP53-V73E- EAAPRVAPA  | 130  | >TP53-V73E- EAAPREAPA  | 2307  | 2177  |
| >TP53-V73E- EAAPRVAPAF | 96   | >TP53-V73E- EAAPREAPAF | 304   | 208   |
| >TP53-V73E- MPEAAPRV   | 23   | >TP53-V73E- MPEAAPRE   | 20845 | 20822 |
| >TP53-V73E- MPEAAPRV   | 487  | >TP53-V73E- MPEAAPRE   | 16169 | 15682 |
| >TP53-V73E- MPEAAPRVA  | 177  | >TP53-V73E- MPEAAPREA  | 370   | 193   |
| >TP53-V73E- MPEAAPRVA  | 65   | >TP53-V73E- MPEAAPREA  | 84    | 19    |
| >TP53-V73E- MPEAAPRVA  | 258  | >TP53-V73E- MPEAAPREA  | 264   | 6     |
| >TP53-V73E- MPEAAPRVA  | 76   | >TP53-V73E- MPEAAPREA  | 68    | 8     |
| >TP53-V73E- MPEAAPRV   | 496  | >TP53-V73E- MPEAAPRE   | 18259 | 17763 |
| >TP53-V73E- MPEAAPRV   | 83   | >TP53-V73E- MPEAAPRE   | 2965  | 2882  |
| >TP53-V73E- MPEAAPRVA  | 15   | >TP53-V73E- MPEAAPREA  | 34    | 19    |
| >TP53-V73E- MPEAAPRVA  | 10   | >TP53-V73E- MPEAAPREA  | 13    | 3     |
| >TP53-V73E- RMPEAAPRV  | 35   | >TP53-V73E- RMPEAAPRE  | 21028 | 20993 |
| >TP53-V73E- RMPEAAPRV  | 224  | >TP53-V73E- RMPEAAPRE  | 26334 | 26110 |
| >TP53-V73E- RMPEAAPRV  | 15   | >TP53-V73E- RMPEAAPRE  | 17204 | 17189 |
| >TP53-V73E- RMPEAAPRV  | 480  | >TP53-V73E- RMPEAAPRE  | 344   | 136   |
| >TP53-V73E- RMPEAAPRV  | 12   | >TP53-V73E- RMPEAAPRE  | 13951 | 13939 |
| >TP53-V73E- RMPEAAPRV  | 2    | >TP53-V73E- RMPEAAPRE  | 4188  | 4186  |
| >TP53-V73E- RMPEAAPRV  | 39   | >TP53-V73E- RMPEAAPRE  | 20    | 19    |
| >TP53-V73E- RMPEAAPRV  | 17   | >TP53-V73E- RMPEAAPRE  | 18226 | 18209 |
| >TP53-V73E- RMPEAAPRV  | 5    | >TP53-V73E- RMPEAAPRE  | 11269 | 11264 |
| >TP53-V73E- RMPEAAPRV  | 356  | >TP53-V73E- RMPEAAPRE  | 139   | 217   |
| >TP53-V73E- RMPEAAPRV  | 6    | >TP53-V73E- RMPEAAPRE  | 20635 | 20629 |
| >TP53-V73E- RMPEAAPRV  | 4    | >TP53-V73E- RMPEAAPRE  | 6062  | 6058  |
| >TP53-V73E- RMPEAAPRV  | 318  | >TP53-V73E- RMPEAAPRE  | 134   | 184   |
| >TP53-V73E- RMPEAAPRV  | 229  | >TP53-V73E- RMPEAAPRE  | 10252 | 10023 |
| >TP53-V73L- VAPAAPTF   | 735  | >TP53-V73L- LAPAAPTP   | 228   | 507   |
| >TP53-V73L- VAPAAPTF   | 6911 | >TP53-V73L- LAPAAPTP   | 368   | 6543  |
| >TP53-V73L- VAPAAPTF   | 125  | >TP53-V73L- LAPAAPTP   | 141   | 16    |
| >TP53-V73L- VAPAAPTF   | 412  | >TP53-V73L- LAPAAPTP   | 471   | 59    |
| >TP53-V73L- VAPAAPTF   | 498  | >TP53-V73L- LAPAAPTP   | 557   | 59    |
| >TP53-V73L- RVAPAPAA   | 4587 | >TP53-V73L- RLAPAPAA   | 132   | 4455  |
| >TP53-V73L- RVAPAPAA   | 2204 | >TP53-V73L- RLAPAPAA   | 87    | 2117  |
| >TP53-V73L- RVAPAPAA   | 3487 | >TP53-V73L- RLAPAPAA   | 215   | 3272  |
| >TP53-V73L- RVAPAPAA   | 259  | >TP53-V73L- RLAPAPAA   | 13    | 246   |
| >TP53-V73L- RVAPAPAA   | 2380 | >TP53-V73L- RLAPAPAA   | 309   | 2071  |
| >TP53-V73L- RVAPAPAA   | 79   | >TP53-V73L- RLAPAPAA   | 56    | 23    |
| >TP53-V73L- RVAPAPAA   | 2346 | >TP53-V73L- RLAPAPAA   | 24    | 2322  |
| >TP53-V73L- RVAPAPAA   | 8008 | >TP53-V73L- RLAPAPAA   | 141   | 7867  |
| >TP53-V73L- RVAPAPAA   | 9910 | >TP53-V73L- RLAPAPAA   | 186   | 9724  |
| >TP53-V73L- RVAPAPAA   | 4427 | >TP53-V73L- RLAPAPAA   | 41    | 4386  |
| >TP53-V73L- RVAPAPAA   | 9048 | >TP53-V73L- RLAPAPAA   | 161   | 8887  |
| >TP53-V73L- RVAPAPAA   | 2422 | >TP53-V73L- RLAPAPAA   | 17    | 2405  |



|                                     |       |                                     |      |       |
|-------------------------------------|-------|-------------------------------------|------|-------|
| >TP53-V73L- <sup>1</sup> RVAPAPAAPT | 12089 | >TP53-V73L- <sup>1</sup> RLAPAPAAPT | 92   | 11997 |
| >TP53-V73L- <sup>1</sup> RVAPAPAA   | 77    | >TP53-V73L- <sup>1</sup> RLAPAPAA   | 813  | 736   |
| >TP53-V73L- <sup>1</sup> RVAPAPAA   | 432   | >TP53-V73L- <sup>1</sup> RLAPAPAA   | 4904 | 4472  |
| >TP53-V73L- <sup>1</sup> APRMPEAAP  | 38    | >TP53-V73L- <sup>1</sup> APRMPEAAP  | 23   | 15    |
| >TP53-V73L- <sup>1</sup> APRVAPAPA  | 22    | >TP53-V73L- <sup>1</sup> APRLAPAPA  | 20   | 2     |
| >TP53-V73L- <sup>1</sup> APRVAPAPA/ | 334   | >TP53-V73L- <sup>1</sup> APRLAPAPAA | 343  | 9     |
| >TP53-V73L- <sup>1</sup> APRVAPAPA  | 61    | >TP53-V73L- <sup>1</sup> APRLAPAPA  | 56   | 5     |
| >TP53-V73L- <sup>1</sup> APRVAPAPA/ | 432   | >TP53-V73L- <sup>1</sup> APRLAPAPAA | 348  | 84    |
| >TP53-V73L- <sup>1</sup> EAAPRVAPA  | 8     | >TP53-V73L- <sup>1</sup> EAAPRLAPA  | 10   | 2     |
| >TP53-V73L- <sup>1</sup> EAAPRVAPAF | 9     | >TP53-V73L- <sup>1</sup> EAAPRLAPAP | 10   | 1     |
| >TP53-V73L- <sup>1</sup> EAAPRVAPA  | 130   | >TP53-V73L- <sup>1</sup> EAAPRLAPA  | 118  | 12    |
| >TP53-V73L- <sup>1</sup> EAAPRVAPAF | 96    | >TP53-V73L- <sup>1</sup> EAAPRLAPAP | 98   | 2     |
| >TP53-V73L- <sup>1</sup> MPEAAPRV   | 23    | >TP53-V73L- <sup>1</sup> MPEAAPRL   | 8    | 15    |
| >TP53-V73L- <sup>1</sup> MPEAAPRV   | 487   | >TP53-V73L- <sup>1</sup> MPEAAPRL   | 129  | 358   |
| >TP53-V73L- <sup>1</sup> MPEAAPRVA  | 177   | >TP53-V73L- <sup>1</sup> MPEAAPRLA  | 1509 | 1332  |
| >TP53-V73L- <sup>1</sup> MPEAAPRVA  | 65    | >TP53-V73L- <sup>1</sup> MPEAAPRLAI | 86   | 21    |
| >TP53-V73L- <sup>1</sup> MPEAAPRV   | 678   | >TP53-V73L- <sup>1</sup> MPEAAPRL   | 86   | 592   |
| >TP53-V73L- <sup>1</sup> MPEAAPRVA  | 258   | >TP53-V73L- <sup>1</sup> MPEAAPRLA  | 1369 | 1111  |
| >TP53-V73L- <sup>1</sup> MPEAAPRVA  | 76    | >TP53-V73L- <sup>1</sup> MPEAAPRLAI | 135  | 59    |
| >TP53-V73L- <sup>1</sup> MPEAAPRV   | 2796  | >TP53-V73L- <sup>1</sup> MPEAAPRL   | 160  | 2636  |
| >TP53-V73L- <sup>1</sup> MPEAAPRV   | 496   | >TP53-V73L- <sup>1</sup> MPEAAPRL   | 2183 | 1687  |
| >TP53-V73L- <sup>1</sup> MPEAAPRV   | 677   | >TP53-V73L- <sup>1</sup> MPEAAPRL   | 168  | 509   |
| >TP53-V73L- <sup>1</sup> MPEAAPRV   | 83    | >TP53-V73L- <sup>1</sup> MPEAAPRL   | 5935 | 5852  |
| >TP53-V73L- <sup>1</sup> MPEAAPRVA  | 15    | >TP53-V73L- <sup>1</sup> MPEAAPRLA  | 14   | 1     |
| >TP53-V73L- <sup>1</sup> MPEAAPRVA  | 10    | >TP53-V73L- <sup>1</sup> MPEAAPRLAI | 8    | 2     |
| >TP53-V73L- <sup>1</sup> RMPEAAPRV  | 35    | >TP53-V73L- <sup>1</sup> RMPEAAPRL  | 98   | 63    |
| >TP53-V73L- <sup>1</sup> RMPEAAPRV  | 224   | >TP53-V73L- <sup>1</sup> RMPEAAPRL  | 309  | 85    |
| >TP53-V73L- <sup>1</sup> RMPEAAPRV  | 15    | >TP53-V73L- <sup>1</sup> RMPEAAPRL  | 129  | 114   |
| >TP53-V73L- <sup>1</sup> RMPEAAPRV  | 480   | >TP53-V73L- <sup>1</sup> RMPEAAPRL/ | 288  | 192   |
| >TP53-V73L- <sup>1</sup> RMPEAAPRV  | 12    | >TP53-V73L- <sup>1</sup> RMPEAAPRL  | 36   | 24    |
| >TP53-V73L- <sup>1</sup> RMPEAAPRV  | 2     | >TP53-V73L- <sup>1</sup> RMPEAAPRL  | 6    | 4     |
| >TP53-V73L- <sup>1</sup> RMPEAAPRV  | 39    | >TP53-V73L- <sup>1</sup> RMPEAAPRL/ | 36   | 3     |
| >TP53-V73L- <sup>1</sup> RMPEAAPRV  | 17    | >TP53-V73L- <sup>1</sup> RMPEAAPRL  | 99   | 82    |
| >TP53-V73L- <sup>1</sup> RMPEAAPRV  | 5     | >TP53-V73L- <sup>1</sup> RMPEAAPRL  | 10   | 5     |
| >TP53-V73L- <sup>1</sup> RMPEAAPRV  | 356   | >TP53-V73L- <sup>1</sup> RMPEAAPRL/ | 244  | 112   |
| >TP53-V73L- <sup>1</sup> RMPEAAPRV  | 6     | >TP53-V73L- <sup>1</sup> RMPEAAPRL  | 31   | 25    |
| >TP53-V73L- <sup>1</sup> RMPEAAPRV  | 4     | >TP53-V73L- <sup>1</sup> RMPEAAPRL  | 9    | 5     |
| >TP53-V73L- <sup>1</sup> RMPEAAPRV  | 318   | >TP53-V73L- <sup>1</sup> RMPEAAPRL/ | 203  | 115   |
| >TP53-V73L- <sup>1</sup> RMPEAAPRV  | 9146  | >TP53-V73L- <sup>1</sup> RMPEAAPRL  | 393  | 8753  |
| >TP53-V73L- <sup>1</sup> RMPEAAPRV  | 229   | >TP53-V73L- <sup>1</sup> RMPEAAPRL  | 37   | 192   |
| >TP53-V73M VAPAPAAPT                | 4724  | >TP53-V73M MAPAPAAPT                | 36   | 4688  |
| >TP53-V73M VAPAPAAPTF               | 735   | >TP53-V73M MAPAPAAPT                | 11   | 724   |
| >TP53-V73M VAPAPAAPTF               | 6911  | >TP53-V73M MAPAPAAPT                | 108  | 6803  |

|                       |       |                      |      |       |
|-----------------------|-------|----------------------|------|-------|
| >TP53-V73M VAPAPAAPT  | 125   | >TP53-V73M MAPAPAAPT | 208  | 83    |
| >TP53-V73M VAPAPAAPTF | 412   | >TP53-V73M MAPAPAAPT | 631  | 219   |
| >TP53-V73M VAPAPAAPTF | 498   | >TP53-V73M MAPAPAAPT | 738  | 240   |
| >TP53-V73M RVAPAPAA   | 4587  | >TP53-V73M RMAPAPAA  | 109  | 4478  |
| >TP53-V73M RVAPAPAA   | 2204  | >TP53-V73M RMAPAPAA  | 115  | 2089  |
| >TP53-V73M RVAPAPAAPT | 3487  | >TP53-V73M RMAPAPAA  | 268  | 3219  |
| >TP53-V73M RVAPAPAA   | 259   | >TP53-V73M RMAPAPAA  | 13   | 246   |
| >TP53-V73M RVAPAPAAPT | 2380  | >TP53-V73M RMAPAPAA  | 325  | 2055  |
| >TP53-V73M RVAPAPAA   | 79    | >TP53-V73M RMAPAPAA  | 39   | 40    |
| >TP53-V73M RVAPAPAA   | 2346  | >TP53-V73M RMAPAPAA  | 16   | 2330  |
| >TP53-V73M RVAPAPAAPT | 8008  | >TP53-V73M RMAPAPAA  | 76   | 7932  |
| >TP53-V73M RVAPAPAA   | 9910  | >TP53-V73M RMAPAPAA  | 117  | 9793  |
| >TP53-V73M RVAPAPAA   | 4427  | >TP53-V73M RMAPAPAA  | 37   | 4390  |
| >TP53-V73M RVAPAPAA   | 9048  | >TP53-V73M RMAPAPAA  | 115  | 8933  |
| >TP53-V73M RVAPAPAA   | 2422  | >TP53-V73M RMAPAPAA  | 25   | 2397  |
| >TP53-V73M RVAPAPAAPT | 12089 | >TP53-V73M RMAPAPAA  | 199  | 11890 |
| >TP53-V73M RVAPAPAA   | 77    | >TP53-V73M RMAPAPAA  | 406  | 329   |
| >TP53-V73M RVAPAPAA   | 432   | >TP53-V73M RMAPAPAA  | 4358 | 3926  |
| >TP53-V73M RVAPAPAA   | 3031  | >TP53-V73M RMAPAPAA  | 283  | 2748  |
| >TP53-V73M RVAPAPAA   | 8482  | >TP53-V73M RMAPAPAA  | 354  | 8128  |
| >TP53-V73M APRMPEAAP  | 38    | >TP53-V73M APRMPEAAP | 18   | 20    |
| >TP53-V73M APRVAPAPA  | 22    | >TP53-V73M APRMAPAPA | 15   | 7     |
| >TP53-V73M APRVAPAPA/ | 334   | >TP53-V73M APRMAPAPA | 238  | 96    |
| >TP53-V73M APRVAPAPA/ | 1042  | >TP53-V73M APRMAPAPA | 300  | 742   |
| >TP53-V73M APRVAPAPA  | 61    | >TP53-V73M APRMAPAPA | 157  | 96    |
| >TP53-V73M APRVAPAPA/ | 432   | >TP53-V73M APRMAPAPA | 392  | 40    |
| >TP53-V73M EAAPRVAPA  | 8     | >TP53-V73M EAAPRMAPA | 8    | 0     |
| >TP53-V73M EAAPRVAPAF | 9     | >TP53-V73M EAAPRMAPA | 9    | 0     |
| >TP53-V73M EAAPRVAPA  | 130   | >TP53-V73M EAAPRMAPA | 59   | 71    |
| >TP53-V73M EAAPRVAPAF | 96    | >TP53-V73M EAAPRMAPA | 69   | 27    |
| >TP53-V73M MPEAAPRV   | 23    | >TP53-V73M MPEAAPRM  | 6    | 17    |
| >TP53-V73M MPEAAPRV   | 487   | >TP53-V73M MPEAAPRM  | 106  | 381   |
| >TP53-V73M MPEAAPRVA  | 177   | >TP53-V73M MPEAAPRM/ | 649  | 472   |
| >TP53-V73M MPEAAPRVA  | 65    | >TP53-V73M MPEAAPRM/ | 67   | 2     |
| >TP53-V73M MPEAAPRV   | 678   | >TP53-V73M MPEAAPRM  | 14   | 664   |
| >TP53-V73M MPEAAPRVA  | 258   | >TP53-V73M MPEAAPRM/ | 844  | 586   |
| >TP53-V73M MPEAAPRVA  | 76    | >TP53-V73M MPEAAPRM/ | 123  | 47    |
| >TP53-V73M MPEAAPRV   | 496   | >TP53-V73M MPEAAPRM  | 2473 | 1977  |
| >TP53-V73M MPEAAPRV   | 677   | >TP53-V73M MPEAAPRM  | 113  | 564   |
| >TP53-V73M MPEAAPRV   | 83    | >TP53-V73M MPEAAPRM  | 4634 | 4551  |
| >TP53-V73M MPEAAPRVA  | 15    | >TP53-V73M MPEAAPRM/ | 21   | 6     |
| >TP53-V73M MPEAAPRVA  | 10    | >TP53-V73M MPEAAPRM/ | 9    | 1     |
| >TP53-V73M RMPEAAPRV  | 35    | >TP53-V73M RMPEAAPRV | 645  | 610   |

|                        |      |                        |      |      |
|------------------------|------|------------------------|------|------|
| >TP53-V73M RMPEAAPRV   | 224  | >TP53-V73M RMPEAAPRV   | 4520 | 4296 |
| >TP53-V73M RMPEAAPRV   | 15   | >TP53-V73M RMPEAAPRV   | 1128 | 1113 |
| >TP53-V73M RMPEAAPRV   | 480  | >TP53-V73M RMPEAAPRV   | 444  | 36   |
| >TP53-V73M RMPEAAPRV   | 12   | >TP53-V73M RMPEAAPRV   | 175  | 163  |
| >TP53-V73M RMPEAAPRV   | 2    | >TP53-V73M RMPEAAPRV   | 31   | 29   |
| >TP53-V73M RMPEAAPRV   | 39   | >TP53-V73M RMPEAAPRV   | 20   | 19   |
| >TP53-V73M RMPEAAPRV   | 17   | >TP53-V73M RMPEAAPRV   | 713  | 696  |
| >TP53-V73M RMPEAAPRV   | 5    | >TP53-V73M RMPEAAPRV   | 72   | 67   |
| >TP53-V73M RMPEAAPRV   | 356  | >TP53-V73M RMPEAAPRV   | 169  | 187  |
| >TP53-V73M RMPEAAPRV   | 6    | >TP53-V73M RMPEAAPRV   | 163  | 157  |
| >TP53-V73M RMPEAAPRV   | 4    | >TP53-V73M RMPEAAPRV   | 72   | 68   |
| >TP53-V73M RMPEAAPRV   | 318  | >TP53-V73M RMPEAAPRV   | 265  | 53   |
| >TP53-V73M RMPEAAPRV   | 229  | >TP53-V73M RMPEAAPRV   | 63   | 166  |
| >TP53-V97A- VPSQKTYQG  | 92   | >TP53-V97A- APSQKTYQG  | 153  | 61   |
| >TP53-V97A- VPSQKTYQG  | 19   | >TP53-V97A- APSQKTYQG  | 42   | 23   |
| >TP53-V97A- VPSQKTYQG  | 254  | >TP53-V97A- APSQKTYQG  | 444  | 190  |
| >TP53-V97A- VPSQKTYQG  | 15   | >TP53-V97A- APSQKTYQG  | 10   | 5    |
| >TP53-V97A- SVPSQKTY   | 183  | >TP53-V97A- SAPSQKTY   | 4843 | 4660 |
| >TP53-V97A- SVPSQKTY   | 442  | >TP53-V97A- SAPSQKTY   | 869  | 427  |
| >TP53-V97A- SSVPSQKTY  | 122  | >TP53-V97A- SSAPSQKTY  | 568  | 446  |
| >TP53-V97A- SSVPSQKTY  | 146  | >TP53-V97A- SSAPSQKTY  | 48   | 98   |
| >TP53-V97A- SSVPSQKTY  | 227  | >TP53-V97A- SSAPSQKTY  | 186  | 41   |
| >TP53-V97A- SSVPSQKTY  | 40   | >TP53-V97A- SSAPSQKTY  | 43   | 3    |
| >TP53-V97A- SSVPSQKTY  | 2    | >TP53-V97A- SSAPSQKTY  | 3    | 1    |
| >TP53-V97A- SSVPSQKTY  | 119  | >TP53-V97A- SSAPSQKTY  | 120  | 1    |
| >TP53-V97A- SSVPSQKTY  | 195  | >TP53-V97A- SSAPSQKTY  | 101  | 94   |
| >TP53-V97A- SSVPSQKTY  | 23   | >TP53-V97A- SSAPSQKTY  | 20   | 3    |
| >TP53-V97A- SSVPSQKTY  | 188  | >TP53-V97A- SSAPSQKTY  | 106  | 82   |
| >TP53-V97A- SSVPSQKTY  | 1958 | >TP53-V97A- SSAPSQKTY  | 452  | 1506 |
| >TP53-V97A- SSSVPSQKTY | 415  | >TP53-V97A- SSSAPSQKTY | 302  | 113  |
| >TP53-V97A- SSSVPSQK   | 230  | >TP53-V97A- SSSAPSQK   | 133  | 97   |
| >TP53-V97A- SSSVPSQK   | 20   | >TP53-V97A- SSSAPSQK   | 15   | 5    |
| >TP53-V97A- SSSVPSQKTY | 514  | >TP53-V97A- SSSAPSQKTY | 262  | 252  |
| >TP53-V97A- SSSVPSQK   | 223  | >TP53-V97A- SSSAPSQK   | 112  | 111  |
| >TP53-V97A- SSSVPSQKTY | 105  | >TP53-V97A- SSSAPSQKTY | 123  | 18   |
| >TP53-V97A- SSSVPSQK   | 226  | >TP53-V97A- SSSAPSQK   | 200  | 26   |
| >TP53-V97A- SSSVPSQKTY | 317  | >TP53-V97A- SSSAPSQKTY | 161  | 156  |
| >TP53-V97A- SSSVPSQKTY | 1015 | >TP53-V97A- SSSAPSQKTY | 481  | 534  |
| >TP53-V97A- SSSVPSQKTY | 112  | >TP53-V97A- SSSAPSQKTY | 76   | 36   |
| >TP53-V97A- SSSVPSQKTY | 4    | >TP53-V97A- SSSAPSQKTY | 4    | 0    |
| >TP53-V97A- SSSVPSQKTY | 27   | >TP53-V97A- SSSAPSQKTY | 34   | 7    |
| >TP53-V97A- SSSVPSQKTY | 457  | >TP53-V97A- SSSAPSQKTY | 210  | 247  |
| >TP53-V97A- SSSVPSQK   | 286  | >TP53-V97A- SSSAPSQK   | 403  | 117  |

|                          |     |                          |      |      |
|--------------------------|-----|--------------------------|------|------|
| >TP53-V97A- LSSSVPSQKT\  | 164 | >TP53-V97A- LSSSAPSQKT\  | 273  | 109  |
| >TP53-V97A- LSSSVPSQK    | 103 | >TP53-V97A- LSSSAPSQK    | 198  | 95   |
| >TP53-V97A- LSSSVPSQK    | 23  | >TP53-V97A- LSSSAPSQK    | 45   | 22   |
| >TP53-V97A- LSSSVPSQKT\  | 450 | >TP53-V97A- LSSSAPSQKT\  | 478  | 28   |
| >TP53-V97A- LSSSVPSQK    | 945 | >TP53-V97A- LSSSAPSQK    | 201  | 744  |
| >TP53-V97A- LSSSVPSQKT\  | 50  | >TP53-V97A- LSSSAPSQKT\  | 56   | 6    |
| >TP53-V97A- LSSSVPSQK    | 34  | >TP53-V97A- LSSSAPSQK    | 79   | 45   |
| >TP53-V97A- LSSSVPSQKT\  | 149 | >TP53-V97A- LSSSAPSQKT\  | 114  | 35   |
| >TP53-V97A- LSSSVPSQKT\  | 32  | >TP53-V97A- LSSSAPSQKT\  | 21   | 11   |
| >TP53-V97A- LSSSVPSQKT\  | 6   | >TP53-V97A- LSSSAPSQKT\  | 4    | 2    |
| >TP53-V97A- LSSSVPSQKT\  | 229 | >TP53-V97A- LSSSAPSQKT\  | 132  | 97   |
| >TP53-V97A- LSSSVPSQKT\  | 204 | >TP53-V97A- LSSSAPSQKT\  | 186  | 18   |
| >TP53-V97A- LSSSVPSQKT\  | 32  | >TP53-V97A- LSSSAPSQKT\  | 60   | 28   |
| >TP53-V97A- LSSSVPSQK    | 189 | >TP53-V97A- LSSSAPSQK    | 565  | 376  |
| >TP53-V97A- LSSSVPSQKT\  | 8   | >TP53-V97A- LSSSAPSQKT\  | 11   | 3    |
| >TP53-V97A- PLSSSVPSQK   | 472 | >TP53-V97A- PLSSSAPSQK   | 544  | 72   |
| >TP53-V97A- PLSSSVPSQK   | 382 | >TP53-V97A- PLSSSAPSQK   | 627  | 245  |
| >TP53-V97A- WPLSSSVP     | 706 | >TP53-V97A- WPLSSSAP     | 196  | 510  |
| >TP53-V97A- WPLSSSVPS    | 27  | >TP53-V97A- WPLSSSAPS    | 31   | 4    |
| >TP53-V97A- WPLSSSVPS    | 159 | >TP53-V97A- WPLSSSAPS    | 255  | 96   |
| >TP53-V97A- SWPLSSSV     | 157 | >TP53-V97A- SWPLSSSA     | 186  | 29   |
| >TP53-V97A- SWPLSSSVP    | 920 | >TP53-V97A- SWPLSSSAP    | 311  | 609  |
| >TP53-V97A- SWPLSSSVPS   | 447 | >TP53-V97A- SWPLSSSAPS   | 472  | 25   |
| >TP53-V97A- APSWPLSSSV   | 286 | >TP53-V97A- APSWPLSSSA   | 2483 | 2197 |
| >TP53-V97I-\ VPSQKTYQGS' | 92  | >TP53-V97I-r IPSQKTYQGS' | 106  | 14   |
| >TP53-V97I-\ VPSQKTYQGS' | 19  | >TP53-V97I-r IPSQKTYQGS' | 16   | 3    |
| >TP53-V97I-\ VPSQKTYQGS' | 254 | >TP53-V97I-r IPSQKTYQGS' | 113  | 141  |
| >TP53-V97I-\ VPSQKTYQGS' | 15  | >TP53-V97I-r IPSQKTYQGS' | 10   | 5    |
| >TP53-V97I-\ SVPSQKTY    | 183 | >TP53-V97I-r SIPSQKTY    | 806  | 623  |
| >TP53-V97I-\ SVPSQKTY    | 442 | >TP53-V97I-r SIPSQKTY    | 545  | 103  |
| >TP53-V97I-\ PAPSWPLSSS  | 987 | >TP53-V97I-r PAPSWPLSSS  | 302  | 685  |
| >TP53-V97I-\ PAPSWPLSSS  | 961 | >TP53-V97I-r PAPSWPLSSS  | 476  | 485  |
| >TP53-V97I-\ SSVPSQKTY   | 122 | >TP53-V97I-r SSIPSQKTY   | 64   | 58   |
| >TP53-V97I-\ SSVPSQKTY   | 963 | >TP53-V97I-r SSIPSQKTY   | 402  | 561  |
| >TP53-V97I-\ SSVPSQKTY   | 146 | >TP53-V97I-r SSIPSQKTY   | 87   | 59   |
| >TP53-V97I-\ SSVPSQKTY   | 227 | >TP53-V97I-r SSIPSQKTY   | 129  | 98   |
| >TP53-V97I-\ SSVPSQKTY   | 40  | >TP53-V97I-r SSIPSQKTY   | 27   | 13   |
| >TP53-V97I-\ SSVPSQKTY   | 2   | >TP53-V97I-r SSIPSQKTY   | 3    | 1    |
| >TP53-V97I-\ SSVPSQKTY   | 119 | >TP53-V97I-r SSIPSQKTY   | 100  | 19   |
| >TP53-V97I-\ SSVPSQKTY   | 195 | >TP53-V97I-r SSIPSQKTY   | 91   | 104  |
| >TP53-V97I-\ SSVPSQKTY   | 23  | >TP53-V97I-r SSIPSQKTY   | 35   | 12   |
| >TP53-V97I-\ SSVPSQKTY   | 188 | >TP53-V97I-r SSIPSQKTY   | 146  | 42   |
| >TP53-V97I-\ SSSVPSQKTY  | 415 | >TP53-V97I-r SSSIPSQKTY  | 306  | 109  |

|                          |      |                          |       |       |
|--------------------------|------|--------------------------|-------|-------|
| >TP53-V97I-ν SSSVPSQK    | 230  | >TP53-V97I-r SSSIPSQK    | 282   | 52    |
| >TP53-V97I-ν SSSVPSQK    | 20   | >TP53-V97I-r SSSIPSQK    | 21    | 1     |
| >TP53-V97I-ν SSSVPSQKTY  | 514  | >TP53-V97I-r SSSIPSQKTY  | 373   | 141   |
| >TP53-V97I-ν SSSVPSQK    | 223  | >TP53-V97I-r SSSIPSQK    | 305   | 82    |
| >TP53-V97I-ν SSSVPSQKTY  | 105  | >TP53-V97I-r SSSIPSQKTY  | 84    | 21    |
| >TP53-V97I-ν SSSVPSQK    | 226  | >TP53-V97I-r SSSIPSQK    | 237   | 11    |
| >TP53-V97I-ν SSSVPSQKTY  | 317  | >TP53-V97I-r SSSIPSQKTY  | 386   | 69    |
| >TP53-V97I-ν SSSVPSQKTY  | 112  | >TP53-V97I-r SSSIPSQKTY  | 205   | 93    |
| >TP53-V97I-ν SSSVPSQKTY  | 4    | >TP53-V97I-r SSSIPSQKTY  | 3     | 1     |
| >TP53-V97I-ν SSSVPSQKTY  | 27   | >TP53-V97I-r SSSIPSQKTY  | 22    | 5     |
| >TP53-V97I-ν SSSVPSQKTY  | 457  | >TP53-V97I-r SSSIPSQKTY  | 648   | 191   |
| >TP53-V97I-ν SSSVPSQK    | 286  | >TP53-V97I-r SSSIPSQK    | 242   | 44    |
| >TP53-V97I-ν LSSSVPSQKTY | 164  | >TP53-V97I-r LSSSIPSQKTY | 167   | 3     |
| >TP53-V97I-ν LSSSVPSQK   | 103  | >TP53-V97I-r LSSSIPSQK   | 145   | 42    |
| >TP53-V97I-ν LSSSVPSQK   | 23   | >TP53-V97I-r LSSSIPSQK   | 27    | 4     |
| >TP53-V97I-ν LSSSVPSQKTY | 450  | >TP53-V97I-r LSSSIPSQKTY | 237   | 213   |
| >TP53-V97I-ν LSSSVPSQKTY | 50   | >TP53-V97I-r LSSSIPSQKTY | 37    | 13    |
| >TP53-V97I-ν LSSSVPSQK   | 34   | >TP53-V97I-r LSSSIPSQK   | 26    | 8     |
| >TP53-V97I-ν LSSSVPSQKTY | 149  | >TP53-V97I-r LSSSIPSQKTY | 206   | 57    |
| >TP53-V97I-ν LSSSVPSQKTY | 32   | >TP53-V97I-r LSSSIPSQKTY | 29    | 3     |
| >TP53-V97I-ν LSSSVPSQKTY | 6    | >TP53-V97I-r LSSSIPSQKTY | 6     | 0     |
| >TP53-V97I-ν LSSSVPSQKTY | 229  | >TP53-V97I-r LSSSIPSQKTY | 182   | 47    |
| >TP53-V97I-ν LSSSVPSQKTY | 204  | >TP53-V97I-r LSSSIPSQKTY | 243   | 39    |
| >TP53-V97I-ν LSSSVPSQKTY | 32   | >TP53-V97I-r LSSSIPSQKTY | 63    | 31    |
| >TP53-V97I-ν LSSSVPSQK   | 189  | >TP53-V97I-r LSSSIPSQK   | 161   | 28    |
| >TP53-V97I-ν LSSSVPSQKTY | 8    | >TP53-V97I-r LSSSIPSQKTY | 8     | 0     |
| >TP53-V97I-ν PLSSSVPSQ   | 530  | >TP53-V97I-r PLSSSIPSQ   | 230   | 300   |
| >TP53-V97I-ν PLSSSVPSQK  | 472  | >TP53-V97I-r PLSSSIPSQK  | 339   | 133   |
| >TP53-V97I-ν PLSSSVPSQK  | 382  | >TP53-V97I-r PLSSSIPSQK  | 459   | 77    |
| >TP53-V97I-ν WPLSSSVPS   | 27   | >TP53-V97I-r WPLSSSIPS   | 17    | 10    |
| >TP53-V97I-ν WPLSSSVPS   | 159  | >TP53-V97I-r WPLSSSIPS   | 247   | 88    |
| >TP53-V97I-ν SWPLSSSV    | 5124 | >TP53-V97I-r SWPLSSSI    | 429   | 4695  |
| >TP53-V97I-ν SWPLSSSV    | 2448 | >TP53-V97I-r SWPLSSSI    | 88    | 2360  |
| >TP53-V97I-ν SWPLSSSV    | 157  | >TP53-V97I-r SWPLSSSI    | 145   | 12    |
| >TP53-V97I-ν SWPLSSSVPS  | 447  | >TP53-V97I-r SWPLSSSIPSC | 417   | 30    |
| >TP53-V97I-ν PSWPLSSSV   | 2768 | >TP53-V97I-r PSWPLSSSI   | 376   | 2392  |
| >TP53-V97I-ν PSWPLSSSV   | 613  | >TP53-V97I-r PSWPLSSSI   | 17    | 596   |
| >TP53-V97I-ν APSWPLSSSV  | 286  | >TP53-V97I-r APSWPLSSSI  | 363   | 77    |
| >TP53-W146 WVDSTPPPG     | 489  | >TP53-W146 CVDSTPPPGT    | 6429  | 5940  |
| >TP53-W146 LWVDSTPP      | 386  | >TP53-W146 LCVDSTPP      | 36880 | 36494 |
| >TP53-W146 LWVDSTPPP     | 467  | >TP53-W146 LCVDSTPPP     | 36769 | 36302 |
| >TP53-W146 LWVDSTPPPG    | 485  | >TP53-W146 LCVDSTPPPG    | 37268 | 36783 |
| >TP53-W146 QLAKTCPVQL    | 343  | >TP53-W146 QLAKTCPVQL    | 21732 | 21389 |

|                       |     |                       |       |       |
|-----------------------|-----|-----------------------|-------|-------|
| >TP53-W146 VQLWVDST   | 120 | >TP53-W146 VQLCVDST   | 197   | 77    |
| >TP53-W146 KTCPVQLWV  | 125 | >TP53-W146 KTCPVQLCV  | 525   | 400   |
| >TP53-W146 KTCPVQLWV  | 53  | >TP53-W146 KTCPVQLCV  | 229   | 176   |
| >TP53-W146 KTCPVQLWV  | 338 | >TP53-W146 KTCPVQLCV  | 293   | 45    |
| >TP53-W146 KTCPVQLWV  | 202 | >TP53-W146 KTCPVQLCV  | 1397  | 1195  |
| >TP53-W146 KTCPVQLWV  | 224 | >TP53-W146 KTCPVQLCV  | 364   | 140   |
| >TP53-W146 KTCPVQLW   | 165 | >TP53-W146 KTCPVQLC   | 5234  | 5069  |
| >TP53-W146 KTCPVQLW   | 4   | >TP53-W146 KTCPVQLC   | 2778  | 2774  |
| >TP53-W146 KTCPVQLWV  | 118 | >TP53-W146 KTCPVQLCV  | 755   | 637   |
| >TP53-W146 KTCPVQLW   | 34  | >TP53-W146 KTCPVQLC   | 11189 | 11155 |
| >TP53-W146 KTCPVQLW   | 10  | >TP53-W146 KTCPVQLC   | 1770  | 1760  |
| >TP53-W146 KTCPVQLWV  | 254 | >TP53-W146 KTCPVQLCV  | 2132  | 1878  |
| >TP53-W146 KTCPVQLWV  | 272 | >TP53-W146 KTCPVQLCV  | 459   | 187   |
| >TP53-W146 AKTCPVQLW  | 192 | >TP53-W146 AKTCPVQLC  | 1682  | 1490  |
| >TP53-W146 AKTCPVQLW  | 503 | >TP53-W146 AKTCPVQLCV | 154   | 349   |
| >TP53-W146 LAKTCPVQLW | 482 | >TP53-W146 LAKTCPVQLC | 2267  | 1785  |
| >TP53-W146 LAKTCPVQLW | 45  | >TP53-W146 LAKTCPVQLC | 19061 | 19016 |
| >TP53-W146 LAKTCPVQLW | 42  | >TP53-W146 LAKTCPVQLC | 19514 | 19472 |
| >TP53-W146 LAKTCPVQLW | 42  | >TP53-W146 LAKTCPVQLC | 21087 | 21045 |
| >TP53-W146 WVDSTPPPG  | 489 | >TP53-W146 GVDSTPPPGI | 10283 | 9794  |
| >TP53-W146 LWVDSTPPP  | 386 | >TP53-W146 LGVDSTPPP  | 35938 | 35552 |
| >TP53-W146 LWVDSTPPP  | 467 | >TP53-W146 LGVDSTPPP  | 35989 | 35522 |
| >TP53-W146 LWVDSTPPPG | 485 | >TP53-W146 LGVDSTPPPG | 36224 | 35739 |
| >TP53-W146 QLAKTCPVQL | 343 | >TP53-W146 QLAKTCPVQL | 22163 | 21820 |
| >TP53-W146 VQLWVDST   | 120 | >TP53-W146 VQLGVDST   | 160   | 40    |
| >TP53-W146 KTCPVQLWV  | 125 | >TP53-W146 KTCPVQLGV  | 73    | 52    |
| >TP53-W146 KTCPVQLWV  | 53  | >TP53-W146 KTCPVQLGV  | 41    | 12    |
| >TP53-W146 KTCPVQLWV  | 338 | >TP53-W146 KTCPVQLGV  | 268   | 70    |
| >TP53-W146 KTCPVQLWV  | 202 | >TP53-W146 KTCPVQLGV  | 374   | 172   |
| >TP53-W146 KTCPVQLWV  | 224 | >TP53-W146 KTCPVQLGV  | 268   | 44    |
| >TP53-W146 KTCPVQLW   | 165 | >TP53-W146 KTCPVQLG   | 10149 | 9984  |
| >TP53-W146 KTCPVQLW   | 4   | >TP53-W146 KTCPVQLG   | 4776  | 4772  |
| >TP53-W146 KTCPVQLWV  | 118 | >TP53-W146 KTCPVQLGV  | 103   | 15    |
| >TP53-W146 KTCPVQLW   | 34  | >TP53-W146 KTCPVQLG   | 11452 | 11418 |
| >TP53-W146 KTCPVQLW   | 10  | >TP53-W146 KTCPVQLG   | 4603  | 4593  |
| >TP53-W146 KTCPVQLWV  | 554 | >TP53-W146 KTCPVQLGV  | 385   | 169   |
| >TP53-W146 KTCPVQLWV  | 254 | >TP53-W146 KTCPVQLGV  | 1774  | 1520  |
| >TP53-W146 KTCPVQLWV  | 272 | >TP53-W146 KTCPVQLGV  | 384   | 112   |
| >TP53-W146 AKTCPVQLW  | 192 | >TP53-W146 AKTCPVQLG  | 5370  | 5178  |
| >TP53-W146 AKTCPVQLW  | 503 | >TP53-W146 AKTCPVQLG  | 250   | 253   |
| >TP53-W146 LAKTCPVQLW | 482 | >TP53-W146 LAKTCPVQLG | 934   | 452   |
| >TP53-W146 LAKTCPVQLW | 45  | >TP53-W146 LAKTCPVQLG | 19238 | 19193 |
| >TP53-W146 LAKTCPVQLW | 42  | >TP53-W146 LAKTCPVQLG | 18836 | 18794 |

|                       |       |                       |       |       |
|-----------------------|-------|-----------------------|-------|-------|
| >TP53-W146 LAKTCPVQLV | 42    | >TP53-W146 LAKTCPVQLG | 22137 | 22095 |
| >TP53-W146 WVDSTPPPG  | 6928  | >TP53-W146 RVDSTPPPGT | 231   | 6697  |
| >TP53-W146 WVDSTPPPG  | 489   | >TP53-W146 RVDSTPPPGT | 6703  | 6214  |
| >TP53-W146 LWVDSTPP   | 386   | >TP53-W146 LRVDSTPP   | 35325 | 34939 |
| >TP53-W146 LWVDSTPPP  | 467   | >TP53-W146 LRVDSTPPP  | 35285 | 34818 |
| >TP53-W146 LWVDSTPPPG | 485   | >TP53-W146 LRVDSTPPPG | 35656 | 35171 |
| >TP53-W146 QLAKTCPVQL | 26037 | >TP53-W146 QLAKTCPVQL | 120   | 25917 |
| >TP53-W146 QLAKTCPVQL | 343   | >TP53-W146 QLAKTCPVQL | 22379 | 22036 |
| >TP53-W146 QLAKTCPVQL | 31948 | >TP53-W146 QLAKTCPVQL | 377   | 31571 |
| >TP53-W146 VQLWVDST   | 120   | >TP53-W146 VQLRVDST   | 469   | 349   |
| >TP53-W146 KTCPVQLWV  | 125   | >TP53-W146 KTCPVQLRV  | 460   | 335   |
| >TP53-W146 KTCPVQLWV  | 53    | >TP53-W146 KTCPVQLRV  | 65    | 12    |
| >TP53-W146 KTCPVQLWV  | 338   | >TP53-W146 KTCPVQLRV  | 740   | 402   |
| >TP53-W146 KTCPVQLWV  | 202   | >TP53-W146 KTCPVQLRV  | 356   | 154   |
| >TP53-W146 KTCPVQLW   | 19563 | >TP53-W146 KTCPVQLR   | 66    | 19497 |
| >TP53-W146 KTCPVQLWV  | 224   | >TP53-W146 KTCPVQLRV  | 221   | 3     |
| >TP53-W146 KTCPVQLW   | 5803  | >TP53-W146 KTCPVQLR   | 14    | 5789  |
| >TP53-W146 KTCPVQLW   | 165   | >TP53-W146 KTCPVQLR   | 9313  | 9148  |
| >TP53-W146 KTCPVQLW   | 26278 | >TP53-W146 KTCPVQLR   | 122   | 26156 |
| >TP53-W146 KTCPVQLW   | 4     | >TP53-W146 KTCPVQLR   | 5409  | 5405  |
| >TP53-W146 KTCPVQLWV  | 118   | >TP53-W146 KTCPVQLRV  | 83    | 35    |
| >TP53-W146 KTCPVQLW   | 34    | >TP53-W146 KTCPVQLR   | 12362 | 12328 |
| >TP53-W146 KTCPVQLW   | 10    | >TP53-W146 KTCPVQLR   | 11114 | 11104 |
| >TP53-W146 KTCPVQLWV  | 554   | >TP53-W146 KTCPVQLRV  | 172   | 382   |
| >TP53-W146 KTCPVQLWV  | 254   | >TP53-W146 KTCPVQLRV  | 382   | 128   |
| >TP53-W146 KTCPVQLW   | 27890 | >TP53-W146 KTCPVQLR   | 97    | 27793 |
| >TP53-W146 KTCPVQLWV  | 272   | >TP53-W146 KTCPVQLRV  | 290   | 18    |
| >TP53-W146 AKTCPVQLW  | 192   | >TP53-W146 AKTCPVQLR  | 484   | 292   |
| >TP53-W146 AKTCPVQLW  | 503   | >TP53-W146 AKTCPVQLRV | 346   | 157   |
| >TP53-W146 LAKTCPVQLV | 482   | >TP53-W146 LAKTCPVQLR | 730   | 248   |
| >TP53-W146 LAKTCPVQLV | 31800 | >TP53-W146 LAKTCPVQLR | 311   | 31489 |
| >TP53-W146 LAKTCPVQLV | 36091 | >TP53-W146 LAKTCPVQLR | 142   | 35949 |
| >TP53-W146 LAKTCPVQLV | 45    | >TP53-W146 LAKTCPVQLR | 19778 | 19733 |
| >TP53-W146 LAKTCPVQLV | 42    | >TP53-W146 LAKTCPVQLR | 19813 | 19771 |
| >TP53-W146 LAKTCPVQLV | 42    | >TP53-W146 LAKTCPVQLR | 22890 | 22848 |
| >TP53-W146 WVDSTPPPG  | 489   | >TP53-W146 SVDSTPPPGT | 794   | 305   |
| >TP53-W146 LWVDSTPPPG | 27266 | >TP53-W146 LSVDSTPPPG | 442   | 26824 |
| >TP53-W146 LWVDSTPP   | 386   | >TP53-W146 LSVDSTPP   | 36085 | 35699 |
| >TP53-W146 LWVDSTPPP  | 467   | >TP53-W146 LSVDSTPPP  | 36189 | 35722 |
| >TP53-W146 LWVDSTPPPG | 485   | >TP53-W146 LSVDSTPPPG | 36565 | 36080 |
| >TP53-W146 QLAKTCPVQL | 343   | >TP53-W146 QLAKTCPVQL | 22211 | 21868 |
| >TP53-W146 VQLWVDST   | 120   | >TP53-W146 VQLSVDST   | 290   | 170   |
| >TP53-W146 KTCPVQLWV  | 125   | >TP53-W146 KTCPVQLSV  | 65    | 60    |

|                       |      |                       |       |       |
|-----------------------|------|-----------------------|-------|-------|
| >TP53-W146 KTCPVQLWV  | 53   | >TP53-W146 KTCPVQLSV  | 55    | 2     |
| >TP53-W146 KTCPVQLWV  | 338  | >TP53-W146 KTCPVQLSV  | 401   | 63    |
| >TP53-W146 KTCPVQLWV  | 202  | >TP53-W146 KTCPVQLSV  | 307   | 105   |
| >TP53-W146 KTCPVQLWV  | 224  | >TP53-W146 KTCPVQLSV  | 59    | 165   |
| >TP53-W146 KTCPVQLW   | 165  | >TP53-W146 KTCPVQLS   | 9931  | 9766  |
| >TP53-W146 KTCPVQLWV  | 1821 | >TP53-W146 KTCPVQLSV  | 217   | 1604  |
| >TP53-W146 KTCPVQLW   | 4    | >TP53-W146 KTCPVQLS   | 3548  | 3544  |
| >TP53-W146 KTCPVQLWV  | 118  | >TP53-W146 KTCPVQLSV  | 98    | 20    |
| >TP53-W146 KTCPVQLW   | 34   | >TP53-W146 KTCPVQLS   | 11210 | 11176 |
| >TP53-W146 KTCPVQLW   | 10   | >TP53-W146 KTCPVQLS   | 7405  | 7395  |
| >TP53-W146 KTCPVQLWV  | 554  | >TP53-W146 KTCPVQLSV  | 130   | 424   |
| >TP53-W146 KTCPVQLWV  | 254  | >TP53-W146 KTCPVQLSV  | 475   | 221   |
| >TP53-W146 KTCPVQLWV  | 272  | >TP53-W146 KTCPVQLSV  | 123   | 149   |
| >TP53-W146 AKTCPVQLW  | 192  | >TP53-W146 AKTCPVQLS  | 2253  | 2061  |
| >TP53-W146 AKTCPVQLW  | 503  | >TP53-W146 AKTCPVQLSV | 63    | 440   |
| >TP53-W146 LAKTCPVQLV | 482  | >TP53-W146 LAKTCPVQLS | 675   | 193   |
| >TP53-W146 LAKTCPVQLV | 45   | >TP53-W146 LAKTCPVQLS | 17937 | 17892 |
| >TP53-W146 LAKTCPVQLV | 42   | >TP53-W146 LAKTCPVQLS | 19027 | 18985 |
| >TP53-W146 LAKTCPVQLV | 42   | >TP53-W146 LAKTCPVQLS | 22578 | 22536 |
| >TP53-W53C QWFTEDPG   | 275  | >TP53-W53C QCFTEDPG   | 35956 | 35681 |
| >TP53-W53C LMLSPDDIEQ | 1352 | >TP53-W53C LMLSPDDIEQ | 17    | 1335  |
| >TP53-W53C LMLSPDDIEQ | 9415 | >TP53-W53C LMLSPDDIEQ | 129   | 9286  |
| >TP53-W53C LMLSPDDIEQ | 5163 | >TP53-W53C LMLSPDDIEQ | 67    | 5096  |
| >TP53-W53C LMLSPDDIEQ | 130  | >TP53-W53C LMLSPDDIEQ | 25509 | 25379 |
| >TP53-W53C LMLSPDDIEQ | 212  | >TP53-W53C LMLSPDDIEQ | 24320 | 24108 |
| >TP53-W53C LMLSPDDIEQ | 17   | >TP53-W53C LMLSPDDIEQ | 17735 | 17718 |
| >TP53-W53C LMLSPDDIEQ | 79   | >TP53-W53C LMLSPDDIEQ | 24931 | 24852 |
| >TP53-W53C LMLSPDDIEQ | 174  | >TP53-W53C LMLSPDDIEQ | 34536 | 34362 |
| >TP53-W53C PDDIEQWFT  | 240  | >TP53-W53C PDDIEQCFT  | 1100  | 860   |
| >TP53-W53C SPDDIEQWF  | 339  | >TP53-W53C SPDDIEQCF  | 112   | 227   |
| >TP53-W53C SPDDIEQW   | 46   | >TP53-W53C SPDDIEQC   | 21447 | 21401 |
| >TP53-W53C SPDDIEQW   | 12   | >TP53-W53C SPDDIEQC   | 15071 | 15059 |
| >TP53-W53C LSPDDIEQW  | 195  | >TP53-W53C LSPDDIEQC  | 23205 | 23010 |
| >TP53-W53C LSPDDIEQWF | 180  | >TP53-W53C LSPDDIEQCF | 1179  | 999   |
| >TP53-W53C LSPDDIEQW  | 126  | >TP53-W53C LSPDDIEQC  | 24840 | 24714 |
| >TP53-W53C LSPDDIEQW  | 149  | >TP53-W53C LSPDDIEQC  | 20957 | 20808 |
| >TP53-W53C LSPDDIEQW  | 181  | >TP53-W53C LSPDDIEQC  | 299   | 118   |
| >TP53-W53C LSPDDIEQWF | 10   | >TP53-W53C LSPDDIEQCF | 71    | 61    |
| >TP53-W53C LSPDDIEQWF | 190  | >TP53-W53C LSPDDIEQCF | 977   | 787   |
| >TP53-W53C LSPDDIEQWF | 84   | >TP53-W53C LSPDDIEQCF | 581   | 497   |
| >TP53-W53C LSPDDIEQW  | 218  | >TP53-W53C LSPDDIEQC  | 31648 | 31430 |
| >TP53-W53C MLSPDDIEQV | 107  | >TP53-W53C MLSPDDIEQC | 287   | 180   |
| >TP53-W53C MLSPDDIEQV | 4633 | >TP53-W53C MLSPDDIEQC | 70    | 4563  |



|                        |       |                        |       |       |
|------------------------|-------|------------------------|-------|-------|
| >TP53-W53C MLSPDDIEQV  | 12936 | >TP53-W53C MLSPDDIEQC  | 194   | 12742 |
| >TP53-W53C MLSPDDIEQV  | 909   | >TP53-W53C MLSPDDIEQC  | 7     | 902   |
| >TP53-W53C MLSPDDIEQV  | 129   | >TP53-W53C MLSPDDIEQC  | 747   | 618   |
| >TP53-W53C MLSPDDIEQV  | 716   | >TP53-W53C MLSPDDIEQC  | 251   | 465   |
| >TP53-W53C MLSPDDIEQV  | 213   | >TP53-W53C MLSPDDIEQC  | 61    | 152   |
| >TP53-W53C MLSPDDIEQV  | 93    | >TP53-W53C MLSPDDIEQC  | 27125 | 27032 |
| >TP53-W53C MLSPDDIEQV  | 427   | >TP53-W53C MLSPDDIEQC  | 3085  | 2658  |
| >TP53-W53C MLSPDDIEQV  | 131   | >TP53-W53C MLSPDDIEQC  | 74    | 57    |
| >TP53-W53C MLSPDDIEQV  | 204   | >TP53-W53C MLSPDDIEQC  | 23308 | 23104 |
| >TP53-W53C MLSPDDIEQV  | 20    | >TP53-W53C MLSPDDIEQC  | 18515 | 18495 |
| >TP53-W53C MLSPDDIEQV  | 292   | >TP53-W53C MLSPDDIEQC  | 29345 | 29053 |
| >TP53-W53C MLSPDDIEQV  | 80    | >TP53-W53C MLSPDDIEQC  | 19656 | 19576 |
| >TP53-W53C MLSPDDIEQV  | 445   | >TP53-W53C MLSPDDIEQC  | 3084  | 2639  |
| >TP53-Y107C YGFRLGFL   | 116   | >TP53-Y107C CGFRLGFL   | 478   | 362   |
| >TP53-Y107C YGFRLGFL   | 486   | >TP53-Y107C CGFRLGFL   | 3125  | 2639  |
| >TP53-Y107C YGFRLGFL   | 443   | >TP53-Y107C CGFRLGFL   | 8637  | 8194  |
| >TP53-Y107C YGFRLGFLH  | 89    | >TP53-Y107C CGFRLGFLH  | 2447  | 2358  |
| >TP53-Y107C YGFRLGFL   | 2188  | >TP53-Y107C CGFRLGFL   | 447   | 1741  |
| >TP53-Y107C SYGFRLGFL  | 95    | >TP53-Y107C SCGFRLGFL  | 27268 | 27173 |
| >TP53-Y107C SYGFRLGF   | 356   | >TP53-Y107C SCGFRLGF   | 22901 | 22545 |
| >TP53-Y107C SYGFRLGF   | 232   | >TP53-Y107C SCGFRLGF   | 15994 | 15762 |
| >TP53-Y107C SYGFRLGFL  | 319   | >TP53-Y107C SCGFRLGFL  | 22399 | 22080 |
| >TP53-Y107C SYGFRLGF   | 7     | >TP53-Y107C SCGFRLGF   | 11277 | 11270 |
| >TP53-Y107C SYGFRLGFL  | 12    | >TP53-Y107C SCGFRLGFL  | 19580 | 19568 |
| >TP53-Y107C SYGFRLGF   | 338   | >TP53-Y107C SCGFRLGF   | 8880  | 8542  |
| >TP53-Y107C SYGFRLGFL  | 139   | >TP53-Y107C SCGFRLGFL  | 2927  | 2788  |
| >TP53-Y107C SYGFRLGFL  | 222   | >TP53-Y107C SCGFRLGFL  | 28450 | 28228 |
| >TP53-Y107C VPSQKTYQG  | 92    | >TP53-Y107C VPSQKTYQG  | 27473 | 27381 |
| >TP53-Y107C VPSQKTYQG  | 19    | >TP53-Y107C VPSQKTYQG  | 5168  | 5149  |
| >TP53-Y107C VPSQKTYQG  | 254   | >TP53-Y107C VPSQKTYQG  | 15428 | 15174 |
| >TP53-Y107C VPSQKTYQG  | 15    | >TP53-Y107C VPSQKTYQG  | 20130 | 20115 |
| >TP53-Y107C GSYGFRLGF  | 78    | >TP53-Y107C GSCGFRLGF  | 8316  | 8238  |
| >TP53-Y107C GSYGFRLGFL | 227   | >TP53-Y107C GSCGFRLGFL | 2487  | 2260  |
| >TP53-Y107C GSYGFRLGFL | 237   | >TP53-Y107C GSCGFRLGFL | 1429  | 1192  |
| >TP53-Y107C GSYGFRLGFL | 491   | >TP53-Y107C GSCGFRLGFL | 9502  | 9011  |
| >TP53-Y107C GSYGFRLGFL | 98    | >TP53-Y107C GSCGFRLGFL | 621   | 523   |
| >TP53-Y107C GSYGFRLGF  | 61    | >TP53-Y107C GSCGFRLGF  | 496   | 435   |
| >TP53-Y107C GSYGFRLGF  | 365   | >TP53-Y107C GSCGFRLGF  | 1082  | 717   |
| >TP53-Y107C GSYGFRLGF  | 111   | >TP53-Y107C GSCGFRLGF  | 1818  | 1707  |
| >TP53-Y107C GSYGFRLGF  | 4     | >TP53-Y107C GSCGFRLGF  | 15    | 11    |
| >TP53-Y107C GSYGFRLGFL | 31    | >TP53-Y107C GSCGFRLGFL | 409   | 378   |
| >TP53-Y107C GSYGFRLGF  | 222   | >TP53-Y107C GSCGFRLGF  | 4468  | 4246  |
| >TP53-Y107C GSYGFRLGF  | 264   | >TP53-Y107C GSCGFRLGF  | 5196  | 4932  |

|                         |     |                        |      |      |
|-------------------------|-----|------------------------|------|------|
| >TP53-Y107C GSYGFRLGF   | 44  | >TP53-Y107C GSCGFRLGF  | 178  | 134  |
| >TP53-Y107C GSYGFRLGFL  | 70  | >TP53-Y107C GSCGFRLGFL | 296  | 226  |
| >TP53-Y107C GSYGFRLGFL  | 63  | >TP53-Y107C GSCGFRLGFL | 288  | 225  |
| >TP53-Y107C QGSYGFRLGF  | 278 | >TP53-Y107C QGSCGFRLGF | 1844 | 1566 |
| >TP53-Y107C YQGSYGFRL   | 30  | >TP53-Y107C YQGSCGFRL  | 45   | 15   |
| >TP53-Y107C YQGSYGFRL   | 36  | >TP53-Y107C YQGSCGFRL  | 67   | 31   |
| >TP53-Y107C YQGSYGFRL   | 15  | >TP53-Y107C YQGSCGFRL  | 25   | 10   |
| >TP53-Y107C YQGSYGFRLC  | 189 | >TP53-Y107C YQGSCGFRLC | 271  | 82   |
| >TP53-Y107C YQGSYGFRL   | 32  | >TP53-Y107C YQGSCGFRL  | 248  | 216  |
| >TP53-Y107C YQGSYGFRL   | 167 | >TP53-Y107C YQGSCGFRL  | 156  | 11   |
| >TP53-Y107C YQGSYGFRL   | 993 | >TP53-Y107C YQGSCGFRL  | 417  | 576  |
| >TP53-Y107C YQGSYGFR    | 54  | >TP53-Y107C YQGSCGFR   | 153  | 99   |
| >TP53-Y107C YQGSYGFR    | 476 | >TP53-Y107C YQGSCGFR   | 717  | 241  |
| >TP53-Y107C YQGSYGFRL   | 211 | >TP53-Y107C YQGSCGFRL  | 351  | 140  |
| >TP53-Y107C YQGSYGFRLC  | 32  | >TP53-Y107C YQGSCGFRLC | 36   | 4    |
| >TP53-Y107C YQGSYGFRLC  | 158 | >TP53-Y107C YQGSCGFRLC | 310  | 152  |
| >TP53-Y107C YQGSYGFRL   | 77  | >TP53-Y107C YQGSCGFRL  | 128  | 51   |
| >TP53-Y107C YQGSYGFRLC  | 6   | >TP53-Y107C YQGSCGFRLC | 8    | 2    |
| >TP53-Y107C YQGSYGFRL   | 145 | >TP53-Y107C YQGSCGFRL  | 320  | 175  |
| >TP53-Y107C YQGSYGFR    | 223 | >TP53-Y107C YQGSCGFR   | 143  | 80   |
| >TP53-Y107C TYQGSYGFRL  | 141 | >TP53-Y107C TYQGSCGFRL | 64   | 77   |
| >TP53-Y107C TYQGSYGF    | 28  | >TP53-Y107C TYQGSCGF   | 135  | 107  |
| >TP53-Y107C TYQGSYGFRL  | 316 | >TP53-Y107C TYQGSCGFRL | 1185 | 869  |
| >TP53-Y107C TYQGSYGF    | 93  | >TP53-Y107C TYQGSCGF   | 330  | 237  |
| >TP53-Y107C TYQGSYGFRL  | 163 | >TP53-Y107C TYQGSCGFRL | 220  | 57   |
| >TP53-Y107C TYQGSYGF    | 5   | >TP53-Y107C TYQGSCGF   | 6    | 1    |
| >TP53-Y107C TYQGSYGFRL  | 255 | >TP53-Y107C TYQGSCGFRL | 1483 | 1228 |
| >TP53-Y107C TYQGSYGFRL  | 7   | >TP53-Y107C TYQGSCGFRL | 12   | 5    |
| >TP53-Y107C TYQGSYGFRL  | 19  | >TP53-Y107C TYQGSCGFRL | 105  | 86   |
| >TP53-Y107C TYQGSYGFRL  | 25  | >TP53-Y107C TYQGSCGFRL | 29   | 4    |
| >TP53-Y107C TYQGSYGFRL  | 154 | >TP53-Y107C TYQGSCGFRL | 122  | 32   |
| >TP53-Y107C TYQGSYGFRL  | 53  | >TP53-Y107C TYQGSCGFRL | 78   | 25   |
| >TP53-Y107C TYQGSYGFRL  | 580 | >TP53-Y107C TYQGSCGFRL | 204  | 376  |
| >TP53-Y107C TYQGSYGFRL  | 598 | >TP53-Y107C TYQGSCGFRL | 473  | 125  |
| >TP53-Y107C KTYQGSYGFRL | 220 | >TP53-Y107C KTYQGSCGFF | 330  | 110  |
| >TP53-Y107C KTYQGSYGFRL | 169 | >TP53-Y107C KTYQGSCGFF | 484  | 315  |
| >TP53-Y107C KTYQGSYGFRL | 260 | >TP53-Y107C KTYQGSCGFF | 596  | 336  |
| >TP53-Y107C KTYQGSYGF   | 391 | >TP53-Y107C KTYQGSCGF  | 643  | 252  |
| >TP53-Y107C KTYQGSYGFRL | 77  | >TP53-Y107C KTYQGSCGFF | 134  | 57   |
| >TP53-Y107C KTYQGSYGFRL | 23  | >TP53-Y107C KTYQGSCGFF | 50   | 27   |
| >TP53-Y107C KTYQGSYGFRL | 175 | >TP53-Y107C KTYQGSCGFF | 170  | 5    |
| >TP53-Y107C KTYQGSYGFRL | 638 | >TP53-Y107C KTYQGSCGFF | 476  | 162  |
| >TP53-Y107C KTYQGSYGFRL | 50  | >TP53-Y107C KTYQGSCGFF | 99   | 49   |

|                        |     |                        |       |       |
|------------------------|-----|------------------------|-------|-------|
| >TP53-Y107C KTYQGSYGFR | 57  | >TP53-Y107C KTYQGSCGFF | 88    | 31    |
| >TP53-Y107C KTYQGSYGF  | 481 | >TP53-Y107C KTYQGSCGF  | 2792  | 2311  |
| >TP53-Y107C KTYQGSYGF  | 192 | >TP53-Y107C KTYQGSCGF  | 500   | 308   |
| >TP53-Y107C KTYQGSYGF  | 294 | >TP53-Y107C KTYQGSCGF  | 7228  | 6934  |
| >TP53-Y107C KTYQGSYGFR | 96  | >TP53-Y107C KTYQGSCGFF | 217   | 121   |
| >TP53-Y107C KTYQGSYGF  | 325 | >TP53-Y107C KTYQGSCGF  | 3595  | 3270  |
| >TP53-Y107C KTYQGSYGFR | 10  | >TP53-Y107C KTYQGSCGFF | 14    | 4     |
| >TP53-Y107C KTYQGSYGF  | 4   | >TP53-Y107C KTYQGSCGF  | 9     | 5     |
| >TP53-Y107C KTYQGSYGFR | 21  | >TP53-Y107C KTYQGSCGFF | 40    | 19    |
| >TP53-Y107C KTYQGSYGFR | 407 | >TP53-Y107C KTYQGSCGFF | 512   | 105   |
| >TP53-Y107C KTYQGSYGFR | 57  | >TP53-Y107C KTYQGSCGFF | 55    | 2     |
| >TP53-Y107C KTYQGSYGFR | 402 | >TP53-Y107C KTYQGSCGFF | 1005  | 603   |
| >TP53-Y107C KTYQGSYGF  | 55  | >TP53-Y107C KTYQGSCGF  | 36    | 19    |
| >TP53-Y107C KTYQGSYGF  | 36  | >TP53-Y107C KTYQGSCGF  | 35    | 1     |
| >TP53-Y107C KTYQGSYG   | 249 | >TP53-Y107C KTYQGSCG   | 1067  | 818   |
| >TP53-Y107C KTYQGSYGF  | 2   | >TP53-Y107C KTYQGSCGF  | 2     | 0     |
| >TP53-Y107C KTYQGSYGFR | 465 | >TP53-Y107C KTYQGSCGFF | 300   | 165   |
| >TP53-Y107C KTYQGSYGFR | 3   | >TP53-Y107C KTYQGSCGFF | 3     | 0     |
| >TP53-Y107C KTYQGSYGF  | 101 | >TP53-Y107C KTYQGSCGF  | 221   | 120   |
| >TP53-Y107C KTYQGSYGFR | 439 | >TP53-Y107C KTYQGSCGFF | 503   | 64    |
| >TP53-Y107C KTYQGSYGF  | 15  | >TP53-Y107C KTYQGSCGF  | 15    | 0     |
| >TP53-Y107C KTYQGSYGFR | 35  | >TP53-Y107C KTYQGSCGFF | 37    | 2     |
| >TP53-Y107C KTYQGSYGFR | 151 | >TP53-Y107C KTYQGSCGFF | 433   | 282   |
| >TP53-Y107C KTYQGSYGF  | 25  | >TP53-Y107C KTYQGSCGF  | 54    | 29    |
| >TP53-Y107C KTYQGSYGFR | 28  | >TP53-Y107C KTYQGSCGFF | 31    | 3     |
| >TP53-Y107C KTYQGSYGFR | 345 | >TP53-Y107C KTYQGSCGFF | 343   | 2     |
| >TP53-Y107C KTYQGSYGFR | 370 | >TP53-Y107C KTYQGSCGFF | 699   | 329   |
| >TP53-Y107C KTYQGSYGFR | 25  | >TP53-Y107C KTYQGSCGFF | 34    | 9     |
| >TP53-Y107C KTYQGSYGFR | 43  | >TP53-Y107C KTYQGSCGFF | 48    | 5     |
| >TP53-Y107C QKTYQGSY   | 308 | >TP53-Y107C QKTYQGSC   | 31446 | 31138 |
| >TP53-Y107C QKTYQGSY   | 40  | >TP53-Y107C QKTYQGSC   | 6332  | 6292  |
| >TP53-Y107C QKTYQGSYGI | 10  | >TP53-Y107C QKTYQGSCGI | 10    | 0     |
| >TP53-Y107C QKTYQGSYGI | 808 | >TP53-Y107C QKTYQGSCGI | 489   | 319   |
| >TP53-Y107C SQKTYQGSY  | 15  | >TP53-Y107C SQKTYQGSC  | 16541 | 16526 |
| >TP53-Y107C SQKTYQGSY  | 38  | >TP53-Y107C SQKTYQGSC  | 7168  | 7130  |
| >TP53-Y107C SQKTYQGSYC | 36  | >TP53-Y107C SQKTYQGSCC | 30    | 6     |
| >TP53-Y107C SQKTYQGSY  | 198 | >TP53-Y107C SQKTYQGSC  | 23033 | 22835 |
| >TP53-Y107C SQKTYQGSYC | 268 | >TP53-Y107C SQKTYQGSCC | 251   | 17    |
| >TP53-Y107C SQKTYQGSY  | 19  | >TP53-Y107C SQKTYQGSC  | 5934  | 5915  |
| >TP53-Y107C SQKTYQGSYC | 9   | >TP53-Y107C SQKTYQGSCC | 11    | 2     |
| >TP53-Y107C PSQKTYQGSY | 71  | >TP53-Y107C PSQKTYQGSC | 17969 | 17898 |
| >TP53-Y107C PSQKTYQGSY | 228 | >TP53-Y107C PSQKTYQGSC | 20400 | 20172 |
| >TP53-Y107C YGFR LGFL  | 116 | >TP53-Y107C DGFRLGFL   | 1983  | 1867  |

|                        |     |                        |       |       |
|------------------------|-----|------------------------|-------|-------|
| >TP53-Y107C YGFRLGFL   | 486 | >TP53-Y107C DGFRLGFL   | 10192 | 9706  |
| >TP53-Y107C YGFRLGFL   | 443 | >TP53-Y107C DGFRLGFL   | 20081 | 19638 |
| >TP53-Y107C YGFRLGFLH  | 89  | >TP53-Y107C DGFRLGFLH  | 5356  | 5267  |
| >TP53-Y107C SYGFRLGFL  | 95  | >TP53-Y107C SDGFRLGFL  | 29309 | 29214 |
| >TP53-Y107C SYGFRLGF   | 356 | >TP53-Y107C SDGFRLGF   | 26610 | 26254 |
| >TP53-Y107C SYGFRLGF   | 232 | >TP53-Y107C SDGFRLGF   | 23391 | 23159 |
| >TP53-Y107C SYGFRLGFL  | 319 | >TP53-Y107C SDGFRLGFL  | 28774 | 28455 |
| >TP53-Y107C SYGFRLGF   | 7   | >TP53-Y107C SDGFRLGF   | 19672 | 19665 |
| >TP53-Y107C SYGFRLGFL  | 12  | >TP53-Y107C SDGFRLGFL  | 24448 | 24436 |
| >TP53-Y107C SYGFRLGF   | 338 | >TP53-Y107C SDGFRLGF   | 17028 | 16690 |
| >TP53-Y107C SYGFRLGFL  | 139 | >TP53-Y107C SDGFRLGFL  | 8625  | 8486  |
| >TP53-Y107C SYGFRLGFL  | 222 | >TP53-Y107C SDGFRLGFL  | 30229 | 30007 |
| >TP53-Y107C VPSQKTYQG  | 92  | >TP53-Y107C VPSQKTYQG  | 29909 | 29817 |
| >TP53-Y107C VPSQKTYQG  | 19  | >TP53-Y107C VPSQKTYQG  | 9793  | 9774  |
| >TP53-Y107C VPSQKTYQG  | 254 | >TP53-Y107C VPSQKTYQG  | 21792 | 21538 |
| >TP53-Y107C VPSQKTYQG  | 15  | >TP53-Y107C VPSQKTYQG  | 22429 | 22414 |
| >TP53-Y107C GSYGFRLGF  | 78  | >TP53-Y107C GSDGFRLGF  | 7184  | 7106  |
| >TP53-Y107C GSYGFRLGFL | 227 | >TP53-Y107C GSDGFRLGFL | 769   | 542   |
| >TP53-Y107C GSYGFRLGFL | 237 | >TP53-Y107C GSDGFRLGFL | 1946  | 1709  |
| >TP53-Y107C GSYGFRLGFL | 491 | >TP53-Y107C GSDGFRLGFL | 13319 | 12828 |
| >TP53-Y107C GSYGFRLGFL | 98  | >TP53-Y107C GSDGFRLGFL | 2516  | 2418  |
| >TP53-Y107C GSYGFRLGF  | 61  | >TP53-Y107C GSDGFRLGF  | 1377  | 1316  |
| >TP53-Y107C GSYGFRLGF  | 365 | >TP53-Y107C GSDGFRLGF  | 12000 | 11635 |
| >TP53-Y107C GSYGFRLGF  | 111 | >TP53-Y107C GSDGFRLGF  | 5864  | 5753  |
| >TP53-Y107C GSYGFRLGF  | 4   | >TP53-Y107C GSDGFRLGF  | 35    | 31    |
| >TP53-Y107C GSYGFRLGFL | 31  | >TP53-Y107C GSDGFRLGFL | 1042  | 1011  |
| >TP53-Y107C GSYGFRLGF  | 222 | >TP53-Y107C GSDGFRLGF  | 5198  | 4976  |
| >TP53-Y107C GSYGFRLGF  | 264 | >TP53-Y107C GSDGFRLGF  | 2939  | 2675  |
| >TP53-Y107C GSYGFRLGF  | 44  | >TP53-Y107C GSDGFRLGF  | 315   | 271   |
| >TP53-Y107C GSYGFRLGFL | 70  | >TP53-Y107C GSDGFRLGFL | 551   | 481   |
| >TP53-Y107C GSYGFRLGFL | 63  | >TP53-Y107C GSDGFRLGFL | 494   | 431   |
| >TP53-Y107C QGSYGFRLGF | 278 | >TP53-Y107C QGSDGFRLG  | 676   | 398   |
| >TP53-Y107C YQGSYGFRL  | 30  | >TP53-Y107C YQGSDGFRL  | 198   | 168   |
| >TP53-Y107C YQGSYGFRL  | 36  | >TP53-Y107C YQGSDGFRL  | 199   | 163   |
| >TP53-Y107C YQGSYGFRL  | 15  | >TP53-Y107C YQGSDGFRL  | 39    | 24    |
| >TP53-Y107C YQGSYGFRLC | 189 | >TP53-Y107C YQGSDGFRLC | 314   | 125   |
| >TP53-Y107C YQGSYGFRL  | 32  | >TP53-Y107C YQGSDGFRL  | 114   | 82    |
| >TP53-Y107C YQGSYGFRL  | 167 | >TP53-Y107C YQGSDGFRL  | 135   | 32    |
| >TP53-Y107C YQGSYGFR   | 54  | >TP53-Y107C YQGSDGFR   | 640   | 586   |
| >TP53-Y107C YQGSYGFR   | 476 | >TP53-Y107C YQGSDGFR   | 933   | 457   |
| >TP53-Y107C YQGSYGFRL  | 211 | >TP53-Y107C YQGSDGFRL  | 515   | 304   |
| >TP53-Y107C YQGSYGFRLC | 32  | >TP53-Y107C YQGSDGFRLC | 37    | 5     |
| >TP53-Y107C YQGSYGFRLC | 158 | >TP53-Y107C YQGSDGFRLC | 158   | 0     |

|                        |     |                       |      |      |
|------------------------|-----|-----------------------|------|------|
| >TP53-Y107C YQGSYGFRL  | 77  | >TP53-Y107C YQGSDFRL  | 271  | 194  |
| >TP53-Y107C YQGSYGFRLC | 6   | >TP53-Y107C YQGSDFRLC | 9    | 3    |
| >TP53-Y107C YQGSYGFRL  | 145 | >TP53-Y107C YQGSDFRL  | 661  | 516  |
| >TP53-Y107C YQGSYGF    | 223 | >TP53-Y107C YQGSDFR   | 372  | 149  |
| >TP53-Y107C TYQGSYGFRL | 141 | >TP53-Y107C TYQGSDFRL | 113  | 28   |
| >TP53-Y107C TYQGSYGF   | 28  | >TP53-Y107C TYQGSDF   | 100  | 72   |
| >TP53-Y107C TYQGSYGFRL | 316 | >TP53-Y107C TYQGSDFRL | 797  | 481  |
| >TP53-Y107C TYQGSYGF   | 93  | >TP53-Y107C TYQGSDF   | 651  | 558  |
| >TP53-Y107C TYQGSYGFRL | 163 | >TP53-Y107C TYQGSDFRL | 412  | 249  |
| >TP53-Y107C TYQGSYGF   | 5   | >TP53-Y107C TYQGSDF   | 6    | 1    |
| >TP53-Y107C TYQGSYGF   | 255 | >TP53-Y107C TYQGSDF   | 2520 | 2265 |
| >TP53-Y107C TYQGSYGFRL | 7   | >TP53-Y107C TYQGSDFRL | 15   | 8    |
| >TP53-Y107C TYQGSYGF   | 19  | >TP53-Y107C TYQGSDF   | 138  | 119  |
| >TP53-Y107C TYQGSYGF   | 25  | >TP53-Y107C TYQGSDF   | 51   | 26   |
| >TP53-Y107C TYQGSYGF   | 154 | >TP53-Y107C TYQGSDF   | 130  | 24   |
| >TP53-Y107C TYQGSYGF   | 53  | >TP53-Y107C TYQGSDF   | 49   | 4    |
| >TP53-Y107C KTYQGSYGF  | 220 | >TP53-Y107C KTYQGSDF  | 948  | 728  |
| >TP53-Y107C KTYQGSYGF  | 169 | >TP53-Y107C KTYQGSDF  | 1016 | 847  |
| >TP53-Y107C KTYQGSYGF  | 260 | >TP53-Y107C KTYQGSDF  | 732  | 472  |
| >TP53-Y107C KTYQGSYGF  | 391 | >TP53-Y107C KTYQGSDF  | 765  | 374  |
| >TP53-Y107C KTYQGSYGF  | 77  | >TP53-Y107C KTYQGSDF  | 173  | 96   |
| >TP53-Y107C KTYQGSYGF  | 23  | >TP53-Y107C KTYQGSDF  | 66   | 43   |
| >TP53-Y107C KTYQGSYGF  | 175 | >TP53-Y107C KTYQGSDF  | 253  | 78   |
| >TP53-Y107C KTYQGSYGF  | 50  | >TP53-Y107C KTYQGSDF  | 555  | 505  |
| >TP53-Y107C KTYQGSYGF  | 57  | >TP53-Y107C KTYQGSDF  | 218  | 161  |
| >TP53-Y107C KTYQGSYGF  | 481 | >TP53-Y107C KTYQGSDF  | 346  | 135  |
| >TP53-Y107C KTYQGSYGF  | 192 | >TP53-Y107C KTYQGSDF  | 418  | 226  |
| >TP53-Y107C KTYQGSYGF  | 294 | >TP53-Y107C KTYQGSDF  | 5635 | 5341 |
| >TP53-Y107C KTYQGSYGF  | 96  | >TP53-Y107C KTYQGSDF  | 672  | 576  |
| >TP53-Y107C KTYQGSYGF  | 325 | >TP53-Y107C KTYQGSDF  | 1925 | 1600 |
| >TP53-Y107C KTYQGSYGF  | 10  | >TP53-Y107C KTYQGSDF  | 31   | 21   |
| >TP53-Y107C KTYQGSYGF  | 4   | >TP53-Y107C KTYQGSDF  | 10   | 6    |
| >TP53-Y107C KTYQGSYGF  | 21  | >TP53-Y107C KTYQGSDF  | 40   | 19   |
| >TP53-Y107C KTYQGSYGF  | 407 | >TP53-Y107C KTYQGSDF  | 2028 | 1621 |
| >TP53-Y107C KTYQGSYGF  | 57  | >TP53-Y107C KTYQGSDF  | 68   | 11   |
| >TP53-Y107C KTYQGSYGF  | 402 | >TP53-Y107C KTYQGSDF  | 1145 | 743  |
| >TP53-Y107C KTYQGSYGF  | 55  | >TP53-Y107C KTYQGSDF  | 87   | 32   |
| >TP53-Y107C KTYQGSYGF  | 36  | >TP53-Y107C KTYQGSDF  | 151  | 115  |
| >TP53-Y107C KTYQGSY    | 249 | >TP53-Y107C KTYQGSDF  | 1008 | 759  |
| >TP53-Y107C KTYQGSYGF  | 2   | >TP53-Y107C KTYQGSDF  | 3    | 1    |
| >TP53-Y107C KTYQGSYGF  | 465 | >TP53-Y107C KTYQGSDF  | 690  | 225  |
| >TP53-Y107C KTYQGSYGF  | 3   | >TP53-Y107C KTYQGSDF  | 3    | 0    |
| >TP53-Y107C KTYQGSYGF  | 101 | >TP53-Y107C KTYQGSDF  | 399  | 298  |

|                        |       |                        |       |       |
|------------------------|-------|------------------------|-------|-------|
| >TP53-Y107C KTYQGSYGFR | 439   | >TP53-Y107C KTYQGSDGFF | 810   | 371   |
| >TP53-Y107C KTYQGSYGF  | 15    | >TP53-Y107C KTYQGSDGF  | 24    | 9     |
| >TP53-Y107C KTYQGSYGFR | 35    | >TP53-Y107C KTYQGSDGFF | 62    | 27    |
| >TP53-Y107C KTYQGSYGFR | 151   | >TP53-Y107C KTYQGSDGFF | 663   | 512   |
| >TP53-Y107C KTYQGSYGF  | 25    | >TP53-Y107C KTYQGSDGF  | 20    | 5     |
| >TP53-Y107C KTYQGSYGFR | 28    | >TP53-Y107C KTYQGSDGFF | 35    | 7     |
| >TP53-Y107C KTYQGSYGFR | 345   | >TP53-Y107C KTYQGSDGFF | 1267  | 922   |
| >TP53-Y107C KTYQGSYGFR | 370   | >TP53-Y107C KTYQGSDGFF | 1149  | 779   |
| >TP53-Y107C KTYQGSYGFR | 25    | >TP53-Y107C KTYQGSDGFF | 37    | 12    |
| >TP53-Y107C KTYQGSYGFR | 43    | >TP53-Y107C KTYQGSDGFF | 42    | 1     |
| >TP53-Y107C QKTYQGSY   | 308   | >TP53-Y107C QKTYQGS    | 34094 | 33786 |
| >TP53-Y107C QKTYQGSY   | 40    | >TP53-Y107C QKTYQGS    | 14217 | 14177 |
| >TP53-Y107C QKTYQGSYGI | 10    | >TP53-Y107C QKTYQGS    | 30    | 20    |
| >TP53-Y107C SQKTYQGSY  | 15    | >TP53-Y107C SQKTYQGS   | 19773 | 19758 |
| >TP53-Y107C SQKTYQGSY  | 38    | >TP53-Y107C SQKTYQGS   | 11497 | 11459 |
| >TP53-Y107C SQKTYQGSY  | 36    | >TP53-Y107C SQKTYQGS   | 45    | 9     |
| >TP53-Y107C SQKTYQGSY  | 198   | >TP53-Y107C SQKTYQGS   | 29999 | 29801 |
| >TP53-Y107C SQKTYQGSY  | 268   | >TP53-Y107C SQKTYQGS   | 256   | 12    |
| >TP53-Y107C SQKTYQGSY  | 19    | >TP53-Y107C SQKTYQGS   | 15765 | 15746 |
| >TP53-Y107C SQKTYQGSY  | 9     | >TP53-Y107C SQKTYQGS   | 20    | 11    |
| >TP53-Y107C PSQKTYQGSY | 71    | >TP53-Y107C PSQKTYQGS  | 17981 | 17910 |
| >TP53-Y107C PSQKTYQGSY | 228   | >TP53-Y107C PSQKTYQGS  | 24044 | 23816 |
| >TP53-Y107C YGFRLGFL   | 116   | >TP53-Y107C QGFRLGFL   | 256   | 140   |
| >TP53-Y107C YGFRLGFL   | 486   | >TP53-Y107C QGFRLGFL   | 2968  | 2482  |
| >TP53-Y107C YGFRLGFL   | 443   | >TP53-Y107C QGFRLGFL   | 6784  | 6341  |
| >TP53-Y107C YGFRLGFLH  | 89    | >TP53-Y107C QGFRLGFLH  | 717   | 628   |
| >TP53-Y107C SYGFRLGFL  | 95    | >TP53-Y107C SQGFRLGFL  | 24563 | 24468 |
| >TP53-Y107C SYGFRLGFL  | 12182 | >TP53-Y107C SQGFRLGFL  | 114   | 12068 |
| >TP53-Y107C SYGFRLGF   | 356   | >TP53-Y107C SQGFRLGF   | 15474 | 15118 |
| >TP53-Y107C SYGFRLGF   | 232   | >TP53-Y107C SQGFRLGF   | 9816  | 9584  |
| >TP53-Y107C SYGFRLGFL  | 319   | >TP53-Y107C SQGFRLGFL  | 15853 | 15534 |
| >TP53-Y107C SYGFRLGF   | 7     | >TP53-Y107C SQGFRLGF   | 7738  | 7731  |
| >TP53-Y107C SYGFRLGFL  | 12    | >TP53-Y107C SQGFRLGFL  | 17222 | 17210 |
| >TP53-Y107C SYGFRLGF   | 13547 | >TP53-Y107C SQGFRLGF   | 71    | 13476 |
| >TP53-Y107C SYGFRLGF   | 8000  | >TP53-Y107C SQGFRLGF   | 171   | 7829  |
| >TP53-Y107C SYGFRLGF   | 338   | >TP53-Y107C SQGFRLGF   | 11442 | 11104 |
| >TP53-Y107C SYGFRLGFL  | 139   | >TP53-Y107C SQGFRLGFL  | 4467  | 4328  |
| >TP53-Y107C SYGFRLGFL  | 222   | >TP53-Y107C SQGFRLGFL  | 22355 | 22133 |
| >TP53-Y107C VPSQKTYQGS | 92    | >TP53-Y107C VPSQKTYQGS | 15420 | 15328 |
| >TP53-Y107C VPSQKTYQGS | 19    | >TP53-Y107C VPSQKTYQGS | 2995  | 2976  |
| >TP53-Y107C VPSQKTYQGS | 254   | >TP53-Y107C VPSQKTYQGS | 14451 | 14197 |
| >TP53-Y107C VPSQKTYQGS | 15    | >TP53-Y107C VPSQKTYQGS | 22058 | 22043 |
| >TP53-Y107C GSYGFRLGF  | 78    | >TP53-Y107C GSQGFRLGF  | 4512  | 4434  |

|                         |     |                         |       |       |
|-------------------------|-----|-------------------------|-------|-------|
| >TP53-Y107C GSYGFRLGFL  | 227 | >TP53-Y107C GSQGFRLGFL  | 434   | 207   |
| >TP53-Y107C GSYGFRLGFL  | 237 | >TP53-Y107C GSQGFRLGFL  | 2564  | 2327  |
| >TP53-Y107C GSYGFRLGFL  | 491 | >TP53-Y107C GSQGFRLGFL  | 13146 | 12655 |
| >TP53-Y107C GSYGFRLGFL  | 98  | >TP53-Y107C GSQGFRLGFL  | 699   | 601   |
| >TP53-Y107C GSYGFRLGF   | 61  | >TP53-Y107C GSQGFRLGF   | 368   | 307   |
| >TP53-Y107C GSYGFRLGF   | 365 | >TP53-Y107C GSQGFRLGF   | 1040  | 675   |
| >TP53-Y107C GSYGFRLGF   | 111 | >TP53-Y107C GSQGFRLGF   | 1521  | 1410  |
| >TP53-Y107C GSYGFRLGF   | 4   | >TP53-Y107C GSQGFRLGF   | 20    | 16    |
| >TP53-Y107C GSYGFRLGFL  | 31  | >TP53-Y107C GSQGFRLGFL  | 797   | 766   |
| >TP53-Y107C GSYGFRLGF   | 222 | >TP53-Y107C GSQGFRLGF   | 1825  | 1603  |
| >TP53-Y107C GSYGFRLGF   | 264 | >TP53-Y107C GSQGFRLGF   | 2354  | 2090  |
| >TP53-Y107C GSYGFRLGF   | 44  | >TP53-Y107C GSQGFRLGF   | 120   | 76    |
| >TP53-Y107C GSYGFRLGFL  | 70  | >TP53-Y107C GSQGFRLGFL  | 76    | 6     |
| >TP53-Y107C GSYGFRLGFL  | 63  | >TP53-Y107C GSQGFRLGFL  | 183   | 120   |
| >TP53-Y107C QGSYGFRLGF  | 278 | >TP53-Y107C QGSQGFRLG   | 1449  | 1171  |
| >TP53-Y107C YQGSYGFRL   | 30  | >TP53-Y107C YQGSQGFRL   | 332   | 302   |
| >TP53-Y107C YQGSYGFRL   | 36  | >TP53-Y107C YQGSQGFRL   | 204   | 168   |
| >TP53-Y107C YQGSYGFRL   | 15  | >TP53-Y107C YQGSQGFRL   | 61    | 46    |
| >TP53-Y107C YQGSYGFRLC  | 189 | >TP53-Y107C YQGSQGFRLC  | 468   | 279   |
| >TP53-Y107C YQGSYGFRL   | 32  | >TP53-Y107C YQGSQGFRL   | 148   | 116   |
| >TP53-Y107C YQGSYGFRL   | 167 | >TP53-Y107C YQGSQGFRL   | 318   | 151   |
| >TP53-Y107C YQGSYGFR    | 54  | >TP53-Y107C YQGSQGFR    | 171   | 117   |
| >TP53-Y107C YQGSYGFR    | 476 | >TP53-Y107C YQGSQGFR    | 1024  | 548   |
| >TP53-Y107C YQGSYGFRL   | 211 | >TP53-Y107C YQGSQGFRL   | 375   | 164   |
| >TP53-Y107C YQGSYGFRLC  | 32  | >TP53-Y107C YQGSQGFRLC  | 36    | 4     |
| >TP53-Y107C YQGSYGFRLC  | 158 | >TP53-Y107C YQGSQGFRLC  | 130   | 28    |
| >TP53-Y107C YQGSYGFRL   | 77  | >TP53-Y107C YQGSQGFRL   | 289   | 212   |
| >TP53-Y107C YQGSYGFRLC  | 6   | >TP53-Y107C YQGSQGFRLC  | 8     | 2     |
| >TP53-Y107C YQGSYGFRL   | 145 | >TP53-Y107C YQGSQGFRL   | 688   | 543   |
| >TP53-Y107C YQGSYGFR    | 223 | >TP53-Y107C YQGSQGFR    | 275   | 52    |
| >TP53-Y107C TYQGSYGFRL  | 141 | >TP53-Y107C TYQGSQGFRI  | 53    | 88    |
| >TP53-Y107C TYQGSYGF    | 28  | >TP53-Y107C TYQGSQGF    | 60    | 32    |
| >TP53-Y107C TYQGSYGFRL  | 316 | >TP53-Y107C TYQGSQGFRI  | 384   | 68    |
| >TP53-Y107C TYQGSYGF    | 93  | >TP53-Y107C TYQGSQGF    | 241   | 148   |
| >TP53-Y107C TYQGSYGFRL  | 163 | >TP53-Y107C TYQGSQGFRI  | 257   | 94    |
| >TP53-Y107C TYQGSYGF    | 5   | >TP53-Y107C TYQGSQGF    | 6     | 1     |
| >TP53-Y107C TYQGSYGFRL  | 255 | >TP53-Y107C TYQGSQGFRL  | 1490  | 1235  |
| >TP53-Y107C TYQGSYGFRL  | 7   | >TP53-Y107C TYQGSQGFRI  | 10    | 3     |
| >TP53-Y107C TYQGSYGFRL  | 19  | >TP53-Y107C TYQGSQGFRL  | 56    | 37    |
| >TP53-Y107C TYQGSYGFRL  | 25  | >TP53-Y107C TYQGSQGFRL  | 37    | 12    |
| >TP53-Y107C TYQGSYGFRL  | 154 | >TP53-Y107C TYQGSQGFRL  | 147   | 7     |
| >TP53-Y107C TYQGSYGFRL  | 53  | >TP53-Y107C TYQGSQGFRL  | 75    | 22    |
| >TP53-Y107C KTYQGSYGFRL | 220 | >TP53-Y107C KTYQGSQGFRL | 375   | 155   |

|                        |     |                        |       |       |
|------------------------|-----|------------------------|-------|-------|
| >TP53-Y107C KTYQGSYGFR | 169 | >TP53-Y107C KTYQGSQGFI | 1130  | 961   |
| >TP53-Y107C KTYQGSYGFR | 260 | >TP53-Y107C KTYQGSQGFI | 837   | 577   |
| >TP53-Y107C KTYQGSYGF  | 391 | >TP53-Y107C KTYQGSQGF  | 1248  | 857   |
| >TP53-Y107C KTYQGSYGFR | 77  | >TP53-Y107C KTYQGSQGFI | 230   | 153   |
| >TP53-Y107C KTYQGSYGFR | 23  | >TP53-Y107C KTYQGSQGFI | 56    | 33    |
| >TP53-Y107C KTYQGSYGFR | 175 | >TP53-Y107C KTYQGSQGFI | 239   | 64    |
| >TP53-Y107C KTYQGSYGFR | 50  | >TP53-Y107C KTYQGSQGFI | 167   | 117   |
| >TP53-Y107C KTYQGSYGFR | 57  | >TP53-Y107C KTYQGSQGFI | 177   | 120   |
| >TP53-Y107C KTYQGSYGF  | 481 | >TP53-Y107C KTYQGSQGF  | 735   | 254   |
| >TP53-Y107C KTYQGSYGF  | 192 | >TP53-Y107C KTYQGSQGF  | 202   | 10    |
| >TP53-Y107C KTYQGSYGF  | 294 | >TP53-Y107C KTYQGSQGF  | 3860  | 3566  |
| >TP53-Y107C KTYQGSYGFR | 96  | >TP53-Y107C KTYQGSQGFI | 130   | 34    |
| >TP53-Y107C KTYQGSYGF  | 325 | >TP53-Y107C KTYQGSQGF  | 2566  | 2241  |
| >TP53-Y107C KTYQGSYGFR | 10  | >TP53-Y107C KTYQGSQGFI | 17    | 7     |
| >TP53-Y107C KTYQGSYGF  | 4   | >TP53-Y107C KTYQGSQGF  | 10    | 6     |
| >TP53-Y107C KTYQGSYGFR | 21  | >TP53-Y107C KTYQGSQGFI | 34    | 13    |
| >TP53-Y107C KTYQGSYGFR | 407 | >TP53-Y107C KTYQGSQGFI | 1854  | 1447  |
| >TP53-Y107C KTYQGSYGFR | 57  | >TP53-Y107C KTYQGSQGFI | 110   | 53    |
| >TP53-Y107C KTYQGSYGFR | 402 | >TP53-Y107C KTYQGSQGFI | 995   | 593   |
| >TP53-Y107C KTYQGSYGF  | 55  | >TP53-Y107C KTYQGSQGF  | 43    | 12    |
| >TP53-Y107C KTYQGSYGF  | 819 | >TP53-Y107C KTYQGSQGF  | 295   | 524   |
| >TP53-Y107C KTYQGSYGF  | 36  | >TP53-Y107C KTYQGSQGF  | 19    | 17    |
| >TP53-Y107C KTYQGSYG   | 249 | >TP53-Y107C KTYQGSQG   | 83    | 166   |
| >TP53-Y107C KTYQGSYGF  | 2   | >TP53-Y107C KTYQGSQGF  | 2     | 0     |
| >TP53-Y107C KTYQGSYGFR | 465 | >TP53-Y107C KTYQGSQGFI | 402   | 63    |
| >TP53-Y107C KTYQGSYGFR | 3   | >TP53-Y107C KTYQGSQGFI | 3     | 0     |
| >TP53-Y107C KTYQGSYGF  | 101 | >TP53-Y107C KTYQGSQGF  | 134   | 33    |
| >TP53-Y107C KTYQGSYGFR | 439 | >TP53-Y107C KTYQGSQGFI | 455   | 16    |
| >TP53-Y107C KTYQGSYGF  | 15  | >TP53-Y107C KTYQGSQGF  | 21    | 6     |
| >TP53-Y107C KTYQGSYGFR | 35  | >TP53-Y107C KTYQGSQGFI | 56    | 21    |
| >TP53-Y107C KTYQGSYGFR | 151 | >TP53-Y107C KTYQGSQGFI | 616   | 465   |
| >TP53-Y107C KTYQGSYGF  | 25  | >TP53-Y107C KTYQGSQGF  | 19    | 6     |
| >TP53-Y107C KTYQGSYGFR | 28  | >TP53-Y107C KTYQGSQGFI | 38    | 10    |
| >TP53-Y107C KTYQGSYGFR | 345 | >TP53-Y107C KTYQGSQGFI | 920   | 575   |
| >TP53-Y107C KTYQGSYGFR | 370 | >TP53-Y107C KTYQGSQGFI | 671   | 301   |
| >TP53-Y107C KTYQGSYGFR | 25  | >TP53-Y107C KTYQGSQGFI | 42    | 17    |
| >TP53-Y107C KTYQGSYGFR | 43  | >TP53-Y107C KTYQGSQGFI | 45    | 2     |
| >TP53-Y107C QKTYQGSY   | 308 | >TP53-Y107C QKTYQGSQ   | 20634 | 20326 |
| >TP53-Y107C QKTYQGSY   | 40  | >TP53-Y107C QKTYQGSQ   | 4135  | 4095  |
| >TP53-Y107C QKTYQGSYGI | 10  | >TP53-Y107C QKTYQGSQ   | 7     | 3     |
| >TP53-Y107C SQKTYQGSY  | 15  | >TP53-Y107C SQKTYQGSQ  | 3565  | 3550  |
| >TP53-Y107C SQKTYQGSY  | 38  | >TP53-Y107C SQKTYQGSQ  | 2159  | 2121  |
| >TP53-Y107C SQKTYQGSYC | 36  | >TP53-Y107C SQKTYQGSQ  | 33    | 3     |



|                         |      |                         |       |       |
|-------------------------|------|-------------------------|-------|-------|
| >TP53-Y107C SQKTYQGSY   | 198  | >TP53-Y107C SQKTYQGSQ   | 19763 | 19565 |
| >TP53-Y107C SQKTYQGSYC  | 268  | >TP53-Y107C SQKTYQGSQC  | 150   | 118   |
| >TP53-Y107C SQKTYQGSY   | 19   | >TP53-Y107C SQKTYQGSQ   | 4784  | 4765  |
| >TP53-Y107C SQKTYQGSYC  | 9    | >TP53-Y107C SQKTYQGSQC  | 7     | 2     |
| >TP53-Y107C PSQKTYQGSY  | 71   | >TP53-Y107C PSQKTYQGSQ  | 14139 | 14068 |
| >TP53-Y107C PSQKTYQGSYC | 228  | >TP53-Y107C PSQKTYQGSQC | 18876 | 18648 |
| >TP53-Y126C YSPALNKMF   | 1122 | >TP53-Y126C CSPALNKMF   | 223   | 899   |
| >TP53-Y126C YSPALNKMF   | 384  | >TP53-Y126C CSPALNKMF   | 576   | 192   |
| >TP53-Y126C YSPALNKMF   | 104  | >TP53-Y126C CSPALNKMF   | 1615  | 1511  |
| >TP53-Y126C YSPALNKMF   | 43   | >TP53-Y126C CSPALNKMF   | 707   | 664   |
| >TP53-Y126C YSPALNKM    | 40   | >TP53-Y126C CSPALNKM    | 61    | 21    |
| >TP53-Y126C YSPALNKMF   | 3    | >TP53-Y126C CSPALNKMF   | 9     | 6     |
| >TP53-Y126C YSPALNKMFC  | 22   | >TP53-Y126C CSPALNKMFC  | 191   | 169   |
| >TP53-Y126C YSPALNKMFC  | 124  | >TP53-Y126C CSPALNKMFC  | 1277  | 1153  |
| >TP53-Y126C YSPALNKM    | 67   | >TP53-Y126C CSPALNKM    | 716   | 649   |
| >TP53-Y126C YSPALNKMF   | 103  | >TP53-Y126C CSPALNKMF   | 2848  | 2745  |
| >TP53-Y126C TYSPALNKM   | 136  | >TP53-Y126C TCSPALNKM   | 30614 | 30478 |
| >TP53-Y126C TYSPALNK    | 220  | >TP53-Y126C TCSPALNK    | 3400  | 3180  |
| >TP53-Y126C TYSPALNKMF  | 179  | >TP53-Y126C TCSPALNKMF  | 12295 | 12116 |
| >TP53-Y126C TYSPALNKMF  | 64   | >TP53-Y126C TCSPALNKMF  | 11638 | 11574 |
| >TP53-Y126C TYSPALNKM   | 27   | >TP53-Y126C TCSPALNKM   | 20942 | 20915 |
| >TP53-Y126C TYSPALNKMF  | 5    | >TP53-Y126C TCSPALNKMF  | 4200  | 4195  |
| >TP53-Y126C TYSPALNK    | 222  | >TP53-Y126C TCSPALNK    | 2705  | 2483  |
| >TP53-Y126C TYSPALNKMF  | 439  | >TP53-Y126C TCSPALNKMF  | 27520 | 27081 |
| >TP53-Y126C SGTAKSVTCT  | 374  | >TP53-Y126C SGTAKSVTCT  | 32245 | 31871 |
| >TP53-Y126C CTYSPALNK   | 30   | >TP53-Y126C CTCSPALNK   | 124   | 94    |
| >TP53-Y126C CTYSPALNK   | 11   | >TP53-Y126C CTCSPALNK   | 20    | 9     |
| >TP53-Y126C CTYSPALNKM  | 343  | >TP53-Y126C CTCSPALNKM  | 726   | 383   |
| >TP53-Y126C CTYSPALNKM  | 63   | >TP53-Y126C CTCSPALNKM  | 72    | 9     |
| >TP53-Y126C CTYSPALNKM  | 380  | >TP53-Y126C CTCSPALNKM  | 401   | 21    |
| >TP53-Y126C CTYSPALNKM  | 246  | >TP53-Y126C CTCSPALNKM  | 294   | 48    |
| >TP53-Y126C CTYSPALNK   | 215  | >TP53-Y126C CTCSPALNK   | 584   | 369   |
| >TP53-Y126C CTYSPALNK   | 30   | >TP53-Y126C CTCSPALNK   | 155   | 125   |
| >TP53-Y126C CTYSPALNKM  | 488  | >TP53-Y126C CTCSPALNKM  | 7905  | 7417  |
| >TP53-Y126C CTYSPALNKM  | 23   | >TP53-Y126C CTCSPALNKM  | 374   | 351   |
| >TP53-Y126C CTYSPALNKM  | 24   | >TP53-Y126C CTCSPALNKM  | 148   | 124   |
| >TP53-Y126C CTYSPALNKM  | 5    | >TP53-Y126C CTCSPALNKM  | 14    | 9     |
| >TP53-Y126C CTYSPALNKM  | 76   | >TP53-Y126C CTCSPALNKM  | 309   | 233   |
| >TP53-Y126C CTYSPALNKM  | 146  | >TP53-Y126C CTCSPALNKM  | 603   | 457   |
| >TP53-Y126C CTYSPALNKM  | 30   | >TP53-Y126C CTCSPALNKM  | 60    | 30    |
| >TP53-Y126C CTYSPALNKM  | 13   | >TP53-Y126C CTCSPALNKM  | 48    | 35    |
| >TP53-Y126C CTYSPALNKM  | 358  | >TP53-Y126C CTCSPALNKM  | 1055  | 697   |
| >TP53-Y126C TCTYSPALNK  | 453  | >TP53-Y126C TCTCSPALNK  | 477   | 24    |

|                        |     |                        |       |       |
|------------------------|-----|------------------------|-------|-------|
| >TP53-Y126C VTCTYSPA   | 415 | >TP53-Y126C VTCTCSPA   | 8851  | 8436  |
| >TP53-Y126C VTCTYSPAL  | 397 | >TP53-Y126C VTCTCSPAL  | 858   | 461   |
| >TP53-Y126C VTCTYSPALN | 80  | >TP53-Y126C VTCTCSPALN | 82    | 2     |
| >TP53-Y126C VTCTYSPALN | 14  | >TP53-Y126C VTCTCSPALN | 18    | 4     |
| >TP53-Y126C VTCTYSPALN | 146 | >TP53-Y126C VTCTCSPALN | 326   | 180   |
| >TP53-Y126C VTCTYSPALN | 490 | >TP53-Y126C VTCTCSPALN | 746   | 256   |
| >TP53-Y126C VTCTYSPAL  | 12  | >TP53-Y126C VTCTCSPAL  | 20    | 8     |
| >TP53-Y126C VTCTYSPAL  | 66  | >TP53-Y126C VTCTCSPAL  | 191   | 125   |
| >TP53-Y126C VTCTYSPAL  | 951 | >TP53-Y126C VTCTCSPAL  | 477   | 474   |
| >TP53-Y126C SVTCTYSPA  | 118 | >TP53-Y126C SVTCTCSPA  | 308   | 190   |
| >TP53-Y126C SVTCTYSPA  | 468 | >TP53-Y126C SVTCTCSPA  | 595   | 127   |
| >TP53-Y126C SVTCTYSPAL | 268 | >TP53-Y126C SVTCTCSPAL | 164   | 104   |
| >TP53-Y126C SVTCTYSPA  | 241 | >TP53-Y126C SVTCTCSPA  | 1900  | 1659  |
| >TP53-Y126C SVTCTYSPA  | 45  | >TP53-Y126C SVTCTCSPA  | 119   | 74    |
| >TP53-Y126C SVTCTYSPAL | 149 | >TP53-Y126C SVTCTCSPAL | 625   | 476   |
| >TP53-Y126C KSVTCTYSPA | 396 | >TP53-Y126C KSVTCTCSPA | 638   | 242   |
| >TP53-Y126C KSVTCTYSPA | 149 | >TP53-Y126C KSVTCTCSPA | 337   | 188   |
| >TP53-Y126C KSVTCTYSPA | 488 | >TP53-Y126C KSVTCTCSPA | 618   | 130   |
| >TP53-Y126C KSVTCTYSPA | 107 | >TP53-Y126C KSVTCTCSPA | 252   | 145   |
| >TP53-Y126C KSVTCTYSPA | 349 | >TP53-Y126C KSVTCTCSPA | 625   | 276   |
| >TP53-Y126C KSVTCTYSPA | 89  | >TP53-Y126C KSVTCTCSPA | 127   | 38    |
| >TP53-Y126C KSVTCTYSPA | 6   | >TP53-Y126C KSVTCTCSPA | 6     | 0     |
| >TP53-Y126C KSVTCTYSPA | 113 | >TP53-Y126C KSVTCTCSPA | 132   | 19    |
| >TP53-Y126C KSVTCTYSPA | 198 | >TP53-Y126C KSVTCTCSPA | 642   | 444   |
| >TP53-Y126C AKSVTCTY   | 8   | >TP53-Y126C AKSVTCTC   | 1315  | 1307  |
| >TP53-Y126C AKSVTCTYSP | 483 | >TP53-Y126C AKSVTCTCSP | 684   | 201   |
| >TP53-Y126C AKSVTCTYSP | 56  | >TP53-Y126C AKSVTCTCSP | 91    | 35    |
| >TP53-Y126C TAKSVTCTY  | 312 | >TP53-Y126C TAKSVTCTC  | 32515 | 32203 |
| >TP53-Y126C TAKSVTCTY  | 247 | >TP53-Y126C TAKSVTCTC  | 21351 | 21104 |
| >TP53-Y126C TAKSVTCTY  | 78  | >TP53-Y126C TAKSVTCTC  | 16335 | 16257 |
| >TP53-Y126C TAKSVTCTY  | 430 | >TP53-Y126C TAKSVTCTC  | 12988 | 12558 |
| >TP53-Y126C TAKSVTCTY  | 265 | >TP53-Y126C TAKSVTCTC  | 23813 | 23548 |
| >TP53-Y126C TAKSVTCTY  | 100 | >TP53-Y126C TAKSVTCTC  | 18476 | 18376 |
| >TP53-Y126C TAKSVTCTY  | 336 | >TP53-Y126C TAKSVTCTC  | 20745 | 20409 |
| >TP53-Y126C GTAKSVTCTY | 466 | >TP53-Y126C GTAKSVTCTC | 34414 | 33948 |
| >TP53-Y126C GTAKSVTCTY | 122 | >TP53-Y126C GTAKSVTCTC | 26016 | 25894 |
| >TP53-Y126C GTAKSVTCTY | 69  | >TP53-Y126C GTAKSVTCTC | 26044 | 25975 |
| >TP53-Y126C GTAKSVTCTY | 71  | >TP53-Y126C GTAKSVTCTC | 13370 | 13299 |
| >TP53-Y126C GTAKSVTCTY | 461 | >TP53-Y126C GTAKSVTCTC | 13251 | 12790 |
| >TP53-Y126C GTAKSVTCTY | 8   | >TP53-Y126C GTAKSVTCTC | 7479  | 7471  |
| >TP53-Y126C GTAKSVTCTY | 296 | >TP53-Y126C GTAKSVTCTC | 11753 | 11457 |
| >TP53-Y126C GTAKSVTCTY | 39  | >TP53-Y126C GTAKSVTCTC | 12259 | 12220 |
| >TP53-Y126C GTAKSVTCTY | 143 | >TP53-Y126C GTAKSVTCTC | 35942 | 35799 |

|                         |       |                         |       |       |
|-------------------------|-------|-------------------------|-------|-------|
| >TP53-Y126C YSPALNKMF   | 1122  | >TP53-Y126C DSPALNKMF   | 481   | 641   |
| >TP53-Y126C YSPALNKMF   | 384   | >TP53-Y126C DSPALNKMF   | 13298 | 12914 |
| >TP53-Y126C YSPALNKMF   | 104   | >TP53-Y126C DSPALNKMF   | 6156  | 6052  |
| >TP53-Y126C YSPALNKMF   | 43    | >TP53-Y126C DSPALNKMF   | 3216  | 3173  |
| >TP53-Y126C YSPALNKM    | 40    | >TP53-Y126C DSPALNKM    | 13774 | 13734 |
| >TP53-Y126C YSPALNKMF   | 3     | >TP53-Y126C DSPALNKMF   | 239   | 236   |
| >TP53-Y126C YSPALNKMF(C | 22    | >TP53-Y126C DSPALNKMF(C | 4399  | 4377  |
| >TP53-Y126C YSPALNKMF(C | 124   | >TP53-Y126C DSPALNKMF(C | 14606 | 14482 |
| >TP53-Y126C YSPALNKM    | 67    | >TP53-Y126C DSPALNKM    | 2936  | 2869  |
| >TP53-Y126C YSPALNKMF   | 103   | >TP53-Y126C DSPALNKMF   | 5718  | 5615  |
| >TP53-Y126C TYSPALNKM   | 136   | >TP53-Y126C TDSPALNKM   | 32146 | 32010 |
| >TP53-Y126C TYSPALNK    | 220   | >TP53-Y126C TDSPALNK    | 4778  | 4558  |
| >TP53-Y126C TYSPALNKMF  | 179   | >TP53-Y126C TDSPALNKMI  | 24958 | 24779 |
| >TP53-Y126C TYSPALNKMF  | 64    | >TP53-Y126C TDSPALNKMI  | 22585 | 22521 |
| >TP53-Y126C TYSPALNKM   | 27    | >TP53-Y126C TDSPALNKM   | 24026 | 23999 |
| >TP53-Y126C TYSPALNKMF  | 5     | >TP53-Y126C TDSPALNKMI  | 15977 | 15972 |
| >TP53-Y126C TYSPALNK    | 222   | >TP53-Y126C TDSPALNK    | 12789 | 12567 |
| >TP53-Y126C TYSPALNKMF  | 439   | >TP53-Y126C TDSPALNKMI  | 30019 | 29580 |
| >TP53-Y126C SGTAKSVTCT  | 374   | >TP53-Y126C SGTAKSVTCT  | 34509 | 34135 |
| >TP53-Y126C CTYSPALNKM  | 13403 | >TP53-Y126C CTDSPALNKM  | 193   | 13210 |
| >TP53-Y126C CTYSPALNK   | 30    | >TP53-Y126C CTDSPALNK   | 236   | 206   |
| >TP53-Y126C CTYSPALNK   | 11    | >TP53-Y126C CTDSPALNK   | 41    | 30    |
| >TP53-Y126C CTYSPALNKM  | 343   | >TP53-Y126C CTDSPALNKM  | 3095  | 2752  |
| >TP53-Y126C CTYSPALNKM  | 63    | >TP53-Y126C CTDSPALNKM  | 5209  | 5146  |
| >TP53-Y126C CTYSPALNKM  | 380   | >TP53-Y126C CTDSPALNKM  | 16699 | 16319 |
| >TP53-Y126C CTYSPALNKM  | 246   | >TP53-Y126C CTDSPALNKM  | 2753  | 2507  |
| >TP53-Y126C CTYSPALNK   | 215   | >TP53-Y126C CTDSPALNK   | 7833  | 7618  |
| >TP53-Y126C CTYSPALNK   | 30    | >TP53-Y126C CTDSPALNK   | 657   | 627   |
| >TP53-Y126C CTYSPALNKM  | 488   | >TP53-Y126C CTDSPALNKM  | 1505  | 1017  |
| >TP53-Y126C CTYSPALNKM  | 23    | >TP53-Y126C CTDSPALNKM  | 3420  | 3397  |
| >TP53-Y126C CTYSPALNKM  | 24    | >TP53-Y126C CTDSPALNKM  | 312   | 288   |
| >TP53-Y126C CTYSPALNKM  | 5     | >TP53-Y126C CTDSPALNKM  | 29    | 24    |
| >TP53-Y126C CTYSPALNKM  | 76    | >TP53-Y126C CTDSPALNKM  | 189   | 113   |
| >TP53-Y126C CTYSPALNKM  | 146   | >TP53-Y126C CTDSPALNKM  | 379   | 233   |
| >TP53-Y126C CTYSPALNKM  | 30    | >TP53-Y126C CTDSPALNKM  | 98    | 68    |
| >TP53-Y126C CTYSPALNKM  | 13    | >TP53-Y126C CTDSPALNKM  | 78    | 65    |
| >TP53-Y126C CTYSPALNKM  | 358   | >TP53-Y126C CTDSPALNKM  | 4800  | 4442  |
| >TP53-Y126C TCTYSPALNKI | 453   | >TP53-Y126C TCTDSPALNK  | 768   | 315   |
| >TP53-Y126C VTCTYSPA    | 415   | >TP53-Y126C VTCTDSPA    | 22036 | 21621 |
| >TP53-Y126C VTCTYSPAL   | 397   | >TP53-Y126C VTCTDSPAL   | 1349  | 952   |
| >TP53-Y126C VTCTYSPALN  | 80    | >TP53-Y126C VTCTDSPALN  | 178   | 98    |
| >TP53-Y126C VTCTYSPALN  | 14    | >TP53-Y126C VTCTDSPALN  | 24    | 10    |
| >TP53-Y126C VTCTYSPAL   | 720   | >TP53-Y126C VTCTDSPAL   | 348   | 372   |

|                         |     |                        |       |       |
|-------------------------|-----|------------------------|-------|-------|
| >TP53-Y126L VTCTYSPALN  | 146 | >TP53-Y126L VTCTDSPALN | 561   | 415   |
| >TP53-Y126L VTCTYSPALN  | 490 | >TP53-Y126L VTCTDSPALN | 812   | 322   |
| >TP53-Y126L VTCTYSPAL   | 12  | >TP53-Y126L VTCTDSPAL  | 48    | 36    |
| >TP53-Y126L VTCTYSPAL   | 66  | >TP53-Y126L VTCTDSPAL  | 733   | 667   |
| >TP53-Y126L SVTCTYSPA   | 118 | >TP53-Y126L SVTCTDSPA  | 1397  | 1279  |
| >TP53-Y126L SVTCTYSPA   | 468 | >TP53-Y126L SVTCTDSPA  | 1230  | 762   |
| >TP53-Y126L SVTCTYSPAL  | 268 | >TP53-Y126L SVTCTDSPAL | 430   | 162   |
| >TP53-Y126L SVTCTYSPA   | 241 | >TP53-Y126L SVTCTDSPA  | 2749  | 2508  |
| >TP53-Y126L SVTCTYSPA   | 45  | >TP53-Y126L SVTCTDSPA  | 79    | 34    |
| >TP53-Y126L SVTCTYSPAL  | 149 | >TP53-Y126L SVTCTDSPAL | 1023  | 874   |
| >TP53-Y126L KSVTCTYSPA  | 396 | >TP53-Y126L KSVTCTDSPA | 703   | 307   |
| >TP53-Y126L KSVTCTYSPA  | 149 | >TP53-Y126L KSVTCTDSPA | 1044  | 895   |
| >TP53-Y126L KSVTCTYSPA  | 488 | >TP53-Y126L KSVTCTDSPA | 1624  | 1136  |
| >TP53-Y126L KSVTCTYSPA  | 107 | >TP53-Y126L KSVTCTDSPA | 270   | 163   |
| >TP53-Y126L KSVTCTYSPA  | 349 | >TP53-Y126L KSVTCTDSPA | 1534  | 1185  |
| >TP53-Y126L KSVTCTYSPA  | 89  | >TP53-Y126L KSVTCTDSPA | 204   | 115   |
| >TP53-Y126L KSVTCTYSPA  | 6   | >TP53-Y126L KSVTCTDSPA | 13    | 7     |
| >TP53-Y126L KSVTCTYSPA  | 113 | >TP53-Y126L KSVTCTDSPA | 235   | 122   |
| >TP53-Y126L KSVTCTYSPA  | 198 | >TP53-Y126L KSVTCTDSPA | 1002  | 804   |
| >TP53-Y126L AKSVTCTY    | 8   | >TP53-Y126L AKSVTCTD   | 5203  | 5195  |
| >TP53-Y126L AKSVTCTYSP  | 483 | >TP53-Y126L AKSVTCTDSP | 1272  | 789   |
| >TP53-Y126L AKSVTCTYSP, | 56  | >TP53-Y126L AKSVTCTDSP | 126   | 70    |
| >TP53-Y126L TAKSVTCTY   | 312 | >TP53-Y126L TAKSVTCTD  | 34805 | 34493 |
| >TP53-Y126L TAKSVTCTY   | 247 | >TP53-Y126L TAKSVTCTD  | 15898 | 15651 |
| >TP53-Y126L TAKSVTCTY   | 78  | >TP53-Y126L TAKSVTCTD  | 20287 | 20209 |
| >TP53-Y126L TAKSVTCTY   | 430 | >TP53-Y126L TAKSVTCTD  | 21104 | 20674 |
| >TP53-Y126L TAKSVTCTY   | 265 | >TP53-Y126L TAKSVTCTD  | 25721 | 25456 |
| >TP53-Y126L TAKSVTCTY   | 100 | >TP53-Y126L TAKSVTCTD  | 23025 | 22925 |
| >TP53-Y126L TAKSVTCTY   | 336 | >TP53-Y126L TAKSVTCTD  | 26726 | 26390 |
| >TP53-Y126L GTAKSVTCTY  | 466 | >TP53-Y126L GTAKSVTCTD | 32938 | 32472 |
| >TP53-Y126L GTAKSVTCTY  | 122 | >TP53-Y126L GTAKSVTCTD | 27275 | 27153 |
| >TP53-Y126L GTAKSVTCTY  | 69  | >TP53-Y126L GTAKSVTCTD | 24907 | 24838 |
| >TP53-Y126L GTAKSVTCTY  | 71  | >TP53-Y126L GTAKSVTCTD | 17350 | 17279 |
| >TP53-Y126L GTAKSVTCTY  | 461 | >TP53-Y126L GTAKSVTCTD | 22039 | 21578 |
| >TP53-Y126L GTAKSVTCTY  | 8   | >TP53-Y126L GTAKSVTCTD | 13057 | 13049 |
| >TP53-Y126L GTAKSVTCTY  | 296 | >TP53-Y126L GTAKSVTCTD | 18678 | 18382 |
| >TP53-Y126L GTAKSVTCTY  | 39  | >TP53-Y126L GTAKSVTCTD | 16118 | 16079 |
| >TP53-Y126L GTAKSVTCTY  | 143 | >TP53-Y126L GTAKSVTCTD | 34864 | 34721 |
| >TP53-Y126N YSPALNKMF   | 384 | >TP53-Y126N NSPALNKMF  | 4383  | 3999  |
| >TP53-Y126N YSPALNKMF   | 104 | >TP53-Y126N NSPALNKMF  | 2537  | 2433  |
| >TP53-Y126N YSPALNKMF   | 43  | >TP53-Y126N NSPALNKMF  | 1597  | 1554  |
| >TP53-Y126N YSPALNKM    | 40  | >TP53-Y126N NSPALNKM   | 543   | 503   |
| >TP53-Y126N YSPALNKMF   | 3   | >TP53-Y126N NSPALNKMF  | 51    | 48    |

|                        |     |                        |       |       |
|------------------------|-----|------------------------|-------|-------|
| >TP53-Y126N YSPALNKMF  | 22  | >TP53-Y126N NSPALNKMF  | 1241  | 1219  |
| >TP53-Y126N YSPALNKMF  | 124 | >TP53-Y126N NSPALNKMF  | 6798  | 6674  |
| >TP53-Y126N YSPALNKM   | 67  | >TP53-Y126N NSPALNKM   | 976   | 909   |
| >TP53-Y126N YSPALNKMF  | 103 | >TP53-Y126N NSPALNKMF  | 2604  | 2501  |
| >TP53-Y126N TYSPALNKM  | 136 | >TP53-Y126N TNSPALNKM  | 28706 | 28570 |
| >TP53-Y126N TYSPALNK   | 220 | >TP53-Y126N TNSPALNK   | 900   | 680   |
| >TP53-Y126N TYSPALNKMF | 179 | >TP53-Y126N TNSPALNKMF | 19595 | 19416 |
| >TP53-Y126N TYSPALNKMF | 64  | >TP53-Y126N TNSPALNKMF | 17429 | 17365 |
| >TP53-Y126N TYSPALNKM  | 27  | >TP53-Y126N TNSPALNKM  | 22352 | 22325 |
| >TP53-Y126N TYSPALNKMF | 5   | >TP53-Y126N TNSPALNKMF | 9902  | 9897  |
| >TP53-Y126N TYSPALNK   | 222 | >TP53-Y126N TNSPALNK   | 5241  | 5019  |
| >TP53-Y126N TYSPALNKMF | 439 | >TP53-Y126N TNSPALNKMF | 26367 | 25928 |
| >TP53-Y126N SGTAKSVTCT | 374 | >TP53-Y126N SGTAKSVTCT | 31798 | 31424 |
| >TP53-Y126N CTYSPALNK  | 30  | >TP53-Y126N CTNSPALNK  | 59    | 29    |
| >TP53-Y126N CTYSPALNK  | 11  | >TP53-Y126N CTNSPALNK  | 18    | 7     |
| >TP53-Y126N CTYSPALNKM | 343 | >TP53-Y126N CTNSPALNKM | 1939  | 1596  |
| >TP53-Y126N CTYSPALNKM | 63  | >TP53-Y126N CTNSPALNKM | 291   | 228   |
| >TP53-Y126N CTYSPALNKM | 380 | >TP53-Y126N CTNSPALNKM | 2063  | 1683  |
| >TP53-Y126N CTYSPALNKM | 246 | >TP53-Y126N CTNSPALNKM | 863   | 617   |
| >TP53-Y126N CTYSPALNK  | 215 | >TP53-Y126N CTNSPALNK  | 250   | 35    |
| >TP53-Y126N CTYSPALNK  | 30  | >TP53-Y126N CTNSPALNK  | 133   | 103   |
| >TP53-Y126N CTYSPALNKM | 488 | >TP53-Y126N CTNSPALNKM | 2983  | 2495  |
| >TP53-Y126N CTYSPALNKM | 23  | >TP53-Y126N CTNSPALNKM | 160   | 137   |
| >TP53-Y126N CTYSPALNKM | 24  | >TP53-Y126N CTNSPALNKM | 199   | 175   |
| >TP53-Y126N CTYSPALNKM | 5   | >TP53-Y126N CTNSPALNKM | 14    | 9     |
| >TP53-Y126N CTYSPALNKM | 76  | >TP53-Y126N CTNSPALNKM | 166   | 90    |
| >TP53-Y126N CTYSPALNKM | 146 | >TP53-Y126N CTNSPALNKM | 328   | 182   |
| >TP53-Y126N CTYSPALNKM | 30  | >TP53-Y126N CTNSPALNKM | 63    | 33    |
| >TP53-Y126N CTYSPALNKM | 13  | >TP53-Y126N CTNSPALNKM | 39    | 26    |
| >TP53-Y126N CTYSPALNKM | 358 | >TP53-Y126N CTNSPALNKM | 3631  | 3273  |
| >TP53-Y126N TCTYSPALNK | 453 | >TP53-Y126N TCTNSPALNK | 387   | 66    |
| >TP53-Y126N VTCTYSPA   | 415 | >TP53-Y126N VTCTNSPA   | 15655 | 15240 |
| >TP53-Y126N VTCTYSPAL  | 397 | >TP53-Y126N VTCTNSPAL  | 2101  | 1704  |
| >TP53-Y126N VTCTYSPALN | 80  | >TP53-Y126N VTCTNSPALN | 98    | 18    |
| >TP53-Y126N VTCTYSPALN | 14  | >TP53-Y126N VTCTNSPALN | 19    | 5     |
| >TP53-Y126N VTCTYSPALN | 146 | >TP53-Y126N VTCTNSPALN | 148   | 2     |
| >TP53-Y126N VTCTYSPALN | 490 | >TP53-Y126N VTCTNSPALN | 505   | 15    |
| >TP53-Y126N VTCTYSPAL  | 12  | >TP53-Y126N VTCTNSPAL  | 16    | 4     |
| >TP53-Y126N VTCTYSPAL  | 66  | >TP53-Y126N VTCTNSPAL  | 288   | 222   |
| >TP53-Y126N SVTCTYSPA  | 118 | >TP53-Y126N SVTCTNSPA  | 544   | 426   |
| >TP53-Y126N SVTCTYSPA  | 468 | >TP53-Y126N SVTCTNSPA  | 835   | 367   |
| >TP53-Y126N SVTCTYSPAL | 268 | >TP53-Y126N SVTCTNSPAL | 545   | 277   |
| >TP53-Y126N SVTCTYSPA  | 241 | >TP53-Y126N SVTCTNSPA  | 516   | 275   |

|                         |      |                        |       |       |
|-------------------------|------|------------------------|-------|-------|
| >TP53-Y126N SVTCTYSPA   | 45   | >TP53-Y126N SVTCTNSPA  | 53    | 8     |
| >TP53-Y126N SVTCTYSPAL  | 149  | >TP53-Y126N SVTCTNSPAL | 243   | 94    |
| >TP53-Y126N KSVTCTYSPA  | 396  | >TP53-Y126N KSVTCTNSPA | 782   | 386   |
| >TP53-Y126N KSVTCTYSPA  | 149  | >TP53-Y126N KSVTCTNSPA | 178   | 29    |
| >TP53-Y126N KSVTCTYSPA  | 488  | >TP53-Y126N KSVTCTNSPA | 438   | 50    |
| >TP53-Y126N KSVTCTYSPA  | 107  | >TP53-Y126N KSVTCTNSPA | 185   | 78    |
| >TP53-Y126N KSVTCTYSPA  | 349  | >TP53-Y126N KSVTCTNSPA | 496   | 147   |
| >TP53-Y126N KSVTCTYSPA  | 89   | >TP53-Y126N KSVTCTNSPA | 107   | 18    |
| >TP53-Y126N KSVTCTYSPA  | 6    | >TP53-Y126N KSVTCTNSPA | 9     | 3     |
| >TP53-Y126N KSVTCTYSPA  | 113  | >TP53-Y126N KSVTCTNSPA | 224   | 111   |
| >TP53-Y126N KSVTCTYSPA  | 198  | >TP53-Y126N KSVTCTNSPA | 493   | 295   |
| >TP53-Y126N AKSVTCTY    | 8    | >TP53-Y126N AKSVTCTN   | 2249  | 2241  |
| >TP53-Y126N AKSVTCTYSP  | 483  | >TP53-Y126N AKSVTCTNSP | 533   | 50    |
| >TP53-Y126N AKSVTCTYSP, | 56   | >TP53-Y126N AKSVTCTNSP | 76    | 20    |
| >TP53-Y126N TAKSVTCTY   | 312  | >TP53-Y126N TAKSVTCTN  | 30762 | 30450 |
| >TP53-Y126N TAKSVTCTY   | 247  | >TP53-Y126N TAKSVTCTN  | 6230  | 5983  |
| >TP53-Y126N TAKSVTCTY   | 78   | >TP53-Y126N TAKSVTCTN  | 17253 | 17175 |
| >TP53-Y126N TAKSVTCTY   | 430  | >TP53-Y126N TAKSVTCTN  | 19110 | 18680 |
| >TP53-Y126N TAKSVTCTY   | 265  | >TP53-Y126N TAKSVTCTN  | 23977 | 23712 |
| >TP53-Y126N TAKSVTCTY   | 100  | >TP53-Y126N TAKSVTCTN  | 20002 | 19902 |
| >TP53-Y126N TAKSVTCTY   | 336  | >TP53-Y126N TAKSVTCTN  | 18474 | 18138 |
| >TP53-Y126N GTAKSVTCTY  | 466  | >TP53-Y126N GTAKSVTCTN | 31991 | 31525 |
| >TP53-Y126N GTAKSVTCTY  | 122  | >TP53-Y126N GTAKSVTCTN | 25986 | 25864 |
| >TP53-Y126N GTAKSVTCTY  | 69   | >TP53-Y126N GTAKSVTCTN | 23450 | 23381 |
| >TP53-Y126N GTAKSVTCTY  | 71   | >TP53-Y126N GTAKSVTCTN | 14451 | 14380 |
| >TP53-Y126N GTAKSVTCTY  | 461  | >TP53-Y126N GTAKSVTCTN | 19201 | 18740 |
| >TP53-Y126N GTAKSVTCTY  | 8    | >TP53-Y126N GTAKSVTCTN | 9034  | 9026  |
| >TP53-Y126N GTAKSVTCTY  | 296  | >TP53-Y126N GTAKSVTCTN | 17618 | 17322 |
| >TP53-Y126N GTAKSVTCTY  | 39   | >TP53-Y126N GTAKSVTCTN | 14168 | 14129 |
| >TP53-Y126N GTAKSVTCTY  | 143  | >TP53-Y126N GTAKSVTCTN | 33971 | 33828 |
| >TP53-Y126S YSPALNKMF   | 384  | >TP53-Y126S SSPALNKMF  | 2660  | 2276  |
| >TP53-Y126S YSPALNKMF   | 104  | >TP53-Y126S SSPALNKMF  | 682   | 578   |
| >TP53-Y126S YSPALNKMF   | 43   | >TP53-Y126S SSPALNKMF  | 291   | 248   |
| >TP53-Y126S YSPALNKM    | 40   | >TP53-Y126S SSPALNKM   | 169   | 129   |
| >TP53-Y126S YSPALNKMF   | 3    | >TP53-Y126S SSPALNKMF  | 5     | 2     |
| >TP53-Y126S YSPALNKMFC  | 22   | >TP53-Y126S SSPALNKMFC | 82    | 60    |
| >TP53-Y126S YSPALNKMFC  | 124  | >TP53-Y126S SSPALNKMFC | 566   | 442   |
| >TP53-Y126S YSPALNKM    | 67   | >TP53-Y126S SSPALNKM   | 711   | 644   |
| >TP53-Y126S YSPALNKMF   | 103  | >TP53-Y126S SSPALNKMF  | 197   | 94    |
| >TP53-Y126S TYSPALNKM   | 136  | >TP53-Y126S TSSPALNKM  | 30202 | 30066 |
| >TP53-Y126S TYSPALNK    | 3681 | >TP53-Y126S TSSPALNK   | 194   | 3487  |
| >TP53-Y126S TYSPALNK    | 220  | >TP53-Y126S TSSPALNK   | 14    | 206   |
| >TP53-Y126S TYSPALNKMF  | 179  | >TP53-Y126S TSSPALNKMF | 13639 | 13460 |

|                        |       |                        |       |       |
|------------------------|-------|------------------------|-------|-------|
| >TP53-Y126S TYSPALNKMF | 64    | >TP53-Y126S TSSPALNKMF | 10627 | 10563 |
| >TP53-Y126S TYSPALNKM  | 27    | >TP53-Y126S TSSPALNKM  | 18513 | 18486 |
| >TP53-Y126S TYSPALNKMF | 5     | >TP53-Y126S TSSPALNKMF | 2712  | 2707  |
| >TP53-Y126S TYSPALNK   | 222   | >TP53-Y126S TSSPALNK   | 216   | 6     |
| >TP53-Y126S TYSPALNK   | 1077  | >TP53-Y126S TSSPALNK   | 127   | 950   |
| >TP53-Y126S TYSPALNKMF | 1792  | >TP53-Y126S TSSPALNKMF | 216   | 1576  |
| >TP53-Y126S TYSPALNKM  | 24003 | >TP53-Y126S TSSPALNKM  | 65    | 23938 |
| >TP53-Y126S TYSPALNKMF | 18126 | >TP53-Y126S TSSPALNKMF | 7     | 18119 |
| >TP53-Y126S TYSPALNKMF | 21521 | >TP53-Y126S TSSPALNKMF | 251   | 21270 |
| >TP53-Y126S TYSPALNKM  | 11313 | >TP53-Y126S TSSPALNKM  | 112   | 11201 |
| >TP53-Y126S TYSPALNKMF | 13100 | >TP53-Y126S TSSPALNKMF | 240   | 12860 |
| >TP53-Y126S TYSPALNKM  | 4265  | >TP53-Y126S TSSPALNKM  | 71    | 4194  |
| >TP53-Y126S TYSPALNKMF | 8351  | >TP53-Y126S TSSPALNKMF | 55    | 8296  |
| >TP53-Y126S TYSPALNK   | 1692  | >TP53-Y126S TSSPALNK   | 249   | 1443  |
| >TP53-Y126S TYSPALNKMF | 439   | >TP53-Y126S TSSPALNKMF | 25369 | 24930 |
| >TP53-Y126S SGTAKSVTCT | 374   | >TP53-Y126S SGTAKSVTCT | 25218 | 24844 |
| >TP53-Y126S CTYSPALNK  | 30    | >TP53-Y126S CTSSPALNK  | 66    | 36    |
| >TP53-Y126S CTYSPALNK  | 11    | >TP53-Y126S CTSSPALNK  | 19    | 8     |
| >TP53-Y126S CTYSPALNKM | 343   | >TP53-Y126S CTSSPALNKM | 592   | 249   |
| >TP53-Y126S CTYSPALNKM | 63    | >TP53-Y126S CTSSPALNKM | 325   | 262   |
| >TP53-Y126S CTYSPALNKM | 380   | >TP53-Y126S CTSSPALNKM | 2345  | 1965  |
| >TP53-Y126S CTYSPALNKM | 246   | >TP53-Y126S CTSSPALNKM | 1771  | 1525  |
| >TP53-Y126S CTYSPALNK  | 215   | >TP53-Y126S CTSSPALNK  | 523   | 308   |
| >TP53-Y126S CTYSPALNK  | 30    | >TP53-Y126S CTSSPALNK  | 74    | 44    |
| >TP53-Y126S CTYSPALNKM | 488   | >TP53-Y126S CTSSPALNKM | 3689  | 3201  |
| >TP53-Y126S CTYSPALNKM | 23    | >TP53-Y126S CTSSPALNKM | 170   | 147   |
| >TP53-Y126S CTYSPALNKM | 24    | >TP53-Y126S CTSSPALNKM | 139   | 115   |
| >TP53-Y126S CTYSPALNKM | 5     | >TP53-Y126S CTSSPALNKM | 12    | 7     |
| >TP53-Y126S CTYSPALNKM | 76    | >TP53-Y126S CTSSPALNKM | 66    | 10    |
| >TP53-Y126S CTYSPALNKM | 146   | >TP53-Y126S CTSSPALNKM | 154   | 8     |
| >TP53-Y126S CTYSPALNKM | 30    | >TP53-Y126S CTSSPALNKM | 25    | 5     |
| >TP53-Y126S CTYSPALNKM | 13    | >TP53-Y126S CTSSPALNKM | 22    | 9     |
| >TP53-Y126S CTYSPALNKM | 358   | >TP53-Y126S CTSSPALNKM | 2119  | 1761  |
| >TP53-Y126S TCTYSPALNK | 453   | >TP53-Y126S TCTSSPALNK | 270   | 183   |
| >TP53-Y126S VTCTYSPA   | 415   | >TP53-Y126S VTCTSSPA   | 14387 | 13972 |
| >TP53-Y126S VTCTYSPAL  | 397   | >TP53-Y126S VTCTSSPAL  | 1401  | 1004  |
| >TP53-Y126S VTCTYSPALN | 80    | >TP53-Y126S VTCTSSPALN | 66    | 14    |
| >TP53-Y126S VTCTYSPALN | 14    | >TP53-Y126S VTCTSSPALN | 13    | 1     |
| >TP53-Y126S VTCTYSPALN | 146   | >TP53-Y126S VTCTSSPALN | 106   | 40    |
| >TP53-Y126S VTCTYSPALN | 490   | >TP53-Y126S VTCTSSPALN | 397   | 93    |
| >TP53-Y126S VTCTYSPAL  | 12    | >TP53-Y126S VTCTSSPAL  | 7     | 5     |
| >TP53-Y126S VTCTYSPAL  | 66    | >TP53-Y126S VTCTSSPAL  | 87    | 21    |
| >TP53-Y126S SVTCTYSPA  | 118   | >TP53-Y126S SVTCTSSPA  | 207   | 89    |

|                        |      |                        |       |       |
|------------------------|------|------------------------|-------|-------|
| >TP53-Y126S SVTCTYSPA  | 468  | >TP53-Y126S SVTCTSSPA  | 487   | 19    |
| >TP53-Y126S SVTCTYSPAL | 268  | >TP53-Y126S SVTCTSSPAL | 379   | 111   |
| >TP53-Y126S SVTCTYSPA  | 241  | >TP53-Y126S SVTCTSSPA  | 259   | 18    |
| >TP53-Y126S SVTCTYSPA  | 45   | >TP53-Y126S SVTCTSSPA  | 53    | 8     |
| >TP53-Y126S SVTCTYSPAL | 149  | >TP53-Y126S SVTCTSSPAL | 203   | 54    |
| >TP53-Y126S KSVTCTYSPA | 396  | >TP53-Y126S KSVTCTSSPA | 783   | 387   |
| >TP53-Y126S KSVTCTYSPA | 149  | >TP53-Y126S KSVTCTSSPA | 149   | 0     |
| >TP53-Y126S KSVTCTYSPA | 488  | >TP53-Y126S KSVTCTSSPA | 405   | 83    |
| >TP53-Y126S KSVTCTYSPA | 107  | >TP53-Y126S KSVTCTSSPA | 348   | 241   |
| >TP53-Y126S KSVTCTYSPA | 349  | >TP53-Y126S KSVTCTSSPA | 316   | 33    |
| >TP53-Y126S KSVTCTYSPA | 89   | >TP53-Y126S KSVTCTSSPA | 55    | 34    |
| >TP53-Y126S KSVTCTYSPA | 1612 | >TP53-Y126S KSVTCTSSPA | 447   | 1165  |
| >TP53-Y126S KSVTCTYSPA | 6    | >TP53-Y126S KSVTCTSSPA | 5     | 1     |
| >TP53-Y126S KSVTCTYSPA | 113  | >TP53-Y126S KSVTCTSSPA | 129   | 16    |
| >TP53-Y126S KSVTCTYSPA | 198  | >TP53-Y126S KSVTCTSSPA | 402   | 204   |
| >TP53-Y126S KSVTCTYSPA | 882  | >TP53-Y126S KSVTCTSSPA | 295   | 587   |
| >TP53-Y126S KSVTCTYSPA | 766  | >TP53-Y126S KSVTCTSSPA | 445   | 321   |
| >TP53-Y126S AKSVTCTY   | 8    | >TP53-Y126S AKSVTCTS   | 1222  | 1214  |
| >TP53-Y126S AKSVTCTYS  | 640  | >TP53-Y126S AKSVTCTSS  | 327   | 313   |
| >TP53-Y126S AKSVTCTYSP | 483  | >TP53-Y126S AKSVTCTSSP | 250   | 233   |
| >TP53-Y126S AKSVTCTYSP | 56   | >TP53-Y126S AKSVTCTSSP | 57    | 1     |
| >TP53-Y126S TAKSVTCTY  | 312  | >TP53-Y126S TAKSVTCTS  | 29787 | 29475 |
| >TP53-Y126S TAKSVTCTY  | 247  | >TP53-Y126S TAKSVTCTS  | 7545  | 7298  |
| >TP53-Y126S TAKSVTCTY  | 78   | >TP53-Y126S TAKSVTCTS  | 14723 | 14645 |
| >TP53-Y126S TAKSVTCTY  | 430  | >TP53-Y126S TAKSVTCTS  | 13302 | 12872 |
| >TP53-Y126S TAKSVTCTY  | 265  | >TP53-Y126S TAKSVTCTS  | 23138 | 22873 |
| >TP53-Y126S TAKSVTCTY  | 100  | >TP53-Y126S TAKSVTCTS  | 15620 | 15520 |
| >TP53-Y126S TAKSVTCTY  | 336  | >TP53-Y126S TAKSVTCTS  | 17521 | 17185 |
| >TP53-Y126S GTAKSVTCTY | 466  | >TP53-Y126S GTAKSVTCTS | 31569 | 31103 |
| >TP53-Y126S GTAKSVTCTY | 122  | >TP53-Y126S GTAKSVTCTS | 24723 | 24601 |
| >TP53-Y126S GTAKSVTCTY | 69   | >TP53-Y126S GTAKSVTCTS | 22108 | 22039 |
| >TP53-Y126S GTAKSVTCTY | 71   | >TP53-Y126S GTAKSVTCTS | 12452 | 12381 |
| >TP53-Y126S GTAKSVTCTY | 461  | >TP53-Y126S GTAKSVTCTS | 14452 | 13991 |
| >TP53-Y126S GTAKSVTCTY | 8    | >TP53-Y126S GTAKSVTCTS | 7259  | 7251  |
| >TP53-Y126S GTAKSVTCTY | 296  | >TP53-Y126S GTAKSVTCTS | 17688 | 17392 |
| >TP53-Y126S GTAKSVTCTY | 39   | >TP53-Y126S GTAKSVTCTS | 10865 | 10826 |
| >TP53-Y126S GTAKSVTCTY | 143  | >TP53-Y126S GTAKSVTCTS | 22950 | 22807 |
| >TP53-Y163C YKQSQHMTE  | 467  | >TP53-Y163C CKQSQHMTE  | 14051 | 13584 |
| >TP53-Y163C YKQSQHMTE  | 30   | >TP53-Y163C CKQSQHMTE  | 266   | 236   |
| >TP53-Y163C YKQSQHMTE  | 42   | >TP53-Y163C CKQSQHMTE  | 329   | 287   |
| >TP53-Y163C IYKQSQHMTI | 402  | >TP53-Y163C ICKQSQHMTI | 21495 | 21093 |
| >TP53-Y163C IYKQSQHM   | 394  | >TP53-Y163C ICKQSQHM   | 3178  | 2784  |
| >TP53-Y163C AIYKQSQHM  | 91   | >TP53-Y163C AICKQSQHM  | 7485  | 7394  |



|                        |     |                        |       |       |
|------------------------|-----|------------------------|-------|-------|
| >TP53-Y163C AIYKQSQH   | 349 | >TP53-Y163C AICKQSQH   | 7908  | 7559  |
| >TP53-Y163C AIYKQSQHM  | 62  | >TP53-Y163C AICKQSQHM  | 164   | 102   |
| >TP53-Y163C AIYKQSQHM  | 198 | >TP53-Y163C AICKQSQHM  | 3332  | 3134  |
| >TP53-Y163C MAIYKQSQH  | 226 | >TP53-Y163C MAICKQSQH  | 225   | 1     |
| >TP53-Y163C MAIYKQSQH  | 205 | >TP53-Y163C MAICKQSQH  | 225   | 20    |
| >TP53-Y163C MAIYKQSQH  | 20  | >TP53-Y163C MAICKQSQH  | 29    | 9     |
| >TP53-Y163C MAIYKQSQH  | 151 | >TP53-Y163C MAICKQSQH  | 315   | 164   |
| >TP53-Y163C AMAIYKQSQ  | 221 | >TP53-Y163C AMAICKQSQ  | 721   | 500   |
| >TP53-Y163C AMAIYKQSQ  | 161 | >TP53-Y163C AMAICKQSQ  | 204   | 43    |
| >TP53-Y163C AMAIYKQSQ  | 199 | >TP53-Y163C AMAICKQSQ  | 699   | 500   |
| >TP53-Y163C AMAIYKQSQ  | 283 | >TP53-Y163C AMAICKQSQ  | 388   | 105   |
| >TP53-Y163C AMAIYKQSQ  | 69  | >TP53-Y163C AMAICKQSQ  | 149   | 80    |
| >TP53-Y163C AMAIYKQSQ  | 49  | >TP53-Y163C AMAICKQSQ  | 80    | 31    |
| >TP53-Y163C AMAIYKQSQ  | 55  | >TP53-Y163C AMAICKQSQ  | 73    | 18    |
| >TP53-Y163C AMAIYKQSQ  | 69  | >TP53-Y163C AMAICKQSQ  | 105   | 36    |
| >TP53-Y163C RAMAIYKQSC | 354 | >TP53-Y163C RAMAICKQSC | 358   | 4     |
| >TP53-Y163C RAMAIYKQSC | 375 | >TP53-Y163C RAMAICKQSC | 274   | 101   |
| >TP53-Y163C VRAMAIYK   | 159 | >TP53-Y163C VRAMAICK   | 214   | 55    |
| >TP53-Y163C RVRAMAIY   | 205 | >TP53-Y163C RVRAMAIC   | 18681 | 18476 |
| >TP53-Y163C RVRAMAIYK  | 28  | >TP53-Y163C RVRAMAICK  | 46    | 18    |
| >TP53-Y163C RVRAMAIYK  | 20  | >TP53-Y163C RVRAMAICK  | 91    | 71    |
| >TP53-Y163C RVRAMAIY   | 241 | >TP53-Y163C RVRAMAIC   | 25873 | 25632 |
| >TP53-Y163C RVRAMAIY   | 398 | >TP53-Y163C RVRAMAIC   | 26253 | 25855 |
| >TP53-Y163C RVRAMAIY   | 5   | >TP53-Y163C RVRAMAIC   | 23    | 18    |
| >TP53-Y163C RVRAMAIYK  | 3   | >TP53-Y163C RVRAMAICK  | 3     | 0     |
| >TP53-Y163C RVRAMAIYK  | 10  | >TP53-Y163C RVRAMAICK  | 8     | 2     |
| >TP53-Y163C RVRAMAIYK  | 9   | >TP53-Y163C RVRAMAICK  | 23    | 14    |
| >TP53-Y163C RVRAMAIY   | 107 | >TP53-Y163C RVRAMAIC   | 21149 | 21042 |
| >TP53-Y163C RVRAMAIYK  | 18  | >TP53-Y163C RVRAMAICK  | 152   | 134   |
| >TP53-Y163C RVRAMAIY   | 26  | >TP53-Y163C RVRAMAIC   | 25018 | 24992 |
| >TP53-Y163C RVRAMAIY   | 85  | >TP53-Y163C RVRAMAIC   | 13563 | 13478 |
| >TP53-Y163C RVRAMAIY   | 311 | >TP53-Y163C RVRAMAIC   | 12482 | 12171 |
| >TP53-Y163C RVRAMAIY   | 7   | >TP53-Y163C RVRAMAIC   | 7019  | 7012  |
| >TP53-Y163C RVRAMAIY   | 211 | >TP53-Y163C RVRAMAIC   | 19305 | 19094 |
| >TP53-Y163C RVRAMAIYK  | 156 | >TP53-Y163C RVRAMAICK  | 4355  | 4199  |
| >TP53-Y163C TRVRAMAIY  | 62  | >TP53-Y163C TRVRAMAIC  | 21969 | 21907 |
| >TP53-Y163C TRVRAMAIY  | 278 | >TP53-Y163C TRVRAMAIC  | 6231  | 5953  |
| >TP53-Y163C GTRVRAMAI  | 269 | >TP53-Y163C GTRVRAMAIC | 34324 | 34055 |
| >TP53-Y163C GTRVRAMAI  | 50  | >TP53-Y163C GTRVRAMAIC | 146   | 96    |
| >TP53-Y163C GTRVRAMAI  | 39  | >TP53-Y163C GTRVRAMAIC | 184   | 145   |
| >TP53-Y163C GTRVRAMAI  | 30  | >TP53-Y163C GTRVRAMAIC | 400   | 370   |
| >TP53-Y163C GTRVRAMAI  | 3   | >TP53-Y163C GTRVRAMAIC | 5     | 2     |
| >TP53-Y163C GTRVRAMAI  | 130 | >TP53-Y163C GTRVRAMAIC | 26494 | 26364 |

|                        |     |                        |       |       |
|------------------------|-----|------------------------|-------|-------|
| >TP53-Y163C GTRVRAMAI  | 115 | >TP53-Y163C GTRVRAMAI  | 1255  | 1140  |
| >TP53-Y163C GTRVRAMAI  | 405 | >TP53-Y163C GTRVRAMAI  | 19678 | 19273 |
| >TP53-Y163C GTRVRAMAI  | 4   | >TP53-Y163C GTRVRAMAI  | 4513  | 4509  |
| >TP53-Y163C GTRVRAMAI  | 21  | >TP53-Y163C GTRVRAMAI  | 2921  | 2900  |
| >TP53-Y163C GTRVRAMAI  | 269 | >TP53-Y163C GTRVRAMAI  | 424   | 155   |
| >TP53-Y163C YKQSQHMTE  | 467 | >TP53-Y163C DKQSQHMTE  | 20721 | 20254 |
| >TP53-Y163C YKQSQHMTE  | 30  | >TP53-Y163C DKQSQHMTE  | 2647  | 2617  |
| >TP53-Y163C YKQSQHMTE  | 42  | >TP53-Y163C DKQSQHMTE  | 2874  | 2832  |
| >TP53-Y163C IYKQSQHMTI | 402 | >TP53-Y163C IDKQSQHMT  | 25128 | 24726 |
| >TP53-Y163C IYKQSQHM   | 394 | >TP53-Y163C IDKQSQHM   | 12002 | 11608 |
| >TP53-Y163C AIYKQSQHM  | 91  | >TP53-Y163C AIDKQSQHM  | 6678  | 6587  |
| >TP53-Y163C AIYKQSQH   | 349 | >TP53-Y163C AIDKQSQH   | 11905 | 11556 |
| >TP53-Y163C AIYKQSQHM  | 62  | >TP53-Y163C AIDKQSQHM  | 3527  | 3465  |
| >TP53-Y163C AIYKQSQHM  | 198 | >TP53-Y163C AIDKQSQHM  | 11256 | 11058 |
| >TP53-Y163C MAIYKQSQHI | 226 | >TP53-Y163C MAIDKQSQH  | 267   | 41    |
| >TP53-Y163C MAIYKQSQHI | 205 | >TP53-Y163C MAIDKQSQH  | 656   | 451   |
| >TP53-Y163C MAIYKQSQH  | 911 | >TP53-Y163C MAIDKQSQH  | 439   | 472   |
| >TP53-Y163C MAIYKQSQHI | 20  | >TP53-Y163C MAIDKQSQH  | 15    | 5     |
| >TP53-Y163C MAIYKQSQHI | 151 | >TP53-Y163C MAIDKQSQH  | 181   | 30    |
| >TP53-Y163C AMAIYKQSQI | 221 | >TP53-Y163C AMAIDKQSQ  | 2411  | 2190  |
| >TP53-Y163C AMAIYKQSQI | 161 | >TP53-Y163C AMAIDKQSQ  | 491   | 330   |
| >TP53-Y163C AMAIYKQSQI | 199 | >TP53-Y163C AMAIDKQSQ  | 476   | 277   |
| >TP53-Y163C AMAIYKQSQI | 283 | >TP53-Y163C AMAIDKQSQ  | 279   | 4     |
| >TP53-Y163C AMAIYKQSQ  | 69  | >TP53-Y163C AMAIDKQSQ  | 144   | 75    |
| >TP53-Y163C AMAIYKQSQI | 49  | >TP53-Y163C AMAIDKQSQ  | 81    | 32    |
| >TP53-Y163C AMAIYKQSQI | 55  | >TP53-Y163C AMAIDKQSQ  | 90    | 35    |
| >TP53-Y163C AMAIYKQSQI | 69  | >TP53-Y163C AMAIDKQSQ  | 125   | 56    |
| >TP53-Y163C RAMAIYKQSC | 354 | >TP53-Y163C RAMAIDKQSI | 275   | 79    |
| >TP53-Y163C RAMAIYKQSC | 375 | >TP53-Y163C RAMAIDKQSI | 631   | 256   |
| >TP53-Y163C VRAMAIYK   | 159 | >TP53-Y163C VRAMAIDK   | 566   | 407   |
| >TP53-Y163C RVRAMAIY   | 205 | >TP53-Y163C RVRAMAID   | 16141 | 15936 |
| >TP53-Y163C RVRAMAIYK  | 28  | >TP53-Y163C RVRAMAIDK  | 52    | 24    |
| >TP53-Y163C RVRAMAIYK  | 20  | >TP53-Y163C RVRAMAIDK  | 177   | 157   |
| >TP53-Y163C RVRAMAIY   | 241 | >TP53-Y163C RVRAMAID   | 28016 | 27775 |
| >TP53-Y163C RVRAMAIY   | 398 | >TP53-Y163C RVRAMAID   | 26976 | 26578 |
| >TP53-Y163C RVRAMAIY   | 5   | >TP53-Y163C RVRAMAID   | 77    | 72    |
| >TP53-Y163C RVRAMAIYK  | 3   | >TP53-Y163C RVRAMAIDK  | 3     | 0     |
| >TP53-Y163C RVRAMAIYKC | 10  | >TP53-Y163C RVRAMAIDKI | 43    | 33    |
| >TP53-Y163C RVRAMAIYKC | 9   | >TP53-Y163C RVRAMAIDKI | 29    | 20    |
| >TP53-Y163C RVRAMAIY   | 107 | >TP53-Y163C RVRAMAID   | 23912 | 23805 |
| >TP53-Y163C RVRAMAIYK  | 18  | >TP53-Y163C RVRAMAIDK  | 1016  | 998   |
| >TP53-Y163C RVRAMAIY   | 26  | >TP53-Y163C RVRAMAID   | 24597 | 24571 |
| >TP53-Y163C RVRAMAIY   | 85  | >TP53-Y163C RVRAMAID   | 17760 | 17675 |

|                        |      |                        |       |       |
|------------------------|------|------------------------|-------|-------|
| >TP53-Y163C RVRAMAIY   | 311  | >TP53-Y163C RVRAMAID   | 26273 | 25962 |
| >TP53-Y163C RVRAMAIY   | 7    | >TP53-Y163C RVRAMAID   | 9613  | 9606  |
| >TP53-Y163C RVRAMAIY   | 211  | >TP53-Y163C RVRAMAID   | 24432 | 24221 |
| >TP53-Y163C RVRAMAIYK  | 156  | >TP53-Y163C RVRAMAIDK  | 5307  | 5151  |
| >TP53-Y163C TRVRAMAIY  | 62   | >TP53-Y163C TRVRAMAID  | 26555 | 26493 |
| >TP53-Y163C TRVRAMAIY  | 278  | >TP53-Y163C TRVRAMAID  | 18336 | 18058 |
| >TP53-Y163C GTRVRAMAIY | 269  | >TP53-Y163C GTRVRAMAII | 35303 | 35034 |
| >TP53-Y163C GTRVRAMAIY | 50   | >TP53-Y163C GTRVRAMAII | 167   | 117   |
| >TP53-Y163C GTRVRAMAIY | 39   | >TP53-Y163C GTRVRAMAII | 441   | 402   |
| >TP53-Y163C GTRVRAMAIY | 30   | >TP53-Y163C GTRVRAMAII | 640   | 610   |
| >TP53-Y163C GTRVRAMAIY | 3    | >TP53-Y163C GTRVRAMAII | 6     | 3     |
| >TP53-Y163C GTRVRAMAIY | 130  | >TP53-Y163C GTRVRAMAII | 26755 | 26625 |
| >TP53-Y163C GTRVRAMAIY | 115  | >TP53-Y163C GTRVRAMAII | 3901  | 3786  |
| >TP53-Y163C GTRVRAMAIY | 405  | >TP53-Y163C GTRVRAMAII | 22200 | 21795 |
| >TP53-Y163C GTRVRAMAIY | 4    | >TP53-Y163C GTRVRAMAII | 10432 | 10428 |
| >TP53-Y163C GTRVRAMAIY | 21   | >TP53-Y163C GTRVRAMAII | 5818  | 5797  |
| >TP53-Y163C GTRVRAMAIY | 269  | >TP53-Y163C GTRVRAMAII | 377   | 108   |
| >TP53-Y163F YKQSQHMTE  | 467  | >TP53-Y163F HKQSQHMTE  | 8497  | 8030  |
| >TP53-Y163F YKQSQHMTE  | 30   | >TP53-Y163F HKQSQHMTE  | 129   | 99    |
| >TP53-Y163F YKQSQHMTE  | 42   | >TP53-Y163F HKQSQHMTE  | 153   | 111   |
| >TP53-Y163F IYKQSQHMTI | 402  | >TP53-Y163F IHKQSQHMT  | 12764 | 12362 |
| >TP53-Y163F IYKQSQHM   | 394  | >TP53-Y163F IHKQSQHM   | 10000 | 9606  |
| >TP53-Y163F IYKQSQHM   | 1922 | >TP53-Y163F IHKQSQHM   | 159   | 1763  |
| >TP53-Y163F AIYKQSQHM  | 91   | >TP53-Y163F AIHKQSQHM  | 1332  | 1241  |
| >TP53-Y163F AIYKQSQH   | 349  | >TP53-Y163F AIHKQSQH   | 3756  | 3407  |
| >TP53-Y163F AIYKQSQHM  | 750  | >TP53-Y163F AIHKQSQHM  | 55    | 695   |
| >TP53-Y163F AIYKQSQHM  | 62   | >TP53-Y163F AIHKQSQHM  | 121   | 59    |
| >TP53-Y163F AIYKQSQHM  | 198  | >TP53-Y163F AIHKQSQHM  | 943   | 745   |
| >TP53-Y163F MAIYKQSQHI | 226  | >TP53-Y163F MAIHKQSQH  | 241   | 15    |
| >TP53-Y163F MAIYKQSQHI | 205  | >TP53-Y163F MAIHKQSQH  | 193   | 12    |
| >TP53-Y163F MAIYKQSQHI | 20   | >TP53-Y163F MAIHKQSQH  | 15    | 5     |
| >TP53-Y163F MAIYKQSQHI | 151  | >TP53-Y163F MAIHKQSQH  | 92    | 59    |
| >TP53-Y163F AMAIYKQSQI | 221  | >TP53-Y163F AMAIHKQSQ  | 336   | 115   |
| >TP53-Y163F AMAIYKQSQI | 161  | >TP53-Y163F AMAIHKQSQ  | 288   | 127   |
| >TP53-Y163F AMAIYKQSQI | 199  | >TP53-Y163F AMAIHKQSQ  | 405   | 206   |
| >TP53-Y163F AMAIYKQSQI | 283  | >TP53-Y163F AMAIHKQSQ  | 509   | 226   |
| >TP53-Y163F AMAIYKQSQ  | 69   | >TP53-Y163F AMAIHKQSQ  | 192   | 123   |
| >TP53-Y163F AMAIYKQSQI | 49   | >TP53-Y163F AMAIHKQSQ  | 96    | 47    |
| >TP53-Y163F AMAIYKQSQI | 55   | >TP53-Y163F AMAIHKQSQ  | 51    | 4     |
| >TP53-Y163F AMAIYKQSQI | 69   | >TP53-Y163F AMAIHKQSQ  | 89    | 20    |
| >TP53-Y163F RAMAIYKQSC | 354  | >TP53-Y163F RAMAIHKQSI | 208   | 146   |
| >TP53-Y163F RAMAIYKQSC | 375  | >TP53-Y163F RAMAIHKQSI | 318   | 57    |
| >TP53-Y163F VRAMAIYK   | 159  | >TP53-Y163F VRAMAIIHK  | 104   | 55    |

|                        |     |                       |       |       |
|------------------------|-----|-----------------------|-------|-------|
| >TP53-Y163F RVRAMAIY   | 205 | >TP53-Y163F RVRAMAIH  | 862   | 657   |
| >TP53-Y163F RVRAMAIYK  | 28  | >TP53-Y163F RVRAMAIHK | 34    | 6     |
| >TP53-Y163F RVRAMAIYK  | 20  | >TP53-Y163F RVRAMAIHK | 73    | 53    |
| >TP53-Y163F RVRAMAIY   | 241 | >TP53-Y163F RVRAMAIH  | 9850  | 9609  |
| >TP53-Y163F RVRAMAIY   | 398 | >TP53-Y163F RVRAMAIH  | 17526 | 17128 |
| >TP53-Y163F RVRAMAIY   | 5   | >TP53-Y163F RVRAMAIH  | 16    | 11    |
| >TP53-Y163F RVRAMAIYK  | 3   | >TP53-Y163F RVRAMAIHK | 3     | 0     |
| >TP53-Y163F RVRAMAIYKC | 10  | >TP53-Y163F RVRAMAIHK | 9     | 1     |
| >TP53-Y163F RVRAMAIYKC | 9   | >TP53-Y163F RVRAMAIHK | 8     | 1     |
| >TP53-Y163F RVRAMAIY   | 107 | >TP53-Y163F RVRAMAIH  | 8722  | 8615  |
| >TP53-Y163F RVRAMAIYK  | 18  | >TP53-Y163F RVRAMAIHK | 44    | 26    |
| >TP53-Y163F RVRAMAIY   | 26  | >TP53-Y163F RVRAMAIH  | 11664 | 11638 |
| >TP53-Y163F RVRAMAIY   | 85  | >TP53-Y163F RVRAMAIH  | 3670  | 3585  |
| >TP53-Y163F RVRAMAIY   | 311 | >TP53-Y163F RVRAMAIH  | 9094  | 8783  |
| >TP53-Y163F RVRAMAIY   | 7   | >TP53-Y163F RVRAMAIH  | 1685  | 1678  |
| >TP53-Y163F RVRAMAIY   | 211 | >TP53-Y163F RVRAMAIH  | 7373  | 7162  |
| >TP53-Y163F RVRAMAIYK  | 156 | >TP53-Y163F RVRAMAIHK | 742   | 586   |
| >TP53-Y163F TRVRAMAIY  | 62  | >TP53-Y163F TRVRAMAIH | 5642  | 5580  |
| >TP53-Y163F TRVRAMAIY  | 278 | >TP53-Y163F TRVRAMAIH | 3681  | 3403  |
| >TP53-Y163F GTRVRAMAI  | 269 | >TP53-Y163F GTRVRAMAI | 26436 | 26167 |
| >TP53-Y163F GTRVRAMAI  | 50  | >TP53-Y163F GTRVRAMAI | 77    | 27    |
| >TP53-Y163F GTRVRAMAI  | 39  | >TP53-Y163F GTRVRAMAI | 216   | 177   |
| >TP53-Y163F GTRVRAMAI  | 30  | >TP53-Y163F GTRVRAMAI | 277   | 247   |
| >TP53-Y163F GTRVRAMAI  | 3   | >TP53-Y163F GTRVRAMAI | 4     | 1     |
| >TP53-Y163F GTRVRAMAI  | 130 | >TP53-Y163F GTRVRAMAI | 18066 | 17936 |
| >TP53-Y163F GTRVRAMAI  | 115 | >TP53-Y163F GTRVRAMAI | 440   | 325   |
| >TP53-Y163F GTRVRAMAI  | 405 | >TP53-Y163F GTRVRAMAI | 12802 | 12397 |
| >TP53-Y163F GTRVRAMAI  | 4   | >TP53-Y163F GTRVRAMAI | 462   | 458   |
| >TP53-Y163F GTRVRAMAI  | 21  | >TP53-Y163F GTRVRAMAI | 850   | 829   |
| >TP53-Y163F GTRVRAMAI  | 269 | >TP53-Y163F GTRVRAMAI | 272   | 3     |
| >TP53-Y163N YKQSQHMTE  | 467 | >TP53-Y163N NKQSQHMTE | 15125 | 14658 |
| >TP53-Y163N YKQSQHMTE  | 30  | >TP53-Y163N NKQSQHMTE | 623   | 593   |
| >TP53-Y163N YKQSQHMTE  | 42  | >TP53-Y163N NKQSQHMTE | 653   | 611   |
| >TP53-Y163N IYKQSQHMTI | 402 | >TP53-Y163N INKQSQHMT | 16529 | 16127 |
| >TP53-Y163N IYKQSQHM   | 394 | >TP53-Y163N INKQSQHM  | 5340  | 4946  |
| >TP53-Y163N AIYKQSQHM  | 91  | >TP53-Y163N AINKQSQHM | 3460  | 3369  |
| >TP53-Y163N AIYKQSQH   | 349 | >TP53-Y163N AINKQSQH  | 2830  | 2481  |
| >TP53-Y163N AIYKQSQHM  | 62  | >TP53-Y163N AINKQSQHM | 130   | 68    |
| >TP53-Y163N AIYKQSQHM  | 198 | >TP53-Y163N AINKQSQHM | 1214  | 1016  |
| >TP53-Y163N MAIYKQSQHI | 226 | >TP53-Y163N MAINKQSQH | 245   | 19    |
| >TP53-Y163N MAIYKQSQHI | 205 | >TP53-Y163N MAINKQSQH | 221   | 16    |
| >TP53-Y163N MAIYKQSQHI | 20  | >TP53-Y163N MAINKQSQH | 26    | 6     |
| >TP53-Y163N MAIYKQSQHI | 151 | >TP53-Y163N MAINKQSQH | 189   | 38    |

|                       |       |                      |       |       |
|-----------------------|-------|----------------------|-------|-------|
| >TP53-Y163NAMAIYKQSQI | 10922 | >TP53-Y163NAMAINKQSQ | 359   | 10563 |
| >TP53-Y163NAMAIYKQSQI | 221   | >TP53-Y163NAMAINKQSQ | 638   | 417   |
| >TP53-Y163NAMAIYKQSQI | 161   | >TP53-Y163NAMAINKQSQ | 506   | 345   |
| >TP53-Y163NAMAIYKQSQI | 199   | >TP53-Y163NAMAINKQSQ | 311   | 112   |
| >TP53-Y163NAMAIYKQSQI | 283   | >TP53-Y163NAMAINKQSQ | 333   | 50    |
| >TP53-Y163NAMAIYKQSQ  | 69    | >TP53-Y163NAMAINKQSQ | 87    | 18    |
| >TP53-Y163NAMAIYKQSQI | 49    | >TP53-Y163NAMAINKQSQ | 57    | 8     |
| >TP53-Y163NAMAIYKQSQI | 55    | >TP53-Y163NAMAINKQSQ | 75    | 20    |
| >TP53-Y163NAMAIYKQSQI | 69    | >TP53-Y163NAMAINKQSQ | 88    | 19    |
| >TP53-Y163NAMAIYKQSC  | 354   | >TP53-Y163NAMAINKQSC | 319   | 35    |
| >TP53-Y163NAMAIYKQSC  | 375   | >TP53-Y163NAMAINKQSC | 335   | 40    |
| >TP53-Y163NVRAMAIYK   | 159   | >TP53-Y163NVRAMAINK  | 156   | 3     |
| >TP53-Y163NVRAMAIY    | 205   | >TP53-Y163NVRAMAIN   | 13231 | 13026 |
| >TP53-Y163NVRAMAIYK   | 28    | >TP53-Y163NVRAMAINK  | 32    | 4     |
| >TP53-Y163NVRAMAIYK   | 20    | >TP53-Y163NVRAMAINK  | 50    | 30    |
| >TP53-Y163NVRAMAIY    | 241   | >TP53-Y163NVRAMAIN   | 23003 | 22762 |
| >TP53-Y163NVRAMAIY    | 398   | >TP53-Y163NVRAMAIN   | 25138 | 24740 |
| >TP53-Y163NVRAMAIY    | 5     | >TP53-Y163NVRAMAIN   | 21    | 16    |
| >TP53-Y163NVRAMAIYK   | 3     | >TP53-Y163NVRAMAINK  | 3     | 0     |
| >TP53-Y163NVRAMAIYKC  | 10    | >TP53-Y163NVRAMAINKI | 9     | 1     |
| >TP53-Y163NVRAMAIYKC  | 9     | >TP53-Y163NVRAMAINKI | 11    | 2     |
| >TP53-Y163NVRAMAIY    | 107   | >TP53-Y163NVRAMAIN   | 17757 | 17650 |
| >TP53-Y163NVRAMAIYK   | 18    | >TP53-Y163NVRAMAINK  | 73    | 55    |
| >TP53-Y163NVRAMAIY    | 26    | >TP53-Y163NVRAMAIN   | 23507 | 23481 |
| >TP53-Y163NVRAMAIY    | 85    | >TP53-Y163NVRAMAIN   | 14323 | 14238 |
| >TP53-Y163NVRAMAIY    | 311   | >TP53-Y163NVRAMAIN   | 21426 | 21115 |
| >TP53-Y163NVRAMAIY    | 7     | >TP53-Y163NVRAMAIN   | 6992  | 6985  |
| >TP53-Y163NVRAMAIY    | 211   | >TP53-Y163NVRAMAIN   | 20824 | 20613 |
| >TP53-Y163NVRAMAIYK   | 156   | >TP53-Y163NVRAMAINK  | 1641  | 1485  |
| >TP53-Y163NTRVRAMAIY  | 62    | >TP53-Y163NTRVRAMAIN | 19646 | 19584 |
| >TP53-Y163NTRVRAMAIY  | 278   | >TP53-Y163NTRVRAMAIN | 13204 | 12926 |
| >TP53-Y163NGTRVRAMAI  | 269   | >TP53-Y163NGTRVRAMAI | 33666 | 33397 |
| >TP53-Y163NGTRVRAMAI  | 50    | >TP53-Y163NGTRVRAMAI | 71    | 21    |
| >TP53-Y163NGTRVRAMAI  | 39    | >TP53-Y163NGTRVRAMAI | 115   | 76    |
| >TP53-Y163NGTRVRAMAI  | 30    | >TP53-Y163NGTRVRAMAI | 359   | 329   |
| >TP53-Y163NGTRVRAMAI  | 3     | >TP53-Y163NGTRVRAMAI | 4     | 1     |
| >TP53-Y163NGTRVRAMAI  | 130   | >TP53-Y163NGTRVRAMAI | 25523 | 25393 |
| >TP53-Y163NGTRVRAMAI  | 115   | >TP53-Y163NGTRVRAMAI | 717   | 602   |
| >TP53-Y163NGTRVRAMAI  | 405   | >TP53-Y163NGTRVRAMAI | 20214 | 19809 |
| >TP53-Y163NGTRVRAMAI  | 4     | >TP53-Y163NGTRVRAMAI | 6530  | 6526  |
| >TP53-Y163NGTRVRAMAI  | 21    | >TP53-Y163NGTRVRAMAI | 4251  | 4230  |
| >TP53-Y163NGTRVRAMAI  | 269   | >TP53-Y163NGTRVRAMAI | 275   | 6     |
| >TP53-Y163SYKQSQHMTE  | 467   | >TP53-Y163SSKQSQHMTE | 4748  | 4281  |

|                        |       |                        |       |       |
|------------------------|-------|------------------------|-------|-------|
| >TP53-Y163S YKQSQHMTE  | 30    | >TP53-Y163S SKQSQHMTE  | 141   | 111   |
| >TP53-Y163S YKQSQHMTE  | 42    | >TP53-Y163S SKQSQHMTE  | 170   | 128   |
| >TP53-Y163S IYKQSQHMTE | 402   | >TP53-Y163S ISKQSQHMTE | 19896 | 19494 |
| >TP53-Y163S IYKQSQHM   | 394   | >TP53-Y163S ISKQSQHM   | 378   | 16    |
| >TP53-Y163S IYKQSQHM   | 5662  | >TP53-Y163S ISKQSQHM   | 174   | 5488  |
| >TP53-Y163S IYKQSQHM   | 1922  | >TP53-Y163S ISKQSQHM   | 144   | 1778  |
| >TP53-Y163S IYKQSQHM   | 19942 | >TP53-Y163S ISKQSQHM   | 8     | 19934 |
| >TP53-Y163S IYKQSQHMTE | 25310 | >TP53-Y163S ISKQSQHMTE | 83    | 25227 |
| >TP53-Y163S IYKQSQHM   | 22419 | >TP53-Y163S ISKQSQHM   | 265   | 22154 |
| >TP53-Y163S IYKQSQHM   | 22479 | >TP53-Y163S ISKQSQHM   | 467   | 22012 |
| >TP53-Y163S AIYKQSQHM  | 91    | >TP53-Y163S AISKQSQHM  | 5311  | 5220  |
| >TP53-Y163S AIYKQSQH   | 349   | >TP53-Y163S AISKQSQH   | 3901  | 3552  |
| >TP53-Y163S AIYKQSQHM  | 62    | >TP53-Y163S AISKQSQHM  | 143   | 81    |
| >TP53-Y163S AIYKQSQHM  | 198   | >TP53-Y163S AISKQSQHM  | 1277  | 1079  |
| >TP53-Y163S MAIYKQSQHI | 226   | >TP53-Y163S MAISKQSQHI | 255   | 29    |
| >TP53-Y163S MAIYKQSQHI | 205   | >TP53-Y163S MAISKQSQHI | 160   | 45    |
| >TP53-Y163S MAIYKQSQHI | 20    | >TP53-Y163S MAISKQSQHI | 24    | 4     |
| >TP53-Y163S MAIYKQSQHI | 151   | >TP53-Y163S MAISKQSQHI | 103   | 48    |
| >TP53-Y163S AMAIYKQSQI | 221   | >TP53-Y163S AMAISKQSQI | 1137  | 916   |
| >TP53-Y163S AMAIYKQSQI | 161   | >TP53-Y163S AMAISKQSQI | 376   | 215   |
| >TP53-Y163S AMAIYKQSQI | 199   | >TP53-Y163S AMAISKQSQI | 457   | 258   |
| >TP53-Y163S AMAIYKQSQI | 283   | >TP53-Y163S AMAISKQSQI | 293   | 10    |
| >TP53-Y163S AMAIYKQSQ  | 69    | >TP53-Y163S AMAISKQSQ  | 119   | 50    |
| >TP53-Y163S AMAIYKQSQI | 49    | >TP53-Y163S AMAISKQSQI | 68    | 19    |
| >TP53-Y163S AMAIYKQSQI | 55    | >TP53-Y163S AMAISKQSQI | 51    | 4     |
| >TP53-Y163S AMAIYKQSQI | 69    | >TP53-Y163S AMAISKQSQI | 39    | 30    |
| >TP53-Y163S RAMAIYKQSC | 354   | >TP53-Y163S RAMAISKQSC | 187   | 167   |
| >TP53-Y163S RAMAIYKQSC | 375   | >TP53-Y163S RAMAISKQSC | 283   | 92    |
| >TP53-Y163S VRAMAIYK   | 159   | >TP53-Y163S VRAMAISK   | 115   | 44    |
| >TP53-Y163S RVRAMAIY   | 205   | >TP53-Y163S RVRAMAI    | 14494 | 14289 |
| >TP53-Y163S RVRAMAIYK  | 28    | >TP53-Y163S RVRAMAISK  | 33    | 5     |
| >TP53-Y163S RVRAMAIYK  | 20    | >TP53-Y163S RVRAMAISK  | 46    | 26    |
| >TP53-Y163S RVRAMAIY   | 241   | >TP53-Y163S RVRAMAI    | 21205 | 20964 |
| >TP53-Y163S RVRAMAIY   | 398   | >TP53-Y163S RVRAMAI    | 25204 | 24806 |
| >TP53-Y163S RVRAMAIY   | 5     | >TP53-Y163S RVRAMAI    | 7     | 2     |
| >TP53-Y163S RVRAMAIYK  | 3     | >TP53-Y163S RVRAMAISK  | 3     | 0     |
| >TP53-Y163S RVRAMAIYKC | 10    | >TP53-Y163S RVRAMAISKC | 10    | 0     |
| >TP53-Y163S RVRAMAIYKC | 9     | >TP53-Y163S RVRAMAISKC | 9     | 0     |
| >TP53-Y163S RVRAMAIY   | 107   | >TP53-Y163S RVRAMAI    | 17028 | 16921 |
| >TP53-Y163S RVRAMAIYK  | 18    | >TP53-Y163S RVRAMAISK  | 143   | 125   |
| >TP53-Y163S RVRAMAIY   | 26    | >TP53-Y163S RVRAMAI    | 23462 | 23436 |
| >TP53-Y163S RVRAMAIY   | 85    | >TP53-Y163S RVRAMAI    | 11520 | 11435 |
| >TP53-Y163S RVRAMAIY   | 311   | >TP53-Y163S RVRAMAI    | 16823 | 16512 |

|                        |      |                        |       |       |
|------------------------|------|------------------------|-------|-------|
| >TP53-Y163S RVRAMAIY   | 7    | >TP53-Y163S RVRAMAI    | 6006  | 5999  |
| >TP53-Y163S RVRAMAIY   | 211  | >TP53-Y163S RVRAMAI    | 18671 | 18460 |
| >TP53-Y163S RVRAMAIYK  | 156  | >TP53-Y163S RVRAMAIK   | 3229  | 3073  |
| >TP53-Y163S TRVRAMAIY  | 62   | >TP53-Y163S TRVRAMAI   | 17843 | 17781 |
| >TP53-Y163S TRVRAMAIY  | 278  | >TP53-Y163S TRVRAMAI   | 8175  | 7897  |
| >TP53-Y163S GTRVRAMAI  | 269  | >TP53-Y163S GTRVRAMAI  | 32770 | 32501 |
| >TP53-Y163S GTRVRAMAI  | 50   | >TP53-Y163S GTRVRAMAI  | 78    | 28    |
| >TP53-Y163S GTRVRAMAI  | 39   | >TP53-Y163S GTRVRAMAI  | 119   | 80    |
| >TP53-Y163S GTRVRAMAI  | 30   | >TP53-Y163S GTRVRAMAI  | 77    | 47    |
| >TP53-Y163S GTRVRAMAI  | 3    | >TP53-Y163S GTRVRAMAI  | 4     | 1     |
| >TP53-Y163S GTRVRAMAI  | 130  | >TP53-Y163S GTRVRAMAI  | 23371 | 23241 |
| >TP53-Y163S GTRVRAMAI  | 115  | >TP53-Y163S GTRVRAMAI  | 1299  | 1184  |
| >TP53-Y163S GTRVRAMAI  | 405  | >TP53-Y163S GTRVRAMAI  | 18989 | 18584 |
| >TP53-Y163S GTRVRAMAI  | 4    | >TP53-Y163S GTRVRAMAI  | 4833  | 4829  |
| >TP53-Y163S GTRVRAMAI  | 21   | >TP53-Y163S GTRVRAMAI  | 2269  | 2248  |
| >TP53-Y163S GTRVRAMAI  | 269  | >TP53-Y163S GTRVRAMAI  | 481   | 212   |
| >TP53-Y205C YLDDRNTF   | 187  | >TP53-Y205C CLDDRNTF   | 5568  | 5381  |
| >TP53-Y205C YLDDRNTFR  | 333  | >TP53-Y205C CLDDRNTFR  | 9690  | 9357  |
| >TP53-Y205C YLDDRNTF   | 149  | >TP53-Y205C CLDDRNTF   | 7371  | 7222  |
| >TP53-Y205C YLDDRNTFR  | 155  | >TP53-Y205C CLDDRNTFR  | 7651  | 7496  |
| >TP53-Y205C YLDDRNTF   | 367  | >TP53-Y205C CLDDRNTF   | 8224  | 7857  |
| >TP53-Y205C YLDDRNTF   | 87   | >TP53-Y205C CLDDRNTF   | 6039  | 5952  |
| >TP53-Y205C YLDDRNTFR  | 189  | >TP53-Y205C CLDDRNTFR  | 9590  | 9401  |
| >TP53-Y205C YLDDRNTFR  | 187  | >TP53-Y205C CLDDRNTFR  | 10018 | 9831  |
| >TP53-Y205C YLDDRNTFR  | 171  | >TP53-Y205C CLDDRNTFR  | 9193  | 9022  |
| >TP53-Y205C YLDDRNTFR  | 282  | >TP53-Y205C CLDDRNTFR  | 333   | 51    |
| >TP53-Y205C YLDDRNTFR  | 55   | >TP53-Y205C CLDDRNTFR  | 112   | 57    |
| >TP53-Y205C YLDDRNTFR  | 68   | >TP53-Y205C CLDDRNTFR  | 222   | 154   |
| >TP53-Y205C YLDDRNTF   | 255  | >TP53-Y205C CLDDRNTF   | 6772  | 6517  |
| >TP53-Y205C YLDDRNTFR  | 336  | >TP53-Y205C CLDDRNTFR  | 241   | 95    |
| >TP53-Y205C EYLDDRNTF  | 103  | >TP53-Y205C ECLDDRNTF  | 12321 | 12218 |
| >TP53-Y205C EYLDDRNTF  | 18   | >TP53-Y205C ECLDDRNTF  | 12095 | 12077 |
| >TP53-Y205C EYLDDRNTF  | 381  | >TP53-Y205C ECLDDRNTF  | 2423  | 2042  |
| >TP53-Y205C EYLDDRNTF  | 301  | >TP53-Y205C ECLDDRNTF  | 290   | 11    |
| >TP53-Y205C EYLDDRNTFR | 328  | >TP53-Y205C ECLDDRNTFR | 1218  | 890   |
| >TP53-Y205C EYLDDRNTFR | 88   | >TP53-Y205C ECLDDRNTFR | 683   | 595   |
| >TP53-Y205C EYLDDRNTFR | 19   | >TP53-Y205C ECLDDRNTFR | 113   | 94    |
| >TP53-Y205C IRVEGNLRVE | 53   | >TP53-Y205C IRVEGNLRVE | 4323  | 4270  |
| >TP53-Y205C VEYLDDRNTF | 124  | >TP53-Y205C VECLDDRNTF | 1679  | 1555  |
| >TP53-Y205C RVEYLDDR   | 433  | >TP53-Y205C RVECLDDR   | 796   | 363   |
| >TP53-Y205C RVEYLDDRNT | 40   | >TP53-Y205C RVECLDDRNT | 107   | 67    |
| >TP53-Y205C RVEYLDDRNT | 78   | >TP53-Y205C RVECLDDRNT | 97    | 19    |
| >TP53-Y205C RVEYLDDR   | 1045 | >TP53-Y205C RVECLDDR   | 407   | 638   |

|                         |      |                         |       |       |
|-------------------------|------|-------------------------|-------|-------|
| >TP53-Y205C VEGNLRVEYL  | 312  | >TP53-Y205C VEGNLRVECL  | 321   | 9     |
| >TP53-Y205C VEGNLRVEY   | 67   | >TP53-Y205C VEGNLRVEC   | 10930 | 10863 |
| >TP53-Y205C VEGNLRVEYL  | 799  | >TP53-Y205C VEGNLRVECL  | 471   | 328   |
| >TP53-Y205C VEGNLRVEYL  | 472  | >TP53-Y205C VEGNLRVECL  | 2391  | 1919  |
| >TP53-Y205C VEGNLRVEY   | 338  | >TP53-Y205C VEGNLRVEC   | 12354 | 12016 |
| >TP53-Y205C VEGNLRVEYL  | 278  | >TP53-Y205C VEGNLRVECL  | 118   | 160   |
| >TP53-Y205C RVEGNLRVEY  | 224  | >TP53-Y205C RVEGNLRVEC  | 28807 | 28583 |
| >TP53-Y205C RVEGNLRVEY  | 301  | >TP53-Y205C RVEGNLRVEC  | 22486 | 22185 |
| >TP53-Y205C RVEGNLRVEY  | 400  | >TP53-Y205C RVEGNLRVEC  | 25324 | 24924 |
| >TP53-Y205C YLDDRNTF    | 187  | >TP53-Y205C DLDDRNTF    | 18619 | 18432 |
| >TP53-Y205C YLDDRNTFR†  | 333  | >TP53-Y205C DLDDRNTFR†  | 24546 | 24213 |
| >TP53-Y205C YLDDRNTF    | 149  | >TP53-Y205C DLDDRNTF    | 14835 | 14686 |
| >TP53-Y205C YLDDRNTFR†  | 155  | >TP53-Y205C DLDDRNTFR†  | 15211 | 15056 |
| >TP53-Y205C YLDDRNTF    | 367  | >TP53-Y205C DLDDRNTF    | 16315 | 15948 |
| >TP53-Y205C YLDDRNTF    | 87   | >TP53-Y205C DLDDRNTF    | 11452 | 11365 |
| >TP53-Y205C YLDDRNTFR   | 189  | >TP53-Y205C DLDDRNTFR   | 15905 | 15716 |
| >TP53-Y205C YLDDRNTFR†  | 187  | >TP53-Y205C DLDDRNTFR†  | 16621 | 16434 |
| >TP53-Y205C YLDDRNTFR†  | 171  | >TP53-Y205C DLDDRNTFR†  | 15712 | 15541 |
| >TP53-Y205C YLDDRNTFR   | 282  | >TP53-Y205C DLDDRNTFR   | 3377  | 3095  |
| >TP53-Y205C YLDDRNTFR   | 55   | >TP53-Y205C DLDDRNTFR   | 15    | 40    |
| >TP53-Y205C YLDDRNTFR   | 68   | >TP53-Y205C DLDDRNTFR   | 119   | 51    |
| >TP53-Y205C YLDDRNTF    | 255  | >TP53-Y205C DLDDRNTF    | 4601  | 4346  |
| >TP53-Y205C YLDDRNTFR   | 336  | >TP53-Y205C DLDDRNTFR   | 2254  | 1918  |
| >TP53-Y205C EYLDDRNTF   | 103  | >TP53-Y205C EDLDDRNTF   | 18837 | 18734 |
| >TP53-Y205C EYLDDRNTF   | 18   | >TP53-Y205C EDLDDRNTF   | 20461 | 20443 |
| >TP53-Y205C EYLDDRNTF   | 381  | >TP53-Y205C EDLDDRNTF   | 10908 | 10527 |
| >TP53-Y205C EYLDDRNTF   | 301  | >TP53-Y205C EDLDDRNTF   | 8461  | 8160  |
| >TP53-Y205C EYLDDRNTFR  | 328  | >TP53-Y205C EDLDDRNTFF  | 5010  | 4682  |
| >TP53-Y205C EYLDDRNTFR  | 88   | >TP53-Y205C EDLDDRNTFF  | 3150  | 3062  |
| >TP53-Y205C EYLDDRNTFR  | 19   | >TP53-Y205C EDLDDRNTFF  | 1075  | 1056  |
| >TP53-Y205C IRVEGNLRVE† | 53   | >TP53-Y205C IRVEGNLRVE† | 12707 | 12654 |
| >TP53-Y205C VEYLDDRNTF  | 124  | >TP53-Y205C VEDLDDRNTF  | 6555  | 6431  |
| >TP53-Y205C RVEYLDDR    | 433  | >TP53-Y205C RVEDLDDR    | 1340  | 907   |
| >TP53-Y205C RVEYLDDRNT  | 40   | >TP53-Y205C RVEDLDDRNT  | 114   | 74    |
| >TP53-Y205C RVEYLDDRNT  | 1271 | >TP53-Y205C RVEDLDDRNT  | 497   | 774   |
| >TP53-Y205C RVEYLDDRNT  | 78   | >TP53-Y205C RVEDLDDRNT  | 110   | 32    |
| >TP53-Y205C VEGNLRVEYL  | 312  | >TP53-Y205C VEGNLRVEDL  | 816   | 504   |
| >TP53-Y205C VEGNLRVEY   | 67   | >TP53-Y205C VEGNLRVED   | 7993  | 7926  |
| >TP53-Y205C VEGNLRVEYL  | 472  | >TP53-Y205C VEGNLRVEDL  | 1095  | 623   |
| >TP53-Y205C VEGNLRVEY   | 338  | >TP53-Y205C VEGNLRVED   | 9378  | 9040  |
| >TP53-Y205C VEGNLRVEYL  | 278  | >TP53-Y205C VEGNLRVEDL  | 288   | 10    |
| >TP53-Y205C RVEGNLRVEY  | 224  | >TP53-Y205C RVEGNLRVEC  | 28927 | 28703 |
| >TP53-Y205C RVEGNLRVEY  | 301  | >TP53-Y205C RVEGNLRVEC  | 23660 | 23359 |



|                         |       |                         |       |       |
|-------------------------|-------|-------------------------|-------|-------|
| >TP53-Y205C RVEGNLRVEY  | 400   | >TP53-Y205C RVEGNLRVEI  | 28290 | 27890 |
| >TP53-Y205F YLDDRNTF    | 708   | >TP53-Y205F FLDDRNTF    | 235   | 473   |
| >TP53-Y205F YLDDRNTFR   | 789   | >TP53-Y205F FLDDRNTFR   | 255   | 534   |
| >TP53-Y205F YLDDRNTF    | 187   | >TP53-Y205F FLDDRNTF    | 138   | 49    |
| >TP53-Y205F YLDDRNTFR†  | 333   | >TP53-Y205F FLDDRNTFR†  | 194   | 139   |
| >TP53-Y205F YLDDRNTF    | 149   | >TP53-Y205F FLDDRNTF    | 196   | 47    |
| >TP53-Y205F YLDDRNTFR†  | 155   | >TP53-Y205F FLDDRNTFR†  | 207   | 52    |
| >TP53-Y205F YLDDRNTF    | 367   | >TP53-Y205F FLDDRNTF    | 542   | 175   |
| >TP53-Y205F YLDDRNTF    | 87    | >TP53-Y205F FLDDRNTF    | 104   | 17    |
| >TP53-Y205F YLDDRNTFR   | 189   | >TP53-Y205F FLDDRNTFR   | 251   | 62    |
| >TP53-Y205F YLDDRNTFR†  | 187   | >TP53-Y205F FLDDRNTFR†  | 242   | 55    |
| >TP53-Y205F YLDDRNTFR†  | 171   | >TP53-Y205F FLDDRNTFR†  | 207   | 36    |
| >TP53-Y205F YLDDRNTFR   | 282   | >TP53-Y205F FLDDRNTFR   | 1092  | 810   |
| >TP53-Y205F YLDDRNTFR   | 55    | >TP53-Y205F FLDDRNTFR   | 76    | 21    |
| >TP53-Y205F YLDDRNTFR   | 68    | >TP53-Y205F FLDDRNTFR   | 48    | 20    |
| >TP53-Y205F YLDDRNTF    | 255   | >TP53-Y205F FLDDRNTF    | 321   | 66    |
| >TP53-Y205F YLDDRNTFR   | 336   | >TP53-Y205F FLDDRNTFR   | 526   | 190   |
| >TP53-Y205F EYLDDRNTF   | 103   | >TP53-Y205F EFLDDRNTF   | 312   | 209   |
| >TP53-Y205F EYLDDRNTF   | 18    | >TP53-Y205F EFLDDRNTF   | 79    | 61    |
| >TP53-Y205F EYLDDRNTF   | 381   | >TP53-Y205F EFLDDRNTF   | 3723  | 3342  |
| >TP53-Y205F EYLDDRNTF   | 301   | >TP53-Y205F EFLDDRNTF   | 1011  | 710   |
| >TP53-Y205F EYLDDRNTFR  | 328   | >TP53-Y205F EFLDDRNTFR  | 111   | 217   |
| >TP53-Y205F EYLDDRNTFR  | 88    | >TP53-Y205F EFLDDRNTFR  | 33    | 55    |
| >TP53-Y205F EYLDDRNTFR  | 508   | >TP53-Y205F EFLDDRNTFR  | 47    | 461   |
| >TP53-Y205F EYLDDRNTFR  | 19    | >TP53-Y205F EFLDDRNTFR  | 35    | 16    |
| >TP53-Y205F IRVEGNLRVE† | 53    | >TP53-Y205F IRVEGNLRVE† | 18    | 35    |
| >TP53-Y205F IRVEGNLRVE† | 668   | >TP53-Y205F IRVEGNLRVE† | 464   | 204   |
| >TP53-Y205F IRVEGNLRVE† | 1131  | >TP53-Y205F IRVEGNLRVE† | 160   | 971   |
| >TP53-Y205F VEYLDDRNTF  | 124   | >TP53-Y205F VEFLDDRNTF  | 90    | 34    |
| >TP53-Y205F VEYLDDRNTF  | 524   | >TP53-Y205F VEFLDDRNTF  | 368   | 156   |
| >TP53-Y205F RVEYLDDR    | 433   | >TP53-Y205F RVEFLDDR    | 486   | 53    |
| >TP53-Y205F RVEYLDDRNT  | 40    | >TP53-Y205F RVEFLDDRNT  | 57    | 17    |
| >TP53-Y205F RVEYLDDRNT  | 78    | >TP53-Y205F RVEFLDDRNT  | 85    | 7     |
| >TP53-Y205F VEGNLRVEYL  | 312   | >TP53-Y205F VEGNLRVEFL  | 60    | 252   |
| >TP53-Y205F VEGNLRVEY   | 1192  | >TP53-Y205F VEGNLRVEF   | 349   | 843   |
| >TP53-Y205F VEGNLRVEY   | 67    | >TP53-Y205F VEGNLRVEF   | 72    | 5     |
| >TP53-Y205F VEGNLRVEY   | 3161  | >TP53-Y205F VEGNLRVEF   | 238   | 2923  |
| >TP53-Y205F VEGNLRVEYL  | 472   | >TP53-Y205F VEGNLRVEFL  | 772   | 300   |
| >TP53-Y205F VEGNLRVEY   | 338   | >TP53-Y205F VEGNLRVEF   | 294   | 44    |
| >TP53-Y205F VEGNLRVEY   | 6763  | >TP53-Y205F VEGNLRVEF   | 371   | 6392  |
| >TP53-Y205F VEGNLRVEYL  | 278   | >TP53-Y205F VEGNLRVEFL  | 87    | 191   |
| >TP53-Y205F RVEGNLRVEY  | 18020 | >TP53-Y205F RVEGNLRVEF  | 443   | 17577 |
| >TP53-Y205F RVEGNLRVEY  | 224   | >TP53-Y205F RVEGNLRVEF  | 8088  | 7864  |

|                         |      |                         |       |       |
|-------------------------|------|-------------------------|-------|-------|
| >TP53-Y205F RVEGNLRVEY  | 810  | >TP53-Y205F RVEGNLRVEF  | 65    | 745   |
| >TP53-Y205F RVEGNLRVEY  | 301  | >TP53-Y205F RVEGNLRVEF  | 241   | 60    |
| >TP53-Y205F RVEGNLRVEY  | 400  | >TP53-Y205F RVEGNLRVEF  | 457   | 57    |
| >TP53-Y205F YLDDRNTF    | 187  | >TP53-Y205F HLDDRNTF    | 3163  | 2976  |
| >TP53-Y205F YLDDRNTFR†  | 333  | >TP53-Y205F HLDDRNTFR†  | 6119  | 5786  |
| >TP53-Y205F YLDDRNTF    | 149  | >TP53-Y205F HLDDRNTF    | 5078  | 4929  |
| >TP53-Y205F YLDDRNTFR†  | 155  | >TP53-Y205F HLDDRNTFR†  | 4547  | 4392  |
| >TP53-Y205F YLDDRNTF    | 367  | >TP53-Y205F HLDDRNTF    | 4444  | 4077  |
| >TP53-Y205F YLDDRNTF    | 87   | >TP53-Y205F HLDDRNTF    | 2351  | 2264  |
| >TP53-Y205F YLDDRNTFR   | 189  | >TP53-Y205F HLDDRNTFR   | 4553  | 4364  |
| >TP53-Y205F YLDDRNTFR†  | 187  | >TP53-Y205F HLDDRNTFR†  | 4389  | 4202  |
| >TP53-Y205F YLDDRNTFR†  | 171  | >TP53-Y205F HLDDRNTFR†  | 4460  | 4289  |
| >TP53-Y205F YLDDRNTFR   | 282  | >TP53-Y205F HLDDRNTFR   | 56    | 226   |
| >TP53-Y205F YLDDRNTFR   | 55   | >TP53-Y205F HLDDRNTFR   | 33    | 22    |
| >TP53-Y205F YLDDRNTFR   | 68   | >TP53-Y205F HLDDRNTFR   | 95    | 27    |
| >TP53-Y205F YLDDRNTF    | 255  | >TP53-Y205F HLDDRNTF    | 704   | 449   |
| >TP53-Y205F YLDDRNTFR   | 336  | >TP53-Y205F HLDDRNTFR   | 104   | 232   |
| >TP53-Y205F EYLDDRNTF   | 103  | >TP53-Y205F EHLDDRNTF   | 6138  | 6035  |
| >TP53-Y205F EYLDDRNTF   | 18   | >TP53-Y205F EHLDDRNTF   | 5514  | 5496  |
| >TP53-Y205F EYLDDRNTF   | 381  | >TP53-Y205F EHLDDRNTF   | 10242 | 9861  |
| >TP53-Y205F EYLDDRNTF   | 301  | >TP53-Y205F EHLDDRNTF   | 6190  | 5889  |
| >TP53-Y205F EYLDDRNTFR  | 328  | >TP53-Y205F EHLDDRNTFF  | 2989  | 2661  |
| >TP53-Y205F EYLDDRNTFR  | 88   | >TP53-Y205F EHLDDRNTFF  | 2530  | 2442  |
| >TP53-Y205F EYLDDRNTF   | 1873 | >TP53-Y205F EHLDDRNTF   | 222   | 1651  |
| >TP53-Y205F EYLDDRNTFR  | 19   | >TP53-Y205F EHLDDRNTFF  | 240   | 221   |
| >TP53-Y205F IRVEGNLRVE† | 53   | >TP53-Y205F IRVEGNLRVE† | 1460  | 1407  |
| >TP53-Y205F VEYLDDRNTF  | 124  | >TP53-Y205F VEHLDDRNTF  | 448   | 324   |
| >TP53-Y205F RVEYLDDR    | 433  | >TP53-Y205F RVEHLDDR    | 702   | 269   |
| >TP53-Y205F RVEYLDDRNT  | 40   | >TP53-Y205F RVEHLDDRNT  | 73    | 33    |
| >TP53-Y205F RVEYLDDRNT  | 78   | >TP53-Y205F RVEHLDDRNT  | 111   | 33    |
| >TP53-Y205F VEGNLRVEYL  | 312  | >TP53-Y205F VEGNLRVEHL  | 1138  | 826   |
| >TP53-Y205F VEGNLRVEY   | 67   | >TP53-Y205F VEGNLRVEH   | 3880  | 3813  |
| >TP53-Y205F VEGNLRVEYL  | 472  | >TP53-Y205F VEGNLRVEHL  | 764   | 292   |
| >TP53-Y205F VEGNLRVEY   | 338  | >TP53-Y205F VEGNLRVEH   | 6839  | 6501  |
| >TP53-Y205F VEGNLRVEYL  | 278  | >TP53-Y205F VEGNLRVEHL  | 299   | 21    |
| >TP53-Y205F RVEGNLRVEY  | 224  | >TP53-Y205F RVEGNLRVE†  | 20718 | 20494 |
| >TP53-Y205F RVEGNLRVEY  | 301  | >TP53-Y205F RVEGNLRVE†  | 15813 | 15512 |
| >TP53-Y205F RVEGNLRVEY  | 400  | >TP53-Y205F RVEGNLRVE†  | 20718 | 20318 |
| >TP53-Y205N YLDDRNTF    | 187  | >TP53-Y205N NLDDRNTF    | 3158  | 2971  |
| >TP53-Y205N YLDDRNTFR†  | 333  | >TP53-Y205N NLDDRNTFR†  | 6518  | 6185  |
| >TP53-Y205N YLDDRNTF    | 149  | >TP53-Y205N NLDDRNTF    | 6738  | 6589  |
| >TP53-Y205N YLDDRNTFR†  | 155  | >TP53-Y205N NLDDRNTFR†  | 7208  | 7053  |
| >TP53-Y205N YLDDRNTF    | 367  | >TP53-Y205N NLDDRNTF    | 6728  | 6361  |

|                        |      |                        |       |       |
|------------------------|------|------------------------|-------|-------|
| >TP53-Y205N YLDDRNTF   | 87   | >TP53-Y205N NLDDRNTF   | 5990  | 5903  |
| >TP53-Y205N YLDDRNTFR  | 189  | >TP53-Y205N NLDDRNTFR  | 10031 | 9842  |
| >TP53-Y205N YLDDRNTFRH | 187  | >TP53-Y205N NLDDRNTFRH | 9806  | 9619  |
| >TP53-Y205N YLDDRNTFRH | 171  | >TP53-Y205N NLDDRNTFRH | 10104 | 9933  |
| >TP53-Y205N YLDDRNTFR  | 282  | >TP53-Y205N NLDDRNTFR  | 776   | 494   |
| >TP53-Y205N YLDDRNTFR  | 55   | >TP53-Y205N NLDDRNTFR  | 43    | 12    |
| >TP53-Y205N YLDDRNTFR  | 68   | >TP53-Y205N NLDDRNTFR  | 100   | 32    |
| >TP53-Y205N YLDDRNTF   | 255  | >TP53-Y205N NLDDRNTF   | 1257  | 1002  |
| >TP53-Y205N YLDDRNTFR  | 336  | >TP53-Y205N NLDDRNTFR  | 573   | 237   |
| >TP53-Y205N EYLDDRNTF  | 103  | >TP53-Y205N ENLDDRNTF  | 12958 | 12855 |
| >TP53-Y205N EYLDDRNTF  | 18   | >TP53-Y205N ENLDDRNTF  | 16568 | 16550 |
| >TP53-Y205N EYLDDRNTF  | 381  | >TP53-Y205N ENLDDRNTF  | 7223  | 6842  |
| >TP53-Y205N EYLDDRNTF  | 301  | >TP53-Y205N ENLDDRNTF  | 3071  | 2770  |
| >TP53-Y205N EYLDDRNTFR | 328  | >TP53-Y205N ENLDDRNTFF | 2853  | 2525  |
| >TP53-Y205N EYLDDRNTFR | 88   | >TP53-Y205N ENLDDRNTFF | 785   | 697   |
| >TP53-Y205N EYLDDRNTFR | 19   | >TP53-Y205N ENLDDRNTFF | 296   | 277   |
| >TP53-Y205N IRVEGNLRVE | 53   | >TP53-Y205N IRVEGNLRVE | 7566  | 7513  |
| >TP53-Y205N VEYLDDRNTF | 124  | >TP53-Y205N VENLDDRNTF | 719   | 595   |
| >TP53-Y205N RVEYLDDR   | 433  | >TP53-Y205N RVENLDDR   | 701   | 268   |
| >TP53-Y205N RVEYLDDRNT | 40   | >TP53-Y205N RVENLDDRNT | 60    | 20    |
| >TP53-Y205N RVEYLDDRNT | 78   | >TP53-Y205N RVENLDDRNT | 63    | 15    |
| >TP53-Y205N VEGNLRVEYL | 312  | >TP53-Y205N VEGNLRVENL | 895   | 583   |
| >TP53-Y205N VEGNLRVEY  | 67   | >TP53-Y205N VEGNLRVEN  | 10131 | 10064 |
| >TP53-Y205N VEGNLRVEYL | 472  | >TP53-Y205N VEGNLRVENL | 947   | 475   |
| >TP53-Y205N VEGNLRVEY  | 338  | >TP53-Y205N VEGNLRVEN  | 11694 | 11356 |
| >TP53-Y205N VEGNLRVEYL | 278  | >TP53-Y205N VEGNLRVENL | 308   | 30    |
| >TP53-Y205N RVEGNLRVEY | 224  | >TP53-Y205N RVEGNLRVEN | 27597 | 27373 |
| >TP53-Y205N RVEGNLRVEY | 1375 | >TP53-Y205N RVEGNLRVEN | 462   | 913   |
| >TP53-Y205N RVEGNLRVEY | 301  | >TP53-Y205N RVEGNLRVEN | 22078 | 21777 |
| >TP53-Y205N RVEGNLRVEY | 400  | >TP53-Y205N RVEGNLRVEN | 26907 | 26507 |
| >TP53-Y205S YLDDRNTF   | 187  | >TP53-Y205S SLDDRNTF   | 2043  | 1856  |
| >TP53-Y205S YLDDRNTFRH | 333  | >TP53-Y205S SLDDRNTFRH | 3860  | 3527  |
| >TP53-Y205S YLDDRNTF   | 149  | >TP53-Y205S SLDDRNTF   | 1366  | 1217  |
| >TP53-Y205S YLDDRNTFRH | 155  | >TP53-Y205S SLDDRNTFRH | 1296  | 1141  |
| >TP53-Y205S YLDDRNTF   | 367  | >TP53-Y205S SLDDRNTF   | 4475  | 4108  |
| >TP53-Y205S YLDDRNTF   | 87   | >TP53-Y205S SLDDRNTF   | 761   | 674   |
| >TP53-Y205S YLDDRNTFR  | 189  | >TP53-Y205S SLDDRNTFR  | 1751  | 1562  |
| >TP53-Y205S YLDDRNTFRH | 187  | >TP53-Y205S SLDDRNTFRH | 1529  | 1342  |
| >TP53-Y205S YLDDRNTFRH | 171  | >TP53-Y205S SLDDRNTFRH | 1876  | 1705  |
| >TP53-Y205S YLDDRNTFR  | 282  | >TP53-Y205S SLDDRNTFR  | 98    | 184   |
| >TP53-Y205S YLDDRNTFR  | 55   | >TP53-Y205S SLDDRNTFR  | 187   | 132   |
| >TP53-Y205S YLDDRNTFR  | 68   | >TP53-Y205S SLDDRNTFR  | 346   | 278   |
| >TP53-Y205S YLDDRNTF   | 255  | >TP53-Y205S SLDDRNTF   | 1180  | 925   |

|                         |       |                         |       |       |
|-------------------------|-------|-------------------------|-------|-------|
| >TP53-Y205S YLDDRNTFR   | 336   | >TP53-Y205S SLDDRNTFR   | 430   | 94    |
| >TP53-Y205S EYLDDRNTF   | 103   | >TP53-Y205S ESLDDRNTF   | 8604  | 8501  |
| >TP53-Y205S EYLDDRNTF   | 18    | >TP53-Y205S ESLDDRNTF   | 9617  | 9599  |
| >TP53-Y205S EYLDDRNTF   | 381   | >TP53-Y205S ESLDDRNTF   | 293   | 88    |
| >TP53-Y205S EYLDDRNTF   | 301   | >TP53-Y205S ESLDDRNTF   | 34    | 267   |
| >TP53-Y205S EYLDDRNTF   | 1315  | >TP53-Y205S ESLDDRNTF   | 379   | 936   |
| >TP53-Y205S EYLDDRNTFR  | 328   | >TP53-Y205S ESLDDRNTFR  | 251   | 77    |
| >TP53-Y205S EYLDDRNTFR  | 88    | >TP53-Y205S ESLDDRNTFR  | 167   | 79    |
| >TP53-Y205S EYLDDRNTFR  | 508   | >TP53-Y205S ESLDDRNTFR  | 17    | 491   |
| >TP53-Y205S EYLDDRNTF   | 1873  | >TP53-Y205S ESLDDRNTF   | 211   | 1662  |
| >TP53-Y205S EYLDDRNTF   | 25381 | >TP53-Y205S ESLDDRNTF   | 190   | 25191 |
| >TP53-Y205S EYLDDRNTF   | 10356 | >TP53-Y205S ESLDDRNTF   | 458   | 9898  |
| >TP53-Y205S EYLDDRNTFR  | 19    | >TP53-Y205S ESLDDRNTFR  | 402   | 383   |
| >TP53-Y205S IRVEGNLRVE' | 53    | >TP53-Y205S IRVEGNLRVE' | 5290  | 5237  |
| >TP53-Y205S VEYLDDRNTF  | 124   | >TP53-Y205S VESLDDRNTF  | 761   | 637   |
| >TP53-Y205S RVEYLDDR    | 433   | >TP53-Y205S RVESLDDR    | 483   | 50    |
| >TP53-Y205S RVEYLDDRNT  | 40    | >TP53-Y205S RVESLDDRNT  | 101   | 61    |
| >TP53-Y205S RVEYLDDRNT  | 78    | >TP53-Y205S RVESLDDRNT  | 49    | 29    |
| >TP53-Y205S VEGNLRVEYL  | 312   | >TP53-Y205S VEGNLRVESL  | 396   | 84    |
| >TP53-Y205S VEGNLRVEY   | 67    | >TP53-Y205S VEGNLRVES   | 8857  | 8790  |
| >TP53-Y205S VEGNLRVEYL  | 799   | >TP53-Y205S VEGNLRVESL  | 339   | 460   |
| >TP53-Y205S VEGNLRVEYL  | 472   | >TP53-Y205S VEGNLRVESL  | 550   | 78    |
| >TP53-Y205S VEGNLRVEY   | 338   | >TP53-Y205S VEGNLRVES   | 10653 | 10315 |
| >TP53-Y205S VEGNLRVEYL  | 278   | >TP53-Y205S VEGNLRVESL  | 159   | 119   |
| >TP53-Y205S RVEGNLRVEY  | 224   | >TP53-Y205S RVEGNLRVES  | 25907 | 25683 |
| >TP53-Y205S RVEGNLRVEY  | 1375  | >TP53-Y205S RVEGNLRVES  | 157   | 1218  |
| >TP53-Y205S RVEGNLRVEY  | 3230  | >TP53-Y205S RVEGNLRVES  | 393   | 2837  |
| >TP53-Y205S RVEGNLRVEY  | 301   | >TP53-Y205S RVEGNLRVES  | 20978 | 20677 |
| >TP53-Y205S RVEGNLRVEY  | 400   | >TP53-Y205S RVEGNLRVES  | 24992 | 24592 |
| >TP53-Y220C NTFRHSVVVF  | 128   | >TP53-Y220C NTFRHSVVVF  | 21541 | 21413 |
| >TP53-Y220C NTFRHSVVVF  | 97    | >TP53-Y220C NTFRHSVVVF  | 16123 | 16026 |
| >TP53-Y220C NTFRHSVVVF  | 123   | >TP53-Y220C NTFRHSVVVF  | 24941 | 24818 |
| >TP53-Y220C NTFRHSVVVF  | 82    | >TP53-Y220C NTFRHSVVVF  | 23165 | 23083 |
| >TP53-Y220C NTFRHSVVVF  | 61    | >TP53-Y220C NTFRHSVVVF  | 588   | 527   |
| >TP53-Y220C NTFRHSVVVF  | 34    | >TP53-Y220C NTFRHSVVVF  | 6908  | 6874  |
| >TP53-Y220C NTFRHSVVVF  | 1311  | >TP53-Y220C NTFRHSVVVF  | 175   | 1136  |
| >TP53-Y220C NTFRHSVVVF  | 65    | >TP53-Y220C NTFRHSVVVF  | 12807 | 12742 |
| >TP53-Y220C NTFRHSVVVF  | 492   | >TP53-Y220C NTFRHSVVVF  | 28588 | 28096 |
| >TP53-Y220C NTFRHSVVVF  | 33    | >TP53-Y220C NTFRHSVVVF  | 5941  | 5908  |
| >TP53-Y220C NTFRHSVVVF  | 23    | >TP53-Y220C NTFRHSVVVF  | 15545 | 15522 |
| >TP53-Y220C NTFRHSVVVF  | 105   | >TP53-Y220C NTFRHSVVVF  | 14707 | 14602 |
| >TP53-Y220C NTFRHSVVVF  | 289   | >TP53-Y220C NTFRHSVVVF  | 21447 | 21158 |
| >TP53-Y220C NTFRHSVVVF  | 23    | >TP53-Y220C NTFRHSVVVF  | 25540 | 25517 |

|                        |      |                        |       |       |
|------------------------|------|------------------------|-------|-------|
| >TP53-Y220C VPYEPPEV   | 184  | >TP53-Y220C VPCEPPEV   | 612   | 428   |
| >TP53-Y220C VPYEPPEV   | 139  | >TP53-Y220C VPCEPPEV   | 1821  | 1682  |
| >TP53-Y220C VPYEPPEV   | 266  | >TP53-Y220C VPCEPPEV   | 5130  | 4864  |
| >TP53-Y220C VPYEPPEV   | 48   | >TP53-Y220C VPCEPPEV   | 719   | 671   |
| >TP53-Y220C VPYEPPEV   | 205  | >TP53-Y220C VPCEPPEV   | 1944  | 1739  |
| >TP53-Y220C VVPYEPPEV  | 662  | >TP53-Y220C VVPCEPPEV  | 321   | 341   |
| >TP53-Y220C VVPYEPPEV  | 507  | >TP53-Y220C VVPCEPPEV  | 251   | 256   |
| >TP53-Y220C VVPYEPPEV  | 214  | >TP53-Y220C VVPCEPPEV  | 31    | 183   |
| >TP53-Y220C VVPYEPPEV  | 329  | >TP53-Y220C VVPCEPPEV  | 210   | 119   |
| >TP53-Y220C VVPYEPPEV  | 56   | >TP53-Y220C VVPCEPPEV  | 54    | 2     |
| >TP53-Y220C VVVPYEPPEV | 390  | >TP53-Y220C VVVPCEPPEV | 468   | 78    |
| >TP53-Y220C VVVPYEPPEV | 136  | >TP53-Y220C VVVPCEPPEV | 144   | 8     |
| >TP53-Y220C VVVPYEPPEV | 28   | >TP53-Y220C VVVPCEPPEV | 92    | 64    |
| >TP53-Y220C VVVPYEPPEV | 72   | >TP53-Y220C VVVPCEPPEV | 75    | 3     |
| >TP53-Y220C VVVPYEPPEV | 9    | >TP53-Y220C VVVPCEPPEV | 12    | 3     |
| >TP53-Y220C VVVPYEPPEV | 353  | >TP53-Y220C VVVPCEPPEV | 1033  | 680   |
| >TP53-Y220C SVVVPYEPPE | 75   | >TP53-Y220C SVVVPCEPPE | 72    | 3     |
| >TP53-Y220C SVVVPYEPPE | 92   | >TP53-Y220C SVVVPCEPPE | 157   | 65    |
| >TP53-Y220C SVVVPYEPPE | 129  | >TP53-Y220C SVVVPCEPPE | 210   | 81    |
| >TP53-Y220C SVVVPYEPPE | 57   | >TP53-Y220C SVVVPCEPPE | 70    | 13    |
| >TP53-Y220C SVVVPYEPPE | 81   | >TP53-Y220C SVVVPCEPPE | 109   | 28    |
| >TP53-Y220C SVVVPYEPPE | 26   | >TP53-Y220C SVVVPCEPPE | 36    | 10    |
| >TP53-Y220C RHSVVVPY   | 23   | >TP53-Y220C RHSVVVPC   | 4644  | 4621  |
| >TP53-Y220C RHSVVVPY   | 413  | >TP53-Y220C RHSVVVPC   | 21630 | 21217 |
| >TP53-Y220C FRHSVVVPY  | 4    | >TP53-Y220C FRHSVVVPC  | 454   | 450   |
| >TP53-Y220C FRHSVVVPY  | 33   | >TP53-Y220C FRHSVVVPC  | 1307  | 1274  |
| >TP53-Y220C FRHSVVVPY  | 1904 | >TP53-Y220C FRHSVVVPC  | 410   | 1494  |
| >TP53-Y220C TFRHSVVVPY | 185  | >TP53-Y220C TFRHSVVVPC | 27949 | 27764 |
| >TP53-Y220C TFRHSVVVPY | 162  | >TP53-Y220C TFRHSVVVPC | 1918  | 1756  |
| >TP53-Y220C TFRHSVVVPY | 140  | >TP53-Y220C TFRHSVVVPC | 16969 | 16829 |
| >TP53-Y220C TFRHSVVVPY | 225  | >TP53-Y220C TFRHSVVVPC | 24728 | 24503 |
| >TP53-Y220C TFRHSVVVPY | 271  | >TP53-Y220C TFRHSVVVPC | 13999 | 13728 |
| >TP53-Y220C NTFRHSVVVF | 128  | >TP53-Y220C NTFRHSVVVF | 21801 | 21673 |
| >TP53-Y220C NTFRHSVVVF | 97   | >TP53-Y220C NTFRHSVVVF | 21275 | 21178 |
| >TP53-Y220C NTFRHSVVVF | 123  | >TP53-Y220C NTFRHSVVVF | 30848 | 30725 |
| >TP53-Y220C NTFRHSVVVF | 82   | >TP53-Y220C NTFRHSVVVF | 24535 | 24453 |
| >TP53-Y220C NTFRHSVVVF | 61   | >TP53-Y220C NTFRHSVVVF | 2337  | 2276  |
| >TP53-Y220C NTFRHSVVVF | 34   | >TP53-Y220C NTFRHSVVVF | 4558  | 4524  |
| >TP53-Y220C NTFRHSVVVF | 65   | >TP53-Y220C NTFRHSVVVF | 16865 | 16800 |
| >TP53-Y220C NTFRHSVVVF | 492  | >TP53-Y220C NTFRHSVVVF | 33840 | 33348 |
| >TP53-Y220C NTFRHSVVVF | 33   | >TP53-Y220C NTFRHSVVVF | 16172 | 16139 |
| >TP53-Y220C NTFRHSVVVF | 23   | >TP53-Y220C NTFRHSVVVF | 19811 | 19788 |
| >TP53-Y220C NTFRHSVVVF | 105  | >TP53-Y220C NTFRHSVVVF | 19817 | 19712 |

|                        |      |                        |       |       |
|------------------------|------|------------------------|-------|-------|
| >TP53-Y220C NTFRHSVVVF | 289  | >TP53-Y220C NTFRHSVVVF | 26433 | 26144 |
| >TP53-Y220C NTFRHSVVVF | 23   | >TP53-Y220C NTFRHSVVVF | 24494 | 24471 |
| >TP53-Y220C VPYEPPEV   | 184  | >TP53-Y220C VPDEPPEV   | 3024  | 2840  |
| >TP53-Y220C VPYEPPEV   | 139  | >TP53-Y220C VPDEPPEV   | 773   | 634   |
| >TP53-Y220C VPYEPPEV   | 266  | >TP53-Y220C VPDEPPEV   | 640   | 374   |
| >TP53-Y220C VPYEPPEV   | 48   | >TP53-Y220C VPDEPPEV   | 561   | 513   |
| >TP53-Y220C VPYEPPEV   | 205  | >TP53-Y220C VPDEPPEV   | 4874  | 4669  |
| >TP53-Y220C VVPYEPPEV  | 923  | >TP53-Y220C VVPDEPPEV  | 204   | 719   |
| >TP53-Y220C VVPYEPPEV  | 662  | >TP53-Y220C VVPDEPPEV  | 194   | 468   |
| >TP53-Y220C VVPYEPPEV  | 507  | >TP53-Y220C VVPDEPPEV  | 94    | 413   |
| >TP53-Y220C VVPYEPPEV  | 214  | >TP53-Y220C VVPDEPPEV  | 11    | 203   |
| >TP53-Y220C VVPYEPPEV  | 329  | >TP53-Y220C VVPDEPPEV  | 35    | 294   |
| >TP53-Y220C VVPYEPPEV  | 2192 | >TP53-Y220C VVPDEPPEV  | 132   | 2060  |
| >TP53-Y220C VVPYEPPEV  | 56   | >TP53-Y220C VVPDEPPEV  | 7     | 49    |
| >TP53-Y220C VVVPYEPPEV | 390  | >TP53-Y220C VVVPDEPPEV | 587   | 197   |
| >TP53-Y220C VVVPYEPPEV | 136  | >TP53-Y220C VVVPDEPPEV | 124   | 12    |
| >TP53-Y220C VVVPYEPPEV | 28   | >TP53-Y220C VVVPDEPPEV | 48    | 20    |
| >TP53-Y220C VVVPYEPPEV | 72   | >TP53-Y220C VVVPDEPPEV | 51    | 21    |
| >TP53-Y220C VVVPYEPPEV | 9    | >TP53-Y220C VVVPDEPPEV | 8     | 1     |
| >TP53-Y220C VVVPYEPPEV | 353  | >TP53-Y220C VVVPDEPPEV | 640   | 287   |
| >TP53-Y220C SVVVPYEPPE | 75   | >TP53-Y220C SVVVPDEPPE | 96    | 21    |
| >TP53-Y220C SVVVPYEPPE | 92   | >TP53-Y220C SVVVPDEPPE | 127   | 35    |
| >TP53-Y220C SVVVPYEPPE | 129  | >TP53-Y220C SVVVPDEPPE | 121   | 8     |
| >TP53-Y220C SVVVPYEPPE | 57   | >TP53-Y220C SVVVPDEPPE | 55    | 2     |
| >TP53-Y220C SVVVPYEPPE | 81   | >TP53-Y220C SVVVPDEPPE | 97    | 16    |
| >TP53-Y220C SVVVPYEPPE | 26   | >TP53-Y220C SVVVPDEPPE | 87    | 61    |
| >TP53-Y220C RHSVVVPY   | 23   | >TP53-Y220C RHSVVVPD   | 13260 | 13237 |
| >TP53-Y220C RHSVVVPY   | 413  | >TP53-Y220C RHSVVVPD   | 17422 | 17009 |
| >TP53-Y220C FRHSVVVPY  | 4    | >TP53-Y220C FRHSVVVPD  | 4188  | 4184  |
| >TP53-Y220C FRHSVVVPY  | 33   | >TP53-Y220C FRHSVVVPD  | 2199  | 2166  |
| >TP53-Y220C TFRHSVVVPY | 185  | >TP53-Y220C TFRHSVVVPC | 30157 | 29972 |
| >TP53-Y220C TFRHSVVVPY | 162  | >TP53-Y220C TFRHSVVVPC | 2007  | 1845  |
| >TP53-Y220C TFRHSVVVPY | 140  | >TP53-Y220C TFRHSVVVPC | 20030 | 19890 |
| >TP53-Y220C TFRHSVVVPY | 225  | >TP53-Y220C TFRHSVVVPC | 31965 | 31740 |
| >TP53-Y220C TFRHSVVVPY | 271  | >TP53-Y220C TFRHSVVVPC | 22175 | 21904 |
| >TP53-Y220F NTFRHSVVVF | 128  | >TP53-Y220F NTFRHSVVVF | 1271  | 1143  |
| >TP53-Y220F NTFRHSVVVF | 97   | >TP53-Y220F NTFRHSVVVF | 9067  | 8970  |
| >TP53-Y220F NTFRHSVVVF | 123  | >TP53-Y220F NTFRHSVVVF | 7541  | 7418  |
| >TP53-Y220F NTFRHSVVVF | 82   | >TP53-Y220F NTFRHSVVVF | 11079 | 10997 |
| >TP53-Y220F NTFRHSVVVF | 61   | >TP53-Y220F NTFRHSVVVF | 1077  | 1016  |
| >TP53-Y220F NTFRHSVVVF | 34   | >TP53-Y220F NTFRHSVVVF | 251   | 217   |
| >TP53-Y220F NTFRHSVVVF | 65   | >TP53-Y220F NTFRHSVVVF | 2935  | 2870  |
| >TP53-Y220F NTFRHSVVVF | 492  | >TP53-Y220F NTFRHSVVVF | 13808 | 13316 |

|                        |     |                        |       |       |
|------------------------|-----|------------------------|-------|-------|
| >TP53-Y220F NTFRHSVVVF | 33  | >TP53-Y220F NTFRHSVVVF | 2179  | 2146  |
| >TP53-Y220F NTFRHSVVVF | 23  | >TP53-Y220F NTFRHSVVVF | 6063  | 6040  |
| >TP53-Y220F NTFRHSVVVF | 105 | >TP53-Y220F NTFRHSVVVF | 2144  | 2039  |
| >TP53-Y220F NTFRHSVVVF | 289 | >TP53-Y220F NTFRHSVVVF | 4914  | 4625  |
| >TP53-Y220F NTFRHSVVVF | 23  | >TP53-Y220F NTFRHSVVVF | 16889 | 16866 |
| >TP53-Y220F VPYEPPEV   | 184 | >TP53-Y220F VPHEPPEV   | 212   | 28    |
| >TP53-Y220F VPYEPPEV   | 139 | >TP53-Y220F VPHEPPEV   | 1445  | 1306  |
| >TP53-Y220F VPYEPPEV   | 266 | >TP53-Y220F VPHEPPEV   | 4397  | 4131  |
| >TP53-Y220F VPYEPPEV   | 48  | >TP53-Y220F VPHEPPEV   | 444   | 396   |
| >TP53-Y220F VPYEPPEV   | 205 | >TP53-Y220F VPHEPPEV   | 1521  | 1316  |
| >TP53-Y220F VVPYEPPEV  | 662 | >TP53-Y220F VVPHEPPEV  | 373   | 289   |
| >TP53-Y220F VVPYEPPEV  | 507 | >TP53-Y220F VVPHEPPEV  | 392   | 115   |
| >TP53-Y220F VVPYEPPEV  | 214 | >TP53-Y220F VVPHEPPEV  | 83    | 131   |
| >TP53-Y220F VVPYEPPEV  | 329 | >TP53-Y220F VVPHEPPEV  | 162   | 167   |
| >TP53-Y220F VVPYEPPEV  | 56  | >TP53-Y220F VVPHEPPEV  | 29    | 27    |
| >TP53-Y220F VVVPYEPPEV | 390 | >TP53-Y220F VVVPHEPPEV | 578   | 188   |
| >TP53-Y220F VVVPYEPPEV | 136 | >TP53-Y220F VVVPHEPPEV | 236   | 100   |
| >TP53-Y220F VVVPYEPPEV | 28  | >TP53-Y220F VVVPHEPPEV | 48    | 20    |
| >TP53-Y220F VVVPYEPPEV | 72  | >TP53-Y220F VVVPHEPPEV | 133   | 61    |
| >TP53-Y220F VVVPYEPPEV | 9   | >TP53-Y220F VVVPHEPPEV | 12    | 3     |
| >TP53-Y220F VVVPYEPPEV | 353 | >TP53-Y220F VVVPHEPPEV | 571   | 218   |
| >TP53-Y220F SVVVPYEPPE | 75  | >TP53-Y220F SVVVPHEPPE | 119   | 44    |
| >TP53-Y220F SVVVPYEPPE | 92  | >TP53-Y220F SVVVPHEPPE | 79    | 13    |
| >TP53-Y220F SVVVPYEPPE | 129 | >TP53-Y220F SVVVPHEPPE | 195   | 66    |
| >TP53-Y220F SVVVPYEPPE | 57  | >TP53-Y220F SVVVPHEPPE | 53    | 4     |
| >TP53-Y220F SVVVPYEPPE | 81  | >TP53-Y220F SVVVPHEPPE | 106   | 25    |
| >TP53-Y220F SVVVPYEPPE | 26  | >TP53-Y220F SVVVPHEPPE | 30    | 4     |
| >TP53-Y220F RHSVVVPY   | 23  | >TP53-Y220F RHSVVVPH   | 1296  | 1273  |
| >TP53-Y220F RHSVVVPY   | 413 | >TP53-Y220F RHSVVVPH   | 13685 | 13272 |
| >TP53-Y220F FRHSVVVPY  | 4   | >TP53-Y220F FRHSVVVPH  | 94    | 90    |
| >TP53-Y220F FRHSVVVPY  | 33  | >TP53-Y220F FRHSVVVPH  | 65    | 32    |
| >TP53-Y220F TFRHSVVVPY | 185 | >TP53-Y220F TFRHSVVVPH | 17533 | 17348 |
| >TP53-Y220F TFRHSVVVPY | 162 | >TP53-Y220F TFRHSVVVPH | 1553  | 1391  |
| >TP53-Y220F TFRHSVVVPY | 140 | >TP53-Y220F TFRHSVVVPH | 8337  | 8197  |
| >TP53-Y220F TFRHSVVVPY | 225 | >TP53-Y220F TFRHSVVVPH | 7602  | 7377  |
| >TP53-Y220F TFRHSVVVPY | 271 | >TP53-Y220F TFRHSVVVPH | 5850  | 5579  |
| >TP53-Y220N NTFRHSVVVF | 128 | >TP53-Y220N NTFRHSVVVF | 12633 | 12505 |
| >TP53-Y220N NTFRHSVVVF | 97  | >TP53-Y220N NTFRHSVVVF | 18964 | 18867 |
| >TP53-Y220N NTFRHSVVVF | 123 | >TP53-Y220N NTFRHSVVVF | 24228 | 24105 |
| >TP53-Y220N NTFRHSVVVF | 82  | >TP53-Y220N NTFRHSVVVF | 21039 | 20957 |
| >TP53-Y220N NTFRHSVVVF | 61  | >TP53-Y220N NTFRHSVVVF | 2159  | 2098  |
| >TP53-Y220N NTFRHSVVVF | 34  | >TP53-Y220N NTFRHSVVVF | 970   | 936   |
| >TP53-Y220N NTFRHSVVVF | 65  | >TP53-Y220N NTFRHSVVVF | 13227 | 13162 |

|                        |     |                        |       |       |
|------------------------|-----|------------------------|-------|-------|
| >TP53-Y220M NTFRHSVVVF | 492 | >TP53-Y220M NTFRHSVVVF | 28554 | 28062 |
| >TP53-Y220M NTFRHSVVVF | 33  | >TP53-Y220M NTFRHSVVVF | 10035 | 10002 |
| >TP53-Y220M NTFRHSVVVF | 23  | >TP53-Y220M NTFRHSVVVF | 16528 | 16505 |
| >TP53-Y220M NTFRHSVVVF | 105 | >TP53-Y220M NTFRHSVVVF | 15923 | 15818 |
| >TP53-Y220M NTFRHSVVVF | 289 | >TP53-Y220M NTFRHSVVVF | 18155 | 17866 |
| >TP53-Y220M NTFRHSVVVF | 23  | >TP53-Y220M NTFRHSVVVF | 23757 | 23734 |
| >TP53-Y220M VPYEPPEV   | 184 | >TP53-Y220M VPNEPPEV   | 1984  | 1800  |
| >TP53-Y220M VPYEPPEV   | 139 | >TP53-Y220M VPNEPPEV   | 1430  | 1291  |
| >TP53-Y220M VPYEPPEV   | 266 | >TP53-Y220M VPNEPPEV   | 1307  | 1041  |
| >TP53-Y220M VPYEPPEV   | 48  | >TP53-Y220M VPNEPPEV   | 320   | 272   |
| >TP53-Y220M VPYEPPEV   | 205 | >TP53-Y220M VPNEPPEV   | 878   | 673   |
| >TP53-Y220M VVPYEPPEV  | 662 | >TP53-Y220M VVPNEPPEV  | 435   | 227   |
| >TP53-Y220M VVPYEPPEV  | 507 | >TP53-Y220M VVPNEPPEV  | 275   | 232   |
| >TP53-Y220M VVPYEPPEV  | 214 | >TP53-Y220M VVPNEPPEV  | 28    | 186   |
| >TP53-Y220M VVPYEPPEV  | 329 | >TP53-Y220M VVPNEPPEV  | 54    | 275   |
| >TP53-Y220M VVPYEPPEV  | 56  | >TP53-Y220M VVPNEPPEV  | 16    | 40    |
| >TP53-Y220M VVVPYEPPEV | 390 | >TP53-Y220M VVVPNEPPEV | 503   | 113   |
| >TP53-Y220M VVVPYEPPEV | 136 | >TP53-Y220M VVVPNEPPEV | 219   | 83    |
| >TP53-Y220M VVVPYEPPEV | 28  | >TP53-Y220M VVVPNEPPEV | 31    | 3     |
| >TP53-Y220M VVVPYEPPEV | 828 | >TP53-Y220M VVVPNEPPEV | 399   | 429   |
| >TP53-Y220M VVVPYEPPEV | 72  | >TP53-Y220M VVVPNEPPEV | 61    | 11    |
| >TP53-Y220M VVVPYEPPEV | 9   | >TP53-Y220M VVVPNEPPEV | 8     | 1     |
| >TP53-Y220M VVVPYEPPEV | 353 | >TP53-Y220M VVVPNEPPEV | 604   | 251   |
| >TP53-Y220M SVVVPYEPPE | 75  | >TP53-Y220M SVVVPNEPPE | 87    | 12    |
| >TP53-Y220M SVVVPYEPPE | 92  | >TP53-Y220M SVVVPNEPPE | 101   | 9     |
| >TP53-Y220M SVVVPYEPPE | 129 | >TP53-Y220M SVVVPNEPPE | 161   | 32    |
| >TP53-Y220M SVVVPYEPPE | 57  | >TP53-Y220M SVVVPNEPPE | 59    | 2     |
| >TP53-Y220M SVVVPYEPPE | 81  | >TP53-Y220M SVVVPNEPPE | 105   | 24    |
| >TP53-Y220M SVVVPYEPPE | 26  | >TP53-Y220M SVVVPNEPPE | 28    | 2     |
| >TP53-Y220M RHSVVVPY   | 23  | >TP53-Y220M RHSVVVPN   | 7945  | 7922  |
| >TP53-Y220M RHSVVVPY   | 413 | >TP53-Y220M RHSVVVPN   | 12758 | 12345 |
| >TP53-Y220M FRHSVVVPY  | 4   | >TP53-Y220M FRHSVVVPN  | 1498  | 1494  |
| >TP53-Y220M FRHSVVVPY  | 33  | >TP53-Y220M FRHSVVVPN  | 657   | 624   |
| >TP53-Y220M TFRHSVVVPY | 185 | >TP53-Y220M TFRHSVVVPN | 28906 | 28721 |
| >TP53-Y220M TFRHSVVVPY | 162 | >TP53-Y220M TFRHSVVVPN | 1591  | 1429  |
| >TP53-Y220M TFRHSVVVPY | 140 | >TP53-Y220M TFRHSVVVPN | 17455 | 17315 |
| >TP53-Y220M TFRHSVVVPY | 225 | >TP53-Y220M TFRHSVVVPN | 25381 | 25156 |
| >TP53-Y220M TFRHSVVVPY | 271 | >TP53-Y220M TFRHSVVVPN | 16758 | 16487 |
| >TP53-Y220S NTFRHSVVVF | 128 | >TP53-Y220S NTFRHSVVVF | 13664 | 13536 |
| >TP53-Y220S NTFRHSVVVF | 97  | >TP53-Y220S NTFRHSVVVF | 19302 | 19205 |
| >TP53-Y220S NTFRHSVVVF | 123 | >TP53-Y220S NTFRHSVVVF | 21551 | 21428 |
| >TP53-Y220S NTFRHSVVVF | 82  | >TP53-Y220S NTFRHSVVVF | 21253 | 21171 |
| >TP53-Y220S NTFRHSVVVF | 61  | >TP53-Y220S NTFRHSVVVF | 1838  | 1777  |



|                        |      |                         |       |       |
|------------------------|------|-------------------------|-------|-------|
| >TP53-Y220S NTFRHSVVVF | 34   | >TP53-Y220S NTFRHSVVVF  | 1250  | 1216  |
| >TP53-Y220S NTFRHSVVVF | 1311 | >TP53-Y220S NTFRHSVVVF  | 47    | 1264  |
| >TP53-Y220S NTFRHSVVVF | 65   | >TP53-Y220S NTFRHSVVVF  | 10524 | 10459 |
| >TP53-Y220S NTFRHSVVVF | 492  | >TP53-Y220S NTFRHSVVVF  | 28433 | 27941 |
| >TP53-Y220S NTFRHSVVVF | 33   | >TP53-Y220S NTFRHSVVVF  | 7159  | 7126  |
| >TP53-Y220S NTFRHSVVVF | 23   | >TP53-Y220S NTFRHSVVVF  | 15104 | 15081 |
| >TP53-Y220S NTFRHSVVVF | 105  | >TP53-Y220S NTFRHSVVVF  | 11250 | 11145 |
| >TP53-Y220S NTFRHSVVVF | 289  | >TP53-Y220S NTFRHSVVVF  | 18555 | 18266 |
| >TP53-Y220S NTFRHSVVVF | 23   | >TP53-Y220S NTFRHSVVVF  | 13477 | 13454 |
| >TP53-Y220S VPYEPPEV   | 184  | >TP53-Y220S VPSEPPEV    | 3476  | 3292  |
| >TP53-Y220S VPYEPPEV   | 139  | >TP53-Y220S VPSEPPEV    | 2880  | 2741  |
| >TP53-Y220S VPYEPPEV   | 266  | >TP53-Y220S VPSEPPEV    | 1881  | 1615  |
| >TP53-Y220S VPYEPPEV   | 48   | >TP53-Y220S VPSEPPEV    | 221   | 173   |
| >TP53-Y220S VPYEPPEV   | 205  | >TP53-Y220S VPSEPPEV    | 3006  | 2801  |
| >TP53-Y220S VVPYEPPEV  | 662  | >TP53-Y220S VVPSEPPEV   | 354   | 308   |
| >TP53-Y220S VVPYEPPEV  | 507  | >TP53-Y220S VVPSEPPEV   | 428   | 79    |
| >TP53-Y220S VVPYEPPEV  | 214  | >TP53-Y220S VVPSEPPEV   | 39    | 175   |
| >TP53-Y220S VVPYEPPEV  | 329  | >TP53-Y220S VVPSEPPEV   | 93    | 236   |
| >TP53-Y220S VVPYEPPEV  | 56   | >TP53-Y220S VVPSEPPEV   | 17    | 39    |
| >TP53-Y220S VVVPYEPPEV | 390  | >TP53-Y220S VVVPSEPPEV  | 473   | 83    |
| >TP53-Y220S VVVPYEPPEV | 136  | >TP53-Y220S VVVPSEPPEV  | 165   | 29    |
| >TP53-Y220S VVVPYEPPEV | 28   | >TP53-Y220S VVVPSEPPEV  | 55    | 27    |
| >TP53-Y220S VVVPYEPPEV | 72   | >TP53-Y220S VVVPSEPPEV  | 54    | 18    |
| >TP53-Y220S VVVPYEPPEV | 9    | >TP53-Y220S VVVPSEPPEV  | 9     | 0     |
| >TP53-Y220S VVVPYEPPEV | 353  | >TP53-Y220S VVVPSEPPEV  | 582   | 229   |
| >TP53-Y220S SVVVPYEPPE | 75   | >TP53-Y220S SVVVPSEPPE' | 68    | 7     |
| >TP53-Y220S SVVVPYEPPE | 92   | >TP53-Y220S SVVVPSEPPE' | 78    | 14    |
| >TP53-Y220S SVVVPYEPPE | 129  | >TP53-Y220S SVVVPSEPPE' | 100   | 29    |
| >TP53-Y220S SVVVPYEPPE | 57   | >TP53-Y220S SVVVPSEPPE' | 48    | 9     |
| >TP53-Y220S SVVVPYEPPE | 81   | >TP53-Y220S SVVVPSEPPE' | 100   | 19    |
| >TP53-Y220S SVVVPYEPPE | 26   | >TP53-Y220S SVVVPSEPPE' | 23    | 3     |
| >TP53-Y220S RHSVVVPY   | 23   | >TP53-Y220S RHSVVVPS    | 5230  | 5207  |
| >TP53-Y220S RHSVVVPY   | 413  | >TP53-Y220S RHSVVVPS    | 17105 | 16692 |
| >TP53-Y220S FRHSVVVPY  | 4    | >TP53-Y220S FRHSVVVPS   | 433   | 429   |
| >TP53-Y220S FRHSVVVPY  | 33   | >TP53-Y220S FRHSVVVPS   | 302   | 269   |
| >TP53-Y220S TFRHSVVVPY | 185  | >TP53-Y220S TFRHSVVVPS  | 27289 | 27104 |
| >TP53-Y220S TFRHSVVVPY | 162  | >TP53-Y220S TFRHSVVVPS  | 420   | 258   |
| >TP53-Y220S TFRHSVVVPY | 140  | >TP53-Y220S TFRHSVVVPS  | 15849 | 15709 |
| >TP53-Y220S TFRHSVVVPY | 225  | >TP53-Y220S TFRHSVVVPS  | 24609 | 24384 |
| >TP53-Y220S TFRHSVVVPY | 271  | >TP53-Y220S TFRHSVVVPS  | 13322 | 13051 |
| >TP53-Y234C YNYMCNSSC  | 429  | >TP53-Y234C CNYMCNSSC   | 5194  | 4765  |
| >TP53-Y234C YNYMCNSSC  | 31   | >TP53-Y234C CNYMCNSSC   | 320   | 289   |
| >TP53-Y234C HNYMCNSS   | 70   | >TP53-Y234C HCNMYCNSS   | 22373 | 22303 |

|                         |      |                         |       |       |
|-------------------------|------|-------------------------|-------|-------|
| >TP53-Y234C HNYMNCNSS   | 2416 | >TP53-Y234C HCNMNCNSS   | 286   | 2130  |
| >TP53-Y234C EVGSDCTTIH' | 11   | >TP53-Y234C EVGSDCTTIH' | 11362 | 11351 |
| >TP53-Y234C EVGSDCTTIH' | 75   | >TP53-Y234C EVGSDCTTIH' | 19480 | 19405 |
| >TP53-Y234C EVGSDCTTIH' | 387  | >TP53-Y234C EVGSDCTTIH' | 23766 | 23379 |
| >TP53-Y234C EVGSDCTTIH' | 326  | >TP53-Y234C EVGSDCTTIH' | 26900 | 26574 |
| >TP53-Y234C TTIHYNM     | 46   | >TP53-Y234C TTIHCNYM    | 5778  | 5732  |
| >TP53-Y234C TTIHYNM     | 46   | >TP53-Y234C TTIHCNYM    | 306   | 260   |
| >TP53-Y234C TTIHYNM     | 5    | >TP53-Y234C TTIHCNYM    | 7     | 2     |
| >TP53-Y234C TTIHYNM     | 135  | >TP53-Y234C TTIHCNYM    | 379   | 244   |
| >TP53-Y234C TTIHYNM     | 17   | >TP53-Y234C TTIHCNYM    | 19    | 2     |
| >TP53-Y234C TTIHYNMCM   | 120  | >TP53-Y234C TTIHCNYMCM  | 76    | 44    |
| >TP53-Y234C TTIHYNMCM   | 102  | >TP53-Y234C TTIHCNYMCM  | 77    | 25    |
| >TP53-Y234C TTIHYNM     | 69   | >TP53-Y234C TTIHCNYM    | 532   | 463   |
| >TP53-Y234C TTIHYNM     | 61   | >TP53-Y234C TTIHCNYM    | 108   | 47    |
| >TP53-Y234C TTIHYNM     | 260  | >TP53-Y234C TTIHCNYM    | 59    | 201   |
| >TP53-Y234C CTTIHYNM    | 116  | >TP53-Y234C CTTIHCNYM   | 826   | 710   |
| >TP53-Y234C CTTIHYNM    | 117  | >TP53-Y234C CTTIHCNY    | 462   | 345   |
| >TP53-Y234C CTTIHYNM    | 161  | >TP53-Y234C CTTIHCNY    | 659   | 498   |
| >TP53-Y234C CTTIHYNM    | 207  | >TP53-Y234C CTTIHCNYM   | 666   | 459   |
| >TP53-Y234C CTTIHYNM    | 35   | >TP53-Y234C CTTIHCNY    | 216   | 181   |
| >TP53-Y234C CTTIHYNM    | 130  | >TP53-Y234C CTTIHCNY    | 426   | 296   |
| >TP53-Y234C CTTIHYNM    | 355  | >TP53-Y234C CTTIHCNY    | 1797  | 1442  |
| >TP53-Y234C CTTIHYNM    | 50   | >TP53-Y234C CTTIHCNY    | 46    | 4     |
| >TP53-Y234C CTTIHYNM    | 11   | >TP53-Y234C CTTIHCNYM   | 16    | 5     |
| >TP53-Y234C CTTIHYNMCM  | 184  | >TP53-Y234C CTTIHCNYMCM | 344   | 160   |
| >TP53-Y234C CTTIHYNM    | 999  | >TP53-Y234C CTTIHCNYM   | 427   | 572   |
| >TP53-Y234C CTTIHYNM    | 68   | >TP53-Y234C CTTIHCNY    | 269   | 201   |
| >TP53-Y234C CTTIHYNM    | 405  | >TP53-Y234C CTTIHCNYM   | 477   | 72    |
| >TP53-Y234C DCTTIHYNM   | 287  | >TP53-Y234C DCTTIHCNY   | 6359  | 6072  |
| >TP53-Y234C SDCTTIHYNM  | 400  | >TP53-Y234C SDCTTIHCNY  | 1500  | 1100  |
| >TP53-Y234C GSDCTTIHY   | 18   | >TP53-Y234C GSDCTTIHC   | 13740 | 13722 |
| >TP53-Y234C GSDCTTIHYN  | 34   | >TP53-Y234C GSDCTTIHCN  | 57    | 23    |
| >TP53-Y234C GSDCTTIHYN  | 174  | >TP53-Y234C GSDCTTIHCN  | 1323  | 1149  |
| >TP53-Y234C GSDCTTIHY   | 68   | >TP53-Y234C GSDCTTIHC   | 19250 | 19182 |
| >TP53-Y234C GSDCTTIHYN  | 99   | >TP53-Y234C GSDCTTIHCN  | 67    | 32    |
| >TP53-Y234C GSDCTTIHYN  | 247  | >TP53-Y234C GSDCTTIHCN  | 358   | 111   |
| >TP53-Y234C GSDCTTIHY   | 242  | >TP53-Y234C GSDCTTIHC   | 38158 | 37916 |
| >TP53-Y234C GSDCTTIHYN  | 97   | >TP53-Y234C GSDCTTIHCN  | 488   | 391   |
| >TP53-Y234C VGSDCTTIHY  | 353  | >TP53-Y234C VGSDCTTIHC  | 34510 | 34157 |
| >TP53-Y234C VGSDCTTIHY  | 184  | >TP53-Y234C VGSDCTTIHC  | 27712 | 27528 |
| >TP53-Y234C VGSDCTTIHY  | 377  | >TP53-Y234C VGSDCTTIHC  | 19831 | 19454 |
| >TP53-Y234C VGSDCTTIHY  | 449  | >TP53-Y234C VGSDCTTIHC  | 26960 | 26511 |
| >TP53-Y234C YNYMNCNSSC  | 429  | >TP53-Y234C DNYMNCSSC   | 12797 | 12368 |

|                        |     |                        |       |       |
|------------------------|-----|------------------------|-------|-------|
| >TP53-Y234C YNYMCNSSC  | 31  | >TP53-Y234C DNYMCNSSC  | 1954  | 1923  |
| >TP53-Y234C HNYMCNSS   | 70  | >TP53-Y234C HDNYMCNSS  | 23740 | 23670 |
| >TP53-Y234C EVGSDCTTIH | 11  | >TP53-Y234C EVGSDCTTIH | 16789 | 16778 |
| >TP53-Y234C EVGSDCTTIH | 75  | >TP53-Y234C EVGSDCTTIH | 24049 | 23974 |
| >TP53-Y234C EVGSDCTTIH | 387 | >TP53-Y234C EVGSDCTTIH | 25124 | 24737 |
| >TP53-Y234C EVGSDCTTIH | 326 | >TP53-Y234C EVGSDCTTIH | 26876 | 26550 |
| >TP53-Y234C TTIHNYM    | 46  | >TP53-Y234C TTIHDNYM   | 17694 | 17648 |
| >TP53-Y234C TTIHNYM    | 46  | >TP53-Y234C TTIHDNYM   | 114   | 68    |
| >TP53-Y234C TTIHNYM    | 5   | >TP53-Y234C TTIHDNYM   | 4     | 1     |
| >TP53-Y234C TTIHNYM    | 135 | >TP53-Y234C TTIHDNYM   | 212   | 77    |
| >TP53-Y234C TTIHNYM    | 17  | >TP53-Y234C TTIHDNYM   | 30    | 13    |
| >TP53-Y234C TTIHNYMC   | 120 | >TP53-Y234C TTIHDNYMC  | 360   | 240   |
| >TP53-Y234C TTIHNYMCI  | 102 | >TP53-Y234C TTIHDNYMCI | 190   | 88    |
| >TP53-Y234C TTIHNYM    | 69  | >TP53-Y234C TTIHDNYM   | 579   | 510   |
| >TP53-Y234C TTIHNYM    | 61  | >TP53-Y234C TTIHDNYM   | 157   | 96    |
| >TP53-Y234C TTIHNYM    | 260 | >TP53-Y234C TTIHDNYM   | 430   | 170   |
| >TP53-Y234C CTTIHNYM   | 116 | >TP53-Y234C CTTIHDNYM  | 1839  | 1723  |
| >TP53-Y234C CTTIHNY    | 117 | >TP53-Y234C CTTIHDNY   | 144   | 27    |
| >TP53-Y234C CTTIHNY    | 161 | >TP53-Y234C CTTIHDNY   | 170   | 9     |
| >TP53-Y234C CTTIHNYM   | 207 | >TP53-Y234C CTTIHDNYM  | 279   | 72    |
| >TP53-Y234C CTTIHNY    | 35  | >TP53-Y234C CTTIHDNY   | 242   | 207   |
| >TP53-Y234C CTTIHNY    | 130 | >TP53-Y234C CTTIHDNY   | 306   | 176   |
| >TP53-Y234C CTTIHNY    | 355 | >TP53-Y234C CTTIHDNY   | 1277  | 922   |
| >TP53-Y234C CTTIHNY    | 50  | >TP53-Y234C CTTIHDNY   | 136   | 86    |
| >TP53-Y234C CTTIHNYM   | 11  | >TP53-Y234C CTTIHDNYM  | 46    | 35    |
| >TP53-Y234C CTTIHNYMC  | 184 | >TP53-Y234C CTTIHDNYMC | 1163  | 979   |
| >TP53-Y234C CTTIHNY    | 68  | >TP53-Y234C CTTIHDNY   | 254   | 186   |
| >TP53-Y234C CTTIHNYM   | 405 | >TP53-Y234C CTTIHDNYM  | 651   | 246   |
| >TP53-Y234C DCTTIHNY   | 521 | >TP53-Y234C DCTTIHDNY  | 440   | 81    |
| >TP53-Y234C DCTTIHNY   | 287 | >TP53-Y234C DCTTIHDNY  | 4209  | 3922  |
| >TP53-Y234C SDCTTIHNY  | 400 | >TP53-Y234C SDCTTIHDNY | 4065  | 3665  |
| >TP53-Y234C GSDCTTIHY  | 18  | >TP53-Y234C GSDCTTIHD  | 17106 | 17088 |
| >TP53-Y234C GSDCTTIHYN | 34  | >TP53-Y234C GSDCTTIHDN | 40    | 6     |
| >TP53-Y234C GSDCTTIHYN | 174 | >TP53-Y234C GSDCTTIHDN | 1251  | 1077  |
| >TP53-Y234C GSDCTTIHY  | 68  | >TP53-Y234C GSDCTTIHD  | 22574 | 22506 |
| >TP53-Y234C GSDCTTIHYN | 99  | >TP53-Y234C GSDCTTIHDN | 267   | 168   |
| >TP53-Y234C GSDCTTIHYN | 247 | >TP53-Y234C GSDCTTIHDN | 196   | 51    |
| >TP53-Y234C GSDCTTIHY  | 242 | >TP53-Y234C GSDCTTIHD  | 36792 | 36550 |
| >TP53-Y234C GSDCTTIHYN | 97  | >TP53-Y234C GSDCTTIHDN | 438   | 341   |
| >TP53-Y234C VGSDCTTIHY | 353 | >TP53-Y234C VGSDCTTIHD | 35030 | 34677 |
| >TP53-Y234C VGSDCTTIHY | 184 | >TP53-Y234C VGSDCTTIHD | 30176 | 29992 |
| >TP53-Y234C VGSDCTTIHY | 377 | >TP53-Y234C VGSDCTTIHD | 22019 | 21642 |
| >TP53-Y234C VGSDCTTIHY | 449 | >TP53-Y234C VGSDCTTIHD | 29432 | 28983 |

|                         |      |                         |       |       |
|-------------------------|------|-------------------------|-------|-------|
| >TP53-Y234F YNYMCNSSCI  | 429  | >TP53-Y234F FNYMCNSSCI  | 740   | 311   |
| >TP53-Y234F YNYMCNSSCI  | 31   | >TP53-Y234F FNYMCNSSCI  | 38    | 7     |
| >TP53-Y234F HNYMCNSS    | 70   | >TP53-Y234F HFNYMCNSS   | 3837  | 3767  |
| >TP53-Y234F EVGSDCTTIH' | 11   | >TP53-Y234F EVGSDCTTIH  | 21    | 10    |
| >TP53-Y234F EVGSDCTTIH' | 75   | >TP53-Y234F EVGSDCTTIH  | 474   | 399   |
| >TP53-Y234F EVGSDCTTIH' | 387  | >TP53-Y234F EVGSDCTTIH  | 7436  | 7049  |
| >TP53-Y234F EVGSDCTTIH' | 326  | >TP53-Y234F EVGSDCTTIH  | 14797 | 14471 |
| >TP53-Y234F IHNYMCNSS   | 575  | >TP53-Y234F IHFNYMCNSS  | 488   | 87    |
| >TP53-Y234F TTIHYNM     | 46   | >TP53-Y234F TTIHFNYM    | 50    | 4     |
| >TP53-Y234F TTIHYNM     | 1118 | >TP53-Y234F TTIHFNYM    | 492   | 626   |
| >TP53-Y234F TTIHYNM     | 46   | >TP53-Y234F TTIHFNYM    | 50    | 4     |
| >TP53-Y234F TTIHYNM     | 5    | >TP53-Y234F TTIHFNYM    | 5     | 0     |
| >TP53-Y234F TTIHYNM     | 135  | >TP53-Y234F TTIHFNYM    | 44    | 91    |
| >TP53-Y234F TTIHYNM     | 17   | >TP53-Y234F TTIHFNYM    | 12    | 5     |
| >TP53-Y234F TTIHYNMCM   | 120  | >TP53-Y234F TTIHFNYMCM  | 67    | 53    |
| >TP53-Y234F TTIHYNMCM   | 102  | >TP53-Y234F TTIHFNYMCM  | 69    | 33    |
| >TP53-Y234F TTIHYNM     | 69   | >TP53-Y234F TTIHFNYM    | 42    | 27    |
| >TP53-Y234F TTIHYNM     | 61   | >TP53-Y234F TTIHFNYM    | 110   | 49    |
| >TP53-Y234F TTIHYNM     | 260  | >TP53-Y234F TTIHFNYM    | 74    | 186   |
| >TP53-Y234F CTTIHYNM    | 116  | >TP53-Y234F CTTIHFNYM   | 211   | 95    |
| >TP53-Y234F CTTIHYNM    | 117  | >TP53-Y234F CTTIHFNY    | 67    | 50    |
| >TP53-Y234F CTTIHYNM    | 161  | >TP53-Y234F CTTIHFNY    | 232   | 71    |
| >TP53-Y234F CTTIHYNM    | 207  | >TP53-Y234F CTTIHFNYM   | 97    | 110   |
| >TP53-Y234F CTTIHYNM    | 35   | >TP53-Y234F CTTIHFNY    | 30    | 5     |
| >TP53-Y234F CTTIHYNM    | 130  | >TP53-Y234F CTTIHFNY    | 141   | 11    |
| >TP53-Y234F CTTIHYNM    | 355  | >TP53-Y234F CTTIHFNY    | 141   | 214   |
| >TP53-Y234F CTTIHYNM    | 50   | >TP53-Y234F CTTIHFNY    | 36    | 14    |
| >TP53-Y234F CTTIHYNM    | 11   | >TP53-Y234F CTTIHFNYM   | 5     | 6     |
| >TP53-Y234F CTTIHYNMCM  | 184  | >TP53-Y234F CTTIHFNYMCM | 80    | 104   |
| >TP53-Y234F CTTIHYNM    | 999  | >TP53-Y234F CTTIHFNYM   | 463   | 536   |
| >TP53-Y234F CTTIHYNM    | 68   | >TP53-Y234F CTTIHFNY    | 103   | 35    |
| >TP53-Y234F CTTIHYNM    | 405  | >TP53-Y234F CTTIHFNYM   | 533   | 128   |
| >TP53-Y234F DCTTIHYNM   | 287  | >TP53-Y234F DCTTIHFNY   | 373   | 86    |
| >TP53-Y234F DCTTIHYNM   | 902  | >TP53-Y234F DCTTIHFNY   | 435   | 467   |
| >TP53-Y234F SDCTTIHYNM  | 400  | >TP53-Y234F SDCTTIHFNY  | 447   | 47    |
| >TP53-Y234F GSDCTTIHY   | 18   | >TP53-Y234F GSDCTTIHF   | 1973  | 1955  |
| >TP53-Y234F GSDCTTIHYN  | 34   | >TP53-Y234F GSDCTTIHFN  | 28    | 6     |
| >TP53-Y234F GSDCTTIHYN  | 174  | >TP53-Y234F GSDCTTIHFN  | 188   | 14    |
| >TP53-Y234F GSDCTTIHY   | 68   | >TP53-Y234F GSDCTTIHF   | 51    | 17    |
| >TP53-Y234F GSDCTTIHYN  | 99   | >TP53-Y234F GSDCTTIHFN  | 55    | 44    |
| >TP53-Y234F GSDCTTIHYN  | 247  | >TP53-Y234F GSDCTTIHFN  | 207   | 40    |
| >TP53-Y234F GSDCTTIHY   | 242  | >TP53-Y234F GSDCTTIHF   | 12363 | 12121 |
| >TP53-Y234F GSDCTTIHYN  | 97   | >TP53-Y234F GSDCTTIHFN  | 97    | 0     |

|                         |      |                        |       |       |
|-------------------------|------|------------------------|-------|-------|
| >TP53-Y234F VGSDCTTIHY  | 353  | >TP53-Y234F VGSDCTTIHF | 6432  | 6079  |
| >TP53-Y234F VGSDCTTIHY  | 184  | >TP53-Y234F VGSDCTTIHF | 1369  | 1185  |
| >TP53-Y234F VGSDCTTIHY  | 377  | >TP53-Y234F VGSDCTTIHF | 544   | 167   |
| >TP53-Y234F VGSDCTTIHY  | 449  | >TP53-Y234F VGSDCTTIHF | 588   | 139   |
| >TP53-Y234F YNYMCNSSCI  | 429  | >TP53-Y234F HNYMCNSSC  | 1713  | 1284  |
| >TP53-Y234F YNYMCNSSCI  | 31   | >TP53-Y234F HNYMCNSSC  | 124   | 93    |
| >TP53-Y234F HNYMCNSS    | 70   | >TP53-Y234F HHNYMCNSS  | 8203  | 8133  |
| >TP53-Y234F HNYMCNSS    | 3354 | >TP53-Y234F HHNYMCNSS  | 386   | 2968  |
| >TP53-Y234F HNYMCNSS    | 7959 | >TP53-Y234F HHNYMCNSS  | 177   | 7782  |
| >TP53-Y234F EVGSDCTTIH' | 11   | >TP53-Y234F EVGSDCTTIH | 889   | 878   |
| >TP53-Y234F EVGSDCTTIH' | 75   | >TP53-Y234F EVGSDCTTIH | 2767  | 2692  |
| >TP53-Y234F EVGSDCTTIH' | 387  | >TP53-Y234F EVGSDCTTIH | 12763 | 12376 |
| >TP53-Y234F EVGSDCTTIH' | 326  | >TP53-Y234F EVGSDCTTIH | 16379 | 16053 |
| >TP53-Y234F TTIHNYM     | 46   | >TP53-Y234F TTIHHNYM   | 1440  | 1394  |
| >TP53-Y234F TTIHNYM     | 46   | >TP53-Y234F TTIHHNYM   | 56    | 10    |
| >TP53-Y234F TTIHNYM     | 5    | >TP53-Y234F TTIHHNYM   | 3     | 2     |
| >TP53-Y234F TTIHNYM     | 135  | >TP53-Y234F TTIHHNYM   | 258   | 123   |
| >TP53-Y234F TTIHNYM     | 17   | >TP53-Y234F TTIHHNYM   | 26    | 9     |
| >TP53-Y234F TTIHNYMC    | 120  | >TP53-Y234F TTIHHNYMC  | 240   | 120   |
| >TP53-Y234F TTIHNYMCI   | 102  | >TP53-Y234F TTIHHNYMCI | 150   | 48    |
| >TP53-Y234F TTIHNYM     | 69   | >TP53-Y234F TTIHHNYM   | 130   | 61    |
| >TP53-Y234F TTIHNYM     | 61   | >TP53-Y234F TTIHHNYM   | 53    | 8     |
| >TP53-Y234F TTIHNYM     | 260  | >TP53-Y234F TTIHHNYM   | 287   | 27    |
| >TP53-Y234F CTTIHNYM    | 116  | >TP53-Y234F CTTIHHNYM  | 575   | 459   |
| >TP53-Y234F CTTIHNY     | 117  | >TP53-Y234F CTTIHHNY   | 73    | 44    |
| >TP53-Y234F CTTIHNY     | 161  | >TP53-Y234F CTTIHHNY   | 96    | 65    |
| >TP53-Y234F CTTIHNYM    | 207  | >TP53-Y234F CTTIHHNYM  | 122   | 85    |
| >TP53-Y234F CTTIHNY     | 35   | >TP53-Y234F CTTIHHNY   | 45    | 10    |
| >TP53-Y234F CTTIHNY     | 130  | >TP53-Y234F CTTIHHNY   | 86    | 44    |
| >TP53-Y234F CTTIHNY     | 355  | >TP53-Y234F CTTIHHNY   | 228   | 127   |
| >TP53-Y234F CTTIHNY     | 50   | >TP53-Y234F CTTIHHNY   | 27    | 23    |
| >TP53-Y234F CTTIHNYM    | 1487 | >TP53-Y234F CTTIHHNYM  | 388   | 1099  |
| >TP53-Y234F CTTIHNYM    | 11   | >TP53-Y234F CTTIHHNYM  | 6     | 5     |
| >TP53-Y234F CTTIHNYMC   | 184  | >TP53-Y234F CTTIHHNYMC | 143   | 41    |
| >TP53-Y234F CTTIHNYM    | 999  | >TP53-Y234F CTTIHHNYM  | 493   | 506   |
| >TP53-Y234F CTTIHNY     | 68   | >TP53-Y234F CTTIHHNY   | 115   | 47    |
| >TP53-Y234F CTTIHNYM    | 405  | >TP53-Y234F CTTIHHNYM  | 700   | 295   |
| >TP53-Y234F DCTTIHNY    | 521  | >TP53-Y234F DCTTIHHNY  | 278   | 243   |
| >TP53-Y234F DCTTIHNYM   | 585  | >TP53-Y234F DCTTIHHNYM | 457   | 128   |
| >TP53-Y234F DCTTIHNY    | 287  | >TP53-Y234F DCTTIHHNY  | 754   | 467   |
| >TP53-Y234F SDCTTIHNY   | 400  | >TP53-Y234F SDCTTIHHNY | 2126  | 1726  |
| >TP53-Y234F GSDCTTIHY   | 18   | >TP53-Y234F GSDCTTIHH  | 6930  | 6912  |
| >TP53-Y234F GSDCTTIHYN  | 34   | >TP53-Y234F GSDCTTIHHN | 26    | 8     |

|                         |      |                         |       |       |
|-------------------------|------|-------------------------|-------|-------|
| >TP53-Y234F GSDCTTIHYN  | 174  | >TP53-Y234F GSDCTTIHHN  | 329   | 155   |
| >TP53-Y234F GSDCTTIHYN  | 582  | >TP53-Y234F GSDCTTIHHN  | 409   | 173   |
| >TP53-Y234F GSDCTTIHY   | 68   | >TP53-Y234F GSDCTTIHH   | 11814 | 11746 |
| >TP53-Y234F GSDCTTIHYN  | 99   | >TP53-Y234F GSDCTTIHHN  | 70    | 29    |
| >TP53-Y234F GSDCTTIHYN  | 247  | >TP53-Y234F GSDCTTIHHN  | 205   | 42    |
| >TP53-Y234F GSDCTTIHY   | 242  | >TP53-Y234F GSDCTTIHH   | 19762 | 19520 |
| >TP53-Y234F GSDCTTIHYN  | 97   | >TP53-Y234F GSDCTTIHHN  | 197   | 100   |
| >TP53-Y234F VGSDCTTIHY  | 353  | >TP53-Y234F VGSDCTTIHH  | 24773 | 24420 |
| >TP53-Y234F VGSDCTTIHY  | 184  | >TP53-Y234F VGSDCTTIHH  | 17959 | 17775 |
| >TP53-Y234F VGSDCTTIHY  | 377  | >TP53-Y234F VGSDCTTIHH  | 13898 | 13521 |
| >TP53-Y234F VGSDCTTIHY  | 449  | >TP53-Y234F VGSDCTTIHH  | 23471 | 23022 |
| >TP53-Y234M NYNYMCNSSC  | 429  | >TP53-Y234M NNYMCNSSC   | 4211  | 3782  |
| >TP53-Y234M NYNYMCNSSC  | 31   | >TP53-Y234M NNYMCNSSC   | 570   | 539   |
| >TP53-Y234M HNYNYMCNSS  | 70   | >TP53-Y234M HNNNYMCNSS  | 17788 | 17718 |
| >TP53-Y234M EVGSDCTTIH' | 11   | >TP53-Y234M EVGSDCTTIH' | 8933  | 8922  |
| >TP53-Y234M EVGSDCTTIH' | 75   | >TP53-Y234M EVGSDCTTIH' | 18417 | 18342 |
| >TP53-Y234M EVGSDCTTIH' | 387  | >TP53-Y234M EVGSDCTTIH' | 21956 | 21569 |
| >TP53-Y234M EVGSDCTTIH' | 326  | >TP53-Y234M EVGSDCTTIH' | 26021 | 25695 |
| >TP53-Y234M TTIHNYM     | 46   | >TP53-Y234M TTIHNNYM    | 11976 | 11930 |
| >TP53-Y234M TTIHNYM     | 46   | >TP53-Y234M TTIHNNYM    | 57    | 11    |
| >TP53-Y234M TTIHNYM     | 5    | >TP53-Y234M TTIHNNYM    | 5     | 0     |
| >TP53-Y234M TTIHNYM     | 135  | >TP53-Y234M TTIHNNYM    | 142   | 7     |
| >TP53-Y234M TTIHNYM     | 17   | >TP53-Y234M TTIHNNYM    | 17    | 0     |
| >TP53-Y234M TTIHNYMC    | 120  | >TP53-Y234M TTIHNNYMC   | 129   | 9     |
| >TP53-Y234M TTIHNYMCI   | 102  | >TP53-Y234M TTIHNNYMC   | 101   | 1     |
| >TP53-Y234M TTIHNYM     | 69   | >TP53-Y234M TTIHNNYM    | 141   | 72    |
| >TP53-Y234M TTIHNYM     | 61   | >TP53-Y234M TTIHNNYM    | 74    | 13    |
| >TP53-Y234M TTIHNYM     | 260  | >TP53-Y234M TTIHNNYM    | 157   | 103   |
| >TP53-Y234M CTTIHNYM    | 116  | >TP53-Y234M CTTIHNNYM   | 2295  | 2179  |
| >TP53-Y234M CTTIHNY     | 117  | >TP53-Y234M CTTIHNNY    | 97    | 20    |
| >TP53-Y234M CTTIHNY     | 161  | >TP53-Y234M CTTIHNNY    | 182   | 21    |
| >TP53-Y234M CTTIHNYM    | 207  | >TP53-Y234M CTTIHNNYM   | 233   | 26    |
| >TP53-Y234M CTTIHNY     | 35   | >TP53-Y234M CTTIHNNY    | 167   | 132   |
| >TP53-Y234M CTTIHNY     | 130  | >TP53-Y234M CTTIHNNY    | 151   | 21    |
| >TP53-Y234M CTTIHNY     | 355  | >TP53-Y234M CTTIHNNY    | 889   | 534   |
| >TP53-Y234M CTTIHNY     | 50   | >TP53-Y234M CTTIHNNY    | 101   | 51    |
| >TP53-Y234M CTTIHNYM    | 11   | >TP53-Y234M CTTIHNNYM   | 12    | 1     |
| >TP53-Y234M CTTIHNYMC   | 184  | >TP53-Y234M CTTIHNNYMC  | 387   | 203   |
| >TP53-Y234M CTTIHNY     | 4345 | >TP53-Y234M CTTIHNNY    | 241   | 4104  |
| >TP53-Y234M CTTIHNY     | 68   | >TP53-Y234M CTTIHNNY    | 200   | 132   |
| >TP53-Y234M CTTIHNYM    | 405  | >TP53-Y234M CTTIHNNYM   | 649   | 244   |
| >TP53-Y234M DCTTIHNY    | 521  | >TP53-Y234M DCTTIHNNY   | 499   | 22    |
| >TP53-Y234M DCTTIHNY    | 287  | >TP53-Y234M DCTTIHNNY   | 2798  | 2511  |

|                         |       |                         |       |       |
|-------------------------|-------|-------------------------|-------|-------|
| >TP53-Y234N SDCTTIHNY   | 400   | >TP53-Y234N SDCTTIHNNY  | 2699  | 2299  |
| >TP53-Y234N GSDCTTIHY   | 18    | >TP53-Y234N GSDCTTIHN   | 14007 | 13989 |
| >TP53-Y234N GSDCTTIHYN  | 34    | >TP53-Y234N GSDCTTIHNN  | 35    | 1     |
| >TP53-Y234N GSDCTTIHYN  | 174   | >TP53-Y234N GSDCTTIHNN  | 845   | 671   |
| >TP53-Y234N GSDCTTIHY   | 68    | >TP53-Y234N GSDCTTIHN   | 19929 | 19861 |
| >TP53-Y234N GSDCTTIHYN  | 99    | >TP53-Y234N GSDCTTIHNN  | 215   | 116   |
| >TP53-Y234N GSDCTTIHYN  | 247   | >TP53-Y234N GSDCTTIHNN  | 106   | 141   |
| >TP53-Y234N GSDCTTIHY   | 242   | >TP53-Y234N GSDCTTIHN   | 34479 | 34237 |
| >TP53-Y234N GSDCTTIHYN  | 97    | >TP53-Y234N GSDCTTIHNN  | 292   | 195   |
| >TP53-Y234N VGSDCTTIHY  | 353   | >TP53-Y234N VGSDCTTIHN  | 33404 | 33051 |
| >TP53-Y234N VGSDCTTIHY  | 184   | >TP53-Y234N VGSDCTTIHN  | 28899 | 28715 |
| >TP53-Y234N VGSDCTTIHY  | 377   | >TP53-Y234N VGSDCTTIHN  | 20326 | 19949 |
| >TP53-Y234N VGSDCTTIHY  | 449   | >TP53-Y234N VGSDCTTIHN  | 28617 | 28168 |
| >TP53-Y234S YNYMCNSSCI  | 429   | >TP53-Y234S SNYMCNSSCI  | 1384  | 955   |
| >TP53-Y234S YNYMCNSSCI  | 31    | >TP53-Y234S SNYMCNSSCI  | 138   | 107   |
| >TP53-Y234S HNYMCNSS    | 70    | >TP53-Y234S HSNYMCNSS   | 21220 | 21150 |
| >TP53-Y234S HNYMCNSS    | 3354  | >TP53-Y234S HSNYMCNSS   | 384   | 2970  |
| >TP53-Y234S HNYMCNSS    | 25031 | >TP53-Y234S HSNYMCNSS   | 247   | 24784 |
| >TP53-Y234S HNYMCNSS    | 2829  | >TP53-Y234S HSNYMCNSS   | 371   | 2458  |
| >TP53-Y234S HNYMCNSS    | 2416  | >TP53-Y234S HSNYMCNSS   | 43    | 2373  |
| >TP53-Y234S EVGSDCTTIH' | 11    | >TP53-Y234S EVGSDCTTIH' | 6324  | 6313  |
| >TP53-Y234S EVGSDCTTIH' | 75    | >TP53-Y234S EVGSDCTTIH' | 15573 | 15498 |
| >TP53-Y234S EVGSDCTTIH' | 387   | >TP53-Y234S EVGSDCTTIH' | 22285 | 21898 |
| >TP53-Y234S EVGSDCTTIH' | 326   | >TP53-Y234S EVGSDCTTIH' | 26101 | 25775 |
| >TP53-Y234S TTIHYNYM    | 46    | >TP53-Y234S TTIHSNYM    | 10520 | 10474 |
| >TP53-Y234S TTIHYNYM    | 46    | >TP53-Y234S TTIHSNYM    | 59    | 13    |
| >TP53-Y234S TTIHYNYM    | 5     | >TP53-Y234S TTIHSNYM    | 5     | 0     |
| >TP53-Y234S TTIHYNYM    | 135   | >TP53-Y234S TTIHSNYM    | 108   | 27    |
| >TP53-Y234S TTIHYNYM    | 17    | >TP53-Y234S TTIHSNYM    | 18    | 1     |
| >TP53-Y234S TTIHYNYMC   | 120   | >TP53-Y234S TTIHSNYMC   | 131   | 11    |
| >TP53-Y234S TTIHYNYMCN  | 102   | >TP53-Y234S TTIHSNYMCN  | 107   | 5     |
| >TP53-Y234S TTIHYNYM    | 69    | >TP53-Y234S TTIHSNYM    | 130   | 61    |
| >TP53-Y234S TTIHYNYM    | 61    | >TP53-Y234S TTIHSNYM    | 20    | 41    |
| >TP53-Y234S TTIHYNYM    | 1634  | >TP53-Y234S TTIHSNYM    | 170   | 1464  |
| >TP53-Y234S TTIHYNYM    | 260   | >TP53-Y234S TTIHSNYM    | 62    | 198   |
| >TP53-Y234S CTTIHYNYM   | 116   | >TP53-Y234S CTTIHSNYM   | 989   | 873   |
| >TP53-Y234S CTTIHYN     | 117   | >TP53-Y234S CTTIHSNY    | 183   | 66    |
| >TP53-Y234S CTTIHYN     | 161   | >TP53-Y234S CTTIHSNY    | 152   | 9     |
| >TP53-Y234S CTTIHYNYM   | 207   | >TP53-Y234S CTTIHSNYM   | 450   | 243   |
| >TP53-Y234S CTTIHYN     | 35    | >TP53-Y234S CTTIHSNY    | 108   | 73    |
| >TP53-Y234S CTTIHYN     | 130   | >TP53-Y234S CTTIHSNY    | 150   | 20    |
| >TP53-Y234S CTTIHYN     | 355   | >TP53-Y234S CTTIHSNY    | 507   | 152   |
| >TP53-Y234S CTTIHYN     | 50    | >TP53-Y234S CTTIHSNY    | 19    | 31    |

|                        |      |                        |       |       |
|------------------------|------|------------------------|-------|-------|
| >TP53-Y234S CTTIHYNYM  | 1487 | >TP53-Y234S CTTIHSNYM  | 295   | 1192  |
| >TP53-Y234S CTTIHYNYM  | 11   | >TP53-Y234S CTTIHSNYM  | 9     | 2     |
| >TP53-Y234S CTTIHYNMYC | 184  | >TP53-Y234S CTTIHSNYMC | 191   | 7     |
| >TP53-Y234S CTTIHYN    | 68   | >TP53-Y234S CTTIHSNY   | 172   | 104   |
| >TP53-Y234S CTTIHYNYM  | 405  | >TP53-Y234S CTTIHSNYM  | 454   | 49    |
| >TP53-Y234S DCTTIHYN   | 521  | >TP53-Y234S DCTTIHSNY  | 291   | 230   |
| >TP53-Y234S DCTTIHYN   | 287  | >TP53-Y234S DCTTIHSNY  | 2337  | 2050  |
| >TP53-Y234S DCTTIHYN   | 6665 | >TP53-Y234S DCTTIHSNY  | 249   | 6416  |
| >TP53-Y234S SDCTTIHYN  | 400  | >TP53-Y234S SDCTTIHSNY | 1654  | 1254  |
| >TP53-Y234S GSDCTTIH   | 18   | >TP53-Y234S GSDCTTIHS  | 11035 | 11017 |
| >TP53-Y234S GSDCTTIHYN | 34   | >TP53-Y234S GSDCTTIHSN | 53    | 19    |
| >TP53-Y234S GSDCTTIHYN | 174  | >TP53-Y234S GSDCTTIHSN | 697   | 523   |
| >TP53-Y234S GSDCTTIH   | 68   | >TP53-Y234S GSDCTTIHS  | 19119 | 19051 |
| >TP53-Y234S GSDCTTIHYN | 99   | >TP53-Y234S GSDCTTIHSN | 53    | 46    |
| >TP53-Y234S GSDCTTIHYN | 247  | >TP53-Y234S GSDCTTIHSN | 26    | 221   |
| >TP53-Y234S GSDCTTIH   | 242  | >TP53-Y234S GSDCTTIHS  | 35604 | 35362 |
| >TP53-Y234S GSDCTTIHYN | 97   | >TP53-Y234S GSDCTTIHSN | 289   | 192   |
| >TP53-Y234S VGSDCTTIH  | 353  | >TP53-Y234S VGSDCTTIHS | 32222 | 31869 |
| >TP53-Y234S VGSDCTTIH  | 184  | >TP53-Y234S VGSDCTTIHS | 26961 | 26777 |
| >TP53-Y234S VGSDCTTIH  | 377  | >TP53-Y234S VGSDCTTIHS | 19248 | 18871 |
| >TP53-Y234S VGSDCTTIH  | 449  | >TP53-Y234S VGSDCTTIHS | 26561 | 26112 |
| >TP53-Y236C YMCNSSCM   | 262  | >TP53-Y236C CMCNSSCM   | 8559  | 8297  |
| >TP53-Y236C YMCNSSCMC  | 252  | >TP53-Y236C CMCNSSCMC  | 6416  | 6164  |
| >TP53-Y236C YMCNSSCM   | 205  | >TP53-Y236C CMCNSSCM   | 4088  | 3883  |
| >TP53-Y236C YMCNSSCMC  | 167  | >TP53-Y236C CMCNSSCMC  | 3507  | 3340  |
| >TP53-Y236C YMCNSSCM   | 283  | >TP53-Y236C CMCNSSCM   | 4622  | 4339  |
| >TP53-Y236C YMCNSSCMC  | 41   | >TP53-Y236C CMCNSSCMC  | 1332  | 1291  |
| >TP53-Y236C YMCNSSCMC  | 143  | >TP53-Y236C CMCNSSCMC  | 7280  | 7137  |
| >TP53-Y236C YMCNSSCM   | 24   | >TP53-Y236C CMCNSSCM   | 1688  | 1664  |
| >TP53-Y236C YMCNSSCMC  | 92   | >TP53-Y236C CMCNSSCMC  | 6751  | 6659  |
| >TP53-Y236C YMCNSSCMC  | 399  | >TP53-Y236C CMCNSSCMC  | 12342 | 11943 |
| >TP53-Y236C YMCNSSCMC  | 16   | >TP53-Y236C CMCNSSCMC  | 1124  | 1108  |
| >TP53-Y236C YMCNSSCM   | 92   | >TP53-Y236C CMCNSSCM   | 4276  | 4184  |
| >TP53-Y236C YMCNSSCMC  | 197  | >TP53-Y236C CMCNSSCMC  | 6256  | 6059  |
| >TP53-Y236C YMCNSSCM   | 150  | >TP53-Y236C CMCNSSCM   | 9035  | 8885  |
| >TP53-Y236C YMCNSSCMC  | 421  | >TP53-Y236C CMCNSSCMC  | 10334 | 9913  |
| >TP53-Y236C YMCNSSCM   | 67   | >TP53-Y236C CMCNSSCM   | 3439  | 3372  |
| >TP53-Y236C YMCNSSCMC  | 332  | >TP53-Y236C CMCNSSCMC  | 6312  | 5980  |
| >TP53-Y236C YMCNSSCM   | 33   | >TP53-Y236C CMCNSSCM   | 3895  | 3862  |
| >TP53-Y236C YMCNSSCMC  | 53   | >TP53-Y236C CMCNSSCMC  | 4963  | 4910  |
| >TP53-Y236C YMCNSSCM   | 33   | >TP53-Y236C CMCNSSCM   | 215   | 182   |
| >TP53-Y236C YMCNSSCMC  | 127  | >TP53-Y236C CMCNSSCMC  | 1496  | 1369  |
| >TP53-Y236C YMCNSSCMC  | 292  | >TP53-Y236C CMCNSSCMC  | 3382  | 3090  |



|                        |     |                        |       |       |
|------------------------|-----|------------------------|-------|-------|
| >TP53-Y236C YMCNSSCMC  | 44  | >TP53-Y236C CMCNSSCMC  | 352   | 308   |
| >TP53-Y236C YMCNSSCM   | 98  | >TP53-Y236C CMCNSSCM   | 3012  | 2914  |
| >TP53-Y236C YMCNSSCMC  | 145 | >TP53-Y236C CMCNSSCMC  | 3553  | 3408  |
| >TP53-Y236C YMCNSSCM   | 20  | >TP53-Y236C CMCNSSCM   | 101   | 81    |
| >TP53-Y236C YMCNSSCMC  | 160 | >TP53-Y236C CMCNSSCMC  | 959   | 799   |
| >TP53-Y236C YMCNSSCMC  | 294 | >TP53-Y236C CMCNSSCMC  | 3805  | 3511  |
| >TP53-Y236C YMCNSSCM   | 310 | >TP53-Y236C CMCNSSCM   | 2556  | 2246  |
| >TP53-Y236C YMCNSSCM   | 346 | >TP53-Y236C CMCNSSCM   | 6959  | 6613  |
| >TP53-Y236C NYMCNSSCM  | 726 | >TP53-Y236C NCMCNSSCM  | 428   | 298   |
| >TP53-Y236C NYMCNSSCM  | 53  | >TP53-Y236C NCMCNSSCM  | 22941 | 22888 |
| >TP53-Y236C GSDCTTIHYN | 34  | >TP53-Y236C GSDCTTIHYN | 16479 | 16445 |
| >TP53-Y236C GSDCTTIHYN | 174 | >TP53-Y236C GSDCTTIHYN | 23189 | 23015 |
| >TP53-Y236C GSDCTTIHYN | 99  | >TP53-Y236C GSDCTTIHYN | 19351 | 19252 |
| >TP53-Y236C GSDCTTIHYN | 247 | >TP53-Y236C GSDCTTIHYN | 19584 | 19337 |
| >TP53-Y236C GSDCTTIHYN | 97  | >TP53-Y236C GSDCTTIHYN | 35227 | 35130 |
| >TP53-Y236C YNYMCNSSC  | 429 | >TP53-Y236C YNCMCNSSC  | 1093  | 664   |
| >TP53-Y236C YNYMCNSSC  | 31  | >TP53-Y236C YNCMCNSSC  | 457   | 426   |
| >TP53-Y236C HNYMCNSS   | 919 | >TP53-Y236C HNCMCNSS   | 326   | 593   |
| >TP53-Y236C HNYMCNSS   | 70  | >TP53-Y236C HNCMCNSS   | 37    | 33    |
| >TP53-Y236C TTIHYNM    | 46  | >TP53-Y236C TTIHYNM    | 396   | 350   |
| >TP53-Y236C TTIHYNM    | 46  | >TP53-Y236C TTIHYNM    | 484   | 438   |
| >TP53-Y236C TTIHYNM    | 5   | >TP53-Y236C TTIHYNM    | 7     | 2     |
| >TP53-Y236C TTIHYNM    | 135 | >TP53-Y236C TTIHYNM    | 187   | 52    |
| >TP53-Y236C TTIHYNM    | 17  | >TP53-Y236C TTIHYNM    | 154   | 137   |
| >TP53-Y236C TTIHYNMC   | 120 | >TP53-Y236C TTIHYNMC   | 1609  | 1489  |
| >TP53-Y236C TTIHYNMCM  | 102 | >TP53-Y236C TTIHYNMCM  | 203   | 101   |
| >TP53-Y236C TTIHYNM    | 69  | >TP53-Y236C TTIHYNM    | 1152  | 1083  |
| >TP53-Y236C TTIHYNM    | 61  | >TP53-Y236C TTIHYNM    | 351   | 290   |
| >TP53-Y236C TTIHYNM    | 260 | >TP53-Y236C TTIHYNM    | 42    | 218   |
| >TP53-Y236C CTTIHYNM   | 116 | >TP53-Y236C CTTIHYNM   | 509   | 393   |
| >TP53-Y236C CTTIHYN    | 117 | >TP53-Y236C CTTIHYN    | 20563 | 20446 |
| >TP53-Y236C CTTIHYN    | 161 | >TP53-Y236C CTTIHYN    | 31595 | 31434 |
| >TP53-Y236C CTTIHYNM   | 207 | >TP53-Y236C CTTIHYNM   | 393   | 186   |
| >TP53-Y236C CTTIHYN    | 35  | >TP53-Y236C CTTIHYN    | 20315 | 20280 |
| >TP53-Y236C CTTIHYN    | 130 | >TP53-Y236C CTTIHYN    | 24698 | 24568 |
| >TP53-Y236C CTTIHYN    | 355 | >TP53-Y236C CTTIHYN    | 25339 | 24984 |
| >TP53-Y236C CTTIHYN    | 50  | >TP53-Y236C CTTIHYN    | 19295 | 19245 |
| >TP53-Y236C CTTIHYNM   | 11  | >TP53-Y236C CTTIHYNM   | 122   | 111   |
| >TP53-Y236C CTTIHYNMC  | 184 | >TP53-Y236C CTTIHYNMC  | 1349  | 1165  |
| >TP53-Y236C CTTIHYN    | 68  | >TP53-Y236C CTTIHYN    | 34263 | 34195 |
| >TP53-Y236C CTTIHYNM   | 405 | >TP53-Y236C CTTIHYNM   | 537   | 132   |
| >TP53-Y236C DCTTIHYN   | 287 | >TP53-Y236C DCTTIHYN   | 24293 | 24006 |
| >TP53-Y236C SDCTTIHYN  | 400 | >TP53-Y236C SDCTTIHYN  | 31989 | 31589 |

|                        |     |                        |       |       |
|------------------------|-----|------------------------|-------|-------|
| >TP53-Y236L YMCNSSCM   | 262 | >TP53-Y236L DMCNSSCM   | 20411 | 20149 |
| >TP53-Y236L YMCNSSCMC  | 252 | >TP53-Y236L DMCNSSCMC  | 18179 | 17927 |
| >TP53-Y236L YMCNSSCM   | 205 | >TP53-Y236L DMCNSSCM   | 18591 | 18386 |
| >TP53-Y236L YMCNSSCMC  | 167 | >TP53-Y236L DMCNSSCMC  | 16356 | 16189 |
| >TP53-Y236L YMCNSSCM   | 283 | >TP53-Y236L DMCNSSCM   | 15104 | 14821 |
| >TP53-Y236L YMCNSSCMC  | 41  | >TP53-Y236L DMCNSSCMC  | 10555 | 10514 |
| >TP53-Y236L YMCNSSCMC  | 143 | >TP53-Y236L DMCNSSCMC  | 20650 | 20507 |
| >TP53-Y236L YMCNSSCM   | 24  | >TP53-Y236L DMCNSSCM   | 5440  | 5416  |
| >TP53-Y236L YMCNSSCMC  | 92  | >TP53-Y236L DMCNSSCMC  | 14464 | 14372 |
| >TP53-Y236L YMCNSSCMC  | 399 | >TP53-Y236L DMCNSSCMC  | 19563 | 19164 |
| >TP53-Y236L YMCNSSCMC  | 16  | >TP53-Y236L DMCNSSCMC  | 4010  | 3994  |
| >TP53-Y236L YMCNSSCM   | 92  | >TP53-Y236L DMCNSSCM   | 11835 | 11743 |
| >TP53-Y236L YMCNSSCMC  | 197 | >TP53-Y236L DMCNSSCMC  | 14202 | 14005 |
| >TP53-Y236L YMCNSSCM   | 150 | >TP53-Y236L DMCNSSCM   | 10665 | 10515 |
| >TP53-Y236L YMCNSSCMC  | 421 | >TP53-Y236L DMCNSSCMC  | 11972 | 11551 |
| >TP53-Y236L YMCNSSCM   | 67  | >TP53-Y236L DMCNSSCM   | 7035  | 6968  |
| >TP53-Y236L YMCNSSCMC  | 332 | >TP53-Y236L DMCNSSCMC  | 9839  | 9507  |
| >TP53-Y236L YMCNSSCM   | 33  | >TP53-Y236L DMCNSSCM   | 9387  | 9354  |
| >TP53-Y236L YMCNSSCMC  | 53  | >TP53-Y236L DMCNSSCMC  | 11508 | 11455 |
| >TP53-Y236L YMCNSSCM   | 33  | >TP53-Y236L DMCNSSCM   | 1513  | 1480  |
| >TP53-Y236L YMCNSSCMC  | 127 | >TP53-Y236L DMCNSSCMC  | 7542  | 7415  |
| >TP53-Y236L YMCNSSCMC  | 292 | >TP53-Y236L DMCNSSCMC  | 11091 | 10799 |
| >TP53-Y236L YMCNSSCMC  | 44  | >TP53-Y236L DMCNSSCMC  | 1998  | 1954  |
| >TP53-Y236L YMCNSSCM   | 98  | >TP53-Y236L DMCNSSCM   | 1885  | 1787  |
| >TP53-Y236L YMCNSSCMC  | 145 | >TP53-Y236L DMCNSSCMC  | 2292  | 2147  |
| >TP53-Y236L YMCNSSCM   | 20  | >TP53-Y236L DMCNSSCM   | 1193  | 1173  |
| >TP53-Y236L YMCNSSCMC  | 160 | >TP53-Y236L DMCNSSCMC  | 4224  | 4064  |
| >TP53-Y236L YMCNSSCMC  | 294 | >TP53-Y236L DMCNSSCMC  | 11263 | 10969 |
| >TP53-Y236L YMCNSSCM   | 310 | >TP53-Y236L DMCNSSCM   | 2296  | 1986  |
| >TP53-Y236L YMCNSSCM   | 346 | >TP53-Y236L DMCNSSCM   | 10162 | 9816  |
| >TP53-Y236L NYMCNSSCM  | 53  | >TP53-Y236L NDMCNSSCM  | 26041 | 25988 |
| >TP53-Y236L GSDCTTIHYN | 34  | >TP53-Y236L GSDCTTIHYN | 19346 | 19312 |
| >TP53-Y236L GSDCTTIHYN | 174 | >TP53-Y236L GSDCTTIHYN | 24328 | 24154 |
| >TP53-Y236L GSDCTTIHYN | 99  | >TP53-Y236L GSDCTTIHYN | 22627 | 22528 |
| >TP53-Y236L GSDCTTIHYN | 247 | >TP53-Y236L GSDCTTIHYN | 25270 | 25023 |
| >TP53-Y236L GSDCTTIHYN | 97  | >TP53-Y236L GSDCTTIHYN | 33068 | 32971 |
| >TP53-Y236L YNYMCNSSCI | 429 | >TP53-Y236L YNDMCNSSC  | 10398 | 9969  |
| >TP53-Y236L YNYMCNSSCI | 31  | >TP53-Y236L YNDMCNSSC  | 3744  | 3713  |
| >TP53-Y236L HNYMCNSS   | 70  | >TP53-Y236L HYNDMCNSS  | 219   | 149   |
| >TP53-Y236L TTIHYNM    | 46  | >TP53-Y236L TTIHYNM    | 349   | 303   |
| >TP53-Y236L TTIHYNM    | 46  | >TP53-Y236L TTIHYNM    | 307   | 261   |
| >TP53-Y236L TTIHYNM    | 5   | >TP53-Y236L TTIHYNM    | 9     | 4     |
| >TP53-Y236L TTIHYNM    | 135 | >TP53-Y236L TTIHYNM    | 188   | 53    |

|                       |     |                       |       |       |
|-----------------------|-----|-----------------------|-------|-------|
| >TP53-Y236L TTIHYNM   | 17  | >TP53-Y236L TTIHYNM   | 341   | 324   |
| >TP53-Y236L TTIHYNMC  | 120 | >TP53-Y236L TTIHYNMC  | 688   | 568   |
| >TP53-Y236L TTIHYNMCI | 102 | >TP53-Y236L TTIHYNMCI | 252   | 150   |
| >TP53-Y236L TTIHYNM   | 69  | >TP53-Y236L TTIHYNM   | 1494  | 1425  |
| >TP53-Y236L TTIHYNM   | 61  | >TP53-Y236L TTIHYNM   | 223   | 162   |
| >TP53-Y236L TTIHYNM   | 260 | >TP53-Y236L TTIHYNM   | 187   | 73    |
| >TP53-Y236L CTTIHYNM  | 116 | >TP53-Y236L CTTIHYNM  | 301   | 185   |
| >TP53-Y236L CTTIHYN   | 117 | >TP53-Y236L CTTIHYN   | 22436 | 22319 |
| >TP53-Y236L CTTIHYN   | 161 | >TP53-Y236L CTTIHYN   | 34475 | 34314 |
| >TP53-Y236L CTTIHYNM  | 207 | >TP53-Y236L CTTIHYNM  | 1436  | 1229  |
| >TP53-Y236L CTTIHYN   | 35  | >TP53-Y236L CTTIHYN   | 21402 | 21367 |
| >TP53-Y236L CTTIHYN   | 130 | >TP53-Y236L CTTIHYN   | 26828 | 26698 |
| >TP53-Y236L CTTIHYN   | 355 | >TP53-Y236L CTTIHYN   | 25177 | 24822 |
| >TP53-Y236L CTTIHYN   | 50  | >TP53-Y236L CTTIHYN   | 22221 | 22171 |
| >TP53-Y236L CTTIHYNM  | 11  | >TP53-Y236L CTTIHYNM  | 128   | 117   |
| >TP53-Y236L CTTIHYNMC | 184 | >TP53-Y236L CTTIHYNMC | 1131  | 947   |
| >TP53-Y236L CTTIHYN   | 68  | >TP53-Y236L CTTIHYN   | 29554 | 29486 |
| >TP53-Y236L CTTIHYNM  | 405 | >TP53-Y236L CTTIHYNM  | 957   | 552   |
| >TP53-Y236L DCTTIHYN  | 287 | >TP53-Y236L DCTTIHYN  | 25220 | 24933 |
| >TP53-Y236L SDCTTIHYN | 400 | >TP53-Y236L SDCTTIHYN | 33177 | 32777 |
| >TP53-Y236F YMCNSSCM  | 262 | >TP53-Y236F YMCNSSCM  | 8177  | 7915  |
| >TP53-Y236F YMCNSSCMC | 252 | >TP53-Y236F YMCNSSCMC | 6158  | 5906  |
| >TP53-Y236F YMCNSSCM  | 205 | >TP53-Y236F YMCNSSCM  | 1890  | 1685  |
| >TP53-Y236F YMCNSSCMC | 167 | >TP53-Y236F YMCNSSCMC | 1551  | 1384  |
| >TP53-Y236F YMCNSSCM  | 283 | >TP53-Y236F YMCNSSCM  | 4172  | 3889  |
| >TP53-Y236F YMCNSSCMC | 41  | >TP53-Y236F YMCNSSCMC | 932   | 891   |
| >TP53-Y236F YMCNSSCMC | 143 | >TP53-Y236F YMCNSSCMC | 4336  | 4193  |
| >TP53-Y236F YMCNSSCM  | 24  | >TP53-Y236F YMCNSSCM  | 929   | 905   |
| >TP53-Y236F YMCNSSCMC | 92  | >TP53-Y236F YMCNSSCMC | 3603  | 3511  |
| >TP53-Y236F YMCNSSCMC | 399 | >TP53-Y236F YMCNSSCMC | 8130  | 7731  |
| >TP53-Y236F YMCNSSCMC | 16  | >TP53-Y236F YMCNSSCMC | 510   | 494   |
| >TP53-Y236F YMCNSSCM  | 92  | >TP53-Y236F YMCNSSCM  | 1388  | 1296  |
| >TP53-Y236F YMCNSSCMC | 197 | >TP53-Y236F YMCNSSCMC | 2608  | 2411  |
| >TP53-Y236F YMCNSSCM  | 150 | >TP53-Y236F YMCNSSCM  | 3653  | 3503  |
| >TP53-Y236F YMCNSSCMC | 421 | >TP53-Y236F YMCNSSCMC | 5294  | 4873  |
| >TP53-Y236F YMCNSSCM  | 67  | >TP53-Y236F YMCNSSCM  | 4379  | 4312  |
| >TP53-Y236F YMCNSSCMC | 332 | >TP53-Y236F YMCNSSCMC | 6661  | 6329  |
| >TP53-Y236F YMCNSSCM  | 33  | >TP53-Y236F YMCNSSCM  | 1341  | 1308  |
| >TP53-Y236F YMCNSSCMC | 53  | >TP53-Y236F YMCNSSCMC | 1633  | 1580  |
| >TP53-Y236F YMCNSSCM  | 33  | >TP53-Y236F YMCNSSCM  | 64    | 31    |
| >TP53-Y236F YMCNSSCMC | 127 | >TP53-Y236F YMCNSSCMC | 345   | 218   |
| >TP53-Y236F YMCNSSCMC | 292 | >TP53-Y236F YMCNSSCMC | 906   | 614   |
| >TP53-Y236F YMCNSSCMC | 44  | >TP53-Y236F YMCNSSCMC | 99    | 55    |

|                        |      |                        |       |       |
|------------------------|------|------------------------|-------|-------|
| >TP53-Y236F YMCNSSCM   | 98   | >TP53-Y236F HMCNSSCM   | 253   | 155   |
| >TP53-Y236F YMCNSSCMC  | 145  | >TP53-Y236F HMCNSSCMC  | 345   | 200   |
| >TP53-Y236F YMCNSSCM   | 20   | >TP53-Y236F HMCNSSCM   | 59    | 39    |
| >TP53-Y236F YMCNSSCMC  | 160  | >TP53-Y236F HMCNSSCMC  | 607   | 447   |
| >TP53-Y236F YMCNSSCMC  | 294  | >TP53-Y236F HMCNSSCMC  | 569   | 275   |
| >TP53-Y236F YMCNSSCM   | 310  | >TP53-Y236F HMCNSSCM   | 615   | 305   |
| >TP53-Y236F YMCNSSCM   | 346  | >TP53-Y236F HMCNSSCM   | 451   | 105   |
| >TP53-Y236F NYMCNSSCN  | 53   | >TP53-Y236F NHMCNSSCN  | 9022  | 8969  |
| >TP53-Y236F NYMCNSSCN  | 1697 | >TP53-Y236F NHMCNSSCN  | 164   | 1533  |
| >TP53-Y236F NYMCNSSCN  | 1703 | >TP53-Y236F NHMCNSSCN  | 19    | 1684  |
| >TP53-Y236F GSDCTTIHYN | 34   | >TP53-Y236F GSDCTTIHYN | 9955  | 9921  |
| >TP53-Y236F GSDCTTIHYN | 174  | >TP53-Y236F GSDCTTIHYN | 11821 | 11647 |
| >TP53-Y236F GSDCTTIHYN | 99   | >TP53-Y236F GSDCTTIHYN | 11051 | 10952 |
| >TP53-Y236F GSDCTTIHYN | 247  | >TP53-Y236F GSDCTTIHYN | 4467  | 4220  |
| >TP53-Y236F GSDCTTIHYN | 97   | >TP53-Y236F GSDCTTIHYN | 10265 | 10168 |
| >TP53-Y236F YNYMCNSSCI | 429  | >TP53-Y236F YNHMCNSSC  | 1076  | 647   |
| >TP53-Y236F YNYMCNSSCI | 31   | >TP53-Y236F YNHMCNSSC  | 137   | 106   |
| >TP53-Y236F HNYMCNSS   | 70   | >TP53-Y236F HYNHMCNSS  | 114   | 44    |
| >TP53-Y236F TTIHYNM    | 46   | >TP53-Y236F TTIHYNM    | 41    | 5     |
| >TP53-Y236F TTIHYNM    | 46   | >TP53-Y236F TTIHYNM    | 125   | 79    |
| >TP53-Y236F TTIHYNM    | 5    | >TP53-Y236F TTIHYNM    | 4     | 1     |
| >TP53-Y236F TTIHYNM    | 135  | >TP53-Y236F TTIHYNM    | 156   | 21    |
| >TP53-Y236F TTIHYNM    | 17   | >TP53-Y236F TTIHYNM    | 39    | 22    |
| >TP53-Y236F TTIHYNMCM  | 120  | >TP53-Y236F TTIHYNHMC  | 277   | 157   |
| >TP53-Y236F TTIHYNMCM  | 102  | >TP53-Y236F TTIHYNHMC  | 167   | 65    |
| >TP53-Y236F TTIHYNM    | 69   | >TP53-Y236F TTIHYNM    | 222   | 153   |
| >TP53-Y236F TTIHYNM    | 61   | >TP53-Y236F TTIHYNM    | 66    | 5     |
| >TP53-Y236F TTIHYNM    | 260  | >TP53-Y236F TTIHYNM    | 120   | 140   |
| >TP53-Y236F CTTIHYNM   | 116  | >TP53-Y236F CTTIHYNM   | 59    | 57    |
| >TP53-Y236F CTTIHYN    | 117  | >TP53-Y236F CTTIHYN    | 17189 | 17072 |
| >TP53-Y236F CTTIHYN    | 161  | >TP53-Y236F CTTIHYN    | 14563 | 14402 |
| >TP53-Y236F CTTIHYNM   | 207  | >TP53-Y236F CTTIHYNM   | 205   | 2     |
| >TP53-Y236F CTTIHYN    | 35   | >TP53-Y236F CTTIHYN    | 5409  | 5374  |
| >TP53-Y236F CTTIHYN    | 130  | >TP53-Y236F CTTIHYN    | 10691 | 10561 |
| >TP53-Y236F CTTIHYN    | 355  | >TP53-Y236F CTTIHYN    | 16022 | 15667 |
| >TP53-Y236F CTTIHYN    | 50   | >TP53-Y236F CTTIHYN    | 11564 | 11514 |
| >TP53-Y236F CTTIHYNM   | 11   | >TP53-Y236F CTTIHYNM   | 45    | 34    |
| >TP53-Y236F CTTIHYNMCM | 184  | >TP53-Y236F CTTIHYNMCM | 277   | 93    |
| >TP53-Y236F CTTIHYN    | 68   | >TP53-Y236F CTTIHYN    | 6187  | 6119  |
| >TP53-Y236F CTTIHYNM   | 405  | >TP53-Y236F CTTIHYNM   | 216   | 189   |
| >TP53-Y236F DCTTIHYN   | 287  | >TP53-Y236F DCTTIHYN   | 14059 | 13772 |
| >TP53-Y236F SDCTTIHYN  | 400  | >TP53-Y236F SDCTTIHYN  | 24670 | 24270 |
| >TP53-Y236F YMCNSSCM   | 262  | >TP53-Y236F NMCNSSCM   | 9334  | 9072  |

|                        |     |                        |       |       |
|------------------------|-----|------------------------|-------|-------|
| >TP53-Y236N YMCNSSCMC  | 252 | >TP53-Y236N NMCNSSCMC  | 7142  | 6890  |
| >TP53-Y236N YMCNSSCM   | 205 | >TP53-Y236N NMCNSSCM   | 3325  | 3120  |
| >TP53-Y236N YMCNSSCMC  | 167 | >TP53-Y236N NMCNSSCMC  | 2644  | 2477  |
| >TP53-Y236N YMCNSSCM   | 283 | >TP53-Y236N NMCNSSCM   | 4213  | 3930  |
| >TP53-Y236N YMCNSSCMC  | 41  | >TP53-Y236N NMCNSSCMC  | 983   | 942   |
| >TP53-Y236N YMCNSSCMC  | 143 | >TP53-Y236N NMCNSSCMC  | 4767  | 4624  |
| >TP53-Y236N YMCNSSCM   | 24  | >TP53-Y236N NMCNSSCM   | 1266  | 1242  |
| >TP53-Y236N YMCNSSCMC  | 92  | >TP53-Y236N NMCNSSCMC  | 4835  | 4743  |
| >TP53-Y236N YMCNSSCMC  | 399 | >TP53-Y236N NMCNSSCMC  | 10096 | 9697  |
| >TP53-Y236N YMCNSSCMC  | 16  | >TP53-Y236N NMCNSSCMC  | 830   | 814   |
| >TP53-Y236N YMCNSSCM   | 92  | >TP53-Y236N NMCNSSCM   | 2389  | 2297  |
| >TP53-Y236N YMCNSSCMC  | 197 | >TP53-Y236N NMCNSSCMC  | 4224  | 4027  |
| >TP53-Y236N YMCNSSCM   | 150 | >TP53-Y236N NMCNSSCM   | 7288  | 7138  |
| >TP53-Y236N YMCNSSCMC  | 421 | >TP53-Y236N NMCNSSCMC  | 8658  | 8237  |
| >TP53-Y236N YMCNSSCM   | 67  | >TP53-Y236N NMCNSSCM   | 2659  | 2592  |
| >TP53-Y236N YMCNSSCMC  | 332 | >TP53-Y236N NMCNSSCMC  | 5391  | 5059  |
| >TP53-Y236N YMCNSSCM   | 33  | >TP53-Y236N NMCNSSCM   | 4049  | 4016  |
| >TP53-Y236N YMCNSSCMC  | 53  | >TP53-Y236N NMCNSSCMC  | 5573  | 5520  |
| >TP53-Y236N YMCNSSCM   | 33  | >TP53-Y236N NMCNSSCM   | 135   | 102   |
| >TP53-Y236N YMCNSSCMC  | 127 | >TP53-Y236N NMCNSSCMC  | 917   | 790   |
| >TP53-Y236N YMCNSSCMC  | 292 | >TP53-Y236N NMCNSSCMC  | 2347  | 2055  |
| >TP53-Y236N YMCNSSCMC  | 44  | >TP53-Y236N NMCNSSCMC  | 226   | 182   |
| >TP53-Y236N YMCNSSCM   | 98  | >TP53-Y236N NMCNSSCM   | 416   | 318   |
| >TP53-Y236N YMCNSSCMC  | 145 | >TP53-Y236N NMCNSSCMC  | 563   | 418   |
| >TP53-Y236N YMCNSSCM   | 20  | >TP53-Y236N NMCNSSCM   | 218   | 198   |
| >TP53-Y236N YMCNSSCMC  | 160 | >TP53-Y236N NMCNSSCMC  | 1814  | 1654  |
| >TP53-Y236N YMCNSSCMC  | 294 | >TP53-Y236N NMCNSSCMC  | 7611  | 7317  |
| >TP53-Y236N YMCNSSCM   | 310 | >TP53-Y236N NMCNSSCM   | 1649  | 1339  |
| >TP53-Y236N YMCNSSCM   | 346 | >TP53-Y236N NMCNSSCM   | 1241  | 895   |
| >TP53-Y236N NYMCNSSCN  | 726 | >TP53-Y236N NNYMCNSSCN | 208   | 518   |
| >TP53-Y236N NYMCNSSCN  | 53  | >TP53-Y236N NNYMCNSSCN | 19731 | 19678 |
| >TP53-Y236N GSDCTTIHYN | 34  | >TP53-Y236N GSDCTTIHYN | 16731 | 16697 |
| >TP53-Y236N GSDCTTIHYN | 174 | >TP53-Y236N GSDCTTIHYN | 21283 | 21109 |
| >TP53-Y236N GSDCTTIHYN | 99  | >TP53-Y236N GSDCTTIHYN | 19572 | 19473 |
| >TP53-Y236N GSDCTTIHYN | 247 | >TP53-Y236N GSDCTTIHYN | 16733 | 16486 |
| >TP53-Y236N GSDCTTIHYN | 97  | >TP53-Y236N GSDCTTIHYN | 29353 | 29256 |
| >TP53-Y236N YNYMCNSSCI | 429 | >TP53-Y236N YNNMCNSSCI | 1006  | 577   |
| >TP53-Y236N YNYMCNSSCI | 31  | >TP53-Y236N YNNMCNSSCI | 220   | 189   |
| >TP53-Y236N HNYMCNSS   | 919 | >TP53-Y236N HNNMCNSS   | 425   | 494   |
| >TP53-Y236N HNYMCNSS   | 70  | >TP53-Y236N HNNMCNSS   | 44    | 26    |
| >TP53-Y236N TTIHYNM    | 46  | >TP53-Y236N TTIHYNM    | 22    | 24    |
| >TP53-Y236N TTIHYNM    | 46  | >TP53-Y236N TTIHYNM    | 121   | 75    |
| >TP53-Y236N TTIHYNM    | 5   | >TP53-Y236N TTIHYNM    | 5     | 0     |

|                          |     |                          |       |       |
|--------------------------|-----|--------------------------|-------|-------|
| >TP53-Y236N TTIHYNM      | 135 | >TP53-Y236N TTIHYNM      | 41    | 94    |
| >TP53-Y236N TTIHYNM      | 17  | >TP53-Y236N TTIHYNM      | 47    | 30    |
| >TP53-Y236N TTIHYNM C    | 120 | >TP53-Y236N TTIHYNM C    | 470   | 350   |
| >TP53-Y236N TTIHYNM C N  | 102 | >TP53-Y236N TTIHYNM C N  | 157   | 55    |
| >TP53-Y236N TTIHYNM      | 69  | >TP53-Y236N TTIHYNM      | 212   | 143   |
| >TP53-Y236N TTIHYNM      | 61  | >TP53-Y236N TTIHYNM      | 56    | 5     |
| >TP53-Y236N TTIHYNM      | 260 | >TP53-Y236N TTIHYNM      | 102   | 158   |
| >TP53-Y236N C TTIHYNM    | 116 | >TP53-Y236N C TTIHYNM    | 147   | 31    |
| >TP53-Y236N C TTIHYN     | 117 | >TP53-Y236N C TTIHYN     | 21207 | 21090 |
| >TP53-Y236N C TTIHYN     | 161 | >TP53-Y236N C TTIHYN     | 29999 | 29838 |
| >TP53-Y236N C TTIHYNM    | 207 | >TP53-Y236N C TTIHYNM    | 345   | 138   |
| >TP53-Y236N C TTIHYN     | 35  | >TP53-Y236N C TTIHYN     | 17243 | 17208 |
| >TP53-Y236N C TTIHYN     | 130 | >TP53-Y236N C TTIHYN     | 21132 | 21002 |
| >TP53-Y236N C TTIHYN     | 355 | >TP53-Y236N C TTIHYN     | 24250 | 23895 |
| >TP53-Y236N C TTIHYN     | 50  | >TP53-Y236N C TTIHYN     | 19482 | 19432 |
| >TP53-Y236N C TTIHYNM    | 11  | >TP53-Y236N C TTIHYNM    | 39    | 28    |
| >TP53-Y236N C TTIHYNM C  | 184 | >TP53-Y236N C TTIHYNM C  | 470   | 286   |
| >TP53-Y236N C TTIHYN     | 68  | >TP53-Y236N C TTIHYN     | 24518 | 24450 |
| >TP53-Y236N C TTIHYNM    | 405 | >TP53-Y236N C TTIHYNM    | 409   | 4     |
| >TP53-Y236N D C TTIHYN   | 287 | >TP53-Y236N D C TTIHYN   | 22694 | 22407 |
| >TP53-Y236N S D C TTIHYN | 400 | >TP53-Y236N S D C TTIHYN | 32269 | 31869 |
| >TP53-Y236S YMCNSSCM     | 262 | >TP53-Y236S YMCNSSCM     | 3111  | 2849  |
| >TP53-Y236S YMCNSSCM C   | 252 | >TP53-Y236S YMCNSSCM C   | 2400  | 2148  |
| >TP53-Y236S YMCNSSCM     | 205 | >TP53-Y236S YMCNSSCM     | 1657  | 1452  |
| >TP53-Y236S YMCNSSCM C   | 167 | >TP53-Y236S YMCNSSCM C   | 1289  | 1122  |
| >TP53-Y236S YMCNSSCM     | 283 | >TP53-Y236S YMCNSSCM     | 1944  | 1661  |
| >TP53-Y236S YMCNSSCM C   | 41  | >TP53-Y236S YMCNSSCM C   | 365   | 324   |
| >TP53-Y236S YMCNSSCM C   | 143 | >TP53-Y236S YMCNSSCM C   | 2123  | 1980  |
| >TP53-Y236S YMCNSSCM     | 24  | >TP53-Y236S YMCNSSCM     | 192   | 168   |
| >TP53-Y236S YMCNSSCM C   | 92  | >TP53-Y236S YMCNSSCM C   | 882   | 790   |
| >TP53-Y236S YMCNSSCM C   | 399 | >TP53-Y236S YMCNSSCM C   | 3043  | 2644  |
| >TP53-Y236S YMCNSSCM C   | 16  | >TP53-Y236S YMCNSSCM C   | 105   | 89    |
| >TP53-Y236S YMCNSSCM     | 92  | >TP53-Y236S YMCNSSCM     | 987   | 895   |
| >TP53-Y236S YMCNSSCM C   | 197 | >TP53-Y236S YMCNSSCM C   | 1960  | 1763  |
| >TP53-Y236S YMCNSSCM     | 150 | >TP53-Y236S YMCNSSCM     | 494   | 344   |
| >TP53-Y236S YMCNSSCM C   | 421 | >TP53-Y236S YMCNSSCM C   | 1195  | 774   |
| >TP53-Y236S YMCNSSCM     | 67  | >TP53-Y236S YMCNSSCM     | 3458  | 3391  |
| >TP53-Y236S YMCNSSCM C   | 332 | >TP53-Y236S YMCNSSCM C   | 5430  | 5098  |
| >TP53-Y236S YMCNSSCM     | 33  | >TP53-Y236S YMCNSSCM     | 472   | 439   |
| >TP53-Y236S YMCNSSCM C   | 53  | >TP53-Y236S YMCNSSCM C   | 507   | 454   |
| >TP53-Y236S YMCNSSCM     | 33  | >TP53-Y236S YMCNSSCM     | 59    | 26    |
| >TP53-Y236S YMCNSSCM C   | 127 | >TP53-Y236S YMCNSSCM C   | 296   | 169   |
| >TP53-Y236S YMCNSSCM C   | 292 | >TP53-Y236S YMCNSSCM C   | 787   | 495   |

|                        |       |                        |       |       |
|------------------------|-------|------------------------|-------|-------|
| >TP53-Y236S YMCNSSCMC  | 44    | >TP53-Y236S SMCNSSCMC  | 88    | 44    |
| >TP53-Y236S YMCNSSCM   | 98    | >TP53-Y236S SMCNSSCM   | 414   | 316   |
| >TP53-Y236S YMCNSSCMC  | 145   | >TP53-Y236S SMCNSSCMC  | 573   | 428   |
| >TP53-Y236S YMCNSSCM   | 20    | >TP53-Y236S SMCNSSCM   | 69    | 49    |
| >TP53-Y236S YMCNSSCMC  | 160   | >TP53-Y236S SMCNSSCMC  | 721   | 561   |
| >TP53-Y236S YMCNSSCMC  | 294   | >TP53-Y236S SMCNSSCMC  | 1208  | 914   |
| >TP53-Y236S YMCNSSCM   | 310   | >TP53-Y236S SMCNSSCM   | 3143  | 2833  |
| >TP53-Y236S YMCNSSCM   | 346   | >TP53-Y236S SMCNSSCM   | 2403  | 2057  |
| >TP53-Y236S NYMCNSSCM  | 726   | >TP53-Y236S NSMCNSSCM  | 23    | 703   |
| >TP53-Y236S NYMCNSSCM  | 53    | >TP53-Y236S NSMCNSSCM  | 22124 | 22071 |
| >TP53-Y236S NYMCNSSCM  | 11682 | >TP53-Y236S NSMCNSSCM  | 455   | 11227 |
| >TP53-Y236S NYMCNSSCM  | 1697  | >TP53-Y236S NSMCNSSCM  | 182   | 1515  |
| >TP53-Y236S NYMCNSSCM  | 1723  | >TP53-Y236S NSMCNSSCM  | 195   | 1528  |
| >TP53-Y236S NYMCNSSCM  | 5301  | >TP53-Y236S NSMCNSSCM  | 117   | 5184  |
| >TP53-Y236S GSDCTTIHYN | 34    | >TP53-Y236S GSDCTTIHYN | 14076 | 14042 |
| >TP53-Y236S GSDCTTIHYN | 174   | >TP53-Y236S GSDCTTIHYN | 21179 | 21005 |
| >TP53-Y236S GSDCTTIHYN | 99    | >TP53-Y236S GSDCTTIHYN | 18553 | 18454 |
| >TP53-Y236S GSDCTTIHYN | 247   | >TP53-Y236S GSDCTTIHYN | 17029 | 16782 |
| >TP53-Y236S GSDCTTIHYN | 97    | >TP53-Y236S GSDCTTIHYN | 30848 | 30751 |
| >TP53-Y236S YNYMCNSSCI | 429   | >TP53-Y236S YNSMCNSSCI | 1141  | 712   |
| >TP53-Y236S YNYMCNSSCI | 31    | >TP53-Y236S YNSMCNSSCI | 208   | 177   |
| >TP53-Y236S HNYMCNSS   | 919   | >TP53-Y236S HNSMCNSS   | 193   | 726   |
| >TP53-Y236S HNYMCNSS   | 1526  | >TP53-Y236S HNSMCNSS   | 355   | 1171  |
| >TP53-Y236S HNYMCNSS   | 70    | >TP53-Y236S HNSMCNSS   | 26    | 44    |
| >TP53-Y236S IHNYMCNSS  | 575   | >TP53-Y236S IHNSMCNSS  | 387   | 188   |
| >TP53-Y236S TTIHYNM    | 46    | >TP53-Y236S TTIHYNM    | 74    | 28    |
| >TP53-Y236S TTIHYNM    | 1130  | >TP53-Y236S TTIHYNM    | 200   | 930   |
| >TP53-Y236S TTIHYNM    | 46    | >TP53-Y236S TTIHYNM    | 40    | 6     |
| >TP53-Y236S TTIHYNM    | 5     | >TP53-Y236S TTIHYNM    | 5     | 0     |
| >TP53-Y236S TTIHYNM    | 135   | >TP53-Y236S TTIHYNM    | 58    | 77    |
| >TP53-Y236S TTIHYNM    | 17    | >TP53-Y236S TTIHYNM    | 58    | 41    |
| >TP53-Y236S TTIHYNMCM  | 120   | >TP53-Y236S TTIHYNMCM  | 749   | 629   |
| >TP53-Y236S TTIHYNMCM  | 102   | >TP53-Y236S TTIHYNMCM  | 192   | 90    |
| >TP53-Y236S TTIHYNM    | 69    | >TP53-Y236S TTIHYNM    | 210   | 141   |
| >TP53-Y236S TTIHYNM    | 1287  | >TP53-Y236S TTIHYNM    | 480   | 807   |
| >TP53-Y236S TTIHYNM    | 61    | >TP53-Y236S TTIHYNM    | 32    | 29    |
| >TP53-Y236S TTIHYNM    | 260   | >TP53-Y236S TTIHYNM    | 64    | 196   |
| >TP53-Y236S TTIHYNMCM  | 7731  | >TP53-Y236S TTIHYNMCM  | 411   | 7320  |
| >TP53-Y236S CTTIHYNM   | 116   | >TP53-Y236S CTTIHYNM   | 187   | 71    |
| >TP53-Y236S CTTIHYN    | 117   | >TP53-Y236S CTTIHYN    | 19566 | 19449 |
| >TP53-Y236S CTTIHYN    | 161   | >TP53-Y236S CTTIHYN    | 28105 | 27944 |
| >TP53-Y236S CTTIHYNM   | 207   | >TP53-Y236S CTTIHYNM   | 519   | 312   |
| >TP53-Y236S CTTIHYN    | 35    | >TP53-Y236S CTTIHYN    | 16919 | 16884 |

|                           |     |                           |       |       |
|---------------------------|-----|---------------------------|-------|-------|
| >TP53-Y236S CTTIHYN Y     | 130 | >TP53-Y236S CTTIHYN S     | 20082 | 19952 |
| >TP53-Y236S CTTIHYN Y     | 355 | >TP53-Y236S CTTIHYN S     | 24324 | 23969 |
| >TP53-Y236S CTTIHYN Y     | 50  | >TP53-Y236S CTTIHYN S     | 19181 | 19131 |
| >TP53-Y236S CTTIHYN Y M   | 11  | >TP53-Y236S CTTIHYN S M   | 32    | 21    |
| >TP53-Y236S CTTIHYN Y M C | 184 | >TP53-Y236S CTTIHYN S M C | 620   | 436   |
| >TP53-Y236S CTTIHYN Y     | 68  | >TP53-Y236S CTTIHYN S     | 26406 | 26338 |
| >TP53-Y236S CTTIHYN Y M   | 405 | >TP53-Y236S CTTIHYN S M   | 139   | 266   |
| >TP53-Y236S DCTTIHYN Y    | 287 | >TP53-Y236S DCTTIHYN S    | 22817 | 22530 |
| >TP53-Y236S SDCTTIHYN Y   | 400 | >TP53-Y236S SDCTTIHYN S   | 31239 | 30839 |
| >TP53-Y327C YFTLQIRGREI   | 337 | >TP53-Y327C DFTLQIRGREI   | 3046  | 2709  |
| >TP53-Y327C YFTLQIRGR     | 129 | >TP53-Y327C DFTLQIRGR     | 27    | 102   |
| >TP53-Y327C YFTLQIRGREI   | 126 | >TP53-Y327C DFTLQIRGREI   | 28    | 98    |
| >TP53-Y327C YFTLQIRGR     | 152 | >TP53-Y327C DFTLQIRGR     | 557   | 405   |
| >TP53-Y327C EYFTLQIR      | 335 | >TP53-Y327C EDFTLQIR      | 15286 | 14951 |
| >TP53-Y327C EYFTLQIR      | 31  | >TP53-Y327C EDFTLQIR      | 8388  | 8357  |
| >TP53-Y327C EYFTLQIRGR    | 315 | >TP53-Y327C EDFTLQIRGR    | 10088 | 9773  |
| >TP53-Y327C EYFTLQIR      | 26  | >TP53-Y327C EDFTLQIR      | 153   | 127   |
| >TP53-Y327C EYFTLQIR      | 19  | >TP53-Y327C EDFTLQIR      | 758   | 739   |
| >TP53-Y327C EYFTLQIRGR    | 20  | >TP53-Y327C EDFTLQIRGR    | 566   | 546   |
| >TP53-Y327C QPKKKPLDGE    | 303 | >TP53-Y327C QPKKKPLDGE    | 20969 | 20666 |
| >TP53-Y327C GEYFTLQI      | 102 | >TP53-Y327C GEDFTLQI      | 253   | 151   |
| >TP53-Y327C GEYFTLQI      | 44  | >TP53-Y327C GEDFTLQI      | 61    | 17    |
| >TP53-Y327C GEYFTLQI      | 43  | >TP53-Y327C GEDFTLQI      | 643   | 600   |
| >TP53-Y327C GEYFTLQI      | 11  | >TP53-Y327C GEDFTLQI      | 116   | 105   |
| >TP53-Y327C GEYFTLQIR     | 190 | >TP53-Y327C GEDFTLQIR     | 5197  | 5007  |
| >TP53-Y327C LDGEYFTLQI    | 87  | >TP53-Y327C LDGEDFTLQI    | 466   | 379   |
| >TP53-Y327C LDGEYFTL      | 344 | >TP53-Y327C LDGEDFTL      | 852   | 508   |
| >TP53-Y327C LDGEYFTLQI    | 94  | >TP53-Y327C LDGEDFTLQI    | 146   | 52    |
| >TP53-Y327C PLDGEYFTL     | 249 | >TP53-Y327C PLDGEDFTL     | 678   | 429   |
| >TP53-Y327C PLDGEYFTL     | 22  | >TP53-Y327C PLDGEDFTL     | 96    | 74    |
| >TP53-Y327C PLDGEYFTLQ    | 68  | >TP53-Y327C PLDGEDFTLQ    | 85    | 17    |
| >TP53-Y327C PLDGEYFTL     | 224 | >TP53-Y327C PLDGEDFTL     | 243   | 19    |
| >TP53-Y327C PLDGEYFTL     | 22  | >TP53-Y327C PLDGEDFTL     | 28    | 6     |
| >TP53-Y327C PLDGEYFTLQ    | 140 | >TP53-Y327C PLDGEDFTLQ    | 100   | 40    |
| >TP53-Y327C PLDGEYFTL     | 23  | >TP53-Y327C PLDGEDFTL     | 98    | 75    |
| >TP53-Y327C PLDGEYFTLQ    | 158 | >TP53-Y327C PLDGEDFTLQ    | 154   | 4     |
| >TP53-Y327C PLDGEYFTL     | 11  | >TP53-Y327C PLDGEDFTL     | 28    | 17    |
| >TP53-Y327C PLDGEYFTLQ    | 111 | >TP53-Y327C PLDGEDFTLQ    | 83    | 28    |
| >TP53-Y327C KPLDGEYF      | 296 | >TP53-Y327C KPLDGEDF      | 798   | 502   |
| >TP53-Y327C KPLDGEYFTL    | 212 | >TP53-Y327C KPLDGEDFTL    | 337   | 125   |
| >TP53-Y327C KPLDGEYF      | 541 | >TP53-Y327C KPLDGEDF      | 369   | 172   |
| >TP53-Y327C KPLDGEYFTL    | 321 | >TP53-Y327C KPLDGEDFTL    | 1228  | 907   |
| >TP53-Y327C KPLDGEYF      | 287 | >TP53-Y327C KPLDGEDF      | 1152  | 865   |



|                        |       |                        |       |       |
|------------------------|-------|------------------------|-------|-------|
| >TP53-Y327C KPLDGEYF   | 195   | >TP53-Y327C KPLDGEDF   | 241   | 46    |
| >TP53-Y327C KPLDGEYFTL | 306   | >TP53-Y327C KPLDGEDFTL | 510   | 204   |
| >TP53-Y327C KKPLDGEYF  | 31    | >TP53-Y327C KKPLDGEDF  | 53    | 22    |
| >TP53-Y327C KKKPLDGEY  | 83    | >TP53-Y327C KKKPLDGED  | 29676 | 29593 |
| >TP53-Y327C KKKPLDGEY  | 138   | >TP53-Y327C KKKPLDGED  | 18452 | 18314 |
| >TP53-Y327C KKKPLDGEYF | 14    | >TP53-Y327C KKKPLDGEDF | 19    | 5     |
| >TP53-Y327C PKKKPLDGEY | 315   | >TP53-Y327C PKKKPLDGED | 31042 | 30727 |
| >TP53-Y327C PKKKPLDGEY | 78    | >TP53-Y327C PKKKPLDGED | 117   | 39    |
| >TPM3-E151 ESRCREMDE   | 15397 | >TPM3-E151 KSRCREMDE   | 455   | 14942 |
| >TPM3-E151 ESRCREMDE   | 12546 | >TPM3-E151 KSRCREMDE   | 136   | 12410 |
| >TPM3-E151 ESRCREMDE   | 8479  | >TPM3-E151 KSRCREMDE   | 33    | 8446  |
| >TPM3-E151 ESRCREMDE   | 1167  | >TPM3-E151 KSRCREMDE   | 35    | 1132  |
| >TPM3-E151 ESRCREMDE   | 1391  | >TPM3-E151 KSRCREMDE   | 148   | 1243  |
| >TPM3-E151 AESRCREM    | 2018  | >TPM3-E151 AKSRCREM    | 62    | 1956  |
| >TPM3-E151 AESRCREM    | 124   | >TPM3-E151 AKSRCREM    | 27613 | 27489 |
| >TPM3-E151 LAESRCREM   | 2178  | >TPM3-E151 LAKSRCREM   | 81    | 2097  |
| >TPM3-E151 LAESRCREM   | 624   | >TPM3-E151 LAKSRCREM   | 373   | 251   |
| >TPM3-E151 ELAESRCR    | 329   | >TPM3-E151 ELAKSRCR    | 500   | 171   |
| >TPM3-E151 ELAESRCR    | 15    | >TPM3-E151 ELAKSRCR    | 19    | 4     |
| >TPM3-E151 AELAESRCRE  | 552   | >TPM3-E151 AELAKSRCRE  | 315   | 237   |
| >TPM3-E151 AELAESRCRE  | 88    | >TPM3-E151 AELAKSRCRE  | 87    | 1     |
| >TPM3-E151 AELAESRCR   | 278   | >TPM3-E151 AELAKSRCR   | 368   | 90    |
| >TPM3-E151 AELAESRCRE  | 121   | >TPM3-E151 AELAKSRCRE  | 139   | 18    |
| >TPM3-E151 AELAESRCRE  | 302   | >TPM3-E151 AELAKSRCRE  | 385   | 83    |
| >TPM3-E151 AELAESRC    | 391   | >TPM3-E151 AELAKSRC    | 518   | 127   |
| >TPM3-E151 AELAESRCRE  | 259   | >TPM3-E151 AELAKSRCRE  | 285   | 26    |
| >TPM3-E151 AELAESRCRE  | 89    | >TPM3-E151 AELAKSRCRE  | 123   | 34    |
| >TPM3-E151 RAELAESR    | 641   | >TPM3-E151 RAELAKSR    | 355   | 286   |
| >TPM3-E151 RAELAESRCR  | 390   | >TPM3-E151 RAELAKSRCR  | 139   | 251   |
| >TPM3-E151 ERAELAESR   | 109   | >TPM3-E151 ERAELAKSR   | 494   | 385   |
| >TPM3-E151 ERAELAESRC  | 435   | >TPM3-E151 ERAELAKSRC  | 822   | 387   |
| >TPM3-E151 RTEERAELAE  | 33800 | >TPM3-E151 RTEERAELAK  | 116   | 33684 |
| >TPM3-E151 RTEERAELAE  | 11033 | >TPM3-E151 RTEERAELAK  | 68    | 10965 |
| >TPM3-I189\IKILTDKL    | 338   | >TPM3-I189\VKILTDKL    | 830   | 492   |
| >TPM3-I189\EIKILTDK    | 90    | >TPM3-I189\EVKILTDK    | 36    | 54    |
| >TPM3-I189\EIKILTDKLK  | 162   | >TPM3-I189\EVKILTDKLK  | 95    | 67    |
| >TPM3-I189\EIKILTDKL   | 2094  | >TPM3-I189\EVKILTDKL   | 443   | 1651  |
| >TPM3-I189\SQKEDKYEEE  | 631   | >TPM3-I189\SQKEDKYEEE  | 121   | 510   |
| >TPM3-I189\EEIKILTDKL  | 215   | >TPM3-I189\EEVKILTDKL  | 186   | 29    |
| >TPM3-I189\EEIKILTDKL  | 353   | >TPM3-I189\EEVKILTDKL  | 707   | 354   |
| >TPM3-I189\EEIKILTDKL  | 344   | >TPM3-I189\EEVKILTDKL  | 418   | 74    |
| >TPM3-I189\EEIKILTDKL  | 357   | >TPM3-I189\EEVKILTDKL  | 797   | 440   |
| >TPM3-I189\EEIKILTDKL  | 263   | >TPM3-I189\EEVKILTDKL  | 1283  | 1020  |

|                         |       |                        |       |       |
|-------------------------|-------|------------------------|-------|-------|
| >TPM3-I189\EEEEIKILTDKL | 392   | >TPM3-I189\EEEEKILTDLK | 550   | 158   |
| >TPM3-I189\EEEEIKILTDKL | 559   | >TPM3-I189\EEEEKILTDLK | 446   | 113   |
| >TPM3-I189\EEEEIKILT    | 221   | >TPM3-I189\EEEEKILT    | 198   | 23    |
| >TPM3-I189\YEEEEIKIL    | 7     | >TPM3-I189\YEEEEKIL    | 5     | 2     |
| >TPM3-I189\YEEEEIKIL    | 108   | >TPM3-I189\YEEEEKIL    | 118   | 10    |
| >TPM3-I189\YEEEEIKIL    | 413   | >TPM3-I189\YEEEEKIL    | 260   | 153   |
| >TPM3-I189\YEEEEIKIL    | 15    | >TPM3-I189\YEEEEKIL    | 17    | 2     |
| >TPM3-I189\YEEEEIKIL    | 383   | >TPM3-I189\YEEEEKIL    | 484   | 101   |
| >TPM3-I189\YEEEEIKILT   | 153   | >TPM3-I189\YEEEEKILT   | 191   | 38    |
| >TPM3-I189\KYEEEEIKI    | 599   | >TPM3-I189\KYEEEEKI    | 494   | 105   |
| >TPM3-I189\KYEEEEIKI    | 51    | >TPM3-I189\KYEEEEKI    | 35    | 16    |
| >TPM3-I189\KYEEEEIKIL   | 81    | >TPM3-I189\KYEEEEKIL   | 80    | 1     |
| >TPM3-I189\KEDKYEEEEI   | 83    | >TPM3-I189\KEDKYEEEV   | 1063  | 980   |
| >TPM3-I189\KEDKYEEEEI   | 126   | >TPM3-I189\KEDKYEEEV   | 386   | 260   |
| >TPM3-I189\KEDKYEEEEIKI | 176   | >TPM3-I189\KEDKYEEEVK  | 229   | 53    |
| >TPM3-I189\KEDKYEEEEI   | 481   | >TPM3-I189\KEDKYEEEV   | 620   | 139   |
| >TPM3-I189\KEDKYEEEEI   | 57    | >TPM3-I189\KEDKYEEEV   | 192   | 135   |
| >TPM3-I189\KEDKYEEEEIKI | 34    | >TPM3-I189\KEDKYEEEVK  | 31    | 3     |
| >TPM4-E204 EFAERTVAKL   | 1709  | >TPM4-E204 QFAERTVAKL  | 379   | 1330  |
| >TPM4-E204 EFAERTVAK    | 157   | >TPM4-E204 QFAERTVAK   | 1669  | 1512  |
| >TPM4-E204 EFAERTVAK    | 39    | >TPM4-E204 QFAERTVAK   | 443   | 404   |
| >TPM4-E204 EFAERTVAK    | 590   | >TPM4-E204 QFAERTVAK   | 306   | 284   |
| >TPM4-E204 AEFAERTV     | 462   | >TPM4-E204 AQFAERTV    | 17245 | 16783 |
| >TPM4-E204 AEFAERTV     | 10120 | >TPM4-E204 AQFAERTV    | 428   | 9692  |
| >TPM4-E204 AEFAERTVAK   | 5174  | >TPM4-E204 AQFAERTVAK  | 124   | 5050  |
| >TPM4-E204 AEFAERTV     | 10909 | >TPM4-E204 AQFAERTV    | 171   | 10738 |
| >TPM4-E204 AEFAERTVAK   | 13931 | >TPM4-E204 AQFAERTVAK  | 403   | 13528 |
| >TPM4-E204 AEFAERTV     | 4981  | >TPM4-E204 AQFAERTV    | 23    | 4958  |
| >TPM4-E204 AEFAERTVA    | 14591 | >TPM4-E204 AQFAERTVA   | 253   | 14338 |
| >TPM4-E204 AEFAERTVAK   | 9735  | >TPM4-E204 AQFAERTVAK  | 96    | 9639  |
| >TPM4-E204 AEFAERTV     | 5422  | >TPM4-E204 AQFAERTV    | 126   | 5296  |
| >TPM4-E204 AEFAERTV     | 10923 | >TPM4-E204 AQFAERTV    | 475   | 10448 |
| >TPM4-E204 AEFAERTVAK   | 5849  | >TPM4-E204 AQFAERTVAK  | 88    | 5761  |
| >TPM4-E204 AEFAERTVAK   | 10251 | >TPM4-E204 AQFAERTVAK  | 54    | 10197 |
| >TPM4-E204 AEFAERTVAK   | 4911  | >TPM4-E204 AQFAERTVAK  | 182   | 4729  |
| >TPM4-E204 AEFAERTVA    | 7370  | >TPM4-E204 AQFAERTVA   | 157   | 7213  |
| >TPM4-E204 AEFAERTVAK   | 8105  | >TPM4-E204 AQFAERTVAK  | 230   | 7875  |
| >TPM4-E204 AEFAERTV     | 1051  | >TPM4-E204 AQFAERTV    | 17    | 1034  |
| >TPM4-E204 AEFAERTVA    | 1650  | >TPM4-E204 AQFAERTVA   | 30    | 1620  |
| >TPM4-E204 AEFAERTVAK   | 1001  | >TPM4-E204 AQFAERTVAK  | 27    | 974   |
| >TPM4-E204 AEFAERTVAK   | 307   | >TPM4-E204 AQFAERTVAK  | 9     | 298   |
| >TPM4-E204 AEFAERTVAK   | 953   | >TPM4-E204 AQFAERTVAK  | 99    | 854   |
| >TPM4-E204 AEFAERTV     | 74    | >TPM4-E204 AQFAERTV    | 4473  | 4399  |

|                       |      |                        |       |       |
|-----------------------|------|------------------------|-------|-------|
| >TPM4-E204 AEFAERTVAK | 21   | >TPM4-E204 AQFAERTVAK  | 765   | 744   |
| >TPM4-E204 AEFAERTV   | 59   | >TPM4-E204 AQFAERTV    | 4362  | 4303  |
| >TPM4-E204 AEFAERTVA  | 28   | >TPM4-E204 AQFAERTVA   | 2150  | 2122  |
| >TPM4-E204 AEFAERTVAK | 257  | >TPM4-E204 AQFAERTVAK  | 26724 | 26467 |
| >TPM4-E204 AEFAERTVAK | 66   | >TPM4-E204 AQFAERTVAK  | 2811  | 2745  |
| >TPM4-E204 AEFAERTV   | 307  | >TPM4-E204 AQFAERTV    | 14221 | 13914 |
| >TPM4-E204 AEFAERTVAK | 204  | >TPM4-E204 AQFAERTVAK  | 10018 | 9814  |
| >TPM4-E204 AEFAERTV   | 65   | >TPM4-E204 AQFAERTV    | 9120  | 9055  |
| >TPM4-E204 AEFAERTVA  | 15   | >TPM4-E204 AQFAERTVA   | 1659  | 1644  |
| >TPM4-E204 AEFAERTVAK | 185  | >TPM4-E204 AQFAERTVAK  | 10301 | 10116 |
| >TPM4-E204 AEFAERTV   | 450  | >TPM4-E204 AQFAERTV    | 4044  | 3594  |
| >TPM4-E204 AEFAERTVA  | 237  | >TPM4-E204 AQFAERTVA   | 16264 | 16027 |
| >TPM4-E204 AEFAERTVAK | 7    | >TPM4-E204 AQFAERTVAK  | 655   | 648   |
| >TPM4-E204 RAEFAERTVA | 618  | >TPM4-E204 RAQFAERTVAK | 95    | 523   |
| >TPM4-E204 RAEFAERTVA | 87   | >TPM4-E204 RAQFAERTVAK | 22    | 65    |
| >TPM4-E204 RAEFAERTVA | 1548 | >TPM4-E204 RAQFAERTVAK | 401   | 1147  |
| >TPM4-E204 TRAEFAER   | 126  | >TPM4-E204 TRAQAER     | 180   | 54    |
| >TPM4-E204 TRAEFAER   | 587  | >TPM4-E204 TRAQAER     | 438   | 149   |
| >TPM4-E204 TRAEFAER   | 805  | >TPM4-E204 TRAQAER     | 337   | 468   |
| >TPM4-E204 ETRAEFAER  | 887  | >TPM4-E204 ETRAQAER    | 394   | 493   |
| >TPM4-E204 ETRAEFAERT | 513  | >TPM4-E204 ETRAQAERT   | 316   | 197   |
| >TPM4-E204 ETRAEFAER  | 137  | >TPM4-E204 ETRAQAER    | 28    | 109   |
| >TPM4-E204 ETRAEFAER  | 14   | >TPM4-E204 ETRAQAER    | 11    | 3     |
| >TPM4-E204 ETRAEFAER  | 6    | >TPM4-E204 ETRAQAER    | 6     | 0     |
| >TPM4-E204 ETRAEFAERT | 350  | >TPM4-E204 ETRAQAERT   | 226   | 124   |
| >TPM4-E204 ETRAEFAERT | 522  | >TPM4-E204 ETRAQAERT   | 423   | 99    |
| >TPM4-E204 AETRAEFA   | 1487 | >TPM4-E204 AETRAQFA    | 489   | 998   |
| >TPM4-E204 AETRAEFA   | 743  | >TPM4-E204 AETRAQFA    | 347   | 396   |
| >TPM4-E204 AETRAEFA   | 733  | >TPM4-E204 AETRAQFA    | 354   | 379   |
| >TPM4-E204 AETRAEFA   | 10   | >TPM4-E204 AETRAQFA    | 8     | 2     |
| >TPM4-E204 AETRAEFAE  | 101  | >TPM4-E204 AETRAQFAE   | 72    | 29    |
| >TPM4-E204 AETRAEFAER | 40   | >TPM4-E204 AETRAQFAEF  | 33    | 7     |
| >TPM4-E204 AETRAEFAER | 491  | >TPM4-E204 AETRAQFAEF  | 340   | 151   |
| >TPM4-E204 EAETRAEFAE | 223  | >TPM4-E204 EAETRAQFAE  | 173   | 50    |
| >TPM4-E204 EAETRAEFAE | 11   | >TPM4-E204 EAETRAQFAE  | 15    | 4     |
| >TPM4-E204 EAETRAEF   | 973  | >TPM4-E204 EAETRAQF    | 343   | 630   |
| >TPM4-E204 KEAETRAEFA | 267  | >TPM4-E204 KEAETRAQFA  | 362   | 95    |
| >TPM4-E204 KEAETRAEF  | 37   | >TPM4-E204 KEAETRAQF   | 82    | 45    |
| >TPM4-E204 KEAETRAEF  | 51   | >TPM4-E204 KEAETRAQF   | 84    | 33    |
| >TPM4-E204 KEAETRAEF  | 325  | >TPM4-E204 KEAETRAQF   | 553   | 228   |
| >TPM4-E204 KEAETRAEF  | 426  | >TPM4-E204 KEAETRAQF   | 741   | 315   |
| >TPM4-E204 KEAETRAEF  | 346  | >TPM4-E204 KEAETRAQF   | 364   | 18    |
| >TPM4-E204 KEAETRAEF  | 374  | >TPM4-E204 KEAETRAQF   | 574   | 200   |

|                         |       |                         |       |       |
|-------------------------|-------|-------------------------|-------|-------|
| >TPM4-E204 KEAETRAEFA   | 245   | >TPM4-E204 KEAETRAQFA   | 230   | 15    |
| >TPM4-E204 KEAETRAEF    | 68    | >TPM4-E204 KEAETRAQF    | 32    | 36    |
| >TPM4-E204 KEAETRAEFA   | 396   | >TPM4-E204 KEAETRAQFA   | 202   | 194   |
| >TPM4-E204 LKEAETRAEF   | 30    | >TPM4-E204 LKEAETRAQF   | 56    | 26    |
| >TPM4-E204 KLKEAETRAEI  | 105   | >TPM4-E204 KLKEAETRAQ   | 114   | 9     |
| >TPM4-E204 KLKEAETRAEI  | 38    | >TPM4-E204 KLKEAETRAQ   | 63    | 25    |
| >TPM4-E204 KLKEAETRAEI  | 234   | >TPM4-E204 KLKEAETRAQ   | 110   | 124   |
| >TPR-K878E- KRQLDTETNL  | 26    | >TPR-K878E- ERQLDTETNL  | 107   | 81    |
| >TPR-K878E- KRQLDTET    | 72    | >TPR-K878E- ERQLDTET    | 2929  | 2857  |
| >TPR-K878E- KRQLDTETN   | 215   | >TPR-K878E- ERQLDTETN   | 4659  | 4444  |
| >TPR-K878E- KRQLDTETNL  | 21    | >TPR-K878E- ERQLDTETNL  | 167   | 146   |
| >TPR-K878E- KRQLDTETNL  | 179   | >TPR-K878E- ERQLDTETNL  | 3772  | 3593  |
| >TPR-K878E- KRQLDTETNL  | 26    | >TPR-K878E- ERQLDTETNL  | 103   | 77    |
| >TPR-K878E- KRQLDTETNL  | 442   | >TPR-K878E- ERQLDTETNL  | 6733  | 6291  |
| >TPR-K878E- TKRQLDTETN  | 273   | >TPR-K878E- TERQLDTETN  | 4047  | 3774  |
| >TPR-K878E- TKRQLDTET   | 24161 | >TPR-K878E- TERQLDTET   | 57    | 24104 |
| >TPR-K878E- TKRQLDTETN  | 19863 | >TPR-K878E- TERQLDTETN  | 59    | 19804 |
| >TPR-K878E- TKRQLDTETN  | 21628 | >TPR-K878E- TERQLDTETN  | 287   | 21341 |
| >TPR-K878E- LLDTKRQL    | 671   | >TPR-K878E- LLDTERQL    | 360   | 311   |
| >TPR-K878E- LLDTKRQL    | 117   | >TPR-K878E- LLDTERQL    | 112   | 5     |
| >TPR-K878E- LLDTKRQL    | 740   | >TPR-K878E- LLDTERQL    | 433   | 307   |
| >TPR-K878E- LLDTKRQL    | 18    | >TPR-K878E- LLDTERQL    | 17    | 1     |
| >TPR-K878E- LLDTKRQLDT  | 756   | >TPR-K878E- LLDTERQLDT  | 456   | 300   |
| >TPR-K878E- QLLDTKRQL   | 33    | >TPR-K878E- QLLDTERQL   | 27    | 6     |
| >TPR-K878E- QLLDTKRQL   | 934   | >TPR-K878E- QLLDTERQL   | 429   | 505   |
| >TPR-K878E- QLLDTKRQL   | 461   | >TPR-K878E- QLLDTERQL   | 173   | 288   |
| >TPR-K878E- QLLDTKRQL   | 118   | >TPR-K878E- QLLDTERQL   | 76    | 42    |
| >TPR-K878E- QLLDTKRQ    | 613   | >TPR-K878E- QLLDTERQ    | 254   | 359   |
| >TPR-K878E- QLLDTKRQL   | 10    | >TPR-K878E- QLLDTERQL   | 10    | 0     |
| >TPR-K878E- VQLLDTKR    | 556   | >TPR-K878E- VQLLDTER    | 415   | 141   |
| >TPR-K878E- DVQLLDTKR   | 38    | >TPR-K878E- DVQLLDTER   | 23    | 15    |
| >TPR-K878E- DVQLLDTK    | 223   | >TPR-K878E- DVQLLDTE    | 19970 | 19747 |
| >TPR-K878E- DVQLLDTKR   | 104   | >TPR-K878E- DVQLLDTER   | 60    | 44    |
| >TPR-L792F-1 LKLSEVRL   | 26    | >TPR-L792F-1 FKLSEVRL   | 15    | 11    |
| >TPR-L792F-1 LKLSEVRLSQ | 437   | >TPR-L792F-1 FKLSEVRLSQ | 265   | 172   |
| >TPR-L792F-1 LKLSEVRL   | 3747  | >TPR-L792F-1 FKLSEVRL   | 122   | 3625  |
| >TPR-L792F-1 MLKLSEVRL  | 140   | >TPR-L792F-1 MFKLSEVRL  | 8788  | 8648  |
| >TPR-L792F-1 MLKLSEVRL  | 14    | >TPR-L792F-1 MFKLSEVRL  | 17402 | 17388 |
| >TPR-L792F-1 MLKLSEVR   | 28    | >TPR-L792F-1 MFKLSEVR   | 12    | 16    |
| >TPR-L792F-1 MLKLSEVR   | 215   | >TPR-L792F-1 MFKLSEVR   | 54    | 161   |
| >TPR-L792F-1 MLKLSEVR   | 81    | >TPR-L792F-1 MFKLSEVR   | 138   | 57    |
| >TPR-L792F-1 MLKLSEVRL  | 382   | >TPR-L792F-1 MFKLSEVRL  | 5234  | 4852  |
| >TPR-L792F-1 MLKLSEVR   | 525   | >TPR-L792F-1 MFKLSEVR   | 118   | 407   |

|                         |      |                         |      |      |
|-------------------------|------|-------------------------|------|------|
| >TPR-L792F-1 AENLKKEKEN | 126  | >TPR-L792F-1 AENLKKEKEN | 1335 | 1209 |
| >TPR-L792F-1 AENLKKEKEN | 379  | >TPR-L792F-1 AENLKKEKEN | 970  | 591  |
| >TPR-L792F-1 AENLKKEKEN | 916  | >TPR-L792F-1 AENLKKEKEN | 201  | 715  |
| >TPR-L792F-1 AENLKKEKEN | 1289 | >TPR-L792F-1 AENLKKEKEN | 294  | 995  |
| >TPR-L792F-1 AENLKKEKEN | 395  | >TPR-L792F-1 AENLKKEKEN | 1355 | 960  |
| >TPR-L792F-1 EMLKLSEV   | 304  | >TPR-L792F-1 EMFKLSEV   | 122  | 182  |
| >TPR-L792F-1 EMLKLSEV   | 215  | >TPR-L792F-1 EMFKLSEV   | 21   | 194  |
| >TPR-L792F-1 EMLKLSEVRL | 730  | >TPR-L792F-1 EMFKLSEVRL | 244  | 486  |
| >TPR-L792F-1 EMLKLSEV   | 274  | >TPR-L792F-1 EMFKLSEV   | 45   | 229  |
| >TPR-L792F-1 EMLKLSEV   | 145  | >TPR-L792F-1 EMFKLSEV   | 165  | 20   |
| >TPR-L792F-1 EMLKLSEV   | 4    | >TPR-L792F-1 EMFKLSEV   | 3    | 1    |
| >TPR-L792F-1 EMLKLSEVRL | 110  | >TPR-L792F-1 EMFKLSEVRL | 64   | 46   |
| >TPR-L792F-1 EMLKLSEV   | 15   | >TPR-L792F-1 EMFKLSEV   | 28   | 13   |
| >TPR-L792F-1 EMLKLSEV   | 10   | >TPR-L792F-1 EMFKLSEV   | 9    | 1    |
| >TPR-L792F-1 EMLKLSEVRL | 134  | >TPR-L792F-1 EMFKLSEVRL | 132  | 2    |
| >TPR-L792F-1 EMLKLSEV   | 5    | >TPR-L792F-1 EMFKLSEV   | 15   | 10   |
| >TPR-L792F-1 EMLKLSEVRL | 120  | >TPR-L792F-1 EMFKLSEVRL | 990  | 870  |
| >TPR-L792F-1 EMLKLSEV   | 6    | >TPR-L792F-1 EMFKLSEV   | 6    | 0    |
| >TPR-L792F-1 EMLKLSEVRL | 158  | >TPR-L792F-1 EMFKLSEVRL | 74   | 84   |
| >TPR-L792F-1 EMLKLSEVR  | 856  | >TPR-L792F-1 EMFKLSEVR  | 297  | 559  |
| >TPR-L792F-1 EMLKLSEVRL | 2033 | >TPR-L792F-1 EMFKLSEVRL | 418  | 1615 |
| >TPR-L792F-1 EMLKLSEVR  | 173  | >TPR-L792F-1 EMFKLSEVR  | 101  | 72   |
| >TPR-L792F-1 EMLKLSEVR  | 77   | >TPR-L792F-1 EMFKLSEVR  | 8    | 69   |
| >TPR-L792F-1 EMLKLSEV   | 558  | >TPR-L792F-1 EMFKLSEV   | 36   | 522  |
| >TPR-L792F-1 EMLKLSEV   | 13   | >TPR-L792F-1 EMFKLSEV   | 21   | 8    |
| >TPR-L792F-1 EMLKLSEV   | 1375 | >TPR-L792F-1 EMFKLSEV   | 284  | 1091 |
| >TPR-L792F-1 EMLKLSEVRL | 1226 | >TPR-L792F-1 EMFKLSEVRL | 242  | 984  |
| >TPR-L792F-1 EMLKLSEVR  | 69   | >TPR-L792F-1 EMFKLSEVR  | 46   | 23   |
| >TPR-L792F-1 KEMLKLSEV  | 21   | >TPR-L792F-1 KEMFKLSEV  | 107  | 86   |
| >TPR-L792F-1 KEMLKLSEV  | 903  | >TPR-L792F-1 KEMFKLSEV  | 300  | 603  |
| >TPR-L792F-1 KEMLKLSEV  | 232  | >TPR-L792F-1 KEMFKLSEV  | 234  | 2    |
| >TPR-L792F-1 KEMLKLSEVR | 799  | >TPR-L792F-1 KEMFKLSEVR | 431  | 368  |
| >TPR-L792F-1 KEMLKLSEVR | 124  | >TPR-L792F-1 KEMFKLSEVR | 57   | 67   |
| >TPR-L792F-1 KEMLKLSEV  | 40   | >TPR-L792F-1 KEMFKLSEV  | 63   | 23   |
| >TPR-L792F-1 KEMLKLSEVR | 54   | >TPR-L792F-1 KEMFKLSEVR | 80   | 26   |
| >TPR-L792F-1 KEMLKLSEV  | 211  | >TPR-L792F-1 KEMFKLSEV  | 154  | 57   |
| >TPR-L792F-1 KEMLKLSEV  | 4    | >TPR-L792F-1 KEMFKLSEV  | 6    | 2    |
| >TPR-L792F-1 KEMLKLSEVR | 8    | >TPR-L792F-1 KEMFKLSEVR | 14   | 6    |
| >TPR-L792F-1 KEMLKLSEVR | 247  | >TPR-L792F-1 KEMFKLSEVR | 256  | 9    |
| >TPR-L792F-1 KEKEMLKL   | 428  | >TPR-L792F-1 KEKEMFKL   | 214  | 214  |
| >TPR-L792F-1 KEKEMLKLSE | 45   | >TPR-L792F-1 KEKEMFKLSE | 69   | 24   |
| >TPR-L792F-1 KEKEMLKL   | 134  | >TPR-L792F-1 KEKEMFKL   | 62   | 72   |
| >TPR-L792F-1 KEKEMLKL   | 31   | >TPR-L792F-1 KEKEMFKL   | 28   | 3    |

|                          |       |                          |      |       |
|--------------------------|-------|--------------------------|------|-------|
| >TPR-L792F-1 KEKEMLKLS   | 587   | >TPR-L792F-1 KEKEMFKLS   | 341  | 246   |
| >TPR-L792F-1 KEKEMLKLS E | 41    | >TPR-L792F-1 KEKEMFKLS E | 38   | 3     |
| >TPR-L792F-1 KEKEMLKLS E | 593   | >TPR-L792F-1 KEKEMFKLS E | 250  | 343   |
| >TPR-L792F-1 KEKEMLKLS   | 110   | >TPR-L792F-1 KEKEMFKLS   | 175  | 65    |
| >TPR-L792F-1 KEKEMLKLS E | 6     | >TPR-L792F-1 KEKEMFKLS E | 7    | 1     |
| >TPR-L792F-1 LKKEKEMLK   | 1506  | >TPR-L792F-1 LKKEKEMFK   | 303  | 1203  |
| >TPR-L792F-1 LKKEKEML    | 354   | >TPR-L792F-1 LKKEKEMF    | 14   | 340   |
| >TPR-L792F-1 LKKEKEMLK L | 335   | >TPR-L792F-1 LKKEKEMFK L | 533  | 198   |
| >TPR-L792F-1 NLKKEKEMLK  | 1475  | >TPR-L792F-1 NLKKEKEMFK  | 338  | 1137  |
| >TPR-L792F-1 NLKKEKEMLK  | 1158  | >TPR-L792F-1 NLKKEKEMFK  | 496  | 662   |
| >TPR-L792F-1 NLKKEKEMLK  | 921   | >TPR-L792F-1 NLKKEKEMFK  | 370  | 551   |
| >TPR-L792F-1 NLKKEKEMLK  | 413   | >TPR-L792F-1 NLKKEKEMFK  | 762  | 349   |
| >TPR-Q500L- QIRVLLMEL    | 2782  | >TPR-Q500L- LIRVLLMEL    | 145  | 2637  |
| >TPR-Q500L- QIRVLLMEL    | 120   | >TPR-Q500L- LIRVLLMEL    | 84   | 36    |
| >TPR-Q500L- QQIRVLLMEL   | 1186  | >TPR-Q500L- QLIRVLLMEL   | 107  | 1079  |
| >TPR-Q500L- QQIRVLLM     | 4236  | >TPR-Q500L- QLIRVLLM     | 349  | 3887  |
| >TPR-Q500L- QQIRVLLMEL   | 324   | >TPR-Q500L- QLIRVLLMEL   | 47   | 277   |
| >TPR-Q500L- QQIRVLLM     | 3988  | >TPR-Q500L- QLIRVLLM     | 482  | 3506  |
| >TPR-Q500L- QQIRVLLMEL   | 298   | >TPR-Q500L- QLIRVLLMEL   | 54   | 244   |
| >TPR-Q500L- QQIRVLLM     | 109   | >TPR-Q500L- QLIRVLLM     | 738  | 629   |
| >TPR-Q500L- QQIRVLLMEL   | 121   | >TPR-Q500L- QLIRVLLMEL   | 114  | 7     |
| >TPR-Q500L- QQIRVLLMEL   | 4852  | >TPR-Q500L- QLIRVLLMEL   | 32   | 4820  |
| >TPR-Q500L- QQIRVLLMEL   | 4450  | >TPR-Q500L- QLIRVLLMEL   | 80   | 4370  |
| >TPR-Q500L- QQIRVLLMEL   | 12665 | >TPR-Q500L- QLIRVLLMEL   | 235  | 12430 |
| >TPR-Q500L- QQIRVLLMEL   | 15585 | >TPR-Q500L- QLIRVLLMEL   | 11   | 15574 |
| >TPR-Q500L- QQIRVLLM     | 213   | >TPR-Q500L- QLIRVLLM     | 1186 | 973   |
| >TPR-Q500L- QQIRVLLM     | 99    | >TPR-Q500L- QLIRVLLM     | 2313 | 2214  |
| >TPR-Q500L- QQIRVLLMEL   | 78    | >TPR-Q500L- QLIRVLLMEL   | 1873 | 1795  |
| >TPR-Q500L- MEIQVKDLSC   | 4632  | >TPR-Q500L- MEIQVKDLSC   | 49   | 4583  |
| >TPR-Q500L- MEIQVKDLSC   | 1709  | >TPR-Q500L- MEIQVKDLSC   | 308  | 1401  |
| >TPR-Q500L- MEIQVKDLSC   | 8726  | >TPR-Q500L- MEIQVKDLSC   | 24   | 8702  |
| >TPR-Q500L- MEIQVKDLSC   | 4785  | >TPR-Q500L- MEIQVKDLSC   | 138  | 4647  |
| >TPR-Q500L- MEIQVKDLSC   | 657   | >TPR-Q500L- MEIQVKDLSC   | 144  | 513   |
| >TPR-Q500L- MEIQVKDLSC   | 333   | >TPR-Q500L- MEIQVKDLSC   | 7    | 326   |
| >TPR-Q500L- SQQIRVLLME   | 929   | >TPR-Q500L- SQLIRVLLMEI  | 187  | 742   |
| >TPR-Q500L- SQQIRVLL     | 442   | >TPR-Q500L- SQLIRVLL     | 41   | 401   |
| >TPR-Q500L- SQQIRVLLM    | 2099  | >TPR-Q500L- SQLIRVLLM    | 207  | 1892  |
| >TPR-Q500L- SQQIRVLLME   | 133   | >TPR-Q500L- SQLIRVLLMEI  | 18   | 115   |
| >TPR-Q500L- SQQIRVLLME   | 3143  | >TPR-Q500L- SQLIRVLLMEI  | 461  | 2682  |
| >TPR-Q500L- SQQIRVLLME   | 5282  | >TPR-Q500L- SQLIRVLLMEI  | 366  | 4916  |
| >TPR-Q500L- SQQIRVLLM    | 217   | >TPR-Q500L- SQLIRVLLM    | 721  | 504   |
| >TPR-Q500L- SQQIRVLL     | 1100  | >TPR-Q500L- SQLIRVLL     | 266  | 834   |
| >TPR-Q500L- SQQIRVLLM    | 923   | >TPR-Q500L- SQLIRVLLM    | 220  | 703   |

|                       |       |                        |      |       |
|-----------------------|-------|------------------------|------|-------|
| >TPR-Q500L-SQQIRVLLME | 492   | >TPR-Q500L-SQLIRVLLMEI | 123  | 369   |
| >TPR-Q500L-SQQIRVLL   | 945   | >TPR-Q500L-SQLIRVLL    | 268  | 677   |
| >TPR-Q500L-SQQIRVLL   | 1322  | >TPR-Q500L-SQLIRVLL    | 476  | 846   |
| >TPR-Q500L-SQQIRVLLME | 461   | >TPR-Q500L-SQLIRVLLMEI | 1327 | 866   |
| >TPR-Q500L-SQQIRVLLM  | 47    | >TPR-Q500L-SQLIRVLLM   | 144  | 97    |
| >TPR-Q500L-SQQIRVLLME | 58    | >TPR-Q500L-SQLIRVLLMEI | 238  | 180   |
| >TPR-Q500L-LSQQIRVL   | 330   | >TPR-Q500L-LSQLIRVL    | 502  | 172   |
| >TPR-Q500L-LSQQIRVLLM | 93    | >TPR-Q500L-LSQLIRVLLM  | 123  | 30    |
| >TPR-Q500L-LSQQIRVLLM | 260   | >TPR-Q500L-LSQLIRVLLM  | 659  | 399   |
| >TPR-Q500L-LSQQIRVLL  | 243   | >TPR-Q500L-LSQLIRVLL   | 234  | 9     |
| >TPR-Q500L-LSQQIRVLLM | 336   | >TPR-Q500L-LSQLIRVLLM  | 333  | 3     |
| >TPR-Q500L-LSQQIRVL   | 237   | >TPR-Q500L-LSQLIRVL    | 193  | 44    |
| >TPR-Q500L-LSQQIRVLL  | 132   | >TPR-Q500L-LSQLIRVLL   | 303  | 171   |
| >TPR-Q500L-LSQQIRVLLM | 37    | >TPR-Q500L-LSQLIRVLLM  | 20   | 17    |
| >TPR-Q500L-LSQQIRVL   | 251   | >TPR-Q500L-LSQLIRVL    | 524  | 273   |
| >TPR-Q500L-LSQQIRVLL  | 292   | >TPR-Q500L-LSQLIRVLL   | 651  | 359   |
| >TPR-Q500L-DLSQQIRVLL | 433   | >TPR-Q500L-DLSQLIRVLL  | 201  | 232   |
| >TPR-Q500L-DLSQQIRV   | 107   | >TPR-Q500L-DLSQLIRV    | 45   | 62    |
| >TPR-Q500L-DLSQQIRV   | 98    | >TPR-Q500L-DLSQLIRV    | 62   | 36    |
| >TPR-Q500L-DLSQQIRV   | 95    | >TPR-Q500L-DLSQLIRV    | 59   | 36    |
| >TPR-Q500L-DLSQQIRV   | 10    | >TPR-Q500L-DLSQLIRV    | 8    | 2     |
| >TPR-Q500L-DLSQQIRVLL | 158   | >TPR-Q500L-DLSQLIRVLL  | 284  | 126   |
| >TPR-Q500L-KDLSQQIRV  | 610   | >TPR-Q500L-KDLSQLIRV   | 114  | 496   |
| >TPR-Q500L-KDLSQQIRVL | 418   | >TPR-Q500L-KDLSQLIRVLL | 156  | 262   |
| >TPR-Q500L-KDLSQQIR   | 363   | >TPR-Q500L-KDLSQLIR    | 151  | 212   |
| >TPR-Q500L-KDLSQQIRV  | 61    | >TPR-Q500L-KDLSQLIRV   | 115  | 54    |
| >TPR-Q500L-KDLSQQIRVL | 389   | >TPR-Q500L-KDLSQLIRVL  | 749  | 360   |
| >TPR-Q500L-KDLSQQIRVL | 387   | >TPR-Q500L-KDLSQLIRVLL | 479  | 92    |
| >TPR-Q500L-QVKDLSQQIF | 773   | >TPR-Q500L-QVKDLSQLIR' | 227  | 546   |
| >TPR-Q500L-QVKDLSQQIF | 58    | >TPR-Q500L-QVKDLSQLIR' | 52   | 6     |
| >TPR-Q500L-QVKDLSQQI  | 184   | >TPR-Q500L-QVKDLSQLI   | 85   | 99    |
| >TPR-Q500L-QVKDLSQQIF | 900   | >TPR-Q500L-QVKDLSQLIR  | 485  | 415   |
| >TPR-Q500L-QVKDLSQQIF | 270   | >TPR-Q500L-QVKDLSQLIR' | 250  | 20    |
| >TPR-Q500L-QVKDLSQQIF | 226   | >TPR-Q500L-QVKDLSQLIR  | 124  | 102   |
| >TPR-Q500L-QVKDLSQQIF | 154   | >TPR-Q500L-QVKDLSQLIR  | 88   | 66    |
| >TPR-Q500L-QVKDLSQQIF | 209   | >TPR-Q500L-QVKDLSQLIR' | 211  | 2     |
| >TPR-Q500L-QVKDLSQQIF | 1084  | >TPR-Q500L-QVKDLSQLIR  | 378  | 706   |
| >TPR-Q500L-IQVKDLSQQ  | 17569 | >TPR-Q500L-IQVKDLSQL   | 462  | 17107 |
| >TPR-Q500L-IQVKDLSQQ  | 12157 | >TPR-Q500L-IQVKDLSQL   | 256  | 11901 |
| >TPR-Q500L-IQVKDLSQQ  | 3134  | >TPR-Q500L-IQVKDLSQL   | 37   | 3097  |
| >TPR-Q500L-IQVKDLSQQ  | 1486  | >TPR-Q500L-IQVKDLSQL   | 42   | 1444  |
| >TPR-Q500L-IQVKDLSQQI | 56    | >TPR-Q500L-IQVKDLSQLI  | 68   | 12    |
| >TPR-Q500L-IQVKDLSQQI | 208   | >TPR-Q500L-IQVKDLSQLIF | 259  | 51    |

|                         |       |                         |      |       |
|-------------------------|-------|-------------------------|------|-------|
| >TPR-S1759F SISQPILTV   | 169   | >TPR-S1759F FISQPILTV   | 23   | 146   |
| >TPR-S1759F SISQPILTV   | 635   | >TPR-S1759F FISQPILTV   | 32   | 603   |
| >TPR-S1759F SISQPILTV   | 39    | >TPR-S1759F FISQPILTV   | 7    | 32    |
| >TPR-S1759F SISQPILTV   | 69    | >TPR-S1759F FISQPILTV   | 10   | 59    |
| >TPR-S1759F SISQPILTV   | 5     | >TPR-S1759F FISQPILTV   | 2    | 3     |
| >TPR-S1759F SISQPILTV   | 229   | >TPR-S1759F FISQPILTV   | 30   | 199   |
| >TPR-S1759F SISQPILTV   | 14    | >TPR-S1759F FISQPILTV   | 9    | 5     |
| >TPR-S1759F SISQPILTV   | 585   | >TPR-S1759F FISQPILTV   | 13   | 572   |
| >TPR-S1759F SISQPILTV   | 3     | >TPR-S1759F FISQPILTV   | 2    | 1     |
| >TPR-S1759F SISQPILTVQC | 2923  | >TPR-S1759F FISQPILTVQC | 308  | 2615  |
| >TPR-S1759F SISQPILTV   | 267   | >TPR-S1759F FISQPILTV   | 65   | 202   |
| >TPR-S1759F SISQPILTV   | 81    | >TPR-S1759F FISQPILTV   | 35   | 46    |
| >TPR-S1759F VRSTSPNVQF  | 1536  | >TPR-S1759F VRSTSPNVQF  | 5    | 1531  |
| >TPR-S1759F QPSISQPIL   | 1743  | >TPR-S1759F QPFISQPIL   | 55   | 1688  |
| >TPR-S1759F QPSISQPI    | 366   | >TPR-S1759F QPFISQPI    | 956  | 590   |
| >TPR-S1759F QPSISQPIL   | 1296  | >TPR-S1759F QPFISQPIL   | 375  | 921   |
| >TPR-S1759F QPSISQPI    | 1825  | >TPR-S1759F QPFISQPI    | 325  | 1500  |
| >TPR-S1759F VQPSISQPI   | 346   | >TPR-S1759F VQPFIQPI    | 404  | 58    |
| >TPR-S1759F VQPSISQPI   | 44    | >TPR-S1759F VQPFIQPI    | 71   | 27    |
| >TPR-S1759F VQPSISQPI   | 521   | >TPR-S1759F VQPFIQPI    | 254  | 267   |
| >TPR-S1759F VQPSISQPI   | 95    | >TPR-S1759F VQPFIQPI    | 453  | 358   |
| >TPR-S1759F VQPSISQPIL  | 160   | >TPR-S1759F VQPFIQPIL   | 641  | 481   |
| >TPR-S1759F VQPSISQPIL  | 487   | >TPR-S1759F VQPFIQPIL   | 431  | 56    |
| >TPR-S1759F VQPSISQPIL  | 230   | >TPR-S1759F VQPFIQPIL   | 808  | 578   |
| >TPR-S1759F NVQPSISQPI  | 854   | >TPR-S1759F NVQPFISQPI  | 226  | 628   |
| >TPR-S1759F NVQPSISQPI  | 267   | >TPR-S1759F NVQPFISQPI  | 99   | 168   |
| >TPR-S1759F SPNVQPSI    | 518   | >TPR-S1759F SPNVQPFI    | 85   | 433   |
| >TPR-S1759F SPNVQPSI    | 212   | >TPR-S1759F SPNVQPFI    | 227  | 15    |
| >TPR-S1759F TSPNVQPSI   | 439   | >TPR-S1759F TSPNVQPFI   | 126  | 313   |
| >TPR-S1759F TSPNVQPS    | 21857 | >TPR-S1759F TSPNVQPF    | 354  | 21503 |
| >TPR-S1759F TSPNVQPS    | 20618 | >TPR-S1759F TSPNVQPF    | 72   | 20546 |
| >TPR-S1759F TSPNVQPSI   | 34    | >TPR-S1759F TSPNVQPFI   | 8    | 26    |
| >TPR-S1759F TSPNVQPSISQ | 831   | >TPR-S1759F TSPNVQPFIQ  | 185  | 646   |
| >TPR-S1759F TSPNVQPSI   | 60    | >TPR-S1759F TSPNVQPFI   | 62   | 2     |
| >TPR-S1759F STSPNVQPSI  | 395   | >TPR-S1759F STSPNVQPFI  | 204  | 191   |
| >TPR-S1759F STSPNVQPSI  | 824   | >TPR-S1759F STSPNVQPFI  | 178  | 646   |
| >TPR-S1759F STSPNVQPS   | 15641 | >TPR-S1759F STSPNVQPF   | 49   | 15592 |
| >TPR-S1759F STSPNVQPSI  | 201   | >TPR-S1759F STSPNVQPFI  | 63   | 138   |
| >TPR-S1759F STSPNVQPS   | 15754 | >TPR-S1759F STSPNVQPF   | 101  | 15653 |
| >TPR-S1759F STSPNVQPSI  | 220   | >TPR-S1759F STSPNVQPFI  | 2072 | 1852  |
| >TPR-S1759F STSPNVQPSI  | 195   | >TPR-S1759F STSPNVQPFI  | 121  | 74    |
| >TPR-S1759F STSPNVQPSI  | 181   | >TPR-S1759F STSPNVQPFI  | 112  | 69    |
| >TPR-S1759F STSPNVQPS   | 9446  | >TPR-S1759F STSPNVQPF   | 44   | 9402  |



|                        |       |                        |      |       |
|------------------------|-------|------------------------|------|-------|
| >TPR-S1759F STSPNVQPS  | 9914  | >TPR-S1759F STSPNVQPF  | 28   | 9886  |
| >TPR-S1759F STSPNVQPS  | 2320  | >TPR-S1759F STSPNVQPF  | 3    | 2317  |
| >TPR-S1759F STSPNVQPSI | 61    | >TPR-S1759F STSPNVQPFI | 104  | 43    |
| >TPR-S1759F STSPNVQPS  | 15894 | >TPR-S1759F STSPNVQPF  | 410  | 15484 |
| >TPR-S1759F STSPNVQPS  | 19159 | >TPR-S1759F STSPNVQPF  | 446  | 18713 |
| >TPR-S1759F STSPNVQPS  | 19512 | >TPR-S1759F STSPNVQPF  | 316  | 19196 |
| >TPR-S1759F STSPNVQPSI | 477   | >TPR-S1759F STSPNVQPFI | 443  | 34    |
| >TPR-S1759F STSPNVQPS  | 10141 | >TPR-S1759F STSPNVQPF  | 266  | 9875  |
| >TPR-S1759F STSPNVQPSI | 377   | >TPR-S1759F STSPNVQPFI | 87   | 290   |
| >TPR-S1759F STSPNVQPS  | 16746 | >TPR-S1759F STSPNVQPF  | 352  | 16394 |
| >TPR-S1759F STSPNVQPSI | 76    | >TPR-S1759F STSPNVQPFI | 51   | 25    |
| >TPR-S1759F RSTSPNVQPS | 176   | >TPR-S1759F RSTSPNVQPF | 61   | 115   |
| >TPR-S1759F RSTSPNVQPS | 10054 | >TPR-S1759F RSTSPNVQPF | 47   | 10007 |
| >TPR-S1759F RSTSPNVQPS | 84    | >TPR-S1759F RSTSPNVQPF | 790  | 706   |
| >TPR-S1759F RSTSPNVQPS | 14313 | >TPR-S1759F RSTSPNVQPF | 153  | 14160 |
| >TPR-S1759F RSTSPNVQPS | 3387  | >TPR-S1759F RSTSPNVQPF | 5    | 3382  |
| >TPR-S1759F RSTSPNVQPS | 334   | >TPR-S1759F RSTSPNVQPF | 841  | 507   |
| >TPR-S1759F RSTSPNVQPS | 1556  | >TPR-S1759F RSTSPNVQPF | 3    | 1553  |
| >TPR-S1759F RSTSPNVQPS | 37    | >TPR-S1759F RSTSPNVQPF | 66   | 29    |
| >TPR-S1759F RSTSPNVQPS | 15588 | >TPR-S1759F RSTSPNVQPF | 227  | 15361 |
| >TPR-S1759F RSTSPNVQPS | 14334 | >TPR-S1759F RSTSPNVQPF | 31   | 14303 |
| >TPR-S1759F RSTSPNVQPS | 53    | >TPR-S1759F RSTSPNVQPF | 51   | 2     |
| >TPR-S1759F RSTSPNVQPS | 7376  | >TPR-S1759F RSTSPNVQPF | 129  | 7247  |
| >TPR-S1759F RSTSPNVQPS | 155   | >TPR-S1759F RSTSPNVQPF | 43   | 112   |
| >TPR-S1759F RSTSPNVQPS | 11467 | >TPR-S1759F RSTSPNVQPF | 111  | 11356 |
| >TPR-S1759F RSTSPNVQPS | 140   | >TPR-S1759F RSTSPNVQPF | 125  | 15    |
| >TPR-S1759F RSTSPNVQPS | 11    | >TPR-S1759F RSTSPNVQPF | 12   | 1     |
| >TPR-S1825M SSSLPKRTR  | 333   | >TPR-S1825M NSSLPKRTR  | 2200 | 1867  |
| >TPR-S1825M TPSSSLPKR  | 316   | >TPR-S1825M TPNSSLPKR  | 555  | 239   |
| >TPR-S1825M ATPSSSLPK  | 113   | >TPR-S1825M ATPNSSLPK  | 116  | 3     |
| >TPR-S1825M ATPSSSLPK  | 19    | >TPR-S1825M ATPNSSLPK  | 17   | 2     |
| >TPR-S1825M ATPSSSLPKR | 55    | >TPR-S1825M ATPNSSLPKR | 69   | 14    |
| >TPR-S1825M ATPSSSLPK  | 15    | >TPR-S1825M ATPNSSLPK  | 14   | 1     |
| >TPR-S1825M ATPSSSLPKR | 395   | >TPR-S1825M ATPNSSLPKR | 370  | 25    |
| >TPR-S1825M ATPSSSLPKR | 26    | >TPR-S1825M ATPNSSLPKR | 51   | 25    |
| >TPR-S1825M ATPSSSLP   | 170   | >TPR-S1825M ATPNSSLP   | 217  | 47    |
| >TPR-S1825M ATPSSSLPK  | 182   | >TPR-S1825M ATPNSSLPK  | 845  | 663   |
| >TPR-S1825M ATPSSSLPKR | 132   | >TPR-S1825M ATPNSSLPKR | 497  | 365   |
| >TPR-S1825M ATPSSSLPK  | 173   | >TPR-S1825M ATPNSSLPK  | 139  | 34    |
| >TPR-S1825M ATPSSSLPKR | 430   | >TPR-S1825M ATPNSSLPKR | 359  | 71    |
| >TPR-S1825M SATPSSSLPK | 71    | >TPR-S1825M SATPNSSLPK | 62   | 9     |
| >TPR-S1825M SATPSSSLPK | 11    | >TPR-S1825M SATPNSSLPK | 10   | 1     |
| >TPR-S1825M SATPSSSLPK | 20    | >TPR-S1825M SATPNSSLPK | 27   | 7     |

|                        |       |                        |       |       |
|------------------------|-------|------------------------|-------|-------|
| >TPR-S1825\SATPSSSLPKF | 183   | >TPR-S1825\SATPNSSLPKI | 249   | 66    |
| >TPR-S1825\SATPSSSLPK  | 61    | >TPR-S1825\SATPNSSLPK  | 77    | 16    |
| >TPR-S1825\SATPSSSLPKF | 42    | >TPR-S1825\SATPNSSLPKI | 54    | 12    |
| >TPR-S1825\SATPSSSL    | 16    | >TPR-S1825\SATPNSSL    | 54    | 38    |
| >TPR-S1825\SATPSSSLPK  | 387   | >TPR-S1825\SATPNSSLPK  | 416   | 29    |
| >TPR-S1825\SATPSSSL    | 107   | >TPR-S1825\SATPNSSL    | 222   | 115   |
| >TPR-S1825\VSATPSSSLPK | 49    | >TPR-S1825\VSATPNSSLPI | 70    | 21    |
| >TPR-S1825\VSATPSSSLPK | 11    | >TPR-S1825\VSATPNSSLPI | 13    | 2     |
| >TPR-S1825\VSATPSSSLPK | 181   | >TPR-S1825\VSATPNSSLPI | 242   | 61    |
| >TPR-S1825\VSATPSSSLPK | 443   | >TPR-S1825\VSATPNSSLPI | 398   | 45    |
| >TPR-S1825\VSATPSSSL   | 482   | >TPR-S1825\VSATPNSSL   | 544   | 62    |
| >TPR-S1825\VSATPSSSL   | 85    | >TPR-S1825\VSATPNSSL   | 122   | 37    |
| >TPR-S1825\VSATPSSSL   | 7     | >TPR-S1825\VSATPNSSL   | 14    | 7     |
| >TPR-S1825\VSATPSSSL   | 57    | >TPR-S1825\VSATPNSSL   | 95    | 38    |
| >TPR-S1825\VSATPSSSL   | 8     | >TPR-S1825\VSATPNSSL   | 9     | 1     |
| >TPR-S1825\VSATPSSSL   | 65    | >TPR-S1825\VSATPNSSL   | 121   | 56    |
| >TPR-S1825\TVSATPSSSL  | 123   | >TPR-S1825\TVSATPNSSL  | 120   | 3     |
| >TPR-S1825\TVSATPSSSL  | 84    | >TPR-S1825\TVSATPNSSL  | 142   | 58    |
| >TPR-S1825\TVSATPSSSL  | 97    | >TPR-S1825\TVSATPNSSL  | 82    | 15    |
| >TPR-S1825\TVSATPSSSL  | 181   | >TPR-S1825\TVSATPNSSL  | 214   | 33    |
| >TPR-S1825\TVSATPSSSL  | 193   | >TPR-S1825\TVSATPNSSL  | 154   | 39    |
| >TPR-S1825\GTVSATPSSSI | 390   | >TPR-S1825\GTVSATPNSS  | 279   | 111   |
| >TPR-S1825\GTVSATPSSSI | 11    | >TPR-S1825\GTVSATPNSS  | 15    | 4     |
| >TPR-S1825\GTVSATPSSSI | 104   | >TPR-S1825\GTVSATPNSS  | 134   | 30    |
| >TPR-S1825\GTVSATPSSSI | 13    | >TPR-S1825\GTVSATPNSS  | 17    | 4     |
| >TPR-S1825\GTVSATPSSSI | 259   | >TPR-S1825\GTVSATPNSS  | 417   | 158   |
| >TRIM33-E81ESSLTPPL    | 13801 | >TRIM33-E81KSSLTPPL    | 69    | 13732 |
| >TRIM33-E81ESSLTPPLS   | 16485 | >TRIM33-E81KSSLTPPLS   | 333   | 16152 |
| >TRIM33-E81ESSLTPPL    | 7721  | >TRIM33-E81KSSLTPPL    | 176   | 7545  |
| >TRIM33-E81ESSLTPPL    | 257   | >TRIM33-E81KSSLTPPL    | 10396 | 10139 |
| >TRIM33-E81ESSLTPPL    | 4842  | >TRIM33-E81KSSLTPPL    | 487   | 4355  |
| >TRIM33-E81ESSLTPPL    | 205   | >TRIM33-E81KSSLTPPL    | 8     | 197   |
| >TRIM33-E81ESSLTPPL    | 12935 | >TRIM33-E81KSSLTPPL    | 84    | 12851 |
| >TRIM33-E81ESSLTPPLST  | 3175  | >TRIM33-E81KSSLTPPLST  | 251   | 2924  |
| >TRIM33-E81PESSLTPPL   | 5596  | >TRIM33-E81PKSSLTPPL   | 205   | 5391  |
| >TRIM33-E81PESSLTPPL   | 246   | >TRIM33-E81PKSSLTPPL   | 18571 | 18325 |
| >TRIM33-E81PESSLTPPL   | 129   | >TRIM33-E81PKSSLTPPL   | 17545 | 17416 |
| >TRIM33-E81RRSACMLSSP  | 15562 | >TRIM33-E81RRSACMLSSP  | 339   | 15223 |
| >TRIM33-E81RRSACMLSSP  | 2142  | >TRIM33-E81RRSACMLSSP  | 292   | 1850  |
| >TRIM33-E81RRSACMLSSP  | 2086  | >TRIM33-E81RRSACMLSSP  | 43    | 2043  |
| >TRIM33-E81RRSACMLSSP  | 559   | >TRIM33-E81RRSACMLSSP  | 325   | 234   |
| >TRIM33-E81RRSACMLSSP  | 2118  | >TRIM33-E81RRSACMLSSP  | 98    | 2020  |
| >TRIM33-E81SPESSLTPPL  | 102   | >TRIM33-E81SPKSSLTPPL  | 96    | 6     |

|                        |       |                        |      |       |
|------------------------|-------|------------------------|------|-------|
| >TRIM33-E81SPESSLTPPL  | 22    | >TRIM33-E81SPKSSLTPPL  | 15   | 7     |
| >TRIM33-E81SPESSLTPPL  | 81    | >TRIM33-E81SPKSSLTPPL  | 1909 | 1828  |
| >TRIM33-E81SSPESSLTPPL | 356   | >TRIM33-E81SSPKSSLTPPL | 285  | 71    |
| >TRIM33-E81SSPESSLTPPL | 139   | >TRIM33-E81SSPKSSLTPPL | 276  | 137   |
| >TRIM33-E81SSPESSLTP   | 492   | >TRIM33-E81SSPKSSLTP   | 590  | 98    |
| >TRIM33-E81SSPESSLTPP  | 497   | >TRIM33-E81SSPKSSLTPP  | 590  | 93    |
| >TRIM33-E81SSPESSLTPPL | 3     | >TRIM33-E81SSPKSSLTPPL | 3    | 0     |
| >TRIM33-E81LSSPESSL    | 265   | >TRIM33-E81LSSPKSSL    | 559  | 294   |
| >TRIM33-E81LSSPESSL    | 10    | >TRIM33-E81LSSPKSSL    | 8    | 2     |
| >TRIM33-E81LSSPESSLT   | 218   | >TRIM33-E81LSSPKSSLT   | 190  | 28    |
| >TRIM33-E81LSSPESSL    | 54    | >TRIM33-E81LSSPKSSL    | 51   | 3     |
| >TRIM33-E81MLSSPESSL   | 176   | >TRIM33-E81MLSSPKSSL   | 624  | 448   |
| >TRIM33-E81MLSSPESS    | 363   | >TRIM33-E81MLSSPKSS    | 2470 | 2107  |
| >TRIM33-E81MLSSPESSL   | 7     | >TRIM33-E81MLSSPKSSL   | 17   | 10    |
| >TRIM33-E81MLSSPESSLT  | 48    | >TRIM33-E81MLSSPKSSLT  | 106  | 58    |
| >TRIM33-E81MLSSPESSL   | 24    | >TRIM33-E81MLSSPKSSL   | 26   | 2     |
| >TRIM33-E81MLSSPESSLT  | 61    | >TRIM33-E81MLSSPKSSLT  | 85   | 24    |
| >TRIM33-E81MLSSPESSL   | 16    | >TRIM33-E81MLSSPKSSL   | 18   | 2     |
| >TRIM33-E81MLSSPESSL   | 136   | >TRIM33-E81MLSSPKSSL   | 337  | 201   |
| >TRIM33-E81MLSSPESSL   | 174   | >TRIM33-E81MLSSPKSSL   | 423  | 249   |
| >TRIM33-E81MLSSPESSL   | 93    | >TRIM33-E81MLSSPKSSL   | 289  | 196   |
| >TRIM33-E81MLSSPESSL   | 3     | >TRIM33-E81MLSSPKSSL   | 3    | 0     |
| >TRIM33-E81MLSSPESSLT  | 39    | >TRIM33-E81MLSSPKSSLT  | 41   | 2     |
| >TRIM33-E81MLSSPESSL   | 733   | >TRIM33-E81MLSSPKSSL   | 384  | 349   |
| >TRIM33-E81MLSSPESSL   | 59    | >TRIM33-E81MLSSPKSSL   | 91   | 32    |
| >TRIM33-E81MLSSPESSL   | 95    | >TRIM33-E81MLSSPKSSL   | 50   | 45    |
| >TRIM33-E81CMLSSPESSL  | 287   | >TRIM33-E81CMLSSPKSSL  | 756  | 469   |
| >TRIM33-E81CMLSSPESSL  | 18    | >TRIM33-E81CMLSSPKSSL  | 40   | 22    |
| >TRIM33-E81CMLSSPESSL  | 106   | >TRIM33-E81CMLSSPKSSL  | 99   | 7     |
| >TRIM33-E81CMLSSPESSL  | 17    | >TRIM33-E81CMLSSPKSSL  | 28   | 11    |
| >TRIM33-E81CMLSSPESSL  | 57    | >TRIM33-E81CMLSSPKSSL  | 137  | 80    |
| >TRIM33-E81CMLSSPESSL  | 279   | >TRIM33-E81CMLSSPKSSL  | 809  | 530   |
| >TRIM33-E81CMLSSPESSL  | 27    | >TRIM33-E81CMLSSPKSSL  | 69   | 42    |
| >TRIM33-E81CMLSSPESSL  | 38    | >TRIM33-E81CMLSSPKSSL  | 58   | 20    |
| >TRIM33-E81CMLSSPESSL  | 13    | >TRIM33-E81CMLSSPKSSL  | 13   | 0     |
| >TRIM33-E81ACMLSSPE    | 12122 | >TRIM33-E81ACMLSSPK    | 80   | 12042 |
| >TRIM33-E81ACMLSSPESS  | 568   | >TRIM33-E81ACMLSSPKSS  | 408  | 160   |
| >TRIM33-E81SACMLSSPE   | 17946 | >TRIM33-E81SACMLSSPK   | 14   | 17932 |
| >TRIM33-E81SACMLSSPE   | 12694 | >TRIM33-E81SACMLSSPK   | 67   | 12627 |
| >TRIM33-E81SACMLSSPE   | 13607 | >TRIM33-E81SACMLSSPK   | 128  | 13479 |
| >TRIM33-E81RSACMLSSPE  | 12894 | >TRIM33-E81RSACMLSSPK  | 17   | 12877 |
| >TRIM33-E81RSACMLSSPE  | 27736 | >TRIM33-E81RSACMLSSPK  | 13   | 27723 |
| >TRIM33-E81RSACMLSSPE  | 6968  | >TRIM33-E81RSACMLSSPK  | 11   | 6957  |

|                        |       |                        |      |       |
|------------------------|-------|------------------------|------|-------|
| >TRIM33-E81RSACMLSSPE  | 10738 | >TRIM33-E81RSACMLSSPK  | 240  | 10498 |
| >TRIM33-E81RSACMLSSPE  | 21364 | >TRIM33-E81RSACMLSSPK  | 51   | 21313 |
| >TRIM33-M5MNCGAFQAI    | 411   | >TRIM33-M5INCGAFQAH    | 429  | 18    |
| >TRIM33-M5NMNCGAFQ/    | 472   | >TRIM33-M5NINCGAFQA    | 6248 | 5776  |
| >TRIM33-M5NMNCGAFQ/    | 393   | >TRIM33-M5NINCGAFQA    | 3103 | 2710  |
| >TRIM33-M5NMNCGAFQ/    | 25    | >TRIM33-M5NINCGAFQA    | 458  | 433   |
| >TRIM33-M5NMNCGAFQ/    | 242   | >TRIM33-M5NINCGAFQA    | 678  | 436   |
| >TRIM33-M5NMNCGAFQ/    | 40    | >TRIM33-M5NINCGAFQA    | 2313 | 2273  |
| >TRIM33-M5NMNCGAFQ/    | 36    | >TRIM33-M5NINCGAFQA    | 3271 | 3235  |
| >TRIM33-M5NMNCGAFQ/    | 216   | >TRIM33-M5NINCGAFQA    | 6464 | 6248  |
| >TRIM33-M5NMNCGAFQ/    | 60    | >TRIM33-M5NINCGAFQA    | 1320 | 1260  |
| >TRIM33-M5NMNCGAFQ/    | 215   | >TRIM33-M5NINCGAFQA    | 6606 | 6391  |
| >TRIM33-M5NMNCGAFQ/    | 2240  | >TRIM33-M5NINCGAFQA    | 187  | 2053  |
| >TRIM33-M5NMNCGAFQ/    | 187   | >TRIM33-M5NINCGAFQA    | 79   | 108   |
| >TRIM33-M5ISVQTMQRG    | 293   | >TRIM33-M5ISVQTMQRG    | 1199 | 906   |
| >TRIM33-M5ISVQTMQRG    | 90    | >TRIM33-M5ISVQTMQRG    | 3887 | 3797  |
| >TRIM33-M5ISVQTMQRG    | 8     | >TRIM33-M5ISVQTMQRG    | 30   | 22    |
| >TRIM33-M5ISVQTMQRG    | 51    | >TRIM33-M5ISVQTMQRG    | 776  | 725   |
| >TRIM33-M5ISVQTMQRG    | 4563  | >TRIM33-M5ISVQTMQRG    | 138  | 4425  |
| >TRIM33-M5GNMNCGAF     | 290   | >TRIM33-M5GNINCGAF     | 525  | 235   |
| >TRIM33-M5RGNMNCGAI    | 155   | >TRIM33-M5RGNINCGAF    | 464  | 309   |
| >TRIM33-M5RGNMNCGAI    | 407   | >TRIM33-M5RGNINCGAF    | 1061 | 654   |
| >TRIM33-M5QRGNMNCG     | 350   | >TRIM33-M5QRGNINCGAI   | 397  | 47    |
| >TRIM33-M5MQRGNMNC     | 77    | >TRIM33-M5MQRGNINCC    | 85   | 8     |
| >TRIM33-M5MQRGNMNC     | 453   | >TRIM33-M5MQRGNINCC    | 443  | 10    |
| >TRIM33-M5MQRGNMNC     | 30    | >TRIM33-M5MQRGNINCC    | 30   | 0     |
| >TRIM33-M5MQRGNMNC     | 74    | >TRIM33-M5MQRGNINCC    | 82   | 8     |
| >TRIM33-M5MQRGNMNC     | 6     | >TRIM33-M5MQRGNINCC    | 5    | 1     |
| >TRIM33-M5TMQRGNMN     | 501   | >TRIM33-M5TMQRGNINCC   | 291  | 210   |
| >TRIM33-M5TMQRGNMN     | 324   | >TRIM33-M5TMQRGNINCC   | 267  | 57    |
| >TRIM33-M5TMQRGNMN     | 31    | >TRIM33-M5TMQRGNINCC   | 42   | 11    |
| >TRIM33-M5QTMQRGNM     | 63    | >TRIM33-M5QTMQRGNI     | 3473 | 3410  |
| >TRIM33-M5QTMQRGNM     | 29    | >TRIM33-M5QTMQRGNI     | 967  | 938   |
| >TRIM33-M5QTMQRGNM     | 2155  | >TRIM33-M5QTMQRGNI     | 116  | 2039  |
| >TRIM33-M5QTMQRGNM     | 887   | >TRIM33-M5QTMQRGNI     | 423  | 464   |
| >TRIM33-M5QTMQRGNM     | 29    | >TRIM33-M5QTMQRGNI     | 214  | 185   |
| >TRIM33-M5QTMQRGNM     | 1580  | >TRIM33-M5QTMQRGNI     | 47   | 1533  |
| >TRIM33-M5SVQTMQRGN    | 3667  | >TRIM33-M5SVQTMQRGNI   | 494  | 3173  |
| >TRIM33-M5SVQTMQRGN    | 107   | >TRIM33-M5SVQTMQRGNI   | 2918 | 2811  |
| >TRIM33-P6C PRHSGPQY   | 429   | >TRIM33-P6C SRHSGPQY   | 53   | 376   |
| >TRIM33-P6C PRHSGPQYSM | 607   | >TRIM33-P6C SRHSGPQYSM | 82   | 525   |
| >TRIM33-P6C PRHSGPQYSM | 428   | >TRIM33-P6C SRHSGPQYSM | 49   | 379   |
| >TRIM33-P6C PRHSGPQYSM | 7003  | >TRIM33-P6C SRHSGPQYSM | 333  | 6670  |

|                         |       |                         |       |       |
|-------------------------|-------|-------------------------|-------|-------|
| >TRIM33-P6C PRHSGPQYSM  | 2805  | >TRIM33-P6C SRHSGPQYSM  | 487   | 2318  |
| >TRIM33-P6C PRHSGPQYSM  | 4025  | >TRIM33-P6C SRHSGPQYSM  | 146   | 3879  |
| >TRIM33-P6C PRHSGPQYSM  | 10035 | >TRIM33-P6C SRHSGPQYSM  | 239   | 9796  |
| >TRIM33-P6C PRHSGPQYSM  | 2506  | >TRIM33-P6C SRHSGPQYSM  | 346   | 2160  |
| >TRIM33-P6C IPRHSGPQYS  | 441   | >TRIM33-P6C ISRHSGPQYSI | 33575 | 33134 |
| >TRIM33-P6C IPRHSGPQY   | 2784  | >TRIM33-P6C ISRHSGPQY   | 289   | 2495  |
| >TRIM33-P6C IPRHSGPQ    | 13772 | >TRIM33-P6C ISRHSGPQ    | 58    | 13714 |
| >TRIM33-P6C IPRHSGPQY   | 12324 | >TRIM33-P6C ISRHSGPQY   | 24    | 12300 |
| >TRIM33-P6C IPRHSGPQYS  | 13575 | >TRIM33-P6C ISRHSGPQYS  | 37    | 13538 |
| >TRIM33-P6C IPRHSGPQYS  | 12596 | >TRIM33-P6C ISRHSGPQYSI | 30    | 12566 |
| >TRIM33-P6C IPRHSGPQY   | 2052  | >TRIM33-P6C ISRHSGPQY   | 59    | 1993  |
| >TRIM33-P6C IPRHSGPQ    | 31    | >TRIM33-P6C ISRHSGPQ    | 12935 | 12904 |
| >TRIM33-P6C IPRHSGPQY   | 247   | >TRIM33-P6C ISRHSGPQY   | 15739 | 15492 |
| >TRIM33-P6C IPRHSGPQYS  | 8     | >TRIM33-P6C ISRHSGPQYSI | 637   | 629   |
| >TRIM33-P6C IPRHSGPQY   | 2430  | >TRIM33-P6C ISRHSGPQY   | 64    | 2366  |
| >TRIM33-P6C IPRHSGPQYS  | 8515  | >TRIM33-P6C ISRHSGPQYSI | 199   | 8316  |
| >TRIM33-P6C IPRHSGPQY   | 483   | >TRIM33-P6C ISRHSGPQY   | 1235  | 752   |
| >TRIM33-P6C IPRHSGPQY   | 58    | >TRIM33-P6C ISRHSGPQY   | 9     | 49    |
| >TRIM33-P6C IPRHSGPQYS  | 146   | >TRIM33-P6C ISRHSGPQYSI | 22    | 124   |
| >TRIM33-P6C IPRHSGPQ    | 21937 | >TRIM33-P6C ISRHSGPQ    | 313   | 21624 |
| >TRIM33-P6C IPRHSGPQY   | 164   | >TRIM33-P6C ISRHSGPQY   | 2     | 162   |
| >TRIM33-P6C IPRHSGPQYS  | 21673 | >TRIM33-P6C ISRHSGPQYS  | 381   | 21292 |
| >TRIM33-P6C IPRHSGPQYS  | 3532  | >TRIM33-P6C ISRHSGPQYSI | 3     | 3529  |
| >TRIM33-P6C IPRHSGPQY   | 77    | >TRIM33-P6C ISRHSGPQY   | 3423  | 3346  |
| >TRIM33-P6C IPRHSGPQYS  | 85    | >TRIM33-P6C ISRHSGPQYSI | 5289  | 5204  |
| >TRIM33-P6C IPRHSGPQY   | 17438 | >TRIM33-P6C ISRHSGPQY   | 170   | 17268 |
| >TRIM33-P6C IPRHSGPQYS  | 18197 | >TRIM33-P6C ISRHSGPQYSI | 195   | 18002 |
| >TRIM33-P6C IPRHSGPQY   | 233   | >TRIM33-P6C ISRHSGPQY   | 10    | 223   |
| >TRIM33-P6C IPRHSGPQYS  | 375   | >TRIM33-P6C ISRHSGPQYSI | 13    | 362   |
| >TRIM33-P6C GIPRHSGPQY  | 647   | >TRIM33-P6C GISRHSGPQY  | 158   | 489   |
| >TRIM33-P6C GIPRHSGPQY  | 9906  | >TRIM33-P6C GISRHSGPQY  | 427   | 9479  |
| >TRIM33-P6C IPGIPRHSGPC | 467   | >TRIM33-P6C IPGISRHSGPC | 742   | 275   |
| >TRIM33-P6C ARIPGIPR    | 163   | >TRIM33-P6C ARIPGISR    | 211   | 48    |
| >TRIM33-P6C ARIPGIPRH   | 584   | >TRIM33-P6C ARIPGISRH   | 486   | 98    |
| >TRIM33-P6C ARIPGIPRH   | 387   | >TRIM33-P6C ARIPGISRH   | 288   | 99    |
| >TRIM33-P6C AARIPGIPR   | 28    | >TRIM33-P6C AARIPGISR   | 53    | 25    |
| >TRIM33-P6C AARIPGIPRH  | 240   | >TRIM33-P6C AARIPGISRH  | 171   | 69    |
| >TRIM33-P6C AARIPGIPR   | 63    | >TRIM33-P6C AARIPGISR   | 267   | 204   |
| >TRIM33-P6C AARIPGIPRH  | 254   | >TRIM33-P6C AARIPGISRH  | 185   | 69    |
| >TRIM33-P6C NAARIPGIPR  | 10    | >TRIM33-P6C NAARIPGISR  | 16    | 6     |
| >TRIM33-P6C QNAARIPGIP  | 227   | >TRIM33-P6C QNAARIPGISI | 1120  | 893   |
| >TRIM33-P71 PSPGPSAL    | 9776  | >TRIM33-P71 SSPGPSAL    | 439   | 9337  |
| >TRIM33-P71 PSPGPSAL    | 75    | >TRIM33-P71 SSPGPSAL    | 20    | 55    |

|                       |       |                       |       |       |
|-----------------------|-------|-----------------------|-------|-------|
| >TRIM33-P71PSPGPSALS  | 92    | >TRIM33-P71SSPGPSALS  | 9     | 83    |
| >TRIM33-P71PSPGPSALSP | 2328  | >TRIM33-P71SSPGPSALSP | 167   | 2161  |
| >TRIM33-P71PSPGPSALSP | 1345  | >TRIM33-P71SSPGPSALSP | 89    | 1256  |
| >TRIM33-P71PSPGPSAL   | 5924  | >TRIM33-P71SSPGPSAL   | 368   | 5556  |
| >TRIM33-P71NPSPGPSA   | 392   | >TRIM33-P71NSSPGPSA   | 22905 | 22513 |
| >TRIM33-P71NPSPGPSAL  | 17    | >TRIM33-P71NSSPGPSAL  | 8022  | 8005  |
| >TRIM33-P71NPSPGPSAL  | 22178 | >TRIM33-P71NSSPGPSAL  | 65    | 22113 |
| >TRIM33-P71NPSPGPSAL  | 42    | >TRIM33-P71NSSPGPSAL  | 1477  | 1435  |
| >TRIM33-P71NPSPGPSAL  | 12    | >TRIM33-P71NSSPGPSAL  | 95    | 83    |
| >TRIM33-P71NPSPGPSA   | 414   | >TRIM33-P71NSSPGPSA   | 29932 | 29518 |
| >TRIM33-P71NPSPGPSAL  | 8214  | >TRIM33-P71NSSPGPSAL  | 328   | 7886  |
| >TRIM33-P71NPSPGPSAL  | 8771  | >TRIM33-P71NSSPGPSAL  | 454   | 8317  |
| >TRIM33-P71MNPSPGPSA  | 1105  | >TRIM33-P71MNSSPGPSA  | 143   | 962   |
| >TRIM33-P71MNPSPGPSA  | 2756  | >TRIM33-P71MNSSPGPSA  | 193   | 2563  |
| >TRIM33-P71TMNPSGPS/  | 1071  | >TRIM33-P71TMNSSGPS/  | 431   | 640   |
| >TRIM33-P71TMNPSGPS/  | 50    | >TRIM33-P71TMNSSGPS/  | 41    | 9     |
| >TRIM33-P71TMNPSGPS   | 398   | >TRIM33-P71TMNSSGPS   | 353   | 45    |
| >TRIM33-P71TMNPSGPS/  | 433   | >TRIM33-P71TMNSSGPS/  | 250   | 183   |
| >TRIM33-P71TMNPSGPS/  | 7     | >TRIM33-P71TMNSSGPS/  | 7     | 0     |
| >TRIM33-P71TMNPSGPS/  | 61    | >TRIM33-P71TMNSSGPS/  | 77    | 16    |
| >TRIM33-P71TMNPSGPS/  | 18    | >TRIM33-P71TMNSSGPS/  | 21    | 3     |
| >TRIM33-P71TMNPSGPS/  | 69    | >TRIM33-P71TMNSSGPS/  | 104   | 35    |
| >TRIM33-P71TMNPSGPS/  | 286   | >TRIM33-P71TMNSSGPS/  | 424   | 138   |
| >TRIM33-P71TMNPSGPS/  | 406   | >TRIM33-P71TMNSSGPS/  | 556   | 150   |
| >TRIM33-P71TMNPSGPS/  | 185   | >TRIM33-P71TMNSSGPS/  | 250   | 65    |
| >TRIM33-P71TMNPSGPS/  | 65    | >TRIM33-P71TMNSSGPS/  | 143   | 78    |
| >TRIM33-P71TMNPSGPS/  | 27    | >TRIM33-P71TMNSSGPS/  | 64    | 37    |
| >TRIM33-P71TMNPSGPS/  | 324   | >TRIM33-P71TMNSSGPS/  | 359   | 35    |
| >TRIM33-P71TMNPSGPS/  | 92    | >TRIM33-P71TMNSSGPS/  | 48    | 44    |
| >TRIM33-P71TMNPSGPS/  | 46    | >TRIM33-P71TMNSSGPS/  | 30    | 16    |
| >TRIM33-P71STMNPSGP!  | 190   | >TRIM33-P71STMNSSGP!  | 140   | 50    |
| >TRIM33-P71STMNPSGP!  | 190   | >TRIM33-P71STMNSSGP!  | 78    | 112   |
| >TRIM33-P71STMNPSGP!  | 317   | >TRIM33-P71STMNSSGP!  | 710   | 393   |
| >TRIM33-P71STMNPSGP!  | 22    | >TRIM33-P71STMNSSGP!  | 42    | 20    |
| >TRIM33-P71STMNPSGP!  | 482   | >TRIM33-P71STMNSSGP!  | 711   | 229   |
| >TRIM33-P71QPTSTMNPS  | 406   | >TRIM33-P71QPTSTMNSS  | 1844  | 1438  |
| >TRIM33-P8&DPNEDWCA\  | 7275  | >TRIM33-P8&DSNEDWCA\  | 332   | 6943  |
| >TRIM33-P8&DPNEDWCA\  | 334   | >TRIM33-P8&DSNEDWCA\  | 143   | 191   |
| >TRIM33-P8&DPNEDWCA\  | 213   | >TRIM33-P8&DSNEDWCA\  | 8953  | 8740  |
| >TRIM33-P8&DPNEDWCA\  | 466   | >TRIM33-P8&DSNEDWCA\  | 29129 | 28663 |
| >TRIM33-R2;RPVFCPVH   | 402   | >TRIM33-R2;HPVFCPVH   | 55    | 347   |
| >TRIM33-R2;RPVFCPVHK  | 144   | >TRIM33-R2;HPVFCPVHK  | 191   | 47    |
| >TRIM33-R2;VSESVGASGC | 397   | >TRIM33-R2;VSESVGASGC | 25278 | 24881 |

|                       |       |                       |       |       |
|-----------------------|-------|-----------------------|-------|-------|
| >TRIM33-R2;VSESVGASGC | 2665  | >TRIM33-R2;VSESVGASGC | 148   | 2517  |
| >TRIM33-R2;GQRPVFCPV  | 2872  | >TRIM33-R2;GQHPVFCPV  | 182   | 2690  |
| >TRIM33-R2;GQRPVFCPV  | 1770  | >TRIM33-R2;GQHPVFCPV  | 250   | 1520  |
| >TRIM33-R2;GQRPVFCPV  | 47    | >TRIM33-R2;GQHPVFCPV  | 22    | 25    |
| >TRIM33-R2;GQRPVFCPV  | 7     | >TRIM33-R2;GQHPVFCPV  | 4     | 3     |
| >TRIM33-R2;GQRPVFCPV  | 240   | >TRIM33-R2;GQHPVFCPV  | 27    | 213   |
| >TRIM33-R2;GQRPVFCPV  | 679   | >TRIM33-R2;GQHPVFCPV  | 66    | 613   |
| >TRIM33-R2;GQRPVFCPV  | 259   | >TRIM33-R2;GQHPVFCPV  | 32    | 227   |
| >TRIM33-R2;GQRPVFCPV  | 626   | >TRIM33-R2;GQHPVFCPV  | 176   | 450   |
| >TRIM33-R2;GQRPVFCPVI | 291   | >TRIM33-R2;GQHPVFCPVI | 324   | 33    |
| >TRIM33-R2;GQRPVFCPVI | 705   | >TRIM33-R2;GQHPVFCPVI | 68    | 637   |
| >TRIM33-R2;GQRPVFCPV  | 127   | >TRIM33-R2;GQHPVFCPV  | 1268  | 1141  |
| >TRIM33-R2;GQRPVFCPVI | 14    | >TRIM33-R2;GQHPVFCPVI | 115   | 101   |
| >TRIM33-R2;GQRPVFCPVI | 141   | >TRIM33-R2;GQHPVFCPVI | 217   | 76    |
| >TRIM33-R2;GQRPVFCPV  | 60    | >TRIM33-R2;GQHPVFCPV  | 84    | 24    |
| >TRIM33-R2;GQRPVFCPVI | 242   | >TRIM33-R2;GQHPVFCPVI | 421   | 179   |
| >TRIM33-R2;GQRPVFCPV  | 177   | >TRIM33-R2;GQHPVFCPV  | 278   | 101   |
| >TRIM33-R2;GQRPVFCPVI | 496   | >TRIM33-R2;GQHPVFCPVI | 768   | 272   |
| >TRIM33-R2;ASGQRPVF   | 289   | >TRIM33-R2;ASGQHPVF   | 133   | 156   |
| >TRIM33-R2;ASGQRPVF   | 278   | >TRIM33-R2;ASGQHPVF   | 134   | 144   |
| >TRIM33-R2;ASGQRPVF   | 19    | >TRIM33-R2;ASGQHPVF   | 14    | 5     |
| >TRIM33-R2;GASGQRPV   | 799   | >TRIM33-R2;GASGQHPV   | 39    | 760   |
| >TRIM33-R2;GASGQRPVF  | 776   | >TRIM33-R2;GASGQHPVF  | 339   | 437   |
| >TRIM33-R2;GASGQRPVF  | 274   | >TRIM33-R2;GASGQHPVF  | 45    | 229   |
| >TRIM33-R2;GASGQRPVF  | 820   | >TRIM33-R2;GASGQHPVF  | 399   | 421   |
| >TRIM33-R2;VGASGQRPV  | 10793 | >TRIM33-R2;VGASGQHPV  | 183   | 10610 |
| >TRIM33-R2;VGASGQRPV  | 657   | >TRIM33-R2;VGASGQHPV  | 374   | 283   |
| >TRIM33-R2;VGASGQRPV  | 633   | >TRIM33-R2;VGASGQHPV  | 477   | 156   |
| >TRIM33-R2;VGASGQRPV  | 2247  | >TRIM33-R2;VGASGQHPV  | 418   | 1829  |
| >TRIM33-R2;SVGASGQRP' | 538   | >TRIM33-R2;SVGASGQHP' | 391   | 147   |
| >TRIM33-R2;SVGASGQRP' | 223   | >TRIM33-R2;SVGASGQHP' | 53    | 170   |
| >TRIM33-R2;SVGASGQRP' | 1320  | >TRIM33-R2;SVGASGQHP' | 150   | 1170  |
| >TRIM33-R2;SVGASGQRP' | 419   | >TRIM33-R2;SVGASGQHP' | 34    | 385   |
| >TRIM33-R2;SVGASGQRP' | 80    | >TRIM33-R2;SVGASGQHP' | 8     | 72    |
| >TRIM33-R2;SVGASGQR   | 462   | >TRIM33-R2;SVGASGQH   | 6417  | 5955  |
| >TRIM33-R2;SVGASGQR   | 270   | >TRIM33-R2;SVGASGQH   | 18831 | 18561 |
| >TRIM33-R2;SVGASGQRP' | 1258  | >TRIM33-R2;SVGASGQHP' | 178   | 1080  |
| >TRIM33-R2;SVGASGQRP' | 390   | >TRIM33-R2;SVGASGQHP' | 37    | 353   |
| >TRIM33-R2;SVGASGQRP' | 106   | >TRIM33-R2;SVGASGQHP' | 65    | 41    |
| >TRIM33-R2;ESVGASGQR  | 3818  | >TRIM33-R2;ESVGASGQH  | 219   | 3599  |
| >TRIM33-R2;ESVGASGQRI | 295   | >TRIM33-R2;ESVGASGQHI | 107   | 188   |
| >TRIM33-R2;ESVGASGQR  | 9     | >TRIM33-R2;ESVGASGQH  | 3349  | 3340  |
| >TRIM33-R2;ESVGASGQRI | 15    | >TRIM33-R2;ESVGASGQHI | 6     | 9     |

|                         |       |                         |       |       |
|-------------------------|-------|-------------------------|-------|-------|
| >TRIM33-R27:ESVGASGQRI  | 59    | >TRIM33-R27:ESVGASGQHI  | 10    | 49    |
| >TRIM33-R6C:RHSGPQYSM   | 322   | >TRIM33-R6C:SHSGPQYSM   | 1955  | 1633  |
| >TRIM33-R6C:RHSGPQYSM   | 247   | >TRIM33-R6C:SHSGPQYSM   | 1424  | 1177  |
| >TRIM33-R6C:RHSGPQYSM   | 186   | >TRIM33-R6C:SHSGPQYSM   | 90    | 96    |
| >TRIM33-R6C:RHSGPQYSM   | 892   | >TRIM33-R6C:SHSGPQYSM   | 417   | 475   |
| >TRIM33-R6C:PRHSGPQY    | 2687  | >TRIM33-R6C:PSHSGPQY    | 303   | 2384  |
| >TRIM33-R6C:PRHSGPQY    | 2758  | >TRIM33-R6C:PSHSGPQY    | 271   | 2487  |
| >TRIM33-R6C:PRHSGPQY    | 429   | >TRIM33-R6C:PSHSGPQY    | 904   | 475   |
| >TRIM33-R6C:PRHSGPQYSM  | 428   | >TRIM33-R6C:PSHSGPQYSM  | 1084  | 656   |
| >TRIM33-R6C:PRHSGPQY    | 25291 | >TRIM33-R6C:PSHSGPQY    | 222   | 25069 |
| >TRIM33-R6C:PRHSGPQYSM  | 12827 | >TRIM33-R6C:PSHSGPQYSM  | 351   | 12476 |
| >TRIM33-R6C:PRHSGPQYSM  | 10035 | >TRIM33-R6C:PSHSGPQYSM  | 403   | 9632  |
| >TRIM33-R6C:QNAARIPGIP  | 227   | >TRIM33-R6C:QNAARIPGIP  | 32009 | 31782 |
| >TRIM33-R6C:IPRHSGPQYS  | 441   | >TRIM33-R6C:IPSHSGPQYSI | 51    | 390   |
| >TRIM33-R6C:IPRHSGPQ    | 31    | >TRIM33-R6C:IPSHSGPQ    | 563   | 532   |
| >TRIM33-R6C:IPRHSGPQY   | 247   | >TRIM33-R6C:IPSHSGPQY   | 3755  | 3508  |
| >TRIM33-R6C:IPRHSGPQYS  | 8     | >TRIM33-R6C:IPSHSGPQYSI | 15    | 7     |
| >TRIM33-R6C:IPRHSGPQY   | 483   | >TRIM33-R6C:IPSHSGPQY   | 1702  | 1219  |
| >TRIM33-R6C:IPRHSGPQY   | 58    | >TRIM33-R6C:IPSHSGPQY   | 174   | 116   |
| >TRIM33-R6C:IPRHSGPQYS  | 146   | >TRIM33-R6C:IPSHSGPQYSI | 389   | 243   |
| >TRIM33-R6C:IPRHSGPQY   | 164   | >TRIM33-R6C:IPSHSGPQY   | 683   | 519   |
| >TRIM33-R6C:IPRHSGPQ    | 2416  | >TRIM33-R6C:IPSHSGPQ    | 462   | 1954  |
| >TRIM33-R6C:IPRHSGPQY   | 77    | >TRIM33-R6C:IPSHSGPQY   | 25    | 52    |
| >TRIM33-R6C:IPRHSGPQYS  | 85    | >TRIM33-R6C:IPSHSGPQYSI | 26    | 59    |
| >TRIM33-R6C:IPRHSGPQY   | 1288  | >TRIM33-R6C:IPSHSGPQY   | 88    | 1200  |
| >TRIM33-R6C:IPRHSGPQYS  | 1197  | >TRIM33-R6C:IPSHSGPQYSI | 120   | 1077  |
| >TRIM33-R6C:IPRHSGPQY   | 233   | >TRIM33-R6C:IPSHSGPQY   | 530   | 297   |
| >TRIM33-R6C:IPRHSGPQYS  | 375   | >TRIM33-R6C:IPSHSGPQYSI | 1073  | 698   |
| >TRIM33-R6C:IPRHSGPQY   | 597   | >TRIM33-R6C:IPSHSGPQY   | 47    | 550   |
| >TRIM33-R6C:IPRHSGPQYS  | 3343  | >TRIM33-R6C:IPSHSGPQYSI | 282   | 3061  |
| >TRIM33-R6C:IPRHSGPQY   | 2466  | >TRIM33-R6C:IPSHSGPQY   | 301   | 2165  |
| >TRIM33-R6C:GIPRHSGPQY  | 647   | >TRIM33-R6C:GIPSHSGPQY  | 428   | 219   |
| >TRIM33-R6C:IPGIPRHSGPC | 467   | >TRIM33-R6C:IPGIPSHSGPC | 1125  | 658   |
| >TRIM33-R6C:ARIPGIPR    | 163   | >TRIM33-R6C:ARIPGIPS    | 1548  | 1385  |
| >TRIM33-R6C:ARIPGIPRH   | 387   | >TRIM33-R6C:ARIPGIPSH   | 464   | 77    |
| >TRIM33-R6C:AARIPGIPR   | 28    | >TRIM33-R6C:AARIPGIPS   | 78    | 50    |
| >TRIM33-R6C:AARIPGIPRH  | 762   | >TRIM33-R6C:AARIPGIPSH  | 279   | 483   |
| >TRIM33-R6C:AARIPGIPRH  | 240   | >TRIM33-R6C:AARIPGIPSH  | 239   | 1     |
| >TRIM33-R6C:AARIPGIPR   | 63    | >TRIM33-R6C:AARIPGIPS   | 17710 | 17647 |
| >TRIM33-R6C:AARIPGIPRH  | 254   | >TRIM33-R6C:AARIPGIPSH  | 367   | 113   |
| >TRIM33-R6C:NAARIPGIPR  | 10    | >TRIM33-R6C:NAARIPGIPS  | 24666 | 24656 |
| >TRIM33-V17:VCQQSLQSRF  | 1815  | >TRIM33-V17:MCQQSLQSR   | 454   | 1361  |
| >TRIM33-V17:AVCQQSLQSI  | 213   | >TRIM33-V17:AMCQQSLQS   | 295   | 82    |



|                        |      |                       |      |      |
|------------------------|------|-----------------------|------|------|
| >TRIM33-V1;AVCQQSLQSI  | 404  | >TRIM33-V1;AMCQQSLQS  | 990  | 586  |
| >TRIM33-V1;AVCQQSLQSI  | 76   | >TRIM33-V1;AMCQQSLQS  | 40   | 36   |
| >TRIM33-V1;AVCQQSLQSI  | 319  | >TRIM33-V1;AMCQQSLQS  | 92   | 227  |
| >TRIM33-V1;AVCQQSLQSI  | 377  | >TRIM33-V1;AMCQQSLQS  | 2245 | 1868 |
| >TRIM33-V1;AVCQQSLQSI  | 2053 | >TRIM33-V1;AMCQQSLQS  | 338  | 1715 |
| >TRIM33-V1;AVCQQSLQSI  | 2278 | >TRIM33-V1;AMCQQSLQS  | 458  | 1820 |
| >TRIM33-V1;PPASLLDTCA' | 592  | >TRIM33-V1;PPASLLDTCA | 127  | 465  |
| >TRIM33-V1;PPASLLDTCA' | 2675 | >TRIM33-V1;PPASLLDTCA | 40   | 2635 |
| >TRIM33-V1;PPASLLDTCA' | 2279 | >TRIM33-V1;PPASLLDTCA | 467  | 1812 |
| >TRIM33-V1;CAVCQQSLQ:  | 1259 | >TRIM33-V1;CAMCQQSLC  | 350  | 909  |
| >TRIM33-V1;CAVCQQSLQ:  | 1858 | >TRIM33-V1;CAMCQQSLC  | 458  | 1400 |
| >TRIM33-V1;CAVCQQSLQ:  | 140  | >TRIM33-V1;CAMCQQSLC  | 91   | 49   |
| >TRIM33-V1;CAVCQQSL    | 1103 | >TRIM33-V1;CAMCQQSL   | 254  | 849  |
| >TRIM33-V1;DTCAVCQQSI  | 307  | >TRIM33-V1;DTCAMCQQS  | 595  | 288  |
| >TRIM33-V1;DTCAVCQQSI  | 126  | >TRIM33-V1;DTCAMCQQS  | 88   | 38   |
| >TRIM33-V1;LLDTCAVC    | 685  | >TRIM33-V1;LLDTCAMC   | 338  | 347  |
| >TRIM33-V1;LLDTCAVC    | 125  | >TRIM33-V1;LLDTCAMC   | 82   | 43   |
| >TRIM33-V1;LLDTCAVCQC  | 74   | >TRIM33-V1;LLDTCAMCQ  | 116  | 42   |
| >TRIM33-V1;SLLDTCAV    | 9    | >TRIM33-V1;SLLDTCAM   | 46   | 37   |
| >TRIM33-V1;SLLDTCAV    | 20   | >TRIM33-V1;SLLDTCAM   | 251  | 231  |
| >TRIM33-V1;SLLDTCAV    | 9    | >TRIM33-V1;SLLDTCAM   | 498  | 489  |
| >TRIM33-V1;SLLDTCAV    | 7    | >TRIM33-V1;SLLDTCAM   | 79   | 72   |
| >TRIM33-V1;SLLDTCAV    | 1    | >TRIM33-V1;SLLDTCAM   | 7    | 6    |
| >TRIM33-V1;SLLDTCAVC   | 21   | >TRIM33-V1;SLLDTCAMC  | 10   | 11   |
| >TRIM33-V1;SLLDTCAVCQ  | 73   | >TRIM33-V1;SLLDTCAMCC | 131  | 58   |
| >TRIM33-V1;SLLDTCAV    | 3    | >TRIM33-V1;SLLDTCAM   | 14   | 11   |
| >TRIM33-V1;SLLDTCAVC   | 106  | >TRIM33-V1;SLLDTCAMC  | 187  | 81   |
| >TRIM33-V1;SLLDTCAV    | 4    | >TRIM33-V1;SLLDTCAM   | 16   | 12   |
| >TRIM33-V1;SLLDTCAVC   | 170  | >TRIM33-V1;SLLDTCAMC  | 77   | 93   |
| >TRIM33-V1;SLLDTCAVCQ  | 202  | >TRIM33-V1;SLLDTCAMCC | 204  | 2    |
| >TRIM33-V1;SLLDTCAVCQ  | 46   | >TRIM33-V1;SLLDTCAMCC | 60   | 14   |
| >TRIM33-V1;SLLDTCAV    | 2    | >TRIM33-V1;SLLDTCAM   | 19   | 17   |
| >TRIM33-V1;SLLDTCAVC   | 113  | >TRIM33-V1;SLLDTCAMC  | 73   | 40   |
| >TRIM33-V1;SLLDTCAV    | 1    | >TRIM33-V1;SLLDTCAM   | 6    | 5    |
| >TRIM33-V1;SLLDTCAVC   | 7    | >TRIM33-V1;SLLDTCAMC  | 6    | 1    |
| >TRIM33-V1;SLLDTCAVCQ  | 56   | >TRIM33-V1;SLLDTCAMCC | 47   | 9    |
| >TRIM33-V1;SLLDTCAVCQ  | 8    | >TRIM33-V1;SLLDTCAMCC | 9    | 1    |
| >TRIM33-V1;SLLDTCAV    | 20   | >TRIM33-V1;SLLDTCAM   | 321  | 301  |
| >TRIM33-V1;SLLDTCAV    | 3245 | >TRIM33-V1;SLLDTCAM   | 232  | 3013 |
| >TRIM33-V1;SLLDTCAV    | 1625 | >TRIM33-V1;SLLDTCAM   | 419  | 1206 |
| >TRIM33-V1;ASLLDTCAV   | 2425 | >TRIM33-V1;ASLLDTCAM  | 129  | 2296 |
| >TRIM33-V1;ASLLDTCAV   | 322  | >TRIM33-V1;ASLLDTCAM  | 8163 | 7841 |
| >TRIM33-V1;ASLLDTCAV   | 1201 | >TRIM33-V1;ASLLDTCAM  | 280  | 921  |

|                        |       |                        |       |       |
|------------------------|-------|------------------------|-------|-------|
| >TRIM33-V1:ASLLDTCAV   | 1089  | >TRIM33-V1:ASLLDTCAM   | 25    | 1064  |
| >TRIP11-E16:ELEKQKQL   | 387   | >TRIP11-E16:KLEKQKQL   | 63    | 324   |
| >TRIP11-E16:ELEKQKQLI  | 1033  | >TRIP11-E16:KLEKQKQLI  | 164   | 869   |
| >TRIP11-E16:ELEKQKQLIA | 2511  | >TRIP11-E16:KLEKQKQLIA | 459   | 2052  |
| >TRIP11-E16:AELEKQKQL  | 107   | >TRIP11-E16:AKLEKQKQL  | 10285 | 10178 |
| >TRIP11-E16:AELEKQKQLI | 10    | >TRIP11-E16:AKLEKQKQLI | 793   | 783   |
| >TRIP11-E16:AELEKQKQL  | 9164  | >TRIP11-E16:AKLEKQKQL  | 245   | 8919  |
| >TRIP11-E16:AELEKQKQLI | 10624 | >TRIP11-E16:AKLEKQKQLI | 490   | 10134 |
| >TRIP11-E16:AELEKQKQL  | 66    | >TRIP11-E16:AKLEKQKQL  | 25284 | 25218 |
| >TRIP11-E16:AELEKQKQLI | 108   | >TRIP11-E16:AKLEKQKQLI | 26214 | 26106 |
| >TRIP11-E16:AELEKQKQL  | 226   | >TRIP11-E16:AKLEKQKQL  | 17475 | 17249 |
| >TRIP11-E16:AELEKQKQL  | 316   | >TRIP11-E16:AKLEKQKQL  | 26985 | 26669 |
| >TRIP11-E16:AELEKQKQLI | 17    | >TRIP11-E16:AKLEKQKQLI | 12755 | 12738 |
| >TRIP11-E16:AELEKQKQL  | 40    | >TRIP11-E16:AKLEKQKQL  | 14097 | 14057 |
| >TRIP11-E16:AELEKQKQLI | 6     | >TRIP11-E16:AKLEKQKQLI | 1465  | 1459  |
| >TRIP11-E16:SAELEKQK   | 10395 | >TRIP11-E16:SAKLEKQK   | 135   | 10260 |
| >TRIP11-E16:YSAELEKQK  | 46    | >TRIP11-E16:YSAKLEKQK  | 64    | 18    |
| >TRIP11-E16:YSAELEKQKQ | 15    | >TRIP11-E16:YSAKLEKQKQ | 20    | 5     |
| >TRIP11-E16:YSAELEKQKQ | 739   | >TRIP11-E16:YSAKLEKQKQ | 224   | 515   |
| >TRIP11-E16:MYSAELEK   | 379   | >TRIP11-E16:MYSAKLEK   | 363   | 16    |
| >TRIP11-E16:MYSAELEK   | 161   | >TRIP11-E16:MYSAKLEK   | 60    | 101   |
| >TRIP11-E16:MYSAELEK   | 3174  | >TRIP11-E16:MYSAKLEK   | 366   | 2808  |
| >TRIP11-E16:MYSAELEK   | 346   | >TRIP11-E16:MYSAKLEK   | 491   | 145   |
| >TRIP11-E16:AMYSAELEKC | 413   | >TRIP11-E16:AMYSAKLEKC | 437   | 24    |
| >TRIP11-E16:AMYSAELEKC | 86    | >TRIP11-E16:AMYSAKLEKC | 88    | 2     |
| >TRIP11-E16:AMYSAELEK  | 33    | >TRIP11-E16:AMYSAKLEK  | 30    | 3     |
| >TRIP11-E16:AMYSAELEKC | 51    | >TRIP11-E16:AMYSAKLEKC | 46    | 5     |
| >TRIP11-E16:AMYSAELEK  | 12    | >TRIP11-E16:AMYSAKLEK  | 10    | 2     |
| >TRIP11-E16:AMYSAELEKC | 32    | >TRIP11-E16:AMYSAKLEKC | 31    | 1     |
| >TRIP11-E16:AMYSAELEK  | 150   | >TRIP11-E16:AMYSAKLEK  | 62    | 88    |
| >TRIP11-E16:AMYSAELEKC | 758   | >TRIP11-E16:AMYSAKLEKC | 442   | 316   |
| >TRIP11-E16:AMYSAELEK  | 1570  | >TRIP11-E16:AMYSAKLEK  | 193   | 1377  |
| >TRIP11-E16:AMYSAELEK  | 151   | >TRIP11-E16:AMYSAKLEK  | 167   | 16    |
| >TRIP11-E16:AMYSAELEKC | 462   | >TRIP11-E16:AMYSAKLEKC | 457   | 5     |
| >TRIP11-E16:KAMYSael   | 381   | >TRIP11-E16:KAMYSaKl   | 1813  | 1432  |
| >TRIP11-E16:KAMYSael   | 86    | >TRIP11-E16:KAMYSaKl   | 386   | 300   |
| >TRIP11-E16:KAMYSael   | 130   | >TRIP11-E16:KAMYSaKl   | 860   | 730   |
| >TRIP11-E16:KAMYSaeLEK | 28    | >TRIP11-E16:KAMYSaKLEK | 18    | 10    |
| >TRIP11-E16:KAMYSaeLEK | 13    | >TRIP11-E16:KAMYSaKLEK | 13    | 0     |
| >TRIP11-E16:KAMYSaeLEK | 32    | >TRIP11-E16:KAMYSaKLEK | 13    | 19    |
| >TRIP11-E16:KAMYSaeLEK | 935   | >TRIP11-E16:KAMYSaKLEK | 326   | 609   |
| >TRIP11-E16:KAMYSael   | 251   | >TRIP11-E16:KAMYSaKl   | 361   | 110   |
| >TRIP11-E16:KAMYSaeLEK | 429   | >TRIP11-E16:KAMYSaKLEK | 483   | 54    |

|                        |       |                        |       |       |
|------------------------|-------|------------------------|-------|-------|
| >TRIP11-E16:KAMYSAEL   | 94    | >TRIP11-E16:KAMYSAKL   | 181   | 87    |
| >TRIP11-E16:KAMYSAEL   | 6     | >TRIP11-E16:KAMYSAKL   | 5     | 1     |
| >TRIP11-E16:KAMYSAEL   | 59    | >TRIP11-E16:KAMYSAKL   | 113   | 54    |
| >TRIP11-E16:KAMYSAELEK | 836   | >TRIP11-E16:KAMYSAKLEK | 453   | 383   |
| >TRIP11-E16:EKAMYSAE   | 18566 | >TRIP11-E16:EKAMYSAK   | 248   | 18318 |
| >TRIP11-E16:EKAMYSAELE | 357   | >TRIP11-E16:EKAMYSAKLE | 437   | 80    |
| >TRIP11-E16:EKAMYSAEL  | 115   | >TRIP11-E16:EKAMYSAKL  | 320   | 205   |
| >TRIP11-E16:EKAMYSAEL  | 163   | >TRIP11-E16:EKAMYSAKL  | 656   | 493   |
| >TRIP11-E16:EEKAMYSAEL | 205   | >TRIP11-E16:EEKAMYSAKL | 698   | 493   |
| >TRIP11-E16:EEKAMYSAEL | 107   | >TRIP11-E16:EEKAMYSAKL | 167   | 60    |
| >TRIP11-E16:EEKAMYSAEL | 97    | >TRIP11-E16:EEKAMYSAKL | 221   | 124   |
| >TRIP11-E16:EEKAMYSAEL | 178   | >TRIP11-E16:EEKAMYSAKL | 438   | 260   |
| >TRIP11-E16:EEKAMYSAE  | 378   | >TRIP11-E16:EEKAMYSAK  | 256   | 122   |
| >TRIP11-E16:QEEKAMYSAI | 60    | >TRIP11-E16:QEEKAMYSAI | 185   | 125   |
| >TRIP11-E16:QEEKAMYSAI | 35    | >TRIP11-E16:QEEKAMYSAI | 46    | 11    |
| >TRIP11-E16:QEEKAMYSAI | 484   | >TRIP11-E16:QEEKAMYSAI | 387   | 97    |
| >TRIP11-E16:QEEKAMYSAI | 216   | >TRIP11-E16:QEEKAMYSAI | 190   | 26    |
| >TRIP11-E16:QEEKAMYSAI | 233   | >TRIP11-E16:QEEKAMYSAI | 113   | 120   |
| >TRIP11-E34:EECENLKL   | 292   | >TRIP11-E34:KECENLKL   | 708   | 416   |
| >TRIP11-E34:EECENLKL   | 204   | >TRIP11-E34:KECENLKL   | 41    | 163   |
| >TRIP11-E34:EECENLKL   | 1600  | >TRIP11-E34:KECENLKL   | 243   | 1357  |
| >TRIP11-E34:EECENLKL   | 474   | >TRIP11-E34:KECENLKL   | 1299  | 825   |
| >TRIP11-E34:MEECENLKL  | 33    | >TRIP11-E34:MKECENLKL  | 15176 | 15143 |
| >TRIP11-E34:MEECENLKL  | 494   | >TRIP11-E34:MKECENLKL  | 25395 | 24901 |
| >TRIP11-E34:QLNVEKRQIM | 18706 | >TRIP11-E34:QLNVEKRQIM | 239   | 18467 |
| >TRIP11-E34:IMEECENL   | 455   | >TRIP11-E34:IMKECENL   | 634   | 179   |
| >TRIP11-E34:IMEECENLKL | 435   | >TRIP11-E34:IMKECENLKL | 771   | 336   |
| >TRIP11-E34:IMEECENL   | 21    | >TRIP11-E34:IMKECENL   | 24    | 3     |
| >TRIP11-E34:IMEECENLKL | 53    | >TRIP11-E34:IMKECENLKL | 33    | 20    |
| >TRIP11-E34:IMEECENL   | 1801  | >TRIP11-E34:IMKECENL   | 52    | 1749  |
| >TRIP11-E34:IMEECENLKL | 934   | >TRIP11-E34:IMKECENLKL | 205   | 729   |
| >TRIP11-E34:IMEECENL   | 219   | >TRIP11-E34:IMKECENL   | 422   | 203   |
| >TRIP11-E34:IMEECENLKL | 296   | >TRIP11-E34:IMKECENLKL | 609   | 313   |
| >TRIP11-E34:IMEECENL   | 189   | >TRIP11-E34:IMKECENL   | 415   | 226   |
| >TRIP11-E34:IMEECENLKL | 167   | >TRIP11-E34:IMKECENLKL | 398   | 231   |
| >TRIP11-E34:IMEECENL   | 22    | >TRIP11-E34:IMKECENL   | 25    | 3     |
| >TRIP11-E34:IMEECENLKL | 30    | >TRIP11-E34:IMKECENLKL | 35    | 5     |
| >TRIP11-E34:IMEECENLK  | 874   | >TRIP11-E34:IMKECENLK  | 164   | 710   |
| >TRIP11-E34:IMEECENLK  | 467   | >TRIP11-E34:IMKECENLK  | 402   | 65    |
| >TRIP11-E34:IMEECENLK  | 12744 | >TRIP11-E34:IMKECENLK  | 371   | 12373 |
| >TRIP11-E34:IMEECENLK  | 5208  | >TRIP11-E34:IMKECENLK  | 443   | 4765  |
| >TRIP11-E34:IMEECENL   | 2289  | >TRIP11-E34:IMKECENL   | 149   | 2140  |
| >TRIP11-E34:IMEECENLKL | 2627  | >TRIP11-E34:IMKECENLKL | 169   | 2458  |

|                        |       |                        |       |       |
|------------------------|-------|------------------------|-------|-------|
| >TRIP11-E34:QIMEECENL  | 19    | >TRIP11-E34:QIMKECENL  | 70    | 51    |
| >TRIP11-E34:QIMEECENLK | 83    | >TRIP11-E34:QIMKECENLK | 298   | 215   |
| >TRIP11-E34:QIMEECENL  | 217   | >TRIP11-E34:QIMKECENL  | 1335  | 1118  |
| >TRIP11-E34:QIMEECENLK | 344   | >TRIP11-E34:QIMKECENLK | 2039  | 1695  |
| >TRIP11-E34:QIMEECENL  | 304   | >TRIP11-E34:QIMKECENL  | 4895  | 4591  |
| >TRIP11-E34:QIMEECENLK | 201   | >TRIP11-E34:QIMKECENLK | 248   | 47    |
| >TRIP11-E34:QIMEECENLK | 335   | >TRIP11-E34:QIMKECENLK | 540   | 205   |
| >TRIP11-E34:QIMEECENL  | 336   | >TRIP11-E34:QIMKECENL  | 3266  | 2930  |
| >TRIP11-E34:QIMEECENLK | 385   | >TRIP11-E34:QIMKECENLK | 2432  | 2047  |
| >TRIP11-E34:RQIMEECENL | 375   | >TRIP11-E34:RQIMKECENL | 814   | 439   |
| >TRIP11-E34:RQIMEECENL | 109   | >TRIP11-E34:RQIMKECENL | 102   | 7     |
| >TRIP11-E34:RQIMEECENL | 1723  | >TRIP11-E34:RQIMKECENL | 398   | 1325  |
| >TRIP11-E34:RQIMEECENL | 498   | >TRIP11-E34:RQIMKECENL | 551   | 53    |
| >TRIP11-E34:RQIMEECENL | 28    | >TRIP11-E34:RQIMKECENL | 45    | 17    |
| >TRIP11-E34:RQIMEECENL | 438   | >TRIP11-E34:RQIMKECENL | 505   | 67    |
| >TRIP11-E34:KRQIMEEC   | 185   | >TRIP11-E34:KRQIMKEC   | 158   | 27    |
| >TRIP11-E34:KRQIMEECEN | 535   | >TRIP11-E34:KRQIMKECEN | 394   | 141   |
| >TRIP11-E34:KRQIMEECEN | 64    | >TRIP11-E34:KRQIMKECEN | 49    | 15    |
| >TRIP11-E34:KRQIMEECEN | 74    | >TRIP11-E34:KRQIMKECEN | 49    | 25    |
| >TRIP11-E34:NVEKRQIME  | 16846 | >TRIP11-E34:NVEKRQIMK  | 124   | 16722 |
| >TRIP11-E53:EKKRVHQL   | 1087  | >TRIP11-E53:AKKRVHQL   | 94    | 993   |
| >TRIP11-E53:DEKKRVHQL  | 208   | >TRIP11-E53:DAKKRVHQL  | 21330 | 21122 |
| >TRIP11-E53:DEKKRVHQL  | 131   | >TRIP11-E53:DAKKRVHQL  | 29    | 102   |
| >TRIP11-E53:DEKKRVHQL  | 58    | >TRIP11-E53:DAKKRVHQL  | 13111 | 13053 |
| >TRIP11-E53:DLNDEKKRV  | 278   | >TRIP11-E53:DLNDAKKRV  | 222   | 56    |
| >TRIP11-E53:DLNDEKKRV  | 1007  | >TRIP11-E53:DLNDAKKRV  | 298   | 709   |
| >TRIP11-E53:DLNDEKKRV  | 13    | >TRIP11-E53:DLNDAKKRV  | 11    | 2     |
| >TRIP11-E53:DLNDEKKR   | 542   | >TRIP11-E53:DLNDAKKR   | 469   | 73    |
| >TRIP11-E53:DLNDEKKR   | 716   | >TRIP11-E53:DLNDAKKR   | 366   | 350   |
| >TRIP11-E53:QDLNDEKKR  | 789   | >TRIP11-E53:QDLNDAKKR  | 436   | 353   |
| >TRIP11-E53:KQDLNDEKKR | 631   | >TRIP11-E53:KQDLNDAKKR | 409   | 222   |
| >TRIP11-E53:KLKQDLNDE  | 16240 | >TRIP11-E53:KLKQDLNDA  | 56    | 16184 |
| >TRIP11-E53:KLKQDLNDE  | 20079 | >TRIP11-E53:KLKQDLNDA  | 390   | 19689 |
| >TRIP11-E53:KLKQDLNDE  | 1280  | >TRIP11-E53:KLKQDLNDA  | 317   | 963   |
| >TRIP11-E53:KLKQDLNDE  | 130   | >TRIP11-E53:KLKQDLNDA  | 84    | 46    |
| >TRIP11-E53:KLKQDLNDE  | 364   | >TRIP11-E53:KLKQDLNDA  | 46    | 318   |
| >TRIP11-G19 GVVVKDLLK  | 87    | >TRIP11-G19 EVVVKDLLK  | 1110  | 1023  |
| >TRIP11-G19 GVVVKDLL   | 18726 | >TRIP11-G19 EVVVKDLL   | 310   | 18416 |
| >TRIP11-G19 GVVVKDLLK  | 1022  | >TRIP11-G19 EVVVKDLLK  | 21    | 1001  |
| >TRIP11-G19 GVVVKDLL   | 11492 | >TRIP11-G19 EVVVKDLL   | 98    | 11394 |
| >TRIP11-G19 AGVVVKDL   | 39197 | >TRIP11-G19 AEVVVKDL   | 270   | 38927 |
| >TRIP11-G19 AGVVVKDLL  | 23686 | >TRIP11-G19 AEVVVKDLL  | 170   | 23516 |
| >TRIP11-G19 AGVVVKDL   | 21998 | >TRIP11-G19 AEVVVKDL   | 58    | 21940 |

|                        |       |                         |      |       |
|------------------------|-------|-------------------------|------|-------|
| >TRIP11-G19 AGVVLKDLL  | 20218 | >TRIP11-G19 AEVVLKDLL   | 18   | 20200 |
| >TRIP11-G19 AGVVLKDL   | 35746 | >TRIP11-G19 AEVVLKDL    | 127  | 35619 |
| >TRIP11-G19 AGVVLKDLL  | 35214 | >TRIP11-G19 AEVVLKDLL   | 76   | 35138 |
| >TRIP11-G19 AGVVLKDL   | 34719 | >TRIP11-G19 AEVVLKDL    | 116  | 34603 |
| >TRIP11-G19 AGVVLKDLL  | 36295 | >TRIP11-G19 AEVVLKDLL   | 146  | 36149 |
| >TRIP11-G19 AGVVLKDLLK | 26603 | >TRIP11-G19 AEVVLKDLLK  | 331  | 26272 |
| >TRIP11-G19 AGVVLKDLL  | 18920 | >TRIP11-G19 AEVVLKDLL   | 10   | 18910 |
| >TRIP11-G19 SAGVVLKDLL | 119   | >TRIP11-G19 SAEVVLKDLLI | 235  | 116   |
| >TRIP11-G19 NSAGVVLKDI | 522   | >TRIP11-G19 NSAEVVLKDL  | 409  | 113   |
| >TRIP11-G19 NSAGVVLK   | 53    | >TRIP11-G19 NSAEVVLK    | 54   | 1     |
| >TRIP11-G19 NSAGVVLK   | 10    | >TRIP11-G19 NSAEVVLK    | 9    | 1     |
| >TRIP11-G19 NSAGVVLKDI | 59    | >TRIP11-G19 NSAEVVLKDL  | 57   | 2     |
| >TRIP11-G19 DNSAGVVLK  | 320   | >TRIP11-G19 DNSAEVVLK   | 403  | 83    |
| >TRIP11-G19 PDNSAGVV   | 76    | >TRIP11-G19 PDNSAEVV    | 71   | 5     |
| >TRIP11-G19 LPDNSAGVVI | 49    | >TRIP11-G19 LPDNSAEVVL  | 50   | 1     |
| >TRIP11-G19 LPDNSAGVV  | 139   | >TRIP11-G19 LPDNSAEVV   | 1072 | 933   |
| >TRIP11-G19 LPDNSAGVVI | 82    | >TRIP11-G19 LPDNSAEVVL  | 178  | 96    |
| >TRIP11-G19 LPDNSAGVVI | 245   | >TRIP11-G19 LPDNSAEVVL  | 219  | 26    |
| >TRIP11-G19 LPDNSAGVVI | 94    | >TRIP11-G19 LPDNSAEVVL  | 110  | 16    |
| >TRIP11-G19 LPDNSAGVV  | 415   | >TRIP11-G19 LPDNSAEVV   | 2569 | 2154  |
| >TRIP11-G19 LPDNSAGVVI | 639   | >TRIP11-G19 LPDNSAEVVL  | 398  | 241   |
| >TRIP11-G19 ALPDNSAGV  | 24    | >TRIP11-G19 ALPDNSAEV   | 16   | 8     |
| >TRIP11-G19 ALPDNSAGV\ | 330   | >TRIP11-G19 ALPDNSAEV\  | 246  | 84    |
| >TRIP11-G19 ALPDNSAGV  | 8     | >TRIP11-G19 ALPDNSAEV   | 6    | 2     |
| >TRIP11-G19 ALPDNSAGV\ | 244   | >TRIP11-G19 ALPDNSAEV\  | 80   | 164   |
| >TRIP11-G19 ALPDNSAGV\ | 38    | >TRIP11-G19 ALPDNSAEV\  | 36   | 2     |
| >TRIP11-G19 ALPDNSAGV  | 4     | >TRIP11-G19 ALPDNSAEV   | 5    | 1     |
| >TRIP11-G19 ALPDNSAGV\ | 77    | >TRIP11-G19 ALPDNSAEV\  | 139  | 62    |
| >TRIP11-G19 ALPDNSAGV\ | 90    | >TRIP11-G19 ALPDNSAEV\  | 217  | 127   |
| >TRIP11-G19 ALPDNSAGV  | 14    | >TRIP11-G19 ALPDNSAEV   | 17   | 3     |
| >TRIP11-G19 ALPDNSAGV\ | 292   | >TRIP11-G19 ALPDNSAEV\  | 463  | 171   |
| >TRIP11-G19 ALPDNSAGV  | 2     | >TRIP11-G19 ALPDNSAEV   | 2    | 0     |
| >TRIP11-G19 ALPDNSAGV\ | 5     | >TRIP11-G19 ALPDNSAEV\  | 3    | 2     |
| >TRIP11-G19 ALPDNSAGV\ | 13    | >TRIP11-G19 ALPDNSAEV\  | 19   | 6     |
| >TRIP11-G19 ALPDNSAGV  | 3     | >TRIP11-G19 ALPDNSAEV   | 4    | 1     |
| >TRIP11-G19 ALPDNSAGV\ | 11    | >TRIP11-G19 ALPDNSAEV\  | 7    | 4     |
| >TRIP11-G19 ALPDNSAGV\ | 20    | >TRIP11-G19 ALPDNSAEV\  | 29   | 9     |
| >TRIP11-G19 ALPDNSAGV  | 5     | >TRIP11-G19 ALPDNSAEV   | 6    | 1     |
| >TRIP11-G19 ALPDNSAGV\ | 15    | >TRIP11-G19 ALPDNSAEV\  | 9    | 6     |
| >TRIP11-G19 ALPDNSAGV\ | 28    | >TRIP11-G19 ALPDNSAEV\  | 33   | 5     |
| >TRIP11-G19 ALPDNSAGV  | 3     | >TRIP11-G19 ALPDNSAEV   | 4    | 1     |
| >TRIP11-G19 ALPDNSAGV\ | 32    | >TRIP11-G19 ALPDNSAEV\  | 8    | 24    |
| >TRIP11-G19 ALPDNSAGV\ | 93    | >TRIP11-G19 ALPDNSAEV\  | 93   | 0     |

|                          |      |                          |      |      |
|--------------------------|------|--------------------------|------|------|
| >TRIP11-G19 ALPDNSAGV    | 1    | >TRIP11-G19 ALPDNSAEV    | 1    | 0    |
| >TRIP11-G19 ALPDNSAGV\   | 2    | >TRIP11-G19 ALPDNSAEV\   | 2    | 0    |
| >TRIP11-G19 ALPDNSAGV\   | 4    | >TRIP11-G19 ALPDNSAEV\   | 4    | 0    |
| >TRIP11-G19 ALPDNSAGV    | 490  | >TRIP11-G19 ALPDNSAEV    | 391  | 99   |
| >TRIP11-G19 ALPDNSAGV\   | 72   | >TRIP11-G19 ALPDNSAEV\   | 233  | 161  |
| >TRIP11-G19 PALPDNSAG\   | 344  | >TRIP11-G19 PALPDNSAEV   | 706  | 362  |
| >TRIP11-G19 LPALPDNSAG   | 104  | >TRIP11-G19 LPALPDNSAE   | 70   | 34   |
| >TRIP11-G19 LPALPDNSAG   | 692  | >TRIP11-G19 LPALPDNSAE   | 264  | 428  |
| >TRIP11-G19 LPALPDNSAG   | 364  | >TRIP11-G19 LPALPDNSAE   | 177  | 187  |
| >TRIP11-G19 LPALPDNSAG   | 28   | >TRIP11-G19 LPALPDNSAE   | 20   | 8    |
| >TRIP11-K10. KNISLTKQI   | 1092 | >TRIP11-K10. NNISLTKQI   | 194  | 898  |
| >TRIP11-K10. KNISLTKQI   | 342  | >TRIP11-K10. NNISLTKQI   | 2198 | 1856 |
| >TRIP11-K10. EKNISLTKQI  | 166  | >TRIP11-K10. ENNISLTKQI  | 344  | 178  |
| >TRIP11-K10. EKNISLTK    | 1386 | >TRIP11-K10. ENNISLTK    | 331  | 1055 |
| >TRIP11-K10. RELEIKLLNEK | 282  | >TRIP11-K10. RELEIKLLNEN | 334  | 52   |
| >TRIP11-K10. NEKNISLTKQI | 6    | >TRIP11-K10. NENNISLTKQ  | 5    | 1    |
| >TRIP11-K10. NEKNISLTKQI | 633  | >TRIP11-K10. NENNISLTKQ  | 448  | 185  |
| >TRIP11-K10. NEKNISLTKQI | 411  | >TRIP11-K10. NENNISLTKQ  | 210  | 201  |
| >TRIP11-K10. NEKNISLTKQI | 1167 | >TRIP11-K10. NENNISLTKQ  | 291  | 876  |
| >TRIP11-K10. NEKNISLT    | 867  | >TRIP11-K10. NENNISLT    | 479  | 388  |
| >TRIP11-K10. NEKNISLTKQI | 14   | >TRIP11-K10. NENNISLTKQ  | 28   | 14   |
| >TRIP11-K10. LLNEKNISL   | 30   | >TRIP11-K10. LLNENNISL   | 29   | 1    |
| >TRIP11-K10. LLNEKNISL   | 9    | >TRIP11-K10. LLNENNISL   | 9    | 0    |
| >TRIP11-K10. LLNEKNISLT  | 392  | >TRIP11-K10. LLNENNISLT  | 251  | 141  |
| >TRIP11-K10. LLNEKNISL   | 13   | >TRIP11-K10. LLNENNISL   | 16   | 3    |
| >TRIP11-K10. LLNEKNISLT  | 153  | >TRIP11-K10. LLNENNISLT  | 108  | 45   |
| >TRIP11-K10. LLNEKNISL   | 173  | >TRIP11-K10. LLNENNISL   | 106  | 67   |
| >TRIP11-K10. LLNEKNISL   | 5    | >TRIP11-K10. LLNENNISL   | 3    | 2    |
| >TRIP11-K10. LLNEKNISLT  | 79   | >TRIP11-K10. LLNENNISLT  | 32   | 47   |
| >TRIP11-K10. LLNEKNISL   | 8    | >TRIP11-K10. LLNENNISL   | 4    | 4    |
| >TRIP11-K10. LLNEKNISLT  | 1075 | >TRIP11-K10. LLNENNISLT  | 217  | 858  |
| >TRIP11-K10. LLNEKNISL   | 32   | >TRIP11-K10. LLNENNISL   | 23   | 9    |
| >TRIP11-K10. LLNEKNISL   | 16   | >TRIP11-K10. LLNENNISL   | 7    | 9    |
| >TRIP11-K10. LLNEKNISL   | 3    | >TRIP11-K10. LLNENNISL   | 2    | 1    |
| >TRIP11-K10. LLNEKNISLT  | 20   | >TRIP11-K10. LLNENNISLT  | 10   | 10   |
| >TRIP11-K10. LLNEKNISLTK | 505  | >TRIP11-K10. LLNENNISLTK | 224  | 281  |
| >TRIP11-K10. LLNEKNISLTK | 50   | >TRIP11-K10. LLNENNISLTK | 53   | 3    |
| >TRIP11-K10. LLNEKNISLTK | 156  | >TRIP11-K10. LLNENNISLTK | 118  | 38   |
| >TRIP11-K10. LLNEKNISLTK | 411  | >TRIP11-K10. LLNENNISLTK | 314  | 97   |
| >TRIP11-K10. KLLNEKNI    | 718  | >TRIP11-K10. KLLNENNI    | 77   | 641  |
| >TRIP11-K10. KLLNEKNISL  | 22   | >TRIP11-K10. KLLNENNISL  | 15   | 7    |
| >TRIP11-K10. KLLNEKNI    | 1645 | >TRIP11-K10. KLLNENNI    | 145  | 1500 |
| >TRIP11-K10. KLLNEKNISL  | 25   | >TRIP11-K10. KLLNENNISL  | 15   | 10   |

|                         |      |                         |       |       |
|-------------------------|------|-------------------------|-------|-------|
| >TRIP11-K10.KLLNEKNI    | 1500 | >TRIP11-K10.KLLNENNI    | 422   | 1078  |
| >TRIP11-K10.KLLNEKNISL  | 130  | >TRIP11-K10.KLLNENNISL  | 91    | 39    |
| >TRIP11-K10.KLLNEKNI    | 2321 | >TRIP11-K10.KLLNENNI    | 315   | 2006  |
| >TRIP11-K10.KLLNEKNISL  | 171  | >TRIP11-K10.KLLNENNISL  | 139   | 32    |
| >TRIP11-K10.KLLNEKNI    | 23   | >TRIP11-K10.KLLNENNI    | 16    | 7     |
| >TRIP11-K10.KLLNEKNISL  | 12   | >TRIP11-K10.KLLNENNISL  | 9     | 3     |
| >TRIP11-K10.KLLNEKNISLT | 190  | >TRIP11-K10.KLLNENNISLT | 130   | 60    |
| >TRIP11-K10.KLLNEKNI    | 35   | >TRIP11-K10.KLLNENNI    | 10    | 25    |
| >TRIP11-K10.KLLNEKNISL  | 10   | >TRIP11-K10.KLLNENNISL  | 6     | 4     |
| >TRIP11-K10.KLLNEKNISLT | 655  | >TRIP11-K10.KLLNENNISLT | 286   | 369   |
| >TRIP11-K10.KLLNEKNI    | 51   | >TRIP11-K10.KLLNENNI    | 22    | 29    |
| >TRIP11-K10.KLLNEKNISL  | 20   | >TRIP11-K10.KLLNENNISL  | 15    | 5     |
| >TRIP11-K10.KLLNEKNISLT | 565  | >TRIP11-K10.KLLNENNISLT | 420   | 145   |
| >TRIP11-K10.KLLNEKNI    | 389  | >TRIP11-K10.KLLNENNI    | 100   | 289   |
| >TRIP11-K10.KLLNEKNISL  | 60   | >TRIP11-K10.KLLNENNISL  | 21    | 39    |
| >TRIP11-K10.KLLNEKNI    | 116  | >TRIP11-K10.KLLNENNI    | 63    | 53    |
| >TRIP11-K10.KLLNEKNISL  | 10   | >TRIP11-K10.KLLNENNISL  | 9     | 1     |
| >TRIP11-K10.KLLNEKNISLT | 262  | >TRIP11-K10.KLLNENNISLT | 228   | 34    |
| >TRIP11-K10.KLLNEKNI    | 121  | >TRIP11-K10.KLLNENNI    | 40    | 81    |
| >TRIP11-K10.KLLNEKNISL  | 46   | >TRIP11-K10.KLLNENNISL  | 18    | 28    |
| >TRIP11-K10.KLLNEKNISL  | 408  | >TRIP11-K10.KLLNENNISL  | 169   | 239   |
| >TRIP11-K10.IKLLNEKNI   | 462  | >TRIP11-K10.IKLLNENNI   | 1068  | 606   |
| >TRIP11-K10.IKLLNEKNI   | 117  | >TRIP11-K10.IKLLNENNI   | 134   | 17    |
| >TRIP11-K10.IKLLNEKNISL | 44   | >TRIP11-K10.IKLLNENNISL | 34    | 10    |
| >TRIP11-K10.EIKLLNEK    | 58   | >TRIP11-K10.EIKLLNEN    | 15509 | 15451 |
| >TRIP11-K10.LEIKLLNEKNI | 17   | >TRIP11-K10.LEIKLLNENNI | 30    | 13    |
| >TRIP11-K10.LEIKLLNEKNI | 564  | >TRIP11-K10.LEIKLLNENNI | 342   | 222   |
| >TRIP11-K10.LEIKLLNEKNI | 341  | >TRIP11-K10.LEIKLLNENNI | 228   | 113   |
| >TRIP11-K10.LEIKLLNEKNI | 12   | >TRIP11-K10.LEIKLLNENNI | 8     | 4     |
| >TRIP11-K12.KLKQQVKK    | 71   | >TRIP11-K12.NLKQQVKK    | 1750  | 1679  |
| >TRIP11-K12.KLKQQVKK    | 10   | >TRIP11-K12.NLKQQVKK    | 2914  | 2904  |
| >TRIP11-K12.KLKQQVKK    | 264  | >TRIP11-K12.NLKQQVKK    | 6754  | 6490  |
| >TRIP11-K12.KLKQQVKKM   | 940  | >TRIP11-K12.NLKQQVKKM   | 197   | 743   |
| >TRIP11-K12.KLKQQVKK    | 463  | >TRIP11-K12.NLKQQVKK    | 4345  | 3882  |
| >TRIP11-K12.RDKLKQQVK   | 348  | >TRIP11-K12.RDNLKQQVK   | 3927  | 3579  |
| >TRIP11-K12.RDKLKQQVKI  | 346  | >TRIP11-K12.RDNLKQQVK   | 3874  | 3528  |
| >TRIP11-K12.RDKLKQQV    | 1220 | >TRIP11-K12.RDNLKQQV    | 356   | 864   |
| >TRIP11-K12.QERDKLKQQ'  | 153  | >TRIP11-K12.QERDNLKQQ   | 139   | 14    |
| >TRIP11-K12.LLQERDKL    | 138  | >TRIP11-K12.LLQERDNL    | 41    | 97    |
| >TRIP11-K12.LLQERDKL    | 160  | >TRIP11-K12.LLQERDNL    | 150   | 10    |
| >TRIP11-K12.LLQERDKL    | 161  | >TRIP11-K12.LLQERDNL    | 72    | 89    |
| >TRIP11-K12.LLQERDKL    | 627  | >TRIP11-K12.LLQERDNL    | 401   | 226   |
| >TRIP11-K12.LLQERDKL    | 9    | >TRIP11-K12.LLQERDNL    | 9     | 0     |

|                         |      |                         |      |      |
|-------------------------|------|-------------------------|------|------|
| >TRIP11-K12 LLQERDKLKQ  | 309  | >TRIP11-K12 LLQERDNLKC  | 220  | 89   |
| >TRIP11-K12 LLQERDKLKQ  | 144  | >TRIP11-K12 LLQERDNLKC  | 78   | 66   |
| >TRIP11-K12 ELLQERDKL   | 220  | >TRIP11-K12 ELLQERDNL   | 220  | 0    |
| >TRIP11-K12 EELLQERDKL  | 201  | >TRIP11-K12 EELLQERDNL  | 176  | 25   |
| >TRIP11-K12 FEELLQERDKI | 112  | >TRIP11-K12 FEELLQERDN  | 94   | 18   |
| >TRIP11-K12 FEELLQERDKI | 53   | >TRIP11-K12 FEELLQERDN  | 57   | 4    |
| >TRIP11-K12 FEELLQERDKI | 755  | >TRIP11-K12 FEELLQERDN  | 312  | 443  |
| >TRIP11-K12 FEELLQERDKI | 60   | >TRIP11-K12 FEELLQERDN  | 91   | 31   |
| >TRIP11-L28 LSKIYEMQK   | 199  | >TRIP11-L28 FSKIYEMQK   | 333  | 134  |
| >TRIP11-L28 LSKIYEMQK   | 14   | >TRIP11-L28 FSKIYEMQK   | 285  | 271  |
| >TRIP11-L28 LSKIYEMQKT  | 415  | >TRIP11-L28 FSKIYEMQKT  | 5114 | 4699 |
| >TRIP11-L28 LSKIYEMQK   | 391  | >TRIP11-L28 FSKIYEMQK   | 82   | 309  |
| >TRIP11-L28 LSKIYEMQKT  | 43   | >TRIP11-L28 FSKIYEMQKT  | 63   | 20   |
| >TRIP11-L28 LSKIYEMQKT  | 98   | >TRIP11-L28 FSKIYEMQKT  | 112  | 14   |
| >TRIP11-L28 DLSKIYEMQK  | 836  | >TRIP11-L28 DFSKIYEMQK  | 432  | 404  |
| >TRIP11-L28 TDLSKIYEMQ  | 4962 | >TRIP11-L28 TDFSKIYEMQ  | 301  | 4661 |
| >TRIP11-L28 TDLSKIYEM   | 1201 | >TRIP11-L28 TDFSKIYEM   | 252  | 949  |
| >TRIP11-L28 TDLSKIYEM   | 283  | >TRIP11-L28 TDFSKIYEM   | 536  | 253  |
| >TRIP11-L28 ETDLSKIY    | 22   | >TRIP11-L28 ETDFSKIY    | 25   | 3    |
| >TRIP11-L28 ETDLSKIYEM  | 951  | >TRIP11-L28 ETDFSKIYEM  | 276  | 675  |
| >TRIP11-L28 ETDLSKIYEM  | 2262 | >TRIP11-L28 ETDFSKIYEM  | 331  | 1931 |
| >TRIP11-L28 ETDLSKIYEM  | 74   | >TRIP11-L28 ETDFSKIYEM  | 34   | 40   |
| >TRIP11-L28 ETDLSKIY    | 131  | >TRIP11-L28 ETDFSKIY    | 148  | 17   |
| >TRIP11-L28 ETDLSKIYEM  | 347  | >TRIP11-L28 ETDFSKIYEM  | 381  | 34   |
| >TRIP11-L28 ETDLSKIY    | 324  | >TRIP11-L28 ETDFSKIY    | 399  | 75   |
| >TRIP11-L28 ETDLSKIY    | 893  | >TRIP11-L28 ETDFSKIY    | 299  | 594  |
| >TRIP11-L28 IETDLSKIY   | 272  | >TRIP11-L28 IETDFSKIY   | 188  | 84   |
| >TRIP11-L28 IETDLSKIYEM | 150  | >TRIP11-L28 IETDFSKIYEM | 120  | 30   |
| >TRIP11-L28 IETDLSKIY   | 880  | >TRIP11-L28 IETDFSKIY   | 179  | 701  |
| >TRIP11-L28 IETDLSKIY   | 43   | >TRIP11-L28 IETDFSKIY   | 28   | 15   |
| >TRIP11-L28 IETDLSKIYEM | 122  | >TRIP11-L28 IETDFSKIYEM | 91   | 31   |
| >TRIP11-L28 IETDLSKI    | 239  | >TRIP11-L28 IETDFSKI    | 118  | 121  |
| >TRIP11-L28 IETDLSKIYEM | 301  | >TRIP11-L28 IETDFSKIYEM | 203  | 98   |
| >TRIP11-L28 IETDLSKIYEM | 224  | >TRIP11-L28 IETDFSKIYEM | 201  | 23   |
| >TRIP11-L28 IETDLSKIY   | 224  | >TRIP11-L28 IETDFSKIY   | 231  | 7    |
| >TRIP11-L28 IETDLSKIYEM | 392  | >TRIP11-L28 IETDFSKIYEM | 392  | 0    |
| >TRIP11-L28 IETDLSKIY   | 89   | >TRIP11-L28 IETDFSKIY   | 88   | 1    |
| >TRIP11-L28 IETDLSKI    | 452  | >TRIP11-L28 IETDFSKI    | 1250 | 798  |
| >TRIP11-L28 IETDLSKIYEM | 103  | >TRIP11-L28 IETDFSKIYEM | 88   | 15   |
| >TRIP11-L28 VIETDLSKIY  | 453  | >TRIP11-L28 VIETDFSKIY  | 206  | 247  |
| >TRIP11-L28 VIETDLSK    | 397  | >TRIP11-L28 VIETDFSK    | 148  | 249  |
| >TRIP11-L28 GVIETDLSKI  | 211  | >TRIP11-L28 GVIETDFSKI  | 349  | 138  |
| >TRIP11-L28 GVIETDLSKI  | 335  | >TRIP11-L28 GVIETDFSKI  | 314  | 21   |



|                         |       |                         |       |       |
|-------------------------|-------|-------------------------|-------|-------|
| >TRIP11-L28<GVIETDLSKI  | 380   | >TRIP11-L28<GVIETDFSKI  | 245   | 135   |
| >TRIP11-L28<GVIETDLSK   | 28    | >TRIP11-L28<GVIETDFSK   | 15    | 13    |
| >TRIP11-L28<GVIETDLSKIY | 536   | >TRIP11-L28<GVIETDFSKIY | 439   | 97    |
| >TRIP11-L28<GVIETDLSKIY | 72    | >TRIP11-L28<GVIETDFSKIY | 69    | 3     |
| >TRIP11-L28<GVIETDLSKIY | 777   | >TRIP11-L28<GVIETDFSKIY | 408   | 369   |
| >TRIP11-L28<GVIETDLSK   | 503   | >TRIP11-L28<GVIETDFSK   | 60    | 443   |
| >TRIP11-L28<GVIETDLSKIY | 328   | >TRIP11-L28<GVIETDFSKIY | 470   | 142   |
| >TRIP11-L28<GVIETDLSKIY | 220   | >TRIP11-L28<GVIETDFSKIY | 251   | 31    |
| >TRIP11-L28<GVIETDLSKIY | 355   | >TRIP11-L28<GVIETDFSKIY | 374   | 19    |
| >TRIP11-L28<GVIETDLSKIY | 410   | >TRIP11-L28<GVIETDFSKIY | 266   | 144   |
| >TRIP11-L28<SGVIETDLSKI | 543   | >TRIP11-L28<SGVIETDFSKI | 386   | 157   |
| >TRIP11-L28<GSGVIETDLSI | 155   | >TRIP11-L28<GSGVIETDFSI | 86    | 69    |
| >TRIP11-L28<GSGVIETDL   | 2933  | >TRIP11-L28<GSGVIETDF   | 439   | 2494  |
| >TRIP11-L54<LEDDKMDI    | 1701  | >TRIP11-L54<FEDDKMDI    | 241   | 1460  |
| >TRIP11-L54<LEDDKMDI    | 258   | >TRIP11-L54<FEDDKMDI    | 164   | 94    |
| >TRIP11-L54<QLEDDKMDI   | 95    | >TRIP11-L54<QFEDDKMDI   | 21650 | 21555 |
| >TRIP11-L54<HQLEDDKM    | 935   | >TRIP11-L54<HQFEDDKM    | 339   | 596   |
| >TRIP11-L54<HQLEDDKM    | 817   | >TRIP11-L54<HQFEDDKM    | 170   | 647   |
| >TRIP11-L54<HQLEDDKMC   | 517   | >TRIP11-L54<HQFEDDKMC   | 105   | 412   |
| >TRIP11-L54<RVHQLEDDK   | 634   | >TRIP11-L54<RVHQFEDDK   | 253   | 381   |
| >TRIP11-L54<RVHQLEDDK   | 414   | >TRIP11-L54<RVHQFEDDK   | 146   | 268   |
| >TRIP11-L54<KRVHQLEDDI  | 953   | >TRIP11-L54<KRVHQFEDDI  | 499   | 454   |
| >TRIP11-L54<KRVHQLEDDI  | 222   | >TRIP11-L54<KRVHQFEDDI  | 279   | 57    |
| >TRIP11-L54<KRVHQLEDDI  | 332   | >TRIP11-L54<KRVHQFEDDI  | 332   | 0     |
| >TRIP11-L54<KKRVHQLEDI  | 209   | >TRIP11-L54<KKRVHQFEDI  | 185   | 24    |
| >TRIP11-L54<EKKRVHQL    | 1087  | >TRIP11-L54<EKKRVHQF    | 38    | 1049  |
| >TRIP11-L54<DEKKRVHQL   | 208   | >TRIP11-L54<DEKKRVHQF   | 558   | 350   |
| >TRIP11-L54<DEKKRVHQL   | 131   | >TRIP11-L54<DEKKRVHQF   | 549   | 418   |
| >TRIP11-L54<DEKKRVHQL   | 58    | >TRIP11-L54<DEKKRVHQF   | 11    | 47    |
| >TRIP11-L54<DEKKRVHQL   | 1915  | >TRIP11-L54<DEKKRVHQF   | 310   | 1605  |
| >TRIP11-P18<GWLGGGSKS   | 34781 | >TRIP11-P18<GWLGGGSKS   | 211   | 34570 |
| >TRIP11-P18<SVPNTPLR    | 358   | >TRIP11-P18<SVRNTPLR    | 803   | 445   |
| >TRIP11-P18<SVPNTPLR    | 7125  | >TRIP11-P18<SVRNTPLR    | 9     | 7116  |
| >TRIP11-P18<SVPNTPLRP   | 14452 | >TRIP11-P18<SVRNTPLRP   | 87    | 14365 |
| >TRIP11-P18<SVPNTPLRPN  | 13025 | >TRIP11-P18<SVRNTPLRPN  | 92    | 12933 |
| >TRIP11-P18<SVPNTPLRPN  | 8604  | >TRIP11-P18<SVRNTPLRPN  | 14    | 8590  |
| >TRIP11-P18<SVPNTPLR    | 609   | >TRIP11-P18<SVRNTPLR    | 33    | 576   |
| >TRIP11-P18<SVPNTPLR    | 95    | >TRIP11-P18<SVRNTPLR    | 134   | 39    |
| >TRIP11-P18<SVPNTPLR    | 419   | >TRIP11-P18<SVRNTPLR    | 940   | 521   |
| >TRIP11-P18<KVPNTPL     | 180   | >TRIP11-P18<KSVRNTPL    | 64    | 116   |
| >TRIP11-P18<KVPNTPL     | 492   | >TRIP11-P18<KSVRNTPL    | 1511  | 1019  |
| >TRIP11-P18<KVPNTPLR    | 193   | >TRIP11-P18<KSVRNTPLR   | 307   | 114   |
| >TRIP11-P18<KVPNTPL     | 573   | >TRIP11-P18<KSVRNTPL    | 315   | 258   |

|                       |       |                        |       |       |
|-----------------------|-------|------------------------|-------|-------|
| >TRIP11-P18.KSVPNTPLR | 130   | >TRIP11-P18.KSVRNTPLR  | 76    | 54    |
| >TRIP11-P18.KSVPNTPLR | 22    | >TRIP11-P18.KSVRNTPLR  | 20    | 2     |
| >TRIP11-P18.KSVPNTPL  | 205   | >TRIP11-P18.KSVRNTPL   | 95    | 110   |
| >TRIP11-P18.KSVPNTPLR | 177   | >TRIP11-P18.KSVRNTPLR  | 209   | 32    |
| >TRIP11-P18.KSVPNTPL  | 168   | >TRIP11-P18.KSVRNTPL   | 154   | 14    |
| >TRIP11-P18.KSVPNTPL  | 4     | >TRIP11-P18.KSVRNTPL   | 8     | 4     |
| >TRIP11-P18.KSVPNTPL  | 104   | >TRIP11-P18.KSVRNTPL   | 133   | 29    |
| >TRIP11-P18.KSVPNTPL  | 699   | >TRIP11-P18.KSVRNTPL   | 194   | 505   |
| >TRIP11-P18.KSVPNTPLR | 335   | >TRIP11-P18.KSVRNTPLR  | 552   | 217   |
| >TRIP11-P18.KSVPNTPLR | 49    | >TRIP11-P18.KSVRNTPLR  | 87    | 38    |
| >TRIP11-P18.KSVPNTPL  | 336   | >TRIP11-P18.KSVRNTPL   | 1306  | 970   |
| >TRIP11-P18.SKSVNTPL  | 22    | >TRIP11-P18.SKSVRNTPL  | 42    | 20    |
| >TRIP11-P18.SKSVNTPL  | 497   | >TRIP11-P18.SKSVRNTPL  | 449   | 48    |
| >TRIP11-P18.GSKSVNTPL | 1063  | >TRIP11-P18.GSKSVRNTPL | 465   | 598   |
| >TRIP11-P18.GSKSVNTPL | 385   | >TRIP11-P18.GSKSVRNTPL | 218   | 167   |
| >TRIP11-P18.GSKSVNTPL | 25    | >TRIP11-P18.GSKSVRNTPL | 15    | 10    |
| >TRIP11-P18.GSKSVNTPL | 219   | >TRIP11-P18.GSKSVRNTPL | 137   | 82    |
| >TRIP11-P18.WLGGGSKSV | 18220 | >TRIP11-P18.WLGGGSKSV  | 48    | 18172 |
| >TRIP11-Q15.QMENTALQN | 2113  | >TRIP11-Q15.KMENTALQN  | 209   | 1904  |
| >TRIP11-Q15.QMENTALQN | 181   | >TRIP11-Q15.KMENTALQN  | 69    | 112   |
| >TRIP11-Q15.QMENTALQN | 858   | >TRIP11-Q15.KMENTALQN  | 126   | 732   |
| >TRIP11-Q15.QMENTALQN | 974   | >TRIP11-Q15.KMENTALQN  | 156   | 818   |
| >TRIP11-Q15.QMENTALQN | 64    | >TRIP11-Q15.KMENTALQN  | 9     | 55    |
| >TRIP11-Q15.QMENTALQN | 71    | >TRIP11-Q15.KMENTALQN  | 10    | 61    |
| >TRIP11-Q15.QMENTALQN | 194   | >TRIP11-Q15.KMENTALQN  | 20    | 174   |
| >TRIP11-Q15.QMENTALQN | 1243  | >TRIP11-Q15.KMENTALQN  | 325   | 918   |
| >TRIP11-Q15.QMENTALQN | 7     | >TRIP11-Q15.KMENTALQN  | 4     | 3     |
| >TRIP11-Q15.KQMENTAL  | 283   | >TRIP11-Q15.KKMENTAL   | 3190  | 2907  |
| >TRIP11-Q15.KQMENTAL  | 28    | >TRIP11-Q15.KKMENTAL   | 11582 | 11554 |
| >TRIP11-Q15.KQMENTAL  | 17    | >TRIP11-Q15.KKMENTAL   | 935   | 918   |
| >TRIP11-Q15.KQMENTAL  | 54    | >TRIP11-Q15.KKMENTAL   | 7329  | 7275  |
| >TRIP11-Q15.KQMENTAL  | 8     | >TRIP11-Q15.KKMENTAL   | 479   | 471   |
| >TRIP11-Q15.KQMENTALQ | 104   | >TRIP11-Q15.KKMENTALQ  | 11084 | 10980 |
| >TRIP11-Q15.KQMENTAL  | 207   | >TRIP11-Q15.KKMENTAL   | 5026  | 4819  |
| >TRIP11-Q15.KQMENTAL  | 29    | >TRIP11-Q15.KKMENTAL   | 2904  | 2875  |
| >TRIP11-Q15.KQMENTAL  | 29    | >TRIP11-Q15.KKMENTAL   | 638   | 609   |
| >TRIP11-Q15.KQMENTAL  | 103   | >TRIP11-Q15.KKMENTAL   | 12731 | 12628 |
| >TRIP11-Q15.KQMENTAL  | 9     | >TRIP11-Q15.KKMENTAL   | 9     | 0     |
| >TRIP11-Q15.KQMENTAL  | 19    | >TRIP11-Q15.KKMENTAL   | 52    | 33    |
| >TRIP11-Q15.KQMENTAL  | 438   | >TRIP11-Q15.KKMENTAL   | 11585 | 11147 |
| >TRIP11-Q15.KQMENTAL  | 59    | >TRIP11-Q15.KKMENTAL   | 360   | 301   |
| >TRIP11-Q15.KQMENTAL  | 452   | >TRIP11-Q15.KKMENTAL   | 1465  | 1013  |
| >TRIP11-Q15.QKQMENTAL | 34    | >TRIP11-Q15.QKKMENTAL  | 17    | 17    |

|                         |       |                         |      |       |
|-------------------------|-------|-------------------------|------|-------|
| >TRIP11-Q15 KQKQMENTA   | 855   | >TRIP11-Q15 KQKKMENTA   | 182  | 673   |
| >TRIP11-Q15 KQKQMENTA   | 165   | >TRIP11-Q15 KQKKMENTA   | 231  | 66    |
| >TRIP11-Q15 KQKQMENTA   | 36    | >TRIP11-Q15 KQKKMENTA   | 23   | 13    |
| >TRIP11-Q15 KQKQMENTA   | 464   | >TRIP11-Q15 KQKKMENTA   | 310  | 154   |
| >TRIP11-Q15 LKQKQMENT   | 44    | >TRIP11-Q15 LKQKKMENT,  | 77   | 33    |
| >TRIP11-Q15 ALKQKQMEN   | 161   | >TRIP11-Q15 ALKQKKMEN   | 382  | 221   |
| >TRIP11-Q15 ALKQKQMEN   | 27    | >TRIP11-Q15 ALKQKKMEN   | 47   | 20    |
| >TRIP11-Q15 ALKQKQMEN   | 505   | >TRIP11-Q15 ALKQKKMEN   | 361  | 144   |
| >TRIP11-Q15 LALKQKQM    | 125   | >TRIP11-Q15 LALKQKKM    | 251  | 126   |
| >TRIP11-Q15 MLALKQKQM   | 263   | >TRIP11-Q15 MLALKQKKM   | 434  | 171   |
| >TRIP11-Q15 MLALKQKQ    | 254   | >TRIP11-Q15 MLALKQKK    | 3151 | 2897  |
| >TRIP11-Q15 MLALKQKQM   | 229   | >TRIP11-Q15 MLALKQKKM   | 758  | 529   |
| >TRIP11-Q15 MLALKQKQ    | 18436 | >TRIP11-Q15 MLALKQKK    | 81   | 18355 |
| >TRIP11-Q15 MLALKQKQ    | 9757  | >TRIP11-Q15 MLALKQKK    | 357  | 9400  |
| >TRIP11-Q15 MLALKQKQM   | 86    | >TRIP11-Q15 MLALKQKKM   | 126  | 40    |
| >TRIP11-Q15 VMLALKQKQ   | 74    | >TRIP11-Q15 VMLALKQKKI  | 147  | 73    |
| >TRIP11-Q15 VMLALKQKQ   | 292   | >TRIP11-Q15 VMLALKQKKI  | 787  | 495   |
| >TRIP11-Q15 VMLALKQKQ   | 299   | >TRIP11-Q15 VMLALKQKK   | 3956 | 3657  |
| >TRIP11-Q15 VMLALKQKQ   | 218   | >TRIP11-Q15 VMLALKQKKI  | 513  | 295   |
| >TRIP11-Q15 VMLALKQKQ   | 19217 | >TRIP11-Q15 VMLALKQKK   | 95   | 19122 |
| >TRIP11-Q15 VMLALKQKQ   | 24975 | >TRIP11-Q15 VMLALKQKK   | 113  | 24862 |
| >TRIP11-Q15 VMLALKQKQ   | 9589  | >TRIP11-Q15 VMLALKQKK   | 285  | 9304  |
| >TRIP11-Q15 VMLALKQKQ   | 402   | >TRIP11-Q15 VMLALKQKKI  | 433  | 31    |
| >TRIP11-Q15 QVMLALKQK   | 21703 | >TRIP11-Q15 QVMLALKQK   | 73   | 21630 |
| >TRIP11-Q15 QVMLALKQK   | 28507 | >TRIP11-Q15 QVMLALKQK   | 28   | 28479 |
| >TRIP11-Q15 QVMLALKQK   | 164   | >TRIP11-Q15 QVMLALKQK   | 245  | 81    |
| >TRIP11-Q15 QVMLALKQK   | 11428 | >TRIP11-Q15 QVMLALKQK   | 468  | 10960 |
| >TRIP11-Q15 QVMLALKQK   | 23412 | >TRIP11-Q15 QVMLALKQK   | 160  | 23252 |
| >TSC1-D47G- TLVDYYLET   | 90    | >TSC1-D47G- TLVGYYLET   | 522  | 432   |
| >TSC1-D47G- TLVDYYLET   | 76    | >TSC1-D47G- TLVGYYLET   | 187  | 111   |
| >TSC1-D47G- TLVDYYLETSS | 437   | >TSC1-D47G- TLVGYYLETSS | 890  | 453   |
| >TSC1-D47G- TLVDYYLET   | 91    | >TSC1-D47G- TLVGYYLET   | 366  | 275   |
| >TSC1-D47G- TLVDYYLET   | 154   | >TSC1-D47G- TLVGYYLET   | 1244 | 1090  |
| >TSC1-D47G- TLVDYYLET   | 173   | >TSC1-D47G- TLVGYYLET   | 361  | 188   |
| >TSC1-D47G- TLVDYYLET   | 18    | >TSC1-D47G- TLVGYYLET   | 42   | 24    |
| >TSC1-D47G- TLVDYYLETS  | 435   | >TSC1-D47G- TLVGYYLETS  | 1065 | 630   |
| >TSC1-D47G- NTLVDYYL    | 488   | >TSC1-D47G- NTLVGYYL    | 305  | 183   |
| >TSC1-D47G- NTLVDYYL    | 1061  | >TSC1-D47G- NTLVGYYL    | 489  | 572   |
| >TSC1-D47G- NTLVDYYL    | 57    | >TSC1-D47G- NTLVGYYL    | 59   | 2     |
| >TSC1-D47G- NTLVDYYL    | 44    | >TSC1-D47G- NTLVGYYL    | 22   | 22    |
| >TSC1-D47G- NTLVDYYLET  | 497   | >TSC1-D47G- NTLVGYYLET  | 378  | 119   |
| >TSC1-D47G- NTLVDYYL    | 2138  | >TSC1-D47G- NTLVGYYL    | 499  | 1639  |
| >TSC1-D47G- NTLVDYYL    | 6248  | >TSC1-D47G- NTLVGYYL    | 252  | 5996  |

|                       |      |                       |      |      |
|-----------------------|------|-----------------------|------|------|
| >TSC1-D47G-VNTLVDYY   | 888  | >TSC1-D47G-VNTLVGY    | 368  | 520  |
| >TSC1-D47G-VNTLVDYY   | 688  | >TSC1-D47G-VNTLVGY    | 246  | 442  |
| >TSC1-D47G-LVNTLVDYY  | 500  | >TSC1-D47G-LVNTLVGY   | 424  | 76   |
| >TSC1-D47G-LVNTLVDYYL | 321  | >TSC1-D47G-LVNTLVGYL  | 674  | 353  |
| >TSC1-D47G-LVNTLVDYYL | 33   | >TSC1-D47G-LVNTLVGYL  | 64   | 31   |
| >TSC1-D47G-LVNTLVDYYL | 178  | >TSC1-D47G-LVNTLVGYL  | 159  | 19   |
| >TSC1-D47G-LVNTLVDYYL | 167  | >TSC1-D47G-LVNTLVGYL  | 107  | 60   |
| >TSC1-D47G-LVNTLVDYYL | 455  | >TSC1-D47G-LVNTLVGYL  | 752  | 297  |
| >TSC1-D47G-LVNTLVDYY  | 3856 | >TSC1-D47G-LVNTLVGY   | 345  | 3511 |
| >TSC1-D47G-LVNTLVDYY  | 365  | >TSC1-D47G-LVNTLVGY   | 562  | 197  |
| >TSC1-D47G-LVNTLVDY   | 458  | >TSC1-D47G-LVNTLVGY   | 190  | 268  |
| >TSC1-D47G-LVNTLVDYY  | 48   | >TSC1-D47G-LVNTLVGY   | 45   | 3    |
| >TSC1-D47G-LVNTLVDY   | 102  | >TSC1-D47G-LVNTLVGY   | 130  | 28   |
| >TSC1-D47G-LVNTLVDYY  | 102  | >TSC1-D47G-LVNTLVGY   | 28   | 74   |
| >TSC1-D47G-LVNTLVDY   | 215  | >TSC1-D47G-LVNTLVGY   | 114  | 101  |
| >TSC1-D47G-LVNTLVDYY  | 80   | >TSC1-D47G-LVNTLVGY   | 18   | 62   |
| >TSC1-D47G-LVNTLVDYYL | 336  | >TSC1-D47G-LVNTLVGYL  | 110  | 226  |
| >TSC1-D47G-LVNTLVDY   | 256  | >TSC1-D47G-LVNTLVGY   | 301  | 45   |
| >TSC1-D47G-LVNTLVDYY  | 164  | >TSC1-D47G-LVNTLVGY   | 36   | 128  |
| >TSC1-D47G-LVNTLVDY   | 420  | >TSC1-D47G-LVNTLVGY   | 177  | 243  |
| >TSC1-D47G-LVNTLVDYY  | 322  | >TSC1-D47G-LVNTLVGY   | 149  | 173  |
| >TSC1-D47G-LVNTLVDY   | 462  | >TSC1-D47G-LVNTLVGY   | 416  | 46   |
| >TSC1-D47G-LVNTLVDYY  | 428  | >TSC1-D47G-LVNTLVGY   | 1043 | 615  |
| >TSC1-D47G-LVNTLVDYY  | 187  | >TSC1-D47G-LVNTLVGY   | 359  | 172  |
| >TSC1-D47G-LVNTLVDYYL | 468  | >TSC1-D47G-LVNTLVGYL  | 1418 | 950  |
| >TSC1-D47G-LVNTLVDYY  | 210  | >TSC1-D47G-LVNTLVGY   | 103  | 107  |
| >TSC1-D47G-LVNTLVDYY  | 506  | >TSC1-D47G-LVNTLVGY   | 425  | 81   |
| >TSC1-D47G-MLVNTLVDY^ | 16   | >TSC1-D47G-MLVNTLVGY^ | 15   | 1    |
| >TSC1-D47G-MLVNTLVDY^ | 460  | >TSC1-D47G-MLVNTLVGY^ | 818  | 358  |
| >TSC1-D47G-MLVNTLVDY^ | 5    | >TSC1-D47G-MLVNTLVGY^ | 4    | 1    |
| >TSC1-D47G-MLVNTLVDY^ | 26   | >TSC1-D47G-MLVNTLVGY^ | 16   | 10   |
| >TSC1-D47G-MLVNTLVDY^ | 21   | >TSC1-D47G-MLVNTLVGY^ | 19   | 2    |
| >TSC1-D47G-MLVNTLVDY^ | 381  | >TSC1-D47G-MLVNTLVGY^ | 384  | 3    |
| >TSC1-D47G-MLVNTLVDY^ | 3    | >TSC1-D47G-MLVNTLVGY^ | 2    | 1    |
| >TSC1-D47G-MLVNTLVDY^ | 4    | >TSC1-D47G-MLVNTLVGY^ | 4    | 0    |
| >TSC1-D47G-MLVNTLVDY^ | 13   | >TSC1-D47G-MLVNTLVGY^ | 11   | 2    |
| >TSC1-D47G-MLVNTLVDY^ | 14   | >TSC1-D47G-MLVNTLVGY^ | 8    | 6    |
| >TSC1-D47G-MLVNTLVDY  | 1015 | >TSC1-D47G-MLVNTLVGY  | 368  | 647  |
| >TSC1-D47G-MLVNTLVDY^ | 4    | >TSC1-D47G-MLVNTLVGY^ | 3    | 1    |
| >TSC1-D47G-MLVNTLVDY^ | 487  | >TSC1-D47G-MLVNTLVGY^ | 169  | 318  |
| >TSC1-D47G-MLVNTLVDY  | 2157 | >TSC1-D47G-MLVNTLVGY  | 97   | 2060 |
| >TSC1-D47G-MLVNTLVDY^ | 1086 | >TSC1-D47G-MLVNTLVGY^ | 231  | 855  |
| >TSC1-D47G-MLVNTLVDY  | 629  | >TSC1-D47G-MLVNTLVGY  | 193  | 436  |

|                        |      |                        |      |      |
|------------------------|------|------------------------|------|------|
| >TSC1-D47G-MLVNTLVGY`  | 101  | >TSC1-D47G-MLVNTLVGY`  | 83   | 18   |
| >TSC1-D47G-MLVNTLVGY`  | 26   | >TSC1-D47G-MLVNTLVGY`  | 37   | 11   |
| >TSC1-D47G-MLVNTLVGY`  | 946  | >TSC1-D47G-MLVNTLVGY`  | 397  | 549  |
| >TSC1-D47G-MLVNTLVGY`  | 297  | >TSC1-D47G-MLVNTLVGY`  | 193  | 104  |
| >TSC1-D47G-MLVNTLVGY`  | 147  | >TSC1-D47G-MLVNTLVGY`  | 21   | 126  |
| >TSC1-D47G-MLVNTLVGY`  | 118  | >TSC1-D47G-MLVNTLVGY`  | 145  | 27   |
| >TSC1-D47G-MLVNTLVGY`  | 1456 | >TSC1-D47G-MLVNTLVGY`  | 455  | 1001 |
| >TSC1-D47G-MLVNTLVGY`  | 186  | >TSC1-D47G-MLVNTLVGY`  | 345  | 159  |
| >TSC1-D47G-MLVNTLVGY`  | 122  | >TSC1-D47G-MLVNTLVGY`  | 56   | 66   |
| >TSC1-D47G-MLVNTLVGY`  | 117  | >TSC1-D47G-MLVNTLVGY`  | 64   | 53   |
| >TSC1-D47G-MLVNTLVGY`  | 97   | >TSC1-D47G-MLVNTLVGY`  | 62   | 35   |
| >TSC1-D47G-MLVNTLVGY`  | 305  | >TSC1-D47G-MLVNTLVGY`  | 156  | 149  |
| >TSC1-D47G-MLVNTLVGY`  | 470  | >TSC1-D47G-MLVNTLVGY`  | 234  | 236  |
| >TSC1-D47G-MLVNTLVGY`  | 26   | >TSC1-D47G-MLVNTLVGY`  | 42   | 16   |
| >TSC1-D47G-MLVNTLVGY`  | 101  | >TSC1-D47G-MLVNTLVGY`  | 148  | 47   |
| >TSC1-D47G-MLVNTLVGY`  | 612  | >TSC1-D47G-MLVNTLVGY`  | 309  | 303  |
| >TSC1-D47G-MLVNTLVGY`  | 1006 | >TSC1-D47G-MLVNTLVGY`  | 128  | 878  |
| >TSC1-D47G-MLVNTLVGY`  | 1209 | >TSC1-D47G-MLVNTLVGY`  | 381  | 828  |
| >TSC1-D47G-MLVNTLVGY`  | 505  | >TSC1-D47G-MLVNTLVGY`  | 415  | 90   |
| >TSC1-D47G-PMLVNTLVG`  | 493  | >TSC1-D47G-PMLVNTLVG`  | 221  | 272  |
| >TSC1-D47G-PMLVNTLVG`  | 25   | >TSC1-D47G-PMLVNTLVG`  | 16   | 9    |
| >TSC1-D47G-PMLVNTLVG`  | 437  | >TSC1-D47G-PMLVNTLVG`  | 748  | 311  |
| >TSC1-D47G-PMLVNTLVG`  | 199  | >TSC1-D47G-PMLVNTLVG`  | 69   | 130  |
| >TSC1-D47G-PMLVNTLVG`  | 530  | >TSC1-D47G-PMLVNTLVG`  | 202  | 328  |
| >TSC1-D47G-PMLVNTLVG`  | 762  | >TSC1-D47G-PMLVNTLVG`  | 456  | 306  |
| >TSC1-D47G-PMLVNTLVG`  | 111  | >TSC1-D47G-PMLVNTLVG`  | 160  | 49   |
| >TSC1-D47G-PMLVNTLVG`  | 371  | >TSC1-D47G-PMLVNTLVG`  | 443  | 72   |
| >TSC1-D47G-GPMLVNTLVG` | 172  | >TSC1-D47G-GPMLVNTLVG` | 138  | 34   |
| >TSC1-D47G-GPMLVNTLVG` | 403  | >TSC1-D47G-GPMLVNTLVG` | 549  | 146  |
| >TSC1-D47G-GPMLVNTLVG` | 488  | >TSC1-D47G-GPMLVNTLVG` | 2097 | 1609 |
| >TSC1-G461FLPGFLGDL    | 381  | >TSC1-G461FLPEFLGDL    | 380  | 1    |
| >TSC1-G461FLPGFLGDLA   | 15   | >TSC1-G461FLPEFLGDLA   | 14   | 1    |
| >TSC1-G461FLDLPGFLGDL  | 489  | >TSC1-G461FLDLPEFLGDL  | 576  | 87   |
| >TSC1-G461FLSDLPGFLGDL | 466  | >TSC1-G461FLSDLPEFLGDL | 146  | 320  |
| >TSC1-G461FLSDLPGFL    | 150  | >TSC1-G461FLSDLPEFL    | 326  | 176  |
| >TSC1-G461FLSDLPGFLGD  | 374  | >TSC1-G461FLSDLPEFLGDI | 681  | 307  |
| >TSC1-G461FLSDLPGFL    | 482  | >TSC1-G461FLSDLPEFL    | 1271 | 789  |
| >TSC1-G461FLTSLDLPGFL  | 121  | >TSC1-G461FLTSLDLPEFL  | 25   | 96   |
| >TSC1-G461FLTSLDLPGF   | 647  | >TSC1-G461FLTSLDLPEF   | 283  | 364  |
| >TSC1-G461FLTSLDLPGFL  | 7    | >TSC1-G461FLTSLDLPEFL  | 3    | 4    |
| >TSC1-G461FLTSLDLPGFL  | 10   | >TSC1-G461FLTSLDLPEFL  | 17   | 7    |
| >TSC1-G461FLTSLDLPGFL  | 1839 | >TSC1-G461FLTSLDLPEFL  | 307  | 1532 |
| >TSC1-G461FLTSLDLPGFL  | 21   | >TSC1-G461FLTSLDLPEFL  | 8    | 13   |

|                         |      |                          |       |       |
|-------------------------|------|--------------------------|-------|-------|
| >TSC1-G461E TLSDLPGFL   | 111  | >TSC1-G461E TLSDLPEFL    | 29    | 82    |
| >TSC1-G461E TLSDLPGFL   | 49   | >TSC1-G461E TLSDLPEFL    | 19    | 30    |
| >TSC1-G461E TLSDLPGFL   | 87   | >TSC1-G461E TLSDLPEFL    | 8     | 79    |
| >TSC1-G461E TLSDLPGFL   | 12   | >TSC1-G461E TLSDLPEFL    | 6     | 6     |
| >TSC1-G461E TLSDLPGFL   | 277  | >TSC1-G461E TLSDLPEFL    | 78    | 199   |
| >TSC1-G461E TLSDLPGF    | 511  | >TSC1-G461E TLSDLPEF     | 455   | 56    |
| >TSC1-G461E VTLSLDPGFL  | 893  | >TSC1-G461E VTLSLDPPEFL  | 383   | 510   |
| >TSC1-G461E VTLSLDPGFL  | 229  | >TSC1-G461E VTLSLDPPEFL  | 86    | 143   |
| >TSC1-G461E VTLSLDPGFL  | 416  | >TSC1-G461E VTLSLDPPEFL  | 712   | 296   |
| >TSC1-G461E VTLSLDPGF   | 218  | >TSC1-G461E VTLSLDPPEF   | 341   | 123   |
| >TSC1-G461E VTLSLDPGFL  | 339  | >TSC1-G461E VTLSLDPPEFL  | 183   | 156   |
| >TSC1-G461E VTLSLDPGFL  | 112  | >TSC1-G461E VTLSLDPPEFL  | 45    | 67    |
| >TSC1-G461E VTLSLDPGFL  | 445  | >TSC1-G461E VTLSLDPPEFL  | 170   | 275   |
| >TSC1-G461E VTLSLDPGFL  | 1334 | >TSC1-G461E VTLSLDPPEFL  | 344   | 990   |
| >TSC1-G461E VTLSLDPGF   | 3495 | >TSC1-G461E VTLSLDPPEF   | 468   | 3027  |
| >TSC1-G461E VTLSLDPGF   | 1432 | >TSC1-G461E VTLSLDPPEF   | 215   | 1217  |
| >TSC1-G461E VTLSLDPGF   | 8    | >TSC1-G461E VTLSLDPPEF   | 10    | 2     |
| >TSC1-G461E VTLSLDPGFL  | 138  | >TSC1-G461E VTLSLDPPEFL  | 160   | 22    |
| >TSC1-G461E VTLSLDPGFL  | 251  | >TSC1-G461E VTLSLDPPEFL  | 313   | 62    |
| >TSC1-G461E VTLSLDPGF   | 166  | >TSC1-G461E VTLSLDPPEF   | 67    | 99    |
| >TSC1-G461E VTLSLDPGF   | 6    | >TSC1-G461E VTLSLDPPEF   | 6     | 0     |
| >TSC1-G461E VTLSLDPGFL  | 47   | >TSC1-G461E VTLSLDPPEFL  | 62    | 15    |
| >TSC1-G461E VTLSLDPGF   | 396  | >TSC1-G461E VTLSLDPPEF   | 202   | 194   |
| >TSC1-G461E VTLSLDPGF   | 70   | >TSC1-G461E VTLSLDPPEF   | 31    | 39    |
| >TSC1-G461E VTLSLDPGFL  | 71   | >TSC1-G461E VTLSLDPPEFL  | 174   | 103   |
| >TSC1-G461E SVTSLDLPGFI | 1475 | >TSC1-G461E SVTSLDLPPEFL | 477   | 998   |
| >TSC1-G461E SVTSLDLPGF  | 124  | >TSC1-G461E SVTSLDLPPEF  | 160   | 36    |
| >TSC1-G461E SVTSLDLPGFI | 371  | >TSC1-G461E SVTSLDLPPEFL | 171   | 200   |
| >TSC1-G461E SVTSLDLPGF  | 208  | >TSC1-G461E SVTSLDLPPEF  | 305   | 97    |
| >TSC1-G461E SVTSLDLPGF  | 212  | >TSC1-G461E SVTSLDLPPEF  | 178   | 34    |
| >TSC1-G461E GSVTSLDLPG  | 368  | >TSC1-G461E GSVTSLDLPPEI | 474   | 106   |
| >TSC1-G461E GSVTSLDLPG  | 769  | >TSC1-G461E GSVTSLDLPPEI | 356   | 413   |
| >TSC1-G461E GSVTSLDLPG  | 12   | >TSC1-G461E GSVTSLDLPPEI | 15    | 3     |
| >TSC1-G461E GSVTSLDLPG  | 982  | >TSC1-G461E GSVTSLDLPPEI | 498   | 484   |
| >TSC1-G461E GSVTSLDLPG  | 91   | >TSC1-G461E GSVTSLDLPPEI | 49    | 42    |
| >TSC1-P590S PPPTRVGF    | 118  | >TSC1-P590S PSPTRVGF     | 213   | 95    |
| >TSC1-P590S PPPTRVGF    | 228  | >TSC1-P590S PSPTRVGF     | 30541 | 30313 |
| >TSC1-P590S IPPPTRVGF   | 176  | >TSC1-P590S IPSPTRVGF    | 15114 | 14938 |
| >TSC1-P590S IPPPTRVGF   | 28   | >TSC1-P590S IPSPTRVGF    | 169   | 141   |
| >TSC1-P590S IPPPTRVGF   | 234  | >TSC1-P590S IPSPTRVGF    | 39    | 195   |
| >TSC1-P590S IPPPTRVGF   | 494  | >TSC1-P590S IPSPTRVGF    | 124   | 370   |
| >TSC1-P590S IPPPTRVGF   | 380  | >TSC1-P590S IPSPTRVGF    | 46    | 334   |
| >TSC1-P590S IPPPTRVGF   | 2118 | >TSC1-P590S IPSPTRVGF    | 290   | 1828  |

|                         |      |                         |       |       |
|-------------------------|------|-------------------------|-------|-------|
| >TSC1-P590S IPPPTRVGF   | 387  | >TSC1-P590S IPSPTRVGF   | 16562 | 16175 |
| >TSC1-P590S IPPPTRVGF   | 1927 | >TSC1-P590S IPSPTRVGF   | 377   | 1550  |
| >TSC1-P590S KIPPTRV     | 87   | >TSC1-P590S KIPSPTRV    | 66    | 21    |
| >TSC1-P590S KIPPTRV     | 368  | >TSC1-P590S KIPSPTRV    | 775   | 407   |
| >TSC1-P590S KIPPTRV     | 26   | >TSC1-P590S KIPSPTRV    | 37    | 11    |
| >TSC1-P590S KIPPTRV     | 261  | >TSC1-P590S KIPSPTRV    | 329   | 68    |
| >TSC1-P590S KIPPTRV     | 22   | >TSC1-P590S KIPSPTRV    | 39    | 17    |
| >TSC1-P590S KIPPTRVGF   | 78   | >TSC1-P590S KIPSPTRVGF  | 50    | 28    |
| >TSC1-P590S KIPPTRVGF   | 603  | >TSC1-P590S KIPSPTRVGF  | 375   | 228   |
| >TSC1-P590S KIPPTRVGF   | 256  | >TSC1-P590S KIPSPTRVGF  | 344   | 88    |
| >TSC1-P590S CKIPPTR     | 381  | >TSC1-P590S CKIPSPTR    | 219   | 162   |
| >TSC1-P590S CKIPPTRV    | 215  | >TSC1-P590S CKIPSPTRV   | 96    | 119   |
| >TSC1-P590S CKIPPTRVGI  | 7    | >TSC1-P590S CKIPSPTRVGI | 5     | 2     |
| >TSC1-P590S SPCKIPPTRV  | 425  | >TSC1-P590S SPCKIPSPTRV | 426   | 1     |
| >TSC1-P590S TPSPCKIPP   | 1705 | >TSC1-P590S TPSPCKIPS   | 185   | 1520  |
| >TSC1-P590S TPSPCKIPPPT | 190  | >TSC1-P590S TPSPCKIPSPT | 171   | 19    |
| >TSC1-P590S FTPSPCKIPP  | 158  | >TSC1-P590S FTPSPCKIPS  | 78    | 80    |
| >TSC1-P590S FTPSPCKIPPP | 74   | >TSC1-P590S FTPSPCKIPSP | 95    | 21    |
| >TSC1-Q65E- QEPHDKHL    | 247  | >TSC1-Q65E- EEPHDKHL    | 284   | 37    |
| >TSC1-Q65E- QEPHDKHLL   | 78   | >TSC1-Q65E- EEPHDKHLL   | 99    | 21    |
| >TSC1-Q65E- LQEPHDKHLL  | 3810 | >TSC1-Q65E- LEEPDKHLL   | 128   | 3682  |
| >TSC1-Q65E- LQEPHDKHL   | 8836 | >TSC1-Q65E- LEEPDKHL    | 430   | 8406  |
| >TSC1-Q65E- TLQEPHDKHL  | 129  | >TSC1-Q65E- TLEEPDKHL   | 200   | 71    |
| >TSC1-Q65E- TLQEPHDKHL  | 160  | >TSC1-Q65E- TLEEPDKHL   | 713   | 553   |
| >TSC1-Q65E- TLQEPHDKHL  | 42   | >TSC1-Q65E- TLEEPDKHL   | 201   | 159   |
| >TSC1-Q65E- TLQEPHDKHL  | 246  | >TSC1-Q65E- TLEEPDKHL   | 1665  | 1419  |
| >TSC1-Q65E- TLQEPHDKHL  | 70   | >TSC1-Q65E- TLEEPDKHL   | 484   | 414   |
| >TSC1-Q65E- TLQEPHDKHL  | 461  | >TSC1-Q65E- TLEEPDKHL   | 2043  | 1582  |
| >TSC1-Q65E- TLQEPHDKHL  | 45   | >TSC1-Q65E- TLEEPDKHL   | 103   | 58    |
| >TSC1-Q65E- TLQEPHDKHL  | 10   | >TSC1-Q65E- TLEEPDKHL   | 18    | 8     |
| >TSC1-Q65E- TLQEPHDK    | 145  | >TSC1-Q65E- TLEEPHDK    | 1176  | 1031  |
| >TSC1-Q65E- TTLQEPHDK   | 62   | >TSC1-Q65E- TTLLEPHDK   | 40    | 22    |
| >TSC1-Q65E- TTLQEPHDK†  | 501  | >TSC1-Q65E- TTLLEPHDKH  | 468   | 33    |
| >TSC1-Q65E- TTLQEPHDK   | 296  | >TSC1-Q65E- TTLLEPHDK   | 258   | 38    |
| >TSC1-Q65E- TTLQEPHDK†  | 1338 | >TSC1-Q65E- TTLLEPHDKH  | 364   | 974   |
| >TSC1-Q65E- TTLQEPHDK†  | 71   | >TSC1-Q65E- TTLLEPHDKH  | 92    | 21    |
| >TSC1-Q65E- TTLQEPHDK   | 66   | >TSC1-Q65E- TTLLEPHDK   | 78    | 12    |
| >TSC1-Q65E- LTTLQEPHDK  | 150  | >TSC1-Q65E- LTTLEPHDK   | 197   | 47    |
| >TSC1-Q65E- ALHILTTLQ   | 217  | >TSC1-Q65E- ALHILTTL    | 10161 | 9944  |
| >TSC1-R204L RSHYSMKE    | 378  | >TSC1-R204L LSHYSMKE    | 6380  | 6002  |
| >TSC1-R204L RSHYSMKENI  | 123  | >TSC1-R204L LSHYSMKENI  | 2888  | 2765  |
| >TSC1-R204L RSHYSMKENI  | 142  | >TSC1-R204L LSHYSMKENI  | 366   | 224   |
| >TSC1-R204L RSHYSMKEN   | 167  | >TSC1-R204L LSHYSMKEN   | 1912  | 1745  |

|                        |       |                        |       |       |
|------------------------|-------|------------------------|-------|-------|
| >TSC1-R204L RSHYSMKENI | 8     | >TSC1-R204L LSHYSMKENL | 30    | 22    |
| >TSC1-R204L RSHYSMKENI | 124   | >TSC1-R204L LSHYSMKENL | 207   | 83    |
| >TSC1-R204L LRSHYSMKEN | 22923 | >TSC1-R204L LLSHYSMKEN | 230   | 22693 |
| >TSC1-R204L LRSHYSMKEN | 7864  | >TSC1-R204L LLSHYSMKEN | 7     | 7857  |
| >TSC1-R204L LRSHYSMKEN | 18806 | >TSC1-R204L LLSHYSMKEN | 48    | 18758 |
| >TSC1-R204L LRSHYSMKEN | 25981 | >TSC1-R204L LLSHYSMKEN | 92    | 25889 |
| >TSC1-R204L LRSHYSMKEN | 24114 | >TSC1-R204L LLSHYSMKEN | 173   | 23941 |
| >TSC1-R204L LRSHYSMKEN | 25562 | >TSC1-R204L LLSHYSMKEN | 279   | 25283 |
| >TSC1-R204L LRSHYSMKEN | 24497 | >TSC1-R204L LLSHYSMKEN | 175   | 24322 |
| >TSC1-R204L LRSHYSMKEN | 25346 | >TSC1-R204L LLSHYSMKEN | 6     | 25340 |
| >TSC1-R204L LRSHYSMK   | 15971 | >TSC1-R204L LLSHYSMK   | 39    | 15932 |
| >TSC1-R204L LRSHYSMK   | 14146 | >TSC1-R204L LLSHYSMK   | 106   | 14040 |
| >TSC1-R204L LRSHYSMKEN | 181   | >TSC1-R204L LLSHYSMKEN | 593   | 412   |
| >TSC1-R204L LRSHYSMK   | 204   | >TSC1-R204L LLSHYSMK   | 19319 | 19115 |
| >TSC1-R204L LRSHYSMKEN | 369   | >TSC1-R204L LLSHYSMKEN | 28775 | 28406 |
| >TSC1-R204L MYPCNFVSFL | 22603 | >TSC1-R204L MYPCNFVSFL | 284   | 22319 |
| >TSC1-R204L MYPCNFVSFL | 459   | >TSC1-R204L MYPCNFVSFL | 32    | 427   |
| >TSC1-R204L MYPCNFVSFL | 461   | >TSC1-R204L MYPCNFVSFL | 27    | 434   |
| >TSC1-R204L MYPCNFVSFL | 68    | >TSC1-R204L MYPCNFVSFL | 4     | 64    |
| >TSC1-R204L MYPCNFVSFL | 20    | >TSC1-R204L MYPCNFVSFL | 5332  | 5312  |
| >TSC1-R204L MYPCNFVSFL | 41    | >TSC1-R204L MYPCNFVSFL | 8731  | 8690  |
| >TSC1-R204L MYPCNFVSFL | 33    | >TSC1-R204L MYPCNFVSFL | 15336 | 15303 |
| >TSC1-R204L MYPCNFVSFL | 16323 | >TSC1-R204L MYPCNFVSFL | 131   | 16192 |
| >TSC1-R204L MYPCNFVSFL | 13952 | >TSC1-R204L MYPCNFVSFL | 42    | 13910 |
| >TSC1-R204L MYPCNFVSFL | 15    | >TSC1-R204L MYPCNFVSFL | 3216  | 3201  |
| >TSC1-R204L MYPCNFVSFL | 7428  | >TSC1-R204L MYPCNFVSFL | 262   | 7166  |
| >TSC1-R204L MYPCNFVSFL | 1634  | >TSC1-R204L MYPCNFVSFL | 479   | 1155  |
| >TSC1-R204L FLRSHYSM   | 357   | >TSC1-R204L FLLSHYSM   | 12    | 345   |
| >TSC1-R204L FLRSHYSM   | 22    | >TSC1-R204L FLLSHYSM   | 10    | 12    |
| >TSC1-R204L FLRSHYSM   | 15    | >TSC1-R204L FLLSHYSM   | 26    | 11    |
| >TSC1-R204L FLRSHYSMK  | 482   | >TSC1-R204L FLLSHYSMK  | 999   | 517   |
| >TSC1-R204L FLRSHYSM   | 1057  | >TSC1-R204L FLLSHYSM   | 26    | 1031  |
| >TSC1-R204L FLRSHYSM   | 57    | >TSC1-R204L FLLSHYSM   | 3     | 54    |
| >TSC1-R204L FLRSHYSMK  | 6540  | >TSC1-R204L FLLSHYSMK  | 196   | 6344  |
| >TSC1-R204L FLRSHYSM   | 310   | >TSC1-R204L FLLSHYSM   | 9     | 301   |
| >TSC1-R204L FLRSHYSM   | 2871  | >TSC1-R204L FLLSHYSM   | 21    | 2850  |
| >TSC1-R204L FLRSHYSM   | 2803  | >TSC1-R204L FLLSHYSM   | 11    | 2792  |
| >TSC1-R204L FLRSHYSM   | 12    | >TSC1-R204L FLLSHYSM   | 5     | 7     |
| >TSC1-R204L FLRSHYSMK  | 864   | >TSC1-R204L FLLSHYSMK  | 180   | 684   |
| >TSC1-R204L FLRSHYSMK  | 43    | >TSC1-R204L FLLSHYSMK  | 51    | 8     |
| >TSC1-R204L FLRSHYSMK  | 4305  | >TSC1-R204L FLLSHYSMK  | 187   | 4118  |
| >TSC1-R204L FLRSHYSM   | 1788  | >TSC1-R204L FLLSHYSM   | 405   | 1383  |
| >TSC1-R204L FLRSHYSMK  | 113   | >TSC1-R204L FLLSHYSMK  | 5258  | 5145  |



|                         |      |                         |      |      |
|-------------------------|------|-------------------------|------|------|
| >TSC1-R204L FLRSHYSMK   | 942  | >TSC1-R204L FLLSHYSMK   | 411  | 531  |
| >TSC1-R204L FLRSHYSM    | 5871 | >TSC1-R204L FLLSHYSM    | 144  | 5727 |
| >TSC1-R204L FLRSHYSM    | 426  | >TSC1-R204L FLLSHYSM    | 9928 | 9502 |
| >TSC1-R204L FLRSHYSM    | 15   | >TSC1-R204L FLLSHYSM    | 38   | 23   |
| >TSC1-R204L FLRSHYSM    | 47   | >TSC1-R204L FLLSHYSM    | 161  | 114  |
| >TSC1-R204L FLRSHYSM    | 130  | >TSC1-R204L FLLSHYSM    | 176  | 46   |
| >TSC1-R204L FLRSHYSM    | 14   | >TSC1-R204L FLLSHYSM    | 20   | 6    |
| >TSC1-R204L FLRSHYSMK   | 247  | >TSC1-R204L FLLSHYSMK   | 352  | 105  |
| >TSC1-R204L FLRSHYSM    | 1434 | >TSC1-R204L FLLSHYSM    | 292  | 1142 |
| >TSC1-R204L SFLRSHYSMK  | 120  | >TSC1-R204L SFLLSHYSMK  | 154  | 34   |
| >TSC1-R204L SFLRSHYSMK  | 172  | >TSC1-R204L SFLLSHYSMK  | 101  | 71   |
| >TSC1-R204L SFLRSHYSM   | 360  | >TSC1-R204L SFLLSHYSM   | 1672 | 1312 |
| >TSC1-R204L SFLRSHYSMK  | 23   | >TSC1-R204L SFLLSHYSMK  | 61   | 38   |
| >TSC1-R204L SFLRSHYSMK  | 437  | >TSC1-R204L SFLLSHYSMK  | 378  | 59   |
| >TSC1-R204L SFLRSHYSMK  | 449  | >TSC1-R204L SFLLSHYSMK  | 830  | 381  |
| >TSC1-R204L SFLRSHYSM   | 245  | >TSC1-R204L SFLLSHYSM   | 232  | 13   |
| >TSC1-R204L SFLRSHYSM   | 106  | >TSC1-R204L SFLLSHYSM   | 148  | 42   |
| >TSC1-R204L VSFLRSHYSM  | 40   | >TSC1-R204L VSFLLSHYSM  | 55   | 15   |
| >TSC1-R204L VSFLRSHY    | 459  | >TSC1-R204L VSFLLSHY    | 397  | 62   |
| >TSC1-R204L VSFLRSHYSM  | 10   | >TSC1-R204L VSFLLSHYSM  | 8    | 2    |
| >TSC1-R204L VSFLRSHY    | 145  | >TSC1-R204L VSFLLSHY    | 62   | 83   |
| >TSC1-R204L VSFLRSHYSM  | 88   | >TSC1-R204L VSFLLSHYSM  | 153  | 65   |
| >TSC1-R204L VSFLRSHY    | 36   | >TSC1-R204L VSFLLSHY    | 29   | 7    |
| >TSC1-R204L VSFLRSHYSM  | 143  | >TSC1-R204L VSFLLSHYSM  | 190  | 47   |
| >TSC1-R204L VSFLRSHYSM  | 598  | >TSC1-R204L VSFLLSHYSM  | 339  | 259  |
| >TSC1-R204L VSFLRSHYSM  | 57   | >TSC1-R204L VSFLLSHYSM  | 43   | 14   |
| >TSC1-R204L VSFLRSHY    | 602  | >TSC1-R204L VSFLLSHY    | 149  | 453  |
| >TSC1-R204L VSFLRSHY    | 92   | >TSC1-R204L VSFLLSHY    | 84   | 8    |
| >TSC1-R204L VSFLRSHYSM  | 390  | >TSC1-R204L VSFLLSHYSM  | 329  | 61   |
| >TSC1-R204L VSFLRSHY    | 52   | >TSC1-R204L VSFLLSHY    | 61   | 9    |
| >TSC1-R204L VSFLRSHYSM  | 80   | >TSC1-R204L VSFLLSHYSM  | 95   | 15   |
| >TSC1-R204L VSFLRSHY    | 4    | >TSC1-R204L VSFLLSHY    | 4    | 0    |
| >TSC1-R204L VSFLRSHYSM  | 6    | >TSC1-R204L VSFLLSHYSM  | 6    | 0    |
| >TSC1-R204L VSFLRSHY    | 457  | >TSC1-R204L VSFLLSHY    | 350  | 107  |
| >TSC1-R204L VSFLRSHYSM  | 285  | >TSC1-R204L VSFLLSHYSM  | 222  | 63   |
| >TSC1-R204L VSFLRSHY    | 416  | >TSC1-R204L VSFLLSHY    | 90   | 326  |
| >TSC1-R204L VSFLRSHYSM  | 262  | >TSC1-R204L VSFLLSHYSM  | 85   | 177  |
| >TSC1-R204L VSFLRSHYSM  | 190  | >TSC1-R204L VSFLLSHYSM  | 71   | 119  |
| >TSC1-R204L VSFLRSHYSM  | 45   | >TSC1-R204L VSFLLSHYSM  | 44   | 1    |
| >TSC1-R204L VSFLRSHYSM  | 626  | >TSC1-R204L VSFLLSHYSM  | 282  | 344  |
| >TSC1-R204L VSFLRSHYSM  | 241  | >TSC1-R204L VSFLLSHYSM  | 257  | 16   |
| >TSC1-R204L FVSFLRSHY   | 774  | >TSC1-R204L FVSFLLSHY   | 310  | 464  |
| >TSC1-R204L FVSFLRSHYSM | 70   | >TSC1-R204L FVSFLLSHYSM | 23   | 47   |

|                         |       |                         |       |       |
|-------------------------|-------|-------------------------|-------|-------|
| >TSC1-R204L FVSFLRSHYSM | 800   | >TSC1-R204L FVSFLLSHYSM | 177   | 623   |
| >TSC1-R204L FVSFLRSHYSM | 540   | >TSC1-R204L FVSFLLSHYSM | 161   | 379   |
| >TSC1-R204L FVSFLRSHY   | 1955  | >TSC1-R204L FVSFLLSHY   | 202   | 1753  |
| >TSC1-R204L FVSFLRSHY   | 1512  | >TSC1-R204L FVSFLLSHY   | 227   | 1285  |
| >TSC1-R204L FVSFLRSHY   | 186   | >TSC1-R204L FVSFLLSHY   | 12    | 174   |
| >TSC1-R204L FVSFLRSHYSM | 1991  | >TSC1-R204L FVSFLLSHYSM | 453   | 1538  |
| >TSC1-R204L FVSFLRSHY   | 15    | >TSC1-R204L FVSFLLSHY   | 10    | 5     |
| >TSC1-R204L FVSFLRSHY   | 42    | >TSC1-R204L FVSFLLSHY   | 54    | 12    |
| >TSC1-R204L FVSFLRSHY   | 120   | >TSC1-R204L FVSFLLSHY   | 291   | 171   |
| >TSC1-R204L FVSFLRSHYSM | 50    | >TSC1-R204L FVSFLLSHYSM | 72    | 22    |
| >TSC1-R204L FVSFLRSHY   | 104   | >TSC1-R204L FVSFLLSHY   | 18    | 86    |
| >TSC1-R204L FVSFLRSHY   | 70    | >TSC1-R204L FVSFLLSHY   | 67    | 3     |
| >TSC1-R204L FVSFLRSHYSM | 213   | >TSC1-R204L FVSFLLSHYSM | 194   | 19    |
| >TSC1-R204L FVSFLRSHY   | 489   | >TSC1-R204L FVSFLLSHY   | 429   | 60    |
| >TSC1-R204L FVSFLRSHYSM | 155   | >TSC1-R204L FVSFLLSHYSM | 137   | 18    |
| >TSC1-R204L FVSFLRSHY   | 12    | >TSC1-R204L FVSFLLSHY   | 9     | 3     |
| >TSC1-R204L FVSFLRSHYSM | 55    | >TSC1-R204L FVSFLLSHYSM | 54    | 1     |
| >TSC1-R204L FVSFLRSHY   | 195   | >TSC1-R204L FVSFLLSHY   | 189   | 6     |
| >TSC1-R204L NFVSFLRSHY  | 220   | >TSC1-R204L NFVSFLLSHY  | 46    | 174   |
| >TSC1-R204L NFVSFLRSHY  | 178   | >TSC1-R204L NFVSFLLSHY  | 220   | 42    |
| >TSC1-R204L NFVSFLRSHY  | 445   | >TSC1-R204L NFVSFLLSHY  | 183   | 262   |
| >TSC1-R204L NFVSFLRSHY  | 721   | >TSC1-R204L NFVSFLLSHY  | 448   | 273   |
| >TSC1-R204L NFVSFLRSHY  | 927   | >TSC1-R204L NFVSFLLSHY  | 109   | 818   |
| >TSC1-R204L CNFVSFLRSH' | 270   | >TSC1-R204L CNFVSFLLSH' | 157   | 113   |
| >TSC1-R204L CNFVSFLRSH' | 355   | >TSC1-R204L CNFVSFLLSH' | 387   | 32    |
| >TSC1-R204L CNFVSFLR    | 81    | >TSC1-R204L CNFVSFLL    | 12382 | 12301 |
| >TSC1-R204L CNFVSFLR    | 29    | >TSC1-R204L CNFVSFLL    | 14113 | 14084 |
| >TSC1-R204L CNFVSFLRSH' | 122   | >TSC1-R204L CNFVSFLLSH' | 135   | 13    |
| >TSC1-R204L CNFVSFLRSH' | 482   | >TSC1-R204L CNFVSFLLSH' | 370   | 112   |
| >TSC1-R204L CNFVSFLRSH' | 466   | >TSC1-R204L CNFVSFLLSH' | 462   | 4     |
| >TSC1-R204L CNFVSFLR    | 123   | >TSC1-R204L CNFVSFLL    | 29309 | 29186 |
| >TSC1-R204L CNFVSFLR    | 34773 | >TSC1-R204L CNFVSFLL    | 387   | 34386 |
| >TSC1-R204L YPCNFVSFLR  | 33541 | >TSC1-R204L YPCNFVSFLL  | 66    | 33475 |
| >TSC1-R204L YPCNFVSFLR  | 54    | >TSC1-R204L YPCNFVSFLL  | 10610 | 10556 |
| >TSC1-R204L YPCNFVSFLR  | 93    | >TSC1-R204L YPCNFVSFLL  | 8307  | 8214  |
| >TSC1-R204L YPCNFVSFLR  | 35    | >TSC1-R204L YPCNFVSFLL  | 21332 | 21297 |
| >TSC1-R204L YPCNFVSFLR  | 13038 | >TSC1-R204L YPCNFVSFLL  | 46    | 12992 |
| >TSC1-R204L YPCNFVSFLR  | 497   | >TSC1-R204L YPCNFVSFLL  | 520   | 23    |
| >TSC1-R204L YPCNFVSFLR' | 1455  | >TSC1-R204L YPCNFVSFLL' | 413   | 1042  |
| >TSC1-R204L YPCNFVSFLR  | 10657 | >TSC1-R204L YPCNFVSFLL  | 347   | 10310 |
| >TSC1-R204L YPCNFVSFLR  | 334   | >TSC1-R204L YPCNFVSFLL  | 28558 | 28224 |
| >TSC1-R804T RNMI AELR   | 335   | >TSC1-R804T TNMI AELR   | 3365  | 3030  |
| >TSC1-R804T RNMI AELR   | 1674  | >TSC1-R804T TNMI AELR   | 75    | 1599  |

|                        |       |                       |       |       |
|------------------------|-------|-----------------------|-------|-------|
| >TSC1-R804TRNMIAELRIE  | 368   | >TSC1-R804TTNMIAELRIE | 9854  | 9486  |
| >TSC1-R804TRNMIAELR    | 173   | >TSC1-R804TTNMIAELR   | 1380  | 1207  |
| >TSC1-R804TRNMIAELRI   | 315   | >TSC1-R804TTNMIAELRI  | 2340  | 2025  |
| >TSC1-R804TCRNMIAELR   | 25126 | >TSC1-R804TCNMIAELR   | 247   | 24879 |
| >TSC1-R804TCRNMIAELR   | 10024 | >TSC1-R804TCNMIAELR   | 49    | 9975  |
| >TSC1-R804TCRNMIAELR   | 14313 | >TSC1-R804TCNMIAELR   | 197   | 14116 |
| >TSC1-R804TCRNMIAELR   | 537   | >TSC1-R804TCNMIAELR   | 4     | 533   |
| >TSC1-R804TCRNMIAEL    | 15092 | >TSC1-R804TCNMIAEL    | 47    | 15045 |
| >TSC1-R804TCRNMIAEL    | 26793 | >TSC1-R804TCNMIAEL    | 227   | 26566 |
| >TSC1-R804TCRNMIAEL    | 469   | >TSC1-R804TCNMIAEL    | 23802 | 23333 |
| >TSC1-R804TCRNMIAELR   | 329   | >TSC1-R804TCNMIAELR   | 22352 | 22023 |
| >TSC1-R804TCRNMIAELRI  | 183   | >TSC1-R804TCNMIAELRI  | 25215 | 25032 |
| >TSC1-R804TCRNMIAEL    | 126   | >TSC1-R804TCNMIAEL    | 17826 | 17700 |
| >TSC1-R804TCRNMIAEL    | 95    | >TSC1-R804TCNMIAEL    | 6306  | 6211  |
| >TSC1-R804TCRNMIAELRI  | 377   | >TSC1-R804TCNMIAELRI  | 26456 | 26079 |
| >TSC1-R804TCRNMIAEL    | 15961 | >TSC1-R804TCNMIAEL    | 250   | 15711 |
| >TSC1-R804TQELQTKLEDC  | 3950  | >TSC1-R804TQELQTKLEDC | 130   | 3820  |
| >TSC1-R804TDRCRNMIAELF | 460   | >TSC1-R804TDCTNMIAELF | 509   | 49    |
| >TSC1-R804TEDRCRNMIAEL | 161   | >TSC1-R804TEDCTNMIAEL | 130   | 31    |
| >TSC1-R804TEDRCRNM     | 129   | >TSC1-R804TEDCTNM     | 35    | 94    |
| >TSC1-R804TEDRCRNM     | 410   | >TSC1-R804TEDCTNM     | 110   | 300   |
| >TSC1-R804TEDRCRNMIAE  | 68    | >TSC1-R804TEDCTNMIAE  | 23    | 45    |
| >TSC1-R804TEDRCRNMIAE  | 426   | >TSC1-R804TEDCTNMIAE  | 503   | 77    |
| >TSC1-R804TKLEDCRNM    | 938   | >TSC1-R804TKLEDCTNM   | 60    | 878   |
| >TSC1-R804TKLEDCRNM    | 943   | >TSC1-R804TKLEDCTNM   | 72    | 871   |
| >TSC1-R804TKLEDCRNM    | 92    | >TSC1-R804TKLEDCTNM   | 8     | 84    |
| >TSC1-R804TKLEDCRNMIA  | 306   | >TSC1-R804TKLEDCTNMIA | 116   | 190   |
| >TSC1-R804TKLEDCRNM    | 1687  | >TSC1-R804TKLEDCTNM   | 86    | 1601  |
| >TSC1-R804TKLEDCRNM    | 2878  | >TSC1-R804TKLEDCTNM   | 278   | 2600  |
| >TSC1-R804TKLEDCRNM    | 1703  | >TSC1-R804TKLEDCTNM   | 176   | 1527  |
| >TSC1-R804TKLEDCRNM    | 886   | >TSC1-R804TKLEDCTNM   | 19    | 867   |
| >TSC1-R804TKLEDCRNMIA  | 995   | >TSC1-R804TKLEDCTNMIA | 109   | 886   |
| >TSC1-R804TKLEDCRNM    | 883   | >TSC1-R804TKLEDCTNM   | 133   | 750   |
| >TSC1-R804TKLEDCRNM    | 53    | >TSC1-R804TKLEDCTNM   | 21    | 32    |
| >TSC1-R804TKLEDCRNMIA  | 104   | >TSC1-R804TKLEDCTNMIA | 62    | 42    |
| >TSC1-R804TKLEDCRNM    | 2441  | >TSC1-R804TKLEDCTNM   | 335   | 2106  |
| >TSC1-R804TKLEDCRNM    | 312   | >TSC1-R804TKLEDCTNM   | 212   | 100   |
| >TSC1-R804TKLEDCRNM    | 269   | >TSC1-R804TKLEDCTNM   | 76    | 193   |
| >TSC1-R804TKLEDCRNM    | 695   | >TSC1-R804TKLEDCTNM   | 407   | 288   |
| >TSC1-R804TQTKLEDCT    | 72    | >TSC1-R804TQTKLEDCT   | 29723 | 29651 |
| >TSC1-R804TQTKLEDCTNM  | 226   | >TSC1-R804TQTKLEDCTNM | 111   | 115   |
| >TSC1-R804TQTKLEDCTNM  | 297   | >TSC1-R804TQTKLEDCTNM | 130   | 167   |
| >TSC1-R804TQTKLEDCTNM  | 905   | >TSC1-R804TQTKLEDCTNM | 496   | 409   |

|                         |      |                         |      |      |
|-------------------------|------|-------------------------|------|------|
| >TSC1-R804T LQTKLEDCRN  | 306  | >TSC1-R804T LQTKLEDCTN  | 137  | 169  |
| >TSC1-S1043 SELSTPEKPPH | 2003 | >TSC1-S1043 NELSTPEKPPH | 208  | 1795 |
| >TSC1-S1043 SSELSTPEK   | 35   | >TSC1-S1043 SSELSTPEK   | 3468 | 3433 |
| >TSC1-S1043 SSELSTPEK   | 129  | >TSC1-S1043 SSELSTPEK   | 4123 | 3994 |
| >TSC1-S1043 SSELSTPEK   | 354  | >TSC1-S1043 SSELSTPEK   | 6018 | 5664 |
| >TSC1-S1043 SSELSTPEK   | 11   | >TSC1-S1043 SSELSTPEK   | 18   | 7    |
| >TSC1-S1043 SSELSTPEK   | 74   | >TSC1-S1043 SSELSTPEK   | 40   | 34   |
| >TSC1-S1043 SSELSTPEK   | 35   | >TSC1-S1043 SSELSTPEK   | 161  | 126  |
| >TSC1-S1043 SSELSTPEK   | 153  | >TSC1-S1043 SSELSTPEK   | 361  | 208  |
| >TSC1-S1043 SSELSTPEK   | 15   | >TSC1-S1043 SSELSTPEK   | 14   | 1    |
| >TSC1-S1043 SSELSTPEK   | 130  | >TSC1-S1043 SSELSTPEK   | 118  | 12   |
| >TSC1-S1043 SSELSTPEK   | 104  | >TSC1-S1043 SSELSTPEK   | 153  | 49   |
| >TSC1-S1043 SSELSTPEK   | 162  | >TSC1-S1043 SSELSTPEK   | 151  | 11   |
| >TSC1-S1043 SSSSEL      | 168  | >TSC1-S1043 SSSSEL      | 312  | 144  |
| >TSC1-S1043 SSSSEL      | 16   | >TSC1-S1043 SSSSEL      | 96   | 80   |
| >TSC1-S1043 SSSSEL      | 538  | >TSC1-S1043 SSSSEL      | 132  | 406  |
| >TSC1-S1043 SSSSEL      | 294  | >TSC1-S1043 SSSSEL      | 811  | 517  |
| >TSC1-S1043 GSSSSSEL    | 892  | >TSC1-S1043 GSSSSSEL    | 447  | 445  |
| >TSC1-S1043 GSSSSSEL    | 144  | >TSC1-S1043 GSSSSSEL    | 326  | 182  |
| >TSC1-S1043 GSSSSSEL    | 10   | >TSC1-S1043 GSSSSSEL    | 118  | 108  |
| >TSC1-S1043 GSSSSSEL    | 7    | >TSC1-S1043 GSSSSSEL    | 56   | 49   |
| >TSC1-S1043 GGGSSSSSEL  | 310  | >TSC1-S1043 GGGSSSSSEL  | 1494 | 1184 |
| >TSC2-A1141ALDVPASQFL   | 200  | >TSC2-A1141ALDVPASQFL   | 285  | 85   |
| >TSC2-A1141ALDVPASQFL   | 13   | >TSC2-A1141ALDVPASQFL   | 49   | 36   |
| >TSC2-A1141ALDVPASQFL   | 35   | >TSC2-A1141ALDVPASQFL   | 100  | 65   |
| >TSC2-A1141ALDVPASQFL   | 16   | >TSC2-A1141ALDVPASQFL   | 42   | 26   |
| >TSC2-A1141ALDVPASQFL   | 38   | >TSC2-A1141ALDVPASQFL   | 63   | 25   |
| >TSC2-A1141ALDVPASQ     | 382  | >TSC2-A1141ALDVPASQ     | 2052 | 1670 |
| >TSC2-A1141ALDVPASQFL   | 12   | >TSC2-A1141ALDVPASQFL   | 30   | 18   |
| >TSC2-A1141ALDVPASQF    | 402  | >TSC2-A1141ALDVPASQF    | 223  | 179  |
| >TSC2-A1141ALDVPASQF    | 135  | >TSC2-A1141ALDVPASQF    | 881  | 746  |
| >TSC2-A1141ALDVPASQF    | 138  | >TSC2-A1141ALDVPASQF    | 186  | 48   |
| >TSC2-A1141GALDVPASQI   | 1065 | >TSC2-A1141GALDVPASQI   | 340  | 725  |
| >TSC2-A1141GALDVPASQI   | 561  | >TSC2-A1141GALDVPASQI   | 198  | 363  |
| >TSC2-A1141GALDVPASQI   | 191  | >TSC2-A1141GALDVPASQI   | 123  | 68   |
| >TSC2-A1141GALDVPASQI   | 111  | >TSC2-A1141GALDVPASQI   | 32   | 79   |
| >TSC2-A1141GALDVPASQI   | 712  | >TSC2-A1141GALDVPASQI   | 101  | 611  |
| >TSC2-A1141GALDVPASQI   | 163  | >TSC2-A1141GALDVPASQI   | 39   | 124  |
| >TSC2-A1141GALDVPASQI   | 5300 | >TSC2-A1141GALDVPASQI   | 269  | 5031 |
| >TSC2-A1141GALDVPASQI   | 476  | >TSC2-A1141GALDVPASQI   | 733  | 257  |
| >TSC2-A1141GALDVPASQI   | 11   | >TSC2-A1141GALDVPASQI   | 4    | 7    |
| >TSC2-A1141GALDVPASQI   | 367  | >TSC2-A1141GALDVPASQI   | 37   | 330  |
| >TSC2-A1141GALDVPASQI   | 492  | >TSC2-A1141GALDVPASQI   | 364  | 128  |

|                                    |      |                                    |     |      |
|------------------------------------|------|------------------------------------|-----|------|
| >TSC2-A1141GALDVPASQI              | 3752 | >TSC2-A1141GTLDVPASQF              | 61  | 3691 |
| >TSC2-A1141GALDVPASQI              | 1091 | >TSC2-A1141GTLDVPASQF              | 57  | 1034 |
| >TSC2-A1141VGALDVPASC              | 408  | >TSC2-A1141VGTLDVPASC              | 576 | 168  |
| >TSC2-A1141VGALDVPASC              | 268  | >TSC2-A1141VGTLDVPASC              | 253 | 15   |
| >TSC2-A1141GLRVGALDV               | 185  | >TSC2-A1141GLRVGTLDV               | 64  | 121  |
| >TSC2-A1141GLRVGALDVF              | 558  | >TSC2-A1141GLRVGTLDVF              | 349 | 209  |
| >TSC2-A1141GLRVGALDV               | 604  | >TSC2-A1141GLRVGTLDV               | 239 | 365  |
| >TSC2-A1141GLRVGALDV               | 121  | >TSC2-A1141GLRVGTLDV               | 58  | 63   |
| >TSC2-A1141GLRVGALDV               | 7    | >TSC2-A1141GLRVGTLDV               | 5   | 2    |
| >TSC2-A1141GLRVGALDVF              | 259  | >TSC2-A1141GLRVGTLDVF              | 206 | 53   |
| >TSC2-A1141GLRVGALDVF              | 388  | >TSC2-A1141GLRVGTLDVF              | 261 | 127  |
| >TSC2-D162 <sup>9</sup> DVDKHRCDK  | 431  | >TSC2-D162 <sup>9</sup> NVDKHRCDK  | 593 | 162  |
| >TSC2-D162 <sup>9</sup> MPTKDVKH   | 149  | >TSC2-D162 <sup>9</sup> MPTKNVDKH  | 195 | 46   |
| >TSC2-D162 <sup>9</sup> LMPTKDVKI  | 642  | >TSC2-D162 <sup>9</sup> LMPTKNVDK  | 406 | 236  |
| >TSC2-D162 <sup>9</sup> LMPTKDVKI  | 104  | >TSC2-D162 <sup>9</sup> LMPTKNVDK  | 105 | 1    |
| >TSC2-D162 <sup>9</sup> TLMPTKDV   | 387  | >TSC2-D162 <sup>9</sup> TLMPTKNV   | 76  | 311  |
| >TSC2-D162 <sup>9</sup> TLMPTKDV   | 112  | >TSC2-D162 <sup>9</sup> TLMPTKNV   | 21  | 91   |
| >TSC2-D162 <sup>9</sup> TLMPTKDV   | 22   | >TSC2-D162 <sup>9</sup> TLMPTKNV   | 8   | 14   |
| >TSC2-D162 <sup>9</sup> TLMPTKDV   | 517  | >TSC2-D162 <sup>9</sup> TLMPTKNV   | 183 | 334  |
| >TSC2-D162 <sup>9</sup> TLMPTKDV   | 29   | >TSC2-D162 <sup>9</sup> TLMPTKNV   | 10  | 19   |
| >TSC2-D162 <sup>9</sup> TLMPTKDV   | 30   | >TSC2-D162 <sup>9</sup> TLMPTKNV   | 10  | 20   |
| >TSC2-D162 <sup>9</sup> TLMPTKDV   | 41   | >TSC2-D162 <sup>9</sup> TLMPTKNV   | 24  | 17   |
| >TSC2-D162 <sup>9</sup> TLMPTKDV   | 16   | >TSC2-D162 <sup>9</sup> TLMPTKNV   | 6   | 10   |
| >TSC2-D162 <sup>9</sup> TLMPTKDV   | 4    | >TSC2-D162 <sup>9</sup> TLMPTKNV   | 3   | 1    |
| >TSC2-D162 <sup>9</sup> TLMPTKDVDI | 105  | >TSC2-D162 <sup>9</sup> TLMPTKNVDI | 33  | 72   |
| >TSC2-D162 <sup>9</sup> TLMPTKDVDI | 53   | >TSC2-D162 <sup>9</sup> TLMPTKNVDI | 29  | 24   |
| >TSC2-D162 <sup>9</sup> TLMPTKDVDI | 495  | >TSC2-D162 <sup>9</sup> TLMPTKNVDI | 421 | 74   |
| >TSC2-D162 <sup>9</sup> TLMPTKDV   | 793  | >TSC2-D162 <sup>9</sup> TLMPTKNV   | 139 | 654  |
| >TSC2-D162 <sup>9</sup> TLMPTKDV   | 880  | >TSC2-D162 <sup>9</sup> TLMPTKNV   | 104 | 776  |
| >TSC2-D162 <sup>9</sup> ATLMPTKDV  | 1011 | >TSC2-D162 <sup>9</sup> ATLMPTKNV  | 144 | 867  |
| >TSC2-D162 <sup>9</sup> ATLMPTKDVI | 63   | >TSC2-D162 <sup>9</sup> ATLMPTKNVI | 36  | 27   |
| >TSC2-D162 <sup>9</sup> ATLMPTKDVI | 213  | >TSC2-D162 <sup>9</sup> ATLMPTKNVI | 62  | 151  |
| >TSC2-D162 <sup>9</sup> ATLMPTKDV  | 1521 | >TSC2-D162 <sup>9</sup> ATLMPTKNV  | 154 | 1367 |
| >TSC2-D162 <sup>9</sup> ATLMPTKDV  | 444  | >TSC2-D162 <sup>9</sup> ATLMPTKNV  | 115 | 329  |
| >TSC2-D162 <sup>9</sup> ATLMPTKDVI | 147  | >TSC2-D162 <sup>9</sup> ATLMPTKNVI | 129 | 18   |
| >TSC2-D162 <sup>9</sup> HIATLMPTKD | 822  | >TSC2-D162 <sup>9</sup> HIATLMPTKN | 157 | 665  |
| >TSC2-D162 <sup>9</sup> HIATLMPTKD | 184  | >TSC2-D162 <sup>9</sup> HIATLMPTKN | 53  | 131  |
| >TSC2-D162 <sup>9</sup> HIATLMPTKD | 866  | >TSC2-D162 <sup>9</sup> HIATLMPTKN | 419 | 447  |
| >TSC2-D162 <sup>9</sup> HIATLMPTKD | 114  | >TSC2-D162 <sup>9</sup> HIATLMPTKN | 59  | 55   |
| >TSC2-D162 <sup>9</sup> HIATLMPTKD | 137  | >TSC2-D162 <sup>9</sup> HIATLMPTKN | 27  | 110  |
| >TSC2-D162 <sup>9</sup> HIATLMPTKD | 336  | >TSC2-D162 <sup>9</sup> HIATLMPTKN | 49  | 287  |
| >TSC2-D223 <sup>1</sup> DAVVCYNCL  | 797  | >TSC2-D223 <sup>1</sup> NAVVCYNCL  | 351 | 446  |
| >TSC2-D223 <sup>1</sup> DAVVCYNCLF | 826  | >TSC2-D223 <sup>1</sup> NAVVCYNCLF | 370 | 456  |

|                       |      |                       |      |      |
|-----------------------|------|-----------------------|------|------|
| >TSC2-D223†VLDAVVCY   | 164  | >TSC2-D223†VLNAVVCY   | 7702 | 7538 |
| >TSC2-D223†VLDAVVCYN( | 62   | >TSC2-D223†VLNAVVCYN( | 128  | 66   |
| >TSC2-D223†VLDAVVCYN( | 27   | >TSC2-D223†VLNAVVCYN( | 8    | 19   |
| >TSC2-D223†VLDAVVCYN( | 1034 | >TSC2-D223†VLNAVVCYN( | 48   | 986  |
| >TSC2-D223†VLDAVVCYN( | 398  | >TSC2-D223†VLNAVVCYN( | 988  | 590  |
| >TSC2-D223†VLDAVVCYN  | 19   | >TSC2-D223†VLNAVVCYN  | 33   | 14   |
| >TSC2-D223†VLDAVVCYN( | 18   | >TSC2-D223†VLNAVVCYN( | 30   | 12   |
| >TSC2-D223†VLDAVVCYN( | 18   | >TSC2-D223†VLNAVVCYN( | 27   | 9    |
| >TSC2-D223†VLDAVVCYN( | 258  | >TSC2-D223†VLNAVVCYN( | 597  | 339  |
| >TSC2-D223†VLDAVVCYN( | 19   | >TSC2-D223†VLNAVVCYN( | 40   | 21   |
| >TSC2-D223†VLDAVVCYN  | 376  | >TSC2-D223†VLNAVVCYN  | 865  | 489  |
| >TSC2-D223†VLDAVVCYN( | 134  | >TSC2-D223†VLNAVVCYN( | 345  | 211  |
| >TSC2-D223†VLDAVVCYN( | 16   | >TSC2-D223†VLNAVVCYN( | 32   | 16   |
| >TSC2-D223†VLDAVVCYN( | 173  | >TSC2-D223†VLNAVVCYN( | 221  | 48   |
| >TSC2-D223†VLDAVVCYN( | 20   | >TSC2-D223†VLNAVVCYN( | 25   | 5    |
| >TSC2-D223†VLDAVVCYN( | 107  | >TSC2-D223†VLNAVVCYN( | 71   | 36   |
| >TSC2-D223†VLDAVVCYN( | 14   | >TSC2-D223†VLNAVVCYN( | 11   | 3    |
| >TSC2-D223†VLDAVVCY   | 2965 | >TSC2-D223†VLNAVVCY   | 367  | 2598 |
| >TSC2-D223†VLDAVVCY   | 1233 | >TSC2-D223†VLNAVVCY   | 282  | 951  |
| >TSC2-D223†VLDAVVCY   | 114  | >TSC2-D223†VLNAVVCY   | 70   | 44   |
| >TSC2-D223†VLDAVVCY   | 1306 | >TSC2-D223†VLNAVVCY   | 82   | 1224 |
| >TSC2-D223†VLDAVVCY   | 3195 | >TSC2-D223†VLNAVVCY   | 236  | 2959 |
| >TSC2-D223†QVLDAVVCY  | 14   | >TSC2-D223†QVLNAVVCY  | 25   | 11   |
| >TSC2-D223†QVLDAVVCY  | 146  | >TSC2-D223†QVLNAVVCY  | 366  | 220  |
| >TSC2-D223†QVLDAVVCY  | 816  | >TSC2-D223†QVLNAVVCY  | 306  | 510  |
| >TSC2-D223†QVLDAVVCY  | 169  | >TSC2-D223†QVLNAVVCY  | 238  | 69   |
| >TSC2-D223†LQVLDAVV   | 526  | >TSC2-D223†LQVLNAV    | 333  | 193  |
| >TSC2-D223†LQVLDAVV   | 19   | >TSC2-D223†LQVLNAV    | 19   | 0    |
| >TSC2-D223†LQVLDAVV   | 780  | >TSC2-D223†LQVLNAV    | 450  | 330  |
| >TSC2-D223†LQVLDAVVCY | 577  | >TSC2-D223†LQVLNAVVCY | 455  | 122  |
| >TSC2-D223†LQVLDAVVCY | 75   | >TSC2-D223†LQVLNAVVCY | 71   | 4    |
| >TSC2-D223†LQVLDAVV   | 423  | >TSC2-D223†LQVLNAV    | 168  | 255  |
| >TSC2-D223†LQVLDAVVCY | 11   | >TSC2-D223†LQVLNAVVCY | 7    | 4    |
| >TSC2-D223†SLQVLDAV   | 83   | >TSC2-D223†SLQVLNAV   | 51   | 32   |
| >TSC2-D223†SLQVLDAVV  | 217  | >TSC2-D223†SLQVLNAV   | 86   | 131  |
| >TSC2-D223†SLQVLDAV   | 25   | >TSC2-D223†SLQVLNAV   | 14   | 11   |
| >TSC2-D223†SLQVLDAVV  | 163  | >TSC2-D223†SLQVLNAV   | 63   | 100  |
| >TSC2-D223†SLQVLDAV   | 64   | >TSC2-D223†SLQVLNAV   | 27   | 37   |
| >TSC2-D223†SLQVLDAVV  | 235  | >TSC2-D223†SLQVLNAV   | 88   | 147  |
| >TSC2-D223†SLQVLDAV   | 173  | >TSC2-D223†SLQVLNAV   | 167  | 6    |
| >TSC2-D223†SLQVLDAV   | 9    | >TSC2-D223†SLQVLNAV   | 8    | 1    |
| >TSC2-D223†SLQVLDAVV  | 34   | >TSC2-D223†SLQVLNAV   | 15   | 19   |
| >TSC2-D223†SLQVLDAV   | 6    | >TSC2-D223†SLQVLNAV   | 6    | 0    |

|                        |      |                        |      |      |
|------------------------|------|------------------------|------|------|
| >TSC2-D223↑SLQVLDAVV   | 9    | >TSC2-D223↑SLQVLNAV    | 9    | 0    |
| >TSC2-D223↑SLQVLDAV    | 13   | >TSC2-D223↑SLQVLNAV    | 16   | 3    |
| >TSC2-D223↑SLQVLDAVV   | 16   | >TSC2-D223↑SLQVLNAV    | 20   | 4    |
| >TSC2-D223↑SLQVLDAV    | 151  | >TSC2-D223↑SLQVLNAV    | 112  | 39   |
| >TSC2-D223↑SLQVLDAVV   | 378  | >TSC2-D223↑SLQVLNAV    | 62   | 316  |
| >TSC2-D223↑SLQVLDAV    | 4    | >TSC2-D223↑SLQVLNAV    | 3    | 1    |
| >TSC2-D223↑SLQVLDAVV   | 6    | >TSC2-D223↑SLQVLNAV    | 4    | 2    |
| >TSC2-D223↑SLQVLDAVVC  | 307  | >TSC2-D223↑SLQVLNAVVC  | 259  | 48   |
| >TSC2-D223↑SLQVLDAVVC  | 96   | >TSC2-D223↑SLQVLNAVVC  | 90   | 6    |
| >TSC2-D223↑SLQVLDAVVC  | 217  | >TSC2-D223↑SLQVLNAVVC  | 183  | 34   |
| >TSC2-D223↑VSLQVLDAV   | 58   | >TSC2-D223↑VSLQVLNAV   | 55   | 3    |
| >TSC2-D223↑VSLQVLDAV   | 94   | >TSC2-D223↑VSLQVLNAV   | 147  | 53   |
| >TSC2-D223↑VSLQVLDAV\  | 503  | >TSC2-D223↑VSLQVLNAV\  | 442  | 61   |
| >TSC2-D223↑EVSLQVLDAV  | 723  | >TSC2-D223↑EVSLQVLNAV  | 396  | 327  |
| >TSC2-D223↑EVSLQVLDA   | 2865 | >TSC2-D223↑EVSLQVLNA   | 376  | 2489 |
| >TSC2-D223↑EVSLQVLDAV  | 78   | >TSC2-D223↑EVSLQVLNAV  | 122  | 44   |
| >TSC2-D223↑EVSLQVLDAV  | 28   | >TSC2-D223↑EVSLQVLNAV  | 17   | 11   |
| >TSC2-D223↑EVSLQVLDAV  | 70   | >TSC2-D223↑EVSLQVLNAV  | 33   | 37   |
| >TSC2-D223↑EVSLQVLDAV  | 487  | >TSC2-D223↑EVSLQVLNAV  | 83   | 404  |
| >TSC2-D223↑IEVSLQVLDA\ | 131  | >TSC2-D223↑IEVSLQVLNA\ | 139  | 8    |
| >TSC2-D223↑IEVSLQVLDA\ | 351  | >TSC2-D223↑IEVSLQVLNA\ | 227  | 124  |
| >TSC2-D223↑IEVSLQVLDA\ | 49   | >TSC2-D223↑IEVSLQVLNA\ | 92   | 43   |
| >TSC2-D223↑IEVSLQVLDA\ | 378  | >TSC2-D223↑IEVSLQVLNA\ | 330  | 48   |
| >TSC2-D223↑IEVSLQVLDA\ | 8    | >TSC2-D223↑IEVSLQVLNA\ | 9    | 1    |
| >TSC2-L45M·LRELSMECGL  | 1232 | >TSC2-L45M·MRELSMECG   | 362  | 870  |
| >TSC2-L45M·LRELSMECGL  | 462  | >TSC2-L45M·MRELSMECG   | 266  | 196  |
| >TSC2-L45M·ILRELSMECGI | 3074 | >TSC2-L45M·IMRELSMECC  | 318  | 2756 |
| >TSC2-L45M·ILRELSMECGI | 120  | >TSC2-L45M·IMRELSMECC  | 131  | 11   |
| >TSC2-L45M·ILRELSMECGI | 91   | >TSC2-L45M·IMRELSMECC  | 66   | 25   |
| >TSC2-L45M·ILRELSMEC   | 175  | >TSC2-L45M·IMRELSMEC   | 86   | 89   |
| >TSC2-L45M·ILRELSMECGI | 25   | >TSC2-L45M·IMRELSMECC  | 17   | 8    |
| >TSC2-L45M·ILRELSMECGI | 108  | >TSC2-L45M·IMRELSMECC  | 69   | 39   |
| >TSC2-L45M·ILRELSMECGI | 99   | >TSC2-L45M·IMRELSMECC  | 87   | 12   |
| >TSC2-L45M·ILRELSMECGI | 354  | >TSC2-L45M·IMRELSMECC  | 278  | 76   |
| >TSC2-L45M·ILRELSMEC   | 32   | >TSC2-L45M·IMRELSMEC   | 64   | 32   |
| >TSC2-L45M·ILRELSMECGI | 3    | >TSC2-L45M·IMRELSMECC  | 4    | 1    |
| >TSC2-L45M·ILRELSMECGI | 1017 | >TSC2-L45M·IMRELSMECC  | 258  | 759  |
| >TSC2-L45M·ILRELSMECGI | 916  | >TSC2-L45M·IMRELSMECC  | 135  | 781  |
| >TSC2-L45M·ILRELSMECGI | 951  | >TSC2-L45M·IMRELSMECC  | 272  | 679  |
| >TSC2-L45M·QTEFIITAEIL | 472  | >TSC2-L45M·QTEFIITAEIM | 1783 | 1311 |
| >TSC2-L45M·QTEFIITAEIL | 434  | >TSC2-L45M·QTEFIITAEIM | 2432 | 1998 |
| >TSC2-L45M·QTEFIITAEIL | 668  | >TSC2-L45M·QTEFIITAEIM | 425  | 243  |
| >TSC2-L45M·QTEFIITAEIL | 74   | >TSC2-L45M·QTEFIITAEIM | 13   | 61   |

|                         |      |                         |      |      |
|-------------------------|------|-------------------------|------|------|
| >TSC2-L45M- EILRELSM    | 2546 | >TSC2-L45M- EIMRELSM    | 89   | 2457 |
| >TSC2-L45M- EILRELSM    | 54   | >TSC2-L45M- EIMRELSM    | 23   | 31   |
| >TSC2-L45M- EILRELSME   | 1037 | >TSC2-L45M- EIMRELSME   | 344  | 693  |
| >TSC2-L45M- EILRELSM    | 457  | >TSC2-L45M- EIMRELSM    | 502  | 45   |
| >TSC2-L45M- EILRELSM    | 449  | >TSC2-L45M- EIMRELSM    | 463  | 14   |
| >TSC2-L45M- EILRELSM    | 1260 | >TSC2-L45M- EIMRELSM    | 364  | 896  |
| >TSC2-L45M- AEILRELSM   | 491  | >TSC2-L45M- AEIMRELSM   | 205  | 286  |
| >TSC2-L45M- AEILRELSM   | 53   | >TSC2-L45M- AEIMRELSM   | 45   | 8    |
| >TSC2-L45M- AEILRELSMEC | 455  | >TSC2-L45M- AEIMRELSME  | 298  | 157  |
| >TSC2-L45M- AEILRELSM   | 523  | >TSC2-L45M- AEIMRELSM   | 435  | 88   |
| >TSC2-L45M- AEILRELS    | 538  | >TSC2-L45M- AEIMRELS    | 441  | 97   |
| >TSC2-L45M- AEILRELSMEC | 304  | >TSC2-L45M- AEIMRELSME  | 231  | 73   |
| >TSC2-L45M- AEILRELSM   | 40   | >TSC2-L45M- AEIMRELSM   | 77   | 37   |
| >TSC2-L45M- AEILRELSMEC | 119  | >TSC2-L45M- AEIMRELSME  | 194  | 75   |
| >TSC2-L45M- ITAEILREL   | 495  | >TSC2-L45M- ITAEIMREL   | 1136 | 641  |
| >TSC2-L45M- ITAEILREL   | 25   | >TSC2-L45M- ITAEIMREL   | 24   | 1    |
| >TSC2-L45M- ITAEILREL   | 145  | >TSC2-L45M- ITAEIMREL   | 235  | 90   |
| >TSC2-L45M- ITAEILREL   | 205  | >TSC2-L45M- ITAEIMREL   | 557  | 352  |
| >TSC2-L45M- ITAEILREL   | 221  | >TSC2-L45M- ITAEIMREL   | 610  | 389  |
| >TSC2-L45M- ITAEILREL   | 797  | >TSC2-L45M- ITAEIMREL   | 225  | 572  |
| >TSC2-L45M- ITAEILRELSM | 422  | >TSC2-L45M- ITAEIMRELSM | 246  | 176  |
| >TSC2-L45M- ITAEILREL   | 37   | >TSC2-L45M- ITAEIMREL   | 17   | 20   |
| >TSC2-L45M- ITAEILREL   | 522  | >TSC2-L45M- ITAEIMREL   | 341  | 181  |
| >TSC2-L45M- ITAEILREL   | 24   | >TSC2-L45M- ITAEIMREL   | 9    | 15   |
| >TSC2-L45M- ITAEILRELSM | 9    | >TSC2-L45M- ITAEIMRELSM | 6    | 3    |
| >TSC2-L45M- ITAEILRELSM | 436  | >TSC2-L45M- ITAEIMRELSM | 434  | 2    |
| >TSC2-L45M- ITAEILREL   | 152  | >TSC2-L45M- ITAEIMREL   | 81   | 71   |
| >TSC2-L45M- ITAEILRELSM | 321  | >TSC2-L45M- ITAEIMRELSM | 225  | 96   |
| >TSC2-L45M- ITAEILREL   | 220  | >TSC2-L45M- ITAEIMREL   | 138  | 82   |
| >TSC2-L45M- ITAEILRELSM | 36   | >TSC2-L45M- ITAEIMRELSM | 29   | 7    |
| >TSC2-L45M- IITAEILREL  | 392  | >TSC2-L45M- IITAEIMREL  | 624  | 232  |
| >TSC2-L45M- IITAEILREL  | 247  | >TSC2-L45M- IITAEIMREL  | 454  | 207  |
| >TSC2-L45M- IITAEILREL  | 92   | >TSC2-L45M- IITAEIMREL  | 128  | 36   |
| >TSC2-L45M- IITAEILR    | 39   | >TSC2-L45M- IITAEIMR    | 42   | 3    |
| >TSC2-L45M- IITAEILR    | 102  | >TSC2-L45M- IITAEIMR    | 184  | 82   |
| >TSC2-L45M- FIITAEIL    | 184  | >TSC2-L45M- FIITAEIM    | 1197 | 1013 |
| >TSC2-L45M- FIITAEILREL | 51   | >TSC2-L45M- FIITAEIMREL | 66   | 15   |
| >TSC2-L45M- FIITAEIL    | 31   | >TSC2-L45M- FIITAEIM    | 385  | 354  |
| >TSC2-L45M- FIITAEILREL | 16   | >TSC2-L45M- FIITAEIMREL | 18   | 2    |
| >TSC2-L45M- FIITAEIL    | 142  | >TSC2-L45M- FIITAEIM    | 1647 | 1505 |
| >TSC2-L45M- FIITAEILREL | 51   | >TSC2-L45M- FIITAEIMREL | 61   | 10   |
| >TSC2-L45M- FIITAEIL    | 27   | >TSC2-L45M- FIITAEIM    | 145  | 118  |
| >TSC2-L45M- FIITAEILREL | 23   | >TSC2-L45M- FIITAEIMREL | 31   | 8    |



|                        |      |                        |      |      |
|------------------------|------|------------------------|------|------|
| >TSC2-L45M·FIITAEILREL | 142  | >TSC2-L45M·FIITAEIMREL | 199  | 57   |
| >TSC2-L45M·FIITAEILREL | 421  | >TSC2-L45M·FIITAEIMREL | 820  | 399  |
| >TSC2-L45M·FIITAEIL    | 95   | >TSC2-L45M·FIITAEIM    | 3374 | 3279 |
| >TSC2-L45M·FIITAEILREL | 41   | >TSC2-L45M·FIITAEIMREL | 72   | 31   |
| >TSC2-L45M·FIITAEIL    | 959  | >TSC2-L45M·FIITAEIM    | 84   | 875  |
| >TSC2-L45M·FIITAEILREL | 400  | >TSC2-L45M·FIITAEIMREL | 196  | 204  |
| >TSC2-L45M·FIITAEILR   | 7    | >TSC2-L45M·FIITAEIMR   | 8    | 1    |
| >TSC2-L45M·FIITAEILREL | 278  | >TSC2-L45M·FIITAEIMREL | 170  | 108  |
| >TSC2-L45M·FIITAEIL    | 4602 | >TSC2-L45M·FIITAEIM    | 442  | 4160 |
| >TSC2-L45M·FIITAEIL    | 255  | >TSC2-L45M·FIITAEIM    | 1634 | 1379 |
| >TSC2-L45M·FIITAEILR   | 207  | >TSC2-L45M·FIITAEIMR   | 487  | 280  |
| >TSC2-L45M·EFIITAEILR  | 415  | >TSC2-L45M·EFIITAEIMR  | 471  | 56   |
| >TSC2-L45M·EFIITAEILR  | 54   | >TSC2-L45M·EFIITAEIMR  | 63   | 9    |
| >TSC2-L45M·EFIITAEILR  | 14   | >TSC2-L45M·EFIITAEIMR  | 17   | 3    |
| >TSC2-L45M·EFIITAEILR  | 77   | >TSC2-L45M·EFIITAEIMR  | 150  | 73   |
| >TSC2-L45M·TEFIITAEIL  | 17   | >TSC2-L45M·TEFIITAEIM  | 21   | 4    |
| >TSC2-L45M·TEFIITAEILR | 38   | >TSC2-L45M·TEFIITAEIMR | 46   | 8    |
| >TSC2-L45M·TEFIITAEIL  | 293  | >TSC2-L45M·TEFIITAEIM  | 1674 | 1381 |
| >TSC2-L45M·TEFIITAEIL  | 151  | >TSC2-L45M·TEFIITAEIM  | 387  | 236  |
| >TSC2-L45M·TEFIITAEIL  | 395  | >TSC2-L45M·TEFIITAEIM  | 872  | 477  |
| >TSC2-L45M·TEFIITAEIL  | 24   | >TSC2-L45M·TEFIITAEIM  | 36   | 12   |
| >TSC2-L45M·TEFIITAEILR | 135  | >TSC2-L45M·TEFIITAEIMR | 230  | 95   |
| >TSC2-M102·MMARYVFS    | 219  | >TSC2-M102·IMARYVFS    | 838  | 619  |
| >TSC2-M102·MMARYVFSM   | 38   | >TSC2-M102·IMARYVFSNF  | 124  | 86   |
| >TSC2-M102·MMARYVFS    | 18   | >TSC2-M102·IMARYVFS    | 68   | 50   |
| >TSC2-M102·MMARYVFSM   | 61   | >TSC2-M102·IMARYVFSN   | 305  | 244  |
| >TSC2-M102·MMARYVFSM   | 5    | >TSC2-M102·IMARYVFSNF  | 11   | 6    |
| >TSC2-M102·MMARYVFS    | 97   | >TSC2-M102·IMARYVFS    | 460  | 363  |
| >TSC2-M102·MMARYVFSM   | 12   | >TSC2-M102·IMARYVFSNF  | 37   | 25   |
| >TSC2-M102·MMARYVFS    | 297  | >TSC2-M102·IMARYVFS    | 810  | 513  |
| >TSC2-M102·MMARYVFSM   | 66   | >TSC2-M102·IMARYVFSNF  | 175  | 109  |
| >TSC2-M102·MMARYVFS    | 111  | >TSC2-M102·IMARYVFS    | 259  | 148  |
| >TSC2-M102·MMARYVFSM   | 74   | >TSC2-M102·IMARYVFSN   | 179  | 105  |
| >TSC2-M102·MMARYVFSM   | 178  | >TSC2-M102·IMARYVFSNF  | 408  | 230  |
| >TSC2-M102·MMARYVFSM   | 28   | >TSC2-M102·IMARYVFSNF  | 59   | 31   |
| >TSC2-M102·MMARYVFSM   | 398  | >TSC2-M102·IMARYVFSNF  | 1085 | 687  |
| >TSC2-M102·MMARYVFSM   | 159  | >TSC2-M102·IMARYVFSNF  | 336  | 177  |
| >TSC2-M102·MMARYVFSM   | 172  | >TSC2-M102·IMARYVFSNF  | 276  | 104  |
| >TSC2-M102·MMARYVFS    | 191  | >TSC2-M102·IMARYVFS    | 819  | 628  |
| >TSC2-M102·MMARYVFSM   | 450  | >TSC2-M102·IMARYVFSN   | 1420 | 970  |
| >TSC2-M102·MMARYVFSM   | 28   | >TSC2-M102·IMARYVFSNF  | 87   | 59   |
| >TSC2-M102·MMARYVFSM   | 157  | >TSC2-M102·IMARYVFSNF  | 366  | 209  |
| >TSC2-M102·MMARYVFSM   | 380  | >TSC2-M102·IMARYVFSNF  | 801  | 421  |

|                       |      |                        |      |      |
|-----------------------|------|------------------------|------|------|
| >TSC2-M102' MMARYVFSN | 65   | >TSC2-M102' IMARYVFSNF | 433  | 368  |
| >TSC2-M102' MMARYVFSN | 156  | >TSC2-M102' IMARYVFSNF | 144  | 12   |
| >TSC2-M102' MMARYVFSN | 326  | >TSC2-M102' IMARYVFSNF | 597  | 271  |
| >TSC2-M102' MMARYVFSN | 26   | >TSC2-M102' IMARYVFSNF | 38   | 12   |
| >TSC2-M102' MMARYVFSN | 289  | >TSC2-M102' IMARYVFSNF | 505  | 216  |
| >TSC2-M102' MMARYVFSN | 3    | >TSC2-M102' IMARYVFSNF | 3    | 0    |
| >TSC2-M102' MMARYVFSN | 465  | >TSC2-M102' IMARYVFSNF | 620  | 155  |
| >TSC2-M102' MMARYVFSN | 46   | >TSC2-M102' IMARYVFSNF | 75   | 29   |
| >TSC2-M102' MMARYVFSN | 433  | >TSC2-M102' IMARYVFSNF | 1521 | 1088 |
| >TSC2-M102' DMMARYVFS | 459  | >TSC2-M102' DIMARYVFSN | 2749 | 2290 |
| >TSC2-M102' DMMARYVFS | 3956 | >TSC2-M102' DIMARYVFSN | 194  | 3762 |
| >TSC2-M102' DMMARYVF  | 3020 | >TSC2-M102' DIMARYVF   | 437  | 2583 |
| >TSC2-M102' DMMARYVFS | 759  | >TSC2-M102' DIMARYVFSN | 103  | 656  |
| >TSC2-M102' DMMARYVF  | 377  | >TSC2-M102' DIMARYVF   | 819  | 442  |
| >TSC2-M102' DMMARYVFS | 462  | >TSC2-M102' DIMARYVFS  | 961  | 499  |
| >TSC2-M102' DMMARYVF  | 157  | >TSC2-M102' DIMARYVF   | 322  | 165  |
| >TSC2-M102' DMMARYVFS | 222  | >TSC2-M102' DIMARYVFSN | 438  | 216  |
| >TSC2-M102' DMMARYVF  | 191  | >TSC2-M102' DIMARYVF   | 1933 | 1742 |
| >TSC2-M102' DMMARYVFS | 292  | >TSC2-M102' DIMARYVFSN | 3436 | 3144 |
| >TSC2-M102' DMMARYVF  | 308  | >TSC2-M102' DIMARYVF   | 2826 | 2518 |
| >TSC2-M102' DMMARYVFS | 201  | >TSC2-M102' DIMARYVFSN | 1823 | 1622 |
| >TSC2-M102' DMMARYVF  | 30   | >TSC2-M102' DIMARYVF   | 1594 | 1564 |
| >TSC2-M102' DMMARYVFS | 14   | >TSC2-M102' DIMARYVFSN | 704  | 690  |
| >TSC2-M102' LDMMARYV  | 412  | >TSC2-M102' LDIMARYV   | 644  | 232  |
| >TSC2-M102' LDMMARYVF | 447  | >TSC2-M102' LDIMARYVF  | 635  | 188  |
| >TSC2-M102' LDMMARYVF | 236  | >TSC2-M102' LDIMARYVF  | 480  | 244  |
| >TSC2-M102' LDMMARYVF | 139  | >TSC2-M102' LDIMARYVF  | 162  | 23   |
| >TSC2-M102' LDMMARYVF | 194  | >TSC2-M102' LDIMARYVF  | 330  | 136  |
| >TSC2-M102' LDMMARYV  | 403  | >TSC2-M102' LDIMARYV   | 271  | 132  |
| >TSC2-M102' CLDMMARY  | 14   | >TSC2-M102' CLDIMARY   | 21   | 7    |
| >TSC2-M102' CLDMMARY\ | 11   | >TSC2-M102' CLDIMARYV  | 11   | 0    |
| >TSC2-M102' CLDMMARY\ | 99   | >TSC2-M102' CLDIMARYV  | 137  | 38   |
| >TSC2-M102' CLDMMARY\ | 73   | >TSC2-M102' CLDIMARYV  | 67   | 6    |
| >TSC2-M102' CLDMMARY\ | 16   | >TSC2-M102' CLDIMARYV  | 36   | 20   |
| >TSC2-M102' CLDMMARY\ | 18   | >TSC2-M102' CLDIMARYV  | 22   | 4    |
| >TSC2-M102' CLDMMARY  | 289  | >TSC2-M102' CLDIMARY   | 243  | 46   |
| >TSC2-M102' CLDMMARY  | 311  | >TSC2-M102' CLDIMARY   | 292  | 19   |
| >TSC2-M102' CLDMMARY  | 51   | >TSC2-M102' CLDIMARY   | 51   | 0    |
| >TSC2-M102' TCLDMMARY | 458  | >TSC2-M102' TCLDIMARYV | 220  | 238  |
| >TSC2-M102' TCLDMMARY | 26   | >TSC2-M102' TCLDIMARY  | 29   | 3    |
| >TSC2-M102' TCLDMMARY | 150  | >TSC2-M102' TCLDIMARY  | 114  | 36   |
| >TSC2-M102' TCLDMMARY | 663  | >TSC2-M102' TCLDIMARY  | 277  | 386  |
| >TSC2-M102' TCLDMMAR  | 410  | >TSC2-M102' TCLDIMAR   | 220  | 190  |

|                        |      |                        |      |      |
|------------------------|------|------------------------|------|------|
| >TSC2-M102' TCLDMMARY  | 110  | >TSC2-M102' TCLDIMARYV | 57   | 53   |
| >TSC2-M102' TCLDMMARY  | 357  | >TSC2-M102' TCLDIMARY  | 149  | 208  |
| >TSC2-M102' TCLDMMARY  | 81   | >TSC2-M102' TCLDIMARY  | 61   | 20   |
| >TSC2-M102' TCLDMMARY  | 313  | >TSC2-M102' TCLDIMARYV | 259  | 54   |
| >TSC2-M102' TCLDMMAR   | 199  | >TSC2-M102' TCLDIMAR   | 114  | 85   |
| >TSC2-M102' ETCLDMMAR  | 216  | >TSC2-M102' ETCLDIMARY | 356  | 140  |
| >TSC2-M102' ETCLDMMAR  | 32   | >TSC2-M102' ETCLDIMARY | 58   | 26   |
| >TSC2-M102' ETCLDMMAR  | 98   | >TSC2-M102' ETCLDIMARY | 146  | 48   |
| >TSC2-M102' ETCLDMMAR  | 144  | >TSC2-M102' ETCLDIMAR  | 700  | 556  |
| >TSC2-M102' ETCLDMMAR  | 2    | >TSC2-M102' ETCLDIMARY | 2    | 0    |
| >TSC2-M102' ETCLDMMAR  | 134  | >TSC2-M102' ETCLDIMARY | 363  | 229  |
| >TSC2-M102' ETCLDMMAR  | 38   | >TSC2-M102' ETCLDIMARY | 56   | 18   |
| >TSC2-M102' ETCLDMMAR  | 502  | >TSC2-M102' ETCLDIMARY | 345  | 157  |
| >TSC2-M102' ETCLDMMAR  | 21   | >TSC2-M102' ETCLDIMAR  | 21   | 0    |
| >TSC2-M102' ETCLDMMAR  | 5    | >TSC2-M102' ETCLDIMAR  | 4    | 1    |
| >TSC2-M102' ETCLDMMAR  | 620  | >TSC2-M102' ETCLDIMARY | 494  | 126  |
| >TSC2-M102' ETCLDMMMA  | 120  | >TSC2-M102' ETCLDIMA   | 274  | 154  |
| >TSC2-M102' ETCLDMMAR  | 26   | >TSC2-M102' ETCLDIMARY | 26   | 0    |
| >TSC2-M102' ETCLDMMAR  | 61   | >TSC2-M102' ETCLDIMARY | 72   | 11   |
| >TSC2-M102' ETCLDMMAR  | 15   | >TSC2-M102' ETCLDIMARY | 28   | 13   |
| >TSC2-M102' ETCLDMMAR  | 281  | >TSC2-M102' ETCLDIMARY | 451  | 170  |
| >TSC2-M102' TETCLDMMMA | 194  | >TSC2-M102' TETCLDIMAR | 186  | 8    |
| >TSC2-M102' TETCLDMM   | 226  | >TSC2-M102' TETCLDIM   | 170  | 56   |
| >TSC2-M102' TETCLDMMMA | 232  | >TSC2-M102' TETCLDIMAR | 252  | 20   |
| >TSC2-M102' TETCLDMMMA | 161  | >TSC2-M102' TETCLDIMAR | 131  | 30   |
| >TSC2-M102' TETCLDMMMA | 196  | >TSC2-M102' TETCLDIMA  | 96   | 100  |
| >TSC2-M102' LTETCLDMM  | 285  | >TSC2-M102' LTETCLDIMA | 325  | 40   |
| >TSC2-M102' LTETCLDMM  | 149  | >TSC2-M102' LTETCLDIMA | 160  | 11   |
| >TSC2-M102' LTETCLDM   | 326  | >TSC2-M102' LTETCLDI   | 2471 | 2145 |
| >TSC2-M102' LTETCLDMM  | 245  | >TSC2-M102' LTETCLDIM  | 294  | 49   |
| >TSC2-M102' LTETCLDM   | 379  | >TSC2-M102' LTETCLDI   | 2756 | 2377 |
| >TSC2-M102' LTETCLDMM  | 7    | >TSC2-M102' LTETCLDIM  | 10   | 3    |
| >TSC2-M102' LTETCLDM   | 3577 | >TSC2-M102' LTETCLDI   | 103  | 3474 |
| >TSC2-M102' ELTETCLDMM | 476  | >TSC2-M102' ELTETCLDIM | 404  | 72   |
| >TSC2-M102' ELTETCLDM  | 1595 | >TSC2-M102' ELTETCLDI  | 222  | 1373 |
| >TSC2-M102' ELTETCLDMM | 180  | >TSC2-M102' ELTETCLDIM | 255  | 75   |
| >TSC2-M102' ELTETCLDMM | 399  | >TSC2-M102' ELTETCLDIM | 439  | 40   |
| >TSC2-M102' LETETCLDM  | 48   | >TSC2-M102' LETETCLDI  | 9    | 39   |
| >TSC2-M102' LETETCLDM  | 20   | >TSC2-M102' LETETCLDIM | 28   | 8    |
| >TSC2-M102' LETETCLDM  | 572  | >TSC2-M102' LETETCLDIM | 444  | 128  |
| >TSC2-M102' LETETCLDM  | 356  | >TSC2-M102' LETETCLDIM | 281  | 75   |
| >TSC2-M102' LETETCLDM  | 60   | >TSC2-M102' LETETCLDI  | 10   | 50   |
| >TSC2-M102' LETETCLDM  | 13   | >TSC2-M102' LETETCLDIM | 11   | 2    |

|                        |       |                        |       |       |
|------------------------|-------|------------------------|-------|-------|
| >TSC2-R1289 RSVSWADSA\ | 542   | >TSC2-R1289 SSVSWADSA\ | 337   | 205   |
| >TSC2-R1289 RSVSWADSA\ | 768   | >TSC2-R1289 SSVSWADSA\ | 490   | 278   |
| >TSC2-R1289 RSVSWADSA\ | 513   | >TSC2-R1289 SSVSWADSA\ | 306   | 207   |
| >TSC2-R1289 RSVSWADSA\ | 355   | >TSC2-R1289 SSVSWADSA\ | 414   | 59    |
| >TSC2-R1289 RSVSWADSA\ | 265   | >TSC2-R1289 SSVSWADSA\ | 126   | 139   |
| >TSC2-R1289 RSVSWADSA\ | 1871  | >TSC2-R1289 SSVSWADSA\ | 98    | 1773  |
| >TSC2-R1289 RSVSWADSA\ | 2032  | >TSC2-R1289 SSVSWADSA\ | 212   | 1820  |
| >TSC2-R1289 RSVSWADSA\ | 1915  | >TSC2-R1289 SSVSWADSA\ | 151   | 1764  |
| >TSC2-R1289 RSVSWADSA\ | 383   | >TSC2-R1289 SSVSWADSA\ | 1729  | 1346  |
| >TSC2-R1289 RSVSWADSA\ | 401   | >TSC2-R1289 SSVSWADSA\ | 1874  | 1473  |
| >TSC2-R1289 RSVSWADSA\ | 42    | >TSC2-R1289 SSVSWADSA\ | 1007  | 965   |
| >TSC2-R1289 RSVSWADSA\ | 42    | >TSC2-R1289 SSVSWADSA\ | 952   | 910   |
| >TSC2-R1289 RSVSWADSA\ | 88    | >TSC2-R1289 SSVSWADSA\ | 109   | 21    |
| >TSC2-R1289 RSVSWADSA\ | 495   | >TSC2-R1289 SSVSWADSA\ | 1314  | 819   |
| >TSC2-R1289 HRSVSWADS  | 6746  | >TSC2-R1289 HSSVSWADS, | 72    | 6674  |
| >TSC2-R1289 HRSVSWADS  | 26230 | >TSC2-R1289 HSSVSWADS, | 179   | 26051 |
| >TSC2-R1289 HRSVSWADS  | 190   | >TSC2-R1289 HSSVSWADS, | 4666  | 4476  |
| >TSC2-R1289 YQSSCQGQLH | 284   | >TSC2-R1289 YQSSCQGQLH | 20709 | 20425 |
| >TSC2-R1289 YQSSCQGQLH | 318   | >TSC2-R1289 YQSSCQGQLH | 1413  | 1095  |
| >TSC2-R1289 YQSSCQGQLH | 140   | >TSC2-R1289 YQSSCQGQLH | 29825 | 29685 |
| >TSC2-R1289 QLHRVSWA   | 461   | >TSC2-R1289 QLHSSVSWA  | 119   | 342   |
| >TSC2-R1289 QLHRVSWA   | 18    | >TSC2-R1289 QLHSSVSWA  | 8     | 10    |
| >TSC2-R1289 QLHRVSWA   | 294   | >TSC2-R1289 QLHSSVSWA  | 170   | 124   |
| >TSC2-R1289 QLHRVSWA   | 24    | >TSC2-R1289 QLHSSVSWA  | 20    | 4     |
| >TSC2-R1289 QLHRVSW    | 271   | >TSC2-R1289 QLHSSVSW   | 319   | 48    |
| >TSC2-R1289 QLHRVSW    | 657   | >TSC2-R1289 QLHSSVSW   | 244   | 413   |
| >TSC2-R1289 QLHRVSW    | 372   | >TSC2-R1289 QLHSSVSW   | 134   | 238   |
| >TSC2-R1289 GQLHRVSW   | 249   | >TSC2-R1289 GQLHSSVSW  | 510   | 261   |
| >TSC2-R1289 GQLHRVSW   | 456   | >TSC2-R1289 GQLHSSVSW  | 174   | 282   |
| >TSC2-R1289 GQLHRVSW   | 79    | >TSC2-R1289 GQLHSSVSW  | 16    | 63    |
| >TSC2-R1289 GQLHRVSW   | 843   | >TSC2-R1289 GQLHSSVSW  | 282   | 561   |
| >TSC2-R1289 GQLHRVSW   | 864   | >TSC2-R1289 GQLHSSVSW  | 238   | 626   |
| >TSC2-R1289 GQLHRVSW   | 306   | >TSC2-R1289 GQLHSSVSW  | 184   | 122   |
| >TSC2-R1289 CQGQLHRV:  | 977   | >TSC2-R1289 CQGQLHSSV: | 441   | 536   |
| >TSC2-R1289 SCQGQLHRV\ | 609   | >TSC2-R1289 SCQGQLHSS\ | 126   | 483   |
| >TSC2-R1289 SCQGQLHR   | 270   | >TSC2-R1289 SCQGQLHS   | 30355 | 30085 |
| >TSC2-R1289 SSCQGQLHR  | 322   | >TSC2-R1289 SSCQGQLHS  | 20185 | 19863 |
| >TSC2-R1289 SSCQGQLHR  | 419   | >TSC2-R1289 SSCQGQLHS  | 33753 | 33334 |
| >TSC2-R1289 SSCQGQLHR: | 1556  | >TSC2-R1289 SSCQGQLHSS | 150   | 1406  |
| >TSC2-R1289 SSCQGQLHR  | 160   | >TSC2-R1289 SSCQGQLHS  | 4492  | 4332  |
| >TSC2-R1289 SSCQGQLHR: | 462   | >TSC2-R1289 SSCQGQLHSS | 232   | 230   |
| >TSC2-R1289 QSSCQGQLH  | 355   | >TSC2-R1289 QSSCQGQLH: | 31705 | 31350 |
| >TSC2-R1289 QSSCQGQLH  | 217   | >TSC2-R1289 QSSCQGQLH: | 27609 | 27392 |

|                        |      |                        |       |       |
|------------------------|------|------------------------|-------|-------|
| >TSC2-R1289 QSSCQGQLH  | 476  | >TSC2-R1289 QSSCQGQLH  | 35460 | 34984 |
| >TSC2-R1289 QSSCQGQLH  | 435  | >TSC2-R1289 QSSCQGQLH  | 7728  | 7293  |
| >TSC2-S641R SPYCVCDYM  | 6    | >TSC2-S641R RPYCVCDYM  | 7     | 1     |
| >TSC2-S641R SPYCVCDYM  | 859  | >TSC2-S641R RPYCVCDYM  | 121   | 738   |
| >TSC2-S641R SPYCVCDY   | 952  | >TSC2-S641R RPYCVCDY   | 181   | 771   |
| >TSC2-S641R SPYCVCDY   | 18   | >TSC2-S641R RPYCVCDY   | 25    | 7     |
| >TSC2-S641R SPYCVCDYM  | 41   | >TSC2-S641R RPYCVCDYM  | 58    | 17    |
| >TSC2-S641R SPYCVCDY   | 347  | >TSC2-S641R RPYCVCDY   | 935   | 588   |
| >TSC2-S641R SPYCVCDYMI | 396  | >TSC2-S641R RPYCVCDYMI | 1359  | 963   |
| >TSC2-S641R SPYCVCDYM  | 129  | >TSC2-S641R RPYCVCDYM  | 98    | 31    |
| >TSC2-S641R SPYCVCDY   | 485  | >TSC2-S641R RPYCVCDY   | 338   | 147   |
| >TSC2-S641R SPYCVCDY   | 457  | >TSC2-S641R RPYCVCDY   | 919   | 462   |
| >TSC2-S641R FSPYCVCDYM | 395  | >TSC2-S641R FRPYCVCDYM | 5732  | 5337  |
| >TSC2-S641R FSPYCVCDY  | 320  | >TSC2-S641R FRPYCVCDY  | 1773  | 1453  |
| >TSC2-S641R FSPYCVCDYM | 403  | >TSC2-S641R FRPYCVCDYM | 1737  | 1334  |
| >TSC2-S641R FSPYCVCDYM | 471  | >TSC2-S641R FRPYCVCDYM | 3876  | 3405  |
| >TSC2-S641R FSPYCVCDY  | 392  | >TSC2-S641R FRPYCVCDY  | 14617 | 14225 |
| >TSC2-S641R FSPYCVCDYM | 274  | >TSC2-S641R FRPYCVCDYM | 9572  | 9298  |
| >TSC2-S641R FSPYCVCDY  | 372  | >TSC2-S641R FRPYCVCDY  | 11764 | 11392 |
| >TSC2-S641R FSPYCVCDY  | 227  | >TSC2-S641R FRPYCVCDY  | 136   | 91    |
| >TSC2-S641R FSPYCVCDYM | 4    | >TSC2-S641R FRPYCVCDYM | 3270  | 3266  |
| >TSC2-S641R FSPYCVCDYM | 280  | >TSC2-S641R FRPYCVCDYM | 16955 | 16675 |
| >TSC2-S641R RFSPYCVCDY | 210  | >TSC2-S641R RFRPYCVCDY | 1037  | 827   |
| >TSC2-S641R RFSPYCVCDY | 87   | >TSC2-S641R RFRPYCVCDY | 631   | 544   |
| >TSC2-S641R RFSPYCV    | 9646 | >TSC2-S641R RFRPYCV    | 127   | 9519  |
| >TSC2-S641R RFSPYCVCDY | 7787 | >TSC2-S641R RFRPYCVCDY | 57    | 7730  |
| >TSC2-S641R RFSPYCVCDY | 4932 | >TSC2-S641R RFRPYCVCDY | 36    | 4896  |
| >TSC2-S641R RFSPYCVCDY | 58   | >TSC2-S641R RFRPYCVCDY | 170   | 112   |
| >TSC2-S641R RFSPYCVCDY | 455  | >TSC2-S641R RFRPYCVCDY | 254   | 201   |
| >TSC2-S641R RFSPYCVCDY | 853  | >TSC2-S641R RFRPYCVCDY | 395   | 458   |
| >TSC2-S641R RFSPYCVCDY | 671  | >TSC2-S641R RFRPYCVCDY | 188   | 483   |
| >TSC2-S641R RFSPYCV    | 299  | >TSC2-S641R RFRPYCV    | 722   | 423   |
| >TSC2-S641R RFSPYCVCDY | 30   | >TSC2-S641R RFRPYCVCDY | 54    | 24    |
| >TSC2-S641R VRFPYCV    | 70   | >TSC2-S641R VRFRPYCV   | 137   | 67    |
| >TSC2-S641R VRFPYCV    | 292  | >TSC2-S641R VRFRPYCV   | 443   | 151   |
| >TSC2-S641R VRFPYCVCD  | 11   | >TSC2-S641R VRFRPYCVCD | 16    | 5     |
| >TSC2-S641R VRFPYCV    | 344  | >TSC2-S641R VRFRPYCV   | 202   | 142   |
| >TSC2-S641R VVRFPYCV   | 192  | >TSC2-S641R VVRFRPYCV  | 203   | 11    |
| >TSC2-S641R VVRFPYCV   | 141  | >TSC2-S641R VVRFRPYCV  | 189   | 48    |
| >TSC2-S641R VVRFPYCV   | 6345 | >TSC2-S641R VVRFRPYCV  | 209   | 6136  |
| >TSC2-S641R GVVRFPYCV  | 442  | >TSC2-S641R GVVRFRPYCV | 900   | 458   |
| >TSC2-S641R GVVRFPYCV  | 244  | >TSC2-S641R GVVRFRPYCV | 474   | 230   |
| >TSC2-S641R GVVRFPYCV  | 213  | >TSC2-S641R GVVRFRPYCV | 315   | 102   |

|                       |       |                        |      |       |
|-----------------------|-------|------------------------|------|-------|
| >TSC2-S641R GVVRFPYCV | 143   | >TSC2-S641R GVVRFRPYCV | 509  | 366   |
| >TSC2-S641R GVVRFPYCV | 92    | >TSC2-S641R GVVRFRPYCV | 559  | 467   |
| >TSC2-S641R GVVRFPYCV | 128   | >TSC2-S641R GVVRFRPYCV | 475  | 347   |
| >TSC2-S641R GVVRFPYCV | 124   | >TSC2-S641R GVVRFRPYCV | 161  | 37    |
| >TSC2-S641R GVVRFPY   | 217   | >TSC2-S641R GVVRFRPY   | 722  | 505   |
| >TSC2-S641R GVVRFPY   | 405   | >TSC2-S641R GVVRFRPY   | 1623 | 1218  |
| >TSC2-S641R GVVRFPY   | 70    | >TSC2-S641R GVVRFRPY   | 149  | 79    |
| >TSC2-S641R GVVRFPY   | 70    | >TSC2-S641R GVVRFRPY   | 156  | 86    |
| >TSC2-S641R GVVRFPY   | 106   | >TSC2-S641R GVVRFRPY   | 296  | 190   |
| >TSC2-S641R GVVRFPY   | 215   | >TSC2-S641R GVVRFRPY   | 264  | 49    |
| >TSC2-S641R DGVVRFPY  | 393   | >TSC2-S641R DGVVRFRPY  | 553  | 160   |
| >TSC2-V1711VARQMALHA  | 257   | >TSC2-V1711MARQMALH,   | 16   | 241   |
| >TSC2-V1711VARQMALHA  | 391   | >TSC2-V1711MARQMALH,   | 25   | 366   |
| >TSC2-V1711VARQMALHA  | 346   | >TSC2-V1711MARQMALH,   | 78   | 268   |
| >TSC2-V1711VARQMALHA  | 3899  | >TSC2-V1711MARQMALH,   | 308  | 3591  |
| >TSC2-V1711VARQMALHA  | 1164  | >TSC2-V1711MARQMALH,   | 438  | 726   |
| >TSC2-V1711VARQMALHA  | 1114  | >TSC2-V1711MARQMALH,   | 347  | 767   |
| >TSC2-V1711VARQMALH   | 851   | >TSC2-V1711MARQMALH    | 394  | 457   |
| >TSC2-V1711VARQMALHA  | 7     | >TSC2-V1711MARQMALH,   | 5    | 2     |
| >TSC2-V1711VARQMALHA  | 1792  | >TSC2-V1711MARQMALH,   | 68   | 1724  |
| >TSC2-V1711VARQMALHA  | 103   | >TSC2-V1711MARQMALH,   | 71   | 32    |
| >TSC2-V1711FVARQMAL   | 178   | >TSC2-V1711FMARQMAL    | 14   | 164   |
| >TSC2-V1711FVARQMALH  | 4817  | >TSC2-V1711FMARQMALH   | 192  | 4625  |
| >TSC2-V1711FVARQMAL   | 10    | >TSC2-V1711FMARQMAL    | 2    | 8     |
| >TSC2-V1711FVARQMALH  | 6334  | >TSC2-V1711FMARQMALH   | 465  | 5869  |
| >TSC2-V1711FVARQMALH  | 1503  | >TSC2-V1711FMARQMALH   | 92   | 1411  |
| >TSC2-V1711FVARQMALH  | 2949  | >TSC2-V1711FMARQMALH   | 124  | 2825  |
| >TSC2-V1711FVARQMAL   | 23    | >TSC2-V1711FMARQMAL    | 4    | 19    |
| >TSC2-V1711FVARQMALH  | 500   | >TSC2-V1711FMARQMALH   | 53   | 447   |
| >TSC2-V1711FVARQMALH  | 7519  | >TSC2-V1711FMARQMALH   | 416  | 7103  |
| >TSC2-V1711FVARQMAL   | 16    | >TSC2-V1711FMARQMAL    | 11   | 5     |
| >TSC2-V1711FVARQMALH  | 616   | >TSC2-V1711FMARQMALH   | 274  | 342   |
| >TSC2-V1711FVARQMAL   | 416   | >TSC2-V1711FMARQMAL    | 6    | 410   |
| >TSC2-V1711FVARQMALH  | 2703  | >TSC2-V1711FMARQMALH   | 31   | 2672  |
| >TSC2-V1711FVARQMAL   | 1055  | >TSC2-V1711FMARQMAL    | 5    | 1050  |
| >TSC2-V1711FVARQMALH  | 7336  | >TSC2-V1711FMARQMALH   | 41   | 7295  |
| >TSC2-V1711FVARQMAL   | 1667  | >TSC2-V1711FMARQMAL    | 14   | 1653  |
| >TSC2-V1711FVARQMALH  | 1636  | >TSC2-V1711FMARQMALH   | 18   | 1618  |
| >TSC2-V1711FVARQMAL   | 3321  | >TSC2-V1711FMARQMAL    | 21   | 3300  |
| >TSC2-V1711FVARQMALH  | 12244 | >TSC2-V1711FMARQMALH   | 397  | 11847 |
| >TSC2-V1711FVARQMAL   | 22    | >TSC2-V1711FMARQMAL    | 2    | 20    |
| >TSC2-V1711FVARQMALH  | 190   | >TSC2-V1711FMARQMALH   | 4    | 186   |
| >TSC2-V1711FVARQMALH  | 14902 | >TSC2-V1711FMARQMALH   | 473  | 14429 |

|                        |      |                        |      |      |
|------------------------|------|------------------------|------|------|
| >TSC2-V1711FVARQMALH   | 219  | >TSC2-V1711FMARQMALH   | 6324 | 6105 |
| >TSC2-V1711FVARQMAL    | 328  | >TSC2-V1711FMARQMAL    | 3755 | 3427 |
| >TSC2-V1711FVARQMALH   | 215  | >TSC2-V1711FMARQMALH   | 6329 | 6114 |
| >TSC2-V1711FVARQMALH   | 849  | >TSC2-V1711FMARQMALH   | 192  | 657  |
| >TSC2-V1711FVARQMAL    | 18   | >TSC2-V1711FMARQMAL    | 828  | 810  |
| >TSC2-V1711FVARQMAL    | 259  | >TSC2-V1711FMARQMAL    | 1094 | 835  |
| >TSC2-V1711FVARQMAL    | 230  | >TSC2-V1711FMARQMAL    | 1776 | 1546 |
| >TSC2-V1711FVARQMAL    | 333  | >TSC2-V1711FMARQMAL    | 66   | 267  |
| >TSC2-V1711FVARQMAL    | 2621 | >TSC2-V1711FMARQMAL    | 186  | 2435 |
| >TSC2-V1711FVARQMALH   | 4349 | >TSC2-V1711FMARQMALH   | 377  | 3972 |
| >TSC2-V1711FVARQMAL    | 1736 | >TSC2-V1711FMARQMAL    | 27   | 1709 |
| >TSC2-V1711FVARQMAL    | 457  | >TSC2-V1711FMARQMAL    | 43   | 414  |
| >TSC2-V1711KIVSDRNLPF\ | 123  | >TSC2-V1711KIVSDRNLPFI | 1808 | 1685 |
| >TSC2-V1711KIVSDRNLPF\ | 87   | >TSC2-V1711KIVSDRNLPFI | 1575 | 1488 |
| >TSC2-V1711KIVSDRNLPF\ | 43   | >TSC2-V1711KIVSDRNLPFI | 3698 | 3655 |
| >TSC2-V1711KIVSDRNLPF\ | 16   | >TSC2-V1711KIVSDRNLPFI | 174  | 158  |
| >TSC2-V1711KIVSDRNLPF\ | 62   | >TSC2-V1711KIVSDRNLPFI | 2638 | 2576 |
| >TSC2-V1711KIVSDRNLPF\ | 160  | >TSC2-V1711KIVSDRNLPFI | 6172 | 6012 |
| >TSC2-V1711KIVSDRNLPF\ | 56   | >TSC2-V1711KIVSDRNLPFI | 5174 | 5118 |
| >TSC2-V1711KIVSDRNLPF\ | 345  | >TSC2-V1711KIVSDRNLPFI | 7343 | 6998 |
| >TSC2-V1711KIVSDRNLPF\ | 20   | >TSC2-V1711KIVSDRNLPFI | 4987 | 4967 |
| >TSC2-V1711KIVSDRNLPF\ | 1062 | >TSC2-V1711KIVSDRNLPFI | 26   | 1036 |
| >TSC2-V1711KIVSDRNLPF\ | 369  | >TSC2-V1711KIVSDRNLPFI | 570  | 201  |
| >TSC2-V1711PFVARQMAL   | 2602 | >TSC2-V1711PFMARQMAI   | 398  | 2204 |
| >TSC2-V1711PFVARQMAL   | 4285 | >TSC2-V1711PFMARQMAI   | 309  | 3976 |
| >TSC2-V1711LPFVARQM    | 13   | >TSC2-V1711LPFMARQM    | 11   | 2    |
| >TSC2-V1711LPFVARQMA   | 8    | >TSC2-V1711LPFMARQMA   | 8    | 0    |
| >TSC2-V1711LPFVARQM    | 50   | >TSC2-V1711LPFMARQM    | 26   | 24   |
| >TSC2-V1711LPFVARQMA   | 763  | >TSC2-V1711LPFMARQMA   | 122  | 641  |
| >TSC2-V1711LPFVARQMA   | 110  | >TSC2-V1711LPFMARQMA   | 89   | 21   |
| >TSC2-V1711LPFVARQMA   | 325  | >TSC2-V1711LPFMARQMA   | 230  | 95   |
| >TSC2-V1711LPFVARQM    | 43   | >TSC2-V1711LPFMARQM    | 32   | 11   |
| >TSC2-V1711LPFVARQMA   | 262  | >TSC2-V1711LPFMARQMA   | 113  | 149  |
| >TSC2-V1711LPFVARQMA   | 385  | >TSC2-V1711LPFMARQMA   | 287  | 98   |
| >TSC2-V1711LPFVARQMA   | 124  | >TSC2-V1711LPFMARQMA   | 152  | 28   |
| >TSC2-V1711LPFVARQMA   | 12   | >TSC2-V1711LPFMARQMA   | 22   | 10   |
| >TSC2-V1711LPFVARQMA   | 128  | >TSC2-V1711LPFMARQMA   | 152  | 24   |
| >TSC2-V1711LPFVARQMA   | 367  | >TSC2-V1711LPFMARQMA   | 282  | 85   |
| >TSC2-V1711NLPFVARQM   | 228  | >TSC2-V1711NLPFMARQM   | 326  | 98   |
| >TSC2-V1711NLPFVARQM   | 205  | >TSC2-V1711NLPFMARQM   | 235  | 30   |
| >TSC2-V1711NLPFVARQM   | 327  | >TSC2-V1711NLPFMARQM   | 1227 | 900  |
| >TSC2-V1711NLPFVARQM   | 429  | >TSC2-V1711NLPFMARQM   | 266  | 163  |
| >TSC2-V1711RNLPFVAR    | 21   | >TSC2-V1711RNLPFMAR    | 24   | 3    |

|                         |       |                        |       |       |
|-------------------------|-------|------------------------|-------|-------|
| >TSC2-V1711RNLPFVARQ    | 662   | >TSC2-V1711RNLPFMARQ   | 270   | 392   |
| >TSC2-V1711RNLPFVAR     | 41    | >TSC2-V1711RNLPFMAR    | 42    | 1     |
| >TSC2-V1711DRNLPFVAR    | 423   | >TSC2-V1711DRNLPFMAR   | 352   | 71    |
| >TSC2-V1711SDRNLPFV     | 368   | >TSC2-V1711SDRNLPFM    | 5262  | 4894  |
| >TSC2-V1711VSDRNLPFV    | 2080  | >TSC2-V1711VSDRNLPFM   | 358   | 1722  |
| >TSC2-V1711VSDRNLPFV    | 74    | >TSC2-V1711VSDRNLPFM   | 4258  | 4184  |
| >TSC2-V1711VSDRNLPFV    | 142   | >TSC2-V1711VSDRNLPFM   | 7728  | 7586  |
| >TSC2-V1711VSDRNLPFV    | 372   | >TSC2-V1711VSDRNLPFM   | 14911 | 14539 |
| >TSC2-V1711VSDRNLPFVA   | 363   | >TSC2-V1711VSDRNLPFM,  | 583   | 220   |
| >TSC2-V1711VSDRNLPFV    | 5023  | >TSC2-V1711VSDRNLPFM   | 113   | 4910  |
| >TSC2-V1711VSDRNLPFV    | 8591  | >TSC2-V1711VSDRNLPFM   | 244   | 8347  |
| >TSC2-V1711VSDRNLPFV    | 1555  | >TSC2-V1711VSDRNLPFM   | 444   | 1111  |
| >TSC2-V1711IVSDRNLPFV   | 128   | >TSC2-V1711IVSDRNLPFM  | 2696  | 2568  |
| >TSC2-V1711IVSDRNLPFV,  | 1179  | >TSC2-V1711IVSDRNLPFM  | 484   | 695   |
| >TSC2-V1711IVSDRNLPFV   | 96    | >TSC2-V1711IVSDRNLPFM  | 511   | 415   |
| >TSC2-V1711IVSDRNLPFV,  | 1015  | >TSC2-V1711IVSDRNLPFM  | 477   | 538   |
| >TSC2-V1711IVSDRNLPFV   | 95    | >TSC2-V1711IVSDRNLPFM  | 1692  | 1597  |
| >TSC2-V1711IVSDRNLPFV,  | 655   | >TSC2-V1711IVSDRNLPFM  | 370   | 285   |
| >TSC2-V1711IVSDRNLPFV   | 74    | >TSC2-V1711IVSDRNLPFM  | 1048  | 974   |
| >TSC2-V1711IVSDRNLPFV,  | 414   | >TSC2-V1711IVSDRNLPFM  | 223   | 191   |
| >TSC2-V1711IVSDRNLPFV   | 34    | >TSC2-V1711IVSDRNLPFM  | 2891  | 2857  |
| >TSC2-V1711IVSDRNLPFV   | 226   | >TSC2-V1711IVSDRNLPFM  | 8341  | 8115  |
| >TSC2-V1711IVSDRNLPFV   | 45    | >TSC2-V1711IVSDRNLPFM  | 6481  | 6436  |
| >TSC2-V1711IVSDRNLPFV   | 36    | >TSC2-V1711IVSDRNLPFM  | 1476  | 1440  |
| >TSC2-V1711IVSDRNLPFV   | 5     | >TSC2-V1711IVSDRNLPFM  | 1514  | 1509  |
| >TSC2-V1711IVSDRNLPFV   | 9872  | >TSC2-V1711IVSDRNLPFM  | 461   | 9411  |
| >TSC2-V1711IVSDRNLPFV   | 435   | >TSC2-V1711IVSDRNLPFM  | 706   | 271   |
| >TSC2-V1711IVSDRNLPFV   | 242   | >TSC2-V1711IVSDRNLPFM  | 2856  | 2614  |
| >TSC2-V1711IVSDRNLPFV   | 4847  | >TSC2-V1711IVSDRNLPFM  | 161   | 4686  |
| >TSC2-V472M VLLINRQFY   | 1196  | >TSC2-V472M MLLINRQFY  | 494   | 702   |
| >TSC2-V472M VLLINRQFY   | 922   | >TSC2-V472M MLLINRQFY  | 316   | 606   |
| >TSC2-V472M VLLINRQFY   | 50    | >TSC2-V472M MLLINRQFY  | 18    | 32    |
| >TSC2-V472M VLLINRQFY   | 37    | >TSC2-V472M MLLINRQFY  | 54    | 17    |
| >TSC2-V472M VLLINRQFY   | 167   | >TSC2-V472M MLLINRQFY  | 195   | 28    |
| >TSC2-V472M VLLINRQF    | 740   | >TSC2-V472M MLLINRQF   | 393   | 347   |
| >TSC2-V472M VLLINRQFY   | 532   | >TSC2-V472M MLLINRQFY  | 329   | 203   |
| >TSC2-V472M VLLINRQF    | 175   | >TSC2-V472M MLLINRQF   | 54    | 121   |
| >TSC2-V472M VLLINRQFY   | 325   | >TSC2-V472M MLLINRQFY  | 105   | 220   |
| >TSC2-V472M VLLINRQF    | 386   | >TSC2-V472M MLLINRQF   | 159   | 227   |
| >TSC2-V472M FVLLINRQ    | 3202  | >TSC2-V472M FMLLINRQ   | 338   | 2864  |
| >TSC2-V472M FVLLINRQ    | 9740  | >TSC2-V472M FMLLINRQ   | 246   | 9494  |
| >TSC2-V472M FVLLINRQFYE | 11811 | >TSC2-V472M FMLLINRQFY | 355   | 11456 |
| >TSC2-V472M FVLLINRQ    | 8537  | >TSC2-V472M FMLLINRQ   | 93    | 8444  |



|                         |      |                         |       |       |
|-------------------------|------|-------------------------|-------|-------|
| >TSC2-V472MFVLLINRQFY   | 769  | >TSC2-V472MFMLLINRQFY   | 334   | 435   |
| >TSC2-V472MFVLLINRQF    | 663  | >TSC2-V472MFMLLINRQF    | 208   | 455   |
| >TSC2-V472MFVLLINRQFY   | 251  | >TSC2-V472MFMLLINRQFY   | 5038  | 4787  |
| >TSC2-V472MFVLLINRQF    | 1083 | >TSC2-V472MFMLLINRQF    | 215   | 868   |
| >TSC2-V472MFVLLINRQFY   | 54   | >TSC2-V472MFMLLINRQFY   | 22    | 32    |
| >TSC2-V472MFVLLINRQFY   | 264  | >TSC2-V472MFMLLINRQFY   | 106   | 158   |
| >TSC2-V472MFVLLINRQF    | 658  | >TSC2-V472MFMLLINRQF    | 347   | 311   |
| >TSC2-V472MFVLLINRQFY   | 476  | >TSC2-V472MFMLLINRQFY   | 1318  | 842   |
| >TSC2-V472MFVLLINRQFY   | 178  | >TSC2-V472MFMLLINRQFY   | 202   | 24    |
| >TSC2-V472MFVLLINRQFY   | 3149 | >TSC2-V472MFMLLINRQFY   | 312   | 2837  |
| >TSC2-V472MFVLLINRQF    | 1615 | >TSC2-V472MFMLLINRQF    | 150   | 1465  |
| >TSC2-V472MFVLLINRQFY   | 831  | >TSC2-V472MFMLLINRQFY   | 85    | 746   |
| >TSC2-V472MFVLLINRQF    | 933  | >TSC2-V472MFMLLINRQF    | 21    | 912   |
| >TSC2-V472MFVLLINRQFY   | 1316 | >TSC2-V472MFMLLINRQFY   | 25    | 1291  |
| >TSC2-V472MFVLLINRQF    | 262  | >TSC2-V472MFMLLINRQF    | 477   | 215   |
| >TSC2-V472MFVLLINRQF    | 288  | >TSC2-V472MFMLLINRQF    | 2261  | 1973  |
| >TSC2-V472MRIKVLVDVLSFV | 344  | >TSC2-V472MRIKVLVDVLSFM | 2865  | 2521  |
| >TSC2-V472MRIKVLVDVLSFV | 50   | >TSC2-V472MRIKVLVDVLSFM | 1508  | 1458  |
| >TSC2-V472MRIKVLVDVLSFV | 169  | >TSC2-V472MRIKVLVDVLSFM | 3883  | 3714  |
| >TSC2-V472MRIKVLVDVLSFV | 150  | >TSC2-V472MRIKVLVDVLSFM | 14187 | 14037 |
| >TSC2-V472MRIKVLVDVLSFV | 18   | >TSC2-V472MRIKVLVDVLSFM | 28    | 10    |
| >TSC2-V472MRIKVLVDVLSFV | 5293 | >TSC2-V472MRIKVLVDVLSFM | 455   | 4838  |
| >TSC2-V472MRIKVLVDVLSFV | 920  | >TSC2-V472MRIKVLVDVLSFM | 61    | 859   |
| >TSC2-V472MSFVLLINRQF   | 666  | >TSC2-V472MSFMLLINRQF   | 316   | 350   |
| >TSC2-V472MSFVLLINRQF   | 76   | >TSC2-V472MSFMLLINRQF   | 16    | 60    |
| >TSC2-V472MSFVLLINRQFY  | 448  | >TSC2-V472MSFMLLINRQF   | 1432  | 984   |
| >TSC2-V472MSFVLLINRQF   | 538  | >TSC2-V472MSFMLLINRQF   | 217   | 321   |
| >TSC2-V472MSFVLLINRQFY  | 24   | >TSC2-V472MSFMLLINRQF   | 25    | 1     |
| >TSC2-V472MSFVLLINRQFY  | 435  | >TSC2-V472MSFMLLINRQF   | 216   | 219   |
| >TSC2-V472MSFVLLINR     | 32   | >TSC2-V472MSFMLLINR     | 14    | 18    |
| >TSC2-V472MSFVLLINR     | 141  | >TSC2-V472MSFMLLINR     | 48    | 93    |
| >TSC2-V472MSFVLLINR     | 421  | >TSC2-V472MSFMLLINR     | 407   | 14    |
| >TSC2-V472MSFVLLINRQFY  | 563  | >TSC2-V472MSFMLLINRQF   | 323   | 240   |
| >TSC2-V472MSFVLLINR     | 33   | >TSC2-V472MSFMLLINR     | 33    | 0     |
| >TSC2-V472MSFVLLINRQF   | 557  | >TSC2-V472MSFMLLINRQ    | 428   | 129   |
| >TSC2-V472MSFVLLINR     | 101  | >TSC2-V472MSFMLLINR     | 54    | 47    |
| >TSC2-V472MSFVLLINR     | 11   | >TSC2-V472MSFMLLINR     | 10    | 1     |
| >TSC2-V472MSFVLLINRQF   | 287  | >TSC2-V472MSFMLLINRQ    | 191   | 96    |
| >TSC2-V472MSFVLLINR     | 152  | >TSC2-V472MSFMLLINR     | 90    | 62    |
| >TSC2-V472MSFVLLINR     | 27   | >TSC2-V472MSFMLLINR     | 23    | 4     |
| >TSC2-V472MSFVLLINRQF   | 230  | >TSC2-V472MSFMLLINRQ    | 136   | 94    |
| >TSC2-V472MSFVLLINRQF   | 25   | >TSC2-V472MSFMLLINRQ    | 18    | 7     |
| >TSC2-V472MSFVLLINRQF   | 4    | >TSC2-V472MSFMLLINRQ    | 4     | 0     |

|                         |     |                         |      |      |
|-------------------------|-----|-------------------------|------|------|
| >TSC2-V472M LSFVLLINRQF | 155 | >TSC2-V472M LSFMLLINRQ  | 263  | 108  |
| >TSC2-V472M LSFVLLINRQF | 82  | >TSC2-V472M LSFMLLINRQ  | 127  | 45   |
| >TSC2-V472M LSFVLLINRQF | 25  | >TSC2-V472M LSFMLLINRQ  | 18   | 7    |
| >TSC2-V472M LSFVLLINR   | 152 | >TSC2-V472M LSFMLLINR   | 180  | 28   |
| >TSC2-V472M LSFVLLINR   | 842 | >TSC2-V472M LSFMLLINR   | 408  | 434  |
| >TSC2-V472M VLSFVLLI    | 62  | >TSC2-V472M VLSFMLLI    | 60   | 2    |
| >TSC2-V472M VLSFVLLI    | 19  | >TSC2-V472M VLSFMLLI    | 24   | 5    |
| >TSC2-V472M VLSFVLLI    | 20  | >TSC2-V472M VLSFMLLI    | 22   | 2    |
| >TSC2-V472M VLSFVLLI    | 12  | >TSC2-V472M VLSFMLLI    | 73   | 61   |
| >TSC2-V472M VLSFVLLI    | 186 | >TSC2-V472M VLSFMLLI    | 415  | 229  |
| >TSC2-V472M VLSFVLLI    | 38  | >TSC2-V472M VLSFMLLI    | 134  | 96   |
| >TSC2-V472M VLSFVLLI    | 83  | >TSC2-V472M VLSFMLLI    | 329  | 246  |
| >TSC2-V472M VLSFVLLI    | 16  | >TSC2-V472M VLSFMLLI    | 15   | 1    |
| >TSC2-V472M VLSFVLLINRC | 433 | >TSC2-V472M VLSFMLLINRC | 253  | 180  |
| >TSC2-V472M VLSFVLLINR  | 224 | >TSC2-V472M VLSFMLLINR  | 227  | 3    |
| >TSC2-V472M VLSFVLLINR  | 116 | >TSC2-V472M VLSFMLLINR  | 83   | 33   |
| >TSC2-V472M VLSFVLLINR  | 30  | >TSC2-V472M VLSFMLLINR  | 21   | 9    |
| >TSC2-V472M VLSFVLLINR  | 243 | >TSC2-V472M VLSFMLLINR  | 276  | 33   |
| >TSC2-V472M VLSFVLLINR  | 74  | >TSC2-V472M VLSFMLLINR  | 97   | 23   |
| >TSC2-V472M DVLSFVLLINR | 317 | >TSC2-V472M DVLSFMLLINR | 214  | 103  |
| >TSC2-V472M DVLSFVLLINR | 16  | >TSC2-V472M DVLSFMLLINR | 12   | 4    |
| >TSC2-V472M DVLSFVLLINR | 26  | >TSC2-V472M DVLSFMLLINR | 25   | 1    |
| >TSC2-V472M DVLSFVLL    | 243 | >TSC2-V472M DVLSFMLL    | 173  | 70   |
| >TSC2-V472M DVLSFVLLI   | 376 | >TSC2-V472M DVLSFMLLI   | 269  | 107  |
| >TSC2-V472M DVLSFVLL    | 23  | >TSC2-V472M DVLSFMLL    | 15   | 8    |
| >TSC2-V472M DVLSFVLLI   | 12  | >TSC2-V472M DVLSFMLLI   | 9    | 3    |
| >TSC2-V472M DVLSFVLLINR | 206 | >TSC2-V472M DVLSFMLLINR | 184  | 22   |
| >TSC2-V472M LDVLSFVLLI  | 58  | >TSC2-V472M LDVLSFMLLI  | 53   | 5    |
| >TSC2-V472M LDVLSFVL    | 398 | >TSC2-V472M LDVLSFML    | 524  | 126  |
| >TSC2-V472M LDVLSFVLL   | 386 | >TSC2-V472M LDVLSFMLL   | 464  | 78   |
| >TSC2-V472M LDVLSFVL    | 198 | >TSC2-V472M LDVLSFML    | 158  | 40   |
| >TSC2-V472M LDVLSFVLL   | 119 | >TSC2-V472M LDVLSFMLL   | 82   | 37   |
| >TSC2-V472M LDVLSFVLLI  | 25  | >TSC2-V472M LDVLSFMLLI  | 23   | 2    |
| >TSC2-V472M VLDVLSFV    | 20  | >TSC2-V472M VLDVLSFM    | 281  | 261  |
| >TSC2-V472M VLDVLSFVL   | 64  | >TSC2-V472M VLDVLSFML   | 30   | 34   |
| >TSC2-V472M VLDVLSFVLL  | 377 | >TSC2-V472M VLDVLSFMLL  | 154  | 223  |
| >TSC2-V472M VLDVLSFVLLI | 45  | >TSC2-V472M VLDVLSFMLLI | 41   | 4    |
| >TSC2-V472M VLDVLSFV    | 14  | >TSC2-V472M VLDVLSFM    | 257  | 243  |
| >TSC2-V472M VLDVLSFVL   | 84  | >TSC2-V472M VLDVLSFML   | 39   | 45   |
| >TSC2-V472M VLDVLSFVLL  | 196 | >TSC2-V472M VLDVLSFMLL  | 92   | 104  |
| >TSC2-V472M VLDVLSFVLLI | 162 | >TSC2-V472M VLDVLSFMLLI | 127  | 35   |
| >TSC2-V472M VLDVLSFV    | 82  | >TSC2-V472M VLDVLSFM    | 2291 | 2209 |
| >TSC2-V472M VLDVLSFVLL  | 689 | >TSC2-V472M VLDVLSFMLL  | 343  | 346  |

|                         |     |                        |     |     |
|-------------------------|-----|------------------------|-----|-----|
| >TSC2-V472M VLDVLSFV    | 27  | >TSC2-V472M VLDVLSFM   | 836 | 809 |
| >TSC2-V472M VLDVLSFVL   | 248 | >TSC2-V472M VLDVLSFML  | 185 | 63  |
| >TSC2-V472M VLDVLSFVLL  | 940 | >TSC2-V472M VLDVLSFMML | 437 | 503 |
| >TSC2-V472M VLDVLSFVLLI | 665 | >TSC2-V472M VLDVLSFMML | 459 | 206 |
| >TSC2-V472M VLDVLSFV    | 2   | >TSC2-V472M VLDVLSFM   | 38  | 36  |
| >TSC2-V472M VLDVLSFVL   | 11  | >TSC2-V472M VLDVLSFML  | 6   | 5   |
| >TSC2-V472M VLDVLSFVLL  | 25  | >TSC2-V472M VLDVLSFMML | 27  | 2   |
| >TSC2-V472M VLDVLSFVLLI | 11  | >TSC2-V472M VLDVLSFMML | 17  | 6   |
| >TSC2-V472M VLDVLSFV    | 4   | >TSC2-V472M VLDVLSFM   | 159 | 155 |
| >TSC2-V472M VLDVLSFVL   | 9   | >TSC2-V472M VLDVLSFML  | 13  | 4   |
| >TSC2-V472M VLDVLSFVLL  | 38  | >TSC2-V472M VLDVLSFMML | 39  | 1   |
| >TSC2-V472M VLDVLSFVLLI | 57  | >TSC2-V472M VLDVLSFMML | 85  | 28  |
| >TSC2-V472M VLDVLSFV    | 4   | >TSC2-V472M VLDVLSFM   | 39  | 35  |
| >TSC2-V472M VLDVLSFVL   | 9   | >TSC2-V472M VLDVLSFML  | 7   | 2   |
| >TSC2-V472M VLDVLSFVLL  | 16  | >TSC2-V472M VLDVLSFMML | 16  | 0   |
| >TSC2-V472M VLDVLSFVLLI | 15  | >TSC2-V472M VLDVLSFMML | 21  | 6   |
| >TSC2-V472M VLDVLSFV    | 3   | >TSC2-V472M VLDVLSFM   | 83  | 80  |
| >TSC2-V472M VLDVLSFVL   | 9   | >TSC2-V472M VLDVLSFML  | 8   | 1   |
| >TSC2-V472M VLDVLSFVLL  | 80  | >TSC2-V472M VLDVLSFMML | 70  | 10  |
| >TSC2-V472M VLDVLSFVLLI | 64  | >TSC2-V472M VLDVLSFMML | 253 | 189 |
| >TSC2-V472M VLDVLSFV    | 3   | >TSC2-V472M VLDVLSFM   | 178 | 175 |
| >TSC2-V472M VLDVLSFVL   | 11  | >TSC2-V472M VLDVLSFML  | 8   | 3   |
| >TSC2-V472M VLDVLSFVLL  | 12  | >TSC2-V472M VLDVLSFMML | 9   | 3   |
| >TSC2-V472M VLDVLSFVLLI | 29  | >TSC2-V472M VLDVLSFMML | 44  | 15  |
| >TSC2-V472M KVLDVLSFV   | 9   | >TSC2-V472M KVLDVLSFM  | 68  | 59  |
| >TSC2-V472M KVLDVLSFVL  | 200 | >TSC2-V472M KVLDVLSFML | 165 | 35  |
| >TSC2-V472M KVLDVLSFVLI | 37  | >TSC2-V472M KVLDVLSFML | 35  | 2   |
| >TSC2-V472M KVLDVLSFV   | 14  | >TSC2-V472M KVLDVLSFM  | 306 | 292 |
| >TSC2-V472M KVLDVLSFVL  | 118 | >TSC2-V472M KVLDVLSFML | 88  | 30  |
| >TSC2-V472M KVLDVLSFVLI | 93  | >TSC2-V472M KVLDVLSFML | 122 | 29  |
| >TSC2-V472M KVLDVLSFV   | 8   | >TSC2-V472M KVLDVLSFM  | 444 | 436 |
| >TSC2-V472M KVLDVLSFVLI | 358 | >TSC2-V472M KVLDVLSFML | 204 | 154 |
| >TSC2-V472M KVLDVLSFV   | 3   | >TSC2-V472M KVLDVLSFM  | 6   | 3   |
| >TSC2-V472M KVLDVLSFVL  | 68  | >TSC2-V472M KVLDVLSFML | 55  | 13  |
| >TSC2-V472M KVLDVLSFVLI | 6   | >TSC2-V472M KVLDVLSFML | 6   | 0   |
| >TSC2-V472M KVLDVLSFV   | 2   | >TSC2-V472M KVLDVLSFM  | 30  | 28  |
| >TSC2-V472M KVLDVLSFVL  | 20  | >TSC2-V472M KVLDVLSFML | 11  | 9   |
| >TSC2-V472M KVLDVLSFVLI | 43  | >TSC2-V472M KVLDVLSFML | 49  | 6   |
| >TSC2-V472M KVLDVLSFV   | 4   | >TSC2-V472M KVLDVLSFM  | 391 | 387 |
| >TSC2-V472M KVLDVLSFVL  | 29  | >TSC2-V472M KVLDVLSFML | 47  | 18  |
| >TSC2-V472M KVLDVLSFVLI | 142 | >TSC2-V472M KVLDVLSFML | 144 | 2   |
| >TSC2-V472M KVLDVLSFV   | 6   | >TSC2-V472M KVLDVLSFM  | 183 | 177 |
| >TSC2-V472M KVLDVLSFVL  | 33  | >TSC2-V472M KVLDVLSFML | 21  | 12  |

|                         |      |                         |      |      |
|-------------------------|------|-------------------------|------|------|
| >TSC2-V472M KVLDVLSFVLI | 77   | >TSC2-V472M KVLDVLSFML  | 90   | 13   |
| >TSC2-V472M KVLDVLSFV   | 4    | >TSC2-V472M KVLDVLSFM   | 111  | 107  |
| >TSC2-V472M KVLDVLSFVL  | 41   | >TSC2-V472M KVLDVLSFML  | 35   | 6    |
| >TSC2-V472M KVLDVLSFVLI | 298  | >TSC2-V472M KVLDVLSFML  | 307  | 9    |
| >TSC2-V472M KVLDVLSFV   | 4    | >TSC2-V472M KVLDVLSFM   | 1412 | 1408 |
| >TSC2-V472M KVLDVLSFVL  | 115  | >TSC2-V472M KVLDVLSFML  | 86   | 29   |
| >TSC2-V472M KVLDVLSFVLI | 89   | >TSC2-V472M KVLDVLSFML  | 77   | 12   |
| >TSC2-V472M KVLDVLSFV   | 1844 | >TSC2-V472M KVLDVLSFM   | 19   | 1825 |
| >TSC2-V472M KVLDVLSFV   | 45   | >TSC2-V472M KVLDVLSFM   | 70   | 25   |
| >TSC2-V472M KVLDVLSFVL  | 231  | >TSC2-V472M KVLDVLSFML  | 264  | 33   |
| >TSC2-V472M KVLDVLSFVLI | 145  | >TSC2-V472M KVLDVLSFML  | 58   | 87   |
| >TSC2-V472M KVLDVLSFVL  | 61   | >TSC2-V472M KVLDVLSFML  | 87   | 26   |
| >TSC2-V472M KVLDVLSFVLI | 149  | >TSC2-V472M KVLDVLSFML  | 352  | 203  |
| >TSC2-V472M KVLDVLSFV   | 139  | >TSC2-V472M KVLDVLSFM   | 5824 | 5685 |
| >TSC2-V472M KVLDVLSFV   | 27   | >TSC2-V472M KVLDVLSFM   | 405  | 378  |
| >TSC2-V472M KVLDVLSFVL  | 611  | >TSC2-V472M KVLDVLSFML  | 103  | 508  |
| >TSC2-V472M KVLDVLSFV   | 7719 | >TSC2-V472M KVLDVLSFM   | 287  | 7432 |
| >TSC2-V472M KVLDVLSFVL  | 289  | >TSC2-V472M KVLDVLSFML  | 214  | 75   |
| >TSC2-V472M KVLDVLSFV   | 9230 | >TSC2-V472M KVLDVLSFM   | 245  | 8985 |
| >TSC2-V472M KVLDVLSFVL  | 144  | >TSC2-V472M KVLDVLSFML  | 405  | 261  |
| >TSC2-V472M KVLDVLSFVLI | 1444 | >TSC2-V472M KVLDVLSFML  | 446  | 998  |
| >TSC2-V472M KVLDVLSFV   | 81   | >TSC2-V472M KVLDVLSFM   | 7    | 74   |
| >TSC2-V472M KVLDVLSFVLI | 178  | >TSC2-V472M KVLDVLSFML  | 81   | 97   |
| >TSC2-V472M KVLDVLSFV   | 191  | >TSC2-V472M KVLDVLSFM   | 52   | 139  |
| >TSC2-V472M KVLDVLSFVL  | 56   | >TSC2-V472M KVLDVLSFM   | 99   | 43   |
| >TSC2-V472M KVLDVLSFVL  | 272  | >TSC2-V472M KVLDVLSFM   | 2019 | 1747 |
| >TSC2-V841I VPLLEFLS    | 557  | >TSC2-V841I IPLLEFLS    | 136  | 421  |
| >TSC2-V841I VPLLEFLST   | 879  | >TSC2-V841I IPLLEFLST   | 173  | 706  |
| >TSC2-V841I VPLLEFLSTLA | 30   | >TSC2-V841I IPLLEFLSTLA | 13   | 17   |
| >TSC2-V841I VPLLEFLSTL  | 219  | >TSC2-V841I IPLLEFLSTL  | 90   | 129  |
| >TSC2-V841I AVPLLEFLSTL | 353  | >TSC2-V841I AIPLLEFLSTL | 497  | 144  |
| >TSC2-V841I AVPLLEFL    | 278  | >TSC2-V841I AIPLLEFL    | 152  | 126  |
| >TSC2-V841I AVPLLEFL    | 169  | >TSC2-V841I AIPLLEFL    | 203  | 34   |
| >TSC2-V841I AVPLLEFLSTL | 320  | >TSC2-V841I AIPLLEFLSTL | 384  | 64   |
| >TSC2-V841I AVPLLEFLSTL | 671  | >TSC2-V841I AIPLLEFLSTL | 205  | 466  |
| >TSC2-V841I AVPLLEFL    | 108  | >TSC2-V841I AIPLLEFL    | 1497 | 1389 |
| >TSC2-V841I AVPLLEFLSTL | 78   | >TSC2-V841I AIPLLEFLSTL | 208  | 130  |
| >TSC2-V841I THISATASMA  | 410  | >TSC2-V841I THISATASMA  | 320  | 90   |
| >TSC2-V841I THISATASMA  | 14   | >TSC2-V841I THISATASMA  | 18   | 4    |
| >TSC2-V841I MAVPLLEFL   | 703  | >TSC2-V841I MAIPLLEFL   | 159  | 544  |
| >TSC2-V841I MAVPLLEFL   | 21   | >TSC2-V841I MAIPLLEFL   | 15   | 6    |
| >TSC2-V841I MAVPLLEFL   | 758  | >TSC2-V841I MAIPLLEFL   | 381  | 377  |
| >TSC2-V841I MAVPLLEF    | 248  | >TSC2-V841I MAIPLLEF    | 164  | 84   |

|                        |      |                         |     |     |
|------------------------|------|-------------------------|-----|-----|
| >TSC2-V841I·MAVPLLEFL  | 8    | >TSC2-V841I·MAIPLLEFL   | 6   | 2   |
| >TSC2-V841I·MAVPLLEFLS | 109  | >TSC2-V841I·MAIPLLEFLST | 72  | 37  |
| >TSC2-V841I·MAVPLLEFL  | 605  | >TSC2-V841I·MAIPLLEFL   | 379 | 226 |
| >TSC2-V841I·MAVPLLEF   | 659  | >TSC2-V841I·MAIPLLEF    | 335 | 324 |
| >TSC2-V841I·MAVPLLEF   | 378  | >TSC2-V841I·MAIPLLEF    | 135 | 243 |
| >TSC2-V841I·MAVPLLEF   | 1099 | >TSC2-V841I·MAIPLLEF    | 498 | 601 |
| >TSC2-V841I·MAVPLLEFL  | 643  | >TSC2-V841I·MAIPLLEFL   | 289 | 354 |
| >TSC2-V841I·MAVPLLEF   | 621  | >TSC2-V841I·MAIPLLEF    | 283 | 338 |
| >TSC2-V841I·MAVPLLEFL  | 9    | >TSC2-V841I·MAIPLLEFL   | 7   | 2   |
| >TSC2-V841I·MAVPLLEFL  | 280  | >TSC2-V841I·MAIPLLEFL   | 224 | 56  |
| >TSC2-V841I·MAVPLLEF   | 226  | >TSC2-V841I·MAIPLLEF    | 106 | 120 |
| >TSC2-V841I·MAVPLLEF   | 54   | >TSC2-V841I·MAIPLLEF    | 40  | 14  |
| >TSC2-V841I·MAVPLLEF   | 4    | >TSC2-V841I·MAIPLLEF    | 4   | 0   |
| >TSC2-V841I·MAVPLLEFL  | 39   | >TSC2-V841I·MAIPLLEFL   | 41  | 2   |
| >TSC2-V841I·MAVPLLEF   | 19   | >TSC2-V841I·MAIPLLEF    | 20  | 1   |
| >TSC2-V841I·MAVPLLEF   | 280  | >TSC2-V841I·MAIPLLEF    | 268 | 12  |
| >TSC2-V841I·MAVPLLEF   | 216  | >TSC2-V841I·MAIPLLEF    | 185 | 31  |
| >TSC2-V841I·MAVPLLEF   | 355  | >TSC2-V841I·MAIPLLEF    | 262 | 93  |
| >TSC2-V841I·MAVPLLEF   | 16   | >TSC2-V841I·MAIPLLEF    | 15  | 1   |
| >TSC2-V841I·MAVPLLEFL  | 79   | >TSC2-V841I·MAIPLLEFL   | 46  | 33  |
| >TSC2-V841I·MAVPLLEFL  | 301  | >TSC2-V841I·MAIPLLEFL   | 592 | 291 |
| >TSC2-V841I·MAVPLLEF   | 467  | >TSC2-V841I·MAIPLLEF    | 902 | 435 |
| >TSC2-V841I·MAVPLLEFL  | 469  | >TSC2-V841I·MAIPLLEFL   | 942 | 473 |
| >TSC2-V841I·SMAVPLLEFL | 100  | >TSC2-V841I·SMAIPLLEFL  | 67  | 33  |
| >TSC2-V841I·SMAVPLLEFL | 14   | >TSC2-V841I·SMAIPLLEFL  | 13  | 1   |
| >TSC2-V841I·SMAVPLLEFL | 58   | >TSC2-V841I·SMAIPLLEFL  | 52  | 6   |
| >TSC2-V841I·SMAVPLLEFL | 97   | >TSC2-V841I·SMAIPLLEFL  | 76  | 21  |
| >TSC2-V841I·SMAVPLLEF  | 1053 | >TSC2-V841I·SMAIPLLEF   | 377 | 676 |
| >TSC2-V841I·SMAVPLLEFL | 6    | >TSC2-V841I·SMAIPLLEFL  | 5   | 1   |
| >TSC2-V841I·SMAVPLLEFL | 40   | >TSC2-V841I·SMAIPLLEFL  | 58  | 18  |
| >TSC2-V841I·SMAVPLLEFL | 10   | >TSC2-V841I·SMAIPLLEFL  | 9   | 1   |
| >TSC2-V841I·SMAVPLLEFL | 36   | >TSC2-V841I·SMAIPLLEFL  | 65  | 29  |
| >TSC2-V841I·SMAVPLLEFL | 8    | >TSC2-V841I·SMAIPLLEFL  | 6   | 2   |
| >TSC2-V841I·SMAVPLLEF  | 503  | >TSC2-V841I·SMAIPLLEF   | 495 | 8   |
| >TSC2-V841I·SMAVPLLEF  | 91   | >TSC2-V841I·SMAIPLLEF   | 65  | 26  |
| >TSC2-V841I·SMAVPLLEF  | 50   | >TSC2-V841I·SMAIPLLEF   | 58  | 8   |
| >TSC2-V841I·SMAVPLLEF  | 100  | >TSC2-V841I·SMAIPLLEF   | 162 | 62  |
| >TSC2-V841I·SMAVPLLEF  | 11   | >TSC2-V841I·SMAIPLLEF   | 17  | 6   |
| >TSC2-V841I·SMAVPLLEF  | 196  | >TSC2-V841I·SMAIPLLEF   | 83  | 113 |
| >TSC2-V841I·SMAVPLLEFL | 328  | >TSC2-V841I·SMAIPLLEFL  | 287 | 41  |
| >TSC2-V841I·ASMAVPLL   | 505  | >TSC2-V841I·ASMAIPLL    | 361 | 144 |
| >TSC2-V841I·ASMAVPLLEF | 427  | >TSC2-V841I·ASMAIPLLEFI | 343 | 84  |
| >TSC2-V841I·ASMAVPLL   | 195  | >TSC2-V841I·ASMAIPLL    | 94  | 101 |

|                        |      |                         |     |     |
|------------------------|------|-------------------------|-----|-----|
| >TSC2-V841I·ASMAVPLLEF | 37   | >TSC2-V841I·ASMAIPLLEFI | 19  | 18  |
| >TSC2-V841I·ASMAVPLL   | 442  | >TSC2-V841I·ASMAIPLL    | 362 | 80  |
| >TSC2-V841I·ASMAVPLLEF | 109  | >TSC2-V841I·ASMAIPLLEFI | 123 | 14  |
| >TSC2-V841I·ASMAVPLLEF | 309  | >TSC2-V841I·ASMAIPLLEF  | 490 | 181 |
| >TSC2-V841I·ASMAVPLL   | 525  | >TSC2-V841I·ASMAIPLL    | 454 | 71  |
| >TSC2-V841I·ASMAVPLLEF | 59   | >TSC2-V841I·ASMAIPLLEF  | 41  | 18  |
| >TSC2-V841I·ASMAVPLLEF | 559  | >TSC2-V841I·ASMAIPLLEFI | 347 | 212 |
| >TSC2-V841I·ASMAVPLLEF | 193  | >TSC2-V841I·ASMAIPLLEFI | 124 | 69  |
| >TSC2-V841I·ASMAVPLLEF | 117  | >TSC2-V841I·ASMAIPLLEF  | 157 | 40  |
| >TSC2-V841I·ASMAVPLLEF | 16   | >TSC2-V841I·ASMAIPLLEF  | 16  | 0   |
| >TSC2-V841I·ASMAVPLL   | 26   | >TSC2-V841I·ASMAIPLL    | 22  | 4   |
| >TSC2-V841I·ASMAVPLLEF | 4    | >TSC2-V841I·ASMAIPLLEF  | 3   | 1   |
| >TSC2-V841I·ASMAVPLLEF | 48   | >TSC2-V841I·ASMAIPLLEFI | 36  | 12  |
| >TSC2-V841I·ASMAVPLL   | 448  | >TSC2-V841I·ASMAIPLL    | 745 | 297 |
| >TSC2-V841I·ASMAVPLL   | 108  | >TSC2-V841I·ASMAIPLL    | 390 | 282 |
| >TSC2-V841I·ASMAVPLLEF | 18   | >TSC2-V841I·ASMAIPLLEF  | 28  | 10  |
| >TSC2-V841I·ASMAVPLLEF | 84   | >TSC2-V841I·ASMAIPLLEFI | 196 | 112 |
| >TSC2-V841I·ASMAVPLLEF | 362  | >TSC2-V841I·ASMAIPLLEFI | 351 | 11  |
| >TSC2-V841I·ASMAVPLLEF | 48   | >TSC2-V841I·ASMAIPLLEF  | 43  | 5   |
| >TSC2-V841I·ASMAVPLLEF | 262  | >TSC2-V841I·ASMAIPLLEFI | 224 | 38  |
| >TSC2-V841I·ASMAVPLLEF | 402  | >TSC2-V841I·ASMAIPLLEFI | 387 | 15  |
| >TSC2-V841I·TASMAVPL   | 115  | >TSC2-V841I·TASMAIPL    | 182 | 67  |
| >TSC2-V841I·TASMAVPLLE | 252  | >TSC2-V841I·TASMAIPLLEI | 375 | 123 |
| >TSC2-V841I·TASMAVPL   | 262  | >TSC2-V841I·TASMAIPL    | 310 | 48  |
| >TSC2-V841I·TASMAVPLLE | 24   | >TSC2-V841I·TASMAIPLLEI | 24  | 0   |
| >TSC2-V841I·TASMAVPL   | 279  | >TSC2-V841I·TASMAIPL    | 262 | 17  |
| >TSC2-V841I·TASMAVPLLE | 137  | >TSC2-V841I·TASMAIPLLEI | 160 | 23  |
| >TSC2-V841I·TASMAVPL   | 441  | >TSC2-V841I·TASMAIPL    | 558 | 117 |
| >TSC2-V841I·TASMAVPLLE | 214  | >TSC2-V841I·TASMAIPLLEI | 387 | 173 |
| >TSC2-V841I·TASMAVPLL  | 41   | >TSC2-V841I·TASMAIPLL   | 33  | 8   |
| >TSC2-V841I·ATASMAVPL  | 66   | >TSC2-V841I·ATASMAIPL   | 160 | 94  |
| >TSC2-V841I·ATASMAVPLI | 202  | >TSC2-V841I·ATASMAIPLL  | 138 | 64  |
| >TSC2-V841I·ATASMAVPL  | 429  | >TSC2-V841I·ATASMAIPL   | 432 | 3   |
| >TSC2-V841I·ATASMAVPLI | 1061 | >TSC2-V841I·ATASMAIPLL  | 437 | 624 |
| >TSC2-V841I·ATASMAVPLI | 430  | >TSC2-V841I·ATASMAIPLL  | 411 | 19  |
| >TSC2-V841I·ATASMAVPL  | 19   | >TSC2-V841I·ATASMAIPL   | 52  | 33  |
| >TSC2-V841I·ATASMAVPL  | 26   | >TSC2-V841I·ATASMAIPL   | 62  | 36  |
| >TSC2-V841I·ATASMAVPLI | 263  | >TSC2-V841I·ATASMAIPLL  | 251 | 12  |
| >TSC2-V841I·ATASMAVPL  | 361  | >TSC2-V841I·ATASMAIPL   | 239 | 122 |
| >TSC2-V841I·ATASMAVPL  | 399  | >TSC2-V841I·ATASMAIPL   | 808 | 409 |
| >TSC2-V841I·ATASMAVPL  | 7    | >TSC2-V841I·ATASMAIPL   | 8   | 1   |
| >TSC2-V841I·ATASMAVPLI | 12   | >TSC2-V841I·ATASMAIPLL  | 14  | 2   |
| >TSC2-V841I·ATASMAVPL  | 292  | >TSC2-V841I·ATASMAIPL   | 308 | 16  |

|                         |       |                          |       |       |
|-------------------------|-------|--------------------------|-------|-------|
| >TSC2-V841I· ATASMAVPL  | 21    | >TSC2-V841I· ATASMAIPL   | 14    | 7     |
| >TSC2-V841I· ATASMAVPLI | 6     | >TSC2-V841I· ATASMAIPLL  | 5     | 1     |
| >TSC2-V841I· ATASMAVPL  | 260   | >TSC2-V841I· ATASMAIPL   | 215   | 45    |
| >TSC2-V841I· ATASMAVPLI | 106   | >TSC2-V841I· ATASMAIPLL  | 71    | 35    |
| >TSC2-V841I· ATASMAVPL  | 378   | >TSC2-V841I· ATASMAIPL   | 389   | 11    |
| >TSC2-V841I· SATASMAV   | 350   | >TSC2-V841I· SATASMAI    | 2540  | 2190  |
| >TSC2-V841I· SATASMAV   | 73    | >TSC2-V841I· SATASMAI    | 624   | 551   |
| >TSC2-V841I· SATASMAVPI | 582   | >TSC2-V841I· SATASMAIPL  | 389   | 193   |
| >TSC2-V841I· SATASMAV   | 161   | >TSC2-V841I· SATASMAI    | 10863 | 10702 |
| >TSC2-V841I· SATASMAV   | 26    | >TSC2-V841I· SATASMAI    | 118   | 92    |
| >TSC2-V841I· SATASMAVPI | 271   | >TSC2-V841I· SATASMAIPL  | 195   | 76    |
| >TSC2-V841I· SATASMAV   | 97    | >TSC2-V841I· SATASMAI    | 769   | 672   |
| >TSC2-V841I· SATASMAVPI | 35    | >TSC2-V841I· SATASMAIPL  | 46    | 11    |
| >TSC2-V841I· SATASMAVPI | 96    | >TSC2-V841I· SATASMAIPL  | 116   | 20    |
| >TSC2-V841I· SATASMAVPI | 316   | >TSC2-V841I· SATASMAIPL  | 393   | 77    |
| >TSC2-V841I· SATASMAVPI | 81    | >TSC2-V841I· SATASMAIPL  | 56    | 25    |
| >TSC2-V841I· SATASMAVPI | 19    | >TSC2-V841I· SATASMAIPL  | 16    | 3     |
| >TSC2-V841I· SATASMAV   | 10848 | >TSC2-V841I· SATASMAI    | 222   | 10626 |
| >TSC2-V841I· ISATASMAVP | 513   | >TSC2-V841I· ISATASMAIPI | 496   | 17    |
| >TSC2-V841I· ISATASMAV  | 421   | >TSC2-V841I· ISATASMAI   | 1548  | 1127  |
| >TSC2-V841I· ISATASMAVP | 478   | >TSC2-V841I· ISATASMAIPI | 765   | 287   |
| >TSC2-V841I· ISATASMAV  | 429   | >TSC2-V841I· ISATASMAI   | 2589  | 2160  |
| >TSC2-V841I· ISATASMAV  | 31    | >TSC2-V841I· ISATASMAI   | 108   | 77    |
| >TSC2-V841I· ISATASMAVP | 115   | >TSC2-V841I· ISATASMAIPI | 232   | 117   |
| >TSC2-V841I· ISATASMAV  | 73    | >TSC2-V841I· ISATASMAI   | 56    | 17    |
| >TSC2-V841I· ISATASMAVP | 65    | >TSC2-V841I· ISATASMAIPI | 128   | 63    |
| >TSC2-V841I· ISATASMAV  | 545   | >TSC2-V841I· ISATASMAI   | 54    | 491   |
| >TSC2-V841I· ISATASMAVP | 8     | >TSC2-V841I· ISATASMAIPI | 8     | 0     |
| >TSC2-V841I· ISATASMAV  | 5026  | >TSC2-V841I· ISATASMAI   | 103   | 4923  |
| >TSC2-V841I· ISATASMAV  | 443   | >TSC2-V841I· ISATASMAI   | 246   | 197   |
| >TSC2-V841I· ISATASMAVP | 43    | >TSC2-V841I· ISATASMAIPI | 30    | 13    |
| >TSC2-V841I· ISATASMAV  | 4565  | >TSC2-V841I· ISATASMAI   | 45    | 4520  |
| >TSC2-V841I· HISATASMAV | 432   | >TSC2-V841I· HISATASMAI  | 2227  | 1795  |
| >TSC2-V841I· HISATASMAV | 88    | >TSC2-V841I· HISATASMAI  | 177   | 89    |
| >TSC2-V841I· HISATASMAV | 51    | >TSC2-V841I· HISATASMAI  | 157   | 106   |
| >TSC2-V841I· HISATASMAV | 141   | >TSC2-V841I· HISATASMAI  | 539   | 398   |
| >TSC2-V841I· HISATASMAV | 220   | >TSC2-V841I· HISATASMAI  | 2860  | 2640  |
| >TSC2-V841I· HISATASMAV | 247   | >TSC2-V841I· HISATASMAI  | 2801  | 2554  |
| >TSC2-V841I· HISATASMAV | 356   | >TSC2-V841I· HISATASMAI  | 6943  | 6587  |
| >TSC2-V841I· HISATASMAV | 16    | >TSC2-V841I· HISATASMAI  | 3073  | 3057  |
| >TSC2-V841I· HISATASMAV | 270   | >TSC2-V841I· HISATASMAI  | 159   | 111   |
| >TSC2-V841I· HISATASMAV | 4563  | >TSC2-V841I· HISATASMAI  | 379   | 4184  |
| >TSC2-V841I· HISATASMAV | 87    | >TSC2-V841I· HISATASMAI  | 242   | 155   |

|                        |       |                        |       |       |
|------------------------|-------|------------------------|-------|-------|
| >TSC2-V841I·HISATASMAV | 28    | >TSC2-V841I·HISATASMAI | 208   | 180   |
| >TSC2-V841I·HISATASMAV | 233   | >TSC2-V841I·HISATASMAI | 187   | 46    |
| >TSC2-Y1608YCW HDDIMC  | 157   | >TSC2-Y1608DCW HDDIMC  | 16749 | 16592 |
| >TSC2-Y1608YCW HDDIMC  | 30    | >TSC2-Y1608DCW HDDIMC  | 4665  | 4635  |
| >TSC2-Y1608YCW HDDIMC  | 60    | >TSC2-Y1608DCW HDDIMC  | 10741 | 10681 |
| >TSC2-Y1608YCW HDDIMC  | 61    | >TSC2-Y1608DCW HDDIMC  | 6279  | 6218  |
| >TSC2-Y1608YCW HDDIMC  | 60    | >TSC2-Y1608DCW HDDIMC  | 12166 | 12106 |
| >TSC2-Y1608YCW HDDIMC  | 237   | >TSC2-Y1608DCW HDDIMC  | 446   | 209   |
| >TSC2-Y1608YCW HDDIM   | 38    | >TSC2-Y1608DCW HDDIM   | 280   | 242   |
| >TSC2-Y1608TYCW HDDI   | 356   | >TSC2-Y1608TDCW HDDI   | 25284 | 24928 |
| >TSC2-Y1608TYCW HDDI   | 411   | >TSC2-Y1608TDCW HDDI   | 26992 | 26581 |
| >TSC2-Y1608TYCW HDDI   | 34    | >TSC2-Y1608TDCW HDDI   | 26159 | 26125 |
| >TSC2-Y1608TYCW HDDI   | 445   | >TSC2-Y1608TDCW HDDI   | 35429 | 34984 |
| >TSC2-Y1608TYCW HDDI   | 26450 | >TSC2-Y1608TDCW HDDI   | 496   | 25954 |
| >TSC2-Y1608DVCGEDGQF   | 424   | >TSC2-Y1608DVCGEDGQF   | 20743 | 20319 |
| >TSC2-Y1608DVCGEDGQF   | 22    | >TSC2-Y1608DVCGEDGQF   | 19953 | 19931 |
| >TSC2-Y1608DVCGEDGQF   | 255   | >TSC2-Y1608DVCGEDGQF   | 34475 | 34220 |
| >TSC2-Y1608DVCGEDGQF   | 102   | >TSC2-Y1608DVCGEDGQF   | 21591 | 21489 |
| >TSC2-Y1608DVCGEDGQF   | 250   | >TSC2-Y1608DVCGEDGQF   | 31845 | 31595 |
| >TSC2-Y1608DVCGEDGQF   | 198   | >TSC2-Y1608DVCGEDGQF   | 20997 | 20799 |
| >TSC2-Y1608DVCGEDGQF   | 463   | >TSC2-Y1608DVCGEDGQF   | 33974 | 33511 |
| >TSC2-Y1608FTYCW HDDII | 105   | >TSC2-Y1608FTDCW HDDII | 1074  | 969   |
| >TSC2-Y1608FTYCW HDDI  | 162   | >TSC2-Y1608FTDCW HDDI  | 4978  | 4816  |
| >TSC2-Y1608FTYCW HDDI  | 191   | >TSC2-Y1608FTDCW HDDI  | 561   | 370   |
| >TSC2-Y1608FTYCW HDDII | 204   | >TSC2-Y1608FTDCW HDDII | 890   | 686   |
| >TSC2-Y1608FTYCW HDDI  | 18    | >TSC2-Y1608FTDCW HDDI  | 96    | 78    |
| >TSC2-Y1608FTYCW HDDII | 304   | >TSC2-Y1608FTDCW HDDII | 1401  | 1097  |
| >TSC2-Y1608FTYCW HDDI  | 276   | >TSC2-Y1608FTDCW HDDI  | 737   | 461   |
| >TSC2-Y1608FTYCW HDDII | 77    | >TSC2-Y1608FTDCW HDDII | 7812  | 7735  |
| >TSC2-Y1608FTYCW HDDI  | 490   | >TSC2-Y1608FTDCW HDDI  | 5525  | 5035  |
| >TSC2-Y1608FTYCW HDDII | 258   | >TSC2-Y1608FTDCW HDDII | 5592  | 5334  |
| >TSC2-Y1608FTYCW HDDI  | 34    | >TSC2-Y1608FTDCW HDDI  | 901   | 867   |
| >TSC2-Y1608FTYCW HDDI  | 23    | >TSC2-Y1608FTDCW HDDI  | 57    | 34    |
| >TSC2-Y1608FTYCW HDDII | 189   | >TSC2-Y1608FTDCW HDDII | 449   | 260   |
| >TSC2-Y1608FTYCW HDDII | 65    | >TSC2-Y1608FTDCW HDDII | 1542  | 1477  |
| >TSC2-Y1608FTYCW HDDII | 405   | >TSC2-Y1608FTDCW HDDII | 988   | 583   |
| >TSC2-Y1608FTYCW HDDI  | 292   | >TSC2-Y1608FTDCW HDDI  | 1775  | 1483  |
| >TSC2-Y1608FTYCW HDDII | 147   | >TSC2-Y1608FTDCW HDDII | 1110  | 963   |
| >TSC2-Y1608FTYCW HDDI  | 33    | >TSC2-Y1608FTDCW HDDI  | 535   | 502   |
| >TSC2-Y1608GQFTYCW HE  | 164   | >TSC2-Y1608GQFTDCW HE  | 275   | 111   |
| >TSC2-Y1608GQFTYCW HE  | 155   | >TSC2-Y1608GQFTDCW HE  | 286   | 131   |
| >TSC2-Y1608GQFTYCW HE  | 127   | >TSC2-Y1608GQFTDCW HE  | 388   | 261   |
| >TSC2-Y1608EDGQFTYCW   | 463   | >TSC2-Y1608EDGQFTDCW   | 758   | 295   |



|                         |     |                        |       |       |
|-------------------------|-----|------------------------|-------|-------|
| >TSC2-Y1608 GEDGQFTYC\  | 146 | >TSC2-Y1608 GEDGQFTDC' | 670   | 524   |
| >TSC2-Y1608 GEDGQFTY    | 388 | >TSC2-Y1608 GEDGQFTD   | 7515  | 7127  |
| >TSC2-Y1608 GEDGQFTYC\  | 195 | >TSC2-Y1608 GEDGQFTDC' | 776   | 581   |
| >TSC2-Y1608 GEDGQFTYC\  | 245 | >TSC2-Y1608 GEDGQFTDC' | 506   | 261   |
| >TSC2-Y1608 CGEDGQFTY   | 97  | >TSC2-Y1608 CGEDGQFTD  | 27761 | 27664 |
| >TSC2-Y1608 CGEDGQFTY   | 291 | >TSC2-Y1608 CGEDGQFTD  | 24324 | 24033 |
| >TSC2-Y1608 CGEDGQFTY(\ | 422 | >TSC2-Y1608 CGEDGQFTD\ | 409   | 13    |
| >TSC2-Y1608 CGEDGQFTY(\ | 773 | >TSC2-Y1608 CGEDGQFTD\ | 303   | 470   |
| >TSC2-Y1608 CGEDGQFTY   | 297 | >TSC2-Y1608 CGEDGQFTD  | 36712 | 36415 |
| >TSC2-Y1608 VCGEDGQFT\  | 130 | >TSC2-Y1608 VCGEDGQFT\ | 25125 | 24995 |
| >TSHR-A428\ALLGNVFV     | 9   | >TSHR-A428\VLLGNVFV    | 9     | 0     |
| >TSHR-A428\ALLGNVFL     | 14  | >TSHR-A428\VLLGNVFL    | 15    | 1     |
| >TSHR-A428\ALLGNVFLL    | 43  | >TSHR-A428\VLLGNVFLL   | 50    | 7     |
| >TSHR-A428\ALLGNVFLL\   | 17  | >TSHR-A428\VLLGNVFLL\  | 21    | 4     |
| >TSHR-A428\ALLGNVFV     | 8   | >TSHR-A428\VLLGNVFV    | 14    | 6     |
| >TSHR-A428\ALLGNVFL     | 39  | >TSHR-A428\VLLGNVFL    | 85    | 46    |
| >TSHR-A428\ALLGNVFLL    | 37  | >TSHR-A428\VLLGNVFLL   | 67    | 30    |
| >TSHR-A428\ALLGNVFLL\   | 76  | >TSHR-A428\VLLGNVFLL\  | 165   | 89    |
| >TSHR-A428\ALLGNVFV     | 17  | >TSHR-A428\VLLGNVFV    | 29    | 12    |
| >TSHR-A428\ALLGNVFL     | 141 | >TSHR-A428\VLLGNVFL    | 261   | 120   |
| >TSHR-A428\ALLGNVFLL    | 70  | >TSHR-A428\VLLGNVFLL   | 150   | 80    |
| >TSHR-A428\ALLGNVFLL\   | 69  | >TSHR-A428\VLLGNVFLL\  | 114   | 45    |
| >TSHR-A428\ALLGNVFV     | 6   | >TSHR-A428\VLLGNVFV    | 7     | 1     |
| >TSHR-A428\ALLGNVFL     | 19  | >TSHR-A428\VLLGNVFL    | 24    | 5     |
| >TSHR-A428\ALLGNVFLL    | 127 | >TSHR-A428\VLLGNVFLL   | 179   | 52    |
| >TSHR-A428\ALLGNVFLL\   | 70  | >TSHR-A428\VLLGNVFLL\  | 101   | 31    |
| >TSHR-A428\ALLGNVFV     | 1   | >TSHR-A428\VLLGNVFV    | 1     | 0     |
| >TSHR-A428\ALLGNVFL     | 2   | >TSHR-A428\VLLGNVFL    | 2     | 0     |
| >TSHR-A428\ALLGNVFLL    | 2   | >TSHR-A428\VLLGNVFLL   | 2     | 0     |
| >TSHR-A428\ALLGNVFLL\   | 2   | >TSHR-A428\VLLGNVFLL\  | 2     | 0     |
| >TSHR-A428\ALLGNVFV     | 3   | >TSHR-A428\VLLGNVFV    | 3     | 0     |
| >TSHR-A428\ALLGNVFL     | 3   | >TSHR-A428\VLLGNVFL    | 3     | 0     |
| >TSHR-A428\ALLGNVFLL    | 7   | >TSHR-A428\VLLGNVFLL   | 7     | 0     |
| >TSHR-A428\ALLGNVFLL\   | 14  | >TSHR-A428\VLLGNVFLL\  | 14    | 0     |
| >TSHR-A428\ALLGNVFV     | 4   | >TSHR-A428\VLLGNVFV    | 3     | 1     |
| >TSHR-A428\ALLGNVFL     | 5   | >TSHR-A428\VLLGNVFL    | 5     | 0     |
| >TSHR-A428\ALLGNVFLL    | 6   | >TSHR-A428\VLLGNVFLL   | 6     | 0     |
| >TSHR-A428\ALLGNVFLL\   | 8   | >TSHR-A428\VLLGNVFLL\  | 8     | 0     |
| >TSHR-A428\ALLGNVFV     | 2   | >TSHR-A428\VLLGNVFV    | 2     | 0     |
| >TSHR-A428\ALLGNVFL     | 3   | >TSHR-A428\VLLGNVFL    | 2     | 1     |
| >TSHR-A428\ALLGNVFLL    | 7   | >TSHR-A428\VLLGNVFLL   | 5     | 2     |
| >TSHR-A428\ALLGNVFLL\   | 11  | >TSHR-A428\VLLGNVFLL\  | 7     | 4     |
| >TSHR-A428\ALLGNVFV     | 2   | >TSHR-A428\VLLGNVFV    | 2     | 0     |

|                        |      |                        |      |      |
|------------------------|------|------------------------|------|------|
| >TSHR-A428\ALLGNVFVL   | 2    | >TSHR-A428\VLLGNVFVL   | 2    | 0    |
| >TSHR-A428\ALLGNVFVLL  | 2    | >TSHR-A428\VLLGNVFVLL  | 2    | 0    |
| >TSHR-A428\ALLGNVFVLL  | 3    | >TSHR-A428\VLLGNVFVLL  | 4    | 1    |
| >TSHR-A428\ALLGNVFVL   | 62   | >TSHR-A428\VLLGNVFVL   | 261  | 199  |
| >TSHR-A428\ALLGNVFVLL  | 81   | >TSHR-A428\VLLGNVFVLL  | 383  | 302  |
| >TSHR-A428\ALLGNVFVLL  | 51   | >TSHR-A428\VLLGNVFVLL  | 220  | 169  |
| >TSHR-A428\ALLGNVVFV   | 268  | >TSHR-A428\VLLGNVVFV   | 352  | 84   |
| >TSHR-A428\ALLGNVFVL   | 134  | >TSHR-A428\VLLGNVFVL   | 447  | 313  |
| >TSHR-A428\ALLGNVFVLL  | 190  | >TSHR-A428\VLLGNVFVLL  | 353  | 163  |
| >TSHR-A428\LALLGNVVFV  | 890  | >TSHR-A428\LVLLGNVVFV  | 99   | 791  |
| >TSHR-A428\LALLGNVFVL  | 729  | >TSHR-A428\LVLLGNVFVL  | 473  | 256  |
| >TSHR-A428\LALLGNVVFV  | 930  | >TSHR-A428\LVLLGNVVFV  | 251  | 679  |
| >TSHR-A428\LALLGNVFVL  | 493  | >TSHR-A428\LVLLGNVFVL  | 232  | 261  |
| >TSHR-A428\LALLGNVVFV  | 33   | >TSHR-A428\LVLLGNVVFV  | 12   | 21   |
| >TSHR-A428\LALLGNVFVL  | 654  | >TSHR-A428\LVLLGNVFVL  | 337  | 317  |
| >TSHR-A428\LALLGNVFVLL | 212  | >TSHR-A428\LVLLGNVFVLL | 62   | 150  |
| >TSHR-A428\LALLGNVVFV  | 265  | >TSHR-A428\LVLLGNVVFV  | 46   | 219  |
| >TSHR-A428\LALLGNVFVL  | 1311 | >TSHR-A428\LVLLGNVFVL  | 304  | 1007 |
| >TSHR-A428\LALLGNVVFV  | 2427 | >TSHR-A428\LVLLGNVVFV  | 160  | 2267 |
| >TSHR-A428\LALLGNVVFV  | 138  | >TSHR-A428\LVLLGNVVFV  | 18   | 120  |
| >TSHR-A428\LALLGNVFVL  | 3912 | >TSHR-A428\LVLLGNVFVL  | 446  | 3466 |
| >TSHR-A428\LALLGNVVFV  | 224  | >TSHR-A428\LVLLGNVVFV  | 16   | 208  |
| >TSHR-A428\LALLGNVFVL  | 992  | >TSHR-A428\LVLLGNVFVL  | 107  | 885  |
| >TSHR-A428\LALLGNVVFV  | 159  | >TSHR-A428\LVLLGNVVFV  | 16   | 143  |
| >TSHR-A428\LALLGNVFVL  | 2362 | >TSHR-A428\LVLLGNVFVL  | 154  | 2208 |
| >TSHR-A428\LALLGNVFVLL | 4935 | >TSHR-A428\LVLLGNVFVLL | 315  | 4620 |
| >TSHR-A428\LALLGNVVFV  | 680  | >TSHR-A428\LVLLGNVVFV  | 123  | 557  |
| >TSHR-A428\LALLGNVVFV  | 118  | >TSHR-A428\LVLLGNVVFV  | 44   | 74   |
| >TSHR-A428\LALLGNVVF   | 444  | >TSHR-A428\LVLLGNVF    | 282  | 162  |
| >TSHR-A428\LALLGNVF    | 52   | >TSHR-A428\LVLLGNVF    | 270  | 218  |
| >TSHR-A428\LALLGNVF    | 31   | >TSHR-A428\LVLLGNVF    | 393  | 362  |
| >TSHR-A428\LALLGNVFVL  | 78   | >TSHR-A428\LVLLGNVFVL  | 925  | 847  |
| >TSHR-A428\LALLGNVF    | 80   | >TSHR-A428\LVLLGNVF    | 294  | 214  |
| >TSHR-A428\LALLGNVF    | 496  | >TSHR-A428\LVLLGNVF    | 3590 | 3094 |
| >TSHR-A428\LALLGNVF    | 198  | >TSHR-A428\LVLLGNVF    | 305  | 107  |
| >TSHR-A428\RIVVWVFSLL  | 1646 | >TSHR-A428\RIVVWVFSLL  | 112  | 1534 |
| >TSHR-A428\RIVVWVFSLL  | 2812 | >TSHR-A428\RIVVWVFSLL  | 325  | 2487 |
| >TSHR-A428\RIVVWVFSLL  | 616  | >TSHR-A428\RIVVWVFSLL  | 99   | 517  |
| >TSHR-A428\RIVVWVFSLL  | 184  | >TSHR-A428\RIVVWVFSLL  | 14   | 170  |
| >TSHR-A428\RIVVWVFSLL  | 1487 | >TSHR-A428\RIVVWVFSLL  | 23   | 1464 |
| >TSHR-A428\RIVVWVFSLL  | 3508 | >TSHR-A428\RIVVWVFSLL  | 76   | 3432 |
| >TSHR-A428\RIVVWVFSLL  | 2342 | >TSHR-A428\RIVVWVFSLL  | 24   | 2318 |
| >TSHR-A428\RIVVWVFSLL  | 449  | >TSHR-A428\RIVVWVFSLL  | 857  | 408  |

|                       |      |                        |     |      |
|-----------------------|------|------------------------|-----|------|
| >TSHR-A428\RIVVWFVSLL | 5362 | >TSHR-A428\RIVVWFVSLL' | 264 | 5098 |
| >TSHR-A428\LLALLGNV   | 135  | >TSHR-A428\LLVLLGNV    | 508 | 373  |
| >TSHR-A428\LLALLGNVFV | 36   | >TSHR-A428\LLVLLGNVFV  | 53  | 17   |
| >TSHR-A428\LLALLGNVFV | 161  | >TSHR-A428\LLVLLGNVFV  | 355 | 194  |
| >TSHR-A428\LLALLGNV   | 12   | >TSHR-A428\LLVLLGNV    | 102 | 90   |
| >TSHR-A428\LLALLGNVFV | 28   | >TSHR-A428\LLVLLGNVFV  | 65  | 37   |
| >TSHR-A428\LLALLGNVFV | 20   | >TSHR-A428\LLVLLGNVFV  | 164 | 144  |
| >TSHR-A428\LLALLGNV   | 8    | >TSHR-A428\LLVLLGNV    | 21  | 13   |
| >TSHR-A428\LLALLGNVFV | 46   | >TSHR-A428\LLVLLGNVFV  | 63  | 17   |
| >TSHR-A428\LLALLGNVFV | 87   | >TSHR-A428\LLVLLGNVFV  | 305 | 218  |
| >TSHR-A428\LLALLGNV   | 138  | >TSHR-A428\LLVLLGNV    | 132 | 6    |
| >TSHR-A428\LLALLGNVFV | 130  | >TSHR-A428\LLVLLGNVFV  | 86  | 44   |
| >TSHR-A428\LLALLGNVFV | 289  | >TSHR-A428\LLVLLGNVFV  | 297 | 8    |
| >TSHR-A428\LLALLGNV   | 13   | >TSHR-A428\LLVLLGNV    | 15  | 2    |
| >TSHR-A428\LLALLGNVFV | 9    | >TSHR-A428\LLVLLGNVFV  | 10  | 1    |
| >TSHR-A428\LLALLGNVFV | 39   | >TSHR-A428\LLVLLGNVFV  | 46  | 7    |
| >TSHR-A428\LLALLGNV   | 37   | >TSHR-A428\LLVLLGNV    | 42  | 5    |
| >TSHR-A428\LLALLGNVFV | 14   | >TSHR-A428\LLVLLGNVFV  | 15  | 1    |
| >TSHR-A428\LLALLGNVFV | 43   | >TSHR-A428\LLVLLGNVFV  | 48  | 5    |
| >TSHR-A428\LLALLGNV   | 13   | >TSHR-A428\LLVLLGNV    | 32  | 19   |
| >TSHR-A428\LLALLGNVFV | 7    | >TSHR-A428\LLVLLGNVFV  | 12  | 5    |
| >TSHR-A428\LLALLGNVFV | 35   | >TSHR-A428\LLVLLGNVFV  | 109 | 74   |
| >TSHR-A428\LLALLGNV   | 18   | >TSHR-A428\LLVLLGNV    | 220 | 202  |
| >TSHR-A428\LLALLGNVFV | 6    | >TSHR-A428\LLVLLGNVFV  | 31  | 25   |
| >TSHR-A428\LLALLGNVFV | 48   | >TSHR-A428\LLVLLGNVFV  | 192 | 144  |
| >TSHR-A428\LLALLGNV   | 3    | >TSHR-A428\LLVLLGNV    | 5   | 2    |
| >TSHR-A428\LLALLGNVFV | 3    | >TSHR-A428\LLVLLGNVFV  | 4   | 1    |
| >TSHR-A428\LLALLGNVFV | 9    | >TSHR-A428\LLVLLGNVFV  | 15  | 6    |
| >TSHR-A428\LLALLGNVF  | 56   | >TSHR-A428\LLVLLGNVF   | 69  | 13   |
| >TSHR-A428\LLALLGNVF  | 489  | >TSHR-A428\LLVLLGNVF   | 890 | 401  |
| >TSHR-A428\LLALLGNVF  | 84   | >TSHR-A428\LLVLLGNVF   | 75  | 9    |
| >TSHR-A428\LLALLGNVF  | 275  | >TSHR-A428\LLVLLGNVF   | 259 | 16   |
| >TSHR-A428\LLALLGNV   | 17   | >TSHR-A428\LLVLLGNV    | 54  | 37   |
| >TSHR-A428\LLALLGNVF\ | 10   | >TSHR-A428\LLVLLGNVF\  | 17  | 7    |
| >TSHR-A428\LLALLGNV   | 29   | >TSHR-A428\LLVLLGNV    | 130 | 101  |
| >TSHR-A428\LLALLGNVF\ | 10   | >TSHR-A428\LLVLLGNVF\  | 27  | 17   |
| >TSHR-A428\LLALLGNV   | 9    | >TSHR-A428\LLVLLGNV    | 41  | 32   |
| >TSHR-A428\LLALLGNVF\ | 23   | >TSHR-A428\LLVLLGNVF\  | 85  | 62   |
| >TSHR-A428\LLALLGNV   | 20   | >TSHR-A428\LLVLLGNV    | 67  | 47   |
| >TSHR-A428\LLALLGNVF\ | 10   | >TSHR-A428\LLVLLGNVF\  | 21  | 11   |
| >TSHR-A428\LLALLGNV   | 2    | >TSHR-A428\LLVLLGNV    | 4   | 2    |
| >TSHR-A428\LLALLGNVF\ | 2    | >TSHR-A428\LLVLLGNVF\  | 2   | 0    |
| >TSHR-A428\LLALLGNV   | 9    | >TSHR-A428\LLVLLGNV    | 15  | 6    |

|                        |     |                        |      |     |
|------------------------|-----|------------------------|------|-----|
| >TSHR-A428\SLLALLGNVF\ | 5   | >TSHR-A428\SLLVLLGNVF\ | 6    | 1   |
| >TSHR-A428\SLLALLGNV   | 5   | >TSHR-A428\SLLVLLGNV   | 6    | 1   |
| >TSHR-A428\SLLALLGNVF\ | 4   | >TSHR-A428\SLLVLLGNVF\ | 4    | 0   |
| >TSHR-A428\SLLALLGNV   | 13  | >TSHR-A428\SLLVLLGNV   | 20   | 7   |
| >TSHR-A428\SLLALLGNVF\ | 4   | >TSHR-A428\SLLVLLGNVF\ | 5    | 1   |
| >TSHR-A428\SLLALLGNV   | 2   | >TSHR-A428\SLLVLLGNV   | 4    | 2   |
| >TSHR-A428\SLLALLGNVF\ | 2   | >TSHR-A428\SLLVLLGNVF\ | 3    | 1   |
| >TSHR-A428\SLLALLGNVF\ | 495 | >TSHR-A428\SLLVLLGNVF\ | 1242 | 747 |
| >TSHR-A428\SLLALLGNV   | 33  | >TSHR-A428\SLLVLLGNV   | 100  | 67  |
| >TSHR-A428\SLLALLGNVF\ | 23  | >TSHR-A428\SLLVLLGNVF\ | 52   | 29  |
| >TSHR-A428\SLLALLGNVF  | 116 | >TSHR-A428\SLLVLLGNVF  | 216  | 100 |
| >TSHR-A428\SLLALLGNVF  | 123 | >TSHR-A428\SLLVLLGNVF  | 259  | 136 |
| >TSHR-A428\SLLALLGNVF  | 127 | >TSHR-A428\SLLVLLGNVF  | 153  | 26  |
| >TSHR-A428\VSLALLGNV   | 381 | >TSHR-A428\VSLVLLGNV   | 434  | 53  |
| >TSHR-A428\VSLALLGNV\  | 71  | >TSHR-A428\VSLVLLGNV\  | 106  | 35  |
| >TSHR-A428\VSLALLGNV   | 463 | >TSHR-A428\VSLVLLGNV   | 1285 | 822 |
| >TSHR-A428\VSLALLGNV\  | 7   | >TSHR-A428\VSLVLLGNV\  | 12   | 5   |
| >TSHR-A428\VSLALLGNV\  | 172 | >TSHR-A428\VSLVLLGNV\  | 82   | 90  |
| >TSHR-A428\VSLALLGNV\  | 45  | >TSHR-A428\VSLVLLGNV\  | 27   | 18  |
| >TSHR-A428\FVSLALL     | 186 | >TSHR-A428\FVSLVLL     | 101  | 85  |
| >TSHR-A428\FVSLALLGN\  | 233 | >TSHR-A428\FVSLVLLGN\  | 148  | 85  |
| >TSHR-A428\FVSLALL     | 10  | >TSHR-A428\FVSLVLL     | 11   | 1   |
| >TSHR-A428\FVSLALLGN\  | 21  | >TSHR-A428\FVSLVLLGN\  | 21   | 0   |
| >TSHR-A428\FVSLALL     | 54  | >TSHR-A428\FVSLVLL     | 76   | 22  |
| >TSHR-A428\FVSLALLGN\  | 14  | >TSHR-A428\FVSLVLLGN\  | 10   | 4   |
| >TSHR-A428\FVSLALL     | 41  | >TSHR-A428\FVSLVLL     | 55   | 14  |
| >TSHR-A428\FVSLALLGN\  | 22  | >TSHR-A428\FVSLVLLGN\  | 24   | 2   |
| >TSHR-A428\FVSLALLGN\  | 257 | >TSHR-A428\FVSLVLLGN\  | 148  | 109 |
| >TSHR-A428\FVSLALLGN\  | 179 | >TSHR-A428\FVSLVLLGN\  | 111  | 68  |
| >TSHR-A428\FVSLALLGN\  | 567 | >TSHR-A428\FVSLVLLGN\  | 274  | 293 |
| >TSHR-A428\FVSLALL     | 108 | >TSHR-A428\FVSLVLL     | 85   | 23  |
| >TSHR-A428\FVSLALLGN\  | 26  | >TSHR-A428\FVSLVLLGN\  | 23   | 3   |
| >TSHR-A428\FVSLALL     | 65  | >TSHR-A428\FVSLVLL     | 61   | 4   |
| >TSHR-A428\FVSLALLGN\  | 19  | >TSHR-A428\FVSLVLLGN\  | 19   | 0   |
| >TSHR-A428\FVSLALLGN\  | 76  | >TSHR-A428\FVSLVLLGN\  | 106  | 30  |
| >TSHR-A428\WVFSLLAL    | 467 | >TSHR-A428\WVFSLLVL    | 1235 | 768 |
| >TSHR-A428\WVFSLLALL   | 74  | >TSHR-A428\WVFSLLVLL   | 128  | 54  |
| >TSHR-A428\WVFSLLAL    | 238 | >TSHR-A428\WVFSLLVL    | 207  | 31  |
| >TSHR-A428\WVFSLLALL   | 126 | >TSHR-A428\WVFSLLVLL   | 99   | 27  |
| >TSHR-A428\WVFSLLAL    | 87  | >TSHR-A428\WVFSLLVL    | 59   | 28  |
| >TSHR-A428\WVFSLLALL   | 126 | >TSHR-A428\WVFSLLVLL   | 53   | 73  |
| >TSHR-A428\WVFSLLALL   | 167 | >TSHR-A428\WVFSLLVLL   | 536  | 369 |
| >TSHR-A428\WVFSLLAL    | 47  | >TSHR-A428\WVFSLLVL    | 168  | 121 |

|                       |       |                       |      |       |
|-----------------------|-------|-----------------------|------|-------|
| >TSHR-A428\VWFVSLLA   | 2856  | >TSHR-A428\VWFVSLLV   | 487  | 2369  |
| >TSHR-A428\VWFVSLLAL  | 299   | >TSHR-A428\VWFVSLLVL  | 183  | 116   |
| >TSHR-A428\VWFVSLLALL | 164   | >TSHR-A428\VWFVSLLVLL | 151  | 13    |
| >TSHR-A428\VWFVSLLALL | 119   | >TSHR-A428\VWFVSLLVLL | 121  | 2     |
| >TSHR-A428\VWFVSLLAL  | 320   | >TSHR-A428\VWFVSLLVL  | 237  | 83    |
| >TSHR-A428\VWFVSLLALL | 411   | >TSHR-A428\VWFVSLLVLL | 211  | 200   |
| >TSHR-A428\VWFVSLLAL  | 435   | >TSHR-A428\VWFVSLLVL  | 644  | 209   |
| >TSHR-A428\VWFVSLLA   | 143   | >TSHR-A428\VWFVSLLV   | 125  | 18    |
| >TSHR-A428\VWFVSLLAL  | 33    | >TSHR-A428\VWFVSLLVL  | 86   | 53    |
| >TSHR-A428\VWFVSLLALL | 120   | >TSHR-A428\VWFVSLLVLL | 98   | 22    |
| >TSHR-A428\VWFVSLLALL | 264   | >TSHR-A428\VWFVSLLVLL | 265  | 1     |
| >TSHR-A428\VVWFVSLLAL | 328   | >TSHR-A428\VVWFVSLLVL | 487  | 159   |
| >TSHR-A428\VVWFVSLLA  | 294   | >TSHR-A428\VVWFVSLLV  | 32   | 262   |
| >TSHR-A428\VVWFVSLLAL | 79    | >TSHR-A428\VVWFVSLLVL | 80   | 1     |
| >TSHR-A428\VVWFVSLLA  | 3028  | >TSHR-A428\VVWFVSLLV  | 392  | 2636  |
| >TSHR-A428\VVWFVSLLAL | 287   | >TSHR-A428\VVWFVSLLVL | 412  | 125   |
| >TSHR-A428\VVWFVSLLA  | 2185  | >TSHR-A428\VVWFVSLLV  | 417  | 1768  |
| >TSHR-A428\VVWFVSLLA  | 944   | >TSHR-A428\VVWFVSLLV  | 64   | 880   |
| >TSHR-A428\VVWFVSLLAL | 371   | >TSHR-A428\VVWFVSLLVL | 1040 | 669   |
| >TSHR-A428\VVWFVSLLAL | 201   | >TSHR-A428\VVWFVSLLVL | 247  | 46    |
| >TSHR-A428\VVWFVSLLA  | 351   | >TSHR-A428\VVWFVSLLV  | 6    | 345   |
| >TSHR-A428\VVWFVSLLAL | 60    | >TSHR-A428\VVWFVSLLVL | 128  | 68    |
| >TSHR-A428\VVWFVSLLAL | 51    | >TSHR-A428\VVWFVSLLVL | 60   | 9     |
| >TSHR-A428\VVWFVSLLA  | 11590 | >TSHR-A428\VVWFVSLLV  | 344  | 11246 |
| >TSHR-A428\VVWFVSLLA  | 516   | >TSHR-A428\VVWFVSLLV  | 14   | 502   |
| >TSHR-A428\VVWFVSLLAL | 314   | >TSHR-A428\VVWFVSLLVL | 301  | 13    |
| >TSHR-A428\VVWFVSLLAL | 174   | >TSHR-A428\VVWFVSLLVL | 111  | 63    |
| >TSHR-A428\VVWFVSLLA  | 3546  | >TSHR-A428\VVWFVSLLV  | 29   | 3517  |
| >TSHR-A428\VVWFVSLLAL | 232   | >TSHR-A428\VVWFVSLLVL | 498  | 266   |
| >TSHR-A428\VVWFVSLLA  | 3886  | >TSHR-A428\VVWFVSLLV  | 23   | 3863  |
| >TSHR-A428\VVWFVSLLAL | 219   | >TSHR-A428\VVWFVSLLVL | 269  | 50    |
| >TSHR-A428\VVWFVSLLA  | 712   | >TSHR-A428\VVWFVSLLV  | 292  | 420   |
| >TSHR-A428\VVWFVSLLAL | 126   | >TSHR-A428\VVWFVSLLVL | 313  | 187   |
| >TSHR-A428\VVWFVSLLAL | 479   | >TSHR-A428\VVWFVSLLVL | 161  | 318   |
| >TSHR-A428\VVWFVSLLA  | 874   | >TSHR-A428\VVWFVSLLV  | 70   | 804   |
| >TSHR-A428\VVWFVSLLAL | 318   | >TSHR-A428\VVWFVSLLVL | 368  | 50    |
| >TSHR-A428\VVWFVSLLA  | 2164  | >TSHR-A428\VVWFVSLLV  | 74   | 2090  |
| >TSHR-A428\VVWFVSLLAL | 458   | >TSHR-A428\VVWFVSLLVL | 576  | 118   |
| >TSHR-A428\VVWFVSLLAL | 147   | >TSHR-A428\VVWFVSLLVL | 313  | 166   |
| >TSHR-A428\VVWFVSLLAL | 396   | >TSHR-A428\VVWFVSLLVL | 195  | 201   |
| >TSHR-A428\IVVWFVSLLA | 79    | >TSHR-A428\IVVWFVSLLV | 235  | 156   |
| >TSHR-A428\IVVWFVSLLA | 762   | >TSHR-A428\IVVWFVSLLV | 147  | 615   |
| >TSHR-A428\IVVWFVSLLA | 397   | >TSHR-A428\IVVWFVSLLV | 882  | 485   |

|                       |       |                       |      |       |
|-----------------------|-------|-----------------------|------|-------|
| >TSHR-A428\IVVWFVSLLA | 463   | >TSHR-A428\IVVWFVSLLV | 131  | 332   |
| >TSHR-A428\IVVWFVSLLA | 287   | >TSHR-A428\IVVWFVSLLV | 752  | 465   |
| >TSHR-A428\IVVWFVSLLA | 374   | >TSHR-A428\IVVWFVSLLV | 86   | 288   |
| >TSHR-A428\IVVWFVSLLA | 162   | >TSHR-A428\IVVWFVSLLV | 417  | 255   |
| >TSHR-A428\IVVWFVSLLA | 197   | >TSHR-A428\IVVWFVSLLV | 64   | 133   |
| >TSHR-A428\IVVWFVSLLA | 30    | >TSHR-A428\IVVWFVSLLV | 90   | 60    |
| >TSHR-A428\IVVWFVSLLA | 666   | >TSHR-A428\IVVWFVSLLV | 13   | 653   |
| >TSHR-A428\IVVWFVSLLA | 119   | >TSHR-A428\IVVWFVSLLV | 228  | 109   |
| >TSHR-A428\IVVWFVSLLA | 5702  | >TSHR-A428\IVVWFVSLLV | 116  | 5586  |
| >TSHR-A428\IVVWFVSLLA | 1178  | >TSHR-A428\IVVWFVSLLV | 13   | 1165  |
| >TSHR-A428\IVVWFVSLLA | 194   | >TSHR-A428\IVVWFVSLLV | 207  | 13    |
| >TSHR-A428\IVVWFVSLLA | 277   | >TSHR-A428\IVVWFVSLLV | 519  | 242   |
| >TSHR-A428\IVVWFVSLLA | 491   | >TSHR-A428\IVVWFVSLLV | 170  | 321   |
| >TSHR-A428\IVVWFVSLLA | 1836  | >TSHR-A428\IVVWFVSLLV | 51   | 1785  |
| >TSHR-A428\IVVWFVSLLA | 163   | >TSHR-A428\IVVWFVSLLV | 207  | 44    |
| >TSHR-A428\IVVWFVSLLA | 607   | >TSHR-A428\IVVWFVSLLV | 197  | 410   |
| >TSHR-A428\IVVWFVSLLA | 12584 | >TSHR-A428\IVVWFVSLLV | 398  | 12186 |
| >TSHR-A593\AFVIVCCCHV | 2165  | >TSHR-A593\NFVIVCCCHV | 196  | 1969  |
| >TSHR-A593\AFVIVCCCHV | 358   | >TSHR-A593\NFVIVCCCHV | 1129 | 771   |
| >TSHR-A593\VAFVIVCCCH | 159   | >TSHR-A593\VNFVIVCCCH | 240  | 81    |
| >TSHR-A593\VAFVIVCCCH | 113   | >TSHR-A593\VNFVIVCCCH | 6888 | 6775  |
| >TSHR-A593\VAFVIVCCCH | 158   | >TSHR-A593\VNFVIVCCCH | 3538 | 3380  |
| >TSHR-A593\VAFVIVCCCH | 97    | >TSHR-A593\VNFVIVCCCH | 1911 | 1814  |
| >TSHR-A593\VAFVIVCCCH | 59    | >TSHR-A593\VNFVIVCCCH | 6708 | 6649  |
| >TSHR-A593\VAFVIVCCCH | 208   | >TSHR-A593\VNFVIVCCCH | 1933 | 1725  |
| >TSHR-A593\NIVAFVIV   | 192   | >TSHR-A593\NIVNFVIV   | 428  | 236   |
| >TSHR-A593\NIVAFVIV   | 71    | >TSHR-A593\NIVNFVIV   | 84   | 13    |
| >TSHR-A593\NIVAFVIV   | 26    | >TSHR-A593\NIVNFVIV   | 35   | 9     |
| >TSHR-A593\NIVAFVIV   | 266   | >TSHR-A593\NIVNFVIV   | 186  | 80    |
| >TSHR-A593\NIVAFVIV   | 945   | >TSHR-A593\NIVNFVIV   | 364  | 581   |
| >TSHR-A593\NIVAFVIV   | 100   | >TSHR-A593\NIVNFVIV   | 101  | 1     |
| >TSHR-A593\NIVAFVIV   | 33    | >TSHR-A593\NIVNFVIV   | 56   | 23    |
| >TSHR-A593\NIVAFVIV   | 32    | >TSHR-A593\NIVNFVIV   | 54   | 22    |
| >TSHR-A593\LNIVAFVIV  | 27770 | >TSHR-A593\LNIVNFVIV  | 168  | 27602 |
| >TSHR-A593\LNIVAFVI   | 168   | >TSHR-A593\LNIVNFVI   | 1238 | 1070  |
| >TSHR-A593\LNIVAFVI   | 341   | >TSHR-A593\LNIVNFVI   | 679  | 338   |
| >TSHR-A593\TLNIVAFV   | 36    | >TSHR-A593\TLNIVNFV   | 42   | 6     |
| >TSHR-A593\TLNIVAFVI  | 490   | >TSHR-A593\TLNIVNFVI  | 215  | 275   |
| >TSHR-A593\TLNIVAFVIV | 383   | >TSHR-A593\TLNIVNFVIV | 520  | 137   |
| >TSHR-A593\TLNIVAFV   | 6     | >TSHR-A593\TLNIVNFV   | 4    | 2     |
| >TSHR-A593\TLNIVAFVI  | 126   | >TSHR-A593\TLNIVNFVI  | 53   | 73    |
| >TSHR-A593\TLNIVAFVIV | 305   | >TSHR-A593\TLNIVNFVIV | 333  | 28    |
| >TSHR-A593\TLNIVAFV   | 7     | >TSHR-A593\TLNIVNFV   | 7    | 0     |

|                         |     |                         |     |     |
|-------------------------|-----|-------------------------|-----|-----|
| >TSHR-A593I TLNIVAFVI   | 156 | >TSHR-A593I TLNIVNFVI   | 214 | 58  |
| >TSHR-A593I TLNIVAFVIV  | 109 | >TSHR-A593I TLNIVNFVIV  | 111 | 2   |
| >TSHR-A593I TLNIVAFV    | 146 | >TSHR-A593I TLNIVNFV    | 170 | 24  |
| >TSHR-A593I TLNIVAFVIV  | 424 | >TSHR-A593I TLNIVNFVIV  | 649 | 225 |
| >TSHR-A593I TLNIVAFV    | 3   | >TSHR-A593I TLNIVNFV    | 3   | 0   |
| >TSHR-A593I TLNIVAFVI   | 15  | >TSHR-A593I TLNIVNFVI   | 18  | 3   |
| >TSHR-A593I TLNIVAFVIV  | 14  | >TSHR-A593I TLNIVNFVIV  | 11  | 3   |
| >TSHR-A593I TLNIVAFVIVC | 142 | >TSHR-A593I TLNIVNFVIVC | 153 | 11  |
| >TSHR-A593I TLNIVAFV    | 10  | >TSHR-A593I TLNIVNFV    | 13  | 3   |
| >TSHR-A593I TLNIVAFVI   | 121 | >TSHR-A593I TLNIVNFVI   | 150 | 29  |
| >TSHR-A593I TLNIVAFVIV  | 27  | >TSHR-A593I TLNIVNFVIV  | 20  | 7   |
| >TSHR-A593I TLNIVAFV    | 6   | >TSHR-A593I TLNIVNFV    | 7   | 1   |
| >TSHR-A593I TLNIVAFVI   | 33  | >TSHR-A593I TLNIVNFVI   | 56  | 23  |
| >TSHR-A593I TLNIVAFVIV  | 11  | >TSHR-A593I TLNIVNFVIV  | 15  | 4   |
| >TSHR-A593I TLNIVAFV    | 6   | >TSHR-A593I TLNIVNFV    | 10  | 4   |
| >TSHR-A593I TLNIVAFVI   | 335 | >TSHR-A593I TLNIVNFVI   | 455 | 120 |
| >TSHR-A593I TLNIVAFVIV  | 43  | >TSHR-A593I TLNIVNFVIV  | 42  | 1   |
| >TSHR-A593I TLNIVAFV    | 3   | >TSHR-A593I TLNIVNFV    | 4   | 1   |
| >TSHR-A593I TLNIVAFVI   | 102 | >TSHR-A593I TLNIVNFVI   | 133 | 31  |
| >TSHR-A593I TLNIVAFVIV  | 6   | >TSHR-A593I TLNIVNFVIV  | 5   | 1   |
| >TSHR-A593I TLNIVAFVI   | 352 | >TSHR-A593I TLNIVNFVI   | 384 | 32  |
| >TSHR-A593I TLNIVAFV    | 43  | >TSHR-A593I TLNIVNFV    | 42  | 1   |
| >TSHR-A593I TLNIVAFVI   | 502 | >TSHR-A593I TLNIVNFVI   | 313 | 189 |
| >TSHR-A593I TLNIVAFV    | 84  | >TSHR-A593I TLNIVNFV    | 183 | 99  |
| >TSHR-A593I TLNIVAFVIV  | 455 | >TSHR-A593I TLNIVNFVIV  | 634 | 179 |
| >TSHR-A593I LTLNIVAFV   | 661 | >TSHR-A593I LTLNIVNFV   | 321 | 340 |
| >TSHR-A593I LTLNIVAFV   | 24  | >TSHR-A593I LTLNIVNFV   | 44  | 20  |
| >TSHR-A593I LTLNIVAFVI  | 506 | >TSHR-A593I LTLNIVNFVI  | 267 | 239 |
| >TSHR-A593I LTLNIVAFVIV | 168 | >TSHR-A593I LTLNIVNFVIV | 285 | 117 |
| >TSHR-A593I LTLNIVAFV   | 26  | >TSHR-A593I LTLNIVNFV   | 21  | 5   |
| >TSHR-A593I LTLNIVAFVI  | 309 | >TSHR-A593I LTLNIVNFVI  | 224 | 85  |
| >TSHR-A593I LTLNIVAFVIV | 399 | >TSHR-A593I LTLNIVNFVIV | 431 | 32  |
| >TSHR-A593I LTLNIVAFV   | 35  | >TSHR-A593I LTLNIVNFV   | 77  | 42  |
| >TSHR-A593I LTLNIVAFVIV | 355 | >TSHR-A593I LTLNIVNFVIV | 492 | 137 |
| >TSHR-A593I LTLNIVAFV   | 6   | >TSHR-A593I LTLNIVNFV   | 7   | 1   |
| >TSHR-A593I LTLNIVAFVI  | 174 | >TSHR-A593I LTLNIVNFVI  | 121 | 53  |
| >TSHR-A593I LTLNIVAFVIV | 19  | >TSHR-A593I LTLNIVNFVIV | 27  | 8   |
| >TSHR-A593I LTLNIVAFV   | 3   | >TSHR-A593I LTLNIVNFV   | 6   | 3   |
| >TSHR-A593I LTLNIVAFVI  | 38  | >TSHR-A593I LTLNIVNFVI  | 70  | 32  |
| >TSHR-A593I LTLNIVAFVIV | 36  | >TSHR-A593I LTLNIVNFVIV | 36  | 0   |
| >TSHR-A593I LTLNIVAFV   | 11  | >TSHR-A593I LTLNIVNFV   | 25  | 14  |
| >TSHR-A593I LTLNIVAFVI  | 497 | >TSHR-A593I LTLNIVNFVI  | 703 | 206 |
| >TSHR-A593I LTLNIVAFVIV | 88  | >TSHR-A593I LTLNIVNFVIV | 67  | 21  |

|                         |      |                         |       |       |
|-------------------------|------|-------------------------|-------|-------|
| >TSHR-A593I LTLNIVAFV   | 8    | >TSHR-A593I LTLNIVNFV   | 13    | 5     |
| >TSHR-A593I LTLNIVAFVI  | 302  | >TSHR-A593I LTLNIVNFVI  | 471   | 169   |
| >TSHR-A593I LTLNIVAFVIV | 40   | >TSHR-A593I LTLNIVNFVIV | 65    | 25    |
| >TSHR-A593I LTLNIVAFV   | 5    | >TSHR-A593I LTLNIVNFV   | 15    | 10    |
| >TSHR-A593I LTLNIVAFVI  | 308  | >TSHR-A593I LTLNIVNFVI  | 622   | 314   |
| >TSHR-A593I LTLNIVAFVIV | 102  | >TSHR-A593I LTLNIVNFVIV | 163   | 61    |
| >TSHR-A593I LTLNIVAFV   | 11   | >TSHR-A593I LTLNIVNFV   | 38    | 27    |
| >TSHR-A593I LTLNIVAFVIV | 53   | >TSHR-A593I LTLNIVNFVIV | 76    | 23    |
| >TSHR-A593I LTLNIVAF    | 1116 | >TSHR-A593I LTLNIVNF    | 407   | 709   |
| >TSHR-A593I LTLNIVAF    | 103  | >TSHR-A593I LTLNIVNF    | 93    | 10    |
| >TSHR-A593I LTLNIVAF    | 227  | >TSHR-A593I LTLNIVNF    | 422   | 195   |
| >TSHR-A593I LTLNIVAFV   | 311  | >TSHR-A593I LTLNIVNFV   | 536   | 225   |
| >TSHR-A593I LTLNIVAF    | 18   | >TSHR-A593I LTLNIVNF    | 34    | 16    |
| >TSHR-A593I LTLNIVAFVI  | 64   | >TSHR-A593I LTLNIVNFVI  | 68    | 4     |
| >TSHR-A593I LTLNIVAFV   | 11   | >TSHR-A593I LTLNIVNFV   | 14    | 3     |
| >TSHR-A593I LTLNIVAFVI  | 161  | >TSHR-A593I LTLNIVNFVI  | 204   | 43    |
| >TSHR-A593I LTLNIVAFVIV | 78   | >TSHR-A593I LTLNIVNFVIV | 97    | 19    |
| >TSHR-A593I LTLNIVAFV   | 9    | >TSHR-A593I LTLNIVNFV   | 15    | 6     |
| >TSHR-A593I LTLNIVAFVI  | 78   | >TSHR-A593I LTLNIVNFVI  | 117   | 39    |
| >TSHR-A593I LTLNIVAFVIV | 35   | >TSHR-A593I LTLNIVNFVIV | 52    | 17    |
| >TSHR-A593I LTLNIVAF    | 131  | >TSHR-A593I LTLNIVNF    | 953   | 822   |
| >TSHR-A593I LTLNIVAF    | 17   | >TSHR-A593I LTLNIVNF    | 33    | 16    |
| >TSHR-A593I LTLNIVAF    | 5    | >TSHR-A593I LTLNIVNF    | 6     | 1     |
| >TSHR-A593I LTLNIVAFV   | 482  | >TSHR-A593I LTLNIVNFV   | 5067  | 4585  |
| >TSHR-A593I LTLNIVAFVI  | 59   | >TSHR-A593I LTLNIVNFVI  | 315   | 256   |
| >TSHR-A593I LTLNIVAF    | 388  | >TSHR-A593I LTLNIVNF    | 3937  | 3549  |
| >TSHR-A593I LTLNIVAF    | 274  | >TSHR-A593I LTLNIVNF    | 205   | 69    |
| >TSHR-A593I LTLNIVAFVI  | 80   | >TSHR-A593I LTLNIVNFVI  | 153   | 73    |
| >TSHR-A593I LTLNIVAFV   | 270  | >TSHR-A593I LTLNIVNFV   | 566   | 296   |
| >TSHR-A593I LTLNIVAF    | 114  | >TSHR-A593I LTLNIVNF    | 195   | 81    |
| >TSHR-A593I LTLNIVAFV   | 50   | >TSHR-A593I LTLNIVNFV   | 47    | 3     |
| >TSHR-A593I LTLNIVAFVIV | 86   | >TSHR-A593I LTLNIVNFVIV | 122   | 36    |
| >TSHR-A593I LTLNIVAFVI  | 292  | >TSHR-A593I LTLNIVNFVI  | 170   | 122   |
| >TSHR-A593I VLTLNIVAFV  | 72   | >TSHR-A593I VLTLNIVNFV  | 122   | 50    |
| >TSHR-A593I VLTLNIVAFVI | 603  | >TSHR-A593I VLTLNIVNFVI | 426   | 177   |
| >TSHR-A593I VLTLNIVAFV  | 101  | >TSHR-A593I VLTLNIVNFV  | 136   | 35    |
| >TSHR-A593I VLTLNIVAFVI | 388  | >TSHR-A593I VLTLNIVNFVI | 263   | 125   |
| >TSHR-A593I VLTLNIVAFV  | 57   | >TSHR-A593I VLTLNIVNFV  | 88    | 31    |
| >TSHR-A593I VLTLNIVA    | 316  | >TSHR-A593I VLTLNIVN    | 12542 | 12226 |
| >TSHR-A593I VLTLNIVAFV  | 3    | >TSHR-A593I VLTLNIVNFV  | 4     | 1     |
| >TSHR-A593I VLTLNIVAFVI | 20   | >TSHR-A593I VLTLNIVNFVI | 25    | 5     |
| >TSHR-A593I VLTLNIVAFV  | 4    | >TSHR-A593I VLTLNIVNFV  | 5     | 1     |
| >TSHR-A593I VLTLNIVAFVI | 31   | >TSHR-A593I VLTLNIVNFVI | 39    | 8     |



|                         |       |                         |       |       |
|-------------------------|-------|-------------------------|-------|-------|
| >TSHR-A593I VLTLNIVA    | 395   | >TSHR-A593I VLTLNIVN    | 19205 | 18810 |
| >TSHR-A593I VLTLNIVAFV  | 5     | >TSHR-A593I VLTLNIVNFV  | 6     | 1     |
| >TSHR-A593I VLTLNIVAFVI | 42    | >TSHR-A593I VLTLNIVNFVI | 46    | 4     |
| >TSHR-A593I VLTLNIVAFV  | 3     | >TSHR-A593I VLTLNIVNFV  | 4     | 1     |
| >TSHR-A593I VLTLNIVAFVI | 74    | >TSHR-A593I VLTLNIVNFVI | 76    | 2     |
| >TSHR-A593I VLTLNIVA    | 25    | >TSHR-A593I VLTLNIVN    | 12496 | 12471 |
| >TSHR-A593I VLTLNIVAFV  | 2     | >TSHR-A593I VLTLNIVNFV  | 2     | 0     |
| >TSHR-A593I VLTLNIVAFVI | 12    | >TSHR-A593I VLTLNIVNFVI | 13    | 1     |
| >TSHR-A593I VLTLNIVAF   | 88    | >TSHR-A593I VLTLNIVNF   | 247   | 159   |
| >TSHR-A593I FVLTNIVA    | 176   | >TSHR-A593I FVLTNIVN    | 18053 | 17877 |
| >TSHR-A593I FVLTNIVAFV  | 9     | >TSHR-A593I FVLTNIVNFV  | 11    | 2     |
| >TSHR-A593I FVLTNIVAFV  | 13    | >TSHR-A593I FVLTNIVNFV  | 12    | 1     |
| >TSHR-A593I FVLTNIVAFV  | 23    | >TSHR-A593I FVLTNIVNFV  | 31    | 8     |
| >TSHR-A593I FVLTNIVA    | 43    | >TSHR-A593I FVLTNIVN    | 11183 | 11140 |
| >TSHR-A593I FVLTNIVAFV  | 4     | >TSHR-A593I FVLTNIVNFV  | 4     | 0     |
| >TSHR-A593I FVLTNIVAFV  | 4     | >TSHR-A593I FVLTNIVNFV  | 5     | 1     |
| >TSHR-A593I FVLTNIVAFV  | 7     | >TSHR-A593I FVLTNIVNFV  | 9     | 2     |
| >TSHR-A593I FVLTNIVAFV  | 7     | >TSHR-A593I FVLTNIVNFV  | 8     | 1     |
| >TSHR-A593I FVLTNIVAFV  | 4     | >TSHR-A593I FVLTNIVNFV  | 6     | 2     |
| >TSHR-A593I FVLTNIVAFV  | 4     | >TSHR-A593I FVLTNIVNFV  | 5     | 1     |
| >TSHR-A593I FVLTNIVAF   | 146   | >TSHR-A593I FVLTNIVNF   | 143   | 3     |
| >TSHR-A593I FVLTNIVAF   | 178   | >TSHR-A593I FVLTNIVNF   | 289   | 111   |
| >TSHR-A593I FVLTNIVAF   | 157   | >TSHR-A593I FVLTNIVNF   | 494   | 337   |
| >TSHR-A593I FVLTNIVAFV  | 12    | >TSHR-A593I FVLTNIVNFV  | 14    | 2     |
| >TSHR-A593I FVLTNIVAFV  | 5     | >TSHR-A593I FVLTNIVNFV  | 7     | 2     |
| >TSHR-A593I FVLTNIVAF   | 373   | >TSHR-A593I FVLTNIVNF   | 1935  | 1562  |
| >TSHR-A593I FVLTNIVAF   | 21    | >TSHR-A593I FVLTNIVNF   | 44    | 23    |
| >TSHR-A593I FVLTNIVAF   | 425   | >TSHR-A593I FVLTNIVNF   | 290   | 135   |
| >TSHR-A593I FVLTNIVA    | 339   | >TSHR-A593I FVLTNIVN    | 13444 | 13105 |
| >TSHR-A593I VFVLTNIVAF  | 36    | >TSHR-A593I VFVLTNIVNF  | 23    | 13    |
| >TSHR-A593I VFVLTNIVAF  | 832   | >TSHR-A593I VFVLTNIVNF  | 491   | 341   |
| >TSHR-A593I VFVLTNIVAF  | 73    | >TSHR-A593I VFVLTNIVNF  | 70    | 3     |
| >TSHR-A623I AKRMAVLI    | 1858  | >TSHR-A623I FKRMAVLI    | 180   | 1678  |
| >TSHR-A623I AKRMAVLI    | 356   | >TSHR-A623I FKRMAVLI    | 8117  | 7761  |
| >TSHR-A623I AKRMAVLI    | 41    | >TSHR-A623I FKRMAVLI    | 21    | 20    |
| >TSHR-A623I AKRMAVLIF   | 3     | >TSHR-A623I FKRMAVLIF   | 2     | 1     |
| >TSHR-A623I AKRMAVLI    | 260   | >TSHR-A623I FKRMAVLI    | 192   | 68    |
| >TSHR-A623I IAKRMAVLI   | 11939 | >TSHR-A623I IFKRMAVLI   | 371   | 11568 |
| >TSHR-A623I IAKRMAVLIF  | 7949  | >TSHR-A623I IFKRMAVLIF  | 207   | 7742  |
| >TSHR-A623I IAKRMAVLI   | 2809  | >TSHR-A623I IFKRMAVLI   | 124   | 2685  |
| >TSHR-A623I IAKRMAVLIF  | 5365  | >TSHR-A623I IFKRMAVLIF  | 194   | 5171  |
| >TSHR-A623I IAKRMAVLIF  | 12421 | >TSHR-A623I IFKRMAVLIF  | 92    | 12329 |
| >TSHR-A623I IAKRMAVLIF  | 4547  | >TSHR-A623I IFKRMAVLIF  | 465   | 4082  |

|                       |      |                         |       |       |
|-----------------------|------|-------------------------|-------|-------|
| >TSHR-A623FIAKRMAVLI  | 156  | >TSHR-A623IFKRMVLI      | 201   | 45    |
| >TSHR-A623FIAKRMAVL   | 326  | >TSHR-A623IFKRMVAVL     | 1266  | 940   |
| >TSHR-A623FIAKRMAVLIF | 326  | >TSHR-A623IFKRMVAVLIF   | 1474  | 1148  |
| >TSHR-A623FIAKRMAVLIF | 21   | >TSHR-A623IFKRMVAVLIF   | 273   | 252   |
| >TSHR-A623FIAKRMAVL   | 151  | >TSHR-A623IFKRMVAVL     | 23727 | 23576 |
| >TSHR-A623FIAKRMAVLIF | 37   | >TSHR-A623IFKRMVAVLIF   | 21451 | 21414 |
| >TSHR-A623FIAKRMAVLIF | 308  | >TSHR-A623IFKRMVAVLIF   | 22329 | 22021 |
| >TSHR-A623FIAKRMAVLIF | 214  | >TSHR-A623IFKRMVAVLIF   | 10045 | 9831  |
| >TSHR-A623FKIAKRMAVL  | 2202 | >TSHR-A623FKIFKRMVAVL   | 137   | 2065  |
| >TSHR-A623FKIAKRMAV   | 230  | >TSHR-A623FKIFKRMVAV    | 58    | 172   |
| >TSHR-A623FKIAKRMAVL  | 1022 | >TSHR-A623FKIFKRMVAVL   | 211   | 811   |
| >TSHR-A623FKIAKRMAV   | 79   | >TSHR-A623FKIFKRMVAV    | 52    | 27    |
| >TSHR-A623FKIAKRMAVL  | 67   | >TSHR-A623FKIFKRMVAVL   | 89    | 22    |
| >TSHR-A623FKIAKRMAV   | 14   | >TSHR-A623FKIFKRMVAV    | 16    | 2     |
| >TSHR-A623FKIAKRMAVL  | 85   | >TSHR-A623FKIFKRMVAVL   | 100   | 15    |
| >TSHR-A623FKIAKRMAVLI | 1401 | >TSHR-A623FKIFKRMVAVLI  | 438   | 963   |
| >TSHR-A623FKIAKRMAV   | 37   | >TSHR-A623FKIFKRMVAV    | 19    | 18    |
| >TSHR-A623FKIAKRMAVL  | 291  | >TSHR-A623FKIFKRMVAVL   | 111   | 180   |
| >TSHR-A623FKIAKRMAV   | 195  | >TSHR-A623FKIFKRMVAV    | 20    | 175   |
| >TSHR-A623FKIAKRMAVL  | 2976 | >TSHR-A623FKIFKRMVAVL   | 375   | 2601  |
| >TSHR-A623FKIAKRMAVLI | 2743 | >TSHR-A623FKIFKRMVAVLI  | 349   | 2394  |
| >TSHR-A623FKIAKRMAV   | 680  | >TSHR-A623FKIFKRMVAV    | 191   | 489   |
| >TSHR-A623FKIAKRMAV   | 201  | >TSHR-A623FKIFKRMVAV    | 59    | 142   |
| >TSHR-A623FKIAKRMAV   | 29   | >TSHR-A623FKIFKRMVAV    | 19    | 10    |
| >TSHR-A623FKIAKRMAVL  | 1098 | >TSHR-A623FKIFKRMVAVL   | 417   | 681   |
| >TSHR-A623FKIAKRMAV   | 493  | >TSHR-A623FKIFKRMVAV    | 39    | 454   |
| >TSHR-A623FKIAKRMAVL  | 1758 | >TSHR-A623FKIFKRMVAVL   | 129   | 1629  |
| >TSHR-A623FKIAKRMAVLI | 643  | >TSHR-A623FKIFKRMVAVLI  | 47    | 596   |
| >TSHR-A623FKIAKRMAV   | 1461 | >TSHR-A623FKIFKRMVAV    | 114   | 1347  |
| >TSHR-A623FKIAKRMAVL  | 1507 | >TSHR-A623FKIFKRMVAVL   | 55    | 1452  |
| >TSHR-A623FKIAKRMAVLI | 101  | >TSHR-A623FKIFKRMVAVLI  | 10    | 91    |
| >TSHR-A623FKIAKRMAVLI | 154  | >TSHR-A623FKIFKRMVAVLIF | 14    | 140   |
| >TSHR-A623FKIAKRMAVL  | 145  | >TSHR-A623FKIFKRMVAVL   | 2663  | 2518  |
| >TSHR-A623FKIAKRMAV   | 577  | >TSHR-A623FKIFKRMVAV    | 484   | 93    |
| >TSHR-A623FKIAKRMAVL  | 216  | >TSHR-A623FKIFKRMVAVL   | 180   | 36    |
| >TSHR-A623FKIAKRMAVLI | 166  | >TSHR-A623FKIFKRMVAVLIF | 83    | 83    |
| >TSHR-A623FKIAKRMAVLI | 110  | >TSHR-A623FKIFKRMVAVLIF | 13    | 97    |
| >TSHR-A623FKIAKRMAVL  | 445  | >TSHR-A623FKIFKRMVAVL   | 60    | 385   |
| >TSHR-A623FKIAKRMAVLI | 148  | >TSHR-A623FKIFKRMVAVLIF | 36    | 112   |
| >TSHR-A623FKIAKRMAVLI | 88   | >TSHR-A623FKIFKRMVAVLIF | 108   | 20    |
| >TSHR-A623FKIAKRMAVL  | 1770 | >TSHR-A623FKIFKRMVAVL   | 305   | 1465  |
| >TSHR-A623FKIAKRMAVLI | 557  | >TSHR-A623FKIFKRMVAVLIF | 106   | 451   |
| >TSHR-A623FTKIAKRMAV  | 645  | >TSHR-A623FTKIFKRMVAV   | 479   | 166   |

|                        |      |                        |      |      |
|------------------------|------|------------------------|------|------|
| >TSHR-A623fTKIAKRMAV   | 171  | >TSHR-A623fTKIFKRMAV   | 299  | 128  |
| >TSHR-A623fTKIAKRMAVL  | 193  | >TSHR-A623fTKIFKRMAVL  | 341  | 148  |
| >TSHR-A623fTKIAKRMAV   | 285  | >TSHR-A623fTKIFKRMAV   | 3178 | 2893 |
| >TSHR-A623fTKIAKRMAVL  | 21   | >TSHR-A623fTKIFKRMAVL  | 110  | 89   |
| >TSHR-A623fDTKIAKRMAV  | 92   | >TSHR-A623fDTKIFKRMAV  | 50   | 42   |
| >TSHR-A623fKDTKIAKRMAV | 470  | >TSHR-A623fKDTKIFKRMAV | 473  | 3    |
| >TSHR-A623fKDTKIAKRMAV | 302  | >TSHR-A623fKDTKIFKRMAV | 99   | 203  |
| >TSHR-A623fKDTKIAKRMAV | 414  | >TSHR-A623fKDTKIFKRMAV | 677  | 263  |
| >TSHR-A623fAKRMAVLI    | 356  | >TSHR-A623fIKRMAVLI    | 1317 | 961  |
| >TSHR-A623fAKRMAVLI    | 41   | >TSHR-A623fIKRMAVLI    | 27   | 14   |
| >TSHR-A623fAKRMAVLIF   | 3    | >TSHR-A623fIKRMAVLIF   | 2    | 1    |
| >TSHR-A623fAKRMAVLI    | 260  | >TSHR-A623fIKRMAVLI    | 1381 | 1121 |
| >TSHR-A623fIAKRMAVLI   | 156  | >TSHR-A623fIIKRMAVLI   | 142  | 14   |
| >TSHR-A623fIAKRMAVL    | 326  | >TSHR-A623fIIKRMAVL    | 203  | 123  |
| >TSHR-A623fIAKRMAVLIF  | 326  | >TSHR-A623fIIKRMAVLIF  | 197  | 129  |
| >TSHR-A623fIAKRMAVLIF  | 21   | >TSHR-A623fIIKRMAVLIF  | 65   | 44   |
| >TSHR-A623fIAKRMAVL    | 151  | >TSHR-A623fIIKRMAVL    | 5095 | 4944 |
| >TSHR-A623fIAKRMAVLIF  | 37   | >TSHR-A623fIIKRMAVLIF  | 1625 | 1588 |
| >TSHR-A623fIAKRMAVLIF  | 308  | >TSHR-A623fIIKRMAVLIF  | 7385 | 7077 |
| >TSHR-A623fIAKRMAVLIF  | 214  | >TSHR-A623fIIKRMAVLIF  | 2428 | 2214 |
| >TSHR-A623fKIAKRMAV    | 230  | >TSHR-A623fKIIKRMAV    | 164  | 66   |
| >TSHR-A623fKIAKRMAV    | 79   | >TSHR-A623fKIIKRMAV    | 263  | 184  |
| >TSHR-A623fKIAKRMAVL   | 67   | >TSHR-A623fKIIKRMAVL   | 312  | 245  |
| >TSHR-A623fKIAKRMAV    | 14   | >TSHR-A623fKIIKRMAV    | 17   | 3    |
| >TSHR-A623fKIAKRMAVL   | 85   | >TSHR-A623fKIIKRMAVL   | 115  | 30   |
| >TSHR-A623fKIAKRMAV    | 37   | >TSHR-A623fKIIKRMAV    | 20   | 17   |
| >TSHR-A623fKIAKRMAVL   | 291  | >TSHR-A623fKIIKRMAVL   | 126  | 165  |
| >TSHR-A623fKIAKRMAV    | 195  | >TSHR-A623fKIIKRMAV    | 162  | 33   |
| >TSHR-A623fKIAKRMAV    | 680  | >TSHR-A623fKIIKRMAV    | 257  | 423  |
| >TSHR-A623fKIAKRMAV    | 201  | >TSHR-A623fKIIKRMAV    | 767  | 566  |
| >TSHR-A623fKIAKRMAV    | 29   | >TSHR-A623fKIIKRMAV    | 52   | 23   |
| >TSHR-A623fKIAKRMAVL   | 1789 | >TSHR-A623fKIIKRMAVL   | 109  | 1680 |
| >TSHR-A623fKIAKRMAVLII | 1385 | >TSHR-A623fKIIKRMAVLIF | 121  | 1264 |
| >TSHR-A623fKIAKRMAV    | 493  | >TSHR-A623fKIIKRMAV    | 272  | 221  |
| >TSHR-A623fKIAKRMAVLI  | 643  | >TSHR-A623fKIIKRMAVLI  | 353  | 290  |
| >TSHR-A623fKIAKRMAVLI  | 101  | >TSHR-A623fKIIKRMAVLI  | 55   | 46   |
| >TSHR-A623fKIAKRMAVLII | 154  | >TSHR-A623fKIIKRMAVLIF | 77   | 77   |
| >TSHR-A623fKIAKRMAVL   | 145  | >TSHR-A623fKIIKRMAVL   | 990  | 845  |
| >TSHR-A623fKIAKRMAV    | 577  | >TSHR-A623fKIIKRMAV    | 464  | 113  |
| >TSHR-A623fKIAKRMAVL   | 216  | >TSHR-A623fKIIKRMAVL   | 161  | 55   |
| >TSHR-A623fKIAKRMAVLII | 166  | >TSHR-A623fKIIKRMAVLIF | 107  | 59   |
| >TSHR-A623fKIAKRMAVLII | 110  | >TSHR-A623fKIIKRMAVLIF | 62   | 48   |
| >TSHR-A623fKIAKRMAVL   | 445  | >TSHR-A623fKIIKRMAVL   | 142  | 303  |

|                         |       |                         |      |       |
|-------------------------|-------|-------------------------|------|-------|
| >TSHR-A623I KIAKRMAVLII | 148   | >TSHR-A623I KIIKRMAVLIF | 56   | 92    |
| >TSHR-A623I KIAKRMAVLII | 88    | >TSHR-A623I KIIKRMAVLIF | 83   | 5     |
| >TSHR-A623I TKIAKRMAV   | 171   | >TSHR-A623I TKIIKRMAV   | 452  | 281   |
| >TSHR-A623I TKIAKRMAVL  | 193   | >TSHR-A623I TKIIKRMAVL  | 443  | 250   |
| >TSHR-A623I TKIAKRMAV   | 285   | >TSHR-A623I TKIIKRMAV   | 3210 | 2925  |
| >TSHR-A623I TKIAKRMAVL  | 21    | >TSHR-A623I TKIIKRMAVL  | 101  | 80    |
| >TSHR-A623I DTKIAKRMAV  | 92    | >TSHR-A623I DTKIIKRMAV  | 90   | 2     |
| >TSHR-A623I KDTKIAKRMAV | 470   | >TSHR-A623I KDTKIIKRMAV | 1415 | 945   |
| >TSHR-A623I KDTKIAKR    | 302   | >TSHR-A623I KDTKIIKR    | 162  | 140   |
| >TSHR-A623I KDTKIAKRMAV | 414   | >TSHR-A623I KDTKIIKRMAV | 608  | 194   |
| >TSHR-A623I GDKDTKIA    | 11589 | >TSHR-A623I GDKDTKII    | 285  | 11304 |
| >TSHR-A623I AKRMAVLI    | 1858  | >TSHR-A623I SKRMAVLI    | 188  | 1670  |
| >TSHR-A623I AKRMAVLI    | 356   | >TSHR-A623I SKRMAVLI    | 615  | 259   |
| >TSHR-A623I AKRMAVLI    | 41    | >TSHR-A623I SKRMAVLI    | 78   | 37    |
| >TSHR-A623I AKRMAVLIF   | 3     | >TSHR-A623I SKRMAVLIF   | 3    | 0     |
| >TSHR-A623I AKRMAVLI    | 260   | >TSHR-A623I SKRMAVLI    | 732  | 472   |
| >TSHR-A623I IAKRMAVL    | 2093  | >TSHR-A623I ISKRMAVL    | 408  | 1685  |
| >TSHR-A623I IAKRMAVL    | 768   | >TSHR-A623I ISKRMAVL    | 249  | 519   |
| >TSHR-A623I IAKRMAVLI   | 156   | >TSHR-A623I ISKRMAVLI   | 51   | 105   |
| >TSHR-A623I IAKRMAVLIF  | 652   | >TSHR-A623I ISKRMAVLIF  | 218  | 434   |
| >TSHR-A623I IAKRMAVL    | 326   | >TSHR-A623I ISKRMAVL    | 1135 | 809   |
| >TSHR-A623I IAKRMAVLIF  | 326   | >TSHR-A623I ISKRMAVLIF  | 177  | 149   |
| >TSHR-A623I IAKRMAVLIF  | 21    | >TSHR-A623I ISKRMAVLIF  | 15   | 6     |
| >TSHR-A623I IAKRMAVL    | 151   | >TSHR-A623I ISKRMAVL    | 16   | 135   |
| >TSHR-A623I IAKRMAVLI   | 2417  | >TSHR-A623I ISKRMAVLI   | 217  | 2200  |
| >TSHR-A623I IAKRMAVLIF  | 37    | >TSHR-A623I ISKRMAVLIF  | 6    | 31    |
| >TSHR-A623I IAKRMAVLIF  | 308   | >TSHR-A623I ISKRMAVLIF  | 165  | 143   |
| >TSHR-A623I IAKRMAVLIF  | 214   | >TSHR-A623I ISKRMAVLIF  | 86   | 128   |
| >TSHR-A623I IAKRMAVLI   | 1024  | >TSHR-A623I ISKRMAVLI   | 114  | 910   |
| >TSHR-A623I IAKRMAVLIF  | 2231  | >TSHR-A623I ISKRMAVLIF  | 85   | 2146  |
| >TSHR-A623I IAKRMAVLI   | 1053  | >TSHR-A623I ISKRMAVLI   | 184  | 869   |
| >TSHR-A623I KIAKRMAV    | 230   | >TSHR-A623I KISKRMAV    | 598  | 368   |
| >TSHR-A623I KIAKRMAV    | 79    | >TSHR-A623I KISKRMAV    | 163  | 84    |
| >TSHR-A623I KIAKRMAVL   | 67    | >TSHR-A623I KISKRMAVL   | 133  | 66    |
| >TSHR-A623I KIAKRMAV    | 14    | >TSHR-A623I KISKRMAV    | 24   | 10    |
| >TSHR-A623I KIAKRMAVL   | 85    | >TSHR-A623I KISKRMAVL   | 169  | 84    |
| >TSHR-A623I KIAKRMAV    | 37    | >TSHR-A623I KISKRMAV    | 91   | 54    |
| >TSHR-A623I KIAKRMAVL   | 291   | >TSHR-A623I KISKRMAVL   | 887  | 596   |
| >TSHR-A623I KIAKRMAV    | 195   | >TSHR-A623I KISKRMAV    | 341  | 146   |
| >TSHR-A623I KIAKRMAV    | 201   | >TSHR-A623I KISKRMAV    | 640  | 439   |
| >TSHR-A623I KIAKRMAV    | 29    | >TSHR-A623I KISKRMAV    | 46   | 17    |
| >TSHR-A623I KIAKRMAV    | 493   | >TSHR-A623I KISKRMAV    | 205  | 288   |
| >TSHR-A623I KIAKRMAVLI  | 643   | >TSHR-A623I KISKRMAVLI  | 262  | 381   |

|                        |     |                        |      |      |
|------------------------|-----|------------------------|------|------|
| >TSHR-A623\KIAKRMAVLI  | 101 | >TSHR-A623\KISKRMAVLI  | 109  | 8    |
| >TSHR-A623\KIAKRMAVLII | 154 | >TSHR-A623\KISKRMAVLIF | 173  | 19   |
| >TSHR-A623\KIAKRMAVL   | 145 | >TSHR-A623\KISKRMAVL   | 1028 | 883  |
| >TSHR-A623\KIAKRMAVL   | 216 | >TSHR-A623\KISKRMAVL   | 239  | 23   |
| >TSHR-A623\KIAKRMAVLII | 166 | >TSHR-A623\KISKRMAVLIF | 186  | 20   |
| >TSHR-A623\KIAKRMAVLII | 110 | >TSHR-A623\KISKRMAVLIF | 102  | 8    |
| >TSHR-A623\KIAKRMAVL   | 445 | >TSHR-A623\KISKRMAVL   | 476  | 31   |
| >TSHR-A623\KIAKRMAVLII | 148 | >TSHR-A623\KISKRMAVLIF | 142  | 6    |
| >TSHR-A623\KIAKRMAVLII | 88  | >TSHR-A623\KISKRMAVLIF | 136  | 48   |
| >TSHR-A623\TKIAKRMAV   | 171 | >TSHR-A623\TKISKRMAV   | 75   | 96   |
| >TSHR-A623\TKIAKRMAVL  | 193 | >TSHR-A623\TKISKRMAVL  | 107  | 86   |
| >TSHR-A623\TKIAKRMAVL  | 619 | >TSHR-A623\TKISKRMAVL  | 330  | 289  |
| >TSHR-A623\TKIAKRMAV   | 285 | >TSHR-A623\TKISKRMAV   | 491  | 206  |
| >TSHR-A623\TKIAKRMAVL  | 21  | >TSHR-A623\TKISKRMAVL  | 28   | 7    |
| >TSHR-A623\DTKIAKRMAV  | 92  | >TSHR-A623\DTKISKRMAV  | 117  | 25   |
| >TSHR-A623\DTKIAKRMAV  | 822 | >TSHR-A623\DTKISKRMAV  | 377  | 445  |
| >TSHR-A623\DTKIAKRMAV  | 805 | >TSHR-A623\DTKISKRMAV  | 314  | 491  |
| >TSHR-A623\KDTKIAKRMAV | 470 | >TSHR-A623\KDTKISKRMAV | 622  | 152  |
| >TSHR-A623\KDTKIAKRMAV | 302 | >TSHR-A623\KDTKISKRMAV | 465  | 163  |
| >TSHR-A623\KDTKIAKRMAV | 414 | >TSHR-A623\KDTKISKRMAV | 709  | 295  |
| >TSHR-A623\AKRMAVLI    | 356 | >TSHR-A623\VKRMAVLI    | 3004 | 2648 |
| >TSHR-A623\AKRMAVLI    | 41  | >TSHR-A623\VKRMAVLI    | 66   | 25   |
| >TSHR-A623\AKRMAVLIF   | 3   | >TSHR-A623\VKRMAVLIF   | 3    | 0    |
| >TSHR-A623\AKRMAVLI    | 260 | >TSHR-A623\VKRMAVLI    | 1398 | 1138 |
| >TSHR-A623\IAKRMAVL    | 768 | >TSHR-A623\IVKRMAVL    | 200  | 568  |
| >TSHR-A623\IAKRMAVLI   | 156 | >TSHR-A623\IVKRMAVLI   | 42   | 114  |
| >TSHR-A623\IAKRMAVLIF  | 652 | >TSHR-A623\IVKRMAVLIF  | 168  | 484  |
| >TSHR-A623\IAKRMAVL    | 326 | >TSHR-A623\IVKRMAVL    | 567  | 241  |
| >TSHR-A623\IAKRMAVLIF  | 326 | >TSHR-A623\IVKRMAVLIF  | 209  | 117  |
| >TSHR-A623\IAKRMAVLIF  | 21  | >TSHR-A623\IVKRMAVLIF  | 93   | 72   |
| >TSHR-A623\IAKRMAVL    | 151 | >TSHR-A623\IVKRMAVL    | 1619 | 1468 |
| >TSHR-A623\IAKRMAVLIF  | 37  | >TSHR-A623\IVKRMAVLIF  | 476  | 439  |
| >TSHR-A623\IAKRMAVLIF  | 308 | >TSHR-A623\IVKRMAVLIF  | 4787 | 4479 |
| >TSHR-A623\IAKRMAVLIF  | 214 | >TSHR-A623\IVKRMAVLIF  | 1269 | 1055 |
| >TSHR-A623\KIAKRMAV    | 230 | >TSHR-A623\KIVKRMAV    | 842  | 612  |
| >TSHR-A623\KIAKRMAV    | 79  | >TSHR-A623\KIVKRMAV    | 461  | 382  |
| >TSHR-A623\KIAKRMAVL   | 67  | >TSHR-A623\KIVKRMAVL   | 584  | 517  |
| >TSHR-A623\KIAKRMAV    | 14  | >TSHR-A623\KIVKRMAV    | 34   | 20   |
| >TSHR-A623\KIAKRMAVL   | 85  | >TSHR-A623\KIVKRMAVL   | 271  | 186  |
| >TSHR-A623\KIAKRMAV    | 37  | >TSHR-A623\KIVKRMAV    | 31   | 6    |
| >TSHR-A623\KIAKRMAVL   | 291 | >TSHR-A623\KIVKRMAVL   | 235  | 56   |
| >TSHR-A623\KIAKRMAV    | 195 | >TSHR-A623\KIVKRMAV    | 250  | 55   |
| >TSHR-A623\KIAKRMAV    | 201 | >TSHR-A623\KIVKRMAV    | 1011 | 810  |

|                        |      |                        |      |      |
|------------------------|------|------------------------|------|------|
| >TSHR-A623\KIAKRMAV    | 29   | >TSHR-A623\KIVKRMAV    | 62   | 33   |
| >TSHR-A623\KIAKRMAVL   | 1789 | >TSHR-A623\KIVKRMAVL   | 253  | 1536 |
| >TSHR-A623\KIAKRMAVLII | 1385 | >TSHR-A623\KIVKRMAVLII | 270  | 1115 |
| >TSHR-A623\KIAKRMAV    | 493  | >TSHR-A623\KIVKRMAV    | 461  | 32   |
| >TSHR-A623\KIAKRMAVLI  | 101  | >TSHR-A623\KIVKRMAVLI  | 128  | 27   |
| >TSHR-A623\KIAKRMAVLII | 154  | >TSHR-A623\KIVKRMAVLII | 174  | 20   |
| >TSHR-A623\KIAKRMAVL   | 145  | >TSHR-A623\KIVKRMAVL   | 1290 | 1145 |
| >TSHR-A623\KIAKRMAVL   | 216  | >TSHR-A623\KIVKRMAVL   | 520  | 304  |
| >TSHR-A623\KIAKRMAVLII | 166  | >TSHR-A623\KIVKRMAVLII | 219  | 53   |
| >TSHR-A623\KIAKRMAVLII | 110  | >TSHR-A623\KIVKRMAVLII | 95   | 15   |
| >TSHR-A623\KIAKRMAVL   | 445  | >TSHR-A623\KIVKRMAVL   | 137  | 308  |
| >TSHR-A623\KIAKRMAVLII | 148  | >TSHR-A623\KIVKRMAVLII | 55   | 93   |
| >TSHR-A623\KIAKRMAVLII | 88   | >TSHR-A623\KIVKRMAVLII | 135  | 47   |
| >TSHR-A623\TKIAKRMAV   | 171  | >TSHR-A623\TKIVKRMAV   | 230  | 59   |
| >TSHR-A623\TKIAKRMAVL  | 193  | >TSHR-A623\TKIVKRMAVL  | 267  | 74   |
| >TSHR-A623\TKIAKRMAV   | 285  | >TSHR-A623\TKIVKRMAV   | 1482 | 1197 |
| >TSHR-A623\TKIAKRMAVL  | 21   | >TSHR-A623\TKIVKRMAVL  | 55   | 34   |
| >TSHR-A623\DTKIAKRMA\  | 92   | >TSHR-A623\DTKIVKRMA\  | 127  | 35   |
| >TSHR-A623\KDTKIAKRM   | 470  | >TSHR-A623\KDTKIVKRM   | 1314 | 844  |
| >TSHR-A623\KDTKIAKR    | 302  | >TSHR-A623\KDTKIVKR    | 161  | 141  |
| >TSHR-A623\KDTKIAKRMA  | 414  | >TSHR-A623\KDTKIVKRMA  | 626  | 212  |
| >TSHR-A627\AVLIFTDFICV | 1195 | >TSHR-A627\VVLIFTDFICV | 420  | 775  |
| >TSHR-A627\AVLIFTDFI   | 339  | >TSHR-A627\VVLIFTDFI   | 145  | 194  |
| >TSHR-A627\AVLIFTDFI   | 201  | >TSHR-A627\VVLIFTDFI   | 500  | 299  |
| >TSHR-A627\AVLIFTDFI   | 47   | >TSHR-A627\VVLIFTDFI   | 79   | 32   |
| >TSHR-A627\AVLIFTDFI   | 98   | >TSHR-A627\VVLIFTDFI   | 71   | 27   |
| >TSHR-A627\AVLIFTDFI   | 264  | >TSHR-A627\VVLIFTDFI   | 222  | 42   |
| >TSHR-A627\AVLIFTDFICV | 287  | >TSHR-A627\VVLIFTDFICV | 1094 | 807  |
| >TSHR-A627\AVLIFTDF    | 63   | >TSHR-A627\VVLIFTDF    | 293  | 230  |
| >TSHR-A627\AVLIFTDFI   | 238  | >TSHR-A627\VVLIFTDFI   | 1100 | 862  |
| >TSHR-A627\AVLIFTDFI   | 189  | >TSHR-A627\VVLIFTDFI   | 210  | 21   |
| >TSHR-A627\AVLIFTDF    | 213  | >TSHR-A627\VVLIFTDF    | 302  | 89   |
| >TSHR-A627\AVLIFTDF    | 424  | >TSHR-A627\VVLIFTDF    | 528  | 104  |
| >TSHR-A627\AVLIFTDFI   | 226  | >TSHR-A627\VVLIFTDFI   | 383  | 157  |
| >TSHR-A627\MAVLIFTDFI  | 190  | >TSHR-A627\MVVLIFTDFI  | 353  | 163  |
| >TSHR-A627\MAVLIFTDFI  | 539  | >TSHR-A627\MVVLIFTDFI  | 267  | 272  |
| >TSHR-A627\MAVLIFTDFI  | 1087 | >TSHR-A627\MVVLIFTDFI  | 480  | 607  |
| >TSHR-A627\MAVLIFTDFI  | 153  | >TSHR-A627\MVVLIFTDFI  | 94   | 59   |
| >TSHR-A627\MAVLIFTDF   | 591  | >TSHR-A627\MVVLIFTDF   | 195  | 396  |
| >TSHR-A627\MAVLIFTDF   | 2382 | >TSHR-A627\MVVLIFTDF   | 337  | 2045 |
| >TSHR-A627\MAVLIFTDF   | 4037 | >TSHR-A627\MVVLIFTDF   | 335  | 3702 |
| >TSHR-A627\MAVLIFTDFI  | 76   | >TSHR-A627\MVVLIFTDFI  | 44   | 32   |
| >TSHR-A627\MAVLIFTDFI  | 304  | >TSHR-A627\MVVLIFTDFI  | 113  | 191  |

|                       |      |                       |      |      |
|-----------------------|------|-----------------------|------|------|
| >TSHR-A627\MAVLIFTDF  | 57   | >TSHR-A627\MVVLIFTDF  | 240  | 183  |
| >TSHR-A627\MAVLIFTDF  | 85   | >TSHR-A627\MVVLIFTDF  | 1379 | 1294 |
| >TSHR-A627\MAVLIFTDF  | 48   | >TSHR-A627\MVVLIFTDF  | 165  | 117  |
| >TSHR-A627\MAVLIFTDF  | 151  | >TSHR-A627\MVVLIFTDF  | 1521 | 1370 |
| >TSHR-A627\MAVLIFTDF  | 406  | >TSHR-A627\MVVLIFTDF  | 194  | 212  |
| >TSHR-A627\RMAVLIFTDF | 1077 | >TSHR-A627\RMVVLIFTDF | 313  | 764  |
| >TSHR-A627\RMAVLIFT   | 161  | >TSHR-A627\RMVVLIFT   | 494  | 333  |
| >TSHR-A627\RMAVLIFTDF | 30   | >TSHR-A627\RMVVLIFTDF | 68   | 38   |
| >TSHR-A627\RMAVLIFT   | 75   | >TSHR-A627\RMVVLIFT   | 609  | 534  |
| >TSHR-A627\RMAVLIFTDF | 5    | >TSHR-A627\RMVVLIFTDF | 26   | 21   |
| >TSHR-A627\RMAVLIFT   | 150  | >TSHR-A627\RMVVLIFT   | 511  | 361  |
| >TSHR-A627\RMAVLIFTDF | 15   | >TSHR-A627\RMVVLIFTDF | 49   | 34   |
| >TSHR-A627\RMAVLIFT   | 289  | >TSHR-A627\RMVVLIFT   | 261  | 28   |
| >TSHR-A627\RMAVLIFTDF | 53   | >TSHR-A627\RMVVLIFTDF | 52   | 1    |
| >TSHR-A627\RMAVLIFT   | 75   | >TSHR-A627\RMVVLIFT   | 89   | 14   |
| >TSHR-A627\RMAVLIFTDF | 8    | >TSHR-A627\RMVVLIFTDF | 9    | 1    |
| >TSHR-A627\RMAVLIFTDF | 25   | >TSHR-A627\RMVVLIFTDF | 28   | 3    |
| >TSHR-A627\RMAVLIFT   | 104  | >TSHR-A627\RMVVLIFT   | 420  | 316  |
| >TSHR-A627\RMAVLIFTDF | 16   | >TSHR-A627\RMVVLIFTDF | 37   | 21   |
| >TSHR-A627\RMAVLIFTDF | 19   | >TSHR-A627\RMVVLIFTDF | 197  | 178  |
| >TSHR-A627\RMAVLIFT   | 425  | >TSHR-A627\RMVVLIFT   | 916  | 491  |
| >TSHR-A627\RMAVLIFTDF | 89   | >TSHR-A627\RMVVLIFTDF | 177  | 88   |
| >TSHR-A627\RMAVLIFTDF | 185  | >TSHR-A627\RMVVLIFTDF | 242  | 57   |
| >TSHR-A627\RMAVLIFTDF | 22   | >TSHR-A627\RMVVLIFTDF | 23   | 1    |
| >TSHR-A627\RMAVLIFTDF | 69   | >TSHR-A627\RMVVLIFTDF | 82   | 13   |
| >TSHR-A627\RMAVLIFTDF | 45   | >TSHR-A627\RMVVLIFTDF | 55   | 10   |
| >TSHR-A627\RMAVLIFTDF | 8    | >TSHR-A627\RMVVLIFTDF | 8    | 0    |
| >TSHR-A627\RMAVLIFTDF | 498  | >TSHR-A627\RMVVLIFTDF | 443  | 55   |
| >TSHR-A627\RMAVLIFTDF | 337  | >TSHR-A627\RMVVLIFTDF | 125  | 212  |
| >TSHR-A627\RMAVLIFTDF | 106  | >TSHR-A627\RMVVLIFTDF | 174  | 68   |
| >TSHR-A627\RMAVLIFTDF | 97   | >TSHR-A627\RMVVLIFTDF | 162  | 65   |
| >TSHR-A627\RMAVLIFTDF | 253  | >TSHR-A627\RMVVLIFTDF | 808  | 555  |
| >TSHR-A627\RMAVLIFTDF | 347  | >TSHR-A627\RMVVLIFTDF | 321  | 26   |
| >TSHR-A627\RMAVLIFTDF | 146  | >TSHR-A627\RMVVLIFTDF | 516  | 370  |
| >TSHR-A627\KRMVVLIF   | 8    | >TSHR-A627\KRMVVLIF   | 10   | 2    |
| >TSHR-A627\KRMVVLIFTD | 14   | >TSHR-A627\KRMVVLIFTD | 17   | 3    |
| >TSHR-A627\KRMVVLIF   | 26   | >TSHR-A627\KRMVVLIF   | 27   | 1    |
| >TSHR-A627\KRMVVLIFT  | 117  | >TSHR-A627\KRMVVLIFT  | 122  | 5    |
| >TSHR-A627\KRMVVLIFTD | 38   | >TSHR-A627\KRMVVLIFTD | 39   | 1    |
| >TSHR-A627\KRMVVLIF   | 139  | >TSHR-A627\KRMVVLIF   | 77   | 62   |
| >TSHR-A627\KRMVVLIFT  | 62   | >TSHR-A627\KRMVVLIFT  | 54   | 8    |
| >TSHR-A627\KRMVVLIFTD | 499  | >TSHR-A627\KRMVVLIFTD | 543  | 44   |
| >TSHR-A627\KRMVVLIFTD | 45   | >TSHR-A627\KRMVVLIFTD | 41   | 4    |

|                       |      |                       |      |      |
|-----------------------|------|-----------------------|------|------|
| >TSHR-A627\KRMVVLIF   | 688  | >TSHR-A627\KRMVVLIF   | 480  | 208  |
| >TSHR-A627\KRMVVLIFT  | 678  | >TSHR-A627\KRMVVLIFT  | 449  | 229  |
| >TSHR-A627\KRMVVLIFTD | 28   | >TSHR-A627\KRMVVLIFTD | 23   | 5    |
| >TSHR-A627\AKRMVLI    | 356  | >TSHR-A627\AKRMVLI    | 701  | 345  |
| >TSHR-A627\AKRMVLI    | 41   | >TSHR-A627\AKRMVLI    | 49   | 8    |
| >TSHR-A627\AKRMVLI    | 3    | >TSHR-A627\AKRMVLI    | 3    | 0    |
| >TSHR-A627\AKRMVLI    | 260  | >TSHR-A627\AKRMVLI    | 236  | 24   |
| >TSHR-A627\IAKRMVLI   | 156  | >TSHR-A627\IAKRMVLI   | 114  | 42   |
| >TSHR-A627\IAKRMVLI   | 326  | >TSHR-A627\IAKRMVLI   | 365  | 39   |
| >TSHR-A627\IAKRMVLI   | 326  | >TSHR-A627\IAKRMVLI   | 239  | 87   |
| >TSHR-A627\IAKRMVLI   | 990  | >TSHR-A627\IAKRMVLI   | 480  | 510  |
| >TSHR-A627\IAKRMVLI   | 21   | >TSHR-A627\IAKRMVLI   | 24   | 3    |
| >TSHR-A627\IAKRMVLI   | 151  | >TSHR-A627\IAKRMVLI   | 431  | 280  |
| >TSHR-A627\IAKRMVLI   | 37   | >TSHR-A627\IAKRMVLI   | 90   | 53   |
| >TSHR-A627\IAKRMVLI   | 308  | >TSHR-A627\IAKRMVLI   | 352  | 44   |
| >TSHR-A627\IAKRMVLI   | 214  | >TSHR-A627\IAKRMVLI   | 111  | 103  |
| >TSHR-A627\IAKRMVLI   | 230  | >TSHR-A627\IAKRMVLI   | 580  | 350  |
| >TSHR-A627\IAKRMVLI   | 79   | >TSHR-A627\IAKRMVLI   | 289  | 210  |
| >TSHR-A627\IAKRMVLI   | 67   | >TSHR-A627\IAKRMVLI   | 133  | 66   |
| >TSHR-A627\IAKRMVLI   | 14   | >TSHR-A627\IAKRMVLI   | 37   | 23   |
| >TSHR-A627\IAKRMVLI   | 85   | >TSHR-A627\IAKRMVLI   | 416  | 331  |
| >TSHR-A627\IAKRMVLI   | 37   | >TSHR-A627\IAKRMVLI   | 144  | 107  |
| >TSHR-A627\IAKRMVLI   | 291  | >TSHR-A627\IAKRMVLI   | 299  | 8    |
| >TSHR-A627\IAKRMVLI   | 195  | >TSHR-A627\IAKRMVLI   | 372  | 177  |
| >TSHR-A627\IAKRMVLI   | 201  | >TSHR-A627\IAKRMVLI   | 161  | 40   |
| >TSHR-A627\IAKRMVLI   | 29   | >TSHR-A627\IAKRMVLI   | 44   | 15   |
| >TSHR-A627\IAKRMVLI   | 493  | >TSHR-A627\IAKRMVLI   | 778  | 285  |
| >TSHR-A627\IAKRMVLI   | 1507 | >TSHR-A627\IAKRMVLI   | 213  | 1294 |
| >TSHR-A627\IAKRMVLI   | 101  | >TSHR-A627\IAKRMVLI   | 51   | 50   |
| >TSHR-A627\IAKRMVLI   | 154  | >TSHR-A627\IAKRMVLI   | 63   | 91   |
| >TSHR-A627\IAKRMVLI   | 145  | >TSHR-A627\IAKRMVLI   | 172  | 27   |
| >TSHR-A627\IAKRMVLI   | 216  | >TSHR-A627\IAKRMVLI   | 398  | 182  |
| >TSHR-A627\IAKRMVLI   | 166  | >TSHR-A627\IAKRMVLI   | 242  | 76   |
| >TSHR-A627\IAKRMVLI   | 110  | >TSHR-A627\IAKRMVLI   | 105  | 5    |
| >TSHR-A627\IAKRMVLI   | 445  | >TSHR-A627\IAKRMVLI   | 2022 | 1577 |
| >TSHR-A627\IAKRMVLI   | 148  | >TSHR-A627\IAKRMVLI   | 405  | 257  |
| >TSHR-A627\IAKRMVLI   | 88   | >TSHR-A627\IAKRMVLI   | 107  | 19   |
| >TSHR-A627\TKIAKRMV   | 171  | >TSHR-A627\TKIAKRMV   | 285  | 114  |
| >TSHR-A627\TKIAKRMV   | 193  | >TSHR-A627\TKIAKRMV   | 114  | 79   |
| >TSHR-A627\TKIAKRMV   | 285  | >TSHR-A627\TKIAKRMV   | 380  | 95   |
| >TSHR-A627\TKIAKRMV   | 21   | >TSHR-A627\TKIAKRMV   | 19   | 2    |
| >TSHR-A627\DTKIAKRMV  | 92   | >TSHR-A627\DTKIAKRMV  | 207  | 115  |
| >TSHR-A627\KDTKIAKRMV | 8489 | >TSHR-A627\KDTKIAKRMV | 297  | 8192 |



|                       |       |                       |      |       |
|-----------------------|-------|-----------------------|------|-------|
| >TSHR-A627\KDTKIAKRM  | 414   | >TSHR-A627\KDTKIAKRM  | 299  | 115   |
| >TSHR-D382\DSHYDYTI   | 13348 | >TSHR-D382\DSHYDYTI   | 153  | 13195 |
| >TSHR-D382\DSHYDYTI   | 1185  | >TSHR-D382\DSHYDYTI   | 115  | 1070  |
| >TSHR-D382\DSHYDYTI   | 340   | >TSHR-D382\DSHYDYTI   | 139  | 201   |
| >TSHR-D382\DSHYDYTI   | 9137  | >TSHR-D382\DSHYDYTI   | 207  | 8930  |
| >TSHR-D382\DSHYDYTI   | 339   | >TSHR-D382\DSHYDYTI   | 24   | 315   |
| >TSHR-D382\FDSHYDYTI  | 688   | >TSHR-D382\FDSHYDYTI  | 319  | 369   |
| >TSHR-D382\FDSHYDYTI  | 6098  | >TSHR-D382\FDSHYDYTI  | 415  | 5683  |
| >TSHR-D382\FDSHYDYTI  | 6518  | >TSHR-D382\FDSHYDYTI  | 59   | 6459  |
| >TSHR-D382\FDSHYDYTI  | 11816 | >TSHR-D382\FDSHYDYTI  | 55   | 11761 |
| >TSHR-D382\FDSHYDYTI  | 20    | >TSHR-D382\FDSHYDYTI  | 2289 | 2269  |
| >TSHR-D382\AFDSHYDYTI | 400   | >TSHR-D382\AFDSHYDYTI | 44   | 356   |
| >TSHR-D382\AFDSHYDY   | 74    | >TSHR-D382\AFDSHYDY   | 15   | 59    |
| >TSHR-D382\AFDSHYDYTI | 15529 | >TSHR-D382\AFDSHYDYTI | 437  | 15092 |
| >TSHR-D382\AFDSHYDY   | 507   | >TSHR-D382\AFDSHYDY   | 290  | 217   |
| >TSHR-D382\AFDSHYDY   | 113   | >TSHR-D382\AFDSHYDY   | 638  | 525   |
| >TSHR-D382\AFDSHYDYTI | 582   | >TSHR-D382\AFDSHYDYTI | 439  | 143   |
| >TSHR-D382\QAFDSHYDY  | 409   | >TSHR-D382\QAFDSHYDY  | 1618 | 1209  |
| >TSHR-D382\QAFDSHYDY  | 19    | >TSHR-D382\QAFDSHYDY  | 18   | 1     |
| >TSHR-D382\QAFDSHYDY  | 177   | >TSHR-D382\QAFDSHYDY  | 101  | 76    |
| >TSHR-D382\QAFDSHYDY  | 50    | >TSHR-D382\QAFDSHYDY  | 35   | 15    |
| >TSHR-D382\QAFDSHYDY  | 167   | >TSHR-D382\QAFDSHYDY  | 307  | 140   |
| >TSHR-D382\QAFDSHYDY  | 26    | >TSHR-D382\QAFDSHYDY  | 27   | 1     |
| >TSHR-D382\QAFDSHYDY  | 344   | >TSHR-D382\QAFDSHYDY  | 1344 | 1000  |
| >TSHR-D382\QAFDSHYDY  | 294   | >TSHR-D382\QAFDSHYDY  | 257  | 37    |
| >TSHR-D382\QAFDSHYDY  | 37    | >TSHR-D382\QAFDSHYDY  | 18   | 19    |
| >TSHR-D382\QAFDSHYDY  | 443   | >TSHR-D382\QAFDSHYDY  | 145  | 298   |
| >TSHR-D382\QAFDSHYDY  | 13    | >TSHR-D382\QAFDSHYDY  | 12   | 1     |
| >TSHR-D382\QAFDSHYDY  | 44    | >TSHR-D382\QAFDSHYDY  | 51   | 7     |
| >TSHR-D382\QAFDSHYDY  | 38    | >TSHR-D382\QAFDSHYDY  | 41   | 3     |
| >TSHR-D382\QAFDSHYDY  | 1177  | >TSHR-D382\QAFDSHYDY  | 229  | 948   |
| >TSHR-D382\QAFDSHYDY  | 790   | >TSHR-D382\QAFDSHYDY  | 456  | 334   |
| >TSHR-D382\QAFDSHYDY  | 89    | >TSHR-D382\QAFDSHYDY  | 73   | 16    |
| >TSHR-D382\LQAFDSHYDY | 396   | >TSHR-D382\LQAFDSHYDY | 240  | 156   |
| >TSHR-D382\LQAFDSHYDY | 181   | >TSHR-D382\LQAFDSHYDY | 164  | 17    |
| >TSHR-D382\LQAFDSHY   | 136   | >TSHR-D382\LQAFDSHY   | 60   | 76    |
| >TSHR-D382\LQAFDSHYDY | 295   | >TSHR-D382\LQAFDSHYDY | 318  | 23    |
| >TSHR-D382\LQAFDSHY   | 32    | >TSHR-D382\LQAFDSHY   | 61   | 29    |
| >TSHR-D382\LQAFDSHYDY | 62    | >TSHR-D382\LQAFDSHYDY | 68   | 6     |
| >TSHR-D382\LQAFDSHY   | 31    | >TSHR-D382\LQAFDSHY   | 29   | 2     |
| >TSHR-D382\LQAFDSHYDY | 57    | >TSHR-D382\LQAFDSHYDY | 49   | 8     |
| >TSHR-D382\LQAFDSHY   | 278   | >TSHR-D382\LQAFDSHY   | 245  | 33    |
| >TSHR-D382\LQAFDSHYDY | 552   | >TSHR-D382\LQAFDSHYDY | 408  | 144   |

|                       |      |                       |     |      |
|-----------------------|------|-----------------------|-----|------|
| >TSHR-D382ILQAFDSHY   | 17   | >TSHR-D382ILQAFHSHY   | 8   | 9    |
| >TSHR-D382ILQAFDSHYDY | 19   | >TSHR-D382ILQAFHSHYDY | 13  | 6    |
| >TSHR-D382ITLQAFDSHY  | 118  | >TSHR-D382ITLQAFHSHY  | 49  | 69   |
| >TSHR-D382ITLQAFDSHYC | 34   | >TSHR-D382ITLQAFHSHYC | 23  | 11   |
| >TSHR-D382ITLQAFDSHY  | 51   | >TSHR-D382ITLQAFHSHY  | 76  | 25   |
| >TSHR-D382ITLQAFDSHYC | 58   | >TSHR-D382ITLQAFHSHYC | 66  | 8    |
| >TSHR-D382ITLQAFDSHY  | 60   | >TSHR-D382ITLQAFHSHY  | 19  | 41   |
| >TSHR-D382ITLQAFDSHYC | 63   | >TSHR-D382ITLQAFHSHYC | 28  | 35   |
| >TSHR-D382ITLQAFDSHY  | 56   | >TSHR-D382ITLQAFHSHY  | 49  | 7    |
| >TSHR-D382ITLQAFDSHYC | 208  | >TSHR-D382ITLQAFHSHYC | 171 | 37   |
| >TSHR-D382ITLQAFDSHY  | 21   | >TSHR-D382ITLQAFHSHY  | 24  | 3    |
| >TSHR-D382ITLQAFDSHYC | 39   | >TSHR-D382ITLQAFHSHYC | 42  | 3    |
| >TSHR-D382ITLQAFDSHY  | 987  | >TSHR-D382ITLQAFHSHY  | 229 | 758  |
| >TSHR-D382ITLQAFDSHY  | 1045 | >TSHR-D382ITLQAFHSHY  | 236 | 809  |
| >TSHR-D382IETLQAFDSHY | 58   | >TSHR-D382IETLQAFHSHY | 61  | 3    |
| >TSHR-D382IETLQAFDSH  | 172  | >TSHR-D382IETLQAFHSH  | 63  | 109  |
| >TSHR-D382IETLQAFDSHY | 79   | >TSHR-D382IETLQAFHSHY | 59  | 20   |
| >TSHR-D382IETLQAFDSHY | 59   | >TSHR-D382IETLQAFHSHY | 71  | 12   |
| >TSHR-D382IETLQAFDSH  | 87   | >TSHR-D382IETLQAFHSH  | 58  | 29   |
| >TSHR-D382IETLQAFDSHY | 3    | >TSHR-D382IETLQAFHSHY | 2   | 1    |
| >TSHR-D382IETLQAFDSH  | 38   | >TSHR-D382IETLQAFHSH  | 13  | 25   |
| >TSHR-D382IETLQAFDSHY | 5    | >TSHR-D382IETLQAFHSHY | 3   | 2    |
| >TSHR-D382IETLQAFDSHY | 140  | >TSHR-D382IETLQAFHSHY | 145 | 5    |
| >TSHR-D382IETLQAFDSHY | 356  | >TSHR-D382IETLQAFHSHY | 438 | 82   |
| >TSHR-D382IETLQAFDSH  | 1359 | >TSHR-D382IETLQAFHSH  | 489 | 870  |
| >TSHR-D382IETLQAFDS   | 1711 | >TSHR-D382IETLQAFHS   | 251 | 1460 |
| >TSHR-D382IETLQAFDSHY | 990  | >TSHR-D382IETLQAFHSHY | 386 | 604  |
| >TSHR-D382IETLQAFDSHY | 1762 | >TSHR-D382IETLQAFHSHY | 418 | 1344 |
| >TSHR-D382IETLQAFDSHY | 516  | >TSHR-D382IETLQAFHSHY | 298 | 218  |
| >TSHR-D382IETLQAFDSHY | 30   | >TSHR-D382IETLQAFHSHY | 12  | 18   |
| >TSHR-D382IETLQAFDSH  | 3239 | >TSHR-D382IETLQAFHSH  | 425 | 2814 |
| >TSHR-D382IEETLQAFD   | 548  | >TSHR-D382IEETLQAFH   | 399 | 149  |
| >TSHR-D382IEETLQAFDSH | 550  | >TSHR-D382IEETLQAFHSH | 294 | 256  |
| >TSHR-D382IEETLQAFDSH | 377  | >TSHR-D382IEETLQAFHSH | 385 | 8    |
| >TSHR-D382IEETLQAFDSH | 164  | >TSHR-D382IEETLQAFHSH | 206 | 42   |
| >TSHR-D395IDMVCTPKSD  | 2005 | >TSHR-D395IDMVCTPKSD  | 466 | 1539 |
| >TSHR-D395IDMVCTPKSD  | 2542 | >TSHR-D395IDMVCTPKSD  | 243 | 2299 |
| >TSHR-D395IDMVCTPKSD  | 1541 | >TSHR-D395IDMVCTPKSD  | 429 | 1112 |
| >TSHR-D395IDMVCTPKSD  | 141  | >TSHR-D395IDMVCTPKSD  | 32  | 109  |
| >TSHR-D395IDMVCTPKSD  | 564  | >TSHR-D395IDMVCTPKSD  | 433 | 131  |
| >TSHR-D395IDMVCTPK    | 1012 | >TSHR-D395IDMVCTPK    | 196 | 816  |
| >TSHR-D395IDSEDMVCTP  | 447  | >TSHR-D395IDSEDMVCTP  | 365 | 82   |
| >TSHR-D395IDSEDMVCTP  | 178  | >TSHR-D395IDSEDMVCTP  | 248 | 70   |

|                        |      |                        |       |       |
|------------------------|------|------------------------|-------|-------|
| >TSHR-D395ITICGDSEDM\  | 217  | >TSHR-D395ITICGDSENMA  | 234   | 17    |
| >TSHR-D395ITICGDSEDM\  | 59   | >TSHR-D395ITICGDSENMA  | 32    | 27    |
| >TSHR-D395ITICGDSEDM   | 369  | >TSHR-D395ITICGDSENMA  | 86    | 283   |
| >TSHR-D395YTICGDSEDM   | 182  | >TSHR-D395YTICGDSENM   | 134   | 48    |
| >TSHR-D395YTICGDSEDM   | 1222 | >TSHR-D395YTICGDSENM   | 415   | 807   |
| >TSHR-D395YTICGDSEDM   | 259  | >TSHR-D395YTICGDSENM   | 193   | 66    |
| >TSHR-D395YTICGDSEDM   | 82   | >TSHR-D395YTICGDSENM   | 40    | 42    |
| >TSHR-D395YTICGDSEDM   | 1330 | >TSHR-D395YTICGDSENM   | 385   | 945   |
| >TSHR-D395YTICGDSEDM   | 26   | >TSHR-D395YTICGDSENM   | 24    | 2     |
| >TSHR-D395YTICGDSEDM   | 20   | >TSHR-D395YTICGDSENM   | 26    | 6     |
| >TSHR-D395YTICGDSEDM   | 28   | >TSHR-D395YTICGDSENM   | 28    | 0     |
| >TSHR-D395YTICGDSEDM   | 103  | >TSHR-D395YTICGDSENM   | 148   | 45    |
| >TSHR-D395YTICGDSEDM   | 167  | >TSHR-D395YTICGDSENM   | 102   | 65    |
| >TSHR-D395YTICGDSEDM   | 9    | >TSHR-D395YTICGDSENM   | 4     | 5     |
| >TSHR-D395YTICGDSEDM   | 410  | >TSHR-D395YTICGDSENM   | 441   | 31    |
| >TSHR-D395YTICGDSEDM   | 132  | >TSHR-D395YTICGDSENM   | 40    | 92    |
| >TSHR-D395YTICGDSEDM   | 10   | >TSHR-D395YTICGDSENM   | 9     | 1     |
| >TSHR-D395YTICGDSEDM   | 1354 | >TSHR-D395YTICGDSENM   | 235   | 1119  |
| >TSHR-D395YTICGDSEDM   | 42   | >TSHR-D395YTICGDSENM   | 29    | 13    |
| >TSHR-D395YTICGDSEDM   | 260  | >TSHR-D395YTICGDSENM   | 189   | 71    |
| >TSHR-D395YTICGDSEDM   | 19   | >TSHR-D395YTICGDSENM   | 8     | 11    |
| >TSHR-D395YTICGDSEDM   | 247  | >TSHR-D395YTICGDSENM   | 213   | 34    |
| >TSHR-D395YTICGDSEDM   | 1318 | >TSHR-D395YTICGDSEN    | 226   | 1092  |
| >TSHR-D395YTICGDSEDM   | 50   | >TSHR-D395YTICGDSENM   | 39    | 11    |
| >TSHR-D395YTICGDSEDM   | 60   | >TSHR-D395YTICGDSENM   | 32    | 28    |
| >TSHR-D619(DTKIAKRMA   | 6493 | >TSHR-D619(GTKIAKRMA   | 314   | 6179  |
| >TSHR-D619(DTKIAKRMA\  | 1954 | >TSHR-D619(GTKIAKRMA\  | 64    | 1890  |
| >TSHR-D619(DTKIAKRMA\  | 6114 | >TSHR-D619(GTKIAKRMA\  | 372   | 5742  |
| >TSHR-D619(DTKIAKRMA\  | 92   | >TSHR-D619(GTKIAKRMA\  | 344   | 252   |
| >TSHR-D619(DTKIAKRM    | 822  | >TSHR-D619(GTKIAKRM    | 35    | 787   |
| >TSHR-D619(DTKIAKRMA\  | 805  | >TSHR-D619(GTKIAKRMA\  | 42    | 763   |
| >TSHR-D619(DTKIAKRMA\  | 3100 | >TSHR-D619(GTKIAKRMA\  | 77    | 3023  |
| >TSHR-D619(KDTKIAKR    | 2790 | >TSHR-D619(KGTKIAKR    | 135   | 2655  |
| >TSHR-D619(KDTKIAKRM   | 470  | >TSHR-D619(KGTKIAKRM   | 137   | 333   |
| >TSHR-D619(KDTKIAKR    | 302  | >TSHR-D619(KGTKIAKR    | 76    | 226   |
| >TSHR-D619(KDTKIAKRMA/ | 414  | >TSHR-D619(KGTKIAKRMA/ | 21717 | 21303 |
| >TSHR-D619(QYNPGDKDT   | 86   | >TSHR-D619(QYNPGDKGT   | 88    | 2     |
| >TSHR-D619(QYNPGDKDT   | 231  | >TSHR-D619(QYNPGDKGT   | 206   | 25    |
| >TSHR-D633IDFICMAPISF  | 269  | >TSHR-D633IEFICMAPISF  | 253   | 16    |
| >TSHR-D633IDFICMAPISF  | 1214 | >TSHR-D633IEFICMAPISF  | 282   | 932   |
| >TSHR-D633IDFICMAPISF  | 1973 | >TSHR-D633IEFICMAPISF  | 444   | 1529  |
| >TSHR-D633IDFICMAPISF\ | 727  | >TSHR-D633IEFICMAPISFY | 182   | 545   |
| >TSHR-D633IDFICMAPISF  | 903  | >TSHR-D633IEFICMAPISF  | 208   | 695   |

|                        |       |                        |      |       |
|------------------------|-------|------------------------|------|-------|
| >TSHR-D633IDFICMAPISF\ | 19    | >TSHR-D633IEFICMAPISFY | 7    | 12    |
| >TSHR-D633IDFICMAPISF  | 955   | >TSHR-D633IEFICMAPISF  | 291  | 664   |
| >TSHR-D633IDFICMAPISF\ | 149   | >TSHR-D633IEFICMAPISFY | 50   | 99    |
| >TSHR-D633IDFICMAPISF  | 487   | >TSHR-D633IEFICMAPISF  | 603  | 116   |
| >TSHR-D633IDFICMAPISF\ | 18    | >TSHR-D633IEFICMAPISFY | 21   | 3     |
| >TSHR-D633IDFICMAPISF\ | 430   | >TSHR-D633IEFICMAPISFY | 146  | 284   |
| >TSHR-D633IDFICMAPI    | 1647  | >TSHR-D633IEFICMAPI    | 256  | 1391  |
| >TSHR-D633ITDFICMAPI   | 103   | >TSHR-D633ITEFICMAPI   | 7    | 96    |
| >TSHR-D633ITDFICMAPISF | 7342  | >TSHR-D633ITEFICMAPISF | 403  | 6939  |
| >TSHR-D633ITDFICMAPI   | 127   | >TSHR-D633ITEFICMAPI   | 325  | 198   |
| >TSHR-D633ITDFICMAPISF | 391   | >TSHR-D633ITEFICMAPISF | 51   | 340   |
| >TSHR-D633ITDFICMAPI   | 10240 | >TSHR-D633ITEFICMAPI   | 90   | 10150 |
| >TSHR-D633ITDFICMAPISF | 627   | >TSHR-D633ITEFICMAPISF | 6    | 621   |
| >TSHR-D633ITDFICMAPI   | 16612 | >TSHR-D633ITEFICMAPI   | 101  | 16511 |
| >TSHR-D633ITDFICMAPISF | 18483 | >TSHR-D633ITEFICMAPISF | 161  | 18322 |
| >TSHR-D633ITDFICMAP    | 3339  | >TSHR-D633ITEFICMAP    | 401  | 2938  |
| >TSHR-D633ITDFICMAPI   | 65    | >TSHR-D633ITEFICMAPI   | 19   | 46    |
| >TSHR-D633ITDFICMAPISF | 138   | >TSHR-D633ITEFICMAPISF | 31   | 107   |
| >TSHR-D633ITDFICMAPISF | 4486  | >TSHR-D633ITEFICMAPISF | 154  | 4332  |
| >TSHR-D633ITDFICMAPISF | 4259  | >TSHR-D633ITEFICMAPISF | 47   | 4212  |
| >TSHR-D633ITDFICMAPI   | 76    | >TSHR-D633ITEFICMAPI   | 4    | 72    |
| >TSHR-D633ITDFICMAPISF | 2475  | >TSHR-D633ITEFICMAPISF | 76   | 2399  |
| >TSHR-D633ITDFICMAPI   | 425   | >TSHR-D633ITEFICMAPI   | 5625 | 5200  |
| >TSHR-D633ITDFICMAPI   | 101   | >TSHR-D633ITEFICMAPI   | 4026 | 3925  |
| >TSHR-D633IFTDFICMA    | 392   | >TSHR-D633IFTEFICMA    | 3759 | 3367  |
| >TSHR-D633IFTDFICMA    | 343   | >TSHR-D633IFTEFICMA    | 5403 | 5060  |
| >TSHR-D633IFTDFICMAPI  | 378   | >TSHR-D633IFTEFICMAPI  | 1090 | 712   |
| >TSHR-D633IFTDFICMA    | 221   | >TSHR-D633IFTEFICMA    | 489  | 268   |
| >TSHR-D633IFTDFICMAPI  | 333   | >TSHR-D633IFTEFICMAPI  | 633  | 300   |
| >TSHR-D633IFTDFICMAPI  | 400   | >TSHR-D633IFTEFICMAPI  | 632  | 232   |
| >TSHR-D633IFTDFICMA    | 140   | >TSHR-D633IFTEFICMA    | 990  | 850   |
| >TSHR-D633IFTDFICMAPI  | 83    | >TSHR-D633IFTEFICMAPI  | 165  | 82    |
| >TSHR-D633IFTDFICMA    | 187   | >TSHR-D633IFTEFICMA    | 2478 | 2291  |
| >TSHR-D633IFTDFICMAPI  | 256   | >TSHR-D633IFTEFICMAPI  | 4466 | 4210  |
| >TSHR-D633IFTDFICMA    | 194   | >TSHR-D633IFTEFICMA    | 182  | 12    |
| >TSHR-D633IFTDFICMAPI  | 29    | >TSHR-D633IFTEFICMAPI  | 46   | 17    |
| >TSHR-D633IFTDFICMA    | 119   | >TSHR-D633IFTEFICMA    | 1579 | 1460  |
| >TSHR-D633IFTDFICMAPI  | 16    | >TSHR-D633IFTEFICMAPI  | 146  | 130   |
| >TSHR-D633IFTDFICMAPI  | 185   | >TSHR-D633IFTEFICMAPI  | 219  | 34    |
| >TSHR-D633IFTDFICMAPI  | 412   | >TSHR-D633IFTEFICMAPI  | 288  | 124   |
| >TSHR-D633IFTDFICMAPI  | 881   | >TSHR-D633IFTEFICMAPI  | 444  | 437   |
| >TSHR-D633IFTDFICMAPI  | 94    | >TSHR-D633IFTEFICMAPI  | 187  | 93    |
| >TSHR-D633IFTDFICMAPI  | 365   | >TSHR-D633IFTEFICMAPI  | 450  | 85    |

|                         |     |                         |     |     |
|-------------------------|-----|-------------------------|-----|-----|
| >TSHR-D633ILIFTDFICMA   | 181 | >TSHR-D633ILIFTEFICMA   | 229 | 48  |
| >TSHR-D633ILIFTDFICMA   | 139 | >TSHR-D633ILIFTEFICMA   | 140 | 1   |
| >TSHR-D633ILIFTDFICM    | 319 | >TSHR-D633ILIFTEFICM    | 473 | 154 |
| >TSHR-D633ILIFTDFICMA   | 109 | >TSHR-D633ILIFTEFICMA   | 138 | 29  |
| >TSHR-D633ILIFTDFICMA   | 72  | >TSHR-D633ILIFTEFICMA   | 80  | 8   |
| >TSHR-D633ILIFTDFICMA   | 302 | >TSHR-D633ILIFTEFICMA   | 377 | 75  |
| >TSHR-D633ILIFTDFICMA   | 52  | >TSHR-D633ILIFTEFICMA   | 71  | 19  |
| >TSHR-D633ILIFTDFICM    | 173 | >TSHR-D633ILIFTEFICM    | 167 | 6   |
| >TSHR-D633IVLIFTDFI     | 68  | >TSHR-D633IVLIFTEFI     | 57  | 11  |
| >TSHR-D633IVLIFTDFICM   | 428 | >TSHR-D633IVLIFTEFICM   | 374 | 54  |
| >TSHR-D633IVLIFTDFICMA/ | 110 | >TSHR-D633IVLIFTEFICMA  | 113 | 3   |
| >TSHR-D633IVLIFTDFI     | 29  | >TSHR-D633IVLIFTEFI     | 29  | 0   |
| >TSHR-D633IVLIFTDFICMA/ | 168 | >TSHR-D633IVLIFTEFICMA  | 179 | 11  |
| >TSHR-D633IVLIFTDFI     | 42  | >TSHR-D633IVLIFTEFI     | 44  | 2   |
| >TSHR-D633IVLIFTDFICMA/ | 62  | >TSHR-D633IVLIFTEFICMA  | 73  | 11  |
| >TSHR-D633IVLIFTDFI     | 161 | >TSHR-D633IVLIFTEFI     | 165 | 4   |
| >TSHR-D633IVLIFTDFICMA/ | 237 | >TSHR-D633IVLIFTEFICMA  | 308 | 71  |
| >TSHR-D633IVLIFTDFI     | 13  | >TSHR-D633IVLIFTEFI     | 8   | 5   |
| >TSHR-D633IVLIFTDFICMA/ | 19  | >TSHR-D633IVLIFTEFICMA  | 14  | 5   |
| >TSHR-D633IVLIFTDFI     | 11  | >TSHR-D633IVLIFTEFI     | 14  | 3   |
| >TSHR-D633IVLIFTDFIC    | 195 | >TSHR-D633IVLIFTEFIC    | 309 | 114 |
| >TSHR-D633IVLIFTDFICM   | 185 | >TSHR-D633IVLIFTEFICM   | 329 | 144 |
| >TSHR-D633IVLIFTDFICMA/ | 56  | >TSHR-D633IVLIFTEFICMA  | 74  | 18  |
| >TSHR-D633IVLIFTDFI     | 30  | >TSHR-D633IVLIFTEFI     | 32  | 2   |
| >TSHR-D633IVLIFTDFICMA/ | 38  | >TSHR-D633IVLIFTEFICMA  | 38  | 0   |
| >TSHR-D633IVLIFTDFI     | 78  | >TSHR-D633IVLIFTEFI     | 46  | 32  |
| >TSHR-D633IVLIFTDFICMA/ | 542 | >TSHR-D633IVLIFTEFICMA  | 477 | 65  |
| >TSHR-D633IVLIFTDFI     | 45  | >TSHR-D633IVLIFTEFI     | 23  | 22  |
| >TSHR-D633IVLIFTDFIC    | 381 | >TSHR-D633IVLIFTEFIC    | 232 | 149 |
| >TSHR-D633IVLIFTDFICMA/ | 14  | >TSHR-D633IVLIFTEFICMA  | 11  | 3   |
| >TSHR-D633I AVLIFTDFI   | 339 | >TSHR-D633I AVLIFTEFI   | 575 | 236 |
| >TSHR-D633I AVLIFTDFI   | 530 | >TSHR-D633I AVLIFTEFI   | 310 | 220 |
| >TSHR-D633I AVLIFTDFI   | 201 | >TSHR-D633I AVLIFTEFI   | 181 | 20  |
| >TSHR-D633I AVLIFTDFI   | 47  | >TSHR-D633I AVLIFTEFI   | 36  | 11  |
| >TSHR-D633I AVLIFTDFI   | 98  | >TSHR-D633I AVLIFTEFI   | 47  | 51  |
| >TSHR-D633I AVLIFTDFI   | 264 | >TSHR-D633I AVLIFTEFI   | 320 | 56  |
| >TSHR-D633I AVLIFTDF    | 865 | >TSHR-D633I AVLIFTEF    | 223 | 642 |
| >TSHR-D633I AVLIFTDFICM | 287 | >TSHR-D633I AVLIFTEFICM | 419 | 132 |
| >TSHR-D633I AVLIFTDF    | 63  | >TSHR-D633I AVLIFTEF    | 52  | 11  |
| >TSHR-D633I AVLIFTDFI   | 238 | >TSHR-D633I AVLIFTEFI   | 117 | 121 |
| >TSHR-D633I AVLIFTDFI   | 552 | >TSHR-D633I AVLIFTEFI   | 284 | 268 |
| >TSHR-D633I AVLIFTDFI   | 189 | >TSHR-D633I AVLIFTEFI   | 95  | 94  |
| >TSHR-D633I AVLIFTDF    | 213 | >TSHR-D633I AVLIFTEF    | 110 | 103 |

|                        |      |                         |     |     |
|------------------------|------|-------------------------|-----|-----|
| >TSHR-D633I AVLIFTFD   | 424  | >TSHR-D633I AVLIFTEF    | 94  | 330 |
| >TSHR-D633I AVLIFTDFI  | 226  | >TSHR-D633I AVLIFTEFI   | 209 | 17  |
| >TSHR-D633I MAVLIFTDFI | 190  | >TSHR-D633I MAVLIFTEFI  | 300 | 110 |
| >TSHR-D633I MAVLIFTDFI | 539  | >TSHR-D633I MAVLIFTEFI  | 402 | 137 |
| >TSHR-D633I MAVLIFTDFI | 153  | >TSHR-D633I MAVLIFTEFI  | 165 | 12  |
| >TSHR-D633I MAVLIFTDF  | 591  | >TSHR-D633I MAVLIFTEF   | 296 | 295 |
| >TSHR-D633I MAVLIFTDFI | 76   | >TSHR-D633I MAVLIFTEFI  | 109 | 33  |
| >TSHR-D633I MAVLIFTDFI | 304  | >TSHR-D633I MAVLIFTEFI  | 146 | 158 |
| >TSHR-D633I MAVLIFTDF  | 57   | >TSHR-D633I MAVLIFTEF   | 34  | 23  |
| >TSHR-D633I MAVLIFTDF  | 85   | >TSHR-D633I MAVLIFTEF   | 20  | 65  |
| >TSHR-D633I MAVLIFTDF  | 48   | >TSHR-D633I MAVLIFTEF   | 19  | 29  |
| >TSHR-D633I MAVLIFTDF  | 151  | >TSHR-D633I MAVLIFTEF   | 84  | 67  |
| >TSHR-D633I MAVLIFTDF  | 903  | >TSHR-D633I MAVLIFTEF   | 110 | 793 |
| >TSHR-D633I MAVLIFTDFI | 1122 | >TSHR-D633I MAVLIFTEFI  | 449 | 673 |
| >TSHR-D633I MAVLIFTDF  | 406  | >TSHR-D633I MAVLIFTEF   | 113 | 293 |
| >TSHR-D633I RMAVLIFTDF | 30   | >TSHR-D633I RMAVLIFTEFI | 23  | 7   |
| >TSHR-D633I RMAVLIFTDF | 5    | >TSHR-D633I RMAVLIFTEFI | 5   | 0   |
| >TSHR-D633I RMAVLIFTDF | 15   | >TSHR-D633I RMAVLIFTEFI | 13  | 2   |
| >TSHR-D633I RMAVLIFTDF | 53   | >TSHR-D633I RMAVLIFTEFI | 43  | 10  |
| >TSHR-D633I RMAVLIFTDF | 8    | >TSHR-D633I RMAVLIFTEFI | 6   | 2   |
| >TSHR-D633I RMAVLIFTDF | 25   | >TSHR-D633I RMAVLIFTEFI | 29  | 4   |
| >TSHR-D633I RMAVLIFTDF | 16   | >TSHR-D633I RMAVLIFTEFI | 16  | 0   |
| >TSHR-D633I RMAVLIFTDF | 19   | >TSHR-D633I RMAVLIFTEFI | 13  | 6   |
| >TSHR-D633I RMAVLIFTDF | 89   | >TSHR-D633I RMAVLIFTEFI | 41  | 48  |
| >TSHR-D633I RMAVLIFTDF | 653  | >TSHR-D633I RMAVLIFTEFI | 393 | 260 |
| >TSHR-D633I RMAVLIFTDF | 185  | >TSHR-D633I RMAVLIFTEF  | 42  | 143 |
| >TSHR-D633I RMAVLIFTD  | 1191 | >TSHR-D633I RMAVLIFTE   | 426 | 765 |
| >TSHR-D633I RMAVLIFTDF | 22   | >TSHR-D633I RMAVLIFTEF  | 22  | 0   |
| >TSHR-D633I RMAVLIFTDF | 69   | >TSHR-D633I RMAVLIFTEFI | 47  | 22  |
| >TSHR-D633I RMAVLIFTDF | 45   | >TSHR-D633I RMAVLIFTEF  | 33  | 12  |
| >TSHR-D633I RMAVLIFTDF | 8    | >TSHR-D633I RMAVLIFTEF  | 6   | 2   |
| >TSHR-D633I RMAVLIFTDF | 498  | >TSHR-D633I RMAVLIFTEFI | 280 | 218 |
| >TSHR-D633I RMAVLIFTDF | 337  | >TSHR-D633I RMAVLIFTEF  | 91  | 246 |
| >TSHR-D633I RMAVLIFTDF | 106  | >TSHR-D633I RMAVLIFTEF  | 30  | 76  |
| >TSHR-D633I RMAVLIFTDF | 97   | >TSHR-D633I RMAVLIFTEFI | 54  | 43  |
| >TSHR-D633I RMAVLIFTDF | 253  | >TSHR-D633I RMAVLIFTEF  | 158 | 95  |
| >TSHR-D633I RMAVLIFTDF | 347  | >TSHR-D633I RMAVLIFTEFI | 368 | 21  |
| >TSHR-D633I RMAVLIFTDF | 520  | >TSHR-D633I RMAVLIFTEF  | 403 | 117 |
| >TSHR-D633I RMAVLIFTDF | 146  | >TSHR-D633I RMAVLIFTEFI | 125 | 21  |
| >TSHR-D633I KRMAVLIFTD | 14   | >TSHR-D633I KRMAVLIFTE  | 8   | 6   |
| >TSHR-D633I KRMAVLIFTD | 902  | >TSHR-D633I KRMAVLIFTE  | 462 | 440 |
| >TSHR-D633I KRMAVLIFTD | 38   | >TSHR-D633I KRMAVLIFTE  | 21  | 17  |
| >TSHR-D633I KRMAVLIFTD | 499  | >TSHR-D633I KRMAVLIFTE  | 479 | 20  |

|                        |       |                        |       |       |
|------------------------|-------|------------------------|-------|-------|
| >TSHR-D633IKRMAVLIFTD  | 45    | >TSHR-D633IKRMAVLIFTE  | 36    | 9     |
| >TSHR-D633IKRMAVLIFTD  | 28    | >TSHR-D633IKRMAVLIFTE  | 12    | 16    |
| >TSHR-D633IDFICMAPI    | 1873  | >TSHR-D633IDFICMAPI    | 453   | 1420  |
| >TSHR-D633IDFICMAPI    | 1779  | >TSHR-D633IDFICMAPI    | 299   | 1480  |
| >TSHR-D633IDFICMAPISF  | 269   | >TSHR-D633IDFICMAPISF  | 431   | 162   |
| >TSHR-D633IDFICMAPISF  | 1214  | >TSHR-D633IDFICMAPISF  | 28    | 1186  |
| >TSHR-D633IDFICMAPISF\ | 19    | >TSHR-D633IDFICMAPISF\ | 41    | 22    |
| >TSHR-D633IDFICMAPISF\ | 149   | >TSHR-D633IDFICMAPISF\ | 256   | 107   |
| >TSHR-D633IDFICMAPISF  | 487   | >TSHR-D633IDFICMAPISF  | 236   | 251   |
| >TSHR-D633IDFICMAPISF\ | 18    | >TSHR-D633IDFICMAPISF\ | 9     | 9     |
| >TSHR-D633IDFICMAPISF\ | 946   | >TSHR-D633IDFICMAPISF\ | 313   | 633   |
| >TSHR-D633IDFICMAPISF\ | 430   | >TSHR-D633IDFICMAPISF\ | 475   | 45    |
| >TSHR-D633IDFICMAPISF\ | 3592  | >TSHR-D633IDFICMAPISF\ | 89    | 3503  |
| >TSHR-D633IDFICMAPISF\ | 2264  | >TSHR-D633IDFICMAPISF\ | 464   | 1800  |
| >TSHR-D633IDFICMAPISF\ | 1502  | >TSHR-D633IDFICMAPISF\ | 410   | 1092  |
| >TSHR-D633IDFICMAPISF\ | 2529  | >TSHR-D633IDFICMAPISF\ | 339   | 2190  |
| >TSHR-D633IDFICMAPISF\ | 1637  | >TSHR-D633IDFICMAPISF\ | 259   | 1378  |
| >TSHR-D633IDFICMAPI    | 2276  | >TSHR-D633IDFICMAPI    | 239   | 2037  |
| >TSHR-D633IDFICMAPI    | 103   | >TSHR-D633IDFICMAPI    | 310   | 207   |
| >TSHR-D633IDFICMAPI    | 127   | >TSHR-D633IDFICMAPI    | 1168  | 1041  |
| >TSHR-D633IDFICMAPISF  | 391   | >TSHR-D633IDFICMAPISF  | 24    | 367   |
| >TSHR-D633IDFICMAPI    | 9398  | >TSHR-D633IDFICMAPI    | 65    | 9333  |
| >TSHR-D633IDFICMAPISF  | 13354 | >TSHR-D633IDFICMAPISF  | 127   | 13227 |
| >TSHR-D633IDFICMAPI    | 65    | >TSHR-D633IDFICMAPI    | 8380  | 8315  |
| >TSHR-D633IDFICMAPISF  | 138   | >TSHR-D633IDFICMAPISF  | 9845  | 9707  |
| >TSHR-D633IDFICMAPI    | 76    | >TSHR-D633IDFICMAPI    | 2593  | 2517  |
| >TSHR-D633IDFICMAPI    | 425   | >TSHR-D633IDFICMAPI    | 8847  | 8422  |
| >TSHR-D633IDFICMAPI    | 27207 | >TSHR-D633IDFICMAPI    | 461   | 26746 |
| >TSHR-D633IDFICMAPI    | 101   | >TSHR-D633IDFICMAPI    | 14387 | 14286 |
| >TSHR-D633IAKRMALVIFT  | 4470  | >TSHR-D633IAKRMALVIFT  | 135   | 4335  |
| >TSHR-D633IFTDFICMA    | 392   | >TSHR-D633IFTDFICMA    | 15143 | 14751 |
| >TSHR-D633IFTDFICMA    | 343   | >TSHR-D633IFTDFICMA    | 1225  | 882   |
| >TSHR-D633IFTDFICMAPI  | 378   | >TSHR-D633IFTDFICMAPI  | 723   | 345   |
| >TSHR-D633IFTDFICMA    | 221   | >TSHR-D633IFTDFICMA    | 220   | 1     |
| >TSHR-D633IFTDFICMAPI  | 333   | >TSHR-D633IFTDFICMAPI  | 295   | 38    |
| >TSHR-D633IFTDFICMA    | 1277  | >TSHR-D633IFTDFICMA    | 149   | 1128  |
| >TSHR-D633IFTDFICMAPI  | 400   | >TSHR-D633IFTDFICMAPI  | 176   | 224   |
| >TSHR-D633IFTDFICMA    | 140   | >TSHR-D633IFTDFICMA    | 511   | 371   |
| >TSHR-D633IFTDFICMAPI  | 83    | >TSHR-D633IFTDFICMAPI  | 125   | 42    |
| >TSHR-D633IFTDFICMA    | 187   | >TSHR-D633IFTDFICMA    | 324   | 137   |
| >TSHR-D633IFTDFICMAPI  | 256   | >TSHR-D633IFTDFICMAPI  | 494   | 238   |
| >TSHR-D633IFTDFICMA    | 194   | >TSHR-D633IFTDFICMA    | 20    | 174   |
| >TSHR-D633IFTDFICMAPI  | 29    | >TSHR-D633IFTDFICMAPI  | 26    | 3     |

|                       |      |                       |     |      |
|-----------------------|------|-----------------------|-----|------|
| >TSHR-D633IFTFDICMA   | 119  | >TSHR-D633IFTFDICMA   | 955 | 836  |
| >TSHR-D633IFTFDICMAPI | 16   | >TSHR-D633IFTFDICMAPI | 89  | 73   |
| >TSHR-D633IFTFDICMAPI | 185  | >TSHR-D633IFTFDICMAPI | 75  | 110  |
| >TSHR-D633IFTFDICMAPI | 412  | >TSHR-D633IFTFDICMAPI | 528 | 116  |
| >TSHR-D633IFTFDICMAPI | 881  | >TSHR-D633IFTFDICMAPI | 294 | 587  |
| >TSHR-D633IFTFDICMAPI | 94   | >TSHR-D633IFTFDICMAPI | 76  | 18   |
| >TSHR-D633IFTFDICMAPI | 365  | >TSHR-D633IFTFDICMAPI | 857 | 492  |
| >TSHR-D633ILFTDFICM   | 2137 | >TSHR-D633ILFTDFICM   | 116 | 2021 |
| >TSHR-D633ILFTDFICM   | 761  | >TSHR-D633ILFTDFICM   | 479 | 282  |
| >TSHR-D633ILFTDFICMA  | 181  | >TSHR-D633ILFTDFICMA  | 300 | 119  |
| >TSHR-D633ILFTDFICMA  | 139  | >TSHR-D633ILFTDFICMA  | 132 | 7    |
| >TSHR-D633ILFTDFICM   | 319  | >TSHR-D633ILFTDFICM   | 289 | 30   |
| >TSHR-D633ILFTDFICMA  | 109  | >TSHR-D633ILFTDFICMA  | 179 | 70   |
| >TSHR-D633ILFTDFICMA  | 72   | >TSHR-D633ILFTDFICMA  | 66  | 6    |
| >TSHR-D633ILFTDFICMA  | 302  | >TSHR-D633ILFTDFICMA  | 744 | 442  |
| >TSHR-D633ILFTDFICMA  | 52   | >TSHR-D633ILFTDFICMA  | 86  | 34   |
| >TSHR-D633ILFTDFICM   | 2868 | >TSHR-D633ILFTDFICM   | 128 | 2740 |
| >TSHR-D633ILFTDFICM   | 785  | >TSHR-D633ILFTDFICM   | 236 | 549  |
| >TSHR-D633ILFTDFICM   | 173  | >TSHR-D633ILFTDFICM   | 99  | 74   |
| >TSHR-D633ILFTDFI     | 68   | >TSHR-D633ILFTDFI     | 40  | 28   |
| >TSHR-D633ILFTDFICM   | 428  | >TSHR-D633ILFTDFICM   | 539 | 111  |
| >TSHR-D633ILFTDFICM/  | 110  | >TSHR-D633ILFTDFICM/  | 153 | 43   |
| >TSHR-D633ILFTDFI     | 29   | >TSHR-D633ILFTDFI     | 22  | 7    |
| >TSHR-D633ILFTDFICM/  | 168  | >TSHR-D633ILFTDFICM/  | 201 | 33   |
| >TSHR-D633ILFTDFI     | 42   | >TSHR-D633ILFTDFI     | 20  | 22   |
| >TSHR-D633ILFTDFICM/  | 62   | >TSHR-D633ILFTDFICM/  | 46  | 16   |
| >TSHR-D633ILFTDFI     | 161  | >TSHR-D633ILFTDFI     | 140 | 21   |
| >TSHR-D633ILFTDFICM/  | 237  | >TSHR-D633ILFTDFICM/  | 379 | 142  |
| >TSHR-D633ILFTDFI     | 13   | >TSHR-D633ILFTDFI     | 5   | 8    |
| >TSHR-D633ILFTDFIC    | 684  | >TSHR-D633ILFTDFIC    | 219 | 465  |
| >TSHR-D633ILFTDFICM   | 677  | >TSHR-D633ILFTDFICM   | 289 | 388  |
| >TSHR-D633ILFTDFICM/  | 19   | >TSHR-D633ILFTDFICM/  | 10  | 9    |
| >TSHR-D633ILFTDFI     | 11   | >TSHR-D633ILFTDFI     | 9   | 2    |
| >TSHR-D633ILFTDFIC    | 195  | >TSHR-D633ILFTDFIC    | 543 | 348  |
| >TSHR-D633ILFTDFICM   | 185  | >TSHR-D633ILFTDFICM   | 405 | 220  |
| >TSHR-D633ILFTDFICM/  | 56   | >TSHR-D633ILFTDFICM/  | 125 | 69   |
| >TSHR-D633ILFTDFI     | 30   | >TSHR-D633ILFTDFI     | 21  | 9    |
| >TSHR-D633ILFTDFICM/  | 38   | >TSHR-D633ILFTDFICM/  | 57  | 19   |
| >TSHR-D633ILFTDFI     | 78   | >TSHR-D633ILFTDFI     | 30  | 48   |
| >TSHR-D633ILFTDFI     | 45   | >TSHR-D633ILFTDFI     | 7   | 38   |
| >TSHR-D633ILFTDFIC    | 381  | >TSHR-D633ILFTDFIC    | 142 | 239  |
| >TSHR-D633ILFTDFICM   | 567  | >TSHR-D633ILFTDFICM   | 411 | 156  |
| >TSHR-D633ILFTDFICM/  | 14   | >TSHR-D633ILFTDFICM/  | 9   | 5    |



|                         |      |                         |     |      |
|-------------------------|------|-------------------------|-----|------|
| >TSHR-D633I VLIFTDFI    | 1908 | >TSHR-D633I VLIFTHFI    | 441 | 1467 |
| >TSHR-D633I VLIFTDFICM  | 894  | >TSHR-D633I VLIFTHFICM  | 460 | 434  |
| >TSHR-D633I VLIFTDFICM  | 1128 | >TSHR-D633I VLIFTHFICM  | 397 | 731  |
| >TSHR-D633I AVLIFTDFI   | 339  | >TSHR-D633I AVLIFTHFI   | 227 | 112  |
| >TSHR-D633I AVLIFTDFI   | 530  | >TSHR-D633I AVLIFTHFI   | 100 | 430  |
| >TSHR-D633I AVLIFTDFI   | 201  | >TSHR-D633I AVLIFTHFI   | 119 | 82   |
| >TSHR-D633I AVLIFTDFI   | 47   | >TSHR-D633I AVLIFTHFI   | 34  | 13   |
| >TSHR-D633I AVLIFTDFI   | 98   | >TSHR-D633I AVLIFTHFI   | 21  | 77   |
| >TSHR-D633I AVLIFTDFI   | 2291 | >TSHR-D633I AVLIFTHFI   | 347 | 1944 |
| >TSHR-D633I AVLIFTDFI   | 264  | >TSHR-D633I AVLIFTHFI   | 70  | 194  |
| >TSHR-D633I AVLIFTDFI   | 2375 | >TSHR-D633I AVLIFTHFI   | 192 | 2183 |
| >TSHR-D633I AVLIFTDFI   | 5314 | >TSHR-D633I AVLIFTHFI   | 109 | 5205 |
| >TSHR-D633I AVLIFTDF    | 865  | >TSHR-D633I AVLIFTHF    | 384 | 481  |
| >TSHR-D633I AVLIFTDFICM | 287  | >TSHR-D633I AVLIFTHFICM | 225 | 62   |
| >TSHR-D633I AVLIFTDFI   | 560  | >TSHR-D633I AVLIFTHFI   | 39  | 521  |
| >TSHR-D633I AVLIFTDF    | 63   | >TSHR-D633I AVLIFTHF    | 147 | 84   |
| >TSHR-D633I AVLIFTDFI   | 238  | >TSHR-D633I AVLIFTHFI   | 132 | 106  |
| >TSHR-D633I AVLIFTDFI   | 552  | >TSHR-D633I AVLIFTHFI   | 233 | 319  |
| >TSHR-D633I AVLIFTDFI   | 189  | >TSHR-D633I AVLIFTHFI   | 14  | 175  |
| >TSHR-D633I AVLIFTDF    | 3048 | >TSHR-D633I AVLIFTHF    | 472 | 2576 |
| >TSHR-D633I AVLIFTDF    | 213  | >TSHR-D633I AVLIFTHF    | 131 | 82   |
| >TSHR-D633I AVLIFTDF    | 424  | >TSHR-D633I AVLIFTHF    | 113 | 311  |
| >TSHR-D633I AVLIFTDFI   | 1096 | >TSHR-D633I AVLIFTHFI   | 230 | 866  |
| >TSHR-D633I AVLIFTDFICM | 1181 | >TSHR-D633I AVLIFTHFICM | 446 | 735  |
| >TSHR-D633I AVLIFTDFI   | 226  | >TSHR-D633I AVLIFTHFI   | 319 | 93   |
| >TSHR-D633I MAVLIFTDF   | 1288 | >TSHR-D633I MAVLIFTHF   | 179 | 1109 |
| >TSHR-D633I MAVLIFTDFI  | 190  | >TSHR-D633I MAVLIFTHFI  | 195 | 5    |
| >TSHR-D633I MAVLIFTDFI  | 539  | >TSHR-D633I MAVLIFTHFI  | 465 | 74   |
| >TSHR-D633I MAVLIFTDFI  | 153  | >TSHR-D633I MAVLIFTHFI  | 168 | 15   |
| >TSHR-D633I MAVLIFTDF   | 591  | >TSHR-D633I MAVLIFTHF   | 184 | 407  |
| >TSHR-D633I MAVLIFTD    | 5517 | >TSHR-D633I MAVLIFTH    | 301 | 5216 |
| >TSHR-D633I MAVLIFTDFI  | 76   | >TSHR-D633I MAVLIFTHFI  | 52  | 24   |
| >TSHR-D633I MAVLIFTDFI  | 304  | >TSHR-D633I MAVLIFTHFI  | 52  | 252  |
| >TSHR-D633I MAVLIFTDF   | 1622 | >TSHR-D633I MAVLIFTHF   | 144 | 1478 |
| >TSHR-D633I MAVLIFTDF   | 57   | >TSHR-D633I MAVLIFTHF   | 41  | 16   |
| >TSHR-D633I MAVLIFTDF   | 85   | >TSHR-D633I MAVLIFTHF   | 32  | 53   |
| >TSHR-D633I MAVLIFTD    | 3579 | >TSHR-D633I MAVLIFTH    | 93  | 3486 |
| >TSHR-D633I MAVLIFTDF   | 48   | >TSHR-D633I MAVLIFTHF   | 57  | 9    |
| >TSHR-D633I MAVLIFTDF   | 151  | >TSHR-D633I MAVLIFTHF   | 109 | 42   |
| >TSHR-D633I MAVLIFTDF   | 903  | >TSHR-D633I MAVLIFTHF   | 43  | 860  |
| >TSHR-D633I MAVLIFTDFI  | 1122 | >TSHR-D633I MAVLIFTHFI  | 158 | 964  |
| >TSHR-D633I MAVLIFTDFI  | 1140 | >TSHR-D633I MAVLIFTHFI  | 288 | 852  |
| >TSHR-D633I MAVLIFTDF   | 406  | >TSHR-D633I MAVLIFTHF   | 227 | 179  |

|                      |       |                       |     |       |
|----------------------|-------|-----------------------|-----|-------|
| >TSHR-D633IRMAVLIFDF | 587   | >TSHR-D633IRMAVLIFTHF | 459 | 128   |
| >TSHR-D633IRMAVLIFDF | 30    | >TSHR-D633IRMAVLIFTHF | 15  | 15    |
| >TSHR-D633IRMAVLIFDF | 5     | >TSHR-D633IRMAVLIFTHF | 5   | 0     |
| >TSHR-D633IRMAVLIFDF | 15    | >TSHR-D633IRMAVLIFTHF | 9   | 6     |
| >TSHR-D633IRMAVLIFDF | 53    | >TSHR-D633IRMAVLIFTHF | 41  | 12    |
| >TSHR-D633IRMAVLIFDF | 8     | >TSHR-D633IRMAVLIFTHF | 4   | 4     |
| >TSHR-D633IRMAVLIFDF | 25    | >TSHR-D633IRMAVLIFTHF | 11  | 14    |
| >TSHR-D633IRMAVLIFDF | 16    | >TSHR-D633IRMAVLIFTHF | 9   | 7     |
| >TSHR-D633IRMAVLIFDF | 19    | >TSHR-D633IRMAVLIFTHF | 7   | 12    |
| >TSHR-D633IRMAVLIFDF | 89    | >TSHR-D633IRMAVLIFTHF | 10  | 79    |
| >TSHR-D633IRMAVLIFD  | 14567 | >TSHR-D633IRMAVLIFTH  | 240 | 14327 |
| >TSHR-D633IRMAVLIFDF | 1224  | >TSHR-D633IRMAVLIFTHF | 390 | 834   |
| >TSHR-D633IRMAVLIFDF | 653   | >TSHR-D633IRMAVLIFTHF | 233 | 420   |
| >TSHR-D633IRMAVLIFDF | 185   | >TSHR-D633IRMAVLIFTHF | 88  | 97    |
| >TSHR-D633IRMAVLIFDF | 1070  | >TSHR-D633IRMAVLIFTHF | 480 | 590   |
| >TSHR-D633IRMAVLIFDF | 1533  | >TSHR-D633IRMAVLIFTHF | 300 | 1233  |
| >TSHR-D633IRMAVLIFDF | 1775  | >TSHR-D633IRMAVLIFTHF | 379 | 1396  |
| >TSHR-D633IRMAVLIFD  | 1191  | >TSHR-D633IRMAVLIFTH  | 47  | 1144  |
| >TSHR-D633IRMAVLIFDF | 1610  | >TSHR-D633IRMAVLIFTHF | 362 | 1248  |
| >TSHR-D633IRMAVLIFD  | 1106  | >TSHR-D633IRMAVLIFTH  | 385 | 721   |
| >TSHR-D633IRMAVLIFDF | 22    | >TSHR-D633IRMAVLIFTHF | 54  | 32    |
| >TSHR-D633IRMAVLIFDF | 69    | >TSHR-D633IRMAVLIFTHF | 49  | 20    |
| >TSHR-D633IRMAVLIFDF | 45    | >TSHR-D633IRMAVLIFTHF | 23  | 22    |
| >TSHR-D633IRMAVLIFDF | 8     | >TSHR-D633IRMAVLIFTHF | 6   | 2     |
| >TSHR-D633IRMAVLIFDF | 498   | >TSHR-D633IRMAVLIFTHF | 250 | 248   |
| >TSHR-D633IRMAVLIFDF | 337   | >TSHR-D633IRMAVLIFTHF | 144 | 193   |
| >TSHR-D633IRMAVLIFD  | 8430  | >TSHR-D633IRMAVLIFTH  | 468 | 7962  |
| >TSHR-D633IRMAVLIFDF | 106   | >TSHR-D633IRMAVLIFTHF | 19  | 87    |
| >TSHR-D633IRMAVLIFDF | 97    | >TSHR-D633IRMAVLIFTHF | 32  | 65    |
| >TSHR-D633IRMAVLIFDF | 253   | >TSHR-D633IRMAVLIFTHF | 378 | 125   |
| >TSHR-D633IRMAVLIFDF | 347   | >TSHR-D633IRMAVLIFTHF | 490 | 143   |
| >TSHR-D633IRMAVLIFDF | 520   | >TSHR-D633IRMAVLIFTHF | 368 | 152   |
| >TSHR-D633IRMAVLIFDF | 146   | >TSHR-D633IRMAVLIFTHF | 169 | 23    |
| >TSHR-D633IKRMAVLIFD | 14    | >TSHR-D633IKRMAVLIFTH | 10  | 4     |
| >TSHR-D633IKRMAVLIFD | 902   | >TSHR-D633IKRMAVLIFTH | 110 | 792   |
| >TSHR-D633IKRMAVLIFD | 38    | >TSHR-D633IKRMAVLIFTH | 17  | 21    |
| >TSHR-D633IKRMAVLIFD | 499   | >TSHR-D633IKRMAVLIFTH | 436 | 63    |
| >TSHR-D633IKRMAVLIFD | 45    | >TSHR-D633IKRMAVLIFTH | 47  | 2     |
| >TSHR-D633IKRMAVLIFD | 28    | >TSHR-D633IKRMAVLIFTH | 13  | 15    |
| >TSHR-D633`DFICMAPI  | 1873  | >TSHR-D633`YFICMAPI   | 292 | 1581  |
| >TSHR-D633`DFICMAPI  | 13759 | >TSHR-D633`YFICMAPI   | 324 | 13435 |
| >TSHR-D633`DFICMAPI  | 19006 | >TSHR-D633`YFICMAPI   | 341 | 18665 |
| >TSHR-D633`DFICMAPI  | 1779  | >TSHR-D633`YFICMAPI   | 76  | 1703  |

|                        |       |                        |       |       |
|------------------------|-------|------------------------|-------|-------|
| >TSHR-D633\DFICMAPISF  | 269   | >TSHR-D633\YFICMAPISF  | 73    | 196   |
| >TSHR-D633\DFICMAPI    | 2733  | >TSHR-D633\YFICMAPI    | 364   | 2369  |
| >TSHR-D633\DFICMAPISF  | 686   | >TSHR-D633\YFICMAPISF  | 153   | 533   |
| >TSHR-D633\DFICMAPI    | 11496 | >TSHR-D633\YFICMAPI    | 206   | 11290 |
| >TSHR-D633\DFICMAPISF  | 1214  | >TSHR-D633\YFICMAPISF  | 10    | 1204  |
| >TSHR-D633\DFICMAPISF\ | 19    | >TSHR-D633\YFICMAPISFY | 20    | 1     |
| >TSHR-D633\DFICMAPISF\ | 149   | >TSHR-D633\YFICMAPISFY | 1024  | 875   |
| >TSHR-D633\DFICMAPISF  | 487   | >TSHR-D633\YFICMAPISF  | 104   | 383   |
| >TSHR-D633\DFICMAPISF\ | 18    | >TSHR-D633\YFICMAPISFY | 5     | 13    |
| >TSHR-D633\DFICMAPISF\ | 430   | >TSHR-D633\YFICMAPISFY | 366   | 64    |
| >TSHR-D633\DFICMAPISF\ | 3592  | >TSHR-D633\YFICMAPISFY | 43    | 3549  |
| >TSHR-D633\DFICMAPISF  | 11929 | >TSHR-D633\YFICMAPISF  | 308   | 11621 |
| >TSHR-D633\DFICMAPISF\ | 11991 | >TSHR-D633\YFICMAPISFY | 343   | 11648 |
| >TSHR-D633\DFICMAPISF\ | 2264  | >TSHR-D633\YFICMAPISFY | 210   | 2054  |
| >TSHR-D633\DFICMAPISF  | 3616  | >TSHR-D633\YFICMAPISF  | 113   | 3503  |
| >TSHR-D633\DFICMAPISF\ | 1502  | >TSHR-D633\YFICMAPISFY | 207   | 1295  |
| >TSHR-D633\DFICMAPISF  | 4287  | >TSHR-D633\YFICMAPISF  | 234   | 4053  |
| >TSHR-D633\DFICMAPISF\ | 2529  | >TSHR-D633\YFICMAPISFY | 47    | 2482  |
| >TSHR-D633\DFICMAPISF\ | 1637  | >TSHR-D633\YFICMAPISFY | 481   | 1156  |
| >TSHR-D633\TDFICMAPI   | 2276  | >TSHR-D633\TYFICMAPI   | 158   | 2118  |
| >TSHR-D633\TDFICMAPI   | 28476 | >TSHR-D633\TYFICMAPI   | 51    | 28425 |
| >TSHR-D633\TDFICMAPI   | 103   | >TSHR-D633\TYFICMAPI   | 740   | 637   |
| >TSHR-D633\TDFICMAPI   | 17372 | >TSHR-D633\TYFICMAPI   | 79    | 17293 |
| >TSHR-D633\TDFICMAPISF | 6649  | >TSHR-D633\TYFICMAPISF | 18    | 6631  |
| >TSHR-D633\TDFICMAPI   | 25198 | >TSHR-D633\TYFICMAPI   | 247   | 24951 |
| >TSHR-D633\TDFICMAPISF | 17646 | >TSHR-D633\TYFICMAPISF | 105   | 17541 |
| >TSHR-D633\TDFICMAPI   | 24408 | >TSHR-D633\TYFICMAPI   | 70    | 24338 |
| >TSHR-D633\TDFICMAPISF | 20443 | >TSHR-D633\TYFICMAPISF | 9     | 20434 |
| >TSHR-D633\TDFICMAPI   | 127   | >TSHR-D633\TYFICMAPI   | 76    | 51    |
| >TSHR-D633\TDFICMAPISF | 391   | >TSHR-D633\TYFICMAPISF | 191   | 200   |
| >TSHR-D633\TDFICMAPI   | 65    | >TSHR-D633\TYFICMAPI   | 17456 | 17391 |
| >TSHR-D633\TDFICMAPISF | 138   | >TSHR-D633\TYFICMAPISF | 17861 | 17723 |
| >TSHR-D633\TDFICMAPI   | 76    | >TSHR-D633\TYFICMAPI   | 9364  | 9288  |
| >TSHR-D633\TDFICMAPI   | 425   | >TSHR-D633\TYFICMAPI   | 9446  | 9021  |
| >TSHR-D633\TDFICMAPI   | 101   | >TSHR-D633\TYFICMAPI   | 19460 | 19359 |
| >TSHR-D633\AKRMAVLIFT  | 4470  | >TSHR-D633\AKRMAVLIFT  | 5     | 4465  |
| >TSHR-D633\FTDFICMAPI  | 3400  | >TSHR-D633\FTYFICMAPI  | 243   | 3157  |
| >TSHR-D633\FTDFICMA    | 392   | >TSHR-D633\FTYFICMA    | 15435 | 15043 |
| >TSHR-D633\FTDFICMA    | 343   | >TSHR-D633\FTYFICMA    | 102   | 241   |
| >TSHR-D633\FTDFICMAPI  | 378   | >TSHR-D633\FTYFICMAPI  | 129   | 249   |
| >TSHR-D633\FTDFICMA    | 221   | >TSHR-D633\FTYFICMA    | 55    | 166   |
| >TSHR-D633\FTDFICMAPI  | 333   | >TSHR-D633\FTYFICMAPI  | 72    | 261   |
| >TSHR-D633\FTDFICMA    | 1277  | >TSHR-D633\FTYFICMA    | 30    | 1247  |

|                        |       |                        |     |       |
|------------------------|-------|------------------------|-----|-------|
| >TSHR-D633\FTDFICMAPI  | 400   | >TSHR-D633\FTYFICMAPI  | 56  | 344   |
| >TSHR-D633\FTDFICMA    | 140   | >TSHR-D633\FTYFICMA    | 56  | 84    |
| >TSHR-D633\FTDFICMAPI  | 83    | >TSHR-D633\FTYFICMAPI  | 43  | 40    |
| >TSHR-D633\FTDFICMA    | 187   | >TSHR-D633\FTYFICMA    | 42  | 145   |
| >TSHR-D633\FTDFICMAPI  | 256   | >TSHR-D633\FTYFICMAPI  | 42  | 214   |
| >TSHR-D633\FTDFICMAPI  | 654   | >TSHR-D633\FTYFICMAPI  | 317 | 337   |
| >TSHR-D633\FTDFICMA    | 767   | >TSHR-D633\FTYFICMA    | 243 | 524   |
| >TSHR-D633\FTDFICMAPI  | 1296  | >TSHR-D633\FTYFICMAPI  | 115 | 1181  |
| >TSHR-D633\FTDFICMA    | 7660  | >TSHR-D633\FTYFICMA    | 368 | 7292  |
| >TSHR-D633\FTDFICMAPI  | 8585  | >TSHR-D633\FTYFICMAPIS | 450 | 8135  |
| >TSHR-D633\FTDFICMA    | 194   | >TSHR-D633\FTYFICMA    | 16  | 178   |
| >TSHR-D633\FTDFICMAPI  | 29    | >TSHR-D633\FTYFICMAPI  | 9   | 20    |
| >TSHR-D633\FTDFICMA    | 119   | >TSHR-D633\FTYFICMA    | 48  | 71    |
| >TSHR-D633\FTDFICMAPI  | 16    | >TSHR-D633\FTYFICMAPI  | 9   | 7     |
| >TSHR-D633\FTDFICMAPI  | 12808 | >TSHR-D633\FTYFICMAPI  | 343 | 12465 |
| >TSHR-D633\FTDFICMAPI  | 185   | >TSHR-D633\FTYFICMAPI  | 18  | 167   |
| >TSHR-D633\FTDFICMAPI  | 412   | >TSHR-D633\FTYFICMAPI  | 212 | 200   |
| >TSHR-D633\FTDFICMAPI  | 881   | >TSHR-D633\FTYFICMAPI  | 136 | 745   |
| >TSHR-D633\FTDFICMAPI  | 2544  | >TSHR-D633\FTYFICMAPIS | 334 | 2210  |
| >TSHR-D633\FTDFICMAPI  | 94    | >TSHR-D633\FTYFICMAPI  | 47  | 47    |
| >TSHR-D633\IFTDFICMAPI | 365   | >TSHR-D633\IFTYFICMAPI | 801 | 436   |
| >TSHR-D633\LIFTDFIC    | 15875 | >TSHR-D633\LIFTYFIC    | 334 | 15541 |
| >TSHR-D633\LIFTDFICM   | 2137  | >TSHR-D633\LIFTYFICM   | 82  | 2055  |
| >TSHR-D633\LIFTDFICM   | 761   | >TSHR-D633\LIFTYFICM   | 128 | 633   |
| >TSHR-D633\LIFTDFICMA  | 181   | >TSHR-D633\LIFTYFICMA  | 213 | 32    |
| >TSHR-D633\LIFTDFICMA  | 139   | >TSHR-D633\LIFTYFICMA  | 115 | 24    |
| >TSHR-D633\LIFTDFICM   | 319   | >TSHR-D633\LIFTYFICM   | 245 | 74    |
| >TSHR-D633\LIFTDFICMA  | 109   | >TSHR-D633\LIFTYFICMA  | 143 | 34    |
| >TSHR-D633\LIFTDFICMA  | 72    | >TSHR-D633\LIFTYFICMA  | 37  | 35    |
| >TSHR-D633\LIFTDFICMA  | 302   | >TSHR-D633\LIFTYFICMA  | 445 | 143   |
| >TSHR-D633\LIFTDFICMA  | 52    | >TSHR-D633\LIFTYFICMA  | 58  | 6     |
| >TSHR-D633\LIFTDFICM   | 2868  | >TSHR-D633\LIFTYFICM   | 361 | 2507  |
| >TSHR-D633\LIFTDFICM   | 785   | >TSHR-D633\LIFTYFICM   | 302 | 483   |
| >TSHR-D633\LIFTDFICM   | 173   | >TSHR-D633\LIFTYFICM   | 42  | 131   |
| >TSHR-D633\VLIFTDFI    | 68    | >TSHR-D633\VLIFTYFI    | 22  | 46    |
| >TSHR-D633\VLIFTDFICM  | 428   | >TSHR-D633\VLIFTYFICM  | 289 | 139   |
| >TSHR-D633\VLIFTDFICMA | 110   | >TSHR-D633\VLIFTYFICMA | 88  | 22    |
| >TSHR-D633\VLIFTDFI    | 29    | >TSHR-D633\VLIFTYFI    | 15  | 14    |
| >TSHR-D633\VLIFTDFICM  | 795   | >TSHR-D633\VLIFTYFICM  | 398 | 397   |
| >TSHR-D633\VLIFTDFICMA | 168   | >TSHR-D633\VLIFTYFICMA | 146 | 22    |
| >TSHR-D633\VLIFTDFI    | 42    | >TSHR-D633\VLIFTYFI    | 19  | 23    |
| >TSHR-D633\VLIFTDFICMA | 62    | >TSHR-D633\VLIFTYFICMA | 31  | 31    |
| >TSHR-D633\VLIFTDFI    | 161   | >TSHR-D633\VLIFTYFI    | 118 | 43    |

|                        |      |                        |     |      |
|------------------------|------|------------------------|-----|------|
| >TSHR-D633\VLIFTDFICM/ | 237  | >TSHR-D633\VLIFTYFICMA | 316 | 79   |
| >TSHR-D633\VLIFTDFI    | 13   | >TSHR-D633\VLIFTYFI    | 5   | 8    |
| >TSHR-D633\VLIFTDFIC   | 684  | >TSHR-D633\VLIFTYFIC   | 219 | 465  |
| >TSHR-D633\VLIFTDFICM  | 677  | >TSHR-D633\VLIFTYFICM  | 205 | 472  |
| >TSHR-D633\VLIFTDFICM/ | 19   | >TSHR-D633\VLIFTYFICMA | 11  | 8    |
| >TSHR-D633\VLIFTDFI    | 11   | >TSHR-D633\VLIFTYFI    | 6   | 5    |
| >TSHR-D633\VLIFTDFIC   | 195  | >TSHR-D633\VLIFTYFIC   | 243 | 48   |
| >TSHR-D633\VLIFTDFICM  | 185  | >TSHR-D633\VLIFTYFICM  | 225 | 40   |
| >TSHR-D633\VLIFTDFICM/ | 56   | >TSHR-D633\VLIFTYFICMA | 89  | 33   |
| >TSHR-D633\VLIFTDFI    | 30   | >TSHR-D633\VLIFTYFI    | 20  | 10   |
| >TSHR-D633\VLIFTDFICM/ | 38   | >TSHR-D633\VLIFTYFICMA | 46  | 8    |
| >TSHR-D633\VLIFTDFI    | 78   | >TSHR-D633\VLIFTYFI    | 22  | 56   |
| >TSHR-D633\VLIFTDFI    | 45   | >TSHR-D633\VLIFTYFI    | 13  | 32   |
| >TSHR-D633\VLIFTDFIC   | 381  | >TSHR-D633\VLIFTYFIC   | 129 | 252  |
| >TSHR-D633\VLIFTDFICM  | 567  | >TSHR-D633\VLIFTYFICM  | 291 | 276  |
| >TSHR-D633\VLIFTDFICM/ | 14   | >TSHR-D633\VLIFTYFICMA | 10  | 4    |
| >TSHR-D633\VLIFTDFI    | 1908 | >TSHR-D633\VLIFTYFI    | 219 | 1689 |
| >TSHR-D633\VLIFTDFI    | 1763 | >TSHR-D633\VLIFTYFI    | 498 | 1265 |
| >TSHR-D633\VLIFTDFI    | 1458 | >TSHR-D633\VLIFTYFI    | 492 | 966  |
| >TSHR-D633\VLIFTDFICM  | 1128 | >TSHR-D633\VLIFTYFICM  | 253 | 875  |
| >TSHR-D633\AVLIFTDFICM | 1195 | >TSHR-D633\AVLIFTYFICM | 481 | 714  |
| >TSHR-D633\AVLIFTDFI   | 339  | >TSHR-D633\AVLIFTYFI   | 386 | 47   |
| >TSHR-D633\AVLIFTDFI   | 530  | >TSHR-D633\AVLIFTYFI   | 43  | 487  |
| >TSHR-D633\AVLIFTDFI   | 201  | >TSHR-D633\AVLIFTYFI   | 61  | 140  |
| >TSHR-D633\AVLIFTDF    | 2120 | >TSHR-D633\AVLIFTYF    | 404 | 1716 |
| >TSHR-D633\AVLIFTDFI   | 47   | >TSHR-D633\AVLIFTYFI   | 41  | 6    |
| >TSHR-D633\AVLIFTDFI   | 98   | >TSHR-D633\AVLIFTYFI   | 19  | 79   |
| >TSHR-D633\AVLIFTDFI   | 2291 | >TSHR-D633\AVLIFTYFI   | 176 | 2115 |
| >TSHR-D633\AVLIFTDFI   | 264  | >TSHR-D633\AVLIFTYFI   | 99  | 165  |
| >TSHR-D633\AVLIFTDFI   | 2375 | >TSHR-D633\AVLIFTYFI   | 172 | 2203 |
| >TSHR-D633\AVLIFTDF    | 865  | >TSHR-D633\AVLIFTYF    | 225 | 640  |
| >TSHR-D633\AVLIFTDFICM | 287  | >TSHR-D633\AVLIFTYFICM | 409 | 122  |
| >TSHR-D633\AVLIFTDF    | 2707 | >TSHR-D633\AVLIFTYF    | 465 | 2242 |
| >TSHR-D633\AVLIFTDFI   | 560  | >TSHR-D633\AVLIFTYFI   | 53  | 507  |
| >TSHR-D633\AVLIFTDF    | 63   | >TSHR-D633\AVLIFTYF    | 142 | 79   |
| >TSHR-D633\AVLIFTDFI   | 238  | >TSHR-D633\AVLIFTYFI   | 32  | 206  |
| >TSHR-D633\AVLIFTDFI   | 552  | >TSHR-D633\AVLIFTYFI   | 98  | 454  |
| >TSHR-D633\AVLIFTDFI   | 189  | >TSHR-D633\AVLIFTYFI   | 35  | 154  |
| >TSHR-D633\AVLIFTDF    | 213  | >TSHR-D633\AVLIFTYF    | 115 | 98   |
| >TSHR-D633\AVLIFTDF    | 424  | >TSHR-D633\AVLIFTYF    | 107 | 317  |
| >TSHR-D633\AVLIFTDFI   | 1096 | >TSHR-D633\AVLIFTYFI   | 232 | 864  |
| >TSHR-D633\AVLIFTDFI   | 226  | >TSHR-D633\AVLIFTYFI   | 267 | 41   |
| >TSHR-D633\MAVLIFTDF   | 1288 | >TSHR-D633\MAVLIFTYF   | 345 | 943  |

|                        |       |                        |     |       |
|------------------------|-------|------------------------|-----|-------|
| >TSHR-D633\MAVLIFTDFI  | 190   | >TSHR-D633\MAVLIFTYFI  | 233 | 43    |
| >TSHR-D633\MAVLIFTDFI  | 1462  | >TSHR-D633\MAVLIFTYFI  | 313 | 1149  |
| >TSHR-D633\MAVLIFTDFI  | 539   | >TSHR-D633\MAVLIFTYFI  | 222 | 317   |
| >TSHR-D633\MAVLIFTDF   | 2217  | >TSHR-D633\MAVLIFTYF   | 332 | 1885  |
| >TSHR-D633\MAVLIFTDFI  | 153   | >TSHR-D633\MAVLIFTYFI  | 79  | 74    |
| >TSHR-D633\MAVLIFTDF   | 591   | >TSHR-D633\MAVLIFTYF   | 461 | 130   |
| >TSHR-D633\MAVLIFTD    | 21655 | >TSHR-D633\MAVLIFTY    | 29  | 21626 |
| >TSHR-D633\MAVLIFTD    | 32292 | >TSHR-D633\MAVLIFTY    | 253 | 32039 |
| >TSHR-D633\MAVLIFTD    | 5517  | >TSHR-D633\MAVLIFTY    | 42  | 5475  |
| >TSHR-D633\MAVLIFTDF   | 3386  | >TSHR-D633\MAVLIFTYF   | 303 | 3083  |
| >TSHR-D633\MAVLIFTDF   | 3847  | >TSHR-D633\MAVLIFTYF   | 392 | 3455  |
| >TSHR-D633\MAVLIFTDFI  | 76    | >TSHR-D633\MAVLIFTYFI  | 54  | 22    |
| >TSHR-D633\MAVLIFTDFI  | 304   | >TSHR-D633\MAVLIFTYFI  | 65  | 239   |
| >TSHR-D633\MAVLIFTD    | 20841 | >TSHR-D633\MAVLIFTY    | 457 | 20384 |
| >TSHR-D633\MAVLIFTD    | 26026 | >TSHR-D633\MAVLIFTY    | 289 | 25737 |
| >TSHR-D633\MAVLIFTDF   | 57    | >TSHR-D633\MAVLIFTYF   | 38  | 19    |
| >TSHR-D633\MAVLIFTD    | 13350 | >TSHR-D633\MAVLIFTY    | 9   | 13341 |
| >TSHR-D633\MAVLIFTDF   | 85    | >TSHR-D633\MAVLIFTYF   | 25  | 60    |
| >TSHR-D633\MAVLIFTD    | 3579  | >TSHR-D633\MAVLIFTY    | 10  | 3569  |
| >TSHR-D633\MAVLIFTDF   | 48    | >TSHR-D633\MAVLIFTYF   | 42  | 6     |
| >TSHR-D633\MAVLIFTD    | 12235 | >TSHR-D633\MAVLIFTY    | 36  | 12199 |
| >TSHR-D633\MAVLIFTDF   | 151   | >TSHR-D633\MAVLIFTYF   | 80  | 71    |
| >TSHR-D633\MAVLIFTDFIC | 880   | >TSHR-D633\MAVLIFTYFIC | 369 | 511   |
| >TSHR-D633\MAVLIFTD    | 14313 | >TSHR-D633\MAVLIFTY    | 74  | 14239 |
| >TSHR-D633\MAVLIFTDF   | 903   | >TSHR-D633\MAVLIFTYF   | 33  | 870   |
| >TSHR-D633\MAVLIFTDFI  | 1122  | >TSHR-D633\MAVLIFTYFI  | 246 | 876   |
| >TSHR-D633\MAVLIFTDF   | 2600  | >TSHR-D633\MAVLIFTYF   | 306 | 2294  |
| >TSHR-D633\MAVLIFTDFI  | 1140  | >TSHR-D633\MAVLIFTYFI  | 211 | 929   |
| >TSHR-D633\MAVLIFTDF   | 406   | >TSHR-D633\MAVLIFTYF   | 62  | 344   |
| >TSHR-D633\MAVLIFTD    | 30980 | >TSHR-D633\MAVLIFTY    | 74  | 30906 |
| >TSHR-D633\MAVLIFTD    | 14907 | >TSHR-D633\MAVLIFTY    | 280 | 14627 |
| >TSHR-D633\MAVLIFTDF   | 1259  | >TSHR-D633\MAVLIFTYF   | 337 | 922   |
| >TSHR-D633\RMAVLIFTDF  | 3210  | >TSHR-D633\RMAVLIFTYF  | 461 | 2749  |
| >TSHR-D633\RMAVLIFTDF  | 30    | >TSHR-D633\RMAVLIFTYFI | 11  | 19    |
| >TSHR-D633\RMAVLIFTDF  | 5     | >TSHR-D633\RMAVLIFTYFI | 4   | 1     |
| >TSHR-D633\RMAVLIFTDF  | 15    | >TSHR-D633\RMAVLIFTYFI | 11  | 4     |
| >TSHR-D633\RMAVLIFTDF  | 53    | >TSHR-D633\RMAVLIFTYFI | 46  | 7     |
| >TSHR-D633\RMAVLIFTDF  | 4546  | >TSHR-D633\RMAVLIFTYF  | 288 | 4258  |
| >TSHR-D633\RMAVLIFTDF  | 8     | >TSHR-D633\RMAVLIFTYFI | 4   | 4     |
| >TSHR-D633\RMAVLIFTDF  | 25    | >TSHR-D633\RMAVLIFTYFI | 8   | 17    |
| >TSHR-D633\RMAVLIFTDF  | 16    | >TSHR-D633\RMAVLIFTYFI | 11  | 5     |
| >TSHR-D633\RMAVLIFTDF  | 19    | >TSHR-D633\RMAVLIFTYFI | 7   | 12    |
| >TSHR-D633\RMAVLIFTDF  | 89    | >TSHR-D633\RMAVLIFTYFI | 25  | 64    |

|                        |       |                        |     |       |
|------------------------|-------|------------------------|-----|-------|
| >TSHR-D633`RMAVLIFTD   | 14567 | >TSHR-D633`RMAVLIFTY   | 74  | 14493 |
| >TSHR-D633`RMAVLIFTD   | 16463 | >TSHR-D633`RMAVLIFTY   | 118 | 16345 |
| >TSHR-D633`RMAVLIFTDf  | 1224  | >TSHR-D633`RMAVLIFTYf  | 380 | 844   |
| >TSHR-D633`RMAVLIFTDf  | 653   | >TSHR-D633`RMAVLIFTYf  | 199 | 454   |
| >TSHR-D633`RMAVLIFTDf  | 185   | >TSHR-D633`RMAVLIFTYf  | 53  | 132   |
| >TSHR-D633`RMAVLIFTD   | 19620 | >TSHR-D633`RMAVLIFTY   | 14  | 19606 |
| >TSHR-D633`RMAVLIFTDf  | 1070  | >TSHR-D633`RMAVLIFTYf  | 164 | 906   |
| >TSHR-D633`RMAVLIFTDf  | 1533  | >TSHR-D633`RMAVLIFTYf  | 369 | 1164  |
| >TSHR-D633`RMAVLIFTD   | 10917 | >TSHR-D633`RMAVLIFTY   | 8   | 10909 |
| >TSHR-D633`RMAVLIFTD   | 1191  | >TSHR-D633`RMAVLIFTY   | 101 | 1090  |
| >TSHR-D633`RMAVLIFTDf  | 1610  | >TSHR-D633`RMAVLIFTYf  | 195 | 1415  |
| >TSHR-D633`RMAVLIFTD   | 1106  | >TSHR-D633`RMAVLIFTY   | 32  | 1074  |
| >TSHR-D633`RMAVLIFTDf  | 22    | >TSHR-D633`RMAVLIFTYf  | 55  | 33    |
| >TSHR-D633`RMAVLIFTDf  | 69    | >TSHR-D633`RMAVLIFTYf  | 22  | 47    |
| >TSHR-D633`RMAVLIFTD   | 21298 | >TSHR-D633`RMAVLIFTY   | 10  | 21288 |
| >TSHR-D633`RMAVLIFTD   | 10294 | >TSHR-D633`RMAVLIFTY   | 45  | 10249 |
| >TSHR-D633`RMAVLIFTDf  | 45    | >TSHR-D633`RMAVLIFTYf  | 30  | 15    |
| >TSHR-D633`RMAVLIFTD   | 12677 | >TSHR-D633`RMAVLIFTY   | 18  | 12659 |
| >TSHR-D633`RMAVLIFTDf  | 8     | >TSHR-D633`RMAVLIFTYf  | 6   | 2     |
| >TSHR-D633`RMAVLIFTDf  | 498   | >TSHR-D633`RMAVLIFTYf  | 190 | 308   |
| >TSHR-D633`RMAVLIFTD   | 15571 | >TSHR-D633`RMAVLIFTY   | 20  | 15551 |
| >TSHR-D633`RMAVLIFTDf  | 337   | >TSHR-D633`RMAVLIFTYf  | 123 | 214   |
| >TSHR-D633`RMAVLIFTD   | 23425 | >TSHR-D633`RMAVLIFTY   | 344 | 23081 |
| >TSHR-D633`RMAVLIFTD   | 8430  | >TSHR-D633`RMAVLIFTY   | 16  | 8414  |
| >TSHR-D633`RMAVLIFTDf  | 106   | >TSHR-D633`RMAVLIFTYf  | 16  | 90    |
| >TSHR-D633`RMAVLIFTDf  | 97    | >TSHR-D633`RMAVLIFTYf  | 40  | 57    |
| >TSHR-D633`RMAVLIFTDf  | 253   | >TSHR-D633`RMAVLIFTYf  | 82  | 171   |
| >TSHR-D633`RMAVLIFTDf  | 347   | >TSHR-D633`RMAVLIFTYf  | 411 | 64    |
| >TSHR-D633`RMAVLIFTD   | 28018 | >TSHR-D633`RMAVLIFTY   | 64  | 27954 |
| >TSHR-D633`RMAVLIFTD   | 29783 | >TSHR-D633`RMAVLIFTY   | 48  | 29735 |
| >TSHR-D633`RMAVLIFTDf  | 520   | >TSHR-D633`RMAVLIFTYf  | 202 | 318   |
| >TSHR-D633`RMAVLIFTDf  | 146   | >TSHR-D633`RMAVLIFTYf  | 141 | 5     |
| >TSHR-D633`KRM AVLIFTD | 31635 | >TSHR-D633`KRM AVLIFTY | 432 | 31203 |
| >TSHR-D633`KRM AVLIFTD | 25796 | >TSHR-D633`KRM AVLIFTY | 58  | 25738 |
| >TSHR-D633`KRM AVLIFTD | 12297 | >TSHR-D633`KRM AVLIFTY | 32  | 12265 |
| >TSHR-D633`KRM AVLIFTD | 14    | >TSHR-D633`KRM AVLIFTY | 9   | 5     |
| >TSHR-D633`KRM AVLIFTD | 902   | >TSHR-D633`KRM AVLIFTY | 15  | 887   |
| >TSHR-D633`KRM AVLIFTD | 38    | >TSHR-D633`KRM AVLIFTY | 22  | 16    |
| >TSHR-D633`KRM AVLIFTD | 499   | >TSHR-D633`KRM AVLIFTY | 487 | 12    |
| >TSHR-D633`KRM AVLIFTD | 45    | >TSHR-D633`KRM AVLIFTY | 42  | 3     |
| >TSHR-D633`KRM AVLIFTD | 28    | >TSHR-D633`KRM AVLIFTY | 14  | 14    |
| >TSHR-E339`EKSKFQDTH   | 3092  | >TSHR-E339`KKSKFQDTH   | 391 | 2701  |
| >TSHR-E339`KEKSKFQDTH  | 6178  | >TSHR-E339`KKKSKFQDTH  | 283 | 5895  |

|                         |      |                         |       |       |
|-------------------------|------|-------------------------|-------|-------|
| >TSHR-E339K KEKSKFQDT   | 280  | >TSHR-E339K KKKSKFQDT   | 31966 | 31686 |
| >TSHR-E339K YKEKSKFQDT  | 3758 | >TSHR-E339K YKKKSKFQDT  | 181   | 3577  |
| >TSHR-E339K GYKEKSKF    | 470  | >TSHR-E339K GYKKKSKF    | 375   | 95    |
| >TSHR-E339K GYKEKSKF    | 23   | >TSHR-E339K GYKKKSKF    | 21    | 2     |
| >TSHR-E339K VGYKEKSKF   | 1192 | >TSHR-E339K VGYKKKSKF   | 153   | 1039  |
| >TSHR-E339K VGYKEKSKF   | 281  | >TSHR-E339K VGYKKKSKF   | 610   | 329   |
| >TSHR-E339K VGYKEKSKF   | 328  | >TSHR-E339K VGYKKKSKF   | 140   | 188   |
| >TSHR-E339K VGYKEKSKF   | 57   | >TSHR-E339K VGYKKKSKF   | 51    | 6     |
| >TSHR-E339K SIVGYKEKSK  | 315  | >TSHR-E339K SIVGYKKKSK  | 133   | 182   |
| >TSHR-E339K SIVGYKEK    | 91   | >TSHR-E339K SIVGYKKK    | 125   | 34    |
| >TSHR-E339K SIVGYKEKSK  | 178  | >TSHR-E339K SIVGYKKKSK  | 158   | 20    |
| >TSHR-E339K SIVGYKEKSKF | 159  | >TSHR-E339K SIVGYKKKSKF | 306   | 147   |
| >TSHR-E339K SIVGYKEK    | 482  | >TSHR-E339K SIVGYKKK    | 878   | 396   |
| >TSHR-E339K SIVGYKEKSKF | 155  | >TSHR-E339K SIVGYKKKSKF | 175   | 20    |
| >TSHR-E339K DSIVGYKE    | 9279 | >TSHR-E339K DSIVGYKK    | 67    | 9212  |
| >TSHR-E339K DSIVGYKEK   | 245  | >TSHR-E339K DSIVGYKKK   | 416   | 171   |
| >TSHR-E339K DSIVGYKEKSI | 324  | >TSHR-E339K DSIVGYKKKSI | 415   | 91    |
| >TSHR-F631C FTDFICMA    | 392  | >TSHR-F631C CTDFICMA    | 537   | 145   |
| >TSHR-F631C FTDFICMA    | 343  | >TSHR-F631C CTDFICMA    | 9320  | 8977  |
| >TSHR-F631C FTDFICMAPI  | 378  | >TSHR-F631C CTDFICMAPI  | 4651  | 4273  |
| >TSHR-F631C FTDFICMA    | 221  | >TSHR-F631C CTDFICMA    | 5429  | 5208  |
| >TSHR-F631C FTDFICMAPI  | 333  | >TSHR-F631C CTDFICMAPI  | 2788  | 2455  |
| >TSHR-F631C FTDFICMAPI  | 400  | >TSHR-F631C CTDFICMAPI  | 3416  | 3016  |
| >TSHR-F631C FTDFICMA    | 140  | >TSHR-F631C CTDFICMA    | 7962  | 7822  |
| >TSHR-F631C FTDFICMAPI  | 83   | >TSHR-F631C CTDFICMAPI  | 1043  | 960   |
| >TSHR-F631C FTDFICMA    | 187  | >TSHR-F631C CTDFICMA    | 5151  | 4964  |
| >TSHR-F631C FTDFICMAPI  | 256  | >TSHR-F631C CTDFICMAPI  | 9216  | 8960  |
| >TSHR-F631C FTDFICMA    | 194  | >TSHR-F631C CTDFICMA    | 1266  | 1072  |
| >TSHR-F631C FTDFICMAPI  | 29   | >TSHR-F631C CTDFICMAPI  | 42    | 13    |
| >TSHR-F631C FTDFICMA    | 119  | >TSHR-F631C CTDFICMA    | 2979  | 2860  |
| >TSHR-F631C FTDFICMAPI  | 16   | >TSHR-F631C CTDFICMAPI  | 387   | 371   |
| >TSHR-F631C FTDFICMAPI  | 185  | >TSHR-F631C CTDFICMAPI  | 941   | 756   |
| >TSHR-F631C FTDFICMAPI  | 412  | >TSHR-F631C CTDFICMAPI  | 1103  | 691   |
| >TSHR-F631C FTDFICMAPI  | 94   | >TSHR-F631C CTDFICMAPI  | 81    | 13    |
| >TSHR-F631C IFTDFICMAPI | 365  | >TSHR-F631C ICTDFICMAPI | 1034  | 669   |
| >TSHR-F631C KIAKRMAVLII | 154  | >TSHR-F631C KIAKRMAVLII | 8630  | 8476  |
| >TSHR-F631C KIAKRMAVLII | 166  | >TSHR-F631C KIAKRMAVLII | 15873 | 15707 |
| >TSHR-F631C KIAKRMAVLII | 110  | >TSHR-F631C KIAKRMAVLII | 17427 | 17317 |
| >TSHR-F631C KIAKRMAVLII | 148  | >TSHR-F631C KIAKRMAVLII | 21897 | 21749 |
| >TSHR-F631C KIAKRMAVLII | 88   | >TSHR-F631C KIAKRMAVLII | 9986  | 9898  |
| >TSHR-F631C LIFTDFICMA  | 181  | >TSHR-F631C LICTDFICMA  | 645   | 464   |
| >TSHR-F631C LIFTDFICMA  | 139  | >TSHR-F631C LICTDFICMA  | 433   | 294   |
| >TSHR-F631C LIFTDFICM   | 319  | >TSHR-F631C LICTDFICM   | 1611  | 1292  |



|                         |      |                         |      |      |
|-------------------------|------|-------------------------|------|------|
| >TSHR-F631C LIFTDFICMA  | 109  | >TSHR-F631C LICTDFICMA  | 177  | 68   |
| >TSHR-F631C LIFTDFICMA  | 72   | >TSHR-F631C LICTDFICMA  | 535  | 463  |
| >TSHR-F631C LIFTDFICMA  | 302  | >TSHR-F631C LICTDFICMA  | 5889 | 5587 |
| >TSHR-F631C LIFTDFICMA  | 52   | >TSHR-F631C LICTDFICMA  | 294  | 242  |
| >TSHR-F631C LIFTDFICM   | 3450 | >TSHR-F631C LICTDFICM   | 388  | 3062 |
| >TSHR-F631C LIFTDFICM   | 173  | >TSHR-F631C LICTDFICM   | 2954 | 2781 |
| >TSHR-F631C VLIFTDFI    | 68   | >TSHR-F631C VLICTDFI    | 42   | 26   |
| >TSHR-F631C VLIFTDFICM  | 428  | >TSHR-F631C VLICTDFICM  | 304  | 124  |
| >TSHR-F631C VLIFTDFICM/ | 110  | >TSHR-F631C VLICTDFICM/ | 66   | 44   |
| >TSHR-F631C VLIFTDFI    | 29   | >TSHR-F631C VLICTDFI    | 25   | 4    |
| >TSHR-F631C VLIFTDFICM/ | 168  | >TSHR-F631C VLICTDFICM/ | 147  | 21   |
| >TSHR-F631C VLIFTDFI    | 42   | >TSHR-F631C VLICTDFI    | 34   | 8    |
| >TSHR-F631C VLIFTDFICM/ | 62   | >TSHR-F631C VLICTDFICM/ | 49   | 13   |
| >TSHR-F631C VLIFTDFI    | 161  | >TSHR-F631C VLICTDFI    | 76   | 85   |
| >TSHR-F631C VLIFTDFICM  | 862  | >TSHR-F631C VLICTDFICM  | 489  | 373  |
| >TSHR-F631C VLIFTDFICM/ | 237  | >TSHR-F631C VLICTDFICM/ | 109  | 128  |
| >TSHR-F631C VLIFTDFI    | 13   | >TSHR-F631C VLICTDFI    | 11   | 2    |
| >TSHR-F631C VLIFTDFIC   | 684  | >TSHR-F631C VLICTDFIC   | 353  | 331  |
| >TSHR-F631C VLIFTDFICM  | 677  | >TSHR-F631C VLICTDFICM  | 373  | 304  |
| >TSHR-F631C VLIFTDFICM/ | 19   | >TSHR-F631C VLICTDFICM/ | 12   | 7    |
| >TSHR-F631C VLIFTDFI    | 11   | >TSHR-F631C VLICTDFI    | 5    | 6    |
| >TSHR-F631C VLIFTDFIC   | 195  | >TSHR-F631C VLICTDFIC   | 39   | 156  |
| >TSHR-F631C VLIFTDFICM  | 185  | >TSHR-F631C VLICTDFICM  | 44   | 141  |
| >TSHR-F631C VLIFTDFICM/ | 56   | >TSHR-F631C VLICTDFICM/ | 15   | 41   |
| >TSHR-F631C VLIFTDFI    | 30   | >TSHR-F631C VLICTDFI    | 36   | 6    |
| >TSHR-F631C VLIFTDFICM/ | 38   | >TSHR-F631C VLICTDFICM/ | 42   | 4    |
| >TSHR-F631C VLIFTDFI    | 78   | >TSHR-F631C VLICTDFI    | 129  | 51   |
| >TSHR-F631C VLIFTDFI    | 45   | >TSHR-F631C VLICTDFI    | 77   | 32   |
| >TSHR-F631C VLIFTDFIC   | 381  | >TSHR-F631C VLICTDFIC   | 751  | 370  |
| >TSHR-F631C VLIFTDFICM/ | 14   | >TSHR-F631C VLICTDFICM/ | 19   | 5    |
| >TSHR-F631C VLIFTDFICM  | 1533 | >TSHR-F631C VLICTDFICM  | 453  | 1080 |
| >TSHR-F631C AVLIFTDFI   | 339  | >TSHR-F631C AVLICTDFI   | 669  | 330  |
| >TSHR-F631C AVLIFTDFI   | 530  | >TSHR-F631C AVLICTDFI   | 480  | 50   |
| >TSHR-F631C AVLIFTDFI   | 201  | >TSHR-F631C AVLICTDFI   | 274  | 73   |
| >TSHR-F631C AVLIFTDFI   | 47   | >TSHR-F631C AVLICTDFI   | 37   | 10   |
| >TSHR-F631C AVLIFTDFI   | 98   | >TSHR-F631C AVLICTDFI   | 892  | 794  |
| >TSHR-F631C AVLIFTDFI   | 264  | >TSHR-F631C AVLICTDFI   | 568  | 304  |
| >TSHR-F631C AVLIFTDFICM | 287  | >TSHR-F631C AVLICTDFICM | 345  | 58   |
| >TSHR-F631C AVLIFTDF    | 63   | >TSHR-F631C AVLICTDF    | 338  | 275  |
| >TSHR-F631C AVLIFTDFI   | 238  | >TSHR-F631C AVLICTDFI   | 2360 | 2122 |
| >TSHR-F631C AVLIFTDFI   | 189  | >TSHR-F631C AVLICTDFI   | 3312 | 3123 |
| >TSHR-F631C AVLIFTDF    | 213  | >TSHR-F631C AVLICTDF    | 447  | 234  |
| >TSHR-F631C AVLIFTDF    | 424  | >TSHR-F631C AVLICTDF    | 341  | 83   |

|                        |     |                        |      |      |
|------------------------|-----|------------------------|------|------|
| >TSHR-F631C AVLIFTDFI  | 226 | >TSHR-F631C AVLICTDFI  | 329  | 103  |
| >TSHR-F631C MAVLIFTDFI | 190 | >TSHR-F631C MAVLICTDFI | 192  | 2    |
| >TSHR-F631C MAVLIFTDFI | 153 | >TSHR-F631C MAVLICTDFI | 194  | 41   |
| >TSHR-F631C MAVLIFTDFI | 76  | >TSHR-F631C MAVLICTDFI | 109  | 33   |
| >TSHR-F631C MAVLIFTDFI | 304 | >TSHR-F631C MAVLICTDFI | 1886 | 1582 |
| >TSHR-F631C MAVLIFTDF  | 57  | >TSHR-F631C MAVLICTDF  | 134  | 77   |
| >TSHR-F631C MAVLIFTDF  | 85  | >TSHR-F631C MAVLICTDF  | 58   | 27   |
| >TSHR-F631C MAVLIFTDF  | 48  | >TSHR-F631C MAVLICTDF  | 48   | 0    |
| >TSHR-F631C MAVLIFTDF  | 151 | >TSHR-F631C MAVLICTDF  | 1599 | 1448 |
| >TSHR-F631C MAVLIFTDF  | 406 | >TSHR-F631C MAVLICTDF  | 329  | 77   |
| >TSHR-F631C RMAVLIFT   | 161 | >TSHR-F631C RMAVLICT   | 1058 | 897  |
| >TSHR-F631C RMAVLIFTDF | 30  | >TSHR-F631C RMAVLICTDF | 41   | 11   |
| >TSHR-F631C RMAVLIFT   | 75  | >TSHR-F631C RMAVLICT   | 590  | 515  |
| >TSHR-F631C RMAVLIFTDF | 5   | >TSHR-F631C RMAVLICTDF | 7    | 2    |
| >TSHR-F631C RMAVLIFT   | 150 | >TSHR-F631C RMAVLICT   | 814  | 664  |
| >TSHR-F631C RMAVLIFTDF | 15  | >TSHR-F631C RMAVLICTDF | 15   | 0    |
| >TSHR-F631C RMAVLIFT   | 289 | >TSHR-F631C RMAVLICT   | 1327 | 1038 |
| >TSHR-F631C RMAVLIFTDF | 53  | >TSHR-F631C RMAVLICTDF | 64   | 11   |
| >TSHR-F631C RMAVLIFT   | 75  | >TSHR-F631C RMAVLICT   | 487  | 412  |
| >TSHR-F631C RMAVLIFTDF | 8   | >TSHR-F631C RMAVLICTDF | 16   | 8    |
| >TSHR-F631C RMAVLIFTDF | 25  | >TSHR-F631C RMAVLICTDF | 31   | 6    |
| >TSHR-F631C RMAVLIFT   | 104 | >TSHR-F631C RMAVLICT   | 334  | 230  |
| >TSHR-F631C RMAVLIFTDF | 16  | >TSHR-F631C RMAVLICTDF | 19   | 3    |
| >TSHR-F631C RMAVLIFTDF | 19  | >TSHR-F631C RMAVLICTDF | 25   | 6    |
| >TSHR-F631C RMAVLIFT   | 425 | >TSHR-F631C RMAVLICT   | 1106 | 681  |
| >TSHR-F631C RMAVLIFTDF | 89  | >TSHR-F631C RMAVLICTDF | 98   | 9    |
| >TSHR-F631C RMAVLIFTDF | 185 | >TSHR-F631C RMAVLICTDF | 681  | 496  |
| >TSHR-F631C RMAVLIFTDF | 22  | >TSHR-F631C RMAVLICTDF | 37   | 15   |
| >TSHR-F631C RMAVLIFTDF | 69  | >TSHR-F631C RMAVLICTDF | 209  | 140  |
| >TSHR-F631C RMAVLIFTDF | 45  | >TSHR-F631C RMAVLICTDF | 50   | 5    |
| >TSHR-F631C RMAVLIFTDF | 8   | >TSHR-F631C RMAVLICTDF | 10   | 2    |
| >TSHR-F631C RMAVLIFTDF | 498 | >TSHR-F631C RMAVLICTDF | 539  | 41   |
| >TSHR-F631C RMAVLIFTDF | 337 | >TSHR-F631C RMAVLICTDF | 312  | 25   |
| >TSHR-F631C RMAVLIFTDF | 106 | >TSHR-F631C RMAVLICTDF | 216  | 110  |
| >TSHR-F631C RMAVLIFTDF | 97  | >TSHR-F631C RMAVLICTDF | 151  | 54   |
| >TSHR-F631C RMAVLIFTDF | 253 | >TSHR-F631C RMAVLICTDF | 502  | 249  |
| >TSHR-F631C RMAVLIFTDF | 347 | >TSHR-F631C RMAVLICTDF | 468  | 121  |
| >TSHR-F631C RMAVLIFTDF | 146 | >TSHR-F631C RMAVLICTDF | 262  | 116  |
| >TSHR-F631C KRMAVLIF   | 8   | >TSHR-F631C KRMAVLIC   | 2045 | 2037 |
| >TSHR-F631C KRMAVLIFTD | 14  | >TSHR-F631C KRMAVLICTD | 17   | 3    |
| >TSHR-F631C KRMAVLIF   | 26  | >TSHR-F631C KRMAVLIC   | 688  | 662  |
| >TSHR-F631C KRMAVLIFT  | 117 | >TSHR-F631C KRMAVLICT  | 156  | 39   |
| >TSHR-F631C KRMAVLIFTD | 38  | >TSHR-F631C KRMAVLICTD | 117  | 79   |

|                          |       |                          |       |       |
|--------------------------|-------|--------------------------|-------|-------|
| >TSHR-F631C KRM AVLIF    | 139   | >TSHR-F631C KRM AVLIC    | 297   | 158   |
| >TSHR-F631C KRM AVLIFT   | 62    | >TSHR-F631C KRM AVLICT   | 111   | 49    |
| >TSHR-F631C KRM AVLIFTD  | 499   | >TSHR-F631C KRM AVLICTD  | 255   | 244   |
| >TSHR-F631C KRM AVLIFTD  | 45    | >TSHR-F631C KRM AVLICTD  | 67    | 22    |
| >TSHR-F631C KRM AVLIFTD  | 28    | >TSHR-F631C KRM AVLICTD  | 83    | 55    |
| >TSHR-F631C AKR MAVLIF   | 3     | >TSHR-F631C AKR MAVLIC   | 305   | 302   |
| >TSHR-F631C IAKR MAVLIF  | 326   | >TSHR-F631C IAKR MAVLIC  | 19316 | 18990 |
| >TSHR-F631C IAKR MAVLIF  | 21    | >TSHR-F631C IAKR MAVLIC  | 10377 | 10356 |
| >TSHR-F631C IAKR MAVLIF  | 37    | >TSHR-F631C IAKR MAVLIC  | 15720 | 15683 |
| >TSHR-F631C IAKR MAVLIF  | 308   | >TSHR-F631C IAKR MAVLIC  | 17766 | 17458 |
| >TSHR-F631C IAKR MAVLIF  | 214   | >TSHR-F631C IAKR MAVLIC  | 16646 | 16432 |
| >TSHR-F631I· FTDFICMA    | 392   | >TSHR-F631I· ITDFICMA    | 2511  | 2119  |
| >TSHR-F631I· FTDFICMA    | 343   | >TSHR-F631I· ITDFICMA    | 4748  | 4405  |
| >TSHR-F631I· FTDFICMAPI  | 378   | >TSHR-F631I· ITDFICMAPI  | 1921  | 1543  |
| >TSHR-F631I· FTDFICMA    | 221   | >TSHR-F631I· ITDFICMA    | 3127  | 2906  |
| >TSHR-F631I· FTDFICMAPI  | 333   | >TSHR-F631I· ITDFICMAPI  | 1183  | 850   |
| >TSHR-F631I· FTDFICMAPI  | 400   | >TSHR-F631I· ITDFICMAPI  | 1423  | 1023  |
| >TSHR-F631I· FTDFICMA    | 140   | >TSHR-F631I· ITDFICMA    | 2046  | 1906  |
| >TSHR-F631I· FTDFICMAPI  | 83    | >TSHR-F631I· ITDFICMAPI  | 428   | 345   |
| >TSHR-F631I· FTDFICMA    | 187   | >TSHR-F631I· ITDFICMA    | 1026  | 839   |
| >TSHR-F631I· FTDFICMAPI  | 256   | >TSHR-F631I· ITDFICMAPI  | 1845  | 1589  |
| >TSHR-F631I· FTDFICMAPI  | 1296  | >TSHR-F631I· ITDFICMAPI  | 295   | 1001  |
| >TSHR-F631I· FTDFICMA    | 194   | >TSHR-F631I· ITDFICMA    | 2533  | 2339  |
| >TSHR-F631I· FTDFICMAPI  | 29    | >TSHR-F631I· ITDFICMAPI  | 87    | 58    |
| >TSHR-F631I· FTDFICMA    | 119   | >TSHR-F631I· ITDFICMA    | 2134  | 2015  |
| >TSHR-F631I· FTDFICMAPI  | 16    | >TSHR-F631I· ITDFICMAPI  | 256   | 240   |
| >TSHR-F631I· FTDFICMAPI  | 185   | >TSHR-F631I· ITDFICMAPI  | 72    | 113   |
| >TSHR-F631I· FTDFICMAPI  | 412   | >TSHR-F631I· ITDFICMAPI  | 494   | 82    |
| >TSHR-F631I· FTDFICMAPI  | 94    | >TSHR-F631I· ITDFICMAPI  | 90    | 4     |
| >TSHR-F631I· IFTDFICM    | 1966  | >TSHR-F631I· IITDFICM    | 428   | 1538  |
| >TSHR-F631I· IFTDFICMAPI | 1112  | >TSHR-F631I· IITDFICMAPI | 311   | 801   |
| >TSHR-F631I· IFTDFICMA   | 12899 | >TSHR-F631I· IITDFICMA   | 208   | 12691 |
| >TSHR-F631I· IFTDFICMAPI | 5230  | >TSHR-F631I· IITDFICMAPI | 55    | 5175  |
| >TSHR-F631I· IFTDFICMA   | 1953  | >TSHR-F631I· IITDFICMA   | 142   | 1811  |
| >TSHR-F631I· IFTDFICMAPI | 365   | >TSHR-F631I· IITDFICMAPI | 38    | 327   |
| >TSHR-F631I· IFTDFICMA   | 10330 | >TSHR-F631I· IITDFICMA   | 107   | 10223 |
| >TSHR-F631I· IFTDFICMAPI | 6132  | >TSHR-F631I· IITDFICMAPI | 22    | 6110  |
| >TSHR-F631I· IFTDFICMA   | 7172  | >TSHR-F631I· IITDFICMA   | 50    | 7122  |
| >TSHR-F631I· IFTDFICMAPI | 2360  | >TSHR-F631I· IITDFICMAPI | 22    | 2338  |
| >TSHR-F631I· IFTDFICMA   | 1766  | >TSHR-F631I· IITDFICMA   | 22    | 1744  |
| >TSHR-F631I· IFTDFICMAPI | 2487  | >TSHR-F631I· IITDFICMAPI | 65    | 2422  |
| >TSHR-F631I· IFTDFICMA   | 7317  | >TSHR-F631I· IITDFICMA   | 154   | 7163  |
| >TSHR-F631I· IFTDFICMA   | 936   | >TSHR-F631I· IITDFICMA   | 8     | 928   |

|                         |       |                         |      |       |
|-------------------------|-------|-------------------------|------|-------|
| >TSHR-F631I·IFTDFICMAPI | 3096  | >TSHR-F631I·IITDFICMAPI | 33   | 3063  |
| >TSHR-F631I·IFTDFICMAPI | 5324  | >TSHR-F631I·IITDFICMAPI | 67   | 5257  |
| >TSHR-F631I·IFTDFICMAPI | 11909 | >TSHR-F631I·IITDFICMAPI | 481  | 11428 |
| >TSHR-F631I·KIAKRMAVLII | 7523  | >TSHR-F631I·KIAKRMAVLII | 67   | 7456  |
| >TSHR-F631I·KIAKRMAVLII | 2973  | >TSHR-F631I·KIAKRMAVLII | 353  | 2620  |
| >TSHR-F631I·KIAKRMAVLII | 6480  | >TSHR-F631I·KIAKRMAVLII | 415  | 6065  |
| >TSHR-F631I·KIAKRMAVLII | 154   | >TSHR-F631I·KIAKRMAVLII | 237  | 83    |
| >TSHR-F631I·KIAKRMAVLII | 166   | >TSHR-F631I·KIAKRMAVLII | 6419 | 6253  |
| >TSHR-F631I·KIAKRMAVLII | 110   | >TSHR-F631I·KIAKRMAVLII | 3413 | 3303  |
| >TSHR-F631I·KIAKRMAVLII | 148   | >TSHR-F631I·KIAKRMAVLII | 5136 | 4988  |
| >TSHR-F631I·KIAKRMAVLII | 88    | >TSHR-F631I·KIAKRMAVLII | 618  | 530   |
| >TSHR-F631I·LIFTDFICMA  | 181   | >TSHR-F631I·LIITDFICMA  | 398  | 217   |
| >TSHR-F631I·LIFTDFICMA  | 139   | >TSHR-F631I·LIITDFICMA  | 239  | 100   |
| >TSHR-F631I·LIFTDFICM   | 319   | >TSHR-F631I·LIITDFICM   | 269  | 50    |
| >TSHR-F631I·LIFTDFICMA  | 109   | >TSHR-F631I·LIITDFICMA  | 82   | 27    |
| >TSHR-F631I·LIFTDFICMA  | 72    | >TSHR-F631I·LIITDFICMA  | 412  | 340   |
| >TSHR-F631I·LIFTDFICMA  | 302   | >TSHR-F631I·LIITDFICMA  | 2352 | 2050  |
| >TSHR-F631I·LIFTDFICMA  | 52    | >TSHR-F631I·LIITDFICMA  | 149  | 97    |
| >TSHR-F631I·LIFTDFICM   | 3450  | >TSHR-F631I·LIITDFICM   | 31   | 3419  |
| >TSHR-F631I·LIFTDFICM   | 1617  | >TSHR-F631I·LIITDFICM   | 381  | 1236  |
| >TSHR-F631I·LIFTDFICM   | 173   | >TSHR-F631I·LIITDFICM   | 987  | 814   |
| >TSHR-F631I·VLIFTDFI    | 68    | >TSHR-F631I·VLIITDFI    | 121  | 53    |
| >TSHR-F631I·VLIFTDFICM  | 428   | >TSHR-F631I·VLIITDFICM  | 360  | 68    |
| >TSHR-F631I·VLIFTDFICM/ | 110   | >TSHR-F631I·VLIITDFICMA | 191  | 81    |
| >TSHR-F631I·VLIFTDFI    | 29    | >TSHR-F631I·VLIITDFI    | 54   | 25    |
| >TSHR-F631I·VLIFTDFICM/ | 168   | >TSHR-F631I·VLIITDFICMA | 268  | 100   |
| >TSHR-F631I·VLIFTDFI    | 42    | >TSHR-F631I·VLIITDFI    | 95   | 53    |
| >TSHR-F631I·VLIFTDFICM/ | 62    | >TSHR-F631I·VLIITDFICMA | 143  | 81    |
| >TSHR-F631I·VLIFTDFI    | 161   | >TSHR-F631I·VLIITDFI    | 236  | 75    |
| >TSHR-F631I·VLIFTDFICM  | 862   | >TSHR-F631I·VLIITDFICM  | 489  | 373   |
| >TSHR-F631I·VLIFTDFICM/ | 237   | >TSHR-F631I·VLIITDFICMA | 333  | 96    |
| >TSHR-F631I·VLIFTDFI    | 13    | >TSHR-F631I·VLIITDFI    | 13   | 0     |
| >TSHR-F631I·VLIFTDFICM/ | 19    | >TSHR-F631I·VLIITDFICMA | 17   | 2     |
| >TSHR-F631I·VLIFTDFI    | 11    | >TSHR-F631I·VLIITDFI    | 21   | 10    |
| >TSHR-F631I·VLIFTDFIC   | 195   | >TSHR-F631I·VLIITDFIC   | 555  | 360   |
| >TSHR-F631I·VLIFTDFICM  | 185   | >TSHR-F631I·VLIITDFICM  | 382  | 197   |
| >TSHR-F631I·VLIFTDFICM/ | 56    | >TSHR-F631I·VLIITDFICMA | 119  | 63    |
| >TSHR-F631I·VLIFTDFI    | 30    | >TSHR-F631I·VLIITDFI    | 23   | 7     |
| >TSHR-F631I·VLIFTDFICM  | 703   | >TSHR-F631I·VLIITDFICM  | 438  | 265   |
| >TSHR-F631I·VLIFTDFICM/ | 38    | >TSHR-F631I·VLIITDFICMA | 28   | 10    |
| >TSHR-F631I·VLIFTDFI    | 78    | >TSHR-F631I·VLIITDFI    | 394  | 316   |
| >TSHR-F631I·VLIFTDFI    | 45    | >TSHR-F631I·VLIITDFI    | 34   | 11    |
| >TSHR-F631I·VLIFTDFIC   | 381   | >TSHR-F631I·VLIITDFIC   | 206  | 175   |

|                         |     |                         |      |      |
|-------------------------|-----|-------------------------|------|------|
| >TSHR-F631I·VLIFTDFICM  | 567 | >TSHR-F631I·VLIITDFICM  | 333  | 234  |
| >TSHR-F631I·VLIFTDFICM/ | 14  | >TSHR-F631I·VLIITDFICMA | 10   | 4    |
| >TSHR-F631I·AVLIFTDFI   | 339 | >TSHR-F631I·AVLIITDFI   | 353  | 14   |
| >TSHR-F631I·AVLIFTDFI   | 201 | >TSHR-F631I·AVLIITDFI   | 131  | 70   |
| >TSHR-F631I·AVLIFTDFI   | 47  | >TSHR-F631I·AVLIITDFI   | 46   | 1    |
| >TSHR-F631I·AVLIFTDFI   | 98  | >TSHR-F631I·AVLIITDFI   | 225  | 127  |
| >TSHR-F631I·AVLIFTDFI   | 264 | >TSHR-F631I·AVLIITDFI   | 192  | 72   |
| >TSHR-F631I·AVLIFTDFICM | 287 | >TSHR-F631I·AVLIITDFICM | 329  | 42   |
| >TSHR-F631I·AVLIFTDF    | 63  | >TSHR-F631I·AVLIITDF    | 61   | 2    |
| >TSHR-F631I·AVLIFTDFI   | 238 | >TSHR-F631I·AVLIITDFI   | 259  | 21   |
| >TSHR-F631I·AVLIFTDFI   | 552 | >TSHR-F631I·AVLIITDFI   | 189  | 363  |
| >TSHR-F631I·AVLIFTDFI   | 189 | >TSHR-F631I·AVLIITDFI   | 541  | 352  |
| >TSHR-F631I·AVLIFTDF    | 213 | >TSHR-F631I·AVLIITDF    | 693  | 480  |
| >TSHR-F631I·AVLIFTDF    | 424 | >TSHR-F631I·AVLIITDF    | 335  | 89   |
| >TSHR-F631I·AVLIFTDFI   | 226 | >TSHR-F631I·AVLIITDFI   | 316  | 90   |
| >TSHR-F631I·MAVLIFTDFI  | 190 | >TSHR-F631I·MAVLIITDFI  | 217  | 27   |
| >TSHR-F631I·MAVLIFTDFI  | 539 | >TSHR-F631I·MAVLIITDFI  | 489  | 50   |
| >TSHR-F631I·MAVLIFTDFI  | 153 | >TSHR-F631I·MAVLIITDFI  | 296  | 143  |
| >TSHR-F631I·MAVLIFTDFI  | 76  | >TSHR-F631I·MAVLIITDFI  | 54   | 22   |
| >TSHR-F631I·MAVLIFTDFI  | 304 | >TSHR-F631I·MAVLIITDFI  | 565  | 261  |
| >TSHR-F631I·MAVLIFTDF   | 57  | >TSHR-F631I·MAVLIITDF   | 117  | 60   |
| >TSHR-F631I·MAVLIFTDF   | 85  | >TSHR-F631I·MAVLIITDF   | 24   | 61   |
| >TSHR-F631I·MAVLIFTDF   | 48  | >TSHR-F631I·MAVLIITDF   | 50   | 2    |
| >TSHR-F631I·MAVLIFTDF   | 151 | >TSHR-F631I·MAVLIITDF   | 284  | 133  |
| >TSHR-F631I·MAVLIFTDF   | 406 | >TSHR-F631I·MAVLIITDF   | 941  | 535  |
| >TSHR-F631I·RMAVLIFT    | 161 | >TSHR-F631I·RMAVLIIT    | 1188 | 1027 |
| >TSHR-F631I·RMAVLIFTDF  | 30  | >TSHR-F631I·RMAVLIITDFI | 44   | 14   |
| >TSHR-F631I·RMAVLIFT    | 75  | >TSHR-F631I·RMAVLIIT    | 723  | 648  |
| >TSHR-F631I·RMAVLIFTDF  | 5   | >TSHR-F631I·RMAVLIITDFI | 8    | 3    |
| >TSHR-F631I·RMAVLIFT    | 150 | >TSHR-F631I·RMAVLIIT    | 345  | 195  |
| >TSHR-F631I·RMAVLIFTDF  | 15  | >TSHR-F631I·RMAVLIITDFI | 17   | 2    |
| >TSHR-F631I·RMAVLIFT    | 289 | >TSHR-F631I·RMAVLIIT    | 1488 | 1199 |
| >TSHR-F631I·RMAVLIFTDF  | 53  | >TSHR-F631I·RMAVLIITDFI | 92   | 39   |
| >TSHR-F631I·RMAVLIFT    | 75  | >TSHR-F631I·RMAVLIIT    | 658  | 583  |
| >TSHR-F631I·RMAVLIFTDF  | 8   | >TSHR-F631I·RMAVLIITDFI | 12   | 4    |
| >TSHR-F631I·RMAVLIFTDF  | 25  | >TSHR-F631I·RMAVLIITDFI | 37   | 12   |
| >TSHR-F631I·RMAVLIFT    | 104 | >TSHR-F631I·RMAVLIIT    | 891  | 787  |
| >TSHR-F631I·RMAVLIFTDF  | 16  | >TSHR-F631I·RMAVLIITDFI | 18   | 2    |
| >TSHR-F631I·RMAVLIFTDF  | 19  | >TSHR-F631I·RMAVLIITDFI | 28   | 9    |
| >TSHR-F631I·RMAVLIFT    | 425 | >TSHR-F631I·RMAVLIIT    | 1380 | 955  |
| >TSHR-F631I·RMAVLIFTDF  | 89  | >TSHR-F631I·RMAVLIITDFI | 135  | 46   |
| >TSHR-F631I·RMAVLIFTDF  | 185 | >TSHR-F631I·RMAVLIITDF  | 451  | 266  |
| >TSHR-F631I·RMAVLIFTDF  | 22  | >TSHR-F631I·RMAVLIITDF  | 25   | 3    |

|                         |      |                           |      |      |
|-------------------------|------|---------------------------|------|------|
| >TSHR-F631I·RMAVLIFTDF  | 69   | >TSHR-F631I·RMAVLIITDFI   | 79   | 10   |
| >TSHR-F631I·RMAVLIFTDF  | 45   | >TSHR-F631I·RMAVLIITDF    | 56   | 11   |
| >TSHR-F631I·RMAVLIFTDF  | 8    | >TSHR-F631I·RMAVLIITDF    | 9    | 1    |
| >TSHR-F631I·RMAVLIFTDF  | 498  | >TSHR-F631I·RMAVLIITDFI   | 711  | 213  |
| >TSHR-F631I·RMAVLIFTDF  | 337  | >TSHR-F631I·RMAVLIITDF    | 166  | 171  |
| >TSHR-F631I·RMAVLIFTDF  | 106  | >TSHR-F631I·RMAVLIITDF    | 127  | 21   |
| >TSHR-F631I·RMAVLIFTDF  | 97   | >TSHR-F631I·RMAVLIITDFI   | 171  | 74   |
| >TSHR-F631I·RMAVLIFTDF  | 253  | >TSHR-F631I·RMAVLIITDF    | 156  | 97   |
| >TSHR-F631I·RMAVLIFTDF  | 347  | >TSHR-F631I·RMAVLIITDFI   | 448  | 101  |
| >TSHR-F631I·RMAVLIFTDF  | 146  | >TSHR-F631I·RMAVLIITDFI   | 188  | 42   |
| >TSHR-F631I·KRM AVLIFTD | 577  | >TSHR-F631I·KRM AVLIIITDI | 480  | 97   |
| >TSHR-F631I·KRM AVLIF   | 8    | >TSHR-F631I·KRM AVLII     | 151  | 143  |
| >TSHR-F631I·KRM AVLIFTD | 14   | >TSHR-F631I·KRM AVLIIITDI | 16   | 2    |
| >TSHR-F631I·KRM AVLIF   | 26   | >TSHR-F631I·KRM AVLII     | 24   | 2    |
| >TSHR-F631I·KRM AVLIFT  | 117  | >TSHR-F631I·KRM AVLIIIT   | 212  | 95   |
| >TSHR-F631I·KRM AVLIFTD | 38   | >TSHR-F631I·KRM AVLIIITDI | 35   | 3    |
| >TSHR-F631I·KRM AVLIF   | 966  | >TSHR-F631I·KRM AVLII     | 381  | 585  |
| >TSHR-F631I·KRM AVLIF   | 139  | >TSHR-F631I·KRM AVLII     | 72   | 67   |
| >TSHR-F631I·KRM AVLIFT  | 62   | >TSHR-F631I·KRM AVLIIIT   | 74   | 12   |
| >TSHR-F631I·KRM AVLIFTD | 499  | >TSHR-F631I·KRM AVLIIITD  | 230  | 269  |
| >TSHR-F631I·KRM AVLIFTD | 45   | >TSHR-F631I·KRM AVLIIITDI | 46   | 1    |
| >TSHR-F631I·KRM AVLIFTD | 28   | >TSHR-F631I·KRM AVLIIITDI | 41   | 13   |
| >TSHR-F631I·AKRM AVLIF  | 3681 | >TSHR-F631I·AKRM AVLII    | 136  | 3545 |
| >TSHR-F631I·AKRM AVLIF  | 3    | >TSHR-F631I·AKRM AVLII    | 13   | 10   |
| >TSHR-F631I·IAKRM AVLIF | 3159 | >TSHR-F631I·IAKRM AVLII   | 105  | 3054 |
| >TSHR-F631I·IAKRM AVLIF | 326  | >TSHR-F631I·IAKRM AVLII   | 9325 | 8999 |
| >TSHR-F631I·IAKRM AVLIF | 21   | >TSHR-F631I·IAKRM AVLII   | 811  | 790  |
| >TSHR-F631I·IAKRM AVLIF | 37   | >TSHR-F631I·IAKRM AVLII   | 1740 | 1703 |
| >TSHR-F631I·IAKRM AVLIF | 308  | >TSHR-F631I·IAKRM AVLII   | 6603 | 6295 |
| >TSHR-F631I·IAKRM AVLIF | 214  | >TSHR-F631I·IAKRM AVLII   | 1870 | 1656 |
| >TSHR-F631I·FTDFICMA    | 392  | >TSHR-F631I·LTDFICMA      | 867  | 475  |
| >TSHR-F631I·FTDFICMA    | 343  | >TSHR-F631I·LTDFICMA      | 5147 | 4804 |
| >TSHR-F631I·FTDFICMAPI  | 378  | >TSHR-F631I·LTDFICMAPI    | 2298 | 1920 |
| >TSHR-F631I·FTDFICMA    | 221  | >TSHR-F631I·LTDFICMA      | 2144 | 1923 |
| >TSHR-F631I·FTDFICMAPI  | 333  | >TSHR-F631I·LTDFICMAPI    | 1065 | 732  |
| >TSHR-F631I·FTDFICMAPI  | 400  | >TSHR-F631I·LTDFICMAPI    | 1327 | 927  |
| >TSHR-F631I·FTDFICMA    | 140  | >TSHR-F631I·LTDFICMA      | 1955 | 1815 |
| >TSHR-F631I·FTDFICMAPI  | 83   | >TSHR-F631I·LTDFICMAPI    | 290  | 207  |
| >TSHR-F631I·FTDFICMA    | 187  | >TSHR-F631I·LTDFICMA      | 1057 | 870  |
| >TSHR-F631I·FTDFICMAPI  | 256  | >TSHR-F631I·LTDFICMAPI    | 1931 | 1675 |
| >TSHR-F631I·FTDFICMA    | 194  | >TSHR-F631I·LTDFICMA      | 1777 | 1583 |
| >TSHR-F631I·FTDFICMAPI  | 29   | >TSHR-F631I·LTDFICMAPI    | 44   | 15   |
| >TSHR-F631I·FTDFICMA    | 119  | >TSHR-F631I·LTDFICMA      | 1155 | 1036 |

|                         |       |                         |      |       |
|-------------------------|-------|-------------------------|------|-------|
| >TSHR-F631L FTDFICMAPI  | 16    | >TSHR-F631L LTDFICMAPI  | 112  | 96    |
| >TSHR-F631L FTDFICMAPI  | 185   | >TSHR-F631L LTDFICMAPI  | 136  | 49    |
| >TSHR-F631L FTDFICMAPI  | 412   | >TSHR-F631L LTDFICMAPI  | 515  | 103   |
| >TSHR-F631L FTDFICMAPI  | 94    | >TSHR-F631L LTDFICMAPI  | 76   | 18    |
| >TSHR-F631L IFTDFICM    | 17585 | >TSHR-F631L ILTDFICM    | 97   | 17488 |
| >TSHR-F631L IFTDFICMA   | 12899 | >TSHR-F631L ILTDFICMA   | 22   | 12877 |
| >TSHR-F631L IFTDFICMAPI | 5230  | >TSHR-F631L ILTDFICMAPI | 13   | 5217  |
| >TSHR-F631L IFTDFICM    | 6703  | >TSHR-F631L ILTDFICM    | 81   | 6622  |
| >TSHR-F631L IFTDFICMA   | 1953  | >TSHR-F631L ILTDFICMA   | 10   | 1943  |
| >TSHR-F631L IFTDFICMAPI | 365   | >TSHR-F631L ILTDFICMAPI | 7    | 358   |
| >TSHR-F631L IFTDFICMA   | 10330 | >TSHR-F631L ILTDFICMA   | 13   | 10317 |
| >TSHR-F631L IFTDFICMAPI | 6132  | >TSHR-F631L ILTDFICMAPI | 6    | 6126  |
| >TSHR-F631L IFTDFICM    | 14297 | >TSHR-F631L ILTDFICM    | 261  | 14036 |
| >TSHR-F631L IFTDFICMA   | 7172  | >TSHR-F631L ILTDFICMA   | 27   | 7145  |
| >TSHR-F631L IFTDFICMAPI | 2360  | >TSHR-F631L ILTDFICMAPI | 17   | 2343  |
| >TSHR-F631L IFTDFICM    | 13993 | >TSHR-F631L ILTDFICM    | 74   | 13919 |
| >TSHR-F631L IFTDFICMA   | 1766  | >TSHR-F631L ILTDFICMA   | 3    | 1763  |
| >TSHR-F631L IFTDFICMAPI | 2487  | >TSHR-F631L ILTDFICMAPI | 7    | 2480  |
| >TSHR-F631L IFTDFICM    | 21215 | >TSHR-F631L ILTDFICM    | 241  | 20974 |
| >TSHR-F631L IFTDFICMA   | 20203 | >TSHR-F631L ILTDFICMA   | 63   | 20140 |
| >TSHR-F631L IFTDFICMAPI | 11432 | >TSHR-F631L ILTDFICMAPI | 11   | 11421 |
| >TSHR-F631L IFTDFICM    | 18149 | >TSHR-F631L ILTDFICM    | 123  | 18026 |
| >TSHR-F631L IFTDFICMA   | 7317  | >TSHR-F631L ILTDFICMA   | 11   | 7306  |
| >TSHR-F631L IFTDFICMAPI | 9863  | >TSHR-F631L ILTDFICMAPI | 28   | 9835  |
| >TSHR-F631L IFTDFICM    | 17640 | >TSHR-F631L ILTDFICM    | 109  | 17531 |
| >TSHR-F631L IFTDFICMA   | 13910 | >TSHR-F631L ILTDFICMA   | 34   | 13876 |
| >TSHR-F631L IFTDFICMAPI | 16093 | >TSHR-F631L ILTDFICMAPI | 34   | 16059 |
| >TSHR-F631L IFTDFICM    | 14313 | >TSHR-F631L ILTDFICM    | 12   | 14301 |
| >TSHR-F631L IFTDFICMA   | 936   | >TSHR-F631L ILTDFICMA   | 2    | 934   |
| >TSHR-F631L IFTDFICMAPI | 3096  | >TSHR-F631L ILTDFICMAPI | 3    | 3093  |
| >TSHR-F631L IFTDFICMAPI | 5324  | >TSHR-F631L ILTDFICMAPI | 417  | 4907  |
| >TSHR-F631L KIAKRMAVLII | 8427  | >TSHR-F631L KIAKRMAVLII | 155  | 8272  |
| >TSHR-F631L KIAKRMAVLII | 7523  | >TSHR-F631L KIAKRMAVLII | 123  | 7400  |
| >TSHR-F631L KIAKRMAVLII | 2973  | >TSHR-F631L KIAKRMAVLII | 357  | 2616  |
| >TSHR-F631L KIAKRMAVLII | 154   | >TSHR-F631L KIAKRMAVLII | 796  | 642   |
| >TSHR-F631L KIAKRMAVLII | 166   | >TSHR-F631L KIAKRMAVLII | 3671 | 3505  |
| >TSHR-F631L KIAKRMAVLII | 110   | >TSHR-F631L KIAKRMAVLII | 2584 | 2474  |
| >TSHR-F631L KIAKRMAVLII | 148   | >TSHR-F631L KIAKRMAVLII | 1706 | 1558  |
| >TSHR-F631L KIAKRMAVLII | 88    | >TSHR-F631L KIAKRMAVLII | 1277 | 1189  |
| >TSHR-F631L LIFTDFICMA  | 181   | >TSHR-F631L LILTDFICMA  | 442  | 261   |
| >TSHR-F631L LIFTDFICMA  | 139   | >TSHR-F631L LILTDFICMA  | 326  | 187   |
| >TSHR-F631L LIFTDFICM   | 319   | >TSHR-F631L LILTDFICM   | 327  | 8     |
| >TSHR-F631L LIFTDFICMA  | 109   | >TSHR-F631L LILTDFICMA  | 74   | 35    |

|                         |     |                         |     |     |
|-------------------------|-----|-------------------------|-----|-----|
| >TSHR-F631L LIFTDFICMA  | 72  | >TSHR-F631L LILTDFICMA  | 112 | 40  |
| >TSHR-F631L LIFTDFICMA  | 302 | >TSHR-F631L LILTDFICMA  | 310 | 8   |
| >TSHR-F631L LIFTDFICMA  | 52  | >TSHR-F631L LILTDFICMA  | 99  | 47  |
| >TSHR-F631L LIFTDFICM   | 173 | >TSHR-F631L LILTDFICM   | 960 | 787 |
| >TSHR-F631L VLIFTDFI    | 68  | >TSHR-F631L VLILTDFI    | 143 | 75  |
| >TSHR-F631L VLIFTDFICM  | 428 | >TSHR-F631L VLILTDFICM  | 339 | 89  |
| >TSHR-F631L VLIFTDFICMA | 110 | >TSHR-F631L VLILTDFICMA | 215 | 105 |
| >TSHR-F631L VLIFTDFI    | 29  | >TSHR-F631L VLILTDFI    | 68  | 39  |
| >TSHR-F631L VLIFTDFICMA | 168 | >TSHR-F631L VLILTDFICMA | 312 | 144 |
| >TSHR-F631L VLIFTDFI    | 42  | >TSHR-F631L VLILTDFI    | 123 | 81  |
| >TSHR-F631L VLIFTDFICMA | 62  | >TSHR-F631L VLILTDFICMA | 161 | 99  |
| >TSHR-F631L VLIFTDFI    | 161 | >TSHR-F631L VLILTDFI    | 286 | 125 |
| >TSHR-F631L VLIFTDFICMA | 237 | >TSHR-F631L VLILTDFICMA | 384 | 147 |
| >TSHR-F631L VLIFTDFI    | 13  | >TSHR-F631L VLILTDFI    | 29  | 16  |
| >TSHR-F631L VLIFTDFICMA | 19  | >TSHR-F631L VLILTDFICMA | 38  | 19  |
| >TSHR-F631L VLIFTDFI    | 11  | >TSHR-F631L VLILTDFI    | 19  | 8   |
| >TSHR-F631L VLIFTDFIC   | 195 | >TSHR-F631L VLILTDFIC   | 411 | 216 |
| >TSHR-F631L VLIFTDFICM  | 185 | >TSHR-F631L VLILTDFICM  | 299 | 114 |
| >TSHR-F631L VLIFTDFICMA | 56  | >TSHR-F631L VLILTDFICMA | 96  | 40  |
| >TSHR-F631L VLIFTDFI    | 30  | >TSHR-F631L VLILTDFI    | 38  | 8   |
| >TSHR-F631L VLIFTDFICMA | 38  | >TSHR-F631L VLILTDFICMA | 50  | 12  |
| >TSHR-F631L VLIFTDFI    | 78  | >TSHR-F631L VLILTDFI    | 193 | 115 |
| >TSHR-F631L VLIFTDFI    | 45  | >TSHR-F631L VLILTDFI    | 68  | 23  |
| >TSHR-F631L VLIFTDFIC   | 381 | >TSHR-F631L VLILTDFIC   | 562 | 181 |
| >TSHR-F631L VLIFTDFICMA | 14  | >TSHR-F631L VLILTDFICMA | 19  | 5   |
| >TSHR-F631L AVLIFTDFI   | 527 | >TSHR-F631L AVLILTDFI   | 301 | 226 |
| >TSHR-F631L AVLIFTDFI   | 339 | >TSHR-F631L AVLILTDFI   | 462 | 123 |
| >TSHR-F631L AVLIFTDFI   | 201 | >TSHR-F631L AVLILTDFI   | 335 | 134 |
| >TSHR-F631L AVLIFTDFI   | 47  | >TSHR-F631L AVLILTDFI   | 60  | 13  |
| >TSHR-F631L AVLIFTDFI   | 98  | >TSHR-F631L AVLILTDFI   | 320 | 222 |
| >TSHR-F631L AVLIFTDFI   | 264 | >TSHR-F631L AVLILTDFI   | 187 | 77  |
| >TSHR-F631L AVLIFTDFICM | 287 | >TSHR-F631L AVLILTDFICM | 344 | 57  |
| >TSHR-F631L AVLIFTDF    | 63  | >TSHR-F631L AVLILTDF    | 108 | 45  |
| >TSHR-F631L AVLIFTDFI   | 238 | >TSHR-F631L AVLILTDFI   | 441 | 203 |
| >TSHR-F631L AVLIFTDFI   | 189 | >TSHR-F631L AVLILTDFI   | 802 | 613 |
| >TSHR-F631L AVLIFTDF    | 213 | >TSHR-F631L AVLILTDF    | 790 | 577 |
| >TSHR-F631L AVLIFTDF    | 424 | >TSHR-F631L AVLILTDF    | 264 | 160 |
| >TSHR-F631L AVLIFTDFI   | 226 | >TSHR-F631L AVLILTDFI   | 601 | 375 |
| >TSHR-F631L MAVLIFTDFI  | 190 | >TSHR-F631L MAVLILTDFI  | 171 | 19  |
| >TSHR-F631L MAVLIFTDFI  | 153 | >TSHR-F631L MAVLILTDFI  | 187 | 34  |
| >TSHR-F631L MAVLIFTDFI  | 76  | >TSHR-F631L MAVLILTDFI  | 185 | 109 |
| >TSHR-F631L MAVLIFTDFI  | 304 | >TSHR-F631L MAVLILTDFI  | 615 | 311 |
| >TSHR-F631L MAVLIFTDF   | 57  | >TSHR-F631L MAVLILTDF   | 177 | 120 |



|                        |     |                        |     |     |
|------------------------|-----|------------------------|-----|-----|
| >TSHR-F631L MAVLIFTDF  | 85  | >TSHR-F631L MAVLILTDF  | 26  | 59  |
| >TSHR-F631L MAVLIFTDF  | 48  | >TSHR-F631L MAVLILTDF  | 73  | 25  |
| >TSHR-F631L MAVLIFTDF  | 151 | >TSHR-F631L MAVLILTDF  | 436 | 285 |
| >TSHR-F631L MAVLIFTDF  | 406 | >TSHR-F631L MAVLILTDF  | 582 | 176 |
| >TSHR-F631L RMAVLIFT   | 161 | >TSHR-F631L RMAVLILT   | 431 | 270 |
| >TSHR-F631L RMAVLIFTDF | 30  | >TSHR-F631L RMAVLILTDF | 48  | 18  |
| >TSHR-F631L RMAVLIFT   | 75  | >TSHR-F631L RMAVLILT   | 212 | 137 |
| >TSHR-F631L RMAVLIFTDF | 5   | >TSHR-F631L RMAVLILTDF | 10  | 5   |
| >TSHR-F631L RMAVLIFT   | 150 | >TSHR-F631L RMAVLILT   | 184 | 34  |
| >TSHR-F631L RMAVLIFTDF | 15  | >TSHR-F631L RMAVLILTDF | 19  | 4   |
| >TSHR-F631L RMAVLIFT   | 289 | >TSHR-F631L RMAVLILT   | 884 | 595 |
| >TSHR-F631L RMAVLIFTDF | 53  | >TSHR-F631L RMAVLILTDF | 106 | 53  |
| >TSHR-F631L RMAVLIFT   | 75  | >TSHR-F631L RMAVLILT   | 291 | 216 |
| >TSHR-F631L RMAVLIFTDF | 8   | >TSHR-F631L RMAVLILTDF | 13  | 5   |
| >TSHR-F631L RMAVLIFTDF | 25  | >TSHR-F631L RMAVLILTDF | 49  | 24  |
| >TSHR-F631L RMAVLIFT   | 104 | >TSHR-F631L RMAVLILT   | 539 | 435 |
| >TSHR-F631L RMAVLIFTDF | 16  | >TSHR-F631L RMAVLILTDF | 19  | 3   |
| >TSHR-F631L RMAVLIFTDF | 19  | >TSHR-F631L RMAVLILTDF | 50  | 31  |
| >TSHR-F631L RMAVLIFT   | 425 | >TSHR-F631L RMAVLILT   | 676 | 251 |
| >TSHR-F631L RMAVLIFTDF | 89  | >TSHR-F631L RMAVLILTDF | 160 | 71  |
| >TSHR-F631L RMAVLIFTDF | 185 | >TSHR-F631L RMAVLILTDF | 436 | 251 |
| >TSHR-F631L RMAVLIFTDF | 22  | >TSHR-F631L RMAVLILTDF | 27  | 5   |
| >TSHR-F631L RMAVLIFTDF | 69  | >TSHR-F631L RMAVLILTDF | 98  | 29  |
| >TSHR-F631L RMAVLIFTDF | 45  | >TSHR-F631L RMAVLILTDF | 54  | 9   |
| >TSHR-F631L RMAVLIFTDF | 8   | >TSHR-F631L RMAVLILTDF | 10  | 2   |
| >TSHR-F631L RMAVLIFTDF | 498 | >TSHR-F631L RMAVLILTDF | 618 | 120 |
| >TSHR-F631L RMAVLIFTDF | 337 | >TSHR-F631L RMAVLILTDF | 139 | 198 |
| >TSHR-F631L RMAVLIFTDF | 106 | >TSHR-F631L RMAVLILTDF | 104 | 2   |
| >TSHR-F631L RMAVLIFTDF | 97  | >TSHR-F631L RMAVLILTDF | 101 | 4   |
| >TSHR-F631L RMAVLIFTDF | 253 | >TSHR-F631L RMAVLILTDF | 122 | 131 |
| >TSHR-F631L RMAVLIFTDF | 347 | >TSHR-F631L RMAVLILTDF | 503 | 156 |
| >TSHR-F631L RMAVLIFTDF | 146 | >TSHR-F631L RMAVLILTDF | 232 | 86  |
| >TSHR-F631L KRMAVLIF   | 8   | >TSHR-F631L KRMAVLIL   | 95  | 87  |
| >TSHR-F631L KRMAVLIFTD | 14  | >TSHR-F631L KRMAVLILTD | 23  | 9   |
| >TSHR-F631L KRMAVLIF   | 26  | >TSHR-F631L KRMAVLIL   | 20  | 6   |
| >TSHR-F631L KRMAVLIFT  | 117 | >TSHR-F631L KRMAVLILT  | 87  | 30  |
| >TSHR-F631L KRMAVLIFTD | 902 | >TSHR-F631L KRMAVLILTD | 357 | 545 |
| >TSHR-F631L KRMAVLIFTD | 38  | >TSHR-F631L KRMAVLILTD | 40  | 2   |
| >TSHR-F631L KRMAVLIF   | 966 | >TSHR-F631L KRMAVLIL   | 34  | 932 |
| >TSHR-F631L KRMAVLIF   | 139 | >TSHR-F631L KRMAVLIL   | 31  | 108 |
| >TSHR-F631L KRMAVLIFT  | 62  | >TSHR-F631L KRMAVLILT  | 48  | 14  |
| >TSHR-F631L KRMAVLIFTD | 499 | >TSHR-F631L KRMAVLILTD | 113 | 386 |
| >TSHR-F631L KRMAVLIFTD | 45  | >TSHR-F631L KRMAVLILTD | 50  | 5   |

|                        |       |                        |      |       |
|------------------------|-------|------------------------|------|-------|
| >TSHR-F631L KRMAVLIF   | 688   | >TSHR-F631L KRMAVLIL   | 274  | 414   |
| >TSHR-F631L KRMAVLIFT  | 678   | >TSHR-F631L KRMAVLILT  | 440  | 238   |
| >TSHR-F631L KRMAVLIFTD | 1357  | >TSHR-F631L KRMAVLILTD | 418  | 939   |
| >TSHR-F631L KRMAVLIFTD | 28    | >TSHR-F631L KRMAVLILTD | 46   | 18    |
| >TSHR-F631L AKRMAVLIF  | 3681  | >TSHR-F631L AKRMAVLIL  | 430  | 3251  |
| >TSHR-F631L AKRMAVLIF  | 3     | >TSHR-F631L AKRMAVLIL  | 10   | 7     |
| >TSHR-F631L IAKRMAVLIF | 3159  | >TSHR-F631L IAKRMAVLIL | 331  | 2828  |
| >TSHR-F631L IAKRMAVLIF | 326   | >TSHR-F631L IAKRMAVLIL | 5856 | 5530  |
| >TSHR-F631L IAKRMAVLIF | 21    | >TSHR-F631L IAKRMAVLIL | 604  | 583   |
| >TSHR-F631L IAKRMAVLIF | 37    | >TSHR-F631L IAKRMAVLIL | 458  | 421   |
| >TSHR-F631L IAKRMAVLIF | 308   | >TSHR-F631L IAKRMAVLIL | 4139 | 3831  |
| >TSHR-F631L IAKRMAVLIF | 214   | >TSHR-F631L IAKRMAVLIL | 3891 | 3677  |
| >TSHR-F631\FTDFICMA    | 392   | >TSHR-F631\VTDFICMA    | 1896 | 1504  |
| >TSHR-F631\FTDFICMA    | 343   | >TSHR-F631\VTDFICMA    | 6872 | 6529  |
| >TSHR-F631\FTDFICMAPI  | 378   | >TSHR-F631\VTDFICMAPI  | 3322 | 2944  |
| >TSHR-F631\FTDFICMA    | 221   | >TSHR-F631\VTDFICMA    | 5249 | 5028  |
| >TSHR-F631\FTDFICMAPI  | 333   | >TSHR-F631\VTDFICMAPI  | 2546 | 2213  |
| >TSHR-F631\FTDFICMAPI  | 400   | >TSHR-F631\VTDFICMAPI  | 2773 | 2373  |
| >TSHR-F631\FTDFICMA    | 140   | >TSHR-F631\VTDFICMA    | 2583 | 2443  |
| >TSHR-F631\FTDFICMAPI  | 83    | >TSHR-F631\VTDFICMAPI  | 836  | 753   |
| >TSHR-F631\FTDFICMA    | 187   | >TSHR-F631\VTDFICMA    | 899  | 712   |
| >TSHR-F631\FTDFICMAPI  | 256   | >TSHR-F631\VTDFICMAPI  | 1593 | 1337  |
| >TSHR-F631\FTDFICMAPI  | 1296  | >TSHR-F631\VTDFICMAPI  | 424  | 872   |
| >TSHR-F631\FTDFICMA    | 194   | >TSHR-F631\VTDFICMA    | 3769 | 3575  |
| >TSHR-F631\FTDFICMAPI  | 29    | >TSHR-F631\VTDFICMAPI  | 92   | 63    |
| >TSHR-F631\FTDFICMA    | 119   | >TSHR-F631\VTDFICMA    | 2575 | 2456  |
| >TSHR-F631\FTDFICMAPI  | 16    | >TSHR-F631\VTDFICMAPI  | 336  | 320   |
| >TSHR-F631\FTDFICMAPI  | 185   | >TSHR-F631\VTDFICMAPI  | 120  | 65    |
| >TSHR-F631\FTDFICMAPI  | 412   | >TSHR-F631\VTDFICMAPI  | 507  | 95    |
| >TSHR-F631\FTDFICMAPI  | 94    | >TSHR-F631\VTDFICMAPI  | 122  | 28    |
| >TSHR-F631\IFTDFICMAPI | 1112  | >TSHR-F631\IVTDFICMAPI | 229  | 883   |
| >TSHR-F631\IFTDFICMA   | 12899 | >TSHR-F631\IVTDFICMA   | 455  | 12444 |
| >TSHR-F631\IFTDFICMAPI | 5230  | >TSHR-F631\IVTDFICMAPI | 99   | 5131  |
| >TSHR-F631\IFTDFICMA   | 1953  | >TSHR-F631\IVTDFICMA   | 370  | 1583  |
| >TSHR-F631\IFTDFICMAPI | 365   | >TSHR-F631\IVTDFICMAPI | 79   | 286   |
| >TSHR-F631\IFTDFICMA   | 10330 | >TSHR-F631\IVTDFICMA   | 242  | 10088 |
| >TSHR-F631\IFTDFICMAPI | 6132  | >TSHR-F631\IVTDFICMAPI | 48   | 6084  |
| >TSHR-F631\IFTDFICM    | 14297 | >TSHR-F631\IVTDFICM    | 486  | 13811 |
| >TSHR-F631\IFTDFICMA   | 7172  | >TSHR-F631\IVTDFICMA   | 42   | 7130  |
| >TSHR-F631\IFTDFICMAPI | 2360  | >TSHR-F631\IVTDFICMAPI | 18   | 2342  |
| >TSHR-F631\IFTDFICMA   | 1766  | >TSHR-F631\IVTDFICMA   | 70   | 1696  |
| >TSHR-F631\IFTDFICMAPI | 2487  | >TSHR-F631\IVTDFICMAPI | 177  | 2310  |
| >TSHR-F631\IFTDFICMA   | 936   | >TSHR-F631\IVTDFICMA   | 16   | 920   |

|                        |       |                        |       |       |
|------------------------|-------|------------------------|-------|-------|
| >TSHR-F631\IFTDFICMAPI | 3096  | >TSHR-F631\IVTDFICMAPI | 90    | 3006  |
| >TSHR-F631\IFTDFICMA   | 17472 | >TSHR-F631\IVTDFICMA   | 337   | 17135 |
| >TSHR-F631\IFTDFICMAPI | 5324  | >TSHR-F631\IVTDFICMAPI | 19    | 5305  |
| >TSHR-F631\IFTDFICMAPI | 11909 | >TSHR-F631\IVTDFICMAPI | 261   | 11648 |
| >TSHR-F631\KIAKRMAVLII | 17444 | >TSHR-F631\KIAKRMAVLI' | 140   | 17304 |
| >TSHR-F631\KIAKRMAVLII | 8427  | >TSHR-F631\KIAKRMAVLI' | 115   | 8312  |
| >TSHR-F631\KIAKRMAVLII | 7523  | >TSHR-F631\KIAKRMAVLI' | 12    | 7511  |
| >TSHR-F631\KIAKRMAVLII | 2973  | >TSHR-F631\KIAKRMAVLI' | 43    | 2930  |
| >TSHR-F631\KIAKRMAVLII | 23719 | >TSHR-F631\KIAKRMAVLI' | 295   | 23424 |
| >TSHR-F631\KIAKRMAVLII | 22893 | >TSHR-F631\KIAKRMAVLI' | 76    | 22817 |
| >TSHR-F631\KIAKRMAVLII | 28417 | >TSHR-F631\KIAKRMAVLI' | 51    | 28366 |
| >TSHR-F631\KIAKRMAVLII | 154   | >TSHR-F631\KIAKRMAVLI' | 2586  | 2432  |
| >TSHR-F631\KIAKRMAVLII | 166   | >TSHR-F631\KIAKRMAVLI' | 7372  | 7206  |
| >TSHR-F631\KIAKRMAVLII | 110   | >TSHR-F631\KIAKRMAVLI' | 4400  | 4290  |
| >TSHR-F631\KIAKRMAVLII | 148   | >TSHR-F631\KIAKRMAVLI' | 12993 | 12845 |
| >TSHR-F631\KIAKRMAVLII | 88    | >TSHR-F631\KIAKRMAVLI' | 8306  | 8218  |
| >TSHR-F631\LIFTDFICMA  | 181   | >TSHR-F631\LIVTDFICMA  | 610   | 429   |
| >TSHR-F631\LIFTDFICMA  | 139   | >TSHR-F631\LIVTDFICMA  | 398   | 259   |
| >TSHR-F631\LIFTDFICM   | 319   | >TSHR-F631\LIVTDFICM   | 446   | 127   |
| >TSHR-F631\LIFTDFICMA  | 109   | >TSHR-F631\LIVTDFICMA  | 104   | 5     |
| >TSHR-F631\LIFTDFICMA  | 72    | >TSHR-F631\LIVTDFICMA  | 567   | 495   |
| >TSHR-F631\LIFTDFICMA  | 302   | >TSHR-F631\LIVTDFICMA  | 2810  | 2508  |
| >TSHR-F631\LIFTDFICMA  | 52    | >TSHR-F631\LIVTDFICMA  | 198   | 146   |
| >TSHR-F631\LIFTDFICM   | 3450  | >TSHR-F631\LIVTDFICM   | 62    | 3388  |
| >TSHR-F631\LIFTDFICM   | 173   | >TSHR-F631\LIVTDFICM   | 1163  | 990   |
| >TSHR-F631\VLIFTDFI    | 68    | >TSHR-F631\VLIVTDFI    | 119   | 51    |
| >TSHR-F631\VLIFTDFICM  | 428   | >TSHR-F631\VLIVTDFICM  | 564   | 136   |
| >TSHR-F631\VLIFTDFICM/ | 110   | >TSHR-F631\VLIVTDFICM/ | 189   | 79    |
| >TSHR-F631\VLIFTDFI    | 29    | >TSHR-F631\VLIVTDFI    | 55    | 26    |
| >TSHR-F631\VLIFTDFICM/ | 168   | >TSHR-F631\VLIVTDFICM/ | 284   | 116   |
| >TSHR-F631\VLIFTDFI    | 42    | >TSHR-F631\VLIVTDFI    | 122   | 80    |
| >TSHR-F631\VLIFTDFICM/ | 62    | >TSHR-F631\VLIVTDFICM/ | 182   | 120   |
| >TSHR-F631\VLIFTDFI    | 161   | >TSHR-F631\VLIVTDFI    | 186   | 25    |
| >TSHR-F631\VLIFTDFICM/ | 237   | >TSHR-F631\VLIVTDFICM/ | 265   | 28    |
| >TSHR-F631\VLIFTDFI    | 13    | >TSHR-F631\VLIVTDFI    | 20    | 7     |
| >TSHR-F631\VLIFTDFICM/ | 19    | >TSHR-F631\VLIVTDFICM/ | 31    | 12    |
| >TSHR-F631\VLIFTDFI    | 11    | >TSHR-F631\VLIVTDFI    | 16    | 5     |
| >TSHR-F631\VLIFTDFIC   | 195   | >TSHR-F631\VLIVTDFIC   | 351   | 156   |
| >TSHR-F631\VLIFTDFICM  | 185   | >TSHR-F631\VLIVTDFICM  | 267   | 82    |
| >TSHR-F631\VLIFTDFICM/ | 56    | >TSHR-F631\VLIVTDFICM/ | 84    | 28    |
| >TSHR-F631\VLIFTDFI    | 30    | >TSHR-F631\VLIVTDFI    | 29    | 1     |
| >TSHR-F631\VLIFTDFICM/ | 38    | >TSHR-F631\VLIVTDFICM/ | 38    | 0     |
| >TSHR-F631\VLIFTDFI    | 78    | >TSHR-F631\VLIVTDFI    | 224   | 146   |

|                        |      |                        |      |      |
|------------------------|------|------------------------|------|------|
| >TSHR-F631\VLIFTDFI    | 45   | >TSHR-F631\VLIVTDFI    | 47   | 2    |
| >TSHR-F631\VLIFTDFIC   | 381  | >TSHR-F631\VLIVTDFIC   | 338  | 43   |
| >TSHR-F631\VLIFTDFICM  | 567  | >TSHR-F631\VLIVTDFICM  | 470  | 97   |
| >TSHR-F631\VLIFTDFICM/ | 14   | >TSHR-F631\VLIVTDFICM/ | 13   | 1    |
| >TSHR-F631\AVLIFTDFI   | 339  | >TSHR-F631\AVLIVTDFI   | 341  | 2    |
| >TSHR-F631\AVLIFTDFI   | 201  | >TSHR-F631\AVLIVTDFI   | 396  | 195  |
| >TSHR-F631\AVLIFTDFI   | 47   | >TSHR-F631\AVLIVTDFI   | 50   | 3    |
| >TSHR-F631\AVLIFTDFI   | 98   | >TSHR-F631\AVLIVTDFI   | 74   | 24   |
| >TSHR-F631\AVLIFTDFI   | 264  | >TSHR-F631\AVLIVTDFI   | 89   | 175  |
| >TSHR-F631\AVLIFTDFICM | 287  | >TSHR-F631\AVLIVTDFICM | 374  | 87   |
| >TSHR-F631\AVLIFTDF    | 63   | >TSHR-F631\AVLIVTDF    | 71   | 8    |
| >TSHR-F631\AVLIFTDFI   | 238  | >TSHR-F631\AVLIVTDFI   | 468  | 230  |
| >TSHR-F631\AVLIFTDFI   | 552  | >TSHR-F631\AVLIVTDFI   | 388  | 164  |
| >TSHR-F631\AVLIFTDFI   | 189  | >TSHR-F631\AVLIVTDFI   | 646  | 457  |
| >TSHR-F631\AVLIFTDF    | 213  | >TSHR-F631\AVLIVTDF    | 615  | 402  |
| >TSHR-F631\AVLIFTDF    | 424  | >TSHR-F631\AVLIVTDF    | 469  | 45   |
| >TSHR-F631\AVLIFTDFI   | 226  | >TSHR-F631\AVLIVTDFI   | 328  | 102  |
| >TSHR-F631\MAVLIFTDFI  | 190  | >TSHR-F631\MAVLIVTDFI  | 170  | 20   |
| >TSHR-F631\MAVLIFTDFI  | 153  | >TSHR-F631\MAVLIVTDFI  | 300  | 147  |
| >TSHR-F631\MAVLIFTDFI  | 76   | >TSHR-F631\MAVLIVTDFI  | 71   | 5    |
| >TSHR-F631\MAVLIFTDFI  | 304  | >TSHR-F631\MAVLIVTDFI  | 606  | 302  |
| >TSHR-F631\MAVLIFTDF   | 57   | >TSHR-F631\MAVLIVTDF   | 77   | 20   |
| >TSHR-F631\MAVLIFTDF   | 85   | >TSHR-F631\MAVLIVTDF   | 19   | 66   |
| >TSHR-F631\MAVLIFTDF   | 48   | >TSHR-F631\MAVLIVTDF   | 42   | 6    |
| >TSHR-F631\MAVLIFTDF   | 151  | >TSHR-F631\MAVLIVTDF   | 228  | 77   |
| >TSHR-F631\MAVLIFTDF   | 903  | >TSHR-F631\MAVLIVTDF   | 246  | 657  |
| >TSHR-F631\MAVLIFTDFI  | 1122 | >TSHR-F631\MAVLIVTDFI  | 435  | 687  |
| >TSHR-F631\MAVLIFTDF   | 406  | >TSHR-F631\MAVLIVTDF   | 870  | 464  |
| >TSHR-F631\RMAVLIFT    | 161  | >TSHR-F631\RMAVLIVT    | 1236 | 1075 |
| >TSHR-F631\RMAVLIFTDF  | 30   | >TSHR-F631\RMAVLIVTDF  | 48   | 18   |
| >TSHR-F631\RMAVLIFT    | 75   | >TSHR-F631\RMAVLIVT    | 646  | 571  |
| >TSHR-F631\RMAVLIFTDF  | 5    | >TSHR-F631\RMAVLIVTDF  | 7    | 2    |
| >TSHR-F631\RMAVLIFT    | 150  | >TSHR-F631\RMAVLIVT    | 374  | 224  |
| >TSHR-F631\RMAVLIFTDF  | 15   | >TSHR-F631\RMAVLIVTDF  | 17   | 2    |
| >TSHR-F631\RMAVLIFT    | 289  | >TSHR-F631\RMAVLIVT    | 1266 | 977  |
| >TSHR-F631\RMAVLIFTDF  | 53   | >TSHR-F631\RMAVLIVTDF  | 94   | 41   |
| >TSHR-F631\RMAVLIFT    | 75   | >TSHR-F631\RMAVLIVT    | 276  | 201  |
| >TSHR-F631\RMAVLIFTDF  | 8    | >TSHR-F631\RMAVLIVTDF  | 9    | 1    |
| >TSHR-F631\RMAVLIFTDF  | 25   | >TSHR-F631\RMAVLIVTDF  | 35   | 10   |
| >TSHR-F631\RMAVLIFT    | 104  | >TSHR-F631\RMAVLIVT    | 726  | 622  |
| >TSHR-F631\RMAVLIFTDF  | 16   | >TSHR-F631\RMAVLIVTDF  | 17   | 1    |
| >TSHR-F631\RMAVLIFTDF  | 19   | >TSHR-F631\RMAVLIVTDF  | 32   | 13   |
| >TSHR-F631\RMAVLIFT    | 425  | >TSHR-F631\RMAVLIVT    | 949  | 524  |

|                        |       |                        |       |       |
|------------------------|-------|------------------------|-------|-------|
| >TSHR-F631\ RMAVLIFTDF | 89    | >TSHR-F631\ RMAVLIVTDF | 140   | 51    |
| >TSHR-F631\ RMAVLIFTDF | 185   | >TSHR-F631\ RMAVLIVTDF | 370   | 185   |
| >TSHR-F631\ RMAVLIFTDF | 22    | >TSHR-F631\ RMAVLIVTDF | 17    | 5     |
| >TSHR-F631\ RMAVLIFTDF | 69    | >TSHR-F631\ RMAVLIVTDF | 74    | 5     |
| >TSHR-F631\ RMAVLIFTDF | 45    | >TSHR-F631\ RMAVLIVTDF | 48    | 3     |
| >TSHR-F631\ RMAVLIFTDF | 8     | >TSHR-F631\ RMAVLIVTDF | 7     | 1     |
| >TSHR-F631\ RMAVLIFTDF | 498   | >TSHR-F631\ RMAVLIVTDF | 529   | 31    |
| >TSHR-F631\ RMAVLIFTDF | 337   | >TSHR-F631\ RMAVLIVTDF | 155   | 182   |
| >TSHR-F631\ RMAVLIFTDF | 106   | >TSHR-F631\ RMAVLIVTDF | 85    | 21    |
| >TSHR-F631\ RMAVLIFTDF | 97    | >TSHR-F631\ RMAVLIVTDF | 118   | 21    |
| >TSHR-F631\ RMAVLIFTDF | 253   | >TSHR-F631\ RMAVLIVTDF | 242   | 11    |
| >TSHR-F631\ RMAVLIFTDF | 347   | >TSHR-F631\ RMAVLIVTDF | 465   | 118   |
| >TSHR-F631\ RMAVLIFTDF | 146   | >TSHR-F631\ RMAVLIVTDF | 183   | 37    |
| >TSHR-F631\ KRMAVLIFTD | 577   | >TSHR-F631\ KRMAVLIVTC | 308   | 269   |
| >TSHR-F631\ KRMAVLIF   | 8     | >TSHR-F631\ KRMAVLIV   | 187   | 179   |
| >TSHR-F631\ KRMAVLIFTD | 14    | >TSHR-F631\ KRMAVLIVTC | 13    | 1     |
| >TSHR-F631\ KRMAVLIF   | 26    | >TSHR-F631\ KRMAVLIV   | 38    | 12    |
| >TSHR-F631\ KRMAVLIFT  | 117   | >TSHR-F631\ KRMAVLIVT  | 172   | 55    |
| >TSHR-F631\ KRMAVLIFTD | 38    | >TSHR-F631\ KRMAVLIVTC | 42    | 4     |
| >TSHR-F631\ KRMAVLIF   | 966   | >TSHR-F631\ KRMAVLIV   | 458   | 508   |
| >TSHR-F631\ KRMAVLIF   | 139   | >TSHR-F631\ KRMAVLIV   | 148   | 9     |
| >TSHR-F631\ KRMAVLIFT  | 62    | >TSHR-F631\ KRMAVLIVT  | 70    | 8     |
| >TSHR-F631\ KRMAVLIFTD | 499   | >TSHR-F631\ KRMAVLIVTC | 414   | 85    |
| >TSHR-F631\ KRMAVLIFTD | 45    | >TSHR-F631\ KRMAVLIVTC | 53    | 8     |
| >TSHR-F631\ KRMAVLIFTD | 28    | >TSHR-F631\ KRMAVLIVTC | 52    | 24    |
| >TSHR-F631\ AKRMAVLIF  | 3681  | >TSHR-F631\ AKRMAVLIV  | 249   | 3432  |
| >TSHR-F631\ AKRMAVLIF  | 3     | >TSHR-F631\ AKRMAVLIV  | 19    | 16    |
| >TSHR-F631\ IAKRMAVLIF | 3159  | >TSHR-F631\ IAKRMAVLIV | 186   | 2973  |
| >TSHR-F631\ IAKRMAVLIF | 326   | >TSHR-F631\ IAKRMAVLIV | 10401 | 10075 |
| >TSHR-F631\ IAKRMAVLIF | 21    | >TSHR-F631\ IAKRMAVLIV | 1412  | 1391  |
| >TSHR-F631\ IAKRMAVLIF | 37    | >TSHR-F631\ IAKRMAVLIV | 6552  | 6515  |
| >TSHR-F631\ IAKRMAVLIF | 308   | >TSHR-F631\ IAKRMAVLIV | 13193 | 12885 |
| >TSHR-F631\ IAKRMAVLIF | 214   | >TSHR-F631\ IAKRMAVLIV | 14942 | 14728 |
| >TSHR-F666L FYPLNSCANP | 232   | >TSHR-F666L LYPLNSCANP | 328   | 96    |
| >TSHR-F666L FYPLNSCANP | 119   | >TSHR-F666L LYPLNSCANP | 72    | 47    |
| >TSHR-F666L FYPLNSCANP | 5     | >TSHR-F666L LYPLNSCANP | 6     | 1     |
| >TSHR-F666L LFYPLNSCA  | 19106 | >TSHR-F666L LLYPLNSCA  | 140   | 18966 |
| >TSHR-F666L LFYPLNSCA  | 2335  | >TSHR-F666L LLYPLNSCA  | 37    | 2298  |
| >TSHR-F666L LFYPLNSC   | 18207 | >TSHR-F666L LLYPLNSC   | 213   | 17994 |
| >TSHR-F666L LFYPLNSCA  | 11799 | >TSHR-F666L LLYPLNSCA  | 18    | 11781 |
| >TSHR-F666L LFYPLNSCA  | 13099 | >TSHR-F666L LLYPLNSCA  | 422   | 12677 |
| >TSHR-F666L LFYPLNSC   | 10019 | >TSHR-F666L LLYPLNSC   | 19    | 10000 |
| >TSHR-F666L LFYPLNSCA  | 13222 | >TSHR-F666L LLYPLNSCA  | 31    | 13191 |

|                         |       |                         |       |       |
|-------------------------|-------|-------------------------|-------|-------|
| >TSHR-F666L LFYPLNSC    | 17911 | >TSHR-F666L LLYPLNSC    | 210   | 17701 |
| >TSHR-F666L LFYPLNSCA   | 17916 | >TSHR-F666L LLYPLNSCA   | 123   | 17793 |
| >TSHR-F666L LFYPLNSCA   | 13058 | >TSHR-F666L LLYPLNSCA   | 23    | 13035 |
| >TSHR-F666L LFYPLNSC    | 12527 | >TSHR-F666L LLYPLNSC    | 8     | 12519 |
| >TSHR-F666L LFYPLNSCA   | 13105 | >TSHR-F666L LLYPLNSCA   | 9     | 13096 |
| >TSHR-F666L LFYPLNSC    | 312   | >TSHR-F666L LLYPLNSC    | 13657 | 13345 |
| >TSHR-F666L LFYPLNSCA   | 481   | >TSHR-F666L LLYPLNSCA   | 17621 | 17140 |
| >TSHR-F666L VSNSKILLVLF | 483   | >TSHR-F666L VSNSKILLVLL | 320   | 163   |
| >TSHR-F666L VSNSKILLVLF | 128   | >TSHR-F666L VSNSKILLVLL | 2999  | 2871  |
| >TSHR-F666L VSNSKILLVLF | 7     | >TSHR-F666L VSNSKILLVLL | 67    | 60    |
| >TSHR-F666L VSNSKILLVLF | 44    | >TSHR-F666L VSNSKILLVLL | 850   | 806   |
| >TSHR-F666L VSNSKILLVLF | 207   | >TSHR-F666L VSNSKILLVLL | 125   | 82    |
| >TSHR-F666L VSNSKILLVLF | 61    | >TSHR-F666L VSNSKILLVLL | 398   | 337   |
| >TSHR-F666L VLFYPLNSCA  | 221   | >TSHR-F666L VLLYPLNSCA  | 635   | 414   |
| >TSHR-F666L VLFYPLNSCA  | 201   | >TSHR-F666L VLLYPLNSCA  | 462   | 261   |
| >TSHR-F666L VLFYPLNSC   | 56    | >TSHR-F666L VLLYPLNSC   | 90    | 34    |
| >TSHR-F666L VLFYPLNSCA  | 70    | >TSHR-F666L VLLYPLNSCA  | 120   | 50    |
| >TSHR-F666L VLFYPLNSC   | 449   | >TSHR-F666L VLLYPLNSC   | 299   | 150   |
| >TSHR-F666L VLFYPLNSCA  | 215   | >TSHR-F666L VLLYPLNSCA  | 154   | 61    |
| >TSHR-F666L VLFYPLNSCA  | 130   | >TSHR-F666L VLLYPLNSCA  | 134   | 4     |
| >TSHR-F666L VLFYPLNSCA  | 2012  | >TSHR-F666L VLLYPLNSCA  | 218   | 1794  |
| >TSHR-F666L VLFYPLNSC   | 134   | >TSHR-F666L VLLYPLNSC   | 264   | 130   |
| >TSHR-F666L VLFYPLNSCA  | 58    | >TSHR-F666L VLLYPLNSCA  | 106   | 48    |
| >TSHR-F666L LLVLFYPL    | 46    | >TSHR-F666L LLVLLYPL    | 579   | 533   |
| >TSHR-F666L LLVLFYPL    | 33    | >TSHR-F666L LLVLLYPL    | 45    | 12    |
| >TSHR-F666L LLVLFYPL    | 26    | >TSHR-F666L LLVLLYPL    | 35    | 9     |
| >TSHR-F666L LLVLFYPL    | 82    | >TSHR-F666L LLVLLYPL    | 83    | 1     |
| >TSHR-F666L LLVLFYPL    | 58    | >TSHR-F666L LLVLLYPL    | 72    | 14    |
| >TSHR-F666L LLVLFYPL    | 17    | >TSHR-F666L LLVLLYPL    | 24    | 7     |
| >TSHR-F666L LLVLFYPLNSC | 413   | >TSHR-F666L LLVLLYPLNSC | 807   | 394   |
| >TSHR-F666L LLVLFYPL    | 25    | >TSHR-F666L LLVLLYPL    | 27    | 2     |
| >TSHR-F666L LLVLFYPL    | 80    | >TSHR-F666L LLVLLYPL    | 60    | 20    |
| >TSHR-F666L LLVLFYPL    | 284   | >TSHR-F666L LLVLLYPL    | 271   | 13    |
| >TSHR-F666L LLVLFYPL    | 8     | >TSHR-F666L LLVLLYPL    | 9     | 1     |
| >TSHR-F666L LLVLFYPLNSC | 146   | >TSHR-F666L LLVLLYPLNSC | 223   | 77    |
| >TSHR-F666L LLVLFYPL    | 446   | >TSHR-F666L LLVLLYPL    | 1305  | 859   |
| >TSHR-F666L ILLVLFYPL   | 424   | >TSHR-F666L ILLVLLYPL   | 311   | 113   |
| >TSHR-F666L ILLVLFYPL   | 125   | >TSHR-F666L ILLVLLYPL   | 309   | 184   |
| >TSHR-F666L ILLVLFYPL   | 11    | >TSHR-F666L ILLVLLYPL   | 10    | 1     |
| >TSHR-F666L ILLVLFYPL   | 37    | >TSHR-F666L ILLVLLYPL   | 31    | 6     |
| >TSHR-F666L ILLVLFYPL   | 525   | >TSHR-F666L ILLVLLYPL   | 235   | 290   |
| >TSHR-F666L ILLVLFYPL   | 19    | >TSHR-F666L ILLVLLYPL   | 24    | 5     |
| >TSHR-F666L ILLVLFYP    | 356   | >TSHR-F666L ILLVLLYP    | 780   | 424   |

|                         |      |                         |      |      |
|-------------------------|------|-------------------------|------|------|
| >TSHR-F666L ILLVLFYPL   | 5    | >TSHR-F666L ILLVLLYPL   | 4    | 1    |
| >TSHR-F666L ILLVLFYPL   | 6    | >TSHR-F666L ILLVLLYPL   | 4    | 2    |
| >TSHR-F666L ILLVLFYPL   | 11   | >TSHR-F666L ILLVLLYPL   | 9    | 2    |
| >TSHR-F666L ILLVLFYPL   | 8    | >TSHR-F666L ILLVLLYPL   | 4    | 4    |
| >TSHR-F666L ILLVLFYPL   | 9    | >TSHR-F666L ILLVLLYPL   | 7    | 2    |
| >TSHR-F666L ILLVLFYPL   | 76   | >TSHR-F666L ILLVLLYPL   | 98   | 22   |
| >TSHR-F666L ILLVLFYPL   | 91   | >TSHR-F666L ILLVLLYPL   | 661  | 570  |
| >TSHR-F666L ILLVLFYPL   | 144  | >TSHR-F666L ILLVLLYPL   | 602  | 458  |
| >TSHR-F666L KILLVLFYPL  | 64   | >TSHR-F666L KILLVLLYPL  | 51   | 13   |
| >TSHR-F666L KILLVLFYPL  | 65   | >TSHR-F666L KILLVLLYPL  | 49   | 16   |
| >TSHR-F666L KILLVLFYPL  | 567  | >TSHR-F666L KILLVLLYPL  | 400  | 167  |
| >TSHR-F666L KILLVLFYPL  | 34   | >TSHR-F666L KILLVLLYPL  | 34   | 0    |
| >TSHR-F666L KILLVLFYPL  | 21   | >TSHR-F666L KILLVLLYPL  | 23   | 2    |
| >TSHR-F666L KILLVLFYPL  | 34   | >TSHR-F666L KILLVLLYPL  | 50   | 16   |
| >TSHR-F666L KILLVLFYPL  | 51   | >TSHR-F666L KILLVLLYPL  | 66   | 15   |
| >TSHR-F666L KILLVLFYPL  | 146  | >TSHR-F666L KILLVLLYPL  | 220  | 74   |
| >TSHR-F666L KILLVLFY    | 99   | >TSHR-F666L KILLVLLY    | 127  | 28   |
| >TSHR-F666L KILLVLFY    | 47   | >TSHR-F666L KILLVLLY    | 92   | 45   |
| >TSHR-F666L KILLVLFY    | 29   | >TSHR-F666L KILLVLLY    | 21   | 8    |
| >TSHR-F666L KILLVLFY    | 357  | >TSHR-F666L KILLVLLY    | 1183 | 826  |
| >TSHR-F666L KILLVLFYPL  | 416  | >TSHR-F666L KILLVLLYPL  | 387  | 29   |
| >TSHR-F666L KILLVLFY    | 83   | >TSHR-F666L KILLVLLY    | 283  | 200  |
| >TSHR-F666L KILLVLFYPL  | 283  | >TSHR-F666L KILLVLLYPL  | 439  | 156  |
| >TSHR-F666L KILLVLFY    | 555  | >TSHR-F666L KILLVLLY    | 302  | 253  |
| >TSHR-F666L KILLVLFYPL  | 17   | >TSHR-F666L KILLVLLYPL  | 20   | 3    |
| >TSHR-F666L KILLVLFY    | 7    | >TSHR-F666L KILLVLLY    | 7    | 0    |
| >TSHR-F666L KILLVLFY    | 447  | >TSHR-F666L KILLVLLY    | 462  | 15   |
| >TSHR-F666L KILLVLFY    | 105  | >TSHR-F666L KILLVLLY    | 103  | 2    |
| >TSHR-F666L KILLVLFY    | 932  | >TSHR-F666L KILLVLLY    | 480  | 452  |
| >TSHR-F666L SKILLVLFY   | 461  | >TSHR-F666L SKILLVLLY   | 4786 | 4325 |
| >TSHR-F666L SKILLVLFY   | 64   | >TSHR-F666L SKILLVLLY   | 46   | 18   |
| >TSHR-F666L SKILLVLFY   | 18   | >TSHR-F666L SKILLVLLY   | 21   | 3    |
| >TSHR-F666L SKILLVLF    | 15   | >TSHR-F666L SKILLVLL    | 430  | 415  |
| >TSHR-F666L SKILLVLFY   | 36   | >TSHR-F666L SKILLVLLY   | 55   | 19   |
| >TSHR-F666L SKILLVLFYPL | 70   | >TSHR-F666L SKILLVLLYPL | 152  | 82   |
| >TSHR-F666L SKILLVLF    | 8057 | >TSHR-F666L SKILLVLL    | 399  | 7658 |
| >TSHR-F666L SKILLVLFYPL | 61   | >TSHR-F666L SKILLVLLYPL | 75   | 14   |
| >TSHR-F666L SKILLVLFYPL | 451  | >TSHR-F666L SKILLVLLYPL | 728  | 277  |
| >TSHR-F666L NSKILLVLFY  | 270  | >TSHR-F666L NSKILLVLLY  | 669  | 399  |
| >TSHR-F666L NSKILLVLFY  | 419  | >TSHR-F666L NSKILLVLLY  | 622  | 203  |
| >TSHR-F666L NSKILLVLFY  | 106  | >TSHR-F666L NSKILLVLLY  | 154  | 48   |
| >TSHR-F666L NSKILLVLF   | 112  | >TSHR-F666L NSKILLVLL   | 2104 | 1992 |
| >TSHR-F666L NSKILLVLFY  | 66   | >TSHR-F666L NSKILLVLLY  | 86   | 20   |

|                          |       |                          |       |       |
|--------------------------|-------|--------------------------|-------|-------|
| >TSHR-F666L NSKILLVLF    | 304   | >TSHR-F666L NSKILLVLL    | 1745  | 1441  |
| >TSHR-F666L NSKILLVLFY   | 186   | >TSHR-F666L NSKILLVLLY   | 256   | 70    |
| >TSHR-F666L SNSKILLVLFY  | 50    | >TSHR-F666L SNSKILLVLLY  | 38    | 12    |
| >TSHR-F666L SNSKILLVLFY  | 243   | >TSHR-F666L SNSKILLVLLY  | 592   | 349   |
| >TSHR-F666L SNSKILLVLFY  | 10    | >TSHR-F666L SNSKILLVLLY  | 11    | 1     |
| >TSHR-F666L SNSKILLVLFY  | 158   | >TSHR-F666L SNSKILLVLLY  | 80    | 78    |
| >TSHR-G336I GYKEKSKF     | 470   | >TSHR-G336I EYKEKSKF     | 1099  | 629   |
| >TSHR-G336I GYKEKSKF     | 23    | >TSHR-G336I EYKEKSKF     | 83    | 60    |
| >TSHR-G336I VGYKEKSKFQ   | 24830 | >TSHR-G336I VEYKEKSKFQ   | 248   | 24582 |
| >TSHR-G336I VGYKEKSKF    | 281   | >TSHR-G336I VEYKEKSKF    | 54    | 227   |
| >TSHR-G336I VGYKEKSKF    | 328   | >TSHR-G336I VEYKEKSKF    | 13113 | 12785 |
| >TSHR-G336I VGYKEKSKF    | 21432 | >TSHR-G336I VEYKEKSKF    | 121   | 21311 |
| >TSHR-G336I VGYKEKSKF    | 57    | >TSHR-G336I VEYKEKSKF    | 493   | 436   |
| >TSHR-G336I VGYKEKSKF    | 36057 | >TSHR-G336I VEYKEKSKF    | 224   | 35833 |
| >TSHR-G336I SIVGYKEKSK   | 315   | >TSHR-G336I SIVEYKEKSK   | 1299  | 984   |
| >TSHR-G336I SIVGYKEK     | 91    | >TSHR-G336I SIVEYKEK     | 90    | 1     |
| >TSHR-G336I SIVGYKEKSK   | 178   | >TSHR-G336I SIVEYKEKSK   | 315   | 137   |
| >TSHR-G336I SIVGYKEKSKF  | 159   | >TSHR-G336I SIVEYKEKSKF  | 235   | 76    |
| >TSHR-G336I SIVGYKEK     | 482   | >TSHR-G336I SIVEYKEK     | 377   | 105   |
| >TSHR-G336I SIVGYKEKSKF  | 155   | >TSHR-G336I SIVEYKEKSKF  | 485   | 330   |
| >TSHR-G336I DSIVGYKEK    | 245   | >TSHR-G336I DSIVEYKEK    | 323   | 78    |
| >TSHR-G336I DSIVGYKEKSI  | 324   | >TSHR-G336I DSIVEYKEKSK  | 358   | 34    |
| >TSHR-G336I LGDSIVGY     | 1210  | >TSHR-G336I LGDSIVEY     | 419   | 791   |
| >TSHR-G336I NLGDSIVGY    | 530   | >TSHR-G336I NLGDSIVEY    | 360   | 170   |
| >TSHR-G336I NLGDSIVGYK   | 99    | >TSHR-G336I NLGDSIVEYK   | 173   | 74    |
| >TSHR-G336I NLGDSIVGYK   | 644   | >TSHR-G336I NLGDSIVEYK   | 274   | 370   |
| >TSHR-G336I NLGDSIVGY    | 813   | >TSHR-G336I NLGDSIVEY    | 474   | 339   |
| >TSHR-G336I NLGDSIVGYK   | 553   | >TSHR-G336I NLGDSIVEYK   | 91    | 462   |
| >TSHR-G336I NLGDSIVGY    | 205   | >TSHR-G336I NLGDSIVEY    | 185   | 20    |
| >TSHR-G336I NLGDSIVGY    | 271   | >TSHR-G336I NLGDSIVEY    | 479   | 208   |
| >TSHR-G336I ENLGDSIVGY   | 335   | >TSHR-G336I ENLGDSIVEY   | 442   | 107   |
| >TSHR-G336I ENLGDSIVGY   | 96    | >TSHR-G336I ENLGDSIVEY   | 953   | 857   |
| >TSHR-G336I ENLGDSIVGY   | 486   | >TSHR-G336I ENLGDSIVEYI  | 297   | 189   |
| >TSHR-G336I EENLGDSIVG   | 183   | >TSHR-G336I EENLGDSIVE`  | 110   | 73    |
| >TSHR-G336I EENLGDSIVG   | 465   | >TSHR-G336I EENLGDSIVE`  | 320   | 145   |
| >TSHR-G336I EENLGDSIVG   | 160   | >TSHR-G336I EENLGDSIVE`  | 138   | 22    |
| >TSHR-G431!GNV FVLLI     | 136   | >TSHR-G431!LSNV FVLLI    | 511   | 375   |
| >TSHR-G431!LGNV FVLL     | 1142  | >TSHR-G431!LSNV FVLL     | 226   | 916   |
| >TSHR-G431!LGNV FVLLLILL | 1181  | >TSHR-G431!LSNV FVLLLILL | 319   | 862   |
| >TSHR-G431!LGNV FVLL     | 1134  | >TSHR-G431!LSNV FVLL     | 495   | 639   |
| >TSHR-G431!LGNV FVLL     | 13173 | >TSHR-G431!LSNV FVLL     | 168   | 13005 |
| >TSHR-G431!LGNV FVLLI    | 13291 | >TSHR-G431!LSNV FVLLI    | 152   | 13139 |
| >TSHR-G431!LGNV FVLLIL   | 11467 | >TSHR-G431!LSNV FVLLIL   | 84    | 11383 |



|                         |       |                         |     |       |
|-------------------------|-------|-------------------------|-----|-------|
| >TSHR-G431!LGNVFLVLLILL | 11767 | >TSHR-G431!LSNVFVLLILL  | 83  | 11684 |
| >TSHR-G431!LGNVFLVLL    | 5972  | >TSHR-G431!LSNVFVLL     | 132 | 5840  |
| >TSHR-G431!LGNVFLVLLI   | 504   | >TSHR-G431!LSNVFVLLI    | 26  | 478   |
| >TSHR-G431!LGNVFLVLLIL  | 1790  | >TSHR-G431!LSNVFVLLIL   | 41  | 1749  |
| >TSHR-G431!LGNVFLVLLILL | 2842  | >TSHR-G431!LSNVFVLLILL  | 76  | 2766  |
| >TSHR-G431!LGNVFLVLL    | 10476 | >TSHR-G431!LSNVFVLL     | 156 | 10320 |
| >TSHR-G431!LGNVFLVLLI   | 3988  | >TSHR-G431!LSNVFVLLI    | 200 | 3788  |
| >TSHR-G431!LGNVFLVLLIL  | 4764  | >TSHR-G431!LSNVFVLLIL   | 293 | 4471  |
| >TSHR-G431!LGNVFLVLLILL | 2116  | >TSHR-G431!LSNVFVLLILL  | 96  | 2020  |
| >TSHR-G431!LGNVFLVLL    | 11542 | >TSHR-G431!LSNVFVLL     | 298 | 11244 |
| >TSHR-G431!LGNVFLVLLIL  | 2187  | >TSHR-G431!LSNVFVLLIL   | 137 | 2050  |
| >TSHR-G431!LGNVFLVLLILL | 3172  | >TSHR-G431!LSNVFVLLILL  | 259 | 2913  |
| >TSHR-G431!LGNVFLVLLI   | 826   | >TSHR-G431!LSNVFVLLI    | 34  | 792   |
| >TSHR-G431!LGNVFLVLLIL  | 9501  | >TSHR-G431!LSNVFVLLIL   | 72  | 9429  |
| >TSHR-G431!VWFVSLALL    | 264   | >TSHR-G431!VWFVSLALL    | 356 | 92    |
| >TSHR-G431!LLGNVFLV     | 69    | >TSHR-G431!LLSNVFLV     | 33  | 36    |
| >TSHR-G431!LLGNVFLVLL   | 63    | >TSHR-G431!LLSNVFLVLL   | 32  | 31    |
| >TSHR-G431!LLGNVFLVLLI  | 136   | >TSHR-G431!LLSNVFLVLLI  | 103 | 33    |
| >TSHR-G431!LLGNVFLVLLIL | 134   | >TSHR-G431!LLSNVFLVLLIL | 54  | 80    |
| >TSHR-G431!LLGNVFLV     | 56    | >TSHR-G431!LLSNVFLV     | 7   | 49    |
| >TSHR-G431!LLGNVFLVLL   | 20    | >TSHR-G431!LLSNVFLVLL   | 4   | 16    |
| >TSHR-G431!LLGNVFLVLLI  | 24    | >TSHR-G431!LLSNVFLVLLI  | 14  | 10    |
| >TSHR-G431!LLGNVFLVLLIL | 144   | >TSHR-G431!LLSNVFLVLLIL | 14  | 130   |
| >TSHR-G431!LLGNVFLV     | 292   | >TSHR-G431!LLSNVFLV     | 26  | 266   |
| >TSHR-G431!LLGNVFLVLL   | 262   | >TSHR-G431!LLSNVFLVLL   | 29  | 233   |
| >TSHR-G431!LLGNVFLVLLI  | 65    | >TSHR-G431!LLSNVFLVLLI  | 36  | 29    |
| >TSHR-G431!LLGNVFLVLLIL | 302   | >TSHR-G431!LLSNVFLVLLIL | 33  | 269   |
| >TSHR-G431!LLGNVFLV     | 237   | >TSHR-G431!LLSNVFLV     | 58  | 179   |
| >TSHR-G431!LLGNVFLVLL   | 139   | >TSHR-G431!LLSNVFLVLL   | 39  | 100   |
| >TSHR-G431!LLGNVFLVLLI  | 309   | >TSHR-G431!LLSNVFLVLLI  | 169 | 140   |
| >TSHR-G431!LLGNVFLVLLIL | 506   | >TSHR-G431!LLSNVFLVLLIL | 120 | 386   |
| >TSHR-G431!LLGNVFLV     | 4     | >TSHR-G431!LLSNVFLV     | 5   | 1     |
| >TSHR-G431!LLGNVFLVLL   | 6     | >TSHR-G431!LLSNVFLVLL   | 9   | 3     |
| >TSHR-G431!LLGNVFLVLLI  | 7     | >TSHR-G431!LLSNVFLVLLI  | 9   | 2     |
| >TSHR-G431!LLGNVFLVLLIL | 16    | >TSHR-G431!LLSNVFLVLLIL | 22  | 6     |
| >TSHR-G431!LLGNVFLV     | 7     | >TSHR-G431!LLSNVFLV     | 8   | 1     |
| >TSHR-G431!LLGNVFLVLL   | 20    | >TSHR-G431!LLSNVFLVLL   | 26  | 6     |
| >TSHR-G431!LLGNVFLVLLI  | 42    | >TSHR-G431!LLSNVFLVLLI  | 57  | 15    |
| >TSHR-G431!LLGNVFLVLLIL | 27    | >TSHR-G431!LLSNVFLVLLIL | 33  | 6     |
| >TSHR-G431!LLGNVFLV     | 12    | >TSHR-G431!LLSNVFLV     | 13  | 1     |
| >TSHR-G431!LLGNVFLVLL   | 14    | >TSHR-G431!LLSNVFLVLL   | 16  | 2     |
| >TSHR-G431!LLGNVFLVLLI  | 25    | >TSHR-G431!LLSNVFLVLLI  | 28  | 3     |
| >TSHR-G431!LLGNVFLVLLIL | 24    | >TSHR-G431!LLSNVFLVLLIL | 27  | 3     |

|                      |      |                      |     |      |
|----------------------|------|----------------------|-----|------|
| >TSHR-G431!LLGNVFVL  | 12   | >TSHR-G431!LLSNVFVL  | 11  | 1    |
| >TSHR-G431!LLGNVFL   | 72   | >TSHR-G431!LLSNVFL   | 64  | 8    |
| >TSHR-G431!LLGNVFL   | 126  | >TSHR-G431!LLSNVFL   | 105 | 21   |
| >TSHR-G431!LLGNVFL   | 128  | >TSHR-G431!LLSNVFL   | 104 | 24   |
| >TSHR-G431!LLGNVFVL  | 3    | >TSHR-G431!LLSNVFVL  | 3   | 0    |
| >TSHR-G431!LLGNVFL   | 3    | >TSHR-G431!LLSNVFL   | 3   | 0    |
| >TSHR-G431!LLGNVFL   | 8    | >TSHR-G431!LLSNVFL   | 7   | 1    |
| >TSHR-G431!LLGNVFL   | 6    | >TSHR-G431!LLSNVFL   | 5   | 1    |
| >TSHR-G431!LLGNVFVL  | 438  | >TSHR-G431!LLSNVFVL  | 258 | 180  |
| >TSHR-G431!ALLGNVFVL | 1436 | >TSHR-G431!ALLSNVFVL | 103 | 1333 |
| >TSHR-G431!ALLGNVFV  | 9    | >TSHR-G431!ALLSNVFV  | 8   | 1    |
| >TSHR-G431!ALLGNVFL  | 14   | >TSHR-G431!ALLSNVFL  | 12  | 2    |
| >TSHR-G431!ALLGNVFL  | 43   | >TSHR-G431!ALLSNVFL  | 48  | 5    |
| >TSHR-G431!ALLGNVFL  | 17   | >TSHR-G431!ALLSNVFL  | 16  | 1    |
| >TSHR-G431!ALLGNVFV  | 8    | >TSHR-G431!ALLSNVFV  | 7   | 1    |
| >TSHR-G431!ALLGNVFL  | 39   | >TSHR-G431!ALLSNVFL  | 31  | 8    |
| >TSHR-G431!ALLGNVFL  | 37   | >TSHR-G431!ALLSNVFL  | 25  | 12   |
| >TSHR-G431!ALLGNVFL  | 76   | >TSHR-G431!ALLSNVFL  | 75  | 1    |
| >TSHR-G431!ALLGNVFV  | 17   | >TSHR-G431!ALLSNVFV  | 13  | 4    |
| >TSHR-G431!ALLGNVFL  | 141  | >TSHR-G431!ALLSNVFL  | 91  | 50   |
| >TSHR-G431!ALLGNVFL  | 70   | >TSHR-G431!ALLSNVFL  | 59  | 11   |
| >TSHR-G431!ALLGNVFL  | 69   | >TSHR-G431!ALLSNVFL  | 51  | 18   |
| >TSHR-G431!ALLGNVFV  | 6    | >TSHR-G431!ALLSNVFV  | 7   | 1    |
| >TSHR-G431!ALLGNVFL  | 19   | >TSHR-G431!ALLSNVFL  | 23  | 4    |
| >TSHR-G431!ALLGNVFL  | 127  | >TSHR-G431!ALLSNVFL  | 161 | 34   |
| >TSHR-G431!ALLGNVFL  | 70   | >TSHR-G431!ALLSNVFL  | 72  | 2    |
| >TSHR-G431!ALLGNVFV  | 1    | >TSHR-G431!ALLSNVFV  | 1   | 0    |
| >TSHR-G431!ALLGNVFL  | 2    | >TSHR-G431!ALLSNVFL  | 2   | 0    |
| >TSHR-G431!ALLGNVFL  | 2    | >TSHR-G431!ALLSNVFL  | 3   | 1    |
| >TSHR-G431!ALLGNVFL  | 2    | >TSHR-G431!ALLSNVFL  | 3   | 1    |
| >TSHR-G431!ALLGNVFV  | 3    | >TSHR-G431!ALLSNVFV  | 3   | 0    |
| >TSHR-G431!ALLGNVFL  | 3    | >TSHR-G431!ALLSNVFL  | 3   | 0    |
| >TSHR-G431!ALLGNVFL  | 7    | >TSHR-G431!ALLSNVFL  | 6   | 1    |
| >TSHR-G431!ALLGNVFL  | 14   | >TSHR-G431!ALLSNVFL  | 12  | 2    |
| >TSHR-G431!ALLGNVFV  | 4    | >TSHR-G431!ALLSNVFV  | 4   | 0    |
| >TSHR-G431!ALLGNVFL  | 5    | >TSHR-G431!ALLSNVFL  | 6   | 1    |
| >TSHR-G431!ALLGNVFL  | 6    | >TSHR-G431!ALLSNVFL  | 7   | 1    |
| >TSHR-G431!ALLGNVFL  | 8    | >TSHR-G431!ALLSNVFL  | 10  | 2    |
| >TSHR-G431!ALLGNVFV  | 2    | >TSHR-G431!ALLSNVFV  | 2   | 0    |
| >TSHR-G431!ALLGNVFL  | 3    | >TSHR-G431!ALLSNVFL  | 3   | 0    |
| >TSHR-G431!ALLGNVFL  | 7    | >TSHR-G431!ALLSNVFL  | 9   | 2    |
| >TSHR-G431!ALLGNVFL  | 11   | >TSHR-G431!ALLSNVFL  | 12  | 1    |
| >TSHR-G431!ALLGNVFV  | 2    | >TSHR-G431!ALLSNVFV  | 2   | 0    |

|                       |      |                       |     |      |
|-----------------------|------|-----------------------|-----|------|
| >TSHR-G431!ALLGNVFVL  | 2    | >TSHR-G431!ALLSNVFVL  | 2   | 0    |
| >TSHR-G431!ALLGNVFL   | 2    | >TSHR-G431!ALLSNVFL   | 3   | 1    |
| >TSHR-G431!ALLGNVFL   | 3    | >TSHR-G431!ALLSNVFL   | 5   | 2    |
| >TSHR-G431!ALLGNVFL   | 62   | >TSHR-G431!ALLSNVFL   | 153 | 91   |
| >TSHR-G431!ALLGNVFL   | 81   | >TSHR-G431!ALLSNVFL   | 190 | 109  |
| >TSHR-G431!ALLGNVFL   | 51   | >TSHR-G431!ALLSNVFL   | 100 | 49   |
| >TSHR-G431!ALLGNVFL   | 268  | >TSHR-G431!ALLSNVFL   | 176 | 92   |
| >TSHR-G431!ALLGNVFL   | 2058 | >TSHR-G431!ALLSNVFL   | 146 | 1912 |
| >TSHR-G431!ALLGNVFL   | 1860 | >TSHR-G431!ALLSNVFL   | 262 | 1598 |
| >TSHR-G431!ALLGNVFL   | 2791 | >TSHR-G431!ALLSNVFL   | 454 | 2337 |
| >TSHR-G431!ALLGNVFL   | 134  | >TSHR-G431!ALLSNVFL   | 141 | 7    |
| >TSHR-G431!ALLGNVFL   | 190  | >TSHR-G431!ALLSNVFL   | 77  | 113  |
| >TSHR-G431!LALLGNVFL  | 493  | >TSHR-G431!LALLSNVFL  | 586 | 93   |
| >TSHR-G431!LALLGNVFL  | 33   | >TSHR-G431!LALLSNVFL  | 54  | 21   |
| >TSHR-G431!LALLGNVFL  | 212  | >TSHR-G431!LALLSNVFL  | 284 | 72   |
| >TSHR-G431!LALLGNVFL  | 265  | >TSHR-G431!LALLSNVFL  | 427 | 162  |
| >TSHR-G431!LALLGNVFL  | 138  | >TSHR-G431!LALLSNVFL  | 418 | 280  |
| >TSHR-G431!LALLGNVFL  | 224  | >TSHR-G431!LALLSNVFL  | 552 | 328  |
| >TSHR-G431!LALLGNVFL  | 159  | >TSHR-G431!LALLSNVFL  | 274 | 115  |
| >TSHR-G431!LALLGNVFL  | 118  | >TSHR-G431!LALLSNVFL  | 154 | 36   |
| >TSHR-G431!LALLGNVFL  | 444  | >TSHR-G431!LALLSNVFL  | 309 | 135  |
| >TSHR-G431!LALLGNVFL  | 52   | >TSHR-G431!LALLSNVFL  | 24  | 28   |
| >TSHR-G431!LALLGNVFL  | 31   | >TSHR-G431!LALLSNVFL  | 15  | 16   |
| >TSHR-G431!LALLGNVFL  | 78   | >TSHR-G431!LALLSNVFL  | 47  | 31   |
| >TSHR-G431!LALLGNVFL  | 640  | >TSHR-G431!LALLSNVFL  | 335 | 305  |
| >TSHR-G431!LALLGNVFL  | 80   | >TSHR-G431!LALLSNVFL  | 56  | 24   |
| >TSHR-G431!LALLGNVFL  | 496  | >TSHR-G431!LALLSNVFL  | 177 | 319  |
| >TSHR-G431!LALLGNVFL  | 730  | >TSHR-G431!LALLSNVFL  | 494 | 236  |
| >TSHR-G431!LALLGNVFL  | 198  | >TSHR-G431!LALLSNVFL  | 209 | 11   |
| >TSHR-G431!LLALLGNV   | 135  | >TSHR-G431!LLALLSNV   | 36  | 99   |
| >TSHR-G431!LLALLGNVFL | 36   | >TSHR-G431!LLALLSNVFL | 31  | 5    |
| >TSHR-G431!LLALLGNVFL | 161  | >TSHR-G431!LLALLSNVFL | 82  | 79   |
| >TSHR-G431!LLALLGNV   | 12   | >TSHR-G431!LLALLSNV   | 5   | 7    |
| >TSHR-G431!LLALLGNVFL | 28   | >TSHR-G431!LLALLSNVFL | 23  | 5    |
| >TSHR-G431!LLALLGNVFL | 20   | >TSHR-G431!LLALLSNVFL | 11  | 9    |
| >TSHR-G431!LLALLGNV   | 8    | >TSHR-G431!LLALLSNV   | 5   | 3    |
| >TSHR-G431!LLALLGNVFL | 46   | >TSHR-G431!LLALLSNVFL | 48  | 2    |
| >TSHR-G431!LLALLGNVFL | 87   | >TSHR-G431!LLALLSNVFL | 62  | 25   |
| >TSHR-G431!LLALLGNV   | 138  | >TSHR-G431!LLALLSNV   | 55  | 83   |
| >TSHR-G431!LLALLGNVFL | 130  | >TSHR-G431!LLALLSNVFL | 122 | 8    |
| >TSHR-G431!LLALLGNVFL | 289  | >TSHR-G431!LLALLSNVFL | 215 | 74   |
| >TSHR-G431!LLALLGNV   | 13   | >TSHR-G431!LLALLSNV   | 9   | 4    |
| >TSHR-G431!LLALLGNVFL | 9    | >TSHR-G431!LLALLSNVFL | 9   | 0    |

|                         |      |                          |     |      |
|-------------------------|------|--------------------------|-----|------|
| >TSHR-G431!LLALLGNV\FV\ | 39   | >TSHR-G431!LLALLSNV\FV\  | 37  | 2    |
| >TSHR-G431!LLALLGNV     | 37   | >TSHR-G431!LLALLSNV      | 12  | 25   |
| >TSHR-G431!LLALLGNV\FV  | 14   | >TSHR-G431!LLALLSNV\FV   | 10  | 4    |
| >TSHR-G431!LLALLGNV\FV\ | 43   | >TSHR-G431!LLALLSNV\FV\  | 24  | 19   |
| >TSHR-G431!LLALLGNV     | 13   | >TSHR-G431!LLALLSNV      | 8   | 5    |
| >TSHR-G431!LLALLGNV\FV  | 7    | >TSHR-G431!LLALLSNV\FV   | 7   | 0    |
| >TSHR-G431!LLALLGNV\FV\ | 35   | >TSHR-G431!LLALLSNV\FV\  | 27  | 8    |
| >TSHR-G431!LLALLGNV     | 18   | >TSHR-G431!LLALLSNV      | 4   | 14   |
| >TSHR-G431!LLALLGNV\FV  | 6    | >TSHR-G431!LLALLSNV\FV   | 4   | 2    |
| >TSHR-G431!LLALLGNV\FV\ | 48   | >TSHR-G431!LLALLSNV\FV\  | 16  | 32   |
| >TSHR-G431!LLALLGNV     | 3    | >TSHR-G431!LLALLSNV      | 2   | 1    |
| >TSHR-G431!LLALLGNV\FV  | 3    | >TSHR-G431!LLALLSNV\FV   | 3   | 0    |
| >TSHR-G431!LLALLGNV\FV\ | 9    | >TSHR-G431!LLALLSNV\FV\  | 7   | 2    |
| >TSHR-G431!LLALLGNV\F   | 56   | >TSHR-G431!LLALLSNV\F    | 40  | 16   |
| >TSHR-G431!LLALLGNV\FV\ | 543  | >TSHR-G431!LLALLSNV\FV\  | 383 | 160  |
| >TSHR-G431!LLALLGNV\F   | 489  | >TSHR-G431!LLALLSNV\F    | 842 | 353  |
| >TSHR-G431!LLALLGNV\F   | 84   | >TSHR-G431!LLALLSNV\F    | 95  | 11   |
| >TSHR-G431!LLALLGNV\F   | 1112 | >TSHR-G431!LLALLSNV\F    | 391 | 721  |
| >TSHR-G431!LLALLGNV\F   | 275  | >TSHR-G431!LLALLSNV\F    | 328 | 53   |
| >TSHR-G431!SLLALLGNV    | 1687 | >TSHR-G431!SLLALLSNV     | 398 | 1289 |
| >TSHR-G431!SLLALLGNV    | 17   | >TSHR-G431!SLLALLSNV     | 9   | 8    |
| >TSHR-G431!SLLALLGNV\F\ | 10   | >TSHR-G431!SLLALLSNV\FV\ | 9   | 1    |
| >TSHR-G431!SLLALLGNV    | 29   | >TSHR-G431!SLLALLSNV     | 9   | 20   |
| >TSHR-G431!SLLALLGNV\F\ | 10   | >TSHR-G431!SLLALLSNV\FV\ | 7   | 3    |
| >TSHR-G431!SLLALLGNV    | 9    | >TSHR-G431!SLLALLSNV     | 5   | 4    |
| >TSHR-G431!SLLALLGNV\F\ | 23   | >TSHR-G431!SLLALLSNV\FV\ | 19  | 4    |
| >TSHR-G431!SLLALLGNV    | 20   | >TSHR-G431!SLLALLSNV     | 9   | 11   |
| >TSHR-G431!SLLALLGNV\F\ | 10   | >TSHR-G431!SLLALLSNV\FV\ | 9   | 1    |
| >TSHR-G431!SLLALLGNV    | 2    | >TSHR-G431!SLLALLSNV     | 2   | 0    |
| >TSHR-G431!SLLALLGNV\F\ | 2    | >TSHR-G431!SLLALLSNV\FV\ | 2   | 0    |
| >TSHR-G431!SLLALLGNV    | 9    | >TSHR-G431!SLLALLSNV     | 5   | 4    |
| >TSHR-G431!SLLALLGNV\F\ | 5    | >TSHR-G431!SLLALLSNV\FV\ | 4   | 1    |
| >TSHR-G431!SLLALLGNV    | 5    | >TSHR-G431!SLLALLSNV     | 4   | 1    |
| >TSHR-G431!SLLALLGNV\F\ | 4    | >TSHR-G431!SLLALLSNV\FV\ | 4   | 0    |
| >TSHR-G431!SLLALLGNV    | 13   | >TSHR-G431!SLLALLSNV     | 4   | 9    |
| >TSHR-G431!SLLALLGNV\F\ | 4    | >TSHR-G431!SLLALLSNV\FV\ | 4   | 0    |
| >TSHR-G431!SLLALLGNV    | 2    | >TSHR-G431!SLLALLSNV     | 2   | 0    |
| >TSHR-G431!SLLALLGNV\F\ | 2    | >TSHR-G431!SLLALLSNV\FV\ | 2   | 0    |
| >TSHR-G431!SLLALLGNV\F  | 500  | >TSHR-G431!SLLALLSNV\F   | 131 | 369  |
| >TSHR-G431!SLLALLGNV\F\ | 495  | >TSHR-G431!SLLALLSNV\FV\ | 421 | 74   |
| >TSHR-G431!SLLALLGNV    | 33   | >TSHR-G431!SLLALLSNV     | 31  | 2    |
| >TSHR-G431!SLLALLGNV\F\ | 23   | >TSHR-G431!SLLALLSNV\FV\ | 26  | 3    |
| >TSHR-G431!SLLALLGNV\F  | 116  | >TSHR-G431!SLLALLSNV\F   | 74  | 42   |

|                        |      |                         |       |       |
|------------------------|------|-------------------------|-------|-------|
| >TSHR-G431!SLLALLGNVF  | 123  | >TSHR-G431!SLLALLSNVF   | 122   | 1     |
| >TSHR-G431!SLLALLGNVF  | 127  | >TSHR-G431!SLLALLSNVF   | 49    | 78    |
| >TSHR-G431!SLLALLGNVF  | 1168 | >TSHR-G431!SLLALLSNVF   | 375   | 793   |
| >TSHR-G431!VSL LALLGNV | 652  | >TSHR-G431!VSL LALLSNVF | 467   | 185   |
| >TSHR-G431!VSL LALLGNV | 381  | >TSHR-G431!VSL LALLSNV  | 211   | 170   |
| >TSHR-G431!VSL LALLGNV | 717  | >TSHR-G431!VSL LALLSNVF | 399   | 318   |
| >TSHR-G431!VSL LALLGNV | 71   | >TSHR-G431!VSL LALLSNVF | 55    | 16    |
| >TSHR-G431!VSL LALLGNV | 463  | >TSHR-G431!VSL LALLSNV  | 160   | 303   |
| >TSHR-G431!VSL LALLGNV | 7    | >TSHR-G431!VSL LALLSNVF | 6     | 1     |
| >TSHR-G431!VSL LALLGNV | 172  | >TSHR-G431!VSL LALLSNVF | 69    | 103   |
| >TSHR-G431!VSL LALLGNV | 45   | >TSHR-G431!VSL LALLSNVF | 37    | 8     |
| >TSHR-G431!FVSL LALLGN | 233  | >TSHR-G431!FVSL LALLSNV | 95    | 138   |
| >TSHR-G431!FVSL LALLGN | 21   | >TSHR-G431!FVSL LALLSNV | 11    | 10    |
| >TSHR-G431!FVSL LALLGN | 14   | >TSHR-G431!FVSL LALLSNV | 9     | 5     |
| >TSHR-G431!FVSL LALLGN | 22   | >TSHR-G431!FVSL LALLSNV | 13    | 9     |
| >TSHR-G431!FVSL LALLGN | 257  | >TSHR-G431!FVSL LALLSNV | 148   | 109   |
| >TSHR-G431!FVSL LALLGN | 957  | >TSHR-G431!FVSL LALLSNV | 294   | 663   |
| >TSHR-G431!FVSL LALLGN | 179  | >TSHR-G431!FVSL LALLSNV | 81    | 98    |
| >TSHR-G431!FVSL LALLGN | 567  | >TSHR-G431!FVSL LALLSNV | 102   | 465   |
| >TSHR-G431!FVSL LALLGN | 26   | >TSHR-G431!FVSL LALLSNV | 9     | 17    |
| >TSHR-G431!FVSL LALLGN | 19   | >TSHR-G431!FVSL LALLSNV | 19    | 0     |
| >TSHR-G431!FVSL LALLGN | 76   | >TSHR-G431!FVSL LALLSNV | 74    | 2     |
| >TSHR-I486F.YTHSEYYNHA | 263  | >TSHR-I486F.YTHSEYYNHA  | 15147 | 14884 |
| >TSHR-I486F.YTHSEYYNHA | 82   | >TSHR-I486F.YTHSEYYNHA  | 4102  | 4020  |
| >TSHR-I486F.YTHSEYYNHA | 139  | >TSHR-I486F.YTHSEYYNHA  | 10280 | 10141 |
| >TSHR-I486F.YTHSEYYNHA | 184  | >TSHR-I486F.YTHSEYYNHA  | 1774  | 1590  |
| >TSHR-I486F.YTHSEYYNHA | 60   | >TSHR-I486F.YTHSEYYNHA  | 5434  | 5374  |
| >TSHR-I486F.YTHSEYYNHA | 484  | >TSHR-I486F.YTHSEYYNHA  | 14502 | 14018 |
| >TSHR-I486F.YTHSEYYNHA | 1810 | >TSHR-I486F.YTHSEYYNHA  | 232   | 1578  |
| >TSHR-I486F.YTHSEYYNHA | 939  | >TSHR-I486F.YTHSEYYNHA  | 50    | 889   |
| >TSHR-I486F.YTHSEYYNHA | 6359 | >TSHR-I486F.YTHSEYYNHA  | 211   | 6148  |
| >TSHR-I486F.YTHSEYYNHA | 640  | >TSHR-I486F.YTHSEYYNHA  | 10    | 630   |
| >TSHR-I486F.YTHSEYYNHA | 5213 | >TSHR-I486F.YTHSEYYNHA  | 150   | 5063  |
| >TSHR-I486F.YTHSEYYNHA | 431  | >TSHR-I486F.YTHSEYYNHA  | 6561  | 6130  |
| >TSHR-I486F.YTHSEYYNHA | 357  | >TSHR-I486F.YTHSEYYNHA  | 250   | 107   |
| >TSHR-I486F.YTHSEYYNHA | 24   | >TSHR-I486F.YTHSEYYNHA  | 5912  | 5888  |
| >TSHR-I486F.YTHSEYYNHA | 61   | >TSHR-I486F.YTHSEYYNHA  | 6959  | 6898  |
| >TSHR-I486F.YTHSEYYNHA | 3530 | >TSHR-I486F.YTHSEYYNHA  | 79    | 3451  |
| >TSHR-I486F.YTHSEYYNHA | 157  | >TSHR-I486F.YTHSEYYNHA  | 9     | 148   |
| >TSHR-I486F.YTHSEYYNHA | 120  | >TSHR-I486F.YTHSEYYNHA  | 6     | 114   |
| >TSHR-I486F.YTHSEYYNHA | 5900 | >TSHR-I486F.YTHSEYYNHA  | 107   | 5793  |
| >TSHR-I486F.YTHSEYYNHA | 83   | >TSHR-I486F.YTHSEYYNHA  | 52    | 31    |
| >TSHR-I486F.YTHSEYYNHA | 550  | >TSHR-I486F.YTHSEYYNHA  | 51    | 499   |

|                        |       |                        |       |       |
|------------------------|-------|------------------------|-------|-------|
| >TSHR-I486F·YTHSEYYNHA | 9291  | >TSHR-I486F·YTHSEYYNHA | 261   | 9030  |
| >TSHR-I486F·YTHSEYYNHA | 63    | >TSHR-I486F·YTHSEYYNHA | 10090 | 10027 |
| >TSHR-I486F·YYNHAI     | 320   | >TSHR-I486F·YYNHAFDW   | 84    | 236   |
| >TSHR-I486F·YYNHAI     | 408   | >TSHR-I486F·YYNHAFDW   | 81    | 327   |
| >TSHR-I486F·YYNHAI     | 12    | >TSHR-I486F·YYNHAFDW   | 7     | 5     |
| >TSHR-I486F·YYNHAI     | 631   | >TSHR-I486F·YYNHAFDW   | 267   | 364   |
| >TSHR-I486F·YYNHAI     | 120   | >TSHR-I486F·YYNHAFDW   | 77    | 43    |
| >TSHR-I486F·YYNHAI     | 358   | >TSHR-I486F·YYNHAFDW   | 240   | 118   |
| >TSHR-I486F·EYYNHAI    | 567   | >TSHR-I486F·EYYNHAFDW  | 130   | 437   |
| >TSHR-I486F·EYYNHAI    | 963   | >TSHR-I486F·EYYNHAFDW  | 194   | 769   |
| >TSHR-I486F·EYYNHAI    | 135   | >TSHR-I486F·EYYNHAFDW  | 48    | 87    |
| >TSHR-I486F·EYYNHAI    | 646   | >TSHR-I486F·EYYNHAFDW  | 474   | 172   |
| >TSHR-I486F·SEYYNHAI   | 5     | >TSHR-I486F·SEYYNHAF   | 16    | 11    |
| >TSHR-I486F·SEYYNHAI   | 342   | >TSHR-I486F·SEYYNHAFDV | 123   | 219   |
| >TSHR-I486F·SEYYNHAI   | 743   | >TSHR-I486F·SEYYNHAF   | 496   | 247   |
| >TSHR-I486F·SEYYNHAI   | 6618  | >TSHR-I486F·SEYYNHAF   | 124   | 6494  |
| >TSHR-I486F·SEYYNHAI   | 7687  | >TSHR-I486F·SEYYNHAF   | 248   | 7439  |
| >TSHR-I486F·SEYYNHAI   | 391   | >TSHR-I486F·SEYYNHAF   | 10    | 381   |
| >TSHR-I486F·SEYYNHAI   | 191   | >TSHR-I486F·SEYYNHAF   | 8     | 183   |
| >TSHR-I486F·SEYYNHAI   | 20    | >TSHR-I486F·SEYYNHAF   | 45    | 25    |
| >TSHR-I486F·SEYYNHAI   | 69    | >TSHR-I486F·SEYYNHAF   | 75    | 6     |
| >TSHR-I486F·SEYYNHAI   | 673   | >TSHR-I486F·SEYYNHAFDV | 158   | 515   |
| >TSHR-I486F·SEYYNHAI   | 836   | >TSHR-I486F·SEYYNHAF   | 194   | 642   |
| >TSHR-I486F·SEYYNHAI   | 11    | >TSHR-I486F·SEYYNHAFDV | 9     | 2     |
| >TSHR-I486F·SEYYNHAI   | 651   | >TSHR-I486F·SEYYNHAF   | 54    | 597   |
| >TSHR-I486F·SEYYNHAI   | 18    | >TSHR-I486F·SEYYNHAFDV | 13    | 5     |
| >TSHR-I486F·SEYYNHAI   | 33    | >TSHR-I486F·SEYYNHAF   | 204   | 171   |
| >TSHR-I486F·SEYYNHAI   | 178   | >TSHR-I486F·SEYYNHAFDV | 166   | 12    |
| >TSHR-I486F·SEYYNHAI   | 459   | >TSHR-I486F·SEYYNHAFDV | 256   | 203   |
| >TSHR-I486F·SEYYNHAI   | 32    | >TSHR-I486F·SEYYNHAF   | 2176  | 2144  |
| >TSHR-I486F·SEYYNHAI   | 555   | >TSHR-I486F·SEYYNHAFDV | 495   | 60    |
| >TSHR-I486F·HSEYYNHAI  | 3404  | >TSHR-I486F·HSEYYNHAF  | 285   | 3119  |
| >TSHR-I486F·HSEYYNHAI  | 297   | >TSHR-I486F·HSEYYNHAF  | 255   | 42    |
| >TSHR-I486F·HSEYYNHAI  | 3551  | >TSHR-I486F·HSEYYNHAF  | 80    | 3471  |
| >TSHR-I486F·HSEYYNHAI  | 696   | >TSHR-I486F·HSEYYNHAF  | 21    | 675   |
| >TSHR-I486F·HSEYYNHAI  | 39    | >TSHR-I486F·HSEYYNHAF  | 33    | 6     |
| >TSHR-I486F·HSEYYNHAI  | 3428  | >TSHR-I486F·HSEYYNHAF  | 74    | 3354  |
| >TSHR-I486F·HSEYYNHAI  | 331   | >TSHR-I486F·HSEYYNHAF  | 164   | 167   |
| >TSHR-I486F·HSEYYNHAI  | 795   | >TSHR-I486F·HSEYYNHAF  | 227   | 568   |
| >TSHR-I486F·HSEYYNHAI  | 4572  | >TSHR-I486F·HSEYYNHAF  | 364   | 4208  |
| >TSHR-I486F·HSEYYNHAI  | 12247 | >TSHR-I486F·HSEYYNHAF  | 458   | 11789 |
| >TSHR-I486F·HSEYYNHAI  | 486   | >TSHR-I486F·HSEYYNHAF  | 412   | 74    |
| >TSHR-I486F·HSEYYNHAI  | 1117  | >TSHR-I486F·HSEYYNHAF  | 288   | 829   |

|                        |      |                        |       |       |
|------------------------|------|------------------------|-------|-------|
| >TSHR-I486F·HSEYYNHAI  | 103  | >TSHR-I486F·HSEYYNHAF  | 20035 | 19932 |
| >TSHR-I486F·THSEYYNHAI | 1041 | >TSHR-I486F·THSEYYNHAF | 36    | 1005  |
| >TSHR-I486F·THSEYYNHAI | 23   | >TSHR-I486F·THSEYYNHAF | 28    | 5     |
| >TSHR-I486M·AIDWQTGPG  | 539  | >TSHR-I486M·AMDWQTGP   | 15    | 524   |
| >TSHR-I486M·AIDWQTGPG  | 4027 | >TSHR-I486M·AMDWQTGP   | 152   | 3875  |
| >TSHR-I486M·AIDWQTGPG  | 2075 | >TSHR-I486M·AMDWQTGP   | 58    | 2017  |
| >TSHR-I486M·YTHSEYYNHA | 263  | >TSHR-I486M·YTHSEYYNHA | 1534  | 1271  |
| >TSHR-I486M·YTHSEYYNHA | 82   | >TSHR-I486M·YTHSEYYNHA | 435   | 353   |
| >TSHR-I486M·YTHSEYYNHA | 139  | >TSHR-I486M·YTHSEYYNHA | 2429  | 2290  |
| >TSHR-I486M·YTHSEYYNHA | 184  | >TSHR-I486M·YTHSEYYNHA | 1234  | 1050  |
| >TSHR-I486M·YTHSEYYNHA | 60   | >TSHR-I486M·YTHSEYYNHA | 566   | 506   |
| >TSHR-I486M·YTHSEYYNHA | 484  | >TSHR-I486M·YTHSEYYNHA | 4064  | 3580  |
| >TSHR-I486M·YTHSEYYNHA | 6359 | >TSHR-I486M·YTHSEYYNHA | 119   | 6240  |
| >TSHR-I486M·YTHSEYYNHA | 640  | >TSHR-I486M·YTHSEYYNHA | 9     | 631   |
| >TSHR-I486M·YTHSEYYNHA | 5263 | >TSHR-I486M·YTHSEYYNHA | 194   | 5069  |
| >TSHR-I486M·YTHSEYYNHA | 431  | >TSHR-I486M·YTHSEYYNHA | 1200  | 769   |
| >TSHR-I486M·YTHSEYYNHA | 357  | >TSHR-I486M·YTHSEYYNHA | 3168  | 2811  |
| >TSHR-I486M·YTHSEYYNHA | 24   | >TSHR-I486M·YTHSEYYNHA | 418   | 394   |
| >TSHR-I486M·YTHSEYYNHA | 61   | >TSHR-I486M·YTHSEYYNHA | 147   | 86    |
| >TSHR-I486M·YTHSEYYNHA | 3530 | >TSHR-I486M·YTHSEYYNHA | 317   | 3213  |
| >TSHR-I486M·YTHSEYYNHA | 157  | >TSHR-I486M·YTHSEYYNHA | 69    | 88    |
| >TSHR-I486M·YTHSEYYNHA | 120  | >TSHR-I486M·YTHSEYYNHA | 20    | 100   |
| >TSHR-I486M·YTHSEYYNHA | 5900 | >TSHR-I486M·YTHSEYYNHA | 121   | 5779  |
| >TSHR-I486M·YTHSEYYNHA | 1157 | >TSHR-I486M·YTHSEYYNHA | 435   | 722   |
| >TSHR-I486M·YTHSEYYNHA | 83   | >TSHR-I486M·YTHSEYYNHA | 41    | 42    |
| >TSHR-I486M·YTHSEYYNHA | 550  | >TSHR-I486M·YTHSEYYNHA | 43    | 507   |
| >TSHR-I486M·YTHSEYYNHA | 63   | >TSHR-I486M·YTHSEYYNHA | 1584  | 1521  |
| >TSHR-I486M·YYNHAI     | 320  | >TSHR-I486M·YYNHAMDW   | 212   | 108   |
| >TSHR-I486M·YYNHAI     | 408  | >TSHR-I486M·YYNHAMDW   | 316   | 92    |
| >TSHR-I486M·YYNHAI     | 12   | >TSHR-I486M·YYNHAMDW   | 8     | 4     |
| >TSHR-I486M·YYNHAI     | 120  | >TSHR-I486M·YYNHAMDW   | 176   | 56    |
| >TSHR-I486M·YYNHAI     | 358  | >TSHR-I486M·YYNHAMDW   | 509   | 151   |
| >TSHR-I486M·EYYNHAI    | 567  | >TSHR-I486M·EYYNHAMDV  | 226   | 341   |
| >TSHR-I486M·EYYNHAI    | 135  | >TSHR-I486M·EYYNHAMDV  | 37    | 98    |
| >TSHR-I486M·SEYYNHAI   | 5    | >TSHR-I486M·SEYYNHAM   | 10    | 5     |
| >TSHR-I486M·SEYYNHAI   | 342  | >TSHR-I486M·SEYYNHAMD  | 222   | 120   |
| >TSHR-I486M·SEYYNHAI   | 391  | >TSHR-I486M·SEYYNHAM   | 112   | 279   |
| >TSHR-I486M·SEYYNHAI   | 191  | >TSHR-I486M·SEYYNHAM   | 30    | 161   |
| >TSHR-I486M·SEYYNHAI   | 1193 | >TSHR-I486M·SEYYNHAM   | 433   | 760   |
| >TSHR-I486M·SEYYNHAI   | 20   | >TSHR-I486M·SEYYNHAM   | 29    | 9     |
| >TSHR-I486M·SEYYNHAI   | 69   | >TSHR-I486M·SEYYNHAM   | 71    | 2     |
| >TSHR-I486M·SEYYNHAI   | 673  | >TSHR-I486M·SEYYNHAMD  | 377   | 296   |
| >TSHR-I486M·SEYYNHAI   | 11   | >TSHR-I486M·SEYYNHAMD  | 9     | 2     |

|                        |      |                        |       |       |
|------------------------|------|------------------------|-------|-------|
| >TSHR-I486M SEYYNHAI   | 651  | >TSHR-I486M SEYYNHAM   | 398   | 253   |
| >TSHR-I486M SEYYNHAIDW | 18   | >TSHR-I486M SEYYNHAMD  | 13    | 5     |
| >TSHR-I486M SEYYNHAI   | 33   | >TSHR-I486M SEYYNHAM   | 91    | 58    |
| >TSHR-I486M SEYYNHAIDW | 178  | >TSHR-I486M SEYYNHAMD  | 135   | 43    |
| >TSHR-I486M SEYYNHAIDW | 459  | >TSHR-I486M SEYYNHAMD  | 468   | 9     |
| >TSHR-I486M SEYYNHAI   | 32   | >TSHR-I486M SEYYNHAM   | 310   | 278   |
| >TSHR-I486M SEYYNHAIDW | 826  | >TSHR-I486M SEYYNHAMD  | 314   | 512   |
| >TSHR-I486M SEYYNHAIDW | 555  | >TSHR-I486M SEYYNHAMD  | 478   | 77    |
| >TSHR-I486M HSEYYNHAI  | 297  | >TSHR-I486M HSEYYNHAM  | 4214  | 3917  |
| >TSHR-I486M HSEYYNHAI  | 696  | >TSHR-I486M HSEYYNHAM  | 65    | 631   |
| >TSHR-I486M HSEYYNHAID | 39   | >TSHR-I486M HSEYYNHAM  | 35    | 4     |
| >TSHR-I486M HSEYYNHAI  | 3428 | >TSHR-I486M HSEYYNHAM  | 83    | 3345  |
| >TSHR-I486M HSEYYNHAI  | 529  | >TSHR-I486M HSEYYNHAM  | 163   | 366   |
| >TSHR-I486M HSEYYNHAID | 331  | >TSHR-I486M HSEYYNHAM  | 171   | 160   |
| >TSHR-I486M HSEYYNHAID | 795  | >TSHR-I486M HSEYYNHAM  | 406   | 389   |
| >TSHR-I486M HSEYYNHAI  | 4572 | >TSHR-I486M HSEYYNHAM  | 366   | 4206  |
| >TSHR-I486M HSEYYNHAID | 486  | >TSHR-I486M HSEYYNHAM  | 484   | 2     |
| >TSHR-I486M HSEYYNHAID | 1117 | >TSHR-I486M HSEYYNHAM  | 243   | 874   |
| >TSHR-I486M HSEYYNHAI  | 103  | >TSHR-I486M HSEYYNHAM  | 4918  | 4815  |
| >TSHR-I486M THSEYYNHAI | 1041 | >TSHR-I486M THSEYYNHAM | 486   | 555   |
| >TSHR-I486M THSEYYNHAI | 890  | >TSHR-I486M THSEYYNHAM | 457   | 433   |
| >TSHR-I486M THSEYYNHAI | 23   | >TSHR-I486M THSEYYNHAM | 11    | 12    |
| >TSHR-I486M YTHSEYYNHA | 263  | >TSHR-I486M YTHSEYYNHA | 21769 | 21506 |
| >TSHR-I486M YTHSEYYNHA | 82   | >TSHR-I486M YTHSEYYNHA | 14783 | 14701 |
| >TSHR-I486M YTHSEYYNHA | 139  | >TSHR-I486M YTHSEYYNHA | 18500 | 18361 |
| >TSHR-I486M YTHSEYYNHA | 184  | >TSHR-I486M YTHSEYYNHA | 21946 | 21762 |
| >TSHR-I486M YTHSEYYNHA | 60   | >TSHR-I486M YTHSEYYNHA | 11901 | 11841 |
| >TSHR-I486M YTHSEYYNHA | 484  | >TSHR-I486M YTHSEYYNHA | 19443 | 18959 |
| >TSHR-I486M YTHSEYYNHA | 431  | >TSHR-I486M YTHSEYYNHA | 6302  | 5871  |
| >TSHR-I486M YTHSEYYNHA | 357  | >TSHR-I486M YTHSEYYNHA | 16735 | 16378 |
| >TSHR-I486M YTHSEYYNHA | 24   | >TSHR-I486M YTHSEYYNHA | 9374  | 9350  |
| >TSHR-I486M YTHSEYYNHA | 61   | >TSHR-I486M YTHSEYYNHA | 12190 | 12129 |
| >TSHR-I486M YTHSEYYNHA | 157  | >TSHR-I486M YTHSEYYNHA | 6404  | 6247  |
| >TSHR-I486M YTHSEYYNHA | 120  | >TSHR-I486M YTHSEYYNHA | 11558 | 11438 |
| >TSHR-I486M YTHSEYYNHA | 83   | >TSHR-I486M YTHSEYYNHA | 6559  | 6476  |
| >TSHR-I486M YTHSEYYNHA | 63   | >TSHR-I486M YTHSEYYNHA | 34214 | 34151 |
| >TSHR-I486M YYNHAIDW   | 320  | >TSHR-I486M YYNHANDW   | 266   | 54    |
| >TSHR-I486M YYNHAIDW   | 408  | >TSHR-I486M YYNHANDW   | 368   | 40    |
| >TSHR-I486M YYNHAIDW   | 12   | >TSHR-I486M YYNHANDW   | 13    | 1     |
| >TSHR-I486M YYNHAIDWQ  | 120  | >TSHR-I486M YYNHANDWC  | 235   | 115   |
| >TSHR-I486M YYNHAIDW   | 358  | >TSHR-I486M YYNHANDW   | 865   | 507   |
| >TSHR-I486M EYYNHAIDW  | 567  | >TSHR-I486M EYYNHANDW  | 485   | 82    |
| >TSHR-I486M EYYNHAIDW  | 135  | >TSHR-I486M EYYNHANDW  | 127   | 8     |



|                         |      |                         |       |       |
|-------------------------|------|-------------------------|-------|-------|
| >TSHR-I486NSEYYNHAI     | 5    | >TSHR-I486NSEYYNHAN     | 80    | 75    |
| >TSHR-I486NSEYYNHAIDM   | 342  | >TSHR-I486NSEYYNHANDA   | 144   | 198   |
| >TSHR-I486NSEYYNHAI     | 391  | >TSHR-I486NSEYYNHAN     | 10524 | 10133 |
| >TSHR-I486NSEYYNHAI     | 191  | >TSHR-I486NSEYYNHAN     | 713   | 522   |
| >TSHR-I486NSEYYNHAI     | 20   | >TSHR-I486NSEYYNHAN     | 2904  | 2884  |
| >TSHR-I486NSEYYNHAI     | 69   | >TSHR-I486NSEYYNHAN     | 1815  | 1746  |
| >TSHR-I486NSEYYNHAIDM   | 11   | >TSHR-I486NSEYYNHANDA   | 12    | 1     |
| >TSHR-I486NSEYYNHAIDM   | 18   | >TSHR-I486NSEYYNHANDA   | 19    | 1     |
| >TSHR-I486NSEYYNHAI     | 33   | >TSHR-I486NSEYYNHAN     | 147   | 114   |
| >TSHR-I486NSEYYNHAIDM   | 178  | >TSHR-I486NSEYYNHANDA   | 298   | 120   |
| >TSHR-I486NSEYYNHAIDM   | 459  | >TSHR-I486NSEYYNHANDA   | 648   | 189   |
| >TSHR-I486NSEYYNHAI     | 32   | >TSHR-I486NSEYYNHAN     | 17537 | 17505 |
| >TSHR-I486NHSEYYNHAI    | 297  | >TSHR-I486NHSEYYNHAN    | 20586 | 20289 |
| >TSHR-I486NHSEYYNHAID   | 39   | >TSHR-I486NHSEYYNHANI   | 69    | 30    |
| >TSHR-I486NHSEYYNHAID   | 331  | >TSHR-I486NHSEYYNHANI   | 318   | 13    |
| >TSHR-I486NHSEYYNHAID   | 486  | >TSHR-I486NHSEYYNHANI   | 834   | 348   |
| >TSHR-I486NHSEYYNHAI    | 103  | >TSHR-I486NHSEYYNHAN    | 38076 | 37973 |
| >TSHR-I486NTHSEYYNHAI   | 23   | >TSHR-I486NTHSEYYNHAN   | 1840  | 1817  |
| >TSHR-I568F.VGISSYAKVSI | 3245 | >TSHR-I568F.VGISSYAKVSF | 307   | 2938  |
| >TSHR-I568F.VGISSYAKVSI | 9180 | >TSHR-I568F.VGISSYAKVSF | 286   | 8894  |
| >TSHR-I568F.VGISSYAKVSI | 1485 | >TSHR-I568F.VGISSYAKVSF | 37    | 1448  |
| >TSHR-I568F.VGISSYAKVSI | 6485 | >TSHR-I568F.VGISSYAKVSF | 181   | 6304  |
| >TSHR-I568F.KVSICLPM    | 420  | >TSHR-I568F.KVSFCLPM    | 354   | 66    |
| >TSHR-I568F.KVSICLPM    | 569  | >TSHR-I568F.KVSFCLPM    | 279   | 290   |
| >TSHR-I568F.KVSICLPM    | 755  | >TSHR-I568F.KVSFCLPM    | 456   | 299   |
| >TSHR-I568F.KVSICLPM    | 169  | >TSHR-I568F.KVSFCLPM    | 411   | 242   |
| >TSHR-I568F.AKVSICLPM   | 5291 | >TSHR-I568F.AKVSFCLPM   | 267   | 5024  |
| >TSHR-I568F.AKVSICLPM   | 14   | >TSHR-I568F.AKVSFCLPM   | 7     | 7     |
| >TSHR-I568F.AKVSICLPM   | 1089 | >TSHR-I568F.AKVSFCLPME  | 457   | 632   |
| >TSHR-I568F.YAKVSICLPM  | 629  | >TSHR-I568F.YAKVSFCLPM  | 450   | 179   |
| >TSHR-I568F.YAKVSICL    | 259  | >TSHR-I568F.YAKVSFCL    | 126   | 133   |
| >TSHR-I568F.YAKVSICLPM  | 89   | >TSHR-I568F.YAKVSFCLPM  | 70    | 19    |
| >TSHR-I568F.YAKVSICL    | 340  | >TSHR-I568F.YAKVSFCL    | 370   | 30    |
| >TSHR-I568F.YAKVSICLPM  | 69   | >TSHR-I568F.YAKVSFCLPM  | 36    | 33    |
| >TSHR-I568F.YAKVSICL    | 449  | >TSHR-I568F.YAKVSFCL    | 481   | 32    |
| >TSHR-I568F.YAKVSICLPM  | 25   | >TSHR-I568F.YAKVSFCLPM  | 29    | 4     |
| >TSHR-I568F.YAKVSICLPM  | 213  | >TSHR-I568F.YAKVSFCLPM  | 289   | 76    |
| >TSHR-I568F.YAKVSICL    | 1213 | >TSHR-I568F.YAKVSFCL    | 246   | 967   |
| >TSHR-I568F.SYAKVSICL   | 113  | >TSHR-I568F.SYAKVSFCL   | 62    | 51    |
| >TSHR-I568F.SYAKVSICLPM | 27   | >TSHR-I568F.SYAKVSFCLPM | 45    | 18    |
| >TSHR-I568F.SYAKVSICL   | 1880 | >TSHR-I568F.SYAKVSFCL   | 222   | 1658  |
| >TSHR-I568F.SYAKVSICL   | 1670 | >TSHR-I568F.SYAKVSFCL   | 378   | 1292  |
| >TSHR-I568F.SYAKVSICL   | 2141 | >TSHR-I568F.SYAKVSFCL   | 400   | 1741  |

|                         |      |                         |       |       |
|-------------------------|------|-------------------------|-------|-------|
| >TSHR-I568F-SYAKVSICL   | 156  | >TSHR-I568F-SYAKVSFCL   | 35    | 121   |
| >TSHR-I568F-SYAKVSICLPM | 459  | >TSHR-I568F-SYAKVSFCLPI | 296   | 163   |
| >TSHR-I568F-SYAKVSICL   | 34   | >TSHR-I568F-SYAKVSFCL   | 12    | 22    |
| >TSHR-I568F-SYAKVSICLPM | 234  | >TSHR-I568F-SYAKVSFCLPI | 134   | 100   |
| >TSHR-I568F-SYAKVSICLPM | 721  | >TSHR-I568F-SYAKVSFCLPI | 485   | 236   |
| >TSHR-I568F-SYAKVSIC    | 2110 | >TSHR-I568F-SYAKVSFC    | 388   | 1722  |
| >TSHR-I568F-SYAKVSICLPM | 418  | >TSHR-I568F-SYAKVSFCLPI | 339   | 79    |
| >TSHR-I568F-SSYAKVSI    | 73   | >TSHR-I568F-SSYAKVSF    | 59    | 14    |
| >TSHR-I568F-SSYAKVSICL  | 164  | >TSHR-I568F-SSYAKVSFCL  | 139   | 25    |
| >TSHR-I568F-SSYAKVSI    | 3109 | >TSHR-I568F-SSYAKVSF    | 56    | 3053  |
| >TSHR-I568F-SSYAKVSI    | 386  | >TSHR-I568F-SSYAKVSF    | 9     | 377   |
| >TSHR-I568F-SSYAKVSICL  | 410  | >TSHR-I568F-SSYAKVSFCL  | 644   | 234   |
| >TSHR-I568F-SSYAKVSI    | 28   | >TSHR-I568F-SSYAKVSF    | 3     | 25    |
| >TSHR-I568F-SSYAKVSICL  | 43   | >TSHR-I568F-SSYAKVSFCL  | 26    | 17    |
| >TSHR-I568F-SSYAKVSI    | 2641 | >TSHR-I568F-SSYAKVSF    | 244   | 2397  |
| >TSHR-I568F-SSYAKVSICL  | 76   | >TSHR-I568F-SSYAKVSFCL  | 107   | 31    |
| >TSHR-I568F-SSYAKVSI    | 12   | >TSHR-I568F-SSYAKVSF    | 2289  | 2277  |
| >TSHR-I568F-SSYAKVSICL  | 442  | >TSHR-I568F-SSYAKVSFCL  | 771   | 329   |
| >TSHR-I568F-ISSYAKVSI   | 383  | >TSHR-I568F-ISSYAKVSF   | 320   | 63    |
| >TSHR-I568F-ISSYAKVSI   | 5480 | >TSHR-I568F-ISSYAKVSF   | 109   | 5371  |
| >TSHR-I568F-ISSYAKVSI   | 181  | >TSHR-I568F-ISSYAKVSF   | 9     | 172   |
| >TSHR-I568F-ISSYAKVSICL | 417  | >TSHR-I568F-ISSYAKVSFCL | 558   | 141   |
| >TSHR-I568F-ISSYAKVSI   | 211  | >TSHR-I568F-ISSYAKVSF   | 9     | 202   |
| >TSHR-I568F-ISSYAKVSICL | 385  | >TSHR-I568F-ISSYAKVSFCL | 214   | 171   |
| >TSHR-I568F-ISSYAKVSI   | 7911 | >TSHR-I568F-ISSYAKVSF   | 276   | 7635  |
| >TSHR-I568F-ISSYAKVSI   | 1578 | >TSHR-I568F-ISSYAKVSF   | 157   | 1421  |
| >TSHR-I568F-ISSYAKVSI   | 1050 | >TSHR-I568F-ISSYAKVSF   | 81    | 969   |
| >TSHR-I568F-ISSYAKVSI   | 60   | >TSHR-I568F-ISSYAKVSF   | 9924  | 9864  |
| >TSHR-I568F-GISSYAKVSI  | 286  | >TSHR-I568F-GISSYAKVSF  | 11416 | 11130 |
| >TSHR-I568F-GISSYAKVSI  | 454  | >TSHR-I568F-GISSYAKVSF  | 17966 | 17512 |
| >TSHR-I568F-GISSYAKVSI  | 8472 | >TSHR-I568F-GISSYAKVSF  | 216   | 8256  |
| >TSHR-I568F-GISSYAKVSI  | 4137 | >TSHR-I568F-GISSYAKVSF  | 190   | 3947  |
| >TSHR-I568F-GISSYAKVSI  | 6171 | >TSHR-I568F-GISSYAKVSF  | 232   | 5939  |
| >TSHR-I568T-KVSICLPM    | 420  | >TSHR-I568T-KVSTCLPM    | 297   | 123   |
| >TSHR-I568T-KVSICLPM    | 569  | >TSHR-I568T-KVSTCLPM    | 321   | 248   |
| >TSHR-I568T-KVSICLPM    | 169  | >TSHR-I568T-KVSTCLPM    | 427   | 258   |
| >TSHR-I568T-AKVSICLPM   | 14   | >TSHR-I568T-AKVSTCLPM   | 6     | 8     |
| >TSHR-I568T-AKVSICLPM   | 1089 | >TSHR-I568T-AKVSTCLPM   | 447   | 642   |
| >TSHR-I568T-AKVSICLPM   | 1145 | >TSHR-I568T-AKVSTCLPM   | 447   | 698   |
| >TSHR-I568T-YAKVSICLPM  | 629  | >TSHR-I568T-YAKVSTCLPM  | 334   | 295   |
| >TSHR-I568T-YAKVSICL    | 259  | >TSHR-I568T-YAKVSTCL    | 155   | 104   |
| >TSHR-I568T-YAKVSICLPM  | 89   | >TSHR-I568T-YAKVSTCLPM  | 70    | 19    |
| >TSHR-I568T-YAKVSICL    | 340  | >TSHR-I568T-YAKVSTCL    | 219   | 121   |

|                         |      |                         |       |       |
|-------------------------|------|-------------------------|-------|-------|
| >TSHR-I568T YAKVSICLPM  | 69   | >TSHR-I568T YAKVSTCLPM  | 48    | 21    |
| >TSHR-I568T YAKVSICL    | 449  | >TSHR-I568T YAKVSTCL    | 367   | 82    |
| >TSHR-I568T YAKVSICLPM  | 25   | >TSHR-I568T YAKVSTCLPM  | 17    | 8     |
| >TSHR-I568T YAKVSICLPM  | 213  | >TSHR-I568T YAKVSTCLPM  | 201   | 12    |
| >TSHR-I568T YAKVSICL    | 890  | >TSHR-I568T YAKVSTCL    | 377   | 513   |
| >TSHR-I568T SYAKVSIC    | 4079 | >TSHR-I568T SYAKVSTC    | 142   | 3937  |
| >TSHR-I568T SYAKVSICL   | 113  | >TSHR-I568T SYAKVSTCL   | 5     | 108   |
| >TSHR-I568T SYAKVSICLPM | 27   | >TSHR-I568T SYAKVSTCLPI | 9     | 18    |
| >TSHR-I568T SYAKVSICL   | 156  | >TSHR-I568T SYAKVSTCL   | 221   | 65    |
| >TSHR-I568T SYAKVSICLPM | 459  | >TSHR-I568T SYAKVSTCLPI | 593   | 134   |
| >TSHR-I568T SYAKVSICL   | 34   | >TSHR-I568T SYAKVSTCL   | 83    | 49    |
| >TSHR-I568T SYAKVSICLPM | 234  | >TSHR-I568T SYAKVSTCLPI | 363   | 129   |
| >TSHR-I568T SYAKVSICLPM | 418  | >TSHR-I568T SYAKVSTCLPI | 360   | 58    |
| >TSHR-I568T SSYAKVSI    | 73   | >TSHR-I568T SSYAKVST    | 7033  | 6960  |
| >TSHR-I568T SSYAKVSICL  | 164  | >TSHR-I568T SSYAKVSTCL  | 344   | 180   |
| >TSHR-I568T SSYAKVSI    | 386  | >TSHR-I568T SSYAKVST    | 8370  | 7984  |
| >TSHR-I568T SSYAKVSICL  | 410  | >TSHR-I568T SSYAKVSTCL  | 250   | 160   |
| >TSHR-I568T SSYAKVSI    | 28   | >TSHR-I568T SSYAKVST    | 1425  | 1397  |
| >TSHR-I568T SSYAKVSIC   | 2297 | >TSHR-I568T SSYAKVSTC   | 238   | 2059  |
| >TSHR-I568T SSYAKVSICL  | 43   | >TSHR-I568T SSYAKVSTCL  | 32    | 11    |
| >TSHR-I568T SSYAKVSICL  | 76   | >TSHR-I568T SSYAKVSTCL  | 124   | 48    |
| >TSHR-I568T SSYAKVSI    | 12   | >TSHR-I568T SSYAKVST    | 18779 | 18767 |
| >TSHR-I568T SSYAKVSICL  | 442  | >TSHR-I568T SSYAKVSTCL  | 177   | 265   |
| >TSHR-I568T ISSYAKVSI   | 383  | >TSHR-I568T ISSYAKVST   | 19222 | 18839 |
| >TSHR-I568T ISSYAKVSI   | 181  | >TSHR-I568T ISSYAKVST   | 6164  | 5983  |
| >TSHR-I568T ISSYAKVSICL | 417  | >TSHR-I568T ISSYAKVSTCL | 263   | 154   |
| >TSHR-I568T ISSYAKVSI   | 211  | >TSHR-I568T ISSYAKVST   | 7339  | 7128  |
| >TSHR-I568T ISSYAKVSICL | 385  | >TSHR-I568T ISSYAKVSTCL | 282   | 103   |
| >TSHR-I568T ISSYAKVSICL | 844  | >TSHR-I568T ISSYAKVSTCL | 233   | 611   |
| >TSHR-I568T ISSYAKVSI   | 60   | >TSHR-I568T ISSYAKVST   | 28192 | 28132 |
| >TSHR-I568T GISSYAKVSI  | 286  | >TSHR-I568T GISSYAKVST  | 2383  | 2097  |
| >TSHR-I568T GISSYAKVSI  | 454  | >TSHR-I568T GISSYAKVST  | 1955  | 1501  |
| >TSHR-I630L IFTDFICMAPI | 365  | >TSHR-I630L LFTDFICMAP  | 240   | 125   |
| >TSHR-I630L IFTDFICMA   | 936  | >TSHR-I630L LFTDFICMA   | 374   | 562   |
| >TSHR-I630L LIFTDFICM   | 761  | >TSHR-I630L LLFTDFICM   | 64    | 697   |
| >TSHR-I630L LIFTDFICMA  | 619  | >TSHR-I630L LLFTDFICMA  | 97    | 522   |
| >TSHR-I630L LIFTDFICM   | 1432 | >TSHR-I630L LLFTDFICM   | 126   | 1306  |
| >TSHR-I630L LIFTDFICMA  | 181  | >TSHR-I630L LLFTDFICMA  | 32    | 149   |
| >TSHR-I630L LIFTDFICMA  | 139  | >TSHR-I630L LLFTDFICMA  | 40    | 99    |
| >TSHR-I630L LIFTDFICM   | 319  | >TSHR-I630L LLFTDFICM   | 220   | 99    |
| >TSHR-I630L LIFTDFICMA  | 109  | >TSHR-I630L LLFTDFICMA  | 90    | 19    |
| >TSHR-I630L LIFTDFIC    | 2386 | >TSHR-I630L LLFTDFIC    | 124   | 2262  |
| >TSHR-I630L LIFTDFICM   | 2907 | >TSHR-I630L LLFTDFICM   | 134   | 2773  |

|                         |      |                         |     |      |
|-------------------------|------|-------------------------|-----|------|
| >TSHR-I630L·LIFTDFICMA  | 72   | >TSHR-I630L·LLFTDFICMA  | 7   | 65   |
| >TSHR-I630L·LIFTDFIC    | 7664 | >TSHR-I630L·LLFTDFIC    | 197 | 7467 |
| >TSHR-I630L·LIFTDFICM   | 7646 | >TSHR-I630L·LLFTDFICM   | 151 | 7495 |
| >TSHR-I630L·LIFTDFICMA  | 2862 | >TSHR-I630L·LLFTDFICMA  | 50  | 2812 |
| >TSHR-I630L·LIFTDFICM   | 5638 | >TSHR-I630L·LLFTDFICM   | 173 | 5465 |
| >TSHR-I630L·LIFTDFICMA  | 302  | >TSHR-I630L·LLFTDFICMA  | 15  | 287  |
| >TSHR-I630L·LIFTDFICMA  | 3341 | >TSHR-I630L·LLFTDFICMA  | 239 | 3102 |
| >TSHR-I630L·LIFTDFIC    | 2396 | >TSHR-I630L·LLFTDFIC    | 24  | 2372 |
| >TSHR-I630L·LIFTDFICM   | 3892 | >TSHR-I630L·LLFTDFICM   | 46  | 3846 |
| >TSHR-I630L·LIFTDFICMA  | 52   | >TSHR-I630L·LLFTDFICMA  | 5   | 47   |
| >TSHR-I630L·LIFTDFICM   | 785  | >TSHR-I630L·LLFTDFICM   | 260 | 525  |
| >TSHR-I630L·LIFTDFICM   | 173  | >TSHR-I630L·LLFTDFICM   | 45  | 128  |
| >TSHR-I630L·TKIAKRMAVL  | 619  | >TSHR-I630L·TKIAKRMAVL  | 330 | 289  |
| >TSHR-I630L·TKIAKRMAVL  | 644  | >TSHR-I630L·TKIAKRMAVL  | 47  | 597  |
| >TSHR-I630L·VLIFTDFI    | 68   | >TSHR-I630L·VLLFTDFI    | 58  | 10   |
| >TSHR-I630L·VLIFTDFICM  | 428  | >TSHR-I630L·VLLFTDFICM  | 235 | 193  |
| >TSHR-I630L·VLIFTDFICM/ | 110  | >TSHR-I630L·VLLFTDFICM/ | 93  | 17   |
| >TSHR-I630L·VLIFTDFI    | 29   | >TSHR-I630L·VLLFTDFI    | 115 | 86   |
| >TSHR-I630L·VLIFTDFICM/ | 168  | >TSHR-I630L·VLLFTDFICM/ | 658 | 490  |
| >TSHR-I630L·VLIFTDFI    | 42   | >TSHR-I630L·VLLFTDFI    | 327 | 285  |
| >TSHR-I630L·VLIFTDFICM/ | 62   | >TSHR-I630L·VLLFTDFICM/ | 358 | 296  |
| >TSHR-I630L·VLIFTDFI    | 161  | >TSHR-I630L·VLLFTDFI    | 138 | 23   |
| >TSHR-I630L·VLIFTDFICM/ | 237  | >TSHR-I630L·VLLFTDFICM/ | 204 | 33   |
| >TSHR-I630L·VLIFTDFI    | 13   | >TSHR-I630L·VLLFTDFI    | 5   | 8    |
| >TSHR-I630L·VLIFTDFIC   | 684  | >TSHR-I630L·VLLFTDFIC   | 206 | 478  |
| >TSHR-I630L·VLIFTDFICM  | 677  | >TSHR-I630L·VLLFTDFICM  | 148 | 529  |
| >TSHR-I630L·VLIFTDFICM/ | 19   | >TSHR-I630L·VLLFTDFICM/ | 7   | 12   |
| >TSHR-I630L·VLIFTDFI    | 11   | >TSHR-I630L·VLLFTDFI    | 9   | 2    |
| >TSHR-I630L·VLIFTDFIC   | 195  | >TSHR-I630L·VLLFTDFIC   | 116 | 79   |
| >TSHR-I630L·VLIFTDFICM  | 185  | >TSHR-I630L·VLLFTDFICM  | 101 | 84   |
| >TSHR-I630L·VLIFTDFICM/ | 56   | >TSHR-I630L·VLLFTDFICM/ | 35  | 21   |
| >TSHR-I630L·VLIFTDFI    | 30   | >TSHR-I630L·VLLFTDFI    | 9   | 21   |
| >TSHR-I630L·VLIFTDFIC   | 2788 | >TSHR-I630L·VLLFTDFIC   | 274 | 2514 |
| >TSHR-I630L·VLIFTDFICM  | 703  | >TSHR-I630L·VLLFTDFICM  | 72  | 631  |
| >TSHR-I630L·VLIFTDFICM/ | 38   | >TSHR-I630L·VLLFTDFICM/ | 11  | 27   |
| >TSHR-I630L·VLIFTDFI    | 78   | >TSHR-I630L·VLLFTDFI    | 6   | 72   |
| >TSHR-I630L·VLIFTDFIC   | 5689 | >TSHR-I630L·VLLFTDFIC   | 292 | 5397 |
| >TSHR-I630L·VLIFTDFICM  | 1658 | >TSHR-I630L·VLLFTDFICM  | 61  | 1597 |
| >TSHR-I630L·VLIFTDFICM/ | 542  | >TSHR-I630L·VLLFTDFICM/ | 21  | 521  |
| >TSHR-I630L·VLIFTDFI    | 45   | >TSHR-I630L·VLLFTDFI    | 31  | 14   |
| >TSHR-I630L·VLIFTDFIC   | 381  | >TSHR-I630L·VLLFTDFIC   | 238 | 143  |
| >TSHR-I630L·VLIFTDFICM  | 567  | >TSHR-I630L·VLLFTDFICM  | 375 | 192  |
| >TSHR-I630L·VLIFTDFICM/ | 14   | >TSHR-I630L·VLLFTDFICM/ | 10  | 4    |

|                         |      |                         |     |     |
|-------------------------|------|-------------------------|-----|-----|
| >TSHR-I630L-AVLIFTDFI   | 339  | >TSHR-I630L-AVLLFTDFI   | 202 | 137 |
| >TSHR-I630L-AVLIFTDFI   | 201  | >TSHR-I630L-AVLLFTDFI   | 206 | 5   |
| >TSHR-I630L-AVLIFTDFI   | 47   | >TSHR-I630L-AVLLFTDFI   | 62  | 15  |
| >TSHR-I630L-AVLIFTDFI   | 98   | >TSHR-I630L-AVLLFTDFI   | 357 | 259 |
| >TSHR-I630L-AVLIFTDFI   | 264  | >TSHR-I630L-AVLLFTDFI   | 633 | 369 |
| >TSHR-I630L-AVLIFTDFICM | 287  | >TSHR-I630L-AVLLFTDFICM | 140 | 147 |
| >TSHR-I630L-AVLIFTDF    | 63   | >TSHR-I630L-AVLLFTDF    | 52  | 11  |
| >TSHR-I630L-AVLIFTDFI   | 238  | >TSHR-I630L-AVLLFTDFI   | 136 | 102 |
| >TSHR-I630L-AVLIFTDFI   | 189  | >TSHR-I630L-AVLLFTDFI   | 297 | 108 |
| >TSHR-I630L-AVLIFTDF    | 213  | >TSHR-I630L-AVLLFTDF    | 260 | 47  |
| >TSHR-I630L-AVLIFTDF    | 424  | >TSHR-I630L-AVLLFTDF    | 912 | 488 |
| >TSHR-I630L-AVLIFTDFI   | 226  | >TSHR-I630L-AVLLFTDFI   | 406 | 180 |
| >TSHR-I630L-MAVLIFTDF   | 1288 | >TSHR-I630L-MAVLLFTDF   | 459 | 829 |
| >TSHR-I630L-MAVLIFTDFI  | 190  | >TSHR-I630L-MAVLLFTDFI  | 207 | 17  |
| >TSHR-I630L-MAVLIFTDFI  | 153  | >TSHR-I630L-MAVLLFTDFI  | 147 | 6   |
| >TSHR-I630L-MAVLIFTDFI  | 76   | >TSHR-I630L-MAVLLFTDFI  | 94  | 18  |
| >TSHR-I630L-MAVLIFTDFI  | 304  | >TSHR-I630L-MAVLLFTDFI  | 399 | 95  |
| >TSHR-I630L-MAVLIFTDF   | 57   | >TSHR-I630L-MAVLLFTDF   | 56  | 1   |
| >TSHR-I630L-MAVLIFTDF   | 85   | >TSHR-I630L-MAVLLFTDF   | 48  | 37  |
| >TSHR-I630L-MAVLIFTDF   | 48   | >TSHR-I630L-MAVLLFTDF   | 45  | 3   |
| >TSHR-I630L-MAVLIFTDF   | 151  | >TSHR-I630L-MAVLLFTDF   | 157 | 6   |
| >TSHR-I630L-MAVLIFTDF   | 406  | >TSHR-I630L-MAVLLFTDF   | 476 | 70  |
| >TSHR-I630L-RMAVLIFTDF  | 587  | >TSHR-I630L-RMAVLLFTDF  | 447 | 140 |
| >TSHR-I630L-RMAVLIFT    | 161  | >TSHR-I630L-RMAVLLFT    | 176 | 15  |
| >TSHR-I630L-RMAVLIFTDF  | 30   | >TSHR-I630L-RMAVLLFTDF  | 31  | 1   |
| >TSHR-I630L-RMAVLIFT    | 75   | >TSHR-I630L-RMAVLLFT    | 81  | 6   |
| >TSHR-I630L-RMAVLIFTDF  | 5    | >TSHR-I630L-RMAVLLFTDF  | 5   | 0   |
| >TSHR-I630L-RMAVLIFT    | 150  | >TSHR-I630L-RMAVLLFT    | 116 | 34  |
| >TSHR-I630L-RMAVLIFTDF  | 15   | >TSHR-I630L-RMAVLLFTDF  | 15  | 0   |
| >TSHR-I630L-RMAVLIFT    | 289  | >TSHR-I630L-RMAVLLFT    | 245 | 44  |
| >TSHR-I630L-RMAVLIFTDF  | 53   | >TSHR-I630L-RMAVLLFTDF  | 40  | 13  |
| >TSHR-I630L-RMAVLIFT    | 75   | >TSHR-I630L-RMAVLLFT    | 155 | 80  |
| >TSHR-I630L-RMAVLIFTDF  | 8    | >TSHR-I630L-RMAVLLFTDF  | 12  | 4   |
| >TSHR-I630L-RMAVLIFTDF  | 25   | >TSHR-I630L-RMAVLLFTDF  | 21  | 4   |
| >TSHR-I630L-RMAVLIFT    | 104  | >TSHR-I630L-RMAVLLFT    | 165 | 61  |
| >TSHR-I630L-RMAVLIFTDF  | 16   | >TSHR-I630L-RMAVLLFTDF  | 20  | 4   |
| >TSHR-I630L-RMAVLIFTDF  | 19   | >TSHR-I630L-RMAVLLFTDF  | 19  | 0   |
| >TSHR-I630L-RMAVLIFT    | 425  | >TSHR-I630L-RMAVLLFT    | 694 | 269 |
| >TSHR-I630L-RMAVLIFTDF  | 89   | >TSHR-I630L-RMAVLLFTDF  | 132 | 43  |
| >TSHR-I630L-RMAVLIFTDF  | 185  | >TSHR-I630L-RMAVLLFTDF  | 204 | 19  |
| >TSHR-I630L-RMAVLIFTDF  | 22   | >TSHR-I630L-RMAVLLFTDF  | 33  | 11  |
| >TSHR-I630L-RMAVLIFTDF  | 69   | >TSHR-I630L-RMAVLLFTDF  | 72  | 3   |
| >TSHR-I630L-RMAVLIFTDF  | 45   | >TSHR-I630L-RMAVLLFTDF  | 44  | 1   |

|                          |      |                          |      |      |
|--------------------------|------|--------------------------|------|------|
| >TSHR-I630L·RMAVLIFTDF   | 8    | >TSHR-I630L·RMAVLLFTDF   | 9    | 1    |
| >TSHR-I630L·RMAVLIFTDF   | 498  | >TSHR-I630L·RMAVLLFTDF   | 717  | 219  |
| >TSHR-I630L·RMAVLIFTDF   | 337  | >TSHR-I630L·RMAVLLFTDF   | 310  | 27   |
| >TSHR-I630L·RMAVLIFTDF   | 106  | >TSHR-I630L·RMAVLLFTDF   | 96   | 10   |
| >TSHR-I630L·RMAVLIFTDF   | 97   | >TSHR-I630L·RMAVLLFTDF   | 107  | 10   |
| >TSHR-I630L·RMAVLIFTDF   | 253  | >TSHR-I630L·RMAVLLFTDF   | 383  | 130  |
| >TSHR-I630L·RMAVLIFTDF   | 347  | >TSHR-I630L·RMAVLLFTDF   | 293  | 54   |
| >TSHR-I630L·RMAVLIFTDF   | 520  | >TSHR-I630L·RMAVLLFTDF   | 483  | 37   |
| >TSHR-I630L·RMAVLIFTDF   | 146  | >TSHR-I630L·RMAVLLFTDF   | 152  | 6    |
| >TSHR-I630L·KRM AVLIF    | 8    | >TSHR-I630L·KRM AVLIF    | 14   | 6    |
| >TSHR-I630L·KRM AVLIFTD  | 14   | >TSHR-I630L·KRM AVLIFTC  | 13   | 1    |
| >TSHR-I630L·KRM AVLIF    | 26   | >TSHR-I630L·KRM AVLIF    | 15   | 11   |
| >TSHR-I630L·KRM AVLIFT   | 117  | >TSHR-I630L·KRM AVLIFTC  | 95   | 22   |
| >TSHR-I630L·KRM AVLIFTD  | 38   | >TSHR-I630L·KRM AVLIFTC  | 35   | 3    |
| >TSHR-I630L·KRM AVLIF    | 139  | >TSHR-I630L·KRM AVLIF    | 58   | 81   |
| >TSHR-I630L·KRM AVLIFT   | 62   | >TSHR-I630L·KRM AVLIFTC  | 46   | 16   |
| >TSHR-I630L·KRM AVLIFTD  | 499  | >TSHR-I630L·KRM AVLIFTC  | 361  | 138  |
| >TSHR-I630L·KRM AVLIFTD  | 45   | >TSHR-I630L·KRM AVLIFTC  | 41   | 4    |
| >TSHR-I630L·KRM AVLIF    | 688  | >TSHR-I630L·KRM AVLIF    | 399  | 289  |
| >TSHR-I630L·KRM AVLIFT   | 678  | >TSHR-I630L·KRM AVLIFTC  | 389  | 289  |
| >TSHR-I630L·KRM AVLIFTD  | 28   | >TSHR-I630L·KRM AVLIFTC  | 23   | 5    |
| >TSHR-I630L·AKRM AVLIF   | 356  | >TSHR-I630L·AKRM AVLIF   | 1036 | 680  |
| >TSHR-I630L·AKRM AVLIF   | 41   | >TSHR-I630L·AKRM AVLIF   | 25   | 16   |
| >TSHR-I630L·AKRM AVLIF   | 3    | >TSHR-I630L·AKRM AVLIF   | 4    | 1    |
| >TSHR-I630L·AKRM AVLIF   | 260  | >TSHR-I630L·AKRM AVLIF   | 9564 | 9304 |
| >TSHR-I630L·IAKRM AVLIF  | 156  | >TSHR-I630L·IAKRM AVLIF  | 533  | 377  |
| >TSHR-I630L·IAKRM AVLIF  | 326  | >TSHR-I630L·IAKRM AVLIF  | 469  | 143  |
| >TSHR-I630L·IAKRM AVLIF  | 21   | >TSHR-I630L·IAKRM AVLIF  | 53   | 32   |
| >TSHR-I630L·IAKRM AVLIF  | 37   | >TSHR-I630L·IAKRM AVLIF  | 25   | 12   |
| >TSHR-I630L·IAKRM AVLIF  | 308  | >TSHR-I630L·IAKRM AVLIF  | 219  | 89   |
| >TSHR-I630L·IAKRM AVLIF  | 214  | >TSHR-I630L·IAKRM AVLIF  | 181  | 33   |
| >TSHR-I630L·IAKRM AVLIF  | 1024 | >TSHR-I630L·IAKRM AVLIF  | 466  | 558  |
| >TSHR-I630L·KIAKRM AVLIF | 101  | >TSHR-I630L·KIAKRM AVLIF | 326  | 225  |
| >TSHR-I630L·KIAKRM AVLIF | 154  | >TSHR-I630L·KIAKRM AVLIF | 215  | 61   |
| >TSHR-I630L·KIAKRM AVLIF | 166  | >TSHR-I630L·KIAKRM AVLIF | 234  | 68   |
| >TSHR-I630L·KIAKRM AVLIF | 110  | >TSHR-I630L·KIAKRM AVLIF | 347  | 237  |
| >TSHR-I630L·KIAKRM AVLIF | 148  | >TSHR-I630L·KIAKRM AVLIF | 97   | 51   |
| >TSHR-I630L·KIAKRM AVLIF | 88   | >TSHR-I630L·KIAKRM AVLIF | 82   | 6    |
| >TSHR-I630L·KIAKRM AVLIF | 557  | >TSHR-I630L·KIAKRM AVLIF | 365  | 192  |
| >TSHR-I635V ICMAPISFYA   | 227  | >TSHR-I635V VCMAPISFYA   | 616  | 389  |
| >TSHR-I635V ICMAPISFYA   | 145  | >TSHR-I635V VCMAPISFYA   | 298  | 153  |
| >TSHR-I635V ICMAPISFY    | 50   | >TSHR-I635V VCMAPISFY    | 40   | 10   |
| >TSHR-I635V ICMAPISFY    | 183  | >TSHR-I635V VCMAPISFY    | 173  | 10   |

|                         |      |                         |     |      |
|-------------------------|------|-------------------------|-----|------|
| >TSHR-I635V ICMAPISFYAL | 375  | >TSHR-I635V VCMAPISFYA  | 679 | 304  |
| >TSHR-I635V ICMAPISFY   | 117  | >TSHR-I635V VCMAPISFY   | 70  | 47   |
| >TSHR-I635V ICMAPISF    | 27   | >TSHR-I635V VCMAPISF    | 53  | 26   |
| >TSHR-I635V ICMAPISFY   | 163  | >TSHR-I635V VCMAPISFY   | 385 | 222  |
| >TSHR-I635V ICMAPISFYAL | 275  | >TSHR-I635V VCMAPISFYA  | 668 | 393  |
| >TSHR-I635V ICMAPISFY   | 9    | >TSHR-I635V VCMAPISFY   | 14  | 5    |
| >TSHR-I635V FICMAPISFYA | 53   | >TSHR-I635V FVCMAPISFY. | 86  | 33   |
| >TSHR-I635V FICMAPISFYA | 40   | >TSHR-I635V FVCMAPISFY. | 79  | 39   |
| >TSHR-I635V FICMAPISFYA | 55   | >TSHR-I635V FVCMAPISFY. | 144 | 89   |
| >TSHR-I635V FICMAPISFYA | 50   | >TSHR-I635V FVCMAPISFY. | 41  | 9    |
| >TSHR-I635V FICMAPISFYA | 20   | >TSHR-I635V FVCMAPISFY. | 56  | 36   |
| >TSHR-I635V FICMAPISFYA | 193  | >TSHR-I635V FVCMAPISFY. | 512 | 319  |
| >TSHR-I635V FICMAPISFYA | 42   | >TSHR-I635V FVCMAPISFY. | 143 | 101  |
| >TSHR-I635V FICMAPISFY  | 98   | >TSHR-I635V FVCMAPISFY  | 131 | 33   |
| >TSHR-I635V FICMAPISFY  | 196  | >TSHR-I635V FVCMAPISFY  | 143 | 53   |
| >TSHR-I635V FICMAPISFY  | 517  | >TSHR-I635V FVCMAPISFY  | 420 | 97   |
| >TSHR-I635V FICMAPISFY  | 44   | >TSHR-I635V FVCMAPISFY  | 18  | 26   |
| >TSHR-I635V FICMAPISFY  | 617  | >TSHR-I635V FVCMAPISFY  | 178 | 439  |
| >TSHR-I635V FICMAPISFY  | 191  | >TSHR-I635V FVCMAPISFY  | 154 | 37   |
| >TSHR-I635V FICMAPISFY  | 668  | >TSHR-I635V FVCMAPISFY  | 435 | 233  |
| >TSHR-I635V FICMAPISFY  | 223  | >TSHR-I635V FVCMAPISFY  | 149 | 74   |
| >TSHR-I635V FICMAPISFYA | 238  | >TSHR-I635V FVCMAPISFY. | 63  | 175  |
| >TSHR-I635V FICMAPISFY  | 173  | >TSHR-I635V FVCMAPISFY  | 79  | 94   |
| >TSHR-I635V FICMAPISF   | 128  | >TSHR-I635V FVCMAPISF   | 143 | 15   |
| >TSHR-I635V FICMAPISFY  | 166  | >TSHR-I635V FVCMAPISFY  | 175 | 9    |
| >TSHR-I635V FICMAPISFY  | 406  | >TSHR-I635V FVCMAPISFY  | 534 | 128  |
| >TSHR-I635V FICMAPISF   | 50   | >TSHR-I635V FVCMAPISF   | 72  | 22   |
| >TSHR-I635V FICMAPISF   | 464  | >TSHR-I635V FVCMAPISF   | 155 | 309  |
| >TSHR-I635V FICMAPISFY  | 668  | >TSHR-I635V FVCMAPISFY  | 206 | 462  |
| >TSHR-I635V FICMAPISF   | 191  | >TSHR-I635V FVCMAPISF   | 61  | 130  |
| >TSHR-I635V FICMAPISFY  | 476  | >TSHR-I635V FVCMAPISFY  | 339 | 137  |
| >TSHR-I635V RMAVLIFTDF  | 30   | >TSHR-I635V RMAVLIFTDF  | 13  | 17   |
| >TSHR-I635V RMAVLIFTDF  | 5    | >TSHR-I635V RMAVLIFTDF  | 3   | 2    |
| >TSHR-I635V RMAVLIFTDF  | 15   | >TSHR-I635V RMAVLIFTDF  | 5   | 10   |
| >TSHR-I635V RMAVLIFTDF  | 53   | >TSHR-I635V RMAVLIFTDF  | 9   | 44   |
| >TSHR-I635V RMAVLIFTDF  | 8    | >TSHR-I635V RMAVLIFTDF  | 2   | 6    |
| >TSHR-I635V RMAVLIFTDF  | 25   | >TSHR-I635V RMAVLIFTDF  | 5   | 20   |
| >TSHR-I635V RMAVLIFTDF  | 16   | >TSHR-I635V RMAVLIFTDF  | 6   | 10   |
| >TSHR-I635V RMAVLIFTDF  | 19   | >TSHR-I635V RMAVLIFTDF  | 3   | 16   |
| >TSHR-I635V RMAVLIFTDF  | 89   | >TSHR-I635V RMAVLIFTDF  | 4   | 85   |
| >TSHR-I635V RMAVLIFTDF  | 69   | >TSHR-I635V RMAVLIFTDF  | 857 | 788  |
| >TSHR-I635V RMAVLIFTDF  | 1884 | >TSHR-I635V RMAVLIFTDF  | 479 | 1405 |
| >TSHR-I635V RMAVLIFTDF  | 498  | >TSHR-I635V RMAVLIFTDF  | 687 | 189  |

|                          |     |                         |      |      |
|--------------------------|-----|-------------------------|------|------|
| >TSHR-I635V RMAVLIFTDF   | 97  | >TSHR-I635V RMAVLIFTDF  | 2628 | 2531 |
| >TSHR-I635V RMAVLIFTDF   | 347 | >TSHR-I635V RMAVLIFTDF  | 1106 | 759  |
| >TSHR-I635V RMAVLIFTDF   | 146 | >TSHR-I635V RMAVLIFTDF  | 8940 | 8794 |
| >TSHR-I635V DFICMAPISF   | 269 | >TSHR-I635V DFVCMAPISF  | 326  | 57   |
| >TSHR-I635V DFICMAPISF\) | 19  | >TSHR-I635V DFVCMAPISF  | 37   | 18   |
| >TSHR-I635V DFICMAPISF\) | 149 | >TSHR-I635V DFVCMAPISF  | 365  | 216  |
| >TSHR-I635V DFICMAPISF   | 487 | >TSHR-I635V DFVCMAPISF  | 868  | 381  |
| >TSHR-I635V DFICMAPISF\) | 18  | >TSHR-I635V DFVCMAPISF  | 34   | 16   |
| >TSHR-I635V DFICMAPISF\) | 430 | >TSHR-I635V DFVCMAPISF  | 821  | 391  |
| >TSHR-I635V TDFICMAPI    | 103 | >TSHR-I635V TDFVCMAPI   | 168  | 65   |
| >TSHR-I635V TDFICMAPI    | 127 | >TSHR-I635V TDFVCMAPI   | 112  | 15   |
| >TSHR-I635V TDFICMAPISF  | 391 | >TSHR-I635V TDFVCMAPIS  | 264  | 127  |
| >TSHR-I635V TDFICMAPI    | 65  | >TSHR-I635V TDFVCMAPI   | 79   | 14   |
| >TSHR-I635V TDFICMAPISF  | 138 | >TSHR-I635V TDFVCMAPIS  | 167  | 29   |
| >TSHR-I635V TDFICMAPI    | 76  | >TSHR-I635V TDFVCMAPI   | 65   | 11   |
| >TSHR-I635V TDFICMAPI    | 425 | >TSHR-I635V TDFVCMAPI   | 990  | 565  |
| >TSHR-I635V TDFICMAPI    | 101 | >TSHR-I635V TDFVCMAPI   | 90   | 11   |
| >TSHR-I635V FTDFICMA     | 392 | >TSHR-I635V FTDFVCMMA   | 334  | 58   |
| >TSHR-I635V FTDFICMA     | 343 | >TSHR-I635V FTDFVCMMA   | 456  | 113  |
| >TSHR-I635V FTDFICMAPI   | 378 | >TSHR-I635V FTDFVCMAPI  | 433  | 55   |
| >TSHR-I635V FTDFICMA     | 221 | >TSHR-I635V FTDFVCMMA   | 469  | 248  |
| >TSHR-I635V FTDFICMAPI   | 333 | >TSHR-I635V FTDFVCMAPI  | 345  | 12   |
| >TSHR-I635V FTDFICMAPI   | 400 | >TSHR-I635V FTDFVCMAPI  | 482  | 82   |
| >TSHR-I635V FTDFICMA     | 140 | >TSHR-I635V FTDFVCMMA   | 178  | 38   |
| >TSHR-I635V FTDFICMAPI   | 83  | >TSHR-I635V FTDFVCMAPI  | 91   | 8    |
| >TSHR-I635V FTDFICMA     | 187 | >TSHR-I635V FTDFVCMMA   | 112  | 75   |
| >TSHR-I635V FTDFICMAPI   | 256 | >TSHR-I635V FTDFVCMAPI  | 142  | 114  |
| >TSHR-I635V FTDFICMA     | 767 | >TSHR-I635V FTDFVCMMA   | 482  | 285  |
| >TSHR-I635V FTDFICMA     | 194 | >TSHR-I635V FTDFVCMMA   | 339  | 145  |
| >TSHR-I635V FTDFICMAPI   | 29  | >TSHR-I635V FTDFVCMAPI  | 30   | 1    |
| >TSHR-I635V FTDFICMA     | 119 | >TSHR-I635V FTDFVCMMA   | 125  | 6    |
| >TSHR-I635V FTDFICMAPI   | 16  | >TSHR-I635V FTDFVCMAPI  | 19   | 3    |
| >TSHR-I635V FTDFICMAPI   | 185 | >TSHR-I635V FTDFVCMAPI  | 243  | 58   |
| >TSHR-I635V FTDFICMAPI   | 412 | >TSHR-I635V FTDFVCMAPI  | 480  | 68   |
| >TSHR-I635V FTDFICMAPI   | 94  | >TSHR-I635V FTDFVCMAPI  | 98   | 4    |
| >TSHR-I635V IFTDFICMAPI  | 365 | >TSHR-I635V IFTDFVCMAP  | 371  | 6    |
| >TSHR-I635V LIFTDFICMA   | 181 | >TSHR-I635V LIFTDFVCMMA | 221  | 40   |
| >TSHR-I635V LIFTDFICMA   | 139 | >TSHR-I635V LIFTDFVCMMA | 188  | 49   |
| >TSHR-I635V LIFTDFICM    | 319 | >TSHR-I635V LIFTDFVCM   | 298  | 21   |
| >TSHR-I635V LIFTDFICMA   | 109 | >TSHR-I635V LIFTDFVCMMA | 177  | 68   |
| >TSHR-I635V LIFTDFICMA   | 72  | >TSHR-I635V LIFTDFVCMMA | 88   | 16   |
| >TSHR-I635V LIFTDFICMA   | 302 | >TSHR-I635V LIFTDFVCMMA | 305  | 3    |
| >TSHR-I635V LIFTDFICMA   | 52  | >TSHR-I635V LIFTDFVCMMA | 60   | 8    |



|                         |      |                         |       |       |
|-------------------------|------|-------------------------|-------|-------|
| >TSHR-I635V LIFTDFICM   | 785  | >TSHR-I635V LIFTDFVCM   | 382   | 403   |
| >TSHR-I635V LIFTDFICM   | 173  | >TSHR-I635V LIFTDFVCM   | 69    | 104   |
| >TSHR-I635V VLIFTDFI    | 68   | >TSHR-I635V VLIFTDFV    | 19    | 49    |
| >TSHR-I635V VLIFTDFICM  | 428  | >TSHR-I635V VLIFTDFVCM  | 795   | 367   |
| >TSHR-I635V VLIFTDFICM/ | 110  | >TSHR-I635V VLIFTDFVCM  | 122   | 12    |
| >TSHR-I635V VLIFTDFI    | 29   | >TSHR-I635V VLIFTDFV    | 9     | 20    |
| >TSHR-I635V VLIFTDFICM/ | 168  | >TSHR-I635V VLIFTDFVCM  | 177   | 9     |
| >TSHR-I635V VLIFTDFI    | 42   | >TSHR-I635V VLIFTDFV    | 10    | 32    |
| >TSHR-I635V VLIFTDFICM/ | 62   | >TSHR-I635V VLIFTDFVCM  | 58    | 4     |
| >TSHR-I635V VLIFTDFI    | 161  | >TSHR-I635V VLIFTDFV    | 18    | 143   |
| >TSHR-I635V VLIFTDFICM/ | 237  | >TSHR-I635V VLIFTDFVCM  | 306   | 69    |
| >TSHR-I635V VLIFTDFI    | 13   | >TSHR-I635V VLIFTDFV    | 3     | 10    |
| >TSHR-I635V VLIFTDFIC   | 684  | >TSHR-I635V VLIFTDFVC   | 269   | 415   |
| >TSHR-I635V VLIFTDFICM/ | 19   | >TSHR-I635V VLIFTDFVCM  | 16    | 3     |
| >TSHR-I635V VLIFTDFI    | 11   | >TSHR-I635V VLIFTDFV    | 3     | 8     |
| >TSHR-I635V VLIFTDFIC   | 195  | >TSHR-I635V VLIFTDFVC   | 152   | 43    |
| >TSHR-I635V VLIFTDFICM  | 185  | >TSHR-I635V VLIFTDFVCM  | 173   | 12    |
| >TSHR-I635V VLIFTDFICM/ | 56   | >TSHR-I635V VLIFTDFVCM  | 58    | 2     |
| >TSHR-I635V VLIFTDFI    | 30   | >TSHR-I635V VLIFTDFV    | 7     | 23    |
| >TSHR-I635V VLIFTDFICM/ | 38   | >TSHR-I635V VLIFTDFVCM  | 37    | 1     |
| >TSHR-I635V VLIFTDFI    | 78   | >TSHR-I635V VLIFTDFV    | 4     | 74    |
| >TSHR-I635V VLIFTDFICM/ | 542  | >TSHR-I635V VLIFTDFVCM  | 422   | 120   |
| >TSHR-I635V VLIFTDFI    | 45   | >TSHR-I635V VLIFTDFV    | 3     | 42    |
| >TSHR-I635V VLIFTDFIC   | 381  | >TSHR-I635V VLIFTDFVC   | 251   | 130   |
| >TSHR-I635V VLIFTDFICM  | 567  | >TSHR-I635V VLIFTDFVCM  | 425   | 142   |
| >TSHR-I635V VLIFTDFICM/ | 14   | >TSHR-I635V VLIFTDFVCM  | 15    | 1     |
| >TSHR-I635V VLIFTDFI    | 1458 | >TSHR-I635V VLIFTDFV    | 435   | 1023  |
| >TSHR-I635V VLIFTDFICM  | 894  | >TSHR-I635V VLIFTDFVCM  | 402   | 492   |
| >TSHR-I635V AVLIFTDFI   | 339  | >TSHR-I635V AVLIFTDFV   | 2412  | 2073  |
| >TSHR-I635V AVLIFTDFI   | 530  | >TSHR-I635V AVLIFTDFV   | 86    | 444   |
| >TSHR-I635V AVLIFTDFI   | 201  | >TSHR-I635V AVLIFTDFV   | 38    | 163   |
| >TSHR-I635V AVLIFTDFI   | 47   | >TSHR-I635V AVLIFTDFV   | 8     | 39    |
| >TSHR-I635V AVLIFTDFI   | 98   | >TSHR-I635V AVLIFTDFV   | 9     | 89    |
| >TSHR-I635V AVLIFTDFI   | 2291 | >TSHR-I635V AVLIFTDFV   | 103   | 2188  |
| >TSHR-I635V AVLIFTDFI   | 264  | >TSHR-I635V AVLIFTDFV   | 15    | 249   |
| >TSHR-I635V AVLIFTDFI   | 2375 | >TSHR-I635V AVLIFTDFV   | 29    | 2346  |
| >TSHR-I635V AVLIFTDFI   | 5314 | >TSHR-I635V AVLIFTDFV   | 30    | 5284  |
| >TSHR-I635V AVLIFTDFICM | 287  | >TSHR-I635V AVLIFTDFVCM | 384   | 97    |
| >TSHR-I635V AVLIFTDFI   | 238  | >TSHR-I635V AVLIFTDFV   | 3564  | 3326  |
| >TSHR-I635V AVLIFTDFI   | 552  | >TSHR-I635V AVLIFTDFV   | 141   | 411   |
| >TSHR-I635V AVLIFTDFI   | 189  | >TSHR-I635V AVLIFTDFV   | 23    | 166   |
| >TSHR-I635V AVLIFTDFI   | 226  | >TSHR-I635V AVLIFTDFV   | 10569 | 10343 |
| >TSHR-I635V MAVLIFTDFI  | 190  | >TSHR-I635V MAVLIFTDFV  | 1332  | 1142  |

|                         |       |                         |       |       |
|-------------------------|-------|-------------------------|-------|-------|
| >TSHR-I635V MAVLIFTDFI  | 1462  | >TSHR-I635V MAVLIFTDFV  | 448   | 1014  |
| >TSHR-I635V MAVLIFTDFI  | 539   | >TSHR-I635V MAVLIFTDFV  | 315   | 224   |
| >TSHR-I635V MAVLIFTDFI  | 1087  | >TSHR-I635V MAVLIFTDFV  | 343   | 744   |
| >TSHR-I635V MAVLIFTDFI  | 153   | >TSHR-I635V MAVLIFTDFV  | 60    | 93    |
| >TSHR-I635V MAVLIFTDFI  | 76    | >TSHR-I635V MAVLIFTDFV  | 31    | 45    |
| >TSHR-I635V MAVLIFTDFI  | 304   | >TSHR-I635V MAVLIFTDFV  | 45    | 259   |
| >TSHR-I640K ISFYALSAI   | 78    | >TSHR-I640K KSFYALSAI   | 284   | 206   |
| >TSHR-I640K ISFYALSAI   | 493   | >TSHR-I640K KSFYALSAI   | 425   | 68    |
| >TSHR-I640K ISFYALSAI   | 361   | >TSHR-I640K KSFYALSAI   | 187   | 174   |
| >TSHR-I640K ISFYALSA    | 468   | >TSHR-I640K KSFYALSA    | 17    | 451   |
| >TSHR-I640K ISFYALSAI   | 548   | >TSHR-I640K KSFYALSAI   | 18    | 530   |
| >TSHR-I640K ISFYALSAIL  | 1173  | >TSHR-I640K KSFYALSAIL  | 31    | 1142  |
| >TSHR-I640K ISFYALSA    | 3254  | >TSHR-I640K KSFYALSA    | 169   | 3085  |
| >TSHR-I640K ISFYALSAI   | 80    | >TSHR-I640K KSFYALSAI   | 8     | 72    |
| >TSHR-I640K ISFYALSAIL  | 290   | >TSHR-I640K KSFYALSAIL  | 17    | 273   |
| >TSHR-I640K ISFYALSAI   | 169   | >TSHR-I640K KSFYALSAI   | 1088  | 919   |
| >TSHR-I640K ISFYALSAI   | 493   | >TSHR-I640K KSFYALSAI   | 542   | 49    |
| >TSHR-I640K ISFYALSA    | 225   | >TSHR-I640K KSFYALSA    | 267   | 42    |
| >TSHR-I640K ISFYALSAI   | 14    | >TSHR-I640K KSFYALSAI   | 15    | 1     |
| >TSHR-I640K ISFYALSAIL  | 28    | >TSHR-I640K KSFYALSAIL  | 24    | 4     |
| >TSHR-I640K ISFYALSA    | 307   | >TSHR-I640K KSFYALSA    | 139   | 168   |
| >TSHR-I640K ISFYALSAI   | 10    | >TSHR-I640K KSFYALSAI   | 10    | 0     |
| >TSHR-I640K ISFYALSAIL  | 5     | >TSHR-I640K KSFYALSAIL  | 4     | 1     |
| >TSHR-I640K ISFYALSAIL  | 718   | >TSHR-I640K KSFYALSAIL  | 343   | 375   |
| >TSHR-I640K ISFYALSAI   | 1338  | >TSHR-I640K KSFYALSAI   | 160   | 1178  |
| >TSHR-I640K ISFYALSAIL  | 279   | >TSHR-I640K KSFYALSAIL  | 53    | 226   |
| >TSHR-I640K ISFYALSAIL  | 101   | >TSHR-I640K KSFYALSAIL  | 190   | 89    |
| >TSHR-I640K ISFYALSAI   | 11    | >TSHR-I640K KSFYALSAI   | 13    | 2     |
| >TSHR-I640K ISFYALSAIL  | 277   | >TSHR-I640K KSFYALSAIL  | 103   | 174   |
| >TSHR-I640K ISFYALSAILN | 231   | >TSHR-I640K KSFYALSAILN | 346   | 115   |
| >TSHR-I640K ISFYALSAI   | 7     | >TSHR-I640K KSFYALSAI   | 6     | 1     |
| >TSHR-I640K ISFYALSAIL  | 142   | >TSHR-I640K KSFYALSAIL  | 302   | 160   |
| >TSHR-I640K PISFYALSAI  | 7843  | >TSHR-I640K PKSFYALSAI  | 337   | 7506  |
| >TSHR-I640K IFTDFICMAPI | 365   | >TSHR-I640K IFTDFICMAPI | 20523 | 20158 |
| >TSHR-I640K IFTDFICMAPI | 25652 | >TSHR-I640K IFTDFICMAPI | 364   | 25288 |
| >TSHR-I640K IFTDFICMAPI | 9521  | >TSHR-I640K IFTDFICMAPI | 103   | 9418  |
| >TSHR-I640K IFTDFICMAPI | 6351  | >TSHR-I640K IFTDFICMAPI | 163   | 6188  |
| >TSHR-I640K IFTDFICMAPI | 27894 | >TSHR-I640K IFTDFICMAPI | 314   | 27580 |
| >TSHR-I640K IFTDFICMAPI | 12922 | >TSHR-I640K IFTDFICMAPI | 72    | 12850 |
| >TSHR-I640K APISFYAL    | 173   | >TSHR-I640K APKSFYAL    | 2436  | 2263  |
| >TSHR-I640K APISFYAL    | 19    | >TSHR-I640K APKSFYAL    | 161   | 142   |
| >TSHR-I640K APISFYALSAI | 52    | >TSHR-I640K APKSFYALSAI | 511   | 459   |
| >TSHR-I640K APISFYAL    | 26    | >TSHR-I640K APKSFYAL    | 34    | 8     |

|                         |      |                         |      |      |
|-------------------------|------|-------------------------|------|------|
| >TSHR-I640K APISFYALSAI | 54   | >TSHR-I640K APKSFYALSAI | 96   | 42   |
| >TSHR-I640K APISFYAL    | 564  | >TSHR-I640K APKSFYAL    | 61   | 503  |
| >TSHR-I640K APISFYALSAI | 3517 | >TSHR-I640K APKSFYALSAI | 451  | 3066 |
| >TSHR-I640K APISFYAL    | 426  | >TSHR-I640K APKSFYAL    | 467  | 41   |
| >TSHR-I640K APISFYAL    | 90   | >TSHR-I640K APKSFYAL    | 1192 | 1102 |
| >TSHR-I640K APISFYAL    | 24   | >TSHR-I640K APKSFYAL    | 1335 | 1311 |
| >TSHR-I640K APISFYAL    | 162  | >TSHR-I640K APKSFYAL    | 2799 | 2637 |
| >TSHR-I640K APISFYALSAI | 259  | >TSHR-I640K APKSFYALSAI | 3996 | 3737 |
| >TSHR-I640K APISFYALSA  | 37   | >TSHR-I640K APKSFYALSA  | 89   | 52   |
| >TSHR-I640K APISFYAL    | 27   | >TSHR-I640K APKSFYAL    | 209  | 182  |
| >TSHR-I640K APISFYALSAI | 148  | >TSHR-I640K APKSFYALSAI | 1893 | 1745 |
| >TSHR-I640K APISFYAL    | 54   | >TSHR-I640K APKSFYAL    | 731  | 677  |
| >TSHR-I640K APISFYALSAI | 285  | >TSHR-I640K APKSFYALSAI | 2247 | 1962 |
| >TSHR-I640K MAPISFYAL   | 211  | >TSHR-I640K MAPKSFYAL   | 372  | 161  |
| >TSHR-I640K MAPISFYAL   | 361  | >TSHR-I640K MAPKSFYAL   | 622  | 261  |
| >TSHR-I640K MAPISFYAL   | 286  | >TSHR-I640K MAPKSFYAL   | 170  | 116  |
| >TSHR-I640K MAPISFYA    | 70   | >TSHR-I640K MAPKSFYA    | 76   | 6    |
| >TSHR-I640K MAPISFYAL   | 51   | >TSHR-I640K MAPKSFYAL   | 39   | 12   |
| >TSHR-I640K MAPISFYALS/ | 277  | >TSHR-I640K MAPKSFYALS  | 215  | 62   |
| >TSHR-I640K MAPISFYA    | 16   | >TSHR-I640K MAPKSFYA    | 21   | 5    |
| >TSHR-I640K MAPISFYAL   | 14   | >TSHR-I640K MAPKSFYAL   | 14   | 0    |
| >TSHR-I640K MAPISFYALS/ | 196  | >TSHR-I640K MAPKSFYALS  | 191  | 5    |
| >TSHR-I640K MAPISFYAL   | 133  | >TSHR-I640K MAPKSFYAL   | 86   | 47   |
| >TSHR-I640K MAPISFYAL   | 785  | >TSHR-I640K MAPKSFYAL   | 206  | 579  |
| >TSHR-I640K MAPISFYAL   | 118  | >TSHR-I640K MAPKSFYAL   | 145  | 27   |
| >TSHR-I640K MAPISFYA    | 229  | >TSHR-I640K MAPKSFYA    | 531  | 302  |
| >TSHR-I640K MAPISFYALS/ | 357  | >TSHR-I640K MAPKSFYALS  | 519  | 162  |
| >TSHR-I640K MAPISFYA    | 199  | >TSHR-I640K MAPKSFYA    | 298  | 99   |
| >TSHR-I640K MAPISFYAL   | 2    | >TSHR-I640K MAPKSFYAL   | 2    | 0    |
| >TSHR-I640K MAPISFYALS  | 8    | >TSHR-I640K MAPKSFYALS  | 13   | 5    |
| >TSHR-I640K MAPISFYALS/ | 158  | >TSHR-I640K MAPKSFYALS  | 278  | 120  |
| >TSHR-I640K CMAPISFY    | 489  | >TSHR-I640K CMAPKSFY    | 850  | 361  |
| >TSHR-I640K CMAPISFYA   | 12   | >TSHR-I640K CMAPKSFYA   | 21   | 9    |
| >TSHR-I640K CMAPISFYAL  | 134  | >TSHR-I640K CMAPKSFYAL  | 271  | 137  |
| >TSHR-I640K CMAPISFYA   | 3    | >TSHR-I640K CMAPKSFYA   | 7    | 4    |
| >TSHR-I640K CMAPISFYAL  | 23   | >TSHR-I640K CMAPKSFYAL  | 39   | 16   |
| >TSHR-I640K CMAPISFYAL: | 40   | >TSHR-I640K CMAPKSFYAL  | 226  | 186  |
| >TSHR-I640K CMAPISFYA   | 9    | >TSHR-I640K CMAPKSFYA   | 10   | 1    |
| >TSHR-I640K CMAPISFYAL  | 176  | >TSHR-I640K CMAPKSFYAL  | 215  | 39   |
| >TSHR-I640K CMAPISFYAL: | 374  | >TSHR-I640K CMAPKSFYAL  | 527  | 153  |
| >TSHR-I640K CMAPISFYA   | 12   | >TSHR-I640K CMAPKSFYA   | 27   | 15   |
| >TSHR-I640K CMAPISFYAL  | 106  | >TSHR-I640K CMAPKSFYAL  | 168  | 62   |
| >TSHR-I640K CMAPISFYA   | 9    | >TSHR-I640K CMAPKSFYA   | 15   | 6    |

|                         |     |                         |      |     |
|-------------------------|-----|-------------------------|------|-----|
| >TSHR-I640K CMAPISFYAL  | 15  | >TSHR-I640K CMAPKSFYAL  | 22   | 7   |
| >TSHR-I640K CMAPISFYA   | 14  | >TSHR-I640K CMAPKSFYA   | 21   | 7   |
| >TSHR-I640K CMAPISFYAL  | 8   | >TSHR-I640K CMAPKSFYAL  | 9    | 1   |
| >TSHR-I640K CMAPISFYA   | 17  | >TSHR-I640K CMAPKSFYA   | 32   | 15  |
| >TSHR-I640K CMAPISFYAL  | 80  | >TSHR-I640K CMAPKSFYAL  | 173  | 93  |
| >TSHR-I640K CMAPISFYA   | 4   | >TSHR-I640K CMAPKSFYA   | 6    | 2   |
| >TSHR-I640K CMAPISFYAL  | 8   | >TSHR-I640K CMAPKSFYAL  | 12   | 4   |
| >TSHR-I640K CMAPISFYA   | 8   | >TSHR-I640K CMAPKSFYA   | 15   | 7   |
| >TSHR-I640K CMAPISFYAL  | 10  | >TSHR-I640K CMAPKSFYAL  | 15   | 5   |
| >TSHR-I640K CMAPISFY    | 127 | >TSHR-I640K CMAPKSFY    | 206  | 79  |
| >TSHR-I640K CMAPISFY    | 373 | >TSHR-I640K CMAPKSFY    | 1111 | 738 |
| >TSHR-I640K CMAPISFYAL  | 279 | >TSHR-I640K CMAPKSFYAL  | 436  | 157 |
| >TSHR-I640K CMAPISFY    | 9   | >TSHR-I640K CMAPKSFY    | 15   | 6   |
| >TSHR-I640K CMAPISFY    | 8   | >TSHR-I640K CMAPKSFY    | 13   | 5   |
| >TSHR-I640K CMAPISFY    | 227 | >TSHR-I640K CMAPKSFY    | 1121 | 894 |
| >TSHR-I640K CMAPISFYA   | 24  | >TSHR-I640K CMAPKSFYA   | 328  | 304 |
| >TSHR-I640K CMAPISFYAL  | 272 | >TSHR-I640K CMAPKSFYAL  | 1070 | 798 |
| >TSHR-I640K CMAPISFY    | 23  | >TSHR-I640K CMAPKSFY    | 73   | 50  |
| >TSHR-I640K CMAPISFY    | 89  | >TSHR-I640K CMAPKSFY    | 143  | 54  |
| >TSHR-I640K CMAPISFY    | 381 | >TSHR-I640K CMAPKSFY    | 435  | 54  |
| >TSHR-I640K CMAPISFY    | 53  | >TSHR-I640K CMAPKSFY    | 115  | 62  |
| >TSHR-I640K CMAPISFYAL  | 122 | >TSHR-I640K CMAPKSFYAL  | 120  | 2   |
| >TSHR-I640K CMAPISFYAL  | 146 | >TSHR-I640K CMAPKSFYAL  | 331  | 185 |
| >TSHR-I640K CMAPISFY    | 75  | >TSHR-I640K CMAPKSFY    | 67   | 8   |
| >TSHR-I640K ICMAPISFYA  | 227 | >TSHR-I640K ICMAPKSFYA  | 797  | 570 |
| >TSHR-I640K ICMAPISFYAL | 145 | >TSHR-I640K ICMAPKSFYAL | 425  | 280 |
| >TSHR-I640K ICMAPISFY   | 50  | >TSHR-I640K ICMAPKSFY   | 734  | 684 |
| >TSHR-I640K ICMAPISFY   | 183 | >TSHR-I640K ICMAPKSFY   | 206  | 23  |
| >TSHR-I640K ICMAPISFYAL | 375 | >TSHR-I640K ICMAPKSFYAL | 924  | 549 |
| >TSHR-I640K ICMAPISFY   | 117 | >TSHR-I640K ICMAPKSFY   | 464  | 347 |
| >TSHR-I640K ICMAPISF    | 27  | >TSHR-I640K ICMAPKSF    | 32   | 5   |
| >TSHR-I640K ICMAPISFY   | 163 | >TSHR-I640K ICMAPKSFY   | 350  | 187 |
| >TSHR-I640K ICMAPISFYAL | 275 | >TSHR-I640K ICMAPKSFYAL | 334  | 59  |
| >TSHR-I640K ICMAPISFY   | 9   | >TSHR-I640K ICMAPKSFY   | 7    | 2   |
| >TSHR-I640K FICMAPISFYA | 53  | >TSHR-I640K FICMAPKSFYA | 172  | 119 |
| >TSHR-I640K FICMAPISFYA | 40  | >TSHR-I640K FICMAPKSFYA | 84   | 44  |
| >TSHR-I640K FICMAPISFYA | 55  | >TSHR-I640K FICMAPKSFYA | 62   | 7   |
| >TSHR-I640K FICMAPISFYA | 50  | >TSHR-I640K FICMAPKSFYA | 93   | 43  |
| >TSHR-I640K FICMAPISFYA | 20  | >TSHR-I640K FICMAPKSFYA | 44   | 24  |
| >TSHR-I640K FICMAPISFYA | 193 | >TSHR-I640K FICMAPKSFYA | 505  | 312 |
| >TSHR-I640K FICMAPISFYA | 42  | >TSHR-I640K FICMAPKSFYA | 104  | 62  |
| >TSHR-I640K FICMAPISFY  | 98  | >TSHR-I640K FICMAPKSFY  | 122  | 24  |
| >TSHR-I640K FICMAPISFY  | 196 | >TSHR-I640K FICMAPKSFY  | 335  | 139 |

|                         |       |                         |       |       |
|-------------------------|-------|-------------------------|-------|-------|
| >TSHR-I640K FICMAPISFY  | 44    | >TSHR-I640K FICMAPKSFY  | 153   | 109   |
| >TSHR-I640K FICMAPISFY  | 191   | >TSHR-I640K FICMAPKSFY  | 158   | 33    |
| >TSHR-I640K FICMAPISFY  | 223   | >TSHR-I640K FICMAPKSFY  | 266   | 43    |
| >TSHR-I640K FICMAPISFYA | 238   | >TSHR-I640K FICMAPKSFY, | 819   | 581   |
| >TSHR-I640K FICMAPISFY  | 173   | >TSHR-I640K FICMAPKSFY  | 580   | 407   |
| >TSHR-I640K FICMAPISF   | 128   | >TSHR-I640K FICMAPKSF   | 194   | 66    |
| >TSHR-I640K FICMAPISFY  | 166   | >TSHR-I640K FICMAPKSFY  | 273   | 107   |
| >TSHR-I640K FICMAPISFY  | 406   | >TSHR-I640K FICMAPKSFY  | 347   | 59    |
| >TSHR-I640K FICMAPISF   | 50    | >TSHR-I640K FICMAPKSF   | 47    | 3     |
| >TSHR-I640K FICMAPISF   | 464   | >TSHR-I640K FICMAPKSF   | 316   | 148   |
| >TSHR-I640K FICMAPISF   | 191   | >TSHR-I640K FICMAPKSF   | 1341  | 1150  |
| >TSHR-I640K FICMAPISFY  | 476   | >TSHR-I640K FICMAPKSFY  | 750   | 274   |
| >TSHR-I640K DFICMAPISF  | 269   | >TSHR-I640K DFICMAPKSF  | 356   | 87    |
| >TSHR-I640K DFICMAPISFY | 19    | >TSHR-I640K DFICMAPKSF  | 64    | 45    |
| >TSHR-I640K DFICMAPISFY | 149   | >TSHR-I640K DFICMAPKSF  | 183   | 34    |
| >TSHR-I640K DFICMAPISF  | 487   | >TSHR-I640K DFICMAPKSF  | 1018  | 531   |
| >TSHR-I640K DFICMAPISFY | 18    | >TSHR-I640K DFICMAPKSF  | 23    | 5     |
| >TSHR-I640K DFICMAPI    | 3692  | >TSHR-I640K DFICMAPK    | 107   | 3585  |
| >TSHR-I640K DFICMAPI    | 26919 | >TSHR-I640K DFICMAPK    | 177   | 26742 |
| >TSHR-I640K DFICMAPISFY | 430   | >TSHR-I640K DFICMAPKSF  | 692   | 262   |
| >TSHR-I640K TDFICMAPI   | 103   | >TSHR-I640K TDFICMAPK   | 25601 | 25498 |
| >TSHR-I640K TDFICMAPI   | 127   | >TSHR-I640K TDFICMAPK   | 20263 | 20136 |
| >TSHR-I640K TDFICMAPISF | 391   | >TSHR-I640K TDFICMAPKS  | 386   | 5     |
| >TSHR-I640K TDFICMAPI   | 65    | >TSHR-I640K TDFICMAPK   | 2317  | 2252  |
| >TSHR-I640K TDFICMAPISF | 138   | >TSHR-I640K TDFICMAPKS  | 209   | 71    |
| >TSHR-I640K TDFICMAPI   | 76    | >TSHR-I640K TDFICMAPK   | 13452 | 13376 |
| >TSHR-I640K TDFICMAPI   | 425   | >TSHR-I640K TDFICMAPK   | 26544 | 26119 |
| >TSHR-I640K TDFICMAPI   | 101   | >TSHR-I640K TDFICMAPK   | 20778 | 20677 |
| >TSHR-I640K FTDFICMAPI  | 378   | >TSHR-I640K FTDFICMAPK  | 11351 | 10973 |
| >TSHR-I640K FTDFICMAPI  | 333   | >TSHR-I640K FTDFICMAPK  | 13522 | 13189 |
| >TSHR-I640K FTDFICMAPI  | 400   | >TSHR-I640K FTDFICMAPK  | 12818 | 12418 |
| >TSHR-I640K FTDFICMAPI  | 83    | >TSHR-I640K FTDFICMAPK  | 5398  | 5315  |
| >TSHR-I640K FTDFICMAPI  | 256   | >TSHR-I640K FTDFICMAPK  | 18831 | 18575 |
| >TSHR-I640K FTDFICMAPI  | 15572 | >TSHR-I640K FTDFICMAPK  | 46    | 15526 |
| >TSHR-I640K FTDFICMAPI  | 30957 | >TSHR-I640K FTDFICMAPK  | 52    | 30905 |
| >TSHR-I640K FTDFICMAPI  | 13524 | >TSHR-I640K FTDFICMAPK  | 25    | 13499 |
| >TSHR-I640K FTDFICMAPI  | 29    | >TSHR-I640K FTDFICMAPK  | 11503 | 11474 |
| >TSHR-I640K FTDFICMAPI  | 16    | >TSHR-I640K FTDFICMAPK  | 4451  | 4435  |
| >TSHR-I640K FTDFICMAPI  | 185   | >TSHR-I640K FTDFICMAPK  | 8164  | 7979  |
| >TSHR-I640K FTDFICMAPI  | 412   | >TSHR-I640K FTDFICMAPK  | 11097 | 10685 |
| >TSHR-I640K FTDFICMAPI  | 94    | >TSHR-I640K FTDFICMAPK  | 33269 | 33175 |
| >TSHR-L512C LTVITLERWY  | 219   | >TSHR-L512C QTVITLERWY  | 514   | 295   |
| >TSHR-L512C LTVITLERWY, | 157   | >TSHR-L512C QTVITLERWY  | 440   | 283   |

|                        |      |                        |       |       |
|------------------------|------|------------------------|-------|-------|
| >TSHR-L512CLTVITLERW   | 2046 | >TSHR-L512C QTVITLERW  | 371   | 1675  |
| >TSHR-L512CLTVITLERWY  | 22   | >TSHR-L512C QTVITLERWY | 8     | 14    |
| >TSHR-L512CLTVITLERWY  | 791  | >TSHR-L512C QTVITLERWY | 250   | 541   |
| >TSHR-L512CLTVITLERWY  | 348  | >TSHR-L512C QTVITLERWY | 510   | 162   |
| >TSHR-L512CLTVITLERWY  | 299  | >TSHR-L512C QTVITLERWY | 503   | 204   |
| >TSHR-L512CLTVITLER    | 120  | >TSHR-L512C QTVITLER   | 279   | 159   |
| >TSHR-L512CLTVITLER    | 19   | >TSHR-L512C QTVITLER   | 13    | 6     |
| >TSHR-L512CLTVITLERWY/ | 268  | >TSHR-L512C QTVITLERWY | 69    | 199   |
| >TSHR-L512CLTVITLERWY/ | 1393 | >TSHR-L512C QTVITLERWY | 378   | 1015  |
| >TSHR-L512CLTVITLERW   | 4    | >TSHR-L512C QTVITLERW  | 5     | 1     |
| >TSHR-L512CLTVITLERWY  | 5    | >TSHR-L512C QTVITLERWY | 7     | 2     |
| >TSHR-L512CLTVITLERW   | 447  | >TSHR-L512C QTVITLERW  | 3128  | 2681  |
| >TSHR-L512CLTVITLERW   | 39   | >TSHR-L512C QTVITLERW  | 89    | 50    |
| >TSHR-L512CLTVITLERWY  | 466  | >TSHR-L512C QTVITLERWY | 2888  | 2422  |
| >TSHR-L512CLTVITLERW   | 13   | >TSHR-L512C QTVITLERW  | 19    | 6     |
| >TSHR-L512CLTVITLERW   | 170  | >TSHR-L512C QTVITLERW  | 509   | 339   |
| >TSHR-L512CLTVITLERWY  | 29   | >TSHR-L512C QTVITLERWY | 49    | 20    |
| >TSHR-L512CLTVITLERW   | 422  | >TSHR-L512C QTVITLERW  | 2619  | 2197  |
| >TSHR-L512CLTVITLER    | 575  | >TSHR-L512C QTVITLER   | 204   | 371   |
| >TSHR-L512CLTVITLER    | 1148 | >TSHR-L512C QTVITLER   | 457   | 691   |
| >TSHR-L512CLTVITLERW^  | 334  | >TSHR-L512C TQTVITLERW | 1508  | 1174  |
| >TSHR-L512CLTVITLERW^  | 459  | >TSHR-L512C TQTVITLERW | 672   | 213   |
| >TSHR-L512CLTVITLER    | 224  | >TSHR-L512C TQTVITLER  | 163   | 61    |
| >TSHR-L512CLTVITLER    | 23   | >TSHR-L512C TQTVITLER  | 136   | 113   |
| >TSHR-L512CLTVITLERW^  | 235  | >TSHR-L512C TQTVITLERW | 809   | 574   |
| >TSHR-L512CLTVITLERW   | 154  | >TSHR-L512C TQTVITLERW | 522   | 368   |
| >TSHR-L512CLTVITLERW   | 1196 | >TSHR-L512C TQTVITLERW | 456   | 740   |
| >TSHR-L512CLTVITLER    | 215  | >TSHR-L512C TQTVITLER  | 366   | 151   |
| >TSHR-L512CVFASELSVYTL | 123  | >TSHR-L512CVFASELSVYTC | 8233  | 8110  |
| >TSHR-L512CVFASELSVYTL | 93   | >TSHR-L512CVFASELSVYTC | 4774  | 4681  |
| >TSHR-L512CVFASELSVYTL | 232  | >TSHR-L512CVFASELSVYTC | 5866  | 5634  |
| >TSHR-L512CVFASELSVYTL | 94   | >TSHR-L512CVFASELSVYTC | 10489 | 10395 |
| >TSHR-L512CVFASELSVYTL | 341  | >TSHR-L512CVFASELSVYTC | 9769  | 9428  |
| >TSHR-L512CYTLTVITL    | 44   | >TSHR-L512CYTQTVITL    | 167   | 123   |
| >TSHR-L512CYTLTVITL    | 18   | >TSHR-L512CYTQTVITL    | 165   | 147   |
| >TSHR-L512CYTLTVITL    | 7    | >TSHR-L512CYTQTVITL    | 48    | 41    |
| >TSHR-L512CYTLTVITL    | 46   | >TSHR-L512CYTQTVITL    | 182   | 136   |
| >TSHR-L512CYTLTVITL    | 25   | >TSHR-L512CYTQTVITL    | 783   | 758   |
| >TSHR-L512CYTLTVITL    | 198  | >TSHR-L512CYTQTVITL    | 3191  | 2993  |
| >TSHR-L512CYTLTVITL    | 119  | >TSHR-L512CYTQTVITL    | 311   | 192   |
| >TSHR-L512CYTLTVITLER  | 323  | >TSHR-L512CYTQTVITLER  | 1139  | 816   |
| >TSHR-L512CYTLTVITLER  | 74   | >TSHR-L512CYTQTVITLER  | 133   | 59    |
| >TSHR-L512CYTLTVITL    | 218  | >TSHR-L512CYTQTVITL    | 722   | 504   |

|                        |     |                         |      |     |
|------------------------|-----|-------------------------|------|-----|
| >TSHR-L512CYTLTVITLER  | 67  | >TSHR-L512C YTQTVITLER  | 69   | 2   |
| >TSHR-L512CYTLTVITL    | 116 | >TSHR-L512C YTQTVITL    | 294  | 178 |
| >TSHR-L512CYTLTVITLER  | 124 | >TSHR-L512C YTQTVITLER  | 135  | 11  |
| >TSHR-L512CYTLTVITLER  | 4   | >TSHR-L512C YTQTVITLER  | 6    | 2   |
| >TSHR-L512CYTLTVITL    | 251 | >TSHR-L512C YTQTVITL    | 287  | 36  |
| >TSHR-L512CYTLTVITL    | 33  | >TSHR-L512C YTQTVITL    | 635  | 602 |
| >TSHR-L512CYTLTVITL    | 347 | >TSHR-L512C YTQTVITL    | 1131 | 784 |
| >TSHR-L512CYTLTVITL    | 10  | >TSHR-L512C YTQTVITL    | 20   | 10  |
| >TSHR-L512CYTLTVITLERV | 5   | >TSHR-L512C YTQTVITLERV | 9    | 4   |
| >TSHR-L512CYTLTVITL    | 250 | >TSHR-L512C YTQTVITL    | 848  | 598 |
| >TSHR-L512CYTLTVITLERV | 47  | >TSHR-L512C YTQTVITLERV | 71   | 24  |
| >TSHR-L512CYTLTVITLERV | 10  | >TSHR-L512C YTQTVITLERV | 13   | 3   |
| >TSHR-L512CYTLTVITL    | 496 | >TSHR-L512C YTQTVITL    | 526  | 30  |
| >TSHR-L512CYTLTVITL    | 171 | >TSHR-L512C YTQTVITL    | 318  | 147 |
| >TSHR-L512CYTLTVITLERV | 19  | >TSHR-L512C YTQTVITLERV | 28   | 9   |
| >TSHR-L512CYTLTVITLERV | 155 | >TSHR-L512C YTQTVITLERV | 700  | 545 |
| >TSHR-L512CYTLTVITLER  | 203 | >TSHR-L512C YTQTVITLER  | 854  | 651 |
| >TSHR-L512CYTLTVITL    | 360 | >TSHR-L512C YTQTVITL    | 292  | 68  |
| >TSHR-L512CVYTLTVITL   | 137 | >TSHR-L512C VYTQTVITL   | 111  | 26  |
| >TSHR-L512CVYTLTVITL   | 207 | >TSHR-L512C VYTQTVITL   | 188  | 19  |
| >TSHR-L512CVYTLTVITL   | 28  | >TSHR-L512C VYTQTVITL   | 11   | 17  |
| >TSHR-L512CVYTLTVITLER | 303 | >TSHR-L512C VYTQTVITLER | 572  | 269 |
| >TSHR-L512CVYTLTVITLER | 322 | >TSHR-L512C VYTQTVITLER | 663  | 341 |
| >TSHR-L512CVYTLTVITLER | 53  | >TSHR-L512C VYTQTVITLER | 33   | 20  |
| >TSHR-L512CVYTLTVITL   | 443 | >TSHR-L512C VYTQTVITL   | 337  | 106 |
| >TSHR-L512CVYTLTVITL   | 573 | >TSHR-L512C VYTQTVITL   | 329  | 244 |
| >TSHR-L512CSVYTLTVITL  | 210 | >TSHR-L512C SVYTQTVITL  | 581  | 371 |
| >TSHR-L512CSVYTLTVITL  | 49  | >TSHR-L512C SVYTQTVITL  | 85   | 36  |
| >TSHR-L512CSVYTLTVI    | 68  | >TSHR-L512C SVYTQTVI    | 165  | 97  |
| >TSHR-L512CSVYTLTVITL  | 64  | >TSHR-L512C SVYTQTVITL  | 85   | 21  |
| >TSHR-L512CSVYTLTVI    | 137 | >TSHR-L512C SVYTQTVI    | 590  | 453 |
| >TSHR-L512CSVYTLTVITL  | 95  | >TSHR-L512C SVYTQTVITL  | 170  | 75  |
| >TSHR-L512CSVYTLTVI    | 240 | >TSHR-L512C SVYTQTVI    | 537  | 297 |
| >TSHR-L512CSVYTLTVITL  | 65  | >TSHR-L512C SVYTQTVITL  | 75   | 10  |
| >TSHR-L512CSVYTLTVITL  | 339 | >TSHR-L512C SVYTQTVITL  | 277  | 62  |
| >TSHR-L512CSVYTLTVI    | 345 | >TSHR-L512C SVYTQTVI    | 679  | 334 |
| >TSHR-L512CSVYTLTVITL  | 53  | >TSHR-L512C SVYTQTVITL  | 69   | 16  |
| >TSHR-L512CSVYTLTVITL  | 79  | >TSHR-L512C SVYTQTVITL  | 46   | 33  |
| >TSHR-L512CSVYTLTVITL  | 718 | >TSHR-L512C SVYTQTVITL  | 369  | 349 |
| >TSHR-L512CSVYTLTVI    | 38  | >TSHR-L512C SVYTQTVI    | 61   | 23  |
| >TSHR-L512CSVYTLTVITL  | 18  | >TSHR-L512C SVYTQTVITL  | 23   | 5   |
| >TSHR-L512CSVYTLTVI    | 137 | >TSHR-L512C SVYTQTVI    | 245  | 108 |
| >TSHR-L512CSVYTLTVITL  | 57  | >TSHR-L512C SVYTQTVITL  | 152  | 95  |

|                        |     |                        |       |       |
|------------------------|-----|------------------------|-------|-------|
| >TSHR-L512CSVYTLTVI    | 381 | >TSHR-L512CSVYTQTVI    | 1040  | 659   |
| >TSHR-L512CSVYTLTVITL  | 151 | >TSHR-L512CSVYTQTVITL  | 242   | 91    |
| >TSHR-L512CSVYTLTVITL  | 378 | >TSHR-L512CSVYTQTVITL  | 248   | 130   |
| >TSHR-L512CSVYTLTVITL  | 254 | >TSHR-L512CSVYTQTVITL  | 350   | 96    |
| >TSHR-L512CSVYTLTVI    | 56  | >TSHR-L512CSVYTQTVI    | 66    | 10    |
| >TSHR-L512CLSVYTLTV    | 122 | >TSHR-L512CLSVYTQTV    | 687   | 565   |
| >TSHR-L512CLSVYTLTV    | 322 | >TSHR-L512CLSVYTQTV    | 211   | 111   |
| >TSHR-L512CLSVYTLTVI   | 104 | >TSHR-L512CLSVYTQTVI   | 79    | 25    |
| >TSHR-L512CLSVYTLTVITL | 102 | >TSHR-L512CLSVYTQTVITL | 80    | 22    |
| >TSHR-L512CLSVYTLTV    | 76  | >TSHR-L512CLSVYTQTV    | 141   | 65    |
| >TSHR-L512CLSVYTLTVI   | 57  | >TSHR-L512CLSVYTQTVI   | 86    | 29    |
| >TSHR-L512CLSVYTLTVITL | 9   | >TSHR-L512CLSVYTQTVITL | 10    | 1     |
| >TSHR-L512CLSVYTLTVI   | 94  | >TSHR-L512CLSVYTQTVI   | 34    | 60    |
| >TSHR-L512CLSVYTLTVITL | 142 | >TSHR-L512CLSVYTQTVITL | 68    | 74    |
| >TSHR-L512CLSVYTLTVITL | 159 | >TSHR-L512CLSVYTQTVITL | 214   | 55    |
| >TSHR-L512CLSVYTLTVI   | 37  | >TSHR-L512CLSVYTQTVI   | 67    | 30    |
| >TSHR-L512CLSVYTLTVITL | 82  | >TSHR-L512CLSVYTQTVITL | 96    | 14    |
| >TSHR-L512CLSVYTLTVI   | 25  | >TSHR-L512CLSVYTQTVI   | 21    | 4     |
| >TSHR-L512CLSVYTLTVITL | 448 | >TSHR-L512CLSVYTQTVITL | 318   | 130   |
| >TSHR-L512CELSVYTLTV   | 405 | >TSHR-L512CELSVYTQTV   | 1554  | 1149  |
| >TSHR-L512CELSVYTLTV   | 95  | >TSHR-L512CELSVYTQTV   | 52    | 43    |
| >TSHR-L512CELSVYTLTVI  | 294 | >TSHR-L512CELSVYTQTVI  | 710   | 416   |
| >TSHR-L512CELSVYTLTV   | 149 | >TSHR-L512CELSVYTQTV   | 114   | 35    |
| >TSHR-L512CELSVYTLTVI  | 134 | >TSHR-L512CELSVYTQTVI  | 1137  | 1003  |
| >TSHR-L512CELSVYTLTV   | 20  | >TSHR-L512CELSVYTQTV   | 15    | 5     |
| >TSHR-L512CELSVYTLTV   | 38  | >TSHR-L512CELSVYTQTV   | 24    | 14    |
| >TSHR-L512CELSVYTLTV   | 35  | >TSHR-L512CELSVYTQTV   | 30    | 5     |
| >TSHR-L512CELSVYTLTV   | 5   | >TSHR-L512CELSVYTQTV   | 4     | 1     |
| >TSHR-L512CELSVYTLTVI  | 510 | >TSHR-L512CELSVYTQTVI  | 468   | 42    |
| >TSHR-L512CELSVYTLTV   | 4   | >TSHR-L512CELSVYTQTV   | 3     | 1     |
| >TSHR-L512CELSVYTLTVI  | 348 | >TSHR-L512CELSVYTQTVI  | 308   | 40    |
| >TSHR-L512CELSVYTLTV   | 253 | >TSHR-L512CELSVYTQTV   | 168   | 85    |
| >TSHR-L512CELSVYTLTV   | 33  | >TSHR-L512CELSVYTQTV   | 40    | 7     |
| >TSHR-L512CELSVYTLTVI  | 335 | >TSHR-L512CELSVYTQTVI  | 253   | 82    |
| >TSHR-L512CELSVYTL     | 31  | >TSHR-L512CELSVYTQ     | 1275  | 1244  |
| >TSHR-L512CELSVYTLTV   | 19  | >TSHR-L512CELSVYTQTV   | 19    | 0     |
| >TSHR-L512CELSVYTLTVI  | 7   | >TSHR-L512CELSVYTQTVI  | 9     | 2     |
| >TSHR-L512CELSVYTLTV   | 448 | >TSHR-L512CELSVYTQTV   | 329   | 119   |
| >TSHR-L512CELSVYTLTV   | 224 | >TSHR-L512CELSVYTQTV   | 234   | 10    |
| >TSHR-L512CELSVYTL     | 81  | >TSHR-L512CELSVYTQ     | 372   | 291   |
| >TSHR-L512CELSVYTL     | 159 | >TSHR-L512CELSVYTQ     | 18713 | 18554 |
| >TSHR-L512CELSVYTL     | 20  | >TSHR-L512CELSVYTQ     | 7898  | 7878  |
| >TSHR-L512CELSVYTLTVI  | 52  | >TSHR-L512CELSVYTQTVI  | 86    | 34    |



|                          |      |                          |       |       |
|--------------------------|------|--------------------------|-------|-------|
| >TSHR-L512C SELSVYTL     | 54   | >TSHR-L512C SELSVYTQ     | 2552  | 2498  |
| >TSHR-L512C SELSVYTLT    | 501  | >TSHR-L512C SELSVYTQT    | 341   | 160   |
| >TSHR-L512C SELSVYTLTV   | 146  | >TSHR-L512C SELSVYTQTV   | 212   | 66    |
| >TSHR-L512C SELSVYTLTVI  | 129  | >TSHR-L512C SELSVYTQTVI  | 129   | 0     |
| >TSHR-L512C SELSVYTL     | 388  | >TSHR-L512C SELSVYTQ     | 1242  | 854   |
| >TSHR-L512C SELSVYTL     | 125  | >TSHR-L512C SELSVYTQ     | 561   | 436   |
| >TSHR-L512C SELSVYTLTV   | 127  | >TSHR-L512C SELSVYTQTV   | 263   | 136   |
| >TSHR-L512C SELSVYTL     | 287  | >TSHR-L512C SELSVYTQ     | 596   | 309   |
| >TSHR-L512C SELSVYTLT    | 87   | >TSHR-L512C SELSVYTQT    | 180   | 93    |
| >TSHR-L512C SELSVYTLTV   | 156  | >TSHR-L512C SELSVYTQTV   | 367   | 211   |
| >TSHR-L512C SELSVYTLTVI  | 157  | >TSHR-L512C SELSVYTQTVI  | 161   | 4     |
| >TSHR-L512C SELSVYTL     | 99   | >TSHR-L512C SELSVYTQ     | 10383 | 10284 |
| >TSHR-L512C SELSVYTLT    | 183  | >TSHR-L512C SELSVYTQT    | 131   | 52    |
| >TSHR-L512C SELSVYTLTV   | 28   | >TSHR-L512C SELSVYTQTV   | 14    | 14    |
| >TSHR-L512C SELSVYTLTVI  | 6    | >TSHR-L512C SELSVYTQTVI  | 10    | 4     |
| >TSHR-L512C A SELSVYTL   | 322  | >TSHR-L512C A SELSVYTQ   | 6769  | 6447  |
| >TSHR-L512C A SELSVYTL   | 8    | >TSHR-L512C A SELSVYTQ   | 3203  | 3195  |
| >TSHR-L512C A SELSVYTLTV | 143  | >TSHR-L512C A SELSVYTQTV | 270   | 127   |
| >TSHR-L512C A SELSVYTL   | 102  | >TSHR-L512C A SELSVYTQ   | 10384 | 10282 |
| >TSHR-L512C F SELSVYTL   | 113  | >TSHR-L512C F SELSVYTQ   | 12096 | 11983 |
| >TSHR-L512C F SELSVYTL   | 23   | >TSHR-L512C F SELSVYTQ   | 5954  | 5931  |
| >TSHR-L512C F SELSVYTLT  | 133  | >TSHR-L512C F SELSVYTQT  | 301   | 168   |
| >TSHR-L512C F SELSVYTL   | 182  | >TSHR-L512C F SELSVYTQ   | 12448 | 12266 |
| >TSHR-L512C F SELSVYTL   | 64   | >TSHR-L512C F SELSVYTQ   | 5752  | 5688  |
| >TSHR-L512C F SELSVYTLT  | 202  | >TSHR-L512C F SELSVYTQT  | 439   | 237   |
| >TSHR-L512C F SELSVYTL   | 48   | >TSHR-L512C F SELSVYTQ   | 5418  | 5370  |
| >TSHR-L512C F SELSVYTL   | 97   | >TSHR-L512C F SELSVYTQ   | 12530 | 12433 |
| >TSHR-L512C F SELSVYTL   | 252  | >TSHR-L512C F SELSVYTQ   | 11603 | 11351 |
| >TSHR-L512C F SELSVYTL   | 213  | >TSHR-L512C F SELSVYTQ   | 16035 | 15822 |
| >TSHR-L512C F SELSVYTL   | 108  | >TSHR-L512C F SELSVYTQ   | 5628  | 5520  |
| >TSHR-L512C F SELSVYTL   | 96   | >TSHR-L512C F SELSVYTQ   | 21152 | 21056 |
| >TSHR-L512C F SELSVYTL   | 147  | >TSHR-L512C F SELSVYTQ   | 6336  | 6189  |
| >TSHR-L512C F SELSVYTL   | 447  | >TSHR-L512C F SELSVYTQ   | 8572  | 8125  |
| >TSHR-L512C F SELSVYTL   | 56   | >TSHR-L512C F SELSVYTQ   | 9348  | 9292  |
| >TSHR-L512C F SELSVYTL   | 46   | >TSHR-L512C F SELSVYTQ   | 11676 | 11630 |
| >TSHR-L512C F SELSVYTL   | 453  | >TSHR-L512C F SELSVYTQ   | 14654 | 14201 |
| >TSHR-L512C F SELSVYTL   | 125  | >TSHR-L512C F SELSVYTQ   | 12532 | 12407 |
| >TSHR-L512C F SELSVYTL   | 334  | >TSHR-L512C F SELSVYTQ   | 14295 | 13961 |
| >TSHR-L512F LTVITLERWY   | 219  | >TSHR-L512F RTVITLERWY   | 470   | 251   |
| >TSHR-L512F LTVITLERWY,  | 157  | >TSHR-L512F RTVITLERWY,  | 182   | 25    |
| >TSHR-L512F LTVITLER     | 1108 | >TSHR-L512F RTVITLER     | 216   | 892   |
| >TSHR-L512F LTVITLERWY   | 22   | >TSHR-L512F RTVITLERWY   | 23    | 1     |
| >TSHR-L512F LTVITLERWY   | 348  | >TSHR-L512F RTVITLERWY   | 467   | 119   |

|                         |       |                        |       |       |
|-------------------------|-------|------------------------|-------|-------|
| >TSHR-L512FLTIVITLERWY, | 4418  | >TSHR-L512FRTVITLERWY, | 223   | 4195  |
| >TSHR-L512FLTIVITLERWY  | 299   | >TSHR-L512FRTVITLERWY  | 87    | 212   |
| >TSHR-L512FLTIVITLER    | 120   | >TSHR-L512FRTVITLER    | 18    | 102   |
| >TSHR-L512FLTIVITLERW   | 14627 | >TSHR-L512FRTVITLERW   | 401   | 14226 |
| >TSHR-L512FLTIVITLER    | 19    | >TSHR-L512FRTVITLER    | 51    | 32    |
| >TSHR-L512FLTIVITLERWY, | 268   | >TSHR-L512FRTVITLERWY, | 1480  | 1212  |
| >TSHR-L512FLTIVITLER    | 3497  | >TSHR-L512FRTVITLER    | 431   | 3066  |
| >TSHR-L512FLTIVITLERW   | 4     | >TSHR-L512FRTVITLERW   | 3     | 1     |
| >TSHR-L512FLTIVITLERWY  | 5     | >TSHR-L512FRTVITLERWY  | 3     | 2     |
| >TSHR-L512FLTIVITLERWY, | 3101  | >TSHR-L512FRTVITLERWY, | 499   | 2602  |
| >TSHR-L512FLTIVITLERW   | 447   | >TSHR-L512FRTVITLERW   | 8193  | 7746  |
| >TSHR-L512FLTIVITLERW   | 39    | >TSHR-L512FRTVITLERW   | 32    | 7     |
| >TSHR-L512FLTIVITLERWY  | 466   | >TSHR-L512FRTVITLERWY  | 127   | 339   |
| >TSHR-L512FLTIVITLERW   | 13    | >TSHR-L512FRTVITLERW   | 9     | 4     |
| >TSHR-L512FLTIVITLERW   | 170   | >TSHR-L512FRTVITLERW   | 88    | 82    |
| >TSHR-L512FLTIVITLERWY  | 29    | >TSHR-L512FRTVITLERWY  | 24    | 5     |
| >TSHR-L512FLTIVITLERW   | 422   | >TSHR-L512FRTVITLERW   | 4855  | 4433  |
| >TSHR-L512FLTIVITLER    | 575   | >TSHR-L512FRTVITLER    | 411   | 164   |
| >TSHR-L512FLTIVITLER    | 1148  | >TSHR-L512FRTVITLER    | 119   | 1029  |
| >TSHR-L512FLTIVITLERW'  | 334   | >TSHR-L512FRTVITLERW'  | 3089  | 2755  |
| >TSHR-L512FLTIVITLERW'  | 459   | >TSHR-L512FRTVITLERW'  | 2824  | 2365  |
| >TSHR-L512FLTIVITLER    | 224   | >TSHR-L512FRTVITLER    | 12401 | 12177 |
| >TSHR-L512FLTIVITLER    | 23    | >TSHR-L512FRTVITLER    | 477   | 454   |
| >TSHR-L512FLTIVITLERW'  | 235   | >TSHR-L512FRTVITLERW'  | 1280  | 1045  |
| >TSHR-L512FLTIVITLER    | 22140 | >TSHR-L512FRTVITLER    | 330   | 21810 |
| >TSHR-L512FLTIVITLERW   | 154   | >TSHR-L512FRTVITLERW   | 9972  | 9818  |
| >TSHR-L512FLTIVITLERW   | 3243  | >TSHR-L512FRTVITLERW   | 356   | 2887  |
| >TSHR-L512FLTIVITLER    | 215   | >TSHR-L512FRTVITLER    | 891   | 676   |
| >TSHR-L512FVFASELSVYTL  | 123   | >TSHR-L512FVFASELSVYTF | 18799 | 18676 |
| >TSHR-L512FVFASELSVYTL  | 93    | >TSHR-L512FVFASELSVYTF | 2712  | 2619  |
| >TSHR-L512FVFASELSVYTL  | 232   | >TSHR-L512FVFASELSVYTF | 4374  | 4142  |
| >TSHR-L512FVFASELSVYTL  | 94    | >TSHR-L512FVFASELSVYTF | 8612  | 8518  |
| >TSHR-L512FVFASELSVYTL  | 14244 | >TSHR-L512FVFASELSVYTF | 55    | 14189 |
| >TSHR-L512FVFASELSVYTL  | 24798 | >TSHR-L512FVFASELSVYTF | 361   | 24437 |
| >TSHR-L512FVFASELSVYTL  | 29423 | >TSHR-L512FVFASELSVYTF | 287   | 29136 |
| >TSHR-L512FVFASELSVYTL  | 28043 | >TSHR-L512FVFASELSVYTF | 194   | 27849 |
| >TSHR-L512FVFASELSVYTL  | 341   | >TSHR-L512FVFASELSVYTF | 10895 | 10554 |
| >TSHR-L512FYTLTVITL     | 44    | >TSHR-L512FYTRTVITL    | 3482  | 3438  |
| >TSHR-L512FYTLTVITL     | 756   | >TSHR-L512FYTRTVITL    | 403   | 353   |
| >TSHR-L512FYTLTVITL     | 18    | >TSHR-L512FYTRTVITL    | 739   | 721   |
| >TSHR-L512FYTLTVITL     | 7     | >TSHR-L512FYTRTVITL    | 268   | 261   |
| >TSHR-L512FYTLTVITL     | 46    | >TSHR-L512FYTRTVITL    | 3658  | 3612  |
| >TSHR-L512FYTLTVITL     | 25    | >TSHR-L512FYTRTVITL    | 3867  | 3842  |

|                        |      |                        |       |       |
|------------------------|------|------------------------|-------|-------|
| >TSHR-L512FYTLTVITL    | 198  | >TSHR-L512FYTRTVITL    | 14522 | 14324 |
| >TSHR-L512FYTLTVITL    | 119  | >TSHR-L512FYTRTVITL    | 719   | 600   |
| >TSHR-L512FYTLTVITLER  | 323  | >TSHR-L512FYTRTVITLER  | 808   | 485   |
| >TSHR-L512FYTLTVITLER  | 74   | >TSHR-L512FYTRTVITLER  | 489   | 415   |
| >TSHR-L512FYTLTVITL    | 218  | >TSHR-L512FYTRTVITL    | 427   | 209   |
| >TSHR-L512FYTLTVITL    | 4040 | >TSHR-L512FYTRTVITL    | 81    | 3959  |
| >TSHR-L512FYTLTVITLER  | 6140 | >TSHR-L512FYTRTVITLER  | 178   | 5962  |
| >TSHR-L512FYTLTVITLER  | 67   | >TSHR-L512FYTRTVITLER  | 44    | 23    |
| >TSHR-L512FYTLTVITL    | 116  | >TSHR-L512FYTRTVITL    | 1062  | 946   |
| >TSHR-L512FYTLTVITLER  | 124  | >TSHR-L512FYTRTVITLER  | 121   | 3     |
| >TSHR-L512FYTLTVITLER  | 4    | >TSHR-L512FYTRTVITLER  | 6     | 2     |
| >TSHR-L512FYTLTVITL    | 251  | >TSHR-L512FYTRTVITL    | 1332  | 1081  |
| >TSHR-L512FYTLTVITL    | 33   | >TSHR-L512FYTRTVITL    | 2838  | 2805  |
| >TSHR-L512FYTLTVITL    | 347  | >TSHR-L512FYTRTVITL    | 281   | 66    |
| >TSHR-L512FYTLTVITL    | 10   | >TSHR-L512FYTRTVITL    | 6     | 4     |
| >TSHR-L512FYTLTVITLERV | 5    | >TSHR-L512FYTRTVITLERV | 5     | 0     |
| >TSHR-L512FYTLTVITL    | 250  | >TSHR-L512FYTRTVITL    | 4917  | 4667  |
| >TSHR-L512FYTLTVITLERV | 47   | >TSHR-L512FYTRTVITLERV | 41    | 6     |
| >TSHR-L512FYTLTVITLERV | 10   | >TSHR-L512FYTRTVITLERV | 30    | 20    |
| >TSHR-L512FYTLTVITL    | 496  | >TSHR-L512FYTRTVITL    | 417   | 79    |
| >TSHR-L512FYTLTVITL    | 171  | >TSHR-L512FYTRTVITL    | 60    | 111   |
| >TSHR-L512FYTLTVITLERV | 19   | >TSHR-L512FYTRTVITLERV | 9     | 10    |
| >TSHR-L512FYTLTVITLERV | 155  | >TSHR-L512FYTRTVITLERV | 2259  | 2104  |
| >TSHR-L512FYTLTVITLER  | 203  | >TSHR-L512FYTRTVITLER  | 973   | 770   |
| >TSHR-L512FYTLTVITL    | 360  | >TSHR-L512FYTRTVITL    | 922   | 562   |
| >TSHR-L512FVYTLTVITL   | 137  | >TSHR-L512FVYTRTVITL   | 89    | 48    |
| >TSHR-L512FVYTLTVITL   | 1117 | >TSHR-L512FVYTRTVITL   | 444   | 673   |
| >TSHR-L512FVYTLTVITL   | 207  | >TSHR-L512FVYTRTVITL   | 110   | 97    |
| >TSHR-L512FVYTLTVITL   | 28   | >TSHR-L512FVYTRTVITL   | 11    | 17    |
| >TSHR-L512FVYTLTVITLER | 303  | >TSHR-L512FVYTRTVITLER | 153   | 150   |
| >TSHR-L512FVYTLTVITLER | 322  | >TSHR-L512FVYTRTVITLER | 564   | 242   |
| >TSHR-L512FVYTLTVITLER | 53   | >TSHR-L512FVYTRTVITLER | 80    | 27    |
| >TSHR-L512FVYTLTVITL   | 443  | >TSHR-L512FVYTRTVITL   | 516   | 73    |
| >TSHR-L512FSVYTLTVITL  | 210  | >TSHR-L512FSVYTRTVITL  | 857   | 647   |
| >TSHR-L512FSVYTLTVITL  | 49   | >TSHR-L512FSVYTRTVITL  | 77    | 28    |
| >TSHR-L512FSVYTLTVI    | 68   | >TSHR-L512FSVYTRTVI    | 182   | 114   |
| >TSHR-L512FSVYTLTVITL  | 64   | >TSHR-L512FSVYTRTVITL  | 86    | 22    |
| >TSHR-L512FSVYTLTVI    | 137  | >TSHR-L512FSVYTRTVI    | 613   | 476   |
| >TSHR-L512FSVYTLTVITL  | 95   | >TSHR-L512FSVYTRTVITL  | 243   | 148   |
| >TSHR-L512FSVYTLTVI    | 240  | >TSHR-L512FSVYTRTVI    | 1243  | 1003  |
| >TSHR-L512FSVYTLTVITL  | 65   | >TSHR-L512FSVYTRTVITL  | 93    | 28    |
| >TSHR-L512FSVYTLTVITL  | 339  | >TSHR-L512FSVYTRTVITL  | 374   | 35    |
| >TSHR-L512FSVYTLTVI    | 345  | >TSHR-L512FSVYTRTVI    | 1970  | 1625  |

|                         |     |                         |      |      |
|-------------------------|-----|-------------------------|------|------|
| >TSHR-L512F SVYTLTVITL  | 53  | >TSHR-L512F SVYTRTVITL  | 115  | 62   |
| >TSHR-L512F SVYTLTVITL  | 79  | >TSHR-L512F SVYTRTVITL  | 57   | 22   |
| >TSHR-L512F SVYTLTVI    | 38  | >TSHR-L512F SVYTRTVI    | 64   | 26   |
| >TSHR-L512F SVYTLTVITL  | 18  | >TSHR-L512F SVYTRTVITL  | 22   | 4    |
| >TSHR-L512F SVYTLTVI    | 137 | >TSHR-L512F SVYTRTVI    | 257  | 120  |
| >TSHR-L512F SVYTLTVITL  | 57  | >TSHR-L512F SVYTRTVITL  | 90   | 33   |
| >TSHR-L512F SVYTLTVI    | 381 | >TSHR-L512F SVYTRTVI    | 2041 | 1660 |
| >TSHR-L512F SVYTLTVITL  | 151 | >TSHR-L512F SVYTRTVITL  | 534  | 383  |
| >TSHR-L512F SVYTLTVITL  | 378 | >TSHR-L512F SVYTRTVITL  | 299  | 79   |
| >TSHR-L512F SVYTLTVITL  | 254 | >TSHR-L512F SVYTRTVITL  | 494  | 240  |
| >TSHR-L512F SVYTLTVI    | 56  | >TSHR-L512F SVYTRTVI    | 59   | 3    |
| >TSHR-L512F LSVYTLTV    | 122 | >TSHR-L512F LSVYTRTV    | 2593 | 2471 |
| >TSHR-L512F LSVYTLTV    | 322 | >TSHR-L512F LSVYTRTV    | 411  | 89   |
| >TSHR-L512F LSVYTLTVI   | 104 | >TSHR-L512F LSVYTRTVI   | 65   | 39   |
| >TSHR-L512F LSVYTLTVITL | 102 | >TSHR-L512F LSVYTRTVITL | 66   | 36   |
| >TSHR-L512F LSVYTLTV    | 76  | >TSHR-L512F LSVYTRTV    | 276  | 200  |
| >TSHR-L512F LSVYTLTVI   | 57  | >TSHR-L512F LSVYTRTVI   | 165  | 108  |
| >TSHR-L512F LSVYTLTVITL | 9   | >TSHR-L512F LSVYTRTVITL | 12   | 3    |
| >TSHR-L512F LSVYTLTVI   | 94  | >TSHR-L512F LSVYTRTVI   | 200  | 106  |
| >TSHR-L512F LSVYTLTVITL | 142 | >TSHR-L512F LSVYTRTVITL | 200  | 58   |
| >TSHR-L512F LSVYTLTVITL | 159 | >TSHR-L512F LSVYTRTVITL | 226  | 67   |
| >TSHR-L512F LSVYTLTVI   | 37  | >TSHR-L512F LSVYTRTVI   | 53   | 16   |
| >TSHR-L512F LSVYTLTVITL | 82  | >TSHR-L512F LSVYTRTVITL | 89   | 7    |
| >TSHR-L512F LSVYTLTVI   | 25  | >TSHR-L512F LSVYTRTVI   | 29   | 4    |
| >TSHR-L512F LSVYTLTVITL | 448 | >TSHR-L512F LSVYTRTVITL | 398  | 50   |
| >TSHR-L512F ELSVYTLTV   | 405 | >TSHR-L512F ELSVYTRTV   | 5453 | 5048 |
| >TSHR-L512F ELSVYTLTV   | 95  | >TSHR-L512F ELSVYTRTV   | 327  | 232  |
| >TSHR-L512F ELSVYTLTVI  | 294 | >TSHR-L512F ELSVYTRTVI  | 764  | 470  |
| >TSHR-L512F ELSVYTLTV   | 149 | >TSHR-L512F ELSVYTRTV   | 264  | 115  |
| >TSHR-L512F ELSVYTLTVI  | 134 | >TSHR-L512F ELSVYTRTVI  | 695  | 561  |
| >TSHR-L512F ELSVYTLTV   | 20  | >TSHR-L512F ELSVYTRTV   | 46   | 26   |
| >TSHR-L512F ELSVYTLTV   | 38  | >TSHR-L512F ELSVYTRTV   | 158  | 120  |
| >TSHR-L512F ELSVYTLTV   | 35  | >TSHR-L512F ELSVYTRTV   | 259  | 224  |
| >TSHR-L512F ELSVYTLTV   | 5   | >TSHR-L512F ELSVYTRTV   | 15   | 10   |
| >TSHR-L512F ELSVYTLTV   | 4   | >TSHR-L512F ELSVYTRTV   | 10   | 6    |
| >TSHR-L512F ELSVYTLTVI  | 348 | >TSHR-L512F ELSVYTRTVI  | 1147 | 799  |
| >TSHR-L512F ELSVYTLTV   | 253 | >TSHR-L512F ELSVYTRTV   | 557  | 304  |
| >TSHR-L512F ELSVYTLTV   | 33  | >TSHR-L512F ELSVYTRTV   | 169  | 136  |
| >TSHR-L512F SELSVYTLTVI | 335 | >TSHR-L512F SELSVYTRTVI | 189  | 146  |
| >TSHR-L512F SELSVYTL    | 31  | >TSHR-L512F SELSVYTR    | 1750 | 1719 |
| >TSHR-L512F SELSVYTLTV  | 19  | >TSHR-L512F SELSVYTRTV  | 16   | 3    |
| >TSHR-L512F SELSVYTLTVI | 7   | >TSHR-L512F SELSVYTRTVI | 9    | 2    |
| >TSHR-L512F SELSVYTLTV  | 448 | >TSHR-L512F SELSVYTRTV  | 763  | 315  |

|                         |       |                         |       |       |
|-------------------------|-------|-------------------------|-------|-------|
| >TSHR-L512F SELSVYTLTV  | 224   | >TSHR-L512F SELSVYTRTV  | 1357  | 1133  |
| >TSHR-L512F SELSVYTL    | 19574 | >TSHR-L512F SELSVYTR    | 440   | 19134 |
| >TSHR-L512F SELSVYTL    | 81    | >TSHR-L512F SELSVYTR    | 736   | 655   |
| >TSHR-L512F SELSVYTL    | 159   | >TSHR-L512F SELSVYTR    | 18505 | 18346 |
| >TSHR-L512F SELSVYTL    | 20    | >TSHR-L512F SELSVYTR    | 10911 | 10891 |
| >TSHR-L512F SELSVYTLTVI | 52    | >TSHR-L512F SELSVYTRTVI | 79    | 27    |
| >TSHR-L512F SELSVYTL    | 54    | >TSHR-L512F SELSVYTR    | 4228  | 4174  |
| >TSHR-L512F SELSVYTLTV  | 146   | >TSHR-L512F SELSVYTRTV  | 177   | 31    |
| >TSHR-L512F SELSVYTLTVI | 129   | >TSHR-L512F SELSVYTRTVI | 166   | 37    |
| >TSHR-L512F SELSVYTL    | 388   | >TSHR-L512F SELSVYTR    | 2224  | 1836  |
| >TSHR-L512F SELSVYTLTV  | 628   | >TSHR-L512F SELSVYTRTV  | 323   | 305   |
| >TSHR-L512F SELSVYTL    | 125   | >TSHR-L512F SELSVYTR    | 930   | 805   |
| >TSHR-L512F SELSVYTLTV  | 127   | >TSHR-L512F SELSVYTRTV  | 257   | 130   |
| >TSHR-L512F SELSVYTL    | 287   | >TSHR-L512F SELSVYTR    | 1324  | 1037  |
| >TSHR-L512F SELSVYTLT   | 87    | >TSHR-L512F SELSVYTRT   | 85    | 2     |
| >TSHR-L512F SELSVYTLTV  | 156   | >TSHR-L512F SELSVYTRTV  | 206   | 50    |
| >TSHR-L512F SELSVYTLTVI | 157   | >TSHR-L512F SELSVYTRTVI | 177   | 20    |
| >TSHR-L512F SELSVYTL    | 99    | >TSHR-L512F SELSVYTR    | 14990 | 14891 |
| >TSHR-L512F SELSVYTLT   | 183   | >TSHR-L512F SELSVYTRT   | 351   | 168   |
| >TSHR-L512F SELSVYTLTV  | 28    | >TSHR-L512F SELSVYTRTV  | 22    | 6     |
| >TSHR-L512F SELSVYTLTVI | 6     | >TSHR-L512F SELSVYTRTVI | 9     | 3     |
| >TSHR-L512F SELSVYTL    | 31643 | >TSHR-L512F SELSVYTR    | 359   | 31284 |
| >TSHR-L512F ASELVYTL    | 16317 | >TSHR-L512F ASELVYTR    | 53    | 16264 |
| >TSHR-L512F ASELVYTL    | 322   | >TSHR-L512F ASELVYTR    | 9971  | 9649  |
| >TSHR-L512F ASELVYTL    | 35814 | >TSHR-L512F ASELVYTR    | 369   | 35445 |
| >TSHR-L512F ASELVYTL    | 8     | >TSHR-L512F ASELVYTR    | 5562  | 5554  |
| >TSHR-L512F ASELVYTLTV  | 143   | >TSHR-L512F ASELVYTRTV  | 400   | 257   |
| >TSHR-L512F ASELVYTL    | 102   | >TSHR-L512F ASELVYTR    | 15976 | 15874 |
| >TSHR-L512F ASELVYTL    | 2521  | >TSHR-L512F ASELVYTR    | 167   | 2354  |
| >TSHR-L512F FASELSVYTL  | 113   | >TSHR-L512F FASELSVYTR  | 9159  | 9046  |
| >TSHR-L512F FASELSVYTL  | 23    | >TSHR-L512F FASELSVYTR  | 4182  | 4159  |
| >TSHR-L512F FASELSVYTLT | 133   | >TSHR-L512F FASELSVYTRT | 456   | 323   |
| >TSHR-L512F FASELSVYTL  | 182   | >TSHR-L512F FASELSVYTR  | 8660  | 8478  |
| >TSHR-L512F FASELSVYTL  | 64    | >TSHR-L512F FASELSVYTR  | 3019  | 2955  |
| >TSHR-L512F FASELSVYTLT | 202   | >TSHR-L512F FASELSVYTRT | 670   | 468   |
| >TSHR-L512F FASELSVYTL  | 48    | >TSHR-L512F FASELSVYTR  | 14866 | 14818 |
| >TSHR-L512F FASELSVYTL  | 97    | >TSHR-L512F FASELSVYTR  | 19122 | 19025 |
| >TSHR-L512F FASELSVYTL  | 252   | >TSHR-L512F FASELSVYTR  | 20620 | 20368 |
| >TSHR-L512F FASELSVYTL  | 213   | >TSHR-L512F FASELSVYTR  | 21729 | 21516 |
| >TSHR-L512F FASELSVYTL  | 108   | >TSHR-L512F FASELSVYTR  | 21025 | 20917 |
| >TSHR-L512F FASELSVYTL  | 27479 | >TSHR-L512F FASELSVYTR  | 314   | 27165 |
| >TSHR-L512F FASELSVYTL  | 10687 | >TSHR-L512F FASELSVYTR  | 65    | 10622 |
| >TSHR-L512F FASELSVYTL  | 21215 | >TSHR-L512F FASELSVYTR  | 281   | 20934 |

|                         |       |                         |       |       |
|-------------------------|-------|-------------------------|-------|-------|
| >TSHR-L512F FASELSVYTL  | 8210  | >TSHR-L512F FASELSVYTR  | 6     | 8204  |
| >TSHR-L512F FASELSVYTL  | 96    | >TSHR-L512F FASELSVYTR  | 17217 | 17121 |
| >TSHR-L512F FASELSVYTL  | 147   | >TSHR-L512F FASELSVYTR  | 13784 | 13637 |
| >TSHR-L512F FASELSVYTL  | 447   | >TSHR-L512F FASELSVYTR  | 4367  | 3920  |
| >TSHR-L512F FASELSVYTL  | 56    | >TSHR-L512F FASELSVYTR  | 12678 | 12622 |
| >TSHR-L512F FASELSVYTL  | 46    | >TSHR-L512F FASELSVYTR  | 12810 | 12764 |
| >TSHR-L512F FASELSVYTL  | 453   | >TSHR-L512F FASELSVYTR  | 18843 | 18390 |
| >TSHR-L512F FASELSVYTL  | 125   | >TSHR-L512F FASELSVYTR  | 18120 | 17995 |
| >TSHR-L512F FASELSVYTL  | 334   | >TSHR-L512F FASELSVYTR  | 18272 | 17938 |
| >TSHR-L512F FASELSVYTL  | 34363 | >TSHR-L512F FASELSVYTR  | 469   | 33894 |
| >TSHR-L629F LIFTDFICM   | 761   | >TSHR-L629F FIFTDFICM   | 66    | 695   |
| >TSHR-L629F LIFTDFICMA  | 619   | >TSHR-L629F FIFTDFICMA  | 102   | 517   |
| >TSHR-L629F LIFTDFICM   | 1432  | >TSHR-L629F FIFTDFICM   | 107   | 1325  |
| >TSHR-L629F LIFTDFICMA  | 181   | >TSHR-L629F FIFTDFICMA  | 55    | 126   |
| >TSHR-L629F LIFTDFICMA  | 139   | >TSHR-L629F FIFTDFICMA  | 45    | 94    |
| >TSHR-L629F LIFTDFIC    | 880   | >TSHR-L629F FIFTDFIC    | 78    | 802   |
| >TSHR-L629F LIFTDFICM   | 319   | >TSHR-L629F FIFTDFICM   | 39    | 280   |
| >TSHR-L629F LIFTDFICMA  | 109   | >TSHR-L629F FIFTDFICMA  | 41    | 68    |
| >TSHR-L629F LIFTDFIC    | 2386  | >TSHR-L629F FIFTDFIC    | 384   | 2002  |
| >TSHR-L629F LIFTDFICM   | 2907  | >TSHR-L629F FIFTDFICM   | 427   | 2480  |
| >TSHR-L629F LIFTDFICMA  | 72    | >TSHR-L629F FIFTDFICMA  | 14    | 58    |
| >TSHR-L629F LIFTDFICMA  | 2862  | >TSHR-L629F FIFTDFICMA  | 399   | 2463  |
| >TSHR-L629F LIFTDFICMA  | 302   | >TSHR-L629F FIFTDFICMA  | 33    | 269   |
| >TSHR-L629F LIFTDFIC    | 2396  | >TSHR-L629F FIFTDFIC    | 348   | 2048  |
| >TSHR-L629F LIFTDFICMA  | 52    | >TSHR-L629F FIFTDFICMA  | 14    | 38    |
| >TSHR-L629F LIFTDFICMA  | 2178  | >TSHR-L629F FIFTDFICMA  | 295   | 1883  |
| >TSHR-L629F LIFTDFICM   | 173   | >TSHR-L629F FIFTDFICM   | 101   | 72    |
| >TSHR-L629F LIFTDFICM   | 787   | >TSHR-L629F FIFTDFICM   | 246   | 541   |
| >TSHR-L629F VLIFTDFI    | 68    | >TSHR-L629F VFIFTDFI    | 14286 | 14218 |
| >TSHR-L629F VLIFTDFICM  | 428   | >TSHR-L629F VFIFTDFICM  | 11853 | 11425 |
| >TSHR-L629F VLIFTDFICM/ | 110   | >TSHR-L629F VFIFTDFICM/ | 14523 | 14413 |
| >TSHR-L629F VLIFTDFI    | 29    | >TSHR-L629F VFIFTDFI    | 873   | 844   |
| >TSHR-L629F VLIFTDFICM/ | 168   | >TSHR-L629F VFIFTDFICM/ | 4909  | 4741  |
| >TSHR-L629F VLIFTDFI    | 42    | >TSHR-L629F VFIFTDFI    | 10748 | 10706 |
| >TSHR-L629F VLIFTDFICM/ | 62    | >TSHR-L629F VFIFTDFICM/ | 9977  | 9915  |
| >TSHR-L629F VLIFTDFI    | 161   | >TSHR-L629F VFIFTDFI    | 3306  | 3145  |
| >TSHR-L629F VLIFTDFICM/ | 237   | >TSHR-L629F VFIFTDFICM/ | 8516  | 8279  |
| >TSHR-L629F VLIFTDFI    | 13    | >TSHR-L629F VFIFTDFI    | 10022 | 10009 |
| >TSHR-L629F VLIFTDFICM/ | 19    | >TSHR-L629F VFIFTDFICM/ | 5836  | 5817  |
| >TSHR-L629F VLIFTDFI    | 11    | >TSHR-L629F VFIFTDFI    | 12255 | 12244 |
| >TSHR-L629F VLIFTDFIC   | 195   | >TSHR-L629F VFIFTDFIC   | 18862 | 18667 |
| >TSHR-L629F VLIFTDFICM  | 185   | >TSHR-L629F VFIFTDFICM  | 19171 | 18986 |
| >TSHR-L629F VLIFTDFICM/ | 56    | >TSHR-L629F VFIFTDFICM/ | 16572 | 16516 |

|                         |       |                         |       |       |
|-------------------------|-------|-------------------------|-------|-------|
| >TSHR-L629F VLIFTDFI    | 30    | >TSHR-L629F VFIFTDFI    | 12917 | 12887 |
| >TSHR-L629F VLIFTDFICM/ | 38    | >TSHR-L629F VFIFTDFICM/ | 13450 | 13412 |
| >TSHR-L629F VLIFTDFI    | 78    | >TSHR-L629F VFIFTDFI    | 18645 | 18567 |
| >TSHR-L629F VLIFTDFI    | 45    | >TSHR-L629F VFIFTDFI    | 24874 | 24829 |
| >TSHR-L629F VLIFTDFIC   | 381   | >TSHR-L629F VFIFTDFIC   | 32486 | 32105 |
| >TSHR-L629F VLIFTDFICM/ | 14    | >TSHR-L629F VFIFTDFICM/ | 11951 | 11937 |
| >TSHR-L629F VLIFTDFI    | 1908  | >TSHR-L629F VFIFTDFI    | 76    | 1832  |
| >TSHR-L629F VLIFTDFI    | 5906  | >TSHR-L629F VFIFTDFI    | 481   | 5425  |
| >TSHR-L629F VLIFTDFI    | 14749 | >TSHR-L629F VFIFTDFI    | 186   | 14563 |
| >TSHR-L629F VLIFTDFI    | 10630 | >TSHR-L629F VFIFTDFI    | 269   | 10361 |
| >TSHR-L629F DTAKIARMA\  | 2012  | >TSHR-L629F DTAKIARMA\  | 355   | 1657  |
| >TSHR-L629F DTAKIARMA\  | 1156  | >TSHR-L629F DTAKIARMA\  | 216   | 940   |
| >TSHR-L629F DTAKIARMA\  | 805   | >TSHR-L629F DTAKIARMA\  | 86    | 719   |
| >TSHR-L629F AVLIFTDFICM | 1195  | >TSHR-L629F AVFIFTDFICM | 305   | 890   |
| >TSHR-L629F AVLIFTDFI   | 339   | >TSHR-L629F AVFIFTDFI   | 234   | 105   |
| >TSHR-L629F AVLIFTDFI   | 530   | >TSHR-L629F AVFIFTDFI   | 228   | 302   |
| >TSHR-L629F AVLIFTDFI   | 201   | >TSHR-L629F AVFIFTDFI   | 25    | 176   |
| >TSHR-L629F AVLIFTDFI   | 2250  | >TSHR-L629F AVFIFTDFI   | 381   | 1869  |
| >TSHR-L629F AVLIFTDFI   | 47    | >TSHR-L629F AVFIFTDFI   | 83    | 36    |
| >TSHR-L629F AVLIFTDFI   | 98    | >TSHR-L629F AVFIFTDFI   | 60    | 38    |
| >TSHR-L629F AVLIFTDFI   | 264   | >TSHR-L629F AVFIFTDFI   | 277   | 13    |
| >TSHR-L629F AVLIFTDFICM | 287   | >TSHR-L629F AVFIFTDFICM | 1422  | 1135  |
| >TSHR-L629F AVLIFTDFI   | 560   | >TSHR-L629F AVFIFTDFI   | 276   | 284   |
| >TSHR-L629F AVLIFTDF    | 63    | >TSHR-L629F AVFIFTDF    | 16    | 47    |
| >TSHR-L629F AVLIFTDFI   | 238   | >TSHR-L629F AVFIFTDFI   | 38    | 200   |
| >TSHR-L629F AVLIFTDFI   | 552   | >TSHR-L629F AVFIFTDFI   | 32    | 520   |
| >TSHR-L629F AVLIFTDFI   | 189   | >TSHR-L629F AVFIFTDFI   | 419   | 230   |
| >TSHR-L629F AVLIFTDF    | 3048  | >TSHR-L629F AVFIFTDF    | 393   | 2655  |
| >TSHR-L629F AVLIFTDF    | 213   | >TSHR-L629F AVFIFTDF    | 48    | 165   |
| >TSHR-L629F AVLIFTDF    | 424   | >TSHR-L629F AVFIFTDF    | 158   | 266   |
| >TSHR-L629F AVLIFTDFI   | 1096  | >TSHR-L629F AVFIFTDFI   | 467   | 629   |
| >TSHR-L629F AVLIFTDFICM | 1181  | >TSHR-L629F AVFIFTDFICM | 465   | 716   |
| >TSHR-L629F AVLIFTDFI   | 226   | >TSHR-L629F AVFIFTDFI   | 83    | 143   |
| >TSHR-L629F MAVLIFTDFI  | 190   | >TSHR-L629F MAVFIFTDFI  | 483   | 293   |
| >TSHR-L629F MAVLIFTDFI  | 153   | >TSHR-L629F MAVFIFTDFI  | 208   | 55    |
| >TSHR-L629F MAVLIFTDF   | 591   | >TSHR-L629F MAVFIFTDF   | 146   | 445   |
| >TSHR-L629F MAVLIFTDFI  | 76    | >TSHR-L629F MAVFIFTDFI  | 21    | 55    |
| >TSHR-L629F MAVLIFTDFI  | 304   | >TSHR-L629F MAVFIFTDFI  | 149   | 155   |
| >TSHR-L629F MAVLIFTDF   | 57    | >TSHR-L629F MAVFIFTDF   | 31    | 26    |
| >TSHR-L629F MAVLIFTDF   | 85    | >TSHR-L629F MAVFIFTDF   | 109   | 24    |
| >TSHR-L629F MAVLIFTDF   | 48    | >TSHR-L629F MAVFIFTDF   | 49    | 1     |
| >TSHR-L629F MAVLIFTDF   | 151   | >TSHR-L629F MAVFIFTDF   | 143   | 8     |
| >TSHR-L629F MAVLIFTDF   | 406   | >TSHR-L629F MAVFIFTDF   | 154   | 252   |

|                        |      |                        |     |     |
|------------------------|------|------------------------|-----|-----|
| >TSHR-L629F RMAVLIFT   | 161  | >TSHR-L629F RMAVFIFT   | 125 | 36  |
| >TSHR-L629F RMAVLIFTDF | 30   | >TSHR-L629F RMAVFIFTDF | 24  | 6   |
| >TSHR-L629F RMAVLIFT   | 75   | >TSHR-L629F RMAVFIFT   | 52  | 23  |
| >TSHR-L629F RMAVLIFTDF | 5    | >TSHR-L629F RMAVFIFTDF | 4   | 1   |
| >TSHR-L629F RMAVLIFT   | 150  | >TSHR-L629F RMAVFIFT   | 177 | 27  |
| >TSHR-L629F RMAVLIFTDF | 15   | >TSHR-L629F RMAVFIFTDF | 12  | 3   |
| >TSHR-L629F RMAVLIFT   | 289  | >TSHR-L629F RMAVFIFT   | 207 | 82  |
| >TSHR-L629F RMAVLIFTDF | 53   | >TSHR-L629F RMAVFIFTDF | 49  | 4   |
| >TSHR-L629F RMAVLIFT   | 75   | >TSHR-L629F RMAVFIFT   | 55  | 20  |
| >TSHR-L629F RMAVLIFTDF | 8    | >TSHR-L629F RMAVFIFTDF | 6   | 2   |
| >TSHR-L629F RMAVLIFTDF | 25   | >TSHR-L629F RMAVFIFTDF | 21  | 4   |
| >TSHR-L629F RMAVLIFT   | 104  | >TSHR-L629F RMAVFIFT   | 143 | 39  |
| >TSHR-L629F RMAVLIFTDF | 16   | >TSHR-L629F RMAVFIFTDF | 18  | 2   |
| >TSHR-L629F RMAVLIFTDF | 19   | >TSHR-L629F RMAVFIFTDF | 14  | 5   |
| >TSHR-L629F RMAVLIFT   | 425  | >TSHR-L629F RMAVFIFT   | 315 | 110 |
| >TSHR-L629F RMAVLIFTDF | 89   | >TSHR-L629F RMAVFIFTDF | 63  | 26  |
| >TSHR-L629F RMAVLIFTDF | 185  | >TSHR-L629F RMAVFIFTDF | 186 | 1   |
| >TSHR-L629F RMAVLIFTDF | 1070 | >TSHR-L629F RMAVFIFTDF | 418 | 652 |
| >TSHR-L629F RMAVLIFTDF | 22   | >TSHR-L629F RMAVFIFTDF | 14  | 8   |
| >TSHR-L629F RMAVLIFTDF | 69   | >TSHR-L629F RMAVFIFTDF | 47  | 22  |
| >TSHR-L629F RMAVLIFTDF | 45   | >TSHR-L629F RMAVFIFTDF | 50  | 5   |
| >TSHR-L629F RMAVLIFTDF | 8    | >TSHR-L629F RMAVFIFTDF | 5   | 3   |
| >TSHR-L629F RMAVLIFTDF | 498  | >TSHR-L629F RMAVFIFTDF | 223 | 275 |
| >TSHR-L629F RMAVLIFTDF | 337  | >TSHR-L629F RMAVFIFTDF | 340 | 3   |
| >TSHR-L629F RMAVLIFTDF | 106  | >TSHR-L629F RMAVFIFTDF | 119 | 13  |
| >TSHR-L629F RMAVLIFTDF | 97   | >TSHR-L629F RMAVFIFTDF | 107 | 10  |
| >TSHR-L629F RMAVLIFTDF | 253  | >TSHR-L629F RMAVFIFTDF | 183 | 70  |
| >TSHR-L629F RMAVLIFTDF | 347  | >TSHR-L629F RMAVFIFTDF | 318 | 29  |
| >TSHR-L629F RMAVLIFTDF | 146  | >TSHR-L629F RMAVFIFTDF | 78  | 68  |
| >TSHR-L629F KRMAVLIF   | 597  | >TSHR-L629F KRMAVFIF   | 388 | 209 |
| >TSHR-L629F KRMAVLIFTD | 577  | >TSHR-L629F KRMAVFIFTD | 405 | 172 |
| >TSHR-L629F KRMAVLIF   | 8    | >TSHR-L629F KRMAVFIF   | 8   | 0   |
| >TSHR-L629F KRMAVLIFTD | 14   | >TSHR-L629F KRMAVFIFTD | 8   | 6   |
| >TSHR-L629F KRMAVLIF   | 26   | >TSHR-L629F KRMAVFIF   | 21  | 5   |
| >TSHR-L629F KRMAVLIFT  | 117  | >TSHR-L629F KRMAVFIFT  | 93  | 24  |
| >TSHR-L629F KRMAVLIFTD | 38   | >TSHR-L629F KRMAVFIFTD | 38  | 0   |
| >TSHR-L629F KRMAVLIF   | 139  | >TSHR-L629F KRMAVFIF   | 241 | 102 |
| >TSHR-L629F KRMAVLIFT  | 62   | >TSHR-L629F KRMAVFIFT  | 51  | 11  |
| >TSHR-L629F KRMAVLIFTD | 499  | >TSHR-L629F KRMAVFIFTD | 384 | 115 |
| >TSHR-L629F KRMAVLIFTD | 45   | >TSHR-L629F KRMAVFIFTD | 39  | 6   |
| >TSHR-L629F KRMAVLIFT  | 678  | >TSHR-L629F KRMAVFIFT  | 210 | 468 |
| >TSHR-L629F KRMAVLIFTD | 28   | >TSHR-L629F KRMAVFIFTD | 17  | 11  |
| >TSHR-L629F AKRMAVLI   | 356  | >TSHR-L629F AKRMAVFI   | 119 | 237 |



|                         |      |                         |      |      |
|-------------------------|------|-------------------------|------|------|
| >TSHR-L629F AKRMAVLI    | 41   | >TSHR-L629F AKRMAVFI    | 31   | 10   |
| >TSHR-L629F AKRMAVLIF   | 3    | >TSHR-L629F AKRMAVFIF   | 3    | 0    |
| >TSHR-L629F AKRMAVLI    | 260  | >TSHR-L629F AKRMAVFI    | 184  | 76   |
| >TSHR-L629F IAKRMAVLI   | 156  | >TSHR-L629F IAKRMAVFI   | 36   | 120  |
| >TSHR-L629F IAKRMAVLIF  | 652  | >TSHR-L629F IAKRMAVFIF  | 446  | 206  |
| >TSHR-L629F IAKRMAVL    | 326  | >TSHR-L629F IAKRMAVF    | 1300 | 974  |
| >TSHR-L629F IAKRMAVL    | 2753 | >TSHR-L629F IAKRMAVF    | 151  | 2602 |
| >TSHR-L629F IAKRMAVLIF  | 326  | >TSHR-L629F IAKRMAVFIF  | 545  | 219  |
| >TSHR-L629F IAKRMAVL    | 990  | >TSHR-L629F IAKRMAVF    | 39   | 951  |
| >TSHR-L629F IAKRMAVLIF  | 21   | >TSHR-L629F IAKRMAVFIF  | 29   | 8    |
| >TSHR-L629F IAKRMAVL    | 151  | >TSHR-L629F IAKRMAVF    | 16   | 135  |
| >TSHR-L629F IAKRMAVLIF  | 37   | >TSHR-L629F IAKRMAVFIF  | 50   | 13   |
| >TSHR-L629F IAKRMAVL    | 3254 | >TSHR-L629F IAKRMAVF    | 232  | 3022 |
| >TSHR-L629F IAKRMAVLIF  | 308  | >TSHR-L629F IAKRMAVFIF  | 165  | 143  |
| >TSHR-L629F IAKRMAVLIF  | 214  | >TSHR-L629F IAKRMAVFIF  | 156  | 58   |
| >TSHR-L629F KIAKRMAVL   | 67   | >TSHR-L629F KIAKRMAVF   | 6660 | 6593 |
| >TSHR-L629F KIAKRMAVL   | 85   | >TSHR-L629F KIAKRMAVF   | 6209 | 6124 |
| >TSHR-L629F KIAKRMAVL   | 291  | >TSHR-L629F KIAKRMAVF   | 2189 | 1898 |
| >TSHR-L629F KIAKRMAVL   | 1789 | >TSHR-L629F KIAKRMAVF   | 146  | 1643 |
| >TSHR-L629F KIAKRMAVLI  | 643  | >TSHR-L629F KIAKRMAVFI  | 165  | 478  |
| >TSHR-L629F KIAKRMAVL   | 1507 | >TSHR-L629F KIAKRMAVF   | 256  | 1251 |
| >TSHR-L629F KIAKRMAVLI  | 101  | >TSHR-L629F KIAKRMAVFI  | 214  | 113  |
| >TSHR-L629F KIAKRMAVLII | 154  | >TSHR-L629F KIAKRMAVFI  | 115  | 39   |
| >TSHR-L629F KIAKRMAVL   | 145  | >TSHR-L629F KIAKRMAVF   | 1217 | 1072 |
| >TSHR-L629F KIAKRMAVL   | 216  | >TSHR-L629F KIAKRMAVF   | 875  | 659  |
| >TSHR-L629F KIAKRMAVL   | 1736 | >TSHR-L629F KIAKRMAVF   | 71   | 1665 |
| >TSHR-L629F KIAKRMAVLII | 166  | >TSHR-L629F KIAKRMAVFI  | 320  | 154  |
| >TSHR-L629F KIAKRMAVL   | 4060 | >TSHR-L629F KIAKRMAVF   | 207  | 3853 |
| >TSHR-L629F KIAKRMAVLII | 110  | >TSHR-L629F KIAKRMAVFI  | 175  | 65   |
| >TSHR-L629F KIAKRMAVL   | 445  | >TSHR-L629F KIAKRMAVF   | 47   | 398  |
| >TSHR-L629F KIAKRMAVLII | 148  | >TSHR-L629F KIAKRMAVFI  | 211  | 63   |
| >TSHR-L629F KIAKRMAVL   | 5548 | >TSHR-L629F KIAKRMAVF   | 242  | 5306 |
| >TSHR-L629F KIAKRMAVLII | 88   | >TSHR-L629F KIAKRMAVFI  | 64   | 24   |
| >TSHR-L629F KIAKRMAVL   | 1770 | >TSHR-L629F KIAKRMAVF   | 242  | 1528 |
| >TSHR-L629F KIAKRMAVL   | 6676 | >TSHR-L629F KIAKRMAVF   | 368  | 6308 |
| >TSHR-L629F KIAKRMAVLII | 743  | >TSHR-L629F KIAKRMAVFI  | 328  | 415  |
| >TSHR-L629F TKIAKRMAVL  | 193  | >TSHR-L629F TKIAKRMAVF  | 13   | 180  |
| >TSHR-L629F TKIAKRMAVL  | 619  | >TSHR-L629F TKIAKRMAVF  | 369  | 250  |
| >TSHR-L629F TKIAKRMAVL  | 21   | >TSHR-L629F TKIAKRMAVF  | 618  | 597  |
| >TSHR-L677V LYAIFTKAF   | 149  | >TSHR-L677V VYAIFTKAF   | 86   | 63   |
| >TSHR-L677V LYAIFTKAF   | 251  | >TSHR-L677V VYAIFTKAF   | 194  | 57   |
| >TSHR-L677V LYAIFTKAF   | 12   | >TSHR-L677V VYAIFTKAF   | 17   | 5    |
| >TSHR-L677V LYAIFTKAFQF | 43   | >TSHR-L677V VYAIFTKAFQI | 51   | 8    |

|                         |      |                         |       |       |
|-------------------------|------|-------------------------|-------|-------|
| >TSHR-L677\ LYAIFTKAFQF | 288  | >TSHR-L677\ VYAIFTKAFQI | 395   | 107   |
| >TSHR-L677\ LYAIFTKAFQF | 145  | >TSHR-L677\ VYAIFTKAFQI | 288   | 143   |
| >TSHR-L677\ LYAIFTKAF   | 101  | >TSHR-L677\ VYAIFTKAF   | 185   | 84    |
| >TSHR-L677\ LYAIFTKAFQF | 31   | >TSHR-L677\ VYAIFTKAFQI | 32    | 1     |
| >TSHR-L677\ FLYAIFTKA   | 10   | >TSHR-L677\ FVYAIFTKA   | 46    | 36    |
| >TSHR-L677\ FLYAIFTKAFC | 481  | >TSHR-L677\ FVYAIFTKAFC | 4116  | 3635  |
| >TSHR-L677\ FLYAIFTK    | 64   | >TSHR-L677\ FVYAIFTK    | 706   | 642   |
| >TSHR-L677\ FLYAIFTKA   | 2    | >TSHR-L677\ FVYAIFTKA   | 7     | 5     |
| >TSHR-L677\ FLYAIFTKAF  | 232  | >TSHR-L677\ FVYAIFTKAF  | 3124  | 2892  |
| >TSHR-L677\ FLYAIFTKAFC | 14   | >TSHR-L677\ FVYAIFTKAFC | 125   | 111   |
| >TSHR-L677\ FLYAIFTK    | 205  | >TSHR-L677\ FVYAIFTK    | 3094  | 2889  |
| >TSHR-L677\ FLYAIFTKA   | 2    | >TSHR-L677\ FVYAIFTKA   | 5     | 3     |
| >TSHR-L677\ FLYAIFTKAF  | 348  | >TSHR-L677\ FVYAIFTKAF  | 2438  | 2090  |
| >TSHR-L677\ FLYAIFTKAFC | 81   | >TSHR-L677\ FVYAIFTKAFC | 1107  | 1026  |
| >TSHR-L677\ FLYAIFTKA   | 8    | >TSHR-L677\ FVYAIFTKA   | 6     | 2     |
| >TSHR-L677\ FLYAIFTKAFC | 474  | >TSHR-L677\ FVYAIFTKAFC | 302   | 172   |
| >TSHR-L677\ FLYAIFTK    | 18   | >TSHR-L677\ FVYAIFTK    | 1194  | 1176  |
| >TSHR-L677\ FLYAIFTKA   | 3    | >TSHR-L677\ FVYAIFTKA   | 78    | 75    |
| >TSHR-L677\ FLYAIFTKAF  | 20   | >TSHR-L677\ FVYAIFTKAF  | 2353  | 2333  |
| >TSHR-L677\ FLYAIFTKAFC | 22   | >TSHR-L677\ FVYAIFTKAFC | 1645  | 1623  |
| >TSHR-L677\ FLYAIFTKA   | 27   | >TSHR-L677\ FVYAIFTKA   | 4047  | 4020  |
| >TSHR-L677\ FLYAIFTK    | 145  | >TSHR-L677\ FVYAIFTK    | 7100  | 6955  |
| >TSHR-L677\ FLYAIFTKA   | 7    | >TSHR-L677\ FVYAIFTKA   | 130   | 123   |
| >TSHR-L677\ FLYAIFTKAFC | 49   | >TSHR-L677\ FVYAIFTKAFC | 3485  | 3436  |
| >TSHR-L677\ FLYAIFTKA   | 73   | >TSHR-L677\ FVYAIFTKA   | 5811  | 5738  |
| >TSHR-L677\ FLYAIFTK    | 8    | >TSHR-L677\ FVYAIFTK    | 1377  | 1369  |
| >TSHR-L677\ FLYAIFTKA   | 2    | >TSHR-L677\ FVYAIFTKA   | 24    | 22    |
| >TSHR-L677\ FLYAIFTKAF  | 146  | >TSHR-L677\ FVYAIFTKAF  | 13509 | 13363 |
| >TSHR-L677\ FLYAIFTKAFC | 6    | >TSHR-L677\ FVYAIFTKAFC | 610   | 604   |
| >TSHR-L677\ FLYAIFTK    | 30   | >TSHR-L677\ FVYAIFTK    | 43    | 13    |
| >TSHR-L677\ FLYAIFTK    | 23   | >TSHR-L677\ FVYAIFTK    | 11    | 12    |
| >TSHR-L677\ FLYAIFTKAF  | 359  | >TSHR-L677\ FVYAIFTKAF  | 182   | 177   |
| >TSHR-L677\ FLYAIFTKAF  | 7225 | >TSHR-L677\ FVYAIFTKAF  | 277   | 6948  |
| >TSHR-L677\ FLYAIFTKAF  | 145  | >TSHR-L677\ FVYAIFTKAF  | 160   | 15    |
| >TSHR-L677\ FLYAIFTK    | 437  | >TSHR-L677\ FVYAIFTK    | 218   | 219   |
| >TSHR-L677\ FLYAIFTKAF  | 45   | >TSHR-L677\ FVYAIFTKAF  | 45    | 0     |
| >TSHR-L677\ FLYAIFTK    | 12   | >TSHR-L677\ FVYAIFTK    | 4     | 8     |
| >TSHR-L677\ FLYAIFTKAFC | 238  | >TSHR-L677\ FVYAIFTKAFC | 32    | 206   |
| >TSHR-L677\ FLYAIFTKA   | 207  | >TSHR-L677\ FVYAIFTKA   | 9     | 198   |
| >TSHR-L677\ FLYAIFTKA   | 388  | >TSHR-L677\ FVYAIFTKA   | 68    | 320   |
| >TSHR-L677\ FLYAIFTKAF  | 38   | >TSHR-L677\ FVYAIFTKAF  | 60    | 22    |
| >TSHR-L677\ FLYAIFTKAF  | 13   | >TSHR-L677\ FVYAIFTKAF  | 46    | 33    |
| >TSHR-L677\ FLYAIFTKAF  | 3    | >TSHR-L677\ FVYAIFTKAF  | 8     | 5     |

|                         |      |                         |      |      |
|-------------------------|------|-------------------------|------|------|
| >TSHR-L677\ FLYAIFTKAF  | 318  | >TSHR-L677\ FVYAIFTKAF  | 45   | 273  |
| >TSHR-L677\ FLYAIFTKA   | 90   | >TSHR-L677\ FVYAIFTKA   | 22   | 68   |
| >TSHR-L677\ FLYAIFTKAF  | 349  | >TSHR-L677\ FVYAIFTKAF  | 117  | 232  |
| >TSHR-L677\ FLYAIFTKAF  | 824  | >TSHR-L677\ FVYAIFTKAF  | 367  | 457  |
| >TSHR-L677\ YPLNSCANPF  | 6    | >TSHR-L677\ YPLNSCANPF  | 12   | 6    |
| >TSHR-L677\ YPLNSCANPF  | 1699 | >TSHR-L677\ YPLNSCANPF  | 327  | 1372 |
| >TSHR-L677\ YPLNSCANPF  | 4748 | >TSHR-L677\ YPLNSCANPF  | 258  | 4490 |
| >TSHR-L677\ YPLNSCANPF  | 164  | >TSHR-L677\ YPLNSCANPF  | 23   | 141  |
| >TSHR-L677\ YPLNSCANPF  | 174  | >TSHR-L677\ YPLNSCANPF  | 921  | 747  |
| >TSHR-L677\ YPLNSCANPF  | 159  | >TSHR-L677\ YPLNSCANPF  | 1214 | 1055 |
| >TSHR-L677\ YPLNSCANPF  | 207  | >TSHR-L677\ YPLNSCANPF  | 4381 | 4174 |
| >TSHR-L677\ YPLNSCANPF  | 1019 | >TSHR-L677\ YPLNSCANPF  | 255  | 764  |
| >TSHR-L677\ YPLNSCANPF  | 6956 | >TSHR-L677\ YPLNSCANPF  | 106  | 6850 |
| >TSHR-L677\ PFLYAIFTK   | 185  | >TSHR-L677\ PFVYAIFTK   | 188  | 3    |
| >TSHR-L677\ PFLYAIFTKAF | 92   | >TSHR-L677\ PFVYAIFTKAF | 92   | 0    |
| >TSHR-L677\ PFLYAIFTKAF | 69   | >TSHR-L677\ PFVYAIFTKAF | 241  | 172  |
| >TSHR-L677\ NPFLYAIFTK  | 175  | >TSHR-L677\ NPFVYAIFTK  | 134  | 41   |
| >TSHR-L677\ NPFLYAIF    | 367  | >TSHR-L677\ NPFVYAIF    | 170  | 197  |
| >TSHR-L677\ NPFLYAIF    | 247  | >TSHR-L677\ NPFVYAIF    | 346  | 99   |
| >TSHR-L677\ NPFLYAIF    | 25   | >TSHR-L677\ NPFVYAIF    | 29   | 4    |
| >TSHR-L677\ NPFLYAIF    | 292  | >TSHR-L677\ NPFVYAIF    | 238  | 54   |
| >TSHR-L677\ NPFLYAIFTKA | 33   | >TSHR-L677\ NPFVYAIFTK/ | 39   | 6    |
| >TSHR-L677\ NPFLYAIF    | 125  | >TSHR-L677\ NPFVYAIF    | 70   | 55   |
| >TSHR-L677\ NPFLYAIF    | 66   | >TSHR-L677\ NPFVYAIF    | 34   | 32   |
| >TSHR-L677\ ANPFLYAIF   | 218  | >TSHR-L677\ ANPFVYAIF   | 857  | 639  |
| >TSHR-L677\ ANPFLYAIF   | 121  | >TSHR-L677\ ANPFVYAIF   | 120  | 1    |
| >TSHR-L677\ CANPFLYAI   | 313  | >TSHR-L677\ CANPFVYAI   | 389  | 76   |
| >TSHR-L677\ CANPFLYAI   | 279  | >TSHR-L677\ CANPFVYAI   | 1067 | 788  |
| >TSHR-L677\ CANPFLYA    | 437  | >TSHR-L677\ CANPFVYA    | 87   | 350  |
| >TSHR-L677\ CANPFLYAI   | 48   | >TSHR-L677\ CANPFVYAI   | 30   | 18   |
| >TSHR-L677\ CANPFLYAIF  | 87   | >TSHR-L677\ CANPFVYAIF  | 61   | 26   |
| >TSHR-L677\ CANPFLYAIF  | 161  | >TSHR-L677\ CANPFVYAIF  | 190  | 29   |
| >TSHR-L677\ CANPFLYAI   | 570  | >TSHR-L677\ CANPFVYAI   | 278  | 292  |
| >TSHR-L677\ CANPFLYAI   | 923  | >TSHR-L677\ CANPFVYAI   | 277  | 646  |
| >TSHR-L677\ CANPFLYAIF  | 36   | >TSHR-L677\ CANPFVYAIF  | 23   | 13   |
| >TSHR-L677\ CANPFLYAIF  | 494  | >TSHR-L677\ CANPFVYAIF  | 487  | 7    |
| >TSHR-L677\ CANPFLYAI   | 18   | >TSHR-L677\ CANPFVYAI   | 24   | 6    |
| >TSHR-L677\ SCANPFLYAI  | 312  | >TSHR-L677\ SCANPFVYAI  | 1080 | 768  |
| >TSHR-L677\ SCANPFLY    | 28   | >TSHR-L677\ SCANPFVY    | 305  | 277  |
| >TSHR-L677\ SCANPFLY    | 323  | >TSHR-L677\ SCANPFVY    | 313  | 10   |
| >TSHR-L677\ SCANPFLYAI  | 427  | >TSHR-L677\ SCANPFVYAI  | 193  | 234  |
| >TSHR-L677\ SCANPFLYA   | 694  | >TSHR-L677\ SCANPFVYA   | 81   | 613  |
| >TSHR-L677\ SCANPFLYAI  | 389  | >TSHR-L677\ SCANPFVYAI  | 423  | 34   |

|                        |      |                        |      |      |
|------------------------|------|------------------------|------|------|
| >TSHR-L677\SCANPFLY    | 20   | >TSHR-L677\SCANPFVY    | 246  | 226  |
| >TSHR-L677\SCANPFLYAIF | 218  | >TSHR-L677\SCANPFVYAI  | 179  | 39   |
| >TSHR-L677\SCANPFLYAIF | 35   | >TSHR-L677\SCANPFVYAI  | 43   | 8    |
| >TSHR-L677\SCANPFLY    | 344  | >TSHR-L677\SCANPFVY    | 957  | 613  |
| >TSHR-L677\NSCANPFLY   | 99   | >TSHR-L677\NSCANPFVY   | 308  | 209  |
| >TSHR-L677\NSCANPFLY   | 216  | >TSHR-L677\NSCANPFVY   | 1378 | 1162 |
| >TSHR-L677\NSCANPFLY   | 31   | >TSHR-L677\NSCANPFVY   | 236  | 205  |
| >TSHR-L677\NSCANPFLY   | 216  | >TSHR-L677\NSCANPFVY   | 188  | 28   |
| >TSHR-L677\NSCANPFLY   | 458  | >TSHR-L677\NSCANPFVY   | 1434 | 976  |
| >TSHR-L677\NSCANPFL    | 2292 | >TSHR-L677\NSCANPFV    | 216  | 2076 |
| >TSHR-L677\NSCANPFLYA  | 113  | >TSHR-L677\NSCANPFVYA  | 75   | 38   |
| >TSHR-L677\NSCANPFLYA  | 135  | >TSHR-L677\NSCANPFVYA  | 131  | 4    |
| >TSHR-L677\NSCANPFL    | 3968 | >TSHR-L677\NSCANPFV    | 395  | 3573 |
| >TSHR-L677\NSCANPFLY   | 43   | >TSHR-L677\NSCANPFVY   | 399  | 356  |
| >TSHR-L677\NSCANPFLY   | 106  | >TSHR-L677\NSCANPFVY   | 71   | 35   |
| >TSHR-L677\NSCANPFLY   | 1632 | >TSHR-L677\NSCANPFVY   | 441  | 1191 |
| >TSHR-L677\NSCANPFLY   | 132  | >TSHR-L677\NSCANPFVY   | 338  | 206  |
| >TSHR-L677\NSCANPFLYA  | 127  | >TSHR-L677\NSCANPFVYA  | 143  | 16   |
| >TSHR-L677\LNSCANPFL   | 369  | >TSHR-L677\LNSCANPFV   | 1678 | 1309 |
| >TSHR-L677\LNSCANPFLY  | 59   | >TSHR-L677\LNSCANPFVY  | 93   | 34   |
| >TSHR-L677\LNSCANPFLY  | 129  | >TSHR-L677\LNSCANPFVY  | 409  | 280  |
| >TSHR-L677\LNSCANPFLY  | 1926 | >TSHR-L677\LNSCANPFVY  | 384  | 1542 |
| >TSHR-L677\LNSCANPFLY  | 160  | >TSHR-L677\LNSCANPFVY  | 246  | 86   |
| >TSHR-L677\PLNSCANPFL  | 310  | >TSHR-L677\PLNSCANPFV  | 316  | 6    |
| >TSHR-L677\PLNSCANPFL  | 704  | >TSHR-L677\PLNSCANPFV  | 41   | 663  |
| >TSHR-L677\PLNSCANPFL  | 1691 | >TSHR-L677\PLNSCANPFV  | 252  | 1439 |
| >TSHR-L677\PLNSCANPFL  | 249  | >TSHR-L677\PLNSCANPFV  | 22   | 227  |
| >TSHR-L677\PLNSCANPFL  | 87   | >TSHR-L677\PLNSCANPFV  | 9    | 78   |
| >TSHR-L677\PLNSCANPFL  | 93   | >TSHR-L677\PLNSCANPFV  | 14   | 79   |
| >TSHR-L677\PLNSCANPFL  | 22   | >TSHR-L677\PLNSCANPFV  | 85   | 63   |
| >TSHR-L677\PLNSCANPFL  | 54   | >TSHR-L677\PLNSCANPFV  | 53   | 1    |
| >TSHR-L677\PLNSCANPFL  | 135  | >TSHR-L677\PLNSCANPFV  | 786  | 651  |
| >TSHR-L677\PLNSCANPFL  | 71   | >TSHR-L677\PLNSCANPFV  | 124  | 53   |
| >TSHR-L6F-wLLQLVLLL    | 90   | >TSHR-L6F-rFLQLVLLL    | 22   | 68   |
| >TSHR-L6F-wLLQLVLLLDL  | 471  | >TSHR-L6F-rFLQLVLLLDL  | 90   | 381  |
| >TSHR-L6F-wLLQLVLLL    | 149  | >TSHR-L6F-rFLQLVLLL    | 12   | 137  |
| >TSHR-L6F-wLLQLVLLLDL  | 122  | >TSHR-L6F-rFLQLVLLLDL  | 39   | 83   |
| >TSHR-L6F-wLLQLVLLLDLP | 2866 | >TSHR-L6F-rFLQLVLLLDLP | 273  | 2593 |
| >TSHR-L6F-wLLQLVLLL    | 294  | >TSHR-L6F-rFLQLVLLL    | 35   | 259  |
| >TSHR-L6F-wLLQLVLLLDL  | 261  | >TSHR-L6F-rFLQLVLLLDL  | 84   | 177  |
| >TSHR-L6F-wLLQLVLLL    | 1420 | >TSHR-L6F-rFLQLVLLL    | 208  | 1212 |
| >TSHR-L6F-wLLQLVLLLDL  | 558  | >TSHR-L6F-rFLQLVLLLDL  | 164  | 394  |
| >TSHR-L6F-wLLQLVLLL    | 44   | >TSHR-L6F-rFLQLVLLL    | 7    | 37   |

|                         |      |                         |       |       |
|-------------------------|------|-------------------------|-------|-------|
| >TSHR-L6F-w LLQLVLLLDL  | 342  | >TSHR-L6F-r FLQLVLLLDL  | 39    | 303   |
| >TSHR-L6F-w LLQLVLLL    | 97   | >TSHR-L6F-r FLQLVLLL    | 14    | 83    |
| >TSHR-L6F-w LLQLVLLLDL  | 209  | >TSHR-L6F-r FLQLVLLLDL  | 25    | 184   |
| >TSHR-L6F-w LLQLVLLL    | 163  | >TSHR-L6F-r FLQLVLLL    | 21    | 142   |
| >TSHR-L6F-w LLQLVLLLDL  | 452  | >TSHR-L6F-r FLQLVLLLDL  | 44    | 408   |
| >TSHR-L6F-w LLQLVLLL    | 367  | >TSHR-L6F-r FLQLVLLL    | 43    | 324   |
| >TSHR-L6F-w LLQLVLLLDL  | 1528 | >TSHR-L6F-r FLQLVLLLDL  | 235   | 1293  |
| >TSHR-L6F-w LLQLVLLL    | 7    | >TSHR-L6F-r FLQLVLLL    | 3     | 4     |
| >TSHR-L6F-w LLQLVLLLDL  | 15   | >TSHR-L6F-r FLQLVLLLDL  | 5     | 10    |
| >TSHR-L6F-w LLQLVLLLDL  | 273  | >TSHR-L6F-r FLQLVLLLDL  | 206   | 67    |
| >TSHR-L6F-w DLLQLVLL    | 134  | >TSHR-L6F-r DFLQLVLL    | 18480 | 18346 |
| >TSHR-L6F-w DLLQLVLLL   | 109  | >TSHR-L6F-r DFLQLVLLL   | 17246 | 17137 |
| >TSHR-L6F-w DLLQLVLL    | 91   | >TSHR-L6F-r DFLQLVLL    | 14290 | 14199 |
| >TSHR-L6F-w DLLQLVLLL   | 70   | >TSHR-L6F-r DFLQLVLLL   | 14048 | 13978 |
| >TSHR-L6F-w DLLQLVLLLDI | 164  | >TSHR-L6F-r DFLQLVLLLDI | 15875 | 15711 |
| >TSHR-L6F-w DLLQLVLL    | 181  | >TSHR-L6F-r DFLQLVLL    | 16632 | 16451 |
| >TSHR-L6F-w DLLQLVLLL   | 250  | >TSHR-L6F-r DFLQLVLLL   | 15766 | 15516 |
| >TSHR-L6F-w DLLQLVLL    | 73   | >TSHR-L6F-r DFLQLVLL    | 20459 | 20386 |
| >TSHR-L6F-w DLLQLVLLL   | 120  | >TSHR-L6F-r DFLQLVLLL   | 21629 | 21509 |
| >TSHR-L6F-w DLLQLVLLLDI | 275  | >TSHR-L6F-r DFLQLVLLLDI | 24713 | 24438 |
| >TSHR-L6F-w DLLQLVLLL   | 2815 | >TSHR-L6F-r DFLQLVLLL   | 444   | 2371  |
| >TSHR-L6F-w DLLQLVLLLDI | 2411 | >TSHR-L6F-r DFLQLVLLLDI | 384   | 2027  |
| >TSHR-L6F-w ADLLQLVL    | 218  | >TSHR-L6F-r ADFLQLVL    | 57    | 161   |
| >TSHR-L6F-w ADLLQLVLL   | 665  | >TSHR-L6F-r ADFLQLVLL   | 161   | 504   |
| >TSHR-L6F-w ADLLQLVL    | 180  | >TSHR-L6F-r ADFLQLVL    | 368   | 188   |
| >TSHR-L6F-w ADLLQLVLL   | 42   | >TSHR-L6F-r ADFLQLVLL   | 24    | 18    |
| >TSHR-L6F-w ADLLQLVLL   | 2693 | >TSHR-L6F-r ADFLQLVLL   | 455   | 2238  |
| >TSHR-L6F-w ADLLQLVL    | 105  | >TSHR-L6F-r ADFLQLVL    | 187   | 82    |
| >TSHR-L6F-w ADLLQLVLL   | 76   | >TSHR-L6F-r ADFLQLVLL   | 131   | 55    |
| >TSHR-L6F-w ADLLQLVLLL  | 69   | >TSHR-L6F-r ADFLQLVLLL  | 113   | 44    |
| >TSHR-L6F-w RPADLLQL    | 27   | >TSHR-L6F-r RPADFLQL    | 25    | 2     |
| >TSHR-L6F-w RPADLLQLV   | 152  | >TSHR-L6F-r RPADFLQLV   | 141   | 11    |
| >TSHR-L6F-w RPADLLQLVL  | 39   | >TSHR-L6F-r RPADFLQLVL  | 46    | 7     |
| >TSHR-L6F-w RPADLLQLVL  | 51   | >TSHR-L6F-r RPADFLQLVL  | 45    | 6     |
| >TSHR-L6F-w RPADLLQLVL  | 217  | >TSHR-L6F-r RPADFLQLVL  | 232   | 15    |
| >TSHR-L6F-w RPADLLQLVL  | 240  | >TSHR-L6F-r RPADFLQLVL  | 206   | 34    |
| >TSHR-L6F-w RPADLLQL    | 493  | >TSHR-L6F-r RPADFLQL    | 347   | 146   |
| >TSHR-L6F-w RPADLLQL    | 442  | >TSHR-L6F-r RPADFLQL    | 625   | 183   |
| >TSHR-L6F-w MRPADLLQL\  | 243  | >TSHR-L6F-r MRPADFLQL\  | 185   | 58    |
| >TSHR-L6F-w MRPADLLQL   | 659  | >TSHR-L6F-r MRPADFLQL   | 439   | 220   |
| >TSHR-L6F-w MRPADLLQL\  | 324  | >TSHR-L6F-r MRPADFLQL\  | 249   | 75    |
| >TSHR-L6F-w MRPADLLQL   | 166  | >TSHR-L6F-r MRPADFLQL   | 50    | 116   |
| >TSHR-L6F-w MRPADLLQL\  | 317  | >TSHR-L6F-r MRPADFLQL\  | 322   | 5     |

|                        |       |                         |       |       |
|------------------------|-------|-------------------------|-------|-------|
| >TSHR-L6F-w MRPADLLQL  | 85    | >TSHR-L6F-r MRPADFLQL   | 45    | 40    |
| >TSHR-M453 MCNLAFA DF  | 353   | >TSHR-M453 TCNLAFA DF   | 2486  | 2133  |
| >TSHR-M453 MCNLAFA DF  | 227   | >TSHR-M453 TCNLAFA DF C | 2527  | 2300  |
| >TSHR-M453 LMCNLAFA    | 91    | >TSHR-M453 LTCNLAFA     | 5647  | 5556  |
| >TSHR-M453 LMCNLAFA    | 40    | >TSHR-M453 LTCNLAFA     | 1035  | 995   |
| >TSHR-M453 LMCNLAFA    | 27    | >TSHR-M453 LTCNLAFA     | 1273  | 1246  |
| >TSHR-M453 LMCNLAFA    | 79    | >TSHR-M453 LTCNLAFA     | 289   | 210   |
| >TSHR-M453 LMCNLAFA    | 11    | >TSHR-M453 LTCNLAFA     | 1483  | 1472  |
| >TSHR-M453 LMCNLAFA DI | 55    | >TSHR-M453 LTCNLAFA DF  | 3604  | 3549  |
| >TSHR-M453 LMCNLAFA    | 171   | >TSHR-M453 LTCNLAFA     | 13359 | 13188 |
| >TSHR-M453 LMCNLAFA    | 102   | >TSHR-M453 LTCNLAFA     | 10567 | 10465 |
| >TSHR-M453 LMCNLAFA    | 334   | >TSHR-M453 LTCNLAFA     | 14491 | 14157 |
| >TSHR-M453 LMCNLAFA    | 12    | >TSHR-M453 LTCNLAFA     | 9553  | 9541  |
| >TSHR-M453 LMCNLAFA DI | 436   | >TSHR-M453 LTCNLAFA DF  | 23567 | 23131 |
| >TSHR-M453 LMCNLAFA DI | 319   | >TSHR-M453 LTCNLAFA DF  | 689   | 370   |
| >TSHR-M453 LMCNLAFA DI | 670   | >TSHR-M453 LTCNLAFA DF  | 472   | 198   |
| >TSHR-M453 LMCNLAFA DI | 42    | >TSHR-M453 LTCNLAFA DF  | 170   | 128   |
| >TSHR-M453 LMCNLAFA DI | 23    | >TSHR-M453 LTCNLAFA DF  | 365   | 342   |
| >TSHR-M453 LMCNLAFA DI | 1036  | >TSHR-M453 LTCNLAFA DF  | 12    | 1024  |
| >TSHR-M453 LMCNLAFA DI | 11083 | >TSHR-M453 LTCNLAFA DF  | 383   | 10700 |
| >TSHR-M453 LMCNLAFA DI | 2222  | >TSHR-M453 LTCNLAFA DF  | 43    | 2179  |
| >TSHR-M453 HYKLNVP RFL | 240   | >TSHR-M453 HYKLNVP RFL  | 3791  | 3551  |
| >TSHR-M453 HYKLNVP RFL | 23    | >TSHR-M453 HYKLNVP RFL  | 179   | 156   |
| >TSHR-M453 FLMCNLAFA   | 101   | >TSHR-M453 FLTCNLAFA    | 966   | 865   |
| >TSHR-M453 FLMCNLA F   | 71    | >TSHR-M453 FLTCNLA F    | 1793  | 1722  |
| >TSHR-M453 FLMCNLAFA   | 7     | >TSHR-M453 FLTCNLAFA    | 20    | 13    |
| >TSHR-M453 FLMCNLAFA I | 359   | >TSHR-M453 FLTCNLAFA D  | 5749  | 5390  |
| >TSHR-M453 FLMCNLAFA I | 234   | >TSHR-M453 FLTCNLAFA D  | 3874  | 3640  |
| >TSHR-M453 FLMCNLA F   | 23    | >TSHR-M453 FLTCNLA F    | 151   | 128   |
| >TSHR-M453 FLMCNLAFA   | 2     | >TSHR-M453 FLTCNLAFA    | 4     | 2     |
| >TSHR-M453 FLMCNLAFA I | 34    | >TSHR-M453 FLTCNLAFA D  | 236   | 202   |
| >TSHR-M453 FLMCNLA F   | 59    | >TSHR-M453 FLTCNLA F    | 703   | 644   |
| >TSHR-M453 FLMCNLAFA   | 2     | >TSHR-M453 FLTCNLAFA    | 3     | 1     |
| >TSHR-M453 FLMCNLAFA I | 42    | >TSHR-M453 FLTCNLAFA D  | 526   | 484   |
| >TSHR-M453 FLMCNLA F   | 30    | >TSHR-M453 FLTCNLA F    | 177   | 147   |
| >TSHR-M453 FLMCNLAFA   | 5     | >TSHR-M453 FLTCNLAFA    | 12    | 7     |
| >TSHR-M453 FLMCNLAFA I | 32    | >TSHR-M453 FLTCNLAFA D  | 198   | 166   |
| >TSHR-M453 FLMCNLA F   | 59    | >TSHR-M453 FLTCNLA F    | 423   | 364   |
| >TSHR-M453 FLMCNLAFA   | 2     | >TSHR-M453 FLTCNLAFA    | 4     | 2     |
| >TSHR-M453 FLMCNLAFA I | 206   | >TSHR-M453 FLTCNLAFA D  | 1415  | 1209  |
| >TSHR-M453 FLMCNLAFA I | 233   | >TSHR-M453 FLTCNLAFA D  | 1387  | 1154  |
| >TSHR-M453 FLMCNLA F   | 54    | >TSHR-M453 FLTCNLA F    | 434   | 380   |
| >TSHR-M453 FLMCNLAFA   | 2     | >TSHR-M453 FLTCNLAFA    | 3     | 1     |

|                       |     |                        |      |      |
|-----------------------|-----|------------------------|------|------|
| >TSHR-M453 FLMCNLAFAL | 87  | >TSHR-M453 FLTCNLAFAD  | 727  | 640  |
| >TSHR-M453 FLMCNLAFAL | 79  | >TSHR-M453 FLTCNLAFAD  | 502  | 423  |
| >TSHR-M453 FLMCNLAFAL | 18  | >TSHR-M453 FLTCNLAFAL  | 19   | 1    |
| >TSHR-M453 FLMCNLAFAL | 2   | >TSHR-M453 FLTCNLAFAL  | 10   | 8    |
| >TSHR-M453 FLMCNLAFAL | 3   | >TSHR-M453 FLTCNLAFAL  | 3    | 0    |
| >TSHR-M453 FLMCNLAF   | 347 | >TSHR-M453 FLTCNLAF    | 1418 | 1071 |
| >TSHR-M453 FLMCNLAFAL | 134 | >TSHR-M453 FLTCNLAFAD  | 540  | 406  |
| >TSHR-M453 FLMCNLAF   | 244 | >TSHR-M453 FLTCNLAF    | 1455 | 1211 |
| >TSHR-M453 FLMCNLAFAL | 128 | >TSHR-M453 FLTCNLAFAD  | 878  | 750  |
| >TSHR-M453 FLMCNLAF   | 159 | >TSHR-M453 FLTCNLAF    | 260  | 101  |
| >TSHR-M453 FLMCNLAFAL | 259 | >TSHR-M453 FLTCNLAFAD  | 449  | 190  |
| >TSHR-M453 FLMCNLAF   | 330 | >TSHR-M453 FLTCNLAF    | 4148 | 3818 |
| >TSHR-M453 FLMCNLAFAL | 37  | >TSHR-M453 FLTCNLAFAL  | 180  | 143  |
| >TSHR-M453 FLMCNLAFAL | 87  | >TSHR-M453 FLTCNLAFAL  | 1305 | 1218 |
| >TSHR-M453 FLMCNLAF   | 182 | >TSHR-M453 FLTCNLAF    | 2772 | 2590 |
| >TSHR-M453 FLMCNLAFAL | 260 | >TSHR-M453 FLTCNLAFAD  | 3138 | 2878 |
| >TSHR-M453 FLMCNLAF   | 31  | >TSHR-M453 FLTCNLAF    | 143  | 112  |
| >TSHR-M453 FLMCNLAFAL | 50  | >TSHR-M453 FLTCNLAFAD  | 464  | 414  |
| >TSHR-M453 FLMCNLAF   | 27  | >TSHR-M453 FLTCNLAF    | 64   | 37   |
| >TSHR-M453 FLMCNLAFAL | 84  | >TSHR-M453 FLTCNLAFAD  | 234  | 150  |
| >TSHR-M453 FLMCNLAF   | 5   | >TSHR-M453 FLTCNLAF    | 17   | 12   |
| >TSHR-M453 FLMCNLAFAL | 9   | >TSHR-M453 FLTCNLAFAD  | 48   | 39   |
| >TSHR-M453 FLMCNLAF   | 55  | >TSHR-M453 FLTCNLAF    | 92   | 37   |
| >TSHR-M453 FLMCNLAFAL | 400 | >TSHR-M453 FLTCNLAFAD  | 693  | 293  |
| >TSHR-M453 FLMCNLAF   | 132 | >TSHR-M453 FLTCNLAF    | 718  | 586  |
| >TSHR-M453 RFLMCNLAF  | 31  | >TSHR-M453 RFLTCNLAF   | 36   | 5    |
| >TSHR-M453 RFLMCNLAF  | 254 | >TSHR-M453 RFLTCNLAF   | 236  | 18   |
| >TSHR-M453 RFLMCNLAF  | 11  | >TSHR-M453 RFLTCNLAF   | 8    | 3    |
| >TSHR-M453 RFLMCNLAF  | 453 | >TSHR-M453 RFLTCNLAF   | 347  | 106  |
| >TSHR-M453 RFLMCNLAL  | 492 | >TSHR-M453 RFLTCNLAL   | 452  | 40   |
| >TSHR-M453 RFLMCNLAF/ | 43  | >TSHR-M453 RFLTCNLAFAL | 45   | 2    |
| >TSHR-M453 RFLMCNLAF  | 156 | >TSHR-M453 RFLTCNLAF   | 165  | 9    |
| >TSHR-M453 RFLMCNLAF  | 458 | >TSHR-M453 RFLTCNLAF   | 1310 | 852  |
| >TSHR-M453 RFLMCNLAF  | 46  | >TSHR-M453 RFLTCNLAF   | 43   | 3    |
| >TSHR-M453 RFLMCNLAF  | 493 | >TSHR-M453 RFLTCNLAF   | 472  | 21   |
| >TSHR-M453 RFLMCNLAL  | 217 | >TSHR-M453 RFLTCNLAL   | 259  | 42   |
| >TSHR-M453 RFLMCNLAF/ | 311 | >TSHR-M453 RFLTCNLAFAL | 301  | 10   |
| >TSHR-M453 PRFLMCNLAF | 83  | >TSHR-M453 PRFLTCNLAF  | 36   | 47   |
| >TSHR-M453 VPRFLMCNL  | 47  | >TSHR-M453 VPRFLTCNL   | 30   | 17   |
| >TSHR-M453 VPRFLMCNL/ | 17  | >TSHR-M453 VPRFLTCNLAL | 14   | 3    |
| >TSHR-M453 VPRFLMCNL/ | 166 | >TSHR-M453 VPRFLTCNLAL | 122  | 44   |
| >TSHR-M453 VPRFLMCNL/ | 46  | >TSHR-M453 VPRFLTCNLAL | 24   | 22   |
| >TSHR-M453 VPRFLMCNL/ | 689 | >TSHR-M453 VPRFLTCNLAL | 452  | 237  |

|                       |      |                       |       |       |
|-----------------------|------|-----------------------|-------|-------|
| >TSHR-M453 VPRFLMCNLA | 498  | >TSHR-M453 VPRFLTCNLA | 628   | 130   |
| >TSHR-M453 NVPRFLMCN  | 178  | >TSHR-M453 NVPRFLTCNL | 206   | 28    |
| >TSHR-M453 NVPRFLMCN  | 90   | >TSHR-M453 NVPRFLTCNL | 156   | 66    |
| >TSHR-M453 LNVPRFLMCN | 322  | >TSHR-M453 LNVPRFLTCN | 401   | 79    |
| >TSHR-M453 KLVNPRFLM  | 302  | >TSHR-M453 KLVNPRFLT  | 449   | 147   |
| >TSHR-M453 KLVNPRFLMC | 540  | >TSHR-M453 KLVNPRFLTC | 233   | 307   |
| >TSHR-M453 KLVNPRFLM  | 456  | >TSHR-M453 KLVNPRFLT  | 1025  | 569   |
| >TSHR-M453 YKLVNPRFLN | 21   | >TSHR-M453 YKLVNPRFLT | 2418  | 2397  |
| >TSHR-M453 YKLVNPRFLN | 486  | >TSHR-M453 YKLVNPRFLT | 298   | 188   |
| >TSHR-M453 YKLVNPRFLN | 372  | >TSHR-M453 YKLVNPRFLT | 13363 | 12991 |
| >TSHR-M463 MGMYLLLIAS | 254  | >TSHR-M463 VGMYLLLIAS | 1938  | 1684  |
| >TSHR-M463 MGMYLLLI   | 188  | >TSHR-M463 VGMYLLLI   | 1317  | 1129  |
| >TSHR-M463 MGMYLLLIAS | 63   | >TSHR-M463 VGMYLLLIAS | 407   | 344   |
| >TSHR-M463 MGMYLLLIAS | 497  | >TSHR-M463 VGMYLLLIAS | 1223  | 726   |
| >TSHR-M463 MGMYLLLI   | 277  | >TSHR-M463 VGMYLLLI   | 1156  | 879   |
| >TSHR-M463 MGMYLLLIAS | 29   | >TSHR-M463 VGMYLLLIAS | 112   | 83    |
| >TSHR-M463 MGMYLLLI   | 284  | >TSHR-M463 VGMYLLLI   | 9774  | 9490  |
| >TSHR-M463 MGMYLLLIAS | 28   | >TSHR-M463 VGMYLLLIAS | 1250  | 1222  |
| >TSHR-M463 MGMYLLLI   | 412  | >TSHR-M463 VGMYLLLI   | 1340  | 928   |
| >TSHR-M463 CMGMYLLLI  | 392  | >TSHR-M463 CVGMYLLLI  | 845   | 453   |
| >TSHR-M463 CMGMYLLL   | 178  | >TSHR-M463 CVGMYLLL   | 3452  | 3274  |
| >TSHR-M463 CMGMYLLLI  | 60   | >TSHR-M463 CVGMYLLLI  | 1386  | 1326  |
| >TSHR-M463 CMGMYLLLI  | 492  | >TSHR-M463 CVGMYLLLIA | 4024  | 3532  |
| >TSHR-M463 CMGMYLLL   | 365  | >TSHR-M463 CVGMYLLL   | 3128  | 2763  |
| >TSHR-M463 CMGMYLLLI  | 482  | >TSHR-M463 CVGMYLLLI  | 3328  | 2846  |
| >TSHR-M463 CMGMYLLLI  | 354  | >TSHR-M463 CVGMYLLLIA | 2969  | 2615  |
| >TSHR-M463 CMGMYLLLI  | 222  | >TSHR-M463 CVGMYLLLI  | 1704  | 1482  |
| >TSHR-M463 CMGMYLLLI  | 260  | >TSHR-M463 CVGMYLLLIA | 1775  | 1515  |
| >TSHR-M463 CMGMYLLL   | 125  | >TSHR-M463 CVGMYLLL   | 8859  | 8734  |
| >TSHR-M463 CMGMYLLLI  | 49   | >TSHR-M463 CVGMYLLLI  | 6539  | 6490  |
| >TSHR-M463 CMGMYLLLI  | 360  | >TSHR-M463 CVGMYLLLI  | 11602 | 11242 |
| >TSHR-M463 CMGMYLLL   | 53   | >TSHR-M463 CVGMYLLL   | 4975  | 4922  |
| >TSHR-M463 CMGMYLLLI  | 202  | >TSHR-M463 CVGMYLLLI  | 10103 | 9901  |
| >TSHR-M463 CMGMYLLLI  | 426  | >TSHR-M463 CVGMYLLLIA | 1445  | 1019  |
| >TSHR-M463 CMGMYLLLI  | 1314 | >TSHR-M463 CVGMYLLLI  | 355   | 959   |
| >TSHR-M463 MCNLAFADF  | 4318 | >TSHR-M463 MCNLAFADF  | 112   | 4206  |
| >TSHR-M463 MCNLAFADF  | 227  | >TSHR-M463 MCNLAFADF  | 10698 | 10471 |
| >TSHR-M463 FCMGMYLL   | 69   | >TSHR-M463 FCVGMYYL   | 1297  | 1228  |
| >TSHR-M463 FCMGMYLLL  | 141  | >TSHR-M463 FCVGMYYLL  | 3381  | 3240  |
| >TSHR-M463 FCMGMYLLLI | 70   | >TSHR-M463 FCVGMYYLLI | 749   | 679   |
| >TSHR-M463 FCMGMYLL   | 14   | >TSHR-M463 FCVGMYYL   | 70    | 56    |
| >TSHR-M463 FCMGMYLLL  | 48   | >TSHR-M463 FCVGMYYLL  | 288   | 240   |
| >TSHR-M463 FCMGMYLLLI | 54   | >TSHR-M463 FCVGMYYLLI | 344   | 290   |



|                       |     |                         |      |      |
|-----------------------|-----|-------------------------|------|------|
| >TSHR-M463 FCMGMYLLLI | 424 | >TSHR-M463 FCVGMYYLLLI/ | 1733 | 1309 |
| >TSHR-M463 FCMGMYLLLI | 121 | >TSHR-M463 FCVGMYYLLLI  | 663  | 542  |
| >TSHR-M463 FCMGMYLLLI | 71  | >TSHR-M463 FCVGMYYLLLI  | 158  | 87   |
| >TSHR-M463 FCMGMYLL   | 154 | >TSHR-M463 FCVGMYYLL    | 428  | 274  |
| >TSHR-M463 FCMGMYLL   | 279 | >TSHR-M463 FCVGMYYLL    | 1282 | 1003 |
| >TSHR-M463 FCMGMYLLL  | 390 | >TSHR-M463 FCVGMYYLLL   | 1777 | 1387 |
| >TSHR-M463 FCMGMYLLLI | 190 | >TSHR-M463 FCVGMYYLLLI/ | 211  | 21   |
| >TSHR-M463 FCMGMYLLL  | 299 | >TSHR-M463 FCVGMYYLLL   | 443  | 144  |
| >TSHR-M463 DFCMGMYYLL | 208 | >TSHR-M463 DFCVGMYYLL   | 302  | 94   |
| >TSHR-M463 DFCMGMYYLL | 355 | >TSHR-M463 DFCVGMYYLLI  | 1128 | 773  |
| >TSHR-M463 DFCMGMYYLL | 215 | >TSHR-M463 DFCVGMYYLLI  | 248  | 33   |
| >TSHR-M463 ADFCMGMY   | 428 | >TSHR-M463 ADFCVGMY     | 924  | 496  |
| >TSHR-M463 ADFCMGMYI  | 153 | >TSHR-M463 ADFCVGMYL    | 731  | 578  |
| >TSHR-M463 ADFCMGMYI  | 73  | >TSHR-M463 ADFCVGMYL    | 224  | 151  |
| >TSHR-M463 ADFCMGMYI  | 391 | >TSHR-M463 ADFCVGMYL    | 859  | 468  |
| >TSHR-M463 ADFCMGMYI  | 34  | >TSHR-M463 ADFCVGMYL    | 49   | 15   |
| >TSHR-M463 ADFCMGMYI  | 129 | >TSHR-M463 ADFCVGMYL    | 214  | 85   |
| >TSHR-M463 ADFCMGMYI  | 237 | >TSHR-M463 ADFCVGMYL    | 305  | 68   |
| >TSHR-M463 ADFCMGMYI  | 326 | >TSHR-M463 ADFCVGMYL    | 463  | 137  |
| >TSHR-M463 FADFCMGM\  | 13  | >TSHR-M463 FADFCVGM Y   | 25   | 12   |
| >TSHR-M463 FADFCMGM\  | 121 | >TSHR-M463 FADFCVGM Y   | 101  | 20   |
| >TSHR-M463 FADFCMGM\  | 124 | >TSHR-M463 FADFCVGM Y   | 110  | 14   |
| >TSHR-M463 FADFCMGM\  | 62  | >TSHR-M463 FADFCVGM Y   | 63   | 1    |
| >TSHR-M463 FADFCMGM\  | 41  | >TSHR-M463 FADFCVGM Y   | 43   | 2    |
| >TSHR-M463 FADFCMGM   | 417 | >TSHR-M463 FADFCVGM     | 425  | 8    |
| >TSHR-M463 FADFCMGM\  | 88  | >TSHR-M463 FADFCVGM Y   | 91   | 3    |
| >TSHR-M463 FADFCMGM\  | 64  | >TSHR-M463 FADFCVGM Y   | 74   | 10   |
| >TSHR-M463 FADFCMGM\  | 428 | >TSHR-M463 FADFCVGM Y   | 116  | 312  |
| >TSHR-M463 FADFCMGM\  | 159 | >TSHR-M463 FADFCVGM Y   | 303  | 144  |
| >TSHR-M463 FADFCMGM\  | 92  | >TSHR-M463 FADFCVGM Y   | 197  | 105  |
| >TSHR-M463 FADFCMGM\  | 499 | >TSHR-M463 FADFCVGM Y   | 174  | 325  |
| >TSHR-M463 FADFCMGM\  | 314 | >TSHR-M463 FADFCVGM Y   | 383  | 69   |
| >TSHR-M463 FADFCMGM\  | 330 | >TSHR-M463 FADFCVGM Y   | 377  | 47   |
| >TSHR-M463 FADFCMGM\  | 455 | >TSHR-M463 FADFCVGM Y   | 621  | 166  |
| >TSHR-M463 FADFCMGM\  | 197 | >TSHR-M463 FADFCVGM Y   | 452  | 255  |
| >TSHR-M463 FADFCMGM   | 159 | >TSHR-M463 FADFCVGM     | 84   | 75   |
| >TSHR-M463 FADFCMGM\  | 75  | >TSHR-M463 FADFCVGM Y   | 47   | 28   |
| >TSHR-M463 FADFCMGM\  | 507 | >TSHR-M463 FADFCVGM Y   | 219  | 288  |
| >TSHR-M463 FADFCMGM\  | 687 | >TSHR-M463 FADFCVGM Y   | 426  | 261  |
| >TSHR-M463 FADFCMGM\  | 402 | >TSHR-M463 FADFCVGM Y   | 518  | 116  |
| >TSHR-M463 FADFCMGM\  | 45  | >TSHR-M463 FADFCVGM Y   | 106  | 61   |
| >TSHR-M463 FADFCMGM\  | 393 | >TSHR-M463 FADFCVGM Y   | 158  | 235  |
| >TSHR-M463 AFADFCMGM  | 349 | >TSHR-M463 AFADFCVGM    | 383  | 34   |

|                      |       |                       |      |       |
|----------------------|-------|-----------------------|------|-------|
| >TSHR-M463 AFADFCMGN | 40    | >TSHR-M463 AFADFCVGM  | 31   | 9     |
| >TSHR-M463 AFADFCMGN | 139   | >TSHR-M463 AFADFCVGM  | 140  | 1     |
| >TSHR-M463 AFADFCMGN | 66    | >TSHR-M463 AFADFCVGM  | 74   | 8     |
| >TSHR-M463 AFADFCMGN | 24    | >TSHR-M463 AFADFCVGM  | 25   | 1     |
| >TSHR-M463 AFADFCMGN | 324   | >TSHR-M463 AFADFCVGM  | 1481 | 1157  |
| >TSHR-M463 AFADFCMGN | 304   | >TSHR-M463 AFADFCVGM  | 725  | 421   |
| >TSHR-M463 AFADFCMGN | 285   | >TSHR-M463 AFADFCVGM  | 409  | 124   |
| >TSHR-M463 AFADFCMGN | 258   | >TSHR-M463 AFADFCVGM  | 277  | 19    |
| >TSHR-M463 LAFADFCM  | 4901  | >TSHR-M463 LAFADFCV   | 142  | 4759  |
| >TSHR-M463 LAFADFCM  | 2042  | >TSHR-M463 LAFADFCV   | 132  | 1910  |
| >TSHR-M463 LAFADFCMG | 329   | >TSHR-M463 LAFADFCVGM | 945  | 616   |
| >TSHR-M463 LAFADFCM  | 737   | >TSHR-M463 LAFADFCV   | 23   | 714   |
| >TSHR-M463 LAFADFCMG | 185   | >TSHR-M463 LAFADFCVGM | 450  | 265   |
| >TSHR-M463 LAFADFCM  | 7364  | >TSHR-M463 LAFADFCV   | 114  | 7250  |
| >TSHR-M463 LAFADFCM  | 9016  | >TSHR-M463 LAFADFCV   | 103  | 8913  |
| >TSHR-M463 LAFADFCM  | 15370 | >TSHR-M463 LAFADFCV   | 47   | 15323 |
| >TSHR-M463 LAFADFCMG | 56    | >TSHR-M463 LAFADFCVGM | 106  | 50    |
| >TSHR-M463 LAFADFCMG | 49    | >TSHR-M463 LAFADFCVGM | 65   | 16    |
| >TSHR-M463 LAFADFCMG | 473   | >TSHR-M463 LAFADFCVGM | 468  | 5     |
| >TSHR-M463 LAFADFCM  | 3557  | >TSHR-M463 LAFADFCV   | 61   | 3496  |
| >TSHR-M463 LAFADFCMG | 468   | >TSHR-M463 LAFADFCVGM | 1178 | 710   |
| >TSHR-M463 LAFADFCM  | 456   | >TSHR-M463 LAFADFCV   | 5173 | 4717  |
| >TSHR-M463 LAFADFCMG | 1973  | >TSHR-M463 LAFADFCVGM | 474  | 1499  |
| >TSHR-M463 LAFADFCMG | 216   | >TSHR-M463 LAFADFCVGM | 180  | 36    |
| >TSHR-M463 LAFADFCMG | 90    | >TSHR-M463 LAFADFCVGM | 67   | 23    |
| >TSHR-M463 LAFADFCM  | 231   | >TSHR-M463 LAFADFCV   | 922  | 691   |
| >TSHR-M463 LAFADFCMG | 77    | >TSHR-M463 LAFADFCVGM | 69   | 8     |
| >TSHR-M463 LAFADFCMG | 143   | >TSHR-M463 LAFADFCVGM | 88   | 55    |
| >TSHR-M463 LAFADFCM  | 474   | >TSHR-M463 LAFADFCV   | 8002 | 7528  |
| >TSHR-M463 LAFADFCMG | 80    | >TSHR-M463 LAFADFCVGM | 80   | 0     |
| >TSHR-M463 LAFADFCMG | 28    | >TSHR-M463 LAFADFCVGM | 34   | 6     |
| >TSHR-M463 LAFADFCM  | 33    | >TSHR-M463 LAFADFCV   | 2523 | 2490  |
| >TSHR-M463 LAFADFCMG | 49    | >TSHR-M463 LAFADFCVGM | 36   | 13    |
| >TSHR-M463 LAFADFCM  | 475   | >TSHR-M463 LAFADFCV   | 2751 | 2276  |
| >TSHR-M463 LAFADFCMG | 352   | >TSHR-M463 LAFADFCVGM | 221  | 131   |
| >TSHR-M463 LAFADFCM  | 384   | >TSHR-M463 LAFADFCV   | 9660 | 9276  |
| >TSHR-M463 LAFADFCMG | 34    | >TSHR-M463 LAFADFCVGM | 54   | 20    |
| >TSHR-M463 LAFADFCMG | 73    | >TSHR-M463 LAFADFCVGM | 109  | 36    |
| >TSHR-M463 NLAFAFCM  | 940   | >TSHR-M463 NLAFAFCV   | 28   | 912   |
| >TSHR-M463 NLAFAFCM  | 70    | >TSHR-M463 NLAFAFCV   | 6    | 64    |
| >TSHR-M463 NLAFAFCM  | 55    | >TSHR-M463 NLAFAFCVC  | 40   | 15    |
| >TSHR-M463 NLAFAFCM  | 5694  | >TSHR-M463 NLAFAFCV   | 115  | 5579  |
| >TSHR-M463 NLAFAFCM  | 365   | >TSHR-M463 NLAFAFCVC  | 754  | 389   |

|                         |       |                         |       |       |
|-------------------------|-------|-------------------------|-------|-------|
| >TSHR-M463 NLAFAFCM     | 1763  | >TSHR-M463 NLAFAFCV     | 43    | 1720  |
| >TSHR-M463 NLAFAFCM     | 6284  | >TSHR-M463 NLAFAFCV     | 92    | 6192  |
| >TSHR-M463 NLAFAFCM     | 1097  | >TSHR-M463 NLAFAFCV     | 11    | 1086  |
| >TSHR-M463 NLAFAFCM     | 563   | >TSHR-M463 NLAFAFCV     | 7     | 556   |
| >TSHR-M463 NLAFAFCM     | 165   | >TSHR-M463 NLAFAFCV     | 3     | 162   |
| >TSHR-M463 NLAFAFCM     | 194   | >TSHR-M463 NLAFAFCV     | 200   | 6     |
| >TSHR-M463 NLAFAFCM     | 4917  | >TSHR-M463 NLAFAFCV     | 19    | 4898  |
| >TSHR-M463 NLAFAFCM     | 948   | >TSHR-M463 NLAFAFCV     | 27    | 921   |
| >TSHR-M463 NLAFAFCM     | 437   | >TSHR-M463 NLAFAFCV     | 532   | 95    |
| >TSHR-M463 NLAFAFCM     | 323   | >TSHR-M463 NLAFAFCV     | 9157  | 8834  |
| >TSHR-P639/ PISFYALSA   | 7879  | >TSHR-P639/ AISFYALSA   | 431   | 7448  |
| >TSHR-P639/ PISFYALSAI  | 3072  | >TSHR-P639/ AISFYALSAI  | 145   | 2927  |
| >TSHR-P639/ PISFYALSAIL | 1226  | >TSHR-P639/ AISFYALSAIL | 31    | 1195  |
| >TSHR-P639/ PISFYALSA   | 3618  | >TSHR-P639/ AISFYALSA   | 103   | 3515  |
| >TSHR-P639/ PISFYALSAI  | 1587  | >TSHR-P639/ AISFYALSAI  | 85    | 1502  |
| >TSHR-P639/ PISFYALSAIL | 4604  | >TSHR-P639/ AISFYALSAIL | 122   | 4482  |
| >TSHR-P639/ PISFYALSAI  | 10318 | >TSHR-P639/ AISFYALSAI  | 462   | 9856  |
| >TSHR-P639/ PISFYALSAIL | 8139  | >TSHR-P639/ AISFYALSAIL | 453   | 7686  |
| >TSHR-P639/ PISFYALSAI  | 4923  | >TSHR-P639/ AISFYALSAI  | 285   | 4638  |
| >TSHR-P639/ PISFYALSAI  | 4776  | >TSHR-P639/ AISFYALSAI  | 381   | 4395  |
| >TSHR-P639/ APISFYAL    | 17247 | >TSHR-P639/ AAISFYAL    | 239   | 17008 |
| >TSHR-P639/ APISFYALSAI | 19240 | >TSHR-P639/ AAISFYALSAI | 411   | 18829 |
| >TSHR-P639/ APISFYAL    | 173   | >TSHR-P639/ AAISFYAL    | 14    | 159   |
| >TSHR-P639/ APISFYALS   | 4651  | >TSHR-P639/ AAISFYALS   | 145   | 4506  |
| >TSHR-P639/ APISFYALSAI | 1711  | >TSHR-P639/ AAISFYALSAI | 104   | 1607  |
| >TSHR-P639/ APISFYAL    | 19    | >TSHR-P639/ AAISFYAL    | 14217 | 14198 |
| >TSHR-P639/ APISFYALSAI | 52    | >TSHR-P639/ AAISFYALSAI | 13838 | 13786 |
| >TSHR-P639/ APISFYAL    | 8645  | >TSHR-P639/ AAISFYAL    | 102   | 8543  |
| >TSHR-P639/ APISFYALSA  | 6241  | >TSHR-P639/ AAISFYALSA  | 238   | 6003  |
| >TSHR-P639/ APISFYALSAI | 14133 | >TSHR-P639/ AAISFYALSAI | 446   | 13687 |
| >TSHR-P639/ APISFYALSA  | 6648  | >TSHR-P639/ AAISFYALSA  | 203   | 6445  |
| >TSHR-P639/ APISFYALSAI | 9457  | >TSHR-P639/ AAISFYALSAI | 115   | 9342  |
| >TSHR-P639/ APISFYAL    | 5273  | >TSHR-P639/ AAISFYAL    | 53    | 5220  |
| >TSHR-P639/ APISFYALSAI | 6799  | >TSHR-P639/ AAISFYALSAI | 80    | 6719  |
| >TSHR-P639/ APISFYAL    | 8416  | >TSHR-P639/ AAISFYAL    | 358   | 8058  |
| >TSHR-P639/ APISFYALSAI | 8290  | >TSHR-P639/ AAISFYALSAI | 471   | 7819  |
| >TSHR-P639/ APISFYAL    | 26    | >TSHR-P639/ AAISFYAL    | 3281  | 3255  |
| >TSHR-P639/ APISFYALSAI | 54    | >TSHR-P639/ AAISFYALSAI | 7838  | 7784  |
| >TSHR-P639/ APISFYAL    | 426   | >TSHR-P639/ AAISFYAL    | 64    | 362   |
| >TSHR-P639/ APISFYALSAI | 681   | >TSHR-P639/ AAISFYALSAI | 106   | 575   |
| >TSHR-P639/ APISFYAL    | 18924 | >TSHR-P639/ AAISFYAL    | 262   | 18662 |
| >TSHR-P639/ APISFYAL    | 90    | >TSHR-P639/ AAISFYAL    | 840   | 750   |
| >TSHR-P639/ APISFYAL    | 24    | >TSHR-P639/ AAISFYAL    | 212   | 188   |

|                        |       |                        |       |       |
|------------------------|-------|------------------------|-------|-------|
| >TSHR-P639/APISFYAL    | 162   | >TSHR-P639/AAISFYAL    | 3065  | 2903  |
| >TSHR-P639/APISFYALSAI | 259   | >TSHR-P639/AAISFYALSAI | 3980  | 3721  |
| >TSHR-P639/APISFYALSA  | 37    | >TSHR-P639/AAISFYALSA  | 14474 | 14437 |
| >TSHR-P639/APISFYAL    | 27    | >TSHR-P639/AAISFYAL    | 859   | 832   |
| >TSHR-P639/APISFYALSAI | 148   | >TSHR-P639/AAISFYALSAI | 5805  | 5657  |
| >TSHR-P639/APISFYAL    | 54    | >TSHR-P639/AAISFYAL    | 4357  | 4303  |
| >TSHR-P639/APISFYALSAI | 285   | >TSHR-P639/AAISFYALSAI | 7746  | 7461  |
| >TSHR-P639/APISFYALSAI | 783   | >TSHR-P639/AAISFYALSAI | 50    | 733   |
| >TSHR-P639/LIFTDFICMAF | 20124 | >TSHR-P639/LIFTDFICMAF | 284   | 19840 |
| >TSHR-P639/LIFTDFICMAF | 6168  | >TSHR-P639/LIFTDFICMAF | 263   | 5905  |
| >TSHR-P639/LIFTDFICMAF | 11516 | >TSHR-P639/LIFTDFICMAF | 106   | 11410 |
| >TSHR-P639/LIFTDFICMAF | 3530  | >TSHR-P639/LIFTDFICMAF | 66    | 3464  |
| >TSHR-P639/LIFTDFICMAF | 25792 | >TSHR-P639/LIFTDFICMAF | 360   | 25432 |
| >TSHR-P639/LIFTDFICMAF | 10921 | >TSHR-P639/LIFTDFICMAF | 303   | 10618 |
| >TSHR-P639/MAPISFYAL   | 211   | >TSHR-P639/MAAISFYAL   | 2314  | 2103  |
| >TSHR-P639/MAPISFYAL   | 361   | >TSHR-P639/MAAISFYAL   | 834   | 473   |
| >TSHR-P639/MAPISFYA    | 704   | >TSHR-P639/MAAISFYA    | 45    | 659   |
| >TSHR-P639/MAPISFYAL   | 286   | >TSHR-P639/MAAISFYAL   | 17    | 269   |
| >TSHR-P639/MAPISFYALS, | 4367  | >TSHR-P639/MAAISFYALS, | 445   | 3922  |
| >TSHR-P639/MAPISFYA    | 70    | >TSHR-P639/MAAISFYA    | 33    | 37    |
| >TSHR-P639/MAPISFYAL   | 51    | >TSHR-P639/MAAISFYAL   | 24    | 27    |
| >TSHR-P639/MAPISFYALS, | 277   | >TSHR-P639/MAAISFYALS, | 120   | 157   |
| >TSHR-P639/MAPISFYA    | 16    | >TSHR-P639/MAAISFYA    | 8     | 8     |
| >TSHR-P639/MAPISFYAL   | 14    | >TSHR-P639/MAAISFYAL   | 8     | 6     |
| >TSHR-P639/MAPISFYALS, | 196   | >TSHR-P639/MAAISFYALS, | 57    | 139   |
| >TSHR-P639/MAPISFYA    | 2532  | >TSHR-P639/MAAISFYA    | 162   | 2370  |
| >TSHR-P639/MAPISFYAL   | 2244  | >TSHR-P639/MAAISFYAL   | 144   | 2100  |
| >TSHR-P639/MAPISFYAL   | 4086  | >TSHR-P639/MAAISFYAL   | 98    | 3988  |
| >TSHR-P639/MAPISFYAL   | 133   | >TSHR-P639/MAAISFYAL   | 47    | 86    |
| >TSHR-P639/MAPISFYAL   | 785   | >TSHR-P639/MAAISFYAL   | 83    | 702   |
| >TSHR-P639/MAPISFYAL   | 1476  | >TSHR-P639/MAAISFYAL   | 45    | 1431  |
| >TSHR-P639/MAPISFYAL   | 118   | >TSHR-P639/MAAISFYAL   | 20    | 98    |
| >TSHR-P639/MAPISFYALS, | 3175  | >TSHR-P639/MAAISFYALS, | 341   | 2834  |
| >TSHR-P639/MAPISFYAL   | 3279  | >TSHR-P639/MAAISFYAL   | 109   | 3170  |
| >TSHR-P639/MAPISFYAL   | 1013  | >TSHR-P639/MAAISFYAL   | 184   | 829   |
| >TSHR-P639/MAPISFYA    | 229   | >TSHR-P639/MAAISFYA    | 58    | 171   |
| >TSHR-P639/MAPISFYAL   | 1621  | >TSHR-P639/MAAISFYAL   | 390   | 1231  |
| >TSHR-P639/MAPISFYALS, | 357   | >TSHR-P639/MAAISFYALS, | 110   | 247   |
| >TSHR-P639/MAPISFYA    | 199   | >TSHR-P639/MAAISFYA    | 9446  | 9247  |
| >TSHR-P639/MAPISFYAL   | 2     | >TSHR-P639/MAAISFYAL   | 30    | 28    |
| >TSHR-P639/MAPISFYALS  | 8     | >TSHR-P639/MAAISFYALS  | 802   | 794   |
| >TSHR-P639/MAPISFYALS, | 158   | >TSHR-P639/MAAISFYALS, | 7417  | 7259  |
| >TSHR-P639/MAPISFYAL   | 18017 | >TSHR-P639/MAAISFYAL   | 375   | 17642 |

|                        |     |                        |     |     |
|------------------------|-----|------------------------|-----|-----|
| >TSHR-P639/CMAPISFY    | 489 | >TSHR-P639/CMAAISFY    | 249 | 240 |
| >TSHR-P639/CMAPISFYA   | 12  | >TSHR-P639/CMAAISFYA   | 10  | 2   |
| >TSHR-P639/CMAPISFYAL  | 134 | >TSHR-P639/CMAAISFYAL  | 149 | 15  |
| >TSHR-P639/CMAPISFYA   | 3   | >TSHR-P639/CMAAISFYA   | 3   | 0   |
| >TSHR-P639/CMAPISFYAL  | 23  | >TSHR-P639/CMAAISFYAL  | 15  | 8   |
| >TSHR-P639/CMAPISFYAL  | 40  | >TSHR-P639/CMAAISFYAL  | 36  | 4   |
| >TSHR-P639/CMAPISFYA   | 9   | >TSHR-P639/CMAAISFYA   | 10  | 1   |
| >TSHR-P639/CMAPISFYAL  | 176 | >TSHR-P639/CMAAISFYAL  | 113 | 63  |
| >TSHR-P639/CMAPISFYAL  | 374 | >TSHR-P639/CMAAISFYAL  | 357 | 17  |
| >TSHR-P639/CMAPISFYA   | 12  | >TSHR-P639/CMAAISFYA   | 21  | 9   |
| >TSHR-P639/CMAPISFYAL  | 106 | >TSHR-P639/CMAAISFYAL  | 140 | 34  |
| >TSHR-P639/CMAPISFYA   | 9   | >TSHR-P639/CMAAISFYA   | 9   | 0   |
| >TSHR-P639/CMAPISFYAL  | 15  | >TSHR-P639/CMAAISFYAL  | 15  | 0   |
| >TSHR-P639/CMAPISFYA   | 14  | >TSHR-P639/CMAAISFYA   | 22  | 8   |
| >TSHR-P639/CMAPISFYAL  | 8   | >TSHR-P639/CMAAISFYAL  | 10  | 2   |
| >TSHR-P639/CMAPISFYA   | 17  | >TSHR-P639/CMAAISFYA   | 27  | 10  |
| >TSHR-P639/CMAPISFYAL  | 80  | >TSHR-P639/CMAAISFYAL  | 98  | 18  |
| >TSHR-P639/CMAPISFYA   | 4   | >TSHR-P639/CMAAISFYA   | 4   | 0   |
| >TSHR-P639/CMAPISFYAL  | 8   | >TSHR-P639/CMAAISFYAL  | 9   | 1   |
| >TSHR-P639/CMAPISFYA   | 8   | >TSHR-P639/CMAAISFYA   | 17  | 9   |
| >TSHR-P639/CMAPISFYAL  | 10  | >TSHR-P639/CMAAISFYAL  | 17  | 7   |
| >TSHR-P639/CMAPISFY    | 127 | >TSHR-P639/CMAAISFY    | 109 | 18  |
| >TSHR-P639/CMAPISFY    | 373 | >TSHR-P639/CMAAISFY    | 404 | 31  |
| >TSHR-P639/CMAPISFYAL  | 279 | >TSHR-P639/CMAAISFYAL  | 763 | 484 |
| >TSHR-P639/CMAPISFY    | 9   | >TSHR-P639/CMAAISFY    | 10  | 1   |
| >TSHR-P639/CMAPISFY    | 8   | >TSHR-P639/CMAAISFY    | 8   | 0   |
| >TSHR-P639/CMAPISFY    | 227 | >TSHR-P639/CMAAISFY    | 193 | 34  |
| >TSHR-P639/CMAPISFYA   | 24  | >TSHR-P639/CMAAISFYA   | 21  | 3   |
| >TSHR-P639/CMAPISFYAL  | 272 | >TSHR-P639/CMAAISFYAL  | 53  | 219 |
| >TSHR-P639/CMAPISFY    | 23  | >TSHR-P639/CMAAISFY    | 15  | 8   |
| >TSHR-P639/CMAPISFY    | 89  | >TSHR-P639/CMAAISFY    | 81  | 8   |
| >TSHR-P639/CMAPISFYAL  | 561 | >TSHR-P639/CMAAISFYAL  | 423 | 138 |
| >TSHR-P639/CMAPISFY    | 381 | >TSHR-P639/CMAAISFY    | 240 | 141 |
| >TSHR-P639/CMAPISFY    | 53  | >TSHR-P639/CMAAISFY    | 79  | 26  |
| >TSHR-P639/CMAPISFYAL  | 122 | >TSHR-P639/CMAAISFYAL  | 127 | 5   |
| >TSHR-P639/CMAPISFYAL  | 146 | >TSHR-P639/CMAAISFYAL  | 61  | 85  |
| >TSHR-P639/CMAPISFY    | 75  | >TSHR-P639/CMAAISFY    | 68  | 7   |
| >TSHR-P639/ICMAPISFYA  | 501 | >TSHR-P639/ICMAAISFYA  | 210 | 291 |
| >TSHR-P639/ICMAPISFYA  | 227 | >TSHR-P639/ICMAAISFYA  | 128 | 99  |
| >TSHR-P639/ICMAPISFYAL | 145 | >TSHR-P639/ICMAAISFYAL | 55  | 90  |
| >TSHR-P639/ICMAPISFY   | 50  | >TSHR-P639/ICMAAISFY   | 84  | 34  |
| >TSHR-P639/ICMAPISFY   | 183 | >TSHR-P639/ICMAAISFY   | 85  | 98  |
| >TSHR-P639/ICMAPISFYAL | 375 | >TSHR-P639/ICMAAISFYAL | 541 | 166 |

|                        |      |                        |     |      |
|------------------------|------|------------------------|-----|------|
| >TSHR-P639/ICMAPISFY   | 117  | >TSHR-P639/ICMAAISFY   | 104 | 13   |
| >TSHR-P639/ICMAPISF    | 27   | >TSHR-P639/ICMAAISF    | 35  | 8    |
| >TSHR-P639/ICMAPISFY   | 163  | >TSHR-P639/ICMAAISFY   | 239 | 76   |
| >TSHR-P639/ICMAPISFYAI | 275  | >TSHR-P639/ICMAAISFYAI | 332 | 57   |
| >TSHR-P639/ICMAPISF    | 735  | >TSHR-P639/ICMAAISF    | 458 | 277  |
| >TSHR-P639/ICMAPISFY   | 9    | >TSHR-P639/ICMAAISFY   | 19  | 10   |
| >TSHR-P639/FICMAPISFY  | 894  | >TSHR-P639/FICMAAISFY  | 449 | 445  |
| >TSHR-P639/FICMAPISFYA | 53   | >TSHR-P639/FICMAAISFYA | 69  | 16   |
| >TSHR-P639/FICMAPISFYA | 40   | >TSHR-P639/FICMAAISFYA | 34  | 6    |
| >TSHR-P639/FICMAPISFYA | 55   | >TSHR-P639/FICMAAISFYA | 73  | 18   |
| >TSHR-P639/FICMAPISFYA | 50   | >TSHR-P639/FICMAAISFYA | 24  | 26   |
| >TSHR-P639/FICMAPISFYA | 20   | >TSHR-P639/FICMAAISFYA | 33  | 13   |
| >TSHR-P639/FICMAPISFYA | 193  | >TSHR-P639/FICMAAISFYA | 237 | 44   |
| >TSHR-P639/FICMAPISFYA | 42   | >TSHR-P639/FICMAAISFYA | 37  | 5    |
| >TSHR-P639/FICMAPISFY  | 98   | >TSHR-P639/FICMAAISFY  | 118 | 20   |
| >TSHR-P639/FICMAPISFY  | 196  | >TSHR-P639/FICMAAISFY  | 213 | 17   |
| >TSHR-P639/FICMAPISFY  | 517  | >TSHR-P639/FICMAAISFY  | 351 | 166  |
| >TSHR-P639/FICMAPISFY  | 44   | >TSHR-P639/FICMAAISFY  | 41  | 3    |
| >TSHR-P639/FICMAPISFY  | 191  | >TSHR-P639/FICMAAISFY  | 252 | 61   |
| >TSHR-P639/FICMAPISFY  | 668  | >TSHR-P639/FICMAAISFY  | 226 | 442  |
| >TSHR-P639/FICMAPISFY  | 223  | >TSHR-P639/FICMAAISFY  | 208 | 15   |
| >TSHR-P639/FICMAPISFYA | 238  | >TSHR-P639/FICMAAISFYA | 219 | 19   |
| >TSHR-P639/FICMAPISFY  | 173  | >TSHR-P639/FICMAAISFY  | 178 | 5    |
| >TSHR-P639/FICMAPISF   | 128  | >TSHR-P639/FICMAAISF   | 76  | 52   |
| >TSHR-P639/FICMAPISFY  | 166  | >TSHR-P639/FICMAAISFY  | 110 | 56   |
| >TSHR-P639/FICMAPISFY  | 406  | >TSHR-P639/FICMAAISFY  | 463 | 57   |
| >TSHR-P639/FICMAPISF   | 50   | >TSHR-P639/FICMAAISF   | 60  | 10   |
| >TSHR-P639/FICMAPISF   | 464  | >TSHR-P639/FICMAAISF   | 151 | 313  |
| >TSHR-P639/FICMAPISFY  | 668  | >TSHR-P639/FICMAAISFY  | 397 | 271  |
| >TSHR-P639/FICMAPISF   | 191  | >TSHR-P639/FICMAAISF   | 129 | 62   |
| >TSHR-P639/FICMAPISFY  | 476  | >TSHR-P639/FICMAAISFY  | 430 | 46   |
| >TSHR-P639/DFICMAPISF  | 269  | >TSHR-P639/DFICMAAISF  | 356 | 87   |
| >TSHR-P639/DFICMAPISF\ | 19   | >TSHR-P639/DFICMAAISF\ | 20  | 1    |
| >TSHR-P639/DFICMAPISF\ | 149  | >TSHR-P639/DFICMAAISF\ | 156 | 7    |
| >TSHR-P639/DFICMAPISF  | 487  | >TSHR-P639/DFICMAAISF  | 508 | 21   |
| >TSHR-P639/DFICMAPISF\ | 18   | >TSHR-P639/DFICMAAISF\ | 20  | 2    |
| >TSHR-P639/DFICMAPISF\ | 430  | >TSHR-P639/DFICMAAISF\ | 247 | 183  |
| >TSHR-P639/TDFICMAPI   | 103  | >TSHR-P639/TDFICMAAI   | 188 | 85   |
| >TSHR-P639/TDFICMAPI   | 127  | >TSHR-P639/TDFICMAAI   | 622 | 495  |
| >TSHR-P639/TDFICMAPISF | 391  | >TSHR-P639/TDFICMAAISI | 435 | 44   |
| >TSHR-P639/TDFICMAPISF | 627  | >TSHR-P639/TDFICMAAISI | 308 | 319  |
| >TSHR-P639/TDFICMAP    | 3339 | >TSHR-P639/TDFICMAA    | 164 | 3175 |
| >TSHR-P639/TDFICMAPI   | 65   | >TSHR-P639/TDFICMAAI   | 109 | 44   |

|                         |       |                         |       |       |
|-------------------------|-------|-------------------------|-------|-------|
| >TSHR-P639/TDFICMAPISF  | 138   | >TSHR-P639/TDFICMAAISI  | 134   | 4     |
| >TSHR-P639/TDFICMAPI    | 76    | >TSHR-P639/TDFICMAAI    | 112   | 36    |
| >TSHR-P639/TDFICMAPI    | 425   | >TSHR-P639/TDFICMAAI    | 549   | 124   |
| >TSHR-P639/TDFICMAPI    | 101   | >TSHR-P639/TDFICMAAI    | 91    | 10    |
| >TSHR-P639/FTDFICMAP    | 4578  | >TSHR-P639/FTDFICMAA    | 327   | 4251  |
| >TSHR-P639/FTDFICMAP    | 19834 | >TSHR-P639/FTDFICMAA    | 345   | 19489 |
| >TSHR-P639/FTDFICMAPI   | 378   | >TSHR-P639/FTDFICMAAI   | 678   | 300   |
| >TSHR-P639/FTDFICMAP    | 6313  | >TSHR-P639/FTDFICMAA    | 155   | 6158  |
| >TSHR-P639/FTDFICMAPI   | 333   | >TSHR-P639/FTDFICMAAI   | 508   | 175   |
| >TSHR-P639/FTDFICMAPI   | 400   | >TSHR-P639/FTDFICMAAI   | 426   | 26    |
| >TSHR-P639/FTDFICMAP    | 6659  | >TSHR-P639/FTDFICMAA    | 79    | 6580  |
| >TSHR-P639/FTDFICMAPI   | 83    | >TSHR-P639/FTDFICMAAI   | 113   | 30    |
| >TSHR-P639/FTDFICMAPI   | 256   | >TSHR-P639/FTDFICMAAI   | 232   | 24    |
| >TSHR-P639/FTDFICMAP    | 5932  | >TSHR-P639/FTDFICMAA    | 34    | 5898  |
| >TSHR-P639/FTDFICMAPI   | 29    | >TSHR-P639/FTDFICMAAI   | 39    | 10    |
| >TSHR-P639/FTDFICMAP    | 9375  | >TSHR-P639/FTDFICMAA    | 173   | 9202  |
| >TSHR-P639/FTDFICMAPI   | 16    | >TSHR-P639/FTDFICMAAI   | 29    | 13    |
| >TSHR-P639/FTDFICMAPI   | 185   | >TSHR-P639/FTDFICMAAI   | 350   | 165   |
| >TSHR-P639/FTDFICMAPI   | 412   | >TSHR-P639/FTDFICMAAI   | 524   | 112   |
| >TSHR-P639/FTDFICMAPI   | 94    | >TSHR-P639/FTDFICMAAI   | 100   | 6     |
| >TSHR-P639/IFTDFICMAPI  | 365   | >TSHR-P639/IFTDFICMAAI  | 480   | 115   |
| >TSHR-P639S PISFYALSA   | 7879  | >TSHR-P639S SISFYALSA   | 450   | 7429  |
| >TSHR-P639S PISFYALSAI  | 3072  | >TSHR-P639S SISFYALSAI  | 103   | 2969  |
| >TSHR-P639S PISFYALSAIL | 1226  | >TSHR-P639S SISFYALSAIL | 30    | 1196  |
| >TSHR-P639S PISFYALSA   | 3618  | >TSHR-P639S SISFYALSA   | 107   | 3511  |
| >TSHR-P639S PISFYALSAI  | 1587  | >TSHR-P639S SISFYALSAI  | 59    | 1528  |
| >TSHR-P639S PISFYALSAIL | 4604  | >TSHR-P639S SISFYALSAIL | 134   | 4470  |
| >TSHR-P639S PISFYALSAI  | 10318 | >TSHR-P639S SISFYALSAI  | 183   | 10135 |
| >TSHR-P639S PISFYALSAI  | 4923  | >TSHR-P639S SISFYALSAI  | 424   | 4499  |
| >TSHR-P639S PISFYALSAI  | 4776  | >TSHR-P639S SISFYALSAI  | 96    | 4680  |
| >TSHR-P639S APISFYAL    | 173   | >TSHR-P639S ASISFYAL    | 4     | 169   |
| >TSHR-P639S APISFYALS   | 4651  | >TSHR-P639S ASISFYALS   | 118   | 4533  |
| >TSHR-P639S APISFYALSAI | 1711  | >TSHR-P639S ASISFYALSAI | 93    | 1618  |
| >TSHR-P639S APISFYAL    | 19    | >TSHR-P639S ASISFYAL    | 12155 | 12136 |
| >TSHR-P639S APISFYALSAI | 52    | >TSHR-P639S ASISFYALSAI | 13419 | 13367 |
| >TSHR-P639S APISFYAL    | 8645  | >TSHR-P639S ASISFYAL    | 158   | 8487  |
| >TSHR-P639S APISFYAL    | 5273  | >TSHR-P639S ASISFYAL    | 251   | 5022  |
| >TSHR-P639S APISFYALSAI | 6799  | >TSHR-P639S ASISFYALSAI | 360   | 6439  |
| >TSHR-P639S APISFYAL    | 3340  | >TSHR-P639S ASISFYAL    | 96    | 3244  |
| >TSHR-P639S APISFYALSAI | 3795  | >TSHR-P639S ASISFYALSAI | 141   | 3654  |
| >TSHR-P639S APISFYALSA  | 16845 | >TSHR-P639S ASISFYALSA  | 403   | 16442 |
| >TSHR-P639S APISFYAL    | 10821 | >TSHR-P639S ASISFYAL    | 244   | 10577 |
| >TSHR-P639S APISFYALSAI | 17748 | >TSHR-P639S ASISFYALSAI | 468   | 17280 |

|                         |       |                         |       |       |
|-------------------------|-------|-------------------------|-------|-------|
| >TSHR-P639ϵ APISFYAL    | 8416  | >TSHR-P639ϵ ASISFYAL    | 431   | 7985  |
| >TSHR-P639ϵ APISFYALSA  | 14737 | >TSHR-P639ϵ ASISFYALSA  | 382   | 14355 |
| >TSHR-P639ϵ APISFYAL    | 26    | >TSHR-P639ϵ ASISFYAL    | 14176 | 14150 |
| >TSHR-P639ϵ APISFYALSAI | 54    | >TSHR-P639ϵ ASISFYALSAI | 18225 | 18171 |
| >TSHR-P639ϵ APISFYAL    | 426   | >TSHR-P639ϵ ASISFYAL    | 38    | 388   |
| >TSHR-P639ϵ APISFYALSA  | 3065  | >TSHR-P639ϵ ASISFYALSA  | 400   | 2665  |
| >TSHR-P639ϵ APISFYALSAI | 681   | >TSHR-P639ϵ ASISFYALSAI | 60    | 621   |
| >TSHR-P639ϵ APISFYAL    | 18924 | >TSHR-P639ϵ ASISFYAL    | 38    | 18886 |
| >TSHR-P639ϵ APISFYALSAI | 20446 | >TSHR-P639ϵ ASISFYALSAI | 65    | 20381 |
| >TSHR-P639ϵ APISFYAL    | 90    | >TSHR-P639ϵ ASISFYAL    | 5719  | 5629  |
| >TSHR-P639ϵ APISFYAL    | 24    | >TSHR-P639ϵ ASISFYAL    | 264   | 240   |
| >TSHR-P639ϵ APISFYALSA  | 983   | >TSHR-P639ϵ ASISFYALSA  | 371   | 612   |
| >TSHR-P639ϵ APISFYAL    | 162   | >TSHR-P639ϵ ASISFYAL    | 16758 | 16596 |
| >TSHR-P639ϵ APISFYALSAI | 259   | >TSHR-P639ϵ ASISFYALSAI | 17610 | 17351 |
| >TSHR-P639ϵ APISFYALSA  | 37    | >TSHR-P639ϵ ASISFYALSA  | 12352 | 12315 |
| >TSHR-P639ϵ APISFYAL    | 3018  | >TSHR-P639ϵ ASISFYAL    | 115   | 2903  |
| >TSHR-P639ϵ APISFYALSAI | 3283  | >TSHR-P639ϵ ASISFYALSAI | 127   | 3156  |
| >TSHR-P639ϵ APISFYAL    | 27    | >TSHR-P639ϵ ASISFYAL    | 3360  | 3333  |
| >TSHR-P639ϵ APISFYALSAI | 148   | >TSHR-P639ϵ ASISFYALSAI | 14975 | 14827 |
| >TSHR-P639ϵ APISFYAL    | 54    | >TSHR-P639ϵ ASISFYAL    | 11298 | 11244 |
| >TSHR-P639ϵ APISFYALSAI | 285   | >TSHR-P639ϵ ASISFYALSAI | 16236 | 15951 |
| >TSHR-P639ϵ APISFYAL    | 6490  | >TSHR-P639ϵ ASISFYAL    | 296   | 6194  |
| >TSHR-P639ϵ APISFYALSAI | 783   | >TSHR-P639ϵ ASISFYALSAI | 16    | 767   |
| >TSHR-P639ϵ MAPISFYAL   | 211   | >TSHR-P639ϵ MASISFYAL   | 5325  | 5114  |
| >TSHR-P639ϵ MAPISFYAL   | 361   | >TSHR-P639ϵ MASISFYAL   | 1507  | 1146  |
| >TSHR-P639ϵ MAPISFYA    | 704   | >TSHR-P639ϵ MASISFYA    | 89    | 615   |
| >TSHR-P639ϵ MAPISFYAL   | 286   | >TSHR-P639ϵ MASISFYAL   | 27    | 259   |
| >TSHR-P639ϵ MAPISFYA    | 70    | >TSHR-P639ϵ MASISFYA    | 74    | 4     |
| >TSHR-P639ϵ MAPISFYAL   | 51    | >TSHR-P639ϵ MASISFYAL   | 54    | 3     |
| >TSHR-P639ϵ MAPISFYALS/ | 277   | >TSHR-P639ϵ MASISFYALS/ | 299   | 22    |
| >TSHR-P639ϵ MAPISFYA    | 16    | >TSHR-P639ϵ MASISFYA    | 16    | 0     |
| >TSHR-P639ϵ MAPISFYAL   | 14    | >TSHR-P639ϵ MASISFYAL   | 16    | 2     |
| >TSHR-P639ϵ MAPISFYALS/ | 196   | >TSHR-P639ϵ MASISFYALS/ | 200   | 4     |
| >TSHR-P639ϵ MAPISFYAL   | 133   | >TSHR-P639ϵ MASISFYAL   | 51    | 82    |
| >TSHR-P639ϵ MAPISFYAL   | 785   | >TSHR-P639ϵ MASISFYAL   | 81    | 704   |
| >TSHR-P639ϵ MAPISFYAL   | 1476  | >TSHR-P639ϵ MASISFYAL   | 48    | 1428  |
| >TSHR-P639ϵ MAPISFYAL   | 118   | >TSHR-P639ϵ MASISFYAL   | 25    | 93    |
| >TSHR-P639ϵ MAPISFYAL   | 3279  | >TSHR-P639ϵ MASISFYAL   | 169   | 3110  |
| >TSHR-P639ϵ MAPISFYAL   | 1013  | >TSHR-P639ϵ MASISFYAL   | 144   | 869   |
| >TSHR-P639ϵ MAPISFYA    | 229   | >TSHR-P639ϵ MASISFYA    | 253   | 24    |
| >TSHR-P639ϵ MAPISFYALS/ | 357   | >TSHR-P639ϵ MASISFYALS/ | 359   | 2     |
| >TSHR-P639ϵ MAPISFYA    | 199   | >TSHR-P639ϵ MASISFYA    | 20406 | 20207 |
| >TSHR-P639ϵ MAPISFYAL   | 2     | >TSHR-P639ϵ MASISFYAL   | 80    | 78    |



|                         |     |                         |      |      |
|-------------------------|-----|-------------------------|------|------|
| >TSHR-P6399 MAPISFYALS  | 8   | >TSHR-P6399 MASISFYALS  | 1668 | 1660 |
| >TSHR-P6399 MAPISFYALS/ | 158 | >TSHR-P6399 MASISFYALS/ | 9870 | 9712 |
| >TSHR-P6399 CMAPISFY    | 489 | >TSHR-P6399 CMASISFY    | 173  | 316  |
| >TSHR-P6399 CMAPISFYA   | 12  | >TSHR-P6399 CMASISFYA   | 10   | 2    |
| >TSHR-P6399 CMAPISFYAL  | 134 | >TSHR-P6399 CMASISFYAL  | 147  | 13   |
| >TSHR-P6399 CMAPISFYA   | 3   | >TSHR-P6399 CMASISFYA   | 3    | 0    |
| >TSHR-P6399 CMAPISFYAL  | 23  | >TSHR-P6399 CMASISFYAL  | 11   | 12   |
| >TSHR-P6399 CMAPISFYAL: | 40  | >TSHR-P6399 CMASISFYAL: | 41   | 1    |
| >TSHR-P6399 CMAPISFYA   | 9   | >TSHR-P6399 CMASISFYA   | 9    | 0    |
| >TSHR-P6399 CMAPISFYAL  | 176 | >TSHR-P6399 CMASISFYAL  | 102  | 74   |
| >TSHR-P6399 CMAPISFYAL: | 374 | >TSHR-P6399 CMASISFYAL: | 360  | 14   |
| >TSHR-P6399 CMAPISFYA   | 12  | >TSHR-P6399 CMASISFYA   | 28   | 16   |
| >TSHR-P6399 CMAPISFYAL  | 106 | >TSHR-P6399 CMASISFYAL  | 119  | 13   |
| >TSHR-P6399 CMAPISFYA   | 9   | >TSHR-P6399 CMASISFYA   | 9    | 0    |
| >TSHR-P6399 CMAPISFYAL  | 15  | >TSHR-P6399 CMASISFYAL  | 16   | 1    |
| >TSHR-P6399 CMAPISFYA   | 14  | >TSHR-P6399 CMASISFYA   | 22   | 8    |
| >TSHR-P6399 CMAPISFYAL  | 8   | >TSHR-P6399 CMASISFYAL  | 11   | 3    |
| >TSHR-P6399 CMAPISFYA   | 17  | >TSHR-P6399 CMASISFYA   | 25   | 8    |
| >TSHR-P6399 CMAPISFYAL  | 80  | >TSHR-P6399 CMASISFYAL  | 104  | 24   |
| >TSHR-P6399 CMAPISFYA   | 4   | >TSHR-P6399 CMASISFYA   | 3    | 1    |
| >TSHR-P6399 CMAPISFYAL  | 8   | >TSHR-P6399 CMASISFYAL  | 7    | 1    |
| >TSHR-P6399 CMAPISFYA   | 8   | >TSHR-P6399 CMASISFYA   | 19   | 11   |
| >TSHR-P6399 CMAPISFYAL  | 10  | >TSHR-P6399 CMASISFYAL  | 19   | 9    |
| >TSHR-P6399 CMAPISFY    | 127 | >TSHR-P6399 CMASISFY    | 112  | 15   |
| >TSHR-P6399 CMAPISFY    | 373 | >TSHR-P6399 CMASISFY    | 404  | 31   |
| >TSHR-P6399 CMAPISFYAL  | 279 | >TSHR-P6399 CMASISFYAL  | 559  | 280  |
| >TSHR-P6399 CMAPISFY    | 767 | >TSHR-P6399 CMASISFY    | 376  | 391  |
| >TSHR-P6399 CMAPISFY    | 9   | >TSHR-P6399 CMASISFY    | 10   | 1    |
| >TSHR-P6399 CMAPISFY    | 8   | >TSHR-P6399 CMASISFY    | 6    | 2    |
| >TSHR-P6399 CMAPISFY    | 227 | >TSHR-P6399 CMASISFY    | 120  | 107  |
| >TSHR-P6399 CMAPISFYA   | 24  | >TSHR-P6399 CMASISFYA   | 37   | 13   |
| >TSHR-P6399 CMAPISFYAL  | 272 | >TSHR-P6399 CMASISFYAL  | 91   | 181  |
| >TSHR-P6399 CMAPISFY    | 23  | >TSHR-P6399 CMASISFY    | 19   | 4    |
| >TSHR-P6399 CMAPISFY    | 89  | >TSHR-P6399 CMASISFY    | 91   | 2    |
| >TSHR-P6399 CMAPISFY    | 381 | >TSHR-P6399 CMASISFY    | 361  | 20   |
| >TSHR-P6399 CMAPISFY    | 53  | >TSHR-P6399 CMASISFY    | 32   | 21   |
| >TSHR-P6399 CMAPISFYAL  | 122 | >TSHR-P6399 CMASISFYAL  | 64   | 58   |
| >TSHR-P6399 CMAPISFYAL  | 146 | >TSHR-P6399 CMASISFYAL  | 88   | 58   |
| >TSHR-P6399 CMAPISFY    | 75  | >TSHR-P6399 CMASISFY    | 80   | 5    |
| >TSHR-P6399 ICMAPISFYA  | 501 | >TSHR-P6399 ICMASISFYA  | 232  | 269  |
| >TSHR-P6399 ICMAPISFYA  | 227 | >TSHR-P6399 ICMASISFYA  | 134  | 93   |
| >TSHR-P6399 ICMAPISFYAL | 145 | >TSHR-P6399 ICMASISFYAL | 68   | 77   |
| >TSHR-P6399 ICMAPISFY   | 50  | >TSHR-P6399 ICMASISFY   | 97   | 47   |

|                        |      |                        |     |      |
|------------------------|------|------------------------|-----|------|
| >TSHR-P639ϵICMAPISFY   | 183  | >TSHR-P639ϵICMASISFY   | 95  | 88   |
| >TSHR-P639ϵICMAPISFYAL | 375  | >TSHR-P639ϵICMASISFYAL | 826 | 451  |
| >TSHR-P639ϵICMAPISFY   | 117  | >TSHR-P639ϵICMASISFY   | 94  | 23   |
| >TSHR-P639ϵICMAPISF    | 27   | >TSHR-P639ϵICMASISF    | 18  | 9    |
| >TSHR-P639ϵICMAPISFY   | 163  | >TSHR-P639ϵICMASISFY   | 66  | 97   |
| >TSHR-P639ϵICMAPISFYAL | 275  | >TSHR-P639ϵICMASISFYAL | 143 | 132  |
| >TSHR-P639ϵICMAPISF    | 735  | >TSHR-P639ϵICMASISF    | 249 | 486  |
| >TSHR-P639ϵICMAPISFY   | 782  | >TSHR-P639ϵICMASISFY   | 221 | 561  |
| >TSHR-P639ϵICMAPISFY   | 9    | >TSHR-P639ϵICMASISFY   | 13  | 4    |
| >TSHR-P639ϵFICMAPISFY  | 894  | >TSHR-P639ϵFICMASISFY  | 389 | 505  |
| >TSHR-P639ϵFICMAPISFYA | 53   | >TSHR-P639ϵFICMASISFYA | 50  | 3    |
| >TSHR-P639ϵFICMAPISFYA | 40   | >TSHR-P639ϵFICMASISFYA | 21  | 19   |
| >TSHR-P639ϵFICMAPISFYA | 55   | >TSHR-P639ϵFICMASISFYA | 56  | 1    |
| >TSHR-P639ϵFICMAPISFYA | 50   | >TSHR-P639ϵFICMASISFYA | 24  | 26   |
| >TSHR-P639ϵFICMAPISFYA | 20   | >TSHR-P639ϵFICMASISFYA | 29  | 9    |
| >TSHR-P639ϵFICMAPISFYA | 193  | >TSHR-P639ϵFICMASISFYA | 178 | 15   |
| >TSHR-P639ϵFICMAPISFYA | 42   | >TSHR-P639ϵFICMASISFYA | 35  | 7    |
| >TSHR-P639ϵFICMAPISFY  | 98   | >TSHR-P639ϵFICMASISFY  | 78  | 20   |
| >TSHR-P639ϵFICMAPISFY  | 196  | >TSHR-P639ϵFICMASISFY  | 145 | 51   |
| >TSHR-P639ϵFICMAPISFY  | 517  | >TSHR-P639ϵFICMASISFY  | 377 | 140  |
| >TSHR-P639ϵFICMAPISFY  | 44   | >TSHR-P639ϵFICMASISFY  | 54  | 10   |
| >TSHR-P639ϵFICMAPISFY  | 191  | >TSHR-P639ϵFICMASISFY  | 207 | 16   |
| >TSHR-P639ϵFICMAPISFY  | 668  | >TSHR-P639ϵFICMASISFY  | 294 | 374  |
| >TSHR-P639ϵFICMAPISFY  | 223  | >TSHR-P639ϵFICMASISFY  | 137 | 86   |
| >TSHR-P639ϵFICMAPISFYA | 238  | >TSHR-P639ϵFICMASISFYA | 188 | 50   |
| >TSHR-P639ϵFICMAPISFY  | 173  | >TSHR-P639ϵFICMASISFY  | 167 | 6    |
| >TSHR-P639ϵFICMAPISF   | 128  | >TSHR-P639ϵFICMASISF   | 38  | 90   |
| >TSHR-P639ϵFICMAPISFY  | 166  | >TSHR-P639ϵFICMASISFY  | 69  | 97   |
| >TSHR-P639ϵFICMAPISFY  | 406  | >TSHR-P639ϵFICMASISFY  | 259 | 147  |
| >TSHR-P639ϵFICMAPISF   | 50   | >TSHR-P639ϵFICMASISF   | 42  | 8    |
| >TSHR-P639ϵFICMAPISFY  | 524  | >TSHR-P639ϵFICMASISFY  | 342 | 182  |
| >TSHR-P639ϵFICMAPISF   | 464  | >TSHR-P639ϵFICMASISF   | 159 | 305  |
| >TSHR-P639ϵFICMAPISFY  | 668  | >TSHR-P639ϵFICMASISFY  | 256 | 412  |
| >TSHR-P639ϵFICMAPISF   | 191  | >TSHR-P639ϵFICMASISF   | 74  | 117  |
| >TSHR-P639ϵFICMAPISFY  | 476  | >TSHR-P639ϵFICMASISFY  | 415 | 61   |
| >TSHR-P639ϵDFICMAPI    | 1873 | >TSHR-P639ϵDFICMASI    | 492 | 1381 |
| >TSHR-P639ϵDFICMAPISF  | 269  | >TSHR-P639ϵDFICMASISF  | 467 | 198  |
| >TSHR-P639ϵDFICMAPISF\ | 19   | >TSHR-P639ϵDFICMASISFY | 21  | 2    |
| >TSHR-P639ϵDFICMAPISF\ | 149  | >TSHR-P639ϵDFICMASISFY | 117 | 32   |
| >TSHR-P639ϵDFICMAPISF  | 487  | >TSHR-P639ϵDFICMASISF  | 643 | 156  |
| >TSHR-P639ϵDFICMAPISF\ | 18   | >TSHR-P639ϵDFICMASISFY | 22  | 4    |
| >TSHR-P639ϵDFICMAPISF\ | 430  | >TSHR-P639ϵDFICMASISFY | 230 | 200  |
| >TSHR-P639ϵTDFICMAPI   | 103  | >TSHR-P639ϵTDFICMASI   | 88  | 15   |

|                        |       |                         |       |       |
|------------------------|-------|-------------------------|-------|-------|
| >TSHR-P639ϵTDFICMAPI   | 127   | >TSHR-P639ϵTDFICMASI    | 658   | 531   |
| >TSHR-P639ϵTDFICMAPISF | 391   | >TSHR-P639ϵTDFICMASISF  | 343   | 48    |
| >TSHR-P639ϵTDFICMAPISF | 627   | >TSHR-P639ϵTDFICMASISF  | 399   | 228   |
| >TSHR-P639ϵTDFICMAPI   | 65    | >TSHR-P639ϵTDFICMASI    | 95    | 30    |
| >TSHR-P639ϵTDFICMAPISF | 138   | >TSHR-P639ϵTDFICMASISF  | 91    | 47    |
| >TSHR-P639ϵTDFICMAPI   | 76    | >TSHR-P639ϵTDFICMASI    | 68    | 8     |
| >TSHR-P639ϵTDFICMAPI   | 425   | >TSHR-P639ϵTDFICMASI    | 587   | 162   |
| >TSHR-P639ϵTDFICMAPI   | 1028  | >TSHR-P639ϵTDFICMASI    | 454   | 574   |
| >TSHR-P639ϵTDFICMAPI   | 101   | >TSHR-P639ϵTDFICMASI    | 114   | 13    |
| >TSHR-P639ϵFTDFICMAPI  | 378   | >TSHR-P639ϵFTDFICMASI   | 549   | 171   |
| >TSHR-P639ϵFTDFICMAPI  | 333   | >TSHR-P639ϵFTDFICMASI   | 356   | 23    |
| >TSHR-P639ϵFTDFICMAPI  | 400   | >TSHR-P639ϵFTDFICMASI   | 316   | 84    |
| >TSHR-P639ϵFTDFICMAPI  | 83    | >TSHR-P639ϵFTDFICMASI   | 108   | 25    |
| >TSHR-P639ϵFTDFICMAPI  | 256   | >TSHR-P639ϵFTDFICMASI   | 286   | 30    |
| >TSHR-P639ϵFTDFICMAPI  | 29    | >TSHR-P639ϵFTDFICMASI   | 39    | 10    |
| >TSHR-P639ϵFTDFICMAPI  | 16    | >TSHR-P639ϵFTDFICMASI   | 32    | 16    |
| >TSHR-P639ϵFTDFICMAPI  | 185   | >TSHR-P639ϵFTDFICMASI   | 242   | 57    |
| >TSHR-P639ϵFTDFICMAPI  | 412   | >TSHR-P639ϵFTDFICMASI   | 396   | 16    |
| >TSHR-P639ϵFTDFICMAPI  | 881   | >TSHR-P639ϵFTDFICMASI   | 216   | 665   |
| >TSHR-P639ϵFTDFICMAPIϵ | 2544  | >TSHR-P639ϵFTDFICMASISϵ | 221   | 2323  |
| >TSHR-P639ϵFTDFICMAPI  | 94    | >TSHR-P639ϵFTDFICMASI   | 68    | 26    |
| >TSHR-P639ϵIFTDFICMAPI | 365   | >TSHR-P639ϵIFTDFICMASI  | 430   | 65    |
| >TSHR-R3121RKSVALNSP   | 495   | >TSHR-R3121TKSVNALNSP   | 5164  | 4669  |
| >TSHR-R3121RKSVALNSP   | 10    | >TSHR-R3121TKSVNALNSP   | 68    | 58    |
| >TSHR-R3121RKSVALNSP   | 287   | >TSHR-R3121TKSVNALNSP   | 44    | 243   |
| >TSHR-R3121RKSVALNSP   | 447   | >TSHR-R3121TKSVNALNSP   | 11455 | 11008 |
| >TSHR-R3121RKSVALNSP   | 215   | >TSHR-R3121TKSVNALNSP   | 7126  | 6911  |
| >TSHR-R3121QRKSVNAL    | 12074 | >TSHR-R3121QTKSVNAL     | 312   | 11762 |
| >TSHR-R3121QRKSVNAL    | 21723 | >TSHR-R3121QTKSVNAL     | 268   | 21455 |
| >TSHR-R3121QRKSVNAL    | 176   | >TSHR-R3121QTKSVNAL     | 978   | 802   |
| >TSHR-R3121QRKSVNAL    | 27361 | >TSHR-R3121QTKSVNAL     | 407   | 26954 |
| >TSHR-R3121QRKSVNAL    | 18063 | >TSHR-R3121QTKSVNAL     | 396   | 17667 |
| >TSHR-R3121QRKSVNALN   | 18328 | >TSHR-R3121QTKSVNALN    | 451   | 17877 |
| >TSHR-R3121RQRKSVNAL   | 487   | >TSHR-R3121RQTKSVNAL    | 803   | 316   |
| >TSHR-R3121RQRKSVNAL   | 648   | >TSHR-R3121RQTKSVNAL    | 70    | 578   |
| >TSHR-R3121RQRKSVNA    | 9     | >TSHR-R3121RQTKSVNA     | 2294  | 2285  |
| >TSHR-R3121RQRKSVNAL   | 14    | >TSHR-R3121RQTKSVNAL    | 4401  | 4387  |
| >TSHR-R3121RQRKSVNALN  | 146   | >TSHR-R3121RQTKSVNALN   | 10320 | 10174 |
| >TSHR-R3121RQRKSVNALN  | 39    | >TSHR-R3121RQTKSVNALN   | 7932  | 7893  |
| >TSHR-R3121RQRKSVNAL   | 271   | >TSHR-R3121RQTKSVNAL    | 9258  | 8987  |
| >TSHR-R3121RQRKSVNA    | 283   | >TSHR-R3121RQTKSVNA     | 4330  | 4047  |
| >TSHR-R3121RQRKSVNAL   | 37    | >TSHR-R3121RQTKSVNAL    | 215   | 178   |
| >TSHR-R3121RQRKSVNA    | 26    | >TSHR-R3121RQTKSVNA     | 173   | 147   |

|                       |      |                       |     |      |
|-----------------------|------|-----------------------|-----|------|
| >TSHR-R3121RQRKSVNAL  | 3    | >TSHR-R3121RQTKSVNAL  | 6   | 3    |
| >TSHR-R3121RQRKSVNAL  | 88   | >TSHR-R3121RQTKSVNAL  | 657 | 569  |
| >TSHR-R3121RQRKSVNAL  | 359  | >TSHR-R3121RQTKSVNAL  | 77  | 282  |
| >TSHR-R3121RQRKSVNAL  | 4507 | >TSHR-R3121RQTKSVNAL  | 340 | 4167 |
| >TSHR-R3121RQRKSVNAL  | 84   | >TSHR-R3121RQTKSVNAL  | 97  | 13   |
| >TSHR-R3121RQRKSVNAL  | 264  | >TSHR-R3121RQTKSVNAL  | 629 | 365  |
| >TSHR-R3121RQRKSVNAL  | 59   | >TSHR-R3121RQTKSVNAL  | 94  | 35   |
| >TSHR-R3121LRQRKSVNAL | 186  | >TSHR-R3121LRQTKSVNAL | 186 | 0    |
| >TSHR-R3121LRQRKSVNAL | 238  | >TSHR-R3121LRQTKSVNAL | 241 | 3    |
| >TSHR-R3121LRQRKSVNAL | 766  | >TSHR-R3121LRQTKSVNAL | 251 | 515  |
| >TSHR-R3121LRQRKSVNAL | 140  | >TSHR-R3121LRQTKSVNAL | 222 | 82   |
| >TSHR-R3121LRQRKSVNAL | 146  | >TSHR-R3121LRQTKSVNAL | 172 | 26   |
| >TSHR-R3121SLRQRKSVNA | 308  | >TSHR-R3121SLRQTKSVNA | 246 | 62   |
| >TSHR-R3121SLRQRKSV   | 77   | >TSHR-R3121SLRQTKSV   | 30  | 47   |
| >TSHR-R3121SLRQRKSVNA | 920  | >TSHR-R3121SLRQTKSVNA | 441 | 479  |
| >TSHR-R3121SLRQRKSVNA | 142  | >TSHR-R3121SLRQTKSVNA | 146 | 4    |
| >TSHR-R3121SLRQRKSV   | 160  | >TSHR-R3121SLRQTKSV   | 28  | 132  |
| >TSHR-R3121SLRQRKSVNA | 478  | >TSHR-R3121SLRQTKSVNA | 232 | 246  |
| >TSHR-R3121SLRQRKSV   | 2071 | >TSHR-R3121SLRQTKSV   | 323 | 1748 |
| >TSHR-R3121SLRQRKSV   | 335  | >TSHR-R3121SLRQTKSV   | 60  | 275  |
| >TSHR-R3121SLRQRKSV   | 4    | >TSHR-R3121SLRQTKSV   | 3   | 1    |
| >TSHR-R3121SLRQRKSVNA | 57   | >TSHR-R3121SLRQTKSVNA | 51  | 6    |
| >TSHR-R3121SLRQRKSVNA | 21   | >TSHR-R3121SLRQTKSVNA | 18  | 3    |
| >TSHR-R3121SLRQRKSV   | 268  | >TSHR-R3121SLRQTKSV   | 244 | 24   |
| >TSHR-R3121SLRQRKSVNA | 114  | >TSHR-R3121SLRQTKSVNA | 91  | 23   |
| >TSHR-R3121SLRQRKSVNA | 472  | >TSHR-R3121SLRQTKSVNA | 331 | 141  |
| >TSHR-R3121SLRQRKSVNA | 93   | >TSHR-R3121SLRQTKSVNA | 107 | 14   |
| >TSHR-R3121SLRQRKSV   | 20   | >TSHR-R3121SLRQTKSV   | 148 | 128  |
| >TSHR-R3121SLRQRKSVNA | 17   | >TSHR-R3121SLRQTKSVNA | 47  | 30   |
| >TSHR-R3121SLRQRKSVNA | 351  | >TSHR-R3121SLRQTKSVNA | 227 | 124  |
| >TSHR-R3121SLRQRKSVNA | 488  | >TSHR-R3121SLRQTKSVNA | 264 | 224  |
| >TSHR-R3121QSLRQRKSVN | 495  | >TSHR-R3121QSLRQTKSVN | 781 | 286  |
| >TSHR-R3121MQSLRQRKS' | 649  | >TSHR-R3121MQSLRQTKS' | 466 | 183  |
| >TSHR-R3121MQSLRQRKS' | 802  | >TSHR-R3121MQSLRQTKS' | 215 | 587  |
| >TSHR-R3121MQSLRQRK   | 444  | >TSHR-R3121MQSLRQTK   | 496 | 52   |
| >TSHR-R3121MQSLRQRK   | 234  | >TSHR-R3121MQSLRQTK   | 196 | 38   |
| >TSHR-R3121MQSLRQRK   | 541  | >TSHR-R3121MQSLRQTK   | 369 | 172  |
| >TSHR-R3121MQSLRQRKS' | 214  | >TSHR-R3121MQSLRQTKS' | 115 | 99   |
| >TSHR-R3121SMQSLRQRK: | 978  | >TSHR-R3121SMQSLRQTK: | 283 | 695  |
| >TSHR-R3121SMQSLRQRK: | 473  | >TSHR-R3121SMQSLRQTK: | 139 | 334  |
| >TSHR-R3121SMQSLRQRK: | 113  | >TSHR-R3121SMQSLRQTK: | 28  | 85   |
| >TSHR-R3121SMQSLRQRK: | 34   | >TSHR-R3121SMQSLRQTK: | 11  | 23   |
| >TSHR-R3121SMQSLRQRK: | 204  | >TSHR-R3121SMQSLRQTK: | 28  | 176  |

|                        |      |                       |       |       |
|------------------------|------|-----------------------|-------|-------|
| >TSHR-R3121SMQSLRQRK:  | 89   | >TSHR-R3121SMQSLRQTK: | 31    | 58    |
| >TSHR-R3121SMQSLRQRK:  | 1805 | >TSHR-R3121SMQSLRQTK: | 278   | 1527  |
| >TSHR-R3121SMQSLRQRK:  | 4    | >TSHR-R3121SMQSLRQTK: | 3     | 1     |
| >TSHR-R3121SMQSLRQRK   | 342  | >TSHR-R3121SMQSLRQTK  | 511   | 169   |
| >TSHR-R3121SMQSLRQRK   | 36   | >TSHR-R3121SMQSLRQTK  | 38    | 2     |
| >TSHR-R3121SMQSLRQRK   | 730  | >TSHR-R3121SMQSLRQTK  | 258   | 472   |
| >TSHR-R3121SMQSLRQR    | 16   | >TSHR-R3121SMQSLRQT   | 15025 | 15009 |
| >TSHR-R3121SMQSLRQRK   | 67   | >TSHR-R3121SMQSLRQTK  | 58    | 9     |
| >TSHR-R3121SMQSLRQRK:  | 562  | >TSHR-R3121SMQSLRQTK: | 375   | 187   |
| >TSHR-R3121SSMQSLRQR:  | 289  | >TSHR-R3121SSMQSLRQTI | 154   | 135   |
| >TSHR-R3121SSMQSLRQR   | 180  | >TSHR-R3121SSMQSLRQT  | 21185 | 21005 |
| >TSHR-R3121SSMQSLRQR:  | 12   | >TSHR-R3121SSMQSLRQTI | 8     | 4     |
| >TSHR-R3121SSMQSLRQR:  | 119  | >TSHR-R3121SSMQSLRQTI | 55    | 64    |
| >TSHR-R3121SSMQSLRQR   | 165  | >TSHR-R3121SSMQSLRQT  | 21768 | 21603 |
| >TSHR-R3121SSMQSLRQR:  | 230  | >TSHR-R3121SSMQSLRQTI | 243   | 13    |
| >TSHR-R3121SSMQSLRQR   | 107  | >TSHR-R3121SSMQSLRQT  | 29334 | 29227 |
| >TSHR-R3121SSMQSLRQR:  | 410  | >TSHR-R3121SSMQSLRQTI | 152   | 258   |
| >TSHR-R3121SSMQSLRQR   | 74   | >TSHR-R3121SSMQSLRQT  | 2157  | 2083  |
| >TSHR-R3121SSMQSLRQR:  | 149  | >TSHR-R3121SSMQSLRQTI | 196   | 47    |
| >TSHR-R3121ESSMQSLRQR: | 147  | >TSHR-R3121ESSMQSLRQT | 26466 | 26319 |
| >TSHR-R3121ESSMQSLRQR: | 61   | >TSHR-R3121ESSMQSLRQT | 32500 | 32439 |
| >TSHR-R3121ESSMQSLRQR: | 55   | >TSHR-R3121ESSMQSLRQT | 36    | 19    |
| >TSHR-R5195RWYAITFAM   | 419  | >TSHR-R5195SWYAITFAM  | 100   | 319   |
| >TSHR-R5195RWYAITFAM:  | 133  | >TSHR-R5195SWYAITFAMI | 40    | 93    |
| >TSHR-R5195RWYAITFA    | 327  | >TSHR-R5195SWYAITFA   | 161   | 166   |
| >TSHR-R5195RWYAITFAM   | 302  | >TSHR-R5195SWYAITFAM  | 160   | 142   |
| >TSHR-R5195RWYAITFAM:  | 377  | >TSHR-R5195SWYAITFAMI | 213   | 164   |
| >TSHR-R5195RWYAITFA    | 218  | >TSHR-R5195SWYAITFA   | 265   | 47    |
| >TSHR-R5195RWYAITFAM   | 250  | >TSHR-R5195SWYAITFAM  | 264   | 14    |
| >TSHR-R5195RWYAITFAM:  | 419  | >TSHR-R5195SWYAITFAMI | 907   | 488   |
| >TSHR-R5195RWYAITFAM   | 302  | >TSHR-R5195SWYAITFAM  | 1638  | 1336  |
| >TSHR-R5195RWYAITFAM:  | 121  | >TSHR-R5195SWYAITFAMI | 431   | 310   |
| >TSHR-R5195RWYAITFAM   | 268  | >TSHR-R5195SWYAITFAMI | 949   | 681   |
| >TSHR-R5195RWYAITFAM   | 57   | >TSHR-R5195SWYAITFAM  | 220   | 163   |
| >TSHR-R5195RWYAITFAM:  | 17   | >TSHR-R5195SWYAITFAMI | 50    | 33    |
| >TSHR-R5195RWYAITFAM   | 1014 | >TSHR-R5195SWYAITFAM  | 315   | 699   |
| >TSHR-R5195RWYAITFA    | 406  | >TSHR-R5195SWYAITFA   | 3560  | 3154  |
| >TSHR-R5195RWYAITFAM:  | 5    | >TSHR-R5195SWYAITFAMI | 9     | 4     |
| >TSHR-R5195RWYAITFAM   | 87   | >TSHR-R5195SWYAITFAM  | 961   | 874   |
| >TSHR-R5195RWYAITFAM:  | 285  | >TSHR-R5195SWYAITFAMI | 2558  | 2273  |
| >TSHR-R5195RWYAITFAM   | 152  | >TSHR-R5195SWYAITFAMI | 57    | 95    |
| >TSHR-R5195RWYAITFAM:  | 717  | >TSHR-R5195SWYAITFAMI | 211   | 506   |
| >TSHR-R5195RWYAITFAM   | 153  | >TSHR-R5195SWYAITFAMI | 3003  | 2850  |

|                         |       |                         |       |       |
|-------------------------|-------|-------------------------|-------|-------|
| >TSHR-R519ϵ RWYAITFAM   | 488   | >TSHR-R519ϵ SWYAITFAM   | 279   | 209   |
| >TSHR-R519ϵ RWYAITFAM   | 145   | >TSHR-R519ϵ SWYAITFAM   | 3154  | 3009  |
| >TSHR-R519ϵ RWYAITFAM   | 193   | >TSHR-R519ϵ SWYAITFAMI  | 3133  | 2940  |
| >TSHR-R519ϵ RWYAITFAM   | 240   | >TSHR-R519ϵ SWYAITFAMI  | 3545  | 3305  |
| >TSHR-R519ϵ RWYAITFA    | 94    | >TSHR-R519ϵ SWYAITFA    | 367   | 273   |
| >TSHR-R519ϵ RWYAITFAM   | 110   | >TSHR-R519ϵ SWYAITFAM   | 385   | 275   |
| >TSHR-R519ϵ RWYAITFAM   | 8     | >TSHR-R519ϵ SWYAITFAMI  | 10    | 2     |
| >TSHR-R519ϵ RWYAITFAM   | 174   | >TSHR-R519ϵ SWYAITFAMI  | 667   | 493   |
| >TSHR-R519ϵ RWYAITFA    | 21    | >TSHR-R519ϵ SWYAITFA    | 22    | 1     |
| >TSHR-R519ϵ RWYAITFAM   | 29    | >TSHR-R519ϵ SWYAITFAM   | 28    | 1     |
| >TSHR-R519ϵ RWYAITFAM   | 59    | >TSHR-R519ϵ SWYAITFAMI  | 60    | 1     |
| >TSHR-R519ϵ ERWYAITF    | 7504  | >TSHR-R519ϵ ESWYAITF    | 127   | 7377  |
| >TSHR-R519ϵ ERWYAITFAN  | 3097  | >TSHR-R519ϵ ESWYAITFAN  | 50    | 3047  |
| >TSHR-R519ϵ ERWYAITFAN  | 7838  | >TSHR-R519ϵ ESWYAITFAN  | 40    | 7798  |
| >TSHR-R519ϵ ERWYAITF    | 1933  | >TSHR-R519ϵ ESWYAITF    | 53    | 1880  |
| >TSHR-R519ϵ ERWYAITFAN  | 6602  | >TSHR-R519ϵ ESWYAITFAN  | 415   | 6187  |
| >TSHR-R519ϵ ERWYAITFAN  | 336   | >TSHR-R519ϵ ESWYAITFAN  | 17    | 319   |
| >TSHR-R519ϵ ERWYAITFAN  | 185   | >TSHR-R519ϵ ESWYAITFAN  | 4     | 181   |
| >TSHR-R519ϵ ERWYAITFA   | 1678  | >TSHR-R519ϵ ESWYAITFA   | 15    | 1663  |
| >TSHR-R519ϵ ERWYAITFAN  | 8825  | >TSHR-R519ϵ ESWYAITFAN  | 179   | 8646  |
| >TSHR-R519ϵ ERWYAITFA   | 9495  | >TSHR-R519ϵ ESWYAITFA   | 180   | 9315  |
| >TSHR-R519ϵ ERWYAITFAN  | 2992  | >TSHR-R519ϵ ESWYAITFAN  | 32    | 2960  |
| >TSHR-R519ϵ ERWYAITF    | 23    | >TSHR-R519ϵ ESWYAITF    | 33    | 10    |
| >TSHR-R519ϵ ERWYAITFAN  | 204   | >TSHR-R519ϵ ESWYAITFAN  | 307   | 103   |
| >TSHR-R519ϵ ERWYAITF    | 20367 | >TSHR-R519ϵ ESWYAITF    | 7     | 20360 |
| >TSHR-R519ϵ ERWYAITFAN  | 26035 | >TSHR-R519ϵ ESWYAITFAN  | 49    | 25986 |
| >TSHR-R519ϵ ERWYAITF    | 148   | >TSHR-R519ϵ ESWYAITF    | 16710 | 16562 |
| >TSHR-R519ϵ ERWYAITFA   | 440   | >TSHR-R519ϵ ESWYAITFA   | 23605 | 23165 |
| >TSHR-R519ϵ ERWYAITFAN  | 45    | >TSHR-R519ϵ ESWYAITFAN  | 20495 | 20450 |
| >TSHR-R519ϵ ERWYAITFAN  | 85    | >TSHR-R519ϵ ESWYAITFAN  | 18206 | 18121 |
| >TSHR-R519ϵ ERWYAITF    | 1006  | >TSHR-R519ϵ ESWYAITF    | 37    | 969   |
| >TSHR-R519ϵ ERWYAITFAN  | 331   | >TSHR-R519ϵ ESWYAITFAN  | 6743  | 6412  |
| >TSHR-R519ϵ ERWYAITFA   | 269   | >TSHR-R519ϵ ESWYAITFA   | 14703 | 14434 |
| >TSHR-R519ϵ ERWYAITFAN  | 386   | >TSHR-R519ϵ ESWYAITFAN  | 17294 | 16908 |
| >TSHR-R519ϵ ERWYAITFAN  | 270   | >TSHR-R519ϵ ESWYAITFAN  | 24470 | 24200 |
| >TSHR-R519ϵ ERWYAITFAN  | 173   | >TSHR-R519ϵ ESWYAITFAN  | 237   | 64    |
| >TSHR-R519ϵ VYTLTVITLER | 303   | >TSHR-R519ϵ VYTLTVITLES | 16107 | 15804 |
| >TSHR-R519ϵ VYTLTVITLER | 322   | >TSHR-R519ϵ VYTLTVITLES | 31008 | 30686 |
| >TSHR-R519ϵ VYTLTVITLER | 53    | >TSHR-R519ϵ VYTLTVITLES | 24879 | 24826 |
| >TSHR-R519ϵ LERWYAITFA  | 377   | >TSHR-R519ϵ LESWYAITFAI | 196   | 181   |
| >TSHR-R519ϵ LERWYAITF   | 39    | >TSHR-R519ϵ LESWYAITF   | 93    | 54    |
| >TSHR-R519ϵ LERWYAITF   | 4     | >TSHR-R519ϵ LESWYAITF   | 5     | 1     |
| >TSHR-R519ϵ LERWYAITFA  | 9     | >TSHR-R519ϵ LESWYAITFAI | 10    | 1     |

|                         |      |                         |     |      |
|-------------------------|------|-------------------------|-----|------|
| >TSHR-R519€ LERWYAITF   | 968  | >TSHR-R519€ LESWYAITF   | 145 | 823  |
| >TSHR-R519€ LERWYAITFA  | 449  | >TSHR-R519€ LESWYAITFAI | 80  | 369  |
| >TSHR-R519€ LERWYAITFA  | 3985 | >TSHR-R519€ LESWYAITFAI | 262 | 3723 |
| >TSHR-R519€ LERWYAITF   | 60   | >TSHR-R519€ LESWYAITF   | 9   | 51   |
| >TSHR-R519€ LERWYAITFA  | 48   | >TSHR-R519€ LESWYAITFAI | 9   | 39   |
| >TSHR-R519€ LERWYAITF   | 245  | >TSHR-R519€ LESWYAITF   | 500 | 255  |
| >TSHR-R519€ LERWYAITFA  | 90   | >TSHR-R519€ LESWYAITFAI | 156 | 66   |
| >TSHR-R519€ LERWYAITF   | 82   | >TSHR-R519€ LESWYAITF   | 51  | 31   |
| >TSHR-R519€ LERWYAITFA  | 546  | >TSHR-R519€ LESWYAITFAI | 265 | 281  |
| >TSHR-R519€ LERWYAIT    | 348  | >TSHR-R519€ LESWYAIT    | 193 | 155  |
| >TSHR-R519€ LERWYAITFA  | 558  | >TSHR-R519€ LESWYAITFAI | 275 | 283  |
| >TSHR-R519€ LERWYAITF   | 152  | >TSHR-R519€ LESWYAITF   | 358 | 206  |
| >TSHR-R519€ LERWYAITFA  | 510  | >TSHR-R519€ LESWYAITFA  | 462 | 48   |
| >TSHR-R519€ LERWYAITFA  | 42   | >TSHR-R519€ LESWYAITFAI | 58  | 16   |
| >TSHR-R519€ TLERWYAI    | 838  | >TSHR-R519€ TLESWYAI    | 228 | 610  |
| >TSHR-R519€ TLERWYAITF, | 1443 | >TSHR-R519€ TLESWYAITF/ | 433 | 1010 |
| >TSHR-R519€ TLERWYAI    | 429  | >TSHR-R519€ TLESWYAI    | 116 | 313  |
| >TSHR-R519€ TLERWYAITF, | 248  | >TSHR-R519€ TLESWYAITF/ | 74  | 174  |
| >TSHR-R519€ TLERWYAITF, | 228  | >TSHR-R519€ TLESWYAITF/ | 86  | 142  |
| >TSHR-R519€ TLERWYAI    | 91   | >TSHR-R519€ TLESWYAI    | 53  | 38   |
| >TSHR-R519€ TLERWYAITF, | 455  | >TSHR-R519€ TLESWYAITF/ | 292 | 163  |
| >TSHR-R519€ TLERWYAI    | 99   | >TSHR-R519€ TLESWYAI    | 67  | 32   |
| >TSHR-R519€ TLERWYAI    | 70   | >TSHR-R519€ TLESWYAI    | 59  | 11   |
| >TSHR-R519€ TLERWYAIT   | 307  | >TSHR-R519€ TLESWYAIT   | 265 | 42   |
| >TSHR-R519€ TLERWYAITF, | 28   | >TSHR-R519€ TLESWYAITF/ | 24  | 4    |
| >TSHR-R519€ ITLERWYAI   | 110  | >TSHR-R519€ ITLESWYAI   | 542 | 432  |
| >TSHR-R519€ ITLERWYAITF | 115  | >TSHR-R519€ ITLESWYAITF | 389 | 274  |
| >TSHR-R519€ ITLERWYA    | 161  | >TSHR-R519€ ITLESWYA    | 65  | 96   |
| >TSHR-R519€ ITLERWYAI   | 61   | >TSHR-R519€ ITLESWYAI   | 47  | 14   |
| >TSHR-R519€ ITLERWYA    | 15   | >TSHR-R519€ ITLESWYA    | 9   | 6    |
| >TSHR-R519€ ITLERWYAI   | 9    | >TSHR-R519€ ITLESWYAI   | 8   | 1    |
| >TSHR-R519€ ITLERWYAITF | 122  | >TSHR-R519€ ITLESWYAITF | 115 | 7    |
| >TSHR-R519€ ITLERWYA    | 37   | >TSHR-R519€ ITLESWYA    | 14  | 23   |
| >TSHR-R519€ ITLERWYAI   | 18   | >TSHR-R519€ ITLESWYAI   | 12  | 6    |
| >TSHR-R519€ ITLERWYA    | 1223 | >TSHR-R519€ ITLESWYA    | 241 | 982  |
| >TSHR-R519€ ITLERWYAI   | 270  | >TSHR-R519€ ITLESWYAI   | 105 | 165  |
| >TSHR-R519€ ITLERWYA    | 368  | >TSHR-R519€ ITLESWYA    | 99  | 269  |
| >TSHR-R519€ ITLERWYAI   | 1036 | >TSHR-R519€ ITLESWYAI   | 429 | 607  |
| >TSHR-R519€ ITLERWYA    | 1688 | >TSHR-R519€ ITLESWYA    | 274 | 1414 |
| >TSHR-R519€ ITLERWYAITF | 827  | >TSHR-R519€ ITLESWYAITF | 396 | 431  |
| >TSHR-R519€ ITLERWYAITF | 387  | >TSHR-R519€ ITLESWYAITF | 526 | 139  |
| >TSHR-R519€ ITLERWYAITF | 451  | >TSHR-R519€ ITLESWYAITF | 434 | 17   |
| >TSHR-R519€ ITLERWYAI   | 458  | >TSHR-R519€ ITLESWYAI   | 342 | 116  |

|                        |      |                        |     |      |
|------------------------|------|------------------------|-----|------|
| >TSHR-R519ϵITLERWYAI   | 112  | >TSHR-R519ϵITLESWYAI   | 157 | 45   |
| >TSHR-R519ϵITLERWYAITF | 26   | >TSHR-R519ϵITLESWYAITF | 35  | 9    |
| >TSHR-R519ϵITLERWYA    | 921  | >TSHR-R519ϵITLESWYA    | 448 | 473  |
| >TSHR-R519ϵITLERWYAI   | 323  | >TSHR-R519ϵITLESWYAI   | 94  | 229  |
| >TSHR-R519ϵITLERWYA    | 319  | >TSHR-R519ϵITLESWYA    | 71  | 248  |
| >TSHR-R519ϵITLERWYAI   | 185  | >TSHR-R519ϵITLESWYAI   | 46  | 139  |
| >TSHR-R519ϵITLERWYAI   | 1516 | >TSHR-R519ϵITLESWYAI   | 284 | 1232 |
| >TSHR-R519ϵITLERWYAITF | 42   | >TSHR-R519ϵITLESWYAITF | 18  | 24   |
| >TSHR-R519ϵITLERWYAI   | 30   | >TSHR-R519ϵITLESWYAI   | 10  | 20   |
| >TSHR-R519ϵITLERWYAITF | 3    | >TSHR-R519ϵITLESWYAITF | 2   | 1    |
| >TSHR-R519ϵITLERWYAITF | 363  | >TSHR-R519ϵITLESWYAITF | 115 | 248  |
| >TSHR-R519ϵITLERWYAITF | 111  | >TSHR-R519ϵITLESWYAITF | 78  | 33   |
| >TSHR-R519ϵITLERWYAITF | 130  | >TSHR-R519ϵITLESWYAITF | 37  | 93   |
| >TSHR-R519ϵITLERWYAITF | 1033 | >TSHR-R519ϵITLESWYAITF | 342 | 691  |
| >TSHR-R519ϵITLERWYAITF | 33   | >TSHR-R519ϵITLESWYAITF | 23  | 10   |
| >TSHR-R519ϵITLERWYAI   | 423  | >TSHR-R519ϵITLESWYAI   | 381 | 42   |
| >TSHR-R519ϵITLERWYAI   | 56   | >TSHR-R519ϵITLESWYAI   | 50  | 6    |
| >TSHR-R519ϵVITLERWYA   | 2598 | >TSHR-R519ϵVITLESWYA   | 350 | 2248 |
| >TSHR-R519ϵVITLERWYA   | 487  | >TSHR-R519ϵVITLESWYA   | 107 | 380  |
| >TSHR-R519ϵVITLERWYA   | 3450 | >TSHR-R519ϵVITLESWYA   | 425 | 3025 |
| >TSHR-R519ϵVITLERWYAI  | 1237 | >TSHR-R519ϵVITLESWYAI  | 409 | 828  |
| >TSHR-R519ϵVITLERWYA   | 3223 | >TSHR-R519ϵVITLESWYA   | 283 | 2940 |
| >TSHR-R519ϵVITLERWYA   | 150  | >TSHR-R519ϵVITLESWYA   | 103 | 47   |
| >TSHR-R519ϵVITLERWY    | 410  | >TSHR-R519ϵVITLESWY    | 192 | 218  |
| >TSHR-R519ϵTVITLERWYA  | 536  | >TSHR-R519ϵTVITLESWYA  | 274 | 262  |
| >TSHR-R519ϵTVITLERWYA  | 420  | >TSHR-R519ϵTVITLESWYA  | 258 | 162  |
| >TSHR-R519ϵTVITLERWYA  | 560  | >TSHR-R519ϵTVITLESWYA  | 283 | 277  |
| >TSHR-R519ϵTVITLERWYA  | 69   | >TSHR-R519ϵTVITLESWYA  | 41  | 28   |
| >TSHR-R519ϵTVITLERWYA  | 225  | >TSHR-R519ϵTVITLESWYAI | 137 | 88   |
| >TSHR-R519ϵTVITLERWY   | 709  | >TSHR-R519ϵTVITLESWY   | 154 | 555  |
| >TSHR-R519ϵTVITLERW    | 200  | >TSHR-R519ϵTVITLESW    | 181 | 19   |
| >TSHR-R519ϵTVITLERWY   | 5    | >TSHR-R519ϵTVITLESWY   | 3   | 2    |
| >TSHR-R519ϵTVITLERWYA  | 355  | >TSHR-R519ϵTVITLESWYAI | 140 | 215  |
| >TSHR-R519ϵTVITLERWY   | 154  | >TSHR-R519ϵTVITLESWY   | 112 | 42   |
| >TSHR-R519ϵTVITLERWY   | 665  | >TSHR-R519ϵTVITLESWY   | 255 | 410  |
| >TSHR-R519ϵTVITLERWY   | 864  | >TSHR-R519ϵTVITLESWY   | 170 | 694  |
| >TSHR-R519ϵTVITLERWY   | 669  | >TSHR-R519ϵTVITLESWY   | 65  | 604  |
| >TSHR-R519ϵTVITLERWYA  | 62   | >TSHR-R519ϵTVITLESWYA  | 103 | 41   |
| >TSHR-R519ϵTVITLERWYA  | 27   | >TSHR-R519ϵTVITLESWYAI | 12  | 15   |
| >TSHR-R519ϵTVITLERW    | 840  | >TSHR-R519ϵTVITLESW    | 430 | 410  |
| >TSHR-R519ϵTVITLERW    | 261  | >TSHR-R519ϵTVITLESW    | 332 | 71   |
| >TSHR-R519ϵTVITLERW    | 59   | >TSHR-R519ϵTVITLESW    | 37  | 22   |
| >TSHR-R519ϵTVITLERWY   | 636  | >TSHR-R519ϵTVITLESWY   | 17  | 619  |



|                          |      |                          |       |       |
|--------------------------|------|--------------------------|-------|-------|
| >TSHR-R519\$ LTVITLERWY  | 219  | >TSHR-R519\$ LTVITLESWY  | 130   | 89    |
| >TSHR-R519\$ LTVITLERWY/ | 1166 | >TSHR-R519\$ LTVITLESWY/ | 388   | 778   |
| >TSHR-R519\$ LTVITLERWY/ | 157  | >TSHR-R519\$ LTVITLESWY/ | 50    | 107   |
| >TSHR-R519\$ LTVITLERWY/ | 1193 | >TSHR-R519\$ LTVITLESWY/ | 411   | 782   |
| >TSHR-R519\$ LTVITLERWY  | 22   | >TSHR-R519\$ LTVITLESWY  | 10    | 12    |
| >TSHR-R519\$ LTVITLERWY  | 348  | >TSHR-R519\$ LTVITLESWY  | 359   | 11    |
| >TSHR-R519\$ LTVITLERWY  | 299  | >TSHR-R519\$ LTVITLESWY  | 88    | 211   |
| >TSHR-R519\$ LTVITLER    | 120  | >TSHR-R519\$ LTVITLES    | 16712 | 16592 |
| >TSHR-R519\$ LTVITLER    | 19   | >TSHR-R519\$ LTVITLES    | 13938 | 13919 |
| >TSHR-R519\$ LTVITLERWY  | 2492 | >TSHR-R519\$ LTVITLESWY  | 341   | 2151  |
| >TSHR-R519\$ LTVITLERWY/ | 268  | >TSHR-R519\$ LTVITLESWY/ | 269   | 1     |
| >TSHR-R519\$ LTVITLERW   | 4    | >TSHR-R519\$ LTVITLESW   | 4     | 0     |
| >TSHR-R519\$ LTVITLERWY  | 5    | >TSHR-R519\$ LTVITLESWY  | 4     | 1     |
| >TSHR-R519\$ LTVITLERW   | 447  | >TSHR-R519\$ LTVITLESW   | 279   | 168   |
| >TSHR-R519\$ LTVITLERW   | 39   | >TSHR-R519\$ LTVITLESW   | 40    | 1     |
| >TSHR-R519\$ LTVITLERWY  | 466  | >TSHR-R519\$ LTVITLESWY  | 876   | 410   |
| >TSHR-R519\$ LTVITLERW   | 13   | >TSHR-R519\$ LTVITLESW   | 12    | 1     |
| >TSHR-R519\$ LTVITLERW   | 170  | >TSHR-R519\$ LTVITLESW   | 231   | 61    |
| >TSHR-R519\$ LTVITLERWY  | 29   | >TSHR-R519\$ LTVITLESWY  | 20    | 9     |
| >TSHR-R519\$ LTVITLERW   | 422  | >TSHR-R519\$ LTVITLESW   | 257   | 165   |
| >TSHR-R519\$ TLTVITLERW\ | 334  | >TSHR-R519\$ TLTVITLESW\ | 204   | 130   |
| >TSHR-R519\$ TLTVITLERW\ | 459  | >TSHR-R519\$ TLTVITLESW\ | 159   | 300   |
| >TSHR-R519\$ TLTVITLER   | 224  | >TSHR-R519\$ TLTVITLES   | 15941 | 15717 |
| >TSHR-R519\$ TLTVITLER   | 23   | >TSHR-R519\$ TLTVITLES   | 17549 | 17526 |
| >TSHR-R519\$ TLTVITLERW\ | 235  | >TSHR-R519\$ TLTVITLESW\ | 114   | 121   |
| >TSHR-R519\$ TLTVITLERW  | 154  | >TSHR-R519\$ TLTVITLESW  | 127   | 27    |
| >TSHR-R519\$ TLTVITLERW\ | 1807 | >TSHR-R519\$ TLTVITLESW\ | 167   | 1640  |
| >TSHR-R519\$ TLTVITLERW\ | 1330 | >TSHR-R519\$ TLTVITLESW\ | 445   | 885   |
| >TSHR-R519\$ TLTVITLER   | 215  | >TSHR-R519\$ TLTVITLES   | 33504 | 33289 |
| >TSHR-R519\$ YTLTVITLER  | 323  | >TSHR-R519\$ YTLTVITLES  | 11131 | 10808 |
| >TSHR-R519\$ YTLTVITLER  | 74   | >TSHR-R519\$ YTLTVITLES  | 26456 | 26382 |
| >TSHR-R519\$ YTLTVITLERM | 2675 | >TSHR-R519\$ YTLTVITLESM | 276   | 2399  |
| >TSHR-R519\$ YTLTVITLER  | 67   | >TSHR-R519\$ YTLTVITLES  | 16196 | 16129 |
| >TSHR-R519\$ YTLTVITLERM | 1273 | >TSHR-R519\$ YTLTVITLESM | 232   | 1041  |
| >TSHR-R519\$ YTLTVITLER  | 124  | >TSHR-R519\$ YTLTVITLES  | 13479 | 13355 |
| >TSHR-R519\$ YTLTVITLER  | 4    | >TSHR-R519\$ YTLTVITLES  | 12628 | 12624 |
| >TSHR-R519\$ YTLTVITLERM | 5    | >TSHR-R519\$ YTLTVITLESM | 6     | 1     |
| >TSHR-R519\$ YTLTVITLERM | 47   | >TSHR-R519\$ YTLTVITLESM | 47    | 0     |
| >TSHR-R519\$ YTLTVITLERM | 10   | >TSHR-R519\$ YTLTVITLESM | 10    | 0     |
| >TSHR-R519\$ YTLTVITLERM | 19   | >TSHR-R519\$ YTLTVITLESM | 23    | 4     |
| >TSHR-R519\$ YTLTVITLERM | 155  | >TSHR-R519\$ YTLTVITLESM | 106   | 49    |
| >TSHR-R519\$ YTLTVITLER  | 203  | >TSHR-R519\$ YTLTVITLES  | 31537 | 31334 |
| >TSHR-S281I· PSHCCAFK    | 76   | >TSHR-S281I· PIHCCAFK    | 183   | 107   |

|                         |       |                         |      |       |
|-------------------------|-------|-------------------------|------|-------|
| >TSHR-S281I·PSHCCAFKNC  | 330   | >TSHR-S281I·PIHCCAFKNC  | 763  | 433   |
| >TSHR-S281I·HLTRADLSYP  | 9483  | >TSHR-S281I·HLTRADLSYP  | 259  | 9224  |
| >TSHR-S281I·HLTRADLSYP  | 1880  | >TSHR-S281I·HLTRADLSYP  | 62   | 1818  |
| >TSHR-S281I·HLTRADLSYP  | 9850  | >TSHR-S281I·HLTRADLSYP  | 323  | 9527  |
| >TSHR-S281I·HLTRADLSYP  | 8101  | >TSHR-S281I·HLTRADLSYP  | 356  | 7745  |
| >TSHR-S281I·HLTRADLSYP  | 8671  | >TSHR-S281I·HLTRADLSYP  | 202  | 8469  |
| >TSHR-S281I·HLTRADLSYP  | 3624  | >TSHR-S281I·HLTRADLSYP  | 25   | 3599  |
| >TSHR-S281I·HLTRADLSYP  | 8547  | >TSHR-S281I·HLTRADLSYP  | 87   | 8460  |
| >TSHR-S281I·HLTRADLSYP  | 4591  | >TSHR-S281I·HLTRADLSYP  | 36   | 4555  |
| >TSHR-S281I·HLTRADLSYP  | 13716 | >TSHR-S281I·HLTRADLSYP  | 157  | 13559 |
| >TSHR-S281I·HLTRADLSYP  | 3287  | >TSHR-S281I·HLTRADLSYP  | 173  | 3114  |
| >TSHR-S281I·YPSHCCAF    | 1945  | >TSHR-S281I·YPIHCCAF    | 230  | 1715  |
| >TSHR-S281I·YPSHCCAFK   | 210   | >TSHR-S281I·YPIHCCAFK   | 113  | 97    |
| >TSHR-S281I·YPSHCCAF    | 25    | >TSHR-S281I·YPIHCCAF    | 25   | 0     |
| >TSHR-S281I·YPSHCCAF    | 42    | >TSHR-S281I·YPIHCCAF    | 34   | 8     |
| >TSHR-S281I·YPSHCCAF    | 7     | >TSHR-S281I·YPIHCCAF    | 7    | 0     |
| >TSHR-S281I·YPSHCCAF    | 91    | >TSHR-S281I·YPIHCCAF    | 72   | 19    |
| >TSHR-S281I·YPSHCCAF    | 2374  | >TSHR-S281I·YPIHCCAF    | 253  | 2121  |
| >TSHR-S281I·YPSHCCAFK   | 2049  | >TSHR-S281I·YPIHCCAFK   | 433  | 1616  |
| >TSHR-S281I·YPSHCCAFKN  | 742   | >TSHR-S281I·YPIHCCAFKN  | 230  | 512   |
| >TSHR-S281I·YPSHCCAFKN  | 1559  | >TSHR-S281I·YPIHCCAFKN  | 219  | 1340  |
| >TSHR-S281I·YPSHCCAF    | 30    | >TSHR-S281I·YPIHCCAF    | 24   | 6     |
| >TSHR-S281I·YPSHCCAF    | 33    | >TSHR-S281I·YPIHCCAF    | 17   | 16    |
| >TSHR-S281I·SYPSHCCAF   | 142   | >TSHR-S281I·SYPIHCCAF   | 180  | 38    |
| >TSHR-S281I·SYPSHCCAF   | 5     | >TSHR-S281I·SYPIHCCAF   | 5    | 0     |
| >TSHR-S281I·SYPSHCCAFK  | 243   | >TSHR-S281I·SYPIHCCAFK  | 194  | 49    |
| >TSHR-S281I·SYPSHCCAFK  | 251   | >TSHR-S281I·SYPIHCCAFK  | 393  | 142   |
| >TSHR-S281I·SYPSHCCAFK  | 125   | >TSHR-S281I·SYPIHCCAFK  | 134  | 9     |
| >TSHR-S281I·SYPSHCCAF   | 324   | >TSHR-S281I·SYPIHCCAF   | 668  | 344   |
| >TSHR-S281I·LSYPSHCCAFI | 37    | >TSHR-S281I·LSYPIHCCAFK | 41   | 4     |
| >TSHR-S281I·LSYPSHCCAFI | 11    | >TSHR-S281I·LSYPIHCCAFK | 11   | 0     |
| >TSHR-S281I·LSYPSHCCA   | 448   | >TSHR-S281I·LSYPIHCCA   | 1182 | 734   |
| >TSHR-S281I·LSYPSHCCAFI | 21    | >TSHR-S281I·LSYPIHCCAFK | 28   | 7     |
| >TSHR-S281I·LSYPSHCCAFI | 38    | >TSHR-S281I·LSYPIHCCAFK | 26   | 12    |
| >TSHR-S281I·LSYPSHCCAF  | 1386  | >TSHR-S281I·LSYPIHCCAF  | 328  | 1058  |
| >TSHR-S281I·LSYPSHCCAFI | 763   | >TSHR-S281I·LSYPIHCCAFK | 299  | 464   |
| >TSHR-S281I·LSYPSHCCAFI | 10    | >TSHR-S281I·LSYPIHCCAFK | 7    | 3     |
| >TSHR-S281I·LSYPSHCCAF  | 24    | >TSHR-S281I·LSYPIHCCAF  | 32   | 8     |
| >TSHR-S281I·LSYPSHCCA   | 304   | >TSHR-S281I·LSYPIHCCA   | 1704 | 1400  |
| >TSHR-S281I·LSYPSHCCAF  | 4     | >TSHR-S281I·LSYPIHCCAF  | 8    | 4     |
| >TSHR-S281I·LSYPSHCCA   | 273   | >TSHR-S281I·LSYPIHCCA   | 2618 | 2345  |
| >TSHR-S281I·LSYPSHCCAF  | 3     | >TSHR-S281I·LSYPIHCCAF  | 3    | 0     |
| >TSHR-S281I·LSYPSHCCAF  | 412   | >TSHR-S281I·LSYPIHCCAF  | 498  | 86    |

|                         |       |                         |      |       |
|-------------------------|-------|-------------------------|------|-------|
| >TSHR-S281I·LSYPSHCCAF  | 26    | >TSHR-S281I·LSYPIHCCAF  | 34   | 8     |
| >TSHR-S281I·LSYPSHCC    | 271   | >TSHR-S281I·LSYPIHCC    | 498  | 227   |
| >TSHR-S281I·LSYPSHCCAF  | 138   | >TSHR-S281I·LSYPIHCCAF  | 192  | 54    |
| >TSHR-S281I·LSYPSHCCAFI | 424   | >TSHR-S281I·LSYPIHCCAFK | 734  | 310   |
| >TSHR-S281I·DLSYPSHCCA  | 862   | >TSHR-S281I·DLSYPIHCCA  | 390  | 472   |
| >TSHR-S281I·DLSYPSHCCA  | 404   | >TSHR-S281I·DLSYPIHCCAF | 792  | 388   |
| >TSHR-S281I·DLSYPSHCCA  | 245   | >TSHR-S281I·DLSYPIHCCAF | 397  | 152   |
| >TSHR-S281I·RADLSYPS    | 5845  | >TSHR-S281I·RADLSYPI    | 140  | 5705  |
| >TSHR-S281I·RADLSYPS    | 34059 | >TSHR-S281I·RADLSYPI    | 173  | 33886 |
| >TSHR-S281I·TRADLSYPS   | 2216  | >TSHR-S281I·TRADLSYPI   | 44   | 2172  |
| >TSHR-S281I·TRADLSYPS   | 2353  | >TSHR-S281I·TRADLSYPI   | 194  | 2159  |
| >TSHR-S281I·TRADLSYPS   | 3110  | >TSHR-S281I·TRADLSYPI   | 32   | 3078  |
| >TSHR-S281I·LTRADLSYPS  | 12146 | >TSHR-S281I·LTRADLSYPI  | 260  | 11886 |
| >TSHR-S281I·LTRADLSYPS  | 8398  | >TSHR-S281I·LTRADLSYPI  | 237  | 8161  |
| >TSHR-S281I·LTRADLSYPS  | 99    | >TSHR-S281I·LTRADLSYPI  | 13   | 86    |
| >TSHR-S281I·LTRADLSYPSI | 158   | >TSHR-S281I·LTRADLSYPIH | 271  | 113   |
| >TSHR-S281I·LTRADLSYPS  | 18481 | >TSHR-S281I·LTRADLSYPI  | 245  | 18236 |
| >TSHR-S281I·LTRADLSYPS  | 1989  | >TSHR-S281I·LTRADLSYPI  | 17   | 1972  |
| >TSHR-S281I·LTRADLSYPSI | 189   | >TSHR-S281I·LTRADLSYPIH | 663  | 474   |
| >TSHR-S281I·LTRADLSYPSI | 100   | >TSHR-S281I·LTRADLSYPIH | 65   | 35    |
| >TSHR-S281I·LTRADLSYPS  | 32614 | >TSHR-S281I·LTRADLSYPI  | 155  | 32459 |
| >TSHR-S281I·PSHCCAFK    | 76    | >TSHR-S281I·PNHCCAFK    | 2139 | 2063  |
| >TSHR-S281I·PSHCCAFKNC  | 330   | >TSHR-S281I·PNHCCAFKNC  | 5087 | 4757  |
| >TSHR-S281I·YPSHCCAFK   | 210   | >TSHR-S281I·YPNHCCAFK   | 397  | 187   |
| >TSHR-S281I·YPSHCCAF    | 25    | >TSHR-S281I·YPNHCCAF    | 26   | 1     |
| >TSHR-S281I·YPSHCCAF    | 42    | >TSHR-S281I·YPNHCCAF    | 41   | 1     |
| >TSHR-S281I·YPSHCCAF    | 7     | >TSHR-S281I·YPNHCCAF    | 7    | 0     |
| >TSHR-S281I·YPSHCCAF    | 91    | >TSHR-S281I·YPNHCCAF    | 86   | 5     |
| >TSHR-S281I·YPSHCCAFKN  | 1559  | >TSHR-S281I·YPNHCCAFKN  | 433  | 1126  |
| >TSHR-S281I·YPSHCCAF    | 30    | >TSHR-S281I·YPNHCCAF    | 28   | 2     |
| >TSHR-S281I·YPSHCCAF    | 33    | >TSHR-S281I·YPNHCCAF    | 25   | 8     |
| >TSHR-S281I·SYPSHCCAF   | 142   | >TSHR-S281I·SYPNHCCAF   | 177  | 35    |
| >TSHR-S281I·SYPSHCCAF   | 5     | >TSHR-S281I·SYPNHCCAF   | 5    | 0     |
| >TSHR-S281I·SYPSHCCAFK  | 243   | >TSHR-S281I·SYPNHCCAFK  | 228  | 15    |
| >TSHR-S281I·SYPSHCCAFK  | 251   | >TSHR-S281I·SYPNHCCAFK  | 262  | 11    |
| >TSHR-S281I·SYPSHCCAFK  | 125   | >TSHR-S281I·SYPNHCCAFK  | 169  | 44    |
| >TSHR-S281I·SYPSHCCAF   | 324   | >TSHR-S281I·SYPNHCCAF   | 508  | 184   |
| >TSHR-S281I·LSYPSHCCAFI | 37    | >TSHR-S281I·LSYPNHCCAF  | 45   | 8     |
| >TSHR-S281I·LSYPSHCCAFI | 11    | >TSHR-S281I·LSYPNHCCAF  | 16   | 5     |
| >TSHR-S281I·LSYPSHCCA   | 448   | >TSHR-S281I·LSYPNHCCA   | 780  | 332   |
| >TSHR-S281I·LSYPSHCCAFI | 21    | >TSHR-S281I·LSYPNHCCAF  | 24   | 3     |
| >TSHR-S281I·LSYPSHCCAFI | 38    | >TSHR-S281I·LSYPNHCCAF  | 47   | 9     |
| >TSHR-S281I·LSYPSHCCAFI | 10    | >TSHR-S281I·LSYPNHCCAF  | 12   | 2     |

|                          |      |                          |      |      |
|--------------------------|------|--------------------------|------|------|
| >TSHR-S281M LSYP SHCCAF  | 24   | >TSHR-S281M LSYP NHCCAF  | 28   | 4    |
| >TSHR-S281M LSYP SHCCA   | 304  | >TSHR-S281M LSYP NHCCA   | 781  | 477  |
| >TSHR-S281M LSYP SHCCAF  | 4    | >TSHR-S281M LSYP NHCCAF  | 6    | 2    |
| >TSHR-S281M LSYP SHCCA   | 273  | >TSHR-S281M LSYP NHCCA   | 1224 | 951  |
| >TSHR-S281M LSYP SHCCAF  | 3    | >TSHR-S281M LSYP NHCCAF  | 3    | 0    |
| >TSHR-S281M LSYP SHCCAF  | 412  | >TSHR-S281M LSYP NHCCAF  | 649  | 237  |
| >TSHR-S281M LSYP SHCCAF  | 26   | >TSHR-S281M LSYP NHCCAF  | 37   | 11   |
| >TSHR-S281M LSYP SHCC    | 271  | >TSHR-S281M LSYP NHCC    | 1346 | 1075 |
| >TSHR-S281M LSYP SHCCAF  | 138  | >TSHR-S281M LSYP NHCCAF  | 139  | 1    |
| >TSHR-S281M LSYP SHCCAFI | 424  | >TSHR-S281M LSYP NHCCAF  | 443  | 19   |
| >TSHR-S281M DLSYP SHCCA  | 404  | >TSHR-S281M DLSYP NHCCA  | 418  | 14   |
| >TSHR-S281M DLSYP SHCCA  | 245  | >TSHR-S281M DLSYP NHCCA  | 312  | 67   |
| >TSHR-S281M LTRADLSYPS   | 99   | >TSHR-S281M LTRADLSYPN   | 466  | 367  |
| >TSHR-S281M LTRADLSYPSI  | 158  | >TSHR-S281M LTRADLSYPN   | 217  | 59   |
| >TSHR-S281M LTRADLSYPSI  | 189  | >TSHR-S281M LTRADLSYPN   | 222  | 33   |
| >TSHR-S281M LTRADLSYPSI  | 100  | >TSHR-S281M LTRADLSYPN   | 243  | 143  |
| >TSHR-S281T PSHCCAFK     | 561  | >TSHR-S281T PTHCCAFK     | 359  | 202  |
| >TSHR-S281T PSHCCAFK     | 76   | >TSHR-S281T PTHCCAFK     | 39   | 37   |
| >TSHR-S281T PSHCCAFKNC   | 330  | >TSHR-S281T PTHCCAFKNC   | 160  | 170  |
| >TSHR-S281T PSHCCAFK     | 1650 | >TSHR-S281T PTHCCAFK     | 307  | 1343 |
| >TSHR-S281T HLTRADLSYP   | 4591 | >TSHR-S281T HLTRADLSYP   | 454  | 4137 |
| >TSHR-S281T YPSHCCAFK    | 210  | >TSHR-S281T YPTHCCAFK    | 231  | 21   |
| >TSHR-S281T YPSHCCAF     | 25   | >TSHR-S281T YPTHCCAF     | 31   | 6    |
| >TSHR-S281T YPSHCCAF     | 42   | >TSHR-S281T YPTHCCAF     | 78   | 36   |
| >TSHR-S281T YPSHCCAF     | 7    | >TSHR-S281T YPTHCCAF     | 7    | 0    |
| >TSHR-S281T YPSHCCAF     | 91   | >TSHR-S281T YPTHCCAF     | 132  | 41   |
| >TSHR-S281T YPSHCCAFKN   | 1559 | >TSHR-S281T YPTHCCAFKN   | 472  | 1087 |
| >TSHR-S281T YPSHCCAF     | 30   | >TSHR-S281T YPTHCCAF     | 54   | 24   |
| >TSHR-S281T YPSHCCAF     | 33   | >TSHR-S281T YPTHCCAF     | 31   | 2    |
| >TSHR-S281T SYPSHCCAF    | 142  | >TSHR-S281T SYPTHCCAF    | 198  | 56   |
| >TSHR-S281T SYPSHCCAF    | 5    | >TSHR-S281T SYPTHCCAF    | 5    | 0    |
| >TSHR-S281T SYPSHCCAFK   | 243  | >TSHR-S281T SYPTHCCAFK   | 210  | 33   |
| >TSHR-S281T SYPSHCCAFK   | 251  | >TSHR-S281T SYPTHCCAFK   | 359  | 108  |
| >TSHR-S281T SYPSHCCAFK   | 125  | >TSHR-S281T SYPTHCCAFK   | 93   | 32   |
| >TSHR-S281T SYPSHCCAF    | 324  | >TSHR-S281T SYPTHCCAF    | 555  | 231  |
| >TSHR-S281T LSYP SHCCAFI | 37   | >TSHR-S281T LSYP THCCAFI | 45   | 8    |
| >TSHR-S281T LSYP SHCCAFI | 11   | >TSHR-S281T LSYP THCCAFI | 13   | 2    |
| >TSHR-S281T LSYP SHCCA   | 448  | >TSHR-S281T LSYP THCCA   | 354  | 94   |
| >TSHR-S281T LSYP SHCCAFI | 21   | >TSHR-S281T LSYP THCCAFI | 19   | 2    |
| >TSHR-S281T LSYP SHCCAFI | 38   | >TSHR-S281T LSYP THCCAFI | 36   | 2    |
| >TSHR-S281T LSYP SHCCAFI | 10   | >TSHR-S281T LSYP THCCAFI | 11   | 1    |
| >TSHR-S281T LSYP SHCCAF  | 24   | >TSHR-S281T LSYP THCCAF  | 26   | 2    |
| >TSHR-S281T LSYP SHCCA   | 304  | >TSHR-S281T LSYP THCCA   | 451  | 147  |

|                         |       |                         |      |       |
|-------------------------|-------|-------------------------|------|-------|
| >TSHR-S281T LSYPSHCCAF  | 4     | >TSHR-S281T LSYPTHCCAF  | 5    | 1     |
| >TSHR-S281T LSYPSHCCA   | 273   | >TSHR-S281T LSYPTHCCA   | 749  | 476   |
| >TSHR-S281T LSYPSHCCAF  | 3     | >TSHR-S281T LSYPTHCCAF  | 3    | 0     |
| >TSHR-S281T LSYPSHCCAF  | 412   | >TSHR-S281T LSYPTHCCAF  | 572  | 160   |
| >TSHR-S281T LSYPSHCCAF  | 26    | >TSHR-S281T LSYPTHCCAF  | 27   | 1     |
| >TSHR-S281T LSYPSHCC    | 271   | >TSHR-S281T LSYPTHCC    | 320  | 49    |
| >TSHR-S281T LSYPSHCCAF  | 138   | >TSHR-S281T LSYPTHCCAF  | 183  | 45    |
| >TSHR-S281T LSYPSHCCAFI | 424   | >TSHR-S281T LSYPTHCCAFI | 595  | 171   |
| >TSHR-S281T DLSYPSHCCA  | 404   | >TSHR-S281T DLSYPTHCCA  | 544  | 140   |
| >TSHR-S281T DLSYPSHCCA  | 245   | >TSHR-S281T DLSYPTHCCA  | 307  | 62    |
| >TSHR-S281T LTRADLSYPS  | 99    | >TSHR-S281T LTRADLSYPT  | 218  | 119   |
| >TSHR-S281T LTRADLSYPSI | 158   | >TSHR-S281T LTRADLSYPTI | 204  | 46    |
| >TSHR-S281T LTRADLSYPSI | 189   | >TSHR-S281T LTRADLSYPTI | 97   | 92    |
| >TSHR-S281T LTRADLSYPSI | 100   | >TSHR-S281T LTRADLSYPTI | 51   | 49    |
| >TSHR-S425I SLLALLGNV   | 17    | >TSHR-S425I ILLALLGNV   | 21   | 4     |
| >TSHR-S425I SLLALLGNVFI | 10    | >TSHR-S425I ILLALLGNVFI | 11   | 1     |
| >TSHR-S425I SLLALLGNV   | 29    | >TSHR-S425I ILLALLGNV   | 40   | 11    |
| >TSHR-S425I SLLALLGNVFI | 10    | >TSHR-S425I ILLALLGNVFI | 12   | 2     |
| >TSHR-S425I SLLALLGNV   | 9     | >TSHR-S425I ILLALLGNV   | 9    | 0     |
| >TSHR-S425I SLLALLGNVFI | 23    | >TSHR-S425I ILLALLGNVFI | 25   | 2     |
| >TSHR-S425I SLLALLGNV   | 20    | >TSHR-S425I ILLALLGNV   | 20   | 0     |
| >TSHR-S425I SLLALLGNVFI | 10    | >TSHR-S425I ILLALLGNVFI | 9    | 1     |
| >TSHR-S425I SLLALLGNV   | 2     | >TSHR-S425I ILLALLGNV   | 2    | 0     |
| >TSHR-S425I SLLALLGNVFI | 2     | >TSHR-S425I ILLALLGNVFI | 2    | 0     |
| >TSHR-S425I SLLALLGNV   | 9     | >TSHR-S425I ILLALLGNV   | 10   | 1     |
| >TSHR-S425I SLLALLGNVFI | 5     | >TSHR-S425I ILLALLGNVFI | 5    | 0     |
| >TSHR-S425I SLLALLGNV   | 5     | >TSHR-S425I ILLALLGNV   | 7    | 2     |
| >TSHR-S425I SLLALLGNVFI | 4     | >TSHR-S425I ILLALLGNVFI | 5    | 1     |
| >TSHR-S425I SLLALLGNV   | 13    | >TSHR-S425I ILLALLGNV   | 4    | 9     |
| >TSHR-S425I SLLALLGNVFI | 4     | >TSHR-S425I ILLALLGNVFI | 2    | 2     |
| >TSHR-S425I SLLALLGNV   | 2     | >TSHR-S425I ILLALLGNV   | 3    | 1     |
| >TSHR-S425I SLLALLGNVFI | 2     | >TSHR-S425I ILLALLGNVFI | 2    | 0     |
| >TSHR-S425I SLLALLGNVFI | 495   | >TSHR-S425I ILLALLGNVFI | 1603 | 1108  |
| >TSHR-S425I SLLALLGNV   | 33    | >TSHR-S425I ILLALLGNV   | 387  | 354   |
| >TSHR-S425I SLLALLGNVFI | 23    | >TSHR-S425I ILLALLGNVFI | 230  | 207   |
| >TSHR-S425I SLLALLGNVFI | 116   | >TSHR-S425I ILLALLGNVFI | 140  | 24    |
| >TSHR-S425I SLLALLGNVFI | 123   | >TSHR-S425I ILLALLGNVFI | 230  | 107   |
| >TSHR-S425I SLLALLGNVFI | 127   | >TSHR-S425I ILLALLGNVFI | 44   | 83    |
| >TSHR-S425I V SLLALLGNV | 1331  | >TSHR-S425I V ILLALLGNV | 165  | 1166  |
| >TSHR-S425I V SLLALLGNV | 1195  | >TSHR-S425I V ILLALLGNV | 103  | 1092  |
| >TSHR-S425I V SLLALLGNV | 381   | >TSHR-S425I V ILLALLGNV | 78   | 303   |
| >TSHR-S425I V SLLALLGNV | 3637  | >TSHR-S425I V ILLALLGNV | 31   | 3606  |
| >TSHR-S425I V SLLALLGNV | 13869 | >TSHR-S425I V ILLALLGNV | 293  | 13576 |

|                          |       |                         |       |       |
|--------------------------|-------|-------------------------|-------|-------|
| >TSHR-S425I·VSL LALLGNV  | 5545  | >TSHR-S425I·VILLALLGNV  | 38    | 5507  |
| >TSHR-S425I·VSL LALLGNV  | 12893 | >TSHR-S425I·VILLALLGNV  | 38    | 12855 |
| >TSHR-S425I·VSL LALLGNV  | 14754 | >TSHR-S425I·VILLALLGNV  | 27    | 14727 |
| >TSHR-S425I·VSL LALLGNV  | 955   | >TSHR-S425I·VILLALLGNV  | 281   | 674   |
| >TSHR-S425I·VSL LALLGNV  | 71    | >TSHR-S425I·VILLALLGNVF | 349   | 278   |
| >TSHR-S425I·VSL LALLGNV  | 463   | >TSHR-S425I·VILLALLGNV  | 15752 | 15289 |
| >TSHR-S425I·VSL LALLGNV  | 7     | >TSHR-S425I·VILLALLGNVF | 1151  | 1144  |
| >TSHR-S425I·VSL LALLGNV  | 172   | >TSHR-S425I·VILLALLGNVF | 5825  | 5653  |
| >TSHR-S425I·VSL LALLGNV  | 45    | >TSHR-S425I·VILLALLGNVF | 576   | 531   |
| >TSHR-S425I·KFLRIVVWFV   | 27774 | >TSHR-S425I·KFLRIVVWFV  | 275   | 27499 |
| >TSHR-S425I·KFLRIVVWFV   | 8630  | >TSHR-S425I·KFLRIVVWFV  | 41    | 8589  |
| >TSHR-S425I·KFLRIVVWFV   | 4573  | >TSHR-S425I·KFLRIVVWFV  | 44    | 4529  |
| >TSHR-S425I·KFLRIVVWFV   | 4665  | >TSHR-S425I·KFLRIVVWFV  | 17    | 4648  |
| >TSHR-S425I·KFLRIVVWFV   | 1394  | >TSHR-S425I·KFLRIVVWFV  | 118   | 1276  |
| >TSHR-S425I·KFLRIVVWFV   | 9064  | >TSHR-S425I·KFLRIVVWFV  | 135   | 8929  |
| >TSHR-S425I·KFLRIVVWFV   | 1012  | >TSHR-S425I·KFLRIVVWFV  | 179   | 833   |
| >TSHR-S425I·FVSL LALL    | 4482  | >TSHR-S425I·FVILLALL    | 374   | 4108  |
| >TSHR-S425I·FVSL LALL    | 186   | >TSHR-S425I·FVILLALL    | 88    | 98    |
| >TSHR-S425I·FVSL LALLGNV | 233   | >TSHR-S425I·FVILLALLGNV | 94    | 139   |
| >TSHR-S425I·FVSL LALL    | 10    | >TSHR-S425I·FVILLALL    | 33    | 23    |
| >TSHR-S425I·FVSL LALLGNV | 21    | >TSHR-S425I·FVILLALLGNV | 69    | 48    |
| >TSHR-S425I·FVSL LALL    | 54    | >TSHR-S425I·FVILLALL    | 56    | 2     |
| >TSHR-S425I·FVSL LALLGNV | 14    | >TSHR-S425I·FVILLALLGNV | 14    | 0     |
| >TSHR-S425I·FVSL LALL    | 41    | >TSHR-S425I·FVILLALL    | 14    | 27    |
| >TSHR-S425I·FVSL LALLGNV | 22    | >TSHR-S425I·FVILLALLGNV | 8     | 14    |
| >TSHR-S425I·FVSL LALLGNV | 257   | >TSHR-S425I·FVILLALLGNV | 112   | 145   |
| >TSHR-S425I·FVSL LALLGNV | 957   | >TSHR-S425I·FVILLALLGNV | 229   | 728   |
| >TSHR-S425I·FVSL LALLGNV | 179   | >TSHR-S425I·FVILLALLGNV | 212   | 33    |
| >TSHR-S425I·FVSL LALL    | 108   | >TSHR-S425I·FVILLALL    | 137   | 29    |
| >TSHR-S425I·FVSL LALLGNV | 26    | >TSHR-S425I·FVILLALLGNV | 32    | 6     |
| >TSHR-S425I·FVSL LALL    | 10910 | >TSHR-S425I·FVILLALL    | 486   | 10424 |
| >TSHR-S425I·FVSL LALL    | 65    | >TSHR-S425I·FVILLALL    | 46    | 19    |
| >TSHR-S425I·FVSL LALLGNV | 19    | >TSHR-S425I·FVILLALLGNV | 15    | 4     |
| >TSHR-S425I·FVSL LALL    | 983   | >TSHR-S425I·FVILLALL    | 247   | 736   |
| >TSHR-S425I·FVSL LALLGNV | 76    | >TSHR-S425I·FVILLALLGNV | 22    | 54    |
| >TSHR-S425I·WVSL LALL    | 467   | >TSHR-S425I·WVILLALL    | 884   | 417   |
| >TSHR-S425I·WVSL LALL    | 74    | >TSHR-S425I·WVILLALL    | 307   | 233   |
| >TSHR-S425I·WVSL LALL    | 238   | >TSHR-S425I·WVILLALL    | 767   | 529   |
| >TSHR-S425I·WVSL LALL    | 126   | >TSHR-S425I·WVILLALL    | 446   | 320   |
| >TSHR-S425I·WVSL LALL    | 87    | >TSHR-S425I·WVILLALL    | 152   | 65    |
| >TSHR-S425I·WVSL LALL    | 126   | >TSHR-S425I·WVILLALL    | 292   | 166   |
| >TSHR-S425I·WVSL LALL    | 167   | >TSHR-S425I·WVILLALL    | 1024  | 857   |
| >TSHR-S425I·VWFVSL LALL  | 47    | >TSHR-S425I·VWFVILLALL  | 53    | 6     |

|                         |     |                        |      |      |
|-------------------------|-----|------------------------|------|------|
| >TSHR-S425I·VWFVSL LAL  | 299 | >TSHR-S425I·VWFVILLAL  | 199  | 100  |
| >TSHR-S425I·VWFVSL LALL | 164 | >TSHR-S425I·VWFVILLALL | 244  | 80   |
| >TSHR-S425I·VWFVSL LALL | 119 | >TSHR-S425I·VWFVILLALL | 199  | 80   |
| >TSHR-S425I·VWFVSL LAL  | 320 | >TSHR-S425I·VWFVILLAL  | 175  | 145  |
| >TSHR-S425I·VWFVSL LALL | 411 | >TSHR-S425I·VWFVILLALL | 333  | 78   |
| >TSHR-S425I·VWFVSL LAL  | 435 | >TSHR-S425I·VWFVILLAL  | 271  | 164  |
| >TSHR-S425I·VWFVSL LA   | 143 | >TSHR-S425I·VWFVILLA   | 98   | 45   |
| >TSHR-S425I·VWFVSL LAL  | 33  | >TSHR-S425I·VWFVILLAL  | 32   | 1    |
| >TSHR-S425I·VWFVSL LALL | 120 | >TSHR-S425I·VWFVILLALL | 156  | 36   |
| >TSHR-S425I·VWFVSL LALL | 264 | >TSHR-S425I·VWFVILLALL | 245  | 19   |
| >TSHR-S425I·VWFVSL L    | 110 | >TSHR-S425I·VWFVILL    | 138  | 28   |
| >TSHR-S425I·VWFVSL LAL  | 328 | >TSHR-S425I·VWFVILLAL  | 385  | 57   |
| >TSHR-S425I·VWFVSL L    | 148 | >TSHR-S425I·VWFVILL    | 73   | 75   |
| >TSHR-S425I·VWFVSL LA   | 294 | >TSHR-S425I·VWFVILLA   | 140  | 154  |
| >TSHR-S425I·VWFVSL LAL  | 79  | >TSHR-S425I·VWFVILLAL  | 73   | 6    |
| >TSHR-S425I·VWFVSL LAL  | 692 | >TSHR-S425I·VWFVILLAL  | 450  | 242  |
| >TSHR-S425I·VWFVSL LAL  | 287 | >TSHR-S425I·VWFVILLAL  | 412  | 125  |
| >TSHR-S425I·VWFVSL L    | 360 | >TSHR-S425I·VWFVILL    | 364  | 4    |
| >TSHR-S425I·VWFVSL LAL  | 371 | >TSHR-S425I·VWFVILLAL  | 329  | 42   |
| >TSHR-S425I·VWFVSL LAL  | 201 | >TSHR-S425I·VWFVILLAL  | 245  | 44   |
| >TSHR-S425I·VWFVSL L    | 50  | >TSHR-S425I·VWFVILL    | 20   | 30   |
| >TSHR-S425I·VWFVSL LA   | 351 | >TSHR-S425I·VWFVILLA   | 58   | 293  |
| >TSHR-S425I·VWFVSL LAL  | 60  | >TSHR-S425I·VWFVILLAL  | 23   | 37   |
| >TSHR-S425I·VWFVSL LAL  | 51  | >TSHR-S425I·VWFVILLAL  | 27   | 24   |
| >TSHR-S425I·VWFVSL L    | 196 | >TSHR-S425I·VWFVILL    | 83   | 113  |
| >TSHR-S425I·VWFVSL LA   | 516 | >TSHR-S425I·VWFVILLA   | 304  | 212  |
| >TSHR-S425I·VWFVSL LAL  | 314 | >TSHR-S425I·VWFVILLAL  | 192  | 122  |
| >TSHR-S425I·VWFVSL LAL  | 174 | >TSHR-S425I·VWFVILLAL  | 136  | 38   |
| >TSHR-S425I·VWFVSL L    | 375 | >TSHR-S425I·VWFVILL    | 240  | 135  |
| >TSHR-S425I·VWFVSL LAL  | 577 | >TSHR-S425I·VWFVILLAL  | 235  | 342  |
| >TSHR-S425I·VWFVSL LAL  | 232 | >TSHR-S425I·VWFVILLAL  | 215  | 17   |
| >TSHR-S425I·VWFVSL L    | 245 | >TSHR-S425I·VWFVILL    | 136  | 109  |
| >TSHR-S425I·VWFVSL LAL  | 509 | >TSHR-S425I·VWFVILLAL  | 237  | 272  |
| >TSHR-S425I·VWFVSL LAL  | 219 | >TSHR-S425I·VWFVILLAL  | 105  | 114  |
| >TSHR-S425I·VWFVSL L    | 569 | >TSHR-S425I·VWFVILL    | 420  | 149  |
| >TSHR-S425I·VWFVSL LAL  | 126 | >TSHR-S425I·VWFVILLAL  | 99   | 27   |
| >TSHR-S425I·VWFVSL LAL  | 479 | >TSHR-S425I·VWFVILLAL  | 896  | 417  |
| >TSHR-S425I·VWFVSL L    | 448 | >TSHR-S425I·VWFVILL    | 426  | 22   |
| >TSHR-S425I·VWFVSL LAL  | 318 | >TSHR-S425I·VWFVILLAL  | 284  | 34   |
| >TSHR-S425I·VWFVSL LAL  | 458 | >TSHR-S425I·VWFVILLAL  | 1645 | 1187 |
| >TSHR-S425I·VWFVSL LAL  | 147 | >TSHR-S425I·VWFVILLAL  | 309  | 162  |
| >TSHR-S425I·VWFVSL LAL  | 396 | >TSHR-S425I·VWFVILLAL  | 1783 | 1387 |
| >TSHR-S425I·IVWFVSL     | 11  | >TSHR-S425I·IVWFVIL    | 52   | 41   |

|                        |     |                         |      |     |
|------------------------|-----|-------------------------|------|-----|
| >TSHR-S425I·IVVWFVSLL  | 27  | >TSHR-S425I·IVVWFVILL   | 48   | 21  |
| >TSHR-S425I·IVVWFVSLLA | 79  | >TSHR-S425I·IVVWFVILLAL | 101  | 22  |
| >TSHR-S425I·IVVWFVSL   | 284 | >TSHR-S425I·IVVWFVIL    | 648  | 364 |
| >TSHR-S425I·IVVWFVSLL  | 312 | >TSHR-S425I·IVVWFVILL   | 96   | 216 |
| >TSHR-S425I·IVVWFVSLLA | 762 | >TSHR-S425I·IVVWFVILLA  | 395  | 367 |
| >TSHR-S425I·IVVWFVSLLA | 397 | >TSHR-S425I·IVVWFVILLAL | 190  | 207 |
| >TSHR-S425I·IVVWFVSL   | 183 | >TSHR-S425I·IVVWFVIL    | 664  | 481 |
| >TSHR-S425I·IVVWFVSLL  | 77  | >TSHR-S425I·IVVWFVILL   | 167  | 90  |
| >TSHR-S425I·IVVWFVSLLA | 463 | >TSHR-S425I·IVVWFVILLA  | 351  | 112 |
| >TSHR-S425I·IVVWFVSLLA | 287 | >TSHR-S425I·IVVWFVILLAL | 271  | 16  |
| >TSHR-S425I·IVVWFVSL   | 316 | >TSHR-S425I·IVVWFVIL    | 1042 | 726 |
| >TSHR-S425I·IVVWFVSLL  | 63  | >TSHR-S425I·IVVWFVILL   | 540  | 477 |
| >TSHR-S425I·IVVWFVSLLA | 374 | >TSHR-S425I·IVVWFVILLA  | 332  | 42  |
| >TSHR-S425I·IVVWFVSLLA | 162 | >TSHR-S425I·IVVWFVILLAL | 344  | 182 |
| >TSHR-S425I·IVVWFVSL   | 29  | >TSHR-S425I·IVVWFVIL    | 66   | 37  |
| >TSHR-S425I·IVVWFVSLL  | 56  | >TSHR-S425I·IVVWFVILL   | 64   | 8   |
| >TSHR-S425I·IVVWFVSLLA | 197 | >TSHR-S425I·IVVWFVILLA  | 149  | 48  |
| >TSHR-S425I·IVVWFVSLLA | 30  | >TSHR-S425I·IVVWFVILLAL | 32   | 2   |
| >TSHR-S425I·IVVWFVSL   | 73  | >TSHR-S425I·IVVWFVIL    | 303  | 230 |
| >TSHR-S425I·IVVWFVSLL  | 60  | >TSHR-S425I·IVVWFVILL   | 37   | 23  |
| >TSHR-S425I·IVVWFVSLLA | 666 | >TSHR-S425I·IVVWFVILLA  | 239  | 427 |
| >TSHR-S425I·IVVWFVSLLA | 119 | >TSHR-S425I·IVVWFVILLAL | 87   | 32  |
| >TSHR-S425I·IVVWFVSL   | 50  | >TSHR-S425I·IVVWFVIL    | 168  | 118 |
| >TSHR-S425I·IVVWFVSLL  | 63  | >TSHR-S425I·IVVWFVILL   | 74   | 11  |
| >TSHR-S425I·IVVWFVSLLA | 194 | >TSHR-S425I·IVVWFVILLAL | 211  | 17  |
| >TSHR-S425I·IVVWFVSLLA | 277 | >TSHR-S425I·IVVWFVILLAL | 469  | 192 |
| >TSHR-S425I·IVVWFVSL   | 152 | >TSHR-S425I·IVVWFVIL    | 447  | 295 |
| >TSHR-S425I·IVVWFVSLLA | 571 | >TSHR-S425I·IVVWFVILLAL | 185  | 386 |
| >TSHR-S425I·IVVWFVSL   | 193 | >TSHR-S425I·IVVWFVIL    | 581  | 388 |
| >TSHR-S425I·IVVWFVSLL  | 160 | >TSHR-S425I·IVVWFVILL   | 200  | 40  |
| >TSHR-S425I·IVVWFVSLLA | 491 | >TSHR-S425I·IVVWFVILLA  | 578  | 87  |
| >TSHR-S425I·IVVWFVSLLA | 857 | >TSHR-S425I·IVVWFVILLAL | 469  | 388 |
| >TSHR-S425I·IVVWFVSL   | 349 | >TSHR-S425I·IVVWFVIL    | 1031 | 682 |
| >TSHR-S425I·IVVWFVSLL  | 495 | >TSHR-S425I·IVVWFVILL   | 223  | 272 |
| >TSHR-S425I·IVVWFVSLLA | 518 | >TSHR-S425I·IVVWFVILLAL | 342  | 176 |
| >TSHR-S425I·IVVWFVSLLA | 163 | >TSHR-S425I·IVVWFVILLAL | 607  | 444 |
| >TSHR-S425I·IVVWFVSLL  | 582 | >TSHR-S425I·IVVWFVILL   | 273  | 309 |
| >TSHR-S425I·IVVWFVSLL  | 20  | >TSHR-S425I·IVVWFVILL   | 573  | 553 |
| >TSHR-S425I·RIVVWFVSL  | 148 | >TSHR-S425I·RIVVWFVIL   | 357  | 209 |
| >TSHR-S425I·RIVVWFVSL  | 283 | >TSHR-S425I·RIVVWFVIL   | 1188 | 905 |
| >TSHR-S425I·RIVVWFVSLL | 993 | >TSHR-S425I·RIVVWFVILL  | 470  | 523 |
| >TSHR-S425I·RIVVWFVSLL | 160 | >TSHR-S425I·RIVVWFVILL  | 204  | 44  |
| >TSHR-S425I·RIVVWFVSLL | 135 | >TSHR-S425I·RIVVWFVILL  | 335  | 200 |



|                        |       |                         |      |       |
|------------------------|-------|-------------------------|------|-------|
| >TSHR-S425I·RIVVWFVS   | 1457  | >TSHR-S425I·RIVVWFVI    | 35   | 1422  |
| >TSHR-S425I·RIVVWFVSL  | 25    | >TSHR-S425I·RIVVWFVIL   | 69   | 44    |
| >TSHR-S425I·RIVVWFVSL  | 150   | >TSHR-S425I·RIVVWFVILL  | 123  | 27    |
| >TSHR-S425I·RIVVWFVSL  | 184   | >TSHR-S425I·RIVVWFVILL/ | 193  | 9     |
| >TSHR-S425I·RIVVWFVS   | 10150 | >TSHR-S425I·RIVVWFVI    | 139  | 10011 |
| >TSHR-S425I·RIVVWFVSL  | 117   | >TSHR-S425I·RIVVWFVIL   | 759  | 642   |
| >TSHR-S425I·RIVVWFVSL  | 142   | >TSHR-S425I·RIVVWFVILL  | 135  | 7     |
| >TSHR-S425I·RIVVWFVSL  | 53    | >TSHR-S425I·RIVVWFVIL   | 362  | 309   |
| >TSHR-S425I·RIVVWFVSL  | 120   | >TSHR-S425I·RIVVWFVILL  | 186  | 66    |
| >TSHR-S425I·RIVVWFVS   | 21140 | >TSHR-S425I·RIVVWFVI    | 499  | 20641 |
| >TSHR-S425I·RIVVWFVSL  | 449   | >TSHR-S425I·RIVVWFVILL/ | 824  | 375   |
| >TSHR-S425I·RIVVWFVS   | 13046 | >TSHR-S425I·RIVVWFVI    | 154  | 12892 |
| >TSHR-S425I·RIVVWFVSL  | 33    | >TSHR-S425I·RIVVWFVIL   | 163  | 130   |
| >TSHR-S425I·RIVVWFVSL  | 403   | >TSHR-S425I·RIVVWFVILL  | 232  | 171   |
| >TSHR-S425I·RIVVWFVSL  | 250   | >TSHR-S425I·RIVVWFVIL   | 1404 | 1154  |
| >TSHR-S425I·RIVVWFVSL  | 336   | >TSHR-S425I·RIVVWFVIL   | 484  | 148   |
| >TSHR-S425I·RIVVWFVS   | 15489 | >TSHR-S425I·RIVVWFVI    | 273  | 15216 |
| >TSHR-S425I·RIVVWFVSL  | 394   | >TSHR-S425I·RIVVWFVIL   | 861  | 467   |
| >TSHR-S425I·LRIVVWFVSL | 160   | >TSHR-S425I·LRIVVWFVIL  | 215  | 55    |
| >TSHR-S425I·LRIVVWFVSL | 385   | >TSHR-S425I·LRIVVWFVILL | 662  | 277   |
| >TSHR-S425I·LRIVVWFVS  | 588   | >TSHR-S425I·LRIVVWFVI   | 56   | 532   |
| >TSHR-S425I·LRIVVWFVSL | 30    | >TSHR-S425I·LRIVVWFVIL  | 22   | 8     |
| >TSHR-S425I·LRIVVWFVSL | 49    | >TSHR-S425I·LRIVVWFVILL | 39   | 10    |
| >TSHR-S425I·LRIVVWFVS  | 13217 | >TSHR-S425I·LRIVVWFVI   | 375  | 12842 |
| >TSHR-S425I·LRIVVWFVSL | 52    | >TSHR-S425I·LRIVVWFVIL  | 46   | 6     |
| >TSHR-S425I·LRIVVWFVSL | 139   | >TSHR-S425I·LRIVVWFVILL | 105  | 34    |
| >TSHR-S425I·LRIVVWFVS  | 515   | >TSHR-S425I·LRIVVWFVI   | 416  | 99    |
| >TSHR-S425I·LRIVVWFVS  | 1941  | >TSHR-S425I·LRIVVWFVI   | 218  | 1723  |
| >TSHR-S425I·LRIVVWFVSL | 500   | >TSHR-S425I·LRIVVWFVIL  | 277  | 223   |
| >TSHR-S425I·LRIVVWFVSL | 58    | >TSHR-S425I·LRIVVWFVILL | 48   | 10    |
| >TSHR-S425I·LRIVVWFVS  | 8347  | >TSHR-S425I·LRIVVWFVI   | 332  | 8015  |
| >TSHR-S425I·LRIVVWFVSL | 91    | >TSHR-S425I·LRIVVWFVIL  | 58   | 33    |
| >TSHR-S425I·LRIVVWFVSL | 9     | >TSHR-S425I·LRIVVWFVILL | 10   | 1     |
| >TSHR-S425I·FLRIVVWFVS | 2027  | >TSHR-S425I·FLRIVVWFVI  | 184  | 1843  |
| >TSHR-S425I·FLRIVVWFVS | 49    | >TSHR-S425I·FLRIVVWFVIL | 105  | 56    |
| >TSHR-S425I·FLRIVVWFVS | 2559  | >TSHR-S425I·FLRIVVWFVI  | 94   | 2465  |
| >TSHR-S425I·FLRIVVWFVS | 20    | >TSHR-S425I·FLRIVVWFVIL | 40   | 20    |
| >TSHR-S425I·FLRIVVWFVS | 4275  | >TSHR-S425I·FLRIVVWFVI  | 349  | 3926  |
| >TSHR-S425I·FLRIVVWFVS | 14    | >TSHR-S425I·FLRIVVWFVIL | 28   | 14    |
| >TSHR-S425I·FLRIVVWFVS | 116   | >TSHR-S425I·FLRIVVWFVIL | 243  | 127   |
| >TSHR-S425I·FLRIVVWFVS | 163   | >TSHR-S425I·FLRIVVWFVI  | 3    | 160   |
| >TSHR-S425I·FLRIVVWFVS | 4     | >TSHR-S425I·FLRIVVWFVIL | 10   | 6     |
| >TSHR-S425I·FLRIVVWFVS | 7907  | >TSHR-S425I·FLRIVVWFVI  | 42   | 7865  |

|                         |       |                         |       |       |
|-------------------------|-------|-------------------------|-------|-------|
| >TSHR-S425I·FLRIVVWFVS  | 27    | >TSHR-S425I·FLRIVVWFVIL | 38    | 11    |
| >TSHR-S425I·FLRIVVWFVS  | 1226  | >TSHR-S425I·FLRIVVWFVI  | 13    | 1213  |
| >TSHR-S425I·FLRIVVWFVS  | 16    | >TSHR-S425I·FLRIVVWFVIL | 24    | 8     |
| >TSHR-S425I·FLRIVVWFVS  | 17054 | >TSHR-S425I·FLRIVVWFVI  | 281   | 16773 |
| >TSHR-S425I·FLRIVVWFVS  | 128   | >TSHR-S425I·FLRIVVWFVIL | 469   | 341   |
| >TSHR-S425I·FLRIVVWFVS  | 334   | >TSHR-S425I·FLRIVVWFVI  | 7     | 327   |
| >TSHR-S425I·FLRIVVWFVS  | 2     | >TSHR-S425I·FLRIVVWFVIL | 3     | 1     |
| >TSHR-S425I·FLRIVVWFVS  | 27    | >TSHR-S425I·FLRIVVWFVIL | 49    | 22    |
| >TSHR-S425I·FLRIVVWFVS  | 341   | >TSHR-S425I·FLRIVVWFVIL | 1300  | 959   |
| >TSHR-S425I·FLRIVVWFVS  | 160   | >TSHR-S425I·FLRIVVWFVIL | 265   | 105   |
| >TSHR-S425I·FLRIVVWFVS  | 2627  | >TSHR-S425I·FLRIVVWFVI  | 234   | 2393  |
| >TSHR-S505M·SELSVYTLTVI | 335   | >TSHR-S505M·NELSVYTLTVI | 1751  | 1416  |
| >TSHR-S505M·SELSVYTL    | 31    | >TSHR-S505M·NELSVYTL    | 188   | 157   |
| >TSHR-S505M·SELSVYTLT   | 551   | >TSHR-S505M·NELSVYTLT   | 344   | 207   |
| >TSHR-S505M·SELSVYTLTV  | 19    | >TSHR-S505M·NELSVYTLTV  | 14    | 5     |
| >TSHR-S505M·SELSVYTLTVI | 7     | >TSHR-S505M·NELSVYTLTVI | 6     | 1     |
| >TSHR-S505M·SELSVYTLTV  | 448   | >TSHR-S505M·NELSVYTLTV  | 3454  | 3006  |
| >TSHR-S505M·SELSVYTLTV  | 224   | >TSHR-S505M·NELSVYTLTV  | 4444  | 4220  |
| >TSHR-S505M·SELSVYTL    | 81    | >TSHR-S505M·NELSVYTL    | 15    | 66    |
| >TSHR-S505M·SELSVYTLTVI | 1365  | >TSHR-S505M·NELSVYTLTVI | 130   | 1235  |
| >TSHR-S505M·SELSVYTL    | 159   | >TSHR-S505M·NELSVYTL    | 74    | 85    |
| >TSHR-S505M·SELSVYTL    | 20    | >TSHR-S505M·NELSVYTL    | 64    | 44    |
| >TSHR-S505M·SELSVYTLTVI | 52    | >TSHR-S505M·NELSVYTLTVI | 278   | 226   |
| >TSHR-S505M·SELSVYTL    | 54    | >TSHR-S505M·NELSVYTL    | 177   | 123   |
| >TSHR-S505M·SELSVYTLTV  | 146   | >TSHR-S505M·NELSVYTLTV  | 297   | 151   |
| >TSHR-S505M·SELSVYTLTVI | 129   | >TSHR-S505M·NELSVYTLTVI | 390   | 261   |
| >TSHR-S505M·SELSVYTL    | 388   | >TSHR-S505M·NELSVYTL    | 551   | 163   |
| >TSHR-S505M·SELSVYTL    | 125   | >TSHR-S505M·NELSVYTL    | 139   | 14    |
| >TSHR-S505M·SELSVYTLTV  | 127   | >TSHR-S505M·NELSVYTLTV  | 410   | 283   |
| >TSHR-S505M·SELSVYTL    | 287   | >TSHR-S505M·NELSVYTL    | 895   | 608   |
| >TSHR-S505M·SELSVYTLT   | 87    | >TSHR-S505M·NELSVYTLT   | 287   | 200   |
| >TSHR-S505M·SELSVYTLTV  | 156   | >TSHR-S505M·NELSVYTLTV  | 909   | 753   |
| >TSHR-S505M·SELSVYTLTVI | 157   | >TSHR-S505M·NELSVYTLTVI | 486   | 329   |
| >TSHR-S505M·SELSVYTL    | 99    | >TSHR-S505M·NELSVYTL    | 231   | 132   |
| >TSHR-S505M·SELSVYTLT   | 183   | >TSHR-S505M·NELSVYTLT   | 391   | 208   |
| >TSHR-S505M·SELSVYTLTV  | 28    | >TSHR-S505M·NELSVYTLTV  | 29    | 1     |
| >TSHR-S505M·SELSVYTLTVI | 6     | >TSHR-S505M·NELSVYTLTVI | 10    | 4     |
| >TSHR-S505M·ASELSVYTL   | 322   | >TSHR-S505M·ANELSVYTL   | 7701  | 7379  |
| >TSHR-S505M·ASELSVYTL   | 8     | >TSHR-S505M·ANELSVYTL   | 12411 | 12403 |
| >TSHR-S505M·ASELSVYTLTV | 143   | >TSHR-S505M·ANELSVYTLT  | 21152 | 21009 |
| >TSHR-S505M·ASELSVYTL   | 102   | >TSHR-S505M·ANELSVYTL   | 9223  | 9121  |
| >TSHR-S505M·ASELSVYTLTV | 3574  | >TSHR-S505M·ANELSVYTLT  | 458   | 3116  |
| >TSHR-S505M·NTAGFFT VFA | 34    | >TSHR-S505M·NTAGFFT VFA | 592   | 558   |

|                         |     |                        |     |     |
|-------------------------|-----|------------------------|-----|-----|
| >TSHR-S505M FASELSVYTL  | 113 | >TSHR-S505M FANELSVYTL | 234 | 121 |
| >TSHR-S505M FASELSVYT   | 58  | >TSHR-S505M FANELSVYT  | 115 | 57  |
| >TSHR-S505M FASELSVYTL  | 23  | >TSHR-S505M FANELSVYTL | 64  | 41  |
| >TSHR-S505M FASELSVYTLT | 133 | >TSHR-S505M FANELSVYTL | 285 | 152 |
| >TSHR-S505M FASELSVYTL  | 182 | >TSHR-S505M FANELSVYTL | 354 | 172 |
| >TSHR-S505M FASELSVYTLT | 654 | >TSHR-S505M FANELSVYTL | 477 | 177 |
| >TSHR-S505M FASELSVYT   | 49  | >TSHR-S505M FANELSVYT  | 81  | 32  |
| >TSHR-S505M FASELSVYTL  | 64  | >TSHR-S505M FANELSVYTL | 113 | 49  |
| >TSHR-S505M FASELSVYTLT | 202 | >TSHR-S505M FANELSVYTL | 348 | 146 |
| >TSHR-S505M FASELSVYT   | 733 | >TSHR-S505M FANELSVYT  | 282 | 451 |
| >TSHR-S505M FASELSVYTL  | 48  | >TSHR-S505M FANELSVYTL | 24  | 24  |
| >TSHR-S505M FASELSVYTL  | 97  | >TSHR-S505M FANELSVYTL | 78  | 19  |
| >TSHR-S505M FASELSVYTL  | 252 | >TSHR-S505M FANELSVYTL | 225 | 27  |
| >TSHR-S505M FASELSVYTL  | 213 | >TSHR-S505M FANELSVYTL | 170 | 43  |
| >TSHR-S505M FASELSVYTL  | 108 | >TSHR-S505M FANELSVYTL | 129 | 21  |
| >TSHR-S505M FASELSVY    | 187 | >TSHR-S505M FANELSVY   | 330 | 143 |
| >TSHR-S505M FASELSVY    | 382 | >TSHR-S505M FANELSVY   | 395 | 13  |
| >TSHR-S505M FASELSVYT   | 238 | >TSHR-S505M FANELSVYT  | 354 | 116 |
| >TSHR-S505M FASELSVYTL  | 96  | >TSHR-S505M FANELSVYTL | 221 | 125 |
| >TSHR-S505M FASELSVYT   | 841 | >TSHR-S505M FANELSVYT  | 459 | 382 |
| >TSHR-S505M FASELSVYTL  | 147 | >TSHR-S505M FANELSVYTL | 88  | 59  |
| >TSHR-S505M FASELSVY    | 89  | >TSHR-S505M FANELSVY   | 73  | 16  |
| >TSHR-S505M FASELSVY    | 110 | >TSHR-S505M FANELSVY   | 103 | 7   |
| >TSHR-S505M FASELSVYTL  | 447 | >TSHR-S505M FANELSVYTL | 475 | 28  |
| >TSHR-S505M FASELSVY    | 20  | >TSHR-S505M FANELSVY   | 29  | 9   |
| >TSHR-S505M FASELSVYTL  | 56  | >TSHR-S505M FANELSVYTL | 84  | 28  |
| >TSHR-S505M FASELSVY    | 11  | >TSHR-S505M FANELSVY   | 12  | 1   |
| >TSHR-S505M FASELSVYTL  | 46  | >TSHR-S505M FANELSVYTL | 94  | 48  |
| >TSHR-S505M FASELSVY    | 89  | >TSHR-S505M FANELSVY   | 81  | 8   |
| >TSHR-S505M FASELSVY    | 135 | >TSHR-S505M FANELSVY   | 128 | 7   |
| >TSHR-S505M FASELSVY    | 441 | >TSHR-S505M FANELSVY   | 284 | 157 |
| >TSHR-S505M FASELSVYTL  | 453 | >TSHR-S505M FANELSVYTL | 290 | 163 |
| >TSHR-S505M FASELSVYTL  | 125 | >TSHR-S505M FANELSVYTL | 274 | 149 |
| >TSHR-S505M FASELSVY    | 109 | >TSHR-S505M FANELSVY   | 116 | 7   |
| >TSHR-S505M FASELSVYTL  | 334 | >TSHR-S505M FANELSVYTL | 349 | 15  |
| >TSHR-S505M VFASELSVYTL | 123 | >TSHR-S505M VFANELSVYT | 264 | 141 |
| >TSHR-S505M VFASELSV    | 391 | >TSHR-S505M VFANELSV   | 335 | 56  |
| >TSHR-S505M VFASELSVYTL | 93  | >TSHR-S505M VFANELSVYT | 104 | 11  |
| >TSHR-S505M VFASELSVYTL | 232 | >TSHR-S505M VFANELSVYT | 261 | 29  |
| >TSHR-S505M VFASELSVYTL | 94  | >TSHR-S505M VFANELSVYT | 105 | 11  |
| >TSHR-S505M VFASELSVY   | 290 | >TSHR-S505M VFANELSVY  | 963 | 673 |
| >TSHR-S505M VFASELSVY   | 46  | >TSHR-S505M VFANELSVY  | 69  | 23  |
| >TSHR-S505M VFASELSVY   | 24  | >TSHR-S505M VFANELSVY  | 35  | 11  |

|                        |     |                       |     |     |
|------------------------|-----|-----------------------|-----|-----|
| >TSHR-S505MVFASELSVY   | 45  | >TSHR-S505MVFANELSVY  | 61  | 16  |
| >TSHR-S505MVFASELSVY   | 430 | >TSHR-S505MVFANELSVY  | 571 | 141 |
| >TSHR-S505MVFASELSVYTL | 341 | >TSHR-S505MVFANELSVYT | 544 | 203 |
| >TSHR-S505MTVFASELSVY  | 334 | >TSHR-S505MTVFANELSVY | 255 | 79  |
| >TSHR-S505MTVFASELSV   | 159 | >TSHR-S505MTVFANELSV  | 215 | 56  |
| >TSHR-S505MTVFASELSV   | 295 | >TSHR-S505MTVFANELSV  | 345 | 50  |
| >TSHR-S505MTVFASELSV   | 169 | >TSHR-S505MTVFANELSV  | 287 | 118 |
| >TSHR-S505MTVFASELSV   | 48  | >TSHR-S505MTVFANELSV  | 63  | 15  |
| >TSHR-S505MTVFASELSV   | 159 | >TSHR-S505MTVFANELSV  | 62  | 97  |
| >TSHR-S505MTVFASELSV   | 149 | >TSHR-S505MTVFANELSV  | 184 | 35  |
| >TSHR-S505MTVFASELSV   | 20  | >TSHR-S505MTVFANELSV  | 14  | 6   |
| >TSHR-S505MTVFASELSVY  | 399 | >TSHR-S505MTVFANELSVY | 410 | 11  |
| >TSHR-S505MTVFASELSVY  | 778 | >TSHR-S505MTVFANELSVY | 419 | 359 |
| >TSHR-S505MTVFASELSVY  | 111 | >TSHR-S505MTVFANELSVY | 105 | 6   |
| >TSHR-S505MTVFASELSVY  | 288 | >TSHR-S505MTVFANELSVY | 336 | 48  |
| >TSHR-S505MTVFASELSVY  | 94  | >TSHR-S505MTVFANELSVY | 123 | 29  |
| >TSHR-S505MTVFASELSVY  | 128 | >TSHR-S505MTVFANELSVY | 157 | 29  |
| >TSHR-S505MTVFASELS    | 205 | >TSHR-S505MTVFANELS   | 200 | 5   |
| >TSHR-S505MTVFASELSV   | 12  | >TSHR-S505MTVFANELSV  | 12  | 0   |
| >TSHR-S505MTVFASELSVY  | 95  | >TSHR-S505MTVFANELSVY | 96  | 1   |
| >TSHR-S505MTVFASELSV   | 122 | >TSHR-S505MTVFANELSV  | 106 | 16  |
| >TSHR-S505MTVFASELSVY  | 72  | >TSHR-S505MTVFANELSVY | 78  | 6   |
| >TSHR-S505MTVFASELSVY  | 80  | >TSHR-S505MTVFANELSVY | 108 | 28  |
| >TSHR-S505MTVFASELSVY  | 104 | >TSHR-S505MTVFANELSVY | 130 | 26  |
| >TSHR-S505MTVFASELSVY  | 183 | >TSHR-S505MTVFANELSVY | 365 | 182 |
| >TSHR-S505MTVFASELSVY  | 51  | >TSHR-S505MTVFANELSVY | 144 | 93  |
| >TSHR-S505MTVFASELSV   | 127 | >TSHR-S505MTVFANELSV  | 131 | 4   |
| >TSHR-S505MTVFASEL     | 18  | >TSHR-S505MTVFANEL    | 14  | 4   |
| >TSHR-S505MTVFASELSV   | 64  | >TSHR-S505MTVFANELSV  | 75  | 11  |
| >TSHR-S505MTVFASEL     | 121 | >TSHR-S505MTVFANEL    | 372 | 251 |
| >TSHR-S505MTVFASELSV   | 94  | >TSHR-S505MTVFANELSV  | 138 | 44  |
| >TSHR-S505MTVFASEL     | 31  | >TSHR-S505MTVFANEL    | 36  | 5   |
| >TSHR-S505MTVFASELSV   | 38  | >TSHR-S505MTVFANELSV  | 46  | 8   |
| >TSHR-S505MTVFASELSV   | 75  | >TSHR-S505MTVFANELSV  | 78  | 3   |
| >TSHR-S505MTVFASELSV   | 492 | >TSHR-S505MTVFANELSV  | 489 | 3   |
| >TSHR-S505MTVFASELSV   | 196 | >TSHR-S505MTVFANELSV  | 410 | 214 |
| >TSHR-S505MTVFASELSV   | 69  | >TSHR-S505MTVFANELSV  | 81  | 12  |
| >TSHR-S505MTVFASELSV\  | 207 | >TSHR-S505MTVFANELSV' | 240 | 33  |
| >TSHR-S505MTVFASELSV\  | 14  | >TSHR-S505MTVFANELSV' | 22  | 8   |
| >TSHR-S505MTVFASEL     | 279 | >TSHR-S505MTVFANEL    | 290 | 11  |
| >TSHR-S505MTVFASELSV\  | 7   | >TSHR-S505MTVFANELSV' | 6   | 1   |
| >TSHR-S505MTVFASELSV\  | 20  | >TSHR-S505MTVFANELSV' | 25  | 5   |
| >TSHR-S505MTVFASELSV\  | 160 | >TSHR-S505MTVFANELSV' | 153 | 7   |

|                        |      |                        |      |      |
|------------------------|------|------------------------|------|------|
| >TSHR-S505MFTVFASELSV\ | 108  | >TSHR-S505MFTVFANELSV' | 103  | 5    |
| >TSHR-S505MFTVFASEL    | 14   | >TSHR-S505MFTVFANEL    | 10   | 4    |
| >TSHR-S505MFTVFASELS   | 47   | >TSHR-S505MFTVFANELS   | 48   | 1    |
| >TSHR-S505MFTVFASELSV  | 22   | >TSHR-S505MFTVFANELSV  | 25   | 3    |
| >TSHR-S505MFTVFASEL    | 57   | >TSHR-S505MFTVFANEL    | 61   | 4    |
| >TSHR-S505MFTVFASELSV  | 28   | >TSHR-S505MFTVFANELSV  | 28   | 0    |
| >TSHR-S505MFTVFASELSV\ | 55   | >TSHR-S505MFTVFANELSV' | 74   | 19   |
| >TSHR-S505MFTVFASELSV\ | 177  | >TSHR-S505MFTVFANELSV' | 210  | 33   |
| >TSHR-S505MFTVFASEL    | 7    | >TSHR-S505MFTVFANEL    | 27   | 20   |
| >TSHR-S505MFTVFASELSV  | 121  | >TSHR-S505MFTVFANELSV  | 342  | 221  |
| >TSHR-S505MFTVFASELSV\ | 5    | >TSHR-S505MFTVFANELSV' | 6    | 1    |
| >TSHR-S505MFTVFASELSV\ | 132  | >TSHR-S505MFTVFANELSV' | 192  | 60   |
| >TSHR-S505MFTVFASEL    | 167  | >TSHR-S505MFTVFANEL    | 115  | 52   |
| >TSHR-S505MFTVFASEL    | 312  | >TSHR-S505MFTVFANEL    | 89   | 223  |
| >TSHR-S505MFTVFASELSV  | 101  | >TSHR-S505MFTVFANELSV  | 127  | 26   |
| >TSHR-S505MFTVFASELSV\ | 4    | >TSHR-S505MFTVFANELSV' | 4    | 0    |
| >TSHR-S505MFFTTFASEL   | 88   | >TSHR-S505MFFTTFANEL   | 39   | 49   |
| >TSHR-S505MFFTTFASELSV | 300  | >TSHR-S505MFFTTFANELS\ | 243  | 57   |
| >TSHR-S505MFFTTFASELSV | 81   | >TSHR-S505MFFTTFANELS\ | 108  | 27   |
| >TSHR-S505MFFTTFASEL   | 43   | >TSHR-S505MFFTTFANEL   | 28   | 15   |
| >TSHR-S505MGFFTTFASEL  | 64   | >TSHR-S505MGFFTTFANEL  | 52   | 12   |
| >TSHR-S505MGFFTTFASEL  | 272  | >TSHR-S505MGFFTTFANEL  | 526  | 254  |
| >TSHR-S505MAGFFTTFASE  | 475  | >TSHR-S505MAGFFTTFANE  | 287  | 188  |
| >TSHR-S505MAGFFTTFASE  | 381  | >TSHR-S505MAGFFTTFANE  | 1839 | 1458 |
| >TSHR-S505MAGFFTTFASE  | 169  | >TSHR-S505MAGFFTTFANE  | 1008 | 839  |
| >TSHR-T632/TDFICMAPI   | 103  | >TSHR-T632/ADFICMAPI   | 471  | 368  |
| >TSHR-T632/TDFICMAPI   | 127  | >TSHR-T632/ADFICMAPI   | 4520 | 4393 |
| >TSHR-T632/TDFICMAPISI | 391  | >TSHR-T632/ADFICMAPISI | 98   | 293  |
| >TSHR-T632/TDFICMAPI   | 65   | >TSHR-T632/ADFICMAPI   | 29   | 36   |
| >TSHR-T632/TDFICMAPISI | 138  | >TSHR-T632/ADFICMAPISI | 71   | 67   |
| >TSHR-T632/TDFICMAPI   | 76   | >TSHR-T632/ADFICMAPI   | 21   | 55   |
| >TSHR-T632/TDFICMAPISI | 2475 | >TSHR-T632/ADFICMAPISI | 371  | 2104 |
| >TSHR-T632/TDFICMAPI   | 425  | >TSHR-T632/ADFICMAPI   | 1348 | 923  |
| >TSHR-T632/TDFICMAPI   | 101  | >TSHR-T632/ADFICMAPI   | 84   | 17   |
| >TSHR-T632/FTDFICMA    | 392  | >TSHR-T632/FADFICMA    | 9358 | 8966 |
| >TSHR-T632/FTDFICMA    | 343  | >TSHR-T632/FADFICMA    | 1135 | 792  |
| >TSHR-T632/FTDFICMAPI  | 378  | >TSHR-T632/FADFICMAPI  | 631  | 253  |
| >TSHR-T632/FTDFICMA    | 221  | >TSHR-T632/FADFICMA    | 626  | 405  |
| >TSHR-T632/FTDFICMAPI  | 333  | >TSHR-T632/FADFICMAPI  | 627  | 294  |
| >TSHR-T632/FTDFICMAPI  | 400  | >TSHR-T632/FADFICMAPI  | 770  | 370  |
| >TSHR-T632/FTDFICMA    | 140  | >TSHR-T632/FADFICMA    | 213  | 73   |
| >TSHR-T632/FTDFICMAPI  | 83   | >TSHR-T632/FADFICMAPI  | 130  | 47   |
| >TSHR-T632/FTDFICMA    | 187  | >TSHR-T632/FADFICMA    | 600  | 413  |

|                        |      |                        |      |      |
|------------------------|------|------------------------|------|------|
| >TSHR-T632/FTDFICMAPI  | 256  | >TSHR-T632/FADFICMAPI  | 996  | 740  |
| >TSHR-T632/FTDFICMA    | 194  | >TSHR-T632/FADFICMA    | 1512 | 1318 |
| >TSHR-T632/FTDFICMAPI  | 29   | >TSHR-T632/FADFICMAPI  | 124  | 95   |
| >TSHR-T632/FTDFICMA    | 119  | >TSHR-T632/FADFICMA    | 659  | 540  |
| >TSHR-T632/FTDFICMAPI  | 16   | >TSHR-T632/FADFICMAPI  | 74   | 58   |
| >TSHR-T632/FTDFICMAPI  | 185  | >TSHR-T632/FADFICMAPI  | 1167 | 982  |
| >TSHR-T632/FTDFICMAPI  | 412  | >TSHR-T632/FADFICMAPI  | 3186 | 2774 |
| >TSHR-T632/FTDFICMAPI  | 94   | >TSHR-T632/FADFICMAPI  | 448  | 354  |
| >TSHR-T632/IAKRMAVLIF  | 652  | >TSHR-T632/IAKRMAVLIF/ | 26   | 626  |
| >TSHR-T632/IFTDFICMA   | 1953 | >TSHR-T632/IFADFICMA   | 203  | 1750 |
| >TSHR-T632/IFTDFICMAPI | 365  | >TSHR-T632/IFADFICMAPI | 39   | 326  |
| >TSHR-T632/LIFTDFICM   | 761  | >TSHR-T632/LIFADFICM   | 366  | 395  |
| >TSHR-T632/LIFTDFICMA  | 619  | >TSHR-T632/LIFADFICMA  | 463  | 156  |
| >TSHR-T632/LIFTDFICMA  | 181  | >TSHR-T632/LIFADFICMA  | 140  | 41   |
| >TSHR-T632/LIFTDFICMA  | 139  | >TSHR-T632/LIFADFICMA  | 94   | 45   |
| >TSHR-T632/LIFTDFIC    | 880  | >TSHR-T632/LIFADFIC    | 436  | 444  |
| >TSHR-T632/LIFTDFICM   | 319  | >TSHR-T632/LIFADFICM   | 146  | 173  |
| >TSHR-T632/LIFTDFICMA  | 109  | >TSHR-T632/LIFADFICMA  | 115  | 6    |
| >TSHR-T632/LIFTDFICMA  | 72   | >TSHR-T632/LIFADFICMA  | 32   | 40   |
| >TSHR-T632/LIFTDFICMA  | 302  | >TSHR-T632/LIFADFICMA  | 155  | 147  |
| >TSHR-T632/LIFTDFICMA  | 52   | >TSHR-T632/LIFADFICMA  | 29   | 23   |
| >TSHR-T632/LIFTDFICMA  | 1303 | >TSHR-T632/LIFADFICMA  | 410  | 893  |
| >TSHR-T632/LIFTDFICM   | 785  | >TSHR-T632/LIFADFICM   | 201  | 584  |
| >TSHR-T632/LIFTDFICM   | 173  | >TSHR-T632/LIFADFICM   | 213  | 40   |
| >TSHR-T632/VLIFTDFI    | 68   | >TSHR-T632/VLIFADFI    | 75   | 7    |
| >TSHR-T632/VLIFTDFICM  | 428  | >TSHR-T632/VLIFADFICM  | 401  | 27   |
| >TSHR-T632/VLIFTDFICM/ | 110  | >TSHR-T632/VLIFADFICM/ | 84   | 26   |
| >TSHR-T632/VLIFTDFI    | 29   | >TSHR-T632/VLIFADFI    | 23   | 6    |
| >TSHR-T632/VLIFTDFICM/ | 168  | >TSHR-T632/VLIFADFICM/ | 94   | 74   |
| >TSHR-T632/VLIFTDFI    | 42   | >TSHR-T632/VLIFADFI    | 51   | 9    |
| >TSHR-T632/VLIFTDFICM/ | 62   | >TSHR-T632/VLIFADFICM/ | 52   | 10   |
| >TSHR-T632/VLIFTDFI    | 161  | >TSHR-T632/VLIFADFI    | 104  | 57   |
| >TSHR-T632/VLIFTDFICM/ | 237  | >TSHR-T632/VLIFADFICM/ | 143  | 94   |
| >TSHR-T632/VLIFTDFI    | 13   | >TSHR-T632/VLIFADFI    | 21   | 8    |
| >TSHR-T632/VLIFTDFICM/ | 19   | >TSHR-T632/VLIFADFICM/ | 30   | 11   |
| >TSHR-T632/VLIFTDFI    | 11   | >TSHR-T632/VLIFADFI    | 18   | 7    |
| >TSHR-T632/VLIFTDFIC   | 195  | >TSHR-T632/VLIFADFIC   | 394  | 199  |
| >TSHR-T632/VLIFTDFICM  | 185  | >TSHR-T632/VLIFADFICM  | 292  | 107  |
| >TSHR-T632/VLIFTDFICM/ | 56   | >TSHR-T632/VLIFADFICM/ | 89   | 33   |
| >TSHR-T632/VLIFTDFI    | 30   | >TSHR-T632/VLIFADFI    | 33   | 3    |
| >TSHR-T632/VLIFTDFICM/ | 38   | >TSHR-T632/VLIFADFICM/ | 37   | 1    |
| >TSHR-T632/VLIFTDFI    | 78   | >TSHR-T632/VLIFADFI    | 131  | 53   |
| >TSHR-T632/VLIFTDFICM/ | 542  | >TSHR-T632/VLIFADFICM/ | 474  | 68   |

|                        |      |                        |     |      |
|------------------------|------|------------------------|-----|------|
| >TSHR-T632/VLIFTDFI    | 45   | >TSHR-T632/VLIFADFI    | 61  | 16   |
| >TSHR-T632/VLIFTDFIC   | 381  | >TSHR-T632/VLIFADFIC   | 455 | 74   |
| >TSHR-T632/VLIFTDFICM/ | 14   | >TSHR-T632/VLIFADFICM/ | 15  | 1    |
| >TSHR-T632/AVLIFTDFI   | 339  | >TSHR-T632/AVLIFADFI   | 409 | 70   |
| >TSHR-T632/AVLIFTDFI   | 201  | >TSHR-T632/AVLIFADFI   | 605 | 404  |
| >TSHR-T632/AVLIFTDFI   | 47   | >TSHR-T632/AVLIFADFI   | 55  | 8    |
| >TSHR-T632/AVLIFTDFI   | 98   | >TSHR-T632/AVLIFADFI   | 159 | 61   |
| >TSHR-T632/AVLIFTDFI   | 264  | >TSHR-T632/AVLIFADFI   | 591 | 327  |
| >TSHR-T632/AVLIFTDFICM | 287  | >TSHR-T632/AVLIFADFICM | 519 | 232  |
| >TSHR-T632/AVLIFTDF    | 63   | >TSHR-T632/AVLIFADF    | 142 | 79   |
| >TSHR-T632/AVLIFTDFI   | 238  | >TSHR-T632/AVLIFADFI   | 861 | 623  |
| >TSHR-T632/AVLIFTDFI   | 189  | >TSHR-T632/AVLIFADFI   | 294 | 105  |
| >TSHR-T632/AVLIFTDF    | 213  | >TSHR-T632/AVLIFADF    | 381 | 168  |
| >TSHR-T632/AVLIFTDF    | 424  | >TSHR-T632/AVLIFADF    | 154 | 270  |
| >TSHR-T632/AVLIFTDFI   | 226  | >TSHR-T632/AVLIFADFI   | 358 | 132  |
| >TSHR-T632/MAVLIFTDFI  | 190  | >TSHR-T632/MAVLIFADFI  | 201 | 11   |
| >TSHR-T632/MAVLIFTDFI  | 153  | >TSHR-T632/MAVLIFADFI  | 248 | 95   |
| >TSHR-T632/MAVLIFTDF   | 591  | >TSHR-T632/MAVLIFADF   | 313 | 278  |
| >TSHR-T632/MAVLIFTDFI  | 76   | >TSHR-T632/MAVLIFADFI  | 58  | 18   |
| >TSHR-T632/MAVLIFTDFI  | 304  | >TSHR-T632/MAVLIFADFI  | 283 | 21   |
| >TSHR-T632/MAVLIFTDF   | 57   | >TSHR-T632/MAVLIFADF   | 115 | 58   |
| >TSHR-T632/MAVLIFTDF   | 85   | >TSHR-T632/MAVLIFADF   | 35  | 50   |
| >TSHR-T632/MAVLIFTDF   | 48   | >TSHR-T632/MAVLIFADF   | 43  | 5    |
| >TSHR-T632/MAVLIFTDF   | 151  | >TSHR-T632/MAVLIFADF   | 177 | 26   |
| >TSHR-T632/MAVLIFTD    | 905  | >TSHR-T632/MAVLIFAD    | 372 | 533  |
| >TSHR-T632/MAVLIFTDF   | 406  | >TSHR-T632/MAVLIFADF   | 985 | 579  |
| >TSHR-T632/MAVLIFTDF   | 1259 | >TSHR-T632/MAVLIFADF   | 205 | 1054 |
| >TSHR-T632/RMAVLIFT    | 161  | >TSHR-T632/RMAVLIFA    | 32  | 129  |
| >TSHR-T632/RMAVLIFTDF  | 30   | >TSHR-T632/RMAVLIFADF  | 55  | 25   |
| >TSHR-T632/RMAVLIFT    | 75   | >TSHR-T632/RMAVLIFA    | 12  | 63   |
| >TSHR-T632/RMAVLIFTDF  | 5    | >TSHR-T632/RMAVLIFADF  | 7   | 2    |
| >TSHR-T632/RMAVLIFT    | 150  | >TSHR-T632/RMAVLIFA    | 15  | 135  |
| >TSHR-T632/RMAVLIFTDF  | 15   | >TSHR-T632/RMAVLIFADF  | 21  | 6    |
| >TSHR-T632/RMAVLIFT    | 289  | >TSHR-T632/RMAVLIFA    | 57  | 232  |
| >TSHR-T632/RMAVLIFTDF  | 53   | >TSHR-T632/RMAVLIFADF  | 50  | 3    |
| >TSHR-T632/RMAVLIFT    | 75   | >TSHR-T632/RMAVLIFA    | 15  | 60   |
| >TSHR-T632/RMAVLIFTDF  | 8    | >TSHR-T632/RMAVLIFADF  | 10  | 2    |
| >TSHR-T632/RMAVLIFT    | 1632 | >TSHR-T632/RMAVLIFA    | 97  | 1535 |
| >TSHR-T632/RMAVLIFTDF  | 25   | >TSHR-T632/RMAVLIFADF  | 36  | 11   |
| >TSHR-T632/RMAVLIFT    | 104  | >TSHR-T632/RMAVLIFA    | 20  | 84   |
| >TSHR-T632/RMAVLIFTDF  | 16   | >TSHR-T632/RMAVLIFADF  | 18  | 2    |
| >TSHR-T632/RMAVLIFT    | 1587 | >TSHR-T632/RMAVLIFA    | 141 | 1446 |
| >TSHR-T632/RMAVLIFTDF  | 19   | >TSHR-T632/RMAVLIFADF  | 38  | 19   |

|                         |      |                         |      |      |
|-------------------------|------|-------------------------|------|------|
| >TSHR-T632/RMAVLIFT     | 425  | >TSHR-T632/RMAVLIFA     | 42   | 383  |
| >TSHR-T632/RMAVLIFTDF   | 89   | >TSHR-T632/RMAVLIFADF   | 142  | 53   |
| >TSHR-T632/RMAVLIFTDF   | 185  | >TSHR-T632/RMAVLIFADF   | 148  | 37   |
| >TSHR-T632/RMAVLIFT     | 5086 | >TSHR-T632/RMAVLIFA     | 344  | 4742 |
| >TSHR-T632/RMAVLIFTDF   | 1462 | >TSHR-T632/RMAVLIFADF   | 425  | 1037 |
| >TSHR-T632/RMAVLIFTDF   | 22   | >TSHR-T632/RMAVLIFADF   | 36   | 14   |
| >TSHR-T632/RMAVLIFTDF   | 69   | >TSHR-T632/RMAVLIFADF   | 125  | 56   |
| >TSHR-T632/RMAVLIFTDF   | 45   | >TSHR-T632/RMAVLIFADF   | 41   | 4    |
| >TSHR-T632/RMAVLIFTDF   | 8    | >TSHR-T632/RMAVLIFADF   | 9    | 1    |
| >TSHR-T632/RMAVLIFTDF   | 498  | >TSHR-T632/RMAVLIFADF   | 512  | 14   |
| >TSHR-T632/RMAVLIFTDF   | 337  | >TSHR-T632/RMAVLIFADF   | 244  | 93   |
| >TSHR-T632/RMAVLIFTDF   | 106  | >TSHR-T632/RMAVLIFADF   | 82   | 24   |
| >TSHR-T632/RMAVLIFTDF   | 97   | >TSHR-T632/RMAVLIFADF   | 147  | 50   |
| >TSHR-T632/RMAVLIFTDF   | 253  | >TSHR-T632/RMAVLIFADF   | 262  | 9    |
| >TSHR-T632/RMAVLIFTDF   | 347  | >TSHR-T632/RMAVLIFADF   | 626  | 279  |
| >TSHR-T632/RMAVLIFTDF   | 146  | >TSHR-T632/RMAVLIFADF   | 204  | 58   |
| >TSHR-T632/KRMAVLIFT    | 2657 | >TSHR-T632/KRMAVLIFA    | 342  | 2315 |
| >TSHR-T632/KRMAVLIFTD   | 14   | >TSHR-T632/KRMAVLIFAC   | 22   | 8    |
| >TSHR-T632/KRMAVLIFT    | 117  | >TSHR-T632/KRMAVLIFA    | 61   | 56   |
| >TSHR-T632/KRMAVLIFTD   | 38   | >TSHR-T632/KRMAVLIFAC   | 38   | 0    |
| >TSHR-T632/KRMAVLIFT    | 62   | >TSHR-T632/KRMAVLIFA    | 73   | 11   |
| >TSHR-T632/KRMAVLIFTD   | 499  | >TSHR-T632/KRMAVLIFAC   | 659  | 160  |
| >TSHR-T632/KRMAVLIFTD   | 45   | >TSHR-T632/KRMAVLIFAC   | 53   | 8    |
| >TSHR-T632/KRMAVLIFT    | 678  | >TSHR-T632/KRMAVLIFA    | 266  | 412  |
| >TSHR-T632/KRMAVLIFTD   | 28   | >TSHR-T632/KRMAVLIFAC   | 26   | 2    |
| >TSHR-T632/AKRMAVLIFT   | 815  | >TSHR-T632/AKRMAVLIFA   | 32   | 783  |
| >TSHR-T632/AKRMAVLIFT   | 1484 | >TSHR-T632/AKRMAVLIFA   | 307  | 1177 |
| >TSHR-T632I TDFICMAPI   | 103  | >TSHR-T632I IDFICMAPI   | 128  | 25   |
| >TSHR-T632I TDFICMAPI   | 127  | >TSHR-T632I IDFICMAPI   | 2435 | 2308 |
| >TSHR-T632I TDFICMAPISF | 391  | >TSHR-T632I IDFICMAPISF | 82   | 309  |
| >TSHR-T632I TDFICMAPISF | 627  | >TSHR-T632I IDFICMAPISF | 435  | 192  |
| >TSHR-T632I TDFICMAPI   | 65   | >TSHR-T632I IDFICMAPI   | 194  | 129  |
| >TSHR-T632I TDFICMAPISF | 138  | >TSHR-T632I IDFICMAPISF | 410  | 272  |
| >TSHR-T632I TDFICMAPI   | 76   | >TSHR-T632I IDFICMAPI   | 32   | 44   |
| >TSHR-T632I TDFICMAPI   | 425  | >TSHR-T632I IDFICMAPI   | 1249 | 824  |
| >TSHR-T632I TDFICMAPI   | 101  | >TSHR-T632I IDFICMAPI   | 153  | 52   |
| >TSHR-T632I FTDFICMA    | 392  | >TSHR-T632I FIDFICMA    | 9246 | 8854 |
| >TSHR-T632I FTDFICMA    | 343  | >TSHR-T632I FIDFICMA    | 70   | 273  |
| >TSHR-T632I FTDFICMAPI  | 378  | >TSHR-T632I FIDFICMAPI  | 129  | 249  |
| >TSHR-T632I FTDFICMA    | 221  | >TSHR-T632I FIDFICMA    | 61   | 160  |
| >TSHR-T632I FTDFICMAPI  | 333  | >TSHR-T632I FIDFICMAPI  | 165  | 168  |
| >TSHR-T632I FTDFICMA    | 1277 | >TSHR-T632I FIDFICMA    | 242  | 1035 |
| >TSHR-T632I FTDFICMAPI  | 400  | >TSHR-T632I FIDFICMAPI  | 183  | 217  |



|                          |      |                         |       |       |
|--------------------------|------|-------------------------|-------|-------|
| >TSHR-T632I·FTDFICMA     | 140  | >TSHR-T632I·FIDFICMA    | 74    | 66    |
| >TSHR-T632I·FTDFICMAPI   | 83   | >TSHR-T632I·FIDFICMAPI  | 78    | 5     |
| >TSHR-T632I·FTDFICMA     | 187  | >TSHR-T632I·FIDFICMA    | 55    | 132   |
| >TSHR-T632I·FTDFICMAPI   | 256  | >TSHR-T632I·FIDFICMAPI  | 58    | 198   |
| >TSHR-T632I·FTDFICMAPI   | 654  | >TSHR-T632I·FIDFICMAPI  | 133   | 521   |
| >TSHR-T632I·FTDFICMA     | 767  | >TSHR-T632I·FIDFICMA    | 133   | 634   |
| >TSHR-T632I·FTDFICMAPI   | 2138 | >TSHR-T632I·FIDFICMAPI  | 334   | 1804  |
| >TSHR-T632I·FTDFICMAPI   | 3142 | >TSHR-T632I·FIDFICMAPI  | 291   | 2851  |
| >TSHR-T632I·FTDFICMA     | 3658 | >TSHR-T632I·FIDFICMA    | 130   | 3528  |
| >TSHR-T632I·FTDFICMAPI   | 9009 | >TSHR-T632I·FIDFICMAPI  | 498   | 8511  |
| >TSHR-T632I·FTDFICMA     | 194  | >TSHR-T632I·FIDFICMA    | 1507  | 1313  |
| >TSHR-T632I·FTDFICMAPI   | 29   | >TSHR-T632I·FIDFICMAPI  | 113   | 84    |
| >TSHR-T632I·FTDFICMA     | 119  | >TSHR-T632I·FIDFICMA    | 477   | 358   |
| >TSHR-T632I·FTDFICMAPI   | 16   | >TSHR-T632I·FIDFICMAPI  | 45    | 29    |
| >TSHR-T632I·FTDFICMAPI   | 185  | >TSHR-T632I·FIDFICMAPI  | 9979  | 9794  |
| >TSHR-T632I·FTDFICMAPI   | 412  | >TSHR-T632I·FIDFICMAPI  | 13889 | 13477 |
| >TSHR-T632I·FTDFICMAPI   | 94   | >TSHR-T632I·FIDFICMAPI  | 6313  | 6219  |
| >TSHR-T632I·IAKRMAVLIFI  | 652  | >TSHR-T632I·IAKRMAVLIFI | 28    | 624   |
| >TSHR-T632I·IFTDFICM     | 1966 | >TSHR-T632I·IFIDFICM    | 324   | 1642  |
| >TSHR-T632I·IFTDFICMAPI  | 1112 | >TSHR-T632I·IFIDFICMAPI | 275   | 837   |
| >TSHR-T632I·IFTDFICMAPI  | 365  | >TSHR-T632I·IFIDFICMAPI | 147   | 218   |
| >TSHR-T632I·IFTDFICMAPI  | 2360 | >TSHR-T632I·IFIDFICMAPI | 466   | 1894  |
| >TSHR-T632I·IFTDFICMAPI  | 2581 | >TSHR-T632I·IFIDFICMAPI | 367   | 2214  |
| >TSHR-T632I·LIFTDFICMA   | 181  | >TSHR-T632I·LIFIDFICMA  | 302   | 121   |
| >TSHR-T632I·LIFTDFICMA   | 139  | >TSHR-T632I·LIFIDFICMA  | 226   | 87    |
| >TSHR-T632I·LIFTDFICM    | 319  | >TSHR-T632I·LIFIDFICM   | 623   | 304   |
| >TSHR-T632I·LIFTDFICMA   | 109  | >TSHR-T632I·LIFIDFICMA  | 125   | 16    |
| >TSHR-T632I·LIFTDFICMA   | 72   | >TSHR-T632I·LIFIDFICMA  | 52    | 20    |
| >TSHR-T632I·LIFTDFICMA   | 302  | >TSHR-T632I·LIFIDFICMA  | 226   | 76    |
| >TSHR-T632I·LIFTDFICMA   | 52   | >TSHR-T632I·LIFIDFICMA  | 54    | 2     |
| >TSHR-T632I·LIFTDFICM    | 173  | >TSHR-T632I·LIFIDFICM   | 491   | 318   |
| >TSHR-T632I·VLIFTDFI     | 68   | >TSHR-T632I·VLIFIDFI    | 37    | 31    |
| >TSHR-T632I·VLIFTDFICM   | 428  | >TSHR-T632I·VLIFIDFICM  | 434   | 6     |
| >TSHR-T632I·VLIFTDFICMA/ | 110  | >TSHR-T632I·VLIFIDFICMA | 59    | 51    |
| >TSHR-T632I·VLIFTDFI     | 29   | >TSHR-T632I·VLIFIDFI    | 14    | 15    |
| >TSHR-T632I·VLIFTDFICMA/ | 168  | >TSHR-T632I·VLIFIDFICMA | 55    | 113   |
| >TSHR-T632I·VLIFTDFI     | 42   | >TSHR-T632I·VLIFIDFI    | 32    | 10    |
| >TSHR-T632I·VLIFTDFICMA/ | 62   | >TSHR-T632I·VLIFIDFICMA | 46    | 16    |
| >TSHR-T632I·VLIFTDFI     | 161  | >TSHR-T632I·VLIFIDFI    | 107   | 54    |
| >TSHR-T632I·VLIFTDFICMA/ | 237  | >TSHR-T632I·VLIFIDFICMA | 195   | 42    |
| >TSHR-T632I·VLIFTDFI     | 13   | >TSHR-T632I·VLIFIDFI    | 10    | 3     |
| >TSHR-T632I·VLIFTDFICMA/ | 19   | >TSHR-T632I·VLIFIDFICMA | 19    | 0     |
| >TSHR-T632I·VLIFTDFI     | 11   | >TSHR-T632I·VLIFIDFI    | 15    | 4     |

|                         |      |                         |      |      |
|-------------------------|------|-------------------------|------|------|
| >TSHR-T632I·VLIFTDFIC   | 195  | >TSHR-T632I·VLIFIDFIC   | 337  | 142  |
| >TSHR-T632I·VLIFTDFICM  | 185  | >TSHR-T632I·VLIFIDFICM  | 336  | 151  |
| >TSHR-T632I·VLIFTDFICM/ | 56   | >TSHR-T632I·VLIFIDFICMA | 81   | 25   |
| >TSHR-T632I·VLIFTDFI    | 30   | >TSHR-T632I·VLIFIDFI    | 25   | 5    |
| >TSHR-T632I·VLIFTDFICM/ | 38   | >TSHR-T632I·VLIFIDFICMA | 41   | 3    |
| >TSHR-T632I·VLIFTDFI    | 78   | >TSHR-T632I·VLIFIDFI    | 54   | 24   |
| >TSHR-T632I·VLIFTDFICM/ | 542  | >TSHR-T632I·VLIFIDFICMA | 366  | 176  |
| >TSHR-T632I·VLIFTDFI    | 45   | >TSHR-T632I·VLIFIDFI    | 32   | 13   |
| >TSHR-T632I·VLIFTDFIC   | 381  | >TSHR-T632I·VLIFIDFIC   | 374  | 7    |
| >TSHR-T632I·VLIFTDFICM/ | 14   | >TSHR-T632I·VLIFIDFICMA | 13   | 1    |
| >TSHR-T632I·VLIFTDFI    | 1458 | >TSHR-T632I·VLIFIDFI    | 472  | 986  |
| >TSHR-T632I·AVLIFTDFI   | 339  | >TSHR-T632I·AVLIFIDFI   | 758  | 419  |
| >TSHR-T632I·AVLIFTDFI   | 530  | >TSHR-T632I·AVLIFIDFI   | 274  | 256  |
| >TSHR-T632I·AVLIFTDFI   | 201  | >TSHR-T632I·AVLIFIDFI   | 299  | 98   |
| >TSHR-T632I·AVLIFTDFI   | 47   | >TSHR-T632I·AVLIFIDFI   | 38   | 9    |
| >TSHR-T632I·AVLIFTDFI   | 98   | >TSHR-T632I·AVLIFIDFI   | 26   | 72   |
| >TSHR-T632I·AVLIFTDFI   | 264  | >TSHR-T632I·AVLIFIDFI   | 128  | 136  |
| >TSHR-T632I·AVLIFTDFICM | 287  | >TSHR-T632I·AVLIFIDFICM | 261  | 26   |
| >TSHR-T632I·AVLIFTDF    | 63   | >TSHR-T632I·AVLIFIDF    | 138  | 75   |
| >TSHR-T632I·AVLIFTDFI   | 238  | >TSHR-T632I·AVLIFIDFI   | 1732 | 1494 |
| >TSHR-T632I·AVLIFTDFI   | 189  | >TSHR-T632I·AVLIFIDFI   | 382  | 193  |
| >TSHR-T632I·AVLIFTDF    | 213  | >TSHR-T632I·AVLIFIDF    | 354  | 141  |
| >TSHR-T632I·AVLIFTDF    | 424  | >TSHR-T632I·AVLIFIDF    | 522  | 98   |
| >TSHR-T632I·AVLIFTDFI   | 226  | >TSHR-T632I·AVLIFIDFI   | 521  | 295  |
| >TSHR-T632I·MAVLIFTDFI  | 190  | >TSHR-T632I·MAVLIFIDFI  | 429  | 239  |
| >TSHR-T632I·MAVLIFTDFI  | 539  | >TSHR-T632I·MAVLIFIDFI  | 470  | 69   |
| >TSHR-T632I·MAVLIFTDFI  | 153  | >TSHR-T632I·MAVLIFIDFI  | 119  | 34   |
| >TSHR-T632I·MAVLIFTDF   | 591  | >TSHR-T632I·MAVLIFIDF   | 455  | 136  |
| >TSHR-T632I·MAVLIFTDFI  | 76   | >TSHR-T632I·MAVLIFIDFI  | 87   | 11   |
| >TSHR-T632I·MAVLIFTDFI  | 304  | >TSHR-T632I·MAVLIFIDFI  | 337  | 33   |
| >TSHR-T632I·MAVLIFTDF   | 57   | >TSHR-T632I·MAVLIFIDF   | 105  | 48   |
| >TSHR-T632I·MAVLIFTDF   | 85   | >TSHR-T632I·MAVLIFIDF   | 144  | 59   |
| >TSHR-T632I·MAVLIFTDF   | 48   | >TSHR-T632I·MAVLIFIDF   | 28   | 20   |
| >TSHR-T632I·MAVLIFTDF   | 151  | >TSHR-T632I·MAVLIFIDF   | 140  | 11   |
| >TSHR-T632I·MAVLIFTDF   | 406  | >TSHR-T632I·MAVLIFIDF   | 2647 | 2241 |
| >TSHR-T632I·RMAVLIFT    | 161  | >TSHR-T632I·RMAVLIFI    | 21   | 140  |
| >TSHR-T632I·RMAVLIFTDF  | 30   | >TSHR-T632I·RMAVLIFIDFI | 25   | 5    |
| >TSHR-T632I·RMAVLIFT    | 75   | >TSHR-T632I·RMAVLIFI    | 8    | 67   |
| >TSHR-T632I·RMAVLIFTDF  | 5    | >TSHR-T632I·RMAVLIFIDFI | 6    | 1    |
| >TSHR-T632I·RMAVLIFT    | 150  | >TSHR-T632I·RMAVLIFI    | 13   | 137  |
| >TSHR-T632I·RMAVLIFTDF  | 15   | >TSHR-T632I·RMAVLIFIDFI | 14   | 1    |
| >TSHR-T632I·RMAVLIFT    | 289  | >TSHR-T632I·RMAVLIFI    | 38   | 251  |
| >TSHR-T632I·RMAVLIFTDF  | 53   | >TSHR-T632I·RMAVLIFIDFI | 45   | 8    |

|                        |       |                         |     |       |
|------------------------|-------|-------------------------|-----|-------|
| >TSHR-T632I RMAVLIFT   | 75    | >TSHR-T632I RMAVLIFI    | 6   | 69    |
| >TSHR-T632I RMAVLIFTDF | 8     | >TSHR-T632I RMAVLIFIDFI | 7   | 1     |
| >TSHR-T632I RMAVLIFT   | 1632  | >TSHR-T632I RMAVLIFI    | 24  | 1608  |
| >TSHR-T632I RMAVLIFTDF | 25    | >TSHR-T632I RMAVLIFIDFI | 27  | 2     |
| >TSHR-T632I RMAVLIFT   | 104   | >TSHR-T632I RMAVLIFI    | 13  | 91    |
| >TSHR-T632I RMAVLIFTDF | 16    | >TSHR-T632I RMAVLIFIDFI | 15  | 1     |
| >TSHR-T632I RMAVLIFT   | 1587  | >TSHR-T632I RMAVLIFI    | 25  | 1562  |
| >TSHR-T632I RMAVLIFTDF | 19    | >TSHR-T632I RMAVLIFIDFI | 22  | 3     |
| >TSHR-T632I RMAVLIFT   | 425   | >TSHR-T632I RMAVLIFI    | 40  | 385   |
| >TSHR-T632I RMAVLIFTDF | 89    | >TSHR-T632I RMAVLIFIDFI | 73  | 16    |
| >TSHR-T632I RMAVLIFTDF | 185   | >TSHR-T632I RMAVLIFIDF  | 143 | 42    |
| >TSHR-T632I RMAVLIFT   | 5086  | >TSHR-T632I RMAVLIFI    | 359 | 4727  |
| >TSHR-T632I RMAVLIFT   | 10895 | >TSHR-T632I RMAVLIFI    | 176 | 10719 |
| >TSHR-T632I RMAVLIFTDF | 22    | >TSHR-T632I RMAVLIFIDF  | 30  | 8     |
| >TSHR-T632I RMAVLIFTDF | 69    | >TSHR-T632I RMAVLIFIDFI | 214 | 145   |
| >TSHR-T632I RMAVLIFTDF | 45    | >TSHR-T632I RMAVLIFIDF  | 60  | 15    |
| >TSHR-T632I RMAVLIFT   | 6683  | >TSHR-T632I RMAVLIFI    | 401 | 6282  |
| >TSHR-T632I RMAVLIFTDF | 8     | >TSHR-T632I RMAVLIFIDF  | 10  | 2     |
| >TSHR-T632I RMAVLIFTDF | 498   | >TSHR-T632I RMAVLIFIDFI | 492 | 6     |
| >TSHR-T632I RMAVLIFTDF | 337   | >TSHR-T632I RMAVLIFIDF  | 619 | 282   |
| >TSHR-T632I RMAVLIFT   | 13559 | >TSHR-T632I RMAVLIFI    | 104 | 13455 |
| >TSHR-T632I RMAVLIFTDF | 106   | >TSHR-T632I RMAVLIFIDF  | 116 | 10    |
| >TSHR-T632I RMAVLIFTDF | 97    | >TSHR-T632I RMAVLIFIDFI | 128 | 31    |
| >TSHR-T632I RMAVLIFTDF | 253   | >TSHR-T632I RMAVLIFIDF  | 150 | 103   |
| >TSHR-T632I RMAVLIFTDF | 347   | >TSHR-T632I RMAVLIFIDFI | 355 | 8     |
| >TSHR-T632I RMAVLIFT   | 35436 | >TSHR-T632I RMAVLIFI    | 168 | 35268 |
| >TSHR-T632I RMAVLIFTDF | 146   | >TSHR-T632I RMAVLIFIDFI | 230 | 84    |
| >TSHR-T632I KRMAVLIFT  | 18092 | >TSHR-T632I KRMAVLIFI   | 348 | 17744 |
| >TSHR-T632I KRMAVLIFT  | 2657  | >TSHR-T632I KRMAVLIFI   | 234 | 2423  |
| >TSHR-T632I KRMAVLIFT  | 5427  | >TSHR-T632I KRMAVLIFI   | 444 | 4983  |
| >TSHR-T632I KRMAVLIFTD | 14    | >TSHR-T632I KRMAVLIFIDI | 20  | 6     |
| >TSHR-T632I KRMAVLIFT  | 117   | >TSHR-T632I KRMAVLIFI   | 19  | 98    |
| >TSHR-T632I KRMAVLIFTD | 38    | >TSHR-T632I KRMAVLIFIDI | 34  | 4     |
| >TSHR-T632I KRMAVLIFT  | 62    | >TSHR-T632I KRMAVLIFI   | 24  | 38    |
| >TSHR-T632I KRMAVLIFTD | 499   | >TSHR-T632I KRMAVLIFID  | 466 | 33    |
| >TSHR-T632I KRMAVLIFTD | 45    | >TSHR-T632I KRMAVLIFIDI | 40  | 5     |
| >TSHR-T632I KRMAVLIFT  | 678   | >TSHR-T632I KRMAVLIFI   | 20  | 658   |
| >TSHR-T632I KRMAVLIFTD | 28    | >TSHR-T632I KRMAVLIFIDI | 18  | 10    |
| >TSHR-T632I AKRMAVLIFT | 815   | >TSHR-T632I AKRMAVLIFI  | 36  | 779   |
| >TSHR-T632I AKRMAVLIFT | 1484  | >TSHR-T632I AKRMAVLIFI  | 46  | 1438  |
| >TSHR-T632I AKRMAVLIFT | 12289 | >TSHR-T632I AKRMAVLIFI  | 201 | 12088 |
| >TSHR-V597F VCCCHVKIYI | 2149  | >TSHR-V597F FCCCHVKIYI  | 457 | 1692  |
| >TSHR-V597F VCCCHVKIY  | 837   | >TSHR-V597F FCCCHVKIY   | 287 | 550   |

|                        |       |                        |       |       |
|------------------------|-------|------------------------|-------|-------|
| >TSHR-V597FVCCCHVKIY   | 967   | >TSHR-V597FVCCCHVKIY   | 301   | 666   |
| >TSHR-V597FIVCCCHVKIYI | 398   | >TSHR-V597FIFCCCHVKIYI | 4621  | 4223  |
| >TSHR-V597FIVCCCHVK    | 56    | >TSHR-V597FIFCCCHVK    | 1384  | 1328  |
| >TSHR-V597FIVCCCHVK    | 6860  | >TSHR-V597FIFCCCHVK    | 392   | 6468  |
| >TSHR-V597FIVCCCHVKI   | 1266  | >TSHR-V597FIFCCCHVKI   | 59    | 1207  |
| >TSHR-V597FIVCCCHVKIYI | 4371  | >TSHR-V597FIFCCCHVKIYI | 278   | 4093  |
| >TSHR-V597FIVCCCHVKI   | 5763  | >TSHR-V597FIFCCCHVKI   | 424   | 5339  |
| >TSHR-V597FIVCCCHVKIY  | 297   | >TSHR-V597FIFCCCHVKIY  | 6288  | 5991  |
| >TSHR-V597FIVCCCHVKIY  | 1630  | >TSHR-V597FIFCCCHVKIY  | 228   | 1402  |
| >TSHR-V597FIVCCCHVK    | 743   | >TSHR-V597FIFCCCHVK    | 390   | 353   |
| >TSHR-V597FIVCCCHVK    | 151   | >TSHR-V597FIFCCCHVK    | 2141  | 1990  |
| >TSHR-V597FIVCCCHVKIYI | 260   | >TSHR-V597FIFCCCHVKIYI | 14678 | 14418 |
| >TSHR-V597FIVCCCHVKIY  | 499   | >TSHR-V597FIFCCCHVKIY  | 3415  | 2916  |
| >TSHR-V597FIVCCCHVKIY  | 295   | >TSHR-V597FIFCCCHVKIY  | 954   | 659   |
| >TSHR-V597FIVCCCHVK    | 841   | >TSHR-V597FIFCCCHVK    | 94    | 747   |
| >TSHR-V597FLTLNIVAFVIV | 168   | >TSHR-V597FLTLNIVAFVIF | 14984 | 14816 |
| >TSHR-V597FLTLNIVAFVIV | 399   | >TSHR-V597FLTLNIVAFVIF | 5893  | 5494  |
| >TSHR-V597FLTLNIVAFVIV | 355   | >TSHR-V597FLTLNIVAFVIF | 15978 | 15623 |
| >TSHR-V597FLTLNIVAFVIV | 19    | >TSHR-V597FLTLNIVAFVIF | 1078  | 1059  |
| >TSHR-V597FLTLNIVAFVIV | 36    | >TSHR-V597FLTLNIVAFVIF | 10230 | 10194 |
| >TSHR-V597FLTLNIVAFVIV | 88    | >TSHR-V597FLTLNIVAFVIF | 15597 | 15509 |
| >TSHR-V597FLTLNIVAFVIV | 40    | >TSHR-V597FLTLNIVAFVIF | 18353 | 18313 |
| >TSHR-V597FLTLNIVAFVIV | 102   | >TSHR-V597FLTLNIVAFVIF | 17073 | 16971 |
| >TSHR-V597FLTLNIVAFVIV | 53    | >TSHR-V597FLTLNIVAFVIF | 28286 | 28233 |
| >TSHR-V597FLTLNIVAFVIV | 14436 | >TSHR-V597FLTLNIVAFVIF | 392   | 14044 |
| >TSHR-V597FLTLNIVAFVIV | 13643 | >TSHR-V597FLTLNIVAFVIF | 76    | 13567 |
| >TSHR-V597FLTLNIVAFVIV | 1249  | >TSHR-V597FLTLNIVAFVIF | 66    | 1183  |
| >TSHR-V597FLTLNIVAFVIV | 78    | >TSHR-V597FLTLNIVAFVIF | 9687  | 9609  |
| >TSHR-V597FLTLNIVAFVIV | 35    | >TSHR-V597FLTLNIVAFVIF | 8580  | 8545  |
| >TSHR-V597FLTLNIVAFVIV | 9116  | >TSHR-V597FLTLNIVAFVIF | 300   | 8816  |
| >TSHR-V597FLTLNIVAFVIV | 927   | >TSHR-V597FLTLNIVAFVIF | 17    | 910   |
| >TSHR-V597FLTLNIVAFVIV | 1850  | >TSHR-V597FLTLNIVAFVIF | 12    | 1838  |
| >TSHR-V597FLTLNIVAFVIV | 8801  | >TSHR-V597FLTLNIVAFVIF | 78    | 8723  |
| >TSHR-V597FLTLNIVAFVIV | 750   | >TSHR-V597FLTLNIVAFVIF | 239   | 511   |
| >TSHR-V597FLTLNIVAFVIV | 86    | >TSHR-V597FLTLNIVAFVIF | 8     | 78    |
| >TSHR-V597FVIVCCCHV    | 844   | >TSHR-V597FVIFCCCHV    | 146   | 698   |
| >TSHR-V597FVIVCCCHV    | 308   | >TSHR-V597FVIFCCCHV    | 25    | 283   |
| >TSHR-V597FVIVCCCHV    | 247   | >TSHR-V597FVIFCCCHV    | 40    | 207   |
| >TSHR-V597FVIVCCCHV    | 75    | >TSHR-V597FVIFCCCHV    | 31    | 44    |
| >TSHR-V597FVIVCCCHV    | 19    | >TSHR-V597FVIFCCCHV    | 15    | 4     |
| >TSHR-V597FVIVCCCHV    | 114   | >TSHR-V597FVIFCCCHV    | 12    | 102   |
| >TSHR-V597FVIVCCCHVKI  | 2093  | >TSHR-V597FVIFCCCHVKI  | 183   | 1910  |
| >TSHR-V597FVIVCCCHV    | 125   | >TSHR-V597FVIFCCCHV    | 41    | 84    |

|                         |      |                         |      |      |
|-------------------------|------|-------------------------|------|------|
| >TSHR-V597F VIVCCCHV    | 145  | >TSHR-V597F VIFCCCHV    | 19   | 126  |
| >TSHR-V597F VIVCCCHV    | 390  | >TSHR-V597F VIFCCCHV    | 93   | 297  |
| >TSHR-V597F VIVCCCHV    | 14   | >TSHR-V597F VIFCCCHV    | 7    | 7    |
| >TSHR-V597F VIVCCCHVK   | 1149 | >TSHR-V597F VIFCCCHVK   | 81   | 1068 |
| >TSHR-V597F VIVCCCHVK   | 123  | >TSHR-V597F VIFCCCHVK   | 24   | 99   |
| >TSHR-V597F VIVCCCHVKIY | 172  | >TSHR-V597F VIFCCCHVKIY | 3935 | 3763 |
| >TSHR-V597F VIVCCCHVKIY | 339  | >TSHR-V597F VIFCCCHVKIY | 152  | 187  |
| >TSHR-V597F VIVCCCHVKIY | 504  | >TSHR-V597F VIFCCCHVKIY | 192  | 312  |
| >TSHR-V597F VIVCCCHVKI  | 4365 | >TSHR-V597F VIFCCCHVKI  | 200  | 4165 |
| >TSHR-V597F VIVCCCHVK   | 432  | >TSHR-V597F VIFCCCHVK   | 93   | 339  |
| >TSHR-V597F VIVCCCHV    | 366  | >TSHR-V597F VIFCCCHV    | 107  | 259  |
| >TSHR-V597F VIVCCCHVKIY | 541  | >TSHR-V597F VIFCCCHVKIY | 202  | 339  |
| >TSHR-V597F VIVCCCHVKIY | 277  | >TSHR-V597F VIFCCCHVKIY | 41   | 236  |
| >TSHR-V597F VIVCCCHVKIY | 425  | >TSHR-V597F VIFCCCHVKIY | 111  | 314  |
| >TSHR-V597F VIVCCCHVKIY | 1349 | >TSHR-V597F VIFCCCHVKIY | 309  | 1040 |
| >TSHR-V597F VIVCCCHVK   | 819  | >TSHR-V597F VIFCCCHVK   | 149  | 670  |
| >TSHR-V597F FVIVCCCHV   | 24   | >TSHR-V597F FVIFCCCHV   | 15   | 9    |
| >TSHR-V597F FVIVCCCHVK  | 150  | >TSHR-V597F FVIFCCCHVKI | 89   | 61   |
| >TSHR-V597F FVIVCCCHV   | 32   | >TSHR-V597F FVIFCCCHV   | 17   | 15   |
| >TSHR-V597F FVIVCCCHVK  | 157  | >TSHR-V597F FVIFCCCHVKI | 87   | 70   |
| >TSHR-V597F FVIVCCCHV   | 35   | >TSHR-V597F FVIFCCCHV   | 13   | 22   |
| >TSHR-V597F FVIVCCCHVK  | 291  | >TSHR-V597F FVIFCCCHVKI | 96   | 195  |
| >TSHR-V597F FVIVCCCHV   | 4    | >TSHR-V597F FVIFCCCHV   | 4    | 0    |
| >TSHR-V597F FVIVCCCHVK  | 28   | >TSHR-V597F FVIFCCCHVKI | 31   | 3    |
| >TSHR-V597F FVIVCCCHV   | 283  | >TSHR-V597F FVIFCCCHV   | 130  | 153  |
| >TSHR-V597F FVIVCCCHV   | 58   | >TSHR-V597F FVIFCCCHV   | 47   | 11   |
| >TSHR-V597F FVIVCCCHV   | 36   | >TSHR-V597F FVIFCCCHV   | 50   | 14   |
| >TSHR-V597F FVIVCCCHV   | 220  | >TSHR-V597F FVIFCCCHV   | 125  | 95   |
| >TSHR-V597F FVIVCCCHV   | 6    | >TSHR-V597F FVIFCCCHV   | 6    | 0    |
| >TSHR-V597F FVIVCCCHVK  | 296  | >TSHR-V597F FVIFCCCHVK  | 57   | 239  |
| >TSHR-V597F FVIVCCCHVK  | 105  | >TSHR-V597F FVIFCCCHVK  | 36   | 69   |
| >TSHR-V597F FVIVCCCHVK  | 359  | >TSHR-V597F FVIFCCCHVKI | 297  | 62   |
| >TSHR-V597F FVIVCCCHVK  | 733  | >TSHR-V597F FVIFCCCHVK  | 189  | 544  |
| >TSHR-V597F FVIVCCCHVK  | 50   | >TSHR-V597F FVIFCCCHVK  | 23   | 27   |
| >TSHR-V597F FVIVCCCHV   | 20   | >TSHR-V597F FVIFCCCHV   | 9    | 11   |
| >TSHR-V597F FVIVCCCHVK  | 31   | >TSHR-V597F FVIFCCCHVKI | 12   | 19   |
| >TSHR-V597F FVIVCCCHV   | 280  | >TSHR-V597F FVIFCCCHV   | 162  | 118  |
| >TSHR-V597F FVIVCCCHV   | 257  | >TSHR-V597F FVIFCCCHV   | 461  | 204  |
| >TSHR-V597F AFVIVCCCHV  | 1288 | >TSHR-V597F AFVIFCCCHV  | 457  | 831  |
| >TSHR-V597F AFVIVCCCHV  | 358  | >TSHR-V597F AFVIFCCCHV  | 293  | 65   |
| >TSHR-V597F VAFVIVCCCH  | 159  | >TSHR-V597F VAFVIFCCCH' | 76   | 83   |
| >TSHR-V597F VAFVIVCCCH  | 113  | >TSHR-V597F VAFVIFCCCH' | 59   | 54   |
| >TSHR-V597F VAFVIVCCCH  | 158  | >TSHR-V597F VAFVIFCCCH' | 238  | 80   |

|                         |       |                         |       |       |
|-------------------------|-------|-------------------------|-------|-------|
| >TSHR-V597F VAFVIVCCCH  | 97    | >TSHR-V597F VAFVIFCCCH' | 147   | 50    |
| >TSHR-V597F VAFVIVCCCH  | 59    | >TSHR-V597F VAFVIFCCCH' | 75    | 16    |
| >TSHR-V597F VAFVIVCCCH  | 208   | >TSHR-V597F VAFVIFCCCH' | 127   | 81    |
| >TSHR-V597F NIVAFVIV    | 192   | >TSHR-V597F NIVAFVIF    | 5050  | 4858  |
| >TSHR-V597F NIVAFVIV    | 71    | >TSHR-V597F NIVAFVIF    | 12383 | 12312 |
| >TSHR-V597F NIVAFVIV    | 26    | >TSHR-V597F NIVAFVIF    | 1903  | 1877  |
| >TSHR-V597F NIVAFVIV    | 266   | >TSHR-V597F NIVAFVIF    | 21735 | 21469 |
| >TSHR-V597F NIVAFVIV    | 100   | >TSHR-V597F NIVAFVIF    | 29130 | 29030 |
| >TSHR-V597F NIVAFVIV    | 8934  | >TSHR-V597F NIVAFVIF    | 265   | 8669  |
| >TSHR-V597F NIVAFVIV    | 33    | >TSHR-V597F NIVAFVIF    | 7782  | 7749  |
| >TSHR-V597F NIVAFVIV    | 32    | >TSHR-V597F NIVAFVIF    | 13847 | 13815 |
| >TSHR-V597F NIVAFVIV    | 5787  | >TSHR-V597F NIVAFVIF    | 232   | 5555  |
| >TSHR-V597F LNIVAFVIV   | 708   | >TSHR-V597F LNIVAFVIF   | 412   | 296   |
| >TSHR-V597F LNIVAFVIV   | 13981 | >TSHR-V597F LNIVAFVIF   | 254   | 13727 |
| >TSHR-V597F LNIVAFVIV   | 8050  | >TSHR-V597F LNIVAFVIF   | 249   | 7801  |
| >TSHR-V597F LNIVAFVIV   | 1156  | >TSHR-V597F LNIVAFVIF   | 23    | 1133  |
| >TSHR-V597F TLNIVAFVIV  | 383   | >TSHR-V597F TLNIVAFVIF  | 8474  | 8091  |
| >TSHR-V597F TLNIVAFVIV  | 305   | >TSHR-V597F TLNIVAFVIF  | 10231 | 9926  |
| >TSHR-V597F TLNIVAFVIV  | 109   | >TSHR-V597F TLNIVAFVIF  | 10984 | 10875 |
| >TSHR-V597F TLNIVAFVIV  | 424   | >TSHR-V597F TLNIVAFVIF  | 17811 | 17387 |
| >TSHR-V597F TLNIVAFVIV  | 14    | >TSHR-V597F TLNIVAFVIF  | 7996  | 7982  |
| >TSHR-V597F TLNIVAFVIVC | 142   | >TSHR-V597F TLNIVAFVIFC | 52    | 90    |
| >TSHR-V597F TLNIVAFVIV  | 27    | >TSHR-V597F TLNIVAFVIF  | 19613 | 19586 |
| >TSHR-V597F TLNIVAFVIV  | 11    | >TSHR-V597F TLNIVAFVIF  | 14756 | 14745 |
| >TSHR-V597F TLNIVAFVIV  | 43    | >TSHR-V597F TLNIVAFVIF  | 22157 | 22114 |
| >TSHR-V597F TLNIVAFVIV  | 6     | >TSHR-V597F TLNIVAFVIF  | 10321 | 10315 |
| >TSHR-V597F TLNIVAFVIVC | 673   | >TSHR-V597F TLNIVAFVIFC | 317   | 356   |
| >TSHR-V597F TLNIVAFVIV  | 5889  | >TSHR-V597F TLNIVAFVIF  | 469   | 5420  |
| >TSHR-V597F TLNIVAFVIV  | 455   | >TSHR-V597F TLNIVAFVIF  | 19108 | 18653 |
| >TSHR-V597F TLNIVAFVIV  | 10295 | >TSHR-V597F TLNIVAFVIF  | 413   | 9882  |
| >TSHR-V597F TLNIVAFVIV  | 5541  | >TSHR-V597F TLNIVAFVIF  | 238   | 5303  |
| >TSHR-V597L IVCCCHVKI   | 7962  | >TSHR-V597L ILCCCHVKI   | 399   | 7563  |
| >TSHR-V597L IVCCCHVKIYI | 1974  | >TSHR-V597L ILCCCHVKIYI | 103   | 1871  |
| >TSHR-V597L IVCCCHVKI   | 4261  | >TSHR-V597L ILCCCHVKI   | 159   | 4102  |
| >TSHR-V597L IVCCCHVKIYI | 2356  | >TSHR-V597L ILCCCHVKIYI | 106   | 2250  |
| >TSHR-V597L IVCCCHVKI   | 4129  | >TSHR-V597L ILCCCHVKI   | 465   | 3664  |
| >TSHR-V597L IVCCCHVKIYI | 3107  | >TSHR-V597L ILCCCHVKIYI | 384   | 2723  |
| >TSHR-V597L IVCCCHVKI   | 2880  | >TSHR-V597L ILCCCHVKI   | 59    | 2821  |
| >TSHR-V597L IVCCCHVKIYI | 398   | >TSHR-V597L ILCCCHVKIYI | 12    | 386   |
| >TSHR-V597L IVCCCHVKIYI | 8801  | >TSHR-V597L ILCCCHVKIYI | 193   | 8608  |
| >TSHR-V597L IVCCCHVKI   | 13264 | >TSHR-V597L ILCCCHVKI   | 140   | 13124 |
| >TSHR-V597L IVCCCHVKIYI | 9284  | >TSHR-V597L ILCCCHVKIYI | 96    | 9188  |
| >TSHR-V597L IVCCCHVK    | 503   | >TSHR-V597L ILCCCHVK    | 162   | 341   |

|                         |      |                         |      |      |
|-------------------------|------|-------------------------|------|------|
| >TSHR-V597I IVCCCHVK    | 56   | >TSHR-V597I ILCCHVK     | 171  | 115  |
| >TSHR-V597I IVCCCHVKIY  | 297  | >TSHR-V597I ILCCHVKIY   | 5347 | 5050 |
| >TSHR-V597I IVCCCHVK    | 151  | >TSHR-V597I ILCCHVK     | 1350 | 1199 |
| >TSHR-V597I IVCCCHVKIYI | 260  | >TSHR-V597I ILCCHVKIYI  | 3694 | 3434 |
| >TSHR-V597I IVCCCHVKIY  | 499  | >TSHR-V597I ILCCHVKIY   | 205  | 294  |
| >TSHR-V597I IVCCCHVKIY  | 295  | >TSHR-V597I ILCCHVKIY   | 59   | 236  |
| >TSHR-V597I IVCCCHVK    | 841  | >TSHR-V597I ILCCHVK     | 455  | 386  |
| >TSHR-V597I LTLNIVAFVIV | 168  | >TSHR-V597I LTLNIVAFVIL | 815  | 647  |
| >TSHR-V597I LTLNIVAFVIV | 399  | >TSHR-V597I LTLNIVAFVIL | 616  | 217  |
| >TSHR-V597I LTLNIVAFVIV | 355  | >TSHR-V597I LTLNIVAFVIL | 2068 | 1713 |
| >TSHR-V597I LTLNIVAFVIV | 19   | >TSHR-V597I LTLNIVAFVIL | 126  | 107  |
| >TSHR-V597I LTLNIVAFVIV | 36   | >TSHR-V597I LTLNIVAFVIL | 454  | 418  |
| >TSHR-V597I LTLNIVAFVIV | 88   | >TSHR-V597I LTLNIVAFVIL | 1253 | 1165 |
| >TSHR-V597I LTLNIVAFVIV | 40   | >TSHR-V597I LTLNIVAFVIL | 903  | 863  |
| >TSHR-V597I LTLNIVAFVIV | 102  | >TSHR-V597I LTLNIVAFVIL | 1194 | 1092 |
| >TSHR-V597I LTLNIVAFVIV | 53   | >TSHR-V597I LTLNIVAFVIL | 1824 | 1771 |
| >TSHR-V597I LTLNIVAFVIV | 1249 | >TSHR-V597I LTLNIVAFVIL | 285  | 964  |
| >TSHR-V597I LTLNIVAFVIV | 78   | >TSHR-V597I LTLNIVAFVIL | 474  | 396  |
| >TSHR-V597I LTLNIVAFVIV | 35   | >TSHR-V597I LTLNIVAFVIL | 344  | 309  |
| >TSHR-V597I LTLNIVAFVIV | 927  | >TSHR-V597I LTLNIVAFVIL | 422  | 505  |
| >TSHR-V597I LTLNIVAFVIV | 1850 | >TSHR-V597I LTLNIVAFVIL | 73   | 1777 |
| >TSHR-V597I LTLNIVAFVIV | 750  | >TSHR-V597I LTLNIVAFVIL | 165  | 585  |
| >TSHR-V597I LTLNIVAFVIV | 86   | >TSHR-V597I LTLNIVAFVIL | 31   | 55   |
| >TSHR-V597I LTLNIVAFVIV | 1088 | >TSHR-V597I LTLNIVAFVIL | 172  | 916  |
| >TSHR-V597I VIVCCCHV    | 308  | >TSHR-V597I VILCCCHV    | 45   | 263  |
| >TSHR-V597I VIVCCCHV    | 247  | >TSHR-V597I VILCCCHV    | 488  | 241  |
| >TSHR-V597I VIVCCCHV    | 75   | >TSHR-V597I VILCCCHV    | 255  | 180  |
| >TSHR-V597I VIVCCCHV    | 19   | >TSHR-V597I VILCCCHV    | 16   | 3    |
| >TSHR-V597I VIVCCCHV    | 114  | >TSHR-V597I VILCCCHV    | 18   | 96   |
| >TSHR-V597I VIVCCCHVKI  | 2093 | >TSHR-V597I VILCCCHVKI  | 330  | 1763 |
| >TSHR-V597I VIVCCCHV    | 125  | >TSHR-V597I VILCCCHV    | 25   | 100  |
| >TSHR-V597I VIVCCCHV    | 145  | >TSHR-V597I VILCCCHV    | 19   | 126  |
| >TSHR-V597I VIVCCCHV    | 390  | >TSHR-V597I VILCCCHV    | 19   | 371  |
| >TSHR-V597I VIVCCCHV    | 14   | >TSHR-V597I VILCCCHV    | 9    | 5    |
| >TSHR-V597I VIVCCCHVK   | 1149 | >TSHR-V597I VILCCCHVK   | 406  | 743  |
| >TSHR-V597I VIVCCCHVK   | 123  | >TSHR-V597I VILCCCHVK   | 59   | 64   |
| >TSHR-V597I VIVCCCHVKIY | 172  | >TSHR-V597I VILCCCHVKIY | 1185 | 1013 |
| >TSHR-V597I VIVCCCHVKIY | 339  | >TSHR-V597I VILCCCHVKIY | 264  | 75   |
| >TSHR-V597I VIVCCCHVKIY | 504  | >TSHR-V597I VILCCCHVKIY | 432  | 72   |
| >TSHR-V597I VIVCCCHVK   | 432  | >TSHR-V597I VILCCCHVK   | 1658 | 1226 |
| >TSHR-V597I VIVCCCHV    | 366  | >TSHR-V597I VILCCCHV    | 2053 | 1687 |
| >TSHR-V597I VIVCCCHVKIY | 277  | >TSHR-V597I VILCCCHVKIY | 186  | 91   |
| >TSHR-V597I VIVCCCHVKIY | 425  | >TSHR-V597I VILCCCHVKIY | 318  | 107  |

|                        |      |                         |      |      |
|------------------------|------|-------------------------|------|------|
| >TSHR-V597I VIVCCCHVK  | 819  | >TSHR-V597I VILCCCHVK   | 354  | 465  |
| >TSHR-V597I FVIVCCCHV  | 24   | >TSHR-V597I FVILCCCHV   | 25   | 1    |
| >TSHR-V597I FVIVCCCHVK | 150  | >TSHR-V597I FVILCCCHVKI | 177  | 27   |
| >TSHR-V597I FVIVCCCHV  | 32   | >TSHR-V597I FVILCCCHV   | 37   | 5    |
| >TSHR-V597I FVIVCCCHVK | 157  | >TSHR-V597I FVILCCCHVKI | 176  | 19   |
| >TSHR-V597I FVIVCCCHV  | 35   | >TSHR-V597I FVILCCCHV   | 34   | 1    |
| >TSHR-V597I FVIVCCCHVK | 291  | >TSHR-V597I FVILCCCHVKI | 251  | 40   |
| >TSHR-V597I FVIVCCCHV  | 4    | >TSHR-V597I FVILCCCHV   | 4    | 0    |
| >TSHR-V597I FVIVCCCHVK | 28   | >TSHR-V597I FVILCCCHVKI | 38   | 10   |
| >TSHR-V597I FVIVCCCHV  | 283  | >TSHR-V597I FVILCCCHV   | 384  | 101  |
| >TSHR-V597I FVIVCCCHV  | 58   | >TSHR-V597I FVILCCCHV   | 76   | 18   |
| >TSHR-V597I FVIVCCCHV  | 36   | >TSHR-V597I FVILCCCHV   | 53   | 17   |
| >TSHR-V597I FVIVCCCHV  | 220  | >TSHR-V597I FVILCCCHV   | 222  | 2    |
| >TSHR-V597I FVIVCCCHV  | 6    | >TSHR-V597I FVILCCCHV   | 8    | 2    |
| >TSHR-V597I FVIVCCCHVK | 296  | >TSHR-V597I FVILCCCHVK  | 183  | 113  |
| >TSHR-V597I FVIVCCCHVK | 105  | >TSHR-V597I FVILCCCHVK  | 63   | 42   |
| >TSHR-V597I FVIVCCCHVK | 359  | >TSHR-V597I FVILCCCHVKI | 795  | 436  |
| >TSHR-V597I FVIVCCCHVK | 733  | >TSHR-V597I FVILCCCHVK  | 379  | 354  |
| >TSHR-V597I FVIVCCCHVK | 50   | >TSHR-V597I FVILCCCHVK  | 65   | 15   |
| >TSHR-V597I FVIVCCCHV  | 20   | >TSHR-V597I FVILCCCHV   | 21   | 1    |
| >TSHR-V597I FVIVCCCHVK | 31   | >TSHR-V597I FVILCCCHVKI | 33   | 2    |
| >TSHR-V597I FVIVCCCHV  | 280  | >TSHR-V597I FVILCCCHV   | 407  | 127  |
| >TSHR-V597I FVIVCCCHV  | 257  | >TSHR-V597I FVILCCCHV   | 226  | 31   |
| >TSHR-V597I AFVIVCCCHV | 358  | >TSHR-V597I AFVILCCCHV  | 308  | 50   |
| >TSHR-V597I AFVIVCCCHV | 942  | >TSHR-V597I AFVILCCCHV  | 495  | 447  |
| >TSHR-V597I VAFVIVCCCH | 159  | >TSHR-V597I VAFVILCCCH\ | 135  | 24   |
| >TSHR-V597I VAFVIVCCCH | 113  | >TSHR-V597I VAFVILCCCH\ | 73   | 40   |
| >TSHR-V597I VAFVIVCCCH | 158  | >TSHR-V597I VAFVILCCCH\ | 209  | 51   |
| >TSHR-V597I VAFVIVCCCH | 97   | >TSHR-V597I VAFVILCCCH\ | 131  | 34   |
| >TSHR-V597I VAFVIVCCCH | 59   | >TSHR-V597I VAFVILCCCH\ | 64   | 5    |
| >TSHR-V597I VAFVIVCCCH | 208  | >TSHR-V597I VAFVILCCCH\ | 259  | 51   |
| >TSHR-V597I NIVAFVIV   | 192  | >TSHR-V597I NIVAFVIL    | 307  | 115  |
| >TSHR-V597I NIVAFVIV   | 71   | >TSHR-V597I NIVAFVIL    | 724  | 653  |
| >TSHR-V597I NIVAFVIV   | 26   | >TSHR-V597I NIVAFVIL    | 194  | 168  |
| >TSHR-V597I NIVAFVIV   | 266  | >TSHR-V597I NIVAFVIL    | 3309 | 3043 |
| >TSHR-V597I NIVAFVIV   | 100  | >TSHR-V597I NIVAFVIL    | 2612 | 2512 |
| >TSHR-V597I NIVAFVIV   | 33   | >TSHR-V597I NIVAFVIL    | 150  | 117  |
| >TSHR-V597I NIVAFVIV   | 32   | >TSHR-V597I NIVAFVIL    | 408  | 376  |
| >TSHR-V597I NIVAFVIV   | 4295 | >TSHR-V597I NIVAFVIL    | 229  | 4066 |
| >TSHR-V597I LNIVAFVIV  | 708  | >TSHR-V597I LNIVAFVIL   | 307  | 401  |
| >TSHR-V597I TLNIVAFVIV | 383  | >TSHR-V597I TLNIVAFVIL  | 1238 | 855  |
| >TSHR-V597I TLNIVAFVIV | 305  | >TSHR-V597I TLNIVAFVIL  | 306  | 1    |
| >TSHR-V597I TLNIVAFVIV | 109  | >TSHR-V597I TLNIVAFVIL  | 469  | 360  |



|                         |       |                         |       |       |
|-------------------------|-------|-------------------------|-------|-------|
| >TSHR-V597I TLNIVAFVIV  | 424   | >TSHR-V597I TLNIVAFVIL  | 1707  | 1283  |
| >TSHR-V597I TLNIVAFVIV  | 14    | >TSHR-V597I TLNIVAFVIL  | 151   | 137   |
| >TSHR-V597I TLNIVAFVIVC | 142   | >TSHR-V597I TLNIVAFVILC | 135   | 7     |
| >TSHR-V597I TLNIVAFVIV  | 27    | >TSHR-V597I TLNIVAFVIL  | 376   | 349   |
| >TSHR-V597I TLNIVAFVIV  | 11    | >TSHR-V597I TLNIVAFVIL  | 81    | 70    |
| >TSHR-V597I TLNIVAFVIV  | 43    | >TSHR-V597I TLNIVAFVIL  | 1177  | 1134  |
| >TSHR-V597I TLNIVAFVIV  | 6     | >TSHR-V597I TLNIVAFVIL  | 39    | 33    |
| >TSHR-V597I TLNIVAFVIVC | 673   | >TSHR-V597I TLNIVAFVILC | 391   | 282   |
| >TSHR-V597I TLNIVAFVIV  | 455   | >TSHR-V597I TLNIVAFVIL  | 4040  | 3585  |
| >TSHR-V656F VSNSKILLVLF | 483   | >TSHR-V656F FSNSKILLVLF | 1498  | 1015  |
| >TSHR-V656F VSNSKILLV   | 4358  | >TSHR-V656F FSNSKILLV   | 126   | 4232  |
| >TSHR-V656F VSNSKILL    | 6002  | >TSHR-V656F FSNSKILL    | 247   | 5755  |
| >TSHR-V656F VSNSKILLV   | 2434  | >TSHR-V656F FSNSKILLV   | 58    | 2376  |
| >TSHR-V656F VSNSKILLV   | 634   | >TSHR-V656F FSNSKILLV   | 37    | 597   |
| >TSHR-V656F VSNSKILLV   | 3264  | >TSHR-V656F FSNSKILLV   | 95    | 3169  |
| >TSHR-V656F VSNSKILLV   | 1414  | >TSHR-V656F FSNSKILLV   | 221   | 1193  |
| >TSHR-V656F VSNSKILLV   | 5809  | >TSHR-V656F FSNSKILLV   | 184   | 5625  |
| >TSHR-V656F VSNSKILLVLF | 1137  | >TSHR-V656F FSNSKILLVLF | 381   | 756   |
| >TSHR-V656F VSNSKILLVLF | 128   | >TSHR-V656F FSNSKILLVLF | 36    | 92    |
| >TSHR-V656F VSNSKILL    | 120   | >TSHR-V656F FSNSKILL    | 185   | 65    |
| >TSHR-V656F VSNSKILLVL  | 43    | >TSHR-V656F FSNSKILLVL  | 72    | 29    |
| >TSHR-V656F VSNSKILLVLF | 7     | >TSHR-V656F FSNSKILLVLF | 8     | 1     |
| >TSHR-V656F VSNSKILLVL  | 259   | >TSHR-V656F FSNSKILLVL  | 254   | 5     |
| >TSHR-V656F VSNSKILLVLF | 44    | >TSHR-V656F FSNSKILLVLF | 44    | 0     |
| >TSHR-V656F VSNSKILLVL  | 533   | >TSHR-V656F FSNSKILLVL  | 490   | 43    |
| >TSHR-V656F VSNSKILLVLF | 207   | >TSHR-V656F FSNSKILLVLF | 192   | 15    |
| >TSHR-V656F VSNSKILLVL  | 728   | >TSHR-V656F FSNSKILLVL  | 382   | 346   |
| >TSHR-V656F VSNSKILLVLF | 61    | >TSHR-V656F FSNSKILLVLF | 65    | 4     |
| >TSHR-V656F VSNSKILLVL  | 502   | >TSHR-V656F FSNSKILLVL  | 327   | 175   |
| >TSHR-V656F TVSNSKILLV  | 147   | >TSHR-V656F TFSNSKILLV  | 1673  | 1526  |
| >TSHR-V656F TVSNSKILLV  | 56    | >TSHR-V656F TFSNSKILLV  | 1616  | 1560  |
| >TSHR-V656F TVSNSKILLV  | 144   | >TSHR-V656F TFSNSKILLV  | 4495  | 4351  |
| >TSHR-V656F TVSNSKILLV  | 58    | >TSHR-V656F TFSNSKILLV  | 2391  | 2333  |
| >TSHR-V656F TVSNSKILLVL | 13221 | >TSHR-V656F TFSNSKILLVL | 408   | 12813 |
| >TSHR-V656F TVSNSKILL   | 193   | >TSHR-V656F TFSNSKILL   | 16977 | 16784 |
| >TSHR-V656F TVSNSKILLV  | 225   | >TSHR-V656F TFSNSKILLV  | 5464  | 5239  |
| >TSHR-V656F TVSNSKILLVL | 445   | >TSHR-V656F TFSNSKILLVL | 17998 | 17553 |
| >TSHR-V656F TVSNSKILLV  | 374   | >TSHR-V656F TFSNSKILLV  | 11850 | 11476 |
| >TSHR-V656F TVSNSKILLV  | 4504  | >TSHR-V656F TFSNSKILLV  | 186   | 4318  |
| >TSHR-V656F SAILNKPLITV | 33    | >TSHR-V656F SAILNKPLITF | 185   | 152   |
| >TSHR-V656F SAILNKPLITV | 162   | >TSHR-V656F SAILNKPLITF | 7784  | 7622  |
| >TSHR-V656F SAILNKPLITV | 386   | >TSHR-V656F SAILNKPLITF | 23848 | 23462 |
| >TSHR-V656F SAILNKPLITV | 300   | >TSHR-V656F SAILNKPLITF | 32422 | 32122 |

|                         |       |                         |       |       |
|-------------------------|-------|-------------------------|-------|-------|
| >TSHR-V656F SAILNKPLITV | 10178 | >TSHR-V656F SAILNKPLITF | 325   | 9853  |
| >TSHR-V656F SAILNKPLITV | 478   | >TSHR-V656F SAILNKPLITF | 20275 | 19797 |
| >TSHR-V656F SAILNKPLITV | 144   | >TSHR-V656F SAILNKPLITF | 15492 | 15348 |
| >TSHR-V656F SAILNKPLITV | 8169  | >TSHR-V656F SAILNKPLITF | 279   | 7890  |
| >TSHR-V656F SAILNKPLITV | 5079  | >TSHR-V656F SAILNKPLITF | 17    | 5062  |
| >TSHR-V656F SAILNKPLITV | 12879 | >TSHR-V656F SAILNKPLITF | 301   | 12578 |
| >TSHR-V656F ITVSNSKIL   | 1630  | >TSHR-V656F ITFSNSKIL   | 385   | 1245  |
| >TSHR-V656F ITVSNSKILLV | 1493  | >TSHR-V656F ITFSNSKILLV | 359   | 1134  |
| >TSHR-V656F ITVSNSKILLV | 1030  | >TSHR-V656F ITFSNSKILLV | 142   | 888   |
| >TSHR-V656F ITVSNSKILL  | 588   | >TSHR-V656F ITFSNSKILL  | 136   | 452   |
| >TSHR-V656F ITVSNSKILLV | 673   | >TSHR-V656F ITFSNSKILLV | 147   | 526   |
| >TSHR-V656F ITVSNSKILLV | 226   | >TSHR-V656F ITFSNSKILLV | 96    | 130   |
| >TSHR-V656F ITVSNSKILLV | 177   | >TSHR-V656F ITFSNSKILLV | 130   | 47    |
| >TSHR-V656F ITVSNSKILLV | 232   | >TSHR-V656F ITFSNSKILLV | 22    | 210   |
| >TSHR-V656F ITVSNSKILLV | 2932  | >TSHR-V656F ITFSNSKILLV | 266   | 2666  |
| >TSHR-V656F ITVSNSKILLV | 372   | >TSHR-V656F ITFSNSKILLV | 77    | 295   |
| >TSHR-V656F ITVSNSKI    | 2138  | >TSHR-V656F ITFSNSKI    | 80    | 2058  |
| >TSHR-V656F ITVSNSKIL   | 5206  | >TSHR-V656F ITFSNSKIL   | 207   | 4999  |
| >TSHR-V656F ITVSNSKILL  | 6323  | >TSHR-V656F ITFSNSKILL  | 472   | 5851  |
| >TSHR-V656F ITVSNSKI    | 584   | >TSHR-V656F ITFSNSKI    | 121   | 463   |
| >TSHR-V656F ITVSNSKILL  | 759   | >TSHR-V656F ITFSNSKILL  | 465   | 294   |
| >TSHR-V656F ITVSNSKILLV | 201   | >TSHR-V656F ITFSNSKILLV | 48    | 153   |
| >TSHR-V656F ITVSNSKILLV | 862   | >TSHR-V656F ITFSNSKILLV | 371   | 491   |
| >TSHR-V656F ITVSNSKI    | 952   | >TSHR-V656F ITFSNSKI    | 148   | 804   |
| >TSHR-V656F ITVSNSKIL   | 280   | >TSHR-V656F ITFSNSKIL   | 33    | 247   |
| >TSHR-V656F ITVSNSKILL  | 1016  | >TSHR-V656F ITFSNSKILL  | 163   | 853   |
| >TSHR-V656F ITVSNSKILLV | 2260  | >TSHR-V656F ITFSNSKILLV | 415   | 1845  |
| >TSHR-V656F ITVSNSKI    | 10    | >TSHR-V656F ITFSNSKI    | 7     | 3     |
| >TSHR-V656F ITVSNSKIL   | 8     | >TSHR-V656F ITFSNSKIL   | 6     | 2     |
| >TSHR-V656F ITVSNSKILL  | 11    | >TSHR-V656F ITFSNSKILL  | 9     | 2     |
| >TSHR-V656F ITVSNSKILLV | 100   | >TSHR-V656F ITFSNSKILLV | 68    | 32    |
| >TSHR-V656F ITVSNSKIL   | 93    | >TSHR-V656F ITFSNSKIL   | 137   | 44    |
| >TSHR-V656F ITVSNSKILL  | 38    | >TSHR-V656F ITFSNSKILL  | 56    | 18    |
| >TSHR-V656F ITVSNSKILLV | 135   | >TSHR-V656F ITFSNSKILLV | 201   | 66    |
| >TSHR-V656F ITVSNSKIL   | 67    | >TSHR-V656F ITFSNSKIL   | 13    | 54    |
| >TSHR-V656F ITVSNSKILL  | 198   | >TSHR-V656F ITFSNSKILL  | 158   | 40    |
| >TSHR-V656F ITVSNSKILLV | 157   | >TSHR-V656F ITFSNSKILLV | 26    | 131   |
| >TSHR-V656F ITVSNSKI    | 73    | >TSHR-V656F ITFSNSKI    | 12    | 61    |
| >TSHR-V656F ITVSNSKIL   | 1681  | >TSHR-V656F ITFSNSKIL   | 121   | 1560  |
| >TSHR-V656F ITVSNSKILL  | 164   | >TSHR-V656F ITFSNSKILL  | 179   | 15    |
| >TSHR-V656F LITVSNSKILL | 894   | >TSHR-V656F LITFSNSKILL | 485   | 409   |
| >TSHR-V656F LITVSNSKILL | 188   | >TSHR-V656F LITFSNSKILL | 236   | 48    |
| >TSHR-V656F LITVSNSK    | 546   | >TSHR-V656F LITFSNSK    | 306   | 240   |

|                         |       |                         |       |       |
|-------------------------|-------|-------------------------|-------|-------|
| >TSHR-V656F LITVSNSK    | 251   | >TSHR-V656F LITFSNSK    | 112   | 139   |
| >TSHR-V656F LITVSNSK    | 466   | >TSHR-V656F LITFSNSK    | 299   | 167   |
| >TSHR-V656F LITVSNSK    | 91    | >TSHR-V656F LITFSNSK    | 43    | 48    |
| >TSHR-V656F LITVSNSKI   | 888   | >TSHR-V656F LITFSNSKI   | 358   | 530   |
| >TSHR-V656F LITVSNSKIL  | 799   | >TSHR-V656F LITFSNSKIL  | 464   | 335   |
| >TSHR-V656F PLITVSNSKI  | 1316  | >TSHR-V656F PLITFSNSKI  | 454   | 862   |
| >TSHR-V656F KPLITVSNSKI | 459   | >TSHR-V656F KPLITFSNSKI | 355   | 104   |
| >TSHR-V656F KPLITVSNSKI | 308   | >TSHR-V656F KPLITFSNSKI | 225   | 83    |
| >TSHR-V656F LNKPLITV    | 11160 | >TSHR-V656F LNKPLITF    | 307   | 10853 |
| >TSHR-V656F LNKPLITV    | 5412  | >TSHR-V656F LNKPLITF    | 130   | 5282  |
| >TSHR-V656F ILNKPLITV   | 42    | >TSHR-V656F ILNKPLITF   | 10456 | 10414 |
| >TSHR-V656F ILNKPLITV   | 50    | >TSHR-V656F ILNKPLITF   | 4970  | 4920  |
| >TSHR-V656F ILNKPLITV   | 8     | >TSHR-V656F ILNKPLITF   | 5696  | 5688  |
| >TSHR-V656F ILNKPLITV   | 70    | >TSHR-V656F ILNKPLITF   | 5184  | 5114  |
| >TSHR-V656F ILNKPLITV   | 2     | >TSHR-V656F ILNKPLITF   | 353   | 351   |
| >TSHR-V656F ILNKPLITVS  | 1391  | >TSHR-V656F ILNKPLITFS  | 454   | 937   |
| >TSHR-V656F ILNKPLITV   | 4     | >TSHR-V656F ILNKPLITF   | 7915  | 7911  |
| >TSHR-V656F ILNKPLITV   | 8     | >TSHR-V656F ILNKPLITF   | 13725 | 13717 |
| >TSHR-V656F ILNKPLITV   | 4     | >TSHR-V656F ILNKPLITF   | 16633 | 16629 |
| >TSHR-V656F ILNKPLITV   | 2     | >TSHR-V656F ILNKPLITF   | 2256  | 2254  |
| >TSHR-V656F ILNKPLITV   | 3514  | >TSHR-V656F ILNKPLITF   | 135   | 3379  |
| >TSHR-V656F ILNKPLITV   | 7552  | >TSHR-V656F ILNKPLITF   | 134   | 7418  |
| >TSHR-V656F ILNKPLITV   | 9147  | >TSHR-V656F ILNKPLITF   | 430   | 8717  |
| >TSHR-V656F ILNKPLITV   | 1269  | >TSHR-V656F ILNKPLITF   | 21    | 1248  |
| >TSHR-V656F ILNKPLITV   | 16908 | >TSHR-V656F ILNKPLITF   | 485   | 16423 |
| >TSHR-V656F ILNKPLITV   | 5812  | >TSHR-V656F ILNKPLITF   | 312   | 5500  |
| >TSHR-V656F ILNKPLITV   | 14492 | >TSHR-V656F ILNKPLITF   | 403   | 14089 |
| >TSHR-V656F AILNKPLITV  | 31    | >TSHR-V656F AILNKPLITF  | 5243  | 5212  |
| >TSHR-V656F AILNKPLITV  | 73    | >TSHR-V656F AILNKPLITF  | 6429  | 6356  |
| >TSHR-V656F AILNKPLITV  | 25    | >TSHR-V656F AILNKPLITF  | 6741  | 6716  |
| >TSHR-V656F AILNKPLITV  | 45    | >TSHR-V656F AILNKPLITF  | 8050  | 8005  |
| >TSHR-V656F AILNKPLITV  | 4     | >TSHR-V656F AILNKPLITF  | 2707  | 2703  |
| >TSHR-V656F AILNKPLITV  | 17    | >TSHR-V656F AILNKPLITF  | 13896 | 13879 |
| >TSHR-V656F AILNKPLITV  | 12    | >TSHR-V656F AILNKPLITF  | 16688 | 16676 |
| >TSHR-V656F AILNKPLITV  | 31    | >TSHR-V656F AILNKPLITF  | 19107 | 19076 |
| >TSHR-V656F AILNKPLITV  | 7     | >TSHR-V656F AILNKPLITF  | 14443 | 14436 |
| >TSHR-V656F AILNKPLITV  | 506   | >TSHR-V656F AILNKPLITF  | 25    | 481   |
| >TSHR-V656F AILNKPLITV  | 4760  | >TSHR-V656F AILNKPLITF  | 78    | 4682  |
| >TSHR-V656F AILNKPLITV  | 14210 | >TSHR-V656F AILNKPLITF  | 164   | 14046 |
| >TSHR-V656F AILNKPLITV  | 7843  | >TSHR-V656F AILNKPLITF  | 407   | 7436  |
| >TSHR-V656I VSNSKILLVLF | 483   | >TSHR-V656I ISNSKILLVLF | 494   | 11    |
| >TSHR-V656I VSNSKILLV   | 634   | >TSHR-V656I ISNSKILLV   | 460   | 174   |
| >TSHR-V656I VSNSKILLVLF | 128   | >TSHR-V656I ISNSKILLVLF | 59    | 69    |

|                         |      |                         |       |       |
|-------------------------|------|-------------------------|-------|-------|
| >TSHR-V656I VSNSKILL    | 120  | >TSHR-V656I ISNSKILL    | 60    | 60    |
| >TSHR-V656I VSNSKILLVL  | 43   | >TSHR-V656I ISNSKILLVL  | 22    | 21    |
| >TSHR-V656I VSNSKILLVLF | 7    | >TSHR-V656I ISNSKILLVLF | 5     | 2     |
| >TSHR-V656I VSNSKILLVLF | 2161 | >TSHR-V656I ISNSKILLVLF | 492   | 1669  |
| >TSHR-V656I VSNSKILLVL  | 259  | >TSHR-V656I ISNSKILLVL  | 127   | 132   |
| >TSHR-V656I VSNSKILLVLF | 44   | >TSHR-V656I ISNSKILLVLF | 32    | 12    |
| >TSHR-V656I VSNSKILLVLF | 207  | >TSHR-V656I ISNSKILLVLF | 207   | 0     |
| >TSHR-V656I VSNSKILLVLF | 61   | >TSHR-V656I ISNSKILLVLF | 34    | 27    |
| >TSHR-V656I VSNSKILLVL  | 502  | >TSHR-V656I ISNSKILLVL  | 296   | 206   |
| >TSHR-V656I TVSNSKILLV  | 679  | >TSHR-V656I TISNSKILLV  | 260   | 419   |
| >TSHR-V656I TVSNSKILLV  | 147  | >TSHR-V656I TISNSKILLV  | 93    | 54    |
| >TSHR-V656I TVSNSKILLV  | 56   | >TSHR-V656I TISNSKILLV  | 35    | 21    |
| >TSHR-V656I TVSNSKILLV  | 144  | >TSHR-V656I TISNSKILLV  | 137   | 7     |
| >TSHR-V656I TVSNSKILLV  | 886  | >TSHR-V656I TISNSKILLV  | 275   | 611   |
| >TSHR-V656I TVSNSKILLV  | 900  | >TSHR-V656I TISNSKILLV  | 271   | 629   |
| >TSHR-V656I TVSNSKILLV  | 58   | >TSHR-V656I TISNSKILLV  | 20    | 38    |
| >TSHR-V656I TVSNSKILL   | 193  | >TSHR-V656I TISNSKILL   | 1078  | 885   |
| >TSHR-V656I TVSNSKILLV  | 225  | >TSHR-V656I TISNSKILLV  | 474   | 249   |
| >TSHR-V656I TVSNSKILLVL | 445  | >TSHR-V656I TISNSKILLVL | 1812  | 1367  |
| >TSHR-V656I TVSNSKILLV  | 374  | >TSHR-V656I TISNSKILLV  | 722   | 348   |
| >TSHR-V656I SAILNKPLITV | 33   | >TSHR-V656I SAILNKPLITI | 11    | 22    |
| >TSHR-V656I SAILNKPLITV | 162  | >TSHR-V656I SAILNKPLITI | 1453  | 1291  |
| >TSHR-V656I SAILNKPLITV | 386  | >TSHR-V656I SAILNKPLITI | 4329  | 3943  |
| >TSHR-V656I SAILNKPLITV | 300  | >TSHR-V656I SAILNKPLITI | 13152 | 12852 |
| >TSHR-V656I SAILNKPLITV | 478  | >TSHR-V656I SAILNKPLITI | 2238  | 1760  |
| >TSHR-V656I SAILNKPLITV | 144  | >TSHR-V656I SAILNKPLITI | 1165  | 1021  |
| >TSHR-V656I SAILNKPLITV | 9276 | >TSHR-V656I SAILNKPLITI | 236   | 9040  |
| >TSHR-V656I ITVSNSKILLV | 1030 | >TSHR-V656I ITISNSKILLV | 303   | 727   |
| >TSHR-V656I ITVSNSKILL  | 588  | >TSHR-V656I ITISNSKILL  | 311   | 277   |
| >TSHR-V656I ITVSNSKILLV | 673  | >TSHR-V656I ITISNSKILLV | 470   | 203   |
| >TSHR-V656I ITVSNSKILLV | 226  | >TSHR-V656I ITISNSKILLV | 104   | 122   |
| >TSHR-V656I ITVSNSKILLV | 177  | >TSHR-V656I ITISNSKILLV | 114   | 63    |
| >TSHR-V656I ITVSNSKILLV | 232  | >TSHR-V656I ITISNSKILLV | 153   | 79    |
| >TSHR-V656I ITVSNSKILLV | 372  | >TSHR-V656I ITISNSKILLV | 277   | 95    |
| >TSHR-V656I ITVSNSKI    | 584  | >TSHR-V656I ITISNSKI    | 279   | 305   |
| >TSHR-V656I ITVSNSKILLV | 201  | >TSHR-V656I ITISNSKILLV | 101   | 100   |
| >TSHR-V656I ITVSNSKIL   | 280  | >TSHR-V656I ITISNSKIL   | 181   | 99    |
| >TSHR-V656I ITVSNSKI    | 10   | >TSHR-V656I ITISNSKI    | 11    | 1     |
| >TSHR-V656I ITVSNSKIL   | 8    | >TSHR-V656I ITISNSKIL   | 8     | 0     |
| >TSHR-V656I ITVSNSKILL  | 11   | >TSHR-V656I ITISNSKILL  | 12    | 1     |
| >TSHR-V656I ITVSNSKILLV | 100  | >TSHR-V656I ITISNSKILLV | 118   | 18    |
| >TSHR-V656I ITVSNSKIL   | 93   | >TSHR-V656I ITISNSKIL   | 220   | 127   |
| >TSHR-V656I ITVSNSKILL  | 38   | >TSHR-V656I ITISNSKILL  | 79    | 41    |

|                         |       |                         |      |       |
|-------------------------|-------|-------------------------|------|-------|
| >TSHR-V656I ITVSNSKILLV | 135   | >TSHR-V656I ITISNSKILLV | 292  | 157   |
| >TSHR-V656I ITVSNSKIL   | 67    | >TSHR-V656I ITISNSKIL   | 110  | 43    |
| >TSHR-V656I ITVSNSKILL  | 198   | >TSHR-V656I ITISNSKILL  | 122  | 76    |
| >TSHR-V656I ITVSNSKILLV | 157   | >TSHR-V656I ITISNSKILLV | 256  | 99    |
| >TSHR-V656I ITVSNSKI    | 73    | >TSHR-V656I ITISNSKI    | 51   | 22    |
| >TSHR-V656I ITVSNSKILL  | 164   | >TSHR-V656I ITISNSKILL  | 202  | 38    |
| >TSHR-V656I LITVSNSKILL | 188   | >TSHR-V656I LITISNSKILL | 126  | 62    |
| >TSHR-V656I LITVSNSK    | 251   | >TSHR-V656I LITISNSK    | 289  | 38    |
| >TSHR-V656I LITVSNSK    | 466   | >TSHR-V656I LITISNSK    | 596  | 130   |
| >TSHR-V656I LITVSNSK    | 91    | >TSHR-V656I LITISNSK    | 89   | 2     |
| >TSHR-V656I KPLITVSNSKI | 459   | >TSHR-V656I KPLITISNSKI | 508  | 49    |
| >TSHR-V656I KPLITVSNSKI | 308   | >TSHR-V656I KPLITISNSKI | 254  | 54    |
| >TSHR-V656I LNKPLITV    | 12663 | >TSHR-V656I LNKPLITI    | 310  | 12353 |
| >TSHR-V656I ILNKPLITV   | 42    | >TSHR-V656I ILNKPLITI   | 204  | 162   |
| >TSHR-V656I ILNKPLITV   | 50    | >TSHR-V656I ILNKPLITI   | 249  | 199   |
| >TSHR-V656I ILNKPLITV   | 8     | >TSHR-V656I ILNKPLITI   | 29   | 21    |
| >TSHR-V656I ILNKPLITV   | 70    | >TSHR-V656I ILNKPLITI   | 712  | 642   |
| >TSHR-V656I ILNKPLITV   | 2     | >TSHR-V656I ILNKPLITI   | 5    | 3     |
| >TSHR-V656I ILNKPLITV   | 4     | >TSHR-V656I ILNKPLITI   | 24   | 20    |
| >TSHR-V656I ILNKPLITV   | 8     | >TSHR-V656I ILNKPLITI   | 63   | 55    |
| >TSHR-V656I ILNKPLITV   | 4     | >TSHR-V656I ILNKPLITI   | 147  | 143   |
| >TSHR-V656I ILNKPLITV   | 2     | >TSHR-V656I ILNKPLITI   | 16   | 14    |
| >TSHR-V656I ILNKPLITV   | 3514  | >TSHR-V656I ILNKPLITI   | 185  | 3329  |
| >TSHR-V656I AILNKPLITV  | 31    | >TSHR-V656I AILNKPLITI  | 159  | 128   |
| >TSHR-V656I AILNKPLITV  | 73    | >TSHR-V656I AILNKPLITI  | 135  | 62    |
| >TSHR-V656I AILNKPLITV  | 25    | >TSHR-V656I AILNKPLITI  | 66   | 41    |
| >TSHR-V656I AILNKPLITV  | 45    | >TSHR-V656I AILNKPLITI  | 115  | 70    |
| >TSHR-V656I AILNKPLITV  | 4     | >TSHR-V656I AILNKPLITI  | 27   | 23    |
| >TSHR-V656I AILNKPLITV  | 17    | >TSHR-V656I AILNKPLITI  | 228  | 211   |
| >TSHR-V656I AILNKPLITV  | 12    | >TSHR-V656I AILNKPLITI  | 217  | 205   |
| >TSHR-V656I AILNKPLITV  | 31    | >TSHR-V656I AILNKPLITI  | 1495 | 1464  |
| >TSHR-V656I AILNKPLITV  | 7     | >TSHR-V656I AILNKPLITI  | 439  | 432   |
| >TSHR-V656I AILNKPLITV  | 506   | >TSHR-V656I AILNKPLITI  | 28   | 478   |
| >TTL-C91F-w CTWFPESYV   | 1220  | >TTL-C91F-m FTWFPESYV   | 21   | 1199  |
| >TTL-C91F-w CTWFPESYV   | 2282  | >TTL-C91F-m FTWFPESYV   | 91   | 2191  |
| >TTL-C91F-w CTWFPESYVI  | 3582  | >TTL-C91F-m FTWFPESYVI  | 318  | 3264  |
| >TTL-C91F-w CTWFPESYV   | 3635  | >TTL-C91F-m FTWFPESYV   | 227  | 3408  |
| >TTL-C91F-w CTWFPESYV   | 2834  | >TTL-C91F-m FTWFPESYV   | 36   | 2798  |
| >TTL-C91F-w CTWFPESYVI  | 1428  | >TTL-C91F-m FTWFPESYVI  | 67   | 1361  |
| >TTL-C91F-w CTWFPESYV   | 29    | >TTL-C91F-m FTWFPESYV   | 2    | 27    |
| >TTL-C91F-w CTWFPESYVI  | 1395  | >TTL-C91F-m FTWFPESYVI  | 17   | 1378  |
| >TTL-C91F-w CTWFPESYV   | 1178  | >TTL-C91F-m FTWFPESYV   | 28   | 1150  |
| >TTL-C91F-w CTWFPESYVI  | 3105  | >TTL-C91F-m FTWFPESYVI  | 132  | 2973  |

|                         |       |                         |     |       |
|-------------------------|-------|-------------------------|-----|-------|
| >TTL-C91F-w CTWFPESYV   | 823   | >TTL-C91F-m FTWFPESYV   | 11  | 812   |
| >TTL-C91F-w CTWFPESYVI  | 10142 | >TTL-C91F-m FTWFPESYVI  | 304 | 9838  |
| >TTL-C91F-w CTWFPESYV   | 341   | >TTL-C91F-m FTWFPESYV   | 41  | 300   |
| >TTL-C91F-w CTWFPESYV   | 1215  | >TTL-C91F-m FTWFPESYV   | 16  | 1199  |
| >TTL-C91F-w CTWFPESY    | 274   | >TTL-C91F-m FTWFPESY    | 151 | 123   |
| >TTL-C91F-w CTWFPESYVI' | 369   | >TTL-C91F-m FTWFPESYVI' | 210 | 159   |
| >TTL-C91F-w CTWFPESY    | 27    | >TTL-C91F-m FTWFPESY    | 9   | 18    |
| >TTL-C91F-w CTWFPESYVI' | 44    | >TTL-C91F-m FTWFPESYVI' | 12  | 32    |
| >TTL-C91F-w CTWFPESY    | 53    | >TTL-C91F-m FTWFPESY    | 124 | 71    |
| >TTL-C91F-w CTWFPESYVI' | 67    | >TTL-C91F-m FTWFPESYVI' | 160 | 93    |
| >TTL-C91F-w CTWFPESYVI  | 349   | >TTL-C91F-m FTWFPESYVI  | 212 | 137   |
| >TTL-C91F-w CTWFPESYV   | 10    | >TTL-C91F-m FTWFPESYV   | 6   | 4     |
| >TTL-C91F-w CTWFPESYVI  | 97    | >TTL-C91F-m FTWFPESYVI  | 34  | 63    |
| >TTL-C91F-w CTWFPESYV   | 94    | >TTL-C91F-m FTWFPESYV   | 6   | 88    |
| >TTL-C91F-w CTWFPESYVI  | 1218  | >TTL-C91F-m FTWFPESYVI  | 44  | 1174  |
| >TTL-C91F-w CTWFPESY    | 3776  | >TTL-C91F-m FTWFPESY    | 392 | 3384  |
| >TTL-C91F-w CTWFPESY    | 5380  | >TTL-C91F-m FTWFPESY    | 322 | 5058  |
| >TTL-C91F-w CTWFPESYVI' | 5152  | >TTL-C91F-m FTWFPESYVI' | 300 | 4852  |
| >TTL-C91F-w CTWFPESY    | 302   | >TTL-C91F-m FTWFPESY    | 41  | 261   |
| >TTL-C91F-w CTWFPESYVI' | 101   | >TTL-C91F-m FTWFPESYVI' | 19  | 82    |
| >TTL-C91F-w CTWFPESY    | 16    | >TTL-C91F-m FTWFPESY    | 6   | 10    |
| >TTL-C91F-w CTWFPESYV   | 1712  | >TTL-C91F-m FTWFPESYV   | 201 | 1511  |
| >TTL-C91F-w CTWFPESYVI  | 374   | >TTL-C91F-m FTWFPESYVI  | 43  | 331   |
| >TTL-C91F-w CTWFPESYVI' | 13    | >TTL-C91F-m FTWFPESYVI' | 5   | 8     |
| >TTL-C91F-w CTWFPESY    | 606   | >TTL-C91F-m FTWFPESY    | 83  | 523   |
| >TTL-C91F-w CTWFPESYVI' | 360   | >TTL-C91F-m FTWFPESYVI' | 55  | 305   |
| >TTL-C91F-w CTWFPESYVI  | 868   | >TTL-C91F-m FTWFPESYVI  | 303 | 565   |
| >TTL-C91F-w CTWFPESY    | 2262  | >TTL-C91F-m FTWFPESY    | 356 | 1906  |
| >TTL-C91F-w CTWFPESYV   | 138   | >TTL-C91F-m FTWFPESYV   | 19  | 119   |
| >TTL-C91F-w CTWFPESYVI' | 65    | >TTL-C91F-m FTWFPESYVI' | 13  | 52    |
| >TTL-C91F-w CTWFPESY    | 294   | >TTL-C91F-m FTWFPESY    | 784 | 490   |
| >TTL-C91F-w CTWFPESYVI' | 265   | >TTL-C91F-m FTWFPESYVI' | 663 | 398   |
| >TTL-C91F-w CTWFPESYV   | 210   | >TTL-C91F-m FTWFPESYV   | 414 | 204   |
| >TTL-C91F-w CTWFPESYVI  | 33    | >TTL-C91F-m FTWFPESYVI  | 43  | 10    |
| >TTL-C91F-w SCTWFPESYV  | 334   | >TTL-C91F-m SFTWFPESYV  | 533 | 199   |
| >TTL-C91F-w SCTWFPESYV  | 81    | >TTL-C91F-m SFTWFPESYV  | 103 | 22    |
| >TTL-C91F-w SCTWFPESYV  | 293   | >TTL-C91F-m SFTWFPESYV  | 225 | 68    |
| >TTL-C91F-w SCTWFPESYV  | 275   | >TTL-C91F-m SFTWFPESYV  | 186 | 89    |
| >TTL-C91F-w SCTWFPESYV  | 10347 | >TTL-C91F-m SFTWFPESYV  | 471 | 9876  |
| >TTL-C91F-w SCTWFPESYV  | 18205 | >TTL-C91F-m SFTWFPESYV  | 192 | 18013 |
| >TTL-C91F-w SCTWFPESY   | 727   | >TTL-C91F-m SFTWFPESY   | 18  | 709   |
| >TTL-C91F-w SCTWFPESY   | 675   | >TTL-C91F-m SFTWFPESY   | 209 | 466   |
| >TTL-C91F-w SCTWFPESYV  | 287   | >TTL-C91F-m SFTWFPESYV  | 577 | 290   |

|                         |       |                         |      |       |
|-------------------------|-------|-------------------------|------|-------|
| >TTL-C91F-w SCTWFPESYV  | 307   | >TTL-C91F-m SFTWFPESYV  | 573  | 266   |
| >TTL-C91F-w SCTWFPESY   | 188   | >TTL-C91F-m SFTWFPESY   | 882  | 694   |
| >TTL-C91F-w SCTWFPESY   | 2748  | >TTL-C91F-m SFTWFPESY   | 285  | 2463  |
| >TTL-C91F-w SCTWFPESYV  | 5740  | >TTL-C91F-m SFTWFPESYV  | 458  | 5282  |
| >TTL-C91F-w SCTWFPES    | 27753 | >TTL-C91F-m SFTWFPES    | 224  | 27529 |
| >TTL-C91F-w SCTWFPESY   | 17232 | >TTL-C91F-m SFTWFPESY   | 106  | 17126 |
| >TTL-C91F-w SCTWFPESYV  | 4802  | >TTL-C91F-m SFTWFPESYV  | 34   | 4768  |
| >TTL-C91F-w SCTWFPESYV  | 13201 | >TTL-C91F-m SFTWFPESYV  | 74   | 13127 |
| >TTL-C91F-w SCTWFPESYV  | 254   | >TTL-C91F-m SFTWFPESYV  | 1755 | 1501  |
| >TTL-C91F-w IKTSPELAESC | 1505  | >TTL-C91F-m IKTSPELAESF | 4    | 1501  |
| >TTL-C91F-w ESCTWFPESY  | 800   | >TTL-C91F-m ESFTWFPESY  | 229  | 571   |
| >TTL-C91F-w ESCTWFPESY  | 2939  | >TTL-C91F-m ESFTWFPESY  | 395  | 2544  |
| >TTL-C91F-w ESCTWFPESY  | 523   | >TTL-C91F-m ESFTWFPESY  | 273  | 250   |
| >TTL-C91F-w ESCTWFPESY  | 12    | >TTL-C91F-m ESFTWFPESY  | 36   | 24    |
| >TTL-C91F-w ESCTWFPESY  | 282   | >TTL-C91F-m ESFTWFPESY  | 2543 | 2261  |
| >TTL-C91F-w ESCTWFPESY  | 86    | >TTL-C91F-m ESFTWFPESY  | 119  | 33    |
| >TTL-C91F-w ESCTWFPESY  | 878   | >TTL-C91F-m ESFTWFPESY  | 107  | 771   |
| >TTL-C91F-w ESCTWFPESY  | 1460  | >TTL-C91F-m ESFTWFPESY  | 165  | 1295  |
| >TTL-C91F-w ESCTWFPESY  | 2567  | >TTL-C91F-m ESFTWFPESY  | 433  | 2134  |
| >TTL-C91F-w ESCTWFPESY  | 32    | >TTL-C91F-m ESFTWFPESY  | 6    | 26    |
| >TTL-C91F-w ESCTWFPESY  | 102   | >TTL-C91F-m ESFTWFPESY  | 12   | 90    |
| >TTL-C91F-w ESCTWFPESY  | 786   | >TTL-C91F-m ESFTWFPESY  | 321  | 465   |
| >TTL-C91F-w ESCTWFPESY  | 923   | >TTL-C91F-m ESFTWFPESY  | 44   | 879   |
| >TTL-C91F-w ESCTWFPESY  | 251   | >TTL-C91F-m ESFTWFPESY  | 33   | 218   |
| >TTL-C91F-w ESCTWFPESY  | 2290  | >TTL-C91F-m ESFTWFPESY  | 232  | 2058  |
| >TTL-C91F-w AESCTWFPES  | 363   | >TTL-C91F-m AESFTWFPES  | 511  | 148   |
| >TTL-C91F-w AESCTWFPES  | 91    | >TTL-C91F-m AESFTWFPES  | 259  | 168   |
| >TTL-C91F-w AESCTWFPES  | 204   | >TTL-C91F-m AESFTWFPES  | 153  | 51    |
| >TTL-C91F-w AESCTWFPE   | 609   | >TTL-C91F-m AESFTWFPE   | 330  | 279   |
| >TTL-C91F-w AESCTWFPE   | 948   | >TTL-C91F-m AESFTWFPE   | 376  | 572   |
| >TTL-C91F-w AESCTWFPES  | 1561  | >TTL-C91F-m AESFTWFPES  | 362  | 1199  |
| >TTL-C91F-w AESCTWFPES  | 86    | >TTL-C91F-m AESFTWFPES  | 200  | 114   |
| >TTL-C91F-w AESCTWFPES  | 42    | >TTL-C91F-m AESFTWFPES  | 58   | 16    |
| >TTL-C91F-w AESCTWFP    | 102   | >TTL-C91F-m AESFTWFP    | 83   | 19    |
| >TTL-C91F-w AESCTWFPE   | 19    | >TTL-C91F-m AESFTWFPE   | 24   | 5     |
| >TTL-C91F-w AESCTWFPES  | 262   | >TTL-C91F-m AESFTWFPES  | 108  | 154   |
| >TTL-C91F-w AESCTWFPES  | 88    | >TTL-C91F-m AESFTWFPES  | 93   | 5     |
| >TTL-C91F-w LAESCTWF    | 105   | >TTL-C91F-m LAESFTWF    | 122  | 17    |
| >TTL-C91F-w LAESCTWF    | 206   | >TTL-C91F-m LAESFTWF    | 222  | 16    |
| >TTL-C91F-w ELAESCTWF   | 996   | >TTL-C91F-m ELAESFTWF   | 441  | 555   |
| >TTL-C91F-w ELAESCTWF   | 5359  | >TTL-C91F-m ELAESFTWF   | 423  | 4936  |
| >TTL-C91F-w ELAESCTWF   | 2552  | >TTL-C91F-m ELAESFTWF   | 255  | 2297  |
| >TTL-C91F-w ELAESCTWF   | 454   | >TTL-C91F-m ELAESFTWF   | 68   | 386   |

|                         |       |                         |     |       |
|-------------------------|-------|-------------------------|-----|-------|
| >TTL-C91F-w ELAESCTWF   | 288   | >TTL-C91F-m ELAESFTWF   | 41  | 247   |
| >TTL-C91F-w ELAESCTWF   | 3860  | >TTL-C91F-m ELAESFTWF   | 284 | 3576  |
| >TTL-C91F-w ELAESCTWF   | 471   | >TTL-C91F-m ELAESFTWF   | 199 | 272   |
| >TTL-C91F-w ELAESCTW    | 651   | >TTL-C91F-m ELAESFTW    | 435 | 216   |
| >TTL-C91F-w ELAESCTW    | 1131  | >TTL-C91F-m ELAESFTW    | 485 | 646   |
| >TTL-C91F-w PELAESCTW   | 135   | >TTL-C91F-m PELAESFTW   | 149 | 14    |
| >TTL-C91F-w PELAESCTW   | 340   | >TTL-C91F-m PELAESFTW   | 95  | 245   |
| >TTL-C91F-w SPELAESC    | 31996 | >TTL-C91F-m SPELAESF    | 172 | 31824 |
| >TTL-C91F-w SPELAESCTW  | 86    | >TTL-C91F-m SPELAESFTW  | 33  | 53    |
| >TTL-C91F-w SPELAESC    | 11300 | >TTL-C91F-m SPELAESF    | 414 | 10886 |
| >TTL-C91F-w SPELAESC    | 9672  | >TTL-C91F-m SPELAESF    | 85  | 9587  |
| >TTL-C91F-w SPELAESCTW  | 206   | >TTL-C91F-m SPELAESFTW  | 208 | 2     |
| >TTL-C91F-w SPELAESCTW  | 259   | >TTL-C91F-m SPELAESFTW  | 395 | 136   |
| >TTL-C91F-w SPELAESCTW  | 510   | >TTL-C91F-m SPELAESFTW  | 410 | 100   |
| >TTL-C91F-w SPELAESC    | 18879 | >TTL-C91F-m SPELAESF    | 401 | 18478 |
| >TTL-C91F-w SPELAESCTW  | 15    | >TTL-C91F-m SPELAESFTW  | 13  | 2     |
| >TTL-C91F-w TSPELAESC   | 9126  | >TTL-C91F-m TSPELAESF   | 295 | 8831  |
| >TTL-C91F-w TSPELAESCTV | 851   | >TTL-C91F-m TSPELAESFTV | 397 | 454   |
| >TTL-C91F-w TSPELAESC   | 23778 | >TTL-C91F-m TSPELAESF   | 301 | 23477 |
| >TTL-C91F-w TSPELAESCTV | 104   | >TTL-C91F-m TSPELAESFTV | 71  | 33    |
| >TTL-C91F-w TSPELAESCTV | 89    | >TTL-C91F-m TSPELAESFTV | 70  | 19    |
| >TTL-C91F-w TSPELAESCTV | 230   | >TTL-C91F-m TSPELAESFTV | 118 | 112   |
| >TTL-C91F-w TSPELAESC   | 333   | >TTL-C91F-m TSPELAESF   | 12  | 321   |
| >TTL-C91F-w TSPELAESCTV | 203   | >TTL-C91F-m TSPELAESFTV | 46  | 157   |
| >TTL-C91F-w KTSPELAESC  | 18420 | >TTL-C91F-m KTSPELAESF  | 404 | 18016 |
| >TTL-C91F-w KTSPELAESC  | 1464  | >TTL-C91F-m KTSPELAESF  | 27  | 1437  |
| >TTL-C91F-w KTSPELAESC  | 17315 | >TTL-C91F-m KTSPELAESF  | 181 | 17134 |
| >TTL-C91F-w KTSPELAESC  | 12942 | >TTL-C91F-m KTSPELAESF  | 111 | 12831 |
| >TTL-C91F-w KTSPELAESC  | 1134  | >TTL-C91F-m KTSPELAESF  | 4   | 1130  |
| >TTL-C91F-w KTSPELAESC  | 7103  | >TTL-C91F-m KTSPELAESF  | 57  | 7046  |
| >TTL-C91F-w KTSPELAESC  | 1645  | >TTL-C91F-m KTSPELAESF  | 13  | 1632  |
| >TTL-C91F-w KTSPELAESC  | 4233  | >TTL-C91F-m KTSPELAESF  | 317 | 3916  |
| >TTL-C91F-w KTSPELAESC  | 8434  | >TTL-C91F-m KTSPELAESF  | 48  | 8386  |
| >TTL6_ENSTRIFVYNEGL     | 406   | >TTL6_ENSTKIFVYNEGL     | 201 | 205   |
| >TTL6_ENSTRIFVYNEGL     | 217   | >TTL6_ENSTKIFVYNEGL     | 77  | 140   |
| >TTL6_ENSTRIFVYNEGL     | 21    | >TTL6_ENSTKIFVYNEGL     | 12  | 9     |
| >TTL6_ENSTRIFVYNEGL     | 73    | >TTL6_ENSTKIFVYNEGL     | 46  | 27    |
| >TTL6_ENSTRIFVYNEGL     | 54    | >TTL6_ENSTKIFVYNEGL     | 52  | 2     |
| >TTL6_ENSTRIFVYNEGLAI   | 367   | >TTL6_ENSTKIFVYNEGLAI   | 366 | 1     |
| >TTL6_ENSTRIFVYNEGLAI   | 141   | >TTL6_ENSTKIFVYNEGLAI   | 156 | 15    |
| >TTL6_ENSTRIFVYNEGLA    | 481   | >TTL6_ENSTKIFVYNEGLA    | 552 | 71    |
| >TTL6_ENSTRIFVYNEGLAI   | 16    | >TTL6_ENSTKIFVYNEGLAI   | 18  | 2     |
| >TTL6_ENSTRIFVYNEGL     | 31    | >TTL6_ENSTKIFVYNEGL     | 29  | 2     |



|                        |      |                        |       |       |
|------------------------|------|------------------------|-------|-------|
| >TTLL6_ENSTRIFVYNEGLAI | 207  | >TTLL6_ENSTKIFVYNEGLAI | 374   | 167   |
| >TTLL6_ENSTRIFVYNEGL   | 264  | >TTLL6_ENSTKIFVYNEGL   | 631   | 367   |
| >TTLL6_ENSTRIFVYNEGLAI | 45   | >TTLL6_ENSTKIFVYNEGLAI | 24    | 21    |
| >TTLL6_ENSTRIFVYNEGL   | 772  | >TTLL6_ENSTLKIFVYNEGL  | 116   | 656   |
| >TTLL6_ENSTRIFVYNEGL   | 210  | >TTLL6_ENSTLKIFVYNEGL  | 13099 | 12889 |
| >TTLL6_ENSTYVLVTSCDPLI | 1252 | >TTLL6_ENSTYVLVTSCDPLI | 101   | 1151  |
| >TTLL6_ENSTYVLVTSCDPLI | 3962 | >TTLL6_ENSTYVLVTSCDPLI | 102   | 3860  |
| >TTLL6_ENSTYVLVTSCDPLI | 127  | >TTLL6_ENSTYVLVTSCDPLI | 2335  | 2208  |
| >TTLL6_ENSTYVLVTSCDPLI | 293  | >TTLL6_ENSTYVLVTSCDPLI | 5169  | 4876  |
| >TTLL6_ENSTYVLVTSCDPLI | 20   | >TTLL6_ENSTYVLVTSCDPLI | 56    | 36    |
| >TTLL6_ENSTYVLVTSCDPLI | 244  | >TTLL6_ENSTYVLVTSCDPLI | 5687  | 5443  |
| >TTLL6_ENSTPLRIFVYNEGI | 262  | >TTLL6_ENSTPLKIFVYNEGI | 399   | 137   |
| >TTLL6_ENSTDPLRIFVY    | 164  | >TTLL6_ENSTDPLKIFVY    | 95    | 69    |
| >TTLL6_ENSTDPLRIFVY    | 47   | >TTLL6_ENSTDPLKIFVY    | 41    | 6     |
| >TTLL6_ENSTDPLRIFVY    | 270  | >TTLL6_ENSTDPLKIFVY    | 165   | 105   |
| >TTLL6_ENSTDPLRIFVY    | 143  | >TTLL6_ENSTDPLKIFVY    | 92    | 51    |
| >TTLL6_ENSTDPLRIFVY    | 45   | >TTLL6_ENSTDPLKIFVY    | 48    | 3     |
| >TTLL6_ENSTCDPLRIFV    | 219  | >TTLL6_ENSTCDPLKIFV    | 165   | 54    |
| >TTLL6_ENSTSCDPLRIFV   | 903  | >TTLL6_ENSTSCDPLKIFV   | 296   | 607   |
| >TTLL6_ENSTSCDPLRIFV   | 216  | >TTLL6_ENSTSCDPLKIFV   | 86    | 130   |
| >TTLL6_ENSTSCDPLRIFVY  | 484  | >TTLL6_ENSTSCDPLKIFVY  | 565   | 81    |
| >TTLL6_ENSTTSCDPLRIFVY | 265  | >TTLL6_ENSTTSCDPLKIFVY | 375   | 110   |
| >TTLL6_ENSTTSCDPLRIF   | 41   | >TTLL6_ENSTTSCDPLKIF   | 51    | 10    |
| >TTLL6_ENSTTSCDPLRIFVY | 50   | >TTLL6_ENSTTSCDPLKIFVY | 43    | 7     |
| >TTLL6_ENSTTSCDPLRIFVY | 373  | >TTLL6_ENSTTSCDPLKIFVY | 419   | 46    |
| >TTLL6_ENSTTSCDPLRIFVY | 191  | >TTLL6_ENSTTSCDPLKIFVY | 214   | 23    |
| >TTLL6_ENSTTSCDPLRIFV  | 63   | >TTLL6_ENSTTSCDPLKIFV  | 234   | 171   |
| >TTLL6_ENSTTSCDPLRIFVY | 442  | >TTLL6_ENSTTSCDPLKIFVY | 566   | 124   |
| >TTLL6_ENSTTSCDPLRI    | 235  | >TTLL6_ENSTTSCDPLKI    | 278   | 43    |
| >TTLL6_ENSTTSCDPLRIF   | 34   | >TTLL6_ENSTTSCDPLKIF   | 21    | 13    |
| >TTLL6_ENSTTSCDPLRIFVY | 16   | >TTLL6_ENSTTSCDPLKIFVY | 14    | 2     |
| >TTLL6_ENSTTSCDPLRIF   | 106  | >TTLL6_ENSTTSCDPLKIF   | 99    | 7     |
| >TTLL6_ENSTTSCDPLRIFVY | 144  | >TTLL6_ENSTTSCDPLKIFVY | 165   | 21    |
| >TTLL6_ENSTTSCDPLRI    | 49   | >TTLL6_ENSTTSCDPLKI    | 41    | 8     |
| >TTLL6_ENSTVTSCDPLRIFV | 486  | >TTLL6_ENSTVTSCDPLKIFV | 583   | 97    |
| >TTLL6_ENSTVTSCDPLRIFV | 366  | >TTLL6_ENSTVTSCDPLKIFV | 406   | 40    |
| >TTLL6_ENSTVTSCDPLRIFV | 159  | >TTLL6_ENSTVTSCDPLKIFV | 93    | 66    |
| >TTLL6_ENSTVTSCDPLRIFV | 571  | >TTLL6_ENSTVTSCDPLKIFV | 337   | 234   |
| >TTLL6_ENSTVTSCDPLR    | 6518 | >TTLL6_ENSTVTSCDPLK    | 382   | 6136  |
| >TTLL6_ENSTVTSCDPLR    | 328  | >TTLL6_ENSTVTSCDPLK    | 23    | 305   |
| >TTLL6_ENSTVTSCDPLR    | 65   | >TTLL6_ENSTVTSCDPLK    | 183   | 118   |
| >TTLL6_ENSTVTSCDPLRIFV | 67   | >TTLL6_ENSTVTSCDPLKIFV | 114   | 47    |
| >TTLL6_ENSTVTSCDPLRIF  | 262  | >TTLL6_ENSTVTSCDPLKIF  | 168   | 94    |

|                        |      |                        |       |      |
|------------------------|------|------------------------|-------|------|
| >TTLL6_ENSTVTSCDPLRI   | 143  | >TTLL6_ENSTVTSCDPLKI   | 191   | 48   |
| >TTLL6_ENSTVTSCDPLRIF  | 20   | >TTLL6_ENSTVTSCDPLKIF  | 15    | 5    |
| >TTLL6_ENSTVTSCDPLRIF  | 72   | >TTLL6_ENSTVTSCDPLKIF  | 62    | 10   |
| >TTLL6_ENSTVTSCDPLR    | 558  | >TTLL6_ENSTVTSCDPLK    | 346   | 212  |
| >TTLL6_ENSTVTSCDPLRI   | 134  | >TTLL6_ENSTVTSCDPLKI   | 96    | 38   |
| >TTLL6_ENSTLVTSCDPLRI  | 422  | >TTLL6_ENSTLVTSCDPLKI  | 455   | 33   |
| >TTLL6_ENSTLVTSCDPLR   | 2474 | >TTLL6_ENSTLVTSCDPLK   | 131   | 2343 |
| >TTLL6_ENSTLVTSCDPLR   | 146  | >TTLL6_ENSTLVTSCDPLK   | 2063  | 1917 |
| >TTLL6_ENSTLVTSCDPLR   | 25   | >TTLL6_ENSTLVTSCDPLK   | 47    | 22   |
| >TTLL6_ENSTLVTSCDPLRIF | 592  | >TTLL6_ENSTLVTSCDPLKIF | 434   | 158  |
| >TTLL6_ENSTLVTSCDPLRIF | 49   | >TTLL6_ENSTLVTSCDPLKIF | 47    | 2    |
| >TTLL6_ENSTLVTSCDPLR   | 298  | >TTLL6_ENSTLVTSCDPLK   | 8663  | 8365 |
| >TTLL6_ENSTLVTSCDPLRI  | 178  | >TTLL6_ENSTLVTSCDPLKI  | 177   | 1    |
| >TTLL6_ENSTVLVTSCDPLRI | 444  | >TTLL6_ENSTVLVTSCDPLKI | 437   | 7    |
| >TTLL6_ENSTVLVTSCDPLR  | 96   | >TTLL6_ENSTVLVTSCDPLKI | 95    | 1    |
| >TTLL6_ENSTVLVTSCDPLRI | 84   | >TTLL6_ENSTVLVTSCDPLKI | 127   | 43   |
| >TTLL6_ENSTVLVTSCDPLR  | 432  | >TTLL6_ENSTVLVTSCDPLKI | 413   | 19   |
| >TTLL6_ENSTVLVTSCDPLRI | 698  | >TTLL6_ENSTVLVTSCDPLKI | 487   | 211  |
| >TTLL6_ENSTVLVTSCDPLR  | 61   | >TTLL6_ENSTVLVTSCDPLKI | 106   | 45   |
| >TTLL6_ENSTVLVTSCDPLR  | 2809 | >TTLL6_ENSTVLVTSCDPLK  | 214   | 2595 |
| >TTLL6_ENSTVLVTSCDPLR  | 275  | >TTLL6_ENSTVLVTSCDPLK  | 600   | 325  |
| >TTLL6_ENSTVLVTSCDPLR  | 482  | >TTLL6_ENSTVLVTSCDPLK  | 10161 | 9679 |
| >USP6-D17N DILMKYDKG†  | 1816 | >USP6-D17N NILMKYDKG†  | 444   | 1372 |
| >USP6-D17N DILMKYDK    | 381  | >USP6-D17N NILMKYDK    | 2418  | 2037 |
| >USP6-D17N DILMKYDKG†  | 32   | >USP6-D17N NILMKYDKG†  | 136   | 104  |
| >USP6-D17N DILMKYDKG†  | 453  | >USP6-D17N NILMKYDKG†  | 557   | 104  |
| >USP6-D17N DILMKYDKG†  | 1196 | >USP6-D17N NILMKYDKG†  | 239   | 957  |
| >USP6-D17N RKDILMKY    | 1674 | >USP6-D17N RKNILMKY    | 450   | 1224 |
| >USP6-D17N RKDILMKY    | 623  | >USP6-D17N RKNILMKY    | 308   | 315  |
| >USP6-D17N RKDILMKY    | 475  | >USP6-D17N RKNILMKY    | 17    | 458  |
| >USP6-D17N RKDILMKY    | 1384 | >USP6-D17N RKNILMKY    | 417   | 967  |
| >USP6-D17N QERKDILM    | 19   | >USP6-D17N QERKNILM    | 8     | 11   |
| >USP6-D17N QERKDILMKY  | 601  | >USP6-D17N QERKNILMKY  | 385   | 216  |
| >USP6-D17N QERKDILMKY  | 247  | >USP6-D17N QERKNILMKY  | 191   | 56   |
| >USP6-D17N QERKDILMKY  | 376  | >USP6-D17N QERKNILMKY  | 168   | 208  |
| >USP6-D17N QERKDILMKY  | 290  | >USP6-D17N QERKNILMKY  | 207   | 83   |
| >USP6-D17N AQERKDILM†  | 2308 | >USP6-D17N AQERKNILM†  | 454   | 1854 |
| >USP6-D17N AQERKDILM†  | 644  | >USP6-D17N AQERKNILM†  | 446   | 198  |
| >USP6-D17N QAQERKDILM  | 488  | >USP6-D17N QAQERKNILM  | 377   | 111  |
| >USP6-D17N QAQERKDILM  | 757  | >USP6-D17N QAQERKNILM  | 286   | 471  |
| >USP6-D17N LQAQERKDI   | 364  | >USP6-D17N LQAQERKNI   | 321   | 43   |
| >USP6-D17N LQAQERKDIL  | 422  | >USP6-D17N LQAQERKNIL  | 352   | 70   |
| >USP6-D17N LQAQERKDI   | 311  | >USP6-D17N LQAQERKNI   | 174   | 137  |

|                         |      |                         |      |      |
|-------------------------|------|-------------------------|------|------|
| >USP6-D17N LQAQERKDIL   | 466  | >USP6-D17N LQAQERKNIL   | 177  | 289  |
| >USP6-D17N LQAQERKDIL   | 342  | >USP6-D17N LQAQERKNIL   | 172  | 170  |
| >USP6-D17N LQAQERKDIL   | 1306 | >USP6-D17N LQAQERKNIL   | 445  | 861  |
| >USP6-D17N SLQAQERKDI   | 327  | >USP6-D17N SLQAQERKNI   | 267  | 60   |
| >USP6-D17N SLQAQERKDI   | 451  | >USP6-D17N SLQAQERKNI   | 398  | 53   |
| >USP6-D17N SLQAQERKDI   | 420  | >USP6-D17N SLQAQERKNI   | 229  | 191  |
| >USP6-D17N SLQAQERKDI   | 65   | >USP6-D17N SLQAQERKNI   | 45   | 20   |
| >USP6-H89N HSSKLIDRVY   | 438  | >USP6-H89N NSSKLIDRVY   | 705  | 267  |
| >USP6-H89N HSSKLIDRVY†  | 151  | >USP6-H89N NSSKLIDRVY†  | 1706 | 1555 |
| >USP6-H89N HSSKLIDRVY†  | 34   | >USP6-H89N NSSKLIDRVY†  | 63   | 29   |
| >USP6-H89N HSSKLIDRVY   | 109  | >USP6-H89N NSSKLIDRVY   | 225  | 116  |
| >USP6-H89N HSSKLIDRVY†  | 47   | >USP6-H89N NSSKLIDRVY†  | 3035 | 2988 |
| >USP6-H89N HSSKLIDRVY   | 100  | >USP6-H89N NSSKLIDRVY   | 143  | 43   |
| >USP6-H89N HSSKLIDR     | 240  | >USP6-H89N NSSKLIDR     | 3014 | 2774 |
| >USP6-H89N HSSKLIDRVY†  | 146  | >USP6-H89N NSSKLIDRVY†  | 1348 | 1202 |
| >USP6-H89N HSSKLIDR     | 59   | >USP6-H89N NSSKLIDR     | 69   | 10   |
| >USP6-H89N HSSKLIDRVY†  | 20   | >USP6-H89N NSSKLIDRVY†  | 23   | 3    |
| >USP6-H89N HSSKLIDRV    | 33   | >USP6-H89N NSSKLIDRV    | 36   | 3    |
| >USP6-H89N HSSKLIDRVY   | 344  | >USP6-H89N NSSKLIDRVY   | 1042 | 698  |
| >USP6-H89N HSSKLIDRVY   | 39   | >USP6-H89N NSSKLIDRVY   | 1398 | 1359 |
| >USP6-H89N HSSKLIDRVY   | 406  | >USP6-H89N NSSKLIDRVY   | 1019 | 613  |
| >USP6-H89N HSSKLIDRVY   | 118  | >USP6-H89N NSSKLIDRVY   | 444  | 326  |
| >USP6-H89N HSSKLIDR     | 393  | >USP6-H89N NSSKLIDR     | 2507 | 2114 |
| >USP6-H89N KHSSKLIDRV\  | 158  | >USP6-H89N KNSSKLIDRV\  | 198  | 40   |
| >USP6-H89N KHSSKLIDRV\  | 419  | >USP6-H89N KNSSKLIDRV\  | 2058 | 1639 |
| >USP6-H89N KHSSKLIDR    | 334  | >USP6-H89N KNSSKLIDR    | 452  | 118  |
| >USP6-H89N YKHSSKLI     | 13   | >USP6-H89N YKNSSKLI     | 17   | 4    |
| >USP6-H89N YKHSSKLIDR   | 122  | >USP6-H89N YKNSSKLIDR   | 183  | 61   |
| >USP6-H89N YKHSSKLIDRV\ | 93   | >USP6-H89N YKNSSKLIDRV\ | 147  | 54   |
| >USP6-H89N TYKHSSKL     | 488  | >USP6-H89N TYKNSSKL     | 79   | 409  |
| >USP6-H89N TYKHSSKLI    | 1521 | >USP6-H89N TYKNSSKLI    | 350  | 1171 |
| >USP6-H89N TYKHSSKLI    | 219  | >USP6-H89N TYKNSSKLI    | 451  | 232  |
| >USP6-H89N TYKHSSKLI    | 324  | >USP6-H89N TYKNSSKLI    | 280  | 44   |
| >USP6-H89N TYKHSSKLI    | 144  | >USP6-H89N TYKNSSKLI    | 201  | 57   |
| >USP6-H89N TYKHSSKL     | 65   | >USP6-H89N TYKNSSKL     | 55   | 10   |
| >USP6-H89N TYKHSSKLI    | 199  | >USP6-H89N TYKNSSKLI    | 170  | 29   |
| >USP6-H89N TYKHSSKLI    | 61   | >USP6-H89N TYKNSSKLI    | 88   | 27   |
| >USP6-H89N TYKHSSKLIDR  | 100  | >USP6-H89N TYKNSSKLIDR  | 83   | 17   |
| >USP6-H89N TYKHSSKLIDR  | 132  | >USP6-H89N TYKNSSKLIDR  | 154  | 22   |
| >USP6-H89N TYKHSSKLIDR  | 122  | >USP6-H89N TYKNSSKLIDR  | 157  | 35   |
| >USP6-H89N ETYKHSSKLI   | 103  | >USP6-H89N ETYKNSSKLI   | 91   | 12   |
| >USP6-H89N ETYKHSSK     | 80   | >USP6-H89N ETYKNSSK     | 134  | 54   |
| >USP6-H89N ETYKHSSK     | 88   | >USP6-H89N ETYKNSSK     | 123  | 35   |

|                       |       |                       |       |       |
|-----------------------|-------|-----------------------|-------|-------|
| >USP6-H89N ETYKHSSKL  | 176   | >USP6-H89N ETYKNSSKL  | 281   | 105   |
| >USP6-H89N ETYKHSSKL  | 27    | >USP6-H89N ETYKNSSKL  | 28    | 1     |
| >USP6-H89N ETYKHSSKL  | 30    | >USP6-H89N ETYKNSSKL  | 81    | 51    |
| >USP6-H89N ETYKHSSK   | 469   | >USP6-H89N ETYKNSSK   | 1047  | 578   |
| >USP6-H89N ETYKHSSK   | 3     | >USP6-H89N ETYKNSSK   | 3     | 0     |
| >USP6-H89N ETYKHSSKL  | 52    | >USP6-H89N ETYKNSSKL  | 28    | 24    |
| >USP6-H89N ETYKHSSKLI | 202   | >USP6-H89N ETYKNSSKLI | 148   | 54    |
| >USP6-H89N ETYKHSSKL  | 15    | >USP6-H89N ETYKNSSKL  | 18    | 3     |
| >USP6-H89N ETYKHSSKLI | 30    | >USP6-H89N ETYKNSSKLI | 31    | 1     |
| >USP6-H89N ETYKHSSKL  | 11    | >USP6-H89N ETYKNSSKL  | 11    | 0     |
| >USP6-H89N ETYKHSSKLI | 71    | >USP6-H89N ETYKNSSKLI | 75    | 4     |
| >USP6-H89N ETYKHSSKL  | 102   | >USP6-H89N ETYKNSSKL  | 85    | 17    |
| >USP6-H89N ETYKHSSKL  | 215   | >USP6-H89N ETYKNSSKL  | 341   | 126   |
| >USP6-H89N ETYKHSSKLI | 78    | >USP6-H89N ETYKNSSKLI | 163   | 85    |
| >USP6-H89N WETYKHSSKL | 276   | >USP6-H89N WETYKNSSKL | 239   | 37    |
| >USP6-H89N WETYKHSSKL | 8     | >USP6-H89N WETYKNSSKL | 9     | 1     |
| >USP6-H89N WETYKHSSKL | 61    | >USP6-H89N WETYKNSSKL | 67    | 6     |
| >USP6-H89N WETYKHSSKL | 173   | >USP6-H89N WETYKNSSKL | 164   | 9     |
| >USP6-H89N WETYKHSSKL | 425   | >USP6-H89N WETYKNSSKL | 494   | 69    |
| >USP6-H89N WETYKHSSKL | 397   | >USP6-H89N WETYKNSSKL | 439   | 42    |
| >USP6-H89N WETYKHSSKL | 63    | >USP6-H89N WETYKNSSKL | 37    | 26    |
| >USP6-H89N WETYKHSSKL | 15    | >USP6-H89N WETYKNSSKL | 11    | 4     |
| >USP6-H89N EWETYKHSSK | 489   | >USP6-H89N EWETYKNSSK | 832   | 343   |
| >USP6-H89N EWETYKHSS  | 374   | >USP6-H89N EWETYKNSS  | 411   | 37    |
| >USP6-H89N EWETYKHSSK | 426   | >USP6-H89N EWETYKNSSK | 452   | 26    |
| >USP6-H89N MLGEWETYK  | 1196  | >USP6-H89N MLGEWETYK  | 178   | 1018  |
| >USP6-H89N MLGEWETYK  | 140   | >USP6-H89N MLGEWETYK  | 163   | 23    |
| >USP6-H89N MLGEWETYK  | 194   | >USP6-H89N MLGEWETYK  | 222   | 28    |
| >USP6-R456\RLPTDLDI   | 346   | >USP6-R456\WLPTDLDI   | 287   | 59    |
| >USP6-R456\RLPTDLDI   | 578   | >USP6-R456\WLPTDLDI   | 448   | 130   |
| >USP6-R456\RLPTDLDI   | 519   | >USP6-R456\WLPTDLDI   | 291   | 228   |
| >USP6-R456\RLPTDLDI   | 286   | >USP6-R456\WLPTDLDI   | 68    | 218   |
| >USP6-R456\RLPTDLDI   | 406   | >USP6-R456\WLPTDLDI   | 18491 | 18085 |
| >USP6-R456\PRLPTDLDI  | 18836 | >USP6-R456\PWLPTDLDI  | 327   | 18509 |
| >USP6-R456\PRLPTDLDI  | 32078 | >USP6-R456\PWLPTDLDI  | 295   | 31783 |
| >USP6-R456\WRFLEWKSM  | 562   | >USP6-R456\WRFLEWKSM  | 211   | 351   |
| >USP6-R456\WRFLEWKSM  | 39    | >USP6-R456\WRFLEWKSM  | 446   | 407   |
| >USP6-R456\WRFLEWKSM  | 7325  | >USP6-R456\WRFLEWKSM  | 18    | 7307  |
| >USP6-R456\WRFLEWKSM  | 50    | >USP6-R456\WRFLEWKSM  | 18591 | 18541 |
| >USP6-R456\MPRLPTDL   | 4988  | >USP6-R456\MPWLPTDL   | 121   | 4867  |
| >USP6-R456\MPRLPTDLDI | 7794  | >USP6-R456\MPWLPTDLDI | 352   | 7442  |
| >USP6-R456\MPRLPTDL   | 18    | >USP6-R456\MPWLPTDL   | 41    | 23    |
| >USP6-R456\MPRLPTDLDI | 186   | >USP6-R456\MPWLPTDLDI | 1244  | 1058  |

|                       |      |                       |      |      |
|-----------------------|------|-----------------------|------|------|
| >USP6-R456\MPRLPTDL   | 370  | >USP6-R456\MPWLPTDL   | 24   | 346  |
| >USP6-R456\MPRLPTDLD  | 8680 | >USP6-R456\MPWLPTDLD  | 443  | 8237 |
| >USP6-R456\MPRLPTDLDI | 614  | >USP6-R456\MPWLPTDLD  | 273  | 341  |
| >USP6-R456\MPRLPTDLDI | 2565 | >USP6-R456\MPWLPTDLD  | 76   | 2489 |
| >USP6-R456\MPRLPTDL   | 1718 | >USP6-R456\MPWLPTDL   | 352  | 1366 |
| >USP6-R456\MPRLPTDL   | 1486 | >USP6-R456\MPWLPTDL   | 93   | 1393 |
| >USP6-R456\MPRLPTDLDI | 132  | >USP6-R456\MPWLPTDLD  | 133  | 1    |
| >USP6-R456\MPRLPTDL   | 2039 | >USP6-R456\MPWLPTDL   | 233  | 1806 |
| >USP6-R456\MPRLPTDLD  | 38   | >USP6-R456\MPWLPTDLD  | 9    | 29   |
| >USP6-R456\MPRLPTDLDI | 329  | >USP6-R456\MPWLPTDLD  | 1019 | 690  |
| >USP6-R456\MPRLPTDLDI | 32   | >USP6-R456\MPWLPTDLD  | 9    | 23   |
| >USP6-R456\SMPRLPTDL  | 511  | >USP6-R456\SMPWLPTDL  | 321  | 190  |
| >USP6-R456\SMPRLPTDL  | 160  | >USP6-R456\SMPWLPTDL  | 65   | 95   |
| >USP6-R456\SMPRLPTDLC | 505  | >USP6-R456\SMPWLPTDL  | 278  | 227  |
| >USP6-R456\SMPRLPTDL  | 168  | >USP6-R456\SMPWLPTDL  | 16   | 152  |
| >USP6-R456\SMPRLPTDLC | 264  | >USP6-R456\SMPWLPTDL  | 40   | 224  |
| >USP6-R456\SMPRLPTDL  | 103  | >USP6-R456\SMPWLPTDL  | 17   | 86   |
| >USP6-R456\SMPRLPTDLC | 95   | >USP6-R456\SMPWLPTDL  | 23   | 72   |
| >USP6-R456\SMPRLPTDL  | 58   | >USP6-R456\SMPWLPTDL  | 12   | 46   |
| >USP6-R456\SMPRLPTDLC | 253  | >USP6-R456\SMPWLPTDL  | 60   | 193  |
| >USP6-R456\SMPRLPTDL  | 600  | >USP6-R456\SMPWLPTDL  | 168  | 432  |
| >USP6-R456\SMPRLPTDLC | 416  | >USP6-R456\SMPWLPTDL  | 152  | 264  |
| >USP6-R456\KSMRPLPT   | 1437 | >USP6-R456\KSMRPLPT   | 282  | 1155 |
| >USP6-R456\KSMRPLPT   | 258  | >USP6-R456\KSMRPLPT   | 431  | 173  |
| >USP6-R456\KSMRPLPTDL | 93   | >USP6-R456\KSMRPLPTD  | 45   | 48   |
| >USP6-R456\KSMRPLPTDL | 281  | >USP6-R456\KSMRPLPTD  | 346  | 65   |
| >USP6-R456\KSMRPLPT   | 145  | >USP6-R456\KSMRPLPT   | 105  | 40   |
| >USP6-R456\KSMRPLPTDL | 7    | >USP6-R456\KSMRPLPTD  | 7    | 0    |
| >USP6-R456\KSMRPLPTDL | 552  | >USP6-R456\KSMRPLPTD  | 400  | 152  |
| >USP6-R456\KSMRPLPTDL | 108  | >USP6-R456\KSMRPLPTD  | 44   | 64   |
| >USP6-R456\KSMRPLPTDL | 188  | >USP6-R456\KSMRPLPTD  | 277  | 89   |
| >USP6-R456\WKSMRPLPT  | 32   | >USP6-R456\WKSMRPLPT  | 47   | 15   |
| >USP6-R456\EWKSMRPL   | 535  | >USP6-R456\EWKSMRPL   | 303  | 232  |
| >USP6-R456\EWKSMRPLP  | 859  | >USP6-R456\EWKSMRPLI  | 230  | 629  |
| >USP6-R456\EWKSMRPLP  | 1635 | >USP6-R456\EWKSMRPLI  | 278  | 1357 |
| >USP6-R456\LEWKSMRPL  | 235  | >USP6-R456\LEWKSMRPLI | 48   | 187  |
| >USP6-R456\LEWKSMRPL  | 683  | >USP6-R456\LEWKSMRPL  | 347  | 336  |
| >USP6-R456\LEWKSMRPL  | 327  | >USP6-R456\LEWKSMRPL  | 35   | 292  |
| >USP6-R456\LEWKSMRPL  | 390  | >USP6-R456\LEWKSMRPLI | 163  | 227  |
| >USP6-R456\LEWKSMRPL  | 229  | >USP6-R456\LEWKSMRPLI | 58   | 171  |
| >USP6-R456\LEWKSMRPL  | 118  | >USP6-R456\LEWKSMRPLI | 274  | 156  |
| >USP6-R456\LEWKSMRPLI | 140  | >USP6-R456\LEWKSMRPLI | 80   | 60   |
| >USP6-R456\LEWKSMRPL  | 3945 | >USP6-R456\LEWKSMRPL  | 83   | 3862 |

|                        |       |                        |       |       |
|------------------------|-------|------------------------|-------|-------|
| >USP6-R456\ LEWKSMPL   | 1200  | >USP6-R456\ LEWKSMPL   | 489   | 711   |
| >USP6-R456\ LEWKSMPL   | 7983  | >USP6-R456\ LEWKSMPL   | 53    | 7930  |
| >USP6-R456\ LEWKSMPL   | 943   | >USP6-R456\ LEWKSMPL   | 318   | 625   |
| >USP6-R456\ LEWKSMPL   | 17    | >USP6-R456\ LEWKSMPL   | 83    | 66    |
| >USP6-R456\ LEWKSMPL   | 425   | >USP6-R456\ LEWKSMPL   | 284   | 141   |
| >USP6-R456\ LEWKSMPL   | 32654 | >USP6-R456\ LEWKSMPL   | 295   | 32359 |
| >USP6-R456\ LEWKSMPL   | 28752 | >USP6-R456\ LEWKSMPL   | 108   | 28644 |
| >USP6-R456\ LEWKSMPL   | 88    | >USP6-R456\ LEWKSMPL   | 16396 | 16308 |
| >USP6-R456\ FLEWKSMPL  | 354   | >USP6-R456\ FLEWKSMPL  | 164   | 190   |
| >USP6-R456\ FLEWKSMPL  | 134   | >USP6-R456\ FLEWKSMPL  | 118   | 16    |
| >USP6-R456\ FLEWKSMPL  | 367   | >USP6-R456\ FLEWKSMPL  | 250   | 117   |
| >USP6-R456\ FLEWKSMPL  | 703   | >USP6-R456\ FLEWKSMPL  | 217   | 486   |
| >USP6-R456\ FLEWKSMPL  | 10    | >USP6-R456\ FLEWKSMPL  | 11    | 1     |
| >USP6-R456\ FLEWKSMPL  | 60    | >USP6-R456\ FLEWKSMPL  | 76    | 16    |
| >USP6-R456\ FLEWKSMPL  | 38    | >USP6-R456\ FLEWKSMPL  | 23    | 15    |
| >USP6-R456\ FLEWKSMPL  | 313   | >USP6-R456\ FLEWKSMPL  | 296   | 17    |
| >USP6-R456\ FLEWKSMPL  | 2     | >USP6-R456\ FLEWKSMPL  | 2     | 0     |
| >USP6-R456\ FLEWKSMPL  | 6348  | >USP6-R456\ FLEWKSMPL  | 382   | 5966  |
| >USP6-R456\ FLEWKSMPL  | 208   | >USP6-R456\ FLEWKSMPL  | 31890 | 31682 |
| >USP6-R456\ FLEWKSMPL  | 132   | >USP6-R456\ FLEWKSMPL  | 27830 | 27698 |
| >USP6-R456\ FLEWKSMPL  | 24997 | >USP6-R456\ FLEWKSMPL  | 258   | 24739 |
| >USP6-R456\ FLEWKSMPL  | 31492 | >USP6-R456\ FLEWKSMPL  | 348   | 31144 |
| >USP6-R456\ FLEWKSMPL  | 30945 | >USP6-R456\ FLEWKSMPL  | 236   | 30709 |
| >USP6-R456\ FLEWKSMPL  | 89    | >USP6-R456\ FLEWKSMPL  | 19500 | 19411 |
| >USP6-R456\ RFLEWKSMPL | 323   | >USP6-R456\ RFLEWKSMPL | 272   | 51    |
| >USP6-R456\ RFLEWKSMPL | 217   | >USP6-R456\ RFLEWKSMPL | 10719 | 10502 |
| >USP6-R456\ RFLEWKSMPL | 179   | >USP6-R456\ RFLEWKSMPL | 296   | 117   |
| >USP6-R456\ RFLEWKSMPL | 3625  | >USP6-R456\ RFLEWKSMPL | 43    | 3582  |
| >USP6-R456\ RFLEWKSMPL | 44    | >USP6-R456\ RFLEWKSMPL | 22    | 22    |
| >USP6-R456\ RFLEWKSMPL | 468   | >USP6-R456\ RFLEWKSMPL | 6208  | 5740  |
| >USP6-R456\ RFLEWKSMPL | 5     | >USP6-R456\ RFLEWKSMPL | 3236  | 3231  |
| >USP6-R456\ RFLEWKSMPL | 12609 | >USP6-R456\ RFLEWKSMPL | 362   | 12247 |
| >USP6-R456\ RFLEWKSMPL | 107   | >USP6-R456\ RFLEWKSMPL | 18806 | 18699 |
| >USP6-R456\ RFLEWKSMPL | 21722 | >USP6-R456\ RFLEWKSMPL | 125   | 21597 |
| >USP6-R456\ RFLEWKSMPL | 123   | >USP6-R456\ RFLEWKSMPL | 27032 | 26909 |
| >USP6-R456\ RFLEWKSMPL | 19    | >USP6-R456\ RFLEWKSMPL | 2096  | 2077  |
| >USP6-R456\ RFLEWKSMPL | 268   | >USP6-R456\ RFLEWKSMPL | 198   | 70    |
| >USP6-V678\ IVDLFHGQL  | 358   | >USP6-V678\ IADLFHGQL  | 328   | 30    |
| >USP6-V678\ IVDLFHGQLR | 404   | >USP6-V678\ IADLFHGQLR | 935   | 531   |
| >USP6-V678\ IVDLFHGQLR | 150   | >USP6-V678\ IADLFHGQLR | 292   | 142   |
| >USP6-V678\ IVDLFHGQL  | 2582  | >USP6-V678\ IADLFHGQL  | 299   | 2283  |
| >USP6-V678\ IVDLFHGQ   | 1360  | >USP6-V678\ IADLFHGQ   | 302   | 1058  |
| >USP6-V678\ IVDLFHGQL  | 513   | >USP6-V678\ IADLFHGQL  | 252   | 261   |

|                        |      |                        |      |     |
|------------------------|------|------------------------|------|-----|
| >USP6-V678/IIVDLFHGQL  | 483  | >USP6-V678/IIADLFHGQL  | 447  | 36  |
| >USP6-V678/IIVDLFHG    | 468  | >USP6-V678/IIADLFHG    | 655  | 187 |
| >USP6-V678/IIVDLFHGQ   | 178  | >USP6-V678/IIADLFHGQ   | 286  | 108 |
| >USP6-V678/IIVDLFHGQL  | 325  | >USP6-V678/IIADLFHGQL  | 681  | 356 |
| >USP6-V678/IIVDLFHGQL  | 160  | >USP6-V678/IIADLFHGQL  | 129  | 31  |
| >USP6-V678/IIVDLFHGQ   | 267  | >USP6-V678/IIADLFHGQ   | 111  | 156 |
| >USP6-V678/IIVDLFHGQL  | 60   | >USP6-V678/IIADLFHGQL  | 33   | 27  |
| >USP6-V678/IIVDLFHGQLF | 84   | >USP6-V678/IIADLFHGQLF | 71   | 13  |
| >USP6-V678/IIVDLFHGQLF | 337  | >USP6-V678/IIADLFHGQLF | 397  | 60  |
| >USP6-V678/IIVDLFHGQLF | 36   | >USP6-V678/IIADLFHGQLF | 20   | 16  |
| >USP6-V678/IIVDLFHGQL  | 707  | >USP6-V678/IIADLFHGQL  | 499  | 208 |
| >USP6-V678/IIVDLFHGQLF | 91   | >USP6-V678/IIADLFHGQLF | 124  | 33  |
| >USP6-V678/SIIVDLFHGQL | 359  | >USP6-V678/SIIADLFHGQL | 105  | 254 |
| >USP6-V678/SIIVDLFHGQL | 689  | >USP6-V678/SIIADLFHGQL | 163  | 526 |
| >USP6-V678/SIIVDLFHG   | 1240 | >USP6-V678/SIIADLFHG   | 307  | 933 |
| >USP6-V678/SIIVDLFHGQL | 414  | >USP6-V678/SIIADLFHGQL | 215  | 199 |
| >USP6-V678/SIIVDLFHGQL | 938  | >USP6-V678/SIIADLFHGQL | 266  | 672 |
| >USP6-V678/SIIVDLFHGQL | 434  | >USP6-V678/SIIADLFHGQL | 160  | 274 |
| >USP6-V678/SIIVDLFH    | 905  | >USP6-V678/SIIADLFH    | 462  | 443 |
| >USP6-V678/SIIVDLFH    | 909  | >USP6-V678/SIIADLFH    | 400  | 509 |
| >USP6-V678/SIIVDLFHGQ  | 868  | >USP6-V678/SIIADLFHGQ  | 367  | 501 |
| >USP6-V678/SIIVDLFHGQL | 190  | >USP6-V678/SIIADLFHGQL | 83   | 107 |
| >USP6-V678/SIIVDLFHGQL | 1016 | >USP6-V678/SIIADLFHGQL | 411  | 605 |
| >USP6-V678/RSIIVDLF    | 115  | >USP6-V678/RSIIADLF    | 289  | 174 |
| >USP6-V678/RSIIVDLF    | 412  | >USP6-V678/RSIIADLF    | 425  | 13  |
| >USP6-V678/RSIIVDLF    | 208  | >USP6-V678/RSIIADLF    | 182  | 26  |
| >USP6-V678/RSIIVDLF    | 4    | >USP6-V678/RSIIADLF    | 3    | 1   |
| >USP6-V678/RSIIVDLFH   | 76   | >USP6-V678/RSIIADLFH   | 18   | 58  |
| >USP6-V678/RSIIVDLFHGC | 1018 | >USP6-V678/RSIIADLFHGC | 348  | 670 |
| >USP6-V678/RSIIVDLF    | 116  | >USP6-V678/RSIIADLF    | 112  | 4   |
| >USP6-V678/RSIIVDLF    | 14   | >USP6-V678/RSIIADLF    | 18   | 4   |
| >USP6-V678/RSIIVDLFH   | 90   | >USP6-V678/RSIIADLFH   | 323  | 233 |
| >USP6-V678/RSIIVDLFHG  | 293  | >USP6-V678/RSIIADLFHG  | 597  | 304 |
| >USP6-V678/RSIIVDLF    | 35   | >USP6-V678/RSIIADLF    | 28   | 7   |
| >USP6-V678/NRSIIVDLF   | 177  | >USP6-V678/NRSIIADLF   | 292  | 115 |
| >USP6-V678/RNRSIIVDL   | 698  | >USP6-V678/RNRSIIADL   | 408  | 290 |
| >USP6-V678/RNRSIIVDLFH | 645  | >USP6-V678/RNRSIIADLFH | 359  | 286 |
| >USP6-V678/RNRSIIVDL   | 436  | >USP6-V678/RNRSIIADL   | 1042 | 606 |
| >USP6-V678/RNRSIIVDLF  | 127  | >USP6-V678/RNRSIIADLF  | 210  | 83  |
| >USP6-V678/RNRSIIVDL   | 242  | >USP6-V678/RNRSIIADL   | 347  | 105 |
| >USP6-V678/RRNRSIIV    | 122  | >USP6-V678/RRNRSIIA    | 597  | 475 |
| >USP6-V678/RRNRSIIVDL  | 51   | >USP6-V678/RRNRSIIADL  | 87   | 36  |
| >USP6-V678/RRNRSIIVDLF | 23   | >USP6-V678/RRNRSIIADLF | 27   | 4   |

|                          |      |                          |      |      |
|--------------------------|------|--------------------------|------|------|
| >USP6-V678/RRNRSIIV      | 119  | >USP6-V678/RRNRSIIA      | 253  | 134  |
| >USP6-V678/RRNRSIIVDL    | 11   | >USP6-V678/RRNRSIIADL    | 11   | 0    |
| >USP6-V678/RRNRSIIVDLF   | 39   | >USP6-V678/RRNRSIIADLF   | 44   | 5    |
| >USP6-V678/RRNRSIIV      | 33   | >USP6-V678/RRNRSIIA      | 76   | 43   |
| >USP6-V678/RRNRSIIVD     | 353  | >USP6-V678/RRNRSIIAD     | 527  | 174  |
| >USP6-V678/RRNRSIIVDL    | 21   | >USP6-V678/RRNRSIIADL    | 20   | 1    |
| >USP6-V678/RRNRSIIVDLF   | 72   | >USP6-V678/RRNRSIIADLF   | 72   | 0    |
| >USP6-V678/RRNRSIIV      | 494  | >USP6-V678/RRNRSIIA      | 1796 | 1302 |
| >USP6-V678/RRNRSIIVDL    | 17   | >USP6-V678/RRNRSIIADL    | 17   | 0    |
| >USP6-V678/RRNRSIIVDLF   | 34   | >USP6-V678/RRNRSIIADLF   | 44   | 10   |
| >USP6-V678/LRRNRSIIV     | 703  | >USP6-V678/LRRNRSIIA     | 355  | 348  |
| >USP6-V678/LRRNRSIIVDL   | 579  | >USP6-V678/LRRNRSIIADL   | 422  | 157  |
| >USP6-V678/LRRNRSIIV     | 166  | >USP6-V678/LRRNRSIIA     | 1053 | 887  |
| >USP6-V678/LRRNRSIIVDL   | 114  | >USP6-V678/LRRNRSIIADL   | 203  | 89   |
| >USP6-V678/LRRNRSIIVDL   | 197  | >USP6-V678/LRRNRSIIADL   | 283  | 86   |
| >USP6-V678/LRRNRSIIVDL   | 54   | >USP6-V678/LRRNRSIIADL   | 71   | 17   |
| >USP6-V678/HLRRNRSIIV    | 494  | >USP6-V678/HLRRNRSIIA    | 2842 | 2348 |
| >USP6-V678/HLRRNRSIIV    | 224  | >USP6-V678/HLRRNRSIIA    | 6481 | 6257 |
| >USP6-V678/HLRRNRSIIV    | 10   | >USP6-V678/HLRRNRSIIA    | 268  | 258  |
| >USP6-V678/HLRRNRSIIV    | 7    | >USP6-V678/HLRRNRSIIA    | 6    | 1    |
| >USP6-V678/HLRRNRSIIVC   | 318  | >USP6-V678/HLRRNRSIIAC   | 225  | 93   |
| >VHL-A11T-v AEVGAEAA     | 380  | >VHL-A11T-n TEVGAEAA     | 1185 | 805  |
| >VHL-A11T-v AEVGAEAA     | 8    | >VHL-A11T-n TEVGAEAA     | 43   | 35   |
| >VHL-A11T-v AEVGAEAAEAG  | 197  | >VHL-A11T-n TEVGAEAAEAG  | 2755 | 2558 |
| >VHL-A11T-v AEVGAEAAEAG\ | 61   | >VHL-A11T-n TEVGAEAAEAG\ | 346  | 285  |
| >VHL-A11T-v EAEVGAEAAEAC | 727  | >VHL-A11T-n ETEVGAEAAEAC | 68   | 659  |
| >VHL-A11T-v EAEVGAEAAEAC | 319  | >VHL-A11T-n ETEVGAEAAEAC | 63   | 256  |
| >VHL-A11T-v MPRRAENWI    | 37   | >VHL-A11T-n MPRRAENWI    | 110  | 73   |
| >VHL-A11T-v MPRRAENWI    | 280  | >VHL-A11T-n MPRRAENWI    | 253  | 27   |
| >VHL-A11T-v MPRRAENWI    | 9    | >VHL-A11T-n MPRRAENWI    | 44   | 35   |
| >VHL-A11T-v DEAEVGAE     | 134  | >VHL-A11T-n DEAEVGAE     | 226  | 92   |
| >VHL-A11T-v DEAEVGAE     | 97   | >VHL-A11T-n DEAEVGAE     | 156  | 59   |
| >VHL-A11T-v ENWDEAEV     | 419  | >VHL-A11T-n ENWDEAEV     | 431  | 12   |
| >VHL-A11T-v ENWDEAEV     | 369  | >VHL-A11T-n ENWDEAEV     | 508  | 139  |
| >VHL-A11T-v AENWDEAEV    | 101  | >VHL-A11T-n AENWDEAEV    | 99   | 2    |
| >VHL-A11T-v AENWDEAEV    | 1447 | >VHL-A11T-n AENWDEAEV    | 465  | 982  |
| >VHL-A11T-v AENWDEAE     | 455  | >VHL-A11T-n AENWDEAE     | 1046 | 591  |
| >VHL-A11T-v AENWDEAEV    | 17   | >VHL-A11T-n AENWDEAEV    | 21   | 4    |
| >VHL-A11T-v AENWDEAEV    | 335  | >VHL-A11T-n AENWDEAEV    | 711  | 376  |
| >VHL-A11T-v AENWDEAEV    | 8    | >VHL-A11T-n AENWDEAEV    | 8    | 0    |
| >VHL-A11T-v AENWDEAEV    | 193  | >VHL-A11T-n AENWDEAEV    | 183  | 10   |
| >VHL-A11T-v RRAENWDEA    | 368  | >VHL-A11T-n RRAENWDEA    | 769  | 401  |
| >VHL-A11T-v RRAENWDEA    | 320  | >VHL-A11T-n RRAENWDEA    | 277  | 43   |



|                         |       |                         |       |       |
|-------------------------|-------|-------------------------|-------|-------|
| >VHL-A11T-v RRAENWDEA   | 196   | >VHL-A11T-n RRAENWDET   | 180   | 16    |
| >VHL-A11T-v RRAENWDEA   | 617   | >VHL-A11T-n RRAENWDET   | 472   | 145   |
| >VHL-A11T-v RRAENWDEA   | 143   | >VHL-A11T-n RRAENWDET   | 109   | 34    |
| >VHL-A11T-v RRAENWDEA   | 233   | >VHL-A11T-n RRAENWDET   | 269   | 36    |
| >VHL-A122E- DAGTHDGL    | 22121 | >VHL-A122E- DEGTHDGL    | 483   | 21638 |
| >VHL-A122E- RDAGTHDGL   | 367   | >VHL-A122E- RDEGTHDGLI  | 441   | 74    |
| >VHL-A122E- RDAGTHDGL   | 133   | >VHL-A122E- RDEGTHDGLI  | 158   | 25    |
| >VHL-A122E- FRDAGTHDG   | 376   | >VHL-A122E- FRDEGTHDGI  | 459   | 83    |
| >VHL-A122E- FRDAGTHDG   | 17    | >VHL-A122E- FRDEGTHDGI  | 18    | 1     |
| >VHL-A122E- FRDAGTHDG   | 35    | >VHL-A122E- FRDEGTHDGI  | 41    | 6     |
| >VHL-A122E- WLFRDAGT    | 330   | >VHL-A122E- WLFRDEGT    | 2119  | 1789  |
| >VHL-A122E- WLFRDAGT    | 468   | >VHL-A122E- WLFRDEGT    | 936   | 468   |
| >VHL-A122E- WLFRDAGT    | 108   | >VHL-A122E- WLFRDEGT    | 148   | 40    |
| >VHL-A122E- WLFRDAGT    | 51    | >VHL-A122E- WLFRDEGT    | 116   | 65    |
| >VHL-A122E- LWLFRDAG    | 90    | >VHL-A122E- LWLFRDEG    | 208   | 118   |
| >VHL-A122E- HLWLFRDA    | 346   | >VHL-A122E- HLWLFRDE    | 24186 | 23840 |
| >VHL-A149D- ANITLPVYTL  | 411   | >VHL-A149D- DNITLPVYTL  | 2994  | 2583  |
| >VHL-A149D- ANITLPVYTLk | 232   | >VHL-A149D- DNITLPVYTLk | 12936 | 12704 |
| >VHL-A149D- ANITLPVY    | 253   | >VHL-A149D- DNITLPVY    | 107   | 146   |
| >VHL-A149D- ANITLPVY    | 453   | >VHL-A149D- DNITLPVY    | 2287  | 1834  |
| >VHL-A149D- ANITLPVYTLk | 2350  | >VHL-A149D- DNITLPVYTLk | 149   | 2201  |
| >VHL-A149D- ANITLPVY    | 481   | >VHL-A149D- DNITLPVY    | 5957  | 5476  |
| >VHL-A149D- FANITLPVYTL | 351   | >VHL-A149D- FDNITLPVYTL | 19862 | 19511 |
| >VHL-A149D- FANITLPV    | 136   | >VHL-A149D- FDNITLPV    | 11784 | 11648 |
| >VHL-A149D- FANITLPV    | 82    | >VHL-A149D- FDNITLPV    | 1449  | 1367  |
| >VHL-A149D- FANITLPVYTL | 156   | >VHL-A149D- FDNITLPVYTL | 1564  | 1408  |
| >VHL-A149D- FANITLPV    | 19    | >VHL-A149D- FDNITLPV    | 1780  | 1761  |
| >VHL-A149D- FANITLPVYTL | 482   | >VHL-A149D- FDNITLPVYTL | 9229  | 8747  |
| >VHL-A149D- FANITLPV    | 12    | >VHL-A149D- FDNITLPV    | 765   | 753   |
| >VHL-A149D- FANITLPVYT  | 292   | >VHL-A149D- FDNITLPVYT  | 8042  | 7750  |
| >VHL-A149D- FANITLPVYTL | 203   | >VHL-A149D- FDNITLPVYTL | 4340  | 4137  |
| >VHL-A149D- FANITLPV    | 31    | >VHL-A149D- FDNITLPV    | 2832  | 2801  |
| >VHL-A149D- FANITLPVYTL | 87    | >VHL-A149D- FDNITLPVYTL | 4905  | 4818  |
| >VHL-A149D- FANITLPV    | 114   | >VHL-A149D- FDNITLPV    | 5393  | 5279  |
| >VHL-A149D- FANITLPV    | 25    | >VHL-A149D- FDNITLPV    | 6708  | 6683  |
| >VHL-A149D- FANITLPVYTL | 407   | >VHL-A149D- FDNITLPVYTL | 15471 | 15064 |
| >VHL-A149D- FANITLPVY   | 243   | >VHL-A149D- FDNITLPVY   | 1445  | 1202  |
| >VHL-A149D- FANITLPVY   | 71    | >VHL-A149D- FDNITLPVY   | 1241  | 1170  |
| >VHL-A149D- FANITLPV    | 96    | >VHL-A149D- FDNITLPV    | 3111  | 3015  |
| >VHL-A149D- FANITLPV    | 24    | >VHL-A149D- FDNITLPV    | 2506  | 2482  |
| >VHL-A149D- FANITLPVYTL | 413   | >VHL-A149D- FDNITLPVYTL | 11656 | 11243 |
| >VHL-A149D- FANITLPVY   | 114   | >VHL-A149D- FDNITLPVY   | 2224  | 2110  |
| >VHL-A149D- FANITLPVY   | 170   | >VHL-A149D- FDNITLPVY   | 1762  | 1592  |

|                        |       |                        |       |       |
|------------------------|-------|------------------------|-------|-------|
| >VHL-A149D·FANITLPVY   | 14    | >VHL-A149D·FDNITLPVY   | 17178 | 17164 |
| >VHL-A149D·FANITLPVYTL | 63    | >VHL-A149D·FDNITLPVYTL | 19119 | 19056 |
| >VHL-A149D·FANITLPVY   | 26    | >VHL-A149D·FDNITLPVY   | 1888  | 1862  |
| >VHL-A149D·FANITLPVYTL | 278   | >VHL-A149D·FDNITLPVYTL | 11372 | 11094 |
| >VHL-A149D·FANITLPV    | 25153 | >VHL-A149D·FDNITLPV    | 470   | 24683 |
| >VHL-A149D·FANITLPVYTL | 21293 | >VHL-A149D·FDNITLPVYTL | 405   | 20888 |
| >VHL-A149D·FANITLPVY   | 375   | >VHL-A149D·FDNITLPVY   | 14320 | 13945 |
| >VHL-A149D·FANITLPVY   | 134   | >VHL-A149D·FDNITLPVY   | 7608  | 7474  |
| >VHL-A149D·FANITLPVYTL | 160   | >VHL-A149D·FDNITLPVYTL | 8719  | 8559  |
| >VHL-A149D·FANITLPV    | 89    | >VHL-A149D·FDNITLPV    | 3576  | 3487  |
| >VHL-A149D·FANITLPVY   | 103   | >VHL-A149D·FDNITLPVY   | 20214 | 20111 |
| >VHL-A149D·FANITLPVYTL | 310   | >VHL-A149D·FDNITLPVYTL | 19068 | 18758 |
| >VHL-A149D·FANITLPV    | 27705 | >VHL-A149D·FDNITLPV    | 96    | 27609 |
| >VHL-A149D·FANITLPVYTL | 28693 | >VHL-A149D·FDNITLPVYTL | 192   | 28501 |
| >VHL-A149D·SLNVDGQPIF  | 120   | >VHL-A149D·SLNVDGQPIF  | 12478 | 12358 |
| >VHL-A149D·SLNVDGQPIF  | 71    | >VHL-A149D·SLNVDGQPIF  | 18906 | 18835 |
| >VHL-A149D·SLNVDGQPIF  | 58    | >VHL-A149D·SLNVDGQPIF  | 9743  | 9685  |
| >VHL-A149D·SLNVDGQPIF  | 235   | >VHL-A149D·SLNVDGQPIF  | 20802 | 20567 |
| >VHL-A149D·SLNVDGQPIF  | 29    | >VHL-A149D·SLNVDGQPIF  | 12125 | 12096 |
| >VHL-A149D·SLNVDGQPIF  | 42    | >VHL-A149D·SLNVDGQPIF  | 12986 | 12944 |
| >VHL-A149D·IFANITLPVY  | 711   | >VHL-A149D·IFDNITLPVY  | 290   | 421   |
| >VHL-A149D·IFANITLPV   | 35    | >VHL-A149D·IFDNITLPV   | 545   | 510   |
| >VHL-A149D·IFANITLPV   | 1181  | >VHL-A149D·IFDNITLPV   | 470   | 711   |
| >VHL-A149D·IFANITLPV   | 478   | >VHL-A149D·IFDNITLPV   | 3622  | 3144  |
| >VHL-A149D·IFANITLPVY  | 52    | >VHL-A149D·IFDNITLPVY  | 94    | 42    |
| >VHL-A149D·IFANITLPVY  | 87    | >VHL-A149D·IFDNITLPVY  | 134   | 47    |
| >VHL-A149D·IFANITLPVY  | 137   | >VHL-A149D·IFDNITLPVY  | 232   | 95    |
| >VHL-A149D·PIFANITLPV  | 393   | >VHL-A149D·PIFDNITLPV  | 305   | 88    |
| >VHL-A149D·PIFANITLPV  | 79    | >VHL-A149D·PIFDNITLPV  | 89    | 10    |
| >VHL-A149D·PIFANITL    | 323   | >VHL-A149D·PIFDNITL    | 115   | 208   |
| >VHL-A149D·PIFANITLPV  | 21    | >VHL-A149D·PIFDNITLPV  | 10    | 11    |
| >VHL-A149D·PIFANITLPV  | 1071  | >VHL-A149D·PIFDNITLPV  | 387   | 684   |
| >VHL-A149D·PIFANITLPV  | 76    | >VHL-A149D·PIFDNITLPV  | 34    | 42    |
| >VHL-A149D·PIFANITLPV  | 610   | >VHL-A149D·PIFDNITLPV  | 156   | 454   |
| >VHL-A149D·PIFANITL    | 341   | >VHL-A149D·PIFDNITL    | 66    | 275   |
| >VHL-A149D·PIFANITLPV  | 25    | >VHL-A149D·PIFDNITLPV  | 8     | 17    |
| >VHL-A149D·PIFANITLPVY | 135   | >VHL-A149D·PIFDNITLPVY | 90    | 45    |
| >VHL-A149D·PIFANITLPVY | 195   | >VHL-A149D·PIFDNITLPVY | 227   | 32    |
| >VHL-A149D·PIFANITL    | 336   | >VHL-A149D·PIFDNITL    | 566   | 230   |
| >VHL-A149D·PIFANITLPV  | 218   | >VHL-A149D·PIFDNITLPV  | 124   | 94    |
| >VHL-A149D·QPIFANITL   | 10    | >VHL-A149D·QPIFDNITL   | 6175  | 6165  |
| >VHL-A149D·QPIFANITLPV | 151   | >VHL-A149D·QPIFDNITLPV | 400   | 249   |
| >VHL-A149D·QPIFANITLPV | 72    | >VHL-A149D·QPIFDNITLPV | 132   | 60    |

|                        |       |                        |       |       |
|------------------------|-------|------------------------|-------|-------|
| >VHL-A149D·QPIFANITL   | 393   | >VHL-A149D·QPIFDNITL   | 1828  | 1435  |
| >VHL-A149D·QPIFANITLPV | 157   | >VHL-A149D·QPIFDNITLPV | 382   | 225   |
| >VHL-A149D·QPIFANITL   | 51    | >VHL-A149D·QPIFDNITL   | 66    | 15    |
| >VHL-A149D·QPIFANITLPV | 148   | >VHL-A149D·QPIFDNITLPV | 193   | 45    |
| >VHL-A149D·QPIFANITL   | 118   | >VHL-A149D·QPIFDNITL   | 233   | 115   |
| >VHL-A149D·QPIFANITL   | 373   | >VHL-A149D·QPIFDNITL   | 150   | 223   |
| >VHL-A149D·QPIFANITLPV | 204   | >VHL-A149D·QPIFDNITLPV | 635   | 431   |
| >VHL-A149D·GQPIFANI    | 412   | >VHL-A149D·GQPIFDNI    | 9773  | 9361  |
| >VHL-A149D·GQPIFANITL  | 236   | >VHL-A149D·GQPIFDNITL  | 284   | 48    |
| >VHL-A149D·GQPIFANI    | 241   | >VHL-A149D·GQPIFDNI    | 530   | 289   |
| >VHL-A149D·GQPIFANITL  | 430   | >VHL-A149D·GQPIFDNITL  | 475   | 45    |
| >VHL-A149D·VDGQPIFANI  | 444   | >VHL-A149D·VDGQPIFDNI  | 382   | 62    |
| >VHL-A149D·NVDGQPIFANI | 253   | >VHL-A149D·NVDGQPIFDNI | 397   | 144   |
| >VHL-A149D·NVDGQPIFANI | 61    | >VHL-A149D·NVDGQPIFDNI | 177   | 116   |
| >VHL-A149P·ANITLPVYTL  | 411   | >VHL-A149P·PNITLPVYTL  | 5498  | 5087  |
| >VHL-A149P·ANITLPVYTLK | 232   | >VHL-A149P·PNITLPVYTLK | 11101 | 10869 |
| >VHL-A149P·ANITLPVY    | 253   | >VHL-A149P·PNITLPVY    | 935   | 682   |
| >VHL-A149P·ANITLPVY    | 453   | >VHL-A149P·PNITLPVY    | 2200  | 1747  |
| >VHL-A149P·ANITLPVY    | 481   | >VHL-A149P·PNITLPVY    | 4114  | 3633  |
| >VHL-A149P·FANITLPVYTL | 351   | >VHL-A149P·FPNITLPVYTL | 14260 | 13909 |
| >VHL-A149P·FANITLPV    | 136   | >VHL-A149P·FPNITLPV    | 12055 | 11919 |
| >VHL-A149P·FANITLPV    | 82    | >VHL-A149P·FPNITLPV    | 6471  | 6389  |
| >VHL-A149P·FANITLPVYTL | 156   | >VHL-A149P·FPNITLPVYTL | 5967  | 5811  |
| >VHL-A149P·FANITLPV    | 19    | >VHL-A149P·FPNITLPV    | 3553  | 3534  |
| >VHL-A149P·FANITLPVYTL | 482   | >VHL-A149P·FPNITLPVYTL | 12978 | 12496 |
| >VHL-A149P·FANITLPV    | 12    | >VHL-A149P·FPNITLPV    | 1143  | 1131  |
| >VHL-A149P·FANITLPVYT  | 292   | >VHL-A149P·FPNITLPVYT  | 5130  | 4838  |
| >VHL-A149P·FANITLPVYTL | 203   | >VHL-A149P·FPNITLPVYTL | 4636  | 4433  |
| >VHL-A149P·FANITLPV    | 31    | >VHL-A149P·FPNITLPV    | 2537  | 2506  |
| >VHL-A149P·FANITLPVYTL | 87    | >VHL-A149P·FPNITLPVYTL | 4419  | 4332  |
| >VHL-A149P·FANITLPV    | 114   | >VHL-A149P·FPNITLPV    | 5391  | 5277  |
| >VHL-A149P·FANITLPV    | 25    | >VHL-A149P·FPNITLPV    | 6667  | 6642  |
| >VHL-A149P·FANITLPVYTL | 407   | >VHL-A149P·FPNITLPVYTL | 15347 | 14940 |
| >VHL-A149P·FANITLPVY   | 243   | >VHL-A149P·FPNITLPVY   | 1416  | 1173  |
| >VHL-A149P·FANITLPVY   | 71    | >VHL-A149P·FPNITLPVY   | 652   | 581   |
| >VHL-A149P·FANITLPV    | 96    | >VHL-A149P·FPNITLPV    | 2057  | 1961  |
| >VHL-A149P·FANITLPV    | 24    | >VHL-A149P·FPNITLPV    | 96    | 72    |
| >VHL-A149P·FANITLPVYTL | 413   | >VHL-A149P·FPNITLPVYTL | 1442  | 1029  |
| >VHL-A149P·FANITLPV    | 7990  | >VHL-A149P·FPNITLPV    | 56    | 7934  |
| >VHL-A149P·FANITLPVYTL | 13399 | >VHL-A149P·FPNITLPVYTL | 92    | 13307 |
| >VHL-A149P·FANITLPVY   | 114   | >VHL-A149P·FPNITLPVY   | 4480  | 4366  |
| >VHL-A149P·FANITLPVY   | 170   | >VHL-A149P·FPNITLPVY   | 1030  | 860   |
| >VHL-A149P·FANITLPVY   | 14    | >VHL-A149P·FPNITLPVY   | 11442 | 11428 |

|                         |       |                         |       |       |
|-------------------------|-------|-------------------------|-------|-------|
| >VHL-A149P- FANITLPVYTL | 63    | >VHL-A149P- FPNITLPVYTL | 14677 | 14614 |
| >VHL-A149P- FANITLPV    | 1143  | >VHL-A149P- FPNITLPV    | 105   | 1038  |
| >VHL-A149P- FANITLPVY   | 26    | >VHL-A149P- FPNITLPVY   | 8     | 18    |
| >VHL-A149P- FANITLPVYTL | 278   | >VHL-A149P- FPNITLPVYTL | 32    | 246   |
| >VHL-A149P- FANITLPVYTL | 806   | >VHL-A149P- FPNITLPVYTL | 59    | 747   |
| >VHL-A149P- FANITLPVY   | 375   | >VHL-A149P- FPNITLPVY   | 16210 | 15835 |
| >VHL-A149P- FANITLPV    | 2692  | >VHL-A149P- FPNITLPV    | 171   | 2521  |
| >VHL-A149P- FANITLPVYTL | 5369  | >VHL-A149P- FPNITLPVYTL | 324   | 5045  |
| >VHL-A149P- FANITLPV    | 2571  | >VHL-A149P- FPNITLPV    | 95    | 2476  |
| >VHL-A149P- FANITLPVY   | 134   | >VHL-A149P- FPNITLPVY   | 16    | 118   |
| >VHL-A149P- FANITLPVYTL | 160   | >VHL-A149P- FPNITLPVYTL | 19    | 141   |
| >VHL-A149P- FANITLPV    | 89    | >VHL-A149P- FPNITLPV    | 6     | 83    |
| >VHL-A149P- FANITLPVY   | 1960  | >VHL-A149P- FPNITLPVY   | 54    | 1906  |
| >VHL-A149P- FANITLPVYT  | 18007 | >VHL-A149P- FPNITLPVYT  | 49    | 17958 |
| >VHL-A149P- FANITLPVYTL | 3501  | >VHL-A149P- FPNITLPVYTL | 40    | 3461  |
| >VHL-A149P- FANITLPVY   | 103   | >VHL-A149P- FPNITLPVY   | 18921 | 18818 |
| >VHL-A149P- FANITLPVYTL | 310   | >VHL-A149P- FPNITLPVYTL | 3649  | 3339  |
| >VHL-A149P- FANITLPVYTL | 3889  | >VHL-A149P- FPNITLPVYTL | 141   | 3748  |
| >VHL-A149P- FANITLPVYTL | 4425  | >VHL-A149P- FPNITLPVYTL | 97    | 4328  |
| >VHL-A149P- SLNVDGQPIF  | 120   | >VHL-A149P- SLNVDGQPIF  | 6529  | 6409  |
| >VHL-A149P- SLNVDGQPIF  | 71    | >VHL-A149P- SLNVDGQPIF  | 13417 | 13346 |
| >VHL-A149P- SLNVDGQPIF  | 58    | >VHL-A149P- SLNVDGQPIF  | 6898  | 6840  |
| >VHL-A149P- SLNVDGQPIF  | 235   | >VHL-A149P- SLNVDGQPIF  | 17807 | 17572 |
| >VHL-A149P- SLNVDGQPIF  | 29    | >VHL-A149P- SLNVDGQPIF  | 7973  | 7944  |
| >VHL-A149P- SLNVDGQPIF  | 42    | >VHL-A149P- SLNVDGQPIF  | 9985  | 9943  |
| >VHL-A149P- IFANITLPV   | 35    | >VHL-A149P- IFPNITLPV   | 719   | 684   |
| >VHL-A149P- IFANITLPV   | 478   | >VHL-A149P- IFPNITLPV   | 3379  | 2901  |
| >VHL-A149P- IFANITLPVY  | 52    | >VHL-A149P- IFPNITLPVY  | 88    | 36    |
| >VHL-A149P- IFANITLPVY  | 87    | >VHL-A149P- IFPNITLPVY  | 180   | 93    |
| >VHL-A149P- IFANITLPVY  | 137   | >VHL-A149P- IFPNITLPVY  | 705   | 568   |
| >VHL-A149P- PIFANITLPV  | 393   | >VHL-A149P- PIFPNITLPV  | 692   | 299   |
| >VHL-A149P- PIFANITLPV  | 79    | >VHL-A149P- PIFPNITLPV  | 127   | 48    |
| >VHL-A149P- PIFANITL    | 323   | >VHL-A149P- PIFPNITL    | 247   | 76    |
| >VHL-A149P- PIFANITLPV  | 21    | >VHL-A149P- PIFPNITLPV  | 21    | 0     |
| >VHL-A149P- PIFANITLPV  | 76    | >VHL-A149P- PIFPNITLPV  | 56    | 20    |
| >VHL-A149P- PIFANITL    | 341   | >VHL-A149P- PIFPNITL    | 155   | 186   |
| >VHL-A149P- PIFANITLPV  | 25    | >VHL-A149P- PIFPNITLPV  | 15    | 10    |
| >VHL-A149P- PIFANITLPVY | 135   | >VHL-A149P- PIFPNITLPVY | 80    | 55    |
| >VHL-A149P- PIFANITLPVY | 195   | >VHL-A149P- PIFPNITLPVY | 184   | 11    |
| >VHL-A149P- PIFANITL    | 336   | >VHL-A149P- PIFPNITL    | 636   | 300   |
| >VHL-A149P- PIFANITLPV  | 218   | >VHL-A149P- PIFPNITLPV  | 300   | 82    |
| >VHL-A149P- QPIFANITL   | 10    | >VHL-A149P- QPIFPNITL   | 2324  | 2314  |
| >VHL-A149P- QPIFANITLPV | 151   | >VHL-A149P- QPIFPNITLPV | 106   | 45    |

|                            |      |                            |      |      |
|----------------------------|------|----------------------------|------|------|
| >VHL-A149P-QPIFANITLPV     | 72   | >VHL-A149P-QPIFPNITLPV     | 54   | 18   |
| >VHL-A149P-QPIFANITL       | 393  | >VHL-A149P-QPIFPNITL       | 207  | 186  |
| >VHL-A149P-QPIFANITLPV     | 157  | >VHL-A149P-QPIFPNITLPV     | 117  | 40   |
| >VHL-A149P-QPIFANITL       | 51   | >VHL-A149P-QPIFPNITL       | 159  | 108  |
| >VHL-A149P-QPIFANITLPV     | 148  | >VHL-A149P-QPIFPNITLPV     | 357  | 209  |
| >VHL-A149P-QPIFANITL       | 118  | >VHL-A149P-QPIFPNITL       | 306  | 188  |
| >VHL-A149P-QPIFANITL       | 373  | >VHL-A149P-QPIFPNITL       | 486  | 113  |
| >VHL-A149P-QPIFANITLPV     | 204  | >VHL-A149P-QPIFPNITLPV     | 163  | 41   |
| >VHL-A149P-GQPIFANI        | 412  | >VHL-A149P-GQPIFPNI        | 2636 | 2224 |
| >VHL-A149P-GQPIFANITL      | 236  | >VHL-A149P-GQPIFPNITL      | 167  | 69   |
| >VHL-A149P-GQPIFANI        | 241  | >VHL-A149P-GQPIFPNI        | 357  | 116  |
| >VHL-A149P-GQPIFANITL      | 430  | >VHL-A149P-GQPIFPNITL      | 543  | 113  |
| >VHL-A149P-GQPIFANITL      | 547  | >VHL-A149P-GQPIFPNITL      | 358  | 189  |
| >VHL-A149P-VDGQPIFANI      | 444  | >VHL-A149P-VDGQPIFPNI      | 896  | 452  |
| >VHL-A149P-NVDGQPIFANI     | 253  | >VHL-A149P-NVDGQPIFPNI     | 1474 | 1221 |
| >VHL-A149P-NVDGQPIFANI     | 61   | >VHL-A149P-NVDGQPIFPNI     | 43   | 18   |
| >VHL-A207T-ERIAHQRM        | 303  | >VHL-A207T-ERITHQRM        | 206  | 97   |
| >VHL-A207T-QERIAHQRM       | 322  | >VHL-A207T-QERITHQRM       | 1092 | 770  |
| >VHL-A207T-QERIAHQRM       | 464  | >VHL-A207T-QERITHQRM       | 638  | 174  |
| >VHL-A207T-TQERIAHQRM      | 152  | >VHL-A207T-TQERITHQRM      | 49   | 103  |
| >VHL-A207T-TQERIAHQRM      | 166  | >VHL-A207T-TQERITHQRM      | 120  | 46   |
| >VHL-A207T-LTQERIAHQRM     | 43   | >VHL-A207T-LTQERITHQRM     | 36   | 7    |
| >VHL-A207T-LTQERIAHQRM     | 317  | >VHL-A207T-LTQERITHQRM     | 235  | 82   |
| >VHL-A207T-LTQERIAHQRM     | 119  | >VHL-A207T-LTQERITHQRM     | 97   | 22   |
| >VHL-A207T-LTQERIAHQRM     | 9    | >VHL-A207T-LTQERITHQRM     | 11   | 2    |
| >VHL-A207T-LTQERIAHQRM     | 109  | >VHL-A207T-LTQERITHQRM     | 59   | 50   |
| >VHL-A207T-LTQERIAHQRM     | 751  | >VHL-A207T-LTQERITHQRM     | 464  | 287  |
| >VHL-A207T-RLTQERIAHQRM    | 311  | >VHL-A207T-RLTQERITHQRM    | 2419 | 2108 |
| >VHL-A207T-RLTQERIAHQRM    | 174  | >VHL-A207T-RLTQERITHQRM    | 177  | 3    |
| >VHL-A207T-RLTQERIAHQRM    | 79   | >VHL-A207T-RLTQERITHQRM    | 57   | 22   |
| >VHL-A207T-RLTQERIAHQRM    | 497  | >VHL-A207T-RLTQERITHQRM    | 396  | 101  |
| >VHL-A207T-RLTQERIAHQRM    | 45   | >VHL-A207T-RLTQERITHQRM    | 37   | 8    |
| >VHL-A207T-LERLTQERIAHQRM  | 341  | >VHL-A207T-LERLTQERITHQRM  | 455  | 114  |
| >VHL-A207V-DLERLTQERIAHQRM | 7693 | >VHL-A207V-DLERLTQERITHQRM | 254  | 7439 |
| >VHL-A207V-ERIAHQRM        | 303  | >VHL-A207V-ERIVHQRM        | 600  | 297  |
| >VHL-A207V-QERIAHQRM       | 322  | >VHL-A207V-QERIVHQRM       | 613  | 291  |
| >VHL-A207V-QERIAHQRM       | 464  | >VHL-A207V-QERIVHQRM       | 535  | 71   |
| >VHL-A207V-QERIAHQRM       | 643  | >VHL-A207V-QERIVHQRM       | 414  | 229  |
| >VHL-A207V-TQERIAHQRM      | 152  | >VHL-A207V-TQERIVHQRM      | 58   | 94   |
| >VHL-A207V-TQERIAHQRM      | 166  | >VHL-A207V-TQERIVHQRM      | 181  | 15   |
| >VHL-A207V-LTQERIAHQRM     | 43   | >VHL-A207V-LTQERIVHQRM     | 39   | 4    |
| >VHL-A207V-LTQERIAHQRM     | 317  | >VHL-A207V-LTQERIVHQRM     | 352  | 35   |
| >VHL-A207V-LTQERIAHQRM     | 119  | >VHL-A207V-LTQERIVHQRM     | 154  | 35   |

|                        |       |                        |       |       |
|------------------------|-------|------------------------|-------|-------|
| >VHL-A207V-LTQERIAHQR  | 9     | >VHL-A207V-LTQERIVHQR  | 16    | 7     |
| >VHL-A207V-LTQERIAHQR  | 109   | >VHL-A207V-LTQERIVHQR  | 116   | 7     |
| >VHL-A207V-LTQERIAHQR  | 751   | >VHL-A207V-LTQERIVHQR  | 381   | 370   |
| >VHL-A207V-RLTQERIA    | 4847  | >VHL-A207V-RLTQERIV    | 130   | 4717  |
| >VHL-A207V-RLTQERIA    | 10352 | >VHL-A207V-RLTQERIV    | 449   | 9903  |
| >VHL-A207V-RLTQERIA    | 4966  | >VHL-A207V-RLTQERIV    | 67    | 4899  |
| >VHL-A207V-RLTQERIA    | 311   | >VHL-A207V-RLTQERIV    | 10    | 301   |
| >VHL-A207V-RLTQERIAHQ  | 174   | >VHL-A207V-RLTQERIVHQ  | 206   | 32    |
| >VHL-A207V-RLTQERIAHQ  | 79    | >VHL-A207V-RLTQERIVHQ  | 66    | 13    |
| >VHL-A207V-RLTQERIAHQ  | 497   | >VHL-A207V-RLTQERIVHQ  | 502   | 5     |
| >VHL-A207V-RLTQERIAHQ  | 45    | >VHL-A207V-RLTQERIVHQ  | 52    | 7     |
| >VHL-A207V-LERLTQERIAH | 341   | >VHL-A207V-LERLTQERIVH | 877   | 536   |
| >VHL-A207V-LERLTQERIA  | 4835  | >VHL-A207V-LERLTQERIV  | 285   | 4550  |
| >VHL-A50G-vAEEEMEAG    | 319   | >VHL-A50G-rGEEEMEAG    | 3438  | 3119  |
| >VHL-A50G-vAEEEMEAGR   | 430   | >VHL-A50G-rGEEEMEAGR   | 4609  | 4179  |
| >VHL-A50G-vLGAEEMEAC   | 442   | >VHL-A50G-rLGGEEMEAC   | 4373  | 3931  |
| >VHL-A50G-vELGAEEMEAC  | 238   | >VHL-A50G-rELGGEEMEAC  | 84    | 154   |
| >VHL-A50G-vEELGAEEM    | 277   | >VHL-A50G-rEELGGEEM    | 218   | 59    |
| >VHL-A50G-vEELGAEEM    | 588   | >VHL-A50G-rEELGGEEM    | 339   | 249   |
| >VHL-A50G-vEELGAEEME   | 18    | >VHL-A50G-rEELGGEEME   | 15    | 3     |
| >VHL-A50G-vGPEELGAE    | 247   | >VHL-A50G-rGPEELGAE    | 387   | 140   |
| >VHL-A50G-vEESGPEELGA  | 355   | >VHL-A50G-rEESGPEELGG  | 2090  | 1735  |
| >VHL-A50P-vAEEEMEAG    | 319   | >VHL-A50P-nPEEEMEAG    | 19144 | 18825 |
| >VHL-A50P-vAEEEMEAGR   | 430   | >VHL-A50P-nPEEEMEAGR   | 11602 | 11172 |
| >VHL-A50P-vLGAEEMEAC   | 442   | >VHL-A50P-nLGPEEMEAC   | 4609  | 4167  |
| >VHL-A50P-vELGAEEMEAC  | 238   | >VHL-A50P-nELGPEEMEAC  | 104   | 134   |
| >VHL-A50P-vEELGAEEM    | 277   | >VHL-A50P-nEELGPEEM    | 643   | 366   |
| >VHL-A50P-vEELGAEEM    | 588   | >VHL-A50P-nEELGPEEM    | 489   | 99    |
| >VHL-A50P-vEELGAEEME   | 18    | >VHL-A50P-nEELGPEEME   | 21    | 3     |
| >VHL-A50P-vGPEELGAE    | 247   | >VHL-A50P-nGPEELGAE    | 424   | 177   |
| >VHL-A50P-vEESGPEELGA  | 355   | >VHL-A50P-nEESGPEELGP  | 3714  | 3359  |
| >VHL-A50T-vAEEEMEAG    | 319   | >VHL-A50T-nTEEEMEAG    | 3972  | 3653  |
| >VHL-A50T-vAEEEMEAGR   | 430   | >VHL-A50T-nTEEEMEAGR   | 3947  | 3517  |
| >VHL-A50T-vLGAEEMEAC   | 442   | >VHL-A50T-nLGTEEMEAC   | 1038  | 596   |
| >VHL-A50T-vELGAEEMEAC  | 238   | >VHL-A50T-nELGTEEMEAC  | 458   | 220   |
| >VHL-A50T-vEELGAEEM    | 277   | >VHL-A50T-nEELGTEEM    | 422   | 145   |
| >VHL-A50T-vEELGAEEM    | 588   | >VHL-A50T-nEELGTEEM    | 449   | 139   |
| >VHL-A50T-vEELGAEEME   | 18    | >VHL-A50T-nEELGTEEME   | 16    | 2     |
| >VHL-A50T-vGPEELGAE    | 247   | >VHL-A50T-nGPEELGAE    | 305   | 58    |
| >VHL-A50T-vEESGPEELGA  | 355   | >VHL-A50T-nEESGPEELGT  | 1741  | 1386  |
| >VHL-C162F-CLQVVRSL    | 4465  | >VHL-C162F-FLQVVRSL    | 89    | 4376  |
| >VHL-C162F-CLQVVRSLV   | 2917  | >VHL-C162F-FLQVVRSLV   | 43    | 2874  |
| >VHL-C162F-CLQVVRSL    | 1434  | >VHL-C162F-FLQVVRSL    | 23    | 1411  |

|                        |       |                         |      |       |
|------------------------|-------|-------------------------|------|-------|
| >VHL-C162F- CLQVVRSLV  | 517   | >VHL-C162F- FLQVVRSLV   | 8    | 509   |
| >VHL-C162F- CLQVVRSL   | 1441  | >VHL-C162F- FLQVVRSL    | 35   | 1406  |
| >VHL-C162F- CLQVVRSLV  | 325   | >VHL-C162F- FLQVVRSLV   | 8    | 317   |
| >VHL-C162F- CLQVVRSLV  | 6264  | >VHL-C162F- FLQVVRSLV   | 118  | 6146  |
| >VHL-C162F- CLQVVRSL   | 888   | >VHL-C162F- FLQVVRSL    | 14   | 874   |
| >VHL-C162F- CLQVVRSLV  | 456   | >VHL-C162F- FLQVVRSLV   | 7    | 449   |
| >VHL-C162F- CLQVVRSL   | 1543  | >VHL-C162F- FLQVVRSL    | 30   | 1513  |
| >VHL-C162F- CLQVVRSLV  | 920   | >VHL-C162F- FLQVVRSLV   | 25   | 895   |
| >VHL-C162F- CLQVVRSL   | 7416  | >VHL-C162F- FLQVVRSL    | 112  | 7304  |
| >VHL-C162F- CLQVVRSLV  | 1170  | >VHL-C162F- FLQVVRSLV   | 15   | 1155  |
| >VHL-C162F- CLQVVRSL   | 3681  | >VHL-C162F- FLQVVRSL    | 265  | 3416  |
| >VHL-C162F- CLQVVRSLV  | 1839  | >VHL-C162F- FLQVVRSLV   | 131  | 1708  |
| >VHL-C162F- CLQVVRSL   | 274   | >VHL-C162F- FLQVVRSL    | 5    | 269   |
| >VHL-C162F- CLQVVRSLV  | 16    | >VHL-C162F- FLQVVRSLV   | 2    | 14    |
| >VHL-C162F- CLQVVRSLVK | 97    | >VHL-C162F- FLQVVRSLVK  | 82   | 15    |
| >VHL-C162F- CLQVVRSLVK | 305   | >VHL-C162F- FLQVVRSLVK  | 172  | 133   |
| >VHL-C162F- CLQVVRSL   | 2306  | >VHL-C162F- FLQVVRSL    | 293  | 2013  |
| >VHL-C162F- RCLQVVRSLV | 392   | >VHL-C162F- RFLQVVRSLV  | 514  | 122   |
| >VHL-C162F- RCLQVVRSL  | 5956  | >VHL-C162F- RFLQVVRSL   | 9    | 5947  |
| >VHL-C162F- RCLQVVRSLV | 17986 | >VHL-C162F- RFLQVVRSLV  | 399  | 17587 |
| >VHL-C162F- RCLQVVRSLV | 67    | >VHL-C162F- RFLQVVRSLV  | 22   | 45    |
| >VHL-C162F- RCLQVVRSLV | 6115  | >VHL-C162F- RFLQVVRSLV  | 415  | 5700  |
| >VHL-C162F- RCLQVVRSL  | 90    | >VHL-C162F- RFLQVVRSL   | 203  | 113   |
| >VHL-C162F- RCLQVVRSLV | 619   | >VHL-C162F- RFLQVVRSLV  | 139  | 480   |
| >VHL-C162F- RCLQVVRSL  | 21876 | >VHL-C162F- RFLQVVRSL   | 85   | 21791 |
| >VHL-C162F- RCLQVVRSLV | 17485 | >VHL-C162F- RFLQVVRSLV  | 85   | 17400 |
| >VHL-C162F- ERCLQVVR   | 1477  | >VHL-C162F- ERFLQVVR    | 192  | 1285  |
| >VHL-C162F- ERCLQVVRSL | 5304  | >VHL-C162F- ERFLQVVRSL' | 391  | 4913  |
| >VHL-C162F- ERCLQVVR   | 6302  | >VHL-C162F- ERFLQVVR    | 194  | 6108  |
| >VHL-C162F- ERCLQVVRSL | 233   | >VHL-C162F- ERFLQVVRSL  | 39   | 194   |
| >VHL-C162F- ERCLQVVRSL | 7805  | >VHL-C162F- ERFLQVVRSL' | 331  | 7474  |
| >VHL-C162F- ERCLQVVRSL | 925   | >VHL-C162F- ERFLQVVRSL  | 217  | 708   |
| >VHL-C162F- ERCLQVVRSL | 884   | >VHL-C162F- ERFLQVVRSL  | 479  | 405   |
| >VHL-C162F- ERCLQVVRSL | 432   | >VHL-C162F- ERFLQVVRSL  | 356  | 76    |
| >VHL-C162F- ERCLQVVR   | 491   | >VHL-C162F- ERFLQVVR    | 183  | 308   |
| >VHL-C162F- KERCLQVV   | 67    | >VHL-C162F- KERFLQVV    | 54   | 13    |
| >VHL-C162F- KERCLQVVR  | 367   | >VHL-C162F- KERFLQVVR   | 272  | 95    |
| >VHL-C162F- KERCLQVVRS | 291   | >VHL-C162F- KERFLQVVRS  | 1061 | 770   |
| >VHL-C162F- KERCLQVVRS | 595   | >VHL-C162F- KERFLQVVRS  | 445  | 150   |
| >VHL-C162F- KERCLQVV   | 80    | >VHL-C162F- KERFLQVV    | 34   | 46    |
| >VHL-C162F- KERCLQVVRS | 27    | >VHL-C162F- KERFLQVVRS  | 16   | 11    |
| >VHL-C162F- KERCLQVV   | 148   | >VHL-C162F- KERFLQVV    | 98   | 50    |
| >VHL-C162F- KERCLQVV   | 1999  | >VHL-C162F- KERFLQVV    | 264  | 1735  |

|                         |      |                         |     |      |
|-------------------------|------|-------------------------|-----|------|
| >VHL-C162F- KERCLQVVRS  | 39   | >VHL-C162F- KERFLQVVRS  | 42  | 3    |
| >VHL-C162F- LKERCLQVV   | 714  | >VHL-C162F- LKERFLQVV   | 398 | 316  |
| >VHL-C162F- TLKERCLQV   | 403  | >VHL-C162F- TLKERFLQV   | 164 | 239  |
| >VHL-C162F- TLKERCLQV   | 328  | >VHL-C162F- TLKERFLQV   | 133 | 195  |
| >VHL-C162F- TLKERCLQVV  | 514  | >VHL-C162F- TLKERFLQVV  | 275 | 239  |
| >VHL-C162F- TLKERCLQV   | 7    | >VHL-C162F- TLKERFLQV   | 5   | 2    |
| >VHL-C162F- TLKERCLQVV  | 50   | >VHL-C162F- TLKERFLQVV  | 39  | 11   |
| >VHL-C162F- TLKERCLQV   | 909  | >VHL-C162F- TLKERFLQV   | 44  | 865  |
| >VHL-C162F- TLKERCLQV   | 186  | >VHL-C162F- TLKERFLQV   | 33  | 153  |
| >VHL-C162F- TLKERCLQVV  | 141  | >VHL-C162F- TLKERFLQVV  | 30  | 111  |
| >VHL-C162F- TLKERCLQV   | 1011 | >VHL-C162F- TLKERFLQV   | 179 | 832  |
| >VHL-C162F- TLKERCLQVV  | 109  | >VHL-C162F- TLKERFLQVV  | 49  | 60   |
| >VHL-C162F- TLKERCLQV   | 308  | >VHL-C162F- TLKERFLQV   | 105 | 203  |
| >VHL-C162F- TLKERCLQVV  | 369  | >VHL-C162F- TLKERFLQVV  | 185 | 184  |
| >VHL-C162F- TLKERCLQV   | 3    | >VHL-C162F- TLKERFLQV   | 2   | 1    |
| >VHL-C162F- TLKERCLQVV  | 4    | >VHL-C162F- TLKERFLQVV  | 3   | 1    |
| >VHL-C162F- TLKERCLQVV  | 58   | >VHL-C162F- TLKERFLQVV  | 23  | 35   |
| >VHL-C162F- TLKERCLQVV  | 96   | >VHL-C162F- TLKERFLQVV  | 62  | 34   |
| >VHL-C162F- TLKERCLQVV  | 211  | >VHL-C162F- TLKERFLQVV  | 196 | 15   |
| >VHL-C162F- TLKERCLQV   | 84   | >VHL-C162F- TLKERFLQV   | 22  | 62   |
| >VHL-C162F- TLKERCLQVV  | 436  | >VHL-C162F- TLKERFLQVV  | 224 | 212  |
| >VHL-C162F- YTLKERCLQV  | 93   | >VHL-C162F- YTLKERFLQV  | 61  | 32   |
| >VHL-C162F- YTLKERCLQV' | 308  | >VHL-C162F- YTLKERFLQV' | 128 | 180  |
| >VHL-C162F- YTLKERCLQV  | 127  | >VHL-C162F- YTLKERFLQV  | 83  | 44   |
| >VHL-C162F- YTLKERCL    | 3877 | >VHL-C162F- YTLKERFL    | 376 | 3501 |
| >VHL-C162F- YTLKERCLQV  | 39   | >VHL-C162F- YTLKERFLQV  | 26  | 13   |
| >VHL-C162F- YTLKERCLQV' | 83   | >VHL-C162F- YTLKERFLQV' | 35  | 48   |
| >VHL-C162F- YTLKERCL    | 1939 | >VHL-C162F- YTLKERFL    | 306 | 1633 |
| >VHL-C162F- YTLKERCLQV  | 32   | >VHL-C162F- YTLKERFLQV  | 16  | 16   |
| >VHL-C162F- YTLKERCLQV' | 28   | >VHL-C162F- YTLKERFLQV' | 16  | 12   |
| >VHL-C162F- YTLKERCLQV  | 860  | >VHL-C162F- YTLKERFLQV  | 217 | 643  |
| >VHL-C162F- YTLKERCLQV' | 95   | >VHL-C162F- YTLKERFLQV' | 64  | 31   |
| >VHL-C162F- YTLKERCLQV  | 31   | >VHL-C162F- YTLKERFLQV  | 20  | 11   |
| >VHL-C162F- YTLKERCLQV' | 40   | >VHL-C162F- YTLKERFLQV' | 29  | 11   |
| >VHL-C162F- YTLKERCLQV  | 709  | >VHL-C162F- YTLKERFLQV  | 384 | 325  |
| >VHL-C162F- YTLKERCLQV' | 416  | >VHL-C162F- YTLKERFLQV' | 289 | 127  |
| >VHL-C162F- YTLKERCLQV  | 19   | >VHL-C162F- YTLKERFLQV  | 15  | 4    |
| >VHL-C162F- YTLKERCLQV' | 21   | >VHL-C162F- YTLKERFLQV' | 19  | 2    |
| >VHL-C162F- YTLKERCLQV' | 819  | >VHL-C162F- YTLKERFLQV' | 364 | 455  |
| >VHL-C162F- YTLKERCL    | 3354 | >VHL-C162F- YTLKERFL    | 394 | 2960 |
| >VHL-C162F- YTLKERCLQV  | 14   | >VHL-C162F- YTLKERFLQV  | 7   | 7    |
| >VHL-C162F- YTLKERCLQV' | 53   | >VHL-C162F- YTLKERFLQV' | 18  | 35   |
| >VHL-C162F- YTLKERCL    | 205  | >VHL-C162F- YTLKERFL    | 44  | 161  |



|                         |       |                         |      |       |
|-------------------------|-------|-------------------------|------|-------|
| >VHL-C162F- YTLKERCLQV  | 211   | >VHL-C162F- YTLKERFLQV  | 274  | 63    |
| >VHL-C162F- YTLKERCL    | 280   | >VHL-C162F- YTLKERFL    | 1169 | 889   |
| >VHL-C162F- YTLKERCLQV' | 130   | >VHL-C162F- YTLKERFLQV' | 96   | 34    |
| >VHL-C162F- VYTLKERC    | 27678 | >VHL-C162F- VYTLKERF    | 199  | 27479 |
| >VHL-C162F- VYTLKERC    | 17028 | >VHL-C162F- VYTLKERF    | 463  | 16565 |
| >VHL-C162F- VYTLKERC    | 10474 | >VHL-C162F- VYTLKERF    | 49   | 10425 |
| >VHL-C162F- VYTLKERCL   | 2394  | >VHL-C162F- VYTLKERFL   | 274  | 2120  |
| >VHL-C162F- LPVYTLKERCI | 224   | >VHL-C162F- LPVYTLKERFL | 209  | 15    |
| >VHL-C162F- LPVYTLKERC  | 16904 | >VHL-C162F- LPVYTLKERF  | 225  | 16679 |
| >VHL-C162F- LPVYTLKERC  | 7934  | >VHL-C162F- LPVYTLKERF  | 263  | 7671  |
| >VHL-C162F- LPVYTLKERCI | 620   | >VHL-C162F- LPVYTLKERFL | 494  | 126   |
| >VHL-C162F- LPVYTLKERC  | 337   | >VHL-C162F- LPVYTLKERF  | 666  | 329   |
| >VHL-C162F- LPVYTLKERC  | 10092 | >VHL-C162F- LPVYTLKERF  | 66   | 10026 |
| >VHL-C162R- CLQVVRSL    | 1434  | >VHL-C162R- RLQVVRSL    | 423  | 1011  |
| >VHL-C162R- CLQVVRSLV   | 517   | >VHL-C162R- RLQVVRSLV   | 159  | 358   |
| >VHL-C162R- CLQVVRSL    | 1441  | >VHL-C162R- RLQVVRSL    | 362  | 1079  |
| >VHL-C162R- CLQVVRSLV   | 325   | >VHL-C162R- RLQVVRSLV   | 53   | 272   |
| >VHL-C162R- CLQVVRSL    | 888   | >VHL-C162R- RLQVVRSL    | 99   | 789   |
| >VHL-C162R- CLQVVRSLV   | 456   | >VHL-C162R- RLQVVRSLV   | 42   | 414   |
| >VHL-C162R- CLQVVRSL    | 1543  | >VHL-C162R- RLQVVRSL    | 399  | 1144  |
| >VHL-C162R- CLQVVRSLV   | 920   | >VHL-C162R- RLQVVRSLV   | 245  | 675   |
| >VHL-C162R- CLQVVRSLV   | 1170  | >VHL-C162R- RLQVVRSLV   | 87   | 1083  |
| >VHL-C162R- CLQVVRSL    | 274   | >VHL-C162R- RLQVVRSL    | 58   | 216   |
| >VHL-C162R- CLQVVRSLV   | 16    | >VHL-C162R- RLQVVRSLV   | 9    | 7     |
| >VHL-C162R- CLQVVRSLVK  | 97    | >VHL-C162R- RLQVVRSLVK  | 26   | 71    |
| >VHL-C162R- CLQVVRSLVK  | 305   | >VHL-C162R- RLQVVRSLVK  | 83   | 222   |
| >VHL-C162R- CLQVVRSLVK  | 2197  | >VHL-C162R- RLQVVRSLVK  | 27   | 2170  |
| >VHL-C162R- CLQVVRSL    | 11478 | >VHL-C162R- RLQVVRSL    | 136  | 11342 |
| >VHL-C162R- CLQVVRSLV   | 5204  | >VHL-C162R- RLQVVRSLV   | 348  | 4856  |
| >VHL-C162R- CLQVVRSL    | 14477 | >VHL-C162R- RLQVVRSL    | 340  | 14137 |
| >VHL-C162R- CLQVVRSLVK  | 1142  | >VHL-C162R- RLQVVRSLVK  | 204  | 938   |
| >VHL-C162R- RCLQVVRSLV  | 392   | >VHL-C162R- RRLQVVRSLV  | 3656 | 3264  |
| >VHL-C162R- RCLQVVRSLV  | 67    | >VHL-C162R- RRLQVVRSLV  | 629  | 562   |
| >VHL-C162R- RCLQVVRSL   | 90    | >VHL-C162R- RRLQVVRSL   | 1123 | 1033  |
| >VHL-C162R- RCLQVVRSL   | 2328  | >VHL-C162R- RRLQVVRSL   | 113  | 2215  |
| >VHL-C162R- RCLQVVRSLV  | 5751  | >VHL-C162R- RRLQVVRSLV  | 385  | 5366  |
| >VHL-C162R- RCLQVVRS    | 22176 | >VHL-C162R- RRLQVVRS    | 95   | 22081 |
| >VHL-C162R- RCLQVVRSL   | 14705 | >VHL-C162R- RRLQVVRSL   | 15   | 14690 |
| >VHL-C162R- RCLQVVRSLV  | 20068 | >VHL-C162R- RRLQVVRSLV  | 22   | 20046 |
| >VHL-C162R- RCLQVVRSLV  | 13700 | >VHL-C162R- RRLQVVRSLV  | 22   | 13678 |
| >VHL-C162R- RCLQVVRSL   | 12026 | >VHL-C162R- RRLQVVRSL   | 328  | 11698 |
| >VHL-C162R- RCLQVVRS    | 20699 | >VHL-C162R- RRLQVVRS    | 171  | 20528 |
| >VHL-C162R- RCLQVVRSLV  | 13622 | >VHL-C162R- RRLQVVRSLV  | 34   | 13588 |

|                          |       |                         |      |       |
|--------------------------|-------|-------------------------|------|-------|
| >VHL-C162R- RCLQVVRSLV   | 17420 | >VHL-C162R- RRLQVVRSLV  | 68   | 17352 |
| >VHL-C162R- RCLQVVRSLV   | 19120 | >VHL-C162R- RRLQVVRSLV  | 45   | 19075 |
| >VHL-C162R- RCLQVVRSLV   | 10527 | >VHL-C162R- RRLQVVRSLV  | 24   | 10503 |
| >VHL-C162R- TLPVYTLKER(C | 43478 | >VHL-C162R- TLPVYTLKERF | 483  | 42995 |
| >VHL-C162R- TLPVYTLKER(C | 37201 | >VHL-C162R- TLPVYTLKERF | 416  | 36785 |
| >VHL-C162R- ERCLQVVRSL   | 233   | >VHL-C162R- ERRLQVVRSL  | 89   | 144   |
| >VHL-C162R- ERCLQVVRSL   | 884   | >VHL-C162R- ERRLQVVRSL  | 179  | 705   |
| >VHL-C162R- ERCLQVVRSL   | 432   | >VHL-C162R- ERRLQVVRSL  | 160  | 272   |
| >VHL-C162R- ERCLQVVR     | 491   | >VHL-C162R- ERRLQVVR    | 1247 | 756   |
| >VHL-C162R- KERCLQVV     | 67    | >VHL-C162R- KERRLQVV    | 136  | 69    |
| >VHL-C162R- KERCLQVVRS   | 1629  | >VHL-C162R- KERRLQVVRS  | 452  | 1177  |
| >VHL-C162R- KERCLQVVVR   | 367   | >VHL-C162R- KERRLQVVVR  | 246  | 121   |
| >VHL-C162R- KERCLQVVRS   | 291   | >VHL-C162R- KERRLQVVRS  | 494  | 203   |
| >VHL-C162R- KERCLQVV     | 80    | >VHL-C162R- KERRLQVV    | 55   | 25    |
| >VHL-C162R- KERCLQVVRS   | 27    | >VHL-C162R- KERRLQVVRS  | 17   | 10    |
| >VHL-C162R- KERCLQVV     | 148   | >VHL-C162R- KERRLQVV    | 186  | 38    |
| >VHL-C162R- KERCLQVVRS   | 39    | >VHL-C162R- KERRLQVVRS  | 40   | 1     |
| >VHL-C162R- TLKERCLQV    | 403   | >VHL-C162R- TLKERRLQV   | 2691 | 2288  |
| >VHL-C162R- TLKERCLQV    | 328   | >VHL-C162R- TLKERRLQV   | 1399 | 1071  |
| >VHL-C162R- TLKERCLQV    | 7     | >VHL-C162R- TLKERRLQV   | 20   | 13    |
| >VHL-C162R- TLKERCLQVV   | 50    | >VHL-C162R- TLKERRLQVV  | 78   | 28    |
| >VHL-C162R- TLKERCLQV    | 186   | >VHL-C162R- TLKERRLQV   | 461  | 275   |
| >VHL-C162R- TLKERCLQVV   | 141   | >VHL-C162R- TLKERRLQVV  | 197  | 56    |
| >VHL-C162R- TLKERCLQVV   | 109   | >VHL-C162R- TLKERRLQVV  | 245  | 136   |
| >VHL-C162R- TLKERCLQV    | 308   | >VHL-C162R- TLKERRLQV   | 1030 | 722   |
| >VHL-C162R- TLKERCLQVV   | 369   | >VHL-C162R- TLKERRLQVV  | 767  | 398   |
| >VHL-C162R- TLKERCLQV    | 3     | >VHL-C162R- TLKERRLQV   | 3    | 0     |
| >VHL-C162R- TLKERCLQVV   | 4     | >VHL-C162R- TLKERRLQVV  | 4    | 0     |
| >VHL-C162R- TLKERCLQVV   | 58    | >VHL-C162R- TLKERRLQVV  | 27   | 31    |
| >VHL-C162R- TLKERCLQVV   | 96    | >VHL-C162R- TLKERRLQVV  | 78   | 18    |
| >VHL-C162R- TLKERCLQVV   | 211   | >VHL-C162R- TLKERRLQVV  | 218  | 7     |
| >VHL-C162R- TLKERCLQV    | 84    | >VHL-C162R- TLKERRLQV   | 32   | 52    |
| >VHL-C162R- TLKERCLQVV   | 436   | >VHL-C162R- TLKERRLQVV  | 389  | 47    |
| >VHL-C162R- YTLKERCLQV   | 93    | >VHL-C162R- YTLKERRLQV  | 346  | 253   |
| >VHL-C162R- YTLKERCLQV'  | 308   | >VHL-C162R- YTLKERRLQV' | 919  | 611   |
| >VHL-C162R- YTLKERCLQV   | 127   | >VHL-C162R- YTLKERRLQV  | 250  | 123   |
| >VHL-C162R- YTLKERCLQV   | 39    | >VHL-C162R- YTLKERRLQV  | 70   | 31    |
| >VHL-C162R- YTLKERCLQV'  | 83    | >VHL-C162R- YTLKERRLQV' | 182  | 99    |
| >VHL-C162R- YTLKERCLQV   | 32    | >VHL-C162R- YTLKERRLQV  | 98   | 66    |
| >VHL-C162R- YTLKERCLQV'  | 28    | >VHL-C162R- YTLKERRLQV' | 53   | 25    |
| >VHL-C162R- YTLKERCLQV'  | 95    | >VHL-C162R- YTLKERRLQV' | 258  | 163   |
| >VHL-C162R- YTLKERCLQV   | 31    | >VHL-C162R- YTLKERRLQV  | 163  | 132   |
| >VHL-C162R- YTLKERCLQV'  | 40    | >VHL-C162R- YTLKERRLQV' | 153  | 113   |

|                        |       |                        |      |       |
|------------------------|-------|------------------------|------|-------|
| >VHL-C162R-YTLKERCLQV' | 416   | >VHL-C162R-YTLKERRLQV' | 1519 | 1103  |
| >VHL-C162R-YTLKERCLQV  | 19    | >VHL-C162R-YTLKERRLQV  | 50   | 31    |
| >VHL-C162R-YTLKERCLQV' | 21    | >VHL-C162R-YTLKERRLQV' | 64   | 43    |
| >VHL-C162R-YTLKERCLQV  | 14    | >VHL-C162R-YTLKERRLQV  | 29   | 15    |
| >VHL-C162R-YTLKERCLQV' | 53    | >VHL-C162R-YTLKERRLQV' | 113  | 60    |
| >VHL-C162R-YTLKERCL    | 205   | >VHL-C162R-YTLKERRL    | 24   | 181   |
| >VHL-C162R-YTLKERCLQV  | 211   | >VHL-C162R-YTLKERRLQV  | 371  | 160   |
| >VHL-C162R-YTLKERCL    | 280   | >VHL-C162R-YTLKERRL    | 1371 | 1091  |
| >VHL-C162R-YTLKERCLQV' | 130   | >VHL-C162R-YTLKERRLQV' | 155  | 25    |
| >VHL-C162R-VYTLKERC    | 22006 | >VHL-C162R-VYTLKERR    | 467  | 21539 |
| >VHL-C162R-VYTLKERC    | 38230 | >VHL-C162R-VYTLKERR    | 385  | 37845 |
| >VHL-C162R-VYTLKERC    | 36497 | >VHL-C162R-VYTLKERR    | 207  | 36290 |
| >VHL-C162R-LPVYTLKERCI | 224   | >VHL-C162R-LPVYTLKERRI | 119  | 105   |
| >VHL-C162R-LPVYTLKERC  | 337   | >VHL-C162R-LPVYTLKERR  | 1207 | 870   |
| >VHL-C162W-CLQVVRSI    | 1434  | >VHL-C162W-WLQVVRSI    | 283  | 1151  |
| >VHL-C162W-CLQVVRSI    | 517   | >VHL-C162W-WLQVVRSI    | 102  | 415   |
| >VHL-C162W-CLQVVRSI    | 1441  | >VHL-C162W-WLQVVRSI    | 321  | 1120  |
| >VHL-C162W-CLQVVRSI    | 325   | >VHL-C162W-WLQVVRSI    | 52   | 273   |
| >VHL-C162W-CLQVVRSI    | 888   | >VHL-C162W-WLQVVRSI    | 82   | 806   |
| >VHL-C162W-CLQVVRSI    | 456   | >VHL-C162W-WLQVVRSI    | 32   | 424   |
| >VHL-C162W-CLQVVRSI    | 1543  | >VHL-C162W-WLQVVRSI    | 303  | 1240  |
| >VHL-C162W-CLQVVRSI    | 920   | >VHL-C162W-WLQVVRSI    | 175  | 745   |
| >VHL-C162W-CLQVVRSI    | 1170  | >VHL-C162W-WLQVVRSI    | 60   | 1110  |
| >VHL-C162W-CLQVVRSI    | 1839  | >VHL-C162W-WLQVVRSI    | 241  | 1598  |
| >VHL-C162W-CLQVVRSI    | 274   | >VHL-C162W-WLQVVRSI    | 21   | 253   |
| >VHL-C162W-CLQVVRSI    | 16    | >VHL-C162W-WLQVVRSI    | 3    | 13    |
| >VHL-C162W-CLQVVRSI    | 97    | >VHL-C162W-WLQVVRSI    | 114  | 17    |
| >VHL-C162W-CLQVVRSI    | 305   | >VHL-C162W-WLQVVRSI    | 396  | 91    |
| >VHL-C162W-CLQVVRSI    | 5204  | >VHL-C162W-WLQVVRSI    | 189  | 5015  |
| >VHL-C162W-CLQVVRSI    | 1142  | >VHL-C162W-WLQVVRSI    | 96   | 1046  |
| >VHL-C162W-RCLQVVRSI   | 392   | >VHL-C162W-RWLQVVRSI   | 1656 | 1264  |
| >VHL-C162W-RCLQVVRSI   | 27346 | >VHL-C162W-RWLQVVRSI   | 355  | 26991 |
| >VHL-C162W-RCLQVVRSI   | 5956  | >VHL-C162W-RWLQVVRSI   | 10   | 5946  |
| >VHL-C162W-RCLQVVRSI   | 17986 | >VHL-C162W-RWLQVVRSI   | 342  | 17644 |
| >VHL-C162W-RCLQVVRSI   | 67    | >VHL-C162W-RWLQVVRSI   | 70   | 3     |
| >VHL-C162W-RCLQVVRSI   | 90    | >VHL-C162W-RWLQVVRSI   | 1019 | 929   |
| >VHL-C162W-RCLQVVRSI   | 619   | >VHL-C162W-RWLQVVRSI   | 34   | 585   |
| >VHL-C162W-RCLQVVRS    | 36419 | >VHL-C162W-RWLQVVRS    | 229  | 36190 |
| >VHL-C162W-RCLQVVRSI   | 21876 | >VHL-C162W-RWLQVVRSI   | 25   | 21851 |
| >VHL-C162W-RCLQVVRSI   | 17485 | >VHL-C162W-RWLQVVRSI   | 32   | 17453 |
| >VHL-C162W-RCLQVVRSI   | 34037 | >VHL-C162W-RWLQVVRSI   | 213  | 33824 |
| >VHL-C162W-ERCLQVVR    | 6302  | >VHL-C162W-ERWLQVVR    | 109  | 6193  |
| >VHL-C162W-ERCLQVVR    | 233   | >VHL-C162W-ERWLQVVR    | 37   | 196   |

|                        |       |                       |      |       |
|------------------------|-------|-----------------------|------|-------|
| >VHL-C162W ERCLQVVRSL  | 7805  | >VHL-C162W ERWLQVVRS  | 187  | 7618  |
| >VHL-C162W ERCLQVVRS   | 12193 | >VHL-C162W ERWLQVVRS  | 457  | 11736 |
| >VHL-C162W ERCLQVVRSL  | 7914  | >VHL-C162W ERWLQVVRS  | 244  | 7670  |
| >VHL-C162W ERCLQVVRSL  | 884   | >VHL-C162W ERWLQVVRS  | 146  | 738   |
| >VHL-C162W ERCLQVVRSL  | 2847  | >VHL-C162W ERWLQVVRS  | 279  | 2568  |
| >VHL-C162W ERCLQVVRSL  | 432   | >VHL-C162W ERWLQVVRS  | 155  | 277   |
| >VHL-C162W ERCLQVVRSL  | 2470  | >VHL-C162W ERWLQVVRS  | 254  | 2216  |
| >VHL-C162W ERCLQVVR    | 491   | >VHL-C162W ERWLQVVR   | 89   | 402   |
| >VHL-C162W KERCLQVV    | 67    | >VHL-C162W KERWLQVV   | 43   | 24    |
| >VHL-C162W KERCLQVVR   | 367   | >VHL-C162W KERWLQVVR  | 204  | 163   |
| >VHL-C162W KERCLQVVRS  | 291   | >VHL-C162W KERWLQVVR  | 1889 | 1598  |
| >VHL-C162W KERCLQVVRS  | 1345  | >VHL-C162W KERWLQVVR  | 368  | 977   |
| >VHL-C162W KERCLQVVRS  | 595   | >VHL-C162W KERWLQVVR  | 132  | 463   |
| >VHL-C162W KERCLQVV    | 80    | >VHL-C162W KERWLQVV   | 76   | 4     |
| >VHL-C162W KERCLQVVRS  | 27    | >VHL-C162W KERWLQVVR  | 27   | 0     |
| >VHL-C162W KERCLQVV    | 148   | >VHL-C162W KERWLQVV   | 83   | 65    |
| >VHL-C162W KERCLQVV    | 1999  | >VHL-C162W KERWLQVV   | 438  | 1561  |
| >VHL-C162W KERCLQVVRS  | 39    | >VHL-C162W KERWLQVVR  | 27   | 12    |
| >VHL-C162W TLKERCLQV   | 403   | >VHL-C162W TLKERWLQV  | 267  | 136   |
| >VHL-C162W TLKERCLQV   | 328   | >VHL-C162W TLKERWLQV  | 481  | 153   |
| >VHL-C162W TLKERCLQV   | 7     | >VHL-C162W TLKERWLQV  | 9    | 2     |
| >VHL-C162W TLKERCLQVV  | 50    | >VHL-C162W TLKERWLQV\ | 76   | 26    |
| >VHL-C162W TLKERCLQV   | 909   | >VHL-C162W TLKERWLQV  | 138  | 771   |
| >VHL-C162W TLKERCLQV   | 186   | >VHL-C162W TLKERWLQV  | 31   | 155   |
| >VHL-C162W TLKERCLQVV  | 141   | >VHL-C162W TLKERWLQV\ | 21   | 120   |
| >VHL-C162W TLKERCLQVV  | 109   | >VHL-C162W TLKERWLQV\ | 65   | 44    |
| >VHL-C162W TLKERCLQV   | 308   | >VHL-C162W TLKERWLQV  | 63   | 245   |
| >VHL-C162W TLKERCLQVV  | 369   | >VHL-C162W TLKERWLQV\ | 87   | 282   |
| >VHL-C162W TLKERCLQ    | 850   | >VHL-C162W TLKERWLQ   | 331  | 519   |
| >VHL-C162W TLKERCLQV   | 3     | >VHL-C162W TLKERWLQV  | 4    | 1     |
| >VHL-C162W TLKERCLQVV  | 4     | >VHL-C162W TLKERWLQV\ | 4    | 0     |
| >VHL-C162W TLKERCLQVV  | 58    | >VHL-C162W TLKERWLQV\ | 28   | 30    |
| >VHL-C162W TLKERCLQVV  | 96    | >VHL-C162W TLKERWLQV\ | 69   | 27    |
| >VHL-C162W TLKERCLQVV  | 211   | >VHL-C162W TLKERWLQV\ | 256  | 45    |
| >VHL-C162W TLKERCLQV   | 84    | >VHL-C162W TLKERWLQV  | 105  | 21    |
| >VHL-C162W TLKERCLQVV  | 436   | >VHL-C162W TLKERWLQV\ | 259  | 177   |
| >VHL-C162W YTLKERCLQV  | 93    | >VHL-C162W YTLKERWLQ\ | 181  | 88    |
| >VHL-C162W YTLKERCLQV' | 308   | >VHL-C162W YTLKERWLQ\ | 93   | 215   |
| >VHL-C162W YTLKERCLQV  | 127   | >VHL-C162W YTLKERWLQ\ | 161  | 34    |
| >VHL-C162W YTLKERCLQV  | 39    | >VHL-C162W YTLKERWLQ\ | 51   | 12    |
| >VHL-C162W YTLKERCLQV' | 83    | >VHL-C162W YTLKERWLQ\ | 29   | 54    |
| >VHL-C162W YTLKERCL    | 1939  | >VHL-C162W YTLKERWL   | 411  | 1528  |
| >VHL-C162W YTLKERCLQV  | 32    | >VHL-C162W YTLKERWLQ\ | 11   | 21    |

|                        |       |                        |      |       |
|------------------------|-------|------------------------|------|-------|
| >VHL-C162W YTLKERCLQV' | 28    | >VHL-C162W YTLKERWLQ\  | 10   | 18    |
| >VHL-C162W YTLKERCLQV  | 860   | >VHL-C162W YTLKERWLQ\  | 274  | 586   |
| >VHL-C162W YTLKERCLQV' | 95    | >VHL-C162W YTLKERWLQ\  | 32   | 63    |
| >VHL-C162W YTLKERCLQV  | 31    | >VHL-C162W YTLKERWLQ\  | 15   | 16    |
| >VHL-C162W YTLKERCLQV' | 40    | >VHL-C162W YTLKERWLQ\  | 19   | 21    |
| >VHL-C162W YTLKERCLQV  | 709   | >VHL-C162W YTLKERWLQ\  | 302  | 407   |
| >VHL-C162W YTLKERCLQV' | 416   | >VHL-C162W YTLKERWLQ\  | 118  | 298   |
| >VHL-C162W YTLKERCLQV  | 19    | >VHL-C162W YTLKERWLQ\  | 19   | 0     |
| >VHL-C162W YTLKERCLQV' | 21    | >VHL-C162W YTLKERWLQ\  | 11   | 10    |
| >VHL-C162W YTLKERCLQV' | 819   | >VHL-C162W YTLKERWLQ\  | 440  | 379   |
| >VHL-C162W YTLKERCLQV  | 14    | >VHL-C162W YTLKERWLQ\  | 8    | 6     |
| >VHL-C162W YTLKERCLQV' | 53    | >VHL-C162W YTLKERWLQ\  | 15   | 38    |
| >VHL-C162W YTLKERCL    | 205   | >VHL-C162W YTLKERWL    | 32   | 173   |
| >VHL-C162W YTLKERCLQV  | 211   | >VHL-C162W YTLKERWLQ\  | 217  | 6     |
| >VHL-C162W YTLKERCL    | 280   | >VHL-C162W YTLKERWL    | 6183 | 5903  |
| >VHL-C162W YTLKERCLQV' | 130   | >VHL-C162W YTLKERWLQ\  | 164  | 34    |
| >VHL-C162W VYTLKERC    | 10474 | >VHL-C162W VYTLKERW    | 302  | 10172 |
| >VHL-C162W VYTLKERCL   | 2394  | >VHL-C162W VYTLKERWL   | 346  | 2048  |
| >VHL-C162W LPVYTLKERCI | 224   | >VHL-C162W LPVYTLKERW  | 133  | 91    |
| >VHL-C162W LPVYTLKERC  | 7934  | >VHL-C162W LPVYTLKERW  | 159  | 7775  |
| >VHL-C162W LPVYTLKERC  | 337   | >VHL-C162W LPVYTLKERW  | 1829 | 1492  |
| >VHL-C162W LPVYTLKERC  | 10092 | >VHL-C162W LPVYTLKERW  | 8    | 10084 |
| >VHL-C162W LPVYTLKERC  | 30471 | >VHL-C162W LPVYTLKERW  | 339  | 30132 |
| >VHL-C162Y- CLQVVRSL   | 4465  | >VHL-C162Y- YLQVVRSL   | 108  | 4357  |
| >VHL-C162Y- CLQVVRSLV  | 2917  | >VHL-C162Y- YLQVVRSLV  | 47   | 2870  |
| >VHL-C162Y- CLQVVRSL   | 1434  | >VHL-C162Y- YLQVVRSL   | 43   | 1391  |
| >VHL-C162Y- CLQVVRSLV  | 517   | >VHL-C162Y- YLQVVRSLV  | 15   | 502   |
| >VHL-C162Y- CLQVVRSL   | 1441  | >VHL-C162Y- YLQVVRSL   | 46   | 1395  |
| >VHL-C162Y- CLQVVRSLV  | 325   | >VHL-C162Y- YLQVVRSLV  | 9    | 316   |
| >VHL-C162Y- CLQVVRSLV  | 6264  | >VHL-C162Y- YLQVVRSLV  | 197  | 6067  |
| >VHL-C162Y- CLQVVRSL   | 888   | >VHL-C162Y- YLQVVRSL   | 12   | 876   |
| >VHL-C162Y- CLQVVRSLV  | 456   | >VHL-C162Y- YLQVVRSLV  | 6    | 450   |
| >VHL-C162Y- CLQVVRSL   | 1543  | >VHL-C162Y- YLQVVRSL   | 23   | 1520  |
| >VHL-C162Y- CLQVVRSLV  | 920   | >VHL-C162Y- YLQVVRSLV  | 20   | 900   |
| >VHL-C162Y- CLQVVRSL   | 7416  | >VHL-C162Y- YLQVVRSL   | 79   | 7337  |
| >VHL-C162Y- CLQVVRSLV  | 1170  | >VHL-C162Y- YLQVVRSLV  | 13   | 1157  |
| >VHL-C162Y- CLQVVRSL   | 3681  | >VHL-C162Y- YLQVVRSL   | 125  | 3556  |
| >VHL-C162Y- CLQVVRSLV  | 1839  | >VHL-C162Y- YLQVVRSLV  | 42   | 1797  |
| >VHL-C162Y- CLQVVRSL   | 274   | >VHL-C162Y- YLQVVRSL   | 4    | 270   |
| >VHL-C162Y- CLQVVRSLV  | 16    | >VHL-C162Y- YLQVVRSLV  | 2    | 14    |
| >VHL-C162Y- CLQVVRSLVK | 97    | >VHL-C162Y- YLQVVRSLVK | 86   | 11    |
| >VHL-C162Y- CLQVVRSLVK | 305   | >VHL-C162Y- YLQVVRSLVK | 192  | 113   |
| >VHL-C162Y- CLQVVRSL   | 2306  | >VHL-C162Y- YLQVVRSL   | 329  | 1977  |

|                        |       |                        |     |       |
|------------------------|-------|------------------------|-----|-------|
| >VHL-C162Y-CLQVVRSLV   | 5204  | >VHL-C162Y-YLQVVRSLV   | 183 | 5021  |
| >VHL-C162Y-RCLQVVRSL   | 14799 | >VHL-C162Y-RYLQVVRSL   | 20  | 14779 |
| >VHL-C162Y-RCLQVVRSLV  | 17999 | >VHL-C162Y-RYLQVVRSLV  | 48  | 17951 |
| >VHL-C162Y-RCLQVVRSLV  | 392   | >VHL-C162Y-RYLQVVRSLV  | 521 | 129   |
| >VHL-C162Y-RCLQVVRSLV  | 27346 | >VHL-C162Y-RYLQVVRSLV  | 370 | 26976 |
| >VHL-C162Y-RCLQVVRSL   | 17740 | >VHL-C162Y-RYLQVVRSL   | 124 | 17616 |
| >VHL-C162Y-RCLQVVRS    | 20287 | >VHL-C162Y-RYLQVVRS    | 209 | 20078 |
| >VHL-C162Y-RCLQVVRSL   | 5956  | >VHL-C162Y-RYLQVVRSL   | 4   | 5952  |
| >VHL-C162Y-RCLQVVRSLV  | 17986 | >VHL-C162Y-RYLQVVRSLV  | 14  | 17972 |
| >VHL-C162Y-RCLQVVRSLV  | 18406 | >VHL-C162Y-RYLQVVRSLV  | 73  | 18333 |
| >VHL-C162Y-RCLQVVRSLV  | 2907  | >VHL-C162Y-RYLQVVRSLV  | 315 | 2592  |
| >VHL-C162Y-RCLQVVRSLV  | 67    | >VHL-C162Y-RYLQVVRSLV  | 10  | 57    |
| >VHL-C162Y-RCLQVVRSL   | 90    | >VHL-C162Y-RYLQVVRSL   | 70  | 20    |
| >VHL-C162Y-RCLQVVRSLV  | 619   | >VHL-C162Y-RYLQVVRSLV  | 52  | 567   |
| >VHL-C162Y-RCLQVVRSL   | 21876 | >VHL-C162Y-RYLQVVRSL   | 76  | 21800 |
| >VHL-C162Y-RCLQVVRSLV  | 17485 | >VHL-C162Y-RYLQVVRSLV  | 61  | 17424 |
| >VHL-C162Y-TLPVYTLKERC | 24483 | >VHL-C162Y-TLPVYTLKERY | 318 | 24165 |
| >VHL-C162Y-TLPVYTLKERC | 25992 | >VHL-C162Y-TLPVYTLKERY | 440 | 25552 |
| >VHL-C162Y-ERCLQVVR    | 1477  | >VHL-C162Y-ERYLQVVR    | 400 | 1077  |
| >VHL-C162Y-ERCLQVVR    | 6302  | >VHL-C162Y-ERYLQVVR    | 336 | 5966  |
| >VHL-C162Y-ERCLQVVRSL  | 233   | >VHL-C162Y-ERYLQVVRSL  | 35  | 198   |
| >VHL-C162Y-ERCLQVVRSL  | 925   | >VHL-C162Y-ERYLQVVRSL  | 274 | 651   |
| >VHL-C162Y-ERCLQVVRSL  | 884   | >VHL-C162Y-ERYLQVVRSL  | 186 | 698   |
| >VHL-C162Y-ERCLQVVRSL  | 2847  | >VHL-C162Y-ERYLQVVRSL  | 352 | 2495  |
| >VHL-C162Y-ERCLQVVRSL  | 432   | >VHL-C162Y-ERYLQVVRSL  | 136 | 296   |
| >VHL-C162Y-ERCLQVVRSL  | 2470  | >VHL-C162Y-ERYLQVVRSL  | 383 | 2087  |
| >VHL-C162Y-ERCLQVVR    | 491   | >VHL-C162Y-ERYLQVVR    | 238 | 253   |
| >VHL-C162Y-KERCLQVV    | 67    | >VHL-C162Y-KERYLQVV    | 23  | 44    |
| >VHL-C162Y-KERCLQVVRS  | 1629  | >VHL-C162Y-KERYLQVVRS  | 424 | 1205  |
| >VHL-C162Y-KERCLQVVR   | 367   | >VHL-C162Y-KERYLQVVR   | 245 | 122   |
| >VHL-C162Y-KERCLQVVRS  | 291   | >VHL-C162Y-KERYLQVVRS  | 306 | 15    |
| >VHL-C162Y-KERCLQVVRS  | 595   | >VHL-C162Y-KERYLQVVRS  | 295 | 300   |
| >VHL-C162Y-KERCLQVV    | 80    | >VHL-C162Y-KERYLQVV    | 39  | 41    |
| >VHL-C162Y-KERCLQVVRS  | 27    | >VHL-C162Y-KERYLQVVRS  | 18  | 9     |
| >VHL-C162Y-KERCLQVV    | 148   | >VHL-C162Y-KERYLQVV    | 101 | 47    |
| >VHL-C162Y-KERCLQVV    | 1999  | >VHL-C162Y-KERYLQVV    | 204 | 1795  |
| >VHL-C162Y-KERCLQVVRS  | 39    | >VHL-C162Y-KERYLQVVRS  | 31  | 8     |
| >VHL-C162Y-LKERCLQVV   | 714   | >VHL-C162Y-LKERYLQVV   | 474 | 240   |
| >VHL-C162Y-TLKERCLQV   | 403   | >VHL-C162Y-TLKERYLQV   | 371 | 32    |
| >VHL-C162Y-TLKERCLQV   | 328   | >VHL-C162Y-TLKERYLQV   | 176 | 152   |
| >VHL-C162Y-TLKERCLQVV  | 514   | >VHL-C162Y-TLKERYLQVV  | 192 | 322   |
| >VHL-C162Y-TLKERCLQV   | 7     | >VHL-C162Y-TLKERYLQV   | 5   | 2     |
| >VHL-C162Y-TLKERCLQVV  | 50    | >VHL-C162Y-TLKERYLQVV  | 45  | 5     |

|                         |       |                         |      |       |
|-------------------------|-------|-------------------------|------|-------|
| >VHL-C162Y- TLKERCLQV   | 186   | >VHL-C162Y- TLKERYLQV   | 33   | 153   |
| >VHL-C162Y- TLKERCLQVV  | 141   | >VHL-C162Y- TLKERYLQVV  | 30   | 111   |
| >VHL-C162Y- TLKERCLQV   | 1011  | >VHL-C162Y- TLKERYLQV   | 282  | 729   |
| >VHL-C162Y- TLKERCLQVV  | 109   | >VHL-C162Y- TLKERYLQVV  | 56   | 53    |
| >VHL-C162Y- TLKERCLQV   | 308   | >VHL-C162Y- TLKERYLQV   | 101  | 207   |
| >VHL-C162Y- TLKERCLQVV  | 369   | >VHL-C162Y- TLKERYLQVV  | 197  | 172   |
| >VHL-C162Y- TLKERCLQV   | 3     | >VHL-C162Y- TLKERYLQV   | 2    | 1     |
| >VHL-C162Y- TLKERCLQVV  | 4     | >VHL-C162Y- TLKERYLQVV  | 3    | 1     |
| >VHL-C162Y- TLKERCLQVV  | 58    | >VHL-C162Y- TLKERYLQVV  | 25   | 33    |
| >VHL-C162Y- TLKERCLQVV  | 96    | >VHL-C162Y- TLKERYLQVV  | 77   | 19    |
| >VHL-C162Y- TLKERCLQVV  | 211   | >VHL-C162Y- TLKERYLQVV  | 227  | 16    |
| >VHL-C162Y- TLKERCLQV   | 84    | >VHL-C162Y- TLKERYLQV   | 55   | 29    |
| >VHL-C162Y- TLKERCLQVV  | 436   | >VHL-C162Y- TLKERYLQVV  | 377  | 59    |
| >VHL-C162Y- YTLKERCLQV  | 93    | >VHL-C162Y- YTLKERYLQV  | 124  | 31    |
| >VHL-C162Y- YTLKERCLQV' | 308   | >VHL-C162Y- YTLKERYLQV' | 124  | 184   |
| >VHL-C162Y- YTLKERCLQV  | 127   | >VHL-C162Y- YTLKERYLQV  | 122  | 5     |
| >VHL-C162Y- YTLKERCLQV  | 39    | >VHL-C162Y- YTLKERYLQV  | 42   | 3     |
| >VHL-C162Y- YTLKERCLQV' | 83    | >VHL-C162Y- YTLKERYLQV' | 53   | 30    |
| >VHL-C162Y- YTLKERCL    | 1939  | >VHL-C162Y- YTLKERYL    | 113  | 1826  |
| >VHL-C162Y- YTLKERCLQV  | 32    | >VHL-C162Y- YTLKERYLQV  | 17   | 15    |
| >VHL-C162Y- YTLKERCLQV' | 28    | >VHL-C162Y- YTLKERYLQV' | 17   | 11    |
| >VHL-C162Y- YTLKERCLQV  | 860   | >VHL-C162Y- YTLKERYLQV  | 245  | 615   |
| >VHL-C162Y- YTLKERCLQV' | 95    | >VHL-C162Y- YTLKERYLQV' | 52   | 43    |
| >VHL-C162Y- YTLKERCLQV  | 31    | >VHL-C162Y- YTLKERYLQV  | 27   | 4     |
| >VHL-C162Y- YTLKERCLQV' | 40    | >VHL-C162Y- YTLKERYLQV' | 43   | 3     |
| >VHL-C162Y- YTLKERCLQV' | 416   | >VHL-C162Y- YTLKERYLQV' | 319  | 97    |
| >VHL-C162Y- YTLKERCLQV  | 19    | >VHL-C162Y- YTLKERYLQV  | 19   | 0     |
| >VHL-C162Y- YTLKERCLQV' | 21    | >VHL-C162Y- YTLKERYLQV' | 23   | 2     |
| >VHL-C162Y- YTLKERCLQV' | 819   | >VHL-C162Y- YTLKERYLQV' | 402  | 417   |
| >VHL-C162Y- YTLKERCL    | 3354  | >VHL-C162Y- YTLKERYL    | 352  | 3002  |
| >VHL-C162Y- YTLKERCLQV  | 14    | >VHL-C162Y- YTLKERYLQV  | 9    | 5     |
| >VHL-C162Y- YTLKERCLQV' | 53    | >VHL-C162Y- YTLKERYLQV' | 26   | 27    |
| >VHL-C162Y- YTLKERCL    | 205   | >VHL-C162Y- YTLKERYL    | 56   | 149   |
| >VHL-C162Y- YTLKERCLQV  | 211   | >VHL-C162Y- YTLKERYLQV  | 302  | 91    |
| >VHL-C162Y- YTLKERCL    | 280   | >VHL-C162Y- YTLKERYL    | 2683 | 2403  |
| >VHL-C162Y- YTLKERCLQV' | 130   | >VHL-C162Y- YTLKERYLQV' | 123  | 7     |
| >VHL-C162Y- VYTLKERCL   | 2394  | >VHL-C162Y- VYTLKERYL   | 216  | 2178  |
| >VHL-C162Y- PVYTLKERC   | 24706 | >VHL-C162Y- PVYTLKERY   | 253  | 24453 |
| >VHL-C162Y- LPVYTLKERCI | 11585 | >VHL-C162Y- LPVYTLKERYL | 335  | 11250 |
| >VHL-C162Y- LPVYTLKERCI | 224   | >VHL-C162Y- LPVYTLKERYL | 173  | 51    |
| >VHL-C162Y- LPVYTLKERC  | 16904 | >VHL-C162Y- LPVYTLKERY  | 125  | 16779 |
| >VHL-C162Y- LPVYTLKERC  | 7934  | >VHL-C162Y- LPVYTLKERY  | 325  | 7609  |
| >VHL-C162Y- LPVYTLKERCI | 620   | >VHL-C162Y- LPVYTLKERYL | 327  | 293   |

|                               |       |                                |     |       |
|-------------------------------|-------|--------------------------------|-----|-------|
| >VHL-C162Y- LPVYTLKERC        | 337   | >VHL-C162Y- LPVYTLKERY         | 446 | 109   |
| >VHL-C162Y- LPVYTLKERC        | 27962 | >VHL-C162Y- LPVYTLKERY         | 209 | 27753 |
| >VHL-C162Y- LPVYTLKERC        | 10092 | >VHL-C162Y- LPVYTLKERY         | 243 | 9849  |
| >VHL-C77S- $\mu$ CNRSRPRVLP   | 910   | >VHL-C77S- $\eta$ SNRSRPRVLP   | 131 | 779   |
| >VHL-C77S- $\mu$ CNRSRPRVL    | 1848  | >VHL-C77S- $\eta$ SNRSRPRVL    | 326 | 1522  |
| >VHL-C77S- $\mu$ CNRSRPRVL    | 734   | >VHL-C77S- $\eta$ SNRSRPRVL    | 446 | 288   |
| >VHL-C77S- $\mu$ CNRSRPRVL    | 3853  | >VHL-C77S- $\eta$ SNRSRPRVL    | 383 | 3470  |
| >VHL-C77S- $\mu$ FCNRSRPRV    | 252   | >VHL-C77S- $\eta$ FSNRSRPRV    | 530 | 278   |
| >VHL-C77S- $\mu$ FCNRSRPRV    | 107   | >VHL-C77S- $\eta$ FSNRSRPRV    | 692 | 585   |
| >VHL-C77S- $\mu$ FCNRSRPRVV   | 2427  | >VHL-C77S- $\eta$ FSNRSRPRVV   | 253 | 2174  |
| >VHL-C77S- $\mu$ FCNRSRPRVVL  | 16502 | >VHL-C77S- $\eta$ FSNRSRPRVVL  | 194 | 16308 |
| >VHL-C77S- $\mu$ IFCNRSRPRV   | 675   | >VHL-C77S- $\eta$ IFSNRSRPRV   | 308 | 367   |
| >VHL-C77S- $\mu$ IFCNRSRPR    | 15    | >VHL-C77S- $\eta$ IFSNRSRPR    | 15  | 0     |
| >VHL-C77S- $\mu$ IFCNRSRPR    | 20    | >VHL-C77S- $\eta$ IFSNRSRPR    | 35  | 15    |
| >VHL-C77S- $\mu$ IFCNRSRPR    | 639   | >VHL-C77S- $\eta$ IFSNRSRPR    | 285 | 354   |
| >VHL-C77S- $\mu$ IFCNRSRPR    | 62    | >VHL-C77S- $\eta$ IFSNRSRPR    | 74  | 12    |
| >VHL-C77S- $\mu$ VIFCNRSRPRV  | 646   | >VHL-C77S- $\eta$ VIFSNRSRPRV  | 274 | 372   |
| >VHL-C77S- $\mu$ VIFCNRSRPRV' | 72    | >VHL-C77S- $\eta$ VIFSNRSRPRV\ | 77  | 5     |
| >VHL-C77S- $\mu$ VIFCNRSRPRV  | 7     | >VHL-C77S- $\eta$ VIFSNRSRPRV  | 8   | 1     |
| >VHL-C77S- $\mu$ VIFCNRSRPRV' | 15    | >VHL-C77S- $\eta$ VIFSNRSRPRV\ | 17  | 2     |
| >VHL-C77S- $\mu$ VIFCNRSRPRV  | 86    | >VHL-C77S- $\eta$ VIFSNRSRPRV  | 380 | 294   |
| >VHL-C77S- $\mu$ VIFCNRSRPRV' | 191   | >VHL-C77S- $\eta$ VIFSNRSRPRV\ | 871 | 680   |
| >VHL-C77S- $\mu$ VIFCNRSRPRV  | 70    | >VHL-C77S- $\eta$ VIFSNRSRPRV  | 42  | 28    |
| >VHL-C77S- $\mu$ VIFCNRSRPRV' | 874   | >VHL-C77S- $\eta$ VIFSNRSRPRV\ | 467 | 407   |
| >VHL-C77S- $\mu$ VIFCNRSRPRV  | 400   | >VHL-C77S- $\eta$ VIFSNRSRPRV  | 264 | 136   |
| >VHL-C77S- $\mu$ VIFCNRSRPRV  | 7     | >VHL-C77S- $\eta$ VIFSNRSRPRV  | 4   | 3     |
| >VHL-C77S- $\mu$ VIFCNRSRPRV' | 59    | >VHL-C77S- $\eta$ VIFSNRSRPRV\ | 20  | 39    |
| >VHL-C77S- $\mu$ VIFCNRSRPR   | 427   | >VHL-C77S- $\eta$ VIFSNRSRPR   | 216 | 211   |
| >VHL-C77S- $\mu$ VIFCNRSRPR   | 113   | >VHL-C77S- $\eta$ VIFSNRSRPR   | 68  | 45    |
| >VHL-C77S- $\mu$ VIFCNRSRPR   | 23    | >VHL-C77S- $\eta$ VIFSNRSRPR   | 10  | 13    |
| >VHL-C77S- $\mu$ VIFCNRSRPR   | 93    | >VHL-C77S- $\eta$ VIFSNRSRPR   | 130 | 37    |
| >VHL-C77S- $\mu$ VIFCNRSRPR   | 24    | >VHL-C77S- $\eta$ VIFSNRSRPR   | 17  | 7     |
| >VHL-C77S- $\mu$ VIFCNRSRPRV' | 360   | >VHL-C77S- $\eta$ VIFSNRSRPRV\ | 304 | 56    |
| >VHL-C77S- $\mu$ QVIFCNRSRPR  | 214   | >VHL-C77S- $\eta$ QVIFSNRSRPR' | 296 | 82    |
| >VHL-C77S- $\mu$ QVIFCNRSRPR  | 511   | >VHL-C77S- $\eta$ QVIFSNRSRPR' | 434 | 77    |
| >VHL-C77S- $\mu$ QVIFCNRSRPR  | 305   | >VHL-C77S- $\eta$ QVIFSNRSRPR  | 582 | 277   |
| >VHL-C77S- $\mu$ QVIFCNRSRPR  | 381   | >VHL-C77S- $\eta$ QVIFSNRSRPR  | 298 | 83    |
| >VHL-C77S- $\mu$ QVIFCNRSRPR  | 11    | >VHL-C77S- $\eta$ QVIFSNRSRPR  | 21  | 10    |
| >VHL-C77S- $\mu$ QVIFCNRSRPR  | 114   | >VHL-C77S- $\eta$ QVIFSNRSRPR  | 237 | 123   |
| >VHL-C77S- $\mu$ QVIFCNRSRPR  | 6     | >VHL-C77S- $\eta$ QVIFSNRSRPR  | 7   | 1     |
| >VHL-C77S- $\mu$ QVIFCNRSRPR  | 36    | >VHL-C77S- $\eta$ QVIFSNRSRPR' | 43  | 7     |
| >VHL-C77S- $\mu$ QVIFCNRSRPR  | 178   | >VHL-C77S- $\eta$ QVIFSNRSRPR' | 81  | 97    |
| >VHL-C77S- $\mu$ QVIFCNRSRPR  | 175   | >VHL-C77S- $\eta$ QVIFSNRSRPR  | 531 | 356   |



|                         |       |                         |       |       |
|-------------------------|-------|-------------------------|-------|-------|
| >VHL-C77S-m SQVIFCNR    | 54    | >VHL-C77S-n SQVIFSNR    | 49    | 5     |
| >VHL-C77S-m SQVIFCNRSPI | 47    | >VHL-C77S-n SQVIFSNRSPI | 35    | 12    |
| >VHL-C77S-m SQVIFCNR    | 423   | >VHL-C77S-n SQVIFSNR    | 320   | 103   |
| >VHL-C77S-m SQVIFCNRSPI | 436   | >VHL-C77S-n SQVIFSNRSPI | 418   | 18    |
| >VHL-C77S-m SQVIFCNRSPI | 301   | >VHL-C77S-n SQVIFSNRSPI | 230   | 71    |
| >VHL-C77S-m SQVIFCNR    | 74    | >VHL-C77S-n SQVIFSNR    | 135   | 61    |
| >VHL-C77S-m SQVIFCNRSPI | 150   | >VHL-C77S-n SQVIFSNRSPI | 130   | 20    |
| >VHL-C77S-m PSQVIFCNR   | 125   | >VHL-C77S-n PSQVIFSNR   | 139   | 14    |
| >VHL-C77S-m PSQVIFCNR   | 362   | >VHL-C77S-n PSQVIFSNR   | 470   | 108   |
| >VHL-C77S-m EPSQVIFCNR  | 355   | >VHL-C77S-n EPSQVIFSNR  | 650   | 295   |
| >VHL-C77S-m EPSQVIFCNR  | 388   | >VHL-C77S-n EPSQVIFSNR  | 522   | 134   |
| >VHL-C77S-m EPSQVIFCNR  | 91    | >VHL-C77S-n EPSQVIFSNR  | 77    | 14    |
| >VHL-C77S-m EPSQVIFCNR  | 213   | >VHL-C77S-n EPSQVIFSNR  | 848   | 635   |
| >VHL-C77S-m REPSQVIFCN  | 1304  | >VHL-C77S-n REPSQVIFSN  | 321   | 983   |
| >VHL-C77S-m REPSQVIFCN  | 43    | >VHL-C77S-n REPSQVIFSN  | 103   | 60    |
| >VHL-D121E-RDAGTHDGL    | 1130  | >VHL-D121E-REAGTHDGL    | 5     | 1125  |
| >VHL-D121E-RDAGTHDGL    | 7893  | >VHL-D121E-REAGTHDGL    | 11    | 7882  |
| >VHL-D121E-RDAGTHDGL    | 3696  | >VHL-D121E-REAGTHDGL    | 204   | 3492  |
| >VHL-D121E-RDAGTHDGL    | 18438 | >VHL-D121E-REAGTHDGL    | 199   | 18239 |
| >VHL-D121E-RDAGTHDGL    | 26814 | >VHL-D121E-REAGTHDGL    | 378   | 26436 |
| >VHL-D121E-RDAGTHDGL    | 15918 | >VHL-D121E-REAGTHDGL    | 78    | 15840 |
| >VHL-D121E-RDAGTHDGL    | 3407  | >VHL-D121E-REAGTHDGL    | 47    | 3360  |
| >VHL-D121E-RDAGTHDGL    | 4787  | >VHL-D121E-REAGTHDGL    | 70    | 4717  |
| >VHL-D121E-RDAGTHDGL    | 367   | >VHL-D121E-REAGTHDGL    | 12034 | 11667 |
| >VHL-D121E-RDAGTHDGL    | 133   | >VHL-D121E-REAGTHDGL    | 7355  | 7222  |
| >VHL-D121E-FRDAGTHDG    | 376   | >VHL-D121E-FREAGTHDGI   | 487   | 111   |
| >VHL-D121E-FRDAGTHDG    | 17    | >VHL-D121E-FREAGTHDGI   | 24    | 7     |
| >VHL-D121E-FRDAGTHDG    | 35    | >VHL-D121E-FREAGTHDGI   | 53    | 18    |
| >VHL-D121E-FRDAGTHDG    | 758   | >VHL-D121E-FREAGTHDGI   | 306   | 452   |
| >VHL-D121E-FRDAGTHDG    | 563   | >VHL-D121E-FREAGTHDGI   | 153   | 410   |
| >VHL-D121E-WLFRDAGT     | 330   | >VHL-D121E-WLFREAGT     | 435   | 105   |
| >VHL-D121E-WLFRDAGT     | 468   | >VHL-D121E-WLFREAGT     | 796   | 328   |
| >VHL-D121E-WLFRDAGT     | 108   | >VHL-D121E-WLFREAGT     | 102   | 6     |
| >VHL-D121E-WLFRDAGT     | 51    | >VHL-D121E-WLFREAGT     | 53    | 2     |
| >VHL-D121E-LWLFRDAG     | 90    | >VHL-D121E-LWLFREAG     | 127   | 37    |
| >VHL-D121E-HLWLFRDA     | 2632  | >VHL-D121E-HLWLFREA     | 343   | 2289  |
| >VHL-D121E-HLWLFRDA     | 1175  | >VHL-D121E-HLWLFREA     | 118   | 1057  |
| >VHL-D121E-HLWLFRDA     | 1111  | >VHL-D121E-HLWLFREA     | 367   | 744   |
| >VHL-D121E-HLWLFRDA     | 346   | >VHL-D121E-HLWLFREA     | 87    | 259   |
| >VHL-D121E-HLWLFRDAG    | 596   | >VHL-D121E-HLWLFREAG    | 343   | 253   |
| >VHL-D121G RDAGTHDGL    | 367   | >VHL-D121G RGAGTHDGL    | 20700 | 20333 |
| >VHL-D121G RDAGTHDGL    | 133   | >VHL-D121G RGAGTHDGL    | 16449 | 16316 |
| >VHL-D121G SYRGHLWLFF   | 1869  | >VHL-D121G SYRGHLWLFF   | 459   | 1410  |

|                       |       |                       |       |       |
|-----------------------|-------|-----------------------|-------|-------|
| >VHL-D121G FRDAGTHDG  | 376   | >VHL-D121G FRGAGTHDG  | 378   | 2     |
| >VHL-D121G FRDAGTHDG  | 17    | >VHL-D121G FRGAGTHDG  | 196   | 179   |
| >VHL-D121G FRDAGTHDG  | 35    | >VHL-D121G FRGAGTHDG  | 385   | 350   |
| >VHL-D121G WLFRDAGT   | 330   | >VHL-D121G WLFRGAGT   | 121   | 209   |
| >VHL-D121G WLFRDAGT   | 468   | >VHL-D121G WLFRGAGT   | 300   | 168   |
| >VHL-D121G WLFRDAGT   | 108   | >VHL-D121G WLFRGAGT   | 47    | 61    |
| >VHL-D121G WLFRDAGT   | 51    | >VHL-D121G WLFRGAGT   | 27    | 24    |
| >VHL-D121G WLFRDAGTH  | 903   | >VHL-D121G WLFRGAGTH  | 150   | 753   |
| >VHL-D121G WLFRDAGTH  | 500   | >VHL-D121G WLFRGAGTH  | 160   | 340   |
| >VHL-D121G LWLFRDAG   | 90    | >VHL-D121G LWLFRGAG   | 105   | 15    |
| >VHL-D121G HLWLFRDA   | 1175  | >VHL-D121G HLWLFRGA   | 146   | 1029  |
| >VHL-D121G HLWLFRDA   | 346   | >VHL-D121G HLWLFRGA   | 134   | 212   |
| >VHL-D121Y-DAGTHDGLL\ | 10249 | >VHL-D121Y-YAGTHDGLL\ | 178   | 10071 |
| >VHL-D121Y-DAGTHDGLL\ | 17937 | >VHL-D121Y-YAGTHDGLL\ | 339   | 17598 |
| >VHL-D121Y-RDAGTHDGL  | 25125 | >VHL-D121Y-RYAGTHDGL  | 118   | 25007 |
| >VHL-D121Y-RDAGTHDGL  | 26807 | >VHL-D121Y-RYAGTHDGLI | 180   | 26627 |
| >VHL-D121Y-RDAGTHDGL  | 27000 | >VHL-D121Y-RYAGTHDGL  | 488   | 26512 |
| >VHL-D121Y-RDAGTHDGL  | 28959 | >VHL-D121Y-RYAGTHDGLI | 210   | 28749 |
| >VHL-D121Y-RDAGTHDGL  | 25587 | >VHL-D121Y-RYAGTHDGLI | 303   | 25284 |
| >VHL-D121Y-RDAGTHDGL  | 20441 | >VHL-D121Y-RYAGTHDGL  | 7     | 20434 |
| >VHL-D121Y-RDAGTHDGL  | 21723 | >VHL-D121Y-RYAGTHDGLI | 10    | 21713 |
| >VHL-D121Y-RDAGTHDGL  | 22607 | >VHL-D121Y-RYAGTHDGLI | 89    | 22518 |
| >VHL-D121Y-RDAGTHDGL  | 8600  | >VHL-D121Y-RYAGTHDGLI | 418   | 8182  |
| >VHL-D121Y-RDAGTHDGL  | 21918 | >VHL-D121Y-RYAGTHDGL  | 103   | 21815 |
| >VHL-D121Y-RDAGTHDGL  | 24252 | >VHL-D121Y-RYAGTHDGLI | 132   | 24120 |
| >VHL-D121Y-RDAGTHDGL  | 28727 | >VHL-D121Y-RYAGTHDGLI | 355   | 28372 |
| >VHL-D121Y-RDAGTHDGL  | 367   | >VHL-D121Y-RYAGTHDGLI | 27211 | 26844 |
| >VHL-D121Y-RDAGTHDGL  | 133   | >VHL-D121Y-RYAGTHDGLI | 21794 | 21661 |
| >VHL-D121Y-SYRGHLWLFF | 4943  | >VHL-D121Y-SYRGHLWLFF | 436   | 4507  |
| >VHL-D121Y-SYRGHLWLFF | 28609 | >VHL-D121Y-SYRGHLWLFF | 66    | 28543 |
| >VHL-D121Y-SYRGHLWLFF | 16700 | >VHL-D121Y-SYRGHLWLFF | 12    | 16688 |
| >VHL-D121Y-SYRGHLWLFF | 1869  | >VHL-D121Y-SYRGHLWLFF | 151   | 1718  |
| >VHL-D121Y-SYRGHLWLFF | 20284 | >VHL-D121Y-SYRGHLWLFF | 109   | 20175 |
| >VHL-D121Y-SYRGHLWLFF | 25188 | >VHL-D121Y-SYRGHLWLFF | 119   | 25069 |
| >VHL-D121Y-SYRGHLWLFF | 22404 | >VHL-D121Y-SYRGHLWLFF | 24    | 22380 |
| >VHL-D121Y-SYRGHLWLFF | 3735  | >VHL-D121Y-SYRGHLWLFF | 317   | 3418  |
| >VHL-D121Y-FRDAGTHDG  | 3894  | >VHL-D121Y-FRYAGTHDGI | 199   | 3695  |
| >VHL-D121Y-FRDAGTHDG  | 5507  | >VHL-D121Y-FRYAGTHDGI | 426   | 5081  |
| >VHL-D121Y-FRDAGTHDG  | 376   | >VHL-D121Y-FRYAGTHDGI | 52    | 324   |
| >VHL-D121Y-FRDAGTHDG  | 1400  | >VHL-D121Y-FRYAGTHDGI | 60    | 1340  |
| >VHL-D121Y-FRDAGTHDG  | 17    | >VHL-D121Y-FRYAGTHDGI | 14    | 3     |
| >VHL-D121Y-FRDAGTHDG  | 35    | >VHL-D121Y-FRYAGTHDGI | 25    | 10    |
| >VHL-D121Y-FRDAGTHDG  | 2233  | >VHL-D121Y-FRYAGTHDGI | 481   | 1752  |

|                       |       |                       |       |       |
|-----------------------|-------|-----------------------|-------|-------|
| >VHL-D121Y-FRDAGTHDG  | 758   | >VHL-D121Y-FRYAGTHDGI | 74    | 684   |
| >VHL-D121Y-FRDAGTHDG  | 686   | >VHL-D121Y-FRYAGTHDGI | 181   | 505   |
| >VHL-D121Y-FRDAGTHDG  | 563   | >VHL-D121Y-FRYAGTHDGI | 35    | 528   |
| >VHL-D121Y-WLFRDAGT   | 682   | >VHL-D121Y-WLFRYAGT   | 142   | 540   |
| >VHL-D121Y-WLFRDAGT   | 330   | >VHL-D121Y-WLFRYAGT   | 60    | 270   |
| >VHL-D121Y-WLFRDAGT   | 468   | >VHL-D121Y-WLFRYAGT   | 197   | 271   |
| >VHL-D121Y-WLFRDAGT   | 108   | >VHL-D121Y-WLFRYAGT   | 26    | 82    |
| >VHL-D121Y-WLFRDAGT   | 51    | >VHL-D121Y-WLFRYAGT   | 25    | 26    |
| >VHL-D121Y-WLFRDAGTH  | 500   | >VHL-D121Y-WLFRYAGTH  | 169   | 331   |
| >VHL-D121Y-LWLFRDAGT  | 5537  | >VHL-D121Y-LWLFRYAGT  | 454   | 5083  |
| >VHL-D121Y-LWLFRDAG   | 90    | >VHL-D121Y-LWLFRYAG   | 67    | 23    |
| >VHL-D121Y-LWLFRDAGT  | 646   | >VHL-D121Y-LWLFRYAGT  | 287   | 359   |
| >VHL-D121Y-HLWLFRDA   | 2632  | >VHL-D121Y-HLWLFRYA   | 110   | 2522  |
| >VHL-D121Y-HLWLFRDA   | 2685  | >VHL-D121Y-HLWLFRYA   | 386   | 2299  |
| >VHL-D121Y-HLWLFRDAG  | 585   | >VHL-D121Y-HLWLFRYAG  | 250   | 335   |
| >VHL-D121Y-HLWLFRDA   | 1175  | >VHL-D121Y-HLWLFRYA   | 29    | 1146  |
| >VHL-D121Y-HLWLFRDAG  | 1311  | >VHL-D121Y-HLWLFRYAG  | 375   | 936   |
| >VHL-D121Y-HLWLFRDA   | 4824  | >VHL-D121Y-HLWLFRYA   | 256   | 4568  |
| >VHL-D121Y-HLWLFRDA   | 1111  | >VHL-D121Y-HLWLFRYA   | 151   | 960   |
| >VHL-D121Y-HLWLFRDA   | 346   | >VHL-D121Y-HLWLFRYA   | 62    | 284   |
| >VHL-D121Y-HLWLFRDAG  | 596   | >VHL-D121Y-HLWLFRYAG  | 195   | 401   |
| >VHL-D121Y-GHLWLFRD   | 23997 | >VHL-D121Y-GHLWLFRY   | 50    | 23947 |
| >VHL-D121Y-GHLWLFRD   | 34283 | >VHL-D121Y-GHLWLFRY   | 338   | 33945 |
| >VHL-D121Y-RGHLWLFRD  | 26523 | >VHL-D121Y-RGHLWLFRY  | 177   | 26346 |
| >VHL-D121Y-RGHLWLFRD  | 2104  | >VHL-D121Y-RGHLWLFRY  | 144   | 1960  |
| >VHL-D121Y-RGHLWLFRD  | 23982 | >VHL-D121Y-RGHLWLFRY  | 56    | 23926 |
| >VHL-D121Y-RGHLWLFRD  | 26751 | >VHL-D121Y-RGHLWLFRY  | 273   | 26478 |
| >VHL-D121Y-RGHLWLFRD  | 20588 | >VHL-D121Y-RGHLWLFRY  | 48    | 20540 |
| >VHL-D121Y-RGHLWLFRD  | 28859 | >VHL-D121Y-RGHLWLFRY  | 460   | 28399 |
| >VHL-D121Y-YRGHLWLFRI | 31915 | >VHL-D121Y-YRGHLWLFRI | 406   | 31509 |
| >VHL-D121Y-YRGHLWLFRI | 22863 | >VHL-D121Y-YRGHLWLFRI | 26    | 22837 |
| >VHL-D121Y-YRGHLWLFRI | 4479  | >VHL-D121Y-YRGHLWLFRI | 47    | 4432  |
| >VHL-D126G DGLLVNQTEL | 7058  | >VHL-D126G GGLLVNQTEL | 260   | 6798  |
| >VHL-D126G HDGLLVNQTI | 237   | >VHL-D126G HGGLLVNQTI | 26424 | 26187 |
| >VHL-D126G GTHDGLLV   | 122   | >VHL-D126G GTHGGLLV   | 255   | 133   |
| >VHL-D126G GTHDGLLV   | 193   | >VHL-D126G GTHGGLLV   | 402   | 209   |
| >VHL-D126G GTHDGLLV   | 78    | >VHL-D126G GTHGGLLV   | 115   | 37    |
| >VHL-D126G GTHDGLLV   | 204   | >VHL-D126G GTHGGLLV   | 282   | 78    |
| >VHL-D126G GTHDGLLV   | 46    | >VHL-D126G GTHGGLLV   | 78    | 32    |
| >VHL-D126G GTHDGLLV   | 611   | >VHL-D126G GTHGGLLV   | 455   | 156   |
| >VHL-D126G RDAGTHDGL  | 367   | >VHL-D126G RDAGTHGGL  | 398   | 31    |
| >VHL-D126G RDAGTHDGL  | 133   | >VHL-D126G RDAGTHGGL  | 163   | 30    |
| >VHL-D126G FRDAGTHDG  | 376   | >VHL-D126G FRDAGTHGG  | 100   | 276   |

|                        |       |                        |       |       |
|------------------------|-------|------------------------|-------|-------|
| >VHL-D126G FRDAGTHDG   | 17    | >VHL-D126G FRDAGTHGG   | 19    | 2     |
| >VHL-D126G FRDAGTHDG   | 35    | >VHL-D126G FRDAGTHGG   | 23    | 12    |
| >VHL-D126G FRDAGTHDG   | 686   | >VHL-D126G FRDAGTHGG   | 116   | 570   |
| >VHL-D126G FRDAGTHDG   | 563   | >VHL-D126G FRDAGTHGG   | 232   | 331   |
| >VHL-D126G LFRDAGTHDG  | 1415  | >VHL-D126G LFRDAGTHGG  | 372   | 1043  |
| >VHL-D126G WLFRDAGTH   | 2682  | >VHL-D126G WLFRDAGTH   | 452   | 2230  |
| >VHL-D126N HDGLLVNQTI  | 237   | >VHL-D126N HNGLLVNQTI  | 12620 | 12383 |
| >VHL-D126N GTHDGLLV    | 122   | >VHL-D126N GTHNGLLV    | 222   | 100   |
| >VHL-D126N GTHDGLLV    | 193   | >VHL-D126N GTHNGLLV    | 493   | 300   |
| >VHL-D126N GTHDGLLV    | 78    | >VHL-D126N GTHNGLLV    | 141   | 63    |
| >VHL-D126N GTHDGLLV    | 204   | >VHL-D126N GTHNGLLV    | 370   | 166   |
| >VHL-D126N GTHDGLLV    | 46    | >VHL-D126N GTHNGLLV    | 257   | 211   |
| >VHL-D126N GTHDGLLV    | 611   | >VHL-D126N GTHNGLLV    | 306   | 305   |
| >VHL-D126N RDAGTHDGL   | 367   | >VHL-D126N RDAGTHNGL   | 477   | 110   |
| >VHL-D126N RDAGTHDGL   | 133   | >VHL-D126N RDAGTHNGL   | 147   | 14    |
| >VHL-D126N FRDAGTHDG   | 376   | >VHL-D126N FRDAGTHNG   | 189   | 187   |
| >VHL-D126N FRDAGTHDG   | 17    | >VHL-D126N FRDAGTHNG   | 10    | 7     |
| >VHL-D126N FRDAGTHDG   | 35    | >VHL-D126N FRDAGTHNG   | 17    | 18    |
| >VHL-D126N FRDAGTHDG   | 686   | >VHL-D126N FRDAGTHNG   | 327   | 359   |
| >VHL-D126N FRDAGTHDG   | 563   | >VHL-D126N FRDAGTHNG   | 264   | 299   |
| >VHL-D126N LFRDAGTHDG  | 1415  | >VHL-D126N LFRDAGTHNG  | 236   | 1179  |
| >VHL-D143E-DGQPIFANI   | 891   | >VHL-D143E-EGQPIFANI   | 80    | 811   |
| >VHL-D143E-VDGQPIFA    | 15675 | >VHL-D143E-VEGQPIFA    | 80    | 15595 |
| >VHL-D143E-VDGQPIFANI  | 23820 | >VHL-D143E-VEGQPIFANI  | 409   | 23411 |
| >VHL-D143E-VDGQPIFANI  | 5038  | >VHL-D143E-VEGQPIFANI  | 55    | 4983  |
| >VHL-D143E-VDGQPIFANI  | 444   | >VHL-D143E-VEGQPIFANI  | 12093 | 11649 |
| >VHL-D143E-NVDGQPIFANI | 253   | >VHL-D143E-NVEGQPIFANI | 252   | 1     |
| >VHL-D143E-NVDGQPIFANI | 61    | >VHL-D143E-NVEGQPIFANI | 878   | 817   |
| >VHL-D143E-LNVDGQPIF   | 423   | >VHL-D143E-LNVEGQPIF   | 371   | 52    |
| >VHL-D143E-SLNVDGQPI   | 169   | >VHL-D143E-SLNVEGQPI   | 120   | 49    |
| >VHL-D143E-SLNVDGQPIF  | 120   | >VHL-D143E-SLNVEGQPIF  | 94    | 26    |
| >VHL-D143E-SLNVDGQPI   | 47    | >VHL-D143E-SLNVEGQPI   | 66    | 19    |
| >VHL-D143E-SLNVDGQPIF  | 71    | >VHL-D143E-SLNVEGQPIF  | 88    | 17    |
| >VHL-D143E-SLNVDGQPI   | 44    | >VHL-D143E-SLNVEGQPI   | 58    | 14    |
| >VHL-D143E-SLNVDGQPIF  | 58    | >VHL-D143E-SLNVEGQPIF  | 68    | 10    |
| >VHL-D143E-SLNVDGQPI   | 49    | >VHL-D143E-SLNVEGQPI   | 89    | 40    |
| >VHL-D143E-SLNVDGQPIF  | 235   | >VHL-D143E-SLNVEGQPIF  | 379   | 144   |
| >VHL-D143E-SLNVDGQPI   | 54    | >VHL-D143E-SLNVEGQPI   | 69    | 15    |
| >VHL-D143E-SLNVDGQPIF  | 29    | >VHL-D143E-SLNVEGQPIF  | 36    | 7     |
| >VHL-D143E-SLNVDGQPI   | 53    | >VHL-D143E-SLNVEGQPI   | 71    | 18    |
| >VHL-D143E-SLNVDGQPIF  | 42    | >VHL-D143E-SLNVEGQPIF  | 50    | 8     |
| >VHL-D143E-SLNVDGQPIF  | 186   | >VHL-D143E-SLNVEGQPIF  | 205   | 19    |
| >VHL-D143E-SLNVDGQPIF  | 261   | >VHL-D143E-SLNVEGQPIF  | 356   | 95    |

|                         |       |                          |       |       |
|-------------------------|-------|--------------------------|-------|-------|
| >VHL-D143E- SLNVDGQPIF  | 93    | >VHL-D143E- SLNVEGQPIF   | 86    | 7     |
| >VHL-D143E- VPSLNVDGQI  | 124   | >VHL-D143E- VPSLNVEGQF   | 175   | 51    |
| >VHL-D143E- VPSLNVDGQI  | 412   | >VHL-D143E- VPSLNVEGQF   | 431   | 19    |
| >VHL-D179A- DIVRSLYEDL  | 8748  | >VHL-D179A- AIVRSLYEDL   | 321   | 8427  |
| >VHL-D179A- DIVRSLYEDL  | 114   | >VHL-D179A- AIVRSLYEDL   | 351   | 237   |
| >VHL-D179A- LDIVRSLYEDL | 7065  | >VHL-D179A- LAIVRSLYEDL  | 297   | 6768  |
| >VHL-D179A- LDIVRSLY    | 428   | >VHL-D179A- LAIVRSLY     | 59    | 369   |
| >VHL-D179A- LDIVRSLY    | 2713  | >VHL-D179A- LAIVRSLY     | 250   | 2463  |
| >VHL-D179A- LDIVRSLY    | 4052  | >VHL-D179A- LAIVRSLY     | 216   | 3836  |
| >VHL-D179A- LDIVRSLY    | 3275  | >VHL-D179A- LAIVRSLY     | 395   | 2880  |
| >VHL-D179A- LDIVRSLY    | 13290 | >VHL-D179A- LAIVRSLY     | 19    | 13271 |
| >VHL-D179A- LDIVRSLY    | 8498  | >VHL-D179A- LAIVRSLY     | 123   | 8375  |
| >VHL-D179A- LDIVRSLY    | 11674 | >VHL-D179A- LAIVRSLY     | 450   | 11224 |
| >VHL-D179A- LDIVRSLY    | 20390 | >VHL-D179A- LAIVRSLY     | 219   | 20171 |
| >VHL-D179A- LDIVRSLYEDL | 491   | >VHL-D179A- LAIVRSLYEDL  | 32793 | 32302 |
| >VHL-D179A- LVKPENYRRL  | 3476  | >VHL-D179A- LVKPENYRRL   | 92    | 3384  |
| >VHL-D179A- RLDIVRSLY   | 116   | >VHL-D179A- RLAIIVRSLY   | 6650  | 6534  |
| >VHL-D179A- RLDIVRSL    | 312   | >VHL-D179A- RLAIIVRSL    | 28    | 284   |
| >VHL-D179A- RLDIVRSL    | 821   | >VHL-D179A- RLAIIVRSL    | 26    | 795   |
| >VHL-D179A- RLDIVRSL    | 14    | >VHL-D179A- RLAIIVRSL    | 27    | 13    |
| >VHL-D179A- RLDIVRSL    | 400   | >VHL-D179A- RLAIIVRSL    | 1121  | 721   |
| >VHL-D179A- RLDIVRSL    | 82    | >VHL-D179A- RLAIIVRSL    | 107   | 25    |
| >VHL-D179A- RLDIVRSL    | 52    | >VHL-D179A- RLAIIVRSL    | 17    | 35    |
| >VHL-D179A- RLDIVRSLY   | 157   | >VHL-D179A- RLAIIVRSLY   | 53    | 104   |
| >VHL-D179A- RLDIVRSLY   | 1152  | >VHL-D179A- RLAIIVRSLY   | 79    | 1073  |
| >VHL-D179A- RLDIVRSLY   | 77    | >VHL-D179A- RLAIIVRSLY   | 13    | 64    |
| >VHL-D179A- RLDIVRSL    | 415   | >VHL-D179A- RLAIIVRSL    | 175   | 240   |
| >VHL-D179A- RLDIVRSLY   | 33    | >VHL-D179A- RLAIIVRSLY   | 20    | 13    |
| >VHL-D179A- RLDIVRSL    | 3824  | >VHL-D179A- RLAIIVRSL    | 234   | 3590  |
| >VHL-D179A- RLDIVRSLY   | 3433  | >VHL-D179A- RLAIIVRSLY   | 148   | 3285  |
| >VHL-D179A- RLDIVRSLY   | 4294  | >VHL-D179A- RLAIIVRSLY   | 429   | 3865  |
| >VHL-D179A- RLDIVRSLY   | 32    | >VHL-D179A- RLAIIVRSLY   | 12    | 20    |
| >VHL-D179A- RRLDIVRSLY  | 81    | >VHL-D179A- RRLAIIVRSLY  | 90    | 9     |
| >VHL-D179A- RRLDIVRSLY  | 437   | >VHL-D179A- RRLAIIVRSLY  | 117   | 320   |
| >VHL-D179A- RRLDIVRSL   | 109   | >VHL-D179A- RRLAIIVRSL   | 56    | 53    |
| >VHL-D179A- RRLDIVRSLY  | 49    | >VHL-D179A- RRLAIIVRSLY  | 27    | 22    |
| >VHL-D179A- RRLDIVRS    | 102   | >VHL-D179A- RRLAIIVRS    | 60    | 42    |
| >VHL-D179A- RRLDIVRSL   | 15    | >VHL-D179A- RRLAIIVRSL   | 11    | 4     |
| >VHL-D179A- RRLDIVRSLY  | 10    | >VHL-D179A- RRLAIIVRSLY  | 9     | 1     |
| >VHL-D179A- RRLDIVRSLYE | 569   | >VHL-D179A- RRLAIIVRSLYE | 346   | 223   |
| >VHL-D179A- RRLDIVRSL   | 527   | >VHL-D179A- RRLAIIVRSL   | 201   | 326   |
| >VHL-D179A- RRLDIVRSL   | 875   | >VHL-D179A- RRLAIIVRSL   | 350   | 525   |
| >VHL-D179A- RRLDIVRS    | 242   | >VHL-D179A- RRLAIIVRS    | 232   | 10    |

|                        |       |                        |       |       |
|------------------------|-------|------------------------|-------|-------|
| >VHL-D179A·RRLDIVRSLY  | 303   | >VHL-D179A·RRLAIVRSLY  | 129   | 174   |
| >VHL-D179A·RRLDIVRSLYE | 319   | >VHL-D179A·RRLAIVRSLYE | 144   | 175   |
| >VHL-D179A·RRLDIVRSLY  | 318   | >VHL-D179A·RRLAIVRSLY  | 218   | 100   |
| >VHL-D179A·YRRLDIVRSL  | 130   | >VHL-D179A·YRRLAIVRSL  | 94    | 36    |
| >VHL-D179A·YRRLDIVRSLY | 65    | >VHL-D179A·YRRLAIVRSLY | 47    | 18    |
| >VHL-D179A·YRRLDIVR    | 308   | >VHL-D179A·YRRLAIVR    | 123   | 185   |
| >VHL-D179A·YRRLDIVRSL  | 43    | >VHL-D179A·YRRLAIVRSL  | 33    | 10    |
| >VHL-D179A·YRRLDIVRSLY | 206   | >VHL-D179A·YRRLAIVRSLY | 128   | 78    |
| >VHL-D179A·YRRLDIVRSLY | 95    | >VHL-D179A·YRRLAIVRSLY | 73    | 22    |
| >VHL-D179A·YRRLDIVRSL  | 304   | >VHL-D179A·YRRLAIVRSL  | 287   | 17    |
| >VHL-D179A·YRRLDIVRSLY | 391   | >VHL-D179A·YRRLAIVRSLY | 384   | 7     |
| >VHL-D179A·YRRLDIVRSL  | 94    | >VHL-D179A·YRRLAIVRSL  | 93    | 1     |
| >VHL-D179A·YRRLDIVRSLY | 177   | >VHL-D179A·YRRLAIVRSLY | 131   | 46    |
| >VHL-D179A·NYRRLDIVRSI | 587   | >VHL-D179A·NYRRLAIVRSI | 189   | 398   |
| >VHL-D179A·NYRRLDIVRSI | 129   | >VHL-D179A·NYRRLAIVRSI | 75    | 54    |
| >VHL-D179A·NYRRLDIV    | 3006  | >VHL-D179A·NYRRLAIV    | 389   | 2617  |
| >VHL-D179A·NYRRLDIVR   | 256   | >VHL-D179A·NYRRLAIVR   | 271   | 15    |
| >VHL-D179A·NYRRLDIVR   | 30    | >VHL-D179A·NYRRLAIVR   | 51    | 21    |
| >VHL-D179A·ENYRRLDIV   | 953   | >VHL-D179A·ENYRRLAIV   | 179   | 774   |
| >VHL-D179A·ENYRRLDI    | 1360  | >VHL-D179A·ENYRRLAI    | 182   | 1178  |
| >VHL-D179A·ENYRRLDIV   | 3548  | >VHL-D179A·ENYRRLAIV   | 440   | 3108  |
| >VHL-D179A·PENYRRLDI   | 86    | >VHL-D179A·PENYRRLAI   | 81    | 5     |
| >VHL-D179A·KPENYRRLD   | 17264 | >VHL-D179A·KPENYRRLA   | 197   | 17067 |
| >VHL-D179A·KPENYRRLDI  | 104   | >VHL-D179A·KPENYRRLAI  | 59    | 45    |
| >VHL-D179A·KPENYRRLDI  | 139   | >VHL-D179A·KPENYRRLAI  | 64    | 75    |
| >VHL-D179A·VKPENYRRLD  | 1549  | >VHL-D179A·VKPENYRRLA  | 427   | 1122  |
| >VHL-D179N·DIVRSLYEDL  | 114   | >VHL-D179N·NIVRSLYEDL  | 643   | 529   |
| >VHL-D179N·LDIVRSLYEDL | 7065  | >VHL-D179N·LNIVRSLYEDL | 455   | 6610  |
| >VHL-D179N·LDIVRSLY    | 428   | >VHL-D179N·LNIVRSLY    | 116   | 312   |
| >VHL-D179N·LDIVRSLYEDL | 491   | >VHL-D179N·LNIVRSLYEDL | 15760 | 15269 |
| >VHL-D179N·RLDIVRSLY   | 116   | >VHL-D179N·RLNIVRSLY   | 7774  | 7658  |
| >VHL-D179N·RLDIVRSL    | 312   | >VHL-D179N·RLNIVRSL    | 75    | 237   |
| >VHL-D179N·RLDIVRSL    | 821   | >VHL-D179N·RLNIVRSL    | 33    | 788   |
| >VHL-D179N·RLDIVRSL    | 14    | >VHL-D179N·RLNIVRSL    | 22    | 8     |
| >VHL-D179N·RLDIVRSL    | 400   | >VHL-D179N·RLNIVRSL    | 939   | 539   |
| >VHL-D179N·RLDIVRSL    | 82    | >VHL-D179N·RLNIVRSL    | 275   | 193   |
| >VHL-D179N·RLDIVRSL    | 52    | >VHL-D179N·RLNIVRSL    | 29    | 23    |
| >VHL-D179N·RLDIVRSLY   | 157   | >VHL-D179N·RLNIVRSLY   | 48    | 109   |
| >VHL-D179N·RLDIVRSLY   | 2141  | >VHL-D179N·RLNIVRSLY   | 460   | 1681  |
| >VHL-D179N·RLDIVRSLY   | 1152  | >VHL-D179N·RLNIVRSLY   | 254   | 898   |
| >VHL-D179N·RLDIVRSLY   | 77    | >VHL-D179N·RLNIVRSLY   | 14    | 63    |
| >VHL-D179N·RLDIVRSLY   | 7023  | >VHL-D179N·RLNIVRSLY   | 438   | 6585  |
| >VHL-D179N·RLDIVRSL    | 415   | >VHL-D179N·RLNIVRSL    | 91    | 324   |

|                        |      |                        |     |      |
|------------------------|------|------------------------|-----|------|
| >VHL-D179N RLDIVRSLY   | 33   | >VHL-D179N RLNIVRSLY   | 22  | 11   |
| >VHL-D179N RLDIVRSLY   | 3433 | >VHL-D179N RLNIVRSLY   | 147 | 3286 |
| >VHL-D179N RLDIVRSLY   | 4294 | >VHL-D179N RLNIVRSLY   | 413 | 3881 |
| >VHL-D179N RLDIVRSLY   | 32   | >VHL-D179N RLNIVRSLY   | 18  | 14   |
| >VHL-D179N RLDIVRSLY   | 68   | >VHL-D179N RLNIVRSLY   | 109 | 41   |
| >VHL-D179N RRLDIVRSLY  | 81   | >VHL-D179N RRLNIVRSLY  | 70  | 11   |
| >VHL-D179N RRLDIVRSL   | 943  | >VHL-D179N RRLNIVRSL   | 274 | 669  |
| >VHL-D179N RRLDIVRSLY  | 437  | >VHL-D179N RRLNIVRSLY  | 260 | 177  |
| >VHL-D179N RRLDIVRSL   | 109  | >VHL-D179N RRLNIVRSL   | 45  | 64   |
| >VHL-D179N RRLDIVRSLY  | 49   | >VHL-D179N RRLNIVRSLY  | 22  | 27   |
| >VHL-D179N RRLDIVRS    | 102  | >VHL-D179N RRLNIVRS    | 56  | 46   |
| >VHL-D179N RRLDIVRSL   | 15   | >VHL-D179N RRLNIVRSL   | 11  | 4    |
| >VHL-D179N RRLDIVRSLY  | 10   | >VHL-D179N RRLNIVRSLY  | 9   | 1    |
| >VHL-D179N RRLDIVRSLYE | 569  | >VHL-D179N RRLNIVRSLYE | 293 | 276  |
| >VHL-D179N RRLDIVRS    | 242  | >VHL-D179N RRLNIVRS    | 345 | 103  |
| >VHL-D179N RRLDIVRSLY  | 303  | >VHL-D179N RRLNIVRSLY  | 137 | 166  |
| >VHL-D179N RRLDIVRSLYE | 319  | >VHL-D179N RRLNIVRSLYE | 194 | 125  |
| >VHL-D179N RRLDIVRS    | 888  | >VHL-D179N RRLNIVRS    | 466 | 422  |
| >VHL-D179N RRLDIVRSLY  | 318  | >VHL-D179N RRLNIVRSLY  | 211 | 107  |
| >VHL-D179N YRRLDIVRSL  | 130  | >VHL-D179N YRRLNIVRSL  | 78  | 52   |
| >VHL-D179N YRRLDIVRSLY | 65   | >VHL-D179N YRRLNIVRSLY | 42  | 23   |
| >VHL-D179N YRRLDIVR    | 308  | >VHL-D179N YRRLNIVR    | 190 | 118  |
| >VHL-D179N YRRLDIVRSL  | 43   | >VHL-D179N YRRLNIVRSL  | 40  | 3    |
| >VHL-D179N YRRLDIVRSLY | 206  | >VHL-D179N YRRLNIVRSLY | 166 | 40   |
| >VHL-D179N YRRLDIVRSLY | 95   | >VHL-D179N YRRLNIVRSLY | 132 | 37   |
| >VHL-D179N YRRLDIVRSL  | 304  | >VHL-D179N YRRLNIVRSL  | 253 | 51   |
| >VHL-D179N YRRLDIVRSLY | 391  | >VHL-D179N YRRLNIVRSLY | 374 | 17   |
| >VHL-D179N YRRLDIVRSL  | 94   | >VHL-D179N YRRLNIVRSL  | 92  | 2    |
| >VHL-D179N YRRLDIVRSLY | 177  | >VHL-D179N YRRLNIVRSLY | 124 | 53   |
| >VHL-D179N NYRRLDIVRSI | 587  | >VHL-D179N NYRRLNIVRSI | 136 | 451  |
| >VHL-D179N NYRRLDIVRSI | 129  | >VHL-D179N NYRRLNIVRSI | 97  | 32   |
| >VHL-D179N NYRRLDIV    | 3006 | >VHL-D179N NYRRLNIV    | 398 | 2608 |
| >VHL-D179N NYRRLDIVR   | 2598 | >VHL-D179N NYRRLNIVR   | 417 | 2181 |
| >VHL-D179N NYRRLDIVRSI | 1019 | >VHL-D179N NYRRLNIVRSI | 378 | 641  |
| >VHL-D179N NYRRLDIVR   | 256  | >VHL-D179N NYRRLNIVR   | 121 | 135  |
| >VHL-D179N NYRRLDIVR   | 30   | >VHL-D179N NYRRLNIVR   | 20  | 10   |
| >VHL-D179N ENYRRLDIV   | 953  | >VHL-D179N ENYRRLNIV   | 196 | 757  |
| >VHL-D179N PENYRRLDI   | 86   | >VHL-D179N PENYRRLNI   | 75  | 11   |
| >VHL-D179N KPENYRRLDI  | 104  | >VHL-D179N KPENYRRLNI  | 160 | 56   |
| >VHL-D179N KPENYRRLDI  | 139  | >VHL-D179N KPENYRRLNI  | 77  | 62   |
| >VHL-D187V·DLEDHPNV    | 8942 | >VHL-D187V·VLEDHPNV    | 167 | 8775 |
| >VHL-D187V·DLEDHPNV    | 3883 | >VHL-D187V·VLEDHPNV    | 72  | 3811 |
| >VHL-D187V·DLEDHPNV    | 3796 | >VHL-D187V·VLEDHPNV    | 43  | 3753 |

|                        |       |                        |      |       |
|------------------------|-------|------------------------|------|-------|
| >VHL-D187V·DLEDHPNV    | 10556 | >VHL-D187V·VLEDHPNV    | 330  | 10226 |
| >VHL-D187V·DLEDHPNV    | 227   | >VHL-D187V·VLEDHPNV    | 6    | 221   |
| >VHL-D187V·DLEDHPNV    | 1332  | >VHL-D187V·VLEDHPNV    | 21   | 1311  |
| >VHL-D187V·DLEDHPNV    | 552   | >VHL-D187V·VLEDHPNV    | 24   | 528   |
| >VHL-D187V·DLEDHPNV    | 1013  | >VHL-D187V·VLEDHPNV    | 51   | 962   |
| >VHL-D187V·DLEDHPNV    | 14    | >VHL-D187V·VLEDHPNV    | 2    | 12    |
| >VHL-D187V·DLEDHPNVQ   | 2743  | >VHL-D187V·VLEDHPNVQ   | 291  | 2452  |
| >VHL-D187V·DLEDHPNV    | 378   | >VHL-D187V·VLEDHPNV    | 2822 | 2444  |
| >VHL-D187V·EDLEDHPNV   | 5258  | >VHL-D187V·EVLEDHPNV   | 283  | 4975  |
| >VHL-D187V·EDLEDHPNV   | 7389  | >VHL-D187V·EVLEDHPNV   | 54   | 7335  |
| >VHL-D187V·EDLEDHPNV   | 6972  | >VHL-D187V·EVLEDHPNV   | 41   | 6931  |
| >VHL-D187V·EDLEDHPNV   | 14331 | >VHL-D187V·EVLEDHPNV   | 38   | 14293 |
| >VHL-D187V·EDLEDHPNV   | 16767 | >VHL-D187V·EVLEDHPNV   | 39   | 16728 |
| >VHL-D187V·EDLEDHPNV   | 20238 | >VHL-D187V·EVLEDHPNV   | 101  | 20137 |
| >VHL-D187V·EDLEDHPNV(  | 16859 | >VHL-D187V·EVLEDHPNV(  | 203  | 16656 |
| >VHL-D187V·EDLEDHPNV(  | 3044  | >VHL-D187V·EVLEDHPNV(  | 21   | 3023  |
| >VHL-D187V·EDLEDHPNV   | 17706 | >VHL-D187V·EVLEDHPNV   | 258  | 17448 |
| >VHL-D187V·EDLEDHPNV   | 25    | >VHL-D187V·EVLEDHPNV   | 3    | 22    |
| >VHL-D187V·EDLEDHPNV(  | 15098 | >VHL-D187V·EVLEDHPNV(  | 477  | 14621 |
| >VHL-D187V·RLDIVRSLYEC | 18655 | >VHL-D187V·RLDIVRSLYEV | 38   | 18617 |
| >VHL-D187V·RLDIVRSLYEC | 12571 | >VHL-D187V·RLDIVRSLYEV | 25   | 12546 |
| >VHL-D187V·RLDIVRSLYEC | 21729 | >VHL-D187V·RLDIVRSLYEV | 99   | 21630 |
| >VHL-D187V·RLDIVRSLYEC | 18269 | >VHL-D187V·RLDIVRSLYEV | 80   | 18189 |
| >VHL-D187V·RLDIVRSLYEC | 4610  | >VHL-D187V·RLDIVRSLYEV | 3    | 4607  |
| >VHL-D187V·RLDIVRSLYEC | 12242 | >VHL-D187V·RLDIVRSLYEV | 15   | 12227 |
| >VHL-D187V·RLDIVRSLYEC | 14612 | >VHL-D187V·RLDIVRSLYEV | 6    | 14606 |
| >VHL-D187V·RLDIVRSLYEC | 25133 | >VHL-D187V·RLDIVRSLYEV | 48   | 25085 |
| >VHL-D187V·RLDIVRSLYEC | 19833 | >VHL-D187V·RLDIVRSLYEV | 4    | 19829 |
| >VHL-D187V·YEDLEDHPN   | 1231  | >VHL-D187V·YEVLEDHPN   | 131  | 1100  |
| >VHL-D187V·YEDLEDHPN\  | 552   | >VHL-D187V·YEVLEDHPNV  | 393  | 159   |
| >VHL-D187V·LYEDLEDHPN  | 331   | >VHL-D187V·LYEVLEDHPN  | 3157 | 2826  |
| >VHL-D187V·SLYEDLED    | 581   | >VHL-D187V·SLYEVLED    | 79   | 502   |
| >VHL-D187V·SLYEDLEDHP  | 652   | >VHL-D187V·SLYEVLEDHP  | 274  | 378   |
| >VHL-D187V·SLYEDLEDHP  | 208   | >VHL-D187V·SLYEVLEDHPI | 73   | 135   |
| >VHL-D187V·SLYEDLEDHP  | 663   | >VHL-D187V·SLYEVLEDHP  | 369  | 294   |
| >VHL-D187V·IVRSLYEDL   | 530   | >VHL-D187V·IVRSLYEVL   | 441  | 89    |
| >VHL-D187V·IVRSLYED    | 25781 | >VHL-D187V·IVRSLYEV    | 408  | 25373 |
| >VHL-D187V·IVRSLYED    | 22849 | >VHL-D187V·IVRSLYEV    | 112  | 22737 |
| >VHL-D187V·IVRSLYED    | 28311 | >VHL-D187V·IVRSLYEV    | 247  | 28064 |
| >VHL-D187V·IVRSLYED    | 29855 | >VHL-D187V·IVRSLYEV    | 251  | 29604 |
| >VHL-D187V·IVRSLYED    | 33351 | >VHL-D187V·IVRSLYEV    | 27   | 33324 |
| >VHL-D187V·IVRSLYED    | 1856  | >VHL-D187V·IVRSLYEV    | 89   | 1767  |
| >VHL-D187V·IVRSLYEDL   | 292   | >VHL-D187V·IVRSLYEVL   | 28   | 264   |



|                        |       |                        |     |       |
|------------------------|-------|------------------------|-----|-------|
| >VHL-D187V·DIVRSLYED   | 35003 | >VHL-D187V·DIVRSLYEV   | 178 | 34825 |
| >VHL-D187V·DIVRSLYED   | 9761  | >VHL-D187V·DIVRSLYEV   | 207 | 9554  |
| >VHL-D187V·DIVRSLYEDL  | 114   | >VHL-D187V·DIVRSLYEVL  | 57  | 57    |
| >VHL-D187V·DIVRSLYED   | 14710 | >VHL-D187V·DIVRSLYEV   | 20  | 14690 |
| >VHL-D187V·DIVRSLYED   | 19061 | >VHL-D187V·DIVRSLYEV   | 48  | 19013 |
| >VHL-D187V·LDIVRSLYED  | 15920 | >VHL-D187V·LDIVRSLYEV  | 56  | 15864 |
| >VHL-D187V·LDIVRSLYEDL | 491   | >VHL-D187V·LDIVRSLYEVL | 262 | 229   |
| >VHL-D28V-v EEDGGEES   | 1748  | >VHL-D28V-r EEVGGEES   | 249 | 1499  |
| >VHL-D28V-v EEYGPEED   | 14688 | >VHL-D28V-r EEYGPEEV   | 414 | 14274 |
| >VHL-D28V-v EEYGPEED   | 1546  | >VHL-D28V-r EEYGPEEV   | 42  | 1504  |
| >VHL-D28V-v VEEYGPEED  | 11839 | >VHL-D28V-r VEEYGPEEV  | 178 | 11661 |
| >VHL-D28V-v VEEYGPEED  | 7163  | >VHL-D28V-r VEEYGPEEV  | 118 | 7045  |
| >VHL-D28V-v GVEEYGPEED | 26877 | >VHL-D28V-r GVEEYGPEEV | 89  | 26788 |
| >VHL-D28V-v GVEEYGPEED | 24154 | >VHL-D28V-r GVEEYGPEEV | 425 | 23729 |
| >VHL-D28V-v GVEEYGPEED | 33552 | >VHL-D28V-r GVEEYGPEEV | 46  | 33506 |
| >VHL-D92N-\ FDGEPQPY   | 1360  | >VHL-D92N-r FNGEPQPY   | 414 | 946   |
| >VHL-D92N-\ FDGEPQPY   | 1713  | >VHL-D92N-r FNGEPQPY   | 357 | 1356  |
| >VHL-D92N-\ NFDGEPQPY  | 338   | >VHL-D92N-r NFNGEPQPY  | 88  | 250   |
| >VHL-D92N-\ NFDGEPQPY  | 955   | >VHL-D92N-r NFNGEPQPY  | 326 | 629   |
| >VHL-D92N-\ NFDGEPQPY  | 501   | >VHL-D92N-r NFNGEPQPY  | 249 | 252   |
| >VHL-D92N-\ LNFDGEPQP\ | 648   | >VHL-D92N-r LNFNGEPQP\ | 476 | 172   |
| >VHL-D92N-\ LNFDGEPQP\ | 165   | >VHL-D92N-r LNFNGEPQP\ | 161 | 4     |
| >VHL-D92N-\ LNFDGEPQP\ | 562   | >VHL-D92N-r LNFNGEPQP\ | 385 | 177   |
| >VHL-D92N-\ LNFDGEPQP\ | 111   | >VHL-D92N-r LNFNGEPQP\ | 49  | 62    |
| >VHL-D92N-\ WLNFDGEPQ  | 50    | >VHL-D92N-r WLNFNNGEPC | 39  | 11    |
| >VHL-D92N-\ WLNFDGEPQ  | 54    | >VHL-D92N-r WLNFNNGEPC | 52  | 2     |
| >VHL-D92N-\ WLNFDGEPQ  | 52    | >VHL-D92N-r WLNFNNGEPC | 38  | 14    |
| >VHL-D92N-\ WLNFDGEPQ  | 102   | >VHL-D92N-r WLNFNNGEPC | 74  | 28    |
| >VHL-D92N-\ WLNFDGEPQ  | 90    | >VHL-D92N-r WLNFNNGEPC | 78  | 12    |
| >VHL-D92N-\ WLNFDGEPQ  | 182   | >VHL-D92N-r WLNFNNGEPC | 133 | 49    |
| >VHL-D92N-\ VWLNFDGE   | 227   | >VHL-D92N-r VWLNFNNGE  | 221 | 6     |
| >VHL-D92N-\ VWLNFDGEP  | 304   | >VHL-D92N-r VWLNFNNGEP | 201 | 103   |
| >VHL-D92N-\ LPVWLNFDG  | 285   | >VHL-D92N-r LPVWLNFNNG | 347 | 62    |
| >VHL-D92N-\ LPVWLNFD   | 106   | >VHL-D92N-r LPVWLNFN   | 94  | 12    |
| >VHL-D92N-\ LPVWLNFDG  | 251   | >VHL-D92N-r LPVWLNFNNG | 119 | 132   |
| >VHL-D92N-\ LPVWLNFDG  | 345   | >VHL-D92N-r LPVWLNFNNG | 262 | 83    |
| >VHL-D92Y-v FDGEPQPYPT | 2339  | >VHL-D92Y-n FYGEPQPYPT | 134 | 2205  |
| >VHL-D92Y-v FDGEPQPYPT | 8130  | >VHL-D92Y-n FYGEPQPYPT | 222 | 7908  |
| >VHL-D92Y-v FDGEPQPYPT | 21115 | >VHL-D92Y-n FYGEPQPYPT | 6   | 21109 |
| >VHL-D92Y-v FDGEPQPY   | 1360  | >VHL-D92Y-n FYGEPQPY   | 33  | 1327  |
| >VHL-D92Y-v FDGEPQPY   | 1713  | >VHL-D92Y-n FYGEPQPY   | 366 | 1347  |
| >VHL-D92Y-v RVVLPVWLN  | 20609 | >VHL-D92Y-n RVVLPVWLN  | 127 | 20482 |
| >VHL-D92Y-v RVVLPVWLN  | 12770 | >VHL-D92Y-n RVVLPVWLN  | 6   | 12764 |

|                        |       |                        |     |       |
|------------------------|-------|------------------------|-----|-------|
| >VHL-D92Y-v RVVLPVWLN  | 34853 | >VHL-D92Y-n RVVLPVWLN  | 333 | 34520 |
| >VHL-D92Y-v RVVLPVWLN  | 22595 | >VHL-D92Y-n RVVLPVWLN  | 37  | 22558 |
| >VHL-D92Y-v RVVLPVWLN  | 18233 | >VHL-D92Y-n RVVLPVWLN  | 64  | 18169 |
| >VHL-D92Y-v RVVLPVWLN  | 21211 | >VHL-D92Y-n RVVLPVWLN  | 13  | 21198 |
| >VHL-D92Y-v RVVLPVWLN  | 17586 | >VHL-D92Y-n RVVLPVWLN  | 53  | 17533 |
| >VHL-D92Y-v RVVLPVWLN  | 20279 | >VHL-D92Y-n RVVLPVWLN  | 82  | 20197 |
| >VHL-D92Y-v NFDGEPQPY  | 338   | >VHL-D92Y-n NFDGEPQPY  | 24  | 314   |
| >VHL-D92Y-v NFDGEPQPY  | 955   | >VHL-D92Y-n NFDGEPQPY  | 78  | 877   |
| >VHL-D92Y-v NFDGEPQPY  | 501   | >VHL-D92Y-n NFDGEPQPY  | 93  | 408   |
| >VHL-D92Y-v LNFDGEPQP\ | 943   | >VHL-D92Y-n LNFDGEPQP\ | 493 | 450   |
| >VHL-D92Y-v LNFDGEPQP\ | 648   | >VHL-D92Y-n LNFDGEPQP\ | 305 | 343   |
| >VHL-D92Y-v LNFDGEPQP\ | 165   | >VHL-D92Y-n LNFDGEPQP\ | 157 | 8     |
| >VHL-D92Y-v LNFDGEPQP\ | 111   | >VHL-D92Y-n LNFDGEPQP\ | 40  | 71    |
| >VHL-D92Y-v WLNFDGEPQ  | 910   | >VHL-D92Y-n WLNFDGEPQ  | 429 | 481   |
| >VHL-D92Y-v WLNFDGEPQ  | 1888  | >VHL-D92Y-n WLNFDGEPQ  | 495 | 1393  |
| >VHL-D92Y-v WLNFDGEPQ  | 50    | >VHL-D92Y-n WLNFDGEPQ  | 33  | 17    |
| >VHL-D92Y-v WLNFDGEPQ  | 54    | >VHL-D92Y-n WLNFDGEPQ  | 48  | 6     |
| >VHL-D92Y-v WLNFDGEPQ  | 52    | >VHL-D92Y-n WLNFDGEPQ  | 52  | 0     |
| >VHL-D92Y-v WLNFDGEPQ  | 102   | >VHL-D92Y-n WLNFDGEPQ  | 43  | 59    |
| >VHL-D92Y-v WLNFDGEPQ  | 90    | >VHL-D92Y-n WLNFDGEPQ  | 76  | 14    |
| >VHL-D92Y-v WLNFDGEPQ  | 182   | >VHL-D92Y-n WLNFDGEPQ  | 137 | 45    |
| >VHL-D92Y-v VWLNFDGEP  | 3031  | >VHL-D92Y-n VWLNFDGEP  | 211 | 2820  |
| >VHL-D92Y-v VWLNFDGE   | 227   | >VHL-D92Y-n VWLNFDGE   | 181 | 46    |
| >VHL-D92Y-v VWLNFDGEP  | 304   | >VHL-D92Y-n VWLNFDGEP  | 141 | 163   |
| >VHL-D92Y-v VWLNFDGEP  | 635   | >VHL-D92Y-n VWLNFDGEP  | 428 | 207   |
| >VHL-D92Y-v LPVWLNFD   | 26545 | >VHL-D92Y-n LPVWLNFD   | 245 | 26300 |
| >VHL-D92Y-v LPVWLNFD   | 34293 | >VHL-D92Y-n LPVWLNFD   | 256 | 34037 |
| >VHL-D92Y-v LPVWLNFD   | 2777  | >VHL-D92Y-n LPVWLNFD   | 12  | 2765  |
| >VHL-D92Y-v LPVWLNFDG  | 285   | >VHL-D92Y-n LPVWLNFDG  | 518 | 233   |
| >VHL-D92Y-v LPVWLNFD   | 5659  | >VHL-D92Y-n LPVWLNFD   | 29  | 5630  |
| >VHL-D92Y-v LPVWLNFD   | 106   | >VHL-D92Y-n LPVWLNFD   | 166 | 60    |
| >VHL-D92Y-v LPVWLNFDG  | 251   | >VHL-D92Y-n LPVWLNFDG  | 82  | 169   |
| >VHL-D92Y-v LPVWLNFDG  | 345   | >VHL-D92Y-n LPVWLNFDG  | 120 | 225   |
| >VHL-D92Y-v LPVWLNFD   | 33130 | >VHL-D92Y-n LPVWLNFD   | 148 | 32982 |
| >VHL-D92Y-v LPVWLNFD   | 20568 | >VHL-D92Y-n LPVWLNFD   | 268 | 20300 |
| >VHL-D92Y-v VLPVWLNFD  | 4571  | >VHL-D92Y-n VLPVWLNFD  | 269 | 4302  |
| >VHL-D92Y-v VLPVWLNFD  | 36815 | >VHL-D92Y-n VLPVWLNFD  | 305 | 36510 |
| >VHL-D92Y-v VLPVWLNFD  | 24503 | >VHL-D92Y-n VLPVWLNFD  | 47  | 24456 |
| >VHL-D92Y-v VLPVWLNFD  | 13405 | >VHL-D92Y-n VLPVWLNFD  | 16  | 13389 |
| >VHL-D92Y-v VLPVWLNFD  | 24643 | >VHL-D92Y-n VLPVWLNFD  | 58  | 24585 |
| >VHL-D92Y-v VVLPVWLNFI | 30394 | >VHL-D92Y-n VVLPVWLNFI | 98  | 30296 |
| >VHL-D92Y-v VVLPVWLNFI | 29766 | >VHL-D92Y-n VVLPVWLNFI | 140 | 29626 |
| >VHL-D92Y-v VVLPVWLNFI | 25283 | >VHL-D92Y-n VVLPVWLNFI | 85  | 25198 |

|                          |       |                          |       |       |
|--------------------------|-------|--------------------------|-------|-------|
| >VHL-D92Y-v VVLPVWLNFI   | 19761 | >VHL-D92Y-n VVLPVWLNFI   | 10    | 19751 |
| >VHL-D92Y-v VVLPVWLNFI   | 23440 | >VHL-D92Y-n VVLPVWLNFI   | 232   | 23208 |
| >VHL-E10G-v EAEVGAEAA    | 319   | >VHL-E10G-n GAEEVGAEEA   | 13787 | 13468 |
| >VHL-E10G-v DEAEVGAE     | 134   | >VHL-E10G-n DGAEEVGAE    | 19837 | 19703 |
| >VHL-E10G-v DEAEVGAAE    | 97    | >VHL-E10G-n DGAEEVGAAE   | 19050 | 18953 |
| >VHL-E10G-v ENWDEAEV     | 419   | >VHL-E10G-n ENWDGAEV     | 188   | 231   |
| >VHL-E10G-v ENWDEAEV     | 369   | >VHL-E10G-n ENWDGAEV     | 90    | 279   |
| >VHL-E10G-v AENWDEAEV    | 101   | >VHL-E10G-n AENWDGAEV    | 46    | 55    |
| >VHL-E10G-v AENWDEAEV    | 1090  | >VHL-E10G-n AENWDGAEV    | 442   | 648   |
| >VHL-E10G-v AENWDEAE     | 455   | >VHL-E10G-n AENWDGAE     | 590   | 135   |
| >VHL-E10G-v AENWDEAEV    | 17    | >VHL-E10G-n AENWDGAEV    | 24    | 7     |
| >VHL-E10G-v AENWDEAEV    | 335   | >VHL-E10G-n AENWDGAEV    | 267   | 68    |
| >VHL-E10G-v AENWDEAEV    | 8     | >VHL-E10G-n AENWDGAEV    | 9     | 1     |
| >VHL-E10G-v AENWDEAEV    | 193   | >VHL-E10G-n AENWDGAEV    | 116   | 77    |
| >VHL-E10G-v RRAENWDEA    | 368   | >VHL-E10G-n RRAENWDG/    | 197   | 171   |
| >VHL-E10G-v RRAENWDEA    | 320   | >VHL-E10G-n RRAENWDG/    | 129   | 191   |
| >VHL-E10G-v RRAENWDEA    | 196   | >VHL-E10G-n RRAENWDG/    | 129   | 67    |
| >VHL-E10G-v RRAENWDE     | 40    | >VHL-E10G-n RRAENWDG     | 22    | 18    |
| >VHL-E10G-v RRAENWDEA    | 617   | >VHL-E10G-n RRAENWDG/    | 361   | 256   |
| >VHL-E10G-v RRAENWDEA    | 143   | >VHL-E10G-n RRAENWDG/    | 125   | 18    |
| >VHL-E10G-v RRAENWDEA    | 1184  | >VHL-E10G-n RRAENWDG/    | 400   | 784   |
| >VHL-E10G-v RRAENWDEA    | 233   | >VHL-E10G-n RRAENWDG/    | 149   | 84    |
| >VHL-E10G-v MPRRAENWI    | 37    | >VHL-E10G-n MPRRAENWI    | 58    | 21    |
| >VHL-E10G-v MPRRAENWI    | 280   | >VHL-E10G-n MPRRAENWI    | 879   | 599   |
| >VHL-E10G-v MPRRAENWI    | 9     | >VHL-E10G-n MPRRAENWI    | 11    | 2     |
| >VHL-E12K-v EVGAEAAEAGV  | 7443  | >VHL-E12K-n KVGAAEAAEAGV | 419   | 7024  |
| >VHL-E12K-v EVGAEAAEAGV  | 2756  | >VHL-E12K-n KVGAAEAAEAGV | 178   | 2578  |
| >VHL-E12K-v EVGAEAAEAGV  | 5865  | >VHL-E12K-n KVGAAEAAEAGV | 305   | 5560  |
| >VHL-E12K-v EVGAEAAEAGV  | 4197  | >VHL-E12K-n KVGAAEAAEAGV | 295   | 3902  |
| >VHL-E12K-v EVGAEAAEAGV  | 422   | >VHL-E12K-n KVGAAEAAEAGV | 56    | 366   |
| >VHL-E12K-v EVGAEAAEAGV  | 69    | >VHL-E12K-n KVGAAEAAEAGV | 11682 | 11613 |
| >VHL-E12K-v EVGAEAAEAGV  | 75    | >VHL-E12K-n KVGAAEAAEAGV | 5808  | 5733  |
| >VHL-E12K-v AEVGAEEAA    | 380   | >VHL-E12K-n AKVGAEEAA    | 32719 | 32339 |
| >VHL-E12K-v AEVGAEEAA    | 8     | >VHL-E12K-n AKVGAEEAA    | 6627  | 6619  |
| >VHL-E12K-v AEVGAEEAAG   | 197   | >VHL-E12K-n AKVGAEEAAG   | 28935 | 28738 |
| >VHL-E12K-v AEVGAEEAAG   | 61    | >VHL-E12K-n AKVGAEEAAG   | 21412 | 21351 |
| >VHL-E12K-v EAEVGAEAAEAC | 727   | >VHL-E12K-n EAKVGAEEAAC  | 458   | 269   |
| >VHL-E12K-v EAEVGAEAAEAC | 319   | >VHL-E12K-n EAKVGAEEAAC  | 642   | 323   |
| >VHL-E12K-v DEAEVGAE     | 134   | >VHL-E12K-n DEAKVGAE     | 465   | 331   |
| >VHL-E12K-v DEAEVGAAE    | 97    | >VHL-E12K-n DEAKVGAAE    | 386   | 289   |
| >VHL-E12K-v ENWDEAEV     | 419   | >VHL-E12K-n ENWDEAKV     | 1847  | 1428  |
| >VHL-E12K-v ENWDEAEV     | 369   | >VHL-E12K-n ENWDEAKV     | 734   | 365   |
| >VHL-E12K-v AENWDEAEV    | 101   | >VHL-E12K-n AENWDEAKV    | 122   | 21    |

|                            |      |                             |       |       |
|----------------------------|------|-----------------------------|-------|-------|
| >VHL-E12K- $\mu$ AENWDEAE  | 455  | >VHL-E12K- $\eta$ AENWDEAK  | 365   | 90    |
| >VHL-E12K- $\mu$ AENWDEAEV | 17   | >VHL-E12K- $\eta$ AENWDEAKV | 42    | 25    |
| >VHL-E12K- $\mu$ AENWDEAEV | 335  | >VHL-E12K- $\eta$ AENWDEAKV | 424   | 89    |
| >VHL-E12K- $\mu$ AENWDEAEV | 8    | >VHL-E12K- $\eta$ AENWDEAKV | 11    | 3     |
| >VHL-E12K- $\mu$ AENWDEAEV | 193  | >VHL-E12K- $\eta$ AENWDEAKV | 106   | 87    |
| >VHL-E12K- $\mu$ RRAENWDEA | 320  | >VHL-E12K- $\eta$ RRAENWDEA | 26    | 294   |
| >VHL-E12K- $\mu$ RRAENWDEA | 196  | >VHL-E12K- $\eta$ RRAENWDEA | 99    | 97    |
| >VHL-E12K- $\mu$ RRAENWDEA | 617  | >VHL-E12K- $\eta$ RRAENWDEA | 318   | 299   |
| >VHL-E12K- $\mu$ RRAENWDEA | 143  | >VHL-E12K- $\eta$ RRAENWDEA | 226   | 83    |
| >VHL-E12K- $\mu$ RRAENWDEA | 1184 | >VHL-E12K- $\eta$ RRAENWDEA | 207   | 977   |
| >VHL-E12K- $\mu$ RRAENWDEA | 233  | >VHL-E12K- $\eta$ RRAENWDEA | 324   | 91    |
| >VHL-E134A- ELFVPSLNV      | 1283 | >VHL-E134A- ALFVPSLNV       | 26    | 1257  |
| >VHL-E134A- ELFVPSLNV      | 336  | >VHL-E134A- ALFVPSLNV       | 21    | 315   |
| >VHL-E134A- ELFVPSLNV      | 565  | >VHL-E134A- ALFVPSLNV       | 21    | 544   |
| >VHL-E134A- ELFVPSLNV      | 1117 | >VHL-E134A- ALFVPSLNV       | 101   | 1016  |
| >VHL-E134A- ELFVPSLNV      | 10   | >VHL-E134A- ALFVPSLNV       | 3     | 7     |
| >VHL-E134A- ELFVPSLNV      | 173  | >VHL-E134A- ALFVPSLNV       | 12    | 161   |
| >VHL-E134A- ELFVPSLNV      | 16   | >VHL-E134A- ALFVPSLNV       | 5     | 11    |
| >VHL-E134A- ELFVPSLNV      | 29   | >VHL-E134A- ALFVPSLNV       | 18    | 11    |
| >VHL-E134A- ELFVPSLNV      | 12   | >VHL-E134A- ALFVPSLNV       | 3     | 9     |
| >VHL-E134A- ELFVPSLNV      | 31   | >VHL-E134A- ALFVPSLNV       | 1740  | 1709  |
| >VHL-E134A- ELFVPSLNV      | 8    | >VHL-E134A- ALFVPSLNV       | 370   | 362   |
| >VHL-E134A- ELFVPSLNV      | 1341 | >VHL-E134A- ALFVPSLNV       | 113   | 1228  |
| >VHL-E134A- TELFVPSL       | 46   | >VHL-E134A- TALFVPSL        | 24014 | 23968 |
| >VHL-E134A- TELFVPSLNV     | 7180 | >VHL-E134A- TALFVPSLNV      | 434   | 6746  |
| >VHL-E134A- TELFVPSLNV     | 2710 | >VHL-E134A- TALFVPSLNV      | 166   | 2544  |
| >VHL-E134A- TELFVPSLNV     | 5732 | >VHL-E134A- TALFVPSLNV      | 427   | 5305  |
| >VHL-E134A- TELFVPSL       | 7793 | >VHL-E134A- TALFVPSL        | 96    | 7697  |
| >VHL-E134A- TELFVPSLNV     | 3297 | >VHL-E134A- TALFVPSLNV      | 19    | 3278  |
| >VHL-E134A- TELFVPSL       | 98   | >VHL-E134A- TALFVPSL        | 17738 | 17640 |
| >VHL-E134A- TELFVPSL       | 471  | >VHL-E134A- TALFVPSL        | 1600  | 1129  |
| >VHL-E134A- TELFVPSL       | 54   | >VHL-E134A- TALFVPSL        | 19921 | 19867 |
| >VHL-E134A- TELFVPSL       | 49   | >VHL-E134A- TALFVPSL        | 21520 | 21471 |
| >VHL-E134A- TELFVPSLNV     | 352  | >VHL-E134A- TALFVPSLNV      | 33251 | 32899 |
| >VHL-E134A- TELFVPSL       | 491  | >VHL-E134A- TALFVPSL        | 35919 | 35428 |
| >VHL-E134A- TELFVPSLNV     | 129  | >VHL-E134A- TALFVPSLNV      | 31508 | 31379 |
| >VHL-E134A- QTELFVPSL      | 4712 | >VHL-E134A- QTALFVPSL       | 313   | 4399  |
| >VHL-E134A- QTELFVPSL      | 3080 | >VHL-E134A- QTALFVPSL       | 344   | 2736  |
| >VHL-E134A- QTELFVPSL      | 5902 | >VHL-E134A- QTALFVPSL       | 142   | 5760  |
| >VHL-E134A- QTELFVPSL      | 513  | >VHL-E134A- QTALFVPSL       | 135   | 378   |
| >VHL-E134A- QTELFVPS       | 3812 | >VHL-E134A- QTALFVPS        | 87    | 3725  |
| >VHL-E134A- QTELFVPSL      | 3686 | >VHL-E134A- QTALFVPSL       | 133   | 3553  |
| >VHL-E134A- QTELFVPSLN'    | 604  | >VHL-E134A- QTALFVPSLN      | 17    | 587   |

|                        |      |                       |     |      |
|------------------------|------|-----------------------|-----|------|
| >VHL-E134A-QTELFVPSL   | 386  | >VHL-E134A-QTALFVPSL  | 22  | 364  |
| >VHL-E134A-QTELFVPSLN' | 74   | >VHL-E134A-QTALFVPSLN | 7   | 67   |
| >VHL-E134A-QTELFVPSL   | 59   | >VHL-E134A-QTALFVPSL  | 17  | 42   |
| >VHL-E134A-QTELFVPSLN' | 1331 | >VHL-E134A-QTALFVPSLN | 337 | 994  |
| >VHL-E134A-QTELFVPSL   | 80   | >VHL-E134A-QTALFVPSL  | 24  | 56   |
| >VHL-E134A-QTELFVPSLN' | 767  | >VHL-E134A-QTALFVPSLN | 251 | 516  |
| >VHL-E134A-QTELFVPSL   | 985  | >VHL-E134A-QTALFVPSL  | 306 | 679  |
| >VHL-E134A-NQTELFVPS   | 68   | >VHL-E134A-NQTALFVPS  | 206 | 138  |
| >VHL-E134A-NQTELFVPSL  | 231  | >VHL-E134A-NQTALFVPSL | 345 | 114  |
| >VHL-E134A-NQTELFVPSL  | 316  | >VHL-E134A-NQTALFVPSL | 263 | 53   |
| >VHL-E134A-NQTELFVPSL  | 42   | >VHL-E134A-NQTALFVPSL | 38  | 4    |
| >VHL-E134A-NQTELFVPSL  | 513  | >VHL-E134A-NQTALFVPSL | 323 | 190  |
| >VHL-E134A-LVNQTELFV   | 493  | >VHL-E134A-LVNQTALFV  | 277 | 216  |
| >VHL-E134A-LVNQTELFV   | 423  | >VHL-E134A-LVNQTALFV  | 73  | 350  |
| >VHL-E134A-LVNQTELFV   | 137  | >VHL-E134A-LVNQTALFV  | 32  | 105  |
| >VHL-E134A-LVNQTELFV   | 66   | >VHL-E134A-LVNQTALFV  | 42  | 24   |
| >VHL-E134A-LVNQTELFV   | 56   | >VHL-E134A-LVNQTALFV  | 50  | 6    |
| >VHL-E134A-LVNQTELFV   | 529  | >VHL-E134A-LVNQTALFV  | 124 | 405  |
| >VHL-E134A-LVNQTELFV   | 17   | >VHL-E134A-LVNQTALFV  | 13  | 4    |
| >VHL-E134A-LVNQTELFV   | 1642 | >VHL-E134A-LVNQTALFV  | 73  | 1569 |
| >VHL-E134A-LVNQTELF    | 220  | >VHL-E134A-LVNQTALF   | 110 | 110  |
| >VHL-E134A-LVNQTELF    | 870  | >VHL-E134A-LVNQTALF   | 84  | 786  |
| >VHL-E134A-LVNQTELF    | 733  | >VHL-E134A-LVNQTALF   | 364 | 369  |
| >VHL-E134A-LVNQTELF    | 74   | >VHL-E134A-LVNQTALF   | 64  | 10   |
| >VHL-E134A-LLVNQTEL    | 146  | >VHL-E134A-LLVNQTAL   | 204 | 58   |
| >VHL-E134A-LLVNQTELFV  | 17   | >VHL-E134A-LLVNQTALFV | 23  | 6    |
| >VHL-E134A-LLVNQTEL    | 11   | >VHL-E134A-LLVNQTAL   | 14  | 3    |
| >VHL-E134A-LLVNQTELF   | 408  | >VHL-E134A-LLVNQTALF  | 375 | 33   |
| >VHL-E134A-LLVNQTELFV  | 15   | >VHL-E134A-LLVNQTALFV | 20  | 5    |
| >VHL-E134A-LLVNQTEL    | 32   | >VHL-E134A-LLVNQTAL   | 18  | 14   |
| >VHL-E134A-LLVNQTELFV  | 28   | >VHL-E134A-LLVNQTALFV | 20  | 8    |
| >VHL-E134A-LLVNQTEL    | 155  | >VHL-E134A-LLVNQTAL   | 97  | 58   |
| >VHL-E134A-LLVNQTELFV  | 61   | >VHL-E134A-LLVNQTALFV | 56  | 5    |
| >VHL-E134A-LLVNQTEL    | 20   | >VHL-E134A-LLVNQTAL   | 21  | 1    |
| >VHL-E134A-LLVNQTELFV  | 3    | >VHL-E134A-LLVNQTALFV | 3   | 0    |
| >VHL-E134A-LLVNQTEL    | 29   | >VHL-E134A-LLVNQTAL   | 15  | 14   |
| >VHL-E134A-LLVNQTELFV  | 6    | >VHL-E134A-LLVNQTALFV | 4   | 2    |
| >VHL-E134A-LLVNQTEL    | 65   | >VHL-E134A-LLVNQTAL   | 150 | 85   |
| >VHL-E134A-LLVNQTELFV  | 7    | >VHL-E134A-LLVNQTALFV | 6   | 1    |
| >VHL-E134A-LLVNQTEL    | 279  | >VHL-E134A-LLVNQTAL   | 303 | 24   |
| >VHL-E134A-LLVNQTELFV  | 9    | >VHL-E134A-LLVNQTALFV | 5   | 4    |
| >VHL-E134A-LLVNQTEL    | 3    | >VHL-E134A-LLVNQTAL   | 4   | 1    |
| >VHL-E134A-LLVNQTELFV  | 2    | >VHL-E134A-LLVNQTALFV | 2   | 0    |

|                       |       |                       |       |       |
|-----------------------|-------|-----------------------|-------|-------|
| >VHL-E134A-LLVNQTELF  | 784   | >VHL-E134A-LLVNQTALF  | 381   | 403   |
| >VHL-E134A-LLVNQTELFV | 1800  | >VHL-E134A-LLVNQTALFV | 411   | 1389  |
| >VHL-E134A-LLVNQTEL   | 1369  | >VHL-E134A-LLVNQTAL   | 362   | 1007  |
| >VHL-E134A-LLVNQTELF  | 85    | >VHL-E134A-LLVNQTALF  | 63    | 22    |
| >VHL-E134A-LLVNQTEL   | 668   | >VHL-E134A-LLVNQTAL   | 279   | 389   |
| >VHL-E134A-LLVNQTELF  | 77    | >VHL-E134A-LLVNQTALF  | 50    | 27    |
| >VHL-E134A-GLLVNQTEL  | 76    | >VHL-E134A-GLLVNQTAL  | 80    | 4     |
| >VHL-E134A-GLLVNQTEL  | 171   | >VHL-E134A-GLLVNQTAL  | 366   | 195   |
| >VHL-E134A-GLLVNQTELF | 31    | >VHL-E134A-GLLVNQTALF | 34    | 3     |
| >VHL-E134A-GLLVNQTEL  | 66    | >VHL-E134A-GLLVNQTAL  | 90    | 24    |
| >VHL-E134A-GLLVNQTELF | 83    | >VHL-E134A-GLLVNQTALF | 79    | 4     |
| >VHL-E134A-GLLVNQTELF | 237   | >VHL-E134A-GLLVNQTALF | 120   | 117   |
| >VHL-E134A-GLLVNQTELF | 81    | >VHL-E134A-GLLVNQTALF | 42    | 39    |
| >VHL-E134A-GLLVNQTE   | 8252  | >VHL-E134A-GLLVNQTA   | 38    | 8214  |
| >VHL-E134A-GLLVNQTEL  | 27    | >VHL-E134A-GLLVNQTAL  | 29    | 2     |
| >VHL-E134A-GLLVNQTELF | 3     | >VHL-E134A-GLLVNQTALF | 3     | 0     |
| >VHL-E134A-GLLVNQTE   | 5663  | >VHL-E134A-GLLVNQTA   | 21    | 5642  |
| >VHL-E134A-GLLVNQTEL  | 17    | >VHL-E134A-GLLVNQTAL  | 11    | 6     |
| >VHL-E134A-GLLVNQTELF | 4     | >VHL-E134A-GLLVNQTALF | 4     | 0     |
| >VHL-E134A-GLLVNQTE   | 11538 | >VHL-E134A-GLLVNQTA   | 35    | 11503 |
| >VHL-E134A-GLLVNQTEL  | 17    | >VHL-E134A-GLLVNQTAL  | 44    | 27    |
| >VHL-E134A-GLLVNQTELF | 4     | >VHL-E134A-GLLVNQTALF | 5     | 1     |
| >VHL-E134A-GLLVNQTEL  | 74    | >VHL-E134A-GLLVNQTAL  | 106   | 32    |
| >VHL-E134A-GLLVNQTELF | 5     | >VHL-E134A-GLLVNQTALF | 5     | 0     |
| >VHL-E134A-GLLVNQTE   | 9014  | >VHL-E134A-GLLVNQTA   | 23    | 8991  |
| >VHL-E134A-GLLVNQTEL  | 8     | >VHL-E134A-GLLVNQTAL  | 12    | 4     |
| >VHL-E134A-GLLVNQTELF | 4     | >VHL-E134A-GLLVNQTALF | 4     | 0     |
| >VHL-E134A-GLLVNQTELF | 484   | >VHL-E134A-GLLVNQTALF | 310   | 174   |
| >VHL-E134A-HDGLLVNQTI | 237   | >VHL-E134A-HDGLLVNQTI | 184   | 53    |
| >VHL-E160K-ERCLQVVRSL | 233   | >VHL-E160K-KRCLQVVRSL | 37    | 196   |
| >VHL-E160K-ERCLQVVRSL | 884   | >VHL-E160K-KRCLQVVRSL | 49    | 835   |
| >VHL-E160K-ERCLQVVRSL | 2847  | >VHL-E160K-KRCLQVVRSL | 141   | 2706  |
| >VHL-E160K-ERCLQVVRSL | 432   | >VHL-E160K-KRCLQVVRSL | 64    | 368   |
| >VHL-E160K-ERCLQVVRSL | 2470  | >VHL-E160K-KRCLQVVRSL | 75    | 2395  |
| >VHL-E160K-ERCLQVVR   | 491   | >VHL-E160K-KRCLQVVR   | 65    | 426   |
| >VHL-E160K-KERCLQVV   | 67    | >VHL-E160K-KKRCLQVV   | 19742 | 19675 |
| >VHL-E160K-KERCLQVV   | 2741  | >VHL-E160K-KKRCLQVV   | 484   | 2257  |
| >VHL-E160K-KERCLQVVRS | 2644  | >VHL-E160K-KKRCLQVVRS | 440   | 2204  |
| >VHL-E160K-KERCLQVVR  | 367   | >VHL-E160K-KKRCLQVVR  | 717   | 350   |
| >VHL-E160K-KERCLQVV   | 722   | >VHL-E160K-KKRCLQVV   | 19    | 703   |
| >VHL-E160K-KERCLQVVR  | 2234  | >VHL-E160K-KKRCLQVVR  | 47    | 2187  |
| >VHL-E160K-KERCLQVVRS | 291   | >VHL-E160K-KKRCLQVVRS | 9     | 282   |
| >VHL-E160K-KERCLQVV   | 80    | >VHL-E160K-KKRCLQVV   | 18507 | 18427 |

|                         |       |                         |       |       |
|-------------------------|-------|-------------------------|-------|-------|
| >VHL-E160K- KERCLQVVRS  | 27    | >VHL-E160K- KKRCLQVVRS  | 11939 | 11912 |
| >VHL-E160K- KERCLQVV    | 148   | >VHL-E160K- KKRCLQVV    | 26422 | 26274 |
| >VHL-E160K- KERCLQVVRS  | 39    | >VHL-E160K- KKRCLQVVRS  | 12278 | 12239 |
| >VHL-E160K- KERCLQVVRS  | 730   | >VHL-E160K- KKRCLQVVRS  | 256   | 474   |
| >VHL-E160K- NITLPVYTLKE | 26275 | >VHL-E160K- NITLPVYTLKK | 129   | 26146 |
| >VHL-E160K- NITLPVYTLKE | 14863 | >VHL-E160K- NITLPVYTLKK | 153   | 14710 |
| >VHL-E160K- LKERCLQV    | 2776  | >VHL-E160K- LKKRCLQV    | 214   | 2562  |
| >VHL-E160K- LKERCLQVV   | 714   | >VHL-E160K- LKKRCLQVV   | 61    | 653   |
| >VHL-E160K- LKERCLQVVR  | 2574  | >VHL-E160K- LKKRCLQVVR  | 198   | 2376  |
| >VHL-E160K- TLKERCLQV   | 403   | >VHL-E160K- TLKKRCLQV   | 2738  | 2335  |
| >VHL-E160K- TLKERCLQV   | 328   | >VHL-E160K- TLKKRCLQV   | 1419  | 1091  |
| >VHL-E160K- TLKERCLQV   | 7     | >VHL-E160K- TLKKRCLQV   | 26    | 19    |
| >VHL-E160K- TLKERCLQVV  | 50    | >VHL-E160K- TLKKRCLQVV  | 74    | 24    |
| >VHL-E160K- TLKERCLQV   | 186   | >VHL-E160K- TLKKRCLQV   | 2010  | 1824  |
| >VHL-E160K- TLKERCLQVV  | 141   | >VHL-E160K- TLKKRCLQVV  | 1115  | 974   |
| >VHL-E160K- TLKERCLQVV  | 109   | >VHL-E160K- TLKKRCLQVV  | 702   | 593   |
| >VHL-E160K- TLKERCLQV   | 308   | >VHL-E160K- TLKKRCLQV   | 1854  | 1546  |
| >VHL-E160K- TLKERCLQVV  | 369   | >VHL-E160K- TLKKRCLQVV  | 1688  | 1319  |
| >VHL-E160K- TLKERCLQV   | 3     | >VHL-E160K- TLKKRCLQV   | 10    | 7     |
| >VHL-E160K- TLKERCLQVV  | 4     | >VHL-E160K- TLKKRCLQVV  | 10    | 6     |
| >VHL-E160K- TLKERCLQVV  | 58    | >VHL-E160K- TLKKRCLQVV  | 40    | 18    |
| >VHL-E160K- TLKERCLQVV  | 96    | >VHL-E160K- TLKKRCLQVV  | 162   | 66    |
| >VHL-E160K- TLKERCLQVV  | 211   | >VHL-E160K- TLKKRCLQVV  | 251   | 40    |
| >VHL-E160K- TLKERCLQV   | 84    | >VHL-E160K- TLKKRCLQV   | 33    | 51    |
| >VHL-E160K- TLKERCLQVV  | 436   | >VHL-E160K- TLKKRCLQVV  | 228   | 208   |
| >VHL-E160K- YTLKERCLQV  | 93    | >VHL-E160K- YTLKKRCLQV  | 364   | 271   |
| >VHL-E160K- YTLKERCLQV' | 308   | >VHL-E160K- YTLKKRCLQV' | 338   | 30    |
| >VHL-E160K- YTLKERCLQV  | 127   | >VHL-E160K- YTLKKRCLQV  | 159   | 32    |
| >VHL-E160K- YTLKERCLQV  | 39    | >VHL-E160K- YTLKKRCLQV  | 63    | 24    |
| >VHL-E160K- YTLKERCLQV' | 83    | >VHL-E160K- YTLKKRCLQV' | 118   | 35    |
| >VHL-E160K- YTLKERCLQV  | 32    | >VHL-E160K- YTLKKRCLQV  | 40    | 8     |
| >VHL-E160K- YTLKERCLQV' | 28    | >VHL-E160K- YTLKKRCLQV' | 25    | 3     |
| >VHL-E160K- YTLKERCLQV' | 95    | >VHL-E160K- YTLKKRCLQV' | 114   | 19    |
| >VHL-E160K- YTLKERCLQV  | 31    | >VHL-E160K- YTLKKRCLQV  | 43    | 12    |
| >VHL-E160K- YTLKERCLQV' | 40    | >VHL-E160K- YTLKKRCLQV' | 47    | 7     |
| >VHL-E160K- YTLKERCLQV' | 416   | >VHL-E160K- YTLKKRCLQV' | 412   | 4     |
| >VHL-E160K- YTLKERCLQV  | 19    | >VHL-E160K- YTLKKRCLQV  | 26    | 7     |
| >VHL-E160K- YTLKERCLQV' | 21    | >VHL-E160K- YTLKKRCLQV' | 22    | 1     |
| >VHL-E160K- YTLKERCLQV  | 14    | >VHL-E160K- YTLKKRCLQV  | 24    | 10    |
| >VHL-E160K- YTLKERCLQV' | 53    | >VHL-E160K- YTLKKRCLQV' | 85    | 32    |
| >VHL-E160K- YTLKERCL    | 1357  | >VHL-E160K- YTLKKRCL    | 121   | 1236  |
| >VHL-E160K- YTLKERCL    | 205   | >VHL-E160K- YTLKKRCL    | 145   | 60    |
| >VHL-E160K- YTLKERCLQV  | 211   | >VHL-E160K- YTLKKRCLQV  | 131   | 80    |

|                         |       |                         |       |       |
|-------------------------|-------|-------------------------|-------|-------|
| >VHL-E160K- YTLKERCL    | 280   | >VHL-E160K- YTLKKRCL    | 161   | 119   |
| >VHL-E160K- YTLKERCLQV' | 130   | >VHL-E160K- YTLKKRCLQV' | 122   | 8     |
| >VHL-E160K- PVYTLKER    | 616   | >VHL-E160K- PVYTLKKR    | 232   | 384   |
| >VHL-E160K- LPVYTLKERCL | 224   | >VHL-E160K- LPVYTLKKRCL | 110   | 114   |
| >VHL-E160K- LPVYTLKER   | 488   | >VHL-E160K- LPVYTLKKR   | 793   | 305   |
| >VHL-E160K- LPVYTLKERC  | 337   | >VHL-E160K- LPVYTLKKRC  | 426   | 89    |
| >VHL-E160K- TLPVYTLKE   | 19364 | >VHL-E160K- TLPVYTLKK   | 102   | 19262 |
| >VHL-E160K- TLPVYTLKE   | 25167 | >VHL-E160K- TLPVYTLKK   | 88    | 25079 |
| >VHL-E160K- TLPVYTLKER  | 247   | >VHL-E160K- TLPVYTLKKR  | 317   | 70    |
| >VHL-E160K- TLPVYTLKER  | 725   | >VHL-E160K- TLPVYTLKKR  | 428   | 297   |
| >VHL-E160K- ITPVYTLKE   | 6650  | >VHL-E160K- ITPVYTLKK   | 19    | 6631  |
| >VHL-E160K- ITPVYTLKE   | 22134 | >VHL-E160K- ITPVYTLKK   | 11    | 22123 |
| >VHL-E160K- ITPVYTLKER  | 348   | >VHL-E160K- ITPVYTLKKR  | 424   | 76    |
| >VHL-E160K- ITPVYTLKE   | 10796 | >VHL-E160K- ITPVYTLKK   | 34    | 10762 |
| >VHL-E160K- ITPVYTLKER  | 20    | >VHL-E160K- ITPVYTLKKR  | 23    | 3     |
| >VHL-E160K- ITPVYTLKER  | 115   | >VHL-E160K- ITPVYTLKKR  | 183   | 68    |
| >VHL-E160K- ITPVYTLKE   | 18507 | >VHL-E160K- ITPVYTLKK   | 66    | 18441 |
| >VHL-E160K- ITPVYTLKER  | 40    | >VHL-E160K- ITPVYTLKKR  | 48    | 8     |
| >VHL-E160K- ITPVYTLKE   | 4479  | >VHL-E160K- ITPVYTLKK   | 186   | 4293  |
| >VHL-E160K- ITPVYTLKER  | 394   | >VHL-E160K- ITPVYTLKKR  | 558   | 164   |
| >VHL-E189K- EDHPNVQK    | 16551 | >VHL-E189K- KDHPNVQK    | 277   | 16274 |
| >VHL-E189K- LEDHPNVQKI  | 144   | >VHL-E189K- LKDHPNVQKI  | 19539 | 19395 |
| >VHL-E189K- DIVRSLYEDLE | 7845  | >VHL-E189K- DIVRSLYEDLK | 28    | 7817  |
| >VHL-E189K- DLEDHPNV    | 3796  | >VHL-E189K- DLKDHPNV    | 236   | 3560  |
| >VHL-E189K- DLEDHPNV    | 227   | >VHL-E189K- DLKDHPNV    | 472   | 245   |
| >VHL-E189K- DLEDHPNV    | 14    | >VHL-E189K- DLKDHPNV    | 14    | 0     |
| >VHL-E189K- DLEDHPNV    | 378   | >VHL-E189K- DLKDHPNV    | 628   | 250   |
| >VHL-E189K- EDLEDHPNV   | 25    | >VHL-E189K- EDLKDHPNV   | 266   | 241   |
| >VHL-E189K- LYEDLEDHPN  | 331   | >VHL-E189K- LYEDLKDHPN  | 458   | 127   |
| >VHL-E189K- SLYEDLEDHPN | 208   | >VHL-E189K- SLYEDLKDHPN | 355   | 147   |
| >VHL-E189K- RSLYEDLE    | 22839 | >VHL-E189K- RSLYEDLK    | 36    | 22803 |
| >VHL-E189K- RSLYEDLE    | 12319 | >VHL-E189K- RSLYEDLK    | 81    | 12238 |
| >VHL-E189K- IVRSLYEDLE  | 7676  | >VHL-E189K- IVRSLYEDLK  | 27    | 7649  |
| >VHL-E189K- IVRSLYEDLE  | 24928 | >VHL-E189K- IVRSLYEDLK  | 400   | 24528 |
| >VHL-E204D- ERIAHQRM    | 303   | >VHL-E204D- DRIAHQRM    | 1399  | 1096  |
| >VHL-E204D- QERIAHQ     | 322   | >VHL-E204D- QDRIAHQ     | 10029 | 9707  |
| >VHL-E204D- QERIAHQRM   | 464   | >VHL-E204D- QDRIAHQRM   | 5370  | 4906  |
| >VHL-E204D- TQERIAHQ    | 152   | >VHL-E204D- TQDRIAHQ    | 528   | 376   |
| >VHL-E204D- TQERIAHQ    | 166   | >VHL-E204D- TQDRIAHQ    | 467   | 301   |
| >VHL-E204D- LTQERIAHQ   | 43    | >VHL-E204D- LTQDRIAHQF  | 24    | 19    |
| >VHL-E204D- LTQERIAHQ   | 317   | >VHL-E204D- LTQDRIAHQF  | 196   | 121   |
| >VHL-E204D- LTQERIAHQ   | 119   | >VHL-E204D- LTQDRIAHQF  | 77    | 42    |
| >VHL-E204D- LTQERIAHQ   | 9     | >VHL-E204D- LTQDRIAHQF  | 8     | 1     |



|                        |       |                        |       |       |
|------------------------|-------|------------------------|-------|-------|
| >VHL-E204D-LTQERIAHQR  | 508   | >VHL-E204D-LTQDRIAHQF  | 427   | 81    |
| >VHL-E204D-LTQERIAHQR  | 109   | >VHL-E204D-LTQDRIAHQF  | 44    | 65    |
| >VHL-E204D-RLTQERIA    | 311   | >VHL-E204D-RLTQDRIA    | 305   | 6     |
| >VHL-E204D-RLTQERIAHQ  | 174   | >VHL-E204D-RLTQDRIAHC  | 121   | 53    |
| >VHL-E204D-RLTQERIAHQ  | 79    | >VHL-E204D-RLTQDRIAHC  | 66    | 13    |
| >VHL-E204D-RLTQERIAHQ  | 497   | >VHL-E204D-RLTQDRIAHC  | 495   | 2     |
| >VHL-E204D-RLTQERIAHQ  | 45    | >VHL-E204D-RLTQDRIAHC  | 62    | 17    |
| >VHL-E204D-LERLTQERI   | 43    | >VHL-E204D-LERLTQDRI   | 26    | 17    |
| >VHL-E204D-LERLTQERIAF | 341   | >VHL-E204D-LERLTQDRIAF | 466   | 125   |
| >VHL-E204D-LERLTQERI   | 25    | >VHL-E204D-LERLTQDRI   | 25    | 0     |
| >VHL-E204D-DLERLTQER   | 222   | >VHL-E204D-DLERLTQDR   | 591   | 369   |
| >VHL-E204D-DLERLTQER   | 454   | >VHL-E204D-DLERLTQDR   | 1501  | 1047  |
| >VHL-E204D-KDLERLTQER  | 55    | >VHL-E204D-KDLERLTQDR  | 53    | 2     |
| >VHL-E204D-KDLERLTQER  | 44    | >VHL-E204D-KDLERLTQDR  | 44    | 0     |
| >VHL-E204G-ERIAHQRM    | 303   | >VHL-E204G-GRIAHQRM    | 14463 | 14160 |
| >VHL-E204G-ERIAHQRM    | 992   | >VHL-E204G-GRIAHQRM    | 110   | 882   |
| >VHL-E204G-QERIAHQR    | 322   | >VHL-E204G-QGRIAHQR    | 37651 | 37329 |
| >VHL-E204G-QERIAHQRM   | 13090 | >VHL-E204G-QGRIAHQRM   | 414   | 12676 |
| >VHL-E204G-QERIAHQRM   | 464   | >VHL-E204G-QGRIAHQRM   | 40736 | 40272 |
| >VHL-E204G-TQERIAHQR   | 152   | >VHL-E204G-TQGRIAHQR   | 109   | 43    |
| >VHL-E204G-TQERIAHQR   | 166   | >VHL-E204G-TQGRIAHQR   | 282   | 116   |
| >VHL-E204G-LTQERIAHQR  | 43    | >VHL-E204G-LTQGRIAHQF  | 16    | 27    |
| >VHL-E204G-LTQERIAHQR  | 317   | >VHL-E204G-LTQGRIAHQF  | 198   | 119   |
| >VHL-E204G-LTQERIAHQR  | 119   | >VHL-E204G-LTQGRIAHQF  | 56    | 63    |
| >VHL-E204G-LTQERIAHQR  | 9     | >VHL-E204G-LTQGRIAHQF  | 8     | 1     |
| >VHL-E204G-LTQERIAHQR  | 508   | >VHL-E204G-LTQGRIAHQF  | 396   | 112   |
| >VHL-E204G-LTQERIAHQR  | 109   | >VHL-E204G-LTQGRIAHQF  | 42    | 67    |
| >VHL-E204G-RLTQERIA    | 311   | >VHL-E204G-RLTQGRIA    | 176   | 135   |
| >VHL-E204G-RLTQERIAHQ  | 174   | >VHL-E204G-RLTQGRIAHC  | 75    | 99    |
| >VHL-E204G-RLTQERIAHQ  | 79    | >VHL-E204G-RLTQGRIAHC  | 34    | 45    |
| >VHL-E204G-RLTQERIAHQ  | 497   | >VHL-E204G-RLTQGRIAHC  | 459   | 38    |
| >VHL-E204G-RLTQERIAHQ  | 45    | >VHL-E204G-RLTQGRIAHC  | 84    | 39    |
| >VHL-E204G-LERLTQERI   | 43    | >VHL-E204G-LERLTQGRI   | 20    | 23    |
| >VHL-E204G-LERLTQERIAF | 341   | >VHL-E204G-LERLTQGRIAF | 260   | 81    |
| >VHL-E204G-LERLTQERI   | 25    | >VHL-E204G-LERLTQGRI   | 35    | 10    |
| >VHL-E204G-DLERLTQER   | 222   | >VHL-E204G-DLERLTQGR   | 368   | 146   |
| >VHL-E204G-DLERLTQER   | 454   | >VHL-E204G-DLERLTQGR   | 652   | 198   |
| >VHL-E204G-KDLERLTQER  | 55    | >VHL-E204G-KDLERLTQGR  | 79    | 24    |
| >VHL-E204G-KDLERLTQER  | 554   | >VHL-E204G-KDLERLTQGR  | 270   | 284   |
| >VHL-E204G-KDLERLTQER  | 44    | >VHL-E204G-KDLERLTQGR  | 38    | 6     |
| >VHL-E204K-ERIAHQRM    | 303   | >VHL-E204K-KRIAHQRM    | 10594 | 10291 |
| >VHL-E204K-ERIAHQRM    | 1758  | >VHL-E204K-KRIAHQRM    | 203   | 1555  |
| >VHL-E204K-ERIAHQRM    | 992   | >VHL-E204K-KRIAHQRM    | 67    | 925   |

|                         |       |                          |       |       |
|-------------------------|-------|--------------------------|-------|-------|
| >VHL-E204K- ERIAHQRM    | 4901  | >VHL-E204K- KRIAHQRM     | 93    | 4808  |
| >VHL-E204K- ERIAHQRMG   | 6506  | >VHL-E204K- KRIAHQRMG    | 356   | 6150  |
| >VHL-E204K- ERIAHQRM    | 1776  | >VHL-E204K- KRIAHQRM     | 235   | 1541  |
| >VHL-E204K- QERIAHQR    | 322   | >VHL-E204K- QKRIAHQR     | 26208 | 25886 |
| >VHL-E204K- QERIAHQRM   | 3343  | >VHL-E204K- QKRIAHQRM    | 69    | 3274  |
| >VHL-E204K- QERIAHQRM   | 464   | >VHL-E204K- QKRIAHQRM    | 35627 | 35163 |
| >VHL-E204K- TQERIAHQR   | 152   | >VHL-E204K- TQKRIAHQR    | 16    | 136   |
| >VHL-E204K- TQERIAHQR   | 166   | >VHL-E204K- TQKRIAHQR    | 127   | 39    |
| >VHL-E204K- TQERIAHQRM  | 4918  | >VHL-E204K- TQKRIAHQRM   | 493   | 4425  |
| >VHL-E204K- LTQERIAHQR  | 43    | >VHL-E204K- LTQKRIAHQR   | 21    | 22    |
| >VHL-E204K- LTQERIAHQR  | 317   | >VHL-E204K- LTQKRIAHQR   | 469   | 152   |
| >VHL-E204K- LTQERIAHQR  | 119   | >VHL-E204K- LTQKRIAHQR   | 223   | 104   |
| >VHL-E204K- LTQERIAHQR  | 9     | >VHL-E204K- LTQKRIAHQR   | 14    | 5     |
| >VHL-E204K- LTQERIAHQR  | 109   | >VHL-E204K- LTQKRIAHQR   | 36    | 73    |
| >VHL-E204K- RLTQERIA    | 311   | >VHL-E204K- RLTQKRIA     | 346   | 35    |
| >VHL-E204K- RLTQERIAHQ  | 174   | >VHL-E204K- RLTQKRIAHO   | 276   | 102   |
| >VHL-E204K- RLTQERIAHQ  | 79    | >VHL-E204K- RLTQKRIAHO   | 22    | 57    |
| >VHL-E204K- RLTQERIAHQ  | 497   | >VHL-E204K- RLTQKRIAHO   | 627   | 130   |
| >VHL-E204K- RLTQERIAHQ  | 45    | >VHL-E204K- RLTQKRIAHO   | 52    | 7     |
| >VHL-E204K- LERLTQERI   | 43    | >VHL-E204K- LERLTQKRI    | 12    | 31    |
| >VHL-E204K- LERLTQERIAH | 341   | >VHL-E204K- LERLTQKRIAHO | 433   | 92    |
| >VHL-E204K- LERLTQERI   | 25    | >VHL-E204K- LERLTQKRI    | 59    | 34    |
| >VHL-E204K- DLERLTQER   | 222   | >VHL-E204K- DLERLTQKR    | 420   | 198   |
| >VHL-E204K- DLERLTQER   | 454   | >VHL-E204K- DLERLTQKR    | 668   | 214   |
| >VHL-E204K- KDLERLTQER  | 757   | >VHL-E204K- KDLERLTQKR   | 281   | 476   |
| >VHL-E204K- KDLERLTQER  | 55    | >VHL-E204K- KDLERLTQKR   | 111   | 56    |
| >VHL-E204K- KDLERLTQER  | 554   | >VHL-E204K- KDLERLTQKR   | 279   | 275   |
| >VHL-E204K- KDLERLTQER  | 44    | >VHL-E204K- KDLERLTQKR   | 79    | 35    |
| >VHL-E26K-v GVEEYGP     | 26304 | >VHL-E26K-n GVEEYGPK     | 126   | 26178 |
| >VHL-E31G-v EESGAEES    | 196   | >VHL-E31G-n GESGAEES     | 853   | 657   |
| >VHL-E37K-v EESGPEES    | 259   | >VHL-E37K-n EKSGPEES     | 30705 | 30446 |
| >VHL-E37K-v AEESGPEES   | 279   | >VHL-E37K-n AEKSGPEES    | 247   | 32    |
| >VHL-E37K-v AEESGPEESG  | 136   | >VHL-E37K-n AEKSGPEESG   | 611   | 475   |
| >VHL-E37K-v EESGAEES    | 196   | >VHL-E37K-n EESGAEKS     | 490   | 294   |
| >VHL-E41V-v EESGPEEL    | 57    | >VHL-E41V-n VESGPEEL     | 24    | 33    |
| >VHL-E41V-v EESGPEEL    | 364   | >VHL-E41V-n VESGPEEL     | 4522  | 4158  |
| >VHL-E41V-v EESGPEELGA  | 355   | >VHL-E41V-n VESGPEELGA   | 1480  | 1125  |
| >VHL-E41V-v PEESGPEEL   | 231   | >VHL-E41V-n PVESGPEEL    | 21847 | 21616 |
| >VHL-E41V-v EESGAEESGP  | 6487  | >VHL-E41V-n EESGAEESGP   | 163   | 6324  |
| >VHL-E41V-v EESGAEESGP  | 1969  | >VHL-E41V-n EESGAEESGP   | 66    | 1903  |
| >VHL-E41V-v GPEESGPEEL  | 1365  | >VHL-E41V-n GPVESGPEEL   | 405   | 960   |
| >VHL-E41V-v EESGPEES    | 259   | >VHL-E41V-n EESGPVES     | 152   | 107   |
| >VHL-E41V-v AEESGPEES   | 279   | >VHL-E41V-n AEESGPVES    | 129   | 150   |

|                        |       |                         |       |       |
|------------------------|-------|-------------------------|-------|-------|
| >VHL-E41V-m AEESGPEESG | 136   | >VHL-E41V-n AEESGPVESG  | 98    | 38    |
| >VHL-E41V-m SGAEESGPE  | 24378 | >VHL-E41V-n SGAEESGPV   | 423   | 23955 |
| >VHL-E41V-m ESGAEESGPE | 30926 | >VHL-E41V-n ESGAEESGPV  | 232   | 30694 |
| >VHL-E41V-m ESGAEESGPE | 19835 | >VHL-E41V-n ESGAEESGPV  | 259   | 19576 |
| >VHL-E42V-m EESGPEEL   | 19997 | >VHL-E42V-n EVSGPEEL    | 203   | 19794 |
| >VHL-E42V-m EESGPEEL   | 8154  | >VHL-E42V-n EVSGPEEL    | 15    | 8139  |
| >VHL-E42V-m EESGPEEL   | 57    | >VHL-E42V-n EVSGPEEL    | 19069 | 19012 |
| >VHL-E42V-m EESGPEEL   | 364   | >VHL-E42V-n EVSGPEEL    | 40941 | 40577 |
| >VHL-E42V-m EESGPEELGA | 355   | >VHL-E42V-n EVSGPEELGA  | 28858 | 28503 |
| >VHL-E42V-m ESGAEESGPE | 19417 | >VHL-E42V-n ESGAEESGPE  | 378   | 19039 |
| >VHL-E42V-m PEESGPEEL  | 231   | >VHL-E42V-n PEVSGPEEL   | 138   | 93    |
| >VHL-E42V-m EESGPEES   | 259   | >VHL-E42V-n EESGPEVS    | 170   | 89    |
| >VHL-E42V-m AEESGPEE   | 6452  | >VHL-E42V-n AEESGPEV    | 78    | 6374  |
| >VHL-E42V-m AEESGPEE   | 701   | >VHL-E42V-n AEESGPEV    | 26    | 675   |
| >VHL-E42V-m AEESGPEES  | 279   | >VHL-E42V-n AEESGPEVS   | 184   | 95    |
| >VHL-E42V-m AEESGPEESG | 136   | >VHL-E42V-n AEESGPEVSG  | 56    | 80    |
| >VHL-E42V-m GAEESGPEE  | 34193 | >VHL-E42V-n GAEESGPEV   | 145   | 34048 |
| >VHL-E42V-m SGAEESGPEE | 24735 | >VHL-E42V-n SGAEESGPEV  | 215   | 24520 |
| >VHL-E47K-m ELGAEEM    | 4313  | >VHL-E47K-n KLGAEEM     | 244   | 4069  |
| >VHL-E47K-m ELGAEEMEA/ | 941   | >VHL-E47K-n KLGAEEMEA/  | 108   | 833   |
| >VHL-E47K-m ELGAEEM    | 3228  | >VHL-E47K-n KLGAEEM     | 257   | 2971  |
| >VHL-E47K-m ELGAEEMEA/ | 1966  | >VHL-E47K-n KLGAEEMEA/  | 128   | 1838  |
| >VHL-E47K-m ELGAEEMEA/ | 5987  | >VHL-E47K-n KLGAEEMEA/  | 396   | 5591  |
| >VHL-E47K-m ELGAEEMEA/ | 2301  | >VHL-E47K-n KLGAEEMEA/  | 94    | 2207  |
| >VHL-E47K-m ELGAEEM    | 2837  | >VHL-E47K-n KLGAEEM     | 376   | 2461  |
| >VHL-E47K-m ELGAEEMEA/ | 238   | >VHL-E47K-n KLGAEEMEA/  | 39    | 199   |
| >VHL-E47K-m EELGAEEM   | 277   | >VHL-E47K-n EKLGAEEEM   | 20464 | 20187 |
| >VHL-E47K-m EELGAEEMEA | 18    | >VHL-E47K-n EKLGAEEEMEA | 11787 | 11769 |
| >VHL-E47K-m ESGPEESGPE | 19455 | >VHL-E47K-n ESGPEESGPE  | 319   | 19136 |
| >VHL-E47K-m GPEELGAEEM | 247   | >VHL-E47K-n GPEKLGAEEM  | 644   | 397   |
| >VHL-E47K-m EESGPEEL   | 57    | >VHL-E47K-n EESGPEKL    | 111   | 54    |
| >VHL-E47K-m EESGPEEL   | 364   | >VHL-E47K-n EESGPEKL    | 941   | 577   |
| >VHL-E47K-m EESGPEELGA | 355   | >VHL-E47K-n EESGPEKLGA  | 409   | 54    |
| >VHL-E47K-m PEESGPEEL  | 231   | >VHL-E47K-n PEESGPEKL   | 310   | 79    |
| >VHL-E51Q-v AEEEMEAG   | 319   | >VHL-E51Q-r AQEEMEAG    | 20605 | 20286 |
| >VHL-E51Q-v AEEEMEAGR  | 430   | >VHL-E51Q-r AQEEMEAGR   | 15040 | 14610 |
| >VHL-E51Q-v LGAEEMEA/  | 442   | >VHL-E51Q-r LGAQEEMEA   | 541   | 99    |
| >VHL-E51Q-v ELGAEEMEA/ | 238   | >VHL-E51Q-r ELGAQEEMEA/ | 232   | 6     |
| >VHL-E51Q-v EELGAEEEM  | 721   | >VHL-E51Q-r EELGAQEEM   | 219   | 502   |
| >VHL-E51Q-v EELGAEEEM  | 277   | >VHL-E51Q-r EELGAQEEM   | 272   | 5     |
| >VHL-E51Q-v EELGAEEEM  | 898   | >VHL-E51Q-r EELGAQEEM   | 279   | 619   |
| >VHL-E51Q-v EELGAEEEM  | 630   | >VHL-E51Q-r EELGAQEEM   | 341   | 289   |
| >VHL-E51Q-v EELGAEEEM  | 588   | >VHL-E51Q-r EELGAQEEM   | 370   | 218   |

|                         |       |                         |      |       |
|-------------------------|-------|-------------------------|------|-------|
| >VHL-E51Q-v EELGAEEME   | 18    | >VHL-E51Q-r EELGAQEEM   | 14   | 4     |
| >VHL-E51Q-v GPEELGAEFE  | 247   | >VHL-E51Q-r GPEELGAQEE  | 411  | 164   |
| >VHL-F119L-l FRDAGTHDG  | 376   | >VHL-F119L-l LRDAGTHDG  | 473  | 97    |
| >VHL-F119L-l FRDAGTHDG  | 17    | >VHL-F119L-l LRDAGTHDG  | 225  | 208   |
| >VHL-F119L-l FRDAGTHDG  | 35    | >VHL-F119L-l LRDAGTHDG  | 441  | 406   |
| >VHL-F119L-l FRDAGTHDG  | 563   | >VHL-F119L-l LRDAGTHDG  | 361  | 202   |
| >VHL-F119L-l LFRDAGTHDC | 5637  | >VHL-F119L-l LLRDAGTHDC | 64   | 5573  |
| >VHL-F119L-l LFRDAGTHDC | 16471 | >VHL-F119L-l LLRDAGTHDC | 63   | 16408 |
| >VHL-F119L-l LFRDAGTHDC | 17028 | >VHL-F119L-l LLRDAGTHDC | 65   | 16963 |
| >VHL-F119L-l LFRDAGTHDC | 21473 | >VHL-F119L-l LLRDAGTHDC | 358  | 21115 |
| >VHL-F119L-l LFRDAGTHDC | 19906 | >VHL-F119L-l LLRDAGTHDC | 402  | 19504 |
| >VHL-F119L-l LFRDAGTHDC | 8984  | >VHL-F119L-l LLRDAGTHDC | 4    | 8980  |
| >VHL-F119L-l LFRDAGTHDC | 5438  | >VHL-F119L-l LLRDAGTHDC | 332  | 5106  |
| >VHL-F119L-l IHSYRGHLWL | 131   | >VHL-F119L-l IHSYRGHLWL | 1061 | 930   |
| >VHL-F119L-l IHSYRGHLWL | 91    | >VHL-F119L-l IHSYRGHLWL | 1724 | 1633  |
| >VHL-F119L-l IHSYRGHLWL | 9580  | >VHL-F119L-l IHSYRGHLWL | 486  | 9094  |
| >VHL-F119L-l IHSYRGHLWL | 402   | >VHL-F119L-l IHSYRGHLWL | 3327 | 2925  |
| >VHL-F119L-l WLFRDAGT   | 330   | >VHL-F119L-l WLLRDAGT   | 2731 | 2401  |
| >VHL-F119L-l WLFRDAGT   | 468   | >VHL-F119L-l WLLRDAGT   | 513  | 45    |
| >VHL-F119L-l WLFRDAGT   | 108   | >VHL-F119L-l WLLRDAGT   | 190  | 82    |
| >VHL-F119L-l WLFRDAGT   | 2909  | >VHL-F119L-l WLLRDAGT   | 493  | 2416  |
| >VHL-F119L-l WLFRDAGT   | 51    | >VHL-F119L-l WLLRDAGT   | 86   | 35    |
| >VHL-F119L-l LWLFRDAG   | 90    | >VHL-F119L-l LWLLRDAG   | 128  | 38    |
| >VHL-F119L-l HLWLFRDA   | 346   | >VHL-F119L-l HLWLLRDA   | 434  | 88    |
| >VHL-F119L-l RGHLWLFR   | 160   | >VHL-F119L-l RGHLWLLR   | 448  | 288   |
| >VHL-F119L-l RGHLWLFR   | 15    | >VHL-F119L-l RGHLWLLR   | 45   | 30    |
| >VHL-F119L-l RGHLWLFR   | 33    | >VHL-F119L-l RGHLWLLR   | 42   | 9     |
| >VHL-F119L-l YRGHLWLF   | 109   | >VHL-F119L-l YRGHLWLL   | 1565 | 1456  |
| >VHL-F119L-l YRGHLWLF   | 75    | >VHL-F119L-l YRGHLWLL   | 65   | 10    |
| >VHL-F119L-l YRGHLWLFR  | 66    | >VHL-F119L-l YRGHLWLLR  | 47   | 19    |
| >VHL-F119L-l YRGHLWLF   | 5439  | >VHL-F119L-l YRGHLWLL   | 388  | 5051  |
| >VHL-F119L-l YRGHLWLF   | 1531  | >VHL-F119L-l YRGHLWLL   | 315  | 1216  |
| >VHL-F119L-l YRGHLWLFR  | 44    | >VHL-F119L-l YRGHLWLLR  | 66   | 22    |
| >VHL-F119L-l SYRGHLWLF  | 32    | >VHL-F119L-l SYRGHLWLL  | 153  | 121   |
| >VHL-F119L-l SYRGHLWLF  | 24    | >VHL-F119L-l SYRGHLWLL  | 73   | 49    |
| >VHL-F119L-l SYRGHLWLF  | 5     | >VHL-F119L-l SYRGHLWLL  | 8    | 3     |
| >VHL-F119L-l SYRGHLWLF  | 351   | >VHL-F119L-l SYRGHLWLL  | 3395 | 3044  |
| >VHL-F119L-l SYRGHLWLF  | 96    | >VHL-F119L-l SYRGHLWLL  | 4327 | 4231  |
| >VHL-F119L-l SYRGHLWLF  | 840   | >VHL-F119L-l SYRGHLWLL  | 54   | 786   |
| >VHL-F119L-l SYRGHLWLF  | 11    | >VHL-F119L-l SYRGHLWLLF | 21   | 10    |
| >VHL-F119L-l SYRGHLWLF  | 7     | >VHL-F119L-l SYRGHLWLLF | 14   | 7     |
| >VHL-F119L-l SYRGHLWLF  | 88    | >VHL-F119L-l SYRGHLWLLF | 363  | 275   |
| >VHL-F119L-l SYRGHLWLF  | 265   | >VHL-F119L-l SYRGHLWLLF | 411  | 146   |

|                                     |       |                                     |       |       |
|-------------------------------------|-------|-------------------------------------|-------|-------|
| >VHL-F119L- <sup>1</sup> SYRGHLWLF  | 396   | >VHL-F119L- <sub>1</sub> SYRGHLWLLF | 437   | 41    |
| >VHL-F119L- <sup>1</sup> SYRGHLWLF  | 23    | >VHL-F119L- <sub>1</sub> SYRGHLWLLF | 31    | 8     |
| >VHL-F119L- <sup>1</sup> SYRGHLWLF  | 430   | >VHL-F119L- <sub>1</sub> SYRGHLWLLF | 432   | 2     |
| >VHL-F119L- <sup>1</sup> SYRGHLWLF  | 277   | >VHL-F119L- <sub>1</sub> SYRGHLWLL  | 108   | 169   |
| >VHL-F119L- <sup>1</sup> HSYRGHLWLI | 15183 | >VHL-F119L- <sub>1</sub> HSYRGHLWLI | 407   | 14776 |
| >VHL-F119L- <sup>1</sup> HSYRGHLWLI | 50    | >VHL-F119L- <sub>1</sub> HSYRGHLWLI | 62    | 12    |
| >VHL-F119L- <sup>1</sup> HSYRGHLWLI | 47    | >VHL-F119L- <sub>1</sub> HSYRGHLWLI | 88    | 41    |
| >VHL-F119L- <sup>1</sup> HSYRGHLWLI | 376   | >VHL-F119L- <sub>1</sub> HSYRGHLWLI | 3928  | 3552  |
| >VHL-F119L- <sup>1</sup> HSYRGHLWLI | 178   | >VHL-F119L- <sub>1</sub> HSYRGHLWLI | 1112  | 934   |
| >VHL-F119L- <sup>1</sup> HSYRGHLWLI | 2619  | >VHL-F119L- <sub>1</sub> HSYRGHLWLI | 288   | 2331  |
| >VHL-F119L- <sup>1</sup> HSYRGHLWLI | 27    | >VHL-F119L- <sub>1</sub> HSYRGHLWLI | 73    | 46    |
| >VHL-F119L- <sup>1</sup> HSYRGHLWLI | 457   | >VHL-F119L- <sub>1</sub> HSYRGHLWLI | 2029  | 1572  |
| >VHL-F119L- <sup>1</sup> HSYRGHLWLI | 8     | >VHL-F119L- <sub>1</sub> HSYRGHLWLI | 13    | 5     |
| >VHL-F119L- <sup>1</sup> HSYRGHLWLI | 293   | >VHL-F119L- <sub>1</sub> HSYRGHLWLI | 1473  | 1180  |
| >VHL-F119L- <sup>1</sup> HSYRGHLWLI | 27    | >VHL-F119L- <sub>1</sub> HSYRGHLWLI | 56    | 29    |
| >VHL-F119L- <sup>1</sup> HSYRGHLWLI | 9     | >VHL-F119L- <sub>1</sub> HSYRGHLWLI | 15    | 6     |
| >VHL-F119L- <sup>1</sup> HSYRGHLWLI | 8864  | >VHL-F119L- <sub>1</sub> HSYRGHLWLI | 297   | 8567  |
| >VHL-F119L- <sup>1</sup> HSYRGHLWLI | 36    | >VHL-F119L- <sub>1</sub> HSYRGHLWLI | 1249  | 1213  |
| >VHL-F119L- <sup>1</sup> HSYRGHLWLI | 62    | >VHL-F119L- <sub>1</sub> HSYRGHLWLI | 311   | 249   |
| >VHL-F119L- <sup>1</sup> HSYRGHLWLI | 19    | >VHL-F119L- <sub>1</sub> HSYRGHLWLI | 83    | 64    |
| >VHL-F119L- <sup>1</sup> HSYRGHLWLI | 705   | >VHL-F119L- <sub>1</sub> HSYRGHLWLI | 408   | 297   |
| >VHL-F119L- <sup>1</sup> HSYRGHLWLI | 55    | >VHL-F119L- <sub>1</sub> HSYRGHLWLI | 381   | 326   |
| >VHL-F119L- <sup>1</sup> HSYRGHLWLI | 300   | >VHL-F119L- <sub>1</sub> HSYRGHLWLI | 321   | 21    |
| >VHL-F119L- <sup>1</sup> HSYRGHLWLI | 46    | >VHL-F119L- <sub>1</sub> HSYRGHLWLI | 64    | 18    |
| >VHL-F136C- LFPVPSLNV               | 352   | >VHL-F136C- LCVPSLNV                | 559   | 207   |
| >VHL-F136C- LFPVPSLNV               | 483   | >VHL-F136C- LCVPSLNV                | 29995 | 29512 |
| >VHL-F136C- ELFPVPSLNV              | 336   | >VHL-F136C- ELCVPSLNV               | 3770  | 3434  |
| >VHL-F136C- ELFPVPSLNV              | 10    | >VHL-F136C- ELCVPSLNV               | 71    | 61    |
| >VHL-F136C- ELFPVPSLNV              | 173   | >VHL-F136C- ELCVPSLNV               | 2209  | 2036  |
| >VHL-F136C- ELFPVPSLNV              | 16    | >VHL-F136C- ELCVPSLNV               | 416   | 400   |
| >VHL-F136C- ELFPVPSLNV              | 29    | >VHL-F136C- ELCVPSLNV               | 287   | 258   |
| >VHL-F136C- ELFPVPSLNV              | 12    | >VHL-F136C- ELCVPSLNV               | 28    | 16    |
| >VHL-F136C- ELFPVPSLNV              | 31    | >VHL-F136C- ELCVPSLNV               | 654   | 623   |
| >VHL-F136C- ELFPVPSLNV              | 8     | >VHL-F136C- ELCVPSLNV               | 101   | 93    |
| >VHL-F136C- TELFVPSL                | 46    | >VHL-F136C- TELCVPSL                | 63    | 17    |
| >VHL-F136C- TELFVPSL                | 98    | >VHL-F136C- TELCVPSL                | 154   | 56    |
| >VHL-F136C- TELFVPSL                | 471   | >VHL-F136C- TELCVPSL                | 357   | 114   |
| >VHL-F136C- TELFVPSL                | 54    | >VHL-F136C- TELCVPSL                | 76    | 22    |
| >VHL-F136C- TELFVPSL                | 49    | >VHL-F136C- TELCVPSL                | 94    | 45    |
| >VHL-F136C- TELFVPSLNV              | 352   | >VHL-F136C- TELCVPSLNV              | 1546  | 1194  |
| >VHL-F136C- TELFVPSL                | 1206  | >VHL-F136C- TELCVPSL                | 370   | 836   |
| >VHL-F136C- TELFVPSL                | 491   | >VHL-F136C- TELCVPSL                | 339   | 152   |
| >VHL-F136C- TELFVPSLNV              | 129   | >VHL-F136C- TELCVPSLNV              | 100   | 29    |

|                         |      |                        |       |       |
|-------------------------|------|------------------------|-------|-------|
| >VHL-F136C- QTELFVPSL   | 386  | >VHL-F136C- QTELCVPSL  | 4703  | 4317  |
| >VHL-F136C- QTELFVPSLN' | 74   | >VHL-F136C- QTELCVPSLN | 445   | 371   |
| >VHL-F136C- QTELFVPSL   | 59   | >VHL-F136C- QTELCVPSL  | 70    | 11    |
| >VHL-F136C- QTELFVPSL   | 80   | >VHL-F136C- QTELCVPSL  | 292   | 212   |
| >VHL-F136C- NQTELFVPS   | 68   | >VHL-F136C- NQTELCVPS  | 814   | 746   |
| >VHL-F136C- NQTELFVPSL  | 231  | >VHL-F136C- NQTELCVPSL | 282   | 51    |
| >VHL-F136C- NQTELFVPSL  | 316  | >VHL-F136C- NQTELCVPSL | 664   | 348   |
| >VHL-F136C- NQTELFVPSL  | 42   | >VHL-F136C- NQTELCVPSL | 77    | 35    |
| >VHL-F136C- LVNQTELFV   | 493  | >VHL-F136C- LVNQTELCV  | 2810  | 2317  |
| >VHL-F136C- LVNQTELFV   | 423  | >VHL-F136C- LVNQTELCV  | 3189  | 2766  |
| >VHL-F136C- LVNQTELFV   | 137  | >VHL-F136C- LVNQTELCV  | 2286  | 2149  |
| >VHL-F136C- LVNQTELFV   | 66   | >VHL-F136C- LVNQTELCV  | 801   | 735   |
| >VHL-F136C- LVNQTELFV   | 56   | >VHL-F136C- LVNQTELCV  | 257   | 201   |
| >VHL-F136C- LVNQTELFV   | 17   | >VHL-F136C- LVNQTELCV  | 53    | 36    |
| >VHL-F136C- LVNQTELF    | 220  | >VHL-F136C- LVNQTELC   | 18003 | 17783 |
| >VHL-F136C- LVNQTELF    | 74   | >VHL-F136C- LVNQTELC   | 12246 | 12172 |
| >VHL-F136C- LLVNQTELFV  | 17   | >VHL-F136C- LLVNQTELCV | 71    | 54    |
| >VHL-F136C- LLVNQTELF   | 408  | >VHL-F136C- LLVNQTELC  | 1476  | 1068  |
| >VHL-F136C- LLVNQTELFV  | 15   | >VHL-F136C- LLVNQTELCV | 45    | 30    |
| >VHL-F136C- LLVNQTELFV  | 28   | >VHL-F136C- LLVNQTELCV | 75    | 47    |
| >VHL-F136C- LLVNQTELFV  | 61   | >VHL-F136C- LLVNQTELCV | 138   | 77    |
| >VHL-F136C- LLVNQTELF   | 3878 | >VHL-F136C- LLVNQTELC  | 324   | 3554  |
| >VHL-F136C- LLVNQTELFV  | 3    | >VHL-F136C- LLVNQTELCV | 9     | 6     |
| >VHL-F136C- LLVNQTELFV  | 6    | >VHL-F136C- LLVNQTELCV | 9     | 3     |
| >VHL-F136C- LLVNQTELFV  | 7    | >VHL-F136C- LLVNQTELCV | 10    | 3     |
| >VHL-F136C- LLVNQTELFV  | 9    | >VHL-F136C- LLVNQTELCV | 18    | 9     |
| >VHL-F136C- LLVNQTELF   | 2777 | >VHL-F136C- LLVNQTELC  | 52    | 2725  |
| >VHL-F136C- LLVNQTELFV  | 2    | >VHL-F136C- LLVNQTELCV | 3     | 1     |
| >VHL-F136C- LLVNQTELF   | 85   | >VHL-F136C- LLVNQTELC  | 15703 | 15618 |
| >VHL-F136C- LLVNQTELF   | 77   | >VHL-F136C- LLVNQTELC  | 18474 | 18397 |
| >VHL-F136C- GLLVNQTELF  | 31   | >VHL-F136C- GLLVNQTELC | 100   | 69    |
| >VHL-F136C- GLLVNQTELF  | 83   | >VHL-F136C- GLLVNQTELC | 374   | 291   |
| >VHL-F136C- GLLVNQTELF  | 237  | >VHL-F136C- GLLVNQTELC | 803   | 566   |
| >VHL-F136C- GLLVNQTELF  | 81   | >VHL-F136C- GLLVNQTELC | 573   | 492   |
| >VHL-F136C- GLLVNQTELF  | 2982 | >VHL-F136C- GLLVNQTELC | 287   | 2695  |
| >VHL-F136C- GLLVNQTELF  | 3    | >VHL-F136C- GLLVNQTELC | 9     | 6     |
| >VHL-F136C- GLLVNQTELF  | 4301 | >VHL-F136C- GLLVNQTELC | 262   | 4039  |
| >VHL-F136C- GLLVNQTELF  | 4    | >VHL-F136C- GLLVNQTELC | 6     | 2     |
| >VHL-F136C- GLLVNQTELF  | 4    | >VHL-F136C- GLLVNQTELC | 5     | 1     |
| >VHL-F136C- GLLVNQTELF  | 5    | >VHL-F136C- GLLVNQTELC | 9     | 4     |
| >VHL-F136C- GLLVNQTELF  | 3430 | >VHL-F136C- GLLVNQTELC | 161   | 3269  |
| >VHL-F136C- GLLVNQTELF  | 4    | >VHL-F136C- GLLVNQTELC | 7     | 3     |
| >VHL-F136C- GLLVNQTELF  | 484  | >VHL-F136C- GLLVNQTELC | 22843 | 22359 |

|                          |       |                          |       |       |
|--------------------------|-------|--------------------------|-------|-------|
| >VHL-F136I-v LFPVPSLNV   | 10916 | >VHL-F136I-r LIVPSSLNV   | 413   | 10503 |
| >VHL-F136I-v LFPVPSLNV   | 638   | >VHL-F136I-r LIVPSSLNV   | 100   | 538   |
| >VHL-F136I-v LFPVPSLNV   | 3687  | >VHL-F136I-r LIVPSSLNV   | 22    | 3665  |
| >VHL-F136I-v LFPVPSLNV   | 1788  | >VHL-F136I-r LIVPSSLNV   | 18    | 1770  |
| >VHL-F136I-v LFPVPSLNV   | 3571  | >VHL-F136I-r LIVPSSLNV   | 49    | 3522  |
| >VHL-F136I-v LFPVPSLNV   | 10145 | >VHL-F136I-r LIVPSSLNV   | 374   | 9771  |
| >VHL-F136I-v LFPVPSLNV   | 5777  | >VHL-F136I-r LIVPSSLNV   | 136   | 5641  |
| >VHL-F136I-v LFPVPSLNV   | 352   | >VHL-F136I-r LIVPSSLNV   | 5     | 347   |
| >VHL-F136I-v LFPVPSLNV   | 10029 | >VHL-F136I-r LIVPSSLNV   | 271   | 9758  |
| >VHL-F136I-v LFPVPSLNV   | 9178  | >VHL-F136I-r LIVPSSLNV   | 252   | 8926  |
| >VHL-F136I-v LFPVPSLNV   | 483   | >VHL-F136I-r LIVPSSLNV   | 21903 | 21420 |
| >VHL-F136I-v ELFPVPSLNV  | 336   | >VHL-F136I-r ELIVPSSLNV  | 1103  | 767   |
| >VHL-F136I-v ELFPVPSLNV  | 10    | >VHL-F136I-r ELIVPSSLNV  | 57    | 47    |
| >VHL-F136I-v ELFPVPSLNV  | 173   | >VHL-F136I-r ELIVPSSLNV  | 191   | 18    |
| >VHL-F136I-v ELFPVPSLNV  | 16    | >VHL-F136I-r ELIVPSSLNV  | 101   | 85    |
| >VHL-F136I-v ELFPVPSLNV  | 29    | >VHL-F136I-r ELIVPSSLNV  | 117   | 88    |
| >VHL-F136I-v ELFPVPSLNV  | 12    | >VHL-F136I-r ELIVPSSLNV  | 19    | 7     |
| >VHL-F136I-v ELFPVPSLNV  | 31    | >VHL-F136I-r ELIVPSSLNV  | 63    | 32    |
| >VHL-F136I-v ELFPVPSLNV  | 8     | >VHL-F136I-r ELIVPSSLNV  | 12    | 4     |
| >VHL-F136I-v TELFVPSL    | 46    | >VHL-F136I-r TELIVPSL    | 57    | 11    |
| >VHL-F136I-v TELFVPSL    | 98    | >VHL-F136I-r TELIVPSL    | 161   | 63    |
| >VHL-F136I-v TELFVPSL    | 471   | >VHL-F136I-r TELIVPSL    | 455   | 16    |
| >VHL-F136I-v TELFVPSL    | 54    | >VHL-F136I-r TELIVPSL    | 106   | 52    |
| >VHL-F136I-v TELFVPSL    | 49    | >VHL-F136I-r TELIVPSL    | 40    | 9     |
| >VHL-F136I-v TELFVPSLNV  | 352   | >VHL-F136I-r TELIVPSLNV  | 977   | 625   |
| >VHL-F136I-v TELFVPSL    | 491   | >VHL-F136I-r TELIVPSL    | 538   | 47    |
| >VHL-F136I-v TELFVPSLNV  | 129   | >VHL-F136I-r TELIVPSLNV  | 198   | 69    |
| >VHL-F136I-v QTELFVPSL   | 513   | >VHL-F136I-r QTELIVPSL   | 360   | 153   |
| >VHL-F136I-v QTELFVPSLN' | 604   | >VHL-F136I-r QTELIVPSLN' | 322   | 282   |
| >VHL-F136I-v QTELFVPSL   | 386   | >VHL-F136I-r QTELIVPSL   | 1142  | 756   |
| >VHL-F136I-v QTELFVPSLN' | 74    | >VHL-F136I-r QTELIVPSLN' | 141   | 67    |
| >VHL-F136I-v QTELFVPSL   | 59    | >VHL-F136I-r QTELIVPSL   | 163   | 104   |
| >VHL-F136I-v QTELFVPSL   | 80    | >VHL-F136I-r QTELIVPSL   | 220   | 140   |
| >VHL-F136I-v NQTELFVPS   | 68    | >VHL-F136I-r NQTELIVPS   | 188   | 120   |
| >VHL-F136I-v NQTELFVPSL  | 231   | >VHL-F136I-r NQTELIVPSL  | 480   | 249   |
| >VHL-F136I-v NQTELFVPSL  | 316   | >VHL-F136I-r NQTELIVPSL  | 706   | 390   |
| >VHL-F136I-v NQTELFVPSL  | 42    | >VHL-F136I-r NQTELIVPSL  | 42    | 0     |
| >VHL-F136I-v NQTELFVPSL  | 513   | >VHL-F136I-r NQTELIVPSL  | 477   | 36    |
| >VHL-F136I-v LVNQTELFV   | 493   | >VHL-F136I-r LVNQTELIV   | 3310  | 2817  |
| >VHL-F136I-v LVNQTELFV   | 423   | >VHL-F136I-r LVNQTELIV   | 1353  | 930   |
| >VHL-F136I-v LVNQTELFV   | 137   | >VHL-F136I-r LVNQTELIV   | 2398  | 2261  |
| >VHL-F136I-v LVNQTELFV   | 66    | >VHL-F136I-r LVNQTELIV   | 918   | 852   |
| >VHL-F136I-v LVNQTELFV   | 56    | >VHL-F136I-r LVNQTELIV   | 643   | 587   |

|                         |       |                         |      |       |
|-------------------------|-------|-------------------------|------|-------|
| >VHL-F136I-v LLVNQTELFV | 17    | >VHL-F136I-r LLVNQTELV  | 46   | 29    |
| >VHL-F136I-v LLVNQTELF  | 220   | >VHL-F136I-r LLVNQTELI  | 8911 | 8691  |
| >VHL-F136I-v LLVNQTELF  | 74    | >VHL-F136I-r LLVNQTELI  | 757  | 683   |
| >VHL-F136I-v LLVNQTELF  | 14320 | >VHL-F136I-r LLVNQTELI  | 252  | 14068 |
| >VHL-F136I-v LLVNQTELFV | 17    | >VHL-F136I-r LLVNQTELV  | 96   | 79    |
| >VHL-F136I-v LLVNQTELF  | 408   | >VHL-F136I-r LLVNQTELI  | 14   | 394   |
| >VHL-F136I-v LLVNQTELFV | 15    | >VHL-F136I-r LLVNQTELV  | 39   | 24    |
| >VHL-F136I-v LLVNQTELF  | 5545  | >VHL-F136I-r LLVNQTELI  | 25   | 5520  |
| >VHL-F136I-v LLVNQTELFV | 28    | >VHL-F136I-r LLVNQTELV  | 47   | 19    |
| >VHL-F136I-v LLVNQTELF  | 1048  | >VHL-F136I-r LLVNQTELI  | 108  | 940   |
| >VHL-F136I-v LLVNQTELFV | 61    | >VHL-F136I-r LLVNQTELV  | 157  | 96    |
| >VHL-F136I-v LLVNQTELF  | 3878  | >VHL-F136I-r LLVNQTELI  | 24   | 3854  |
| >VHL-F136I-v LLVNQTELFV | 3     | >VHL-F136I-r LLVNQTELV  | 12   | 9     |
| >VHL-F136I-v LLVNQTELF  | 10282 | >VHL-F136I-r LLVNQTELI  | 34   | 10248 |
| >VHL-F136I-v LLVNQTELFV | 6     | >VHL-F136I-r LLVNQTELV  | 10   | 4     |
| >VHL-F136I-v LLVNQTELF  | 16375 | >VHL-F136I-r LLVNQTELI  | 139  | 16236 |
| >VHL-F136I-v LLVNQTELFV | 7     | >VHL-F136I-r LLVNQTELV  | 14   | 7     |
| >VHL-F136I-v LLVNQTELF  | 16464 | >VHL-F136I-r LLVNQTELI  | 444  | 16020 |
| >VHL-F136I-v LLVNQTELFV | 9     | >VHL-F136I-r LLVNQTELV  | 56   | 47    |
| >VHL-F136I-v LLVNQTELF  | 2777  | >VHL-F136I-r LLVNQTELI  | 14   | 2763  |
| >VHL-F136I-v LLVNQTELFV | 2     | >VHL-F136I-r LLVNQTELV  | 3    | 1     |
| >VHL-F136I-v LLVNQTELF  | 85    | >VHL-F136I-r LLVNQTELI  | 5149 | 5064  |
| >VHL-F136I-v LLVNQTELF  | 77    | >VHL-F136I-r LLVNQTELI  | 3638 | 3561  |
| >VHL-F136I-v GLLVNQTELF | 7197  | >VHL-F136I-r GLLVNQTELI | 414  | 6783  |
| >VHL-F136I-v GLLVNQTELF | 31    | >VHL-F136I-r GLLVNQTELV | 177  | 146   |
| >VHL-F136I-v GLLVNQTELF | 4774  | >VHL-F136I-r GLLVNQTELI | 155  | 4619  |
| >VHL-F136I-v GLLVNQTELF | 83    | >VHL-F136I-r GLLVNQTELV | 465  | 382   |
| >VHL-F136I-v GLLVNQTELF | 11687 | >VHL-F136I-r GLLVNQTELI | 210  | 11477 |
| >VHL-F136I-v GLLVNQTELF | 237   | >VHL-F136I-r GLLVNQTELV | 421  | 184   |
| >VHL-F136I-v GLLVNQTELF | 81    | >VHL-F136I-r GLLVNQTELV | 462  | 381   |
| >VHL-F136I-v GLLVNQTELF | 2982  | >VHL-F136I-r GLLVNQTELI | 26   | 2956  |
| >VHL-F136I-v GLLVNQTELF | 3     | >VHL-F136I-r GLLVNQTELV | 11   | 8     |
| >VHL-F136I-v GLLVNQTELF | 4301  | >VHL-F136I-r GLLVNQTELI | 16   | 4285  |
| >VHL-F136I-v GLLVNQTELF | 4     | >VHL-F136I-r GLLVNQTELV | 7    | 3     |
| >VHL-F136I-v GLLVNQTELF | 8615  | >VHL-F136I-r GLLVNQTELI | 32   | 8583  |
| >VHL-F136I-v GLLVNQTELF | 4     | >VHL-F136I-r GLLVNQTELV | 6    | 2     |
| >VHL-F136I-v GLLVNQTELF | 15249 | >VHL-F136I-r GLLVNQTELI | 128  | 15121 |
| >VHL-F136I-v GLLVNQTELF | 5     | >VHL-F136I-r GLLVNQTELV | 25   | 20    |
| >VHL-F136I-v GLLVNQTELF | 3430  | >VHL-F136I-r GLLVNQTELI | 41   | 3389  |
| >VHL-F136I-v GLLVNQTELF | 4     | >VHL-F136I-r GLLVNQTELV | 6    | 2     |
| >VHL-F136I-v GLLVNQTELF | 484   | >VHL-F136I-r GLLVNQTELI | 8351 | 7867  |
| >VHL-F136L-l LFVPSLNV   | 10916 | >VHL-F136L-l LLVPSLNV   | 38   | 10878 |
| >VHL-F136L-l LFVPSLNV   | 638   | >VHL-F136L-l LLVPSLNV   | 16   | 622   |



|                          |       |                          |       |       |
|--------------------------|-------|--------------------------|-------|-------|
| >VHL-F136L-1 LFPVPSLNVDG | 12856 | >VHL-F136L-1 LLVPSLNVDG  | 391   | 12465 |
| >VHL-F136L-1 LFPVPSLNV   | 3687  | >VHL-F136L-1 LLVPSLNV    | 6     | 3681  |
| >VHL-F136L-1 LFPVPSLNV   | 1788  | >VHL-F136L-1 LLVPSLNV    | 11    | 1777  |
| >VHL-F136L-1 LFPVPSLNV   | 3571  | >VHL-F136L-1 LLVPSLNV    | 4     | 3567  |
| >VHL-F136L-1 LFPVPSLNV   | 10145 | >VHL-F136L-1 LLVPSLNV    | 7     | 10138 |
| >VHL-F136L-1 LFPVPSLNV   | 5777  | >VHL-F136L-1 LLVPSLNV    | 9     | 5768  |
| >VHL-F136L-1 LFPVPSLNV   | 16083 | >VHL-F136L-1 LLVPSLNV    | 13    | 16070 |
| >VHL-F136L-1 LFPVPSLNV   | 352   | >VHL-F136L-1 LLVPSLNV    | 2     | 350   |
| >VHL-F136L-1 LFPVPSLNVDG | 26515 | >VHL-F136L-1 LLVPSLNVDG  | 84    | 26431 |
| >VHL-F136L-1 LFPVPSLNV   | 483   | >VHL-F136L-1 LLVPSLNV    | 17187 | 16704 |
| >VHL-F136L-1 ELFPVPSLNV  | 336   | >VHL-F136L-1 ELLVPSLNV   | 2298  | 1962  |
| >VHL-F136L-1 ELFPVPSLNV  | 10    | >VHL-F136L-1 ELLVPSLNV   | 15    | 5     |
| >VHL-F136L-1 ELFPVPSLNV  | 173   | >VHL-F136L-1 ELLVPSLNV   | 110   | 63    |
| >VHL-F136L-1 ELFPVPSLNV  | 16    | >VHL-F136L-1 ELLVPSLNV   | 17    | 1     |
| >VHL-F136L-1 ELFPVPSLNV  | 29    | >VHL-F136L-1 ELLVPSLNV   | 8     | 21    |
| >VHL-F136L-1 ELFPVPSLNV  | 12    | >VHL-F136L-1 ELLVPSLNV   | 15    | 3     |
| >VHL-F136L-1 ELFPVPSLNV  | 31    | >VHL-F136L-1 ELLVPSLNV   | 632   | 601   |
| >VHL-F136L-1 ELFPVPSLNV  | 8     | >VHL-F136L-1 ELLVPSLNV   | 6     | 2     |
| >VHL-F136L-1 TELFPVPSL   | 46    | >VHL-F136L-1 TELLVPSL    | 17    | 29    |
| >VHL-F136L-1 TELFPVPSL   | 98    | >VHL-F136L-1 TELLVPSL    | 115   | 17    |
| >VHL-F136L-1 TELFPVPSL   | 471   | >VHL-F136L-1 TELLVPSL    | 312   | 159   |
| >VHL-F136L-1 TELFPVPSL   | 54    | >VHL-F136L-1 TELLVPSL    | 95    | 41    |
| >VHL-F136L-1 TELFPVPSL   | 49    | >VHL-F136L-1 TELLVPSL    | 37    | 12    |
| >VHL-F136L-1 TELFPVPSLNV | 352   | >VHL-F136L-1 TELLVPSLNV  | 474   | 122   |
| >VHL-F136L-1 TELFPVPSL   | 491   | >VHL-F136L-1 TELLVPSL    | 639   | 148   |
| >VHL-F136L-1 TELFPVPSL   | 724   | >VHL-F136L-1 TELLVPSL    | 273   | 451   |
| >VHL-F136L-1 TELFPVPSLNV | 129   | >VHL-F136L-1 TELLVPSLNV  | 168   | 39    |
| >VHL-F136L-1 QTELPVPSL   | 386   | >VHL-F136L-1 QTELLVPSL   | 1613  | 1227  |
| >VHL-F136L-1 QTELPVPSLN' | 74    | >VHL-F136L-1 QTELLVPSLN' | 180   | 106   |
| >VHL-F136L-1 QTELPVPSL   | 59    | >VHL-F136L-1 QTELLVPSL   | 75    | 16    |
| >VHL-F136L-1 QTELPVPSL   | 80    | >VHL-F136L-1 QTELLVPSL   | 218   | 138   |
| >VHL-F136L-1 NQTELPVPS   | 68    | >VHL-F136L-1 NQTELLVPS   | 124   | 56    |
| >VHL-F136L-1 NQTELPVPSL  | 231   | >VHL-F136L-1 NQTELLVPSL  | 284   | 53    |
| >VHL-F136L-1 NQTELPVPSL  | 316   | >VHL-F136L-1 NQTELLVPSL  | 929   | 613   |
| >VHL-F136L-1 NQTELPVPSL  | 42    | >VHL-F136L-1 NQTELLVPSL  | 60    | 18    |
| >VHL-F136L-1 LVNQTELF    | 8425  | >VHL-F136L-1 LVNQTELL    | 206   | 8219  |
| >VHL-F136L-1 LVNQTELFV   | 493   | >VHL-F136L-1 LVNQTELLV   | 1041  | 548   |
| >VHL-F136L-1 LVNQTELFV   | 423   | >VHL-F136L-1 LVNQTELLV   | 582   | 159   |
| >VHL-F136L-1 LVNQTELFV   | 137   | >VHL-F136L-1 LVNQTELLV   | 581   | 444   |
| >VHL-F136L-1 LVNQTELFV   | 66    | >VHL-F136L-1 LVNQTELLV   | 274   | 208   |
| >VHL-F136L-1 LVNQTELFV   | 56    | >VHL-F136L-1 LVNQTELLV   | 316   | 260   |
| >VHL-F136L-1 LVNQTELF    | 25363 | >VHL-F136L-1 LVNQTELL    | 392   | 24971 |
| >VHL-F136L-1 LVNQTELFV   | 17    | >VHL-F136L-1 LVNQTELLV   | 18    | 1     |

|                                      |       |                                      |      |       |
|--------------------------------------|-------|--------------------------------------|------|-------|
| >VHL-F136L- <sup>-1</sup> LVNQTELF   | 220   | >VHL-F136L- <sup>-1</sup> LVNQTELL   | 5492 | 5272  |
| >VHL-F136L- <sup>-1</sup> LVNQTELF   | 74    | >VHL-F136L- <sup>-1</sup> LVNQTELL   | 1714 | 1640  |
| >VHL-F136L- <sup>-1</sup> LLVNQTELF  | 14320 | >VHL-F136L- <sup>-1</sup> LLVNQTELL  | 189  | 14131 |
| >VHL-F136L- <sup>-1</sup> LLVNQTELFV | 17    | >VHL-F136L- <sup>-1</sup> LLVNQTELLV | 37   | 20    |
| >VHL-F136L- <sup>-1</sup> LLVNQTELF  | 408   | >VHL-F136L- <sup>-1</sup> LLVNQTELL  | 7    | 401   |
| >VHL-F136L- <sup>-1</sup> LLVNQTELFV | 15    | >VHL-F136L- <sup>-1</sup> LLVNQTELLV | 18   | 3     |
| >VHL-F136L- <sup>-1</sup> LLVNQTELF  | 5545  | >VHL-F136L- <sup>-1</sup> LLVNQTELL  | 46   | 5499  |
| >VHL-F136L- <sup>-1</sup> LLVNQTELFV | 28    | >VHL-F136L- <sup>-1</sup> LLVNQTELLV | 31   | 3     |
| >VHL-F136L- <sup>-1</sup> LLVNQTELF  | 1048  | >VHL-F136L- <sup>-1</sup> LLVNQTELL  | 116  | 932   |
| >VHL-F136L- <sup>-1</sup> LLVNQTELFV | 61    | >VHL-F136L- <sup>-1</sup> LLVNQTELLV | 83   | 22    |
| >VHL-F136L- <sup>-1</sup> LLVNQTELF  | 3878  | >VHL-F136L- <sup>-1</sup> LLVNQTELL  | 28   | 3850  |
| >VHL-F136L- <sup>-1</sup> LLVNQTELFV | 3     | >VHL-F136L- <sup>-1</sup> LLVNQTELLV | 5    | 2     |
| >VHL-F136L- <sup>-1</sup> LLVNQTELF  | 10282 | >VHL-F136L- <sup>-1</sup> LLVNQTELL  | 32   | 10250 |
| >VHL-F136L- <sup>-1</sup> LLVNQTELFV | 6     | >VHL-F136L- <sup>-1</sup> LLVNQTELLV | 11   | 5     |
| >VHL-F136L- <sup>-1</sup> LLVNQTELF  | 16375 | >VHL-F136L- <sup>-1</sup> LLVNQTELL  | 102  | 16273 |
| >VHL-F136L- <sup>-1</sup> LLVNQTELFV | 7     | >VHL-F136L- <sup>-1</sup> LLVNQTELLV | 10   | 3     |
| >VHL-F136L- <sup>-1</sup> LLVNQTELF  | 16464 | >VHL-F136L- <sup>-1</sup> LLVNQTELL  | 228  | 16236 |
| >VHL-F136L- <sup>-1</sup> LLVNQTELFV | 9     | >VHL-F136L- <sup>-1</sup> LLVNQTELLV | 38   | 29    |
| >VHL-F136L- <sup>-1</sup> LLVNQTELF  | 2777  | >VHL-F136L- <sup>-1</sup> LLVNQTELL  | 5    | 2772  |
| >VHL-F136L- <sup>-1</sup> LLVNQTELFV | 2     | >VHL-F136L- <sup>-1</sup> LLVNQTELLV | 2    | 0     |
| >VHL-F136L- <sup>-1</sup> LLVNQTELF  | 85    | >VHL-F136L- <sup>-1</sup> LLVNQTELL  | 2459 | 2374  |
| >VHL-F136L- <sup>-1</sup> LLVNQTELF  | 77    | >VHL-F136L- <sup>-1</sup> LLVNQTELL  | 2751 | 2674  |
| >VHL-F136L- <sup>-1</sup> GLLVNQTELF | 7197  | >VHL-F136L- <sup>-1</sup> GLLVNQTELL | 326  | 6871  |
| >VHL-F136L- <sup>-1</sup> GLLVNQTELF | 31    | >VHL-F136L- <sup>-1</sup> GLLVNQTELL | 47   | 16    |
| >VHL-F136L- <sup>-1</sup> GLLVNQTELF | 4774  | >VHL-F136L- <sup>-1</sup> GLLVNQTELL | 87   | 4687  |
| >VHL-F136L- <sup>-1</sup> GLLVNQTELF | 83    | >VHL-F136L- <sup>-1</sup> GLLVNQTELL | 152  | 69    |
| >VHL-F136L- <sup>-1</sup> GLLVNQTELF | 11687 | >VHL-F136L- <sup>-1</sup> GLLVNQTELL | 304  | 11383 |
| >VHL-F136L- <sup>-1</sup> GLLVNQTELF | 237   | >VHL-F136L- <sup>-1</sup> GLLVNQTELL | 286  | 49    |
| >VHL-F136L- <sup>-1</sup> GLLVNQTELF | 81    | >VHL-F136L- <sup>-1</sup> GLLVNQTELL | 203  | 122   |
| >VHL-F136L- <sup>-1</sup> GLLVNQTELF | 2982  | >VHL-F136L- <sup>-1</sup> GLLVNQTELL | 29   | 2953  |
| >VHL-F136L- <sup>-1</sup> GLLVNQTELF | 3     | >VHL-F136L- <sup>-1</sup> GLLVNQTELL | 6    | 3     |
| >VHL-F136L- <sup>-1</sup> GLLVNQTELF | 4301  | >VHL-F136L- <sup>-1</sup> GLLVNQTELL | 15   | 4286  |
| >VHL-F136L- <sup>-1</sup> GLLVNQTELF | 4     | >VHL-F136L- <sup>-1</sup> GLLVNQTELL | 7    | 3     |
| >VHL-F136L- <sup>-1</sup> GLLVNQTELF | 8615  | >VHL-F136L- <sup>-1</sup> GLLVNQTELL | 22   | 8593  |
| >VHL-F136L- <sup>-1</sup> GLLVNQTELF | 4     | >VHL-F136L- <sup>-1</sup> GLLVNQTELL | 5    | 1     |
| >VHL-F136L- <sup>-1</sup> GLLVNQTELF | 15249 | >VHL-F136L- <sup>-1</sup> GLLVNQTELL | 69   | 15180 |
| >VHL-F136L- <sup>-1</sup> GLLVNQTELF | 5     | >VHL-F136L- <sup>-1</sup> GLLVNQTELL | 20   | 15    |
| >VHL-F136L- <sup>-1</sup> GLLVNQTELF | 3430  | >VHL-F136L- <sup>-1</sup> GLLVNQTELL | 16   | 3414  |
| >VHL-F136L- <sup>-1</sup> GLLVNQTELF | 4     | >VHL-F136L- <sup>-1</sup> GLLVNQTELL | 5    | 1     |
| >VHL-F136L- <sup>-1</sup> GLLVNQTELF | 484   | >VHL-F136L- <sup>-1</sup> GLLVNQTELL | 7243 | 6759  |
| >VHL-F136S- <sup>-1</sup> LFVPSLNV   | 1788  | >VHL-F136S- <sup>-1</sup> LSVPSLNV   | 421  | 1367  |
| >VHL-F136S- <sup>-1</sup> LFVPSLNV   | 352   | >VHL-F136S- <sup>-1</sup> LSVPSLNV   | 3343 | 2991  |
| >VHL-F136S- <sup>-1</sup> LFVPSLNV   | 10029 | >VHL-F136S- <sup>-1</sup> LSVPSLNV   | 431  | 9598  |

|                        |       |                        |       |       |
|------------------------|-------|------------------------|-------|-------|
| >VHL-F136S-LFVPSLNV    | 22460 | >VHL-F136S-LSVPSLNV    | 33    | 22427 |
| >VHL-F136S-LFVPSLNV    | 483   | >VHL-F136S-LSVPSLNV    | 27955 | 27472 |
| >VHL-F136S-ELFVPSLNV   | 336   | >VHL-F136S-ELSVPSLNV   | 942   | 606   |
| >VHL-F136S-ELFVPSLNV   | 10    | >VHL-F136S-ELSVPSLNV   | 121   | 111   |
| >VHL-F136S-ELFVPSLNV   | 173   | >VHL-F136S-ELSVPSLNV   | 588   | 415   |
| >VHL-F136S-ELFVPSLNV   | 16    | >VHL-F136S-ELSVPSLNV   | 71    | 55    |
| >VHL-F136S-ELFVPSLNV   | 29    | >VHL-F136S-ELSVPSLNV   | 22    | 7     |
| >VHL-F136S-ELFVPSLNV   | 12    | >VHL-F136S-ELSVPSLNV   | 16    | 4     |
| >VHL-F136S-ELFVPSLNV   | 31    | >VHL-F136S-ELSVPSLNV   | 111   | 80    |
| >VHL-F136S-ELFVPSLNV   | 8     | >VHL-F136S-ELSVPSLNV   | 29    | 21    |
| >VHL-F136S-TELFVPSL    | 46    | >VHL-F136S-TELSVPSL    | 139   | 93    |
| >VHL-F136S-TELFVPSL    | 98    | >VHL-F136S-TELSVPSL    | 210   | 112   |
| >VHL-F136S-TELFVPSL    | 471   | >VHL-F136S-TELSVPSL    | 87    | 384   |
| >VHL-F136S-TELFVPSL    | 54    | >VHL-F136S-TELSVPSL    | 60    | 6     |
| >VHL-F136S-TELFVPSL    | 49    | >VHL-F136S-TELSVPSL    | 63    | 14    |
| >VHL-F136S-TELFVPSLNV  | 352   | >VHL-F136S-TELSVPSLNV  | 621   | 269   |
| >VHL-F136S-TELFVPSL    | 1206  | >VHL-F136S-TELSVPSL    | 447   | 759   |
| >VHL-F136S-TELFVPSL    | 491   | >VHL-F136S-TELSVPSL    | 368   | 123   |
| >VHL-F136S-TELFVPSLNV  | 129   | >VHL-F136S-TELSVPSLNV  | 110   | 19    |
| >VHL-F136S-QTELFVPSL   | 386   | >VHL-F136S-QTELSVPSL   | 1895  | 1509  |
| >VHL-F136S-QTELFVPSLN' | 74    | >VHL-F136S-QTELSVPSLN' | 211   | 137   |
| >VHL-F136S-QTELFVPSL   | 59    | >VHL-F136S-QTELSVPSL   | 12    | 47    |
| >VHL-F136S-QTELFVPSLN' | 1331  | >VHL-F136S-QTELSVPSLN' | 382   | 949   |
| >VHL-F136S-QTELFVPSL   | 80    | >VHL-F136S-QTELSVPSL   | 150   | 70    |
| >VHL-F136S-NQTELFVPS   | 68    | >VHL-F136S-NQTELSVPS   | 521   | 453   |
| >VHL-F136S-NQTELFVPSL  | 231   | >VHL-F136S-NQTELSVPSL  | 665   | 434   |
| >VHL-F136S-NQTELFVPSL  | 316   | >VHL-F136S-NQTELSVPSL  | 318   | 2     |
| >VHL-F136S-NQTELFVPSL  | 42    | >VHL-F136S-NQTELSVPSL  | 28    | 14    |
| >VHL-F136S-LVNQTELFV   | 493   | >VHL-F136S-LVNQTELSV   | 1584  | 1091  |
| >VHL-F136S-LVNQTELFV   | 423   | >VHL-F136S-LVNQTELSV   | 439   | 16    |
| >VHL-F136S-LVNQTELFV   | 137   | >VHL-F136S-LVNQTELSV   | 396   | 259   |
| >VHL-F136S-LVNQTELFV   | 66    | >VHL-F136S-LVNQTELSV   | 146   | 80    |
| >VHL-F136S-LVNQTELFV   | 56    | >VHL-F136S-LVNQTELSV   | 292   | 236   |
| >VHL-F136S-LVNQTELFV   | 17    | >VHL-F136S-LVNQTELSV   | 9     | 8     |
| >VHL-F136S-LVNQTELF    | 220   | >VHL-F136S-LVNQTELS    | 17283 | 17063 |
| >VHL-F136S-LVNQTELF    | 74    | >VHL-F136S-LVNQTELS    | 17530 | 17456 |
| >VHL-F136S-LLVNQTELFV  | 17    | >VHL-F136S-LLVNQTELSV  | 28    | 11    |
| >VHL-F136S-LLVNQTELF   | 408   | >VHL-F136S-LLVNQTELS   | 496   | 88    |
| >VHL-F136S-LLVNQTELFV  | 15    | >VHL-F136S-LLVNQTELSV  | 18    | 3     |
| >VHL-F136S-LLVNQTELFV  | 28    | >VHL-F136S-LLVNQTELSV  | 19    | 9     |
| >VHL-F136S-LLVNQTELFV  | 61    | >VHL-F136S-LLVNQTELSV  | 70    | 9     |
| >VHL-F136S-LLVNQTELFV  | 3     | >VHL-F136S-LLVNQTELSV  | 4     | 1     |
| >VHL-F136S-LLVNQTELFV  | 6     | >VHL-F136S-LLVNQTELSV  | 7     | 1     |

|                        |       |                       |       |       |
|------------------------|-------|-----------------------|-------|-------|
| >VHL-F136S-LLVNQTELFV  | 7     | >VHL-F136S-LLVNQTELSV | 11    | 4     |
| >VHL-F136S-LLVNQTELFV  | 9     | >VHL-F136S-LLVNQTELSV | 19    | 10    |
| >VHL-F136S-LLVNQTELFV  | 2     | >VHL-F136S-LLVNQTELSV | 2     | 0     |
| >VHL-F136S-LLVNQTELF   | 85    | >VHL-F136S-LLVNQTELS  | 14530 | 14445 |
| >VHL-F136S-LLVNQTELF   | 77    | >VHL-F136S-LLVNQTELS  | 19204 | 19127 |
| >VHL-F136S-GLLVNQTELF  | 31    | >VHL-F136S-GLLVNQTELS | 54    | 23    |
| >VHL-F136S-GLLVNQTELF  | 83    | >VHL-F136S-GLLVNQTELS | 185   | 102   |
| >VHL-F136S-GLLVNQTELF  | 237   | >VHL-F136S-GLLVNQTELS | 200   | 37    |
| >VHL-F136S-GLLVNQTELF  | 81    | >VHL-F136S-GLLVNQTELS | 177   | 96    |
| >VHL-F136S-GLLVNQTELF  | 3     | >VHL-F136S-GLLVNQTELS | 4     | 1     |
| >VHL-F136S-GLLVNQTELF  | 4     | >VHL-F136S-GLLVNQTELS | 5     | 1     |
| >VHL-F136S-GLLVNQTELF  | 4     | >VHL-F136S-GLLVNQTELS | 5     | 1     |
| >VHL-F136S-GLLVNQTELF  | 5     | >VHL-F136S-GLLVNQTELS | 8     | 3     |
| >VHL-F136S-GLLVNQTELF  | 4     | >VHL-F136S-GLLVNQTELS | 3     | 1     |
| >VHL-F136S-GLLVNQTELF  | 484   | >VHL-F136S-GLLVNQTELS | 23873 | 23389 |
| >VHL-F136V-LFVPSLNV    | 638   | >VHL-F136V-LVVP SLNV  | 195   | 443   |
| >VHL-F136V-LFVPSLNV    | 3687  | >VHL-F136V-LVVP SLNV  | 46    | 3641  |
| >VHL-F136V-LFVPSLNV    | 1788  | >VHL-F136V-LVVP SLNV  | 18    | 1770  |
| >VHL-F136V-LFVPSLNV    | 3571  | >VHL-F136V-LVVP SLNV  | 188   | 3383  |
| >VHL-F136V-LFVPSLNV    | 5777  | >VHL-F136V-LVVP SLNV  | 478   | 5299  |
| >VHL-F136V-LFVPSLNV    | 352   | >VHL-F136V-LVVP SLNV  | 8     | 344   |
| >VHL-F136V-LFVPSLNV    | 10029 | >VHL-F136V-LVVP SLNV  | 61    | 9968  |
| >VHL-F136V-LFVPSLNV    | 9178  | >VHL-F136V-LVVP SLNV  | 125   | 9053  |
| >VHL-F136V-LFVPSLNV    | 483   | >VHL-F136V-LVVP SLNV  | 24639 | 24156 |
| >VHL-F136V-ELFVPSLNV   | 336   | >VHL-F136V-ELVVP SLNV | 1841  | 1505  |
| >VHL-F136V-ELFVPSLNV   | 10    | >VHL-F136V-ELVVP SLNV | 87    | 77    |
| >VHL-F136V-ELFVPSLNV   | 173   | >VHL-F136V-ELVVP SLNV | 654   | 481   |
| >VHL-F136V-ELFVPSLNV   | 16    | >VHL-F136V-ELVVP SLNV | 131   | 115   |
| >VHL-F136V-ELFVPSLNV   | 29    | >VHL-F136V-ELVVP SLNV | 113   | 84    |
| >VHL-F136V-ELFVPSLNV   | 12    | >VHL-F136V-ELVVP SLNV | 21    | 9     |
| >VHL-F136V-ELFVPSLNV   | 31    | >VHL-F136V-ELVVP SLNV | 111   | 80    |
| >VHL-F136V-ELFVPSLNV   | 8     | >VHL-F136V-ELVVP SLNV | 14    | 6     |
| >VHL-F136V-TELFVPSL    | 46    | >VHL-F136V-TELVVPSL   | 58    | 12    |
| >VHL-F136V-TELFVPSL    | 98    | >VHL-F136V-TELVVPSL   | 168   | 70    |
| >VHL-F136V-TELFVPSL    | 471   | >VHL-F136V-TELVVPSL   | 217   | 254   |
| >VHL-F136V-TELFVPSL    | 54    | >VHL-F136V-TELVVPSL   | 86    | 32    |
| >VHL-F136V-TELFVPSL    | 49    | >VHL-F136V-TELVVPSL   | 48    | 1     |
| >VHL-F136V-TELFVPSLNV  | 352   | >VHL-F136V-TELVVPSLNV | 552   | 200   |
| >VHL-F136V-TELFVPSL    | 491   | >VHL-F136V-TELVVPSL   | 560   | 69    |
| >VHL-F136V-TELFVPSLNV  | 129   | >VHL-F136V-TELVVPSLNV | 201   | 72    |
| >VHL-F136V-QTELFVPSLN' | 604   | >VHL-F136V-QTELVVPSLN | 468   | 136   |
| >VHL-F136V-QTELFVPSL   | 386   | >VHL-F136V-QTELVVPSL  | 1488  | 1102  |
| >VHL-F136V-QTELFVPSLN' | 74    | >VHL-F136V-QTELVVPSLN | 171   | 97    |

|                        |       |                        |       |       |
|------------------------|-------|------------------------|-------|-------|
| >VHL-F136V- QTELVVPSL  | 59    | >VHL-F136V- QTELVVPSL  | 299   | 240   |
| >VHL-F136V- QTELVVPSL  | 80    | >VHL-F136V- QTELVVPSL  | 237   | 157   |
| >VHL-F136V- NQTELVVPS  | 68    | >VHL-F136V- NQTELVVPS  | 461   | 393   |
| >VHL-F136V- NQTELVVPSL | 231   | >VHL-F136V- NQTELVVPSL | 493   | 262   |
| >VHL-F136V- NQTELVVPSL | 316   | >VHL-F136V- NQTELVVPSL | 615   | 299   |
| >VHL-F136V- NQTELVVPSL | 42    | >VHL-F136V- NQTELVVPSL | 32    | 10    |
| >VHL-F136V- LVNQTELV   | 8425  | >VHL-F136V- LVNQTELV   | 156   | 8269  |
| >VHL-F136V- LVNQTELVV  | 493   | >VHL-F136V- LVNQTELVV  | 3571  | 3078  |
| >VHL-F136V- LVNQTELV   | 19052 | >VHL-F136V- LVNQTELV   | 163   | 18889 |
| >VHL-F136V- LVNQTELVV  | 423   | >VHL-F136V- LVNQTELVV  | 1592  | 1169  |
| >VHL-F136V- LVNQTELV   | 8492  | >VHL-F136V- LVNQTELV   | 245   | 8247  |
| >VHL-F136V- LVNQTELVV  | 137   | >VHL-F136V- LVNQTELVV  | 2059  | 1922  |
| >VHL-F136V- LVNQTELV   | 20678 | >VHL-F136V- LVNQTELV   | 127   | 20551 |
| >VHL-F136V- LVNQTELVV  | 66    | >VHL-F136V- LVNQTELVV  | 290   | 224   |
| >VHL-F136V- LVNQTELV   | 25016 | >VHL-F136V- LVNQTELV   | 381   | 24635 |
| >VHL-F136V- LVNQTELVV  | 56    | >VHL-F136V- LVNQTELVV  | 483   | 427   |
| >VHL-F136V- LVNQTELV   | 25363 | >VHL-F136V- LVNQTELV   | 15    | 25348 |
| >VHL-F136V- LVNQTELVV  | 17    | >VHL-F136V- LVNQTELVV  | 31    | 14    |
| >VHL-F136V- LVNQTELV   | 20265 | >VHL-F136V- LVNQTELV   | 314   | 19951 |
| >VHL-F136V- LVNQTELV   | 220   | >VHL-F136V- LVNQTELV   | 10165 | 9945  |
| >VHL-F136V- LVNQTELV   | 74    | >VHL-F136V- LVNQTELV   | 10827 | 10753 |
| >VHL-F136V- LLVNQTELV  | 14320 | >VHL-F136V- LLVNQTELV  | 52    | 14268 |
| >VHL-F136V- LLVNQTELVV | 17    | >VHL-F136V- LLVNQTELVV | 65    | 48    |
| >VHL-F136V- LLVNQTELV  | 408   | >VHL-F136V- LLVNQTELV  | 6     | 402   |
| >VHL-F136V- LLVNQTELVV | 15    | >VHL-F136V- LLVNQTELVV | 35    | 20    |
| >VHL-F136V- LLVNQTELV  | 5545  | >VHL-F136V- LLVNQTELV  | 7     | 5538  |
| >VHL-F136V- LLVNQTELVV | 28    | >VHL-F136V- LLVNQTELVV | 46    | 18    |
| >VHL-F136V- LLVNQTELV  | 1048  | >VHL-F136V- LLVNQTELV  | 19    | 1029  |
| >VHL-F136V- LLVNQTELVV | 61    | >VHL-F136V- LLVNQTELVV | 143   | 82    |
| >VHL-F136V- LLVNQTELV  | 3878  | >VHL-F136V- LLVNQTELV  | 4     | 3874  |
| >VHL-F136V- LLVNQTELVV | 3     | >VHL-F136V- LLVNQTELVV | 5     | 2     |
| >VHL-F136V- LLVNQTELV  | 10282 | >VHL-F136V- LLVNQTELV  | 6     | 10276 |
| >VHL-F136V- LLVNQTELVV | 6     | >VHL-F136V- LLVNQTELVV | 8     | 2     |
| >VHL-F136V- LLVNQTELV  | 16375 | >VHL-F136V- LLVNQTELV  | 11    | 16364 |
| >VHL-F136V- LLVNQTELVV | 7     | >VHL-F136V- LLVNQTELVV | 12    | 5     |
| >VHL-F136V- LLVNQTELV  | 16464 | >VHL-F136V- LLVNQTELV  | 9     | 16455 |
| >VHL-F136V- LLVNQTELVV | 9     | >VHL-F136V- LLVNQTELVV | 32    | 23    |
| >VHL-F136V- LLVNQTELV  | 2777  | >VHL-F136V- LLVNQTELV  | 2     | 2775  |
| >VHL-F136V- LLVNQTELVV | 2     | >VHL-F136V- LLVNQTELVV | 2     | 0     |
| >VHL-F136V- LLVNQTELV  | 85    | >VHL-F136V- LLVNQTELV  | 6043  | 5958  |
| >VHL-F136V- LLVNQTELV  | 77    | >VHL-F136V- LLVNQTELV  | 4917  | 4840  |
| >VHL-F136V- GLLVNQTELV | 7197  | >VHL-F136V- GLLVNQTELV | 81    | 7116  |
| >VHL-F136V- GLLVNQTELV | 31    | >VHL-F136V- GLLVNQTELV | 164   | 133   |

|                         |       |                         |       |       |
|-------------------------|-------|-------------------------|-------|-------|
| >VHL-F136V- GLLVNQTELF  | 4774  | >VHL-F136V- GLLVNQTELV  | 95    | 4679  |
| >VHL-F136V- GLLVNQTELF  | 83    | >VHL-F136V- GLLVNQTELV  | 467   | 384   |
| >VHL-F136V- GLLVNQTELF  | 11687 | >VHL-F136V- GLLVNQTELV  | 63    | 11624 |
| >VHL-F136V- GLLVNQTELF  | 237   | >VHL-F136V- GLLVNQTELV  | 445   | 208   |
| >VHL-F136V- GLLVNQTELF  | 81    | >VHL-F136V- GLLVNQTELV  | 450   | 369   |
| >VHL-F136V- GLLVNQTELF  | 2982  | >VHL-F136V- GLLVNQTELV  | 4     | 2978  |
| >VHL-F136V- GLLVNQTELF  | 3     | >VHL-F136V- GLLVNQTELV  | 6     | 3     |
| >VHL-F136V- GLLVNQTELF  | 4301  | >VHL-F136V- GLLVNQTELV  | 5     | 4296  |
| >VHL-F136V- GLLVNQTELF  | 4     | >VHL-F136V- GLLVNQTELV  | 6     | 2     |
| >VHL-F136V- GLLVNQTELF  | 8615  | >VHL-F136V- GLLVNQTELV  | 6     | 8609  |
| >VHL-F136V- GLLVNQTELF  | 4     | >VHL-F136V- GLLVNQTELV  | 6     | 2     |
| >VHL-F136V- GLLVNQTELF  | 15249 | >VHL-F136V- GLLVNQTELV  | 6     | 15243 |
| >VHL-F136V- GLLVNQTELF  | 5     | >VHL-F136V- GLLVNQTELV  | 16    | 11    |
| >VHL-F136V- GLLVNQTELF  | 3430  | >VHL-F136V- GLLVNQTELV  | 5     | 3425  |
| >VHL-F136V- GLLVNQTELF  | 4     | >VHL-F136V- GLLVNQTELV  | 5     | 1     |
| >VHL-F136V- GLLVNQTELF  | 484   | >VHL-F136V- GLLVNQTELV  | 10130 | 9646  |
| >VHL-F136Y- LFPVPSLNV   | 11581 | >VHL-F136Y- LYVPSLNV    | 468   | 11113 |
| >VHL-F136Y- LFPVPSLNV   | 352   | >VHL-F136Y- LYVPSLNV    | 258   | 94    |
| >VHL-F136Y- LFPVPSLNV   | 4338  | >VHL-F136Y- LYVPSLNV    | 189   | 4149  |
| >VHL-F136Y- LFPVPSLNV   | 483   | >VHL-F136Y- LYVPSLNV    | 443   | 40    |
| >VHL-F136Y- ELFPVPSLNV  | 336   | >VHL-F136Y- ELYVPSLNV   | 768   | 432   |
| >VHL-F136Y- ELFPVPSLNV  | 565   | >VHL-F136Y- ELYVPSLNV   | 249   | 316   |
| >VHL-F136Y- ELFPVPSLNV  | 10    | >VHL-F136Y- ELYVPSLNV   | 8     | 2     |
| >VHL-F136Y- ELFPVPSLNV  | 173   | >VHL-F136Y- ELYVPSLNV   | 133   | 40    |
| >VHL-F136Y- ELFPVPSLNV  | 16    | >VHL-F136Y- ELYVPSLNV   | 14    | 2     |
| >VHL-F136Y- ELFPVPSLNV  | 29    | >VHL-F136Y- ELYVPSLNV   | 27    | 2     |
| >VHL-F136Y- ELFPVPSLNV  | 12    | >VHL-F136Y- ELYVPSLNV   | 10    | 2     |
| >VHL-F136Y- ELFPVPSLNV  | 31    | >VHL-F136Y- ELYVPSLNV   | 123   | 92    |
| >VHL-F136Y- ELFPVPSLNV  | 8     | >VHL-F136Y- ELYVPSLNV   | 6     | 2     |
| >VHL-F136Y- TELFVPSL    | 46    | >VHL-F136Y- TELYVPSL    | 22    | 24    |
| >VHL-F136Y- TELFVPSL    | 98    | >VHL-F136Y- TELYVPSL    | 165   | 67    |
| >VHL-F136Y- TELFVPSL    | 471   | >VHL-F136Y- TELYVPSL    | 234   | 237   |
| >VHL-F136Y- TELFVPSL    | 54    | >VHL-F136Y- TELYVPSL    | 38    | 16    |
| >VHL-F136Y- TELFVPSL    | 49    | >VHL-F136Y- TELYVPSL    | 57    | 8     |
| >VHL-F136Y- TELFVPSLNV  | 352   | >VHL-F136Y- TELYVPSLNV  | 239   | 113   |
| >VHL-F136Y- TELFVPSL    | 491   | >VHL-F136Y- TELYVPSL    | 387   | 104   |
| >VHL-F136Y- TELFVPSL    | 724   | >VHL-F136Y- TELYVPSL    | 323   | 401   |
| >VHL-F136Y- TELFVPSLNV  | 129   | >VHL-F136Y- TELYVPSLNV  | 62    | 67    |
| >VHL-F136Y- QTELFVPSL   | 386   | >VHL-F136Y- QTELYVPSL   | 759   | 373   |
| >VHL-F136Y- QTELFVPSLN' | 74    | >VHL-F136Y- QTELYVPSLN' | 110   | 36    |
| >VHL-F136Y- QTELFVPSL   | 59    | >VHL-F136Y- QTELYVPSL   | 28    | 31    |
| >VHL-F136Y- QTELFVPSL   | 80    | >VHL-F136Y- QTELYVPSL   | 117   | 37    |
| >VHL-F136Y- NQTELFVPSL  | 527   | >VHL-F136Y- NQTELYVPSL  | 411   | 116   |

|                        |       |                        |      |       |
|------------------------|-------|------------------------|------|-------|
| >VHL-F136Y- NQTELVPS   | 68    | >VHL-F136Y- NQTELYVPS  | 663  | 595   |
| >VHL-F136Y- NQTELVPSL  | 231   | >VHL-F136Y- NQTELYVPSL | 492  | 261   |
| >VHL-F136Y- NQTELVPSL  | 316   | >VHL-F136Y- NQTELYVPSL | 372  | 56    |
| >VHL-F136Y- NQTELVPSL  | 42    | >VHL-F136Y- NQTELYVPSL | 33   | 9     |
| >VHL-F136Y- NQTELVPSL  | 513   | >VHL-F136Y- NQTELYVPSL | 484  | 29    |
| >VHL-F136Y- LVNQTELF   | 13242 | >VHL-F136Y- LVNQTELY   | 291  | 12951 |
| >VHL-F136Y- LVNQTELV   | 493   | >VHL-F136Y- LVNQTELYV  | 520  | 27    |
| >VHL-F136Y- LVNQTELV   | 423   | >VHL-F136Y- LVNQTELYV  | 369  | 54    |
| >VHL-F136Y- LVNQTELV   | 137   | >VHL-F136Y- LVNQTELYV  | 161  | 24    |
| >VHL-F136Y- LVNQTELV   | 66    | >VHL-F136Y- LVNQTELYV  | 21   | 45    |
| >VHL-F136Y- LVNQTELV   | 56    | >VHL-F136Y- LVNQTELYV  | 61   | 5     |
| >VHL-F136Y- LVNQTELV   | 529   | >VHL-F136Y- LVNQTELYV  | 197  | 332   |
| >VHL-F136Y- LVNQTELV   | 17    | >VHL-F136Y- LVNQTELYV  | 10   | 7     |
| >VHL-F136Y- LVNQTELF   | 1892  | >VHL-F136Y- LVNQTELY   | 33   | 1859  |
| >VHL-F136Y- LVNQTELF   | 13134 | >VHL-F136Y- LVNQTELY   | 149  | 12985 |
| >VHL-F136Y- LVNQTELF   | 11863 | >VHL-F136Y- LVNQTELY   | 44   | 11819 |
| >VHL-F136Y- LVNQTELF   | 220   | >VHL-F136Y- LVNQTELY   | 173  | 47    |
| >VHL-F136Y- LVNQTELF   | 733   | >VHL-F136Y- LVNQTELY   | 318  | 415   |
| >VHL-F136Y- LVNQTELF   | 74    | >VHL-F136Y- LVNQTELY   | 269  | 195   |
| >VHL-F136Y- LLVNQTELV  | 17    | >VHL-F136Y- LLVNQTELYV | 11   | 6     |
| >VHL-F136Y- LLVNQTELF  | 408   | >VHL-F136Y- LLVNQTELY  | 3828 | 3420  |
| >VHL-F136Y- LLVNQTELV  | 15    | >VHL-F136Y- LLVNQTELYV | 11   | 4     |
| >VHL-F136Y- LLVNQTELV  | 28    | >VHL-F136Y- LLVNQTELYV | 15   | 13    |
| >VHL-F136Y- LLVNQTELV  | 61    | >VHL-F136Y- LLVNQTELYV | 44   | 17    |
| >VHL-F136Y- LLVNQTELV  | 3     | >VHL-F136Y- LLVNQTELYV | 2    | 1     |
| >VHL-F136Y- LLVNQTELV  | 6     | >VHL-F136Y- LLVNQTELYV | 4    | 2     |
| >VHL-F136Y- LLVNQTELV  | 7     | >VHL-F136Y- LLVNQTELYV | 7    | 0     |
| >VHL-F136Y- LLVNQTELV  | 9     | >VHL-F136Y- LLVNQTELYV | 6    | 3     |
| >VHL-F136Y- LLVNQTELV  | 2     | >VHL-F136Y- LLVNQTELYV | 2    | 0     |
| >VHL-F136Y- LLVNQTELF  | 784   | >VHL-F136Y- LLVNQTELY  | 16   | 768   |
| >VHL-F136Y- LLVNQTELF  | 10153 | >VHL-F136Y- LLVNQTELY  | 18   | 10135 |
| >VHL-F136Y- LLVNQTELF  | 85    | >VHL-F136Y- LLVNQTELY  | 88   | 3     |
| >VHL-F136Y- LLVNQTELF  | 991   | >VHL-F136Y- LLVNQTELY  | 333  | 658   |
| >VHL-F136Y- LLVNQTELF  | 77    | >VHL-F136Y- LLVNQTELY  | 518  | 441   |
| >VHL-F136Y- GLLVNQTELF | 31    | >VHL-F136Y- GLLVNQTELY | 23   | 8     |
| >VHL-F136Y- GLLVNQTELF | 83    | >VHL-F136Y- GLLVNQTELY | 72   | 11    |
| >VHL-F136Y- GLLVNQTELF | 237   | >VHL-F136Y- GLLVNQTELY | 203  | 34    |
| >VHL-F136Y- GLLVNQTELF | 81    | >VHL-F136Y- GLLVNQTELY | 82   | 1     |
| >VHL-F136Y- GLLVNQTELF | 3     | >VHL-F136Y- GLLVNQTELY | 2    | 1     |
| >VHL-F136Y- GLLVNQTELF | 4     | >VHL-F136Y- GLLVNQTELY | 4    | 0     |
| >VHL-F136Y- GLLVNQTELF | 4     | >VHL-F136Y- GLLVNQTELY | 5    | 1     |
| >VHL-F136Y- GLLVNQTELF | 5     | >VHL-F136Y- GLLVNQTELY | 4    | 1     |
| >VHL-F136Y- GLLVNQTELF | 4     | >VHL-F136Y- GLLVNQTELY | 3    | 1     |

|                         |       |                         |       |       |
|-------------------------|-------|-------------------------|-------|-------|
| >VHL-F136Y- GLLVNQTELF  | 3249  | >VHL-F136Y- GLLVNQTELY  | 422   | 2827  |
| >VHL-F136Y- GLLVNQTELF  | 16529 | >VHL-F136Y- GLLVNQTELY  | 449   | 16080 |
| >VHL-F136Y- GLLVNQTELF  | 993   | >VHL-F136Y- GLLVNQTELY  | 364   | 629   |
| >VHL-F136Y- GLLVNQTELF  | 484   | >VHL-F136Y- GLLVNQTELY  | 2192  | 1708  |
| >VHL-F148S- FANITLPVYTL | 351   | >VHL-F148S- SANITLPVYTL | 1007  | 656   |
| >VHL-F148S- FANITLPV    | 136   | >VHL-F148S- SANITLPV    | 2115  | 1979  |
| >VHL-F148S- FANITLPV    | 82    | >VHL-F148S- SANITLPV    | 1299  | 1217  |
| >VHL-F148S- FANITLPVYTL | 156   | >VHL-F148S- SANITLPVYTL | 1700  | 1544  |
| >VHL-F148S- FANITLPV    | 19    | >VHL-F148S- SANITLPV    | 189   | 170   |
| >VHL-F148S- FANITLPVYTL | 482   | >VHL-F148S- SANITLPVYTL | 3545  | 3063  |
| >VHL-F148S- FANITLPV    | 12    | >VHL-F148S- SANITLPV    | 132   | 120   |
| >VHL-F148S- FANITLPVYT  | 292   | >VHL-F148S- SANITLPVYT  | 2018  | 1726  |
| >VHL-F148S- FANITLPVYTL | 203   | >VHL-F148S- SANITLPVYTL | 2697  | 2494  |
| >VHL-F148S- FANITLPV    | 31    | >VHL-F148S- SANITLPV    | 222   | 191   |
| >VHL-F148S- FANITLPVYTL | 87    | >VHL-F148S- SANITLPVYTL | 593   | 506   |
| >VHL-F148S- FANITLPV    | 114   | >VHL-F148S- SANITLPV    | 281   | 167   |
| >VHL-F148S- FANITLPV    | 25    | >VHL-F148S- SANITLPV    | 367   | 342   |
| >VHL-F148S- FANITLPVYTL | 407   | >VHL-F148S- SANITLPVYTL | 3436  | 3029  |
| >VHL-F148S- FANITLPVY   | 243   | >VHL-F148S- SANITLPVY   | 1344  | 1101  |
| >VHL-F148S- FANITLPVY   | 71    | >VHL-F148S- SANITLPVY   | 20    | 51    |
| >VHL-F148S- FANITLPV    | 96    | >VHL-F148S- SANITLPV    | 247   | 151   |
| >VHL-F148S- FANITLPV    | 24    | >VHL-F148S- SANITLPV    | 50    | 26    |
| >VHL-F148S- FANITLPVYTL | 413   | >VHL-F148S- SANITLPVYTL | 1310  | 897   |
| >VHL-F148S- FANITLPVY   | 114   | >VHL-F148S- SANITLPVY   | 162   | 48    |
| >VHL-F148S- FANITLPVY   | 170   | >VHL-F148S- SANITLPVY   | 933   | 763   |
| >VHL-F148S- FANITLPVY   | 14    | >VHL-F148S- SANITLPVY   | 24    | 10    |
| >VHL-F148S- FANITLPVYTL | 63    | >VHL-F148S- SANITLPVYTL | 84    | 21    |
| >VHL-F148S- FANITLPVY   | 26    | >VHL-F148S- SANITLPVY   | 281   | 255   |
| >VHL-F148S- FANITLPVYTL | 278   | >VHL-F148S- SANITLPVYTL | 3475  | 3197  |
| >VHL-F148S- FANITLPVY   | 375   | >VHL-F148S- SANITLPVY   | 6400  | 6025  |
| >VHL-F148S- FANITLPVY   | 134   | >VHL-F148S- SANITLPVY   | 3417  | 3283  |
| >VHL-F148S- FANITLPVYTL | 160   | >VHL-F148S- SANITLPVYTL | 3482  | 3322  |
| >VHL-F148S- FANITLPV    | 89    | >VHL-F148S- SANITLPV    | 12618 | 12529 |
| >VHL-F148S- FANITLPVY   | 103   | >VHL-F148S- SANITLPVY   | 625   | 522   |
| >VHL-F148S- FANITLPVYTL | 310   | >VHL-F148S- SANITLPVYTL | 469   | 159   |
| >VHL-F148S- FANITLPVY   | 582   | >VHL-F148S- SANITLPVY   | 398   | 184   |
| >VHL-F148S- IFANITLPVY  | 711   | >VHL-F148S- ISANITLPVY  | 105   | 606   |
| >VHL-F148S- IFANITLPV   | 1137  | >VHL-F148S- ISANITLPV   | 331   | 806   |
| >VHL-F148S- IFANITLPV   | 35    | >VHL-F148S- ISANITLPV   | 61    | 26    |
| >VHL-F148S- IFANITLPV   | 958   | >VHL-F148S- ISANITLPV   | 239   | 719   |
| >VHL-F148S- IFANITLPV   | 740   | >VHL-F148S- ISANITLPV   | 101   | 639   |
| >VHL-F148S- IFANITLPVY  | 5259  | >VHL-F148S- ISANITLPVY  | 490   | 4769  |
| >VHL-F148S- IFANITLPV   | 478   | >VHL-F148S- ISANITLPV   | 6613  | 6135  |



|                         |       |                         |       |       |
|-------------------------|-------|-------------------------|-------|-------|
| >VHL-F148S-IFANITLPVY   | 52    | >VHL-F148S-ISANITLPVY   | 223   | 171   |
| >VHL-F148S-IFANITLPVY   | 87    | >VHL-F148S-ISANITLPVY   | 33    | 54    |
| >VHL-F148S-IFANITLPV    | 2843  | >VHL-F148S-ISANITLPV    | 215   | 2628  |
| >VHL-F148S-IFANITLPV    | 881   | >VHL-F148S-ISANITLPV    | 11    | 870   |
| >VHL-F148S-IFANITLPV    | 4569  | >VHL-F148S-ISANITLPV    | 182   | 4387  |
| >VHL-F148S-IFANITLPVY   | 137   | >VHL-F148S-ISANITLPVY   | 237   | 100   |
| >VHL-F148S-IFANITLPVY   | 438   | >VHL-F148S-ISANITLPVY   | 78    | 360   |
| >VHL-F148S-IFANITLPV    | 4998  | >VHL-F148S-ISANITLPV    | 449   | 4549  |
| >VHL-F148S-IFANITLPVY   | 1410  | >VHL-F148S-ISANITLPVY   | 57    | 1353  |
| >VHL-F148S-IFANITLPVY   | 19657 | >VHL-F148S-ISANITLPVY   | 6     | 19651 |
| >VHL-F148S-IFANITLPVY   | 6027  | >VHL-F148S-ISANITLPVY   | 30    | 5997  |
| >VHL-F148S-IFANITLPVY   | 15300 | >VHL-F148S-ISANITLPVY   | 171   | 15129 |
| >VHL-F148S-PIFANITLPV   | 393   | >VHL-F148S-PISANITLPV   | 769   | 376   |
| >VHL-F148S-PIFANITLPV   | 79    | >VHL-F148S-PISANITLPV   | 197   | 118   |
| >VHL-F148S-PIFANITL     | 323   | >VHL-F148S-PISANITL     | 3619  | 3296  |
| >VHL-F148S-PIFANITLPV   | 21    | >VHL-F148S-PISANITLPV   | 402   | 381   |
| >VHL-F148S-PIFANITLPV   | 76    | >VHL-F148S-PISANITLPV   | 628   | 552   |
| >VHL-F148S-PIFANITL     | 341   | >VHL-F148S-PISANITL     | 1327  | 986   |
| >VHL-F148S-PIFANITLPV   | 25    | >VHL-F148S-PISANITLPV   | 62    | 37    |
| >VHL-F148S-PIFANITLPVY  | 135   | >VHL-F148S-PISANITLPVY  | 391   | 256   |
| >VHL-F148S-PIFANITLPVY  | 195   | >VHL-F148S-PISANITLPVY  | 182   | 13    |
| >VHL-F148S-PIFANITL     | 336   | >VHL-F148S-PISANITL     | 5920  | 5584  |
| >VHL-F148S-PIFANITLPV   | 218   | >VHL-F148S-PISANITLPV   | 1118  | 900   |
| >VHL-F148S-QPIFANITL    | 10    | >VHL-F148S-QPISANITL    | 4     | 6     |
| >VHL-F148S-QPIFANITLPV  | 1392  | >VHL-F148S-QPISANITLPV  | 143   | 1249  |
| >VHL-F148S-QPIFANITLPV  | 151   | >VHL-F148S-QPISANITLPV  | 346   | 195   |
| >VHL-F148S-QPIFANITLPV  | 72    | >VHL-F148S-QPISANITLPV  | 63    | 9     |
| >VHL-F148S-QPIFANITL    | 393   | >VHL-F148S-QPISANITL    | 186   | 207   |
| >VHL-F148S-QPIFANITLPV  | 157   | >VHL-F148S-QPISANITLPV  | 110   | 47    |
| >VHL-F148S-QPIFANITL    | 51    | >VHL-F148S-QPISANITL    | 38    | 13    |
| >VHL-F148S-QPIFANITLPV  | 148   | >VHL-F148S-QPISANITLPV  | 101   | 47    |
| >VHL-F148S-QPIFANITL    | 118   | >VHL-F148S-QPISANITL    | 27    | 91    |
| >VHL-F148S-QPIFANITLPV  | 1901  | >VHL-F148S-QPISANITLPV  | 388   | 1513  |
| >VHL-F148S-QPIFANITL    | 373   | >VHL-F148S-QPISANITL    | 215   | 158   |
| >VHL-F148S-QPIFANITLPV  | 204   | >VHL-F148S-QPISANITLPV  | 168   | 36    |
| >VHL-F148S-GQPIFANI     | 412   | >VHL-F148S-GQPISANI     | 25063 | 24651 |
| >VHL-F148S-GQPIFANITL   | 236   | >VHL-F148S-GQPISANITL   | 577   | 341   |
| >VHL-F148S-GQPIFANI     | 241   | >VHL-F148S-GQPISANI     | 1146  | 905   |
| >VHL-F148S-GQPIFANITL   | 430   | >VHL-F148S-GQPISANITL   | 928   | 498   |
| >VHL-F148S-VDGQPIFANI   | 444   | >VHL-F148S-VDGQPISANI   | 1061  | 617   |
| >VHL-F148S-NVDGQPIFANI  | 253   | >VHL-F148S-NVDGQPISANI  | 407   | 154   |
| >VHL-F148S-NVDGQPIFANI  | 61    | >VHL-F148S-NVDGQPISANI  | 85    | 24    |
| >VHL-F148S-LNVDGQPIFANI | 423   | >VHL-F148S-LNVDGQPISANI | 22856 | 22433 |

|                        |       |                        |       |       |
|------------------------|-------|------------------------|-------|-------|
| >VHL-F148S-·SLNVDGQPIF | 120   | >VHL-F148S-·SLNVDGQPIS | 432   | 312   |
| >VHL-F148S-·SLNVDGQPIF | 71    | >VHL-F148S-·SLNVDGQPIS | 57    | 14    |
| >VHL-F148S-·SLNVDGQPIF | 58    | >VHL-F148S-·SLNVDGQPIS | 92    | 34    |
| >VHL-F148S-·SLNVDGQPIF | 235   | >VHL-F148S-·SLNVDGQPIS | 318   | 83    |
| >VHL-F148S-·SLNVDGQPIF | 29    | >VHL-F148S-·SLNVDGQPIS | 84    | 55    |
| >VHL-F148S-·SLNVDGQPIF | 42    | >VHL-F148S-·SLNVDGQPIS | 32    | 10    |
| >VHL-F148S-·SLNVDGQPIF | 186   | >VHL-F148S-·SLNVDGQPIS | 15213 | 15027 |
| >VHL-F148S-·SLNVDGQPIF | 261   | >VHL-F148S-·SLNVDGQPIS | 18687 | 18426 |
| >VHL-F148S-·SLNVDGQPIF | 93    | >VHL-F148S-·SLNVDGQPIS | 15709 | 15616 |
| >VHL-F76L-wFCNRSPRV    | 252   | >VHL-F76L-rLCNRSPRV    | 1727  | 1475  |
| >VHL-F76L-wFCNRSPRV    | 107   | >VHL-F76L-rLCNRSPRV    | 482   | 375   |
| >VHL-F76L-wIFCNRSPRV   | 14853 | >VHL-F76L-rILCNRSPRV   | 45    | 14808 |
| >VHL-F76L-wIFCNRSPRV   | 12700 | >VHL-F76L-rILCNRSPRV   | 233   | 12467 |
| >VHL-F76L-wIFCNRSPRVV  | 16001 | >VHL-F76L-rILCNRSPRVV  | 306   | 15695 |
| >VHL-F76L-wIFCNRSPRV   | 12980 | >VHL-F76L-rILCNRSPRV   | 32    | 12948 |
| >VHL-F76L-wIFCNRSPRVV  | 6412  | >VHL-F76L-rILCNRSPRVV  | 42    | 6370  |
| >VHL-F76L-wIFCNRSPRV   | 7487  | >VHL-F76L-rILCNRSPRV   | 141   | 7346  |
| >VHL-F76L-wIFCNRSPRV   | 1734  | >VHL-F76L-rILCNRSPRV   | 3     | 1731  |
| >VHL-F76L-wIFCNRSPRVV  | 4250  | >VHL-F76L-rILCNRSPRVV  | 6     | 4244  |
| >VHL-F76L-wIFCNRSPRVVI | 15781 | >VHL-F76L-rILCNRSPRVVI | 64    | 15717 |
| >VHL-F76L-wIFCNRSPRV   | 16630 | >VHL-F76L-rILCNRSPRV   | 128   | 16502 |
| >VHL-F76L-wIFCNRSPRVV  | 19659 | >VHL-F76L-rILCNRSPRVV  | 283   | 19376 |
| >VHL-F76L-wIFCNRSPRV   | 6700  | >VHL-F76L-rILCNRSPRV   | 12    | 6688  |
| >VHL-F76L-wIFCNRSPRVV  | 14090 | >VHL-F76L-rILCNRSPRVV  | 140   | 13950 |
| >VHL-F76L-wIFCNRSPRV   | 15888 | >VHL-F76L-rILCNRSPRV   | 18    | 15870 |
| >VHL-F76L-wIFCNRSPRVV  | 18788 | >VHL-F76L-rILCNRSPRVV  | 248   | 18540 |
| >VHL-F76L-wIFCNRSPRV   | 675   | >VHL-F76L-rILCNRSPRV   | 2     | 673   |
| >VHL-F76L-wIFCNRSPRVV  | 5374  | >VHL-F76L-rILCNRSPRVV  | 8     | 5366  |
| >VHL-F76L-wIFCNRSPRVVI | 14084 | >VHL-F76L-rILCNRSPRVVI | 14    | 14070 |
| >VHL-F76L-wIFCNRSPR    | 12479 | >VHL-F76L-rILCNRSPR    | 398   | 12081 |
| >VHL-F76L-wIFCNRSPR    | 15    | >VHL-F76L-rILCNRSPR    | 27    | 12    |
| >VHL-F76L-wIFCNRSPR    | 20    | >VHL-F76L-rILCNRSPR    | 62    | 42    |
| >VHL-F76L-wIFCNRSPR    | 639   | >VHL-F76L-rILCNRSPR    | 367   | 272   |
| >VHL-F76L-wIFCNRSPR    | 62    | >VHL-F76L-rILCNRSPR    | 215   | 153   |
| >VHL-F76L-wVNSREPSQVI  | 101   | >VHL-F76L-rVNSREPSQVI  | 2154  | 2053  |
| >VHL-F76L-wVIFCNRSPRV\ | 72    | >VHL-F76L-rVILCNRSPRV\ | 554   | 482   |
| >VHL-F76L-wVIFCNRSPRV  | 662   | >VHL-F76L-rVILCNRSPRV  | 400   | 262   |
| >VHL-F76L-wVIFCNRSPRV  | 7     | >VHL-F76L-rVILCNRSPRV  | 10    | 3     |
| >VHL-F76L-wVIFCNRSPRV\ | 15    | >VHL-F76L-rVILCNRSPRV\ | 23    | 8     |
| >VHL-F76L-wVIFCNRSPRV  | 86    | >VHL-F76L-rVILCNRSPRV  | 49    | 37    |
| >VHL-F76L-wVIFCNRSPRV\ | 191   | >VHL-F76L-rVILCNRSPRV\ | 115   | 76    |
| >VHL-F76L-wVIFCNRSPRV  | 70    | >VHL-F76L-rVILCNRSPRV  | 71    | 1     |
| >VHL-F76L-wVIFCNRSPRV  | 400   | >VHL-F76L-rVILCNRSPRV  | 53    | 347   |

|                          |      |                          |      |      |
|--------------------------|------|--------------------------|------|------|
| >VHL-F76L-w VIFCNRSRPRV  | 7    | >VHL-F76L-r VILCNRSRPRV  | 8    | 1    |
| >VHL-F76L-w VIFCNRSRPRV^ | 59   | >VHL-F76L-r VILCNRSRPRV^ | 120  | 61   |
| >VHL-F76L-w VIFCNRSRPR   | 427  | >VHL-F76L-r VILCNRSRPR   | 2976 | 2549 |
| >VHL-F76L-w VIFCNRSRPR   | 113  | >VHL-F76L-r VILCNRSRPR   | 702  | 589  |
| >VHL-F76L-w VIFCNRSRPR   | 23   | >VHL-F76L-r VILCNRSRPR   | 52   | 29   |
| >VHL-F76L-w VIFCNRSRPR   | 93   | >VHL-F76L-r VILCNRSRPR   | 178  | 85   |
| >VHL-F76L-w VIFCNRSRPR   | 24   | >VHL-F76L-r VILCNRSRPR   | 355  | 331  |
| >VHL-F76L-w VIFCNRSRPRV  | 508  | >VHL-F76L-r VILCNRSRPRV  | 253  | 255  |
| >VHL-F76L-w VIFCNRSRPRV^ | 360  | >VHL-F76L-r VILCNRSRPRV^ | 1644 | 1284 |
| >VHL-F76L-w QVIFCNRSRPR  | 214  | >VHL-F76L-r QVILCNRSRPR^ | 236  | 22   |
| >VHL-F76L-w QVIFCNRSRPR  | 305  | >VHL-F76L-r QVILCNRSRPR  | 1027 | 722  |
| >VHL-F76L-w QVIFCNRSRPR  | 381  | >VHL-F76L-r QVILCNRSRPR  | 764  | 383  |
| >VHL-F76L-w QVIFCNRSRPR  | 11   | >VHL-F76L-r QVILCNRSRPR  | 16   | 5    |
| >VHL-F76L-w QVIFCNRSRPR  | 114  | >VHL-F76L-r QVILCNRSRPR  | 117  | 3    |
| >VHL-F76L-w QVIFCNRSRPR  | 6    | >VHL-F76L-r QVILCNRSRPR  | 12   | 6    |
| >VHL-F76L-w QVIFCNRSRPR  | 36   | >VHL-F76L-r QVILCNRSRPR^ | 106  | 70   |
| >VHL-F76L-w QVIFCNRSRPR  | 178  | >VHL-F76L-r QVILCNRSRPR^ | 386  | 208  |
| >VHL-F76L-w QVIFCNRSRPR  | 175  | >VHL-F76L-r QVILCNRSRPR  | 158  | 17   |
| >VHL-F76L-w SQVIFCNR     | 54   | >VHL-F76L-r SQVILCNR     | 97   | 43   |
| >VHL-F76L-w SQVIFCNRSPI  | 47   | >VHL-F76L-r SQVILCNRSPI  | 58   | 11   |
| >VHL-F76L-w SQVIFCNR     | 423  | >VHL-F76L-r SQVILCNR     | 1194 | 771  |
| >VHL-F76L-w SQVIFCNRSPI  | 436  | >VHL-F76L-r SQVILCNRSPI  | 1044 | 608  |
| >VHL-F76L-w SQVIFCNRSPI  | 301  | >VHL-F76L-r SQVILCNRSPI  | 654  | 353  |
| >VHL-F76L-w SQVIFCNR     | 74   | >VHL-F76L-r SQVILCNR     | 225  | 151  |
| >VHL-F76L-w SQVIFCNRSPI  | 150  | >VHL-F76L-r SQVILCNRSPI  | 292  | 142  |
| >VHL-F76L-w PSQVIFCNR    | 125  | >VHL-F76L-r PSQVILCNR    | 441  | 316  |
| >VHL-F76L-w PSQVIFCNR    | 362  | >VHL-F76L-r PSQVILCNR    | 1138 | 776  |
| >VHL-F76L-w EPSQVIFCNR   | 355  | >VHL-F76L-r EPSQVILCNR   | 778  | 423  |
| >VHL-F76L-w EPSQVIFCNR   | 388  | >VHL-F76L-r EPSQVILCNR   | 890  | 502  |
| >VHL-F76L-w EPSQVIFCNR   | 91   | >VHL-F76L-r EPSQVILCNR   | 93   | 2    |
| >VHL-F76L-w EPSQVIFCNR   | 213  | >VHL-F76L-r EPSQVILCNR   | 551  | 338  |
| >VHL-F76L-w REPSQVIF     | 56   | >VHL-F76L-r REPSQVIL     | 1761 | 1705 |
| >VHL-F76L-w REPSQVIF     | 1332 | >VHL-F76L-r REPSQVIL     | 116  | 1216 |
| >VHL-F76L-w REPSQVIF     | 1459 | >VHL-F76L-r REPSQVIL     | 495  | 964  |
| >VHL-F76L-w REPSQVIFCN   | 43   | >VHL-F76L-r REPSQVILCNI  | 78   | 35   |
| >VHL-F76L-w SREPSQVIF    | 78   | >VHL-F76L-r SREPSQVIL    | 919  | 841  |
| >VHL-F76L-w SREPSQVIF    | 1302 | >VHL-F76L-r SREPSQVIL    | 46   | 1256 |
| >VHL-F76L-w SREPSQVIF    | 1449 | >VHL-F76L-r SREPSQVIL    | 407  | 1042 |
| >VHL-F76L-w SREPSQVIF    | 185  | >VHL-F76L-r SREPSQVIL    | 61   | 124  |
| >VHL-F76L-w NSREPSQVIF   | 13   | >VHL-F76L-r NSREPSQVIL   | 132  | 119  |
| >VHL-F76L-w NSREPSQVIF   | 127  | >VHL-F76L-r NSREPSQVIL   | 1308 | 1181 |
| >VHL-F76S-w FCNRSRPRV    | 252  | >VHL-F76S-r SCNRSRPRV    | 1419 | 1167 |
| >VHL-F76S-w FCNRSRPRV    | 107  | >VHL-F76S-r SCNRSRPRV    | 745  | 638  |

|                         |       |                          |       |       |
|-------------------------|-------|--------------------------|-------|-------|
| >VHL-F76S-w IFCNRSPR    | 9491  | >VHL-F76S-r ISCNRSRPR    | 367   | 9124  |
| >VHL-F76S-w IFCNRSPR    | 15    | >VHL-F76S-r ISCNRSRPR    | 17    | 2     |
| >VHL-F76S-w IFCNRSPR    | 20    | >VHL-F76S-r ISCNRSRPR    | 83    | 63    |
| >VHL-F76S-w IFCNRSPR    | 639   | >VHL-F76S-r ISCNRSRPR    | 86    | 553   |
| >VHL-F76S-w IFCNRSPRVVI | 5319  | >VHL-F76S-r ISCNRSRPRVVI | 385   | 4934  |
| >VHL-F76S-w IFCNRSPRV   | 25111 | >VHL-F76S-r ISCNRSRPRV   | 187   | 24924 |
| >VHL-F76S-w IFCNRSPRVVI | 22518 | >VHL-F76S-r ISCNRSRPRVVI | 36    | 22482 |
| >VHL-F76S-w IFCNRSPRVVI | 7072  | >VHL-F76S-r ISCNRSRPRVVI | 287   | 6785  |
| >VHL-F76S-w IFCNRSPR    | 62    | >VHL-F76S-r ISCNRSRPR    | 1200  | 1138  |
| >VHL-F76S-w IFCNRSPRVV  | 24260 | >VHL-F76S-r ISCNRSRPRVV  | 459   | 23801 |
| >VHL-F76S-w IFCNRSPRVVI | 19202 | >VHL-F76S-r ISCNRSRPRVVI | 314   | 18888 |
| >VHL-F76S-w VNSREPSQVI  | 101   | >VHL-F76S-r VNSREPSQVI   | 17073 | 16972 |
| >VHL-F76S-w VIFCNRSRPRV | 72    | >VHL-F76S-r VISCNRSPRV   | 108   | 36    |
| >VHL-F76S-w VIFCNRSRPRV | 7     | >VHL-F76S-r VISCNRSPRV   | 77    | 70    |
| >VHL-F76S-w VIFCNRSRPRV | 15    | >VHL-F76S-r VISCNRSPRV   | 210   | 195   |
| >VHL-F76S-w VIFCNRSRPRV | 86    | >VHL-F76S-r VISCNRSPRV   | 353   | 267   |
| >VHL-F76S-w VIFCNRSRPRV | 191   | >VHL-F76S-r VISCNRSPRV   | 837   | 646   |
| >VHL-F76S-w VIFCNRSRPRV | 70    | >VHL-F76S-r VISCNRSPRV   | 423   | 353   |
| >VHL-F76S-w VIFCNRSRPRV | 400   | >VHL-F76S-r VISCNRSPRV   | 394   | 6     |
| >VHL-F76S-w VIFCNRSRPRV | 7     | >VHL-F76S-r VISCNRSPRV   | 10    | 3     |
| >VHL-F76S-w VIFCNRSRPRV | 59    | >VHL-F76S-r VISCNRSPRV   | 184   | 125   |
| >VHL-F76S-w VIFCNRSRPR  | 427   | >VHL-F76S-r VISCNRSPR    | 2324  | 1897  |
| >VHL-F76S-w VIFCNRSRPR  | 113   | >VHL-F76S-r VISCNRSPR    | 670   | 557   |
| >VHL-F76S-w VIFCNRSRPR  | 23    | >VHL-F76S-r VISCNRSPR    | 89    | 66    |
| >VHL-F76S-w VIFCNRSRPR  | 93    | >VHL-F76S-r VISCNRSPR    | 334   | 241   |
| >VHL-F76S-w VIFCNRSRPR  | 24    | >VHL-F76S-r VISCNRSPR    | 82    | 58    |
| >VHL-F76S-w VIFCNRSRPRV | 360   | >VHL-F76S-r VISCNRSPRV   | 2725  | 2365  |
| >VHL-F76S-w QVIFCNRSRPR | 214   | >VHL-F76S-r QVISCNRSPR   | 192   | 22    |
| >VHL-F76S-w QVIFCNRSRPR | 511   | >VHL-F76S-r QVISCNRSPR   | 208   | 303   |
| >VHL-F76S-w QVIFCNRSRPR | 305   | >VHL-F76S-r QVISCNRSPR   | 911   | 606   |
| >VHL-F76S-w QVIFCNRSRPR | 381   | >VHL-F76S-r QVISCNRSPR   | 689   | 308   |
| >VHL-F76S-w QVIFCNRSRPR | 11    | >VHL-F76S-r QVISCNRSPR   | 21    | 10    |
| >VHL-F76S-w QVIFCNRSRPR | 114   | >VHL-F76S-r QVISCNRSPR   | 136   | 22    |
| >VHL-F76S-w QVIFCNRSRPR | 6     | >VHL-F76S-r QVISCNRSPR   | 9     | 3     |
| >VHL-F76S-w QVIFCNRSRPR | 36    | >VHL-F76S-r QVISCNRSPR   | 60    | 24    |
| >VHL-F76S-w QVIFCNRSRPR | 178   | >VHL-F76S-r QVISCNRSPR   | 147   | 31    |
| >VHL-F76S-w QVIFCNRSRPR | 175   | >VHL-F76S-r QVISCNRSPR   | 203   | 28    |
| >VHL-F76S-w SQVIFCNR    | 54    | >VHL-F76S-r SQVISCNR     | 156   | 102   |
| >VHL-F76S-w SQVIFCNRSP  | 47    | >VHL-F76S-r SQVISCNRSP   | 74    | 27    |
| >VHL-F76S-w SQVIFCNR    | 423   | >VHL-F76S-r SQVISCNR     | 943   | 520   |
| >VHL-F76S-w SQVIFCNRSP  | 436   | >VHL-F76S-r SQVISCNRSP   | 779   | 343   |
| >VHL-F76S-w SQVIFCNRSP  | 301   | >VHL-F76S-r SQVISCNRSP   | 235   | 66    |
| >VHL-F76S-w SQVIFCNR    | 74    | >VHL-F76S-r SQVISCNR     | 278   | 204   |

|                         |       |                         |       |       |
|-------------------------|-------|-------------------------|-------|-------|
| >VHL-F76S-w SQVIFCNRSP  | 150   | >VHL-F76S-r SQVISCNRSP  | 542   | 392   |
| >VHL-F76S-w PSQVIFCNR   | 125   | >VHL-F76S-r PSQVISCNR   | 972   | 847   |
| >VHL-F76S-w PSQVIFCNR   | 362   | >VHL-F76S-r PSQVISCNR   | 2035  | 1673  |
| >VHL-F76S-w EPSQVIFCNR  | 355   | >VHL-F76S-r EPSQVISCNR  | 1152  | 797   |
| >VHL-F76S-w EPSQVIFCNR  | 388   | >VHL-F76S-r EPSQVISCNR  | 1184  | 796   |
| >VHL-F76S-w EPSQVIFCNR  | 91    | >VHL-F76S-r EPSQVISCNR  | 59    | 32    |
| >VHL-F76S-w EPSQVIFCNR  | 213   | >VHL-F76S-r EPSQVISCNR  | 735   | 522   |
| >VHL-F76S-w REPSQVIF    | 56    | >VHL-F76S-r REPSQVIS    | 14336 | 14280 |
| >VHL-F76S-w REPSQVIFCN  | 43    | >VHL-F76S-r REPSQVISCN  | 69    | 26    |
| >VHL-F76S-w SREPSQVIF   | 78    | >VHL-F76S-r SREPSQVIS   | 9768  | 9690  |
| >VHL-F76S-w SREPSQVIF   | 185   | >VHL-F76S-r SREPSQVIS   | 9734  | 9549  |
| >VHL-F76S-w NSREPSQVIF  | 13    | >VHL-F76S-r NSREPSQVIS  | 12593 | 12580 |
| >VHL-F76S-w NSREPSQVIF  | 127   | >VHL-F76S-r NSREPSQVIS  | 18623 | 18496 |
| >VHL-F76Y-w FCNRSPRV    | 252   | >VHL-F76Y-r YCNRSPRV    | 197   | 55    |
| >VHL-F76Y-w FCNRSPRV    | 107   | >VHL-F76Y-r YCNRSPRV    | 97    | 10    |
| >VHL-F76Y-w IFCNRSPRVV  | 10694 | >VHL-F76Y-r IYCNRSPRVV  | 484   | 10210 |
| >VHL-F76Y-w IFCNRSPRVV  | 2667  | >VHL-F76Y-r IYCNRSPRVV  | 450   | 2217  |
| >VHL-F76Y-w IFCNRSPRVV  | 894   | >VHL-F76Y-r IYCNRSPRVV  | 35    | 859   |
| >VHL-F76Y-w IFCNRSPR    | 15    | >VHL-F76Y-r IYCNRSPR    | 19    | 4     |
| >VHL-F76Y-w IFCNRSPR    | 20    | >VHL-F76Y-r IYCNRSPR    | 20    | 0     |
| >VHL-F76Y-w IFCNRSPR    | 62    | >VHL-F76Y-r IYCNRSPR    | 32    | 30    |
| >VHL-F76Y-w VNSREPSQVI  | 101   | >VHL-F76Y-r VNSREPSQVI  | 404   | 303   |
| >VHL-F76Y-w VIFCNRSPRV  | 646   | >VHL-F76Y-r VIYCNRSPRV  | 489   | 157   |
| >VHL-F76Y-w VIFCNRSPRV' | 72    | >VHL-F76Y-r VIYCNRSPRV' | 33    | 39    |
| >VHL-F76Y-w VIFCNRSPRV  | 7     | >VHL-F76Y-r VIYCNRSPRV  | 6     | 1     |
| >VHL-F76Y-w VIFCNRSPRV' | 15    | >VHL-F76Y-r VIYCNRSPRV' | 12    | 3     |
| >VHL-F76Y-w VIFCNRSPRV  | 86    | >VHL-F76Y-r VIYCNRSPRV  | 61    | 25    |
| >VHL-F76Y-w VIFCNRSPRV' | 191   | >VHL-F76Y-r VIYCNRSPRV' | 142   | 49    |
| >VHL-F76Y-w VIFCNRSPRV  | 70    | >VHL-F76Y-r VIYCNRSPRV  | 54    | 16    |
| >VHL-F76Y-w VIFCNRSPRV  | 400   | >VHL-F76Y-r VIYCNRSPRV  | 399   | 1     |
| >VHL-F76Y-w VIFCNRSPRV  | 7     | >VHL-F76Y-r VIYCNRSPRV  | 6     | 1     |
| >VHL-F76Y-w VIFCNRSPRV' | 59    | >VHL-F76Y-r VIYCNRSPRV' | 46    | 13    |
| >VHL-F76Y-w VIFCNRSPR   | 427   | >VHL-F76Y-r VIYCNRSPR   | 164   | 263   |
| >VHL-F76Y-w VIFCNRSPR   | 113   | >VHL-F76Y-r VIYCNRSPR   | 153   | 40    |
| >VHL-F76Y-w VIFCNRSPR   | 23    | >VHL-F76Y-r VIYCNRSPR   | 26    | 3     |
| >VHL-F76Y-w VIFCNRSPR   | 93    | >VHL-F76Y-r VIYCNRSPR   | 143   | 50    |
| >VHL-F76Y-w VIFCNRSPR   | 24    | >VHL-F76Y-r VIYCNRSPR   | 50    | 26    |
| >VHL-F76Y-w VIFCNRSPRV  | 508   | >VHL-F76Y-r VIYCNRSPRV  | 253   | 255   |
| >VHL-F76Y-w VIFCNRSPRV' | 360   | >VHL-F76Y-r VIYCNRSPRV' | 482   | 122   |
| >VHL-F76Y-w QVIFCNRSPR  | 214   | >VHL-F76Y-r QVIYCNRSPR  | 190   | 24    |
| >VHL-F76Y-w QVIFCNRSPR  | 305   | >VHL-F76Y-r QVIYCNRSPR  | 297   | 8     |
| >VHL-F76Y-w QVIFCNRSPR  | 381   | >VHL-F76Y-r QVIYCNRSPR  | 498   | 117   |
| >VHL-F76Y-w QVIFCNRSPR  | 11    | >VHL-F76Y-r QVIYCNRSPR  | 18    | 7     |

|                         |       |                         |      |       |
|-------------------------|-------|-------------------------|------|-------|
| >VHL-F76Y-w QVIFCNRSR   | 114   | >VHL-F76Y-r QVIYCNRSR   | 129  | 15    |
| >VHL-F76Y-w QVIFCNRSR   | 6     | >VHL-F76Y-r QVIYCNRSR   | 8    | 2     |
| >VHL-F76Y-w QVIFCNRSR   | 36    | >VHL-F76Y-r QVIYCNRSR   | 40   | 4     |
| >VHL-F76Y-w QVIFCNRSR   | 178   | >VHL-F76Y-r QVIYCNRSR   | 250  | 72    |
| >VHL-F76Y-w QVIFCNRSR   | 175   | >VHL-F76Y-r QVIYCNRSR   | 225  | 50    |
| >VHL-F76Y-w SQVIFCNR    | 54    | >VHL-F76Y-r SQVIYCNR    | 56   | 2     |
| >VHL-F76Y-w SQVIFCNRSPI | 47    | >VHL-F76Y-r SQVIYCNRSPI | 48   | 1     |
| >VHL-F76Y-w SQVIFCNR    | 423   | >VHL-F76Y-r SQVIYCNR    | 858  | 435   |
| >VHL-F76Y-w SQVIFCNRSPI | 436   | >VHL-F76Y-r SQVIYCNRSPI | 798  | 362   |
| >VHL-F76Y-w SQVIFCNRSPI | 301   | >VHL-F76Y-r SQVIYCNRSPI | 328  | 27    |
| >VHL-F76Y-w SQVIFCNR    | 74    | >VHL-F76Y-r SQVIYCNR    | 162  | 88    |
| >VHL-F76Y-w SQVIFCNRSPI | 150   | >VHL-F76Y-r SQVIYCNRSPI | 300  | 150   |
| >VHL-F76Y-w PSQVIFCNR   | 125   | >VHL-F76Y-r PSQVIYCNR   | 162  | 37    |
| >VHL-F76Y-w PSQVIFCNR   | 362   | >VHL-F76Y-r PSQVIYCNR   | 624  | 262   |
| >VHL-F76Y-w EPSQVIFCNR  | 355   | >VHL-F76Y-r EPSQVIYCNR  | 590  | 235   |
| >VHL-F76Y-w EPSQVIFCNR  | 388   | >VHL-F76Y-r EPSQVIYCNR  | 443  | 55    |
| >VHL-F76Y-w EPSQVIFCNR  | 91    | >VHL-F76Y-r EPSQVIYCNR  | 89   | 2     |
| >VHL-F76Y-w EPSQVIFCNR  | 213   | >VHL-F76Y-r EPSQVIYCNR  | 255  | 42    |
| >VHL-F76Y-w REPSQVIF    | 56    | >VHL-F76Y-r REPSQVIY    | 314  | 258   |
| >VHL-F76Y-w REPSQVIFCN  | 43    | >VHL-F76Y-r REPSQVIYCN  | 51   | 8     |
| >VHL-F76Y-w SREPSQVIF   | 78    | >VHL-F76Y-r SREPSQVIY   | 252  | 174   |
| >VHL-F76Y-w SREPSQVIF   | 185   | >VHL-F76Y-r SREPSQVIY   | 1105 | 920   |
| >VHL-F76Y-w NSREPSQVIF  | 527   | >VHL-F76Y-r NSREPSQVIY  | 375  | 152   |
| >VHL-F76Y-w NSREPSQVIF  | 984   | >VHL-F76Y-r NSREPSQVIY  | 415  | 569   |
| >VHL-F76Y-w NSREPSQVIF  | 13    | >VHL-F76Y-r NSREPSQVIY  | 18   | 5     |
| >VHL-F76Y-w NSREPSQVIF  | 127   | >VHL-F76Y-r NSREPSQVIY  | 107  | 20    |
| >VHL-F91L-w NFDGEPQPY   | 5992  | >VHL-F91L-r NLDGEPQPY   | 106  | 5886  |
| >VHL-F91L-w NFDGEPQPY   | 20550 | >VHL-F91L-r NLDGEPQPY   | 225  | 20325 |
| >VHL-F91L-w NFDGEPQPY   | 338   | >VHL-F91L-r NLDGEPQPY   | 1127 | 789   |
| >VHL-F91L-w NFDGEPQPY   | 955   | >VHL-F91L-r NLDGEPQPY   | 226  | 729   |
| >VHL-F91L-w PRVVLPVWLI  | 364   | >VHL-F91L-r PRVVLPVWLI  | 2661 | 2297  |
| >VHL-F91L-w PRVVLPVWLI  | 385   | >VHL-F91L-r PRVVLPVWLI  | 92   | 293   |
| >VHL-F91L-w LNFDGEPQPY  | 165   | >VHL-F91L-r LNLDGEPQPY  | 1145 | 980   |
| >VHL-F91L-w LNFDGEPQPY  | 111   | >VHL-F91L-r LNLDGEPQPY  | 557  | 446   |
| >VHL-F91L-w WLNFDGEPQ   | 50    | >VHL-F91L-r WLNLDGEPQ   | 118  | 68    |
| >VHL-F91L-w WLNFDGEPQ   | 54    | >VHL-F91L-r WLNLDGEPQ   | 78   | 24    |
| >VHL-F91L-w WLNFDGEPQ   | 52    | >VHL-F91L-r WLNLDGEPQ   | 66   | 14    |
| >VHL-F91L-w WLNFDGEPQ   | 102   | >VHL-F91L-r WLNLDGEPQ   | 158  | 56    |
| >VHL-F91L-w WLNFDGEPQ   | 90    | >VHL-F91L-r WLNLDGEPQ   | 106  | 16    |
| >VHL-F91L-w WLNFDGEPQ   | 182   | >VHL-F91L-r WLNLDGEPQ   | 553  | 371   |
| >VHL-F91L-w VWLNLDGE    | 227   | >VHL-F91L-r VWLNLDGE    | 320  | 93    |
| >VHL-F91L-w VWLNLDGEP   | 304   | >VHL-F91L-r VWLNLDGEP   | 485  | 181   |
| >VHL-F91L-w LPVWLNLDG   | 285   | >VHL-F91L-r LPVWLNLDG   | 464  | 179   |

|                       |       |                       |      |       |
|-----------------------|-------|-----------------------|------|-------|
| >VHL-F91L-w LPVWLNFD  | 106   | >VHL-F91L-r LPVWLNLD  | 50   | 56    |
| >VHL-F91L-w LPVWLNFDG | 251   | >VHL-F91L-r LPVWLNLDG | 1357 | 1106  |
| >VHL-F91L-w LPVWLNFDG | 345   | >VHL-F91L-r LPVWLNLDG | 561  | 216   |
| >VHL-F91L-w VLPVWLNF  | 5930  | >VHL-F91L-r VLPVWLNL  | 160  | 5770  |
| >VHL-F91L-w VLPVWLNF  | 13275 | >VHL-F91L-r VLPVWLNL  | 170  | 13105 |
| >VHL-F91L-w VLPVWLNF  | 7834  | >VHL-F91L-r VLPVWLNL  | 234  | 7600  |
| >VHL-F91L-w VLPVWLNF  | 8014  | >VHL-F91L-r VLPVWLNL  | 268  | 7746  |
| >VHL-F91L-w VLPVWLNF  | 3053  | >VHL-F91L-r VLPVWLNL  | 326  | 2727  |
| >VHL-F91L-w VLPVWLNF  | 1928  | >VHL-F91L-r VLPVWLNL  | 20   | 1908  |
| >VHL-F91L-w VLPVWLNF  | 14851 | >VHL-F91L-r VLPVWLNL  | 301  | 14550 |
| >VHL-F91L-w VLPVWLNF  | 8737  | >VHL-F91L-r VLPVWLNL  | 26   | 8711  |
| >VHL-F91L-w VLPVWLNF  | 18890 | >VHL-F91L-r VLPVWLNL  | 209  | 18681 |
| >VHL-F91L-w VLPVWLNF  | 3365  | >VHL-F91L-r VLPVWLNL  | 7    | 3358  |
| >VHL-F91L-w VLPVWLNF  | 235   | >VHL-F91L-r VLPVWLNL  | 3319 | 3084  |
| >VHL-F91L-w VLPVWLNF  | 454   | >VHL-F91L-r VLPVWLNL  | 4031 | 3577  |
| >VHL-F91L-w VVLPVWLNF | 443   | >VHL-F91L-r VVLPVWLNL | 257  | 186   |
| >VHL-F91L-w VVLPVWLNF | 15148 | >VHL-F91L-r VVLPVWLNL | 359  | 14789 |
| >VHL-F91L-w VVLPVWLNF | 261   | >VHL-F91L-r VVLPVWLNL | 25   | 236   |
| >VHL-F91L-w VVLPVWLNF | 6024  | >VHL-F91L-r VVLPVWLNL | 64   | 5960  |
| >VHL-F91L-w VVLPVWLNF | 9989  | >VHL-F91L-r VVLPVWLNL | 72   | 9917  |
| >VHL-F91L-w VVLPVWLNF | 21348 | >VHL-F91L-r VVLPVWLNL | 405  | 20943 |
| >VHL-F91L-w VVLPVWLNF | 42    | >VHL-F91L-r VVLPVWLNL | 971  | 929   |
| >VHL-F91L-w VVLPVWLNF | 449   | >VHL-F91L-r VVLPVWLNL | 3505 | 3056  |
| >VHL-F91L-w VVLPVWLNF | 190   | >VHL-F91L-r VVLPVWLNL | 3599 | 3409  |
| >VHL-F91L-w VVLPVWLNF | 70    | >VHL-F91L-r VVLPVWLNL | 3422 | 3352  |
| >VHL-F91L-w VVLPVWLNF | 461   | >VHL-F91L-r VVLPVWLNL | 4451 | 3990  |
| >VHL-F91L-w VVLPVWLNF | 20    | >VHL-F91L-r VVLPVWLNL | 247  | 227   |
| >VHL-F91L-w VVLPVWLNF | 399   | >VHL-F91L-r VVLPVWLNL | 2565 | 2166  |
| >VHL-F91L-w RVVLPVWLN | 182   | >VHL-F91L-r RVVLPVWLN | 1283 | 1101  |
| >VHL-F91L-w RVVLPVWLN | 202   | >VHL-F91L-r RVVLPVWLN | 1087 | 885   |
| >VHL-F91L-w RVVLPVWLN | 355   | >VHL-F91L-r RVVLPVWLN | 4134 | 3779  |
| >VHL-F91L-w RVVLPVWLN | 9     | >VHL-F91L-r RVVLPVWLN | 49   | 40    |
| >VHL-F91L-w RVVLPVWLN | 56    | >VHL-F91L-r RVVLPVWLN | 1040 | 984   |
| >VHL-F91L-w RVVLPVWLN | 230   | >VHL-F91L-r RVVLPVWLN | 2448 | 2218  |
| >VHL-F91L-w RVVLPVWLN | 320   | >VHL-F91L-r RVVLPVWLN | 253  | 67    |
| >VHL-G106A·GRRHSYRGH  | 212   | >VHL-G106A·ARRHSYRGH  | 243  | 31    |
| >VHL-G106A·GRRHSYRGH  | 174   | >VHL-G106A·ARRHSYRGH  | 188  | 14    |
| >VHL-G106A·GRRHSYRGH  | 13    | >VHL-G106A·ARRHSYRGH  | 17   | 4     |
| >VHL-G106A·TGRRHSY    | 1160  | >VHL-G106A·TARRHSY    | 141  | 1019  |
| >VHL-G106A·TGRRHSYR   | 148   | >VHL-G106A·TARRHSYR   | 22   | 126   |
| >VHL-G106A·TGRRHSY    | 185   | >VHL-G106A·TARRHSY    | 166  | 19    |
| >VHL-G106A·TGRRHSYR   | 14    | >VHL-G106A·TARRHSYR   | 7    | 7     |
| >VHL-G106A·TGRRHSYR   | 1285  | >VHL-G106A·TARRHSYR   | 20   | 1265  |

|                       |       |                       |      |       |
|-----------------------|-------|-----------------------|------|-------|
| >VHL-G106A·TGRRIHSYR  | 104   | >VHL-G106A·TARRIHSYR  | 6    | 98    |
| >VHL-G106A·TGRRIHSY   | 819   | >VHL-G106A·TARRIHSY   | 327  | 492   |
| >VHL-G106A·TGRRIHSY   | 2973  | >VHL-G106A·TARRIHSY   | 312  | 2661  |
| >VHL-G106A·TGRRIHSY   | 1951  | >VHL-G106A·TARRIHSY   | 67   | 1884  |
| >VHL-G106A·TGRRIHSY   | 2863  | >VHL-G106A·TARRIHSY   | 209  | 2654  |
| >VHL-G106A·QPYPTLPPGT | 1050  | >VHL-G106A·QPYPTLPPGT | 24   | 1026  |
| >VHL-G106A·GTGRIHSY   | 2389  | >VHL-G106A·GTARRIHSY  | 473  | 1916  |
| >VHL-G106A·GTGRIHSYR  | 452   | >VHL-G106A·GTARRIHSYR | 243  | 209   |
| >VHL-G106A·GTGRIHSY   | 643   | >VHL-G106A·GTARRIHSY  | 130  | 513   |
| >VHL-G106A·GTGRIHSYR  | 568   | >VHL-G106A·GTARRIHSYR | 150  | 418   |
| >VHL-G106A·GTGRIHSY   | 1317  | >VHL-G106A·GTARRIHSY  | 225  | 1092  |
| >VHL-G106A·GTGRIHSY   | 10865 | >VHL-G106A·GTARRIHSY  | 247  | 10618 |
| >VHL-G106A·GTGRIHSY   | 415   | >VHL-G106A·GTARRIHSY  | 53   | 362   |
| >VHL-G106A·GTGRIHSY   | 316   | >VHL-G106A·GTARRIHSY  | 115  | 201   |
| >VHL-G106A·GTGRIHSY   | 74    | >VHL-G106A·GTARRIHSY  | 26   | 48    |
| >VHL-G106A·GTGRIHSYR  | 38    | >VHL-G106A·GTARRIHSYR | 27   | 11    |
| >VHL-G106A·GTGRIHSYR  | 117   | >VHL-G106A·GTARRIHSYR | 97   | 20    |
| >VHL-G106A·GTGRIHSYR  | 245   | >VHL-G106A·GTARRIHSYR | 16   | 229   |
| >VHL-G106A·GTGRIHSY   | 439   | >VHL-G106A·GTARRIHSY  | 835  | 396   |
| >VHL-G106A·GTGRIHSY   | 491   | >VHL-G106A·GTARRIHSY  | 242  | 249   |
| >VHL-G106A·GTGRIHSY   | 91    | >VHL-G106A·GTARRIHSY  | 13   | 78    |
| >VHL-G106A·GTGRIHSY   | 131   | >VHL-G106A·GTARRIHSY  | 31   | 100   |
| >VHL-G106A·GTGRIHSY   | 1078  | >VHL-G106A·GTARRIHSY  | 399  | 679   |
| >VHL-G106A·GTGRIHSY   | 623   | >VHL-G106A·GTARRIHSY  | 206  | 417   |
| >VHL-G106A·GTGRIHSYR  | 400   | >VHL-G106A·GTARRIHSYR | 145  | 255   |
| >VHL-G106A·PGTGRIHSY  | 524   | >VHL-G106A·PGTARRIHSY | 435  | 89    |
| >VHL-G106A·LPPGTGRI   | 158   | >VHL-G106A·LPPGTARRI  | 548  | 390   |
| >VHL-G106A·TLPPGTGRI  | 214   | >VHL-G106A·TLPPGTARRI | 145  | 69    |
| >VHL-G106A·TLPPGTGRI  | 83    | >VHL-G106A·TLPPGTARRI | 39   | 44    |
| >VHL-G106A·TLPPGTGRR  | 1209  | >VHL-G106A·TLPPGTARR  | 410  | 799   |
| >VHL-G106A·TLPPGTGRI  | 926   | >VHL-G106A·TLPPGTARRI | 287  | 639   |
| >VHL-G106A·TLPPGTGRR  | 1015  | >VHL-G106A·TLPPGTARR  | 448  | 567   |
| >VHL-G106A·PTLPPGTGRR | 139   | >VHL-G106A·PTLPPGTARR | 134  | 5     |
| >VHL-G106A·YPTLPPGTGR | 474   | >VHL-G106A·YPTLPPGTAR | 373  | 101   |
| >VHL-G106A·YPTLPPGTG  | 410   | >VHL-G106A·YPTLPPGTA  | 11   | 399   |
| >VHL-G106A·PYPTLPPGTG | 66    | >VHL-G106A·PYPTLPPGTA | 97   | 31    |
| >VHL-G106D·GRIHSYR    | 8381  | >VHL-G106D·DRRIHSYR   | 265  | 8116  |
| >VHL-G106D·GRIHSYRGH  | 212   | >VHL-G106D·DRRIHSYRGH | 4022 | 3810  |
| >VHL-G106D·GRIHSYRGH  | 174   | >VHL-G106D·DRRIHSYRGH | 1479 | 1305  |
| >VHL-G106D·GRIHSYRGH  | 13    | >VHL-G106D·DRRIHSYRGH | 258  | 245   |
| >VHL-G106D·TGRRIHSYR  | 148   | >VHL-G106D·TDRRIHSYR  | 4899 | 4751  |
| >VHL-G106D·TGRRIHSY   | 185   | >VHL-G106D·TDRRIHSY   | 1979 | 1794  |
| >VHL-G106D·TGRRIHSYR  | 14    | >VHL-G106D·TDRRIHSYR  | 132  | 118   |



|                       |      |                       |      |      |
|-----------------------|------|-----------------------|------|------|
| >VHL-G106D TGRRHSYR   | 104  | >VHL-G106D TDRRIHSYR  | 333  | 229  |
| >VHL-G106D GTGRRHSY   | 2389 | >VHL-G106D GTDRRIHSY  | 15   | 2374 |
| >VHL-G106D GTGRRHSYR  | 452  | >VHL-G106D GTDRRIHSYR | 674  | 222  |
| >VHL-G106D GTGRRHSYR  | 568  | >VHL-G106D GTDRRIHSYR | 372  | 196  |
| >VHL-G106D GTGRRHSY   | 415  | >VHL-G106D GTDRRIHSY  | 5211 | 4796 |
| >VHL-G106D GTGRRHSY   | 316  | >VHL-G106D GTDRRIHSY  | 961  | 645  |
| >VHL-G106D GTGRRHSY   | 74   | >VHL-G106D GTDRRIHSY  | 101  | 27   |
| >VHL-G106D GTGRRHSYR  | 38   | >VHL-G106D GTDRRIHSYR | 58   | 20   |
| >VHL-G106D GTGRRHSYR  | 117  | >VHL-G106D GTDRRIHSYR | 192  | 75   |
| >VHL-G106D GTGRRHSYR  | 245  | >VHL-G106D GTDRRIHSYR | 241  | 4    |
| >VHL-G106D GTGRRHSY   | 439  | >VHL-G106D GTDRRIHSY  | 1154 | 715  |
| >VHL-G106D GTGRRHSY   | 491  | >VHL-G106D GTDRRIHSY  | 5818 | 5327 |
| >VHL-G106D GTGRRHSY   | 91   | >VHL-G106D GTDRRIHSY  | 41   | 50   |
| >VHL-G106D GTGRRHSY   | 131  | >VHL-G106D GTDRRIHSY  | 116  | 15   |
| >VHL-G106D GTGRRHSY   | 1078 | >VHL-G106D GTDRRIHSY  | 300  | 778  |
| >VHL-G106D GTGRRHSYR  | 400  | >VHL-G106D GTDRRIHSYR | 395  | 5    |
| >VHL-G106D PGTGRRHSY  | 524  | >VHL-G106D PGTDRRIHSY | 406  | 118  |
| >VHL-G106D LPPGTGRR   | 158  | >VHL-G106D LPPGTDRRI  | 2372 | 2214 |
| >VHL-G106D TLPPGTGRR  | 214  | >VHL-G106D TLPPGTDRRI | 334  | 120  |
| >VHL-G106D TLPPGTGRR  | 83   | >VHL-G106D TLPPGTDRRI | 94   | 11   |
| >VHL-G106D PTLPPGTGRR | 139  | >VHL-G106D PTLPPGTDRR | 186  | 47   |
| >VHL-G106D YPTLPPGTGR | 474  | >VHL-G106D YPTLPPGTDR | 741  | 267  |
| >VHL-G106D YPTLPPGTG  | 410  | >VHL-G106D YPTLPPGTD  | 856  | 446  |
| >VHL-G106D PYPTLPPGTG | 66   | >VHL-G106D PYPTLPPGTD | 188  | 122  |
| >VHL-G114A RGHLWLF    | 2228 | >VHL-G114A RAHLWLF    | 158  | 2070 |
| >VHL-G114A RGHLWLF    | 160  | >VHL-G114A RAHLWLF    | 31   | 129  |
| >VHL-G114A RGHLWLF    | 2104 | >VHL-G114A RAHLWLF    | 273  | 1831 |
| >VHL-G114A RGHLWLF    | 15   | >VHL-G114A RAHLWLF    | 7    | 8    |
| >VHL-G114A RGHLWLF    | 7361 | >VHL-G114A RAHLWLF    | 163  | 7198 |
| >VHL-G114A RGHLWLF    | 4446 | >VHL-G114A RAHLWLF    | 224  | 4222 |
| >VHL-G114A RGHLWLF    | 33   | >VHL-G114A RAHLWLF    | 52   | 19   |
| >VHL-G114A YRGHLWLF   | 762  | >VHL-G114A YRAHLWLF   | 430  | 332  |
| >VHL-G114A YRGHLWLF   | 856  | >VHL-G114A YRAHLWLF   | 349  | 507  |
| >VHL-G114A YRGHLWLF   | 3575 | >VHL-G114A YRAHLWLF   | 293  | 3282 |
| >VHL-G114A YRGHLWLF   | 109  | >VHL-G114A YRAHLWLF   | 27   | 82   |
| >VHL-G114A YRGHLWLF   | 75   | >VHL-G114A YRAHLWLF   | 28   | 47   |
| >VHL-G114A YRGHLWLF   | 66   | >VHL-G114A YRAHLWLF   | 23   | 43   |
| >VHL-G114A YRGHLWLF   | 5439 | >VHL-G114A YRAHLWLF   | 480  | 4959 |
| >VHL-G114A YRGHLWLF   | 1531 | >VHL-G114A YRAHLWLF   | 491  | 1040 |
| >VHL-G114A YRGHLWLF   | 1169 | >VHL-G114A YRAHLWLF   | 292  | 877  |
| >VHL-G114A YRGHLWLF   | 44   | >VHL-G114A YRAHLWLF   | 49   | 5    |
| >VHL-G114A SYRGHLWLF  | 32   | >VHL-G114A SYRAHLWLF  | 27   | 5    |
| >VHL-G114A SYRGHLWLF  | 24   | >VHL-G114A SYRAHLWLF  | 26   | 2    |

|                       |      |                       |      |      |
|-----------------------|------|-----------------------|------|------|
| >VHL-G114A·SYRGHLWL   | 17   | >VHL-G114A·SYRAHLWL   | 19   | 2    |
| >VHL-G114A·SYRGHLWLF  | 5    | >VHL-G114A·SYRAHLWLF  | 5    | 0    |
| >VHL-G114A·SYRGHLWLF  | 351  | >VHL-G114A·SYRAHLWLF  | 1126 | 775  |
| >VHL-G114A·SYRGHLWLF  | 96   | >VHL-G114A·SYRAHLWLF  | 181  | 85   |
| >VHL-G114A·SYRGHLWL   | 38   | >VHL-G114A·SYRAHLWL   | 18   | 20   |
| >VHL-G114A·SYRGHLWLF  | 840  | >VHL-G114A·SYRAHLWLF  | 286  | 554  |
| >VHL-G114A·SYRGHLWLFF | 11   | >VHL-G114A·SYRAHLWLFF | 7    | 4    |
| >VHL-G114A·SYRGHLWLFF | 7    | >VHL-G114A·SYRAHLWLFF | 10   | 3    |
| >VHL-G114A·SYRGHLWLFF | 88   | >VHL-G114A·SYRAHLWLFF | 105  | 17   |
| >VHL-G114A·SYRGHLWLFF | 265  | >VHL-G114A·SYRAHLWLFF | 241  | 24   |
| >VHL-G114A·SYRGHLWLFF | 396  | >VHL-G114A·SYRAHLWLFF | 412  | 16   |
| >VHL-G114A·SYRGHLWLFF | 23   | >VHL-G114A·SYRAHLWLFF | 23   | 0    |
| >VHL-G114A·SYRGHLWL   | 262  | >VHL-G114A·SYRAHLWL   | 280  | 18   |
| >VHL-G114A·SYRGHLWLFF | 430  | >VHL-G114A·SYRAHLWLFF | 189  | 241  |
| >VHL-G114A·SYRGHLWL   | 420  | >VHL-G114A·SYRAHLWL   | 535  | 115  |
| >VHL-G114A·SYRGHLWLF  | 277  | >VHL-G114A·SYRAHLWLF  | 414  | 137  |
| >VHL-G114A·HSYRGHLWL  | 522  | >VHL-G114A·HSYRAHLWL  | 192  | 330  |
| >VHL-G114A·HSYRGHLWLI | 50   | >VHL-G114A·HSYRAHLWLI | 53   | 3    |
| >VHL-G114A·HSYRGHLWLI | 47   | >VHL-G114A·HSYRAHLWLI | 44   | 3    |
| >VHL-G114A·HSYRGHLWLI | 376  | >VHL-G114A·HSYRAHLWLI | 357  | 19   |
| >VHL-G114A·HSYRGHLWLI | 178  | >VHL-G114A·HSYRAHLWLI | 241  | 63   |
| >VHL-G114A·HSYRGHLWLI | 1343 | >VHL-G114A·HSYRAHLWLI | 495  | 848  |
| >VHL-G114A·HSYRGHLWL  | 93   | >VHL-G114A·HSYRAHLWL  | 33   | 60   |
| >VHL-G114A·HSYRGHLWLI | 27   | >VHL-G114A·HSYRAHLWLI | 17   | 10   |
| >VHL-G114A·HSYRGHLWLI | 457  | >VHL-G114A·HSYRAHLWLI | 344  | 113  |
| >VHL-G114A·HSYRGHLWLI | 8    | >VHL-G114A·HSYRAHLWLI | 7    | 1    |
| >VHL-G114A·HSYRGHLWLI | 293  | >VHL-G114A·HSYRAHLWLI | 360  | 67   |
| >VHL-G114A·HSYRGHLWLI | 27   | >VHL-G114A·HSYRAHLWLI | 31   | 4    |
| >VHL-G114A·HSYRGHLWLI | 9    | >VHL-G114A·HSYRAHLWLI | 6    | 3    |
| >VHL-G114A·HSYRGHLWLI | 623  | >VHL-G114A·HSYRAHLWLI | 498  | 125  |
| >VHL-G114A·HSYRGHLWLI | 36   | >VHL-G114A·HSYRAHLWLI | 24   | 12   |
| >VHL-G114A·HSYRGHLW   | 4    | >VHL-G114A·HSYRAHLW   | 4    | 0    |
| >VHL-G114A·HSYRGHLWL  | 5    | >VHL-G114A·HSYRAHLWL  | 6    | 1    |
| >VHL-G114A·HSYRGHLW   | 34   | >VHL-G114A·HSYRAHLW   | 29   | 5    |
| >VHL-G114A·HSYRGHLWL  | 838  | >VHL-G114A·HSYRAHLWL  | 182  | 656  |
| >VHL-G114A·HSYRGHLWLI | 62   | >VHL-G114A·HSYRAHLWLI | 43   | 19   |
| >VHL-G114A·HSYRGHLW   | 10   | >VHL-G114A·HSYRAHLW   | 9    | 1    |
| >VHL-G114A·HSYRGHLWL  | 339  | >VHL-G114A·HSYRAHLWL  | 271  | 68   |
| >VHL-G114A·HSYRGHLWLI | 19   | >VHL-G114A·HSYRAHLWLI | 18   | 1    |
| >VHL-G114A·HSYRGHLWL  | 1217 | >VHL-G114A·HSYRAHLWL  | 204  | 1013 |
| >VHL-G114A·HSYRGHLWLI | 705  | >VHL-G114A·HSYRAHLWLI | 213  | 492  |
| >VHL-G114A·HSYRGHLWL  | 126  | >VHL-G114A·HSYRAHLWL  | 222  | 96   |
| >VHL-G114A·HSYRGHLWLI | 55   | >VHL-G114A·HSYRAHLWLI | 43   | 12   |

|                        |      |                        |     |      |
|------------------------|------|------------------------|-----|------|
| >VHL-G114A·HSYRGHLW    | 137  | >VHL-G114A·HSYRAHLW    | 181 | 44   |
| >VHL-G114A·HSYRGHLWLI  | 300  | >VHL-G114A·HSYRAHLWLI  | 335 | 35   |
| >VHL-G114A·HSYRGHLWLI  | 46   | >VHL-G114A·HSYRAHLWLI  | 35  | 11   |
| >VHL-G114A·HSYRGHLWL   | 153  | >VHL-G114A·HSYRAHLWL   | 173 | 20   |
| >VHL-G114A·IHSYRGHLWL  | 131  | >VHL-G114A·IHSYRAHLWL  | 118 | 13   |
| >VHL-G114A·IHSYRGHLWL  | 91   | >VHL-G114A·IHSYRAHLWL  | 90  | 1    |
| >VHL-G114A·IHSYRGHLW   | 25   | >VHL-G114A·IHSYRAHLW   | 28  | 3    |
| >VHL-G114A·IHSYRGHLWL  | 402  | >VHL-G114A·IHSYRAHLWL  | 443 | 41   |
| >VHL-G114A·RIHSYRGHL   | 336  | >VHL-G114A·RIHSYRAHL   | 129 | 207  |
| >VHL-G114A·RIHSYRGHL   | 3999 | >VHL-G114A·RIHSYRAHL   | 267 | 3732 |
| >VHL-G114A·RIHSYRGHLV  | 414  | >VHL-G114A·RIHSYRAHLV  | 220 | 194  |
| >VHL-G114A·RIHSYRGH    | 1112 | >VHL-G114A·RIHSYRAH    | 358 | 754  |
| >VHL-G114A·RIHSYRGHL   | 23   | >VHL-G114A·RIHSYRAHL   | 11  | 12   |
| >VHL-G114A·RIHSYRGHLV  | 21   | >VHL-G114A·RIHSYRAHLV  | 13  | 8    |
| >VHL-G114A·RIHSYRGHL   | 922  | >VHL-G114A·RIHSYRAHL   | 143 | 779  |
| >VHL-G114A·RIHSYRGHL   | 877  | >VHL-G114A·RIHSYRAHL   | 159 | 718  |
| >VHL-G114A·RIHSYRGHL   | 1083 | >VHL-G114A·RIHSYRAHL   | 367 | 716  |
| >VHL-G114A·RIHSYRGHLV  | 117  | >VHL-G114A·RIHSYRAHLV  | 75  | 42   |
| >VHL-G114A·RIHSYRGHLV  | 50   | >VHL-G114A·RIHSYRAHLV  | 25  | 25   |
| >VHL-G114A·RIHSYRGHLV  | 74   | >VHL-G114A·RIHSYRAHLV  | 136 | 62   |
| >VHL-G114A·RRIHSYRG    | 3263 | >VHL-G114A·RRIHSYRA    | 382 | 2881 |
| >VHL-G114A·RRIHSYRGH   | 107  | >VHL-G114A·RRIHSYRAH   | 21  | 86   |
| >VHL-G114A·RRIHSYRGHL  | 52   | >VHL-G114A·RRIHSYRAHL  | 17  | 35   |
| >VHL-G114A·RRIHSYRGHL' | 119  | >VHL-G114A·RRIHSYRAHL' | 130 | 11   |
| >VHL-G114A·RRIHSYRG    | 947  | >VHL-G114A·RRIHSYRA    | 146 | 801  |
| >VHL-G114A·RRIHSYRGH   | 112  | >VHL-G114A·RRIHSYRAH   | 126 | 14   |
| >VHL-G114A·RRIHSYRGHL  | 9    | >VHL-G114A·RRIHSYRAHL  | 10  | 1    |
| >VHL-G114A·RRIHSYRGHL' | 134  | >VHL-G114A·RRIHSYRAHL' | 123 | 11   |
| >VHL-G114A·RRIHSYRG    | 99   | >VHL-G114A·RRIHSYRA    | 139 | 40   |
| >VHL-G114A·RRIHSYRGHL  | 21   | >VHL-G114A·RRIHSYRAHL  | 22  | 1    |
| >VHL-G114A·RRIHSYRGHL' | 96   | >VHL-G114A·RRIHSYRAHL' | 86  | 10   |
| >VHL-G114A·RRIHSYRGH   | 201  | >VHL-G114A·RRIHSYRAH   | 313 | 112  |
| >VHL-G114A·RRIHSYRGHL  | 18   | >VHL-G114A·RRIHSYRAHL  | 24  | 6    |
| >VHL-G114A·RRIHSYRGHL' | 336  | >VHL-G114A·RRIHSYRAHL' | 285 | 51   |
| >VHL-G114A·RRIHSYRGHL' | 124  | >VHL-G114A·RRIHSYRAHL' | 135 | 11   |
| >VHL-G114A·GRIHSYRGH   | 212  | >VHL-G114A·GRIHSYRAH   | 180 | 32   |
| >VHL-G114A·GRIHSYRGH   | 174  | >VHL-G114A·GRIHSYRAH   | 153 | 21   |
| >VHL-G114A·GRIHSYRGH   | 13   | >VHL-G114A·GRIHSYRAH   | 12  | 1    |
| >VHL-G114A·TGRIHSYRG   | 2695 | >VHL-G114A·TGRIHSYRA   | 283 | 2412 |
| >VHL-G114C·RGHLWLFR    | 160  | >VHL-G114C·RCHLWLFR    | 104 | 56   |
| >VHL-G114C·RGHLWLFR    | 15   | >VHL-G114C·RCHLWLFR    | 21  | 6    |
| >VHL-G114C·RGHLWLFR    | 33   | >VHL-G114C·RCHLWLFR    | 27  | 6    |
| >VHL-G114C·YRGHLWLF    | 109  | >VHL-G114C·YRCHLWLF    | 58  | 51   |

|                       |      |                       |      |      |
|-----------------------|------|-----------------------|------|------|
| >VHL-G114C·YRGHLWLF   | 75   | >VHL-G114C·YRCHLWLF   | 124  | 49   |
| >VHL-G114C·YRGHLWLF   | 66   | >VHL-G114C·YRCHLWLF   | 114  | 48   |
| >VHL-G114C·YRGHLWLF   | 1169 | >VHL-G114C·YRCHLWLF   | 331  | 838  |
| >VHL-G114C·YRGHLWLF   | 44   | >VHL-G114C·YRCHLWLF   | 47   | 3    |
| >VHL-G114C·SYRGHLWLF  | 32   | >VHL-G114C·SYRCHLWLF  | 16   | 16   |
| >VHL-G114C·SYRGHLWLF  | 24   | >VHL-G114C·SYRCHLWLF  | 22   | 2    |
| >VHL-G114C·SYRGHLWL   | 17   | >VHL-G114C·SYRCHLWL   | 24   | 7    |
| >VHL-G114C·SYRGHLWLF  | 5    | >VHL-G114C·SYRCHLWLF  | 7    | 2    |
| >VHL-G114C·SYRGHLWLF  | 351  | >VHL-G114C·SYRCHLWLF  | 1334 | 983  |
| >VHL-G114C·SYRGHLWLF  | 96   | >VHL-G114C·SYRCHLWLF  | 173  | 77   |
| >VHL-G114C·SYRGHLWL   | 38   | >VHL-G114C·SYRCHLWL   | 32   | 6    |
| >VHL-G114C·SYRGHLWLF  | 11   | >VHL-G114C·SYRCHLWLF  | 9    | 2    |
| >VHL-G114C·SYRGHLWLF  | 7    | >VHL-G114C·SYRCHLWLF  | 8    | 1    |
| >VHL-G114C·SYRGHLWLF  | 88   | >VHL-G114C·SYRCHLWLF  | 70   | 18   |
| >VHL-G114C·SYRGHLWLF  | 265  | >VHL-G114C·SYRCHLWLF  | 154  | 111  |
| >VHL-G114C·SYRGHLWLF  | 396  | >VHL-G114C·SYRCHLWLF  | 250  | 146  |
| >VHL-G114C·SYRGHLWLF  | 23   | >VHL-G114C·SYRCHLWLF  | 21   | 2    |
| >VHL-G114C·SYRGHLWL   | 262  | >VHL-G114C·SYRCHLWL   | 273  | 11   |
| >VHL-G114C·SYRGHLWLF  | 430  | >VHL-G114C·SYRCHLWLF  | 96   | 334  |
| >VHL-G114C·SYRGHLWL   | 420  | >VHL-G114C·SYRCHLWL   | 800  | 380  |
| >VHL-G114C·SYRGHLWLF  | 277  | >VHL-G114C·SYRCHLWLF  | 783  | 506  |
| >VHL-G114C·HSYRGHLWL  | 522  | >VHL-G114C·HSYRCHLWL  | 168  | 354  |
| >VHL-G114C·HSYRGHLWLI | 50   | >VHL-G114C·HSYRCHLWLI | 50   | 0    |
| >VHL-G114C·HSYRGHLWLI | 47   | >VHL-G114C·HSYRCHLWLI | 45   | 2    |
| >VHL-G114C·HSYRGHLWLI | 376  | >VHL-G114C·HSYRCHLWLI | 597  | 221  |
| >VHL-G114C·HSYRGHLWLI | 178  | >VHL-G114C·HSYRCHLWLI | 361  | 183  |
| >VHL-G114C·HSYRGHLWLI | 1343 | >VHL-G114C·HSYRCHLWLI | 264  | 1079 |
| >VHL-G114C·HSYRGHLWL  | 93   | >VHL-G114C·HSYRCHLWL  | 257  | 164  |
| >VHL-G114C·HSYRGHLWLI | 27   | >VHL-G114C·HSYRCHLWLI | 46   | 19   |
| >VHL-G114C·HSYRGHLWLI | 457  | >VHL-G114C·HSYRCHLWLI | 694  | 237  |
| >VHL-G114C·HSYRGHLWLI | 8    | >VHL-G114C·HSYRCHLWLI | 7    | 1    |
| >VHL-G114C·HSYRGHLWLI | 293  | >VHL-G114C·HSYRCHLWLI | 515  | 222  |
| >VHL-G114C·HSYRGHLWLI | 27   | >VHL-G114C·HSYRCHLWLI | 23   | 4    |
| >VHL-G114C·HSYRGHLWLI | 9    | >VHL-G114C·HSYRCHLWLI | 7    | 2    |
| >VHL-G114C·HSYRGHLWLI | 36   | >VHL-G114C·HSYRCHLWLI | 28   | 8    |
| >VHL-G114C·HSYRGHLW   | 4    | >VHL-G114C·HSYRCHLW   | 5    | 1    |
| >VHL-G114C·HSYRGHLWL  | 5    | >VHL-G114C·HSYRCHLWL  | 7    | 2    |
| >VHL-G114C·HSYRGHLW   | 34   | >VHL-G114C·HSYRCHLW   | 32   | 2    |
| >VHL-G114C·HSYRGHLWL  | 838  | >VHL-G114C·HSYRCHLWL  | 182  | 656  |
| >VHL-G114C·HSYRGHLWLI | 62   | >VHL-G114C·HSYRCHLWLI | 55   | 7    |
| >VHL-G114C·HSYRGHLW   | 10   | >VHL-G114C·HSYRCHLW   | 10   | 0    |
| >VHL-G114C·HSYRGHLWL  | 339  | >VHL-G114C·HSYRCHLWL  | 452  | 113  |
| >VHL-G114C·HSYRGHLWLI | 19   | >VHL-G114C·HSYRCHLWLI | 22   | 3    |

|                        |      |                        |     |      |
|------------------------|------|------------------------|-----|------|
| >VHL-G114C·HSYRGHLWL   | 1217 | >VHL-G114C·HSYRCHLWL   | 460 | 757  |
| >VHL-G114C·HSYRGHLWLI  | 705  | >VHL-G114C·HSYRCHLWLF  | 451 | 254  |
| >VHL-G114C·HSYRGHLWL   | 126  | >VHL-G114C·HSYRCHLWL   | 78  | 48   |
| >VHL-G114C·HSYRGHLWLI  | 55   | >VHL-G114C·HSYRCHLWLF  | 73  | 18   |
| >VHL-G114C·HSYRGHLWL   | 790  | >VHL-G114C·HSYRCHLWL   | 488 | 302  |
| >VHL-G114C·HSYRGHLW    | 137  | >VHL-G114C·HSYRCHLW    | 174 | 37   |
| >VHL-G114C·HSYRGHLWLI  | 300  | >VHL-G114C·HSYRCHLWLF  | 247 | 53   |
| >VHL-G114C·HSYRGHLWLI  | 46   | >VHL-G114C·HSYRCHLWLF  | 21  | 25   |
| >VHL-G114C·HSYRGHLWL   | 153  | >VHL-G114C·HSYRCHLWL   | 123 | 30   |
| >VHL-G114C·IHSYRGHLWL  | 569  | >VHL-G114C·IHSYRCHLWL  | 253 | 316  |
| >VHL-G114C·IHSYRGHLWL  | 131  | >VHL-G114C·IHSYRCHLWL  | 99  | 32   |
| >VHL-G114C·IHSYRGHLWL  | 91   | >VHL-G114C·IHSYRCHLWL  | 85  | 6    |
| >VHL-G114C·IHSYRGHLW   | 25   | >VHL-G114C·IHSYRCHLW   | 39  | 14   |
| >VHL-G114C·IHSYRGHLWL  | 402  | >VHL-G114C·IHSYRCHLWL  | 625 | 223  |
| >VHL-G114C·RIHSYRGHL   | 336  | >VHL-G114C·RIHSYRCHL   | 197 | 139  |
| >VHL-G114C·RIHSYRGHL   | 3999 | >VHL-G114C·RIHSYRCHL   | 116 | 3883 |
| >VHL-G114C·RIHSYRGHLV  | 414  | >VHL-G114C·RIHSYRCHLW  | 176 | 238  |
| >VHL-G114C·RIHSYRGHL   | 23   | >VHL-G114C·RIHSYRCHL   | 13  | 10   |
| >VHL-G114C·RIHSYRGHLV  | 21   | >VHL-G114C·RIHSYRCHLW  | 21  | 0    |
| >VHL-G114C·RIHSYRGHL   | 922  | >VHL-G114C·RIHSYRCHL   | 327 | 595  |
| >VHL-G114C·RIHSYRGHL   | 877  | >VHL-G114C·RIHSYRCHL   | 108 | 769  |
| >VHL-G114C·RIHSYRGHL   | 1083 | >VHL-G114C·RIHSYRCHL   | 296 | 787  |
| >VHL-G114C·RIHSYRGHL   | 2162 | >VHL-G114C·RIHSYRCHL   | 471 | 1691 |
| >VHL-G114C·RIHSYRGHLV  | 117  | >VHL-G114C·RIHSYRCHLW  | 121 | 4    |
| >VHL-G114C·RIHSYRGHLV  | 50   | >VHL-G114C·RIHSYRCHLW  | 34  | 16   |
| >VHL-G114C·RIHSYRGHLV  | 74   | >VHL-G114C·RIHSYRCHLW  | 299 | 225  |
| >VHL-G114C·RRIHSYRGH   | 107  | >VHL-G114C·RRIHSYRCH   | 61  | 46   |
| >VHL-G114C·RRIHSYRGHL  | 52   | >VHL-G114C·RRIHSYRCHL  | 21  | 31   |
| >VHL-G114C·RRIHSYRGHL' | 119  | >VHL-G114C·RRIHSYRCHL\ | 162 | 43   |
| >VHL-G114C·RRIHSYRGH   | 112  | >VHL-G114C·RRIHSYRCH   | 139 | 27   |
| >VHL-G114C·RRIHSYRGHL  | 9    | >VHL-G114C·RRIHSYRCHL  | 13  | 4    |
| >VHL-G114C·RRIHSYRGHL' | 134  | >VHL-G114C·RRIHSYRCHL\ | 320 | 186  |
| >VHL-G114C·RRIHSYRG    | 99   | >VHL-G114C·RRIHSYRC    | 69  | 30   |
| >VHL-G114C·RRIHSYRGHL  | 21   | >VHL-G114C·RRIHSYRCHL  | 19  | 2    |
| >VHL-G114C·RRIHSYRGHL' | 96   | >VHL-G114C·RRIHSYRCHL\ | 104 | 8    |
| >VHL-G114C·RRIHSYRGH   | 201  | >VHL-G114C·RRIHSYRCH   | 410 | 209  |
| >VHL-G114C·RRIHSYRGHL  | 18   | >VHL-G114C·RRIHSYRCHL  | 29  | 11   |
| >VHL-G114C·RRIHSYRGHL' | 336  | >VHL-G114C·RRIHSYRCHL\ | 323 | 13   |
| >VHL-G114C·RRIHSYRGHL' | 124  | >VHL-G114C·RRIHSYRCHL\ | 209 | 85   |
| >VHL-G114C·GRIHSYRGH   | 1579 | >VHL-G114C·GRIHSYRCH   | 411 | 1168 |
| >VHL-G114C·GRIHSYRGH   | 730  | >VHL-G114C·GRIHSYRCH   | 477 | 253  |
| >VHL-G114C·GRIHSYRGH   | 212  | >VHL-G114C·GRIHSYRCH   | 285 | 73   |
| >VHL-G114C·GRIHSYRGH   | 174  | >VHL-G114C·GRIHSYRCH   | 149 | 25   |

|                       |     |                       |      |      |
|-----------------------|-----|-----------------------|------|------|
| >VHL-G114C·GRRHHSYRGH | 13  | >VHL-G114C·GRRHHSYRCH | 18   | 5    |
| >VHL-G114D RGHLWLFR   | 160 | >VHL-G114D RDHLWLFR   | 3454 | 3294 |
| >VHL-G114D RGHLWLFR   | 15  | >VHL-G114D RDHLWLFR   | 200  | 185  |
| >VHL-G114D RGHLWLFR   | 33  | >VHL-G114D RDHLWLFR   | 78   | 45   |
| >VHL-G114D YRGHLWLF   | 109 | >VHL-G114D YRDHLWLF   | 411  | 302  |
| >VHL-G114D YRGHLWLF   | 75  | >VHL-G114D YRDHLWLF   | 153  | 78   |
| >VHL-G114D YRGHLWLFR  | 66  | >VHL-G114D YRDHLWLFR  | 145  | 79   |
| >VHL-G114D YRGHLWLFR  | 44  | >VHL-G114D YRDHLWLFR  | 136  | 92   |
| >VHL-G114D SYRGHLWLF  | 32  | >VHL-G114D SYRDHLWLF  | 22   | 10   |
| >VHL-G114D SYRGHLWLF  | 24  | >VHL-G114D SYRDHLWLF  | 32   | 8    |
| >VHL-G114D SYRGHLWL   | 17  | >VHL-G114D SYRDHLWL   | 40   | 23   |
| >VHL-G114D SYRGHLWLF  | 5   | >VHL-G114D SYRDHLWLF  | 7    | 2    |
| >VHL-G114D SYRGHLWLF  | 351 | >VHL-G114D SYRDHLWLF  | 806  | 455  |
| >VHL-G114D SYRGHLWLF  | 96  | >VHL-G114D SYRDHLWLF  | 92   | 4    |
| >VHL-G114D SYRGHLWL   | 38  | >VHL-G114D SYRDHLWL   | 45   | 7    |
| >VHL-G114D SYRGHLWLFF | 11  | >VHL-G114D SYRDHLWLFF | 10   | 1    |
| >VHL-G114D SYRGHLWLFF | 7   | >VHL-G114D SYRDHLWLFF | 9    | 2    |
| >VHL-G114D SYRGHLWLFF | 88  | >VHL-G114D SYRDHLWLFF | 96   | 8    |
| >VHL-G114D SYRGHLWLFF | 265 | >VHL-G114D SYRDHLWLFF | 430  | 165  |
| >VHL-G114D SYRGHLWLFF | 396 | >VHL-G114D SYRDHLWLFF | 311  | 85   |
| >VHL-G114D SYRGHLWLFF | 23  | >VHL-G114D SYRDHLWLFF | 25   | 2    |
| >VHL-G114D SYRGHLWL   | 262 | >VHL-G114D SYRDHLWL   | 236  | 26   |
| >VHL-G114D SYRGHLWLFF | 430 | >VHL-G114D SYRDHLWLFF | 120  | 310  |
| >VHL-G114D SYRGHLWL   | 420 | >VHL-G114D SYRDHLWL   | 676  | 256  |
| >VHL-G114D SYRGHLWLF  | 277 | >VHL-G114D SYRDHLWLF  | 548  | 271  |
| >VHL-G114D HSYRGHLWLI | 50  | >VHL-G114D HSYRDHLWLI | 82   | 32   |
| >VHL-G114D HSYRGHLWLI | 47  | >VHL-G114D HSYRDHLWLI | 70   | 23   |
| >VHL-G114D HSYRGHLWLI | 376 | >VHL-G114D HSYRDHLWLI | 539  | 163  |
| >VHL-G114D HSYRGHLWLI | 178 | >VHL-G114D HSYRDHLWLI | 139  | 39   |
| >VHL-G114D HSYRGHLWL  | 93  | >VHL-G114D HSYRDHLWL  | 633  | 540  |
| >VHL-G114D HSYRGHLWLI | 27  | >VHL-G114D HSYRDHLWLI | 78   | 51   |
| >VHL-G114D HSYRGHLWLI | 457 | >VHL-G114D HSYRDHLWLI | 764  | 307  |
| >VHL-G114D HSYRGHLWLI | 8   | >VHL-G114D HSYRDHLWLI | 9    | 1    |
| >VHL-G114D HSYRGHLWLI | 293 | >VHL-G114D HSYRDHLWLI | 501  | 208  |
| >VHL-G114D HSYRGHLWLI | 27  | >VHL-G114D HSYRDHLWLI | 37   | 10   |
| >VHL-G114D HSYRGHLWLI | 9   | >VHL-G114D HSYRDHLWLI | 9    | 0    |
| >VHL-G114D HSYRGHLWLI | 36  | >VHL-G114D HSYRDHLWLI | 37   | 1    |
| >VHL-G114D HSYRGHLW   | 4   | >VHL-G114D HSYRDHLW   | 5    | 1    |
| >VHL-G114D HSYRGHLWL  | 5   | >VHL-G114D HSYRDHLWL  | 9    | 4    |
| >VHL-G114D HSYRGHLW   | 34  | >VHL-G114D HSYRDHLW   | 32   | 2    |
| >VHL-G114D HSYRGHLWL  | 838 | >VHL-G114D HSYRDHLWL  | 339  | 499  |
| >VHL-G114D HSYRGHLWLI | 62  | >VHL-G114D HSYRDHLWLI | 57   | 5    |
| >VHL-G114D HSYRGHLW   | 10  | >VHL-G114D HSYRDHLW   | 9    | 1    |

|                        |       |                        |     |       |
|------------------------|-------|------------------------|-----|-------|
| >VHL-G114D HSYRGHLWL   | 339   | >VHL-G114D HSYRDHLWL   | 840 | 501   |
| >VHL-G114D HSYRGHLWLI  | 19    | >VHL-G114D HSYRDHLWLI  | 23  | 4     |
| >VHL-G114D HSYRGHLWL   | 126   | >VHL-G114D HSYRDHLWL   | 397 | 271   |
| >VHL-G114D HSYRGHLWLI  | 55    | >VHL-G114D HSYRDHLWLI  | 86  | 31    |
| >VHL-G114D HSYRGHLW    | 755   | >VHL-G114D HSYRDHLW    | 338 | 417   |
| >VHL-G114D HSYRGHLW    | 137   | >VHL-G114D HSYRDHLW    | 103 | 34    |
| >VHL-G114D HSYRGHLWLI  | 300   | >VHL-G114D HSYRDHLWLI  | 250 | 50    |
| >VHL-G114D HSYRGHLWLI  | 46    | >VHL-G114D HSYRDHLWLI  | 41  | 5     |
| >VHL-G114D HSYRGHLWL   | 153   | >VHL-G114D HSYRDHLWL   | 245 | 92    |
| >VHL-G114D IHSYRGHLWL  | 569   | >VHL-G114D IHSYRDHLWL  | 451 | 118   |
| >VHL-G114D IHSYRGHLWL  | 131   | >VHL-G114D IHSYRDHLWL  | 195 | 64    |
| >VHL-G114D IHSYRGHLWL  | 91    | >VHL-G114D IHSYRDHLWL  | 179 | 88    |
| >VHL-G114D IHSYRGHLW   | 1827  | >VHL-G114D IHSYRDHLW   | 461 | 1366  |
| >VHL-G114D IHSYRGHLW   | 25    | >VHL-G114D IHSYRDHLW   | 15  | 10    |
| >VHL-G114D IHSYRGHLWL  | 402   | >VHL-G114D IHSYRDHLWL  | 302 | 100   |
| >VHL-G114D RIHSYRGHL   | 336   | >VHL-G114D RIHSYRDHL   | 492 | 156   |
| >VHL-G114D RIHSYRGHLV  | 414   | >VHL-G114D RIHSYRDHLV  | 463 | 49    |
| >VHL-G114D RIHSYRGHL   | 23    | >VHL-G114D RIHSYRDHL   | 126 | 103   |
| >VHL-G114D RIHSYRGHLV  | 21    | >VHL-G114D RIHSYRDHLV  | 62  | 41    |
| >VHL-G114D RIHSYRGHLV  | 117   | >VHL-G114D RIHSYRDHLV  | 94  | 23    |
| >VHL-G114D RIHSYRGHLV  | 50    | >VHL-G114D RIHSYRDHLV  | 31  | 19    |
| >VHL-G114D RIHSYRGHLV  | 74    | >VHL-G114D RIHSYRDHLV  | 92  | 18    |
| >VHL-G114D RRIHSYRGH   | 107   | >VHL-G114D RRIHSYRDH   | 67  | 40    |
| >VHL-G114D RRIHSYRGHL  | 52    | >VHL-G114D RRIHSYRDHL  | 38  | 14    |
| >VHL-G114D RRIHSYRGHL' | 119   | >VHL-G114D RRIHSYRDHL' | 236 | 117   |
| >VHL-G114D RRIHSYRGH   | 112   | >VHL-G114D RRIHSYRDH   | 467 | 355   |
| >VHL-G114D RRIHSYRGHL  | 9     | >VHL-G114D RRIHSYRDHL  | 13  | 4     |
| >VHL-G114D RRIHSYRGHL' | 134   | >VHL-G114D RRIHSYRDHL' | 262 | 128   |
| >VHL-G114D RRIHSYRG    | 99    | >VHL-G114D RRIHSYRD    | 371 | 272   |
| >VHL-G114D RRIHSYRGHL  | 21    | >VHL-G114D RRIHSYRDHL  | 43  | 22    |
| >VHL-G114D RRIHSYRGHL' | 96    | >VHL-G114D RRIHSYRDHL' | 129 | 33    |
| >VHL-G114D RRIHSYRGH   | 201   | >VHL-G114D RRIHSYRDH   | 715 | 514   |
| >VHL-G114D RRIHSYRGHL  | 18    | >VHL-G114D RRIHSYRDHL  | 50  | 32    |
| >VHL-G114D RRIHSYRGHL' | 336   | >VHL-G114D RRIHSYRDHL' | 598 | 262   |
| >VHL-G114D RRIHSYRGHL' | 124   | >VHL-G114D RRIHSYRDHL' | 102 | 22    |
| >VHL-G114D GRIHSYRGH   | 212   | >VHL-G114D GRIHSYRDH   | 378 | 166   |
| >VHL-G114D GRIHSYRGH   | 174   | >VHL-G114D GRIHSYRDH   | 205 | 31    |
| >VHL-G114D GRIHSYRGH   | 13    | >VHL-G114D GRIHSYRDH   | 20  | 7     |
| >VHL-G114R RGHLWLFR    | 160   | >VHL-G114R RRHLWLFR    | 775 | 615   |
| >VHL-G114R RGHLWLFR    | 15    | >VHL-G114R RRHLWLFR    | 365 | 350   |
| >VHL-G114R RGHLWLFR    | 7538  | >VHL-G114R RRHLWLFR    | 26  | 7512  |
| >VHL-G114R RGHLWLFRD   | 20838 | >VHL-G114R RRHLWLFRD   | 335 | 20503 |
| >VHL-G114R RGHLWLFRD,  | 17362 | >VHL-G114R RRHLWLFRD,  | 23  | 17339 |

|                       |       |                       |     |       |
|-----------------------|-------|-----------------------|-----|-------|
| >VHL-G114R·RGHLWLFR   | 25030 | >VHL-G114R·RRHLWLFR   | 360 | 24670 |
| >VHL-G114R·RGHLWLFRD, | 21882 | >VHL-G114R·RRHLWLFRD, | 134 | 21748 |
| >VHL-G114R·RGHLWLFRD, | 22628 | >VHL-G114R·RRHLWLFRD, | 323 | 22305 |
| >VHL-G114R·RGHLWLFRD, | 17400 | >VHL-G114R·RRHLWLFRD, | 53  | 17347 |
| >VHL-G114R·RGHLWLFR   | 33    | >VHL-G114R·RRHLWLFR   | 40  | 7     |
| >VHL-G114R·GTGRRHSYR  | 26077 | >VHL-G114R·GTGRRHSYR  | 265 | 25812 |
| >VHL-G114R·GTGRRHSYR  | 18717 | >VHL-G114R·GTGRRHSYR  | 23  | 18694 |
| >VHL-G114R·GTGRRHSYR  | 40759 | >VHL-G114R·GTGRRHSYR  | 487 | 40272 |
| >VHL-G114R·GTGRRHSYR  | 9062  | >VHL-G114R·GTGRRHSYR  | 144 | 8918  |
| >VHL-G114R·YRGHLWLF   | 109   | >VHL-G114R·YRRHLWLF   | 15  | 94    |
| >VHL-G114R·YRGHLWLF   | 75    | >VHL-G114R·YRRHLWLF   | 67  | 8     |
| >VHL-G114R·YRGHLWLFR  | 66    | >VHL-G114R·YRRHLWLFR  | 55  | 11    |
| >VHL-G114R·YRGHLWLFR  | 1169  | >VHL-G114R·YRRHLWLFR  | 230 | 939   |
| >VHL-G114R·YRGHLWLFR  | 44    | >VHL-G114R·YRRHLWLFR  | 77  | 33    |
| >VHL-G114R·SYRGHLWLF  | 32    | >VHL-G114R·SYRRHLWLF  | 24  | 8     |
| >VHL-G114R·SYRGHLWL   | 650   | >VHL-G114R·SYRRHLWL   | 339 | 311   |
| >VHL-G114R·SYRGHLWLF  | 24    | >VHL-G114R·SYRRHLWLF  | 17  | 7     |
| >VHL-G114R·SYRGHLWL   | 17    | >VHL-G114R·SYRRHLWL   | 18  | 1     |
| >VHL-G114R·SYRGHLWLF  | 5     | >VHL-G114R·SYRRHLWLF  | 5   | 0     |
| >VHL-G114R·SYRGHLWLF  | 351   | >VHL-G114R·SYRRHLWLF  | 687 | 336   |
| >VHL-G114R·SYRGHLWLF  | 96    | >VHL-G114R·SYRRHLWLF  | 549 | 453   |
| >VHL-G114R·SYRGHLWL   | 38    | >VHL-G114R·SYRRHLWL   | 14  | 24    |
| >VHL-G114R·SYRGHLWLF  | 840   | >VHL-G114R·SYRRHLWLF  | 164 | 676   |
| >VHL-G114R·SYRGHLWLFF | 11    | >VHL-G114R·SYRRHLWLFF | 6   | 5     |
| >VHL-G114R·SYRGHLWLFF | 7     | >VHL-G114R·SYRRHLWLFF | 9   | 2     |
| >VHL-G114R·SYRGHLWLFF | 88    | >VHL-G114R·SYRRHLWLFF | 71  | 17    |
| >VHL-G114R·SYRGHLWLFF | 265   | >VHL-G114R·SYRRHLWLFF | 335 | 70    |
| >VHL-G114R·SYRGHLWLFF | 396   | >VHL-G114R·SYRRHLWLFF | 337 | 59    |
| >VHL-G114R·SYRGHLWLFF | 23    | >VHL-G114R·SYRRHLWLFF | 38  | 15    |
| >VHL-G114R·SYRGHLWL   | 262   | >VHL-G114R·SYRRHLWL   | 313 | 51    |
| >VHL-G114R·SYRGHLWLFF | 430   | >VHL-G114R·SYRRHLWLFF | 272 | 158   |
| >VHL-G114R·SYRGHLWL   | 420   | >VHL-G114R·SYRRHLWL   | 583 | 163   |
| >VHL-G114R·SYRGHLWLF  | 277   | >VHL-G114R·SYRRHLWLF  | 544 | 267   |
| >VHL-G114R·HSYRGHLWL  | 522   | >VHL-G114R·HSYRRHLWL  | 40  | 482   |
| >VHL-G114R·HSYRGHLWLI | 50    | >VHL-G114R·HSYRRHLWLI | 41  | 9     |
| >VHL-G114R·HSYRGHLWLI | 47    | >VHL-G114R·HSYRRHLWLI | 41  | 6     |
| >VHL-G114R·HSYRGHLWLI | 376   | >VHL-G114R·HSYRRHLWLI | 597 | 221   |
| >VHL-G114R·HSYRGHLWLI | 178   | >VHL-G114R·HSYRRHLWLI | 490 | 312   |
| >VHL-G114R·HSYRGHLWL  | 93    | >VHL-G114R·HSYRRHLWL  | 52  | 41    |
| >VHL-G114R·HSYRGHLWLI | 27    | >VHL-G114R·HSYRRHLWLI | 21  | 6     |
| >VHL-G114R·HSYRGHLWLI | 457   | >VHL-G114R·HSYRRHLWLI | 549 | 92    |
| >VHL-G114R·HSYRGHLWLI | 8     | >VHL-G114R·HSYRRHLWLI | 6   | 2     |
| >VHL-G114R·HSYRGHLWLI | 293   | >VHL-G114R·HSYRRHLWLI | 302 | 9     |



|                        |       |                        |      |       |
|------------------------|-------|------------------------|------|-------|
| >VHL-G114R·HSYRGHLWLI  | 27    | >VHL-G114R·HSYRRHLWLI  | 15   | 12    |
| >VHL-G114R·HSYRGHLWLI  | 9     | >VHL-G114R·HSYRRHLWLI  | 8    | 1     |
| >VHL-G114R·HSYRGHLWL   | 14326 | >VHL-G114R·HSYRRHLWL   | 456  | 13870 |
| >VHL-G114R·HSYRGHLWLI  | 36    | >VHL-G114R·HSYRRHLWLI  | 36   | 0     |
| >VHL-G114R·HSYRGHLW    | 4     | >VHL-G114R·HSYRRHLW    | 5    | 1     |
| >VHL-G114R·HSYRGHLWL   | 5     | >VHL-G114R·HSYRRHLWL   | 5    | 0     |
| >VHL-G114R·HSYRGHLW    | 34    | >VHL-G114R·HSYRRHLW    | 32   | 2     |
| >VHL-G114R·HSYRGHLWLI  | 62    | >VHL-G114R·HSYRRHLWLI  | 52   | 10    |
| >VHL-G114R·HSYRGHLW    | 10    | >VHL-G114R·HSYRRHLW    | 10   | 0     |
| >VHL-G114R·HSYRGHLWL   | 339   | >VHL-G114R·HSYRRHLWL   | 1679 | 1340  |
| >VHL-G114R·HSYRGHLWLI  | 19    | >VHL-G114R·HSYRRHLWLI  | 26   | 7     |
| >VHL-G114R·HSYRGHLWL   | 126   | >VHL-G114R·HSYRRHLWL   | 306  | 180   |
| >VHL-G114R·HSYRGHLWLI  | 55    | >VHL-G114R·HSYRRHLWLI  | 41   | 14    |
| >VHL-G114R·HSYRGHLWL   | 790   | >VHL-G114R·HSYRRHLWL   | 307  | 483   |
| >VHL-G114R·HSYRGHLW    | 137   | >VHL-G114R·HSYRRHLW    | 437  | 300   |
| >VHL-G114R·HSYRGHLWLI  | 300   | >VHL-G114R·HSYRRHLWLI  | 228  | 72    |
| >VHL-G114R·HSYRGHLWLI  | 46    | >VHL-G114R·HSYRRHLWLI  | 32   | 14    |
| >VHL-G114R·HSYRGHLWL   | 153   | >VHL-G114R·HSYRRHLWL   | 272  | 119   |
| >VHL-G114R·IHSYRGHLWL  | 569   | >VHL-G114R·IHSYRRHLWL  | 420  | 149   |
| >VHL-G114R·IHSYRGHLWL  | 131   | >VHL-G114R·IHSYRRHLWL  | 172  | 41    |
| >VHL-G114R·IHSYRGHLWL  | 91    | >VHL-G114R·IHSYRRHLWL  | 91   | 0     |
| >VHL-G114R·IHSYRGHLW   | 25    | >VHL-G114R·IHSYRRHLW   | 29   | 4     |
| >VHL-G114R·IHSYRGHLWL  | 402   | >VHL-G114R·IHSYRRHLWL  | 485  | 83    |
| >VHL-G114R·RIHSYRGHL   | 336   | >VHL-G114R·RIHSYRRHL   | 294  | 42    |
| >VHL-G114R·RIHSYRGHLV  | 414   | >VHL-G114R·RIHSYRRHLW  | 642  | 228   |
| >VHL-G114R·RIHSYRGHL   | 23    | >VHL-G114R·RIHSYRRHL   | 17   | 6     |
| >VHL-G114R·RIHSYRGHLV  | 21    | >VHL-G114R·RIHSYRRHLW  | 17   | 4     |
| >VHL-G114R·RIHSYRGHL   | 877   | >VHL-G114R·RIHSYRRHL   | 223  | 654   |
| >VHL-G114R·RIHSYRGHLV  | 2790  | >VHL-G114R·RIHSYRRHLW  | 464  | 2326  |
| >VHL-G114R·RIHSYRGHLV  | 117   | >VHL-G114R·RIHSYRRHLW  | 79   | 38    |
| >VHL-G114R·RIHSYRGHLV  | 50    | >VHL-G114R·RIHSYRRHLW  | 68   | 18    |
| >VHL-G114R·RIHSYRGHLV  | 74    | >VHL-G114R·RIHSYRRHLW  | 181  | 107   |
| >VHL-G114R·RRIHSYRG    | 3263  | >VHL-G114R·RRIHSYRR    | 348  | 2915  |
| >VHL-G114R·RRIHSYRGH   | 107   | >VHL-G114R·RRIHSYRRH   | 149  | 42    |
| >VHL-G114R·RRIHSYRGHL  | 52    | >VHL-G114R·RRIHSYRRHL  | 22   | 30    |
| >VHL-G114R·RRIHSYRGHL' | 119   | >VHL-G114R·RRIHSYRRHL\ | 158  | 39    |
| >VHL-G114R·RRIHSYRG    | 947   | >VHL-G114R·RRIHSYRR    | 48   | 899   |
| >VHL-G114R·RRIHSYRGH   | 112   | >VHL-G114R·RRIHSYRRH   | 116  | 4     |
| >VHL-G114R·RRIHSYRGHL  | 9     | >VHL-G114R·RRIHSYRRHL  | 10   | 1     |
| >VHL-G114R·RRIHSYRGHL' | 134   | >VHL-G114R·RRIHSYRRHL\ | 128  | 6     |
| >VHL-G114R·RRIHSYRG    | 99    | >VHL-G114R·RRIHSYRR    | 117  | 18    |
| >VHL-G114R·RRIHSYRGHL  | 21    | >VHL-G114R·RRIHSYRRHL  | 20   | 1     |
| >VHL-G114R·RRIHSYRGHL' | 96    | >VHL-G114R·RRIHSYRRHL\ | 70   | 26    |

|                        |       |                        |     |       |
|------------------------|-------|------------------------|-----|-------|
| >VHL-G114R·RRIHSYRGH   | 201   | >VHL-G114R·RRIHSYRRH   | 339 | 138   |
| >VHL-G114R·RRIHSYRGHL  | 18    | >VHL-G114R·RRIHSYRRHL  | 26  | 8     |
| >VHL-G114R·RRIHSYRGHL' | 336   | >VHL-G114R·RRIHSYRRHL\ | 190 | 146   |
| >VHL-G114R·RRIHSYRGHL' | 124   | >VHL-G114R·RRIHSYRRHL\ | 149 | 25    |
| >VHL-G114R·RRIHSYRG    | 33158 | >VHL-G114R·RRIHSYRR    | 91  | 33067 |
| >VHL-G114R·GRIHSYRG    | 8314  | >VHL-G114R·GRIHSYRR    | 456 | 7858  |
| >VHL-G114R·GRIHSYRGH   | 212   | >VHL-G114R·GRIHSYRRH   | 181 | 31    |
| >VHL-G114R·GRIHSYRGH   | 174   | >VHL-G114R·GRIHSYRRH   | 135 | 39    |
| >VHL-G114R·GRIHSYRGH   | 13    | >VHL-G114R·GRIHSYRRH   | 10  | 3     |
| >VHL-G114R·TGRRIHSYRG  | 31706 | >VHL-G114R·TGRRIHSYRR  | 386 | 31320 |
| >VHL-G114S·RGHLWLFR    | 4363  | >VHL-G114S·RSHLWLFR    | 314 | 4049  |
| >VHL-G114S·RGHLWLFR    | 2228  | >VHL-G114S·RSHLWLFR    | 41  | 2187  |
| >VHL-G114S·RGHLWLFR    | 160   | >VHL-G114S·RSHLWLFR    | 16  | 144   |
| >VHL-G114S·RGHLWLFRD,  | 2104  | >VHL-G114S·RSHLWLFRD/  | 93  | 2011  |
| >VHL-G114S·RGHLWLFR    | 15    | >VHL-G114S·RSHLWLFR    | 7   | 8     |
| >VHL-G114S·RGHLWLFR    | 7361  | >VHL-G114S·RSHLWLFR    | 250 | 7111  |
| >VHL-G114S·RGHLWLFR    | 4446  | >VHL-G114S·RSHLWLFR    | 319 | 4127  |
| >VHL-G114S·RGHLWLFR    | 2464  | >VHL-G114S·RSHLWLFR    | 432 | 2032  |
| >VHL-G114S·RGHLWLFR    | 33    | >VHL-G114S·RSHLWLFR    | 52  | 19    |
| >VHL-G114S·YRGHLWLF    | 109   | >VHL-G114S·YRSHLWLF    | 28  | 81    |
| >VHL-G114S·YRGHLWLF    | 75    | >VHL-G114S·YRSHLWLF    | 38  | 37    |
| >VHL-G114S·YRGHLWLFR   | 66    | >VHL-G114S·YRSHLWLFR   | 34  | 32    |
| >VHL-G114S·YRGHLWLFR   | 1169  | >VHL-G114S·YRSHLWLFR   | 465 | 704   |
| >VHL-G114S·YRGHLWLFR   | 44    | >VHL-G114S·YRSHLWLFR   | 50  | 6     |
| >VHL-G114S·SYRGHLWLF   | 32    | >VHL-G114S·SYRSHLWLF   | 19  | 13    |
| >VHL-G114S·SYRGHLWLF   | 24    | >VHL-G114S·SYRSHLWLF   | 19  | 5     |
| >VHL-G114S·SYRGHLWL    | 17    | >VHL-G114S·SYRSHLWL    | 19  | 2     |
| >VHL-G114S·SYRGHLWLF   | 5     | >VHL-G114S·SYRSHLWLF   | 6   | 1     |
| >VHL-G114S·SYRGHLWLF   | 351   | >VHL-G114S·SYRSHLWLF   | 504 | 153   |
| >VHL-G114S·SYRGHLWLF   | 96    | >VHL-G114S·SYRSHLWLF   | 121 | 25    |
| >VHL-G114S·SYRGHLWL    | 38    | >VHL-G114S·SYRSHLWL    | 27  | 11    |
| >VHL-G114S·SYRGHLWLFF  | 11    | >VHL-G114S·SYRSHLWLFR  | 9   | 2     |
| >VHL-G114S·SYRGHLWLFF  | 7     | >VHL-G114S·SYRSHLWLFR  | 9   | 2     |
| >VHL-G114S·SYRGHLWLFF  | 88    | >VHL-G114S·SYRSHLWLFR  | 97  | 9     |
| >VHL-G114S·SYRGHLWLFF  | 265   | >VHL-G114S·SYRSHLWLFR  | 363 | 98    |
| >VHL-G114S·SYRGHLWLFF  | 396   | >VHL-G114S·SYRSHLWLFR  | 266 | 130   |
| >VHL-G114S·SYRGHLWLFF  | 23    | >VHL-G114S·SYRSHLWLFR  | 28  | 5     |
| >VHL-G114S·SYRGHLWL    | 262   | >VHL-G114S·SYRSHLWL    | 168 | 94    |
| >VHL-G114S·SYRGHLWLFF  | 430   | >VHL-G114S·SYRSHLWLFR  | 190 | 240   |
| >VHL-G114S·SYRGHLWL    | 420   | >VHL-G114S·SYRSHLWL    | 374 | 46    |
| >VHL-G114S·SYRGHLWLF   | 277   | >VHL-G114S·SYRSHLWLF   | 327 | 50    |
| >VHL-G114S·HSYRGHLWL   | 522   | >VHL-G114S·HSYRSHLWL   | 301 | 221   |
| >VHL-G114S·HSYRGHLWLI  | 50    | >VHL-G114S·HSYRSHLWLF  | 44  | 6     |

|                         |      |                        |     |      |
|-------------------------|------|------------------------|-----|------|
| >VHL-G114S- HSYRGHLWLI  | 47   | >VHL-G114S- HSYRSHLWLF | 29  | 18   |
| >VHL-G114S- HSYRGHLWLI  | 376  | >VHL-G114S- HSYRSHLWLF | 496 | 120  |
| >VHL-G114S- HSYRGHLWLI  | 178  | >VHL-G114S- HSYRSHLWLF | 235 | 57   |
| >VHL-G114S- HSYRGHLWLI  | 1343 | >VHL-G114S- HSYRSHLWLF | 445 | 898  |
| >VHL-G114S- HSYRGHLWL   | 93   | >VHL-G114S- HSYRSHLWL  | 42  | 51   |
| >VHL-G114S- HSYRGHLWLI  | 27   | >VHL-G114S- HSYRSHLWLF | 19  | 8    |
| >VHL-G114S- HSYRGHLWLI  | 457  | >VHL-G114S- HSYRSHLWLF | 397 | 60   |
| >VHL-G114S- HSYRGHLWLI  | 8    | >VHL-G114S- HSYRSHLWLF | 7   | 1    |
| >VHL-G114S- HSYRGHLWLI  | 293  | >VHL-G114S- HSYRSHLWLF | 495 | 202  |
| >VHL-G114S- HSYRGHLWLI  | 27   | >VHL-G114S- HSYRSHLWLF | 31  | 4    |
| >VHL-G114S- HSYRGHLWLI  | 9    | >VHL-G114S- HSYRSHLWLF | 6   | 3    |
| >VHL-G114S- HSYRGHLWL   | 1085 | >VHL-G114S- HSYRSHLWL  | 197 | 888  |
| >VHL-G114S- HSYRGHLWLI  | 36   | >VHL-G114S- HSYRSHLWLF | 11  | 25   |
| >VHL-G114S- HSYRGHLW    | 4    | >VHL-G114S- HSYRSHLW   | 3   | 1    |
| >VHL-G114S- HSYRGHLWL   | 5    | >VHL-G114S- HSYRSHLWL  | 4   | 1    |
| >VHL-G114S- HSYRGHLW    | 34   | >VHL-G114S- HSYRSHLW   | 30  | 4    |
| >VHL-G114S- HSYRGHLWL   | 838  | >VHL-G114S- HSYRSHLWL  | 190 | 648  |
| >VHL-G114S- HSYRGHLWLI  | 62   | >VHL-G114S- HSYRSHLWLF | 46  | 16   |
| >VHL-G114S- HSYRGHLW    | 10   | >VHL-G114S- HSYRSHLW   | 9   | 1    |
| >VHL-G114S- HSYRGHLWL   | 339  | >VHL-G114S- HSYRSHLWL  | 156 | 183  |
| >VHL-G114S- HSYRGHLWLI  | 19   | >VHL-G114S- HSYRSHLWLF | 17  | 2    |
| >VHL-G114S- HSYRGHLWL   | 1217 | >VHL-G114S- HSYRSHLWL  | 242 | 975  |
| >VHL-G114S- HSYRGHLWLI  | 705  | >VHL-G114S- HSYRSHLWLF | 226 | 479  |
| >VHL-G114S- HSYRGHLWL   | 126  | >VHL-G114S- HSYRSHLWL  | 171 | 45   |
| >VHL-G114S- HSYRGHLWLI  | 55   | >VHL-G114S- HSYRSHLWLF | 45  | 10   |
| >VHL-G114S- HSYRGHLW    | 755  | >VHL-G114S- HSYRSHLW   | 485 | 270  |
| >VHL-G114S- HSYRGHLW    | 137  | >VHL-G114S- HSYRSHLW   | 118 | 19   |
| >VHL-G114S- HSYRGHLWLI  | 300  | >VHL-G114S- HSYRSHLWLF | 194 | 106  |
| >VHL-G114S- HSYRGHLWLI  | 46   | >VHL-G114S- HSYRSHLWLF | 37  | 9    |
| >VHL-G114S- HSYRGHLWL   | 153  | >VHL-G114S- HSYRSHLWL  | 196 | 43   |
| >VHL-G114S- IHSYRGHLWLI | 569  | >VHL-G114S- IHSYRSHLWL | 407 | 162  |
| >VHL-G114S- IHSYRGHLWLI | 131  | >VHL-G114S- IHSYRSHLWL | 84  | 47   |
| >VHL-G114S- IHSYRGHL    | 1237 | >VHL-G114S- IHSYRSHL   | 268 | 969  |
| >VHL-G114S- IHSYRGHLWLI | 91   | >VHL-G114S- IHSYRSHLWL | 63  | 28   |
| >VHL-G114S- IHSYRGHLW   | 25   | >VHL-G114S- IHSYRSHLW  | 23  | 2    |
| >VHL-G114S- IHSYRGHLWLI | 402  | >VHL-G114S- IHSYRSHLWL | 383 | 19   |
| >VHL-G114S- RIHSYRGHL   | 336  | >VHL-G114S- RIHSYRSHL  | 141 | 195  |
| >VHL-G114S- RIHSYRGHL   | 1605 | >VHL-G114S- RIHSYRSHL  | 472 | 1133 |
| >VHL-G114S- RIHSYRGHLV  | 414  | >VHL-G114S- RIHSYRSHLW | 253 | 161  |
| >VHL-G114S- RIHSYRGH    | 1112 | >VHL-G114S- RIHSYRSH   | 298 | 814  |
| >VHL-G114S- RIHSYRGHL   | 23   | >VHL-G114S- RIHSYRSHL  | 18  | 5    |
| >VHL-G114S- RIHSYRGHLV  | 21   | >VHL-G114S- RIHSYRSHLW | 17  | 4    |
| >VHL-G114S- RIHSYRGHL   | 922  | >VHL-G114S- RIHSYRSHL  | 314 | 608  |

|                        |       |                        |     |       |
|------------------------|-------|------------------------|-----|-------|
| >VHL-G114S-RIHSYRGHL   | 877   | >VHL-G114S-RIHSYRSHL   | 150 | 727   |
| >VHL-G114S-RIHSYRGHL   | 1083  | >VHL-G114S-RIHSYRSHL   | 410 | 673   |
| >VHL-G114S-RIHSYRGHL   | 2162  | >VHL-G114S-RIHSYRSHL   | 192 | 1970  |
| >VHL-G114S-RIHSYRGHLV  | 705   | >VHL-G114S-RIHSYRSHLW  | 339 | 366   |
| >VHL-G114S-RIHSYRGHLV  | 117   | >VHL-G114S-RIHSYRSHLW  | 96  | 21    |
| >VHL-G114S-RIHSYRGHLV  | 50    | >VHL-G114S-RIHSYRSHLW  | 29  | 21    |
| >VHL-G114S-RIHSYRGHLV  | 74    | >VHL-G114S-RIHSYRSHLW  | 102 | 28    |
| >VHL-G114S-RIHSYRGHL   | 107   | >VHL-G114S-RIHSYRSHL   | 22  | 85    |
| >VHL-G114S-RIHSYRGHL   | 52    | >VHL-G114S-RIHSYRSHL   | 9   | 43    |
| >VHL-G114S-RIHSYRGHL'  | 119   | >VHL-G114S-RIHSYRSHL\  | 100 | 19    |
| >VHL-G114S-RIHSYRG     | 947   | >VHL-G114S-RIHSYRS     | 240 | 707   |
| >VHL-G114S-RIHSYRGH    | 112   | >VHL-G114S-RIHSYRS     | 106 | 6     |
| >VHL-G114S-RIHSYRGHL   | 9     | >VHL-G114S-RIHSYRSHL   | 9   | 0     |
| >VHL-G114S-RIHSYRGHL'  | 134   | >VHL-G114S-RIHSYRSHL\  | 142 | 8     |
| >VHL-G114S-RIHSYRG     | 99    | >VHL-G114S-RIHSYRS     | 379 | 280   |
| >VHL-G114S-RIHSYRGHL   | 21    | >VHL-G114S-RIHSYRSHL   | 28  | 7     |
| >VHL-G114S-RIHSYRGHL'  | 96    | >VHL-G114S-RIHSYRSHL\  | 107 | 11    |
| >VHL-G114S-RIHSYRGH    | 201   | >VHL-G114S-RIHSYRS     | 422 | 221   |
| >VHL-G114S-RIHSYRGHL   | 18    | >VHL-G114S-RIHSYRSHL   | 27  | 9     |
| >VHL-G114S-RIHSYRGHL'  | 336   | >VHL-G114S-RIHSYRSHL\  | 382 | 46    |
| >VHL-G114S-RIHSYRGHL'  | 124   | >VHL-G114S-RIHSYRSHL\  | 112 | 12    |
| >VHL-G114S-RIHSYRGH    | 212   | >VHL-G114S-RIHSYRS     | 233 | 21    |
| >VHL-G114S-RIHSYRGH    | 174   | >VHL-G114S-RIHSYRS     | 122 | 52    |
| >VHL-G114S-RIHSYRGH    | 13    | >VHL-G114S-RIHSYRS     | 9   | 4     |
| >VHL-G144A-GQPIFANI    | 412   | >VHL-G144A-GQPIFANI    | 58  | 354   |
| >VHL-G144A-GQPIFANITL  | 236   | >VHL-G144A-GQPIFANITL  | 219 | 17    |
| >VHL-G144A-GQPIFANI    | 241   | >VHL-G144A-GQPIFANI    | 81  | 160   |
| >VHL-G144A-GQPIFANITL  | 430   | >VHL-G144A-GQPIFANITL  | 268 | 162   |
| >VHL-G144A-GQPIFANITL  | 1726  | >VHL-G144A-GQPIFANITL  | 315 | 1411  |
| >VHL-G144A-GQPIFANITL  | 674   | >VHL-G144A-GQPIFANITL  | 289 | 385   |
| >VHL-G144A-DGQPIFANI   | 891   | >VHL-G144A-DGQPIFANI   | 30  | 861   |
| >VHL-G144A-DGQPIFANI   | 8278  | >VHL-G144A-DGQPIFANI   | 357 | 7921  |
| >VHL-G144A-ELFVPSLNVD  | 23220 | >VHL-G144A-ELFVPSLNVD  | 496 | 22724 |
| >VHL-G144A-VDGQPIFANI  | 444   | >VHL-G144A-VDGQPIFANI  | 122 | 322   |
| >VHL-G144A-NVDGQPIFANI | 253   | >VHL-G144A-NVDGQPIFANI | 173 | 80    |
| >VHL-G144A-NVDGQPIFANI | 817   | >VHL-G144A-NVDGQPIFANI | 457 | 360   |
| >VHL-G144A-NVDGQPIFANI | 61    | >VHL-G144A-NVDGQPIFANI | 35  | 26    |
| >VHL-G144A-LNVDGQPIF   | 423   | >VHL-G144A-LNVDGQPIF   | 215 | 208   |
| >VHL-G144A-LNVDGQPI    | 1051  | >VHL-G144A-LNVDGQPI    | 394 | 657   |
| >VHL-G144A-SLNVDGQPI   | 169   | >VHL-G144A-SLNVDGQPI   | 135 | 34    |
| >VHL-G144A-SLNVDGQPIF  | 120   | >VHL-G144A-SLNVDGQPIF  | 102 | 18    |
| >VHL-G144A-SLNVDGQPI   | 47    | >VHL-G144A-SLNVDGQPI   | 37  | 10    |
| >VHL-G144A-SLNVDGQPIF  | 71    | >VHL-G144A-SLNVDGQPIF  | 58  | 13    |

|                         |      |                         |      |      |
|-------------------------|------|-------------------------|------|------|
| >VHL-G144A·SLNVDGQPI    | 44   | >VHL-G144A·SLNVDAQPI    | 55   | 11   |
| >VHL-G144A·SLNVDGQPIF   | 58   | >VHL-G144A·SLNVDAQPIF   | 68   | 10   |
| >VHL-G144A·SLNVDGQPI    | 49   | >VHL-G144A·SLNVDAQPI    | 39   | 10   |
| >VHL-G144A·SLNVDGQPIF   | 235  | >VHL-G144A·SLNVDAQPIF   | 203  | 32   |
| >VHL-G144A·SLNVDGQPI    | 54   | >VHL-G144A·SLNVDAQPI    | 47   | 7    |
| >VHL-G144A·SLNVDGQPIF   | 29   | >VHL-G144A·SLNVDAQPIF   | 29   | 0    |
| >VHL-G144A·SLNVDGQPI    | 53   | >VHL-G144A·SLNVDAQPI    | 38   | 15   |
| >VHL-G144A·SLNVDGQPIF   | 42   | >VHL-G144A·SLNVDAQPIF   | 43   | 1    |
| >VHL-G144A·SLNVDGQPIF   | 186  | >VHL-G144A·SLNVDAQPIF   | 261  | 75   |
| >VHL-G144A·SLNVDGQPIF   | 261  | >VHL-G144A·SLNVDAQPIF   | 780  | 519  |
| >VHL-G144A·SLNVDGQPIF   | 93   | >VHL-G144A·SLNVDAQPIF   | 101  | 8    |
| >VHL-G144A·VPSLNVDGQI   | 124  | >VHL-G144A·VPSLNVDQI    | 119  | 5    |
| >VHL-G144A·VPSLNVDGQ    | 6049 | >VHL-G144A·VPSLNVDQ     | 486  | 5563 |
| >VHL-G144A·VPSLNVDGQI   | 412  | >VHL-G144A·VPSLNVDQI    | 294  | 118  |
| >VHL-G144A·FVPSLNVDG    | 8244 | >VHL-G144A·FVPSLNVDQ    | 160  | 8084 |
| >VHL-G39D-ν EESGPEES    | 259  | >VHL-G39D-r EESDPEES    | 675  | 416  |
| >VHL-G39D-ν AEESGPEES   | 279  | >VHL-G39D-r AEESDPEES   | 653  | 374  |
| >VHL-G39D-ν AEESGPEESG  | 136  | >VHL-G39D-r AEESDPEESG  | 161  | 25   |
| >VHL-G39S-ν GPEESGPEEL  | 1365 | >VHL-G39S-n SPEESGPEEL  | 134  | 1231 |
| >VHL-G39S-ν GPEESGPEEL  | 3229 | >VHL-G39S-n SPEESGPEEL  | 186  | 3043 |
| >VHL-G39S-ν SGPEESGPEE  | 2646 | >VHL-G39S-n SSPEESGPEEL | 39   | 2607 |
| >VHL-G39S-ν EESGPEES    | 259  | >VHL-G39S-n EESSPEES    | 392  | 133  |
| >VHL-G39S-ν AEESGPEES   | 279  | >VHL-G39S-n AEESSPEES   | 266  | 13   |
| >VHL-G39S-ν AEESGPEESG  | 136  | >VHL-G39S-n AEESSPEESG  | 109  | 27   |
| >VHL-G39S-ν EESGAEESG   | 1003 | >VHL-G39S-n EESGAEES    | 309  | 694  |
| >VHL-G44D-ν GPEELGAEEL  | 247  | >VHL-G44D-r DPEELGAEEL  | 60   | 187  |
| >VHL-G44D-ν EESGPEEL    | 57   | >VHL-G44D-r EESDPEEL    | 152  | 95   |
| >VHL-G44D-ν EESGPEEL    | 364  | >VHL-G44D-r EESDPEEL    | 882  | 518  |
| >VHL-G44D-ν EESGPEELGA  | 355  | >VHL-G44D-r EESDPEELGA  | 276  | 79   |
| >VHL-G44D-ν PEESGPEEL   | 231  | >VHL-G44D-r PEESDPEEL   | 458  | 227  |
| >VHL-G44D-ν AEESGPEESG  | 136  | >VHL-G44D-r AEESGPEESD  | 517  | 381  |
| >VHL-G49C-ν LGAEELMEAC  | 442  | >VHL-G49C-r LCAEELMEAC  | 1437 | 995  |
| >VHL-G49C-ν ELGAEELMEAC | 238  | >VHL-G49C-r ELCAEELMEAC | 325  | 87   |
| >VHL-G49C-ν ELGAEELME   | 3622 | >VHL-G49C-r ELCAEELME   | 499  | 3123 |
| >VHL-G49C-ν EELGAEELME  | 277  | >VHL-G49C-r EELCAEELME  | 1140 | 863  |
| >VHL-G49C-ν EELGAEELME  | 18   | >VHL-G49C-r EELCAEELME  | 23   | 5    |
| >VHL-G49C-ν GPEELGAEEL  | 247  | >VHL-G49C-r GPEELCAEEL  | 230  | 17   |
| >VHL-G49C-ν EESGPEELGA  | 355  | >VHL-G49C-r EESGPEELCA  | 169  | 186  |
| >VHL-G49D-ν LGAEELMEAC  | 442  | >VHL-G49D-r LDAEELMEAC  | 1455 | 1013 |
| >VHL-G49D-ν ELGAEELMEAC | 238  | >VHL-G49D-r ELDAEELMEAC | 304  | 66   |
| >VHL-G49D-ν EELGAEELME  | 277  | >VHL-G49D-r EELDAEELME  | 667  | 390  |
| >VHL-G49D-ν EELGAEELME  | 18   | >VHL-G49D-r EELDAEELME  | 32   | 14   |
| >VHL-G49D-ν GPEELGAEEL  | 247  | >VHL-G49D-r GPEELDAEEL  | 133  | 114  |

|                         |       |                          |      |       |
|-------------------------|-------|--------------------------|------|-------|
| >VHL-G49D-v EESGPEELGA  | 355   | >VHL-G49D-r EESGPEELDA   | 278  | 77    |
| >VHL-G57E-v AGRPRPV LRS | 24092 | >VHL-G57E-n AERPRPV LRS  | 244  | 23848 |
| >VHL-G57E-v AGRPRPV L   | 91    | >VHL-G57E-n AERPRPV L    | 3208 | 3117  |
| >VHL-G57E-v AGRPRPV LR  | 124   | >VHL-G57E-n AERPRPV LR   | 4197 | 4073  |
| >VHL-G57E-v AGRPRPV LRS | 65    | >VHL-G57E-n AERPRPV LRS  | 2642 | 2577  |
| >VHL-G57E-v AGRPRPV LR  | 93    | >VHL-G57E-n AERPRPV LR   | 764  | 671   |
| >VHL-G57E-v AGRPRPV L   | 32092 | >VHL-G57E-n AERPRPV L    | 122  | 31970 |
| >VHL-G57E-v AGRPRPV LRS | 38270 | >VHL-G57E-n AERPRPV LRS  | 245  | 38025 |
| >VHL-G57E-v AGRPRPV LRS | 37445 | >VHL-G57E-n AERPRPV LRS  | 138  | 37307 |
| >VHL-G57E-v AGRPRPV LRS | 25147 | >VHL-G57E-n AERPRPV LRS  | 18   | 25129 |
| >VHL-G57E-v EAGRPRPV LR | 127   | >VHL-G57E-n EAERPRPV LR  | 232  | 105   |
| >VHL-G57E-v EAGRPRPV    | 354   | >VHL-G57E-n EAERPRPV     | 706  | 352   |
| >VHL-G57E-v EAGRPRPV    | 81    | >VHL-G57E-n EAERPRPV     | 321  | 240   |
| >VHL-G57E-v MEAGRPRPV   | 194   | >VHL-G57E-n MEAERPRPV    | 75   | 119   |
| >VHL-G57E-v MEAGRPRPV   | 355   | >VHL-G57E-n MEAERPRPV I  | 285  | 70    |
| >VHL-G57E-v MEAGRPRPV   | 104   | >VHL-G57E-n MEAERPRPV I  | 103  | 1     |
| >VHL-G57E-v MEAGRPRPV   | 248   | >VHL-G57E-n MEAERPRPV I  | 278  | 30    |
| >VHL-G57E-v MEAGRPRPV   | 56    | >VHL-G57E-n MEAERPRPV    | 93   | 37    |
| >VHL-G57E-v MEAGRPRPV   | 205   | >VHL-G57E-n MEAERPRPV    | 42   | 163   |
| >VHL-G57E-v MEAGRPRPV   | 329   | >VHL-G57E-n MEAERPRPV I  | 232  | 97    |
| >VHL-G57E-v MEAGRPRPV   | 213   | >VHL-G57E-n MEAERPRPV I  | 333  | 120   |
| >VHL-G57E-v EMEAGRPRP'  | 490   | >VHL-G57E-n EMEAERPRP\   | 560  | 70    |
| >VHL-G57E-v EMEAGRPRP'  | 279   | >VHL-G57E-n EMEAERPRP\   | 363  | 84    |
| >VHL-G57E-v EMEAGRPRP'  | 50    | >VHL-G57E-n EMEAERPRP\   | 86   | 36    |
| >VHL-G57E-v EMEAGRPRP'  | 115   | >VHL-G57E-n EMEAERPRP\   | 195  | 80    |
| >VHL-G57E-v EMEAGRPR    | 299   | >VHL-G57E-n EMEAERPR     | 353  | 54    |
| >VHL-G57E-v EMEAGRPR    | 190   | >VHL-G57E-n EMEAERPR     | 149  | 41    |
| >VHL-G57E-v EMEAGRPRP'  | 160   | >VHL-G57E-n EMEAERPRP\   | 343  | 183   |
| >VHL-G57E-v EMEAGRPR    | 412   | >VHL-G57E-n EMEAERPR     | 190  | 222   |
| >VHL-G57E-v EEMEAGRP    | 393   | >VHL-G57E-n EEMEAGERP    | 2760 | 2367  |
| >VHL-G57E-v EEMEAGRPR   | 177   | >VHL-G57E-n EEMEAGERPR I | 127  | 50    |
| >VHL-G57E-v EEMEAGRPR   | 273   | >VHL-G57E-n EEMEAGERPR   | 1330 | 1057  |
| >VHL-G57E-v EEMEAGRPR   | 378   | >VHL-G57E-n EEMEAGERPR I | 796  | 418   |
| >VHL-G57E-v EEMEAGRPR I | 268   | >VHL-G57E-n EEMEAGERPR I | 379  | 111   |
| >VHL-G57E-v EEMEAGRPR   | 419   | >VHL-G57E-n EEMEAGERPR I | 736  | 317   |
| >VHL-G57E-v EEMEAGRPR I | 27    | >VHL-G57E-n EEMEAGERPR I | 29   | 2     |
| >VHL-G57E-v EEMEAGRPR   | 138   | >VHL-G57E-n EEMEAGERPR I | 136  | 2     |
| >VHL-G57E-v AEEEMEAG    | 319   | >VHL-G57E-n AEEEMEAE     | 572  | 253   |
| >VHL-G57E-v AEEEMEAGR   | 430   | >VHL-G57E-n AEEEMEAE R I | 804  | 374   |
| >VHL-G57E-v LGAEEMEAE I | 442   | >VHL-G57E-n LGAEEMEAE I  | 336  | 106   |
| >VHL-G93R-v GEPQPYPTL   | 197   | >VHL-G93R-r REPQPYPTL    | 57   | 140   |
| >VHL-G93R-v GEPQPYPT    | 688   | >VHL-G93R-r REPQPYPT     | 391  | 297   |
| >VHL-G93R-v GEPQPYPTL   | 460   | >VHL-G93R-r REPQPYPTL    | 309  | 151   |

|                        |       |                        |      |       |
|------------------------|-------|------------------------|------|-------|
| >VHL-G93R-v GEPQPYPTL  | 2202  | >VHL-G93R-r REPQPYPTL  | 269  | 1933  |
| >VHL-G93R-v VVLPVWLNFI | 22411 | >VHL-G93R-r VVLPVWLNFI | 69   | 22342 |
| >VHL-G93R-v VVLPVWLNFI | 18872 | >VHL-G93R-r VVLPVWLNFI | 46   | 18826 |
| >VHL-G93R-v VVLPVWLNFI | 29580 | >VHL-G93R-r VVLPVWLNFI | 136  | 29444 |
| >VHL-G93R-v VVLPVWLNFI | 37212 | >VHL-G93R-r VVLPVWLNFI | 251  | 36961 |
| >VHL-G93R-v VVLPVWLNFI | 34541 | >VHL-G93R-r VVLPVWLNFI | 475  | 34066 |
| >VHL-G93R-v FDGEPQPY   | 1713  | >VHL-G93R-r FDREPQPY   | 424  | 1289  |
| >VHL-G93R-v FDGEPQPY   | 2777  | >VHL-G93R-r FDREPQPY   | 318  | 2459  |
| >VHL-G93R-v NFDGEPQPY  | 338   | >VHL-G93R-r NFDREPQPY  | 1325 | 987   |
| >VHL-G93R-v LNFDGEPQPY | 165   | >VHL-G93R-r LNFDREPQPY | 253  | 88    |
| >VHL-G93R-v LNFDGEPQPY | 111   | >VHL-G93R-r LNFDREPQPY | 90   | 21    |
| >VHL-G93R-v WLNFDGEPQ  | 50    | >VHL-G93R-r WLNFDREPQ  | 95   | 45    |
| >VHL-G93R-v WLNFDGEPQ  | 54    | >VHL-G93R-r WLNFDREPQ  | 61   | 7     |
| >VHL-G93R-v WLNFDGEPQ  | 52    | >VHL-G93R-r WLNFDREPQ  | 129  | 77    |
| >VHL-G93R-v WLNFDGEPQ  | 102   | >VHL-G93R-r WLNFDREPQ  | 104  | 2     |
| >VHL-G93R-v WLNFDGEPQ  | 90    | >VHL-G93R-r WLNFDREPQ  | 142  | 52    |
| >VHL-G93R-v WLNFDGEPQ  | 182   | >VHL-G93R-r WLNFDREPQ  | 209  | 27    |
| >VHL-G93R-v VWLNFDGE   | 227   | >VHL-G93R-r VWLNFDRE   | 345  | 118   |
| >VHL-G93R-v VWLNFDGEP  | 304   | >VHL-G93R-r VWLNFDREP  | 400  | 96    |
| >VHL-G93R-v PVWLNFDG   | 33520 | >VHL-G93R-r PVWLNFDRE  | 151  | 33369 |
| >VHL-G93R-v LPVWLNFDG  | 39285 | >VHL-G93R-r LPVWLNFDRE | 261  | 39024 |
| >VHL-G93R-v LPVWLNFDG  | 285   | >VHL-G93R-r LPVWLNFDRE | 770  | 485   |
| >VHL-G93R-v LPVWLNFDG  | 251   | >VHL-G93R-r LPVWLNFDRE | 955  | 704   |
| >VHL-G93R-v LPVWLNFDG  | 345   | >VHL-G93R-r LPVWLNFDRI | 402  | 57    |
| >VHL-G93R-v LPVWLNFDG  | 36020 | >VHL-G93R-r LPVWLNFDRE | 330  | 35690 |
| >VHL-G93R-v VLPVWLNFDI | 29756 | >VHL-G93R-r VLPVWLNFDI | 275  | 29481 |
| >VHL-G93S-v GEPQPYPTL  | 197   | >VHL-G93S-n SEPQPYPTL  | 662  | 465   |
| >VHL-G93S-v GEPQPYPTL  | 460   | >VHL-G93S-n SEPQPYPTL  | 957  | 497   |
| >VHL-G93S-v GEPQPYPTLP | 3347  | >VHL-G93S-n SEPQPYPTLP | 493  | 2854  |
| >VHL-G93S-v FDGEPQPY   | 893   | >VHL-G93S-n FDSEPQPY   | 131  | 762   |
| >VHL-G93S-v NFDGEPQPY  | 338   | >VHL-G93S-n NFDSEPQPY  | 401  | 63    |
| >VHL-G93S-v NFDGEPQPY  | 501   | >VHL-G93S-n NFDSEPQPY  | 465  | 36    |
| >VHL-G93S-v LNFDGEPQPY | 943   | >VHL-G93S-n LNFDSEPQPY | 328  | 615   |
| >VHL-G93S-v LNFDGEPQPY | 165   | >VHL-G93S-n LNFDSEPQPY | 150  | 15    |
| >VHL-G93S-v LNFDGEPQPY | 111   | >VHL-G93S-n LNFDSEPQPY | 30   | 81    |
| >VHL-G93S-v WLNFDGEPQ  | 50    | >VHL-G93S-n WLNFDSEPQ  | 51   | 1     |
| >VHL-G93S-v WLNFDGEPQ  | 54    | >VHL-G93S-n WLNFDSEPQ  | 45   | 9     |
| >VHL-G93S-v WLNFDGEPQ  | 52    | >VHL-G93S-n WLNFDSEPQ  | 64   | 12    |
| >VHL-G93S-v WLNFDGEPQ  | 102   | >VHL-G93S-n WLNFDSEPQ  | 77   | 25    |
| >VHL-G93S-v WLNFDGEPQ  | 90    | >VHL-G93S-n WLNFDSEPQ  | 59   | 31    |
| >VHL-G93S-v WLNFDGEPQ  | 182   | >VHL-G93S-n WLNFDSEPQ  | 203  | 21    |
| >VHL-G93S-v VWLNFDGE   | 227   | >VHL-G93S-n VWLNFDSE   | 135  | 92    |
| >VHL-G93S-v VWLNFDGEP  | 304   | >VHL-G93S-n VWLNFDSEP  | 338  | 34    |

|                         |       |                         |      |       |
|-------------------------|-------|-------------------------|------|-------|
| >VHL-G93S-v LPVWLNFDG   | 285   | >VHL-G93S-n LPVWLNFDSE  | 142  | 143   |
| >VHL-G93S-v LPVWLNFDG   | 538   | >VHL-G93S-n LPVWLNFDSE  | 298  | 240   |
| >VHL-G93S-v LPVWLNFDG   | 251   | >VHL-G93S-n LPVWLNFDSE  | 187  | 64    |
| >VHL-G93S-v LPVWLNFDG   | 345   | >VHL-G93S-n LPVWLNFDSE  | 303  | 42    |
| >VHL-H110P- HSYRGHLWLI  | 50    | >VHL-H110P- PSYRGHLWLI  | 1306 | 1256  |
| >VHL-H110P- HSYRGHLWLI  | 47    | >VHL-H110P- PSYRGHLWLI  | 809  | 762   |
| >VHL-H110P- HSYRGHLWLI  | 376   | >VHL-H110P- PSYRGHLWLI  | 3288 | 2912  |
| >VHL-H110P- HSYRGHLWLI  | 178   | >VHL-H110P- PSYRGHLWLI  | 727  | 549   |
| >VHL-H110P- HSYRGHLWL   | 93    | >VHL-H110P- PSYRGHLWL   | 5038 | 4945  |
| >VHL-H110P- HSYRGHLWLI  | 27    | >VHL-H110P- PSYRGHLWLI  | 1527 | 1500  |
| >VHL-H110P- HSYRGHLWLI  | 457   | >VHL-H110P- PSYRGHLWLI  | 1384 | 927   |
| >VHL-H110P- HSYRGHLWLI  | 8     | >VHL-H110P- PSYRGHLWLI  | 110  | 102   |
| >VHL-H110P- HSYRGHLWLI  | 293   | >VHL-H110P- PSYRGHLWLI  | 3245 | 2952  |
| >VHL-H110P- HSYRGHLWLI  | 27    | >VHL-H110P- PSYRGHLWLI  | 340  | 313   |
| >VHL-H110P- HSYRGHLWLI  | 9     | >VHL-H110P- PSYRGHLWLI  | 673  | 664   |
| >VHL-H110P- HSYRGHLWLI  | 36    | >VHL-H110P- PSYRGHLWLI  | 408  | 372   |
| >VHL-H110P- HSYRGHLW    | 4     | >VHL-H110P- PSYRGHLW    | 41   | 37    |
| >VHL-H110P- HSYRGHLWL   | 5     | >VHL-H110P- PSYRGHLWL   | 184  | 179   |
| >VHL-H110P- HSYRGHLW    | 34    | >VHL-H110P- PSYRGHLW    | 96   | 62    |
| >VHL-H110P- HSYRGHLWLI  | 62    | >VHL-H110P- PSYRGHLWLI  | 1549 | 1487  |
| >VHL-H110P- HSYRGHLW    | 10    | >VHL-H110P- PSYRGHLW    | 91   | 81    |
| >VHL-H110P- HSYRGHLWLI  | 19    | >VHL-H110P- PSYRGHLWLI  | 1197 | 1178  |
| >VHL-H110P- HSYRGHLWL   | 126   | >VHL-H110P- PSYRGHLWL   | 3905 | 3779  |
| >VHL-H110P- HSYRGHLWLI  | 55    | >VHL-H110P- PSYRGHLWLI  | 174  | 119   |
| >VHL-H110P- HSYRGHLW    | 137   | >VHL-H110P- PSYRGHLW    | 3994 | 3857  |
| >VHL-H110P- HSYRGHLWLI  | 300   | >VHL-H110P- PSYRGHLWLI  | 613  | 313   |
| >VHL-H110P- HSYRGHLWLI  | 46    | >VHL-H110P- PSYRGHLWLI  | 273  | 227   |
| >VHL-H110P- HSYRGHLWL   | 153   | >VHL-H110P- PSYRGHLWL   | 1942 | 1789  |
| >VHL-H110P- IHSYRGHLWLI | 131   | >VHL-H110P- IPSYRGHLWLI | 1083 | 952   |
| >VHL-H110P- IHSYRGHL    | 19579 | >VHL-H110P- IPSYRGHL    | 16   | 19563 |
| >VHL-H110P- IHSYRGHLW   | 26681 | >VHL-H110P- IPSYRGHLW   | 234  | 26447 |
| >VHL-H110P- IHSYRGHLWLI | 25498 | >VHL-H110P- IPSYRGHLWLI | 218  | 25280 |
| >VHL-H110P- IHSYRGHLWLI | 91    | >VHL-H110P- IPSYRGHLWLI | 719  | 628   |
| >VHL-H110P- IHSYRGHLWLI | 15741 | >VHL-H110P- IPSYRGHLWLI | 203  | 15538 |
| >VHL-H110P- IHSYRGHLW   | 3111  | >VHL-H110P- IPSYRGHLW   | 17   | 3094  |
| >VHL-H110P- IHSYRGHLWLI | 11670 | >VHL-H110P- IPSYRGHLWLI | 64   | 11606 |
| >VHL-H110P- IHSYRGHLW   | 2529  | >VHL-H110P- IPSYRGHLW   | 10   | 2519  |
| >VHL-H110P- IHSYRGHLWLI | 17154 | >VHL-H110P- IPSYRGHLWLI | 79   | 17075 |
| >VHL-H110P- IHSYRGHLWLI | 402   | >VHL-H110P- IPSYRGHLWLI | 6303 | 5901  |
| >VHL-H110P- RIHSYRGHL   | 336   | >VHL-H110P- RIPSYRGHL   | 355  | 19    |
| >VHL-H110P- RIHSYRGHLW  | 414   | >VHL-H110P- RIPSYRGHLW  | 566  | 152   |
| >VHL-H110P- RIHSYRGHL   | 23    | >VHL-H110P- RIPSYRGHL   | 4268 | 4245  |
| >VHL-H110P- RIHSYRGHLW  | 21    | >VHL-H110P- RIPSYRGHLW  | 3788 | 3767  |



|                       |      |                        |      |      |
|-----------------------|------|------------------------|------|------|
| >VHL-H110P-RIHSYRGHLV | 117  | >VHL-H110P-RIPSYRGHLW  | 458  | 341  |
| >VHL-H110P-RIHSYRGHLV | 50   | >VHL-H110P-RIPSYRGHLW  | 1189 | 1139 |
| >VHL-H110P-RIHSYRGHLV | 8213 | >VHL-H110P-RIPSYRGHLW  | 37   | 8176 |
| >VHL-H110P-RIHSYRGHLV | 74   | >VHL-H110P-RIPSYRGHLW  | 157  | 83   |
| >VHL-H110P-RIHSYRGHL  | 107  | >VHL-H110P-RRIPSYRGH   | 272  | 165  |
| >VHL-H110P-RIHSYRGHL  | 52   | >VHL-H110P-RRIPSYRGHL  | 127  | 75   |
| >VHL-H110P-RIHSYRGHL' | 119  | >VHL-H110P-RRIPSYRGHL\ | 271  | 152  |
| >VHL-H110P-RIHSYRGH   | 112  | >VHL-H110P-RRIPSYRGH   | 133  | 21   |
| >VHL-H110P-RIHSYRGHL  | 9    | >VHL-H110P-RRIPSYRGHL  | 11   | 2    |
| >VHL-H110P-RIHSYRGHL' | 134  | >VHL-H110P-RRIPSYRGHL\ | 176  | 42   |
| >VHL-H110P-RIHSYRG    | 99   | >VHL-H110P-RRIPSYRG    | 108  | 9    |
| >VHL-H110P-RIHSYRGH   | 195  | >VHL-H110P-RRIPSYRGH   | 209  | 14   |
| >VHL-H110P-RIHSYRGHL  | 21   | >VHL-H110P-RRIPSYRGHL  | 17   | 4    |
| >VHL-H110P-RIHSYRGHL' | 96   | >VHL-H110P-RRIPSYRGHL\ | 102  | 6    |
| >VHL-H110P-RIHSYRGH   | 201  | >VHL-H110P-RRIPSYRGH   | 91   | 110  |
| >VHL-H110P-RIHSYRGHL  | 18   | >VHL-H110P-RRIPSYRGHL  | 13   | 5    |
| >VHL-H110P-RIHSYRGHL' | 336  | >VHL-H110P-RRIPSYRGHL\ | 174  | 162  |
| >VHL-H110P-RIHSYRGHL' | 124  | >VHL-H110P-RRIPSYRGHL\ | 62   | 62   |
| >VHL-H110P-GRRIHSYRGH | 212  | >VHL-H110P-GRRIPSYRGH  | 388  | 176  |
| >VHL-H110P-GRRIHSYRGH | 174  | >VHL-H110P-GRRIPSYRGH  | 192  | 18   |
| >VHL-H110P-GRRIHSYRGH | 13   | >VHL-H110P-GRRIPSYRGH  | 31   | 18   |
| >VHL-H110P-TGRRIHSYR  | 148  | >VHL-H110P-TGRRIPSYR   | 686  | 538  |
| >VHL-H110P-TGRRIHSY   | 185  | >VHL-H110P-TGRRIPSY    | 392  | 207  |
| >VHL-H110P-TGRRIHSYR  | 14   | >VHL-H110P-TGRRIPSYR   | 49   | 35   |
| >VHL-H110P-TGRRIHSYR  | 104  | >VHL-H110P-TGRRIPSYR   | 358  | 254  |
| >VHL-H110P-GTGRRISYR  | 452  | >VHL-H110P-GTGRRIPSYR  | 732  | 280  |
| >VHL-H110P-GTGRRISY   | 415  | >VHL-H110P-GTGRRIPSY   | 353  | 62   |
| >VHL-H110P-GTGRRISY   | 316  | >VHL-H110P-GTGRRIPSY   | 700  | 384  |
| >VHL-H110P-GTGRRISY   | 74   | >VHL-H110P-GTGRRIPSY   | 153  | 79   |
| >VHL-H110P-GTGRRISYR  | 38   | >VHL-H110P-GTGRRIPSYR  | 98   | 60   |
| >VHL-H110P-GTGRRISYR  | 117  | >VHL-H110P-GTGRRIPSYR  | 831  | 714  |
| >VHL-H110P-GTGRRISYR  | 245  | >VHL-H110P-GTGRRIPSYR  | 177  | 68   |
| >VHL-H110P-GTGRRISY   | 439  | >VHL-H110P-GTGRRIPSY   | 3445 | 3006 |
| >VHL-H110P-GTGRRISY   | 491  | >VHL-H110P-GTGRRIPSY   | 313  | 178  |
| >VHL-H110P-GTGRRISY   | 91   | >VHL-H110P-GTGRRIPSY   | 108  | 17   |
| >VHL-H110P-GTGRRISY   | 131  | >VHL-H110P-GTGRRIPSY   | 154  | 23   |
| >VHL-H110P-GTGRRISYR  | 400  | >VHL-H110P-GTGRRIPSYR  | 447  | 47   |
| >VHL-H110P-LPPGTGRRIP | 1281 | >VHL-H110P-LPPGTGRRIP  | 242  | 1039 |
| >VHL-H110Q-HSYRGHLWL  | 522  | >VHL-H110Q-QSYRGHLWL   | 238  | 284  |
| >VHL-H110Q-HSYRGHLWL  | 50   | >VHL-H110Q-QSYRGHLWL   | 126  | 76   |
| >VHL-H110Q-HSYRGHLWL  | 47   | >VHL-H110Q-QSYRGHLWL   | 46   | 1    |
| >VHL-H110Q-HSYRGHLWL  | 376  | >VHL-H110Q-QSYRGHLWL   | 864  | 488  |
| >VHL-H110Q-HSYRGHLWL  | 178  | >VHL-H110Q-QSYRGHLWL   | 171  | 7    |

|                        |       |                       |      |       |
|------------------------|-------|-----------------------|------|-------|
| >VHL-H110Q HSYRGHLWL   | 93    | >VHL-H110Q QSYRGHLWL  | 1601 | 1508  |
| >VHL-H110Q HSYRGHLWLI  | 27    | >VHL-H110Q QSYRGHLWL  | 315  | 288   |
| >VHL-H110Q HSYRGHLWLI  | 457   | >VHL-H110Q QSYRGHLWL  | 609  | 152   |
| >VHL-H110Q HSYRGHLWLI  | 8     | >VHL-H110Q QSYRGHLWL  | 18   | 10    |
| >VHL-H110Q HSYRGHLWLI  | 293   | >VHL-H110Q QSYRGHLWL  | 230  | 63    |
| >VHL-H110Q HSYRGHLWLI  | 27    | >VHL-H110Q QSYRGHLWL  | 146  | 119   |
| >VHL-H110Q HSYRGHLWLI  | 9     | >VHL-H110Q QSYRGHLWL  | 18   | 9     |
| >VHL-H110Q HSYRGHLWLI  | 36    | >VHL-H110Q QSYRGHLWL  | 51   | 15    |
| >VHL-H110Q HSYRGHLW    | 4     | >VHL-H110Q QSYRGHLW   | 5    | 1     |
| >VHL-H110Q HSYRGHLWL   | 5     | >VHL-H110Q QSYRGHLWL  | 7    | 2     |
| >VHL-H110Q HSYRGHLW    | 34    | >VHL-H110Q QSYRGHLW   | 48   | 14    |
| >VHL-H110Q HSYRGHLWLI  | 62    | >VHL-H110Q QSYRGHLWL  | 267  | 205   |
| >VHL-H110Q HSYRGHLW    | 10    | >VHL-H110Q QSYRGHLW   | 13   | 3     |
| >VHL-H110Q HSYRGHLWLI  | 19    | >VHL-H110Q QSYRGHLWL  | 29   | 10    |
| >VHL-H110Q HSYRGHLWLI  | 705   | >VHL-H110Q QSYRGHLWL  | 357  | 348   |
| >VHL-H110Q HSYRGHLWL   | 126   | >VHL-H110Q QSYRGHLWL  | 121  | 5     |
| >VHL-H110Q HSYRGHLWLI  | 55    | >VHL-H110Q QSYRGHLWL  | 33   | 22    |
| >VHL-H110Q HSYRGHLW    | 137   | >VHL-H110Q QSYRGHLW   | 2676 | 2539  |
| >VHL-H110Q HSYRGHLWLI  | 300   | >VHL-H110Q QSYRGHLWL  | 108  | 192   |
| >VHL-H110Q HSYRGHLWLI  | 46    | >VHL-H110Q QSYRGHLWL  | 115  | 69    |
| >VHL-H110Q HSYRGHLWL   | 153   | >VHL-H110Q QSYRGHLWL  | 321  | 168   |
| >VHL-H110Q IHSYRGHLWL  | 15853 | >VHL-H110Q IQSYRGHLWL | 95   | 15758 |
| >VHL-H110Q IHSYRGHLWL  | 131   | >VHL-H110Q IQSYRGHLWL | 134  | 3     |
| >VHL-H110Q IHSYRGHL    | 19724 | >VHL-H110Q IQSYRGHL   | 242  | 19482 |
| >VHL-H110Q IHSYRGHLWLI | 17200 | >VHL-H110Q IQSYRGHLWL | 130  | 17070 |
| >VHL-H110Q IHSYRGHL    | 1237  | >VHL-H110Q IQSYRGHL   | 97   | 1140  |
| >VHL-H110Q IHSYRGHLW   | 3314  | >VHL-H110Q IQSYRGHLW  | 295  | 3019  |
| >VHL-H110Q IHSYRGHLWLI | 1296  | >VHL-H110Q IQSYRGHLWL | 107  | 1189  |
| >VHL-H110Q IHSYRGHLWLI | 91    | >VHL-H110Q IQSYRGHLWL | 8    | 83    |
| >VHL-H110Q IHSYRGHLWLI | 402   | >VHL-H110Q IQSYRGHLWL | 6374 | 5972  |
| >VHL-H110Q RIHSYRGHL   | 336   | >VHL-H110Q RIQSYRGHL  | 1091 | 755   |
| >VHL-H110Q RIHSYRGHLV  | 414   | >VHL-H110Q RIQSYRGHLV | 564  | 150   |
| >VHL-H110Q RIHSYRGHL   | 23    | >VHL-H110Q RIQSYRGHL  | 866  | 843   |
| >VHL-H110Q RIHSYRGHLV  | 21    | >VHL-H110Q RIQSYRGHLV | 758  | 737   |
| >VHL-H110Q RIHSYRGHLV  | 117   | >VHL-H110Q RIQSYRGHLV | 148  | 31    |
| >VHL-H110Q RIHSYRGHLV  | 50    | >VHL-H110Q RIQSYRGHLV | 31   | 19    |
| >VHL-H110Q RIHSYRGHLV  | 940   | >VHL-H110Q RIQSYRGHLV | 243  | 697   |
| >VHL-H110Q RIHSYRGHLV  | 74    | >VHL-H110Q RIQSYRGHLV | 169  | 95    |
| >VHL-H110Q RRIHSYRGH   | 107   | >VHL-H110Q RRIQSYRGH  | 518  | 411   |
| >VHL-H110Q RRIHSYRGHL  | 52    | >VHL-H110Q RRIQSYRGHL | 173  | 121   |
| >VHL-H110Q RRIHSYRGHL  | 119   | >VHL-H110Q RRIQSYRGHL | 351  | 232   |
| >VHL-H110Q RRIHSYRGH   | 112   | >VHL-H110Q RRIQSYRGH  | 111  | 1     |
| >VHL-H110Q RRIHSYRGHL  | 9     | >VHL-H110Q RRIQSYRGHL | 8    | 1     |

|                        |     |                        |       |       |
|------------------------|-----|------------------------|-------|-------|
| >VHL-H110Q RRIHSYRGHL' | 134 | >VHL-H110Q RRIQSYRGHL' | 126   | 8     |
| >VHL-H110Q RRIHSYRG    | 99  | >VHL-H110Q RRIQSYRG    | 57    | 42    |
| >VHL-H110Q RRIHSYRGH   | 195 | >VHL-H110Q RRIQSYRGH   | 190   | 5     |
| >VHL-H110Q RRIHSYRGHL  | 21  | >VHL-H110Q RRIQSYRGHL  | 11    | 10    |
| >VHL-H110Q RRIHSYRGHL' | 96  | >VHL-H110Q RRIQSYRGHL' | 91    | 5     |
| >VHL-H110Q RRIHSYRGH   | 201 | >VHL-H110Q RRIQSYRGH   | 141   | 60    |
| >VHL-H110Q RRIHSYRGHL  | 18  | >VHL-H110Q RRIQSYRGHL  | 10    | 8     |
| >VHL-H110Q RRIHSYRGHL' | 336 | >VHL-H110Q RRIQSYRGHL' | 229   | 107   |
| >VHL-H110Q RRIHSYRGHL' | 124 | >VHL-H110Q RRIQSYRGHL' | 212   | 88    |
| >VHL-H110Q GRIHSYRGH   | 212 | >VHL-H110Q GRIQSYRGH   | 223   | 11    |
| >VHL-H110Q GRIHSYRGH   | 174 | >VHL-H110Q GRIQSYRGH   | 234   | 60    |
| >VHL-H110Q GRIHSYRGH   | 13  | >VHL-H110Q GRIQSYRGH   | 32    | 19    |
| >VHL-H110Q TGRIHSYR    | 148 | >VHL-H110Q TGRIQSYR    | 655   | 507   |
| >VHL-H110Q TGRIHSY     | 185 | >VHL-H110Q TGRIQSY     | 748   | 563   |
| >VHL-H110Q TGRIHSYR    | 14  | >VHL-H110Q TGRIQSYR    | 27    | 13    |
| >VHL-H110Q TGRIHSYR    | 104 | >VHL-H110Q TGRIQSYR    | 192   | 88    |
| >VHL-H110Q GTGRIHSYR   | 452 | >VHL-H110Q GTGRIQSYR   | 960   | 508   |
| >VHL-H110Q GTGRIHSY    | 415 | >VHL-H110Q GTGRIQSY    | 1116  | 701   |
| >VHL-H110Q GTGRIHSY    | 316 | >VHL-H110Q GTGRIQSY    | 1872  | 1556  |
| >VHL-H110Q GTGRIHSY    | 74  | >VHL-H110Q GTGRIQSY    | 1183  | 1109  |
| >VHL-H110Q GTGRIHSYR   | 38  | >VHL-H110Q GTGRIQSYR   | 72    | 34    |
| >VHL-H110Q GTGRIHSYR   | 117 | >VHL-H110Q GTGRIQSYR   | 488   | 371   |
| >VHL-H110Q GTGRIHSYR   | 245 | >VHL-H110Q GTGRIQSYR   | 233   | 12    |
| >VHL-H110Q GTGRIHSY    | 439 | >VHL-H110Q GTGRIQSY    | 2156  | 1717  |
| >VHL-H110Q GTGRIHSY    | 491 | >VHL-H110Q GTGRIQSY    | 274   | 217   |
| >VHL-H110Q GTGRIHSY    | 91  | >VHL-H110Q GTGRIQSY    | 80    | 11    |
| >VHL-H110Q GTGRIHSY    | 131 | >VHL-H110Q GTGRIQSY    | 106   | 25    |
| >VHL-H110Q GTGRIHSYR   | 400 | >VHL-H110Q GTGRIQSYR   | 757   | 357   |
| >VHL-H115D·HLWLFRDA    | 346 | >VHL-H115D·DLWLFRDA    | 4949  | 4603  |
| >VHL-H115D·RGHLWLFR    | 160 | >VHL-H115D·RGDLWLFR    | 12438 | 12278 |
| >VHL-H115D·RGHLWLFR    | 15  | >VHL-H115D·RGDLWLFR    | 139   | 124   |
| >VHL-H115D·RGHLWLFR    | 33  | >VHL-H115D·RGDLWLFR    | 77    | 44    |
| >VHL-H115D·YRGHLWLF    | 109 | >VHL-H115D·YRGDLWLF    | 454   | 345   |
| >VHL-H115D·YRGHLWLF    | 75  | >VHL-H115D·YRGDLWLF    | 106   | 31    |
| >VHL-H115D·YRGHLWLFR   | 66  | >VHL-H115D·YRGDLWLFR   | 97    | 31    |
| >VHL-H115D·YRGHLWLFR   | 44  | >VHL-H115D·YRGDLWLFR   | 33    | 11    |
| >VHL-H115D·SYRGHLWLF   | 32  | >VHL-H115D·SYRGDLWLF   | 35    | 3     |
| >VHL-H115D·SYRGHLWLF   | 24  | >VHL-H115D·SYRGDLWLF   | 44    | 20    |
| >VHL-H115D·SYRGHLWL    | 17  | >VHL-H115D·SYRGDLWL    | 23    | 6     |
| >VHL-H115D·SYRGHLWLF   | 5   | >VHL-H115D·SYRGDLWLF   | 6     | 1     |
| >VHL-H115D·SYRGHLWLF   | 351 | >VHL-H115D·SYRGDLWLF   | 679   | 328   |
| >VHL-H115D·SYRGHLWLF   | 96  | >VHL-H115D·SYRGDLWLF   | 192   | 96    |
| >VHL-H115D·SYRGHLWL    | 38  | >VHL-H115D·SYRGDLWL    | 440   | 402   |

|                       |     |                       |      |      |
|-----------------------|-----|-----------------------|------|------|
| >VHL-H115D·SYRGHLWLFF | 11  | >VHL-H115D·SYRGDLWLFF | 36   | 25   |
| >VHL-H115D·SYRGHLWLFF | 7   | >VHL-H115D·SYRGDLWLFF | 17   | 10   |
| >VHL-H115D·SYRGHLWLFF | 88  | >VHL-H115D·SYRGDLWLFF | 83   | 5    |
| >VHL-H115D·SYRGHLWLFF | 265 | >VHL-H115D·SYRGDLWLFF | 634  | 369  |
| >VHL-H115D·SYRGHLWLFF | 396 | >VHL-H115D·SYRGDLWLFF | 826  | 430  |
| >VHL-H115D·SYRGHLWLFF | 23  | >VHL-H115D·SYRGDLWLFF | 27   | 4    |
| >VHL-H115D·SYRGHLWL   | 262 | >VHL-H115D·SYRGDLWL   | 563  | 301  |
| >VHL-H115D·SYRGHLWLFF | 430 | >VHL-H115D·SYRGDLWLFF | 190  | 240  |
| >VHL-H115D·SYRGHLWL   | 420 | >VHL-H115D·SYRGDLWL   | 549  | 129  |
| >VHL-H115D·SYRGHLWLF  | 277 | >VHL-H115D·SYRGDLWLF  | 371  | 94   |
| >VHL-H115D·SYRGHLWLFF | 523 | >VHL-H115D·SYRGDLWLFF | 414  | 109  |
| >VHL-H115D·HSYRGHLWLI | 50  | >VHL-H115D·HSYRGDLWLI | 101  | 51   |
| >VHL-H115D·HSYRGHLWLI | 47  | >VHL-H115D·HSYRGDLWLI | 95   | 48   |
| >VHL-H115D·HSYRGHLWLI | 376 | >VHL-H115D·HSYRGDLWLI | 577  | 201  |
| >VHL-H115D·HSYRGHLWLI | 178 | >VHL-H115D·HSYRGDLWLI | 305  | 127  |
| >VHL-H115D·HSYRGHLWL  | 93  | >VHL-H115D·HSYRGDLWL  | 2204 | 2111 |
| >VHL-H115D·HSYRGHLWLI | 27  | >VHL-H115D·HSYRGDLWLI | 122  | 95   |
| >VHL-H115D·HSYRGHLWLI | 457 | >VHL-H115D·HSYRGDLWLI | 446  | 11   |
| >VHL-H115D·HSYRGHLWLI | 8   | >VHL-H115D·HSYRGDLWLI | 14   | 6    |
| >VHL-H115D·HSYRGHLWLI | 293 | >VHL-H115D·HSYRGDLWLI | 670  | 377  |
| >VHL-H115D·HSYRGHLWLI | 27  | >VHL-H115D·HSYRGDLWLI | 36   | 9    |
| >VHL-H115D·HSYRGHLWLI | 9   | >VHL-H115D·HSYRGDLWLI | 10   | 1    |
| >VHL-H115D·HSYRGHLWLI | 36  | >VHL-H115D·HSYRGDLWLI | 110  | 74   |
| >VHL-H115D·HSYRGHLW   | 4   | >VHL-H115D·HSYRGDLW   | 6    | 2    |
| >VHL-H115D·HSYRGHLWL  | 5   | >VHL-H115D·HSYRGDLWL  | 6    | 1    |
| >VHL-H115D·HSYRGHLW   | 34  | >VHL-H115D·HSYRGDLW   | 39   | 5    |
| >VHL-H115D·HSYRGHLWLI | 62  | >VHL-H115D·HSYRGDLWLI | 65   | 3    |
| >VHL-H115D·HSYRGHLW   | 10  | >VHL-H115D·HSYRGDLW   | 11   | 1    |
| >VHL-H115D·HSYRGHLWL  | 339 | >VHL-H115D·HSYRGDLWL  | 233  | 106  |
| >VHL-H115D·HSYRGHLWLI | 19  | >VHL-H115D·HSYRGDLWLI | 17   | 2    |
| >VHL-H115D·HSYRGHLWL  | 126 | >VHL-H115D·HSYRGDLWL  | 538  | 412  |
| >VHL-H115D·HSYRGHLWLI | 55  | >VHL-H115D·HSYRGDLWLI | 81   | 26   |
| >VHL-H115D·HSYRGHLW   | 137 | >VHL-H115D·HSYRGDLW   | 32   | 105  |
| >VHL-H115D·HSYRGHLWLI | 300 | >VHL-H115D·HSYRGDLWLI | 525  | 225  |
| >VHL-H115D·HSYRGHLWLI | 46  | >VHL-H115D·HSYRGDLWLI | 45   | 1    |
| >VHL-H115D·HSYRGHLWL  | 153 | >VHL-H115D·HSYRGDLWL  | 143  | 10   |
| >VHL-H115D·IHSYRGHLWL | 131 | >VHL-H115D·IHSYRGDLWL | 311  | 180  |
| >VHL-H115D·IHSYRGHLWL | 91  | >VHL-H115D·IHSYRGDLWL | 171  | 80   |
| >VHL-H115D·IHSYRGHLW  | 25  | >VHL-H115D·IHSYRGDLW  | 8    | 17   |
| >VHL-H115D·IHSYRGHLWL | 402 | >VHL-H115D·IHSYRGDLWL | 162  | 240  |
| >VHL-H115D·RIHSYRGHL  | 336 | >VHL-H115D·RIHSYRGDL  | 2092 | 1756 |
| >VHL-H115D·RIHSYRGHLV | 414 | >VHL-H115D·RIHSYRGDLV | 694  | 280  |
| >VHL-H115D·RIHSYRGHL  | 23  | >VHL-H115D·RIHSYRGDL  | 166  | 143  |

|                        |      |                        |      |      |
|------------------------|------|------------------------|------|------|
| >VHL-H115D·RIHSYRGHLM  | 21   | >VHL-H115D·RIHSYRGDLM  | 106  | 85   |
| >VHL-H115D·RIHSYRGHLM  | 117  | >VHL-H115D·RIHSYRGDLM  | 287  | 170  |
| >VHL-H115D·RIHSYRGHLM  | 50   | >VHL-H115D·RIHSYRGDLM  | 191  | 141  |
| >VHL-H115D·RIHSYRGHLM  | 74   | >VHL-H115D·RIHSYRGDLM  | 38   | 36   |
| >VHL-H115D·RRIHSYRGH   | 107  | >VHL-H115D·RRIHSYRGD   | 4933 | 4826 |
| >VHL-H115D·RRIHSYRGHL  | 52   | >VHL-H115D·RRIHSYRGDL  | 71   | 19   |
| >VHL-H115D·RRIHSYRGHL' | 119  | >VHL-H115D·RRIHSYRGDL' | 222  | 103  |
| >VHL-H115D·RRIHSYRGH   | 112  | >VHL-H115D·RRIHSYRGD   | 1484 | 1372 |
| >VHL-H115D·RRIHSYRGHL  | 9    | >VHL-H115D·RRIHSYRGDL  | 10   | 1    |
| >VHL-H115D·RRIHSYRGHL' | 134  | >VHL-H115D·RRIHSYRGDL' | 408  | 274  |
| >VHL-H115D·RRIHSYRGHL  | 21   | >VHL-H115D·RRIHSYRGDL  | 25   | 4    |
| >VHL-H115D·RRIHSYRGHL' | 96   | >VHL-H115D·RRIHSYRGDL' | 133  | 37   |
| >VHL-H115D·RRIHSYRGH   | 201  | >VHL-H115D·RRIHSYRGD   | 1191 | 990  |
| >VHL-H115D·RRIHSYRGHL  | 18   | >VHL-H115D·RRIHSYRGDL  | 21   | 3    |
| >VHL-H115D·RRIHSYRGHL' | 336  | >VHL-H115D·RRIHSYRGDL' | 531  | 195  |
| >VHL-H115D·RRIHSYRGHL' | 124  | >VHL-H115D·RRIHSYRGDL' | 38   | 86   |
| >VHL-H115D·GRIHSYRGH   | 212  | >VHL-H115D·GRIHSYRGD   | 1085 | 873  |
| >VHL-H115D·GRIHSYRGH   | 174  | >VHL-H115D·GRIHSYRGD   | 138  | 36   |
| >VHL-H115D·GRIHSYRGH   | 13   | >VHL-H115D·GRIHSYRGD   | 30   | 17   |
| >VHL-H115N·HLWLFRDAG'  | 585  | >VHL-H115N·NLWLFRDAG'  | 435  | 150  |
| >VHL-H115N·HLWLFRDA    | 346  | >VHL-H115N·NLWLFRDA    | 1560 | 1214 |
| >VHL-H115N·RGHLWLFR    | 160  | >VHL-H115N·RGNLWLFR    | 1517 | 1357 |
| >VHL-H115N·RGHLWLFR    | 15   | >VHL-H115N·RGNLWLFR    | 11   | 4    |
| >VHL-H115N·RGHLWLFR    | 33   | >VHL-H115N·RGNLWLFR    | 46   | 13   |
| >VHL-H115N·YRGHLWLF    | 109  | >VHL-H115N·YRGNLWLF    | 201  | 92   |
| >VHL-H115N·YRGHLWLF    | 75   | >VHL-H115N·YRGNLWLF    | 50   | 25   |
| >VHL-H115N·YRGHLWLFR   | 66   | >VHL-H115N·YRGNLWLFR   | 44   | 22   |
| >VHL-H115N·YRGHLWLFR   | 44   | >VHL-H115N·YRGNLWLFR   | 62   | 18   |
| >VHL-H115N·SYRGHLWL    | 1728 | >VHL-H115N·SYRGNLWL    | 126  | 1602 |
| >VHL-H115N·SYRGHLWLF   | 32   | >VHL-H115N·SYRGNLWLF   | 17   | 15   |
| >VHL-H115N·SYRGHLWLF   | 24   | >VHL-H115N·SYRGNLWLF   | 23   | 1    |
| >VHL-H115N·SYRGHLWL    | 17   | >VHL-H115N·SYRGNLWL    | 15   | 2    |
| >VHL-H115N·SYRGHLWLF   | 5    | >VHL-H115N·SYRGNLWLF   | 4    | 1    |
| >VHL-H115N·SYRGHLWLF   | 351  | >VHL-H115N·SYRGNLWLF   | 1385 | 1034 |
| >VHL-H115N·SYRGHLWLF   | 96   | >VHL-H115N·SYRGNLWLF   | 122  | 26   |
| >VHL-H115N·SYRGHLWL    | 38   | >VHL-H115N·SYRGNLWL    | 54   | 16   |
| >VHL-H115N·SYRGHLWLFF  | 11   | >VHL-H115N·SYRGNLWLFF  | 11   | 0    |
| >VHL-H115N·SYRGHLWLFF  | 7    | >VHL-H115N·SYRGNLWLFF  | 8    | 1    |
| >VHL-H115N·SYRGHLWLFF  | 88   | >VHL-H115N·SYRGNLWLFF  | 56   | 32   |
| >VHL-H115N·SYRGHLWLFF  | 265  | >VHL-H115N·SYRGNLWLFF  | 544  | 279  |
| >VHL-H115N·SYRGHLWLFF  | 396  | >VHL-H115N·SYRGNLWLFF  | 653  | 257  |
| >VHL-H115N·SYRGHLWLFF  | 23   | >VHL-H115N·SYRGNLWLFF  | 22   | 1    |
| >VHL-H115N·SYRGHLWL    | 262  | >VHL-H115N·SYRGNLWL    | 370  | 108  |

|                        |     |                        |      |      |
|------------------------|-----|------------------------|------|------|
| >VHL-H115N SYRGHLWLF   | 430 | >VHL-H115N SYRGNLWLF   | 172  | 258  |
| >VHL-H115N SYRGHLWL    | 420 | >VHL-H115N SYRGNLWL    | 337  | 83   |
| >VHL-H115N SYRGHLWLF   | 277 | >VHL-H115N SYRGNLWLF   | 179  | 98   |
| >VHL-H115N SYRGHLWLF   | 523 | >VHL-H115N SYRGNLWLF   | 233  | 290  |
| >VHL-H115N HSYRGHLWLI  | 50  | >VHL-H115N HSYRGNLWLI  | 55   | 5    |
| >VHL-H115N HSYRGHLWLI  | 47  | >VHL-H115N HSYRGNLWLI  | 51   | 4    |
| >VHL-H115N HSYRGHLWLI  | 376 | >VHL-H115N HSYRGNLWLI  | 410  | 34   |
| >VHL-H115N HSYRGHLWLI  | 178 | >VHL-H115N HSYRGNLWLI  | 349  | 171  |
| >VHL-H115N HSYRGHLWL   | 93  | >VHL-H115N HSYRGNLWL   | 332  | 239  |
| >VHL-H115N HSYRGHLWLI  | 27  | >VHL-H115N HSYRGNLWLI  | 45   | 18   |
| >VHL-H115N HSYRGHLWLI  | 457 | >VHL-H115N HSYRGNLWLI  | 239  | 218  |
| >VHL-H115N HSYRGHLWLI  | 8   | >VHL-H115N HSYRGNLWLI  | 11   | 3    |
| >VHL-H115N HSYRGHLWLI  | 293 | >VHL-H115N HSYRGNLWLI  | 251  | 42   |
| >VHL-H115N HSYRGHLWLI  | 27  | >VHL-H115N HSYRGNLWLI  | 31   | 4    |
| >VHL-H115N HSYRGHLWLI  | 9   | >VHL-H115N HSYRGNLWLI  | 9    | 0    |
| >VHL-H115N HSYRGHLWLI  | 36  | >VHL-H115N HSYRGNLWLI  | 41   | 5    |
| >VHL-H115N HSYRGHLW    | 4   | >VHL-H115N HSYRGNLW    | 5    | 1    |
| >VHL-H115N HSYRGHLWL   | 5   | >VHL-H115N HSYRGNLWL   | 7    | 2    |
| >VHL-H115N HSYRGHLW    | 34  | >VHL-H115N HSYRGNLW    | 38   | 4    |
| >VHL-H115N HSYRGHLWLI  | 62  | >VHL-H115N HSYRGNLWLI  | 83   | 21   |
| >VHL-H115N HSYRGHLW    | 10  | >VHL-H115N HSYRGNLW    | 12   | 2    |
| >VHL-H115N HSYRGHLWL   | 339 | >VHL-H115N HSYRGNLWL   | 553  | 214  |
| >VHL-H115N HSYRGHLWLI  | 19  | >VHL-H115N HSYRGNLWLI  | 19   | 0    |
| >VHL-H115N HSYRGHLW    | 715 | >VHL-H115N HSYRGNLW    | 168  | 547  |
| >VHL-H115N HSYRGHLWL   | 126 | >VHL-H115N HSYRGNLWL   | 169  | 43   |
| >VHL-H115N HSYRGHLWLI  | 55  | >VHL-H115N HSYRGNLWLI  | 60   | 5    |
| >VHL-H115N HSYRGHLW    | 137 | >VHL-H115N HSYRGNLW    | 106  | 31   |
| >VHL-H115N HSYRGHLWLI  | 300 | >VHL-H115N HSYRGNLWLI  | 440  | 140  |
| >VHL-H115N HSYRGHLWLI  | 46  | >VHL-H115N HSYRGNLWLI  | 50   | 4    |
| >VHL-H115N HSYRGHLWL   | 153 | >VHL-H115N HSYRGNLWL   | 140  | 13   |
| >VHL-H115N IHSYRGHLWLI | 131 | >VHL-H115N IHSYRGNLWLI | 171  | 40   |
| >VHL-H115N IHSYRGHLWLI | 91  | >VHL-H115N IHSYRGNLWLI | 88   | 3    |
| >VHL-H115N IHSYRGHLW   | 25  | >VHL-H115N IHSYRGNLW   | 20   | 5    |
| >VHL-H115N IHSYRGHLWLI | 402 | >VHL-H115N IHSYRGNLWLI | 363  | 39   |
| >VHL-H115N RIHSYRGHL   | 336 | >VHL-H115N RIHSYRGNL   | 976  | 640  |
| >VHL-H115N RIHSYRGHLV  | 414 | >VHL-H115N RIHSYRGNLV  | 570  | 156  |
| >VHL-H115N RIHSYRGHL   | 23  | >VHL-H115N RIHSYRGNL   | 29   | 6    |
| >VHL-H115N RIHSYRGHLV  | 21  | >VHL-H115N RIHSYRGNLV  | 32   | 11   |
| >VHL-H115N RIHSYRGHLV  | 117 | >VHL-H115N RIHSYRGNLV  | 260  | 143  |
| >VHL-H115N RIHSYRGHLV  | 50  | >VHL-H115N RIHSYRGNLV  | 174  | 124  |
| >VHL-H115N RIHSYRGHLV  | 74  | >VHL-H115N RIHSYRGNLV  | 65   | 9    |
| >VHL-H115N RRIHSYRGH   | 107 | >VHL-H115N RRIHSYRGN   | 1596 | 1489 |
| >VHL-H115N RRIHSYRGHL  | 52  | >VHL-H115N RRIHSYRGNL  | 48   | 4    |

|                        |       |                        |      |       |
|------------------------|-------|------------------------|------|-------|
| >VHL-H115N RRIHSYRGHL' | 119   | >VHL-H115N RRIHSYRGNL' | 97   | 22    |
| >VHL-H115N RRIHSYRGH   | 112   | >VHL-H115N RRIHSYRGN   | 562  | 450   |
| >VHL-H115N RRIHSYRGHL  | 9     | >VHL-H115N RRIHSYRGNL  | 9    | 0     |
| >VHL-H115N RRIHSYRGHL' | 134   | >VHL-H115N RRIHSYRGNL' | 391  | 257   |
| >VHL-H115N RRIHSYRGHL  | 21    | >VHL-H115N RRIHSYRGNL  | 28   | 7     |
| >VHL-H115N RRIHSYRGHL' | 96    | >VHL-H115N RRIHSYRGNL' | 105  | 9     |
| >VHL-H115N RRIHSYRGH   | 201   | >VHL-H115N RRIHSYRGN   | 325  | 124   |
| >VHL-H115N RRIHSYRGHL  | 18    | >VHL-H115N RRIHSYRGNL  | 22   | 4     |
| >VHL-H115N RRIHSYRGHL' | 336   | >VHL-H115N RRIHSYRGNL' | 334  | 2     |
| >VHL-H115N RRIHSYRGHL' | 124   | >VHL-H115N RRIHSYRGNL' | 98   | 26    |
| >VHL-H115N GRIHSYRGH   | 212   | >VHL-H115N GRIHSYRGN   | 291  | 79    |
| >VHL-H115N GRIHSYRGH   | 174   | >VHL-H115N GRIHSYRGN   | 182  | 8     |
| >VHL-H115N GRIHSYRGH   | 13    | >VHL-H115N GRIHSYRGN   | 19   | 6     |
| >VHL-H115P-HLWLFDA     | 346   | >VHL-H115P-PLWLFDA     | 2347 | 2001  |
| >VHL-H115P-GHLWLFDA    | 20366 | >VHL-H115P-GPLWLFDA    | 69   | 20297 |
| >VHL-H115P-RGHLWLF     | 160   | >VHL-H115P-RGPLWLF     | 8444 | 8284  |
| >VHL-H115P-RGHLWLF     | 15    | >VHL-H115P-RGPLWLF     | 103  | 88    |
| >VHL-H115P-RGHLWLF     | 33    | >VHL-H115P-RGPLWLF     | 36   | 3     |
| >VHL-H115P-YRGHLWLF    | 109   | >VHL-H115P-YRGPLWLF    | 274  | 165   |
| >VHL-H115P-YRGHLWLF    | 75    | >VHL-H115P-YRGPLWLF    | 124  | 49    |
| >VHL-H115P-YRGHLWLF    | 66    | >VHL-H115P-YRGPLWLF    | 99   | 33    |
| >VHL-H115P-YRGHLWLF    | 1169  | >VHL-H115P-YRGPLWLF    | 496  | 673   |
| >VHL-H115P-YRGHLWLF    | 44    | >VHL-H115P-YRGPLWLF    | 46   | 2     |
| >VHL-H115P-SYRGHLWLF   | 32    | >VHL-H115P-SYRGPLWLF   | 61   | 29    |
| >VHL-H115P-SYRGHLWLF   | 24    | >VHL-H115P-SYRGPLWLF   | 43   | 19    |
| >VHL-H115P-SYRGHLWL    | 17    | >VHL-H115P-SYRGPLWL    | 25   | 8     |
| >VHL-H115P-SYRGHLWLF   | 5     | >VHL-H115P-SYRGPLWLF   | 5    | 0     |
| >VHL-H115P-SYRGHLWLF   | 351   | >VHL-H115P-SYRGPLWLF   | 629  | 278   |
| >VHL-H115P-SYRGHLWLF   | 96    | >VHL-H115P-SYRGPLWLF   | 208  | 112   |
| >VHL-H115P-SYRGHLWL    | 38    | >VHL-H115P-SYRGPLWL    | 98   | 60    |
| >VHL-H115P-SYRGHLWLF   | 11    | >VHL-H115P-SYRGPLWLF   | 16   | 5     |
| >VHL-H115P-SYRGHLWLF   | 7     | >VHL-H115P-SYRGPLWLF   | 8    | 1     |
| >VHL-H115P-SYRGHLWLF   | 88    | >VHL-H115P-SYRGPLWLF   | 63   | 25    |
| >VHL-H115P-SYRGHLWLF   | 2627  | >VHL-H115P-SYRGPLWLF   | 405  | 2222  |
| >VHL-H115P-SYRGHLWLF   | 265   | >VHL-H115P-SYRGPLWLF   | 296  | 31    |
| >VHL-H115P-SYRGHLWLF   | 396   | >VHL-H115P-SYRGPLWLF   | 1208 | 812   |
| >VHL-H115P-SYRGHLWLF   | 23    | >VHL-H115P-SYRGPLWLF   | 23   | 0     |
| >VHL-H115P-SYRGHLWL    | 262   | >VHL-H115P-SYRGPLWL    | 312  | 50    |
| >VHL-H115P-SYRGHLWLF   | 430   | >VHL-H115P-SYRGPLWLF   | 259  | 171   |
| >VHL-H115P-SYRGHLWL    | 420   | >VHL-H115P-SYRGPLWL    | 309  | 111   |
| >VHL-H115P-SYRGHLWLF   | 277   | >VHL-H115P-SYRGPLWLF   | 150  | 127   |
| >VHL-H115P-SYRGHLWLF   | 523   | >VHL-H115P-SYRGPLWLF   | 158  | 365   |
| >VHL-H115P-HSYRGHLWLI  | 50    | >VHL-H115P-HSYRGPLWLI  | 48   | 2     |

|                         |      |                         |     |      |
|-------------------------|------|-------------------------|-----|------|
| >VHL-H115P- HSYRGHLWLI  | 47   | >VHL-H115P- HSYRGPLWLF  | 47  | 0    |
| >VHL-H115P- HSYRGHLWLI  | 376  | >VHL-H115P- HSYRGPLWLF  | 726 | 350  |
| >VHL-H115P- HSYRGHLWLI  | 178  | >VHL-H115P- HSYRGPLWLF  | 303 | 125  |
| >VHL-H115P- HSYRGHLWL   | 93   | >VHL-H115P- HSYRGPLWL   | 392 | 299  |
| >VHL-H115P- HSYRGHLWLI  | 27   | >VHL-H115P- HSYRGPLWLF  | 47  | 20   |
| >VHL-H115P- HSYRGHLWLI  | 457  | >VHL-H115P- HSYRGPLWLF  | 679 | 222  |
| >VHL-H115P- HSYRGHLWLI  | 8    | >VHL-H115P- HSYRGPLWLF  | 13  | 5    |
| >VHL-H115P- HSYRGHLWLI  | 293  | >VHL-H115P- HSYRGPLWLF  | 285 | 8    |
| >VHL-H115P- HSYRGHLWLI  | 27   | >VHL-H115P- HSYRGPLWLF  | 40  | 13   |
| >VHL-H115P- HSYRGHLWLI  | 9    | >VHL-H115P- HSYRGPLWLF  | 12  | 3    |
| >VHL-H115P- HSYRGHLWLI  | 36   | >VHL-H115P- HSYRGPLWLF  | 36  | 0    |
| >VHL-H115P- HSYRGHLW    | 4    | >VHL-H115P- HSYRGPLW    | 4   | 0    |
| >VHL-H115P- HSYRGHLWL   | 5    | >VHL-H115P- HSYRGPLWL   | 6   | 1    |
| >VHL-H115P- HSYRGHLW    | 34   | >VHL-H115P- HSYRGPLW    | 38  | 4    |
| >VHL-H115P- HSYRGHLWLI  | 62   | >VHL-H115P- HSYRGPLWLF  | 62  | 0    |
| >VHL-H115P- HSYRGHLW    | 10   | >VHL-H115P- HSYRGPLW    | 10  | 0    |
| >VHL-H115P- HSYRGHLWL   | 339  | >VHL-H115P- HSYRGPLWL   | 178 | 161  |
| >VHL-H115P- HSYRGHLWLI  | 19   | >VHL-H115P- HSYRGPLWLF  | 17  | 2    |
| >VHL-H115P- HSYRGHLWL   | 126  | >VHL-H115P- HSYRGPLWL   | 364 | 238  |
| >VHL-H115P- HSYRGHLWLI  | 55   | >VHL-H115P- HSYRGPLWLF  | 49  | 6    |
| >VHL-H115P- HSYRGHLW    | 137  | >VHL-H115P- HSYRGPLW    | 129 | 8    |
| >VHL-H115P- HSYRGHLWLI  | 300  | >VHL-H115P- HSYRGPLWLF  | 236 | 64   |
| >VHL-H115P- HSYRGHLWLI  | 46   | >VHL-H115P- HSYRGPLWLF  | 45  | 1    |
| >VHL-H115P- HSYRGHLWL   | 153  | >VHL-H115P- HSYRGPLWL   | 156 | 3    |
| >VHL-H115P- IHSYRGHLWL  | 131  | >VHL-H115P- IHSYRGPLWL  | 228 | 97   |
| >VHL-H115P- IHSYRGHLWL  | 91   | >VHL-H115P- IHSYRGPLWL  | 90  | 1    |
| >VHL-H115P- IHSYRGHLW   | 25   | >VHL-H115P- IHSYRGPLW   | 18  | 7    |
| >VHL-H115P- IHSYRGHLWLI | 402  | >VHL-H115P- IHSYRGPLWL  | 504 | 102  |
| >VHL-H115P- RIHSYRGHL   | 336  | >VHL-H115P- RIHSYRGPL   | 345 | 9    |
| >VHL-H115P- RIHSYRGHL   | 1605 | >VHL-H115P- RIHSYRGPL   | 387 | 1218 |
| >VHL-H115P- RIHSYRGHLV  | 903  | >VHL-H115P- RIHSYRGPLW  | 380 | 523  |
| >VHL-H115P- RIHSYRGHLV  | 414  | >VHL-H115P- RIHSYRGPLW  | 548 | 134  |
| >VHL-H115P- RIHSYRGHL   | 23   | >VHL-H115P- RIHSYRGPL   | 14  | 9    |
| >VHL-H115P- RIHSYRGHLV  | 21   | >VHL-H115P- RIHSYRGPLW  | 31  | 10   |
| >VHL-H115P- RIHSYRGHL   | 1210 | >VHL-H115P- RIHSYRGPL   | 111 | 1099 |
| >VHL-H115P- RIHSYRGHL   | 877  | >VHL-H115P- RIHSYRGPL   | 350 | 527  |
| >VHL-H115P- RIHSYRGHLV  | 117  | >VHL-H115P- RIHSYRGPLW  | 250 | 133  |
| >VHL-H115P- RIHSYRGHLV  | 50   | >VHL-H115P- RIHSYRGPLW  | 90  | 40   |
| >VHL-H115P- RIHSYRGHLV  | 74   | >VHL-H115P- RIHSYRGPLW  | 203 | 129  |
| >VHL-H115P- RRIHSYRGH   | 107  | >VHL-H115P- RRIHSYRGP   | 413 | 306  |
| >VHL-H115P- RRIHSYRGHL  | 52   | >VHL-H115P- RRIHSYRGPL  | 27  | 25   |
| >VHL-H115P- RRIHSYRGHL' | 119  | >VHL-H115P- RRIHSYRGPL\ | 102 | 17   |
| >VHL-H115P- RRIHSYRGH   | 112  | >VHL-H115P- RRIHSYRGP   | 688 | 576  |



|                         |       |                         |      |       |
|-------------------------|-------|-------------------------|------|-------|
| >VHL-H115P- RRIHSYRGHL  | 9     | >VHL-H115P- RRIHSYRGPL  | 10   | 1     |
| >VHL-H115P- RRIHSYRGHL' | 134   | >VHL-H115P- RRIHSYRGPL\ | 305  | 171   |
| >VHL-H115P- RRIHSYRGHL  | 3099  | >VHL-H115P- RRIHSYRGPL  | 251  | 2848  |
| >VHL-H115P- RRIHSYRGHL  | 21    | >VHL-H115P- RRIHSYRGPL  | 26   | 5     |
| >VHL-H115P- RRIHSYRGHL' | 96    | >VHL-H115P- RRIHSYRGPL\ | 82   | 14    |
| >VHL-H115P- RRIHSYRGH   | 201   | >VHL-H115P- RRIHSYRGP   | 732  | 531   |
| >VHL-H115P- RRIHSYRGHL  | 18    | >VHL-H115P- RRIHSYRGPL  | 24   | 6     |
| >VHL-H115P- RRIHSYRGHL' | 336   | >VHL-H115P- RRIHSYRGPL\ | 302  | 34    |
| >VHL-H115P- RRIHSYRGHL' | 124   | >VHL-H115P- RRIHSYRGPL\ | 99   | 25    |
| >VHL-H115P- GRIHSYRGH   | 212   | >VHL-H115P- GRIHSYRGP   | 185  | 27    |
| >VHL-H115P- GRIHSYRGH   | 174   | >VHL-H115P- GRIHSYRGP   | 137  | 37    |
| >VHL-H115P- GRIHSYRGH   | 13    | >VHL-H115P- GRIHSYRGP   | 19   | 6     |
| >VHL-H115Y- HLWLFDA     | 2632  | >VHL-H115Y- YLWLFDA     | 81   | 2551  |
| >VHL-H115Y- HLWLFDA'    | 1468  | >VHL-H115Y- YLWLFDA'    | 74   | 1394  |
| >VHL-H115Y- HLWLFDA'    | 666   | >VHL-H115Y- YLWLFDA'    | 80   | 586   |
| >VHL-H115Y- HLWLFDA     | 3928  | >VHL-H115Y- YLWLFDA     | 306  | 3622  |
| >VHL-H115Y- HLWLFDA'    | 585   | >VHL-H115Y- YLWLFDA'    | 59   | 526   |
| >VHL-H115Y- HLWLFDA'    | 3314  | >VHL-H115Y- YLWLFDA'    | 194  | 3120  |
| >VHL-H115Y- HLWLFDA     | 1175  | >VHL-H115Y- YLWLFDA     | 25   | 1150  |
| >VHL-H115Y- HLWLFDA'    | 1311  | >VHL-H115Y- YLWLFDA'    | 30   | 1281  |
| >VHL-H115Y- HLWLFDA     | 4824  | >VHL-H115Y- YLWLFDA     | 261  | 4563  |
| >VHL-H115Y- HLWLFDA'    | 3148  | >VHL-H115Y- YLWLFDA'    | 285  | 2863  |
| >VHL-H115Y- HLWLFDA     | 1111  | >VHL-H115Y- YLWLFDA     | 38   | 1073  |
| >VHL-H115Y- HLWLFDA'    | 2889  | >VHL-H115Y- YLWLFDA'    | 112  | 2777  |
| >VHL-H115Y- HLWLFDA'    | 8884  | >VHL-H115Y- YLWLFDA'    | 212  | 8672  |
| >VHL-H115Y- HLWLFDA     | 346   | >VHL-H115Y- YLWLFDA     | 15   | 331   |
| >VHL-H115Y- HLWLFDA'    | 596   | >VHL-H115Y- YLWLFDA'    | 24   | 572   |
| >VHL-H115Y- GHLWLFDA    | 10743 | >VHL-H115Y- GYLWLFDA    | 222  | 10521 |
| >VHL-H115Y- TGRIHSYRG   | 3086  | >VHL-H115Y- TGRIHSYRG   | 282  | 2804  |
| >VHL-H115Y- RGHLWLF     | 4363  | >VHL-H115Y- RGYLWLF     | 404  | 3959  |
| >VHL-H115Y- RGHLWLF     | 2228  | >VHL-H115Y- RGYLWLF     | 302  | 1926  |
| >VHL-H115Y- RGHLWLF     | 160   | >VHL-H115Y- RGYLWLF     | 1502 | 1342  |
| >VHL-H115Y- RGHLWLF     | 15    | >VHL-H115Y- RGYLWLF     | 11   | 4     |
| >VHL-H115Y- RGHLWLF     | 33    | >VHL-H115Y- RGYLWLF     | 24   | 9     |
| >VHL-H115Y- YRGHLWLF    | 109   | >VHL-H115Y- YRGYLWLF    | 145  | 36    |
| >VHL-H115Y- YRGHLWLF    | 75    | >VHL-H115Y- YRGYLWLF    | 68   | 7     |
| >VHL-H115Y- YRGHLWLF    | 66    | >VHL-H115Y- YRGYLWLF    | 63   | 3     |
| >VHL-H115Y- YRGHLWLF    | 44    | >VHL-H115Y- YRGYLWLF    | 58   | 14    |
| >VHL-H115Y- SYRGHLWLF   | 32    | >VHL-H115Y- SYRGYLWLF   | 23   | 9     |
| >VHL-H115Y- SYRGHLWL    | 650   | >VHL-H115Y- SYRGYLWL    | 451  | 199   |
| >VHL-H115Y- SYRGHLWLF   | 24    | >VHL-H115Y- SYRGYLWLF   | 21   | 3     |
| >VHL-H115Y- SYRGHLWL    | 17    | >VHL-H115Y- SYRGYLWL    | 12   | 5     |
| >VHL-H115Y- SYRGHLWLF   | 5     | >VHL-H115Y- SYRGYLWLF   | 6    | 1     |

|                       |     |                       |      |      |
|-----------------------|-----|-----------------------|------|------|
| >VHL-H115Y-SYRGHLWLF  | 351 | >VHL-H115Y-SYRGYLWLF  | 1408 | 1057 |
| >VHL-H115Y-SYRGHLWLF  | 96  | >VHL-H115Y-SYRGYLWLF  | 111  | 15   |
| >VHL-H115Y-SYRGHLWL   | 38  | >VHL-H115Y-SYRGYLWL   | 46   | 8    |
| >VHL-H115Y-SYRGHLWLFF | 11  | >VHL-H115Y-SYRGYLWLFR | 11   | 0    |
| >VHL-H115Y-SYRGHLWLFF | 7   | >VHL-H115Y-SYRGYLWLFR | 6    | 1    |
| >VHL-H115Y-SYRGHLWLFF | 88  | >VHL-H115Y-SYRGYLWLFR | 34   | 54   |
| >VHL-H115Y-SYRGHLWLFF | 265 | >VHL-H115Y-SYRGYLWLFR | 199  | 66   |
| >VHL-H115Y-SYRGHLWLFF | 396 | >VHL-H115Y-SYRGYLWLFR | 529  | 133  |
| >VHL-H115Y-SYRGHLWLFF | 23  | >VHL-H115Y-SYRGYLWLFR | 24   | 1    |
| >VHL-H115Y-SYRGHLWL   | 262 | >VHL-H115Y-SYRGYLWL   | 229  | 33   |
| >VHL-H115Y-SYRGHLWLFF | 430 | >VHL-H115Y-SYRGYLWLFR | 164  | 266  |
| >VHL-H115Y-SYRGHLWL   | 420 | >VHL-H115Y-SYRGYLWL   | 264  | 156  |
| >VHL-H115Y-SYRGHLWLF  | 277 | >VHL-H115Y-SYRGYLWLF  | 115  | 162  |
| >VHL-H115Y-SYRGHLWLFF | 523 | >VHL-H115Y-SYRGYLWLFR | 360  | 163  |
| >VHL-H115Y-HSYRGHLWL  | 522 | >VHL-H115Y-HSYRGYLWL  | 71   | 451  |
| >VHL-H115Y-HSYRGHLWLI | 50  | >VHL-H115Y-HSYRGYLWLF | 50   | 0    |
| >VHL-H115Y-HSYRGHLWLI | 47  | >VHL-H115Y-HSYRGYLWLF | 38   | 9    |
| >VHL-H115Y-HSYRGHLWLI | 376 | >VHL-H115Y-HSYRGYLWLF | 154  | 222  |
| >VHL-H115Y-HSYRGHLWLI | 178 | >VHL-H115Y-HSYRGYLWLF | 267  | 89   |
| >VHL-H115Y-HSYRGHLWL  | 93  | >VHL-H115Y-HSYRGYLWL  | 160  | 67   |
| >VHL-H115Y-HSYRGHLWLI | 27  | >VHL-H115Y-HSYRGYLWLF | 33   | 6    |
| >VHL-H115Y-HSYRGHLWLI | 457 | >VHL-H115Y-HSYRGYLWLF | 449  | 8    |
| >VHL-H115Y-HSYRGHLWLI | 8   | >VHL-H115Y-HSYRGYLWLF | 8    | 0    |
| >VHL-H115Y-HSYRGHLWLI | 293 | >VHL-H115Y-HSYRGYLWLF | 612  | 319  |
| >VHL-H115Y-HSYRGHLWLI | 27  | >VHL-H115Y-HSYRGYLWLF | 26   | 1    |
| >VHL-H115Y-HSYRGHLWLI | 9   | >VHL-H115Y-HSYRGYLWLF | 9    | 0    |
| >VHL-H115Y-HSYRGHLWLI | 36  | >VHL-H115Y-HSYRGYLWLF | 26   | 10   |
| >VHL-H115Y-HSYRGHLW   | 4   | >VHL-H115Y-HSYRGYLW   | 5    | 1    |
| >VHL-H115Y-HSYRGHLWL  | 5   | >VHL-H115Y-HSYRGYLWL  | 8    | 3    |
| >VHL-H115Y-HSYRGHLW   | 34  | >VHL-H115Y-HSYRGYLW   | 37   | 3    |
| >VHL-H115Y-HSYRGHLWLI | 62  | >VHL-H115Y-HSYRGYLWLF | 72   | 10   |
| >VHL-H115Y-HSYRGHLW   | 10  | >VHL-H115Y-HSYRGYLW   | 10   | 0    |
| >VHL-H115Y-HSYRGHLWL  | 339 | >VHL-H115Y-HSYRGYLWL  | 192  | 147  |
| >VHL-H115Y-HSYRGHLWLI | 19  | >VHL-H115Y-HSYRGYLWLF | 17   | 2    |
| >VHL-H115Y-HSYRGHLWL  | 126 | >VHL-H115Y-HSYRGYLWL  | 224  | 98   |
| >VHL-H115Y-HSYRGHLWLI | 55  | >VHL-H115Y-HSYRGYLWLF | 70   | 15   |
| >VHL-H115Y-HSYRGHLW   | 755 | >VHL-H115Y-HSYRGYLW   | 388  | 367  |
| >VHL-H115Y-HSYRGHLWL  | 790 | >VHL-H115Y-HSYRGYLWL  | 380  | 410  |
| >VHL-H115Y-HSYRGHLW   | 137 | >VHL-H115Y-HSYRGYLW   | 71   | 66   |
| >VHL-H115Y-HSYRGHLWLI | 300 | >VHL-H115Y-HSYRGYLWLF | 282  | 18   |
| >VHL-H115Y-HSYRGHLWLI | 46  | >VHL-H115Y-HSYRGYLWLF | 59   | 13   |
| >VHL-H115Y-HSYRGHLWL  | 153 | >VHL-H115Y-HSYRGYLWL  | 79   | 74   |
| >VHL-H115Y-IHSYRGHLWL | 131 | >VHL-H115Y-IHSYRGYLWL | 114  | 17   |

|                       |       |                       |      |       |
|-----------------------|-------|-----------------------|------|-------|
| >VHL-H115Y-IHSYRGHLWL | 91    | >VHL-H115Y-IHSYRGYLWL | 69   | 22    |
| >VHL-H115Y-IHSYRGHLW  | 25    | >VHL-H115Y-IHSYRGYLW  | 11   | 14    |
| >VHL-H115Y-IHSYRGHLWL | 402   | >VHL-H115Y-IHSYRGYLWL | 193  | 209   |
| >VHL-H115Y-RIHSYRGHL  | 336   | >VHL-H115Y-RIHSYRGYL  | 805  | 469   |
| >VHL-H115Y-RIHSYRGHLV | 903   | >VHL-H115Y-RIHSYRGYLW | 329  | 574   |
| >VHL-H115Y-RIHSYRGHL  | 4518  | >VHL-H115Y-RIHSYRGYL  | 460  | 4058  |
| >VHL-H115Y-RIHSYRGHLV | 414   | >VHL-H115Y-RIHSYRGYLW | 347  | 67    |
| >VHL-H115Y-RIHSYRGH   | 2103  | >VHL-H115Y-RIHSYRGY   | 452  | 1651  |
| >VHL-H115Y-RIHSYRGH   | 1112  | >VHL-H115Y-RIHSYRGY   | 102  | 1010  |
| >VHL-H115Y-RIHSYRGHL  | 23    | >VHL-H115Y-RIHSYRGYL  | 13   | 10    |
| >VHL-H115Y-RIHSYRGHLV | 21    | >VHL-H115Y-RIHSYRGYLW | 22   | 1     |
| >VHL-H115Y-RIHSYRGH   | 9360  | >VHL-H115Y-RIHSYRGY   | 93   | 9267  |
| >VHL-H115Y-RIHSYRGHL  | 922   | >VHL-H115Y-RIHSYRGYL  | 286  | 636   |
| >VHL-H115Y-RIHSYRGHLV | 1987  | >VHL-H115Y-RIHSYRGYLW | 498  | 1489  |
| >VHL-H115Y-RIHSYRGH   | 19490 | >VHL-H115Y-RIHSYRGY   | 433  | 19057 |
| >VHL-H115Y-RIHSYRGH   | 8809  | >VHL-H115Y-RIHSYRGY   | 120  | 8689  |
| >VHL-H115Y-RIHSYRGH   | 6464  | >VHL-H115Y-RIHSYRGY   | 272  | 6192  |
| >VHL-H115Y-RIHSYRGH   | 16400 | >VHL-H115Y-RIHSYRGY   | 169  | 16231 |
| >VHL-H115Y-RIHSYRGHLV | 117   | >VHL-H115Y-RIHSYRGYLW | 116  | 1     |
| >VHL-H115Y-RIHSYRGHLV | 50    | >VHL-H115Y-RIHSYRGYLW | 61   | 11    |
| >VHL-H115Y-RIHSYRGHLV | 74    | >VHL-H115Y-RIHSYRGYLW | 55   | 19    |
| >VHL-H115Y-RRHSYRGH   | 107   | >VHL-H115Y-RRHSYRGY   | 6    | 101   |
| >VHL-H115Y-RRHSYRGHL  | 52    | >VHL-H115Y-RRHSYRGYL  | 48   | 4     |
| >VHL-H115Y-RRHSYRGHL' | 119   | >VHL-H115Y-RRHSYRGYL\ | 105  | 14    |
| >VHL-H115Y-RRHSYRGH   | 112   | >VHL-H115Y-RRHSYRGY   | 70   | 42    |
| >VHL-H115Y-RRHSYRGHL  | 9     | >VHL-H115Y-RRHSYRGYL  | 9    | 0     |
| >VHL-H115Y-RRHSYRGHL' | 134   | >VHL-H115Y-RRHSYRGYL\ | 159  | 25    |
| >VHL-H115Y-RRHSYRGHL  | 21    | >VHL-H115Y-RRHSYRGYL  | 20   | 1     |
| >VHL-H115Y-RRHSYRGHL' | 96    | >VHL-H115Y-RRHSYRGYL\ | 108  | 12    |
| >VHL-H115Y-RRHSYRGH   | 201   | >VHL-H115Y-RRHSYRGY   | 115  | 86    |
| >VHL-H115Y-RRHSYRGHL  | 18    | >VHL-H115Y-RRHSYRGYL  | 16   | 2     |
| >VHL-H115Y-RRHSYRGHL' | 336   | >VHL-H115Y-RRHSYRGYL\ | 500  | 164   |
| >VHL-H115Y-RRHSYRGHL' | 124   | >VHL-H115Y-RRHSYRGYL\ | 61   | 63    |
| >VHL-H115Y-GRRHSYRGH  | 4898  | >VHL-H115Y-GRRHSYRGY  | 312  | 4586  |
| >VHL-H115Y-GRRHSYRGH  | 730   | >VHL-H115Y-GRRHSYRGY  | 53   | 677   |
| >VHL-H115Y-GRRHSYRGH  | 212   | >VHL-H115Y-GRRHSYRGY  | 394  | 182   |
| >VHL-H115Y-GRRHSYRGH  | 174   | >VHL-H115Y-GRRHSYRGY  | 134  | 40    |
| >VHL-H115Y-GRRHSYRGH  | 13    | >VHL-H115Y-GRRHSYRGY  | 15   | 2     |
| >VHL-I109N-IHSYRGHLWL | 131   | >VHL-I109N-IHSYRGHLW  | 613  | 482   |
| >VHL-I109N-IHSYRGHLWL | 91    | >VHL-I109N-IHSYRGHLW  | 1003 | 912   |
| >VHL-I109N-IHSYRGHLWL | 848   | >VHL-I109N-IHSYRGHLW  | 272  | 576   |
| >VHL-I109N-IHSYRGHLWL | 2292  | >VHL-I109N-IHSYRGHLW  | 232  | 2060  |
| >VHL-I109N-IHSYRGHLWL | 402   | >VHL-I109N-IHSYRGHLW  | 3858 | 3456  |

|                         |      |                        |       |       |
|-------------------------|------|------------------------|-------|-------|
| >VHL-I109N- RIHSYRGHL   | 336  | >VHL-I109N- RNHSYRGHL  | 337   | 1     |
| >VHL-I109N- RIHSYRGHLM  | 414  | >VHL-I109N- RNHSYRGHL\ | 26439 | 26025 |
| >VHL-I109N- RIHSYRGHL   | 23   | >VHL-I109N- RNHSYRGHL  | 270   | 247   |
| >VHL-I109N- RIHSYRGHLM  | 21   | >VHL-I109N- RNHSYRGHL\ | 245   | 224   |
| >VHL-I109N- RIHSYRGHLM  | 117  | >VHL-I109N- RNHSYRGHL\ | 484   | 367   |
| >VHL-I109N- RIHSYRGHLM  | 50   | >VHL-I109N- RNHSYRGHL\ | 399   | 349   |
| >VHL-I109N- RIHSYRGHLM  | 1751 | >VHL-I109N- RNHSYRGHL\ | 351   | 1400  |
| >VHL-I109N- RIHSYRGHLM  | 940  | >VHL-I109N- RNHSYRGHL\ | 431   | 509   |
| >VHL-I109N- RIHSYRGHLM  | 74   | >VHL-I109N- RNHSYRGHL\ | 78    | 4     |
| >VHL-I109N- PTLPPGTGRR  | 139  | >VHL-I109N- PTLPPGTGRR | 36606 | 36467 |
| >VHL-I109N- RRIHSYRGH   | 107  | >VHL-I109N- RRNHSYRGH  | 201   | 94    |
| >VHL-I109N- RRIHSYRGHL  | 52   | >VHL-I109N- RRNHSYRGHI | 81    | 29    |
| >VHL-I109N- RRIHSYRGHL' | 119  | >VHL-I109N- RRNHSYRGHI | 196   | 77    |
| >VHL-I109N- RRIHSYRGH   | 112  | >VHL-I109N- RRNHSYRGH  | 212   | 100   |
| >VHL-I109N- RRIHSYRGHL  | 9    | >VHL-I109N- RRNHSYRGHI | 13    | 4     |
| >VHL-I109N- RRIHSYRGHL' | 134  | >VHL-I109N- RRNHSYRGHI | 306   | 172   |
| >VHL-I109N- RRIHSYRG    | 99   | >VHL-I109N- RRNHSYRG   | 124   | 25    |
| >VHL-I109N- RRIHSYRGH   | 195  | >VHL-I109N- RRNHSYRGH  | 402   | 207   |
| >VHL-I109N- RRIHSYRGHL  | 21   | >VHL-I109N- RRNHSYRGHI | 31    | 10    |
| >VHL-I109N- RRIHSYRGHL' | 96   | >VHL-I109N- RRNHSYRGHI | 167   | 71    |
| >VHL-I109N- RRIHSYRGH   | 201  | >VHL-I109N- RRNHSYRGH  | 432   | 231   |
| >VHL-I109N- RRIHSYRGHL  | 18   | >VHL-I109N- RRNHSYRGHI | 23    | 5     |
| >VHL-I109N- RRIHSYRGHL' | 336  | >VHL-I109N- RRNHSYRGHI | 643   | 307   |
| >VHL-I109N- RRIHSYRGHL' | 124  | >VHL-I109N- RRNHSYRGHI | 145   | 21    |
| >VHL-I109N- GRRHSYRGH   | 212  | >VHL-I109N- GRRNHSYRG  | 147   | 65    |
| >VHL-I109N- GRRHSYRGH   | 174  | >VHL-I109N- GRRNHSYRG  | 197   | 23    |
| >VHL-I109N- GRRHSYRGH   | 13   | >VHL-I109N- GRRNHSYRG  | 16    | 3     |
| >VHL-I109N- TGRRHSYR    | 148  | >VHL-I109N- TGRRNHSYR  | 90    | 58    |
| >VHL-I109N- TGRRHSY     | 185  | >VHL-I109N- TGRRNHSY   | 218   | 33    |
| >VHL-I109N- TGRRHSYR    | 14   | >VHL-I109N- TGRRNHSYR  | 27    | 13    |
| >VHL-I109N- TGRRHSYR    | 104  | >VHL-I109N- TGRRNHSYR  | 375   | 271   |
| >VHL-I109N- GTGRRHSYR   | 452  | >VHL-I109N- GTGRRNHSYI | 1035  | 583   |
| >VHL-I109N- GTGRRHSY    | 415  | >VHL-I109N- GTGRRNHSY  | 2688  | 2273  |
| >VHL-I109N- GTGRRHSY    | 722  | >VHL-I109N- GTGRRNHSY  | 332   | 390   |
| >VHL-I109N- GTGRRHSY    | 316  | >VHL-I109N- GTGRRNHSY  | 282   | 34    |
| >VHL-I109N- GTGRRHSY    | 74   | >VHL-I109N- GTGRRNHSY  | 46    | 28    |
| >VHL-I109N- GTGRRHSYR   | 38   | >VHL-I109N- GTGRRNHSYI | 112   | 74    |
| >VHL-I109N- GTGRRHSYR   | 117  | >VHL-I109N- GTGRRNHSYI | 577   | 460   |
| >VHL-I109N- GTGRRHSYR   | 245  | >VHL-I109N- GTGRRNHSYI | 850   | 605   |
| >VHL-I109N- GTGRRHSY    | 439  | >VHL-I109N- GTGRRNHSY  | 674   | 235   |
| >VHL-I109N- GTGRRHSY    | 491  | >VHL-I109N- GTGRRNHSY  | 549   | 58    |
| >VHL-I109N- GTGRRHSY    | 91   | >VHL-I109N- GTGRRNHSY  | 131   | 40    |
| >VHL-I109N- GTGRRHSY    | 131  | >VHL-I109N- GTGRRNHSY  | 74    | 57    |

|                          |       |                         |       |       |
|--------------------------|-------|-------------------------|-------|-------|
| >VHL-I109N-v GTGRRIHYSYR | 400   | >VHL-I109N-f GTGRRNHSYI | 508   | 108   |
| >VHL-I109N-v LPPGTGRRR   | 158   | >VHL-I109N-f LPPGTGRRN  | 19092 | 18934 |
| >VHL-I109N-v TLPPGTGRRR  | 214   | >VHL-I109N-f TLPPGTGRRN | 17346 | 17132 |
| >VHL-I109N-v TLPPGTGRRR  | 83    | >VHL-I109N-f TLPPGTGRRN | 14597 | 14514 |
| >VHL-I109S-v IHSYRGHLWL  | 131   | >VHL-I109S-r SHSYRGHLW  | 348   | 217   |
| >VHL-I109S-v IHSYRGHLWL  | 91    | >VHL-I109S-r SHSYRGHLW  | 262   | 171   |
| >VHL-I109S-v IHSYRGHLWL  | 848   | >VHL-I109S-r SHSYRGHLW  | 427   | 421   |
| >VHL-I109S-v IHSYRGHLWL  | 2292  | >VHL-I109S-r SHSYRGHLW  | 465   | 1827  |
| >VHL-I109S-v IHSYRGHLWL  | 402   | >VHL-I109S-r SHSYRGHLW  | 4529  | 4127  |
| >VHL-I109S-v RIHSYRGHL   | 336   | >VHL-I109S-r RSHSYRGHL  | 233   | 103   |
| >VHL-I109S-v RIHSYRGHLV  | 414   | >VHL-I109S-r RSHSYRGHLV | 21191 | 20777 |
| >VHL-I109S-v RIHSYRGH    | 1112  | >VHL-I109S-r RSHSYRGH   | 421   | 691   |
| >VHL-I109S-v RIHSYRGHL   | 23    | >VHL-I109S-r RSHSYRGHL  | 12    | 11    |
| >VHL-I109S-v RIHSYRGHLV  | 21    | >VHL-I109S-r RSHSYRGHLV | 12    | 9     |
| >VHL-I109S-v RIHSYRGHL   | 2162  | >VHL-I109S-r RSHSYRGHL  | 490   | 1672  |
| >VHL-I109S-v RIHSYRGH    | 16400 | >VHL-I109S-r RSHSYRGH   | 378   | 16022 |
| >VHL-I109S-v RIHSYRGHL   | 4901  | >VHL-I109S-r RSHSYRGHL  | 17    | 4884  |
| >VHL-I109S-v RIHSYRGHLV  | 705   | >VHL-I109S-r RSHSYRGHLV | 6     | 699   |
| >VHL-I109S-v RIHSYRGHLV  | 117   | >VHL-I109S-r RSHSYRGHLV | 34    | 83    |
| >VHL-I109S-v RIHSYRGHLV  | 50    | >VHL-I109S-r RSHSYRGHLV | 12    | 38    |
| >VHL-I109S-v RIHSYRGHLV  | 8213  | >VHL-I109S-r RSHSYRGHLV | 412   | 7801  |
| >VHL-I109S-v RIHSYRGHL   | 5454  | >VHL-I109S-r RSHSYRGHL  | 449   | 5005  |
| >VHL-I109S-v RIHSYRGHLV  | 1214  | >VHL-I109S-r RSHSYRGHLV | 89    | 1125  |
| >VHL-I109S-v RIHSYRGHLV  | 74    | >VHL-I109S-r RSHSYRGHLV | 57    | 17    |
| >VHL-I109S-v RIHSYRGHL   | 5239  | >VHL-I109S-r RSHSYRGHL  | 69    | 5170  |
| >VHL-I109S-v RIHSYRGHLV  | 6447  | >VHL-I109S-r RSHSYRGHLV | 132   | 6315  |
| >VHL-I109S-v PTLPPGTGRR  | 139   | >VHL-I109S-r PTLPPGTGRR | 31731 | 31592 |
| >VHL-I109S-v RRIHSYRGH   | 107   | >VHL-I109S-r RRSYRGH    | 191   | 84    |
| >VHL-I109S-v RRIHSYRGHL  | 52    | >VHL-I109S-r RRSYRGHL   | 80    | 28    |
| >VHL-I109S-v RRIHSYRGHL' | 119   | >VHL-I109S-r RRSYRGHL   | 176   | 57    |
| >VHL-I109S-v RRIHSYRGH   | 112   | >VHL-I109S-r RRSYRGH    | 267   | 155   |
| >VHL-I109S-v RRIHSYRGHL  | 9     | >VHL-I109S-r RRSYRGHL   | 17    | 8     |
| >VHL-I109S-v RRIHSYRGHL' | 134   | >VHL-I109S-r RRSYRGHL   | 380   | 246   |
| >VHL-I109S-v RRIHSYRG    | 99    | >VHL-I109S-r RRSYRG     | 401   | 302   |
| >VHL-I109S-v RRIHSYRGH   | 195   | >VHL-I109S-r RRSYRGH    | 374   | 179   |
| >VHL-I109S-v RRIHSYRGHL  | 21    | >VHL-I109S-r RRSYRGHL   | 42    | 21    |
| >VHL-I109S-v RRIHSYRGHL' | 96    | >VHL-I109S-r RRSYRGHL   | 160   | 64    |
| >VHL-I109S-v RRIHSYRGH   | 201   | >VHL-I109S-r RRSYRGH    | 348   | 147   |
| >VHL-I109S-v RRIHSYRGHL  | 18    | >VHL-I109S-r RRSYRGHL   | 29    | 11    |
| >VHL-I109S-v RRIHSYRGHL' | 336   | >VHL-I109S-r RRSYRGHL   | 544   | 208   |
| >VHL-I109S-v RRIHSYRGHL' | 124   | >VHL-I109S-r RRSYRGHL   | 33    | 91    |
| >VHL-I109S-v GRRIHYSYRGH | 212   | >VHL-I109S-r GRRSHSYRGH | 163   | 49    |
| >VHL-I109S-v GRRIHYSYRGH | 174   | >VHL-I109S-r GRRSHSYRGH | 168   | 6     |

|                               |      |                          |       |       |
|-------------------------------|------|--------------------------|-------|-------|
| >VHL-I109S- $\nu$ GRRIHSYRGH  | 13   | >VHL-I109S-r GRRSHSYRGH  | 20    | 7     |
| >VHL-I109S- $\nu$ TGRRIHSHY   | 1160 | >VHL-I109S-r TGRRSHSY    | 455   | 705   |
| >VHL-I109S- $\nu$ TGRRIHSHY   | 148  | >VHL-I109S-r TGRRSHSYR   | 55    | 93    |
| >VHL-I109S- $\nu$ TGRRIHSHY   | 185  | >VHL-I109S-r TGRRSHSY    | 301   | 116   |
| >VHL-I109S- $\nu$ TGRRIHSHY   | 14   | >VHL-I109S-r TGRRSHSYR   | 24    | 10    |
| >VHL-I109S- $\nu$ TGRRIHSHY   | 104  | >VHL-I109S-r TGRRSHSYR   | 277   | 173   |
| >VHL-I109S- $\nu$ TGRRIHSHY   | 819  | >VHL-I109S-r TGRRSHSY    | 267   | 552   |
| >VHL-I109S- $\nu$ TGRRIHSHY   | 1595 | >VHL-I109S-r TGRRSHSY    | 387   | 1208  |
| >VHL-I109S- $\nu$ TGRRIHSHY   | 1951 | >VHL-I109S-r TGRRSHSY    | 491   | 1460  |
| >VHL-I109S- $\nu$ GTGRRIHSHYR | 452  | >VHL-I109S-r GTGRRSHSYF  | 598   | 146   |
| >VHL-I109S- $\nu$ GTGRRIHSHY  | 415  | >VHL-I109S-r GTGRRSHSY   | 3887  | 3472  |
| >VHL-I109S- $\nu$ GTGRRIHSHY  | 316  | >VHL-I109S-r GTGRRSHSY   | 143   | 173   |
| >VHL-I109S- $\nu$ GTGRRIHSHY  | 74   | >VHL-I109S-r GTGRRSHSY   | 62    | 12    |
| >VHL-I109S- $\nu$ GTGRRIHSHYR | 38   | >VHL-I109S-r GTGRRSHSYF  | 59    | 21    |
| >VHL-I109S- $\nu$ GTGRRIHSHYR | 117  | >VHL-I109S-r GTGRRSHSYF  | 197   | 80    |
| >VHL-I109S- $\nu$ GTGRRIHSHYR | 245  | >VHL-I109S-r GTGRRSHSYF  | 516   | 271   |
| >VHL-I109S- $\nu$ GTGRRIHSHY  | 439  | >VHL-I109S-r GTGRRSHSY   | 169   | 270   |
| >VHL-I109S- $\nu$ GTGRRIHSHY  | 491  | >VHL-I109S-r GTGRRSHSY   | 179   | 312   |
| >VHL-I109S- $\nu$ GTGRRIHSHY  | 91   | >VHL-I109S-r GTGRRSHSY   | 47    | 44    |
| >VHL-I109S- $\nu$ GTGRRIHSHY  | 131  | >VHL-I109S-r GTGRRSHSY   | 65    | 66    |
| >VHL-I109S- $\nu$ GTGRRIHSHYR | 400  | >VHL-I109S-r GTGRRSHSYF  | 394   | 6     |
| >VHL-I109S- $\nu$ LPPGTGRRRI  | 158  | >VHL-I109S-r LPPGTGRRS   | 11605 | 11447 |
| >VHL-I109S- $\nu$ TLPPGTGRRRI | 214  | >VHL-I109S-r TLPPGTGRRS  | 11128 | 10914 |
| >VHL-I109S- $\nu$ TLPPGTGRRRI | 83   | >VHL-I109S-r TLPPGTGRRS  | 6473  | 6390  |
| >VHL-I151F- $\nu$ ITLPVYTL    | 202  | >VHL-I151F-r FTLPVYTL    | 1539  | 1337  |
| >VHL-I151F- $\nu$ ITLPVYTL    | 273  | >VHL-I151F-r FTLPVYTL    | 33    | 240   |
| >VHL-I151F- $\nu$ ITLPVYTL    | 614  | >VHL-I151F-r FTLPVYTL    | 55    | 559   |
| >VHL-I151F- $\nu$ ITLPVYTL    | 2623 | >VHL-I151F-r FTLPVYTL    | 383   | 2240  |
| >VHL-I151F- $\nu$ ITLPVYTL    | 54   | >VHL-I151F-r FTLPVYTL    | 7     | 47    |
| >VHL-I151F- $\nu$ ITLPVYTL    | 21   | >VHL-I151F-r FTLPVYTL    | 5     | 16    |
| >VHL-I151F- $\nu$ ITLPVYTL    | 408  | >VHL-I151F-r FTLPVYTL    | 31    | 377   |
| >VHL-I151F- $\nu$ ITLPVYTL    | 307  | >VHL-I151F-r FTLPVYTL    | 23    | 284   |
| >VHL-I151F- $\nu$ ITLPVYTL    | 958  | >VHL-I151F-r FTLPVYTL    | 217   | 741   |
| >VHL-I151F- $\nu$ ITLPVYTL    | 841  | >VHL-I151F-r FTLPVYTL    | 60    | 781   |
| >VHL-I151F- $\nu$ ITLPVYTLK   | 50   | >VHL-I151F-r FTLPVYTLK   | 149   | 99    |
| >VHL-I151F- $\nu$ ITLPVYTLK   | 9    | >VHL-I151F-r FTLPVYTLK   | 13    | 4     |
| >VHL-I151F- $\nu$ ITLPVYTLKER | 348  | >VHL-I151F-r FTLPVYTLKEF | 1220  | 872   |
| >VHL-I151F- $\nu$ ITLPVYTL    | 1149 | >VHL-I151F-r FTLPVYTL    | 115   | 1034  |
| >VHL-I151F- $\nu$ ITLPVYTLK   | 45   | >VHL-I151F-r FTLPVYTLK   | 1135  | 1090  |
| >VHL-I151F- $\nu$ ITLPVYTLK   | 30   | >VHL-I151F-r FTLPVYTLK   | 227   | 197   |
| >VHL-I151F- $\nu$ ITLPVYTLKER | 20   | >VHL-I151F-r FTLPVYTLKEF | 108   | 88    |
| >VHL-I151F- $\nu$ ITLPVYTL    | 68   | >VHL-I151F-r FTLPVYTL    | 251   | 183   |
| >VHL-I151F- $\nu$ ITLPVYTLK   | 351  | >VHL-I151F-r FTLPVYTLK   | 343   | 8     |

|                         |       |                          |       |       |
|-------------------------|-------|--------------------------|-------|-------|
| >VHL-I151F-vITLPVYTLKER | 115   | >VHL-I151F-rFTLPVYTLKER  | 130   | 15    |
| >VHL-I151F-vITLPVYTLK   | 21    | >VHL-I151F-rFTLPVYTLK    | 9     | 12    |
| >VHL-I151F-vITLPVYTLKER | 40    | >VHL-I151F-rFTLPVYTLKER  | 18    | 22    |
| >VHL-I151F-vITLPVYTL    | 248   | >VHL-I151F-rFTLPVYTL     | 21    | 227   |
| >VHL-I151F-vITLPVYTL    | 263   | >VHL-I151F-rFTLPVYTL     | 16    | 247   |
| >VHL-I151F-vITLPVYTL    | 587   | >VHL-I151F-rFTLPVYTL     | 348   | 239   |
| >VHL-I151F-vITLPVYTL    | 6     | >VHL-I151F-rFTLPVYTL     | 17    | 11    |
| >VHL-I151F-vITLPVYTL    | 7745  | >VHL-I151F-rFTLPVYTL     | 423   | 7322  |
| >VHL-I151F-vITLPVYTL    | 185   | >VHL-I151F-rFTLPVYTL     | 2295  | 2110  |
| >VHL-I151F-vITLPVYTL    | 70    | >VHL-I151F-rFTLPVYTL     | 157   | 87    |
| >VHL-I151F-vITLPVYTL    | 143   | >VHL-I151F-rFTLPVYTL     | 72    | 71    |
| >VHL-I151F-vITLPVYTLK   | 144   | >VHL-I151F-rFTLPVYTLK    | 192   | 48    |
| >VHL-I151F-vITLPVYTLKER | 394   | >VHL-I151F-rFTLPVYTLKER  | 1136  | 742   |
| >VHL-I151F-vITLPVYTL    | 96    | >VHL-I151F-rFTLPVYTL     | 52    | 44    |
| >VHL-I151F-vNITLPVYTLK  | 194   | >VHL-I151F-rNFTLPVYTLK   | 929   | 735   |
| >VHL-I151F-vNITLPVYTLK  | 45    | >VHL-I151F-rNFTLPVYTLK   | 375   | 330   |
| >VHL-I151F-vNITLPVYTL   | 19217 | >VHL-I151F-rNFTLPVYTL    | 462   | 18755 |
| >VHL-I151F-vNITLPVYTLK  | 24    | >VHL-I151F-rNFTLPVYTLK   | 68    | 44    |
| >VHL-I151F-vNITLPVYTL   | 70    | >VHL-I151F-rNFTLPVYTL    | 6799  | 6729  |
| >VHL-I151F-vNVDGQPIFAN  | 253   | >VHL-I151F-rNVDGQPIFAN   | 11924 | 11671 |
| >VHL-I151F-vNVDGQPIFAN  | 61    | >VHL-I151F-rNVDGQPIFAN   | 8526  | 8465  |
| >VHL-I151F-vANITLPVYTL  | 411   | >VHL-I151F-rANFTLPVYTL   | 161   | 250   |
| >VHL-I151F-vANITLPVYTLK | 232   | >VHL-I151F-rANFTLPVYTLI  | 56    | 176   |
| >VHL-I151F-vANITLPVY    | 253   | >VHL-I151F-rANFTLPVY     | 8906  | 8653  |
| >VHL-I151F-vANITLPVY    | 682   | >VHL-I151F-rANFTLPVY     | 405   | 277   |
| >VHL-I151F-vANITLPVY    | 453   | >VHL-I151F-rANFTLPVY     | 243   | 210   |
| >VHL-I151F-vANITLPVYTL  | 928   | >VHL-I151F-rANFTLPVYTL   | 128   | 800   |
| >VHL-I151F-vANITLPVY    | 481   | >VHL-I151F-rANFTLPVY     | 76    | 405   |
| >VHL-I151F-vANITLPVYTL  | 1524  | >VHL-I151F-rANFTLPVYTL   | 299   | 1225  |
| >VHL-I151F-vANITLPVYTL  | 564   | >VHL-I151F-rANFTLPVYTL   | 444   | 120   |
| >VHL-I151F-vANITLPVYTLK | 1036  | >VHL-I151F-rANFTLPVYTLI  | 365   | 671   |
| >VHL-I151F-vFANITLPVYTL | 351   | >VHL-I151F-rFANFTLPVYTLI | 699   | 348   |
| >VHL-I151F-vFANITLPV    | 136   | >VHL-I151F-rFANFTLPV     | 65    | 71    |
| >VHL-I151F-vFANITLPVYTL | 689   | >VHL-I151F-rFANFTLPVYTLI | 384   | 305   |
| >VHL-I151F-vFANITLPV    | 82    | >VHL-I151F-rFANFTLPV     | 44    | 38    |
| >VHL-I151F-vFANITLPVYTL | 156   | >VHL-I151F-rFANFTLPVYTLI | 75    | 81    |
| >VHL-I151F-vFANITLPV    | 19    | >VHL-I151F-rFANFTLPV     | 10    | 9     |
| >VHL-I151F-vFANITLPVYTL | 482   | >VHL-I151F-rFANFTLPVYTLI | 176   | 306   |
| >VHL-I151F-vFANITLPV    | 12    | >VHL-I151F-rFANFTLPV     | 11    | 1     |
| >VHL-I151F-vFANITLPVYT  | 292   | >VHL-I151F-rFANFTLPVYT   | 539   | 247   |
| >VHL-I151F-vFANITLPVYTL | 203   | >VHL-I151F-rFANFTLPVYTLI | 142   | 61    |
| >VHL-I151F-vFANITLPV    | 31    | >VHL-I151F-rFANFTLPV     | 31    | 0     |
| >VHL-I151F-vFANITLPVYTL | 87    | >VHL-I151F-rFANFTLPVYTLI | 104   | 17    |

|                          |      |                          |     |      |
|--------------------------|------|--------------------------|-----|------|
| >VHL-I151F-v FANITLPV    | 705  | >VHL-I151F-r FANFTLPV    | 391 | 314  |
| >VHL-I151F-v FANITLPVYTL | 920  | >VHL-I151F-r FANFTLPVYTL | 497 | 423  |
| >VHL-I151F-v FANITLPV    | 114  | >VHL-I151F-r FANFTLPV    | 176 | 62   |
| >VHL-I151F-v FANITLPV    | 1084 | >VHL-I151F-r FANFTLPV    | 341 | 743  |
| >VHL-I151F-v FANITLPVYTL | 1706 | >VHL-I151F-r FANFTLPVYTL | 351 | 1355 |
| >VHL-I151F-v FANITLPV    | 25   | >VHL-I151F-r FANFTLPV    | 41  | 16   |
| >VHL-I151F-v FANITLPVYTL | 407  | >VHL-I151F-r FANFTLPVYTL | 651 | 244  |
| >VHL-I151F-v FANITLPVY   | 243  | >VHL-I151F-r FANFTLPVY   | 83  | 160  |
| >VHL-I151F-v FANITLPVY   | 71   | >VHL-I151F-r FANFTLPVY   | 55  | 16   |
| >VHL-I151F-v FANITLPV    | 96   | >VHL-I151F-r FANFTLPV    | 36  | 60   |
| >VHL-I151F-v FANITLPVYTL | 644  | >VHL-I151F-r FANFTLPVYTL | 234 | 410  |
| >VHL-I151F-v FANITLPV    | 24   | >VHL-I151F-r FANFTLPV    | 17  | 7    |
| >VHL-I151F-v FANITLPVYTL | 413  | >VHL-I151F-r FANFTLPVYTL | 251 | 162  |
| >VHL-I151F-v FANITLPVY   | 114  | >VHL-I151F-r FANFTLPVY   | 75  | 39   |
| >VHL-I151F-v FANITLPVY   | 170  | >VHL-I151F-r FANFTLPVY   | 110 | 60   |
| >VHL-I151F-v FANITLPVY   | 14   | >VHL-I151F-r FANFTLPVY   | 33  | 19   |
| >VHL-I151F-v FANITLPVYTL | 63   | >VHL-I151F-r FANFTLPVYTL | 153 | 90   |
| >VHL-I151F-v FANITLPVY   | 26   | >VHL-I151F-r FANFTLPVY   | 24  | 2    |
| >VHL-I151F-v FANITLPVYTL | 278  | >VHL-I151F-r FANFTLPVYTL | 206 | 72   |
| >VHL-I151F-v FANITLPVY   | 375  | >VHL-I151F-r FANFTLPVY   | 542 | 167  |
| >VHL-I151F-v FANITLPVY   | 134  | >VHL-I151F-r FANFTLPVY   | 241 | 107  |
| >VHL-I151F-v FANITLPVYTL | 160  | >VHL-I151F-r FANFTLPVYTL | 269 | 109  |
| >VHL-I151F-v FANITLPV    | 89   | >VHL-I151F-r FANFTLPV    | 169 | 80   |
| >VHL-I151F-v FANITLPVY   | 103  | >VHL-I151F-r FANFTLPVY   | 135 | 32   |
| >VHL-I151F-v FANITLPVYTL | 310  | >VHL-I151F-r FANFTLPVYTL | 512 | 202  |
| >VHL-I151F-v FANITLPVY   | 582  | >VHL-I151F-r FANFTLPVY   | 223 | 359  |
| >VHL-I151F-v IFANITLPV   | 35   | >VHL-I151F-r IFANFTLPV   | 55  | 20   |
| >VHL-I151F-v IFANITLPV   | 478  | >VHL-I151F-r IFANFTLPV   | 702 | 224  |
| >VHL-I151F-v IFANITLPVY  | 52   | >VHL-I151F-r IFANFTLPVY  | 41  | 11   |
| >VHL-I151F-v IFANITLPVY  | 87   | >VHL-I151F-r IFANFTLPVY  | 68  | 19   |
| >VHL-I151F-v IFANITLPVY  | 137  | >VHL-I151F-r IFANFTLPVY  | 155 | 18   |
| >VHL-I151F-v IFANITLPVY  | 1038 | >VHL-I151F-r IFANFTLPVY  | 458 | 580  |
| >VHL-I151F-v PIFANITL    | 1078 | >VHL-I151F-r PIFANFTL    | 477 | 601  |
| >VHL-I151F-v PIFANITLPV  | 393  | >VHL-I151F-r PIFANFTLPV  | 404 | 11   |
| >VHL-I151F-v PIFANITLPV  | 79   | >VHL-I151F-r PIFANFTLPV  | 90  | 11   |
| >VHL-I151F-v PIFANITL    | 323  | >VHL-I151F-r PIFANFTL    | 326 | 3    |
| >VHL-I151F-v PIFANITLPV  | 21   | >VHL-I151F-r PIFANFTLPV  | 34  | 13   |
| >VHL-I151F-v PIFANITLPV  | 76   | >VHL-I151F-r PIFANFTLPV  | 139 | 63   |
| >VHL-I151F-v PIFANITL    | 341  | >VHL-I151F-r PIFANFTL    | 287 | 54   |
| >VHL-I151F-v PIFANITLPV  | 25   | >VHL-I151F-r PIFANFTLPV  | 32  | 7    |
| >VHL-I151F-v PIFANITLPVY | 135  | >VHL-I151F-r PIFANFTLPVY | 66  | 69   |
| >VHL-I151F-v PIFANITLPVY | 195  | >VHL-I151F-r PIFANFTLPVY | 164 | 31   |
| >VHL-I151F-v PIFANITL    | 336  | >VHL-I151F-r PIFANFTL    | 224 | 112  |



|                          |      |                          |       |       |
|--------------------------|------|--------------------------|-------|-------|
| >VHL-I151F-v PIFANITLPV  | 218  | >VHL-I151F-r PIFANFTLPV  | 100   | 118   |
| >VHL-I151F-v QPIFANITL   | 10   | >VHL-I151F-r QPIFANFTL   | 6     | 4     |
| >VHL-I151F-v QPIFANITLPV | 151  | >VHL-I151F-r QPIFANFTLPV | 142   | 9     |
| >VHL-I151F-v QPIFANITL   | 1406 | >VHL-I151F-r QPIFANFTL   | 489   | 917   |
| >VHL-I151F-v QPIFANITLPV | 72   | >VHL-I151F-r QPIFANFTLPV | 41    | 31    |
| >VHL-I151F-v QPIFANITL   | 393  | >VHL-I151F-r QPIFANFTL   | 436   | 43    |
| >VHL-I151F-v QPIFANITLPV | 157  | >VHL-I151F-r QPIFANFTLPV | 161   | 4     |
| >VHL-I151F-v QPIFANITL   | 51   | >VHL-I151F-r QPIFANFTL   | 58    | 7     |
| >VHL-I151F-v QPIFANITLPV | 148  | >VHL-I151F-r QPIFANFTLPV | 154   | 6     |
| >VHL-I151F-v QPIFANITL   | 118  | >VHL-I151F-r QPIFANFTL   | 122   | 4     |
| >VHL-I151F-v QPIFANITL   | 373  | >VHL-I151F-r QPIFANFTL   | 116   | 257   |
| >VHL-I151F-v QPIFANITLPV | 204  | >VHL-I151F-r QPIFANFTLPV | 198   | 6     |
| >VHL-I151F-v GQPIFANI    | 412  | >VHL-I151F-r GQPIFANF    | 3903  | 3491  |
| >VHL-I151F-v GQPIFANITL  | 236  | >VHL-I151F-r GQPIFANFTL  | 101   | 135   |
| >VHL-I151F-v GQPIFANI    | 241  | >VHL-I151F-r GQPIFANF    | 1774  | 1533  |
| >VHL-I151F-v GQPIFANITL  | 430  | >VHL-I151F-r GQPIFANFTL  | 288   | 142   |
| >VHL-I151F-v GQPIFANI    | 2819 | >VHL-I151F-r GQPIFANF    | 87    | 2732  |
| >VHL-I151F-v GQPIFANITL  | 674  | >VHL-I151F-r GQPIFANFTL  | 438   | 236   |
| >VHL-I151F-v VDGQPIFANI  | 444  | >VHL-I151F-r VDGQPIFANF  | 20215 | 19771 |
| >VHL-I151M- ITLPVYTL     | 202  | >VHL-I151M- MTLPVYTL     | 808   | 606   |
| >VHL-I151M- ITLPVYTL     | 273  | >VHL-I151M- MTLPVYTL     | 77    | 196   |
| >VHL-I151M- ITLPVYTL     | 614  | >VHL-I151M- MTLPVYTL     | 147   | 467   |
| >VHL-I151M- ITLPVYTL     | 54   | >VHL-I151M- MTLPVYTL     | 19    | 35    |
| >VHL-I151M- ITLPVYTL     | 21   | >VHL-I151M- MTLPVYTL     | 11    | 10    |
| >VHL-I151M- ITLPVYTL     | 408  | >VHL-I151M- MTLPVYTL     | 151   | 257   |
| >VHL-I151M- ITLPVYTL     | 307  | >VHL-I151M- MTLPVYTL     | 145   | 162   |
| >VHL-I151M- ITLPVYTL     | 841  | >VHL-I151M- MTLPVYTL     | 247   | 594   |
| >VHL-I151M- ITLPVYTLK    | 50   | >VHL-I151M- MTLPVYTLK    | 45    | 5     |
| >VHL-I151M- ITLPVYTLK    | 9    | >VHL-I151M- MTLPVYTLK    | 7     | 2     |
| >VHL-I151M- ITLPVYTLKER  | 348  | >VHL-I151M- MTLPVYTLKE   | 125   | 223   |
| >VHL-I151M- ITLPVYTL     | 1149 | >VHL-I151M- MTLPVYTL     | 166   | 983   |
| >VHL-I151M- ITLPVYTLK    | 45   | >VHL-I151M- MTLPVYTLK    | 12    | 33    |
| >VHL-I151M- ITLPVYTLK    | 30   | >VHL-I151M- MTLPVYTLK    | 13    | 17    |
| >VHL-I151M- ITLPVYTLKER  | 20   | >VHL-I151M- MTLPVYTLKE   | 11    | 9     |
| >VHL-I151M- ITLPVYTL     | 68   | >VHL-I151M- MTLPVYTL     | 43    | 25    |
| >VHL-I151M- ITLPVYTLK    | 351  | >VHL-I151M- MTLPVYTLK    | 136   | 215   |
| >VHL-I151M- ITLPVYTLKER  | 115  | >VHL-I151M- MTLPVYTLKE   | 47    | 68    |
| >VHL-I151M- ITLPVYTLK    | 21   | >VHL-I151M- MTLPVYTLK    | 5     | 16    |
| >VHL-I151M- ITLPVYTLKER  | 40   | >VHL-I151M- MTLPVYTLKE   | 7     | 33    |
| >VHL-I151M- ITLPVYTL     | 248  | >VHL-I151M- MTLPVYTL     | 9     | 239   |
| >VHL-I151M- ITLPVYTL     | 263  | >VHL-I151M- MTLPVYTL     | 20    | 243   |
| >VHL-I151M- ITLPVYTL     | 587  | >VHL-I151M- MTLPVYTL     | 381   | 206   |
| >VHL-I151M- ITLPVYTL     | 6    | >VHL-I151M- MTLPVYTL     | 9     | 3     |

|                         |      |                         |      |      |
|-------------------------|------|-------------------------|------|------|
| >VHL-I151M- ITLPVYTL    | 185  | >VHL-I151M- MTLPVYTL    | 306  | 121  |
| >VHL-I151M- ITLPVYTL    | 70   | >VHL-I151M- MTLPVYTL    | 41   | 29   |
| >VHL-I151M- ITLPVYTL    | 143  | >VHL-I151M- MTLPVYTL    | 117  | 26   |
| >VHL-I151M- ITLPVYTLK   | 144  | >VHL-I151M- MTLPVYTLK   | 175  | 31   |
| >VHL-I151M- ITLPVYTLKER | 394  | >VHL-I151M- MTLPVYTLKE  | 620  | 226  |
| >VHL-I151M- ITLPVYTL    | 96   | >VHL-I151M- MTLPVYTL    | 49   | 47   |
| >VHL-I151M- NITLPVYTL   | 3507 | >VHL-I151M- NMTLPVYTL   | 271  | 3236 |
| >VHL-I151M- NITLPVYTL   | 1345 | >VHL-I151M- NMTLPVYTL   | 151  | 1194 |
| >VHL-I151M- NITLPVYTL   | 2887 | >VHL-I151M- NMTLPVYTL   | 449  | 2438 |
| >VHL-I151M- NITLPVYTL   | 1468 | >VHL-I151M- NMTLPVYTL   | 19   | 1449 |
| >VHL-I151M- NITLPVYTL   | 1608 | >VHL-I151M- NMTLPVYTL   | 12   | 1596 |
| >VHL-I151M- NITLPVYTL   | 6078 | >VHL-I151M- NMTLPVYTL   | 164  | 5914 |
| >VHL-I151M- NITLPVYTL   | 2431 | >VHL-I151M- NMTLPVYTL   | 25   | 2406 |
| >VHL-I151M- NITLPVYTL   | 3295 | >VHL-I151M- NMTLPVYTL   | 55   | 3240 |
| >VHL-I151M- NITLPVYTLK  | 194  | >VHL-I151M- NMTLPVYTLK  | 111  | 83   |
| >VHL-I151M- NITLPVYTLK  | 45   | >VHL-I151M- NMTLPVYTLK  | 52   | 7    |
| >VHL-I151M- NITLPVYTLK  | 24   | >VHL-I151M- NMTLPVYTLK  | 45   | 21   |
| >VHL-I151M- NITLPVYTL   | 70   | >VHL-I151M- NMTLPVYTL   | 701  | 631  |
| >VHL-I151M- NITLPVYTL   | 3918 | >VHL-I151M- NMTLPVYTL   | 391  | 3527 |
| >VHL-I151M- NVDGQPIFAM  | 253  | >VHL-I151M- NVDGQPIFAM  | 2161 | 1908 |
| >VHL-I151M- NVDGQPIFAM  | 61   | >VHL-I151M- NVDGQPIFAM  | 143  | 82   |
| >VHL-I151M- ANITLPVYTL  | 411  | >VHL-I151M- ANMTLPVYTI  | 97   | 314  |
| >VHL-I151M- ANITLPVYTLK | 232  | >VHL-I151M- ANMTLPVYTI  | 53   | 179  |
| >VHL-I151M- ANITLPVY    | 253  | >VHL-I151M- ANMTLPVY    | 1527 | 1274 |
| >VHL-I151M- ANITLPVY    | 453  | >VHL-I151M- ANMTLPVY    | 362  | 91   |
| >VHL-I151M- ANITLPVYTL  | 928  | >VHL-I151M- ANMTLPVYTI  | 265  | 663  |
| >VHL-I151M- ANITLPVY    | 481  | >VHL-I151M- ANMTLPVY    | 228  | 253  |
| >VHL-I151M- ANITLPVYTL  | 564  | >VHL-I151M- ANMTLPVYTI  | 188  | 376  |
| >VHL-I151M- FANITLPVYTL | 351  | >VHL-I151M- FANMTLPVYTI | 270  | 81   |
| >VHL-I151M- FANITLPV    | 136  | >VHL-I151M- FANMTLPV    | 94   | 42   |
| >VHL-I151M- FANITLPVYTL | 689  | >VHL-I151M- FANMTLPVYTI | 471  | 218  |
| >VHL-I151M- FANITLPV    | 82   | >VHL-I151M- FANMTLPV    | 107  | 25   |
| >VHL-I151M- FANITLPVYTL | 156  | >VHL-I151M- FANMTLPVYTI | 157  | 1    |
| >VHL-I151M- FANITLPV    | 19   | >VHL-I151M- FANMTLPV    | 12   | 7    |
| >VHL-I151M- FANITLPVYTL | 482  | >VHL-I151M- FANMTLPVYTI | 256  | 226  |
| >VHL-I151M- FANITLPV    | 12   | >VHL-I151M- FANMTLPV    | 11   | 1    |
| >VHL-I151M- FANITLPVYTL | 292  | >VHL-I151M- FANMTLPVYTI | 293  | 1    |
| >VHL-I151M- FANITLPVYTL | 203  | >VHL-I151M- FANMTLPVYTI | 135  | 68   |
| >VHL-I151M- FANITLPV    | 31   | >VHL-I151M- FANMTLPV    | 37   | 6    |
| >VHL-I151M- FANITLPVYTL | 87   | >VHL-I151M- FANMTLPVYTI | 87   | 0    |
| >VHL-I151M- FANITLPV    | 114  | >VHL-I151M- FANMTLPV    | 139  | 25   |
| >VHL-I151M- FANITLPV    | 25   | >VHL-I151M- FANMTLPV    | 18   | 7    |
| >VHL-I151M- FANITLPVYTL | 407  | >VHL-I151M- FANMTLPVYTI | 260  | 147  |

|                         |      |                         |     |     |
|-------------------------|------|-------------------------|-----|-----|
| >VHL-I151M- FANITLPVY   | 243  | >VHL-I151M- FANMTLPVY   | 311 | 68  |
| >VHL-I151M- FANITLPVY   | 71   | >VHL-I151M- FANMTLPVY   | 83  | 12  |
| >VHL-I151M- FANITLPV    | 96   | >VHL-I151M- FANMTLPV    | 110 | 14  |
| >VHL-I151M- FANITLPV    | 24   | >VHL-I151M- FANMTLPV    | 41  | 17  |
| >VHL-I151M- FANITLPVYTL | 413  | >VHL-I151M- FANMTLPVYTL | 604 | 191 |
| >VHL-I151M- FANITLPVY   | 114  | >VHL-I151M- FANMTLPVY   | 63  | 51  |
| >VHL-I151M- FANITLPVY   | 170  | >VHL-I151M- FANMTLPVY   | 55  | 115 |
| >VHL-I151M- FANITLPVYTL | 859  | >VHL-I151M- FANMTLPVYTL | 341 | 518 |
| >VHL-I151M- FANITLPVY   | 14   | >VHL-I151M- FANMTLPVY   | 22  | 8   |
| >VHL-I151M- FANITLPVYTL | 63   | >VHL-I151M- FANMTLPVYTL | 95  | 32  |
| >VHL-I151M- FANITLPVY   | 26   | >VHL-I151M- FANMTLPVY   | 21  | 5   |
| >VHL-I151M- FANITLPVYTL | 278  | >VHL-I151M- FANMTLPVYTL | 183 | 95  |
| >VHL-I151M- FANITLPVYTL | 806  | >VHL-I151M- FANMTLPVYTL | 478 | 328 |
| >VHL-I151M- FANITLPVY   | 375  | >VHL-I151M- FANMTLPVY   | 496 | 121 |
| >VHL-I151M- FANITLPVY   | 134  | >VHL-I151M- FANMTLPVY   | 189 | 55  |
| >VHL-I151M- FANITLPVYTL | 160  | >VHL-I151M- FANMTLPVYTL | 210 | 50  |
| >VHL-I151M- FANITLPV    | 89   | >VHL-I151M- FANMTLPV    | 186 | 97  |
| >VHL-I151M- FANITLPVY   | 103  | >VHL-I151M- FANMTLPVY   | 102 | 1   |
| >VHL-I151M- FANITLPVYTL | 603  | >VHL-I151M- FANMTLPVYTL | 483 | 120 |
| >VHL-I151M- FANITLPVYTL | 310  | >VHL-I151M- FANMTLPVYTL | 257 | 53  |
| >VHL-I151M- FANITLPVY   | 582  | >VHL-I151M- FANMTLPVY   | 306 | 276 |
| >VHL-I151M- IFANITLPVY  | 711  | >VHL-I151M- IFANMTLPVY  | 485 | 226 |
| >VHL-I151M- IFANITLPV   | 35   | >VHL-I151M- IFANMTLPV   | 219 | 184 |
| >VHL-I151M- IFANITLPV   | 638  | >VHL-I151M- IFANMTLPV   | 462 | 176 |
| >VHL-I151M- IFANITLPV   | 478  | >VHL-I151M- IFANMTLPV   | 714 | 236 |
| >VHL-I151M- IFANITLPVY  | 52   | >VHL-I151M- IFANMTLPVY  | 54  | 2   |
| >VHL-I151M- IFANITLPVY  | 87   | >VHL-I151M- IFANMTLPVY  | 79  | 8   |
| >VHL-I151M- IFANITLPVY  | 137  | >VHL-I151M- IFANMTLPVY  | 210 | 73  |
| >VHL-I151M- PIFANITLPV  | 393  | >VHL-I151M- PIFANMTLPV  | 455 | 62  |
| >VHL-I151M- PIFANITLPV  | 79   | >VHL-I151M- PIFANMTLPV  | 88  | 9   |
| >VHL-I151M- PIFANITL    | 323  | >VHL-I151M- PIFANMTL    | 924 | 601 |
| >VHL-I151M- PIFANITLPV  | 21   | >VHL-I151M- PIFANMTLPV  | 71  | 50  |
| >VHL-I151M- PIFANITLPV  | 76   | >VHL-I151M- PIFANMTLPV  | 181 | 105 |
| >VHL-I151M- PIFANITL    | 341  | >VHL-I151M- PIFANMTL    | 553 | 212 |
| >VHL-I151M- PIFANITLPV  | 25   | >VHL-I151M- PIFANMTLPV  | 40  | 15  |
| >VHL-I151M- PIFANITLPVY | 1082 | >VHL-I151M- PIFANMTLPVY | 443 | 639 |
| >VHL-I151M- PIFANITLPVY | 135  | >VHL-I151M- PIFANMTLPVY | 97  | 38  |
| >VHL-I151M- PIFANITLPVY | 195  | >VHL-I151M- PIFANMTLPVY | 152 | 43  |
| >VHL-I151M- PIFANITL    | 336  | >VHL-I151M- PIFANMTL    | 380 | 44  |
| >VHL-I151M- PIFANITLPV  | 218  | >VHL-I151M- PIFANMTLPV  | 218 | 0   |
| >VHL-I151M- QPIFANITL   | 10   | >VHL-I151M- QPIFANMTL   | 32  | 22  |
| >VHL-I151M- QPIFANITLPV | 151  | >VHL-I151M- QPIFANMTLF  | 208 | 57  |
| >VHL-I151M- QPIFANITLPV | 72   | >VHL-I151M- QPIFANMTLF  | 93  | 21  |

|                        |     |                         |       |       |
|------------------------|-----|-------------------------|-------|-------|
| >VHL-I151M-QPIFANITL   | 393 | >VHL-I151M-QPIFANMTL    | 246   | 147   |
| >VHL-I151M-QPIFANITLPV | 157 | >VHL-I151M-QPIFANMTLF   | 106   | 51    |
| >VHL-I151M-QPIFANITL   | 51  | >VHL-I151M-QPIFANMTL    | 113   | 62    |
| >VHL-I151M-QPIFANITLPV | 148 | >VHL-I151M-QPIFANMTLF   | 192   | 44    |
| >VHL-I151M-QPIFANITL   | 118 | >VHL-I151M-QPIFANMTL    | 157   | 39    |
| >VHL-I151M-QPIFANITL   | 373 | >VHL-I151M-QPIFANMTL    | 361   | 12    |
| >VHL-I151M-QPIFANITLPV | 204 | >VHL-I151M-QPIFANMTLF   | 233   | 29    |
| >VHL-I151M-GQPIFANI    | 412 | >VHL-I151M-GQPIFANM     | 190   | 222   |
| >VHL-I151M-GQPIFANITL  | 236 | >VHL-I151M-GQPIFANMTI   | 123   | 113   |
| >VHL-I151M-GQPIFANI    | 241 | >VHL-I151M-GQPIFANM     | 1365  | 1124  |
| >VHL-I151M-GQPIFANITL  | 430 | >VHL-I151M-GQPIFANMTI   | 287   | 143   |
| >VHL-I151M-VDGQPIFANI  | 444 | >VHL-I151M-VDGQPIFANM   | 9355  | 8911  |
| >VHL-I151N-ITLPVYTL    | 202 | >VHL-I151N-INTLPVYTL    | 7750  | 7548  |
| >VHL-I151N-ITLPVYTL    | 273 | >VHL-I151N-INTLPVYTL    | 1252  | 979   |
| >VHL-I151N-ITLPVYTL    | 54  | >VHL-I151N-INTLPVYTL    | 156   | 102   |
| >VHL-I151N-ITLPVYTL    | 21  | >VHL-I151N-INTLPVYTL    | 146   | 125   |
| >VHL-I151N-ITLPVYTL    | 408 | >VHL-I151N-INTLPVYTL    | 542   | 134   |
| >VHL-I151N-ITLPVYTL    | 307 | >VHL-I151N-INTLPVYTL    | 1442  | 1135  |
| >VHL-I151N-ITLPVYTLK   | 50  | >VHL-I151N-INTLPVYTLK   | 254   | 204   |
| >VHL-I151N-ITLPVYTLK   | 9   | >VHL-I151N-INTLPVYTLK   | 19    | 10    |
| >VHL-I151N-ITLPVYTLKER | 348 | >VHL-I151N-INTLPVYTLKEI | 1835  | 1487  |
| >VHL-I151N-ITLPVYTLK   | 45  | >VHL-I151N-INTLPVYTLK   | 834   | 789   |
| >VHL-I151N-ITLPVYTLK   | 30  | >VHL-I151N-INTLPVYTLK   | 151   | 121   |
| >VHL-I151N-ITLPVYTLKER | 20  | >VHL-I151N-INTLPVYTLKEI | 79    | 59    |
| >VHL-I151N-ITLPVYTL    | 68  | >VHL-I151N-INTLPVYTL    | 302   | 234   |
| >VHL-I151N-ITLPVYTLK   | 351 | >VHL-I151N-INTLPVYTLK   | 167   | 184   |
| >VHL-I151N-ITLPVYTLKER | 115 | >VHL-I151N-INTLPVYTLKEI | 71    | 44    |
| >VHL-I151N-ITLPVYTLK   | 21  | >VHL-I151N-INTLPVYTLK   | 11    | 10    |
| >VHL-I151N-ITLPVYTLKER | 40  | >VHL-I151N-INTLPVYTLKEI | 21    | 19    |
| >VHL-I151N-ITLPVYTL    | 248 | >VHL-I151N-INTLPVYTL    | 25    | 223   |
| >VHL-I151N-ITLPVYTL    | 263 | >VHL-I151N-INTLPVYTL    | 22    | 241   |
| >VHL-I151N-ITLPVYTL    | 6   | >VHL-I151N-INTLPVYTL    | 105   | 99    |
| >VHL-I151N-ITLPVYTL    | 185 | >VHL-I151N-INTLPVYTL    | 5667  | 5482  |
| >VHL-I151N-ITLPVYTL    | 70  | >VHL-I151N-INTLPVYTL    | 4782  | 4712  |
| >VHL-I151N-ITLPVYTL    | 143 | >VHL-I151N-INTLPVYTL    | 1431  | 1288  |
| >VHL-I151N-ITLPVYTLK   | 144 | >VHL-I151N-INTLPVYTLK   | 1588  | 1444  |
| >VHL-I151N-ITLPVYTLKER | 394 | >VHL-I151N-INTLPVYTLKEI | 983   | 589   |
| >VHL-I151N-ITLPVYTL    | 96  | >VHL-I151N-INTLPVYTL    | 359   | 263   |
| >VHL-I151N-NITLPVYTLK  | 194 | >VHL-I151N-INNTLPVYTLK  | 7699  | 7505  |
| >VHL-I151N-NITLPVYTLK  | 45  | >VHL-I151N-INNTLPVYTLK  | 4083  | 4038  |
| >VHL-I151N-NITLPVYTLK  | 24  | >VHL-I151N-INNTLPVYTLK  | 740   | 716   |
| >VHL-I151N-NITLPVYTL   | 70  | >VHL-I151N-INNTLPVYTL   | 1442  | 1372  |
| >VHL-I151N-NVDGQPIFANI | 253 | >VHL-I151N-INVDGQPIFANI | 15807 | 15554 |

|                         |      |                        |       |       |
|-------------------------|------|------------------------|-------|-------|
| >VHL-I151N-·NVDGQPIFAM  | 61   | >VHL-I151N-·NVDGQPIFAM | 13214 | 13153 |
| >VHL-I151N-·ANITLPVYTL  | 411  | >VHL-I151N-·ANNTLPVYTL | 1564  | 1153  |
| >VHL-I151N-·ANITLPVYTLK | 232  | >VHL-I151N-·ANNTLPVYTL | 225   | 7     |
| >VHL-I151N-·ANITLPVY    | 253  | >VHL-I151N-·ANNTLPVY   | 7032  | 6779  |
| >VHL-I151N-·ANITLPVY    | 453  | >VHL-I151N-·ANNTLPVY   | 252   | 201   |
| >VHL-I151N-·ANITLPVY    | 481  | >VHL-I151N-·ANNTLPVY   | 828   | 347   |
| >VHL-I151N-·FANITLPVYTL | 351  | >VHL-I151N-·FANNTLPVYT | 931   | 580   |
| >VHL-I151N-·FANITLPV    | 136  | >VHL-I151N-·FANNTLPV   | 65    | 71    |
| >VHL-I151N-·FANITLPVYTL | 689  | >VHL-I151N-·FANNTLPVYT | 299   | 390   |
| >VHL-I151N-·FANITLPV    | 82   | >VHL-I151N-·FANNTLPV   | 70    | 12    |
| >VHL-I151N-·FANITLPVYTL | 156  | >VHL-I151N-·FANNTLPVYT | 86    | 70    |
| >VHL-I151N-·FANITLPV    | 19   | >VHL-I151N-·FANNTLPV   | 9     | 10    |
| >VHL-I151N-·FANITLPVYT  | 585  | >VHL-I151N-·FANNTLPVYT | 297   | 288   |
| >VHL-I151N-·FANITLPVYTL | 482  | >VHL-I151N-·FANNTLPVYT | 160   | 322   |
| >VHL-I151N-·FANITLPV    | 12   | >VHL-I151N-·FANNTLPV   | 7     | 5     |
| >VHL-I151N-·FANITLPVYT  | 292  | >VHL-I151N-·FANNTLPVYT | 261   | 31    |
| >VHL-I151N-·FANITLPVYTL | 203  | >VHL-I151N-·FANNTLPVYT | 55    | 148   |
| >VHL-I151N-·FANITLPV    | 31   | >VHL-I151N-·FANNTLPV   | 16    | 15    |
| >VHL-I151N-·FANITLPVYTL | 87   | >VHL-I151N-·FANNTLPVYT | 45    | 42    |
| >VHL-I151N-·FANITLPV    | 705  | >VHL-I151N-·FANNTLPV   | 136   | 569   |
| >VHL-I151N-·FANITLPVYTL | 920  | >VHL-I151N-·FANNTLPVYT | 209   | 711   |
| >VHL-I151N-·FANITLPV    | 114  | >VHL-I151N-·FANNTLPV   | 78    | 36    |
| >VHL-I151N-·FANITLPV    | 1084 | >VHL-I151N-·FANNTLPV   | 379   | 705   |
| >VHL-I151N-·FANITLPVYTL | 1706 | >VHL-I151N-·FANNTLPVYT | 369   | 1337  |
| >VHL-I151N-·FANITLPV    | 25   | >VHL-I151N-·FANNTLPV   | 14    | 11    |
| >VHL-I151N-·FANITLPVYTL | 407  | >VHL-I151N-·FANNTLPVYT | 219   | 188   |
| >VHL-I151N-·FANITLPVY   | 243  | >VHL-I151N-·FANNTLPVY  | 209   | 34    |
| >VHL-I151N-·FANITLPVY   | 71   | >VHL-I151N-·FANNTLPVY  | 65    | 6     |
| >VHL-I151N-·FANITLPV    | 96   | >VHL-I151N-·FANNTLPV   | 77    | 19    |
| >VHL-I151N-·FANITLPVYTL | 644  | >VHL-I151N-·FANNTLPVYT | 481   | 163   |
| >VHL-I151N-·FANITLPV    | 24   | >VHL-I151N-·FANNTLPV   | 21    | 3     |
| >VHL-I151N-·FANITLPVYTL | 413  | >VHL-I151N-·FANNTLPVYT | 286   | 127   |
| >VHL-I151N-·FANITLPVY   | 114  | >VHL-I151N-·FANNTLPVY  | 57    | 57    |
| >VHL-I151N-·FANITLPV    | 1516 | >VHL-I151N-·FANNTLPV   | 426   | 1090  |
| >VHL-I151N-·FANITLPVY   | 170  | >VHL-I151N-·FANNTLPVY  | 31    | 139   |
| >VHL-I151N-·FANITLPVYTL | 859  | >VHL-I151N-·FANNTLPVYT | 232   | 627   |
| >VHL-I151N-·FANITLPVY   | 14   | >VHL-I151N-·FANNTLPVY  | 43    | 29    |
| >VHL-I151N-·FANITLPVYTL | 63   | >VHL-I151N-·FANNTLPVYT | 166   | 103   |
| >VHL-I151N-·FANITLPVY   | 26   | >VHL-I151N-·FANNTLPVY  | 22    | 4     |
| >VHL-I151N-·FANITLPVYTL | 278  | >VHL-I151N-·FANNTLPVYT | 205   | 73    |
| >VHL-I151N-·FANITLPVYTL | 806  | >VHL-I151N-·FANNTLPVYT | 373   | 433   |
| >VHL-I151N-·FANITLPV    | 939  | >VHL-I151N-·FANNTLPV   | 282   | 657   |
| >VHL-I151N-·FANITLPVY   | 375  | >VHL-I151N-·FANNTLPVY  | 124   | 251   |

|                         |      |                        |       |       |
|-------------------------|------|------------------------|-------|-------|
| >VHL-I151N- FANITLPVY   | 134  | >VHL-I151N- FANNTLPVY  | 178   | 44    |
| >VHL-I151N- FANITLPVYTL | 160  | >VHL-I151N- FANNTLPVYT | 202   | 42    |
| >VHL-I151N- FANITLPV    | 89   | >VHL-I151N- FANNTLPV   | 118   | 29    |
| >VHL-I151N- FANITLPVY   | 103  | >VHL-I151N- FANNTLPVY  | 107   | 4     |
| >VHL-I151N- FANITLPVYTL | 310  | >VHL-I151N- FANNTLPVYT | 521   | 211   |
| >VHL-I151N- FANITLPVY   | 582  | >VHL-I151N- FANNTLPVY  | 147   | 435   |
| >VHL-I151N- IFANITLPVY  | 711  | >VHL-I151N- IFANNTLPVY | 276   | 435   |
| >VHL-I151N- IFANITLPV   | 35   | >VHL-I151N- IFANNTLPV  | 369   | 334   |
| >VHL-I151N- IFANITLPV   | 638  | >VHL-I151N- IFANNTLPV  | 434   | 204   |
| >VHL-I151N- IFANITLPV   | 478  | >VHL-I151N- IFANNTLPV  | 883   | 405   |
| >VHL-I151N- IFANITLPVY  | 52   | >VHL-I151N- IFANNTLPVY | 71    | 19    |
| >VHL-I151N- IFANITLPVY  | 87   | >VHL-I151N- IFANNTLPVY | 117   | 30    |
| >VHL-I151N- IFANITLPVY  | 137  | >VHL-I151N- IFANNTLPVY | 385   | 248   |
| >VHL-I151N- IFANITLPVY  | 1038 | >VHL-I151N- IFANNTLPVY | 425   | 613   |
| >VHL-I151N- PIFANITLPV  | 393  | >VHL-I151N- PIFANNTLPV | 668   | 275   |
| >VHL-I151N- PIFANITLPV  | 79   | >VHL-I151N- PIFANNTLPV | 125   | 46    |
| >VHL-I151N- PIFANITL    | 323  | >VHL-I151N- PIFANNTL   | 1786  | 1463  |
| >VHL-I151N- PIFANITLPV  | 21   | >VHL-I151N- PIFANNTLPV | 57    | 36    |
| >VHL-I151N- PIFANITLPV  | 76   | >VHL-I151N- PIFANNTLPV | 225   | 149   |
| >VHL-I151N- PIFANITL    | 341  | >VHL-I151N- PIFANNTL   | 1435  | 1094  |
| >VHL-I151N- PIFANITLPV  | 25   | >VHL-I151N- PIFANNTLPV | 43    | 18    |
| >VHL-I151N- PIFANITLPVY | 135  | >VHL-I151N- PIFANNTLPV | 128   | 7     |
| >VHL-I151N- PIFANITLPVY | 195  | >VHL-I151N- PIFANNTLPV | 166   | 29    |
| >VHL-I151N- PIFANITL    | 336  | >VHL-I151N- PIFANNTL   | 368   | 32    |
| >VHL-I151N- PIFANITLPV  | 218  | >VHL-I151N- PIFANNTLPV | 279   | 61    |
| >VHL-I151N- QPIFANITL   | 10   | >VHL-I151N- QPIFANNTL  | 50    | 40    |
| >VHL-I151N- QPIFANITLPV | 151  | >VHL-I151N- QPIFANNTLP | 270   | 119   |
| >VHL-I151N- QPIFANITLPV | 72   | >VHL-I151N- QPIFANNTLP | 100   | 28    |
| >VHL-I151N- QPIFANITL   | 393  | >VHL-I151N- QPIFANNTL  | 282   | 111   |
| >VHL-I151N- QPIFANITLPV | 157  | >VHL-I151N- QPIFANNTLP | 110   | 47    |
| >VHL-I151N- QPIFANITL   | 51   | >VHL-I151N- QPIFANNTL  | 122   | 71    |
| >VHL-I151N- QPIFANITLPV | 148  | >VHL-I151N- QPIFANNTLP | 238   | 90    |
| >VHL-I151N- QPIFANITL   | 118  | >VHL-I151N- QPIFANNTL  | 204   | 86    |
| >VHL-I151N- QPIFANITL   | 373  | >VHL-I151N- QPIFANNTL  | 1103  | 730   |
| >VHL-I151N- QPIFANITLPV | 204  | >VHL-I151N- QPIFANNTLP | 198   | 6     |
| >VHL-I151N- GQPIFANI    | 412  | >VHL-I151N- GQPIFANN   | 16987 | 16575 |
| >VHL-I151N- GQPIFANITL  | 236  | >VHL-I151N- GQPIFANNTL | 324   | 88    |
| >VHL-I151N- GQPIFANI    | 241  | >VHL-I151N- GQPIFANN   | 19440 | 19199 |
| >VHL-I151N- GQPIFANITL  | 430  | >VHL-I151N- GQPIFANNTL | 1064  | 634   |
| >VHL-I151N- VDGQPIFANI  | 444  | >VHL-I151N- VDGQPIFANN | 27370 | 26926 |
| >VHL-I151S- vITLPVYTL   | 202  | >VHL-I151S- rSTLPVYTL  | 696   | 494   |
| >VHL-I151S- vITLPVYTL   | 273  | >VHL-I151S- rSTLPVYTL  | 257   | 16    |
| >VHL-I151S- vITLPVYTL   | 54   | >VHL-I151S- rSTLPVYTL  | 54    | 0     |

|                         |       |                         |      |       |
|-------------------------|-------|-------------------------|------|-------|
| >VHL-I151S-vITLPVYTL    | 21    | >VHL-I151S-rSTLPVYTL    | 19   | 2     |
| >VHL-I151S-vITLPVYTL    | 408   | >VHL-I151S-rSTLPVYTL    | 220  | 188   |
| >VHL-I151S-vITLPVYTL    | 307   | >VHL-I151S-rSTLPVYTL    | 55   | 252   |
| >VHL-I151S-vITLPVYTLK   | 50    | >VHL-I151S-rSTLPVYTLK   | 66   | 16    |
| >VHL-I151S-vITLPVYTLK   | 9     | >VHL-I151S-rSTLPVYTLK   | 6    | 3     |
| >VHL-I151S-vITLPVYTLKER | 348   | >VHL-I151S-rSTLPVYTLKER | 86   | 262   |
| >VHL-I151S-vITLPVYTLK   | 45    | >VHL-I151S-rSTLPVYTLK   | 22   | 23    |
| >VHL-I151S-vITLPVYTLK   | 30    | >VHL-I151S-rSTLPVYTLK   | 28   | 2     |
| >VHL-I151S-vITLPVYTLKER | 20    | >VHL-I151S-rSTLPVYTLKER | 20   | 0     |
| >VHL-I151S-vITLPVYTL    | 68    | >VHL-I151S-rSTLPVYTL    | 39   | 29    |
| >VHL-I151S-vITLPVYTLK   | 351   | >VHL-I151S-rSTLPVYTLK   | 926  | 575   |
| >VHL-I151S-vITLPVYTLKER | 115   | >VHL-I151S-rSTLPVYTLKER | 321  | 206   |
| >VHL-I151S-vITLPVYTLK   | 21    | >VHL-I151S-rSTLPVYTLK   | 22   | 1     |
| >VHL-I151S-vITLPVYTLKER | 40    | >VHL-I151S-rSTLPVYTLKER | 36   | 4     |
| >VHL-I151S-vITLPVYTL    | 248   | >VHL-I151S-rSTLPVYTL    | 50   | 198   |
| >VHL-I151S-vITLPVYTL    | 263   | >VHL-I151S-rSTLPVYTL    | 35   | 228   |
| >VHL-I151S-vITLPVYTL    | 6     | >VHL-I151S-rSTLPVYTL    | 11   | 5     |
| >VHL-I151S-vITLPVYTL    | 185   | >VHL-I151S-rSTLPVYTL    | 1843 | 1658  |
| >VHL-I151S-vITLPVYTL    | 70    | >VHL-I151S-rSTLPVYTL    | 1033 | 963   |
| >VHL-I151S-vITLPVYTL    | 143   | >VHL-I151S-rSTLPVYTL    | 491  | 348   |
| >VHL-I151S-vITLPVYTLK   | 144   | >VHL-I151S-rSTLPVYTLK   | 190  | 46    |
| >VHL-I151S-vITLPVYTLKER | 394   | >VHL-I151S-rSTLPVYTLKER | 105  | 289   |
| >VHL-I151S-vITLPVYTL    | 96    | >VHL-I151S-rSTLPVYTL    | 49   | 47    |
| >VHL-I151S-vNITLPVYTLK  | 194   | >VHL-I151S-rNSTLPVYTLK  | 359  | 165   |
| >VHL-I151S-vNITLPVYTLK  | 45    | >VHL-I151S-rNSTLPVYTLK  | 25   | 20    |
| >VHL-I151S-vNITLPVYTLK  | 24    | >VHL-I151S-rNSTLPVYTLK  | 20   | 4     |
| >VHL-I151S-vNITLPVYTL   | 70    | >VHL-I151S-rNSTLPVYTL   | 77   | 7     |
| >VHL-I151S-vNITLPVYTL   | 13567 | >VHL-I151S-rNSTLPVYTL   | 311  | 13256 |
| >VHL-I151S-vNITLPVYTL   | 6686  | >VHL-I151S-rNSTLPVYTL   | 159  | 6527  |
| >VHL-I151S-vNVDGQPIFAM  | 253   | >VHL-I151S-rNVDGQPIFAM  | 3840 | 3587  |
| >VHL-I151S-vNVDGQPIFAM  | 61    | >VHL-I151S-rNVDGQPIFAM  | 8826 | 8765  |
| >VHL-I151S-vANITLPVYTL  | 411   | >VHL-I151S-rANSTLPVYTL  | 387  | 24    |
| >VHL-I151S-vANITLPVYTLK | 232   | >VHL-I151S-rANSTLPVYTLK | 283  | 51    |
| >VHL-I151S-vANITLPVY    | 253   | >VHL-I151S-rANSTLPVY    | 7687 | 7434  |
| >VHL-I151S-vANITLPVY    | 453   | >VHL-I151S-rANSTLPVY    | 247  | 206   |
| >VHL-I151S-vANITLPVY    | 481   | >VHL-I151S-rANSTLPVY    | 875  | 394   |
| >VHL-I151S-vFANITLPVYTL | 351   | >VHL-I151S-rFANSTLPVYTL | 336  | 15    |
| >VHL-I151S-vFANITLPV    | 136   | >VHL-I151S-rFANSTLPV    | 45   | 91    |
| >VHL-I151S-vFANITLPVYTL | 689   | >VHL-I151S-rFANSTLPVYTL | 212  | 477   |
| >VHL-I151S-vFANITLPV    | 82    | >VHL-I151S-rFANSTLPV    | 32   | 50    |
| >VHL-I151S-vFANITLPVYTL | 156   | >VHL-I151S-rFANSTLPVYTL | 42   | 114   |
| >VHL-I151S-vFANITLPV    | 19    | >VHL-I151S-rFANSTLPV    | 7    | 12    |
| >VHL-I151S-vFANITLPVYT  | 585   | >VHL-I151S-rFANSTLPVYT  | 261  | 324   |

|                          |      |                          |      |      |
|--------------------------|------|--------------------------|------|------|
| >VHL-I151S-v FANITLPVYTL | 482  | >VHL-I151S-r FANSTLPVYTL | 128  | 354  |
| >VHL-I151S-v FANITLPV    | 12   | >VHL-I151S-r FANSTLPV    | 8    | 4    |
| >VHL-I151S-v FANITLPVYT  | 292  | >VHL-I151S-r FANSTLPVYT  | 335  | 43   |
| >VHL-I151S-v FANITLPVYTL | 203  | >VHL-I151S-r FANSTLPVYTL | 65   | 138  |
| >VHL-I151S-v FANITLPV    | 31   | >VHL-I151S-r FANSTLPV    | 25   | 6    |
| >VHL-I151S-v FANITLPVYTL | 87   | >VHL-I151S-r FANSTLPVYTL | 60   | 27   |
| >VHL-I151S-v FANITLPV    | 705  | >VHL-I151S-r FANSTLPV    | 421  | 284  |
| >VHL-I151S-v FANITLPVYTL | 920  | >VHL-I151S-r FANSTLPVYTL | 444  | 476  |
| >VHL-I151S-v FANITLPV    | 114  | >VHL-I151S-r FANSTLPV    | 94   | 20   |
| >VHL-I151S-v FANITLPV    | 1084 | >VHL-I151S-r FANSTLPV    | 451  | 633  |
| >VHL-I151S-v FANITLPVYTL | 1706 | >VHL-I151S-r FANSTLPVYTL | 422  | 1284 |
| >VHL-I151S-v FANITLPV    | 25   | >VHL-I151S-r FANSTLPV    | 16   | 9    |
| >VHL-I151S-v FANITLPVYTL | 407  | >VHL-I151S-r FANSTLPVYTL | 239  | 168  |
| >VHL-I151S-v FANITLPVY   | 2461 | >VHL-I151S-r FANSTLPVY   | 247  | 2214 |
| >VHL-I151S-v FANITLPVY   | 243  | >VHL-I151S-r FANSTLPVY   | 123  | 120  |
| >VHL-I151S-v FANITLPVY   | 71   | >VHL-I151S-r FANSTLPVY   | 40   | 31   |
| >VHL-I151S-v FANITLPV    | 96   | >VHL-I151S-r FANSTLPV    | 60   | 36   |
| >VHL-I151S-v FANITLPVYTL | 644  | >VHL-I151S-r FANSTLPVYTL | 391  | 253  |
| >VHL-I151S-v FANITLPV    | 24   | >VHL-I151S-r FANSTLPV    | 16   | 8    |
| >VHL-I151S-v FANITLPVYTL | 413  | >VHL-I151S-r FANSTLPVYTL | 212  | 201  |
| >VHL-I151S-v FANITLPVY   | 114  | >VHL-I151S-r FANSTLPVY   | 56   | 58   |
| >VHL-I151S-v FANITLPV    | 1516 | >VHL-I151S-r FANSTLPV    | 247  | 1269 |
| >VHL-I151S-v FANITLPVY   | 170  | >VHL-I151S-r FANSTLPVY   | 23   | 147  |
| >VHL-I151S-v FANITLPVYTL | 859  | >VHL-I151S-r FANSTLPVYTL | 173  | 686  |
| >VHL-I151S-v FANITLPVY   | 14   | >VHL-I151S-r FANSTLPVY   | 31   | 17   |
| >VHL-I151S-v FANITLPVYTL | 63   | >VHL-I151S-r FANSTLPVYTL | 143  | 80   |
| >VHL-I151S-v FANITLPVY   | 26   | >VHL-I151S-r FANSTLPVY   | 20   | 6    |
| >VHL-I151S-v FANITLPVYTL | 278  | >VHL-I151S-r FANSTLPVYTL | 164  | 114  |
| >VHL-I151S-v FANITLPVYTL | 806  | >VHL-I151S-r FANSTLPVYTL | 163  | 643  |
| >VHL-I151S-v FANITLPVY   | 375  | >VHL-I151S-r FANSTLPVY   | 219  | 156  |
| >VHL-I151S-v FANITLPVY   | 134  | >VHL-I151S-r FANSTLPVY   | 129  | 5    |
| >VHL-I151S-v FANITLPVYTL | 160  | >VHL-I151S-r FANSTLPVYTL | 155  | 5    |
| >VHL-I151S-v FANITLPV    | 89   | >VHL-I151S-r FANSTLPV    | 171  | 82   |
| >VHL-I151S-v FANITLPVY   | 103  | >VHL-I151S-r FANSTLPVY   | 55   | 48   |
| >VHL-I151S-v FANITLPVYTL | 603  | >VHL-I151S-r FANSTLPVYTL | 296  | 307  |
| >VHL-I151S-v FANITLPVYTL | 310  | >VHL-I151S-r FANSTLPVYTL | 181  | 129  |
| >VHL-I151S-v FANITLPVY   | 582  | >VHL-I151S-r FANSTLPVY   | 109  | 473  |
| >VHL-I151S-v IFANITLPVY  | 711  | >VHL-I151S-r IFANSTLPVY  | 365  | 346  |
| >VHL-I151S-v IFANITLPV   | 35   | >VHL-I151S-r IFANSTLPV   | 275  | 240  |
| >VHL-I151S-v IFANITLPV   | 478  | >VHL-I151S-r IFANSTLPV   | 2118 | 1640 |
| >VHL-I151S-v IFANITLPVY  | 52   | >VHL-I151S-r IFANSTLPVY  | 59   | 7    |
| >VHL-I151S-v IFANITLPVY  | 87   | >VHL-I151S-r IFANSTLPVY  | 85   | 2    |
| >VHL-I151S-v IFANITLPVY  | 137  | >VHL-I151S-r IFANSTLPVY  | 360  | 223  |



|                          |      |                          |       |       |
|--------------------------|------|--------------------------|-------|-------|
| >VHL-I151S-v IFANITLPVY  | 1038 | >VHL-I151S-r IFANSTLPVY  | 333   | 705   |
| >VHL-I151S-v IFANITLPVY  | 1410 | >VHL-I151S-r IFANSTLPVY  | 432   | 978   |
| >VHL-I151S-v PIFANITLPV  | 393  | >VHL-I151S-r PIFANSTLPV  | 523   | 130   |
| >VHL-I151S-v PIFANITLPV  | 79   | >VHL-I151S-r PIFANSTLPV  | 73    | 6     |
| >VHL-I151S-v PIFANITL    | 323  | >VHL-I151S-r PIFANSTL    | 864   | 541   |
| >VHL-I151S-v PIFANITLPV  | 21   | >VHL-I151S-r PIFANSTLPV  | 57    | 36    |
| >VHL-I151S-v PIFANITLPV  | 76   | >VHL-I151S-r PIFANSTLPV  | 123   | 47    |
| >VHL-I151S-v PIFANITL    | 341  | >VHL-I151S-r PIFANSTL    | 637   | 296   |
| >VHL-I151S-v PIFANITLPV  | 25   | >VHL-I151S-r PIFANSTLPV  | 39    | 14    |
| >VHL-I151S-v PIFANITLPVY | 135  | >VHL-I151S-r PIFANSTLPVY | 90    | 45    |
| >VHL-I151S-v PIFANITLPVY | 195  | >VHL-I151S-r PIFANSTLPVY | 178   | 17    |
| >VHL-I151S-v PIFANITL    | 336  | >VHL-I151S-r PIFANSTL    | 603   | 267   |
| >VHL-I151S-v PIFANITLPV  | 218  | >VHL-I151S-r PIFANSTLPV  | 237   | 19    |
| >VHL-I151S-v QPIFANITL   | 10   | >VHL-I151S-r QPIFANSTL   | 22    | 12    |
| >VHL-I151S-v QPIFANITLPV | 151  | >VHL-I151S-r QPIFANSTLPV | 307   | 156   |
| >VHL-I151S-v QPIFANITLPV | 72   | >VHL-I151S-r QPIFANSTLPV | 110   | 38    |
| >VHL-I151S-v QPIFANITL   | 393  | >VHL-I151S-r QPIFANSTL   | 126   | 267   |
| >VHL-I151S-v QPIFANITLPV | 157  | >VHL-I151S-r QPIFANSTLPV | 79    | 78    |
| >VHL-I151S-v QPIFANITL   | 51   | >VHL-I151S-r QPIFANSTL   | 72    | 21    |
| >VHL-I151S-v QPIFANITLPV | 148  | >VHL-I151S-r QPIFANSTLPV | 195   | 47    |
| >VHL-I151S-v QPIFANITL   | 118  | >VHL-I151S-r QPIFANSTL   | 261   | 143   |
| >VHL-I151S-v QPIFANITL   | 373  | >VHL-I151S-r QPIFANSTL   | 576   | 203   |
| >VHL-I151S-v QPIFANITLPV | 204  | >VHL-I151S-r QPIFANSTLPV | 441   | 237   |
| >VHL-I151S-v GQPIFANI    | 412  | >VHL-I151S-r GQPIFANS    | 9635  | 9223  |
| >VHL-I151S-v GQPIFANITL  | 236  | >VHL-I151S-r GQPIFANSTL  | 190   | 46    |
| >VHL-I151S-v GQPIFANI    | 241  | >VHL-I151S-r GQPIFANS    | 7749  | 7508  |
| >VHL-I151S-v GQPIFANITL  | 430  | >VHL-I151S-r GQPIFANSTL  | 782   | 352   |
| >VHL-I151S-v VDGQPIFANI  | 444  | >VHL-I151S-r VDGQPIFANS  | 23352 | 22908 |
| >VHL-I151T-v ITLPVYTL    | 202  | >VHL-I151T-r TTLPVYTL    | 1442  | 1240  |
| >VHL-I151T-v ITLPVYTL    | 273  | >VHL-I151T-r TTLPVYTL    | 701   | 428   |
| >VHL-I151T-v ITLPVYTL    | 54   | >VHL-I151T-r TTLPVYTL    | 120   | 66    |
| >VHL-I151T-v ITLPVYTL    | 21   | >VHL-I151T-r TTLPVYTL    | 91    | 70    |
| >VHL-I151T-v ITLPVYTL    | 408  | >VHL-I151T-r TTLPVYTL    | 788   | 380   |
| >VHL-I151T-v ITLPVYTL    | 307  | >VHL-I151T-r TTLPVYTL    | 645   | 338   |
| >VHL-I151T-v ITLPVYTLK   | 50   | >VHL-I151T-r TTLPVYTLK   | 69    | 19    |
| >VHL-I151T-v ITLPVYTLK   | 9    | >VHL-I151T-r TTLPVYTLK   | 7     | 2     |
| >VHL-I151T-v ITLPVYTLKER | 348  | >VHL-I151T-r TTLPVYTLKEF | 142   | 206   |
| >VHL-I151T-v ITLPVYTLK   | 45   | >VHL-I151T-r TTLPVYTLK   | 85    | 40    |
| >VHL-I151T-v ITLPVYTLK   | 30   | >VHL-I151T-r TTLPVYTLK   | 34    | 4     |
| >VHL-I151T-v ITLPVYTLKER | 20   | >VHL-I151T-r TTLPVYTLKEF | 24    | 4     |
| >VHL-I151T-v ITLPVYTL    | 68   | >VHL-I151T-r TTLPVYTL    | 93    | 25    |
| >VHL-I151T-v ITLPVYTLK   | 351  | >VHL-I151T-r TTLPVYTLK   | 327   | 24    |
| >VHL-I151T-v ITLPVYTLKER | 115  | >VHL-I151T-r TTLPVYTLKEF | 109   | 6     |

|                               |       |                          |      |       |
|-------------------------------|-------|--------------------------|------|-------|
| >VHL-I151T- $\nu$ ITLPVYTLK   | 21    | >VHL-I151T-r TTLPVYTLK   | 8    | 13    |
| >VHL-I151T- $\nu$ ITLPVYTLKER | 40    | >VHL-I151T-r TTLPVYTLKEF | 14   | 26    |
| >VHL-I151T- $\nu$ ITLPVYTL    | 248   | >VHL-I151T-r TTLPVYTL    | 18   | 230   |
| >VHL-I151T- $\nu$ ITLPVYTL    | 263   | >VHL-I151T-r TTLPVYTL    | 26   | 237   |
| >VHL-I151T- $\nu$ ITLPVYTL    | 6     | >VHL-I151T-r TTLPVYTL    | 18   | 12    |
| >VHL-I151T- $\nu$ ITLPVYTL    | 185   | >VHL-I151T-r TTLPVYTL    | 689  | 504   |
| >VHL-I151T- $\nu$ ITLPVYTL    | 70    | >VHL-I151T-r TTLPVYTL    | 694  | 624   |
| >VHL-I151T- $\nu$ ITLPVYTL    | 143   | >VHL-I151T-r TTLPVYTL    | 245  | 102   |
| >VHL-I151T- $\nu$ ITLPVYTLK   | 144   | >VHL-I151T-r TTLPVYTLK   | 587  | 443   |
| >VHL-I151T- $\nu$ ITLPVYTLKER | 394   | >VHL-I151T-r TTLPVYTLKEF | 338  | 56    |
| >VHL-I151T- $\nu$ ITLPVYTL    | 96    | >VHL-I151T-r TTLPVYTL    | 152  | 56    |
| >VHL-I151T- $\nu$ NITLPVYTLK  | 194   | >VHL-I151T-r NTTLPVYTLK  | 212  | 18    |
| >VHL-I151T- $\nu$ NITLPVYTLK  | 45    | >VHL-I151T-r NTTLPVYTLK  | 21   | 24    |
| >VHL-I151T- $\nu$ NITLPVYTL   | 1909  | >VHL-I151T-r NTTLPVYTL   | 398  | 1511  |
| >VHL-I151T- $\nu$ NITLPVYTL   | 1590  | >VHL-I151T-r NTTLPVYTL   | 496  | 1094  |
| >VHL-I151T- $\nu$ NITLPVYTLK  | 24    | >VHL-I151T-r NTTLPVYTLK  | 11   | 13    |
| >VHL-I151T- $\nu$ NITLPVYTL   | 1488  | >VHL-I151T-r NTTLPVYTL   | 186  | 1302  |
| >VHL-I151T- $\nu$ NITLPVYTL   | 70    | >VHL-I151T-r NTTLPVYTL   | 12   | 58    |
| >VHL-I151T- $\nu$ NITLPVYTL   | 700   | >VHL-I151T-r NTTLPVYTL   | 155  | 545   |
| >VHL-I151T- $\nu$ NITLPVYTL   | 13567 | >VHL-I151T-r NTTLPVYTL   | 212  | 13355 |
| >VHL-I151T- $\nu$ NITLPVYTL   | 6686  | >VHL-I151T-r NTTLPVYTL   | 52   | 6634  |
| >VHL-I151T- $\nu$ NVDGQPIFAM  | 253   | >VHL-I151T-r NVDGQPIFAM  | 3696 | 3443  |
| >VHL-I151T- $\nu$ NVDGQPIFAM  | 61    | >VHL-I151T-r NVDGQPIFAM  | 2143 | 2082  |
| >VHL-I151T- $\nu$ ANITLPVYTL  | 411   | >VHL-I151T-r ANTTLPVYTL  | 1333 | 922   |
| >VHL-I151T- $\nu$ ANITLPVYTLK | 232   | >VHL-I151T-r ANTTLPVYTLK | 859  | 627   |
| >VHL-I151T- $\nu$ ANITLPVY    | 253   | >VHL-I151T-r ANTTLPVY    | 3796 | 3543  |
| >VHL-I151T- $\nu$ ANITLPVY    | 453   | >VHL-I151T-r ANTTLPVY    | 511  | 58    |
| >VHL-I151T- $\nu$ ANITLPVY    | 481   | >VHL-I151T-r ANTTLPVY    | 1805 | 1324  |
| >VHL-I151T- $\nu$ FANITLPVYTL | 351   | >VHL-I151T-r FANTTLPVYTL | 219  | 132   |
| >VHL-I151T- $\nu$ FANITLPV    | 136   | >VHL-I151T-r FANTTLPV    | 69   | 67    |
| >VHL-I151T- $\nu$ FANITLPVYTL | 689   | >VHL-I151T-r FANTTLPVYTL | 316  | 373   |
| >VHL-I151T- $\nu$ FANITLPV    | 82    | >VHL-I151T-r FANTTLPV    | 68   | 14    |
| >VHL-I151T- $\nu$ FANITLPVYTL | 156   | >VHL-I151T-r FANTTLPVYTL | 80   | 76    |
| >VHL-I151T- $\nu$ FANITLPV    | 19    | >VHL-I151T-r FANTTLPV    | 11   | 8     |
| >VHL-I151T- $\nu$ FANITLPVYTL | 585   | >VHL-I151T-r FANTTLPVYTL | 431  | 154   |
| >VHL-I151T- $\nu$ FANITLPVYTL | 482   | >VHL-I151T-r FANTTLPVYTL | 223  | 259   |
| >VHL-I151T- $\nu$ FANITLPV    | 12    | >VHL-I151T-r FANTTLPV    | 9    | 3     |
| >VHL-I151T- $\nu$ FANITLPVYTL | 292   | >VHL-I151T-r FANTTLPVYTL | 330  | 38    |
| >VHL-I151T- $\nu$ FANITLPVYTL | 203   | >VHL-I151T-r FANTTLPVYTL | 86   | 117   |
| >VHL-I151T- $\nu$ FANITLPV    | 31    | >VHL-I151T-r FANTTLPV    | 43   | 12    |
| >VHL-I151T- $\nu$ FANITLPVYTL | 87    | >VHL-I151T-r FANTTLPVYTL | 129  | 42    |
| >VHL-I151T- $\nu$ FANITLPV    | 705   | >VHL-I151T-r FANTTLPV    | 388  | 317   |
| >VHL-I151T- $\nu$ FANITLPVYTL | 920   | >VHL-I151T-r FANTTLPVYTL | 485  | 435   |

|                          |      |                          |      |      |
|--------------------------|------|--------------------------|------|------|
| >VHL-I151T-ν FANITLPV    | 114  | >VHL-I151T-r FANTTLPV    | 154  | 40   |
| >VHL-I151T-ν FANITLPV    | 25   | >VHL-I151T-r FANTTLPV    | 25   | 0    |
| >VHL-I151T-ν FANITLPVYTL | 407  | >VHL-I151T-r FANTTLPVYTL | 412  | 5    |
| >VHL-I151T-ν FANITLPVY   | 2461 | >VHL-I151T-r FANTTLPVY   | 307  | 2154 |
| >VHL-I151T-ν FANITLPVY   | 243  | >VHL-I151T-r FANTTLPVY   | 210  | 33   |
| >VHL-I151T-ν FANITLPVY   | 71   | >VHL-I151T-r FANTTLPVY   | 77   | 6    |
| >VHL-I151T-ν FANITLPV    | 96   | >VHL-I151T-r FANTTLPV    | 69   | 27   |
| >VHL-I151T-ν FANITLPVYTL | 644  | >VHL-I151T-r FANTTLPVYTL | 368  | 276  |
| >VHL-I151T-ν FANITLPV    | 24   | >VHL-I151T-r FANTTLPV    | 25   | 1    |
| >VHL-I151T-ν FANITLPVYTL | 413  | >VHL-I151T-r FANTTLPVYTL | 423  | 10   |
| >VHL-I151T-ν FANITLPVY   | 114  | >VHL-I151T-r FANTTLPVY   | 98   | 16   |
| >VHL-I151T-ν FANITLPV    | 1516 | >VHL-I151T-r FANTTLPV    | 462  | 1054 |
| >VHL-I151T-ν FANITLPVY   | 170  | >VHL-I151T-r FANTTLPVY   | 43   | 127  |
| >VHL-I151T-ν FANITLPVYTL | 859  | >VHL-I151T-r FANTTLPVYTL | 309  | 550  |
| >VHL-I151T-ν FANITLPVY   | 14   | >VHL-I151T-r FANTTLPVY   | 38   | 24   |
| >VHL-I151T-ν FANITLPVYTL | 63   | >VHL-I151T-r FANTTLPVYTL | 177  | 114  |
| >VHL-I151T-ν FANITLPVY   | 26   | >VHL-I151T-r FANTTLPVY   | 21   | 5    |
| >VHL-I151T-ν FANITLPVYTL | 278  | >VHL-I151T-r FANTTLPVYTL | 188  | 90   |
| >VHL-I151T-ν FANITLPVYTL | 806  | >VHL-I151T-r FANTTLPVYTL | 185  | 621  |
| >VHL-I151T-ν FANITLPVY   | 375  | >VHL-I151T-r FANTTLPVY   | 396  | 21   |
| >VHL-I151T-ν FANITLPVY   | 134  | >VHL-I151T-r FANTTLPVY   | 123  | 11   |
| >VHL-I151T-ν FANITLPVYTL | 160  | >VHL-I151T-r FANTTLPVYTL | 147  | 13   |
| >VHL-I151T-ν FANITLPV    | 89   | >VHL-I151T-r FANTTLPV    | 149  | 60   |
| >VHL-I151T-ν FANITLPVY   | 103  | >VHL-I151T-r FANTTLPVY   | 74   | 29   |
| >VHL-I151T-ν FANITLPVYTL | 603  | >VHL-I151T-r FANTTLPVYTL | 414  | 189  |
| >VHL-I151T-ν FANITLPVYTL | 310  | >VHL-I151T-r FANTTLPVYTL | 290  | 20   |
| >VHL-I151T-ν FANITLPVY   | 582  | >VHL-I151T-r FANTTLPVY   | 317  | 265  |
| >VHL-I151T-ν IFANITLPVY  | 711  | >VHL-I151T-r IFANTTLPVY  | 336  | 375  |
| >VHL-I151T-ν IFANITLPV   | 35   | >VHL-I151T-r IFANTTLPV   | 318  | 283  |
| >VHL-I151T-ν IFANITLPV   | 478  | >VHL-I151T-r IFANTTLPV   | 1295 | 817  |
| >VHL-I151T-ν IFANITLPVY  | 52   | >VHL-I151T-r IFANTTLPVY  | 49   | 3    |
| >VHL-I151T-ν IFANITLPVY  | 87   | >VHL-I151T-r IFANTTLPVY  | 90   | 3    |
| >VHL-I151T-ν IFANITLPVY  | 137  | >VHL-I151T-r IFANTTLPVY  | 280  | 143  |
| >VHL-I151T-ν IFANITLPVY  | 1038 | >VHL-I151T-r IFANTTLPVY  | 483  | 555  |
| >VHL-I151T-ν PIFANITLPV  | 393  | >VHL-I151T-r PIFANTTLPV  | 476  | 83   |
| >VHL-I151T-ν PIFANITLPV  | 79   | >VHL-I151T-r PIFANTTLPV  | 72   | 7    |
| >VHL-I151T-ν PIFANITL    | 323  | >VHL-I151T-r PIFANTTL    | 1022 | 699  |
| >VHL-I151T-ν PIFANITLPV  | 21   | >VHL-I151T-r PIFANTTLPV  | 40   | 19   |
| >VHL-I151T-ν PIFANITLPV  | 76   | >VHL-I151T-r PIFANTTLPV  | 107  | 31   |
| >VHL-I151T-ν PIFANITL    | 341  | >VHL-I151T-r PIFANTTL    | 465  | 124  |
| >VHL-I151T-ν PIFANITLPV  | 25   | >VHL-I151T-r PIFANTTLPV  | 34   | 9    |
| >VHL-I151T-ν PIFANITLPVY | 135  | >VHL-I151T-r PIFANTTLPVY | 89   | 46   |
| >VHL-I151T-ν PIFANITLPVY | 195  | >VHL-I151T-r PIFANTTLPVY | 188  | 7    |

|                          |     |                          |       |       |
|--------------------------|-----|--------------------------|-------|-------|
| >VHL-I151T-ν PIFANITL    | 336 | >VHL-I151T-r PIFANTTL    | 144   | 192   |
| >VHL-I151T-ν PIFANITLPV  | 218 | >VHL-I151T-r PIFANTTLPV  | 158   | 60    |
| >VHL-I151T-ν QPIFANITL   | 10  | >VHL-I151T-r QPIFANTTL   | 20    | 10    |
| >VHL-I151T-ν QPIFANITLPV | 151 | >VHL-I151T-r QPIFANTTLPV | 398   | 247   |
| >VHL-I151T-ν QPIFANITLPV | 72  | >VHL-I151T-r QPIFANTTLPV | 96    | 24    |
| >VHL-I151T-ν QPIFANITL   | 393 | >VHL-I151T-r QPIFANTTL   | 150   | 243   |
| >VHL-I151T-ν QPIFANITLPV | 157 | >VHL-I151T-r QPIFANTTLPV | 93    | 64    |
| >VHL-I151T-ν QPIFANIT    | 970 | >VHL-I151T-r QPIFANTT    | 428   | 542   |
| >VHL-I151T-ν QPIFANITL   | 51  | >VHL-I151T-r QPIFANTTL   | 73    | 22    |
| >VHL-I151T-ν QPIFANITLPV | 148 | >VHL-I151T-r QPIFANTTLPV | 193   | 45    |
| >VHL-I151T-ν QPIFANITL   | 118 | >VHL-I151T-r QPIFANTTL   | 484   | 366   |
| >VHL-I151T-ν QPIFANITL   | 373 | >VHL-I151T-r QPIFANTTL   | 473   | 100   |
| >VHL-I151T-ν QPIFANITLPV | 204 | >VHL-I151T-r QPIFANTTLPV | 318   | 114   |
| >VHL-I151T-ν GQPIFANI    | 412 | >VHL-I151T-r GQPIFANT    | 5334  | 4922  |
| >VHL-I151T-ν GQPIFANITL  | 236 | >VHL-I151T-r GQPIFANTTL  | 223   | 13    |
| >VHL-I151T-ν GQPIFANI    | 241 | >VHL-I151T-r GQPIFANT    | 3276  | 3035  |
| >VHL-I151T-ν GQPIFANITL  | 430 | >VHL-I151T-r GQPIFANTTL  | 755   | 325   |
| >VHL-I151T-ν VDGQPIFANI  | 444 | >VHL-I151T-r VDGQPIFANT  | 15606 | 15162 |
| >VHL-I180N-ι IVRSLYEDL   | 292 | >VHL-I180N-ι NVRSLYEDL   | 3611  | 3319  |
| >VHL-I180N-ι DIVRSLYEDL  | 114 | >VHL-I180N-ι DNVRSLYEDL  | 6494  | 6380  |
| >VHL-I180N-ι LDIVRSLY    | 428 | >VHL-I180N-ι LDNVRSLY    | 1819  | 1391  |
| >VHL-I180N-ι LDIVRSLYEDL | 491 | >VHL-I180N-ι LDNVRSLYED  | 864   | 373   |
| >VHL-I180N-ι RLDIVRSLY   | 116 | >VHL-I180N-ι RLDNVRSLY   | 95    | 21    |
| >VHL-I180N-ι RLDIVRSL    | 922 | >VHL-I180N-ι RLDNVRSL    | 498   | 424   |
| >VHL-I180N-ι RLDIVRSL    | 312 | >VHL-I180N-ι RLDNVRSL    | 305   | 7     |
| >VHL-I180N-ι RLDIVRSL    | 14  | >VHL-I180N-ι RLDNVRSL    | 8     | 6     |
| >VHL-I180N-ι RLDIVRSL    | 400 | >VHL-I180N-ι RLDNVRSL    | 55    | 345   |
| >VHL-I180N-ι RLDIVRSL    | 82  | >VHL-I180N-ι RLDNVRSL    | 53    | 29    |
| >VHL-I180N-ι RLDIVRSL    | 52  | >VHL-I180N-ι RLDNVRSL    | 26    | 26    |
| >VHL-I180N-ι RLDIVRSLY   | 157 | >VHL-I180N-ι RLDNVRSLY   | 91    | 66    |
| >VHL-I180N-ι RLDIVRSLY   | 77  | >VHL-I180N-ι RLDNVRSLY   | 62    | 15    |
| >VHL-I180N-ι RLDIVRSL    | 415 | >VHL-I180N-ι RLDNVRSL    | 146   | 269   |
| >VHL-I180N-ι RLDIVRSLY   | 33  | >VHL-I180N-ι RLDNVRSLY   | 24    | 9     |
| >VHL-I180N-ι RLDIVRSLY   | 32  | >VHL-I180N-ι RLDNVRSLY   | 11    | 21    |
| >VHL-I180N-ι RLDIVRSLY   | 68  | >VHL-I180N-ι RLDNVRSLY   | 79    | 11    |
| >VHL-I180N-ι RRLDIVRSLY  | 81  | >VHL-I180N-ι RRLDNVRSLY  | 102   | 21    |
| >VHL-I180N-ι RRLDIVRSLY  | 437 | >VHL-I180N-ι RRLDNVRSLY  | 1474  | 1037  |
| >VHL-I180N-ι RRLDIVRSL   | 109 | >VHL-I180N-ι RRLDNVRSL   | 55    | 54    |
| >VHL-I180N-ι RRLDIVRSLY  | 49  | >VHL-I180N-ι RRLDNVRSLY  | 26    | 23    |
| >VHL-I180N-ι RRLDIVRS    | 102 | >VHL-I180N-ι RRLDNVRS    | 223   | 121   |
| >VHL-I180N-ι RRLDIVRSL   | 15  | >VHL-I180N-ι RRLDNVRSL   | 23    | 8     |
| >VHL-I180N-ι RRLDIVRSLY  | 10  | >VHL-I180N-ι RRLDNVRSLY  | 10    | 0     |
| >VHL-I180N-ι RRLDIVRS    | 242 | >VHL-I180N-ι RRLDNVRS    | 291   | 49    |

|                        |      |                       |       |       |
|------------------------|------|-----------------------|-------|-------|
| >VHL-I180N-RRLDIVRSLY  | 303  | >VHL-I180N-RRLDNVRSLY | 228   | 75    |
| >VHL-I180N-RRLDIVRSLYE | 319  | >VHL-I180N-RRLDNVRSLY | 587   | 268   |
| >VHL-I180N-RRLDIVRSLY  | 318  | >VHL-I180N-RRLDNVRSLY | 365   | 47    |
| >VHL-I180N-YRRLDIVRSL  | 130  | >VHL-I180N-YRRLDNVRSL | 100   | 30    |
| >VHL-I180N-YRRLDIVRSLY | 65   | >VHL-I180N-YRRLDNVRSL | 53    | 12    |
| >VHL-I180N-YRRLDIVR    | 308  | >VHL-I180N-YRRLDNVR   | 1055  | 747   |
| >VHL-I180N-YRRLDIVRSL  | 43   | >VHL-I180N-YRRLDNVRSL | 72    | 29    |
| >VHL-I180N-YRRLDIVRSLY | 206  | >VHL-I180N-YRRLDNVRSL | 322   | 116   |
| >VHL-I180N-YRRLDIVRSLY | 95   | >VHL-I180N-YRRLDNVRSL | 61    | 34    |
| >VHL-I180N-YRRLDIVRSL  | 304  | >VHL-I180N-YRRLDNVRSL | 330   | 26    |
| >VHL-I180N-YRRLDIVRSLY | 391  | >VHL-I180N-YRRLDNVRSL | 656   | 265   |
| >VHL-I180N-YRRLDIVRSL  | 94   | >VHL-I180N-YRRLDNVRSL | 147   | 53    |
| >VHL-I180N-YRRLDIVRSLY | 177  | >VHL-I180N-YRRLDNVRSL | 348   | 171   |
| >VHL-I180N-NYRRLDIVRSI | 587  | >VHL-I180N-NYRRLDNVR  | 257   | 330   |
| >VHL-I180N-NYRRLDIVRSI | 129  | >VHL-I180N-NYRRLDNVR  | 117   | 12    |
| >VHL-I180N-NYRRLDIVR   | 256  | >VHL-I180N-NYRRLDNVR  | 335   | 79    |
| >VHL-I180N-NYRRLDIVR   | 30   | >VHL-I180N-NYRRLDNVR  | 38    | 8     |
| >VHL-I180N-PENYRRLDI   | 86   | >VHL-I180N-PENYRRLDN  | 23269 | 23183 |
| >VHL-I180N-KPENYRRLDI  | 104  | >VHL-I180N-KPENYRRLDN | 6358  | 6254  |
| >VHL-I180N-KPENYRRLDI  | 139  | >VHL-I180N-KPENYRRLDN | 258   | 119   |
| >VHL-K171N-KPENYRRL    | 39   | >VHL-K171N-NPENYRRL   | 135   | 96    |
| >VHL-K171N-KPENYRRLDI  | 104  | >VHL-K171N-NPENYRRLDI | 368   | 264   |
| >VHL-K171N-KPENYRRLDI  | 139  | >VHL-K171N-NPENYRRLDI | 531   | 392   |
| >VHL-K171N-VKPENYRRL   | 771  | >VHL-K171N-VNPENYRRL  | 81    | 690   |
| >VHL-K171N-RCLQVVRSLV  | 67   | >VHL-K171N-RCLQVVRSLV | 10210 | 10143 |
| >VHL-K171N-LVKPENYRRL  | 1540 | >VHL-K171N-LVNPENYRRL | 389   | 1151  |
| >VHL-K171N-LVKPENYR    | 2668 | >VHL-K171N-LVNPENYR   | 281   | 2387  |
| >VHL-K171N-LVKPENYR    | 23   | >VHL-K171N-LVNPENYR   | 29    | 6     |
| >VHL-K171N-LVKPENYRR   | 35   | >VHL-K171N-LVNPENYRR  | 47    | 12    |
| >VHL-K171N-LVKPENYR    | 159  | >VHL-K171N-LVNPENYR   | 329   | 170   |
| >VHL-K171N-LVKPENYRR   | 302  | >VHL-K171N-LVNPENYRR  | 628   | 326   |
| >VHL-K171N-LVKPENYR    | 60   | >VHL-K171N-LVNPENYR   | 42    | 18    |
| >VHL-K171N-LVKPENYRR   | 122  | >VHL-K171N-LVNPENYRR  | 77    | 45    |
| >VHL-K171N-LVKPENYR    | 287  | >VHL-K171N-LVNPENYR   | 326   | 39    |
| >VHL-K171N-SLVKPENYRR  | 409  | >VHL-K171N-SLVNPENYRR | 361   | 48    |
| >VHL-K171N-SLVKPENYRR  | 44   | >VHL-K171N-SLVNPENYRR | 17    | 27    |
| >VHL-K171N-SLVKPENYRR  | 647  | >VHL-K171N-SLVNPENYRR | 231   | 416   |
| >VHL-K171N-SLVKPENYRR  | 394  | >VHL-K171N-SLVNPENYRR | 227   | 167   |
| >VHL-K171N-SLVKPENYRR  | 26   | >VHL-K171N-SLVNPENYRR | 12    | 14    |
| >VHL-K171N-SLVKPENYRR  | 672  | >VHL-K171N-SLVNPENYRR | 279   | 393   |
| >VHL-K171N-SLVKPENY    | 281  | >VHL-K171N-SLVNPENY   | 268   | 13    |
| >VHL-K171N-SLVKPENY    | 434  | >VHL-K171N-SLVNPENY   | 184   | 250   |
| >VHL-K171N-SLVKPENYR   | 177  | >VHL-K171N-SLVNPENYR  | 139   | 38    |

|                       |       |                       |       |       |
|-----------------------|-------|-----------------------|-------|-------|
| >VHL-K171N·SLVKPENYRR | 103   | >VHL-K171N·SLVNPENYRR | 120   | 17    |
| >VHL-K171N·SLVKPENYR  | 133   | >VHL-K171N·SLVNPENYR  | 115   | 18    |
| >VHL-K171N·SLVKPENYRR | 142   | >VHL-K171N·SLVNPENYRR | 82    | 60    |
| >VHL-K171N·SLVKPENY   | 96    | >VHL-K171N·SLVNPENY   | 271   | 175   |
| >VHL-K171N·SLVKPENY   | 218   | >VHL-K171N·SLVNPENY   | 128   | 90    |
| >VHL-K171N·SLVKPENY   | 749   | >VHL-K171N·SLVNPENY   | 410   | 339   |
| >VHL-K171N·SLVKPENYRR | 85    | >VHL-K171N·SLVNPENYRR | 179   | 94    |
| >VHL-K171N·RSLVKPENYR | 782   | >VHL-K171N·RSLVNPENYR | 385   | 397   |
| >VHL-K171N·RSLVKPENY  | 961   | >VHL-K171N·RSLVNPENY  | 491   | 470   |
| >VHL-K171N·RSLVKPENYR | 40    | >VHL-K171N·RSLVNPENYR | 41    | 1     |
| >VHL-K171N·RSLVKPENYR | 12    | >VHL-K171N·RSLVNPENYR | 15    | 3     |
| >VHL-K171N·RSLVKPENYR | 542   | >VHL-K171N·RSLVNPENYR | 274   | 268   |
| >VHL-K171N·RSLVKPENY  | 242   | >VHL-K171N·RSLVNPENY  | 516   | 274   |
| >VHL-K171N·RSLVKPENY  | 185   | >VHL-K171N·RSLVNPENY  | 39    | 146   |
| >VHL-K171N·RSLVKPENY  | 3     | >VHL-K171N·RSLVNPENY  | 3     | 0     |
| >VHL-K171N·RSLVKPENY  | 56    | >VHL-K171N·RSLVNPENY  | 28    | 28    |
| >VHL-K171N·RSLVKPENYR | 355   | >VHL-K171N·RSLVNPENYR | 230   | 125   |
| >VHL-K171N·RSLVKPENYR | 124   | >VHL-K171N·RSLVNPENYR | 116   | 8     |
| >VHL-K171N·RSLVKPENYR | 148   | >VHL-K171N·RSLVNPENYR | 120   | 28    |
| >VHL-K171N·VRSLVKPENY | 846   | >VHL-K171N·VRSLVNPENY | 406   | 440   |
| >VHL-K171N·VRSLVKPENY | 930   | >VHL-K171N·VRSLVNPENY | 479   | 451   |
| >VHL-K171N·VRSLVKPENY | 310   | >VHL-K171N·VRSLVNPENY | 164   | 146   |
| >VHL-K171N·VVRSLVKPEN | 228   | >VHL-K171N·VVRSLVNPEN | 129   | 99    |
| >VHL-K171N·VVRSLVKPEN | 427   | >VHL-K171N·VVRSLVNPEN | 209   | 218   |
| >VHL-K171N·VVRSLVKPEN | 732   | >VHL-K171N·VVRSLVNPEN | 280   | 452   |
| >VHL-K171N·VVRSLVKPEN | 141   | >VHL-K171N·VVRSLVNPEN | 112   | 29    |
| >VHL-K171N·VVRSLVKPEN | 538   | >VHL-K171N·VVRSLVNPEN | 395   | 143   |
| >VHL-K171N·VVRSLVKPEN | 579   | >VHL-K171N·VVRSLVNPEN | 404   | 175   |
| >VHL-K171N·VVRSLVKPEN | 83    | >VHL-K171N·VVRSLVNPEN | 153   | 70    |
| >VHL-K171N·VVRSLVKPEN | 126   | >VHL-K171N·VVRSLVNPEN | 106   | 20    |
| >VHL-K171N·QVVRSLVK   | 358   | >VHL-K171N·QVVRSLVN   | 18988 | 18630 |
| >VHL-K171N·QVVRSLVK   | 70    | >VHL-K171N·QVVRSLVN   | 22949 | 22879 |
| >VHL-K171N·QVVRSLVK   | 136   | >VHL-K171N·QVVRSLVN   | 13841 | 13705 |
| >VHL-K171N·QVVRSLVK   | 208   | >VHL-K171N·QVVRSLVN   | 21522 | 21314 |
| >VHL-K171N·CLQVVRSLVK | 97    | >VHL-K171N·CLQVVRSLVN | 19980 | 19883 |
| >VHL-K171N·CLQVVRSLVK | 305   | >VHL-K171N·CLQVVRSLVN | 34650 | 34345 |
| >VHL-L101P·LPPGTGRR   | 158   | >VHL-L101P·PPPGTGRR   | 3212  | 3054  |
| >VHL-L101P·TLPPGTGRR  | 214   | >VHL-L101P·TPPPGTGRR  | 27536 | 27322 |
| >VHL-L101P·TLPPGTGRR  | 83    | >VHL-L101P·TPPPGTGRR  | 33624 | 33541 |
| >VHL-L101P·PTLPPGTGRR | 10488 | >VHL-L101P·PTPPPGTGRR | 19    | 10469 |
| >VHL-L101P·PTLPPGTGRR | 139   | >VHL-L101P·PTPPPGTGRR | 215   | 76    |
| >VHL-L101P·YPTLPPGTGR | 474   | >VHL-L101P·YTPPPGTGR  | 630   | 156   |
| >VHL-L101P·YPTLPPGT   | 313   | >VHL-L101P·YTPPPGT    | 544   | 231   |

|                        |      |                        |       |       |
|------------------------|------|------------------------|-------|-------|
| >VHL-L101P- YPTLPPGTG  | 410  | >VHL-L101P- YPTPPPGTG  | 1079  | 669   |
| >VHL-L101P- PYPTLPPGTG | 66   | >VHL-L101P- PYPTPPPGTG | 126   | 60    |
| >VHL-L101P- QPYPTLPPG  | 497  | >VHL-L101P- QPYPTPPPG  | 375   | 122   |
| >VHL-L101P- QPYPTLPPG  | 159  | >VHL-L101P- QPYPTPPPG  | 510   | 351   |
| >VHL-L101P- EPQPYPTL   | 420  | >VHL-L101P- EPQPYPTP   | 7601  | 7181  |
| >VHL-L101P- GEPQPYPTL  | 197  | >VHL-L101P- GEPQPYPTP  | 12442 | 12245 |
| >VHL-L101P- GEPQPYPTL  | 460  | >VHL-L101P- GEPQPYPTP  | 13859 | 13399 |
| >VHL-L116V- LWLFRDAG   | 90   | >VHL-L116V- VWLFRDAG   | 127   | 37    |
| >VHL-L116V- HLWLFRDA   | 346  | >VHL-L116V- HVWLFRDA   | 18193 | 17847 |
| >VHL-L116V- HLWLFRDAG  | 1266 | >VHL-L116V- HVWLFRDAG  | 402   | 864   |
| >VHL-L116V- GRRHSYRGH  | 212  | >VHL-L116V- GRRHSYRGH  | 566   | 354   |
| >VHL-L116V- GRRHSYRGH  | 174  | >VHL-L116V- GRRHSYRGH  | 988   | 814   |
| >VHL-L116V- GRRHSYRGH  | 13   | >VHL-L116V- GRRHSYRGH  | 124   | 111   |
| >VHL-L116V- RGHLWLFR   | 160  | >VHL-L116V- RGHVWLFR   | 109   | 51    |
| >VHL-L116V- RGHLWLFR   | 15   | >VHL-L116V- RGHVWLFR   | 13    | 2     |
| >VHL-L116V- RGHLWLFR   | 33   | >VHL-L116V- RGHVWLFR   | 56    | 23    |
| >VHL-L116V- YRGHLWLF   | 109  | >VHL-L116V- YRGHVWLF   | 71    | 38    |
| >VHL-L116V- YRGHLWLF   | 75   | >VHL-L116V- YRGHVWLF   | 97    | 22    |
| >VHL-L116V- YRGHLWLFR  | 66   | >VHL-L116V- YRGHVWLFR  | 117   | 51    |
| >VHL-L116V- YRGHLWLFR  | 44   | >VHL-L116V- YRGHVWLFR  | 126   | 82    |
| >VHL-L116V- SYRGHLWLF  | 32   | >VHL-L116V- SYRGHVWLF  | 56    | 24    |
| >VHL-L116V- SYRGHLWLF  | 24   | >VHL-L116V- SYRGHVWLF  | 19    | 5     |
| >VHL-L116V- SYRGHLWL   | 17   | >VHL-L116V- SYRGHVWL   | 14    | 3     |
| >VHL-L116V- SYRGHLWLF  | 5    | >VHL-L116V- SYRGHVWLF  | 5     | 0     |
| >VHL-L116V- SYRGHLWLF  | 351  | >VHL-L116V- SYRGHVWLF  | 747   | 396   |
| >VHL-L116V- SYRGHLWLF  | 96   | >VHL-L116V- SYRGHVWLF  | 201   | 105   |
| >VHL-L116V- SYRGHLWL   | 38   | >VHL-L116V- SYRGHVWL   | 54    | 16    |
| >VHL-L116V- SYRGHLWLFF | 11   | >VHL-L116V- SYRGHVWLFI | 11    | 0     |
| >VHL-L116V- SYRGHLWLFF | 7    | >VHL-L116V- SYRGHVWLFI | 6     | 1     |
| >VHL-L116V- SYRGHLWLFF | 88   | >VHL-L116V- SYRGHVWLFI | 58    | 30    |
| >VHL-L116V- SYRGHLWLFF | 265  | >VHL-L116V- SYRGHVWLFI | 176   | 89    |
| >VHL-L116V- SYRGHLWLFF | 396  | >VHL-L116V- SYRGHVWLFI | 430   | 34    |
| >VHL-L116V- SYRGHLWLFF | 23   | >VHL-L116V- SYRGHVWLFI | 24    | 1     |
| >VHL-L116V- SYRGHLWL   | 262  | >VHL-L116V- SYRGHVWL   | 665   | 403   |
| >VHL-L116V- SYRGHLWLFF | 430  | >VHL-L116V- SYRGHVWLFI | 585   | 155   |
| >VHL-L116V- SYRGHLWL   | 420  | >VHL-L116V- SYRGHVWL   | 472   | 52    |
| >VHL-L116V- SYRGHLWLF  | 277  | >VHL-L116V- SYRGHVWLF  | 261   | 16    |
| >VHL-L116V- HSYRGHLWL  | 522  | >VHL-L116V- HSYRGHVWL  | 303   | 219   |
| >VHL-L116V- HSYRGHLWLI | 50   | >VHL-L116V- HSYRGHVWLI | 58    | 8     |
| >VHL-L116V- HSYRGHLWLI | 47   | >VHL-L116V- HSYRGHVWLI | 59    | 12    |
| >VHL-L116V- HSYRGHLWLI | 376  | >VHL-L116V- HSYRGHVWLI | 349   | 27    |
| >VHL-L116V- HSYRGHLWLI | 178  | >VHL-L116V- HSYRGHVWLI | 215   | 37    |
| >VHL-L116V- HSYRGHLWL  | 93   | >VHL-L116V- HSYRGHVWL  | 203   | 110   |

|                         |      |                        |      |      |
|-------------------------|------|------------------------|------|------|
| >VHL-L116V- HSYRGHLWLI  | 27   | >VHL-L116V- HSYRGHVWL  | 33   | 6    |
| >VHL-L116V- HSYRGHLWLI  | 457  | >VHL-L116V- HSYRGHVWL  | 506  | 49   |
| >VHL-L116V- HSYRGHLWLI  | 8    | >VHL-L116V- HSYRGHVWL  | 7    | 1    |
| >VHL-L116V- HSYRGHLWLI  | 293  | >VHL-L116V- HSYRGHVWL  | 135  | 158  |
| >VHL-L116V- HSYRGHLWLI  | 27   | >VHL-L116V- HSYRGHVWL  | 20   | 7    |
| >VHL-L116V- HSYRGHLWLI  | 9    | >VHL-L116V- HSYRGHVWL  | 6    | 3    |
| >VHL-L116V- HSYRGHLWLI  | 623  | >VHL-L116V- HSYRGHVWL  | 465  | 158  |
| >VHL-L116V- HSYRGHLWLI  | 36   | >VHL-L116V- HSYRGHVWL  | 21   | 15   |
| >VHL-L116V- HSYRGHLW    | 4    | >VHL-L116V- HSYRGHVW   | 4    | 0    |
| >VHL-L116V- HSYRGHLWL   | 5    | >VHL-L116V- HSYRGHVWL  | 8    | 3    |
| >VHL-L116V- HSYRGHLW    | 34   | >VHL-L116V- HSYRGHVW   | 34   | 0    |
| >VHL-L116V- HSYRGHLWLI  | 62   | >VHL-L116V- HSYRGHVWL  | 62   | 0    |
| >VHL-L116V- HSYRGHLW    | 10   | >VHL-L116V- HSYRGHVW   | 9    | 1    |
| >VHL-L116V- HSYRGHLWL   | 339  | >VHL-L116V- HSYRGHVWL  | 2560 | 2221 |
| >VHL-L116V- HSYRGHLWLI  | 19   | >VHL-L116V- HSYRGHVWL  | 24   | 5    |
| >VHL-L116V- HSYRGHLWL   | 126  | >VHL-L116V- HSYRGHVWL  | 255  | 129  |
| >VHL-L116V- HSYRGHLWLI  | 55   | >VHL-L116V- HSYRGHVWL  | 97   | 42   |
| >VHL-L116V- HSYRGHLW    | 137  | >VHL-L116V- HSYRGHVW   | 270  | 133  |
| >VHL-L116V- HSYRGHLWLI  | 300  | >VHL-L116V- HSYRGHVWL  | 376  | 76   |
| >VHL-L116V- HSYRGHLWLI  | 46   | >VHL-L116V- HSYRGHVWL  | 61   | 15   |
| >VHL-L116V- HSYRGHLWL   | 153  | >VHL-L116V- HSYRGHVWL  | 188  | 35   |
| >VHL-L116V- IHSYRGHLWL  | 131  | >VHL-L116V- IHSYRGHVWI | 129  | 2    |
| >VHL-L116V- IHSYRGHLWL  | 91   | >VHL-L116V- IHSYRGHVWI | 51   | 40   |
| >VHL-L116V- IHSYRGHLW   | 25   | >VHL-L116V- IHSYRGHVW  | 44   | 19   |
| >VHL-L116V- IHSYRGHLWL  | 402  | >VHL-L116V- IHSYRGHVWI | 564  | 162  |
| >VHL-L116V- RIHSYRGHL   | 336  | >VHL-L116V- RIHSYRGHV  | 1073 | 737  |
| >VHL-L116V- RIHSYRGHL   | 1605 | >VHL-L116V- RIHSYRGHV  | 83   | 1522 |
| >VHL-L116V- RIHSYRGHL   | 4518 | >VHL-L116V- RIHSYRGHV  | 344  | 4174 |
| >VHL-L116V- RIHSYRGHL   | 3999 | >VHL-L116V- RIHSYRGHV  | 115  | 3884 |
| >VHL-L116V- RIHSYRGHLV  | 414  | >VHL-L116V- RIHSYRGHVV | 267  | 147  |
| >VHL-L116V- RIHSYRGHL   | 23   | >VHL-L116V- RIHSYRGHV  | 17   | 6    |
| >VHL-L116V- RIHSYRGHLV  | 21   | >VHL-L116V- RIHSYRGHVV | 31   | 10   |
| >VHL-L116V- RIHSYRGHLV  | 117  | >VHL-L116V- RIHSYRGHVV | 144  | 27   |
| >VHL-L116V- RIHSYRGHLV  | 50   | >VHL-L116V- RIHSYRGHVV | 45   | 5    |
| >VHL-L116V- RIHSYRGHLV  | 74   | >VHL-L116V- RIHSYRGHVV | 172  | 98   |
| >VHL-L116V- RRIHSYRGHL  | 52   | >VHL-L116V- RRIHSYRGHV | 97   | 45   |
| >VHL-L116V- RRIHSYRGHL' | 119  | >VHL-L116V- RRIHSYRGHV | 46   | 73   |
| >VHL-L116V- RRIHSYRGHL  | 9    | >VHL-L116V- RRIHSYRGHV | 25   | 16   |
| >VHL-L116V- RRIHSYRGHL' | 134  | >VHL-L116V- RRIHSYRGHV | 246  | 112  |
| >VHL-L116V- RRIHSYRGHL  | 21   | >VHL-L116V- RRIHSYRGHV | 89   | 68   |
| >VHL-L116V- RRIHSYRGHL' | 96   | >VHL-L116V- RRIHSYRGHV | 130  | 34   |
| >VHL-L116V- RRIHSYRGHL  | 18   | >VHL-L116V- RRIHSYRGHV | 53   | 35   |
| >VHL-L116V- RRIHSYRGHL' | 336  | >VHL-L116V- RRIHSYRGHV | 791  | 455  |



|                         |      |                        |       |       |
|-------------------------|------|------------------------|-------|-------|
| >VHL-L116V- RRIHSYRGHLV | 124  | >VHL-L116V- RRIHSYRGHV | 221   | 97    |
| >VHL-L118H- LFRDAGTHDC  | 3507 | >VHL-L118H- HFRDAGTHD  | 460   | 3047  |
| >VHL-L118H- LFRDAGTHDC  | 1415 | >VHL-L118H- HFRDAGTHD  | 127   | 1288  |
| >VHL-L118H- WLFRDAGT    | 330  | >VHL-L118H- WHFRDAGT   | 21981 | 21651 |
| >VHL-L118H- WLFRDAGT    | 468  | >VHL-L118H- WHFRDAGT   | 22181 | 21713 |
| >VHL-L118H- WLFRDAGT    | 108  | >VHL-L118H- WHFRDAGT   | 23981 | 23873 |
| >VHL-L118H- WLFRDAGT    | 51   | >VHL-L118H- WHFRDAGT   | 33366 | 33315 |
| >VHL-L118H- RIHSYRGHLV  | 414  | >VHL-L118H- RIHSYRGHLV | 29649 | 29235 |
| >VHL-L118H- RIHSYRGHLV  | 9681 | >VHL-L118H- RIHSYRGHLV | 407   | 9274  |
| >VHL-L118H- RIHSYRGHLV  | 21   | >VHL-L118H- RIHSYRGHLV | 246   | 225   |
| >VHL-L118H- LWLFRDAG    | 90   | >VHL-L118H- LWHFRDAG   | 214   | 124   |
| >VHL-L118H- HLWLFRDA    | 346  | >VHL-L118H- HLWHRDA    | 197   | 149   |
| >VHL-L118H- HLWLFRDAG   | 596  | >VHL-L118H- HLWHRDAG   | 366   | 230   |
| >VHL-L118H- RGHLWLFR    | 160  | >VHL-L118H- RGHLWHFR   | 136   | 24    |
| >VHL-L118H- RGHLWLFR    | 15   | >VHL-L118H- RGHLWHFR   | 8     | 7     |
| >VHL-L118H- RGHLWLFR    | 33   | >VHL-L118H- RGHLWHFR   | 24    | 9     |
| >VHL-L118H- YRGHLWLF    | 892  | >VHL-L118H- YRGHLWHF   | 463   | 429   |
| >VHL-L118H- YRGHLWLF    | 109  | >VHL-L118H- YRGHLWHF   | 68    | 41    |
| >VHL-L118H- YRGHLWLF    | 75   | >VHL-L118H- YRGHLWHF   | 85    | 10    |
| >VHL-L118H- YRGHLWLFR   | 66   | >VHL-L118H- YRGHLWHFR  | 67    | 1     |
| >VHL-L118H- YRGHLWLFR   | 44   | >VHL-L118H- YRGHLWHFR  | 43    | 1     |
| >VHL-L118H- SYRGHLWLF   | 32   | >VHL-L118H- SYRGHLWHF  | 26    | 6     |
| >VHL-L118H- SYRGHLWLF   | 24   | >VHL-L118H- SYRGHLWHF  | 45    | 21    |
| >VHL-L118H- SYRGHLWL    | 17   | >VHL-L118H- SYRGHLWH   | 6708  | 6691  |
| >VHL-L118H- SYRGHLWLF   | 5    | >VHL-L118H- SYRGHLWHF  | 5     | 0     |
| >VHL-L118H- SYRGHLWLF   | 351  | >VHL-L118H- SYRGHLWHF  | 29    | 322   |
| >VHL-L118H- SYRGHLWLF   | 96   | >VHL-L118H- SYRGHLWHF  | 428   | 332   |
| >VHL-L118H- SYRGHLWL    | 38   | >VHL-L118H- SYRGHLWH   | 524   | 486   |
| >VHL-L118H- SYRGHLWLFF  | 11   | >VHL-L118H- SYRGHLWHF  | 13    | 2     |
| >VHL-L118H- SYRGHLWLFF  | 7    | >VHL-L118H- SYRGHLWHF  | 5     | 2     |
| >VHL-L118H- SYRGHLWLFF  | 88   | >VHL-L118H- SYRGHLWHF  | 125   | 37    |
| >VHL-L118H- SYRGHLWLFF  | 265  | >VHL-L118H- SYRGHLWHF  | 314   | 49    |
| >VHL-L118H- SYRGHLWLFF  | 396  | >VHL-L118H- SYRGHLWHF  | 306   | 90    |
| >VHL-L118H- SYRGHLWLFF  | 23   | >VHL-L118H- SYRGHLWHF  | 22    | 1     |
| >VHL-L118H- SYRGHLWL    | 262  | >VHL-L118H- SYRGHLWH   | 6334  | 6072  |
| >VHL-L118H- SYRGHLWLFF  | 430  | >VHL-L118H- SYRGHLWHF  | 1791  | 1361  |
| >VHL-L118H- SYRGHLWL    | 420  | >VHL-L118H- SYRGHLWH   | 2490  | 2070  |
| >VHL-L118H- SYRGHLWLF   | 277  | >VHL-L118H- SYRGHLWHF  | 648   | 371   |
| >VHL-L118H- HSYRGHLWL   | 7430 | >VHL-L118H- HSYRGHLWH  | 236   | 7194  |
| >VHL-L118H- HSYRGHLWLI  | 50   | >VHL-L118H- HSYRGHLWH  | 84    | 34    |
| >VHL-L118H- HSYRGHLWLI  | 47   | >VHL-L118H- HSYRGHLWH  | 64    | 17    |
| >VHL-L118H- HSYRGHLWLI  | 376  | >VHL-L118H- HSYRGHLWH  | 287   | 89    |
| >VHL-L118H- HSYRGHLWLI  | 178  | >VHL-L118H- HSYRGHLWH  | 40    | 138   |

|                        |       |                        |       |       |
|------------------------|-------|------------------------|-------|-------|
| >VHL-L118H- HSYRGHLWL  | 93    | >VHL-L118H- HSYRGHLWH  | 1577  | 1484  |
| >VHL-L118H- HSYRGHLWLI | 27    | >VHL-L118H- HSYRGHLWH  | 42    | 15    |
| >VHL-L118H- HSYRGHLWLI | 457   | >VHL-L118H- HSYRGHLWH  | 878   | 421   |
| >VHL-L118H- HSYRGHLWLI | 8     | >VHL-L118H- HSYRGHLWH  | 6     | 2     |
| >VHL-L118H- HSYRGHLWLI | 293   | >VHL-L118H- HSYRGHLWH  | 506   | 213   |
| >VHL-L118H- HSYRGHLWLI | 27    | >VHL-L118H- HSYRGHLWH  | 22    | 5     |
| >VHL-L118H- HSYRGHLWLI | 9     | >VHL-L118H- HSYRGHLWH  | 6     | 3     |
| >VHL-L118H- HSYRGHLWLI | 623   | >VHL-L118H- HSYRGHLWH  | 117   | 506   |
| >VHL-L118H- HSYRGHLWLI | 36    | >VHL-L118H- HSYRGHLWH  | 20    | 16    |
| >VHL-L118H- HSYRGHLWL  | 5     | >VHL-L118H- HSYRGHLWH  | 59    | 54    |
| >VHL-L118H- HSYRGHLWLI | 62    | >VHL-L118H- HSYRGHLWH  | 56    | 6     |
| >VHL-L118H- HSYRGHLWL  | 339   | >VHL-L118H- HSYRGHLWH  | 6563  | 6224  |
| >VHL-L118H- HSYRGHLWLI | 19    | >VHL-L118H- HSYRGHLWH  | 17    | 2     |
| >VHL-L118H- HSYRGHLWL  | 126   | >VHL-L118H- HSYRGHLWH  | 281   | 155   |
| >VHL-L118H- HSYRGHLWLI | 55    | >VHL-L118H- HSYRGHLWH  | 200   | 145   |
| >VHL-L118H- HSYRGHLWLI | 300   | >VHL-L118H- HSYRGHLWH  | 245   | 55    |
| >VHL-L118H- HSYRGHLWLI | 46    | >VHL-L118H- HSYRGHLWH  | 43    | 3     |
| >VHL-L118H- HSYRGHLWL  | 153   | >VHL-L118H- HSYRGHLWH  | 33902 | 33749 |
| >VHL-L118H- IHSYRGHLWL | 569   | >VHL-L118H- IHSYRGHLWH | 435   | 134   |
| >VHL-L118H- IHSYRGHLWL | 131   | >VHL-L118H- IHSYRGHLWH | 324   | 193   |
| >VHL-L118H- IHSYRGHLWL | 91    | >VHL-L118H- IHSYRGHLWH | 48    | 43    |
| >VHL-L118H- IHSYRGHLWL | 402   | >VHL-L118H- IHSYRGHLWH | 1358  | 956   |
| >VHL-L118P- WLFRDAGT   | 330   | >VHL-L118P- WPFRDAGT   | 23133 | 22803 |
| >VHL-L118P- WLFRDAGT   | 468   | >VHL-L118P- WPFRDAGT   | 22501 | 22033 |
| >VHL-L118P- WLFRDAGT   | 108   | >VHL-L118P- WPFRDAGT   | 26747 | 26639 |
| >VHL-L118P- WLFRDAGT   | 51    | >VHL-L118P- WPFRDAGT   | 35716 | 35665 |
| >VHL-L118P- WLFRDAGT   | 10610 | >VHL-L118P- WPFRDAGT   | 330   | 10280 |
| >VHL-L118P- WLFRDAGTH  | 2673  | >VHL-L118P- WPFRDAGTH  | 45    | 2628  |
| >VHL-L118P- RIHSYRGHLV | 414   | >VHL-L118P- RIHSYRGHLV | 27699 | 27285 |
| >VHL-L118P- RIHSYRGHLV | 21    | >VHL-L118P- RIHSYRGHLV | 205   | 184   |
| >VHL-L118P- LWLFRDAG   | 90    | >VHL-L118P- LWLFRDAG   | 244   | 154   |
| >VHL-L118P- HLWLFRDA   | 1175  | >VHL-L118P- HLWLFRDA   | 212   | 963   |
| >VHL-L118P- HLWLFRDAG  | 1311  | >VHL-L118P- HLWLFRDAG  | 276   | 1035  |
| >VHL-L118P- HLWLFRDA   | 1111  | >VHL-L118P- HLWLFRDA   | 361   | 750   |
| >VHL-L118P- HLWLFRDA   | 346   | >VHL-L118P- HLWLFRDA   | 45    | 301   |
| >VHL-L118P- HLWLFRDAG  | 596   | >VHL-L118P- HLWLFRDAG  | 71    | 525   |
| >VHL-L118P- RGHLWLFR   | 160   | >VHL-L118P- RGHLWLFR   | 114   | 46    |
| >VHL-L118P- RGHLWLFR   | 15    | >VHL-L118P- RGHLWLFR   | 15    | 0     |
| >VHL-L118P- RGHLWLFR   | 33    | >VHL-L118P- RGHLWLFR   | 29    | 4     |
| >VHL-L118P- YRGHLWLF   | 109   | >VHL-L118P- YRGHLWLF   | 32    | 77    |
| >VHL-L118P- YRGHLWLF   | 75    | >VHL-L118P- YRGHLWLF   | 85    | 10    |
| >VHL-L118P- YRGHLWLF   | 66    | >VHL-L118P- YRGHLWLF   | 159   | 93    |
| >VHL-L118P- YRGHLWLF   | 44    | >VHL-L118P- YRGHLWLF   | 99    | 55    |

|                        |     |                         |       |       |
|------------------------|-----|-------------------------|-------|-------|
| >VHL-L118P- SYRGHLWLF  | 32  | >VHL-L118P- SYRGHLWPF   | 58    | 26    |
| >VHL-L118P- SYRGHLWLF  | 24  | >VHL-L118P- SYRGHLWPF   | 61    | 37    |
| >VHL-L118P- SYRGHLWL   | 17  | >VHL-L118P- SYRGHLWP    | 7193  | 7176  |
| >VHL-L118P- SYRGHLWLF  | 5   | >VHL-L118P- SYRGHLWPF   | 6     | 1     |
| >VHL-L118P- SYRGHLWLF  | 351 | >VHL-L118P- SYRGHLWPF   | 45    | 306   |
| >VHL-L118P- SYRGHLWLF  | 96  | >VHL-L118P- SYRGHLWPF   | 449   | 353   |
| >VHL-L118P- SYRGHLWL   | 38  | >VHL-L118P- SYRGHLWP    | 468   | 430   |
| >VHL-L118P- SYRGHLWLF  | 840 | >VHL-L118P- SYRGHLWPF   | 298   | 542   |
| >VHL-L118P- SYRGHLWLFF | 11  | >VHL-L118P- SYRGHLWPFIF | 8     | 3     |
| >VHL-L118P- SYRGHLWLFF | 7   | >VHL-L118P- SYRGHLWPFIF | 10    | 3     |
| >VHL-L118P- SYRGHLWLFF | 88  | >VHL-L118P- SYRGHLWPFIF | 382   | 294   |
| >VHL-L118P- SYRGHLWLFF | 265 | >VHL-L118P- SYRGHLWPFIF | 414   | 149   |
| >VHL-L118P- SYRGHLWLFF | 396 | >VHL-L118P- SYRGHLWPFIF | 604   | 208   |
| >VHL-L118P- SYRGHLWLFF | 23  | >VHL-L118P- SYRGHLWPFIF | 26    | 3     |
| >VHL-L118P- SYRGHLWL   | 262 | >VHL-L118P- SYRGHLWP    | 8822  | 8560  |
| >VHL-L118P- SYRGHLWLFF | 430 | >VHL-L118P- SYRGHLWPFIF | 1764  | 1334  |
| >VHL-L118P- SYRGHLWL   | 420 | >VHL-L118P- SYRGHLWP    | 1636  | 1216  |
| >VHL-L118P- SYRGHLWLF  | 277 | >VHL-L118P- SYRGHLWPF   | 260   | 17    |
| >VHL-L118P- SYRGHLWLFF | 523 | >VHL-L118P- SYRGHLWPFIF | 289   | 234   |
| >VHL-L118P- HSYRGHLWLI | 50  | >VHL-L118P- HSYRGHLWP   | 72    | 22    |
| >VHL-L118P- HSYRGHLWLI | 47  | >VHL-L118P- HSYRGHLWP   | 95    | 48    |
| >VHL-L118P- HSYRGHLWLI | 376 | >VHL-L118P- HSYRGHLWP   | 768   | 392   |
| >VHL-L118P- HSYRGHLWLI | 178 | >VHL-L118P- HSYRGHLWP   | 48    | 130   |
| >VHL-L118P- HSYRGHLWL  | 93  | >VHL-L118P- HSYRGHLWP   | 1568  | 1475  |
| >VHL-L118P- HSYRGHLWLI | 27  | >VHL-L118P- HSYRGHLWP   | 22    | 5     |
| >VHL-L118P- HSYRGHLWLI | 457 | >VHL-L118P- HSYRGHLWP   | 970   | 513   |
| >VHL-L118P- HSYRGHLWLI | 8   | >VHL-L118P- HSYRGHLWP   | 7     | 1     |
| >VHL-L118P- HSYRGHLWLI | 293 | >VHL-L118P- HSYRGHLWP   | 56    | 237   |
| >VHL-L118P- HSYRGHLWLI | 27  | >VHL-L118P- HSYRGHLWP   | 29    | 2     |
| >VHL-L118P- HSYRGHLWLI | 9   | >VHL-L118P- HSYRGHLWP   | 8     | 1     |
| >VHL-L118P- HSYRGHLWLI | 623 | >VHL-L118P- HSYRGHLWP   | 85    | 538   |
| >VHL-L118P- HSYRGHLWLI | 36  | >VHL-L118P- HSYRGHLWP   | 10    | 26    |
| >VHL-L118P- HSYRGHLWL  | 5   | >VHL-L118P- HSYRGHLWP   | 3793  | 3788  |
| >VHL-L118P- HSYRGHLWLI | 62  | >VHL-L118P- HSYRGHLWP   | 64    | 2     |
| >VHL-L118P- HSYRGHLWL  | 339 | >VHL-L118P- HSYRGHLWP   | 18379 | 18040 |
| >VHL-L118P- HSYRGHLWLI | 19  | >VHL-L118P- HSYRGHLWP   | 24    | 5     |
| >VHL-L118P- HSYRGHLWL  | 126 | >VHL-L118P- HSYRGHLWP   | 8972  | 8846  |
| >VHL-L118P- HSYRGHLWLI | 55  | >VHL-L118P- HSYRGHLWP   | 170   | 115   |
| >VHL-L118P- HSYRGHLWLI | 300 | >VHL-L118P- HSYRGHLWP   | 413   | 113   |
| >VHL-L118P- HSYRGHLWLI | 46  | >VHL-L118P- HSYRGHLWP   | 69    | 23    |
| >VHL-L118P- HSYRGHLWL  | 153 | >VHL-L118P- HSYRGHLWP   | 18802 | 18649 |
| >VHL-L118P- IHSYRGHLWL | 131 | >VHL-L118P- IHSYRGHLWF  | 383   | 252   |
| >VHL-L118P- IHSYRGHLWL | 91  | >VHL-L118P- IHSYRGHLWF  | 20    | 71    |

|                        |      |                        |       |       |
|------------------------|------|------------------------|-------|-------|
| >VHL-L118P- IHSYRGHLWL | 402  | >VHL-L118P- IHSYRGHLWF | 389   | 13    |
| >VHL-L128H- LLVNQTEL   | 146  | >VHL-L128H- HLVNQTEL   | 531   | 385   |
| >VHL-L128H- LLVNQTELFV | 17   | >VHL-L128H- HLVNQTELFV | 32    | 15    |
| >VHL-L128H- LLVNQTEL   | 11   | >VHL-L128H- HLVNQTEL   | 14    | 3     |
| >VHL-L128H- LLVNQTELF  | 408  | >VHL-L128H- HLVNQTELF  | 693   | 285   |
| >VHL-L128H- LLVNQTELFV | 15   | >VHL-L128H- HLVNQTELFV | 29    | 14    |
| >VHL-L128H- LLVNQTEL   | 32   | >VHL-L128H- HLVNQTEL   | 86    | 54    |
| >VHL-L128H- LLVNQTELFV | 28   | >VHL-L128H- HLVNQTELFV | 67    | 39    |
| >VHL-L128H- LLVNQTEL   | 155  | >VHL-L128H- HLVNQTEL   | 712   | 557   |
| >VHL-L128H- LLVNQTELFV | 61   | >VHL-L128H- HLVNQTELFV | 246   | 185   |
| >VHL-L128H- LLVNQTEL   | 20   | >VHL-L128H- HLVNQTEL   | 96    | 76    |
| >VHL-L128H- LLVNQTELFV | 3    | >VHL-L128H- HLVNQTELFV | 8     | 5     |
| >VHL-L128H- LLVNQTEL   | 29   | >VHL-L128H- HLVNQTEL   | 46    | 17    |
| >VHL-L128H- LLVNQTELFV | 6    | >VHL-L128H- HLVNQTELFV | 8     | 2     |
| >VHL-L128H- LLVNQTEL   | 65   | >VHL-L128H- HLVNQTEL   | 149   | 84    |
| >VHL-L128H- LLVNQTELFV | 7    | >VHL-L128H- HLVNQTELFV | 10    | 3     |
| >VHL-L128H- LLVNQTEL   | 279  | >VHL-L128H- HLVNQTEL   | 1368  | 1089  |
| >VHL-L128H- LLVNQTELFV | 9    | >VHL-L128H- HLVNQTELFV | 48    | 39    |
| >VHL-L128H- LLVNQTEL   | 3    | >VHL-L128H- HLVNQTEL   | 6     | 3     |
| >VHL-L128H- LLVNQTELFV | 2    | >VHL-L128H- HLVNQTELFV | 4     | 2     |
| >VHL-L128H- LLVNQTELF  | 645  | >VHL-L128H- HLVNQTELF  | 131   | 514   |
| >VHL-L128H- LLVNQTELFV | 1800 | >VHL-L128H- HLVNQTELFV | 434   | 1366  |
| >VHL-L128H- LLVNQTELF  | 85   | >VHL-L128H- HLVNQTELF  | 230   | 145   |
| >VHL-L128H- LLVNQTELF  | 991  | >VHL-L128H- HLVNQTELF  | 267   | 724   |
| >VHL-L128H- LLVNQTELF  | 77   | >VHL-L128H- HLVNQTELF  | 158   | 81    |
| >VHL-L128H- GLLVNQTEL  | 76   | >VHL-L128H- GHLVNQTEL  | 394   | 318   |
| >VHL-L128H- GLLVNQTEL  | 171  | >VHL-L128H- GHLVNQTEL  | 23368 | 23197 |
| >VHL-L128H- GLLVNQTELF | 31   | >VHL-L128H- GHLVNQTELF | 20556 | 20525 |
| >VHL-L128H- GLLVNQTEL  | 66   | >VHL-L128H- GHLVNQTEL  | 17637 | 17571 |
| >VHL-L128H- GLLVNQTELF | 83   | >VHL-L128H- GHLVNQTELF | 13776 | 13693 |
| >VHL-L128H- GLLVNQTELF | 237  | >VHL-L128H- GHLVNQTELF | 17718 | 17481 |
| >VHL-L128H- GLLVNQTELF | 81   | >VHL-L128H- GHLVNQTELF | 13046 | 12965 |
| >VHL-L128H- GLLVNQTEL  | 27   | >VHL-L128H- GHLVNQTEL  | 20653 | 20626 |
| >VHL-L128H- GLLVNQTELF | 3    | >VHL-L128H- GHLVNQTELF | 7374  | 7371  |
| >VHL-L128H- GLLVNQTEL  | 17   | >VHL-L128H- GHLVNQTEL  | 18595 | 18578 |
| >VHL-L128H- GLLVNQTELF | 4    | >VHL-L128H- GHLVNQTELF | 8941  | 8937  |
| >VHL-L128H- GLLVNQTEL  | 17   | >VHL-L128H- GHLVNQTEL  | 17219 | 17202 |
| >VHL-L128H- GLLVNQTELF | 4    | >VHL-L128H- GHLVNQTELF | 2651  | 2647  |
| >VHL-L128H- GLLVNQTEL  | 74   | >VHL-L128H- GHLVNQTEL  | 23790 | 23716 |
| >VHL-L128H- GLLVNQTELF | 5    | >VHL-L128H- GHLVNQTELF | 18222 | 18217 |
| >VHL-L128H- GLLVNQTEL  | 8    | >VHL-L128H- GHLVNQTEL  | 25830 | 25822 |
| >VHL-L128H- GLLVNQTELF | 4    | >VHL-L128H- GHLVNQTELF | 12328 | 12324 |
| >VHL-L128H- GLLVNQTELF | 484  | >VHL-L128H- GHLVNQTELF | 352   | 132   |

|                         |     |                         |      |      |
|-------------------------|-----|-------------------------|------|------|
| >VHL-L128H- HDGLLVNQTI  | 237 | >VHL-L128H- HDGHLVNQT   | 224  | 13   |
| >VHL-L128H- GTHDGLLV    | 122 | >VHL-L128H- GTHDGHLV    | 216  | 94   |
| >VHL-L128H- GTHDGLLV    | 193 | >VHL-L128H- GTHDGHLV    | 563  | 370  |
| >VHL-L128H- GTHDGLLV    | 78  | >VHL-L128H- GTHDGHLV    | 46   | 32   |
| >VHL-L128H- GTHDGLLV    | 204 | >VHL-L128H- GTHDGHLV    | 228  | 24   |
| >VHL-L128H- GTHDGLLV    | 46  | >VHL-L128H- GTHDGHLV    | 20   | 26   |
| >VHL-L128H- RDAGTHDGL   | 367 | >VHL-L128H- RDAGTHDGH   | 1427 | 1060 |
| >VHL-L128H- RDAGTHDGL   | 133 | >VHL-L128H- RDAGTHDGH   | 142  | 9    |
| >VHL-L128H- FRDAGTHDG   | 376 | >VHL-L128H- FRDAGTHDG   | 5909 | 5533 |
| >VHL-L128H- FRDAGTHDG   | 17  | >VHL-L128H- FRDAGTHDG   | 4079 | 4062 |
| >VHL-L128H- FRDAGTHDG   | 35  | >VHL-L128H- FRDAGTHDG   | 90   | 55   |
| >VHL-L128I-v LLVNQTEL   | 146 | >VHL-L128I-r ILVNQTEL   | 138  | 8    |
| >VHL-L128I-v LLVNQTELFV | 17  | >VHL-L128I-r ILVNQTELFV | 15   | 2    |
| >VHL-L128I-v LLVNQTEL   | 11  | >VHL-L128I-r ILVNQTEL   | 10   | 1    |
| >VHL-L128I-v LLVNQTELF  | 408 | >VHL-L128I-r ILVNQTELF  | 473  | 65   |
| >VHL-L128I-v LLVNQTELFV | 15  | >VHL-L128I-r ILVNQTELFV | 17   | 2    |
| >VHL-L128I-v LLVNQTEL   | 32  | >VHL-L128I-r ILVNQTEL   | 35   | 3    |
| >VHL-L128I-v LLVNQTELFV | 28  | >VHL-L128I-r ILVNQTELFV | 29   | 1    |
| >VHL-L128I-v LLVNQTEL   | 155 | >VHL-L128I-r ILVNQTEL   | 181  | 26   |
| >VHL-L128I-v LLVNQTELFV | 61  | >VHL-L128I-r ILVNQTELFV | 84   | 23   |
| >VHL-L128I-v LLVNQTEL   | 20  | >VHL-L128I-r ILVNQTEL   | 20   | 0    |
| >VHL-L128I-v LLVNQTELFV | 3   | >VHL-L128I-r ILVNQTELFV | 3    | 0    |
| >VHL-L128I-v LLVNQTEL   | 29  | >VHL-L128I-r ILVNQTEL   | 49   | 20   |
| >VHL-L128I-v LLVNQTELFV | 6   | >VHL-L128I-r ILVNQTELFV | 7    | 1    |
| >VHL-L128I-v LLVNQTEL   | 65  | >VHL-L128I-r ILVNQTEL   | 81   | 16   |
| >VHL-L128I-v LLVNQTELFV | 7   | >VHL-L128I-r ILVNQTELFV | 7    | 0    |
| >VHL-L128I-v LLVNQTEL   | 279 | >VHL-L128I-r ILVNQTEL   | 218  | 61   |
| >VHL-L128I-v LLVNQTELFV | 9   | >VHL-L128I-r ILVNQTELFV | 7    | 2    |
| >VHL-L128I-v LLVNQTEL   | 3   | >VHL-L128I-r ILVNQTEL   | 4    | 1    |
| >VHL-L128I-v LLVNQTELFV | 2   | >VHL-L128I-r ILVNQTELFV | 3    | 1    |
| >VHL-L128I-v LLVNQTELF  | 907 | >VHL-L128I-r ILVNQTELF  | 321  | 586  |
| >VHL-L128I-v LLVNQTELF  | 645 | >VHL-L128I-r ILVNQTELF  | 213  | 432  |
| >VHL-L128I-v LLVNQTELF  | 85  | >VHL-L128I-r ILVNQTELF  | 188  | 103  |
| >VHL-L128I-v LLVNQTELF  | 77  | >VHL-L128I-r ILVNQTELF  | 58   | 19   |
| >VHL-L128I-v GLLVNQTEL  | 76  | >VHL-L128I-r GILVNQTEL  | 125  | 49   |
| >VHL-L128I-v GLLVNQTEL  | 171 | >VHL-L128I-r GILVNQTEL  | 2970 | 2799 |
| >VHL-L128I-v GLLVNQTELF | 31  | >VHL-L128I-r GILVNQTELF | 324  | 293  |
| >VHL-L128I-v GLLVNQTEL  | 66  | >VHL-L128I-r GILVNQTEL  | 853  | 787  |
| >VHL-L128I-v GLLVNQTELF | 83  | >VHL-L128I-r GILVNQTELF | 727  | 644  |
| >VHL-L128I-v GLLVNQTELF | 237 | >VHL-L128I-r GILVNQTELF | 999  | 762  |
| >VHL-L128I-v GLLVNQTELF | 81  | >VHL-L128I-r GILVNQTELF | 89   | 8    |
| >VHL-L128I-v GLLVNQTEL  | 27  | >VHL-L128I-r GILVNQTEL  | 770  | 743  |
| >VHL-L128I-v GLLVNQTELF | 3   | >VHL-L128I-r GILVNQTELF | 28   | 25   |

|                         |      |                          |       |       |
|-------------------------|------|--------------------------|-------|-------|
| >VHL-L128I-v GLLVNQTEL  | 17   | >VHL-L128I-r GILVNQTEL   | 550   | 533   |
| >VHL-L128I-v GLLVNQTELF | 4    | >VHL-L128I-r GILVNQTELF\ | 46    | 42    |
| >VHL-L128I-v GLLVNQTEL  | 17   | >VHL-L128I-r GILVNQTEL   | 420   | 403   |
| >VHL-L128I-v GLLVNQTELF | 4    | >VHL-L128I-r GILVNQTELF\ | 12    | 8     |
| >VHL-L128I-v GLLVNQTEL  | 74   | >VHL-L128I-r GILVNQTEL   | 3109  | 3035  |
| >VHL-L128I-v GLLVNQTELF | 5    | >VHL-L128I-r GILVNQTELF\ | 129   | 124   |
| >VHL-L128I-v GLLVNQTEL  | 8    | >VHL-L128I-r GILVNQTEL   | 138   | 130   |
| >VHL-L128I-v GLLVNQTELF | 4    | >VHL-L128I-r GILVNQTELF\ | 24    | 20    |
| >VHL-L128I-v GLLVNQTELF | 484  | >VHL-L128I-r GILVNQTELF  | 1988  | 1504  |
| >VHL-L128I-v LFRDAGTHDC | 1415 | >VHL-L128I-r LFRDAGTHDC  | 493   | 922   |
| >VHL-L128I-v HDGLLVNQTI | 237  | >VHL-L128I-r HDGILVNQTE  | 248   | 11    |
| >VHL-L128I-v GTHDGLLV   | 122  | >VHL-L128I-r GTHDGILV    | 169   | 47    |
| >VHL-L128I-v GTHDGLLV   | 193  | >VHL-L128I-r GTHDGILV    | 216   | 23    |
| >VHL-L128I-v GTHDGLLV   | 78   | >VHL-L128I-r GTHDGILV    | 38    | 40    |
| >VHL-L128I-v GTHDGLLV   | 204  | >VHL-L128I-r GTHDGILV    | 125   | 79    |
| >VHL-L128I-v GTHDGLLV   | 46   | >VHL-L128I-r GTHDGILV    | 34    | 12    |
| >VHL-L128I-v RDAGTHDGL  | 367  | >VHL-L128I-r RDAGTHDGIL  | 581   | 214   |
| >VHL-L128I-v RDAGTHDGL  | 133  | >VHL-L128I-r RDAGTHDGIL  | 211   | 78    |
| >VHL-L128I-v FRDAGTHDG  | 376  | >VHL-L128I-r FRDAGTHDG   | 1357  | 981   |
| >VHL-L128I-v FRDAGTHDG  | 17   | >VHL-L128I-r FRDAGTHDG   | 123   | 106   |
| >VHL-L128I-v FRDAGTHDG  | 35   | >VHL-L128I-r FRDAGTHDG   | 20    | 15    |
| >VHL-L128P- LLVNQTEL    | 146  | >VHL-L128P- PLVNQTEL     | 8478  | 8332  |
| >VHL-L128P- LLVNQTELFV  | 17   | >VHL-L128P- PLVNQTELFV   | 1014  | 997   |
| >VHL-L128P- LLVNQTEL    | 11   | >VHL-L128P- PLVNQTEL     | 365   | 354   |
| >VHL-L128P- LLVNQTELF   | 408  | >VHL-L128P- PLVNQTELF    | 9128  | 8720  |
| >VHL-L128P- LLVNQTELFV  | 15   | >VHL-L128P- PLVNQTELFV   | 365   | 350   |
| >VHL-L128P- LLVNQTEL    | 32   | >VHL-L128P- PLVNQTEL     | 3278  | 3246  |
| >VHL-L128P- LLVNQTELFV  | 28   | >VHL-L128P- PLVNQTELFV   | 685   | 657   |
| >VHL-L128P- LLVNQTEL    | 155  | >VHL-L128P- PLVNQTEL     | 11625 | 11470 |
| >VHL-L128P- LLVNQTELFV  | 61   | >VHL-L128P- PLVNQTELFV   | 4614  | 4553  |
| >VHL-L128P- LLVNQTEL    | 20   | >VHL-L128P- PLVNQTEL     | 675   | 655   |
| >VHL-L128P- LLVNQTELFV  | 3    | >VHL-L128P- PLVNQTELFV   | 32    | 29    |
| >VHL-L128P- LLVNQTEL    | 29   | >VHL-L128P- PLVNQTEL     | 2798  | 2769  |
| >VHL-L128P- LLVNQTELFV  | 6    | >VHL-L128P- PLVNQTELFV   | 363   | 357   |
| >VHL-L128P- LLVNQTEL    | 65   | >VHL-L128P- PLVNQTEL     | 1005  | 940   |
| >VHL-L128P- LLVNQTELFV  | 7    | >VHL-L128P- PLVNQTELFV   | 24    | 17    |
| >VHL-L128P- LLVNQTEL    | 279  | >VHL-L128P- PLVNQTEL     | 3604  | 3325  |
| >VHL-L128P- LLVNQTELFV  | 9    | >VHL-L128P- PLVNQTELFV   | 106   | 97    |
| >VHL-L128P- LLVNQTEL    | 3    | >VHL-L128P- PLVNQTEL     | 36    | 33    |
| >VHL-L128P- LLVNQTELFV  | 2    | >VHL-L128P- PLVNQTELFV   | 14    | 12    |
| >VHL-L128P- LLVNQTELF   | 85   | >VHL-L128P- PLVNQTELF    | 6279  | 6194  |
| >VHL-L128P- LLVNQTELF   | 77   | >VHL-L128P- PLVNQTELF    | 1787  | 1710  |
| >VHL-L128P- GLLVNQTEL   | 76   | >VHL-L128P- GPLVNQTEL    | 395   | 319   |

|                        |       |                        |       |       |
|------------------------|-------|------------------------|-------|-------|
| >VHL-L128P- GLLVNQTEL  | 27516 | >VHL-L128P- GPLVNQTEL  | 120   | 27396 |
| >VHL-L128P- GLLVNQTELF | 29294 | >VHL-L128P- GPLVNQTELF | 420   | 28874 |
| >VHL-L128P- GLLVNQTEL  | 171   | >VHL-L128P- GPLVNQTEL  | 23688 | 23517 |
| >VHL-L128P- GLLVNQTELF | 31    | >VHL-L128P- GPLVNQTELF | 21294 | 21263 |
| >VHL-L128P- GLLVNQTEL  | 66    | >VHL-L128P- GPLVNQTEL  | 29344 | 29278 |
| >VHL-L128P- GLLVNQTELF | 83    | >VHL-L128P- GPLVNQTELF | 26504 | 26421 |
| >VHL-L128P- GLLVNQTELF | 237   | >VHL-L128P- GPLVNQTELF | 18843 | 18606 |
| >VHL-L128P- GLLVNQTELF | 81    | >VHL-L128P- GPLVNQTELF | 12705 | 12624 |
| >VHL-L128P- GLLVNQTEL  | 27    | >VHL-L128P- GPLVNQTEL  | 23376 | 23349 |
| >VHL-L128P- GLLVNQTELF | 3     | >VHL-L128P- GPLVNQTELF | 10536 | 10533 |
| >VHL-L128P- GLLVNQTEL  | 17    | >VHL-L128P- GPLVNQTEL  | 20259 | 20242 |
| >VHL-L128P- GLLVNQTELF | 4     | >VHL-L128P- GPLVNQTELF | 12205 | 12201 |
| >VHL-L128P- GLLVNQTEL  | 17    | >VHL-L128P- GPLVNQTEL  | 19776 | 19759 |
| >VHL-L128P- GLLVNQTELF | 4     | >VHL-L128P- GPLVNQTELF | 5222  | 5218  |
| >VHL-L128P- GLLVNQTEL  | 74    | >VHL-L128P- GPLVNQTEL  | 24105 | 24031 |
| >VHL-L128P- GLLVNQTELF | 5     | >VHL-L128P- GPLVNQTELF | 18744 | 18739 |
| >VHL-L128P- GLLVNQTEL  | 8     | >VHL-L128P- GPLVNQTEL  | 29243 | 29235 |
| >VHL-L128P- GLLVNQTELF | 4     | >VHL-L128P- GPLVNQTELF | 17865 | 17861 |
| >VHL-L128P- GLLVNQTEL  | 20920 | >VHL-L128P- GPLVNQTEL  | 444   | 20476 |
| >VHL-L128P- GLLVNQTELF | 484   | >VHL-L128P- GPLVNQTELF | 3040  | 2556  |
| >VHL-L128P- GLLVNQTELF | 21693 | >VHL-L128P- GPLVNQTELF | 186   | 21507 |
| >VHL-L128P- DGLLVNQTEL | 23040 | >VHL-L128P- DGPLVNQTEI | 213   | 22827 |
| >VHL-L128P- HDGLLVNQTI | 237   | >VHL-L128P- HDGPLVNQT  | 373   | 136   |
| >VHL-L128P- GTHDGLLV   | 122   | >VHL-L128P- GTHDGPLV   | 240   | 118   |
| >VHL-L128P- GTHDGLLV   | 193   | >VHL-L128P- GTHDGPLV   | 707   | 514   |
| >VHL-L128P- GTHDGLLV   | 78    | >VHL-L128P- GTHDGPLV   | 49    | 29    |
| >VHL-L128P- GTHDGLLV   | 204   | >VHL-L128P- GTHDGPLV   | 110   | 94    |
| >VHL-L128P- GTHDGLLV   | 46    | >VHL-L128P- GTHDGPLV   | 43    | 3     |
| >VHL-L128P- GTHDGLLV   | 611   | >VHL-L128P- GTHDGPLV   | 421   | 190   |
| >VHL-L128P- RDAGTHDGL  | 367   | >VHL-L128P- RDAGTHDGP  | 1042  | 675   |
| >VHL-L128P- RDAGTHDGL  | 133   | >VHL-L128P- RDAGTHDGP  | 264   | 131   |
| >VHL-L128P- FRDAGTHDG  | 376   | >VHL-L128P- FRDAGTHDG  | 17633 | 17257 |
| >VHL-L128P- FRDAGTHDG  | 17    | >VHL-L128P- FRDAGTHDG  | 6481  | 6464  |
| >VHL-L128P- FRDAGTHDG  | 35    | >VHL-L128P- FRDAGTHDG  | 14    | 21    |
| >VHL-L128R- LLVNQTEL   | 146   | >VHL-L128R- RLVNQTEL   | 218   | 72    |
| >VHL-L128R- LLVNQTELFV | 17    | >VHL-L128R- RLVNQTELFV | 19    | 2     |
| >VHL-L128R- LLVNQTEL   | 11    | >VHL-L128R- RLVNQTEL   | 16    | 5     |
| >VHL-L128R- LLVNQTELF  | 408   | >VHL-L128R- RLVNQTELF  | 1101  | 693   |
| >VHL-L128R- LLVNQTELFV | 15    | >VHL-L128R- RLVNQTELFV | 22    | 7     |
| >VHL-L128R- LLVNQTEL   | 32    | >VHL-L128R- RLVNQTEL   | 33    | 1     |
| >VHL-L128R- LLVNQTELFV | 28    | >VHL-L128R- RLVNQTELFV | 34    | 6     |
| >VHL-L128R- LLVNQTEL   | 155   | >VHL-L128R- RLVNQTEL   | 206   | 51    |
| >VHL-L128R- LLVNQTELFV | 61    | >VHL-L128R- RLVNQTELFV | 117   | 56    |

|                        |       |                        |       |       |
|------------------------|-------|------------------------|-------|-------|
| >VHL-L128R- LLVNQTEL   | 20    | >VHL-L128R- RLVNQTEL   | 20    | 0     |
| >VHL-L128R- LLVNQTELFV | 3     | >VHL-L128R- RLVNQTELFV | 3     | 0     |
| >VHL-L128R- LLVNQTEL   | 29    | >VHL-L128R- RLVNQTEL   | 38    | 9     |
| >VHL-L128R- LLVNQTELFV | 6     | >VHL-L128R- RLVNQTELFV | 6     | 0     |
| >VHL-L128R- LLVNQTEL   | 65    | >VHL-L128R- RLVNQTEL   | 68    | 3     |
| >VHL-L128R- LLVNQTELFV | 7     | >VHL-L128R- RLVNQTELFV | 8     | 1     |
| >VHL-L128R- LLVNQTEL   | 279   | >VHL-L128R- RLVNQTEL   | 851   | 572   |
| >VHL-L128R- LLVNQTELFV | 9     | >VHL-L128R- RLVNQTELFV | 26    | 17    |
| >VHL-L128R- LLVNQTEL   | 3     | >VHL-L128R- RLVNQTEL   | 7     | 4     |
| >VHL-L128R- LLVNQTELFV | 2     | >VHL-L128R- RLVNQTELFV | 4     | 2     |
| >VHL-L128R- LLVNQTELF  | 907   | >VHL-L128R- RLVNQTELF  | 445   | 462   |
| >VHL-L128R- LLVNQTEL   | 5948  | >VHL-L128R- RLVNQTEL   | 95    | 5853  |
| >VHL-L128R- LLVNQTELF  | 645   | >VHL-L128R- RLVNQTELF  | 17    | 628   |
| >VHL-L128R- LLVNQTELF  | 85    | >VHL-L128R- RLVNQTELF  | 86    | 1     |
| >VHL-L128R- LLVNQTEL   | 668   | >VHL-L128R- RLVNQTEL   | 369   | 299   |
| >VHL-L128R- LLVNQTELF  | 77    | >VHL-L128R- RLVNQTELF  | 51    | 26    |
| >VHL-L128R- GLLVNQTEL  | 76    | >VHL-L128R- GRLVNQTEL  | 1255  | 1179  |
| >VHL-L128R- GLLVNQTEL  | 171   | >VHL-L128R- GRLVNQTEL  | 23560 | 23389 |
| >VHL-L128R- GLLVNQTELF | 31    | >VHL-L128R- GRLVNQTELF | 20908 | 20877 |
| >VHL-L128R- GLLVNQTEL  | 66    | >VHL-L128R- GRLVNQTEL  | 22460 | 22394 |
| >VHL-L128R- GLLVNQTELF | 83    | >VHL-L128R- GRLVNQTELF | 17496 | 17413 |
| >VHL-L128R- GLLVNQTELF | 237   | >VHL-L128R- GRLVNQTELF | 17222 | 16985 |
| >VHL-L128R- GLLVNQTELF | 81    | >VHL-L128R- GRLVNQTELF | 11610 | 11529 |
| >VHL-L128R- GLLVNQTEL  | 27    | >VHL-L128R- GRLVNQTEL  | 21186 | 21159 |
| >VHL-L128R- GLLVNQTELF | 3     | >VHL-L128R- GRLVNQTELF | 7800  | 7797  |
| >VHL-L128R- GLLVNQTEL  | 17    | >VHL-L128R- GRLVNQTEL  | 18741 | 18724 |
| >VHL-L128R- GLLVNQTELF | 4     | >VHL-L128R- GRLVNQTELF | 8675  | 8671  |
| >VHL-L128R- GLLVNQTEL  | 17    | >VHL-L128R- GRLVNQTEL  | 17904 | 17887 |
| >VHL-L128R- GLLVNQTELF | 4     | >VHL-L128R- GRLVNQTELF | 3239  | 3235  |
| >VHL-L128R- GLLVNQTEL  | 74    | >VHL-L128R- GRLVNQTEL  | 23523 | 23449 |
| >VHL-L128R- GLLVNQTELF | 5     | >VHL-L128R- GRLVNQTELF | 17586 | 17581 |
| >VHL-L128R- GLLVNQTEL  | 8     | >VHL-L128R- GRLVNQTEL  | 24513 | 24505 |
| >VHL-L128R- GLLVNQTELF | 4     | >VHL-L128R- GRLVNQTELF | 11130 | 11126 |
| >VHL-L128R- GLLVNQTELF | 484   | >VHL-L128R- GRLVNQTELF | 140   | 344   |
| >VHL-L128R- GLLVNQTEL  | 19740 | >VHL-L128R- GRLVNQTEL  | 90    | 19650 |
| >VHL-L128R- GLLVNQTELF | 25429 | >VHL-L128R- GRLVNQTELF | 79    | 25350 |
| >VHL-L128R- GLLVNQTELF | 18908 | >VHL-L128R- GRLVNQTELF | 238   | 18670 |
| >VHL-L128R- GLLVNQTEL  | 9383  | >VHL-L128R- GRLVNQTEL  | 22    | 9361  |
| >VHL-L128R- GLLVNQTELF | 16395 | >VHL-L128R- GRLVNQTELF | 169   | 16226 |
| >VHL-L128R- LFRDAGTHDC | 18576 | >VHL-L128R- LFRDAGTHDC | 176   | 18400 |
| >VHL-L128R- LFRDAGTHDC | 22417 | >VHL-L128R- LFRDAGTHDC | 203   | 22214 |
| >VHL-L128R- HDGLLVNQTI | 237   | >VHL-L128R- HDGRLVNQT  | 328   | 91    |
| >VHL-L128R- GTHDGLLV   | 122   | >VHL-L128R- GTHDGRLV   | 729   | 607   |



|                                       |       |                                       |       |       |
|---------------------------------------|-------|---------------------------------------|-------|-------|
| >VHL-L128R- GTHDGLLV                  | 193   | >VHL-L128R- GTHDGRLV                  | 3001  | 2808  |
| >VHL-L128R- GTHDGLLV                  | 78    | >VHL-L128R- GTHDGRLV                  | 510   | 432   |
| >VHL-L128R- GTHDGLLV                  | 204   | >VHL-L128R- GTHDGRLV                  | 2509  | 2305  |
| >VHL-L128R- GTHDGLLV                  | 46    | >VHL-L128R- GTHDGRLV                  | 247   | 201   |
| >VHL-L128R- DAGTHDGL                  | 31842 | >VHL-L128R- DAGTHDGR                  | 142   | 31700 |
| >VHL-L128R- RDAGTHDGL                 | 367   | >VHL-L128R- RDAGTHDGR                 | 1177  | 810   |
| >VHL-L128R- RDAGTHDGL                 | 133   | >VHL-L128R- RDAGTHDGR                 | 320   | 187   |
| >VHL-L128R- FRDAGTHDG                 | 376   | >VHL-L128R- FRDAGTHDG                 | 1240  | 864   |
| >VHL-L128R- FRDAGTHDG                 | 17    | >VHL-L128R- FRDAGTHDG                 | 4740  | 4723  |
| >VHL-L128R- FRDAGTHDG                 | 35    | >VHL-L128R- FRDAGTHDG                 | 72    | 37    |
| >VHL-L135F- <sup>-1</sup> LFVPSLNV    | 638   | >VHL-L135F- <sup>-1</sup> FFVPSLNV    | 78    | 560   |
| >VHL-L135F- <sup>-1</sup> LFVPSLNV    | 1788  | >VHL-L135F- <sup>-1</sup> FFVPSLNV    | 147   | 1641  |
| >VHL-L135F- <sup>-1</sup> LFVPSLNV    | 352   | >VHL-L135F- <sup>-1</sup> FFVPSLNV    | 60    | 292   |
| >VHL-L135F- <sup>-1</sup> LFVPSLNV    | 483   | >VHL-L135F- <sup>-1</sup> FFVPSLNV    | 601   | 118   |
| >VHL-L135F- <sup>-1</sup> ELFVPSLNV   | 336   | >VHL-L135F- <sup>-1</sup> EFFVPSLNV   | 10377 | 10041 |
| >VHL-L135F- <sup>-1</sup> ELFVPSLNV   | 10    | >VHL-L135F- <sup>-1</sup> EFFVPSLNV   | 6517  | 6507  |
| >VHL-L135F- <sup>-1</sup> ELFVPSLNV   | 173   | >VHL-L135F- <sup>-1</sup> EFFVPSLNV   | 18740 | 18567 |
| >VHL-L135F- <sup>-1</sup> ELFVPSLNV   | 16    | >VHL-L135F- <sup>-1</sup> EFFVPSLNV   | 7382  | 7366  |
| >VHL-L135F- <sup>-1</sup> ELFVPSLNV   | 29    | >VHL-L135F- <sup>-1</sup> EFFVPSLNV   | 15357 | 15328 |
| >VHL-L135F- <sup>-1</sup> ELFVPSLNV   | 12    | >VHL-L135F- <sup>-1</sup> EFFVPSLNV   | 9851  | 9839  |
| >VHL-L135F- <sup>-1</sup> ELFVPSLNV   | 31    | >VHL-L135F- <sup>-1</sup> EFFVPSLNV   | 710   | 679   |
| >VHL-L135F- <sup>-1</sup> ELFVPSLNV   | 8     | >VHL-L135F- <sup>-1</sup> EFFVPSLNV   | 148   | 140   |
| >VHL-L135F- <sup>-1</sup> HDGLLVNQTI  | 237   | >VHL-L135F- <sup>-1</sup> HDGLLVNQTI  | 569   | 332   |
| >VHL-L135F- <sup>-1</sup> TELFVPSL    | 46    | >VHL-L135F- <sup>-1</sup> TEFFVPSL    | 69    | 23    |
| >VHL-L135F- <sup>-1</sup> TELFVPSL    | 98    | >VHL-L135F- <sup>-1</sup> TEFFVPSL    | 47    | 51    |
| >VHL-L135F- <sup>-1</sup> TELFVPSL    | 471   | >VHL-L135F- <sup>-1</sup> TEFFVPSL    | 212   | 259   |
| >VHL-L135F- <sup>-1</sup> TELFVPSL    | 54    | >VHL-L135F- <sup>-1</sup> TEFFVPSL    | 16    | 38    |
| >VHL-L135F- <sup>-1</sup> TELFVPSL    | 49    | >VHL-L135F- <sup>-1</sup> TEFFVPSL    | 28    | 21    |
| >VHL-L135F- <sup>-1</sup> TELFVPSLNV  | 352   | >VHL-L135F- <sup>-1</sup> TEFFVPSLNV  | 156   | 196   |
| >VHL-L135F- <sup>-1</sup> TELFVPSL    | 491   | >VHL-L135F- <sup>-1</sup> TEFFVPSL    | 203   | 288   |
| >VHL-L135F- <sup>-1</sup> TELFVPSLNV  | 1852  | >VHL-L135F- <sup>-1</sup> TEFFVPSLNV  | 492   | 1360  |
| >VHL-L135F- <sup>-1</sup> TELFVPSLNV  | 129   | >VHL-L135F- <sup>-1</sup> TEFFVPSLNV  | 117   | 12    |
| >VHL-L135F- <sup>-1</sup> QTELFVPSL   | 513   | >VHL-L135F- <sup>-1</sup> QTEFFVPSL   | 149   | 364   |
| >VHL-L135F- <sup>-1</sup> QTELFVPSLN' | 604   | >VHL-L135F- <sup>-1</sup> QTEFFVPSLN' | 164   | 440   |
| >VHL-L135F- <sup>-1</sup> QTELFVPSL   | 386   | >VHL-L135F- <sup>-1</sup> QTEFFVPSL   | 134   | 252   |
| >VHL-L135F- <sup>-1</sup> QTELFVPSLN' | 74    | >VHL-L135F- <sup>-1</sup> QTEFFVPSLN' | 34    | 40    |
| >VHL-L135F- <sup>-1</sup> QTELFVPSL   | 59    | >VHL-L135F- <sup>-1</sup> QTEFFVPSL   | 61    | 2     |
| >VHL-L135F- <sup>-1</sup> QTELFVPSL   | 80    | >VHL-L135F- <sup>-1</sup> QTEFFVPSL   | 117   | 37    |
| >VHL-L135F- <sup>-1</sup> QTELFVPSL   | 1188  | >VHL-L135F- <sup>-1</sup> QTEFFVPSL   | 410   | 778   |
| >VHL-L135F- <sup>-1</sup> NQTELFVPSL  | 527   | >VHL-L135F- <sup>-1</sup> NQTEFFVPSL  | 214   | 313   |
| >VHL-L135F- <sup>-1</sup> NQTELFVPS   | 68    | >VHL-L135F- <sup>-1</sup> NQTEFFVPS   | 41    | 27    |
| >VHL-L135F- <sup>-1</sup> NQTELFVPSL  | 231   | >VHL-L135F- <sup>-1</sup> NQTEFFVPSL  | 146   | 85    |
| >VHL-L135F- <sup>-1</sup> NQTELFVPSL  | 316   | >VHL-L135F- <sup>-1</sup> NQTEFFVPSL  | 111   | 205   |

|                         |      |                         |       |       |
|-------------------------|------|-------------------------|-------|-------|
| >VHL-L135F-1 NQTELFVPSL | 42   | >VHL-L135F-1 NQTEFFVPSL | 43    | 1     |
| >VHL-L135F-1 NQTELFVPSL | 513  | >VHL-L135F-1 NQTEFFVPSL | 349   | 164   |
| >VHL-L135F-1 LVNQTELFV  | 1621 | >VHL-L135F-1 LVNQTEFFV  | 178   | 1443  |
| >VHL-L135F-1 LVNQTELFV  | 493  | >VHL-L135F-1 LVNQTEFFV  | 57    | 436   |
| >VHL-L135F-1 LVNQTELFV  | 423  | >VHL-L135F-1 LVNQTEFFV  | 401   | 22    |
| >VHL-L135F-1 LVNQTELFV  | 137  | >VHL-L135F-1 LVNQTEFFV  | 16    | 121   |
| >VHL-L135F-1 LVNQTELFV  | 66   | >VHL-L135F-1 LVNQTEFFV  | 14    | 52    |
| >VHL-L135F-1 LVNQTELFV  | 1677 | >VHL-L135F-1 LVNQTEFFV  | 160   | 1517  |
| >VHL-L135F-1 LVNQTELFV  | 56   | >VHL-L135F-1 LVNQTEFFV  | 17    | 39    |
| >VHL-L135F-1 LVNQTELFV  | 529  | >VHL-L135F-1 LVNQTEFFV  | 15    | 514   |
| >VHL-L135F-1 LVNQTELFV  | 17   | >VHL-L135F-1 LVNQTEFFV  | 6     | 11    |
| >VHL-L135F-1 LVNQTELFV  | 2621 | >VHL-L135F-1 LVNQTEFFV  | 192   | 2429  |
| >VHL-L135F-1 LVNQTELFV  | 1642 | >VHL-L135F-1 LVNQTEFFV  | 213   | 1429  |
| >VHL-L135F-1 LVNQTELF   | 220  | >VHL-L135F-1 LVNQTEFF   | 191   | 29    |
| >VHL-L135F-1 LVNQTELF   | 74   | >VHL-L135F-1 LVNQTEFF   | 71    | 3     |
| >VHL-L135F-1 LLVNQTEL   | 146  | >VHL-L135F-1 LLVNQTEF   | 12956 | 12810 |
| >VHL-L135F-1 LLVNQTELFV | 17   | >VHL-L135F-1 LLVNQTEFFV | 11    | 6     |
| >VHL-L135F-1 LLVNQTEL   | 11   | >VHL-L135F-1 LLVNQTEF   | 813   | 802   |
| >VHL-L135F-1 LLVNQTELF  | 408  | >VHL-L135F-1 LLVNQTEFF  | 169   | 239   |
| >VHL-L135F-1 LLVNQTELFV | 15   | >VHL-L135F-1 LLVNQTEFFV | 11    | 4     |
| >VHL-L135F-1 LLVNQTEL   | 32   | >VHL-L135F-1 LLVNQTEF   | 3896  | 3864  |
| >VHL-L135F-1 LLVNQTELFV | 28   | >VHL-L135F-1 LLVNQTEFFV | 67    | 39    |
| >VHL-L135F-1 LLVNQTEL   | 155  | >VHL-L135F-1 LLVNQTEF   | 1445  | 1290  |
| >VHL-L135F-1 LLVNQTELF  | 1048 | >VHL-L135F-1 LLVNQTEFF  | 340   | 708   |
| >VHL-L135F-1 LLVNQTELFV | 61   | >VHL-L135F-1 LLVNQTEFFV | 50    | 11    |
| >VHL-L135F-1 LLVNQTEL   | 20   | >VHL-L135F-1 LLVNQTEF   | 2653  | 2633  |
| >VHL-L135F-1 LLVNQTELFV | 3    | >VHL-L135F-1 LLVNQTEFFV | 2     | 1     |
| >VHL-L135F-1 LLVNQTEL   | 29   | >VHL-L135F-1 LLVNQTEF   | 7586  | 7557  |
| >VHL-L135F-1 LLVNQTELFV | 6    | >VHL-L135F-1 LLVNQTEFFV | 3     | 3     |
| >VHL-L135F-1 LLVNQTEL   | 65   | >VHL-L135F-1 LLVNQTEF   | 12869 | 12804 |
| >VHL-L135F-1 LLVNQTELFV | 7    | >VHL-L135F-1 LLVNQTEFFV | 5     | 2     |
| >VHL-L135F-1 LLVNQTEL   | 279  | >VHL-L135F-1 LLVNQTEF   | 16185 | 15906 |
| >VHL-L135F-1 LLVNQTELFV | 9    | >VHL-L135F-1 LLVNQTEFFV | 3     | 6     |
| >VHL-L135F-1 LLVNQTEL   | 3    | >VHL-L135F-1 LLVNQTEF   | 986   | 983   |
| >VHL-L135F-1 LLVNQTELFV | 2    | >VHL-L135F-1 LLVNQTEFFV | 2     | 0     |
| >VHL-L135F-1 LLVNQTEL   | 1369 | >VHL-L135F-1 LLVNQTEF   | 64    | 1305  |
| >VHL-L135F-1 LLVNQTELF  | 85   | >VHL-L135F-1 LLVNQTEFF  | 61    | 24    |
| >VHL-L135F-1 LLVNQTEL   | 668  | >VHL-L135F-1 LLVNQTEF   | 24    | 644   |
| >VHL-L135F-1 LLVNQTELF  | 77   | >VHL-L135F-1 LLVNQTEFF  | 52    | 25    |
| >VHL-L135F-1 GLLVNQTEL  | 76   | >VHL-L135F-1 GLLVNQTEF  | 1870  | 1794  |
| >VHL-L135F-1 GLLVNQTEL  | 171  | >VHL-L135F-1 GLLVNQTEF  | 14821 | 14650 |
| >VHL-L135F-1 GLLVNQTELF | 31   | >VHL-L135F-1 GLLVNQTEFF | 16    | 15    |
| >VHL-L135F-1 GLLVNQTEL  | 66   | >VHL-L135F-1 GLLVNQTEF  | 6064  | 5998  |

|                                      |      |                                      |       |       |
|--------------------------------------|------|--------------------------------------|-------|-------|
| >VHL-L135F- <sup>-</sup> GLLVNQTELF  | 83   | >VHL-L135F- <sup>-</sup> GLLVNQTEFF  | 22    | 61    |
| >VHL-L135F- <sup>-</sup> GLLVNQTELF  | 237  | >VHL-L135F- <sup>-</sup> GLLVNQTEFF  | 197   | 40    |
| >VHL-L135F- <sup>-</sup> GLLVNQTELF  | 81   | >VHL-L135F- <sup>-</sup> GLLVNQTEFF  | 24    | 57    |
| >VHL-L135F- <sup>-</sup> GLLVNQTEL   | 27   | >VHL-L135F- <sup>-</sup> GLLVNQTEF   | 2676  | 2649  |
| >VHL-L135F- <sup>-</sup> GLLVNQTELF  | 3    | >VHL-L135F- <sup>-</sup> GLLVNQTEFF  | 2     | 1     |
| >VHL-L135F- <sup>-</sup> GLLVNQTEL   | 17   | >VHL-L135F- <sup>-</sup> GLLVNQTEF   | 2967  | 2950  |
| >VHL-L135F- <sup>-</sup> GLLVNQTELF  | 4    | >VHL-L135F- <sup>-</sup> GLLVNQTEFF  | 3     | 1     |
| >VHL-L135F- <sup>-</sup> GLLVNQTEL   | 17   | >VHL-L135F- <sup>-</sup> GLLVNQTEF   | 6053  | 6036  |
| >VHL-L135F- <sup>-</sup> GLLVNQTELF  | 4    | >VHL-L135F- <sup>-</sup> GLLVNQTEFF  | 4     | 0     |
| >VHL-L135F- <sup>-</sup> GLLVNQTEL   | 74   | >VHL-L135F- <sup>-</sup> GLLVNQTEF   | 16027 | 15953 |
| >VHL-L135F- <sup>-</sup> GLLVNQTELF  | 5    | >VHL-L135F- <sup>-</sup> GLLVNQTEFF  | 3     | 2     |
| >VHL-L135F- <sup>-</sup> GLLVNQTEL   | 8    | >VHL-L135F- <sup>-</sup> GLLVNQTEF   | 1783  | 1775  |
| >VHL-L135F- <sup>-</sup> GLLVNQTELF  | 4    | >VHL-L135F- <sup>-</sup> GLLVNQTEFF  | 3     | 1     |
| >VHL-L135F- <sup>-</sup> GLLVNQTEL   | 2507 | >VHL-L135F- <sup>-</sup> GLLVNQTEF   | 104   | 2403  |
| >VHL-L135F- <sup>-</sup> GLLVNQTELF  | 484  | >VHL-L135F- <sup>-</sup> GLLVNQTEFF  | 306   | 178   |
| >VHL-L153P- <sup>-</sup> LPVYTLKERCI | 224  | >VHL-L153P- <sup>-</sup> PPVYTLKERCI | 5414  | 5190  |
| >VHL-L153P- <sup>-</sup> LPVYTLKER   | 488  | >VHL-L153P- <sup>-</sup> PPVYTLKER   | 6373  | 5885  |
| >VHL-L153P- <sup>-</sup> LPVYTLKERC  | 337  | >VHL-L153P- <sup>-</sup> PPVYTLKERC  | 13268 | 12931 |
| >VHL-L153P- <sup>-</sup> TLPVYTLK    | 146  | >VHL-L153P- <sup>-</sup> TPPVYTLK    | 14748 | 14602 |
| >VHL-L153P- <sup>-</sup> TLPVYTLK    | 148  | >VHL-L153P- <sup>-</sup> TPPVYTLK    | 9135  | 8987  |
| >VHL-L153P- <sup>-</sup> TLPVYTLK    | 438  | >VHL-L153P- <sup>-</sup> TPPVYTLK    | 2776  | 2338  |
| >VHL-L153P- <sup>-</sup> TLPVYTLKER  | 247  | >VHL-L153P- <sup>-</sup> TPPVYTLKER  | 2797  | 2550  |
| >VHL-L153P- <sup>-</sup> ITLPVYTL    | 202  | >VHL-L153P- <sup>-</sup> ITPPVYTL    | 491   | 289   |
| >VHL-L153P- <sup>-</sup> ITLPVYTL    | 273  | >VHL-L153P- <sup>-</sup> ITPPVYTL    | 2396  | 2123  |
| >VHL-L153P- <sup>-</sup> ITLPVYTL    | 54   | >VHL-L153P- <sup>-</sup> ITPPVYTL    | 299   | 245   |
| >VHL-L153P- <sup>-</sup> ITLPVYTL    | 21   | >VHL-L153P- <sup>-</sup> ITPPVYTL    | 165   | 144   |
| >VHL-L153P- <sup>-</sup> ITLPVYTL    | 408  | >VHL-L153P- <sup>-</sup> ITPPVYTL    | 5297  | 4889  |
| >VHL-L153P- <sup>-</sup> ITLPVYTL    | 307  | >VHL-L153P- <sup>-</sup> ITPPVYTL    | 2943  | 2636  |
| >VHL-L153P- <sup>-</sup> ITLPVYTLK   | 50   | >VHL-L153P- <sup>-</sup> ITPPVYTLK   | 110   | 60    |
| >VHL-L153P- <sup>-</sup> ITLPVYTLK   | 9    | >VHL-L153P- <sup>-</sup> ITPPVYTLK   | 23    | 14    |
| >VHL-L153P- <sup>-</sup> ITLPVYTLKER | 348  | >VHL-L153P- <sup>-</sup> ITPPVYTLKER | 3146  | 2798  |
| >VHL-L153P- <sup>-</sup> ITLPVYTLK   | 45   | >VHL-L153P- <sup>-</sup> ITPPVYTLK   | 1224  | 1179  |
| >VHL-L153P- <sup>-</sup> ITLPVYTLK   | 30   | >VHL-L153P- <sup>-</sup> ITPPVYTLK   | 336   | 306   |
| >VHL-L153P- <sup>-</sup> ITLPVYTLKER | 20   | >VHL-L153P- <sup>-</sup> ITPPVYTLKER | 149   | 129   |
| >VHL-L153P- <sup>-</sup> ITLPVYTL    | 68   | >VHL-L153P- <sup>-</sup> ITPPVYTL    | 204   | 136   |
| >VHL-L153P- <sup>-</sup> ITLPVYTLK   | 351  | >VHL-L153P- <sup>-</sup> ITPPVYTLK   | 1942  | 1591  |
| >VHL-L153P- <sup>-</sup> ITLPVYTLKER | 115  | >VHL-L153P- <sup>-</sup> ITPPVYTLKER | 788   | 673   |
| >VHL-L153P- <sup>-</sup> ITLPVYTLK   | 21   | >VHL-L153P- <sup>-</sup> ITPPVYTLK   | 31    | 10    |
| >VHL-L153P- <sup>-</sup> ITLPVYTLKER | 40   | >VHL-L153P- <sup>-</sup> ITPPVYTLKER | 62    | 22    |
| >VHL-L153P- <sup>-</sup> ITLPVYTL    | 248  | >VHL-L153P- <sup>-</sup> ITPPVYTL    | 33    | 215   |
| >VHL-L153P- <sup>-</sup> ITLPVYTL    | 263  | >VHL-L153P- <sup>-</sup> ITPPVYTL    | 6567  | 6304  |
| >VHL-L153P- <sup>-</sup> ITLPVYTL    | 6    | >VHL-L153P- <sup>-</sup> ITPPVYTL    | 78    | 72    |
| >VHL-L153P- <sup>-</sup> ITLPVYTL    | 185  | >VHL-L153P- <sup>-</sup> ITPPVYTL    | 1963  | 1778  |

|                         |       |                         |      |       |
|-------------------------|-------|-------------------------|------|-------|
| >VHL-L153P- ITLPVYTL    | 70    | >VHL-L153P- ITPPVYTL    | 7000 | 6930  |
| >VHL-L153P- ITLPVYTL    | 143   | >VHL-L153P- ITPPVYTL    | 2    | 141   |
| >VHL-L153P- ITLPVYTLK   | 7014  | >VHL-L153P- ITPPVYTLK   | 8    | 7006  |
| >VHL-L153P- ITLPVYTLKE  | 11881 | >VHL-L153P- ITPPVYTLKE  | 24   | 11857 |
| >VHL-L153P- ITLPVYTLKER | 19009 | >VHL-L153P- ITPPVYTLKER | 155  | 18854 |
| >VHL-L153P- ITLPVYTLK   | 144   | >VHL-L153P- ITPPVYTLK   | 2602 | 2458  |
| >VHL-L153P- ITLPVYTLKER | 394   | >VHL-L153P- ITPPVYTLKER | 2544 | 2150  |
| >VHL-L153P- ITLPVYTL    | 96    | >VHL-L153P- ITPPVYTL    | 197  | 101   |
| >VHL-L153P- NITLPVYTL   | 1345  | >VHL-L153P- NITPPVYTL   | 311  | 1034  |
| >VHL-L153P- NITLPVYTL   | 2985  | >VHL-L153P- NITPPVYTL   | 357  | 2628  |
| >VHL-L153P- NITLPVYTL   | 1468  | >VHL-L153P- NITPPVYTL   | 145  | 1323  |
| >VHL-L153P- NITLPVYTL   | 1608  | >VHL-L153P- NITPPVYTL   | 356  | 1252  |
| >VHL-L153P- NITLPVYTL   | 3295  | >VHL-L153P- NITPPVYTL   | 188  | 3107  |
| >VHL-L153P- NITLPVYTLK  | 194   | >VHL-L153P- NITPPVYTLK  | 118  | 76    |
| >VHL-L153P- NITLPVYTLK  | 45    | >VHL-L153P- NITPPVYTLK  | 52   | 7     |
| >VHL-L153P- NITLPVYTLK  | 24    | >VHL-L153P- NITPPVYTLK  | 15   | 9     |
| >VHL-L153P- NITLPVYTL   | 70    | >VHL-L153P- NITPPVYTL   | 21   | 49    |
| >VHL-L153P- NITLPVYTL   | 700   | >VHL-L153P- NITPPVYTL   | 233  | 467   |
| >VHL-L153P- ANITLPVYTL  | 411   | >VHL-L153P- ANITPPVYTL  | 822  | 411   |
| >VHL-L153P- ANITLPVYTLK | 232   | >VHL-L153P- ANITPPVYTLK | 304  | 72    |
| >VHL-L153P- ANITLPVY    | 253   | >VHL-L153P- ANITPPVY    | 454  | 201   |
| >VHL-L153P- ANITLPVY    | 453   | >VHL-L153P- ANITPPVY    | 834  | 381   |
| >VHL-L153P- ANITLPVY    | 481   | >VHL-L153P- ANITPPVY    | 217  | 264   |
| >VHL-L153P- FANITLPVYTL | 351   | >VHL-L153P- FANITPPVYTL | 636  | 285   |
| >VHL-L153P- FANITLPV    | 136   | >VHL-L153P- FANITPPV    | 179  | 43    |
| >VHL-L153P- FANITLPV    | 82    | >VHL-L153P- FANITPPV    | 170  | 88    |
| >VHL-L153P- FANITLPVYTL | 156   | >VHL-L153P- FANITPPVYTL | 258  | 102   |
| >VHL-L153P- FANITLPV    | 19    | >VHL-L153P- FANITPPV    | 27   | 8     |
| >VHL-L153P- FANITLPVYTL | 482   | >VHL-L153P- FANITPPVYTL | 660  | 178   |
| >VHL-L153P- FANITLPV    | 12    | >VHL-L153P- FANITPPV    | 27   | 15    |
| >VHL-L153P- FANITLPVYT  | 292   | >VHL-L153P- FANITPPVYT  | 648  | 356   |
| >VHL-L153P- FANITLPVYTL | 203   | >VHL-L153P- FANITPPVYTL | 657  | 454   |
| >VHL-L153P- FANITLPV    | 31    | >VHL-L153P- FANITPPV    | 19   | 12    |
| >VHL-L153P- FANITLPVYTL | 87    | >VHL-L153P- FANITPPVYTL | 62   | 25    |
| >VHL-L153P- FANITLPV    | 114   | >VHL-L153P- FANITPPV    | 54   | 60    |
| >VHL-L153P- FANITLPV    | 25    | >VHL-L153P- FANITPPV    | 26   | 1     |
| >VHL-L153P- FANITLPVYTL | 407   | >VHL-L153P- FANITPPVYTL | 477  | 70    |
| >VHL-L153P- FANITLPVY   | 243   | >VHL-L153P- FANITPPVY   | 144  | 99    |
| >VHL-L153P- FANITLPVY   | 71    | >VHL-L153P- FANITPPVY   | 153  | 82    |
| >VHL-L153P- FANITLPV    | 96    | >VHL-L153P- FANITPPV    | 172  | 76    |
| >VHL-L153P- FANITLPV    | 24    | >VHL-L153P- FANITPPV    | 16   | 8     |
| >VHL-L153P- FANITLPVYTL | 413   | >VHL-L153P- FANITPPVYTL | 487  | 74    |
| >VHL-L153P- FANITLPVY   | 114   | >VHL-L153P- FANITPPVY   | 236  | 122   |

|                         |      |                         |       |       |
|-------------------------|------|-------------------------|-------|-------|
| >VHL-L153P- FANITLPVY   | 170  | >VHL-L153P- FANITPPVY   | 86    | 84    |
| >VHL-L153P- FANITLPVYTL | 859  | >VHL-L153P- FANITPPVYTL | 471   | 388   |
| >VHL-L153P- FANITLPVY   | 14   | >VHL-L153P- FANITPPVY   | 16    | 2     |
| >VHL-L153P- FANITLPVYTL | 63   | >VHL-L153P- FANITPPVYTL | 49    | 14    |
| >VHL-L153P- FANITLPVY   | 26   | >VHL-L153P- FANITPPVY   | 19    | 7     |
| >VHL-L153P- FANITLPVYTL | 278  | >VHL-L153P- FANITPPVYTL | 196   | 82    |
| >VHL-L153P- FANITLPVYTL | 806  | >VHL-L153P- FANITPPVYTL | 307   | 499   |
| >VHL-L153P- FANITLPVY   | 375  | >VHL-L153P- FANITPPVY   | 697   | 322   |
| >VHL-L153P- FANITLPVY   | 134  | >VHL-L153P- FANITPPVY   | 107   | 27    |
| >VHL-L153P- FANITLPVYTL | 160  | >VHL-L153P- FANITPPVYTL | 116   | 44    |
| >VHL-L153P- FANITLPV    | 89   | >VHL-L153P- FANITPPV    | 59    | 30    |
| >VHL-L153P- FANITLPVY   | 103  | >VHL-L153P- FANITPPVY   | 59    | 44    |
| >VHL-L153P- FANITLPVYTL | 603  | >VHL-L153P- FANITPPVYTL | 300   | 303   |
| >VHL-L153P- FANITLPVYTL | 310  | >VHL-L153P- FANITPPVYTL | 412   | 102   |
| >VHL-L153P- IFANITLPV   | 35   | >VHL-L153P- IFANITPPV   | 46    | 11    |
| >VHL-L153P- IFANITLPV   | 740  | >VHL-L153P- IFANITPPV   | 335   | 405   |
| >VHL-L153P- IFANITLPV   | 1181 | >VHL-L153P- IFANITPPV   | 448   | 733   |
| >VHL-L153P- IFANITLPV   | 643  | >VHL-L153P- IFANITPPV   | 113   | 530   |
| >VHL-L153P- IFANITLPV   | 2558 | >VHL-L153P- IFANITPPV   | 425   | 2133  |
| >VHL-L153P- IFANITLPV   | 638  | >VHL-L153P- IFANITPPV   | 175   | 463   |
| >VHL-L153P- IFANITLPV   | 478  | >VHL-L153P- IFANITPPV   | 2675  | 2197  |
| >VHL-L153P- IFANITLPVY  | 52   | >VHL-L153P- IFANITPPVY  | 30    | 22    |
| >VHL-L153P- IFANITLPVY  | 87   | >VHL-L153P- IFANITPPVY  | 162   | 75    |
| >VHL-L153P- IFANITLPVY  | 137  | >VHL-L153P- IFANITPPVY  | 311   | 174   |
| >VHL-L153P- PIFANITLPV  | 393  | >VHL-L153P- PIFANITPPV  | 854   | 461   |
| >VHL-L153P- PIFANITLPV  | 79   | >VHL-L153P- PIFANITPPV  | 200   | 121   |
| >VHL-L153P- PIFANITL    | 323  | >VHL-L153P- PIFANITP    | 21119 | 20796 |
| >VHL-L153P- PIFANITLPV  | 21   | >VHL-L153P- PIFANITPPV  | 14    | 7     |
| >VHL-L153P- PIFANITLPV  | 76   | >VHL-L153P- PIFANITPPV  | 30    | 46    |
| >VHL-L153P- PIFANITLPV  | 610  | >VHL-L153P- PIFANITPPV  | 161   | 449   |
| >VHL-L153P- PIFANITL    | 341  | >VHL-L153P- PIFANITP    | 30263 | 29922 |
| >VHL-L153P- PIFANITLPV  | 25   | >VHL-L153P- PIFANITPPV  | 17    | 8     |
| >VHL-L153P- PIFANITLPVY | 135  | >VHL-L153P- PIFANITPPVY | 137   | 2     |
| >VHL-L153P- PIFANITLPVY | 195  | >VHL-L153P- PIFANITPPVY | 304   | 109   |
| >VHL-L153P- PIFANITL    | 336  | >VHL-L153P- PIFANITP    | 12368 | 12032 |
| >VHL-L153P- PIFANITLPV  | 218  | >VHL-L153P- PIFANITPPV  | 60    | 158   |
| >VHL-L153P- QPIFANITL   | 10   | >VHL-L153P- QPIFANITP   | 30515 | 30505 |
| >VHL-L153P- QPIFANITLPV | 151  | >VHL-L153P- QPIFANITPPV | 280   | 129   |
| >VHL-L153P- QPIFANITLPV | 72   | >VHL-L153P- QPIFANITPPV | 39    | 33    |
| >VHL-L153P- QPIFANITL   | 393  | >VHL-L153P- QPIFANITP   | 25525 | 25132 |
| >VHL-L153P- QPIFANITLPV | 157  | >VHL-L153P- QPIFANITPPV | 342   | 185   |
| >VHL-L153P- QPIFANITL   | 51   | >VHL-L153P- QPIFANITP   | 1664  | 1613  |
| >VHL-L153P- QPIFANITLPV | 148  | >VHL-L153P- QPIFANITPPV | 175   | 27    |

|                         |       |                         |       |       |
|-------------------------|-------|-------------------------|-------|-------|
| >VHL-L153P- QPIFANITL   | 118   | >VHL-L153P- QPIFANITP   | 19370 | 19252 |
| >VHL-L153P- QPIFANITL   | 373   | >VHL-L153P- QPIFANITP   | 11103 | 10730 |
| >VHL-L153P- QPIFANITLPV | 204   | >VHL-L153P- QPIFANITPPV | 58    | 146   |
| >VHL-L153P- GQPIFANITL  | 236   | >VHL-L153P- GQPIFANITP  | 18097 | 17861 |
| >VHL-L153P- GQPIFANITL  | 430   | >VHL-L153P- GQPIFANITP  | 16389 | 15959 |
| >VHL-L158P- TLKERCLQV   | 403   | >VHL-L158P- TPKERCLQV   | 22698 | 22295 |
| >VHL-L158P- TLKERCLQV   | 328   | >VHL-L158P- TPKERCLQV   | 33585 | 33257 |
| >VHL-L158P- TLKERCLQV   | 7     | >VHL-L158P- TPKERCLQV   | 16508 | 16501 |
| >VHL-L158P- TLKERCLQVV  | 50    | >VHL-L158P- TPKERCLQVV  | 16171 | 16121 |
| >VHL-L158P- TLKERCLQV   | 186   | >VHL-L158P- TPKERCLQV   | 25151 | 24965 |
| >VHL-L158P- TLKERCLQVV  | 141   | >VHL-L158P- TPKERCLQVV  | 24732 | 24591 |
| >VHL-L158P- TLKERCLQVV  | 109   | >VHL-L158P- TPKERCLQVV  | 23532 | 23423 |
| >VHL-L158P- TLKERCLQV   | 308   | >VHL-L158P- TPKERCLQV   | 24859 | 24551 |
| >VHL-L158P- TLKERCLQVV  | 369   | >VHL-L158P- TPKERCLQVV  | 25290 | 24921 |
| >VHL-L158P- TLKERCLQV   | 3     | >VHL-L158P- TPKERCLQV   | 19435 | 19432 |
| >VHL-L158P- TLKERCLQVV  | 4     | >VHL-L158P- TPKERCLQVV  | 18498 | 18494 |
| >VHL-L158P- TLKERCLQVV  | 58    | >VHL-L158P- TPKERCLQVV  | 3497  | 3439  |
| >VHL-L158P- TLKERCLQVV  | 96    | >VHL-L158P- TPKERCLQVV  | 909   | 813   |
| >VHL-L158P- TLKERCLQVV  | 211   | >VHL-L158P- TPKERCLQVV  | 1553  | 1342  |
| >VHL-L158P- TLKERCLQVV  | 23893 | >VHL-L158P- TPKERCLQVV  | 152   | 23741 |
| >VHL-L158P- TLKERCLQV   | 84    | >VHL-L158P- TPKERCLQV   | 98    | 14    |
| >VHL-L158P- TLKERCLQVV  | 436   | >VHL-L158P- TPKERCLQVV  | 1320  | 884   |
| >VHL-L158P- FANITLPVYTL | 351   | >VHL-L158P- FANITLPVYTF | 23093 | 22742 |
| >VHL-L158P- FANITLPVYTL | 156   | >VHL-L158P- FANITLPVYTF | 8219  | 8063  |
| >VHL-L158P- FANITLPVYTL | 482   | >VHL-L158P- FANITLPVYTF | 16081 | 15599 |
| >VHL-L158P- FANITLPVYTL | 203   | >VHL-L158P- FANITLPVYTF | 13029 | 12826 |
| >VHL-L158P- FANITLPVYTL | 87    | >VHL-L158P- FANITLPVYTF | 14661 | 14574 |
| >VHL-L158P- FANITLPVYTL | 407   | >VHL-L158P- FANITLPVYTF | 29117 | 28710 |
| >VHL-L158P- FANITLPVYTL | 413   | >VHL-L158P- FANITLPVYTF | 15087 | 14674 |
| >VHL-L158P- FANITLPVYTL | 63    | >VHL-L158P- FANITLPVYTF | 17066 | 17003 |
| >VHL-L158P- FANITLPVYTL | 278   | >VHL-L158P- FANITLPVYTF | 10006 | 9728  |
| >VHL-L158P- FANITLPVYTL | 160   | >VHL-L158P- FANITLPVYTF | 7365  | 7205  |
| >VHL-L158P- FANITLPVYTL | 310   | >VHL-L158P- FANITLPVYTF | 17563 | 17253 |
| >VHL-L158P- YTLKERCLQV  | 93    | >VHL-L158P- YTPKERCLQV  | 1504  | 1411  |
| >VHL-L158P- YTLKERCLQV' | 308   | >VHL-L158P- YTPKERCLQV  | 2400  | 2092  |
| >VHL-L158P- YTLKERCLQV  | 127   | >VHL-L158P- YTPKERCLQV  | 458   | 331   |
| >VHL-L158P- YTLKERCLQV  | 39    | >VHL-L158P- YTPKERCLQV  | 103   | 64    |
| >VHL-L158P- YTLKERCLQV' | 83    | >VHL-L158P- YTPKERCLQV  | 313   | 230   |
| >VHL-L158P- YTLKERCLQV  | 32    | >VHL-L158P- YTPKERCLQV  | 247   | 215   |
| >VHL-L158P- YTLKERCLQV' | 28    | >VHL-L158P- YTPKERCLQV  | 198   | 170   |
| >VHL-L158P- YTLKERCLQV' | 95    | >VHL-L158P- YTPKERCLQV  | 1442  | 1347  |
| >VHL-L158P- YTLKERCLQV  | 31    | >VHL-L158P- YTPKERCLQV  | 341   | 310   |
| >VHL-L158P- YTLKERCLQV' | 40    | >VHL-L158P- YTPKERCLQV  | 393   | 353   |

|                         |       |                         |       |       |
|-------------------------|-------|-------------------------|-------|-------|
| >VHL-L158P-YTLKERCLQV'  | 416   | >VHL-L158P- YTPKERCLQV  | 6494  | 6078  |
| >VHL-L158P- YTLKERCLQV  | 19    | >VHL-L158P- YTPKERCLQV  | 34    | 15    |
| >VHL-L158P- YTLKERCLQV' | 21    | >VHL-L158P- YTPKERCLQV  | 35    | 14    |
| >VHL-L158P- YTLKERCLQV  | 1106  | >VHL-L158P- YTPKERCLQV  | 204   | 902   |
| >VHL-L158P- YTLKERCLQV' | 819   | >VHL-L158P- YTPKERCLQV  | 161   | 658   |
| >VHL-L158P- YTLKERCLQV  | 14    | >VHL-L158P- YTPKERCLQV  | 561   | 547   |
| >VHL-L158P- YTLKERCLQV' | 53    | >VHL-L158P- YTPKERCLQV  | 2598  | 2545  |
| >VHL-L158P- YTLKERCL    | 205   | >VHL-L158P- YTPKERCL    | 5156  | 4951  |
| >VHL-L158P- YTLKERCLQV  | 211   | >VHL-L158P- YTPKERCLQV  | 5907  | 5696  |
| >VHL-L158P- YTLKERCL    | 12341 | >VHL-L158P- YTPKERCL    | 47    | 12294 |
| >VHL-L158P- YTLKERCLQ   | 15422 | >VHL-L158P- YTPKERCLQ   | 64    | 15358 |
| >VHL-L158P- YTLKERCLQV  | 5384  | >VHL-L158P- YTPKERCLQV  | 9     | 5375  |
| >VHL-L158P- YTLKERCLQV' | 4361  | >VHL-L158P- YTPKERCLQV  | 6     | 4355  |
| >VHL-L158P- YTLKERCL    | 280   | >VHL-L158P- YTPKERCL    | 1299  | 1019  |
| >VHL-L158P- YTLKERCLQV' | 130   | >VHL-L158P- YTPKERCLQV  | 2342  | 2212  |
| >VHL-L158P- VYTLKERCLQ' | 2788  | >VHL-L158P- VYTPKERCLQ  | 412   | 2376  |
| >VHL-L158P- LPVYTLKERCI | 224   | >VHL-L158P- LPVYTPKERCI | 297   | 73    |
| >VHL-L158P- LPVYTLKERCI | 620   | >VHL-L158P- LPVYTPKERCI | 432   | 188   |
| >VHL-L158P- LPVYTLKER   | 488   | >VHL-L158P- LPVYTPKER   | 1386  | 898   |
| >VHL-L158P- LPVYTLKERC  | 337   | >VHL-L158P- LPVYTPKERC  | 917   | 580   |
| >VHL-L158P- TLPVYTLK    | 146   | >VHL-L158P- TLPVYTPK    | 280   | 134   |
| >VHL-L158P- TLPVYTLK    | 148   | >VHL-L158P- TLPVYTPK    | 192   | 44    |
| >VHL-L158P- TLPVYTLK    | 438   | >VHL-L158P- TLPVYTPK    | 885   | 447   |
| >VHL-L158P- TLPVYTLKER  | 247   | >VHL-L158P- TLPVYTPKER  | 509   | 262   |
| >VHL-L158P- ITLPVYTL    | 202   | >VHL-L158P- ITLPVYTP    | 25192 | 24990 |
| >VHL-L158P- ITLPVYTL    | 273   | >VHL-L158P- ITLPVYTP    | 20849 | 20576 |
| >VHL-L158P- ITLPVYTL    | 54    | >VHL-L158P- ITLPVYTP    | 8376  | 8322  |
| >VHL-L158P- ITLPVYTL    | 21    | >VHL-L158P- ITLPVYTP    | 8854  | 8833  |
| >VHL-L158P- ITLPVYTL    | 408   | >VHL-L158P- ITLPVYTP    | 15871 | 15463 |
| >VHL-L158P- ITLPVYTL    | 307   | >VHL-L158P- ITLPVYTP    | 19028 | 18721 |
| >VHL-L158P- ITLPVYTLK   | 50    | >VHL-L158P- ITLPVYTPK   | 67    | 17    |
| >VHL-L158P- ITLPVYTLK   | 9     | >VHL-L158P- ITLPVYTPK   | 8     | 1     |
| >VHL-L158P- ITLPVYTLKER | 348   | >VHL-L158P- ITLPVYTPKER | 359   | 11    |
| >VHL-L158P- ITLPVYTLK   | 45    | >VHL-L158P- ITLPVYTPK   | 21    | 24    |
| >VHL-L158P- ITLPVYTLK   | 30    | >VHL-L158P- ITLPVYTPK   | 23    | 7     |
| >VHL-L158P- ITLPVYTLKER | 20    | >VHL-L158P- ITLPVYTPKER | 33    | 13    |
| >VHL-L158P- ITLPVYTL    | 68    | >VHL-L158P- ITLPVYTP    | 2771  | 2703  |
| >VHL-L158P- ITLPVYTLK   | 351   | >VHL-L158P- ITLPVYTPK   | 239   | 112   |
| >VHL-L158P- ITLPVYTLKER | 115   | >VHL-L158P- ITLPVYTPKER | 157   | 42    |
| >VHL-L158P- ITLPVYTLK   | 21    | >VHL-L158P- ITLPVYTPK   | 56    | 35    |
| >VHL-L158P- ITLPVYTLKER | 40    | >VHL-L158P- ITLPVYTPKER | 52    | 12    |
| >VHL-L158P- ITLPVYTL    | 248   | >VHL-L158P- ITLPVYTP    | 15086 | 14838 |
| >VHL-L158P- ITLPVYTL    | 263   | >VHL-L158P- ITLPVYTP    | 11830 | 11567 |

|                         |     |                         |       |       |
|-------------------------|-----|-------------------------|-------|-------|
| >VHL-L158P- ITLPVYTL    | 6   | >VHL-L158P- ITLPVYTP    | 4773  | 4767  |
| >VHL-L158P- ITLPVYTL    | 185 | >VHL-L158P- ITLPVYTP    | 9924  | 9739  |
| >VHL-L158P- ITLPVYTL    | 70  | >VHL-L158P- ITLPVYTP    | 13033 | 12963 |
| >VHL-L158P- ITLPVYTL    | 143 | >VHL-L158P- ITLPVYTP    | 17370 | 17227 |
| >VHL-L158P- ITLPVYTLK   | 144 | >VHL-L158P- ITLPVYTPK   | 1719  | 1575  |
| >VHL-L158P- ITLPVYTLKER | 394 | >VHL-L158P- ITLPVYTPKER | 315   | 79    |
| >VHL-L158P- ITLPVYTL    | 96  | >VHL-L158P- ITLPVYTP    | 19777 | 19681 |
| >VHL-L158P- NITLPVYTLK  | 194 | >VHL-L158P- NITLPVYTPK  | 167   | 27    |
| >VHL-L158P- NITLPVYTLK  | 45  | >VHL-L158P- NITLPVYTPK  | 39    | 6     |
| >VHL-L158P- NITLPVYTLK  | 24  | >VHL-L158P- NITLPVYTPK  | 31    | 7     |
| >VHL-L158P- NITLPVYTL   | 70  | >VHL-L158P- NITLPVYTP   | 10780 | 10710 |
| >VHL-L158P- ANITLPVYTL  | 411 | >VHL-L158P- ANITLPVYTP  | 21352 | 20941 |
| >VHL-L158P- ANITLPVYTLK | 232 | >VHL-L158P- ANITLPVYTPK | 237   | 5     |
| >VHL-L158Q- TLKERCLQV   | 403 | >VHL-L158Q- TQKERCLQV   | 4595  | 4192  |
| >VHL-L158Q- TLKERCLQV   | 328 | >VHL-L158Q- TQKERCLQV   | 10577 | 10249 |
| >VHL-L158Q- TLKERCLQV   | 7   | >VHL-L158Q- TQKERCLQV   | 124   | 117   |
| >VHL-L158Q- TLKERCLQVV  | 50  | >VHL-L158Q- TQKERCLQV\  | 626   | 576   |
| >VHL-L158Q- TLKERCLQV   | 909 | >VHL-L158Q- TQKERCLQV   | 152   | 757   |
| >VHL-L158Q- TLKERCLQV   | 186 | >VHL-L158Q- TQKERCLQV   | 8013  | 7827  |
| >VHL-L158Q- TLKERCLQVV  | 141 | >VHL-L158Q- TQKERCLQV\  | 6805  | 6664  |
| >VHL-L158Q- TLKERCLQVV  | 109 | >VHL-L158Q- TQKERCLQV\  | 5800  | 5691  |
| >VHL-L158Q- TLKERCLQV   | 308 | >VHL-L158Q- TQKERCLQV   | 12900 | 12592 |
| >VHL-L158Q- TLKERCLQVV  | 369 | >VHL-L158Q- TQKERCLQV\  | 13826 | 13457 |
| >VHL-L158Q- TLKERCLQV   | 3   | >VHL-L158Q- TQKERCLQV   | 4451  | 4448  |
| >VHL-L158Q- TLKERCLQVV  | 4   | >VHL-L158Q- TQKERCLQV\  | 4137  | 4133  |
| >VHL-L158Q- TLKERCLQVV  | 58  | >VHL-L158Q- TQKERCLQV\  | 54    | 4     |
| >VHL-L158Q- TLKERCLQVV  | 96  | >VHL-L158Q- TQKERCLQV\  | 871   | 775   |
| >VHL-L158Q- TLKERCLQVV  | 211 | >VHL-L158Q- TQKERCLQV\  | 1716  | 1505  |
| >VHL-L158Q- TLKERCLQV   | 84  | >VHL-L158Q- TQKERCLQV   | 1899  | 1815  |
| >VHL-L158Q- TLKERCLQVV  | 436 | >VHL-L158Q- TQKERCLQV\  | 527   | 91    |
| >VHL-L158Q- FANITLPVYTL | 351 | >VHL-L158Q- FANITLPVYTC | 31413 | 31062 |
| >VHL-L158Q- FANITLPVYTL | 156 | >VHL-L158Q- FANITLPVYTC | 5341  | 5185  |
| >VHL-L158Q- FANITLPVYTL | 482 | >VHL-L158Q- FANITLPVYTC | 12234 | 11752 |
| >VHL-L158Q- FANITLPVYTL | 203 | >VHL-L158Q- FANITLPVYTC | 9826  | 9623  |
| >VHL-L158Q- FANITLPVYTL | 87  | >VHL-L158Q- FANITLPVYTC | 8204  | 8117  |
| >VHL-L158Q- FANITLPVYTL | 407 | >VHL-L158Q- FANITLPVYTC | 12213 | 11806 |
| >VHL-L158Q- FANITLPVYTL | 413 | >VHL-L158Q- FANITLPVYTC | 9972  | 9559  |
| >VHL-L158Q- FANITLPVYTL | 63  | >VHL-L158Q- FANITLPVYTC | 9605  | 9542  |
| >VHL-L158Q- FANITLPVYTL | 278 | >VHL-L158Q- FANITLPVYTC | 2561  | 2283  |
| >VHL-L158Q- FANITLPVYTL | 160 | >VHL-L158Q- FANITLPVYTC | 6774  | 6614  |
| >VHL-L158Q- FANITLPVYTL | 310 | >VHL-L158Q- FANITLPVYTC | 13811 | 13501 |
| >VHL-L158Q- YTLKERCLQV  | 93  | >VHL-L158Q- YTQKERCLQV  | 1819  | 1726  |
| >VHL-L158Q- YTLKERCLQV' | 308 | >VHL-L158Q- YTQKERCLQV  | 1364  | 1056  |



|                         |     |                         |       |       |
|-------------------------|-----|-------------------------|-------|-------|
| >VHL-L158Q- YTLKERCLQV  | 127 | >VHL-L158Q- YTQKERCLQV  | 626   | 499   |
| >VHL-L158Q- YTLKERCLQV  | 39  | >VHL-L158Q- YTQKERCLQV  | 222   | 183   |
| >VHL-L158Q- YTLKERCLQV' | 83  | >VHL-L158Q- YTQKERCLQV  | 523   | 440   |
| >VHL-L158Q- YTLKERCLQV  | 32  | >VHL-L158Q- YTQKERCLQV  | 325   | 293   |
| >VHL-L158Q- YTLKERCLQV' | 28  | >VHL-L158Q- YTQKERCLQV  | 253   | 225   |
| >VHL-L158Q- YTLKERCLQV' | 95  | >VHL-L158Q- YTQKERCLQV  | 315   | 220   |
| >VHL-L158Q- YTLKERCLQV  | 31  | >VHL-L158Q- YTQKERCLQV  | 785   | 754   |
| >VHL-L158Q- YTLKERCLQV' | 40  | >VHL-L158Q- YTQKERCLQV  | 929   | 889   |
| >VHL-L158Q- YTLKERCLQV' | 416 | >VHL-L158Q- YTQKERCLQV  | 3352  | 2936  |
| >VHL-L158Q- YTLKERCLQV  | 19  | >VHL-L158Q- YTQKERCLQV  | 31    | 12    |
| >VHL-L158Q- YTLKERCLQV' | 21  | >VHL-L158Q- YTQKERCLQV  | 35    | 14    |
| >VHL-L158Q- YTLKERCLQV  | 14  | >VHL-L158Q- YTQKERCLQV  | 307   | 293   |
| >VHL-L158Q- YTLKERCLQV' | 53  | >VHL-L158Q- YTQKERCLQV  | 1470  | 1417  |
| >VHL-L158Q- YTLKERCL    | 205 | >VHL-L158Q- YTQKERCL    | 859   | 654   |
| >VHL-L158Q- YTLKERCLQV  | 211 | >VHL-L158Q- YTQKERCLQV  | 780   | 569   |
| >VHL-L158Q- YTLKERCL    | 280 | >VHL-L158Q- YTQKERCL    | 295   | 15    |
| >VHL-L158Q- YTLKERCLQV' | 130 | >VHL-L158Q- YTQKERCLQV  | 217   | 87    |
| >VHL-L158Q- LPVYTLKERCL | 224 | >VHL-L158Q- LPVYTQKERC  | 232   | 8     |
| >VHL-L158Q- LPVYTLKERCL | 620 | >VHL-L158Q- LPVYTQKERC  | 460   | 160   |
| >VHL-L158Q- LPVYTLKER   | 488 | >VHL-L158Q- LPVYTQKER   | 1268  | 780   |
| >VHL-L158Q- LPVYTLKERC  | 337 | >VHL-L158Q- LPVYTQKERC  | 440   | 103   |
| >VHL-L158Q- TLPVYTLK    | 146 | >VHL-L158Q- TLPVYTQK    | 328   | 182   |
| >VHL-L158Q- TLPVYTLK    | 148 | >VHL-L158Q- TLPVYTQK    | 476   | 328   |
| >VHL-L158Q- TLPVYTLK    | 438 | >VHL-L158Q- TLPVYTQK    | 802   | 364   |
| >VHL-L158Q- TLPVYTLKER  | 247 | >VHL-L158Q- TLPVYTQKER  | 611   | 364   |
| >VHL-L158Q- ITLPVYTL    | 202 | >VHL-L158Q- ITLPVYTQ    | 19578 | 19376 |
| >VHL-L158Q- ITLPVYTL    | 273 | >VHL-L158Q- ITLPVYTQ    | 15850 | 15577 |
| >VHL-L158Q- ITLPVYTL    | 54  | >VHL-L158Q- ITLPVYTQ    | 5638  | 5584  |
| >VHL-L158Q- ITLPVYTL    | 21  | >VHL-L158Q- ITLPVYTQ    | 3809  | 3788  |
| >VHL-L158Q- ITLPVYTL    | 408 | >VHL-L158Q- ITLPVYTQ    | 15834 | 15426 |
| >VHL-L158Q- ITLPVYTL    | 307 | >VHL-L158Q- ITLPVYTQ    | 11055 | 10748 |
| >VHL-L158Q- ITLPVYTLK   | 50  | >VHL-L158Q- ITLPVYTQK   | 63    | 13    |
| >VHL-L158Q- ITLPVYTLK   | 9   | >VHL-L158Q- ITLPVYTQK   | 13    | 4     |
| >VHL-L158Q- ITLPVYTLKER | 348 | >VHL-L158Q- ITLPVYTQKEF | 579   | 231   |
| >VHL-L158Q- ITLPVYTLK   | 45  | >VHL-L158Q- ITLPVYTQK   | 86    | 41    |
| >VHL-L158Q- ITLPVYTLK   | 30  | >VHL-L158Q- ITLPVYTQK   | 55    | 25    |
| >VHL-L158Q- ITLPVYTLKER | 20  | >VHL-L158Q- ITLPVYTQKEF | 28    | 8     |
| >VHL-L158Q- ITLPVYTL    | 68  | >VHL-L158Q- ITLPVYTQ    | 1589  | 1521  |
| >VHL-L158Q- ITLPVYTLK   | 351 | >VHL-L158Q- ITLPVYTQK   | 692   | 341   |
| >VHL-L158Q- ITLPVYTLKER | 115 | >VHL-L158Q- ITLPVYTQKEF | 141   | 26    |
| >VHL-L158Q- ITLPVYTLK   | 21  | >VHL-L158Q- ITLPVYTQK   | 33    | 12    |
| >VHL-L158Q- ITLPVYTLKER | 40  | >VHL-L158Q- ITLPVYTQKEF | 37    | 3     |
| >VHL-L158Q- ITLPVYTL    | 248 | >VHL-L158Q- ITLPVYTQ    | 13532 | 13284 |

|                        |       |                        |       |       |
|------------------------|-------|------------------------|-------|-------|
| >VHL-L158Q-ITLPVYTL    | 263   | >VHL-L158Q-ITLPVYTQ    | 8037  | 7774  |
| >VHL-L158Q-ITLPVYTL    | 6     | >VHL-L158Q-ITLPVYTQ    | 628   | 622   |
| >VHL-L158Q-ITLPVYTL    | 185   | >VHL-L158Q-ITLPVYTQ    | 3045  | 2860  |
| >VHL-L158Q-ITLPVYTL    | 70    | >VHL-L158Q-ITLPVYTQ    | 7488  | 7418  |
| >VHL-L158Q-ITLPVYTL    | 143   | >VHL-L158Q-ITLPVYTQ    | 16885 | 16742 |
| >VHL-L158Q-ITLPVYTLK   | 144   | >VHL-L158Q-ITLPVYTQK   | 311   | 167   |
| >VHL-L158Q-ITLPVYTLKER | 394   | >VHL-L158Q-ITLPVYTQKEF | 348   | 46    |
| >VHL-L158Q-ITLPVYTL    | 96    | >VHL-L158Q-ITLPVYTQ    | 30263 | 30167 |
| >VHL-L158Q-NITLPVYTLK  | 194   | >VHL-L158Q-NITLPVYTQK  | 309   | 115   |
| >VHL-L158Q-NITLPVYTLK  | 45    | >VHL-L158Q-NITLPVYTQK  | 63    | 18    |
| >VHL-L158Q-NITLPVYTLK  | 24    | >VHL-L158Q-NITLPVYTQK  | 57    | 33    |
| >VHL-L158Q-NITLPVYTL   | 70    | >VHL-L158Q-NITLPVYTQ   | 9375  | 9305  |
| >VHL-L158Q-ANITLPVYTL  | 411   | >VHL-L158Q-ANITLPVYTQ  | 21739 | 21328 |
| >VHL-L158Q-ANITLPVYTLK | 232   | >VHL-L158Q-ANITLPVYTQK | 446   | 214   |
| >VHL-L158R-LKERCLQVV   | 714   | >VHL-L158R-RKERCLQVV   | 346   | 368   |
| >VHL-L158R-LKERCLQVVR  | 1919  | >VHL-L158R-RKERCLQVVF  | 265   | 1654  |
| >VHL-L158R-TLKERCLQV   | 403   | >VHL-L158R-TRKERCLQV   | 22280 | 21877 |
| >VHL-L158R-TLKERCLQV   | 328   | >VHL-L158R-TRKERCLQV   | 30673 | 30345 |
| >VHL-L158R-TLKERCLQV   | 7     | >VHL-L158R-TRKERCLQV   | 14296 | 14289 |
| >VHL-L158R-TLKERCLQVV  | 50    | >VHL-L158R-TRKERCLQVV  | 13541 | 13491 |
| >VHL-L158R-TLKERCLQV   | 186   | >VHL-L158R-TRKERCLQV   | 23810 | 23624 |
| >VHL-L158R-TLKERCLQVV  | 141   | >VHL-L158R-TRKERCLQVV  | 23110 | 22969 |
| >VHL-L158R-TLKERCLQVV  | 109   | >VHL-L158R-TRKERCLQVV  | 22908 | 22799 |
| >VHL-L158R-TLKERCLQV   | 308   | >VHL-L158R-TRKERCLQV   | 23922 | 23614 |
| >VHL-L158R-TLKERCLQVV  | 369   | >VHL-L158R-TRKERCLQVV  | 24367 | 23998 |
| >VHL-L158R-TLKERCLQV   | 3     | >VHL-L158R-TRKERCLQV   | 13312 | 13309 |
| >VHL-L158R-TLKERCLQVV  | 4     | >VHL-L158R-TRKERCLQVV  | 12522 | 12518 |
| >VHL-L158R-TLKERCLQVV  | 58    | >VHL-L158R-TRKERCLQVV  | 7417  | 7359  |
| >VHL-L158R-TLKERCLQVV  | 96    | >VHL-L158R-TRKERCLQVV  | 4391  | 4295  |
| >VHL-L158R-TLKERCLQVV  | 211   | >VHL-L158R-TRKERCLQVV  | 4564  | 4353  |
| >VHL-L158R-TLKERCLQV   | 84    | >VHL-L158R-TRKERCLQV   | 1190  | 1106  |
| >VHL-L158R-TLKERCLQVV  | 26534 | >VHL-L158R-TRKERCLQVV  | 456   | 26078 |
| >VHL-L158R-TLKERCLQVV  | 436   | >VHL-L158R-TRKERCLQVV  | 1218  | 782   |
| >VHL-L158R-FANITLPVYTL | 351   | >VHL-L158R-FANITLPVYTF | 35344 | 34993 |
| >VHL-L158R-FANITLPVYTL | 156   | >VHL-L158R-FANITLPVYTF | 13165 | 13009 |
| >VHL-L158R-FANITLPVYTL | 482   | >VHL-L158R-FANITLPVYTF | 19967 | 19485 |
| >VHL-L158R-FANITLPVYTL | 203   | >VHL-L158R-FANITLPVYTF | 19097 | 18894 |
| >VHL-L158R-FANITLPVYTL | 87    | >VHL-L158R-FANITLPVYTF | 18154 | 18067 |
| >VHL-L158R-FANITLPVYTL | 407   | >VHL-L158R-FANITLPVYTF | 27724 | 27317 |
| >VHL-L158R-FANITLPVYTL | 12832 | >VHL-L158R-FANITLPVYTF | 101   | 12731 |
| >VHL-L158R-FANITLPVYTL | 22510 | >VHL-L158R-FANITLPVYTF | 354   | 22156 |
| >VHL-L158R-FANITLPVYTL | 15998 | >VHL-L158R-FANITLPVYTF | 30    | 15968 |
| >VHL-L158R-FANITLPVYTL | 413   | >VHL-L158R-FANITLPVYTF | 16216 | 15803 |

|                         |      |                         |       |       |
|-------------------------|------|-------------------------|-------|-------|
| >VHL-L158R- FANITLPVYTL | 63   | >VHL-L158R- FANITLPVYTF | 12739 | 12676 |
| >VHL-L158R- FANITLPVYTL | 278  | >VHL-L158R- FANITLPVYTF | 8001  | 7723  |
| >VHL-L158R- FANITLPVYTL | 160  | >VHL-L158R- FANITLPVYTF | 11900 | 11740 |
| >VHL-L158R- FANITLPVYTL | 310  | >VHL-L158R- FANITLPVYTF | 19001 | 18691 |
| >VHL-L158R- YTLKERCLQV  | 93   | >VHL-L158R- YTRKERCLQV  | 3141  | 3048  |
| >VHL-L158R- YTLKERCLQV' | 308  | >VHL-L158R- YTRKERCLQV  | 8979  | 8671  |
| >VHL-L158R- YTLKERCLQV  | 127  | >VHL-L158R- YTRKERCLQV  | 542   | 415   |
| >VHL-L158R- YTLKERCLQV' | 734  | >VHL-L158R- YTRKERCLQV  | 465   | 269   |
| >VHL-L158R- YTLKERCLQV  | 39   | >VHL-L158R- YTRKERCLQV  | 767   | 728   |
| >VHL-L158R- YTLKERCLQV' | 83   | >VHL-L158R- YTRKERCLQV  | 1700  | 1617  |
| >VHL-L158R- YTLKERCLQV  | 32   | >VHL-L158R- YTRKERCLQV  | 1357  | 1325  |
| >VHL-L158R- YTLKERCLQV' | 28   | >VHL-L158R- YTRKERCLQV  | 1104  | 1076  |
| >VHL-L158R- YTLKERCLQV' | 95   | >VHL-L158R- YTRKERCLQV  | 3954  | 3859  |
| >VHL-L158R- YTLKERCLQV  | 31   | >VHL-L158R- YTRKERCLQV  | 3313  | 3282  |
| >VHL-L158R- YTLKERCLQV' | 40   | >VHL-L158R- YTRKERCLQV  | 3917  | 3877  |
| >VHL-L158R- YTLKERCLQV' | 416  | >VHL-L158R- YTRKERCLQV  | 13306 | 12890 |
| >VHL-L158R- YTLKERCLQV  | 19   | >VHL-L158R- YTRKERCLQV  | 57    | 38    |
| >VHL-L158R- YTLKERCLQV' | 21   | >VHL-L158R- YTRKERCLQV  | 62    | 41    |
| >VHL-L158R- YTLKERCLQ   | 5928 | >VHL-L158R- YTRKERCLQ   | 182   | 5746  |
| >VHL-L158R- YTLKERCLQV  | 4198 | >VHL-L158R- YTRKERCLQV  | 87    | 4111  |
| >VHL-L158R- YTLKERCLQV' | 5238 | >VHL-L158R- YTRKERCLQV  | 87    | 5151  |
| >VHL-L158R- YTLKERCLQV  | 14   | >VHL-L158R- YTRKERCLQV  | 1213  | 1199  |
| >VHL-L158R- YTLKERCLQV' | 53   | >VHL-L158R- YTRKERCLQV  | 4388  | 4335  |
| >VHL-L158R- YTLKERCL    | 1357 | >VHL-L158R- YTRKERCL    | 328   | 1029  |
| >VHL-L158R- YTLKERCL    | 205  | >VHL-L158R- YTRKERCL    | 86    | 119   |
| >VHL-L158R- YTLKERCLQV  | 211  | >VHL-L158R- YTRKERCLQV  | 82    | 129   |
| >VHL-L158R- YTLKERCLQV' | 973  | >VHL-L158R- YTRKERCLQV  | 383   | 590   |
| >VHL-L158R- YTLKERCL    | 280  | >VHL-L158R- YTRKERCL    | 214   | 66    |
| >VHL-L158R- YTLKERCLQV' | 130  | >VHL-L158R- YTRKERCLQV  | 47    | 83    |
| >VHL-L158R- LPVYTLKERCL | 224  | >VHL-L158R- LPVYTRKERCL | 76    | 148   |
| >VHL-L158R- LPVYTLKER   | 488  | >VHL-L158R- LPVYTRKER   | 1270  | 782   |
| >VHL-L158R- LPVYTLKERC  | 337  | >VHL-L158R- LPVYTRKERC  | 797   | 460   |
| >VHL-L158R- TLPVYTLK    | 146  | >VHL-L158R- TLPVYTRK    | 286   | 140   |
| >VHL-L158R- TLPVYTLK    | 148  | >VHL-L158R- TLPVYTRK    | 682   | 534   |
| >VHL-L158R- TLPVYTLKER  | 774  | >VHL-L158R- TLPVYTRKER  | 279   | 495   |
| >VHL-L158R- TLPVYTLK    | 438  | >VHL-L158R- TLPVYTRK    | 1414  | 976   |
| >VHL-L158R- TLPVYTLKER  | 247  | >VHL-L158R- TLPVYTRKER  | 510   | 263   |
| >VHL-L158R- ITLPVYTL    | 202  | >VHL-L158R- ITLPVYTR    | 15394 | 15192 |
| >VHL-L158R- ITLPVYTL    | 273  | >VHL-L158R- ITLPVYTR    | 21134 | 20861 |
| >VHL-L158R- ITLPVYTL    | 54   | >VHL-L158R- ITLPVYTR    | 17333 | 17279 |
| >VHL-L158R- ITLPVYTL    | 21   | >VHL-L158R- ITLPVYTR    | 12604 | 12583 |
| >VHL-L158R- ITLPVYTL    | 408  | >VHL-L158R- ITLPVYTR    | 21004 | 20596 |
| >VHL-L158R- ITLPVYTL    | 307  | >VHL-L158R- ITLPVYTR    | 20018 | 19711 |

|                         |       |                         |       |       |
|-------------------------|-------|-------------------------|-------|-------|
| >VHL-L158R- ITLPVYTLK   | 50    | >VHL-L158R- ITLPVYTRK   | 58    | 8     |
| >VHL-L158R- ITLPVYTL    | 16352 | >VHL-L158R- ITLPVYTR    | 63    | 16289 |
| >VHL-L158R- ITLPVYTLK   | 9     | >VHL-L158R- ITLPVYTRK   | 14    | 5     |
| >VHL-L158R- ITLPVYTLKER | 348   | >VHL-L158R- ITLPVYTRKER | 467   | 119   |
| >VHL-L158R- ITLPVYTLK   | 45    | >VHL-L158R- ITLPVYTRK   | 126   | 81    |
| >VHL-L158R- ITLPVYTL    | 3485  | >VHL-L158R- ITLPVYTR    | 11    | 3474  |
| >VHL-L158R- ITLPVYTLK   | 30    | >VHL-L158R- ITLPVYTRK   | 57    | 27    |
| >VHL-L158R- ITLPVYTLKER | 20    | >VHL-L158R- ITLPVYTRKER | 17    | 3     |
| >VHL-L158R- ITLPVYTL    | 68    | >VHL-L158R- ITLPVYTR    | 2362  | 2294  |
| >VHL-L158R- ITLPVYTL    | 7546  | >VHL-L158R- ITLPVYTR    | 30    | 7516  |
| >VHL-L158R- ITLPVYTLK   | 351   | >VHL-L158R- ITLPVYTRK   | 853   | 502   |
| >VHL-L158R- ITLPVYTLKER | 115   | >VHL-L158R- ITLPVYTRKER | 81    | 34    |
| >VHL-L158R- ITLPVYTL    | 12132 | >VHL-L158R- ITLPVYTR    | 18    | 12114 |
| >VHL-L158R- ITLPVYTLK   | 21    | >VHL-L158R- ITLPVYTRK   | 51    | 30    |
| >VHL-L158R- ITLPVYTLKER | 40    | >VHL-L158R- ITLPVYTRKER | 31    | 9     |
| >VHL-L158R- ITLPVYTL    | 248   | >VHL-L158R- ITLPVYTR    | 18970 | 18722 |
| >VHL-L158R- ITLPVYTL    | 263   | >VHL-L158R- ITLPVYTR    | 13600 | 13337 |
| >VHL-L158R- ITLPVYTL    | 6     | >VHL-L158R- ITLPVYTR    | 1689  | 1683  |
| >VHL-L158R- ITLPVYTL    | 185   | >VHL-L158R- ITLPVYTR    | 5918  | 5733  |
| >VHL-L158R- ITLPVYTL    | 70    | >VHL-L158R- ITLPVYTR    | 13530 | 13460 |
| >VHL-L158R- ITLPVYTL    | 143   | >VHL-L158R- ITLPVYTR    | 23443 | 23300 |
| >VHL-L158R- ITLPVYTLK   | 144   | >VHL-L158R- ITLPVYTRK   | 299   | 155   |
| >VHL-L158R- ITLPVYTL    | 3854  | >VHL-L158R- ITLPVYTR    | 223   | 3631  |
| >VHL-L158R- ITLPVYTLKER | 394   | >VHL-L158R- ITLPVYTRKER | 632   | 238   |
| >VHL-L158R- ITLPVYTL    | 31247 | >VHL-L158R- ITLPVYTR    | 193   | 31054 |
| >VHL-L158R- ITLPVYTL    | 96    | >VHL-L158R- ITLPVYTR    | 33201 | 33105 |
| >VHL-L158R- NITLPVYTLK  | 194   | >VHL-L158R- NITLPVYTRK  | 306   | 112   |
| >VHL-L158R- NITLPVYTLK  | 45    | >VHL-L158R- NITLPVYTRK  | 66    | 21    |
| >VHL-L158R- NITLPVYTL   | 16905 | >VHL-L158R- NITLPVYTR   | 408   | 16497 |
| >VHL-L158R- NITLPVYTL   | 15169 | >VHL-L158R- NITLPVYTR   | 47    | 15122 |
| >VHL-L158R- NITLPVYTL   | 14986 | >VHL-L158R- NITLPVYTR   | 35    | 14951 |
| >VHL-L158R- NITLPVYTLK  | 24    | >VHL-L158R- NITLPVYTRK  | 69    | 45    |
| >VHL-L158R- NITLPVYTL   | 70    | >VHL-L158R- NITLPVYTR   | 16359 | 16289 |
| >VHL-L158R- ANITLPVYTL  | 411   | >VHL-L158R- ANITLPVYTR  | 19602 | 19191 |
| >VHL-L158R- ANITLPVYTLK | 232   | >VHL-L158R- ANITLPVYTRK | 639   | 407   |
| >VHL-L158R- ANITLPVYTL  | 33097 | >VHL-L158R- ANITLPVYTR  | 455   | 32642 |
| >VHL-L158V- TLKERCLQV   | 403   | >VHL-L158V- TVKERCLQV   | 5572  | 5169  |
| >VHL-L158V- TLKERCLQV   | 328   | >VHL-L158V- TVKERCLQV   | 8789  | 8461  |
| >VHL-L158V- TLKERCLQV   | 7     | >VHL-L158V- TVKERCLQV   | 117   | 110   |
| >VHL-L158V- TLKERCLQVV  | 50    | >VHL-L158V- TVKERCLQVV  | 398   | 348   |
| >VHL-L158V- TLKERCLQV   | 186   | >VHL-L158V- TVKERCLQV   | 5726  | 5540  |
| >VHL-L158V- TLKERCLQVV  | 141   | >VHL-L158V- TVKERCLQVV  | 4967  | 4826  |
| >VHL-L158V- TLKERCLQVV  | 109   | >VHL-L158V- TVKERCLQVV  | 6147  | 6038  |

|                         |      |                         |       |       |
|-------------------------|------|-------------------------|-------|-------|
| >VHL-L158V- TLKERCLQV   | 308  | >VHL-L158V- TVKERCLQV   | 10323 | 10015 |
| >VHL-L158V- TLKERCLQVV  | 369  | >VHL-L158V- TVKERCLQVV  | 11112 | 10743 |
| >VHL-L158V- TLKERCLQV   | 3    | >VHL-L158V- TVKERCLQV   | 98    | 95    |
| >VHL-L158V- TLKERCLQVV  | 4    | >VHL-L158V- TVKERCLQVV  | 130   | 126   |
| >VHL-L158V- TLKERCLQVV  | 58   | >VHL-L158V- TVKERCLQVV  | 46    | 12    |
| >VHL-L158V- TLKERCLQVV  | 96   | >VHL-L158V- TVKERCLQVV  | 81    | 15    |
| >VHL-L158V- TLKERCLQVV  | 211  | >VHL-L158V- TVKERCLQVV  | 34    | 177   |
| >VHL-L158V- TLKERCLQV   | 84   | >VHL-L158V- TVKERCLQV   | 714   | 630   |
| >VHL-L158V- TLKERCLQVV  | 436  | >VHL-L158V- TVKERCLQVV  | 740   | 304   |
| >VHL-L158V- FANITLPVYTL | 351  | >VHL-L158V- FANITLPVYTV | 1100  | 749   |
| >VHL-L158V- FANITLPVYTL | 689  | >VHL-L158V- FANITLPVYTV | 142   | 547   |
| >VHL-L158V- FANITLPVYTL | 156  | >VHL-L158V- FANITLPVYTV | 117   | 39    |
| >VHL-L158V- FANITLPVYTL | 482  | >VHL-L158V- FANITLPVYTV | 36    | 446   |
| >VHL-L158V- FANITLPVYTL | 203  | >VHL-L158V- FANITLPVYTV | 24    | 179   |
| >VHL-L158V- FANITLPVYTL | 87   | >VHL-L158V- FANITLPVYTV | 8     | 79    |
| >VHL-L158V- FANITLPVYTL | 920  | >VHL-L158V- FANITLPVYTV | 69    | 851   |
| >VHL-L158V- FANITLPVYTL | 1120 | >VHL-L158V- FANITLPVYTV | 56    | 1064  |
| >VHL-L158V- FANITLPVYTL | 1706 | >VHL-L158V- FANITLPVYTV | 93    | 1613  |
| >VHL-L158V- FANITLPVYTL | 407  | >VHL-L158V- FANITLPVYTV | 13    | 394   |
| >VHL-L158V- FANITLPVYTL | 644  | >VHL-L158V- FANITLPVYTV | 132   | 512   |
| >VHL-L158V- FANITLPVYTL | 413  | >VHL-L158V- FANITLPVYTV | 40    | 373   |
| >VHL-L158V- FANITLPVYTL | 63   | >VHL-L158V- FANITLPVYTV | 1738  | 1675  |
| >VHL-L158V- FANITLPVYTL | 278  | >VHL-L158V- FANITLPVYTV | 2764  | 2486  |
| >VHL-L158V- FANITLPVYTL | 160  | >VHL-L158V- FANITLPVYTV | 596   | 436   |
| >VHL-L158V- FANITLPVYTL | 3501 | >VHL-L158V- FANITLPVYTV | 50    | 3451  |
| >VHL-L158V- FANITLPVYTL | 310  | >VHL-L158V- FANITLPVYTV | 1498  | 1188  |
| >VHL-L158V- YTLKERCLQV  | 93   | >VHL-L158V- YTVKERCLQV  | 593   | 500   |
| >VHL-L158V- YTLKERCLQV' | 308  | >VHL-L158V- YTVKERCLQV  | 1433  | 1125  |
| >VHL-L158V- YTLKERCLQV  | 127  | >VHL-L158V- YTVKERCLQV  | 194   | 67    |
| >VHL-L158V- YTLKERCLQV' | 734  | >VHL-L158V- YTVKERCLQV  | 263   | 471   |
| >VHL-L158V- YTLKERCLQV  | 39   | >VHL-L158V- YTVKERCLQV  | 64    | 25    |
| >VHL-L158V- YTLKERCLQV' | 83   | >VHL-L158V- YTVKERCLQV  | 111   | 28    |
| >VHL-L158V- YTLKERCLQV  | 32   | >VHL-L158V- YTVKERCLQV  | 216   | 184   |
| >VHL-L158V- YTLKERCLQV' | 28   | >VHL-L158V- YTVKERCLQV  | 175   | 147   |
| >VHL-L158V- YTLKERCLQV' | 95   | >VHL-L158V- YTVKERCLQV  | 496   | 401   |
| >VHL-L158V- YTLKERCLQV  | 31   | >VHL-L158V- YTVKERCLQV  | 345   | 314   |
| >VHL-L158V- YTLKERCLQV' | 40   | >VHL-L158V- YTVKERCLQV  | 433   | 393   |
| >VHL-L158V- YTLKERCLQV' | 416  | >VHL-L158V- YTVKERCLQV  | 5124  | 4708  |
| >VHL-L158V- YTLKERCLQV  | 19   | >VHL-L158V- YTVKERCLQV  | 33    | 14    |
| >VHL-L158V- YTLKERCLQV' | 21   | >VHL-L158V- YTVKERCLQV  | 36    | 15    |
| >VHL-L158V- YTLKERCL    | 2700 | >VHL-L158V- YTVKERCL    | 238   | 2462  |
| >VHL-L158V- YTLKERCLQ   | 1975 | >VHL-L158V- YTVKERCLQ   | 465   | 1510  |
| >VHL-L158V- YTLKERCLQV  | 1106 | >VHL-L158V- YTVKERCLQV  | 191   | 915   |

|                         |      |                         |      |      |
|-------------------------|------|-------------------------|------|------|
| >VHL-L158V- YTLKERCLQV' | 819  | >VHL-L158V- YTVKERCLQV  | 144  | 675  |
| >VHL-L158V- YTLKERCLQV  | 14   | >VHL-L158V- YTVKERCLQV  | 53   | 39   |
| >VHL-L158V- YTLKERCLQV' | 53   | >VHL-L158V- YTVKERCLQV  | 262  | 209  |
| >VHL-L158V- YTLKERCL    | 205  | >VHL-L158V- YTVKERCL    | 151  | 54   |
| >VHL-L158V- YTLKERCLQV  | 211  | >VHL-L158V- YTVKERCLQV  | 155  | 56   |
| >VHL-L158V- YTLKERCL    | 280  | >VHL-L158V- YTVKERCL    | 173  | 107  |
| >VHL-L158V- YTLKERCLQV' | 130  | >VHL-L158V- YTVKERCLQV  | 169  | 39   |
| >VHL-L158V- LPVYTLKERCL | 224  | >VHL-L158V- LPVYTVKERC  | 297  | 73   |
| >VHL-L158V- LPVYTLKERCL | 620  | >VHL-L158V- LPVYTVKERC  | 432  | 188  |
| >VHL-L158V- LPVYTLKER   | 488  | >VHL-L158V- LPVYTVKER   | 1046 | 558  |
| >VHL-L158V- LPVYTLKERC  | 337  | >VHL-L158V- LPVYTVKERC  | 209  | 128  |
| >VHL-L158V- LPVYTLKERCL | 611  | >VHL-L158V- LPVYTVKERC  | 249  | 362  |
| >VHL-L158V- TLPVYTLK    | 146  | >VHL-L158V- TLPVYTVK    | 400  | 254  |
| >VHL-L158V- TLPVYTLK    | 148  | >VHL-L158V- TLPVYTVK    | 600  | 452  |
| >VHL-L158V- TLPVYTLK    | 438  | >VHL-L158V- TLPVYTVK    | 936  | 498  |
| >VHL-L158V- TLPVYTLKER  | 247  | >VHL-L158V- TLPVYTVKER  | 330  | 83   |
| >VHL-L158V- ITLPVYTL    | 202  | >VHL-L158V- ITLPVYTV    | 1370 | 1168 |
| >VHL-L158V- ITLPVYTL    | 273  | >VHL-L158V- ITLPVYTV    | 58   | 215  |
| >VHL-L158V- ITLPVYTL    | 614  | >VHL-L158V- ITLPVYTV    | 310  | 304  |
| >VHL-L158V- ITLPVYTL    | 2623 | >VHL-L158V- ITLPVYTV    | 372  | 2251 |
| >VHL-L158V- ITLPVYTL    | 54   | >VHL-L158V- ITLPVYTV    | 12   | 42   |
| >VHL-L158V- ITLPVYTL    | 21   | >VHL-L158V- ITLPVYTV    | 4    | 17   |
| >VHL-L158V- ITLPVYTL    | 408  | >VHL-L158V- ITLPVYTV    | 45   | 363  |
| >VHL-L158V- ITLPVYTL    | 307  | >VHL-L158V- ITLPVYTV    | 19   | 288  |
| >VHL-L158V- ITLPVYTL    | 958  | >VHL-L158V- ITLPVYTV    | 72   | 886  |
| >VHL-L158V- ITLPVYTL    | 841  | >VHL-L158V- ITLPVYTV    | 22   | 819  |
| >VHL-L158V- ITLPVYTLK   | 50   | >VHL-L158V- ITLPVYTVK   | 87   | 37   |
| >VHL-L158V- ITLPVYTLK   | 9    | >VHL-L158V- ITLPVYTVK   | 13   | 4    |
| >VHL-L158V- ITLPVYTLKER | 348  | >VHL-L158V- ITLPVYTVKER | 394  | 46   |
| >VHL-L158V- ITLPVYTLK   | 45   | >VHL-L158V- ITLPVYTVK   | 82   | 37   |
| >VHL-L158V- ITLPVYTLK   | 30   | >VHL-L158V- ITLPVYTVK   | 65   | 35   |
| >VHL-L158V- ITLPVYTLKER | 20   | >VHL-L158V- ITLPVYTVKER | 26   | 6    |
| >VHL-L158V- ITLPVYTL    | 68   | >VHL-L158V- ITLPVYTV    | 349  | 281  |
| >VHL-L158V- ITLPVYTLK   | 351  | >VHL-L158V- ITLPVYTVK   | 1016 | 665  |
| >VHL-L158V- ITLPVYTLKER | 115  | >VHL-L158V- ITLPVYTVKER | 167  | 52   |
| >VHL-L158V- ITLPVYTLK   | 21   | >VHL-L158V- ITLPVYTVK   | 69   | 48   |
| >VHL-L158V- ITLPVYTLKER | 40   | >VHL-L158V- ITLPVYTVKER | 35   | 5    |
| >VHL-L158V- ITLPVYTL    | 248  | >VHL-L158V- ITLPVYTV    | 26   | 222  |
| >VHL-L158V- ITLPVYTL    | 263  | >VHL-L158V- ITLPVYTV    | 28   | 235  |
| >VHL-L158V- ITLPVYTL    | 6    | >VHL-L158V- ITLPVYTV    | 51   | 45   |
| >VHL-L158V- ITLPVYTL    | 185  | >VHL-L158V- ITLPVYTV    | 1342 | 1157 |
| >VHL-L158V- ITLPVYTL    | 70   | >VHL-L158V- ITLPVYTV    | 1749 | 1679 |
| >VHL-L158V- ITLPVYTL    | 143  | >VHL-L158V- ITLPVYTV    | 1104 | 961  |

|                         |      |                         |       |       |
|-------------------------|------|-------------------------|-------|-------|
| >VHL-L158V- ITLPVYTLK   | 144  | >VHL-L158V- ITLPVYTVK   | 200   | 56    |
| >VHL-L158V- ITLPVYTLKER | 394  | >VHL-L158V- ITLPVYTVKER | 390   | 4     |
| >VHL-L158V- ITLPVYTL    | 96   | >VHL-L158V- ITLPVYTV    | 546   | 450   |
| >VHL-L158V- NITLPVYTL   | 2887 | >VHL-L158V- NITLPVYTV   | 426   | 2461  |
| >VHL-L158V- NITLPVYTL   | 2985 | >VHL-L158V- NITLPVYTV   | 408   | 2577  |
| >VHL-L158V- NITLPVYTL   | 1468 | >VHL-L158V- NITLPVYTV   | 50    | 1418  |
| >VHL-L158V- NITLPVYTL   | 1608 | >VHL-L158V- NITLPVYTV   | 107   | 1501  |
| >VHL-L158V- NITLPVYTL   | 6078 | >VHL-L158V- NITLPVYTV   | 263   | 5815  |
| >VHL-L158V- NITLPVYTL   | 2431 | >VHL-L158V- NITLPVYTV   | 73    | 2358  |
| >VHL-L158V- NITLPVYTL   | 3295 | >VHL-L158V- NITLPVYTV   | 74    | 3221  |
| >VHL-L158V- NITLPVYTLK  | 194  | >VHL-L158V- NITLPVYTVK  | 467   | 273   |
| >VHL-L158V- NITLPVYTLK  | 45   | >VHL-L158V- NITLPVYTVK  | 82    | 37    |
| >VHL-L158V- NITLPVYTLK  | 24   | >VHL-L158V- NITLPVYTVK  | 88    | 64    |
| >VHL-L158V- NITLPVYTL   | 70   | >VHL-L158V- NITLPVYTV   | 14    | 56    |
| >VHL-L158V- NITLPVYTL   | 700  | >VHL-L158V- NITLPVYTV   | 56    | 644   |
| >VHL-L158V- ANITLPVYTL  | 411  | >VHL-L158V- ANITLPVYTV  | 379   | 32    |
| >VHL-L158V- ANITLPVYTL  | 1968 | >VHL-L158V- ANITLPVYTV  | 359   | 1609  |
| >VHL-L158V- ANITLPVYTLK | 232  | >VHL-L158V- ANITLPVYTVK | 900   | 668   |
| >VHL-L163H- LQVVRSLV    | 147  | >VHL-L163H- HQVVRSLV    | 392   | 245   |
| >VHL-L163H- LQVVRSLV    | 14   | >VHL-L163H- HQVVRSLV    | 33    | 19    |
| >VHL-L163H- LQVVRSLVK   | 660  | >VHL-L163H- HQVVRSLVK   | 289   | 371   |
| >VHL-L163H- LQVVRSLVK   | 1367 | >VHL-L163H- HQVVRSLVK   | 138   | 1229  |
| >VHL-L163H- LQVVRSLV    | 214  | >VHL-L163H- HQVVRSLV    | 432   | 218   |
| >VHL-L163H- CLQVVRSLV   | 325  | >VHL-L163H- CHQVVRSLV   | 15723 | 15398 |
| >VHL-L163H- CLQVVRSLV   | 456  | >VHL-L163H- CHQVVRSLV   | 26616 | 26160 |
| >VHL-L163H- CLQVVRSL    | 274  | >VHL-L163H- CHQVVRSL    | 34521 | 34247 |
| >VHL-L163H- CLQVVRSLV   | 16   | >VHL-L163H- CHQVVRSLV   | 27382 | 27366 |
| >VHL-L163H- CLQVVRSLVK  | 97   | >VHL-L163H- CHQVVRSLVK  | 15752 | 15655 |
| >VHL-L163H- CLQVVRSLVK  | 305  | >VHL-L163H- CHQVVRSLVK  | 21914 | 21609 |
| >VHL-L163H- LPVYTLKERCL | 224  | >VHL-L163H- LPVYTLKERCL | 15965 | 15741 |
| >VHL-L163H- RCLQVVRSLV  | 392  | >VHL-L163H- RCHQVVRSLV  | 1456  | 1064  |
| >VHL-L163H- RCLQVVRSLV  | 2907 | >VHL-L163H- RCHQVVRSLV  | 350   | 2557  |
| >VHL-L163H- RCLQVVRSLV  | 67   | >VHL-L163H- RCHQVVRSLV  | 11    | 56    |
| >VHL-L163H- RCLQVVRSL   | 90   | >VHL-L163H- RCHQVVRSL   | 229   | 139   |
| >VHL-L163H- ERCLQVVRSL  | 233  | >VHL-L163H- ERCHQVVRSL  | 295   | 62    |
| >VHL-L163H- ERCLQVVRSL  | 432  | >VHL-L163H- ERCHQVVRSL  | 775   | 343   |
| >VHL-L163H- ERCLQVVR    | 491  | >VHL-L163H- ERCHQVVR    | 454   | 37    |
| >VHL-L163H- KERCLQVV    | 67   | >VHL-L163H- KERCHQVV    | 39    | 28    |
| >VHL-L163H- KERCLQVVR   | 367  | >VHL-L163H- KERCHQVVR   | 258   | 109   |
| >VHL-L163H- KERCLQVV    | 722  | >VHL-L163H- KERCHQVV    | 326   | 396   |
| >VHL-L163H- KERCLQVVRS  | 291  | >VHL-L163H- KERCHQVVRS  | 167   | 124   |
| >VHL-L163H- KERCLQVV    | 80   | >VHL-L163H- KERCHQVV    | 150   | 70    |
| >VHL-L163H- KERCLQVVRS  | 27   | >VHL-L163H- KERCHQVVRS  | 49    | 22    |

|                         |      |                        |      |      |
|-------------------------|------|------------------------|------|------|
| >VHL-L163H- KERCLQVV    | 148  | >VHL-L163H- KERCHQVV   | 108  | 40   |
| >VHL-L163H- KERCLQVVR   | 39   | >VHL-L163H- KERCHQVVR  | 31   | 8    |
| >VHL-L163H- LKERCLQVV   | 714  | >VHL-L163H- LKERCHQVV  | 391  | 323  |
| >VHL-L163H- TLKERCLQV   | 403  | >VHL-L163H- TLKERCHQV  | 286  | 117  |
| >VHL-L163H- TLKERCLQV   | 328  | >VHL-L163H- TLKERCHQV  | 46   | 282  |
| >VHL-L163H- TLKERCLQV   | 7    | >VHL-L163H- TLKERCHQV  | 6    | 1    |
| >VHL-L163H- TLKERCLQVV  | 50   | >VHL-L163H- TLKERCHQVV | 204  | 154  |
| >VHL-L163H- TLKERCLQV   | 186  | >VHL-L163H- TLKERCHQV  | 45   | 141  |
| >VHL-L163H- TLKERCLQVV  | 141  | >VHL-L163H- TLKERCHQVV | 119  | 22   |
| >VHL-L163H- TLKERCLQV   | 1011 | >VHL-L163H- TLKERCHQV  | 150  | 861  |
| >VHL-L163H- TLKERCLQVV  | 109  | >VHL-L163H- TLKERCHQVV | 167  | 58   |
| >VHL-L163H- TLKERCLQV   | 308  | >VHL-L163H- TLKERCHQV  | 112  | 196  |
| >VHL-L163H- TLKERCLQVV  | 369  | >VHL-L163H- TLKERCHQVV | 488  | 119  |
| >VHL-L163H- TLKERCLQV   | 1402 | >VHL-L163H- TLKERCHQV  | 88   | 1314 |
| >VHL-L163H- TLKERCLQV   | 3    | >VHL-L163H- TLKERCHQV  | 2    | 1    |
| >VHL-L163H- TLKERCLQVV  | 4    | >VHL-L163H- TLKERCHQVV | 4    | 0    |
| >VHL-L163H- TLKERCLQVV  | 58   | >VHL-L163H- TLKERCHQVV | 32   | 26   |
| >VHL-L163H- TLKERCLQVV  | 96   | >VHL-L163H- TLKERCHQVV | 102  | 6    |
| >VHL-L163H- TLKERCLQVV  | 211  | >VHL-L163H- TLKERCHQVV | 170  | 41   |
| >VHL-L163H- TLKERCLQV   | 84   | >VHL-L163H- TLKERCHQV  | 54   | 30   |
| >VHL-L163H- TLKERCLQVV  | 436  | >VHL-L163H- TLKERCHQVV | 434  | 2    |
| >VHL-L163H- YTLKERCLQV  | 93   | >VHL-L163H- YTLKERCHQV | 392  | 299  |
| >VHL-L163H- YTLKERCLQV' | 308  | >VHL-L163H- YTLKERCHQV | 1507 | 1199 |
| >VHL-L163H- YTLKERCLQV  | 127  | >VHL-L163H- YTLKERCHQV | 258  | 131  |
| >VHL-L163H- YTLKERCLQV  | 39   | >VHL-L163H- YTLKERCHQV | 77   | 38   |
| >VHL-L163H- YTLKERCLQV' | 83   | >VHL-L163H- YTLKERCHQV | 227  | 144  |
| >VHL-L163H- YTLKERCLQV  | 32   | >VHL-L163H- YTLKERCHQV | 16   | 16   |
| >VHL-L163H- YTLKERCLQV' | 28   | >VHL-L163H- YTLKERCHQV | 34   | 6    |
| >VHL-L163H- YTLKERCLQV  | 860  | >VHL-L163H- YTLKERCHQV | 178  | 682  |
| >VHL-L163H- YTLKERCLQV' | 95   | >VHL-L163H- YTLKERCHQV | 239  | 144  |
| >VHL-L163H- YTLKERCLQV  | 31   | >VHL-L163H- YTLKERCHQV | 20   | 11   |
| >VHL-L163H- YTLKERCLQV' | 40   | >VHL-L163H- YTLKERCHQV | 55   | 15   |
| >VHL-L163H- YTLKERCLQV  | 709  | >VHL-L163H- YTLKERCHQV | 175  | 534  |
| >VHL-L163H- YTLKERCLQV' | 416  | >VHL-L163H- YTLKERCHQV | 1386 | 970  |
| >VHL-L163H- YTLKERCLQV  | 19   | >VHL-L163H- YTLKERCHQV | 8    | 11   |
| >VHL-L163H- YTLKERCLQV' | 21   | >VHL-L163H- YTLKERCHQV | 27   | 6    |
| >VHL-L163H- YTLKERCLQV  | 1106 | >VHL-L163H- YTLKERCHQV | 186  | 920  |
| >VHL-L163H- YTLKERCLQV  | 14   | >VHL-L163H- YTLKERCHQV | 8    | 6    |
| >VHL-L163H- YTLKERCLQV' | 53   | >VHL-L163H- YTLKERCHQV | 61   | 8    |
| >VHL-L163H- YTLKERCLQV' | 803  | >VHL-L163H- YTLKERCHQV | 484  | 319  |
| >VHL-L163H- YTLKERCL    | 205  | >VHL-L163H- YTLKERCH   | 7096 | 6891 |
| >VHL-L163H- YTLKERCLQV  | 211  | >VHL-L163H- YTLKERCHQV | 316  | 105  |
| >VHL-L163H- YTLKERCL    | 280  | >VHL-L163H- YTLKERCH   | 2047 | 1767 |



|                         |       |                         |       |       |
|-------------------------|-------|-------------------------|-------|-------|
| >VHL-L163H- YTLKERCLQV' | 130   | >VHL-L163H- YTLKERCHQV  | 173   | 43    |
| >VHL-L163P- LQVVRSLV    | 147   | >VHL-L163P- PQVVRSLV    | 4193  | 4046  |
| >VHL-L163P- LQVVRSLV    | 14    | >VHL-L163P- PQVVRSLV    | 1365  | 1351  |
| >VHL-L163P- LQVVRSLV    | 214   | >VHL-L163P- PQVVRSLV    | 2724  | 2510  |
| >VHL-L163P- CLQVVRSLV   | 325   | >VHL-L163P- CPQVVRSLV   | 16623 | 16298 |
| >VHL-L163P- CLQVVRSLV   | 456   | >VHL-L163P- CPQVVRSLV   | 28303 | 27847 |
| >VHL-L163P- CLQVVRSL    | 274   | >VHL-L163P- CPQVVRSL    | 36055 | 35781 |
| >VHL-L163P- CLQVVRSLV   | 16    | >VHL-L163P- CPQVVRSLV   | 30519 | 30503 |
| >VHL-L163P- CLQVVRSLVK  | 97    | >VHL-L163P- CPQVVRSLVK  | 7351  | 7254  |
| >VHL-L163P- CLQVVRSLVK  | 305   | >VHL-L163P- CPQVVRSLVK  | 9288  | 8983  |
| >VHL-L163P- CLQVVRSL    | 14068 | >VHL-L163P- CPQVVRSL    | 71    | 13997 |
| >VHL-L163P- CLQVVRSLV   | 28576 | >VHL-L163P- CPQVVRSLV   | 154   | 28422 |
| >VHL-L163P- LPVYTLKERCI | 224   | >VHL-L163P- LPVYTLKERCI | 25577 | 25353 |
| >VHL-L163P- RCLQVVRSLV  | 392   | >VHL-L163P- RCPQVVRSLV  | 2352  | 1960  |
| >VHL-L163P- RCLQVVRSLV  | 67    | >VHL-L163P- RCPQVVRSLV  | 1526  | 1459  |
| >VHL-L163P- RCLQVVRSL   | 90    | >VHL-L163P- RCPQVVRSL   | 325   | 235   |
| >VHL-L163P- ERCLQVVRSL  | 233   | >VHL-L163P- ERCPQVVRSL  | 647   | 414   |
| >VHL-L163P- ERCLQVVRSL  | 925   | >VHL-L163P- ERCPQVVRSL  | 463   | 462   |
| >VHL-L163P- ERCLQVVRSL  | 432   | >VHL-L163P- ERCPQVVRSL  | 481   | 49    |
| >VHL-L163P- ERCLQVVR    | 491   | >VHL-L163P- ERCPQVVR    | 502   | 11    |
| >VHL-L163P- KERCLQVV    | 67    | >VHL-L163P- KERCPQVV    | 33    | 34    |
| >VHL-L163P- KERCLQVVR   | 367   | >VHL-L163P- KERCPQVVR   | 1037  | 670   |
| >VHL-L163P- KERCLQVV    | 722   | >VHL-L163P- KERCPQVV    | 289   | 433   |
| >VHL-L163P- KERCLQVVRS  | 291   | >VHL-L163P- KERCPQVVRS  | 141   | 150   |
| >VHL-L163P- KERCLQVV    | 80    | >VHL-L163P- KERCPQVV    | 526   | 446   |
| >VHL-L163P- KERCLQVVRS  | 27    | >VHL-L163P- KERCPQVVRS  | 111   | 84    |
| >VHL-L163P- KERCLQVV    | 148   | >VHL-L163P- KERCPQVV    | 271   | 123   |
| >VHL-L163P- KERCLQVVRS  | 39    | >VHL-L163P- KERCPQVVRS  | 57    | 18    |
| >VHL-L163P- LKERCLQVV   | 714   | >VHL-L163P- LKERCPQVV   | 408   | 306   |
| >VHL-L163P- TLKERCLQV   | 403   | >VHL-L163P- TLKERCPQV   | 230   | 173   |
| >VHL-L163P- TLKERCLQV   | 328   | >VHL-L163P- TLKERCPQV   | 429   | 101   |
| >VHL-L163P- TLKERCLQV   | 7     | >VHL-L163P- TLKERCPQV   | 9     | 2     |
| >VHL-L163P- TLKERCLQVV  | 50    | >VHL-L163P- TLKERCPQVV  | 74    | 24    |
| >VHL-L163P- TLKERCLQV   | 186   | >VHL-L163P- TLKERCPQV   | 84    | 102   |
| >VHL-L163P- TLKERCLQVV  | 141   | >VHL-L163P- TLKERCPQVV  | 108   | 33    |
| >VHL-L163P- TLKERCLQVV  | 109   | >VHL-L163P- TLKERCPQVV  | 165   | 56    |
| >VHL-L163P- TLKERCLQV   | 308   | >VHL-L163P- TLKERCPQV   | 66    | 242   |
| >VHL-L163P- TLKERCLQVV  | 369   | >VHL-L163P- TLKERCPQVV  | 293   | 76    |
| >VHL-L163P- TLKERCLQV   | 1402  | >VHL-L163P- TLKERCPQV   | 202   | 1200  |
| >VHL-L163P- TLKERCLQV   | 3     | >VHL-L163P- TLKERCPQV   | 3     | 0     |
| >VHL-L163P- TLKERCLQVV  | 4     | >VHL-L163P- TLKERCPQVV  | 6     | 2     |
| >VHL-L163P- TLKERCLQVV  | 58    | >VHL-L163P- TLKERCPQVV  | 62    | 4     |
| >VHL-L163P- TLKERCLQVV  | 96    | >VHL-L163P- TLKERCPQVV  | 138   | 42    |

|                         |     |                        |       |       |
|-------------------------|-----|------------------------|-------|-------|
| >VHL-L163P- TLKERCLQVV  | 211 | >VHL-L163P- TLKERCPQVV | 186   | 25    |
| >VHL-L163P- TLKERCLQV   | 84  | >VHL-L163P- TLKERCPQV  | 153   | 69    |
| >VHL-L163P- TLKERCLQVV  | 436 | >VHL-L163P- TLKERCPQVV | 911   | 475   |
| >VHL-L163P- YTLKERCLQV  | 93  | >VHL-L163P- YTLKERCPQV | 172   | 79    |
| >VHL-L163P- YTLKERCLQV' | 308 | >VHL-L163P- YTLKERCPQV | 580   | 272   |
| >VHL-L163P- YTLKERCLQV  | 127 | >VHL-L163P- YTLKERCPQV | 382   | 255   |
| >VHL-L163P- YTLKERCLQV  | 39  | >VHL-L163P- YTLKERCPQV | 45    | 6     |
| >VHL-L163P- YTLKERCLQV' | 83  | >VHL-L163P- YTLKERCPQV | 305   | 222   |
| >VHL-L163P- YTLKERCLQV  | 32  | >VHL-L163P- YTLKERCPQV | 20    | 12    |
| >VHL-L163P- YTLKERCLQV' | 28  | >VHL-L163P- YTLKERCPQV | 23    | 5     |
| >VHL-L163P- YTLKERCLQV  | 860 | >VHL-L163P- YTLKERCPQV | 410   | 450   |
| >VHL-L163P- YTLKERCLQV' | 95  | >VHL-L163P- YTLKERCPQV | 116   | 21    |
| >VHL-L163P- YTLKERCLQV  | 31  | >VHL-L163P- YTLKERCPQV | 17    | 14    |
| >VHL-L163P- YTLKERCLQV' | 40  | >VHL-L163P- YTLKERCPQV | 45    | 5     |
| >VHL-L163P- YTLKERCLQV  | 709 | >VHL-L163P- YTLKERCPQV | 264   | 445   |
| >VHL-L163P- YTLKERCLQV' | 416 | >VHL-L163P- YTLKERCPQV | 516   | 100   |
| >VHL-L163P- YTLKERCLQV  | 19  | >VHL-L163P- YTLKERCPQV | 14    | 5     |
| >VHL-L163P- YTLKERCLQV' | 21  | >VHL-L163P- YTLKERCPQV | 34    | 13    |
| >VHL-L163P- YTLKERCLQV  | 14  | >VHL-L163P- YTLKERCPQV | 7     | 7     |
| >VHL-L163P- YTLKERCLQV' | 53  | >VHL-L163P- YTLKERCPQV | 58    | 5     |
| >VHL-L163P- YTLKERCLQV' | 803 | >VHL-L163P- YTLKERCPQV | 445   | 358   |
| >VHL-L163P- YTLKERCL    | 205 | >VHL-L163P- YTLKERCP   | 22588 | 22383 |
| >VHL-L163P- YTLKERCLQV  | 211 | >VHL-L163P- YTLKERCPQV | 239   | 28    |
| >VHL-L163P- YTLKERCL    | 280 | >VHL-L163P- YTLKERCP   | 12969 | 12689 |
| >VHL-L163P- YTLKERCLQV' | 130 | >VHL-L163P- YTLKERCPQV | 288   | 158   |
| >VHL-L169P- LVKPENYR    | 23  | >VHL-L169P- PVKPENYR   | 389   | 366   |
| >VHL-L169P- LVKPENYRR   | 35  | >VHL-L169P- PVKPENYRR  | 585   | 550   |
| >VHL-L169P- LVKPENYR    | 159 | >VHL-L169P- PVKPENYR   | 877   | 718   |
| >VHL-L169P- LVKPENYRR   | 302 | >VHL-L169P- PVKPENYRR  | 1424  | 1122  |
| >VHL-L169P- LVKPENYR    | 60  | >VHL-L169P- PVKPENYR   | 1141  | 1081  |
| >VHL-L169P- LVKPENYRR   | 122 | >VHL-L169P- PVKPENYRR  | 2278  | 2156  |
| >VHL-L169P- LVKPENYR    | 287 | >VHL-L169P- PVKPENYR   | 372   | 85    |
| >VHL-L169P- SLVKPENYRR  | 409 | >VHL-L169P- SPVKPENYRR | 32332 | 31923 |
| >VHL-L169P- SLVKPENYRR  | 44  | >VHL-L169P- SPVKPENYRR | 24441 | 24397 |
| >VHL-L169P- SLVKPENYRR  | 394 | >VHL-L169P- SPVKPENYRR | 25924 | 25530 |
| >VHL-L169P- SLVKPENYRR  | 26  | >VHL-L169P- SPVKPENYRR | 31843 | 31817 |
| >VHL-L169P- SLVKPENY    | 281 | >VHL-L169P- SPVKPENY   | 813   | 532   |
| >VHL-L169P- SLVKPENY    | 434 | >VHL-L169P- SPVKPENY   | 7137  | 6703  |
| >VHL-L169P- SLVKPENYR   | 177 | >VHL-L169P- SPVKPENYR  | 7200  | 7023  |
| >VHL-L169P- SLVKPENYRR  | 103 | >VHL-L169P- SPVKPENYRR | 1119  | 1016  |
| >VHL-L169P- SLVKPENYR   | 133 | >VHL-L169P- SPVKPENYR  | 984   | 851   |
| >VHL-L169P- SLVKPENYRR  | 142 | >VHL-L169P- SPVKPENYRR | 719   | 577   |
| >VHL-L169P- SLVKPENY    | 96  | >VHL-L169P- SPVKPENY   | 4147  | 4051  |

|                        |       |                        |       |       |
|------------------------|-------|------------------------|-------|-------|
| >VHL-L169P- SLVKPENYRR | 18973 | >VHL-L169P- SPVKPENYRR | 45    | 18928 |
| >VHL-L169P- SLVKPENY   | 218   | >VHL-L169P- SPVKPENY   | 2765  | 2547  |
| >VHL-L169P- SLVKPENY   | 10639 | >VHL-L169P- SPVKPENY   | 123   | 10516 |
| >VHL-L169P- SLVKPENY   | 29958 | >VHL-L169P- SPVKPENY   | 223   | 29735 |
| >VHL-L169P- SLVKPENY   | 9388  | >VHL-L169P- SPVKPENY   | 332   | 9056  |
| >VHL-L169P- SLVKPENYRR | 85    | >VHL-L169P- SPVKPENYRR | 263   | 178   |
| >VHL-L169P- KERCLQVVRS | 291   | >VHL-L169P- KERCLQVVRS | 7795  | 7504  |
| >VHL-L169P- KERCLQVVRS | 27    | >VHL-L169P- KERCLQVVRS | 1000  | 973   |
| >VHL-L169P- KERCLQVVRS | 39    | >VHL-L169P- KERCLQVVRS | 1767  | 1728  |
| >VHL-L169P- RSLVKPENYR | 40    | >VHL-L169P- RSPVKPENYR | 194   | 154   |
| >VHL-L169P- RSLVKPENYR | 12    | >VHL-L169P- RSPVKPENYR | 63    | 51    |
| >VHL-L169P- RSLVKPENYR | 542   | >VHL-L169P- RSPVKPENYR | 279   | 263   |
| >VHL-L169P- RSLVKPENY  | 242   | >VHL-L169P- RSPVKPENY  | 2466  | 2224  |
| >VHL-L169P- RSLVKPENY  | 185   | >VHL-L169P- RSPVKPENY  | 2095  | 1910  |
| >VHL-L169P- RSLVKPENY  | 3     | >VHL-L169P- RSPVKPENY  | 34    | 31    |
| >VHL-L169P- RSLVKPENY  | 56    | >VHL-L169P- RSPVKPENY  | 7642  | 7586  |
| >VHL-L169P- RSLVKPENYR | 355   | >VHL-L169P- RSPVKPENYR | 3305  | 2950  |
| >VHL-L169P- RSLVKPENYR | 124   | >VHL-L169P- RSPVKPENYR | 264   | 140   |
| >VHL-L169P- RSLVKPENYR | 148   | >VHL-L169P- RSPVKPENYR | 232   | 84    |
| >VHL-L169P- VRSLVKPENY | 930   | >VHL-L169P- VRSPVKPENY | 458   | 472   |
| >VHL-L169P- VRSLVKPENY | 310   | >VHL-L169P- VRSPVKPENY | 825   | 515   |
| >VHL-L169P- VVRSLVKPEN | 228   | >VHL-L169P- VVRSPVKPEN | 103   | 125   |
| >VHL-L169P- VVRSLVKPEN | 905   | >VHL-L169P- VVRSPVKPEN | 363   | 542   |
| >VHL-L169P- VVRSLVKPEN | 427   | >VHL-L169P- VVRSPVKPEN | 660   | 233   |
| >VHL-L169P- VVRSLVKPEN | 141   | >VHL-L169P- VVRSPVKPEN | 533   | 392   |
| >VHL-L169P- VVRSLVKPEN | 579   | >VHL-L169P- VVRSPVKPEN | 322   | 257   |
| >VHL-L169P- VVRSLVKPEN | 83    | >VHL-L169P- VVRSPVKPEN | 44    | 39    |
| >VHL-L169P- VVRSLVKPEN | 126   | >VHL-L169P- VVRSPVKPEN | 119   | 7     |
| >VHL-L169P- QVVRSLVK   | 358   | >VHL-L169P- QVVRSPVK   | 626   | 268   |
| >VHL-L169P- QVVRSLVK   | 70    | >VHL-L169P- QVVRSPVK   | 126   | 56    |
| >VHL-L169P- QVVRSLVK   | 136   | >VHL-L169P- QVVRSPVK   | 90    | 46    |
| >VHL-L169P- QVVRSLVK   | 208   | >VHL-L169P- QVVRSPVK   | 190   | 18    |
| >VHL-L169P- LQVVRSLV   | 147   | >VHL-L169P- LQVVRSPV   | 90    | 57    |
| >VHL-L169P- LQVVRSLV   | 14    | >VHL-L169P- LQVVRSPV   | 10    | 4     |
| >VHL-L169P- LQVVRSLV   | 1545  | >VHL-L169P- LQVVRSPV   | 203   | 1342  |
| >VHL-L169P- LQVVRSLV   | 214   | >VHL-L169P- LQVVRSPV   | 46    | 168   |
| >VHL-L169P- CLQVVRSLV  | 325   | >VHL-L169P- CLQVVRSPV  | 145   | 180   |
| >VHL-L169P- CLQVVRSLV  | 456   | >VHL-L169P- CLQVVRSPV  | 219   | 237   |
| >VHL-L169P- CLQVVRSLV  | 920   | >VHL-L169P- CLQVVRSPV  | 248   | 672   |
| >VHL-L169P- CLQVVRSL   | 274   | >VHL-L169P- CLQVVRSP   | 28171 | 27897 |
| >VHL-L169P- CLQVVRSLV  | 16    | >VHL-L169P- CLQVVRSPV  | 13    | 3     |
| >VHL-L169P- CLQVVRSLVK | 97    | >VHL-L169P- CLQVVRSPVK | 364   | 267   |
| >VHL-L169P- CLQVVRSLVK | 305   | >VHL-L169P- CLQVVRSPVK | 975   | 670   |

|                         |       |                         |       |       |
|-------------------------|-------|-------------------------|-------|-------|
| >VHL-L169P- RCLQVVRSLV  | 392   | >VHL-L169P- RCLQVVRSPV  | 234   | 158   |
| >VHL-L169P- RCLQVVRSLV  | 67    | >VHL-L169P- RCLQVVRSPV  | 49    | 18    |
| >VHL-L169P- RCLQVVRSL   | 90    | >VHL-L169P- RCLQVVRSP   | 5302  | 5212  |
| >VHL-L169P- ERCLQVVRSL  | 233   | >VHL-L169P- ERCLQVVRSP  | 17277 | 17044 |
| >VHL-L169P- ERCLQVVRSL  | 432   | >VHL-L169P- ERCLQVVRSP  | 17168 | 16736 |
| >VHL-L178R- LDIVRSLY    | 428   | >VHL-L178R- RDIVRSLY    | 1325  | 897   |
| >VHL-L178R- LDIVRSLYEDL | 1598  | >VHL-L178R- RDIVRSLYEDL | 240   | 1358  |
| >VHL-L178R- LDIVRSLYEDL | 491   | >VHL-L178R- RDIVRSLYEDL | 421   | 70    |
| >VHL-L178R- RLDIVRSLY   | 116   | >VHL-L178R- RRDIVRSLY   | 8450  | 8334  |
| >VHL-L178R- RLDIVRSL    | 312   | >VHL-L178R- RRDIVRSL    | 22609 | 22297 |
| >VHL-L178R- RLDIVRSL    | 14    | >VHL-L178R- RRDIVRSL    | 19215 | 19201 |
| >VHL-L178R- RLDIVRSL    | 400   | >VHL-L178R- RRDIVRSL    | 24790 | 24390 |
| >VHL-L178R- RLDIVRSL    | 82    | >VHL-L178R- RRDIVRSL    | 24306 | 24224 |
| >VHL-L178R- RLDIVRSL    | 52    | >VHL-L178R- RRDIVRSL    | 32289 | 32237 |
| >VHL-L178R- RLDIVRSLY   | 157   | >VHL-L178R- RRDIVRSLY   | 21063 | 20906 |
| >VHL-L178R- RLDIVRSLY   | 77    | >VHL-L178R- RRDIVRSLY   | 540   | 463   |
| >VHL-L178R- RLDIVRSL    | 415   | >VHL-L178R- RRDIVRSL    | 12389 | 11974 |
| >VHL-L178R- RLDIVRSLY   | 33    | >VHL-L178R- RRDIVRSLY   | 1218  | 1185  |
| >VHL-L178R- RLDIVRSL    | 12969 | >VHL-L178R- RRDIVRSL    | 179   | 12790 |
| >VHL-L178R- RLDIVRSLY   | 12104 | >VHL-L178R- RRDIVRSLY   | 343   | 11761 |
| >VHL-L178R- RLDIVRSLYE  | 28032 | >VHL-L178R- RRDIVRSLYE  | 434   | 27598 |
| >VHL-L178R- RLDIVRSLY   | 32    | >VHL-L178R- RRDIVRSLY   | 99    | 67    |
| >VHL-L178R- RLDIVRSL    | 4874  | >VHL-L178R- RRDIVRSL    | 21    | 4853  |
| >VHL-L178R- RLDIVRSLYE  | 17095 | >VHL-L178R- RRDIVRSLYE  | 81    | 17014 |
| >VHL-L178R- RLDIVRSL    | 5879  | >VHL-L178R- RRDIVRSL    | 84    | 5795  |
| >VHL-L178R- RLDIVRSLYE  | 22368 | >VHL-L178R- RRDIVRSLYE  | 176   | 22192 |
| >VHL-L178R- SLVKPENYRR  | 409   | >VHL-L178R- SLVKPENYRR  | 23341 | 22932 |
| >VHL-L178R- SLVKPENYRR  | 44    | >VHL-L178R- SLVKPENYRR  | 15165 | 15121 |
| >VHL-L178R- SLVKPENYRR  | 394   | >VHL-L178R- SLVKPENYRR  | 21987 | 21593 |
| >VHL-L178R- SLVKPENYRR  | 26    | >VHL-L178R- SLVKPENYRR  | 14637 | 14611 |
| >VHL-L178R- RRLDIVRSL   | 10406 | >VHL-L178R- RRRDIVRSL   | 413   | 9993  |
| >VHL-L178R- RRLDIVRSLY  | 10222 | >VHL-L178R- RRRDIVRSLY  | 454   | 9768  |
| >VHL-L178R- RRLDIVRSLY  | 81    | >VHL-L178R- RRRDIVRSLY  | 182   | 101   |
| >VHL-L178R- RRLDIVRSLY  | 437   | >VHL-L178R- RRRDIVRSLY  | 1540  | 1103  |
| >VHL-L178R- RRLDIVRSL   | 109   | >VHL-L178R- RRRDIVRSL   | 81    | 28    |
| >VHL-L178R- RRLDIVRSLY  | 49    | >VHL-L178R- RRRDIVRSLY  | 35    | 14    |
| >VHL-L178R- RRLDIVRS    | 102   | >VHL-L178R- RRRDIVRS    | 385   | 283   |
| >VHL-L178R- RRLDIVRSL   | 15    | >VHL-L178R- RRRDIVRSL   | 35    | 20    |
| >VHL-L178R- RRLDIVRSLY  | 10    | >VHL-L178R- RRRDIVRSLY  | 11    | 1     |
| >VHL-L178R- RRLDIVRS    | 242   | >VHL-L178R- RRRDIVRS    | 90    | 152   |
| >VHL-L178R- RRLDIVRSLY  | 303   | >VHL-L178R- RRRDIVRSLY  | 136   | 167   |
| >VHL-L178R- RRLDIVRSLYE | 319   | >VHL-L178R- RRRDIVRSLYE | 156   | 163   |
| >VHL-L178R- RRLDIVRSLY  | 318   | >VHL-L178R- RRRDIVRSLY  | 202   | 116   |

|                         |       |                         |       |       |
|-------------------------|-------|-------------------------|-------|-------|
| >VHL-L178R- YRRLDIVRSL  | 130   | >VHL-L178R- YRRRDIVRSL  | 42    | 88    |
| >VHL-L178R- YRRLDIVRSLY | 65    | >VHL-L178R- YRRRDIVRSLY | 21    | 44    |
| >VHL-L178R- YRRLDIVR    | 308   | >VHL-L178R- YRRRDIVR    | 223   | 85    |
| >VHL-L178R- YRRLDIVRSL  | 43    | >VHL-L178R- YRRRDIVRSL  | 57    | 14    |
| >VHL-L178R- YRRLDIVRSLY | 206   | >VHL-L178R- YRRRDIVRSLY | 132   | 74    |
| >VHL-L178R- YRRLDIVRSLY | 95    | >VHL-L178R- YRRRDIVRSLY | 59    | 36    |
| >VHL-L178R- YRRLDIVRSL  | 304   | >VHL-L178R- YRRRDIVRSL  | 181   | 123   |
| >VHL-L178R- YRRLDIVRSLY | 391   | >VHL-L178R- YRRRDIVRSLY | 244   | 147   |
| >VHL-L178R- YRRLDIVRSL  | 94    | >VHL-L178R- YRRRDIVRSL  | 75    | 19    |
| >VHL-L178R- YRRLDIVRSLY | 177   | >VHL-L178R- YRRRDIVRSLY | 185   | 8     |
| >VHL-L178R- NYRRLDIVRSI | 129   | >VHL-L178R- NYRRRDIVRS  | 263   | 134   |
| >VHL-L178R- NYRRLDIVR   | 256   | >VHL-L178R- NYRRRDIVR   | 195   | 61    |
| >VHL-L178R- NYRRLDIVR   | 30    | >VHL-L178R- NYRRRDIVR   | 19    | 11    |
| >VHL-L178R- NYRRLDIVRSI | 2631  | >VHL-L178R- NYRRRDIVRS  | 273   | 2358  |
| >VHL-L178R- PENYRRLDI   | 86    | >VHL-L178R- PENYRRRDI   | 74    | 12    |
| >VHL-L178R- KPENYRRL    | 39    | >VHL-L178R- KPENYRRR    | 17746 | 17707 |
| >VHL-L178R- KPENYRRLDI  | 104   | >VHL-L178R- KPENYRRRDI  | 77    | 27    |
| >VHL-L178R- KPENYRRLDI  | 139   | >VHL-L178R- KPENYRRRDI  | 48    | 91    |
| >VHL-L178R- LVKPENYRRL  | 20686 | >VHL-L178R- LVKPENYRRR  | 187   | 20499 |
| >VHL-L184P- LYEDLEDHPN  | 331   | >VHL-L184P- PYEDLEDHPN  | 7071  | 6740  |
| >VHL-L184P- SLYEDLEDHP  | 208   | >VHL-L184P- SPYEDLEDHP  | 26841 | 26633 |
| >VHL-L184P- NYRRLDIVRSI | 129   | >VHL-L184P- NYRRLDIVRSI | 14261 | 14132 |
| >VHL-L184P- IVRSLYEDL   | 292   | >VHL-L184P- IVRSPYEDL   | 304   | 12    |
| >VHL-L184P- DIVRSLYEDL  | 114   | >VHL-L184P- DIVRSPYEDL  | 335   | 221   |
| >VHL-L184P- LDIVRSLY    | 428   | >VHL-L184P- LDIVRSPY    | 2250  | 1822  |
| >VHL-L184P- LDIVRSLYEDL | 491   | >VHL-L184P- LDIVRSPYEDL | 937   | 446   |
| >VHL-L184P- RLDIVRSLY   | 116   | >VHL-L184P- RLDIVRSPY   | 378   | 262   |
| >VHL-L184P- RLDIVRSL    | 312   | >VHL-L184P- RLDIVRSP    | 15672 | 15360 |
| >VHL-L184P- RLDIVRSL    | 14    | >VHL-L184P- RLDIVRSP    | 6557  | 6543  |
| >VHL-L184P- RLDIVRSL    | 400   | >VHL-L184P- RLDIVRSP    | 20075 | 19675 |
| >VHL-L184P- RLDIVRSL    | 82    | >VHL-L184P- RLDIVRSP    | 17595 | 17513 |
| >VHL-L184P- RLDIVRSL    | 52    | >VHL-L184P- RLDIVRSP    | 23423 | 23371 |
| >VHL-L184P- RLDIVRSLY   | 157   | >VHL-L184P- RLDIVRSPY   | 315   | 158   |
| >VHL-L184P- RLDIVRSLY   | 77    | >VHL-L184P- RLDIVRSPY   | 118   | 41    |
| >VHL-L184P- RLDIVRSL    | 415   | >VHL-L184P- RLDIVRSP    | 10331 | 9916  |
| >VHL-L184P- RLDIVRSLY   | 33    | >VHL-L184P- RLDIVRSPY   | 310   | 277   |
| >VHL-L184P- RLDIVRSLY   | 3433  | >VHL-L184P- RLDIVRSPY   | 234   | 3199  |
| >VHL-L184P- RLDIVRSLY   | 32    | >VHL-L184P- RLDIVRSPY   | 478   | 446   |
| >VHL-L184P- RLDIVRSLY   | 68    | >VHL-L184P- RLDIVRSPY   | 197   | 129   |
| >VHL-L184P- RRLDIVRSLY  | 81    | >VHL-L184P- RRLDIVRSPY  | 222   | 141   |
| >VHL-L184P- RRLDIVRSLY  | 437   | >VHL-L184P- RRLDIVRSPY  | 1712  | 1275  |
| >VHL-L184P- RRLDIVRSL   | 109   | >VHL-L184P- RRLDIVRSP   | 2975  | 2866  |
| >VHL-L184P- RRLDIVRSLY  | 49    | >VHL-L184P- RRLDIVRSPY  | 12    | 37    |

|                          |      |                          |       |       |
|--------------------------|------|--------------------------|-------|-------|
| >VHL-L184P- RRLDIVRSL    | 15   | >VHL-L184P- RRLDIVRSP    | 216   | 201   |
| >VHL-L184P- RRLDIVRSLY   | 10   | >VHL-L184P- RRLDIVRSPY   | 12    | 2     |
| >VHL-L184P- RRLDIVRSLY   | 303  | >VHL-L184P- RRLDIVRSPY   | 618   | 315   |
| >VHL-L184P- RRLDIVRSLYE  | 319  | >VHL-L184P- RRLDIVRSPYE  | 613   | 294   |
| >VHL-L184P- RRLDIVRSLY   | 318  | >VHL-L184P- RRLDIVRSPY   | 667   | 349   |
| >VHL-L184P- YRRLDIVRSL   | 130  | >VHL-L184P- YRRLDIVRSP   | 3908  | 3778  |
| >VHL-L184P- YRRLDIVRSLY  | 65   | >VHL-L184P- YRRLDIVRSPY  | 16    | 49    |
| >VHL-L184P- YRRLDIVRSL   | 43   | >VHL-L184P- YRRLDIVRSP   | 7081  | 7038  |
| >VHL-L184P- YRRLDIVRSLY  | 206  | >VHL-L184P- YRRLDIVRSPY  | 155   | 51    |
| >VHL-L184P- YRRLDIVRSLY  | 95   | >VHL-L184P- YRRLDIVRSPY  | 546   | 451   |
| >VHL-L184P- YRRLDIVRSL   | 304  | >VHL-L184P- YRRLDIVRSP   | 8238  | 7934  |
| >VHL-L184P- YRRLDIVRSLY  | 391  | >VHL-L184P- YRRLDIVRSPY  | 945   | 554   |
| >VHL-L184P- YRRLDIVRSL   | 94   | >VHL-L184P- YRRLDIVRSP   | 6402  | 6308  |
| >VHL-L184P- YRRLDIVRSLY  | 177  | >VHL-L184P- YRRLDIVRSPY  | 637   | 460   |
| >VHL-L188P- LEDHPNVQKI   | 144  | >VHL-L188P- PEDHPNVQK    | 1866  | 1722  |
| >VHL-L188P- DLEDHPNV     | 227  | >VHL-L188P- DPEDHPNV     | 27273 | 27046 |
| >VHL-L188P- DLEDHPNV     | 14   | >VHL-L188P- DPEDHPNV     | 25164 | 25150 |
| >VHL-L188P- DLEDHPNV     | 378  | >VHL-L188P- DPEDHPNV     | 1448  | 1070  |
| >VHL-L188P- LDIVRSLYEDL  | 491  | >VHL-L188P- LDIVRSLYEDF  | 20234 | 19743 |
| >VHL-L188P- EDLEDHPNV    | 25   | >VHL-L188P- EDPEDHPNV    | 1648  | 1623  |
| >VHL-L188P- YEDLEDHPNV   | 999  | >VHL-L188P- YEDPEDHPNV   | 257   | 742   |
| >VHL-L188P- YEDLEDHPNV   | 3930 | >VHL-L188P- YEDPEDHPNV   | 485   | 3445  |
| >VHL-L188P- LYEDLEDHPNV  | 331  | >VHL-L188P- LYEDPEDHPNV  | 265   | 66    |
| >VHL-L188P- SLYEDLED     | 581  | >VHL-L188P- SLYEDPED     | 343   | 238   |
| >VHL-L188P- SLYEDLEDHPNV | 208  | >VHL-L188P- SLYEDPEDHPNV | 159   | 49    |
| >VHL-L188P- IVRSLYEDL    | 292  | >VHL-L188P- IVRSLYEDP    | 11912 | 11620 |
| >VHL-L188P- DIVRSLYEDL   | 114  | >VHL-L188P- DIVRSLYEDP   | 14381 | 14267 |
| >VHL-L188Q- LEDHPNVQKI   | 144  | >VHL-L188Q- QEDHPNVQK    | 260   | 116   |
| >VHL-L188Q- DLEDHPNV     | 227  | >VHL-L188Q- DQEDHPNV     | 9691  | 9464  |
| >VHL-L188Q- DLEDHPNV     | 14   | >VHL-L188Q- DQEDHPNV     | 10297 | 10283 |
| >VHL-L188Q- DLEDHPNV     | 378  | >VHL-L188Q- DQEDHPNV     | 4827  | 4449  |
| >VHL-L188Q- LDIVRSLYEDL  | 491  | >VHL-L188Q- LDIVRSLYEDC  | 16712 | 16221 |
| >VHL-L188Q- EDLEDHPNV    | 25   | >VHL-L188Q- EDQEDHPNV    | 977   | 952   |
| >VHL-L188Q- YEDLEDHPNV   | 999  | >VHL-L188Q- YEDQEDHPNV   | 339   | 660   |
| >VHL-L188Q- LYEDLEDHPNV  | 331  | >VHL-L188Q- LYEDQEDHPNV  | 230   | 101   |
| >VHL-L188Q- SLYEDLEDHPNV | 208  | >VHL-L188Q- SLYEDQEDHPNV | 295   | 87    |
| >VHL-L188Q- IVRSLYEDL    | 292  | >VHL-L188Q- IVRSLYEDQ    | 3979  | 3687  |
| >VHL-L188Q- DIVRSLYEDL   | 114  | >VHL-L188Q- DIVRSLYEDQ   | 1559  | 1445  |
| >VHL-L188R- LEDHPNVQKI   | 144  | >VHL-L188R- REDHPNVQK    | 29    | 115   |
| >VHL-L188R- DLEDHPNV     | 227  | >VHL-L188R- DREDHPNV     | 26098 | 25871 |
| >VHL-L188R- DLEDHPNV     | 14   | >VHL-L188R- DREDHPNV     | 20071 | 20057 |
| >VHL-L188R- DLEDHPNV     | 378  | >VHL-L188R- DREDHPNV     | 12455 | 12077 |
| >VHL-L188R- LDIVRSLYEDL  | 491  | >VHL-L188R- LDIVRSLYEDF  | 20753 | 20262 |

|                             |       |                                   |       |       |
|-----------------------------|-------|-----------------------------------|-------|-------|
| >VHL-L188R- EDLEDHPNV       | 25    | >VHL-L188R- EDREDHPNV             | 3173  | 3148  |
| >VHL-L188R- LYEDLEDHPN      | 331   | >VHL-L188R- LYEDREDHPN            | 265   | 66    |
| >VHL-L188R- SLYEDLEDHP      | 208   | >VHL-L188R- SLYEDREDHP            | 794   | 586   |
| >VHL-L188R- IVRSLYEDL       | 16213 | >VHL-L188R- IVRSLYEDR             | 60    | 16153 |
| >VHL-L188R- IVRSLYEDL       | 23309 | >VHL-L188R- IVRSLYEDR             | 260   | 23049 |
| >VHL-L188R- IVRSLYEDL       | 33593 | >VHL-L188R- IVRSLYEDR             | 360   | 33233 |
| >VHL-L188R- IVRSLYEDL       | 292   | >VHL-L188R- IVRSLYEDR             | 7024  | 6732  |
| >VHL-L188R- DIVRSLYEDL      | 114   | >VHL-L188R- DIVRSLYEDR            | 6559  | 6445  |
| >VHL-L188R- DIVRSLYEDL      | 21884 | >VHL-L188R- DIVRSLYEDR            | 262   | 21622 |
| >VHL-L188R- DIVRSLYEDL      | 31376 | >VHL-L188R- DIVRSLYEDR            | 207   | 31169 |
| >VHL-L188V- LEDHPNVQKI      | 144   | >VHL-L188V- VEDHPNVQK             | 291   | 147   |
| >VHL-L188V- DLEDHPNV        | 227   | >VHL-L188V- DVEDHPNV              | 8044  | 7817  |
| >VHL-L188V- DLEDHPNV        | 14    | >VHL-L188V- DVEDHPNV              | 830   | 816   |
| >VHL-L188V- DLEDHPNVQ       | 3048  | >VHL-L188V- DVEDHPNVQ             | 324   | 2724  |
| >VHL-L188V- DLEDHPNV        | 378   | >VHL-L188V- DVEDHPNV              | 103   | 275   |
| >VHL-L188V- LDIVRSLYEDL     | 491   | >VHL-L188V- LDIVRSLYEDV           | 98    | 393   |
| >VHL-L188V- EDLEDHPNV       | 25    | >VHL-L188V- EDVEDHPNV             | 126   | 101   |
| >VHL-L188V- LYEDLEDHPN      | 331   | >VHL-L188V- LYEDVEDHPN            | 319   | 12    |
| >VHL-L188V- SLYEDLED        | 581   | >VHL-L188V- SLYEDVED              | 369   | 212   |
| >VHL-L188V- SLYEDLEDHP      | 652   | >VHL-L188V- SLYEDVEDHP            | 323   | 329   |
| >VHL-L188V- SLYEDLEDHP      | 208   | >VHL-L188V- SLYEDVEDHP            | 151   | 57    |
| >VHL-L188V- SLYEDLEDHP      | 663   | >VHL-L188V- SLYEDVEDHP            | 375   | 288   |
| >VHL-L188V- IVRSLYEDL       | 6792  | >VHL-L188V- IVRSLYEDV             | 347   | 6445  |
| >VHL-L188V- IVRSLYEDL       | 292   | >VHL-L188V- IVRSLYEDV             | 927   | 635   |
| >VHL-L188V- DIVRSLYEDL      | 114   | >VHL-L188V- DIVRSLYEDV            | 1408  | 1294  |
| >VHL-L188V- DIVRSLYEDL      | 2947  | >VHL-L188V- DIVRSLYEDV            | 350   | 2597  |
| >VHL-L198P- LERLTQERI       | 43    | >VHL-L198P- PERLTQERI             | 495   | 452   |
| >VHL-L198P- LERLTQERIAI     | 341   | >VHL-L198P- PERLTQERIAI           | 4369  | 4028  |
| >VHL-L198P- LERLTQERI       | 25    | >VHL-L198P- PERLTQERI             | 279   | 254   |
| >VHL-L198P- DLERLTQER       | 222   | >VHL-L198P- DPERLTQER             | 3125  | 2903  |
| >VHL-L198P- DLERLTQER       | 454   | >VHL-L198P- DPERLTQER             | 2408  | 1954  |
| >VHL-L198P- LEDHPNVQKI      | 144   | >VHL-L198P- LEDHPNVQKI            | 12193 | 12049 |
| >VHL-L198P- KDLERLTQER      | 55    | >VHL-L198P- KDPERLTQER            | 364   | 309   |
| >VHL-L198P- KDLERLTQER      | 44    | >VHL-L198P- KDPERLTQER            | 289   | 245   |
| >VHL-L198P- NVQKDLERL       | 388   | >VHL-L198P- NVQKDPERL             | 6331  | 5943  |
| >VHL-L198P- NVQKDLER        | 163   | >VHL-L198P- NVQKDPER              | 175   | 12    |
| >VHL-L198P- HPNVQKDL        | 401   | >VHL-L198P- HPNVQKDP              | 26809 | 26408 |
| >VHL-L198P- HPNVQKDLEI      | 230   | >VHL-L198P- HPNVQKDPE             | 221   | 9     |
| >VHL-L48V- $\nu$ LGAEEMEAC  | 442   | >VHL-L48V- $\bar{\nu}$ VGAEEMEAC  | 1164  | 722   |
| >VHL-L48V- $\nu$ ELGAEEMEAC | 238   | >VHL-L48V- $\bar{\nu}$ EVGAEEMEAC | 15710 | 15472 |
| >VHL-L48V- $\nu$ ELGAEEM    | 3622  | >VHL-L48V- $\bar{\nu}$ EVGAEEM    | 69    | 3553  |
| >VHL-L48V- $\nu$ EELGAEEM   | 277   | >VHL-L48V- $\bar{\nu}$ EEVGAEEM   | 156   | 121   |
| >VHL-L48V- $\nu$ EELGAEEME  | 18    | >VHL-L48V- $\bar{\nu}$ EEVGAEEMI  | 19    | 1     |

|                        |       |                        |      |       |
|------------------------|-------|------------------------|------|-------|
| >VHL-L48V-w GPEELGAEED | 247   | >VHL-L48V-r GPEEVGAEED | 233  | 14    |
| >VHL-L48V-w EESGPEEL   | 57    | >VHL-L48V-r EESGPEEV   | 751  | 694   |
| >VHL-L48V-w EESGPEEL   | 364   | >VHL-L48V-r EESGPEEV   | 49   | 315   |
| >VHL-L48V-w EESGPEELGA | 355   | >VHL-L48V-r EESGPEEVGA | 308  | 47    |
| >VHL-L48V-w PEESGPEEL  | 231   | >VHL-L48V-r PEESGPEEV  | 2481 | 2250  |
| >VHL-L85P-w LPVWLNFDG  | 285   | >VHL-L85P-r PPVWLNFDG  | 5331 | 5046  |
| >VHL-L85P-w LPVWLNFD   | 106   | >VHL-L85P-r PPVWLNFD   | 2859 | 2753  |
| >VHL-L85P-w LPVWLNFDG  | 251   | >VHL-L85P-r PPVWLNFDG  | 5505 | 5254  |
| >VHL-L85P-w LPVWLNFDG  | 345   | >VHL-L85P-r PPVWLNFDG  | 6092 | 5747  |
| >VHL-L85P-w VLPVWLN    | 1383  | >VHL-L85P-r VPPVWLN    | 94   | 1289  |
| >VHL-L85P-w VLPVWLN    | 27444 | >VHL-L85P-r VPPVWLN    | 232  | 27212 |
| >VHL-L85P-w VLPVWLN    | 235   | >VHL-L85P-r VPPVWLN    | 1420 | 1185  |
| >VHL-L85P-w VLPVWLN    | 454   | >VHL-L85P-r VPPVWLN    | 2414 | 1960  |
| >VHL-L85P-w VLPVWLN    | 29573 | >VHL-L85P-r VPPVWLN    | 401  | 29172 |
| >VHL-L85P-w VVLPVWLN   | 443   | >VHL-L85P-r VVPPVWLN   | 1075 | 632   |
| >VHL-L85P-w VVLPVWLN   | 261   | >VHL-L85P-r VVPPVWLN   | 1160 | 899   |
| >VHL-L85P-w VVLPVWLN   | 42    | >VHL-L85P-r VVPPVWLN   | 188  | 146   |
| >VHL-L85P-w VVLPVWLN   | 449   | >VHL-L85P-r VVPPVWLN   | 196  | 253   |
| >VHL-L85P-w VVLPVWLN   | 190   | >VHL-L85P-r VVPPVWLN   | 109  | 81    |
| >VHL-L85P-w VVLPVWLN   | 70    | >VHL-L85P-r VVPPVWLN   | 696  | 626   |
| >VHL-L85P-w VVLPVWLN   | 461   | >VHL-L85P-r VVPPVWLN   | 2679 | 2218  |
| >VHL-L85P-w VVLPVWLN   | 20    | >VHL-L85P-r VVPPVWLN   | 1446 | 1426  |
| >VHL-L85P-w VVLPVWLN   | 63    | >VHL-L85P-r VVPPVWLN   | 6746 | 6683  |
| >VHL-L85P-w VVLPVWLN   | 399   | >VHL-L85P-r VVPPVWLN   | 5139 | 4740  |
| >VHL-L85P-w RVVLPVWL   | 415   | >VHL-L85P-r RVVPPVWL   | 93   | 322   |
| >VHL-L85P-w RVVLPVWL   | 1138  | >VHL-L85P-r RVVPPVWL   | 217  | 921   |
| >VHL-L85P-w RVVLPVWL   | 1579  | >VHL-L85P-r RVVPPVWL   | 194  | 1385  |
| >VHL-L85P-w RVVLPVWLN  | 582   | >VHL-L85P-r RVVPPVWLN  | 122  | 460   |
| >VHL-L85P-w RVVLPVWL   | 535   | >VHL-L85P-r RVVPPVWL   | 298  | 237   |
| >VHL-L85P-w RVVLPVWLN  | 182   | >VHL-L85P-r RVVPPVWLN  | 128  | 54    |
| >VHL-L85P-w RVVLPVWL   | 351   | >VHL-L85P-r RVVPPVWL   | 476  | 125   |
| >VHL-L85P-w RVVLPVWLN  | 202   | >VHL-L85P-r RVVPPVWLN  | 241  | 39    |
| >VHL-L85P-w RVVLPVWLN  | 819   | >VHL-L85P-r RVVPPVWLN  | 258  | 561   |
| >VHL-L85P-w RVVLPVWLN  | 355   | >VHL-L85P-r RVVPPVWLN  | 140  | 215   |
| >VHL-L85P-w RVVLPVWL   | 89    | >VHL-L85P-r RVVPPVWL   | 19   | 70    |
| >VHL-L85P-w RVVLPVWLN  | 9     | >VHL-L85P-r RVVPPVWLN  | 4    | 5     |
| >VHL-L85P-w RVVLPVWLN  | 2106  | >VHL-L85P-r RVVPPVWLN  | 455  | 1651  |
| >VHL-L85P-w RVVLPVWLN  | 56    | >VHL-L85P-r RVVPPVWLN  | 20   | 36    |
| >VHL-L85P-w RVVLPVWL   | 1825  | >VHL-L85P-r RVVPPVWL   | 319  | 1506  |
| >VHL-L85P-w RVVLPVWLN  | 230   | >VHL-L85P-r RVVPPVWLN  | 712  | 482   |
| >VHL-L85P-w RVVLPVWLN  | 320   | >VHL-L85P-r RVVPPVWLN  | 231  | 89    |
| >VHL-L85P-w PRVLPVWLI  | 364   | >VHL-L85P-r PRVPPVWLI  | 230  | 134   |
| >VHL-L85P-w PRVLPVWL   | 89    | >VHL-L85P-r PRVPPVWL   | 678  | 589   |



|                        |     |                        |       |       |
|------------------------|-----|------------------------|-------|-------|
| >VHL-L85P-w PRVVLPVWLI | 385 | >VHL-L85P-n PRVVPPVWLI | 1266  | 881   |
| >VHL-L85P-w SPRVVLPV   | 21  | >VHL-L85P-n SPRVVPPV   | 37    | 16    |
| >VHL-L85P-w SPRVVLPVW  | 189 | >VHL-L85P-n SPRVVPPVW  | 389   | 200   |
| >VHL-L85P-w SPRVVLPVWI | 61  | >VHL-L85P-n SPRVVPPVWI | 65    | 4     |
| >VHL-L85P-w SPRVVLPVW  | 318 | >VHL-L85P-n SPRVVPPVW  | 354   | 36    |
| >VHL-L85P-w SPRVVLPV   | 251 | >VHL-L85P-n SPRVVPPV   | 165   | 86    |
| >VHL-L85P-w SPRVVLPVW  | 42  | >VHL-L85P-n SPRVVPPVW  | 256   | 214   |
| >VHL-L85P-w RSPRVVLPV  | 488 | >VHL-L85P-n RSPRVVPPV  | 259   | 229   |
| >VHL-L85P-w RSPRVVLPV  | 664 | >VHL-L85P-n RSPRVVPPV  | 303   | 361   |
| >VHL-L85P-w RSPRVVLPV  | 301 | >VHL-L85P-n RSPRVVPPV  | 170   | 131   |
| >VHL-L85P-w RSPRVVLPV  | 130 | >VHL-L85P-n RSPRVVPPV  | 419   | 289   |
| >VHL-L85P-w RSPRVVLPVW | 247 | >VHL-L85P-n RSPRVVPPVW | 244   | 3     |
| >VHL-L85P-w RSPRVVLPVW | 147 | >VHL-L85P-n RSPRVVPPVW | 290   | 143   |
| >VHL-L85P-w RSPRVVLPVW | 55  | >VHL-L85P-n RSPRVVPPVW | 80    | 25    |
| >VHL-L85P-w RSPRVVLPVW | 301 | >VHL-L85P-n RSPRVVPPVW | 314   | 13    |
| >VHL-L85P-w RSPRVVLPVW | 48  | >VHL-L85P-n RSPRVVPPVW | 47    | 1     |
| >VHL-L85P-w RSPRVVLPVW | 12  | >VHL-L85P-n RSPRVVPPVW | 11    | 1     |
| >VHL-L85P-w RSPRVVLPVW | 39  | >VHL-L85P-n RSPRVVPPVW | 89    | 50    |
| >VHL-L85P-w RSPRVVLPVW | 4   | >VHL-L85P-n RSPRVVPPVW | 4     | 0     |
| >VHL-L85P-w RSPRVVLPVW | 493 | >VHL-L85P-n RSPRVVPPVW | 995   | 502   |
| >VHL-L85P-w RSPRVVLPVW | 345 | >VHL-L85P-n RSPRVVPPVW | 268   | 77    |
| >VHL-L85P-w NRSPRVVL   | 22  | >VHL-L85P-n NRSPRVVP   | 10694 | 10672 |
| >VHL-L85P-w NRSPRVVLPV | 265 | >VHL-L85P-n NRSPRVVPPV | 269   | 4     |
| >VHL-L89H-w LNFDGEPQ\  | 165 | >VHL-L89H-n HNFDGEPQ'  | 403   | 238   |
| >VHL-L89H-w LNFDGEPQ\  | 562 | >VHL-L89H-n HNFDGEPQ'  | 172   | 390   |
| >VHL-L89H-w LNFDGEPQ\  | 111 | >VHL-L89H-n HNFDGEPQ'  | 188   | 77    |
| >VHL-L89H-w WLNFDGEPQ  | 50  | >VHL-L89H-n WHNFDGEPQ' | 504   | 454   |
| >VHL-L89H-w WLNFDGEPQ  | 54  | >VHL-L89H-n WHNFDGEPQ' | 5238  | 5184  |
| >VHL-L89H-w WLNFDGEPQ  | 52  | >VHL-L89H-n WHNFDGEPQ' | 1533  | 1481  |
| >VHL-L89H-w WLNFDGEPQ  | 102 | >VHL-L89H-n WHNFDGEPQ' | 64    | 38    |
| >VHL-L89H-w WLNFDGEPQ  | 90  | >VHL-L89H-n WHNFDGEPQ' | 350   | 260   |
| >VHL-L89H-w WLNFDGEPQ  | 182 | >VHL-L89H-n WHNFDGEPQ' | 942   | 760   |
| >VHL-L89H-w RSPRVVLPVW | 147 | >VHL-L89H-n RSPRVVLPVW | 2569  | 2422  |
| >VHL-L89H-w RSPRVVLPVW | 301 | >VHL-L89H-n RSPRVVLPVW | 7334  | 7033  |
| >VHL-L89H-w RSPRVVLPVW | 4   | >VHL-L89H-n RSPRVVLPVW | 647   | 643   |
| >VHL-L89H-w RSPRVVLPVW | 493 | >VHL-L89H-n RSPRVVLPVW | 7681  | 7188  |
| >VHL-L89H-w RSPRVVLPVW | 345 | >VHL-L89H-n RSPRVVLPVW | 34018 | 33673 |
| >VHL-L89H-w VWLNFDGE   | 227 | >VHL-L89H-n VWHNFDGE   | 624   | 397   |
| >VHL-L89H-w VWLNFDGEP  | 304 | >VHL-L89H-n VWHNFDGEF  | 738   | 434   |
| >VHL-L89H-w LPVWLNFDG  | 285 | >VHL-L89H-n LPVWLNFDG  | 195   | 90    |
| >VHL-L89H-w LPVWLNFDG  | 538 | >VHL-L89H-n LPVWLNFDG  | 432   | 106   |
| >VHL-L89H-w LPVWLNFD   | 106 | >VHL-L89H-n LPVWLNFD   | 187   | 81    |
| >VHL-L89H-w LPVWLNFDG  | 251 | >VHL-L89H-n LPVWLNFDG  | 354   | 103   |

|                        |       |                        |       |       |
|------------------------|-------|------------------------|-------|-------|
| >VHL-L89H-w LPVWLNFDG  | 345   | >VHL-L89H-n LPVWHNFDG  | 431   | 86    |
| >VHL-L89H-w VLPVWLNF   | 235   | >VHL-L89H-n VLPVWHNF   | 118   | 117   |
| >VHL-L89H-w VLPVWLNF   | 454   | >VHL-L89H-n VLPVWHNF   | 282   | 172   |
| >VHL-L89H-w VVLPVWLNF  | 443   | >VHL-L89H-n VVLPVWHNF  | 1026  | 583   |
| >VHL-L89H-w VVLPVWLNF  | 261   | >VHL-L89H-n VVLPVWHNF  | 106   | 155   |
| >VHL-L89H-w VVLPVWLNF  | 42    | >VHL-L89H-n VVLPVWHNF  | 18    | 24    |
| >VHL-L89H-w VVLPVWLNF  | 449   | >VHL-L89H-n VVLPVWHNF  | 284   | 165   |
| >VHL-L89H-w VVLPVWLNF  | 190   | >VHL-L89H-n VVLPVWHNF  | 101   | 89    |
| >VHL-L89H-w VVLPVWLNF  | 70    | >VHL-L89H-n VVLPVWHNF  | 198   | 128   |
| >VHL-L89H-w VVLPVWLNF  | 461   | >VHL-L89H-n VVLPVWHNF  | 704   | 243   |
| >VHL-L89H-w VVLPVWLNF  | 20    | >VHL-L89H-n VVLPVWHNF  | 32    | 12    |
| >VHL-L89H-w VVLPVWLNF  | 399   | >VHL-L89H-n VVLPVWHNF  | 447   | 48    |
| >VHL-L89H-w RVVLPVWL   | 415   | >VHL-L89H-n RVVLPVWH   | 22206 | 21791 |
| >VHL-L89H-w RVVLPVWLN  | 582   | >VHL-L89H-n RVVLPVWHN  | 408   | 174   |
| >VHL-L89H-w RVVLPVWLN  | 182   | >VHL-L89H-n RVVLPVWHN  | 45    | 137   |
| >VHL-L89H-w RVVLPVWLN  | 1032  | >VHL-L89H-n RVVLPVWHN  | 180   | 852   |
| >VHL-L89H-w RVVLPVWL   | 351   | >VHL-L89H-n RVVLPVWH   | 8390  | 8039  |
| >VHL-L89H-w RVVLPVWLN  | 202   | >VHL-L89H-n RVVLPVWHN  | 263   | 61    |
| >VHL-L89H-w RVVLPVWLN  | 355   | >VHL-L89H-n RVVLPVWHN  | 401   | 46    |
| >VHL-L89H-w RVVLPVWL   | 89    | >VHL-L89H-n RVVLPVWH   | 4947  | 4858  |
| >VHL-L89H-w RVVLPVWLN  | 9     | >VHL-L89H-n RVVLPVWHN  | 11    | 2     |
| >VHL-L89H-w RVVLPVWLN  | 56    | >VHL-L89H-n RVVLPVWHN  | 48    | 8     |
| >VHL-L89H-w RVVLPVWLN  | 230   | >VHL-L89H-n RVVLPVWHN  | 1841  | 1611  |
| >VHL-L89H-w RVVLPVWLN  | 320   | >VHL-L89H-n RVVLPVWHN  | 1325  | 1005  |
| >VHL-L89H-w PRVVPVWLI  | 364   | >VHL-L89H-n PRVVPVWH   | 503   | 139   |
| >VHL-L89H-w PRVVPVWL   | 89    | >VHL-L89H-n PRVVPVWH   | 4328  | 4239  |
| >VHL-L89H-w PRVVPVWLI  | 385   | >VHL-L89H-n PRVVPVWH   | 693   | 308   |
| >VHL-L89H-w SPRVLPVWI  | 61    | >VHL-L89H-n SPRVLPVWI  | 4516  | 4455  |
| >VHL-L89P-w LNFDGEPQ\` | 165   | >VHL-L89P-n PNFDGEPQ\` | 6974  | 6809  |
| >VHL-L89P-w LNFDGEPQ\` | 111   | >VHL-L89P-n PNFDGEPQ\` | 1099  | 988   |
| >VHL-L89P-w WLNFDGEPQ  | 50    | >VHL-L89P-n WPNFDGEPQ  | 1862  | 1812  |
| >VHL-L89P-w WLNFDGEPQ  | 54    | >VHL-L89P-n WPNFDGEPQ  | 4246  | 4192  |
| >VHL-L89P-w WLNFDGEPQ  | 52    | >VHL-L89P-n WPNFDGEPQ  | 591   | 539   |
| >VHL-L89P-w WLNFDGEPQ  | 102   | >VHL-L89P-n WPNFDGEPQ  | 749   | 647   |
| >VHL-L89P-w WLNFDGEPQ  | 11997 | >VHL-L89P-n WPNFDGEPQ  | 170   | 11827 |
| >VHL-L89P-w WLNFDGEPQ  | 90    | >VHL-L89P-n WPNFDGEPQ  | 8     | 82    |
| >VHL-L89P-w WLNFDGEPQ  | 24218 | >VHL-L89P-n WPNFDGEPQ  | 120   | 24098 |
| >VHL-L89P-w WLNFDGEPQ  | 182   | >VHL-L89P-n WPNFDGEPQ  | 2587  | 2405  |
| >VHL-L89P-w RSPRVLPVV  | 147   | >VHL-L89P-n RSPRVLPVV  | 4552  | 4405  |
| >VHL-L89P-w RSPRVLPVV  | 301   | >VHL-L89P-n RSPRVLPVV  | 20258 | 19957 |
| >VHL-L89P-w RSPRVLPVV  | 4     | >VHL-L89P-n RSPRVLPVV  | 825   | 821   |
| >VHL-L89P-w RSPRVLPVV  | 493   | >VHL-L89P-n RSPRVLPVV  | 16701 | 16208 |
| >VHL-L89P-w RSPRVLPVV  | 345   | >VHL-L89P-n RSPRVLPVV  | 24327 | 23982 |

|                        |       |                        |       |       |
|------------------------|-------|------------------------|-------|-------|
| >VHL-L89P-w VWLNFDGE   | 227   | >VHL-L89P-r VWPNFDFGE  | 743   | 516   |
| >VHL-L89P-w VWLNFDGEP  | 304   | >VHL-L89P-r VWPNFDFGEP | 866   | 562   |
| >VHL-L89P-w LPVWLNFDG  | 285   | >VHL-L89P-r LPVWPNFDG  | 686   | 401   |
| >VHL-L89P-w LPVWLNFD   | 106   | >VHL-L89P-r LPVWPNFD   | 113   | 7     |
| >VHL-L89P-w LPVWLNFDG  | 251   | >VHL-L89P-r LPVWPNFDG  | 171   | 80    |
| >VHL-L89P-w LPVWLNFDG  | 345   | >VHL-L89P-r LPVWPNFDG  | 255   | 90    |
| >VHL-L89P-w VLPVWLNf   | 235   | >VHL-L89P-r VLPVWPNF   | 213   | 22    |
| >VHL-L89P-w VLPVWLNf   | 454   | >VHL-L89P-r VLPVWPNF   | 420   | 34    |
| >VHL-L89P-w VVLPVWLNf  | 443   | >VHL-L89P-r VVLPVWPNF  | 349   | 94    |
| >VHL-L89P-w VVLPVWLNf  | 261   | >VHL-L89P-r VVLPVWPNF  | 86    | 175   |
| >VHL-L89P-w VVLPVWLNf  | 42    | >VHL-L89P-r VVLPVWPNF  | 46    | 4     |
| >VHL-L89P-w VVLPVWLNf  | 449   | >VHL-L89P-r VVLPVWPNF  | 589   | 140   |
| >VHL-L89P-w VVLPVWLNf  | 190   | >VHL-L89P-r VVLPVWPNF  | 342   | 152   |
| >VHL-L89P-w VVLPVWLNf  | 70    | >VHL-L89P-r VVLPVWPNF  | 432   | 362   |
| >VHL-L89P-w VVLPVWLNf  | 461   | >VHL-L89P-r VVLPVWPNF  | 452   | 9     |
| >VHL-L89P-w VVLPVWLNf  | 20    | >VHL-L89P-r VVLPVWPNF  | 28    | 8     |
| >VHL-L89P-w VVLPVWLNf  | 399   | >VHL-L89P-r VVLPVWPNF  | 503   | 104   |
| >VHL-L89P-w RVVLPVWL   | 415   | >VHL-L89P-r RVVLPVWP   | 15357 | 14942 |
| >VHL-L89P-w RVVLPVWLN  | 182   | >VHL-L89P-r RVVLPVWPN  | 48    | 134   |
| >VHL-L89P-w RVVLPVWLN  | 1032  | >VHL-L89P-r RVVLPVWPN  | 425   | 607   |
| >VHL-L89P-w RVVLPVWL   | 351   | >VHL-L89P-r RVVLPVWP   | 12189 | 11838 |
| >VHL-L89P-w RVVLPVWLN  | 202   | >VHL-L89P-r RVVLPVWPN  | 321   | 119   |
| >VHL-L89P-w RVVLPVWLN  | 355   | >VHL-L89P-r RVVLPVWPN  | 264   | 91    |
| >VHL-L89P-w RVVLPVWL   | 89    | >VHL-L89P-r RVVLPVWP   | 17793 | 17704 |
| >VHL-L89P-w RVVLPVWLN  | 9     | >VHL-L89P-r RVVLPVWPN  | 9     | 0     |
| >VHL-L89P-w RVVLPVWLN  | 56    | >VHL-L89P-r RVVLPVWPN  | 106   | 50    |
| >VHL-L89P-w RVVLPVWLN  | 230   | >VHL-L89P-r RVVLPVWPN  | 590   | 360   |
| >VHL-L89P-w RVVLPVWLN  | 320   | >VHL-L89P-r RVVLPVWPN  | 1307  | 987   |
| >VHL-L89P-w PRVVLVWLI  | 364   | >VHL-L89P-r PRVVLVWPI  | 426   | 62    |
| >VHL-L89P-w PRVVLVWL   | 89    | >VHL-L89P-r PRVVLVWP   | 16594 | 16505 |
| >VHL-L89P-w PRVVLVWLI  | 385   | >VHL-L89P-r PRVVLVWPI  | 588   | 203   |
| >VHL-L89P-w SPRVLPVWI  | 61    | >VHL-L89P-r SPRVLPVWI  | 6319  | 6258  |
| >VHL-L89P-w LNFDGEPQP\ | 648   | >VHL-L89P-r RNFDGEPQP' | 158   | 490   |
| >VHL-L89P-w LNFDGEPQP\ | 165   | >VHL-L89P-r RNFDGEPQP' | 158   | 7     |
| >VHL-L89P-w LNFDGEPQP\ | 111   | >VHL-L89P-r RNFDGEPQP' | 61    | 50    |
| >VHL-L89P-w LNFDGEPQP\ | 1965  | >VHL-L89P-r RNFDGEPQP' | 219   | 1746  |
| >VHL-L89P-w WLNFDGEPQ  | 50    | >VHL-L89P-r WRNFDGEPQ  | 1984  | 1934  |
| >VHL-L89P-w WLNFDGEPQ  | 54    | >VHL-L89P-r WRNFDGEPQ  | 4949  | 4895  |
| >VHL-L89P-w WLNFDGEPQ  | 52    | >VHL-L89P-r WRNFDGEPQ  | 1969  | 1917  |
| >VHL-L89P-w WLNFDGEPQ  | 102   | >VHL-L89P-r WRNFDGEPQ  | 54    | 48    |
| >VHL-L89P-w WLNFDGEPQ  | 90    | >VHL-L89P-r WRNFDGEPQ  | 1272  | 1182  |
| >VHL-L89P-w WLNFDGEPQ  | 182   | >VHL-L89P-r WRNFDGEPQ  | 1378  | 1196  |
| >VHL-L89P-w RSPRVLPVW  | 12886 | >VHL-L89P-r RSPRVLPVW  | 35    | 12851 |

|                             |       |                              |       |       |
|-----------------------------|-------|------------------------------|-------|-------|
| >VHL-L89R- $\nu$ RSPRVVLPVV | 147   | >VHL-L89R- $\eta$ RSPRVVLPVV | 3681  | 3534  |
| >VHL-L89R- $\nu$ RSPRVVLPVV | 301   | >VHL-L89R- $\eta$ RSPRVVLPVV | 15571 | 15270 |
| >VHL-L89R- $\nu$ RSPRVVLPVV | 4     | >VHL-L89R- $\eta$ RSPRVVLPVV | 1220  | 1216  |
| >VHL-L89R- $\nu$ RSPRVVLPVV | 493   | >VHL-L89R- $\eta$ RSPRVVLPVV | 6099  | 5606  |
| >VHL-L89R- $\nu$ RSPRVVLPVV | 30204 | >VHL-L89R- $\eta$ RSPRVVLPVV | 178   | 30026 |
| >VHL-L89R- $\nu$ RSPRVVLPVV | 345   | >VHL-L89R- $\eta$ RSPRVVLPVV | 35095 | 34750 |
| >VHL-L89R- $\nu$ VWLNFDGE   | 227   | >VHL-L89R- $\eta$ VWRNFDGE   | 606   | 379   |
| >VHL-L89R- $\nu$ VWLNFDGEP  | 304   | >VHL-L89R- $\eta$ VWRNFDGEP  | 720   | 416   |
| >VHL-L89R- $\nu$ LPVWLNFDG  | 285   | >VHL-L89R- $\eta$ LPVWRNFDG  | 1361  | 1076  |
| >VHL-L89R- $\nu$ LPVWLNFD   | 106   | >VHL-L89R- $\eta$ LPVWRNFD   | 192   | 86    |
| >VHL-L89R- $\nu$ LPVWLNFDG  | 251   | >VHL-L89R- $\eta$ LPVWRNFDG  | 455   | 204   |
| >VHL-L89R- $\nu$ LPVWLNFDG  | 345   | >VHL-L89R- $\eta$ LPVWRNFDG  | 516   | 171   |
| >VHL-L89R- $\nu$ VLPVWLNF   | 235   | >VHL-L89R- $\eta$ VLPVWRNF   | 773   | 538   |
| >VHL-L89R- $\nu$ VLPVWLNF   | 454   | >VHL-L89R- $\eta$ VLPVWRNF   | 1527  | 1073  |
| >VHL-L89R- $\nu$ VVLPVWLNF  | 443   | >VHL-L89R- $\eta$ VVLPVWRNF  | 897   | 454   |
| >VHL-L89R- $\nu$ VVLPVWLNF  | 261   | >VHL-L89R- $\eta$ VVLPVWRNF  | 1480  | 1219  |
| >VHL-L89R- $\nu$ VVLPVWLNF  | 42    | >VHL-L89R- $\eta$ VVLPVWRNF  | 179   | 137   |
| >VHL-L89R- $\nu$ VVLPVWLNF  | 449   | >VHL-L89R- $\eta$ VVLPVWRNF  | 1354  | 905   |
| >VHL-L89R- $\nu$ VVLPVWLNF  | 190   | >VHL-L89R- $\eta$ VVLPVWRNF  | 848   | 658   |
| >VHL-L89R- $\nu$ VVLPVWLNF  | 70    | >VHL-L89R- $\eta$ VVLPVWRNF  | 2167  | 2097  |
| >VHL-L89R- $\nu$ VVLPVWLNF  | 461   | >VHL-L89R- $\eta$ VVLPVWRNF  | 704   | 243   |
| >VHL-L89R- $\nu$ VVLPVWLNF  | 20    | >VHL-L89R- $\eta$ VVLPVWRNF  | 59    | 39    |
| >VHL-L89R- $\nu$ VVLPVWLNF  | 399   | >VHL-L89R- $\eta$ VVLPVWRNF  | 524   | 125   |
| >VHL-L89R- $\nu$ RVVLPVWL   | 415   | >VHL-L89R- $\eta$ RVVLPVWR   | 21477 | 21062 |
| >VHL-L89R- $\nu$ RVVLPVWL   | 20569 | >VHL-L89R- $\eta$ RVVLPVWR   | 453   | 20116 |
| >VHL-L89R- $\nu$ RVVLPVWLN  | 182   | >VHL-L89R- $\eta$ RVVLPVWRN  | 110   | 72    |
| >VHL-L89R- $\nu$ RVVLPVWL   | 7940  | >VHL-L89R- $\eta$ RVVLPVWR   | 18    | 7922  |
| >VHL-L89R- $\nu$ RVVLPVWL   | 351   | >VHL-L89R- $\eta$ RVVLPVWR   | 11406 | 11055 |
| >VHL-L89R- $\nu$ RVVLPVWLN  | 202   | >VHL-L89R- $\eta$ RVVLPVWRN  | 319   | 117   |
| >VHL-L89R- $\nu$ RVVLPVWL   | 29730 | >VHL-L89R- $\eta$ RVVLPVWR   | 165   | 29565 |
| >VHL-L89R- $\nu$ RVVLPVWLN  | 355   | >VHL-L89R- $\eta$ RVVLPVWRN  | 502   | 147   |
| >VHL-L89R- $\nu$ RVVLPVWL   | 89    | >VHL-L89R- $\eta$ RVVLPVWR   | 13887 | 13798 |
| >VHL-L89R- $\nu$ RVVLPVWLN  | 9     | >VHL-L89R- $\eta$ RVVLPVWRN  | 13    | 4     |
| >VHL-L89R- $\nu$ RVVLPVWLN  | 56    | >VHL-L89R- $\eta$ RVVLPVWRN  | 668   | 612   |
| >VHL-L89R- $\nu$ RVVLPVWLN  | 230   | >VHL-L89R- $\eta$ RVVLPVWRN  | 673   | 443   |
| >VHL-L89R- $\nu$ RVVLPVWL   | 20681 | >VHL-L89R- $\eta$ RVVLPVWR   | 63    | 20618 |
| >VHL-L89R- $\nu$ RVVLPVWLN  | 320   | >VHL-L89R- $\eta$ RVVLPVWRN  | 2902  | 2582  |
| >VHL-L89R- $\nu$ PRVVLPVWLI | 364   | >VHL-L89R- $\eta$ PRVVLPVWR  | 493   | 129   |
| >VHL-L89R- $\nu$ PRVVLPVWL  | 89    | >VHL-L89R- $\eta$ PRVVLPVWR  | 3203  | 3114  |
| >VHL-L89R- $\nu$ PRVVLPVWLI | 385   | >VHL-L89R- $\eta$ PRVVLPVWR  | 586   | 201   |
| >VHL-L89R- $\nu$ SPRVVLPVWI | 16337 | >VHL-L89R- $\eta$ SPRVVLPVWI | 227   | 16110 |
| >VHL-L89R- $\nu$ SPRVVLPVWI | 61    | >VHL-L89R- $\eta$ SPRVVLPVWI | 3658  | 3597  |
| >VHL-M1I-wi MPRRAENW        | 110   | >VHL-M1I-mi MPRRAENW         | 217   | 107   |

|                       |       |                        |      |       |
|-----------------------|-------|------------------------|------|-------|
| >VHL-M1I-wi MPRRAENWI | 37    | >VHL-M1I-mi IPRRAENWDI | 63   | 26    |
| >VHL-M1I-wi MPRRAENWI | 280   | >VHL-M1I-mi IPRRAENWDI | 3235 | 2955  |
| >VHL-M1I-wi MPRRAENW  | 25    | >VHL-M1I-mi IPRRAENW   | 78   | 53    |
| >VHL-M1I-wi MPRRAENWI | 309   | >VHL-M1I-mi IPRRAENWD  | 2547 | 2238  |
| >VHL-M1I-wi MPRRAENWI | 9     | >VHL-M1I-mi IPRRAENWDI | 34   | 25    |
| >VHL-M1I-wi MPRRAENW  | 21    | >VHL-M1I-mi IPRRAENW   | 23   | 2     |
| >VHL-M1I-wi MPRRAENW  | 64    | >VHL-M1I-mi IPRRAENW   | 1100 | 1036  |
| >VHL-M211I-LTQERIAHQR | 9     | >VHL-M211I-LTQERIAHQR  | 37   | 28    |
| >VHL-M211I-LTQERIAHQR | 109   | >VHL-M211I-LTQERIAHQR  | 1582 | 1473  |
| >VHL-M211I-LTQERIAHQR | 931   | >VHL-M211I-LTQERIAHQR  | 35   | 896   |
| >VHL-M211I-ERIAHQRM   | 303   | >VHL-M211I-ERIAHQRI    | 8674 | 8371  |
| >VHL-M211I-QERIAHQRM  | 7565  | >VHL-M211I-QERIAHQRI   | 286  | 7279  |
| >VHL-M211I-QERIAHQRM  | 464   | >VHL-M211I-QERIAHQRI   | 441  | 23    |
| >VHL-M211I-QERIAHQRM  | 1263  | >VHL-M211I-QERIAHQRI   | 404  | 859   |
| >VHL-M211I-QERIAHQRM  | 643   | >VHL-M211I-QERIAHQRI   | 64   | 579   |
| >VHL-N131K-NQTELFVPSL | 527   | >VHL-N131K-KQTELFVPSL  | 239  | 288   |
| >VHL-N131K-NQTELFVP   | 2129  | >VHL-N131K-KQTELFVP    | 476  | 1653  |
| >VHL-N131K-NQTELVPS   | 68    | >VHL-N131K-KQTELVPS    | 21   | 47    |
| >VHL-N131K-NQTELFVPSL | 231   | >VHL-N131K-KQTELFVPSL  | 104  | 127   |
| >VHL-N131K-NQTELFVPSL | 2606  | >VHL-N131K-KQTELFVPSL  | 369  | 2237  |
| >VHL-N131K-NQTELFVPSL | 2294  | >VHL-N131K-KQTELFVPSL  | 488  | 1806  |
| >VHL-N131K-NQTELFVPSL | 3390  | >VHL-N131K-KQTELFVPSL  | 270  | 3120  |
| >VHL-N131K-NQTELFVPSL | 10560 | >VHL-N131K-KQTELFVPSL  | 148  | 10412 |
| >VHL-N131K-NQTELFVPSL | 316   | >VHL-N131K-KQTELFVPSL  | 36   | 280   |
| >VHL-N131K-NQTELFVPSL | 42    | >VHL-N131K-KQTELFVPSL  | 418  | 376   |
| >VHL-N131K-NQTELFVPSL | 513   | >VHL-N131K-KQTELFVPSL  | 147  | 366   |
| >VHL-N131K-VNQTELVPS  | 4568  | >VHL-N131K-VKQTELVPS   | 114  | 4454  |
| >VHL-N131K-LVNQTELV   | 493   | >VHL-N131K-LVKQTELV    | 3034 | 2541  |
| >VHL-N131K-LVNQTELV   | 423   | >VHL-N131K-LVKQTELV    | 868  | 445   |
| >VHL-N131K-LVNQTELV   | 137   | >VHL-N131K-LVKQTELV    | 765  | 628   |
| >VHL-N131K-LVNQTELV   | 66    | >VHL-N131K-LVKQTELV    | 1683 | 1617  |
| >VHL-N131K-LVNQTELV   | 56    | >VHL-N131K-LVKQTELV    | 1941 | 1885  |
| >VHL-N131K-LVNQTELV   | 17    | >VHL-N131K-LVKQTELV    | 55   | 38    |
| >VHL-N131K-LVNQTELV   | 2260  | >VHL-N131K-LVKQTELV    | 88   | 2172  |
| >VHL-N131K-LVNQTELF   | 220   | >VHL-N131K-LVKQTELF    | 133  | 87    |
| >VHL-N131K-LVNQTELF   | 74    | >VHL-N131K-LVKQTELF    | 2719 | 2645  |
| >VHL-N131K-LLVNQTEL   | 146   | >VHL-N131K-LLVKQTEL    | 266  | 120   |
| >VHL-N131K-LLVNQTELV  | 17    | >VHL-N131K-LLVKQTELV   | 55   | 38    |
| >VHL-N131K-LLVNQTEL   | 11    | >VHL-N131K-LLVKQTEL    | 13   | 2     |
| >VHL-N131K-LLVNQTELF  | 408   | >VHL-N131K-LLVKQTELF   | 580  | 172   |
| >VHL-N131K-LLVNQTELV  | 15    | >VHL-N131K-LLVKQTELV   | 44   | 29    |
| >VHL-N131K-LLVNQTEL   | 32    | >VHL-N131K-LLVKQTEL    | 54   | 22    |
| >VHL-N131K-LLVNQTELV  | 28    | >VHL-N131K-LLVKQTELV   | 48   | 20    |

|                       |       |                       |       |       |
|-----------------------|-------|-----------------------|-------|-------|
| >VHL-N131K·LLVNQTEL   | 155   | >VHL-N131K·LLVKQTEL   | 341   | 186   |
| >VHL-N131K·LLVNQTELFV | 61    | >VHL-N131K·LLVKQTELFV | 156   | 95    |
| >VHL-N131K·LLVNQTEL   | 20    | >VHL-N131K·LLVKQTEL   | 65    | 45    |
| >VHL-N131K·LLVNQTELFV | 3     | >VHL-N131K·LLVKQTELFV | 6     | 3     |
| >VHL-N131K·LLVNQTEL   | 29    | >VHL-N131K·LLVKQTEL   | 142   | 113   |
| >VHL-N131K·LLVNQTELFV | 6     | >VHL-N131K·LLVKQTELFV | 11    | 5     |
| >VHL-N131K·LLVNQTEL   | 65    | >VHL-N131K·LLVKQTEL   | 125   | 60    |
| >VHL-N131K·LLVNQTELFV | 7     | >VHL-N131K·LLVKQTELFV | 8     | 1     |
| >VHL-N131K·LLVNQTEL   | 279   | >VHL-N131K·LLVKQTEL   | 1145  | 866   |
| >VHL-N131K·LLVNQTELFV | 9     | >VHL-N131K·LLVKQTELFV | 29    | 20    |
| >VHL-N131K·LLVNQTEL   | 3     | >VHL-N131K·LLVKQTEL   | 6     | 3     |
| >VHL-N131K·LLVNQTELFV | 2     | >VHL-N131K·LLVKQTELFV | 3     | 1     |
| >VHL-N131K·LLVNQTELF  | 85    | >VHL-N131K·LLVKQTELF  | 110   | 25    |
| >VHL-N131K·LLVNQTELF  | 77    | >VHL-N131K·LLVKQTELF  | 109   | 32    |
| >VHL-N131K·GLLVNQTEL  | 76    | >VHL-N131K·GLLVKQTEL  | 13555 | 13479 |
| >VHL-N131K·GLLVNQTEL  | 171   | >VHL-N131K·GLLVKQTEL  | 191   | 20    |
| >VHL-N131K·GLLVNQTELF | 31    | >VHL-N131K·GLLVKQTELF | 31    | 0     |
| >VHL-N131K·GLLVNQTEL  | 66    | >VHL-N131K·GLLVKQTEL  | 56    | 10    |
| >VHL-N131K·GLLVNQTELF | 83    | >VHL-N131K·GLLVKQTELF | 76    | 7     |
| >VHL-N131K·GLLVNQTELF | 237   | >VHL-N131K·GLLVKQTELF | 195   | 42    |
| >VHL-N131K·GLLVNQTELF | 81    | >VHL-N131K·GLLVKQTELF | 107   | 26    |
| >VHL-N131K·GLLVNQTEL  | 27    | >VHL-N131K·GLLVKQTEL  | 73    | 46    |
| >VHL-N131K·GLLVNQTELF | 3     | >VHL-N131K·GLLVKQTELF | 5     | 2     |
| >VHL-N131K·GLLVNQTEL  | 17    | >VHL-N131K·GLLVKQTEL  | 54    | 37    |
| >VHL-N131K·GLLVNQTELF | 4     | >VHL-N131K·GLLVKQTELF | 6     | 2     |
| >VHL-N131K·GLLVNQTEL  | 17    | >VHL-N131K·GLLVKQTEL  | 21    | 4     |
| >VHL-N131K·GLLVNQTELF | 4     | >VHL-N131K·GLLVKQTELF | 5     | 1     |
| >VHL-N131K·GLLVNQTEL  | 74    | >VHL-N131K·GLLVKQTEL  | 333   | 259   |
| >VHL-N131K·GLLVNQTELF | 5     | >VHL-N131K·GLLVKQTELF | 8     | 3     |
| >VHL-N131K·GLLVNQTEL  | 8     | >VHL-N131K·GLLVKQTEL  | 14    | 6     |
| >VHL-N131K·GLLVNQTELF | 4     | >VHL-N131K·GLLVKQTELF | 6     | 2     |
| >VHL-N131K·GLLVNQTELF | 484   | >VHL-N131K·GLLVKQTELF | 1309  | 825   |
| >VHL-N131K·HDGLLVNQTI | 237   | >VHL-N131K·HDGLLVKQTE | 345   | 108   |
| >VHL-N131K·GTHDGLLVN  | 21170 | >VHL-N131K·GTHDGLLVK  | 292   | 20878 |
| >VHL-N131K·GTHDGLLVN  | 18273 | >VHL-N131K·GTHDGLLVK  | 20    | 18253 |
| >VHL-N131K·GTHDGLLVN  | 7313  | >VHL-N131K·GTHDGLLVK  | 15    | 7298  |
| >VHL-N131Y·NQTELFVPSL | 2209  | >VHL-N131Y·YQTELFVPSL | 146   | 2063  |
| >VHL-N131Y·NQTELFVPSL | 527   | >VHL-N131Y·YQTELFVPSL | 64    | 463   |
| >VHL-N131Y·NQTELFVPSL | 1326  | >VHL-N131Y·YQTELFVPSL | 181   | 1145  |
| >VHL-N131Y·NQTELFVP   | 2129  | >VHL-N131Y·YQTELFVP   | 114   | 2015  |
| >VHL-N131Y·NQTELFVPS  | 68    | >VHL-N131Y·YQTELFVPS  | 9     | 59    |
| >VHL-N131Y·NQTELFVPSL | 231   | >VHL-N131Y·YQTELFVPSL | 40    | 191   |
| >VHL-N131Y·NQTELFVPSL | 2606  | >VHL-N131Y·YQTELFVPSL | 42    | 2564  |

|                      |       |                      |     |       |
|----------------------|-------|----------------------|-----|-------|
| >VHL-N131Y-NQTELVPSL | 2294  | >VHL-N131Y-YQTELVPSL | 59  | 2235  |
| >VHL-N131Y-NQTELVPSL | 3390  | >VHL-N131Y-YQTELVPSL | 49  | 3341  |
| >VHL-N131Y-NQTELVPSL | 11676 | >VHL-N131Y-YQTELVPSL | 118 | 11558 |
| >VHL-N131Y-NQTELVPSL | 3014  | >VHL-N131Y-YQTELVPSL | 302 | 2712  |
| >VHL-N131Y-NQTELVPS  | 6002  | >VHL-N131Y-YQTELVPS  | 474 | 5528  |
| >VHL-N131Y-NQTELVPSL | 316   | >VHL-N131Y-YQTELVPSL | 21  | 295   |
| >VHL-N131Y-NQTELVPSL | 42    | >VHL-N131Y-YQTELVPSL | 20  | 22    |
| >VHL-N131Y-NQTELVPSL | 513   | >VHL-N131Y-YQTELVPSL | 163 | 350   |
| >VHL-N131Y-VNQTFLVPS | 17433 | >VHL-N131Y-VYQTFLVPS | 288 | 17145 |
| >VHL-N131Y-VNQTFLVPS | 17037 | >VHL-N131Y-VYQTFLVPS | 184 | 16853 |
| >VHL-N131Y-VNQTFLV   | 25146 | >VHL-N131Y-VYQTFLV   | 136 | 25010 |
| >VHL-N131Y-VNQTFLVPS | 20568 | >VHL-N131Y-VYQTFLVPS | 9   | 20559 |
| >VHL-N131Y-VNQTFLV   | 13864 | >VHL-N131Y-VYQTFLV   | 312 | 13552 |
| >VHL-N131Y-VNQTFLVPS | 9278  | >VHL-N131Y-VYQTFLVPS | 242 | 9036  |
| >VHL-N131Y-DAGTHDGLL | 32024 | >VHL-N131Y-DAGTHDGLL | 419 | 31605 |
| >VHL-N131Y-DAGTHDGLL | 18009 | >VHL-N131Y-DAGTHDGLL | 252 | 17757 |
| >VHL-N131Y-LVNQTFLV  | 1621  | >VHL-N131Y-LVYQTFLV  | 139 | 1482  |
| >VHL-N131Y-LVNQTFLV  | 493   | >VHL-N131Y-LVYQTFLV  | 343 | 150   |
| >VHL-N131Y-LVNQTFLV  | 423   | >VHL-N131Y-LVYQTFLV  | 136 | 287   |
| >VHL-N131Y-LVNQTFLV  | 137   | >VHL-N131Y-LVYQTFLV  | 26  | 111   |
| >VHL-N131Y-LVNQTFLV  | 66    | >VHL-N131Y-LVYQTFLV  | 9   | 57    |
| >VHL-N131Y-LVNQTFLV  | 1677  | >VHL-N131Y-LVYQTFLV  | 389 | 1288  |
| >VHL-N131Y-LVNQTFLV  | 56    | >VHL-N131Y-LVYQTFLV  | 11  | 45    |
| >VHL-N131Y-LVNQTFLV  | 529   | >VHL-N131Y-LVYQTFLV  | 473 | 56    |
| >VHL-N131Y-LVNQTFLV  | 17    | >VHL-N131Y-LVYQTFLV  | 7   | 10    |
| >VHL-N131Y-LVNQTFL   | 1892  | >VHL-N131Y-LVYQTFL   | 340 | 1552  |
| >VHL-N131Y-LVNQTFLV  | 1642  | >VHL-N131Y-LVYQTFLV  | 240 | 1402  |
| >VHL-N131Y-LVNQTFL   | 220   | >VHL-N131Y-LVYQTFL   | 108 | 112   |
| >VHL-N131Y-LVNQTFL   | 748   | >VHL-N131Y-LVYQTFL   | 126 | 622   |
| >VHL-N131Y-LVNQTFL   | 870   | >VHL-N131Y-LVYQTFL   | 31  | 839   |
| >VHL-N131Y-LVNQTFL   | 733   | >VHL-N131Y-LVYQTFL   | 251 | 482   |
| >VHL-N131Y-LVNQTFL   | 74    | >VHL-N131Y-LVYQTFL   | 56  | 18    |
| >VHL-N131Y-LLVNQTEL  | 146   | >VHL-N131Y-LLVYQTEL  | 111 | 35    |
| >VHL-N131Y-LLVNQTELV | 17    | >VHL-N131Y-LLVYQTELV | 23  | 6     |
| >VHL-N131Y-LLVNQTEL  | 11    | >VHL-N131Y-LLVYQTEL  | 9   | 2     |
| >VHL-N131Y-LLVNQTELV | 408   | >VHL-N131Y-LLVYQTELV | 503 | 95    |
| >VHL-N131Y-LLVNQTELV | 15    | >VHL-N131Y-LLVYQTELV | 28  | 13    |
| >VHL-N131Y-LLVNQTEL  | 32    | >VHL-N131Y-LLVYQTEL  | 47  | 15    |
| >VHL-N131Y-LLVNQTELV | 28    | >VHL-N131Y-LLVYQTELV | 46  | 18    |
| >VHL-N131Y-LLVNQTEL  | 155   | >VHL-N131Y-LLVYQTEL  | 231 | 76    |
| >VHL-N131Y-LLVNQTELV | 61    | >VHL-N131Y-LLVYQTELV | 76  | 15    |
| >VHL-N131Y-LLVNQTEL  | 20    | >VHL-N131Y-LLVYQTEL  | 94  | 74    |
| >VHL-N131Y-LLVNQTELV | 3     | >VHL-N131Y-LLVYQTELV | 10  | 7     |

|                       |       |                       |       |       |
|-----------------------|-------|-----------------------|-------|-------|
| >VHL-N131Y-LLVNQTEL   | 29    | >VHL-N131Y-LLVYQTEL   | 118   | 89    |
| >VHL-N131Y-LLVNQTELFV | 6     | >VHL-N131Y-LLVYQTELFV | 12    | 6     |
| >VHL-N131Y-LLVNQTEL   | 65    | >VHL-N131Y-LLVYQTEL   | 299   | 234   |
| >VHL-N131Y-LLVNQTELFV | 7     | >VHL-N131Y-LLVYQTELFV | 13    | 6     |
| >VHL-N131Y-LLVNQTEL   | 279   | >VHL-N131Y-LLVYQTEL   | 1239  | 960   |
| >VHL-N131Y-LLVNQTELFV | 9     | >VHL-N131Y-LLVYQTELFV | 33    | 24    |
| >VHL-N131Y-LLVNQTEL   | 3     | >VHL-N131Y-LLVYQTEL   | 8     | 5     |
| >VHL-N131Y-LLVNQTELFV | 2     | >VHL-N131Y-LLVYQTELFV | 5     | 3     |
| >VHL-N131Y-LLVNQTELF  | 784   | >VHL-N131Y-LLVYQTELF  | 277   | 507   |
| >VHL-N131Y-LLVNQTELF  | 645   | >VHL-N131Y-LLVYQTELF  | 410   | 235   |
| >VHL-N131Y-LLVNQTELF  | 85    | >VHL-N131Y-LLVYQTELF  | 86    | 1     |
| >VHL-N131Y-LLVNQTELF  | 77    | >VHL-N131Y-LLVYQTELF  | 79    | 2     |
| >VHL-N131Y-GLLVNQTEL  | 76    | >VHL-N131Y-GLLVYQTEL  | 12848 | 12772 |
| >VHL-N131Y-GLLVNQTEL  | 171   | >VHL-N131Y-GLLVYQTEL  | 22    | 149   |
| >VHL-N131Y-GLLVNQTELF | 31    | >VHL-N131Y-GLLVYQTELF | 14    | 17    |
| >VHL-N131Y-GLLVNQTEL  | 66    | >VHL-N131Y-GLLVYQTEL  | 13    | 53    |
| >VHL-N131Y-GLLVNQTELF | 83    | >VHL-N131Y-GLLVYQTELF | 34    | 49    |
| >VHL-N131Y-GLLVNQTEL  | 695   | >VHL-N131Y-GLLVYQTEL  | 312   | 383   |
| >VHL-N131Y-GLLVNQTELF | 237   | >VHL-N131Y-GLLVYQTELF | 164   | 73    |
| >VHL-N131Y-GLLVNQTEL  | 1444  | >VHL-N131Y-GLLVYQTEL  | 356   | 1088  |
| >VHL-N131Y-GLLVNQTELF | 81    | >VHL-N131Y-GLLVYQTELF | 40    | 41    |
| >VHL-N131Y-GLLVNQTEL  | 27    | >VHL-N131Y-GLLVYQTEL  | 15    | 12    |
| >VHL-N131Y-GLLVNQTELF | 3     | >VHL-N131Y-GLLVYQTELF | 3     | 0     |
| >VHL-N131Y-GLLVNQTEL  | 17    | >VHL-N131Y-GLLVYQTEL  | 30    | 13    |
| >VHL-N131Y-GLLVNQTELF | 4     | >VHL-N131Y-GLLVYQTELF | 5     | 1     |
| >VHL-N131Y-GLLVNQTEL  | 17    | >VHL-N131Y-GLLVYQTEL  | 15    | 2     |
| >VHL-N131Y-GLLVNQTELF | 4     | >VHL-N131Y-GLLVYQTELF | 4     | 0     |
| >VHL-N131Y-GLLVNQTEL  | 74    | >VHL-N131Y-GLLVYQTEL  | 117   | 43    |
| >VHL-N131Y-GLLVNQTELF | 5     | >VHL-N131Y-GLLVYQTELF | 6     | 1     |
| >VHL-N131Y-GLLVNQTEL  | 8     | >VHL-N131Y-GLLVYQTEL  | 6     | 2     |
| >VHL-N131Y-GLLVNQTELF | 4     | >VHL-N131Y-GLLVYQTELF | 4     | 0     |
| >VHL-N131Y-GLLVNQTELF | 484   | >VHL-N131Y-GLLVYQTELF | 326   | 158   |
| >VHL-N131Y-HDGLLVNQTI | 237   | >VHL-N131Y-HDGLLVYQTE | 142   | 95    |
| >VHL-N131Y-GTHDGLLVN  | 23116 | >VHL-N131Y-GTHDGLLVY  | 493   | 22623 |
| >VHL-N131Y-GTHDGLLVN  | 18273 | >VHL-N131Y-GTHDGLLVY  | 393   | 17880 |
| >VHL-N131Y-GTHDGLLVN  | 19119 | >VHL-N131Y-GTHDGLLVY  | 86    | 19033 |
| >VHL-N131Y-GTHDGLLVN  | 27156 | >VHL-N131Y-GTHDGLLVY  | 72    | 27084 |
| >VHL-N131Y-GTHDGLLVN  | 12153 | >VHL-N131Y-GTHDGLLVY  | 12    | 12141 |
| >VHL-N131Y-GTHDGLLVN  | 23626 | >VHL-N131Y-GTHDGLLVY  | 74    | 23552 |
| >VHL-N131Y-GTHDGLLVN  | 22024 | >VHL-N131Y-GTHDGLLVY  | 231   | 21793 |
| >VHL-N131Y-GTHDGLLVN  | 17063 | >VHL-N131Y-GTHDGLLVY  | 85    | 16978 |
| >VHL-N131Y-GTHDGLLVN  | 9155  | >VHL-N131Y-GTHDGLLVY  | 4     | 9151  |
| >VHL-N131Y-GTHDGLLVN  | 2415  | >VHL-N131Y-GTHDGLLVY  | 10    | 2405  |



|                        |       |                        |      |       |
|------------------------|-------|------------------------|------|-------|
| >VHL-N174D NYRRLDIVRSI | 129   | >VHL-N174D DYRRLDIVRSI | 2236 | 2107  |
| >VHL-N174D NYRRLDIVR   | 256   | >VHL-N174D DYRRLDIVR   | 1238 | 982   |
| >VHL-N174D NYRRLDIVR   | 30    | >VHL-N174D DYRRLDIVR   | 11   | 19    |
| >VHL-N174D ENYRRLDIV   | 680   | >VHL-N174D EDYRRLDIV   | 159  | 521   |
| >VHL-N174D ENYRRLDI    | 12009 | >VHL-N174D EDYRRLDI    | 343  | 11666 |
| >VHL-N174D ENYRRLDIV   | 9447  | >VHL-N174D EDYRRLDIV   | 218  | 9229  |
| >VHL-N174D PENYRRLDI   | 86    | >VHL-N174D PEDYRRLDI   | 311  | 225   |
| >VHL-N174D KPENYRRL    | 39    | >VHL-N174D KPEDYRRL    | 45   | 6     |
| >VHL-N174D KPENYRRLDI  | 104   | >VHL-N174D KPEDYRRLDI  | 148  | 44    |
| >VHL-N174D KPENYRRLDI  | 139   | >VHL-N174D KPEDYRRLDI  | 134  | 5     |
| >VHL-N174D LVKPENYR    | 23    | >VHL-N174D LVKPEDYR    | 44   | 21    |
| >VHL-N174D LVKPENYRR   | 35    | >VHL-N174D LVKPEDYRR   | 50   | 15    |
| >VHL-N174D LVKPENYR    | 159   | >VHL-N174D LVKPEDYR    | 337  | 178   |
| >VHL-N174D LVKPENYRR   | 302   | >VHL-N174D LVKPEDYRR   | 535  | 233   |
| >VHL-N174D LVKPENYR    | 60    | >VHL-N174D LVKPEDYR    | 72   | 12    |
| >VHL-N174D LVKPENYRR   | 122   | >VHL-N174D LVKPEDYRR   | 172  | 50    |
| >VHL-N174D LVKPENYR    | 287   | >VHL-N174D LVKPEDYR    | 391  | 104   |
| >VHL-N174D SLVKPENYRR  | 409   | >VHL-N174D SLVKPEDYRR  | 397  | 12    |
| >VHL-N174D SLVKPENYRR  | 44    | >VHL-N174D SLVKPEDYRR  | 50   | 6     |
| >VHL-N174D SLVKPENYRR  | 394   | >VHL-N174D SLVKPEDYRR  | 315  | 79    |
| >VHL-N174D SLVKPENYRR  | 26    | >VHL-N174D SLVKPEDYRR  | 34   | 8     |
| >VHL-N174D SLVKPENY    | 281   | >VHL-N174D SLVKPEDY    | 682  | 401   |
| >VHL-N174D SLVKPENY    | 434   | >VHL-N174D SLVKPEDY    | 384  | 50    |
| >VHL-N174D SLVKPENYR   | 177   | >VHL-N174D SLVKPEDYR   | 814  | 637   |
| >VHL-N174D SLVKPENYRR  | 103   | >VHL-N174D SLVKPEDYRR  | 230  | 127   |
| >VHL-N174D SLVKPENYR   | 133   | >VHL-N174D SLVKPEDYR   | 161  | 28    |
| >VHL-N174D SLVKPENYRR  | 142   | >VHL-N174D SLVKPEDYRR  | 154  | 12    |
| >VHL-N174D SLVKPENY    | 96    | >VHL-N174D SLVKPEDY    | 165  | 69    |
| >VHL-N174D SLVKPENY    | 218   | >VHL-N174D SLVKPEDY    | 239  | 21    |
| >VHL-N174D SLVKPENYRR  | 85    | >VHL-N174D SLVKPEDYRR  | 110  | 25    |
| >VHL-N174D RSLVKPENYR  | 40    | >VHL-N174D RSLVKPEDYR  | 160  | 120   |
| >VHL-N174D RSLVKPENYR  | 12    | >VHL-N174D RSLVKPEDYR  | 18   | 6     |
| >VHL-N174D RSLVKPENY   | 242   | >VHL-N174D RSLVKPEDY   | 403  | 161   |
| >VHL-N174D RSLVKPENY   | 185   | >VHL-N174D RSLVKPEDY   | 333  | 148   |
| >VHL-N174D RSLVKPENY   | 3     | >VHL-N174D RSLVKPEDY   | 6    | 3     |
| >VHL-N174D RSLVKPENY   | 56    | >VHL-N174D RSLVKPEDY   | 289  | 233   |
| >VHL-N174D RSLVKPENYR  | 355   | >VHL-N174D RSLVKPEDYR  | 387  | 32    |
| >VHL-N174D RSLVKPENYR  | 124   | >VHL-N174D RSLVKPEDYR  | 226  | 102   |
| >VHL-N174D RSLVKPENYR  | 148   | >VHL-N174D RSLVKPEDYR  | 204  | 56    |
| >VHL-N174D VRSLVKPENY  | 310   | >VHL-N174D VRSLVKPEDY  | 541  | 231   |
| >VHL-N174D VVRSLVKPEN  | 228   | >VHL-N174D VVRSLVKPED  | 536  | 308   |
| >VHL-N174D VVRSLVKPEN  | 427   | >VHL-N174D VVRSLVKPED  | 329  | 98    |
| >VHL-N174D VVRSLVKPEN  | 141   | >VHL-N174D VVRSLVKPED  | 220  | 79    |

|                        |       |                         |      |       |
|------------------------|-------|-------------------------|------|-------|
| >VHL-N174D VVRSLVKPEN  | 83    | >VHL-N174D VVRSLVKPED   | 385  | 302   |
| >VHL-N174D VVRSLVKPEN  | 126   | >VHL-N174D VVRSLVKPED   | 232  | 106   |
| >VHL-N67S-v NSREPSQV   | 2345  | >VHL-N67S-n SSREPSQV    | 60   | 2285  |
| >VHL-N67S-v NSREPSQVI  | 839   | >VHL-N67S-n SSREPSQVI   | 17   | 822   |
| >VHL-N67S-v NSREPSQVIF | 2730  | >VHL-N67S-n SSREPSQVIFC | 110  | 2620  |
| >VHL-N67S-v NSREPSQVIF | 527   | >VHL-N67S-n SSREPSQVIF  | 144  | 383   |
| >VHL-N67S-v NSREPSQVI  | 1082  | >VHL-N67S-n SSREPSQVI   | 293  | 789   |
| >VHL-N67S-v NSREPSQV   | 1525  | >VHL-N67S-n SSREPSQV    | 95   | 1430  |
| >VHL-N67S-v NSREPSQVI  | 546   | >VHL-N67S-n SSREPSQVI   | 48   | 498   |
| >VHL-N67S-v NSREPSQVIF | 13    | >VHL-N67S-n SSREPSQVIF  | 4    | 9     |
| >VHL-N67S-v NSREPSQVI  | 1470  | >VHL-N67S-n SSREPSQVI   | 135  | 1335  |
| >VHL-N67S-v NSREPSQVIF | 127   | >VHL-N67S-n SSREPSQVIF  | 26   | 101   |
| >VHL-N67S-v NSREPSQVI  | 134   | >VHL-N67S-n SSREPSQVI   | 22   | 112   |
| >VHL-N67S-v VNSREPSQVI | 101   | >VHL-N67S-n VSSREPSQVIF | 19   | 82    |
| >VHL-N67S-v VNSREPSQVI | 21851 | >VHL-N67S-n VSSREPSQVI  | 429  | 21422 |
| >VHL-N67S-v VNSREPSQVI | 14154 | >VHL-N67S-n VSSREPSQVIF | 17   | 14137 |
| >VHL-N67S-v VNSREPSQVI | 18302 | >VHL-N67S-n VSSREPSQVIF | 365  | 17937 |
| >VHL-N67S-v VNSREPSQVI | 16140 | >VHL-N67S-n VSSREPSQVI  | 199  | 15941 |
| >VHL-N67S-v VNSREPSQVI | 5020  | >VHL-N67S-n VSSREPSQVIF | 21   | 4999  |
| >VHL-N67S-v VNSREPSQV  | 5299  | >VHL-N67S-n VSSREPSQV   | 342  | 4957  |
| >VHL-N67S-v VNSREPSQVI | 1393  | >VHL-N67S-n VSSREPSQVIF | 81   | 1312  |
| >VHL-N67S-v VNSREPSQVI | 9989  | >VHL-N67S-n VSSREPSQVI  | 118  | 9871  |
| >VHL-N67S-v SVNSREPSQV | 1341  | >VHL-N67S-n SVSSREPSQV  | 329  | 1012  |
| >VHL-N67S-v SVNSREPSQV | 190   | >VHL-N67S-n SVSSREPSQV  | 90   | 100   |
| >VHL-N67S-v SVNSREPSQV | 126   | >VHL-N67S-n SVSSREPSQV  | 295  | 169   |
| >VHL-N67S-v SVNSREPSQV | 165   | >VHL-N67S-n SVSSREPSQV  | 198  | 33    |
| >VHL-N67S-v SVNSREPSQV | 25    | >VHL-N67S-n SVSSREPSQV  | 19   | 6     |
| >VHL-N67S-v SVNSREPSQV | 1930  | >VHL-N67S-n SVSSREPSQV  | 291  | 1639  |
| >VHL-N67S-v SVNSREPSQV | 590   | >VHL-N67S-n SVSSREPSQV  | 349  | 241   |
| >VHL-N67S-v RSVNSREPSQ | 225   | >VHL-N67S-n RSVSSREPSQ  | 150  | 75    |
| >VHL-N67S-v RSVNSREPSQ | 22    | >VHL-N67S-n RSVSSREPSQ  | 21   | 1     |
| >VHL-N67S-v RSVNSREPSQ | 136   | >VHL-N67S-n RSVSSREPSQ  | 96   | 40    |
| >VHL-N67S-v VLRSVNSR   | 625   | >VHL-N67S-n VLRSVSSR    | 183  | 442   |
| >VHL-N67S-v VLRSVNSR   | 83    | >VHL-N67S-n VLRSVSSR    | 64   | 19    |
| >VHL-N67S-v VLRSVNSR   | 206   | >VHL-N67S-n VLRSVSSR    | 195  | 11    |
| >VHL-N67S-v RPVLRSVNSR | 239   | >VHL-N67S-n RPVLRSVSSR  | 197  | 42    |
| >VHL-N67S-v RPVLRSVNSR | 315   | >VHL-N67S-n RPVLRSVSSR  | 556  | 241   |
| >VHL-N67S-v RPRPVLRSVN | 598   | >VHL-N67S-n RPRPVLRSVS  | 263  | 335   |
| >VHL-N67S-v RPRPVLRSVN | 138   | >VHL-N67S-n RPRPVLRSVS  | 27   | 111   |
| >VHL-N78D-r NRSRPRVVL  | 22    | >VHL-N78D-r DRSPRVVL    | 295  | 273   |
| >VHL-N78D-r NRSRPRVLPV | 265   | >VHL-N78D-r DRSPRVVLPV  | 4033 | 3768  |
| >VHL-N78D-r CNRSRPRVV  | 11335 | >VHL-N78D-r CDRSPRVV    | 427  | 10908 |
| >VHL-N78D-r CNRSRPRVLP | 11274 | >VHL-N78D-r CDRSPRVVLP  | 367  | 10907 |

|                         |      |                         |      |      |
|-------------------------|------|-------------------------|------|------|
| >VHL-N78D-\ FCNRSPRV    | 252  | >VHL-N78D-r FCDRSPRV    | 138  | 114  |
| >VHL-N78D-\ FCNRSPRV    | 1257 | >VHL-N78D-r FCDRSPRV    | 496  | 761  |
| >VHL-N78D-\ FCNRSPRV    | 107  | >VHL-N78D-r FCDRSPRV    | 162  | 55   |
| >VHL-N78D-\ IFCNRSPRV   | 675  | >VHL-N78D-r IFCDRSPRV   | 67   | 608  |
| >VHL-N78D-\ IFCNRSPR    | 15   | >VHL-N78D-r IFCDRSPR    | 20   | 5    |
| >VHL-N78D-\ IFCNRSPR    | 20   | >VHL-N78D-r IFCDRSPR    | 17   | 3    |
| >VHL-N78D-\ IFCNRSPR    | 62   | >VHL-N78D-r IFCDRSPR    | 38   | 24   |
| >VHL-N78D-\ VIFCNRSPRV^ | 72   | >VHL-N78D-r VIFCDRSPRV^ | 72   | 0    |
| >VHL-N78D-\ VIFCNRSPRV  | 662  | >VHL-N78D-r VIFCDRSPRV  | 327  | 335  |
| >VHL-N78D-\ VIFCNRSPRV  | 7    | >VHL-N78D-r VIFCDRSPRV  | 10   | 3    |
| >VHL-N78D-\ VIFCNRSPRV^ | 15   | >VHL-N78D-r VIFCDRSPRV^ | 25   | 10   |
| >VHL-N78D-\ VIFCNRSPRV  | 86   | >VHL-N78D-r VIFCDRSPRV  | 129  | 43   |
| >VHL-N78D-\ VIFCNRSPRV^ | 191  | >VHL-N78D-r VIFCDRSPRV^ | 318  | 127  |
| >VHL-N78D-\ VIFCNRSPRV  | 70   | >VHL-N78D-r VIFCDRSPRV  | 56   | 14   |
| >VHL-N78D-\ VIFCNRSPRV  | 400  | >VHL-N78D-r VIFCDRSPRV  | 360  | 40   |
| >VHL-N78D-\ VIFCNRSPRV  | 7    | >VHL-N78D-r VIFCDRSPRV  | 8    | 1    |
| >VHL-N78D-\ VIFCNRSPRV^ | 59   | >VHL-N78D-r VIFCDRSPRV^ | 75   | 16   |
| >VHL-N78D-\ VIFCNRSPR   | 427  | >VHL-N78D-r VIFCDRSPR   | 1252 | 825  |
| >VHL-N78D-\ VIFCNRSPR   | 113  | >VHL-N78D-r VIFCDRSPR   | 198  | 85   |
| >VHL-N78D-\ VIFCNRSPR   | 23   | >VHL-N78D-r VIFCDRSPR   | 42   | 19   |
| >VHL-N78D-\ VIFCNRSPR   | 93   | >VHL-N78D-r VIFCDRSPR   | 80   | 13   |
| >VHL-N78D-\ VIFCNRSPR   | 24   | >VHL-N78D-r VIFCDRSPR   | 45   | 21   |
| >VHL-N78D-\ VIFCNRSPRV^ | 360  | >VHL-N78D-r VIFCDRSPRV^ | 556  | 196  |
| >VHL-N78D-\ QVIFCNRSPR  | 214  | >VHL-N78D-r QVIFCDRSPR^ | 249  | 35   |
| >VHL-N78D-\ QVIFCNRSPR  | 511  | >VHL-N78D-r QVIFCDRSPR^ | 440  | 71   |
| >VHL-N78D-\ QVIFCNRSPR  | 305  | >VHL-N78D-r QVIFCDRSPR  | 1387 | 1082 |
| >VHL-N78D-\ QVIFCNRSPR  | 381  | >VHL-N78D-r QVIFCDRSPR  | 565  | 184  |
| >VHL-N78D-\ QVIFCNRSPR  | 11   | >VHL-N78D-r QVIFCDRSPR  | 22   | 11   |
| >VHL-N78D-\ QVIFCNRSPR  | 114  | >VHL-N78D-r QVIFCDRSPR  | 175  | 61   |
| >VHL-N78D-\ QVIFCNRSPR  | 6    | >VHL-N78D-r QVIFCDRSPR  | 5    | 1    |
| >VHL-N78D-\ QVIFCNRSPR  | 36   | >VHL-N78D-r QVIFCDRSPR^ | 35   | 1    |
| >VHL-N78D-\ QVIFCNRSPR  | 178  | >VHL-N78D-r QVIFCDRSPR^ | 408  | 230  |
| >VHL-N78D-\ QVIFCNRSPR  | 175  | >VHL-N78D-r QVIFCDRSPR  | 251  | 76   |
| >VHL-N78D-\ SQVIFCNR    | 54   | >VHL-N78D-r SQVIFCDR    | 347  | 293  |
| >VHL-N78D-\ SQVIFCNRSPI | 47   | >VHL-N78D-r SQVIFCDRSPi | 100  | 53   |
| >VHL-N78D-\ SQVIFCNR    | 423  | >VHL-N78D-r SQVIFCDR    | 924  | 501  |
| >VHL-N78D-\ SQVIFCNRSPI | 436  | >VHL-N78D-r SQVIFCDRSPi | 611  | 175  |
| >VHL-N78D-\ SQVIFCNRSPI | 301  | >VHL-N78D-r SQVIFCDRSPi | 581  | 280  |
| >VHL-N78D-\ SQVIFCNR    | 74   | >VHL-N78D-r SQVIFCDR    | 136  | 62   |
| >VHL-N78D-\ SQVIFCNRSPI | 150  | >VHL-N78D-r SQVIFCDRSPi | 233  | 83   |
| >VHL-N78D-\ PSQVIFCNR   | 125  | >VHL-N78D-r PSQVIFCDR   | 1447 | 1322 |
| >VHL-N78D-\ PSQVIFCNR   | 362  | >VHL-N78D-r PSQVIFCDR   | 1348 | 986  |
| >VHL-N78D-\ EPSQVIFCNR  | 355  | >VHL-N78D-r EPSQVIFCDR  | 1176 | 821  |

|                         |       |                         |      |       |
|-------------------------|-------|-------------------------|------|-------|
| >VHL-N78D-\ EPSQVIFCNR  | 388   | >VHL-N78D-r EPSQVIFCDR  | 1333 | 945   |
| >VHL-N78D-\ EPSQVIFCNR  | 91    | >VHL-N78D-r EPSQVIFCDR  | 191  | 100   |
| >VHL-N78D-\ EPSQVIFCNR  | 213   | >VHL-N78D-r EPSQVIFCDR  | 569  | 356   |
| >VHL-N78D-\ REPSQVIFCN  | 43    | >VHL-N78D-r REPSQVIFCDI | 78   | 35    |
| >VHL-N78H-\ NRSRPRVVL   | 993   | >VHL-N78H-r HRSRPRVVL   | 404  | 589   |
| >VHL-N78H-\ NRSRPRVVL   | 1503  | >VHL-N78H-r HRSRPRVVL   | 152  | 1351  |
| >VHL-N78H-\ NRSRPRVVL   | 22    | >VHL-N78H-r HRSRPRVVL   | 14   | 8     |
| >VHL-N78H-\ NRSRPRVLPV  | 265   | >VHL-N78H-r HRSRPRVLPV  | 110  | 155   |
| >VHL-N78H-\ NRSRPRVLPV  | 1062  | >VHL-N78H-r HRSRPRVLPV  | 467  | 595   |
| >VHL-N78H-\ NRSRPRVLPV  | 601   | >VHL-N78H-r HRSRPRVLPV  | 36   | 565   |
| >VHL-N78H-\ CNRSRPRVVL  | 734   | >VHL-N78H-r CHRSPRVVL   | 95   | 639   |
| >VHL-N78H-\ CNRSRPRVLP  | 1732  | >VHL-N78H-r CHRSPRVLP   | 271  | 1461  |
| >VHL-N78H-\ CNRSRPRVVL  | 11978 | >VHL-N78H-r CHRSPRVVL   | 431  | 11547 |
| >VHL-N78H-\ FCNRSRPRV   | 252   | >VHL-N78H-r FCHRSPRV    | 237  | 15    |
| >VHL-N78H-\ FCNRSRPRV   | 107   | >VHL-N78H-r FCHRSPRV    | 96   | 11    |
| >VHL-N78H-\ IFCNRSRPR   | 15    | >VHL-N78H-r IFCHRSPR    | 16   | 1     |
| >VHL-N78H-\ IFCNRSRPR   | 20    | >VHL-N78H-r IFCHRSPR    | 17   | 3     |
| >VHL-N78H-\ IFCNRSRPR   | 62    | >VHL-N78H-r IFCHRSPR    | 43   | 19    |
| >VHL-N78H-\ VIFCNRSRPR' | 72    | >VHL-N78H-r VIFCHRSPRV' | 30   | 42    |
| >VHL-N78H-\ VIFCNRSRPRV | 7     | >VHL-N78H-r VIFCHRSPRV  | 10   | 3     |
| >VHL-N78H-\ VIFCNRSRPR' | 15    | >VHL-N78H-r VIFCHRSPRV' | 20   | 5     |
| >VHL-N78H-\ VIFCNRSRPRV | 86    | >VHL-N78H-r VIFCHRSPRV  | 220  | 134   |
| >VHL-N78H-\ VIFCNRSRPR' | 191   | >VHL-N78H-r VIFCHRSPRV' | 495  | 304   |
| >VHL-N78H-\ VIFCNRSRPRV | 70    | >VHL-N78H-r VIFCHRSPRV  | 116  | 46    |
| >VHL-N78H-\ VIFCNRSRPRV | 400   | >VHL-N78H-r VIFCHRSPRV  | 1230 | 830   |
| >VHL-N78H-\ VIFCNRSRPRV | 7     | >VHL-N78H-r VIFCHRSPRV  | 11   | 4     |
| >VHL-N78H-\ VIFCNRSRPR' | 59    | >VHL-N78H-r VIFCHRSPRV' | 90   | 31    |
| >VHL-N78H-\ VIFCNRSRPR  | 427   | >VHL-N78H-r VIFCHRSPR   | 120  | 307   |
| >VHL-N78H-\ VIFCNRSRPR  | 113   | >VHL-N78H-r VIFCHRSPR   | 88   | 25    |
| >VHL-N78H-\ VIFCNRSRPR  | 23    | >VHL-N78H-r VIFCHRSPR   | 12   | 11    |
| >VHL-N78H-\ VIFCNRSRPR  | 93    | >VHL-N78H-r VIFCHRSPR   | 49   | 44    |
| >VHL-N78H-\ VIFCNRSRPR  | 24    | >VHL-N78H-r VIFCHRSPR   | 36   | 12    |
| >VHL-N78H-\ VIFCNRSRPRV | 508   | >VHL-N78H-r VIFCHRSPRV  | 490  | 18    |
| >VHL-N78H-\ VIFCNRSRPR' | 360   | >VHL-N78H-r VIFCHRSPRV' | 379  | 19    |
| >VHL-N78H-\ QVIFCNRSRPR | 214   | >VHL-N78H-r QVIFCHRSPR' | 278  | 64    |
| >VHL-N78H-\ QVIFCNRSRPR | 511   | >VHL-N78H-r QVIFCHRSPR' | 495  | 16    |
| >VHL-N78H-\ QVIFCNRSRPR | 305   | >VHL-N78H-r QVIFCHRSPR  | 311  | 6     |
| >VHL-N78H-\ QVIFCNRSRPR | 381   | >VHL-N78H-r QVIFCHRSPR  | 579  | 198   |
| >VHL-N78H-\ QVIFCNRSRPR | 11    | >VHL-N78H-r QVIFCHRSPR  | 11   | 0     |
| >VHL-N78H-\ QVIFCNRSRPR | 114   | >VHL-N78H-r QVIFCHRSPR  | 102  | 12    |
| >VHL-N78H-\ QVIFCNRSRPR | 6     | >VHL-N78H-r QVIFCHRSPR  | 6    | 0     |
| >VHL-N78H-\ QVIFCNRSRPR | 36    | >VHL-N78H-r QVIFCHRSPR' | 37   | 1     |
| >VHL-N78H-\ QVIFCNRSRPR | 178   | >VHL-N78H-r QVIFCHRSPR' | 189  | 11    |

|                         |       |                         |      |       |
|-------------------------|-------|-------------------------|------|-------|
| >VHL-N78H-\ QVIFCNRSPI  | 175   | >VHL-N78H-r QVIFCHRSPR  | 156  | 19    |
| >VHL-N78H-\ SQVIFCNR    | 54    | >VHL-N78H-r SQVIFCHR    | 27   | 27    |
| >VHL-N78H-\ SQVIFCNRSPI | 47    | >VHL-N78H-r SQVIFCHRSP  | 26   | 21    |
| >VHL-N78H-\ SQVIFCNR    | 423   | >VHL-N78H-r SQVIFCHR    | 411  | 12    |
| >VHL-N78H-\ SQVIFCNRSPI | 436   | >VHL-N78H-r SQVIFCHRSP  | 405  | 31    |
| >VHL-N78H-\ SQVIFCNRSPI | 301   | >VHL-N78H-r SQVIFCHRSP  | 317  | 16    |
| >VHL-N78H-\ SQVIFCNR    | 569   | >VHL-N78H-r SQVIFCHR    | 386  | 183   |
| >VHL-N78H-\ SQVIFCNR    | 74    | >VHL-N78H-r SQVIFCHR    | 34   | 40    |
| >VHL-N78H-\ SQVIFCNRSPI | 150   | >VHL-N78H-r SQVIFCHRSP  | 102  | 48    |
| >VHL-N78H-\ PSQVIFCNR   | 125   | >VHL-N78H-r PSQVIFCHR   | 77   | 48    |
| >VHL-N78H-\ PSQVIFCNR   | 362   | >VHL-N78H-r PSQVIFCHR   | 203  | 159   |
| >VHL-N78H-\ EPSQVIFCNR  | 355   | >VHL-N78H-r EPSQVIFCHR  | 452  | 97    |
| >VHL-N78H-\ EPSQVIFCNR  | 388   | >VHL-N78H-r EPSQVIFCHR  | 768  | 380   |
| >VHL-N78H-\ EPSQVIFCNR  | 91    | >VHL-N78H-r EPSQVIFCHR  | 125  | 34    |
| >VHL-N78H-\ EPSQVIFCN   | 1938  | >VHL-N78H-r EPSQVIFCH   | 79   | 1859  |
| >VHL-N78H-\ EPSQVIFCNR  | 213   | >VHL-N78H-r EPSQVIFCHR  | 141  | 72    |
| >VHL-N78H-\ REPSQVIFCN  | 43    | >VHL-N78H-r REPSQVIFCH  | 31   | 12    |
| >VHL-N78I-w NRSPRVVL    | 993   | >VHL-N78I-r IRSPRVVL    | 144  | 849   |
| >VHL-N78I-w NRSPRVVL    | 22    | >VHL-N78I-r IRSPRVVL    | 178  | 156   |
| >VHL-N78I-w NRSPRVVLPV  | 265   | >VHL-N78I-r IRSPRVVLPV  | 3024 | 2759  |
| >VHL-N78I-w NRSPRVVLPV  | 1062  | >VHL-N78I-r IRSPRVVLPV  | 268  | 794   |
| >VHL-N78I-w NRSPRVVLPV  | 601   | >VHL-N78I-r IRSPRVVLPV  | 50   | 551   |
| >VHL-N78I-w CNRSRVVLP   | 10953 | >VHL-N78I-r CIRSPRVVLP  | 356  | 10597 |
| >VHL-N78I-w CNRSRVVLP   | 24972 | >VHL-N78I-r CIRSPRVVLP  | 338  | 24634 |
| >VHL-N78I-w CNRSRVV     | 4766  | >VHL-N78I-r CIRSPRVV    | 440  | 4326  |
| >VHL-N78I-w CNRSRVVL    | 4554  | >VHL-N78I-r CIRSPRVL    | 420  | 4134  |
| >VHL-N78I-w CNRSRVVLP   | 910   | >VHL-N78I-r CIRSPRVVLP  | 51   | 859   |
| >VHL-N78I-w CNRSRVVL    | 1848  | >VHL-N78I-r CIRSPRVL    | 174  | 1674  |
| >VHL-N78I-w FCNRSRPRV   | 252   | >VHL-N78I-r FCIRSRPRV   | 250  | 2     |
| >VHL-N78I-w FCNRSRPRV   | 107   | >VHL-N78I-r FCIRSRPRV   | 100  | 7     |
| >VHL-N78I-w IFCNRSRPR   | 15    | >VHL-N78I-r IFCIRSRPR   | 16   | 1     |
| >VHL-N78I-w IFCNRSRPR   | 20    | >VHL-N78I-r IFCIRSRPR   | 18   | 2     |
| >VHL-N78I-w IFCNRSRPR   | 62    | >VHL-N78I-r IFCIRSRPR   | 41   | 21    |
| >VHL-N78I-w VIFCNRSRPRV | 1499  | >VHL-N78I-r VIFCIRSRPRV | 494  | 1005  |
| >VHL-N78I-w VIFCNRSRPRV | 72    | >VHL-N78I-r VIFCIRSRPRV | 49   | 23    |
| >VHL-N78I-w VIFCNRSRPRV | 662   | >VHL-N78I-r VIFCIRSRPRV | 297  | 365   |
| >VHL-N78I-w VIFCNRSRPRV | 7     | >VHL-N78I-r VIFCIRSRPRV | 8    | 1     |
| >VHL-N78I-w VIFCNRSRPRV | 15    | >VHL-N78I-r VIFCIRSRPRV | 16   | 1     |
| >VHL-N78I-w VIFCNRSRPRV | 86    | >VHL-N78I-r VIFCIRSRPRV | 233  | 147   |
| >VHL-N78I-w VIFCNRSRPRV | 191   | >VHL-N78I-r VIFCIRSRPRV | 434  | 243   |
| >VHL-N78I-w VIFCNRSRPRV | 70    | >VHL-N78I-r VIFCIRSRPRV | 42   | 28    |
| >VHL-N78I-w VIFCNRSRPRV | 874   | >VHL-N78I-r VIFCIRSRPRV | 470  | 404   |
| >VHL-N78I-w VIFCNRSRPRV | 400   | >VHL-N78I-r VIFCIRSRPRV | 415  | 15    |

|                         |       |                         |      |       |
|-------------------------|-------|-------------------------|------|-------|
| >VHL-N78I-w VIFCNRSPRV  | 7     | >VHL-N78I-r VIFCIRSPRV  | 8    | 1     |
| >VHL-N78I-w VIFCNRSPRV' | 59    | >VHL-N78I-r VIFCIRSPRVV | 69   | 10    |
| >VHL-N78I-w VIFCNRSPR   | 427   | >VHL-N78I-r VIFCIRSPR   | 271  | 156   |
| >VHL-N78I-w VIFCNRSPR   | 113   | >VHL-N78I-r VIFCIRSPR   | 54   | 59    |
| >VHL-N78I-w VIFCNRSPR   | 23    | >VHL-N78I-r VIFCIRSPR   | 11   | 12    |
| >VHL-N78I-w VIFCNRSPR   | 93    | >VHL-N78I-r VIFCIRSPR   | 21   | 72    |
| >VHL-N78I-w VIFCNRSPR   | 24    | >VHL-N78I-r VIFCIRSPR   | 12   | 12    |
| >VHL-N78I-w VIFCNRSPRV' | 548   | >VHL-N78I-r VIFCIRSPRVV | 207  | 341   |
| >VHL-N78I-w VIFCNRSPRV  | 508   | >VHL-N78I-r VIFCIRSPRV  | 367  | 141   |
| >VHL-N78I-w VIFCNRSPRV' | 360   | >VHL-N78I-r VIFCIRSPRVV | 595  | 235   |
| >VHL-N78I-w QVIFCNRSPR  | 755   | >VHL-N78I-r QVIFCIRSPRV | 292  | 463   |
| >VHL-N78I-w QVIFCNRSPR  | 214   | >VHL-N78I-r QVIFCIRSPRV | 84   | 130   |
| >VHL-N78I-w QVIFCNRSPR  | 511   | >VHL-N78I-r QVIFCIRSPRV | 245  | 266   |
| >VHL-N78I-w QVIFCNRSPR  | 305   | >VHL-N78I-r QVIFCIRSPR  | 174  | 131   |
| >VHL-N78I-w QVIFCNRSPR  | 381   | >VHL-N78I-r QVIFCIRSPR  | 217  | 164   |
| >VHL-N78I-w QVIFCNRSPR  | 11    | >VHL-N78I-r QVIFCIRSPR  | 6    | 5     |
| >VHL-N78I-w QVIFCNRSPR  | 114   | >VHL-N78I-r QVIFCIRSPR  | 46   | 68    |
| >VHL-N78I-w QVIFCNRSPR  | 6     | >VHL-N78I-r QVIFCIRSPR  | 3    | 3     |
| >VHL-N78I-w QVIFCNRSPR  | 36    | >VHL-N78I-r QVIFCIRSPRV | 32   | 4     |
| >VHL-N78I-w QVIFCNRSPR  | 178   | >VHL-N78I-r QVIFCIRSPRV | 176  | 2     |
| >VHL-N78I-w QVIFCNRSPR  | 175   | >VHL-N78I-r QVIFCIRSPR  | 135  | 40    |
| >VHL-N78I-w SQVIFCNRSPR | 1037  | >VHL-N78I-r SQVIFCIRSPR | 482  | 555   |
| >VHL-N78I-w SQVIFCNR    | 54    | >VHL-N78I-r SQVIFCIR    | 79   | 25    |
| >VHL-N78I-w SQVIFCNRSPR | 47    | >VHL-N78I-r SQVIFCIRSPR | 34   | 13    |
| >VHL-N78I-w SQVIFCNR    | 423   | >VHL-N78I-r SQVIFCIR    | 645  | 222   |
| >VHL-N78I-w SQVIFCNRSPR | 436   | >VHL-N78I-r SQVIFCIRSPR | 272  | 164   |
| >VHL-N78I-w SQVIFCNRSPR | 301   | >VHL-N78I-r SQVIFCIRSPR | 401  | 100   |
| >VHL-N78I-w SQVIFCNR    | 74    | >VHL-N78I-r SQVIFCIR    | 61   | 13    |
| >VHL-N78I-w SQVIFCNRSPR | 150   | >VHL-N78I-r SQVIFCIRSPR | 92   | 58    |
| >VHL-N78I-w PSQVIFCNR   | 125   | >VHL-N78I-r PSQVIFCIR   | 292  | 167   |
| >VHL-N78I-w PSQVIFCNR   | 362   | >VHL-N78I-r PSQVIFCIR   | 1300 | 938   |
| >VHL-N78I-w EPSQVIFCNR  | 355   | >VHL-N78I-r EPSQVIFCIR  | 994  | 639   |
| >VHL-N78I-w EPSQVIFCNR  | 388   | >VHL-N78I-r EPSQVIFCIR  | 578  | 190   |
| >VHL-N78I-w EPSQVIFCNR  | 91    | >VHL-N78I-r EPSQVIFCIR  | 139  | 48    |
| >VHL-N78I-w EPSQVIFCN   | 6877  | >VHL-N78I-r EPSQVIFCI   | 45   | 6832  |
| >VHL-N78I-w EPSQVIFCNR  | 213   | >VHL-N78I-r EPSQVIFCIR  | 306  | 93    |
| >VHL-N78I-w REPSQVIFCN  | 1304  | >VHL-N78I-r REPSQVIFCI  | 116  | 1188  |
| >VHL-N78I-w REPSQVIFCN  | 10427 | >VHL-N78I-r REPSQVIFCI  | 9    | 10418 |
| >VHL-N78I-w REPSQVIFCN  | 43    | >VHL-N78I-r REPSQVIFCIR | 58   | 15    |
| >VHL-N78K-v NRSRPPVL    | 993   | >VHL-N78K-r KRSPRVVL    | 158  | 835   |
| >VHL-N78K-v NRSRPPVL    | 1503  | >VHL-N78K-r KRSPRVVL    | 201  | 1302  |
| >VHL-N78K-v NRSRPPVL    | 22    | >VHL-N78K-r KRSPRVVL    | 181  | 159   |
| >VHL-N78K-v NRSRPPVLPV  | 265   | >VHL-N78K-r KRSPRVVLPV  | 3076 | 2811  |

|                         |      |                         |      |      |
|-------------------------|------|-------------------------|------|------|
| >VHL-N78K-v NRSRPRVVL   | 4077 | >VHL-N78K-r KRSPRVVL    | 88   | 3989 |
| >VHL-N78K-v NRSRPRVLPV  | 2134 | >VHL-N78K-r KRSPRVVLPV  | 140  | 1994 |
| >VHL-N78K-v NRSRPRVLPV  | 3430 | >VHL-N78K-r KRSPRVVLPV  | 230  | 3200 |
| >VHL-N78K-v NRSRPRVVL   | 733  | >VHL-N78K-r KRSPRVVL    | 202  | 531  |
| >VHL-N78K-v NRSRPRVLPV  | 1062 | >VHL-N78K-r KRSPRVVLPV  | 121  | 941  |
| >VHL-N78K-v NRSRPRVLPV  | 601  | >VHL-N78K-r KRSPRVVLPV  | 109  | 492  |
| >VHL-N78K-v CNRSRPRV    | 4120 | >VHL-N78K-r CKRSPRVV    | 42   | 4078 |
| >VHL-N78K-v CNRSRPRVVL  | 734  | >VHL-N78K-r CKRSPRVVL   | 9    | 725  |
| >VHL-N78K-v CNRSRPRVLPV | 1732 | >VHL-N78K-r CKRSPRVVLPV | 19   | 1713 |
| >VHL-N78K-v FCNRSRPRV   | 252  | >VHL-N78K-r FCKRSPRV    | 3625 | 3373 |
| >VHL-N78K-v FCNRSRPRV   | 107  | >VHL-N78K-r FCKRSPRV    | 352  | 245  |
| >VHL-N78K-v IFCNRSRPR   | 15   | >VHL-N78K-r IFCKRSPR    | 16   | 1    |
| >VHL-N78K-v IFCNRSRPR   | 20   | >VHL-N78K-r IFCKRSPR    | 21   | 1    |
| >VHL-N78K-v IFCNRSRPR   | 62   | >VHL-N78K-r IFCKRSPR    | 36   | 26   |
| >VHL-N78K-v VIFCNRSRPRV | 72   | >VHL-N78K-r VIFCKRSPRV  | 61   | 11   |
| >VHL-N78K-v VIFCNRSRPRV | 7    | >VHL-N78K-r VIFCKRSPRV  | 14   | 7    |
| >VHL-N78K-v VIFCNRSRPRV | 15   | >VHL-N78K-r VIFCKRSPRV  | 29   | 14   |
| >VHL-N78K-v VIFCNRSRPRV | 86   | >VHL-N78K-r VIFCKRSPRV  | 279  | 193  |
| >VHL-N78K-v VIFCNRSRPRV | 191  | >VHL-N78K-r VIFCKRSPRV  | 564  | 373  |
| >VHL-N78K-v VIFCNRSRPRV | 70   | >VHL-N78K-r VIFCKRSPRV  | 92   | 22   |
| >VHL-N78K-v VIFCNRSRPRV | 400  | >VHL-N78K-r VIFCKRSPRV  | 860  | 460  |
| >VHL-N78K-v VIFCNRSRPRV | 7    | >VHL-N78K-r VIFCKRSPRV  | 12   | 5    |
| >VHL-N78K-v VIFCNRSRPRV | 59   | >VHL-N78K-r VIFCKRSPRV  | 100  | 41   |
| >VHL-N78K-v VIFCNRSRPR  | 427  | >VHL-N78K-r VIFCKRSPR   | 409  | 18   |
| >VHL-N78K-v VIFCNRSRPR  | 113  | >VHL-N78K-r VIFCKRSPR   | 148  | 35   |
| >VHL-N78K-v VIFCNRSRPR  | 23   | >VHL-N78K-r VIFCKRSPR   | 11   | 12   |
| >VHL-N78K-v VIFCNRSRPR  | 93   | >VHL-N78K-r VIFCKRSPR   | 34   | 59   |
| >VHL-N78K-v VIFCNRSRPR  | 24   | >VHL-N78K-r VIFCKRSPR   | 61   | 37   |
| >VHL-N78K-v VIFCNRSRPRV | 360  | >VHL-N78K-r VIFCKRSPRV  | 848  | 488  |
| >VHL-N78K-v QVIFCNRSRPR | 214  | >VHL-N78K-r QVIFCKRSPRV | 490  | 276  |
| >VHL-N78K-v QVIFCNRSRPR | 305  | >VHL-N78K-r QVIFCKRSPR  | 276  | 29   |
| >VHL-N78K-v QVIFCNRSRPR | 381  | >VHL-N78K-r QVIFCKRSPR  | 454  | 73   |
| >VHL-N78K-v QVIFCNRSRPR | 11   | >VHL-N78K-r QVIFCKRSPR  | 8    | 3    |
| >VHL-N78K-v QVIFCNRSRPR | 114  | >VHL-N78K-r QVIFCKRSPR  | 99   | 15   |
| >VHL-N78K-v QVIFCNRSRPR | 6    | >VHL-N78K-r QVIFCKRSPR  | 9    | 3    |
| >VHL-N78K-v QVIFCNRSRPR | 36   | >VHL-N78K-r QVIFCKRSPRV | 58   | 22   |
| >VHL-N78K-v QVIFCNRSRPR | 178  | >VHL-N78K-r QVIFCKRSPRV | 305  | 127  |
| >VHL-N78K-v QVIFCNRSRPR | 175  | >VHL-N78K-r QVIFCKRSPR  | 208  | 33   |
| >VHL-N78K-v SQVIFCNR    | 54   | >VHL-N78K-r SQVIFCKR    | 73   | 19   |
| >VHL-N78K-v SQVIFCNRSPV | 47   | >VHL-N78K-r SQVIFCKRSPV | 52   | 5    |
| >VHL-N78K-v SQVIFCNR    | 423  | >VHL-N78K-r SQVIFCKR    | 685  | 262  |
| >VHL-N78K-v SQVIFCNRSPV | 436  | >VHL-N78K-r SQVIFCKRSPV | 994  | 558  |
| >VHL-N78K-v SQVIFCNRSPV | 301  | >VHL-N78K-r SQVIFCKRSPV | 476  | 175  |

|                         |       |                         |     |       |
|-------------------------|-------|-------------------------|-----|-------|
| >VHL-N78K-v SQVIFCNR    | 74    | >VHL-N78K-r SQVIFCKR    | 74  | 0     |
| >VHL-N78K-v SQVIFCNRSPf | 150   | >VHL-N78K-r SQVIFCKRSPf | 155 | 5     |
| >VHL-N78K-v PSQVIFCN    | 24588 | >VHL-N78K-r PSQVIFCK    | 255 | 24333 |
| >VHL-N78K-v PSQVIFCNR   | 125   | >VHL-N78K-r PSQVIFCKR   | 224 | 99    |
| >VHL-N78K-v PSQVIFCNR   | 362   | >VHL-N78K-r PSQVIFCKR   | 842 | 480   |
| >VHL-N78K-v EPSQVIFCNR  | 355   | >VHL-N78K-r EPSQVIFCKR  | 601 | 246   |
| >VHL-N78K-v EPSQVIFCNR  | 388   | >VHL-N78K-r EPSQVIFCKR  | 456 | 68    |
| >VHL-N78K-v EPSQVIFCN   | 10530 | >VHL-N78K-r EPSQVIFCK   | 31  | 10499 |
| >VHL-N78K-v EPSQVIFCNR  | 91    | >VHL-N78K-r EPSQVIFCKR  | 106 | 15    |
| >VHL-N78K-v EPSQVIFCNR  | 213   | >VHL-N78K-r EPSQVIFCKR  | 272 | 59    |
| >VHL-N78K-v REPSQVIFCN  | 43    | >VHL-N78K-r REPSQVIFCKf | 49  | 6     |
| >VHL-N78S-v NRSRPRVVL   | 993   | >VHL-N78S-n RSRPRVVL    | 418 | 575   |
| >VHL-N78S-v NRSRPRVVL   | 22    | >VHL-N78S-n RSRPRVVL    | 39  | 17    |
| >VHL-N78S-v NRSRPRVLPV  | 265   | >VHL-N78S-n RSRPRVLPV   | 561 | 296   |
| >VHL-N78S-v CNRSRPRVV   | 4766  | >VHL-N78S-n CSRSPRVV    | 154 | 4612  |
| >VHL-N78S-v CNRSRPRVVL  | 4554  | >VHL-N78S-n CSRSPRVVL   | 155 | 4399  |
| >VHL-N78S-v CNRSRPRVLP  | 910   | >VHL-N78S-n CSRSPRVLP'  | 24  | 886   |
| >VHL-N78S-v CNRSRPRVVL  | 734   | >VHL-N78S-n CSRSPRVVL   | 90  | 644   |
| >VHL-N78S-v CNRSRPRVLP  | 1732  | >VHL-N78S-n CSRSPRVLP'  | 242 | 1490  |
| >VHL-N78S-v CNRSRPRVVL  | 23120 | >VHL-N78S-n CSRSPRVVL   | 383 | 22737 |
| >VHL-N78S-v CNRSRPRVVL  | 3853  | >VHL-N78S-n CSRSPRVVL   | 253 | 3600  |
| >VHL-N78S-v CNRSRPRVVL  | 3102  | >VHL-N78S-n CSRSPRVVL   | 197 | 2905  |
| >VHL-N78S-v FCNRSRPRV   | 252   | >VHL-N78S-n FCSRSPRV    | 540 | 288   |
| >VHL-N78S-v FCNRSRPRV   | 107   | >VHL-N78S-n FCSRSPRV    | 91  | 16    |
| >VHL-N78S-v IFCNRSRPR   | 15    | >VHL-N78S-n IFCSRSPR    | 13  | 2     |
| >VHL-N78S-v IFCNRSRPR   | 20    | >VHL-N78S-n IFCSRSPR    | 18  | 2     |
| >VHL-N78S-v IFCNRSRPR   | 639   | >VHL-N78S-n IFCSRSPR    | 460 | 179   |
| >VHL-N78S-v IFCNRSRPR   | 62    | >VHL-N78S-n IFCSRSPR    | 54  | 8     |
| >VHL-N78S-v VIFCNRSPRV' | 72    | >VHL-N78S-n VIFCSRSPRV\ | 51  | 21    |
| >VHL-N78S-v VIFCNRSPRV  | 662   | >VHL-N78S-n VIFCSRSPRV  | 453 | 209   |
| >VHL-N78S-v VIFCNRSPRV  | 7     | >VHL-N78S-n VIFCSRSPRV  | 11  | 4     |
| >VHL-N78S-v VIFCNRSPRV' | 15    | >VHL-N78S-n VIFCSRSPRV\ | 24  | 9     |
| >VHL-N78S-v VIFCNRSPRV  | 86    | >VHL-N78S-n VIFCSRSPRV  | 208 | 122   |
| >VHL-N78S-v VIFCNRSPRV' | 191   | >VHL-N78S-n VIFCSRSPRV\ | 428 | 237   |
| >VHL-N78S-v VIFCNRSPRV  | 70    | >VHL-N78S-n VIFCSRSPRV  | 60  | 10    |
| >VHL-N78S-v VIFCNRSPRV  | 400   | >VHL-N78S-n VIFCSRSPRV  | 524 | 124   |
| >VHL-N78S-v VIFCNRSPRV  | 7     | >VHL-N78S-n VIFCSRSPRV  | 8   | 1     |
| >VHL-N78S-v VIFCNRSPRV' | 59    | >VHL-N78S-n VIFCSRSPRV\ | 69  | 10    |
| >VHL-N78S-v VIFCNRSPR   | 427   | >VHL-N78S-n VIFCSRSPR   | 184 | 243   |
| >VHL-N78S-v VIFCNRSPR   | 113   | >VHL-N78S-n VIFCSRSPR   | 44  | 69    |
| >VHL-N78S-v VIFCNRSPR   | 23    | >VHL-N78S-n VIFCSRSPR   | 16  | 7     |
| >VHL-N78S-v VIFCNRSPR   | 93    | >VHL-N78S-n VIFCSRSPR   | 55  | 38    |
| >VHL-N78S-v VIFCNRSPR   | 24    | >VHL-N78S-n VIFCSRSPR   | 23  | 1     |



|                         |       |                         |     |       |
|-------------------------|-------|-------------------------|-----|-------|
| >VHL-N78S-v VIFCNRSPRV  | 508   | >VHL-N78S-n VIFCSRSPRV  | 480 | 28    |
| >VHL-N78S-v VIFCNRSPR   | 689   | >VHL-N78S-n VIFCSRSPR   | 225 | 464   |
| >VHL-N78S-v VIFCNRSPRV' | 360   | >VHL-N78S-n VIFCSRSPRV\ | 163 | 197   |
| >VHL-N78S-v QVIFCNRSPR  | 755   | >VHL-N78S-n QVIFCSRSPR\ | 435 | 320   |
| >VHL-N78S-v QVIFCNRSPR  | 214   | >VHL-N78S-n QVIFCSRSPR\ | 155 | 59    |
| >VHL-N78S-v QVIFCNRSPR  | 511   | >VHL-N78S-n QVIFCSRSPR\ | 430 | 81    |
| >VHL-N78S-v QVIFCNRSPR  | 305   | >VHL-N78S-n QVIFCSRSPR  | 163 | 142   |
| >VHL-N78S-v QVIFCNRSPR  | 381   | >VHL-N78S-n QVIFCSRSPR  | 208 | 173   |
| >VHL-N78S-v QVIFCNRSPR  | 11    | >VHL-N78S-n QVIFCSRSPR  | 7   | 4     |
| >VHL-N78S-v QVIFCNRSPR  | 114   | >VHL-N78S-n QVIFCSRSPR  | 52  | 62    |
| >VHL-N78S-v QVIFCNRSPR  | 6     | >VHL-N78S-n QVIFCSRSPR  | 5   | 1     |
| >VHL-N78S-v QVIFCNRSPR  | 36    | >VHL-N78S-n QVIFCSRSPR\ | 35  | 1     |
| >VHL-N78S-v QVIFCNRSPR  | 178   | >VHL-N78S-n QVIFCSRSPR\ | 139 | 39    |
| >VHL-N78S-v QVIFCNRSPR  | 175   | >VHL-N78S-n QVIFCSRSPR  | 257 | 82    |
| >VHL-N78S-v SQVIFCNR    | 54    | >VHL-N78S-n SQVIFCSR    | 69  | 15    |
| >VHL-N78S-v SQVIFCNRSPi | 47    | >VHL-N78S-n SQVIFCSRSPF | 37  | 10    |
| >VHL-N78S-v SQVIFCNR    | 423   | >VHL-N78S-n SQVIFCSR    | 414 | 9     |
| >VHL-N78S-v SQVIFCNRSPi | 436   | >VHL-N78S-n SQVIFCSRSPF | 346 | 90    |
| >VHL-N78S-v SQVIFCNRSPi | 301   | >VHL-N78S-n SQVIFCSRSPF | 170 | 131   |
| >VHL-N78S-v SQVIFCNR    | 74    | >VHL-N78S-n SQVIFCSR    | 109 | 35    |
| >VHL-N78S-v SQVIFCNRSPi | 150   | >VHL-N78S-n SQVIFCSRSPF | 204 | 54    |
| >VHL-N78S-v PSQVIFCNR   | 125   | >VHL-N78S-n PSQVIFCSR   | 263 | 138   |
| >VHL-N78S-v PSQVIFCNR   | 362   | >VHL-N78S-n PSQVIFCSR   | 329 | 33    |
| >VHL-N78S-v EPSQVIFCNR  | 355   | >VHL-N78S-n EPSQVIFCSR  | 578 | 223   |
| >VHL-N78S-v EPSQVIFCNR  | 388   | >VHL-N78S-n EPSQVIFCSR  | 337 | 51    |
| >VHL-N78S-v EPSQVIFCNR  | 91    | >VHL-N78S-n EPSQVIFCSR  | 123 | 32    |
| >VHL-N78S-v EPSQVIFCNR  | 213   | >VHL-N78S-n EPSQVIFCSR  | 409 | 196   |
| >VHL-N78S-v REPSQVIFCNi | 43    | >VHL-N78S-n REPSQVIFCSF | 57  | 14    |
| >VHL-N78T-v NRSPRVVL    | 22    | >VHL-N78T-n TRSPRVVL    | 22  | 0     |
| >VHL-N78T-v NRSPRVVLPV  | 265   | >VHL-N78T-n TRSPRVVLPV  | 263 | 2     |
| >VHL-N78T-v CNRSPRVV    | 4766  | >VHL-N78T-n CTRSPRVV    | 69  | 4697  |
| >VHL-N78T-v CNRSPRVVL   | 4554  | >VHL-N78T-n CTRSPRVVL   | 67  | 4487  |
| >VHL-N78T-v CNRSPRVVLP  | 910   | >VHL-N78T-n CTRSPRVVLP' | 14  | 896   |
| >VHL-N78T-v CNRSPRVVLP  | 9492  | >VHL-N78T-n CTRSPRVVLP' | 154 | 9338  |
| >VHL-N78T-v CNRSPRVVL   | 1848  | >VHL-N78T-n CTRSPRVVL   | 242 | 1606  |
| >VHL-N78T-v CNRSPRVVL   | 734   | >VHL-N78T-n CTRSPRVVL   | 384 | 350   |
| >VHL-N78T-v CNRSPRVVL   | 23120 | >VHL-N78T-n CTRSPRVVL   | 238 | 22882 |
| >VHL-N78T-v CNRSPRVVL   | 3853  | >VHL-N78T-n CTRSPRVVL   | 82  | 3771  |
| >VHL-N78T-v CNRSPRVVL   | 3102  | >VHL-N78T-n CTRSPRVVL   | 187 | 2915  |
| >VHL-N78T-v FCNRSPRV    | 252   | >VHL-N78T-n FCTRSPRV    | 755 | 503   |
| >VHL-N78T-v FCNRSPRV    | 107   | >VHL-N78T-n FCTRSPRV    | 71  | 36    |
| >VHL-N78T-v IFCNRSPR    | 15    | >VHL-N78T-n IFCTRSPR    | 17  | 2     |
| >VHL-N78T-v IFCNRSPR    | 20    | >VHL-N78T-n IFCTRSPR    | 22  | 2     |

|                        |     |                         |     |     |
|------------------------|-----|-------------------------|-----|-----|
| >VHL-N78T-v IFCNRSPR   | 62  | >VHL-N78T-n IFCTRSPR    | 33  | 29  |
| >VHL-N78T-v VIFCNRSPRV | 72  | >VHL-N78T-n VIFCTRSPRV  | 66  | 6   |
| >VHL-N78T-v VIFCNRSPRV | 662 | >VHL-N78T-n VIFCTRSPRV  | 271 | 391 |
| >VHL-N78T-v VIFCNRSPRV | 7   | >VHL-N78T-n VIFCTRSPRV  | 8   | 1   |
| >VHL-N78T-v VIFCNRSPRV | 15  | >VHL-N78T-n VIFCTRSPRV  | 16  | 1   |
| >VHL-N78T-v VIFCNRSPRV | 86  | >VHL-N78T-n VIFCTRSPRV  | 151 | 65  |
| >VHL-N78T-v VIFCNRSPRV | 191 | >VHL-N78T-n VIFCTRSPRV  | 305 | 114 |
| >VHL-N78T-v VIFCNRSPRV | 70  | >VHL-N78T-n VIFCTRSPRV  | 41  | 29  |
| >VHL-N78T-v VIFCNRSPRV | 874 | >VHL-N78T-n VIFCTRSPRV  | 439 | 435 |
| >VHL-N78T-v VIFCNRSPRV | 400 | >VHL-N78T-n VIFCTRSPRV  | 505 | 105 |
| >VHL-N78T-v VIFCNRSPRV | 7   | >VHL-N78T-n VIFCTRSPRV  | 8   | 1   |
| >VHL-N78T-v VIFCNRSPRV | 59  | >VHL-N78T-n VIFCTRSPRV  | 74  | 15  |
| >VHL-N78T-v VIFCNRSPR  | 427 | >VHL-N78T-n VIFCTRSPR   | 403 | 24  |
| >VHL-N78T-v VIFCNRSPR  | 113 | >VHL-N78T-n VIFCTRSPR   | 76  | 37  |
| >VHL-N78T-v VIFCNRSPR  | 23  | >VHL-N78T-n VIFCTRSPR   | 16  | 7   |
| >VHL-N78T-v VIFCNRSPR  | 93  | >VHL-N78T-n VIFCTRSPR   | 50  | 43  |
| >VHL-N78T-v VIFCNRSPR  | 24  | >VHL-N78T-n VIFCTRSPR   | 26  | 2   |
| >VHL-N78T-v VIFCNRSPRV | 508 | >VHL-N78T-n VIFCTRSPRV  | 438 | 70  |
| >VHL-N78T-v VIFCNRSPR  | 689 | >VHL-N78T-n VIFCTRSPR   | 384 | 305 |
| >VHL-N78T-v VIFCNRSPRV | 360 | >VHL-N78T-n VIFCTRSPRV  | 238 | 122 |
| >VHL-N78T-v QVIFCNRSPR | 755 | >VHL-N78T-n QVIFCTRSPRV | 354 | 401 |
| >VHL-N78T-v QVIFCNRSPR | 214 | >VHL-N78T-n QVIFCTRSPRV | 145 | 69  |
| >VHL-N78T-v QVIFCNRSPR | 511 | >VHL-N78T-n QVIFCTRSPRV | 385 | 126 |
| >VHL-N78T-v QVIFCNRSPR | 305 | >VHL-N78T-n QVIFCTRSPR  | 161 | 144 |
| >VHL-N78T-v QVIFCNRSPR | 381 | >VHL-N78T-n QVIFCTRSPR  | 182 | 199 |
| >VHL-N78T-v QVIFCNRSPR | 11  | >VHL-N78T-n QVIFCTRSPR  | 8   | 3   |
| >VHL-N78T-v QVIFCNRSPR | 114 | >VHL-N78T-n QVIFCTRSPR  | 76  | 38  |
| >VHL-N78T-v QVIFCNRSPR | 6   | >VHL-N78T-n QVIFCTRSPR  | 5   | 1   |
| >VHL-N78T-v QVIFCNRSPR | 36  | >VHL-N78T-n QVIFCTRSPRV | 28  | 8   |
| >VHL-N78T-v QVIFCNRSPR | 178 | >VHL-N78T-n QVIFCTRSPRV | 134 | 44  |
| >VHL-N78T-v QVIFCNRSPR | 175 | >VHL-N78T-n QVIFCTRSPR  | 144 | 31  |
| >VHL-N78T-v SQVIFCNR   | 54  | >VHL-N78T-n SQVIFCTR    | 48  | 6   |
| >VHL-N78T-v SQVIFCNRSP | 47  | >VHL-N78T-n SQVIFCTRSPF | 33  | 14  |
| >VHL-N78T-v SQVIFCNR   | 423 | >VHL-N78T-n SQVIFCTR    | 389 | 34  |
| >VHL-N78T-v SQVIFCNRSP | 436 | >VHL-N78T-n SQVIFCTRSPF | 407 | 29  |
| >VHL-N78T-v SQVIFCNRSP | 301 | >VHL-N78T-n SQVIFCTRSPF | 208 | 93  |
| >VHL-N78T-v SQVIFCNR   | 74  | >VHL-N78T-n SQVIFCTR    | 84  | 10  |
| >VHL-N78T-v SQVIFCNRSP | 150 | >VHL-N78T-n SQVIFCTRSPF | 143 | 7   |
| >VHL-N78T-v PSQVIFCNR  | 125 | >VHL-N78T-n PSQVIFCTR   | 183 | 58  |
| >VHL-N78T-v PSQVIFCNR  | 362 | >VHL-N78T-n PSQVIFCTR   | 352 | 10  |
| >VHL-N78T-v EPSQVIFCNR | 355 | >VHL-N78T-n EPSQVIFCTR  | 458 | 103 |
| >VHL-N78T-v EPSQVIFCNR | 388 | >VHL-N78T-n EPSQVIFCTR  | 418 | 30  |
| >VHL-N78T-v EPSQVIFCNR | 91  | >VHL-N78T-n EPSQVIFCTR  | 67  | 24  |

|                         |       |                         |     |       |
|-------------------------|-------|-------------------------|-----|-------|
| >VHL-N78T-v EPSQVIFCN   | 1938  | >VHL-N78T-n EPSQVIFCT   | 394 | 1544  |
| >VHL-N78T-v EPSQVIFCNR  | 213   | >VHL-N78T-n EPSQVIFCTR  | 302 | 89    |
| >VHL-N78T-v REPSQVIFCN  | 1304  | >VHL-N78T-n REPSQVIFCT  | 426 | 878   |
| >VHL-N78T-v REPSQVIFCNI | 43    | >VHL-N78T-n REPSQVIFCTI | 53  | 10    |
| >VHL-N78Y-v NRSRPRVLPV  | 13442 | >VHL-N78Y-n YRSRPRVLPV  | 448 | 12994 |
| >VHL-N78Y-v NRSRPRVVL   | 993   | >VHL-N78Y-n YRSRPRVVL   | 91  | 902   |
| >VHL-N78Y-v NRSRPRVVL   | 1503  | >VHL-N78Y-n YRSRPRVVL   | 110 | 1393  |
| >VHL-N78Y-v NRSRPRVVL   | 22    | >VHL-N78Y-n YRSRPRVVL   | 12  | 10    |
| >VHL-N78Y-v NRSRPRVLPV  | 265   | >VHL-N78Y-n YRSRPRVLPV  | 84  | 181   |
| >VHL-N78Y-v NRSRPRVLPV  | 601   | >VHL-N78Y-n YRSRPRVLPV  | 90  | 511   |
| >VHL-N78Y-v CNRSRPRVVL  | 21649 | >VHL-N78Y-n CYRSRPRVVL  | 16  | 21633 |
| >VHL-N78Y-v CNRSRPRVV   | 4766  | >VHL-N78Y-n CYRSRPRVV   | 159 | 4607  |
| >VHL-N78Y-v CNRSRPRVVL  | 4554  | >VHL-N78Y-n CYRSRPRVVL  | 161 | 4393  |
| >VHL-N78Y-v CNRSRPRVLPV | 910   | >VHL-N78Y-n CYRSRPRVLPV | 24  | 886   |
| >VHL-N78Y-v FCNRSRPRV   | 252   | >VHL-N78Y-n FCYRSRPRV   | 26  | 226   |
| >VHL-N78Y-v FCNRSRPRVV  | 994   | >VHL-N78Y-n FCYRSRPRVV  | 90  | 904   |
| >VHL-N78Y-v FCNRSRPRV   | 1257  | >VHL-N78Y-n FCYRSRPRV   | 137 | 1120  |
| >VHL-N78Y-v FCNRSRPRV   | 107   | >VHL-N78Y-n FCYRSRPRV   | 31  | 76    |
| >VHL-N78Y-v FCNRSRPRV   | 1444  | >VHL-N78Y-n FCYRSRPRV   | 316 | 1128  |
| >VHL-N78Y-v FCNRSRPRVV  | 2427  | >VHL-N78Y-n FCYRSRPRVV  | 384 | 2043  |
| >VHL-N78Y-v IFCNRSRPR   | 15    | >VHL-N78Y-n IFCYRSRPR   | 12  | 3     |
| >VHL-N78Y-v IFCNRSRPR   | 20    | >VHL-N78Y-n IFCYRSRPR   | 12  | 8     |
| >VHL-N78Y-v IFCNRSRPR   | 639   | >VHL-N78Y-n IFCYRSRPR   | 379 | 260   |
| >VHL-N78Y-v IFCNRSRPR   | 62    | >VHL-N78Y-n IFCYRSRPR   | 55  | 7     |
| >VHL-N78Y-v VIFCNRSRPR  | 18941 | >VHL-N78Y-n VIFCYRSRPR  | 443 | 18498 |
| >VHL-N78Y-v VIFCNRSRPRV | 1031  | >VHL-N78Y-n VIFCYRSRPRV | 477 | 554   |
| >VHL-N78Y-v VIFCNRSRPRV | 72    | >VHL-N78Y-n VIFCYRSRPRV | 42  | 30    |
| >VHL-N78Y-v VIFCNRSRPRV | 662   | >VHL-N78Y-n VIFCYRSRPRV | 387 | 275   |
| >VHL-N78Y-v VIFCNRSRPRV | 7     | >VHL-N78Y-n VIFCYRSRPRV | 7   | 0     |
| >VHL-N78Y-v VIFCNRSRPRV | 15    | >VHL-N78Y-n VIFCYRSRPRV | 11  | 4     |
| >VHL-N78Y-v VIFCNRSRPRV | 86    | >VHL-N78Y-n VIFCYRSRPRV | 152 | 66    |
| >VHL-N78Y-v VIFCNRSRPRV | 191   | >VHL-N78Y-n VIFCYRSRPRV | 318 | 127   |
| >VHL-N78Y-v VIFCNRSRPRV | 70    | >VHL-N78Y-n VIFCYRSRPRV | 67  | 3     |
| >VHL-N78Y-v VIFCNRSRPRV | 400   | >VHL-N78Y-n VIFCYRSRPRV | 646 | 246   |
| >VHL-N78Y-v VIFCNRSRPRV | 7     | >VHL-N78Y-n VIFCYRSRPRV | 7   | 0     |
| >VHL-N78Y-v VIFCNRSRPRV | 59    | >VHL-N78Y-n VIFCYRSRPRV | 54  | 5     |
| >VHL-N78Y-v VIFCNRSRPR  | 427   | >VHL-N78Y-n VIFCYRSRPR  | 290 | 137   |
| >VHL-N78Y-v VIFCNRSRPR  | 113   | >VHL-N78Y-n VIFCYRSRPR  | 58  | 55    |
| >VHL-N78Y-v VIFCNRSRPR  | 23    | >VHL-N78Y-n VIFCYRSRPR  | 11  | 12    |
| >VHL-N78Y-v VIFCNRSRPR  | 93    | >VHL-N78Y-n VIFCYRSRPR  | 28  | 65    |
| >VHL-N78Y-v VIFCNRSRPR  | 24    | >VHL-N78Y-n VIFCYRSRPR  | 26  | 2     |
| >VHL-N78Y-v VIFCNRSRPRV | 508   | >VHL-N78Y-n VIFCYRSRPRV | 300 | 208   |
| >VHL-N78Y-v VIFCNRSRPR  | 689   | >VHL-N78Y-n VIFCYRSRPR  | 359 | 330   |

|                         |       |                         |      |       |
|-------------------------|-------|-------------------------|------|-------|
| >VHL-N78Y-v VIFCNRSPRV\ | 360   | >VHL-N78Y-n VIFCYRSPRV\ | 234  | 126   |
| >VHL-N78Y-v QVIFCNRSPR  | 1851  | >VHL-N78Y-n QVIFCYRSPR\ | 375  | 1476  |
| >VHL-N78Y-v QVIFCNRSPR  | 755   | >VHL-N78Y-n QVIFCYRSPR\ | 435  | 320   |
| >VHL-N78Y-v QVIFCNRSPR  | 214   | >VHL-N78Y-n QVIFCYRSPR\ | 158  | 56    |
| >VHL-N78Y-v QVIFCNRSPR  | 305   | >VHL-N78Y-n QVIFCYRSPR  | 286  | 19    |
| >VHL-N78Y-v QVIFCNRSPR  | 381   | >VHL-N78Y-n QVIFCYRSPR  | 245  | 136   |
| >VHL-N78Y-v QVIFCNRSPR  | 11    | >VHL-N78Y-n QVIFCYRSPR  | 8    | 3     |
| >VHL-N78Y-v QVIFCNRSPR  | 114   | >VHL-N78Y-n QVIFCYRSPR  | 44   | 70    |
| >VHL-N78Y-v QVIFCNRSPR  | 6     | >VHL-N78Y-n QVIFCYRSPR  | 5    | 1     |
| >VHL-N78Y-v QVIFCNRS    | 824   | >VHL-N78Y-n QVIFCYRS    | 294  | 530   |
| >VHL-N78Y-v QVIFCNRSPR  | 36    | >VHL-N78Y-n QVIFCYRSPR\ | 28   | 8     |
| >VHL-N78Y-v QVIFCNRSPR  | 178   | >VHL-N78Y-n QVIFCYRSPR\ | 152  | 26    |
| >VHL-N78Y-v QVIFCNRSPR  | 175   | >VHL-N78Y-n QVIFCYRSPR  | 189  | 14    |
| >VHL-N78Y-v SQVIFCNR    | 883   | >VHL-N78Y-n SQVIFCYR    | 162  | 721   |
| >VHL-N78Y-v SQVIFCNRSP\ | 1037  | >VHL-N78Y-n SQVIFCYRSPF | 402  | 635   |
| >VHL-N78Y-v SQVIFCNR    | 54    | >VHL-N78Y-n SQVIFCYR    | 15   | 39    |
| >VHL-N78Y-v SQVIFCNRSP\ | 47    | >VHL-N78Y-n SQVIFCYRSPF | 21   | 26    |
| >VHL-N78Y-v SQVIFCNR    | 423   | >VHL-N78Y-n SQVIFCYR    | 126  | 297   |
| >VHL-N78Y-v SQVIFCNRSP\ | 436   | >VHL-N78Y-n SQVIFCYRSPF | 316  | 120   |
| >VHL-N78Y-v SQVIFCNRSP\ | 301   | >VHL-N78Y-n SQVIFCYRSPF | 264  | 37    |
| >VHL-N78Y-v SQVIFCNR    | 569   | >VHL-N78Y-n SQVIFCYR    | 356  | 213   |
| >VHL-N78Y-v SQVIFCNR    | 74    | >VHL-N78Y-n SQVIFCYR    | 18   | 56    |
| >VHL-N78Y-v SQVIFCNRSP\ | 150   | >VHL-N78Y-n SQVIFCYRSPF | 75   | 75    |
| >VHL-N78Y-v PSQVIFCN    | 28925 | >VHL-N78Y-n PSQVIFCY    | 392  | 28533 |
| >VHL-N78Y-v PSQVIFCNR   | 125   | >VHL-N78Y-n PSQVIFCYR   | 24   | 101   |
| >VHL-N78Y-v PSQVIFCNR   | 362   | >VHL-N78Y-n PSQVIFCYR   | 125  | 237   |
| >VHL-N78Y-v PSQVIFCN    | 16947 | >VHL-N78Y-n PSQVIFCY    | 476  | 16471 |
| >VHL-N78Y-v EPSQVIFCNR  | 355   | >VHL-N78Y-n EPSQVIFCYR  | 120  | 235   |
| >VHL-N78Y-v EPSQVIFCNR  | 388   | >VHL-N78Y-n EPSQVIFCYR  | 79   | 309   |
| >VHL-N78Y-v EPSQVIFCNR  | 91    | >VHL-N78Y-n EPSQVIFCYR  | 30   | 61    |
| >VHL-N78Y-v EPSQVIFCN   | 1938  | >VHL-N78Y-n EPSQVIFCY   | 11   | 1927  |
| >VHL-N78Y-v EPSQVIFCN   | 6877  | >VHL-N78Y-n EPSQVIFCY   | 27   | 6850  |
| >VHL-N78Y-v EPSQVIFCN   | 24077 | >VHL-N78Y-n EPSQVIFCY   | 26   | 24051 |
| >VHL-N78Y-v EPSQVIFCN   | 13737 | >VHL-N78Y-n EPSQVIFCY   | 146  | 13591 |
| >VHL-N78Y-v EPSQVIFCNR  | 213   | >VHL-N78Y-n EPSQVIFCYR  | 66   | 147   |
| >VHL-N78Y-v REPSQVIFCN\ | 1396  | >VHL-N78Y-n REPSQVIFCYF | 284  | 1112  |
| >VHL-N78Y-v REPSQVIFCN  | 43    | >VHL-N78Y-n REPSQVIFCYF | 23   | 20    |
| >VHL-N7D-w ENWDEAEV     | 419   | >VHL-N7D-m EDWDEAEV     | 2954 | 2535  |
| >VHL-N7D-w ENWDEAEV     | 369   | >VHL-N7D-m EDWDEAEV     | 935  | 566   |
| >VHL-N7D-w ENWDEAEV     | 6759  | >VHL-N7D-m EDWDEAEV     | 121  | 6638  |
| >VHL-N7D-w AENWDEAEV    | 101   | >VHL-N7D-m AEDWDEAEV    | 57   | 44    |
| >VHL-N7D-w AENWDEAE     | 455   | >VHL-N7D-m AEDWDEAE     | 2288 | 1833  |
| >VHL-N7D-w AENWDEAEV    | 17    | >VHL-N7D-m AEDWDEAEV    | 106  | 89    |

|                        |       |                       |     |       |
|------------------------|-------|-----------------------|-----|-------|
| >VHL-N7D-w AENWDEAEV   | 335   | >VHL-N7D-m AEDWDEAEV  | 498 | 163   |
| >VHL-N7D-w AENWDEAEV   | 8     | >VHL-N7D-m AEDWDEAEV  | 34  | 26    |
| >VHL-N7D-w AENWDEAEV   | 193   | >VHL-N7D-m AEDWDEAEV  | 371 | 178   |
| >VHL-N7D-w RAENWDEAE   | 904   | >VHL-N7D-m RAEDWDEAE  | 421 | 483   |
| >VHL-N7D-w RAENWDEAE   | 515   | >VHL-N7D-m RAEDWDEAE  | 78  | 437   |
| >VHL-N7D-w RRAENWDEA   | 368   | >VHL-N7D-m RRAEDWDEA  | 518 | 150   |
| >VHL-N7D-w RRAENWDEA   | 320   | >VHL-N7D-m RRAEDWDEA  | 349 | 29    |
| >VHL-N7D-w RRAENWDEA   | 196   | >VHL-N7D-m RRAEDWDEA  | 242 | 46    |
| >VHL-N7D-w RRAENWDE    | 40    | >VHL-N7D-m RRAEDWDE   | 59  | 19    |
| >VHL-N7D-w RRAENWDEA   | 143   | >VHL-N7D-m RRAEDWDEA  | 150 | 7     |
| >VHL-N7D-w RRAENWDEA   | 233   | >VHL-N7D-m RRAEDWDEA  | 333 | 100   |
| >VHL-N7D-w MPRRAENW    | 110   | >VHL-N7D-m MPRRAEDW   | 150 | 40    |
| >VHL-N7D-w MPRRAENWI   | 37    | >VHL-N7D-m MPRRAEDWI  | 63  | 26    |
| >VHL-N7D-w MPRRAENWI   | 280   | >VHL-N7D-m MPRRAEDWI  | 243 | 37    |
| >VHL-N7D-w MPRRAENW    | 25    | >VHL-N7D-m MPRRAEDW   | 45  | 20    |
| >VHL-N7D-w MPRRAENWI   | 309   | >VHL-N7D-m MPRRAEDWI  | 602 | 293   |
| >VHL-N7D-w MPRRAENWI   | 9     | >VHL-N7D-m MPRRAEDWI  | 13  | 4     |
| >VHL-N7D-w MPRRAENW    | 21    | >VHL-N7D-m MPRRAEDW   | 25  | 4     |
| >VHL-N7D-w MPRRAENW    | 64    | >VHL-N7D-m MPRRAEDW   | 50  | 14    |
| >VHL-N7T-wi ENWDEAEV   | 5840  | >VHL-N7T-m ETWDEAEV   | 55  | 5785  |
| >VHL-N7T-wi ENWDEAEV   | 9029  | >VHL-N7T-m ETWDEAEV   | 217 | 8812  |
| >VHL-N7T-wi ENWDEAEV   | 14464 | >VHL-N7T-m ETWDEAEV   | 268 | 14196 |
| >VHL-N7T-wi ENWDEAEV   | 10198 | >VHL-N7T-m ETWDEAEV   | 85  | 10113 |
| >VHL-N7T-wi ENWDEAEV   | 419   | >VHL-N7T-m ETWDEAEV   | 8   | 411   |
| >VHL-N7T-wi ENWDEAEVCG | 9125  | >VHL-N7T-m ETWDEAEVCG | 170 | 8955  |
| >VHL-N7T-wi ENWDEAEV   | 369   | >VHL-N7T-m ETWDEAEV   | 4   | 365   |
| >VHL-N7T-wi ENWDEAEVCG | 3634  | >VHL-N7T-m ETWDEAEVCG | 18  | 3616  |
| >VHL-N7T-wi AENWDEAEV  | 101   | >VHL-N7T-m AETWDEAEV  | 43  | 58    |
| >VHL-N7T-wi AENWDEAE   | 455   | >VHL-N7T-m AETWDEAE   | 602 | 147   |
| >VHL-N7T-wi AENWDEAEV  | 17    | >VHL-N7T-m AETWDEAEV  | 24  | 7     |
| >VHL-N7T-wi AENWDEAEV  | 335   | >VHL-N7T-m AETWDEAEV  | 687 | 352   |
| >VHL-N7T-wi AENWDEAEV  | 8     | >VHL-N7T-m AETWDEAEV  | 11  | 3     |
| >VHL-N7T-wi AENWDEAEV  | 193   | >VHL-N7T-m AETWDEAEV  | 127 | 66    |
| >VHL-N7T-wi RRAENWDEA  | 368   | >VHL-N7T-m RRAETWDEA  | 351 | 17    |
| >VHL-N7T-wi RRAENWDEA  | 320   | >VHL-N7T-m RRAETWDEA  | 331 | 11    |
| >VHL-N7T-wi RRAENWDEA  | 196   | >VHL-N7T-m RRAETWDEA  | 184 | 12    |
| >VHL-N7T-wi RRAENWDE   | 40    | >VHL-N7T-m RRAETWDE   | 70  | 30    |
| >VHL-N7T-wi RRAENWDEA  | 143   | >VHL-N7T-m RRAETWDEA  | 111 | 32    |
| >VHL-N7T-wi RRAENWDEA  | 233   | >VHL-N7T-m RRAETWDEA  | 219 | 14    |
| >VHL-N7T-wi MPRRAENW   | 110   | >VHL-N7T-m MPRRAETW   | 45  | 65    |
| >VHL-N7T-wi MPRRAENWI  | 37    | >VHL-N7T-m MPRRAETWI  | 32  | 5     |
| >VHL-N7T-wi MPRRAENW   | 1261  | >VHL-N7T-m MPRRAETW   | 187 | 1074  |
| >VHL-N7T-wi MPRRAENWI  | 280   | >VHL-N7T-m MPRRAETWI  | 248 | 32    |

|                        |       |                         |      |       |
|------------------------|-------|-------------------------|------|-------|
| >VHL-N7T-wi MPRRAENW   | 25    | >VHL-N7T-m MPRRAETW     | 24   | 1     |
| >VHL-N7T-wi MPRRAENWI  | 309   | >VHL-N7T-m MPRRAETWI    | 1243 | 934   |
| >VHL-N7T-wi MPRRAENWI  | 9     | >VHL-N7T-m MPRRAETWI    | 11   | 2     |
| >VHL-N7T-wi MPRRAENW   | 1191  | >VHL-N7T-m MPRRAETW     | 363  | 828   |
| >VHL-N7T-wi MPRRAENW   | 21    | >VHL-N7T-m MPRRAETW     | 14   | 7     |
| >VHL-N7T-wi MPRRAENW   | 64    | >VHL-N7T-m MPRRAETW     | 37   | 27    |
| >VHL-N90I-w NFDGEPQPY  | 338   | >VHL-N90I-r IFDGEPQPY   | 161  | 177   |
| >VHL-N90I-w LNFDFGEPQ  | 30336 | >VHL-N90I-r LIFDFGEPQ   | 411  | 29925 |
| >VHL-N90I-w LNFDFGEPQ\ | 943   | >VHL-N90I-r LIFDFGEPQPY | 476  | 467   |
| >VHL-N90I-w LNFDFGEPQ\ | 648   | >VHL-N90I-r LIFDFGEPQPY | 402  | 246   |
| >VHL-N90I-w LNFDFGEPQ\ | 165   | >VHL-N90I-r LIFDFGEPQPY | 55   | 110   |
| >VHL-N90I-w LNFDFGEPQ\ | 562   | >VHL-N90I-r LIFDFGEPQPY | 176  | 386   |
| >VHL-N90I-w LNFDFGEPQ\ | 111   | >VHL-N90I-r LIFDFGEPQPY | 128  | 17    |
| >VHL-N90I-w LNFDFGEPQ\ | 1965  | >VHL-N90I-r LIFDFGEPQPY | 61   | 1904  |
| >VHL-N90I-w SPRVVLPVWI | 19197 | >VHL-N90I-r SPRVVLPVWI  | 215  | 18982 |
| >VHL-N90I-w WLNDFGEPQ  | 6209  | >VHL-N90I-r WLIFDFGEPQF | 301  | 5908  |
| >VHL-N90I-w WLNDFGEPQ  | 50    | >VHL-N90I-r WLIFDFGEPQF | 23   | 27    |
| >VHL-N90I-w WLNDFGEPQ  | 54    | >VHL-N90I-r WLIFDFGEPQF | 52   | 2     |
| >VHL-N90I-w WLNDFGEPQ  | 52    | >VHL-N90I-r WLIFDFGEPQF | 47   | 5     |
| >VHL-N90I-w WLNDFGEPQ  | 102   | >VHL-N90I-r WLIFDFGEPQF | 67   | 35    |
| >VHL-N90I-w WLNDFGEPQ  | 90    | >VHL-N90I-r WLIFDFGEPQF | 71   | 19    |
| >VHL-N90I-w WLNDFGEPQ  | 182   | >VHL-N90I-r WLIFDFGEPQF | 554  | 372   |
| >VHL-N90I-w VWLNDFGE   | 227   | >VHL-N90I-r VWLIFDFGE   | 202  | 25    |
| >VHL-N90I-w VWLNDFGEP  | 304   | >VHL-N90I-r VWLIFDFGEP  | 290  | 14    |
| >VHL-N90I-w LPVWLNFDG  | 285   | >VHL-N90I-r LPVWLIFDG   | 419  | 134   |
| >VHL-N90I-w LPVWLNFD   | 106   | >VHL-N90I-r LPVWLIFD    | 135  | 29    |
| >VHL-N90I-w LPVWLNFDG  | 251   | >VHL-N90I-r LPVWLIFDG   | 128  | 123   |
| >VHL-N90I-w LPVWLNFDG  | 345   | >VHL-N90I-r LPVWLIFDGE  | 232  | 113   |
| >VHL-N90I-w VLPVWLNF   | 235   | >VHL-N90I-r VLPVWLIF    | 566  | 331   |
| >VHL-N90I-w VLPVWLNF   | 454   | >VHL-N90I-r VLPVWLIF    | 432  | 22    |
| >VHL-N90I-w VVLPVWLNF  | 443   | >VHL-N90I-r VVLPVWLIF   | 626  | 183   |
| >VHL-N90I-w VVLPVWLN   | 17557 | >VHL-N90I-r VVLPVWLI    | 100  | 17457 |
| >VHL-N90I-w VVLPVWLN   | 4420  | >VHL-N90I-r VVLPVWLI    | 10   | 4410  |
| >VHL-N90I-w VVLPVWLNF  | 261   | >VHL-N90I-r VVLPVWLIF   | 363  | 102   |
| >VHL-N90I-w VVLPVWLN   | 5002  | >VHL-N90I-r VVLPVWLI    | 13   | 4989  |
| >VHL-N90I-w VVLPVWLN   | 14325 | >VHL-N90I-r VVLPVWLI    | 42   | 14283 |
| >VHL-N90I-w VVLPVWLN   | 21307 | >VHL-N90I-r VVLPVWLI    | 210  | 21097 |
| >VHL-N90I-w VVLPVWLN   | 19145 | >VHL-N90I-r VVLPVWLI    | 132  | 19013 |
| >VHL-N90I-w VVLPVWLN   | 26572 | >VHL-N90I-r VVLPVWLI    | 491  | 26081 |
| >VHL-N90I-w VVLPVWLNF  | 42    | >VHL-N90I-r VVLPVWLIF   | 80   | 38    |
| >VHL-N90I-w VVLPVWLNF  | 449   | >VHL-N90I-r VVLPVWLIF   | 385  | 64    |
| >VHL-N90I-w VVLPVWLNF  | 190   | >VHL-N90I-r VVLPVWLIF   | 426  | 236   |
| >VHL-N90I-w VVLPVWLNF  | 70    | >VHL-N90I-r VVLPVWLIF   | 129  | 59    |

|                        |       |                        |     |       |
|------------------------|-------|------------------------|-----|-------|
| >VHL-N90I-w VVLPVWLN   | 15988 | >VHL-N90I-r VVLPVWLI   | 262 | 15726 |
| >VHL-N90I-w VVLPVWLNf  | 461   | >VHL-N90I-r VVLPVWLIF  | 382 | 79    |
| >VHL-N90I-w VVLPVWLNf  | 20    | >VHL-N90I-r VVLPVWLIF  | 71  | 51    |
| >VHL-N90I-w VVLPVWLN   | 15569 | >VHL-N90I-r VVLPVWLI   | 306 | 15263 |
| >VHL-N90I-w VVLPVWLNf  | 399   | >VHL-N90I-r VVLPVWLIF  | 71  | 328   |
| >VHL-N90I-w VVLPVWLN   | 37265 | >VHL-N90I-r VVLPVWLI   | 412 | 36853 |
| >VHL-N90I-w RVVLPVWLN  | 13120 | >VHL-N90I-r RVVLPVWLI  | 65  | 13055 |
| >VHL-N90I-w RVVLPVWLN  | 16830 | >VHL-N90I-r RVVLPVWLI  | 162 | 16668 |
| >VHL-N90I-w RVVLPVWLN  | 182   | >VHL-N90I-r RVVLPVWLIF | 330 | 148   |
| >VHL-N90I-w RVVLPVWLN  | 15934 | >VHL-N90I-r RVVLPVWLI  | 250 | 15684 |
| >VHL-N90I-w RVVLPVWLN  | 202   | >VHL-N90I-r RVVLPVWLIF | 253 | 51    |
| >VHL-N90I-w RVVLPVWLN  | 16411 | >VHL-N90I-r RVVLPVWLI  | 229 | 16182 |
| >VHL-N90I-w RVVLPVWLN  | 355   | >VHL-N90I-r RVVLPVWLIF | 270 | 85    |
| >VHL-N90I-w RVVLPVWLN  | 9     | >VHL-N90I-r RVVLPVWLIF | 22  | 13    |
| >VHL-N90I-w RVVLPVWLN  | 56    | >VHL-N90I-r RVVLPVWLIF | 33  | 23    |
| >VHL-N90I-w RVVLPVWLN  | 230   | >VHL-N90I-r RVVLPVWLIF | 137 | 93    |
| >VHL-N90I-w RVVLPVWLN  | 320   | >VHL-N90I-r RVVLPVWLIF | 164 | 156   |
| >VHL-N90I-w PRVVPVWLI  | 364   | >VHL-N90I-r PRVVPVWLI  | 317 | 47    |
| >VHL-N90I-w PRVVPVWLI  | 385   | >VHL-N90I-r PRVVPVWLI  | 270 | 115   |
| >VHL-N90Y-v NFDGEPQPY  | 338   | >VHL-N90Y-n YFDGEPQPY  | 51  | 287   |
| >VHL-N90Y-v NFDGEPQPY  | 955   | >VHL-N90Y-n YFDGEPQPY  | 220 | 735   |
| >VHL-N90Y-v NFDGEPQPY  | 501   | >VHL-N90Y-n YFDGEPQPY  | 90  | 411   |
| >VHL-N90Y-v NFDGEPQPY  | 720   | >VHL-N90Y-n YFDGEPQPY  | 162 | 558   |
| >VHL-N90Y-v LNFDGEPQP\ | 3910  | >VHL-N90Y-n LYFDGEPQPY | 276 | 3634  |
| >VHL-N90Y-v LNFDGEPQP\ | 943   | >VHL-N90Y-n LYFDGEPQPY | 40  | 903   |
| >VHL-N90Y-v LNFDGEPQP\ | 648   | >VHL-N90Y-n LYFDGEPQPY | 98  | 550   |
| >VHL-N90Y-v LNFDGEPQP\ | 165   | >VHL-N90Y-n LYFDGEPQPY | 962 | 797   |
| >VHL-N90Y-v LNFDGEPQP\ | 111   | >VHL-N90Y-n LYFDGEPQPY | 259 | 148   |
| >VHL-N90Y-v SPRVLPVWI  | 19922 | >VHL-N90Y-n SPRVLPVWI  | 438 | 19484 |
| >VHL-N90Y-v SPRVLPVWI  | 15423 | >VHL-N90Y-n SPRVLPVWI  | 372 | 15051 |
| >VHL-N90Y-v WLNFDGEPQ  | 4786  | >VHL-N90Y-n WLYFDGEPQ  | 440 | 4346  |
| >VHL-N90Y-v WLNFDGEPQ  | 1589  | >VHL-N90Y-n WLYFDGEPQ  | 439 | 1150  |
| >VHL-N90Y-v WLNFDGEPQ  | 50    | >VHL-N90Y-n WLYFDGEPQ  | 20  | 30    |
| >VHL-N90Y-v WLNFDGEPQ  | 54    | >VHL-N90Y-n WLYFDGEPQ  | 41  | 13    |
| >VHL-N90Y-v WLNFDGEPQ  | 52    | >VHL-N90Y-n WLYFDGEPQ  | 18  | 34    |
| >VHL-N90Y-v WLNFDGEPQ  | 102   | >VHL-N90Y-n WLYFDGEPQ  | 20  | 82    |
| >VHL-N90Y-v WLNFDGEPQ  | 6691  | >VHL-N90Y-n WLYFDGEPQ  | 434 | 6257  |
| >VHL-N90Y-v WLNFDGEPQ  | 90    | >VHL-N90Y-n WLYFDGEPQ  | 46  | 44    |
| >VHL-N90Y-v WLNFDGEPQ  | 182   | >VHL-N90Y-n WLYFDGEPQ  | 347 | 165   |
| >VHL-N90Y-v VWLNFDGE   | 227   | >VHL-N90Y-n VWLYFDGE   | 154 | 73    |
| >VHL-N90Y-v VWLNFDGEP  | 304   | >VHL-N90Y-n VWLYFDGEP  | 217 | 87    |
| >VHL-N90Y-v VWLNFDGEP  | 635   | >VHL-N90Y-n VWLYFDGEP  | 489 | 146   |
| >VHL-N90Y-v LPVWLNFDG  | 285   | >VHL-N90Y-n LPVWLYFDG  | 304 | 19    |

|                       |       |                        |     |       |
|-----------------------|-------|------------------------|-----|-------|
| >VHL-N90Y-v LPVWLNFD  | 106   | >VHL-N90Y-n LPVWLYFD   | 60  | 46    |
| >VHL-N90Y-v LPVWLNFDG | 251   | >VHL-N90Y-n LPVWLYFDG  | 62  | 189   |
| >VHL-N90Y-v LPVWLNFDG | 345   | >VHL-N90Y-n LPVWLYFDG  | 159 | 186   |
| >VHL-N90Y-v VLPVWLNF  | 1928  | >VHL-N90Y-n VLPVWLYF   | 154 | 1774  |
| >VHL-N90Y-v VLPVWLNF  | 235   | >VHL-N90Y-n VLPVWLYF   | 324 | 89    |
| >VHL-N90Y-v VLPVWLNF  | 454   | >VHL-N90Y-n VLPVWLYF   | 350 | 104   |
| >VHL-N90Y-v VLPVWLNF  | 1059  | >VHL-N90Y-n VLPVWLYF   | 499 | 560   |
| >VHL-N90Y-v VLPVWLNF  | 2940  | >VHL-N90Y-n VLPVWLYF   | 461 | 2479  |
| >VHL-N90Y-v VVLPVWLNF | 443   | >VHL-N90Y-n VVLPVWLYF  | 393 | 50    |
| >VHL-N90Y-v VVLPVWLNF | 261   | >VHL-N90Y-n VVLPVWLYF  | 56  | 205   |
| >VHL-N90Y-v VVLPVWLN  | 9587  | >VHL-N90Y-n VVLPVWLY   | 69  | 9518  |
| >VHL-N90Y-v VVLPVWLNF | 42    | >VHL-N90Y-n VVLPVWLYF  | 69  | 27    |
| >VHL-N90Y-v VVLPVWLNF | 449   | >VHL-N90Y-n VVLPVWLYF  | 401 | 48    |
| >VHL-N90Y-v VVLPVWLNF | 190   | >VHL-N90Y-n VVLPVWLYF  | 76  | 114   |
| >VHL-N90Y-v VVLPVWLN  | 7231  | >VHL-N90Y-n VVLPVWLY   | 7   | 7224  |
| >VHL-N90Y-v VVLPVWLNF | 70    | >VHL-N90Y-n VVLPVWLYF  | 19  | 51    |
| >VHL-N90Y-v VVLPVWLN  | 16251 | >VHL-N90Y-n VVLPVWLY   | 57  | 16194 |
| >VHL-N90Y-v VVLPVWLN  | 14578 | >VHL-N90Y-n VVLPVWLY   | 9   | 14569 |
| >VHL-N90Y-v VVLPVWLNF | 461   | >VHL-N90Y-n VVLPVWLYF  | 491 | 30    |
| >VHL-N90Y-v VVLPVWLN  | 19429 | >VHL-N90Y-n VVLPVWLY   | 100 | 19329 |
| >VHL-N90Y-v VVLPVWLNF | 20    | >VHL-N90Y-n VVLPVWLYF  | 32  | 12    |
| >VHL-N90Y-v VVLPVWLNF | 2022  | >VHL-N90Y-n VVLPVWLYF  | 310 | 1712  |
| >VHL-N90Y-v VVLPVWLN  | 15569 | >VHL-N90Y-n VVLPVWLY   | 130 | 15439 |
| >VHL-N90Y-v VVLPVWLNF | 399   | >VHL-N90Y-n VVLPVWLYF  | 118 | 281   |
| >VHL-N90Y-v RVVLPVWLN | 10559 | >VHL-N90Y-n RVVLPVWLY  | 106 | 10453 |
| >VHL-N90Y-v RVVLPVWLN | 582   | >VHL-N90Y-n RVVLPVWLYF | 297 | 285   |
| >VHL-N90Y-v RVVLPVWLN | 20348 | >VHL-N90Y-n RVVLPVWLY  | 29  | 20319 |
| >VHL-N90Y-v RVVLPVWLN | 182   | >VHL-N90Y-n RVVLPVWLYF | 122 | 60    |
| >VHL-N90Y-v RVVLPVWLN | 15615 | >VHL-N90Y-n RVVLPVWLY  | 19  | 15596 |
| >VHL-N90Y-v RVVLPVWLN | 17985 | >VHL-N90Y-n RVVLPVWLY  | 231 | 17754 |
| >VHL-N90Y-v RVVLPVWLN | 202   | >VHL-N90Y-n RVVLPVWLYF | 616 | 414   |
| >VHL-N90Y-v RVVLPVWLN | 16227 | >VHL-N90Y-n RVVLPVWLY  | 6   | 16221 |
| >VHL-N90Y-v RVVLPVWLN | 819   | >VHL-N90Y-n RVVLPVWLYF | 431 | 388   |
| >VHL-N90Y-v RVVLPVWLN | 355   | >VHL-N90Y-n RVVLPVWLYF | 375 | 20    |
| >VHL-N90Y-v RVVLPVWLN | 11832 | >VHL-N90Y-n RVVLPVWLY  | 19  | 11813 |
| >VHL-N90Y-v RVVLPVWLN | 9     | >VHL-N90Y-n RVVLPVWLYF | 11  | 2     |
| >VHL-N90Y-v RVVLPVWLN | 56    | >VHL-N90Y-n RVVLPVWLYF | 21  | 35    |
| >VHL-N90Y-v RVVLPVWLN | 17835 | >VHL-N90Y-n RVVLPVWLY  | 284 | 17551 |
| >VHL-N90Y-v RVVLPVWLN | 230   | >VHL-N90Y-n RVVLPVWLYF | 97  | 133   |
| >VHL-N90Y-v RVVLPVWLN | 28461 | >VHL-N90Y-n RVVLPVWLY  | 125 | 28336 |
| >VHL-N90Y-v RVVLPVWLN | 320   | >VHL-N90Y-n RVVLPVWLYF | 143 | 177   |
| >VHL-N90Y-v PRVLPVWLI | 364   | >VHL-N90Y-n PRVLPVWLY  | 356 | 8     |
| >VHL-N90Y-v PRVLPVWLI | 12004 | >VHL-N90Y-n PRVLPVWLY  | 338 | 11666 |



|                        |       |                        |       |       |
|------------------------|-------|------------------------|-------|-------|
| >VHL-N90Y-v PRVVLPVWLI | 385   | >VHL-N90Y-n PRVVLPVWLI | 291   | 94    |
| >VHL-P102A- PPGTGRIHS  | 1860  | >VHL-P102A- APGTGRIHS  | 393   | 1467  |
| >VHL-P102A- PPGTGRI    | 4260  | >VHL-P102A- APGTGRI    | 127   | 4133  |
| >VHL-P102A- PPGTGRIHS  | 3195  | >VHL-P102A- APGTGRIHS  | 289   | 2906  |
| >VHL-P102A- LPPGTGRI   | 158   | >VHL-P102A- LAPGTGRI   | 9873  | 9715  |
| >VHL-P102A- LPPGTGRI   | 3085  | >VHL-P102A- LAPGTGRI   | 309   | 2776  |
| >VHL-P102A- TLPPGTGRI  | 1407  | >VHL-P102A- TLAPGTGRI  | 373   | 1034  |
| >VHL-P102A- TLPPGTGRI  | 214   | >VHL-P102A- TLAPGTGRI  | 122   | 92    |
| >VHL-P102A- TLPPGTGRI  | 83    | >VHL-P102A- TLAPGTGRI  | 27    | 56    |
| >VHL-P102A- TLPPGTGRR  | 3801  | >VHL-P102A- TLAPGTGRR  | 451   | 3350  |
| >VHL-P102A- TLPPGTGR   | 892   | >VHL-P102A- TLAPGTGR   | 99    | 793   |
| >VHL-P102A- TLPPGTGRR  | 1209  | >VHL-P102A- TLAPGTGRR  | 153   | 1056  |
| >VHL-P102A- PTLPPGTGRR | 139   | >VHL-P102A- PTLAPGTGRR | 460   | 321   |
| >VHL-P102A- YPTLPPGTGR | 474   | >VHL-P102A- YPTLAPGTGR | 554   | 80    |
| >VHL-P102A- YPTLPPGT   | 1028  | >VHL-P102A- YPTLAPGT   | 401   | 627   |
| >VHL-P102A- YPTLPPGTG  | 1469  | >VHL-P102A- YPTLAPGTG  | 324   | 1145  |
| >VHL-P102A- YPTLPPGT   | 313   | >VHL-P102A- YPTLAPGT   | 397   | 84    |
| >VHL-P102A- YPTLPPGTG  | 410   | >VHL-P102A- YPTLAPGTG  | 581   | 171   |
| >VHL-P102A- PYPTLPPGTG | 66    | >VHL-P102A- PYPTLAPGTG | 65    | 1     |
| >VHL-P102A- QPYPTLPPG  | 497   | >VHL-P102A- QPYPTLAPG  | 359   | 138   |
| >VHL-P102A- QPYPTLPPG  | 159   | >VHL-P102A- QPYPTLAPG  | 229   | 70    |
| >VHL-P102A- GEPQPYPTLP | 3347  | >VHL-P102A- GEPQPYPTLA | 235   | 3112  |
| >VHL-P138R- PSLNVDGQPI | 11161 | >VHL-P138R- RSLNVDGQPI | 242   | 10919 |
| >VHL-P138R- PSLNVDGQPI | 5584  | >VHL-P138R- RSLNVDGQPI | 56    | 5528  |
| >VHL-P138R- PSLNVDGQPI | 7893  | >VHL-P138R- RSLNVDGQPI | 101   | 7792  |
| >VHL-P138R- PSLNVDGQPI | 4140  | >VHL-P138R- RSLNVDGQPI | 362   | 3778  |
| >VHL-P138R- PSLNVDGQPI | 957   | >VHL-P138R- RSLNVDGQPI | 37    | 920   |
| >VHL-P138R- PSLNVDGQPI | 14746 | >VHL-P138R- RSLNVDGQPI | 32    | 14714 |
| >VHL-P138R- PSLNVDGQPI | 2199  | >VHL-P138R- RSLNVDGQPI | 6     | 2193  |
| >VHL-P138R- PSLNVDGQPI | 15758 | >VHL-P138R- RSLNVDGQPI | 336   | 15422 |
| >VHL-P138R- PSLNVDGQPI | 16178 | >VHL-P138R- RSLNVDGQPI | 278   | 15900 |
| >VHL-P138R- PSLNVDGQPI | 4771  | >VHL-P138R- RSLNVDGQPI | 13    | 4758  |
| >VHL-P138R- PSLNVDGQPI | 2357  | >VHL-P138R- RSLNVDGQPI | 15    | 2342  |
| >VHL-P138R- VPSLNVDGQI | 124   | >VHL-P138R- VRSLNVDGQI | 25304 | 25180 |
| >VHL-P138R- VPSLNVDGQI | 412   | >VHL-P138R- VRSLNVDGQI | 22523 | 22111 |
| >VHL-P138R- LLVNQTELFV | 20079 | >VHL-P138R- LLVNQTELFV | 141   | 19938 |
| >VHL-P138R- LLVNQTELFV | 35513 | >VHL-P138R- LLVNQTELFV | 172   | 35341 |
| >VHL-P138R- LFPVPSLNV  | 352   | >VHL-P138R- LFPVPSLNV  | 1008  | 656   |
| >VHL-P138R- LFPVPSLNV  | 483   | >VHL-P138R- LFPVPSLNV  | 1556  | 1073  |
| >VHL-P138R- ELFPVPSLNV | 336   | >VHL-P138R- ELFPVPSLNV | 173   | 163   |
| >VHL-P138R- ELFPVPSLNV | 565   | >VHL-P138R- ELFPVPSLNV | 268   | 297   |
| >VHL-P138R- ELFPVPSLNV | 10    | >VHL-P138R- ELFPVPSLNV | 32    | 22    |
| >VHL-P138R- ELFPVPSLNV | 173   | >VHL-P138R- ELFPVPSLNV | 200   | 27    |

|                        |       |                        |      |       |
|------------------------|-------|------------------------|------|-------|
| >VHL-P138R-ELFVPSLNV   | 16    | >VHL-P138R-ELFVRSLNV   | 15   | 1     |
| >VHL-P138R-ELFVPSLNV   | 29    | >VHL-P138R-ELFVRSLNV   | 69   | 40    |
| >VHL-P138R-ELFVPSLNV   | 12    | >VHL-P138R-ELFVRSLNV   | 11   | 1     |
| >VHL-P138R-ELFVPSLNV   | 31    | >VHL-P138R-ELFVRSLNV   | 237  | 206   |
| >VHL-P138R-ELFVPSLNV   | 8     | >VHL-P138R-ELFVRSLNV   | 61   | 53    |
| >VHL-P138R-ELFVPSLNV   | 16239 | >VHL-P138R-ELFVRSLNV   | 424  | 15815 |
| >VHL-P138R-TELFVPSL    | 46    | >VHL-P138R-TELFVRSL    | 9    | 37    |
| >VHL-P138R-TELFVPSL    | 98    | >VHL-P138R-TELFVRSL    | 62   | 36    |
| >VHL-P138R-TELFVPSL    | 471   | >VHL-P138R-TELFVRSL    | 1601 | 1130  |
| >VHL-P138R-TELFVPSL    | 54    | >VHL-P138R-TELFVRSL    | 91   | 37    |
| >VHL-P138R-TELFVPSL    | 49    | >VHL-P138R-TELFVRSL    | 49   | 0     |
| >VHL-P138R-TELFVPSLNV  | 352   | >VHL-P138R-TELFVRSLNV  | 261  | 91    |
| >VHL-P138R-TELFVPSL    | 491   | >VHL-P138R-TELFVRSL    | 775  | 284   |
| >VHL-P138R-TELFVPSL    | 724   | >VHL-P138R-TELFVRSL    | 277  | 447   |
| >VHL-P138R-TELFVPSLNV  | 129   | >VHL-P138R-TELFVRSLNV  | 469  | 340   |
| >VHL-P138R-QTELFVPSL   | 513   | >VHL-P138R-QTELFVRSL   | 427  | 86    |
| >VHL-P138R-QTELFVPSL   | 386   | >VHL-P138R-QTELFVRSL   | 5410 | 5024  |
| >VHL-P138R-QTELFVPSLN' | 74    | >VHL-P138R-QTELFVRSLN' | 523  | 449   |
| >VHL-P138R-QTELFVPSL   | 59    | >VHL-P138R-QTELFVRSL   | 141  | 82    |
| >VHL-P138R-QTELFVPSL   | 80    | >VHL-P138R-QTELFVRSL   | 345  | 265   |
| >VHL-P138R-NQTELFVPS   | 68    | >VHL-P138R-NQTELFVRS   | 730  | 662   |
| >VHL-P138R-NQTELFVPSL  | 231   | >VHL-P138R-NQTELFVRSL  | 1437 | 1206  |
| >VHL-P138R-NQTELFVP    | 19672 | >VHL-P138R-NQTELFVR    | 267  | 19405 |
| >VHL-P138R-NQTELFVP    | 37428 | >VHL-P138R-NQTELFVR    | 467  | 36961 |
| >VHL-P138R-NQTELFVP    | 39660 | >VHL-P138R-NQTELFVR    | 446  | 39214 |
| >VHL-P138R-NQTELFVPSL  | 316   | >VHL-P138R-NQTELFVRSL  | 536  | 220   |
| >VHL-P138R-NQTELFVPSL  | 42    | >VHL-P138R-NQTELFVRSL  | 167  | 125   |
| >VHL-P138R-NQTELFVP    | 34959 | >VHL-P138R-NQTELFVR    | 255  | 34704 |
| >VHL-P138R-LVNQTELFVP  | 29512 | >VHL-P138R-LVNQTELFVR  | 426  | 29086 |
| >VHL-P138R-LVNQTELFVP  | 29958 | >VHL-P138R-LVNQTELFVR  | 170  | 29788 |
| >VHL-P138R-LVNQTELFVP  | 33478 | >VHL-P138R-LVNQTELFVR  | 152  | 33326 |
| >VHL-P146A-PIFANITL    | 5223  | >VHL-P146A-AIFANITL    | 71   | 5152  |
| >VHL-P146A-PIFANITLPV  | 1013  | >VHL-P146A-AIFANITLPV  | 35   | 978   |
| >VHL-P146A-PIFANITL    | 1078  | >VHL-P146A-AIFANITL    | 60   | 1018  |
| >VHL-P146A-PIFANITLPV  | 393   | >VHL-P146A-AIFANITLPV  | 24   | 369   |
| >VHL-P146A-PIFANITL    | 3449  | >VHL-P146A-AIFANITL    | 124  | 3325  |
| >VHL-P146A-PIFANITLPV  | 79    | >VHL-P146A-AIFANITLPV  | 9    | 70    |
| >VHL-P146A-PIFANITL    | 3210  | >VHL-P146A-AIFANITL    | 65   | 3145  |
| >VHL-P146A-PIFANITLPV  | 1597  | >VHL-P146A-AIFANITLPV  | 56   | 1541  |
| >VHL-P146A-PIFANITL    | 323   | >VHL-P146A-AIFANITL    | 16   | 307   |
| >VHL-P146A-PIFANITLPV  | 21    | >VHL-P146A-AIFANITLPV  | 3    | 18    |
| >VHL-P146A-PIFANITL    | 5155  | >VHL-P146A-AIFANITL    | 200  | 4955  |
| >VHL-P146A-PIFANITLPV  | 1071  | >VHL-P146A-AIFANITLPV  | 18   | 1053  |

|                         |       |                         |       |       |
|-------------------------|-------|-------------------------|-------|-------|
| >VHL-P146A- PIFANITL    | 2614  | >VHL-P146A- AIFANITL    | 84    | 2530  |
| >VHL-P146A- PIFANITLPV  | 76    | >VHL-P146A- AIFANITLPV  | 9     | 67    |
| >VHL-P146A- PIFANITLPV  | 610   | >VHL-P146A- AIFANITLPV  | 81    | 529   |
| >VHL-P146A- PIFANITL    | 341   | >VHL-P146A- AIFANITL    | 11    | 330   |
| >VHL-P146A- PIFANITLPV  | 25    | >VHL-P146A- AIFANITLPV  | 3     | 22    |
| >VHL-P146A- PIFANITLPVY | 5271  | >VHL-P146A- AIFANITLPVY | 280   | 4991  |
| >VHL-P146A- PIFANITLPVY | 9647  | >VHL-P146A- AIFANITLPVY | 127   | 9520  |
| >VHL-P146A- PIFANITLPVY | 1082  | >VHL-P146A- AIFANITLPVY | 232   | 850   |
| >VHL-P146A- PIFANITLPVY | 135   | >VHL-P146A- AIFANITLPVY | 96    | 39    |
| >VHL-P146A- PIFANITLPV  | 4407  | >VHL-P146A- AIFANITLPV  | 224   | 4183  |
| >VHL-P146A- PIFANITLPVY | 195   | >VHL-P146A- AIFANITLPVY | 38    | 157   |
| >VHL-P146A- PIFANITL    | 336   | >VHL-P146A- AIFANITL    | 22    | 314   |
| >VHL-P146A- PIFANITLPV  | 820   | >VHL-P146A- AIFANITLPV  | 80    | 740   |
| >VHL-P146A- PIFANITLPV  | 627   | >VHL-P146A- AIFANITLPV  | 70    | 557   |
| >VHL-P146A- PIFANITLPV  | 218   | >VHL-P146A- AIFANITLPV  | 60    | 158   |
| >VHL-P146A- PIFANITLPVY | 914   | >VHL-P146A- AIFANITLPVY | 73    | 841   |
| >VHL-P146A- PIFANITLPVY | 1841  | >VHL-P146A- AIFANITLPVY | 431   | 1410  |
| >VHL-P146A- PIFANITL    | 5034  | >VHL-P146A- AIFANITL    | 373   | 4661  |
| >VHL-P146A- PIFANITLPV  | 4439  | >VHL-P146A- AIFANITLPV  | 366   | 4073  |
| >VHL-P146A- PIFANITLPVY | 1193  | >VHL-P146A- AIFANITLPVY | 80    | 1113  |
| >VHL-P146A- PIFANITLPVY | 8768  | >VHL-P146A- AIFANITLPVY | 60    | 8708  |
| >VHL-P146A- PIFANITLPVY | 7650  | >VHL-P146A- AIFANITLPVY | 481   | 7169  |
| >VHL-P146A- PIFANITLPVY | 4161  | >VHL-P146A- AIFANITLPVY | 406   | 3755  |
| >VHL-P146A- QPIFANITL   | 10    | >VHL-P146A- QAIFANITL   | 15837 | 15827 |
| >VHL-P146A- QPIFANITLPV | 6673  | >VHL-P146A- QAIFANITLPV | 71    | 6602  |
| >VHL-P146A- QPIFANITL   | 6256  | >VHL-P146A- QAIFANITL   | 121   | 6135  |
| >VHL-P146A- QPIFANITLPV | 151   | >VHL-P146A- QAIFANITLPV | 9     | 142   |
| >VHL-P146A- QPIFANITLPV | 72    | >VHL-P146A- QAIFANITLPV | 15    | 57    |
| >VHL-P146A- QPIFANITL   | 393   | >VHL-P146A- QAIFANITL   | 19522 | 19129 |
| >VHL-P146A- QPIFANITLPV | 157   | >VHL-P146A- QAIFANITLPV | 15547 | 15390 |
| >VHL-P146A- QPIFANITL   | 17222 | >VHL-P146A- QAIFANITL   | 112   | 17110 |
| >VHL-P146A- QPIFANITL   | 51    | >VHL-P146A- QAIFANITL   | 214   | 163   |
| >VHL-P146A- QPIFANITLPV | 148   | >VHL-P146A- QAIFANITLPV | 1070  | 922   |
| >VHL-P146A- QPIFANITL   | 118   | >VHL-P146A- QAIFANITL   | 1759  | 1641  |
| >VHL-P146A- QPIFANITL   | 373   | >VHL-P146A- QAIFANITL   | 6225  | 5852  |
| >VHL-P146A- QPIFANITLPV | 204   | >VHL-P146A- QAIFANITLPV | 12012 | 11808 |
| >VHL-P146A- FVPSLNVDGC  | 11950 | >VHL-P146A- FVPSLNVDGC  | 67    | 11883 |
| >VHL-P146A- GQPIFANI    | 412   | >VHL-P146A- GQAIFANI    | 3530  | 3118  |
| >VHL-P146A- GQPIFANI    | 2248  | >VHL-P146A- GQAIFANI    | 124   | 2124  |
| >VHL-P146A- GQPIFANITL  | 236   | >VHL-P146A- GQAIFANITL  | 80    | 156   |
| >VHL-P146A- GQPIFANI    | 1359  | >VHL-P146A- GQAIFANI    | 264   | 1095  |
| >VHL-P146A- GQPIFANI    | 241   | >VHL-P146A- GQAIFANI    | 85    | 156   |
| >VHL-P146A- GQPIFANITL  | 430   | >VHL-P146A- GQAIFANITL  | 436   | 6     |

|                        |       |                        |       |       |
|------------------------|-------|------------------------|-------|-------|
| >VHL-P146A-GQPIFANITL  | 1726  | >VHL-P146A-GQAIFANITL  | 278   | 1448  |
| >VHL-P146A-GQPIFANITL  | 3910  | >VHL-P146A-GQAIFANITL  | 157   | 3753  |
| >VHL-P146A-GQPIFANITL  | 547   | >VHL-P146A-GQAIFANITL  | 457   | 90    |
| >VHL-P146A-VDGQPIFANI  | 444   | >VHL-P146A-VDGQAIFANI  | 223   | 221   |
| >VHL-P146A-NVDGQPIFAI  | 756   | >VHL-P146A-NVDGQAIFAI  | 447   | 309   |
| >VHL-P146A-NVDGQPIFAI  | 253   | >VHL-P146A-NVDGQAIFAI  | 232   | 21    |
| >VHL-P146A-NVDGQPIFA   | 817   | >VHL-P146A-NVDGQAIFA   | 395   | 422   |
| >VHL-P146A-NVDGQPIFAI  | 61    | >VHL-P146A-NVDGQAIFAI  | 40    | 21    |
| >VHL-P146A-LNVDGQPIF   | 423   | >VHL-P146A-LNVDGQAIF   | 509   | 86    |
| >VHL-P146A-SLNVDGQPI   | 169   | >VHL-P146A-SLNVDGQAI   | 214   | 45    |
| >VHL-P146A-SLNVDGQPIF  | 120   | >VHL-P146A-SLNVDGQAIF  | 131   | 11    |
| >VHL-P146A-SLNVDGQP    | 15682 | >VHL-P146A-SLNVDGQA    | 147   | 15535 |
| >VHL-P146A-SLNVDGQPI   | 47    | >VHL-P146A-SLNVDGQAI   | 79    | 32    |
| >VHL-P146A-SLNVDGQPIF  | 71    | >VHL-P146A-SLNVDGQAIF  | 97    | 26    |
| >VHL-P146A-SLNVDGQP    | 15263 | >VHL-P146A-SLNVDGQA    | 354   | 14909 |
| >VHL-P146A-SLNVDGQPI   | 44    | >VHL-P146A-SLNVDGQAI   | 47    | 3     |
| >VHL-P146A-SLNVDGQPIF  | 58    | >VHL-P146A-SLNVDGQAIF  | 92    | 34    |
| >VHL-P146A-SLNVDGQPI   | 49    | >VHL-P146A-SLNVDGQAI   | 50    | 1     |
| >VHL-P146A-SLNVDGQPIF  | 235   | >VHL-P146A-SLNVDGQAIF  | 261   | 26    |
| >VHL-P146A-SLNVDGQP    | 15295 | >VHL-P146A-SLNVDGQA    | 196   | 15099 |
| >VHL-P146A-SLNVDGQPI   | 54    | >VHL-P146A-SLNVDGQAI   | 132   | 78    |
| >VHL-P146A-SLNVDGQPIF  | 29    | >VHL-P146A-SLNVDGQAIF  | 36    | 7     |
| >VHL-P146A-SLNVDGQP    | 16851 | >VHL-P146A-SLNVDGQA    | 99    | 16752 |
| >VHL-P146A-SLNVDGQPI   | 53    | >VHL-P146A-SLNVDGQAI   | 61    | 8     |
| >VHL-P146A-SLNVDGQPIF  | 42    | >VHL-P146A-SLNVDGQAIF  | 37    | 5     |
| >VHL-P146A-SLNVDGQPIF  | 186   | >VHL-P146A-SLNVDGQAIF  | 126   | 60    |
| >VHL-P146A-SLNVDGQPIF  | 261   | >VHL-P146A-SLNVDGQAIF  | 113   | 148   |
| >VHL-P146A-SLNVDGQPIF  | 93    | >VHL-P146A-SLNVDGQAIF  | 102   | 9     |
| >VHL-P146A-SLNVDGQPIF  | 1071  | >VHL-P146A-SLNVDGQAIF  | 492   | 579   |
| >VHL-P146A-VPSLNVDGQI  | 124   | >VHL-P146A-VPSLNVDGQI  | 142   | 18    |
| >VHL-P146A-VPSLNVDGQI  | 412   | >VHL-P146A-VPSLNVDGQI  | 474   | 62    |
| >VHL-P146A-VPSLNVDGQI  | 6497  | >VHL-P146A-VPSLNVDGQI  | 111   | 6386  |
| >VHL-P154L-PVYTLKER    | 1246  | >VHL-P154L-LVYTLKER    | 40    | 1206  |
| >VHL-P154L-PVYTLKER    | 1408  | >VHL-P154L-LVYTLKER    | 60    | 1348  |
| >VHL-P154L-PVYTLKER    | 616   | >VHL-P154L-LVYTLKER    | 372   | 244   |
| >VHL-P154L-LPVYTLKERC  | 37619 | >VHL-P154L-LLVYTLKERC  | 483   | 37136 |
| >VHL-P154L-LPVYTLKERCL | 35530 | >VHL-P154L-LLVYTLKERCL | 181   | 35349 |
| >VHL-P154L-LPVYTLKER   | 8396  | >VHL-P154L-LLVYTLKER   | 442   | 7954  |
| >VHL-P154L-LPVYTLKERCL | 224   | >VHL-P154L-LLVYTLKERCL | 19629 | 19405 |
| >VHL-P154L-LPVYTLKER   | 488   | >VHL-P154L-LLVYTLKER   | 30756 | 30268 |
| >VHL-P154L-LPVYTLKERC  | 337   | >VHL-P154L-LLVYTLKERC  | 32084 | 31747 |
| >VHL-P154L-GQPIFANITLF | 12660 | >VHL-P154L-GQPIFANITLL | 202   | 12458 |
| >VHL-P154L-GQPIFANITLF | 17020 | >VHL-P154L-GQPIFANITLL | 313   | 16707 |

|                         |       |                         |      |       |
|-------------------------|-------|-------------------------|------|-------|
| >VHL-P154L- GQPIFANITLF | 16824 | >VHL-P154L- GQPIFANITLL | 120  | 16704 |
| >VHL-P154L- GQPIFANITLF | 14852 | >VHL-P154L- GQPIFANITLL | 97   | 14755 |
| >VHL-P154L- TLPVYTLKERC | 3353  | >VHL-P154L- TLLVYTLKERC | 480  | 2873  |
| >VHL-P154L- TLPVYTLKERC | 1195  | >VHL-P154L- TLLVYTLKERC | 474  | 721   |
| >VHL-P154L- TLPVYTLK    | 146   | >VHL-P154L- TLLVYTLK    | 57   | 89    |
| >VHL-P154L- TLPVYTLK    | 148   | >VHL-P154L- TLLVYTLK    | 21   | 127   |
| >VHL-P154L- TLPVYTLK    | 3179  | >VHL-P154L- TLLVYTLK    | 427  | 2752  |
| >VHL-P154L- TLPVYTLKER  | 774   | >VHL-P154L- TLLVYTLKER  | 260  | 514   |
| >VHL-P154L- TLPVYTLK    | 438   | >VHL-P154L- TLLVYTLK    | 295  | 143   |
| >VHL-P154L- TLPVYTLKER  | 247   | >VHL-P154L- TLLVYTLKER  | 522  | 275   |
| >VHL-P154L- TLPVYTLKER  | 725   | >VHL-P154L- TLLVYTLKER  | 400  | 325   |
| >VHL-P154L- ITLPVYTL    | 202   | >VHL-P154L- ITLLVYTL    | 55   | 147   |
| >VHL-P154L- ITLPVYTL    | 273   | >VHL-P154L- ITLLVYTL    | 619  | 346   |
| >VHL-P154L- ITLPVYTL    | 54    | >VHL-P154L- ITLLVYTL    | 259  | 205   |
| >VHL-P154L- ITLPVYTL    | 21    | >VHL-P154L- ITLLVYTL    | 111  | 90    |
| >VHL-P154L- ITLPVYTL    | 408   | >VHL-P154L- ITLLVYTL    | 1041 | 633   |
| >VHL-P154L- ITLPVYTL    | 307   | >VHL-P154L- ITLLVYTL    | 814  | 507   |
| >VHL-P154L- ITLPVYTLK   | 50    | >VHL-P154L- ITLLVYTLK   | 73   | 23    |
| >VHL-P154L- ITLPVYTLK   | 9     | >VHL-P154L- ITLLVYTLK   | 12   | 3     |
| >VHL-P154L- ITLPVYTLKER | 348   | >VHL-P154L- ITLLVYTLKER | 673  | 325   |
| >VHL-P154L- ITLPVYTLK   | 45    | >VHL-P154L- ITLLVYTLK   | 113  | 68    |
| >VHL-P154L- ITLPVYTLK   | 30    | >VHL-P154L- ITLLVYTLK   | 72   | 42    |
| >VHL-P154L- ITLPVYTLKER | 20    | >VHL-P154L- ITLLVYTLKER | 27   | 7     |
| >VHL-P154L- ITLPVYTL    | 68    | >VHL-P154L- ITLLVYTL    | 51   | 17    |
| >VHL-P154L- ITLPVYTLK   | 351   | >VHL-P154L- ITLLVYTLK   | 168  | 183   |
| >VHL-P154L- ITLPVYTLKER | 115   | >VHL-P154L- ITLLVYTLKER | 72   | 43    |
| >VHL-P154L- ITLPVYTLK   | 21    | >VHL-P154L- ITLLVYTLK   | 27   | 6     |
| >VHL-P154L- ITLPVYTLKER | 40    | >VHL-P154L- ITLLVYTLKER | 61   | 21    |
| >VHL-P154L- ITLPVYTL    | 248   | >VHL-P154L- ITLLVYTL    | 1025 | 777   |
| >VHL-P154L- ITLPVYTL    | 263   | >VHL-P154L- ITLLVYTL    | 714  | 451   |
| >VHL-P154L- ITLPVYTL    | 6     | >VHL-P154L- ITLLVYTL    | 11   | 5     |
| >VHL-P154L- ITLPVYTL    | 185   | >VHL-P154L- ITLLVYTL    | 1004 | 819   |
| >VHL-P154L- ITLPVYTL    | 70    | >VHL-P154L- ITLLVYTL    | 316  | 246   |
| >VHL-P154L- ITLPVYTL    | 143   | >VHL-P154L- ITLLVYTL    | 912  | 769   |
| >VHL-P154L- ITLPVYTLK   | 144   | >VHL-P154L- ITLLVYTLK   | 312  | 168   |
| >VHL-P154L- ITLPVYTLKER | 394   | >VHL-P154L- ITLLVYTLKER | 782  | 388   |
| >VHL-P154L- ITLPVYTL    | 96    | >VHL-P154L- ITLLVYTL    | 841  | 745   |
| >VHL-P154L- NITLPVYTL   | 1345  | >VHL-P154L- NITLLVYTL   | 434  | 911   |
| >VHL-P154L- NITLPVYTLK  | 194   | >VHL-P154L- NITLLVYTLK  | 237  | 43    |
| >VHL-P154L- NITLPVYTLK  | 45    | >VHL-P154L- NITLLVYTLK  | 50   | 5     |
| >VHL-P154L- NITLPVYTL   | 1590  | >VHL-P154L- NITLLVYTL   | 469  | 1121  |
| >VHL-P154L- NITLPVYTLK  | 24    | >VHL-P154L- NITLLVYTLK  | 25   | 1     |
| >VHL-P154L- NITLPVYTL   | 70    | >VHL-P154L- NITLLVYTL   | 124  | 54    |

|                         |      |                         |     |      |
|-------------------------|------|-------------------------|-----|------|
| >VHL-P154L- ANITLPVYTL  | 411  | >VHL-P154L- ANITLLVYTL  | 442 | 31   |
| >VHL-P154L- ANITLPVYTLK | 232  | >VHL-P154L- ANITLLVYTLK | 229 | 3    |
| >VHL-P154L- ANITLPVY    | 253  | >VHL-P154L- ANITLLVY    | 293 | 40   |
| >VHL-P154L- ANITLPVY    | 682  | >VHL-P154L- ANITLLVY    | 249 | 433  |
| >VHL-P154L- ANITLPVY    | 453  | >VHL-P154L- ANITLLVY    | 926 | 473  |
| >VHL-P154L- ANITLPVY    | 845  | >VHL-P154L- ANITLLVY    | 437 | 408  |
| >VHL-P154L- ANITLPVY    | 481  | >VHL-P154L- ANITLLVY    | 503 | 22   |
| >VHL-P154L- FANITLPVYTL | 351  | >VHL-P154L- FANITLLVYTL | 238 | 113  |
| >VHL-P154L- FANITLPVY   | 3654 | >VHL-P154L- FANITLLVY   | 176 | 3478 |
| >VHL-P154L- FANITLPV    | 136  | >VHL-P154L- FANITLLV    | 244 | 108  |
| >VHL-P154L- FANITLPV    | 82   | >VHL-P154L- FANITLLV    | 73  | 9    |
| >VHL-P154L- FANITLPVYTL | 156  | >VHL-P154L- FANITLLVYTL | 117 | 39   |
| >VHL-P154L- FANITLPV    | 19   | >VHL-P154L- FANITLLV    | 38  | 19   |
| >VHL-P154L- FANITLPVYT  | 585  | >VHL-P154L- FANITLLVYT  | 476 | 109  |
| >VHL-P154L- FANITLPVYTL | 482  | >VHL-P154L- FANITLLVYTL | 389 | 93   |
| >VHL-P154L- FANITLPV    | 12   | >VHL-P154L- FANITLLV    | 27  | 15   |
| >VHL-P154L- FANITLPVYT  | 292  | >VHL-P154L- FANITLLVYT  | 171 | 121  |
| >VHL-P154L- FANITLPVYTL | 203  | >VHL-P154L- FANITLLVYTL | 300 | 97   |
| >VHL-P154L- FANITLPV    | 31   | >VHL-P154L- FANITLLV    | 63  | 32   |
| >VHL-P154L- FANITLPVYTL | 87   | >VHL-P154L- FANITLLVYTL | 142 | 55   |
| >VHL-P154L- FANITLPV    | 114  | >VHL-P154L- FANITLLV    | 216 | 102  |
| >VHL-P154L- FANITLPV    | 25   | >VHL-P154L- FANITLLV    | 28  | 3    |
| >VHL-P154L- FANITLPVYTL | 407  | >VHL-P154L- FANITLLVYTL | 581 | 174  |
| >VHL-P154L- FANITLPVY   | 243  | >VHL-P154L- FANITLLVY   | 38  | 205  |
| >VHL-P154L- FANITLPVY   | 71   | >VHL-P154L- FANITLLVY   | 468 | 397  |
| >VHL-P154L- FANITLPV    | 96   | >VHL-P154L- FANITLLV    | 202 | 106  |
| >VHL-P154L- FANITLPV    | 24   | >VHL-P154L- FANITLLV    | 90  | 66   |
| >VHL-P154L- FANITLPVYTL | 413  | >VHL-P154L- FANITLLVYTL | 873 | 460  |
| >VHL-P154L- FANITLPVY   | 6439 | >VHL-P154L- FANITLLVY   | 149 | 6290 |
| >VHL-P154L- FANITLPVY   | 114  | >VHL-P154L- FANITLLVY   | 82  | 32   |
| >VHL-P154L- FANITLPVY   | 170  | >VHL-P154L- FANITLLVY   | 126 | 44   |
| >VHL-P154L- FANITLPVY   | 14   | >VHL-P154L- FANITLLVY   | 10  | 4    |
| >VHL-P154L- FANITLPVYTL | 63   | >VHL-P154L- FANITLLVYTL | 68  | 5    |
| >VHL-P154L- FANITLPVY   | 26   | >VHL-P154L- FANITLLVY   | 34  | 8    |
| >VHL-P154L- FANITLPVYTL | 278  | >VHL-P154L- FANITLLVYTL | 225 | 53   |
| >VHL-P154L- FANITLPVY   | 375  | >VHL-P154L- FANITLLVY   | 117 | 258  |
| >VHL-P154L- FANITLPVY   | 134  | >VHL-P154L- FANITLLVY   | 77  | 57   |
| >VHL-P154L- FANITLPVYTL | 160  | >VHL-P154L- FANITLLVYTL | 89  | 71   |
| >VHL-P154L- FANITLPV    | 89   | >VHL-P154L- FANITLLV    | 308 | 219  |
| >VHL-P154L- FANITLPVY   | 103  | >VHL-P154L- FANITLLVY   | 46  | 57   |
| >VHL-P154L- FANITLPVYTL | 603  | >VHL-P154L- FANITLLVYTL | 257 | 346  |
| >VHL-P154L- FANITLPVYTL | 310  | >VHL-P154L- FANITLLVYTL | 416 | 106  |
| >VHL-P154L- FANITLPVY   | 1484 | >VHL-P154L- FANITLLVY   | 433 | 1051 |

|                         |       |                         |       |       |
|-------------------------|-------|-------------------------|-------|-------|
| >VHL-P154L- IFANITLP    | 9804  | >VHL-P154L- IFANITLL    | 38    | 9766  |
| >VHL-P154L- IFANITLPV   | 35    | >VHL-P154L- IFANITLLV   | 27    | 8     |
| >VHL-P154L- IFANITLP    | 19571 | >VHL-P154L- IFANITLL    | 286   | 19285 |
| >VHL-P154L- IFANITLP    | 10084 | >VHL-P154L- IFANITLL    | 389   | 9695  |
| >VHL-P154L- IFANITLPV   | 478   | >VHL-P154L- IFANITLLV   | 124   | 354   |
| >VHL-P154L- IFANITLPVY  | 52    | >VHL-P154L- IFANITLLVY  | 23    | 29    |
| >VHL-P154L- IFANITLPVY  | 87    | >VHL-P154L- IFANITLLVY  | 184   | 97    |
| >VHL-P154L- IFANITLPVY  | 137   | >VHL-P154L- IFANITLLVY  | 9     | 128   |
| >VHL-P154L- PIFANITLP   | 9732  | >VHL-P154L- PIFANITLL   | 233   | 9499  |
| >VHL-P154L- PIFANITLPV  | 393   | >VHL-P154L- PIFANITLLV  | 467   | 74    |
| >VHL-P154L- PIFANITLPV  | 79    | >VHL-P154L- PIFANITLLV  | 128   | 49    |
| >VHL-P154L- PIFANITLP   | 21342 | >VHL-P154L- PIFANITLL   | 359   | 20983 |
| >VHL-P154L- PIFANITLPV  | 21    | >VHL-P154L- PIFANITLLV  | 38    | 17    |
| >VHL-P154L- PIFANITLPV  | 76    | >VHL-P154L- PIFANITLLV  | 122   | 46    |
| >VHL-P154L- PIFANITLP   | 28155 | >VHL-P154L- PIFANITLL   | 144   | 28011 |
| >VHL-P154L- PIFANITLPV  | 25    | >VHL-P154L- PIFANITLLV  | 25    | 0     |
| >VHL-P154L- PIFANITLPVY | 135   | >VHL-P154L- PIFANITLLVY | 44    | 91    |
| >VHL-P154L- PIFANITLPVY | 195   | >VHL-P154L- PIFANITLLVY | 592   | 397   |
| >VHL-P154L- PIFANITLPV  | 218   | >VHL-P154L- PIFANITLLV  | 1019  | 801   |
| >VHL-P154L- PIFANITLPVY | 5003  | >VHL-P154L- PIFANITLLVY | 415   | 4588  |
| >VHL-P154L- PIFANITLPVY | 687   | >VHL-P154L- PIFANITLLVY | 323   | 364   |
| >VHL-P154L- QPIFANITLPV | 151   | >VHL-P154L- QPIFANITLLV | 466   | 315   |
| >VHL-P154L- QPIFANITLPV | 72    | >VHL-P154L- QPIFANITLLV | 262   | 190   |
| >VHL-P154L- QPIFANITLP  | 9888  | >VHL-P154L- QPIFANITLL  | 118   | 9770  |
| >VHL-P154L- QPIFANITLPV | 157   | >VHL-P154L- QPIFANITLLV | 2965  | 2808  |
| >VHL-P154L- QPIFANITLPV | 148   | >VHL-P154L- QPIFANITLLV | 1305  | 1157  |
| >VHL-P154L- QPIFANITLPV | 204   | >VHL-P154L- QPIFANITLLV | 491   | 287   |
| >VHL-P192L- HPNVQKDLEI  | 28513 | >VHL-P192L- HLNQKDF     | 53    | 28460 |
| >VHL-P192L- HPNVQKDLEI  | 30113 | >VHL-P192L- HLNQKDF     | 450   | 29663 |
| >VHL-P192L- HPNVQKDL    | 35910 | >VHL-P192L- HLNQKDL     | 163   | 35747 |
| >VHL-P192L- HPNVQKDLEI  | 33952 | >VHL-P192L- HLNQKDF     | 36    | 33916 |
| >VHL-P192L- HPNVQKDL    | 401   | >VHL-P192L- HLNQKDL     | 24797 | 24396 |
| >VHL-P192L- HPNVQKDLEI  | 230   | >VHL-P192L- HLNQKDF     | 26680 | 26450 |
| >VHL-P192L- HPNVQKDLEI  | 1343  | >VHL-P192L- HLNQKDF     | 336   | 1007  |
| >VHL-P192L- RSLYEDLEDH  | 13713 | >VHL-P192L- RSLYEDLEDH  | 22    | 13691 |
| >VHL-P192L- RSLYEDLEDH  | 12084 | >VHL-P192L- RSLYEDLEDH  | 126   | 11958 |
| >VHL-P192L- RSLYEDLEDH  | 21299 | >VHL-P192L- RSLYEDLEDH  | 204   | 21095 |
| >VHL-P192L- LEDHPNVQKI  | 1765  | >VHL-P192L- LEDHLNVQKI  | 301   | 1464  |
| >VHL-P192L- LEDHPNVQKI  | 144   | >VHL-P192L- LEDHLNVQKI  | 138   | 6     |
| >VHL-P192L- DLEDHPNV    | 227   | >VHL-P192L- DLEDHLNV    | 361   | 134   |
| >VHL-P192L- DLEDHPNV    | 14    | >VHL-P192L- DLEDHLNV    | 12    | 2     |
| >VHL-P192L- DLEDHPNV    | 378   | >VHL-P192L- DLEDHLNV    | 479   | 101   |
| >VHL-P192L- EDLEDHPNV   | 25    | >VHL-P192L- EDLEDHLNV   | 116   | 91    |

|                        |       |                        |       |       |
|------------------------|-------|------------------------|-------|-------|
| >VHL-P192L-YEDLEDHP    | 4981  | >VHL-P192L-YEDLEDHL    | 172   | 4809  |
| >VHL-P192L-YEDLEDHP    | 9252  | >VHL-P192L-YEDLEDHL    | 51    | 9201  |
| >VHL-P192L-LYEDLEDHPN  | 331   | >VHL-P192L-LYEDLEDHLN  | 725   | 394   |
| >VHL-P192L-LYEDLEDHP   | 10806 | >VHL-P192L-LYEDLEDHL   | 65    | 10741 |
| >VHL-P192L-SLYEDLEDHP  | 4408  | >VHL-P192L-SLYEDLEDHL  | 57    | 4351  |
| >VHL-P192L-SLYEDLEDHP  | 2348  | >VHL-P192L-SLYEDLEDHL  | 10    | 2338  |
| >VHL-P192L-SLYEDLEDHP  | 9789  | >VHL-P192L-SLYEDLEDHL  | 139   | 9650  |
| >VHL-P192L-SLYEDLEDHP  | 12405 | >VHL-P192L-SLYEDLEDHL  | 219   | 12186 |
| >VHL-P192L-SLYEDLEDHP  | 652   | >VHL-P192L-SLYEDLEDHL  | 3     | 649   |
| >VHL-P192L-SLYEDLEDHP  | 208   | >VHL-P192L-SLYEDLEDHLI | 354   | 146   |
| >VHL-P192L-SLYEDLEDHP  | 3703  | >VHL-P192L-SLYEDLEDHL  | 7     | 3696  |
| >VHL-P192L-SLYEDLEDHP  | 663   | >VHL-P192L-SLYEDLEDHL  | 5     | 658   |
| >VHL-P192L-SLYEDLEDHP  | 20774 | >VHL-P192L-SLYEDLEDHL  | 148   | 20626 |
| >VHL-P192L-SLYEDLEDHP  | 3335  | >VHL-P192L-SLYEDLEDHL  | 4     | 3331  |
| >VHL-P192S-HPNVQKDL    | 401   | >VHL-P192S-HSNVQKDL    | 26807 | 26406 |
| >VHL-P192S-HPNVQKDLEI  | 24279 | >VHL-P192S-HSNVQKDLEI  | 415   | 23864 |
| >VHL-P192S-HPNVQKDLEI  | 230   | >VHL-P192S-HSNVQKDLEI  | 16915 | 16685 |
| >VHL-P192S-EDHPNVQK    | 1414  | >VHL-P192S-EDHSNVQK    | 498   | 916   |
| >VHL-P192S-LEDHPNVQKI  | 1765  | >VHL-P192S-LEDHSNVQKI  | 406   | 1359  |
| >VHL-P192S-LEDHPNVQKI  | 144   | >VHL-P192S-LEDHSNVQKI  | 107   | 37    |
| >VHL-P192S-DLEDHPNV    | 227   | >VHL-P192S-DLEDHSNV    | 505   | 278   |
| >VHL-P192S-DLEDHPNV    | 14    | >VHL-P192S-DLEDHSNV    | 12    | 2     |
| >VHL-P192S-DLEDHPNV    | 378   | >VHL-P192S-DLEDHSNV    | 571   | 193   |
| >VHL-P192S-EDLEDHPNV   | 25    | >VHL-P192S-EDLEDHSNV   | 160   | 135   |
| >VHL-P192S-LYEDLEDHPN  | 331   | >VHL-P192S-LYEDLEDHSN  | 553   | 222   |
| >VHL-P192S-SLYEDLEDHP  | 652   | >VHL-P192S-SLYEDLEDHS  | 91    | 561   |
| >VHL-P192S-SLYEDLEDHP  | 208   | >VHL-P192S-SLYEDLEDHSI | 213   | 5     |
| >VHL-P192S-SLYEDLEDHP  | 663   | >VHL-P192S-SLYEDLEDHS  | 103   | 560   |
| >VHL-P192S-SLYEDLEDHP  | 3335  | >VHL-P192S-SLYEDLEDHS  | 364   | 2971  |
| >VHL-P192S-SLYEDLEDHP  | 813   | >VHL-P192S-SLYEDLEDHSI | 388   | 425   |
| >VHL-P25L-w AEEAGVEEYC | 1915  | >VHL-P25L-r AEEAGVEEYC | 18    | 1897  |
| >VHL-P25L-w AEEAGVEEYC | 8579  | >VHL-P25L-r AEEAGVEEYC | 287   | 8292  |
| >VHL-P25L-w AEEAGVEEYC | 639   | >VHL-P25L-r AEEAGVEEYC | 130   | 509   |
| >VHL-P25L-w AEEAGVEEYC | 4314  | >VHL-P25L-r AEEAGVEEYC | 45    | 4269  |
| >VHL-P25L-w EEAGVEEYGP | 4564  | >VHL-P25L-r EEAGVEEYGL | 479   | 4085  |
| >VHL-P25L-w EEAGVEEYGP | 22483 | >VHL-P25L-r EEAGVEEYGL | 243   | 22240 |
| >VHL-P25S-w PEEDGGEESC | 9339  | >VHL-P25S-r SEEDGGEESG | 358   | 8981  |
| >VHL-P25S-w PEEDGGEESC | 3018  | >VHL-P25S-r SEEDGGEESG | 91    | 2927  |
| >VHL-P25S-w AEEAGVEEYC | 639   | >VHL-P25S-r AEEAGVEEYC | 68    | 571   |
| >VHL-P40S-w PEESGPEEL  | 231   | >VHL-P40S-r SEESGPEEL  | 31    | 200   |
| >VHL-P40S-w PEESGPEELG | 7723  | >VHL-P40S-r SEESGPEELG | 327   | 7396  |
| >VHL-P40S-w PEESGPEELG | 2969  | >VHL-P40S-r SEESGPEELG | 74    | 2895  |
| >VHL-P40S-w PEESGPEEL  | 4113  | >VHL-P40S-r SEESGPEEL  | 436   | 3677  |



|                             |       |                              |       |       |
|-----------------------------|-------|------------------------------|-------|-------|
| >VHL-P40S- $\nu$ GPEESGPEEL | 22568 | >VHL-P40S- $\eta$ GSEESGPEEL | 269   | 22299 |
| >VHL-P40S- $\nu$ EESGPEES   | 259   | >VHL-P40S- $\eta$ EESGSEES   | 144   | 115   |
| >VHL-P40S- $\nu$ AEESGPEES  | 279   | >VHL-P40S- $\eta$ AEESGSEES  | 142   | 137   |
| >VHL-P40S- $\nu$ AEESGPEESG | 136   | >VHL-P40S- $\eta$ AEESGSEESG | 145   | 9     |
| >VHL-P81S- $\nu$ PRVVLPVWLI | 364   | >VHL-P81S- $\eta$ SRVVLPVWLI | 84    | 280   |
| >VHL-P81S- $\nu$ PRVVLPVWL  | 1731  | >VHL-P81S- $\eta$ SRVVLPVWL  | 189   | 1542  |
| >VHL-P81S- $\nu$ PRVVLPVWLI | 1210  | >VHL-P81S- $\eta$ SRVVLPVWLI | 110   | 1100  |
| >VHL-P81S- $\nu$ PRVVLPVWL  | 6039  | >VHL-P81S- $\eta$ SRVVLPVWL  | 351   | 5688  |
| >VHL-P81S- $\nu$ PRVVLPVWL  | 738   | >VHL-P81S- $\eta$ SRVVLPVWL  | 98    | 640   |
| >VHL-P81S- $\nu$ PRVVLPVWLI | 1694  | >VHL-P81S- $\eta$ SRVVLPVWLI | 277   | 1417  |
| >VHL-P81S- $\nu$ PRVVLPVWL  | 89    | >VHL-P81S- $\eta$ SRVVLPVWL  | 13    | 76    |
| >VHL-P81S- $\nu$ PRVVLPVWLI | 385   | >VHL-P81S- $\eta$ SRVVLPVWLI | 46    | 339   |
| >VHL-P81S- $\nu$ SPRVVLPV   | 8227  | >VHL-P81S- $\eta$ SSRVVLPV   | 9     | 8218  |
| >VHL-P81S- $\nu$ SPRVVLPV   | 21    | >VHL-P81S- $\eta$ SSRVVLPV   | 10325 | 10304 |
| >VHL-P81S- $\nu$ SPRVVLPVW  | 189   | >VHL-P81S- $\eta$ SSRVVLPVW  | 20172 | 19983 |
| >VHL-P81S- $\nu$ SPRVVLPVWI | 61    | >VHL-P81S- $\eta$ SSRVVLPVWI | 19396 | 19335 |
| >VHL-P81S- $\nu$ SPRVVLPV   | 22305 | >VHL-P81S- $\eta$ SSRVVLPV   | 445   | 21860 |
| >VHL-P81S- $\nu$ SPRVVLPVW  | 5915  | >VHL-P81S- $\eta$ SSRVVLPVW  | 7     | 5908  |
| >VHL-P81S- $\nu$ SPRVVLPVWI | 18262 | >VHL-P81S- $\eta$ SSRVVLPVWI | 24    | 18238 |
| >VHL-P81S- $\nu$ SPRVVLPVW  | 318   | >VHL-P81S- $\eta$ SSRVVLPVW  | 17910 | 17592 |
| >VHL-P81S- $\nu$ SPRVVLPV   | 251   | >VHL-P81S- $\eta$ SSRVVLPV   | 28309 | 28058 |
| >VHL-P81S- $\nu$ SPRVVLPVW  | 9583  | >VHL-P81S- $\eta$ SSRVVLPVW  | 46    | 9537  |
| >VHL-P81S- $\nu$ SPRVVLPVW  | 11772 | >VHL-P81S- $\eta$ SSRVVLPVW  | 22    | 11750 |
| >VHL-P81S- $\nu$ SPRVVLPVW  | 2763  | >VHL-P81S- $\eta$ SSRVVLPVW  | 82    | 2681  |
| >VHL-P81S- $\nu$ SPRVVLPVWI | 2353  | >VHL-P81S- $\eta$ SSRVVLPVWI | 29    | 2324  |
| >VHL-P81S- $\nu$ SPRVVLPVW  | 42    | >VHL-P81S- $\eta$ SSRVVLPVW  | 9200  | 9158  |
| >VHL-P81S- $\nu$ RSPRVVLPV  | 1309  | >VHL-P81S- $\eta$ RSSRVVLPV  | 476   | 833   |
| >VHL-P81S- $\nu$ RSPRVVLPV  | 488   | >VHL-P81S- $\eta$ RSSRVVLPV  | 395   | 93    |
| >VHL-P81S- $\nu$ RSPRVVLPV  | 301   | >VHL-P81S- $\eta$ RSSRVVLPV  | 27    | 274   |
| >VHL-P81S- $\nu$ RSPRVVLPVW | 3369  | >VHL-P81S- $\eta$ RSSRVVLPVW | 473   | 2896  |
| >VHL-P81S- $\nu$ RSPRVVLPV  | 130   | >VHL-P81S- $\eta$ RSSRVVLPV  | 113   | 17    |
| >VHL-P81S- $\nu$ RSPRVVLPVW | 247   | >VHL-P81S- $\eta$ RSSRVVLPVW | 204   | 43    |
| >VHL-P81S- $\nu$ RSPRVVLPVW | 147   | >VHL-P81S- $\eta$ RSSRVVLPVW | 127   | 20    |
| >VHL-P81S- $\nu$ RSPRVVLPV  | 1354  | >VHL-P81S- $\eta$ RSSRVVLPV  | 250   | 1104  |
| >VHL-P81S- $\nu$ RSPRVVLPV  | 3748  | >VHL-P81S- $\eta$ RSSRVVLPV  | 174   | 3574  |
| >VHL-P81S- $\nu$ RSPRVVLPVW | 55    | >VHL-P81S- $\eta$ RSSRVVLPVW | 6     | 49    |
| >VHL-P81S- $\nu$ RSPRVVLPVW | 301   | >VHL-P81S- $\eta$ RSSRVVLPVW | 15    | 286   |
| >VHL-P81S- $\nu$ RSPRVVLPVW | 48    | >VHL-P81S- $\eta$ RSSRVVLPVW | 32    | 16    |
| >VHL-P81S- $\nu$ RSPRVVLPVW | 2702  | >VHL-P81S- $\eta$ RSSRVVLPVW | 384   | 2318  |
| >VHL-P81S- $\nu$ RSPRVVLPV  | 9858  | >VHL-P81S- $\eta$ RSSRVVLPV  | 63    | 9795  |
| >VHL-P81S- $\nu$ RSPRVVLPVW | 12    | >VHL-P81S- $\eta$ RSSRVVLPVW | 8     | 4     |
| >VHL-P81S- $\nu$ RSPRVVLPVW | 4191  | >VHL-P81S- $\eta$ RSSRVVLPVW | 43    | 4148  |
| >VHL-P81S- $\nu$ RSPRVVLPVW | 39    | >VHL-P81S- $\eta$ RSSRVVLPVW | 4924  | 4885  |

|                              |      |                               |     |      |
|------------------------------|------|-------------------------------|-----|------|
| >VHL-P81S- $\nu$ RSPRVVLPVM  | 4    | >VHL-P81S- $\eta$ RSSRVVLPVM  | 487 | 483  |
| >VHL-P81S- $\nu$ RSPRVVLPVM  | 3486 | >VHL-P81S- $\eta$ RSSRVVLPVM  | 234 | 3252 |
| >VHL-P81S- $\nu$ RSPRVVLPVM  | 493  | >VHL-P81S- $\eta$ RSSRVVLPVM  | 352 | 141  |
| >VHL-P81S- $\nu$ RSPRVVLPVM  | 345  | >VHL-P81S- $\eta$ RSSRVVLPVM  | 358 | 13   |
| >VHL-P81S- $\nu$ NRSPRVVL    | 22   | >VHL-P81S- $\eta$ NRSSRVVL    | 16  | 6    |
| >VHL-P81S- $\nu$ NRSPRVVLPV  | 265  | >VHL-P81S- $\eta$ NRSSRVVLPV  | 171 | 94   |
| >VHL-P81S- $\nu$ CNRSPRVVLP  | 910  | >VHL-P81S- $\eta$ CNRSSRVVLP  | 362 | 548  |
| >VHL-P81S- $\nu$ CNRSPRVVL   | 734  | >VHL-P81S- $\eta$ CNRSSRVVL   | 203 | 531  |
| >VHL-P81S- $\nu$ FCNRSPRV    | 252  | >VHL-P81S- $\eta$ FCNRSSRV    | 555 | 303  |
| >VHL-P81S- $\nu$ FCNRSPRV    | 107  | >VHL-P81S- $\eta$ FCNRSSRV    | 141 | 34   |
| >VHL-P81S- $\nu$ IFCNRSPR    | 15   | >VHL-P81S- $\eta$ IFCNRSSR    | 24  | 9    |
| >VHL-P81S- $\nu$ IFCNRSPR    | 20   | >VHL-P81S- $\eta$ IFCNRSSR    | 22  | 2    |
| >VHL-P81S- $\nu$ IFCNRSPR    | 62   | >VHL-P81S- $\eta$ IFCNRSSR    | 189 | 127  |
| >VHL-P81S- $\nu$ VIFCNRSRV   | 646  | >VHL-P81S- $\eta$ VIFCNRSRV   | 184 | 462  |
| >VHL-P81S- $\nu$ VIFCNRSRV'  | 72   | >VHL-P81S- $\eta$ VIFCNRSRV'  | 82  | 10   |
| >VHL-P81S- $\nu$ VIFCNRSRV   | 7    | >VHL-P81S- $\eta$ VIFCNRSRV   | 9   | 2    |
| >VHL-P81S- $\nu$ VIFCNRSRV'  | 15   | >VHL-P81S- $\eta$ VIFCNRSRV'  | 21  | 6    |
| >VHL-P81S- $\nu$ VIFCNRSRV   | 86   | >VHL-P81S- $\eta$ VIFCNRSRV   | 101 | 15   |
| >VHL-P81S- $\nu$ VIFCNRSRV'  | 191  | >VHL-P81S- $\eta$ VIFCNRSRV'  | 165 | 26   |
| >VHL-P81S- $\nu$ VIFCNRSRV   | 70   | >VHL-P81S- $\eta$ VIFCNRSRV   | 250 | 180  |
| >VHL-P81S- $\nu$ VIFCNRSRV   | 400  | >VHL-P81S- $\eta$ VIFCNRSRV   | 956 | 556  |
| >VHL-P81S- $\nu$ VIFCNRSRV   | 7    | >VHL-P81S- $\eta$ VIFCNRSRV   | 7   | 0    |
| >VHL-P81S- $\nu$ VIFCNRSRV'  | 59   | >VHL-P81S- $\eta$ VIFCNRSRV'  | 46  | 13   |
| >VHL-P81S- $\nu$ VIFCNRSRV   | 427  | >VHL-P81S- $\eta$ VIFCNRSRV   | 425 | 2    |
| >VHL-P81S- $\nu$ VIFCNRSRV   | 113  | >VHL-P81S- $\eta$ VIFCNRSRV   | 309 | 196  |
| >VHL-P81S- $\nu$ VIFCNRSRV   | 23   | >VHL-P81S- $\eta$ VIFCNRSRV   | 65  | 42   |
| >VHL-P81S- $\nu$ VIFCNRSRV   | 93   | >VHL-P81S- $\eta$ VIFCNRSRV   | 189 | 96   |
| >VHL-P81S- $\nu$ VIFCNRSRV   | 24   | >VHL-P81S- $\eta$ VIFCNRSRV   | 22  | 2    |
| >VHL-P81S- $\nu$ VIFCNRSRV'  | 548  | >VHL-P81S- $\eta$ VIFCNRSRV'  | 479 | 69   |
| >VHL-P81S- $\nu$ VIFCNRSRV'  | 360  | >VHL-P81S- $\eta$ VIFCNRSRV'  | 335 | 25   |
| >VHL-P81S- $\nu$ QVIFCNRSRV  | 755  | >VHL-P81S- $\eta$ QVIFCNRSRV  | 213 | 542  |
| >VHL-P81S- $\nu$ QVIFCNRSRV  | 214  | >VHL-P81S- $\eta$ QVIFCNRSRV  | 519 | 305  |
| >VHL-P81S- $\nu$ QVIFCNRSRV  | 305  | >VHL-P81S- $\eta$ QVIFCNRSRV  | 394 | 89   |
| >VHL-P81S- $\nu$ QVIFCNRSRV  | 381  | >VHL-P81S- $\eta$ QVIFCNRSRV  | 441 | 60   |
| >VHL-P81S- $\nu$ QVIFCNRSRV  | 11   | >VHL-P81S- $\eta$ QVIFCNRSRV  | 16  | 5    |
| >VHL-P81S- $\nu$ QVIFCNRSRV  | 114  | >VHL-P81S- $\eta$ QVIFCNRSRV  | 210 | 96   |
| >VHL-P81S- $\nu$ QVIFCNRSRV  | 6    | >VHL-P81S- $\eta$ QVIFCNRSRV  | 9   | 3    |
| >VHL-P81S- $\nu$ QVIFCNRSRV  | 36   | >VHL-P81S- $\eta$ QVIFCNRSRV  | 13  | 23   |
| >VHL-P81S- $\nu$ QVIFCNRSRV  | 178  | >VHL-P81S- $\eta$ QVIFCNRSRV  | 620 | 442  |
| >VHL-P81S- $\nu$ QVIFCNRSRV  | 175  | >VHL-P81S- $\eta$ QVIFCNRSRV  | 498 | 323  |
| >VHL-P81S- $\nu$ SQVIFCNRSRV | 47   | >VHL-P81S- $\eta$ SQVIFCNRSRV | 115 | 68   |
| >VHL-P81S- $\nu$ SQVIFCNRSRV | 436  | >VHL-P81S- $\eta$ SQVIFCNRSRV | 415 | 21   |
| >VHL-P81S- $\nu$ SQVIFCNRSRV | 301  | >VHL-P81S- $\eta$ SQVIFCNRSRV | 329 | 28   |

|                         |      |                         |      |      |
|-------------------------|------|-------------------------|------|------|
| >VHL-P81S-v SQVIFCNRSPI | 150  | >VHL-P81S-r SQVIFCNRSSI | 456  | 306  |
| >VHL-P86A-v LPVWLNFDG   | 285  | >VHL-P86A-n LAVWLNFDG   | 3967 | 3682 |
| >VHL-P86A-v LPVWLNFD    | 106  | >VHL-P86A-n LAVWLNFD    | 3926 | 3820 |
| >VHL-P86A-v LPVWLNFDG   | 251  | >VHL-P86A-n LAVWLNFDG   | 7183 | 6932 |
| >VHL-P86A-v LPVWLNFDG   | 345  | >VHL-P86A-n LAVWLNFDG   | 7834 | 7489 |
| >VHL-P86A-v VLPVWLN     | 235  | >VHL-P86A-n VLAVWLN     | 144  | 91   |
| >VHL-P86A-v VLPVWLN     | 454  | >VHL-P86A-n VLAVWLN     | 817  | 363  |
| >VHL-P86A-v VLPVWLN     | 2940 | >VHL-P86A-n VLAVWLN     | 431  | 2509 |
| >VHL-P86A-v VLPVWLN     | 1932 | >VHL-P86A-n VLAVWLN     | 237  | 1695 |
| >VHL-P86A-v VLPVWLN     | 871  | >VHL-P86A-n VLAVWLN     | 181  | 690  |
| >VHL-P86A-v VVLPVWLN    | 443  | >VHL-P86A-n VVLAVWLN    | 474  | 31   |
| >VHL-P86A-v VVLPVWLN    | 261  | >VHL-P86A-n VVLAVWLN    | 579  | 318  |
| >VHL-P86A-v VVLPVWLN    | 42   | >VHL-P86A-n VVLAVWLN    | 72   | 30   |
| >VHL-P86A-v VVLPVWLN    | 449  | >VHL-P86A-n VVLAVWLN    | 928  | 479  |
| >VHL-P86A-v VVLPVWLN    | 190  | >VHL-P86A-n VVLAVWLN    | 791  | 601  |
| >VHL-P86A-v VVLPVWLN    | 70   | >VHL-P86A-n VVLAVWLN    | 207  | 137  |
| >VHL-P86A-v VVLPVWLN    | 461  | >VHL-P86A-n VVLAVWLN    | 509  | 48   |
| >VHL-P86A-v VVLPVWLN    | 20   | >VHL-P86A-n VVLAVWLN    | 79   | 59   |
| >VHL-P86A-v VVLPVWLN    | 63   | >VHL-P86A-n VVLAVWLN    | 72   | 9    |
| >VHL-P86A-v VVLPVWLN    | 399  | >VHL-P86A-n VVLAVWLN    | 808  | 409  |
| >VHL-P86A-v RVVLPVWL    | 415  | >VHL-P86A-n RVVLAVWL    | 132  | 283  |
| >VHL-P86A-v RVVLPVWLN   | 582  | >VHL-P86A-n RVVLAVWLN   | 443  | 139  |
| >VHL-P86A-v RVVLPVWLN   | 182  | >VHL-P86A-n RVVLAVWLN   | 261  | 79   |
| >VHL-P86A-v RVVLPVWL    | 351  | >VHL-P86A-n RVVLAVWL    | 426  | 75   |
| >VHL-P86A-v RVVLPVWLN   | 202  | >VHL-P86A-n RVVLAVWLN   | 184  | 18   |
| >VHL-P86A-v RVVLPVWLN   | 819  | >VHL-P86A-n RVVLAVWLN   | 421  | 398  |
| >VHL-P86A-v RVVLPVWLN   | 355  | >VHL-P86A-n RVVLAVWLN   | 409  | 54   |
| >VHL-P86A-v RVVLPVWL    | 89   | >VHL-P86A-n RVVLAVWL    | 72   | 17   |
| >VHL-P86A-v RVVLPVWLN   | 9    | >VHL-P86A-n RVVLAVWLN   | 11   | 2    |
| >VHL-P86A-v RVVLPVWLN   | 56   | >VHL-P86A-n RVVLAVWLN   | 38   | 18   |
| >VHL-P86A-v RVVLPVWLN   | 230  | >VHL-P86A-n RVVLAVWLN   | 143  | 87   |
| >VHL-P86A-v RVVLPVWLN   | 320  | >VHL-P86A-n RVVLAVWLN   | 314  | 6    |
| >VHL-P86A-v PRVVLVWLI   | 364  | >VHL-P86A-n PRVVLAVWLI  | 422  | 58   |
| >VHL-P86A-v PRVVLVWL    | 89   | >VHL-P86A-n PRVVLAVWL   | 99   | 10   |
| >VHL-P86A-v PRVVLVWLI   | 385  | >VHL-P86A-n PRVVLAVWLI  | 507  | 122  |
| >VHL-P86A-v SPRVLPV     | 21   | >VHL-P86A-n SPRVVLAV    | 18   | 3    |
| >VHL-P86A-v SPRVLPVW    | 189  | >VHL-P86A-n SPRVVLAVW   | 63   | 126  |
| >VHL-P86A-v SPRVLPVWI   | 61   | >VHL-P86A-n SPRVVLAVWI  | 42   | 19   |
| >VHL-P86A-v SPRVLPVW    | 318  | >VHL-P86A-n SPRVVLAVW   | 360  | 42   |
| >VHL-P86A-v SPRVLPV     | 251  | >VHL-P86A-n SPRVVLAV    | 318  | 67   |
| >VHL-P86A-v SPRVLPVW    | 42   | >VHL-P86A-n SPRVVLAVW   | 28   | 14   |
| >VHL-P86A-v RSPRVLPV    | 488  | >VHL-P86A-n RSPRVVLAV   | 640  | 152  |
| >VHL-P86A-v RSPRVLPV    | 301  | >VHL-P86A-n RSPRVVLAV   | 1021 | 720  |

|                        |      |                        |       |       |
|------------------------|------|------------------------|-------|-------|
| >VHL-P86A-v RSPRVVLPV  | 130  | >VHL-P86A-n RSPRVVLAV  | 117   | 13    |
| >VHL-P86A-v RSPRVVLPVV | 247  | >VHL-P86A-n RSPRVVLAVV | 192   | 55    |
| >VHL-P86A-v RSPRVVLPVV | 147  | >VHL-P86A-n RSPRVVLAVV | 161   | 14    |
| >VHL-P86A-v RSPRVVLPVV | 55   | >VHL-P86A-n RSPRVVLAVV | 41    | 14    |
| >VHL-P86A-v RSPRVVLPVV | 301  | >VHL-P86A-n RSPRVVLAVV | 172   | 129   |
| >VHL-P86A-v RSPRVVLPVV | 48   | >VHL-P86A-n RSPRVVLAVV | 44    | 4     |
| >VHL-P86A-v RSPRVVLPVV | 12   | >VHL-P86A-n RSPRVVLAVV | 11    | 1     |
| >VHL-P86A-v RSPRVVLPVV | 39   | >VHL-P86A-n RSPRVVLAVV | 23    | 16    |
| >VHL-P86A-v RSPRVVLPVV | 4    | >VHL-P86A-n RSPRVVLAVV | 3     | 1     |
| >VHL-P86A-v RSPRVVLPVV | 493  | >VHL-P86A-n RSPRVVLAVV | 568   | 75    |
| >VHL-P86A-v RSPRVVLPVV | 345  | >VHL-P86A-n RSPRVVLAVV | 299   | 46    |
| >VHL-P86A-v NRSRVLVLPV | 265  | >VHL-P86A-n NRSRVLVLA  | 178   | 87    |
| >VHL-P86A-v NRSRVLVLPV | 601  | >VHL-P86A-n NRSRVLVLA  | 165   | 436   |
| >VHL-P86H-v LPVWLNFDG  | 285  | >VHL-P86H-r LHVWLNFDG  | 21917 | 21632 |
| >VHL-P86H-v LPVWLNFD   | 106  | >VHL-P86H-r LHVWLNFD   | 11694 | 11588 |
| >VHL-P86H-v LPVWLNFDG  | 251  | >VHL-P86H-r LHVWLNFDG  | 16456 | 16205 |
| >VHL-P86H-v LPVWLNFDG  | 345  | >VHL-P86H-r LHVWLNFDG  | 17064 | 16719 |
| >VHL-P86H-v VLPVWLN    | 235  | >VHL-P86H-r VLHVWLN    | 276   | 41    |
| >VHL-P86H-v VLPVWLN    | 454  | >VHL-P86H-r VLHVWLN    | 1866  | 1412  |
| >VHL-P86H-v VLPVWLN    | 1932 | >VHL-P86H-r VLHVWLN    | 243   | 1689  |
| >VHL-P86H-v VLPVWLN    | 871  | >VHL-P86H-r VLHVWLN    | 112   | 759   |
| >VHL-P86H-v VVLPVWLN   | 443  | >VHL-P86H-r VVLHVWLN   | 222   | 221   |
| >VHL-P86H-v VVLPVWLN   | 261  | >VHL-P86H-r VVLHVWLN   | 1040  | 779   |
| >VHL-P86H-v VVLPVWLN   | 42   | >VHL-P86H-r VVLHVWLN   | 67    | 25    |
| >VHL-P86H-v VVLPVWLN   | 449  | >VHL-P86H-r VVLHVWLN   | 662   | 213   |
| >VHL-P86H-v VVLPVWLN   | 190  | >VHL-P86H-r VVLHVWLN   | 1009  | 819   |
| >VHL-P86H-v VVLPVWLN   | 70   | >VHL-P86H-r VVLHVWLN   | 125   | 55    |
| >VHL-P86H-v VVLPVWLN   | 461  | >VHL-P86H-r VVLHVWLN   | 237   | 224   |
| >VHL-P86H-v VVLPVWLN   | 20   | >VHL-P86H-r VVLHVWLN   | 73    | 53    |
| >VHL-P86H-v VVLPVWLN   | 63   | >VHL-P86H-r VVLHVWLN   | 143   | 80    |
| >VHL-P86H-v VVLPVWLN   | 399  | >VHL-P86H-r VVLHVWLN   | 522   | 123   |
| >VHL-P86H-v RVVLPVWL   | 415  | >VHL-P86H-r RVVLHVWL   | 178   | 237   |
| >VHL-P86H-v RVVLPVWL   | 535  | >VHL-P86H-r RVVLHVWL   | 304   | 231   |
| >VHL-P86H-v RVVLPVWLN  | 182  | >VHL-P86H-r RVVLHVWLN  | 109   | 73    |
| >VHL-P86H-v RVVLPVWL   | 351  | >VHL-P86H-r RVVLHVWL   | 309   | 42    |
| >VHL-P86H-v RVVLPVWLN  | 202  | >VHL-P86H-r RVVLHVWLN  | 134   | 68    |
| >VHL-P86H-v RVVLPVWLN  | 819  | >VHL-P86H-r RVVLHVWLN  | 434   | 385   |
| >VHL-P86H-v RVVLPVWLN  | 355  | >VHL-P86H-r RVVLHVWLN  | 321   | 34    |
| >VHL-P86H-v RVVLPVWL   | 89   | >VHL-P86H-r RVVLHVWL   | 107   | 18    |
| >VHL-P86H-v RVVLPVWLN  | 9    | >VHL-P86H-r RVVLHVWLN  | 12    | 3     |
| >VHL-P86H-v RVVLPVWLN  | 56   | >VHL-P86H-r RVVLHVWLN  | 58    | 2     |
| >VHL-P86H-v RVVLPVWLN  | 230  | >VHL-P86H-r RVVLHVWLN  | 224   | 6     |
| >VHL-P86H-v RVVLPVWLN  | 320  | >VHL-P86H-r RVVLHVWLN  | 578   | 258   |

|                        |      |                        |       |       |
|------------------------|------|------------------------|-------|-------|
| >VHL-P86H-v PRVVLPVWLI | 364  | >VHL-P86H-r PRVVLVHWLI | 331   | 33    |
| >VHL-P86H-v PRVVLPVWL  | 89   | >VHL-P86H-r PRVVLVHWL  | 98    | 9     |
| >VHL-P86H-v PRVVLPVWLI | 385  | >VHL-P86H-r PRVVLVHWLI | 525   | 140   |
| >VHL-P86H-v SPRVVLPV   | 21   | >VHL-P86H-r SPRVVLVH   | 73    | 52    |
| >VHL-P86H-v SPRVVLPVW  | 189  | >VHL-P86H-r SPRVVLVHW  | 60    | 129   |
| >VHL-P86H-v SPRVVLPVWI | 61   | >VHL-P86H-r SPRVVLVHWI | 37    | 24    |
| >VHL-P86H-v SPRVVLPVW  | 318  | >VHL-P86H-r SPRVVLVHW  | 282   | 36    |
| >VHL-P86H-v SPRVVLPV   | 251  | >VHL-P86H-r SPRVVLVH   | 1454  | 1203  |
| >VHL-P86H-v SPRVVLPVW  | 42   | >VHL-P86H-r SPRVVLVHW  | 25    | 17    |
| >VHL-P86H-v RSPRVVLPV  | 488  | >VHL-P86H-r RSPRVVLHV  | 1183  | 695   |
| >VHL-P86H-v RSPRVVLPV  | 301  | >VHL-P86H-r RSPRVVLHV  | 711   | 410   |
| >VHL-P86H-v RSPRVVLPV  | 130  | >VHL-P86H-r RSPRVVLHV  | 1327  | 1197  |
| >VHL-P86H-v RSPRVVLPVW | 247  | >VHL-P86H-r RSPRVVLHVW | 210   | 37    |
| >VHL-P86H-v RSPRVVLPVW | 147  | >VHL-P86H-r RSPRVVLHVW | 236   | 89    |
| >VHL-P86H-v RSPRVVLPVW | 55   | >VHL-P86H-r RSPRVVLHVW | 47    | 8     |
| >VHL-P86H-v RSPRVVLPVW | 301  | >VHL-P86H-r RSPRVVLHVW | 267   | 34    |
| >VHL-P86H-v RSPRVVLPVW | 48   | >VHL-P86H-r RSPRVVLHVW | 37    | 11    |
| >VHL-P86H-v RSPRVVLPVW | 12   | >VHL-P86H-r RSPRVVLHVW | 10    | 2     |
| >VHL-P86H-v RSPRVVLPVW | 39   | >VHL-P86H-r RSPRVVLHVW | 24    | 15    |
| >VHL-P86H-v RSPRVVLPVW | 4    | >VHL-P86H-r RSPRVVLHVW | 3     | 1     |
| >VHL-P86H-v RSPRVVLPVW | 493  | >VHL-P86H-r RSPRVVLHVW | 520   | 27    |
| >VHL-P86H-v RSPRVVLPVW | 345  | >VHL-P86H-r RSPRVVLHVW | 290   | 55    |
| >VHL-P86H-v NRSRVVLPV  | 265  | >VHL-P86H-r NRSRVVLHV  | 2574  | 2309  |
| >VHL-P86L-w LPVWLNFDG  | 285  | >VHL-P86L-r LLVWLNFDG  | 17112 | 16827 |
| >VHL-P86L-w LPVWLNFD   | 106  | >VHL-P86L-r LLVWLNFD   | 19766 | 19660 |
| >VHL-P86L-w LPVWLNFDG  | 251  | >VHL-P86L-r LLVWLNFDG  | 21368 | 21117 |
| >VHL-P86L-w LPVWLNFDG  | 345  | >VHL-P86L-r LLVWLNFDGI | 22879 | 22534 |
| >VHL-P86L-w VLPVWLNF   | 1928 | >VHL-P86L-r VLLVWLNF   | 233   | 1695  |
| >VHL-P86L-w VLPVWLNF   | 235  | >VHL-P86L-r VLLVWLNF   | 52    | 183   |
| >VHL-P86L-w VLPVWLNF   | 454  | >VHL-P86L-r VLLVWLNF   | 1136  | 682   |
| >VHL-P86L-w VLPVWLNF   | 2940 | >VHL-P86L-r VLLVWLNF   | 404   | 2536  |
| >VHL-P86L-w VLPVWLNF   | 871  | >VHL-P86L-r VLLVWLNF   | 88    | 783   |
| >VHL-P86L-w VVLPVWLNF  | 443  | >VHL-P86L-r VVLLVWLNF  | 243   | 200   |
| >VHL-P86L-w VVLPVWLNF  | 261  | >VHL-P86L-r VVLLVWLNF  | 2532  | 2271  |
| >VHL-P86L-w VVLPVWLNF  | 42   | >VHL-P86L-r VVLLVWLNF  | 172   | 130   |
| >VHL-P86L-w VVLPVWLNF  | 449  | >VHL-P86L-r VVLLVWLNF  | 791   | 342   |
| >VHL-P86L-w VVLPVWLNF  | 190  | >VHL-P86L-r VVLLVWLNF  | 1375  | 1185  |
| >VHL-P86L-w VVLPVWLNF  | 70   | >VHL-P86L-r VVLLVWLNF  | 305   | 235   |
| >VHL-P86L-w VVLPVWLNF  | 461  | >VHL-P86L-r VVLLVWLNF  | 1238  | 777   |
| >VHL-P86L-w VVLPVWLNF  | 20   | >VHL-P86L-r VVLLVWLNF  | 130   | 110   |
| >VHL-P86L-w VVLPVWLNF  | 63   | >VHL-P86L-r VVLLVWLNF  | 619   | 556   |
| >VHL-P86L-w VVLPVWLNF  | 399  | >VHL-P86L-r VVLLVWLNF  | 951   | 552   |
| >VHL-P86L-w RVVLPVWL   | 415  | >VHL-P86L-r RVVLLVWL   | 116   | 299   |

|                        |       |                        |      |       |
|------------------------|-------|------------------------|------|-------|
| >VHL-P86L-w RVVLPVWL   | 535   | >VHL-P86L-r RVVLLVWL   | 362  | 173   |
| >VHL-P86L-w RVVLPVWLNI | 182   | >VHL-P86L-r RVVLLVWLNI | 469  | 287   |
| >VHL-P86L-w RVVLPVWL   | 351   | >VHL-P86L-r RVVLLVWL   | 264  | 87    |
| >VHL-P86L-w RVVLPVWLNI | 202   | >VHL-P86L-r RVVLLVWLNI | 99   | 103   |
| >VHL-P86L-w RVVLPVWLNI | 355   | >VHL-P86L-r RVVLLVWLNI | 705  | 350   |
| >VHL-P86L-w RVVLPVWL   | 89    | >VHL-P86L-r RVVLLVWL   | 150  | 61    |
| >VHL-P86L-w RVVLPVWLNI | 9     | >VHL-P86L-r RVVLLVWLNI | 16   | 7     |
| >VHL-P86L-w RVVLPVWLNI | 56    | >VHL-P86L-r RVVLLVWLNI | 39   | 17    |
| >VHL-P86L-w RVVLPVWLNI | 230   | >VHL-P86L-r RVVLLVWLNI | 146  | 84    |
| >VHL-P86L-w RVVLPVWLNI | 320   | >VHL-P86L-r RVVLLVWLNI | 186  | 134   |
| >VHL-P86L-w PRVVLVWLNI | 364   | >VHL-P86L-r PRVVLVWLNI | 504  | 140   |
| >VHL-P86L-w PRVVLVWL   | 738   | >VHL-P86L-r PRVVLVWL   | 465  | 273   |
| >VHL-P86L-w PRVVLVWL   | 89    | >VHL-P86L-r PRVVLVWL   | 59   | 30    |
| >VHL-P86L-w PRVVLVWLNI | 385   | >VHL-P86L-r PRVVLVWLNI | 360  | 25    |
| >VHL-P86L-w SPRVLPV    | 3386  | >VHL-P86L-r SPRVLLV    | 414  | 2972  |
| >VHL-P86L-w SPRVLPV    | 21    | >VHL-P86L-r SPRVLLV    | 103  | 82    |
| >VHL-P86L-w SPRVLPVW   | 189   | >VHL-P86L-r SPRVLLVW   | 60   | 129   |
| >VHL-P86L-w SPRVLPVWI  | 61    | >VHL-P86L-r SPRVLLVWI  | 38   | 23    |
| >VHL-P86L-w SPRVLPVW   | 318   | >VHL-P86L-r SPRVLLVW   | 171  | 147   |
| >VHL-P86L-w SPRVLPV    | 251   | >VHL-P86L-r SPRVLLV    | 736  | 485   |
| >VHL-P86L-w SPRVLPVW   | 42    | >VHL-P86L-r SPRVLLVW   | 30   | 12    |
| >VHL-P86L-w RSPRVLP    | 26092 | >VHL-P86L-r RSPRVLL    | 424  | 25668 |
| >VHL-P86L-w RSPRVLPV   | 488   | >VHL-P86L-r RSPRVLLV   | 1180 | 692   |
| >VHL-P86L-w RSPRVLPV   | 301   | >VHL-P86L-r RSPRVLLV   | 833  | 532   |
| >VHL-P86L-w RSPRVLP    | 6455  | >VHL-P86L-r RSPRVLL    | 181  | 6274  |
| >VHL-P86L-w RSPRVLPV   | 130   | >VHL-P86L-r RSPRVLLV   | 733  | 603   |
| >VHL-P86L-w RSPRVLPVW  | 247   | >VHL-P86L-r RSPRVLLVW  | 145  | 102   |
| >VHL-P86L-w RSPRVLPVW  | 147   | >VHL-P86L-r RSPRVLLVW  | 290  | 143   |
| >VHL-P86L-w RSPRVLPVW  | 55    | >VHL-P86L-r RSPRVLLVW  | 41   | 14    |
| >VHL-P86L-w RSPRVLPVW  | 301   | >VHL-P86L-r RSPRVLLVW  | 301  | 0     |
| >VHL-P86L-w RSPRVLPVW  | 48    | >VHL-P86L-r RSPRVLLVW  | 44   | 4     |
| >VHL-P86L-w RSPRVLPVW  | 12    | >VHL-P86L-r RSPRVLLVW  | 10   | 2     |
| >VHL-P86L-w RSPRVLP    | 2336  | >VHL-P86L-r RSPRVLL    | 10   | 2326  |
| >VHL-P86L-w RSPRVLPVW  | 39    | >VHL-P86L-r RSPRVLLVW  | 27   | 12    |
| >VHL-P86L-w RSPRVLPVW  | 4     | >VHL-P86L-r RSPRVLLVW  | 3    | 1     |
| >VHL-P86L-w RSPRVLP    | 10276 | >VHL-P86L-r RSPRVLL    | 170  | 10106 |
| >VHL-P86L-w RSPRVLPVW  | 493   | >VHL-P86L-r RSPRVLLVW  | 315  | 178   |
| >VHL-P86L-w RSPRVLP    | 24329 | >VHL-P86L-r RSPRVLL    | 327  | 24002 |
| >VHL-P86L-w RSPRVLPVW  | 345   | >VHL-P86L-r RSPRVLLVW  | 312  | 33    |
| >VHL-P86L-w NRSRVLP    | 15887 | >VHL-P86L-r NRSRVLL    | 55   | 15832 |
| >VHL-P86L-w NRSRVLPV   | 265   | >VHL-P86L-r NRSRVLLV   | 1142 | 877   |
| >VHL-P86L-w NRSRVLP    | 8106  | >VHL-P86L-r NRSRVLL    | 221  | 7885  |
| >VHL-P86L-w NRSRVLP    | 3067  | >VHL-P86L-r NRSRVLL    | 11   | 3056  |

|                        |      |                        |       |       |
|------------------------|------|------------------------|-------|-------|
| >VHL-P86L-w NRSRVLPLV  | 1062 | >VHL-P86L-n NRSRVLPLV  | 485   | 577   |
| >VHL-P86R-v LPVWLNFDG  | 285  | >VHL-P86R-n LRVWLNFDG  | 24657 | 24372 |
| >VHL-P86R-v LPVWLNFD   | 106  | >VHL-P86R-n LRVWLNFD   | 20363 | 20257 |
| >VHL-P86R-v LPVWLNFDG  | 251  | >VHL-P86R-n LRVWLNFDG  | 22491 | 22240 |
| >VHL-P86R-v LPVWLNFDG  | 345  | >VHL-P86R-n LRVWLNFDG  | 23985 | 23640 |
| >VHL-P86R-v VLPVWLN    | 235  | >VHL-P86R-n VLRVWLN    | 240   | 5     |
| >VHL-P86R-v VLPVWLN    | 454  | >VHL-P86R-n VLRVWLN    | 3187  | 2733  |
| >VHL-P86R-v VLPVWLN    | 1932 | >VHL-P86R-n VLRVWLN    | 139   | 1793  |
| >VHL-P86R-v VLPVWLN    | 2107 | >VHL-P86R-n VLRVWLN    | 497   | 1610  |
| >VHL-P86R-v VLPVWLN    | 871  | >VHL-P86R-n VLRVWLN    | 60    | 811   |
| >VHL-P86R-v VLPVWLN    | 9688 | >VHL-P86R-n VLRVWLN    | 212   | 9476  |
| >VHL-P86R-v VVLPVWLN   | 443  | >VHL-P86R-n VVLRVWLN   | 230   | 213   |
| >VHL-P86R-v VVLPVWLN   | 261  | >VHL-P86R-n VVLRVWLN   | 1550  | 1289  |
| >VHL-P86R-v VVLPVWLN   | 42   | >VHL-P86R-n VVLRVWLN   | 57    | 15    |
| >VHL-P86R-v VVLPVWLN   | 449  | >VHL-P86R-n VVLRVWLN   | 361   | 88    |
| >VHL-P86R-v VVLPVWLN   | 190  | >VHL-P86R-n VVLRVWLN   | 651   | 461   |
| >VHL-P86R-v VVLPVWLN   | 70   | >VHL-P86R-n VVLRVWLN   | 602   | 532   |
| >VHL-P86R-v VVLPVWLN   | 461  | >VHL-P86R-n VVLRVWLN   | 456   | 5     |
| >VHL-P86R-v VVLPVWLN   | 20   | >VHL-P86R-n VVLRVWLN   | 436   | 416   |
| >VHL-P86R-v VVLPVWLN   | 63   | >VHL-P86R-n VVLRVWLN   | 89    | 26    |
| >VHL-P86R-v VVLPVWLN   | 399  | >VHL-P86R-n VVLRVWLN   | 485   | 86    |
| >VHL-P86R-v RVVLPVWL   | 415  | >VHL-P86R-n RVVLRVWL   | 295   | 120   |
| >VHL-P86R-v RVVLPVWLN  | 182  | >VHL-P86R-n RVVLRVWLN  | 608   | 426   |
| >VHL-P86R-v RVVLPVWL   | 351  | >VHL-P86R-n RVVLRVWL   | 533   | 182   |
| >VHL-P86R-v RVVLPVWLN  | 202  | >VHL-P86R-n RVVLRVWLN  | 158   | 44    |
| >VHL-P86R-v RVVLPVWLN  | 355  | >VHL-P86R-n RVVLRVWLN  | 553   | 198   |
| >VHL-P86R-v RVVLPVWL   | 89   | >VHL-P86R-n RVVLRVWL   | 192   | 103   |
| >VHL-P86R-v RVVLPVWLN  | 9    | >VHL-P86R-n RVVLRVWLN  | 13    | 4     |
| >VHL-P86R-v RVVLPVWLN  | 56   | >VHL-P86R-n RVVLRVWLN  | 89    | 33    |
| >VHL-P86R-v RVVLPVWLN  | 230  | >VHL-P86R-n RVVLRVWLN  | 119   | 111   |
| >VHL-P86R-v RVVLPVWLN  | 320  | >VHL-P86R-n RVVLRVWLN  | 351   | 31    |
| >VHL-P86R-v PRVVLPLVLI | 364  | >VHL-P86R-n PRVVLPLVLI | 377   | 13    |
| >VHL-P86R-v PRVVLPLVWL | 738  | >VHL-P86R-n PRVVLPLVWL | 323   | 415   |
| >VHL-P86R-v PRVVLPLVWL | 89   | >VHL-P86R-n PRVVLPLVWL | 49    | 40    |
| >VHL-P86R-v PRVVLPLVLI | 385  | >VHL-P86R-n PRVVLPLVLI | 306   | 79    |
| >VHL-P86R-v SPRVLPV    | 21   | >VHL-P86R-n SPRVLPV    | 61    | 40    |
| >VHL-P86R-v SPRVLPVWL  | 189  | >VHL-P86R-n SPRVLPVWL  | 36    | 153   |
| >VHL-P86R-v SPRVLPVWI  | 61   | >VHL-P86R-n SPRVLPVWI  | 24    | 37    |
| >VHL-P86R-v SPRVLPVWL  | 318  | >VHL-P86R-n SPRVLPVWL  | 979   | 661   |
| >VHL-P86R-v SPRVLPV    | 251  | >VHL-P86R-n SPRVLPV    | 2750  | 2499  |
| >VHL-P86R-v SPRVLPVWL  | 42   | >VHL-P86R-n SPRVLPVWL  | 40    | 2     |
| >VHL-P86R-v RSPRVLPV   | 488  | >VHL-P86R-n RSPRVLPV   | 4060  | 3572  |
| >VHL-P86R-v RSPRVLPV   | 301  | >VHL-P86R-n RSPRVLPV   | 2311  | 2010  |

|                                |       |                                |       |       |
|--------------------------------|-------|--------------------------------|-------|-------|
| >VHL-P86R- <i>v</i> RSPRVVLP   | 17029 | >VHL-P86R- <i>n</i> RSPRVVLR   | 29    | 17000 |
| >VHL-P86R- <i>v</i> RSPRVVLPV  | 130   | >VHL-P86R- <i>n</i> RSPRVVLRV  | 646   | 516   |
| >VHL-P86R- <i>v</i> RSPRVVLPVW | 247   | >VHL-P86R- <i>n</i> RSPRVVLRVW | 256   | 9     |
| >VHL-P86R- <i>v</i> RSPRVVLPVW | 147   | >VHL-P86R- <i>n</i> RSPRVVLRVW | 291   | 144   |
| >VHL-P86R- <i>v</i> RSPRVVLPVW | 55    | >VHL-P86R- <i>n</i> RSPRVVLRVW | 83    | 28    |
| >VHL-P86R- <i>v</i> RSPRVVLPVW | 301   | >VHL-P86R- <i>n</i> RSPRVVLRVW | 492   | 191   |
| >VHL-P86R- <i>v</i> RSPRVVLPVW | 48    | >VHL-P86R- <i>n</i> RSPRVVLRVW | 40    | 8     |
| >VHL-P86R- <i>v</i> RSPRVVLPVW | 12    | >VHL-P86R- <i>n</i> RSPRVVLRVW | 22    | 10    |
| >VHL-P86R- <i>v</i> RSPRVVLPVW | 39    | >VHL-P86R- <i>n</i> RSPRVVLRVW | 56    | 17    |
| >VHL-P86R- <i>v</i> RSPRVVLPVW | 4     | >VHL-P86R- <i>n</i> RSPRVVLRVW | 4     | 0     |
| >VHL-P86R- <i>v</i> RSPRVVLPVW | 493   | >VHL-P86R- <i>n</i> RSPRVVLRVW | 382   | 111   |
| >VHL-P86R- <i>v</i> RSPRVVLP   | 35647 | >VHL-P86R- <i>n</i> RSPRVVLR   | 260   | 35387 |
| >VHL-P86R- <i>v</i> RSPRVVLPVW | 345   | >VHL-P86R- <i>n</i> RSPRVVLRVW | 396   | 51    |
| >VHL-P86R- <i>v</i> NRSPRVVLPV | 265   | >VHL-P86R- <i>n</i> NRSPRVVLRV | 2260  | 1995  |
| >VHL-P86R- <i>v</i> NRSPRVVLP  | 3067  | >VHL-P86R- <i>n</i> NRSPRVVLR  | 457   | 2610  |
| >VHL-P86S- <i>v</i> LPVWLNFDG  | 285   | >VHL-P86S- <i>n</i> LSVWLNFDG  | 14554 | 14269 |
| >VHL-P86S- <i>v</i> LPVWLNFD   | 106   | >VHL-P86S- <i>n</i> LSVWLNFD   | 13944 | 13838 |
| >VHL-P86S- <i>v</i> LPVWLNFDG  | 251   | >VHL-P86S- <i>n</i> LSVWLNFDG  | 17979 | 17728 |
| >VHL-P86S- <i>v</i> LPVWLNFDG  | 345   | >VHL-P86S- <i>n</i> LSVWLNFDG  | 18765 | 18420 |
| >VHL-P86S- <i>v</i> VLPVWLN    | 235   | >VHL-P86S- <i>n</i> VLSVWLN    | 341   | 106   |
| >VHL-P86S- <i>v</i> VLPVWLN    | 454   | >VHL-P86S- <i>n</i> VLSVWLN    | 1520  | 1066  |
| >VHL-P86S- <i>v</i> VLPVWLN    | 1932  | >VHL-P86S- <i>n</i> VLSVWLN    | 275   | 1657  |
| >VHL-P86S- <i>v</i> VLPVWLN    | 871   | >VHL-P86S- <i>n</i> VLSVWLN    | 184   | 687   |
| >VHL-P86S- <i>v</i> VVLPVWLN   | 443   | >VHL-P86S- <i>n</i> VVLSVWLN   | 263   | 180   |
| >VHL-P86S- <i>v</i> VVLPVWLN   | 261   | >VHL-P86S- <i>n</i> VVLSVWLN   | 855   | 594   |
| >VHL-P86S- <i>v</i> VVLPVWLN   | 42    | >VHL-P86S- <i>n</i> VVLSVWLN   | 36    | 6     |
| >VHL-P86S- <i>v</i> VVLPVWLN   | 449   | >VHL-P86S- <i>n</i> VVLSVWLN   | 552   | 103   |
| >VHL-P86S- <i>v</i> VVLPVWLN   | 190   | >VHL-P86S- <i>n</i> VVLSVWLN   | 510   | 320   |
| >VHL-P86S- <i>v</i> VVLPVWLN   | 70    | >VHL-P86S- <i>n</i> VVLSVWLN   | 128   | 58    |
| >VHL-P86S- <i>v</i> VVLPVWLN   | 461   | >VHL-P86S- <i>n</i> VVLSVWLN   | 239   | 222   |
| >VHL-P86S- <i>v</i> VVLPVWLN   | 20    | >VHL-P86S- <i>n</i> VVLSVWLN   | 131   | 111   |
| >VHL-P86S- <i>v</i> VVLPVWLN   | 63    | >VHL-P86S- <i>n</i> VVLSVWLN   | 191   | 128   |
| >VHL-P86S- <i>v</i> VVLPVWLN   | 399   | >VHL-P86S- <i>n</i> VVLSVWLN   | 161   | 238   |
| >VHL-P86S- <i>v</i> RVVLPVWL   | 415   | >VHL-P86S- <i>n</i> RVVLSVWL   | 144   | 271   |
| >VHL-P86S- <i>v</i> RVVLPVWLN  | 182   | >VHL-P86S- <i>n</i> RVVLSVWLN  | 252   | 70    |
| >VHL-P86S- <i>v</i> RVVLPVWL   | 351   | >VHL-P86S- <i>n</i> RVVLSVWL   | 438   | 87    |
| >VHL-P86S- <i>v</i> RVVLPVWLN  | 202   | >VHL-P86S- <i>n</i> RVVLSVWLN  | 239   | 37    |
| >VHL-P86S- <i>v</i> RVVLPVWLN  | 819   | >VHL-P86S- <i>n</i> RVVLSVWLN  | 392   | 427   |
| >VHL-P86S- <i>v</i> RVVLPVWLN  | 355   | >VHL-P86S- <i>n</i> RVVLSVWLN  | 169   | 186   |
| >VHL-P86S- <i>v</i> RVVLPVWL   | 89    | >VHL-P86S- <i>n</i> RVVLSVWL   | 32    | 57    |
| >VHL-P86S- <i>v</i> RVVLPVWLN  | 9     | >VHL-P86S- <i>n</i> RVVLSVWLN  | 7     | 2     |
| >VHL-P86S- <i>v</i> RVVLPVWLN  | 56    | >VHL-P86S- <i>n</i> RVVLSVWLN  | 34    | 22    |
| >VHL-P86S- <i>v</i> RVVLPVWLN  | 230   | >VHL-P86S- <i>n</i> RVVLSVWLN  | 140   | 90    |



|                             |       |                              |       |       |
|-----------------------------|-------|------------------------------|-------|-------|
| >VHL-P86S- $\nu$ RVVLPVWLN  | 320   | >VHL-P86S- $\eta$ RVVLSVWLN  | 353   | 33    |
| >VHL-P86S- $\nu$ PRVVLPVWLI | 364   | >VHL-P86S- $\eta$ PRVVLSVWLI | 292   | 72    |
| >VHL-P86S- $\nu$ PRVVLPVWL  | 89    | >VHL-P86S- $\eta$ PRVVLSVWL  | 205   | 116   |
| >VHL-P86S- $\nu$ PRVVLPVWLI | 385   | >VHL-P86S- $\eta$ PRVVLSVWLI | 775   | 390   |
| >VHL-P86S- $\nu$ SPRVLPV    | 21    | >VHL-P86S- $\eta$ SPRVLSV    | 21    | 0     |
| >VHL-P86S- $\nu$ SPRVLPVW   | 189   | >VHL-P86S- $\eta$ SPRVLSVW   | 41    | 148   |
| >VHL-P86S- $\nu$ SPRVLPVWI  | 61    | >VHL-P86S- $\eta$ SPRVLSVWI  | 45    | 16    |
| >VHL-P86S- $\nu$ SPRVLPVW   | 318   | >VHL-P86S- $\eta$ SPRVLSVW   | 360   | 42    |
| >VHL-P86S- $\nu$ SPRVLPV    | 251   | >VHL-P86S- $\eta$ SPRVLSV    | 1271  | 1020  |
| >VHL-P86S- $\nu$ SPRVLPVW   | 2763  | >VHL-P86S- $\eta$ SPRVLSVW   | 83    | 2680  |
| >VHL-P86S- $\nu$ SPRVLPVW   | 42    | >VHL-P86S- $\eta$ SPRVLSVW   | 34    | 8     |
| >VHL-P86S- $\nu$ RSPRVLPV   | 488   | >VHL-P86S- $\eta$ RSPRVLSV   | 640   | 152   |
| >VHL-P86S- $\nu$ RSPRVLPV   | 301   | >VHL-P86S- $\eta$ RSPRVLSV   | 661   | 360   |
| >VHL-P86S- $\nu$ RSPRVLPV   | 130   | >VHL-P86S- $\eta$ RSPRVLSV   | 105   | 25    |
| >VHL-P86S- $\nu$ RSPRVLPVW  | 247   | >VHL-P86S- $\eta$ RSPRVLSVW  | 301   | 54    |
| >VHL-P86S- $\nu$ RSPRVLPVW  | 147   | >VHL-P86S- $\eta$ RSPRVLSVW  | 141   | 6     |
| >VHL-P86S- $\nu$ RSPRVLPVW  | 55    | >VHL-P86S- $\eta$ RSPRVLSVW  | 49    | 6     |
| >VHL-P86S- $\nu$ RSPRVLPVW  | 301   | >VHL-P86S- $\eta$ RSPRVLSVW  | 190   | 111   |
| >VHL-P86S- $\nu$ RSPRVLPVW  | 48    | >VHL-P86S- $\eta$ RSPRVLSVW  | 45    | 3     |
| >VHL-P86S- $\nu$ RSPRVLPVW  | 12    | >VHL-P86S- $\eta$ RSPRVLSVW  | 12    | 0     |
| >VHL-P86S- $\nu$ RSPRVLPVW  | 39    | >VHL-P86S- $\eta$ RSPRVLSVW  | 51    | 12    |
| >VHL-P86S- $\nu$ RSPRVLPVW  | 4     | >VHL-P86S- $\eta$ RSPRVLSVW  | 3     | 1     |
| >VHL-P86S- $\nu$ RSPRVLPVW  | 493   | >VHL-P86S- $\eta$ RSPRVLSVW  | 826   | 333   |
| >VHL-P86S- $\nu$ RSPRVLPVW  | 345   | >VHL-P86S- $\eta$ RSPRVLSVW  | 228   | 117   |
| >VHL-P86S- $\nu$ NRSRVLPV   | 265   | >VHL-P86S- $\eta$ NRSRVLSV   | 508   | 243   |
| >VHL-P86S- $\nu$ NRSRVLPV   | 601   | >VHL-P86S- $\eta$ NRSRVLSV   | 367   | 234   |
| >VHL-P95R- $\nu$ EPQPYPTL   | 420   | >VHL-P95R- $\eta$ ERQPYPTL   | 17464 | 17044 |
| >VHL-P95R- $\nu$ EPQPYPTL   | 537   | >VHL-P95R- $\eta$ ERQPYPTL   | 260   | 277   |
| >VHL-P95R- $\nu$ EPQPYPTL   | 20391 | >VHL-P95R- $\eta$ ERQPYPTL   | 350   | 20041 |
| >VHL-P95R- $\nu$ LPVWLNFDG  | 39022 | >VHL-P95R- $\eta$ LPVWLNFDG  | 381   | 38641 |
| >VHL-P95R- $\nu$ LPVWLNFDG  | 538   | >VHL-P95R- $\eta$ LPVWLNFDG  | 347   | 191   |
| >VHL-P95R- $\nu$ LPVWLNFDG  | 345   | >VHL-P95R- $\eta$ LPVWLNFDG  | 1100  | 755   |
| >VHL-P95R- $\nu$ GEPQPYPTL  | 197   | >VHL-P95R- $\eta$ GERQPYPTL  | 101   | 96    |
| >VHL-P95R- $\nu$ GEPQPYPT   | 688   | >VHL-P95R- $\eta$ GERQPYPT   | 69    | 619   |
| >VHL-P95R- $\nu$ GEPQPYPTL  | 460   | >VHL-P95R- $\eta$ GERQPYPTL  | 50    | 410   |
| >VHL-P95R- $\nu$ GEPQPYPT   | 3932  | >VHL-P95R- $\eta$ GERQPYPT   | 157   | 3775  |
| >VHL-P95R- $\nu$ NFDGERQP   | 338   | >VHL-P95R- $\eta$ NFDGERQP   | 823   | 485   |
| >VHL-P95R- $\nu$ LNFDGERQP  | 165   | >VHL-P95R- $\eta$ LNFDGERQP  | 159   | 6     |
| >VHL-P95R- $\nu$ LNFDGERQP  | 111   | >VHL-P95R- $\eta$ LNFDGERQP  | 136   | 25    |
| >VHL-P95R- $\nu$ WLNFDGERQ  | 50    | >VHL-P95R- $\eta$ WLNFDGERQ  | 84    | 34    |
| >VHL-P95R- $\nu$ WLNFDGERQ  | 854   | >VHL-P95R- $\eta$ WLNFDGERQ  | 468   | 386   |
| >VHL-P95R- $\nu$ WLNFDGERQ  | 54    | >VHL-P95R- $\eta$ WLNFDGERQ  | 54    | 0     |
| >VHL-P95R- $\nu$ WLNFDGERQ  | 52    | >VHL-P95R- $\eta$ WLNFDGERQ  | 76    | 24    |

|                        |       |                        |       |       |
|------------------------|-------|------------------------|-------|-------|
| >VHL-P95R-w WLNFDGEPQ  | 102   | >VHL-P95R-n WLNFDGERC  | 166   | 64    |
| >VHL-P95R-w WLNFDGEPQ  | 90    | >VHL-P95R-n WLNFDGERC  | 179   | 89    |
| >VHL-P95R-w WLNFDGEPQ  | 182   | >VHL-P95R-n WLNFDGERC  | 148   | 34    |
| >VHL-P95R-w VWLNFDGEP  | 25450 | >VHL-P95R-n VWLNFDGER  | 37    | 25413 |
| >VHL-P95R-w VWLNFDGEP  | 304   | >VHL-P95R-n VWLNFDGER  | 364   | 60    |
| >VHL-P95R-w PVWLNFDGE  | 34581 | >VHL-P95R-n PVWLNFDGE  | 372   | 34209 |
| >VHL-P99L-w PTLPPGTGRR | 5984  | >VHL-P99L-r LTLPPGTGRR | 378   | 5606  |
| >VHL-P99L-w PTLPPGTGR  | 2755  | >VHL-P99L-r LTLPPGTGR  | 103   | 2652  |
| >VHL-P99L-w PTLPPGTGRR | 4060  | >VHL-P99L-r LTLPPGTGRR | 412   | 3648  |
| >VHL-P99L-w PTLPPGTGR  | 4703  | >VHL-P99L-r LTLPPGTGR  | 317   | 4386  |
| >VHL-P99L-w PTLPPGTGRR | 1073  | >VHL-P99L-r LTLPPGTGRR | 15    | 1058  |
| >VHL-P99L-w PTLPPGTGRR | 4380  | >VHL-P99L-r LTLPPGTGRR | 47    | 4333  |
| >VHL-P99L-w PTLPPGTGRR | 139   | >VHL-P99L-r LTLPPGTGRR | 12    | 127   |
| >VHL-P99L-w YPTLPPGT   | 25342 | >VHL-P99L-r YLTLPPGT   | 91    | 25251 |
| >VHL-P99L-w YPTLPPGT   | 22617 | >VHL-P99L-r YLTLPPGT   | 228   | 22389 |
| >VHL-P99L-w YPTLPPGT   | 34555 | >VHL-P99L-r YLTLPPGT   | 36    | 34519 |
| >VHL-P99L-w YPTLPPGTGR | 474   | >VHL-P99L-r YLTLPPGTGR | 79    | 395   |
| >VHL-P99L-w YPTLPPGTGR | 2156  | >VHL-P99L-r YLTLPPGTGR | 320   | 1836  |
| >VHL-P99L-w YPTLPPGT   | 313   | >VHL-P99L-r YLTLPPGT   | 30611 | 30298 |
| >VHL-P99L-w YPTLPPGTG  | 410   | >VHL-P99L-r YLTLPPGTG  | 30641 | 30231 |
| >VHL-P99L-w LNFDGEPQP\ | 40359 | >VHL-P99L-r LNFDGEPQP\ | 370   | 39989 |
| >VHL-P99L-w PYPTLPPGTG | 66    | >VHL-P99L-r PYLTLPPGTG | 41    | 25    |
| >VHL-P99L-w QPYPTLPPG  | 497   | >VHL-P99L-r QPYLTLPPG  | 1190  | 693   |
| >VHL-P99L-w QPYPTLPPG  | 159   | >VHL-P99L-r QPYLTLPPG  | 66    | 93    |
| >VHL-P99L-w EPQPYPTL   | 420   | >VHL-P99L-r EPQPYLTL   | 376   | 44    |
| >VHL-P99L-w GEPQPYPTL  | 197   | >VHL-P99L-r GEPQPYLTL  | 127   | 70    |
| >VHL-P99L-w GEPQPYPTL  | 460   | >VHL-P99L-r GEPQPYLTL  | 598   | 138   |
| >VHL-P99L-w NFDGEPQPYI | 5923  | >VHL-P99L-r NFDGEPQPYI | 85    | 5838  |
| >VHL-Q132H QTELFVPSLN' | 604   | >VHL-Q132H HTELFVPSLN' | 314   | 290   |
| >VHL-Q132H QTELFVPSL   | 386   | >VHL-Q132H HTELFVPSL   | 241   | 145   |
| >VHL-Q132H QTELFVPSLN' | 74    | >VHL-Q132H HTELFVPSLN' | 44    | 30    |
| >VHL-Q132H QTELFVPSL   | 59    | >VHL-Q132H HTELFVPSL   | 25    | 34    |
| >VHL-Q132H QTELFVPSLN' | 1331  | >VHL-Q132H HTELFVPSLN' | 410   | 921   |
| >VHL-Q132H QTELFVPSL   | 80    | >VHL-Q132H HTELFVPSL   | 144   | 64    |
| >VHL-Q132H NQTELFVPS   | 68    | >VHL-Q132H NHTELFVPS   | 22353 | 22285 |
| >VHL-Q132H NQTELFVPSL  | 231   | >VHL-Q132H NHTELFVPSL  | 12244 | 12013 |
| >VHL-Q132H NQTELFVPSL  | 316   | >VHL-Q132H NHTELFVPSL  | 2756  | 2440  |
| >VHL-Q132H NQTELFVPSL  | 42    | >VHL-Q132H NHTELFVPSL  | 24    | 18    |
| >VHL-Q132H LVNQTELFV   | 493   | >VHL-Q132H LVNHTELFV   | 304   | 189   |
| >VHL-Q132H LVNQTELFV   | 423   | >VHL-Q132H LVNHTELFV   | 144   | 279   |
| >VHL-Q132H LVNQTELFV   | 137   | >VHL-Q132H LVNHTELFV   | 88    | 49    |
| >VHL-Q132H LVNQTELFV   | 66    | >VHL-Q132H LVNHTELFV   | 125   | 59    |
| >VHL-Q132H LVNQTELFV   | 56    | >VHL-Q132H LVNHTELFV   | 98    | 42    |

|                       |      |                        |     |     |
|-----------------------|------|------------------------|-----|-----|
| >VHL-Q132H LVNQTELFV  | 17   | >VHL-Q132H LVNHTELFV   | 45  | 28  |
| >VHL-Q132H LVNQTELF   | 220  | >VHL-Q132H LVNHTELF    | 204 | 16  |
| >VHL-Q132H LVNQTELF   | 748  | >VHL-Q132H LVNHTELF    | 268 | 480 |
| >VHL-Q132H LVNQTELF   | 74   | >VHL-Q132H LVNHTELF    | 74  | 0   |
| >VHL-Q132H LLVNQTEL   | 146  | >VHL-Q132H LLVNHTEL    | 136 | 10  |
| >VHL-Q132H LLVNQTELFV | 17   | >VHL-Q132H LLVNHTELFV  | 14  | 3   |
| >VHL-Q132H LLVNQTEL   | 11   | >VHL-Q132H LLVNHTEL    | 11  | 0   |
| >VHL-Q132H LLVNQTELF  | 408  | >VHL-Q132H LLVNHTELF   | 190 | 218 |
| >VHL-Q132H LLVNQTELFV | 15   | >VHL-Q132H LLVNHTELFV  | 12  | 3   |
| >VHL-Q132H LLVNQTEL   | 32   | >VHL-Q132H LLVNHTEL    | 16  | 16  |
| >VHL-Q132H LLVNQTELFV | 28   | >VHL-Q132H LLVNHTELFV  | 23  | 5   |
| >VHL-Q132H LLVNQTEL   | 155  | >VHL-Q132H LLVNHTEL    | 101 | 54  |
| >VHL-Q132H LLVNQTELF  | 1048 | >VHL-Q132H LLVNHTELF   | 399 | 649 |
| >VHL-Q132H LLVNQTELFV | 61   | >VHL-Q132H LLVNHTELFV  | 57  | 4   |
| >VHL-Q132H LLVNQTEL   | 20   | >VHL-Q132H LLVNHTEL    | 12  | 8   |
| >VHL-Q132H LLVNQTELFV | 3    | >VHL-Q132H LLVNHTELFV  | 3   | 0   |
| >VHL-Q132H LLVNQTEL   | 29   | >VHL-Q132H LLVNHTEL    | 44  | 15  |
| >VHL-Q132H LLVNQTELFV | 6    | >VHL-Q132H LLVNHTELFV  | 5   | 1   |
| >VHL-Q132H LLVNQTEL   | 65   | >VHL-Q132H LLVNHTEL    | 141 | 76  |
| >VHL-Q132H LLVNQTELFV | 7    | >VHL-Q132H LLVNHTELFV  | 8   | 1   |
| >VHL-Q132H LLVNQTEL   | 279  | >VHL-Q132H LLVNHTEL    | 642 | 363 |
| >VHL-Q132H LLVNQTELFV | 9    | >VHL-Q132H LLVNHTELFV  | 13  | 4   |
| >VHL-Q132H LLVNQTEL   | 3    | >VHL-Q132H LLVNHTEL    | 3   | 0   |
| >VHL-Q132H LLVNQTELFV | 2    | >VHL-Q132H LLVNHTELFV  | 2   | 0   |
| >VHL-Q132H LLVNQTELF  | 907  | >VHL-Q132H LLVNHTELF   | 316 | 591 |
| >VHL-Q132H LLVNQTELF  | 784  | >VHL-Q132H LLVNHTELF   | 389 | 395 |
| >VHL-Q132H LLVNQTELF  | 645  | >VHL-Q132H LLVNHTELF   | 423 | 222 |
| >VHL-Q132H LLVNQTELF  | 85   | >VHL-Q132H LLVNHTELF   | 52  | 33  |
| >VHL-Q132H LLVNQTEL   | 668  | >VHL-Q132H LLVNHTEL    | 379 | 289 |
| >VHL-Q132H LLVNQTELF  | 77   | >VHL-Q132H LLVNHTELF   | 50  | 27  |
| >VHL-Q132H GLLVNQTEL  | 76   | >VHL-Q132H GLLVNHTEL   | 185 | 109 |
| >VHL-Q132H GLLVNQTEL  | 171  | >VHL-Q132H GLLVNHTEL   | 588 | 417 |
| >VHL-Q132H GLLVNQTELF | 31   | >VHL-Q132H GLLVNHTELF' | 46  | 15  |
| >VHL-Q132H GLLVNQTEL  | 66   | >VHL-Q132H GLLVNHTEL   | 132 | 66  |
| >VHL-Q132H GLLVNQTELF | 83   | >VHL-Q132H GLLVNHTELF' | 112 | 29  |
| >VHL-Q132H GLLVNQTELF | 237  | >VHL-Q132H GLLVNHTELF' | 211 | 26  |
| >VHL-Q132H GLLVNQTELF | 81   | >VHL-Q132H GLLVNHTELF' | 77  | 4   |
| >VHL-Q132H GLLVNQTEL  | 27   | >VHL-Q132H GLLVNHTEL   | 17  | 10  |
| >VHL-Q132H GLLVNQTELF | 3    | >VHL-Q132H GLLVNHTELF' | 3   | 0   |
| >VHL-Q132H GLLVNQTEL  | 17   | >VHL-Q132H GLLVNHTEL   | 28  | 11  |
| >VHL-Q132H GLLVNQTELF | 4    | >VHL-Q132H GLLVNHTELF' | 5   | 1   |
| >VHL-Q132H GLLVNQTEL  | 17   | >VHL-Q132H GLLVNHTEL   | 26  | 9   |
| >VHL-Q132H GLLVNQTELF | 4    | >VHL-Q132H GLLVNHTELF' | 5   | 1   |

|                        |      |                        |       |       |
|------------------------|------|------------------------|-------|-------|
| >VHL-Q132H GLLVNQTEL   | 74   | >VHL-Q132H GLLVNHTEL   | 491   | 417   |
| >VHL-Q132H GLLVNQTELF  | 5    | >VHL-Q132H GLLVNHTELF  | 10    | 5     |
| >VHL-Q132H GLLVNQTEL   | 8    | >VHL-Q132H GLLVNHTEL   | 7     | 1     |
| >VHL-Q132H GLLVNQTELF  | 4    | >VHL-Q132H GLLVNHTELF  | 4     | 0     |
| >VHL-Q132H GLLVNQTELF  | 484  | >VHL-Q132H GLLVNHTELF  | 263   | 221   |
| >VHL-Q132H HDGLLVNQTI  | 237  | >VHL-Q132H HDGLLVNHTI  | 236   | 1     |
| >VHL-Q145H QPIFANITL   | 10   | >VHL-Q145H HPIFANITL   | 6     | 4     |
| >VHL-Q145H QPIFANITLPV | 151  | >VHL-Q145H HPIFANITLPV | 69    | 82    |
| >VHL-Q145H QPIFANITLPV | 72   | >VHL-Q145H HPIFANITLPV | 49    | 23    |
| >VHL-Q145H QPIFANITL   | 393  | >VHL-Q145H HPIFANITL   | 32    | 361   |
| >VHL-Q145H QPIFANITLPV | 157  | >VHL-Q145H HPIFANITLPV | 26    | 131   |
| >VHL-Q145H QPIFANIT    | 970  | >VHL-Q145H HPIFANIT    | 211   | 759   |
| >VHL-Q145H QPIFANITL   | 51   | >VHL-Q145H HPIFANITL   | 19    | 32    |
| >VHL-Q145H QPIFANITLPV | 148  | >VHL-Q145H HPIFANITLPV | 42    | 106   |
| >VHL-Q145H QPIFANITL   | 118  | >VHL-Q145H HPIFANITL   | 18    | 100   |
| >VHL-Q145H QPIFANITLPV | 1901 | >VHL-Q145H HPIFANITLPV | 158   | 1743  |
| >VHL-Q145H QPIFANITL   | 373  | >VHL-Q145H HPIFANITL   | 132   | 241   |
| >VHL-Q145H QPIFANIT    | 1074 | >VHL-Q145H HPIFANIT    | 219   | 855   |
| >VHL-Q145H QPIFANITLPV | 204  | >VHL-Q145H HPIFANITLPV | 35    | 169   |
| >VHL-Q145H QPIFANITLPV | 2068 | >VHL-Q145H HPIFANITLPV | 323   | 1745  |
| >VHL-Q145H GQPIFANI    | 412  | >VHL-Q145H GHPIFANI    | 620   | 208   |
| >VHL-Q145H GQPIFANITL  | 236  | >VHL-Q145H GHPIFANITL  | 7717  | 7481  |
| >VHL-Q145H GQPIFANI    | 241  | >VHL-Q145H GHPIFANI    | 24379 | 24138 |
| >VHL-Q145H GQPIFANITL  | 430  | >VHL-Q145H GHPIFANITL  | 14702 | 14272 |
| >VHL-Q145H DGQPIFANI   | 891  | >VHL-Q145H DGHPIFANI   | 124   | 767   |
| >VHL-Q145H VDGQPIFANI  | 444  | >VHL-Q145H VDGHPIFANI  | 261   | 183   |
| >VHL-Q145H NVDGQPIFANI | 756  | >VHL-Q145H NVDGHPIFANI | 480   | 276   |
| >VHL-Q145H NVDGQPIFANI | 253  | >VHL-Q145H NVDGHPIFANI | 242   | 11    |
| >VHL-Q145H NVDGQPIFANI | 817  | >VHL-Q145H NVDGHPIFANI | 338   | 479   |
| >VHL-Q145H NVDGQPIFANI | 61   | >VHL-Q145H NVDGHPIFANI | 35    | 26    |
| >VHL-Q145H LNVDGQPIF   | 423  | >VHL-Q145H LNVDGHPIF   | 301   | 122   |
| >VHL-Q145H SLNVDGQPI   | 596  | >VHL-Q145H SLNVDGHPI   | 349   | 247   |
| >VHL-Q145H SLNVDGQPIF  | 836  | >VHL-Q145H SLNVDGHPIF  | 407   | 429   |
| >VHL-Q145H SLNVDGQPI   | 169  | >VHL-Q145H SLNVDGHPI   | 44    | 125   |
| >VHL-Q145H SLNVDGQPIF  | 120  | >VHL-Q145H SLNVDGHPIF  | 58    | 62    |
| >VHL-Q145H SLNVDGQPI   | 47   | >VHL-Q145H SLNVDGHPI   | 29    | 18    |
| >VHL-Q145H SLNVDGQPIF  | 71   | >VHL-Q145H SLNVDGHPIF  | 38    | 33    |
| >VHL-Q145H SLNVDGQPI   | 44   | >VHL-Q145H SLNVDGHPI   | 19    | 25    |
| >VHL-Q145H SLNVDGQPIF  | 58   | >VHL-Q145H SLNVDGHPIF  | 36    | 22    |
| >VHL-Q145H SLNVDGQPI   | 49   | >VHL-Q145H SLNVDGHPI   | 15    | 34    |
| >VHL-Q145H SLNVDGQPIF  | 235  | >VHL-Q145H SLNVDGHPIF  | 140   | 95    |
| >VHL-Q145H SLNVDGQPI   | 54   | >VHL-Q145H SLNVDGHPI   | 19    | 35    |
| >VHL-Q145H SLNVDGQPIF  | 29   | >VHL-Q145H SLNVDGHPIF  | 24    | 5     |

|                       |      |                       |       |       |
|-----------------------|------|-----------------------|-------|-------|
| >VHL-Q145H SLNVDGQPI  | 2972 | >VHL-Q145H SLNVDGHPI  | 470   | 2502  |
| >VHL-Q145H SLNVDGQPI  | 53   | >VHL-Q145H SLNVDGHPI  | 17    | 36    |
| >VHL-Q145H SLNVDGQPIF | 42   | >VHL-Q145H SLNVDGHPIF | 32    | 10    |
| >VHL-Q145H SLNVDGQPIF | 186  | >VHL-Q145H SLNVDGHPIF | 147   | 39    |
| >VHL-Q145H SLNVDGQPIF | 261  | >VHL-Q145H SLNVDGHPIF | 205   | 56    |
| >VHL-Q145H SLNVDGQPIF | 93   | >VHL-Q145H SLNVDGHPIF | 99    | 6     |
| >VHL-Q145H VPSLNVDGQI | 124  | >VHL-Q145H VPSLNVDGHI | 96    | 28    |
| >VHL-Q145H VPSLNVDGQI | 412  | >VHL-Q145H VPSLNVDGHI | 369   | 43    |
| >VHL-Q164H QVVRSLVK   | 358  | >VHL-Q164H HVVRSLVK   | 107   | 251   |
| >VHL-Q164H QVVRSLVK   | 70   | >VHL-Q164H HVVRSLVK   | 74    | 4     |
| >VHL-Q164H QVVRSLVK   | 136  | >VHL-Q164H HVVRSLVK   | 14    | 122   |
| >VHL-Q164H QVVRSLVK   | 208  | >VHL-Q164H HVVRSLVK   | 78    | 130   |
| >VHL-Q164H LQVVRSLV   | 147  | >VHL-Q164H LHVVRSLV   | 11863 | 11716 |
| >VHL-Q164H LQVVRSLV   | 14   | >VHL-Q164H LHVVRSLV   | 12083 | 12069 |
| >VHL-Q164H LQVVRSLV   | 214  | >VHL-Q164H LHVVRSLV   | 2530  | 2316  |
| >VHL-Q164H CLQVVRSLV  | 517  | >VHL-Q164H CLHVVRSLV  | 322   | 195   |
| >VHL-Q164H CLQVVRSLV  | 325  | >VHL-Q164H CLHVVRSLV  | 96    | 229   |
| >VHL-Q164H CLQVVRSL   | 888  | >VHL-Q164H CLHVVRSL   | 359   | 529   |
| >VHL-Q164H CLQVVRSLV  | 456  | >VHL-Q164H CLHVVRSLV  | 174   | 282   |
| >VHL-Q164H CLQVVRSL   | 274  | >VHL-Q164H CLHVVRSL   | 209   | 65    |
| >VHL-Q164H CLQVVRSLV  | 16   | >VHL-Q164H CLHVVRSLV  | 15    | 1     |
| >VHL-Q164H CLQVVRSLVK | 97   | >VHL-Q164H CLHVVRSLVK | 80    | 17    |
| >VHL-Q164H CLQVVRSLVK | 305  | >VHL-Q164H CLHVVRSLVK | 622   | 317   |
| >VHL-Q164H CLQVVRSLVK | 2197 | >VHL-Q164H CLHVVRSLVK | 45    | 2152  |
| >VHL-Q164H RCLQVVRSLV | 392  | >VHL-Q164H RCLHVVRSLV | 671   | 279   |
| >VHL-Q164H RCLQVVRSLV | 67   | >VHL-Q164H RCLHVVRSLV | 21    | 46    |
| >VHL-Q164H RCLQVVRSL  | 90   | >VHL-Q164H RCLHVVRSL  | 85    | 5     |
| >VHL-Q164H ERCLQVVRSL | 233  | >VHL-Q164H ERCLHVVRSL | 375   | 142   |
| >VHL-Q164H ERCLQVVRSL | 432  | >VHL-Q164H ERCLHVVRSL | 1027  | 595   |
| >VHL-Q164H ERCLQVVR   | 491  | >VHL-Q164H ERCLHVVR   | 363   | 128   |
| >VHL-Q164H KERCLQVV   | 67   | >VHL-Q164H KERCLHVV   | 45    | 22    |
| >VHL-Q164H KERCLQVVR  | 367  | >VHL-Q164H KERCLHVVR  | 93    | 274   |
| >VHL-Q164H KERCLQVVRS | 291  | >VHL-Q164H KERCLHVVRS | 162   | 129   |
| >VHL-Q164H KERCLQVVRS | 595  | >VHL-Q164H KERCLHVVRS | 309   | 286   |
| >VHL-Q164H KERCLQVV   | 80   | >VHL-Q164H KERCLHVV   | 60    | 20    |
| >VHL-Q164H KERCLQVVRS | 27   | >VHL-Q164H KERCLHVVRS | 24    | 3     |
| >VHL-Q164H KERCLQVV   | 148  | >VHL-Q164H KERCLHVV   | 75    | 73    |
| >VHL-Q164H KERCLQVVRS | 39   | >VHL-Q164H KERCLHVVRS | 55    | 16    |
| >VHL-Q164H TLKERCLQV  | 403  | >VHL-Q164H TLKERCLHV  | 464   | 61    |
| >VHL-Q164H TLKERCLQVV | 559  | >VHL-Q164H TLKERCLHVV | 399   | 160   |
| >VHL-Q164H TLKERCLQV  | 328  | >VHL-Q164H TLKERCLHV  | 502   | 174   |
| >VHL-Q164H TLKERCLQVV | 514  | >VHL-Q164H TLKERCLHVV | 263   | 251   |
| >VHL-Q164H TLKERCLQV  | 7    | >VHL-Q164H TLKERCLHV  | 9     | 2     |

|                        |      |                        |     |      |
|------------------------|------|------------------------|-----|------|
| >VHL-Q164H TLKERCLQVV  | 50   | >VHL-Q164H TLKERCLHVV  | 31  | 19   |
| >VHL-Q164H TLKERCLQV   | 909  | >VHL-Q164H TLKERCLHV   | 243 | 666  |
| >VHL-Q164H TLKERCLQV   | 186  | >VHL-Q164H TLKERCLHV   | 341 | 155  |
| >VHL-Q164H TLKERCLQVV  | 141  | >VHL-Q164H TLKERCLHVV  | 85  | 56   |
| >VHL-Q164H TLKERCLQV   | 1011 | >VHL-Q164H TLKERCLHV   | 364 | 647  |
| >VHL-Q164H TLKERCLQVV  | 109  | >VHL-Q164H TLKERCLHVV  | 39  | 70   |
| >VHL-Q164H TLKERCLQV   | 308  | >VHL-Q164H TLKERCLHV   | 156 | 152  |
| >VHL-Q164H TLKERCLQVV  | 369  | >VHL-Q164H TLKERCLHVV  | 157 | 212  |
| >VHL-Q164H TLKERCLQVV  | 1003 | >VHL-Q164H TLKERCLHVV  | 349 | 654  |
| >VHL-Q164H TLKERCLQV   | 3    | >VHL-Q164H TLKERCLHV   | 4   | 1    |
| >VHL-Q164H TLKERCLQVV  | 4    | >VHL-Q164H TLKERCLHVV  | 3   | 1    |
| >VHL-Q164H TLKERCLQVV  | 58   | >VHL-Q164H TLKERCLHVV  | 34  | 24   |
| >VHL-Q164H TLKERCLQVV  | 96   | >VHL-Q164H TLKERCLHVV  | 55  | 41   |
| >VHL-Q164H TLKERCLQVV  | 211  | >VHL-Q164H TLKERCLHVV  | 180 | 31   |
| >VHL-Q164H TLKERCLQV   | 84   | >VHL-Q164H TLKERCLHV   | 70  | 14   |
| >VHL-Q164H TLKERCLQVV  | 436  | >VHL-Q164H TLKERCLHVV  | 259 | 177  |
| >VHL-Q164H YTLKERCLQV  | 93   | >VHL-Q164H YTLKERCLHV  | 68  | 25   |
| >VHL-Q164H YTLKERCLQV' | 308  | >VHL-Q164H YTLKERCLHV' | 149 | 159  |
| >VHL-Q164H YTLKERCLQV  | 127  | >VHL-Q164H YTLKERCLHV  | 96  | 31   |
| >VHL-Q164H YTLKERCLQV  | 39   | >VHL-Q164H YTLKERCLHV  | 37  | 2    |
| >VHL-Q164H YTLKERCLQV' | 83   | >VHL-Q164H YTLKERCLHV' | 48  | 35   |
| >VHL-Q164H YTLKERCLQV  | 32   | >VHL-Q164H YTLKERCLHV  | 53  | 21   |
| >VHL-Q164H YTLKERCLQV' | 28   | >VHL-Q164H YTLKERCLHV' | 18  | 10   |
| >VHL-Q164H YTLKERCLQV  | 860  | >VHL-Q164H YTLKERCLHV  | 336 | 524  |
| >VHL-Q164H YTLKERCLQV' | 95   | >VHL-Q164H YTLKERCLHV' | 47  | 48   |
| >VHL-Q164H YTLKERCLQV  | 31   | >VHL-Q164H YTLKERCLHV  | 24  | 7    |
| >VHL-Q164H YTLKERCLQV' | 40   | >VHL-Q164H YTLKERCLHV' | 26  | 14   |
| >VHL-Q164H YTLKERCLQV' | 416  | >VHL-Q164H YTLKERCLHV' | 158 | 258  |
| >VHL-Q164H YTLKERCLQV  | 19   | >VHL-Q164H YTLKERCLHV  | 35  | 16   |
| >VHL-Q164H YTLKERCLQV' | 21   | >VHL-Q164H YTLKERCLHV' | 13  | 8    |
| >VHL-Q164H YTLKERCLQV' | 819  | >VHL-Q164H YTLKERCLHV' | 286 | 533  |
| >VHL-Q164H YTLKERCLQV  | 14   | >VHL-Q164H YTLKERCLHV  | 24  | 10   |
| >VHL-Q164H YTLKERCLQV' | 53   | >VHL-Q164H YTLKERCLHV' | 17  | 36   |
| >VHL-Q164H YTLKERCLQV  | 211  | >VHL-Q164H YTLKERCLHV  | 619 | 408  |
| >VHL-Q164H YTLKERCLQ   | 1689 | >VHL-Q164H YTLKERCLH   | 337 | 1352 |
| >VHL-Q164H YTLKERCLQV' | 130  | >VHL-Q164H YTLKERCLHV' | 142 | 12   |
| >VHL-Q164L-QVVRSLVK    | 358  | >VHL-Q164L-LVVRSLVK    | 194 | 164  |
| >VHL-Q164L-QVVRSLVK    | 70   | >VHL-Q164L-LVVRSLVK    | 54  | 16   |
| >VHL-Q164L-QVVRSLVK    | 136  | >VHL-Q164L-LVVRSLVK    | 93  | 43   |
| >VHL-Q164L-QVVRSLVK    | 208  | >VHL-Q164L-LVVRSLVK    | 291 | 83   |
| >VHL-Q164L-LQVVRSLV    | 3147 | >VHL-Q164L-LLVVRSLV    | 297 | 2850 |
| >VHL-Q164L-LQVVRSLV    | 559  | >VHL-Q164L-LLVVRSLV    | 41  | 518  |
| >VHL-Q164L-LQVVRSLV    | 147  | >VHL-Q164L-LLVVRSLV    | 16  | 131  |

|                        |       |                        |      |       |
|------------------------|-------|------------------------|------|-------|
| >VHL-Q164L-LQVVRSLV    | 14    | >VHL-Q164L-LLVVRSLV    | 77   | 63    |
| >VHL-Q164L-LQVVRSLV    | 2875  | >VHL-Q164L-LLVVRSLV    | 22   | 2853  |
| >VHL-Q164L-LQVVRSLV    | 4007  | >VHL-Q164L-LLVVRSLV    | 79   | 3928  |
| >VHL-Q164L-LQVVRSLV    | 5770  | >VHL-Q164L-LLVVRSLV    | 33   | 5737  |
| >VHL-Q164L-LQVVRSLV    | 15248 | >VHL-Q164L-LLVVRSLV    | 276  | 14972 |
| >VHL-Q164L-LQVVRSLV    | 1871  | >VHL-Q164L-LLVVRSLV    | 3    | 1868  |
| >VHL-Q164L-LQVVRSLVK   | 660   | >VHL-Q164L-LLVVRSLVK   | 75   | 585   |
| >VHL-Q164L-LQVVRSLVK   | 514   | >VHL-Q164L-LLVVRSLVK   | 402  | 112   |
| >VHL-Q164L-LQVVRSLV    | 214   | >VHL-Q164L-LLVVRSLV    | 3563 | 3349  |
| >VHL-Q164L-PVYTLKERCLC | 15850 | >VHL-Q164L-PVYTLKERCLI | 485  | 15365 |
| >VHL-Q164L-CLQVVRSLV   | 517   | >VHL-Q164L-CLLVVRSLV   | 385  | 132   |
| >VHL-Q164L-CLQVVRSLV   | 325   | >VHL-Q164L-CLLVVRSLV   | 342  | 17    |
| >VHL-Q164L-CLQVVRSL    | 888   | >VHL-Q164L-CLLVVRSL    | 84   | 804   |
| >VHL-Q164L-CLQVVRSLV   | 456   | >VHL-Q164L-CLLVVRSLV   | 38   | 418   |
| >VHL-Q164L-CLQVVRSLV   | 920   | >VHL-Q164L-CLLVVRSLV   | 395  | 525   |
| >VHL-Q164L-CLQVVRSLV   | 1170  | >VHL-Q164L-CLLVVRSLV   | 39   | 1131  |
| >VHL-Q164L-CLQVVRSL    | 3681  | >VHL-Q164L-CLLVVRSL    | 341  | 3340  |
| >VHL-Q164L-CLQVVRSLV   | 1839  | >VHL-Q164L-CLLVVRSLV   | 97   | 1742  |
| >VHL-Q164L-CLQVVRSL    | 274   | >VHL-Q164L-CLLVVRSL    | 121  | 153   |
| >VHL-Q164L-CLQVVRSLV   | 16    | >VHL-Q164L-CLLVVRSLV   | 11   | 5     |
| >VHL-Q164L-CLQVVRSLVK  | 97    | >VHL-Q164L-CLLVVRSLVK  | 41   | 56    |
| >VHL-Q164L-CLQVVRSLVK  | 305   | >VHL-Q164L-CLLVVRSLVK  | 142  | 163   |
| >VHL-Q164L-RCLQVVRSLV  | 392   | >VHL-Q164L-RCLLVVRSLV  | 1410 | 1018  |
| >VHL-Q164L-RCLQVVRSLV  | 67    | >VHL-Q164L-RCLLVVRSLVI | 36   | 31    |
| >VHL-Q164L-RCLQVVRSL   | 90    | >VHL-Q164L-RCLLVVRSL   | 137  | 47    |
| >VHL-Q164L-ERCLQVVRSL  | 233   | >VHL-Q164L-ERCLLVVRSL  | 151  | 82    |
| >VHL-Q164L-ERCLQVVRSL  | 432   | >VHL-Q164L-ERCLLVVRSL  | 347  | 85    |
| >VHL-Q164L-ERCLQVVR    | 491   | >VHL-Q164L-ERCLLVVR    | 384  | 107   |
| >VHL-Q164L-KERCLQVV    | 67    | >VHL-Q164L-KERCLLVV    | 59   | 8     |
| >VHL-Q164L-KERCLQVVR   | 367   | >VHL-Q164L-KERCLLVVR   | 244  | 123   |
| >VHL-Q164L-KERCLQVVRS  | 291   | >VHL-Q164L-KERCLLVVRSI | 385  | 94    |
| >VHL-Q164L-KERCLQVVRS  | 595   | >VHL-Q164L-KERCLLVVRSI | 447  | 148   |
| >VHL-Q164L-KERCLQVV    | 80    | >VHL-Q164L-KERCLLVV    | 62   | 18    |
| >VHL-Q164L-KERCLQVVRS  | 27    | >VHL-Q164L-KERCLLVVRSI | 28   | 1     |
| >VHL-Q164L-KERCLQVV    | 148   | >VHL-Q164L-KERCLLVV    | 173  | 25    |
| >VHL-Q164L-KERCLQVVRS  | 39    | >VHL-Q164L-KERCLLVVRSI | 18   | 21    |
| >VHL-Q164L-TLKERCLQV   | 403   | >VHL-Q164L-TLKERCLLV   | 177  | 226   |
| >VHL-Q164L-TLKERCLQVV  | 559   | >VHL-Q164L-TLKERCLLVV  | 122  | 437   |
| >VHL-Q164L-TLKERCLQ    | 11424 | >VHL-Q164L-TLKERCLL    | 179  | 11245 |
| >VHL-Q164L-TLKERCLQV   | 328   | >VHL-Q164L-TLKERCLLV   | 142  | 186   |
| >VHL-Q164L-TLKERCLQVV  | 514   | >VHL-Q164L-TLKERCLLVV  | 182  | 332   |
| >VHL-Q164L-TLKERCLQ    | 8300  | >VHL-Q164L-TLKERCLL    | 107  | 8193  |
| >VHL-Q164L-TLKERCLQV   | 7     | >VHL-Q164L-TLKERCLLV   | 7    | 0     |

|                        |       |                        |      |       |
|------------------------|-------|------------------------|------|-------|
| >VHL-Q164L-TLKERCLQVV  | 50    | >VHL-Q164L-TLKERCLLVV  | 24   | 26    |
| >VHL-Q164L-TLKERCLQV   | 909   | >VHL-Q164L-TLKERCLLV   | 436  | 473   |
| >VHL-Q164L-TLKERCLQVV  | 2984  | >VHL-Q164L-TLKERCLLVV  | 482  | 2502  |
| >VHL-Q164L-TLKERCLQV   | 186   | >VHL-Q164L-TLKERCLLV   | 390  | 204   |
| >VHL-Q164L-TLKERCLQVV  | 141   | >VHL-Q164L-TLKERCLLVV  | 192  | 51    |
| >VHL-Q164L-TLKERCLQVV  | 109   | >VHL-Q164L-TLKERCLLVV  | 132  | 23    |
| >VHL-Q164L-TLKERCLQV   | 308   | >VHL-Q164L-TLKERCLLV   | 406  | 98    |
| >VHL-Q164L-TLKERCLQVV  | 369   | >VHL-Q164L-TLKERCLLVV  | 356  | 13    |
| >VHL-Q164L-TLKERCLQ    | 850   | >VHL-Q164L-TLKERCLL    | 17   | 833   |
| >VHL-Q164L-TLKERCLQV   | 3     | >VHL-Q164L-TLKERCLLV   | 5    | 2     |
| >VHL-Q164L-TLKERCLQVV  | 4     | >VHL-Q164L-TLKERCLLVV  | 5    | 1     |
| >VHL-Q164L-TLKERCLQVV  | 58    | >VHL-Q164L-TLKERCLLVVF | 45   | 13    |
| >VHL-Q164L-TLKERCLQVV  | 96    | >VHL-Q164L-TLKERCLLVVF | 76   | 20    |
| >VHL-Q164L-TLKERCLQVV  | 211   | >VHL-Q164L-TLKERCLLVVF | 243  | 32    |
| >VHL-Q164L-TLKERCLQ    | 7625  | >VHL-Q164L-TLKERCLL    | 108  | 7517  |
| >VHL-Q164L-TLKERCLQV   | 84    | >VHL-Q164L-TLKERCLLV   | 281  | 197   |
| >VHL-Q164L-TLKERCLQVV  | 436   | >VHL-Q164L-TLKERCLLVVF | 428  | 8     |
| >VHL-Q164L-YTLKERCLQV  | 93    | >VHL-Q164L-YTLKERCLLV  | 42   | 51    |
| >VHL-Q164L-YTLKERCLQV' | 308   | >VHL-Q164L-YTLKERCLLV\ | 177  | 131   |
| >VHL-Q164L-YTLKERCLQV  | 991   | >VHL-Q164L-YTLKERCLLV  | 397  | 594   |
| >VHL-Q164L-YTLKERCLQV  | 127   | >VHL-Q164L-YTLKERCLLV  | 69   | 58    |
| >VHL-Q164L-YTLKERCLQV  | 39    | >VHL-Q164L-YTLKERCLLV  | 31   | 8     |
| >VHL-Q164L-YTLKERCLQV' | 83    | >VHL-Q164L-YTLKERCLLV\ | 51   | 32    |
| >VHL-Q164L-YTLKERCLQV  | 32    | >VHL-Q164L-YTLKERCLLV  | 54   | 22    |
| >VHL-Q164L-YTLKERCLQV' | 28    | >VHL-Q164L-YTLKERCLLV\ | 32   | 4     |
| >VHL-Q164L-YTLKERCLQV' | 95    | >VHL-Q164L-YTLKERCLLV\ | 125  | 30    |
| >VHL-Q164L-YTLKERCLQV  | 31    | >VHL-Q164L-YTLKERCLLV  | 39   | 8     |
| >VHL-Q164L-YTLKERCLQV' | 40    | >VHL-Q164L-YTLKERCLLV\ | 38   | 2     |
| >VHL-Q164L-YTLKERCLQV' | 416   | >VHL-Q164L-YTLKERCLLV\ | 557  | 141   |
| >VHL-Q164L-YTLKERCLQ   | 13526 | >VHL-Q164L-YTLKERCLL   | 294  | 13232 |
| >VHL-Q164L-YTLKERCLQV  | 19    | >VHL-Q164L-YTLKERCLLV  | 35   | 16    |
| >VHL-Q164L-YTLKERCLQV' | 21    | >VHL-Q164L-YTLKERCLLV\ | 36   | 15    |
| >VHL-Q164L-YTLKERCLQ   | 11357 | >VHL-Q164L-YTLKERCLL   | 335  | 11022 |
| >VHL-Q164L-YTLKERCLQV  | 14    | >VHL-Q164L-YTLKERCLLV  | 20   | 6     |
| >VHL-Q164L-YTLKERCLQV' | 53    | >VHL-Q164L-YTLKERCLLV\ | 43   | 10    |
| >VHL-Q164L-YTLKERCLQ   | 11656 | >VHL-Q164L-YTLKERCLL   | 41   | 11615 |
| >VHL-Q164L-YTLKERCLQV  | 211   | >VHL-Q164L-YTLKERCLLV  | 902  | 691   |
| >VHL-Q164L-YTLKERCLQ   | 1689  | >VHL-Q164L-YTLKERCLL   | 135  | 1554  |
| >VHL-Q164L-YTLKERCLQV' | 130   | >VHL-Q164L-YTLKERCLLV\ | 117  | 13    |
| >VHL-Q164L-VYTLKERCLQ  | 11542 | >VHL-Q164L-VYTLKERCLL  | 345  | 11197 |
| >VHL-Q164P·QVVRSLVK    | 358   | >VHL-Q164P·PVVRSLVK    | 2837 | 2479  |
| >VHL-Q164P·QVVRSLVK    | 70    | >VHL-Q164P·PVVRSLVK    | 882  | 812   |
| >VHL-Q164P·QVVRSLVK    | 136   | >VHL-Q164P·PVVRSLVK    | 811  | 675   |



|                       |       |                       |       |       |
|-----------------------|-------|-----------------------|-------|-------|
| >VHL-Q164P·QVVRSLVK   | 208   | >VHL-Q164P·PVVRSLVK   | 5263  | 5055  |
| >VHL-Q164P·LQVVRSLV   | 147   | >VHL-Q164P·LPVVRSLV   | 13779 | 13632 |
| >VHL-Q164P·LQVVRSLV   | 14    | >VHL-Q164P·LPVVRSLV   | 12243 | 12229 |
| >VHL-Q164P·LQVVRSLV   | 25535 | >VHL-Q164P·LPVVRSLV   | 180   | 25355 |
| >VHL-Q164P·LQVVRSLV   | 214   | >VHL-Q164P·LPVVRSLV   | 9940  | 9726  |
| >VHL-Q164P·LQVVRSLV   | 14136 | >VHL-Q164P·LPVVRSLV   | 162   | 13974 |
| >VHL-Q164P·LQVVRSLV   | 16955 | >VHL-Q164P·LPVVRSLV   | 21    | 16934 |
| >VHL-Q164P·LQVVRSLVKP | 27186 | >VHL-Q164P·LPVVRSLVKP | 450   | 26736 |
| >VHL-Q164P·CLQVVRSLV  | 517   | >VHL-Q164P·CLPVVRSLV  | 357   | 160   |
| >VHL-Q164P·CLQVVRSLV  | 325   | >VHL-Q164P·CLPVVRSLV  | 150   | 175   |
| >VHL-Q164P·CLQVVRSLV  | 456   | >VHL-Q164P·CLPVVRSLV  | 325   | 131   |
| >VHL-Q164P·CLQVVRSL   | 274   | >VHL-Q164P·CLPVVRSL   | 285   | 11    |
| >VHL-Q164P·CLQVVRSLV  | 16    | >VHL-Q164P·CLPVVRSLV  | 17    | 1     |
| >VHL-Q164P·CLQVVRSLVK | 97    | >VHL-Q164P·CLPVVRSLVK | 150   | 53    |
| >VHL-Q164P·CLQVVRSLVK | 305   | >VHL-Q164P·CLPVVRSLVK | 293   | 12    |
| >VHL-Q164P·CLQVVRSLV  | 1882  | >VHL-Q164P·CLPVVRSLV  | 286   | 1596  |
| >VHL-Q164P·RCLQVVRSLV | 392   | >VHL-Q164P·RCLPVVRSLV | 305   | 87    |
| >VHL-Q164P·RCLQVVRSLV | 67    | >VHL-Q164P·RCLPVVRSLV | 19    | 48    |
| >VHL-Q164P·RCLQVVRSL  | 90    | >VHL-Q164P·RCLPVVRSL  | 172   | 82    |
| >VHL-Q164P·ERCLQVVRSL | 233   | >VHL-Q164P·ERCLPVVRSL | 405   | 172   |
| >VHL-Q164P·ERCLQVVRSL | 432   | >VHL-Q164P·ERCLPVVRSL | 449   | 17    |
| >VHL-Q164P·ERCLQVVR   | 491   | >VHL-Q164P·ERCLPVVR   | 541   | 50    |
| >VHL-Q164P·KERCLQVV   | 67    | >VHL-Q164P·KERCLPVV   | 198   | 131   |
| >VHL-Q164P·KERCLQVVR  | 367   | >VHL-Q164P·KERCLPVVR  | 890   | 523   |
| >VHL-Q164P·KERCLQVVRS | 291   | >VHL-Q164P·KERCLPVVRS | 215   | 76    |
| >VHL-Q164P·KERCLQVV   | 80    | >VHL-Q164P·KERCLPVV   | 93    | 13    |
| >VHL-Q164P·KERCLQVVRS | 27    | >VHL-Q164P·KERCLPVVRS | 43    | 16    |
| >VHL-Q164P·KERCLQVV   | 148   | >VHL-Q164P·KERCLPVV   | 178   | 30    |
| >VHL-Q164P·KERCLQVVRS | 39    | >VHL-Q164P·KERCLPVVRS | 39    | 0     |
| >VHL-Q164P·TLKERCLQV  | 403   | >VHL-Q164P·TLKERCLPV  | 147   | 256   |
| >VHL-Q164P·TLKERCLQVV | 559   | >VHL-Q164P·TLKERCLPVV | 149   | 410   |
| >VHL-Q164P·TLKERCLQV  | 328   | >VHL-Q164P·TLKERCLPV  | 189   | 139   |
| >VHL-Q164P·TLKERCLQVV | 514   | >VHL-Q164P·TLKERCLPVV | 423   | 91    |
| >VHL-Q164P·TLKERCLQV  | 7     | >VHL-Q164P·TLKERCLPV  | 5     | 2     |
| >VHL-Q164P·TLKERCLQVV | 50    | >VHL-Q164P·TLKERCLPVV | 46    | 4     |
| >VHL-Q164P·TLKERCLQV  | 909   | >VHL-Q164P·TLKERCLPV  | 129   | 780   |
| >VHL-Q164P·TLKERCLQVV | 2984  | >VHL-Q164P·TLKERCLPVV | 419   | 2565  |
| >VHL-Q164P·TLKERCLQV  | 186   | >VHL-Q164P·TLKERCLPV  | 168   | 18    |
| >VHL-Q164P·TLKERCLQVV | 141   | >VHL-Q164P·TLKERCLPVV | 110   | 31    |
| >VHL-Q164P·TLKERCLQV  | 1011  | >VHL-Q164P·TLKERCLPV  | 195   | 816   |
| >VHL-Q164P·TLKERCLQVV | 109   | >VHL-Q164P·TLKERCLPVV | 84    | 25    |
| >VHL-Q164P·TLKERCLQV  | 308   | >VHL-Q164P·TLKERCLPV  | 297   | 11    |
| >VHL-Q164P·TLKERCLQVV | 369   | >VHL-Q164P·TLKERCLPVV | 125   | 244   |

|                        |       |                        |       |       |
|------------------------|-------|------------------------|-------|-------|
| >VHL-Q164P·TLKERCLQV   | 3     | >VHL-Q164P·TLKERCLPV   | 4     | 1     |
| >VHL-Q164P·TLKERCLQVV  | 4     | >VHL-Q164P·TLKERCLPVV  | 5     | 1     |
| >VHL-Q164P·TLKERCLQVV  | 58    | >VHL-Q164P·TLKERCLPVVI | 69    | 11    |
| >VHL-Q164P·TLKERCLQVV  | 96    | >VHL-Q164P·TLKERCLPVVI | 107   | 11    |
| >VHL-Q164P·TLKERCLQVV  | 211   | >VHL-Q164P·TLKERCLPVVI | 343   | 132   |
| >VHL-Q164P·TLKERCLQV   | 84    | >VHL-Q164P·TLKERCLPV   | 37    | 47    |
| >VHL-Q164P·TLKERCLQVV  | 436   | >VHL-Q164P·TLKERCLPVVI | 245   | 191   |
| >VHL-Q164P·YTLKERCLQV  | 93    | >VHL-Q164P·YTLKERCLPV  | 28    | 65    |
| >VHL-Q164P·YTLKERCLQV' | 308   | >VHL-Q164P·YTLKERCLPV\ | 136   | 172   |
| >VHL-Q164P·YTLKERCLQV  | 991   | >VHL-Q164P·YTLKERCLPV  | 281   | 710   |
| >VHL-Q164P·YTLKERCLQV  | 127   | >VHL-Q164P·YTLKERCLPV  | 47    | 80    |
| >VHL-Q164P·YTLKERCLQV  | 39    | >VHL-Q164P·YTLKERCLPV  | 23    | 16    |
| >VHL-Q164P·YTLKERCLQV' | 83    | >VHL-Q164P·YTLKERCLPV\ | 47    | 36    |
| >VHL-Q164P·YTLKERCLQV  | 32    | >VHL-Q164P·YTLKERCLPV  | 30    | 2     |
| >VHL-Q164P·YTLKERCLQV' | 28    | >VHL-Q164P·YTLKERCLPV\ | 23    | 5     |
| >VHL-Q164P·YTLKERCLQV  | 860   | >VHL-Q164P·YTLKERCLPV  | 203   | 657   |
| >VHL-Q164P·YTLKERCLQV' | 95    | >VHL-Q164P·YTLKERCLPV\ | 92    | 3     |
| >VHL-Q164P·YTLKERCLQV  | 31    | >VHL-Q164P·YTLKERCLPV  | 37    | 6     |
| >VHL-Q164P·YTLKERCLQV' | 40    | >VHL-Q164P·YTLKERCLPV\ | 20    | 20    |
| >VHL-Q164P·YTLKERCLQV' | 416   | >VHL-Q164P·YTLKERCLPV\ | 223   | 193   |
| >VHL-Q164P·YTLKERCLQV  | 19    | >VHL-Q164P·YTLKERCLPV  | 36    | 17    |
| >VHL-Q164P·YTLKERCLQV' | 21    | >VHL-Q164P·YTLKERCLPV\ | 20    | 1     |
| >VHL-Q164P·YTLKERCLQV  | 1106  | >VHL-Q164P·YTLKERCLPV  | 406   | 700   |
| >VHL-Q164P·YTLKERCLQV  | 14    | >VHL-Q164P·YTLKERCLPV  | 9     | 5     |
| >VHL-Q164P·YTLKERCLQV' | 53    | >VHL-Q164P·YTLKERCLPV\ | 19    | 34    |
| >VHL-Q164P·YTLKERCLQV  | 211   | >VHL-Q164P·YTLKERCLPV  | 279   | 68    |
| >VHL-Q164P·YTLKERCLQV' | 130   | >VHL-Q164P·YTLKERCLPV\ | 159   | 29    |
| >VHL-Q164R·QVVRSLVK    | 358   | >VHL-Q164R·RVVRSLVK    | 58    | 300   |
| >VHL-Q164R·QVVRSLVK    | 70    | >VHL-Q164R·RVVRSLVK    | 25    | 45    |
| >VHL-Q164R·QVVRSLVK    | 136   | >VHL-Q164R·RVVRSLVK    | 7     | 129   |
| >VHL-Q164R·QVVRSLVK    | 5442  | >VHL-Q164R·RVVRSLVK    | 316   | 5126  |
| >VHL-Q164R·QVVRSLVK    | 208   | >VHL-Q164R·RVVRSLVK    | 1082  | 874   |
| >VHL-Q164R·LQVVRSLV    | 147   | >VHL-Q164R·LRVVRSLV    | 11603 | 11456 |
| >VHL-Q164R·LQVVRSLV    | 14    | >VHL-Q164R·LRVVRSLV    | 11075 | 11061 |
| >VHL-Q164R·LQVVRSLV    | 214   | >VHL-Q164R·LRVVRSLV    | 1084  | 870   |
| >VHL-Q164R·LQVVRSLV    | 7241  | >VHL-Q164R·LRVVRSLV    | 355   | 6886  |
| >VHL-Q164R·LQVVRSLVK   | 2854  | >VHL-Q164R·LRVVRSLVK   | 107   | 2747  |
| >VHL-Q164R·PVYTLKERCLF | 15498 | >VHL-Q164R·PVYTLKERCLF | 458   | 15040 |
| >VHL-Q164R·PVYTLKERCLF | 15513 | >VHL-Q164R·PVYTLKERCLF | 305   | 15208 |
| >VHL-Q164R·PVYTLKERCLF | 17506 | >VHL-Q164R·PVYTLKERCLF | 101   | 17405 |
| >VHL-Q164R·CLQVVRSLV   | 325   | >VHL-Q164R·CLRVRSLV    | 179   | 146   |
| >VHL-Q164R·CLQVVRSLV   | 456   | >VHL-Q164R·CLRVRSLV    | 1720  | 1264  |
| >VHL-Q164R·CLQVVRSL    | 274   | >VHL-Q164R·CLRVRSL     | 540   | 266   |

|                       |       |                      |      |       |
|-----------------------|-------|----------------------|------|-------|
| >VHL-Q164R·CLQVVRSLV  | 16    | >VHL-Q164R·CLRVRSLV  | 23   | 7     |
| >VHL-Q164R·CLQVVRSLVK | 97    | >VHL-Q164R·CLRVRSLVK | 80   | 17    |
| >VHL-Q164R·CLQVVRSLVK | 305   | >VHL-Q164R·CLRVRSLVK | 978  | 673   |
| >VHL-Q164R·CLQVVRSLV  | 12498 | >VHL-Q164R·CLRVRSLV  | 319  | 12179 |
| >VHL-Q164R·CLQVVRSLVK | 2197  | >VHL-Q164R·CLRVRSLVK | 9    | 2188  |
| >VHL-Q164R·CLQVVRSL   | 2306  | >VHL-Q164R·CLRVRSL   | 254  | 2052  |
| >VHL-Q164R·RCLQVVRSLV | 392   | >VHL-Q164R·RCLRVRSLV | 552  | 160   |
| >VHL-Q164R·RCLQVVRSLV | 67    | >VHL-Q164R·RCLRVRSLV | 14   | 53    |
| >VHL-Q164R·RCLQVVRSL  | 90    | >VHL-Q164R·RCLRVRSL  | 83   | 7     |
| >VHL-Q164R·ERCLQVVRSL | 233   | >VHL-Q164R·ERCLRVRSL | 213  | 20    |
| >VHL-Q164R·ERCLQVVRSL | 884   | >VHL-Q164R·ERCLRVRSL | 448  | 436   |
| >VHL-Q164R·ERCLQVVRSL | 432   | >VHL-Q164R·ERCLRVRSL | 296  | 136   |
| >VHL-Q164R·ERCLQVVR   | 491   | >VHL-Q164R·ERCLRVR   | 438  | 53    |
| >VHL-Q164R·KERCLQVV   | 67    | >VHL-Q164R·KERCLRVV  | 28   | 39    |
| >VHL-Q164R·KERCLQVVR  | 367   | >VHL-Q164R·KERCLRVR  | 114  | 253   |
| >VHL-Q164R·KERCLQVVRS | 291   | >VHL-Q164R·KERCLRVR  | 229  | 62    |
| >VHL-Q164R·KERCLQVV   | 80    | >VHL-Q164R·KERCLRVV  | 89   | 9     |
| >VHL-Q164R·KERCLQVVRS | 27    | >VHL-Q164R·KERCLRVR  | 29   | 2     |
| >VHL-Q164R·KERCLQVV   | 148   | >VHL-Q164R·KERCLRVV  | 281  | 133   |
| >VHL-Q164R·KERCLQVVRS | 39    | >VHL-Q164R·KERCLRVR  | 35   | 4     |
| >VHL-Q164R·TLKERCLQV  | 403   | >VHL-Q164R·TLKERCLR  | 431  | 28    |
| >VHL-Q164R·TLKERCLQV  | 328   | >VHL-Q164R·TLKERCLR  | 591  | 263   |
| >VHL-Q164R·TLKERCLQV  | 7     | >VHL-Q164R·TLKERCLR  | 10   | 3     |
| >VHL-Q164R·TLKERCLQVV | 50    | >VHL-Q164R·TLKERCLR  | 44   | 6     |
| >VHL-Q164R·TLKERCLQV  | 186   | >VHL-Q164R·TLKERCLR  | 237  | 51    |
| >VHL-Q164R·TLKERCLQVV | 141   | >VHL-Q164R·TLKERCLR  | 303  | 162   |
| >VHL-Q164R·TLKERCLQVV | 109   | >VHL-Q164R·TLKERCLR  | 367  | 258   |
| >VHL-Q164R·TLKERCLQV  | 308   | >VHL-Q164R·TLKERCLR  | 698  | 390   |
| >VHL-Q164R·TLKERCLQVV | 369   | >VHL-Q164R·TLKERCLR  | 1819 | 1450  |
| >VHL-Q164R·TLKERCLQV  | 3     | >VHL-Q164R·TLKERCLR  | 3    | 0     |
| >VHL-Q164R·TLKERCLQVV | 4     | >VHL-Q164R·TLKERCLR  | 9    | 5     |
| >VHL-Q164R·TLKERCLQ   | 11089 | >VHL-Q164R·TLKERCLR  | 37   | 11052 |
| >VHL-Q164R·TLKERCLQVV | 58    | >VHL-Q164R·TLKERCLR  | 40   | 18    |
| >VHL-Q164R·TLKERCLQ   | 9049  | >VHL-Q164R·TLKERCLR  | 33   | 9016  |
| >VHL-Q164R·TLKERCLQVV | 96    | >VHL-Q164R·TLKERCLR  | 65   | 31    |
| >VHL-Q164R·TLKERCLQ   | 13459 | >VHL-Q164R·TLKERCLR  | 101  | 13358 |
| >VHL-Q164R·TLKERCLQVV | 211   | >VHL-Q164R·TLKERCLR  | 199  | 12    |
| >VHL-Q164R·TLKERCLQV  | 84    | >VHL-Q164R·TLKERCLR  | 112  | 28    |
| >VHL-Q164R·TLKERCLQ   | 21490 | >VHL-Q164R·TLKERCLR  | 317  | 21173 |
| >VHL-Q164R·TLKERCLQVV | 436   | >VHL-Q164R·TLKERCLR  | 336  | 100   |
| >VHL-Q164R·YTLKERCLQV | 93    | >VHL-Q164R·YTLKERCLR | 98   | 5     |
| >VHL-Q164R·YTLKERCLQV | 308   | >VHL-Q164R·YTLKERCLR | 917  | 609   |
| >VHL-Q164R·YTLKERCLQV | 127   | >VHL-Q164R·YTLKERCLR | 136  | 9     |

|                                    |       |                                  |      |       |
|------------------------------------|-------|----------------------------------|------|-------|
| >VHL-Q164R·YTLKERCLQV              | 39    | >VHL-Q164R·YTLKERCLRV            | 47   | 8     |
| >VHL-Q164R·YTLKERCLQV'             | 83    | >VHL-Q164R·YTLKERCLRV\           | 196  | 113   |
| >VHL-Q164R·YTLKERCLQV              | 32    | >VHL-Q164R·YTLKERCLRV            | 38   | 6     |
| >VHL-Q164R·YTLKERCLQV'             | 28    | >VHL-Q164R·YTLKERCLRV\           | 55   | 27    |
| >VHL-Q164R·YTLKERCLQV'             | 95    | >VHL-Q164R·YTLKERCLRV\           | 326  | 231   |
| >VHL-Q164R·YTLKERCLQV              | 31    | >VHL-Q164R·YTLKERCLRV            | 65   | 34    |
| >VHL-Q164R·YTLKERCLQV'             | 40    | >VHL-Q164R·YTLKERCLRV\           | 182  | 142   |
| >VHL-Q164R·YTLKERCLQV'             | 416   | >VHL-Q164R·YTLKERCLRV\           | 1779 | 1363  |
| >VHL-Q164R·YTLKERCLQV              | 19    | >VHL-Q164R·YTLKERCLRV            | 24   | 5     |
| >VHL-Q164R·YTLKERCLQV'             | 21    | >VHL-Q164R·YTLKERCLRV\           | 139  | 118   |
| >VHL-Q164R·YTLKERCLQ               | 14744 | >VHL-Q164R·YTLKERCLR             | 66   | 14678 |
| >VHL-Q164R·YTLKERCLQ               | 10295 | >VHL-Q164R·YTLKERCLR             | 42   | 10253 |
| >VHL-Q164R·YTLKERCLQ               | 1975  | >VHL-Q164R·YTLKERCLR             | 8    | 1967  |
| >VHL-Q164R·YTLKERCLQV              | 14    | >VHL-Q164R·YTLKERCLRV            | 30   | 16    |
| >VHL-Q164R·YTLKERCLQV'             | 53    | >VHL-Q164R·YTLKERCLRV\           | 152  | 99    |
| >VHL-Q164R·YTLKERCLQV              | 211   | >VHL-Q164R·YTLKERCLRV            | 260  | 49    |
| >VHL-Q164R·YTLKERCLQV'             | 130   | >VHL-Q164R·YTLKERCLRV\           | 151  | 21    |
| >VHL-Q164R·VYTLKERCLQ              | 15951 | >VHL-Q164R·VYTLKERCLR            | 72   | 15879 |
| >VHL-Q164R·VYTLKERCLQ              | 12671 | >VHL-Q164R·VYTLKERCLR            | 147  | 12524 |
| >VHL-Q164R·VYTLKERCLQ              | 10244 | >VHL-Q164R·VYTLKERCLR            | 96   | 10148 |
| >VHL-Q195R·NVQKDLERL               | 388   | >VHL-Q195R·NVRKDLERL             | 251  | 137   |
| >VHL-Q195R·NVQKDLER                | 864   | >VHL-Q195R·NVRKDLER              | 296  | 568   |
| >VHL-Q195R·NVQKDLER                | 163   | >VHL-Q195R·NVRKDLER              | 271  | 108   |
| >VHL-Q195R·HPNVQKDL                | 401   | >VHL-Q195R·HPNVRKDL              | 42   | 359   |
| >VHL-Q195R·HPNVQKDLEI              | 557   | >VHL-Q195R·HPNVRKDLEF            | 162  | 395   |
| >VHL-Q195R·HPNVQKDLEI              | 230   | >VHL-Q195R·HPNVRKDLEF            | 678  | 448   |
| >VHL-Q195R·LEDHPNVQKI              | 144   | >VHL-Q195R·LEDHPNVRKI            | 124  | 20    |
| >VHL-Q96H- $\backslash$ QPYPTLPP   | 1667  | >VHL-Q96H- $\uparrow$ HPYPTLPP   | 363  | 1304  |
| >VHL-Q96H- $\backslash$ QPYPTLPPG  | 497   | >VHL-Q96H- $\uparrow$ HPYPTLPPG  | 90   | 407   |
| >VHL-Q96H- $\backslash$ QPYPTLPPGT | 1755  | >VHL-Q96H- $\uparrow$ HPYPTLPPGT | 347  | 1408  |
| >VHL-Q96H- $\backslash$ QPYPTLPP   | 1150  | >VHL-Q96H- $\uparrow$ HPYPTLPP   | 240  | 910   |
| >VHL-Q96H- $\backslash$ QPYPTLPPG  | 159   | >VHL-Q96H- $\uparrow$ HPYPTLPPG  | 37   | 122   |
| >VHL-Q96H- $\backslash$ QPYPTLPPGT | 1826  | >VHL-Q96H- $\uparrow$ HPYPTLPPGT | 186  | 1640  |
| >VHL-Q96H- $\backslash$ QPYPTLPPGT | 1050  | >VHL-Q96H- $\uparrow$ HPYPTLPPGT | 232  | 818   |
| >VHL-Q96H- $\backslash$ EPQPYPTL   | 1737  | >VHL-Q96H- $\uparrow$ EPHPYPTL   | 371  | 1366  |
| >VHL-Q96H- $\backslash$ EPQPYPTL   | 420   | >VHL-Q96H- $\uparrow$ EPHPYPTL   | 360  | 60    |
| >VHL-Q96H- $\backslash$ EPQPYPTL   | 537   | >VHL-Q96H- $\uparrow$ EPHPYPTL   | 221  | 316   |
| >VHL-Q96H- $\backslash$ GEPQPYPTL  | 197   | >VHL-Q96H- $\uparrow$ GEPHPYPTL  | 153  | 44    |
| >VHL-Q96H- $\backslash$ GEPQPYPTL  | 460   | >VHL-Q96H- $\uparrow$ GEPHPYPTL  | 535  | 75    |
| >VHL-Q96H- $\backslash$ FDGEPQPY   | 1360  | >VHL-Q96H- $\uparrow$ FDGEPHPY   | 272  | 1088  |
| >VHL-Q96H- $\backslash$ NFDGEPQPY  | 338   | >VHL-Q96H- $\uparrow$ NFDGEPHPY  | 86   | 252   |
| >VHL-Q96H- $\backslash$ NFDGEPQPY  | 501   | >VHL-Q96H- $\uparrow$ NFDGEPHPY  | 369  | 132   |
| >VHL-Q96H- $\backslash$ NFDGEPQPY  | 720   | >VHL-Q96H- $\uparrow$ NFDGEPHPY  | 188  | 532   |

|                         |       |                         |       |       |
|-------------------------|-------|-------------------------|-------|-------|
| >VHL-Q96H-\ LNFDGEPQP\  | 648   | >VHL-Q96H-r LNFDGEPHPY  | 322   | 326   |
| >VHL-Q96H-\ LNFDGEPQP\  | 165   | >VHL-Q96H-r LNFDGEPHPY  | 174   | 9     |
| >VHL-Q96H-\ LNFDGEPQP\  | 111   | >VHL-Q96H-r LNFDGEPHPY  | 171   | 60    |
| >VHL-Q96H-\ WLNFDGEPQ   | 910   | >VHL-Q96H-r WLNFDGEPH   | 384   | 526   |
| >VHL-Q96H-\ WLNFDGEPQ   | 50    | >VHL-Q96H-r WLNFDGEPH   | 21    | 29    |
| >VHL-Q96H-\ WLNFDGEPQ   | 854   | >VHL-Q96H-r WLNFDGEPH   | 121   | 733   |
| >VHL-Q96H-\ WLNFDGEPQ   | 1027  | >VHL-Q96H-r WLNFDGEPH   | 374   | 653   |
| >VHL-Q96H-\ WLNFDGEPQ   | 54    | >VHL-Q96H-r WLNFDGEPH   | 65    | 11    |
| >VHL-Q96H-\ WLNFDGEPQ   | 52    | >VHL-Q96H-r WLNFDGEPH   | 53    | 1     |
| >VHL-Q96H-\ WLNFDGEPQ   | 102   | >VHL-Q96H-r WLNFDGEPH   | 175   | 73    |
| >VHL-Q96H-\ WLNFDGEPQ   | 90    | >VHL-Q96H-r WLNFDGEPH   | 85    | 5     |
| >VHL-Q96H-\ WLNFDGEPQ   | 182   | >VHL-Q96H-r WLNFDGEPH   | 92    | 90    |
| >VHL-R107P- RRIHSYRGH   | 107   | >VHL-R107P- PRIHSYRGH   | 3055  | 2948  |
| >VHL-R107P- RRIHSYRGHL  | 52    | >VHL-R107P- PRIHSYRGHL  | 1249  | 1197  |
| >VHL-R107P- RRIHSYRGHL' | 119   | >VHL-R107P- PRIHSYRGHL' | 2904  | 2785  |
| >VHL-R107P- RRIHSYRGH   | 112   | >VHL-R107P- PRIHSYRGH   | 5972  | 5860  |
| >VHL-R107P- RRIHSYRGHL  | 9     | >VHL-R107P- PRIHSYRGHL  | 544   | 535   |
| >VHL-R107P- RRIHSYRGHL' | 134   | >VHL-R107P- PRIHSYRGHL' | 9525  | 9391  |
| >VHL-R107P- RRIHSYRG    | 99    | >VHL-R107P- PRIHSYRG    | 22763 | 22664 |
| >VHL-R107P- RRIHSYRGH   | 195   | >VHL-R107P- PRIHSYRGH   | 11952 | 11757 |
| >VHL-R107P- RRIHSYRGHL  | 21    | >VHL-R107P- PRIHSYRGHL  | 1100  | 1079  |
| >VHL-R107P- RRIHSYRGHL' | 96    | >VHL-R107P- PRIHSYRGHL' | 6447  | 6351  |
| >VHL-R107P- RRIHSYRGH   | 201   | >VHL-R107P- PRIHSYRGH   | 8028  | 7827  |
| >VHL-R107P- RRIHSYRGHL  | 18    | >VHL-R107P- PRIHSYRGHL  | 444   | 426   |
| >VHL-R107P- RRIHSYRGHL' | 336   | >VHL-R107P- PRIHSYRGHL' | 14730 | 14394 |
| >VHL-R107P- RRIHSYRGHL' | 124   | >VHL-R107P- PRIHSYRGHL' | 4854  | 4730  |
| >VHL-R107P- GRRHSYR     | 1438  | >VHL-R107P- GPRIHSYR    | 402   | 1036  |
| >VHL-R107P- GRRHSYRGH   | 15440 | >VHL-R107P- GPRIHSYRGH  | 13    | 15427 |
| >VHL-R107P- GRRHSYRGH   | 1579  | >VHL-R107P- GPRIHSYRGH  | 154   | 1425  |
| >VHL-R107P- GRRHSYRGH   | 212   | >VHL-R107P- GPRIHSYRGH  | 25121 | 24909 |
| >VHL-R107P- GRRHSYRGH   | 174   | >VHL-R107P- GPRIHSYRGH  | 19239 | 19065 |
| >VHL-R107P- GRRHSYRGH   | 13    | >VHL-R107P- GPRIHSYRGH  | 13033 | 13020 |
| >VHL-R107P- PYPTLPPGTG  | 66    | >VHL-R107P- PYPTLPPGTG  | 30155 | 30089 |
| >VHL-R107P- TGRRIHSY    | 24190 | >VHL-R107P- TGPRIHSY    | 233   | 23957 |
| >VHL-R107P- TGRRIHSYR   | 148   | >VHL-R107P- TGPRIHSYR   | 15573 | 15425 |
| >VHL-R107P- TGRRIHSY    | 185   | >VHL-R107P- TGPRIHSY    | 342   | 157   |
| >VHL-R107P- TGRRIHSYR   | 14    | >VHL-R107P- TGPRIHSYR   | 115   | 101   |
| >VHL-R107P- TGRRIHSYR   | 104   | >VHL-R107P- TGPRIHSYR   | 73    | 31    |
| >VHL-R107P- TGRRIHSYR   | 516   | >VHL-R107P- TGPRIHSYR   | 200   | 316   |
| >VHL-R107P- GTGRRHSYR   | 452   | >VHL-R107P- GTGPRIHSYR  | 235   | 217   |
| >VHL-R107P- GTGRRHSY    | 643   | >VHL-R107P- GTGPRIHSY   | 421   | 222   |
| >VHL-R107P- GTGRRHSYR   | 568   | >VHL-R107P- GTGPRIHSYR  | 243   | 325   |
| >VHL-R107P- GTGRRHSY    | 1317  | >VHL-R107P- GTGPRIHSY   | 399   | 918   |

|                         |      |                        |       |       |
|-------------------------|------|------------------------|-------|-------|
| >VHL-R107P- GTGRRHSY    | 415  | >VHL-R107P- GTGPRIHSY  | 789   | 374   |
| >VHL-R107P- GTGRRHSY    | 316  | >VHL-R107P- GTGPRIHSY  | 50    | 266   |
| >VHL-R107P- GTGRRHSY    | 74   | >VHL-R107P- GTGPRIHSY  | 28    | 46    |
| >VHL-R107P- GTGRRHSYR   | 38   | >VHL-R107P- GTGPRIHSYR | 40    | 2     |
| >VHL-R107P- GTGRRHSYR   | 117  | >VHL-R107P- GTGPRIHSYR | 306   | 189   |
| >VHL-R107P- GTGRRHSYR   | 245  | >VHL-R107P- GTGPRIHSYR | 82    | 163   |
| >VHL-R107P- GTGRRHSY    | 439  | >VHL-R107P- GTGPRIHSY  | 989   | 550   |
| >VHL-R107P- GTGRRHSY    | 491  | >VHL-R107P- GTGPRIHSY  | 251   | 240   |
| >VHL-R107P- GTGRRHSY    | 91   | >VHL-R107P- GTGPRIHSY  | 10    | 81    |
| >VHL-R107P- GTGRRHSY    | 131  | >VHL-R107P- GTGPRIHSY  | 102   | 29    |
| >VHL-R107P- GTGRRHSY    | 623  | >VHL-R107P- GTGPRIHSY  | 305   | 318   |
| >VHL-R107P- GTGRRHSYR   | 400  | >VHL-R107P- GTGPRIHSYR | 241   | 159   |
| >VHL-R107P- LPPGTGRRI   | 2206 | >VHL-R107P- LPPGTGPRI  | 94    | 2112  |
| >VHL-R107P- LPPGTGRRI   | 158  | >VHL-R107P- LPPGTGPRI  | 1027  | 869   |
| >VHL-R107P- LPPGTGRRI   | 1078 | >VHL-R107P- LPPGTGPRI  | 447   | 631   |
| >VHL-R107P- LPPGTGRRI   | 1043 | >VHL-R107P- LPPGTGPRI  | 229   | 814   |
| >VHL-R107P- TLPPGTGRRI  | 214  | >VHL-R107P- TLPPGTGPRI | 67    | 147   |
| >VHL-R107P- TLPPGTGRRI  | 1636 | >VHL-R107P- TLPPGTGPRI | 86    | 1550  |
| >VHL-R107P- TLPPGTGRRI  | 83   | >VHL-R107P- TLPPGTGPRI | 19    | 64    |
| >VHL-R107P- TLPPGTGRRI  | 1015 | >VHL-R107P- TLPPGTGPR  | 336   | 679   |
| >VHL-R107P- PTLPPGTGRRI | 139  | >VHL-R107P- PTLPPGTGPR | 104   | 35    |
| >VHL-R107P- YPTLPPGTGR  | 474  | >VHL-R107P- YPTLPPGTGP | 38553 | 38079 |
| >VHL-R107P- YPTLPPGTGR  | 723  | >VHL-R107P- YPTLPPGTGP | 313   | 410   |
| >VHL-R161P- RCLQVVRSLV  | 392  | >VHL-R161P- PCLQVVRSLV | 4639  | 4247  |
| >VHL-R161P- RCLQVVRSLV  | 67   | >VHL-R161P- PCLQVVRSLV | 6914  | 6847  |
| >VHL-R161P- RCLQVVRSL   | 90   | >VHL-R161P- PCLQVVRSL  | 7464  | 7374  |
| >VHL-R161P- ERCLQVVR    | 1477 | >VHL-R161P- EPCLQVVR   | 416   | 1061  |
| >VHL-R161P- ERCLQVVRSL  | 233  | >VHL-R161P- EPCLQVVRSL | 29879 | 29646 |
| >VHL-R161P- ERCLQVVRSL  | 432  | >VHL-R161P- EPCLQVVRSL | 31654 | 31222 |
| >VHL-R161P- ERCLQVVR    | 491  | >VHL-R161P- EPCLQVVR   | 550   | 59    |
| >VHL-R161P- ITPVYTLKER  | 348  | >VHL-R161P- ITPVYTLKEP | 24671 | 24323 |
| >VHL-R161P- ITPVYTLKER  | 20   | >VHL-R161P- ITPVYTLKEP | 16951 | 16931 |
| >VHL-R161P- ITPVYTLKER  | 115  | >VHL-R161P- ITPVYTLKEP | 25563 | 25448 |
| >VHL-R161P- ITPVYTLKER  | 40   | >VHL-R161P- ITPVYTLKEP | 26338 | 26298 |
| >VHL-R161P- ITPVYTLKER  | 394  | >VHL-R161P- ITPVYTLKEP | 13237 | 12843 |
| >VHL-R161P- KERCLQVV    | 67   | >VHL-R161P- KEPCLQVV   | 986   | 919   |
| >VHL-R161P- KERCLQVVR   | 367  | >VHL-R161P- KEPCLQVVR  | 3827  | 3460  |
| >VHL-R161P- KERCLQVVRS  | 291  | >VHL-R161P- KEPCLQVVRS | 3795  | 3504  |
| >VHL-R161P- KERCLQVV    | 80   | >VHL-R161P- KEPCLQVV   | 887   | 807   |
| >VHL-R161P- KERCLQVVRS  | 27   | >VHL-R161P- KEPCLQVVRS | 250   | 223   |
| >VHL-R161P- KERCLQVV    | 148  | >VHL-R161P- KEPCLQVV   | 4478  | 4330  |
| >VHL-R161P- KERCLQVVRS  | 39   | >VHL-R161P- KEPCLQVVRS | 92    | 53    |
| >VHL-R161P- TLKERCLQV   | 403  | >VHL-R161P- TLKEPCLQV  | 515   | 112   |

|                         |      |                         |       |       |
|-------------------------|------|-------------------------|-------|-------|
| >VHL-R161P- TLKERCLQV   | 328  | >VHL-R161P- TLKEPCLQV   | 700   | 372   |
| >VHL-R161P- TLKERCLQVV  | 514  | >VHL-R161P- TLKEPCLQVV  | 336   | 178   |
| >VHL-R161P- TLKERCLQV   | 7    | >VHL-R161P- TLKEPCLQV   | 13    | 6     |
| >VHL-R161P- TLKERCLQVV  | 50   | >VHL-R161P- TLKEPCLQVV  | 34    | 16    |
| >VHL-R161P- TLKERCLQV   | 186  | >VHL-R161P- TLKEPCLQV   | 35    | 151   |
| >VHL-R161P- TLKERCLQVV  | 141  | >VHL-R161P- TLKEPCLQVV  | 45    | 96    |
| >VHL-R161P- TLKERCLQVV  | 109  | >VHL-R161P- TLKEPCLQVV  | 76    | 33    |
| >VHL-R161P- TLKERCLQV   | 308  | >VHL-R161P- TLKEPCLQV   | 240   | 68    |
| >VHL-R161P- TLKERCLQVV  | 369  | >VHL-R161P- TLKEPCLQVV  | 253   | 116   |
| >VHL-R161P- TLKERCLQVV  | 1003 | >VHL-R161P- TLKEPCLQVV  | 389   | 614   |
| >VHL-R161P- TLKERCLQV   | 3    | >VHL-R161P- TLKEPCLQV   | 3     | 0     |
| >VHL-R161P- TLKERCLQVV  | 4    | >VHL-R161P- TLKEPCLQVV  | 4     | 0     |
| >VHL-R161P- TLKERCLQVV  | 58   | >VHL-R161P- TLKEPCLQVV  | 125   | 67    |
| >VHL-R161P- TLKERCLQVV  | 96   | >VHL-R161P- TLKEPCLQVV  | 230   | 134   |
| >VHL-R161P- TLKERCLQVV  | 211  | >VHL-R161P- TLKEPCLQVV  | 175   | 36    |
| >VHL-R161P- TLKERCLQV   | 2140 | >VHL-R161P- TLKEPCLQV   | 444   | 1696  |
| >VHL-R161P- TLKERCLQV   | 84   | >VHL-R161P- TLKEPCLQV   | 12480 | 12396 |
| >VHL-R161P- TLKERCLQVV  | 436  | >VHL-R161P- TLKEPCLQVV  | 672   | 236   |
| >VHL-R161P- YTLKERCLQV  | 93   | >VHL-R161P- YTLKEPCLQV  | 46    | 47    |
| >VHL-R161P- YTLKERCLQV' | 308  | >VHL-R161P- YTLKEPCLQV' | 101   | 207   |
| >VHL-R161P- YTLKERCLQV  | 991  | >VHL-R161P- YTLKEPCLQV  | 363   | 628   |
| >VHL-R161P- YTLKERCLQV  | 127  | >VHL-R161P- YTLKEPCLQV  | 69    | 58    |
| >VHL-R161P- YTLKERCLQV' | 734  | >VHL-R161P- YTLKEPCLQV' | 302   | 432   |
| >VHL-R161P- YTLKERCLQV  | 39   | >VHL-R161P- YTLKEPCLQV  | 32    | 7     |
| >VHL-R161P- YTLKERCLQV' | 83   | >VHL-R161P- YTLKEPCLQV' | 78    | 5     |
| >VHL-R161P- YTLKERCL    | 1939 | >VHL-R161P- YTLKEPCL    | 197   | 1742  |
| >VHL-R161P- YTLKERCLQV  | 32   | >VHL-R161P- YTLKEPCLQV  | 7     | 25    |
| >VHL-R161P- YTLKERCLQV' | 28   | >VHL-R161P- YTLKEPCLQV' | 7     | 21    |
| >VHL-R161P- YTLKERCLQV  | 860  | >VHL-R161P- YTLKEPCLQV  | 194   | 666   |
| >VHL-R161P- YTLKERCLQV' | 95   | >VHL-R161P- YTLKEPCLQV' | 22    | 73    |
| >VHL-R161P- YTLKERCL    | 2311 | >VHL-R161P- YTLKEPCL    | 90    | 2221  |
| >VHL-R161P- YTLKERCLQV  | 31   | >VHL-R161P- YTLKEPCLQV  | 15    | 16    |
| >VHL-R161P- YTLKERCLQV' | 40   | >VHL-R161P- YTLKEPCLQV' | 17    | 23    |
| >VHL-R161P- YTLKERCLQV  | 709  | >VHL-R161P- YTLKEPCLQV  | 80    | 629   |
| >VHL-R161P- YTLKERCLQV' | 416  | >VHL-R161P- YTLKEPCLQV' | 70    | 346   |
| >VHL-R161P- YTLKERCLQV  | 19   | >VHL-R161P- YTLKEPCLQV  | 22    | 3     |
| >VHL-R161P- YTLKERCLQV' | 21   | >VHL-R161P- YTLKEPCLQV' | 20    | 1     |
| >VHL-R161P- YTLKERCLQV  | 14   | >VHL-R161P- YTLKEPCLQV  | 7     | 7     |
| >VHL-R161P- YTLKERCLQV' | 53   | >VHL-R161P- YTLKEPCLQV' | 30    | 23    |
| >VHL-R161P- YTLKERCL    | 205  | >VHL-R161P- YTLKEPCL    | 89    | 116   |
| >VHL-R161P- YTLKERCLQV  | 211  | >VHL-R161P- YTLKEPCLQV  | 128   | 83    |
| >VHL-R161P- YTLKERCLQV' | 973  | >VHL-R161P- YTLKEPCLQV' | 404   | 569   |
| >VHL-R161P- YTLKERCL    | 280  | >VHL-R161P- YTLKEPCL    | 1334  | 1054  |

|                         |      |                         |       |       |
|-------------------------|------|-------------------------|-------|-------|
| >VHL-R161P- YTLKERCLQV' | 130  | >VHL-R161P- YTLKEPCLQV' | 153   | 23    |
| >VHL-R161P- LPVYTLKERCL | 224  | >VHL-R161P- LPVYTLKEPCL | 911   | 687   |
| >VHL-R161P- LPVYTLKERCL | 885  | >VHL-R161P- LPVYTLKEPCL | 393   | 492   |
| >VHL-R161P- LPVYTLKERCL | 620  | >VHL-R161P- LPVYTLKEPCL | 276   | 344   |
| >VHL-R161P- LPVYTLKER   | 488  | >VHL-R161P- LPVYTLKEP   | 138   | 350   |
| >VHL-R161P- LPVYTLKERC  | 337  | >VHL-R161P- LPVYTLKEPC  | 288   | 49    |
| >VHL-R161P- TLPVYTLKER  | 247  | >VHL-R161P- TLPVYTLKEP  | 38569 | 38322 |
| >VHL-R161Q: RCLQVVRSLV  | 392  | >VHL-R161Q: QCLQVVRSLV  | 2189  | 1797  |
| >VHL-R161Q: RCLQVVRSLV  | 67   | >VHL-R161Q: QCLQVVRSLV  | 2533  | 2466  |
| >VHL-R161Q: RCLQVVRSL   | 90   | >VHL-R161Q: QCLQVVRSL   | 979   | 889   |
| >VHL-R161Q: ERCLQVVR    | 1477 | >VHL-R161Q: EQCLQVVR    | 427   | 1050  |
| >VHL-R161Q: ERCLQVVRSL  | 233  | >VHL-R161Q: EQCLQVVRSL  | 14783 | 14550 |
| >VHL-R161Q: ERCLQVVRSL  | 432  | >VHL-R161Q: EQCLQVVRSL  | 12031 | 11599 |
| >VHL-R161Q: ERCLQVVR    | 491  | >VHL-R161Q: EQCLQVVR    | 236   | 255   |
| >VHL-R161Q: ITPVYTLKER  | 348  | >VHL-R161Q: ITPVYTLKEQ  | 20659 | 20311 |
| >VHL-R161Q: ITPVYTLKER  | 20   | >VHL-R161Q: ITPVYTLKEQ  | 8100  | 8080  |
| >VHL-R161Q: ITPVYTLKER  | 115  | >VHL-R161Q: ITPVYTLKEQ  | 14110 | 13995 |
| >VHL-R161Q: ITPVYTLKER  | 40   | >VHL-R161Q: ITPVYTLKEQ  | 5569  | 5529  |
| >VHL-R161Q: ITPVYTLKER  | 394  | >VHL-R161Q: ITPVYTLKEQ  | 4276  | 3882  |
| >VHL-R161Q: KERCLQVV    | 67   | >VHL-R161Q: KEQCLQVV    | 173   | 106   |
| >VHL-R161Q: KERCLQVVR   | 367  | >VHL-R161Q: KEQCLQVVR   | 640   | 273   |
| >VHL-R161Q: KERCLQVVRS  | 291  | >VHL-R161Q: KEQCLQVVRS  | 1711  | 1420  |
| >VHL-R161Q: KERCLQVVRS  | 595  | >VHL-R161Q: KEQCLQVVRS  | 151   | 444   |
| >VHL-R161Q: KERCLQVV    | 80   | >VHL-R161Q: KEQCLQVV    | 179   | 99    |
| >VHL-R161Q: KERCLQVVRS  | 27   | >VHL-R161Q: KEQCLQVVRS  | 53    | 26    |
| >VHL-R161Q: KERCLQVVRS  | 1640 | >VHL-R161Q: KEQCLQVVRS  | 434   | 1206  |
| >VHL-R161Q: KERCLQVV    | 148  | >VHL-R161Q: KEQCLQVV    | 48    | 100   |
| >VHL-R161Q: KERCLQVVRS  | 39   | >VHL-R161Q: KEQCLQVVRS  | 66    | 27    |
| >VHL-R161Q: TLKERCLQV   | 403  | >VHL-R161Q: TLKEQCLQV   | 471   | 68    |
| >VHL-R161Q: TLKERCLQVV  | 559  | >VHL-R161Q: TLKEQCLQVV  | 397   | 162   |
| >VHL-R161Q: TLKERCLQV   | 328  | >VHL-R161Q: TLKEQCLQV   | 188   | 140   |
| >VHL-R161Q: TLKERCLQVV  | 514  | >VHL-R161Q: TLKEQCLQVV  | 489   | 25    |
| >VHL-R161Q: TLKERCLQV   | 7    | >VHL-R161Q: TLKEQCLQV   | 9     | 2     |
| >VHL-R161Q: TLKERCLQVV  | 50   | >VHL-R161Q: TLKEQCLQVV  | 45    | 5     |
| >VHL-R161Q: TLKERCLQV   | 186  | >VHL-R161Q: TLKEQCLQV   | 141   | 45    |
| >VHL-R161Q: TLKERCLQVV  | 141  | >VHL-R161Q: TLKEQCLQVV  | 113   | 28    |
| >VHL-R161Q: TLKERCLQVV  | 109  | >VHL-R161Q: TLKEQCLQVV  | 81    | 28    |
| >VHL-R161Q: TLKERCLQV   | 308  | >VHL-R161Q: TLKEQCLQV   | 158   | 150   |
| >VHL-R161Q: TLKERCLQVV  | 369  | >VHL-R161Q: TLKEQCLQVV  | 218   | 151   |
| >VHL-R161Q: TLKERCLQV   | 3    | >VHL-R161Q: TLKEQCLQV   | 3     | 0     |
| >VHL-R161Q: TLKERCLQVV  | 4    | >VHL-R161Q: TLKEQCLQVV  | 4     | 0     |
| >VHL-R161Q: TLKERCLQVV  | 58   | >VHL-R161Q: TLKEQCLQVV  | 101   | 43    |
| >VHL-R161Q: TLKERCLQVV  | 96   | >VHL-R161Q: TLKEQCLQVV  | 273   | 177   |



|                         |      |                         |       |       |
|-------------------------|------|-------------------------|-------|-------|
| >VHL-R161Q: TLKERCLQVV  | 211  | >VHL-R161Q: TLKEQCLQVV  | 276   | 65    |
| >VHL-R161Q: TLKERCLQV   | 84   | >VHL-R161Q: TLKEQCLQV   | 2362  | 2278  |
| >VHL-R161Q: TLKERCLQVV  | 436  | >VHL-R161Q: TLKEQCLQVV  | 382   | 54    |
| >VHL-R161Q: YTLKERCLQV  | 93   | >VHL-R161Q: YTLKEQCLQV  | 63    | 30    |
| >VHL-R161Q: YTLKERCLQV' | 308  | >VHL-R161Q: YTLKEQCLQV  | 133   | 175   |
| >VHL-R161Q: YTLKERCLQV  | 127  | >VHL-R161Q: YTLKEQCLQV  | 126   | 1     |
| >VHL-R161Q: YTLKERCLQV  | 39   | >VHL-R161Q: YTLKEQCLQV  | 41    | 2     |
| >VHL-R161Q: YTLKERCLQV' | 83   | >VHL-R161Q: YTLKEQCLQV  | 60    | 23    |
| >VHL-R161Q: YTLKERCL    | 1939 | >VHL-R161Q: YTLKEQCL    | 446   | 1493  |
| >VHL-R161Q: YTLKERCLQV  | 32   | >VHL-R161Q: YTLKEQCLQV  | 14    | 18    |
| >VHL-R161Q: YTLKERCLQV' | 28   | >VHL-R161Q: YTLKEQCLQV  | 11    | 17    |
| >VHL-R161Q: YTLKERCLQV  | 860  | >VHL-R161Q: YTLKEQCLQV  | 200   | 660   |
| >VHL-R161Q: YTLKERCLQV' | 95   | >VHL-R161Q: YTLKEQCLQV  | 28    | 67    |
| >VHL-R161Q: YTLKERCL    | 2311 | >VHL-R161Q: YTLKEQCL    | 246   | 2065  |
| >VHL-R161Q: YTLKERCLQV  | 31   | >VHL-R161Q: YTLKEQCLQV  | 15    | 16    |
| >VHL-R161Q: YTLKERCLQV' | 40   | >VHL-R161Q: YTLKEQCLQV  | 18    | 22    |
| >VHL-R161Q: YTLKERCLQV  | 709  | >VHL-R161Q: YTLKEQCLQV  | 91    | 618   |
| >VHL-R161Q: YTLKERCLQV' | 416  | >VHL-R161Q: YTLKEQCLQV  | 73    | 343   |
| >VHL-R161Q: YTLKERCLQV  | 19   | >VHL-R161Q: YTLKEQCLQV  | 15    | 4     |
| >VHL-R161Q: YTLKERCLQV' | 21   | >VHL-R161Q: YTLKEQCLQV  | 17    | 4     |
| >VHL-R161Q: YTLKERCLQV  | 14   | >VHL-R161Q: YTLKEQCLQV  | 10    | 4     |
| >VHL-R161Q: YTLKERCLQV' | 53   | >VHL-R161Q: YTLKEQCLQV  | 38    | 15    |
| >VHL-R161Q: YTLKERCL    | 205  | >VHL-R161Q: YTLKEQCL    | 119   | 86    |
| >VHL-R161Q: YTLKERCLQV  | 211  | >VHL-R161Q: YTLKEQCLQV  | 168   | 43    |
| >VHL-R161Q: YTLKERCL    | 280  | >VHL-R161Q: YTLKEQCL    | 653   | 373   |
| >VHL-R161Q: YTLKERCLQV' | 130  | >VHL-R161Q: YTLKEQCLQV  | 137   | 7     |
| >VHL-R161Q: LPVYTLKERCI | 224  | >VHL-R161Q: LPVYTLKEQCI | 452   | 228   |
| >VHL-R161Q: LPVYTLKERCI | 620  | >VHL-R161Q: LPVYTLKEQCI | 447   | 173   |
| >VHL-R161Q: LPVYTLKER   | 488  | >VHL-R161Q: LPVYTLKEQ   | 284   | 204   |
| >VHL-R161Q: LPVYTLKERC  | 337  | >VHL-R161Q: LPVYTLKEQC  | 326   | 11    |
| >VHL-R161Q: TLPVYTLKER  | 247  | >VHL-R161Q: TLPVYTLKEQ  | 34463 | 34216 |
| >VHL-R167G: RSLVKPENYR  | 40   | >VHL-R167G: GSLVKPENYR  | 679   | 639   |
| >VHL-R167G: RSLVKPENYR  | 12   | >VHL-R167G: GSLVKPENYR  | 70    | 58    |
| >VHL-R167G: RSLVKPENY   | 242  | >VHL-R167G: GSLVKPENY   | 6733  | 6491  |
| >VHL-R167G: RSLVKPENY   | 185  | >VHL-R167G: GSLVKPENY   | 2739  | 2554  |
| >VHL-R167G: RSLVKPENY   | 3    | >VHL-R167G: GSLVKPENY   | 15    | 12    |
| >VHL-R167G: RSLVKPENY   | 56   | >VHL-R167G: GSLVKPENY   | 6080  | 6024  |
| >VHL-R167G: RSLVKPENYR  | 1131 | >VHL-R167G: GSLVKPENYR  | 474   | 657   |
| >VHL-R167G: RSLVKPENYR  | 355  | >VHL-R167G: GSLVKPENYR  | 158   | 197   |
| >VHL-R167G: RSLVKPENYR  | 124  | >VHL-R167G: GSLVKPENYR  | 4045  | 3921  |
| >VHL-R167G: RSLVKPENYR  | 148  | >VHL-R167G: GSLVKPENYR  | 3046  | 2898  |
| >VHL-R167G: VRSLVKPENY  | 809  | >VHL-R167G: VGSLVKPENY  | 423   | 386   |
| >VHL-R167G: VRSLVKPENY  | 310  | >VHL-R167G: VGSLVKPENY  | 29865 | 29555 |

|                       |      |                       |       |       |
|-----------------------|------|-----------------------|-------|-------|
| >VHL-R167G·VRSLVKPENY | 3309 | >VHL-R167G·VGSLVKPENY | 315   | 2994  |
| >VHL-R167G·TLKERCLQVV | 58   | >VHL-R167G·TLKERCLQVV | 17646 | 17588 |
| >VHL-R167G·TLKERCLQVV | 96   | >VHL-R167G·TLKERCLQVV | 29408 | 29312 |
| >VHL-R167G·TLKERCLQVV | 211  | >VHL-R167G·TLKERCLQVV | 38615 | 38404 |
| >VHL-R167G·TLKERCLQVV | 436  | >VHL-R167G·TLKERCLQVV | 35641 | 35205 |
| >VHL-R167G·VVRSLVKPEN | 228  | >VHL-R167G·VVGSLVKPEN | 410   | 182   |
| >VHL-R167G·VVRSLVKPEN | 427  | >VHL-R167G·VVGSLVKPEN | 193   | 234   |
| >VHL-R167G·VVRSLVKPEN | 141  | >VHL-R167G·VVGSLVKPEN | 23    | 118   |
| >VHL-R167G·VVRSLVKPEN | 83   | >VHL-R167G·VVGSLVKPEN | 2826  | 2743  |
| >VHL-R167G·VVRSLVKPEN | 126  | >VHL-R167G·VVGSLVKPEN | 1442  | 1316  |
| >VHL-R167G·QVVRSLVK   | 358  | >VHL-R167G·QVVGSLVK   | 591   | 233   |
| >VHL-R167G·QVVRSLVK   | 70   | >VHL-R167G·QVVGSLVK   | 81    | 11    |
| >VHL-R167G·QVVRSLVK   | 136  | >VHL-R167G·QVVGSLVK   | 595   | 459   |
| >VHL-R167G·QVVRSLVK   | 208  | >VHL-R167G·QVVGSLVK   | 186   | 22    |
| >VHL-R167G·LQVVRSLV   | 559  | >VHL-R167G·LQVVGSLV   | 427   | 132   |
| >VHL-R167G·LQVVRSLV   | 147  | >VHL-R167G·LQVVGSLV   | 89    | 58    |
| >VHL-R167G·LQVVRSLV   | 14   | >VHL-R167G·LQVVGSLV   | 8     | 6     |
| >VHL-R167G·LQVVRSLV   | 214  | >VHL-R167G·LQVVGSLV   | 146   | 68    |
| >VHL-R167G·LQVVRSLVK  | 509  | >VHL-R167G·LQVVGSLVK  | 456   | 53    |
| >VHL-R167G·CLQVVRSLV  | 517  | >VHL-R167G·CLQVVGSLV  | 398   | 119   |
| >VHL-R167G·CLQVVRSLV  | 325  | >VHL-R167G·CLQVVGSLV  | 136   | 189   |
| >VHL-R167G·CLQVVRSL   | 888  | >VHL-R167G·CLQVVGSL   | 382   | 506   |
| >VHL-R167G·CLQVVRSLV  | 456  | >VHL-R167G·CLQVVGSLV  | 48    | 408   |
| >VHL-R167G·CLQVVRSLV  | 920  | >VHL-R167G·CLQVVGSLV  | 110   | 810   |
| >VHL-R167G·CLQVVRSLV  | 1170 | >VHL-R167G·CLQVVGSLV  | 177   | 993   |
| >VHL-R167G·CLQVVRSLV  | 1839 | >VHL-R167G·CLQVVGSLV  | 305   | 1534  |
| >VHL-R167G·CLQVVRSL   | 274  | >VHL-R167G·CLQVVGSL   | 237   | 37    |
| >VHL-R167G·CLQVVRSLV  | 16   | >VHL-R167G·CLQVVGSLV  | 17    | 1     |
| >VHL-R167G·CLQVVRSLVK | 97   | >VHL-R167G·CLQVVGSLVK | 113   | 16    |
| >VHL-R167G·CLQVVRSLVK | 305  | >VHL-R167G·CLQVVGSLVK | 383   | 78    |
| >VHL-R167G·RCLQVVRSLV | 392  | >VHL-R167G·RCLQVVGSLV | 130   | 262   |
| >VHL-R167G·RCLQVVRSLV | 67   | >VHL-R167G·RCLQVVGSLV | 88    | 21    |
| >VHL-R167G·RCLQVVRSL  | 90   | >VHL-R167G·RCLQVVGSL  | 498   | 408   |
| >VHL-R167G·RCLQVVRSL  | 1026 | >VHL-R167G·RCLQVVGSL  | 442   | 584   |
| >VHL-R167G·ERCLQVVRSL | 233  | >VHL-R167G·ERCLQVVGSL | 142   | 91    |
| >VHL-R167G·ERCLQVVRSL | 432  | >VHL-R167G·ERCLQVVGSL | 235   | 197   |
| >VHL-R167G·ERCLQVVR   | 491  | >VHL-R167G·ERCLQVVG   | 36133 | 35642 |
| >VHL-R167G·KERCLQVVR  | 367  | >VHL-R167G·KERCLQVVG  | 20284 | 19917 |
| >VHL-R167G·KERCLQVVRS | 291  | >VHL-R167G·KERCLQVVG  | 837   | 546   |
| >VHL-R167G·KERCLQVVRS | 595  | >VHL-R167G·KERCLQVVG  | 329   | 266   |
| >VHL-R167G·KERCLQVVRS | 27   | >VHL-R167G·KERCLQVVG  | 38    | 11    |
| >VHL-R167G·KERCLQVVRS | 39   | >VHL-R167G·KERCLQVVG  | 22    | 17    |
| >VHL-R167G·RSLVKPENYR | 40   | >VHL-R167G·RSLVKPENYR | 306   | 266   |

|                        |      |                        |       |       |
|------------------------|------|------------------------|-------|-------|
| >VHL-R167Q: RSLVKPENYR | 12   | >VHL-R167Q: QSLVKPENYR | 120   | 108   |
| >VHL-R167Q: RSLVKPENYR | 542  | >VHL-R167Q: QSLVKPENYR | 139   | 403   |
| >VHL-R167Q: RSLVKPENY  | 242  | >VHL-R167Q: QSLVKPENY  | 2017  | 1775  |
| >VHL-R167Q: RSLVKPENY  | 185  | >VHL-R167Q: QSLVKPENY  | 888   | 703   |
| >VHL-R167Q: RSLVKPENY  | 3    | >VHL-R167Q: QSLVKPENY  | 11    | 8     |
| >VHL-R167Q: RSLVKPENY  | 56   | >VHL-R167Q: QSLVKPENY  | 3145  | 3089  |
| >VHL-R167Q: RSLVKPENYR | 355  | >VHL-R167Q: QSLVKPENYR | 185   | 170   |
| >VHL-R167Q: RSLVKPENYR | 124  | >VHL-R167Q: QSLVKPENYR | 494   | 370   |
| >VHL-R167Q: RSLVKPENYR | 148  | >VHL-R167Q: QSLVKPENYR | 494   | 346   |
| >VHL-R167Q: VRSLVKPENY | 846  | >VHL-R167Q: VQSLVKPENY | 424   | 422   |
| >VHL-R167Q: VRSLVKPENY | 809  | >VHL-R167Q: VQSLVKPENY | 159   | 650   |
| >VHL-R167Q: VRSLVKPENY | 9820 | >VHL-R167Q: VQSLVKPENY | 80    | 9740  |
| >VHL-R167Q: VRSLVKPENY | 930  | >VHL-R167Q: VQSLVKPENY | 161   | 769   |
| >VHL-R167Q: VRSLVKPENY | 310  | >VHL-R167Q: VQSLVKPENY | 15925 | 15615 |
| >VHL-R167Q: TLKERCLQVV | 58   | >VHL-R167Q: TLKERCLQVV | 11666 | 11608 |
| >VHL-R167Q: TLKERCLQVV | 96   | >VHL-R167Q: TLKERCLQVV | 17716 | 17620 |
| >VHL-R167Q: TLKERCLQVV | 211  | >VHL-R167Q: TLKERCLQVV | 17677 | 17466 |
| >VHL-R167Q: TLKERCLQVV | 436  | >VHL-R167Q: TLKERCLQVV | 23375 | 22939 |
| >VHL-R167Q: VVRSVLKPEN | 228  | >VHL-R167Q: VVQSLVKPEN | 361   | 133   |
| >VHL-R167Q: VVRSVLKPEN | 427  | >VHL-R167Q: VVQSLVKPEN | 373   | 54    |
| >VHL-R167Q: VVRSVLKPEN | 732  | >VHL-R167Q: VVQSLVKPEN | 319   | 413   |
| >VHL-R167Q: VVRSVLKPEN | 141  | >VHL-R167Q: VVQSLVKPEN | 89    | 52    |
| >VHL-R167Q: VVRSVLKPEN | 83   | >VHL-R167Q: VVQSLVKPEN | 938   | 855   |
| >VHL-R167Q: VVRSVLKPEN | 126  | >VHL-R167Q: VVQSLVKPEN | 503   | 377   |
| >VHL-R167Q: QVVRSLVK   | 358  | >VHL-R167Q: QVVQSLVK   | 1073  | 715   |
| >VHL-R167Q: QVVRSLVK   | 70   | >VHL-R167Q: QVVQSLVK   | 123   | 53    |
| >VHL-R167Q: QVVRSLVK   | 136  | >VHL-R167Q: QVVQSLVK   | 921   | 785   |
| >VHL-R167Q: QVVRSLVK   | 208  | >VHL-R167Q: QVVQSLVK   | 206   | 2     |
| >VHL-R167Q: LQVVRSLV   | 559  | >VHL-R167Q: LQVVQSLV   | 242   | 317   |
| >VHL-R167Q: LQVVRSLV   | 147  | >VHL-R167Q: LQVVQSLV   | 137   | 10    |
| >VHL-R167Q: LQVVRSLV   | 14   | >VHL-R167Q: LQVVQSLV   | 13    | 1     |
| >VHL-R167Q: LQVVRSLV   | 214  | >VHL-R167Q: LQVVQSLV   | 216   | 2     |
| >VHL-R167Q: LQVVRSLVK  | 509  | >VHL-R167Q: LQVVQSLVK  | 408   | 101   |
| >VHL-R167Q: CLQVVRSL   | 1434 | >VHL-R167Q: CLQVVQSL   | 383   | 1051  |
| >VHL-R167Q: CLQVVRSLV  | 517  | >VHL-R167Q: CLQVVQSLV  | 149   | 368   |
| >VHL-R167Q: CLQVVRSLV  | 325  | >VHL-R167Q: CLQVVQSLV  | 190   | 135   |
| >VHL-R167Q: CLQVVRSL   | 888  | >VHL-R167Q: CLQVVQSL   | 205   | 683   |
| >VHL-R167Q: CLQVVRSLV  | 456  | >VHL-R167Q: CLQVVQSLV  | 64    | 392   |
| >VHL-R167Q: CLQVVRSL   | 1543 | >VHL-R167Q: CLQVVQSL   | 212   | 1331  |
| >VHL-R167Q: CLQVVRSLV  | 920  | >VHL-R167Q: CLQVVQSLV  | 102   | 818   |
| >VHL-R167Q: CLQVVRSLV  | 1170 | >VHL-R167Q: CLQVVQSLV  | 149   | 1021  |
| >VHL-R167Q: CLQVVRSL   | 3681 | >VHL-R167Q: CLQVVQSL   | 381   | 3300  |
| >VHL-R167Q: CLQVVRSLV  | 1839 | >VHL-R167Q: CLQVVQSLV  | 80    | 1759  |

|                        |      |                        |       |       |
|------------------------|------|------------------------|-------|-------|
| >VHL-R167Q: CLQVVRSL   | 274  | >VHL-R167Q: CLQVVQSL   | 34    | 240   |
| >VHL-R167Q: CLQVVRSLV  | 16   | >VHL-R167Q: CLQVVQSLV  | 11    | 5     |
| >VHL-R167Q: CLQVVRSLVK | 97   | >VHL-R167Q: CLQVVQSLVK | 153   | 56    |
| >VHL-R167Q: CLQVVRSLVK | 305  | >VHL-R167Q: CLQVVQSLVK | 381   | 76    |
| >VHL-R167Q: RCLQVVRSL  | 1240 | >VHL-R167Q: RCLQVVQSL  | 310   | 930   |
| >VHL-R167Q: RCLQVVRSLV | 392  | >VHL-R167Q: RCLQVVQSLV | 103   | 289   |
| >VHL-R167Q: RCLQVVRSLV | 1714 | >VHL-R167Q: RCLQVVQSLV | 297   | 1417  |
| >VHL-R167Q: RCLQVVRSLV | 67   | >VHL-R167Q: RCLQVVQSLV | 60    | 7     |
| >VHL-R167Q: RCLQVVRSL  | 90   | >VHL-R167Q: RCLQVVQSL  | 70    | 20    |
| >VHL-R167Q: RCLQVVRSLV | 619  | >VHL-R167Q: RCLQVVQSLV | 469   | 150   |
| >VHL-R167Q: ERCLQVVRSL | 233  | >VHL-R167Q: ERCLQVVQSL | 117   | 116   |
| >VHL-R167Q: ERCLQVVRSL | 925  | >VHL-R167Q: ERCLQVVQSL | 308   | 617   |
| >VHL-R167Q: ERCLQVVRSL | 432  | >VHL-R167Q: ERCLQVVQSL | 211   | 221   |
| >VHL-R167Q: ERCLQVVR   | 491  | >VHL-R167Q: ERCLQVVQ   | 24893 | 24402 |
| >VHL-R167Q: KERCLQVVR  | 367  | >VHL-R167Q: KERCLQVVQ  | 16692 | 16325 |
| >VHL-R167Q: KERCLQVVRS | 291  | >VHL-R167Q: KERCLQVVQ  | 134   | 157   |
| >VHL-R167Q: KERCLQVVRS | 595  | >VHL-R167Q: KERCLQVVQ  | 270   | 325   |
| >VHL-R167Q: KERCLQVVRS | 27   | >VHL-R167Q: KERCLQVVQ  | 25    | 2     |
| >VHL-R167Q: KERCLQVVRS | 39   | >VHL-R167Q: KERCLQVVQ  | 23    | 16    |
| >VHL-R167W RSLVKPENY   | 1912 | >VHL-R167W WSLVKPENY   | 471   | 1441  |
| >VHL-R167W RSLVKPENYR  | 40   | >VHL-R167W WSLVKPENYF  | 926   | 886   |
| >VHL-R167W RSLVKPENYR  | 12   | >VHL-R167W WSLVKPENYF  | 522   | 510   |
| >VHL-R167W RSLVKPENYR  | 542  | >VHL-R167W WSLVKPENYF  | 131   | 411   |
| >VHL-R167W RSLVKPENY   | 242  | >VHL-R167W WSLVKPENY   | 4340  | 4098  |
| >VHL-R167W RSLVKPENY   | 185  | >VHL-R167W WSLVKPENY   | 277   | 92    |
| >VHL-R167W RSLVKPENY   | 3    | >VHL-R167W WSLVKPENY   | 10    | 7     |
| >VHL-R167W RSLVKPENY   | 56   | >VHL-R167W WSLVKPENY   | 2407  | 2351  |
| >VHL-R167W RSLVKPENY   | 520  | >VHL-R167W WSLVKPENY   | 348   | 172   |
| >VHL-R167W RSLVKPENYR  | 355  | >VHL-R167W WSLVKPENYF  | 1584  | 1229  |
| >VHL-R167W RSLVKPENYR  | 124  | >VHL-R167W WSLVKPENYF  | 641   | 517   |
| >VHL-R167W RSLVKPENYR  | 148  | >VHL-R167W WSLVKPENYF  | 509   | 361   |
| >VHL-R167W VRSLVKPENY  | 6650 | >VHL-R167W VWSLVKPEN'  | 338   | 6312  |
| >VHL-R167W VRSLVKPENY  | 846  | >VHL-R167W VWSLVKPEN'  | 42    | 804   |
| >VHL-R167W VRSLVKPENY  | 809  | >VHL-R167W VWSLVKPEN'  | 101   | 708   |
| >VHL-R167W VRSLVKPENY  | 9820 | >VHL-R167W VWSLVKPEN'  | 263   | 9557  |
| >VHL-R167W VRSLVKPENY  | 310  | >VHL-R167W VWSLVKPEN'  | 16292 | 15982 |
| >VHL-R167W VRSLVKPENY  | 2299 | >VHL-R167W VWSLVKPEN'  | 26    | 2273  |
| >VHL-R167W TLKERCLQVV  | 58   | >VHL-R167W TLKERCLQVV  | 15920 | 15862 |
| >VHL-R167W TLKERCLQVV  | 96   | >VHL-R167W TLKERCLQVV  | 26634 | 26538 |
| >VHL-R167W TLKERCLQVV  | 211  | >VHL-R167W TLKERCLQVV  | 32626 | 32415 |
| >VHL-R167W TLKERCLQVV  | 436  | >VHL-R167W TLKERCLQVV  | 34055 | 33619 |
| >VHL-R167W VVRSLVKPEN  | 228  | >VHL-R167W VVWSLVKPEI  | 333   | 105   |
| >VHL-R167W VVRSLVKPEN  | 427  | >VHL-R167W VVWSLVKPEI  | 27    | 400   |

|                       |       |                       |     |       |
|-----------------------|-------|-----------------------|-----|-------|
| >VHL-R167W VVRSVLKPEN | 732   | >VHL-R167W VVWSLVKPEI | 154 | 578   |
| >VHL-R167W VVRSVLKPEN | 141   | >VHL-R167W VVWSLVKPEI | 38  | 103   |
| >VHL-R167W VVRSVLKPEN | 579   | >VHL-R167W VVWSLVKPEI | 394 | 185   |
| >VHL-R167W VVRSVLKPEN | 83    | >VHL-R167W VVWSLVKPEI | 102 | 19    |
| >VHL-R167W VVRSVLKPEN | 126   | >VHL-R167W VVWSLVKPEI | 444 | 318   |
| >VHL-R167W QVVRSLVK   | 358   | >VHL-R167W QVVWSLVK   | 362 | 4     |
| >VHL-R167W QVVRSLVK   | 70    | >VHL-R167W QVVWSLVK   | 42  | 28    |
| >VHL-R167W QVVRSLVK   | 136   | >VHL-R167W QVVWSLVK   | 998 | 862   |
| >VHL-R167W QVVRSLVK   | 208   | >VHL-R167W QVVWSLVK   | 72  | 136   |
| >VHL-R167W LQVVRSLV   | 3147  | >VHL-R167W LQVVWSLV   | 272 | 2875  |
| >VHL-R167W LQVVRSLV   | 559   | >VHL-R167W LQVVWSLV   | 250 | 309   |
| >VHL-R167W LQVVRSLV   | 147   | >VHL-R167W LQVVWSLV   | 94  | 53    |
| >VHL-R167W LQVVRSLV   | 14    | >VHL-R167W LQVVWSLV   | 5   | 9     |
| >VHL-R167W LQVVRSLV   | 2875  | >VHL-R167W LQVVWSLV   | 139 | 2736  |
| >VHL-R167W LQVVRSLV   | 5770  | >VHL-R167W LQVVWSLV   | 491 | 5279  |
| >VHL-R167W LQVVRSLV   | 1871  | >VHL-R167W LQVVWSLV   | 440 | 1431  |
| >VHL-R167W LQVVRSLVK  | 514   | >VHL-R167W LQVVWSLVK  | 212 | 302   |
| >VHL-R167W LQVVRSLV   | 214   | >VHL-R167W LQVVWSLV   | 194 | 20    |
| >VHL-R167W LQVVRSLVK  | 509   | >VHL-R167W LQVVWSLVK  | 386 | 123   |
| >VHL-R167W CLQVVRSL   | 4465  | >VHL-R167W CLQVVWSL   | 158 | 4307  |
| >VHL-R167W CLQVVRSLV  | 2917  | >VHL-R167W CLQVVWSLV  | 332 | 2585  |
| >VHL-R167W CLQVVRSL   | 1434  | >VHL-R167W CLQVVWSL   | 176 | 1258  |
| >VHL-R167W CLQVVRSLV  | 517   | >VHL-R167W CLQVVWSLV  | 316 | 201   |
| >VHL-R167W CLQVVRSLV  | 325   | >VHL-R167W CLQVVWSLV  | 246 | 79    |
| >VHL-R167W CLQVVRSL   | 888   | >VHL-R167W CLQVVWSL   | 42  | 846   |
| >VHL-R167W CLQVVRSLV  | 456   | >VHL-R167W CLQVVWSLV  | 32  | 424   |
| >VHL-R167W CLQVVRSL   | 1543  | >VHL-R167W CLQVVWSL   | 62  | 1481  |
| >VHL-R167W CLQVVRSLV  | 920   | >VHL-R167W CLQVVWSLV  | 229 | 691   |
| >VHL-R167W CLQVVRSL   | 7416  | >VHL-R167W CLQVVWSL   | 275 | 7141  |
| >VHL-R167W CLQVVRSLV  | 1170  | >VHL-R167W CLQVVWSLV  | 59  | 1111  |
| >VHL-R167W CLQVVRSL   | 3681  | >VHL-R167W CLQVVWSL   | 114 | 3567  |
| >VHL-R167W CLQVVRSLV  | 1839  | >VHL-R167W CLQVVWSLV  | 177 | 1662  |
| >VHL-R167W CLQVVRSL   | 274   | >VHL-R167W CLQVVWSL   | 22  | 252   |
| >VHL-R167W CLQVVRSLV  | 16    | >VHL-R167W CLQVVWSLV  | 18  | 2     |
| >VHL-R167W CLQVVRSLVK | 97    | >VHL-R167W CLQVVWSLVK | 223 | 126   |
| >VHL-R167W CLQVVRSLVK | 305   | >VHL-R167W CLQVVWSLVK | 348 | 43    |
| >VHL-R167W CLQVVRSLVK | 1142  | >VHL-R167W CLQVVWSLVK | 489 | 653   |
| >VHL-R167W RCLQVVRSL  | 1240  | >VHL-R167W RCLQVVWSL  | 22  | 1218  |
| >VHL-R167W RCLQVVRSLV | 392   | >VHL-R167W RCLQVVWSLV | 41  | 351   |
| >VHL-R167W RCLQVVRSL  | 11955 | >VHL-R167W RCLQVVWSL  | 186 | 11769 |
| >VHL-R167W RCLQVVRSLV | 1714  | >VHL-R167W RCLQVVWSLV | 97  | 1617  |
| >VHL-R167W RCLQVVRSL  | 5956  | >VHL-R167W RCLQVVWSL  | 188 | 5768  |
| >VHL-R167W RCLQVVRSLV | 67    | >VHL-R167W RCLQVVWSLV | 111 | 44    |

|                         |       |                         |       |       |
|-------------------------|-------|-------------------------|-------|-------|
| >VHL-R167W RCLQVVRSL    | 90    | >VHL-R167W RCLQVVWSL    | 46    | 44    |
| >VHL-R167W RCLQVVRSLV   | 619   | >VHL-R167W RCLQVVWSL    | 203   | 416   |
| >VHL-R167W ERCLQVVRSL   | 233   | >VHL-R167W ERCLQVVWS    | 107   | 126   |
| >VHL-R167W ERCLQVVRSL   | 925   | >VHL-R167W ERCLQVVWS    | 154   | 771   |
| >VHL-R167W ERCLQVVRSL   | 432   | >VHL-R167W ERCLQVVWS    | 213   | 219   |
| >VHL-R167W ERCLQVVR     | 491   | >VHL-R167W ERCLQVVW     | 34685 | 34194 |
| >VHL-R167W KERCLQVVR    | 367   | >VHL-R167W KERCLQVVW    | 18909 | 18542 |
| >VHL-R167W KERCLQVVR    | 291   | >VHL-R167W KERCLQVVW    | 287   | 4     |
| >VHL-R167W KERCLQVVR    | 1345  | >VHL-R167W KERCLQVVW    | 241   | 1104  |
| >VHL-R167W KERCLQVVR    | 595   | >VHL-R167W KERCLQVVW    | 163   | 432   |
| >VHL-R167W KERCLQVVR    | 27    | >VHL-R167W KERCLQVVW    | 15    | 12    |
| >VHL-R167W KERCLQVVR    | 9712  | >VHL-R167W KERCLQVVW    | 115   | 9597  |
| >VHL-R167W KERCLQVVR    | 10017 | >VHL-R167W KERCLQVVW    | 99    | 9918  |
| >VHL-R167W KERCLQVVR    | 2107  | >VHL-R167W KERCLQVVW    | 180   | 1927  |
| >VHL-R167W KERCLQVVR    | 39    | >VHL-R167W KERCLQVVW    | 20    | 19    |
| >VHL-R167W LKERCLQVVR   | 30383 | >VHL-R167W LKERCLQVV    | 115   | 30268 |
| >VHL-R167W LKERCLQVVR   | 30774 | >VHL-R167W LKERCLQVV    | 492   | 30282 |
| >VHL-R176K- RRLDIVRSLY  | 81    | >VHL-R176K- KRLDIVRSLY  | 268   | 187   |
| >VHL-R176K- RRLDIVRSLY  | 437   | >VHL-R176K- KRLDIVRSLY  | 559   | 122   |
| >VHL-R176K- RRLDIVRSL   | 109   | >VHL-R176K- KRLDIVRSL   | 199   | 90    |
| >VHL-R176K- RRLDIVRSLY  | 49    | >VHL-R176K- KRLDIVRSLY  | 86    | 37    |
| >VHL-R176K- RRLDIVRS    | 102   | >VHL-R176K- KRLDIVRS    | 420   | 318   |
| >VHL-R176K- RRLDIVRSL   | 15    | >VHL-R176K- KRLDIVRSL   | 32    | 17    |
| >VHL-R176K- RRLDIVRSLY  | 10    | >VHL-R176K- KRLDIVRSLY  | 22    | 12    |
| >VHL-R176K- RRLDIVRS    | 242   | >VHL-R176K- KRLDIVRS    | 887   | 645   |
| >VHL-R176K- RRLDIVRSLY  | 303   | >VHL-R176K- KRLDIVRSLY  | 1106  | 803   |
| >VHL-R176K- RRLDIVRSLYE | 319   | >VHL-R176K- KRLDIVRSLYE | 1031  | 712   |
| >VHL-R176K- RRLDIVRSLY  | 318   | >VHL-R176K- KRLDIVRSLY  | 1350  | 1032  |
| >VHL-R176K- YRRLDIVR    | 2068  | >VHL-R176K- YKRLDIVR    | 370   | 1698  |
| >VHL-R176K- YRRLDIVRSL  | 130   | >VHL-R176K- YKRLDIVRSL  | 17    | 113   |
| >VHL-R176K- YRRLDIVRSLY | 65    | >VHL-R176K- YKRLDIVRSLY | 8     | 57    |
| >VHL-R176K- YRRLDIVR    | 308   | >VHL-R176K- YKRLDIVR    | 9266  | 8958  |
| >VHL-R176K- YRRLDIVRSL  | 43    | >VHL-R176K- YKRLDIVRSL  | 5783  | 5740  |
| >VHL-R176K- YRRLDIVRSLY | 206   | >VHL-R176K- YKRLDIVRSLY | 7126  | 6920  |
| >VHL-R176K- YRRLDIVRSLY | 95    | >VHL-R176K- YKRLDIVRSLY | 91    | 4     |
| >VHL-R176K- YRRLDIVRSL  | 304   | >VHL-R176K- YKRLDIVRSL  | 7037  | 6733  |
| >VHL-R176K- YRRLDIVRSLY | 391   | >VHL-R176K- YKRLDIVRSLY | 8590  | 8199  |
| >VHL-R176K- YRRLDIVRSL  | 94    | >VHL-R176K- YKRLDIVRSL  | 4443  | 4349  |
| >VHL-R176K- YRRLDIVRSLY | 177   | >VHL-R176K- YKRLDIVRSLY | 10334 | 10157 |
| >VHL-R176K- NYRRLDIVRSI | 587   | >VHL-R176K- NYKRLDIVRSI | 300   | 287   |
| >VHL-R176K- NYRRLDIVRSI | 129   | >VHL-R176K- NYKRLDIVRSI | 80    | 49    |
| >VHL-R176K- NYRRLDIVR   | 256   | >VHL-R176K- NYKRLDIVR   | 131   | 125   |
| >VHL-R176K- NYRRLDIVR   | 30    | >VHL-R176K- NYKRLDIVR   | 39    | 9     |

|                        |      |                        |      |      |
|------------------------|------|------------------------|------|------|
| >VHL-R176K- ENYRRLDIVR | 724  | >VHL-R176K- ENYKRLDIVR | 319  | 405  |
| >VHL-R176K- PENYRRLDI  | 86   | >VHL-R176K- PENYKRLDI  | 243  | 157  |
| >VHL-R176K- KPENYRRL   | 39   | >VHL-R176K- KPENYKRL   | 181  | 142  |
| >VHL-R176K- KPENYRRLDI | 104  | >VHL-R176K- KPENYKRLDI | 245  | 141  |
| >VHL-R176K- KPENYRRLDI | 139  | >VHL-R176K- KPENYKRLDI | 276  | 137  |
| >VHL-R176K- LVKPENYR   | 2668 | >VHL-R176K- LVKPENYK   | 145  | 2523 |
| >VHL-R176K- LVKPENYR   | 686  | >VHL-R176K- LVKPENYK   | 10   | 676  |
| >VHL-R176K- LVKPENYR   | 23   | >VHL-R176K- LVKPENYK   | 260  | 237  |
| >VHL-R176K- LVKPENYRR  | 35   | >VHL-R176K- LVKPENYKR  | 36   | 1    |
| >VHL-R176K- LVKPENYR   | 159  | >VHL-R176K- LVKPENYK   | 2704 | 2545 |
| >VHL-R176K- LVKPENYRR  | 302  | >VHL-R176K- LVKPENYKR  | 358  | 56   |
| >VHL-R176K- LVKPENYR   | 60   | >VHL-R176K- LVKPENYK   | 180  | 120  |
| >VHL-R176K- LVKPENYRR  | 122  | >VHL-R176K- LVKPENYKR  | 114  | 8    |
| >VHL-R176K- LVKPENYR   | 287  | >VHL-R176K- LVKPENYK   | 6285 | 5998 |
| >VHL-R176K- SLVKPENYRR | 409  | >VHL-R176K- SLVKPENYKR | 445  | 36   |
| >VHL-R176K- SLVKPENYRR | 44   | >VHL-R176K- SLVKPENYKR | 54   | 10   |
| >VHL-R176K- SLVKPENYRR | 394  | >VHL-R176K- SLVKPENYKR | 337  | 57   |
| >VHL-R176K- SLVKPENYRR | 26   | >VHL-R176K- SLVKPENYKR | 19   | 7    |
| >VHL-R176K- SLVKPENYR  | 3975 | >VHL-R176K- SLVKPENYK  | 139  | 3836 |
| >VHL-R176K- SLVKPENYR  | 1447 | >VHL-R176K- SLVKPENYK  | 56   | 1391 |
| >VHL-R176K- SLVKPENYR  | 177  | >VHL-R176K- SLVKPENYK  | 3824 | 3647 |
| >VHL-R176K- SLVKPENYRR | 103  | >VHL-R176K- SLVKPENYKR | 125  | 22   |
| >VHL-R176K- SLVKPENYR  | 133  | >VHL-R176K- SLVKPENYK  | 408  | 275  |
| >VHL-R176K- SLVKPENYRR | 142  | >VHL-R176K- SLVKPENYKR | 99   | 43   |
| >VHL-R176K- SLVKPENYRR | 562  | >VHL-R176K- SLVKPENYKR | 446  | 116  |
| >VHL-R176K- SLVKPENYRR | 85   | >VHL-R176K- SLVKPENYKR | 77   | 8    |
| >VHL-R176K- RSLVKPENYR | 2602 | >VHL-R176K- RSLVKPENYK | 95   | 2507 |
| >VHL-R176K- RSLVKPENYR | 782  | >VHL-R176K- RSLVKPENYK | 49   | 733  |
| >VHL-R176K- RSLVKPENYR | 713  | >VHL-R176K- RSLVKPENYK | 12   | 701  |
| >VHL-R176K- RSLVKPENYR | 40   | >VHL-R176K- RSLVKPENYK | 766  | 726  |
| >VHL-R176K- RSLVKPENYR | 12   | >VHL-R176K- RSLVKPENYK | 12   | 0    |
| >VHL-R176K- RSLVKPENYR | 355  | >VHL-R176K- RSLVKPENYK | 583  | 228  |
| >VHL-R176K- RSLVKPENYR | 124  | >VHL-R176K- RSLVKPENYK | 3686 | 3562 |
| >VHL-R176K- RSLVKPENYR | 148  | >VHL-R176K- RSLVKPENYK | 116  | 32   |
| >VHL-R176W RRLDIVRSLY  | 81   | >VHL-R176W WRLDIVRSLY  | 1185 | 1104 |
| >VHL-R176W RRLDIVRSLY  | 437  | >VHL-R176W WRLDIVRSLY  | 4749 | 4312 |
| >VHL-R176W RRLDIVRSL   | 109  | >VHL-R176W WRLDIVRSL   | 265  | 156  |
| >VHL-R176W RRLDIVRSLY  | 49   | >VHL-R176W WRLDIVRSLY  | 121  | 72   |
| >VHL-R176W RRLDIVRS    | 102  | >VHL-R176W WRLDIVRS    | 478  | 376  |
| >VHL-R176W RRLDIVRSL   | 15   | >VHL-R176W WRLDIVRSL   | 41   | 26   |
| >VHL-R176W RRLDIVRSLY  | 10   | >VHL-R176W WRLDIVRSLY  | 20   | 10   |
| >VHL-R176W RRLDIVRSL   | 527  | >VHL-R176W WRLDIVRSL   | 55   | 472  |
| >VHL-R176W RRLDIVRS    | 242  | >VHL-R176W WRLDIVRS    | 4470 | 4228 |

|                        |       |                        |       |       |
|------------------------|-------|------------------------|-------|-------|
| >VHL-R176W RRLDIVRSLY  | 303   | >VHL-R176W WRDLIVRSLY  | 2066  | 1763  |
| >VHL-R176W RRLDIVRSLYE | 319   | >VHL-R176W WRDLIVRSLY  | 10703 | 10384 |
| >VHL-R176W RRLDIVRSLY  | 318   | >VHL-R176W WRDLIVRSLY  | 1023  | 705   |
| >VHL-R176W YRRDLIVRSL  | 23531 | >VHL-R176W YWRDLIVRSL  | 485   | 23046 |
| >VHL-R176W YRRDLIVRSLY | 1061  | >VHL-R176W YWRDLIVRSL  | 37    | 1024  |
| >VHL-R176W YRRDLIVR    | 7087  | >VHL-R176W YWRDLIVR    | 498   | 6589  |
| >VHL-R176W YRRDLIVRSL  | 130   | >VHL-R176W YWRDLIVRSL  | 4742  | 4612  |
| >VHL-R176W YRRDLIVRSLY | 65    | >VHL-R176W YWRDLIVRSL  | 2115  | 2050  |
| >VHL-R176W YRRDLIVR    | 308   | >VHL-R176W YWRDLIVR    | 16546 | 16238 |
| >VHL-R176W YRRDLIVRSL  | 43    | >VHL-R176W YWRDLIVRSL  | 6083  | 6040  |
| >VHL-R176W YRRDLIVRSLY | 206   | >VHL-R176W YWRDLIVRSL  | 14095 | 13889 |
| >VHL-R176W YRRDLIVRSLY | 95    | >VHL-R176W YWRDLIVRSL  | 117   | 22    |
| >VHL-R176W YRRDLIVRSL  | 304   | >VHL-R176W YWRDLIVRSL  | 9626  | 9322  |
| >VHL-R176W YRRDLIVRSLY | 391   | >VHL-R176W YWRDLIVRSL  | 18596 | 18205 |
| >VHL-R176W YRRDLIVRSL  | 94    | >VHL-R176W YWRDLIVRSL  | 5645  | 5551  |
| >VHL-R176W YRRDLIVRSLY | 177   | >VHL-R176W YWRDLIVRSL  | 28471 | 28294 |
| >VHL-R176W YRRDLIVR    | 1154  | >VHL-R176W YWRDLIVR    | 29    | 1125  |
| >VHL-R176W VRSLVKPENY  | 29419 | >VHL-R176W VRSLVKPENY  | 162   | 29257 |
| >VHL-R176W NYRRDLIVRSI | 587   | >VHL-R176W NYWRDLIVRSI | 217   | 370   |
| >VHL-R176W NYRRDLIVRSI | 129   | >VHL-R176W NYWRDLIVRSI | 32    | 97    |
| >VHL-R176W NYRRDLIVR   | 256   | >VHL-R176W NYWRDLIVR   | 132   | 124   |
| >VHL-R176W NYRRDLIVR   | 30    | >VHL-R176W NYWRDLIVR   | 31    | 1     |
| >VHL-R176W ENYRRDLIVR  | 724   | >VHL-R176W ENYWRDLIVR  | 208   | 516   |
| >VHL-R176W PENYRRDLI   | 86    | >VHL-R176W PENYWRDLI   | 115   | 29    |
| >VHL-R176W PENYRRDLI   | 1176  | >VHL-R176W PENYWRDLI   | 319   | 857   |
| >VHL-R176W KPENYRRL    | 39    | >VHL-R176W KPENYWRL    | 249   | 210   |
| >VHL-R176W KPENYRRDLI  | 104   | >VHL-R176W KPENYWRLDI  | 201   | 97    |
| >VHL-R176W KPENYRRDLI  | 139   | >VHL-R176W KPENYWRLDI  | 285   | 146   |
| >VHL-R176W VKPENYRR    | 1118  | >VHL-R176W VKPENYWRR   | 439   | 679   |
| >VHL-R176W LVKPENYRRL  | 1540  | >VHL-R176W LVKPENYWRI  | 45    | 1495  |
| >VHL-R176W LVKPENYR    | 23    | >VHL-R176W LVKPENYW    | 17403 | 17380 |
| >VHL-R176W LVKPENYRR   | 35    | >VHL-R176W LVKPENYWRR  | 28    | 7     |
| >VHL-R176W LVKPENYR    | 159   | >VHL-R176W LVKPENYW    | 27904 | 27745 |
| >VHL-R176W LVKPENYRR   | 302   | >VHL-R176W LVKPENYWRR  | 140   | 162   |
| >VHL-R176W LVKPENYR    | 60    | >VHL-R176W LVKPENYW    | 22646 | 22586 |
| >VHL-R176W LVKPENYRR   | 122   | >VHL-R176W LVKPENYWRR  | 58    | 64    |
| >VHL-R176W LVKPENYR    | 25671 | >VHL-R176W LVKPENYW    | 93    | 25578 |
| >VHL-R176W LVKPENYR    | 22781 | >VHL-R176W LVKPENYW    | 76    | 22705 |
| >VHL-R176W LVKPENYR    | 22224 | >VHL-R176W LVKPENYW    | 153   | 22071 |
| >VHL-R176W LVKPENYR    | 287   | >VHL-R176W LVKPENYW    | 31930 | 31643 |
| >VHL-R176W SLVKPENYRR  | 3374  | >VHL-R176W SLVKPENYWRR | 167   | 3207  |
| >VHL-R176W SLVKPENYRR  | 409   | >VHL-R176W SLVKPENYWRR | 39    | 370   |
| >VHL-R176W SLVKPENYRR  | 942   | >VHL-R176W SLVKPENYWRR | 438   | 504   |



|                        |       |                        |       |       |
|------------------------|-------|------------------------|-------|-------|
| >VHL-R176W SLVKPENYRR  | 7330  | >VHL-R176W SLVKPENYWF  | 378   | 6952  |
| >VHL-R176W SLVKPENYRR  | 44    | >VHL-R176W SLVKPENYWF  | 9     | 35    |
| >VHL-R176W SLVKPENYRR  | 647   | >VHL-R176W SLVKPENYWF  | 41    | 606   |
| >VHL-R176W SLVKPENYRR  | 394   | >VHL-R176W SLVKPENYWF  | 23    | 371   |
| >VHL-R176W SLVKPENYRR  | 26    | >VHL-R176W SLVKPENYWF  | 6     | 20    |
| >VHL-R176W SLVKPENYRR  | 672   | >VHL-R176W SLVKPENYWF  | 258   | 414   |
| >VHL-R176W SLVKPENYR   | 177   | >VHL-R176W SLVKPENYW   | 21820 | 21643 |
| >VHL-R176W SLVKPENYRR  | 103   | >VHL-R176W SLVKPENYWF  | 39    | 64    |
| >VHL-R176W SLVKPENYR   | 133   | >VHL-R176W SLVKPENYW   | 26610 | 26477 |
| >VHL-R176W SLVKPENYRR  | 142   | >VHL-R176W SLVKPENYWF  | 48    | 94    |
| >VHL-R176W SLVKPENYRR  | 562   | >VHL-R176W SLVKPENYWF  | 165   | 397   |
| >VHL-R176W SLVKPENYRR  | 85    | >VHL-R176W SLVKPENYWF  | 85    | 0     |
| >VHL-R176W RSLVKPENYR  | 40    | >VHL-R176W RSLVKPENYW  | 21672 | 21632 |
| >VHL-R176W RSLVKPENYR  | 12    | >VHL-R176W RSLVKPENYW  | 11    | 1     |
| >VHL-R176W RSLVKPENYR  | 8040  | >VHL-R176W RSLVKPENYW  | 4     | 8036  |
| >VHL-R176W RSLVKPENYR  | 14122 | >VHL-R176W RSLVKPENYW  | 35    | 14087 |
| >VHL-R176W RSLVKPENYR  | 17018 | >VHL-R176W RSLVKPENYW  | 9     | 17009 |
| >VHL-R176W RSLVKPENYR  | 355   | >VHL-R176W RSLVKPENYW  | 242   | 113   |
| >VHL-R176W RSLVKPENYR  | 124   | >VHL-R176W RSLVKPENYW  | 31149 | 31025 |
| >VHL-R176W RSLVKPENYR  | 148   | >VHL-R176W RSLVKPENYW  | 113   | 35    |
| >VHL-R182K-IVRSLYEDL   | 292   | >VHL-R182K-IVKSLYEDL   | 1143  | 851   |
| >VHL-R182K-DIVRSLYEDL  | 114   | >VHL-R182K-DIVKSLYEDL  | 192   | 78    |
| >VHL-R182K-LDIVRSLY    | 428   | >VHL-R182K-LDIVKSLY    | 558   | 130   |
| >VHL-R182K-LDIVRSLYEDL | 491   | >VHL-R182K-LDIVKSLYEDL | 591   | 100   |
| >VHL-R182K-RLDIVRSLY   | 116   | >VHL-R182K-RLDIVKSLY   | 224   | 108   |
| >VHL-R182K-RLDIVRSL    | 312   | >VHL-R182K-RLDIVKSL    | 373   | 61    |
| >VHL-R182K-RLDIVRSL    | 14    | >VHL-R182K-RLDIVKSL    | 11    | 3     |
| >VHL-R182K-RLDIVRSL    | 400   | >VHL-R182K-RLDIVKSL    | 253   | 147   |
| >VHL-R182K-RLDIVRSL    | 82    | >VHL-R182K-RLDIVKSL    | 51    | 31    |
| >VHL-R182K-RLDIVRSL    | 52    | >VHL-R182K-RLDIVKSL    | 37    | 15    |
| >VHL-R182K-RLDIVRSLY   | 157   | >VHL-R182K-RLDIVKSLY   | 271   | 114   |
| >VHL-R182K-RLDIVRSLY   | 77    | >VHL-R182K-RLDIVKSLY   | 142   | 65    |
| >VHL-R182K-RLDIVRSL    | 415   | >VHL-R182K-RLDIVKSL    | 656   | 241   |
| >VHL-R182K-RLDIVRSLY   | 33    | >VHL-R182K-RLDIVKSLY   | 32    | 1     |
| >VHL-R182K-RLDIVRSLY   | 32    | >VHL-R182K-RLDIVKSLY   | 32    | 0     |
| >VHL-R182K-RLDIVRSLY   | 68    | >VHL-R182K-RLDIVKSLY   | 58    | 10    |
| >VHL-R182K-RRLDIVRSLY  | 81    | >VHL-R182K-RRLDIVKSLY  | 86    | 5     |
| >VHL-R182K-RRLDIVRSLY  | 437   | >VHL-R182K-RRLDIVKSLY  | 514   | 77    |
| >VHL-R182K-RRLDIVRSL   | 109   | >VHL-R182K-RRLDIVKSL   | 80    | 29    |
| >VHL-R182K-RRLDIVRSLY  | 49    | >VHL-R182K-RRLDIVKSLY  | 68    | 19    |
| >VHL-R182K-RRLDIVRS    | 102   | >VHL-R182K-RRLDIVKS    | 76    | 26    |
| >VHL-R182K-RRLDIVRSL   | 15    | >VHL-R182K-RRLDIVKSL   | 16    | 1     |
| >VHL-R182K-RRLDIVRSLY  | 10    | >VHL-R182K-RRLDIVKSLY  | 10    | 0     |

|                        |       |                        |       |       |
|------------------------|-------|------------------------|-------|-------|
| >VHL-R182K-RRLDIVRS    | 242   | >VHL-R182K-RRLDIVKS    | 373   | 131   |
| >VHL-R182K-RRLDIVRSLY  | 303   | >VHL-R182K-RRLDIVKSLY  | 360   | 57    |
| >VHL-R182K-RRLDIVRSLYE | 319   | >VHL-R182K-RRLDIVKSLYE | 540   | 221   |
| >VHL-R182K-RRLDIVRSLY  | 318   | >VHL-R182K-RRLDIVKSLY  | 318   | 0     |
| >VHL-R182K-YRRLDIVRSL  | 130   | >VHL-R182K-YRRLDIVKSL  | 80    | 50    |
| >VHL-R182K-YRRLDIVRSLY | 65    | >VHL-R182K-YRRLDIVKSLY | 90    | 25    |
| >VHL-R182K-YRRLDIVR    | 308   | >VHL-R182K-YRRLDIVK    | 159   | 149   |
| >VHL-R182K-YRRLDIVRSL  | 43    | >VHL-R182K-YRRLDIVKSL  | 47    | 4     |
| >VHL-R182K-YRRLDIVRSLY | 206   | >VHL-R182K-YRRLDIVKSLY | 273   | 67    |
| >VHL-R182K-YRRLDIVRSLY | 95    | >VHL-R182K-YRRLDIVKSLY | 99    | 4     |
| >VHL-R182K-YRRLDIVRSL  | 304   | >VHL-R182K-YRRLDIVKSL  | 491   | 187   |
| >VHL-R182K-YRRLDIVRSLY | 391   | >VHL-R182K-YRRLDIVKSLY | 587   | 196   |
| >VHL-R182K-YRRLDIVRSL  | 94    | >VHL-R182K-YRRLDIVKSL  | 131   | 37    |
| >VHL-R182K-YRRLDIVRSLY | 177   | >VHL-R182K-YRRLDIVKSLY | 306   | 129   |
| >VHL-R182K-NYRRLDIVRSI | 129   | >VHL-R182K-NYRRLDIVKSI | 91    | 38    |
| >VHL-R182K-NYRRLDIVR   | 2598  | >VHL-R182K-NYRRLDIVK   | 19    | 2579  |
| >VHL-R182K-NYRRLDIVR   | 256   | >VHL-R182K-NYRRLDIVK   | 3060  | 2804  |
| >VHL-R182K-NYRRLDIVR   | 30    | >VHL-R182K-NYRRLDIVK   | 778   | 748   |
| >VHL-R200W RLTQERIA    | 311   | >VHL-R200W WLTQERIA    | 89    | 222   |
| >VHL-R200W RLTQERIAHQ  | 174   | >VHL-R200W WLTQERIAHC  | 48    | 126   |
| >VHL-R200W RLTQERIAHQ  | 79    | >VHL-R200W WLTQERIAHC  | 4827  | 4748  |
| >VHL-R200W RLTQERIAHQ  | 497   | >VHL-R200W WLTQERIAHC  | 135   | 362   |
| >VHL-R200W RLTQERIAHQ  | 45    | >VHL-R200W WLTQERIAHC  | 126   | 81    |
| >VHL-R200W ERLTQERI    | 36250 | >VHL-R200W EWLTQERI    | 411   | 35839 |
| >VHL-R200W LERLTQERI   | 43    | >VHL-R200W LEWLTQERI   | 14    | 29    |
| >VHL-R200W LERLTQER    | 2227  | >VHL-R200W LEWLTQER    | 482   | 1745  |
| >VHL-R200W LERLTQERIAF | 341   | >VHL-R200W LEWLTQERIA  | 91    | 250   |
| >VHL-R200W LERLTQERI   | 25    | >VHL-R200W LEWLTQERI   | 30    | 5     |
| >VHL-R200W LERLTQER    | 4852  | >VHL-R200W LEWLTQER    | 454   | 4398  |
| >VHL-R200W DLERLTQER   | 222   | >VHL-R200W DLEWLTQER   | 110   | 112   |
| >VHL-R200W DLERLTQER   | 454   | >VHL-R200W DLEWLTQER   | 105   | 349   |
| >VHL-R200W KDLERLTQER  | 55    | >VHL-R200W KDLEWLTQER  | 27    | 28    |
| >VHL-R200W KDLERLTQER  | 554   | >VHL-R200W KDLEWLTQER  | 204   | 350   |
| >VHL-R200W KDLERLTQER  | 44    | >VHL-R200W KDLEWLTQER  | 55    | 11    |
| >VHL-R200W VQKDLERL    | 1048  | >VHL-R200W VQKDLEWL    | 169   | 879   |
| >VHL-R200W NVQKDLERL   | 388   | >VHL-R200W NVQKDLEWL   | 119   | 269   |
| >VHL-R200W NVQKDLER    | 163   | >VHL-R200W NVQKDLEW    | 29694 | 29531 |
| >VHL-R200W HPNVQKDLEI  | 5933  | >VHL-R200W HPNVQKDLEI  | 147   | 5786  |
| >VHL-R200W HPNVQKDLEI  | 230   | >VHL-R200W HPNVQKDLEI  | 278   | 48    |
| >VHL-R200W HPNVQKDLEI  | 20440 | >VHL-R200W HPNVQKDLEI  | 16    | 20424 |
| >VHL-R210W RLTQERIAHQ  | 79    | >VHL-R210W RLTQERIAHQ  | 17080 | 17001 |
| >VHL-R210W RLTQERIAHQ  | 10306 | >VHL-R210W RLTQERIAHQ  | 275   | 10031 |
| >VHL-R210W RLTQERIAHQ  | 497   | >VHL-R210W RLTQERIAHQ  | 35935 | 35438 |

|                       |       |                       |       |       |
|-----------------------|-------|-----------------------|-------|-------|
| >VHL-R210W RLTQERIAHQ | 22515 | >VHL-R210W RLTQERIAHQ | 152   | 22363 |
| >VHL-R210W RLTQERIAHQ | 22816 | >VHL-R210W RLTQERIAHQ | 157   | 22659 |
| >VHL-R210W RLTQERIAHQ | 20740 | >VHL-R210W RLTQERIAHQ | 24    | 20716 |
| >VHL-R210W RLTQERIAHQ | 45    | >VHL-R210W RLTQERIAHQ | 23098 | 23053 |
| >VHL-R210W ERIAHQRM   | 303   | >VHL-R210W ERIAHQWM   | 106   | 197   |
| >VHL-R210W QERIAHQR   | 322   | >VHL-R210W QERIAHQW   | 72    | 250   |
| >VHL-R210W QERIAHQR   | 2378  | >VHL-R210W QERIAHQW   | 112   | 2266  |
| >VHL-R210W QERIAHQRM  | 641   | >VHL-R210W QERIAHQWN  | 210   | 431   |
| >VHL-R210W QERIAHQRM  | 464   | >VHL-R210W QERIAHQWN  | 1524  | 1060  |
| >VHL-R210W QERIAHQR   | 8843  | >VHL-R210W QERIAHQW   | 100   | 8743  |
| >VHL-R210W QERIAHQR   | 10499 | >VHL-R210W QERIAHQW   | 72    | 10427 |
| >VHL-R210W QERIAHQRM  | 1263  | >VHL-R210W QERIAHQWN  | 430   | 833   |
| >VHL-R210W TQERIAHQR  | 152   | >VHL-R210W TQERIAHQW  | 21998 | 21846 |
| >VHL-R210W TQERIAHQR  | 166   | >VHL-R210W TQERIAHQW  | 34729 | 34563 |
| >VHL-R210W LTQERIAHQR | 752   | >VHL-R210W LTQERIAHQV | 222   | 530   |
| >VHL-R210W LTQERIAHQR | 43    | >VHL-R210W LTQERIAHQV | 22123 | 22080 |
| >VHL-R210W LTQERIAHQR | 317   | >VHL-R210W LTQERIAHQV | 28101 | 27784 |
| >VHL-R210W LTQERIAHQR | 119   | >VHL-R210W LTQERIAHQV | 35156 | 35037 |
| >VHL-R210W LTQERIAHQR | 7641  | >VHL-R210W LTQERIAHQV | 5     | 7636  |
| >VHL-R210W LTQERIAHQR | 9     | >VHL-R210W LTQERIAHQV | 13    | 4     |
| >VHL-R210W LTQERIAHQR | 19685 | >VHL-R210W LTQERIAHQV | 37    | 19648 |
| >VHL-R210W LTQERIAHQR | 19196 | >VHL-R210W LTQERIAHQV | 12    | 19184 |
| >VHL-R210W LTQERIAHQR | 508   | >VHL-R210W LTQERIAHQV | 109   | 399   |
| >VHL-R210W LTQERIAHQR | 109   | >VHL-R210W LTQERIAHQV | 82    | 27    |
| >VHL-R210W LTQERIAHQR | 31582 | >VHL-R210W LTQERIAHQV | 130   | 31452 |
| >VHL-R60W- RPVLRSVNSR | 239   | >VHL-R60W- WPVLRSVNSI | 3339  | 3100  |
| >VHL-R60W- RPVLRSVNSR | 315   | >VHL-R60W- WPVLRSVNSI | 1205  | 890   |
| >VHL-R60W- PRPVLRSVNS | 11696 | >VHL-R60W- PWPVLRSVN: | 100   | 11596 |
| >VHL-R60W- AEEEMEAGR  | 7995  | >VHL-R60W- AEEEMEAGR  | 118   | 7877  |
| >VHL-R60W- AEEEMEAGR  | 4398  | >VHL-R60W- AEEEMEAGR  | 33    | 4365  |
| >VHL-R60W- RPRPVLR    | 366   | >VHL-R60W- RPWPVLR    | 5019  | 4653  |
| >VHL-R60W- RPRPVLRV   | 9     | >VHL-R60W- RPWPVLRV   | 11    | 2     |
| >VHL-R60W- RPRPVLRSVN | 138   | >VHL-R60W- RPWPVLRSVI | 1797  | 1659  |
| >VHL-R60W- RPRPVLRV   | 2931  | >VHL-R60W- RPWPVLRV   | 189   | 2742  |
| >VHL-R60W- AGRPRPV    | 91    | >VHL-R60W- AGRPWPV    | 166   | 75    |
| >VHL-R60W- AGRPRPVLR  | 124   | >VHL-R60W- AGRPWPVLR  | 435   | 311   |
| >VHL-R60W- AGRPRPVLR  | 65    | >VHL-R60W- AGRPWPVLR  | 143   | 78    |
| >VHL-R60W- AGRPRPVLR  | 93    | >VHL-R60W- AGRPWPVLR  | 90    | 3     |
| >VHL-R60W- EAGRPRPV   | 127   | >VHL-R60W- EAGRPPV    | 111   | 16    |
| >VHL-R60W- EAGRPRPV   | 354   | >VHL-R60W- EAGRPPV    | 52    | 302   |
| >VHL-R60W- EAGRPRPV   | 81    | >VHL-R60W- EAGRPPV    | 10    | 71    |
| >VHL-R60W- MEAGRPRPV  | 194   | >VHL-R60W- MEAGRPPV   | 400   | 206   |
| >VHL-R60W- MEAGRPRPV  | 6040  | >VHL-R60W- MEAGRPPV   | 471   | 5569  |

|                       |       |                       |       |       |
|-----------------------|-------|-----------------------|-------|-------|
| >VHL-R60W- MEAGRPRPV  | 3751  | >VHL-R60W- MEAGRPWP\  | 102   | 3649  |
| >VHL-R60W- MEAGRPRPV  | 4510  | >VHL-R60W- MEAGRPWP\  | 131   | 4379  |
| >VHL-R60W- MEAGRPRPV  | 13089 | >VHL-R60W- MEAGRPWP\  | 115   | 12974 |
| >VHL-R60W- MEAGRPRPV  | 355   | >VHL-R60W- MEAGRPWP\  | 197   | 158   |
| >VHL-R60W- MEAGRPRPV  | 3142  | >VHL-R60W- MEAGRPWP\  | 141   | 3001  |
| >VHL-R60W- MEAGRPRPV  | 1442  | >VHL-R60W- MEAGRPWP\  | 82    | 1360  |
| >VHL-R60W- MEAGRPRPV  | 4080  | >VHL-R60W- MEAGRPWP\  | 195   | 3885  |
| >VHL-R60W- MEAGRPRPV  | 104   | >VHL-R60W- MEAGRPWP\  | 44    | 60    |
| >VHL-R60W- MEAGRPRPV  | 652   | >VHL-R60W- MEAGRPWP\  | 141   | 511   |
| >VHL-R60W- MEAGRPRPV  | 1580  | >VHL-R60W- MEAGRPWP\  | 353   | 1227  |
| >VHL-R60W- MEAGRPRPV  | 248   | >VHL-R60W- MEAGRPWP\  | 201   | 47    |
| >VHL-R60W- MEAGRPRPV  | 56    | >VHL-R60W- MEAGRPWP\  | 15    | 41    |
| >VHL-R60W- MEAGRPRPV  | 205   | >VHL-R60W- MEAGRPWP\  | 47    | 158   |
| >VHL-R60W- MEAGRPRPV  | 329   | >VHL-R60W- MEAGRPWP\  | 292   | 37    |
| >VHL-R60W- MEAGRPRPV  | 213   | >VHL-R60W- MEAGRPWP\  | 80    | 133   |
| >VHL-R60W- EMEAGRPRP' | 4959  | >VHL-R60W- EMEAGRPWF  | 279   | 4680  |
| >VHL-R60W- EMEAGRPRP' | 1851  | >VHL-R60W- EMEAGRPWF  | 350   | 1501  |
| >VHL-R60W- EMEAGRPRP' | 490   | >VHL-R60W- EMEAGRPWF  | 367   | 123   |
| >VHL-R60W- EMEAGRPRP' | 279   | >VHL-R60W- EMEAGRPWF  | 34    | 245   |
| >VHL-R60W- EMEAGRPRP' | 2417  | >VHL-R60W- EMEAGRPWF  | 90    | 2327  |
| >VHL-R60W- EMEAGRPRP' | 2030  | >VHL-R60W- EMEAGRPWF  | 68    | 1962  |
| >VHL-R60W- EMEAGRPRP' | 5448  | >VHL-R60W- EMEAGRPWF  | 207   | 5241  |
| >VHL-R60W- EMEAGRPRP' | 50    | >VHL-R60W- EMEAGRPWF  | 6     | 44    |
| >VHL-R60W- EMEAGRPRP' | 115   | >VHL-R60W- EMEAGRPWF  | 106   | 9     |
| >VHL-R60W- EMEAGRPR   | 299   | >VHL-R60W- EMEAGRPW   | 30251 | 29952 |
| >VHL-R60W- EMEAGRPR   | 190   | >VHL-R60W- EMEAGRPW   | 33289 | 33099 |
| >VHL-R60W- EMEAGRPRP' | 564   | >VHL-R60W- EMEAGRPWF  | 46    | 518   |
| >VHL-R60W- EMEAGRPRP' | 160   | >VHL-R60W- EMEAGRPWF  | 170   | 10    |
| >VHL-R60W- EMEAGRPR   | 412   | >VHL-R60W- EMEAGRPW   | 34341 | 33929 |
| >VHL-R60W- EEMEAGRPR  | 177   | >VHL-R60W- EEMEAGRPA  | 247   | 70    |
| >VHL-R60W- EEMEAGRPR  | 2344  | >VHL-R60W- EEMEAGRPA  | 247   | 2097  |
| >VHL-R60W- EEMEAGRPR  | 781   | >VHL-R60W- EEMEAGRPA  | 83    | 698   |
| >VHL-R60W- EEMEAGRPR  | 273   | >VHL-R60W- EEMEAGRPA  | 17    | 256   |
| >VHL-R60W- EEMEAGRPR  | 378   | >VHL-R60W- EEMEAGRPA  | 74    | 304   |
| >VHL-R60W- EEMEAGRPR  | 604   | >VHL-R60W- EEMEAGRPA  | 210   | 394   |
| >VHL-R60W- EEMEAGRPR  | 268   | >VHL-R60W- EEMEAGRPA  | 134   | 134   |
| >VHL-R60W- EEMEAGRPR  | 4368  | >VHL-R60W- EEMEAGRPA  | 66    | 4302  |
| >VHL-R60W- EEMEAGRPR  | 871   | >VHL-R60W- EEMEAGRPA  | 9     | 862   |
| >VHL-R60W- EEMEAGRPR  | 419   | >VHL-R60W- EEMEAGRPA  | 188   | 231   |
| >VHL-R60W- EEMEAGRPR  | 27    | >VHL-R60W- EEMEAGRPA  | 13    | 14    |
| >VHL-R60W- EEMEAGRPR  | 138   | >VHL-R60W- EEMEAGRPA  | 58    | 80    |
| >VHL-R60W- EEEMEAGRPI | 8842  | >VHL-R60W- EEEMEAGRPI | 19    | 8823  |
| >VHL-R60W- EEEMEAGRPI | 21165 | >VHL-R60W- EEEMEAGRPI | 189   | 20976 |

|                        |       |                        |       |       |
|------------------------|-------|------------------------|-------|-------|
| >VHL-R69C-v REPSQVIF   | 6056  | >VHL-R69C-n CEPSQVIF   | 300   | 5756  |
| >VHL-R69C-v REPSQVIF   | 56    | >VHL-R69C-n CEPSQVIF   | 597   | 541   |
| >VHL-R69C-v REPSQVIFCN | 43    | >VHL-R69C-n CEPSQVIFCN | 91    | 48    |
| >VHL-R69C-v SREPSQVIF  | 78    | >VHL-R69C-n SCEPSQVIF  | 1130  | 1052  |
| >VHL-R69C-v SREPSQVIF  | 185   | >VHL-R69C-n SCEPSQVIF  | 35944 | 35759 |
| >VHL-R69C-v SREPSQVI   | 1046  | >VHL-R69C-n SCEPSQVI   | 295   | 751   |
| >VHL-R69C-v NSREPSQV   | 2191  | >VHL-R69C-n NSCEPSQV   | 321   | 1870  |
| >VHL-R69C-v NSREPSQV   | 904   | >VHL-R69C-n NSCEPSQV   | 379   | 525   |
| >VHL-R69C-v NSREPSQVIF | 13    | >VHL-R69C-n NSCEPSQVIF | 45    | 32    |
| >VHL-R69C-v NSREPSQVIF | 127   | >VHL-R69C-n NSCEPSQVIF | 392   | 265   |
| >VHL-R69C-v NSREPSQVI  | 134   | >VHL-R69C-n NSCEPSQVI  | 35    | 99    |
| >VHL-R69C-v VNSREPSQVI | 101   | >VHL-R69C-n VNSCEPSQVI | 76    | 25    |
| >VHL-R69C-v SVNSREPSQV | 1341  | >VHL-R69C-n SVNSCEPSQV | 246   | 1095  |
| >VHL-R69C-v SVNSREPSQV | 190   | >VHL-R69C-n SVNSCEPSQV | 98    | 92    |
| >VHL-R69C-v SVNSREPSQV | 126   | >VHL-R69C-n SVNSCEPSQV | 121   | 5     |
| >VHL-R69C-v SVNSREPSQV | 165   | >VHL-R69C-n SVNSCEPSQV | 119   | 46    |
| >VHL-R69C-v SVNSREPSQV | 2119  | >VHL-R69C-n SVNSCEPSQV | 443   | 1676  |
| >VHL-R69C-v SVNSREPSQV | 25    | >VHL-R69C-n SVNSCEPSQV | 27    | 2     |
| >VHL-R69C-v SVNSREPSQV | 614   | >VHL-R69C-n SVNSCEPSQV | 412   | 202   |
| >VHL-R69C-v SVNSREPSQV | 590   | >VHL-R69C-n SVNSCEPSQV | 407   | 183   |
| >VHL-R69C-v RSVNSREPSQ | 225   | >VHL-R69C-n RSVNSCEPSQ | 221   | 4     |
| >VHL-R69C-v RSVNSREPSQ | 22    | >VHL-R69C-n RSVNSCEPSQ | 16    | 6     |
| >VHL-R69C-v RSVNSREPSQ | 136   | >VHL-R69C-n RSVNSCEPSQ | 86    | 50    |
| >VHL-R69C-v VLRSVNSR   | 11842 | >VHL-R69C-n VLRSVNSC   | 192   | 11650 |
| >VHL-R69C-v VLRSVNSR   | 83    | >VHL-R69C-n VLRSVNSC   | 22628 | 22545 |
| >VHL-R69C-v VLRSVNSR   | 206   | >VHL-R69C-n VLRSVNSC   | 34846 | 34640 |
| >VHL-R69C-v RPVLRSVNSR | 239   | >VHL-R69C-n RPVLRSVNSC | 27671 | 27432 |
| >VHL-R69C-v RPVLRSVNSR | 315   | >VHL-R69C-n RPVLRSVNSC | 35531 | 35216 |
| >VHL-R79H-v RSPRVVLPV  | 488   | >VHL-R79H-r HSPRVVLPV  | 1740  | 1252  |
| >VHL-R79H-v RSPRVVLPV  | 301   | >VHL-R79H-r HSPRVVLPV  | 1203  | 902   |
| >VHL-R79H-v RSPRVVLPV  | 130   | >VHL-R79H-r HSPRVVLPV  | 1420  | 1290  |
| >VHL-R79H-v RSPRVVLPV  | 247   | >VHL-R79H-r HSPRVVLPV  | 1867  | 1620  |
| >VHL-R79H-v RSPRVVLPV  | 147   | >VHL-R79H-r HSPRVVLPV  | 1275  | 1128  |
| >VHL-R79H-v RSPRVVLPV  | 594   | >VHL-R79H-r HSPRVVLPV  | 14    | 580   |
| >VHL-R79H-v RSPRVVLPV  | 9185  | >VHL-R79H-r HSPRVVLPV  | 397   | 8788  |
| >VHL-R79H-v RSPRVVLPV  | 55    | >VHL-R79H-r HSPRVVLPV  | 282   | 227   |
| >VHL-R79H-v RSPRVVLPV  | 301   | >VHL-R79H-r HSPRVVLPV  | 1886  | 1585  |
| >VHL-R79H-v RSPRVVLPV  | 48    | >VHL-R79H-r HSPRVVLPV  | 65    | 17    |
| >VHL-R79H-v RSPRVVLPV  | 12    | >VHL-R79H-r HSPRVVLPV  | 23    | 11    |
| >VHL-R79H-v RSPRVVLPV  | 39    | >VHL-R79H-r HSPRVVLPV  | 227   | 188   |
| >VHL-R79H-v RSPRVVLPV  | 4     | >VHL-R79H-r HSPRVVLPV  | 12    | 8     |
| >VHL-R79H-v RSPRVVLPV  | 493   | >VHL-R79H-r HSPRVVLPV  | 6161  | 5668  |
| >VHL-R79H-v RSPRVVLPV  | 345   | >VHL-R79H-r HSPRVVLPV  | 2057  | 1712  |

|                          |      |                          |       |       |
|--------------------------|------|--------------------------|-------|-------|
| >VHL-R79H-v NRSRPRVVL    | 3681 | >VHL-R79H-r NHSPRVVL     | 180   | 3501  |
| >VHL-R79H-v NRSRPRVVL    | 22   | >VHL-R79H-r NHSPRVVL     | 13    | 9     |
| >VHL-R79H-v NRSRPRVLPV   | 265  | >VHL-R79H-r NHSPRVLPV    | 100   | 165   |
| >VHL-R79H-v NRSRPRVLPV   | 601  | >VHL-R79H-r NHSPRVLPV    | 131   | 470   |
| >VHL-R79H-v REPSQVIFCN   | 43   | >VHL-R79H-r REPSQVIFCN   | 14270 | 14227 |
| >VHL-R79H-v FCNRSRPRV    | 252  | >VHL-R79H-r FCNHSPRV     | 257   | 5     |
| >VHL-R79H-v FCNRSRPRV    | 107  | >VHL-R79H-r FCNHSPRV     | 208   | 101   |
| >VHL-R79H-v IFCNRSRPR    | 15   | >VHL-R79H-r IFCNHSPR     | 20    | 5     |
| >VHL-R79H-v IFCNRSRPR    | 20   | >VHL-R79H-r IFCNHSPR     | 39    | 19    |
| >VHL-R79H-v IFCNRSRPR    | 62   | >VHL-R79H-r IFCNHSPR     | 51    | 11    |
| >VHL-R79H-v VIFCNRSRPR'  | 72   | >VHL-R79H-r VIFCNHSRPR'  | 43    | 29    |
| >VHL-R79H-v VIFCNRSRPRV  | 7    | >VHL-R79H-r VIFCNHSRPRV  | 3     | 4     |
| >VHL-R79H-v VIFCNRSRPR'  | 15   | >VHL-R79H-r VIFCNHSRPR'  | 7     | 8     |
| >VHL-R79H-v VIFCNRSRPRV  | 86   | >VHL-R79H-r VIFCNHSRPRV  | 41    | 45    |
| >VHL-R79H-v VIFCNRSRPR'  | 191  | >VHL-R79H-r VIFCNHSRPR'  | 86    | 105   |
| >VHL-R79H-v VIFCNRSRPRV  | 70   | >VHL-R79H-r VIFCNHSRPRV  | 35    | 35    |
| >VHL-R79H-v VIFCNRSRPR'  | 874  | >VHL-R79H-r VIFCNHSRPR'  | 410   | 464   |
| >VHL-R79H-v VIFCNRSRPRV  | 400  | >VHL-R79H-r VIFCNHSRPRV  | 121   | 279   |
| >VHL-R79H-v VIFCNRSRPRV  | 7    | >VHL-R79H-r VIFCNHSRPRV  | 6     | 1     |
| >VHL-R79H-v VIFCNRSRPRV' | 59   | >VHL-R79H-r VIFCNHSRPRV' | 58    | 1     |
| >VHL-R79H-v VIFCNRSRPR   | 427  | >VHL-R79H-r VIFCNHSRPR   | 677   | 250   |
| >VHL-R79H-v VIFCNRSRPR   | 113  | >VHL-R79H-r VIFCNHSRPR   | 111   | 2     |
| >VHL-R79H-v VIFCNRSRPR   | 23   | >VHL-R79H-r VIFCNHSRPR   | 25    | 2     |
| >VHL-R79H-v VIFCNRSRPR   | 93   | >VHL-R79H-r VIFCNHSRPR   | 104   | 11    |
| >VHL-R79H-v VIFCNRSRPR   | 24   | >VHL-R79H-r VIFCNHSRPR   | 23    | 1     |
| >VHL-R79H-v VIFCNRSRPRV  | 508  | >VHL-R79H-r VIFCNHSRPRV  | 146   | 362   |
| >VHL-R79H-v VIFCNRSRPRV' | 360  | >VHL-R79H-r VIFCNHSRPRV' | 271   | 89    |
| >VHL-R79H-v QVIFCNRSRPR  | 1270 | >VHL-R79H-r QVIFCNHSRPR  | 336   | 934   |
| >VHL-R79H-v QVIFCNRSRPR  | 755  | >VHL-R79H-r QVIFCNHSRPR  | 317   | 438   |
| >VHL-R79H-v QVIFCNRSRPR  | 214  | >VHL-R79H-r QVIFCNHSRPR  | 61    | 153   |
| >VHL-R79H-v QVIFCNRSRPR  | 511  | >VHL-R79H-r QVIFCNHSRPR  | 124   | 387   |
| >VHL-R79H-v QVIFCNRSRPR  | 305  | >VHL-R79H-r QVIFCNHSRPR  | 192   | 113   |
| >VHL-R79H-v QVIFCNRSRPR  | 381  | >VHL-R79H-r QVIFCNHSRPR  | 207   | 174   |
| >VHL-R79H-v QVIFCNRSRPR  | 11   | >VHL-R79H-r QVIFCNHSRPR  | 17    | 6     |
| >VHL-R79H-v QVIFCNRSRPR  | 114  | >VHL-R79H-r QVIFCNHSRPR  | 65    | 49    |
| >VHL-R79H-v QVIFCNRSRPR  | 6    | >VHL-R79H-r QVIFCNHSRPR  | 6     | 0     |
| >VHL-R79H-v QVIFCNRS     | 824  | >VHL-R79H-r QVIFCNHS     | 318   | 506   |
| >VHL-R79H-v QVIFCNRSRPR  | 36   | >VHL-R79H-r QVIFCNHSRPR  | 22    | 14    |
| >VHL-R79H-v QVIFCNRSRPR  | 178  | >VHL-R79H-r QVIFCNHSRPR  | 31    | 147   |
| >VHL-R79H-v QVIFCNRSRPR  | 175  | >VHL-R79H-r QVIFCNHSRPR  | 95    | 80    |
| >VHL-R79H-v SQVIFCNR     | 54   | >VHL-R79H-r SQVIFCNH     | 6010  | 5956  |
| >VHL-R79H-v SQVIFCNRSPI  | 47   | >VHL-R79H-r SQVIFCNHSP   | 38    | 9     |
| >VHL-R79H-v SQVIFCNR     | 423  | >VHL-R79H-r SQVIFCNH     | 26588 | 26165 |

|                        |       |                        |       |       |
|------------------------|-------|------------------------|-------|-------|
| >VHL-R79H-v SQVIFCNRSP | 436   | >VHL-R79H-r SQVIFCNHSP | 413   | 23    |
| >VHL-R79H-v SQVIFCNRSP | 301   | >VHL-R79H-r SQVIFCNHSP | 229   | 72    |
| >VHL-R79H-v SQVIFCNR   | 74    | >VHL-R79H-r SQVIFCNH   | 14667 | 14593 |
| >VHL-R79H-v SQVIFCNRSP | 150   | >VHL-R79H-r SQVIFCNHSP | 119   | 31    |
| >VHL-R79H-v PSQVIFCNR  | 125   | >VHL-R79H-r PSQVIFCNH  | 12303 | 12178 |
| >VHL-R79H-v PSQVIFCNR  | 362   | >VHL-R79H-r PSQVIFCNH  | 28999 | 28637 |
| >VHL-R79H-v EPSQVIFCNR | 355   | >VHL-R79H-r EPSQVIFCNH | 17158 | 16803 |
| >VHL-R79H-v EPSQVIFCNR | 388   | >VHL-R79H-r EPSQVIFCNH | 12431 | 12043 |
| >VHL-R79H-v EPSQVIFCNR | 91    | >VHL-R79H-r EPSQVIFCNH | 12501 | 12410 |
| >VHL-R79H-v EPSQVIFCNR | 213   | >VHL-R79H-r EPSQVIFCNH | 28179 | 27966 |
| >VHL-R79P-v RSPRVVLPV  | 488   | >VHL-R79P-n RSPRVVLPV  | 13477 | 12989 |
| >VHL-R79P-v RSPRVVLPV  | 301   | >VHL-R79P-n RSPRVVLPV  | 12101 | 11800 |
| >VHL-R79P-v RSPRVVLPV  | 130   | >VHL-R79P-n RSPRVVLPV  | 7177  | 7047  |
| >VHL-R79P-v RSPRVVLPVV | 247   | >VHL-R79P-n RSPRVVLPVV | 8068  | 7821  |
| >VHL-R79P-v RSPRVVLPVV | 147   | >VHL-R79P-n RSPRVVLPVV | 7222  | 7075  |
| >VHL-R79P-v RSPRVVLPVV | 55    | >VHL-R79P-n RSPRVVLPVV | 5642  | 5587  |
| >VHL-R79P-v RSPRVVLPVV | 301   | >VHL-R79P-n RSPRVVLPVV | 17305 | 17004 |
| >VHL-R79P-v RSPRVVLPVV | 48    | >VHL-R79P-n RSPRVVLPVV | 1370  | 1322  |
| >VHL-R79P-v RSPRVVLPVV | 12    | >VHL-R79P-n RSPRVVLPVV | 2114  | 2102  |
| >VHL-R79P-v RSPRVVLPVV | 39    | >VHL-R79P-n RSPRVVLPVV | 490   | 451   |
| >VHL-R79P-v RSPRVVLPVV | 4     | >VHL-R79P-n RSPRVVLPVV | 22    | 18    |
| >VHL-R79P-v RSPRVVLPVV | 493   | >VHL-R79P-n RSPRVVLPVV | 26187 | 25694 |
| >VHL-R79P-v RSPRVVLPVV | 345   | >VHL-R79P-n RSPRVVLPVV | 11890 | 11545 |
| >VHL-R79P-v NRSRVL     | 18635 | >VHL-R79P-n NRSRVL     | 20    | 18615 |
| >VHL-R79P-v NRSRVL     | 3695  | >VHL-R79P-n NRSRVL     | 490   | 3205  |
| >VHL-R79P-v NRSRVL     | 22    | >VHL-R79P-n NRSRVL     | 43    | 21    |
| >VHL-R79P-v NRSRVL     | 265   | >VHL-R79P-n NRSRVL     | 760   | 495   |
| >VHL-R79P-v NRSRVL     | 12133 | >VHL-R79P-n NRSRVL     | 38    | 12095 |
| >VHL-R79P-v NRSRVL     | 28977 | >VHL-R79P-n NRSRVL     | 355   | 28622 |
| >VHL-R79P-v NRSRVL     | 4145  | >VHL-R79P-n NRSRVL     | 11    | 4134  |
| >VHL-R79P-v REPSQVIFCN | 43    | >VHL-R79P-n REPSQVIFCN | 25588 | 25545 |
| >VHL-R79P-v CNRSRVL    | 17445 | >VHL-R79P-n CNRSRVL    | 176   | 17269 |
| >VHL-R79P-v CNRSRVL    | 9492  | >VHL-R79P-n CNRSRVL    | 484   | 9008  |
| >VHL-R79P-v FCNRSRVL   | 252   | >VHL-R79P-n FCNRSRVL   | 103   | 149   |
| >VHL-R79P-v FCNRSRVL   | 994   | >VHL-R79P-n FCNRSRVL   | 481   | 513   |
| >VHL-R79P-v FCNRSRVL   | 107   | >VHL-R79P-n FCNRSRVL   | 50    | 57    |
| >VHL-R79P-v IFCNRSRVL  | 1734  | >VHL-R79P-n IFCNRSRVL  | 485   | 1249  |
| >VHL-R79P-v IFCNRSR    | 15    | >VHL-R79P-n IFCNRSR    | 31    | 16    |
| >VHL-R79P-v IFCNRSR    | 20    | >VHL-R79P-n IFCNRSR    | 57    | 37    |
| >VHL-R79P-v IFCNRSR    | 62    | >VHL-R79P-n IFCNRSR    | 104   | 42    |
| >VHL-R79P-v VIFCNRSRVL | 1031  | >VHL-R79P-n VIFCNRSRVL | 423   | 608   |
| >VHL-R79P-v VIFCNRSRVL | 646   | >VHL-R79P-n VIFCNRSRVL | 348   | 298   |
| >VHL-R79P-v VIFCNRSRVL | 72    | >VHL-R79P-n VIFCNRSRVL | 28    | 44    |

|                         |      |                         |       |       |
|-------------------------|------|-------------------------|-------|-------|
| >VHL-R79P-v VIFCNRSPRV  | 7    | >VHL-R79P-n VIFCNPSPRV  | 3     | 4     |
| >VHL-R79P-v VIFCNRSPRV^ | 15   | >VHL-R79P-n VIFCNPSPRV^ | 5     | 10    |
| >VHL-R79P-v VIFCNRSPRV  | 86   | >VHL-R79P-n VIFCNPSPRV  | 28    | 58    |
| >VHL-R79P-v VIFCNRSPRV^ | 191  | >VHL-R79P-n VIFCNPSPRV^ | 54    | 137   |
| >VHL-R79P-v VIFCNRSPRV  | 70   | >VHL-R79P-n VIFCNPSPRV  | 21    | 49    |
| >VHL-R79P-v VIFCNRSPRV^ | 874  | >VHL-R79P-n VIFCNPSPRV^ | 228   | 646   |
| >VHL-R79P-v VIFCNRSPRV  | 400  | >VHL-R79P-n VIFCNPSPRV  | 36    | 364   |
| >VHL-R79P-v VIFCNRSPRV  | 7    | >VHL-R79P-n VIFCNPSPRV  | 8     | 1     |
| >VHL-R79P-v VIFCNRSPRV^ | 59   | >VHL-R79P-n VIFCNPSPRV^ | 59    | 0     |
| >VHL-R79P-v VIFCNRSPR   | 427  | >VHL-R79P-n VIFCNPSPR   | 400   | 27    |
| >VHL-R79P-v VIFCNRSPR   | 113  | >VHL-R79P-n VIFCNPSPR   | 94    | 19    |
| >VHL-R79P-v VIFCNRSPR   | 23   | >VHL-R79P-n VIFCNPSPR   | 116   | 93    |
| >VHL-R79P-v VIFCNRSPR   | 93   | >VHL-R79P-n VIFCNPSPR   | 357   | 264   |
| >VHL-R79P-v VIFCNRSPR   | 24   | >VHL-R79P-n VIFCNPSPR   | 55    | 31    |
| >VHL-R79P-v VIFCNRSPRV  | 508  | >VHL-R79P-n VIFCNPSPRV  | 121   | 387   |
| >VHL-R79P-v VIFCNRSPRV^ | 360  | >VHL-R79P-n VIFCNPSPRV^ | 341   | 19    |
| >VHL-R79P-v QVIFCNRSPR  | 1270 | >VHL-R79P-n QVIFCNRSPR^ | 477   | 793   |
| >VHL-R79P-v QVIFCNRSPR  | 214  | >VHL-R79P-n QVIFCNRSPR^ | 70    | 144   |
| >VHL-R79P-v QVIFCNRSPR  | 511  | >VHL-R79P-n QVIFCNRSPR^ | 189   | 322   |
| >VHL-R79P-v QVIFCNRSPR  | 305  | >VHL-R79P-n QVIFCNRSPR  | 264   | 41    |
| >VHL-R79P-v QVIFCNRSPR  | 381  | >VHL-R79P-n QVIFCNRSPR  | 189   | 192   |
| >VHL-R79P-v QVIFCNRSPR  | 11   | >VHL-R79P-n QVIFCNRSPR  | 34    | 23    |
| >VHL-R79P-v QVIFCNRSPR  | 114  | >VHL-R79P-n QVIFCNRSPR  | 290   | 176   |
| >VHL-R79P-v QVIFCNRSPR  | 6    | >VHL-R79P-n QVIFCNRSPR  | 6     | 0     |
| >VHL-R79P-v QVIFCNRS    | 824  | >VHL-R79P-n QVIFCNRS    | 188   | 636   |
| >VHL-R79P-v QVIFCNRSPR  | 36   | >VHL-R79P-n QVIFCNRSPR^ | 24    | 12    |
| >VHL-R79P-v QVIFCNRSPR  | 178  | >VHL-R79P-n QVIFCNRSPR^ | 28    | 150   |
| >VHL-R79P-v QVIFCNRSPR  | 175  | >VHL-R79P-n QVIFCNRSPR  | 184   | 9     |
| >VHL-R79P-v SQVIFCNR    | 54   | >VHL-R79P-n SQVIFCNP    | 19218 | 19164 |
| >VHL-R79P-v SQVIFCNRSPi | 47   | >VHL-R79P-n SQVIFCNPSPi | 80    | 33    |
| >VHL-R79P-v SQVIFCNR    | 423  | >VHL-R79P-n SQVIFCNP    | 40698 | 40275 |
| >VHL-R79P-v SQVIFCNRSPi | 436  | >VHL-R79P-n SQVIFCNPSPi | 684   | 248   |
| >VHL-R79P-v SQVIFCNRSPi | 301  | >VHL-R79P-n SQVIFCNPSPi | 202   | 99    |
| >VHL-R79P-v SQVIFCNR    | 74   | >VHL-R79P-n SQVIFCNP    | 23809 | 23735 |
| >VHL-R79P-v SQVIFCNRSPi | 150  | >VHL-R79P-n SQVIFCNPSPi | 134   | 16    |
| >VHL-R79P-v PSQVIFCNR   | 125  | >VHL-R79P-n PSQVIFCNP   | 22069 | 21944 |
| >VHL-R79P-v PSQVIFCNR   | 362  | >VHL-R79P-n PSQVIFCNP   | 36970 | 36608 |
| >VHL-R79P-v EPSQVIFCNR  | 355  | >VHL-R79P-n EPSQVIFCNP  | 32686 | 32331 |
| >VHL-R79P-v EPSQVIFCNR  | 388  | >VHL-R79P-n EPSQVIFCNP  | 28684 | 28296 |
| >VHL-R79P-v EPSQVIFCNR  | 91   | >VHL-R79P-n EPSQVIFCNP  | 34414 | 34323 |
| >VHL-R79P-v EPSQVIFCNR: | 1597 | >VHL-R79P-n EPSQVIFCNP: | 155   | 1442  |
| >VHL-R79P-v EPSQVIFCNR  | 213  | >VHL-R79P-n EPSQVIFCNP  | 33877 | 33664 |
| >VHL-R82C-v RVVLPVWL    | 415  | >VHL-R82C-n CVVLPVWL    | 1715  | 1300  |



|                        |      |                        |       |       |
|------------------------|------|------------------------|-------|-------|
| >VHL-R82C-v RVVLPVWL   | 535  | >VHL-R82C-n CVVLPVWL   | 307   | 228   |
| >VHL-R82C-v RVVLPVWLN  | 182  | >VHL-R82C-n CVVLPVWLN  | 109   | 73    |
| >VHL-R82C-v RVVLPVWL   | 351  | >VHL-R82C-n CVVLPVWL   | 17746 | 17395 |
| >VHL-R82C-v RVVLPVWLN  | 202  | >VHL-R82C-n CVVLPVWLN  | 12806 | 12604 |
| >VHL-R82C-v RVVLPVWL   | 2436 | >VHL-R82C-n CVVLPVWL   | 343   | 2093  |
| >VHL-R82C-v RVVLPVWL   | 89   | >VHL-R82C-n CVVLPVWL   | 5868  | 5779  |
| >VHL-R82C-v RVVLPVWLN  | 9    | >VHL-R82C-n CVVLPVWLN  | 385   | 376   |
| >VHL-R82C-v RVVLPVWLN  | 56   | >VHL-R82C-n CVVLPVWLN  | 1008  | 952   |
| >VHL-R82C-v RVVLPVWL   | 1825 | >VHL-R82C-n CVVLPVWL   | 257   | 1568  |
| >VHL-R82C-v RVVLPVWLN  | 230  | >VHL-R82C-n CVVLPVWLN  | 3195  | 2965  |
| >VHL-R82C-v RVVLPVWLN  | 320  | >VHL-R82C-n CVVLPVWLN  | 359   | 39    |
| >VHL-R82C-v PRVVLPPVWL | 364  | >VHL-R82C-n PCVVLPPVWL | 3219  | 2855  |
| >VHL-R82C-v PRVVLPPVWL | 89   | >VHL-R82C-n PCVVLPPVWL | 30301 | 30212 |
| >VHL-R82C-v PRVVLPPVWL | 385  | >VHL-R82C-n PCVVLPPVWL | 36514 | 36129 |
| >VHL-R82C-v SQVIFCNRSP | 47   | >VHL-R82C-n SQVIFCNRSP | 19671 | 19624 |
| >VHL-R82C-v SQVIFCNRSP | 436  | >VHL-R82C-n SQVIFCNRSP | 42942 | 42506 |
| >VHL-R82C-v SQVIFCNRSP | 301  | >VHL-R82C-n SQVIFCNRSP | 1521  | 1220  |
| >VHL-R82C-v SQVIFCNRSP | 150  | >VHL-R82C-n SQVIFCNRSP | 32753 | 32603 |
| >VHL-R82C-v SPRVLPV    | 21   | >VHL-R82C-n SPCVLPV    | 1745  | 1724  |
| >VHL-R82C-v SPRVLPVW   | 189  | >VHL-R82C-n SPCVLPVW   | 11548 | 11359 |
| >VHL-R82C-v SPRVLPVWI  | 61   | >VHL-R82C-n SPCVLPVWI  | 835   | 774   |
| >VHL-R82C-v SPRVLPVW   | 318  | >VHL-R82C-n SPCVLPVW   | 279   | 39    |
| >VHL-R82C-v SPRVLPV    | 251  | >VHL-R82C-n SPCVLPV    | 609   | 358   |
| >VHL-R82C-v SPRVLPVW   | 42   | >VHL-R82C-n SPCVLPVW   | 24    | 18    |
| >VHL-R82C-v RSPRVLPV   | 1309 | >VHL-R82C-n RSPCVLPV   | 485   | 824   |
| >VHL-R82C-v RSPRVLPV   | 488  | >VHL-R82C-n RSPCVLPV   | 206   | 282   |
| >VHL-R82C-v RSPRVLPV   | 664  | >VHL-R82C-n RSPCVLPV   | 350   | 314   |
| >VHL-R82C-v RSPRVLPV   | 301  | >VHL-R82C-n RSPCVLPV   | 1000  | 699   |
| >VHL-R82C-v RSPRVLPV   | 130  | >VHL-R82C-n RSPCVLPV   | 136   | 6     |
| >VHL-R82C-v RSPRVLPVW  | 247  | >VHL-R82C-n RSPCVLPVW  | 227   | 20    |
| >VHL-R82C-v RSPRVLPVW  | 147  | >VHL-R82C-n RSPCVLPVW  | 138   | 9     |
| >VHL-R82C-v RSPRVLPV   | 594  | >VHL-R82C-n RSPCVLPV   | 101   | 493   |
| >VHL-R82C-v RSPRVLPVW  | 55   | >VHL-R82C-n RSPCVLPVW  | 42    | 13    |
| >VHL-R82C-v RSPRVLPVW  | 301  | >VHL-R82C-n RSPCVLPVW  | 195   | 106   |
| >VHL-R82C-v RSPRVLPVW  | 48   | >VHL-R82C-n RSPCVLPVW  | 84    | 36    |
| >VHL-R82C-v RSPRVLPVW  | 12   | >VHL-R82C-n RSPCVLPVW  | 17    | 5     |
| >VHL-R82C-v RSPRVLPVW  | 39   | >VHL-R82C-n RSPCVLPVW  | 33    | 6     |
| >VHL-R82C-v RSPRVLPVW  | 4    | >VHL-R82C-n RSPCVLPVW  | 4     | 0     |
| >VHL-R82C-v RSPRVLPVW  | 493  | >VHL-R82C-n RSPCVLPVW  | 1948  | 1455  |
| >VHL-R82C-v RSPRVLPVW  | 345  | >VHL-R82C-n RSPCVLPVW  | 344   | 1     |
| >VHL-R82C-v NRSRVL     | 22   | >VHL-R82C-n NRSPCVL    | 27    | 5     |
| >VHL-R82C-v NRSRVL     | 265  | >VHL-R82C-n NRSPCVL    | 158   | 107   |
| >VHL-R82C-v NRSRVL     | 601  | >VHL-R82C-n NRSPCVL    | 169   | 432   |

|                         |      |                         |       |       |
|-------------------------|------|-------------------------|-------|-------|
| >VHL-R82C-v FCNRSPRV    | 252  | >VHL-R82C-n FCNRSPCV    | 463   | 211   |
| >VHL-R82C-v FCNRSPRVV   | 994  | >VHL-R82C-n FCNRSPCVV   | 114   | 880   |
| >VHL-R82C-v FCNRSPRV    | 1257 | >VHL-R82C-n FCNRSPCV    | 312   | 945   |
| >VHL-R82C-v FCNRSPRV    | 107  | >VHL-R82C-n FCNRSPCV    | 155   | 48    |
| >VHL-R82C-v FCNRSPRVV   | 2898 | >VHL-R82C-n FCNRSPCVV   | 84    | 2814  |
| >VHL-R82C-v IFCNRSPR    | 15   | >VHL-R82C-n IFCNRSPC    | 17876 | 17861 |
| >VHL-R82C-v IFCNRSPR    | 20   | >VHL-R82C-n IFCNRSPC    | 20799 | 20779 |
| >VHL-R82C-v IFCNRSPR    | 62   | >VHL-R82C-n IFCNRSPC    | 33911 | 33849 |
| >VHL-R82C-v VIFCNRSPRV^ | 72   | >VHL-R82C-n VIFCNRSPCV^ | 49    | 23    |
| >VHL-R82C-v VIFCNRSPRV  | 662  | >VHL-R82C-n VIFCNRSPCV  | 469   | 193   |
| >VHL-R82C-v VIFCNRSPRV  | 7    | >VHL-R82C-n VIFCNRSPCV  | 17    | 10    |
| >VHL-R82C-v VIFCNRSPRV^ | 15   | >VHL-R82C-n VIFCNRSPCV^ | 8     | 7     |
| >VHL-R82C-v VIFCNRSPRV  | 86   | >VHL-R82C-n VIFCNRSPCV  | 48    | 38    |
| >VHL-R82C-v VIFCNRSPRV^ | 191  | >VHL-R82C-n VIFCNRSPCV^ | 45    | 146   |
| >VHL-R82C-v VIFCNRSPRV  | 70   | >VHL-R82C-n VIFCNRSPCV  | 44    | 26    |
| >VHL-R82C-v VIFCNRSPRV^ | 874  | >VHL-R82C-n VIFCNRSPCV^ | 82    | 792   |
| >VHL-R82C-v VIFCNRSPRV  | 400  | >VHL-R82C-n VIFCNRSPCV  | 212   | 188   |
| >VHL-R82C-v VIFCNRSPRV^ | 3511 | >VHL-R82C-n VIFCNRSPCV^ | 400   | 3111  |
| >VHL-R82C-v VIFCNRSPRV  | 7    | >VHL-R82C-n VIFCNRSPCV  | 17    | 10    |
| >VHL-R82C-v VIFCNRSPRV^ | 59   | >VHL-R82C-n VIFCNRSPCV^ | 13    | 46    |
| >VHL-R82C-v VIFCNRSPR   | 427  | >VHL-R82C-n VIFCNRSPC   | 20540 | 20113 |
| >VHL-R82C-v VIFCNRSPR   | 113  | >VHL-R82C-n VIFCNRSPC   | 23574 | 23461 |
| >VHL-R82C-v VIFCNRSPR   | 23   | >VHL-R82C-n VIFCNRSPC   | 16626 | 16603 |
| >VHL-R82C-v VIFCNRSPR   | 93   | >VHL-R82C-n VIFCNRSPC   | 29561 | 29468 |
| >VHL-R82C-v VIFCNRSPR   | 24   | >VHL-R82C-n VIFCNRSPC   | 27890 | 27866 |
| >VHL-R82C-v VIFCNRSPRV^ | 548  | >VHL-R82C-n VIFCNRSPCV^ | 217   | 331   |
| >VHL-R82C-v VIFCNRSPRV^ | 360  | >VHL-R82C-n VIFCNRSPCV^ | 193   | 167   |
| >VHL-R82C-v QVIFCNRSPR  | 214  | >VHL-R82C-n QVIFCNRSPC  | 239   | 25    |
| >VHL-R82C-v QVIFCNRSPR  | 305  | >VHL-R82C-n QVIFCNRSPC  | 16848 | 16543 |
| >VHL-R82C-v QVIFCNRSPR  | 381  | >VHL-R82C-n QVIFCNRSPC  | 32585 | 32204 |
| >VHL-R82C-v QVIFCNRSPR  | 11   | >VHL-R82C-n QVIFCNRSPC  | 6064  | 6053  |
| >VHL-R82C-v QVIFCNRSPR  | 114  | >VHL-R82C-n QVIFCNRSPC  | 14990 | 14876 |
| >VHL-R82C-v QVIFCNRSPR  | 6    | >VHL-R82C-n QVIFCNRSPC  | 19141 | 19135 |
| >VHL-R82C-v QVIFCNRSPR  | 36   | >VHL-R82C-n QVIFCNRSPC  | 70    | 34    |
| >VHL-R82C-v QVIFCNRSPR  | 178  | >VHL-R82C-n QVIFCNRSPC  | 546   | 368   |
| >VHL-R82C-v QVIFCNRSPR  | 175  | >VHL-R82C-n QVIFCNRSPC  | 34537 | 34362 |
| >VHL-R82P-v RVVLPVWL    | 415  | >VHL-R82P-n PVVLPVWL    | 8426  | 8011  |
| >VHL-R82P-v RVVLPVWL    | 535  | >VHL-R82P-n PVVLPVWL    | 439   | 96    |
| >VHL-R82P-v RVVLPVWLN   | 182  | >VHL-R82P-n PVVLPVWLN   | 153   | 29    |
| >VHL-R82P-v RVVLPVWL    | 351  | >VHL-R82P-n PVVLPVWL    | 15908 | 15557 |
| >VHL-R82P-v RVVLPVWLN   | 202  | >VHL-R82P-n PVVLPVWLN   | 11679 | 11477 |
| >VHL-R82P-v RVVLPVWL    | 89   | >VHL-R82P-n PVVLPVWL    | 16203 | 16114 |
| >VHL-R82P-v RVVLPVWLN   | 9    | >VHL-R82P-n PVVLPVWLN   | 4129  | 4120  |

|                         |       |                         |       |       |
|-------------------------|-------|-------------------------|-------|-------|
| >VHL-R82P-v RVVLPVWLN   | 56    | >VHL-R82P-n PVVLPVWLN   | 14237 | 14181 |
| >VHL-R82P-v RVVLPVWLN   | 230   | >VHL-R82P-n PVVLPVWLN   | 8283  | 8053  |
| >VHL-R82P-v RVVLPVWLN   | 320   | >VHL-R82P-n PVVLPVWLN   | 2032  | 1712  |
| >VHL-R82P-v PRVVLPPVWLI | 29428 | >VHL-R82P-n PPVVLPPVWLI | 208   | 29220 |
| >VHL-R82P-v PRVVLPPVWLI | 364   | >VHL-R82P-n PPVVLPPVWLI | 2925  | 2561  |
| >VHL-R82P-v PRVVLPPVW   | 9956  | >VHL-R82P-n PPVVLPPVW   | 43    | 9913  |
| >VHL-R82P-v PRVVLPPVWLI | 18586 | >VHL-R82P-n PPVVLPPVWLI | 116   | 18470 |
| >VHL-R82P-v PRVVLPPVW   | 11243 | >VHL-R82P-n PPVVLPPVW   | 24    | 11219 |
| >VHL-R82P-v PRVVLPPVWL  | 89    | >VHL-R82P-n PPVVLPPVWL  | 25129 | 25040 |
| >VHL-R82P-v PRVVLPPVWLI | 385   | >VHL-R82P-n PPVVLPPVWLI | 33763 | 33378 |
| >VHL-R82P-v SQVIFCNRSP  | 47    | >VHL-R82P-n SQVIFCNRSP  | 19260 | 19213 |
| >VHL-R82P-v SQVIFCNRSP  | 436   | >VHL-R82P-n SQVIFCNRSP  | 40012 | 39576 |
| >VHL-R82P-v SQVIFCNRSP  | 301   | >VHL-R82P-n SQVIFCNRSP  | 1167  | 866   |
| >VHL-R82P-v SQVIFCNRSP  | 150   | >VHL-R82P-n SQVIFCNRSP  | 30457 | 30307 |
| >VHL-R82P-v SPRVVLPPV   | 21    | >VHL-R82P-n SPPVVLPPV   | 631   | 610   |
| >VHL-R82P-v SPRVVLPPVW  | 189   | >VHL-R82P-n SPPVVLPPVW  | 9193  | 9004  |
| >VHL-R82P-v SPRVVLPPVWI | 61    | >VHL-R82P-n SPPVVLPPVWI | 217   | 156   |
| >VHL-R82P-v SPRVVLPPVW  | 318   | >VHL-R82P-n SPPVVLPPVW  | 268   | 50    |
| >VHL-R82P-v SPRVVLPPV   | 251   | >VHL-R82P-n SPPVVLPPV   | 729   | 478   |
| >VHL-R82P-v SPRVVLPPVWI | 12847 | >VHL-R82P-n SPPVVLPPVWI | 70    | 12777 |
| >VHL-R82P-v SPRVVLPPVW  | 42    | >VHL-R82P-n SPPVVLPPVW  | 43    | 1     |
| >VHL-R82P-v RSPRVVLPPV  | 488   | >VHL-R82P-n RSPPVVLPPV  | 92    | 396   |
| >VHL-R82P-v RSPRVVLPPV  | 664   | >VHL-R82P-n RSPPVVLPPV  | 290   | 374   |
| >VHL-R82P-v RSPRVVLPPV  | 301   | >VHL-R82P-n RSPPVVLPPV  | 550   | 249   |
| >VHL-R82P-v RSPRVVLPPV  | 130   | >VHL-R82P-n RSPPVVLPPV  | 308   | 178   |
| >VHL-R82P-v RSPRVVLPPVW | 247   | >VHL-R82P-n RSPPVVLPPVW | 323   | 76    |
| >VHL-R82P-v RSPRVVLPPVW | 147   | >VHL-R82P-n RSPPVVLPPVW | 202   | 55    |
| >VHL-R82P-v RSPRVVLPPV  | 594   | >VHL-R82P-n RSPPVVLPPV  | 134   | 460   |
| >VHL-R82P-v RSPRVVLPPV  | 3748  | >VHL-R82P-n RSPPVVLPPV  | 317   | 3431  |
| >VHL-R82P-v RSPRVVLPPVW | 55    | >VHL-R82P-n RSPPVVLPPVW | 9     | 46    |
| >VHL-R82P-v RSPRVVLPPVW | 301   | >VHL-R82P-n RSPPVVLPPVW | 32    | 269   |
| >VHL-R82P-v RSPRVVLPPVW | 48    | >VHL-R82P-n RSPPVVLPPVW | 38    | 10    |
| >VHL-R82P-v RSPRVVLPPVW | 12    | >VHL-R82P-n RSPPVVLPPVW | 10    | 2     |
| >VHL-R82P-v RSPRVVLPP   | 2336  | >VHL-R82P-n RSPPVVLPP   | 268   | 2068  |
| >VHL-R82P-v RSPRVVLPPVW | 39    | >VHL-R82P-n RSPPVVLPPVW | 9     | 30    |
| >VHL-R82P-v RSPRVVLPPVW | 4     | >VHL-R82P-n RSPPVVLPPVW | 2     | 2     |
| >VHL-R82P-v RSPRVVLPPVW | 493   | >VHL-R82P-n RSPPVVLPPVW | 663   | 170   |
| >VHL-R82P-v RSPRVVLPPVW | 345   | >VHL-R82P-n RSPPVVLPPVW | 97    | 248   |
| >VHL-R82P-v NRSRPPVVL   | 22    | >VHL-R82P-n NRSPPVVL    | 19    | 3     |
| >VHL-R82P-v NRSRPPVLPV  | 265   | >VHL-R82P-n NRSPPVLPV   | 208   | 57    |
| >VHL-R82P-v NRSRPPVLPV  | 601   | >VHL-R82P-n NRSPPVLPV   | 411   | 190   |
| >VHL-R82P-v FCNRSRPPV   | 252   | >VHL-R82P-n FCNRSPPV    | 144   | 108   |
| >VHL-R82P-v FCNRSRPPV   | 994   | >VHL-R82P-n FCNRSPPV    | 164   | 830   |

|                          |      |                         |       |       |
|--------------------------|------|-------------------------|-------|-------|
| >VHL-R82P-v FCNRSRPRV    | 1257 | >VHL-R82P-n FCNRSPPV    | 300   | 957   |
| >VHL-R82P-v FCNRSRPRV    | 107  | >VHL-R82P-n FCNRSPPV    | 99    | 8     |
| >VHL-R82P-v FCNRSRPRV    | 2898 | >VHL-R82P-n FCNRSPPVV   | 111   | 2787  |
| >VHL-R82P-v FCNRSRPRV    | 1444 | >VHL-R82P-n FCNRSPPV    | 199   | 1245  |
| >VHL-R82P-v IFCNRSRPR    | 15   | >VHL-R82P-n IFCNRSPP    | 17492 | 17477 |
| >VHL-R82P-v IFCNRSRPR    | 20   | >VHL-R82P-n IFCNRSPP    | 17753 | 17733 |
| >VHL-R82P-v IFCNRSRPR    | 62   | >VHL-R82P-n IFCNRSPP    | 31861 | 31799 |
| >VHL-R82P-v VIFCNRSRPRV  | 1031 | >VHL-R82P-n VIFCNRSPPV  | 209   | 822   |
| >VHL-R82P-v VIFCNRSRPRV^ | 2445 | >VHL-R82P-n VIFCNRSPPV^ | 297   | 2148  |
| >VHL-R82P-v VIFCNRSRPRV  | 646  | >VHL-R82P-n VIFCNRSPPV  | 187   | 459   |
| >VHL-R82P-v VIFCNRSRPRV^ | 72   | >VHL-R82P-n VIFCNRSPPV^ | 53    | 19    |
| >VHL-R82P-v VIFCNRSRPRV  | 662  | >VHL-R82P-n VIFCNRSPPV  | 154   | 508   |
| >VHL-R82P-v VIFCNRSRPRV^ | 1824 | >VHL-R82P-n VIFCNRSPPV^ | 214   | 1610  |
| >VHL-R82P-v VIFCNRSRPRV  | 7    | >VHL-R82P-n VIFCNRSPPV  | 6     | 1     |
| >VHL-R82P-v VIFCNRSRPRV^ | 15   | >VHL-R82P-n VIFCNRSPPV^ | 8     | 7     |
| >VHL-R82P-v VIFCNRSRPRV  | 86   | >VHL-R82P-n VIFCNRSPPV  | 21    | 65    |
| >VHL-R82P-v VIFCNRSRPRV^ | 191  | >VHL-R82P-n VIFCNRSPPV^ | 58    | 133   |
| >VHL-R82P-v VIFCNRSRPRV  | 70   | >VHL-R82P-n VIFCNRSPPV  | 41    | 29    |
| >VHL-R82P-v VIFCNRSRPRV^ | 874  | >VHL-R82P-n VIFCNRSPPV^ | 62    | 812   |
| >VHL-R82P-v VIFCNRSRPRV  | 400  | >VHL-R82P-n VIFCNRSPPV  | 385   | 15    |
| >VHL-R82P-v VIFCNRSRPRV^ | 3511 | >VHL-R82P-n VIFCNRSPPV^ | 352   | 3159  |
| >VHL-R82P-v VIFCNRSRPRV  | 7    | >VHL-R82P-n VIFCNRSPPV  | 8     | 1     |
| >VHL-R82P-v VIFCNRSRPRV^ | 59   | >VHL-R82P-n VIFCNRSPPV^ | 14    | 45    |
| >VHL-R82P-v VIFCNRSRPR   | 427  | >VHL-R82P-n VIFCNRSPP   | 18271 | 17844 |
| >VHL-R82P-v VIFCNRSRPR   | 113  | >VHL-R82P-n VIFCNRSPP   | 20692 | 20579 |
| >VHL-R82P-v VIFCNRSRPR   | 23   | >VHL-R82P-n VIFCNRSPP   | 16317 | 16294 |
| >VHL-R82P-v VIFCNRSRPR   | 93   | >VHL-R82P-n VIFCNRSPP   | 28146 | 28053 |
| >VHL-R82P-v VIFCNRSRPR   | 24   | >VHL-R82P-n VIFCNRSPP   | 22794 | 22770 |
| >VHL-R82P-v VIFCNRSRPRV  | 508  | >VHL-R82P-n VIFCNRSPPV  | 84    | 424   |
| >VHL-R82P-v VIFCNRSRPRV^ | 360  | >VHL-R82P-n VIFCNRSPPV^ | 288   | 72    |
| >VHL-R82P-v QVIFCNRSRPR  | 1270 | >VHL-R82P-n QVIFCNRSPP^ | 391   | 879   |
| >VHL-R82P-v QVIFCNRSRPR  | 755  | >VHL-R82P-n QVIFCNRSPP^ | 179   | 576   |
| >VHL-R82P-v QVIFCNRSRPR  | 214  | >VHL-R82P-n QVIFCNRSPP^ | 45    | 169   |
| >VHL-R82P-v QVIFCNRSRPR  | 305  | >VHL-R82P-n QVIFCNRSPP  | 13103 | 12798 |
| >VHL-R82P-v QVIFCNRSRPR  | 381  | >VHL-R82P-n QVIFCNRSPP  | 30086 | 29705 |
| >VHL-R82P-v QVIFCNRSRPR  | 11   | >VHL-R82P-n QVIFCNRSPP  | 7620  | 7609  |
| >VHL-R82P-v QVIFCNRSRPR  | 114  | >VHL-R82P-n QVIFCNRSPP  | 15390 | 15276 |
| >VHL-R82P-v QVIFCNRSRPR  | 6    | >VHL-R82P-n QVIFCNRSPP  | 13177 | 13171 |
| >VHL-R82P-v QVIFCNRSRPR  | 36   | >VHL-R82P-n QVIFCNRSPP^ | 17    | 19    |
| >VHL-R82P-v QVIFCNRSRPR  | 178  | >VHL-R82P-n QVIFCNRSPP^ | 40    | 138   |
| >VHL-R82P-v QVIFCNRSRPR  | 175  | >VHL-R82P-n QVIFCNRSPP  | 33089 | 32914 |
| >VHL-S111G-SYRGHLWLF     | 32   | >VHL-S111G-GYRGHLWLF    | 24    | 8     |
| >VHL-S111G-SYRGHLWLF     | 24   | >VHL-S111G-GYRGHLWLF    | 61    | 37    |

|                       |     |                       |       |       |
|-----------------------|-----|-----------------------|-------|-------|
| >VHL-S111G-SYRGHLWL   | 17  | >VHL-S111G-GYRGHLWL   | 26    | 9     |
| >VHL-S111G-SYRGHLWLF  | 5   | >VHL-S111G-GYRGHLWLF  | 7     | 2     |
| >VHL-S111G-SYRGHLWLF  | 351 | >VHL-S111G-GYRGHLWLF  | 5564  | 5213  |
| >VHL-S111G-SYRGHLWLF  | 96  | >VHL-S111G-GYRGHLWLF  | 101   | 5     |
| >VHL-S111G-SYRGHLWL   | 38  | >VHL-S111G-GYRGHLWL   | 193   | 155   |
| >VHL-S111G-SYRGHLWLF  | 11  | >VHL-S111G-GYRGHLWLF  | 34    | 23    |
| >VHL-S111G-SYRGHLWLF  | 7   | >VHL-S111G-GYRGHLWLF  | 23    | 16    |
| >VHL-S111G-SYRGHLWLF  | 88  | >VHL-S111G-GYRGHLWLF  | 828   | 740   |
| >VHL-S111G-SYRGHLWLF  | 406 | >VHL-S111G-GYRGHLWLF  | 446   | 40    |
| >VHL-S111G-SYRGHLWLF  | 265 | >VHL-S111G-GYRGHLWLF  | 1115  | 850   |
| >VHL-S111G-SYRGHLWLF  | 396 | >VHL-S111G-GYRGHLWLF  | 651   | 255   |
| >VHL-S111G-SYRGHLWLF  | 23  | >VHL-S111G-GYRGHLWLF  | 47    | 24    |
| >VHL-S111G-SYRGHLWL   | 262 | >VHL-S111G-GYRGHLWL   | 1602  | 1340  |
| >VHL-S111G-SYRGHLWLF  | 430 | >VHL-S111G-GYRGHLWLF  | 1696  | 1266  |
| >VHL-S111G-SYRGHLWL   | 420 | >VHL-S111G-GYRGHLWL   | 2813  | 2393  |
| >VHL-S111G-SYRGHLWLF  | 277 | >VHL-S111G-GYRGHLWLF  | 2428  | 2151  |
| >VHL-S111G-HSYRGHLWLI | 50  | >VHL-S111G-HGYRGHLWL  | 432   | 382   |
| >VHL-S111G-HSYRGHLWLI | 47  | >VHL-S111G-HGYRGHLWL  | 2975  | 2928  |
| >VHL-S111G-HSYRGHLWLI | 376 | >VHL-S111G-HGYRGHLWL  | 3143  | 2767  |
| >VHL-S111G-HSYRGHLWLI | 178 | >VHL-S111G-HGYRGHLWL  | 14890 | 14712 |
| >VHL-S111G-HSYRGHLWL  | 93  | >VHL-S111G-HGYRGHLWL  | 2196  | 2103  |
| >VHL-S111G-HSYRGHLWLI | 27  | >VHL-S111G-HGYRGHLWL  | 451   | 424   |
| >VHL-S111G-HSYRGHLWLI | 457 | >VHL-S111G-HGYRGHLWL  | 4140  | 3683  |
| >VHL-S111G-HSYRGHLWLI | 8   | >VHL-S111G-HGYRGHLWL  | 30    | 22    |
| >VHL-S111G-HSYRGHLWLI | 293 | >VHL-S111G-HGYRGHLWL  | 11773 | 11480 |
| >VHL-S111G-HSYRGHLWLI | 27  | >VHL-S111G-HGYRGHLWL  | 867   | 840   |
| >VHL-S111G-HSYRGHLWLI | 9   | >VHL-S111G-HGYRGHLWL  | 136   | 127   |
| >VHL-S111G-HSYRGHLWLI | 36  | >VHL-S111G-HGYRGHLWL  | 628   | 592   |
| >VHL-S111G-HSYRGHLW   | 4   | >VHL-S111G-HGYRGHLW   | 66    | 62    |
| >VHL-S111G-HSYRGHLWL  | 5   | >VHL-S111G-HGYRGHLWL  | 335   | 330   |
| >VHL-S111G-HSYRGHLW   | 34  | >VHL-S111G-HGYRGHLW   | 65    | 31    |
| >VHL-S111G-HSYRGHLWLI | 62  | >VHL-S111G-HGYRGHLWL  | 709   | 647   |
| >VHL-S111G-HSYRGHLW   | 10  | >VHL-S111G-HGYRGHLW   | 28    | 18    |
| >VHL-S111G-HSYRGHLWLI | 19  | >VHL-S111G-HGYRGHLWL  | 217   | 198   |
| >VHL-S111G-HSYRGHLWL  | 126 | >VHL-S111G-HGYRGHLWL  | 1605  | 1479  |
| >VHL-S111G-HSYRGHLWLI | 55  | >VHL-S111G-HGYRGHLWL  | 682   | 627   |
| >VHL-S111G-HSYRGHLW   | 137 | >VHL-S111G-HGYRGHLW   | 485   | 348   |
| >VHL-S111G-HSYRGHLWLI | 300 | >VHL-S111G-HGYRGHLWL  | 1948  | 1648  |
| >VHL-S111G-HSYRGHLWLI | 46  | >VHL-S111G-HGYRGHLWL  | 30    | 16    |
| >VHL-S111G-HSYRGHLWL  | 153 | >VHL-S111G-HGYRGHLWL  | 3088  | 2935  |
| >VHL-S111G-IHSYRGHLWL | 569 | >VHL-S111G-IHGYRGHLWI | 244   | 325   |
| >VHL-S111G-IHSYRGHLWL | 131 | >VHL-S111G-IHGYRGHLWI | 121   | 10    |
| >VHL-S111G-IHSYRGHLWL | 91  | >VHL-S111G-IHGYRGHLWI | 395   | 304   |

|                       |     |                       |      |      |
|-----------------------|-----|-----------------------|------|------|
| >VHL-S111G-IHSYRGHLWL | 402 | >VHL-S111G-IHGYRGHLWI | 5271 | 4869 |
| >VHL-S111G-RIHSYRGHL  | 336 | >VHL-S111G-RIHGYRGHL  | 608  | 272  |
| >VHL-S111G-RIHSYRGHLM | 799 | >VHL-S111G-RIHGYRGHLV | 470  | 329  |
| >VHL-S111G-RIHSYRGHLM | 414 | >VHL-S111G-RIHGYRGHLV | 117  | 297  |
| >VHL-S111G-RIHSYRGHL  | 23  | >VHL-S111G-RIHGYRGHL  | 30   | 7    |
| >VHL-S111G-RIHSYRGHLM | 21  | >VHL-S111G-RIHGYRGHLV | 26   | 5    |
| >VHL-S111G-RIHSYRGHLM | 117 | >VHL-S111G-RIHGYRGHLV | 81   | 36   |
| >VHL-S111G-RIHSYRGHLM | 50  | >VHL-S111G-RIHGYRGHLV | 47   | 3    |
| >VHL-S111G-RIHSYRGHLM | 74  | >VHL-S111G-RIHGYRGHLV | 142  | 68   |
| >VHL-S111G-RRHSYRGH   | 107 | >VHL-S111G-RRIHGYRGH  | 483  | 376  |
| >VHL-S111G-RRHSYRGHL  | 52  | >VHL-S111G-RRIHGYRGHL | 152  | 100  |
| >VHL-S111G-RRHSYRGHL' | 119 | >VHL-S111G-RRIHGYRGHL | 277  | 158  |
| >VHL-S111G-RRHSYRGH   | 112 | >VHL-S111G-RRIHGYRGH  | 102  | 10   |
| >VHL-S111G-RRHSYRGHL  | 9   | >VHL-S111G-RRIHGYRGHL | 9    | 0    |
| >VHL-S111G-RRHSYRGHL' | 134 | >VHL-S111G-RRIHGYRGHL | 118  | 16   |
| >VHL-S111G-RRHSYRG    | 99  | >VHL-S111G-RRIHGYRG   | 122  | 23   |
| >VHL-S111G-RRHSYRGH   | 195 | >VHL-S111G-RRIHGYRGH  | 124  | 71   |
| >VHL-S111G-RRHSYRGHL  | 21  | >VHL-S111G-RRIHGYRGHL | 23   | 2    |
| >VHL-S111G-RRHSYRGHL' | 96  | >VHL-S111G-RRIHGYRGHL | 73   | 23   |
| >VHL-S111G-RRHSYRGH   | 201 | >VHL-S111G-RRIHGYRGH  | 94   | 107  |
| >VHL-S111G-RRHSYRGHL  | 18  | >VHL-S111G-RRIHGYRGHL | 20   | 2    |
| >VHL-S111G-RRHSYRGHL' | 336 | >VHL-S111G-RRIHGYRGHL | 188  | 148  |
| >VHL-S111G-RRHSYRGHL' | 124 | >VHL-S111G-RRIHGYRGHL | 131  | 7    |
| >VHL-S111G-GRRHSYRGH  | 212 | >VHL-S111G-GRRIHGYRGH | 187  | 25   |
| >VHL-S111G-GRRHSYRGH  | 174 | >VHL-S111G-GRRIHGYRGH | 166  | 8    |
| >VHL-S111G-GRRHSYRGH  | 13  | >VHL-S111G-GRRIHGYRGH | 15   | 2    |
| >VHL-S111G-TGRRHSYR   | 148 | >VHL-S111G-TGRRIHGYR  | 223  | 75   |
| >VHL-S111G-TGRRHSY    | 185 | >VHL-S111G-TGRRIHGY   | 257  | 72   |
| >VHL-S111G-TGRRHSYR   | 14  | >VHL-S111G-TGRRIHGYR  | 25   | 11   |
| >VHL-S111G-TGRRHSYR   | 104 | >VHL-S111G-TGRRIHGYR  | 373  | 269  |
| >VHL-S111G-GTGRRHSYR  | 452 | >VHL-S111G-GTGRRIHGYR | 1418 | 966  |
| >VHL-S111G-GTGRRHSY   | 415 | >VHL-S111G-GTGRRIHGY  | 378  | 37   |
| >VHL-S111G-GTGRRHSY   | 722 | >VHL-S111G-GTGRRIHGY  | 268  | 454  |
| >VHL-S111G-GTGRRHSY   | 316 | >VHL-S111G-GTGRRIHGY  | 483  | 167  |
| >VHL-S111G-GTGRRHSY   | 74  | >VHL-S111G-GTGRRIHGY  | 125  | 51   |
| >VHL-S111G-GTGRRHSYR  | 38  | >VHL-S111G-GTGRRIHGYR | 113  | 75   |
| >VHL-S111G-GTGRRHSYR  | 117 | >VHL-S111G-GTGRRIHGYR | 609  | 492  |
| >VHL-S111G-GTGRRHSYR  | 245 | >VHL-S111G-GTGRRIHGYR | 1818 | 1573 |
| >VHL-S111G-GTGRRHSY   | 439 | >VHL-S111G-GTGRRIHGY  | 367  | 72   |
| >VHL-S111G-GTGRRHSY   | 491 | >VHL-S111G-GTGRRIHGY  | 2204 | 1713 |
| >VHL-S111G-GTGRRHSY   | 91  | >VHL-S111G-GTGRRIHGY  | 67   | 24   |
| >VHL-S111G-GTGRRHSY   | 131 | >VHL-S111G-GTGRRIHGY  | 622  | 491  |
| >VHL-S111G-GTGRRHSYR  | 400 | >VHL-S111G-GTGRRIHGYR | 362  | 38   |

|                         |       |                         |      |       |
|-------------------------|-------|-------------------------|------|-------|
| >VHL-S111I-ν SYRGHLWL   | 1678  | >VHL-S111I-r IYRGHLWL   | 315  | 1363  |
| >VHL-S111I-ν SYRGHLWLF  | 32    | >VHL-S111I-r IYRGHLWLF  | 19   | 13    |
| >VHL-S111I-ν SYRGHLWL   | 650   | >VHL-S111I-r IYRGHLWL   | 229  | 421   |
| >VHL-S111I-ν SYRGHLWLF  | 24    | >VHL-S111I-r IYRGHLWLF  | 15   | 9     |
| >VHL-S111I-ν SYRGHLWL   | 17    | >VHL-S111I-r IYRGHLWL   | 32   | 15    |
| >VHL-S111I-ν SYRGHLWLF  | 5     | >VHL-S111I-r IYRGHLWLF  | 10   | 5     |
| >VHL-S111I-ν SYRGHLWLF  | 351   | >VHL-S111I-r IYRGHLWLF  | 2260 | 1909  |
| >VHL-S111I-ν SYRGHLWLF  | 96    | >VHL-S111I-r IYRGHLWLF  | 98   | 2     |
| >VHL-S111I-ν SYRGHLWL   | 38    | >VHL-S111I-r IYRGHLWL   | 87   | 49    |
| >VHL-S111I-ν SYRGHLWLFF | 11    | >VHL-S111I-r IYRGHLWLFR | 19   | 8     |
| >VHL-S111I-ν SYRGHLWLFF | 7     | >VHL-S111I-r IYRGHLWLFR | 9    | 2     |
| >VHL-S111I-ν SYRGHLWLFF | 88    | >VHL-S111I-r IYRGHLWLFR | 75   | 13    |
| >VHL-S111I-ν SYRGHLWLF  | 406   | >VHL-S111I-r IYRGHLWLF  | 969  | 563   |
| >VHL-S111I-ν SYRGHLWLFF | 265   | >VHL-S111I-r IYRGHLWLFR | 810  | 545   |
| >VHL-S111I-ν SYRGHLWLFF | 396   | >VHL-S111I-r IYRGHLWLFR | 1505 | 1109  |
| >VHL-S111I-ν SYRGHLWLFF | 23    | >VHL-S111I-r IYRGHLWLFR | 23   | 0     |
| >VHL-S111I-ν SYRGHLWL   | 262   | >VHL-S111I-r IYRGHLWL   | 748  | 486   |
| >VHL-S111I-ν SYRGHLWLFF | 430   | >VHL-S111I-r IYRGHLWLFR | 1336 | 906   |
| >VHL-S111I-ν SYRGHLWL   | 420   | >VHL-S111I-r IYRGHLWL   | 1227 | 807   |
| >VHL-S111I-ν SYRGHLWLF  | 277   | >VHL-S111I-r IYRGHLWLF  | 874  | 597   |
| >VHL-S111I-ν HSYRGHLWL  | 7949  | >VHL-S111I-r HIYRGHLWL  | 211  | 7738  |
| >VHL-S111I-ν HSYRGHLWL  | 11647 | >VHL-S111I-r HIYRGHLWL  | 25   | 11622 |
| >VHL-S111I-ν HSYRGHLWLI | 50    | >VHL-S111I-r HIYRGHLWLF | 36   | 14    |
| >VHL-S111I-ν HSYRGHLWLI | 47    | >VHL-S111I-r HIYRGHLWLF | 71   | 24    |
| >VHL-S111I-ν HSYRGHLWLI | 376   | >VHL-S111I-r HIYRGHLWLF | 467  | 91    |
| >VHL-S111I-ν HSYRGHLWLI | 178   | >VHL-S111I-r HIYRGHLWLF | 162  | 16    |
| >VHL-S111I-ν HSYRGHLWL  | 93    | >VHL-S111I-r HIYRGHLWL  | 249  | 156   |
| >VHL-S111I-ν HSYRGHLWLI | 27    | >VHL-S111I-r HIYRGHLWLF | 58   | 31    |
| >VHL-S111I-ν HSYRGHLWLI | 457   | >VHL-S111I-r HIYRGHLWLF | 3067 | 2610  |
| >VHL-S111I-ν HSYRGHLWLI | 8     | >VHL-S111I-r HIYRGHLWLF | 9    | 1     |
| >VHL-S111I-ν HSYRGHLWLI | 293   | >VHL-S111I-r HIYRGHLWLF | 237  | 56    |
| >VHL-S111I-ν HSYRGHLWLI | 27    | >VHL-S111I-r HIYRGHLWLF | 18   | 9     |
| >VHL-S111I-ν HSYRGHLWLI | 9     | >VHL-S111I-r HIYRGHLWLF | 12   | 3     |
| >VHL-S111I-ν HSYRGHLWLI | 2265  | >VHL-S111I-r HIYRGHLWLF | 341  | 1924  |
| >VHL-S111I-ν HSYRGHLWLI | 36    | >VHL-S111I-r HIYRGHLWLF | 213  | 177   |
| >VHL-S111I-ν HSYRGHLW   | 4     | >VHL-S111I-r HIYRGHLW   | 57   | 53    |
| >VHL-S111I-ν HSYRGHLWL  | 5     | >VHL-S111I-r HIYRGHLWL  | 265  | 260   |
| >VHL-S111I-ν HSYRGHLW   | 34    | >VHL-S111I-r HIYRGHLW   | 79   | 45    |
| >VHL-S111I-ν HSYRGHLWLI | 62    | >VHL-S111I-r HIYRGHLWLF | 953  | 891   |
| >VHL-S111I-ν HSYRGHLW   | 10    | >VHL-S111I-r HIYRGHLW   | 22   | 12    |
| >VHL-S111I-ν HSYRGHLWLI | 19    | >VHL-S111I-r HIYRGHLWLF | 138  | 119   |
| >VHL-S111I-ν HSYRGHLWL  | 126   | >VHL-S111I-r HIYRGHLWL  | 1607 | 1481  |
| >VHL-S111I-ν HSYRGHLWLI | 55    | >VHL-S111I-r HIYRGHLWLF | 708  | 653   |

|                          |       |                          |      |       |
|--------------------------|-------|--------------------------|------|-------|
| >VHL-S111I-v HSYRGHLW    | 137   | >VHL-S111I-r HIYRGHLW    | 810  | 673   |
| >VHL-S111I-v HSYRGHLWLI  | 300   | >VHL-S111I-r HIYRGHLWLF  | 3227 | 2927  |
| >VHL-S111I-v HSYRGHLWLI  | 46    | >VHL-S111I-r HIYRGHLWLF  | 23   | 23    |
| >VHL-S111I-v HSYRGHLWL   | 153   | >VHL-S111I-r HIYRGHLWL   | 7509 | 7356  |
| >VHL-S111I-v LPPGTGRRIH  | 14408 | >VHL-S111I-r LPPGTGRRIH  | 130  | 14278 |
| >VHL-S111I-v LPPGTGRRIH  | 15095 | >VHL-S111I-r LPPGTGRRIH  | 295  | 14800 |
| >VHL-S111I-v IHSYRGHLWL  | 569   | >VHL-S111I-r IHIYRGHLWL  | 77   | 492   |
| >VHL-S111I-v IHSYRGHLWL  | 131   | >VHL-S111I-r IHIYRGHLWL  | 80   | 51    |
| >VHL-S111I-v IHSYRGHLWL  | 845   | >VHL-S111I-r IHIYRGHLWL  | 324  | 521   |
| >VHL-S111I-v IHSYRGHLWL  | 91    | >VHL-S111I-r IHIYRGHLWL  | 53   | 38    |
| >VHL-S111I-v IHSYRGHLWL  | 402   | >VHL-S111I-r IHIYRGHLWL  | 1665 | 1263  |
| >VHL-S111I-v RIHSYRGHL   | 336   | >VHL-S111I-r RIHIYRGHL   | 458  | 122   |
| >VHL-S111I-v RIHSYRGHLV  | 414   | >VHL-S111I-r RIHIYRGHLW  | 638  | 224   |
| >VHL-S111I-v RIHSYRGHL   | 23    | >VHL-S111I-r RIHIYRGHL   | 28   | 5     |
| >VHL-S111I-v RIHSYRGHLV  | 21    | >VHL-S111I-r RIHIYRGHLW  | 24   | 3     |
| >VHL-S111I-v RIHSYRGHLV  | 705   | >VHL-S111I-r RIHIYRGHLW  | 339  | 366   |
| >VHL-S111I-v RIHSYRGHLV  | 117   | >VHL-S111I-r RIHIYRGHLW  | 127  | 10    |
| >VHL-S111I-v RIHSYRGHLV  | 50    | >VHL-S111I-r RIHIYRGHLW  | 62   | 12    |
| >VHL-S111I-v RIHSYRGHLV  | 74    | >VHL-S111I-r RIHIYRGHLW  | 109  | 35    |
| >VHL-S111I-v RRIHSYRGH   | 107   | >VHL-S111I-r RRIHIYRGH   | 649  | 542   |
| >VHL-S111I-v RRIHSYRGHL  | 52    | >VHL-S111I-r RRIHIYRGHL  | 186  | 134   |
| >VHL-S111I-v RRIHSYRGHL' | 119   | >VHL-S111I-r RRIHIYRGHLV | 315  | 196   |
| >VHL-S111I-v RRIHSYRG    | 947   | >VHL-S111I-r RRIHIYRG    | 407  | 540   |
| >VHL-S111I-v RRIHSYRGH   | 112   | >VHL-S111I-r RRIHIYRGH   | 59   | 53    |
| >VHL-S111I-v RRIHSYRGHL  | 9     | >VHL-S111I-r RRIHIYRGHL  | 9    | 0     |
| >VHL-S111I-v RRIHSYRGHL' | 134   | >VHL-S111I-r RRIHIYRGHLV | 74   | 60    |
| >VHL-S111I-v RRIHSYRG    | 99    | >VHL-S111I-r RRIHIYRG    | 45   | 54    |
| >VHL-S111I-v RRIHSYRGH   | 195   | >VHL-S111I-r RRIHIYRGH   | 98   | 97    |
| >VHL-S111I-v RRIHSYRGHL  | 21    | >VHL-S111I-r RRIHIYRGHL  | 24   | 3     |
| >VHL-S111I-v RRIHSYRGHL' | 96    | >VHL-S111I-r RRIHIYRGHLV | 67   | 29    |
| >VHL-S111I-v RRIHSYRGH   | 201   | >VHL-S111I-r RRIHIYRGH   | 64   | 137   |
| >VHL-S111I-v RRIHSYRGHL  | 18    | >VHL-S111I-r RRIHIYRGHL  | 17   | 1     |
| >VHL-S111I-v RRIHSYRGHL' | 336   | >VHL-S111I-r RRIHIYRGHLV | 144  | 192   |
| >VHL-S111I-v RRIHSYRGHL' | 124   | >VHL-S111I-r RRIHIYRGHLV | 108  | 16    |
| >VHL-S111I-v GRRHSYRGH   | 730   | >VHL-S111I-r GRRHIYRGH   | 322  | 408   |
| >VHL-S111I-v GRRHSYRGH   | 212   | >VHL-S111I-r GRRHIYRGHL  | 128  | 84    |
| >VHL-S111I-v GRRHSYRGH   | 174   | >VHL-S111I-r GRRHIYRGHL  | 89   | 85    |
| >VHL-S111I-v GRRHSYRGH   | 13    | >VHL-S111I-r GRRHIYRGHL  | 7    | 6     |
| >VHL-S111I-v TGRRHSYR    | 148   | >VHL-S111I-r TGRRHIYR    | 43   | 105   |
| >VHL-S111I-v TGRRHSY     | 185   | >VHL-S111I-r TGRRHIY     | 391  | 206   |
| >VHL-S111I-v TGRRHSYR    | 14    | >VHL-S111I-r TGRRHIYR    | 14   | 0     |
| >VHL-S111I-v TGRRHSYR    | 104   | >VHL-S111I-r TGRRHIYR    | 151  | 47    |
| >VHL-S111I-v TGRRHSYR    | 516   | >VHL-S111I-r TGRRHIYR    | 107  | 409   |



|                        |       |                        |      |       |
|------------------------|-------|------------------------|------|-------|
| >VHL-S111I-v GTGRRHSYR | 452   | >VHL-S111I-r GTGRRHSYR | 513  | 61    |
| >VHL-S111I-v GTGRRHSYR | 568   | >VHL-S111I-r GTGRRHSYR | 233  | 335   |
| >VHL-S111I-v GTGRRHSY  | 415   | >VHL-S111I-r GTGRRHSY  | 806  | 391   |
| >VHL-S111I-v GTGRRHSY  | 316   | >VHL-S111I-r GTGRRHSY  | 667  | 351   |
| >VHL-S111I-v GTGRRHSY  | 74    | >VHL-S111I-r GTGRRHSY  | 127  | 53    |
| >VHL-S111I-v GTGRRHSYR | 38    | >VHL-S111I-r GTGRRHSYR | 42   | 4     |
| >VHL-S111I-v GTGRRHSYR | 117   | >VHL-S111I-r GTGRRHSYR | 90   | 27    |
| >VHL-S111I-v GTGRRHSYR | 245   | >VHL-S111I-r GTGRRHSYR | 235  | 10    |
| >VHL-S111I-v GTGRRHSY  | 439   | >VHL-S111I-r GTGRRHSY  | 218  | 221   |
| >VHL-S111I-v GTGRRHSY  | 491   | >VHL-S111I-r GTGRRHSY  | 2984 | 2493  |
| >VHL-S111I-v GTGRRHSY  | 91    | >VHL-S111I-r GTGRRHSY  | 360  | 269   |
| >VHL-S111I-v GTGRRHSY  | 131   | >VHL-S111I-r GTGRRHSY  | 84   | 47    |
| >VHL-S111I-v GTGRRHSYR | 400   | >VHL-S111I-r GTGRRHSYR | 243  | 157   |
| >VHL-S111I-v GTGRRHSYR | 1236  | >VHL-S111I-r GTGRRHSYR | 367  | 869   |
| >VHL-S111I-v GTGRRHS   | 33570 | >VHL-S111I-r GTGRRHS   | 136  | 33434 |
| >VHL-S111I-v PGTGRRHSY | 524   | >VHL-S111I-r PGTGRRHSY | 182  | 342   |
| >VHL-S111N-SYRGHLWLF   | 32    | >VHL-S111N-NYRGHLWLF   | 20   | 12    |
| >VHL-S111N-SYRGHLWLF   | 24    | >VHL-S111N-NYRGHLWLF   | 35   | 11    |
| >VHL-S111N-SYRGHLWL    | 17    | >VHL-S111N-NYRGHLWL    | 30   | 13    |
| >VHL-S111N-SYRGHLWLF   | 5     | >VHL-S111N-NYRGHLWLF   | 7    | 2     |
| >VHL-S111N-SYRGHLWLF   | 351   | >VHL-S111N-NYRGHLWLF   | 1004 | 653   |
| >VHL-S111N-SYRGHLWLF   | 96    | >VHL-S111N-NYRGHLWLF   | 259  | 163   |
| >VHL-S111N-SYRGHLWL    | 38    | >VHL-S111N-NYRGHLWL    | 1313 | 1275  |
| >VHL-S111N-SYRGHLWLF   | 11    | >VHL-S111N-NYRGHLWLF   | 189  | 178   |
| >VHL-S111N-SYRGHLWLF   | 7     | >VHL-S111N-NYRGHLWLF   | 15   | 8     |
| >VHL-S111N-SYRGHLWLF   | 88    | >VHL-S111N-NYRGHLWLF   | 66   | 22    |
| >VHL-S111N-SYRGHLWLF   | 265   | >VHL-S111N-NYRGHLWLF   | 2202 | 1937  |
| >VHL-S111N-SYRGHLWLF   | 396   | >VHL-S111N-NYRGHLWLF   | 3845 | 3449  |
| >VHL-S111N-SYRGHLWLF   | 23    | >VHL-S111N-NYRGHLWLF   | 20   | 3     |
| >VHL-S111N-SYRGHLWL    | 262   | >VHL-S111N-NYRGHLWL    | 536  | 274   |
| >VHL-S111N-SYRGHLWLF   | 430   | >VHL-S111N-NYRGHLWLF   | 2252 | 1822  |
| >VHL-S111N-SYRGHLWL    | 420   | >VHL-S111N-NYRGHLWL    | 1365 | 945   |
| >VHL-S111N-SYRGHLWLF   | 277   | >VHL-S111N-NYRGHLWLF   | 1052 | 775   |
| >VHL-S111N-HSYRGHLWLI  | 50    | >VHL-S111N-HNYRGHLWL   | 2367 | 2317  |
| >VHL-S111N-HSYRGHLWLI  | 47    | >VHL-S111N-HNYRGHLWL   | 6036 | 5989  |
| >VHL-S111N-HSYRGHLWLI  | 376   | >VHL-S111N-HNYRGHLWL   | 2433 | 2057  |
| >VHL-S111N-HSYRGHLWLI  | 178   | >VHL-S111N-HNYRGHLWL   | 6278 | 6100  |
| >VHL-S111N-HSYRGHLWL   | 93    | >VHL-S111N-HNYRGHLWL   | 3554 | 3461  |
| >VHL-S111N-HSYRGHLWLI  | 27    | >VHL-S111N-HNYRGHLWL   | 843  | 816   |
| >VHL-S111N-HSYRGHLWLI  | 457   | >VHL-S111N-HNYRGHLWL   | 4605 | 4148  |
| >VHL-S111N-HSYRGHLWLI  | 8     | >VHL-S111N-HNYRGHLWL   | 46   | 38    |
| >VHL-S111N-HSYRGHLWLI  | 293   | >VHL-S111N-HNYRGHLWL   | 7068 | 6775  |
| >VHL-S111N-HSYRGHLWLI  | 27    | >VHL-S111N-HNYRGHLWL   | 366  | 339   |

|                         |     |                        |       |       |
|-------------------------|-----|------------------------|-------|-------|
| >VHL-S111N- HSYRGHLWLI  | 9   | >VHL-S111N- HNYRGHLWL  | 69    | 60    |
| >VHL-S111N- HSYRGHLWLI  | 36  | >VHL-S111N- HNYRGHLWL  | 230   | 194   |
| >VHL-S111N- HSYRGHLW    | 4   | >VHL-S111N- HNYRGHLW   | 801   | 797   |
| >VHL-S111N- HSYRGHLWL   | 5   | >VHL-S111N- HNYRGHLWL  | 6231  | 6226  |
| >VHL-S111N- HSYRGHLW    | 34  | >VHL-S111N- HNYRGHLW   | 242   | 208   |
| >VHL-S111N- HSYRGHLWLI  | 62  | >VHL-S111N- HNYRGHLWL  | 6106  | 6044  |
| >VHL-S111N- HSYRGHLW    | 10  | >VHL-S111N- HNYRGHLW   | 110   | 100   |
| >VHL-S111N- HSYRGHLWL   | 339 | >VHL-S111N- HNYRGHLWL  | 18344 | 18005 |
| >VHL-S111N- HSYRGHLWLI  | 19  | >VHL-S111N- HNYRGHLWL  | 1656  | 1637  |
| >VHL-S111N- HSYRGHLWL   | 126 | >VHL-S111N- HNYRGHLWL  | 1911  | 1785  |
| >VHL-S111N- HSYRGHLWLI  | 55  | >VHL-S111N- HNYRGHLWL  | 3605  | 3550  |
| >VHL-S111N- HSYRGHLWL   | 790 | >VHL-S111N- HNYRGHLWL  | 396   | 394   |
| >VHL-S111N- HSYRGHLW    | 137 | >VHL-S111N- HNYRGHLW   | 936   | 799   |
| >VHL-S111N- HSYRGHLWLI  | 300 | >VHL-S111N- HNYRGHLWL  | 2679  | 2379  |
| >VHL-S111N- HSYRGHLWLI  | 46  | >VHL-S111N- HNYRGHLWL  | 36    | 10    |
| >VHL-S111N- HSYRGHLWL   | 153 | >VHL-S111N- HNYRGHLWL  | 2713  | 2560  |
| >VHL-S111N- IHSYRGHLWL  | 131 | >VHL-S111N- IHNYRGHLWL | 277   | 146   |
| >VHL-S111N- IHSYRGHLWL  | 91  | >VHL-S111N- IHNYRGHLWL | 93    | 2     |
| >VHL-S111N- IHSYRGHLW   | 25  | >VHL-S111N- IHNYRGHLW  | 116   | 91    |
| >VHL-S111N- IHSYRGHLWL  | 402 | >VHL-S111N- IHNYRGHLWL | 1640  | 1238  |
| >VHL-S111N- RIHSYRGHL   | 336 | >VHL-S111N- RIHNYRGHL  | 333   | 3     |
| >VHL-S111N- RIHSYRGHLV  | 414 | >VHL-S111N- RIHNYRGHLV | 392   | 22    |
| >VHL-S111N- RIHSYRGHL   | 23  | >VHL-S111N- RIHNYRGHL  | 23    | 0     |
| >VHL-S111N- RIHSYRGHLV  | 21  | >VHL-S111N- RIHNYRGHLV | 21    | 0     |
| >VHL-S111N- RIHSYRGHLV  | 117 | >VHL-S111N- RIHNYRGHLV | 133   | 16    |
| >VHL-S111N- RIHSYRGHLV  | 50  | >VHL-S111N- RIHNYRGHLV | 69    | 19    |
| >VHL-S111N- RIHSYRGHLV  | 74  | >VHL-S111N- RIHNYRGHLV | 89    | 15    |
| >VHL-S111N- RRIHSYRGH   | 107 | >VHL-S111N- RRIHNYRGH  | 359   | 252   |
| >VHL-S111N- RRIHSYRGHL  | 52  | >VHL-S111N- RRIHNYRGHL | 107   | 55    |
| >VHL-S111N- RRIHSYRGHL' | 119 | >VHL-S111N- RRIHNYRGHL | 230   | 111   |
| >VHL-S111N- RRIHSYRGH   | 112 | >VHL-S111N- RRIHNYRGH  | 84    | 28    |
| >VHL-S111N- RRIHSYRGHL  | 9   | >VHL-S111N- RRIHNYRGHL | 9     | 0     |
| >VHL-S111N- RRIHSYRGHL' | 134 | >VHL-S111N- RRIHNYRGHL | 111   | 23    |
| >VHL-S111N- RRIHSYRG    | 99  | >VHL-S111N- RRIHNYRG   | 59    | 40    |
| >VHL-S111N- RRIHSYRGHL  | 21  | >VHL-S111N- RRIHNYRGHL | 20    | 1     |
| >VHL-S111N- RRIHSYRGHL' | 96  | >VHL-S111N- RRIHNYRGHL | 96    | 0     |
| >VHL-S111N- RRIHSYRGH   | 201 | >VHL-S111N- RRIHNYRGH  | 133   | 68    |
| >VHL-S111N- RRIHSYRGHL  | 18  | >VHL-S111N- RRIHNYRGHL | 17    | 1     |
| >VHL-S111N- RRIHSYRGHL' | 336 | >VHL-S111N- RRIHNYRGHL | 242   | 94    |
| >VHL-S111N- RRIHSYRGHL' | 124 | >VHL-S111N- RRIHNYRGHL | 202   | 78    |
| >VHL-S111N- GRIHSYRGH   | 212 | >VHL-S111N- GRIHNYRGH  | 212   | 0     |
| >VHL-S111N- GRIHSYRGH   | 174 | >VHL-S111N- GRIHNYRGH  | 150   | 24    |
| >VHL-S111N- GRIHSYRGH   | 13  | >VHL-S111N- GRIHNYRGH  | 12    | 1     |

|                       |      |                      |       |       |
|-----------------------|------|----------------------|-------|-------|
| >VHL-S111N-TGRRHSYR   | 148  | >VHL-S111N-TGRRHNYR  | 107   | 41    |
| >VHL-S111N-TGRRHSY    | 185  | >VHL-S111N-TGRRHNY   | 411   | 226   |
| >VHL-S111N-TGRRHSYR   | 14   | >VHL-S111N-TGRRHNYR  | 19    | 5     |
| >VHL-S111N-TGRRHSYR   | 104  | >VHL-S111N-TGRRHNYR  | 169   | 65    |
| >VHL-S111N-TGRRHSYR   | 516  | >VHL-S111N-TGRRHNYR  | 314   | 202   |
| >VHL-S111N-GTGRRHSYR  | 452  | >VHL-S111N-GTGRRHNYR | 2518  | 2066  |
| >VHL-S111N-GTGRRHSY   | 415  | >VHL-S111N-GTGRRHNY  | 285   | 130   |
| >VHL-S111N-GTGRRHSY   | 722  | >VHL-S111N-GTGRRHNY  | 469   | 253   |
| >VHL-S111N-GTGRRHSY   | 316  | >VHL-S111N-GTGRRHNY  | 330   | 14    |
| >VHL-S111N-GTGRRHSY   | 74   | >VHL-S111N-GTGRRHNY  | 195   | 121   |
| >VHL-S111N-GTGRRHSYR  | 38   | >VHL-S111N-GTGRRHNYR | 48    | 10    |
| >VHL-S111N-GTGRRHSYR  | 117  | >VHL-S111N-GTGRRHNYR | 261   | 144   |
| >VHL-S111N-GTGRRHSYR  | 245  | >VHL-S111N-GTGRRHNYR | 460   | 215   |
| >VHL-S111N-GTGRRHSY   | 439  | >VHL-S111N-GTGRRHNY  | 132   | 307   |
| >VHL-S111N-GTGRRHSY   | 491  | >VHL-S111N-GTGRRHNY  | 3567  | 3076  |
| >VHL-S111N-GTGRRHSY   | 91   | >VHL-S111N-GTGRRHNY  | 101   | 10    |
| >VHL-S111N-GTGRRHSY   | 131  | >VHL-S111N-GTGRRHNY  | 495   | 364   |
| >VHL-S111N-GTGRRHSYR  | 400  | >VHL-S111N-GTGRRHNYR | 364   | 36    |
| >VHL-S111N-PGTGRRHSY  | 524  | >VHL-S111N-PGTGRRHNY | 367   | 157   |
| >VHL-S111R-SYRGHLWL   | 1678 | >VHL-S111R-RYRGHLWL  | 447   | 1231  |
| >VHL-S111R-SYRGHLWLF  | 32   | >VHL-S111R-RYRGHLWLF | 20    | 12    |
| >VHL-S111R-SYRGHLWL   | 650  | >VHL-S111R-RYRGHLWL  | 221   | 429   |
| >VHL-S111R-SYRGHLWLF  | 24   | >VHL-S111R-RYRGHLWLF | 15    | 9     |
| >VHL-S111R-SYRGHLWL   | 17   | >VHL-S111R-RYRGHLWL  | 7     | 10    |
| >VHL-S111R-SYRGHLWLF  | 5    | >VHL-S111R-RYRGHLWLF | 4     | 1     |
| >VHL-S111R-SYRGHLWLF  | 351  | >VHL-S111R-RYRGHLWLF | 2330  | 1979  |
| >VHL-S111R-SYRGHLWLF  | 96   | >VHL-S111R-RYRGHLWLF | 296   | 200   |
| >VHL-S111R-SYRGHLWL   | 38   | >VHL-S111R-RYRGHLWL  | 7     | 31    |
| >VHL-S111R-SYRGHLWLF  | 840  | >VHL-S111R-RYRGHLWLF | 45    | 795   |
| >VHL-S111R-SYRGHLWLF  | 11   | >VHL-S111R-RYRGHLWLF | 4     | 7     |
| >VHL-S111R-SYRGHLWLF  | 1869 | >VHL-S111R-RYRGHLWLF | 296   | 1573  |
| >VHL-S111R-SYRGHLWLF  | 7    | >VHL-S111R-RYRGHLWLF | 4     | 3     |
| >VHL-S111R-SYRGHLWLF  | 88   | >VHL-S111R-RYRGHLWLF | 399   | 311   |
| >VHL-S111R-SYRGHLWLF  | 265  | >VHL-S111R-RYRGHLWLF | 149   | 116   |
| >VHL-S111R-SYRGHLWLF  | 396  | >VHL-S111R-RYRGHLWLF | 1698  | 1302  |
| >VHL-S111R-SYRGHLWLF  | 23   | >VHL-S111R-RYRGHLWLF | 15    | 8     |
| >VHL-S111R-SYRGHLWL   | 262  | >VHL-S111R-RYRGHLWL  | 566   | 304   |
| >VHL-S111R-SYRGHLWLF  | 430  | >VHL-S111R-RYRGHLWLF | 1036  | 606   |
| >VHL-S111R-SYRGHLWL   | 420  | >VHL-S111R-RYRGHLWL  | 401   | 19    |
| >VHL-S111R-SYRGHLWLF  | 277  | >VHL-S111R-RYRGHLWLF | 245   | 32    |
| >VHL-S111R-HSYRGHLWLI | 50   | >VHL-S111R-HRYRGHLWL | 11634 | 11584 |
| >VHL-S111R-HSYRGHLWLI | 47   | >VHL-S111R-HRYRGHLWL | 17315 | 17268 |
| >VHL-S111R-HSYRGHLWLI | 376  | >VHL-S111R-HRYRGHLWL | 2785  | 2409  |

|                        |       |                        |       |       |
|------------------------|-------|------------------------|-------|-------|
| >VHL-S111R- HSYRGHLWLI | 178   | >VHL-S111R- HRYRGHLWL  | 10326 | 10148 |
| >VHL-S111R- HSYRGHLWL  | 93    | >VHL-S111R- HRYRGHLWL  | 7308  | 7215  |
| >VHL-S111R- HSYRGHLWLI | 27    | >VHL-S111R- HRYRGHLWL  | 2426  | 2399  |
| >VHL-S111R- HSYRGHLWLI | 457   | >VHL-S111R- HRYRGHLWL  | 6505  | 6048  |
| >VHL-S111R- HSYRGHLWLI | 8     | >VHL-S111R- HRYRGHLWL  | 947   | 939   |
| >VHL-S111R- HSYRGHLWLI | 293   | >VHL-S111R- HRYRGHLWL  | 12329 | 12036 |
| >VHL-S111R- HSYRGHLWLI | 27    | >VHL-S111R- HRYRGHLWL  | 537   | 510   |
| >VHL-S111R- HSYRGHLWLI | 9     | >VHL-S111R- HRYRGHLWL  | 505   | 496   |
| >VHL-S111R- HSYRGHLWL  | 1085  | >VHL-S111R- HRYRGHLWL  | 451   | 634   |
| >VHL-S111R- HSYRGHLWLI | 36    | >VHL-S111R- HRYRGHLWL  | 33    | 3     |
| >VHL-S111R- HSYRGHLW   | 4     | >VHL-S111R- HRYRGHLW   | 3422  | 3418  |
| >VHL-S111R- HSYRGHLWL  | 5     | >VHL-S111R- HRYRGHLWL  | 17029 | 17024 |
| >VHL-S111R- HSYRGHLW   | 18455 | >VHL-S111R- HRYRGHLW   | 184   | 18271 |
| >VHL-S111R- HSYRGHLWL  | 14217 | >VHL-S111R- HRYRGHLWL  | 72    | 14145 |
| >VHL-S111R- HSYRGHLWLI | 4747  | >VHL-S111R- HRYRGHLWL  | 12    | 4735  |
| >VHL-S111R- HSYRGHLWLI | 9177  | >VHL-S111R- HRYRGHLWL  | 29    | 9148  |
| >VHL-S111R- HSYRGHLWL  | 3608  | >VHL-S111R- HRYRGHLWL  | 124   | 3484  |
| >VHL-S111R- HSYRGHLW   | 34    | >VHL-S111R- HRYRGHLW   | 3118  | 3084  |
| >VHL-S111R- HSYRGHLWLI | 62    | >VHL-S111R- HRYRGHLWL  | 17972 | 17910 |
| >VHL-S111R- HSYRGHLW   | 10    | >VHL-S111R- HRYRGHLW   | 4321  | 4311  |
| >VHL-S111R- HSYRGHLWL  | 339   | >VHL-S111R- HRYRGHLWL  | 21712 | 21373 |
| >VHL-S111R- HSYRGHLWLI | 19    | >VHL-S111R- HRYRGHLWL  | 15603 | 15584 |
| >VHL-S111R- HSYRGHLWL  | 17148 | >VHL-S111R- HRYRGHLWL  | 392   | 16756 |
| >VHL-S111R- HSYRGHLWL  | 126   | >VHL-S111R- HRYRGHLWL  | 6356  | 6230  |
| >VHL-S111R- HSYRGHLWLI | 55    | >VHL-S111R- HRYRGHLWL  | 5919  | 5864  |
| >VHL-S111R- HSYRGHLWLI | 13736 | >VHL-S111R- HRYRGHLWL  | 91    | 13645 |
| >VHL-S111R- HSYRGHLWLI | 13051 | >VHL-S111R- HRYRGHLWL  | 191   | 12860 |
| >VHL-S111R- HSYRGHLWL  | 790   | >VHL-S111R- HRYRGHLWL  | 6     | 784   |
| >VHL-S111R- HSYRGHLWLI | 15544 | >VHL-S111R- HRYRGHLWL  | 117   | 15427 |
| >VHL-S111R- HSYRGHLWLI | 9971  | >VHL-S111R- HRYRGHLWL  | 64    | 9907  |
| >VHL-S111R- HSYRGHLW   | 137   | >VHL-S111R- HRYRGHLW   | 23    | 114   |
| >VHL-S111R- HSYRGHLWLI | 300   | >VHL-S111R- HRYRGHLWL  | 6556  | 6256  |
| >VHL-S111R- HSYRGHLWLI | 46    | >VHL-S111R- HRYRGHLWL  | 37    | 9     |
| >VHL-S111R- HSYRGHLWL  | 153   | >VHL-S111R- HRYRGHLWL  | 9804  | 9651  |
| >VHL-S111R- IHSYRGHLWL | 569   | >VHL-S111R- IHRYRGHLWI | 334   | 235   |
| >VHL-S111R- IHSYRGHLWL | 131   | >VHL-S111R- IHRYRGHLWI | 279   | 148   |
| >VHL-S111R- IHSYRGHLWL | 91    | >VHL-S111R- IHRYRGHLWI | 33    | 58    |
| >VHL-S111R- IHSYRGHLW  | 25    | >VHL-S111R- IHRYRGHLW  | 109   | 84    |
| >VHL-S111R- IHSYRGHLWL | 402   | >VHL-S111R- IHRYRGHLWI | 1556  | 1154  |
| >VHL-S111R- RIHSYRGHL  | 336   | >VHL-S111R- RIHRYRGHL  | 272   | 64    |
| >VHL-S111R- RIHSYRGHLV | 414   | >VHL-S111R- RIHRYRGHLV | 417   | 3     |
| >VHL-S111R- RIHSYRGH   | 1112  | >VHL-S111R- RIHRYRGH   | 456   | 656   |
| >VHL-S111R- RIHSYRGHL  | 23    | >VHL-S111R- RIHRYRGHL  | 12    | 11    |

|                         |       |                        |      |       |
|-------------------------|-------|------------------------|------|-------|
| >VHL-S111R- RIHSYRGHLM  | 21    | >VHL-S111R- RIHRYRGHLM | 13   | 8     |
| >VHL-S111R- RIHSYRGHL   | 877   | >VHL-S111R- RIHRYRGHL  | 296  | 581   |
| >VHL-S111R- RIHSYRGHLM  | 117   | >VHL-S111R- RIHRYRGHLM | 80   | 37    |
| >VHL-S111R- RIHSYRGHLM  | 50    | >VHL-S111R- RIHRYRGHLM | 38   | 12    |
| >VHL-S111R- RIHSYRGHLM  | 940   | >VHL-S111R- RIHRYRGHLM | 385  | 555   |
| >VHL-S111R- RIHSYRGHLM  | 74    | >VHL-S111R- RIHRYRGHLM | 201  | 127   |
| >VHL-S111R- RRIHSYRGH   | 107   | >VHL-S111R- RRIHRYRGH  | 677  | 570   |
| >VHL-S111R- RRIHSYRGHL  | 52    | >VHL-S111R- RRIHRYRGHL | 155  | 103   |
| >VHL-S111R- RRIHSYRGHL' | 119   | >VHL-S111R- RRIHRYRGHL | 356  | 237   |
| >VHL-S111R- RRIHSYRG    | 947   | >VHL-S111R- RRIHRYRG   | 447  | 500   |
| >VHL-S111R- RRIHSYRGH   | 112   | >VHL-S111R- RRIHRYRGH  | 58   | 54    |
| >VHL-S111R- RRIHSYRGHL  | 9     | >VHL-S111R- RRIHRYRGHL | 8    | 1     |
| >VHL-S111R- RRIHSYRGHL' | 134   | >VHL-S111R- RRIHRYRGHL | 76   | 58    |
| >VHL-S111R- RRIHSYRG    | 99    | >VHL-S111R- RRIHRYRG   | 42   | 57    |
| >VHL-S111R- RRIHSYRGHL  | 21    | >VHL-S111R- RRIHRYRGHL | 16   | 5     |
| >VHL-S111R- RRIHSYRGHL' | 96    | >VHL-S111R- RRIHRYRGHL | 74   | 22    |
| >VHL-S111R- RRIHSYRGH   | 201   | >VHL-S111R- RRIHRYRGH  | 66   | 135   |
| >VHL-S111R- RRIHSYRGHL  | 18    | >VHL-S111R- RRIHRYRGHL | 15   | 3     |
| >VHL-S111R- RRIHSYRGHL' | 336   | >VHL-S111R- RRIHRYRGHL | 138  | 198   |
| >VHL-S111R- RRIHSYRGHL' | 124   | >VHL-S111R- RRIHRYRGHL | 405  | 281   |
| >VHL-S111R- GRIHSYRGH   | 212   | >VHL-S111R- GRIHRYRGH  | 152  | 60    |
| >VHL-S111R- GRIHSYRGH   | 174   | >VHL-S111R- GRIHRYRGH  | 92   | 82    |
| >VHL-S111R- GRIHSYRGH   | 13    | >VHL-S111R- GRIHRYRGH  | 8    | 5     |
| >VHL-S111R- TGRIHSYR    | 148   | >VHL-S111R- TGRIHRYR   | 154  | 6     |
| >VHL-S111R- TGRIHSY     | 185   | >VHL-S111R- TGRIHRY    | 414  | 229   |
| >VHL-S111R- TGRIHSYR    | 14    | >VHL-S111R- TGRIHRYR   | 24   | 10    |
| >VHL-S111R- TGRIHSYR    | 104   | >VHL-S111R- TGRIHRYR   | 706  | 602   |
| >VHL-S111R- GTGRIHSYR   | 452   | >VHL-S111R- GTGRIHRYR  | 1373 | 921   |
| >VHL-S111R- GTGRIHSY    | 415   | >VHL-S111R- GTGRIHRY   | 322  | 93    |
| >VHL-S111R- GTGRIHSY    | 316   | >VHL-S111R- GTGRIHRY   | 245  | 71    |
| >VHL-S111R- GTGRIHSY    | 74    | >VHL-S111R- GTGRIHRY   | 121  | 47    |
| >VHL-S111R- GTGRIHS     | 13350 | >VHL-S111R- GTGRIHR    | 26   | 13324 |
| >VHL-S111R- GTGRIHSYR   | 38    | >VHL-S111R- GTGRIHRYR  | 38   | 0     |
| >VHL-S111R- GTGRIHSYR   | 117   | >VHL-S111R- GTGRIHRYR  | 399  | 282   |
| >VHL-S111R- GTGRIHSYR   | 245   | >VHL-S111R- GTGRIHRYR  | 1902 | 1657  |
| >VHL-S111R- GTGRIHSY    | 439   | >VHL-S111R- GTGRIHRY   | 235  | 204   |
| >VHL-S111R- GTGRIHSY    | 491   | >VHL-S111R- GTGRIHRY   | 3080 | 2589  |
| >VHL-S111R- GTGRIHSY    | 91    | >VHL-S111R- GTGRIHRY   | 57   | 34    |
| >VHL-S111R- GTGRIHSY    | 131   | >VHL-S111R- GTGRIHRY   | 106  | 25    |
| >VHL-S111R- GTGRIHS     | 8100  | >VHL-S111R- GTGRIHR    | 343  | 7757  |
| >VHL-S111R- GTGRIHSYR   | 400   | >VHL-S111R- GTGRIHRYR  | 309  | 91    |
| >VHL-S33A-m EESGAEES    | 196   | >VHL-S33A-n EEAGAEES   | 157  | 39    |
| >VHL-S33A-m EEDGGEEES   | 1748  | >VHL-S33A-n EEDGGEEA   | 62   | 1686  |

|                        |       |                        |      |       |
|------------------------|-------|------------------------|------|-------|
| >VHL-S38F-w EESGPEES   | 259   | >VHL-S38F-r EEFGPEES   | 401  | 142   |
| >VHL-S38F-w AEESGPEE   | 701   | >VHL-S38F-r AEEFGPEE   | 475  | 226   |
| >VHL-S38F-w AEESGPEES  | 279   | >VHL-S38F-r AEEFGPEES  | 230  | 49    |
| >VHL-S38F-w AEESGPEESG | 136   | >VHL-S38F-r AEEFGPEESG | 129  | 7     |
| >VHL-S38F-w EESGAEES   | 9782  | >VHL-S38F-r EESGAEEF   | 143  | 9639  |
| >VHL-S38F-w EESGAEES   | 11136 | >VHL-S38F-r EESGAEEF   | 213  | 10923 |
| >VHL-S38F-w EESGAEES   | 4486  | >VHL-S38F-r EESGAEEF   | 99   | 4387  |
| >VHL-S38F-w EESGAEES   | 196   | >VHL-S38F-r EESGAEEF   | 604  | 408   |
| >VHL-S38F-w GEESGAEES  | 3030  | >VHL-S38F-r GEESGAEEF  | 27   | 3003  |
| >VHL-S38F-w GEESGAEES  | 7079  | >VHL-S38F-r GEESGAEEF  | 343  | 6736  |
| >VHL-S38F-w GEESGAEES  | 11367 | >VHL-S38F-r GEESGAEEF  | 392  | 10975 |
| >VHL-S38F-w GEESGAEES  | 4100  | >VHL-S38F-r GEESGAEEF  | 278  | 3822  |
| >VHL-S65L-w SVNSREPSQV | 190   | >VHL-S65L-r LVNSREPSQV | 216  | 26    |
| >VHL-S65L-w SVNSREPSQV | 126   | >VHL-S65L-r LVNSREPSQV | 145  | 19    |
| >VHL-S65L-w SVNSREPSQV | 165   | >VHL-S65L-r LVNSREPSQV | 651  | 486   |
| >VHL-S65L-w SVNSREPSQV | 25    | >VHL-S65L-r LVNSREPSQV | 13   | 12    |
| >VHL-S65L-w RSVNSREPSQ | 12862 | >VHL-S65L-r RLVNSREPSQ | 99   | 12763 |
| >VHL-S65L-w RSVNSREPSQ | 3522  | >VHL-S65L-r RLVNSREPSQ | 11   | 3511  |
| >VHL-S65L-w RSVNSREPSQ | 4104  | >VHL-S65L-r RLVNSREPSQ | 279  | 3825  |
| >VHL-S65L-w RSVNSREPSQ | 5789  | >VHL-S65L-r RLVNSREPSQ | 6    | 5783  |
| >VHL-S65L-w RSVNSREPSQ | 17155 | >VHL-S65L-r RLVNSREPSQ | 47   | 17108 |
| >VHL-S65L-w RSVNSREPSQ | 15275 | >VHL-S65L-r RLVNSREPSQ | 22   | 15253 |
| >VHL-S65L-w RSVNSREPSQ | 21254 | >VHL-S65L-r RLVNSREPSQ | 124  | 21130 |
| >VHL-S65L-w RSVNSREPSQ | 35344 | >VHL-S65L-r RLVNSREPSQ | 428  | 34916 |
| >VHL-S65L-w RSVNSREPSQ | 12767 | >VHL-S65L-r RLVNSREPSQ | 4    | 12763 |
| >VHL-S65L-w RSVNSREPSQ | 225   | >VHL-S65L-r RLVNSREPSQ | 304  | 79    |
| >VHL-S65L-w RSVNSREPSQ | 22    | >VHL-S65L-r RLVNSREPSQ | 6222 | 6200  |
| >VHL-S65L-w RSVNSREPSQ | 136   | >VHL-S65L-r RLVNSREPSQ | 2614 | 2478  |
| >VHL-S65L-w VLRSVNSR   | 83    | >VHL-S65L-r VLRLVNSR   | 155  | 72    |
| >VHL-S65L-w VLRSVNSR   | 206   | >VHL-S65L-r VLRLVNSR   | 121  | 85    |
| >VHL-S65L-w RPVLRSVNSR | 239   | >VHL-S65L-r RPVLRLVNSR | 344  | 105   |
| >VHL-S65L-w RPVLRSVNSR | 315   | >VHL-S65L-r RPVLRLVNSR | 319  | 4     |
| >VHL-S65L-w RPRPVLRS   | 366   | >VHL-S65L-r RPRPVLRL   | 11   | 355   |
| >VHL-S65L-w RPRPVLRSV  | 9     | >VHL-S65L-r RPRPVLRLV  | 21   | 12    |
| >VHL-S65L-w RPRPVLRSVN | 138   | >VHL-S65L-r RPRPVLRLVN | 333  | 195   |
| >VHL-S65L-w GRPRPVLRS  | 3120  | >VHL-S65L-r GRPRPVLRL  | 22   | 3098  |
| >VHL-S65L-w AGRPRPVLRS | 65    | >VHL-S65L-r AGRPRPVLRL | 78   | 13    |
| >VHL-S65L-w AGRPRPVLRS | 12435 | >VHL-S65L-r AGRPRPVLRL | 143  | 12292 |
| >VHL-S65P-w SVNSREPSQV | 190   | >VHL-S65P-r PVNSREPSQV | 4544 | 4354  |
| >VHL-S65P-w SVNSREPSQV | 126   | >VHL-S65P-r PVNSREPSQV | 3184 | 3058  |
| >VHL-S65P-w SVNSREPSQV | 165   | >VHL-S65P-r PVNSREPSQV | 5160 | 4995  |
| >VHL-S65P-w SVNSREPSQV | 25    | >VHL-S65P-r PVNSREPSQV | 368  | 343   |
| >VHL-S65P-w RSVNSREPS  | 23993 | >VHL-S65P-r RPVNSREPS  | 451  | 23542 |

|                         |       |                         |       |       |
|-------------------------|-------|-------------------------|-------|-------|
| >VHL-S65P-v RSVNSREPSQ  | 17589 | >VHL-S65P-r RPVNSREPSC  | 54    | 17535 |
| >VHL-S65P-v RSVNSREPSQ  | 225   | >VHL-S65P-r RPVNSREPSC  | 2107  | 1882  |
| >VHL-S65P-v RSVNSREPSQ  | 22    | >VHL-S65P-r RPVNSREPSC  | 18260 | 18238 |
| >VHL-S65P-v RSVNSREPSQ  | 136   | >VHL-S65P-r RPVNSREPSC  | 3326  | 3190  |
| >VHL-S65P-v VLRSVNSR    | 83    | >VHL-S65P-r VLRPVNSR    | 105   | 22    |
| >VHL-S65P-v VLRSVNSR    | 206   | >VHL-S65P-r VLRPVNSR    | 212   | 6     |
| >VHL-S65P-v RPVLRVNSR   | 239   | >VHL-S65P-r RPVLRVNSR   | 1416  | 1177  |
| >VHL-S65P-v RPVLRVNSR   | 315   | >VHL-S65P-r RPVLRVNSR   | 296   | 19    |
| >VHL-S65P-v RPRPVLR     | 366   | >VHL-S65P-r RPRPVLR     | 1525  | 1159  |
| >VHL-S65P-v RPRPVLRV    | 9     | >VHL-S65P-r RPRPVLRV    | 7     | 2     |
| >VHL-S65P-v RPRPVLRV    | 138   | >VHL-S65P-r RPRPVLRV    | 316   | 178   |
| >VHL-S65P-v RPRPVLRV    | 2931  | >VHL-S65P-r RPRPVLRV    | 365   | 2566  |
| >VHL-S65P-v AGRPRVLR    | 65    | >VHL-S65P-r AGRPRVLR    | 37    | 28    |
| >VHL-S65W-i SVNSREPSQ   | 190   | >VHL-S65W-i WVNSREPSQ   | 287   | 97    |
| >VHL-S65W-i SVNSREPSQ   | 126   | >VHL-S65W-i WVNSREPSQ   | 117   | 9     |
| >VHL-S65W-i SVNSREPSQ   | 165   | >VHL-S65W-i WVNSREPSQ   | 367   | 202   |
| >VHL-S65W-i SVNSREPSQ   | 2119  | >VHL-S65W-i WVNSREPSQ   | 230   | 1889  |
| >VHL-S65W-i SVNSREPSQ   | 25    | >VHL-S65W-i WVNSREPSQ   | 12    | 13    |
| >VHL-S65W-i SVNSREPSQ   | 614   | >VHL-S65W-i WVNSREPSQ   | 400   | 214   |
| >VHL-S65W-i RSVNSREPSQ  | 225   | >VHL-S65W-i RWVNSREPSQ  | 2814  | 2589  |
| >VHL-S65W-i RSVNSREPSQ  | 22    | >VHL-S65W-i RWVNSREPSQ  | 24012 | 23990 |
| >VHL-S65W-i RSVNSREPSQ  | 136   | >VHL-S65W-i RWVNSREPSQ  | 6600  | 6464  |
| >VHL-S65W-i RSVNSREP    | 30779 | >VHL-S65W-i RWVNSREP    | 259   | 30520 |
| >VHL-S65W-i RSVNSREPSQ  | 28832 | >VHL-S65W-i RWVNSREPSQ  | 108   | 28724 |
| >VHL-S65W-i EAGRPRVLR   | 22788 | >VHL-S65W-i EAGRPRVLR   | 134   | 22654 |
| >VHL-S65W-i LRSVNSRE    | 5024  | >VHL-S65W-i LRWVNSRE    | 314   | 4710  |
| >VHL-S65W-i LRSVNSREP   | 5747  | >VHL-S65W-i LRWVNSREP   | 352   | 5395  |
| >VHL-S65W-i LRSVNSREPS  | 5612  | >VHL-S65W-i LRWVNSREPSQ | 405   | 5207  |
| >VHL-S65W-i LRSVNSREPSQ | 5516  | >VHL-S65W-i LRWVNSREPSQ | 359   | 5157  |
| >VHL-S65W-i VLRSVNSR    | 83    | >VHL-S65W-i VLRWVNSR    | 69    | 14    |
| >VHL-S65W-i VLRSVNSR    | 206   | >VHL-S65W-i VLRWVNSR    | 71    | 135   |
| >VHL-S65W-i RPVLRVNSR   | 239   | >VHL-S65W-i RPVLRWVNS   | 291   | 52    |
| >VHL-S65W-i RPVLRVNSR   | 315   | >VHL-S65W-i RPVLRWVNS   | 177   | 138   |
| >VHL-S65W-i RPRPVLR     | 366   | >VHL-S65W-i RPRPVLRW    | 27    | 339   |
| >VHL-S65W-i RPRPVLRV    | 9     | >VHL-S65W-i RPRPVLRWV   | 11    | 2     |
| >VHL-S65W-i RPRPVLRV    | 138   | >VHL-S65W-i RPRPVLRWV   | 176   | 38    |
| >VHL-S65W-i RPRPVLR     | 18274 | >VHL-S65W-i RPRPVLRW    | 58    | 18216 |
| >VHL-S65W-i RPRPVLR     | 23429 | >VHL-S65W-i RPRPVLRW    | 169   | 23260 |
| >VHL-S65W-i RPRPVLR     | 28458 | >VHL-S65W-i RPRPVLRW    | 107   | 28351 |
| >VHL-S65W-i AGRPRVLR    | 65    | >VHL-S65W-i AGRPRVLRV   | 210   | 145   |
| >VHL-S65W-i AGRPRVLR    | 12435 | >VHL-S65W-i AGRPRVLRV   | 9     | 12426 |
| >VHL-S65W-i AGRPRVLR    | 24648 | >VHL-S65W-i AGRPRVLRV   | 187   | 24461 |
| >VHL-S68L-w SREPSQVIF   | 78    | >VHL-S68L-r LREPSQVIF   | 49    | 29    |

|                         |       |                         |       |       |
|-------------------------|-------|-------------------------|-------|-------|
| >VHL-S68L-w SREPSQVIF   | 185   | >VHL-S68L-r LREPSQVIF   | 370   | 185   |
| >VHL-S68L-w NSREPSQV    | 4945  | >VHL-S68L-r NLREPSQV    | 13    | 4932  |
| >VHL-S68L-w NSREPSQVI   | 16073 | >VHL-S68L-r NLREPSQVI   | 340   | 15733 |
| >VHL-S68L-w NSREPSQV    | 8576  | >VHL-S68L-r NLREPSQV    | 12    | 8564  |
| >VHL-S68L-w NSREPSQVI   | 17988 | >VHL-S68L-r NLREPSQVI   | 133   | 17855 |
| >VHL-S68L-w NSREPSQVIF  | 23302 | >VHL-S68L-r NLREPSQVIF  | 470   | 22832 |
| >VHL-S68L-w NSREPSQV    | 19149 | >VHL-S68L-r NLREPSQV    | 114   | 19035 |
| >VHL-S68L-w NSREPSQVI   | 21004 | >VHL-S68L-r NLREPSQVI   | 365   | 20639 |
| >VHL-S68L-w NSREPSQV    | 18960 | >VHL-S68L-r NLREPSQV    | 153   | 18807 |
| >VHL-S68L-w NSREPSQV    | 21384 | >VHL-S68L-r NLREPSQV    | 138   | 21246 |
| >VHL-S68L-w NSREPSQV    | 14991 | >VHL-S68L-r NLREPSQV    | 6     | 14985 |
| >VHL-S68L-w NSREPSQVI   | 31780 | >VHL-S68L-r NLREPSQVI   | 174   | 31606 |
| >VHL-S68L-w NSREPSQVIF  | 527   | >VHL-S68L-r NLREPSQVIF  | 204   | 323   |
| >VHL-S68L-w NSREPSQVI   | 7411  | >VHL-S68L-r NLREPSQVI   | 261   | 7150  |
| >VHL-S68L-w NSREPSQVIF  | 984   | >VHL-S68L-r NLREPSQVIF  | 39    | 945   |
| >VHL-S68L-w NSREPSQVIF  | 13    | >VHL-S68L-r NLREPSQVIF  | 2786  | 2773  |
| >VHL-S68L-w NSREPSQVIF  | 127   | >VHL-S68L-r NLREPSQVIF  | 2042  | 1915  |
| >VHL-S68L-w NSREPSQVI   | 134   | >VHL-S68L-r NLREPSQVI   | 7411  | 7277  |
| >VHL-S68L-w RPRPVLRVSVN | 138   | >VHL-S68L-r RPRPVLRVSVN | 9     | 129   |
| >VHL-S68L-w VNSREPSQVI  | 101   | >VHL-S68L-r VNLREPSQVI  | 43    | 58    |
| >VHL-S68L-w SVNSREPSQV  | 190   | >VHL-S68L-r SVNREPSQV   | 320   | 130   |
| >VHL-S68L-w SVNSREPSQV  | 126   | >VHL-S68L-r SVNREPSQV   | 495   | 369   |
| >VHL-S68L-w SVNSREPSQV  | 165   | >VHL-S68L-r SVNREPSQV   | 403   | 238   |
| >VHL-S68L-w SVNSREPSQV  | 25    | >VHL-S68L-r SVNREPSQV   | 63    | 38    |
| >VHL-S68L-w RSVNSREPSQ  | 225   | >VHL-S68L-r RSVNLREPSQ  | 744   | 519   |
| >VHL-S68L-w RSVNSREPSQ  | 22    | >VHL-S68L-r RSVNLREPSQ  | 69    | 47    |
| >VHL-S68L-w RSVNSREPSQ  | 136   | >VHL-S68L-r RSVNLREPSQ  | 91    | 45    |
| >VHL-S68L-w VLRSVNSR    | 625   | >VHL-S68L-r VLRSVNLR    | 264   | 361   |
| >VHL-S68L-w VLRSVNSR    | 83    | >VHL-S68L-r VLRSVNLR    | 49    | 34    |
| >VHL-S68L-w VLRSVNSR    | 206   | >VHL-S68L-r VLRSVNLR    | 183   | 23    |
| >VHL-S68L-w RPVLRVSVNS  | 38865 | >VHL-S68L-r RPVLRVSVNL  | 226   | 38639 |
| >VHL-S68L-w RPVLRVSVNSR | 239   | >VHL-S68L-r RPVLRVSVNLR | 165   | 74    |
| >VHL-S68L-w RPVLRVSVNS  | 4429  | >VHL-S68L-r RPVLRVSVNL  | 16    | 4413  |
| >VHL-S68L-w RPVLRVSVNSR | 315   | >VHL-S68L-r RPVLRVSVNLR | 162   | 153   |
| >VHL-S68P-v SREPSQVIF   | 78    | >VHL-S68P-r PREPSQVIF   | 450   | 372   |
| >VHL-S68P-v SREPSQVIF   | 185   | >VHL-S68P-r PREPSQVIF   | 1897  | 1712  |
| >VHL-S68P-v NSREPSQV    | 16570 | >VHL-S68P-r NPREPSQV    | 58    | 16512 |
| >VHL-S68P-v NSREPSQVI   | 7610  | >VHL-S68P-r NPREPSQVI   | 22    | 7588  |
| >VHL-S68P-v NSREPSQVIF  | 26694 | >VHL-S68P-r NPREPSQVIF  | 198   | 26496 |
| >VHL-S68P-v NSREPSQVIF  | 984   | >VHL-S68P-r NPREPSQVIF  | 398   | 586   |
| >VHL-S68P-v NSREPSQVIF  | 13    | >VHL-S68P-r NPREPSQVIF  | 14873 | 14860 |
| >VHL-S68P-v NSREPSQVIF  | 31472 | >VHL-S68P-r NPREPSQVIF  | 354   | 31118 |
| >VHL-S68P-v NSREPSQVI   | 14249 | >VHL-S68P-r NPREPSQVI   | 287   | 13962 |



|                        |       |                        |       |       |
|------------------------|-------|------------------------|-------|-------|
| >VHL-S68P-w NSREPSQVIF | 127   | >VHL-S68P-r NPREPSQVIF | 13346 | 13219 |
| >VHL-S68P-w NSREPSQVIF | 10599 | >VHL-S68P-r NPREPSQVIF | 78    | 10521 |
| >VHL-S68P-w NSREPSQVI  | 134   | >VHL-S68P-r NPREPSQVI  | 4371  | 4237  |
| >VHL-S68P-w RPRPVLRSVN | 138   | >VHL-S68P-r RPRPVLRSVN | 519   | 381   |
| >VHL-S68P-w VNSREPSQVI | 101   | >VHL-S68P-r VNPREPSQVI | 586   | 485   |
| >VHL-S68P-w SVNSREPSQV | 190   | >VHL-S68P-r SVNPREPSQV | 321   | 131   |
| >VHL-S68P-w SVNSREPSQV | 126   | >VHL-S68P-r SVNPREPSQV | 106   | 20    |
| >VHL-S68P-w SVNSREPSQV | 165   | >VHL-S68P-r SVNPREPSQV | 128   | 37    |
| >VHL-S68P-w SVNSREPSQV | 25    | >VHL-S68P-r SVNPREPSQV | 14    | 11    |
| >VHL-S68P-w SVNSREPSQV | 590   | >VHL-S68P-r SVNPREPSQV | 280   | 310   |
| >VHL-S68P-w RSVNSREPSC | 225   | >VHL-S68P-r RSVNPREPSC | 408   | 183   |
| >VHL-S68P-w RSVNSREPSC | 22    | >VHL-S68P-r RSVNPREPSC | 45    | 23    |
| >VHL-S68P-w RSVNSREPSC | 136   | >VHL-S68P-r RSVNPREPSC | 92    | 44    |
| >VHL-S68P-w VLRSVNSR   | 83    | >VHL-S68P-r VLRSVNPR   | 31    | 52    |
| >VHL-S68P-w VLRSVNSR   | 206   | >VHL-S68P-r VLRSVNPR   | 160   | 46    |
| >VHL-S68P-w RPVLRVNSR  | 239   | >VHL-S68P-r RPVLRVNSR  | 135   | 104   |
| >VHL-S68P-w RPVLRVNSR  | 315   | >VHL-S68P-r RPVLRVNSR  | 70    | 245   |
| >VHL-S68T-w SREPSQVIF  | 78    | >VHL-S68T-r TREPSQVIF  | 165   | 87    |
| >VHL-S68T-w SREPSQVI   | 707   | >VHL-S68T-r TREPSQVI   | 319   | 388   |
| >VHL-S68T-w SREPSQVIF  | 185   | >VHL-S68T-r TREPSQVIF  | 555   | 370   |
| >VHL-S68T-w NSREPSQVI  | 839   | >VHL-S68T-r NTREPSQVI  | 362   | 477   |
| >VHL-S68T-w NSREPSQV   | 2191  | >VHL-S68T-r NTREPSQV   | 223   | 1968  |
| >VHL-S68T-w NSREPSQV   | 904   | >VHL-S68T-r NTREPSQV   | 67    | 837   |
| >VHL-S68T-w NSREPSQVI  | 546   | >VHL-S68T-r NTREPSQVI  | 316   | 230   |
| >VHL-S68T-w NSREPSQVIF | 13    | >VHL-S68T-r NTREPSQVIF | 9     | 4     |
| >VHL-S68T-w NSREPSQVIF | 127   | >VHL-S68T-r NTREPSQVIF | 55    | 72    |
| >VHL-S68T-w NSREPSQVI  | 134   | >VHL-S68T-r NTREPSQVI  | 103   | 31    |
| >VHL-S68T-w RPRPVLRSVN | 138   | >VHL-S68T-r RPRPVLRSVN | 25    | 113   |
| >VHL-S68T-w VNSREPSQVI | 101   | >VHL-S68T-r VNTREPSQVI | 218   | 117   |
| >VHL-S68T-w SVNSREPSQV | 190   | >VHL-S68T-r SVNTREPSQV | 265   | 75    |
| >VHL-S68T-w SVNSREPSQV | 126   | >VHL-S68T-r SVNTREPSQV | 265   | 139   |
| >VHL-S68T-w SVNSREPSQV | 165   | >VHL-S68T-r SVNTREPSQV | 289   | 124   |
| >VHL-S68T-w SVNSREPSQV | 25    | >VHL-S68T-r SVNTREPSQV | 36    | 11    |
| >VHL-S68T-w RSVNSREPSC | 225   | >VHL-S68T-r RSVNTREPSC | 306   | 81    |
| >VHL-S68T-w RSVNSREPSC | 22    | >VHL-S68T-r RSVNTREPSC | 42    | 20    |
| >VHL-S68T-w RSVNSREPSC | 136   | >VHL-S68T-r RSVNTREPSC | 100   | 36    |
| >VHL-S68T-w VLRSVNSR   | 83    | >VHL-S68T-r VLRSVNTR   | 52    | 31    |
| >VHL-S68T-w VLRSVNSR   | 206   | >VHL-S68T-r VLRSVNTR   | 226   | 20    |
| >VHL-S68T-w RPVLRVNSR  | 239   | >VHL-S68T-r RPVLRVNSR  | 197   | 42    |
| >VHL-S68T-w RPVLRVNS   | 4429  | >VHL-S68T-r RPVLRVNS   | 398   | 4031  |
| >VHL-S68T-w RPVLRVNSR  | 315   | >VHL-S68T-r RPVLRVNSR  | 232   | 83    |
| >VHL-S80N-v SPRVVLPV   | 21    | >VHL-S80N-r NPRVVLPV   | 30    | 9     |
| >VHL-S80N-v SPRVVLPVW  | 189   | >VHL-S80N-r NPRVVLPVW  | 412   | 223   |

|                        |     |                        |       |       |
|------------------------|-----|------------------------|-------|-------|
| >VHL-S80N-v SPRVVLPVWI | 61  | >VHL-S80N-n NPRVVLPVW  | 316   | 255   |
| >VHL-S80N-v SPRVVLPVW  | 318 | >VHL-S80N-n NPRVVLPVW  | 158   | 160   |
| >VHL-S80N-v SPRVVLPV   | 251 | >VHL-S80N-n NPRVVLPV   | 144   | 107   |
| >VHL-S80N-v SPRVVLPVW  | 42  | >VHL-S80N-n NPRVVLPVW  | 42    | 0     |
| >VHL-S80N-v RSPRVVLPV  | 488 | >VHL-S80N-n RNPRVVLPV  | 6915  | 6427  |
| >VHL-S80N-v RSPRVVLPV  | 301 | >VHL-S80N-n RNPRVVLPV  | 6460  | 6159  |
| >VHL-S80N-v RSPRVVLPV  | 130 | >VHL-S80N-n RNPRVVLPV  | 2737  | 2607  |
| >VHL-S80N-v RSPRVVLPVW | 247 | >VHL-S80N-n RNPRVVLPVW | 3332  | 3085  |
| >VHL-S80N-v RSPRVVLPVW | 147 | >VHL-S80N-n RNPRVVLPVW | 2502  | 2355  |
| >VHL-S80N-v RSPRVVLPVW | 55  | >VHL-S80N-n RNPRVVLPVW | 10529 | 10474 |
| >VHL-S80N-v RSPRVVLPVW | 301 | >VHL-S80N-n RNPRVVLPVW | 22929 | 22628 |
| >VHL-S80N-v RSPRVVLPVW | 48  | >VHL-S80N-n RNPRVVLPVW | 2311  | 2263  |
| >VHL-S80N-v RSPRVVLPVW | 12  | >VHL-S80N-n RNPRVVLPVW | 442   | 430   |
| >VHL-S80N-v RSPRVVLPVW | 39  | >VHL-S80N-n RNPRVVLPVW | 5946  | 5907  |
| >VHL-S80N-v RSPRVVLPVW | 4   | >VHL-S80N-n RNPRVVLPVW | 344   | 340   |
| >VHL-S80N-v RSPRVVLPVW | 697 | >VHL-S80N-n RNPRVVLPVW | 454   | 243   |
| >VHL-S80N-v RSPRVVLPVW | 493 | >VHL-S80N-n RNPRVVLPVW | 282   | 211   |
| >VHL-S80N-v RSPRVVLPVW | 345 | >VHL-S80N-n RNPRVVLPVW | 6365  | 6020  |
| >VHL-S80N-v NRSRVL     | 22  | >VHL-S80N-n NRNRVL     | 37    | 15    |
| >VHL-S80N-v NRSRVL     | 265 | >VHL-S80N-n NRNRVL     | 522   | 257   |
| >VHL-S80N-v NRSRVL     | 733 | >VHL-S80N-n NRNRVL     | 333   | 400   |
| >VHL-S80N-v FCNRSRVL   | 252 | >VHL-S80N-n FCNRSRVL   | 196   | 56    |
| >VHL-S80N-v FCNRSRVL   | 994 | >VHL-S80N-n FCNRSRVL   | 458   | 536   |
| >VHL-S80N-v FCNRSRVL   | 107 | >VHL-S80N-n FCNRSRVL   | 119   | 12    |
| >VHL-S80N-v IFCNRSRVL  | 15  | >VHL-S80N-n IFCNRSRVL  | 16    | 1     |
| >VHL-S80N-v IFCNRSRVL  | 20  | >VHL-S80N-n IFCNRSRVL  | 19    | 1     |
| >VHL-S80N-v IFCNRSRVL  | 62  | >VHL-S80N-n IFCNRSRVL  | 40    | 22    |
| >VHL-S80N-v VIFCNRSRVL | 72  | >VHL-S80N-n VIFCNRSRVL | 125   | 53    |
| >VHL-S80N-v VIFCNRSRVL | 7   | >VHL-S80N-n VIFCNRSRVL | 10    | 3     |
| >VHL-S80N-v VIFCNRSRVL | 15  | >VHL-S80N-n VIFCNRSRVL | 16    | 1     |
| >VHL-S80N-v VIFCNRSRVL | 86  | >VHL-S80N-n VIFCNRSRVL | 139   | 53    |
| >VHL-S80N-v VIFCNRSRVL | 191 | >VHL-S80N-n VIFCNRSRVL | 126   | 65    |
| >VHL-S80N-v VIFCNRSRVL | 70  | >VHL-S80N-n VIFCNRSRVL | 107   | 37    |
| >VHL-S80N-v VIFCNRSRVL | 400 | >VHL-S80N-n VIFCNRSRVL | 814   | 414   |
| >VHL-S80N-v VIFCNRSRVL | 7   | >VHL-S80N-n VIFCNRSRVL | 10    | 3     |
| >VHL-S80N-v VIFCNRSRVL | 59  | >VHL-S80N-n VIFCNRSRVL | 71    | 12    |
| >VHL-S80N-v VIFCNRSRVL | 427 | >VHL-S80N-n VIFCNRSRVL | 1589  | 1162  |
| >VHL-S80N-v VIFCNRSRVL | 113 | >VHL-S80N-n VIFCNRSRVL | 158   | 45    |
| >VHL-S80N-v VIFCNRSRVL | 23  | >VHL-S80N-n VIFCNRSRVL | 28    | 5     |
| >VHL-S80N-v VIFCNRSRVL | 93  | >VHL-S80N-n VIFCNRSRVL | 132   | 39    |
| >VHL-S80N-v VIFCNRSRVL | 24  | >VHL-S80N-n VIFCNRSRVL | 34    | 10    |
| >VHL-S80N-v VIFCNRSRVL | 548 | >VHL-S80N-n VIFCNRSRVL | 492   | 56    |
| >VHL-S80N-v VIFCNRSRVL | 360 | >VHL-S80N-n VIFCNRSRVL | 698   | 338   |

|                           |       |                           |       |       |
|---------------------------|-------|---------------------------|-------|-------|
| >VHL-S80N-v QVIFCNRSPR    | 214   | >VHL-S80N-n QVIFCNRNPR    | 377   | 163   |
| >VHL-S80N-v QVIFCNRSPR    | 305   | >VHL-S80N-n QVIFCNRNPR    | 1335  | 1030  |
| >VHL-S80N-v QVIFCNRSPR    | 381   | >VHL-S80N-n QVIFCNRNPR    | 622   | 241   |
| >VHL-S80N-v QVIFCNRSPR    | 11    | >VHL-S80N-n QVIFCNRNPR    | 12    | 1     |
| >VHL-S80N-v QVIFCNRSPR    | 114   | >VHL-S80N-n QVIFCNRNPR    | 165   | 51    |
| >VHL-S80N-v QVIFCNRSPR    | 6     | >VHL-S80N-n QVIFCNRNPR    | 7     | 1     |
| >VHL-S80N-v QVIFCNRSPR    | 36    | >VHL-S80N-n QVIFCNRNPR    | 36    | 0     |
| >VHL-S80N-v QVIFCNRSPR    | 178   | >VHL-S80N-n QVIFCNRNPR    | 217   | 39    |
| >VHL-S80N-v QVIFCNRSPR    | 175   | >VHL-S80N-n QVIFCNRNPR    | 98    | 77    |
| >VHL-S80N-v SQVIFCNRSPR   | 47    | >VHL-S80N-n SQVIFCNRNP    | 54    | 7     |
| >VHL-S80N-v SQVIFCNRSPR   | 436   | >VHL-S80N-n SQVIFCNRNP    | 584   | 148   |
| >VHL-S80N-v SQVIFCNRSPR   | 301   | >VHL-S80N-n SQVIFCNRNP    | 520   | 219   |
| >VHL-S80N-v SQVIFCNRSPR   | 150   | >VHL-S80N-n SQVIFCNRNP    | 119   | 31    |
| >VHL-S80R-m SPRVVLPV      | 21    | >VHL-S80R-n RPRVVLPV      | 12    | 9     |
| >VHL-S80R-m SPRVVLPVW     | 189   | >VHL-S80R-n RPRVVLPVW     | 46    | 143   |
| >VHL-S80R-m SPRVVLPVWI    | 61    | >VHL-S80R-n RPRVVLPVWI    | 45    | 16    |
| >VHL-S80R-m SPRVVLPVW     | 318   | >VHL-S80R-n RPRVVLPVW     | 594   | 276   |
| >VHL-S80R-m SPRVVLPV      | 251   | >VHL-S80R-n RPRVVLPV      | 475   | 224   |
| >VHL-S80R-m SPRVVLPVW     | 42    | >VHL-S80R-n RPRVVLPVW     | 102   | 60    |
| >VHL-S80R-m RSPRVVLPV     | 488   | >VHL-S80R-n RRPRVVLPV     | 7873  | 7385  |
| >VHL-S80R-m RSPRVVLPV     | 301   | >VHL-S80R-n RRPRVVLPV     | 10306 | 10005 |
| >VHL-S80R-m RSPRVVLPV     | 130   | >VHL-S80R-n RRPRVVLPV     | 4913  | 4783  |
| >VHL-S80R-m RSPRVVLPVW    | 247   | >VHL-S80R-n RRPRVVLPVW    | 5999  | 5752  |
| >VHL-S80R-m RSPRVVLPVW    | 147   | >VHL-S80R-n RRPRVVLPVW    | 4875  | 4728  |
| >VHL-S80R-m RSPRVVLPV     | 1354  | >VHL-S80R-n RRPRVVLPV     | 468   | 886   |
| >VHL-S80R-m RSPRVVLPVW    | 55    | >VHL-S80R-n RRPRVVLPVW    | 14360 | 14305 |
| >VHL-S80R-m RSPRVVLPVW    | 301   | >VHL-S80R-n RRPRVVLPVW    | 26698 | 26397 |
| >VHL-S80R-m RSPRVVLPV     | 9221  | >VHL-S80R-n RRPRVVLPV     | 97    | 9124  |
| >VHL-S80R-m RSPRVVLPVW    | 11611 | >VHL-S80R-n RRPRVVLPVW    | 140   | 11471 |
| >VHL-S80R-m RSPRVVLPVW    | 48    | >VHL-S80R-n RRPRVVLPVW    | 10731 | 10683 |
| >VHL-S80R-m RSPRVVLPVW    | 12    | >VHL-S80R-n RRPRVVLPVW    | 6701  | 6689  |
| >VHL-S80R-m RSPRVVLPVW    | 39    | >VHL-S80R-n RRPRVVLPVW    | 20642 | 20603 |
| >VHL-S80R-m RSPRVVLPVW    | 4     | >VHL-S80R-n RRPRVVLPVW    | 3613  | 3609  |
| >VHL-S80R-m RSPRVVLP      | 21424 | >VHL-S80R-n RRPRVVLP      | 286   | 21138 |
| >VHL-S80R-m RSPRVVLPV     | 2461  | >VHL-S80R-n RRPRVVLPV     | 46    | 2415  |
| >VHL-S80R-m RSPRVVLPVW    | 12982 | >VHL-S80R-n RRPRVVLPVW    | 112   | 12870 |
| >VHL-S80R-m RSPRVVLPVW    | 697   | >VHL-S80R-n RRPRVVLPVW    | 22    | 675   |
| >VHL-S80R-m RSPRVVLPV     | 4734  | >VHL-S80R-n RRPRVVLPV     | 40    | 4694  |
| >VHL-S80R-m RSPRVVLPVW    | 19941 | >VHL-S80R-n RRPRVVLPVW    | 134   | 19807 |
| >VHL-S80R-m RSPRVVLPVW    | 493   | >VHL-S80R-n RRPRVVLPVW    | 7     | 486   |
| >VHL-S80R-m RSPRVVLPVW    | 345   | >VHL-S80R-n RRPRVVLPVW    | 15623 | 15278 |
| >VHL-S80R-m EPSQVIFCNRSPR | 20214 | >VHL-S80R-n EPSQVIFCNRSPR | 25    | 20189 |
| >VHL-S80R-m NRSRPRVVL     | 993   | >VHL-S80R-n NRRPRVVL      | 497   | 496   |

|                              |       |                               |      |       |
|------------------------------|-------|-------------------------------|------|-------|
| >VHL-S80R- $\mu$ NRSPRVVL    | 22    | >VHL-S80R- $\eta$ NRRPRVVL    | 347  | 325   |
| >VHL-S80R- $\mu$ NRSPRVVLPV  | 265   | >VHL-S80R- $\eta$ NRRPRVVLPV  | 4409 | 4144  |
| >VHL-S80R- $\mu$ NRSPRVVLPV  | 2134  | >VHL-S80R- $\eta$ NRRPRVVLPV  | 271  | 1863  |
| >VHL-S80R- $\mu$ NRSPRVVL    | 733   | >VHL-S80R- $\eta$ NRRPRVVL    | 379  | 354   |
| >VHL-S80R- $\mu$ NRSPRVVLPV  | 1062  | >VHL-S80R- $\eta$ NRRPRVVLPV  | 241  | 821   |
| >VHL-S80R- $\mu$ CNRSPRVVL   | 910   | >VHL-S80R- $\eta$ CNRRPRVVLF  | 342  | 568   |
| >VHL-S80R- $\mu$ FCNRSRPV    | 252   | >VHL-S80R- $\eta$ FCNRRRPV    | 790  | 538   |
| >VHL-S80R- $\mu$ FCNRSRPV    | 107   | >VHL-S80R- $\eta$ FCNRRRPV    | 146  | 39    |
| >VHL-S80R- $\mu$ IFCNRSRPR   | 15    | >VHL-S80R- $\eta$ IFCNRRRPR   | 14   | 1     |
| >VHL-S80R- $\mu$ IFCNRSRPR   | 20    | >VHL-S80R- $\eta$ IFCNRRRPR   | 22   | 2     |
| >VHL-S80R- $\mu$ IFCNRSRPR   | 62    | >VHL-S80R- $\eta$ IFCNRRRPR   | 54   | 8     |
| >VHL-S80R- $\mu$ VIFCNRSRPV' | 72    | >VHL-S80R- $\eta$ VIFCNRRRPV' | 155  | 83    |
| >VHL-S80R- $\mu$ VIFCNRSRPV  | 7     | >VHL-S80R- $\eta$ VIFCNRRRPV  | 19   | 12    |
| >VHL-S80R- $\mu$ VIFCNRSRPV' | 15    | >VHL-S80R- $\eta$ VIFCNRRRPV' | 22   | 7     |
| >VHL-S80R- $\mu$ VIFCNRSRPV  | 86    | >VHL-S80R- $\eta$ VIFCNRRRPV  | 685  | 599   |
| >VHL-S80R- $\mu$ VIFCNRSRPV' | 191   | >VHL-S80R- $\eta$ VIFCNRRRPV' | 463  | 272   |
| >VHL-S80R- $\mu$ VIFCNRSRPV  | 70    | >VHL-S80R- $\eta$ VIFCNRRRPV  | 335  | 265   |
| >VHL-S80R- $\mu$ VIFCNRSRPV  | 400   | >VHL-S80R- $\eta$ VIFCNRRRPV  | 3708 | 3308  |
| >VHL-S80R- $\mu$ VIFCNRSRPV  | 7     | >VHL-S80R- $\eta$ VIFCNRRRPV  | 16   | 9     |
| >VHL-S80R- $\mu$ VIFCNRSRPV' | 59    | >VHL-S80R- $\eta$ VIFCNRRRPV' | 131  | 72    |
| >VHL-S80R- $\mu$ VIFCNRSRPR  | 427   | >VHL-S80R- $\eta$ VIFCNRRRPR  | 1842 | 1415  |
| >VHL-S80R- $\mu$ VIFCNRSRPR  | 113   | >VHL-S80R- $\eta$ VIFCNRRRPR  | 601  | 488   |
| >VHL-S80R- $\mu$ VIFCNRSRPR  | 23    | >VHL-S80R- $\eta$ VIFCNRRRPR  | 41   | 18    |
| >VHL-S80R- $\mu$ VIFCNRSRPR  | 93    | >VHL-S80R- $\eta$ VIFCNRRRPR  | 265  | 172   |
| >VHL-S80R- $\mu$ VIFCNRSRPR  | 24    | >VHL-S80R- $\eta$ VIFCNRRRPR  | 141  | 117   |
| >VHL-S80R- $\mu$ VIFCNRSRPV' | 360   | >VHL-S80R- $\eta$ VIFCNRRRPV' | 1118 | 758   |
| >VHL-S80R- $\mu$ QVIFCNRSRPR | 214   | >VHL-S80R- $\eta$ QVIFCNRRRPR | 806  | 592   |
| >VHL-S80R- $\mu$ QVIFCNRSRPR | 305   | >VHL-S80R- $\eta$ QVIFCNRRRPR | 706  | 401   |
| >VHL-S80R- $\mu$ QVIFCNRSRPR | 381   | >VHL-S80R- $\eta$ QVIFCNRRRPR | 1176 | 795   |
| >VHL-S80R- $\mu$ QVIFCNRS    | 20028 | >VHL-S80R- $\eta$ QVIFCNRR    | 339  | 19689 |
| >VHL-S80R- $\mu$ QVIFCNRSRPR | 11    | >VHL-S80R- $\eta$ QVIFCNRRRPR | 9    | 2     |
| >VHL-S80R- $\mu$ QVIFCNRS    | 32854 | >VHL-S80R- $\eta$ QVIFCNRR    | 443  | 32411 |
| >VHL-S80R- $\mu$ QVIFCNRSRPR | 114   | >VHL-S80R- $\eta$ QVIFCNRRRPR | 194  | 80    |
| >VHL-S80R- $\mu$ QVIFCNRS    | 11241 | >VHL-S80R- $\eta$ QVIFCNRR    | 15   | 11226 |
| >VHL-S80R- $\mu$ QVIFCNRSRPR | 6     | >VHL-S80R- $\eta$ QVIFCNRRRPR | 15   | 9     |
| >VHL-S80R- $\mu$ QVIFCNRSRPR | 36    | >VHL-S80R- $\eta$ QVIFCNRRRPR | 34   | 2     |
| >VHL-S80R- $\mu$ QVIFCNRSRPR | 178   | >VHL-S80R- $\eta$ QVIFCNRRRPR | 463  | 285   |
| >VHL-S80R- $\mu$ QVIFCNRS    | 30837 | >VHL-S80R- $\eta$ QVIFCNRR    | 256  | 30581 |
| >VHL-S80R- $\mu$ QVIFCNRSRPR | 175   | >VHL-S80R- $\eta$ QVIFCNRRRPR | 161  | 14    |
| >VHL-S80R- $\mu$ SQVIFCNRS   | 20218 | >VHL-S80R- $\eta$ SQVIFCNRR   | 178  | 20040 |
| >VHL-S80R- $\mu$ SQVIFCNRSPI | 47    | >VHL-S80R- $\eta$ SQVIFCNRRP  | 72   | 25    |
| >VHL-S80R- $\mu$ SQVIFCNRS   | 36907 | >VHL-S80R- $\eta$ SQVIFCNRR   | 475  | 36432 |
| >VHL-S80R- $\mu$ SQVIFCNRSPI | 436   | >VHL-S80R- $\eta$ SQVIFCNRRP  | 1381 | 945   |

|                         |       |                         |      |       |
|-------------------------|-------|-------------------------|------|-------|
| >VHL-S80R-m SQVIFCNRSPI | 301   | >VHL-S80R-nr SQVIFCNRRP | 709  | 408   |
| >VHL-S80R-m SQVIFCNRSPI | 150   | >VHL-S80R-nr SQVIFCNRRP | 151  | 1     |
| >VHL-T100A- TLPPGTGRR   | 214   | >VHL-T100A- ALPPGTGRR   | 45   | 169   |
| >VHL-T100A- TLPPGTGRR   | 1636  | >VHL-T100A- ALPPGTGRR   | 441  | 1195  |
| >VHL-T100A- TLPPGTGRR   | 83    | >VHL-T100A- ALPPGTGRR   | 16   | 67    |
| >VHL-T100A- PTLPPGTGRR  | 139   | >VHL-T100A- PALPPGTGRF  | 577  | 438   |
| >VHL-T100A- YPTLPPGTGR  | 474   | >VHL-T100A- YPALPPGTGR  | 183  | 291   |
| >VHL-T100A- YPTLPPGT    | 313   | >VHL-T100A- YPALPPGT    | 240  | 73    |
| >VHL-T100A- YPTLPPGTG   | 410   | >VHL-T100A- YPALPPGTG   | 328  | 82    |
| >VHL-T100A- PYPTLPPGTG  | 66    | >VHL-T100A- PYPALPPGTG  | 67   | 1     |
| >VHL-T100A- QPYPTLPPG   | 497   | >VHL-T100A- QYPALPPG    | 198  | 299   |
| >VHL-T100A- QPYPTLPPG   | 159   | >VHL-T100A- QYPALPPG    | 158  | 1     |
| >VHL-T100A- EPQPYPTL    | 420   | >VHL-T100A- EPQPYPAL    | 156  | 264   |
| >VHL-T100A- EPQPYPTL    | 537   | >VHL-T100A- EPQPYPAL    | 164  | 373   |
| >VHL-T100A- GEPQPYPTL   | 197   | >VHL-T100A- GEPQPYPAL   | 98   | 99    |
| >VHL-T100A- GEPQPYPTL   | 460   | >VHL-T100A- GEPQPYPAL   | 169  | 291   |
| >VHL-T105M TGRRHSY      | 1160  | >VHL-T105M MGRRHSY      | 82   | 1078  |
| >VHL-T105M TGRRHSYR     | 148   | >VHL-T105M MGRRHSYR     | 16   | 132   |
| >VHL-T105M TGRRHSYRG    | 2695  | >VHL-T105M MGRRHSYRC    | 275  | 2420  |
| >VHL-T105M TGRRHSY      | 185   | >VHL-T105M MGRRHSY      | 91   | 94    |
| >VHL-T105M TGRRHSYR     | 14    | >VHL-T105M MGRRHSYR     | 9    | 5     |
| >VHL-T105M TGRRHSYR     | 104   | >VHL-T105M MGRRHSYR     | 37   | 67    |
| >VHL-T105M TGRRHSY      | 819   | >VHL-T105M MGRRHSY      | 198  | 621   |
| >VHL-T105M TGRRHSY      | 2973  | >VHL-T105M MGRRHSY      | 296  | 2677  |
| >VHL-T105M TGRRHSY      | 1951  | >VHL-T105M MGRRHSY      | 259  | 1692  |
| >VHL-T105M TGRRHSY      | 4760  | >VHL-T105M MGRRHSY      | 462  | 4298  |
| >VHL-T105M TGRRHSYR     | 516   | >VHL-T105M MGRRHSYR     | 233  | 283   |
| >VHL-T105M GTGRRHSY     | 24954 | >VHL-T105M GMGRRHSY     | 482  | 24472 |
| >VHL-T105M GTGRRHSY     | 2715  | >VHL-T105M GMGRRHSY     | 495  | 2220  |
| >VHL-T105M GTGRRHSYR    | 452   | >VHL-T105M GMGRRHSYR    | 181  | 271   |
| >VHL-T105M GTGRRHSY     | 415   | >VHL-T105M GMGRRHSY     | 8151 | 7736  |
| >VHL-T105M GTGRRHSY     | 316   | >VHL-T105M GMGRRHSY     | 75   | 241   |
| >VHL-T105M GTGRRHSY     | 74    | >VHL-T105M GMGRRHSY     | 34   | 40    |
| >VHL-T105M GTGRRHSYR    | 38    | >VHL-T105M GMGRRHSYR    | 26   | 12    |
| >VHL-T105M GTGRRHSYR    | 117   | >VHL-T105M GMGRRHSYR    | 62   | 55    |
| >VHL-T105M GTGRRHSYR    | 245   | >VHL-T105M GMGRRHSYR    | 1500 | 1255  |
| >VHL-T105M GTGRRHSY     | 439   | >VHL-T105M GMGRRHSY     | 319  | 120   |
| >VHL-T105M GTGRRHSY     | 491   | >VHL-T105M GMGRRHSY     | 66   | 425   |
| >VHL-T105M GTGRRHSY     | 8678  | >VHL-T105M GMGRRHSY     | 447  | 8231  |
| >VHL-T105M GTGRRHSY     | 91    | >VHL-T105M GMGRRHSY     | 9634 | 9543  |
| >VHL-T105M GTGRRHSY     | 131   | >VHL-T105M GMGRRHSY     | 9196 | 9065  |
| >VHL-T105M GTGRRHSYR    | 2640  | >VHL-T105M GMGRRHSYR    | 161  | 2479  |
| >VHL-T105M GTGRRHSYR    | 400   | >VHL-T105M GMGRRHSYR    | 5179 | 4779  |

|                        |       |                        |       |       |
|------------------------|-------|------------------------|-------|-------|
| >VHL-T105M GTGRRHSYR   | 1236  | >VHL-T105M GMGRRHSYR   | 182   | 1054  |
| >VHL-T105M PGTGRRHSY   | 2207  | >VHL-T105M PGMGRRHSY   | 335   | 1872  |
| >VHL-T105M PGTGRRHSY   | 1667  | >VHL-T105M PGMGRRHSY   | 494   | 1173  |
| >VHL-T105M PGTGRRHSY   | 524   | >VHL-T105M PGMGRRHSY   | 218   | 306   |
| >VHL-T105M LPPGTGRRR   | 158   | >VHL-T105M LPPGMGRRR   | 154   | 4     |
| >VHL-T105M LPPGTGRRR   | 1043  | >VHL-T105M LPPGMGRRR   | 441   | 602   |
| >VHL-T105M TLPPGTGRRR  | 214   | >VHL-T105M TLPPGMGRRR  | 344   | 130   |
| >VHL-T105M TLPPGTGRRR  | 83    | >VHL-T105M TLPPGMGRRR  | 97    | 14    |
| >VHL-T105M PTLPPGTGRR  | 139   | >VHL-T105M PTLPPGMGRR  | 221   | 82    |
| >VHL-T105M YPTLPPGTGR  | 474   | >VHL-T105M YPTLPPGMGI  | 272   | 202   |
| >VHL-T105M YPTLPPGT    | 6622  | >VHL-T105M YPTLPPGM    | 130   | 6492  |
| >VHL-T105M YPTLPPGT    | 1028  | >VHL-T105M YPTLPPGM    | 27    | 1001  |
| >VHL-T105M YPTLPPGT    | 313   | >VHL-T105M YPTLPPGM    | 5209  | 4896  |
| >VHL-T105M YPTLPPGTG   | 410   | >VHL-T105M YPTLPPGMG   | 582   | 172   |
| >VHL-T105M YPTLPPGTGR  | 723   | >VHL-T105M YPTLPPGMGI  | 386   | 337   |
| >VHL-T105M PYPTLPPGTG  | 66    | >VHL-T105M PYPTLPPGMC  | 45    | 21    |
| >VHL-T105M QPYPTLPPGT  | 1703  | >VHL-T105M QPYPTLPPGM  | 270   | 1433  |
| >VHL-T105P- TGRRHSYR   | 148   | >VHL-T105P- PGRRIHSYR  | 659   | 511   |
| >VHL-T105P- TGRRHSY    | 185   | >VHL-T105P- PGRRIHSY   | 636   | 451   |
| >VHL-T105P- TGRRHSYR   | 14    | >VHL-T105P- PGRRIHSYR  | 172   | 158   |
| >VHL-T105P- TGRRHSYR   | 104   | >VHL-T105P- PGRRIHSYR  | 9585  | 9481  |
| >VHL-T105P- GTGRRHSYR  | 452   | >VHL-T105P- GPGRRHSYR  | 13589 | 13137 |
| >VHL-T105P- GTGRRHSY   | 415   | >VHL-T105P- GPGRRHSY   | 12920 | 12505 |
| >VHL-T105P- GTGRRHSY   | 316   | >VHL-T105P- GPGRRHSY   | 5955  | 5639  |
| >VHL-T105P- GTGRRHSY   | 74    | >VHL-T105P- GPGRRHSY   | 1372  | 1298  |
| >VHL-T105P- GTGRRHSYR  | 38    | >VHL-T105P- GPGRRHSYR  | 633   | 595   |
| >VHL-T105P- GTGRRHSYR  | 117   | >VHL-T105P- GPGRRHSYR  | 1814  | 1697  |
| >VHL-T105P- GTGRRHSYR  | 245   | >VHL-T105P- GPGRRHSYR  | 10715 | 10470 |
| >VHL-T105P- GTGRRHSY   | 439   | >VHL-T105P- GPGRRHSY   | 7910  | 7471  |
| >VHL-T105P- GTGRRHSY   | 491   | >VHL-T105P- GPGRRHSY   | 10064 | 9573  |
| >VHL-T105P- GTGRRHSY   | 91    | >VHL-T105P- GPGRRHSY   | 20810 | 20719 |
| >VHL-T105P- GTGRRHSY   | 131   | >VHL-T105P- GPGRRHSY   | 7385  | 7254  |
| >VHL-T105P- GTGRRHSYR  | 400   | >VHL-T105P- GPGRRHSYR  | 8365  | 7965  |
| >VHL-T105P- PGTGRRHSY  | 12906 | >VHL-T105P- PGPGRRIHSY | 97    | 12809 |
| >VHL-T105P- PGTGRRHSY  | 524   | >VHL-T105P- PGPGRRIHSY | 368   | 156   |
| >VHL-T105P- LPPGTGRRR  | 158   | >VHL-T105P- LPPGPGRRR  | 99    | 59    |
| >VHL-T105P- TLPPGTGRRR | 214   | >VHL-T105P- TLPPGPGRRR | 131   | 83    |
| >VHL-T105P- TLPPGTGRRR | 83    | >VHL-T105P- TLPPGPGRRR | 158   | 75    |
| >VHL-T105P- PTLPPGTGRR | 139   | >VHL-T105P- PTLPPGPGRR | 124   | 15    |
| >VHL-T105P- YPTLPPGTGR | 474   | >VHL-T105P- YPTLPPGPGR | 1294  | 820   |
| >VHL-T105P- YPTLPPGT   | 313   | >VHL-T105P- YPTLPPGP   | 896   | 583   |
| >VHL-T105P- YPTLPPGTG  | 410   | >VHL-T105P- YPTLPPGPG  | 87    | 323   |
| >VHL-T105P- PYPTLPPGTG | 66    | >VHL-T105P- PYPTLPPGPG | 68    | 2     |

|                         |      |                         |      |      |
|-------------------------|------|-------------------------|------|------|
| >VHL-T105P- QPYPTLPPGT  | 1050 | >VHL-T105P- QPYPTLPPGP  | 449  | 601  |
| >VHL-T133S- TELFVPSL    | 46   | >VHL-T133S- SELFVPSL    | 27   | 19   |
| >VHL-T133S- TELFVPSL    | 98   | >VHL-T133S- SELFVPSL    | 211  | 113  |
| >VHL-T133S- TELFVPSL    | 471  | >VHL-T133S- SELFVPSL    | 983  | 512  |
| >VHL-T133S- TELFVPSL    | 54   | >VHL-T133S- SELFVPSL    | 53   | 1    |
| >VHL-T133S- TELFVPSL    | 49   | >VHL-T133S- SELFVPSL    | 50   | 1    |
| >VHL-T133S- TELFVPSLNV  | 352  | >VHL-T133S- SELFVPSLNV  | 301  | 51   |
| >VHL-T133S- TELFVPSL    | 491  | >VHL-T133S- SELFVPSL    | 227  | 264  |
| >VHL-T133S- TELFVPSLNV  | 1852 | >VHL-T133S- SELFVPSLNV  | 239  | 1613 |
| >VHL-T133S- TELFVPSL    | 724  | >VHL-T133S- SELFVPSL    | 262  | 462  |
| >VHL-T133S- TELFVPSLNV  | 129  | >VHL-T133S- SELFVPSLNV  | 146  | 17   |
| >VHL-T133S- QTELFVPSL   | 386  | >VHL-T133S- QSELFVPSL   | 4924 | 4538 |
| >VHL-T133S- QTELFVPSLN' | 74   | >VHL-T133S- QSELFVPSLN' | 1325 | 1251 |
| >VHL-T133S- QTELFVPSL   | 59   | >VHL-T133S- QSELFVPSL   | 104  | 45   |
| >VHL-T133S- QTELFVPSL   | 80   | >VHL-T133S- QSELFVPSL   | 232  | 152  |
| >VHL-T133S- NQTELFVPSL  | 527  | >VHL-T133S- NQSELFVPSL  | 158  | 369  |
| >VHL-T133S- NQTELFVPS   | 68   | >VHL-T133S- NQSELFVPS   | 71   | 3    |
| >VHL-T133S- NQTELFVPSL  | 231  | >VHL-T133S- NQSELFVPSL  | 153  | 78   |
| >VHL-T133S- NQTELFVPSL  | 3014 | >VHL-T133S- NQSELFVPSL  | 377  | 2637 |
| >VHL-T133S- NQTELFVPSL  | 316  | >VHL-T133S- NQSELFVPSL  | 125  | 191  |
| >VHL-T133S- NQTELFVPSL  | 42   | >VHL-T133S- NQSELFVPSL  | 17   | 25   |
| >VHL-T133S- NQTELFVPSL  | 513  | >VHL-T133S- NQSELFVPSL  | 376  | 137  |
| >VHL-T133S- LVNQTELFV   | 493  | >VHL-T133S- LVNQSELFV   | 372  | 121  |
| >VHL-T133S- LVNQTELFV   | 423  | >VHL-T133S- LVNQSELFV   | 330  | 93   |
| >VHL-T133S- LVNQTELFV   | 137  | >VHL-T133S- LVNQSELFV   | 136  | 1    |
| >VHL-T133S- LVNQTELFV   | 66   | >VHL-T133S- LVNQSELFV   | 129  | 63   |
| >VHL-T133S- LVNQTELFV   | 56   | >VHL-T133S- LVNQSELFV   | 87   | 31   |
| >VHL-T133S- LVNQTELFV   | 17   | >VHL-T133S- LVNQSELFV   | 17   | 0    |
| >VHL-T133S- LVNQTELF    | 220  | >VHL-T133S- LVNQSELF    | 141  | 79   |
| >VHL-T133S- LVNQTELF    | 870  | >VHL-T133S- LVNQSELF    | 275  | 595  |
| >VHL-T133S- LVNQTELF    | 74   | >VHL-T133S- LVNQSELF    | 99   | 25   |
| >VHL-T133S- LLVNQTEL    | 146  | >VHL-T133S- LLVNQSEL    | 286  | 140  |
| >VHL-T133S- LLVNQTELFV  | 17   | >VHL-T133S- LLVNQSELFV  | 21   | 4    |
| >VHL-T133S- LLVNQTEL    | 11   | >VHL-T133S- LLVNQSEL    | 17   | 6    |
| >VHL-T133S- LLVNQTELF   | 408  | >VHL-T133S- LLVNQSELF   | 680  | 272  |
| >VHL-T133S- LLVNQTELFV  | 15   | >VHL-T133S- LLVNQSELFV  | 16   | 1    |
| >VHL-T133S- LLVNQTEL    | 32   | >VHL-T133S- LLVNQSEL    | 42   | 10   |
| >VHL-T133S- LLVNQTELFV  | 28   | >VHL-T133S- LLVNQSELFV  | 28   | 0    |
| >VHL-T133S- LLVNQTEL    | 155  | >VHL-T133S- LLVNQSEL    | 300  | 145  |
| >VHL-T133S- LLVNQTELFV  | 61   | >VHL-T133S- LLVNQSELFV  | 90   | 29   |
| >VHL-T133S- LLVNQTEL    | 20   | >VHL-T133S- LLVNQSEL    | 17   | 3    |
| >VHL-T133S- LLVNQTELFV  | 3    | >VHL-T133S- LLVNQSELFV  | 4    | 1    |
| >VHL-T133S- LLVNQTEL    | 29   | >VHL-T133S- LLVNQSEL    | 19   | 10   |

|                                     |      |                         |     |      |
|-------------------------------------|------|-------------------------|-----|------|
| >VHL-T133S- LLVNQTELFV              | 6    | >VHL-T133S- LLVNQSELFV  | 6   | 0    |
| >VHL-T133S- LLVNQTEL                | 65   | >VHL-T133S- LLVNQSEL    | 76  | 11   |
| >VHL-T133S- LLVNQTELFV              | 7    | >VHL-T133S- LLVNQSELFV  | 7   | 0    |
| >VHL-T133S- LLVNQTEL                | 279  | >VHL-T133S- LLVNQSEL    | 299 | 20   |
| >VHL-T133S- LLVNQTELFV              | 9    | >VHL-T133S- LLVNQSELFV  | 12  | 3    |
| >VHL-T133S- LLVNQTEL                | 3    | >VHL-T133S- LLVNQSEL    | 4   | 1    |
| >VHL-T133S- LLVNQTELFV              | 2    | >VHL-T133S- LLVNQSELFV  | 2   | 0    |
| >VHL-T133S- LLVNQTELF               | 85   | >VHL-T133S- LLVNQSELF   | 57  | 28   |
| >VHL-T133S- LLVNQTELF               | 77   | >VHL-T133S- LLVNQSELF   | 59  | 18   |
| >VHL-T133S- LLVNQTELF               | 1152 | >VHL-T133S- LLVNQSELF   | 496 | 656  |
| >VHL-T133S- GLLVNQTEL               | 76   | >VHL-T133S- GLLVNQSEL   | 378 | 302  |
| >VHL-T133S- GLLVNQTEL               | 171  | >VHL-T133S- GLLVNQSEL   | 410 | 239  |
| >VHL-T133S- GLLVNQTELF              | 31   | >VHL-T133S- GLLVNQSELF  | 36  | 5    |
| >VHL-T133S- GLLVNQTEL               | 66   | >VHL-T133S- GLLVNQSEL   | 135 | 69   |
| >VHL-T133S- GLLVNQTELF              | 83   | >VHL-T133S- GLLVNQSELF  | 82  | 1    |
| >VHL-T133S- GLLVNQTELF              | 237  | >VHL-T133S- GLLVNQSELF  | 207 | 30   |
| >VHL-T133S- GLLVNQTELF              | 81   | >VHL-T133S- GLLVNQSELF  | 90  | 9    |
| >VHL-T133S- GLLVNQTEL               | 27   | >VHL-T133S- GLLVNQSEL   | 20  | 7    |
| >VHL-T133S- GLLVNQTELF              | 3    | >VHL-T133S- GLLVNQSELF  | 4   | 1    |
| >VHL-T133S- GLLVNQTEL               | 17   | >VHL-T133S- GLLVNQSEL   | 11  | 6    |
| >VHL-T133S- GLLVNQTELF              | 4    | >VHL-T133S- GLLVNQSELF  | 4   | 0    |
| >VHL-T133S- GLLVNQTEL               | 17   | >VHL-T133S- GLLVNQSEL   | 18  | 1    |
| >VHL-T133S- GLLVNQTELF              | 4    | >VHL-T133S- GLLVNQSELF  | 5   | 1    |
| >VHL-T133S- GLLVNQTEL               | 74   | >VHL-T133S- GLLVNQSEL   | 44  | 30   |
| >VHL-T133S- GLLVNQTELF              | 5    | >VHL-T133S- GLLVNQSELF  | 6   | 1    |
| >VHL-T133S- GLLVNQTEL               | 8    | >VHL-T133S- GLLVNQSEL   | 8   | 0    |
| >VHL-T133S- GLLVNQTELF              | 4    | >VHL-T133S- GLLVNQSELF  | 4   | 0    |
| >VHL-T133S- GLLVNQTELF              | 484  | >VHL-T133S- GLLVNQSELF  | 392 | 92   |
| >VHL-T133S- HDGLLVNQTI              | 237  | >VHL-T133S- HDGLLVNQSI  | 258 | 21   |
| >VHL-T157I- <del>v</del> TLKERCLQV  | 403  | >VHL-T157I-r ILKERCLQV  | 156 | 247  |
| >VHL-T157I- <del>v</del> TLKERCLQVV | 559  | >VHL-T157I-r ILKERCLQVV | 313 | 246  |
| >VHL-T157I- <del>v</del> TLKERCLQV  | 328  | >VHL-T157I-r ILKERCLQV  | 120 | 208  |
| >VHL-T157I- <del>v</del> TLKERCLQVV | 514  | >VHL-T157I-r ILKERCLQVV | 326 | 188  |
| >VHL-T157I- <del>v</del> TLKERCLQV  | 7    | >VHL-T157I-r ILKERCLQV  | 6   | 1    |
| >VHL-T157I- <del>v</del> TLKERCLQVV | 50   | >VHL-T157I-r ILKERCLQVV | 47  | 3    |
| >VHL-T157I- <del>v</del> TLKERCLQV  | 909  | >VHL-T157I-r ILKERCLQV  | 276 | 633  |
| >VHL-T157I- <del>v</del> TLKERCLQV  | 186  | >VHL-T157I-r ILKERCLQV  | 31  | 155  |
| >VHL-T157I- <del>v</del> TLKERCLQVV | 141  | >VHL-T157I-r ILKERCLQVV | 29  | 112  |
| >VHL-T157I- <del>v</del> TLKERCLQVV | 109  | >VHL-T157I-r ILKERCLQVV | 59  | 50   |
| >VHL-T157I- <del>v</del> TLKERCLQV  | 308  | >VHL-T157I-r ILKERCLQV  | 120 | 188  |
| >VHL-T157I- <del>v</del> TLKERCLQVV | 369  | >VHL-T157I-r ILKERCLQVV | 170 | 199  |
| >VHL-T157I- <del>v</del> TLKERCLQV  | 1402 | >VHL-T157I-r ILKERCLQV  | 215 | 1187 |
| >VHL-T157I- <del>v</del> TLKERCLQVV | 1003 | >VHL-T157I-r ILKERCLQVV | 176 | 827  |



|                          |       |                          |       |       |
|--------------------------|-------|--------------------------|-------|-------|
| >VHL-T157I-\ TLKERCLQ    | 850   | >VHL-T157I-r ILKERCLQ    | 224   | 626   |
| >VHL-T157I-\ TLKERCLQV   | 3     | >VHL-T157I-r ILKERCLQV   | 2     | 1     |
| >VHL-T157I-\ TLKERCLQVV  | 4     | >VHL-T157I-r ILKERCLQVV  | 3     | 1     |
| >VHL-T157I-\ TLKERCLQVV  | 58    | >VHL-T157I-r ILKERCLQVVF | 46    | 12    |
| >VHL-T157I-\ TLKERCLQVV  | 96    | >VHL-T157I-r ILKERCLQVVF | 96    | 0     |
| >VHL-T157I-\ TLKERCLQVV  | 211   | >VHL-T157I-r ILKERCLQVVF | 824   | 613   |
| >VHL-T157I-\ TLKERCLQV   | 84    | >VHL-T157I-r ILKERCLQV   | 89    | 5     |
| >VHL-T157I-\ TLKERCLQVV  | 436   | >VHL-T157I-r ILKERCLQVVF | 283   | 153   |
| >VHL-T157I-\ YTLKERCLQV  | 93    | >VHL-T157I-r YILKERCLQV  | 39    | 54    |
| >VHL-T157I-\ YTLKERCLQV' | 308   | >VHL-T157I-r YILKERCLQV\ | 85    | 223   |
| >VHL-T157I-\ YTLKERCLQV' | 1518  | >VHL-T157I-r YILKERCLQV\ | 418   | 1100  |
| >VHL-T157I-\ YTLKERCLQV  | 127   | >VHL-T157I-r YILKERCLQV  | 55    | 72    |
| >VHL-T157I-\ YTLKERCLQV' | 734   | >VHL-T157I-r YILKERCLQV\ | 134   | 600   |
| >VHL-T157I-\ YTLKERCLQV  | 39    | >VHL-T157I-r YILKERCLQV  | 41    | 2     |
| >VHL-T157I-\ YTLKERCLQV' | 83    | >VHL-T157I-r YILKERCLQV\ | 28    | 55    |
| >VHL-T157I-\ YTLKERCL    | 1939  | >VHL-T157I-r YILKERCL    | 464   | 1475  |
| >VHL-T157I-\ YTLKERCLQV  | 32    | >VHL-T157I-r YILKERCLQV  | 10    | 22    |
| >VHL-T157I-\ YTLKERCLQV' | 28    | >VHL-T157I-r YILKERCLQV\ | 9     | 19    |
| >VHL-T157I-\ YTLKERCLQV  | 860   | >VHL-T157I-r YILKERCLQV  | 200   | 660   |
| >VHL-T157I-\ YTLKERCLQV' | 95    | >VHL-T157I-r YILKERCLQV\ | 30    | 65    |
| >VHL-T157I-\ YTLKERCL    | 2311  | >VHL-T157I-r YILKERCL    | 343   | 1968  |
| >VHL-T157I-\ YTLKERCLQV  | 31    | >VHL-T157I-r YILKERCLQV  | 10    | 21    |
| >VHL-T157I-\ YTLKERCLQV' | 40    | >VHL-T157I-r YILKERCLQV\ | 13    | 27    |
| >VHL-T157I-\ YTLKERCLQV  | 709   | >VHL-T157I-r YILKERCLQV  | 23    | 686   |
| >VHL-T157I-\ YTLKERCLQV' | 416   | >VHL-T157I-r YILKERCLQV\ | 24    | 392   |
| >VHL-T157I-\ YTLKERCL    | 4181  | >VHL-T157I-r YILKERCL    | 241   | 3940  |
| >VHL-T157I-\ YTLKERCLQV  | 19    | >VHL-T157I-r YILKERCLQV  | 3     | 16    |
| >VHL-T157I-\ YTLKERCLQV' | 21    | >VHL-T157I-r YILKERCLQV\ | 4     | 17    |
| >VHL-T157I-\ YTLKERCLQV  | 14    | >VHL-T157I-r YILKERCLQV  | 48    | 34    |
| >VHL-T157I-\ YTLKERCLQV' | 53    | >VHL-T157I-r YILKERCLQV\ | 234   | 181   |
| >VHL-T157I-\ YTLKERCL    | 1357  | >VHL-T157I-r YILKERCL    | 189   | 1168  |
| >VHL-T157I-\ YTLKERCL    | 205   | >VHL-T157I-r YILKERCL    | 15790 | 15585 |
| >VHL-T157I-\ YTLKERCLQV  | 211   | >VHL-T157I-r YILKERCLQV  | 15122 | 14911 |
| >VHL-T157I-\ YTLKERCL    | 280   | >VHL-T157I-r YILKERCL    | 7204  | 6924  |
| >VHL-T157I-\ YTLKERCLQV' | 130   | >VHL-T157I-r YILKERCLQV\ | 4016  | 3886  |
| >VHL-T157I-\ IFANITLPVYT | 1841  | >VHL-T157I-r IFANITLPVYI | 98    | 1743  |
| >VHL-T157I-\ IFANITLPVYT | 16278 | >VHL-T157I-r IFANITLPVYI | 152   | 16126 |
| >VHL-T157I-\ IFANITLPVYT | 10309 | >VHL-T157I-r IFANITLPVYI | 167   | 10142 |
| >VHL-T157I-\ IFANITLPVYT | 12179 | >VHL-T157I-r IFANITLPVYI | 212   | 11967 |
| >VHL-T157I-\ LPVYTLKERCL | 224   | >VHL-T157I-r LPVYILKERCL | 441   | 217   |
| >VHL-T157I-\ LPVYTLKERCL | 620   | >VHL-T157I-r LPVYILKERCL | 479   | 141   |
| >VHL-T157I-\ LPVYTLKER   | 488   | >VHL-T157I-r LPVYILKER   | 312   | 176   |
| >VHL-T157I-\ LPVYTLKERC  | 337   | >VHL-T157I-r LPVYILKERC  | 155   | 182   |

|                               |      |                         |      |      |
|-------------------------------|------|-------------------------|------|------|
| >VHL-T157I- $\nu$ LPVYTLKERCI | 611  | >VHL-T157I-rLPVYILKERCL | 412  | 199  |
| >VHL-T157I- $\nu$ TLPVYTLK    | 146  | >VHL-T157I-rTLPVYILK    | 137  | 9    |
| >VHL-T157I- $\nu$ TLPVYTLK    | 148  | >VHL-T157I-rTLPVYILK    | 80   | 68   |
| >VHL-T157I- $\nu$ TLPVYTLKER  | 774  | >VHL-T157I-rTLPVYILKER  | 488  | 286  |
| >VHL-T157I- $\nu$ TLPVYTLK    | 438  | >VHL-T157I-rTLPVYILK    | 518  | 80   |
| >VHL-T157I- $\nu$ TLPVYTLKER  | 247  | >VHL-T157I-rTLPVYILKER  | 80   | 167  |
| >VHL-T157I- $\nu$ ITLPVYTL    | 202  | >VHL-T157I-rITLPVYIL    | 617  | 415  |
| >VHL-T157I- $\nu$ ITLPVYTL    | 273  | >VHL-T157I-rITLPVYIL    | 540  | 267  |
| >VHL-T157I- $\nu$ ITLPVYTL    | 54   | >VHL-T157I-rITLPVYIL    | 250  | 196  |
| >VHL-T157I- $\nu$ ITLPVYTL    | 21   | >VHL-T157I-rITLPVYIL    | 111  | 90   |
| >VHL-T157I- $\nu$ ITLPVYTL    | 408  | >VHL-T157I-rITLPVYIL    | 1386 | 978  |
| >VHL-T157I- $\nu$ ITLPVYTL    | 307  | >VHL-T157I-rITLPVYIL    | 914  | 607  |
| >VHL-T157I- $\nu$ ITLPVYTLK   | 50   | >VHL-T157I-rITLPVYILK   | 46   | 4    |
| >VHL-T157I- $\nu$ ITLPVYTLK   | 9    | >VHL-T157I-rITLPVYILK   | 6    | 3    |
| >VHL-T157I- $\nu$ ITLPVYTLKER | 348  | >VHL-T157I-rITLPVYILKER | 237  | 111  |
| >VHL-T157I- $\nu$ ITLPVYTLK   | 45   | >VHL-T157I-rITLPVYILK   | 9    | 36   |
| >VHL-T157I- $\nu$ ITLPVYTLK   | 30   | >VHL-T157I-rITLPVYILK   | 46   | 16   |
| >VHL-T157I- $\nu$ ITLPVYTLKER | 20   | >VHL-T157I-rITLPVYILKER | 18   | 2    |
| >VHL-T157I- $\nu$ ITLPVYTL    | 68   | >VHL-T157I-rITLPVYIL    | 399  | 331  |
| >VHL-T157I- $\nu$ ITLPVYTLK   | 351  | >VHL-T157I-rITLPVYILK   | 378  | 27   |
| >VHL-T157I- $\nu$ ITLPVYTLKER | 115  | >VHL-T157I-rITLPVYILKER | 75   | 40   |
| >VHL-T157I- $\nu$ ITLPVYTLK   | 21   | >VHL-T157I-rITLPVYILK   | 27   | 6    |
| >VHL-T157I- $\nu$ ITLPVYTLKER | 40   | >VHL-T157I-rITLPVYILKER | 29   | 11   |
| >VHL-T157I- $\nu$ ITLPVYTL    | 248  | >VHL-T157I-rITLPVYIL    | 568  | 320  |
| >VHL-T157I- $\nu$ ITLPVYTL    | 263  | >VHL-T157I-rITLPVYIL    | 643  | 380  |
| >VHL-T157I- $\nu$ ITLPVYTL    | 6    | >VHL-T157I-rITLPVYIL    | 16   | 10   |
| >VHL-T157I- $\nu$ ITLPVYTL    | 185  | >VHL-T157I-rITLPVYIL    | 409  | 224  |
| >VHL-T157I- $\nu$ ITLPVYTL    | 70   | >VHL-T157I-rITLPVYIL    | 83   | 13   |
| >VHL-T157I- $\nu$ ITLPVYTL    | 143  | >VHL-T157I-rITLPVYIL    | 36   | 107  |
| >VHL-T157I- $\nu$ ITLPVYTLK   | 144  | >VHL-T157I-rITLPVYILK   | 860  | 716  |
| >VHL-T157I- $\nu$ ITLPVYTLKER | 394  | >VHL-T157I-rITLPVYILKER | 430  | 36   |
| >VHL-T157I- $\nu$ ITLPVYTL    | 96   | >VHL-T157I-rITLPVYIL    | 180  | 84   |
| >VHL-T157I- $\nu$ NITLPVYTLK  | 194  | >VHL-T157I-rNITLPVYILK  | 175  | 19   |
| >VHL-T157I- $\nu$ NITLPVYTLK  | 45   | >VHL-T157I-rNITLPVYILK  | 26   | 19   |
| >VHL-T157I- $\nu$ NITLPVYTLK  | 24   | >VHL-T157I-rNITLPVYILK  | 20   | 4    |
| >VHL-T157I- $\nu$ NITLPVYT    | 1488 | >VHL-T157I-rNITLPVYI    | 44   | 1444 |
| >VHL-T157I- $\nu$ NITLPVYTL   | 70   | >VHL-T157I-rNITLPVYIL   | 193  | 123  |
| >VHL-T157I- $\nu$ NITLPVYT    | 9490 | >VHL-T157I-rNITLPVYI    | 482  | 9008 |
| >VHL-T157I- $\nu$ ANITLPVYTL  | 411  | >VHL-T157I-rANITLPVYIL  | 1296 | 885  |
| >VHL-T157I- $\nu$ ANITLPVYTLK | 232  | >VHL-T157I-rANITLPVYILK | 95   | 137  |
| >VHL-T157I- $\nu$ FANITLPVYTL | 351  | >VHL-T157I-rFANITLPVYIL | 1012 | 661  |
| >VHL-T157I- $\nu$ FANITLPVYT  | 2481 | >VHL-T157I-rFANITLPVYI  | 336  | 2145 |
| >VHL-T157I- $\nu$ FANITLPVYT  | 1873 | >VHL-T157I-rFANITLPVYI  | 240  | 1633 |

|                          |       |                          |       |       |
|--------------------------|-------|--------------------------|-------|-------|
| >VHL-T157I-l FANITLPVYTL | 156   | >VHL-T157I-r FANITLPVYIL | 212   | 56    |
| >VHL-T157I-l FANITLPVYT  | 585   | >VHL-T157I-r FANITLPVYI  | 142   | 443   |
| >VHL-T157I-l FANITLPVYTL | 482   | >VHL-T157I-r FANITLPVYIL | 981   | 499   |
| >VHL-T157I-l FANITLPVYT  | 292   | >VHL-T157I-r FANITLPVYI  | 80    | 212   |
| >VHL-T157I-l FANITLPVYTL | 203   | >VHL-T157I-r FANITLPVYIL | 399   | 196   |
| >VHL-T157I-l FANITLPVYT  | 1755  | >VHL-T157I-r FANITLPVYI  | 73    | 1682  |
| >VHL-T157I-l FANITLPVYTL | 87    | >VHL-T157I-r FANITLPVYIL | 669   | 582   |
| >VHL-T157I-l FANITLPVYTL | 407   | >VHL-T157I-r FANITLPVYIL | 1594  | 1187  |
| >VHL-T157I-l FANITLPVYT  | 4548  | >VHL-T157I-r FANITLPVYI  | 233   | 4315  |
| >VHL-T157I-l FANITLPVYTL | 413   | >VHL-T157I-r FANITLPVYIL | 1323  | 910   |
| >VHL-T157I-l FANITLPVYTL | 63    | >VHL-T157I-r FANITLPVYIL | 468   | 405   |
| >VHL-T157I-l FANITLPVYTL | 278   | >VHL-T157I-r FANITLPVYIL | 907   | 629   |
| >VHL-T157I-l FANITLPVYTL | 160   | >VHL-T157I-r FANITLPVYIL | 230   | 70    |
| >VHL-T157I-l FANITLPVYT  | 16338 | >VHL-T157I-r FANITLPVYI  | 203   | 16135 |
| >VHL-T157I-l FANITLPVYTL | 310   | >VHL-T157I-r FANITLPVYIL | 293   | 17    |
| >VHL-V130D·LVNQTELFV     | 493   | >VHL-V130D·LDNQTELFV     | 10707 | 10214 |
| >VHL-V130D·LVNQTELFV     | 423   | >VHL-V130D·LDNQTELFV     | 16060 | 15637 |
| >VHL-V130D·LVNQTELFV     | 137   | >VHL-V130D·LDNQTELFV     | 14448 | 14311 |
| >VHL-V130D·LVNQTELFV     | 66    | >VHL-V130D·LDNQTELFV     | 9431  | 9365  |
| >VHL-V130D·LVNQTELFV     | 56    | >VHL-V130D·LDNQTELFV     | 8006  | 7950  |
| >VHL-V130D·LVNQTELFV     | 17    | >VHL-V130D·LDNQTELFV     | 11832 | 11815 |
| >VHL-V130D·LVNQTELF      | 220   | >VHL-V130D·LDNQTELF      | 7338  | 7118  |
| >VHL-V130D·LVNQTELF      | 74    | >VHL-V130D·LDNQTELF      | 14398 | 14324 |
| >VHL-V130D·RDAGTHDGL     | 133   | >VHL-V130D·RDAGTHDGL     | 22280 | 22147 |
| >VHL-V130D·LLVNQTEL      | 146   | >VHL-V130D·LLDNQTEL      | 64    | 82    |
| >VHL-V130D·LLVNQTELFV    | 17    | >VHL-V130D·LLDNQTELFV    | 15    | 2     |
| >VHL-V130D·LLVNQTEL      | 11    | >VHL-V130D·LLDNQTEL      | 20    | 9     |
| >VHL-V130D·LLVNQTELF     | 408   | >VHL-V130D·LLDNQTELF     | 1299  | 891   |
| >VHL-V130D·LLVNQTELFV    | 15    | >VHL-V130D·LLDNQTELFV    | 19    | 4     |
| >VHL-V130D·LLVNQTEL      | 32    | >VHL-V130D·LLDNQTEL      | 499   | 467   |
| >VHL-V130D·LLVNQTELFV    | 28    | >VHL-V130D·LLDNQTELFV    | 60    | 32    |
| >VHL-V130D·LLVNQTEL      | 155   | >VHL-V130D·LLDNQTEL      | 299   | 144   |
| >VHL-V130D·LLVNQTELFV    | 61    | >VHL-V130D·LLDNQTELFV    | 142   | 81    |
| >VHL-V130D·LLVNQTEL      | 20    | >VHL-V130D·LLDNQTEL      | 8     | 12    |
| >VHL-V130D·LLVNQTELFV    | 3     | >VHL-V130D·LLDNQTELFV    | 2     | 1     |
| >VHL-V130D·LLVNQTEL      | 29    | >VHL-V130D·LLDNQTEL      | 12    | 17    |
| >VHL-V130D·LLVNQTELFV    | 6     | >VHL-V130D·LLDNQTELFV    | 4     | 2     |
| >VHL-V130D·LLVNQTEL      | 65    | >VHL-V130D·LLDNQTEL      | 16    | 49    |
| >VHL-V130D·LLVNQTELFV    | 7     | >VHL-V130D·LLDNQTELFV    | 4     | 3     |
| >VHL-V130D·LLVNQTEL      | 279   | >VHL-V130D·LLDNQTEL      | 30    | 249   |
| >VHL-V130D·LLVNQTELFV    | 9     | >VHL-V130D·LLDNQTELFV    | 3     | 6     |
| >VHL-V130D·LLVNQTEL      | 3     | >VHL-V130D·LLDNQTEL      | 4     | 1     |
| >VHL-V130D·LLVNQTELFV    | 2     | >VHL-V130D·LLDNQTELFV    | 2     | 0     |

|                        |      |                        |       |       |
|------------------------|------|------------------------|-------|-------|
| >VHL-V130D·LLVNQTSELF  | 85   | >VHL-V130D·LLDNQTSELF  | 1978  | 1893  |
| >VHL-V130D·LLVNQTSELF  | 77   | >VHL-V130D·LLDNQTSELF  | 2952  | 2875  |
| >VHL-V130D·GLLVNQTEL   | 76   | >VHL-V130D·GLLDNQTEL   | 3683  | 3607  |
| >VHL-V130D·GLLVNQTEL   | 171  | >VHL-V130D·GLLDNQTEL   | 19    | 152   |
| >VHL-V130D·GLLVNQTSELF | 31   | >VHL-V130D·GLLDNQTELF  | 10    | 21    |
| >VHL-V130D·GLLVNQTEL   | 66   | >VHL-V130D·GLLDNQTEL   | 10    | 56    |
| >VHL-V130D·GLLVNQTSELF | 83   | >VHL-V130D·GLLDNQTELF  | 23    | 60    |
| >VHL-V130D·GLLVNQTEL   | 695  | >VHL-V130D·GLLDNQTEL   | 68    | 627   |
| >VHL-V130D·GLLVNQTSELF | 237  | >VHL-V130D·GLLDNQTELF  | 37    | 200   |
| >VHL-V130D·GLLVNQTEL   | 1444 | >VHL-V130D·GLLDNQTEL   | 116   | 1328  |
| >VHL-V130D·GLLVNQTSELF | 81   | >VHL-V130D·GLLDNQTELF  | 14    | 67    |
| >VHL-V130D·GLLVNQTEL   | 27   | >VHL-V130D·GLLDNQTEL   | 4     | 23    |
| >VHL-V130D·GLLVNQTSELF | 2982 | >VHL-V130D·GLLDNQTELF  | 312   | 2670  |
| >VHL-V130D·GLLVNQTEL   | 3    | >VHL-V130D·GLLDNQTELF  | 2     | 1     |
| >VHL-V130D·GLLVNQTEL   | 17   | >VHL-V130D·GLLDNQTEL   | 4     | 13    |
| >VHL-V130D·GLLVNQTSELF | 4    | >VHL-V130D·GLLDNQTELF  | 3     | 1     |
| >VHL-V130D·GLLVNQTEL   | 17   | >VHL-V130D·GLLDNQTEL   | 6     | 11    |
| >VHL-V130D·GLLVNQTSELF | 4    | >VHL-V130D·GLLDNQTELF  | 4     | 0     |
| >VHL-V130D·GLLVNQTEL   | 74   | >VHL-V130D·GLLDNQTEL   | 7     | 67    |
| >VHL-V130D·GLLVNQTSELF | 5    | >VHL-V130D·GLLDNQTELF  | 3     | 2     |
| >VHL-V130D·GLLVNQTEL   | 8    | >VHL-V130D·GLLDNQTEL   | 2     | 6     |
| >VHL-V130D·GLLVNQTSELF | 3430 | >VHL-V130D·GLLDNQTELF  | 413   | 3017  |
| >VHL-V130D·GLLVNQTEL   | 4    | >VHL-V130D·GLLDNQTELF  | 2     | 2     |
| >VHL-V130D·GLLVNQTSELF | 484  | >VHL-V130D·GLLDNQTELF  | 703   | 219   |
| >VHL-V130D·HDGLLVNQTEL | 237  | >VHL-V130D·HDGLLDNQTEL | 319   | 82    |
| >VHL-V130D·GTHDGLLV    | 122  | >VHL-V130D·GTHDGLLD    | 22590 | 22468 |
| >VHL-V130D·GTHDGLLV    | 193  | >VHL-V130D·GTHDGLLD    | 29104 | 28911 |
| >VHL-V130D·GTHDGLLV    | 78   | >VHL-V130D·GTHDGLLD    | 26816 | 26738 |
| >VHL-V130D·GTHDGLLV    | 204  | >VHL-V130D·GTHDGLLD    | 23636 | 23432 |
| >VHL-V130D·GTHDGLLV    | 46   | >VHL-V130D·GTHDGLLD    | 33307 | 33261 |
| >VHL-V130L·LVNQTSELFV  | 1621 | >VHL-V130L·LLNQTSELFV  | 51    | 1570  |
| >VHL-V130L·LVNQTSELFV  | 493  | >VHL-V130L·LLNQTSELFV  | 24    | 469   |
| >VHL-V130L·LVNQTSELFV  | 423  | >VHL-V130L·LLNQTSELFV  | 23    | 400   |
| >VHL-V130L·LVNQTSELFV  | 137  | >VHL-V130L·LLNQTSELFV  | 194   | 57    |
| >VHL-V130L·LVNQTSELFV  | 66   | >VHL-V130L·LLNQTSELFV  | 3     | 63    |
| >VHL-V130L·LVNQTSELFV  | 1677 | >VHL-V130L·LLNQTSELFV  | 11    | 1666  |
| >VHL-V130L·LVNQTSELFV  | 56   | >VHL-V130L·LLNQTSELFV  | 6     | 50    |
| >VHL-V130L·LVNQTSELFV  | 529  | >VHL-V130L·LLNQTSELFV  | 5     | 524   |
| >VHL-V130L·LVNQTSELFV  | 17   | >VHL-V130L·LLNQTSELFV  | 2     | 15    |
| >VHL-V130L·LVNQTSELF   | 220  | >VHL-V130L·LLNQTSELF   | 87    | 133   |
| >VHL-V130L·LVNQTSELF   | 748  | >VHL-V130L·LLNQTSELF   | 137   | 611   |
| >VHL-V130L·LVNQTSELF   | 74   | >VHL-V130L·LLNQTSELF   | 542   | 468   |
| >VHL-V130L·RDAGTHDGL   | 133  | >VHL-V130L·RDAGTHDGL   | 755   | 622   |

|                        |      |                        |      |      |
|------------------------|------|------------------------|------|------|
| >VHL-V130L- LLVNQTEL   | 146  | >VHL-V130L- LLLNQTEL   | 30   | 116  |
| >VHL-V130L- LLVNQTELFV | 17   | >VHL-V130L- LLLNQTELFV | 8    | 9    |
| >VHL-V130L- LLVNQTEL   | 11   | >VHL-V130L- LLLNQTEL   | 22   | 11   |
| >VHL-V130L- LLVNQTELF  | 408  | >VHL-V130L- LLLNQTELF  | 1159 | 751  |
| >VHL-V130L- LLVNQTELFV | 15   | >VHL-V130L- LLLNQTELFV | 14   | 1    |
| >VHL-V130L- LLVNQTEL   | 32   | >VHL-V130L- LLLNQTEL   | 119  | 87   |
| >VHL-V130L- LLVNQTELFV | 28   | >VHL-V130L- LLLNQTELFV | 26   | 2    |
| >VHL-V130L- LLVNQTEL   | 155  | >VHL-V130L- LLLNQTEL   | 81   | 74   |
| >VHL-V130L- LLVNQTELFV | 61   | >VHL-V130L- LLLNQTELFV | 38   | 23   |
| >VHL-V130L- LLVNQTEL   | 20   | >VHL-V130L- LLLNQTEL   | 5    | 15   |
| >VHL-V130L- LLVNQTELFV | 3    | >VHL-V130L- LLLNQTELFV | 2    | 1    |
| >VHL-V130L- LLVNQTEL   | 29   | >VHL-V130L- LLLNQTEL   | 8    | 21   |
| >VHL-V130L- LLVNQTELFV | 6    | >VHL-V130L- LLLNQTELFV | 3    | 3    |
| >VHL-V130L- LLVNQTEL   | 65   | >VHL-V130L- LLLNQTEL   | 10   | 55   |
| >VHL-V130L- LLVNQTELFV | 7    | >VHL-V130L- LLLNQTELFV | 4    | 3    |
| >VHL-V130L- LLVNQTEL   | 279  | >VHL-V130L- LLLNQTEL   | 8    | 271  |
| >VHL-V130L- LLVNQTELFV | 9    | >VHL-V130L- LLLNQTELFV | 2    | 7    |
| >VHL-V130L- LLVNQTEL   | 3    | >VHL-V130L- LLLNQTEL   | 3    | 0    |
| >VHL-V130L- LLVNQTELFV | 2    | >VHL-V130L- LLLNQTELFV | 2    | 0    |
| >VHL-V130L- LLVNQTELF  | 2193 | >VHL-V130L- LLLNQTELF  | 260  | 1933 |
| >VHL-V130L- LLVNQTELF  | 645  | >VHL-V130L- LLLNQTELF  | 187  | 458  |
| >VHL-V130L- LLVNQTELF  | 85   | >VHL-V130L- LLLNQTELF  | 191  | 106  |
| >VHL-V130L- LLVNQTEL   | 668  | >VHL-V130L- LLLNQTEL   | 438  | 230  |
| >VHL-V130L- LLVNQTELF  | 77   | >VHL-V130L- LLLNQTELF  | 48   | 29   |
| >VHL-V130L- GLLVNQTEL  | 76   | >VHL-V130L- GLLLNQTEL  | 119  | 43   |
| >VHL-V130L- GLLVNQTEL  | 171  | >VHL-V130L- GLLLNQTEL  | 181  | 10   |
| >VHL-V130L- GLLVNQTELF | 31   | >VHL-V130L- GLLLNQTELF | 32   | 1    |
| >VHL-V130L- GLLVNQTEL  | 66   | >VHL-V130L- GLLLNQTEL  | 83   | 17   |
| >VHL-V130L- GLLVNQTELF | 83   | >VHL-V130L- GLLLNQTELF | 98   | 15   |
| >VHL-V130L- GLLVNQTELF | 237  | >VHL-V130L- GLLLNQTELF | 242  | 5    |
| >VHL-V130L- GLLVNQTELF | 81   | >VHL-V130L- GLLLNQTELF | 119  | 38   |
| >VHL-V130L- GLLVNQTEL  | 27   | >VHL-V130L- GLLLNQTEL  | 36   | 9    |
| >VHL-V130L- GLLVNQTELF | 3    | >VHL-V130L- GLLLNQTELF | 4    | 1    |
| >VHL-V130L- GLLVNQTEL  | 17   | >VHL-V130L- GLLLNQTEL  | 20   | 3    |
| >VHL-V130L- GLLVNQTELF | 4    | >VHL-V130L- GLLLNQTELF | 5    | 1    |
| >VHL-V130L- GLLVNQTEL  | 17   | >VHL-V130L- GLLLNQTEL  | 22   | 5    |
| >VHL-V130L- GLLVNQTELF | 4    | >VHL-V130L- GLLLNQTELF | 5    | 1    |
| >VHL-V130L- GLLVNQTEL  | 74   | >VHL-V130L- GLLLNQTEL  | 60   | 14   |
| >VHL-V130L- GLLVNQTELF | 5    | >VHL-V130L- GLLLNQTELF | 5    | 0    |
| >VHL-V130L- GLLVNQTEL  | 8    | >VHL-V130L- GLLLNQTEL  | 10   | 2    |
| >VHL-V130L- GLLVNQTELF | 4    | >VHL-V130L- GLLLNQTELF | 5    | 1    |
| >VHL-V130L- GLLVNQTELF | 484  | >VHL-V130L- GLLLNQTELF | 1004 | 520  |
| >VHL-V130L- HDGLLVNQTE | 237  | >VHL-V130L- HDGLLLNQTE | 195  | 42   |

|                         |      |                         |       |       |
|-------------------------|------|-------------------------|-------|-------|
| >VHL-V130L-GTHDGLLV     | 122  | >VHL-V130L-GTHDGLLL     | 1397  | 1275  |
| >VHL-V130L-GTHDGLLV     | 193  | >VHL-V130L-GTHDGLLL     | 1316  | 1123  |
| >VHL-V130L-GTHDGLLV     | 78   | >VHL-V130L-GTHDGLLL     | 1339  | 1261  |
| >VHL-V130L-GTHDGLLV     | 204  | >VHL-V130L-GTHDGLLL     | 3481  | 3277  |
| >VHL-V130L-GTHDGLLV     | 46   | >VHL-V130L-GTHDGLLL     | 1250  | 1204  |
| >VHL-V130L-GTHDGLLV     | 1456 | >VHL-V130L-GTHDGLLL     | 34    | 1422  |
| >VHL-V130L-GTHDGLLV     | 2269 | >VHL-V130L-GTHDGLLL     | 433   | 1836  |
| >VHL-V155D-QPIFANITLPV  | 151  | >VHL-V155D-QPIFANITLPC  | 21487 | 21336 |
| >VHL-V155D-QPIFANITLPV  | 72   | >VHL-V155D-QPIFANITLPC  | 16841 | 16769 |
| >VHL-V155D-QPIFANITLPV  | 157  | >VHL-V155D-QPIFANITLPC  | 20383 | 20226 |
| >VHL-V155D-QPIFANITLPV  | 148  | >VHL-V155D-QPIFANITLPC  | 823   | 675   |
| >VHL-V155D-QPIFANITLPV  | 204  | >VHL-V155D-QPIFANITLPC  | 3153  | 2949  |
| >VHL-V155D-LPVYTLKERCI  | 224  | >VHL-V155D-LPDYTLKERCI  | 697   | 473   |
| >VHL-V155D-LPVYTLKER    | 488  | >VHL-V155D-LPDYTLKER    | 3076  | 2588  |
| >VHL-V155D-LPVYTLKERC   | 337  | >VHL-V155D-LPDYTLKERC   | 1446  | 1109  |
| >VHL-V155D-TLPVYTLKERCI | 3353 | >VHL-V155D-TLPDYTLKERCI | 390   | 2963  |
| >VHL-V155D-TLPVYTLKERCI | 1195 | >VHL-V155D-TLPDYTLKERCI | 57    | 1138  |
| >VHL-V155D-TLPVYTLK     | 146  | >VHL-V155D-TLPDYTLK     | 230   | 84    |
| >VHL-V155D-TLPVYTLK     | 148  | >VHL-V155D-TLPDYTLK     | 139   | 9     |
| >VHL-V155D-TLPVYTLK     | 438  | >VHL-V155D-TLPDYTLK     | 435   | 3     |
| >VHL-V155D-TLPVYTLKER   | 247  | >VHL-V155D-TLPDYTLKER   | 338   | 91    |
| >VHL-V155D-TLPVYTLKER   | 725  | >VHL-V155D-TLPDYTLKER   | 293   | 432   |
| >VHL-V155D-ITLPVYTL     | 202  | >VHL-V155D-ITLPDYTL     | 3232  | 3030  |
| >VHL-V155D-ITLPVYTL     | 273  | >VHL-V155D-ITLPDYTL     | 897   | 624   |
| >VHL-V155D-ITLPVYTL     | 54   | >VHL-V155D-ITLPDYTL     | 160   | 106   |
| >VHL-V155D-ITLPVYTL     | 21   | >VHL-V155D-ITLPDYTL     | 153   | 132   |
| >VHL-V155D-ITLPVYTL     | 408  | >VHL-V155D-ITLPDYTL     | 472   | 64    |
| >VHL-V155D-ITLPVYTL     | 307  | >VHL-V155D-ITLPDYTL     | 1145  | 838   |
| >VHL-V155D-ITLPVYTLK    | 50   | >VHL-V155D-ITLPDYTLK    | 125   | 75    |
| >VHL-V155D-ITLPVYTLK    | 9    | >VHL-V155D-ITLPDYTLK    | 17    | 8     |
| >VHL-V155D-ITLPVYTLKER  | 348  | >VHL-V155D-ITLPDYTLKER  | 1155  | 807   |
| >VHL-V155D-ITLPVYTLK    | 45   | >VHL-V155D-ITLPDYTLK    | 219   | 174   |
| >VHL-V155D-ITLPVYTLK    | 30   | >VHL-V155D-ITLPDYTLK    | 224   | 194   |
| >VHL-V155D-ITLPVYTLKER  | 20   | >VHL-V155D-ITLPDYTLKER  | 49    | 29    |
| >VHL-V155D-ITLPVYTL     | 68   | >VHL-V155D-ITLPDYTL     | 222   | 154   |
| >VHL-V155D-ITLPVYTLK    | 351  | >VHL-V155D-ITLPDYTLK    | 2124  | 1773  |
| >VHL-V155D-ITLPVYTLKER  | 115  | >VHL-V155D-ITLPDYTLKER  | 433   | 318   |
| >VHL-V155D-ITLPVYTLK    | 21   | >VHL-V155D-ITLPDYTLK    | 139   | 118   |
| >VHL-V155D-ITLPVYTLKER  | 40   | >VHL-V155D-ITLPDYTLKER  | 119   | 79    |
| >VHL-V155D-ITLPVYTL     | 248  | >VHL-V155D-ITLPDYTL     | 1300  | 1052  |
| >VHL-V155D-ITLPVYTL     | 263  | >VHL-V155D-ITLPDYTL     | 1424  | 1161  |
| >VHL-V155D-ITLPVYTL     | 6    | >VHL-V155D-ITLPDYTL     | 6     | 0     |
| >VHL-V155D-ITLPVYTL     | 185  | >VHL-V155D-ITLPDYTL     | 260   | 75    |

|                        |     |                        |       |       |
|------------------------|-----|------------------------|-------|-------|
| >VHL-V155D·ITLPVYTL    | 70  | >VHL-V155D·ITLPDYTL    | 400   | 330   |
| >VHL-V155D·ITLPVYTL    | 143 | >VHL-V155D·ITLPDYTL    | 453   | 310   |
| >VHL-V155D·ITLPVYTLK   | 144 | >VHL-V155D·ITLPDYTLK   | 576   | 432   |
| >VHL-V155D·ITLPVYTLKER | 394 | >VHL-V155D·ITLPDYTLKER | 236   | 158   |
| >VHL-V155D·ITLPVYTL    | 96  | >VHL-V155D·ITLPDYTL    | 91    | 5     |
| >VHL-V155D·NITLPVYTLK  | 194 | >VHL-V155D·NITLPDYTLK  | 840   | 646   |
| >VHL-V155D·NITLPVYTLK  | 45  | >VHL-V155D·NITLPDYTLK  | 102   | 57    |
| >VHL-V155D·NITLPVYTLK  | 24  | >VHL-V155D·NITLPDYTLK  | 45    | 21    |
| >VHL-V155D·NITLPVYTL   | 70  | >VHL-V155D·NITLPDYTL   | 105   | 35    |
| >VHL-V155D·ANITLPVYTL  | 411 | >VHL-V155D·ANITLPDYTL  | 354   | 57    |
| >VHL-V155D·ANITLPVYTLK | 232 | >VHL-V155D·ANITLPDYTLK | 601   | 369   |
| >VHL-V155D·ANITLPVY    | 253 | >VHL-V155D·ANITLPDY    | 431   | 178   |
| >VHL-V155D·ANITLPVY    | 682 | >VHL-V155D·ANITLPDY    | 359   | 323   |
| >VHL-V155D·ANITLPVY    | 453 | >VHL-V155D·ANITLPDY    | 722   | 269   |
| >VHL-V155D·ANITLPVY    | 481 | >VHL-V155D·ANITLPDY    | 1319  | 838   |
| >VHL-V155D·FANITLPVYTL | 351 | >VHL-V155D·FANITLPDYTL | 849   | 498   |
| >VHL-V155D·FANITLPV    | 136 | >VHL-V155D·FANITLPD    | 22664 | 22528 |
| >VHL-V155D·FANITLPV    | 82  | >VHL-V155D·FANITLPD    | 15735 | 15653 |
| >VHL-V155D·FANITLPVYTL | 156 | >VHL-V155D·FANITLPDYTL | 326   | 170   |
| >VHL-V155D·FANITLPV    | 19  | >VHL-V155D·FANITLPD    | 16482 | 16463 |
| >VHL-V155D·FANITLPVYTL | 482 | >VHL-V155D·FANITLPDYTL | 1852  | 1370  |
| >VHL-V155D·FANITLPV    | 12  | >VHL-V155D·FANITLPD    | 15878 | 15866 |
| >VHL-V155D·FANITLPVYT  | 292 | >VHL-V155D·FANITLPDYT  | 295   | 3     |
| >VHL-V155D·FANITLPVYTL | 203 | >VHL-V155D·FANITLPDYTL | 327   | 124   |
| >VHL-V155D·FANITLPV    | 31  | >VHL-V155D·FANITLPD    | 25107 | 25076 |
| >VHL-V155D·FANITLPVYTL | 87  | >VHL-V155D·FANITLPDYTL | 427   | 340   |
| >VHL-V155D·FANITLPV    | 114 | >VHL-V155D·FANITLPD    | 24321 | 24207 |
| >VHL-V155D·FANITLPV    | 25  | >VHL-V155D·FANITLPD    | 33902 | 33877 |
| >VHL-V155D·FANITLPVYTL | 407 | >VHL-V155D·FANITLPDYTL | 1035  | 628   |
| >VHL-V155D·FANITLPVY   | 243 | >VHL-V155D·FANITLPDY   | 92    | 151   |
| >VHL-V155D·FANITLPVY   | 71  | >VHL-V155D·FANITLPDY   | 123   | 52    |
| >VHL-V155D·FANITLPV    | 96  | >VHL-V155D·FANITLPD    | 14640 | 14544 |
| >VHL-V155D·FANITLPV    | 24  | >VHL-V155D·FANITLPD    | 16788 | 16764 |
| >VHL-V155D·FANITLPVYTL | 413 | >VHL-V155D·FANITLPDYTL | 1567  | 1154  |
| >VHL-V155D·FANITLPVY   | 114 | >VHL-V155D·FANITLPDY   | 966   | 852   |
| >VHL-V155D·FANITLPVY   | 170 | >VHL-V155D·FANITLPDY   | 359   | 189   |
| >VHL-V155D·FANITLPVY   | 14  | >VHL-V155D·FANITLPDY   | 44    | 30    |
| >VHL-V155D·FANITLPVYTL | 63  | >VHL-V155D·FANITLPDYTL | 93    | 30    |
| >VHL-V155D·FANITLPVY   | 26  | >VHL-V155D·FANITLPDY   | 80    | 54    |
| >VHL-V155D·FANITLPVYTL | 278 | >VHL-V155D·FANITLPDYTL | 184   | 94    |
| >VHL-V155D·FANITLPVY   | 375 | >VHL-V155D·FANITLPDY   | 2783  | 2408  |
| >VHL-V155D·FANITLPVY   | 134 | >VHL-V155D·FANITLPDY   | 187   | 53    |
| >VHL-V155D·FANITLPVYTL | 160 | >VHL-V155D·FANITLPDYTL | 176   | 16    |

|                         |      |                         |       |       |
|-------------------------|------|-------------------------|-------|-------|
| >VHL-V155D·FANITLPV     | 89   | >VHL-V155D·FANITLPD     | 2191  | 2102  |
| >VHL-V155D·FANITLPVY    | 103  | >VHL-V155D·FANITLPDY    | 1922  | 1819  |
| >VHL-V155D·FANITLPVYTL  | 310  | >VHL-V155D·FANITLPDYTL  | 1078  | 768   |
| >VHL-V155D·IFANITLPVY   | 711  | >VHL-V155D·IFANITLPDY   | 357   | 354   |
| >VHL-V155D·IFANITLPV    | 35   | >VHL-V155D·IFANITLPD    | 14623 | 14588 |
| >VHL-V155D·IFANITLPV    | 478  | >VHL-V155D·IFANITLPD    | 5607  | 5129  |
| >VHL-V155D·IFANITLPVY   | 52   | >VHL-V155D·IFANITLPDY   | 90    | 38    |
| >VHL-V155D·IFANITLPVY   | 87   | >VHL-V155D·IFANITLPDY   | 61    | 26    |
| >VHL-V155D·IFANITLPVY   | 137  | >VHL-V155D·IFANITLPDY   | 83    | 54    |
| >VHL-V155D·PIFANITLPV   | 393  | >VHL-V155D·PIFANITLPD   | 23463 | 23070 |
| >VHL-V155D·PIFANITLPV   | 79   | >VHL-V155D·PIFANITLPD   | 17365 | 17286 |
| >VHL-V155D·PIFANITLPV   | 21   | >VHL-V155D·PIFANITLPD   | 24114 | 24093 |
| >VHL-V155D·PIFANITLPV   | 76   | >VHL-V155D·PIFANITLPD   | 24551 | 24475 |
| >VHL-V155D·PIFANITLPV   | 25   | >VHL-V155D·PIFANITLPD   | 32983 | 32958 |
| >VHL-V155D·PIFANITLPVY  | 135  | >VHL-V155D·PIFANITLPDY  | 55    | 80    |
| >VHL-V155D·PIFANITLPVY  | 195  | >VHL-V155D·PIFANITLPDY  | 277   | 82    |
| >VHL-V155D·PIFANITLPV   | 218  | >VHL-V155D·PIFANITLPD   | 21714 | 21496 |
| >VHL-V155G·QPIFANITLPV  | 151  | >VHL-V155G·QPIFANITLPC  | 16850 | 16699 |
| >VHL-V155G·QPIFANITLPV  | 72   | >VHL-V155G·QPIFANITLPC  | 12114 | 12042 |
| >VHL-V155G·QPIFANITLPV  | 157  | >VHL-V155G·QPIFANITLPC  | 18055 | 17898 |
| >VHL-V155G·QPIFANITLPV  | 148  | >VHL-V155G·QPIFANITLPC  | 180   | 32    |
| >VHL-V155G·QPIFANITLPV  | 204  | >VHL-V155G·QPIFANITLPC  | 1791  | 1587  |
| >VHL-V155G·LPVYTLKERCI  | 224  | >VHL-V155G·LPGYTLKERCI  | 525   | 301   |
| >VHL-V155G·LPVYTLKER    | 488  | >VHL-V155G·LPGYTLKER    | 3124  | 2636  |
| >VHL-V155G·LPVYTLKERC   | 337  | >VHL-V155G·LPGYTLKERC   | 3813  | 3476  |
| >VHL-V155G·TLPVYTLKER(C | 1195 | >VHL-V155G·TLPGYTLKER(C | 117   | 1078  |
| >VHL-V155G·TLPVYTLK     | 146  | >VHL-V155G·TLPGYTLK     | 116   | 30    |
| >VHL-V155G·TLPVYTLK     | 148  | >VHL-V155G·TLPGYTLK     | 188   | 40    |
| >VHL-V155G·TLPVYTLKER   | 774  | >VHL-V155G·TLPGYTLKER   | 343   | 431   |
| >VHL-V155G·TLPVYTLK     | 438  | >VHL-V155G·TLPGYTLK     | 601   | 163   |
| >VHL-V155G·TLPVYTLKER   | 247  | >VHL-V155G·TLPGYTLKER   | 235   | 12    |
| >VHL-V155G·TLPVYTLKER   | 725  | >VHL-V155G·TLPGYTLKER   | 353   | 372   |
| >VHL-V155G·ITLPVYTL     | 202  | >VHL-V155G·ITLPGYTL     | 1510  | 1308  |
| >VHL-V155G·ITLPVYTL     | 273  | >VHL-V155G·ITLPGYTL     | 964   | 691   |
| >VHL-V155G·ITLPVYTL     | 54   | >VHL-V155G·ITLPGYTL     | 79    | 25    |
| >VHL-V155G·ITLPVYTL     | 21   | >VHL-V155G·ITLPGYTL     | 66    | 45    |
| >VHL-V155G·ITLPVYTL     | 408  | >VHL-V155G·ITLPGYTL     | 626   | 218   |
| >VHL-V155G·ITLPVYTL     | 307  | >VHL-V155G·ITLPGYTL     | 795   | 488   |
| >VHL-V155G·ITLPVYTLK    | 50   | >VHL-V155G·ITLPGYTLK    | 55    | 5     |
| >VHL-V155G·ITLPVYTLK    | 9    | >VHL-V155G·ITLPGYTLK    | 12    | 3     |
| >VHL-V155G·ITLPVYTLKER  | 348  | >VHL-V155G·ITLPGYTLKER  | 764   | 416   |
| >VHL-V155G·ITLPVYTLK    | 45   | >VHL-V155G·ITLPGYTLK    | 38    | 7     |
| >VHL-V155G·ITLPVYTLK    | 30   | >VHL-V155G·ITLPGYTLK    | 58    | 28    |



|                        |      |                        |       |       |
|------------------------|------|------------------------|-------|-------|
| >VHL-V155G·ITLPVYTLKER | 20   | >VHL-V155G·ITLPGYTLKER | 28    | 8     |
| >VHL-V155G·ITLPVYTL    | 68   | >VHL-V155G·ITLPGYTL    | 204   | 136   |
| >VHL-V155G·ITLPVYTLK   | 351  | >VHL-V155G·ITLPGYTLK   | 790   | 439   |
| >VHL-V155G·ITLPVYTLKER | 115  | >VHL-V155G·ITLPGYTLKER | 198   | 83    |
| >VHL-V155G·ITLPVYTLK   | 21   | >VHL-V155G·ITLPGYTLK   | 106   | 85    |
| >VHL-V155G·ITLPVYTLKER | 40   | >VHL-V155G·ITLPGYTLKER | 112   | 72    |
| >VHL-V155G·ITLPVYTL    | 248  | >VHL-V155G·ITLPGYTL    | 1733  | 1485  |
| >VHL-V155G·ITLPVYTL    | 263  | >VHL-V155G·ITLPGYTL    | 410   | 147   |
| >VHL-V155G·ITLPVYTL    | 587  | >VHL-V155G·ITLPGYTL    | 465   | 122   |
| >VHL-V155G·ITLPVYTL    | 6    | >VHL-V155G·ITLPGYTL    | 4     | 2     |
| >VHL-V155G·ITLPVYTLKE  | 1561 | >VHL-V155G·ITLPGYTLKE  | 495   | 1066  |
| >VHL-V155G·ITLPVYTL    | 185  | >VHL-V155G·ITLPGYTL    | 466   | 281   |
| >VHL-V155G·ITLPVYTL    | 70   | >VHL-V155G·ITLPGYTL    | 443   | 373   |
| >VHL-V155G·ITLPVYTL    | 143  | >VHL-V155G·ITLPGYTL    | 22    | 121   |
| >VHL-V155G·ITLPVYTLK   | 144  | >VHL-V155G·ITLPGYTLK   | 250   | 106   |
| >VHL-V155G·ITLPVYTLKER | 394  | >VHL-V155G·ITLPGYTLKER | 283   | 111   |
| >VHL-V155G·ITLPVYTL    | 96   | >VHL-V155G·ITLPGYTL    | 74    | 22    |
| >VHL-V155G·NITLPVYTLK  | 194  | >VHL-V155G·NITLPGYTLK  | 182   | 12    |
| >VHL-V155G·NITLPVYTLK  | 45   | >VHL-V155G·NITLPGYTLK  | 87    | 42    |
| >VHL-V155G·NITLPVYTLK  | 24   | >VHL-V155G·NITLPGYTLK  | 65    | 41    |
| >VHL-V155G·NITLPVYTL   | 70   | >VHL-V155G·NITLPGYTL   | 444   | 374   |
| >VHL-V155G·ANITLPVYTL  | 411  | >VHL-V155G·ANITLPGYTL  | 822   | 411   |
| >VHL-V155G·ANITLPVYTLK | 232  | >VHL-V155G·ANITLPGYTLK | 600   | 368   |
| >VHL-V155G·ANITLPVY    | 253  | >VHL-V155G·ANITLPGY    | 218   | 35    |
| >VHL-V155G·ANITLPVY    | 682  | >VHL-V155G·ANITLPGY    | 462   | 220   |
| >VHL-V155G·ANITLPVY    | 453  | >VHL-V155G·ANITLPGY    | 360   | 93    |
| >VHL-V155G·ANITLPVY    | 481  | >VHL-V155G·ANITLPGY    | 1974  | 1493  |
| >VHL-V155G·FANITLPVYTL | 351  | >VHL-V155G·FANITLPGYTL | 559   | 208   |
| >VHL-V155G·FANITLPV    | 136  | >VHL-V155G·FANITLPG    | 20679 | 20543 |
| >VHL-V155G·FANITLPV    | 82   | >VHL-V155G·FANITLPG    | 7639  | 7557  |
| >VHL-V155G·FANITLPVYTL | 156  | >VHL-V155G·FANITLPGYTL | 255   | 99    |
| >VHL-V155G·FANITLPV    | 19   | >VHL-V155G·FANITLPG    | 9775  | 9756  |
| >VHL-V155G·FANITLPVYT  | 585  | >VHL-V155G·FANITLPGYT  | 338   | 247   |
| >VHL-V155G·FANITLPVYTL | 482  | >VHL-V155G·FANITLPGYTL | 900   | 418   |
| >VHL-V155G·FANITLPV    | 12   | >VHL-V155G·FANITLPG    | 7864  | 7852  |
| >VHL-V155G·FANITLPVYT  | 292  | >VHL-V155G·FANITLPGYT  | 516   | 224   |
| >VHL-V155G·FANITLPVYTL | 203  | >VHL-V155G·FANITLPGYTL | 223   | 20    |
| >VHL-V155G·FANITLPV    | 31   | >VHL-V155G·FANITLPG    | 18172 | 18141 |
| >VHL-V155G·FANITLPVYTL | 87   | >VHL-V155G·FANITLPGYTL | 149   | 62    |
| >VHL-V155G·FANITLPV    | 114  | >VHL-V155G·FANITLPG    | 21837 | 21723 |
| >VHL-V155G·FANITLPV    | 25   | >VHL-V155G·FANITLPG    | 31199 | 31174 |
| >VHL-V155G·FANITLPVYTL | 407  | >VHL-V155G·FANITLPGYTL | 705   | 298   |
| >VHL-V155G·FANITLPVY   | 243  | >VHL-V155G·FANITLPGY   | 178   | 65    |

|                        |      |                        |       |       |
|------------------------|------|------------------------|-------|-------|
| >VHL-V155G·FANITLPVY   | 71   | >VHL-V155G·FANITLPGY   | 87    | 16    |
| >VHL-V155G·FANITLPV    | 96   | >VHL-V155G·FANITLPG    | 9675  | 9579  |
| >VHL-V155G·FANITLPV    | 24   | >VHL-V155G·FANITLPG    | 13211 | 13187 |
| >VHL-V155G·FANITLPVYTL | 413  | >VHL-V155G·FANITLPGYTL | 473   | 60    |
| >VHL-V155G·FANITLPVY   | 114  | >VHL-V155G·FANITLPGY   | 338   | 224   |
| >VHL-V155G·FANITLPVY   | 170  | >VHL-V155G·FANITLPGY   | 609   | 439   |
| >VHL-V155G·FANITLPVY   | 14   | >VHL-V155G·FANITLPGY   | 10    | 4     |
| >VHL-V155G·FANITLPVYTL | 63   | >VHL-V155G·FANITLPGYTL | 56    | 7     |
| >VHL-V155G·FANITLPVY   | 26   | >VHL-V155G·FANITLPGY   | 56    | 30    |
| >VHL-V155G·FANITLPVYTL | 278  | >VHL-V155G·FANITLPGYTL | 332   | 54    |
| >VHL-V155G·FANITLPVY   | 375  | >VHL-V155G·FANITLPGY   | 6809  | 6434  |
| >VHL-V155G·FANITLPVY   | 134  | >VHL-V155G·FANITLPGY   | 381   | 247   |
| >VHL-V155G·FANITLPVYTL | 160  | >VHL-V155G·FANITLPGYTL | 309   | 149   |
| >VHL-V155G·FANITLPV    | 89   | >VHL-V155G·FANITLPG    | 1122  | 1033  |
| >VHL-V155G·FANITLPVY   | 103  | >VHL-V155G·FANITLPGY   | 503   | 400   |
| >VHL-V155G·FANITLPVYTL | 310  | >VHL-V155G·FANITLPGYTL | 428   | 118   |
| >VHL-V155G·IFANITLPV   | 35   | >VHL-V155G·IFANITLPG   | 7440  | 7405  |
| >VHL-V155G·IFANITLPV   | 478  | >VHL-V155G·IFANITLPG   | 5587  | 5109  |
| >VHL-V155G·IFANITLPVY  | 52   | >VHL-V155G·IFANITLPGY  | 47    | 5     |
| >VHL-V155G·IFANITLPVY  | 87   | >VHL-V155G·IFANITLPGY  | 93    | 6     |
| >VHL-V155G·IFANITLPVY  | 137  | >VHL-V155G·IFANITLPGY  | 125   | 12    |
| >VHL-V155G·PIFANITLPV  | 393  | >VHL-V155G·PIFANITLPG  | 17450 | 17057 |
| >VHL-V155G·PIFANITLPV  | 79   | >VHL-V155G·PIFANITLPG  | 13295 | 13216 |
| >VHL-V155G·PIFANITLPV  | 21   | >VHL-V155G·PIFANITLPG  | 17502 | 17481 |
| >VHL-V155G·PIFANITLPV  | 76   | >VHL-V155G·PIFANITLPG  | 22415 | 22339 |
| >VHL-V155G·PIFANITLPV  | 25   | >VHL-V155G·PIFANITLPG  | 30106 | 30081 |
| >VHL-V155G·PIFANITLPVY | 135  | >VHL-V155G·PIFANITLPGY | 93    | 42    |
| >VHL-V155G·PIFANITLPVY | 195  | >VHL-V155G·PIFANITLPGY | 199   | 4     |
| >VHL-V155G·PIFANITLPV  | 218  | >VHL-V155G·PIFANITLPG  | 20240 | 20022 |
| >VHL-V155L·PVYTLKER    | 616  | >VHL-V155L·PLYTLKER    | 359   | 257   |
| >VHL-V155L·QPIFANITLPV | 1392 | >VHL-V155L·QPIFANITLPL | 275   | 1117  |
| >VHL-V155L·QPIFANITLPV | 151  | >VHL-V155L·QPIFANITLPL | 1757  | 1606  |
| >VHL-V155L·QPIFANITLPV | 72   | >VHL-V155L·QPIFANITLPL | 460   | 388   |
| >VHL-V155L·QPIFANITLPV | 157  | >VHL-V155L·QPIFANITLPL | 40    | 117   |
| >VHL-V155L·QPIFANITLPV | 148  | >VHL-V155L·QPIFANITLPL | 30    | 118   |
| >VHL-V155L·QPIFANITLPV | 1901 | >VHL-V155L·QPIFANITLPL | 82    | 1819  |
| >VHL-V155L·QPIFANITLPV | 204  | >VHL-V155L·QPIFANITLPL | 9468  | 9264  |
| >VHL-V155L·QPIFANITLPV | 2068 | >VHL-V155L·QPIFANITLPL | 268   | 1800  |
| >VHL-V155L·LPVYTLKERCL | 224  | >VHL-V155L·LPLYTLKERCL | 431   | 207   |
| >VHL-V155L·LPVYTLKERCL | 1300 | >VHL-V155L·LPLYTLKERCL | 351   | 949   |
| >VHL-V155L·LPVYTLKER   | 488  | >VHL-V155L·LPLYTLKER   | 685   | 197   |
| >VHL-V155L·LPVYTLKERC  | 337  | >VHL-V155L·LPLYTLKERC  | 272   | 65    |
| >VHL-V155L·LPVYTLKERCL | 611  | >VHL-V155L·LPLYTLKERCL | 330   | 281   |

|                         |      |                         |      |      |
|-------------------------|------|-------------------------|------|------|
| >VHL-V155L- TLPVYTLK    | 146  | >VHL-V155L- TLPLYTLK    | 172  | 26   |
| >VHL-V155L- TLPVYTLK    | 148  | >VHL-V155L- TLPLYTLK    | 144  | 4    |
| >VHL-V155L- TLPVYTLKER  | 774  | >VHL-V155L- TLPLYTLKER  | 407  | 367  |
| >VHL-V155L- TLPVYTLK    | 438  | >VHL-V155L- TLPLYTLK    | 694  | 256  |
| >VHL-V155L- TLPVYTLKER  | 247  | >VHL-V155L- TLPLYTLKER  | 352  | 105  |
| >VHL-V155L- TLPVYTLKER  | 725  | >VHL-V155L- TLPLYTLKER  | 368  | 357  |
| >VHL-V155L- ITLPVYTL    | 202  | >VHL-V155L- ITLPLYTL    | 165  | 37   |
| >VHL-V155L- ITLPVYTL    | 273  | >VHL-V155L- ITLPLYTL    | 294  | 21   |
| >VHL-V155L- ITLPVYTL    | 54   | >VHL-V155L- ITLPLYTL    | 49   | 5    |
| >VHL-V155L- ITLPVYTL    | 21   | >VHL-V155L- ITLPLYTL    | 56   | 35   |
| >VHL-V155L- ITLPVYTL    | 408  | >VHL-V155L- ITLPLYTL    | 410  | 2    |
| >VHL-V155L- ITLPVYTL    | 307  | >VHL-V155L- ITLPLYTL    | 700  | 393  |
| >VHL-V155L- ITLPVYTLK   | 50   | >VHL-V155L- ITLPLYTLK   | 66   | 16   |
| >VHL-V155L- ITLPVYTLK   | 9    | >VHL-V155L- ITLPLYTLK   | 9    | 0    |
| >VHL-V155L- ITLPVYTLKER | 348  | >VHL-V155L- ITLPLYTLKER | 506  | 158  |
| >VHL-V155L- ITLPVYTLK   | 45   | >VHL-V155L- ITLPLYTLK   | 49   | 4    |
| >VHL-V155L- ITLPVYTLK   | 30   | >VHL-V155L- ITLPLYTLK   | 33   | 3    |
| >VHL-V155L- ITLPVYTLKER | 20   | >VHL-V155L- ITLPLYTLKER | 21   | 1    |
| >VHL-V155L- ITLPVYTL    | 68   | >VHL-V155L- ITLPLYTL    | 90   | 22   |
| >VHL-V155L- ITLPVYTLK   | 351  | >VHL-V155L- ITLPLYTLK   | 667  | 316  |
| >VHL-V155L- ITLPVYTLKER | 115  | >VHL-V155L- ITLPLYTLKER | 178  | 63   |
| >VHL-V155L- ITLPVYTLK   | 21   | >VHL-V155L- ITLPLYTLK   | 62   | 41   |
| >VHL-V155L- ITLPVYTLKER | 40   | >VHL-V155L- ITLPLYTLKER | 79   | 39   |
| >VHL-V155L- ITLPVYTL    | 248  | >VHL-V155L- ITLPLYTL    | 618  | 370  |
| >VHL-V155L- ITLPVYTL    | 263  | >VHL-V155L- ITLPLYTL    | 279  | 16   |
| >VHL-V155L- ITLPVYTL    | 6    | >VHL-V155L- ITLPLYTL    | 5    | 1    |
| >VHL-V155L- ITLPVYTL    | 185  | >VHL-V155L- ITLPLYTL    | 264  | 79   |
| >VHL-V155L- ITLPVYTL    | 70   | >VHL-V155L- ITLPLYTL    | 163  | 93   |
| >VHL-V155L- ITLPVYTL    | 143  | >VHL-V155L- ITLPLYTL    | 208  | 65   |
| >VHL-V155L- ITLPVYTLK   | 144  | >VHL-V155L- ITLPLYTLK   | 132  | 12   |
| >VHL-V155L- ITLPVYTLKER | 394  | >VHL-V155L- ITLPLYTLKER | 253  | 141  |
| >VHL-V155L- ITLPVYTLKER | 1004 | >VHL-V155L- ITLPLYTLKER | 476  | 528  |
| >VHL-V155L- ITLPVYTL    | 96   | >VHL-V155L- ITLPLYTL    | 110  | 14   |
| >VHL-V155L- NITLPVYTLK  | 194  | >VHL-V155L- NITLPLYTLK  | 245  | 51   |
| >VHL-V155L- NITLPVYTLK  | 45   | >VHL-V155L- NITLPLYTLK  | 61   | 16   |
| >VHL-V155L- NITLPVYTLK  | 24   | >VHL-V155L- NITLPLYTLK  | 50   | 26   |
| >VHL-V155L- NITLPVYTL   | 70   | >VHL-V155L- NITLPLYTL   | 105  | 35   |
| >VHL-V155L- ANITLPVYTL  | 411  | >VHL-V155L- ANITLPLYTL  | 242  | 169  |
| >VHL-V155L- ANITLPVYTLK | 232  | >VHL-V155L- ANITLPLYTLK | 204  | 28   |
| >VHL-V155L- ANITLPVY    | 253  | >VHL-V155L- ANITLPLY    | 675  | 422  |
| >VHL-V155L- ANITLPVY    | 682  | >VHL-V155L- ANITLPLY    | 54   | 628  |
| >VHL-V155L- ANITLPVY    | 453  | >VHL-V155L- ANITLPLY    | 469  | 16   |
| >VHL-V155L- ANITLPVY    | 481  | >VHL-V155L- ANITLPLY    | 1564 | 1083 |

|                         |      |                         |      |      |
|-------------------------|------|-------------------------|------|------|
| >VHL-V155L- FANITLPV    | 1507 | >VHL-V155L- FANITLPL    | 415  | 1092 |
| >VHL-V155L- FANITLPVYTL | 351  | >VHL-V155L- FANITLPLYTL | 302  | 49   |
| >VHL-V155L- FANITLPV    | 136  | >VHL-V155L- FANITLPL    | 732  | 596  |
| >VHL-V155L- FANITLPVYTL | 689  | >VHL-V155L- FANITLPLYTL | 495  | 194  |
| >VHL-V155L- FANITLPV    | 82   | >VHL-V155L- FANITLPL    | 104  | 22   |
| >VHL-V155L- FANITLPVYTL | 156  | >VHL-V155L- FANITLPLYTL | 103  | 53   |
| >VHL-V155L- FANITLPV    | 19   | >VHL-V155L- FANITLPL    | 235  | 216  |
| >VHL-V155L- FANITLPVYT  | 585  | >VHL-V155L- FANITLPLYT  | 320  | 265  |
| >VHL-V155L- FANITLPVYTL | 482  | >VHL-V155L- FANITLPLYTL | 428  | 54   |
| >VHL-V155L- FANITLPV    | 12   | >VHL-V155L- FANITLPL    | 69   | 57   |
| >VHL-V155L- FANITLPVYT  | 292  | >VHL-V155L- FANITLPLYT  | 178  | 114  |
| >VHL-V155L- FANITLPVYTL | 203  | >VHL-V155L- FANITLPLYTL | 92   | 111  |
| >VHL-V155L- FANITLPV    | 31   | >VHL-V155L- FANITLPL    | 628  | 597  |
| >VHL-V155L- FANITLPVYTL | 87   | >VHL-V155L- FANITLPLYTL | 114  | 27   |
| >VHL-V155L- FANITLPV    | 114  | >VHL-V155L- FANITLPL    | 2968 | 2854 |
| >VHL-V155L- FANITLPV    | 25   | >VHL-V155L- FANITLPL    | 1082 | 1057 |
| >VHL-V155L- FANITLPVYTL | 407  | >VHL-V155L- FANITLPLYTL | 405  | 2    |
| >VHL-V155L- FANITLPVY   | 243  | >VHL-V155L- FANITLPLY   | 30   | 213  |
| >VHL-V155L- FANITLPVY   | 71   | >VHL-V155L- FANITLPLY   | 75   | 4    |
| >VHL-V155L- FANITLPV    | 96   | >VHL-V155L- FANITLPL    | 552  | 456  |
| >VHL-V155L- FANITLPV    | 24   | >VHL-V155L- FANITLPL    | 188  | 164  |
| >VHL-V155L- FANITLPVYTL | 413  | >VHL-V155L- FANITLPLYTL | 325  | 88   |
| >VHL-V155L- FANITLPVY   | 114  | >VHL-V155L- FANITLPLY   | 792  | 678  |
| >VHL-V155L- FANITLPVY   | 170  | >VHL-V155L- FANITLPLY   | 649  | 479  |
| >VHL-V155L- FANITLPV    | 2746 | >VHL-V155L- FANITLPL    | 101  | 2645 |
| >VHL-V155L- FANITLPVY   | 14   | >VHL-V155L- FANITLPLY   | 17   | 3    |
| >VHL-V155L- FANITLPVYTL | 63   | >VHL-V155L- FANITLPLYTL | 81   | 18   |
| >VHL-V155L- FANITLPV    | 1143 | >VHL-V155L- FANITLPL    | 149  | 994  |
| >VHL-V155L- FANITLPVY   | 26   | >VHL-V155L- FANITLPLY   | 70   | 44   |
| >VHL-V155L- FANITLPVYTL | 278  | >VHL-V155L- FANITLPLYTL | 483  | 205  |
| >VHL-V155L- FANITLPVY   | 375  | >VHL-V155L- FANITLPLY   | 6310 | 5935 |
| >VHL-V155L- FANITLPVY   | 134  | >VHL-V155L- FANITLPLY   | 71   | 63   |
| >VHL-V155L- FANITLPVYTL | 160  | >VHL-V155L- FANITLPLYTL | 218  | 58   |
| >VHL-V155L- FANITLPV    | 89   | >VHL-V155L- FANITLPL    | 6733 | 6644 |
| >VHL-V155L- FANITLPVY   | 103  | >VHL-V155L- FANITLPLY   | 110  | 7    |
| >VHL-V155L- FANITLPVYTL | 310  | >VHL-V155L- FANITLPLYTL | 297  | 13   |
| >VHL-V155L- FANITLPVY   | 582  | >VHL-V155L- FANITLPLY   | 348  | 234  |
| >VHL-V155L- FANITLPVY   | 1484 | >VHL-V155L- FANITLPLY   | 494  | 990  |
| >VHL-V155L- IFANITLPVY  | 711  | >VHL-V155L- IFANITLPLY  | 363  | 348  |
| >VHL-V155L- IFANITLPV   | 35   | >VHL-V155L- IFANITLPL   | 44   | 9    |
| >VHL-V155L- IFANITLPV   | 4086 | >VHL-V155L- IFANITLPL   | 397  | 3689 |
| >VHL-V155L- IFANITLPV   | 1613 | >VHL-V155L- IFANITLPL   | 421  | 1192 |
| >VHL-V155L- IFANITLPV   | 8941 | >VHL-V155L- IFANITLPL   | 463  | 8478 |

|                         |      |                         |      |      |
|-------------------------|------|-------------------------|------|------|
| >VHL-V155L- IFANITLPV   | 478  | >VHL-V155L- IFANITLPL   | 1124 | 646  |
| >VHL-V155L- IFANITLPVY  | 52   | >VHL-V155L- IFANITLPLY  | 34   | 18   |
| >VHL-V155L- IFANITLPVY  | 87   | >VHL-V155L- IFANITLPLY  | 33   | 54   |
| >VHL-V155L- IFANITLPV   | 2843 | >VHL-V155L- IFANITLPL   | 429  | 2414 |
| >VHL-V155L- IFANITLPVY  | 137  | >VHL-V155L- IFANITLPLY  | 29   | 108  |
| >VHL-V155L- PIFANITLPV  | 393  | >VHL-V155L- PIFANITLPL  | 371  | 22   |
| >VHL-V155L- PIFANITLPV  | 79   | >VHL-V155L- PIFANITLPL  | 379  | 300  |
| >VHL-V155L- PIFANITLPV  | 21   | >VHL-V155L- PIFANITLPL  | 356  | 335  |
| >VHL-V155L- PIFANITLPV  | 76   | >VHL-V155L- PIFANITLPL  | 2275 | 2199 |
| >VHL-V155L- PIFANITLPV  | 25   | >VHL-V155L- PIFANITLPL  | 551  | 526  |
| >VHL-V155L- PIFANITLPVY | 135  | >VHL-V155L- PIFANITLPLY | 25   | 110  |
| >VHL-V155L- PIFANITLPVY | 195  | >VHL-V155L- PIFANITLPLY | 206  | 11   |
| >VHL-V155L- PIFANITLPV  | 820  | >VHL-V155L- PIFANITLPL  | 168  | 652  |
| >VHL-V155L- PIFANITLPV  | 218  | >VHL-V155L- PIFANITLPL  | 2756 | 2538 |
| >VHL-V155L- PIFANITLPVY | 687  | >VHL-V155L- PIFANITLPLY | 326  | 361  |
| >VHL-V155M PVYTLKER     | 1246 | >VHL-V155M PMYTLKER     | 342  | 904  |
| >VHL-V155M PVYTLKER     | 616  | >VHL-V155M PMYTLKER     | 129  | 487  |
| >VHL-V155M QPIFANITLPV  | 1392 | >VHL-V155M QPIFANITLPM  | 148  | 1244 |
| >VHL-V155M QPIFANITLPV  | 151  | >VHL-V155M QPIFANITLPM  | 8574 | 8423 |
| >VHL-V155M QPIFANITLPV  | 72   | >VHL-V155M QPIFANITLPM  | 757  | 685  |
| >VHL-V155M QPIFANITLPV  | 157  | >VHL-V155M QPIFANITLPM  | 40   | 117  |
| >VHL-V155M QPIFANITLPV  | 148  | >VHL-V155M QPIFANITLPM  | 10   | 138  |
| >VHL-V155M QPIFANITLPV  | 1901 | >VHL-V155M QPIFANITLPM  | 443  | 1458 |
| >VHL-V155M QPIFANITLPV  | 2344 | >VHL-V155M QPIFANITLPM  | 399  | 1945 |
| >VHL-V155M QPIFANITLPV  | 204  | >VHL-V155M QPIFANITLPM  | 8509 | 8305 |
| >VHL-V155M QPIFANITLPV  | 2068 | >VHL-V155M QPIFANITLPM  | 326  | 1742 |
| >VHL-V155M LPVYTLKERCI  | 224  | >VHL-V155M LPMYTLKERC   | 43   | 181  |
| >VHL-V155M LPVYTLKERCI  | 1300 | >VHL-V155M LPMYTLKERC   | 117  | 1183 |
| >VHL-V155M LPVYTLKERCI  | 620  | >VHL-V155M LPMYTLKERC   | 431  | 189  |
| >VHL-V155M LPVYTLKER    | 488  | >VHL-V155M LPMYTLKER    | 415  | 73   |
| >VHL-V155M LPVYTLKERC   | 337  | >VHL-V155M LPMYTLKERC   | 94   | 243  |
| >VHL-V155M TLPVYTLK     | 146  | >VHL-V155M TLPMYTLK     | 128  | 18   |
| >VHL-V155M TLPVYTLK     | 148  | >VHL-V155M TLPMYTLK     | 102  | 46   |
| >VHL-V155M TLPVYTLKER   | 774  | >VHL-V155M TLPMYTLKER   | 376  | 398  |
| >VHL-V155M TLPVYTLK     | 438  | >VHL-V155M TLPMYTLK     | 409  | 29   |
| >VHL-V155M TLPVYTLKER   | 247  | >VHL-V155M TLPMYTLKER   | 146  | 101  |
| >VHL-V155M TLPVYTLKER   | 725  | >VHL-V155M TLPMYTLKER   | 396  | 329  |
| >VHL-V155M ITLPVYTL     | 202  | >VHL-V155M ITLPMYTL     | 140  | 62   |
| >VHL-V155M ITLPVYTL     | 273  | >VHL-V155M ITLPMYTL     | 373  | 100  |
| >VHL-V155M ITLPVYTL     | 54   | >VHL-V155M ITLPMYTL     | 86   | 32   |
| >VHL-V155M ITLPVYTL     | 21   | >VHL-V155M ITLPMYTL     | 128  | 107  |
| >VHL-V155M ITLPVYTL     | 408  | >VHL-V155M ITLPMYTL     | 701  | 293  |
| >VHL-V155M ITLPVYTL     | 307  | >VHL-V155M ITLPMYTL     | 1375 | 1068 |

|                       |      |                       |      |      |
|-----------------------|------|-----------------------|------|------|
| >VHL-V155MITLPVYTLK   | 50   | >VHL-V155MITLPMYTLK   | 58   | 8    |
| >VHL-V155MITLPVYTLK   | 9    | >VHL-V155MITLPMYTLK   | 9    | 0    |
| >VHL-V155MITLPVYTLKER | 348  | >VHL-V155MITLPMYTLKEF | 413  | 65   |
| >VHL-V155MITLPVYTLK   | 45   | >VHL-V155MITLPMYTLK   | 32   | 13   |
| >VHL-V155MITLPVYTLK   | 30   | >VHL-V155MITLPMYTLK   | 32   | 2    |
| >VHL-V155MITLPVYTLKER | 20   | >VHL-V155MITLPMYTLKEF | 21   | 1    |
| >VHL-V155MITLPVYTL    | 68   | >VHL-V155MITLPMYTL    | 90   | 22   |
| >VHL-V155MITLPVYTLK   | 351  | >VHL-V155MITLPMYTLK   | 989  | 638  |
| >VHL-V155MITLPVYTLKER | 115  | >VHL-V155MITLPMYTLKEF | 232  | 117  |
| >VHL-V155MITLPVYTLK   | 21   | >VHL-V155MITLPMYTLK   | 40   | 19   |
| >VHL-V155MITLPVYTLKER | 40   | >VHL-V155MITLPMYTLKEF | 52   | 12   |
| >VHL-V155MITLPVYTL    | 248  | >VHL-V155MITLPMYTL    | 481  | 233  |
| >VHL-V155MITLPVYTL    | 263  | >VHL-V155MITLPMYTL    | 377  | 114  |
| >VHL-V155MITLPVYTL    | 6    | >VHL-V155MITLPMYTL    | 4    | 2    |
| >VHL-V155MITLPVYTL    | 185  | >VHL-V155MITLPMYTL    | 369  | 184  |
| >VHL-V155MITLPVYTL    | 70   | >VHL-V155MITLPMYTL    | 305  | 235  |
| >VHL-V155MITLPVYTL    | 143  | >VHL-V155MITLPMYTL    | 233  | 90   |
| >VHL-V155MITLPVYTLK   | 144  | >VHL-V155MITLPMYTLK   | 167  | 23   |
| >VHL-V155MITLPVYTLKER | 394  | >VHL-V155MITLPMYTLKEF | 220  | 174  |
| >VHL-V155MITLPVYTL    | 96   | >VHL-V155MITLPMYTL    | 115  | 19   |
| >VHL-V155MNITLPVYTLK  | 194  | >VHL-V155MNITLPMYTLK  | 141  | 53   |
| >VHL-V155MNITLPVYTLK  | 45   | >VHL-V155MNITLPMYTLK  | 53   | 8    |
| >VHL-V155MNITLPVYTLK  | 24   | >VHL-V155MNITLPMYTLK  | 22   | 2    |
| >VHL-V155MNITLPVYTL   | 70   | >VHL-V155MNITLPMYTL   | 36   | 34   |
| >VHL-V155MNITLPVYTL   | 700  | >VHL-V155MNITLPMYTL   | 355  | 345  |
| >VHL-V155MANITLPVYTL  | 411  | >VHL-V155MANITLPMYTL  | 367  | 44   |
| >VHL-V155MANITLPVYTLK | 232  | >VHL-V155MANITLPMYTLK | 164  | 68   |
| >VHL-V155MANITLPVY    | 253  | >VHL-V155MANITLPMY    | 365  | 112  |
| >VHL-V155MANITLPVY    | 682  | >VHL-V155MANITLPMY    | 165  | 517  |
| >VHL-V155MANITLPVY    | 453  | >VHL-V155MANITLPMY    | 470  | 17   |
| >VHL-V155MANITLPVY    | 481  | >VHL-V155MANITLPMY    | 732  | 251  |
| >VHL-V155MFANITLPV    | 1507 | >VHL-V155MFANITLPM    | 140  | 1367 |
| >VHL-V155MFANITLPVYTL | 351  | >VHL-V155MFANITLPMYT  | 365  | 14   |
| >VHL-V155MFANITLPV    | 136  | >VHL-V155MFANITLPM    | 3646 | 3510 |
| >VHL-V155MFANITLPV    | 82   | >VHL-V155MFANITLPM    | 764  | 682  |
| >VHL-V155MFANITLPVYTL | 156  | >VHL-V155MFANITLPMYT  | 125  | 31   |
| >VHL-V155MFANITLPV    | 19   | >VHL-V155MFANITLPM    | 1670 | 1651 |
| >VHL-V155MFANITLPVYT  | 585  | >VHL-V155MFANITLPMYT  | 256  | 329  |
| >VHL-V155MFANITLPVYTL | 482  | >VHL-V155MFANITLPMYT  | 552  | 70   |
| >VHL-V155MFANITLPV    | 12   | >VHL-V155MFANITLPM    | 455  | 443  |
| >VHL-V155MFANITLPVYT  | 292  | >VHL-V155MFANITLPMYT  | 137  | 155  |
| >VHL-V155MFANITLPVYTL | 203  | >VHL-V155MFANITLPMYT  | 141  | 62   |
| >VHL-V155MFANITLPV    | 31   | >VHL-V155MFANITLPM    | 3644 | 3613 |

|                        |       |                        |       |       |
|------------------------|-------|------------------------|-------|-------|
| >VHL-V155M FANITLPVYTL | 87    | >VHL-V155M FANITLPMYT  | 156   | 69    |
| >VHL-V155M FANITLPV    | 114   | >VHL-V155M FANITLPM    | 11221 | 11107 |
| >VHL-V155M FANITLPV    | 25    | >VHL-V155M FANITLPM    | 11602 | 11577 |
| >VHL-V155M FANITLPVYTL | 407   | >VHL-V155M FANITLPMYT  | 666   | 259   |
| >VHL-V155M FANITLPVY   | 243   | >VHL-V155M FANITLPMY   | 63    | 180   |
| >VHL-V155M FANITLPVY   | 71    | >VHL-V155M FANITLPMY   | 74    | 3     |
| >VHL-V155M FANITLPV    | 96    | >VHL-V155M FANITLPM    | 2587  | 2491  |
| >VHL-V155M FANITLPVYTL | 644   | >VHL-V155M FANITLPMYT  | 436   | 208   |
| >VHL-V155M FANITLPV    | 24    | >VHL-V155M FANITLPM    | 283   | 259   |
| >VHL-V155M FANITLPVYTL | 413   | >VHL-V155M FANITLPMYT  | 207   | 206   |
| >VHL-V155M FANITLPV    | 4738  | >VHL-V155M FANITLPM    | 402   | 4336  |
| >VHL-V155M FANITLPVY   | 114   | >VHL-V155M FANITLPMY   | 372   | 258   |
| >VHL-V155M FANITLPV    | 1516  | >VHL-V155M FANITLPM    | 376   | 1140  |
| >VHL-V155M FANITLPVY   | 170   | >VHL-V155M FANITLPMY   | 299   | 129   |
| >VHL-V155M FANITLPV    | 2746  | >VHL-V155M FANITLPM    | 58    | 2688  |
| >VHL-V155M FANITLPVY   | 14    | >VHL-V155M FANITLPMY   | 14    | 0     |
| >VHL-V155M FANITLPVYTL | 63    | >VHL-V155M FANITLPMYT  | 38    | 25    |
| >VHL-V155M FANITLPV    | 1143  | >VHL-V155M FANITLPM    | 22    | 1121  |
| >VHL-V155M FANITLPVY   | 26    | >VHL-V155M FANITLPMY   | 47    | 21    |
| >VHL-V155M FANITLPVYTL | 278   | >VHL-V155M FANITLPMYT  | 444   | 166   |
| >VHL-V155M FANITLPV    | 939   | >VHL-V155M FANITLPM    | 205   | 734   |
| >VHL-V155M FANITLPVY   | 375   | >VHL-V155M FANITLPMY   | 3264  | 2889  |
| >VHL-V155M FANITLPV    | 2571  | >VHL-V155M FANITLPM    | 409   | 2162  |
| >VHL-V155M FANITLPVY   | 134   | >VHL-V155M FANITLPMY   | 99    | 35    |
| >VHL-V155M FANITLPVYTL | 160   | >VHL-V155M FANITLPMYT  | 254   | 94    |
| >VHL-V155M FANITLPV    | 89    | >VHL-V155M FANITLPM    | 5467  | 5378  |
| >VHL-V155M FANITLPV    | 11224 | >VHL-V155M FANITLPM    | 472   | 10752 |
| >VHL-V155M FANITLPVY   | 103   | >VHL-V155M FANITLPMY   | 352   | 249   |
| >VHL-V155M FANITLPVYTL | 310   | >VHL-V155M FANITLPMYT  | 231   | 79    |
| >VHL-V155M FANITLPVY   | 582   | >VHL-V155M FANITLPMY   | 316   | 266   |
| >VHL-V155M IFANITLPV   | 35    | >VHL-V155M IFANITLPM   | 523   | 488   |
| >VHL-V155M IFANITLPV   | 478   | >VHL-V155M IFANITLPM   | 92    | 386   |
| >VHL-V155M IFANITLPVY  | 52    | >VHL-V155M IFANITLPMY  | 43    | 9     |
| >VHL-V155M IFANITLPVY  | 87    | >VHL-V155M IFANITLPMY  | 46    | 41    |
| >VHL-V155M IFANITLPVY  | 137   | >VHL-V155M IFANITLPMY  | 91    | 46    |
| >VHL-V155M IFANITLPV   | 9871  | >VHL-V155M IFANITLPM   | 153   | 9718  |
| >VHL-V155M PIFANITLPV  | 393   | >VHL-V155M PIFANITLPM  | 1556  | 1163  |
| >VHL-V155M PIFANITLPV  | 79    | >VHL-V155M PIFANITLPM  | 1541  | 1462  |
| >VHL-V155M PIFANITLPV  | 21    | >VHL-V155M PIFANITLPM  | 2511  | 2490  |
| >VHL-V155M PIFANITLPV  | 76    | >VHL-V155M PIFANITLPM  | 12171 | 12095 |
| >VHL-V155M PIFANITLPV  | 25    | >VHL-V155M PIFANITLPM  | 9404  | 9379  |
| >VHL-V155M PIFANITLPVY | 135   | >VHL-V155M PIFANITLPMY | 47    | 88    |
| >VHL-V155M PIFANITLPVY | 195   | >VHL-V155M PIFANITLPMY | 201   | 6     |

|                       |      |                       |       |       |
|-----------------------|------|-----------------------|-------|-------|
| >VHL-V155M PIFANITLPV | 218  | >VHL-V155M PIFANITLPM | 3375  | 3157  |
| >VHL-V165D·VVRSLVKPEN | 228  | >VHL-V165D·DVRSLVKPEN | 28    | 200   |
| >VHL-V165D·VVRSLVKPEN | 905  | >VHL-V165D·DVRSLVKPEN | 57    | 848   |
| >VHL-V165D·VVRSLVKPEN | 427  | >VHL-V165D·DVRSLVKPEN | 1920  | 1493  |
| >VHL-V165D·VVRSLVKPEN | 141  | >VHL-V165D·DVRSLVKPEN | 4604  | 4463  |
| >VHL-V165D·VVRSLVKPEN | 83   | >VHL-V165D·DVRSLVKPEN | 4217  | 4134  |
| >VHL-V165D·VVRSLVKPEN | 126  | >VHL-V165D·DVRSLVKPEN | 1717  | 1591  |
| >VHL-V165D·QVVRSLVK   | 358  | >VHL-V165D·QDVRSLVK   | 16964 | 16606 |
| >VHL-V165D·QVVRSLVK   | 70   | >VHL-V165D·QDVRSLVK   | 16556 | 16486 |
| >VHL-V165D·QVVRSLVK   | 136  | >VHL-V165D·QDVRSLVK   | 13229 | 13093 |
| >VHL-V165D·QVVRSLVK   | 208  | >VHL-V165D·QDVRSLVK   | 12624 | 12416 |
| >VHL-V165D·LQVVRSLV   | 147  | >VHL-V165D·LQDVRSLV   | 1500  | 1353  |
| >VHL-V165D·LQVVRSLV   | 14   | >VHL-V165D·LQDVRSLV   | 24    | 10    |
| >VHL-V165D·LQVVRSLVK  | 514  | >VHL-V165D·LQDVRSLVK  | 445   | 69    |
| >VHL-V165D·LQVVRSLV   | 214  | >VHL-V165D·LQDVRSLV   | 4147  | 3933  |
| >VHL-V165D·CLQVVRSLV  | 2917 | >VHL-V165D·CLQDVRSLV  | 168   | 2749  |
| >VHL-V165D·CLQVVRSL   | 1434 | >VHL-V165D·CLQDVRSL   | 282   | 1152  |
| >VHL-V165D·CLQVVRSLV  | 517  | >VHL-V165D·CLQDVRSLV  | 79    | 438   |
| >VHL-V165D·CLQVVRSL   | 1441 | >VHL-V165D·CLQDVRSL   | 334   | 1107  |
| >VHL-V165D·CLQVVRSLV  | 325  | >VHL-V165D·CLQDVRSLV  | 29    | 296   |
| >VHL-V165D·CLQVVRSL   | 888  | >VHL-V165D·CLQDVRSL   | 152   | 736   |
| >VHL-V165D·CLQVVRSLV  | 456  | >VHL-V165D·CLQDVRSLV  | 30    | 426   |
| >VHL-V165D·CLQVVRSL   | 1543 | >VHL-V165D·CLQDVRSL   | 295   | 1248  |
| >VHL-V165D·CLQVVRSLV  | 920  | >VHL-V165D·CLQDVRSLV  | 140   | 780   |
| >VHL-V165D·CLQVVRSLV  | 1170 | >VHL-V165D·CLQDVRSLV  | 169   | 1001  |
| >VHL-V165D·CLQVVRSLV  | 1839 | >VHL-V165D·CLQDVRSLV  | 226   | 1613  |
| >VHL-V165D·CLQVVRSL   | 274  | >VHL-V165D·CLQDVRSL   | 18    | 256   |
| >VHL-V165D·CLQVVRSLV  | 16   | >VHL-V165D·CLQDVRSLV  | 3     | 13    |
| >VHL-V165D·CLQVVRSLVK | 97   | >VHL-V165D·CLQDVRSLVK | 44    | 53    |
| >VHL-V165D·CLQVVRSLVK | 305  | >VHL-V165D·CLQDVRSLVK | 166   | 139   |
| >VHL-V165D·RCLQVVRSLV | 392  | >VHL-V165D·RCLQDVRSLV | 874   | 482   |
| >VHL-V165D·RCLQVVRSLV | 67   | >VHL-V165D·RCLQDVRSLV | 216   | 149   |
| >VHL-V165D·RCLQVVRSL  | 90   | >VHL-V165D·RCLQDVRSL  | 507   | 417   |
| >VHL-V165D·ERCLQVVRSL | 233  | >VHL-V165D·ERCLQDVRSL | 801   | 568   |
| >VHL-V165D·ERCLQVVRSL | 432  | >VHL-V165D·ERCLQDVRSL | 1621  | 1189  |
| >VHL-V165D·ERCLQVVR   | 491  | >VHL-V165D·ERCLQDVR   | 1508  | 1017  |
| >VHL-V165D·KERCLQVV   | 67   | >VHL-V165D·KERCLQDV   | 459   | 392   |
| >VHL-V165D·KERCLQVVR  | 367  | >VHL-V165D·KERCLQDVR  | 3374  | 3007  |
| >VHL-V165D·KERCLQVVRS | 291  | >VHL-V165D·KERCLQDVRS | 647   | 356   |
| >VHL-V165D·KERCLQVV   | 80   | >VHL-V165D·KERCLQDV   | 159   | 79    |
| >VHL-V165D·KERCLQVVRS | 27   | >VHL-V165D·KERCLQDVRS | 35    | 8     |
| >VHL-V165D·KERCLQVV   | 148  | >VHL-V165D·KERCLQDV   | 550   | 402   |
| >VHL-V165D·KERCLQVVRS | 39   | >VHL-V165D·KERCLQDVRS | 56    | 17    |



|                         |     |                          |       |       |
|-------------------------|-----|--------------------------|-------|-------|
| >VHL-V165D·TLKERCLQV    | 403 | >VHL-V165D·TLKERCLQD     | 24607 | 24204 |
| >VHL-V165D·TLKERCLQV    | 328 | >VHL-V165D·TLKERCLQD     | 27978 | 27650 |
| >VHL-V165D·TLKERCLQV    | 7   | >VHL-V165D·TLKERCLQD     | 17433 | 17426 |
| >VHL-V165D·TLKERCLQVV   | 50  | >VHL-V165D·TLKERCLQDV    | 74    | 24    |
| >VHL-V165D·TLKERCLQV    | 186 | >VHL-V165D·TLKERCLQD     | 27854 | 27668 |
| >VHL-V165D·TLKERCLQVV   | 141 | >VHL-V165D·TLKERCLQDV    | 515   | 374   |
| >VHL-V165D·TLKERCLQVV   | 109 | >VHL-V165D·TLKERCLQDV    | 356   | 247   |
| >VHL-V165D·TLKERCLQV    | 308 | >VHL-V165D·TLKERCLQD     | 25324 | 25016 |
| >VHL-V165D·TLKERCLQVV   | 369 | >VHL-V165D·TLKERCLQDV    | 576   | 207   |
| >VHL-V165D·TLKERCLQV    | 3   | >VHL-V165D·TLKERCLQD     | 19159 | 19156 |
| >VHL-V165D·TLKERCLQVV   | 4   | >VHL-V165D·TLKERCLQDV    | 4     | 0     |
| >VHL-V165D·TLKERCLQVV   | 58  | >VHL-V165D·TLKERCLQDV    | 265   | 207   |
| >VHL-V165D·TLKERCLQVV   | 96  | >VHL-V165D·TLKERCLQDV    | 246   | 150   |
| >VHL-V165D·TLKERCLQVV   | 211 | >VHL-V165D·TLKERCLQDV    | 330   | 119   |
| >VHL-V165D·TLKERCLQV    | 84  | >VHL-V165D·TLKERCLQD     | 6248  | 6164  |
| >VHL-V165D·TLKERCLQVV   | 436 | >VHL-V165D·TLKERCLQDV    | 1513  | 1077  |
| >VHL-V165D·YTLKERCLQV   | 93  | >VHL-V165D·YTLKERCLQD    | 24030 | 23937 |
| >VHL-V165D·YTLKERCLQV'  | 308 | >VHL-V165D·YTLKERCLQD'   | 569   | 261   |
| >VHL-V165D·YTLKERCLQV   | 127 | >VHL-V165D·YTLKERCLQD    | 23942 | 23815 |
| >VHL-V165D·YTLKERCLQV   | 39  | >VHL-V165D·YTLKERCLQD    | 14112 | 14073 |
| >VHL-V165D·YTLKERCLQV'  | 83  | >VHL-V165D·YTLKERCLQD'   | 197   | 114   |
| >VHL-V165D·YTLKERCLQV   | 32  | >VHL-V165D·YTLKERCLQD    | 23436 | 23404 |
| >VHL-V165D·YTLKERCLQV'  | 28  | >VHL-V165D·YTLKERCLQD'   | 106   | 78    |
| >VHL-V165D·YTLKERCLQV'  | 95  | >VHL-V165D·YTLKERCLQD'   | 234   | 139   |
| >VHL-V165D·YTLKERCLQV   | 31  | >VHL-V165D·YTLKERCLQD    | 21758 | 21727 |
| >VHL-V165D·YTLKERCLQV'  | 40  | >VHL-V165D·YTLKERCLQD'   | 59    | 19    |
| >VHL-V165D·YTLKERCLQV'  | 416 | >VHL-V165D·YTLKERCLQD'   | 1567  | 1151  |
| >VHL-V165D·YTLKERCLQV   | 19  | >VHL-V165D·YTLKERCLQD    | 32571 | 32552 |
| >VHL-V165D·YTLKERCLQV'  | 21  | >VHL-V165D·YTLKERCLQD'   | 24    | 3     |
| >VHL-V165D·YTLKERCLQV   | 14  | >VHL-V165D·YTLKERCLQD    | 16155 | 16141 |
| >VHL-V165D·YTLKERCLQV'  | 53  | >VHL-V165D·YTLKERCLQD'   | 95    | 42    |
| >VHL-V165D·YTLKERCLQV   | 211 | >VHL-V165D·YTLKERCLQD    | 8245  | 8034  |
| >VHL-V165D·YTLKERCLQV'  | 130 | >VHL-V165D·YTLKERCLQD'   | 974   | 844   |
| >VHL-V165I-1 VVRSLVKPEN | 228 | >VHL-V165I-1 IVRSLVKPEN\ | 320   | 92    |
| >VHL-V165I-1 VVRSLVKPEN | 427 | >VHL-V165I-1 IVRSLVKPEN\ | 287   | 140   |
| >VHL-V165I-1 VVRSLVKPEN | 141 | >VHL-V165I-1 IVRSLVKPEN\ | 243   | 102   |
| >VHL-V165I-1 VVRSLVKPEN | 538 | >VHL-V165I-1 IVRSLVKPEN\ | 428   | 110   |
| >VHL-V165I-1 VVRSLVKPEN | 579 | >VHL-V165I-1 IVRSLVKPEN\ | 259   | 320   |
| >VHL-V165I-1 VVRSLVKPEN | 83  | >VHL-V165I-1 IVRSLVKPEN\ | 48    | 35    |
| >VHL-V165I-1 VVRSLVKPEN | 126 | >VHL-V165I-1 IVRSLVKPEN\ | 74    | 52    |
| >VHL-V165I-1 QVVRSLVK   | 358 | >VHL-V165I-1 QIVRSLVK    | 311   | 47    |
| >VHL-V165I-1 QVVRSLVK   | 70  | >VHL-V165I-1 QIVRSLVK    | 119   | 49    |
| >VHL-V165I-1 QVVRSLVK   | 136 | >VHL-V165I-1 QIVRSLVK    | 473   | 337   |

|                          |      |                          |      |      |
|--------------------------|------|--------------------------|------|------|
| >VHL-V165I-1 QVVRSLVK    | 208  | >VHL-V165I-1 QIVRSLVK    | 559  | 351  |
| >VHL-V165I-1 VYTLKERCLQ' | 3034 | >VHL-V165I-1 VYTLKERCLQ' | 438  | 2596 |
| >VHL-V165I-1 VYTLKERCLQ' | 2124 | >VHL-V165I-1 VYTLKERCLQ' | 120  | 2004 |
| >VHL-V165I-1 LQVVRSLV    | 559  | >VHL-V165I-1 LQIVRSLV    | 418  | 141  |
| >VHL-V165I-1 LQVVRSLV    | 147  | >VHL-V165I-1 LQIVRSLV    | 76   | 71   |
| >VHL-V165I-1 LQVVRSLV    | 14   | >VHL-V165I-1 LQIVRSLV    | 10   | 4    |
| >VHL-V165I-1 LQVVRSLVK   | 514  | >VHL-V165I-1 LQIVRSLVK   | 175  | 339  |
| >VHL-V165I-1 LQVVRSLV    | 214  | >VHL-V165I-1 LQIVRSLV    | 145  | 69   |
| >VHL-V165I-1 LQVVRSLVK   | 509  | >VHL-V165I-1 LQIVRSLVK   | 351  | 158  |
| >VHL-V165I-1 CLQVVRSLV   | 325  | >VHL-V165I-1 CLQIVRSLV   | 281  | 44   |
| >VHL-V165I-1 CLQVVRSLV   | 456  | >VHL-V165I-1 CLQIVRSLV   | 171  | 285  |
| >VHL-V165I-1 CLQVVRSL    | 274  | >VHL-V165I-1 CLQIVRSL    | 175  | 99   |
| >VHL-V165I-1 CLQVVRSLV   | 16   | >VHL-V165I-1 CLQIVRSLV   | 13   | 3    |
| >VHL-V165I-1 CLQVVRSLVK  | 97   | >VHL-V165I-1 CLQIVRSLVK  | 74   | 23   |
| >VHL-V165I-1 CLQVVRSLVK  | 305  | >VHL-V165I-1 CLQIVRSLVK  | 225  | 80   |
| >VHL-V165I-1 RCLQVVRSLV  | 392  | >VHL-V165I-1 RCLQIVRSLV  | 706  | 314  |
| >VHL-V165I-1 RCLQVVRSLV  | 67   | >VHL-V165I-1 RCLQIVRSLV† | 62   | 5    |
| >VHL-V165I-1 RCLQVVRSL   | 90   | >VHL-V165I-1 RCLQIVRSL   | 43   | 47   |
| >VHL-V165I-1 RCLQVVRSLV  | 619  | >VHL-V165I-1 RCLQIVRSLV† | 289  | 330  |
| >VHL-V165I-1 ERCLQVVRSL  | 233  | >VHL-V165I-1 ERCLQIVRSL  | 133  | 100  |
| >VHL-V165I-1 ERCLQVVRSL  | 432  | >VHL-V165I-1 ERCLQIVRSL  | 291  | 141  |
| >VHL-V165I-1 ERCLQVVR    | 491  | >VHL-V165I-1 ERCLQIVR    | 487  | 4    |
| >VHL-V165I-1 KERCLQVV    | 67   | >VHL-V165I-1 KERCLQIV    | 57   | 10   |
| >VHL-V165I-1 KERCLQVVR   | 367  | >VHL-V165I-1 KERCLQIVR   | 725  | 358  |
| >VHL-V165I-1 KERCLQVVRS  | 291  | >VHL-V165I-1 KERCLQIVRSI | 410  | 119  |
| >VHL-V165I-1 KERCLQVV    | 80   | >VHL-V165I-1 KERCLQIV    | 100  | 20   |
| >VHL-V165I-1 KERCLQVVRS  | 27   | >VHL-V165I-1 KERCLQIVRSI | 22   | 5    |
| >VHL-V165I-1 KERCLQVV    | 148  | >VHL-V165I-1 KERCLQIV    | 281  | 133  |
| >VHL-V165I-1 KERCLQVVRS  | 39   | >VHL-V165I-1 KERCLQIVRSI | 40   | 1    |
| >VHL-V165I-1 TLKERCLQV   | 403  | >VHL-V165I-1 TLKERCLQI   | 1843 | 1440 |
| >VHL-V165I-1 TLKERCLQV   | 328  | >VHL-V165I-1 TLKERCLQI   | 1377 | 1049 |
| >VHL-V165I-1 TLKERCLQV   | 7    | >VHL-V165I-1 TLKERCLQI   | 28   | 21   |
| >VHL-V165I-1 TLKERCLQVV  | 50   | >VHL-V165I-1 TLKERCLQIV  | 51   | 1    |
| >VHL-V165I-1 TLKERCLQV   | 186  | >VHL-V165I-1 TLKERCLQI   | 2231 | 2045 |
| >VHL-V165I-1 TLKERCLQVV  | 141  | >VHL-V165I-1 TLKERCLQIV  | 367  | 226  |
| >VHL-V165I-1 TLKERCLQVV  | 109  | >VHL-V165I-1 TLKERCLQIV  | 131  | 22   |
| >VHL-V165I-1 TLKERCLQV   | 308  | >VHL-V165I-1 TLKERCLQI   | 6011 | 5703 |
| >VHL-V165I-1 TLKERCLQVV  | 369  | >VHL-V165I-1 TLKERCLQIV  | 463  | 94   |
| >VHL-V165I-1 TLKERCLQV   | 3    | >VHL-V165I-1 TLKERCLQI   | 53   | 50   |
| >VHL-V165I-1 TLKERCLQVV  | 4    | >VHL-V165I-1 TLKERCLQIV  | 5    | 1    |
| >VHL-V165I-1 TLKERCLQVV  | 58   | >VHL-V165I-1 TLKERCLQIVF | 84   | 26   |
| >VHL-V165I-1 TLKERCLQVV  | 96   | >VHL-V165I-1 TLKERCLQIVF | 101  | 5    |
| >VHL-V165I-1 TLKERCLQVV  | 211  | >VHL-V165I-1 TLKERCLQIVF | 265  | 54   |

|                          |      |                          |       |       |
|--------------------------|------|--------------------------|-------|-------|
| >VHL-V165I-1 TLKERCLQV   | 84   | >VHL-V165I-1 TLKERCLQI   | 60    | 24    |
| >VHL-V165I-1 TLKERCLQVV  | 436  | >VHL-V165I-1 TLKERCLQIVF | 498   | 62    |
| >VHL-V165I-1 YTLKERCLQV  | 93   | >VHL-V165I-1 YTLKERCLQI  | 559   | 466   |
| >VHL-V165I-1 YTLKERCLQV' | 308  | >VHL-V165I-1 YTLKERCLQIV | 312   | 4     |
| >VHL-V165I-1 YTLKERCLQV  | 127  | >VHL-V165I-1 YTLKERCLQI  | 457   | 330   |
| >VHL-V165I-1 YTLKERCLQV  | 39   | >VHL-V165I-1 YTLKERCLQI  | 96    | 57    |
| >VHL-V165I-1 YTLKERCLQV' | 83   | >VHL-V165I-1 YTLKERCLQIV | 93    | 10    |
| >VHL-V165I-1 YTLKERCLQV  | 32   | >VHL-V165I-1 YTLKERCLQI  | 410   | 378   |
| >VHL-V165I-1 YTLKERCLQV' | 28   | >VHL-V165I-1 YTLKERCLQIV | 68    | 40    |
| >VHL-V165I-1 YTLKERCLQV' | 95   | >VHL-V165I-1 YTLKERCLQIV | 113   | 18    |
| >VHL-V165I-1 YTLKERCLQV  | 31   | >VHL-V165I-1 YTLKERCLQI  | 1040  | 1009  |
| >VHL-V165I-1 YTLKERCLQV' | 40   | >VHL-V165I-1 YTLKERCLQIV | 47    | 7     |
| >VHL-V165I-1 YTLKERCLQV' | 416  | >VHL-V165I-1 YTLKERCLQIV | 720   | 304   |
| >VHL-V165I-1 YTLKERCLQV  | 19   | >VHL-V165I-1 YTLKERCLQI  | 2073  | 2054  |
| >VHL-V165I-1 YTLKERCLQV' | 21   | >VHL-V165I-1 YTLKERCLQIV | 27    | 6     |
| >VHL-V165I-1 YTLKERCLQV  | 14   | >VHL-V165I-1 YTLKERCLQI  | 80    | 66    |
| >VHL-V165I-1 YTLKERCLQV' | 53   | >VHL-V165I-1 YTLKERCLQIV | 57    | 4     |
| >VHL-V165I-1 YTLKERCLQV  | 211  | >VHL-V165I-1 YTLKERCLQI  | 38    | 173   |
| >VHL-V165I-1 YTLKERCLQV' | 130  | >VHL-V165I-1 YTLKERCLQIV | 141   | 11    |
| >VHL-V166D·VRSLVKPENY    | 310  | >VHL-V166D·DRSLVKPENY    | 1684  | 1374  |
| >VHL-V166D·VVRSLVKPEN    | 228  | >VHL-V166D·VDRSLVKPEN    | 21193 | 20965 |
| >VHL-V166D·VVRSLVKPEN    | 427  | >VHL-V166D·VDRSLVKPEN    | 8213  | 7786  |
| >VHL-V166D·VVRSLVKPEN    | 141  | >VHL-V166D·VDRSLVKPEN    | 7353  | 7212  |
| >VHL-V166D·VVRSLVKPEN    | 83   | >VHL-V166D·VDRSLVKPEN    | 11766 | 11683 |
| >VHL-V166D·VVRSLVKPEN    | 126  | >VHL-V166D·VDRSLVKPEN    | 1121  | 995   |
| >VHL-V166D·YTLKERCLQV'   | 308  | >VHL-V166D·YTLKERCLQV    | 23461 | 23153 |
| >VHL-V166D·YTLKERCLQV'   | 83   | >VHL-V166D·YTLKERCLQV    | 23569 | 23486 |
| >VHL-V166D·YTLKERCLQV'   | 28   | >VHL-V166D·YTLKERCLQV    | 22950 | 22922 |
| >VHL-V166D·YTLKERCLQV'   | 95   | >VHL-V166D·YTLKERCLQV    | 22607 | 22512 |
| >VHL-V166D·YTLKERCLQV'   | 40   | >VHL-V166D·YTLKERCLQV    | 23463 | 23423 |
| >VHL-V166D·YTLKERCLQV'   | 416  | >VHL-V166D·YTLKERCLQV    | 25822 | 25406 |
| >VHL-V166D·YTLKERCLQV'   | 21   | >VHL-V166D·YTLKERCLQV    | 32284 | 32263 |
| >VHL-V166D·YTLKERCLQV'   | 53   | >VHL-V166D·YTLKERCLQV    | 19877 | 19824 |
| >VHL-V166D·YTLKERCLQV'   | 130  | >VHL-V166D·YTLKERCLQV    | 3797  | 3667  |
| >VHL-V166D·QVVRSLVK      | 358  | >VHL-V166D·QVDRSLVK      | 622   | 264   |
| >VHL-V166D·QVVRSLVK      | 70   | >VHL-V166D·QVDRSLVK      | 78    | 8     |
| >VHL-V166D·QVVRSLVK      | 136  | >VHL-V166D·QVDRSLVK      | 3511  | 3375  |
| >VHL-V166D·QVVRSLVK      | 208  | >VHL-V166D·QVDRSLVK      | 1873  | 1665  |
| >VHL-V166D·LQVVRSLV      | 3147 | >VHL-V166D·LQVDRSLV      | 467   | 2680  |
| >VHL-V166D·LQVVRSLV      | 559  | >VHL-V166D·LQVDRSLV      | 166   | 393   |
| >VHL-V166D·LQVVRSLV      | 147  | >VHL-V166D·LQVDRSLV      | 35    | 112   |
| >VHL-V166D·LQVVRSLV      | 14   | >VHL-V166D·LQVDRSLV      | 13    | 1     |
| >VHL-V166D·LQVVRSLV      | 1871 | >VHL-V166D·LQVDRSLV      | 82    | 1789  |

|                        |      |                       |       |       |
|------------------------|------|-----------------------|-------|-------|
| >VHL-V166D·LQVVRSLVK   | 514  | >VHL-V166D·LQVDRSLVK  | 296   | 218   |
| >VHL-V166D·LQVVRSLV    | 214  | >VHL-V166D·LQVDRSLV   | 287   | 73    |
| >VHL-V166D·CLQVVRSLV   | 325  | >VHL-V166D·CLQVDRSLV  | 550   | 225   |
| >VHL-V166D·CLQVVRSLV   | 456  | >VHL-V166D·CLQVDRSLV  | 1758  | 1302  |
| >VHL-V166D·CLQVVRSL    | 274  | >VHL-V166D·CLQVDRSL   | 398   | 124   |
| >VHL-V166D·CLQVVRSLV   | 16   | >VHL-V166D·CLQVDRSLV  | 16    | 0     |
| >VHL-V166D·CLQVVRSLVK  | 97   | >VHL-V166D·CLQVDRSLVK | 358   | 261   |
| >VHL-V166D·CLQVVRSLVK  | 305  | >VHL-V166D·CLQVDRSLVK | 382   | 77    |
| >VHL-V166D·RCLQVVRSLV  | 392  | >VHL-V166D·RCLQVDRSLV | 2187  | 1795  |
| >VHL-V166D·RCLQVVRSLV  | 67   | >VHL-V166D·RCLQVDRSLV | 153   | 86    |
| >VHL-V166D·RCLQVVRSL   | 90   | >VHL-V166D·RCLQVDRSL  | 393   | 303   |
| >VHL-V166D·ERCLQVVRSL  | 233  | >VHL-V166D·ERCLQVDRSL | 232   | 1     |
| >VHL-V166D·ERCLQVVRSL  | 432  | >VHL-V166D·ERCLQVDRSL | 478   | 46    |
| >VHL-V166D·ERCLQVVR    | 491  | >VHL-V166D·ERCLQVDR   | 1349  | 858   |
| >VHL-V166D·KERCLQVV    | 67   | >VHL-V166D·KERCLQVD   | 4610  | 4543  |
| >VHL-V166D·KERCLQVVR   | 367  | >VHL-V166D·KERCLQVDR  | 2201  | 1834  |
| >VHL-V166D·KERCLQVVRS  | 291  | >VHL-V166D·KERCLQVDRS | 834   | 543   |
| >VHL-V166D·KERCLQVV    | 80   | >VHL-V166D·KERCLQVD   | 2239  | 2159  |
| >VHL-V166D·KERCLQVVRS  | 27   | >VHL-V166D·KERCLQVDRS | 40    | 13    |
| >VHL-V166D·KERCLQVV    | 148  | >VHL-V166D·KERCLQVD   | 5048  | 4900  |
| >VHL-V166D·KERCLQVVRS  | 39   | >VHL-V166D·KERCLQVDRS | 120   | 81    |
| >VHL-V166D·TLKERCLQVV  | 50   | >VHL-V166D·TLKERCLQVD | 16933 | 16883 |
| >VHL-V166D·TLKERCLQVV  | 141  | >VHL-V166D·TLKERCLQVD | 26703 | 26562 |
| >VHL-V166D·TLKERCLQVV  | 109  | >VHL-V166D·TLKERCLQVD | 26707 | 26598 |
| >VHL-V166D·TLKERCLQVV  | 369  | >VHL-V166D·TLKERCLQVD | 25802 | 25433 |
| >VHL-V166D·TLKERCLQVV  | 4    | >VHL-V166D·TLKERCLQVD | 18138 | 18134 |
| >VHL-V166D·TLKERCLQVV  | 58   | >VHL-V166D·TLKERCLQVD | 211   | 153   |
| >VHL-V166D·TLKERCLQVV  | 96   | >VHL-V166D·TLKERCLQVD | 119   | 23    |
| >VHL-V166D·TLKERCLQVV  | 211  | >VHL-V166D·TLKERCLQVD | 414   | 203   |
| >VHL-V166D·TLKERCLQVV  | 436  | >VHL-V166D·TLKERCLQVD | 798   | 362   |
| >VHL-V166F·VRSLVKPENY  | 846  | >VHL-V166F·FRSLVKPENY | 465   | 381   |
| >VHL-V166F·VRSLVKPENY  | 3567 | >VHL-V166F·FRSLVKPENY | 408   | 3159  |
| >VHL-V166F·VRSLVKPENY  | 930  | >VHL-V166F·FRSLVKPENY | 394   | 536   |
| >VHL-V166F·VRSLVKPENY  | 310  | >VHL-V166F·FRSLVKPENY | 171   | 139   |
| >VHL-V166F·VVRSLVKPEN  | 228  | >VHL-V166F·VFRSLVKPEN | 8211  | 7983  |
| >VHL-V166F·VVRSLVKPEN  | 427  | >VHL-V166F·VFRSLVKPEN | 146   | 281   |
| >VHL-V166F·VVRSLVKPEN  | 141  | >VHL-V166F·VFRSLVKPEN | 809   | 668   |
| >VHL-V166F·VVRSLVKPEN  | 83   | >VHL-V166F·VFRSLVKPEN | 15741 | 15658 |
| >VHL-V166F·VVRSLVKPEN  | 126  | >VHL-V166F·VFRSLVKPEN | 901   | 775   |
| >VHL-V166F·YTLKERCLQV' | 308  | >VHL-V166F·YTLKERCLQV | 18905 | 18597 |
| >VHL-V166F·YTLKERCLQV' | 83   | >VHL-V166F·YTLKERCLQV | 2049  | 1966  |
| >VHL-V166F·YTLKERCLQV' | 28   | >VHL-V166F·YTLKERCLQV | 11361 | 11333 |
| >VHL-V166F·YTLKERCLQV' | 95   | >VHL-V166F·YTLKERCLQV | 16154 | 16059 |

|                        |       |                        |       |       |
|------------------------|-------|------------------------|-------|-------|
| >VHL-V166F-YTLKERCLQV' | 40    | >VHL-V166F-YTLKERCLQV' | 18533 | 18493 |
| >VHL-V166F-YTLKERCLQV' | 416   | >VHL-V166F-YTLKERCLQV' | 18795 | 18379 |
| >VHL-V166F-YTLKERCLQV' | 21    | >VHL-V166F-YTLKERCLQV' | 24350 | 24329 |
| >VHL-V166F-YTLKERCLQV' | 14682 | >VHL-V166F-YTLKERCLQV' | 482   | 14200 |
| >VHL-V166F-YTLKERCLQV' | 10037 | >VHL-V166F-YTLKERCLQV' | 54    | 9983  |
| >VHL-V166F-YTLKERCLQV' | 4094  | >VHL-V166F-YTLKERCLQV' | 85    | 4009  |
| >VHL-V166F-YTLKERCLQV' | 53    | >VHL-V166F-YTLKERCLQV' | 13439 | 13386 |
| >VHL-V166F-YTLKERCLQV' | 8709  | >VHL-V166F-YTLKERCLQV' | 193   | 8516  |
| >VHL-V166F-YTLKERCLQV' | 803   | >VHL-V166F-YTLKERCLQV' | 17    | 786   |
| >VHL-V166F-YTLKERCLQV' | 973   | >VHL-V166F-YTLKERCLQV' | 6     | 967   |
| >VHL-V166F-YTLKERCLQV' | 15081 | >VHL-V166F-YTLKERCLQV' | 419   | 14662 |
| >VHL-V166F-YTLKERCLQV' | 13497 | >VHL-V166F-YTLKERCLQV' | 255   | 13242 |
| >VHL-V166F-YTLKERCLQV' | 130   | >VHL-V166F-YTLKERCLQV' | 12    | 118   |
| >VHL-V166F-QVVRSLVK    | 358   | >VHL-V166F-QVFRSLVK    | 49    | 309   |
| >VHL-V166F-QVVRSLVK    | 70    | >VHL-V166F-QVFRSLVK    | 19    | 51    |
| >VHL-V166F-QVVRSLVK    | 136   | >VHL-V166F-QVFRSLVK    | 16    | 120   |
| >VHL-V166F-QVVRSLVK    | 208   | >VHL-V166F-QVFRSLVK    | 36    | 172   |
| >VHL-V166F-QVVRSLVK    | 1598  | >VHL-V166F-QVFRSLVK    | 415   | 1183  |
| >VHL-V166F-LQVVRSLV    | 559   | >VHL-V166F-LQVFRSLV    | 208   | 351   |
| >VHL-V166F-LQVVRSLV    | 147   | >VHL-V166F-LQVFRSLV    | 52    | 95    |
| >VHL-V166F-LQVVRSLV    | 14    | >VHL-V166F-LQVFRSLV    | 15    | 1     |
| >VHL-V166F-LQVVRSLVK   | 660   | >VHL-V166F-LQVFRSLVK   | 301   | 359   |
| >VHL-V166F-LQVVRSLVK   | 514   | >VHL-V166F-LQVFRSLVK   | 200   | 314   |
| >VHL-V166F-LQVVRSLV    | 214   | >VHL-V166F-LQVFRSLV    | 220   | 6     |
| >VHL-V166F-CLQVVRSLV   | 517   | >VHL-V166F-CLQVFRSLV   | 351   | 166   |
| >VHL-V166F-CLQVVRSLV   | 325   | >VHL-V166F-CLQVFRSLV   | 333   | 8     |
| >VHL-V166F-CLQVVRSLV   | 456   | >VHL-V166F-CLQVFRSLV   | 603   | 147   |
| >VHL-V166F-CLQVVRSL    | 274   | >VHL-V166F-CLQVFRSL    | 236   | 38    |
| >VHL-V166F-CLQVVRSLV   | 16    | >VHL-V166F-CLQVFRSLV   | 11    | 5     |
| >VHL-V166F-CLQVVRSLVK  | 97    | >VHL-V166F-CLQVFRSLVK  | 70    | 27    |
| >VHL-V166F-CLQVVRSLVK  | 305   | >VHL-V166F-CLQVFRSLVK  | 148   | 157   |
| >VHL-V166F-CLQVVRSL    | 2306  | >VHL-V166F-CLQVFRSL    | 492   | 1814  |
| >VHL-V166F-CLQVVRSLVK  | 1142  | >VHL-V166F-CLQVFRSLVK  | 354   | 788   |
| >VHL-V166F-RCLQVVRSLV  | 392   | >VHL-V166F-RCLQVFRSLV  | 836   | 444   |
| >VHL-V166F-RCLQVVRSLV  | 67    | >VHL-V166F-RCLQVFRSLV  | 56    | 11    |
| >VHL-V166F-RCLQVVRSL   | 90    | >VHL-V166F-RCLQVFRSL   | 180   | 90    |
| >VHL-V166F-RCLQVVRSL   | 1026  | >VHL-V166F-RCLQVFRSL   | 395   | 631   |
| >VHL-V166F-RCLQVVRSLV  | 619   | >VHL-V166F-RCLQVFRSLV  | 299   | 320   |
| >VHL-V166F-ERCLQVVR    | 1477  | >VHL-V166F-ERCLQVFR    | 213   | 1264  |
| >VHL-V166F-ERCLQVVRSL  | 233   | >VHL-V166F-ERCLQVFRSL  | 168   | 65    |
| >VHL-V166F-ERCLQVVRSL  | 432   | >VHL-V166F-ERCLQVFRSL  | 222   | 210   |
| >VHL-V166F-ERCLQVVR    | 491   | >VHL-V166F-ERCLQVFR    | 165   | 326   |
| >VHL-V166F-KERCLQVV    | 67    | >VHL-V166F-KERCLQVF    | 390   | 323   |

|                         |      |                         |       |       |
|-------------------------|------|-------------------------|-------|-------|
| >VHL-V166F- KERCLQVVR   | 367  | >VHL-V166F- KERCLQVFR   | 41    | 326   |
| >VHL-V166F- KERCLQVV    | 9655 | >VHL-V166F- KERCLQVF    | 222   | 9433  |
| >VHL-V166F- KERCLQVV    | 722  | >VHL-V166F- KERCLQVF    | 15    | 707   |
| >VHL-V166F- KERCLQVVRS  | 291  | >VHL-V166F- KERCLQVFRS  | 268   | 23    |
| >VHL-V166F- KERCLQVV    | 5664 | >VHL-V166F- KERCLQVF    | 192   | 5472  |
| >VHL-V166F- KERCLQVVRS  | 595  | >VHL-V166F- KERCLQVFRS  | 315   | 280   |
| >VHL-V166F- KERCLQVV    | 80   | >VHL-V166F- KERCLQVF    | 80    | 0     |
| >VHL-V166F- KERCLQVVRS  | 27   | >VHL-V166F- KERCLQVFRS  | 21    | 6     |
| >VHL-V166F- KERCLQVV    | 4251 | >VHL-V166F- KERCLQVF    | 309   | 3942  |
| >VHL-V166F- KERCLQVV    | 148  | >VHL-V166F- KERCLQVF    | 3666  | 3518  |
| >VHL-V166F- KERCLQVVRS  | 39   | >VHL-V166F- KERCLQVFRS  | 43    | 4     |
| >VHL-V166F- LKERCLQVV   | 714  | >VHL-V166F- LKERCLQVF   | 29    | 685   |
| >VHL-V166F- TLKERCLQVV  | 50   | >VHL-V166F- TLKERCLQVF  | 11856 | 11806 |
| >VHL-V166F- TLKERCLQVV  | 141  | >VHL-V166F- TLKERCLQVF  | 17711 | 17570 |
| >VHL-V166F- TLKERCLQVV  | 109  | >VHL-V166F- TLKERCLQVF  | 20242 | 20133 |
| >VHL-V166F- TLKERCLQVV  | 369  | >VHL-V166F- TLKERCLQVF  | 23021 | 22652 |
| >VHL-V166F- TLKERCLQVV  | 4    | >VHL-V166F- TLKERCLQVF  | 7128  | 7124  |
| >VHL-V166F- TLKERCLQVV  | 1741 | >VHL-V166F- TLKERCLQVFI | 332   | 1409  |
| >VHL-V166F- TLKERCLQVV  | 58   | >VHL-V166F- TLKERCLQVFI | 22    | 36    |
| >VHL-V166F- TLKERCLQVV  | 96   | >VHL-V166F- TLKERCLQVFI | 21    | 75    |
| >VHL-V166F- TLKERCLQVV  | 211  | >VHL-V166F- TLKERCLQVFI | 42    | 169   |
| >VHL-V166F- TLKERCLQVV  | 4655 | >VHL-V166F- TLKERCLQVF  | 73    | 4582  |
| >VHL-V166F- TLKERCLQVV  | 6784 | >VHL-V166F- TLKERCLQVF  | 216   | 6568  |
| >VHL-V166F- TLKERCLQVV  | 436  | >VHL-V166F- TLKERCLQVFI | 189   | 247   |
| >VHL-V166G- VRSLVKPENY  | 310  | >VHL-V166G- GRSLVKPENY  | 75    | 235   |
| >VHL-V166G- VVRSVLKPEN  | 228  | >VHL-V166G- VGRSLVKPEN  | 22554 | 22326 |
| >VHL-V166G- VVRSVLKPEN  | 427  | >VHL-V166G- VGRSLVKPEN  | 6690  | 6263  |
| >VHL-V166G- VVRSVLKPEN  | 141  | >VHL-V166G- VGRSLVKPEN  | 5121  | 4980  |
| >VHL-V166G- VVRSVLKPEN  | 83   | >VHL-V166G- VGRSLVKPEN  | 557   | 474   |
| >VHL-V166G- VVRSVLKPEN  | 126  | >VHL-V166G- VGRSLVKPEN  | 401   | 275   |
| >VHL-V166G- YTLKERCLQV' | 308  | >VHL-V166G- YTLKERCLQV' | 21779 | 21471 |
| >VHL-V166G- YTLKERCLQV' | 83   | >VHL-V166G- YTLKERCLQV' | 13746 | 13663 |
| >VHL-V166G- YTLKERCLQV' | 28   | >VHL-V166G- YTLKERCLQV' | 15795 | 15767 |
| >VHL-V166G- YTLKERCLQV' | 95   | >VHL-V166G- YTLKERCLQV' | 17685 | 17590 |
| >VHL-V166G- YTLKERCLQV' | 40   | >VHL-V166G- YTLKERCLQV' | 19129 | 19089 |
| >VHL-V166G- YTLKERCLQV' | 416  | >VHL-V166G- YTLKERCLQV' | 23723 | 23307 |
| >VHL-V166G- YTLKERCLQV' | 21   | >VHL-V166G- YTLKERCLQV' | 28786 | 28765 |
| >VHL-V166G- YTLKERCLQV' | 53   | >VHL-V166G- YTLKERCLQV' | 16772 | 16719 |
| >VHL-V166G- YTLKERCLQV' | 130  | >VHL-V166G- YTLKERCLQV' | 2081  | 1951  |
| >VHL-V166G- QVVRSLVK    | 358  | >VHL-V166G- QVGRSLVK    | 305   | 53    |
| >VHL-V166G- QVVRSLVK    | 70   | >VHL-V166G- QVGRSLVK    | 90    | 20    |
| >VHL-V166G- QVVRSLVK    | 136  | >VHL-V166G- QVGRSLVK    | 380   | 244   |
| >VHL-V166G- QVVRSLVK    | 208  | >VHL-V166G- QVGRSLVK    | 1504  | 1296  |

|                         |      |                          |       |       |
|-------------------------|------|--------------------------|-------|-------|
| >VHL-V166G·LQVVRSLV     | 559  | >VHL-V166G·LQVGRSLV      | 249   | 310   |
| >VHL-V166G·LQVVRSLV     | 147  | >VHL-V166G·LQVGRSLV      | 60    | 87    |
| >VHL-V166G·LQVVRSLV     | 14   | >VHL-V166G·LQVGRSLV      | 12    | 2     |
| >VHL-V166G·LQVVRSLV     | 1871 | >VHL-V166G·LQVGRSLV      | 157   | 1714  |
| >VHL-V166G·LQVVRSLVK    | 660  | >VHL-V166G·LQVGRSLVK     | 417   | 243   |
| >VHL-V166G·LQVVRSLVK    | 514  | >VHL-V166G·LQVGRSLVK     | 425   | 89    |
| >VHL-V166G·LQVVRSLV     | 214  | >VHL-V166G·LQVGRSLV      | 621   | 407   |
| >VHL-V166G·CLQVVRSLV    | 325  | >VHL-V166G·CLQVGRSLV     | 283   | 42    |
| >VHL-V166G·CLQVVRSLV    | 456  | >VHL-V166G·CLQVGRSLV     | 1169  | 713   |
| >VHL-V166G·CLQVVRSL     | 274  | >VHL-V166G·CLQVGRSL      | 235   | 39    |
| >VHL-V166G·CLQVVRSLV    | 16   | >VHL-V166G·CLQVGRSLV     | 10    | 6     |
| >VHL-V166G·CLQVVRSLVK   | 97   | >VHL-V166G·CLQVGRSLVK    | 94    | 3     |
| >VHL-V166G·CLQVVRSLVK   | 305  | >VHL-V166G·CLQVGRSLVK    | 300   | 5     |
| >VHL-V166G·RCLQVVRSLV   | 392  | >VHL-V166G·RCLQVGRSLV    | 1106  | 714   |
| >VHL-V166G·RCLQVVRSLV   | 67   | >VHL-V166G·RCLQVGRSLV    | 90    | 23    |
| >VHL-V166G·RCLQVVRSL    | 90   | >VHL-V166G·RCLQVGRSL     | 512   | 422   |
| >VHL-V166G·RCLQVVRSL    | 1026 | >VHL-V166G·RCLQVGRSL     | 416   | 610   |
| >VHL-V166G·ERCLQVVRSL   | 233  | >VHL-V166G·ERCLQVGRSL    | 220   | 13    |
| >VHL-V166G·ERCLQVVRSL   | 432  | >VHL-V166G·ERCLQVGRSL    | 461   | 29    |
| >VHL-V166G·ERCLQVVR     | 491  | >VHL-V166G·ERCLQVGR      | 596   | 105   |
| >VHL-V166G·KERCLQVV     | 67   | >VHL-V166G·KERCLQVG      | 4430  | 4363  |
| >VHL-V166G·KERCLQVVR    | 367  | >VHL-V166G·KERCLQVGR     | 695   | 328   |
| >VHL-V166G·KERCLQVVRS   | 291  | >VHL-V166G·KERCLQVGRS    | 341   | 50    |
| >VHL-V166G·KERCLQVVRS   | 595  | >VHL-V166G·KERCLQVGRS    | 383   | 212   |
| >VHL-V166G·KERCLQVV     | 80   | >VHL-V166G·KERCLQVG      | 3211  | 3131  |
| >VHL-V166G·KERCLQVVRS   | 27   | >VHL-V166G·KERCLQVGRS    | 32    | 5     |
| >VHL-V166G·KERCLQVV     | 148  | >VHL-V166G·KERCLQVG      | 3105  | 2957  |
| >VHL-V166G·KERCLQVVRS   | 39   | >VHL-V166G·KERCLQVGRS    | 85    | 46    |
| >VHL-V166G·TLKERCLQVV   | 50   | >VHL-V166G·TLKERCLQVG    | 13608 | 13558 |
| >VHL-V166G·TLKERCLQVV   | 141  | >VHL-V166G·TLKERCLQVG    | 22104 | 21963 |
| >VHL-V166G·TLKERCLQVV   | 109  | >VHL-V166G·TLKERCLQVG    | 22865 | 22756 |
| >VHL-V166G·TLKERCLQVV   | 369  | >VHL-V166G·TLKERCLQVG    | 24443 | 24074 |
| >VHL-V166G·TLKERCLQVV   | 4    | >VHL-V166G·TLKERCLQVG    | 12702 | 12698 |
| >VHL-V166G·TLKERCLQVV   | 58   | >VHL-V166G·TLKERCLQVG    | 85    | 27    |
| >VHL-V166G·TLKERCLQVV   | 96   | >VHL-V166G·TLKERCLQVG    | 86    | 10    |
| >VHL-V166G·TLKERCLQVV   | 211  | >VHL-V166G·TLKERCLQVG    | 207   | 4     |
| >VHL-V166G·TLKERCLQVV   | 436  | >VHL-V166G·TLKERCLQVG    | 404   | 32    |
| >VHL-V166I-1 VRSLVKPENY | 310  | >VHL-V166I-1 VIRSLVKPENY | 138   | 172   |
| >VHL-V166I-1 VVRSLVKPEN | 228  | >VHL-V166I-1 VIRSLVKPEN\ | 883   | 655   |
| >VHL-V166I-1 VVRSLVKPEN | 427  | >VHL-V166I-1 VIRSLVKPEN\ | 838   | 411   |
| >VHL-V166I-1 VVRSLVKPEN | 141  | >VHL-V166I-1 VIRSLVKPEN\ | 375   | 234   |
| >VHL-V166I-1 VVRSLVKPEN | 579  | >VHL-V166I-1 VIRSLVKPEN\ | 414   | 165   |
| >VHL-V166I-1 VVRSLVKPEN | 83   | >VHL-V166I-1 VIRSLVKPEN\ | 372   | 289   |

|                          |      |                          |      |      |
|--------------------------|------|--------------------------|------|------|
| >VHL-V166I-1 VVRSLVKPEN  | 126  | >VHL-V166I-1 VIRSLVKPEN\ | 473  | 347  |
| >VHL-V166I-1 YTLKERCLQV' | 308  | >VHL-V166I-1 YTLKERCLQV  | 1540 | 1232 |
| >VHL-V166I-1 YTLKERCLQV' | 83   | >VHL-V166I-1 YTLKERCLQV  | 341  | 258  |
| >VHL-V166I-1 YTLKERCLQV' | 28   | >VHL-V166I-1 YTLKERCLQV  | 356  | 328  |
| >VHL-V166I-1 YTLKERCLQV' | 95   | >VHL-V166I-1 YTLKERCLQV  | 964  | 869  |
| >VHL-V166I-1 YTLKERCLQV' | 40   | >VHL-V166I-1 YTLKERCLQV  | 1270 | 1230 |
| >VHL-V166I-1 YTLKERCLQV' | 416  | >VHL-V166I-1 YTLKERCLQV  | 4020 | 3604 |
| >VHL-V166I-1 YTLKERCLQV' | 21   | >VHL-V166I-1 YTLKERCLQV  | 2311 | 2290 |
| >VHL-V166I-1 YTLKERCLQV' | 53   | >VHL-V166I-1 YTLKERCLQV  | 475  | 422  |
| >VHL-V166I-1 YTLKERCLQV' | 973  | >VHL-V166I-1 YTLKERCLQV  | 164  | 809  |
| >VHL-V166I-1 YTLKERCLQV' | 130  | >VHL-V166I-1 YTLKERCLQV  | 98   | 32   |
| >VHL-V166I-1 YTLKERCLQV' | 5091 | >VHL-V166I-1 YTLKERCLQV  | 59   | 5032 |
| >VHL-V166I-1 QVVRSLVK    | 358  | >VHL-V166I-1 QVIRSLVK    | 282  | 76   |
| >VHL-V166I-1 QVVRSLVK    | 70   | >VHL-V166I-1 QVIRSLVK    | 31   | 39   |
| >VHL-V166I-1 QVVRSLVK    | 136  | >VHL-V166I-1 QVIRSLVK    | 79   | 57   |
| >VHL-V166I-1 QVVRSLVK    | 208  | >VHL-V166I-1 QVIRSLVK    | 118  | 90   |
| >VHL-V166I-1 LQVVRSLV    | 559  | >VHL-V166I-1 LQVIRSLV    | 391  | 168  |
| >VHL-V166I-1 LQVVRSLV    | 147  | >VHL-V166I-1 LQVIRSLV    | 117  | 30   |
| >VHL-V166I-1 LQVVRSLV    | 14   | >VHL-V166I-1 LQVIRSLV    | 16   | 2    |
| >VHL-V166I-1 LQVVRSLV    | 214  | >VHL-V166I-1 LQVIRSLV    | 375  | 161  |
| >VHL-V166I-1 CLQVVRSLV   | 517  | >VHL-V166I-1 CLQVIRSLV   | 189  | 328  |
| >VHL-V166I-1 CLQVVRSLV   | 325  | >VHL-V166I-1 CLQVIRSLV   | 284  | 41   |
| >VHL-V166I-1 CLQVVRSLV   | 456  | >VHL-V166I-1 CLQVIRSLV   | 1180 | 724  |
| >VHL-V166I-1 CLQVVRSL    | 274  | >VHL-V166I-1 CLQVIRSL    | 155  | 119  |
| >VHL-V166I-1 CLQVVRSLV   | 16   | >VHL-V166I-1 CLQVIRSLV   | 15   | 1    |
| >VHL-V166I-1 CLQVVRSLVK  | 97   | >VHL-V166I-1 CLQVIRSLVK  | 137  | 40   |
| >VHL-V166I-1 CLQVVRSLVK  | 305  | >VHL-V166I-1 CLQVIRSLVK  | 308  | 3    |
| >VHL-V166I-1 RCLQVVRSLV  | 392  | >VHL-V166I-1 RCLQVIRSLV  | 398  | 6    |
| >VHL-V166I-1 RCLQVVRSLV  | 67   | >VHL-V166I-1 RCLQVIRSLV† | 66   | 1    |
| >VHL-V166I-1 RCLQVVRSL   | 90   | >VHL-V166I-1 RCLQVIRSL   | 202  | 112  |
| >VHL-V166I-1 RCLQVVRSLV  | 619  | >VHL-V166I-1 RCLQVIRSLV† | 439  | 180  |
| >VHL-V166I-1 ERCLQVVRSL  | 233  | >VHL-V166I-1 ERCLQVIRSL  | 225  | 8    |
| >VHL-V166I-1 ERCLQVVRSL  | 432  | >VHL-V166I-1 ERCLQVIRSL  | 370  | 62   |
| >VHL-V166I-1 ERCLQVVR    | 491  | >VHL-V166I-1 ERCLQVIR    | 515  | 24   |
| >VHL-V166I-1 KERCLQVV    | 67   | >VHL-V166I-1 KERCLQVI    | 22   | 45   |
| >VHL-V166I-1 KERCLQVVR   | 367  | >VHL-V166I-1 KERCLQVIR   | 438  | 71   |
| >VHL-V166I-1 KERCLQVVRS  | 291  | >VHL-V166I-1 KERCLQVIRSL | 369  | 78   |
| >VHL-V166I-1 KERCLQVVRS  | 595  | >VHL-V166I-1 KERCLQVIRSL | 490  | 105  |
| >VHL-V166I-1 KERCLQVV    | 80   | >VHL-V166I-1 KERCLQVI    | 60   | 20   |
| >VHL-V166I-1 KERCLQVVRS  | 27   | >VHL-V166I-1 KERCLQVIRSL | 27   | 0    |
| >VHL-V166I-1 KERCLQVV    | 148  | >VHL-V166I-1 KERCLQVI    | 646  | 498  |
| >VHL-V166I-1 KERCLQVV    | 1999 | >VHL-V166I-1 KERCLQVI    | 340  | 1659 |
| >VHL-V166I-1 KERCLQVVRS  | 39   | >VHL-V166I-1 KERCLQVIRSL | 34   | 5    |



|                         |      |                          |       |       |
|-------------------------|------|--------------------------|-------|-------|
| >VHL-V166I-1 TLKERCLQVV | 50   | >VHL-V166I-1 TLKERCLQVI  | 165   | 115   |
| >VHL-V166I-1 TLKERCLQVV | 141  | >VHL-V166I-1 TLKERCLQVI  | 1632  | 1491  |
| >VHL-V166I-1 TLKERCLQVV | 109  | >VHL-V166I-1 TLKERCLQVI  | 1032  | 923   |
| >VHL-V166I-1 TLKERCLQVV | 369  | >VHL-V166I-1 TLKERCLQVI  | 6718  | 6349  |
| >VHL-V166I-1 TLKERCLQVV | 4    | >VHL-V166I-1 TLKERCLQVI  | 77    | 73    |
| >VHL-V166I-1 TLKERCLQVV | 58   | >VHL-V166I-1 TLKERCLQVIF | 68    | 10    |
| >VHL-V166I-1 TLKERCLQVV | 96   | >VHL-V166I-1 TLKERCLQVIF | 129   | 33    |
| >VHL-V166I-1 TLKERCLQVV | 211  | >VHL-V166I-1 TLKERCLQVIF | 226   | 15    |
| >VHL-V166I-1 TLKERCLQVV | 436  | >VHL-V166I-1 TLKERCLQVIF | 494   | 58    |
| >VHL-V170D·LVKPENYR     | 23   | >VHL-V170D·LDKPENYR      | 2660  | 2637  |
| >VHL-V170D·LVKPENYRR    | 35   | >VHL-V170D·LDKPENYRR     | 3176  | 3141  |
| >VHL-V170D·LVKPENYR     | 159  | >VHL-V170D·LDKPENYR      | 11022 | 10863 |
| >VHL-V170D·LVKPENYRR    | 302  | >VHL-V170D·LDKPENYRR     | 13852 | 13550 |
| >VHL-V170D·LVKPENYR     | 60   | >VHL-V170D·LDKPENYR      | 5031  | 4971  |
| >VHL-V170D·LVKPENYRR    | 122  | >VHL-V170D·LDKPENYRR     | 7392  | 7270  |
| >VHL-V170D·LVKPENYR     | 287  | >VHL-V170D·LDKPENYR      | 1806  | 1519  |
| >VHL-V170D·SLVKPENYRR   | 409  | >VHL-V170D·SLDKPENYRR    | 821   | 412   |
| >VHL-V170D·SLVKPENYRR   | 44   | >VHL-V170D·SLDKPENYRR    | 18    | 26    |
| >VHL-V170D·SLVKPENYRR   | 647  | >VHL-V170D·SLDKPENYRR    | 270   | 377   |
| >VHL-V170D·SLVKPENYRR   | 394  | >VHL-V170D·SLDKPENYRR    | 78    | 316   |
| >VHL-V170D·SLVKPENYRR   | 26   | >VHL-V170D·SLDKPENYRR    | 38    | 12    |
| >VHL-V170D·SLVKPENY     | 281  | >VHL-V170D·SLDKPENY      | 16454 | 16173 |
| >VHL-V170D·SLVKPENY     | 434  | >VHL-V170D·SLDKPENY      | 2528  | 2094  |
| >VHL-V170D·SLVKPENYR    | 177  | >VHL-V170D·SLDKPENYR     | 1320  | 1143  |
| >VHL-V170D·SLVKPENYRR   | 103  | >VHL-V170D·SLDKPENYRR    | 388   | 285   |
| >VHL-V170D·SLVKPENYR    | 133  | >VHL-V170D·SLDKPENYR     | 793   | 660   |
| >VHL-V170D·SLVKPENYRR   | 142  | >VHL-V170D·SLDKPENYRR    | 1574  | 1432  |
| >VHL-V170D·SLVKPENY     | 96   | >VHL-V170D·SLDKPENY      | 108   | 12    |
| >VHL-V170D·SLVKPENY     | 218  | >VHL-V170D·SLDKPENY      | 636   | 418   |
| >VHL-V170D·SLVKPENY     | 1611 | >VHL-V170D·SLDKPENY      | 282   | 1329  |
| >VHL-V170D·SLVKPENYRR   | 85   | >VHL-V170D·SLDKPENYRR    | 441   | 356   |
| >VHL-V170D·RSLVKPENYR   | 782  | >VHL-V170D·RSLDKPENYR    | 482   | 300   |
| >VHL-V170D·RSLVKPENYR   | 40   | >VHL-V170D·RSLDKPENYR    | 34    | 6     |
| >VHL-V170D·RSLVKPENYR   | 12   | >VHL-V170D·RSLDKPENYR    | 17    | 5     |
| >VHL-V170D·RSLVKPENY    | 860  | >VHL-V170D·RSLDKPENY     | 457   | 403   |
| >VHL-V170D·RSLVKPENYR   | 542  | >VHL-V170D·RSLDKPENYR    | 439   | 103   |
| >VHL-V170D·RSLVKPENY    | 242  | >VHL-V170D·RSLDKPENY     | 283   | 41    |
| >VHL-V170D·RSLVKPENY    | 185  | >VHL-V170D·RSLDKPENY     | 314   | 129   |
| >VHL-V170D·RSLVKPENY    | 3    | >VHL-V170D·RSLDKPENY     | 4     | 1     |
| >VHL-V170D·RSLVKPENY    | 56   | >VHL-V170D·RSLDKPENY     | 126   | 70    |
| >VHL-V170D·RSLVKPENY    | 520  | >VHL-V170D·RSLDKPENY     | 325   | 195   |
| >VHL-V170D·RSLVKPENYR   | 355  | >VHL-V170D·RSLDKPENYR    | 510   | 155   |
| >VHL-V170D·RSLVKPENYR   | 124  | >VHL-V170D·RSLDKPENYR    | 51    | 73    |

|                         |      |                         |       |       |
|-------------------------|------|-------------------------|-------|-------|
| >VHL-V170D·RSLVKPENYR   | 148  | >VHL-V170D·RSLDKPENYR   | 60    | 88    |
| >VHL-V170D·VRSLVKPENY   | 310  | >VHL-V170D·VRSLDKPENY   | 421   | 111   |
| >VHL-V170D·VVRSLVKPEN   | 228  | >VHL-V170D·VVRSLDKPEN   | 635   | 407   |
| >VHL-V170D·VVRSLVKPEN   | 427  | >VHL-V170D·VVRSLDKPEN   | 287   | 140   |
| >VHL-V170D·VVRSLVKPEN   | 141  | >VHL-V170D·VVRSLDKPEN   | 265   | 124   |
| >VHL-V170D·VVRSLVKPEN   | 83   | >VHL-V170D·VVRSLDKPEN   | 114   | 31    |
| >VHL-V170D·VVRSLVKPEN   | 126  | >VHL-V170D·VVRSLDKPEN   | 160   | 34    |
| >VHL-V170D·QVVRSLVK     | 358  | >VHL-V170D·QVVRSLDK     | 880   | 522   |
| >VHL-V170D·QVVRSLVK     | 70   | >VHL-V170D·QVVRSLDK     | 168   | 98    |
| >VHL-V170D·QVVRSLVK     | 136  | >VHL-V170D·QVVRSLDK     | 839   | 703   |
| >VHL-V170D·QVVRSLVK     | 208  | >VHL-V170D·QVVRSLDK     | 345   | 137   |
| >VHL-V170D·LQVVRSLV     | 147  | >VHL-V170D·LQVVRSLD     | 22282 | 22135 |
| >VHL-V170D·LQVVRSLV     | 14   | >VHL-V170D·LQVVRSLD     | 17513 | 17499 |
| >VHL-V170D·LQVVRSLV     | 214  | >VHL-V170D·LQVVRSLD     | 11213 | 10999 |
| >VHL-V170D·CLQVVRSLV    | 325  | >VHL-V170D·CLQVVRSLD    | 20940 | 20615 |
| >VHL-V170D·CLQVVRSLV    | 456  | >VHL-V170D·CLQVVRSLD    | 30125 | 29669 |
| >VHL-V170D·CLQVVRSLV    | 16   | >VHL-V170D·CLQVVRSLD    | 30471 | 30455 |
| >VHL-V170D·CLQVVRSLVK   | 97   | >VHL-V170D·CLQVVRSLDK   | 139   | 42    |
| >VHL-V170D·CLQVVRSLVK   | 305  | >VHL-V170D·CLQVVRSLDK   | 414   | 109   |
| >VHL-V170D·RCLQVVRSLV   | 392  | >VHL-V170D·RCLQVVRSLD   | 29203 | 28811 |
| >VHL-V170D·RCLQVVRSLV   | 67   | >VHL-V170D·RCLQVVRSLD   | 213   | 146   |
| >VHL-V74A-v VIFCNRSPRV  | 646  | >VHL-V74A-r AIFCNRSPRV  | 296   | 350   |
| >VHL-V74A-v VIFCNRSPRV' | 72   | >VHL-V74A-r AIFCNRSPRV' | 49    | 23    |
| >VHL-V74A-v VIFCNRSPRV  | 7    | >VHL-V74A-r AIFCNRSPRV  | 10    | 3     |
| >VHL-V74A-v VIFCNRSPRV' | 15   | >VHL-V74A-r AIFCNRSPRV' | 20    | 5     |
| >VHL-V74A-v VIFCNRSPRV  | 86   | >VHL-V74A-r AIFCNRSPRV  | 96    | 10    |
| >VHL-V74A-v VIFCNRSPRV' | 191  | >VHL-V74A-r AIFCNRSPRV' | 213   | 22    |
| >VHL-V74A-v VIFCNRSPRV  | 70   | >VHL-V74A-r AIFCNRSPRV  | 65    | 5     |
| >VHL-V74A-v VIFCNRSPRV  | 400  | >VHL-V74A-r AIFCNRSPRV  | 952   | 552   |
| >VHL-V74A-v VIFCNRSPRV  | 7    | >VHL-V74A-r AIFCNRSPRV  | 7     | 0     |
| >VHL-V74A-v VIFCNRSPRV' | 59   | >VHL-V74A-r AIFCNRSPRV' | 54    | 5     |
| >VHL-V74A-v VIFCNRSPR   | 427  | >VHL-V74A-r AIFCNRSPR   | 400   | 27    |
| >VHL-V74A-v VIFCNRSPR   | 113  | >VHL-V74A-r AIFCNRSPR   | 63    | 50    |
| >VHL-V74A-v VIFCNRSPR   | 2323 | >VHL-V74A-r AIFCNRSPR   | 352   | 1971  |
| >VHL-V74A-v VIFCNRSPR   | 23   | >VHL-V74A-r AIFCNRSPR   | 14    | 9     |
| >VHL-V74A-v VIFCNRSPR   | 93   | >VHL-V74A-r AIFCNRSPR   | 293   | 200   |
| >VHL-V74A-v VIFCNRSPR   | 24   | >VHL-V74A-r AIFCNRSPR   | 26    | 2     |
| >VHL-V74A-v VIFCNRSPRV  | 508  | >VHL-V74A-r AIFCNRSPRV  | 434   | 74    |
| >VHL-V74A-v VIFCNRSPR   | 689  | >VHL-V74A-r AIFCNRSPR   | 425   | 264   |
| >VHL-V74A-v VIFCNRSPRV' | 360  | >VHL-V74A-r AIFCNRSPRV' | 210   | 150   |
| >VHL-V74A-v QVIFCNRSPR  | 214  | >VHL-V74A-r QAIFCNRSPR  | 1060  | 846   |
| >VHL-V74A-v QVIFCNRSPR  | 305  | >VHL-V74A-r QAIFCNRSPR  | 1423  | 1118  |
| >VHL-V74A-v QVIFCNRSPR  | 381  | >VHL-V74A-r QAIFCNRSPR  | 1260  | 879   |

|                        |     |                         |      |      |
|------------------------|-----|-------------------------|------|------|
| >VHL-V74A-v QVIFCNRSPR | 11  | >VHL-V74A-r QAIFCNRSPR  | 16   | 5    |
| >VHL-V74A-v QVIFCNRSPR | 114 | >VHL-V74A-r QAIFCNRSPR  | 218  | 104  |
| >VHL-V74A-v QVIFCNRSPR | 6   | >VHL-V74A-r QAIFCNRSPR  | 7    | 1    |
| >VHL-V74A-v QVIFCNRSPR | 36  | >VHL-V74A-r QAIFCNRSPR  | 127  | 91   |
| >VHL-V74A-v QVIFCNRSPR | 178 | >VHL-V74A-r QAIFCNRSPR  | 482  | 304  |
| >VHL-V74A-v QVIFCNRSPR | 175 | >VHL-V74A-r QAIFCNRSPR  | 293  | 118  |
| >VHL-V74A-v RSVNSREPSQ | 225 | >VHL-V74A-r RSVNSREPSQ  | 1187 | 962  |
| >VHL-V74A-v RSVNSREPSQ | 22  | >VHL-V74A-r RSVNSREPSQ  | 366  | 344  |
| >VHL-V74A-v RSVNSREPSQ | 136 | >VHL-V74A-r RSVNSREPSQ  | 938  | 802  |
| >VHL-V74A-v SQVIFCNR   | 54  | >VHL-V74A-r SQAIFCNR    | 53   | 1    |
| >VHL-V74A-v SQVIFCNRSP | 47  | >VHL-V74A-r SQAIFCNRSP  | 44   | 3    |
| >VHL-V74A-v SQVIFCNR   | 423 | >VHL-V74A-r SQAIFCNR    | 221  | 202  |
| >VHL-V74A-v SQVIFCNRSP | 436 | >VHL-V74A-r SQAIFCNRSP  | 239  | 197  |
| >VHL-V74A-v SQVIFCNRSP | 301 | >VHL-V74A-r SQAIFCNRSP  | 345  | 44   |
| >VHL-V74A-v SQVIFCNR   | 569 | >VHL-V74A-r SQAIFCNR    | 368  | 201  |
| >VHL-V74A-v SQVIFCNR   | 74  | >VHL-V74A-r SQAIFCNR    | 100  | 26   |
| >VHL-V74A-v SQVIFCNRSP | 150 | >VHL-V74A-r SQAIFCNRSP  | 195  | 45   |
| >VHL-V74A-v PSQVIFCNR  | 125 | >VHL-V74A-r PSQAIFCNR   | 125  | 0    |
| >VHL-V74A-v PSQVIFCNR  | 362 | >VHL-V74A-r PSQAIFCNR   | 515  | 153  |
| >VHL-V74A-v EPSQVIFCNR | 355 | >VHL-V74A-r EPSQAIFCNR  | 454  | 99   |
| >VHL-V74A-v EPSQVIFCNR | 388 | >VHL-V74A-r EPSQAIFCNR  | 1054 | 666  |
| >VHL-V74A-v EPSQVIFCNR | 91  | >VHL-V74A-r EPSQAIFCNR  | 153  | 62   |
| >VHL-V74A-v EPSQVIFCNR | 213 | >VHL-V74A-r EPSQAIFCNR  | 148  | 65   |
| >VHL-V74A-v REPSQVIF   | 56  | >VHL-V74A-r REPSQAIF    | 112  | 56   |
| >VHL-V74A-v REPSQVIFCN | 43  | >VHL-V74A-r REPSQAIFCN  | 39   | 4    |
| >VHL-V74A-v SREPSQVIF  | 78  | >VHL-V74A-r SREPSQAIF   | 174  | 96   |
| >VHL-V74A-v SREPSQVIF  | 185 | >VHL-V74A-r SREPSQAIF   | 248  | 63   |
| >VHL-V74A-v NSREPSQVI  | 839 | >VHL-V74A-r NSREPSQAI   | 463  | 376  |
| >VHL-V74A-v NSREPSQVIF | 527 | >VHL-V74A-r NSREPSQAIF  | 363  | 164  |
| >VHL-V74A-v NSREPSQVI  | 546 | >VHL-V74A-r NSREPSQAI   | 409  | 137  |
| >VHL-V74A-v NSREPSQVIF | 13  | >VHL-V74A-r NSREPSQAIF  | 8    | 5    |
| >VHL-V74A-v NSREPSQVIF | 127 | >VHL-V74A-r NSREPSQAIF  | 178  | 51   |
| >VHL-V74A-v NSREPSQVI  | 134 | >VHL-V74A-r NSREPSQAI   | 210  | 76   |
| >VHL-V74A-v VNSREPSQVI | 101 | >VHL-V74A-r VNSREPSQAI  | 188  | 87   |
| >VHL-V74A-v SVNSREPSQV | 190 | >VHL-V74A-r SVNSREPSQAI | 1401 | 1211 |
| >VHL-V74A-v SVNSREPSQV | 126 | >VHL-V74A-r SVNSREPSQAI | 4962 | 4836 |
| >VHL-V74A-v SVNSREPSQV | 165 | >VHL-V74A-r SVNSREPSQAI | 6475 | 6310 |
| >VHL-V74A-v SVNSREPSQV | 25  | >VHL-V74A-r SVNSREPSQAI | 2215 | 2190 |
| >VHL-V74A-v SVNSREPSQV | 955 | >VHL-V74A-r SVNSREPSQAI | 369  | 586  |
| >VHL-V74D-v VIFCNRSPRV | 72  | >VHL-V74D-r DIFCNRSPRV  | 4022 | 3950 |
| >VHL-V74D-v VIFCNRSPRV | 7   | >VHL-V74D-r DIFCNRSPRV  | 296  | 289  |
| >VHL-V74D-v VIFCNRSPRV | 15  | >VHL-V74D-r DIFCNRSPRV  | 820  | 805  |
| >VHL-V74D-v VIFCNRSPRV | 86  | >VHL-V74D-r DIFCNRSPRV  | 2355 | 2269 |

|                         |      |                         |       |       |
|-------------------------|------|-------------------------|-------|-------|
| >VHL-V74D-v VIFCNRSPRV' | 191  | >VHL-V74D-r DIFCNRSPRV' | 4701  | 4510  |
| >VHL-V74D-v VIFCNRSPRV  | 70   | >VHL-V74D-r DIFCNRSPRV  | 924   | 854   |
| >VHL-V74D-v VIFCNRSPRV  | 400  | >VHL-V74D-r DIFCNRSPRV  | 3009  | 2609  |
| >VHL-V74D-v VIFCNRSPRV  | 7    | >VHL-V74D-r DIFCNRSPRV  | 197   | 190   |
| >VHL-V74D-v VIFCNRSPRV' | 59   | >VHL-V74D-r DIFCNRSPRV' | 2593  | 2534  |
| >VHL-V74D-v VIFCNRSPR   | 427  | >VHL-V74D-r DIFCNRSPR   | 11432 | 11005 |
| >VHL-V74D-v VIFCNRSPR   | 113  | >VHL-V74D-r DIFCNRSPR   | 6277  | 6164  |
| >VHL-V74D-v VIFCNRSPR   | 23   | >VHL-V74D-r DIFCNRSPR   | 267   | 244   |
| >VHL-V74D-v VIFCNRSPR   | 93   | >VHL-V74D-r DIFCNRSPR   | 13    | 80    |
| >VHL-V74D-v VIFCNRSPR   | 24   | >VHL-V74D-r DIFCNRSPR   | 5     | 19    |
| >VHL-V74D-v VIFCNRSPRV' | 548  | >VHL-V74D-r DIFCNRSPRV' | 83    | 465   |
| >VHL-V74D-v VIFCNRSPRV  | 508  | >VHL-V74D-r DIFCNRSPRV  | 27    | 481   |
| >VHL-V74D-v VIFCNRSPRV' | 4061 | >VHL-V74D-r DIFCNRSPRV' | 434   | 3627  |
| >VHL-V74D-v VIFCNRSPRV' | 360  | >VHL-V74D-r DIFCNRSPRV' | 4327  | 3967  |
| >VHL-V74D-v QVIFCNRSPR  | 214  | >VHL-V74D-r QDIFCNRSPR  | 9624  | 9410  |
| >VHL-V74D-v QVIFCNRSPR  | 305  | >VHL-V74D-r QDIFCNRSPR  | 17213 | 16908 |
| >VHL-V74D-v QVIFCNRSPR  | 381  | >VHL-V74D-r QDIFCNRSPR  | 23738 | 23357 |
| >VHL-V74D-v QVIFCNRSPR  | 11   | >VHL-V74D-r QDIFCNRSPR  | 254   | 243   |
| >VHL-V74D-v QVIFCNRSPR  | 114  | >VHL-V74D-r QDIFCNRSPR  | 1540  | 1426  |
| >VHL-V74D-v QVIFCNRSPR  | 6    | >VHL-V74D-r QDIFCNRSPR  | 2057  | 2051  |
| >VHL-V74D-v QVIFCNRSPR  | 36   | >VHL-V74D-r QDIFCNRSPR  | 6720  | 6684  |
| >VHL-V74D-v QVIFCNRSPR  | 178  | >VHL-V74D-r QDIFCNRSPR  | 13461 | 13283 |
| >VHL-V74D-v QVIFCNRSPR  | 175  | >VHL-V74D-r QDIFCNRSPR  | 820   | 645   |
| >VHL-V74D-v RSVNSREPSQ  | 225  | >VHL-V74D-r RSVNSREPSQ  | 11165 | 10940 |
| >VHL-V74D-v RSVNSREPSQ  | 22   | >VHL-V74D-r RSVNSREPSQ  | 2647  | 2625  |
| >VHL-V74D-v RSVNSREPSQ  | 136  | >VHL-V74D-r RSVNSREPSQ  | 4304  | 4168  |
| >VHL-V74D-v SQVIFCNR    | 54   | >VHL-V74D-r SQDIFCNR    | 306   | 252   |
| >VHL-V74D-v SQVIFCNRSP  | 47   | >VHL-V74D-r SQDIFCNRSP  | 254   | 207   |
| >VHL-V74D-v SQVIFCNR    | 423  | >VHL-V74D-r SQDIFCNR    | 2863  | 2440  |
| >VHL-V74D-v SQVIFCNRSP  | 436  | >VHL-V74D-r SQDIFCNRSP  | 2840  | 2404  |
| >VHL-V74D-v SQVIFCNRSP  | 301  | >VHL-V74D-r SQDIFCNRSP  | 5934  | 5633  |
| >VHL-V74D-v SQVIFCNR    | 74   | >VHL-V74D-r SQDIFCNR    | 266   | 192   |
| >VHL-V74D-v SQVIFCNRSP  | 150  | >VHL-V74D-r SQDIFCNRSP  | 676   | 526   |
| >VHL-V74D-v PSQVIFCNR   | 125  | >VHL-V74D-r PSQDIFCNR   | 248   | 123   |
| >VHL-V74D-v PSQVIFCNR   | 362  | >VHL-V74D-r PSQDIFCNR   | 310   | 52    |
| >VHL-V74D-v EPSQVIFCNR  | 355  | >VHL-V74D-r EPSQDIFCNR  | 1276  | 921   |
| >VHL-V74D-v EPSQVIFCNR  | 388  | >VHL-V74D-r EPSQDIFCNR  | 1504  | 1116  |
| >VHL-V74D-v EPSQVIFCNR  | 91   | >VHL-V74D-r EPSQDIFCNR  | 350   | 259   |
| >VHL-V74D-v EPSQVIFCNR  | 213  | >VHL-V74D-r EPSQDIFCNR  | 195   | 18    |
| >VHL-V74D-v REPSQVIF    | 56   | >VHL-V74D-r REPSQDIF    | 482   | 426   |
| >VHL-V74D-v REPSQVIFCN  | 43   | >VHL-V74D-r REPSQDIFCN  | 37    | 6     |
| >VHL-V74D-v SREPSQVIF   | 78   | >VHL-V74D-r SREPSQDIF   | 470   | 392   |
| >VHL-V74D-v SREPSQVIF   | 185  | >VHL-V74D-r SREPSQDIF   | 566   | 381   |

|                        |      |                        |       |       |
|------------------------|------|------------------------|-------|-------|
| >VHL-V74D-v NSREPSQVIF | 13   | >VHL-V74D-r NSREPSQDIF | 39    | 26    |
| >VHL-V74D-v NSREPSQVIF | 127  | >VHL-V74D-r NSREPSQDIF | 1085  | 958   |
| >VHL-V74D-v NSREPSQVI  | 134  | >VHL-V74D-r NSREPSQDI  | 608   | 474   |
| >VHL-V74D-v VNSREPSQVI | 101  | >VHL-V74D-r VNSREPSQDI | 481   | 380   |
| >VHL-V74D-v SVNSREPSQV | 190  | >VHL-V74D-r SVNSREPSQD | 25660 | 25470 |
| >VHL-V74D-v SVNSREPSQV | 126  | >VHL-V74D-r SVNSREPSQD | 28235 | 28109 |
| >VHL-V74D-v SVNSREPSQV | 165  | >VHL-V74D-r SVNSREPSQD | 25298 | 25133 |
| >VHL-V74D-v SVNSREPSQV | 25   | >VHL-V74D-r SVNSREPSQD | 31637 | 31612 |
| >VHL-V83I-w VVLPVWLN   | 443  | >VHL-V83I-m IVLPVWLN   | 545   | 102   |
| >VHL-V83I-w VVLPVWLN   | 261  | >VHL-V83I-m IVLPVWLN   | 155   | 106   |
| >VHL-V83I-w VVLPVWLN   | 42   | >VHL-V83I-m IVLPVWLN   | 40    | 2     |
| >VHL-V83I-w VVLPVWLN   | 449  | >VHL-V83I-m IVLPVWLN   | 245   | 204   |
| >VHL-V83I-w VVLPVWLN   | 190  | >VHL-V83I-m IVLPVWLN   | 275   | 85    |
| >VHL-V83I-w VVLPVWLN   | 70   | >VHL-V83I-m IVLPVWLN   | 49    | 21    |
| >VHL-V83I-w VVLPVWLN   | 461  | >VHL-V83I-m IVLPVWLN   | 219   | 242   |
| >VHL-V83I-w VVLPVWLN   | 20   | >VHL-V83I-m IVLPVWLN   | 13    | 7     |
| >VHL-V83I-w VVLPVWLN   | 63   | >VHL-V83I-m IVLPVWLN   | 34    | 29    |
| >VHL-V83I-w VVLPVWLN   | 399  | >VHL-V83I-m IVLPVWLN   | 211   | 188   |
| >VHL-V83I-w RVVLPVWL   | 415  | >VHL-V83I-m RIVLPVWL   | 477   | 62    |
| >VHL-V83I-w RVVLPVWL   | 1138 | >VHL-V83I-m RIVLPVWL   | 366   | 772   |
| >VHL-V83I-w RVVLPVWLN  | 182  | >VHL-V83I-m RIVLPVWLN  | 682   | 500   |
| >VHL-V83I-w RVVLPVWL   | 351  | >VHL-V83I-m RIVLPVWL   | 431   | 80    |
| >VHL-V83I-w RVVLPVWLN  | 202  | >VHL-V83I-m RIVLPVWLN  | 250   | 48    |
| >VHL-V83I-w RVVLPVWL   | 89   | >VHL-V83I-m RIVLPVWL   | 421   | 332   |
| >VHL-V83I-w RVVLPVWLN  | 9    | >VHL-V83I-m RIVLPVWLN  | 25    | 16    |
| >VHL-V83I-w RVVLPVWLN  | 56   | >VHL-V83I-m RIVLPVWLN  | 101   | 45    |
| >VHL-V83I-w RVVLPVWLN  | 230  | >VHL-V83I-m RIVLPVWLN  | 308   | 78    |
| >VHL-V83I-w RVVLPVWLN  | 320  | >VHL-V83I-m RIVLPVWLN  | 284   | 36    |
| >VHL-V83I-w QVIFCNRSPR | 214  | >VHL-V83I-m QVIFCNRSPR | 1566  | 1352  |
| >VHL-V83I-w QVIFCNRSPR | 36   | >VHL-V83I-m QVIFCNRSPR | 133   | 97    |
| >VHL-V83I-w QVIFCNRSPR | 178  | >VHL-V83I-m QVIFCNRSPR | 1111  | 933   |
| >VHL-V83I-w PRVLPVWLI  | 364  | >VHL-V83I-m PRIVLPVWLN | 293   | 71    |
| >VHL-V83I-w PRVLPVWL   | 738  | >VHL-V83I-m PRIVLPVWL  | 371   | 367   |
| >VHL-V83I-w PRVLPVWL   | 89   | >VHL-V83I-m PRIVLPVWL  | 47    | 42    |
| >VHL-V83I-w PRVLPVWLI  | 385  | >VHL-V83I-m PRIVLPVWLN | 185   | 200   |
| >VHL-V83I-w SPRVLPV    | 21   | >VHL-V83I-m SPRIVLPV   | 21    | 0     |
| >VHL-V83I-w SPRVLPVW   | 189  | >VHL-V83I-m SPRIVLPVW  | 205   | 16    |
| >VHL-V83I-w SPRVLPVWI  | 61   | >VHL-V83I-m SPRIVLPVWL | 79    | 18    |
| >VHL-V83I-w SPRVLPVW   | 318  | >VHL-V83I-m SPRIVLPVW  | 273   | 45    |
| >VHL-V83I-w SPRVLPV    | 251  | >VHL-V83I-m SPRIVLPV   | 225   | 26    |
| >VHL-V83I-w SPRVLPVW   | 42   | >VHL-V83I-m SPRIVLPVW  | 69    | 27    |
| >VHL-V83I-w RSPRVLPV   | 488  | >VHL-V83I-m RSPRIVLPV  | 563   | 75    |
| >VHL-V83I-w RSPRVLPV   | 301  | >VHL-V83I-m RSPRIVLPV  | 262   | 39    |

|                        |      |                         |       |       |
|------------------------|------|-------------------------|-------|-------|
| >VHL-V83I-w RSPRVVLPV  | 130  | >VHL-V83I-m RSPRIVLPV   | 87    | 43    |
| >VHL-V83I-w RSPRVVLPVW | 247  | >VHL-V83I-m RSPRIVLPVW  | 166   | 81    |
| >VHL-V83I-w RSPRVVLPVW | 147  | >VHL-V83I-m RSPRIVLPVW  | 100   | 47    |
| >VHL-V83I-w RSPRVVLPV  | 594  | >VHL-V83I-m RSPRIVLPV   | 301   | 293   |
| >VHL-V83I-w RSPRVVLPVW | 55   | >VHL-V83I-m RSPRIVLPVW  | 42    | 13    |
| >VHL-V83I-w RSPRVVLPVW | 301  | >VHL-V83I-m RSPRIVLPVW  | 244   | 57    |
| >VHL-V83I-w RSPRVVLPVW | 48   | >VHL-V83I-m RSPRIVLPVW  | 50    | 2     |
| >VHL-V83I-w RSPRVVLPVW | 12   | >VHL-V83I-m RSPRIVLPVW  | 14    | 2     |
| >VHL-V83I-w RSPRVVLPVW | 39   | >VHL-V83I-m RSPRIVLPVW  | 31    | 8     |
| >VHL-V83I-w RSPRVVLPVW | 4    | >VHL-V83I-m RSPRIVLPVW  | 4     | 0     |
| >VHL-V83I-w RSPRVVLPVW | 493  | >VHL-V83I-m RSPRIVLPVW  | 445   | 48    |
| >VHL-V83I-w RSPRVVLPVW | 345  | >VHL-V83I-m RSPRIVLPVW  | 338   | 7     |
| >VHL-V83I-w NRSPRVVL   | 22   | >VHL-V83I-m NRSPRIVL    | 28    | 6     |
| >VHL-V83I-w NRSPRVVLPV | 265  | >VHL-V83I-m NRSPRIVLPV  | 390   | 125   |
| >VHL-V83I-w FCNRSPRV   | 252  | >VHL-V83I-m FCNRSPRI    | 2781  | 2529  |
| >VHL-V83I-w FCNRSPRV   | 107  | >VHL-V83I-m FCNRSPRI    | 7486  | 7379  |
| >VHL-V83I-w VIFCNRSPRV | 72   | >VHL-V83I-m VIFCNRSPRIV | 64    | 8     |
| >VHL-V83I-w VIFCNRSPRV | 7    | >VHL-V83I-m VIFCNRSPRI  | 62    | 55    |
| >VHL-V83I-w VIFCNRSPRV | 15   | >VHL-V83I-m VIFCNRSPRIV | 36    | 21    |
| >VHL-V83I-w VIFCNRSPRV | 86   | >VHL-V83I-m VIFCNRSPRI  | 765   | 679   |
| >VHL-V83I-w VIFCNRSPRV | 191  | >VHL-V83I-m VIFCNRSPRIV | 234   | 43    |
| >VHL-V83I-w VIFCNRSPRV | 70   | >VHL-V83I-m VIFCNRSPRI  | 1233  | 1163  |
| >VHL-V83I-w VIFCNRSPRV | 400  | >VHL-V83I-m VIFCNRSPRI  | 5908  | 5508  |
| >VHL-V83I-w VIFCNRSPRV | 7    | >VHL-V83I-m VIFCNRSPRI  | 364   | 357   |
| >VHL-V83I-w VIFCNRSPRV | 59   | >VHL-V83I-m VIFCNRSPRIV | 80    | 21    |
| >VHL-V83I-w VIFCNRSPRV | 5742 | >VHL-V83I-m VIFCNRSPRI  | 496   | 5246  |
| >VHL-V83I-w VIFCNRSPRV | 360  | >VHL-V83I-m VIFCNRSPRIV | 456   | 96    |
| >VHL-W117C WLFRDAGT    | 330  | >VHL-W117C CLFRDAGT     | 1298  | 968   |
| >VHL-W117C WLFRDAGT    | 468  | >VHL-W117C CLFRDAGT     | 6445  | 5977  |
| >VHL-W117C WLFRDAGT    | 108  | >VHL-W117C CLFRDAGT     | 1260  | 1152  |
| >VHL-W117C WLFRDAGT    | 51   | >VHL-W117C CLFRDAGT     | 556   | 505   |
| >VHL-W117C LWLFRDAG    | 90   | >VHL-W117C LCLFRDAG     | 31273 | 31183 |
| >VHL-W117C RRIHSYRGHL  | 119  | >VHL-W117C RRIHSYRGHL   | 875   | 756   |
| >VHL-W117C RRIHSYRGHL  | 134  | >VHL-W117C RRIHSYRGHL   | 374   | 240   |
| >VHL-W117C RRIHSYRGHL  | 96   | >VHL-W117C RRIHSYRGHL   | 97    | 1     |
| >VHL-W117C RRIHSYRGHL  | 336  | >VHL-W117C RRIHSYRGHL   | 96    | 240   |
| >VHL-W117C RRIHSYRGHL  | 124  | >VHL-W117C RRIHSYRGHL   | 33769 | 33645 |
| >VHL-W117C HLWLFDA     | 346  | >VHL-W117C HLCLFRDA     | 2768  | 2422  |
| >VHL-W117C RGHLWLF     | 160  | >VHL-W117C RGHLCLFR     | 565   | 405   |
| >VHL-W117C RGHLWLF     | 15   | >VHL-W117C RGHLCLFR     | 31    | 16    |
| >VHL-W117C RGHLWLF     | 33   | >VHL-W117C RGHLCLFR     | 21    | 12    |
| >VHL-W117C YRGHLWLF    | 109  | >VHL-W117C YRGHLCLF     | 75    | 34    |
| >VHL-W117C YRGHLWLF    | 75   | >VHL-W117C YRGHLCLF     | 492   | 417   |

|                       |      |                       |       |       |
|-----------------------|------|-----------------------|-------|-------|
| >VHL-W117C YRGHLWLF   | 66   | >VHL-W117C YRGHLCLFR  | 712   | 646   |
| >VHL-W117C YRGHLWLF   | 44   | >VHL-W117C YRGHLCLFR  | 90    | 46    |
| >VHL-W117C SYRGHLWLF  | 32   | >VHL-W117C SYRGHLCLF  | 485   | 453   |
| >VHL-W117C SYRGHLWLF  | 24   | >VHL-W117C SYRGHLCLF  | 148   | 124   |
| >VHL-W117C SYRGHLWL   | 17   | >VHL-W117C SYRGHLCL   | 149   | 132   |
| >VHL-W117C SYRGHLWLF  | 5    | >VHL-W117C SYRGHLCLF  | 10    | 5     |
| >VHL-W117C SYRGHLWLF  | 351  | >VHL-W117C SYRGHLCLF  | 1328  | 977   |
| >VHL-W117C SYRGHLWLF  | 96   | >VHL-W117C SYRGHLCLF  | 2420  | 2324  |
| >VHL-W117C SYRGHLWL   | 38   | >VHL-W117C SYRGHLCL   | 41    | 3     |
| >VHL-W117C SYRGHLWLF  | 840  | >VHL-W117C SYRGHLCLF  | 171   | 669   |
| >VHL-W117C SYRGHLWLF  | 11   | >VHL-W117C SYRGHLCLFR | 15    | 4     |
| >VHL-W117C SYRGHLWLF  | 7    | >VHL-W117C SYRGHLCLFR | 10    | 3     |
| >VHL-W117C SYRGHLWLF  | 88   | >VHL-W117C SYRGHLCLFR | 52    | 36    |
| >VHL-W117C SYRGHLWLF  | 265  | >VHL-W117C SYRGHLCLFR | 219   | 46    |
| >VHL-W117C SYRGHLWLF  | 396  | >VHL-W117C SYRGHLCLFR | 1251  | 855   |
| >VHL-W117C SYRGHLWLF  | 23   | >VHL-W117C SYRGHLCLFR | 24    | 1     |
| >VHL-W117C SYRGHLWL   | 262  | >VHL-W117C SYRGHLCL   | 206   | 56    |
| >VHL-W117C SYRGHLWLF  | 430  | >VHL-W117C SYRGHLCLFR | 6866  | 6436  |
| >VHL-W117C SYRGHLWL   | 420  | >VHL-W117C SYRGHLCL   | 906   | 486   |
| >VHL-W117C SYRGHLWLF  | 277  | >VHL-W117C SYRGHLCLF  | 2102  | 1825  |
| >VHL-W117C HSYRGHLWLI | 50   | >VHL-W117C HSYRGHLCLF | 61    | 11    |
| >VHL-W117C HSYRGHLWLI | 47   | >VHL-W117C HSYRGHLCLF | 51    | 4     |
| >VHL-W117C HSYRGHLWLI | 376  | >VHL-W117C HSYRGHLCLF | 3731  | 3355  |
| >VHL-W117C HSYRGHLWLI | 178  | >VHL-W117C HSYRGHLCLF | 537   | 359   |
| >VHL-W117C HSYRGHLWL  | 93   | >VHL-W117C HSYRGHLCL  | 164   | 71    |
| >VHL-W117C HSYRGHLWLI | 27   | >VHL-W117C HSYRGHLCLF | 106   | 79    |
| >VHL-W117C HSYRGHLWLI | 457  | >VHL-W117C HSYRGHLCLF | 802   | 345   |
| >VHL-W117C HSYRGHLWLI | 8    | >VHL-W117C HSYRGHLCLF | 12    | 4     |
| >VHL-W117C HSYRGHLWLI | 293  | >VHL-W117C HSYRGHLCLF | 515   | 222   |
| >VHL-W117C HSYRGHLWLI | 27   | >VHL-W117C HSYRGHLCLF | 30    | 3     |
| >VHL-W117C HSYRGHLWLI | 9    | >VHL-W117C HSYRGHLCLF | 8     | 1     |
| >VHL-W117C HSYRGHLWLI | 623  | >VHL-W117C HSYRGHLCLF | 140   | 483   |
| >VHL-W117C HSYRGHLWL  | 1085 | >VHL-W117C HSYRGHLCL  | 192   | 893   |
| >VHL-W117C HSYRGHLWLI | 36   | >VHL-W117C HSYRGHLCLF | 29    | 7     |
| >VHL-W117C HSYRGHLW   | 4    | >VHL-W117C HSYRGHLC   | 4522  | 4518  |
| >VHL-W117C HSYRGHLWL  | 5    | >VHL-W117C HSYRGHLCL  | 18    | 13    |
| >VHL-W117C HSYRGHLWL  | 3608 | >VHL-W117C HSYRGHLCL  | 390   | 3218  |
| >VHL-W117C HSYRGHLW   | 34   | >VHL-W117C HSYRGHLC   | 11420 | 11386 |
| >VHL-W117C HSYRGHLWLI | 62   | >VHL-W117C HSYRGHLCLF | 168   | 106   |
| >VHL-W117C HSYRGHLW   | 10   | >VHL-W117C HSYRGHLC   | 4064  | 4054  |
| >VHL-W117C HSYRGHLWL  | 339  | >VHL-W117C HSYRGHLCL  | 568   | 229   |
| >VHL-W117C HSYRGHLWLI | 19   | >VHL-W117C HSYRGHLCLF | 26    | 7     |
| >VHL-W117C HSYRGHLWL  | 126  | >VHL-W117C HSYRGHLCL  | 1249  | 1123  |

|                        |      |                        |       |       |
|------------------------|------|------------------------|-------|-------|
| >VHL-W117C HSYRGHLWLI  | 55   | >VHL-W117C HSYRGHLCLF  | 59    | 4     |
| >VHL-W117C HSYRGHLW    | 137  | >VHL-W117C HSYRGHLC    | 34161 | 34024 |
| >VHL-W117C HSYRGHLWLI  | 300  | >VHL-W117C HSYRGHLCLF  | 692   | 392   |
| >VHL-W117C HSYRGHLWLI  | 46   | >VHL-W117C HSYRGHLCLF  | 60    | 14    |
| >VHL-W117C HSYRGHLWL   | 153  | >VHL-W117C HSYRGHLCL   | 228   | 75    |
| >VHL-W117C IHSYRGHLWL  | 131  | >VHL-W117C IHSYRGHLCLF | 744   | 613   |
| >VHL-W117C IHSYRGHLWL  | 1296 | >VHL-W117C IHSYRGHLCL  | 484   | 812   |
| >VHL-W117C IHSYRGHLWL  | 91   | >VHL-W117C IHSYRGHLCLF | 57    | 34    |
| >VHL-W117C IHSYRGHLWL  | 2292 | >VHL-W117C IHSYRGHLCL  | 374   | 1918  |
| >VHL-W117C IHSYRGHLW   | 25   | >VHL-W117C IHSYRGHLC   | 28243 | 28218 |
| >VHL-W117C IHSYRGHLWL  | 402  | >VHL-W117C IHSYRGHLCLF | 417   | 15    |
| >VHL-W117C RIHSYRGHLV  | 414  | >VHL-W117C RIHSYRGHLC  | 2184  | 1770  |
| >VHL-W117C RIHSYRGHLV  | 21   | >VHL-W117C RIHSYRGHLC  | 31    | 10    |
| >VHL-W117C RIHSYRGHLV  | 117  | >VHL-W117C RIHSYRGHLC  | 22770 | 22653 |
| >VHL-W117C RIHSYRGHLV  | 50   | >VHL-W117C RIHSYRGHLC  | 20112 | 20062 |
| >VHL-W117C RIHSYRGHLV  | 74   | >VHL-W117C RIHSYRGHLC  | 22034 | 21960 |
| >VHL-W117C WLFRDAGT    | 330  | >VHL-W117C GLFRDAGT    | 561   | 231   |
| >VHL-W117C WLFRDAGT    | 468  | >VHL-W117C GLFRDAGT    | 3443  | 2975  |
| >VHL-W117C WLFRDAGT    | 108  | >VHL-W117C GLFRDAGT    | 287   | 179   |
| >VHL-W117C WLFRDAGT    | 51   | >VHL-W117C GLFRDAGT    | 119   | 68    |
| >VHL-W117C LWLFRDAG    | 90   | >VHL-W117C LGLFRDAG    | 29564 | 29474 |
| >VHL-W117C RRIHSYRGHL' | 119  | >VHL-W117C RRIHSYRGHL' | 2670  | 2551  |
| >VHL-W117C RRIHSYRGHL' | 134  | >VHL-W117C RRIHSYRGHL' | 446   | 312   |
| >VHL-W117C RRIHSYRGHL' | 96   | >VHL-W117C RRIHSYRGHL' | 228   | 132   |
| >VHL-W117C RRIHSYRGHL' | 336  | >VHL-W117C RRIHSYRGHL' | 358   | 22    |
| >VHL-W117C RRIHSYRGHL' | 124  | >VHL-W117C RRIHSYRGHL' | 32099 | 31975 |
| >VHL-W117C HLWLFRDA    | 346  | >VHL-W117C HLGLFRDA    | 2001  | 1655  |
| >VHL-W117C RGHLWLFR    | 160  | >VHL-W117C RGHLGLFR    | 242   | 82    |
| >VHL-W117C RGHLWLFR    | 15   | >VHL-W117C RGHLGLFR    | 43    | 28    |
| >VHL-W117C RGHLWLFR    | 33   | >VHL-W117C RGHLGLFR    | 74    | 41    |
| >VHL-W117C YRGHLWLF    | 109  | >VHL-W117C YRGHLGLF    | 192   | 83    |
| >VHL-W117C YRGHLWLF    | 75   | >VHL-W117C YRGHLGLF    | 189   | 114   |
| >VHL-W117C YRGHLWLFR   | 66   | >VHL-W117C YRGHLGLFR   | 161   | 95    |
| >VHL-W117C YRGHLWLFR   | 44   | >VHL-W117C YRGHLGLFR   | 144   | 100   |
| >VHL-W117C SYRGHLWLF   | 32   | >VHL-W117C SYRGHLGLF   | 388   | 356   |
| >VHL-W117C SYRGHLWLF   | 24   | >VHL-W117C SYRGHLGLF   | 198   | 174   |
| >VHL-W117C SYRGHLWL    | 17   | >VHL-W117C SYRGHLGL    | 41    | 24    |
| >VHL-W117C SYRGHLWLF   | 5    | >VHL-W117C SYRGHLGLF   | 8     | 3     |
| >VHL-W117C SYRGHLWLF   | 351  | >VHL-W117C SYRGHLGLF   | 179   | 172   |
| >VHL-W117C SYRGHLWLF   | 96   | >VHL-W117C SYRGHLGLF   | 435   | 339   |
| >VHL-W117C SYRGHLWL    | 38   | >VHL-W117C SYRGHLGL    | 38    | 0     |
| >VHL-W117C SYRGHLWLFF  | 11   | >VHL-W117C SYRGHLGLFR  | 15    | 4     |
| >VHL-W117C SYRGHLWLFF  | 7    | >VHL-W117C SYRGHLGLFR  | 11    | 4     |



|                       |      |                        |       |       |
|-----------------------|------|------------------------|-------|-------|
| >VHL-W117C SYRGHLWLFF | 88   | >VHL-W117C SYRGHLGLFR  | 63    | 25    |
| >VHL-W117C SYRGHLWLFF | 265  | >VHL-W117C SYRGHLGLFR  | 630   | 365   |
| >VHL-W117C SYRGHLWLFF | 396  | >VHL-W117C SYRGHLGLFR  | 1971  | 1575  |
| >VHL-W117C SYRGHLWLFF | 23   | >VHL-W117C SYRGHLGLFR  | 44    | 21    |
| >VHL-W117C SYRGHLWL   | 262  | >VHL-W117C SYRGHLGL    | 293   | 31    |
| >VHL-W117C SYRGHLWLFF | 430  | >VHL-W117C SYRGHLGLFR  | 7656  | 7226  |
| >VHL-W117C SYRGHLWL   | 420  | >VHL-W117C SYRGHLGL    | 575   | 155   |
| >VHL-W117C SYRGHLWLF  | 277  | >VHL-W117C SYRGHLGLF   | 1262  | 985   |
| >VHL-W117C HSYRGHLWL  | 522  | >VHL-W117C HSYRGHLGL   | 241   | 281   |
| >VHL-W117C HSYRGHLWLI | 50   | >VHL-W117C HSYRGHLGLF  | 56    | 6     |
| >VHL-W117C HSYRGHLWLI | 47   | >VHL-W117C HSYRGHLGLF  | 51    | 4     |
| >VHL-W117C HSYRGHLWLI | 376  | >VHL-W117C HSYRGHLGLF  | 2501  | 2125  |
| >VHL-W117C HSYRGHLWLI | 178  | >VHL-W117C HSYRGHLGLF  | 183   | 5     |
| >VHL-W117C HSYRGHLWL  | 93   | >VHL-W117C HSYRGHLGL   | 112   | 19    |
| >VHL-W117C HSYRGHLWLI | 27   | >VHL-W117C HSYRGHLGLF  | 64    | 37    |
| >VHL-W117C HSYRGHLWLI | 457  | >VHL-W117C HSYRGHLGLF  | 189   | 268   |
| >VHL-W117C HSYRGHLWLI | 8    | >VHL-W117C HSYRGHLGLF  | 11    | 3     |
| >VHL-W117C HSYRGHLWLI | 293  | >VHL-W117C HSYRGHLGLF  | 1488  | 1195  |
| >VHL-W117C HSYRGHLWLI | 27   | >VHL-W117C HSYRGHLGLF  | 57    | 30    |
| >VHL-W117C HSYRGHLWLI | 9    | >VHL-W117C HSYRGHLGLF  | 11    | 2     |
| >VHL-W117C HSYRGHLWL  | 1268 | >VHL-W117C HSYRGHLGL   | 397   | 871   |
| >VHL-W117C HSYRGHLWLI | 623  | >VHL-W117C HSYRGHLGLF  | 243   | 380   |
| >VHL-W117C HSYRGHLWL  | 1085 | >VHL-W117C HSYRGHLGL   | 376   | 709   |
| >VHL-W117C HSYRGHLWLI | 36   | >VHL-W117C HSYRGHLGLF  | 101   | 65    |
| >VHL-W117C HSYRGHLW   | 4    | >VHL-W117C HSYRGHLG    | 5784  | 5780  |
| >VHL-W117C HSYRGHLWL  | 5    | >VHL-W117C HSYRGHLGL   | 4     | 1     |
| >VHL-W117C HSYRGHLW   | 34   | >VHL-W117C HSYRGHLG    | 10561 | 10527 |
| >VHL-W117C HSYRGHLWLI | 62   | >VHL-W117C HSYRGHLGLF  | 248   | 186   |
| >VHL-W117C HSYRGHLW   | 10   | >VHL-W117C HSYRGHLG    | 8913  | 8903  |
| >VHL-W117C HSYRGHLWL  | 339  | >VHL-W117C HSYRGHLGL   | 264   | 75    |
| >VHL-W117C HSYRGHLWLI | 19   | >VHL-W117C HSYRGHLGLF  | 47    | 28    |
| >VHL-W117C HSYRGHLWL  | 126  | >VHL-W117C HSYRGHLGL   | 1133  | 1007  |
| >VHL-W117C HSYRGHLWLI | 55   | >VHL-W117C HSYRGHLGLF  | 37    | 18    |
| >VHL-W117C HSYRGHLW   | 137  | >VHL-W117C HSYRGHLG    | 32628 | 32491 |
| >VHL-W117C HSYRGHLWLI | 300  | >VHL-W117C HSYRGHLGLF  | 967   | 667   |
| >VHL-W117C HSYRGHLWLI | 46   | >VHL-W117C HSYRGHLGLF  | 68    | 22    |
| >VHL-W117C HSYRGHLWL  | 153  | >VHL-W117C HSYRGHLGL   | 226   | 73    |
| >VHL-W117C IHSYRGHLWL | 131  | >VHL-W117C IHSYRGHLGLI | 861   | 730   |
| >VHL-W117C IHSYRGHLWL | 91   | >VHL-W117C IHSYRGHLGLI | 236   | 145   |
| >VHL-W117C IHSYRGHLW  | 25   | >VHL-W117C IHSYRGHLG   | 25972 | 25947 |
| >VHL-W117C IHSYRGHLWL | 402  | >VHL-W117C IHSYRGHLGLI | 216   | 186   |
| >VHL-W117C RIHSYRGHLV | 414  | >VHL-W117C RIHSYRGHLG  | 716   | 302   |
| >VHL-W117C RIHSYRGHLV | 1588 | >VHL-W117C RIHSYRGHLG  | 115   | 1473  |

|                        |       |                       |       |       |
|------------------------|-------|-----------------------|-------|-------|
| >VHL-W117C RIHSYRGHLM  | 21    | >VHL-W117C RIHSYRGHLG | 24    | 3     |
| >VHL-W117C RIHSYRGHLM  | 117   | >VHL-W117C RIHSYRGHLG | 23658 | 23541 |
| >VHL-W117C RIHSYRGHLM  | 50    | >VHL-W117C RIHSYRGHLG | 21368 | 21318 |
| >VHL-W117C RIHSYRGHLM  | 74    | >VHL-W117C RIHSYRGHLG | 19045 | 18971 |
| >VHL-W117L WLFRDAGT    | 330   | >VHL-W117L LLFRDAGT   | 301   | 29    |
| >VHL-W117L WLFRDAGT    | 468   | >VHL-W117L LLFRDAGT   | 1254  | 786   |
| >VHL-W117L WLFRDAGT    | 108   | >VHL-W117L LLFRDAGT   | 130   | 22    |
| >VHL-W117L WLFRDAGT    | 51    | >VHL-W117L LLFRDAGT   | 38    | 13    |
| >VHL-W117L LWLFRDAGT   | 36411 | >VHL-W117L LLLFRDAGT  | 169   | 36242 |
| >VHL-W117L LWLFRDAG    | 90    | >VHL-W117L LLLFRDAG   | 21721 | 21631 |
| >VHL-W117L RRIHSYRGHL' | 119   | >VHL-W117L RRIHSYRGHL | 35    | 84    |
| >VHL-W117L RRIHSYRGHL' | 134   | >VHL-W117L RRIHSYRGHL | 19    | 115   |
| >VHL-W117L RRIHSYRGHL' | 16534 | >VHL-W117L RRIHSYRGHL | 366   | 16168 |
| >VHL-W117L RRIHSYRGHL' | 96    | >VHL-W117L RRIHSYRGHL | 20    | 76    |
| >VHL-W117L RRIHSYRGHL' | 336   | >VHL-W117L RRIHSYRGHL | 8     | 328   |
| >VHL-W117L RRIHSYRGHL' | 124   | >VHL-W117L RRIHSYRGHL | 20426 | 20302 |
| >VHL-W117L HLWLFRDA    | 346   | >VHL-W117L HLLLFRDA   | 956   | 610   |
| >VHL-W117L RGHLWLFR    | 160   | >VHL-W117L RGHLLLFR   | 227   | 67    |
| >VHL-W117L RGHLWLFR    | 15    | >VHL-W117L RGHLLLFR   | 19    | 4     |
| >VHL-W117L RGHLWLFR    | 33    | >VHL-W117L RGHLLLFR   | 34    | 1     |
| >VHL-W117L YRGHLWLF    | 109   | >VHL-W117L YRGHLLLF   | 75    | 34    |
| >VHL-W117L YRGHLWLF    | 75    | >VHL-W117L YRGHLLLF   | 106   | 31    |
| >VHL-W117L YRGHLWLFR   | 66    | >VHL-W117L YRGHLLLFR  | 97    | 31    |
| >VHL-W117L YRGHLWLFR   | 44    | >VHL-W117L YRGHLLLFR  | 96    | 52    |
| >VHL-W117L SYRGHLWLF   | 32    | >VHL-W117L SYRGHLLLF  | 95    | 63    |
| >VHL-W117L SYRGHLWL    | 650   | >VHL-W117L SYRGHLLL   | 330   | 320   |
| >VHL-W117L SYRGHLWLF   | 24    | >VHL-W117L SYRGHLLLF  | 56    | 32    |
| >VHL-W117L SYRGHLWL    | 17    | >VHL-W117L SYRGHLLL   | 29    | 12    |
| >VHL-W117L SYRGHLWLF   | 5     | >VHL-W117L SYRGHLLLF  | 7     | 2     |
| >VHL-W117L SYRGHLWLF   | 351   | >VHL-W117L SYRGHLLLF  | 949   | 598   |
| >VHL-W117L SYRGHLWLF   | 96    | >VHL-W117L SYRGHLLLF  | 54    | 42    |
| >VHL-W117L SYRGHLWL    | 38    | >VHL-W117L SYRGHLLL   | 15    | 23    |
| >VHL-W117L SYRGHLWLF   | 840   | >VHL-W117L SYRGHLLLF  | 141   | 699   |
| >VHL-W117L SYRGHLWLFF  | 11    | >VHL-W117L SYRGHLLLFR | 9     | 2     |
| >VHL-W117L SYRGHLWLFF  | 7     | >VHL-W117L SYRGHLLLFR | 7     | 0     |
| >VHL-W117L SYRGHLWLFF  | 88    | >VHL-W117L SYRGHLLLFR | 45    | 43    |
| >VHL-W117L SYRGHLWLFF  | 265   | >VHL-W117L SYRGHLLLFR | 290   | 25    |
| >VHL-W117L SYRGHLWLFF  | 396   | >VHL-W117L SYRGHLLLFR | 765   | 369   |
| >VHL-W117L SYRGHLWLFF  | 23    | >VHL-W117L SYRGHLLLFR | 30    | 7     |
| >VHL-W117L SYRGHLWL    | 262   | >VHL-W117L SYRGHLLL   | 130   | 132   |
| >VHL-W117L SYRGHLWLFF  | 430   | >VHL-W117L SYRGHLLLFR | 2590  | 2160  |
| >VHL-W117L SYRGHLWL    | 420   | >VHL-W117L SYRGHLLL   | 481   | 61    |
| >VHL-W117L SYRGHLWLF   | 277   | >VHL-W117L SYRGHLLLF  | 1450  | 1173  |

|                        |       |                        |       |       |
|------------------------|-------|------------------------|-------|-------|
| >VHL-W117L HSYRGHLWL   | 522   | >VHL-W117L HSYRGHLLL   | 130   | 392   |
| >VHL-W117L HSYRGHLWLI  | 50    | >VHL-W117L HSYRGHLLLF  | 46    | 4     |
| >VHL-W117L HSYRGHLWLI  | 47    | >VHL-W117L HSYRGHLLLF  | 34    | 13    |
| >VHL-W117L HSYRGHLWLI  | 376   | >VHL-W117L HSYRGHLLLF  | 1823  | 1447  |
| >VHL-W117L HSYRGHLWLI  | 178   | >VHL-W117L HSYRGHLLLF  | 481   | 303   |
| >VHL-W117L HSYRGHLW    | 6316  | >VHL-W117L HSYRGHLL    | 268   | 6048  |
| >VHL-W117L HSYRGHLWL   | 93    | >VHL-W117L HSYRGHLLL   | 33    | 60    |
| >VHL-W117L HSYRGHLWLI  | 27    | >VHL-W117L HSYRGHLLLF  | 40    | 13    |
| >VHL-W117L HSYRGHLWLI  | 457   | >VHL-W117L HSYRGHLLLF  | 2403  | 1946  |
| >VHL-W117L HSYRGHLWLI  | 8     | >VHL-W117L HSYRGHLLLF  | 8     | 0     |
| >VHL-W117L HSYRGHLWLI  | 293   | >VHL-W117L HSYRGHLLLF  | 240   | 53    |
| >VHL-W117L HSYRGHLWLI  | 27    | >VHL-W117L HSYRGHLLLF  | 30    | 3     |
| >VHL-W117L HSYRGHLWLI  | 9     | >VHL-W117L HSYRGHLLLF  | 8     | 1     |
| >VHL-W117L HSYRGHLWLI  | 623   | >VHL-W117L HSYRGHLLLF  | 164   | 459   |
| >VHL-W117L HSYRGHLWL   | 1085  | >VHL-W117L HSYRGHLLL   | 442   | 643   |
| >VHL-W117L HSYRGHLWLI  | 36    | >VHL-W117L HSYRGHLLLF  | 20    | 16    |
| >VHL-W117L HSYRGHLW    | 4     | >VHL-W117L HSYRGHLL    | 10    | 6     |
| >VHL-W117L HSYRGHLWL   | 5     | >VHL-W117L HSYRGHLLL   | 6     | 1     |
| >VHL-W117L HSYRGHLW    | 34    | >VHL-W117L HSYRGHLL    | 733   | 699   |
| >VHL-W117L HSYRGHLWLI  | 62    | >VHL-W117L HSYRGHLLLF  | 136   | 74    |
| >VHL-W117L HSYRGHLW    | 10    | >VHL-W117L HSYRGHLL    | 215   | 205   |
| >VHL-W117L HSYRGHLWL   | 339   | >VHL-W117L HSYRGHLLL   | 72    | 267   |
| >VHL-W117L HSYRGHLWLI  | 19    | >VHL-W117L HSYRGHLLLF  | 19    | 0     |
| >VHL-W117L HSYRGHLW    | 1543  | >VHL-W117L HSYRGHLL    | 19    | 1524  |
| >VHL-W117L HSYRGHLW    | 715   | >VHL-W117L HSYRGHLL    | 424   | 291   |
| >VHL-W117L HSYRGHLWL   | 126   | >VHL-W117L HSYRGHLLL   | 95    | 31    |
| >VHL-W117L HSYRGHLWLI  | 55    | >VHL-W117L HSYRGHLLLF  | 42    | 13    |
| >VHL-W117L HSYRGHLWL   | 790   | >VHL-W117L HSYRGHLLL   | 346   | 444   |
| >VHL-W117L HSYRGHLW    | 137   | >VHL-W117L HSYRGHLL    | 20037 | 19900 |
| >VHL-W117L HSYRGHLWLI  | 300   | >VHL-W117L HSYRGHLLLF  | 597   | 297   |
| >VHL-W117L HSYRGHLWLI  | 46    | >VHL-W117L HSYRGHLLLF  | 60    | 14    |
| >VHL-W117L HSYRGHLW    | 25652 | >VHL-W117L HSYRGHLL    | 161   | 25491 |
| >VHL-W117L HSYRGHLWL   | 153   | >VHL-W117L HSYRGHLLL   | 121   | 32    |
| >VHL-W117L IHSYRGHLWL  | 131   | >VHL-W117L IHSYRGHLLLF | 348   | 217   |
| >VHL-W117L IHSYRGHLWLI | 91    | >VHL-W117L IHSYRGHLLLF | 62    | 29    |
| >VHL-W117L IHSYRGHLW   | 25    | >VHL-W117L IHSYRGHLL   | 10356 | 10331 |
| >VHL-W117L IHSYRGHLWLI | 402   | >VHL-W117L IHSYRGHLLLF | 627   | 225   |
| >VHL-W117L RIHSYRGHLV  | 23991 | >VHL-W117L RIHSYRGHLL  | 450   | 23541 |
| >VHL-W117L RIHSYRGHLV  | 29647 | >VHL-W117L RIHSYRGHLL  | 457   | 29190 |
| >VHL-W117L RIHSYRGHLV  | 414   | >VHL-W117L RIHSYRGHLLI | 896   | 482   |
| >VHL-W117L RIHSYRGHLV  | 1588  | >VHL-W117L RIHSYRGHLL  | 29    | 1559  |
| >VHL-W117L RIHSYRGHLV  | 21    | >VHL-W117L RIHSYRGHLLI | 12    | 9     |
| >VHL-W117L RIHSYRGHLV  | 117   | >VHL-W117L RIHSYRGHLL  | 14688 | 14571 |

|                        |       |                       |       |       |
|------------------------|-------|-----------------------|-------|-------|
| >VHL-W117L RIHSYRGHLM  | 50    | >VHL-W117L RIHSYRGHLL | 11933 | 11883 |
| >VHL-W117L RIHSYRGHLM  | 74    | >VHL-W117L RIHSYRGHLL | 12378 | 12304 |
| >VHL-W117R WLFRDAGT    | 330   | >VHL-W117R RLFRDAGT   | 374   | 44    |
| >VHL-W117R WLFRDAGT    | 468   | >VHL-W117R RLFRDAGT   | 1469  | 1001  |
| >VHL-W117R WLFRDAGT    | 108   | >VHL-W117R RLFRDAGT   | 129   | 21    |
| >VHL-W117R WLFRDAGT    | 51    | >VHL-W117R RLFRDAGT   | 146   | 95    |
| >VHL-W117R WLFRDAGTH   | 11771 | >VHL-W117R RLFRDAGTH  | 335   | 11436 |
| >VHL-W117R LWLFRDAG    | 90    | >VHL-W117R RLLFRDAG   | 28948 | 28858 |
| >VHL-W117R RRIHSYRGHL' | 119   | >VHL-W117R RRIHSYRGHL | 267   | 148   |
| >VHL-W117R RRIHSYRGHL' | 134   | >VHL-W117R RRIHSYRGHL | 27    | 107   |
| >VHL-W117R RRIHSYRGHL' | 96    | >VHL-W117R RRIHSYRGHL | 140   | 44    |
| >VHL-W117R RRIHSYRGHL' | 336   | >VHL-W117R RRIHSYRGHL | 141   | 195   |
| >VHL-W117R RRIHSYRGHL' | 124   | >VHL-W117R RRIHSYRGHL | 29834 | 29710 |
| >VHL-W117R RRIHSYRGHL' | 30677 | >VHL-W117R RRIHSYRGHL | 222   | 30455 |
| >VHL-W117R HLWLFRDA    | 346   | >VHL-W117R HLRLFRDA   | 3395  | 3049  |
| >VHL-W117R HLWLFRDA    | 11185 | >VHL-W117R HLRLFRDA   | 96    | 11089 |
| >VHL-W117R RGHLWLFR    | 160   | >VHL-W117R RGHLRLFR   | 93    | 67    |
| >VHL-W117R RGHLWLFR    | 15    | >VHL-W117R RGHLRLFR   | 15    | 0     |
| >VHL-W117R RGHLWLFR    | 33    | >VHL-W117R RGHLRLFR   | 42    | 9     |
| >VHL-W117R YRGHLWLF    | 109   | >VHL-W117R YRGHLRLF   | 96    | 13    |
| >VHL-W117R YRGHLWLF    | 75    | >VHL-W117R YRGHLRLF   | 133   | 58    |
| >VHL-W117R YRGHLWLFR   | 66    | >VHL-W117R YRGHLRLFR  | 78    | 12    |
| >VHL-W117R YRGHLWLFR   | 44    | >VHL-W117R YRGHLRLFR  | 62    | 18    |
| >VHL-W117R SYRGHLWLF   | 32    | >VHL-W117R SYRGHLRLF  | 294   | 262   |
| >VHL-W117R SYRGHLWLF   | 24    | >VHL-W117R SYRGHLRLF  | 146   | 122   |
| >VHL-W117R SYRGHLWL    | 17    | >VHL-W117R SYRGHLRL   | 45    | 28    |
| >VHL-W117R SYRGHLWLF   | 5     | >VHL-W117R SYRGHLRLF  | 12    | 7     |
| >VHL-W117R SYRGHLWLF   | 351   | >VHL-W117R SYRGHLRLF  | 629   | 278   |
| >VHL-W117R SYRGHLWLF   | 96    | >VHL-W117R SYRGHLRLF  | 1640  | 1544  |
| >VHL-W117R SYRGHLWL    | 38    | >VHL-W117R SYRGHLRL   | 32    | 6     |
| >VHL-W117R SYRGHLWLF   | 840   | >VHL-W117R SYRGHLRLF  | 445   | 395   |
| >VHL-W117R SYRGHLWLFF  | 11    | >VHL-W117R SYRGHLRLFR | 10    | 1     |
| >VHL-W117R SYRGHLWLFF  | 7     | >VHL-W117R SYRGHLRLFR | 5     | 2     |
| >VHL-W117R SYRGHLWLFF  | 88    | >VHL-W117R SYRGHLRLFR | 43    | 45    |
| >VHL-W117R SYRGHLWLFF  | 265   | >VHL-W117R SYRGHLRLFR | 641   | 376   |
| >VHL-W117R SYRGHLWLFF  | 396   | >VHL-W117R SYRGHLRLFR | 2047  | 1651  |
| >VHL-W117R SYRGHLWLFF  | 23    | >VHL-W117R SYRGHLRLFR | 41    | 18    |
| >VHL-W117R SYRGHLWL    | 262   | >VHL-W117R SYRGHLRL   | 227   | 35    |
| >VHL-W117R SYRGHLWLFF  | 430   | >VHL-W117R SYRGHLRLFR | 17093 | 16663 |
| >VHL-W117R SYRGHLWL    | 420   | >VHL-W117R SYRGHLRL   | 955   | 535   |
| >VHL-W117R SYRGHLWLF   | 277   | >VHL-W117R SYRGHLRLF  | 1403  | 1126  |
| >VHL-W117R HSYRGHLWL   | 522   | >VHL-W117R HSYRGHLRL  | 117   | 405   |
| >VHL-W117R HSYRGHLW    | 16234 | >VHL-W117R HSYRGHLR   | 134   | 16100 |

|                       |       |                       |       |       |
|-----------------------|-------|-----------------------|-------|-------|
| >VHL-W117RHSYRGHLWLI  | 50    | >VHL-W117RHSYRGHLRLF  | 48    | 2     |
| >VHL-W117RHSYRGHLW    | 23040 | >VHL-W117RHSYRGHLR    | 173   | 22867 |
| >VHL-W117RHSYRGHLWLI  | 47    | >VHL-W117RHSYRGHLRLF  | 46    | 1     |
| >VHL-W117RHSYRGHLWLI  | 376   | >VHL-W117RHSYRGHLRLF  | 4151  | 3775  |
| >VHL-W117RHSYRGHLWLI  | 178   | >VHL-W117RHSYRGHLRLF  | 310   | 132   |
| >VHL-W117RHSYRGHLW    | 6316  | >VHL-W117RHSYRGHLR    | 422   | 5894  |
| >VHL-W117RHSYRGHLWL   | 93    | >VHL-W117RHSYRGHLRL   | 87    | 6     |
| >VHL-W117RHSYRGHLWLI  | 27    | >VHL-W117RHSYRGHLRLF  | 30    | 3     |
| >VHL-W117RHSYRGHLWLI  | 457   | >VHL-W117RHSYRGHLRLF  | 1493  | 1036  |
| >VHL-W117RHSYRGHLW    | 9518  | >VHL-W117RHSYRGHLR    | 9     | 9509  |
| >VHL-W117RHSYRGHLWLI  | 8     | >VHL-W117RHSYRGHLRLF  | 8     | 0     |
| >VHL-W117RHSYRGHLWLI  | 293   | >VHL-W117RHSYRGHLRLF  | 467   | 174   |
| >VHL-W117RHSYRGHLW    | 16550 | >VHL-W117RHSYRGHLR    | 65    | 16485 |
| >VHL-W117RHSYRGHLWLI  | 27    | >VHL-W117RHSYRGHLRLF  | 28    | 1     |
| >VHL-W117RHSYRGHLW    | 6858  | >VHL-W117RHSYRGHLR    | 11    | 6847  |
| >VHL-W117RHSYRGHLWLI  | 9     | >VHL-W117RHSYRGHLRLF  | 8     | 1     |
| >VHL-W117RHSYRGHLWLI  | 623   | >VHL-W117RHSYRGHLRLF  | 341   | 282   |
| >VHL-W117RHSYRGHLWLI  | 36    | >VHL-W117RHSYRGHLRLF  | 37    | 1     |
| >VHL-W117RHSYRGHLW    | 4     | >VHL-W117RHSYRGHLR    | 5470  | 5466  |
| >VHL-W117RHSYRGHLWL   | 5     | >VHL-W117RHSYRGHLRL   | 3     | 2     |
| >VHL-W117RHSYRGHLW    | 34    | >VHL-W117RHSYRGHLR    | 12851 | 12817 |
| >VHL-W117RHSYRGHLWLI  | 62    | >VHL-W117RHSYRGHLRLF  | 98    | 36    |
| >VHL-W117RHSYRGHLW    | 10    | >VHL-W117RHSYRGHLR    | 16594 | 16584 |
| >VHL-W117RHSYRGHLWL   | 339   | >VHL-W117RHSYRGHLRL   | 122   | 217   |
| >VHL-W117RHSYRGHLWLI  | 19    | >VHL-W117RHSYRGHLRLF  | 84    | 65    |
| >VHL-W117RHSYRGHLWL   | 126   | >VHL-W117RHSYRGHLRL   | 187   | 61    |
| >VHL-W117RHSYRGHLWLI  | 55    | >VHL-W117RHSYRGHLRLF  | 96    | 41    |
| >VHL-W117RHSYRGHLW    | 137   | >VHL-W117RHSYRGHLR    | 29964 | 29827 |
| >VHL-W117RHSYRGHLWLI  | 300   | >VHL-W117RHSYRGHLRLF  | 923   | 623   |
| >VHL-W117RHSYRGHLW    | 31851 | >VHL-W117RHSYRGHLR    | 110   | 31741 |
| >VHL-W117RHSYRGHLWLI  | 46    | >VHL-W117RHSYRGHLRLF  | 56    | 10    |
| >VHL-W117RHSYRGHLWL   | 153   | >VHL-W117RHSYRGHLRL   | 213   | 60    |
| >VHL-W117RIHSYRGHLWLI | 131   | >VHL-W117RIHSYRGHLRLF | 816   | 685   |
| >VHL-W117RIHSYRGHLWL  | 91    | >VHL-W117RIHSYRGHLRLF | 86    | 5     |
| >VHL-W117RIHSYRGHLW   | 25    | >VHL-W117RIHSYRGHLR   | 22264 | 22239 |
| >VHL-W117RIHSYRGHLWL  | 402   | >VHL-W117RIHSYRGHLRLF | 2761  | 2359  |
| >VHL-W117RIHSYRGHLV   | 414   | >VHL-W117RIHSYRGHLRL  | 603   | 189   |
| >VHL-W117RIHSYRGHLV   | 11906 | >VHL-W117RIHSYRGHLR   | 198   | 11708 |
| >VHL-W117RIHSYRGHLV   | 1588  | >VHL-W117RIHSYRGHLR   | 46    | 1542  |
| >VHL-W117RIHSYRGHLV   | 21    | >VHL-W117RIHSYRGHLRL  | 21    | 0     |
| >VHL-W117RIHSYRGHLV   | 6522  | >VHL-W117RIHSYRGHLR   | 7     | 6515  |
| >VHL-W117RIHSYRGHLV   | 32582 | >VHL-W117RIHSYRGHLR   | 85    | 32497 |
| >VHL-W117RIHSYRGHLV   | 705   | >VHL-W117RIHSYRGHLRL  | 446   | 259   |

|                       |       |                       |       |       |
|-----------------------|-------|-----------------------|-------|-------|
| >VHL-W117R RIHSYRGHLV | 117   | >VHL-W117R RIHSYRGHLR | 23742 | 23625 |
| >VHL-W117R RIHSYRGHLV | 50    | >VHL-W117R RIHSYRGHLR | 22131 | 22081 |
| >VHL-W117R RIHSYRGHLV | 74    | >VHL-W117R RIHSYRGHLR | 18801 | 18727 |
| >VHL-W117R RIHSYRGHLV | 25881 | >VHL-W117R RIHSYRGHLR | 62    | 25819 |
| >VHL-W117R RIHSYRGHLV | 14999 | >VHL-W117R RIHSYRGHLR | 50    | 14949 |
| >VHL-W88C- WLNFDGEPQ  | 50    | >VHL-W88C- CLNFDGEPQF | 149   | 99    |
| >VHL-W88C- WLNFDGEPQ  | 854   | >VHL-W88C- CLNFDGEPQF | 355   | 499   |
| >VHL-W88C- WLNFDGEPQ  | 1027  | >VHL-W88C- CLNFDGEPQF | 480   | 547   |
| >VHL-W88C- WLNFDGEPQ  | 54    | >VHL-W88C- CLNFDGEPQF | 185   | 131   |
| >VHL-W88C- WLNFDGEPQ  | 52    | >VHL-W88C- CLNFDGEPQF | 499   | 447   |
| >VHL-W88C- WLNFDGEPQ  | 102   | >VHL-W88C- CLNFDGEPQF | 421   | 319   |
| >VHL-W88C- WLNFDGEPQ  | 90    | >VHL-W88C- CLNFDGEPQF | 767   | 677   |
| >VHL-W88C- WLNFDGEPQ  | 182   | >VHL-W88C- CLNFDGEPQF | 188   | 6     |
| >VHL-W88C- VWLNFDGE   | 227   | >VHL-W88C- VCLNFDGE   | 35726 | 35499 |
| >VHL-W88C- LPVWLNFDG  | 285   | >VHL-W88C- LPVCLNFDG  | 582   | 297   |
| >VHL-W88C- LPVWLNFD   | 106   | >VHL-W88C- LPVCLNFD   | 212   | 106   |
| >VHL-W88C- LPVWLNFDG  | 251   | >VHL-W88C- LPVCLNFDG  | 698   | 447   |
| >VHL-W88C- LPVWLNFDG  | 345   | >VHL-W88C- LPVCLNFDGE | 780   | 435   |
| >VHL-W88C- VLPVWLN    | 235   | >VHL-W88C- VLPVCLNF   | 290   | 55    |
| >VHL-W88C- VLPVWLN    | 454   | >VHL-W88C- VLPVCLNF   | 1385  | 931   |
| >VHL-W88C- VVLPVWLN   | 443   | >VHL-W88C- VVLPVCLNF  | 2496  | 2053  |
| >VHL-W88C- VVLPVWLN   | 261   | >VHL-W88C- VVLPVCLNF  | 955   | 694   |
| >VHL-W88C- VVLPVWLN   | 42    | >VHL-W88C- VVLPVCLNF  | 36    | 6     |
| >VHL-W88C- VVLPVWLN   | 449   | >VHL-W88C- VVLPVCLNF  | 1709  | 1260  |
| >VHL-W88C- VVLPVWLN   | 190   | >VHL-W88C- VVLPVCLNF  | 231   | 41    |
| >VHL-W88C- VVLPVWLN   | 70    | >VHL-W88C- VVLPVCLNF  | 133   | 63    |
| >VHL-W88C- VVLPVWLN   | 461   | >VHL-W88C- VVLPVCLNF  | 341   | 120   |
| >VHL-W88C- VVLPVWLN   | 20    | >VHL-W88C- VVLPVCLNF  | 39    | 19    |
| >VHL-W88C- VVLPVWLN   | 63    | >VHL-W88C- VVLPVCLNF  | 137   | 74    |
| >VHL-W88C- VVLPVWLN   | 399   | >VHL-W88C- VVLPVCLNF  | 176   | 223   |
| >VHL-W88C- RVVLPVWL   | 415   | >VHL-W88C- RVVLPVCL   | 1121  | 706   |
| >VHL-W88C- RVVLPVWL   | 182   | >VHL-W88C- RVVLPVCLNF | 521   | 339   |
| >VHL-W88C- RVVLPVWL   | 351   | >VHL-W88C- RVVLPVCL   | 674   | 323   |
| >VHL-W88C- RVVLPVWL   | 202   | >VHL-W88C- RVVLPVCLNF | 127   | 75    |
| >VHL-W88C- RVVLPVWL   | 819   | >VHL-W88C- RVVLPVCLNF | 416   | 403   |
| >VHL-W88C- RVVLPVWL   | 355   | >VHL-W88C- RVVLPVCLNF | 285   | 70    |
| >VHL-W88C- RVVLPVWL   | 89    | >VHL-W88C- RVVLPVCL   | 746   | 657   |
| >VHL-W88C- RVVLPVWL   | 9     | >VHL-W88C- RVVLPVCLNF | 10    | 1     |
| >VHL-W88C- RVVLPVWL   | 56    | >VHL-W88C- RVVLPVCLNF | 109   | 53    |
| >VHL-W88C- RVVLPVWL   | 230   | >VHL-W88C- RVVLPVCLNF | 682   | 452   |
| >VHL-W88C- RVVLPVWL   | 320   | >VHL-W88C- RVVLPVCLNF | 5251  | 4931  |
| >VHL-W88C- PRVVLPVWLI | 364   | >VHL-W88C- PRVVLPVCLN | 305   | 59    |
| >VHL-W88C- PRVVLPVWL  | 89    | >VHL-W88C- PRVVLPVCL  | 251   | 162   |

|                       |      |                        |       |       |
|-----------------------|------|------------------------|-------|-------|
| >VHL-W88C- PRVVLPVWLI | 385  | >VHL-W88C- PRVVLPVCLN  | 742   | 357   |
| >VHL-W88C- SPRVVLPVW  | 189  | >VHL-W88C- SPRVVLPVC   | 1106  | 917   |
| >VHL-W88C- SPRVVLPVWI | 61   | >VHL-W88C- SPRVVLPVCL  | 60    | 1     |
| >VHL-W88C- SPRVVLPVW  | 318  | >VHL-W88C- SPRVVLPVC   | 30868 | 30550 |
| >VHL-W88C- SPRVVLPVW  | 42   | >VHL-W88C- SPRVVLPVC   | 25818 | 25776 |
| >VHL-W88C- RSPRVVLPVW | 247  | >VHL-W88C- RSPRVVLPVC  | 3598  | 3351  |
| >VHL-W88C- RSPRVVLPVW | 147  | >VHL-W88C- RSPRVVLPVC  | 219   | 72    |
| >VHL-W88C- RSPRVVLPVW | 55   | >VHL-W88C- RSPRVVLPVC  | 16363 | 16308 |
| >VHL-W88C- RSPRVVLPVW | 301  | >VHL-W88C- RSPRVVLPVC  | 1720  | 1419  |
| >VHL-W88C- RSPRVVLPVW | 48   | >VHL-W88C- RSPRVVLPVC  | 19552 | 19504 |
| >VHL-W88C- RSPRVVLPVW | 12   | >VHL-W88C- RSPRVVLPVC  | 9804  | 9792  |
| >VHL-W88C- RSPRVVLPVW | 39   | >VHL-W88C- RSPRVVLPVC  | 68    | 29    |
| >VHL-W88C- RSPRVVLPVW | 4    | >VHL-W88C- RSPRVVLPVC  | 15    | 11    |
| >VHL-W88C- RSPRVVLPVW | 493  | >VHL-W88C- RSPRVVLPVC  | 993   | 500   |
| >VHL-W88C- RSPRVVLPVW | 345  | >VHL-W88C- RSPRVVLPVC  | 574   | 229   |
| >VHL-W88L-1 WLNFDGEPQ | 50   | >VHL-W88L-1 LLNFDGEPQF | 68    | 18    |
| >VHL-W88L-1 WLNFDGEPQ | 854  | >VHL-W88L-1 LLNFDGEPQF | 339   | 515   |
| >VHL-W88L-1 WLNFDGEPQ | 54   | >VHL-W88L-1 LLNFDGEPQF | 42    | 12    |
| >VHL-W88L-1 WLNFDGEPQ | 52   | >VHL-W88L-1 LLNFDGEPQF | 151   | 99    |
| >VHL-W88L-1 WLNFDGEPQ | 102  | >VHL-W88L-1 LLNFDGEPQF | 147   | 45    |
| >VHL-W88L-1 WLNFDGEPQ | 90   | >VHL-W88L-1 LLNFDGEPQF | 254   | 164   |
| >VHL-W88L-1 WLNFDGEPQ | 182  | >VHL-W88L-1 LLNFDGEPQF | 897   | 715   |
| >VHL-W88L-1 VWLNFDGE  | 227  | >VHL-W88L-1 VLLNFDGE   | 28658 | 28431 |
| >VHL-W88L-1 VWLNFDGEP | 304  | >VHL-W88L-1 VLLNFDGEP  | 31433 | 31129 |
| >VHL-W88L-1 NRSRVVLPV | 5859 | >VHL-W88L-1 NRSRVVLPV  | 37    | 5822  |
| >VHL-W88L-1 NRSRVVLPV | 3430 | >VHL-W88L-1 NRSRVVLPV  | 289   | 3141  |
| >VHL-W88L-1 NRSRVVLPV | 4387 | >VHL-W88L-1 NRSRVVLPV  | 26    | 4361  |
| >VHL-W88L-1 LPVWLNFDG | 285  | >VHL-W88L-1 LPVLLNFDG  | 1768  | 1483  |
| >VHL-W88L-1 LPVWLNFD  | 106  | >VHL-W88L-1 LPVLLNFD   | 190   | 84    |
| >VHL-W88L-1 LPVWLNFDG | 251  | >VHL-W88L-1 LPVLLNFDG  | 386   | 135   |
| >VHL-W88L-1 LPVWLNFDG | 345  | >VHL-W88L-1 LPVLLNFDGE | 493   | 148   |
| >VHL-W88L-1 VLPVWLNf  | 235  | >VHL-W88L-1 VLPVLLNF   | 944   | 709   |
| >VHL-W88L-1 VLPVWLNf  | 454  | >VHL-W88L-1 VLPVLLNF   | 1857  | 1403  |
| >VHL-W88L-1 VVLPVWLNf | 443  | >VHL-W88L-1 VVLPVLLNF  | 1622  | 1179  |
| >VHL-W88L-1 VVLPVWLNf | 261  | >VHL-W88L-1 VVLPVLLNF  | 227   | 34    |
| >VHL-W88L-1 VVLPVWLNf | 42   | >VHL-W88L-1 VVLPVLLNF  | 54    | 12    |
| >VHL-W88L-1 VVLPVWLNf | 449  | >VHL-W88L-1 VVLPVLLNF  | 1772  | 1323  |
| >VHL-W88L-1 VVLPVWLNf | 190  | >VHL-W88L-1 VVLPVLLNF  | 73    | 117   |
| >VHL-W88L-1 VVLPVWLNf | 70   | >VHL-W88L-1 VVLPVLLNF  | 154   | 84    |
| >VHL-W88L-1 VVLPVWLNf | 461  | >VHL-W88L-1 VVLPVLLNF  | 433   | 28    |
| >VHL-W88L-1 VVLPVWLNf | 20   | >VHL-W88L-1 VVLPVLLNF  | 24    | 4     |
| >VHL-W88L-1 VVLPVWLNf | 399  | >VHL-W88L-1 VVLPVLLNF  | 274   | 125   |
| >VHL-W88L-1 RVVLPVWLL | 415  | >VHL-W88L-1 RVVLPVWLL  | 690   | 275   |

|                       |       |                        |       |       |
|-----------------------|-------|------------------------|-------|-------|
| >VHL-W88L-1 RVVLPVWLN | 182   | >VHL-W88L-f RVVLPVLLNF | 66    | 116   |
| >VHL-W88L-1 RVVLPVWL  | 351   | >VHL-W88L-f RVVLPVLL   | 244   | 107   |
| >VHL-W88L-1 RVVLPVWLN | 202   | >VHL-W88L-f RVVLPVLLNF | 82    | 120   |
| >VHL-W88L-1 RVVLPVWLN | 819   | >VHL-W88L-f RVVLPVLLNF | 490   | 329   |
| >VHL-W88L-1 RVVLPVWLN | 355   | >VHL-W88L-f RVVLPVLLNF | 282   | 73    |
| >VHL-W88L-1 RVVLPVWL  | 89    | >VHL-W88L-f RVVLPVLL   | 167   | 78    |
| >VHL-W88L-1 RVVLPVWLN | 9     | >VHL-W88L-f RVVLPVLLNF | 7     | 2     |
| >VHL-W88L-1 RVVLPVWLN | 56    | >VHL-W88L-f RVVLPVLLNF | 59    | 3     |
| >VHL-W88L-1 RVVLPVWL  | 1825  | >VHL-W88L-f RVVLPVLL   | 348   | 1477  |
| >VHL-W88L-1 RVVLPVWL  | 8715  | >VHL-W88L-f RVVLPVLL   | 491   | 8224  |
| >VHL-W88L-1 RVVLPVWLN | 230   | >VHL-W88L-f RVVLPVLLNF | 156   | 74    |
| >VHL-W88L-1 RVVLPVWLN | 320   | >VHL-W88L-f RVVLPVLLNF | 1965  | 1645  |
| >VHL-W88L-1 PRVVLVWLI | 364   | >VHL-W88L-f PRVVLVLLN  | 320   | 44    |
| >VHL-W88L-1 PRVVLVWL  | 738   | >VHL-W88L-f PRVVLVLL   | 377   | 361   |
| >VHL-W88L-1 PRVVLVWL  | 89    | >VHL-W88L-f PRVVLVLL   | 44    | 45    |
| >VHL-W88L-1 PRVVLVWLI | 385   | >VHL-W88L-f PRVVLVLLN  | 366   | 19    |
| >VHL-W88L-1 SPRVLPVW  | 189   | >VHL-W88L-f SPRVLPVL   | 27    | 162   |
| >VHL-W88L-1 SPRVLPVWI | 61    | >VHL-W88L-f SPRVLPVLL  | 47    | 14    |
| >VHL-W88L-1 SPRVLPVW  | 318   | >VHL-W88L-f SPRVLPVL   | 9304  | 8986  |
| >VHL-W88L-1 SPRVLPVW  | 42    | >VHL-W88L-f SPRVLPVL   | 12278 | 12236 |
| >VHL-W88L-1 RSPRVLPVW | 247   | >VHL-W88L-f RSPRVLPVL  | 300   | 53    |
| >VHL-W88L-1 RSPRVLPVW | 147   | >VHL-W88L-f RSPRVLPVL  | 104   | 43    |
| >VHL-W88L-1 RSPRVLPVW | 55    | >VHL-W88L-f RSPRVLPVL  | 522   | 467   |
| >VHL-W88L-1 RSPRVLPVW | 301   | >VHL-W88L-f RSPRVLPVL  | 669   | 368   |
| >VHL-W88L-1 RSPRVLPVW | 48    | >VHL-W88L-f RSPRVLPVL  | 6010  | 5962  |
| >VHL-W88L-1 RSPRVLPVW | 12    | >VHL-W88L-f RSPRVLPVL  | 878   | 866   |
| >VHL-W88L-1 RSPRVLPVW | 39    | >VHL-W88L-f RSPRVLPVL  | 4     | 35    |
| >VHL-W88L-1 RSPRVLPVW | 4     | >VHL-W88L-f RSPRVLPVL  | 3     | 1     |
| >VHL-W88L-1 RSPRVLPVW | 5043  | >VHL-W88L-f RSPRVLPVL  | 432   | 4611  |
| >VHL-W88L-1 RSPRVLPVW | 697   | >VHL-W88L-f RSPRVLPVL  | 455   | 242   |
| >VHL-W88L-1 RSPRVLPVW | 493   | >VHL-W88L-f RSPRVLPVL  | 232   | 261   |
| >VHL-W88L-1 RSPRVLPVW | 345   | >VHL-W88L-f RSPRVLPVL  | 382   | 37    |
| >VHL-W88R- WLNFDGEPQ  | 50    | >VHL-W88R- RLNFDGEPQ   | 245   | 195   |
| >VHL-W88R- WLNFDGEPQ  | 854   | >VHL-W88R- RLNFDGEPQ   | 190   | 664   |
| >VHL-W88R- WLNFDGEPQ  | 12987 | >VHL-W88R- RLNFDGEPQ   | 248   | 12739 |
| >VHL-W88R- WLNFDGEPQ  | 1027  | >VHL-W88R- RLNFDGEPQ   | 67    | 960   |
| >VHL-W88R- WLNFDGEPQ  | 54    | >VHL-W88R- RLNFDGEPQ   | 41    | 13    |
| >VHL-W88R- WLNFDGEPQ  | 52    | >VHL-W88R- RLNFDGEPQ   | 353   | 301   |
| >VHL-W88R- WLNFDGEPQ  | 102   | >VHL-W88R- RLNFDGEPQ   | 66    | 36    |
| >VHL-W88R- WLNFDGEPQ  | 90    | >VHL-W88R- RLNFDGEPQ   | 1608  | 1518  |
| >VHL-W88R- WLNFDGEPQ  | 182   | >VHL-W88R- RLNFDGEPQ   | 559   | 377   |
| >VHL-W88R- VWLNFDGE   | 227   | >VHL-W88R- VRLNFDGE    | 33488 | 33261 |
| >VHL-W88R- VWLNFDGEP  | 304   | >VHL-W88R- VRLNFDGEP   | 35461 | 35157 |



|                      |       |                       |       |       |
|----------------------|-------|-----------------------|-------|-------|
| >VHL-W88R- LPVWLNFDG | 285   | >VHL-W88R- LPVRLNFDG  | 2797  | 2512  |
| >VHL-W88R- LPVWLNFD  | 106   | >VHL-W88R- LPVRLNFD   | 398   | 292   |
| >VHL-W88R- LPVWLNFDG | 251   | >VHL-W88R- LPVRLNFDG  | 895   | 644   |
| >VHL-W88R- LPVWLNFDG | 345   | >VHL-W88R- LPVRLNFDGE | 950   | 605   |
| >VHL-W88R- VLPVWLNF  | 235   | >VHL-W88R- VLPVRLNF   | 1267  | 1032  |
| >VHL-W88R- VLPVWLNF  | 454   | >VHL-W88R- VLPVRLNF   | 2176  | 1722  |
| >VHL-W88R- VVLPVWLNF | 443   | >VHL-W88R- VVLPVRLNF  | 1766  | 1323  |
| >VHL-W88R- VVLPVWLNF | 261   | >VHL-W88R- VVLPVRLNF  | 2641  | 2380  |
| >VHL-W88R- VVLPVWLNF | 42    | >VHL-W88R- VVLPVRLNF  | 97    | 55    |
| >VHL-W88R- VVLPVWLNF | 449   | >VHL-W88R- VVLPVRLNF  | 3953  | 3504  |
| >VHL-W88R- VVLPVWLNF | 190   | >VHL-W88R- VVLPVRLNF  | 178   | 12    |
| >VHL-W88R- VVLPVWLNF | 70    | >VHL-W88R- VVLPVRLNF  | 348   | 278   |
| >VHL-W88R- VVLPVWLNF | 461   | >VHL-W88R- VVLPVRLNF  | 311   | 150   |
| >VHL-W88R- VVLPVWLNF | 20    | >VHL-W88R- VVLPVRLNF  | 56    | 36    |
| >VHL-W88R- VVLPVWLNF | 399   | >VHL-W88R- VVLPVRLNF  | 411   | 12    |
| >VHL-W88R- RVVLPVWL  | 415   | >VHL-W88R- RVVLPVRL   | 1626  | 1211  |
| >VHL-W88R- RVVLPVWLN | 182   | >VHL-W88R- RVVLPVRLNF | 340   | 158   |
| >VHL-W88R- RVVLPVWL  | 351   | >VHL-W88R- RVVLPVRL   | 252   | 99    |
| >VHL-W88R- RVVLPVWLN | 202   | >VHL-W88R- RVVLPVRLNF | 115   | 87    |
| >VHL-W88R- RVVLPVWLN | 355   | >VHL-W88R- RVVLPVRLNF | 298   | 57    |
| >VHL-W88R- RVVLPVWL  | 89    | >VHL-W88R- RVVLPVRL   | 59    | 30    |
| >VHL-W88R- RVVLPVWLN | 9     | >VHL-W88R- RVVLPVRLNF | 13    | 4     |
| >VHL-W88R- RVVLPVWLN | 56    | >VHL-W88R- RVVLPVRLNF | 310   | 254   |
| >VHL-W88R- RVVLPVWLN | 230   | >VHL-W88R- RVVLPVRLNF | 216   | 14    |
| >VHL-W88R- RVVLPVWLN | 320   | >VHL-W88R- RVVLPVRLNF | 14470 | 14150 |
| >VHL-W88R- PRVVPVWLI | 364   | >VHL-W88R- PRVVPVRLN  | 301   | 63    |
| >VHL-W88R- PRVVPVWL  | 89    | >VHL-W88R- PRVVPVRL   | 182   | 93    |
| >VHL-W88R- PRVVPVWLI | 385   | >VHL-W88R- PRVVPVRLN  | 406   | 21    |
| >VHL-W88R- SPRVVPVW  | 189   | >VHL-W88R- SPRVVPVR   | 9123  | 8934  |
| >VHL-W88R- SPRVVPVWI | 61    | >VHL-W88R- SPRVVPVRL  | 136   | 75    |
| >VHL-W88R- SPRVVPVW  | 318   | >VHL-W88R- SPRVVPVR   | 31863 | 31545 |
| >VHL-W88R- SPRVVPVW  | 42    | >VHL-W88R- SPRVVPVR   | 29093 | 29051 |
| >VHL-W88R- RSPRVVPVW | 24989 | >VHL-W88R- RSPRVVPVR  | 103   | 24886 |
| >VHL-W88R- RSPRVVPVW | 247   | >VHL-W88R- RSPRVVPVR  | 6227  | 5980  |
| >VHL-W88R- RSPRVVPVW | 147   | >VHL-W88R- RSPRVVPVR  | 93    | 54    |
| >VHL-W88R- RSPRVVPVW | 55    | >VHL-W88R- RSPRVVPVR  | 15852 | 15797 |
| >VHL-W88R- RSPRVVPVW | 301   | >VHL-W88R- RSPRVVPVR  | 234   | 67    |
| >VHL-W88R- RSPRVVPVW | 48    | >VHL-W88R- RSPRVVPVR  | 20000 | 19952 |
| >VHL-W88R- RSPRVVPVW | 12    | >VHL-W88R- RSPRVVPVR  | 18726 | 18714 |
| >VHL-W88R- RSPRVVPVW | 39    | >VHL-W88R- RSPRVVPVR  | 1019  | 980   |
| >VHL-W88R- RSPRVVPVW | 4     | >VHL-W88R- RSPRVVPVR  | 10    | 6     |
| >VHL-W88R- RSPRVVPVW | 493   | >VHL-W88R- RSPRVVPVR  | 1015  | 522   |
| >VHL-W88R- RSPRVVPVW | 345   | >VHL-W88R- RSPRVVPVR  | 503   | 158   |

|                      |      |                       |       |       |
|----------------------|------|-----------------------|-------|-------|
| >VHL-W88S-1WLNFDGEPQ | 50   | >VHL-W88S-1SLNFDGEPQF | 83    | 33    |
| >VHL-W88S-1WLNFDGEPQ | 854  | >VHL-W88S-1SLNFDGEPQF | 233   | 621   |
| >VHL-W88S-1WLNFDGEPQ | 1027 | >VHL-W88S-1SLNFDGEPQF | 160   | 867   |
| >VHL-W88S-1WLNFDGEPQ | 54   | >VHL-W88S-1SLNFDGEPQF | 52    | 2     |
| >VHL-W88S-1WLNFDGEPQ | 52   | >VHL-W88S-1SLNFDGEPQF | 80    | 28    |
| >VHL-W88S-1WLNFDGEPQ | 102  | >VHL-W88S-1SLNFDGEPQF | 375   | 273   |
| >VHL-W88S-1WLNFDGEPQ | 90   | >VHL-W88S-1SLNFDGEPQF | 1057  | 967   |
| >VHL-W88S-1WLNFDGEPQ | 182  | >VHL-W88S-1SLNFDGEPQF | 770   | 588   |
| >VHL-W88S-1VWLNFDGE  | 227  | >VHL-W88S-1VSLNFDGE   | 34290 | 34063 |
| >VHL-W88S-1VWLNFDGEP | 304  | >VHL-W88S-1VSLNFDGEP  | 35865 | 35561 |
| >VHL-W88S-1LPVWLNFDG | 285  | >VHL-W88S-1LPVSLNFDG  | 965   | 680   |
| >VHL-W88S-1LPVWLNFD  | 106  | >VHL-W88S-1LPVSLNFD   | 348   | 242   |
| >VHL-W88S-1LPVWLNFDG | 251  | >VHL-W88S-1LPVSLNFDG  | 849   | 598   |
| >VHL-W88S-1LPVWLNFDG | 345  | >VHL-W88S-1LPVSLNFDGE | 948   | 603   |
| >VHL-W88S-1VLPVWLN   | 235  | >VHL-W88S-1VLPVSLN    | 768   | 533   |
| >VHL-W88S-1VLPVWLN   | 454  | >VHL-W88S-1VLPVSLN    | 1715  | 1261  |
| >VHL-W88S-1VLPVWLN   | 871  | >VHL-W88S-1VLPVSLN    | 297   | 574   |
| >VHL-W88S-1VVLPVWLN  | 443  | >VHL-W88S-1VVLPVSLN   | 2539  | 2096  |
| >VHL-W88S-1VVLPVWLN  | 261  | >VHL-W88S-1VVLPVSLN   | 663   | 402   |
| >VHL-W88S-1VVLPVWLN  | 42   | >VHL-W88S-1VVLPVSLN   | 99    | 57    |
| >VHL-W88S-1VVLPVWLN  | 449  | >VHL-W88S-1VVLPVSLN   | 1274  | 825   |
| >VHL-W88S-1VVLPVWLN  | 190  | >VHL-W88S-1VVLPVSLN   | 121   | 69    |
| >VHL-W88S-1VVLPVWLN  | 70   | >VHL-W88S-1VVLPVSLN   | 144   | 74    |
| >VHL-W88S-1VVLPVWLN  | 3373 | >VHL-W88S-1VVLPVSLN   | 203   | 3170  |
| >VHL-W88S-1VVLPVWLN  | 3144 | >VHL-W88S-1VVLPVSLN   | 457   | 2687  |
| >VHL-W88S-1VVLPVWLN  | 1629 | >VHL-W88S-1VVLPVSLN   | 497   | 1132  |
| >VHL-W88S-1VVLPVWLN  | 461  | >VHL-W88S-1VVLPVSLN   | 181   | 280   |
| >VHL-W88S-1VVLPVWLN  | 20   | >VHL-W88S-1VVLPVSLN   | 13    | 7     |
| >VHL-W88S-1VVLPVWLN  | 399  | >VHL-W88S-1VVLPVSLN   | 230   | 169   |
| >VHL-W88S-1RVVLPVWL  | 415  | >VHL-W88S-1RVVLPVSL   | 420   | 5     |
| >VHL-W88S-1RVVLPVWLN | 182  | >VHL-W88S-1RVVLPVSLN  | 239   | 57    |
| >VHL-W88S-1RVVLPVWL  | 351  | >VHL-W88S-1RVVLPVSL   | 75    | 276   |
| >VHL-W88S-1RVVLPVWLN | 202  | >VHL-W88S-1RVVLPVSLN  | 85    | 117   |
| >VHL-W88S-1RVVLPVWL  | 2494 | >VHL-W88S-1RVVLPVSL   | 306   | 2188  |
| >VHL-W88S-1RVVLPVWLN | 819  | >VHL-W88S-1RVVLPVSLN  | 261   | 558   |
| >VHL-W88S-1RVVLPVWLN | 355  | >VHL-W88S-1RVVLPVSLN  | 140   | 215   |
| >VHL-W88S-1RVVLPVWL  | 89   | >VHL-W88S-1RVVLPVSL   | 60    | 29    |
| >VHL-W88S-1RVVLPVWLN | 9    | >VHL-W88S-1RVVLPVSLN  | 6     | 3     |
| >VHL-W88S-1RVVLPVWLN | 56   | >VHL-W88S-1RVVLPVSLN  | 89    | 33    |
| >VHL-W88S-1RVVLPVWLN | 230  | >VHL-W88S-1RVVLPVSLN  | 76    | 154   |
| >VHL-W88S-1RVVLPVWLN | 320  | >VHL-W88S-1RVVLPVSLN  | 8983  | 8663  |
| >VHL-W88S-1PRVLPVWLI | 364  | >VHL-W88S-1PRVLPVSLN  | 185   | 179   |
| >VHL-W88S-1PRVLPVWL  | 89   | >VHL-W88S-1PRVLPVSL   | 229   | 140   |

|                        |       |                        |       |       |
|------------------------|-------|------------------------|-------|-------|
| >VHL-W88S-1 PRVVLPVWLI | 385   | >VHL-W88S-1 PRVVLPVSLN | 936   | 551   |
| >VHL-W88S-1 SPRVVLPVW  | 189   | >VHL-W88S-1 SPRVVLPVS  | 4157  | 3968  |
| >VHL-W88S-1 SPRVVLPVWI | 61    | >VHL-W88S-1 SPRVVLPVSL | 21    | 40    |
| >VHL-W88S-1 SPRVVLPVW  | 318   | >VHL-W88S-1 SPRVVLPVS  | 32284 | 31966 |
| >VHL-W88S-1 SPRVVLPVW  | 42    | >VHL-W88S-1 SPRVVLPVS  | 29714 | 29672 |
| >VHL-W88S-1 RSPRVVLPVW | 247   | >VHL-W88S-1 RSPRVVLPVS | 6836  | 6589  |
| >VHL-W88S-1 RSPRVVLPVW | 147   | >VHL-W88S-1 RSPRVVLPVS | 30    | 117   |
| >VHL-W88S-1 RSPRVVLPVW | 55    | >VHL-W88S-1 RSPRVVLPVS | 14858 | 14803 |
| >VHL-W88S-1 RSPRVVLPVW | 301   | >VHL-W88S-1 RSPRVVLPVS | 277   | 24    |
| >VHL-W88S-1 RSPRVVLPVW | 48    | >VHL-W88S-1 RSPRVVLPVS | 19335 | 19287 |
| >VHL-W88S-1 RSPRVVLPVW | 12    | >VHL-W88S-1 RSPRVVLPVS | 16793 | 16781 |
| >VHL-W88S-1 RSPRVVLPVW | 39    | >VHL-W88S-1 RSPRVVLPVS | 252   | 213   |
| >VHL-W88S-1 RSPRVVLPVW | 4     | >VHL-W88S-1 RSPRVVLPVS | 9     | 5     |
| >VHL-W88S-1 RSPRVVLPVW | 493   | >VHL-W88S-1 RSPRVVLPVS | 1232  | 739   |
| >VHL-W88S-1 RSPRVVLPVW | 345   | >VHL-W88S-1 RSPRVVLPVS | 233   | 112   |
| >VHL-Y112D- YRGHLWLF   | 109   | >VHL-Y112D- DRGHLWLF   | 3477  | 3368  |
| >VHL-Y112D- YRGHLWLF   | 75    | >VHL-Y112D- DRGHLWLF   | 2604  | 2529  |
| >VHL-Y112D- YRGHLWLF   | 66    | >VHL-Y112D- DRGHLWLF   | 2155  | 2089  |
| >VHL-Y112D- YRGHLWLF   | 44    | >VHL-Y112D- DRGHLWLF   | 154   | 110   |
| >VHL-Y112D- SYRGHLWLF  | 32    | >VHL-Y112D- SDRGHLWLF  | 6377  | 6345  |
| >VHL-Y112D- SYRGHLWLF  | 24    | >VHL-Y112D- SDRGHLWLF  | 5281  | 5257  |
| >VHL-Y112D- SYRGHLWL   | 17    | >VHL-Y112D- SDRGHLWL   | 24229 | 24212 |
| >VHL-Y112D- SYRGHLWLF  | 5     | >VHL-Y112D- SDRGHLWLF  | 15404 | 15399 |
| >VHL-Y112D- SYRGHLWLF  | 351   | >VHL-Y112D- SDRGHLWLF  | 11302 | 10951 |
| >VHL-Y112D- SYRGHLWLF  | 96    | >VHL-Y112D- SDRGHLWLF  | 3158  | 3062  |
| >VHL-Y112D- SYRGHLWL   | 38    | >VHL-Y112D- SDRGHLWL   | 7258  | 7220  |
| >VHL-Y112D- SYRGHLWLF  | 11    | >VHL-Y112D- SDRGHLWLF  | 2446  | 2435  |
| >VHL-Y112D- SYRGHLWLF  | 7     | >VHL-Y112D- SDRGHLWLF  | 105   | 98    |
| >VHL-Y112D- SYRGHLWLF  | 88    | >VHL-Y112D- SDRGHLWLF  | 2669  | 2581  |
| >VHL-Y112D- SYRGHLWLF  | 265   | >VHL-Y112D- SDRGHLWLF  | 2822  | 2557  |
| >VHL-Y112D- SYRGHLWLF  | 396   | >VHL-Y112D- SDRGHLWLF  | 2808  | 2412  |
| >VHL-Y112D- SYRGHLWLF  | 23    | >VHL-Y112D- SDRGHLWLF  | 593   | 570   |
| >VHL-Y112D- SYRGHLWL   | 262   | >VHL-Y112D- SDRGHLWL   | 12599 | 12337 |
| >VHL-Y112D- SYRGHLWLF  | 430   | >VHL-Y112D- SDRGHLWLF  | 26624 | 26194 |
| >VHL-Y112D- SYRGHLWL   | 420   | >VHL-Y112D- SDRGHLWL   | 31215 | 30795 |
| >VHL-Y112D- SYRGHLWLF  | 277   | >VHL-Y112D- SDRGHLWLF  | 29137 | 28860 |
| >VHL-Y112D- HSYRGHLW   | 16997 | >VHL-Y112D- HSDRGHLW   | 338   | 16659 |
| >VHL-Y112D- HSYRGHLWLI | 50    | >VHL-Y112D- HSDRGHLWL  | 1969  | 1919  |
| >VHL-Y112D- HSYRGHLWLI | 47    | >VHL-Y112D- HSDRGHLWL  | 782   | 735   |
| >VHL-Y112D- HSYRGHLWLI | 376   | >VHL-Y112D- HSDRGHLWL  | 3015  | 2639  |
| >VHL-Y112D- HSYRGHLWLI | 178   | >VHL-Y112D- HSDRGHLWL  | 8124  | 7946  |
| >VHL-Y112D- HSYRGHLWL  | 93    | >VHL-Y112D- HSDRGHLWL  | 7064  | 6971  |
| >VHL-Y112D- HSYRGHLWLI | 27    | >VHL-Y112D- HSDRGHLWL  | 2520  | 2493  |

|                         |     |                        |      |      |
|-------------------------|-----|------------------------|------|------|
| >VHL-Y112D- HSYRGHLWLI  | 457 | >VHL-Y112D- HSDRGHLWL  | 1918 | 1461 |
| >VHL-Y112D- HSYRGHLWLI  | 8   | >VHL-Y112D- HSDRGHLWL  | 76   | 68   |
| >VHL-Y112D- HSYRGHLWLI  | 293 | >VHL-Y112D- HSDRGHLWL  | 5167 | 4874 |
| >VHL-Y112D- HSYRGHLWLI  | 27  | >VHL-Y112D- HSDRGHLWL  | 157  | 130  |
| >VHL-Y112D- HSYRGHLWLI  | 9   | >VHL-Y112D- HSDRGHLWL  | 182  | 173  |
| >VHL-Y112D- HSYRGHLWLI  | 36  | >VHL-Y112D- HSDRGHLWL  | 4072 | 4036 |
| >VHL-Y112D- HSYRGHLW    | 4   | >VHL-Y112D- HSDRGHLW   | 26   | 22   |
| >VHL-Y112D- HSYRGHLWL   | 5   | >VHL-Y112D- HSDRGHLWL  | 24   | 19   |
| >VHL-Y112D- HSYRGHLW    | 34  | >VHL-Y112D- HSDRGHLW   | 55   | 21   |
| >VHL-Y112D- HSYRGHLWLI  | 62  | >VHL-Y112D- HSDRGHLWL  | 424  | 362  |
| >VHL-Y112D- HSYRGHLW    | 10  | >VHL-Y112D- HSDRGHLW   | 12   | 2    |
| >VHL-Y112D- HSYRGHLWL   | 339 | >VHL-Y112D- HSDRGHLWL  | 3279 | 2940 |
| >VHL-Y112D- HSYRGHLWLI  | 19  | >VHL-Y112D- HSDRGHLWL  | 49   | 30   |
| >VHL-Y112D- HSYRGHLWL   | 126 | >VHL-Y112D- HSDRGHLWL  | 988  | 862  |
| >VHL-Y112D- HSYRGHLWLI  | 55  | >VHL-Y112D- HSDRGHLWL  | 385  | 330  |
| >VHL-Y112D- HSYRGHLW    | 137 | >VHL-Y112D- HSDRGHLW   | 2969 | 2832 |
| >VHL-Y112D- HSYRGHLWLI  | 300 | >VHL-Y112D- HSDRGHLWL  | 866  | 566  |
| >VHL-Y112D- HSYRGHLWLI  | 46  | >VHL-Y112D- HSDRGHLWL  | 419  | 373  |
| >VHL-Y112D- HSYRGHLWL   | 153 | >VHL-Y112D- HSDRGHLWL  | 2649 | 2496 |
| >VHL-Y112D- IHSYRGHLWL  | 131 | >VHL-Y112D- IHSDRGHLWI | 238  | 107  |
| >VHL-Y112D- IHSYRGHLWL  | 91  | >VHL-Y112D- IHSDRGHLWI | 233  | 142  |
| >VHL-Y112D- IHSYRGHLW   | 25  | >VHL-Y112D- IHSDRGHLW  | 21   | 4    |
| >VHL-Y112D- IHSYRGHLWL  | 402 | >VHL-Y112D- IHSDRGHLWI | 323  | 79   |
| >VHL-Y112D- RIHSYRGHL   | 336 | >VHL-Y112D- RIHSDRGHL  | 7091 | 6755 |
| >VHL-Y112D- RIHSYRGHLV  | 414 | >VHL-Y112D- RIHSDRGHLV | 509  | 95   |
| >VHL-Y112D- RIHSYRGHL   | 23  | >VHL-Y112D- RIHSDRGHL  | 143  | 120  |
| >VHL-Y112D- RIHSYRGHLV  | 21  | >VHL-Y112D- RIHSDRGHLV | 74   | 53   |
| >VHL-Y112D- RIHSYRGHLV  | 117 | >VHL-Y112D- RIHSDRGHLV | 138  | 21   |
| >VHL-Y112D- RIHSYRGHLV  | 50  | >VHL-Y112D- RIHSDRGHLV | 71   | 21   |
| >VHL-Y112D- RIHSYRGHLV  | 74  | >VHL-Y112D- RIHSDRGHLV | 110  | 36   |
| >VHL-Y112D- RRIHSYRGH   | 107 | >VHL-Y112D- RRIHSDRGH  | 571  | 464  |
| >VHL-Y112D- RRIHSYRGHL  | 52  | >VHL-Y112D- RRIHSDRGHL | 121  | 69   |
| >VHL-Y112D- RRIHSYRGHL' | 119 | >VHL-Y112D- RRIHSDRGHL | 329  | 210  |
| >VHL-Y112D- RRIHSYRGH   | 112 | >VHL-Y112D- RRIHSDRGH  | 220  | 108  |
| >VHL-Y112D- RRIHSYRGHL  | 9   | >VHL-Y112D- RRIHSDRGHL | 13   | 4    |
| >VHL-Y112D- RRIHSYRGHL' | 134 | >VHL-Y112D- RRIHSDRGHL | 221  | 87   |
| >VHL-Y112D- RRIHSYRG    | 99  | >VHL-Y112D- RRIHSDRG   | 156  | 57   |
| >VHL-Y112D- RRIHSYRGHL  | 21  | >VHL-Y112D- RRIHSDRGHL | 35   | 14   |
| >VHL-Y112D- RRIHSYRGHL' | 96  | >VHL-Y112D- RRIHSDRGHL | 190  | 94   |
| >VHL-Y112D- RRIHSYRGH   | 201 | >VHL-Y112D- RRIHSDRGH  | 1053 | 852  |
| >VHL-Y112D- RRIHSYRGHL  | 18  | >VHL-Y112D- RRIHSDRGHL | 48   | 30   |
| >VHL-Y112D- RRIHSYRGHL' | 336 | >VHL-Y112D- RRIHSDRGHL | 821  | 485  |
| >VHL-Y112D- RRIHSYRGHL' | 124 | >VHL-Y112D- RRIHSDRGHL | 85   | 39   |

|                         |       |                         |       |       |
|-------------------------|-------|-------------------------|-------|-------|
| >VHL-Y112D- GRRHSYRGH   | 212   | >VHL-Y112D- GRRHSYRGH   | 591   | 379   |
| >VHL-Y112D- GRRHSYRGH   | 174   | >VHL-Y112D- GRRHSYRGH   | 298   | 124   |
| >VHL-Y112D- GRRHSYRGH   | 13    | >VHL-Y112D- GRRHSYRGH   | 26    | 13    |
| >VHL-Y112D- TGRRHSYR    | 148   | >VHL-Y112D- TGRRHSYR    | 3376  | 3228  |
| >VHL-Y112D- TGRRHSY     | 185   | >VHL-Y112D- TGRRHSY     | 29894 | 29709 |
| >VHL-Y112D- TGRRHSYR    | 14    | >VHL-Y112D- TGRRHSYR    | 483   | 469   |
| >VHL-Y112D- TGRRHSYR    | 104   | >VHL-Y112D- TGRRHSYR    | 1161  | 1057  |
| >VHL-Y112D- GTGRRHSYR   | 452   | >VHL-Y112D- GTGRRHSYR   | 5388  | 4936  |
| >VHL-Y112D- GTGRRHSY    | 415   | >VHL-Y112D- GTGRRHSY    | 34999 | 34584 |
| >VHL-Y112D- GTGRRHSY    | 316   | >VHL-Y112D- GTGRRHSY    | 26684 | 26368 |
| >VHL-Y112D- GTGRRHSY    | 74    | >VHL-Y112D- GTGRRHSY    | 24169 | 24095 |
| >VHL-Y112D- GTGRRHSYR   | 38    | >VHL-Y112D- GTGRRHSYR   | 259   | 221   |
| >VHL-Y112D- GTGRRHSYR   | 117   | >VHL-Y112D- GTGRRHSYR   | 1924  | 1807  |
| >VHL-Y112D- GTGRRHSYR   | 245   | >VHL-Y112D- GTGRRHSYR   | 3391  | 3146  |
| >VHL-Y112D- GTGRRHSY    | 439   | >VHL-Y112D- GTGRRHSY    | 26532 | 26093 |
| >VHL-Y112D- GTGRRHSY    | 491   | >VHL-Y112D- GTGRRHSY    | 22760 | 22269 |
| >VHL-Y112D- GTGRRHSY    | 91    | >VHL-Y112D- GTGRRHSY    | 25006 | 24915 |
| >VHL-Y112D- GTGRRHSY    | 131   | >VHL-Y112D- GTGRRHSY    | 24011 | 23880 |
| >VHL-Y112D- GTGRRHSYR   | 400   | >VHL-Y112D- GTGRRHSYR   | 602   | 202   |
| >VHL-Y156D- YTLKERCLQV  | 93    | >VHL-Y156D- YTLKERCLQV  | 6287  | 6194  |
| >VHL-Y156D- YTLKERCLQV' | 308   | >VHL-Y156D- YTLKERCLQV' | 18578 | 18270 |
| >VHL-Y156D- YTLKERCLQV  | 127   | >VHL-Y156D- YTLKERCLQV  | 3597  | 3470  |
| >VHL-Y156D- YTLKERCLQV  | 39    | >VHL-Y156D- YTLKERCLQV  | 2110  | 2071  |
| >VHL-Y156D- YTLKERCLQV' | 83    | >VHL-Y156D- YTLKERCLQV' | 9243  | 9160  |
| >VHL-Y156D- YTLKERCLQV  | 32    | >VHL-Y156D- YTLKERCLQV  | 6470  | 6438  |
| >VHL-Y156D- YTLKERCLQV' | 28    | >VHL-Y156D- YTLKERCLQV' | 6200  | 6172  |
| >VHL-Y156D- YTLKERCLQV' | 95    | >VHL-Y156D- YTLKERCLQV' | 9523  | 9428  |
| >VHL-Y156D- YTLKERCLQV  | 31    | >VHL-Y156D- YTLKERCLQV  | 4513  | 4482  |
| >VHL-Y156D- YTLKERCLQV' | 40    | >VHL-Y156D- YTLKERCLQV' | 5252  | 5212  |
| >VHL-Y156D- YTLKERCLQV' | 416   | >VHL-Y156D- YTLKERCLQV' | 6563  | 6147  |
| >VHL-Y156D- YTLKERCLQV  | 19    | >VHL-Y156D- YTLKERCLQV  | 5688  | 5669  |
| >VHL-Y156D- YTLKERCLQV' | 21    | >VHL-Y156D- YTLKERCLQV' | 5962  | 5941  |
| >VHL-Y156D- YTLKERCLQV  | 14    | >VHL-Y156D- YTLKERCLQV  | 29    | 15    |
| >VHL-Y156D- YTLKERCLQV' | 53    | >VHL-Y156D- YTLKERCLQV' | 104   | 51    |
| >VHL-Y156D- YTLKERCL    | 205   | >VHL-Y156D- YTLKERCL    | 9789  | 9584  |
| >VHL-Y156D- YTLKERCLQV  | 211   | >VHL-Y156D- YTLKERCLQV  | 10304 | 10093 |
| >VHL-Y156D- YTLKERCL    | 280   | >VHL-Y156D- YTLKERCL    | 10368 | 10088 |
| >VHL-Y156D- YTLKERCLQV' | 130   | >VHL-Y156D- YTLKERCLQV' | 6109  | 5979  |
| >VHL-Y156D- VYTLKERCLQ' | 21381 | >VHL-Y156D- VYTLKERCLQ' | 165   | 21216 |
| >VHL-Y156D- PIFANITLPVY | 135   | >VHL-Y156D- PIFANITLPVY | 24809 | 24674 |
| >VHL-Y156D- PIFANITLPVY | 195   | >VHL-Y156D- PIFANITLPVY | 31417 | 31222 |
| >VHL-Y156D- LPVYTLKERCL | 224   | >VHL-Y156D- LPVYTLKERCL | 253   | 29    |
| >VHL-Y156D- LPVYTLKER   | 488   | >VHL-Y156D- LPVYTLKER   | 795   | 307   |

|                        |     |                        |       |       |
|------------------------|-----|------------------------|-------|-------|
| >VHL-Y156D-LPVYTLKERC  | 337 | >VHL-Y156D-LPVDTLKERC  | 1338  | 1001  |
| >VHL-Y156D-LPVYTLKERCI | 611 | >VHL-Y156D-LPVDTLKERC  | 471   | 140   |
| >VHL-Y156D-TLPVYTLK    | 146 | >VHL-Y156D-TLPVDTLK    | 608   | 462   |
| >VHL-Y156D-TLPVYTLK    | 148 | >VHL-Y156D-TLPVDTLK    | 775   | 627   |
| >VHL-Y156D-TLPVYTLK    | 438 | >VHL-Y156D-TLPVDTLK    | 607   | 169   |
| >VHL-Y156D-TLPVYTLKER  | 247 | >VHL-Y156D-TLPVDTLKER  | 919   | 672   |
| >VHL-Y156D-ITLPVYTL    | 202 | >VHL-Y156D-ITLPVDTL    | 3680  | 3478  |
| >VHL-Y156D-ITLPVYTL    | 273 | >VHL-Y156D-ITLPVDTL    | 2318  | 2045  |
| >VHL-Y156D-ITLPVYTL    | 54  | >VHL-Y156D-ITLPVDTL    | 168   | 114   |
| >VHL-Y156D-ITLPVYTL    | 21  | >VHL-Y156D-ITLPVDTL    | 95    | 74    |
| >VHL-Y156D-ITLPVYTL    | 408 | >VHL-Y156D-ITLPVDTL    | 1992  | 1584  |
| >VHL-Y156D-ITLPVYTL    | 307 | >VHL-Y156D-ITLPVDTL    | 661   | 354   |
| >VHL-Y156D-ITLPVYTLK   | 50  | >VHL-Y156D-ITLPVDTLK   | 137   | 87    |
| >VHL-Y156D-ITLPVYTLK   | 9   | >VHL-Y156D-ITLPVDTLK   | 22    | 13    |
| >VHL-Y156D-ITLPVYTLKER | 348 | >VHL-Y156D-ITLPVDTLKER | 981   | 633   |
| >VHL-Y156D-ITLPVYTLK   | 45  | >VHL-Y156D-ITLPVDTLK   | 606   | 561   |
| >VHL-Y156D-ITLPVYTLK   | 30  | >VHL-Y156D-ITLPVDTLK   | 234   | 204   |
| >VHL-Y156D-ITLPVYTLKER | 20  | >VHL-Y156D-ITLPVDTLKER | 40    | 20    |
| >VHL-Y156D-ITLPVYTL    | 68  | >VHL-Y156D-ITLPVDTL    | 183   | 115   |
| >VHL-Y156D-ITLPVYTLK   | 351 | >VHL-Y156D-ITLPVDTLK   | 817   | 466   |
| >VHL-Y156D-ITLPVYTLKER | 115 | >VHL-Y156D-ITLPVDTLKER | 211   | 96    |
| >VHL-Y156D-ITLPVYTLK   | 21  | >VHL-Y156D-ITLPVDTLK   | 22    | 1     |
| >VHL-Y156D-ITLPVYTLKER | 40  | >VHL-Y156D-ITLPVDTLKER | 48    | 8     |
| >VHL-Y156D-ITLPVYTL    | 248 | >VHL-Y156D-ITLPVDTL    | 1205  | 957   |
| >VHL-Y156D-ITLPVYTL    | 263 | >VHL-Y156D-ITLPVDTL    | 1811  | 1548  |
| >VHL-Y156D-ITLPVYTL    | 6   | >VHL-Y156D-ITLPVDTL    | 8     | 2     |
| >VHL-Y156D-ITLPVYTL    | 185 | >VHL-Y156D-ITLPVDTL    | 478   | 293   |
| >VHL-Y156D-ITLPVYTL    | 70  | >VHL-Y156D-ITLPVDTL    | 158   | 88    |
| >VHL-Y156D-ITLPVYTL    | 143 | >VHL-Y156D-ITLPVDTL    | 4019  | 3876  |
| >VHL-Y156D-ITLPVYTLK   | 144 | >VHL-Y156D-ITLPVDTLK   | 363   | 219   |
| >VHL-Y156D-ITLPVYTLKER | 394 | >VHL-Y156D-ITLPVDTLKER | 1040  | 646   |
| >VHL-Y156D-ITLPVYTL    | 96  | >VHL-Y156D-ITLPVDTL    | 108   | 12    |
| >VHL-Y156D-NITLPVYTLK  | 194 | >VHL-Y156D-NITLPVDTLK  | 959   | 765   |
| >VHL-Y156D-NITLPVYTLK  | 45  | >VHL-Y156D-NITLPVDTLK  | 100   | 55    |
| >VHL-Y156D-NITLPVYTLK  | 24  | >VHL-Y156D-NITLPVDTLK  | 24    | 0     |
| >VHL-Y156D-NITLPVYTL   | 70  | >VHL-Y156D-NITLPVDTL   | 487   | 417   |
| >VHL-Y156D-ANITLPVYTL  | 411 | >VHL-Y156D-ANITLPVDTL  | 1371  | 960   |
| >VHL-Y156D-ANITLPVYTLK | 232 | >VHL-Y156D-ANITLPVDTLK | 1175  | 943   |
| >VHL-Y156D-ANITLPVY    | 253 | >VHL-Y156D-ANITLPVD    | 27141 | 26888 |
| >VHL-Y156D-ANITLPVY    | 453 | >VHL-Y156D-ANITLPVD    | 31763 | 31310 |
| >VHL-Y156D-ANITLPVY    | 481 | >VHL-Y156D-ANITLPVD    | 26102 | 25621 |
| >VHL-Y156D-FANITLPVYTL | 351 | >VHL-Y156D-FANITLPVDTI | 309   | 42    |
| >VHL-Y156D-FANITLPVYTL | 156 | >VHL-Y156D-FANITLPVDTI | 318   | 162   |

|                         |     |                         |       |       |
|-------------------------|-----|-------------------------|-------|-------|
| >VHL-Y156D- FANITLPVYTL | 482 | >VHL-Y156D- FANITLPVDTI | 788   | 306   |
| >VHL-Y156D- FANITLPVYT  | 292 | >VHL-Y156D- FANITLPVDT  | 2294  | 2002  |
| >VHL-Y156D- FANITLPVYTL | 203 | >VHL-Y156D- FANITLPVDTI | 237   | 34    |
| >VHL-Y156D- FANITLPVYTL | 87  | >VHL-Y156D- FANITLPVDTI | 302   | 215   |
| >VHL-Y156D- FANITLPVYTL | 407 | >VHL-Y156D- FANITLPVDTI | 1324  | 917   |
| >VHL-Y156D- FANITLPVY   | 243 | >VHL-Y156D- FANITLPVD   | 26151 | 25908 |
| >VHL-Y156D- FANITLPVY   | 71  | >VHL-Y156D- FANITLPVD   | 27223 | 27152 |
| >VHL-Y156D- FANITLPVYTL | 413 | >VHL-Y156D- FANITLPVDTI | 1048  | 635   |
| >VHL-Y156D- FANITLPVY   | 114 | >VHL-Y156D- FANITLPVD   | 20933 | 20819 |
| >VHL-Y156D- FANITLPVY   | 170 | >VHL-Y156D- FANITLPVD   | 24082 | 23912 |
| >VHL-Y156D- FANITLPVY   | 14  | >VHL-Y156D- FANITLPVD   | 18688 | 18674 |
| >VHL-Y156D- FANITLPVYTL | 63  | >VHL-Y156D- FANITLPVDTI | 190   | 127   |
| >VHL-Y156D- FANITLPVY   | 26  | >VHL-Y156D- FANITLPVD   | 16283 | 16257 |
| >VHL-Y156D- FANITLPVYTL | 278 | >VHL-Y156D- FANITLPVDTI | 433   | 155   |
| >VHL-Y156D- FANITLPVY   | 375 | >VHL-Y156D- FANITLPVD   | 19505 | 19130 |
| >VHL-Y156D- FANITLPVY   | 134 | >VHL-Y156D- FANITLPVD   | 26311 | 26177 |
| >VHL-Y156D- FANITLPVYTL | 160 | >VHL-Y156D- FANITLPVDTI | 563   | 403   |
| >VHL-Y156D- FANITLPVY   | 103 | >VHL-Y156D- FANITLPVD   | 18400 | 18297 |
| >VHL-Y156D- FANITLPVYTL | 310 | >VHL-Y156D- FANITLPVDTI | 1069  | 759   |
| >VHL-Y156D- IFANITLPVY  | 52  | >VHL-Y156D- IFANITLPVD  | 26861 | 26809 |
| >VHL-Y156D- IFANITLPVY  | 87  | >VHL-Y156D- IFANITLPVD  | 29252 | 29165 |
| >VHL-Y156D- IFANITLPVY  | 137 | >VHL-Y156D- IFANITLPVD  | 23943 | 23806 |
| >VHL-Y175D- YRRLDIVRSL  | 130 | >VHL-Y175D- DRRLDIVRSL  | 3874  | 3744  |
| >VHL-Y175D- YRRLDIVRSLY | 65  | >VHL-Y175D- DRRLDIVRSLY | 1916  | 1851  |
| >VHL-Y175D- YRRLDIVR    | 308 | >VHL-Y175D- DRRLDIVR    | 6621  | 6313  |
| >VHL-Y175D- YRRLDIVRSL  | 43  | >VHL-Y175D- DRRLDIVRSL  | 362   | 319   |
| >VHL-Y175D- YRRLDIVRSLY | 206 | >VHL-Y175D- DRRLDIVRSLY | 4408  | 4202  |
| >VHL-Y175D- YRRLDIVRSLY | 95  | >VHL-Y175D- DRRLDIVRSLY | 2157  | 2062  |
| >VHL-Y175D- YRRLDIVRSL  | 304 | >VHL-Y175D- DRRLDIVRSL  | 734   | 430   |
| >VHL-Y175D- YRRLDIVRSLY | 391 | >VHL-Y175D- DRRLDIVRSLY | 1778  | 1387  |
| >VHL-Y175D- YRRLDIVRSL  | 94  | >VHL-Y175D- DRRLDIVRSL  | 600   | 506   |
| >VHL-Y175D- YRRLDIVRSLY | 177 | >VHL-Y175D- DRRLDIVRSLY | 898   | 721   |
| >VHL-Y175D- NYRRLDIVRSI | 129 | >VHL-Y175D- NDRRLDIVRS  | 26992 | 26863 |
| >VHL-Y175D- NYRRLDIVR   | 256 | >VHL-Y175D- NDRRLDIVR   | 12540 | 12284 |
| >VHL-Y175D- NYRRLDIVR   | 30  | >VHL-Y175D- NDRRLDIVR   | 11345 | 11315 |
| >VHL-Y175D- VVRSVVKPEN  | 228 | >VHL-Y175D- VVRSVVKPEN  | 32980 | 32752 |
| >VHL-Y175D- VVRSVVKPEN  | 427 | >VHL-Y175D- VVRSVVKPEN  | 27390 | 26963 |
| >VHL-Y175D- VVRSVVKPEN  | 141 | >VHL-Y175D- VVRSVVKPEN  | 25649 | 25508 |
| >VHL-Y175D- VVRSVVKPEN  | 83  | >VHL-Y175D- VVRSVVKPEN  | 21277 | 21194 |
| >VHL-Y175D- VVRSVVKPEN  | 126 | >VHL-Y175D- VVRSVVKPEN  | 18834 | 18708 |
| >VHL-Y175D- PENYRRLDI   | 86  | >VHL-Y175D- PENDRRLDI   | 247   | 161   |
| >VHL-Y175D- KPENYRRRL   | 39  | >VHL-Y175D- KPENDRRL    | 73    | 34    |
| >VHL-Y175D- KPENYRRLDI  | 104 | >VHL-Y175D- KPENDRRLDI  | 92    | 12    |

|                        |     |                        |       |       |
|------------------------|-----|------------------------|-------|-------|
| >VHL-Y175D-KPENYRRLDI  | 139 | >VHL-Y175D-KPENDRRLDI  | 264   | 125   |
| >VHL-Y175D-LVKPENYR    | 23  | >VHL-Y175D-LVKPENDR    | 910   | 887   |
| >VHL-Y175D-LVKPENYRR   | 35  | >VHL-Y175D-LVKPENDRR   | 865   | 830   |
| >VHL-Y175D-LVKPENYR    | 159 | >VHL-Y175D-LVKPENDR    | 1614  | 1455  |
| >VHL-Y175D-LVKPENYRR   | 302 | >VHL-Y175D-LVKPENDRR   | 2462  | 2160  |
| >VHL-Y175D-LVKPENYR    | 60  | >VHL-Y175D-LVKPENDR    | 360   | 300   |
| >VHL-Y175D-LVKPENYRR   | 122 | >VHL-Y175D-LVKPENDRR   | 216   | 94    |
| >VHL-Y175D-LVKPENYR    | 287 | >VHL-Y175D-LVKPENDR    | 3790  | 3503  |
| >VHL-Y175D-SLVKPENYRR  | 409 | >VHL-Y175D-SLVKPENDRR  | 1107  | 698   |
| >VHL-Y175D-SLVKPENYRR  | 44  | >VHL-Y175D-SLVKPENDRR  | 183   | 139   |
| >VHL-Y175D-SLVKPENYRR  | 394 | >VHL-Y175D-SLVKPENDRR  | 750   | 356   |
| >VHL-Y175D-SLVKPENYRR  | 26  | >VHL-Y175D-SLVKPENDRR  | 50    | 24    |
| >VHL-Y175D-SLVKPENY    | 281 | >VHL-Y175D-SLVKPEND    | 36534 | 36253 |
| >VHL-Y175D-SLVKPENY    | 434 | >VHL-Y175D-SLVKPEND    | 26644 | 26210 |
| >VHL-Y175D-SLVKPENYR   | 177 | >VHL-Y175D-SLVKPENDR   | 7815  | 7638  |
| >VHL-Y175D-SLVKPENYRR  | 103 | >VHL-Y175D-SLVKPENDRR  | 1690  | 1587  |
| >VHL-Y175D-SLVKPENYR   | 133 | >VHL-Y175D-SLVKPENDR   | 1105  | 972   |
| >VHL-Y175D-SLVKPENYRR  | 142 | >VHL-Y175D-SLVKPENDRR  | 615   | 473   |
| >VHL-Y175D-SLVKPENY    | 96  | >VHL-Y175D-SLVKPEND    | 24808 | 24712 |
| >VHL-Y175D-SLVKPENY    | 218 | >VHL-Y175D-SLVKPEND    | 29915 | 29697 |
| >VHL-Y175D-SLVKPENYRR  | 85  | >VHL-Y175D-SLVKPENDRR  | 1066  | 981   |
| >VHL-Y175D-RSLVKPENYR  | 40  | >VHL-Y175D-RSLVKPENDR  | 342   | 302   |
| >VHL-Y175D-RSLVKPENYR  | 12  | >VHL-Y175D-RSLVKPENDR  | 49    | 37    |
| >VHL-Y175D-RSLVKPENY   | 242 | >VHL-Y175D-RSLVKPEND   | 25106 | 24864 |
| >VHL-Y175D-RSLVKPENY   | 185 | >VHL-Y175D-RSLVKPEND   | 23444 | 23259 |
| >VHL-Y175D-RSLVKPENY   | 3   | >VHL-Y175D-RSLVKPEND   | 8964  | 8961  |
| >VHL-Y175D-RSLVKPENY   | 56  | >VHL-Y175D-RSLVKPEND   | 16477 | 16421 |
| >VHL-Y175D-RSLVKPENYR  | 355 | >VHL-Y175D-RSLVKPENDR  | 1145  | 790   |
| >VHL-Y175D-RSLVKPENYR  | 124 | >VHL-Y175D-RSLVKPENDR  | 1769  | 1645  |
| >VHL-Y175D-RSLVKPENYR  | 148 | >VHL-Y175D-RSLVKPENDR  | 829   | 681   |
| >VHL-Y175D-VRSLVKPENY  | 310 | >VHL-Y175D-VRSLVKPEND  | 16276 | 15966 |
| >VHL-Y98D-v YPTLPPGTGR | 474 | >VHL-Y98D-n DPTLPPGTGR | 921   | 447   |
| >VHL-Y98D-v YPTLPPGT   | 313 | >VHL-Y98D-n DPTLPPGT   | 7519  | 7206  |
| >VHL-Y98D-v YPTLPPGTG  | 410 | >VHL-Y98D-n DPTLPPGTG  | 6883  | 6473  |
| >VHL-Y98D-v PYPTLPPGTG | 66  | >VHL-Y98D-n PDPTLPPGTG | 9138  | 9072  |
| >VHL-Y98D-v WLNFDGEPQ  | 50  | >VHL-Y98D-n WLNFDGEPQ  | 23482 | 23432 |
| >VHL-Y98D-v WLNFDGEPQ  | 54  | >VHL-Y98D-n WLNFDGEPQ  | 15747 | 15693 |
| >VHL-Y98D-v WLNFDGEPQ  | 52  | >VHL-Y98D-n WLNFDGEPQ  | 23074 | 23022 |
| >VHL-Y98D-v WLNFDGEPQ  | 102 | >VHL-Y98D-n WLNFDGEPQ  | 21399 | 21297 |
| >VHL-Y98D-v WLNFDGEPQ  | 90  | >VHL-Y98D-n WLNFDGEPQ  | 18737 | 18647 |
| >VHL-Y98D-v WLNFDGEPQ  | 182 | >VHL-Y98D-n WLNFDGEPQ  | 35291 | 35109 |
| >VHL-Y98D-v QPYPTLPPG  | 497 | >VHL-Y98D-n QPDPTLPPG  | 2960  | 2463  |
| >VHL-Y98D-v QPYPTLPPG  | 159 | >VHL-Y98D-n QPDPTLPPG  | 2706  | 2547  |



|                        |      |                        |       |       |
|------------------------|------|------------------------|-------|-------|
| >VHL-Y98D-v EPQPYPTL   | 420  | >VHL-Y98D-n EPQPDPTL   | 254   | 166   |
| >VHL-Y98D-v GEPQPYPTL  | 197  | >VHL-Y98D-n GEPQPDPTL  | 543   | 346   |
| >VHL-Y98D-v GEPQPYPTL  | 460  | >VHL-Y98D-n GEPQPDPTL  | 1585  | 1125  |
| >VHL-Y98D-v NFDGEPQPY  | 338  | >VHL-Y98D-n NFDGEPQPD  | 25389 | 25051 |
| >VHL-Y98D-v LNFDGEPQP\ | 165  | >VHL-Y98D-n LNFDGEPQPI | 20527 | 20362 |
| >VHL-Y98D-v LNFDGEPQP\ | 111  | >VHL-Y98D-n LNFDGEPQPI | 21115 | 21004 |
| >VHL-Y98F-w YPTLPPGTGR | 474  | >VHL-Y98F-r FPTLPPGTGR | 441   | 33    |
| >VHL-Y98F-w YPTLPPGT   | 313  | >VHL-Y98F-r FPTLPPGT   | 26    | 287   |
| >VHL-Y98F-w YPTLPPGTG  | 410  | >VHL-Y98F-r FPTLPPGTG  | 32    | 378   |
| >VHL-Y98F-w YPTLPPGTGR | 723  | >VHL-Y98F-r FPTLPPGTGR | 136   | 587   |
| >VHL-Y98F-w YPTLPPGTGR | 4373 | >VHL-Y98F-r FPTLPPGTGR | 495   | 3878  |
| >VHL-Y98F-w PYPTLPPGTG | 66   | >VHL-Y98F-r PFPTLPPGTG | 179   | 113   |
| >VHL-Y98F-w WLNFDGEPQ  | 50   | >VHL-Y98F-r WLNFDGEPQ  | 3063  | 3013  |
| >VHL-Y98F-w WLNFDGEPQ  | 54   | >VHL-Y98F-r WLNFDGEPQ  | 48    | 6     |
| >VHL-Y98F-w WLNFDGEPQ  | 52   | >VHL-Y98F-r WLNFDGEPQ  | 103   | 51    |
| >VHL-Y98F-w WLNFDGEPQ  | 102  | >VHL-Y98F-r WLNFDGEPQ  | 23    | 79    |
| >VHL-Y98F-w WLNFDGEPQ  | 90   | >VHL-Y98F-r WLNFDGEPQ  | 150   | 60    |
| >VHL-Y98F-w WLNFDGEPQ  | 182  | >VHL-Y98F-r WLNFDGEPQ  | 8338  | 8156  |
| >VHL-Y98F-w QPYPTLPPG  | 497  | >VHL-Y98F-r QPFPTLPPG  | 744   | 247   |
| >VHL-Y98F-w QPYPTLPPG  | 159  | >VHL-Y98F-r QPFPTLPPG  | 345   | 186   |
| >VHL-Y98F-w EPQPYPTL   | 420  | >VHL-Y98F-r EPQPFPTL   | 306   | 114   |
| >VHL-Y98F-w GEPQPYPTL  | 197  | >VHL-Y98F-r GEPQPFPTL  | 182   | 15    |
| >VHL-Y98F-w GEPQPYPTL  | 460  | >VHL-Y98F-r GEPQPFPTL  | 207   | 253   |
| >VHL-Y98F-w NFDGEPQPY  | 338  | >VHL-Y98F-r NFDGEPQPF  | 6901  | 6563  |
| >VHL-Y98F-w LNFDGEPQP\ | 165  | >VHL-Y98F-r LNFDGEPQPF | 198   | 33    |
| >VHL-Y98F-w LNFDGEPQP\ | 111  | >VHL-Y98F-r LNFDGEPQPF | 28    | 83    |
| >VHL-Y98N-v YPTLPPGTGR | 474  | >VHL-Y98N-n NPTLPPGTGR | 644   | 170   |
| >VHL-Y98N-v YPTLPPGT   | 313  | >VHL-Y98N-n NPTLPPGT   | 3071  | 2758  |
| >VHL-Y98N-v YPTLPPGTG  | 410  | >VHL-Y98N-n NPTLPPGTG  | 3277  | 2867  |
| >VHL-Y98N-v PYPTLPPGTG | 66   | >VHL-Y98N-n PNPTLPPGTG | 3624  | 3558  |
| >VHL-Y98N-v WLNFDGEPQ  | 50   | >VHL-Y98N-n WLNFDGEPQ  | 18981 | 18931 |
| >VHL-Y98N-v WLNFDGEPQ  | 54   | >VHL-Y98N-n WLNFDGEPQ  | 11950 | 11896 |
| >VHL-Y98N-v WLNFDGEPQ  | 52   | >VHL-Y98N-n WLNFDGEPQ  | 15018 | 14966 |
| >VHL-Y98N-v WLNFDGEPQ  | 102  | >VHL-Y98N-n WLNFDGEPQ  | 14744 | 14642 |
| >VHL-Y98N-v WLNFDGEPQ  | 90   | >VHL-Y98N-n WLNFDGEPQ  | 13359 | 13269 |
| >VHL-Y98N-v WLNFDGEPQ  | 182  | >VHL-Y98N-n WLNFDGEPQ  | 32074 | 31892 |
| >VHL-Y98N-v QPYPTLPPG  | 497  | >VHL-Y98N-n QPNPTLPPG  | 1137  | 640   |
| >VHL-Y98N-v QPYPTLPPG  | 159  | >VHL-Y98N-n QPNPTLPPG  | 593   | 434   |
| >VHL-Y98N-v EPQPYPTL   | 420  | >VHL-Y98N-n EPQPNPTL   | 488   | 68    |
| >VHL-Y98N-v GEPQPYPTL  | 197  | >VHL-Y98N-n GEPQPNPTL  | 294   | 97    |
| >VHL-Y98N-v GEPQPYPTL  | 460  | >VHL-Y98N-n GEPQPNPTL  | 728   | 268   |
| >VHL-Y98N-v NFDGEPQPY  | 338  | >VHL-Y98N-n NFDGEPQPN  | 21875 | 21537 |
| >VHL-Y98N-v LNFDGEPQP\ | 165  | >VHL-Y98N-n LNFDGEPQPI | 18058 | 17893 |

|                         |       |                         |       |       |
|-------------------------|-------|-------------------------|-------|-------|
| >VHL-Y98N-v LNFDFGEPQPY | 111   | >VHL-Y98N-r LNFDFGEPQPI | 14501 | 14390 |
| >WAS-P417S PALVPAGGL    | 2746  | >WAS-P417S SALVPAGGL    | 127   | 2619  |
| >WAS-P417S PALVPAGGL    | 4521  | >WAS-P417S SALVPAGGL    | 57    | 4464  |
| >WAS-P417S PPALVPAGGL   | 370   | >WAS-P417S PSALVPAGGL   | 17907 | 17537 |
| >WAS-P417S LPPALVPAGG   | 148   | >WAS-P417S LPSALVPAGG   | 872   | 724   |
| >WAS-P417S LPPALVPA     | 1388  | >WAS-P417S LPSALVPA     | 315   | 1073  |
| >WAS-P417S LPPALVPAGG   | 378   | >WAS-P417S LPSALVPAGG   | 78    | 300   |
| >WAS-P417S LPPALVPA     | 989   | >WAS-P417S LPSALVPA     | 111   | 878   |
| >WAS-P417S LPPALVPAG    | 1002  | >WAS-P417S LPSALVPAG    | 110   | 892   |
| >WAS-P417S LPPALVPAGG   | 1594  | >WAS-P417S LPSALVPAGG   | 174   | 1420  |
| >WAS-P417S LPPALVPA     | 8     | >WAS-P417S LPSALVPA     | 7     | 1     |
| >WAS-P417S LPPALVPAG    | 119   | >WAS-P417S LPSALVPAG    | 130   | 11    |
| >WAS-P417S LPPALVPAGG   | 1203  | >WAS-P417S LPSALVPAGG   | 427   | 776   |
| >WAS-P417S LPPALVPAGG   | 197   | >WAS-P417S LPSALVPAGG   | 12626 | 12429 |
| >WAS-P417S PLPPALVPA    | 460   | >WAS-P417S PLPSALVPA    | 1456  | 996   |
| >WAS-P417S PLPPALVPA    | 73    | >WAS-P417S PLPSALVPA    | 229   | 156   |
| >WAS-P417S PPPLPPALVP,  | 266   | >WAS-P417S PPPLPSALVP,  | 244   | 22    |
| >WAS-P417S PPPLPPALV    | 1293  | >WAS-P417S PPPLPSALV    | 259   | 1034  |
| >WAS-P417S APPPLPPAL    | 296   | >WAS-P417S APPPLPSAL    | 760   | 464   |
| >WAS-P417S APPPLPPAL    | 24    | >WAS-P417S APPPLPSAL    | 162   | 138   |
| >WAS-P417S APPPLPPAL    | 169   | >WAS-P417S APPPLPSAL    | 61    | 108   |
| >WAS-P417S APPPLPPA     | 219   | >WAS-P417S APPPLPSA     | 951   | 732   |
| >WAS-P417S APPPLPPAL    | 286   | >WAS-P417S APPPLPSAL    | 734   | 448   |
| >WAS-P417S APPPLPPALV   | 130   | >WAS-P417S APPPLPSALV   | 85    | 45    |
| >WAS-P417S PAPPPLPPAL   | 29    | >WAS-P417S PAPPPLPSAL   | 52    | 23    |
| >WAS-P417S PAPPPLPPAL'  | 18    | >WAS-P417S PAPPPLPSAL\  | 11    | 7     |
| >WAS-P417S GPAPPPLPPA   | 32    | >WAS-P417S GPAPPPLPSA   | 17    | 15    |
| >WAS-P417S GPAPPPLPPA   | 529   | >WAS-P417S GPAPPPLPSA   | 447   | 82    |
| >WAS-P417S GPAPPPLPPA   | 176   | >WAS-P417S GPAPPPLPSA   | 162   | 14    |
| >WHSC1L1-G TGDGKFIDQF   | 23953 | >WHSC1L1-G TEDGKFIDQF   | 255   | 23698 |
| >WHSC1L1-G TGDGKFIDQF   | 22646 | >WHSC1L1-G TEDGKFIDQF   | 167   | 22479 |
| >WHSC1L1-G TGDGKFIDQF   | 28084 | >WHSC1L1-G TEDGKFIDQF   | 263   | 27821 |
| >WHSC1L1-G TGDGKFIDQF   | 37304 | >WHSC1L1-G TEDGKFIDQF   | 307   | 36997 |
| >WHSC1L1-G ATGDGKFIDC   | 380   | >WHSC1L1-G ATEDGKFIDQ   | 1898  | 1518  |
| >WHSC1L1-G ATGDGKFI     | 798   | >WHSC1L1-G ATEDGKFI     | 411   | 387   |
| >WHSC1L1-G ATGDGKFIDC   | 22    | >WHSC1L1-G ATEDGKFIDQ   | 12    | 10    |
| >WHSC1L1-G ATGDGKFIDC   | 121   | >WHSC1L1-G ATEDGKFIDQ   | 42    | 79    |
| >WHSC1L1-G ATGDGKFI     | 42    | >WHSC1L1-G ATEDGKFI     | 75    | 33    |
| >WHSC1L1-G NATGDGKF     | 483   | >WHSC1L1-G NATEDGKF     | 324   | 159   |
| >WHSC1L1-G QNATGDGKF    | 526   | >WHSC1L1-G QNATEDGKFI   | 415   | 111   |
| >WHSC1L1-G LQNATGDGK    | 231   | >WHSC1L1-G LQNATEDGKI   | 180   | 51    |
| >WHSC1L1-G LQNATGDGK    | 221   | >WHSC1L1-G LQNATEDGKI   | 286   | 65    |
| >WHSC1L1-G LQNATGDGK    | 63    | >WHSC1L1-G LQNATEDGKI   | 132   | 69    |

|                       |       |                        |       |       |
|-----------------------|-------|------------------------|-------|-------|
| >WHSC1L1-G LQ NATGDGK | 161   | >WHSC1L1-G LQ NATEDGKI | 1057  | 896   |
| >WHSC1L1-G LQ NATGDGK | 38    | >WHSC1L1-G LQ NATEDGKI | 56    | 18    |
| >WHSC1L1-G LQ NATGDGK | 110   | >WHSC1L1-G LQ NATEDGKI | 153   | 43    |
| >WHSC1L1-G ALQ NATGDG | 62    | >WHSC1L1-G ALQ NATEDG  | 292   | 230   |
| >WHSC1L1-G ALQ NATGDG | 135   | >WHSC1L1-G ALQ NATEDG  | 332   | 197   |
| >WHSC1L1-G ALQ NATGDG | 285   | >WHSC1L1-G ALQ NATEDG  | 371   | 86    |
| >WHSC1L1-G ALQ NATGDG | 112   | >WHSC1L1-G ALQ NATEDG  | 334   | 222   |
| >WHSC1L1-G FALQ NATG  | 294   | >WHSC1L1-G FALQ NATE   | 4712  | 4418  |
| >WHSC1L1-G FALQ NATGD | 253   | >WHSC1L1-G FALQ NATEDC | 156   | 97    |
| >WHSC1L1-S SITMHKGS   | 177   | >WHSC1L1-S PITMHKGS    | 2301  | 2124  |
| >WHSC1L1-S ASITMHKGS  | 18110 | >WHSC1L1-S APITMHKGS   | 52    | 18058 |
| >WHSC1L1-S ASITMHKGS  | 17245 | >WHSC1L1-S APITMHKGS   | 43    | 17202 |
| >WHSC1L1-S ASITMHKGS  | 31    | >WHSC1L1-S APITMHKGS   | 18002 | 17971 |
| >WHSC1L1-S ASITMHKGS  | 177   | >WHSC1L1-S APITMHKGS   | 16770 | 16593 |
| >WHSC1L1-S PASITMHKGS | 10647 | >WHSC1L1-S PAPITMHKGS  | 260   | 10387 |
| >WHSC1L1-S LPASITMHK  | 177   | >WHSC1L1-S LPAPITMHK   | 396   | 219   |
| >WHSC1L1-S LPASITMH   | 67    | >WHSC1L1-S LPAPITMH    | 77    | 10    |
| >WHSC1L1-S LPASITMHK  | 496   | >WHSC1L1-S LPAPITMHK   | 554   | 58    |
| >WHSC1L1-S SLPASITM   | 438   | >WHSC1L1-S SLPAPITM    | 636   | 198   |
| >WHSC1L1-S SLPASITM   | 398   | >WHSC1L1-S SLPAPITM    | 1175  | 777   |
| >WHSC1L1-S SLPASITM   | 311   | >WHSC1L1-S SLPAPITM    | 651   | 340   |
| >WHSC1L1-S SLPASITM   | 61    | >WHSC1L1-S SLPAPITM    | 26    | 35    |
| >WHSC1L1-S SLPASITM   | 77    | >WHSC1L1-S SLPAPITM    | 131   | 54    |
| >WHSC1L1-S SLPASITM   | 30    | >WHSC1L1-S SLPAPITM    | 54    | 24    |
| >WHSC1L1-S SLPASITMHK | 26    | >WHSC1L1-S SLPAPITMHK  | 20    | 6     |
| >WHSC1L1-S SLPASITMHK | 11    | >WHSC1L1-S SLPAPITMHK  | 11    | 0     |
| >WHSC1L1-S SLPASITMHK | 140   | >WHSC1L1-S SLPAPITMHK  | 103   | 37    |
| >WHSC1L1-S SLPASITMHK | 73    | >WHSC1L1-S SLPAPITMHK  | 111   | 38    |
| >WHSC1L1-S KSLPASITMH | 43    | >WHSC1L1-S KSLPAPITMH  | 49    | 6     |
| >WHSC1L1-S KSLPASITMH | 14    | >WHSC1L1-S KSLPAPITMH  | 15    | 1     |
| >WHSC1L1-S KSLPASITM  | 12    | >WHSC1L1-S KSLPAPITM   | 20    | 8     |
| >WHSC1L1-S KSLPASITMH | 4     | >WHSC1L1-S KSLPAPITMH  | 4     | 0     |
| >WHSC1L1-S KSLPASITMH | 68    | >WHSC1L1-S KSLPAPITMH  | 85    | 17    |
| >WHSC1L1-S KSLPASITM  | 105   | >WHSC1L1-S KSLPAPITM   | 124   | 19    |
| >WHSC1L1-S KSLPASITM  | 59    | >WHSC1L1-S KSLPAPITM   | 63    | 4     |
| >WHSC1L1-S KSLPASIT   | 263   | >WHSC1L1-S KSLPAPIT    | 580   | 317   |
| >WHSC1L1-S KSLPASITM  | 3     | >WHSC1L1-S KSLPAPITM   | 3     | 0     |
| >WHSC1L1-S KSLPASITMH | 20    | >WHSC1L1-S KSLPAPITMH  | 41    | 21    |
| >WHSC1L1-S KSLPASITM  | 62    | >WHSC1L1-S KSLPAPITM   | 45    | 17    |
| >WHSC1L1-S KSLPASITM  | 14    | >WHSC1L1-S KSLPAPITM   | 14    | 0     |
| >WHSC1L1-S KSLPASITM  | 289   | >WHSC1L1-S KSLPAPITM   | 1219  | 930   |
| >WHSC1L1-S KSLPASITM  | 26    | >WHSC1L1-S KSLPAPITM   | 63    | 37    |
| >WHSC1L1-S KSLPASITMH | 204   | >WHSC1L1-S KSLPAPITMH  | 138   | 66    |

|                        |       |                        |      |       |
|------------------------|-------|------------------------|------|-------|
| >WHSC1L1-S KSLPASITMH  | 369   | >WHSC1L1-S KSLPAPITMH  | 365  | 4     |
| >WHSC1L1-S KSLPASITM   | 54    | >WHSC1L1-S KSLPAPITM   | 50   | 4     |
| >WHSC1L1-S RKSLPASI    | 33    | >WHSC1L1-S RKSLPAPI    | 38   | 5     |
| >WHSC1L1-S RKSLPASITM  | 12    | >WHSC1L1-S RKSLPAPITM  | 16   | 4     |
| >WHSC1L1-S RKSLPASITMI | 126   | >WHSC1L1-S RKSLPAPITMI | 238  | 112   |
| >WHSC1L1-S RKSLPASITM  | 42    | >WHSC1L1-S RKSLPAPITM  | 35   | 7     |
| >WHSC1L1-S RKSLPASI    | 4211  | >WHSC1L1-S RKSLPAPI    | 435  | 3776  |
| >WHSC1L1-S RKSLPASI    | 311   | >WHSC1L1-S RKSLPAPI    | 833  | 522   |
| >WHSC1L1-S ARKSLPASI   | 215   | >WHSC1L1-S ARKSLPAPI   | 181  | 34    |
| >WHSC1L1-S ARKSLPASITM | 70    | >WHSC1L1-S ARKSLPAPITM | 72   | 2     |
| >WHSC1L1-S ARKSLPASI   | 219   | >WHSC1L1-S ARKSLPAPI   | 152  | 67    |
| >WHSC1L1-S ARKSLPASITM | 117   | >WHSC1L1-S ARKSLPAPITM | 106  | 11    |
| >WHSC1L1-S ARKSLPASITM | 607   | >WHSC1L1-S ARKSLPAPITM | 466  | 141   |
| >WHSC1L1-S ARKSLPASI   | 354   | >WHSC1L1-S ARKSLPAPI   | 376  | 22    |
| >WHSC1L1-S ARKSLPASITM | 281   | >WHSC1L1-S ARKSLPAPITM | 182  | 99    |
| >WHSC1L1-S AARKSLPAS   | 19    | >WHSC1L1-S AARKSLPAP   | 53   | 34    |
| >WHSC1L1-S AARKSLPASI  | 7     | >WHSC1L1-S AARKSLPAPI  | 6    | 1     |
| >WHSC1L1-S AARKSLPASIT | 304   | >WHSC1L1-S AARKSLPAPIT | 110  | 194   |
| >WHSC1L1-S AARKSLPASI  | 189   | >WHSC1L1-S AARKSLPAPI  | 181  | 8     |
| >WHSC1L1-S AARKSLPASI  | 56    | >WHSC1L1-S AARKSLPAPI  | 39   | 17    |
| >WHSC1L1-S AAARKSLPAS  | 535   | >WHSC1L1-S AAARKSLPAP  | 439  | 96    |
| >WHSC1L1-S AAARKSLPAS  | 102   | >WHSC1L1-S AAARKSLPAP  | 187  | 85    |
| >WHSC1L1-S SAAIEETV    | 963   | >WHSC1L1-S FAAIEETV    | 49   | 914   |
| >WHSC1L1-S SAAIEETV    | 3024  | >WHSC1L1-S FAAIEETV    | 293  | 2731  |
| >WHSC1L1-S SAAIEETV    | 1026  | >WHSC1L1-S FAAIEETV    | 40   | 986   |
| >WHSC1L1-S SAAIEETV    | 885   | >WHSC1L1-S FAAIEETV    | 137  | 748   |
| >WHSC1L1-S SAAIEETV    | 515   | >WHSC1L1-S FAAIEETV    | 180  | 335   |
| >WHSC1L1-S SAAIEETV    | 338   | >WHSC1L1-S FAAIEETV    | 28   | 310   |
| >WHSC1L1-S SAAIEETV    | 334   | >WHSC1L1-S FAAIEETV    | 109  | 225   |
| >WHSC1L1-S VSAAIEETV   | 7148  | >WHSC1L1-S VFAAIEETV   | 419  | 6729  |
| >WHSC1L1-S VSAAIEETV   | 172   | >WHSC1L1-S VFAAIEETV   | 90   | 82    |
| >WHSC1L1-S VSAAIEETV   | 48    | >WHSC1L1-S VFAAIEETV   | 4928 | 4880  |
| >WHSC1L1-S GSVRFSDSSV  | 13485 | >WHSC1L1-S GSVRFSDSSV  | 99   | 13386 |
| >WHSC1L1-S GSVRFSDSSV  | 9280  | >WHSC1L1-S GSVRFSDSSV  | 41   | 9239  |
| >WHSC1L1-S GSVRFSDSSV  | 13221 | >WHSC1L1-S GSVRFSDSSV  | 11   | 13210 |
| >WHSC1L1-S GSVRFSDSSV  | 19908 | >WHSC1L1-S GSVRFSDSSV  | 177  | 19731 |
| >WHSC1L1-S GSVRFSDSSV  | 473   | >WHSC1L1-S GSVRFSDSSV  | 6    | 467   |
| >WHSC1L1-S SVSAAIEETV  | 710   | >WHSC1L1-S SVFAAIEETV  | 124  | 586   |
| >WHSC1L1-S SVSAAIEET   | 564   | >WHSC1L1-S SVFAAIEET   | 291  | 273   |
| >WHSC1L1-S SVSAAIEETV  | 44    | >WHSC1L1-S SVFAAIEETV  | 27   | 17    |
| >WHSC1L1-S SVSAAIEETV  | 110   | >WHSC1L1-S SVFAAIEETV  | 47   | 63    |
| >WHSC1L1-S SVSAAIEET   | 861   | >WHSC1L1-S SVFAAIEET   | 163  | 698   |
| >WHSC1L1-S SVSAAIEETV  | 529   | >WHSC1L1-S SVFAAIEETV  | 157  | 372   |

|                        |       |                        |     |       |
|------------------------|-------|------------------------|-----|-------|
| >WHSC1L1-S SVSAAIEETV  | 47    | >WHSC1L1-S SVFAAIEETV  | 5   | 42    |
| >WHSC1L1-S SVSAAIEETV  | 573   | >WHSC1L1-S SVFAAIEETV  | 104 | 469   |
| >WHSC1L1-S SVSAAIEETV  | 37    | >WHSC1L1-S SVFAAIEETV  | 11  | 26    |
| >WHSC1L1-S SVSAAIEETV  | 338   | >WHSC1L1-S SVFAAIEETV  | 367 | 29    |
| >WHSC1L1-S SVSAAIEETV  | 10    | >WHSC1L1-S SVFAAIEETV  | 7   | 3     |
| >WHSC1L1-S SVSAAIEETV  | 2558  | >WHSC1L1-S SVFAAIEETV  | 157 | 2401  |
| >WHSC1L1-S SVSAAIEET   | 189   | >WHSC1L1-S SVFAAIEET   | 45  | 144   |
| >WHSC1L1-S SVSAAIEETV  | 19    | >WHSC1L1-S SVFAAIEETV  | 16  | 3     |
| >WHSC1L1-S SVSAAIEETV  | 312   | >WHSC1L1-S SVFAAIEETV  | 53  | 259   |
| >WHSC1L1-S SSVSAAIEETV | 79    | >WHSC1L1-S SSVFAAIEETV | 40  | 39    |
| >WHSC1L1-S SSVSAAIEETV | 250   | >WHSC1L1-S SSVFAAIEETV | 461 | 211   |
| >WHSC1L1-S DSSVSAAI    | 435   | >WHSC1L1-S DSSVFAAI    | 150 | 285   |
| >WHSC1L1-S DSSVSAAI    | 663   | >WHSC1L1-S DSSVFAAI    | 457 | 206   |
| >WHSC1L1-S SDSSVSAAI   | 970   | >WHSC1L1-S SDSSVFAAI   | 431 | 539   |
| >WHSC1L1-S SDSSVSAAI   | 97    | >WHSC1L1-S SDSSVFAAI   | 68  | 29    |
| >WHSC1L1-S FSDSSVSA    | 784   | >WHSC1L1-S FSDSSVFA    | 192 | 592   |
| >WHSC1L1-S FSDSSVSAA   | 438   | >WHSC1L1-S FSDSSVFAA   | 133 | 305   |
| >WHSC1L1-S FSDSSVSAA   | 5532  | >WHSC1L1-S FSDSSVFAA   | 202 | 5330  |
| >WHSC1L1-S FSDSSVSA    | 1358  | >WHSC1L1-S FSDSSVFA    | 328 | 1030  |
| >WHSC1L1-S FSDSSVSAA   | 985   | >WHSC1L1-S FSDSSVFAA   | 179 | 806   |
| >WHSC1L1-S FSDSSVSAAI  | 937   | >WHSC1L1-S FSDSSVFAAI  | 476 | 461   |
| >WHSC1L1-S FSDSSVSA    | 421   | >WHSC1L1-S FSDSSVFA    | 111 | 310   |
| >WHSC1L1-S FSDSSVSAA   | 488   | >WHSC1L1-S FSDSSVFAA   | 41  | 447   |
| >WHSC1L1-S FSDSSVSAAI  | 633   | >WHSC1L1-S FSDSSVFAAI  | 181 | 452   |
| >WHSC1L1-S FSDSSVSAAI  | 536   | >WHSC1L1-S FSDSSVFAAI  | 301 | 235   |
| >WHSC1L1-S FSDSSVSAAI  | 360   | >WHSC1L1-S FSDSSVFAAI  | 92  | 268   |
| >WHSC1L1-S FSDSSVSAA   | 3519  | >WHSC1L1-S FSDSSVFAA   | 454 | 3065  |
| >WHSC1L1-S FSDSSVSAAI  | 281   | >WHSC1L1-S FSDSSVFAAI  | 110 | 171   |
| >WHSC1L1-S FSDSSVSAAI  | 94    | >WHSC1L1-S FSDSSVFAAI  | 244 | 150   |
| >WHSC1L1-S FSDSSVSAAI  | 177   | >WHSC1L1-S FSDSSVFAAI  | 224 | 47    |
| >WHSC1L1-S FSDSSVSAAI  | 349   | >WHSC1L1-S FSDSSVFAAI  | 109 | 240   |
| >WHSC1L1-S FSDSSVSAAI  | 45    | >WHSC1L1-S FSDSSVFAAI  | 45  | 0     |
| >WHSC1L1-S RFDSSVSAA   | 519   | >WHSC1L1-S RFDSSVFAA   | 444 | 75    |
| >WHSC1L1-S RFDSSVS     | 27344 | >WHSC1L1-S RFDSSVF     | 252 | 27092 |
| >WHSC1L1-S RFDSSVS     | 21485 | >WHSC1L1-S RFDSSVF     | 275 | 21210 |
| >WHSC1L1-S RFDSSVS     | 9532  | >WHSC1L1-S RFDSSVF     | 12  | 9520  |
| >WHSC1L1-S RFDSSVSAA   | 141   | >WHSC1L1-S RFDSSVFAA   | 61  | 80    |
| >WHSC1L1-S RFDSSVSA    | 117   | >WHSC1L1-S RFDSSVFA    | 36  | 81    |
| >WHSC1L1-S RFDSSVSAA   | 305   | >WHSC1L1-S RFDSSVFAA   | 196 | 109   |
| >WHSC1L1-S RFDSSVSAA   | 162   | >WHSC1L1-S RFDSSVFAA   | 191 | 29    |
| >WHSC1L1-S RFDSSVSAA   | 368   | >WHSC1L1-S RFDSSVFAA   | 763 | 395   |
| >WHSC1L1-S RFDSSVS     | 14525 | >WHSC1L1-S RFDSSVF     | 97  | 14428 |
| >WHSC1L1-S RFDSSVS     | 14939 | >WHSC1L1-S RFDSSVF     | 98  | 14841 |

|                        |       |                        |       |       |
|------------------------|-------|------------------------|-------|-------|
| >WHSC1L1-S RFDSSVSA    | 359   | >WHSC1L1-S RFDSSVFA    | 119   | 240   |
| >WHSC1L1-S RFDSSVSAA   | 350   | >WHSC1L1-S RFDSSVFAA   | 255   | 95    |
| >WHSC1L1-S VRFSDSSVS   | 338   | >WHSC1L1-S VRFSDSSVF   | 2     | 336   |
| >WHSC1L1-S VRFSDSSVSA  | 47    | >WHSC1L1-S VRFSDSSVFA  | 178   | 131   |
| >WHSC1L1-S VRFSDSSVSA  | 30    | >WHSC1L1-S VRFSDSSVFA  | 76    | 46    |
| >WHSC1L1-S VRFSDSSVS   | 2818  | >WHSC1L1-S VRFSDSSVF   | 392   | 2426  |
| >WHSC1L1-S VRFSDSSVSA  | 293   | >WHSC1L1-S VRFSDSSVFA  | 545   | 252   |
| >WHSC1L1-S VRFSDSSVSA  | 440   | >WHSC1L1-S VRFSDSSVFA  | 308   | 132   |
| >WHSC1L1-S VRFSDSSVS   | 2692  | >WHSC1L1-S VRFSDSSVF   | 16    | 2676  |
| >WHSC1L1-S VRFSDSSVS   | 15827 | >WHSC1L1-S VRFSDSSVF   | 205   | 15622 |
| >WHSC1L1-S SVRFSDSSVS  | 18955 | >WHSC1L1-S SVRFSDSSVF  | 407   | 18548 |
| >WHSC1L1-S SVRFSDSSVS  | 181   | >WHSC1L1-S SVRFSDSSVF  | 573   | 392   |
| >WHSC1L1-S SVRFSDSSVS/ | 7     | >WHSC1L1-S SVRFSDSSVF/ | 5     | 2     |
| >WHSC1L1-S SVRFSDSSVS  | 6162  | >WHSC1L1-S SVRFSDSSVF  | 31    | 6131  |
| >WHSC1L1-S SVRFSDSSVS  | 16548 | >WHSC1L1-S SVRFSDSSVF  | 134   | 16414 |
| >WHSC1L1-S SVRFSDSSVS  | 14536 | >WHSC1L1-S SVRFSDSSVF  | 79    | 14457 |
| >WHSC1L1-S SVRFSDSSVS  | 7707  | >WHSC1L1-S SVRFSDSSVF  | 39    | 7668  |
| >WHSC1L1-S SVRFSDSSVS  | 13286 | >WHSC1L1-S SVRFSDSSVF  | 63    | 13223 |
| >WHSC1L1-V WSKVGTYPW   | 5614  | >WHSC1L1-V SSKVGTYPW   | 354   | 5260  |
| >WHSC1L1-V WSKVGTYPW   | 489   | >WHSC1L1-V SSKVGTYPW   | 679   | 190   |
| >WHSC1L1-V WSKVGTYPW   | 7     | >WHSC1L1-V SSKVGTYPW   | 9     | 2     |
| >WHSC1L1-V WSKVGTYPW   | 8     | >WHSC1L1-V SSKVGTYPW\  | 11    | 3     |
| >WHSC1L1-V WSKVGTYPW   | 49    | >WHSC1L1-V SSKVGTYPW   | 53    | 4     |
| >WHSC1L1-V WSKVGTYPW   | 57    | >WHSC1L1-V SSKVGTYPW\  | 63    | 6     |
| >WHSC1L1-V WSKVGTYPW   | 47    | >WHSC1L1-V SSKVGTYPW   | 83    | 36    |
| >WHSC1L1-V WSKVGTYPW   | 59    | >WHSC1L1-V SSKVGTYPW\  | 107   | 48    |
| >WHSC1L1-V VWSKVGTY    | 19926 | >WHSC1L1-V VSSKVGTY    | 181   | 19745 |
| >WHSC1L1-V VWSKVGTYP'  | 23    | >WHSC1L1-V VSSKVGTYPW  | 6244  | 6221  |
| >WHSC1L1-V VWSKVGTYP'  | 32    | >WHSC1L1-V VSSKVGTYPW  | 2308  | 2276  |
| >WHSC1L1-V VWSKVGTYP'  | 347   | >WHSC1L1-V VSSKVGTYPW  | 6317  | 5970  |
| >WHSC1L1-V VWSKVGTYP'  | 403   | >WHSC1L1-V VSSKVGTYPW  | 16269 | 15866 |
| >WHSC1L1-V VWSKVGTYP'  | 129   | >WHSC1L1-V VSSKVGTYPW  | 12992 | 12863 |
| >WHSC1L1-V VWSKVGTYP'  | 233   | >WHSC1L1-V VSSKVGTYPW  | 1048  | 815   |
| >WHSC1L1-V VWSKVGTY    | 54    | >WHSC1L1-V VSSKVGTY    | 30    | 24    |
| >WHSC1L1-V VWSKVGTY    | 6996  | >WHSC1L1-V VSSKVGTY    | 175   | 6821  |
| >WHSC1L1-V VWSKVGTY    | 21426 | >WHSC1L1-V VSSKVGTY    | 11    | 21415 |
| >WHSC1L1-V VWSKVGTYP'  | 12448 | >WHSC1L1-V VSSKVGTYPW  | 10    | 12438 |
| >WHSC1L1-V VWSKVGTYP'  | 10843 | >WHSC1L1-V VSSKVGTYPW  | 13    | 10830 |
| >WHSC1L1-V VWSKVGTYP'  | 11508 | >WHSC1L1-V VSSKVGTYPW  | 43    | 11465 |
| >WHSC1L1-V VWSKVGTYP'  | 12599 | >WHSC1L1-V VSSKVGTYPW  | 44    | 12555 |
| >WHSC1L1-V VWSKVGTY    | 19298 | >WHSC1L1-V VSSKVGTY    | 272   | 19026 |
| >WHSC1L1-V VWSKVGTYP'  | 1306  | >WHSC1L1-V VSSKVGTYPW  | 11    | 1295  |
| >WHSC1L1-V VWSKVGTYP'  | 1980  | >WHSC1L1-V VSSKVGTYPW  | 12    | 1968  |

|                        |       |                        |       |       |
|------------------------|-------|------------------------|-------|-------|
| >WHSC1L1-V VWSKVGTY    | 14767 | >WHSC1L1-V VSSKVGTY    | 67    | 14700 |
| >WHSC1L1-V VWSKVGTYP'  | 6814  | >WHSC1L1-V VSSKVGTYPV  | 115   | 6699  |
| >WHSC1L1-V VWSKVGTY    | 461   | >WHSC1L1-V VSSKVGTY    | 360   | 101   |
| >WHSC1L1-V VWSKVGTYP'  | 1201  | >WHSC1L1-V VSSKVGTYPV  | 183   | 1018  |
| >WHSC1L1-V VWSKVGTYP   | 441   | >WHSC1L1-V VSSKVGTYP   | 32936 | 32495 |
| >WHSC1L1-V LVWSKVGTY   | 106   | >WHSC1L1-V LVSSKVGTY   | 102   | 4     |
| >WHSC1L1-V LVWSKVGTY   | 24    | >WHSC1L1-V LVSSKVGTY   | 102   | 78    |
| >WHSC1L1-V LVWSKVGTY   | 21    | >WHSC1L1-V LVSSKVGTY   | 22    | 1     |
| >WHSC1L1-V LVWSKVGTYI  | 123   | >WHSC1L1-V LVSSKVGTYP' | 859   | 736   |
| >WHSC1L1-V LVWSKVGTY   | 261   | >WHSC1L1-V LVSSKVGTY   | 501   | 240   |
| >WHSC1L1-V LVWSKVGTY   | 120   | >WHSC1L1-V LVSSKVGTY   | 78    | 42    |
| >WHSC1L1-V LVWSKVGTY   | 23    | >WHSC1L1-V LVSSKVGTY   | 91    | 68    |
| >WHSC1L1-V LVWSKVGTYI  | 25    | >WHSC1L1-V LVSSKVGTYP' | 68    | 43    |
| >WHSC1L1-V LVWSKVGTY   | 58    | >WHSC1L1-V LVSSKVGTY   | 224   | 166   |
| >WHSC1L1-V LVWSKVGTYI  | 358   | >WHSC1L1-V LVSSKVGTYP' | 1408  | 1050  |
| >WHSC1L1-V LVWSKVGTYI  | 161   | >WHSC1L1-V LVSSKVGTYP' | 319   | 158   |
| >WHSC1L1-V LVWSKVGTYI  | 140   | >WHSC1L1-V LVSSKVGTYP' | 436   | 296   |
| >WHSC1L1-V LVWSKVGTYI  | 43    | >WHSC1L1-V LVSSKVGTYP' | 37    | 6     |
| >WHSC1L1-V LVWSKVGTY   | 68    | >WHSC1L1-V LVSSKVGTY   | 54    | 14    |
| >WHSC1L1-V LVWSKVGTY   | 104   | >WHSC1L1-V LVSSKVGTY   | 51    | 53    |
| >WHSC1L1-V LVWSKVGTYI  | 189   | >WHSC1L1-V LVSSKVGTYP' | 174   | 15    |
| >WHSC1L1-V LVWSKVGTYI  | 309   | >WHSC1L1-V LVSSKVGTYP' | 159   | 150   |
| >WHSC1L1-V DLVWSKVGTY  | 143   | >WHSC1L1-V DLVSSKVGTY  | 77    | 66    |
| >WHSC1L1-V DLVWSKVGTY  | 224   | >WHSC1L1-V DLVSSKVGTY  | 294   | 70    |
| >WHSC1L1-V DLVWSKVGTY  | 190   | >WHSC1L1-V DLVSSKVGTY  | 124   | 66    |
| >WHSC1L1-V DLVWSKVGTY  | 864   | >WHSC1L1-V DLVSSKVGTY  | 318   | 546   |
| >WHSC1L1-V GDLVWSKVGTY | 392   | >WHSC1L1-V GDLVSSKVGTY | 586   | 194   |
| >WHSC1L1-V GDLVWSKV    | 257   | >WHSC1L1-V GDLVSSKV    | 110   | 147   |
| >WHSC1L1-V QVGDVWSKV   | 469   | >WHSC1L1-V QVGDVSSKV   | 348   | 121   |
| >WHSC1L1-V QVGDVWSKV   | 93    | >WHSC1L1-V QVGDVSSKV   | 237   | 144   |
| >WHSC1L1-V QVGDVWSKV   | 184   | >WHSC1L1-V QVGDVSSKV   | 679   | 495   |
| >WHSC1L1-V QVGDVWSKV   | 288   | >WHSC1L1-V QVGDVSSKV   | 519   | 231   |
| >WHSC1L1-V QVGDVWSKV   | 40    | >WHSC1L1-V QVGDVSSKV   | 48    | 8     |
| >WHSC1L1-V QVGDVWSKV   | 28    | >WHSC1L1-V QVGDVSSK    | 56    | 28    |
| >WHSC1L1-V QVGDVWSKV   | 260   | >WHSC1L1-V QVGDVSSK    | 214   | 46    |
| >WHSC1L1-V QVGDVWSKV   | 111   | >WHSC1L1-V QVGDVSSKV   | 117   | 6     |
| >WHSC1L1-V FQVGDVWSKV  | 50    | >WHSC1L1-V FQVGDVSSK   | 57    | 7     |
| >WHSC1L1-V FQVGDVWSKV  | 22    | >WHSC1L1-V FQVGDVSSK   | 13    | 9     |
| >WHSC1L1-V FQVGDVWSKV  | 10    | >WHSC1L1-V FQVGDVSSK   | 8     | 2     |
| >WHSC1L1-V FQVGDVWS    | 638   | >WHSC1L1-V FQVGDVSS    | 78    | 560   |
| >WHSC1L1-V FQVGDVWS    | 14    | >WHSC1L1-V FQVGDVSS    | 9     | 5     |
| >WHSC1L1-V FQVGDVWS    | 360   | >WHSC1L1-V FQVGDVSSK   | 1721  | 1361  |
| >WHSC1L1-V FQVGDVWS    | 3     | >WHSC1L1-V FQVGDVSSK   | 4     | 1     |

|                        |      |                        |       |       |
|------------------------|------|------------------------|-------|-------|
| >WHSC1L1-V FQVGDVWS    | 18   | >WHSC1L1-V FQVGDVSSK   | 22    | 4     |
| >WHSC1L1-V FQVGDVWS    | 121  | >WHSC1L1-V FQVGDVSSK   | 46    | 75    |
| >WHSC1L1-V FQVGDVWS    | 51   | >WHSC1L1-V FQVGDVSSK   | 61    | 10    |
| >WHSC1L1-V FQVGDVWS    | 35   | >WHSC1L1-V FQVGDVSSK   | 28    | 7     |
| >WHSC1L1-V FQVGDVWS    | 269  | >WHSC1L1-V FQVGDVSSK   | 445   | 176   |
| >WHSC1L1-V FQVGDVW     | 278  | >WHSC1L1-V FQVGDVSS    | 3525  | 3247  |
| >WHSC1L1-V FQVGDVWS    | 1112 | >WHSC1L1-V FQVGDVSSK   | 329   | 783   |
| >WHSC1L1-V FQVGDVWS    | 524  | >WHSC1L1-V FQVGDVSSK   | 223   | 301   |
| >WHSC1L1-V FQVGDVW     | 239  | >WHSC1L1-V FQVGDVSS    | 33210 | 32971 |
| >WHSC1L1-V FQVGDVW     | 234  | >WHSC1L1-V FQVGDVSS    | 21877 | 21643 |
| >WHSC1L1-V FQVGDVW     | 37   | >WHSC1L1-V FQVGDVSS    | 29427 | 29390 |
| >WHSC1L1-V FQVGDVW     | 54   | >WHSC1L1-V FQVGDVSS    | 30160 | 30106 |
| >WHSC1L1-V KFQVGDVW    | 427  | >WHSC1L1-V KFQVGDVSS   | 20033 | 19606 |
| >WHSC1L1-V KFQVGDVW    | 189  | >WHSC1L1-V KFQVGDVSS   | 10527 | 10338 |
| >WHSC1L1-V KFQVGDVW    | 108  | >WHSC1L1-V KFQVGDVSS   | 71    | 37    |
| >WHSC1L1-V KFQVGDVW    | 130  | >WHSC1L1-V KFQVGDVSS   | 229   | 99    |
| >WHSC1L1-V KFQVGDVW    | 31   | >WHSC1L1-V KFQVGDVSS   | 19401 | 19370 |
| >WHSC1L1-V KFQVGDVW    | 250  | >WHSC1L1-V KFQVGDVSS   | 948   | 698   |
| >WHSC1L1-V VKFQVGDVW   | 130  | >WHSC1L1-V VKFQVGDVSS  | 1796  | 1666  |
| >WHSC1L1-V VKFQVGDVW   | 407  | >WHSC1L1-V VKFQVGDVSS  | 32964 | 32557 |
| >WRN-D511I EEDDENE     | 239  | >WRN-D511I EENDENE     | 31    | 208   |
| >WRN-D511I EEEDDENE    | 74   | >WRN-D511I EEENDENE    | 59    | 15    |
| >WRN-D511I EEEEDDENE   | 260  | >WRN-D511I EEEENDENE   | 196   | 64    |
| >WRN-D511I KEEEDDENE   | 217  | >WRN-D511I KEEENDENE   | 156   | 61    |
| >WRN-E469C EDLEMEML    | 1519 | >WRN-E469C GDLEMEML    | 317   | 1202  |
| >WRN-E469C EDLEMEMLK   | 381  | >WRN-E469C GDLEMEMLK   | 74    | 307   |
| >WRN-E469C EDLEMEML    | 2745 | >WRN-E469C GDLEMEML    | 142   | 2603  |
| >WRN-E469C EDLEMEMLK   | 3336 | >WRN-E469C GDLEMEMLK   | 173   | 3163  |
| >WRN-E469C EDLEMEML    | 341  | >WRN-E469C GDLEMEML    | 262   | 79    |
| >WRN-E469C DEDLEMEM    | 167  | >WRN-E469C DGDLEMEM    | 20022 | 19855 |
| >WRN-E469C DEDLEMEML   | 211  | >WRN-E469C DGDLEMEML   | 385   | 174   |
| >WRN-E469C SDEDLEMEM   | 289  | >WRN-E469C SDGDLEMEM   | 976   | 687   |
| >WRN-E469C ESDLEMEM    | 275  | >WRN-E469C ESGDLEMEM   | 1529  | 1254  |
| >WRN-E469C ESDLEMEM    | 94   | >WRN-E469C ESGDLEMEM   | 546   | 452   |
| >WRN-E469C IESDEDLEM   | 372  | >WRN-E469C IESDGDLEM   | 99    | 273   |
| >WRN-E469C IESDEDLEME  | 321  | >WRN-E469C IESDGDLEME  | 135   | 186   |
| >WRN-E469C IESDEDLEM   | 490  | >WRN-E469C IESDGDLEM   | 52    | 438   |
| >WRN-E469C IESDEDLEME  | 272  | >WRN-E469C IESDGDLEME  | 66    | 206   |
| >WRN-E469C IESDEDLEME  | 531  | >WRN-E469C IESDGDLEME  | 302   | 229   |
| >WRN-E469C YVIESDEDLEM | 214  | >WRN-E469C YVIESDGDLEI | 282   | 68    |
| >WRN-E469C YVIESDEDL   | 464  | >WRN-E469C YVIESDGDLEI | 2631  | 2167  |
| >WRN-E469C YVIESDEDL   | 99   | >WRN-E469C YVIESDGDLEI | 435   | 336   |
| >WRN-E469C YVIESDEDLEM | 39   | >WRN-E469C YVIESDGDLEI | 51    | 12    |



|                        |       |                        |      |       |
|------------------------|-------|------------------------|------|-------|
| >WRN-E469C YVIESDEDL   | 238   | >WRN-E469C YVIESDGDL   | 1030 | 792   |
| >WRN-E469C YVIESDEDL   | 101   | >WRN-E469C YVIESDGDL   | 385  | 284   |
| >WRN-E469C YVIESDEDL   | 6065  | >WRN-E469C YVIESDGDL   | 369  | 5696  |
| >WRN-E469C YVIESDEDLEM | 56    | >WRN-E469C YVIESDGDLEI | 24   | 32    |
| >WRN-E469C YVIESDEDL   | 100   | >WRN-E469C YVIESDGDL   | 74   | 26    |
| >WRN-E469C YVIESDEDLEM | 19    | >WRN-E469C YVIESDGDLEI | 15   | 4     |
| >WRN-E469C YVIESDEDLEM | 883   | >WRN-E469C YVIESDGDLEI | 426  | 457   |
| >WRN-E469C YVIESDEDLEM | 726   | >WRN-E469C YVIESDGDLEI | 417  | 309   |
| >WRN-E469C YVIESDEDL   | 196   | >WRN-E469C YVIESDGDL   | 534  | 338   |
| >WRN-E469C YVIESDEDLEM | 220   | >WRN-E469C YVIESDGDLEI | 184  | 36    |
| >WRN-E469C YVIESDEDLEM | 1395  | >WRN-E469C YVIESDGDLEI | 476  | 919   |
| >WRN-E469C YVIESDEDLEM | 75    | >WRN-E469C YVIESDGDLEI | 43   | 32    |
| >WRN-E469C YVIESDEDLEM | 18    | >WRN-E469C YVIESDGDLEI | 16   | 2     |
| >WRN-E469C SYVIESDEDL  | 306   | >WRN-E469C SYVIESDGDL  | 200  | 106   |
| >WRN-E469C SYVIESDEDL  | 51    | >WRN-E469C SYVIESDGDL  | 78   | 27    |
| >WRN-E469C TSYVIESDEDL | 645   | >WRN-E469C TSYVIESDGD  | 421  | 224   |
| >WRN-E469C TSYVIESDEDL | 179   | >WRN-E469C TSYVIESDGD  | 139  | 40    |
| >WRN-G92V·GKLGKVAL     | 501   | >WRN-G92V·VKLGKVAL     | 122  | 379   |
| >WRN-G92V·GKLGKVAL     | 545   | >WRN-G92V·VKLGKVAL     | 307  | 238   |
| >WRN-G92V·GKLGKVAL     | 424   | >WRN-G92V·VKLGKVAL     | 1536 | 1112  |
| >WRN-G92V·RGKLGKVA     | 658   | >WRN-G92V·RVKLGKVA     | 24   | 634   |
| >WRN-G92V·RGKLGKVAL    | 996   | >WRN-G92V·RVKLGKVAL    | 29   | 967   |
| >WRN-G92V·RGKLGKVALI   | 124   | >WRN-G92V·RVKLGKVALI   | 9    | 115   |
| >WRN-G92V·RGKLGKVALIK  | 1846  | >WRN-G92V·RVKLGKVALIK  | 92   | 1754  |
| >WRN-G92V·RGKLGKVAL    | 2686  | >WRN-G92V·RVKLGKVAL    | 40   | 2646  |
| >WRN-G92V·DMEWPPLYN    | 19053 | >WRN-G92V·DMEWPPLYN    | 59   | 18994 |
| >WRN-G92V·DMEWPPLYN    | 29572 | >WRN-G92V·DMEWPPLYN    | 29   | 29543 |
| >WRN-G92V·DMEWPPLYN    | 18661 | >WRN-G92V·DMEWPPLYN    | 277  | 18384 |
| >WRN-G92V·NRGKLGKVAI   | 1295  | >WRN-G92V·NRVKGKVAL    | 310  | 985   |
| >WRN-G92V·NRGKLGKVAI   | 1946  | >WRN-G92V·NRVKGKVAL    | 435  | 1511  |
| >WRN-G92V·NRGKLGKVAI   | 295   | >WRN-G92V·NRVKGKVAL    | 26   | 269   |
| >WRN-G92V·YNRGKLGK     | 469   | >WRN-G92V·YNRVKGK      | 317  | 152   |
| >WRN-G92V·YNRGKLGKV/   | 485   | >WRN-G92V·YNRVKGKV/    | 1169 | 684   |
| >WRN-G92V·YNRGKLGKV/   | 476   | >WRN-G92V·YNRVKGKV/    | 191  | 285   |
| >WRN-G92V·LYNRGKLGK    | 165   | >WRN-G92V·LYNRVKGK     | 202  | 37    |
| >WRN-G92V·PLYNRGKLGK   | 106   | >WRN-G92V·PLYNRVKGK    | 43   | 63    |
| >WRN-G92V·PLYNRGK      | 384   | >WRN-G92V·PLYNRVK      | 94   | 290   |
| >WRN-G92V·PLYNRGKLGK   | 12    | >WRN-G92V·PLYNRVKGK    | 9    | 3     |
| >WRN-G92V·PLYNRGK      | 1194  | >WRN-G92V·PLYNRVK      | 203  | 991   |
| >WRN-G92V·PLYNRGKLGK   | 40    | >WRN-G92V·PLYNRVKGK    | 29   | 11    |
| >WRN-G92V·PLYNRGK      | 105   | >WRN-G92V·PLYNRVK      | 24   | 81    |
| >WRN-G92V·PLYNRGKLGK   | 11    | >WRN-G92V·PLYNRVKGK    | 8    | 3     |
| >WRN-G92V·PLYNRGKLGK   | 55    | >WRN-G92V·PLYNRVKGK    | 42   | 13    |

|                        |       |                       |      |       |
|------------------------|-------|-----------------------|------|-------|
| >WRN-G92V·PPLYNRGKL    | 147   | >WRN-G92V·PPLYNRVKL   | 38   | 109   |
| >WRN-G92V·WPPLYNRG     | 1431  | >WRN-G92V·WPPLYNRV    | 125  | 1306  |
| >WRN-G92V·EWPPLYNRG    | 4555  | >WRN-G92V·EWPPLYNRV   | 496  | 4059  |
| >WRN-G92V·EWPPLYNRG    | 45    | >WRN-G92V·EWPPLYNRVI  | 28   | 17    |
| >WRN-G92V·EWPPLYNRG    | 181   | >WRN-G92V·EWPPLYNRVI  | 189  | 8     |
| >WRN-G92V·EWPPLYNRG    | 629   | >WRN-G92V·EWPPLYNRV   | 268  | 361   |
| >WRN-G92V·EWPPLYNRG    | 245   | >WRN-G92V·EWPPLYNRVI  | 275  | 30    |
| >WRN-G92V·MEWPPLYNR    | 14736 | >WRN-G92V·MEWPPLYNR   | 145  | 14591 |
| >WRN-G92V·MEWPPLYNR    | 19594 | >WRN-G92V·MEWPPLYNR   | 147  | 19447 |
| >WRN-G92V·MEWPPLYNR    | 35737 | >WRN-G92V·MEWPPLYNR   | 382  | 35355 |
| >WRN-G92V·MEWPPLYNR    | 284   | >WRN-G92V·MEWPPLYNR   | 191  | 93    |
| >WRN-G92V·MEWPPLYNR    | 18404 | >WRN-G92V·MEWPPLYNR   | 57   | 18347 |
| >WRN-I631M IKLGKYRIVYV | 721   | >WRN-I631M MKLGKYRIVY | 243  | 478   |
| >WRN-I631M IKLGKYRIVYV | 204   | >WRN-I631M MKLGKYRIVY | 100  | 104   |
| >WRN-I631M IKLGKYRIV   | 547   | >WRN-I631M MKLGKYRIV  | 408  | 139   |
| >WRN-I631M IKLGKYRIVY  | 13    | >WRN-I631M MKLGKYRIVY | 11   | 2     |
| >WRN-I631M IKLGKYRIVYV | 184   | >WRN-I631M MKLGKYRIVY | 143  | 41    |
| >WRN-I631M DIKLGKYRIVY | 1292  | >WRN-I631M DMKLGKYRIV | 293  | 999   |
| >WRN-I631M DIKLGKYR    | 333   | >WRN-I631M DMKLGKYR   | 71   | 262   |
| >WRN-I631M DIKLGKYR    | 21    | >WRN-I631M DMKLGKYR   | 16   | 5     |
| >WRN-I631M DIKLGKYR    | 156   | >WRN-I631M DMKLGKYR   | 401  | 245   |
| >WRN-I631M DIKLGKYR    | 529   | >WRN-I631M DMKLGKYR   | 312  | 217   |
| >WRN-I631M SAQSENVLTC  | 210   | >WRN-I631M SAQSENVLTC | 5087 | 4877  |
| >WRN-I631M TDIKLGKYRI  | 538   | >WRN-I631M TDMKLGKYRI | 454  | 84    |
| >WRN-I631M TDIKLGKYR   | 469   | >WRN-I631M TDMKLGKYR  | 312  | 157   |
| >WRN-I631M TDIKLGKYRI  | 132   | >WRN-I631M TDMKLGKYRI | 176  | 44    |
| >WRN-I631M TDIKLGKYRIV | 372   | >WRN-I631M TDMKLGKYRI | 560  | 188   |
| >WRN-I631M LTDIKLGKY   | 9     | >WRN-I631M LTDMKLGKY  | 7    | 2     |
| >WRN-I631M LTDIKLGK    | 220   | >WRN-I631M LTDMKLGK   | 121  | 99    |
| >WRN-I631M LTDIKLGKY   | 113   | >WRN-I631M LTDMKLGKY  | 114  | 1     |
| >WRN-I631M LTDIKLGKYR  | 210   | >WRN-I631M LTDMKLGKYF | 165  | 45    |
| >WRN-I631M LTDIKLGKYR  | 843   | >WRN-I631M LTDMKLGKYF | 461  | 382   |
| >WRN-I631M LTDIKLGKYR  | 136   | >WRN-I631M LTDMKLGKYF | 138  | 2     |
| >WRN-I631M LTDIKLGKY   | 11    | >WRN-I631M LTDMKLGKY  | 18   | 7     |
| >WRN-I631M LTDIKLGKYRI | 140   | >WRN-I631M LTDMKLGKYF | 244  | 104   |
| >WRN-I631M LTDIKLGKY   | 150   | >WRN-I631M LTDMKLGKY  | 82   | 68    |
| >WRN-I631M LTDIKLGKY   | 439   | >WRN-I631M LTDMKLGKY  | 406  | 33    |
| >WRN-I631M LTDIKLGKYRI | 183   | >WRN-I631M LTDMKLGKYF | 238  | 55    |
| >WRN-I631M VLTDIKLGKY  | 167   | >WRN-I631M VLTDIKLGK^ | 112  | 55    |
| >WRN-I631M VLTDIKLGK   | 126   | >WRN-I631M VLTDIKLGK  | 94   | 32    |
| >WRN-I631M VLTDIKLGK   | 176   | >WRN-I631M VLTDIKLGK  | 186  | 10    |
| >WRN-I631M VLTDIKLGK   | 130   | >WRN-I631M VLTDIKLGK  | 115  | 15    |
| >WRN-I631M VLTDIKLGKY  | 39    | >WRN-I631M VLTDIKLGK^ | 35   | 4     |

|                        |      |                        |       |       |
|------------------------|------|------------------------|-------|-------|
| >WRN-I631M VLTDIKLGKYF | 114  | >WRN-I631M VLTDIKLGKYF | 141   | 27    |
| >WRN-I631M VLTDIKLGKYF | 460  | >WRN-I631M VLTDIKLGKYF | 932   | 472   |
| >WRN-I631M VLTDIKLGKY  | 67   | >WRN-I631M VLTDIKLGKY  | 100   | 33    |
| >WRN-I631M VLTDIKLGKY  | 327  | >WRN-I631M VLTDIKLGKY  | 161   | 166   |
| >WRN-I631M VLTDIKLGKYF | 87   | >WRN-I631M VLTDIKLGKYF | 132   | 45    |
| >WRN-I631M NVLTDIKLGK  | 168  | >WRN-I631M NVLTDIKLGK  | 161   | 7     |
| >WRN-I631M NVLTDIKLGK  | 110  | >WRN-I631M NVLTDIKLGK  | 125   | 15    |
| >WRN-I631M NVLTDIKLGK' | 35   | >WRN-I631M NVLTDIKLGK' | 14    | 21    |
| >WRN-I631M NVLTDIKLGK' | 268  | >WRN-I631M NVLTDIKLGK' | 183   | 85    |
| >WRN-I631M NVLTDIKLGK' | 375  | >WRN-I631M NVLTDIKLGK' | 286   | 89    |
| >WRN-I631M NVLTDIKLGK  | 99   | >WRN-I631M NVLTDIKLGK  | 147   | 48    |
| >WRN-I631M NVLTDIKLGK' | 977  | >WRN-I631M NVLTDIKLGK' | 438   | 539   |
| >WRN-I631M ENVLTDIK    | 442  | >WRN-I631M ENVLTDIK    | 173   | 269   |
| >WRN-I631M ENVLTDIKLGI | 498  | >WRN-I631M ENVLTDIKLGI | 552   | 54    |
| >WRN-I631M SENVLTDI    | 162  | >WRN-I631M SENVLTDI    | 1188  | 1026  |
| >WRN-I631M SENVLTDIKL  | 479  | >WRN-I631M SENVLTDIKL  | 344   | 135   |
| >WRN-I631M SENVLTDIKL  | 572  | >WRN-I631M SENVLTDIKL  | 309   | 263   |
| >WRN-I631M SENVLTDI    | 213  | >WRN-I631M SENVLTDI    | 245   | 32    |
| >WRN-I631M SENVLTDIKL  | 312  | >WRN-I631M SENVLTDIKL  | 176   | 136   |
| >WRN-I631M SENVLTDI    | 558  | >WRN-I631M SENVLTDI    | 484   | 74    |
| >WRN-I631M SENVLTDIKL  | 460  | >WRN-I631M SENVLTDIKL  | 236   | 224   |
| >WRN-I631M SENVLTDI    | 649  | >WRN-I631M SENVLTDI    | 455   | 194   |
| >WRN-I631M SENVLTDIKL  | 262  | >WRN-I631M SENVLTDIKL  | 124   | 138   |
| >WRN-I631M SENVLTDI    | 443  | >WRN-I631M SENVLTDI    | 1383  | 940   |
| >WRN-I631M SENVLTDI    | 245  | >WRN-I631M SENVLTDI    | 3271  | 3026  |
| >WRN-I631M SENVLTDIKL  | 87   | >WRN-I631M SENVLTDIKL  | 49    | 38    |
| >WRN-I631M QSENVLTDIK  | 624  | >WRN-I631M QSENVLTDIK  | 341   | 283   |
| >WRN-I631M QSENVLTDI   | 1616 | >WRN-I631M QSENVLTDI   | 93    | 1523  |
| >WRN-I631M QSENVLTDI   | 450  | >WRN-I631M QSENVLTDI   | 10764 | 10314 |
| >WRN-I631M AQSENVLTDI  | 251  | >WRN-I631M AQSENVLTDI  | 1878  | 1627  |
| >WRN-I631M AQSENVLTDI  | 94   | >WRN-I631M AQSENVLTDI  | 60    | 34    |
| >WRN-I631M AQSENVLTDI  | 1899 | >WRN-I631M AQSENVLTDI  | 157   | 1742  |
| >WRN-I631M AQSENVLTDI  | 105  | >WRN-I631M AQSENVLTDI  | 37    | 68    |
| >WRN-L211V LYAATDAYA   | 444  | >WRN-L211V LYAATDAYA   | 1546  | 1102  |
| >WRN-L211V LYAATDAYAC  | 87   | >WRN-L211V LYAATDAYAC  | 67    | 20    |
| >WRN-L211V LYAATDAYAC  | 188  | >WRN-L211V LYAATDAYAC  | 151   | 37    |
| >WRN-L211V LYAATDAY    | 480  | >WRN-L211V LYAATDAY    | 1062  | 582   |
| >WRN-L211V LYAATDAYAC  | 7    | >WRN-L211V LYAATDAYAC  | 10    | 3     |
| >WRN-L211V LYAATDAY    | 50   | >WRN-L211V LYAATDAY    | 80    | 30    |
| >WRN-L211V LYAATDAY    | 69   | >WRN-L211V LYAATDAY    | 40    | 29    |
| >WRN-L211V LYAATDAY    | 1210 | >WRN-L211V LYAATDAY    | 283   | 927   |
| >WRN-L211V LYAATDAY    | 480  | >WRN-L211V LYAATDAY    | 459   | 21    |
| >WRN-L211V LYAATDAY    | 120  | >WRN-L211V LYAATDAY    | 325   | 205   |

|                       |      |                       |       |       |
|-----------------------|------|-----------------------|-------|-------|
| >WRN-L211V LYAATDAY   | 431  | >WRN-L211V VYAATDAY   | 672   | 241   |
| >WRN-L211V LYAATDAY   | 196  | >WRN-L211V VYAATDAY   | 258   | 62    |
| >WRN-L211V LYAATDAYA  | 458  | >WRN-L211V VYAATDAYA  | 690   | 232   |
| >WRN-L211V KLYAATDA   | 139  | >WRN-L211V KVYAATDA   | 3178  | 3039  |
| >WRN-L211V KLYAATDAYA | 21   | >WRN-L211V KVYAATDAYA | 398   | 377   |
| >WRN-L211V KLYAATDA   | 63   | >WRN-L211V KVYAATDA   | 1620  | 1557  |
| >WRN-L211V KLYAATDAYA | 8    | >WRN-L211V KVYAATDAYA | 53    | 45    |
| >WRN-L211V KLYAATDAYA | 277  | >WRN-L211V KVYAATDAYA | 4131  | 3854  |
| >WRN-L211V KLYAATDA   | 9    | >WRN-L211V KVYAATDA   | 156   | 147   |
| >WRN-L211V KLYAATDAYA | 18   | >WRN-L211V KVYAATDAYA | 74    | 56    |
| >WRN-L211V KLYAATDA   | 87   | >WRN-L211V KVYAATDA   | 179   | 92    |
| >WRN-L211V KLYAATDAYA | 163  | >WRN-L211V KVYAATDAYA | 220   | 57    |
| >WRN-L211V KLYAATDA   | 47   | >WRN-L211V KVYAATDA   | 4171  | 4124  |
| >WRN-L211V KLYAATDAYA | 4    | >WRN-L211V KVYAATDAYA | 113   | 109   |
| >WRN-L211V KLYAATDAYA | 273  | >WRN-L211V KVYAATDAYA | 10605 | 10332 |
| >WRN-L211V KLYAATDA   | 191  | >WRN-L211V KVYAATDA   | 9097  | 8906  |
| >WRN-L211V KLYAATDAYA | 9    | >WRN-L211V KVYAATDAYA | 759   | 750   |
| >WRN-L211V KLYAATDA   | 20   | >WRN-L211V KVYAATDA   | 1900  | 1880  |
| >WRN-L211V KLYAATDAYA | 10   | >WRN-L211V KVYAATDAYA | 246   | 236   |
| >WRN-L211V KLYAATDAYA | 81   | >WRN-L211V KVYAATDAYA | 4395  | 4314  |
| >WRN-L211V KLYAATDA   | 24   | >WRN-L211V KVYAATDA   | 3774  | 3750  |
| >WRN-L211V KLYAATDAYA | 13   | >WRN-L211V KVYAATDAYA | 1119  | 1106  |
| >WRN-L211V KLYAATDAY  | 56   | >WRN-L211V KVYAATDAY  | 97    | 41    |
| >WRN-L211V KLYAATDAY  | 600  | >WRN-L211V KVYAATDAY  | 102   | 498   |
| >WRN-L211V KLYAATDAY  | 1510 | >WRN-L211V KVYAATDAY  | 38    | 1472  |
| >WRN-L211V KLYAATDAY  | 2672 | >WRN-L211V KVYAATDAY  | 479   | 2193  |
| >WRN-L211V KLYAATDAY  | 134  | >WRN-L211V KVYAATDAY  | 105   | 29    |
| >WRN-L211V KLYAATDA   | 2854 | >WRN-L211V KVYAATDA   | 464   | 2390  |
| >WRN-L211V KLYAATDAYA | 141  | >WRN-L211V KVYAATDAYA | 21    | 120   |
| >WRN-L211V KLYAATDAY  | 45   | >WRN-L211V KVYAATDAY  | 45    | 0     |
| >WRN-L211V KLYAATDAY  | 16   | >WRN-L211V KVYAATDAY  | 16    | 0     |
| >WRN-L211V KLYAATDAYA | 136  | >WRN-L211V KVYAATDAYA | 134   | 2     |
| >WRN-L211V KLYAATDAYA | 1348 | >WRN-L211V KVYAATDAYA | 164   | 1184  |
| >WRN-L211V KLYAATDAY  | 24   | >WRN-L211V KVYAATDAY  | 26    | 2     |
| >WRN-L211V KLYAATDAY  | 43   | >WRN-L211V KVYAATDAY  | 56    | 13    |
| >WRN-L211V KLYAATDAY  | 29   | >WRN-L211V KVYAATDAY  | 131   | 102   |
| >WRN-L211V KLYAATDAY  | 17   | >WRN-L211V KVYAATDAY  | 161   | 144   |
| >WRN-L211V KLYAATDAY  | 198  | >WRN-L211V KVYAATDAY  | 41    | 157   |
| >WRN-L211V KLYAATDAY  | 82   | >WRN-L211V KVYAATDAY  | 25    | 57    |
| >WRN-L211V KLYAATDAY  | 1484 | >WRN-L211V KVYAATDAY  | 135   | 1349  |
| >WRN-L211V KLYAATDAY  | 73   | >WRN-L211V KVYAATDAY  | 28    | 45    |
| >WRN-L211V SKFPLTEDQK | 65   | >WRN-L211V SKFPLTEDQK | 145   | 80    |
| >WRN-L211V QKLYAATDA  | 451  | >WRN-L211V QKVYAATDA  | 557   | 106   |

|                        |       |                       |      |       |
|------------------------|-------|-----------------------|------|-------|
| >WRN-L211VQKLYAATDA\   | 8     | >WRN-L211VQKVYAATDA'  | 9    | 1     |
| >WRN-L211VDQKLYAATD/   | 387   | >WRN-L211VDQKVYAATD,  | 242  | 145   |
| >WRN-L211VDQKLYAATD/   | 565   | >WRN-L211VDQKVYAATD,  | 297  | 268   |
| >WRN-L211VDQKLYAATD/   | 497   | >WRN-L211VDQKVYAATD,  | 195  | 302   |
| >WRN-L211VDQKLYAATD/   | 147   | >WRN-L211VDQKVYAATD,  | 203  | 56    |
| >WRN-L211V TEDQKLYAA   | 294   | >WRN-L211V TEDQKVYAA  | 292  | 2     |
| >WRN-L211V TEDQKLYAAT  | 512   | >WRN-L211V TEDQKVYAA  | 383  | 129   |
| >WRN-L211V TEDQKLYA    | 604   | >WRN-L211V TEDQKVYA   | 468  | 136   |
| >WRN-L211V TEDQKLYAA   | 59    | >WRN-L211V TEDQKVYAA  | 67   | 8     |
| >WRN-L211V LTEDQKLY    | 20    | >WRN-L211V LTEDQKVY   | 67   | 47    |
| >WRN-L211V LTEDQKLYAA  | 406   | >WRN-L211V LTEDQKVYAA | 1558 | 1152  |
| >WRN-L211V LTEDQKLY    | 174   | >WRN-L211V LTEDQKVY   | 1667 | 1493  |
| >WRN-L211V LTEDQKLY    | 19    | >WRN-L211V LTEDQKVY   | 19   | 0     |
| >WRN-L211V LTEDQKLY    | 203   | >WRN-L211V LTEDQKVY   | 232  | 29    |
| >WRN-L211V PLTEDQKL    | 1187  | >WRN-L211V PLTEDQKV   | 91   | 1096  |
| >WRN-L211V PLTEDQKLYA  | 628   | >WRN-L211V PLTEDQKVYA | 449  | 179   |
| >WRN-L211V PLTEDQKL    | 572   | >WRN-L211V PLTEDQKV   | 28   | 544   |
| >WRN-L211V PLTEDQKLYA  | 575   | >WRN-L211V PLTEDQKVYA | 477  | 98    |
| >WRN-L211V PLTEDQKL    | 2527  | >WRN-L211V PLTEDQKV   | 144  | 2383  |
| >WRN-L211V PLTEDQKL    | 30    | >WRN-L211V PLTEDQKV   | 6    | 24    |
| >WRN-L211V PLTEDQKLYA  | 70    | >WRN-L211V PLTEDQKVYA | 59   | 11    |
| >WRN-L211V PLTEDQKLYA  | 151   | >WRN-L211V PLTEDQKVYA | 163  | 12    |
| >WRN-L211V PLTEDQKLY   | 478   | >WRN-L211V PLTEDQKVY  | 4294 | 3816  |
| >WRN-L211V FPLTEDQKL   | 410   | >WRN-L211V FPLTEDQKV  | 2225 | 1815  |
| >WRN-L211V FPLTEDQKL   | 103   | >WRN-L211V FPLTEDQKV  | 722  | 619   |
| >WRN-L211V FPLTEDQKLY  | 35    | >WRN-L211V FPLTEDQKVY | 20   | 15    |
| >WRN-L211V FPLTEDQKL   | 1911  | >WRN-L211V FPLTEDQKV  | 411  | 1500  |
| >WRN-L211V FPLTEDQKL   | 45    | >WRN-L211V FPLTEDQKV  | 153  | 108   |
| >WRN-L211V FPLTEDQKLY  | 158   | >WRN-L211V FPLTEDQKVY | 132  | 26    |
| >WRN-L211V FPLTEDQKLY, | 466   | >WRN-L211V FPLTEDQKVY | 618  | 152   |
| >WRN-L211V FPLTEDQKL   | 17469 | >WRN-L211V FPLTEDQKV  | 394  | 17075 |
| >WRN-L211V FPLTEDQKLY, | 34    | >WRN-L211V FPLTEDQKVY | 18   | 16    |
| >WRN-L211V FPLTEDQKLY  | 1365  | >WRN-L211V FPLTEDQKVY | 194  | 1171  |
| >WRN-L211V FPLTEDQKL   | 90    | >WRN-L211V FPLTEDQKV  | 689  | 599   |
| >WRN-L211V FPLTEDQKLY  | 34    | >WRN-L211V FPLTEDQKVY | 25   | 9     |
| >WRN-L211V KFPLTEDQKL  | 116   | >WRN-L211V KFPLTEDQKV | 3477 | 3361  |
| >WRN-M602 MEDQVLQL     | 76    | >WRN-M602 KEDQVLQL    | 163  | 87    |
| >WRN-M602 MEDQVLQLK    | 403   | >WRN-M602 KEDQVLQLK   | 2449 | 2046  |
| >WRN-M602 MEDQVLQL     | 393   | >WRN-M602 KEDQVLQL    | 5434 | 5041  |
| >WRN-M602 MEDQVLQL     | 33    | >WRN-M602 KEDQVLQL    | 35   | 2     |
| >WRN-M602 MEDQVLQL     | 380   | >WRN-M602 KEDQVLQL    | 139  | 241   |
| >WRN-M602 MEDQVLQL     | 472   | >WRN-M602 KEDQVLQL    | 1656 | 1184  |
| >WRN-M602 MEDQVLQLK    | 222   | >WRN-M602 KEDQVLQLK   | 176  | 46    |

|                       |       |                       |       |       |
|-----------------------|-------|-----------------------|-------|-------|
| >WRN-M602 LMEDQVLQL   | 106   | >WRN-M602 LKEDQVLQL   | 22880 | 22774 |
| >WRN-M602 LMEDQVLQL   | 19    | >WRN-M602 LKEDQVLQL   | 12406 | 12387 |
| >WRN-M602 LMEDQVLQL   | 115   | >WRN-M602 LKEDQVLQL   | 19155 | 19040 |
| >WRN-M602 LMEDQVLQL   | 337   | >WRN-M602 LKEDQVLQL   | 16048 | 15711 |
| >WRN-M602 LMEDQVLQL   | 14    | >WRN-M602 LKEDQVLQL   | 13461 | 13447 |
| >WRN-M602 LMEDQVLQL   | 495   | >WRN-M602 LKEDQVLQLK  | 25327 | 24832 |
| >WRN-M602 LMEDQVLQL   | 62    | >WRN-M602 LKEDQVLQL   | 23220 | 23158 |
| >WRN-M602 LMEDQVLQL   | 131   | >WRN-M602 LKEDQVLQL   | 21968 | 21837 |
| >WRN-M602 LMEDQVLQL   | 140   | >WRN-M602 LKEDQVLQL   | 23551 | 23411 |
| >WRN-M602 LMEDQVLQ    | 61    | >WRN-M602 LKEDQVLQ    | 29009 | 28948 |
| >WRN-M602 LMEDQVLQL   | 2     | >WRN-M602 LKEDQVLQL   | 7841  | 7839  |
| >WRN-M602 LMEDQVLQL   | 416   | >WRN-M602 LKEDQVLQLK  | 32997 | 32581 |
| >WRN-M602 LMEDQVLQL   | 42    | >WRN-M602 LKEDQVLQLK  | 27260 | 27218 |
| >WRN-M602 LMEDQVLQL   | 228   | >WRN-M602 LKEDQVLQLK  | 15129 | 14901 |
| >WRN-M602 LMEDQVLQL   | 205   | >WRN-M602 LKEDQVLQLK  | 14334 | 14129 |
| >WRN-M602 GLVISPLISLM | 449   | >WRN-M602 GLVISPLISLK | 7522  | 7073  |
| >WRN-M602 GLVISPLISLM | 333   | >WRN-M602 GLVISPLISLK | 9341  | 9008  |
| >WRN-M602 GLVISPLISLM | 410   | >WRN-M602 GLVISPLISLK | 9806  | 9396  |
| >WRN-M602 GLVISPLISLM | 228   | >WRN-M602 GLVISPLISLK | 4355  | 4127  |
| >WRN-M602 GLVISPLISLM | 16904 | >WRN-M602 GLVISPLISLK | 81    | 16823 |
| >WRN-M602 GLVISPLISLM | 23062 | >WRN-M602 GLVISPLISLK | 47    | 23015 |
| >WRN-M602 GLVISPLISLM | 123   | >WRN-M602 GLVISPLISLK | 10908 | 10785 |
| >WRN-M602 SLMEDQVL    | 24    | >WRN-M602 SLKEDQVL    | 2230  | 2206  |
| >WRN-M602 SLMEDQVLQ   | 13    | >WRN-M602 SLKEDQVLQL  | 757   | 744   |
| >WRN-M602 SLMEDQVL    | 8     | >WRN-M602 SLKEDQVL    | 127   | 119   |
| >WRN-M602 SLMEDQVLQ   | 99    | >WRN-M602 SLKEDQVLQ   | 2322  | 2223  |
| >WRN-M602 SLMEDQVLQ   | 10    | >WRN-M602 SLKEDQVLQL  | 63    | 53    |
| >WRN-M602 SLMEDQVL    | 38    | >WRN-M602 SLKEDQVL    | 148   | 110   |
| >WRN-M602 SLMEDQVLQ   | 25    | >WRN-M602 SLKEDQVLQL  | 160   | 135   |
| >WRN-M602 SLMEDQVL    | 124   | >WRN-M602 SLKEDQVL    | 7163  | 7039  |
| >WRN-M602 SLMEDQVLQ   | 86    | >WRN-M602 SLKEDQVLQL  | 3710  | 3624  |
| >WRN-M602 SLMEDQVL    | 8     | >WRN-M602 SLKEDQVL    | 245   | 237   |
| >WRN-M602 SLMEDQVLQ   | 3     | >WRN-M602 SLKEDQVLQL  | 51    | 48    |
| >WRN-M602 SLMEDQVL    | 7     | >WRN-M602 SLKEDQVL    | 123   | 116   |
| >WRN-M602 SLMEDQVLQ   | 6     | >WRN-M602 SLKEDQVLQL  | 152   | 146   |
| >WRN-M602 SLMEDQVL    | 11    | >WRN-M602 SLKEDQVL    | 425   | 414   |
| >WRN-M602 SLMEDQVLQ   | 363   | >WRN-M602 SLKEDQVLQ   | 9113  | 8750  |
| >WRN-M602 SLMEDQVLQ   | 6     | >WRN-M602 SLKEDQVLQL  | 77    | 71    |
| >WRN-M602 SLMEDQVL    | 14    | >WRN-M602 SLKEDQVL    | 5209  | 5195  |
| >WRN-M602 SLMEDQVLQ   | 4     | >WRN-M602 SLKEDQVLQL  | 1093  | 1089  |
| >WRN-M602 SLMEDQVL    | 4     | >WRN-M602 SLKEDQVL    | 9     | 5     |
| >WRN-M602 SLMEDQVLQ   | 29    | >WRN-M602 SLKEDQVLQ   | 137   | 108   |
| >WRN-M602 SLMEDQVLQ   | 2     | >WRN-M602 SLKEDQVLQL  | 3     | 1     |

|                       |       |                       |       |       |
|-----------------------|-------|-----------------------|-------|-------|
| >WRN-M602 SLMEDQVLQ   | 200   | >WRN-M602 SLKEDQVLQL  | 1328  | 1128  |
| >WRN-M602 SLMEDQVLQ   | 54    | >WRN-M602 SLKEDQVLQL  | 174   | 120   |
| >WRN-M602 SLMEDQVLQ   | 21    | >WRN-M602 SLKEDQVLQL  | 443   | 422   |
| >WRN-M602 SLMEDQVLQ   | 2073  | >WRN-M602 SLKEDQVLQL  | 78    | 1995  |
| >WRN-M602 SLMEDQVLQ   | 364   | >WRN-M602 SLKEDQVLQL  | 7189  | 6825  |
| >WRN-M602 SLMEDQVLQ   | 362   | >WRN-M602 SLKEDQVLQL  | 1817  | 1455  |
| >WRN-M602 SLMEDQVLQ   | 299   | >WRN-M602 SLKEDQVLQL  | 5568  | 5269  |
| >WRN-M602 SLMEDQVL    | 440   | >WRN-M602 SLKEDQVL    | 16460 | 16020 |
| >WRN-M602 SLMEDQVLQ   | 385   | >WRN-M602 SLKEDQVLQL  | 1964  | 1579  |
| >WRN-M602 ISLMEDQVL   | 477   | >WRN-M602 ISLKEDQVL   | 422   | 55    |
| >WRN-M602 ISLMEDQVL   | 19    | >WRN-M602 ISLKEDQVL   | 66    | 47    |
| >WRN-M602 ISLMEDQVLC  | 6     | >WRN-M602 ISLKEDQVLQI | 11    | 5     |
| >WRN-M602 ISLMEDQVLC  | 238   | >WRN-M602 ISLKEDQVLQI | 227   | 11    |
| >WRN-M602 LISLMEDQV   | 137   | >WRN-M602 LISLKEDQV   | 254   | 117   |
| >WRN-M602 LISLMEDQV   | 43    | >WRN-M602 LISLKEDQV   | 79    | 36    |
| >WRN-M602 PLISLMEDQV  | 113   | >WRN-M602 PLISLKEDQV  | 167   | 54    |
| >WRN-M602 PLISLMEDQV  | 104   | >WRN-M602 PLISLKEDQV  | 178   | 74    |
| >WRN-M602 PLISLMEDQV  | 23    | >WRN-M602 PLISLKEDQV  | 29    | 6     |
| >WRN-M602 PLISLMEDQV  | 248   | >WRN-M602 PLISLKEDQVL | 279   | 31    |
| >WRN-M602 SPLISLMEDQV | 496   | >WRN-M602 SPLISLKEDQV | 1512  | 1016  |
| >WRN-M602 SPLISLMEDQV | 460   | >WRN-M602 SPLISLKEDQV | 787   | 327   |
| >WRN-M602 ISPLISLM    | 424   | >WRN-M602 ISPLISLK    | 17201 | 16777 |
| >WRN-M602 ISPLISLM    | 21736 | >WRN-M602 ISPLISLK    | 377   | 21359 |
| >WRN-M602 ISPLISLM    | 24623 | >WRN-M602 ISPLISLK    | 74    | 24549 |
| >WRN-M602 ISPLISLM    | 23088 | >WRN-M602 ISPLISLK    | 310   | 22778 |
| >WRN-M602 ISPLISLM    | 337   | >WRN-M602 ISPLISLK    | 20023 | 19686 |
| >WRN-M602 ISPLISLM    | 4     | >WRN-M602 ISPLISLK    | 270   | 266   |
| >WRN-M602 ISPLISLME   | 94    | >WRN-M602 ISPLISLKE   | 474   | 380   |
| >WRN-M602 ISPLISLM    | 369   | >WRN-M602 ISPLISLK    | 20666 | 20297 |
| >WRN-M602 VISPLISLM   | 162   | >WRN-M602 VISPLISLK   | 9511  | 9349  |
| >WRN-M602 VISPLISLM   | 189   | >WRN-M602 VISPLISLK   | 12142 | 11953 |
| >WRN-M602 VISPLISLM   | 477   | >WRN-M602 VISPLISLK   | 8779  | 8302  |
| >WRN-M602 VISPLISLM   | 15361 | >WRN-M602 VISPLISLK   | 42    | 15319 |
| >WRN-M602 VISPLISLM   | 15204 | >WRN-M602 VISPLISLK   | 10    | 15194 |
| >WRN-M602 VISPLISLM   | 18919 | >WRN-M602 VISPLISLK   | 171   | 18748 |
| >WRN-M602 VISPLISLM   | 11    | >WRN-M602 VISPLISLK   | 3199  | 3188  |
| >WRN-M602 LVISPLISLM  | 175   | >WRN-M602 LVISPLISLK  | 8581  | 8406  |
| >WRN-M602 LVISPLISLM  | 418   | >WRN-M602 LVISPLISLK  | 6733  | 6315  |
| >WRN-M602 LVISPLISLM  | 239   | >WRN-M602 LVISPLISLK  | 7079  | 6840  |
| >WRN-M602 LVISPLISLM  | 11793 | >WRN-M602 LVISPLISLK  | 59    | 11734 |
| >WRN-M602 LVISPLISLM  | 27423 | >WRN-M602 LVISPLISLK  | 23    | 27400 |
| >WRN-M602 LVISPLISLM  | 8     | >WRN-M602 LVISPLISLK  | 3585  | 3577  |
| >WRN-M602 LVISPLISLM  | 446   | >WRN-M602 LVISPLISLK  | 12421 | 11975 |

|                        |      |                        |       |       |
|------------------------|------|------------------------|-------|-------|
| >WRN-M602 LVISPLISLM   | 8420 | >WRN-M602 LVISPLISLK   | 321   | 8099  |
| >WRN-M602 LVISPLISLM   | 9284 | >WRN-M602 LVISPLISLK   | 24    | 9260  |
| >WRN-M602 LVISPLISLM   | 412  | >WRN-M602 LVISPLISLK   | 16564 | 16152 |
| >WRN-M602 LVISPLISLM   | 488  | >WRN-M602 LVISPLISLK   | 21240 | 20752 |
| >WRN-M602 LVISPLISLM   | 133  | >WRN-M602 LVISPLISLK   | 23215 | 23082 |
| >WRN-R999(C RRHSLFGTGK | 333  | >WRN-R999(C CRHSLFGTGK | 8051  | 7718  |
| >WRN-R999(C RRHSLFGT   | 108  | >WRN-R999(C CRHSLFGT   | 2310  | 2202  |
| >WRN-R999(C RRHSLFGTG  | 350  | >WRN-R999(C CRHSLFGTG  | 6680  | 6330  |
| >WRN-R999(C RRHSLFGTGK | 16   | >WRN-R999(C CRHSLFGTGK | 159   | 143   |
| >WRN-R999(C RRHSLFGT   | 82   | >WRN-R999(C CRHSLFGT   | 4454  | 4372  |
| >WRN-R999(C RRHSLFGTG  | 159  | >WRN-R999(C CRHSLFGTG  | 12386 | 12227 |
| >WRN-R999(C RRHSLFGTGK | 85   | >WRN-R999(C CRHSLFGTGK | 2326  | 2241  |
| >WRN-R999(C RRHSLFGT   | 351  | >WRN-R999(C CRHSLFGT   | 1340  | 989   |
| >WRN-R999(C RRHSLFGTG  | 140  | >WRN-R999(C CRHSLFGTG  | 2965  | 2825  |
| >WRN-R999(C RRHSLFGTGK | 45   | >WRN-R999(C CRHSLFGTGK | 514   | 469   |
| >WRN-R999(C YRRHSLFGTG | 920  | >WRN-R999(C YCRHSLFGTG | 110   | 810   |
| >WRN-R999(C YRRHSLFGTG | 234  | >WRN-R999(C YCRHSLFGTG | 3716  | 3482  |
| >WRN-R999(C YRRHSLFGTG | 79   | >WRN-R999(C YCRHSLFGTG | 21930 | 21851 |
| >WRN-R999(C SNSQRLADQ' | 450  | >WRN-R999(C SNSQRLADQ' | 32178 | 31728 |
| >WRN-R999(C QYRRHSLF   | 137  | >WRN-R999(C QYCRHSLF   | 184   | 47    |
| >WRN-R999(C QYRRHSLF   | 73   | >WRN-R999(C QYCRHSLF   | 60    | 13    |
| >WRN-R999(C QYRRHSLF   | 11   | >WRN-R999(C QYCRHSLF   | 7     | 4     |
| >WRN-R999(C QYRRHSLF   | 165  | >WRN-R999(C QYCRHSLF   | 11453 | 11288 |
| >WRN-R999(C QYRRHSLFG  | 7    | >WRN-R999(C QYCRHSLFG  | 1679  | 1672  |
| >WRN-R999(C QYRRHSLFGT | 197  | >WRN-R999(C QYCRHSLFGT | 9909  | 9712  |
| >WRN-R999(C QYRRHSLFGT | 84   | >WRN-R999(C QYCRHSLFGT | 7336  | 7252  |
| >WRN-R999(C QYRRHSLF   | 285  | >WRN-R999(C QYCRHSLF   | 1238  | 953   |
| >WRN-R999(C DQYRRHSLF  | 401  | >WRN-R999(C DQYCRHSLF  | 994   | 593   |
| >WRN-R999(C DQYRRHSL   | 167  | >WRN-R999(C DQYCRHSL   | 511   | 344   |
| >WRN-R999(C DQYRRHSLF  | 638  | >WRN-R999(C DQYCRHSLF  | 391   | 247   |
| >WRN-R999(C DQYRRHSLF  | 277  | >WRN-R999(C DQYCRHSLF  | 287   | 10    |
| >WRN-R999(C DQYRRHSL   | 320  | >WRN-R999(C DQYCRHSL   | 166   | 154   |
| >WRN-R999(C DQYRRHSLF  | 22   | >WRN-R999(C DQYCRHSLF  | 20    | 2     |
| >WRN-R999(C DQYRRHSL   | 875  | >WRN-R999(C DQYCRHSL   | 395   | 480   |
| >WRN-R999(C DQYRRHSLF  | 879  | >WRN-R999(C DQYCRHSLF  | 495   | 384   |
| >WRN-R999(C DQYRRHSL   | 547  | >WRN-R999(C DQYCRHSL   | 398   | 149   |
| >WRN-R999(C ADQYRRHSL  | 241  | >WRN-R999(C ADQYCRHSL  | 8685  | 8444  |
| >WRN-R999(C ADQYRRHSL  | 1942 | >WRN-R999(C ADQYCRHSL  | 246   | 1696  |
| >WRN-R999(C ADQYRRHSLF | 216  | >WRN-R999(C ADQYCRHSLF | 158   | 58    |
| >WRN-R999(C ADQYRRHSLF | 956  | >WRN-R999(C ADQYCRHSLF | 471   | 485   |
| >WRN-R999(C LADQYRRHSL | 128  | >WRN-R999(C LADQYCRHSL | 102   | 26    |
| >WRN-R999(C LADQYRRHSL | 93   | >WRN-R999(C LADQYCRHSL | 63    | 30    |
| >WRN-R999(C RLADQYRRH! | 134  | >WRN-R999(C RLADQYCRH! | 37    | 97    |



|                       |      |                       |       |       |
|-----------------------|------|-----------------------|-------|-------|
| >WRN-R999C RLADQYRRH  | 8    | >WRN-R999C RLADQYCRH  | 5     | 3     |
| >WRN-R999C RLADQYRRH  | 15   | >WRN-R999C RLADQYCRH  | 13    | 2     |
| >WRN-R999C RLADQYRRH  | 201  | >WRN-R999C RLADQYCRH  | 53    | 148   |
| >WRN-R999C RLADQYRRH  | 31   | >WRN-R999C RLADQYCRH  | 22    | 9     |
| >WRN-R999C RLADQYRRH  | 88   | >WRN-R999C RLADQYCRH  | 26    | 62    |
| >WRN-R999C RLADQYRRH  | 90   | >WRN-R999C RLADQYCRH  | 33    | 57    |
| >WRN-R999C RLADQYRRH  | 226  | >WRN-R999C RLADQYCRH  | 40    | 186   |
| >WRN-R999C RLADQYRRH  | 3    | >WRN-R999C RLADQYCRH  | 3     | 0     |
| >WRN-R999C RLADQYRR   | 18   | >WRN-R999C RLADQYCR   | 21    | 3     |
| >WRN-R999C RLADQYRRH  | 368  | >WRN-R999C RLADQYCRH  | 414   | 46    |
| >WRN-R999C RLADQYRRH  | 180  | >WRN-R999C RLADQYCRH  | 283   | 103   |
| >WRN-R999C RLADQYRRH  | 422  | >WRN-R999C RLADQYCRH  | 978   | 556   |
| >WRN-R999C RLADQYRRH  | 805  | >WRN-R999C RLADQYCRH  | 450   | 355   |
| >WRN-R999C RLADQYRR   | 41   | >WRN-R999C RLADQYCR   | 62    | 21    |
| >WRN-R999C QRLADQYR   | 389  | >WRN-R999C QRLADQYC   | 6949  | 6560  |
| >WRN-R999C QRLADQYRR  | 107  | >WRN-R999C QRLADQYCR  | 149   | 42    |
| >WRN-R999C QRLADQYR   | 66   | >WRN-R999C QRLADQYC   | 33099 | 33033 |
| >WRN-R999C QRLADQYRR  | 137  | >WRN-R999C QRLADQYCR  | 297   | 160   |
| >WRN-R999C SURLADQYR  | 394  | >WRN-R999C SURLADQYC  | 3377  | 2983  |
| >WRN-R999C SURLADQYR  | 51   | >WRN-R999C SURLADQYC  | 21492 | 21441 |
| >WRN-R999C SURLADQYRF | 201  | >WRN-R999C SURLADQYCF | 138   | 63    |
| >WRN-R999C SURLADQYR  | 289  | >WRN-R999C SURLADQYC  | 33392 | 33103 |
| >WRN-R999C NSURLADQYI | 252  | >WRN-R999C NSURLADQYI | 31192 | 30940 |
| >WRN-R999C NSURLADQYI | 335  | >WRN-R999C NSURLADQYI | 403   | 68    |
| >WRN-R999C NSURLADQYI | 231  | >WRN-R999C NSURLADQYI | 28368 | 28137 |
| >WRN-R999C NSURLADQYI | 64   | >WRN-R999C NSURLADQYI | 36797 | 36733 |
| >WRN-R999C NSURLADQYI | 102  | >WRN-R999C NSURLADQYI | 105   | 3     |
| >WRN-T123C QTDLFSSTK  | 50   | >WRN-T123C QSDFLSSTK  | 86    | 36    |
| >WRN-T123C QTDLFSSTK  | 124  | >WRN-T123C QSDFLSSTK  | 589   | 465   |
| >WRN-T123C VQTDLFSS   | 2040 | >WRN-T123C VQSDLFSS   | 448   | 1592  |
| >WRN-T123C VQTDLFSS   | 72   | >WRN-T123C VQSDLFSS   | 72    | 0     |
| >WRN-T123C VQTDLFSS   | 26   | >WRN-T123C VQSDLFSS   | 26    | 0     |
| >WRN-T123C VQTDLFSSTK | 243  | >WRN-T123C VQSDLFSSTK | 92    | 151   |
| >WRN-T123C VQTDLFSSTK | 72   | >WRN-T123C VQSDLFSSTK | 35    | 37    |
| >WRN-T123C VQTDLFSSTK | 927  | >WRN-T123C VQSDLFSSTK | 441   | 486   |
| >WRN-T123C VQTDLFSSTK | 841  | >WRN-T123C VQSDLFSSTK | 338   | 503   |
| >WRN-T123C SVQTDLFSS  | 15   | >WRN-T123C SVQSDLFSS  | 15    | 0     |
| >WRN-T123C SVQTDLFSS  | 225  | >WRN-T123C SVQSDLFSS  | 263   | 38    |
| >WRN-T123C SVQTDLFSS  | 245  | >WRN-T123C SVQSDLFSS  | 164   | 81    |
| >WRN-T123C NSVQTDLF   | 91   | >WRN-T123C NSVQSDLF   | 35    | 56    |
| >WRN-T123C NSVQTDLF   | 187  | >WRN-T123C NSVQSDLF   | 314   | 127   |
| >WRN-T123C QTNSVQTDL  | 450  | >WRN-T123C QTNSVQSDL  | 1756  | 1306  |
| >WRN-T123C QTNSVQTDLI | 106  | >WRN-T123C QTNSVQSDLI | 310   | 204   |

|                        |       |                        |       |       |
|------------------------|-------|------------------------|-------|-------|
| >WRN-T123C QTNSVQTDL   | 217   | >WRN-T123C QTNSVQSDL   | 199   | 18    |
| >WRN-T123C QTNSVQTDLI  | 208   | >WRN-T123C QTNSVQSDLF  | 106   | 102   |
| >WRN-T123C QTNSVQTDLI  | 84    | >WRN-T123C QTNSVQSDLF  | 118   | 34    |
| >WRN-T123C QTNSVQTDL   | 317   | >WRN-T123C QTNSVQSDL   | 50    | 267   |
| >WRN-T123C QTNSVQTDLI  | 374   | >WRN-T123C QTNSVQSDLF  | 231   | 143   |
| >WRN-T123C CQTNSVQTD   | 93    | >WRN-T123C CQTNSVQSDI  | 72    | 21    |
| >WRN-T123C CQTNSVQTD   | 30    | >WRN-T123C CQTNSVQSDI  | 27    | 3     |
| >WRN-T123C CQTNSVQTD   | 286   | >WRN-T123C CQTNSVQSDI  | 344   | 58    |
| >WRN-V131Z VQKIIADVI   | 400   | >WRN-V131Z FQKIIADVI   | 86    | 314   |
| >WRN-V131Z VQKIIADV    | 4840  | >WRN-V131Z FQKIIADV    | 354   | 4486  |
| >WRN-V131Z VQKIIADV    | 195   | >WRN-V131Z FQKIIADV    | 17    | 178   |
| >WRN-V131Z VQKIIADV    | 501   | >WRN-V131Z FQKIIADV    | 24    | 477   |
| >WRN-V131Z VQKIIADVI   | 2811  | >WRN-V131Z FQKIIADVI   | 119   | 2692  |
| >WRN-V131Z VQKIIADVIR  | 4301  | >WRN-V131Z FQKIIADVIR  | 353   | 3948  |
| >WRN-V131Z VQKIIADV    | 1351  | >WRN-V131Z FQKIIADV    | 454   | 897   |
| >WRN-V131Z EVQKIIADV   | 441   | >WRN-V131Z EFQKIIADV   | 9134  | 8693  |
| >WRN-V131Z EVQKIIADVI  | 11565 | >WRN-V131Z EFQKIIADVI  | 447   | 11118 |
| >WRN-V131Z EVQKIIADVIR | 156   | >WRN-V131Z EFQKIIADVIR | 61    | 95    |
| >WRN-V131Z EVQKIIADVIR | 8     | >WRN-V131Z EFQKIIADVIR | 56    | 48    |
| >WRN-V131Z EVQKIIADV   | 12    | >WRN-V131Z EFQKIIADV   | 3351  | 3339  |
| >WRN-V131Z EVQKIIADV   | 76    | >WRN-V131Z EFQKIIADV   | 7713  | 7637  |
| >WRN-V131Z EVQKIIADVIR | 511   | >WRN-V131Z EFQKIIADVIR | 76    | 435   |
| >WRN-V131Z DLERAGLTPE  | 263   | >WRN-V131Z DLERAGLTPE  | 21595 | 21332 |
| >WRN-V131Z DLERAGLTPE  | 18    | >WRN-V131Z DLERAGLTPE  | 16141 | 16123 |
| >WRN-V131Z PEVQKIIADVI | 149   | >WRN-V131Z PEFQKIIADVI | 33    | 116   |
| >WRN-V131Z PEVQKIIADVI | 991   | >WRN-V131Z PEFQKIIADVI | 497   | 494   |
| >WRN-V131Z PEVQKIIADVI | 107   | >WRN-V131Z PEFQKIIADVI | 37    | 70    |
| >WRN-V131Z LTPEVQKI    | 434   | >WRN-V131Z LTPEFQKI    | 762   | 328   |
| >WRN-V131Z LTPEVQKI    | 298   | >WRN-V131Z LTPEFQKI    | 351   | 53    |
| >WRN-V131Z LTPEVQKI    | 24    | >WRN-V131Z LTPEFQKI    | 11    | 13    |
| >WRN-V131Z LTPEVQKII   | 5     | >WRN-V131Z LTPEFQKII   | 3     | 2     |
| >WRN-V131Z LTPEVQKIIA  | 191   | >WRN-V131Z LTPEFQKIIA  | 77    | 114   |
| >WRN-V131Z LTPEVQKIIAD | 833   | >WRN-V131Z LTPEFQKIIAD | 326   | 507   |
| >WRN-V131Z LTPEVQKI    | 50    | >WRN-V131Z LTPEFQKI    | 31    | 19    |
| >WRN-V131Z LTPEVQKII   | 39    | >WRN-V131Z LTPEFQKII   | 21    | 18    |
| >WRN-V131Z GLTPEVQKI   | 69    | >WRN-V131Z GLTPEFQKI   | 86    | 17    |
| >WRN-V131Z GLTPEVQKI   | 59    | >WRN-V131Z GLTPEFQKI   | 175   | 116   |
| >WRN-V131Z GLTPEVQKI   | 2747  | >WRN-V131Z GLTPEFQKI   | 329   | 2418  |
| >WRN-V131Z GLTPEVQKI   | 45    | >WRN-V131Z GLTPEFQKI   | 161   | 116   |
| >WRN-V131Z GLTPEVQKII  | 285   | >WRN-V131Z GLTPEFQKII  | 542   | 257   |
| >WRN-V131Z GLTPEVQKI   | 54    | >WRN-V131Z GLTPEFQKI   | 99    | 45    |
| >WRN-V131Z GLTPEVQKII  | 186   | >WRN-V131Z GLTPEFQKII  | 254   | 68    |
| >WRN-V131Z GLTPEVQKI   | 27    | >WRN-V131Z GLTPEFQKI   | 78    | 51    |

|                       |       |                       |      |       |
|-----------------------|-------|-----------------------|------|-------|
| >WRN-V1312GLTPEVQKII  | 128   | >WRN-V1312GLTPEFQKII  | 333  | 205   |
| >WRN-V1312GLTPEVQKIIA | 219   | >WRN-V1312GLTPEFQKIIA | 402  | 183   |
| >WRN-V1312GLTPEVQK    | 613   | >WRN-V1312GLTPEFQK    | 464  | 149   |
| >WRN-V1312GLTPEVQKI   | 5     | >WRN-V1312GLTPEFQKI   | 7    | 2     |
| >WRN-V1312GLTPEVQKII  | 37    | >WRN-V1312GLTPEFQKII  | 36   | 1     |
| >WRN-V1312GLTPEVQKIIA | 24    | >WRN-V1312GLTPEFQKIIA | 31   | 7     |
| >WRN-V1312GLTPEVQK    | 604   | >WRN-V1312GLTPEFQK    | 321  | 283   |
| >WRN-V1312GLTPEVQK    | 405   | >WRN-V1312GLTPEFQK    | 94   | 311   |
| >WRN-V1312AGLTPEVQK   | 864   | >WRN-V1312AGLTPEFQK   | 141  | 723   |
| >WRN-V1312RAGLTPEVQK  | 669   | >WRN-V1312RAGLTPEFQK  | 236  | 433   |
| >WRN-V1312RAGLTPEV    | 8457  | >WRN-V1312RAGLTPEF    | 252  | 8205  |
| >WRN-V1312RAGLTPEV    | 4599  | >WRN-V1312RAGLTPEF    | 26   | 4573  |
| >WRN-V1312RAGLTPEV    | 10167 | >WRN-V1312RAGLTPEF    | 54   | 10113 |
| >WRN-V1312RAGLTPEVQK  | 143   | >WRN-V1312RAGLTPEFQK  | 97   | 46    |
| >WRN-V1312ERAGLTPEVC  | 690   | >WRN-V1312ERAGLTPEFQ  | 395  | 295   |
| >WRN-V1312LERAGLTPEV  | 280   | >WRN-V1312LERAGLTPEF  | 2525 | 2245  |
| >WRN-V1312LERAGLTPEV  | 4434  | >WRN-V1312LERAGLTPEF  | 104  | 4330  |
| >WRN-V1312LERAGLTPEV  | 2562  | >WRN-V1312LERAGLTPEF  | 35   | 2527  |
| >WRN-V1312LERAGLTPEV  | 419   | >WRN-V1312LERAGLTPEF  | 674  | 255   |
| >WT1-A31V-AAQWAPVLC   | 425   | >WT1-A31V-VAQWAPVLC   | 626  | 201   |
| >WT1-A31V-AAQWAPVL    | 277   | >WT1-A31V-VAQWAPVL    | 292  | 15    |
| >WT1-A31V-AAQWAPVLC   | 40    | >WT1-A31V-VAQWAPVLC   | 51   | 11    |
| >WT1-A31V-AAQWAPVLC   | 1844  | >WT1-A31V-VAQWAPVLC   | 321  | 1523  |
| >WT1-A31V-GAAQWAPV    | 902   | >WT1-A31V-GVAQWAPV    | 99   | 803   |
| >WT1-A31V-GAAQWAPV    | 748   | >WT1-A31V-GVAQWAPV    | 141  | 607   |
| >WT1-A31V-GAAQWAPV    | 201   | >WT1-A31V-GVAQWAPV    | 21   | 180   |
| >WT1-A31V-GAAQWAPV    | 56    | >WT1-A31V-GVAQWAPV    | 13   | 43    |
| >WT1-A31V-GAAQWAPVI   | 2528  | >WT1-A31V-GVAQWAPVI   | 374  | 2154  |
| >WT1-A31V-GAAQWAPV    | 135   | >WT1-A31V-GVAQWAPV    | 28   | 107   |
| >WT1-A31V-GAAQWAPVI   | 2139  | >WT1-A31V-GVAQWAPVI   | 394  | 1745  |
| >WT1-A31V-GAAQWAPV    | 2027  | >WT1-A31V-GVAQWAPV    | 157  | 1870  |
| >WT1-A31V-GAAQWAPV    | 152   | >WT1-A31V-GVAQWAPV    | 20   | 132   |
| >WT1-A31V-GAAQWAPVI   | 1472  | >WT1-A31V-GVAQWAPVI   | 87   | 1385  |
| >WT1-A31V-GAAQWAPV    | 4382  | >WT1-A31V-GVAQWAPV    | 380  | 4002  |
| >WT1-A31V-GAAQWAPV    | 74    | >WT1-A31V-GVAQWAPV    | 10   | 64    |
| >WT1-A31V-GAAQWAPVI   | 967   | >WT1-A31V-GVAQWAPVI   | 58   | 909   |
| >WT1-A31V-GAAQWAPVI   | 1224  | >WT1-A31V-GVAQWAPVI   | 175  | 1049  |
| >WT1-A31V-GAAQWAPV    | 489   | >WT1-A31V-GVAQWAPV    | 112  | 377   |
| >WT1-A31V-GAAQWAPV    | 219   | >WT1-A31V-GVAQWAPV    | 79   | 140   |
| >WT1-A31V-GAAQWAPVI   | 602   | >WT1-A31V-GVAQWAPVI   | 374  | 228   |
| >WT1-A31V-GAAQWAPVI   | 341   | >WT1-A31V-GVAQWAPVI   | 3115 | 2774  |
| >WT1-A31V-GAAQWAPVI   | 58    | >WT1-A31V-GVAQWAPVI   | 535  | 477   |
| >WT1-A31V-GAAQWAPVI   | 264   | >WT1-A31V-GVAQWAPVI   | 474  | 210   |

|                        |      |                        |     |      |
|------------------------|------|------------------------|-----|------|
| >WT1-A31V- GAAQWAPVI   | 432  | >WT1-A31V- GVAQWAPVI   | 249 | 183  |
| >WT1-A31V- GAAQWAPVI   | 611  | >WT1-A31V- GVAQWAPVI   | 357 | 254  |
| >WT1-A31V- SGAAQWAPV   | 142  | >WT1-A31V- SGVAQWAPV   | 94  | 48   |
| >WT1-A31V- SGAAQWAPV   | 32   | >WT1-A31V- SGVAQWAPV   | 141 | 109  |
| >WT1-A31V- VSGAAQWAF   | 106  | >WT1-A31V- VSGVAQWAF   | 133 | 27   |
| >WT1-A31V- VSGAAQWAF   | 269  | >WT1-A31V- VSGVAQWAF   | 465 | 196  |
| >WT1-A31V- VSGAAQWAF   | 201  | >WT1-A31V- VSGVAQWAF   | 499 | 298  |
| >WT1-A31V- PVSGAAQWAF  | 141  | >WT1-A31V- PVSGVAQWAF  | 168 | 27   |
| >WT1-A31V- PVSGAAQWAF  | 263  | >WT1-A31V- PVSGVAQWAF  | 135 | 128  |
| >WT1-A31V- LPVSGAAQW   | 150  | >WT1-A31V- LPVSGVAQW   | 217 | 67   |
| >WT1-A31V- LPVSGAAQ    | 69   | >WT1-A31V- LPVSGVAQ    | 80  | 11   |
| >WT1-A31V- LPVSGAAQW   | 85   | >WT1-A31V- LPVSGVAQW   | 104 | 19   |
| >WT1-A31V- LPVSGAAQW   | 397  | >WT1-A31V- LPVSGVAQW   | 534 | 137  |
| >WT1-A31V- LPVSGAAQW   | 8    | >WT1-A31V- LPVSGVAQW   | 7   | 1    |
| >WT1-A31V- LPVSGAAQ    | 201  | >WT1-A31V- LPVSGVAQ    | 143 | 58   |
| >WT1-A31V- LPVSGAAQW   | 438  | >WT1-A31V- LPVSGVAQW   | 413 | 25   |
| >WT1-A31V- LPVSGAAQW   | 86   | >WT1-A31V- LPVSGVAQW   | 39  | 47   |
| >WT1-A31V- LPVSGAAQW   | 153  | >WT1-A31V- LPVSGVAQW   | 131 | 22   |
| >WT1-A31V- LPVSGAAQW   | 888  | >WT1-A31V- LPVSGVAQW   | 303 | 585  |
| >WT1-A31V- LPVSGAAQW   | 4    | >WT1-A31V- LPVSGVAQW   | 3   | 1    |
| >WT1-A31V- LPVSGAAQW   | 80   | >WT1-A31V- LPVSGVAQW   | 138 | 58   |
| >WT1-A31V- ALPVSGAA    | 95   | >WT1-A31V- ALPVSGVA    | 349 | 254  |
| >WT1-A31V- ALPVSGAAQ\  | 147  | >WT1-A31V- ALPVSGVAQ\  | 240 | 93   |
| >WT1-A31V- ALPVSGAA    | 428  | >WT1-A31V- ALPVSGVA    | 817 | 389  |
| >WT1-A31V- ALPVSGAAQ\  | 404  | >WT1-A31V- ALPVSGVAQ\  | 234 | 170  |
| >WT1-A31V- ALPVSGAAQ\  | 388  | >WT1-A31V- ALPVSGVAQ\  | 258 | 130  |
| >WT1-A31V- ALPVSGAA    | 155  | >WT1-A31V- ALPVSGVA    | 173 | 18   |
| >WT1-A31V- ALPVSGAAQ\  | 17   | >WT1-A31V- ALPVSGVAQ\  | 18  | 1    |
| >WT1-A31V- ALPVSGAAQ\  | 437  | >WT1-A31V- ALPVSGVAQ\  | 618 | 181  |
| >WT1-A31V- CALPVSGA    | 2259 | >WT1-A31V- CALPVSGV    | 261 | 1998 |
| >WT1-A31V- CALPVSGA    | 6380 | >WT1-A31V- CALPVSGV    | 165 | 6215 |
| >WT1-A31V- CALPVSGA    | 2375 | >WT1-A31V- CALPVSGV    | 157 | 2218 |
| >WT1-A31V- CALPVSGA    | 5012 | >WT1-A31V- CALPVSGV    | 205 | 4807 |
| >WT1-A31V- CALPVSGAAC  | 8    | >WT1-A31V- CALPVSGVAC  | 8   | 0    |
| >WT1-A31V- CALPVSGAAC  | 197  | >WT1-A31V- CALPVSGVAC  | 166 | 31   |
| >WT1-A31V- CALPVSGAAC  | 50   | >WT1-A31V- CALPVSGVAC  | 42  | 8    |
| >WT1-A31V- CALPVSGAAC  | 9    | >WT1-A31V- CALPVSGVAC  | 9   | 0    |
| >WT1-A31V- CALPVSGAAC  | 59   | >WT1-A31V- CALPVSGVAC  | 38  | 21   |
| >WT1-A31V- CALPVSGAAC  | 45   | >WT1-A31V- CALPVSGVAC  | 51  | 6    |
| >WT1-C107S CRYGPFPGPPP | 564  | >WT1-C107S SRYGPFPGPPP | 479 | 85   |
| >WT1-C107S CRYGPFPGPPP | 413  | >WT1-C107S SRYGPFPGPPP | 359 | 54   |
| >WT1-C107S ACRYGPFPG   | 145  | >WT1-C107S ASRYGPFPG   | 15  | 130  |
| >WT1-C107S ACRYGPFPG   | 3772 | >WT1-C107S ASRYGPFPG   | 451 | 3321 |

|                        |      |                        |     |      |
|------------------------|------|------------------------|-----|------|
| >WT1-C107S ACRYGPFPGPF | 1614 | >WT1-C107S ASRYGPFPGPF | 145 | 1469 |
| >WT1-C107S ACRYGPFPGPF | 455  | >WT1-C107S ASRYGPFPGPF | 42  | 413  |
| >WT1-C107S GACRYGPF    | 304  | >WT1-C107S GASRYGPF    | 290 | 14   |
| >WT1-C107S GACRYGPF    | 695  | >WT1-C107S GASRYGPF    | 336 | 359  |
| >WT1-C107S GACRYGPF    | 304  | >WT1-C107S GASRYGPF    | 340 | 36   |
| >WT1-C107S AGACRYGPF   | 3117 | >WT1-C107S AGASRYGPF   | 356 | 2761 |
| >WT1-C107S AGACRYGPF   | 687  | >WT1-C107S AGASRYGPF   | 370 | 317  |
| >WT1-C107S AGACRYGPF   | 266  | >WT1-C107S AGASRYGPF   | 289 | 23   |
| >WT1-C107S TAGACRYGPF  | 597  | >WT1-C107S TAGASRYGPF  | 358 | 239  |
| >WT1-C107S GTAGACRY    | 731  | >WT1-C107S GTAGASRY    | 183 | 548  |
| >WT1-C107S GTAGACRYGI  | 591  | >WT1-C107S GTAGASRYGI  | 199 | 392  |
| >WT1-C107S GTAGACRY    | 694  | >WT1-C107S GTAGASRY    | 157 | 537  |
| >WT1-C107S GTAGACRYGI  | 727  | >WT1-C107S GTAGASRYGI  | 472 | 255  |
| >WT1-C107S GTAGACRY    | 57   | >WT1-C107S GTAGASRY    | 29  | 28   |
| >WT1-C107S GTAGACRY    | 179  | >WT1-C107S GTAGASRY    | 59  | 120  |
| >WT1-C107S GTAGACRY    | 464  | >WT1-C107S GTAGASRY    | 347 | 117  |
| >WT1-C107S GTAGACRYGI  | 194  | >WT1-C107S GTAGASRYGI  | 123 | 71   |
| >WT1-C107S GTAGACRY    | 15   | >WT1-C107S GTAGASRY    | 6   | 9    |
| >WT1-C107S GTAGACRYGI  | 22   | >WT1-C107S GTAGASRYGI  | 11  | 11   |
| >WT1-C107S GTAGACRYGI  | 42   | >WT1-C107S GTAGASRYGI  | 41  | 1    |
| >WT1-C107S GTAGACRY    | 160  | >WT1-C107S GTAGASRY    | 129 | 31   |
| >WT1-C107S TGTAGACRY   | 1290 | >WT1-C107S TGTAGASRY   | 170 | 1120 |
| >WT1-C107S TGTAGACR    | 389  | >WT1-C107S TGTAGASR    | 345 | 44   |
| >WT1-C107S TGTAGACRY   | 1225 | >WT1-C107S TGTAGASRY   | 246 | 979  |
| >WT1-C107S TGTAGACRY   | 1779 | >WT1-C107S TGTAGASRY   | 23  | 1756 |
| >WT1-C107S FTGTAGACRY  | 78   | >WT1-C107S FTGTAGASRY  | 33  | 45   |
| >WT1-C107S FTGTAGACRY  | 281  | >WT1-C107S FTGTAGASRY  | 62  | 219  |
| >WT1-C107S FTGTAGACRY  | 998  | >WT1-C107S FTGTAGASRY  | 377 | 621  |
| >WT1-C107S FTGTAGACRY  | 89   | >WT1-C107S FTGTAGASRY  | 110 | 21   |
| >WT1-C107S FTGTAGACRY  | 202  | >WT1-C107S FTGTAGASRY  | 175 | 27   |
| >WT1-C107S FTGTAGACR   | 30   | >WT1-C107S FTGTAGASR   | 36  | 6    |
| >WT1-C107S FTGTAGACRY  | 555  | >WT1-C107S FTGTAGASRY  | 263 | 292  |
| >WT1-C107S FTGTAGACRY  | 170  | >WT1-C107S FTGTAGASRY  | 187 | 17   |
| >WT1-C107S FTGTAGACRY  | 1422 | >WT1-C107S FTGTAGASRY  | 469 | 953  |
| >WT1-C107S FTGTAGACRY  | 14   | >WT1-C107S FTGTAGASRY  | 8   | 6    |
| >WT1-C107S FTGTAGACRY  | 80   | >WT1-C107S FTGTAGASRY  | 51  | 29   |
| >WT1-C107S QFTGTAGACI  | 41   | >WT1-C107S QFTGTAGASFI | 20  | 21   |
| >WT1-C107S QFTGTAGACI  | 1072 | >WT1-C107S QFTGTAGASFI | 340 | 732  |
| >WT1-C107S QFTGTAGACI  | 42   | >WT1-C107S QFTGTAGASFI | 82  | 40   |
| >WT1-C107S QFTGTAGACI  | 50   | >WT1-C107S QFTGTAGASFI | 107 | 57   |
| >WT1-C107S QFTGTAGACI  | 160  | >WT1-C107S QFTGTAGASFI | 92  | 68   |
| >WT1-C107S QFTGTAGACI  | 295  | >WT1-C107S QFTGTAGASFI | 111 | 184  |
| >WT1-C107S QFTGTAGACI  | 1830 | >WT1-C107S QFTGTAGASFI | 119 | 1711 |

|                        |       |                        |      |       |
|------------------------|-------|------------------------|------|-------|
| >WT1-C107S QFTGTAGACI  | 243   | >WT1-C107S QFTGTAGASF  | 308  | 65    |
| >WT1-C107S QFTGTAGACI  | 104   | >WT1-C107S QFTGTAGASF  | 65   | 39    |
| >WT1-C107S QFTGTAGACI  | 332   | >WT1-C107S QFTGTAGASF  | 239  | 93    |
| >WT1-C107S QFTGTAGAC   | 369   | >WT1-C107S QFTGTAGAS   | 1083 | 714   |
| >WT1-C107S GQFTGTAGA   | 63    | >WT1-C107S GQFTGTAGA   | 61   | 2     |
| >WT1-C107S GQFTGTAGA   | 436   | >WT1-C107S GQFTGTAGA   | 161  | 275   |
| >WT1-C282R ESDNHTTPI   | 34885 | >WT1-C282R ESDNHTTPI   | 29   | 34856 |
| >WT1-C282R ILCGAQYRI   | 63    | >WT1-C282R ILRGAQYRI   | 984  | 921   |
| >WT1-C282R ILCGAQYRI   | 19    | >WT1-C282R ILRGAQYRI   | 78   | 59    |
| >WT1-C282R ILCGAQYRI   | 556   | >WT1-C282R ILRGAQYRI   | 287  | 269   |
| >WT1-C282R ILCGAQYRI   | 11    | >WT1-C282R ILRGAQYRI   | 50   | 39    |
| >WT1-C282R ILCGAQYRI   | 435   | >WT1-C282R ILRGAQYRI   | 570  | 135   |
| >WT1-C282R ILCGAQYRI   | 238   | >WT1-C282R ILRGAQYRI   | 950  | 712   |
| >WT1-C282R ILCGAQYRI   | 21    | >WT1-C282R ILRGAQYRI   | 243  | 222   |
| >WT1-C282R ILCGAQYRI   | 7     | >WT1-C282R ILRGAQYRI   | 7    | 0     |
| >WT1-C282R ILCGAQYRIH  | 63    | >WT1-C282R ILRGAQYRIH  | 80   | 17    |
| >WT1-C282R ILCGAQYR    | 1088  | >WT1-C282R ILRGAQYR    | 370  | 718   |
| >WT1-C282R ILCGAQYR    | 12128 | >WT1-C282R ILRGAQYR    | 314  | 11814 |
| >WT1-C282R ILCGAQYRI   | 11127 | >WT1-C282R ILRGAQYRI   | 268  | 10859 |
| >WT1-C282R ILCGAQYR    | 70    | >WT1-C282R ILRGAQYR    | 37   | 33    |
| >WT1-C282R ILCGAQYR    | 128   | >WT1-C282R ILRGAQYR    | 96   | 32    |
| >WT1-C282R ILCGAQYR    | 165   | >WT1-C282R ILRGAQYR    | 860  | 695   |
| >WT1-C282R ILCGAQYR    | 49    | >WT1-C282R ILRGAQYR    | 134  | 85    |
| >WT1-C282R PILCGAQY    | 81    | >WT1-C282R PILRGAQY    | 214  | 133   |
| >WT1-C282R PILCGAQYR   | 77    | >WT1-C282R PILRGAQYR   | 216  | 139   |
| >WT1-C282R TPILCGAQYRI | 76    | >WT1-C282R TPILRGAQYRI | 265  | 189   |
| >WT1-C282R TPILCGAQYR  | 380   | >WT1-C282R TPILRGAQYR  | 583  | 203   |
| >WT1-C282R TPILCGAQYR  | 138   | >WT1-C282R TPILRGAQYR  | 383  | 245   |
| >WT1-C282R TPILCGAQY   | 22    | >WT1-C282R TPILRGAQY   | 105  | 83    |
| >WT1-C282R TPILCGAQY   | 62    | >WT1-C282R TPILRGAQY   | 985  | 923   |
| >WT1-C282R TPILCGAQYRI | 101   | >WT1-C282R TPILRGAQYRI | 577  | 476   |
| >WT1-C282R TPILCGAQYRI | 300   | >WT1-C282R TPILRGAQYRI | 1482 | 1182  |
| >WT1-C282R TPILCGAQY   | 339   | >WT1-C282R TPILRGAQY   | 136  | 203   |
| >WT1-C282R TPILCGAQY   | 441   | >WT1-C282R TPILRGAQY   | 1204 | 763   |
| >WT1-C282R TPILCGAQYR  | 197   | >WT1-C282R TPILRGAQYR  | 785  | 588   |
| >WT1-C282R TTPILCGAQY  | 165   | >WT1-C282R TTPILRGAQY  | 229  | 64    |
| >WT1-C282R TTPILCGAQY  | 259   | >WT1-C282R TTPILRGAQY  | 409  | 150   |
| >WT1-C282R TTPILCGAQY  | 398   | >WT1-C282R TTPILRGAQY  | 476  | 78    |
| >WT1-C282R TTPILCGAQY  | 119   | >WT1-C282R TTPILRGAQY  | 109  | 10    |
| >WT1-C282R TTPILCGAQYI | 237   | >WT1-C282R TTPILRGAQYI | 106  | 131   |
| >WT1-C282R TTPILCGAQY  | 179   | >WT1-C282R TTPILRGAQY  | 127  | 52    |
| >WT1-C282R TTPILCGAQYI | 30    | >WT1-C282R TTPILRGAQYI | 28   | 2     |
| >WT1-C282R TTPILCGA    | 61    | >WT1-C282R TTPILRGA    | 93   | 32    |

|                        |       |                        |      |       |
|------------------------|-------|------------------------|------|-------|
| >WT1-C282R TTPILCGAQY  | 223   | >WT1-C282R TTPILRGAQY  | 179  | 44    |
| >WT1-C282R TTPILCGAQ   | 492   | >WT1-C282R TTPILRGAQ   | 1487 | 995   |
| >WT1-C282R TTPILCGAQY  | 52    | >WT1-C282R TTPILRGAQY  | 117  | 65    |
| >WT1-C282R TTPILCGAQYI | 235   | >WT1-C282R TTPILRGAQYI | 387  | 152   |
| >WT1-C282R TTPILCGAQY  | 35    | >WT1-C282R TTPILRGAQY  | 43   | 8     |
| >WT1-C282R TTPILCGAQYI | 425   | >WT1-C282R TTPILRGAQYI | 372  | 53    |
| >WT1-C282R HTTPILCGAQ  | 409   | >WT1-C282R HTTPILRGAQ  | 675  | 266   |
| >WT1-C282R HTTPILCGA   | 234   | >WT1-C282R HTTPILRGA   | 1979 | 1745  |
| >WT1-C282R HTTPILCGAQ  | 83    | >WT1-C282R HTTPILRGAQ  | 85   | 2     |
| >WT1-C282R HTTPILCGAQ  | 81    | >WT1-C282R HTTPILRGAQ  | 52   | 29    |
| >WT1-C282R HTTPILCGAQ  | 62    | >WT1-C282R HTTPILRGAQ  | 64   | 2     |
| >WT1-C282R HTTPILCGAQ  | 51    | >WT1-C282R HTTPILRGAQ  | 55   | 4     |
| >WT1-C282R HTTPILCGAQ  | 80    | >WT1-C282R HTTPILRGAQ  | 129  | 49    |
| >WT1-C282R HTTPILCGAQ  | 109   | >WT1-C282R HTTPILRGAQ  | 180  | 71    |
| >WT1-C282R HTTPILCGA   | 9     | >WT1-C282R HTTPILRGA   | 23   | 14    |
| >WT1-C282R HTTPILCGA   | 330   | >WT1-C282R HTTPILRGA   | 1593 | 1263  |
| >WT1-C282R HTTPILCGAQ  | 317   | >WT1-C282R HTTPILRGAQ  | 268  | 49    |
| >WT1-C282R HTTPILCGAQ  | 4     | >WT1-C282R HTTPILRGAQ  | 5    | 1     |
| >WT1-C282R HTTPILCGAQ  | 187   | >WT1-C282R HTTPILRGAQ  | 226  | 39    |
| >WT1-C282R HTTPILCGAQ  | 233   | >WT1-C282R HTTPILRGAQ  | 991  | 758   |
| >WT1-C282R HTTPILCGAQ  | 17    | >WT1-C282R HTTPILRGAQ  | 19   | 2     |
| >WT1-C282R HTTPILCGAQ  | 195   | >WT1-C282R HTTPILRGAQ  | 306  | 111   |
| >WT1-C282R DNHTTPILC   | 41007 | >WT1-C282R DNHTTPILR   | 274  | 40733 |
| >WT1-C385Y CKTCQRKF    | 38    | >WT1-C385Y YKTCQRKF    | 7    | 31    |
| >WT1-C385Y QCKTCQRKF   | 20831 | >WT1-C385Y QYKTCQRKF   | 39   | 20792 |
| >WT1-C385Y QCKTCQRK    | 646   | >WT1-C385Y QYKTCQRK    | 41   | 605   |
| >WT1-C385Y QCKTCQRKFS  | 271   | >WT1-C385Y QYKTCQRKFS  | 21   | 250   |
| >WT1-C385Y QCKTCQRKFS  | 1238  | >WT1-C385Y QYKTCQRKFS  | 72   | 1166  |
| >WT1-C385Y QCKTCQRK    | 6028  | >WT1-C385Y QYKTCQRK    | 411  | 5617  |
| >WT1-C385Y QCKTCQRKFS  | 136   | >WT1-C385Y QYKTCQRKFS  | 19   | 117   |
| >WT1-C385Y RRHTGVKPF   | 3308  | >WT1-C385Y RRHTGVKPF   | 36   | 3272  |
| >WT1-C385Y RRHTGVKPF   | 773   | >WT1-C385Y RRHTGVKPF   | 46   | 727   |
| >WT1-C385Y RRHTGVKPF   | 251   | >WT1-C385Y RRHTGVKPF   | 158  | 93    |
| >WT1-C385Y FQCKTCQR    | 819   | >WT1-C385Y FQYKTCQR    | 285  | 534   |
| >WT1-C385Y FQCKTCQR    | 709   | >WT1-C385Y FQYKTCQR    | 156  | 553   |
| >WT1-C385Y FQCKTCQRKF  | 166   | >WT1-C385Y FQYKTCQRKF  | 73   | 93    |
| >WT1-C385Y FQCKTCQRKF  | 666   | >WT1-C385Y FQYKTCQRKF  | 71   | 595   |
| >WT1-C385Y FQCKTCQR    | 706   | >WT1-C385Y FQYKTCQR    | 51   | 655   |
| >WT1-C385Y FQCKTCQRK   | 581   | >WT1-C385Y FQYKTCQRK   | 52   | 529   |
| >WT1-C385Y FQCKTCQRKF  | 8     | >WT1-C385Y FQYKTCQRKF  | 2    | 6     |
| >WT1-C385Y FQCKTCQRKF  | 2260  | >WT1-C385Y FQYKTCQRKF  | 194  | 2066  |
| >WT1-C385Y FQCKTCQR    | 314   | >WT1-C385Y FQYKTCQR    | 158  | 156   |
| >WT1-C385Y PFQCKTCQRK  | 292   | >WT1-C385Y PFQYKTCQRK  | 445  | 153   |

|                        |       |                       |     |       |
|------------------------|-------|-----------------------|-----|-------|
| >WT1-C385Y PFQCKTCQRK  | 315   | >WT1-C385Y PFQYKTCQRK | 372 | 57    |
| >WT1-C385Y PFQCKTCQR   | 835   | >WT1-C385Y PFQYKTCQR  | 386 | 449   |
| >WT1-C385Y PFQCKTCQR   | 59    | >WT1-C385Y PFQYKTCQR  | 130 | 71    |
| >WT1-C385Y KPFQCKTCQF  | 90    | >WT1-C385Y KPFQYKTCQF | 86  | 4     |
| >WT1-C385Y KPFQCKTCQF  | 18    | >WT1-C385Y KPFQYKTCQF | 31  | 13    |
| >WT1-C385Y KPFQCKTCQF  | 265   | >WT1-C385Y KPFQYKTCQF | 569 | 304   |
| >WT1-C385Y GVKPFQCK    | 889   | >WT1-C385Y GVKPFQYK   | 157 | 732   |
| >WT1-C385Y GVKPFQCK    | 97    | >WT1-C385Y GVKPFQYK   | 20  | 77    |
| >WT1-C385Y GVKPFQCK    | 18    | >WT1-C385Y GVKPFQYK   | 7   | 11    |
| >WT1-C385Y GVKPFQCK    | 286   | >WT1-C385Y GVKPFQYK   | 30  | 256   |
| >WT1-C385Y GVKPFQCK    | 828   | >WT1-C385Y GVKPFQYK   | 365 | 463   |
| >WT1-C385Y TGVKPFQCK   | 1924  | >WT1-C385Y TGVKPFQYK  | 366 | 1558  |
| >WT1-C385Y HTGVKPFQC   | 19476 | >WT1-C385Y HTGVKPFQY  | 140 | 19336 |
| >WT1-C385Y HTGVKPFQCI  | 324   | >WT1-C385Y HTGVKPFQYK | 70  | 254   |
| >WT1-C385Y HTGVKPFQCI  | 607   | >WT1-C385Y HTGVKPFQYK | 78  | 529   |
| >WT1-C385Y HTGVKPFQC   | 20983 | >WT1-C385Y HTGVKPFQY  | 26  | 20957 |
| >WT1-C385Y HTGVKPFQCI  | 231   | >WT1-C385Y HTGVKPFQYK | 27  | 204   |
| >WT1-C385Y HTGVKPFQCI  | 1611  | >WT1-C385Y HTGVKPFQYK | 90  | 1521  |
| >WT1-C385Y HTGVKPFQC   | 25318 | >WT1-C385Y HTGVKPFQY  | 14  | 25304 |
| >WT1-C385Y HTGVKPFQC   | 8978  | >WT1-C385Y HTGVKPFQY  | 12  | 8966  |
| >WT1-C385Y HTGVKPFQC   | 15166 | >WT1-C385Y HTGVKPFQY  | 368 | 14798 |
| >WT1-C385Y HTGVKPFQC   | 33121 | >WT1-C385Y HTGVKPFQY  | 53  | 33068 |
| >WT1-C385Y RHTGVKPFQCI | 31323 | >WT1-C385Y RHTGVKPFQY | 476 | 30847 |
| >WT1-C385Y RHTGVKPFQCI | 30821 | >WT1-C385Y RHTGVKPFQY | 375 | 30446 |
| >WT1-C388Y CQRKFSRSDH  | 5517  | >WT1-C388Y YQRKFSRSDH | 170 | 5347  |
| >WT1-C388Y CQRKFSRSDH  | 2566  | >WT1-C388Y YQRKFSRSDH | 459 | 2107  |
| >WT1-C388Y CQRKFSRSDH  | 4647  | >WT1-C388Y YQRKFSRSDH | 382 | 4265  |
| >WT1-C388Y CQRKFSRSDH  | 557   | >WT1-C388Y YQRKFSRSDH | 53  | 504   |
| >WT1-C388Y CQRKFSRSDH  | 6691  | >WT1-C388Y YQRKFSRSDH | 308 | 6383  |
| >WT1-C388Y CQRKFSRS    | 3301  | >WT1-C388Y YQRKFSRS   | 339 | 2962  |
| >WT1-C388Y CQRKFSRSDH  | 171   | >WT1-C388Y YQRKFSRSDH | 19  | 152   |
| >WT1-C388Y CQRKFSRSDH  | 104   | >WT1-C388Y YQRKFSRSDH | 14  | 90    |
| >WT1-C388Y TCQRKFSR    | 106   | >WT1-C388Y TYQRKFSR   | 11  | 95    |
| >WT1-C388Y TCQRKFSR    | 444   | >WT1-C388Y TYQRKFSR   | 24  | 420   |
| >WT1-C388Y TCQRKFSR    | 1121  | >WT1-C388Y TYQRKFSR   | 86  | 1035  |
| >WT1-C388Y TGVKPFQCKT  | 22439 | >WT1-C388Y TGVKPFQCKT | 420 | 22019 |
| >WT1-C388Y KTCQRKFSR   | 1246  | >WT1-C388Y KTYQRKFSR  | 66  | 1180  |
| >WT1-C388Y KTCQRKFSR   | 129   | >WT1-C388Y KTYQRKFSR  | 33  | 96    |
| >WT1-C388Y KTCQRKFS    | 1091  | >WT1-C388Y KTYQRKFS   | 469 | 622   |
| >WT1-C388Y KTCQRKFSR   | 7     | >WT1-C388Y KTYQRKFSR  | 6   | 1     |
| >WT1-C388Y KTCQRKFSR   | 140   | >WT1-C388Y KTYQRKFSR  | 129 | 11    |
| >WT1-C388Y KTCQRKFSR   | 178   | >WT1-C388Y KTYQRKFSR  | 50  | 128   |
| >WT1-C388Y KTCQRKFSRS  | 3573  | >WT1-C388Y KTYQRKFSRS | 280 | 3293  |



|                       |       |                       |     |       |
|-----------------------|-------|-----------------------|-----|-------|
| >WT1-C388Y KTCQRKFSR  | 385   | >WT1-C388Y KTYQRKFSR  | 156 | 229   |
| >WT1-C388Y KTCQRKFSR  | 34    | >WT1-C388Y KTYQRKFSR  | 21  | 13    |
| >WT1-C388Y CKTCQRKF   | 38    | >WT1-C388Y CKTYQRKF   | 31  | 7     |
| >WT1-C388Y QCKTCQRK   | 646   | >WT1-C388Y QCKTYQRK   | 109 | 537   |
| >WT1-C388Y QCKTCQRKFS | 271   | >WT1-C388Y QCKTYQRKFS | 180 | 91    |
| >WT1-C388Y QCKTCQRKFS | 136   | >WT1-C388Y QCKTYQRKFS | 312 | 176   |
| >WT1-C388Y FQCKTCQR   | 819   | >WT1-C388Y FQCKTYQR   | 161 | 658   |
| >WT1-C388Y FQCKTCQR   | 709   | >WT1-C388Y FQCKTYQR   | 487 | 222   |
| >WT1-C388Y FQCKTCQRKF | 166   | >WT1-C388Y FQCKTYQRKF | 158 | 8     |
| >WT1-C388Y FQCKTCQRKF | 666   | >WT1-C388Y FQCKTYQRKF | 490 | 176   |
| >WT1-C388Y FQCKTCQRK  | 581   | >WT1-C388Y FQCKTYQRK  | 274 | 307   |
| >WT1-C388Y FQCKTCQRKF | 8     | >WT1-C388Y FQCKTYQRKF | 5   | 3     |
| >WT1-C388Y FQCKTCQR   | 314   | >WT1-C388Y FQCKTYQR   | 147 | 167   |
| >WT1-C388Y PFQCKTCQRK | 292   | >WT1-C388Y PFQCKTYQRK | 184 | 108   |
| >WT1-C388Y PFQCKTCQRK | 315   | >WT1-C388Y PFQCKTYQRK | 218 | 97    |
| >WT1-C388Y PFQCKTCQR  | 868   | >WT1-C388Y PFQCKTYQR  | 157 | 711   |
| >WT1-C388Y PFQCKTCQR  | 835   | >WT1-C388Y PFQCKTYQR  | 313 | 522   |
| >WT1-C388Y PFQCKTCQR  | 59    | >WT1-C388Y PFQCKTYQR  | 30  | 29    |
| >WT1-C388Y KPFQCKTCQ  | 17141 | >WT1-C388Y KPFQCKTYQ  | 272 | 16869 |
| >WT1-C388Y KPFQCKTCQF | 90    | >WT1-C388Y KPFQCKTYQF | 60  | 30    |
| >WT1-C388Y KPFQCKTC   | 10216 | >WT1-C388Y KPFQCKTY   | 195 | 10021 |
| >WT1-C388Y KPFQCKTC   | 8458  | >WT1-C388Y KPFQCKTY   | 32  | 8426  |
| >WT1-C388Y KPFQCKTC   | 19260 | >WT1-C388Y KPFQCKTY   | 421 | 18839 |
| >WT1-C388Y KPFQCKTC   | 19421 | >WT1-C388Y KPFQCKTY   | 26  | 19395 |
| >WT1-C388Y KPFQCKTCQ  | 1718  | >WT1-C388Y KPFQCKTYQ  | 96  | 1622  |
| >WT1-C388Y KPFQCKTCQF | 18    | >WT1-C388Y KPFQCKTYQF | 12  | 6     |
| >WT1-C388Y KPFQCKTCQF | 265   | >WT1-C388Y KPFQCKTYQF | 99  | 166   |
| >WT1-C388Y VKPFQCKTC  | 11863 | >WT1-C388Y VKPFQCKTY  | 148 | 11715 |
| >WT1-C388Y GVKPFQCKTC | 18774 | >WT1-C388Y GVKPFQCKTY | 336 | 18438 |
| >WT1-C388Y GVKPFQCKTC | 24589 | >WT1-C388Y GVKPFQCKTY | 223 | 24366 |
| >WT1-D299Y DVRRVPGV   | 6593  | >WT1-D299Y YVRRVPGV   | 18  | 6575  |
| >WT1-D299Y DVRRVPGVA  | 15524 | >WT1-D299Y YVRRVPGVA  | 371 | 15153 |
| >WT1-D299Y DVRRVPGV   | 12988 | >WT1-D299Y YVRRVPGV   | 107 | 12881 |
| >WT1-D299Y DVRRVPGV   | 6046  | >WT1-D299Y YVRRVPGV   | 19  | 6027  |
| >WT1-D299Y DVRRVPGV   | 8594  | >WT1-D299Y YVRRVPGV   | 99  | 8495  |
| >WT1-D299Y DVRRVPGV   | 2123  | >WT1-D299Y YVRRVPGV   | 8   | 2115  |
| >WT1-D299Y DVRRVPGV   | 1841  | >WT1-D299Y YVRRVPGV   | 69  | 1772  |
| >WT1-D299Y DVRRVPGVA  | 2092  | >WT1-D299Y YVRRVPGVA  | 55  | 2037  |
| >WT1-D299Y DVRRVPGVA  | 4231  | >WT1-D299Y YVRRVPGVA  | 222 | 4009  |
| >WT1-D299Y DVRRVPGV   | 583   | >WT1-D299Y YVRRVPGV   | 274 | 309   |
| >WT1-D299Y HTHGVFRGIC | 18489 | >WT1-D299Y HTHGVFRGIC | 391 | 18098 |
| >WT1-D299Y HTHGVFRGIC | 22489 | >WT1-D299Y HTHGVFRGIC | 404 | 22085 |
| >WT1-D299Y HTHGVFRGIC | 18210 | >WT1-D299Y HTHGVFRGIC | 38  | 18172 |

|                       |       |                       |      |       |
|-----------------------|-------|-----------------------|------|-------|
| >WT1-D299Y HTHGVFRGIC | 29721 | >WT1-D299Y HTHGVFRGIC | 76   | 29645 |
| >WT1-D299Y HTHGVFRGIC | 14065 | >WT1-D299Y HTHGVFRGIC | 20   | 14045 |
| >WT1-D299Y HTHGVFRGIC | 23846 | >WT1-D299Y HTHGVFRGIC | 68   | 23778 |
| >WT1-D299Y HTHGVFRGIC | 1592  | >WT1-D299Y HTHGVFRGIC | 75   | 1517  |
| >WT1-D299Y HTHGVFRGIC | 17539 | >WT1-D299Y HTHGVFRGIC | 320  | 17219 |
| >WT1-D299Y HTHGVFRGIC | 26893 | >WT1-D299Y HTHGVFRGIC | 283  | 26610 |
| >WT1-D299Y HTHGVFRGIC | 22453 | >WT1-D299Y HTHGVFRGIC | 422  | 22031 |
| >WT1-D299Y HTHGVFRGIC | 15164 | >WT1-D299Y HTHGVFRGIC | 9    | 15155 |
| >WT1-D299Y HTHGVFRGIC | 20283 | >WT1-D299Y HTHGVFRGIC | 473  | 19810 |
| >WT1-D299Y HTHGVFRGIC | 16254 | >WT1-D299Y HTHGVFRGIC | 58   | 16196 |
| >WT1-D299Y IQDVRRVPG\ | 2002  | >WT1-D299Y IQVRRVPGV  | 150  | 1852  |
| >WT1-D299Y IQDVRRVPG\ | 465   | >WT1-D299Y IQVRRVPGV  | 159  | 306   |
| >WT1-D299Y IQDVRRVPG\ | 325   | >WT1-D299Y IQVRRVPGV  | 75   | 250   |
| >WT1-D299Y IQDVRRVPG\ | 471   | >WT1-D299Y IQVRRVPGV  | 161  | 310   |
| >WT1-D299Y IQDVRRVPG\ | 1558  | >WT1-D299Y IQVRRVPGV  | 182  | 1376  |
| >WT1-D299Y IQDVRRVPG  | 11573 | >WT1-D299Y IQVRRVPG   | 450  | 11123 |
| >WT1-D299Y IQDVRRVPG  | 14166 | >WT1-D299Y IQVRRVPG   | 387  | 13779 |
| >WT1-D299Y IQDVRRVPG\ | 3437  | >WT1-D299Y IQVRRVPGV  | 34   | 3403  |
| >WT1-D299Y IQDVRRVPG\ | 9347  | >WT1-D299Y IQVRRVPGV  | 235  | 9112  |
| >WT1-D299Y GIQDVRRVPC | 473   | >WT1-D299Y GIQVRRVPC  | 1092 | 619   |
| >WT1-D299Y GIQDVRRV   | 351   | >WT1-D299Y GIQVRRV    | 585  | 234   |
| >WT1-D299Y GIQDVRRVPC | 151   | >WT1-D299Y GIQVRRVPC  | 325  | 174   |
| >WT1-D299Y GIQDVRRVPC | 297   | >WT1-D299Y GIQVRRVPC  | 715  | 418   |
| >WT1-D299Y GIQDVRRV   | 69    | >WT1-D299Y GIQVRRV    | 541  | 472   |
| >WT1-D299Y GIQDVRRVPC | 37    | >WT1-D299Y GIQVRRVPC  | 309  | 272   |
| >WT1-D299Y GIQDVRRVPC | 173   | >WT1-D299Y GIQVRRVPC  | 386  | 213   |
| >WT1-D299Y GIQDVRRVPC | 91    | >WT1-D299Y GIQVRRVPC  | 372  | 281   |
| >WT1-D299Y GIQDVRRV   | 15    | >WT1-D299Y GIQVRRV    | 422  | 407   |
| >WT1-D299Y GIQDVRRVPC | 9     | >WT1-D299Y GIQVRRVPC  | 135  | 126   |
| >WT1-D299Y RGIQDVRR   | 1156  | >WT1-D299Y RGIQVRR    | 97   | 1059  |
| >WT1-D299Y RGIQDVRR   | 94    | >WT1-D299Y RGIQVRR    | 62   | 32    |
| >WT1-D299Y FRGIQDVR   | 1630  | >WT1-D299Y FRGIQYVR   | 334  | 1296  |
| >WT1-D299Y FRGIQDVRR  | 1177  | >WT1-D299Y FRGIQYVRR  | 374  | 803   |
| >WT1-D299Y FRGIQDVR   | 2126  | >WT1-D299Y FRGIQYVR   | 285  | 1841  |
| >WT1-D299Y FRGIQDVRR  | 637   | >WT1-D299Y FRGIQYVRR  | 419  | 218   |
| >WT1-D299Y VFRGIQDV   | 659   | >WT1-D299Y VFRGIQYV   | 88   | 571   |
| >WT1-D299Y VFRGIQDV   | 3541  | >WT1-D299Y VFRGIQYV   | 272  | 3269  |
| >WT1-D299Y VFRGIQDVR  | 195   | >WT1-D299Y VFRGIQYVR  | 10   | 185   |
| >WT1-D299Y VFRGIQDVRF | 54    | >WT1-D299Y VFRGIQYVRR | 18   | 36    |
| >WT1-D299Y VFRGIQDVR  | 251   | >WT1-D299Y VFRGIQYVR  | 22   | 229   |
| >WT1-D299Y VFRGIQDVRF | 329   | >WT1-D299Y VFRGIQYVRR | 98   | 231   |
| >WT1-D299Y VFRGIQDVR  | 763   | >WT1-D299Y VFRGIQYVR  | 52   | 711   |
| >WT1-D299Y VFRGIQDVRF | 243   | >WT1-D299Y VFRGIQYVRR | 100  | 143   |

|                       |       |                       |      |       |
|-----------------------|-------|-----------------------|------|-------|
| >WT1-D299Y GVFRGIQDV  | 1809  | >WT1-D299Y GVFRGIQYV  | 37   | 1772  |
| >WT1-D299Y GVFRGIQDV  | 2136  | >WT1-D299Y GVFRGIQYV  | 54   | 2082  |
| >WT1-D299Y GVFRGIQDV  | 92    | >WT1-D299Y GVFRGIQYV  | 16   | 76    |
| >WT1-D299Y GVFRGIQDV  | 210   | >WT1-D299Y GVFRGIQYV  | 8    | 202   |
| >WT1-D299Y GVFRGIQDV  | 40    | >WT1-D299Y GVFRGIQYV  | 3    | 37    |
| >WT1-D299Y GVFRGIQDV  | 301   | >WT1-D299Y GVFRGIQYV  | 14   | 287   |
| >WT1-D299Y GVFRGIQDV  | 23    | >WT1-D299Y GVFRGIQYV  | 9    | 14    |
| >WT1-D299Y GVFRGIQDV  | 3355  | >WT1-D299Y GVFRGIQYV  | 65   | 3290  |
| >WT1-D299Y GVFRGIQDV  | 5     | >WT1-D299Y GVFRGIQYV  | 3    | 2     |
| >WT1-D299Y GVFRGIQD   | 18015 | >WT1-D299Y GVFRGIQY   | 275  | 17740 |
| >WT1-D299Y GVFRGIQDVF | 2087  | >WT1-D299Y GVFRGIQYVR | 498  | 1589  |
| >WT1-D299Y GVFRGIQD   | 22776 | >WT1-D299Y GVFRGIQY   | 127  | 22649 |
| >WT1-D299Y GVFRGIQDVF | 4434  | >WT1-D299Y GVFRGIQYVR | 484  | 3950  |
| >WT1-D299Y GVFRGIQDVF | 363   | >WT1-D299Y GVFRGIQYVR | 76   | 287   |
| >WT1-D299Y GVFRGIQD   | 21632 | >WT1-D299Y GVFRGIQY   | 25   | 21607 |
| >WT1-D299Y GVFRGIQDVF | 1893  | >WT1-D299Y GVFRGIQYVR | 95   | 1798  |
| >WT1-D299Y GVFRGIQDVF | 56    | >WT1-D299Y GVFRGIQYVR | 20   | 36    |
| >WT1-D299Y GVFRGIQDVF | 320   | >WT1-D299Y GVFRGIQYVR | 55   | 265   |
| >WT1-D299Y GVFRGIQDVF | 115   | >WT1-D299Y GVFRGIQYVR | 75   | 40    |
| >WT1-D299Y GVFRGIQDV  | 4541  | >WT1-D299Y GVFRGIQYV  | 125  | 4416  |
| >WT1-D299Y GVFRGIQD   | 21519 | >WT1-D299Y GVFRGIQY   | 217  | 21302 |
| >WT1-D299Y GVFRGIQD   | 33292 | >WT1-D299Y GVFRGIQY   | 380  | 32912 |
| >WT1-D299Y GVFRGIQD   | 23841 | >WT1-D299Y GVFRGIQY   | 109  | 23732 |
| >WT1-D299Y GVFRGIQDVF | 1548  | >WT1-D299Y GVFRGIQYVR | 471  | 1077  |
| >WT1-D299Y GVFRGIQDVF | 612   | >WT1-D299Y GVFRGIQYVR | 258  | 354   |
| >WT1-D299Y GVFRGIQDVF | 3611  | >WT1-D299Y GVFRGIQYVR | 445  | 3166  |
| >WT1-D299Y HGVFRGIQD\ | 1795  | >WT1-D299Y HGVFRGIQY\ | 157  | 1638  |
| >WT1-D299Y HGVFRGIQD\ | 536   | >WT1-D299Y HGVFRGIQY\ | 318  | 218   |
| >WT1-D299Y HGVFRGIQD  | 24449 | >WT1-D299Y HGVFRGIQY  | 145  | 24304 |
| >WT1-D299Y HGVFRGIQD\ | 430   | >WT1-D299Y HGVFRGIQY\ | 70   | 360   |
| >WT1-D396C SDHLKTHTR  | 3823  | >WT1-D396C SGHLKTHTR  | 179  | 3644  |
| >WT1-D396C SDHLKTHTR  | 612   | >WT1-D396C SGHLKTHTR  | 195  | 417   |
| >WT1-D396C RSDHLKTHTR | 27    | >WT1-D396C RSGHLKTHTR | 19   | 8     |
| >WT1-D396C RSDHLKTH   | 388   | >WT1-D396C RSGHLKTH   | 1156 | 768   |
| >WT1-D396C RSDHLKTH   | 408   | >WT1-D396C RSGHLKTH   | 684  | 276   |
| >WT1-D396C RSDHLKTHTR | 310   | >WT1-D396C RSGHLKTHTR | 66   | 244   |
| >WT1-D396C SRSDHLKTHT | 890   | >WT1-D396C SRSGHLKTHT | 378  | 512   |
| >WT1-D396C SRSDHLKTHT | 411   | >WT1-D396C SRSGHLKTHT | 528  | 117   |
| >WT1-D396C FSRSDHLK   | 60    | >WT1-D396C FSRSGHLK   | 18   | 42    |
| >WT1-D396C FSRSDHLK   | 165   | >WT1-D396C FSRSGHLK   | 235  | 70    |
| >WT1-D396C FSRSDHLKTH | 351   | >WT1-D396C FSRSGHLKTH | 93   | 258   |
| >WT1-D396C FSRSDHLKT  | 1383  | >WT1-D396C FSRSGHLKT  | 474  | 909   |
| >WT1-D396C KFSRSDHLK  | 1118  | >WT1-D396C KFSRSGHLK  | 221  | 897   |

|                        |       |                        |     |       |
|------------------------|-------|------------------------|-----|-------|
| >WT1-D396C KFSRSDHLK   | 283   | >WT1-D396C KFSRSGHLK   | 148 | 135   |
| >WT1-D396C KFSRSDHL    | 362   | >WT1-D396C KFSRSGHL    | 399 | 37    |
| >WT1-D396C KFSRSDHLK   | 23    | >WT1-D396C KFSRSGHLK   | 12  | 11    |
| >WT1-D396C KFSRSDHLK   | 49    | >WT1-D396C KFSRSGHLK   | 36  | 13    |
| >WT1-D396C KFSRSDHLK   | 143   | >WT1-D396C KFSRSGHLK   | 391 | 248   |
| >WT1-D396C KFSRSDHL    | 147   | >WT1-D396C KFSRSGHL    | 193 | 46    |
| >WT1-D396C KFSRSDHLK   | 375   | >WT1-D396C KFSRSGHLK   | 351 | 24    |
| >WT1-D396C RKFSRSDHLK  | 2295  | >WT1-D396C RKFSRSGHLK  | 372 | 1923  |
| >WT1-D396C RKFSRSDHLK  | 253   | >WT1-D396C RKFSRSGHLK  | 71  | 182   |
| >WT1-D396C RKFSRSDH    | 17    | >WT1-D396C RKFSRSGH    | 25  | 8     |
| >WT1-D396C RKFSRSDHL   | 6     | >WT1-D396C RKFSRSGHL   | 9   | 3     |
| >WT1-D396C RKFSRSDHLK  | 104   | >WT1-D396C RKFSRSGHLK  | 54  | 50    |
| >WT1-D396C RKFSRSDHLK  | 174   | >WT1-D396C RKFSRSGHLK  | 207 | 33    |
| >WT1-D396C RKFSRSDHL   | 614   | >WT1-D396C RKFSRSGHL   | 252 | 362   |
| >WT1-D396C RKFSRSDHLK  | 275   | >WT1-D396C RKFSRSGHLK  | 279 | 4     |
| >WT1-D396C RKFSRSDHL   | 1107  | >WT1-D396C RKFSRSGHL   | 477 | 630   |
| >WT1-D396C QRKFSRSDHL  | 520   | >WT1-D396C QRKFSRSGHL  | 270 | 250   |
| >WT1-D396C QRKFSRSDHL  | 874   | >WT1-D396C QRKFSRSGHL  | 225 | 649   |
| >WT1-D396C QRKFSRSDHL  | 847   | >WT1-D396C QRKFSRSGHL  | 417 | 430   |
| >WT1-D396C QRKFSRSDHL  | 1191  | >WT1-D396C QRKFSRSGHL  | 216 | 975   |
| >WT1-D396C QRKFSRSDHL  | 633   | >WT1-D396C QRKFSRSGHL  | 327 | 306   |
| >WT1-D396C CQRKFSRSDH  | 1454  | >WT1-D396C CQRKFSRSGH  | 497 | 957   |
| >WT1-D396C CQRKFSRSDH  | 557   | >WT1-D396C CQRKFSRSGH  | 329 | 228   |
| >WT1-D396C CQRKFSRSDH  | 171   | >WT1-D396C CQRKFSRSGH  | 245 | 74    |
| >WT1-D396C CQRKFSRSDH  | 104   | >WT1-D396C CQRKFSRSGH  | 144 | 40    |
| >WT1-D396F DHLKTHTR    | 9381  | >WT1-D396F HHLKTHTR    | 474 | 8907  |
| >WT1-D396F DHLKTHTR    | 601   | >WT1-D396F HHLKTHTR    | 39  | 562   |
| >WT1-D396F SDHLKTHTR   | 612   | >WT1-D396F SHHLKTHTR   | 203 | 409   |
| >WT1-D396F KTCQRKFSRS  | 9881  | >WT1-D396F KTCQRKFSRS  | 377 | 9504  |
| >WT1-D396F RSDHLKTHTR  | 11742 | >WT1-D396F RSHHLKTHTR  | 55  | 11687 |
| >WT1-D396F RSDHLKTHTR  | 16174 | >WT1-D396F RSHHLKTHTR  | 474 | 15700 |
| >WT1-D396F RSDHLKTHTR  | 27    | >WT1-D396F RSHHLKTHTR  | 13  | 14    |
| >WT1-D396F RSDHLKTH    | 388   | >WT1-D396F RSHHLKTH    | 129 | 259   |
| >WT1-D396F RSDHLKTH    | 408   | >WT1-D396F RSHHLKTH    | 397 | 11    |
| >WT1-D396F RSDHLKTHTR  | 310   | >WT1-D396F RSHHLKTHTR  | 67  | 243   |
| >WT1-D396F SRSDHLKTHTR | 411   | >WT1-D396F SRSHHLKTHTR | 540 | 129   |
| >WT1-D396F FSRSDHLK    | 2364  | >WT1-D396F FSRSHHLK    | 281 | 2083  |
| >WT1-D396F FSRSDHLK    | 1413  | >WT1-D396F FSRSHHLK    | 423 | 990   |
| >WT1-D396F FSRSDHLK    | 60    | >WT1-D396F FSRSHHLK    | 9   | 51    |
| >WT1-D396F FSRSDHLK    | 2980  | >WT1-D396F FSRSHHLK    | 376 | 2604  |
| >WT1-D396F FSRSDHLK    | 165   | >WT1-D396F FSRSHHLK    | 146 | 19    |
| >WT1-D396F FSRSDHLKTH  | 747   | >WT1-D396F FSRSHHLKTH  | 399 | 348   |
| >WT1-D396F FSRSDHLKTH  | 351   | >WT1-D396F FSRSHHLKTH  | 156 | 195   |

|                       |      |                       |     |      |
|-----------------------|------|-----------------------|-----|------|
| >WT1-D396F KFSRSDHLK  | 1118 | >WT1-D396F KFSRSHHLK  | 178 | 940  |
| >WT1-D396F KFSRSDHLK  | 283  | >WT1-D396F KFSRSHHLK  | 83  | 200  |
| >WT1-D396F KFSRSDHL   | 2141 | >WT1-D396F KFSRSHHL   | 388 | 1753 |
| >WT1-D396F KFSRSDHL   | 362  | >WT1-D396F KFSRSHHL   | 129 | 233  |
| >WT1-D396F KFSRSDHL   | 2900 | >WT1-D396F KFSRSHHL   | 220 | 2680 |
| >WT1-D396F KFSRSDHLK  | 23   | >WT1-D396F KFSRSHHLK  | 6   | 17   |
| >WT1-D396F KFSRSDHLK  | 49   | >WT1-D396F KFSRSHHLK  | 12  | 37   |
| >WT1-D396F KFSRSDHLK  | 143  | >WT1-D396F KFSRSHHLK  | 122 | 21   |
| >WT1-D396F KFSRSDHL   | 147  | >WT1-D396F KFSRSHHL   | 112 | 35   |
| >WT1-D396F KFSRSDHLK  | 375  | >WT1-D396F KFSRSHHLK  | 242 | 133  |
| >WT1-D396F RKFSRSDHLK | 2295 | >WT1-D396F RKFSRSHHLK | 337 | 1958 |
| >WT1-D396F RKFSRSDHLK | 253  | >WT1-D396F RKFSRSHHLK | 28  | 225  |
| >WT1-D396F RKFSRSDHLK | 1013 | >WT1-D396F RKFSRSHHLK | 219 | 794  |
| >WT1-D396F RKFSRSDH   | 17   | >WT1-D396F RKFSRSHH   | 12  | 5    |
| >WT1-D396F RKFSRSDHL  | 6    | >WT1-D396F RKFSRSHHL  | 4   | 2    |
| >WT1-D396F RKFSRSDHLK | 104  | >WT1-D396F RKFSRSHHLK | 36  | 68   |
| >WT1-D396F RKFSRSDHLK | 174  | >WT1-D396F RKFSRSHHLK | 89  | 85   |
| >WT1-D396F RKFSRSDHL  | 614  | >WT1-D396F RKFSRSHHL  | 107 | 507  |
| >WT1-D396F RKFSRSDHLK | 275  | >WT1-D396F RKFSRSHHLK | 201 | 74   |
| >WT1-D396F RKFSRSDHL  | 3334 | >WT1-D396F RKFSRSHHL  | 365 | 2969 |
| >WT1-D396F RKFSRSDHL  | 1027 | >WT1-D396F RKFSRSHHL  | 260 | 767  |
| >WT1-D396F RKFSRSDHLK | 657  | >WT1-D396F RKFSRSHHLK | 277 | 380  |
| >WT1-D396F QRKFSRSDHL | 520  | >WT1-D396F QRKFSRSHHL | 79  | 441  |
| >WT1-D396F QRKFSRSDHL | 706  | >WT1-D396F QRKFSRSHHL | 379 | 327  |
| >WT1-D396F QRKFSRSDHL | 874  | >WT1-D396F QRKFSRSHHL | 222 | 652  |
| >WT1-D396F QRKFSRSDHL | 1191 | >WT1-D396F QRKFSRSHHL | 248 | 943  |
| >WT1-D396F QRKFSRSDHL | 633  | >WT1-D396F QRKFSRSHHL | 269 | 364  |
| >WT1-D396F CQRKFSRSDH | 1454 | >WT1-D396F CQRKFSRSHH | 332 | 1122 |
| >WT1-D396F CQRKFSRSDH | 557  | >WT1-D396F CQRKFSRSHH | 327 | 230  |
| >WT1-D396F CQRKFSRSD  | 5784 | >WT1-D396F CQRKFSRSH  | 132 | 5652 |
| >WT1-D396F CQRKFSRSDH | 171  | >WT1-D396F CQRKFSRSHH | 121 | 50   |
| >WT1-D396F CQRKFSRSDH | 104  | >WT1-D396F CQRKFSRSHH | 46  | 58   |
| >WT1-D396N DHLKTHTR   | 601  | >WT1-D396N NHLKTHTR   | 160 | 441  |
| >WT1-D396N SDHLKTHTR  | 3823 | >WT1-D396N SNHLKTHTR  | 341 | 3482 |
| >WT1-D396N SDHLKTHTR  | 612  | >WT1-D396N SNHLKTHTR  | 267 | 345  |
| >WT1-D396N RSDHLKTHTR | 27   | >WT1-D396N RSNHLKTHTR | 8   | 19   |
| >WT1-D396N RSDHLKTH   | 388  | >WT1-D396N RSNHLKTH   | 259 | 129  |
| >WT1-D396N RSDHLKTH   | 408  | >WT1-D396N RSNHLKTH   | 814 | 406  |
| >WT1-D396N RSDHLKTHTR | 310  | >WT1-D396N RSNHLKTHTR | 128 | 182  |
| >WT1-D396N SRSDHLKTHT | 890  | >WT1-D396N RSNHLKTHT  | 454 | 436  |
| >WT1-D396N SRSDHLKTHT | 411  | >WT1-D396N RSNHLKTHT  | 822 | 411  |
| >WT1-D396N FSRSDHLK   | 60   | >WT1-D396N FSRSNHLK   | 12  | 48   |
| >WT1-D396N FSRSDHLK   | 165  | >WT1-D396N FSRSNHLK   | 96  | 69   |

|                       |       |                       |       |       |
|-----------------------|-------|-----------------------|-------|-------|
| >WT1-D396M FSRSDHLKTH | 747   | >WT1-D396M FSRSNHLKTH | 446   | 301   |
| >WT1-D396M FSRSDHLKTH | 351   | >WT1-D396M FSRSNHLKTH | 167   | 184   |
| >WT1-D396M KFSRSDHL   | 1386  | >WT1-D396M KFSRSNHL   | 299   | 1087  |
| >WT1-D396M KFSRSDHLK  | 1118  | >WT1-D396M KFSRSNHLK  | 232   | 886   |
| >WT1-D396M KFSRSDHLK  | 283   | >WT1-D396M KFSRSNHLK  | 104   | 179   |
| >WT1-D396M KFSRSDHL   | 362   | >WT1-D396M KFSRSNHL   | 308   | 54    |
| >WT1-D396M KFSRSDHL   | 2900  | >WT1-D396M KFSRSNHL   | 328   | 2572  |
| >WT1-D396M KFSRSDHLK  | 23    | >WT1-D396M KFSRSNHLK  | 9     | 14    |
| >WT1-D396M KFSRSDHLK  | 49    | >WT1-D396M KFSRSNHLK  | 29    | 20    |
| >WT1-D396M KFSRSDHLK  | 143   | >WT1-D396M KFSRSNHLK  | 107   | 36    |
| >WT1-D396M KFSRSDHL   | 147   | >WT1-D396M KFSRSNHL   | 163   | 16    |
| >WT1-D396M KFSRSDHLK  | 375   | >WT1-D396M KFSRSNHLK  | 264   | 111   |
| >WT1-D396M RKFSRSDHL  | 1778  | >WT1-D396M RKFSRSNHL  | 353   | 1425  |
| >WT1-D396M RKFSRSDHLK | 253   | >WT1-D396M RKFSRSNHLK | 41    | 212   |
| >WT1-D396M RKFSRSDHLK | 1013  | >WT1-D396M RKFSRSNHLK | 458   | 555   |
| >WT1-D396M RKFSRSDH   | 17    | >WT1-D396M RKFSRSNH   | 9     | 8     |
| >WT1-D396M RKFSRSDHL  | 6     | >WT1-D396M RKFSRSNHL  | 3     | 3     |
| >WT1-D396M RKFSRSDHLK | 104   | >WT1-D396M RKFSRSNHLK | 38    | 66    |
| >WT1-D396M RKFSRSDHLK | 174   | >WT1-D396M RKFSRSNHLK | 75    | 99    |
| >WT1-D396M RKFSRSDHL  | 614   | >WT1-D396M RKFSRSNHL  | 492   | 122   |
| >WT1-D396M RKFSRSDHLK | 275   | >WT1-D396M RKFSRSNHLK | 407   | 132   |
| >WT1-D396M RKFSRSDHL  | 1027  | >WT1-D396M RKFSRSNHL  | 280   | 747   |
| >WT1-D396M RKFSRSDHLK | 657   | >WT1-D396M RKFSRSNHLK | 448   | 209   |
| >WT1-D396M QRKFSRSDHL | 520   | >WT1-D396M QRKFSRSNHL | 149   | 371   |
| >WT1-D396M QRKFSRSDHL | 706   | >WT1-D396M QRKFSRSNHL | 297   | 409   |
| >WT1-D396M QRKFSRSDHL | 874   | >WT1-D396M QRKFSRSNHL | 455   | 419   |
| >WT1-D396M QRKFSRSDHL | 847   | >WT1-D396M QRKFSRSNHL | 493   | 354   |
| >WT1-D396M QRKFSRSDHL | 633   | >WT1-D396M QRKFSRSNHL | 364   | 269   |
| >WT1-D396M CQRKFSRSDH | 1454  | >WT1-D396M CQRKFSRSNH | 299   | 1155  |
| >WT1-D396M CQRKFSRSDH | 557   | >WT1-D396M CQRKFSRSNH | 329   | 228   |
| >WT1-D396M CQRKFSRSDH | 171   | >WT1-D396M CQRKFSRSNH | 104   | 67    |
| >WT1-D396M CQRKFSRSDH | 104   | >WT1-D396M CQRKFSRSNH | 41    | 63    |
| >WT1-E262A EGQSNHSTG  | 1566  | >WT1-E262A AGQSNHSTG  | 243   | 1323  |
| >WT1-E262A EGQSNHSTG  | 1239  | >WT1-E262A AGQSNHSTG  | 140   | 1099  |
| >WT1-E262A TEGQSNHSTC | 529   | >WT1-E262A TAGQSNHSTC | 267   | 262   |
| >WT1-E262A TEGQSNHSTC | 19839 | >WT1-E262A TAGQSNHSTC | 99    | 19740 |
| >WT1-E262A TEGQSNHSTC | 204   | >WT1-E262A TAGQSNHSTC | 17737 | 17533 |
| >WT1-E262A TEGQSNHSTC | 7161  | >WT1-E262A TAGQSNHSTC | 131   | 7030  |
| >WT1-E262A TEGQSNHST  | 422   | >WT1-E262A TAGQSNHST  | 37453 | 37031 |
| >WT1-E262A TEGQSNHSTC | 348   | >WT1-E262A TAGQSNHSTC | 18140 | 17792 |
| >WT1-E262A TEGQSNHSTC | 213   | >WT1-E262A TAGQSNHSTC | 30019 | 29806 |
| >WT1-E262A TEGQSNHST  | 47    | >WT1-E262A TAGQSNHST  | 28197 | 28150 |
| >WT1-E262A WTEGQSNHS  | 10406 | >WT1-E262A WTAGQSNHS  | 198   | 10208 |

|                       |       |                       |      |       |
|-----------------------|-------|-----------------------|------|-------|
| >WT1-E262A WTEGQSNHS  | 414   | >WT1-E262A WTAGQSNHS  | 288  | 126   |
| >WT1-E262A KWTEGQSN   | 305   | >WT1-E262A KWTAGQSN   | 290  | 15    |
| >WT1-E262A KWTEGQSNH  | 90    | >WT1-E262A KWTAGQSNH  | 95   | 5     |
| >WT1-E262A VKWTEGQSN  | 359   | >WT1-E262A VKWTAGQSN  | 327  | 32    |
| >WT1-E262A VKWTEGQSN  | 64    | >WT1-E262A VKWTAGQSN  | 57   | 7     |
| >WT1-E262A SVKWTEGQS  | 955   | >WT1-E262A SVKWTAGQS  | 456  | 499   |
| >WT1-F154S·TFDGTPSY   | 7921  | >WT1-F154S·TSDGTPSY   | 28   | 7893  |
| >WT1-F154S·TFDGTPSY   | 78    | >WT1-F154S·TSDGTPSY   | 658  | 580   |
| >WT1-F154S·TFDGTPSY   | 422   | >WT1-F154S·TSDGTPSY   | 139  | 283   |
| >WT1-F154S·TFDGTPSY   | 22655 | >WT1-F154S·TSDGTPSY   | 25   | 22630 |
| >WT1-F154S·TFDGTPSY   | 9576  | >WT1-F154S·TSDGTPSY   | 66   | 9510  |
| >WT1-F154S·TFDGTPSY   | 226   | >WT1-F154S·TSDGTPSY   | 574  | 348   |
| >WT1-F154S·IRNQGYSTVT | 7     | >WT1-F154S·IRNQGYSTVT | 1381 | 1374  |
| >WT1-F154S·IRNQGYSTVT | 121   | >WT1-F154S·IRNQGYSTVT | 6959 | 6838  |
| >WT1-F154S·VTFDGTPSY  | 1220  | >WT1-F154S·VTSDGTPSY  | 108  | 1112  |
| >WT1-F154S·VTFDGTPSY  | 477   | >WT1-F154S·VTSDGTPSY  | 2582 | 2105  |
| >WT1-F154S·VTFDGTPSY  | 42    | >WT1-F154S·VTSDGTPSY  | 256  | 214   |
| >WT1-F154S·VTFDGTPSYG | 296   | >WT1-F154S·VTSDGTPSYG | 1690 | 1394  |
| >WT1-F154S·VTFDGTPSY  | 108   | >WT1-F154S·VTSDGTPSY  | 243  | 135   |
| >WT1-F154S·VTFDGTPSY  | 90    | >WT1-F154S·VTSDGTPSY  | 421  | 331   |
| >WT1-F154S·VTFDGTPSY  | 127   | >WT1-F154S·VTSDGTPSY  | 81   | 46    |
| >WT1-F154S·VTFDGTPSY  | 232   | >WT1-F154S·VTSDGTPSY  | 2231 | 1999  |
| >WT1-F154S·VTFDGTPSY  | 10    | >WT1-F154S·VTSDGTPSY  | 23   | 13    |
| >WT1-F154S·VTFDGTPSY  | 6     | >WT1-F154S·VTSDGTPSY  | 6    | 0     |
| >WT1-F154S·VTFDGTPSY  | 138   | >WT1-F154S·VTSDGTPSY  | 3631 | 3493  |
| >WT1-F154S·VTFDGTPSY  | 255   | >WT1-F154S·VTSDGTPSY  | 1745 | 1490  |
| >WT1-F154S·VTFDGTPSY  | 93    | >WT1-F154S·VTSDGTPSY  | 184  | 91    |
| >WT1-F154S·VTFDGTPSY  | 42    | >WT1-F154S·VTSDGTPSY  | 69   | 27    |
| >WT1-F154S·VTFDGTPSY  | 463   | >WT1-F154S·VTSDGTPSY  | 2867 | 2404  |
| >WT1-F154S·VTFDGTPSY  | 88    | >WT1-F154S·VTSDGTPSY  | 893  | 805   |
| >WT1-F154S·VTFDGTPSY  | 3     | >WT1-F154S·VTSDGTPSY  | 4    | 1     |
| >WT1-F154S·VTFDGTPSYG | 39    | >WT1-F154S·VTSDGTPSYG | 208  | 169   |
| >WT1-F154S·VTFDGTPSY  | 149   | >WT1-F154S·VTSDGTPSY  | 173  | 24    |
| >WT1-F154S·VTFDGTPSY  | 420   | >WT1-F154S·VTSDGTPSY  | 2097 | 1677  |
| >WT1-F154S·VTFDGTPSY  | 183   | >WT1-F154S·VTSDGTPSY  | 210  | 27    |
| >WT1-F154S·VTFDGTPSY  | 9     | >WT1-F154S·VTSDGTPSY  | 24   | 15    |
| >WT1-F154S·VTFDGTPSYG | 256   | >WT1-F154S·VTSDGTPSYG | 1152 | 896   |
| >WT1-F154S·TVTFDGTPSY | 34    | >WT1-F154S·TVTSDGTPSY | 21   | 13    |
| >WT1-F154S·TVTFDGTPSY | 383   | >WT1-F154S·TVTSDGTPSY | 487  | 104   |
| >WT1-F154S·TVTFDGTPSY | 875   | >WT1-F154S·TVTSDGTPSY | 475  | 400   |
| >WT1-F154S·TVTFDGTPSY | 337   | >WT1-F154S·TVTSDGTPSY | 639  | 302   |
| >WT1-F154S·STVTFDGTPS | 363   | >WT1-F154S·STVTSDGTPS | 601  | 238   |
| >WT1-F154S·STVTFDGTPS | 119   | >WT1-F154S·STVTSDGTPS | 184  | 65    |

|                        |       |                         |       |       |
|------------------------|-------|-------------------------|-------|-------|
| >WT1-F154S·STVTFDGTPS' | 14    | >WT1-F154S·STVTSDDGTPS' | 15    | 1     |
| >WT1-F154S·STVTFDGTPS' | 4     | >WT1-F154S·STVTSDDGTPS' | 4     | 0     |
| >WT1-F154S·STVTFDGTPS' | 96    | >WT1-F154S·STVTSDDGTPS' | 66    | 30    |
| >WT1-F154S·STVTFDGTPS' | 30    | >WT1-F154S·STVTSDDGTPS' | 53    | 23    |
| >WT1-F154S·STVTFDGTPS' | 14    | >WT1-F154S·STVTSDDGTPS' | 16    | 2     |
| >WT1-F154S·STVTFDGTPS' | 314   | >WT1-F154S·STVTSDDGTPS' | 433   | 119   |
| >WT1-F154S·STVTFDGTPS' | 208   | >WT1-F154S·STVTSDDGTPS' | 586   | 378   |
| >WT1-F154S·STVTFDGTPS' | 198   | >WT1-F154S·STVTSDDGTPS' | 103   | 95    |
| >WT1-F154S·STVTFDGTPS' | 6     | >WT1-F154S·STVTSDDGTPS' | 4     | 2     |
| >WT1-F154S·STVTFDGTPS' | 272   | >WT1-F154S·STVTSDDGTPS' | 332   | 60    |
| >WT1-F154S·STVTFDGTPS' | 15    | >WT1-F154S·STVTSDDGTPS' | 21    | 6     |
| >WT1-F154S·QGYSTVTF    | 466   | >WT1-F154S·QGYSTVTS     | 22224 | 21758 |
| >WT1-F154S·QGYSTVTF    | 274   | >WT1-F154S·QGYSTVTS     | 17661 | 17387 |
| >WT1-F154S·QGYSTVTF    | 14    | >WT1-F154S·QGYSTVTS     | 8695  | 8681  |
| >WT1-F154S·QGYSTVTF    | 43    | >WT1-F154S·QGYSTVTS     | 20173 | 20130 |
| >WT1-F154S·QGYSTVTF    | 244   | >WT1-F154S·QGYSTVTS     | 11856 | 11612 |
| >WT1-F154S·NQGYSTVTF   | 123   | >WT1-F154S·NQGYSTVTS    | 18825 | 18702 |
| >WT1-F154S·NQGYSTVTF   | 43    | >WT1-F154S·NQGYSTVTS    | 6235  | 6192  |
| >WT1-F154S·NQGYSTVTF   | 357   | >WT1-F154S·NQGYSTVTS    | 19491 | 19134 |
| >WT1-F154S·NQGYSTVTF   | 5     | >WT1-F154S·NQGYSTVTS    | 3577  | 3572  |
| >WT1-F154S·RNQGYSTVTF  | 49    | >WT1-F154S·RNQGYSTVTS   | 4806  | 4757  |
| >WT1-F154S·RNQGYSTVTF  | 133   | >WT1-F154S·RNQGYSTVTS   | 14919 | 14786 |
| >WT1-F154S·RNQGYSTVTF  | 43    | >WT1-F154S·RNQGYSTVTS   | 15316 | 15273 |
| >WT1-F154S·RNQGYSTVTF  | 210   | >WT1-F154S·RNQGYSTVTS   | 22819 | 22609 |
| >WT1-G201E·SVPPPVGDC   | 267   | >WT1-G201E·SVPPPVGDC    | 2471  | 2204  |
| >WT1-G201E·SVPPPVGDC   | 112   | >WT1-G201E·SVPPPVGDC    | 227   | 115   |
| >WT1-G201E·YSVPPPVGDC  | 237   | >WT1-G201E·YSVPPPVGDC   | 1212  | 975   |
| >WT1-G379V·GVKPFQCK    | 97    | >WT1-G379V·VVKPFQCK     | 112   | 15    |
| >WT1-G379V·GVKPFQCK    | 18    | >WT1-G379V·VVKPFQCK     | 20    | 2     |
| >WT1-G379V·GVKPFQCK    | 286   | >WT1-G379V·VVKPFQCK     | 226   | 60    |
| >WT1-G379V·TGVKPFQCK   | 1924  | >WT1-G379V·TVVKPFQCK    | 31    | 1893  |
| >WT1-G379V·TGVKPFQCK   | 2712  | >WT1-G379V·TVVKPFQCK    | 44    | 2668  |
| >WT1-G379V·QLKRHQRRH'  | 16402 | >WT1-G379V·QLKRHQRRH'   | 77    | 16325 |
| >WT1-G379V·QLKRHQRRH'  | 17241 | >WT1-G379V·QLKRHQRRH'   | 8     | 17233 |
| >WT1-G379V·QLKRHQRRH'  | 90    | >WT1-G379V·QLKRHQRRH'   | 20    | 70    |
| >WT1-G379V·HTGVKPFQCK  | 324   | >WT1-G379V·HTVVKPFQCK   | 214   | 110   |
| >WT1-G379V·HTGVKPFQCK  | 607   | >WT1-G379V·HTVVKPFQCK   | 166   | 441   |
| >WT1-G379V·HTGVKPFQCK  | 231   | >WT1-G379V·HTVVKPFQCK   | 87    | 144   |
| >WT1-G379V·HTGVKPFQCK  | 1611  | >WT1-G379V·HTVVKPFQCK   | 204   | 1407  |
| >WT1-G379V·RHTGVKPF    | 80    | >WT1-G379V·RHTVVKPF     | 36    | 44    |
| >WT1-G379V·RHTGVKPF    | 267   | >WT1-G379V·RHTVVKPF     | 662   | 395   |
| >WT1-G379V·RRHTGVKPF   | 3     | >WT1-G379V·RRHTVVKPF    | 3     | 0     |
| >WT1-G379V·RRHTGVKPF   | 551   | >WT1-G379V·RRHTVVKPF    | 367   | 184   |



|                       |      |                       |     |      |
|-----------------------|------|-----------------------|-----|------|
| >WT1-G379V RRHTGVKPF  | 42   | >WT1-G379V RRHTVVKPF  | 26  | 16   |
| >WT1-G379V RRHTGVKPF  | 79   | >WT1-G379V RRHTVVKPF  | 63  | 16   |
| >WT1-G379V RRHTGVKPF  | 172  | >WT1-G379V RRHTVVKPF  | 85  | 87   |
| >WT1-G379V RRHTGVKPF  | 106  | >WT1-G379V RRHTVVKPF  | 96  | 10   |
| >WT1-G379V RRHTGVKPF  | 77   | >WT1-G379V RRHTVVKPF  | 68  | 9    |
| >WT1-G379V RRHTGVKPF  | 251  | >WT1-G379V RRHTVVKPF  | 191 | 60   |
| >WT1-G379V RRHTGVKPF  | 102  | >WT1-G379V RRHTVVKPF  | 91  | 11   |
| >WT1-G379V RRHTGVKPF  | 202  | >WT1-G379V RRHTVVKPF  | 201 | 1    |
| >WT1-G379V QRRHTGVK   | 161  | >WT1-G379V QRRHTVVK   | 95  | 66   |
| >WT1-G379V QRRHTGVK   | 1110 | >WT1-G379V QRRHTVVK   | 305 | 805  |
| >WT1-G379V QRRHTGVKPI | 4    | >WT1-G379V QRRHTVVKPI | 5   | 1    |
| >WT1-G379V QRRHTGVK   | 684  | >WT1-G379V QRRHTVVK   | 458 | 226  |
| >WT1-G379V QRRHTGVKPI | 347  | >WT1-G379V QRRHTVVKPI | 215 | 132  |
| >WT1-G379V HQRRHTGV   | 161  | >WT1-G379V HQRRHTVV   | 473 | 312  |
| >WT1-G379V HQRRHTGVK  | 117  | >WT1-G379V HQRRHTVVK  | 89  | 28   |
| >WT1-G379V HQRRHTGV   | 57   | >WT1-G379V HQRRHTVV   | 32  | 25   |
| >WT1-G379V HQRRHTGVK  | 4    | >WT1-G379V HQRRHTVVK  | 4   | 0    |
| >WT1-G379V HQRRHTGVK  | 317  | >WT1-G379V HQRRHTVVK  | 270 | 47   |
| >WT1-G379V HQRRHTGVK  | 540  | >WT1-G379V HQRRHTVVK  | 106 | 434  |
| >WT1-G379V HQRRHTGV   | 790  | >WT1-G379V HQRRHTVV   | 219 | 571  |
| >WT1-G379V HQRRHTGVK  | 30   | >WT1-G379V HQRRHTVVK  | 30  | 0    |
| >WT1-G379V HQRRHTGVK  | 58   | >WT1-G379V HQRRHTVVK  | 117 | 59   |
| >WT1-G379V HQRRHTGV   | 178  | >WT1-G379V HQRRHTVV   | 31  | 147  |
| >WT1-G379V HQRRHTGVK  | 2060 | >WT1-G379V HQRRHTVVK  | 69  | 1991 |
| >WT1-G379V HQRRHTGVK  | 3    | >WT1-G379V HQRRHTVVK  | 2   | 1    |
| >WT1-G379V RHQRRHTG   | 604  | >WT1-G379V RHQRRHTV   | 221 | 383  |
| >WT1-G379V RHQRRHTGV  | 782  | >WT1-G379V RHQRRHTVV  | 451 | 331  |
| >WT1-G379V RHQRRHTGV  | 229  | >WT1-G379V RHQRRHTVV  | 490 | 261  |
| >WT1-G379V KRHQRRHTG  | 53   | >WT1-G379V KRHQRRHTV  | 37  | 16   |
| >WT1-G379V KRHQRRHTG  | 1533 | >WT1-G379V KRHQRRHTV  | 168 | 1365 |
| >WT1-G379V KRHQRRHTG  | 995  | >WT1-G379V KRHQRRHTV  | 324 | 671  |
| >WT1-G379V KRHQRRHTG  | 876  | >WT1-G379V KRHQRRHTV  | 67  | 809  |
| >WT1-G379V KRHQRRHTG  | 151  | >WT1-G379V KRHQRRHTV  | 103 | 48   |
| >WT1-G379V KRHQRRHTG  | 83   | >WT1-G379V KRHQRRHTV  | 64  | 19   |
| >WT1-G379V KRHQRRHTG  | 288  | >WT1-G379V KRHQRRHTV  | 57  | 231  |
| >WT1-G379V KRHQRRHTG  | 42   | >WT1-G379V KRHQRRHTV  | 39  | 3    |
| >WT1-G379V KRHQRRHTG  | 360  | >WT1-G379V KRHQRRHTV  | 228 | 132  |
| >WT1-G379V KRHQRRHTG  | 517  | >WT1-G379V KRHQRRHTV  | 41  | 476  |
| >WT1-G379V KRHQRRHTG  | 56   | >WT1-G379V KRHQRRHTV  | 54  | 2    |
| >WT1-G379V KRHQRRHTG  | 156  | >WT1-G379V KRHQRRHTV  | 105 | 51   |
| >WT1-G379V KRHQRRHTG  | 1299 | >WT1-G379V KRHQRRHTV  | 441 | 858  |
| >WT1-G379V LKRHQRRHTG | 2057 | >WT1-G379V LKRHQRRHTV | 38  | 2019 |
| >WT1-G379V LKRHQRRHTG | 43   | >WT1-G379V LKRHQRRHTV | 19  | 24   |

|                      |       |                      |      |       |
|----------------------|-------|----------------------|------|-------|
| >WT1-H373YHQRRHTGV   | 161   | >WT1-H373YQRRHTGV    | 14   | 147   |
| >WT1-H373YHQRRHTGV   | 723   | >WT1-H373YQRRHTGV    | 38   | 685   |
| >WT1-H373YHQRRHTGV   | 6708  | >WT1-H373YQRRHTGV    | 287  | 6421  |
| >WT1-H373YHQRRHTGV   | 6499  | >WT1-H373YQRRHTGV    | 170  | 6329  |
| >WT1-H373YHQRRHTGVK  | 117   | >WT1-H373YQRRHTGVK   | 400  | 283   |
| >WT1-H373YHQRRHTGV   | 57    | >WT1-H373YQRRHTGV    | 1562 | 1505  |
| >WT1-H373YHQRRHTGVK  | 4     | >WT1-H373YQRRHTGVK   | 19   | 15    |
| >WT1-H373YHQRRHTGVK  | 317   | >WT1-H373YQRRHTGVKI  | 4647 | 4330  |
| >WT1-H373YHQRRHTGVK  | 1126  | >WT1-H373YQRRHTGVKI  | 332  | 794   |
| >WT1-H373YHQRRHTGV   | 790   | >WT1-H373YQRRHTGV    | 206  | 584   |
| >WT1-H373YHQRRHTGVK  | 30    | >WT1-H373YQRRHTGVKI  | 24   | 6     |
| >WT1-H373YHQRRHTGVK  | 58    | >WT1-H373YQRRHTGVKI  | 31   | 27    |
| >WT1-H373YHQRRHTGV   | 178   | >WT1-H373YQRRHTGV    | 36   | 142   |
| >WT1-H373YHQRRHTGVK  | 2060  | >WT1-H373YQRRHTGVK   | 418  | 1642  |
| >WT1-H373YHQRRHTGVK  | 1180  | >WT1-H373YQRRHTGVKI  | 299  | 881   |
| >WT1-H373YHQRRHTGVK  | 3     | >WT1-H373YQRRHTGVKI  | 2    | 1     |
| >WT1-H373YRHQRRHTGV  | 13787 | >WT1-H373YRYQRRHTGV  | 109  | 13678 |
| >WT1-H373YRHQRRHTG   | 15403 | >WT1-H373YRYQRRHTG   | 433  | 14970 |
| >WT1-H373YRHQRRHTGV  | 18301 | >WT1-H373YRYQRRHTGV  | 273  | 18028 |
| >WT1-H373YRHQRRHTGV  | 13922 | >WT1-H373YRYQRRHTGVI | 275  | 13647 |
| >WT1-H373YRHQRRHTGV  | 11753 | >WT1-H373YRYQRRHTGV  | 287  | 11466 |
| >WT1-H373YRHQRRHTGV  | 1136  | >WT1-H373YRYQRRHTGVI | 8    | 1128  |
| >WT1-H373YRHQRRHTGV  | 229   | >WT1-H373YRYQRRHTGV  | 485  | 256   |
| >WT1-H373YRHQRRHTGV  | 10787 | >WT1-H373YRYQRRHTGVI | 337  | 10450 |
| >WT1-H373YRFSRSDQLKR | 14331 | >WT1-H373YRFSRSDQLKR | 467  | 13864 |
| >WT1-H373YRFSRSDQLKR | 18487 | >WT1-H373YRFSRSDQLKR | 422  | 18065 |
| >WT1-H373YKRHQRRTG   | 53    | >WT1-H373YKRYQRRTG   | 779  | 726   |
| >WT1-H373YKRHQRRTG   | 995   | >WT1-H373YKRYQRRTG   | 308  | 687   |
| >WT1-H373YKRHQRRT    | 602   | >WT1-H373YKRYQRRT    | 166  | 436   |
| >WT1-H373YKRHQRRTG   | 876   | >WT1-H373YKRYQRRTG   | 253  | 623   |
| >WT1-H373YKRHQRRTG   | 151   | >WT1-H373YKRYQRRTG   | 44   | 107   |
| >WT1-H373YKRHQRRTG   | 83    | >WT1-H373YKRYQRRTG   | 38   | 45    |
| >WT1-H373YKRHQRRTG   | 1485  | >WT1-H373YKRYQRRTG   | 355  | 1130  |
| >WT1-H373YKRHQRRT    | 63    | >WT1-H373YKRYQRRT    | 29   | 34    |
| >WT1-H373YKRHQRRTG   | 288   | >WT1-H373YKRYQRRTG   | 76   | 212   |
| >WT1-H373YKRHQRRTG   | 42    | >WT1-H373YKRYQRRTG   | 26   | 16    |
| >WT1-H373YKRHQRRTG   | 360   | >WT1-H373YKRYQRRTG   | 81   | 279   |
| >WT1-H373YKRHQRRTG   | 517   | >WT1-H373YKRYQRRTG   | 71   | 446   |
| >WT1-H373YKRHQRRTG   | 56    | >WT1-H373YKRYQRRTG   | 33   | 23    |
| >WT1-H373YKRHQRRTG   | 156   | >WT1-H373YKRYQRRTG   | 26   | 130   |
| >WT1-H373YLKRHQRRT   | 43    | >WT1-H373YLKRYQRRT   | 47   | 4     |
| >WT1-H373YQLKRHQRR   | 35    | >WT1-H373YQLKRYQRR   | 31   | 4     |
| >WT1-H373YQLKRHQRRH  | 90    | >WT1-H373YQLKRYQRRH  | 209  | 119   |

|                       |       |                       |      |       |
|-----------------------|-------|-----------------------|------|-------|
| >WT1-H373Y DQLKRHRQ   | 249   | >WT1-H373Y DQLKRYQR   | 155  | 94    |
| >WT1-H373Y DQLKRHRQR  | 443   | >WT1-H373Y DQLKRYQRR  | 472  | 29    |
| >WT1-H373Y DQLKRHRQ   | 99    | >WT1-H373Y DQLKRYQR   | 62   | 37    |
| >WT1-H373Y DQLKRHRQR  | 159   | >WT1-H373Y DQLKRYQRR  | 171  | 12    |
| >WT1-H373Y DQLKRHRQ   | 573   | >WT1-H373Y DQLKRYQR   | 352  | 221   |
| >WT1-H373Y RSDQLKRH   | 13910 | >WT1-H373Y RSDQLKRY   | 86   | 13824 |
| >WT1-H373Y RSDQLKRHQI | 25    | >WT1-H373Y RSDQLKRYQF | 19   | 6     |
| >WT1-H373Y RSDQLKRHQI | 112   | >WT1-H373Y RSDQLKRYQF | 98   | 14    |
| >WT1-H373Y RSDQLKRH   | 739   | >WT1-H373Y RSDQLKRY   | 6    | 733   |
| >WT1-H373Y RSDQLKRH   | 1451  | >WT1-H373Y RSDQLKRY   | 33   | 1418  |
| >WT1-H373Y RSDQLKRHQI | 564   | >WT1-H373Y RSDQLKRYQF | 228  | 336   |
| >WT1-H373Y FSRSDQLKRH | 15075 | >WT1-H373Y FSRSDQLKRY | 70   | 15005 |
| >WT1-H373Y FSRSDQLKRH | 13017 | >WT1-H373Y FSRSDQLKRY | 142  | 12875 |
| >WT1-H373Y FSRSDQLKRH | 14536 | >WT1-H373Y FSRSDQLKRY | 314  | 14222 |
| >WT1-H373Y FSRSDQLKRH | 3558  | >WT1-H373Y FSRSDQLKRY | 84   | 3474  |
| >WT1-H373Y FSRSDQLKRH | 764   | >WT1-H373Y FSRSDQLKRY | 6    | 758   |
| >WT1-H373Y FSRSDQLKRH | 15082 | >WT1-H373Y FSRSDQLKRY | 196  | 14886 |
| >WT1-H397C HLKTHTRTHT | 133   | >WT1-H397C DLKTHTRTHT | 307  | 174   |
| >WT1-H397C RSDHLKTHTR | 27    | >WT1-H397C RSDDLKTHTR | 32   | 5     |
| >WT1-H397C RSDHLKTH   | 388   | >WT1-H397C RSDDLKTH   | 472  | 84    |
| >WT1-H397C RSDHLKTH   | 408   | >WT1-H397C RSDDLKTH   | 611  | 203   |
| >WT1-H397C RSDHLKTHTR | 310   | >WT1-H397C RSDDLKTHTR | 205  | 105   |
| >WT1-H397C SRSDHLKTHT | 411   | >WT1-H397C SRSDDLKTHT | 694  | 283   |
| >WT1-H397C FSRSDHLK   | 60    | >WT1-H397C FSRDDLK    | 866  | 806   |
| >WT1-H397C FSRSDHLK   | 165   | >WT1-H397C FSRDDLK    | 249  | 84    |
| >WT1-H397C FSRSDHLKTH | 351   | >WT1-H397C FSRDDLKTH  | 690  | 339   |
| >WT1-H397C KFSRSDHLK  | 283   | >WT1-H397C KFSRDDLK   | 1049 | 766   |
| >WT1-H397C KFSRSDHL   | 362   | >WT1-H397C KFSRDDL    | 901  | 539   |
| >WT1-H397C KFSRSDHLK  | 23    | >WT1-H397C KFSRDDLK   | 259  | 236   |
| >WT1-H397C KFSRSDHLK  | 49    | >WT1-H397C KFSRDDLK   | 911  | 862   |
| >WT1-H397C KFSRSDHLK  | 143   | >WT1-H397C KFSRDDLK   | 1269 | 1126  |
| >WT1-H397C KFSRSDHL   | 147   | >WT1-H397C KFSRDDL    | 152  | 5     |
| >WT1-H397C KFSRSDHLK  | 375   | >WT1-H397C KFSRDDLK   | 435  | 60    |
| >WT1-H397C RKFSRSDHLK | 253   | >WT1-H397C RKFSRDDLK  | 1653 | 1400  |
| >WT1-H397C RKFSRSDH   | 17    | >WT1-H397C RKFSRDDL   | 953  | 936   |
| >WT1-H397C RKFSRSDHL  | 6     | >WT1-H397C RKFSRDDL   | 8    | 2     |
| >WT1-H397C RKFSRSDHLK | 104   | >WT1-H397C RKFSRDDLK  | 256  | 152   |
| >WT1-H397C RKFSRSDHLK | 174   | >WT1-H397C RKFSRDDLK  | 524  | 350   |
| >WT1-H397C RKFSRSDHLK | 275   | >WT1-H397C RKFSRDDLK  | 1028 | 753   |
| >WT1-H397C CQRKFSRSDH | 171   | >WT1-H397C CQRKFSRSDH | 5657 | 5486  |
| >WT1-H397C CQRKFSRSDH | 104   | >WT1-H397C CQRKFSRSDH | 143  | 39    |
| >WT1-H397C HLKTHTRTHT | 133   | >WT1-H397C QLKTHTRTHT | 152  | 19    |
| >WT1-H397C DHLKTHTR   | 9381  | >WT1-H397C DQLKTHTR   | 436  | 8945  |

|                        |       |                        |      |       |
|------------------------|-------|------------------------|------|-------|
| >WT1-H397C DHLKTHTR    | 949   | >WT1-H397C DQLKTHTR    | 187  | 762   |
| >WT1-H397C DHLKTHTR    | 601   | >WT1-H397C DQLKTHTR    | 314  | 287   |
| >WT1-H397C RSDHLKTHTR  | 27    | >WT1-H397C RSDQLKTHTR  | 42   | 15    |
| >WT1-H397C RSDHLKTH    | 388   | >WT1-H397C RSDQLKTH    | 399  | 11    |
| >WT1-H397C RSDHLKTH    | 408   | >WT1-H397C RSDQLKTH    | 679  | 271   |
| >WT1-H397C RSDHLKTHTR  | 310   | >WT1-H397C RSDQLKTHTR  | 172  | 138   |
| >WT1-H397C SRSDHLKTHTR | 411   | >WT1-H397C SRSDQLKTHTR | 424  | 13    |
| >WT1-H397C FSRSDHLK    | 60    | >WT1-H397C FSRSDQLK    | 100  | 40    |
| >WT1-H397C FSRSDHLK    | 165   | >WT1-H397C FSRSDQLK    | 471  | 306   |
| >WT1-H397C FSRSDHLKTH  | 351   | >WT1-H397C FSRSDQLKTH  | 497  | 146   |
| >WT1-H397C KFSRSDHLK   | 283   | >WT1-H397C KFSRSDQLK   | 1758 | 1475  |
| >WT1-H397C KFSRSDHL    | 362   | >WT1-H397C KFSRSDQL    | 283  | 79    |
| >WT1-H397C KFSRSDHLK   | 23    | >WT1-H397C KFSRSDQLK   | 22   | 1     |
| >WT1-H397C KFSRSDHLK   | 49    | >WT1-H397C KFSRSDQLK   | 204  | 155   |
| >WT1-H397C KFSRSDHLK   | 143   | >WT1-H397C KFSRSDQLK   | 758  | 615   |
| >WT1-H397C KFSRSDHL    | 147   | >WT1-H397C KFSRSDQL    | 173  | 26    |
| >WT1-H397C KFSRSDHLK   | 375   | >WT1-H397C KFSRSDQLK   | 987  | 612   |
| >WT1-H397C RKFSRSDHLK  | 253   | >WT1-H397C RKFSRSDQLK  | 273  | 20    |
| >WT1-H397C RKFSRSDH    | 17    | >WT1-H397C RKFSRSDQ    | 79   | 62    |
| >WT1-H397C RKFSRSDHL   | 6     | >WT1-H397C RKFSRSDQL   | 9    | 3     |
| >WT1-H397C RKFSRSDHLK  | 104   | >WT1-H397C RKFSRSDQLK  | 63   | 41    |
| >WT1-H397C RKFSRSDHLK  | 174   | >WT1-H397C RKFSRSDQLK  | 285  | 111   |
| >WT1-H397C RKFSRSDHLK  | 275   | >WT1-H397C RKFSRSDQLK  | 212  | 63    |
| >WT1-H397C RKFSRSDHL   | 970   | >WT1-H397C RKFSRSDQL   | 263  | 707   |
| >WT1-H397C QRKFSRSDHL  | 520   | >WT1-H397C QRKFSRSDQL  | 496  | 24    |
| >WT1-H397C CQRKFSRSDH  | 171   | >WT1-H397C CQRKFSRSDC  | 806  | 635   |
| >WT1-H397C CQRKFSRSDH  | 104   | >WT1-H397C CQRKFSRSDC  | 164  | 60    |
| >WT1-H405L HTGKTSEK    | 281   | >WT1-H405L LTGKTSEK    | 702  | 421   |
| >WT1-H405L HTGKTSEK    | 191   | >WT1-H405L LTGKTSEK    | 129  | 62    |
| >WT1-H405L HTGKTSEK    | 71    | >WT1-H405L LTGKTSEK    | 746  | 675   |
| >WT1-H405L HTGKTSEK    | 72    | >WT1-H405L LTGKTSEK    | 252  | 180   |
| >WT1-H405L HTGKTSEKPF  | 461   | >WT1-H405L LTGKTSEKPF  | 161  | 300   |
| >WT1-H405L HTGKTSEKPF  | 181   | >WT1-H405L LTGKTSEKPF  | 105  | 76    |
| >WT1-H405L HTGKTSEKPF  | 15    | >WT1-H405L LTGKTSEKPF  | 12   | 3     |
| >WT1-H405L HTGKTSEKPF  | 1714  | >WT1-H405L LTGKTSEKPF  | 297  | 1417  |
| >WT1-H405L THTGKTSEK   | 15597 | >WT1-H405L TLTGKTSEK   | 120  | 15477 |
| >WT1-H405L THTGKTSEK   | 15329 | >WT1-H405L TLTGKTSEK   | 204  | 15125 |
| >WT1-H405L THTGKTSEK   | 3288  | >WT1-H405L TLTGKTSEK   | 270  | 3018  |
| >WT1-H405L THTGKTSEKPF | 5755  | >WT1-H405L TLTGKTSEKPF | 172  | 5583  |
| >WT1-H405L RHTGKTSEK   | 31    | >WT1-H405L RTLTGKTSEK  | 16   | 15    |
| >WT1-H405L RHTGKTSEK   | 69    | >WT1-H405L RTLTGKTSEK  | 16   | 53    |
| >WT1-H405L RHTGKTS     | 132   | >WT1-H405L RTLTGKTS    | 1434 | 1302  |
| >WT1-H405L RHTGKTSEK   | 4     | >WT1-H405L RTLTGKTSEK  | 9    | 5     |

|                       |       |                       |       |       |
|-----------------------|-------|-----------------------|-------|-------|
| >WT1-H405L RTHTGKTSEK | 1070  | >WT1-H405L RLTGKTSEK  | 350   | 720   |
| >WT1-H405L RTHTGKTS   | 797   | >WT1-H405L RLTGKTS    | 443   | 354   |
| >WT1-H405L HTRTHTGK   | 75    | >WT1-H405L HTRTLTGK   | 97    | 22    |
| >WT1-H405L HTRTHTGK   | 3     | >WT1-H405L HTRTLTGK   | 4     | 1     |
| >WT1-H405L HTRTHTGKT  | 47    | >WT1-H405L HTRTLTGKT  | 82    | 35    |
| >WT1-H405L HTRTHTGKTS | 19    | >WT1-H405L HTRTLTGKTS | 28    | 9     |
| >WT1-H405L HTRTHTGKTS | 271   | >WT1-H405L HTRTLTGKTS | 397   | 126   |
| >WT1-H405L HTRTHTGK   | 142   | >WT1-H405L HTRTLTGK   | 251   | 109   |
| >WT1-H405L HTRTHTGK   | 115   | >WT1-H405L HTRTLTGK   | 113   | 2     |
| >WT1-H405L KTHTRTHTGK | 32    | >WT1-H405L KTHTRTLTGK | 21    | 11    |
| >WT1-H405L KTHTRTHTGK | 112   | >WT1-H405L KTHTRTLTGK | 57    | 55    |
| >WT1-H405L KTHTRTHT   | 56    | >WT1-H405L KTHTRTLT   | 55    | 1     |
| >WT1-H405L KTHTRTHTG  | 16    | >WT1-H405L KTHTRTLTG  | 10    | 6     |
| >WT1-H405L KTHTRTHTGK | 3     | >WT1-H405L KTHTRTLTGK | 4     | 1     |
| >WT1-H405L KTHTRTHTGK | 88    | >WT1-H405L KTHTRTLTGK | 89    | 1     |
| >WT1-H405L KTHTRTHTGK | 304   | >WT1-H405L KTHTRTLTGK | 343   | 39    |
| >WT1-H405L KTHTRTHTG  | 229   | >WT1-H405L KTHTRTLTG  | 193   | 36    |
| >WT1-H405L LKTHTRTH   | 269   | >WT1-H405L LKTHTRTL   | 33    | 236   |
| >WT1-H405L LKTHTRHTG  | 312   | >WT1-H405L LKTHTRTLTG | 503   | 191   |
| >WT1-H405L HLKTHTRTH  | 28794 | >WT1-H405L HLKTHTRTL  | 385   | 28409 |
| >WT1-H405L HLKTHTRTH  | 16624 | >WT1-H405L HLKTHTRTL  | 33    | 16591 |
| >WT1-H405L HLKTHTRTH  | 29631 | >WT1-H405L HLKTHTRTL  | 252   | 29379 |
| >WT1-H405L HLKTHTRTH  | 2242  | >WT1-H405L HLKTHTRTL  | 137   | 2105  |
| >WT1-H405L HLKTHTRTHT | 526   | >WT1-H405L HLKTHTRTLT | 306   | 220   |
| >WT1-H405L HLKTHTRTH  | 3062  | >WT1-H405L HLKTHTRTL  | 17    | 3045  |
| >WT1-H405L HLKTHTRTHT | 133   | >WT1-H405L HLKTHTRTLT | 178   | 45    |
| >WT1-H405L DHLKTHTRTH | 5410  | >WT1-H405L DHLKTHTRTL | 420   | 4990  |
| >WT1-H405L DHLKTHTRTH | 21118 | >WT1-H405L DHLKTHTRTL | 399   | 20719 |
| >WT1-K336E KLSHLQMH   | 424   | >WT1-K336E ELSHLQMH   | 12945 | 12521 |
| >WT1-K336E KLSHLQMHSI | 206   | >WT1-K336E ELSHLQMHSI | 3561  | 3355  |
| >WT1-K336E KLSHLQMHSI | 29    | >WT1-K336E ELSHLQMHSI | 218   | 189   |
| >WT1-K336E KLSHLQMHSI | 62    | >WT1-K336E ELSHLQMHSI | 1427  | 1365  |
| >WT1-K336E KLSHLQMHSI | 46    | >WT1-K336E ELSHLQMHSI | 12749 | 12703 |
| >WT1-K336E KLSHLQMHSI | 13    | >WT1-K336E ELSHLQMHSI | 212   | 199   |
| >WT1-K336E KLSHLQMHSI | 222   | >WT1-K336E ELSHLQMHSI | 10520 | 10298 |
| >WT1-K336E KLSHLQMHSI | 3902  | >WT1-K336E ELSHLQMHSI | 479   | 3423  |
| >WT1-K336E KLSHLQMHSI | 7124  | >WT1-K336E ELSHLQMHSI | 291   | 6833  |
| >WT1-K336E KLSHLQMHSI | 4494  | >WT1-K336E ELSHLQMHSI | 38    | 4456  |
| >WT1-K336E KLSHLQMHSI | 50    | >WT1-K336E ELSHLQMHSI | 759   | 709   |
| >WT1-K336E KLSHLQMHSI | 32    | >WT1-K336E ELSHLQMHSI | 207   | 175   |
| >WT1-K336E FKLSHLQM   | 30780 | >WT1-K336E FELSHLQM   | 223   | 30557 |
| >WT1-K336E FKLSHLQM   | 6     | >WT1-K336E FELSHLQM   | 228   | 222   |
| >WT1-K336E FKLSHLQMH  | 53    | >WT1-K336E FELSHLQMH  | 1621  | 1568  |

|                        |       |                        |       |       |
|------------------------|-------|------------------------|-------|-------|
| >WT1-K336E FKLSHLQMH!  | 265   | >WT1-K336E FELSHLQMH!  | 8115  | 7850  |
| >WT1-K336E FKLSHLQMH!  | 77    | >WT1-K336E FELSHLQMH!  | 2445  | 2368  |
| >WT1-K336E FKLSHLQMQ   | 16020 | >WT1-K336E FELSHLQMQ   | 88    | 15932 |
| >WT1-K336E FKLSHLQMH   | 24412 | >WT1-K336E FELSHLQMH   | 466   | 23946 |
| >WT1-K336E FKLSHLQMH!  | 21416 | >WT1-K336E FELSHLQMH!  | 242   | 21174 |
| >WT1-K336E FKLSHLQMQ   | 313   | >WT1-K336E FELSHLQMQ   | 1172  | 859   |
| >WT1-K336E FKLSHLQMQ   | 18307 | >WT1-K336E FELSHLQMQ   | 211   | 18096 |
| >WT1-K336E FKLSHLQMQ   | 20665 | >WT1-K336E FELSHLQMQ   | 67    | 20598 |
| >WT1-K336E FKLSHLQMQ   | 8938  | >WT1-K336E FELSHLQMQ   | 93    | 8845  |
| >WT1-K336E AYPGCNKRYF  | 414   | >WT1-K336E AYPGCNKRYF  | 15591 | 15177 |
| >WT1-K336E AYPGCNKRYF  | 442   | >WT1-K336E AYPGCNKRYF  | 10987 | 10545 |
| >WT1-K336E AYPGCNKRYF  | 97    | >WT1-K336E AYPGCNKRYF  | 7145  | 7048  |
| >WT1-K336E YFKLSHLQMQ  | 342   | >WT1-K336E YFELSHLQMQ  | 333   | 9     |
| >WT1-K336E RYFKLSHL    | 201   | >WT1-K336E RYFELSHL    | 276   | 75    |
| >WT1-K336E RYFKLSHL    | 12    | >WT1-K336E RYFELSHL    | 28    | 16    |
| >WT1-K336E RYFKLSHL    | 1070  | >WT1-K336E RYFELSHL    | 325   | 745   |
| >WT1-K336E RYFKLSHL    | 80    | >WT1-K336E RYFELSHL    | 94    | 14    |
| >WT1-K336E RYFKLSHLQMQ | 301   | >WT1-K336E RYFELSHLQMQ | 547   | 246   |
| >WT1-K336E RYFKLSHL    | 140   | >WT1-K336E RYFELSHL    | 239   | 99    |
| >WT1-K336E RYFKLSHLQMQ | 190   | >WT1-K336E RYFELSHLQMQ | 372   | 182   |
| >WT1-K336E RYFKLSHL    | 4     | >WT1-K336E RYFELSHL    | 4     | 0     |
| >WT1-K336E RYFKLSHLQ   | 173   | >WT1-K336E RYFELSHLQ   | 295   | 122   |
| >WT1-K336E RYFKLSHLQMQ | 8     | >WT1-K336E RYFELSHLQMQ | 10    | 2     |
| >WT1-K336E RYFKLSHLQMQ | 167   | >WT1-K336E RYFELSHLQMQ | 277   | 110   |
| >WT1-K336E RYFKLSHL    | 86    | >WT1-K336E RYFELSHL    | 217   | 131   |
| >WT1-K336E RYFKLSHLQ   | 194   | >WT1-K336E RYFELSHLQ   | 448   | 254   |
| >WT1-K336E RYFKLSHLQMQ | 32    | >WT1-K336E RYFELSHLQMQ | 55    | 23    |
| >WT1-K336E RYFKLSHL    | 424   | >WT1-K336E RYFELSHL    | 773   | 349   |
| >WT1-K336E RYFKLSHLQMQ | 289   | >WT1-K336E RYFELSHLQMQ | 342   | 53    |
| >WT1-K336E RYFKLSHL    | 646   | >WT1-K336E RYFELSHL    | 437   | 209   |
| >WT1-K336E RYFKLSHLQMQ | 318   | >WT1-K336E RYFELSHLQMQ | 205   | 113   |
| >WT1-K336E RYFKLSHLQMQ | 482   | >WT1-K336E RYFELSHLQMQ | 770   | 288   |
| >WT1-K336E RYFKLSHLQ   | 29    | >WT1-K336E RYFELSHLQ   | 42    | 13    |
| >WT1-K336E RYFKLSHLQMQ | 311   | >WT1-K336E RYFELSHLQMQ | 523   | 212   |
| >WT1-K336E RYFKLSHLQMQ | 282   | >WT1-K336E RYFELSHLQMQ | 185   | 97    |
| >WT1-K336E RYFKLSHL    | 323   | >WT1-K336E RYFELSHL    | 252   | 71    |
| >WT1-K336E RYFKLSHLQ   | 530   | >WT1-K336E RYFELSHLQ   | 397   | 133   |
| >WT1-K336E RYFKLSHLQMQ | 249   | >WT1-K336E RYFELSHLQMQ | 658   | 409   |
| >WT1-K336E KRYFKLSHL   | 159   | >WT1-K336E KRYFELSHL   | 1049  | 890   |
| >WT1-K336E KRYFKLSHLQ  | 453   | >WT1-K336E KRYFELSHLQ  | 1461  | 1008  |
| >WT1-K336E KRYFKLSH    | 641   | >WT1-K336E KRYFELSH    | 353   | 288   |
| >WT1-K336E KRYFKLSHL   | 200   | >WT1-K336E KRYFELSHL   | 81    | 119   |
| >WT1-K336E KRYFKLSHLQ  | 85    | >WT1-K336E KRYFELSHLQ  | 48    | 37    |

|                        |       |                        |       |       |
|------------------------|-------|------------------------|-------|-------|
| >WT1-K336E KRYFKLSH    | 133   | >WT1-K336E KRYFELSH    | 208   | 75    |
| >WT1-K336E KRYFKLSHL   | 72    | >WT1-K336E KRYFELSHL   | 108   | 36    |
| >WT1-K336E KRYFKLSHLQ  | 174   | >WT1-K336E KRYFELSHLQ  | 200   | 26    |
| >WT1-K336E KRYFKLSHLQI | 43    | >WT1-K336E KRYFELSHLQI | 58    | 15    |
| >WT1-K336E KRYFKLSH    | 131   | >WT1-K336E KRYFELSH    | 535   | 404   |
| >WT1-K336E KRYFKLSHL   | 28    | >WT1-K336E KRYFELSHL   | 43    | 15    |
| >WT1-K336E KRYFKLSHLQ  | 202   | >WT1-K336E KRYFELSHLQ  | 306   | 104   |
| >WT1-K336E KRYFKLSHLQI | 47    | >WT1-K336E KRYFELSHLQI | 68    | 21    |
| >WT1-K336E KRYFKLSHL   | 7     | >WT1-K336E KRYFELSHL   | 10    | 3     |
| >WT1-K336E KRYFKLSHLQ  | 442   | >WT1-K336E KRYFELSHLQ  | 643   | 201   |
| >WT1-K336E KRYFKLSHLQI | 43    | >WT1-K336E KRYFELSHLQI | 66    | 23    |
| >WT1-K336E NKRYFKLSH   | 357   | >WT1-K336E NKRYFELSH   | 252   | 105   |
| >WT1-K336E NKRYFKLSHL  | 96    | >WT1-K336E NKRYFELSHL  | 54    | 42    |
| >WT1-K336E CNKRYFKLSH  | 344   | >WT1-K336E CNKRYFELSH  | 584   | 240   |
| >WT1-K336E CNKRYFKL    | 433   | >WT1-K336E CNKRYFEL    | 578   | 145   |
| >WT1-K336E CNKRYFKLSH  | 135   | >WT1-K336E CNKRYFELSH  | 631   | 496   |
| >WT1-K336E GCNKRYFK    | 460   | >WT1-K336E GCNKRYFE    | 15526 | 15066 |
| >WT1-K336E GCNKRYFK    | 213   | >WT1-K336E GCNKRYFE    | 12259 | 12046 |
| >WT1-K336E YPGCNKRYFK  | 125   | >WT1-K336E YPGCNKRYFE  | 61    | 64    |
| >WT1-K336E YPGCNKRYFK  | 108   | >WT1-K336E YPGCNKRYFE  | 43    | 65    |
| >WT1-K336E YPGCNKRYFK  | 1010  | >WT1-K336E YPGCNKRYFE  | 282   | 728   |
| >WT1-K346R KHTGEKPY    | 1337  | >WT1-K346R RHTGEKPY    | 167   | 1170  |
| >WT1-K346R RKHTGEKPY   | 4     | >WT1-K346R RRHTGEKPY   | 13    | 9     |
| >WT1-K346R RKHTGEKPY   | 4398  | >WT1-K346R RRHTGEKPY   | 155   | 4243  |
| >WT1-K346R RKHTGEKPYC  | 12753 | >WT1-K346R RRHTGEKPYC  | 215   | 12538 |
| >WT1-K346R RKHTGEKP    | 8006  | >WT1-K346R RRHTGEKP    | 350   | 7656  |
| >WT1-K346R RKHTGEKPY   | 6765  | >WT1-K346R RRHTGEKPY   | 375   | 6390  |
| >WT1-K346R RKHTGEKPYC  | 5532  | >WT1-K346R RRHTGEKPYC  | 260   | 5272  |
| >WT1-K346R KLSHLQMHSI  | 29    | >WT1-K346R KLSHLQMHSI  | 83    | 54    |
| >WT1-K346R KLSHLQMHSI  | 62    | >WT1-K346R KLSHLQMHSI  | 2107  | 2045  |
| >WT1-K346R KLSHLQMHSI  | 46    | >WT1-K346R KLSHLQMHSI  | 3571  | 3525  |
| >WT1-K346R KLSHLQMHSI  | 222   | >WT1-K346R KLSHLQMHSI  | 17    | 205   |
| >WT1-K346R KLSHLQMHSI  | 1332  | >WT1-K346R KLSHLQMHSI  | 57    | 1275  |
| >WT1-K346R SRKHTGEK    | 488   | >WT1-K346R SRRHTGEK    | 72    | 416   |
| >WT1-K346R SRKHTGEKPY  | 29    | >WT1-K346R SRRHTGEKPY  | 16    | 13    |
| >WT1-K346R SRKHTGEKPY  | 272   | >WT1-K346R SRRHTGEKPY  | 155   | 117   |
| >WT1-K346R HSRKHTGEK   | 99    | >WT1-K346R HSRRHTGEK   | 98    | 1     |
| >WT1-K346R HSRKHTGEKF  | 194   | >WT1-K346R HSRRHTGEKF  | 115   | 79    |
| >WT1-K346R HSRKHTGE    | 656   | >WT1-K346R HSRRHTGE    | 305   | 351   |
| >WT1-K346R HSRKHTGEK   | 3     | >WT1-K346R HSRRHTGEK   | 3     | 0     |
| >WT1-K346R HSRKHTGEKF  | 591   | >WT1-K346R HSRRHTGEKF  | 317   | 274   |
| >WT1-K346R HSRKHTGEKF  | 15    | >WT1-K346R HSRRHTGEKF  | 11    | 4     |
| >WT1-K346R HSRKHTGEK   | 491   | >WT1-K346R HSRRHTGEK   | 288   | 203   |

|                       |      |                       |      |      |
|-----------------------|------|-----------------------|------|------|
| >WT1-K346R HSRKHTGEKF | 105  | >WT1-K346R HSRRHTGEKF | 118  | 13   |
| >WT1-K346R HSRKHTGEKF | 406  | >WT1-K346R HSRRHTGEKF | 528  | 122  |
| >WT1-K346R HSRKHTGEKF | 63   | >WT1-K346R HSRRHTGEKF | 69   | 6    |
| >WT1-K346R HSRKHTGEKF | 7    | >WT1-K346R HSRRHTGEKF | 8    | 1    |
| >WT1-K346R HSRKHTGEKF | 309  | >WT1-K346R HSRRHTGEKF | 384  | 75   |
| >WT1-K346R QMHSRKHTC  | 107  | >WT1-K346R QMHSRRHTC  | 88   | 19   |
| >WT1-K346R QMHSRKHTC  | 296  | >WT1-K346R QMHSRRHTC  | 187  | 109  |
| >WT1-K346R QMHSRKHTC  | 73   | >WT1-K346R QMHSRRHTC  | 28   | 45   |
| >WT1-K346R QMHSRKHTC  | 351  | >WT1-K346R QMHSRRHTC  | 250  | 101  |
| >WT1-K346R QMHSRKHTC  | 221  | >WT1-K346R QMHSRRHTC  | 102  | 119  |
| >WT1-K346R LQMHSRKH   | 914  | >WT1-K346R LQMHSRRH   | 338  | 576  |
| >WT1-K346R LQMHSRKHT  | 447  | >WT1-K346R LQMHSRRHT  | 309  | 138  |
| >WT1-K346R LQMHSRKH   | 75   | >WT1-K346R LQMHSRRH   | 115  | 40   |
| >WT1-K346R LQMHSRKHT  | 117  | >WT1-K346R LQMHSRRHT  | 191  | 74   |
| >WT1-K346R HLQMHSRK   | 74   | >WT1-K346R HLQMHSRR   | 1351 | 1277 |
| >WT1-K346R HLQMHSRK   | 401  | >WT1-K346R HLQMHSRR   | 8645 | 8244 |
| >WT1-K346R HLQMHSRK   | 233  | >WT1-K346R HLQMHSRR   | 8072 | 7839 |
| >WT1-K346R HLQMHSRK   | 582  | >WT1-K346R HLQMHSRR   | 24   | 558  |
| >WT1-K346R HLQMHSRK   | 3516 | >WT1-K346R HLQMHSRR   | 134  | 3382 |
| >WT1-K346R HLQMHSRK   | 1734 | >WT1-K346R HLQMHSRR   | 450  | 1284 |
| >WT1-K346R HLQMHSRKH  | 635  | >WT1-K346R HLQMHSRRH  | 426  | 209  |
| >WT1-K346R HLQMHSRK   | 8853 | >WT1-K346R HLQMHSRR   | 242  | 8611 |
| >WT1-K346R LSHLQMHSRI | 185  | >WT1-K346R LSHLQMHSRI | 4322 | 4137 |
| >WT1-K346R LSHLQMHSRI | 276  | >WT1-K346R LSHLQMHSRI | 3891 | 3615 |
| >WT1-K346R LSHLQMHSRI | 17   | >WT1-K346R LSHLQMHSRI | 1224 | 1207 |
| >WT1-K346R LSHLQMHSRI | 1176 | >WT1-K346R LSHLQMHSRI | 57   | 1119 |
| >WT1-K346R LSHLQMHSRI | 8826 | >WT1-K346R LSHLQMHSRI | 484  | 8342 |
| >WT1-K346R LSHLQMHSRI | 1411 | >WT1-K346R LSHLQMHSRI | 425  | 986  |
| >WT1-K371R KRHQRRTG   | 53   | >WT1-K371R RRHQRRTG   | 49   | 4    |
| >WT1-K371R KRHQRRT    | 602  | >WT1-K371R RRHQRRT    | 155  | 447  |
| >WT1-K371R KRHQRRTG   | 876  | >WT1-K371R RRHQRRTG   | 223  | 653  |
| >WT1-K371R KRHQRRTG   | 151  | >WT1-K371R RRHQRRTG   | 33   | 118  |
| >WT1-K371R KRHQRRTG   | 83   | >WT1-K371R RRHQRRTG   | 34   | 49   |
| >WT1-K371R KRHQRRT    | 63   | >WT1-K371R RRHQRRT    | 25   | 38   |
| >WT1-K371R KRHQRRTG   | 288  | >WT1-K371R RRHQRRTG   | 132  | 156  |
| >WT1-K371R KRHQRRTG   | 42   | >WT1-K371R RRHQRRTG   | 21   | 21   |
| >WT1-K371R KRHQRRTG   | 360  | >WT1-K371R RRHQRRTG   | 149  | 211  |
| >WT1-K371R KRHQRRT    | 1643 | >WT1-K371R RRHQRRT    | 335  | 1308 |
| >WT1-K371R KRHQRRTG   | 517  | >WT1-K371R RRHQRRTG   | 102  | 415  |
| >WT1-K371R KRHQRRTG   | 56   | >WT1-K371R RRHQRRTG   | 22   | 34   |
| >WT1-K371R KRHQRRTG   | 156  | >WT1-K371R RRHQRRTG   | 50   | 106  |
| >WT1-K371R LKRHQRRTG  | 43   | >WT1-K371R LRRHQRRTG  | 244  | 201  |
| >WT1-K371R QLKRHQR    | 35   | >WT1-K371R QLRRHQR    | 65   | 30   |



|                       |      |                       |      |      |
|-----------------------|------|-----------------------|------|------|
| >WT1-K371R QLKRHQRRH' | 90   | >WT1-K371R QLRRHQRRH' | 111  | 21   |
| >WT1-K371R DQLKRHQRR  | 249  | >WT1-K371R DQLRRHQRR  | 146  | 103  |
| >WT1-K371R DQLKRHQRR  | 443  | >WT1-K371R DQLRRHQRR  | 259  | 184  |
| >WT1-K371R DQLKRHQRR  | 99   | >WT1-K371R DQLRRHQRR  | 78   | 21   |
| >WT1-K371R DQLKRHQRR  | 159  | >WT1-K371R DQLRRHQRR  | 147  | 12   |
| >WT1-K371R RSDQLKRHQI | 25   | >WT1-K371R RSDQLRRHQI | 19   | 6    |
| >WT1-K371R RSDQLKRHQI | 112  | >WT1-K371R RSDQLRRHQI | 83   | 29   |
| >WT1-K371R RSDQLKRHQI | 564  | >WT1-K371R RSDQLRRHQI | 471  | 93   |
| >WT1-K371R SRSDQLKRHC | 565  | >WT1-K371R SRSDQLRRHC | 414  | 151  |
| >WT1-K371R FSRSDQLK   | 100  | >WT1-K371R FSRSDQLR   | 5502 | 5402 |
| >WT1-K371R FSRSDQLK   | 471  | >WT1-K371R FSRSDQLR   | 146  | 325  |
| >WT1-K371R FSRSDQLKR  | 413  | >WT1-K371R FSRSDQLRR  | 455  | 42   |
| >WT1-K371R RFSRSDQLK  | 22   | >WT1-K371R RFSRSDQLR  | 1888 | 1866 |
| >WT1-K371R RFSRSDQLK  | 179  | >WT1-K371R RFSRSDQLR  | 13   | 166  |
| >WT1-K371R RFSRSDQLKR | 45   | >WT1-K371R RFSRSDQLRR | 36   | 9    |
| >WT1-K371R RFSRSDQLKR | 94   | >WT1-K371R RFSRSDQLRR | 110  | 16   |
| >WT1-K371R RFSRSDQLK  | 1439 | >WT1-K371R RFSRSDQLR  | 61   | 1378 |
| >WT1-K371R RFSRSDQLKR | 45   | >WT1-K371R RFSRSDQLRR | 49   | 4    |
| >WT1-K371R RRFSDQLK   | 296  | >WT1-K371R RRFSDQLR   | 8612 | 8316 |
| >WT1-K371R RRFSDQLK   | 2444 | >WT1-K371R RRFSDQLR   | 136  | 2308 |
| >WT1-K371R RRFSDQLK   | 414  | >WT1-K371R RRFSDQLR   | 332  | 82   |
| >WT1-K371R RRFSDQLK   | 375  | >WT1-K371R RRFSDQLR   | 572  | 197  |
| >WT1-K371R RRFSDQLK   | 10   | >WT1-K371R RRFSDQLR   | 10   | 0    |
| >WT1-K371R RRFSDQLK   | 12   | >WT1-K371R RRFSDQLR   | 14   | 2    |
| >WT1-K371R RRFSDQLK   | 44   | >WT1-K371R RRFSDQLR   | 35   | 9    |
| >WT1-K371R RRFSDQLK   | 236  | >WT1-K371R RRFSDQLR   | 192  | 44   |
| >WT1-K371R RRFSDQLK   | 60   | >WT1-K371R RRFSDQLR   | 52   | 8    |
| >WT1-K371R RRFSDQLK   | 521  | >WT1-K371R RRFSDQLR   | 424  | 97   |
| >WT1-K371R RRFSDQLK   | 1819 | >WT1-K371R RRFSDQLR   | 80   | 1739 |
| >WT1-K371R RRFSDQLK   | 75   | >WT1-K371R RRFSDQLR   | 83   | 8    |
| >WT1-N266S QSNHSTGY   | 459  | >WT1-N266S QSSHSTGY   | 258  | 201  |
| >WT1-N266S QSNHSTGY   | 101  | >WT1-N266S QSSHSTGY   | 105  | 4    |
| >WT1-N266S QSNHSTGY   | 113  | >WT1-N266S QSSHSTGY   | 133  | 20   |
| >WT1-N266S QSNHSTGY   | 138  | >WT1-N266S QSSHSTGY   | 136  | 2    |
| >WT1-N266S QSNHSTGY   | 6    | >WT1-N266S QSSHSTGY   | 6    | 0    |
| >WT1-N266S QSNHSTGY   | 483  | >WT1-N266S QSSHSTGY   | 270  | 213  |
| >WT1-N266S QSNHSTGY   | 828  | >WT1-N266S QSSHSTGY   | 237  | 591  |
| >WT1-N266S GQSNHSTGY  | 655  | >WT1-N266S GQSSHSTGY  | 368  | 287  |
| >WT1-N266S GQSNHSTGY  | 38   | >WT1-N266S GQSSHSTGY  | 36   | 2    |
| >WT1-N266S GQSNHSTGY  | 158  | >WT1-N266S GQSSHSTGY  | 187  | 29   |
| >WT1-N266S GQSNHSTGY  | 20   | >WT1-N266S GQSSHSTGY  | 14   | 6    |
| >WT1-N266S TEGQSNHSTC | 529  | >WT1-N266S TEGQSSHSTC | 301  | 228  |
| >WT1-N266S TEGQSNHSTC | 204  | >WT1-N266S TEGQSSHSTC | 186  | 18   |

|                       |      |                       |       |       |
|-----------------------|------|-----------------------|-------|-------|
| >WT1-N266S TEGQSNHST  | 422  | >WT1-N266S TEGQSSHST  | 623   | 201   |
| >WT1-N266S TEGQSNHSTC | 348  | >WT1-N266S TEGQSSHSTC | 263   | 85    |
| >WT1-N266S TEGQSNHSTC | 213  | >WT1-N266S TEGQSSHSTC | 221   | 8     |
| >WT1-N266S TEGQSNHST  | 47   | >WT1-N266S TEGQSSHST  | 53    | 6     |
| >WT1-N266S WTEGQSNHS  | 414  | >WT1-N266S WTEGQSSHS  | 144   | 270   |
| >WT1-N266S KWTEGQSN   | 305  | >WT1-N266S KWTEGQSS   | 223   | 82    |
| >WT1-N266S KWTEGQSNH  | 641  | >WT1-N266S KWTEGQSSH  | 218   | 423   |
| >WT1-N266S KWTEGQSNH  | 90   | >WT1-N266S KWTEGQSSH  | 89    | 1     |
| >WT1-N266S VKWTEGQSN  | 359  | >WT1-N266S VKWTEGQSS  | 166   | 193   |
| >WT1-N266S VKWTEGQSN  | 64   | >WT1-N266S VKWTEGQSS  | 34    | 30    |
| >WT1-N266S VKWTEGQSN  | 759  | >WT1-N266S VKWTEGQSS  | 430   | 329   |
| >WT1-N266S SVKWTEGQS  | 955  | >WT1-N266S SVKWTEGQS  | 368   | 587   |
| >WT1-P181S PMGQQGSL   | 5338 | >WT1-P181S SMGQQGSL   | 227   | 5111  |
| >WT1-P181S PMGQQGSL   | 9528 | >WT1-P181S SMGQQGSL   | 420   | 9108  |
| >WT1-P181S PMGQQGSL   | 1135 | >WT1-P181S SMGQQGSL   | 32    | 1103  |
| >WT1-P181S PMGQQGSL   | 6986 | >WT1-P181S SMGQQGSL   | 173   | 6813  |
| >WT1-P181S PMGQQGSL   | 3046 | >WT1-P181S SMGQQGSL   | 57    | 2989  |
| >WT1-P181S PMGQQGSL   | 390  | >WT1-P181S SMGQQGSL   | 13    | 377   |
| >WT1-P181S PMGQQGSL   | 8420 | >WT1-P181S SMGQQGSL   | 397   | 8023  |
| >WT1-P181S DPMGQQGSI  | 3505 | >WT1-P181S DSMGQQGSI  | 281   | 3224  |
| >WT1-P181S DPMGQQGSI  | 322  | >WT1-P181S DSMGQQGSI  | 19680 | 19358 |
| >WT1-P181S FPNHSFKHED | 457  | >WT1-P181S FPNHSFKHED | 310   | 147   |
| >WT1-P181S HEDPMGQQC  | 587  | >WT1-P181S HEDSMGQQC  | 346   | 241   |
| >WT1-P181S HEDPMGQQC  | 28   | >WT1-P181S HEDSMGQQC  | 19    | 9     |
| >WT1-P181S HEDPMGQQC  | 135  | >WT1-P181S HEDSMGQQC  | 124   | 11    |
| >WT1-P181S HEDPMGQQC  | 714  | >WT1-P181S HEDSMGQQC  | 215   | 499   |
| >WT1-P181S HSFKHEDPM  | 484  | >WT1-P181S HSFKHEDSM  | 6251  | 5767  |
| >WT1-P181S HSFKHEDPM  | 211  | >WT1-P181S HSFKHEDSM  | 996   | 785   |
| >WT1-P181S HSFKHEDPM  | 236  | >WT1-P181S HSFKHEDSM  | 259   | 23    |
| >WT1-P181S HSFKHEDPM  | 62   | >WT1-P181S HSFKHEDSM  | 96    | 34    |
| >WT1-P181S HSFKHEDPM  | 44   | >WT1-P181S HSFKHEDSM  | 165   | 121   |
| >WT1-P181S HSFKHEDPM  | 1811 | >WT1-P181S HSFKHEDSM  | 330   | 1481  |
| >WT1-R302H RVPGVAPTLV | 150  | >WT1-R302H HVPGVAPTLV | 338   | 188   |
| >WT1-R302H RVPGVAPTL  | 102  | >WT1-R302H HVPGVAPTL  | 293   | 191   |
| >WT1-R302H RVPGVAPTLV | 284  | >WT1-R302H HVPGVAPTLV | 657   | 373   |
| >WT1-R302H RVPGVAPTL  | 136  | >WT1-R302H HVPGVAPTL  | 626   | 490   |
| >WT1-R302H RVPGVAPTLV | 68   | >WT1-R302H HVPGVAPTLV | 293   | 225   |
| >WT1-R302H RVPGVAPTL  | 245  | >WT1-R302H HVPGVAPTL  | 520   | 275   |
| >WT1-R302H RVPGVAPTLV | 115  | >WT1-R302H HVPGVAPTLV | 246   | 131   |
| >WT1-R302H RVPGVAPTL  | 234  | >WT1-R302H HVPGVAPTL  | 261   | 27    |
| >WT1-R302H RVPGVAPTLV | 46   | >WT1-R302H HVPGVAPTLV | 46    | 0     |
| >WT1-R302H RVPGVAPTL  | 445  | >WT1-R302H HVPGVAPTL  | 1494  | 1049  |
| >WT1-R302H RVPGVAPTLV | 464  | >WT1-R302H HVPGVAPTLV | 2044  | 1580  |

|                      |      |                      |       |       |
|----------------------|------|----------------------|-------|-------|
| >WT1-R302HRVPGVAPTL  | 28   | >WT1-R302HHVPGVAPTL  | 166   | 138   |
| >WT1-R302HRVPGVAPTLV | 638  | >WT1-R302HHVPGVAPTLV | 49    | 589   |
| >WT1-R302HRVPGVAPT   | 4761 | >WT1-R302HHVPGVAPT   | 148   | 4613  |
| >WT1-R302HRVPGVAPTL  | 7150 | >WT1-R302HHVPGVAPTL  | 242   | 6908  |
| >WT1-R302HRVPGVAPTLV | 4161 | >WT1-R302HHVPGVAPTLV | 396   | 3765  |
| >WT1-R302HRVPGVAPTL  | 23   | >WT1-R302HHVPGVAPTL  | 122   | 99    |
| >WT1-R302HRVPGVAPTLV | 86   | >WT1-R302HHVPGVAPTLV | 573   | 487   |
| >WT1-R302HRVPGVAPTLV | 106  | >WT1-R302HHVPGVAPTLV | 118   | 12    |
| >WT1-R302HRRVPGVAPTL | 113  | >WT1-R302HRHVPGVAPTI | 270   | 157   |
| >WT1-R302HRRVPGVAPTL | 273  | >WT1-R302HRHVPGVAPTI | 791   | 518   |
| >WT1-R302HRRVPGVAPT  | 262  | >WT1-R302HRHVPGVAPT  | 15954 | 15692 |
| >WT1-R302HRRVPGVAPTL | 11   | >WT1-R302HRHVPGVAPTI | 426   | 415   |
| >WT1-R302HRRVPGVAPTL | 58   | >WT1-R302HRHVPGVAPTI | 10796 | 10738 |
| >WT1-R302HRRVPGVAPTL | 41   | >WT1-R302HRHVPGVAPTI | 23    | 18    |
| >WT1-R302HRRVPGVAPT  | 331  | >WT1-R302HRHVPGVAPT  | 14413 | 14082 |
| >WT1-R302HRRVPGVAPTL | 39   | >WT1-R302HRHVPGVAPTI | 5204  | 5165  |
| >WT1-R302HRRVPGVAPTL | 62   | >WT1-R302HRHVPGVAPTI | 3142  | 3080  |
| >WT1-R302HRRVPGVAPTL | 24   | >WT1-R302HRHVPGVAPTI | 4241  | 4217  |
| >WT1-R302HRRVPGVAPTL | 34   | >WT1-R302HRHVPGVAPTI | 3333  | 3299  |
| >WT1-R302HGVFRGIQDVF | 363  | >WT1-R302HGVFRGIQDVF | 5386  | 5023  |
| >WT1-R302HGVFRGIQDVF | 56   | >WT1-R302HGVFRGIQDVF | 7950  | 7894  |
| >WT1-R302HGVFRGIQDVF | 115  | >WT1-R302HGVFRGIQDVF | 13573 | 13458 |
| >WT1-R302HVRHVPGVAP  | 104  | >WT1-R302HVRHVPGVAP  | 152   | 48    |
| >WT1-R302HVRHVPGVAP  | 4384 | >WT1-R302HVRHVPGVAP  | 348   | 4036  |
| >WT1-R302HVRHVPGVAP  | 129  | >WT1-R302HVRHVPGVAP  | 468   | 339   |
| >WT1-R302HVRHVPGVAP  | 66   | >WT1-R302HVRHVPGVAP  | 144   | 78    |
| >WT1-R302HDVRRVPGV   | 583  | >WT1-R302HDVRRVPGV   | 366   | 217   |
| >WT1-R302HQDVRHVPGV  | 1144 | >WT1-R302HQDVRHVPGV  | 372   | 772   |
| >WT1-R302HIQDVRHVPGV | 465  | >WT1-R302HIQDVRHVPGV | 500   | 35    |
| >WT1-R302HIQDVRHVPGV | 325  | >WT1-R302HIQDVRHVPGV | 88    | 237   |
| >WT1-R302HIQDVRHVPGV | 471  | >WT1-R302HIQDVRHVPGV | 332   | 139   |
| >WT1-R302HGIQDVRHVPC | 473  | >WT1-R302HGIQDVRHVPC | 163   | 310   |
| >WT1-R302HGIQDVRHVPC | 1492 | >WT1-R302HGIQDVRHVPC | 477   | 1015  |
| >WT1-R302HGIQDVRHV   | 351  | >WT1-R302HGIQDVRHV   | 213   | 138   |
| >WT1-R302HGIQDVRHVPC | 151  | >WT1-R302HGIQDVRHVPC | 74    | 77    |
| >WT1-R302HGIQDVRHVPC | 297  | >WT1-R302HGIQDVRHVPC | 108   | 189   |
| >WT1-R302HGIQDVRHV   | 69   | >WT1-R302HGIQDVRHV   | 57    | 12    |
| >WT1-R302HGIQDVRHVPC | 37   | >WT1-R302HGIQDVRHVPC | 15    | 22    |
| >WT1-R302HGIQDVRHV   | 965  | >WT1-R302HGIQDVRHV   | 185   | 780   |
| >WT1-R302HGIQDVRHVPC | 173  | >WT1-R302HGIQDVRHVPC | 51    | 122   |
| >WT1-R302HGIQDVRHV   | 819  | >WT1-R302HGIQDVRHV   | 126   | 693   |
| >WT1-R302HGIQDVRHVPC | 91   | >WT1-R302HGIQDVRHVPC | 30    | 61    |
| >WT1-R302HGIQDVRHVPC | 675  | >WT1-R302HGIQDVRHVPC | 279   | 396   |

|                       |      |                       |       |       |
|-----------------------|------|-----------------------|-------|-------|
| >WT1-R302HGIQDVERRV   | 15   | >WT1-R302HGIQDVRHV    | 12    | 3     |
| >WT1-R302HGIQDVERRVPC | 9    | >WT1-R302HGIQDVRHVPC  | 4     | 5     |
| >WT1-R302HRGIQDVERR   | 94   | >WT1-R302HRGIQDVRH    | 25647 | 25553 |
| >WT1-R302HVFRGIQDVRF  | 54   | >WT1-R302HVFRGIQDVRF  | 7529  | 7475  |
| >WT1-R302HVFRGIQDVRF  | 329  | >WT1-R302HVFRGIQDVRF  | 13309 | 12980 |
| >WT1-R302HVFRGIQDVRF  | 243  | >WT1-R302HVFRGIQDVRF  | 27744 | 27501 |
| >WT1-R312GRSASETSEK   | 102  | >WT1-R312GGSASETSEK   | 591   | 489   |
| >WT1-R312GRSASETSEK   | 22   | >WT1-R312GGSASETSEK   | 30    | 8     |
| >WT1-R312GRSASETSEK   | 86   | >WT1-R312GGSASETSEK   | 4539  | 4453  |
| >WT1-R312GRSASETSEKR  | 323  | >WT1-R312GGSASETSEKR  | 4992  | 4669  |
| >WT1-R312GRSASETSEK   | 189  | >WT1-R312GGSASETSEK   | 143   | 46    |
| >WT1-R312GRSASETSEKR  | 59   | >WT1-R312GGSASETSEKR  | 110   | 51    |
| >WT1-R312GRSASETSEK   | 587  | >WT1-R312GGSASETSEK   | 234   | 353   |
| >WT1-R312GRVPGVAPTLV  | 464  | >WT1-R312GRVPGVAPTLV  | 21748 | 21284 |
| >WT1-R312GRVPGVAPTLV  | 106  | >WT1-R312GRVPGVAPTLV  | 32475 | 32369 |
| >WT1-R312GLVRSASETSEK | 260  | >WT1-R312GLVGSASETSEI | 683   | 423   |
| >WT1-R312GLVRSASETSEK | 1115 | >WT1-R312GLVGSASETSEI | 155   | 960   |
| >WT1-R312GLVRSASETS   | 499  | >WT1-R312GLVGSASETS   | 15518 | 15019 |
| >WT1-R312GLVRSASETSEK | 5    | >WT1-R312GLVGSASETSEI | 1752  | 1747  |
| >WT1-R312GLVRSASETSEK | 280  | >WT1-R312GLVGSASETSEI | 225   | 55    |
| >WT1-R312GTLVRSASET   | 690  | >WT1-R312GTLVGSASET   | 350   | 340   |
| >WT1-R312GTLVRSASET   | 396  | >WT1-R312GTLVGSASET   | 63    | 333   |
| >WT1-R312GAPTLVRS     | 127  | >WT1-R312GAPTLVGSA    | 213   | 86    |
| >WT1-R312GAPTLVRSASE  | 416  | >WT1-R312GAPTLVGSAE   | 602   | 186   |
| >WT1-R312GAPTLVRS     | 560  | >WT1-R312GAPTLVGSA    | 340   | 220   |
| >WT1-R312GGVAPTLVRS   | 723  | >WT1-R312GGVAPTLVGSA  | 372   | 351   |
| >WT1-R312GGVAPTLVR    | 133  | >WT1-R312GGVAPTLVG    | 23386 | 23253 |
| >WT1-R312GGVAPTLVR    | 312  | >WT1-R312GGVAPTLVG    | 23295 | 22983 |
| >WT1-R312GGVAPTLVR    | 114  | >WT1-R312GGVAPTLVG    | 34620 | 34506 |
| >WT1-R312GPGVAPTLVR   | 284  | >WT1-R312GPGVAPTLVG   | 35199 | 34915 |
| >WT1-R312CRSASETSEK   | 102  | >WT1-R312CQSASETSEK   | 1134  | 1032  |
| >WT1-R312CRSASETSEK   | 22   | >WT1-R312CQSASETSEK   | 80    | 58    |
| >WT1-R312CRSASETSEK   | 86   | >WT1-R312CQSASETSEK   | 3771  | 3685  |
| >WT1-R312CRSASETSEKR  | 323  | >WT1-R312CQSASETSEKR  | 2960  | 2637  |
| >WT1-R312CRSASETSEK   | 189  | >WT1-R312CQSASETSEK   | 27    | 162   |
| >WT1-R312CRSASETSEKR  | 59   | >WT1-R312CQSASETSEKR  | 22    | 37    |
| >WT1-R312CRSASETSEK   | 587  | >WT1-R312CQSASETSEK   | 290   | 297   |
| >WT1-R312CVRSASETSEK  | 3321 | >WT1-R312CVQSASETSEK  | 88    | 3233  |
| >WT1-R312CVRSASETSEK  | 1308 | >WT1-R312CVQSASETSEK  | 211   | 1097  |
| >WT1-R312CRVPGVAPTLV  | 464  | >WT1-R312CRVPGVAPTLV  | 17856 | 17392 |
| >WT1-R312CRVPGVAPTLV  | 106  | >WT1-R312CRVPGVAPTLV  | 11426 | 11320 |
| >WT1-R312CLVRSASETSEK | 260  | >WT1-R312CLVQSASETSEI | 1296  | 1036  |
| >WT1-R312CLVRSASETSEK | 1115 | >WT1-R312CLVQSASETSEI | 67    | 1048  |

|                        |      |                         |       |       |
|------------------------|------|-------------------------|-------|-------|
| >WT1-R312C LVRSASETS   | 499  | >WT1-R312C LVQSASETS    | 13134 | 12635 |
| >WT1-R312C LVRSASETSEK | 5    | >WT1-R312C LVQSASETSEI  | 533   | 528   |
| >WT1-R312C LVRSASETSEK | 280  | >WT1-R312C LVQSASETSEI  | 142   | 138   |
| >WT1-R312C TLVRSASET   | 396  | >WT1-R312C TLVQSASET    | 290   | 106   |
| >WT1-R312C APTLVRSA    | 127  | >WT1-R312C APTLVQSA     | 846   | 719   |
| >WT1-R312C APTLVRSASE  | 416  | >WT1-R312C APTLVQSASE   | 1701  | 1285  |
| >WT1-R312C GVAPTLVRS   | 1987 | >WT1-R312C GVAPTLVQSA   | 283   | 1704  |
| >WT1-R312C GVAPTLVR    | 133  | >WT1-R312C GVAPTLVQ     | 16494 | 16361 |
| >WT1-R312C GVAPTLVR    | 312  | >WT1-R312C GVAPTLVQ     | 19368 | 19056 |
| >WT1-R312C GVAPTLVR    | 114  | >WT1-R312C GVAPTLVQ     | 10707 | 10593 |
| >WT1-R312C PGVAPTLVR   | 284  | >WT1-R312C PGVAPTLVQ    | 24398 | 24114 |
| >WT1-R333K RYFKLSHL    | 201  | >WT1-R333K KYFKLSHL     | 174   | 27    |
| >WT1-R333K RYFKLSHL    | 12   | >WT1-R333K KYFKLSHL     | 4     | 8     |
| >WT1-R333K RYFKLSHLQMV | 863  | >WT1-R333K KYFKLSHLQMV  | 152   | 711   |
| >WT1-R333K RYFKLSHL    | 1070 | >WT1-R333K KYFKLSHL     | 442   | 628   |
| >WT1-R333K RYFKLSHL    | 80   | >WT1-R333K KYFKLSHL     | 61    | 19    |
| >WT1-R333K RYFKLSHLQMV | 301  | >WT1-R333K KYFKLSHLQMV  | 1605  | 1304  |
| >WT1-R333K RYFKLSHL    | 140  | >WT1-R333K KYFKLSHL     | 192   | 52    |
| >WT1-R333K RYFKLSHLQMV | 190  | >WT1-R333K KYFKLSHLQMV  | 710   | 520   |
| >WT1-R333K RYFKLSHL    | 4    | >WT1-R333K KYFKLSHL     | 6     | 2     |
| >WT1-R333K RYFKLSHLQ   | 173  | >WT1-R333K KYFKLSHLQ    | 719   | 546   |
| >WT1-R333K RYFKLSHLQMV | 8    | >WT1-R333K KYFKLSHLQMV  | 19    | 11    |
| >WT1-R333K RYFKLSHLQMV | 167  | >WT1-R333K KYFKLSHLQMV  | 691   | 524   |
| >WT1-R333K RYFKLSHL    | 86   | >WT1-R333K KYFKLSHL     | 95    | 9     |
| >WT1-R333K RYFKLSHLQ   | 194  | >WT1-R333K KYFKLSHLQ    | 219   | 25    |
| >WT1-R333K RYFKLSHLQMV | 32   | >WT1-R333K KYFKLSHLQMV  | 33    | 1     |
| >WT1-R333K RYFKLSHL    | 424  | >WT1-R333K KYFKLSHL     | 487   | 63    |
| >WT1-R333K RYFKLSHLQMV | 289  | >WT1-R333K KYFKLSHLQMV  | 327   | 38    |
| >WT1-R333K RYFKLSHLQMV | 318  | >WT1-R333K KYFKLSHLQMV  | 338   | 20    |
| >WT1-R333K RYFKLSHLQMV | 482  | >WT1-R333K KYFKLSHLQMV  | 724   | 242   |
| >WT1-R333K RYFKLSHLQ   | 29   | >WT1-R333K KYFKLSHLQ    | 21    | 8     |
| >WT1-R333K RYFKLSHLQMV | 311  | >WT1-R333K KYFKLSHLQMV  | 175   | 136   |
| >WT1-R333K RYFKLSHLQMV | 588  | >WT1-R333K KYFKLSHLQMV  | 345   | 243   |
| >WT1-R333K RYFKLSHL    | 567  | >WT1-R333K KYFKLSHL     | 431   | 136   |
| >WT1-R333K RYFKLSHLQMV | 282  | >WT1-R333K KYFKLSHLQMV  | 490   | 208   |
| >WT1-R333K RYFKLSHL    | 323  | >WT1-R333K KYFKLSHL     | 139   | 184   |
| >WT1-R333K RYFKLSHLQ   | 530  | >WT1-R333K KYFKLSHLQ    | 207   | 323   |
| >WT1-R333K RYFKLSHLQMV | 249  | >WT1-R333K KYFKLSHLQMV  | 481   | 232   |
| >WT1-R333K RYFKLSHL    | 159  | >WT1-R333K KKYFKLSHL    | 97    | 62    |
| >WT1-R333K RYFKLSHLQMV | 453  | >WT1-R333K KKYFKLSHLQMV | 315   | 138   |
| >WT1-R333K RYFKLSH     | 641  | >WT1-R333K KKYFKLSH     | 93    | 548   |
| >WT1-R333K RYFKLSHL    | 200  | >WT1-R333K KKYFKLSHL    | 21    | 179   |
| >WT1-R333K RYFKLSHLQMV | 85   | >WT1-R333K KKYFKLSHLQMV | 14    | 71    |

|                       |      |                       |       |       |
|-----------------------|------|-----------------------|-------|-------|
| >WT1-R333K KRYFKLSH   | 133  | >WT1-R333K KKYFKLSH   | 6892  | 6759  |
| >WT1-R333K KRYFKLSHL  | 72   | >WT1-R333K KKYFKLSHL  | 5265  | 5193  |
| >WT1-R333K KRYFKLSHLQ | 174  | >WT1-R333K KKYFKLSHLQ | 11667 | 11493 |
| >WT1-R333K KRYFKLSHLQ | 43   | >WT1-R333K KKYFKLSHLQ | 3050  | 3007  |
| >WT1-R333K KRYFKLSH   | 131  | >WT1-R333K KKYFKLSH   | 5922  | 5791  |
| >WT1-R333K KRYFKLSHL  | 28   | >WT1-R333K KKYFKLSHL  | 414   | 386   |
| >WT1-R333K KRYFKLSHLQ | 202  | >WT1-R333K KKYFKLSHLQ | 5926  | 5724  |
| >WT1-R333K KRYFKLSHLQ | 47   | >WT1-R333K KKYFKLSHLQ | 1058  | 1011  |
| >WT1-R333K KRYFKLSHL  | 7    | >WT1-R333K KKYFKLSHL  | 215   | 208   |
| >WT1-R333K KRYFKLSHLQ | 442  | >WT1-R333K KKYFKLSHLQ | 12369 | 11927 |
| >WT1-R333K KRYFKLSHLQ | 43   | >WT1-R333K KKYFKLSHLQ | 2158  | 2115  |
| >WT1-R333K FMCAYPGCN  | 5937 | >WT1-R333K FMCAYPGCN  | 264   | 5673  |
| >WT1-R333K FMCAYPGCN  | 5585 | >WT1-R333K FMCAYPGCN  | 194   | 5391  |
| >WT1-R333K FMCAYPGCN  | 327  | >WT1-R333K FMCAYPGCN  | 4552  | 4225  |
| >WT1-R333K FMCAYPGCN  | 199  | >WT1-R333K FMCAYPGCN  | 4233  | 4034  |
| >WT1-R333K FMCAYPGCN  | 117  | >WT1-R333K FMCAYPGCN  | 451   | 334   |
| >WT1-R333K FMCAYPGCN  | 280  | >WT1-R333K FMCAYPGCN  | 5456  | 5176  |
| >WT1-R333K NKRYFKLSH  | 357  | >WT1-R333K NKKYFKLSH  | 860   | 503   |
| >WT1-R333K NKRYFKLSHL | 96   | >WT1-R333K NKKYFKLSHL | 219   | 123   |
| >WT1-R333K CNKRYFKLSH | 344  | >WT1-R333K CNKKYFKLSH | 531   | 187   |
| >WT1-R333K CNKRYFKL   | 433  | >WT1-R333K CNKKYFKL   | 594   | 161   |
| >WT1-R333K CNKRYFKLSH | 135  | >WT1-R333K CNKKYFKLSH | 158   | 23    |
| >WT1-R333K GCNKRYFK   | 460  | >WT1-R333K GCNKKYFK   | 1280  | 820   |
| >WT1-R333K GCNKRYFK   | 213  | >WT1-R333K GCNKKYFK   | 365   | 152   |
| >WT1-R333K YPGCNKRYF  | 98   | >WT1-R333K YPGCNKKYF  | 21    | 77    |
| >WT1-R333K YPGCNKRYFK | 125  | >WT1-R333K YPGCNKKYFK | 89    | 36    |
| >WT1-R333K YPGCNKRYF  | 95   | >WT1-R333K YPGCNKKYF  | 523   | 428   |
| >WT1-R333K YPGCNKRYFK | 108  | >WT1-R333K YPGCNKKYFK | 259   | 151   |
| >WT1-R333K YPGCNKRY   | 28   | >WT1-R333K YPGCNKKY   | 33    | 5     |
| >WT1-R333K YPGCNKRYF  | 303  | >WT1-R333K YPGCNKKYF  | 402   | 99    |
| >WT1-R333K AYPGCNKRYF | 35   | >WT1-R333K AYPGCNKKYF | 65    | 30    |
| >WT1-R333K AYPGCNKRYF | 43   | >WT1-R333K AYPGCNKKYF | 61    | 18    |
| >WT1-R333K AYPGCNKRY  | 867  | >WT1-R333K AYPGCNKKY  | 371   | 496   |
| >WT1-R333K AYPGCNKRYF | 5    | >WT1-R333K AYPGCNKKYF | 5     | 0     |
| >WT1-R333K AYPGCNKRYF | 50   | >WT1-R333K AYPGCNKKYF | 76    | 26    |
| >WT1-R333K AYPGCNKRYF | 414  | >WT1-R333K AYPGCNKKYF | 1117  | 703   |
| >WT1-R333K AYPGCNKRYF | 442  | >WT1-R333K AYPGCNKKYF | 568   | 126   |
| >WT1-R333K AYPGCNKRY  | 488  | >WT1-R333K AYPGCNKKY  | 848   | 360   |
| >WT1-R333K AYPGCNKR   | 70   | >WT1-R333K AYPGCNKK   | 1214  | 1144  |
| >WT1-R333K AYPGCNKRYF | 97   | >WT1-R333K AYPGCNKKYF | 96    | 1     |
| >WT1-R333K CAYPGCNKR  | 6384 | >WT1-R333K CAYPGCNKK  | 267   | 6117  |
| >WT1-R333K CAYPGCNKR  | 4907 | >WT1-R333K CAYPGCNKK  | 215   | 4692  |
| >WT1-R333K CAYPGCNKR  | 610  | >WT1-R333K CAYPGCNKK  | 453   | 157   |

|                       |      |                       |       |       |
|-----------------------|------|-----------------------|-------|-------|
| >WT1-R333K CAYPGCNKR\ | 562  | >WT1-R333K CAYPGCNKK\ | 460   | 102   |
| >WT1-R333K CAYPGCNKR  | 421  | >WT1-R333K CAYPGCNKK  | 6208  | 5787  |
| >WT1-R333K CAYPGCNKR  | 358  | >WT1-R333K CAYPGCNKK  | 5815  | 5457  |
| >WT1-R333K CAYPGCNKR  | 48   | >WT1-R333K CAYPGCNKK  | 107   | 59    |
| >WT1-R333K CAYPGCNKR\ | 465  | >WT1-R333K CAYPGCNKK\ | 295   | 170   |
| >WT1-R333K CAYPGCNKR\ | 74   | >WT1-R333K CAYPGCNKK\ | 48    | 26    |
| >WT1-R333K CAYPGCNKR\ | 12   | >WT1-R333K CAYPGCNKK\ | 15    | 3     |
| >WT1-R333K CAYPGCNKR\ | 31   | >WT1-R333K CAYPGCNKK\ | 22    | 9     |
| >WT1-R333K MCAYPGCNK  | 701  | >WT1-R333K MCAYPGCNK  | 480   | 221   |
| >WT1-R333K MCAYPGCNK  | 99   | >WT1-R333K MCAYPGCNK  | 147   | 48    |
| >WT1-R366C RSDQLKRHQI | 25   | >WT1-R366C CSDQLKRHQI | 149   | 124   |
| >WT1-R366C RSDQLKRHQI | 112  | >WT1-R366C CSDQLKRHQI | 2255  | 2143  |
| >WT1-R366C SRSDQLKR   | 755  | >WT1-R366C SCSDQLKR   | 378   | 377   |
| >WT1-R366C SRSDQLKRHC | 815  | >WT1-R366C SCSDQLKRHC | 433   | 382   |
| >WT1-R366C DFKDCERRFS | 104  | >WT1-R366C DFKDCERRFS | 20394 | 20290 |
| >WT1-R366C DFKDCERRFS | 7    | >WT1-R366C DFKDCERRFS | 3167  | 3160  |
| >WT1-R366C DFKDCERRFS | 367  | >WT1-R366C DFKDCERRFS | 40414 | 40047 |
| >WT1-R366C DFKDCERRFS | 201  | >WT1-R366C DFKDCERRFS | 35359 | 35158 |
| >WT1-R366C FSRSDQLK   | 4780 | >WT1-R366C FSCSDQLK   | 281   | 4499  |
| >WT1-R366C FSRSDQLK   | 100  | >WT1-R366C FSCSDQLK   | 7402  | 7302  |
| >WT1-R366C FSRSDQLK   | 471  | >WT1-R366C FSCSDQLK   | 90    | 381   |
| >WT1-R366C FSRSDQLKR  | 413  | >WT1-R366C FSCSDQLKR  | 84    | 329   |
| >WT1-R366C RFSRSDQL   | 59   | >WT1-R366C RFSCSDQL   | 75    | 16    |
| >WT1-R366C RFSRSDQLK  | 22   | >WT1-R366C RFSCSDQLK  | 48    | 26    |
| >WT1-R366C RFSRSDQLK  | 179  | >WT1-R366C RFSCSDQLK  | 395   | 216   |
| >WT1-R366C RFSRSDQLKR | 45   | >WT1-R366C RFSCSDQLKR | 36    | 9     |
| >WT1-R366C RFSRSDQLKR | 94   | >WT1-R366C RFSCSDQLKR | 49    | 45    |
| >WT1-R366C RFSRSDQLKR | 45   | >WT1-R366C RFSCSDQLKR | 22    | 23    |
| >WT1-R366C RFSRSDQL   | 404  | >WT1-R366C RFSCSDQL   | 551   | 147   |
| >WT1-R366C RRFSDQLK   | 296  | >WT1-R366C RRFSCSDQLK | 907   | 611   |
| >WT1-R366C RRFSDQ     | 433  | >WT1-R366C RRFSCSDQ   | 294   | 139   |
| >WT1-R366C RRFSDQL    | 81   | >WT1-R366C RRFSCSDQL  | 59    | 22    |
| >WT1-R366C RRFSDQLK   | 414  | >WT1-R366C RRFSCSDQLK | 223   | 191   |
| >WT1-R366C RRFSDQLK   | 375  | >WT1-R366C RRFSCSDQLK | 228   | 147   |
| >WT1-R366C RRFSDQ     | 226  | >WT1-R366C RRFSCSDQ   | 921   | 695   |
| >WT1-R366C RRFSDQL    | 14   | >WT1-R366C RRFSCSDQL  | 27    | 13    |
| >WT1-R366C RRFSDQLK   | 10   | >WT1-R366C RRFSCSDQLK | 8     | 2     |
| >WT1-R366C RRFSDQLK   | 12   | >WT1-R366C RRFSCSDQLK | 17    | 5     |
| >WT1-R366C RRFSDQL    | 539  | >WT1-R366C RRFSCSDQL  | 252   | 287   |
| >WT1-R366C RRFSDQL    | 1613 | >WT1-R366C RRFSCSDQL  | 370   | 1243  |
| >WT1-R366C RRFSDQ     | 47   | >WT1-R366C RRFSCSDQ   | 181   | 134   |
| >WT1-R366C RRFSDQL    | 48   | >WT1-R366C RRFSCSDQL  | 50    | 2     |
| >WT1-R366C RRFSDQLK   | 44   | >WT1-R366C RRFSCSDQLK | 48    | 4     |

|                       |       |                       |       |       |
|-----------------------|-------|-----------------------|-------|-------|
| >WT1-R366C RRFSDQLK   | 236   | >WT1-R366C RRFSCSDQLK | 243   | 7     |
| >WT1-R366C RRFSDQL    | 66    | >WT1-R366C RRFSCSDQL  | 74    | 8     |
| >WT1-R366C RRFSDQLK   | 60    | >WT1-R366C RRFSCSDQLK | 65    | 5     |
| >WT1-R366C RRFSDQLK   | 1819  | >WT1-R366C RRFSCSDQLK | 455   | 1364  |
| >WT1-R366C RRFSDQLK   | 75    | >WT1-R366C RRFSCSDQLK | 43    | 32    |
| >WT1-R366C CERRSDQ    | 261   | >WT1-R366C CERRFSCSDQ | 306   | 45    |
| >WT1-R366C CERRSDQ    | 168   | >WT1-R366C CERRFSCSDQ | 84    | 84    |
| >WT1-R366C CERRSRS    | 976   | >WT1-R366C CERRFSCS   | 485   | 491   |
| >WT1-R366C CERRSDQ    | 94    | >WT1-R366C CERRFSCSDQ | 45    | 49    |
| >WT1-R366C DCERRSR    | 39    | >WT1-R366C DCERRFSC   | 29957 | 29918 |
| >WT1-R366C KDCERRSR   | 100   | >WT1-R366C KDCERRFSC  | 21505 | 21405 |
| >WT1-R366C KDCERRSR   | 314   | >WT1-R366C KDCERRFSC  | 34501 | 34187 |
| >WT1-R390P RKFSRDHLK  | 253   | >WT1-R390P PKFSRDHLK  | 11060 | 10807 |
| >WT1-R390P RKFSRDH    | 17    | >WT1-R390P PKFSRDH    | 443   | 426   |
| >WT1-R390P RKFSRDHL   | 6     | >WT1-R390P PKFSRDHL   | 313   | 307   |
| >WT1-R390P RKFSRDHLK  | 104   | >WT1-R390P PKFSRDHLK  | 2014  | 1910  |
| >WT1-R390P RKFSRDHLK  | 174   | >WT1-R390P PKFSRDHLK  | 4775  | 4601  |
| >WT1-R390P RKFSRDHLK  | 275   | >WT1-R390P PKFSRDHLK  | 23943 | 23668 |
| >WT1-R390P QRKFSRDHL  | 30477 | >WT1-R390P QPKFSRDHL  | 171   | 30306 |
| >WT1-R390P CQRKFSRDH  | 171   | >WT1-R390P CQPKFSRDH  | 1663  | 1492  |
| >WT1-R390P CQRKFSRDH  | 104   | >WT1-R390P CQPKFSRDH  | 1233  | 1129  |
| >WT1-R390P TCQRKFSR   | 106   | >WT1-R390P TCQPKFSR   | 122   | 16    |
| >WT1-R390P TCQRKFSR   | 444   | >WT1-R390P TCQPKFSR   | 526   | 82    |
| >WT1-R390P KTCQRKFSR  | 129   | >WT1-R390P KTCQPKFSR  | 90    | 39    |
| >WT1-R390P KTCQRKFSR  | 7     | >WT1-R390P KTCQPKFSR  | 9     | 2     |
| >WT1-R390P KTCQRKFSR  | 140   | >WT1-R390P KTCQPKFSR  | 592   | 452   |
| >WT1-R390P KTCQRKFSR  | 178   | >WT1-R390P KTCQPKFSR  | 212   | 34    |
| >WT1-R390P KTCQRKFSR  | 385   | >WT1-R390P KTCQPKFSR  | 1091  | 706   |
| >WT1-R390P KTCQRKFSR  | 34    | >WT1-R390P KTCQPKFSR  | 45    | 11    |
| >WT1-R390P CKTCQRKF   | 38    | >WT1-R390P CKTCQPKF   | 32    | 6     |
| >WT1-R390P QCKTCQRK   | 646   | >WT1-R390P QCKTCQPK   | 82    | 564   |
| >WT1-R390P QCKTCQRKFS | 271   | >WT1-R390P QCKTCQPKFS | 335   | 64    |
| >WT1-R390P QCKTCQRKFS | 136   | >WT1-R390P QCKTCQPKFS | 120   | 16    |
| >WT1-R390P FQCKTCQRKF | 166   | >WT1-R390P FQCKTCQPKF | 110   | 56    |
| >WT1-R390P FQCKTCQRK  | 581   | >WT1-R390P FQCKTCQPK  | 82    | 499   |
| >WT1-R390P FQCKTCQRKF | 8     | >WT1-R390P FQCKTCQPKF | 6     | 2     |
| >WT1-R390P FQCKTCQR   | 314   | >WT1-R390P FQCKTCQP   | 34558 | 34244 |
| >WT1-R390P PFQCKTCQRK | 292   | >WT1-R390P PFQCKTCQPK | 126   | 166   |
| >WT1-R390P PFQCKTCQRK | 315   | >WT1-R390P PFQCKTCQPK | 203   | 112   |
| >WT1-R390P PFQCKTCQR  | 59    | >WT1-R390P PFQCKTCQP  | 33588 | 33529 |
| >WT1-R390P KPFQCKTCQF | 90    | >WT1-R390P KPFQCKTCQF | 22966 | 22876 |
| >WT1-R390P KPFQCKTCQF | 18    | >WT1-R390P KPFQCKTCQF | 10762 | 10744 |
| >WT1-R390P KPFQCKTCQF | 265   | >WT1-R390P KPFQCKTCQF | 109   | 156   |



|                        |       |                        |       |       |
|------------------------|-------|------------------------|-------|-------|
| >WT1-R394G RSDHLKTHTR  | 27    | >WT1-R394G GSDHLKTHTF  | 303   | 276   |
| >WT1-R394G RSDHLKTH    | 388   | >WT1-R394G GSDHLKTH    | 8666  | 8278  |
| >WT1-R394G RSDHLKTH    | 408   | >WT1-R394G GSDHLKTH    | 7148  | 6740  |
| >WT1-R394G RSDHLKTHTR  | 310   | >WT1-R394G GSDHLKTHTF  | 7576  | 7266  |
| >WT1-R394G SRSDHLKTHTR | 411   | >WT1-R394G SGSDHLKTHTR | 323   | 88    |
| >WT1-R394G QCKTCQRKFS  | 271   | >WT1-R394G QCKTCQRKFS  | 21536 | 21265 |
| >WT1-R394G QCKTCQRKFS  | 136   | >WT1-R394G QCKTCQRKFS  | 33024 | 32888 |
| >WT1-R394G FSRSDHLK    | 1413  | >WT1-R394G FSGSDHLK    | 199   | 1214  |
| >WT1-R394G FSRSDHLK    | 60    | >WT1-R394G FSGSDHLK    | 10900 | 10840 |
| >WT1-R394G FSRSDHLK    | 165   | >WT1-R394G FSGSDHLK    | 120   | 45    |
| >WT1-R394G FSRSDHLKTH  | 351   | >WT1-R394G FSGSDHLKTH  | 7204  | 6853  |
| >WT1-R394G KFSRSDHLK   | 283   | >WT1-R394G KFSGSDHLK   | 378   | 95    |
| >WT1-R394G KFSRSDHL    | 362   | >WT1-R394G KFSGSDHL    | 301   | 61    |
| >WT1-R394G KFSRSDHLK   | 23    | >WT1-R394G KFSGSDHLK   | 78    | 55    |
| >WT1-R394G KFSRSDHLK   | 49    | >WT1-R394G KFSGSDHLK   | 132   | 83    |
| >WT1-R394G KFSRSDHLK   | 143   | >WT1-R394G KFSGSDHLK   | 87    | 56    |
| >WT1-R394G KFSRSDHL    | 147   | >WT1-R394G KFSGSDHL    | 125   | 22    |
| >WT1-R394G KFSRSDHLK   | 375   | >WT1-R394G KFSGSDHLK   | 276   | 99    |
| >WT1-R394G RKFSRSDHLK  | 253   | >WT1-R394G RKFSGSDHLK  | 495   | 242   |
| >WT1-R394G RKFSRSDH    | 17    | >WT1-R394G RKFSGSDH    | 13    | 4     |
| >WT1-R394G RKFSRSDHL   | 6     | >WT1-R394G RKFSGSDHL   | 5     | 1     |
| >WT1-R394G RKFSRSDHLK  | 104   | >WT1-R394G RKFSGSDHLK  | 111   | 7     |
| >WT1-R394G RKFSRSDHLK  | 174   | >WT1-R394G RKFSGSDHLK  | 135   | 39    |
| >WT1-R394G RKFSRSDHLK  | 275   | >WT1-R394G RKFSGSDHLK  | 519   | 244   |
| >WT1-R394G RKFSRSDHL   | 970   | >WT1-R394G RKFSGSDHL   | 393   | 577   |
| >WT1-R394G QRKFSRSDHL  | 706   | >WT1-R394G QRKFSGSDHL  | 484   | 222   |
| >WT1-R394G CQRKFSRSDH  | 557   | >WT1-R394G CQRKFSGSDH  | 367   | 190   |
| >WT1-R394G CQRKFSRSDH  | 171   | >WT1-R394G CQRKFSGSDH  | 202   | 31    |
| >WT1-R394G CQRKFSRSDH  | 104   | >WT1-R394G CQRKFSGSDH  | 138   | 34    |
| >WT1-R394G TCQRKFSR    | 106   | >WT1-R394G TCQRKFSG    | 21597 | 21491 |
| >WT1-R394G TCQRKFSR    | 444   | >WT1-R394G TCQRKFSG    | 35977 | 35533 |
| >WT1-R394G KTCQRKFSR   | 129   | >WT1-R394G KTCQRKFSG   | 20641 | 20512 |
| >WT1-R394G KTCQRKFSR   | 7     | >WT1-R394G KTCQRKFSG   | 4927  | 4920  |
| >WT1-R394G KTCQRKFSR   | 140   | >WT1-R394G KTCQRKFSG   | 32333 | 32193 |
| >WT1-R394G KTCQRKFSR   | 178   | >WT1-R394G KTCQRKFSG   | 35909 | 35731 |
| >WT1-R394G KTCQRKFSR   | 385   | >WT1-R394G KTCQRKFSG   | 16525 | 16140 |
| >WT1-R394G KTCQRKFSR   | 34    | >WT1-R394G KTCQRKFSG   | 30498 | 30464 |
| >WT1-R394P RSDHLKTHTR  | 27    | >WT1-R394P PSDHLKTHTR  | 1224  | 1197  |
| >WT1-R394P RSDHLKTH    | 388   | >WT1-R394P PSDHLKTH    | 19665 | 19277 |
| >WT1-R394P RSDHLKTH    | 408   | >WT1-R394P PSDHLKTH    | 12313 | 11905 |
| >WT1-R394P RSDHLKTHTR  | 310   | >WT1-R394P PSDHLKTHTR  | 5664  | 5354  |
| >WT1-R394P SRSDHLKTH   | 23284 | >WT1-R394P SPSDHLKTH   | 424   | 22860 |
| >WT1-R394P SRSDHLKTHTR | 411   | >WT1-R394P SPSDHLKTHTR | 471   | 60    |

|                        |       |                        |       |       |
|------------------------|-------|------------------------|-------|-------|
| >WT1-R394P QCKTCQRKFS  | 271   | >WT1-R394P QCKTCQRKFS  | 21771 | 21500 |
| >WT1-R394P QCKTCQRKFS  | 136   | >WT1-R394P QCKTCQRKFS  | 32683 | 32547 |
| >WT1-R394P FSRSDHLK    | 60    | >WT1-R394P FSPSDHLK    | 12720 | 12660 |
| >WT1-R394P FSRSDHLK    | 165   | >WT1-R394P FSPSDHLK    | 107   | 58    |
| >WT1-R394P FSRSDHLKTH  | 351   | >WT1-R394P FSPSDHLKTH  | 11005 | 10654 |
| >WT1-R394P FSRSDHLK    | 23779 | >WT1-R394P FSPSDHLK    | 183   | 23596 |
| >WT1-R394P FSRSDHLKT   | 27398 | >WT1-R394P FSPSDHLKT   | 446   | 26952 |
| >WT1-R394P KFSRSDHLK   | 283   | >WT1-R394P KFSPSDHLK   | 263   | 20    |
| >WT1-R394P KFSRSDHL    | 362   | >WT1-R394P KFSPSDHL    | 180   | 182   |
| >WT1-R394P KFSRSDHLK   | 23    | >WT1-R394P KFSPSDHLK   | 32    | 9     |
| >WT1-R394P KFSRSDHLK   | 49    | >WT1-R394P KFSPSDHLK   | 42    | 7     |
| >WT1-R394P KFSRSDHLK   | 143   | >WT1-R394P KFSPSDHLK   | 85    | 58    |
| >WT1-R394P KFSRSDHL    | 147   | >WT1-R394P KFSPSDHL    | 102   | 45    |
| >WT1-R394P KFSRSDHLK   | 375   | >WT1-R394P KFSPSDHLK   | 210   | 165   |
| >WT1-R394P KFSRSDHLKTI | 890   | >WT1-R394P KFSPSDHLKTI | 492   | 398   |
| >WT1-R394P RKFSRSDHLK  | 253   | >WT1-R394P RKFSPSDHLK  | 555   | 302   |
| >WT1-R394P RKFSRSDH    | 17    | >WT1-R394P RKFSPSDH    | 11    | 6     |
| >WT1-R394P RKFSRSDHL   | 6     | >WT1-R394P RKFSPSDHL   | 4     | 2     |
| >WT1-R394P RKFSRSDHLK  | 104   | >WT1-R394P RKFSPSDHLK  | 57    | 47    |
| >WT1-R394P RKFSRSDHLK  | 174   | >WT1-R394P RKFSPSDHLK  | 89    | 85    |
| >WT1-R394P RKFSRSDHLK  | 275   | >WT1-R394P RKFSPSDHLK  | 500   | 225   |
| >WT1-R394P RKFSRSDHL   | 970   | >WT1-R394P RKFSPSDHL   | 332   | 638   |
| >WT1-R394P CQRKFSRSDH  | 557   | >WT1-R394P CQRKFSPSDH  | 471   | 86    |
| >WT1-R394P CQRKFSRSDH  | 171   | >WT1-R394P CQRKFSPSDH  | 119   | 52    |
| >WT1-R394P CQRKFSRSDH  | 104   | >WT1-R394P CQRKFSPSDH  | 67    | 37    |
| >WT1-R394P TCQRKFSR    | 106   | >WT1-R394P TCQRKFSP    | 22016 | 21910 |
| >WT1-R394P TCQRKFSR    | 444   | >WT1-R394P TCQRKFSP    | 37193 | 36749 |
| >WT1-R394P KTCQRKFSR   | 129   | >WT1-R394P KTCQRKFSP   | 18513 | 18384 |
| >WT1-R394P KTCQRKFSR   | 7     | >WT1-R394P KTCQRKFSP   | 5301  | 5294  |
| >WT1-R394P KTCQRKFSR   | 140   | >WT1-R394P KTCQRKFSP   | 33499 | 33359 |
| >WT1-R394P KTCQRKFSR   | 178   | >WT1-R394P KTCQRKFSP   | 34027 | 33849 |
| >WT1-R394P KTCQRKFSR   | 385   | >WT1-R394P KTCQRKFSP   | 15530 | 15145 |
| >WT1-R394P KTCQRKFSR   | 34    | >WT1-R394P KTCQRKFSP   | 29003 | 28969 |
| >WT1-R394C RSDHLKTHTR  | 27    | >WT1-R394C QSDHLKTHTF  | 187   | 160   |
| >WT1-R394C RSDHLKTH    | 388   | >WT1-R394C QSDHLKTH    | 5801  | 5413  |
| >WT1-R394C RSDHLKTH    | 408   | >WT1-R394C QSDHLKTH    | 4036  | 3628  |
| >WT1-R394C RSDHLKTHTR  | 310   | >WT1-R394C QSDHLKTHTF  | 1462  | 1152  |
| >WT1-R394C SRSDHLKTHT  | 8527  | >WT1-R394C SQSDHLKTHT  | 57    | 8470  |
| >WT1-R394C SRSDHLKTHT  | 411   | >WT1-R394C SQSDHLKTHT  | 226   | 185   |
| >WT1-R394C QCKTCQRKFS  | 271   | >WT1-R394C QCKTCQRKFS  | 17589 | 17318 |
| >WT1-R394C QCKTCQRKFS  | 136   | >WT1-R394C QCKTCQRKFS  | 16564 | 16428 |
| >WT1-R394C FSRSDHLK    | 1413  | >WT1-R394C FSQSDHLK    | 78    | 1335  |
| >WT1-R394C FSRSDHLK    | 60    | >WT1-R394C FSQSDHLK    | 7733  | 7673  |

|                        |       |                        |       |       |
|------------------------|-------|------------------------|-------|-------|
| >WT1-R394C FSRSDHLK    | 165   | >WT1-R394C FSQSDHLK    | 92    | 73    |
| >WT1-R394C FSRSDHLKTH  | 351   | >WT1-R394C FSQSDHLKTH  | 3493  | 3142  |
| >WT1-R394C KFSRSDHLK   | 283   | >WT1-R394C KFSQSDHLK   | 622   | 339   |
| >WT1-R394C KFSRSDHL    | 362   | >WT1-R394C KFSQSDHL    | 221   | 141   |
| >WT1-R394C KFSRSDHLK   | 23    | >WT1-R394C KFSQSDHLK   | 184   | 161   |
| >WT1-R394C KFSRSDHLK   | 49    | >WT1-R394C KFSQSDHLK   | 279   | 230   |
| >WT1-R394C KFSRSDHLK   | 143   | >WT1-R394C KFSQSDHLK   | 63    | 80    |
| >WT1-R394C KFSRSDHL    | 147   | >WT1-R394C KFSQSDHL    | 116   | 31    |
| >WT1-R394C KFSRSDHLK   | 375   | >WT1-R394C KFSQSDHLK   | 277   | 98    |
| >WT1-R394C RKFSRSDHLK  | 253   | >WT1-R394C RKFSQSDHLK  | 366   | 113   |
| >WT1-R394C RKFSRSDH    | 17    | >WT1-R394C RKFSQSDH    | 17    | 0     |
| >WT1-R394C RKFSRSDHL   | 6     | >WT1-R394C RKFSQSDHL   | 5     | 1     |
| >WT1-R394C RKFSRSDHLK  | 104   | >WT1-R394C RKFSQSDHLK  | 100   | 4     |
| >WT1-R394C RKFSRSDHLK  | 174   | >WT1-R394C RKFSQSDHLK  | 157   | 17    |
| >WT1-R394C RKFSRSDHLK  | 275   | >WT1-R394C RKFSQSDHLK  | 308   | 33    |
| >WT1-R394C RKFSRSDHLK  | 657   | >WT1-R394C RKFSQSDHLK  | 474   | 183   |
| >WT1-R394C CQRKFSRSDH  | 557   | >WT1-R394C CQRKFSQSDH  | 399   | 158   |
| >WT1-R394C CQRKFSRSDH  | 171   | >WT1-R394C CQRKFSQSDH  | 116   | 55    |
| >WT1-R394C CQRKFSRSDH  | 104   | >WT1-R394C CQRKFSQSDH  | 75    | 29    |
| >WT1-R394C TCQRKFSR    | 106   | >WT1-R394C TCQRKFSQ    | 17363 | 17257 |
| >WT1-R394C TCQRKFSR    | 444   | >WT1-R394C TCQRKFSQ    | 27521 | 27077 |
| >WT1-R394C KTCQRKFSR   | 129   | >WT1-R394C KTCQRKFSQ   | 14285 | 14156 |
| >WT1-R394C KTCQRKFSR   | 7     | >WT1-R394C KTCQRKFSQ   | 857   | 850   |
| >WT1-R394C KTCQRKFSR   | 140   | >WT1-R394C KTCQRKFSQ   | 22183 | 22043 |
| >WT1-R394C KTCQRKFSR   | 178   | >WT1-R394C KTCQRKFSQ   | 12332 | 12154 |
| >WT1-R394C KTCQRKFSR   | 385   | >WT1-R394C KTCQRKFSQ   | 5052  | 4667  |
| >WT1-R394C KTCQRKFSR   | 34    | >WT1-R394C KTCQRKFSQ   | 8182  | 8148  |
| >WT1-R394V RSDHLKTHTR  | 27    | >WT1-R394V WSDHLKTHTR  | 436   | 409   |
| >WT1-R394V RSDHLKTH    | 388   | >WT1-R394V WSDHLKTH    | 5150  | 4762  |
| >WT1-R394V RSDHLKTH    | 408   | >WT1-R394V WSDHLKTH    | 774   | 366   |
| >WT1-R394V RSDHLKTHTR  | 310   | >WT1-R394V WSDHLKTHTR  | 1553  | 1243  |
| >WT1-R394V SRSDHLKTHTR | 8527  | >WT1-R394V SWSDHLKTHTR | 164   | 8363  |
| >WT1-R394V SRSDHLKTHTR | 411   | >WT1-R394V SWSDHLKTHTR | 17    | 394   |
| >WT1-R394V SRSDHLKT    | 35437 | >WT1-R394V SWSDHLKT    | 491   | 34946 |
| >WT1-R394V SRSDHLKTH   | 33425 | >WT1-R394V SWSDHLKTH   | 367   | 33058 |
| >WT1-R394V SRSDHLKTHTR | 32033 | >WT1-R394V SWSDHLKTHTR | 259   | 31774 |
| >WT1-R394V QCKTCQRKFS  | 271   | >WT1-R394V QCKTCQRKFS  | 20552 | 20281 |
| >WT1-R394V QCKTCQRKFS  | 136   | >WT1-R394V QCKTCQRKFS  | 28412 | 28276 |
| >WT1-R394V FSRSDHLK    | 1413  | >WT1-R394V FSWSDHLK    | 76    | 1337  |
| >WT1-R394V FSRSDHLK    | 60    | >WT1-R394V FSWSDHLK    | 7722  | 7662  |
| >WT1-R394V FSRSDHLK    | 165   | >WT1-R394V FSWSDHLK    | 73    | 92    |
| >WT1-R394V FSRSDHLKTH  | 747   | >WT1-R394V FSWSDHLKTH  | 386   | 361   |
| >WT1-R394V FSRSDHLKTH  | 351   | >WT1-R394V FSWSDHLKTH  | 521   | 170   |

|                        |       |                        |       |       |
|------------------------|-------|------------------------|-------|-------|
| >WT1-R394V KFSRSDHLK   | 283   | >WT1-R394V KFSWSDHLK   | 94    | 189   |
| >WT1-R394V KFSRSDHL    | 362   | >WT1-R394V KFSWSDHL    | 227   | 135   |
| >WT1-R394V KFSRSDHLK   | 23    | >WT1-R394V KFSWSDHLK   | 147   | 124   |
| >WT1-R394V KFSRSDHLK   | 49    | >WT1-R394V KFSWSDHLK   | 47    | 2     |
| >WT1-R394V KFSRSDHLK   | 143   | >WT1-R394V KFSWSDHLK   | 43    | 100   |
| >WT1-R394V KFSRSDHL    | 147   | >WT1-R394V KFSWSDHL    | 26    | 121   |
| >WT1-R394V KFSRSDHLK   | 375   | >WT1-R394V KFSWSDHLK   | 40    | 335   |
| >WT1-R394V KFSRSDHLKTI | 890   | >WT1-R394V KFSWSDHLKTI | 147   | 743   |
| >WT1-R394V RKFSRSDHLK  | 253   | >WT1-R394V RKFSWSDHLK  | 751   | 498   |
| >WT1-R394V RKFSRSDH    | 17    | >WT1-R394V RKFSWSDH    | 14    | 3     |
| >WT1-R394V RKFSRSDHL   | 6     | >WT1-R394V RKFSWSDHL   | 6     | 0     |
| >WT1-R394V RKFSRSDHLK  | 104   | >WT1-R394V RKFSWSDHLK  | 108   | 4     |
| >WT1-R394V RKFSRSDHLK  | 174   | >WT1-R394V RKFSWSDHLK  | 133   | 41    |
| >WT1-R394V RKFSRSDHL   | 614   | >WT1-R394V RKFSWSDHL   | 314   | 300   |
| >WT1-R394V RKFSRSDHLK  | 275   | >WT1-R394V RKFSWSDHLK  | 159   | 116   |
| >WT1-R394V RKFSRSDHL   | 970   | >WT1-R394V RKFSWSDHL   | 312   | 658   |
| >WT1-R394V RKFSRSDHLK  | 657   | >WT1-R394V RKFSWSDHLK  | 271   | 386   |
| >WT1-R394V QRKFSRSDHL  | 874   | >WT1-R394V QRKFSWSDH   | 239   | 635   |
| >WT1-R394V CQRKFSRSDH  | 557   | >WT1-R394V CQRKFSWSD   | 488   | 69    |
| >WT1-R394V CQRKFSRSDH  | 171   | >WT1-R394V CQRKFSWSD   | 178   | 7     |
| >WT1-R394V CQRKFSRSDH  | 104   | >WT1-R394V CQRKFSWSD   | 91    | 13    |
| >WT1-R394V TCQRKFSR    | 106   | >WT1-R394V TCQRKFSW    | 20858 | 20752 |
| >WT1-R394V TCQRKFSR    | 444   | >WT1-R394V TCQRKFSW    | 32349 | 31905 |
| >WT1-R394V KTCQRKFSR   | 129   | >WT1-R394V KTCQRKFSW   | 20516 | 20387 |
| >WT1-R394V KTCQRKFSR   | 7     | >WT1-R394V KTCQRKFSW   | 2860  | 2853  |
| >WT1-R394V KTCQRKFSR   | 4224  | >WT1-R394V KTCQRKFSW   | 43    | 4181  |
| >WT1-R394V KTCQRKFSR   | 140   | >WT1-R394V KTCQRKFSW   | 28955 | 28815 |
| >WT1-R394V KTCQRKFSR   | 178   | >WT1-R394V KTCQRKFSW   | 29401 | 29223 |
| >WT1-R394V KTCQRKFSR   | 6437  | >WT1-R394V KTCQRKFSW   | 9     | 6428  |
| >WT1-R394V KTCQRKFSR   | 17294 | >WT1-R394V KTCQRKFSW   | 54    | 17240 |
| >WT1-R394V KTCQRKFSR   | 19589 | >WT1-R394V KTCQRKFSW   | 14    | 19575 |
| >WT1-R394V KTCQRKFSR   | 385   | >WT1-R394V KTCQRKFSW   | 10291 | 9906  |
| >WT1-R394V KTCQRKFSR   | 34    | >WT1-R394V KTCQRKFSW   | 23783 | 23749 |
| >WT1-R394V CKTCQRKFSR  | 28138 | >WT1-R394V CKTCQRKFSV  | 284   | 27854 |
| >WT1-R403T RTHTGKTSEK  | 31    | >WT1-R403T TTHTGKTSEK  | 97    | 66    |
| >WT1-R403T RTHTGKTSEK  | 69    | >WT1-R403T TTHTGKTSEK  | 75    | 6     |
| >WT1-R403T RTHTGKTS    | 132   | >WT1-R403T TTHTGKTS    | 4336  | 4204  |
| >WT1-R403T RTHTGKTSEK  | 4     | >WT1-R403T TTHTGKTSEK  | 27    | 23    |
| >WT1-R403T RTHTGKTSEK  | 845   | >WT1-R403T TTHTGKTSEK  | 97    | 748   |
| >WT1-R403T TRTHTGKTSE  | 19654 | >WT1-R403T TTTHTGKTSE  | 74    | 19580 |
| >WT1-R403T TRTHTGKTSE  | 13014 | >WT1-R403T TTTHTGKTSE  | 493   | 12521 |
| >WT1-R403T TRTHTGKTSE  | 6603  | >WT1-R403T TTTHTGKTSE  | 26    | 6577  |
| >WT1-R403T SRSDHLKTH   | 411   | >WT1-R403T SRSDHLKTH   | 28720 | 28309 |

|                       |      |                       |       |       |
|-----------------------|------|-----------------------|-------|-------|
| >WT1-R403T HTRHTGK    | 75   | >WT1-R403T HTTTHTGK   | 169   | 94    |
| >WT1-R403T HTRHTGK    | 1869 | >WT1-R403T HTTTHTGK   | 177   | 1692  |
| >WT1-R403T HTRHTGK    | 3    | >WT1-R403T HTTTHTGK   | 51    | 48    |
| >WT1-R403T HTRHTGKT   | 47   | >WT1-R403T HTTTHTGKT  | 8396  | 8349  |
| >WT1-R403T HTRHTGKTS  | 19   | >WT1-R403T HTTTHTGKTS | 4628  | 4609  |
| >WT1-R403T HTRHTGKTS  | 271  | >WT1-R403T HTTTHTGKTS | 11327 | 11056 |
| >WT1-R403T HTRHTGK    | 142  | >WT1-R403T HTTTHTGK   | 550   | 408   |
| >WT1-R403T HTRHTGK    | 115  | >WT1-R403T HTTTHTGK   | 16    | 99    |
| >WT1-R403T KTHTRHTGK  | 32   | >WT1-R403T KTHTTTHTGK | 42    | 10    |
| >WT1-R403T KTHTRHTGK  | 112  | >WT1-R403T KTHTTTHTGK | 82    | 30    |
| >WT1-R403T KTHTRHT    | 56   | >WT1-R403T KTHTTTHT   | 51    | 5     |
| >WT1-R403T KTHTRHTG   | 16   | >WT1-R403T KTHTTTHTG  | 12    | 4     |
| >WT1-R403T KTHTRHTGK  | 3    | >WT1-R403T KTHTTTHTGK | 3     | 0     |
| >WT1-R403T KTHTRHTGK  | 88   | >WT1-R403T KTHTTTHTGK | 65    | 23    |
| >WT1-R403T KTHTRHTGK  | 304  | >WT1-R403T KTHTTTHTGK | 829   | 525   |
| >WT1-R403T KTHTRHTG   | 229  | >WT1-R403T KTHTTTHTG  | 169   | 60    |
| >WT1-R403T LKTHTRTH   | 269  | >WT1-R403T LKTHTTTH   | 125   | 144   |
| >WT1-R403T LKTHTRHTG  | 312  | >WT1-R403T LKTHTTTHTG | 283   | 29    |
| >WT1-R403T HLKTHTRT   | 569  | >WT1-R403T HLKTHTTT   | 169   | 400   |
| >WT1-R403T HLKTHTRHT  | 133  | >WT1-R403T HLKTHTTTHT | 451   | 318   |
| >WT1-R403T RSDHLKTHTR | 27   | >WT1-R403T RSDHLKTHTT | 12804 | 12777 |
| >WT1-R403T RSDHLKTHTR | 310  | >WT1-R403T RSDHLKTHTT | 33729 | 33419 |
| >WT1-R433C RHNNMHQR   | 74   | >WT1-R433C CHNNMHQR   | 1747  | 1673  |
| >WT1-R433C RHNNMHQR   | 145  | >WT1-R433C CHNNMHQR   | 1409  | 1264  |
| >WT1-R433C RHNNMHQR   | 156  | >WT1-R433C CHNNMHQR   | 580   | 424   |
| >WT1-R433C VRHNNMHQ   | 137  | >WT1-R433C VCHNNMHQ   | 4249  | 4112  |
| >WT1-R433C VRHNNMHQ   | 466  | >WT1-R433C VCHNNMHQ   | 25784 | 25318 |
| >WT1-R433C VRHNNMHQ   | 248  | >WT1-R433C VCHNNMHQ   | 25438 | 25190 |
| >WT1-R433C VRHNNMHQ   | 830  | >WT1-R433C VCHNNMHQ   | 341   | 489   |
| >WT1-R433C KKFARSDELV | 69   | >WT1-R433C KKFARSDELV | 262   | 193   |
| >WT1-R433C KKFARSDELV | 52   | >WT1-R433C KKFARSDELV | 31039 | 30987 |
| >WT1-R433C LVRHNNMH   | 339  | >WT1-R433C LVCHNNMH   | 12844 | 12505 |
| >WT1-R433C LVRHNNMHC  | 19   | >WT1-R433C LVCHNNMHC  | 3765  | 3746  |
| >WT1-R433C LVRHNNMHC  | 37   | >WT1-R433C LVCHNNMHC  | 6238  | 6201  |
| >WT1-R433C LVRHNNMHC  | 273  | >WT1-R433C LVCHNNMHC  | 11424 | 11151 |
| >WT1-R433C LVRHNNMHC  | 43   | >WT1-R433C LVCHNNMHC  | 32    | 11    |
| >WT1-R433C LVRHNNMHC  | 997  | >WT1-R433C LVCHNNMHC  | 365   | 632   |
| >WT1-R433C LVRHNNMHC  | 908  | >WT1-R433C LVCHNNMHC  | 464   | 444   |
| >WT1-R433C ELVRHNNM   | 10   | >WT1-R433C ELVCHNNM   | 13    | 3     |
| >WT1-R433C ELVRHNNMH  | 449  | >WT1-R433C ELVCHNNMH  | 865   | 416   |
| >WT1-R433C ELVRHNNM   | 291  | >WT1-R433C ELVCHNNM   | 184   | 107   |
| >WT1-R433C ELVRHNNMH  | 203  | >WT1-R433C ELVCHNNMH  | 178   | 25    |
| >WT1-R433C ELVRHNNMH  | 12   | >WT1-R433C ELVCHNNMH  | 10    | 2     |

|                       |      |                       |       |       |
|-----------------------|------|-----------------------|-------|-------|
| >WT1-R433C ELVRHHNM   | 311  | >WT1-R433C ELVCHHNM   | 102   | 209   |
| >WT1-R433C ELVRHHNMH  | 352  | >WT1-R433C ELVCHHNMH  | 143   | 209   |
| >WT1-R433C DELVRHHN   | 270  | >WT1-R433C DELVCHHN   | 148   | 122   |
| >WT1-R433C DELVRHHNM  | 11   | >WT1-R433C DELVCHHNM  | 5     | 6     |
| >WT1-R433C DELVRHHNM  | 245  | >WT1-R433C DELVCHHNM  | 94    | 151   |
| >WT1-R433C RSDELVRH   | 450  | >WT1-R433C RSDELVCH   | 2477  | 2027  |
| >WT1-R433C RSDELVRHH  | 1070 | >WT1-R433C RSDELVCHH  | 320   | 750   |
| >WT1-R433C RSDELVRHHM | 8    | >WT1-R433C RSDELVCHHM | 8     | 0     |
| >WT1-R433C RSDELVRHH  | 5988 | >WT1-R433C RSDELVCHH  | 283   | 5705  |
| >WT1-R433C RSDELVRHHM | 138  | >WT1-R433C RSDELVCHHM | 49    | 89    |
| >WT1-R433C FARSDELVR  | 442  | >WT1-R433C FARSDELVC  | 41110 | 40668 |
| >WT1-R433C KFARSDELVR | 169  | >WT1-R433C KFARSDELVC | 31871 | 31702 |
| >WT1-R433C KFARSDELVR | 34   | >WT1-R433C KFARSDELVC | 32021 | 31987 |
| >WT1-S223T·SDNLYQMTS  | 451  | >WT1-S223T·TDNLYQMTS  | 447   | 4     |
| >WT1-S223T·SDNLYQMTS  | 235  | >WT1-S223T·TDNLYQMTS  | 207   | 28    |
| >WT1-S223T·SSDNLYQM   | 2603 | >WT1-S223T·STDNLYQM   | 148   | 2455  |
| >WT1-S223T·SSDNLYQM   | 258  | >WT1-S223T·STDNLYQM   | 180   | 78    |
| >WT1-S223T·YSSDNLYQM  | 446  | >WT1-S223T·YSTDNLYQM  | 115   | 331   |
| >WT1-S223T·YSSDNLYQM  | 136  | >WT1-S223T·YSTDNLYQM  | 801   | 665   |
| >WT1-S223T·YSSDNLYQM  | 71   | >WT1-S223T·YSTDNLYQM  | 27    | 44    |
| >WT1-S223T·YSSDNLYQM  | 456  | >WT1-S223T·YSTDNLYQM  | 586   | 130   |
| >WT1-S223T·YSSDNLYQM  | 8    | >WT1-S223T·YSTDNLYQM  | 10    | 2     |
| >WT1-S223T·YSSDNLYQM  | 234  | >WT1-S223T·YSTDNLYQM  | 420   | 186   |
| >WT1-S223T·YSSDNLYQM  | 466  | >WT1-S223T·YSTDNLYQM  | 549   | 83    |
| >WT1-S223T·YSSDNLYQM  | 160  | >WT1-S223T·YSTDNLYQM  | 200   | 40    |
| >WT1-S223T·YSSDNLYQM  | 65   | >WT1-S223T·YSTDNLYQM  | 21    | 44    |
| >WT1-S223T·YSSDNLYQM  | 72   | >WT1-S223T·YSTDNLYQM  | 75    | 3     |
| >WT1-S223T·PYSSDNLY   | 41   | >WT1-S223T·PYSTDNLY   | 54    | 13    |
| >WT1-S223T·PYSSDNLY   | 105  | >WT1-S223T·PYSTDNLY   | 178   | 73    |
| >WT1-S223T·PYSSDNLY   | 244  | >WT1-S223T·PYSTDNLY   | 198   | 46    |
| >WT1-S223T·TPYSSDNL   | 9    | >WT1-S223T·TPYSTDNL   | 11    | 2     |
| >WT1-S223T·TPYSSDNLYQ | 293  | >WT1-S223T·TPYSTDNLYQ | 528   | 235   |
| >WT1-S223T·TPYSSDNLYQ | 9    | >WT1-S223T·TPYSTDNLYQ | 11    | 2     |
| >WT1-S223T·TPYSSDNLY  | 279  | >WT1-S223T·TPYSTDNLY  | 157   | 122   |
| >WT1-S223T·TPYSSDNLY  | 470  | >WT1-S223T·TPYSTDNLY  | 354   | 116   |
| >WT1-S223T·TPYSSDNL   | 582  | >WT1-S223T·TPYSTDNL   | 476   | 106   |
| >WT1-S223T·TPYSSDNLYQ | 357  | >WT1-S223T·TPYSTDNLYQ | 435   | 78    |
| >WT1-S223T·TPYSSDNLY  | 157  | >WT1-S223T·TPYSTDNLY  | 229   | 72    |
| >WT1-S223T·TPYSSDNL   | 334  | >WT1-S223T·TPYSTDNL   | 253   | 81    |
| >WT1-S223T·TPYSSDNLY  | 19   | >WT1-S223T·TPYSTDNLY  | 15    | 4     |
| >WT1-S223T·TPYSSDNLYQ | 20   | >WT1-S223T·TPYSTDNLYQ | 18    | 2     |
| >WT1-S223T·TPYSSDNL   | 387  | >WT1-S223T·TPYSTDNL   | 302   | 85    |
| >WT1-S223T·TPYSSDNLYQ | 449  | >WT1-S223T·TPYSTDNLYQ | 325   | 124   |

|                        |      |                        |     |      |
|------------------------|------|------------------------|-----|------|
| >WT1-S223T·TPYSSDNL    | 324  | >WT1-S223T·TPYSTDNL    | 278 | 46   |
| >WT1-S223T·TPYSSDNL    | 35   | >WT1-S223T·TPYSTDNLY   | 31  | 4    |
| >WT1-S223T·TPYSSDNL    | 174  | >WT1-S223T·TPYSTDNLYQ  | 134 | 40   |
| >WT1-S223T·TPYSSDNL    | 267  | >WT1-S223T·TPYSTDNLY   | 158 | 109  |
| >WT1-S223T·TPYSSDNL    | 74   | >WT1-S223T·TPYSTDNLY   | 93  | 19   |
| >WT1-S223T·TPYSSDNL    | 318  | >WT1-S223T·TPYSTDNL    | 202 | 116  |
| >WT1-S223T·TPYSSDNL    | 87   | >WT1-S223T·TPYSTDNLY   | 66  | 21   |
| >WT1-S223T·TPYSSDNL    | 566  | >WT1-S223T·TPYSTDNLYQ  | 480 | 86   |
| >WT1-S223T·RTPYSSDNL   | 99   | >WT1-S223T·RTPYSTDNLY  | 93  | 6    |
| >WT1-S223T·RTPYSSDNL   | 455  | >WT1-S223T·RTPYSTDNLY  | 368 | 87   |
| >WT1-S223T·RTPYSSDNL   | 814  | >WT1-S223T·RTPYSTDNLY  | 429 | 385  |
| >WT1-S223T·RTPYSSDNL   | 890  | >WT1-S223T·RTPYSTDNLY  | 420 | 470  |
| >WT1-S223T·RTPYSSDNL   | 266  | >WT1-S223T·RTPYSTDNLY  | 233 | 33   |
| >WT1-S223T·RTPYSSDNL   | 17   | >WT1-S223T·RTPYSTDNLY  | 13  | 4    |
| >WT1-S223T·RTPYSSDNL   | 79   | >WT1-S223T·RTPYSTDNL   | 36  | 43   |
| >WT1-S223T·RTPYSSDNL   | 743  | >WT1-S223T·RTPYSTDNLY  | 355 | 388  |
| >WT1-S223T·RTPYSSDNL   | 759  | >WT1-S223T·RTPYSTDNL   | 370 | 389  |
| >WT1-S223T·RTPYSSDNL   | 428  | >WT1-S223T·RTPYSTDNLY  | 179 | 249  |
| >WT1-S223T·RTPYSSDNL   | 55   | >WT1-S223T·RTPYSTDNL   | 107 | 52   |
| >WT1-S223T·RTPYSSDNL   | 25   | >WT1-S223T·RTPYSTDNLY  | 48  | 23   |
| >WT1-S223T·RTPYSSDNL   | 4    | >WT1-S223T·RTPYSTDNL   | 3   | 1    |
| >WT1-S223T·RTPYSSDNL   | 18   | >WT1-S223T·RTPYSTDNLY  | 17  | 1    |
| >WT1-S223T·RTPYSSDNL   | 42   | >WT1-S223T·RTPYSTDNLY  | 42  | 0    |
| >WT1-S223T·RTPYSSDNL   | 19   | >WT1-S223T·RTPYSTDNLY  | 21  | 2    |
| >WT1-S223T·RTPYSSDNL   | 233  | >WT1-S223T·RTPYSTDNL   | 184 | 49   |
| >WT1-S223T·LRTPYSSDNL  | 545  | >WT1-S223T·LRTPYSTDNL  | 475 | 70   |
| >WT1-S223T·LRTPYSSDNL  | 488  | >WT1-S223T·LRTPYSTDNL  | 721 | 233  |
| >WT1-S223T·LRTPYSSDNL  | 376  | >WT1-S223T·LRTPYSTDNL  | 484 | 108  |
| >WT1-S223T·LRTPYSSDNL  | 147  | >WT1-S223T·LRTPYSTDNL  | 185 | 38   |
| >WT1-S223T·LRTPYSSDNL  | 669  | >WT1-S223T·LRTPYSTDNL  | 373 | 296  |
| >WT1-S223T·LRTPYSSDNL  | 295  | >WT1-S223T·LRTPYSTDNL  | 463 | 168  |
| >WT1-S223T·LRTPYSSDNL  | 73   | >WT1-S223T·LRTPYSTDNL  | 108 | 35   |
| >WT1-S223T·LLRTPYSSDNI | 202  | >WT1-S223T·LLRTPYSTDNI | 186 | 16   |
| >WT1-S223T·LLRTPYSSDNI | 144  | >WT1-S223T·LLRTPYSTDNI | 112 | 32   |
| >WT1-S223T·LLRTPYSS    | 3309 | >WT1-S223T·LLRTPYST    | 243 | 3066 |
| >WT1-S223T·LLRTPYSSDNI | 33   | >WT1-S223T·LLRTPYSTDNI | 26  | 7    |
| >WT1-S223T·LLRTPYSSDNI | 177  | >WT1-S223T·LLRTPYSTDNI | 218 | 41   |
| >WT1-S223T·LLLRTPYSS   | 2356 | >WT1-S223T·LLLRTPYST   | 277 | 2079 |
| >WT1-S223T·LLLRTPYSS   | 64   | >WT1-S223T·LLLRTPYST   | 13  | 51   |
| >WT1-S223T·LLLRTPYSS   | 493  | >WT1-S223T·LLLRTPYST   | 72  | 421  |
| >WT1-S223T·LLLRTPYSS   | 1672 | >WT1-S223T·LLLRTPYST   | 202 | 1470 |
| >WT1-S223T·LLLRTPYSS   | 4126 | >WT1-S223T·LLLRTPYST   | 116 | 4010 |
| >WT1-S223T·LLLRTPYSS   | 676  | >WT1-S223T·LLLRTPYST   | 40  | 636  |

|                         |       |                         |       |       |
|-------------------------|-------|-------------------------|-------|-------|
| >WT1-S223T·ALLRTPYSS    | 2010  | >WT1-S223T·ALLRTPYST    | 237   | 1773  |
| >WT1-S223T·ALLRTPYSS    | 1911  | >WT1-S223T·ALLRTPYST    | 282   | 1629  |
| >WT1-S223T·ALLRTPYSS    | 2221  | >WT1-S223T·ALLRTPYST    | 233   | 1988  |
| >WT1-S223T·ALLRTPYSS    | 538   | >WT1-S223T·ALLRTPYST    | 91    | 447   |
| >WT1-S223T·ALLRTPYSS    | 2063  | >WT1-S223T·ALLRTPYST    | 414   | 1649  |
| >WT1-S223T·ALLRTPYSS    | 2569  | >WT1-S223T·ALLRTPYST    | 313   | 2256  |
| >WT1-S223T·ALLRTPYSS    | 1497  | >WT1-S223T·ALLRTPYST    | 95    | 1402  |
| >WT1-S273G SDNHTTPI     | 916   | >WT1-S273G GDNHTTPI     | 420   | 496   |
| >WT1-S273G SDNHTTPIL    | 866   | >WT1-S273G GDNHTTPIL    | 418   | 448   |
| >WT1-S273G SDNHTTPI     | 786   | >WT1-S273G GDNHTTPI     | 147   | 639   |
| >WT1-S273G SDNHTTPI     | 56    | >WT1-S273G GDNHTTPI     | 83    | 27    |
| >WT1-S273G SDNHTTPIL    | 281   | >WT1-S273G GDNHTTPIL    | 447   | 166   |
| >WT1-S273G ESDNHTTPI    | 297   | >WT1-S273G EGDNHTTPI    | 15363 | 15066 |
| >WT1-S273G ESDNHTTPI    | 484   | >WT1-S273G EGDNHTTPI    | 7263  | 6779  |
| >WT1-S273G ESDNHTTPI    | 35    | >WT1-S273G EGDNHTTPI    | 663   | 628   |
| >WT1-S273G ESDNHTTPIL   | 204   | >WT1-S273G EGDNHTTPIL   | 3322  | 3118  |
| >WT1-S273G YESDNHHT     | 205   | >WT1-S273G YEGDNHHT     | 603   | 398   |
| >WT1-S273G YESDNHTTPI   | 65    | >WT1-S273G YEGDNHTTPI   | 95    | 30    |
| >WT1-S273G YESDNHTTPI   | 286   | >WT1-S273G YEGDNHTTPI   | 1865  | 1579  |
| >WT1-S273G YESDNHHT     | 261   | >WT1-S273G YEGDNHHT     | 889   | 628   |
| >WT1-S273G YESDNHTTPII  | 53    | >WT1-S273G YEGDNHTTPII  | 163   | 110   |
| >WT1-S273G YESDNHTTPII  | 57    | >WT1-S273G YEGDNHTTPII  | 920   | 863   |
| >WT1-S273G YESDNHTTPII  | 7     | >WT1-S273G YEGDNHTTPII  | 20    | 13    |
| >WT1-S273G YESDNHTTPI   | 127   | >WT1-S273G YEGDNHTTPI   | 263   | 136   |
| >WT1-S273G YESDNHTTPII  | 85    | >WT1-S273G YEGDNHTTPII  | 131   | 46    |
| >WT1-S273G YESDNHTTPI   | 25    | >WT1-S273G YEGDNHTTPI   | 31    | 6     |
| >WT1-S273G YESDNHTTPII  | 21    | >WT1-S273G YEGDNHTTPII  | 53    | 32    |
| >WT1-S273G GYESDNHTTF   | 48    | >WT1-S273G GYEGDNHTTF   | 78    | 30    |
| >WT1-S273G GYESDNHTTF   | 459   | >WT1-S273G GYEGDNHTTF   | 443   | 16    |
| >WT1-S315P·SETSEKRPFM   | 85    | >WT1-S315P·PETSEKRPFM   | 1222  | 1137  |
| >WT1-S315P·SETSEKRPF    | 180   | >WT1-S315P·PETSEKRPF    | 946   | 766   |
| >WT1-S315P·SETSEKRPF    | 411   | >WT1-S315P·PETSEKRPF    | 2566  | 2155  |
| >WT1-S315P·SETSEKRPF    | 355   | >WT1-S315P·PETSEKRPF    | 3429  | 3074  |
| >WT1-S315P·ASETSEKRPFII | 3976  | >WT1-S315P·APETSEKRPFII | 14    | 3962  |
| >WT1-S315P·ASETSEKRPF   | 20459 | >WT1-S315P·APETSEKRPF   | 65    | 20394 |
| >WT1-S315P·ASETSEKRPFII | 20777 | >WT1-S315P·APETSEKRPFII | 315   | 20462 |
| >WT1-S315P·ASETSEKRPF   | 411   | >WT1-S315P·APETSEKRPF   | 2877  | 2466  |
| >WT1-S315P·ASETSEKRPF   | 18    | >WT1-S315P·APETSEKRPF   | 16489 | 16471 |
| >WT1-S315P·ASETSEKRPFII | 86    | >WT1-S315P·APETSEKRPFII | 21650 | 21564 |
| >WT1-S315P·ASETSEKRPF   | 19275 | >WT1-S315P·APETSEKRPF   | 444   | 18831 |
| >WT1-S315P·SASETSEK     | 44    | >WT1-S315P·SAPETSEK     | 478   | 434   |
| >WT1-S315P·SASETSEK     | 58    | >WT1-S315P·SAPETSEK     | 400   | 342   |
| >WT1-S315P·SASETSEKR    | 24    | >WT1-S315P·SAPETSEKR    | 148   | 124   |



|                        |      |                          |       |       |
|------------------------|------|--------------------------|-------|-------|
| >WT1-S315P SASETSEKRPI | 285  | >WT1-S315P SAPETSEKRPI   | 1573  | 1288  |
| >WT1-S315P SASETSEKRPI | 93   | >WT1-S315P SAPETSEKRPI   | 738   | 645   |
| >WT1-S315P SASETSEKRPI | 52   | >WT1-S315P SAPETSEKRPI   | 1081  | 1029  |
| >WT1-S315P SASETSEKRPI | 196  | >WT1-S315P SAPETSEKRPI   | 1257  | 1061  |
| >WT1-S315P SASETSEKRPI | 8990 | >WT1-S315P SAPETSEKRPI   | 75    | 8915  |
| >WT1-S315P RSASETSEK   | 102  | >WT1-S315P RSAPETSEK     | 113   | 11    |
| >WT1-S315P RSASETSEK   | 22   | >WT1-S315P RSAPETSEK     | 23    | 1     |
| >WT1-S315P RSASETSEK   | 86   | >WT1-S315P RSAPETSEK     | 45    | 41    |
| >WT1-S315P RSASETSEKR  | 323  | >WT1-S315P RSAPETSEKR    | 409   | 86    |
| >WT1-S315P RSASETSEK   | 189  | >WT1-S315P RSAPETSEK     | 475   | 286   |
| >WT1-S315P RSASETSEKR  | 59   | >WT1-S315P RSAPETSEKR    | 92    | 33    |
| >WT1-S315P RSASETSEK   | 587  | >WT1-S315P RSAPETSEK     | 399   | 188   |
| >WT1-S315P RSASETSEKR  | 595  | >WT1-S315P RSAPETSEKR    | 465   | 130   |
| >WT1-S315P LRSASETSEK  | 260  | >WT1-S315P LRSAPETSEK    | 331   | 71    |
| >WT1-S315P LRSASET     | 713  | >WT1-S315P LRSAPET       | 363   | 350   |
| >WT1-S315P LRSASETS    | 499  | >WT1-S315P LRSAPETS      | 1073  | 574   |
| >WT1-S315P LRSASETSEK  | 5    | >WT1-S315P LRSAPETSEK    | 6     | 1     |
| >WT1-S315P LRSASETSEK  | 280  | >WT1-S315P LRSAPETSEK    | 466   | 186   |
| >WT1-S315P TLRSASET    | 396  | >WT1-S315P TLRSAPET      | 135   | 261   |
| >WT1-S315P APTLRSASEK  | 416  | >WT1-S315P APTLRSAPETSEK | 1064  | 648   |
| >WT1-S338P SHLQMHSR    | 272  | >WT1-S338P PHLQMHSR      | 559   | 287   |
| >WT1-S338P LSHLQMHSRI  | 185  | >WT1-S338P LPHLQMHSRI    | 6146  | 5961  |
| >WT1-S338P LSHLQMHSRI  | 276  | >WT1-S338P LPHLQMHSRI    | 15131 | 14855 |
| >WT1-S338P LSHLQMHSRI  | 17   | >WT1-S338P LPHLQMHSRI    | 10902 | 10885 |
| >WT1-S338P LSHLQMHSR   | 23   | >WT1-S338P LPHLQMHSR     | 3024  | 3001  |
| >WT1-S338P LSHLQMHSR   | 225  | >WT1-S338P LPHLQMHSR     | 3606  | 3381  |
| >WT1-S338P KLSHLQMH    | 424  | >WT1-S338P KLPHLQMH      | 3308  | 2884  |
| >WT1-S338P KLSHLQMHSI  | 206  | >WT1-S338P KLPHLQMHSI    | 894   | 688   |
| >WT1-S338P KLSHLQMHSI  | 29   | >WT1-S338P KLPHLQMHSI    | 51    | 22    |
| >WT1-S338P KLSHLQMHSI  | 62   | >WT1-S338P KLPHLQMHSI    | 878   | 816   |
| >WT1-S338P KLSHLQMHSI  | 46   | >WT1-S338P KLPHLQMHSI    | 452   | 406   |
| >WT1-S338P KLSHLQMHSI  | 13   | >WT1-S338P KLPHLQMHSI    | 48    | 35    |
| >WT1-S338P KLSHLQMHSI  | 222  | >WT1-S338P KLPHLQMHSI    | 1123  | 901   |
| >WT1-S338P KLSHLQMHSI  | 50   | >WT1-S338P KLPHLQMHSI    | 55    | 5     |
| >WT1-S338P KLSHLQMHSI  | 32   | >WT1-S338P KLPHLQMHSI    | 28    | 4     |
| >WT1-S338P FKLSHLQM    | 6    | >WT1-S338P FKLPHLQM      | 12    | 6     |
| >WT1-S338P FKLSHLQMH   | 53   | >WT1-S338P FKLPHLQMH     | 87    | 34    |
| >WT1-S338P FKLSHLQMH   | 265  | >WT1-S338P FKLPHLQMH     | 500   | 235   |
| >WT1-S338P FKLSHLQMH   | 77   | >WT1-S338P FKLPHLQMH     | 112   | 35    |
| >WT1-S338P FKLSHLQM    | 313  | >WT1-S338P FKLPHLQM      | 645   | 332   |
| >WT1-S338P YFKLSHLQM   | 342  | >WT1-S338P YFKLPHLQM     | 272   | 70    |
| >WT1-S338P YFKLSHLQM   | 967  | >WT1-S338P YFKLPHLQM     | 479   | 488   |
| >WT1-S338P RYFKLSHL    | 201  | >WT1-S338P RYFKLPHL      | 279   | 78    |

|                        |     |                        |     |     |
|------------------------|-----|------------------------|-----|-----|
| >WT1-S338P RYFKLSHL    | 12  | >WT1-S338P RYFKLPHL    | 279 | 267 |
| >WT1-S338P RYFKLSHL    | 80  | >WT1-S338P RYFKLPHL    | 54  | 26  |
| >WT1-S338P RYFKLSHLQNM | 301 | >WT1-S338P RYFKLPHLQNM | 567 | 266 |
| >WT1-S338P RYFKLSHL    | 140 | >WT1-S338P RYFKLPHL    | 126 | 14  |
| >WT1-S338P RYFKLSHLQNM | 190 | >WT1-S338P RYFKLPHLQNM | 344 | 154 |
| >WT1-S338P RYFKLSHL    | 4   | >WT1-S338P RYFKLPHL    | 4   | 0   |
| >WT1-S338P RYFKLSHLQ   | 173 | >WT1-S338P RYFKLPHLQ   | 430 | 257 |
| >WT1-S338P RYFKLSHLQNM | 8   | >WT1-S338P RYFKLPHLQNM | 10  | 2   |
| >WT1-S338P RYFKLSHLQNM | 167 | >WT1-S338P RYFKLPHLQNM | 241 | 74  |
| >WT1-S338P RYFKLSHL    | 86  | >WT1-S338P RYFKLPHL    | 49  | 37  |
| >WT1-S338P RYFKLSHLQ   | 194 | >WT1-S338P RYFKLPHLQ   | 460 | 266 |
| >WT1-S338P RYFKLSHLQNM | 32  | >WT1-S338P RYFKLPHLQNM | 63  | 31  |
| >WT1-S338P RYFKLSHL    | 424 | >WT1-S338P RYFKLPHL    | 643 | 219 |
| >WT1-S338P RYFKLSHLQNM | 289 | >WT1-S338P RYFKLPHLQNM | 362 | 73  |
| >WT1-S338P RYFKLSHLQNM | 318 | >WT1-S338P RYFKLPHLQNM | 305 | 13  |
| >WT1-S338P RYFKLSHLQNM | 482 | >WT1-S338P RYFKLPHLQNM | 809 | 327 |
| >WT1-S338P RYFKLSHL    | 616 | >WT1-S338P RYFKLPHL    | 328 | 288 |
| >WT1-S338P RYFKLSHLQ   | 29  | >WT1-S338P RYFKLPHLQ   | 27  | 2   |
| >WT1-S338P RYFKLSHLQNM | 311 | >WT1-S338P RYFKLPHLQNM | 306 | 5   |
| >WT1-S338P RYFKLSHL    | 567 | >WT1-S338P RYFKLPHL    | 408 | 159 |
| >WT1-S338P RYFKLSHLQNM | 282 | >WT1-S338P RYFKLPHLQNM | 135 | 147 |
| >WT1-S338P RYFKLSHL    | 323 | >WT1-S338P RYFKLPHL    | 284 | 39  |
| >WT1-S338P RYFKLSHLQ   | 530 | >WT1-S338P RYFKLPHLQ   | 289 | 241 |
| >WT1-S338P RYFKLSHLQNM | 249 | >WT1-S338P RYFKLPHLQNM | 117 | 132 |
| >WT1-S338P KRYFKLSHL   | 159 | >WT1-S338P KRYFKLPHL   | 139 | 20  |
| >WT1-S338P KRYFKLSHLQ  | 453 | >WT1-S338P KRYFKLPHLQ  | 453 | 0   |
| >WT1-S338P KRYFKLSHL   | 200 | >WT1-S338P KRYFKLPHL   | 524 | 324 |
| >WT1-S338P KRYFKLSHLQ  | 85  | >WT1-S338P KRYFKLPHLQ  | 163 | 78  |
| >WT1-S338P KRYFKLSH    | 133 | >WT1-S338P KRYFKLPH    | 99  | 34  |
| >WT1-S338P KRYFKLSHL   | 72  | >WT1-S338P KRYFKLPHL   | 83  | 11  |
| >WT1-S338P KRYFKLSHLQ  | 174 | >WT1-S338P KRYFKLPHLQ  | 45  | 129 |
| >WT1-S338P KRYFKLSHLQ  | 43  | >WT1-S338P KRYFKLPHLQ  | 54  | 11  |
| >WT1-S338P KRYFKLSH    | 131 | >WT1-S338P KRYFKLPH    | 49  | 82  |
| >WT1-S338P KRYFKLSHL   | 28  | >WT1-S338P KRYFKLPHL   | 28  | 0   |
| >WT1-S338P KRYFKLSHLQ  | 202 | >WT1-S338P KRYFKLPHLQ  | 118 | 84  |
| >WT1-S338P KRYFKLSHLQ  | 47  | >WT1-S338P KRYFKLPHLQ  | 43  | 4   |
| >WT1-S338P KRYFKLSHL   | 7   | >WT1-S338P KRYFKLPHL   | 8   | 1   |
| >WT1-S338P KRYFKLSHLQ  | 442 | >WT1-S338P KRYFKLPHLQ  | 215 | 227 |
| >WT1-S338P KRYFKLSHLQ  | 43  | >WT1-S338P KRYFKLPHLQ  | 50  | 7   |
| >WT1-S338P NKRYFKLSH   | 357 | >WT1-S338P NKRYFKLPH   | 271 | 86  |
| >WT1-S338P NKRYFKLSHL  | 96  | >WT1-S338P NKRYFKLPHL  | 191 | 95  |
| >WT1-S338P CNKRYFKLSH  | 344 | >WT1-S338P CNKRYFKLPH  | 283 | 61  |
| >WT1-S338P CNKRYFKLSH  | 135 | >WT1-S338P CNKRYFKLPH  | 221 | 86  |

|                       |      |                       |       |       |
|-----------------------|------|-----------------------|-------|-------|
| >WT1-S338Y·SHLQMHSR   | 272  | >WT1-S338Y·YHLQMHSR   | 228   | 44    |
| >WT1-S338Y·LSHLQMHSRI | 185  | >WT1-S338Y·LYHLQMHSRI | 4082  | 3897  |
| >WT1-S338Y·LSHLQMHSRI | 276  | >WT1-S338Y·LYHLQMHSRI | 14620 | 14344 |
| >WT1-S338Y·LSHLQMHSRI | 17   | >WT1-S338Y·LYHLQMHSRI | 17    | 0     |
| >WT1-S338Y·LSHLQMHSR  | 23   | >WT1-S338Y·LYHLQMHSR  | 23    | 0     |
| >WT1-S338Y·LSHLQMHSR  | 614  | >WT1-S338Y·LYHLQMHSR  | 62    | 552   |
| >WT1-S338Y·LSHLQMHSR  | 225  | >WT1-S338Y·LYHLQMHSR  | 1941  | 1716  |
| >WT1-S338Y·LSHLQMHSR  | 1370 | >WT1-S338Y·LYHLQMHSR  | 54    | 1316  |
| >WT1-S338Y·KLSHLQMH   | 424  | >WT1-S338Y·KLYHLQMH   | 63    | 361   |
| >WT1-S338Y·KLSHLQMHSI | 206  | >WT1-S338Y·KLYHLQMHSI | 56    | 150   |
| >WT1-S338Y·KLSHLQMHSI | 29   | >WT1-S338Y·KLYHLQMHSI | 23    | 6     |
| >WT1-S338Y·KLSHLQMHSI | 62   | >WT1-S338Y·KLYHLQMHSI | 32    | 30    |
| >WT1-S338Y·KLSHLQMHSI | 46   | >WT1-S338Y·KLYHLQMHSI | 23    | 23    |
| >WT1-S338Y·KLSHLQMHSI | 13   | >WT1-S338Y·KLYHLQMHSI | 9     | 4     |
| >WT1-S338Y·KLSHLQMHSI | 222  | >WT1-S338Y·KLYHLQMHSI | 50    | 172   |
| >WT1-S338Y·KLSHLQMHSI | 50   | >WT1-S338Y·KLYHLQMHSI | 44    | 6     |
| >WT1-S338Y·KLSHLQMHSI | 32   | >WT1-S338Y·KLYHLQMHSI | 18    | 14    |
| >WT1-S338Y·KLSHLQMHSI | 1332 | >WT1-S338Y·KLYHLQMHSI | 178   | 1154  |
| >WT1-S338Y·FKLSHLQM   | 6    | >WT1-S338Y·FKLYHLQM   | 10    | 4     |
| >WT1-S338Y·FKLSHLQMH  | 53   | >WT1-S338Y·FKLYHLQMH  | 53    | 0     |
| >WT1-S338Y·FKLSHLQMH! | 265  | >WT1-S338Y·FKLYHLQMH! | 352   | 87    |
| >WT1-S338Y·FKLSHLQMH! | 77   | >WT1-S338Y·FKLYHLQMH! | 104   | 27    |
| >WT1-S338Y·FKLSHLQM   | 313  | >WT1-S338Y·FKLYHLQM   | 761   | 448   |
| >WT1-S338Y·YFKLSHLQM  | 342  | >WT1-S338Y·YFKLYHLQM  | 148   | 194   |
| >WT1-S338Y·YFKLSHLQM  | 1332 | >WT1-S338Y·YFKLYHLQM  | 242   | 1090  |
| >WT1-S338Y·RYFKLSHL   | 201  | >WT1-S338Y·RYFKLYHL   | 167   | 34    |
| >WT1-S338Y·RYFKLSHL   | 12   | >WT1-S338Y·RYFKLYHL   | 143   | 131   |
| >WT1-S338Y·RYFKLSHL   | 1070 | >WT1-S338Y·RYFKLYHL   | 437   | 633   |
| >WT1-S338Y·RYFKLSHL   | 80   | >WT1-S338Y·RYFKLYHL   | 28    | 52    |
| >WT1-S338Y·RYFKLSHLQV | 301  | >WT1-S338Y·RYFKLYHLQV | 389   | 88    |
| >WT1-S338Y·RYFKLSHL   | 140  | >WT1-S338Y·RYFKLYHL   | 57    | 83    |
| >WT1-S338Y·RYFKLSHLQ  | 890  | >WT1-S338Y·RYFKLYHLQ  | 285   | 605   |
| >WT1-S338Y·RYFKLSHLQV | 190  | >WT1-S338Y·RYFKLYHLQV | 195   | 5     |
| >WT1-S338Y·RYFKLSHL   | 4    | >WT1-S338Y·RYFKLYHL   | 4     | 0     |
| >WT1-S338Y·RYFKLSHLQ  | 173  | >WT1-S338Y·RYFKLYHLQ  | 45    | 128   |
| >WT1-S338Y·RYFKLSHLQV | 8    | >WT1-S338Y·RYFKLYHLQV | 6     | 2     |
| >WT1-S338Y·RYFKLSHLQV | 167  | >WT1-S338Y·RYFKLYHLQV | 96    | 71    |
| >WT1-S338Y·RYFKLSHL   | 86   | >WT1-S338Y·RYFKLYHL   | 89    | 3     |
| >WT1-S338Y·RYFKLSHLQ  | 194  | >WT1-S338Y·RYFKLYHLQ  | 183   | 11    |
| >WT1-S338Y·RYFKLSHLQV | 32   | >WT1-S338Y·RYFKLYHLQV | 34    | 2     |
| >WT1-S338Y·RYFKLSHL   | 424  | >WT1-S338Y·RYFKLYHL   | 86    | 338   |
| >WT1-S338Y·RYFKLSHLQ  | 626  | >WT1-S338Y·RYFKLYHLQ  | 195   | 431   |
| >WT1-S338Y·RYFKLSHLQV | 289  | >WT1-S338Y·RYFKLYHLQV | 165   | 124   |

|                        |      |                        |      |      |
|------------------------|------|------------------------|------|------|
| >WT1-S338Y·RYFKLSHL    | 646  | >WT1-S338Y·RYFKLYHL    | 184  | 462  |
| >WT1-S338Y·RYFKLSHLQMV | 318  | >WT1-S338Y·RYFKLYHLQMV | 645  | 327  |
| >WT1-S338Y·RYFKLSHLQMV | 482  | >WT1-S338Y·RYFKLYHLQMV | 478  | 4    |
| >WT1-S338Y·RYFKLSHL    | 1249 | >WT1-S338Y·RYFKLYHL    | 224  | 1025 |
| >WT1-S338Y·RYFKLSHLQ   | 29   | >WT1-S338Y·RYFKLYHLQ   | 27   | 2    |
| >WT1-S338Y·RYFKLSHLQMV | 311  | >WT1-S338Y·RYFKLYHLQMV | 207  | 104  |
| >WT1-S338Y·RYFKLSHL    | 567  | >WT1-S338Y·RYFKLYHL    | 201  | 366  |
| >WT1-S338Y·RYFKLSHLQMV | 282  | >WT1-S338Y·RYFKLYHLQMV | 141  | 141  |
| >WT1-S338Y·RYFKLSHL    | 323  | >WT1-S338Y·RYFKLYHL    | 182  | 141  |
| >WT1-S338Y·RYFKLSHLQ   | 530  | >WT1-S338Y·RYFKLYHLQ   | 227  | 303  |
| >WT1-S338Y·RYFKLSHLQMV | 249  | >WT1-S338Y·RYFKLYHLQMV | 154  | 95   |
| >WT1-S338Y·KRYFKLSHL   | 159  | >WT1-S338Y·KRYFKLYHL   | 275  | 116  |
| >WT1-S338Y·KRYFKLSHLQ  | 453  | >WT1-S338Y·KRYFKLYHLQ  | 292  | 161  |
| >WT1-S338Y·KRYFKLSHL   | 200  | >WT1-S338Y·KRYFKLYHL   | 515  | 315  |
| >WT1-S338Y·KRYFKLSHLQ  | 85   | >WT1-S338Y·KRYFKLYHLQ  | 152  | 67   |
| >WT1-S338Y·KRYFKLSH    | 133  | >WT1-S338Y·KRYFKLYH    | 181  | 48   |
| >WT1-S338Y·KRYFKLSHL   | 72   | >WT1-S338Y·KRYFKLYHL   | 33   | 39   |
| >WT1-S338Y·KRYFKLSHLQ  | 174  | >WT1-S338Y·KRYFKLYHLQ  | 70   | 104  |
| >WT1-S338Y·KRYFKLSHLQ  | 43   | >WT1-S338Y·KRYFKLYHLQ  | 27   | 16   |
| >WT1-S338Y·KRYFKLSH    | 131  | >WT1-S338Y·KRYFKLYH    | 212  | 81   |
| >WT1-S338Y·KRYFKLSHL   | 28   | >WT1-S338Y·KRYFKLYHL   | 35   | 7    |
| >WT1-S338Y·KRYFKLSHLQ  | 202  | >WT1-S338Y·KRYFKLYHLQ  | 152  | 50   |
| >WT1-S338Y·KRYFKLSHLQ  | 47   | >WT1-S338Y·KRYFKLYHLQ  | 45   | 2    |
| >WT1-S338Y·KRYFKLSHL   | 7    | >WT1-S338Y·KRYFKLYHL   | 16   | 9    |
| >WT1-S338Y·KRYFKLSHLQ  | 442  | >WT1-S338Y·KRYFKLYHLQ  | 255  | 187  |
| >WT1-S338Y·KRYFKLSHLQ  | 43   | >WT1-S338Y·KRYFKLYHLQ  | 43   | 0    |
| >WT1-S338Y·NKRYFKLS    | 4574 | >WT1-S338Y·NKRYFKLY    | 17   | 4557 |
| >WT1-S338Y·NKRYFKLSH   | 357  | >WT1-S338Y·NKRYFKLYH   | 872  | 515  |
| >WT1-S338Y·NKRYFKLSHL  | 96   | >WT1-S338Y·NKRYFKLYHL  | 201  | 105  |
| >WT1-S338Y·CNKRYFKLSH  | 344  | >WT1-S338Y·CNKRYFKLYH  | 421  | 77   |
| >WT1-S338Y·CNKRYFKLSH  | 135  | >WT1-S338Y·CNKRYFKLYH  | 115  | 20   |
| >WT1-Y286C·YRIHTHGVFR  | 240  | >WT1-Y286C·CRIHTHGVFR  | 199  | 41   |
| >WT1-Y286C·YRIHTHGVFR  | 411  | >WT1-Y286C·CRIHTHGVFR  | 565  | 154  |
| >WT1-Y286C·YRIHTHGVFR  | 232  | >WT1-Y286C·CRIHTHGVFR  | 1206 | 974  |
| >WT1-Y286C·YRIHTHGV    | 177  | >WT1-Y286C·CRIHTHGV    | 1249 | 1072 |
| >WT1-Y286C·YRIHTHGVF   | 9    | >WT1-Y286C·CRIHTHGVF   | 36   | 27   |
| >WT1-Y286C·YRIHTHGVFR  | 276  | >WT1-Y286C·CRIHTHGVFR  | 1763 | 1487 |
| >WT1-Y286C·YRIHTHGV    | 159  | >WT1-Y286C·CRIHTHGV    | 1158 | 999  |
| >WT1-Y286C·YRIHTHGVF   | 244  | >WT1-Y286C·CRIHTHGVF   | 1729 | 1485 |
| >WT1-Y286C·YRIHTHGVFR  | 100  | >WT1-Y286C·CRIHTHGVFR  | 87   | 13   |
| >WT1-Y286C·YRIHTHGV    | 185  | >WT1-Y286C·CRIHTHGV    | 4027 | 3842 |
| >WT1-Y286C·YRIHTHGVF   | 169  | >WT1-Y286C·CRIHTHGVF   | 4116 | 3947 |
| >WT1-Y286C·YRIHTHGVF   | 374  | >WT1-Y286C·CRIHTHGVF   | 6878 | 6504 |

|                        |      |                        |       |       |
|------------------------|------|------------------------|-------|-------|
| >WT1-Y286C YRIHTHG VF  | 1376 | >WT1-Y286C CRIHTHG VF  | 310   | 1066  |
| >WT1-Y286C YRIHTHG VFR | 311  | >WT1-Y286C CRIHTHG VFR | 257   | 54    |
| >WT1-Y286C QYRIHTHG VF | 26   | >WT1-Y286C QCRIHTHG VF | 2985  | 2959  |
| >WT1-Y286C QYRIHTHG VF | 52   | >WT1-Y286C QCRIHTHG VF | 10706 | 10654 |
| >WT1-Y286C QYRIHTHG VF | 12   | >WT1-Y286C QCRIHTHG VF | 12296 | 12284 |
| >WT1-Y286C QYRIHTHG    | 485  | >WT1-Y286C QCRIHTHG    | 3583  | 3098  |
| >WT1-Y286C QYRIHTHG V  | 102  | >WT1-Y286C QCRIHTHG V  | 1264  | 1162  |
| >WT1-Y286C QYRIHTHG VF | 42   | >WT1-Y286C QCRIHTHG VF | 512   | 470   |
| >WT1-Y286C QYRIHTHG VF | 11   | >WT1-Y286C QCRIHTHG VF | 149   | 138   |
| >WT1-Y286C QYRIHTHG VF | 47   | >WT1-Y286C QCRIHTHG VF | 924   | 877   |
| >WT1-Y286C QYRIHTHG VF | 23   | >WT1-Y286C QCRIHTHG VF | 98    | 75    |
| >WT1-Y286C HTTPILCGAQ  | 409  | >WT1-Y286C HTTPILCGAQ  | 22112 | 21703 |
| >WT1-Y286C HTTPILCGAQ  | 83   | >WT1-Y286C HTTPILCGAQ  | 12386 | 12303 |
| >WT1-Y286C HTTPILCGAQ  | 81   | >WT1-Y286C HTTPILCGAQ  | 13286 | 13205 |
| >WT1-Y286C HTTPILCGAQ  | 62   | >WT1-Y286C HTTPILCGAQ  | 25475 | 25413 |
| >WT1-Y286C HTTPILCGAQ  | 51   | >WT1-Y286C HTTPILCGAQ  | 21455 | 21404 |
| >WT1-Y286C HTTPILCGAQ  | 80   | >WT1-Y286C HTTPILCGAQ  | 22736 | 22656 |
| >WT1-Y286C HTTPILCGAQ  | 109  | >WT1-Y286C HTTPILCGAQ  | 15844 | 15735 |
| >WT1-Y286C HTTPILCGAQ  | 317  | >WT1-Y286C HTTPILCGAQ  | 27378 | 27061 |
| >WT1-Y286C HTTPILCGAQ  | 4    | >WT1-Y286C HTTPILCGAQ  | 1621  | 1617  |
| >WT1-Y286C HTTPILCGAQ  | 187  | >WT1-Y286C HTTPILCGAQ  | 14744 | 14557 |
| >WT1-Y286C HTTPILCGAQ  | 233  | >WT1-Y286C HTTPILCGAQ  | 10242 | 10009 |
| >WT1-Y286C HTTPILCGAQ  | 17   | >WT1-Y286C HTTPILCGAQ  | 4712  | 4695  |
| >WT1-Y286C HTTPILCGAQ  | 195  | >WT1-Y286C HTTPILCGAQ  | 37154 | 36959 |
| >WT1-Y286C AQYRIHTHG \ | 210  | >WT1-Y286C AQCRIHTHG \ | 1127  | 917   |
| >WT1-Y286C AQYRIHTHG \ | 45   | >WT1-Y286C AQCRIHTHG \ | 246   | 201   |
| >WT1-Y286C AQYRIHTHG \ | 291  | >WT1-Y286C AQCRIHTHG \ | 944   | 653   |
| >WT1-Y286C AQYRIHTHG \ | 12   | >WT1-Y286C AQCRIHTHG \ | 116   | 104   |
| >WT1-Y286C AQYRIHTHG \ | 67   | >WT1-Y286C AQCRIHTHG \ | 1447  | 1380  |
| >WT1-Y286C AQYRIHTHG \ | 36   | >WT1-Y286C AQCRIHTHG \ | 1791  | 1755  |
| >WT1-Y286C AQYRIHTHG \ | 28   | >WT1-Y286C AQCRIHTHG \ | 221   | 193   |
| >WT1-Y286C AQYRIHTHG \ | 331  | >WT1-Y286C AQCRIHTHG \ | 1867  | 1536  |
| >WT1-Y286C AQYRIHTHG   | 304  | >WT1-Y286C AQCRIHTHG   | 913   | 609   |
| >WT1-Y286C AQYRIHTHG \ | 28   | >WT1-Y286C AQCRIHTHG \ | 43    | 15    |
| >WT1-Y286C AQYRIHTHG \ | 254  | >WT1-Y286C AQCRIHTHG \ | 3071  | 2817  |
| >WT1-Y286C AQYRIHTH    | 65   | >WT1-Y286C AQCRIHTH    | 1177  | 1112  |
| >WT1-Y286C AQYRIHTHG \ | 46   | >WT1-Y286C AQCRIHTHG \ | 883   | 837   |
| >WT1-Y286C AQYRIHTHG \ | 3    | >WT1-Y286C AQCRIHTHG \ | 15    | 12    |
| >WT1-Y286C GAQYRIHTHC  | 760  | >WT1-Y286C GAQCRIHTHC  | 483   | 277   |
| >WT1-Y286C GAQYRIHTHC  | 729  | >WT1-Y286C GAQCRIHTHC  | 469   | 260   |
| >WT1-Y286C GAQYRIHTHC  | 1409 | >WT1-Y286C GAQCRIHTHC  | 282   | 1127  |
| >WT1-Y286C GAQYRIHTHC  | 544  | >WT1-Y286C GAQCRIHTHC  | 96    | 448   |
| >WT1-Y286C GAQYRIHTHC  | 276  | >WT1-Y286C GAQCRIHTHC  | 251   | 25    |

|                        |      |                        |       |       |
|------------------------|------|------------------------|-------|-------|
| >WT1-Y286C ILCGAQYRI   | 63   | >WT1-Y286C ILCGAQCRI   | 695   | 632   |
| >WT1-Y286C ILCGAQYRI   | 19   | >WT1-Y286C ILCGAQCRI   | 140   | 121   |
| >WT1-Y286C ILCGAQYRI   | 11   | >WT1-Y286C ILCGAQCRI   | 14    | 3     |
| >WT1-Y286C ILCGAQYRI   | 435  | >WT1-Y286C ILCGAQCRI   | 1770  | 1335  |
| >WT1-Y286C ILCGAQYRI   | 238  | >WT1-Y286C ILCGAQCRI   | 141   | 97    |
| >WT1-Y286C ILCGAQYRI   | 21   | >WT1-Y286C ILCGAQCRI   | 67    | 46    |
| >WT1-Y286C ILCGAQYRI   | 7    | >WT1-Y286C ILCGAQCRI   | 5     | 2     |
| >WT1-Y286C ILCGAQYRIHT | 63   | >WT1-Y286C ILCGAQCRIHT | 65    | 2     |
| >WT1-Y286C ILCGAQYR    | 70   | >WT1-Y286C ILCGAQCR    | 678   | 608   |
| >WT1-Y286C ILCGAQYR    | 128  | >WT1-Y286C ILCGAQCR    | 462   | 334   |
| >WT1-Y286C ILCGAQYR    | 165  | >WT1-Y286C ILCGAQCR    | 616   | 451   |
| >WT1-Y286C ILCGAQYR    | 49   | >WT1-Y286C ILCGAQCR    | 602   | 553   |
| >WT1-Y286C PILCGAQY    | 81   | >WT1-Y286C PILCGAQC    | 21604 | 21523 |
| >WT1-Y286C PILCGAQYR   | 77   | >WT1-Y286C PILCGAQCR   | 1980  | 1903  |
| >WT1-Y286C TPILCGAQYRI | 76   | >WT1-Y286C TPILCGAQCR  | 216   | 140   |
| >WT1-Y286C TPILCGAQYR  | 380  | >WT1-Y286C TPILCGAQCR  | 957   | 577   |
| >WT1-Y286C TPILCGAQYR  | 138  | >WT1-Y286C TPILCGAQCR  | 2364  | 2226  |
| >WT1-Y286C TPILCGAQY   | 22   | >WT1-Y286C TPILCGAQC   | 3603  | 3581  |
| >WT1-Y286C TPILCGAQY   | 62   | >WT1-Y286C TPILCGAQC   | 13970 | 13908 |
| >WT1-Y286C TPILCGAQYRI | 101  | >WT1-Y286C TPILCGAQCR  | 203   | 102   |
| >WT1-Y286C TPILCGAQYRI | 300  | >WT1-Y286C TPILCGAQCR  | 449   | 149   |
| >WT1-Y286C TPILCGAQY   | 339  | >WT1-Y286C TPILCGAQC   | 34480 | 34141 |
| >WT1-Y286C TPILCGAQY   | 441  | >WT1-Y286C TPILCGAQC   | 11479 | 11038 |
| >WT1-Y286C TPILCGAQYR  | 197  | >WT1-Y286C TPILCGAQCR  | 2443  | 2246  |
| >WT1-Y286C TTPILCGAQY  | 165  | >WT1-Y286C TTPILCGAQC  | 31869 | 31704 |
| >WT1-Y286C TTPILCGAQY  | 259  | >WT1-Y286C TTPILCGAQC  | 18356 | 18097 |
| >WT1-Y286C TTPILCGAQY  | 398  | >WT1-Y286C TTPILCGAQC  | 31459 | 31061 |
| >WT1-Y286C TTPILCGAQY  | 119  | >WT1-Y286C TTPILCGAQC  | 27119 | 27000 |
| >WT1-Y286C TTPILCGAQYI | 237  | >WT1-Y286C TTPILCGAQC  | 1877  | 1640  |
| >WT1-Y286C TTPILCGAQY  | 179  | >WT1-Y286C TTPILCGAQC  | 27827 | 27648 |
| >WT1-Y286C TTPILCGAQYI | 30   | >WT1-Y286C TTPILCGAQC  | 55    | 25    |
| >WT1-Y286C TTPILCGAQY  | 223  | >WT1-Y286C TTPILCGAQC  | 16239 | 16016 |
| >WT1-Y286C TTPILCGAQY  | 52   | >WT1-Y286C TTPILCGAQC  | 32    | 20    |
| >WT1-Y286C TTPILCGAQYI | 235  | >WT1-Y286C TTPILCGAQC  | 2860  | 2625  |
| >WT1-Y286C TTPILCGAQY  | 35   | >WT1-Y286C TTPILCGAQC  | 7985  | 7950  |
| >WT1-Y286C TTPILCGAQYI | 425  | >WT1-Y286C TTPILCGAQC  | 4527  | 4102  |
| >WT1-Y327HYPGCNKRYF    | 98   | >WT1-Y327H HPGCNKRYF   | 289   | 191   |
| >WT1-Y327HYPGCNKRYFK   | 125  | >WT1-Y327H HPGCNKRYFK  | 283   | 158   |
| >WT1-Y327HYPGCNKRYF    | 95   | >WT1-Y327H HPGCNKRYF   | 135   | 40    |
| >WT1-Y327HYPGCNKRYFK   | 108  | >WT1-Y327H HPGCNKRYFK  | 174   | 66    |
| >WT1-Y327HYPGCNKRY     | 28   | >WT1-Y327H HPGCNKRY    | 65    | 37    |
| >WT1-Y327HYPGCNKRYF    | 303  | >WT1-Y327H HPGCNKRYF   | 735   | 432   |
| >WT1-Y327HYPGCNKRYFK   | 1098 | >WT1-Y327H HPGCNKRYFK  | 410   | 688   |

|                      |      |                      |       |       |
|----------------------|------|----------------------|-------|-------|
| >WT1-Y327HAYPGCNKRYF | 35   | >WT1-Y327HAHPGCNKRYI | 1365  | 1330  |
| >WT1-Y327HAYPGCNKRYF | 43   | >WT1-Y327HAHPGCNKRYI | 1664  | 1621  |
| >WT1-Y327HAYPGCNKRYF | 5    | >WT1-Y327HAHPGCNKRYI | 2075  | 2070  |
| >WT1-Y327HAYPGCNKRYF | 50   | >WT1-Y327HAHPGCNKRYI | 2260  | 2210  |
| >WT1-Y327HAYPGCNKRYF | 414  | >WT1-Y327HAHPGCNKRYI | 10011 | 9597  |
| >WT1-Y327HAYPGCNKRYF | 442  | >WT1-Y327HAHPGCNKRYI | 9769  | 9327  |
| >WT1-Y327HAYPGCNKRY  | 488  | >WT1-Y327HAHPGCNKRY  | 5173  | 4685  |
| >WT1-Y327HAYPGCNKR   | 70   | >WT1-Y327HAHPGCNKR   | 1884  | 1814  |
| >WT1-Y327HAYPGCNKRYF | 97   | >WT1-Y327HAHPGCNKRYI | 3247  | 3150  |
| >WT1-Y327HTSEKRPFMCA | 29   | >WT1-Y327HTSEKRPFMCA | 10682 | 10653 |
| >WT1-Y327HTSEKRPFMCA | 36   | >WT1-Y327HTSEKRPFMCA | 8055  | 8019  |
| >WT1-Y327HTSEKRPFMCA | 487  | >WT1-Y327HTSEKRPFMCA | 5762  | 5275  |
| >WT1-Y327HCAYPGCNK   | 207  | >WT1-Y327HCAHPGCNK   | 2581  | 2374  |
| >WT1-Y327HCAYPGCNK   | 87   | >WT1-Y327HCAHPGCNK   | 529   | 442   |
| >WT1-Y327HCAYPGCNK   | 1188 | >WT1-Y327HCAHPGCNK   | 78    | 1110  |
| >WT1-Y327HCAYPGCNKR  | 421  | >WT1-Y327HCAHPGCNKR  | 1020  | 599   |
| >WT1-Y327HCAYPGCNKR  | 358  | >WT1-Y327HCAHPGCNKR  | 1332  | 974   |
| >WT1-Y327HCAYPGCNK   | 115  | >WT1-Y327HCAHPGCNK   | 508   | 393   |
| >WT1-Y327HCAYPGCNKR  | 48   | >WT1-Y327HCAHPGCNKR  | 186   | 138   |
| >WT1-Y327HCAYPGCNKR) | 465  | >WT1-Y327HCAHPGCNKR' | 1644  | 1179  |
| >WT1-Y327HCAYPGCNKR) | 74   | >WT1-Y327HCAHPGCNKR' | 323   | 249   |
| >WT1-Y327HCAYPGCNKR) | 12   | >WT1-Y327HCAHPGCNKR' | 64    | 52    |
| >WT1-Y327HCAYPGCNKR) | 31   | >WT1-Y327HCAHPGCNKR' | 167   | 136   |
| >WT1-Y327HMCAYPGCNK  | 99   | >WT1-Y327HMCAYHPGCNK | 137   | 38    |
| >WT1-Y327HFMCAYPGC   | 283  | >WT1-Y327HFMCAHPGC   | 319   | 36    |
| >WT1-Y327HFMCAYPGC   | 256  | >WT1-Y327HFMCAHPGC   | 385   | 129   |
| >WT1-Y327HFMCAYPGC   | 7    | >WT1-Y327HFMCAHPGC   | 10    | 3     |
| >WT1-Y327HFMCAYPGC   | 18   | >WT1-Y327HFMCAHPGC   | 28    | 10    |
| >WT1-Y327HFMCAYPGCN  | 28   | >WT1-Y327HFMCAHPGCN  | 28    | 0     |
| >WT1-Y327HFMCAYPGCN  | 54   | >WT1-Y327HFMCAHPGCN  | 58    | 4     |
| >WT1-Y327HFMCAYPGCN  | 327  | >WT1-Y327HFMCAHPGCN  | 420   | 93    |
| >WT1-Y327HFMCAYPGCN  | 199  | >WT1-Y327HFMCAHPGCN  | 351   | 152   |
| >WT1-Y327HFMCAYPGCN  | 84   | >WT1-Y327HFMCAHPGCN  | 90    | 6     |
| >WT1-Y327HFMCAYPGCN  | 117  | >WT1-Y327HFMCAHPGCN  | 183   | 66    |
| >WT1-Y327HFMCAYPGCN  | 124  | >WT1-Y327HFMCAHPGCN  | 164   | 40    |
| >WT1-Y327HFMCAYPGCN  | 280  | >WT1-Y327HFMCAHPGCN  | 315   | 35    |
| >WT1-Y327HRPFMCAYPG  | 311  | >WT1-Y327HRPFMCAHPG  | 914   | 603   |
| >WT1-Y327HRPFMCAYPG  | 263  | >WT1-Y327HRPFMCAHPG  | 484   | 221   |
| >WT1-Y327HKRPFMCA    | 378  | >WT1-Y327HKRPFMCAH   | 6033  | 5655  |
| >WT1-Y327HKRPFMCAYPG | 390  | >WT1-Y327HKRPFMCAHPG | 506   | 116   |
| >WT1-Y327HEKRPFMCA   | 300  | >WT1-Y327HEKRPFMCAH  | 8686  | 8386  |
| >WT1-Y327HEKRPFMCA   | 274  | >WT1-Y327HEKRPFMCAH  | 12777 | 12503 |
| >WT1-Y327HEKRPFMCA   | 11   | >WT1-Y327HEKRPFMCAH  | 416   | 405   |

|                       |       |                        |       |       |
|-----------------------|-------|------------------------|-------|-------|
| >WT1-Y327HSEKRPFMCA\  | 122   | >WT1-Y327HSEKRPFMCA\   | 8269  | 8147  |
| >WT1-Y327HSEKRPFMCA\  | 92    | >WT1-Y327HSEKRPFMCA\   | 3575  | 3483  |
| >WT1-Y327HSEKRPFMCA\  | 470   | >WT1-Y327HSEKRPFMCA\   | 18621 | 18151 |
| >XPA-K221E- KVKELRRAV | 101   | >XPA-K221E- EKVKELRRAV | 1272  | 1171  |
| >XPA-K221E- KVKELRR   | 100   | >XPA-K221E- EKVKELRR   | 1433  | 1333  |
| >XPA-K221E- KVKELRRAV | 190   | >XPA-K221E- EKVKELRRAV | 2171  | 1981  |
| >XPA-K221E- DKVKELRRA | 17757 | >XPA-K221E- DEKVKELRRA | 458   | 17299 |
| >XPA-K221E- KFDKVKELR | 34    | >XPA-K221E- KFDEKVKELR | 79    | 45    |
| >XPA-K221E- KFDKVKELR | 193   | >XPA-K221E- KFDEKVKELR | 307   | 114   |
| >XPA-K221E- KFDKVKELR | 313   | >XPA-K221E- KFDEKVKELR | 562   | 249   |
| >XPA-K221E- KFDKVKELR | 50    | >XPA-K221E- KFDEKVKELR | 87    | 37    |
| >XPA-K221E- KFDKVKELR | 35    | >XPA-K221E- KFDEKVKELR | 55    | 20    |
| >XPA-K221E- KFKDKVKEL | 258   | >XPA-K221E- KKFDEKVKEL | 915   | 657   |
| >XPA-K221E- KFKDKVK   | 313   | >XPA-K221E- KKFDEKVK   | 162   | 151   |
| >XPA-K221E- KFKDKVKEL | 21    | >XPA-K221E- KKFDEKVKEL | 13    | 8     |
| >XPA-K221E- KFKDKVKEL | 39    | >XPA-K221E- KKFDEKVKEL | 35    | 4     |
| >XPA-K221E- QKKFDKVK  | 251   | >XPA-K221E- QKKFDEKVK  | 218   | 33    |
| >XPA-K221E- KQKKFDKK  | 36    | >XPA-K221E- KQKKFDEK   | 42    | 6     |
| >XPA-K221E- KQKKFDKVK | 31    | >XPA-K221E- KQKKFDEKVK | 86    | 55    |
| >XPA-K221E- KQKKFDKK  | 105   | >XPA-K221E- KQKKFDEK   | 84    | 21    |
| >XPA-K221E- KQKKFDKVK | 216   | >XPA-K221E- KQKKFDEKV  | 440   | 224   |
| >XPA-K221E- KQKKFDKVK | 496   | >XPA-K221E- KQKKFDEKVK | 483   | 13    |
| >XPA-K221E- KQKKFDKK  | 431   | >XPA-K221E- KQKKFDEK   | 799   | 368   |
| >XPA-K221E- KMKQKKFDK | 2242  | >XPA-K221E- KMKQKKFDE  | 489   | 1753  |
| >XPA-K221E- KMKQKKFDK | 168   | >XPA-K221E- KMKQKKFDE  | 119   | 49    |
| >XPA-K221E- KMKQKKFDK | 171   | >XPA-K221E- KMKQKKFDE  | 58    | 113   |
| >XPA-K221E- KMKQKKFDK | 544   | >XPA-K221E- KMKQKKFDE  | 220   | 324   |
| >XPA-K221E- KMKQKKFDK | 519   | >XPA-K221E- KMKQKKFDE  | 153   | 366   |
| >XPA-K221E- KMKQKKFDK | 18    | >XPA-K221E- KMKQKKFDE  | 10    | 8     |
| >XPA-K221E- KMKQKKFDK | 117   | >XPA-K221E- KMKQKKFDE  | 19754 | 19637 |
| >XPA-K221E- KMKQKKFDK | 109   | >XPA-K221E- KMKQKKFDE  | 117   | 8     |
| >XPA-K221E- KMKQKKFDK | 26    | >XPA-K221E- KMKQKKFDE  | 9936  | 9910  |
| >XPA-K221E- KMKQKKFDK | 35    | >XPA-K221E- KMKQKKFDE  | 27    | 8     |
| >XPA-K221E- KMKQKKFDK | 32    | >XPA-K221E- KMKQKKFDE  | 2649  | 2617  |
| >XPA-K221E- KMKQKKFDK | 292   | >XPA-K221E- KMKQKKFDE  | 297   | 5     |
| >XPA-K221E- KMKQKKFDK | 418   | >XPA-K221E- KMKQKKFDE  | 19804 | 19386 |
| >XPA-K221E- KMKQKKFDK | 339   | >XPA-K221E- KMKQKKFDE  | 556   | 217   |
| >XPC-G757R- GNVYFLPSV | 1059  | >XPC-G757R- RNVYFLPSM  | 495   | 564   |
| >XPC-G757R- GNVYFLPSV | 3509  | >XPC-G757R- RNVYFLPSM  | 262   | 3247  |
| >XPC-G757R- GNVYFLPSV | 4186  | >XPC-G757R- RNVYFLPSM  | 384   | 3802  |
| >XPC-G757R- GNVYFLPSV | 2301  | >XPC-G757R- RNVYFLPSM  | 276   | 2025  |
| >XPC-G757R- GNVYFLPSV | 24    | >XPC-G757R- RNVYFLPSM  | 20    | 4     |
| >XPC-G757R- FGNVYFL   | 57    | >XPC-G757R- FRNVYFL    | 403   | 346   |



|                        |       |                        |      |       |
|------------------------|-------|------------------------|------|-------|
| >XPC-G757R-FGNVYLFL    | 257   | >XPC-G757R-FRNVYLFL    | 1889 | 1632  |
| >XPC-G757R-FGNVYLFLPSI | 457   | >XPC-G757R-FRNVYLFLPSI | 2899 | 2442  |
| >XPC-G757R-FGNVYLFL    | 5772  | >XPC-G757R-FRNVYLFL    | 287  | 5485  |
| >XPC-G757R-FGNVYLFLPSI | 2351  | >XPC-G757R-FRNVYLFLPSI | 108  | 2243  |
| >XPC-G757R-FGNVYLFL    | 19669 | >XPC-G757R-FRNVYLFL    | 39   | 19630 |
| >XPC-G757R-FGNVYLFLP   | 23200 | >XPC-G757R-FRNVYLFLP   | 433  | 22767 |
| >XPC-G757R-FGNVYLFLPSI | 17664 | >XPC-G757R-FRNVYLFLPSI | 25   | 17639 |
| >XPC-G757R-FGNVYLFL    | 9087  | >XPC-G757R-FRNVYLFL    | 96   | 8991  |
| >XPC-G757R-FGNVYLFLPSI | 12723 | >XPC-G757R-FRNVYLFLPSI | 152  | 12571 |
| >XPC-G757R-FGNVYLFL    | 27228 | >XPC-G757R-FRNVYLFL    | 169  | 27059 |
| >XPC-G757R-FGNVYLFL    | 21320 | >XPC-G757R-FRNVYLFL    | 395  | 20925 |
| >XPC-G757R-FGNVYLFLPSI | 35486 | >XPC-G757R-FRNVYLFLPSI | 438  | 35048 |
| >XPC-G757R-EFGNVYLF    | 33    | >XPC-G757R-EFRNVYLF    | 39   | 6     |
| >XPC-G757R-EFGNVYLF    | 77    | >XPC-G757R-EFRNVYLF    | 174  | 97    |
| >XPC-G757R-EFGNVYLF    | 393   | >XPC-G757R-EFRNVYLF    | 872  | 479   |
| >XPC-G757R-EFGNVYLF    | 30    | >XPC-G757R-EFRNVYLF    | 115  | 85    |
| >XPC-G757R-EFGNVYLF    | 64    | >XPC-G757R-EFRNVYLF    | 281  | 217   |
| >XPC-G757R-EFGNVYLF    | 412   | >XPC-G757R-EFRNVYLF    | 424  | 12    |
| >XPC-G757R-EFGNVYLF    | 159   | >XPC-G757R-EFRNVYLF    | 171  | 12    |
| >XPC-G757R-EFGNVYLF    | 798   | >XPC-G757R-EFRNVYLF    | 310  | 488   |
| >XPC-G757R-NEFGNVYL    | 258   | >XPC-G757R-NEFRNVYL    | 204  | 54    |
| >XPC-G757R-NEFGNVYLF   | 74    | >XPC-G757R-NEFRNVYLF   | 24   | 50    |
| >XPC-G757R-NEFGNVYLFL  | 11    | >XPC-G757R-NEFRNVYLFL  | 7    | 4     |
| >XPC-G757R-NEFGNVYLF   | 354   | >XPC-G757R-NEFRNVYLF   | 278  | 76    |
| >XPC-G757R-NEFGNVYLF   | 579   | >XPC-G757R-NEFRNVYLF   | 127  | 452   |
| >XPC-G757R-NEFGNVYL    | 18    | >XPC-G757R-NEFRNVYL    | 64   | 46    |
| >XPC-G757R-NEFGNVYLF   | 4     | >XPC-G757R-NEFRNVYLF   | 6    | 2     |
| >XPC-G757R-NEFGNVYLFL  | 287   | >XPC-G757R-NEFRNVYLFL  | 914  | 627   |
| >XPC-G757R-NEFGNVYL    | 219   | >XPC-G757R-NEFRNVYL    | 1200 | 981   |
| >XPC-G757R-NEFGNVYLFL  | 186   | >XPC-G757R-NEFRNVYLFL  | 790  | 604   |
| >XPC-G757R-NEFGNVYL    | 20    | >XPC-G757R-NEFRNVYL    | 67   | 47    |
| >XPC-G757R-NEFGNVYLF   | 145   | >XPC-G757R-NEFRNVYLF   | 571  | 426   |
| >XPC-G757R-NEFGNVYLFL  | 608   | >XPC-G757R-NEFRNVYLFL  | 417  | 191   |
| >XPC-G757R-NEFGNVYL    | 79    | >XPC-G757R-NEFRNVYL    | 145  | 66    |
| >XPC-G757R-NEFGNVYLF   | 103   | >XPC-G757R-NEFRNVYLF   | 167  | 64    |
| >XPC-G757R-NEFGNVYLFL  | 63    | >XPC-G757R-NEFRNVYLFL  | 78   | 15    |
| >XPC-G757R-NEFGNVYLF   | 304   | >XPC-G757R-NEFRNVYLF   | 210  | 94    |
| >XPC-G757R-NEFGNVYLFL  | 146   | >XPC-G757R-NEFRNVYLFL  | 225  | 79    |
| >XPC-G757R-NEFGNVYL    | 70    | >XPC-G757R-NEFRNVYL    | 86   | 16    |
| >XPC-G757R-NEFGNVYLF   | 16    | >XPC-G757R-NEFRNVYLF   | 17   | 1     |
| >XPC-G757R-NEFGNVYLFL  | 96    | >XPC-G757R-NEFRNVYLFL  | 126  | 30    |
| >XPC-G757R-NEFGNVYLF   | 83    | >XPC-G757R-NEFRNVYLF   | 51   | 32    |
| >XPC-G757R-NEFGNVYLFL  | 35    | >XPC-G757R-NEFRNVYLFL  | 30   | 5     |

|                       |       |                       |       |       |
|-----------------------|-------|-----------------------|-------|-------|
| >XPC-G757R-RNEFGNVY   | 481   | >XPC-G757R-RNEFRNVY   | 723   | 242   |
| >XPC-G757R-RNEFGNVY   | 61    | >XPC-G757R-RNEFRNVY   | 141   | 80    |
| >XPC-G757R-RNEFGNVYLF | 375   | >XPC-G757R-RNEFRNVYLF | 324   | 51    |
| >XPC-G757R-RNEFGNVYLF | 296   | >XPC-G757R-RNEFRNVYLF | 161   | 135   |
| >XPC-G757R-PRNEFGNVY  | 225   | >XPC-G757R-PRNEFRNVY  | 389   | 164   |
| >XPC-G757R-PRNEFGNVYL | 291   | >XPC-G757R-PRNEFRNVYL | 324   | 33    |
| >XPC-G757R-VPRNEFGNV\ | 183   | >XPC-G757R-VPRNEFRNV\ | 581   | 398   |
| >XPC-G757R-VPRNEFGNV  | 173   | >XPC-G757R-VPRNEFRNV  | 133   | 40    |
| >XPC-G757R-VPRNEFGNV\ | 42    | >XPC-G757R-VPRNEFRNV\ | 31    | 11    |
| >XPC-G757R-VPRNEFGNV\ | 2606  | >XPC-G757R-VPRNEFRNV\ | 374   | 2232  |
| >XPC-G757R-VPRNEFGNV\ | 398   | >XPC-G757R-VPRNEFRNV\ | 361   | 37    |
| >XPC-G757R-VPRNEFGNV\ | 196   | >XPC-G757R-VPRNEFRNV\ | 134   | 62    |
| >XPC-G757R-KVPRNEFGN\ | 225   | >XPC-G757R-KVPRNEFRN\ | 449   | 224   |
| >XPC-G757R-KVPRNEFGN\ | 463   | >XPC-G757R-KVPRNEFRN\ | 629   | 166   |
| >XPC-G757R-KVPRNEFGN\ | 498   | >XPC-G757R-KVPRNEFRN\ | 558   | 60    |
| >XPC-G757R-KVPRNEFGN\ | 242   | >XPC-G757R-KVPRNEFRN\ | 325   | 83    |
| >XPC-G757R-KVPRNEFGN\ | 139   | >XPC-G757R-KVPRNEFRN\ | 92    | 47    |
| >XPC-G757R-KVPRNEFG   | 18257 | >XPC-G757R-KVPRNEFR   | 31    | 18226 |
| >XPC-G757R-KVPRNEFG   | 40456 | >XPC-G757R-KVPRNEFR   | 292   | 40164 |
| >XPC-G757R-KVPRNEFG   | 30920 | >XPC-G757R-KVPRNEFR   | 66    | 30854 |
| >XPC-K387T-NKGGRKKR   | 13013 | >XPC-K387T-NTGGRKKR   | 255   | 12758 |
| >XPC-K387T-RNKGGRKK   | 26    | >XPC-K387T-RNTGGRKK   | 2353  | 2327  |
| >XPC-K387T-RNKGGRKKR\ | 13    | >XPC-K387T-RNTGGRKKR\ | 872   | 859   |
| >XPC-K387T-RNKGGRKKR  | 225   | >XPC-K387T-RNTGGRKKR  | 1825  | 1600  |
| >XPC-K387T-KRNKGGRKKI | 409   | >XPC-K387T-KRNTGGRKKI | 387   | 22    |
| >XPC-K387T-KRNKGGRK   | 202   | >XPC-K387T-KRNTGGRK   | 201   | 1     |
| >XPC-K387T-KRNKGGRKK  | 134   | >XPC-K387T-KRNTGGRKK  | 141   | 7     |
| >XPC-K387T-KRNKGGRKKI | 280   | >XPC-K387T-KRNTGGRKKI | 227   | 53    |
| >XPC-K387T-KRNKGGRK   | 581   | >XPC-K387T-KRNTGGRK   | 379   | 202   |
| >XPC-K387T-KGKRNTGGR  | 1320  | >XPC-K387T-KGKRNTGGR  | 365   | 955   |
| >XPC-K387T-KGKRNTGGR  | 13    | >XPC-K387T-KGKRNTGGR  | 8     | 5     |
| >XPC-K387T-KGKRNTGGR  | 11    | >XPC-K387T-KGKRNTGGR  | 9     | 2     |
| >XPC-K387T-KGKRNTGGR  | 117   | >XPC-K387T-KGKRNTGGR  | 195   | 78    |
| >XPC-K387T-KGKRNTGGR  | 547   | >XPC-K387T-KGKRNTGGR  | 201   | 346   |
| >XPC-K387T-SAKGKRNK   | 15    | >XPC-K387T-SAKGKRNT   | 4983  | 4968  |
| >XPC-K387T-SAKGKRNTG\ | 84    | >XPC-K387T-SAKGKRNTG\ | 110   | 26    |
| >XPC-K387T-SAKGKRNTG\ | 621   | >XPC-K387T-SAKGKRNTG\ | 337   | 284   |
| >XPC-Q742E-YQPPVAVDG  | 3766  | >XPC-Q742E-YEPPVAVDG\ | 133   | 3633  |
| >XPC-Q742E-YQPPVAVDG  | 166   | >XPC-Q742E-YEPPVAVDG\ | 11271 | 11105 |
| >XPC-Q742E-YQPPVAVDG  | 29    | >XPC-Q742E-YEPPVAVDG\ | 2194  | 2165  |
| >XPC-Q742E-YQPPVAVDG  | 53    | >XPC-Q742E-YEPPVAVDG\ | 2305  | 2252  |
| >XPC-Q742E-YQPPVAVDG  | 65    | >XPC-Q742E-YEPPVAVDG\ | 2680  | 2615  |
| >XPC-Q742E-YQPPVAVDG  | 433   | >XPC-Q742E-YEPPVAVDG\ | 5009  | 4576  |

|                        |      |                        |      |      |
|------------------------|------|------------------------|------|------|
| >XPC-Q742E-YQPPVAVDG   | 9463 | >XPC-Q742E-YEPPVAVDG   | 65   | 9398 |
| >XPC-Q742E-EEYQPPVAV   | 1736 | >XPC-Q742E-EEYEPVAV    | 230  | 1506 |
| >XPC-Q742E-EEYQPPVAV   | 2038 | >XPC-Q742E-EEYEPVAV    | 380  | 1658 |
| >XPC-Q742E-EEYQPPVAV   | 453  | >XPC-Q742E-EEYEPVAV    | 51   | 402  |
| >XPC-Q742E-EEYQPPVAV   | 455  | >XPC-Q742E-EEYEPVAV    | 240  | 215  |
| >XPC-Q742E-EEYQPPVA    | 13   | >XPC-Q742E-EEYEPVA     | 16   | 3    |
| >XPC-Q742E-EEYQPPVAV   | 28   | >XPC-Q742E-EEYEPVAV    | 37   | 9    |
| >XPC-Q742E-EEYQPPVAV   | 363  | >XPC-Q742E-EEYEPVAVD   | 547  | 184  |
| >XPC-Q742E-EEYQPPVAV   | 61   | >XPC-Q742E-EEYEPVAV    | 49   | 12   |
| >XPC-Q742E-TEEYQPPV    | 256  | >XPC-Q742E-TEEYEPV     | 443  | 187  |
| >XPC-Q742E-TEEYQPPV    | 435  | >XPC-Q742E-TEEYEPV     | 499  | 64   |
| >XPC-Q742E-TEEYQPPVAV  | 186  | >XPC-Q742E-TEEYEPVAV   | 184  | 2    |
| >XPC-Q742E-TEEYQPPV    | 176  | >XPC-Q742E-TEEYEPV     | 192  | 16   |
| >XPC-Q742E-TEEYQPPVA   | 89   | >XPC-Q742E-TEEYEPVA    | 74   | 15   |
| >XPC-Q742E-TEEYQPPVAV  | 186  | >XPC-Q742E-TEEYEPVAV   | 236  | 50   |
| >XPC-Q742E-TEEYQPPVAV  | 61   | >XPC-Q742E-TEEYEPVAV   | 56   | 5    |
| >XPC-Q742E-QTEEYQPPV   | 161  | >XPC-Q742E-QTEEYEPV    | 240  | 79   |
| >XPC-Q742E-QTEEYQPPV   | 447  | >XPC-Q742E-QTEEYEPV    | 698  | 251  |
| >XPC-Q742E-QTEEYQPPVA  | 393  | >XPC-Q742E-QTEEYEPVA   | 356  | 37   |
| >XPC-Q742E-QTEEYQPPV   | 269  | >XPC-Q742E-QTEEYEPV    | 1232 | 963  |
| >XPC-Q742E-QTEEYQPPVA  | 158  | >XPC-Q742E-QTEEYEPVA   | 264  | 106  |
| >XPC-Q742E-QTEEYQPPV   | 7    | >XPC-Q742E-QTEEYEPV    | 21   | 14   |
| >XPC-Q742E-QTEEYQPPVA  | 23   | >XPC-Q742E-QTEEYEPVA   | 34   | 11   |
| >XPC-Q742E-WQTEEYQPP   | 420  | >XPC-Q742E-WQTEEYEPV   | 208  | 212  |
| >XPC-Q742E-WQTEEYQPP   | 206  | >XPC-Q742E-WQTEEYEPV   | 134  | 72   |
| >XPC-Q742E-WQTEEYQPP   | 215  | >XPC-Q742E-WQTEEYEPV   | 173  | 42   |
| >XPC-Q742E-WQTEEYQPP   | 36   | >XPC-Q742E-WQTEEYEPV   | 44   | 8    |
| >XPC-Q742E-WQTEEYQPP   | 67   | >XPC-Q742E-WQTEEYEPV   | 101  | 34   |
| >XPC-Q742E-WQTEEYQPP   | 33   | >XPC-Q742E-WQTEEYEPV   | 39   | 6    |
| >XPC-Q742E-WQTEEYQPP   | 49   | >XPC-Q742E-WQTEEYEPV   | 102  | 53   |
| >XPC-Q742E-WQTEEYQPP   | 106  | >XPC-Q742E-WQTEEYEPV   | 176  | 70   |
| >XPC-Q742E-WQTEEYQPP   | 276  | >XPC-Q742E-WQTEEYEPV   | 488  | 212  |
| >XPC-Q742E-YWQTEEYQ    | 497  | >XPC-Q742E-YWQTEEYE    | 614  | 117  |
| >XPC-Q742E-YWQTEEYQP   | 495  | >XPC-Q742E-YWQTEEYEP   | 487  | 8    |
| >ZBTB16-A1E SDDNDTEATI | 2914 | >ZBTB16-A1E SDDNDTEATI | 91   | 2823 |
| >ZBTB16-A1E EATMADGGA  | 358  | >ZBTB16-A1E EATMVDGGA  | 104  | 254  |
| >ZBTB16-A1E TEATMADGG  | 426  | >ZBTB16-A1E TEATMVDGG  | 389  | 37   |
| >ZBTB16-A1E NDTEATMA   | 2946 | >ZBTB16-A1E NDTEATMV   | 81   | 2865 |
| >ZBTB16-A1E DDNDTEATM  | 5457 | >ZBTB16-A1E DDNDTEATM  | 198  | 5259 |
| >ZBTB16-E51 EVHAGVRSYI | 2337 | >ZBTB16-E51 KVHAGVRSYI | 211  | 2126 |
| >ZBTB16-E51 EVHAGVRSYI | 1316 | >ZBTB16-E51 KVHAGVRSYI | 176  | 1140 |
| >ZBTB16-E51 EVHAGVRSYI | 956  | >ZBTB16-E51 KVHAGVRSYI | 168  | 788  |
| >ZBTB16-E51 EVHAGVRSYI | 2886 | >ZBTB16-E51 KVHAGVRSYI | 222  | 2664 |

|                       |       |                       |       |       |
|-----------------------|-------|-----------------------|-------|-------|
| >ZBTB16-E51EVHAGVRSY  | 11575 | >ZBTB16-E51KVHAGVRSY  | 256   | 11319 |
| >ZBTB16-E51EVHAGVRSY  | 36    | >ZBTB16-E51KVHAGVRSY  | 1330  | 1294  |
| >ZBTB16-E51EVHAGVRSY  | 10    | >ZBTB16-E51KVHAGVRSY  | 7762  | 7752  |
| >ZBTB16-E51EVHAGVRSY  | 3     | >ZBTB16-E51KVHAGVRSY  | 83    | 80    |
| >ZBTB16-E51EVHAGVRSYI | 210   | >ZBTB16-E51KVHAGVRSYI | 7276  | 7066  |
| >ZBTB16-E51EVHAGVRSY  | 6     | >ZBTB16-E51KVHAGVRSY  | 208   | 202   |
| >ZBTB16-E51EVHAGVRS   | 14929 | >ZBTB16-E51KVHAGVRS   | 119   | 14810 |
| >ZBTB16-E51EVHAGVRSY  | 10288 | >ZBTB16-E51KVHAGVRSY  | 18    | 10270 |
| >ZBTB16-E51EVHAGVRSYI | 3202  | >ZBTB16-E51KVHAGVRSYI | 5     | 3197  |
| >ZBTB16-E51EVHAGVRSYI | 15386 | >ZBTB16-E51KVHAGVRSYI | 238   | 15148 |
| >ZBTB16-E51EVHAGVRSY  | 1084  | >ZBTB16-E51KVHAGVRSY  | 61    | 1023  |
| >ZBTB16-E51EVHAGVRSY  | 8657  | >ZBTB16-E51KVHAGVRSY  | 174   | 8483  |
| >ZBTB16-E51EVHAGVRSYI | 8435  | >ZBTB16-E51KVHAGVRSYI | 339   | 8096  |
| >ZBTB16-E51EVHAGVRSYI | 23    | >ZBTB16-E51KVHAGVRSYI | 445   | 422   |
| >ZBTB16-E51EVHAGVRSYI | 206   | >ZBTB16-E51KVHAGVRSYI | 11634 | 11428 |
| >ZBTB16-E51EVHAGVRSY  | 3735  | >ZBTB16-E51KVHAGVRSY  | 78    | 3657  |
| >ZBTB16-E51EVHAGVRSY  | 172   | >ZBTB16-E51KVHAGVRSY  | 67    | 105   |
| >ZBTB16-E51EVHAGVRSY  | 212   | >ZBTB16-E51KVHAGVRSY  | 348   | 136   |
| >ZBTB16-E51EVHAGVRSY  | 3138  | >ZBTB16-E51KVHAGVRSY  | 284   | 2854  |
| >ZBTB16-E51EVHAGVRSY  | 702   | >ZBTB16-E51KVHAGVRSY  | 20    | 682   |
| >ZBTB16-E51EVHAGVRSYI | 498   | >ZBTB16-E51KVHAGVRSYI | 307   | 191   |
| >ZBTB16-E51MEVHAGVR   | 92    | >ZBTB16-E51MKVHAGVR   | 23416 | 23324 |
| >ZBTB16-E51MEVHAGVRS  | 22    | >ZBTB16-E51MKVHAGVRS  | 1116  | 1094  |
| >ZBTB16-E51MEVHAGVRS  | 103   | >ZBTB16-E51MKVHAGVRS  | 788   | 685   |
| >ZBTB16-E51MEVHAGVR   | 5743  | >ZBTB16-E51MKVHAGVR   | 272   | 5471  |
| >ZBTB16-E51MEVHAGVRS  | 10914 | >ZBTB16-E51MKVHAGVRS  | 468   | 10446 |
| >ZBTB16-E51MEVHAGVRS  | 41    | >ZBTB16-E51MKVHAGVRS  | 3     | 38    |
| >ZBTB16-E51MEVHAGVRS  | 511   | >ZBTB16-E51MKVHAGVRS  | 18    | 493   |
| >ZBTB16-E51MEVHAGVRS  | 217   | >ZBTB16-E51MKVHAGVRS  | 16448 | 16231 |
| >ZBTB16-E51MEVHAGVRS  | 30    | >ZBTB16-E51MKVHAGVRS  | 13988 | 13958 |
| >ZBTB16-E51MEVHAGVRS  | 423   | >ZBTB16-E51MKVHAGVRS  | 30414 | 29991 |
| >ZBTB16-E51MEVHAGVRS  | 80    | >ZBTB16-E51MKVHAGVRS  | 10812 | 10732 |
| >ZBTB16-E51MEVHAGVRS  | 283   | >ZBTB16-E51MKVHAGVRS  | 19449 | 19166 |
| >ZBTB16-E51MEVHAGVRS  | 135   | >ZBTB16-E51MKVHAGVRS  | 21343 | 21208 |
| >ZBTB16-E51MEVHAGVRS  | 13    | >ZBTB16-E51MKVHAGVRS  | 9003  | 8990  |
| >ZBTB16-E51QAQSALQQH  | 25973 | >ZBTB16-E51QAQSALQQH  | 320   | 25653 |
| >ZBTB16-E51QAQSALQQH  | 22062 | >ZBTB16-E51QAQSALQQH  | 455   | 21607 |
| >ZBTB16-E51HMEVHAGV   | 178   | >ZBTB16-E51HMKVHAGV   | 227   | 49    |
| >ZBTB16-E51HMEVHAGV   | 140   | >ZBTB16-E51HMKVHAGV   | 9     | 131   |
| >ZBTB16-E51HMEVHAGV   | 54    | >ZBTB16-E51HMKVHAGV   | 101   | 47    |
| >ZBTB16-E51HMEVHAGV   | 28    | >ZBTB16-E51HMKVHAGV   | 58    | 30    |
| >ZBTB16-E51HMEVHAGV   | 11    | >ZBTB16-E51HMKVHAGV   | 11    | 0     |
| >ZBTB16-E51HMEVHAGVF  | 1144  | >ZBTB16-E51HMKVHAGVF  | 427   | 717   |

|                        |       |                        |      |       |
|------------------------|-------|------------------------|------|-------|
| >ZBTB16-E51HMEVHAGVF   | 322   | >ZBTB16-E51HMKVHAGVF   | 245  | 77    |
| >ZBTB16-E51HMEVHAGV    | 9007  | >ZBTB16-E51HMKVHAGV    | 116  | 8891  |
| >ZBTB16-E51HMEVHAGVF   | 12120 | >ZBTB16-E51HMKVHAGVF   | 271  | 11849 |
| >ZBTB16-E51HMEVHAGVF   | 143   | >ZBTB16-E51HMKVHAGVF   | 73   | 70    |
| >ZBTB16-E51HMEVHAGVF   | 163   | >ZBTB16-E51HMKVHAGVF   | 14   | 149   |
| >ZBTB16-E51HMEVHAGVF   | 2524  | >ZBTB16-E51HMKVHAGVF   | 327  | 2197  |
| >ZBTB16-E51HMEVHAGVF   | 148   | >ZBTB16-E51HMKVHAGVF   | 37   | 111   |
| >ZBTB16-E51HMEVHAGVF   | 53    | >ZBTB16-E51HMKVHAGVF   | 32   | 21    |
| >ZBTB16-E51HMEVHAGVF   | 742   | >ZBTB16-E51HMKVHAGVF   | 24   | 718   |
| >ZBTB16-E51HMEVHAGVF   | 980   | >ZBTB16-E51HMKVHAGVF   | 362  | 618   |
| >ZBTB16-E51HMEVHAGVF   | 279   | >ZBTB16-E51HMKVHAGVF   | 1000 | 721   |
| >ZBTB16-E51HMEVHAGVF   | 289   | >ZBTB16-E51HMKVHAGVF   | 208  | 81    |
| >ZBTB16-E51QHMEVHAGV   | 190   | >ZBTB16-E51QHMKVHAGV   | 688  | 498   |
| >ZBTB16-E51QQHMEVHAGV  | 366   | >ZBTB16-E51QQHMKVHAGV  | 457  | 91    |
| >ZBTB16-E51QQHMEVHAGV  | 189   | >ZBTB16-E51QQHMKVHAGV  | 265  | 76    |
| >ZBTB16-E51QQHMEVHAGV  | 1285  | >ZBTB16-E51QQHMKVHAGV  | 347  | 938   |
| >ZBTB16-E51QQHMEVHAGV  | 343   | >ZBTB16-E51QQHMKVHAGV  | 598  | 255   |
| >ZBTB16-E51LQQHMEVHAGV | 252   | >ZBTB16-E51LQQHMKVHAGV | 332  | 80    |
| >ZBTB16-E51LQQHMEVHAGV | 56    | >ZBTB16-E51LQQHMKVHAGV | 85   | 29    |
| >ZBTB16-E51LQQHMEVHAGV | 362   | >ZBTB16-E51LQQHMKVHAGV | 534  | 172   |
| >ZBTB16-E51LQQHMEVHAGV | 205   | >ZBTB16-E51LQQHMKVHAGV | 473  | 268   |
| >ZBTB16-E51LQQHMEVHAGV | 374   | >ZBTB16-E51LQQHMKVHAGV | 595  | 221   |
| >ZBTB16-E51LQQHMEVHAGV | 439   | >ZBTB16-E51LQQHMKVHAGV | 325  | 114   |
| >ZBTB16-E51LQQHMEVHAGV | 510   | >ZBTB16-E51LQQHMKVHAGV | 454  | 56    |
| >ZBTB16-E51LQQHMEVHAGV | 507   | >ZBTB16-E51LQQHMKVHAGV | 424  | 83    |
| >ZBTB16-E51LQQHMEVHAGV | 475   | >ZBTB16-E51LQQHMKVHAGV | 533  | 58    |
| >ZBTB16-E51ALQQHMEV    | 48    | >ZBTB16-E51ALQQHMKV    | 212  | 164   |
| >ZBTB16-E51ALQQHMEV    | 24    | >ZBTB16-E51ALQQHMKV    | 94   | 70    |
| >ZBTB16-E51ALQQHMEV    | 10    | >ZBTB16-E51ALQQHMKV    | 15   | 5     |
| >ZBTB16-E51ALQQHMEV    | 149   | >ZBTB16-E51ALQQHMKV    | 856  | 707   |
| >ZBTB16-E51ALQQHMEV    | 4     | >ZBTB16-E51ALQQHMKV    | 8    | 4     |
| >ZBTB16-E51ALQQHMEV    | 469   | >ZBTB16-E51ALQQHMKV    | 856  | 387   |
| >ZBTB16-E51ALQQHMEV    | 14    | >ZBTB16-E51ALQQHMKV    | 34   | 20    |
| >ZBTB16-E51ALQQHMEV    | 16    | >ZBTB16-E51ALQQHMKV    | 33   | 17    |
| >ZBTB16-E51ALQQHMEV    | 140   | >ZBTB16-E51ALQQHMKV    | 338  | 198   |
| >ZBTB16-E51ALQQHMEV    | 2     | >ZBTB16-E51ALQQHMKV    | 2    | 0     |
| >ZBTB16-E51ALQQHMEV    | 23    | >ZBTB16-E51ALQQHMKV    | 33   | 10    |
| >ZBTB16-E51SALQQHMEV   | 74    | >ZBTB16-E51SALQQHMKV   | 219  | 145   |
| >ZBTB16-E51SALQQHMEV   | 135   | >ZBTB16-E51SALQQHMKV   | 369  | 234   |
| >ZBTB16-E51SALQQHMEV   | 39    | >ZBTB16-E51SALQQHMKV   | 105  | 66    |
| >ZBTB16-E51SALQQHME    | 24527 | >ZBTB16-E51SALQQHMK    | 44   | 24483 |
| >ZBTB16-E51SALQQHME    | 15175 | >ZBTB16-E51SALQQHMK    | 174  | 15001 |
| >ZBTB16-E51SALQQHMEV   | 31    | >ZBTB16-E51SALQQHMKV   | 48   | 17    |

|                       |       |                      |       |       |
|-----------------------|-------|----------------------|-------|-------|
| >ZBTB16-E51SALQQHME   | 7471  | >ZBTB16-E51SALQQHMK  | 124   | 7347  |
| >ZBTB16-E51QSALQQHME  | 24505 | >ZBTB16-E51QSALQQHMK | 89    | 24416 |
| >ZBTB16-E51QSALQQHME  | 11309 | >ZBTB16-E51QSALQQHMK | 90    | 11219 |
| >ZBTB16-E51QSALQQHME  | 490   | >ZBTB16-E51QSALQQHMK | 295   | 195   |
| >ZBTB16-E51QSALQQHME  | 6581  | >ZBTB16-E51QSALQQHMK | 108   | 6473  |
| >ZBTB16-E51AQSALQQHM  | 80    | >ZBTB16-E51AQSALQQHM | 234   | 154   |
| >ZBTB16-E51AQSALQQHM  | 69    | >ZBTB16-E51AQSALQQHM | 143   | 74    |
| >ZBTB16-E51AQSALQQHM  | 31    | >ZBTB16-E51AQSALQQHM | 134   | 103   |
| >ZBTB16-E51AQSALQQHM  | 287   | >ZBTB16-E51AQSALQQHM | 607   | 320   |
| >ZBTB16-E51AQSALQQHM  | 259   | >ZBTB16-E51AQSALQQHM | 515   | 256   |
| >ZBTB16-E51AQSALQQHM  | 140   | >ZBTB16-E51AQSALQQHM | 333   | 193   |
| >ZBTB16-E51AQSALQQHM  | 25980 | >ZBTB16-E51AQSALQQHM | 220   | 25760 |
| >ZBTB16-E51AQSALQQHM  | 32428 | >ZBTB16-E51AQSALQQHM | 58    | 32370 |
| >ZBTB16-E51AQSALQQHM  | 98    | >ZBTB16-E51AQSALQQHM | 201   | 103   |
| >ZBTB16-L42LHSGMKTY   | 224   | >ZBTB16-L42QHSGMKTY  | 9179  | 8955  |
| >ZBTB16-L42KLHSGMKT   | 302   | >ZBTB16-L42KQHSGMKT  | 5352  | 5050  |
| >ZBTB16-L42KLHSGMKTYC | 86    | >ZBTB16-L42KQHSGMKTY | 4411  | 4325  |
| >ZBTB16-L42KLHSGMKTYC | 258   | >ZBTB16-L42KQHSGMKTY | 5772  | 5514  |
| >ZBTB16-L42KLHSGMKT   | 346   | >ZBTB16-L42KQHSGMKT  | 32016 | 31670 |
| >ZBTB16-L42KLHSGMKTYC | 147   | >ZBTB16-L42KQHSGMKTY | 27062 | 26915 |
| >ZBTB16-L42KLHSGMKTY  | 273   | >ZBTB16-L42KQHSGMKTY | 4492  | 4219  |
| >ZBTB16-L42KLHSGMKTY  | 305   | >ZBTB16-L42KQHSGMKTY | 1130  | 825   |
| >ZBTB16-L42KLHSGMKTY  | 365   | >ZBTB16-L42KQHSGMKTY | 3925  | 3560  |
| >ZBTB16-L42KLHSGMKTY  | 29    | >ZBTB16-L42KQHSGMKTY | 36    | 7     |
| >ZBTB16-L42KLHSGMKTY  | 75    | >ZBTB16-L42KQHSGMKTY | 1350  | 1275  |
| >ZBTB16-L42KLHSGMKTY  | 93    | >ZBTB16-L42KQHSGMKTY | 52    | 41    |
| >ZBTB16-L42KLHSGMKTY  | 79    | >ZBTB16-L42KQHSGMKTY | 126   | 47    |
| >ZBTB16-L42KLHSGMKTY  | 40    | >ZBTB16-L42KQHSGMKTY | 4     | 36    |
| >ZBTB16-L42KLHSGMKTY  | 16    | >ZBTB16-L42KQHSGMKTY | 114   | 98    |
| >ZBTB16-L42KLHSGMKTY  | 163   | >ZBTB16-L42KQHSGMKTY | 971   | 808   |
| >ZBTB16-L42RKLHSGMK   | 306   | >ZBTB16-L42RKQHSGMK  | 1227  | 921   |
| >ZBTB16-L42RKLHSGMKT  | 609   | >ZBTB16-L42RKQHSGMKT | 333   | 276   |
| >ZBTB16-L42RKLHSGMK   | 114   | >ZBTB16-L42RKQHSGMK  | 344   | 230   |
| >ZBTB16-L42RKLHSGMKT  | 50    | >ZBTB16-L42RKQHSGMKT | 156   | 106   |
| >ZBTB16-L42RKLHSGMKT  | 2     | >ZBTB16-L42RKQHSGMKT | 3     | 1     |
| >ZBTB16-L42RKLHSGMKT  | 428   | >ZBTB16-L42RKQHSGMKT | 1168  | 740   |
| >ZBTB16-L42RKLHSGMKT  | 211   | >ZBTB16-L42RKQHSGMKT | 1154  | 943   |
| >ZBTB16-L42HRKLHSGMK  | 103   | >ZBTB16-L42HRKQHSGMK | 242   | 139   |
| >ZBTB16-L42HRKLHSGMK  | 1307  | >ZBTB16-L42HRKQHSGMK | 475   | 832   |
| >ZBTB16-L42HRKLHSGMK  | 270   | >ZBTB16-L42HRKQHSGMK | 166   | 104   |
| >ZBTB16-L42HRKLHSGM   | 135   | >ZBTB16-L42HRKQHSGM  | 163   | 28    |
| >ZBTB16-L42HRKLHSGMK  | 156   | >ZBTB16-L42HRKQHSGMK | 155   | 1     |
| >ZBTB16-L42HRKLHSGMK  | 197   | >ZBTB16-L42HRKQHSGMK | 199   | 2     |

|                        |      |                       |      |      |
|------------------------|------|-----------------------|------|------|
| >ZBTB16-L42 HRKLHSGMK  | 851  | >ZBTB16-L42 HRKQHSGMK | 451  | 400  |
| >ZBTB16-L42 QHRKLHSGM  | 346  | >ZBTB16-L42 QHRKQHSGM | 207  | 139  |
| >ZBTB16-L42 QHRKLHSGM  | 340  | >ZBTB16-L42 QHRKQHSGM | 374  | 34   |
| >ZBTB16-L42 QHRKLHSGM  | 227  | >ZBTB16-L42 QHRKQHSGM | 1057 | 830  |
| >ZBTB16-L42 EQHRKLHSGI | 292  | >ZBTB16-L42 EQHRKQHSG | 833  | 541  |
| >ZBTB16-L42 EQHRKLHSGI | 43   | >ZBTB16-L42 EQHRKQHSG | 110  | 67   |
| >ZBTB16-M6 MKGHKPEEI   | 350  | >ZBTB16-M6 IKGHKPEEI  | 420  | 70   |
| >ZBTB16-M6 HMKGHKPEE   | 411  | >ZBTB16-M6 HIKGHKPEEI | 1705 | 1294 |
| >ZBTB16-M6 HMKGHKPEE   | 377  | >ZBTB16-M6 HIKGHKPEEI | 8239 | 7862 |
| >ZBTB16-M6 HMKGHKPEE   | 146  | >ZBTB16-M6 HIKGHKPEEI | 4483 | 4337 |
| >ZBTB16-M6 HMKGHKPEE   | 490  | >ZBTB16-M6 HIKGHKPEEI | 355  | 135  |
| >ZBTB16-M6 CPSLSSMQK†  | 361  | >ZBTB16-M6 CPSLSSMQK† | 7129 | 6768 |
| >ZBTB16-M6 CPSLSSMQK†  | 3357 | >ZBTB16-M6 CPSLSSMQK† | 365  | 2992 |
| >ZBTB16-M6 CPSLSSMQK†  | 408  | >ZBTB16-M6 CPSLSSMQK† | 258  | 150  |
| >ZBTB16-M6 KHMKGHKPE   | 289  | >ZBTB16-M6 KHIKGHKPEE | 545  | 256  |
| >ZBTB16-M6 MQKHMKGH    | 18   | >ZBTB16-M6 MQKHIKGHK  | 21   | 3    |
| >ZBTB16-M6 MQKHMKGH    | 45   | >ZBTB16-M6 MQKHIKGHK  | 41   | 4    |
| >ZBTB16-M6 SMQKHMKG†   | 110  | >ZBTB16-M6 SMQKHIKGH† | 113  | 3    |
| >ZBTB16-M6 SMQKHMKG†   | 325  | >ZBTB16-M6 SMQKHIKGH† | 282  | 43   |
| >ZBTB16-M6 SMQKHMKG†   | 547  | >ZBTB16-M6 SMQKHIKGH† | 379  | 168  |
| >ZBTB16-M6 SSMQKHKM    | 381  | >ZBTB16-M6 SSMQKHIK   | 723  | 342  |
| >ZBTB16-M6 SSMQKHKM†   | 230  | >ZBTB16-M6 SSMQKHIK†  | 252  | 22   |
| >ZBTB16-M6 SSMQKHKM    | 9    | >ZBTB16-M6 SSMQKHIK   | 12   | 3    |
| >ZBTB16-M6 SSMQKHKM†   | 19   | >ZBTB16-M6 SSMQKHIK†  | 22   | 3    |
| >ZBTB16-M6 SSMQKHKM    | 167  | >ZBTB16-M6 SSMQKHIK   | 139  | 28   |
| >ZBTB16-M6 SSMQKHKM†   | 87   | >ZBTB16-M6 SSMQKHIK†  | 101  | 14   |
| >ZBTB16-M6 SSMQKHKM    | 459  | >ZBTB16-M6 SSMQKHIK   | 629  | 170  |
| >ZBTB16-M6 SSMQKHKM†   | 519  | >ZBTB16-M6 SSMQKHIK†  | 454  | 65   |
| >ZBTB16-M6 SSMQKHKM    | 81   | >ZBTB16-M6 SSMQKHIK   | 207  | 126  |
| >ZBTB16-M6 SSMQKHKM†   | 331  | >ZBTB16-M6 SSMQKHIK†  | 310  | 21   |
| >ZBTB16-M6 SSMQKHKM†   | 317  | >ZBTB16-M6 SSMQKHIK†  | 666  | 349  |
| >ZBTB16-M6 SSMQKHKM    | 57   | >ZBTB16-M6 SSMQKHIK   | 61   | 4    |
| >ZBTB16-M6 SSMQKHKM†   | 87   | >ZBTB16-M6 SSMQKHIK†  | 118  | 31   |
| >ZBTB16-M6 LSSMQKHKM   | 48   | >ZBTB16-M6 LSSMQKHIK  | 88   | 40   |
| >ZBTB16-M6 LSSMQKHKM   | 597  | >ZBTB16-M6 LSSMQKHIK  | 442  | 155  |
| >ZBTB16-M6 LSSMQKHKM   | 194  | >ZBTB16-M6 LSSMQKHIK  | 563  | 369  |
| >ZBTB16-M6 LSSMQKHM    | 55   | >ZBTB16-M6 LSSMQKHI   | 383  | 328  |
| >ZBTB16-M6 LSSMQKHM    | 442  | >ZBTB16-M6 LSSMQKHI   | 692  | 250  |
| >ZBTB16-M6 LSSMQKHM    | 380  | >ZBTB16-M6 LSSMQKHI   | 3411 | 3031 |
| >ZBTB16-M6 LSSMQKHM†   | 347  | >ZBTB16-M6 LSSMQKHIK  | 381  | 34   |
| >ZBTB16-M6 LSSMQKHM    | 1774 | >ZBTB16-M6 LSSMQKHI   | 53   | 1721 |
| >ZBTB16-M6 SLSSMQKHM   | 593  | >ZBTB16-M6 SLSSMQKHI  | 141  | 452  |
| >ZBTB16-M6 SLSSMQKHM   | 1759 | >ZBTB16-M6 SLSSMQKHI  | 100  | 1659 |

|                       |      |                       |      |      |
|-----------------------|------|-----------------------|------|------|
| >ZBTB16-M6 SLSSMQKHM  | 2518 | >ZBTB16-M6 SLSSMQKHI  | 324  | 2194 |
| >ZBTB16-M6 SLSSMQKHM  | 1569 | >ZBTB16-M6 SLSSMQKHI  | 121  | 1448 |
| >ZBTB16-M6 SLSSMQKHM  | 254  | >ZBTB16-M6 SLSSMQKHI  | 33   | 221  |
| >ZBTB16-M6 SLSSMQKHM  | 36   | >ZBTB16-M6 SLSSMQKHIK | 69   | 33   |
| >ZBTB16-M6 SLSSMQKHM  | 23   | >ZBTB16-M6 SLSSMQKHIK | 38   | 15   |
| >ZBTB16-M6 SLSSMQKHM  | 392  | >ZBTB16-M6 SLSSMQKHIK | 912  | 520  |
| >ZBTB16-M6 SLSSMQKHM  | 241  | >ZBTB16-M6 SLSSMQKHIK | 326  | 85   |
| >ZBTB16-M6 PSLSSMQKHI | 376  | >ZBTB16-M6 PSLSSMQKHI | 7301 | 6925 |
| >ZMYM2-C4!CQSCVSEYKC  | 3717 | >ZMYM2-C4!FQSCVSEYKQ  | 139  | 3578 |
| >ZMYM2-C4!CQSCVSEYKC  | 851  | >ZMYM2-C4!FQSCVSEYKQ  | 21   | 830  |
| >ZMYM2-C4!CQSCVSEYKC  | 299  | >ZMYM2-C4!FQSCVSEYKQ  | 9    | 290  |
| >ZMYM2-C4!CQSCVSEY    | 9581 | >ZMYM2-C4!FQSCVSEY    | 367  | 9214 |
| >ZMYM2-C4!CQSCVSEYKC  | 465  | >ZMYM2-C4!FQSCVSEYKQ  | 12   | 453  |
| >ZMYM2-C4!CQSCVSEYKC  | 1475 | >ZMYM2-C4!FQSCVSEYKQ  | 33   | 1442 |
| >ZMYM2-C4!CQSCVSEYKC  | 2633 | >ZMYM2-C4!FQSCVSEYKQ  | 151  | 2482 |
| >ZMYM2-C4!CQSCVSEYKC  | 6204 | >ZMYM2-C4!FQSCVSEYKQ  | 195  | 6009 |
| >ZMYM2-C4!CQSCVSEYKC  | 4906 | >ZMYM2-C4!FQSCVSEYKQ  | 498  | 4408 |
| >ZMYM2-C4!CQSCVSEYK   | 68   | >ZMYM2-C4!FQSCVSEYK   | 100  | 32   |
| >ZMYM2-C4!CQSCVSEY    | 2016 | >ZMYM2-C4!FQSCVSEY    | 300  | 1716 |
| >ZMYM2-C4!CQSCVSEY    | 280  | >ZMYM2-C4!FQSCVSEY    | 668  | 388  |
| >ZMYM2-C4!CQSCVSEYK   | 516  | >ZMYM2-C4!FQSCVSEYK   | 105  | 411  |
| >ZMYM2-C4!CQSCVSEY    | 73   | >ZMYM2-C4!FQSCVSEY    | 40   | 33   |
| >ZMYM2-C4!CQSCVSEY    | 1929 | >ZMYM2-C4!FQSCVSEY    | 110  | 1819 |
| >ZMYM2-C4!CQSCVSEY    | 16   | >ZMYM2-C4!FQSCVSEY    | 4    | 12   |
| >ZMYM2-C4!CQSCVSEYKC  | 378  | >ZMYM2-C4!FQSCVSEYKQ  | 46   | 332  |
| >ZMYM2-C4!CQSCVSEY    | 679  | >ZMYM2-C4!FQSCVSEY    | 97   | 582  |
| >ZMYM2-C4!CCQSCVSEYK  | 1894 | >ZMYM2-C4!CFQSCVSEYK  | 333  | 1561 |
| >ZMYM2-C4!CCQSCVSEYK  | 3313 | >ZMYM2-C4!CFQSCVSEYK  | 263  | 3050 |
| >ZMYM2-C4!CCQSCVSEY   | 3148 | >ZMYM2-C4!CFQSCVSEY   | 144  | 3004 |
| >ZMYM2-C4!CCQSCVSEY   | 110  | >ZMYM2-C4!CFQSCVSEY   | 54   | 56   |
| >ZMYM2-C4!CCQSCVSEYK  | 1816 | >ZMYM2-C4!CFQSCVSEYK  | 142  | 1674 |
| >ZMYM2-C4!CCQSCVSEYK  | 5963 | >ZMYM2-C4!CFQSCVSEYK  | 286  | 5677 |
| >ZMYM2-C4!CCQSCVSEYK  | 3113 | >ZMYM2-C4!CFQSCVSEYK  | 71   | 3042 |
| >ZMYM2-C4!CCQSCVSEY   | 49   | >ZMYM2-C4!CFQSCVSEY   | 312  | 263  |
| >ZMYM2-C4!CCQSCVSEY   | 760  | >ZMYM2-C4!CFQSCVSEY   | 127  | 633  |
| >ZMYM2-C4!CCQSCVSEYK  | 8118 | >ZMYM2-C4!CFQSCVSEYK  | 340  | 7778 |
| >ZMYM2-C4!CCQSCVSEYK  | 2727 | >ZMYM2-C4!CFQSCVSEYK  | 486  | 2241 |
| >ZMYM2-C4!FCCQSCVSEY  | 1214 | >ZMYM2-C4!FCFQSCVSEY  | 320  | 894  |
| >ZMYM2-C4!FCCQSCVSEY  | 1726 | >ZMYM2-C4!FCFQSCVSEY  | 220  | 1506 |
| >ZMYM2-C4!FCCQSCVSEY  | 1465 | >ZMYM2-C4!FCFQSCVSEY  | 137  | 1328 |
| >ZMYM2-C4!FCCQSCVSEY  | 864  | >ZMYM2-C4!FCFQSCVSEY  | 66   | 798  |
| >ZMYM2-C4!FCCQSCVSEY  | 3320 | >ZMYM2-C4!FCFQSCVSEY  | 496  | 2824 |
| >ZMYM2-C4!FCCQSCVSEY  | 182  | >ZMYM2-C4!FCFQSCVSEY  | 13   | 169  |



|                      |       |                      |     |       |
|----------------------|-------|----------------------|-----|-------|
| >ZMYM2-C4:FCCQSCVSEY | 1928  | >ZMYM2-C4:FCFQSCVSEY | 368 | 1560  |
| >ZMYM2-C4:FCCQSCVSEY | 5081  | >ZMYM2-C4:FCFQSCVSEY | 180 | 4901  |
| >ZMYM2-C4:RFCCQSCVSE | 200   | >ZMYM2-C4:RFCFQSCVSE | 98  | 102   |
| >ZMYM2-C4:RFCCQSCVSE | 687   | >ZMYM2-C4:RFCFQSCVSE | 156 | 531   |
| >ZMYM2-C4:RFCCQSCVSE | 158   | >ZMYM2-C4:RFCFQSCVSE | 90  | 68    |
| >ZMYM2-C4:RFCCQSCVSE | 175   | >ZMYM2-C4:RFCFQSCVSE | 224 | 49    |
| >ZMYM2-C4:RFCCQSCVSE | 383   | >ZMYM2-C4:RFCFQSCVSE | 360 | 23    |
| >ZMYM2-C4:KRFCQSC    | 268   | >ZMYM2-C4:KRFCFQSC   | 121 | 147   |
| >ZMYM2-C4:KRFCQSCV   | 22    | >ZMYM2-C4:KRFCFQSCV  | 12  | 10    |
| >ZMYM2-C4:KRFCQSCVS  | 237   | >ZMYM2-C4:KRFCFQSCVS | 205 | 32    |
| >ZMYM2-C4:KRFCQSCVS  | 383   | >ZMYM2-C4:KRFCFQSCVS | 281 | 102   |
| >ZMYM2-C4:KRFCQSC    | 2134  | >ZMYM2-C4:KRFCFQSC   | 425 | 1709  |
| >ZMYM2-C4:KRFCQSCV   | 104   | >ZMYM2-C4:KRFCFQSCV  | 26  | 78    |
| >ZMYM2-C4:KRFCQSC    | 203   | >ZMYM2-C4:KRFCFQSC   | 57  | 146   |
| >ZMYM2-C4:KRFCQSCV   | 139   | >ZMYM2-C4:KRFCFQSCV  | 59  | 80    |
| >ZMYM2-C4:KRFCQSCVS  | 373   | >ZMYM2-C4:KRFCFQSCVS | 783 | 410   |
| >ZMYM2-C4:KRFCQSCV   | 362   | >ZMYM2-C4:KRFCFQSCV  | 216 | 146   |
| >ZMYM2-C4:QKRFCQSC   | 1015  | >ZMYM2-C4:QKRFCFQSC  | 326 | 689   |
| >ZMYM2-C4:QKRFCQSCV  | 55    | >ZMYM2-C4:QKRFCFQSCV | 25  | 30    |
| >ZMYM2-C4:QKRFCQSCV  | 87    | >ZMYM2-C4:QKRFCFQSCV | 70  | 17    |
| >ZMYM2-C4:GQQKRFC    | 13077 | >ZMYM2-C4:GQQKRFCF   | 118 | 12959 |
| >ZMYM2-C4:GQQKRFC    | 14290 | >ZMYM2-C4:GQQKRFCF   | 53  | 14237 |
| >ZMYM2-G3:TAMATSLTN\ | 22728 | >ZMYM2-G3:TAMATSLTN\ | 133 | 22595 |
| >ZMYM2-G3:TAMATSLTN\ | 21907 | >ZMYM2-G3:TAMATSLTN\ | 119 | 21788 |
| >ZMYM2-G3:TAMATSLTN\ | 20701 | >ZMYM2-G3:TAMATSLTN\ | 10  | 20691 |
| >ZMYM2-G3:TAMATSLTN\ | 36422 | >ZMYM2-G3:TAMATSLTN\ | 426 | 35996 |
| >ZMYM2-G3:NVGNSFSGP/ | 11642 | >ZMYM2-G3:NVRNSFSGP/ | 55  | 11587 |
| >ZMYM2-G3:LTNVGNSF   | 65    | >ZMYM2-G3:LTNVRNSF   | 124 | 59    |
| >ZMYM2-G3:LTNVGNSF   | 71    | >ZMYM2-G3:LTNVRNSF   | 105 | 34    |
| >ZMYM2-G3:LTNVGNSF   | 8     | >ZMYM2-G3:LTNVRNSF   | 16  | 8     |
| >ZMYM2-G3:LTNVGNSF   | 93    | >ZMYM2-G3:LTNVRNSF   | 176 | 83    |
| >ZMYM2-G3:LTNVGNSF   | 42    | >ZMYM2-G3:LTNVRNSF   | 110 | 68    |
| >ZMYM2-G3:LTNVGNSFS  | 233   | >ZMYM2-G3:LTNVRNSFS  | 556 | 323   |
| >ZMYM2-G3:SLTNVGNSF  | 308   | >ZMYM2-G3:SLTNVRNSF  | 162 | 146   |
| >ZMYM2-G3:SLTNVGNSF  | 188   | >ZMYM2-G3:SLTNVRNSF  | 598 | 410   |
| >ZMYM2-G3:SLTNVGNSF  | 63    | >ZMYM2-G3:SLTNVRNSF  | 467 | 404   |
| >ZMYM2-G3:SLTNVGNSF  | 60    | >ZMYM2-G3:SLTNVRNSF  | 137 | 77    |
| >ZMYM2-G3:SLTNVGNSF  | 91    | >ZMYM2-G3:SLTNVRNSF  | 172 | 81    |
| >ZMYM2-G3:TSLTNVGNSF | 315   | >ZMYM2-G3:TSLTNVRNSF | 435 | 120   |
| >ZMYM2-G3:TSLTNVGNSF | 831   | >ZMYM2-G3:TSLTNVRNSF | 359 | 472   |
| >ZMYM2-G3:TSLTNVGNSF | 42    | >ZMYM2-G3:TSLTNVRNSF | 33  | 9     |
| >ZMYM2-G3:TSLTNVGNSF | 26    | >ZMYM2-G3:TSLTNVRNSF | 51  | 25    |
| >ZMYM2-G3:TSLTNVGNSF | 144   | >ZMYM2-G3:TSLTNVRNSF | 176 | 32    |

|                      |       |                      |       |       |
|----------------------|-------|----------------------|-------|-------|
| >ZMYM2-G3:ATSLTNVG   | 22561 | >ZMYM2-G3:ATSLTNVR   | 178   | 22383 |
| >ZMYM2-G3:ATSLTNVG   | 20878 | >ZMYM2-G3:ATSLTNVR   | 101   | 20777 |
| >ZMYM2-G3:ATSLTNVGN5 | 100   | >ZMYM2-G3:ATSLTNVRNS | 84    | 16    |
| >ZMYM2-G3:ATSLTNVG   | 33698 | >ZMYM2-G3:ATSLTNVR   | 38    | 33660 |
| >ZMYM2-G3:ATSLTNVGN5 | 222   | >ZMYM2-G3:ATSLTNVRNS | 407   | 185   |
| >ZMYM2-G3:ATSLTNVGN5 | 73    | >ZMYM2-G3:ATSLTNVRNS | 120   | 47    |
| >ZMYM2-G3:ATSLTNVGN5 | 10    | >ZMYM2-G3:ATSLTNVRNS | 18    | 8     |
| >ZMYM2-G3:ATSLTNVGN5 | 384   | >ZMYM2-G3:ATSLTNVRNS | 510   | 126   |
| >ZMYM2-G3:ATSLTNVGN5 | 31    | >ZMYM2-G3:ATSLTNVRNS | 31    | 0     |
| >ZMYM2-G3:ATSLTNVG   | 15934 | >ZMYM2-G3:ATSLTNVR   | 393   | 15541 |
| >ZMYM2-G3:MATSLTNVG  | 19655 | >ZMYM2-G3:MATSLTNVR  | 32    | 19623 |
| >ZMYM2-G3:MATSLTNVG  | 35603 | >ZMYM2-G3:MATSLTNVR  | 351   | 35252 |
| >ZMYM2-G3:MATSLTNVG  | 12588 | >ZMYM2-G3:MATSLTNVR  | 4     | 12584 |
| >ZMYM2-G3:MATSLTNVG  | 35719 | >ZMYM2-G3:MATSLTNVR  | 484   | 35235 |
| >ZMYM2-G3:AMATSLTNVI | 31771 | >ZMYM2-G3:AMATSLTNVI | 206   | 31565 |
| >ZMYM2-G3:AMATSLTNVI | 35805 | >ZMYM2-G3:AMATSLTNVI | 218   | 35587 |
| >ZMYM2-G3:AMATSLTNVI | 2787  | >ZMYM2-G3:AMATSLTNVI | 245   | 2542  |
| >ZMYM2-R4!RYRMANGL   | 337   | >ZMYM2-R4!TYRMANGL   | 121   | 216   |
| >ZMYM2-R4!RYRMANGLI  | 80    | >ZMYM2-R4!TYRMANGLI  | 36    | 44    |
| >ZMYM2-R4!RYRMANGLI  | 229   | >ZMYM2-R4!TYRMANGLI  | 444   | 215   |
| >ZMYM2-R4!RYRMANGL   | 26    | >ZMYM2-R4!TYRMANGL   | 168   | 142   |
| >ZMYM2-R4!RYRMANGLI  | 31    | >ZMYM2-R4!TYRMANGLI  | 254   | 223   |
| >ZMYM2-R4!RYRMANGLI  | 435   | >ZMYM2-R4!TYRMANGLI  | 2907  | 2472  |
| >ZMYM2-R4!RYRMANGL   | 7     | >ZMYM2-R4!TYRMANGL   | 186   | 179   |
| >ZMYM2-R4!RYRMANGLI  | 4     | >ZMYM2-R4!TYRMANGLI  | 15    | 11    |
| >ZMYM2-R4!RYRMANGLI  | 4     | >ZMYM2-R4!TYRMANGLI  | 41    | 37    |
| >ZMYM2-R4!RYRMANGLI  | 18    | >ZMYM2-R4!TYRMANGLI  | 897   | 879   |
| >ZMYM2-R4!RYRMANGL   | 373   | >ZMYM2-R4!TYRMANGL   | 1160  | 787   |
| >ZMYM2-R4!RYRMANGLI  | 457   | >ZMYM2-R4!TYRMANGLI  | 1527  | 1070  |
| >ZMYM2-R4!NRYRMANGL  | 2514  | >ZMYM2-R4!NTYRMANGL  | 305   | 2209  |
| >ZMYM2-R4!NRYRMANGL  | 22    | >ZMYM2-R4!NTYRMANGL  | 37    | 15    |
| >ZMYM2-R4!NRYRMANGL  | 8808  | >ZMYM2-R4!NTYRMANGL  | 196   | 8612  |
| >ZMYM2-R4!NRYRMANGL  | 9248  | >ZMYM2-R4!NTYRMANGL  | 300   | 8948  |
| >ZMYM2-R4!NRYRMANGL  | 15133 | >ZMYM2-R4!NTYRMANGL  | 39    | 15094 |
| >ZMYM2-R4!NRYRMANGL  | 6784  | >ZMYM2-R4!NTYRMANGL  | 26    | 6758  |
| >ZMYM2-R4!NRYRMANGL  | 16502 | >ZMYM2-R4!NTYRMANGL  | 42    | 16460 |
| >ZMYM2-R4!NRYRMANGL  | 17026 | >ZMYM2-R4!NTYRMANGL  | 74    | 16952 |
| >ZMYM2-R4!NRYRMANGL  | 243   | >ZMYM2-R4!NTYRMANGL  | 1635  | 1392  |
| >ZMYM2-R4!NRYRMANGL  | 26391 | >ZMYM2-R4!NTYRMANGL  | 242   | 26149 |
| >ZMYM2-R4!NRYRMANGL  | 25436 | >ZMYM2-R4!NTYRMANGL  | 95    | 25341 |
| >ZMYM2-R4!NRYRMANGL  | 153   | >ZMYM2-R4!NTYRMANGL  | 22816 | 22663 |
| >ZMYM2-R4!NRYRMANGL  | 239   | >ZMYM2-R4!NTYRMANGL  | 28921 | 28682 |
| >ZMYM2-R4!NRYRMANGL  | 100   | >ZMYM2-R4!NTYRMANGL  | 19792 | 19692 |

|                      |       |                      |       |       |
|----------------------|-------|----------------------|-------|-------|
| >ZMYM2-R4!NRYRMANGL  | 99    | >ZMYM2-R4!NTYRMANGL  | 5788  | 5689  |
| >ZMYM2-R4!NRYRMANGL  | 126   | >ZMYM2-R4!NTYRMANGL  | 7485  | 7359  |
| >ZMYM2-R4!NRYRMANG   | 349   | >ZMYM2-R4!NTYRMANG   | 17432 | 17083 |
| >ZMYM2-R4!NRYRMANGL  | 20478 | >ZMYM2-R4!NTYRMANGL  | 495   | 19983 |
| >ZMYM2-R4!NRYRMANGL  | 21542 | >ZMYM2-R4!NTYRMANGL  | 202   | 21340 |
| >ZMYM2-R4!NRYRMANGL  | 6140  | >ZMYM2-R4!NTYRMANGL  | 36    | 6104  |
| >ZMYM2-R4!NRYRMANGL  | 97    | >ZMYM2-R4!NTYRMANGL  | 7201  | 7104  |
| >ZMYM2-R4!NRYRMANGL  | 198   | >ZMYM2-R4!NTYRMANGL  | 14452 | 14254 |
| >ZMYM2-R4!NRYRMANGL  | 9     | >ZMYM2-R4!NTYRMANGL  | 2790  | 2781  |
| >ZMYM2-R4!NRYRMANGL  | 417   | >ZMYM2-R4!NTYRMANGL  | 26819 | 26402 |
| >ZMYM2-R4!NRYRMANGL  | 66    | >ZMYM2-R4!NTYRMANGL  | 13051 | 12985 |
| >ZMYM2-R4!HKLCSDHCFN | 462   | >ZMYM2-R4!HKLCSDHCFN | 2537  | 2075  |
| >ZMYM2-R4!HKLCSDHCFN | 69    | >ZMYM2-R4!HKLCSDHCFN | 25951 | 25882 |
| >ZMYM2-R4!FNRYRMANG  | 454   | >ZMYM2-R4!FNTYRMANG  | 203   | 251   |
| >ZMYM2-R4!FNRYRMANG  | 733   | >ZMYM2-R4!FNTYRMANG  | 477   | 256   |
| >ZMYM2-R4!CFNRYRMAN  | 334   | >ZMYM2-R4!CFNTYRMAN  | 687   | 353   |
| >ZMYM2-R4!DHCFNRYR   | 512   | >ZMYM2-R4!DHCFNTRYR  | 382   | 130   |
| >ZMYM2-R4!DHCFNRYR   | 268   | >ZMYM2-R4!DHCFNTRYR  | 86    | 182   |
| >ZMYM2-R4!DHCFNRYR   | 522   | >ZMYM2-R4!DHCFNTRYR  | 233   | 289   |
| >ZMYM2-R4!SDHCFNRYR  | 997   | >ZMYM2-R4!SDHCFNTRYR | 215   | 782   |
| >ZMYM2-R4!SDHCFNRYR  | 91    | >ZMYM2-R4!SDHCFNTRYR | 60    | 31    |
| >ZMYM2-R4!CSDHCFNRY  | 9     | >ZMYM2-R4!CSDHCFNTY  | 10    | 1     |
| >ZMYM2-R4!CSDHCFNRY  | 40    | >ZMYM2-R4!CSDHCFNTY  | 36    | 4     |
| >ZMYM2-R4!CSDHCFNR   | 221   | >ZMYM2-R4!CSDHCFNT   | 20807 | 20586 |
| >ZMYM2-R4!CSDHCFNRYF | 24    | >ZMYM2-R4!CSDHCFNTYF | 29    | 5     |
| >ZMYM2-R4!CSDHCFNRYF | 428   | >ZMYM2-R4!CSDHCFNTYF | 261   | 167   |
| >ZMYM2-R4!CSDHCFNRYF | 380   | >ZMYM2-R4!CSDHCFNTYF | 55    | 325   |
| >ZMYM2-R4!CSDHCFNRY  | 2523  | >ZMYM2-R4!CSDHCFNTY  | 297   | 2226  |
| >ZMYM2-R4!CSDHCFNRY  | 146   | >ZMYM2-R4!CSDHCFNTY  | 81    | 65    |
| >ZMYM2-R4!CSDHCFNRY  | 54    | >ZMYM2-R4!CSDHCFNTY  | 74    | 20    |
| >ZMYM2-R4!CSDHCFNR   | 332   | >ZMYM2-R4!CSDHCFNT   | 8434  | 8102  |
| >ZMYM2-R4!CSDHCFNRYF | 118   | >ZMYM2-R4!CSDHCFNTYF | 79    | 39    |
| >ZMYM2-R4!LCSDHCFNRY | 166   | >ZMYM2-R4!LCSDHCFNTY | 251   | 85    |
| >ZMYM2-R4!LCSDHCFNR  | 196   | >ZMYM2-R4!LCSDHCFNT  | 22125 | 21929 |
| >ZMYM2-R4!LCSDHCFNRY | 302   | >ZMYM2-R4!LCSDHCFNTY | 118   | 184   |
| >ZMYM2-R4!LCSDHCFNR  | 498   | >ZMYM2-R4!LCSDHCFNT  | 31657 | 31159 |
| >ZMYM2-R4!LCSDHCFNRY | 693   | >ZMYM2-R4!LCSDHCFNTY | 335   | 358   |
| >ZMYM2-R4!LCSDHCFNRY | 1254  | >ZMYM2-R4!LCSDHCFNTY | 499   | 755   |
| >ZMYM2-R4!LCSDHCFNRY | 3937  | >ZMYM2-R4!LCSDHCFNTY | 479   | 3458  |
| >ZMYM2-R4!LCSDHCFNR  | 222   | >ZMYM2-R4!LCSDHCFNT  | 32524 | 32302 |
| >ZMYM2-R4!LCSDHCFNRY | 75    | >ZMYM2-R4!LCSDHCFNTY | 54    | 21    |
| >ZMYM2-R4!KLCSDHCFNR | 5053  | >ZMYM2-R4!KLCSDHCFNT | 386   | 4667  |
| >ZMYM2-R4!KLCSDHCFNR | 11019 | >ZMYM2-R4!KLCSDHCFNT | 341   | 10678 |

|                         |      |                         |       |       |
|-------------------------|------|-------------------------|-------|-------|
| >ZMYM2-R4! KLCSDFCFNR   | 9838 | >ZMYM2-R4! KLCSDFCFNT   | 236   | 9602  |
| >ZMYM2-R4! KLCSDFCFNR   | 457  | >ZMYM2-R4! KLCSDFCFNT   | 580   | 123   |
| >ZMYM2-R4! KLCSDFCFNR   | 212  | >ZMYM2-R4! KLCSDFCFNT   | 218   | 6     |
| >ZMYM2-R4! KLCSDFCFNR   | 20   | >ZMYM2-R4! KLCSDFCFNT   | 17    | 3     |
| >ZMYM2-R4! KLCSDFCFNR   | 20   | >ZMYM2-R4! KLCSDFCFNT   | 11682 | 11662 |
| >ZMYM2-R4! KLCSDFCFNR   | 44   | >ZMYM2-R4! KLCSDFCFNT   | 65    | 21    |
| >ZMYM2-R4! KLCSDFCFNR   | 122  | >ZMYM2-R4! KLCSDFCFNT   | 68    | 54    |
| >ZMYM2-R4! KLCSDFCFNR   | 291  | >ZMYM2-R4! KLCSDFCFNT   | 79    | 212   |
| >ZMYM2-R4! KLCSDFCFNR   | 457  | >ZMYM2-R4! KLCSDFCFNT   | 297   | 160   |
| >ZMYM2-R4! KLCSDFCFNR   | 64   | >ZMYM2-R4! KLCSDFCFNT   | 13180 | 13116 |
| >ZMYM2-R4! KLCSDFCFNR   | 26   | >ZMYM2-R4! KLCSDFCFNT   | 18013 | 17987 |
| >ZMYM2-T9€ TTNINSVII    | 775  | >ZMYM2-T9€ ATNINSVII    | 161   | 614   |
| >ZMYM2-T9€ TTNINSVII    | 1916 | >ZMYM2-T9€ ATNINSVII    | 234   | 1682  |
| >ZMYM2-T9€ TTNINSVI     | 760  | >ZMYM2-T9€ ATNINSVI     | 202   | 558   |
| >ZMYM2-T9€ TTNINSVII    | 195  | >ZMYM2-T9€ ATNINSVII    | 51    | 144   |
| >ZMYM2-T9€ TTNINSVI     | 51   | >ZMYM2-T9€ ATNINSVI     | 1558  | 1507  |
| >ZMYM2-T9€ TTNINSVII    | 107  | >ZMYM2-T9€ ATNINSVII    | 3637  | 3530  |
| >ZMYM2-T9€ TTNINSVI     | 311  | >ZMYM2-T9€ ATNINSVI     | 71    | 240   |
| >ZMYM2-T9€ TTNINSVII    | 459  | >ZMYM2-T9€ ATNINSVII    | 87    | 372   |
| >ZMYM2-T9€ TTNINSVI     | 64   | >ZMYM2-T9€ ATNINSVI     | 44    | 20    |
| >ZMYM2-T9€ TTNINSVII    | 135  | >ZMYM2-T9€ ATNINSVII    | 78    | 57    |
| >ZMYM2-T9€ ETTNINSV     | 224  | >ZMYM2-T9€ EATNINSV     | 6913  | 6689  |
| >ZMYM2-T9€ ETTNINSVII   | 324  | >ZMYM2-T9€ EATNINSVII   | 6684  | 6360  |
| >ZMYM2-T9€ ETTNINSVIIIE | 339  | >ZMYM2-T9€ EATNINSVIIIE | 1854  | 1515  |
| >ZMYM2-T9€ ETTNINSV     | 5    | >ZMYM2-T9€ EATNINSV     | 8     | 3     |
| >ZMYM2-T9€ ETTNINSVI    | 7    | >ZMYM2-T9€ EATNINSVI    | 25    | 18    |
| >ZMYM2-T9€ ETTNINSVII   | 58   | >ZMYM2-T9€ EATNINSVII   | 383   | 325   |
| >ZMYM2-T9€ ETTNINSV     | 11   | >ZMYM2-T9€ EATNINSV     | 42    | 31    |
| >ZMYM2-T9€ ETTNINSVI    | 252  | >ZMYM2-T9€ EATNINSVI    | 1755  | 1503  |
| >ZMYM2-T9€ ETTNINSVII   | 219  | >ZMYM2-T9€ EATNINSVII   | 1355  | 1136  |
| >ZMYM2-T9€ ETTNINSVI    | 17   | >ZMYM2-T9€ EATNINSVI    | 397   | 380   |
| >ZMYM2-T9€ ETTNINSVI    | 131  | >ZMYM2-T9€ EATNINSVI    | 589   | 458   |
| >ZMYM2-T9€ ETTNINSVII   | 413  | >ZMYM2-T9€ EATNINSVII   | 3173  | 2760  |
| >ZMYM2-T9€ MMSSEDEGKT   | 890  | >ZMYM2-T9€ MMSSEDEGKT   | 149   | 741   |
| >ZMYM2-T9€ MMSSEDEGKT   | 221  | >ZMYM2-T9€ MMSSEDEGKT   | 31    | 190   |
| >ZMYM2-T9€ MMSSEDEGKT   | 102  | >ZMYM2-T9€ MMSSEDEGKT   | 12    | 90    |
| >ZMYM2-T9€ MMSSEDEGKT   | 1274 | >ZMYM2-T9€ MMSSEDEGKT   | 164   | 1110  |
| >ZMYM2-T9€ MMSSEDEGKT   | 128  | >ZMYM2-T9€ MMSSEDEGKT   | 22    | 106   |
| >ZMYM2-T9€ MMSSEDEGKT   | 2504 | >ZMYM2-T9€ MMSSEDEGKT   | 153   | 2351  |
| >ZMYM2-T9€ MMSSEDEGKT   | 771  | >ZMYM2-T9€ MMSSEDEGKT   | 51    | 720   |
| >ZMYM2-T9€ MMSSEDEGKT   | 2282 | >ZMYM2-T9€ MMSSEDEGKT   | 332   | 1950  |
| >ZMYM2-T9€ MMSSEDEGKT   | 28   | >ZMYM2-T9€ MMSSEDEGKT   | 6     | 22    |
| >ZMYM2-T9€ TETTININSV   | 29   | >ZMYM2-T9€ TEATNINSV    | 17    | 12    |

|                       |      |                       |      |      |
|-----------------------|------|-----------------------|------|------|
| >ZMYM2-T9€TETTNINSVI  | 15   | >ZMYM2-T9€TEATNINSVI  | 11   | 4    |
| >ZMYM2-T9€TETTNINSVII | 13   | >ZMYM2-T9€TEATNINSVII | 9    | 4    |
| >ZMYM2-T9€TETTNINSV   | 2991 | >ZMYM2-T9€TEATNINSV   | 403  | 2588 |
| >ZMYM2-T9€TETTNINSVII | 119  | >ZMYM2-T9€TEATNINSVII | 134  | 15   |
| >ZMYM2-T9€TETTNINSV   | 323  | >ZMYM2-T9€TEATNINSV   | 620  | 297  |
| >ZMYM2-T9€TETTNINSV   | 629  | >ZMYM2-T9€TEATNINSV   | 256  | 373  |
| >ZMYM2-T9€TETTNINSV   | 36   | >ZMYM2-T9€TEATNINSV   | 20   | 16   |
| >ZMYM2-T9€TETTNINSVI  | 40   | >ZMYM2-T9€TEATNINSVI  | 14   | 26   |
| >ZMYM2-T9€TETTNINSVII | 13   | >ZMYM2-T9€TEATNINSVII | 9    | 4    |
| >ZMYM2-T9€KTETTNINSV  | 435  | >ZMYM2-T9€KTEATNINSV  | 275  | 160  |
| >ZMYM2-T9€KTETTNINSV  | 438  | >ZMYM2-T9€KTEATNINSV  | 476  | 38   |
| >ZMYM2-T9€KTETTNINSV  | 222  | >ZMYM2-T9€KTEATNINSV  | 150  | 72   |
| >ZMYM2-T9€KTETTNINSVI | 314  | >ZMYM2-T9€KTEATNINSVI | 223  | 91   |
| >ZMYM2-T9€KTETTNINSV  | 446  | >ZMYM2-T9€KTEATNINSV  | 391  | 55   |
| >ZMYM2-T9€KTETTNINSVI | 77   | >ZMYM2-T9€KTEATNINSVI | 55   | 22   |
| >ZMYM2-T9€KTETTNINSVI | 151  | >ZMYM2-T9€KTEATNINSVI | 72   | 79   |
| >ZMYM2-T9€KTETTNINSVI | 30   | >ZMYM2-T9€KTEATNINSVI | 37   | 7    |
| >ZMYM2-T9€KTETTNINSVI | 32   | >ZMYM2-T9€KTEATNINSVI | 33   | 1    |
| >ZMYM2-T9€DEGKTETTNI  | 104  | >ZMYM2-T9€DEGKTEATNI  | 113  | 9    |
| >ZMYM2-T9€DEGKTETTNI  | 274  | >ZMYM2-T9€DEGKTEATNI  | 299  | 25   |
| >ZMYM2-T9€EDEGKTETTNI | 171  | >ZMYM2-T9€EDEGKTEATNI | 151  | 20   |
| >ZMYM2-T9€SEDEGKTET   | 1241 | >ZMYM2-T9€SEDEGKTEA   | 136  | 1105 |
| >ZMYM2-V1(VFGEEYEEQP  | 1247 | >ZMYM2-V1(IFGEEYEEQPF | 423  | 824  |
| >ZMYM2-V1(VFGEEYEEQP  | 180  | >ZMYM2-V1(IFGEEYEEQPF | 63   | 117  |
| >ZMYM2-V1(DMENEFLLPF  | 204  | >ZMYM2-V1(DMENEFLLPF  | 2742 | 2538 |
| >ZMYM2-V1(DMENEFLLPF  | 229  | >ZMYM2-V1(DMENEFLLPF  | 1938 | 1709 |
| >ZMYM2-V1(DMENEFLLPF  | 204  | >ZMYM2-V1(DMENEFLLPF  | 4583 | 4379 |
| >ZMYM2-V1(DMENEFLLPF  | 42   | >ZMYM2-V1(DMENEFLLPF  | 3008 | 2966 |
| >ZMYM2-V1(DMENEFLLPF  | 209  | >ZMYM2-V1(DMENEFLLPF  | 1034 | 825  |
| >ZMYM2-V1(PPVFGEEY    | 122  | >ZMYM2-V1(PPIFGEEY    | 135  | 13   |
| >ZMYM2-V1(PPVFGEEY    | 216  | >ZMYM2-V1(PPIFGEEY    | 195  | 21   |
| >ZMYM2-V1(LPPVFGEEY   | 64   | >ZMYM2-V1(LPPIFGEEY   | 55   | 9    |
| >ZMYM2-V1(LPPVFGEEY   | 194  | >ZMYM2-V1(LPPIFGEEY   | 160  | 34   |
| >ZMYM2-V1(LPPVFGEEY   | 360  | >ZMYM2-V1(LPPIFGEEY   | 674  | 314  |
| >ZMYM2-V1(LLPPVFGEEY  | 175  | >ZMYM2-V1(LLPPIFGEEY  | 275  | 100  |
| >ZMYM2-V1(LLPPVFGEEY  | 870  | >ZMYM2-V1(LLPPIFGEEY  | 461  | 409  |
| >ZMYM2-V1(LLPPVFGEEY  | 115  | >ZMYM2-V1(LLPPIFGEEY  | 149  | 34   |
| >ZMYM2-V1(LLPPVFGEEY  | 458  | >ZMYM2-V1(LLPPIFGEEY  | 605  | 147  |
| >ZMYM2-V1(FLLPPVFG    | 208  | >ZMYM2-V1(FLLPPIFG    | 292  | 84   |
| >ZMYM2-V1(FLLPPVFG    | 467  | >ZMYM2-V1(FLLPPIFG    | 399  | 68   |
| >ZMYM2-V1(FLLPPVFG    | 157  | >ZMYM2-V1(FLLPPIFG    | 86   | 71   |
| >ZMYM2-V1(FLLPPVFGEEY | 369  | >ZMYM2-V1(FLLPPIFGEEY | 275  | 94   |
| >ZMYM2-V1(FLLPPVFG    | 15   | >ZMYM2-V1(FLLPPIFG    | 12   | 3    |

|                       |     |                       |      |      |
|-----------------------|-----|-----------------------|------|------|
| >ZMYM2-V1(FLLPPVFG    | 16  | >ZMYM2-V1(FLLPPIFGE   | 13   | 3    |
| >ZMYM2-V1(FLLPPVFGEE  | 128 | >ZMYM2-V1(FLLPPIFGEE  | 159  | 31   |
| >ZMYM2-V1(FLLPPVFGEE) | 20  | >ZMYM2-V1(FLLPPIFGEEY | 16   | 4    |
| >ZMYM2-V1(FLLPPVFG    | 374 | >ZMYM2-V1(FLLPPIFGE   | 314  | 60   |
| >ZMYM2-V1(FLLPPVFG    | 140 | >ZMYM2-V1(FLLPPIFG    | 138  | 2    |
| >ZMYM2-V1(FLLPPVFG    | 289 | >ZMYM2-V1(FLLPPIFGE   | 281  | 8    |
| >ZMYM2-V1(FLLPPVFGEE) | 433 | >ZMYM2-V1(FLLPPIFGEEY | 409  | 24   |
| >ZMYM2-V1(FLLPPVFG    | 128 | >ZMYM2-V1(FLLPPIFG    | 125  | 3    |
| >ZMYM2-V1(FLLPPVFG    | 37  | >ZMYM2-V1(FLLPPIFGE   | 19   | 18   |
| >ZMYM2-V1(FLLPPVFGEE  | 287 | >ZMYM2-V1(FLLPPIFGEE  | 180  | 107  |
| >ZMYM2-V1(FLLPPVFGEE) | 43  | >ZMYM2-V1(FLLPPIFGEEY | 34   | 9    |
| >ZMYM2-V1(FLLPPVFGEE) | 11  | >ZMYM2-V1(FLLPPIFGEEY | 11   | 0    |
| >ZMYM2-V1(FLLPPVFGEE) | 134 | >ZMYM2-V1(FLLPPIFGEEY | 163  | 29   |
| >ZMYM2-V1(FLLPPVFGEE) | 99  | >ZMYM2-V1(FLLPPIFGEEY | 122  | 23   |
| >ZMYM2-V1(FLLPPVFGEE) | 21  | >ZMYM2-V1(FLLPPIFGEEY | 22   | 1    |
| >ZMYM2-V1(FLLPPVFGEE) | 26  | >ZMYM2-V1(FLLPPIFGEEY | 35   | 9    |
| >ZMYM2-V1(FLLPPVFGEE) | 128 | >ZMYM2-V1(FLLPPIFGEEY | 131  | 3    |
| >ZMYM2-V1(FLLPPVFGEE) | 332 | >ZMYM2-V1(FLLPPIFGEEY | 385  | 53   |
| >ZMYM2-V1(EFLLPPVF    | 166 | >ZMYM2-V1(EFLLPPIF    | 371  | 205  |
| >ZMYM2-V1(NEFLLPPV    | 433 | >ZMYM2-V1(NEFLLPPI    | 119  | 314  |
| >ZMYM2-V1(NEFLLPPVF   | 351 | >ZMYM2-V1(NEFLLPPIF   | 303  | 48   |
| >ZMYM2-V1(NEFLLPPVF   | 285 | >ZMYM2-V1(NEFLLPPIF   | 274  | 11   |
| >ZMYM2-V1(NEFLLPPV    | 19  | >ZMYM2-V1(NEFLLPPI    | 27   | 8    |
| >ZMYM2-V1(NEFLLPPVF   | 6   | >ZMYM2-V1(NEFLLPPIF   | 6    | 0    |
| >ZMYM2-V1(NEFLLPPVFG  | 346 | >ZMYM2-V1(NEFLLPPIFGE | 369  | 23   |
| >ZMYM2-V1(NEFLLPPV    | 539 | >ZMYM2-V1(NEFLLPPI    | 248  | 291  |
| >ZMYM2-V1(NEFLLPPV    | 44  | >ZMYM2-V1(NEFLLPPI    | 30   | 14   |
| >ZMYM2-V1(NEFLLPPVF   | 68  | >ZMYM2-V1(NEFLLPPIF   | 91   | 23   |
| >ZMYM2-V1(NEFLLPPVF   | 288 | >ZMYM2-V1(NEFLLPPIF   | 283  | 5    |
| >ZMYM2-V1(NEFLLPPV    | 370 | >ZMYM2-V1(NEFLLPPI    | 272  | 98   |
| >ZMYM2-V1(NEFLLPPVF   | 47  | >ZMYM2-V1(NEFLLPPIF   | 31   | 16   |
| >ZMYM2-V1(NEFLLPPVFG  | 194 | >ZMYM2-V1(NEFLLPPIFG  | 303  | 109  |
| >ZMYM2-V1(NEFLLPPV    | 162 | >ZMYM2-V1(NEFLLPPI    | 727  | 565  |
| >ZMYM2-V1(NEFLLPPVFG  | 420 | >ZMYM2-V1(NEFLLPPIFG  | 509  | 89   |
| >ZMYM2-V1(NEFLLPPV    | 79  | >ZMYM2-V1(NEFLLPPI    | 14   | 65   |
| >ZMYM2-V1(NEFLLPPVF   | 67  | >ZMYM2-V1(NEFLLPPIF   | 36   | 31   |
| >ZMYM2-V1(MENEFLPPV   | 24  | >ZMYM2-V1(MENEFLPPI   | 7    | 17   |
| >ZMYM2-V1(MENEFLPPV   | 551 | >ZMYM2-V1(MENEFLPPII  | 491  | 60   |
| >ZMYM2-V1(MENEFLPPV   | 141 | >ZMYM2-V1(MENEFLPPI   | 511  | 370  |
| >ZMYM2-V1(MENEFLPPV   | 120 | >ZMYM2-V1(MENEFLPPI   | 1364 | 1244 |
| >ZMYM2-V1(MENEFLPPV   | 156 | >ZMYM2-V1(MENEFLPPI   | 1102 | 946  |
| >ZMYM2-V1(MENEFLPPV   | 356 | >ZMYM2-V1(MENEFLPPII  | 1525 | 1169 |
| >ZMYM2-V1(MENEFLPPV   | 36  | >ZMYM2-V1(MENEFLPPII  | 38   | 2    |

|                       |       |                       |     |       |
|-----------------------|-------|-----------------------|-----|-------|
| >ZMYM2-V1(MENEFLPPV   | 7     | >ZMYM2-V1(MENEFLPPI   | 7   | 0     |
| >ZMYM2-V1(MENEFLPPV   | 299   | >ZMYM2-V1(MENEFLPPI   | 317 | 18    |
| >ZMYM2-V1(MENEFLPPV   | 172   | >ZMYM2-V1(MENEFLPPI   | 133 | 39    |
| >ZMYM2-V1(MENEFLPPV   | 155   | >ZMYM2-V1(MENEFLPPI   | 119 | 36    |
| >ZMYM2-V1(MENEFLPPV   | 44    | >ZMYM2-V1(MENEFLPPI   | 57  | 13    |
| >ZMYM2-V1(MENEFLPPV   | 437   | >ZMYM2-V1(MENEFLPPI   | 178 | 259   |
| >ZMYM2-V1(MENEFLPPV   | 287   | >ZMYM2-V1(MENEFLPPI   | 283 | 4     |
| >ZMYM2-V1(MENEFLPPV   | 530   | >ZMYM2-V1(MENEFLPPI   | 288 | 242   |
| >ZMYM2-V1(MENEFLPPV   | 32    | >ZMYM2-V1(MENEFLPPI   | 22  | 10    |
| >ZMYM2-V1(MENEFLPPV   | 98    | >ZMYM2-V1(MENEFLPPI   | 156 | 58    |
| >ZMYM2-V1(MENEFLPPV   | 172   | >ZMYM2-V1(MENEFLPPI   | 338 | 166   |
| >ZMYM2-V1(MENEFLPPV   | 103   | >ZMYM2-V1(MENEFLPPI   | 15  | 88    |
| >ZMYM2-V1(MENEFLPPV   | 39    | >ZMYM2-V1(MENEFLPPI   | 28  | 11    |
| >ZNF331-G1{QLTQHQKIHT | 22346 | >ZNF331-G1{QLTQHQKIHT | 269 | 22077 |
| >ZNF331-G1{HTGEKPYEC  | 2074  | >ZNF331-G1{HTWEKPYEC  | 168 | 1906  |
| >ZNF331-G1{HTGEKPYECK | 653   | >ZNF331-G1{HTWEKPYECI | 319 | 334   |
| >ZNF331-G1{IHTGEKPY   | 491   | >ZNF331-G1{IHTWEKPY   | 391 | 100   |
| >ZNF331-G1{KIHTGEKPY  | 308   | >ZNF331-G1{KIHTWEKPY  | 490 | 182   |
| >ZNF331-G1{KIHTGEKPY  | 241   | >ZNF331-G1{KIHTWEKPY  | 147 | 94    |
| >ZNF331-G1{KIHTGEKPY  | 530   | >ZNF331-G1{KIHTWEKPY  | 459 | 71    |
| >ZNF331-G1{KIHTGEKPY  | 455   | >ZNF331-G1{KIHTWEKPY  | 339 | 116   |
| >ZNF331-G1{KIHTGEKPY  | 369   | >ZNF331-G1{KIHTWEKPY  | 801 | 432   |
| >ZNF331-G1{QKIHTGEK   | 622   | >ZNF331-G1{QKIHTWEK   | 356 | 266   |
| >ZNF331-G1{QKIHTGEKPY | 5     | >ZNF331-G1{QKIHTWEKPY | 6   | 1     |
| >ZNF331-G1{HQKIHTGEK  | 15    | >ZNF331-G1{HQKIHTWEK  | 21  | 6     |
| >ZNF331-G1{HQKIHTGEK  | 242   | >ZNF331-G1{HQKIHTWEK  | 36  | 206   |
| >ZNF331-G1{HQKIHTGEKP | 48    | >ZNF331-G1{HQKIHTWEKI | 53  | 5     |
| >ZNF331-G1{HQKIHTGEKP | 85    | >ZNF331-G1{HQKIHTWEKI | 193 | 108   |
| >ZNF331-G1{HQKIHTGEKP | 22    | >ZNF331-G1{HQKIHTWEKI | 12  | 10    |
| >ZNF331-G1{TQHQKIHTGE | 406   | >ZNF331-G1{TQHQKIHTW  | 103 | 303   |
| >ZNF331-G1{TQHQKIHTG  | 31546 | >ZNF331-G1{TQHQKIHTW  | 214 | 31332 |
| >ZNF331-G1{LTQHQKIHTC | 10596 | >ZNF331-G1{LTQHQKIHTV | 6   | 10590 |
| >ZNF331-G1{LTQHQKIHTC | 20363 | >ZNF331-G1{LTQHQKIHTV | 40  | 20323 |
| >ZNF331-G1{LTQHQKIHTC | 16892 | >ZNF331-G1{LTQHQKIHTV | 16  | 16876 |
| >ZNF331-G1{LTQHQKIHTC | 28936 | >ZNF331-G1{LTQHQKIHTV | 124 | 28812 |
| >ZNF331-G1{GKAFRWGSS  | 14652 | >ZNF331-G1{EKAFRWGSSI | 233 | 14419 |
| >ZNF331-G1{GKAFRWGSS  | 290   | >ZNF331-G1{EKAFRWGSSI | 443 | 153   |
| >ZNF331-G1{CGKAFRWGS  | 22501 | >ZNF331-G1{CEKAFRWGS! | 247 | 22254 |
| >ZNF331-G1{CGKAFRWGS  | 22947 | >ZNF331-G1{CEKAFRWGS! | 354 | 22593 |
| >ZNF331-G1{CGKAFRWGS  | 27906 | >ZNF331-G1{CEKAFRWGS! | 32  | 27874 |
| >ZNF331-G1{CGKAFRWG   | 40605 | >ZNF331-G1{CEKAFRWG   | 472 | 40133 |
| >ZNF331-G1{CGKAFRWGS  | 34666 | >ZNF331-G1{CEKAFRWGS  | 100 | 34566 |
| >ZNF331-G1{CGKAFRWGS  | 23993 | >ZNF331-G1{CEKAFRWGS! | 399 | 23594 |

|                       |       |                       |       |       |
|-----------------------|-------|-----------------------|-------|-------|
| >ZNF331-G1!CGKAFRWGS  | 40376 | >ZNF331-G1!CEKAFRWGS! | 417   | 39959 |
| >ZNF331-G1!CGKAFRWGS  | 28210 | >ZNF331-G1!CEKAFRWGS! | 127   | 28083 |
| >ZNF331-G1!KDCGKAFR   | 382   | >ZNF331-G1!KDCEKAFR   | 460   | 78    |
| >ZNF331-G1!KDCGKAFR   | 132   | >ZNF331-G1!KDCEKAFR   | 149   | 17    |
| >ZNF331-G1!CKDCGKAF   | 118   | >ZNF331-G1!CKDCEKAF   | 182   | 64    |
| >ZNF331-G1!ECKDCGKAFF | 146   | >ZNF331-G1!ECKDCEKAFR | 190   | 44    |
| >ZNF331-G1!ECKDCGKAFF | 109   | >ZNF331-G1!ECKDCEKAFR | 97    | 12    |
| >ZNF331-G1!ECKDCGKAF  | 455   | >ZNF331-G1!ECKDCEKAF  | 1160  | 705   |
| >ZNF331-G1!ECKDCGKAFF | 184   | >ZNF331-G1!ECKDCEKAFR | 115   | 69    |
| >ZNF331-G1!YECKDCGKAF | 363   | >ZNF331-G1!YECKDCEKAF | 1000  | 637   |
| >ZNF331-G1!YECKDCGKAF | 67    | >ZNF331-G1!YECKDCEKAF | 59    | 8     |
| >ZNF331-G1!YECKDCGKAF | 363   | >ZNF331-G1!YECKDCEKAF | 718   | 355   |
| >ZNF331-G1!YECKDCGKAF | 656   | >ZNF331-G1!YECKDCEKAF | 423   | 233   |
| >ZNF331-G1!PYECKDCGKA | 492   | >ZNF331-G1!PYECKDCEKA | 423   | 69    |
| >ZNF331-G1!KPYECKDCGK | 159   | >ZNF331-G1!KPYECKDCEK | 330   | 171   |
| >ZNF331-G1!KPYECKDCGK | 272   | >ZNF331-G1!KPYECKDCEK | 542   | 270   |
| >ZNF331-L79LGRNWICEG` | 479   | >ZNF331-L79FGRNWICEG` | 573   | 94    |
| >ZNF331-L79SLGRNWIC   | 205   | >ZNF331-L79SFGRNWIC   | 20415 | 20210 |
| >ZNF331-L79SLGRNWICEC | 421   | >ZNF331-L79SFGRNWICEC | 20830 | 20409 |
| >ZNF331-L79SLGRNWICEC | 392   | >ZNF331-L79SFGRNWICEC | 22278 | 21886 |
| >ZNF331-L79SLGRNWIC   | 47    | >ZNF331-L79SFGRNWIC   | 25597 | 25550 |
| >ZNF331-L79SLGRNWICEC | 225   | >ZNF331-L79SFGRNWICEC | 29728 | 29503 |
| >ZNF331-L79KRNSDRRSKS | 85    | >ZNF331-L79KRNSDRRSKS | 7     | 78    |
| >ZNF331-L79KRNSDRRSKS | 175   | >ZNF331-L79KRNSDRRSKS | 232   | 57    |
| >ZNF331-L79KRNSDRRSKS | 201   | >ZNF331-L79KRNSDRRSKS | 684   | 483   |
| >ZNF331-L79KRNSDRRSKS | 281   | >ZNF331-L79KRNSDRRSKS | 974   | 693   |
| >ZNF331-L79KSLGRNWI   | 155   | >ZNF331-L79KSFGRNWI   | 76    | 79    |
| >ZNF331-L79KSLGRNWI   | 87    | >ZNF331-L79KSFGRNWI   | 22    | 65    |
| >ZNF331-L79KSLGRNWIC  | 1380  | >ZNF331-L79KSFGRNWIC  | 196   | 1184  |
| >ZNF331-L79KSLGRNWI   | 41    | >ZNF331-L79KSFGRNWI   | 20    | 21    |
| >ZNF331-L79KSLGRNWI   | 1439  | >ZNF331-L79KSFGRNWI   | 434   | 1005  |
| >ZNF331-L79KSLGRNWI   | 651   | >ZNF331-L79KSFGRNWI   | 440   | 211   |
| >ZNF331-L79KSLGRNWI   | 60    | >ZNF331-L79KSFGRNWI   | 23    | 37    |
| >ZNF331-L79RSKSLGRNWI | 14    | >ZNF331-L79RSKSFGRNW  | 9     | 5     |
| >ZNF331-L79RSKSLGRNWI | 862   | >ZNF331-L79RSKSFGRNW  | 463   | 399   |
| >ZNF331-L79RSKSLGRNW  | 883   | >ZNF331-L79RSKSFGRNW  | 196   | 687   |
| >ZNF331-L79RSKSLGRNW  | 6     | >ZNF331-L79RSKSFGRNW  | 6     | 0     |
| >ZNF331-L79RSKSLGRNWI | 116   | >ZNF331-L79RSKSFGRNW  | 105   | 11    |
| >ZNF331-L79RSKSLGRNW  | 39    | >ZNF331-L79RSKSFGRNW  | 30    | 9     |
| >ZNF331-L79RSKSLGRNW  | 97    | >ZNF331-L79RSKSFGRNW  | 115   | 18    |
| >ZNF331-L79RSKSLGRNW  | 166   | >ZNF331-L79RSKSFGRNW  | 165   | 1     |
| >ZNF331-L79RSKSLGRNWI | 166   | >ZNF331-L79RSKSFGRNW  | 119   | 47    |
| >ZNF331-L79RRSKSLGRNV | 501   | >ZNF331-L79RRSKSFGRNV | 229   | 272   |



|                        |       |                        |      |       |
|------------------------|-------|------------------------|------|-------|
| >ZNF331-L79 RRSKSLGRNV | 804   | >ZNF331-L79 RRSKSFGRNV | 469  | 335   |
| >ZNF331-L79 RRSKSLGR   | 79    | >ZNF331-L79 RRSKSFGR   | 64   | 15    |
| >ZNF331-L79 RRSKSLGRNV | 118   | >ZNF331-L79 RRSKSFGRNV | 153  | 35    |
| >ZNF331-L79 RRSKSLGRNV | 221   | >ZNF331-L79 RRSKSFGRNV | 222  | 1     |
| >ZNF331-L79 RRSKSLGR   | 346   | >ZNF331-L79 RRSKSFGR   | 624  | 278   |
| >ZNF331-L79 RRSKSLGRN  | 556   | >ZNF331-L79 RRSKSFGRN  | 400  | 156   |
| >ZNF331-L79 RRSKSLGRNV | 603   | >ZNF331-L79 RRSKSFGRNV | 491  | 112   |
| >ZNF331-L79 RRSKSLGRNV | 85    | >ZNF331-L79 RRSKSFGRNV | 71   | 14    |
| >ZNF331-L79 RRSKSLGRNV | 305   | >ZNF331-L79 RRSKSFGRNV | 327  | 22    |
| >ZNF331-L79 RRSKSLGRNV | 30    | >ZNF331-L79 RRSKSFGRNV | 19   | 11    |
| >ZNF331-L79 RRSKSLGRNV | 396   | >ZNF331-L79 RRSKSFGRNV | 358  | 38    |
| >ZNF331-L79 RRSKSLGR   | 168   | >ZNF331-L79 RRSKSFGR   | 98   | 70    |
| >ZNF331-L79 SDRRSKSL   | 4617  | >ZNF331-L79 SDRRSKSF   | 172  | 4445  |
| >ZNF331-L79 NSDRRSKSL  | 2744  | >ZNF331-L79 NSDRRSKSF  | 219  | 2525  |
| >ZNF331-L79 RNSDRRSKSL | 2002  | >ZNF331-L79 RNSDRRSKSF | 58   | 1944  |
| >ZNF331-L79 RNSDRRSKSL | 1191  | >ZNF331-L79 RNSDRRSKSF | 152  | 1039  |
| >ZNF331-T7M TFADVAIDF  | 202   | >ZNF331-T7M MFADVAIDF  | 104  | 98    |
| >ZNF331-T7M TFADVAIDF  | 79    | >ZNF331-T7M MFADVAIDF  | 21   | 58    |
| >ZNF331-T7M TFADVAIDF  | 212   | >ZNF331-T7M MFADVAIDF  | 56   | 156   |
| >ZNF331-T7M TFADVAIDF  | 1711  | >ZNF331-T7M MFADVAIDF  | 123  | 1588  |
| >ZNF331-T7M VTFADVAI   | 943   | >ZNF331-T7M VMFADVAI   | 21   | 922   |
| >ZNF331-T7M VTFADVAI   | 502   | >ZNF331-T7M VMFADVAI   | 20   | 482   |
| >ZNF331-T7M VTFADVAIDF | 3054  | >ZNF331-T7M VMFADVAIDI | 112  | 2942  |
| >ZNF331-T7M VTFADVAI   | 594   | >ZNF331-T7M VMFADVAI   | 14   | 580   |
| >ZNF331-T7M VTFADVAIDF | 8745  | >ZNF331-T7M VMFADVAIDI | 354  | 8391  |
| >ZNF331-T7M VTFADVAI   | 128   | >ZNF331-T7M VMFADVAI   | 45   | 83    |
| >ZNF331-T7M VTFADVAI   | 119   | >ZNF331-T7M VMFADVAI   | 3    | 116   |
| >ZNF331-T7M VTFADVAIDF | 12051 | >ZNF331-T7M VMFADVAIDI | 212  | 11839 |
| >ZNF331-T7M VTFADVAIDF | 5258  | >ZNF331-T7M VMFADVAIDI | 43   | 5215  |
| >ZNF331-T7M VTFADVAI   | 2038  | >ZNF331-T7M VMFADVAI   | 10   | 2028  |
| >ZNF331-T7M VTFADVAI   | 2323  | >ZNF331-T7M VMFADVAI   | 11   | 2312  |
| >ZNF331-T7M VTFADVAIDF | 14113 | >ZNF331-T7M VMFADVAIDI | 376  | 13737 |
| >ZNF331-T7M VTFADVAI   | 10129 | >ZNF331-T7M VMFADVAI   | 48   | 10081 |
| >ZNF331-T7M VTFADVAI   | 6240  | >ZNF331-T7M VMFADVAI   | 10   | 6230  |
| >ZNF331-T7M VTFADVAI   | 21    | >ZNF331-T7M VMFADVAI   | 33   | 12    |
| >ZNF331-T7M VTFADVAIDF | 46    | >ZNF331-T7M VMFADVAIDI | 68   | 22    |
| >ZNF331-T7M VTFADVAI   | 50    | >ZNF331-T7M VMFADVAI   | 2583 | 2533  |
| >ZNF331-T7M VTFADVAI   | 2805  | >ZNF331-T7M VMFADVAI   | 148  | 2657  |
| >ZNF331-T7M VTFADVAIDF | 425   | >ZNF331-T7M VMFADVAIDI | 58   | 367   |
| >ZNF331-T7M VTFADVAIDF | 5023  | >ZNF331-T7M VMFADVAIDI | 166  | 4857  |
| >ZNF331-T7M VTFADVAI   | 467   | >ZNF331-T7M VMFADVAI   | 21   | 446   |
| >ZNF331-T7M VTFADVAIDF | 36    | >ZNF331-T7M VMFADVAIDI | 4    | 32    |
| >ZNF331-T7M VTFADVAI   | 31    | >ZNF331-T7M VMFADVAI   | 4036 | 4005  |

|                         |      |                        |      |      |
|-------------------------|------|------------------------|------|------|
| >ZNF331-T7M VTFADVAIDF  | 7    | >ZNF331-T7M VMFADVAIDI | 227  | 220  |
| >ZNF331-T7M VTFADVAIDF  | 273  | >ZNF331-T7M VMFADVAIDI | 4136 | 3863 |
| >ZNF331-T7M VTFADVAIDF  | 162  | >ZNF331-T7M VMFADVAIDI | 943  | 781  |
| >ZNF331-T7M VTFADVAIDF  | 76   | >ZNF331-T7M VMFADVAIDI | 4154 | 4078 |
| >ZNF331-T7M VTFADVAI    | 25   | >ZNF331-T7M VMFADVAI   | 1240 | 1215 |
| >ZNF331-T7M LVTFADVAI   | 1792 | >ZNF331-T7M LVMFADVAI  | 189  | 1603 |
| >ZNF331-T7M LVTFADVA    | 2988 | >ZNF331-T7M LVMFADVA   | 317  | 2671 |
| >ZNF331-T7M LVTFADVAI   | 381  | >ZNF331-T7M LVMFADVAI  | 57   | 324  |
| >ZNF331-T7M LVTFADVAI   | 1055 | >ZNF331-T7M LVMFADVAI  | 87   | 968  |
| >ZNF331-T7M LVTFADVAID  | 1843 | >ZNF331-T7M LVMFADVAIE | 206  | 1637 |
| >ZNF331-T7M LVTFADVA    | 810  | >ZNF331-T7M LVMFADVA   | 162  | 648  |
| >ZNF331-T7M LVTFADVAI   | 68   | >ZNF331-T7M LVMFADVAI  | 22   | 46   |
| >ZNF331-T7M LVTFADVAID  | 3002 | >ZNF331-T7M LVMFADVAIE | 190  | 2812 |
| >ZNF331-T7M LVTFADVAID  | 1815 | >ZNF331-T7M LVMFADVAIE | 339  | 1476 |
| >ZNF331-T7M LVTFADVAID  | 1389 | >ZNF331-T7M LVMFADVAIE | 365  | 1024 |
| >ZNF331-T7M LVTFADVAI   | 517  | >ZNF331-T7M LVMFADVAI  | 269  | 248  |
| >ZNF331-T7M LVTFADVAID  | 159  | >ZNF331-T7M LVMFADVAIE | 84   | 75   |
| >ZNF331-T7M LVTFADVAI   | 769  | >ZNF331-T7M LVMFADVAI  | 281  | 488  |
| >ZNF331-T7M GLVTFADV    | 210  | >ZNF331-T7M GLVMFADV   | 240  | 30   |
| >ZNF331-T7M GLVTFADVAI  | 348  | >ZNF331-T7M GLVMFADVA  | 278  | 70   |
| >ZNF331-T7M GLVTFADV    | 50   | >ZNF331-T7M GLVMFADV   | 89   | 39   |
| >ZNF331-T7M GLVTFADVA   | 273  | >ZNF331-T7M GLVMFADVA  | 473  | 200  |
| >ZNF331-T7M GLVTFADVAI  | 36   | >ZNF331-T7M GLVMFADVA  | 48   | 12   |
| >ZNF331-T7M GLVTFADV    | 15   | >ZNF331-T7M GLVMFADV   | 16   | 1    |
| >ZNF331-T7M GLVTFADVA   | 387  | >ZNF331-T7M GLVMFADVA  | 437  | 50   |
| >ZNF331-T7M GLVTFADVAI  | 164  | >ZNF331-T7M GLVMFADVA  | 216  | 52   |
| >ZNF331-T7M GLVTFADV    | 80   | >ZNF331-T7M GLVMFADV   | 99   | 19   |
| >ZNF331-T7M GLVTFADVAI  | 403  | >ZNF331-T7M GLVMFADVA  | 345  | 58   |
| >ZNF331-T7M GLVTFADV    | 16   | >ZNF331-T7M GLVMFADV   | 15   | 1    |
| >ZNF331-T7M GLVTFADVA   | 649  | >ZNF331-T7M GLVMFADVA  | 395  | 254  |
| >ZNF331-T7M GLVTFADVAI  | 104  | >ZNF331-T7M GLVMFADVA  | 71   | 33   |
| >ZNF331-T7M GLVTFADV    | 11   | >ZNF331-T7M GLVMFADV   | 18   | 7    |
| >ZNF331-T7M GLVTFADVA   | 486  | >ZNF331-T7M GLVMFADVA  | 860  | 374  |
| >ZNF331-T7M GLVTFADVAI  | 28   | >ZNF331-T7M GLVMFADVA  | 49   | 21   |
| >ZNF331-T7M GLVTFADV    | 18   | >ZNF331-T7M GLVMFADV   | 15   | 3    |
| >ZNF331-T7M GLVTFADVAI  | 337  | >ZNF331-T7M GLVMFADVA  | 268  | 69   |
| >ZNF331-T7M GLVTFADV    | 4    | >ZNF331-T7M GLVMFADV   | 4    | 0    |
| >ZNF331-T7M GLVTFADVA   | 589  | >ZNF331-T7M GLVMFADVA  | 367  | 222  |
| >ZNF331-T7M GLVTFADVAI  | 216  | >ZNF331-T7M GLVMFADVA  | 155  | 61   |
| >ZNF331-T7M GLVTFADVAI  | 333  | >ZNF331-T7M GLVMFADVA  | 356  | 23   |
| >ZNF331-T7M AQGLVTFADV  | 358  | >ZNF331-T7M AQGLVMFAD  | 409  | 51   |
| >ZNF331-T7M AQGLVTFADVA | 154  | >ZNF331-T7M AQGLVMFA   | 186  | 32   |
| >ZNF331-T7M AQGLVTFADVA | 548  | >ZNF331-T7M AQGLVMFA   | 379  | 169  |

|                         |       |                        |      |       |
|-------------------------|-------|------------------------|------|-------|
| >ZNF331-T7M MAQGLVTFAD\ | 214   | >ZNF331-T7M MAQGLVMFAD | 158  | 56    |
| >ZNF331-T7M MAQGLVTFA   | 208   | >ZNF331-T7M MAQGLVMF/  | 506  | 298   |
| >ZNF331-T7M MAQGLVTFA   | 339   | >ZNF331-T7M MAQGLVMF/  | 513  | 174   |
| >ZNF331-T7M MAQGLVTFA   | 420   | >ZNF331-T7M MAQGLVMF/  | 450  | 30    |
| >ZNF331-T7M MAQGLVTFA   | 445   | >ZNF331-T7M MAQGLVMF/  | 699  | 254   |
| >ZNF331-T7M MAQGLVTFA   | 268   | >ZNF331-T7M MAQGLVMF/  | 353  | 85    |
| >ZNF331-T7M MAQGLVTFA   | 46    | >ZNF331-T7M MAQGLVMF/  | 37   | 9     |
| >ZNF331-T7M MAQGLVTF    | 239   | >ZNF331-T7M MAQGLVMF   | 119  | 120   |
| >ZNF331-T7M MAQGLVTFA   | 4388  | >ZNF331-T7M MAQGLVMF/  | 414  | 3974  |
| >ZNF331-T7M MAQGLVTF    | 173   | >ZNF331-T7M MAQGLVMF   | 1204 | 1031  |
| >ZNF331-T7M MAQGLVTFA   | 81    | >ZNF331-T7M MAQGLVMF/  | 31   | 50    |
| >ZNF331-T7M MAQGLVTFA   | 89    | >ZNF331-T7M MAQGLVMF/  | 58   | 31    |
| >ZNF331-T7M MAQGLVTF    | 159   | >ZNF331-T7M MAQGLVMF   | 309  | 150   |
| >ZNF331-T7M MAQGLVTF    | 126   | >ZNF331-T7M MAQGLVMF   | 235  | 109   |
| >ZNF331-T7M MAQGLVTF    | 10    | >ZNF331-T7M MAQGLVMF   | 23   | 13    |
| >ZNF331-T7M MAQGLVTF    | 24    | >ZNF331-T7M MAQGLVMF   | 61   | 37    |
| >ZNF331-T7M MAQGLVTF    | 296   | >ZNF331-T7M MAQGLVMF   | 431  | 135   |
| >ZNF331-T7M MAQGLVTF    | 56    | >ZNF331-T7M MAQGLVMF   | 134  | 78    |
| >ZNF384-A4E AQAQAQAQ/   | 273   | >ZNF384-A4E AQAQAQAQ/  | 2442 | 2169  |
| >ZNF384-A4E AQAQAQAQ/   | 407   | >ZNF384-A4E AQAQAQAQ/  | 3723 | 3316  |
| >ZNF384-A4E AQAQASQA    | 459   | >ZNF384-A4E AQTQASQA   | 2666 | 2207  |
| >ZNF384-A4E AQAQASQA    | 193   | >ZNF384-A4E AQTQASQA   | 500  | 307   |
| >ZNF384-A4E AQAQASQA    | 406   | >ZNF384-A4E AQTQASQA   | 3771 | 3365  |
| >ZNF384-A4E AQAQASQAS   | 311   | >ZNF384-A4E AQTQASQAS  | 3369 | 3058  |
| >ZNF384-A4E AQAQASQAS   | 183   | >ZNF384-A4E AQTQASQAS\ | 1527 | 1344  |
| >ZNF384-A4E AQAQAQASC   | 301   | >ZNF384-A4E AQAQTQASC  | 396  | 95    |
| >ZNF384-A4E AQAQAQASC   | 407   | >ZNF384-A4E AQAQTQASC  | 629  | 222   |
| >ZNF384-A4E AQAQAQAQ/   | 273   | >ZNF384-A4E AQAQAQTQ/  | 317  | 44    |
| >ZNF384-A4E AQAQAQAQ/   | 407   | >ZNF384-A4E AQAQAQTQ/  | 619  | 212   |
| >ZNF384-A4E AQAQAQAQ/   | 371   | >ZNF384-A4E AQAQAQTQ/  | 466  | 95    |
| >ZNF384-A4E AQAQAQAQ/   | 273   | >ZNF384-A4E AQAQAQAQ\  | 2442 | 2169  |
| >ZNF384-A4E AQAQAQAQ/   | 273   | >ZNF384-A4E AQAQAQAQ\  | 301  | 28    |
| >ZNF384-A4E AQAQAQAQ/   | 407   | >ZNF384-A4E AQAQAQAQ\  | 3723 | 3316  |
| >ZNF384-A4E AQAQAQAQ/   | 407   | >ZNF384-A4E AQAQAQAQ\  | 538  | 131   |
| >ZNF384-Q4I PHFQSPGAAI  | 23080 | >ZNF384-Q4I PHFQSPGAAI | 286  | 22794 |
| >ZNF384-Q4I APQGGGGGGI  | 5618  | >ZNF384-Q4I APRGGGGGGI | 244  | 5374  |
| >ZNF384-Q4I QSPGAAPQ    | 17879 | >ZNF384-Q4I QSPGAAPR   | 254  | 17625 |
| >ZNF384-Q4I FQSPGAAPQ   | 46    | >ZNF384-Q4I FQSPGAAPR  | 403  | 357   |
| >ZNF384-Q4I FQSPGAAPQ   | 366   | >ZNF384-Q4I FQSPGAAPR  | 935  | 569   |
| >ZNF384-Q4I FQSPGAAPQ   | 17401 | >ZNF384-Q4I FQSPGAAPR  | 426  | 16975 |
| >ZNF384-Q4I FQSPGAAPQ   | 170   | >ZNF384-Q4I FQSPGAAPR  | 1270 | 1100  |
| >ZNF384-Q4I FQSPGAAPQ   | 749   | >ZNF384-Q4I FQSPGAAPR  | 150  | 599   |
| >ZNF384-Q4I FQSPGAAPQ   | 413   | >ZNF384-Q4I FQSPGAAPR  | 662  | 249   |

|                        |       |                        |       |       |
|------------------------|-------|------------------------|-------|-------|
| >ZNF384-Q4(HFQSPGAAP(  | 17223 | >ZNF384-Q4(HFQSPGAAP(  | 35    | 17188 |
| >ZNF384-Q4(HFQSPGAAP(  | 14947 | >ZNF384-Q4(HFQSPGAAP(  | 118   | 14829 |
| >ZNF384-Q4(HFQSPGAAP(  | 27531 | >ZNF384-Q4(HFQSPGAAP(  | 99    | 27432 |
| >ZNF384-Q4(HFQSPGAAP(  | 10830 | >ZNF384-Q4(HFQSPGAAP(  | 75    | 10755 |
| >ZNF384-S2€SYLAQHIRI   | 17    | >ZNF384-S2€FYLAQHIRI   | 45    | 28    |
| >ZNF384-S2€SYLAQHIRI   | 582   | >ZNF384-S2€FYLAQHIRI   | 159   | 423   |
| >ZNF384-S2€SYLAQHIRI   | 282   | >ZNF384-S2€FYLAQHIRI   | 365   | 83    |
| >ZNF384-S2€SYLAQHIR    | 751   | >ZNF384-S2€FYLAQHIR    | 315   | 436   |
| >ZNF384-S2€SYLAQHIRI   | 8     | >ZNF384-S2€FYLAQHIRI   | 6     | 2     |
| >ZNF384-S2€SYLAQHIRIHS | 1382  | >ZNF384-S2€FYLAQHIRIHS | 448   | 934   |
| >ZNF384-S2€SYLAQHIRI   | 70    | >ZNF384-S2€FYLAQHIRI   | 3947  | 3877  |
| >ZNF384-S2€SYLAQHIR    | 20    | >ZNF384-S2€FYLAQHIR    | 164   | 144   |
| >ZNF384-S2€SYLAQHIR    | 318   | >ZNF384-S2€FYLAQHIR    | 110   | 208   |
| >ZNF384-S2€SYLAQHIR    | 20    | >ZNF384-S2€FYLAQHIR    | 22    | 2     |
| >ZNF384-S2€SSYLAQHI    | 96    | >ZNF384-S2€SFYLAQHI    | 453   | 357   |
| >ZNF384-S2€SSYLAQHI    | 12746 | >ZNF384-S2€SFYLAQHI    | 261   | 12485 |
| >ZNF384-S2€SSYLAQHIR   | 116   | >ZNF384-S2€SFYLAQHIR   | 4993  | 4877  |
| >ZNF384-S2€SSYLAQHI    | 16907 | >ZNF384-S2€SFYLAQHI    | 200   | 16707 |
| >ZNF384-S2€SSYLAQHIRI  | 17952 | >ZNF384-S2€SFYLAQHIRI  | 433   | 17519 |
| >ZNF384-S2€SSYLAQHIRI  | 398   | >ZNF384-S2€SFYLAQHIRI  | 1287  | 889   |
| >ZNF384-S2€SSYLAQHIR   | 38    | >ZNF384-S2€SFYLAQHIR   | 21    | 17    |
| >ZNF384-S2€SSYLAQHIR   | 2001  | >ZNF384-S2€SFYLAQHIR   | 335   | 1666  |
| >ZNF384-S2€SSYLAQHIR   | 32    | >ZNF384-S2€SFYLAQHIR   | 309   | 277   |
| >ZNF384-S2€SSYLAQHIRI  | 147   | >ZNF384-S2€SFYLAQHIRI  | 5902  | 5755  |
| >ZNF384-S2€SSYLAQHI    | 46    | >ZNF384-S2€SFYLAQHI    | 25357 | 25311 |
| >ZNF384-S2€SSYLAQHIRI  | 34    | >ZNF384-S2€SFYLAQHIRI  | 23194 | 23160 |
| >ZNF384-S2€SSYLAQHIRI  | 191   | >ZNF384-S2€SFYLAQHIRI  | 16401 | 16210 |
| >ZNF384-S2€SSYLAQHI    | 309   | >ZNF384-S2€SFYLAQHI    | 2293  | 1984  |
| >ZNF384-S2€SSYLAQHIR   | 125   | >ZNF384-S2€SFYLAQHIR   | 1368  | 1243  |
| >ZNF384-S2€SSYLAQHIR   | 473   | >ZNF384-S2€SFYLAQHIR   | 32    | 441   |
| >ZNF384-S2€SSYLAQHI    | 11    | >ZNF384-S2€SFYLAQHI    | 1151  | 1140  |
| >ZNF384-S2€SSYLAQHIRI  | 65    | >ZNF384-S2€SFYLAQHIRI  | 12906 | 12841 |
| >ZNF384-S2€NSSYLAQHIR  | 139   | >ZNF384-S2€NSFYLAQHIR  | 126   | 13    |
| >ZNF384-S2€NSSYLAQHIR  | 5182  | >ZNF384-S2€NSFYLAQHIR  | 318   | 4864  |
| >ZNF384-S2€NSSYLAQHIR  | 795   | >ZNF384-S2€NSFYLAQHIR  | 428   | 367   |
| >ZNF384-S2€NSSYLAQH    | 3042  | >ZNF384-S2€NSFYLAQH    | 468   | 2574  |
| >ZNF384-S2€NSSYLAQHIR  | 14    | >ZNF384-S2€NSFYLAQHIR  | 8     | 6     |
| >ZNF384-S2€NSSYLAQHI   | 212   | >ZNF384-S2€NSFYLAQHI   | 37    | 175   |
| >ZNF384-S2€NSSYLAQHIR  | 242   | >ZNF384-S2€NSFYLAQHIR  | 42    | 200   |
| >ZNF384-S2€NSSYLAQHIR  | 3085  | >ZNF384-S2€NSFYLAQHIR  | 493   | 2592  |
| >ZNF384-S2€NSSYLAQHIR  | 1682  | >ZNF384-S2€NSFYLAQHIR  | 488   | 1194  |
| >ZNF384-S2€NSSYLAQHIR  | 2108  | >ZNF384-S2€NSFYLAQHIR  | 303   | 1805  |
| >ZNF384-S2€NSSYLAQHI   | 134   | >ZNF384-S2€NSFYLAQHI   | 31    | 103   |

|                        |      |                        |     |      |
|------------------------|------|------------------------|-----|------|
| >ZNF384-S2E NSSYLAQHIR | 344  | >ZNF384-S2E NSFYLAQHIR | 67  | 277  |
| >ZNF384-S2E FANSSYLAQH | 2827 | >ZNF384-S2E FANSFYLAQH | 369 | 2458 |
| >ZNF384-S2E FANSSYLA   | 1064 | >ZNF384-S2E FANSFYLA   | 359 | 705  |
| >ZNF384-S2E FANSSYLA   | 96   | >ZNF384-S2E FANSFYLA   | 30  | 66   |
| >ZNF384-S2E FANSSYLAQH | 367  | >ZNF384-S2E FANSFYLAQH | 119 | 248  |
| >ZNF384-S2E FANSSYLA   | 124  | >ZNF384-S2E FANSFYLA   | 99  | 25   |
| >ZNF384-S2E FANSSYLAQH | 198  | >ZNF384-S2E FANSFYLAQH | 193 | 5    |
| >ZNF384-S2E FANSSYLA   | 238  | >ZNF384-S2E FANSFYLA   | 79  | 159  |
| >ZNF384-S2E FANSSYLAQH | 253  | >ZNF384-S2E FANSFYLAQH | 176 | 77   |
| >ZNF384-S2E FANSSYLA   | 167  | >ZNF384-S2E FANSFYLA   | 67  | 100  |
| >ZNF384-S2E FANSSYLAQH | 434  | >ZNF384-S2E FANSFYLAQH | 182 | 252  |
| >ZNF384-S2E FANSSYLAQH | 545  | >ZNF384-S2E FANSFYLAQH | 191 | 354  |
| >ZNF384-S2E FANSSYLAQH | 128  | >ZNF384-S2E FANSFYLAQH | 187 | 59   |
| >ZNF384-S2E FANSSYLAQ  | 481  | >ZNF384-S2E FANSFYLAQ  | 416 | 65   |
| >ZNF384-S2E FANSSYLAQH | 368  | >ZNF384-S2E FANSFYLAQH | 254 | 114  |
| >ZNF384-S2E FANSSYLA   | 45   | >ZNF384-S2E FANSFYLA   | 23  | 22   |
| >ZNF384-S2E FANSSYLAQH | 182  | >ZNF384-S2E FANSFYLAQH | 222 | 40   |
| >ZNF384-S2E FANSSYLAQH | 101  | >ZNF384-S2E FANSFYLAQH | 65  | 36   |
| >ZNF384-S2E TFANSSYL   | 184  | >ZNF384-S2E TFANSFYL   | 73  | 111  |
| >ZNF384-S2E TFANSSYL   | 795  | >ZNF384-S2E TFANSFYL   | 124 | 671  |
| >ZNF384-S2E TFANSSYL   | 1377 | >ZNF384-S2E TFANSFYL   | 370 | 1007 |
| >ZNF384-S2E TFANSSYL   | 283  | >ZNF384-S2E TFANSFYL   | 55  | 228  |
| >ZNF384-S2E KTFANSSYL  | 60   | >ZNF384-S2E KTFANSFYL  | 38  | 22   |
| >ZNF384-S2E KTFANSSYL  | 378  | >ZNF384-S2E KTFANSFYL  | 455 | 77   |
| >ZNF384-S2E KTFANSSYL  | 1132 | >ZNF384-S2E KTFANSFYL  | 137 | 995  |
| >ZNF384-S2E KTFANSSY   | 2612 | >ZNF384-S2E KTFANSFY   | 498 | 2114 |
| >ZNF384-S2E KTFANSSYL  | 136  | >ZNF384-S2E KTFANSFYL  | 13  | 123  |
| >ZNF384-S2E KTFANSSYLA | 1107 | >ZNF384-S2E KTFANSFYLA | 345 | 762  |
| >ZNF384-S2E KTFANSSYL  | 16   | >ZNF384-S2E KTFANSFYL  | 7   | 9    |
| >ZNF384-S2E KTFANSSYLA | 149  | >ZNF384-S2E KTFANSFYLA | 106 | 43   |
| >ZNF384-S2E KTFANSSYL  | 133  | >ZNF384-S2E KTFANSFYL  | 537 | 404  |
| >ZNF384-S2E KTFANSSYLA | 295  | >ZNF384-S2E KTFANSFYLA | 176 | 119  |
| >ZNF384-S2E KTFANSSYL  | 57   | >ZNF384-S2E KTFANSFYL  | 6   | 51   |
| >ZNF384-S2E KTFANSSYLA | 194  | >ZNF384-S2E KTFANSFYLA | 80  | 114  |
| >ZNF384-S2E KTFANSSYL  | 18   | >ZNF384-S2E KTFANSFYL  | 6   | 12   |
| >ZNF384-S2E KTFANSSYLA | 265  | >ZNF384-S2E KTFANSFYLA | 144 | 121  |
| >ZNF384-S2E KTFANSSYL  | 90   | >ZNF384-S2E KTFANSFYL  | 13  | 77   |
| >ZNF384-S2E KTFANSSYL  | 333  | >ZNF384-S2E KTFANSFYL  | 33  | 300  |
| >ZNF384-S2E KTFANSSYL  | 3798 | >ZNF384-S2E KTFANSFYL  | 262 | 3536 |
| >ZNF384-S2E KTFANSSYL  | 1302 | >ZNF384-S2E KTFANSFYL  | 481 | 821  |
| >ZNF384-S2E KTFANSSY   | 66   | >ZNF384-S2E KTFANSFY   | 41  | 25   |
| >ZNF384-S2E KTFANSSY   | 39   | >ZNF384-S2E KTFANSFY   | 16  | 23   |
| >ZNF384-S2E KTFANSSYL  | 1838 | >ZNF384-S2E KTFANSFYL  | 152 | 1686 |

|                        |      |                        |      |      |
|------------------------|------|------------------------|------|------|
| >ZNF384-S2E KTFANSSY   | 257  | >ZNF384-S2E KTFANSFY   | 6154 | 5897 |
| >ZNF384-S2E KTFANSSY   | 1437 | >ZNF384-S2E KTFANSFY   | 462  | 975  |
| >ZNF384-S2E KTFANSSY   | 265  | >ZNF384-S2E KTFANSFY   | 380  | 115  |
| >ZNF384-S2E KTFANSSY   | 60   | >ZNF384-S2E KTFANSFY   | 19   | 41   |
| >ZNF384-S2E KTFANSSY   | 26   | >ZNF384-S2E KTFANSFY   | 12   | 14   |
| >ZNF384-S2E KTFANSSYL  | 8    | >ZNF384-S2E KTFANSFYL  | 8    | 0    |
| >ZNF384-S2E KTFANSSYLA | 8    | >ZNF384-S2E KTFANSFYLA | 9    | 1    |
| >ZNF384-S2E KTFANSSYLA | 26   | >ZNF384-S2E KTFANSFYLA | 23   | 3    |
| >ZNF384-S2E KTFANSSY   | 9    | >ZNF384-S2E KTFANSFY   | 7    | 2    |
| >ZNF384-S2E KTFANSSY   | 1848 | >ZNF384-S2E KTFANSFY   | 190  | 1658 |
| >ZNF384-S2E KTFANSSYL  | 185  | >ZNF384-S2E KTFANSFYL  | 33   | 152  |
| >ZNF384-S2E KTFANSSYLA | 1223 | >ZNF384-S2E KTFANSFYLA | 456  | 767  |
| >ZNF384-S2E KTFANSSY   | 18   | >ZNF384-S2E KTFANSFY   | 97   | 79   |
| >ZNF384-S2E KTFANSSYL  | 34   | >ZNF384-S2E KTFANSFYL  | 7    | 27   |
| >ZNF384-S2E KTFANSSYLA | 102  | >ZNF384-S2E KTFANSFYLA | 67   | 35   |
| >ZNF384-S2E KTFANSSYLA | 253  | >ZNF384-S2E KTFANSFYLA | 75   | 178  |
| >ZNF384-S2E KTFANSSY   | 426  | >ZNF384-S2E KTFANSFY   | 70   | 356  |
| >ZNF384-S2E KTFANSSYL  | 54   | >ZNF384-S2E KTFANSFYL  | 18   | 36   |
| >ZNF384-S2E KTFANSSYLA | 151  | >ZNF384-S2E KTFANSFYLA | 56   | 95   |
| >ZNF384-S2E KTFANSSYL  | 516  | >ZNF384-S2E KTFANSFYL  | 41   | 475  |
| >ZNF384-S2E KTFANSSY   | 61   | >ZNF384-S2E KTFANSFY   | 9    | 52   |
| >ZNF384-S2E KTFANSSY   | 44   | >ZNF384-S2E KTFANSFY   | 91   | 47   |
| >ZNF384-S2E KTFANSSY   | 255  | >ZNF384-S2E KTFANSFY   | 981  | 726  |
| >ZNF384-S2E KTFANSSY   | 8    | >ZNF384-S2E KTFANSFY   | 21   | 13   |
| >ZNF384-S2E KTFANSSYL  | 42   | >ZNF384-S2E KTFANSFYL  | 184  | 142  |
| >ZNF384-S2E KTFANSSY   | 3    | >ZNF384-S2E KTFANSFY   | 3    | 0    |
| >ZNF384-S2E KTFANSSYL  | 3    | >ZNF384-S2E KTFANSFYL  | 3    | 0    |
| >ZNF384-S2E KTFANSSYLA | 173  | >ZNF384-S2E KTFANSFYLA | 497  | 324  |
| >ZNF384-S2E KTFANSSYLA | 84   | >ZNF384-S2E KTFANSFYLA | 163  | 79   |
| >ZNF384-S2E KTFANSSY   | 76   | >ZNF384-S2E KTFANSFY   | 67   | 9    |
| >ZNF384-S2E KTFANSSYL  | 168  | >ZNF384-S2E KTFANSFYL  | 87   | 81   |
| >ZNF384-S2E KTFANSSY   | 26   | >ZNF384-S2E KTFANSFY   | 23   | 3    |
| >ZNF384-S2E KTFANSSYL  | 30   | >ZNF384-S2E KTFANSFYL  | 12   | 18   |
| >ZNF384-S2E KTFANSSYL  | 70   | >ZNF384-S2E KTFANSFYL  | 21   | 49   |
| >ZNF384-S2E KTFANSSYLA | 1308 | >ZNF384-S2E KTFANSFYLA | 429  | 879  |
| >ZNF384-S2E KTFANSSYL  | 7    | >ZNF384-S2E KTFANSFYL  | 93   | 86   |
| >ZNF384-S2E KTFANSSY   | 177  | >ZNF384-S2E KTFANSFY   | 122  | 55   |
| >ZNF384-S2E KTFANSSYLA | 1891 | >ZNF384-S2E KTFANSFYLA | 485  | 1406 |
| >ZNF384-S2E KTFANSSYL  | 34   | >ZNF384-S2E KTFANSFYL  | 49   | 15   |
| >ZNF384-S2E SKTFANSSY  | 102  | >ZNF384-S2E SKTFANSFY  | 59   | 43   |
| >ZNF384-S2E SKTFANSS   | 7703 | >ZNF384-S2E SKTFANSF   | 8    | 7695 |
| >ZNF384-S2E SKTFANSSY  | 12   | >ZNF384-S2E SKTFANSFY  | 47   | 35   |
| >ZNF384-S2E SKTFANSSYL | 111  | >ZNF384-S2E SKTFANSFYL | 408  | 297  |

|                         |       |                         |       |       |
|-------------------------|-------|-------------------------|-------|-------|
| >ZNF384-S2E SKTFANSSY   | 62    | >ZNF384-S2E SKTFANSFY   | 42    | 20    |
| >ZNF384-S2E CSKTFANSSY  | 561   | >ZNF384-S2E CSKTFANSFY  | 156   | 405   |
| >ZNF384-S2E CSKTFANSSY  | 1602  | >ZNF384-S2E CSKTFANSFY  | 438   | 1164  |
| >ZNF384-S2E CSKTFANSSY  | 945   | >ZNF384-S2E CSKTFANSFY  | 146   | 799   |
| >ZNF384-S2E CSKTFANSSY  | 553   | >ZNF384-S2E CSKTFANSFY  | 171   | 382   |
| >ZNF384-S2E CSKTFANSSYI | 146   | >ZNF384-S2E CSKTFANSFYI | 112   | 34    |
| >ZNF384-S2E CSKTFANSSY  | 97    | >ZNF384-S2E CSKTFANSFY  | 47    | 50    |
| >ZNF384-S2E CSKTFANSSY  | 351   | >ZNF384-S2E CSKTFANSFY  | 1335  | 984   |
| >ZNF384-S2E CSKTFANSS   | 8181  | >ZNF384-S2E CSKTFANSF   | 20    | 8161  |
| >ZNF384-S2E CSKTFANSSY  | 38    | >ZNF384-S2E CSKTFANSFY  | 111   | 73    |
| >ZNF384-S2E CSKTFANSSYI | 478   | >ZNF384-S2E CSKTFANSFYI | 1238  | 760   |
| >ZNF384-S2E CSKTFANSS   | 25178 | >ZNF384-S2E CSKTFANSF   | 75    | 25103 |
| >ZNF384-S2E CSKTFANSSY  | 53    | >ZNF384-S2E CSKTFANSFY  | 85    | 32    |
| >ZNF384-S2E CSKTFANSSYI | 433   | >ZNF384-S2E CSKTFANSFYI | 528   | 95    |
| >ZNF384-S2E CSKTFANSSYI | 306   | >ZNF384-S2E CSKTFANSFYI | 106   | 200   |
| >ZNF384-S2E CSKTFANSS   | 9494  | >ZNF384-S2E CSKTFANSF   | 81    | 9413  |
| >ZNF384-S2E CSKTFANSSY  | 70    | >ZNF384-S2E CSKTFANSFY  | 53    | 17    |
| >ZNF384-S2E CSKTFANSSYI | 256   | >ZNF384-S2E CSKTFANSFYI | 1995  | 1739  |
| >ZNF384-S2E CSKTFANSSYI | 207   | >ZNF384-S2E CSKTFANSFYI | 276   | 69    |
| >ZNF384-S2E HCSKTFANSS  | 453   | >ZNF384-S2E HCSKTFANSF  | 4993  | 4540  |
| >ZNF384-S2E HCSKTFANSS  | 199   | >ZNF384-S2E HCSKTFANSF  | 123   | 76    |
| >ZNF384-S2E HCSKTFANSS  | 809   | >ZNF384-S2E HCSKTFANSF  | 78    | 731   |
| >ZNF384-S2E HCSKTFANSS  | 15614 | >ZNF384-S2E HCSKTFANSF  | 73    | 15541 |
| >ZNF384-S2E HCSKTFANSS  | 240   | >ZNF384-S2E HCSKTFANSF  | 760   | 520   |
| >ZNF384-S2E HCSKTFANSS  | 447   | >ZNF384-S2E HCSKTFANSF  | 1737  | 1290  |
| >ZNF384-S2E HCSKTFANSS  | 32    | >ZNF384-S2E HCSKTFANSF  | 30    | 2     |
| >ZNF384-S2E HCSKTFANSS  | 17844 | >ZNF384-S2E HCSKTFANSF  | 443   | 17401 |
| >ZNF384-S2E HCSKTFANSS  | 129   | >ZNF384-S2E HCSKTFANSF  | 294   | 165   |
| >ZNF521-E2E AECHPECS    | 347   | >ZNF521-E2E AQCHPECS    | 17065 | 16718 |
| >ZNF521-E2E FPEDLQKHIA  | 416   | >ZNF521-E2E FPEDLQKHIAI | 181   | 235   |
| >ZNF521-E2E LQKHIAECH   | 709   | >ZNF521-E2E LQKHIAQCH   | 238   | 471   |
| >ZNF521-E72 EVFDSKVSI   | 13618 | >ZNF521-E72 KVFDSKVSI   | 257   | 13361 |
| >ZNF521-E72 EVFDSKVSIQI | 7501  | >ZNF521-E72 KVFDSKVSIQI | 133   | 7368  |
| >ZNF521-E72 EVFDSKVSI   | 4001  | >ZNF521-E72 KVFDSKVSI   | 385   | 3616  |
| >ZNF521-E72 EVFDSKVSIQI | 1164  | >ZNF521-E72 KVFDSKVSIQI | 76    | 1088  |
| >ZNF521-E72 EVFDSKVSI   | 1786  | >ZNF521-E72 KVFDSKVSI   | 27    | 1759  |
| >ZNF521-E72 EVFDSKVSIQI | 2147  | >ZNF521-E72 KVFDSKVSIQI | 47    | 2100  |
| >ZNF521-E72 EVFDSKVSI   | 1547  | >ZNF521-E72 KVFDSKVSI   | 97    | 1450  |
| >ZNF521-E72 EVFDSKVSIQI | 686   | >ZNF521-E72 KVFDSKVSIQI | 50    | 636   |
| >ZNF521-E72 EVFDSKVSIQI | 1875  | >ZNF521-E72 KVFDSKVSIQI | 126   | 1749  |
| >ZNF521-E72 EVFDSKVSI   | 1173  | >ZNF521-E72 KVFDSKVSI   | 103   | 1070  |
| >ZNF521-E72 EVFDSKVSIQI | 282   | >ZNF521-E72 KVFDSKVSIQI | 36    | 246   |
| >ZNF521-E72 EVFDSKVSI   | 12106 | >ZNF521-E72 KVFDSKVSI   | 31    | 12075 |

|                          |       |                          |       |       |
|--------------------------|-------|--------------------------|-------|-------|
| >ZNF521-E72 EVFDSKVSIIQI | 13803 | >ZNF521-E72 KVFDSKVSIIQI | 53    | 13750 |
| >ZNF521-E72 EVFDSKVSI    | 233   | >ZNF521-E72 KVFDSKVSI    | 9     | 224   |
| >ZNF521-E72 EVFDSKVSIIQI | 749   | >ZNF521-E72 KVFDSKVSIIQI | 25    | 724   |
| >ZNF521-E72 EVFDSKVSIIQI | 449   | >ZNF521-E72 KVFDSKVSIIQI | 13145 | 12696 |
| >ZNF521-E72 EVFDSKVSI    | 6     | >ZNF521-E72 KVFDSKVSI    | 430   | 424   |
| >ZNF521-E72 EVFDSKVSIIQI | 9     | >ZNF521-E72 KVFDSKVSIIQI | 1017  | 1008  |
| >ZNF521-E72 EVFDSKVSI    | 16    | >ZNF521-E72 KVFDSKVSI    | 1926  | 1910  |
| >ZNF521-E72 EVFDSKVSIIQI | 12    | >ZNF521-E72 KVFDSKVSIIQI | 1327  | 1315  |
| >ZNF521-E72 EVFDSKVSI    | 2678  | >ZNF521-E72 KVFDSKVSI    | 350   | 2328  |
| >ZNF521-E72 EVFDSKVSI    | 5888  | >ZNF521-E72 KVFDSKVSI    | 119   | 5769  |
| >ZNF521-E72 EVFDSKVSIIQI | 1121  | >ZNF521-E72 KVFDSKVSIIQI | 27    | 1094  |
| >ZNF521-E72 EVFDSKVSIIQI | 3636  | >ZNF521-E72 KVFDSKVSIIQI | 325   | 3311  |
| >ZNF521-E72 EVFDSKVSI    | 1205  | >ZNF521-E72 KVFDSKVSI    | 136   | 1069  |
| >ZNF521-E72 QEVFDSKV     | 283   | >ZNF521-E72 QKVFDISKV    | 23477 | 23194 |
| >ZNF521-E72 QEVFDSKVSI   | 42    | >ZNF521-E72 QKVFDISKVSI  | 3679  | 3637  |
| >ZNF521-E72 QEVFDSKVSI   | 2865  | >ZNF521-E72 QKVFDISKVSI  | 64    | 2801  |
| >ZNF521-E72 QEVFDSKVSI   | 81    | >ZNF521-E72 QKVFDISKVSI  | 20941 | 20860 |
| >ZNF521-E72 QEVFDSKVSI   | 327   | >ZNF521-E72 QKVFDISKVSI  | 18838 | 18511 |
| >ZNF521-E72 QEVFDSKVSI   | 85    | >ZNF521-E72 QKVFDISKVSI  | 20391 | 20306 |
| >ZNF521-E72 FVFFRCTLQI   | 16461 | >ZNF521-E72 FVFFRCTLQI   | 98    | 16363 |
| >ZNF521-E72 FVFFRCTLQI   | 21754 | >ZNF521-E72 FVFFRCTLQI   | 39    | 21715 |
| >ZNF521-E72 FVFFRCTLQI   | 7799  | >ZNF521-E72 FVFFRCTLQI   | 302   | 7497  |
| >ZNF521-E72 FVFFRCTLQI   | 790   | >ZNF521-E72 FVFFRCTLQI   | 4     | 786   |
| >ZNF521-E72 CQEVFDSKV    | 4942  | >ZNF521-E72 CQKVFDISKV   | 447   | 4495  |
| >ZNF521-E72 CQEVFDSKVS   | 1522  | >ZNF521-E72 CQKVFDISKVS  | 88    | 1434  |
| >ZNF521-E72 CQEVFDSKVS   | 422   | >ZNF521-E72 CQKVFDISKVS  | 672   | 250   |
| >ZNF521-E72 TLCQEVFDSK   | 87    | >ZNF521-E72 TLCQKVFDISK  | 135   | 48    |
| >ZNF521-E72 TLCQEVFDSK   | 83    | >ZNF521-E72 TLCQKVFDISK  | 57    | 26    |
| >ZNF521-E72 TLCQEVFDSK   | 16    | >ZNF521-E72 TLCQKVFDISK  | 15    | 1     |
| >ZNF521-E72 TLCQEVFDSK   | 464   | >ZNF521-E72 TLCQKVFDISK  | 485   | 21    |
| >ZNF521-E72 TLCQEVFDSK   | 48    | >ZNF521-E72 TLCQKVFDISK  | 53    | 5     |
| >ZNF521-E72 TLCQEVFDSK   | 298   | >ZNF521-E72 TLCQKVFDISK  | 304   | 6     |
| >ZNF521-E72 TLCQEVFDSK   | 4     | >ZNF521-E72 TLCQKVFDISK  | 4     | 0     |
| >ZNF521-E72 TLCQEVFDSK   | 382   | >ZNF521-E72 TLCQKVFDISK  | 133   | 249   |
| >ZNF521-E72 TLCQEVFDSK   | 144   | >ZNF521-E72 TLCQKVFDISK  | 124   | 20    |
| >ZNF521-E72 CTLCQEVFDS   | 47    | >ZNF521-E72 CTLCQKVFDIS  | 43    | 4     |
| >ZNF521-E72 CTLCQEVF     | 169   | >ZNF521-E72 CTLCQKVF     | 343   | 174   |
| >ZNF521-E72 CTLCQEVFDS   | 597   | >ZNF521-E72 CTLCQKVFDIS  | 368   | 229   |
| >ZNF521-E72 CTLCQEVFDS   | 111   | >ZNF521-E72 CTLCQKVFDIS  | 163   | 52    |
| >ZNF521-E72 CTLCQEVF     | 256   | >ZNF521-E72 CTLCQKVF     | 207   | 49    |
| >ZNF521-E72 CTLCQEVF     | 53    | >ZNF521-E72 CTLCQKVF     | 34    | 19    |
| >ZNF521-E72 CTLCQEVF     | 1203  | >ZNF521-E72 CTLCQKVF     | 494   | 709   |
| >ZNF521-E72 CTLCQEVFDS   | 406   | >ZNF521-E72 CTLCQKVFDIS  | 316   | 90    |



|                        |       |                        |       |       |
|------------------------|-------|------------------------|-------|-------|
| >ZNF521-E72 RCTLCQEVF  | 153   | >ZNF521-E72 RCTLCQKVF  | 229   | 76    |
| >ZNF521-E72 FRCTLCQEVF | 45    | >ZNF521-E72 FRCTLCQKVF | 37    | 8     |
| >ZNF521-E72 FRCTLCQEVF | 392   | >ZNF521-E72 FRCTLCQKVF | 271   | 121   |
| >ZNF521-E72 FFRCTLCQEV | 273   | >ZNF521-E72 FFRCTLCQKV | 553   | 280   |
| >ZNF521-E72 FFRCTLCQEV | 93    | >ZNF521-E72 FFRCTLCQKV | 142   | 49    |
| >ZNF521-E72 FFRCTLCQEV | 29    | >ZNF521-E72 FFRCTLCQKV | 46    | 17    |
| >ZNF521-E72 FFRCTLCQE  | 10213 | >ZNF521-E72 FFRCTLCQK  | 24    | 10189 |
| >ZNF521-E72 FFRCTLCQEV | 199   | >ZNF521-E72 FFRCTLCQKV | 411   | 212   |
| >ZNF521-E72 FFRCTLCQEV | 105   | >ZNF521-E72 FFRCTLCQKV | 78    | 27    |
| >ZNF521-E72 FFRCTLCQEV | 471   | >ZNF521-E72 FFRCTLCQKV | 610   | 139   |
| >ZNF521-E72 VFFRCTLCQE | 160   | >ZNF521-E72 VFFRCTLCQK | 349   | 189   |
| >ZNF521-E72 VFFRCTLCQE | 22075 | >ZNF521-E72 VFFRCTLCQK | 128   | 21947 |
| >ZNF521-E72 VFFRCTLCQE | 34883 | >ZNF521-E72 VFFRCTLCQK | 407   | 34476 |
| >ZNF521-E72 VFFRCTLCQE | 15273 | >ZNF521-E72 VFFRCTLCQK | 231   | 15042 |
| >ZNF521-E72 VFFRCTLCQE | 6029  | >ZNF521-E72 VFFRCTLCQK | 223   | 5806  |
| >ZNF521-E72 VFFRCTLCQE | 8257  | >ZNF521-E72 VFFRCTLCQK | 242   | 8015  |
| >ZNF521-E74 NEKKVYRCT  | 131   | >ZNF521-E74 NKKKVYRCT  | 28089 | 27958 |
| >ZNF521-E74 QLHLAVKHSN | 20446 | >ZNF521-E74 QLHLAVKHSN | 175   | 20271 |
| >ZNF521-E74 QLHLAVKHSN | 12195 | >ZNF521-E74 QLHLAVKHSN | 52    | 12143 |
| >ZNF521-E74 SNEKKVYR   | 376   | >ZNF521-E74 SNKKKVYR   | 32    | 344   |
| >ZNF521-E74 SNEKKVYR   | 200   | >ZNF521-E74 SNKKKVYR   | 162   | 38    |
| >ZNF521-E74 HSNEKKVY   | 353   | >ZNF521-E74 HSNKKKVY   | 336   | 17    |
| >ZNF521-E74 HSNEKKVYR  | 9     | >ZNF521-E74 HSNKKKVYR  | 7     | 2     |
| >ZNF521-E74 HSNEKKVYR  | 34    | >ZNF521-E74 HSNKKKVYR  | 60    | 26    |
| >ZNF521-E74 HSNEKKVYR  | 25    | >ZNF521-E74 HSNKKKVYR  | 31    | 6     |
| >ZNF521-E74 HSNEKKVY   | 20    | >ZNF521-E74 HSNKKKVY   | 27    | 7     |
| >ZNF521-E74 HSNEKKVY   | 1609  | >ZNF521-E74 HSNKKKVY   | 398   | 1211  |
| >ZNF521-E74 HSNEKKVYR  | 49    | >ZNF521-E74 HSNKKKVYR  | 33    | 16    |
| >ZNF521-E74 KHSNEKKVYR | 125   | >ZNF521-E74 KHSNKKKVYF | 47    | 78    |
| >ZNF521-E74 KHSNEKKVY  | 145   | >ZNF521-E74 KHSNKKKVY  | 377   | 232   |
| >ZNF521-E74 KHSNEKKVYR | 35    | >ZNF521-E74 KHSNKKKVYF | 38    | 3     |
| >ZNF521-E74 VKHSNEKKV  | 152   | >ZNF521-E74 VKHSNKKKV  | 247   | 95    |
| >ZNF521-E74 VKHSNEKKVY | 8     | >ZNF521-E74 VKHSNKKKVY | 11    | 3     |
| >ZNF521-E74 VKHSNEKKVY | 377   | >ZNF521-E74 VKHSNKKKVY | 256   | 121   |
| >ZNF521-E74 AVKHSNEK   | 427   | >ZNF521-E74 AVKHSNKK   | 230   | 197   |
| >ZNF521-E74 AVKHSNEK   | 144   | >ZNF521-E74 AVKHSNKK   | 179   | 35    |
| >ZNF521-E74 AVKHSNEKK  | 203   | >ZNF521-E74 AVKHSNKKK  | 516   | 313   |
| >ZNF521-E74 AVKHSNEK   | 5     | >ZNF521-E74 AVKHSNKK   | 5     | 0     |
| >ZNF521-E74 AVKHSNEKK  | 12    | >ZNF521-E74 AVKHSNKKK  | 6     | 6     |
| >ZNF521-E74 AVKHSNEKK\ | 385   | >ZNF521-E74 AVKHSNKKK\ | 123   | 262   |
| >ZNF521-E74 AVKHSNEKK\ | 705   | >ZNF521-E74 AVKHSNKKK\ | 275   | 430   |
| >ZNF521-E74 AVKHSNEKK\ | 316   | >ZNF521-E74 AVKHSNKKK\ | 422   | 106   |
| >ZNF521-E74 AVKHSNEKK\ | 144   | >ZNF521-E74 AVKHSNKKK\ | 196   | 52    |

|                        |       |                        |      |       |
|------------------------|-------|------------------------|------|-------|
| >ZNF521-E74AVKHSNEKK\  | 294   | >ZNF521-E74AVKHSNKKK\  | 309  | 15    |
| >ZNF521-E74AVKHSNEKK\  | 377   | >ZNF521-E74AVKHSNKKK\  | 205  | 172   |
| >ZNF521-E74AVKHSNEKK\  | 363   | >ZNF521-E74AVKHSNKKK\  | 426  | 63    |
| >ZNF521-E74LAVKHSNE    | 18870 | >ZNF521-E74LAVKHSNK    | 167  | 18703 |
| >ZNF521-E74LAVKHSNEK   | 168   | >ZNF521-E74LAVKHSNKK   | 197  | 29    |
| >ZNF521-E74LAVKHSNEKK  | 139   | >ZNF521-E74LAVKHSNKKK  | 955  | 816   |
| >ZNF521-E74HLAVKHSNE   | 16050 | >ZNF521-E74HLAVKHSNK   | 45   | 16005 |
| >ZNF521-E74HLAVKHSNEK  | 287   | >ZNF521-E74HLAVKHSNKK  | 265  | 22    |
| >ZNF521-E74HLAVKHSNEK  | 122   | >ZNF521-E74HLAVKHSNKK  | 87   | 35    |
| >ZNF521-E74HLAVKHSNE   | 15032 | >ZNF521-E74HLAVKHSNK   | 162  | 14870 |
| >ZNF521-E74HLAVKHSNEK  | 203   | >ZNF521-E74HLAVKHSNKK  | 284  | 81    |
| >ZNF521-E74HLAVKHSNE   | 13227 | >ZNF521-E74HLAVKHSNK   | 214  | 13013 |
| >ZNF521-E74HLAVKHSNE   | 18726 | >ZNF521-E74HLAVKHSNK   | 241  | 18485 |
| >ZNF521-E74HLAVKHSNEK  | 229   | >ZNF521-E74HLAVKHSNKK  | 627  | 398   |
| >ZNF521-H8(HSKKYNCK    | 5     | >ZNF521-H8(QSKKYNCK    | 15   | 10    |
| >ZNF521-H8(HSKKYNCKF   | 360   | >ZNF521-H8(QSKKYNCKF   | 4085 | 3725  |
| >ZNF521-H8(HSKKYNCKFC  | 381   | >ZNF521-H8(QSKKYNCKFC  | 3593 | 3212  |
| >ZNF521-H8(HSKKYNCK    | 118   | >ZNF521-H8(QSKKYNCK    | 859  | 741   |
| >ZNF521-H8(HSKKYNCK    | 285   | >ZNF521-H8(QSKKYNCK    | 818  | 533   |
| >ZNF521-H8(HSKKYNCKF   | 355   | >ZNF521-H8(QSKKYNCKF   | 582  | 227   |
| >ZNF521-H8(HSKKYNCKF   | 74    | >ZNF521-H8(QSKKYNCKF   | 72   | 2     |
| >ZNF521-H8(HSKKYNCKF   | 11    | >ZNF521-H8(QSKKYNCKF   | 16   | 5     |
| >ZNF521-H8(HSKKYNCKF   | 360   | >ZNF521-H8(QSKKYNCKF   | 341  | 19    |
| >ZNF521-H8(THSKKYNCK   | 10175 | >ZNF521-H8(TQSKKYNCK   | 121  | 10054 |
| >ZNF521-H8(THSKKYNCKF  | 19154 | >ZNF521-H8(TQSKKYNCKF  | 268  | 18886 |
| >ZNF521-H8(THSKKYNCKF  | 306   | >ZNF521-H8(TQSKKYNCKF  | 32   | 274   |
| >ZNF521-H8(TTHSKKYNCK  | 371   | >ZNF521-H8(TTQSKKYNCK  | 560  | 189   |
| >ZNF521-H8(TTHSKKYNCK  | 149   | >ZNF521-H8(TTQSKKYNCK  | 85   | 64    |
| >ZNF521-H8(TTHSKKYNCK  | 31    | >ZNF521-H8(TTQSKKYNCK  | 1283 | 1252  |
| >ZNF521-H8(TTHSKKYNCK  | 12    | >ZNF521-H8(TTQSKKYNCK  | 31   | 19    |
| >ZNF521-H8(TTHSKKYNCK  | 306   | >ZNF521-H8(TTQSKKYNCK  | 207  | 99    |
| >ZNF521-H8(ITTHSKKYNCI | 141   | >ZNF521-H8(ITTQSKKYNCI | 203  | 62    |
| >ZNF521-H8(ITTHSKKY    | 398   | >ZNF521-H8(ITTQSKKY    | 620  | 222   |
| >ZNF521-H8(ITTHSKKYNCI | 317   | >ZNF521-H8(ITTQSKKYNCI | 1054 | 737   |
| >ZNF521-H8(ITTHSKKY    | 182   | >ZNF521-H8(ITTQSKKY    | 203  | 21    |
| >ZNF521-H8(ITTHSKKYNCI | 81    | >ZNF521-H8(ITTQSKKYNCI | 69   | 12    |
| >ZNF521-H8(ITTHSKKY    | 398   | >ZNF521-H8(ITTQSKKY    | 1095 | 697   |
| >ZNF521-H8(ITTHSKKY    | 3     | >ZNF521-H8(ITTQSKKY    | 4    | 1     |
| >ZNF521-H8(ITTHSKKY    | 529   | >ZNF521-H8(ITTQSKKY    | 311  | 218   |
| >ZNF521-H8(ITTHSKKY    | 45    | >ZNF521-H8(ITTQSKKY    | 80   | 35    |
| >ZNF521-H8(HITTHSKK    | 97    | >ZNF521-H8(HITTQSKK    | 144  | 47    |
| >ZNF521-H8(HITTHSKK    | 413   | >ZNF521-H8(HITTQSKK    | 657  | 244   |
| >ZNF521-H8(HITTHSKKY   | 229   | >ZNF521-H8(HITTQSKKY   | 1188 | 959   |

|                        |       |                        |       |       |
|------------------------|-------|------------------------|-------|-------|
| >ZNF521-H8(HITTHSKKY   | 331   | >ZNF521-H8(HITTQSKKY   | 1125  | 794   |
| >ZNF521-H8(HITTHSKK    | 113   | >ZNF521-H8(HITTQSKK    | 167   | 54    |
| >ZNF521-H8(HITTHSKK    | 119   | >ZNF521-H8(HITTQSKK    | 179   | 60    |
| >ZNF521-H8(HITTHSKKY   | 362   | >ZNF521-H8(HITTQSKKY   | 430   | 68    |
| >ZNF521-H8(HITTHSKKY   | 237   | >ZNF521-H8(HITTQSKKY   | 236   | 1     |
| >ZNF521-H8(HITTHSKKY   | 278   | >ZNF521-H8(HITTQSKKY   | 470   | 192   |
| >ZNF521-H8(CHITTHSKKY  | 193   | >ZNF521-H8(CHITTQSKKY  | 281   | 88    |
| >ZNF521-H8(QCHITTHSK   | 31    | >ZNF521-H8(QCHITTQSK   | 28    | 3     |
| >ZNF521-H8(QCHITTHSKK  | 64    | >ZNF521-H8(QCHITTQSKK  | 122   | 58    |
| >ZNF521-H8(LQCHITTHSK  | 185   | >ZNF521-H8(LQCHITTQSK  | 286   | 101   |
| >ZNF521-H8(LQCHITTHSK  | 191   | >ZNF521-H8(LQCHITTQSK  | 237   | 46    |
| >ZNF521-H8(LQCHITTHSKI | 353   | >ZNF521-H8(LQCHITTQSKI | 436   | 83    |
| >ZNF521-H8(LQCHITTH    | 404   | >ZNF521-H8(LQCHITTQ    | 788   | 384   |
| >ZNF521-H8(LQCHITTH    | 329   | >ZNF521-H8(LQCHITTQ    | 1446  | 1117  |
| >ZNF521-H8(LQCHITTHSK  | 395   | >ZNF521-H8(LQCHITTQSK  | 235   | 160   |
| >ZNF521-H8(ELQCHITTHSI | 144   | >ZNF521-H8(ELQCHITTQSI | 426   | 282   |
| >ZNF521-K7(KVYRCTSCNV  | 8506  | >ZNF521-K7(EVYRCTSCNV  | 406   | 8100  |
| >ZNF521-K7(KVYRCTSC    | 419   | >ZNF521-K7(EVYRCTSC    | 8260  | 7841  |
| >ZNF521-K7(KVYRCTSCNV  | 39    | >ZNF521-K7(EVYRCTSCNV  | 1885  | 1846  |
| >ZNF521-K7(KVYRCTSCNV  | 21    | >ZNF521-K7(EVYRCTSCNV  | 180   | 159   |
| >ZNF521-K7(KVYRCTSCNV  | 88    | >ZNF521-K7(EVYRCTSCNV  | 1772  | 1684  |
| >ZNF521-K7(KVYRCTSCNV  | 13    | >ZNF521-K7(EVYRCTSCNV  | 154   | 141   |
| >ZNF521-K7(KVYRCTSCNV  | 519   | >ZNF521-K7(EVYRCTSCNV  | 295   | 224   |
| >ZNF521-K7(KKVYRCTSC   | 398   | >ZNF521-K7(KEVYRCTSC   | 5714  | 5316  |
| >ZNF521-K7(KKVYRCTSCN  | 52    | >ZNF521-K7(KEVYRCTSCN  | 1421  | 1369  |
| >ZNF521-K7(KKVYRCTSCN  | 6344  | >ZNF521-K7(KEVYRCTSCN  | 91    | 6253  |
| >ZNF521-K7(KKVYRCTSCN  | 9845  | >ZNF521-K7(KEVYRCTSCN  | 97    | 9748  |
| >ZNF521-K7(KKVYRCTSC   | 25785 | >ZNF521-K7(KEVYRCTSC   | 404   | 25381 |
| >ZNF521-K7(KKVYRCTSCN  | 25200 | >ZNF521-K7(KEVYRCTSCN  | 194   | 25006 |
| >ZNF521-K7(HLAVKHSNEK  | 122   | >ZNF521-K7(HLAVKHSNEK  | 19769 | 19647 |
| >ZNF521-K7(HLAVKHSNEK  | 229   | >ZNF521-K7(HLAVKHSNEK  | 17713 | 17484 |
| >ZNF521-K7(NEKKVYRCT   | 725   | >ZNF521-K7(NEKEVYRCT   | 399   | 326   |
| >ZNF521-K7(NEKKVYRCT   | 131   | >ZNF521-K7(NEKEVYRCT   | 100   | 31    |
| >ZNF521-K7(SNEKKVYR    | 376   | >ZNF521-K7(SNEKEVYR    | 2785  | 2409  |
| >ZNF521-K7(SNEKKVYR    | 200   | >ZNF521-K7(SNEKEVYR    | 202   | 2     |
| >ZNF521-K7(HSNEKKVY    | 1836  | >ZNF521-K7(HSNEKEVY    | 260   | 1576  |
| >ZNF521-K7(HSNEKKVY    | 353   | >ZNF521-K7(HSNEKEVY    | 241   | 112   |
| >ZNF521-K7(HSNEKKVYR   | 9     | >ZNF521-K7(HSNEKEVYR   | 13    | 4     |
| >ZNF521-K7(HSNEKKVYR   | 34    | >ZNF521-K7(HSNEKEVYR   | 42    | 8     |
| >ZNF521-K7(HSNEKKVYR   | 25    | >ZNF521-K7(HSNEKEVYR   | 20    | 5     |
| >ZNF521-K7(HSNEKKVY    | 766   | >ZNF521-K7(HSNEKEVY    | 472   | 294   |
| >ZNF521-K7(HSNEKKVY    | 20    | >ZNF521-K7(HSNEKEVY    | 31    | 11    |
| >ZNF521-K7(HSNEKKVYR   | 49    | >ZNF521-K7(HSNEKEVYR   | 71    | 22    |

|                        |       |                        |       |       |
|------------------------|-------|------------------------|-------|-------|
| >ZNF521-K7E KHSNEKKVY  | 591   | >ZNF521-K7E KHSNEKEVY  | 344   | 247   |
| >ZNF521-K7E KHSNEKKVYR | 125   | >ZNF521-K7E KHSNEKEVYR | 336   | 211   |
| >ZNF521-K7E KHSNEKKVY  | 145   | >ZNF521-K7E KHSNEKEVY  | 269   | 124   |
| >ZNF521-K7E KHSNEKKVY  | 7280  | >ZNF521-K7E KHSNEKEVY  | 487   | 6793  |
| >ZNF521-K7E KHSNEKKVYR | 35    | >ZNF521-K7E KHSNEKEVYR | 45    | 10    |
| >ZNF521-K7E VKHSNEKKV  | 152   | >ZNF521-K7E VKHSNEKEV  | 61    | 91    |
| >ZNF521-K7E VKHSNEKKVY | 8     | >ZNF521-K7E VKHSNEKEVY | 9     | 1     |
| >ZNF521-K7E VKHSNEKKVY | 682   | >ZNF521-K7E VKHSNEKEVY | 494   | 188   |
| >ZNF521-K7E VKHSNEKKVY | 377   | >ZNF521-K7E VKHSNEKEVY | 574   | 197   |
| >ZNF521-K7E AVKHSNEKK\ | 961   | >ZNF521-K7E AVKHSNEKE\ | 396   | 565   |
| >ZNF521-K7E AVKHSNEKK  | 203   | >ZNF521-K7E AVKHSNEKE  | 26043 | 25840 |
| >ZNF521-K7E AVKHSNEKK  | 12    | >ZNF521-K7E AVKHSNEKE  | 6921  | 6909  |
| >ZNF521-K7E AVKHSNEKK\ | 385   | >ZNF521-K7E AVKHSNEKE\ | 276   | 109   |
| >ZNF521-K7E AVKHSNEKK\ | 316   | >ZNF521-K7E AVKHSNEKE\ | 229   | 87    |
| >ZNF521-K7E AVKHSNEKK\ | 144   | >ZNF521-K7E AVKHSNEKE\ | 88    | 56    |
| >ZNF521-K7E AVKHSNEKK\ | 294   | >ZNF521-K7E AVKHSNEKE\ | 405   | 111   |
| >ZNF521-K7E AVKHSNEKK\ | 377   | >ZNF521-K7E AVKHSNEKE\ | 733   | 356   |
| >ZNF521-K7E AVKHSNEKK\ | 363   | >ZNF521-K7E AVKHSNEKE\ | 255   | 108   |
| >ZNF521-K7E LAVKHSNEKK | 139   | >ZNF521-K7E LAVKHSNEKE | 30189 | 30050 |
| >ZNF521-N9E NCRICKMPL  | 5157  | >ZNF521-N9E KCRICKMPL  | 19    | 5138  |
| >ZNF521-N9E NCRICKMPLC | 7264  | >ZNF521-N9E KCRICKMPLC | 96    | 7168  |
| >ZNF521-N9E NCRICKMPLC | 10798 | >ZNF521-N9E KCRICKMPLC | 186   | 10612 |
| >ZNF521-N9E VTHSKSLDTG | 19251 | >ZNF521-N9E VTHSKSLDTG | 303   | 18948 |
| >ZNF521-N9E VTHSKSLDTG | 22754 | >ZNF521-N9E VTHSKSLDTG | 88    | 22666 |
| >ZNF521-N9E VTHSKSLDTG | 10396 | >ZNF521-N9E VTHSKSLDTG | 135   | 10261 |
| >ZNF521-N9E VTHSKSLDTG | 24750 | >ZNF521-N9E VTHSKSLDTG | 309   | 24441 |
| >ZNF521-N9E TGNCRICK   | 482   | >ZNF521-N9E TGKCRICK   | 2872  | 2390  |
| >ZNF521-N9E TGNCRICK   | 3835  | >ZNF521-N9E TGKCRICK   | 276   | 3559  |
| >ZNF521-N9E TGNCRICKM  | 3868  | >ZNF521-N9E TGKCRICKM  | 198   | 3670  |
| >ZNF521-N9E TGNCRICKMF | 1568  | >ZNF521-N9E TGKCRICKMF | 144   | 1424  |
| >ZNF521-N9E DTGNCRICK  | 336   | >ZNF521-N9E DTGKCRICK  | 454   | 118   |
| >ZNF521-N9E DTGNCRICK  | 71    | >ZNF521-N9E DTGKCRICK  | 82    | 11    |
| >ZNF521-N9E DTGNCRICKM | 409   | >ZNF521-N9E DTGKCRICKM | 638   | 229   |
| >ZNF521-N9E LDTGNCRI   | 187   | >ZNF521-N9E LDTGKCRI   | 268   | 81    |
| >ZNF521-N9E SLDTGNCRI  | 162   | >ZNF521-N9E SLDTGKCRI  | 1639  | 1477  |
| >ZNF521-N9E SLDTGNCRI  | 10    | >ZNF521-N9E SLDTGKCRI  | 14    | 4     |
| >ZNF521-N9E SLDTGNCRI  | 73    | >ZNF521-N9E SLDTGKCRI  | 200   | 127   |
| >ZNF521-N9E SLDTGNCRI  | 20    | >ZNF521-N9E SLDTGKCRI  | 25    | 5     |
| >ZNF521-N9E SLDTGNCRI  | 296   | >ZNF521-N9E SLDTGKCRI  | 1332  | 1036  |
| >ZNF521-N9E SLDTGNCRI  | 7     | >ZNF521-N9E SLDTGKCRI  | 8     | 1     |
| >ZNF521-N9E SLDTGNCRIC | 357   | >ZNF521-N9E SLDTGKCRIC | 355   | 2     |
| >ZNF521-N9E SLDTGNCRIC | 125   | >ZNF521-N9E SLDTGKCRIC | 179   | 54    |
| >ZNF521-N9E KSLDTGNCRI | 102   | >ZNF521-N9E KSLDTGKCRI | 258   | 156   |

|                        |       |                        |       |       |
|------------------------|-------|------------------------|-------|-------|
| >ZNF521-N9{KSLDTGNCR   | 38    | >ZNF521-N9{KSLDTGKCR   | 72    | 34    |
| >ZNF521-N9{KSLDTGNCRI  | 293   | >ZNF521-N9{KSLDTGKCRI  | 913   | 620   |
| >ZNF521-N9{KSLDTGNCRI  | 16    | >ZNF521-N9{KSLDTGKCRI  | 12    | 4     |
| >ZNF521-N9{KSLDTGNCRI  | 99    | >ZNF521-N9{KSLDTGKCRI  | 207   | 108   |
| >ZNF521-N9{KSLDTGNCR   | 423   | >ZNF521-N9{KSLDTGKCR   | 347   | 76    |
| >ZNF521-N9{HSKSLDTGN   | 9703  | >ZNF521-N9{HSKSLDTGK   | 36    | 9667  |
| >ZNF521-N9{HSKSLDTGN   | 15647 | >ZNF521-N9{HSKSLDTGK   | 290   | 15357 |
| >ZNF521-N9{HSKSLDTGNC  | 31    | >ZNF521-N9{HSKSLDTGKC  | 47    | 16    |
| >ZNF521-N9{HSKSLDTGNC  | 160   | >ZNF521-N9{HSKSLDTGKC  | 348   | 188   |
| >ZNF521-N9{HSKSLDTGN   | 20771 | >ZNF521-N9{HSKSLDTGK   | 176   | 20595 |
| >ZNF521-N9{HSKSLDTGNC  | 81    | >ZNF521-N9{HSKSLDTGKC  | 258   | 177   |
| >ZNF521-R9{RFPSLLTL    | 136   | >ZNF521-R9{QFPSLLTL    | 773   | 637   |
| >ZNF521-R9{RFPSLLTL    | 7     | >ZNF521-R9{QFPSLLTL    | 25    | 18    |
| >ZNF521-R9{RFPSLLTL    | 170   | >ZNF521-R9{QFPSLLTL    | 101   | 69    |
| >ZNF521-R9{RFPSLLTL    | 342   | >ZNF521-R9{QFPSLLTL    | 755   | 413   |
| >ZNF521-R9{ERFPSLLTL   | 14239 | >ZNF521-R9{EQFPSLLTL   | 14    | 14225 |
| >ZNF521-R9{ERFPSLLTL   | 19542 | >ZNF521-R9{EQFPSLLTL   | 167   | 19375 |
| >ZNF521-R9{ERFPSLLTL   | 127   | >ZNF521-R9{EQFPSLLTL   | 11    | 116   |
| >ZNF521-R9{ERFPSLLTL   | 306   | >ZNF521-R9{EQFPSLLTL   | 6618  | 6312  |
| >ZNF521-R9{ERFPSLLTL   | 52    | >ZNF521-R9{EQFPSLLTL   | 41    | 11    |
| >ZNF521-R9{ERFPSLLTL   | 117   | >ZNF521-R9{EQFPSLLTL   | 2671  | 2554  |
| >ZNF521-R9{ERFPSLLTL   | 40    | >ZNF521-R9{EQFPSLLTL   | 2542  | 2502  |
| >ZNF521-R9{KHYMCPICGE  | 406   | >ZNF521-R9{KHYMCPICGE  | 18430 | 18024 |
| >ZNF521-R9{KHYMCPICGE  | 57    | >ZNF521-R9{KHYMCPICGE  | 5739  | 5682  |
| >ZNF521-R9{GERFPSLL    | 55    | >ZNF521-R9{GEQFPSLL    | 128   | 73    |
| >ZNF521-R9{GERFPSLL    | 277   | >ZNF521-R9{GEQFPSLL    | 80    | 197   |
| >ZNF521-R9{GERFPSLL    | 125   | >ZNF521-R9{GEQFPSLL    | 291   | 166   |
| >ZNF521-R9{GERFPSLLTL  | 86    | >ZNF521-R9{GEQFPSLLTL  | 55    | 31    |
| >ZNF521-R9{GERFPSLLTLT | 313   | >ZNF521-R9{GEQFPSLLTLT | 778   | 465   |
| >ZNF521-R9{GERFPSLLTL  | 2153  | >ZNF521-R9{GEQFPSLLTL  | 420   | 1733  |
| >ZNF521-R9{GERFPSLLT   | 1147  | >ZNF521-R9{GEQFPSLLT   | 395   | 752   |
| >ZNF521-R9{GERFPSLLTLT | 1250  | >ZNF521-R9{GEQFPSLLTLT | 410   | 840   |
| >ZNF521-R9{GERFPSLL    | 260   | >ZNF521-R9{GEQFPSLL    | 850   | 590   |
| >ZNF521-R9{GERFPSLLT   | 194   | >ZNF521-R9{GEQFPSLLT   | 483   | 289   |
| >ZNF521-R9{GERFPSLLTL  | 170   | >ZNF521-R9{GEQFPSLLTL  | 149   | 21    |
| >ZNF521-R9{GERFPSLLTLT | 62    | >ZNF521-R9{GEQFPSLLTLT | 116   | 54    |
| >ZNF521-R9{ICGERFPSL   | 240   | >ZNF521-R9{ICGEQFPSL   | 5104  | 4864  |
| >ZNF521-R9{CPICGERF    | 674   | >ZNF521-R9{CPICGEQF    | 169   | 505   |
| >ZNF521-R9{CPICGERFPSL | 89    | >ZNF521-R9{CPICGEQFPSI | 45    | 44    |
| >ZNF521-R9{CPICGERFPSL | 147   | >ZNF521-R9{CPICGEQFPSI | 347   | 200   |
| >ZNF521-R9{CPICGERF    | 47    | >ZNF521-R9{CPICGEQF    | 28    | 19    |
| >ZNF521-R9{CPICGERFPSL | 215   | >ZNF521-R9{CPICGEQFPSI | 97    | 118   |
| >ZNF521-R9{CPICGERF    | 91    | >ZNF521-R9{CPICGEQF    | 90    | 1     |

|                        |       |                        |       |       |
|------------------------|-------|------------------------|-------|-------|
| >ZNF521-R9€CPICGERFPSL | 279   | >ZNF521-R9€CPICGEQFPSI | 164   | 115   |
| >ZNF521-R9€CPICGERF    | 255   | >ZNF521-R9€CPICGEQF    | 157   | 98    |
| >ZNF521-R9€MCPICGER    | 418   | >ZNF521-R9€MCPICGEQ    | 23238 | 22820 |
| >ZNF521-R9€YMCPCICGERF | 320   | >ZNF521-R9€YMCPCICGEQF | 260   | 60    |
| >ZNF521-R9€YMCPCICGER  | 5055  | >ZNF521-R9€YMCPCICGEQ  | 87    | 4968  |
| >ZNF521-R9€YMCPCICGERF | 128   | >ZNF521-R9€YMCPCICGEQF | 46    | 82    |
| >ZNF521-R9€YMCPCICGER  | 81    | >ZNF521-R9€YMCPCICGEQ  | 16156 | 16075 |
| >ZNF521-R9€YMCPCICGER  | 56    | >ZNF521-R9€YMCPCICGEQ  | 14016 | 13960 |
| >ZNF521-R9€YMCPCICGER  | 57    | >ZNF521-R9€YMCPCICGEQ  | 8259  | 8202  |
| >ZNF521-R9€YMCPCICGERF | 42    | >ZNF521-R9€YMCPCICGEQF | 38    | 4     |
| >ZNF521-R9€YMCPCICGERF | 374   | >ZNF521-R9€YMCPCICGEQF | 281   | 93    |
| >ZNF521-R9€YMCPCICGERF | 63    | >ZNF521-R9€YMCPCICGEQF | 36    | 27    |
| >ZNF521-R9€YMCPCICGERF | 115   | >ZNF521-R9€YMCPCICGEQF | 88    | 27    |
| >ZNF521-R9€HYMCPICGEF  | 56    | >ZNF521-R9€HYMCPICGEC  | 60    | 4     |
| >ZNF521-R9€HYMCPICGEF  | 194   | >ZNF521-R9€HYMCPICGEC  | 181   | 13    |
| >ZNF521-R9€HYMCPICGEF  | 436   | >ZNF521-R9€HYMCPICGEC  | 718   | 282   |
| >ZNF521-R9€HYMCPICGEF  | 6     | >ZNF521-R9€HYMCPICGEC  | 4     | 2     |
| >ZNF521-R9€HYMCPICGEF  | 55    | >ZNF521-R9€HYMCPICGEC  | 15520 | 15465 |
| >ZNF521-R9€HYMCPICGEF  | 296   | >ZNF521-R9€HYMCPICGEC  | 13863 | 13567 |
| >ZNF521-R9€HYMCPICGEF  | 179   | >ZNF521-R9€HYMCPICGEC  | 29296 | 29117 |
| >ZNF521-R9€HYMCPICGEF  | 412   | >ZNF521-R9€HYMCPICGEC  | 235   | 177   |
| >ZNF521-R9€HYMCPICGEF  | 25    | >ZNF521-R9€HYMCPICGEC  | 2246  | 2221  |
| >ZNF521-T11TPQVSPMPR   | 3071  | >ZNF521-T11MPQVSPMPF   | 311   | 2760  |
| >ZNF521-T11TPQVSPMPR   | 11037 | >ZNF521-T11MPQVSPMPF   | 379   | 10658 |
| >ZNF521-T11KTPQVSPM    | 13362 | >ZNF521-T11KMPQVSPM    | 389   | 12973 |
| >ZNF521-T11KTPQVSPMPF  | 7159  | >ZNF521-T11KMPQVSPMF   | 82    | 7077  |
| >ZNF521-T11KTPQVSPM    | 8159  | >ZNF521-T11KMPQVSPM    | 436   | 7723  |
| >ZNF521-T11KTPQVSPM    | 5833  | >ZNF521-T11KMPQVSPM    | 144   | 5689  |
| >ZNF521-T11KTPQVSPMPF  | 7911  | >ZNF521-T11KMPQVSPMF   | 132   | 7779  |
| >ZNF521-T11KTPQVSPM    | 2901  | >ZNF521-T11KMPQVSPM    | 227   | 2674  |
| >ZNF521-T11KTPQVSPMPF  | 1506  | >ZNF521-T11KMPQVSPMF   | 114   | 1392  |
| >ZNF521-T11KTPQVSPM    | 4449  | >ZNF521-T11KMPQVSPM    | 32    | 4417  |
| >ZNF521-T11KTPQVSPMPF  | 636   | >ZNF521-T11KMPQVSPMF   | 5     | 631   |
| >ZNF521-T11KTPQVSPM    | 16694 | >ZNF521-T11KMPQVSPM    | 402   | 16292 |
| >ZNF521-T11KTPQVSPMPF  | 16718 | >ZNF521-T11KMPQVSPMF   | 269   | 16449 |
| >ZNF521-T11KTPQVSPM    | 9624  | >ZNF521-T11KMPQVSPM    | 120   | 9504  |
| >ZNF521-T11KTPQVSPMPF  | 2250  | >ZNF521-T11KMPQVSPMF   | 19    | 2231  |
| >ZNF521-T11KTPQVSPM    | 23603 | >ZNF521-T11KMPQVSPM    | 462   | 23141 |
| >ZNF521-T11KTPQVSPMPF  | 12353 | >ZNF521-T11KMPQVSPMF   | 41    | 12312 |
| >ZNF521-T11KTPQVSPMPF  | 618   | >ZNF521-T11KMPQVSPMF   | 217   | 401   |
| >ZNF521-T11KTPQVSPMPF  | 55    | >ZNF521-T11KMPQVSPMF   | 169   | 114   |
| >ZNF521-T11KTPQVSPM    | 328   | >ZNF521-T11KMPQVSPM    | 7190  | 6862  |
| >ZNF521-T11KTPQVSPM    | 305   | >ZNF521-T11KMPQVSPM    | 6449  | 6144  |

|                       |       |                       |       |       |
|-----------------------|-------|-----------------------|-------|-------|
| >ZNF521-T11KTPQVSPMP  | 44    | >ZNF521-T11KMPQVSPMF  | 26    | 18    |
| >ZNF521-T11KTPQVSPM   | 191   | >ZNF521-T11KMPQVSPM   | 279   | 88    |
| >ZNF521-T11KTPQVSPMP  | 92    | >ZNF521-T11KMPQVSPMF  | 144   | 52    |
| >ZNF521-T11KTPQVSPMP  | 66    | >ZNF521-T11KMPQVSPMF  | 531   | 465   |
| >ZNF521-T11KTPQVSPM   | 1188  | >ZNF521-T11KMPQVSPM   | 99    | 1089  |
| >ZNF521-T11KTPQVSPM   | 2839  | >ZNF521-T11KMPQVSPM   | 141   | 2698  |
| >ZNF521-T11KTPQVSPM   | 37    | >ZNF521-T11KMPQVSPM   | 6125  | 6088  |
| >ZNF521-T11KTPQVSPMP  | 173   | >ZNF521-T11KMPQVSPMF  | 11407 | 11234 |
| >ZNF521-T11KTPQVSPM   | 62    | >ZNF521-T11KMPQVSPM   | 10921 | 10859 |
| >ZNF521-T11KTPQVSPMP  | 95    | >ZNF521-T11KMPQVSPMF  | 11035 | 10940 |
| >ZNF521-T11KTPQVSPMP  | 4     | >ZNF521-T11KMPQVSPMF  | 171   | 167   |
| >ZNF521-T11KTPQVSPMP  | 945   | >ZNF521-T11KMPQVSPMF  | 57    | 888   |
| >ZNF521-T11KTPQVSPMP  | 52    | >ZNF521-T11KMPQVSPMF  | 21    | 31    |
| >ZNF521-T11KTPQVSPM   | 451   | >ZNF521-T11KMPQVSPM   | 12975 | 12524 |
| >ZNF521-T11KTPQVSPMP  | 23    | >ZNF521-T11KMPQVSPMF  | 731   | 708   |
| >ZNF521-T11VPDSNSTQLK | 10961 | >ZNF521-T11VPDSNSTQLK | 16    | 10945 |
| >ZNF521-T11VPDSNSTQLK | 11258 | >ZNF521-T11VPDSNSTQLK | 302   | 10956 |
| >ZNF521-T11VPDSNSTQLK | 6175  | >ZNF521-T11VPDSNSTQLK | 141   | 6034  |
| >ZNF521-T11VPDSNSTQLK | 8072  | >ZNF521-T11VPDSNSTQLK | 416   | 7656  |
| >ZNF521-T11LKTPQVSPM  | 7416  | >ZNF521-T11LKMPQVSPM  | 400   | 7016  |
| >ZNF521-T11LKTPQVSP   | 1516  | >ZNF521-T11LKMPQVSP   | 220   | 1296  |
| >ZNF521-T11LKTPQVSPM  | 9     | >ZNF521-T11LKMPQVSPM  | 3     | 6     |
| >ZNF521-T11LKTPQVSPMF | 2710  | >ZNF521-T11LKMPQVSPM  | 463   | 2247  |
| >ZNF521-T11LKTPQVSPMF | 92    | >ZNF521-T11LKMPQVSPM  | 19    | 73    |
| >ZNF521-T11LKTPQVSPM  | 5505  | >ZNF521-T11LKMPQVSPM  | 280   | 5225  |
| >ZNF521-T11QLKTPQVSPM | 180   | >ZNF521-T11QLKMPQVSP  | 90    | 90    |
| >ZNF521-T11QLKTPQVSPM | 235   | >ZNF521-T11QLKMPQVSP  | 226   | 9     |
| >ZNF521-T11QLKTPQVSPM | 127   | >ZNF521-T11QLKMPQVSP  | 139   | 12    |
| >ZNF521-T11TQLKTPQVSP | 2017  | >ZNF521-T11TQLKMPQVS  | 446   | 1571  |
| >ZNF521-T11TQLKTPQV   | 408   | >ZNF521-T11TQLKMPQV   | 286   | 122   |
| >ZNF521-T11TQLKTPQV   | 37    | >ZNF521-T11TQLKMPQV   | 43    | 6     |
| >ZNF521-T11TQLKTPQV   | 94    | >ZNF521-T11TQLKMPQV   | 210   | 116   |
| >ZNF521-T11TQLKTPQV   | 67    | >ZNF521-T11TQLKMPQV   | 139   | 72    |
| >ZNF521-T11TQLKTPQV   | 490   | >ZNF521-T11TQLKMPQV   | 1567  | 1077  |
| >ZNF521-T11TQLKTPQVSP | 117   | >ZNF521-T11TQLKMPQVS  | 138   | 21    |
| >ZNF521-T11TQLKTPQVSP | 308   | >ZNF521-T11TQLKMPQVS  | 619   | 311   |
| >ZNF521-T11TQLKTPQV   | 369   | >ZNF521-T11TQLKMPQV   | 1128  | 759   |
| >ZNF521-T11TQLKTPQVSP | 7     | >ZNF521-T11TQLKMPQVS  | 15    | 8     |
| >ZNF521-T11TQLKTPQVSP | 26    | >ZNF521-T11TQLKMPQVS  | 43    | 17    |
| >ZNF521-T11STQLKTPQV  | 237   | >ZNF521-T11STQLKMPQV  | 522   | 285   |
| >ZNF521-T11STQLKTPQV  | 142   | >ZNF521-T11STQLKMPQV  | 139   | 3     |
| >ZNF521-T11STQLKTPQV  | 767   | >ZNF521-T11STQLKMPQV  | 210   | 557   |
| >ZNF521-T11STQLKTPQVS | 760   | >ZNF521-T11STQLKMPQV  | 364   | 396   |

|                       |      |                       |       |       |
|-----------------------|------|-----------------------|-------|-------|
| >ZNF521-T11NSTQLKTPQV | 399  | >ZNF521-T11NSTQLKMPQ  | 297   | 102   |
| >ZNF521-V12VFYNEWDIQ' | 100  | >ZNF521-V12AFYNEWDIQ' | 132   | 32    |
| >ZNF521-V12VFYNEWDIQ' | 116  | >ZNF521-V12AFYNEWDIQ' | 105   | 11    |
| >ZNF521-V12VFYNEWDIQ' | 164  | >ZNF521-V12AFYNEWDIQ' | 135   | 29    |
| >ZNF521-V12VFYNEWDI   | 30   | >ZNF521-V12AFYNEWDI   | 126   | 96    |
| >ZNF521-V12VFYNEWDI   | 436  | >ZNF521-V12AFYNEWDI   | 1168  | 732   |
| >ZNF521-V12VFYNEWDI   | 138  | >ZNF521-V12AFYNEWDI   | 116   | 22    |
| >ZNF521-V12MVFYNEWDI  | 162  | >ZNF521-V12MAFYNEWDI  | 1795  | 1633  |
| >ZNF521-V12MVFYNEWDI  | 23   | >ZNF521-V12MAFYNEWDI  | 98    | 75    |
| >ZNF521-V12MVFYNEWDI  | 387  | >ZNF521-V12MAFYNEWDI  | 1668  | 1281  |
| >ZNF521-V12MVFYNEWDI  | 37   | >ZNF521-V12MAFYNEWDI  | 197   | 160   |
| >ZNF521-V12MVFYNEWDI  | 124  | >ZNF521-V12MAFYNEWDI  | 938   | 814   |
| >ZNF521-V12MVFYNEWDI  | 190  | >ZNF521-V12MAFYNEWDI  | 1302  | 1112  |
| >ZNF521-V12MVFYNEWDI  | 23   | >ZNF521-V12MAFYNEWDI  | 84    | 61    |
| >ZNF521-V12MVFYNEWDI  | 331  | >ZNF521-V12MAFYNEWDI  | 1609  | 1278  |
| >ZNF521-V12MVFYNEWDI  | 11   | >ZNF521-V12MAFYNEWDI  | 34    | 23    |
| >ZNF521-V12MVFYNEWDI  | 342  | >ZNF521-V12MAFYNEWDI  | 2961  | 2619  |
| >ZNF521-V12MVFYNEWDI  | 52   | >ZNF521-V12MAFYNEWDI  | 613   | 561   |
| >ZNF521-V12MVFYNEWDI  | 31   | >ZNF521-V12MAFYNEWDI  | 239   | 208   |
| >ZNF521-V12MVFYNEWDI  | 134  | >ZNF521-V12MAFYNEWDI  | 1327  | 1193  |
| >ZNF521-V12MVFYNEWDI  | 402  | >ZNF521-V12MAFYNEWDI  | 5965  | 5563  |
| >ZNF521-V12MVFYNEWDI  | 7    | >ZNF521-V12MAFYNEWDI  | 33    | 26    |
| >ZNF521-V12MVFYNEWDI  | 395  | >ZNF521-V12MAFYNEWDI  | 1229  | 834   |
| >ZNF521-V12MVFYNEWDI  | 39   | >ZNF521-V12MAFYNEWDI  | 693   | 654   |
| >ZNF521-V12MVFYNEWDI  | 15   | >ZNF521-V12MAFYNEWDI  | 56    | 41    |
| >ZNF521-V12MVFYNEWDI  | 5    | >ZNF521-V12MAFYNEWDI  | 8     | 3     |
| >ZNF521-V12MVFYNEWDI  | 34   | >ZNF521-V12MAFYNEWDI  | 84    | 50    |
| >ZNF521-V12MVFYNEWDI  | 1369 | >ZNF521-V12MAFYNEWDI  | 346   | 1023  |
| >ZNF521-V12MVFYNEWDI  | 1364 | >ZNF521-V12MAFYNEWDI  | 351   | 1013  |
| >ZNF521-V12MVFYNEWDI  | 1710 | >ZNF521-V12MAFYNEWDI  | 425   | 1285  |
| >ZNF521-V12MVFYNEWDI  | 2201 | >ZNF521-V12MAFYNEWDI  | 129   | 2072  |
| >ZNF521-V12MVFYNEWDI  | 1831 | >ZNF521-V12MAFYNEWDI  | 446   | 1385  |
| >ZNF521-V12KTYQCIKCQM | 398  | >ZNF521-V12KTYQCIKCQM | 4958  | 4560  |
| >ZNF521-V12KTYQCIKCQM | 134  | >ZNF521-V12KTYQCIKCQM | 1345  | 1211  |
| >ZNF521-V12KTYQCIKCQM | 227  | >ZNF521-V12KTYQCIKCQM | 2374  | 2147  |
| >ZNF521-V12KTYQCIKCQM | 32   | >ZNF521-V12KTYQCIKCQM | 1550  | 1518  |
| >ZNF521-V12KTYQCIKCQM | 113  | >ZNF521-V12KTYQCIKCQM | 4575  | 4462  |
| >ZNF521-V12KTYQCIKCQM | 116  | >ZNF521-V12KTYQCIKCQM | 10844 | 10728 |
| >ZNF521-V12KTYQCIKCQM | 25   | >ZNF521-V12KTYQCIKCQM | 295   | 270   |
| >ZNF521-V12KTYQCIKCQM | 89   | >ZNF521-V12KTYQCIKCQM | 725   | 636   |
| >ZNF521-V12KTYQCIKCQM | 247  | >ZNF521-V12KTYQCIKCQM | 1429  | 1182  |
| >ZNF521-V12QMVFYNEWI  | 532  | >ZNF521-V12QMAFYNEWI  | 230   | 302   |
| >ZNF521-V12QMVFYNEWI  | 180  | >ZNF521-V12QMAFYNEWI  | 141   | 39    |



|                       |      |                       |       |       |
|-----------------------|------|-----------------------|-------|-------|
| >ZNF521-V12QMVFYNEWI  | 190  | >ZNF521-V12QMAFYNEWI  | 194   | 4     |
| >ZNF521-V12QMVFYNEWI  | 2242 | >ZNF521-V12QMAFYNEWI  | 303   | 1939  |
| >ZNF521-V12QMVFYNEWI  | 375  | >ZNF521-V12QMAFYNEWI  | 161   | 214   |
| >ZNF521-V12QMVFYNEWI  | 532  | >ZNF521-V12QMAFYNEWI  | 410   | 122   |
| >ZNF521-V12QMVFYNEW   | 156  | >ZNF521-V12QMAFYNEW   | 93    | 63    |
| >ZNF521-V12CQMVFYNEV  | 1221 | >ZNF521-V12CQMAFYNEV  | 308   | 913   |
| >ZNF521-V12CQMVFYNEV  | 1430 | >ZNF521-V12CQMAFYNEV  | 455   | 975   |
| >ZNF521-V12CQMVFYNEV  | 163  | >ZNF521-V12CQMAFYNEV  | 79    | 84    |
| >ZNF521-V12CQMVFYNEV  | 440  | >ZNF521-V12CQMAFYNEV  | 241   | 199   |
| >ZNF521-V12CQMVFYNEV  | 92   | >ZNF521-V12CQMAFYNEV  | 81    | 11    |
| >ZNF521-V12CQMVFYNEV  | 148  | >ZNF521-V12CQMAFYNEV  | 138   | 10    |
| >ZNF521-V12CQMVFYNEV  | 773  | >ZNF521-V12CQMAFYNEV  | 447   | 326   |
| >ZNF521-V12CQMVFYNEV  | 464  | >ZNF521-V12CQMAFYNEV  | 250   | 214   |
| >ZNF521-V12CQMVFYNEV  | 31   | >ZNF521-V12CQMAFYNEV  | 45    | 14    |
| >ZNF521-V12CQMVFYNEV  | 408  | >ZNF521-V12CQMAFYNEV  | 392   | 16    |
| >ZNF521-V12KCQMVFYNE  | 153  | >ZNF521-V12KCQMAFYNE  | 265   | 112   |
| >ZNF521-V12KCQMVFYNE  | 333  | >ZNF521-V12KCQMAFYNE  | 500   | 167   |
| >ZNF521-V12IKCQMVFY   | 747  | >ZNF521-V12IKCQMAFY   | 425   | 322   |
| >ZNF521-V12IKCQMVFY   | 355  | >ZNF521-V12IKCQMAFY   | 111   | 244   |
| >ZNF521-V12IKCQMVFY   | 28   | >ZNF521-V12IKCQMAFY   | 54    | 26    |
| >ZNF521-V12IKCQMVFYNE | 456  | >ZNF521-V12IKCQMAFYNE | 515   | 59    |
| >ZNF521-V12IKCQMVFYNE | 130  | >ZNF521-V12IKCQMAFYNE | 267   | 137   |
| >ZNF521-V12CIKCQMVFY  | 1660 | >ZNF521-V12CIKCQMAFY  | 356   | 1304  |
| >ZNF521-V12CIKCQMVFY  | 28   | >ZNF521-V12CIKCQMAFY  | 8     | 20    |
| >ZNF521-V12CIKCQMVFY  | 260  | >ZNF521-V12CIKCQMAFY  | 187   | 73    |
| >ZNF521-V12CIKCQMVFY  | 469  | >ZNF521-V12CIKCQMAFY  | 261   | 208   |
| >ZNF521-V12CIKCQMVFY  | 416  | >ZNF521-V12CIKCQMAFY  | 93    | 323   |
| >ZNF521-V12CIKCQMVFY  | 85   | >ZNF521-V12CIKCQMAFY  | 85    | 0     |
| >ZNF521-V12CIKCQMV    | 401  | >ZNF521-V12CIKCQMAF   | 380   | 21    |
| >ZNF521-V12CIKCQMV    | 281  | >ZNF521-V12CIKCQMAF   | 188   | 93    |
| >ZNF521-V12QCIKCQMV   | 31   | >ZNF521-V12QCIKCQMAF  | 16    | 15    |
| >ZNF521-V12QCIKCQMV   | 122  | >ZNF521-V12QCIKCQMAF  | 146   | 24    |
| >ZNF521-V12QCIKCQMV   | 189  | >ZNF521-V12QCIKCQMAF  | 63    | 126   |
| >ZNF521-V12QCIKCQMV   | 41   | >ZNF521-V12QCIKCQMAF  | 41    | 0     |
| >ZNF521-V12QCIKCQMV   | 107  | >ZNF521-V12QCIKCQMAF  | 54    | 53    |
| >ZNF521-V12QCIKCQMV   | 309  | >ZNF521-V12QCIKCQMAF  | 1003  | 694   |
| >ZNF521-V12YQCIKCQMV  | 234  | >ZNF521-V12YQCIKCQMA  | 2263  | 2029  |
| >ZNF521-V12YQCIKCQMV  | 66   | >ZNF521-V12YQCIKCQMA  | 637   | 571   |
| >ZNF521-V12YQCIKCQMV  | 107  | >ZNF521-V12YQCIKCQMA  | 4531  | 4424  |
| >ZNF521-V12YQCIKCQMV  | 379  | >ZNF521-V12YQCIKCQMA  | 18149 | 17770 |
| >ZNF521-V12YQCIKCQMVI | 1011 | >ZNF521-V12YQCIKCQMAI | 481   | 530   |
| >ZNF521-V12YQCIKCQMVI | 116  | >ZNF521-V12YQCIKCQMAI | 86    | 30    |
| >ZNF521-V12YQCIKCQMVI | 429  | >ZNF521-V12YQCIKCQMAI | 148   | 281   |

|                       |       |                       |      |       |
|-----------------------|-------|-----------------------|------|-------|
| >ZNF521-V12YQCIKCQMVI | 164   | >ZNF521-V12YQCIKCQMAI | 159  | 5     |
| >ZNF521-V12YQCIKCQMVI | 45    | >ZNF521-V12YQCIKCQMAI | 47   | 2     |
| >ZNF521-V12YQCIKCQMVI | 75    | >ZNF521-V12YQCIKCQMAI | 66   | 9     |
| >ZNF521-V12YQCIKCQMVI | 8     | >ZNF521-V12YQCIKCQMAI | 6    | 2     |
| >ZNF521-V12YQCIKCQMVI | 43    | >ZNF521-V12YQCIKCQMAI | 78   | 35    |
| >ZNF521-V12YQCIKCQMVI | 490   | >ZNF521-V12YQCIKCQMAI | 1058 | 568   |
| >ZNF521-V12TYQCIKCQM  | 69    | >ZNF521-V12TYQCIKCQM  | 2491 | 2422  |
| >ZNF521-V12TYQCIKCQM  | 18    | >ZNF521-V12TYQCIKCQM  | 19   | 1     |
| >ZNF521-V12TYQCIKCQM  | 59    | >ZNF521-V12TYQCIKCQM  | 152  | 93    |
| >ZNF521-V12TYQCIKCQM  | 252   | >ZNF521-V12TYQCIKCQM  | 2051 | 1799  |
| >ZNF521-V12TYQCIKCQM  | 5     | >ZNF521-V12TYQCIKCQM  | 5    | 0     |
| >ZNF521-V12QVHVANHMI  | 5004  | >ZNF521-V12QLHVANHMI  | 169  | 4835  |
| >ZNF521-V12QVHVANHMI  | 9712  | >ZNF521-V12QLHVANHMI  | 263  | 9449  |
| >ZNF521-V12QVHVANHMI  | 11941 | >ZNF521-V12QLHVANHMI  | 83   | 11858 |
| >ZNF521-V12QVHVANHMI  | 320   | >ZNF521-V12QLHVANHMI  | 7712 | 7392  |
| >ZNF521-V12QVHVANHMI  | 376   | >ZNF521-V12QLHVANHMI  | 2383 | 2007  |
| >ZNF521-V12QVHVANHMI  | 121   | >ZNF521-V12QLHVANHMI  | 958  | 837   |
| >ZNF521-V12QVHVANHMI  | 55    | >ZNF521-V12QLHVANHMI  | 1821 | 1766  |
| >ZNF521-V12QVHVANHMI  | 213   | >ZNF521-V12QLHVANHMI  | 1011 | 798   |
| >ZNF521-V12MVFYNEWDI  | 862   | >ZNF521-V12MVFYNEWDI  | 302  | 560   |
| >ZNF521-V12MVFYNEWDI  | 23    | >ZNF521-V12MVFYNEWDI  | 78   | 55    |
| >ZNF521-V12MVFYNEWDI  | 37    | >ZNF521-V12MVFYNEWDI  | 60   | 23    |
| >ZNF521-V12MVFYNEWDI  | 124   | >ZNF521-V12MVFYNEWDI  | 1167 | 1043  |
| >ZNF521-V12MVFYNEWDI  | 23    | >ZNF521-V12MVFYNEWDI  | 122  | 99    |
| >ZNF521-V12MVFYNEWDI  | 11    | >ZNF521-V12MVFYNEWDI  | 89   | 78    |
| >ZNF521-V12MVFYNEWDI  | 52    | >ZNF521-V12MVFYNEWDI  | 563  | 511   |
| >ZNF521-V12MVFYNEWDI  | 31    | >ZNF521-V12MVFYNEWDI  | 520  | 489   |
| >ZNF521-V12MVFYNEWDI  | 134   | >ZNF521-V12MVFYNEWDI  | 1660 | 1526  |
| >ZNF521-V12MVFYNEWDI  | 7     | >ZNF521-V12MVFYNEWDI  | 54   | 47    |
| >ZNF521-V12MVFYNEWDI  | 504   | >ZNF521-V12MVFYNEWDI  | 77   | 427   |
| >ZNF521-V12MVFYNEWDI  | 5     | >ZNF521-V12MVFYNEWDI  | 10   | 5     |
| >ZNF521-V12MVFYNEWDI  | 34    | >ZNF521-V12MVFYNEWDI  | 316  | 282   |
| >ZNF521-V12MVFYNEWDI  | 5266  | >ZNF521-V12MVFYNEWDI  | 288  | 4978  |
| >ZNF521-V12MVFYNEWDI  | 1364  | >ZNF521-V12MVFYNEWDI  | 232  | 1132  |
| >ZNF521-V12IQVHVANHM  | 218   | >ZNF521-V12IQLHVANHM  | 78   | 140   |
| >ZNF521-V12IQVHVANHM  | 82    | >ZNF521-V12IQLHVANHM  | 75   | 7     |
| >ZNF521-V12IQVHVANHM  | 2362  | >ZNF521-V12IQLHVANHM  | 392  | 1970  |
| >ZNF521-V12IQVHVANHM  | 79    | >ZNF521-V12IQLHVANHM  | 151  | 72    |
| >ZNF521-V12IQVHVANH   | 193   | >ZNF521-V12IQLHVANH   | 129  | 64    |
| >ZNF521-V12IQVHVANHM  | 17    | >ZNF521-V12IQLHVANHM  | 12   | 5     |
| >ZNF521-V12IQVHVANHM  | 52    | >ZNF521-V12IQLHVANHM  | 37   | 15    |
| >ZNF521-V12DIQVHVANH  | 159   | >ZNF521-V12DIQLHVANH  | 143  | 16    |
| >ZNF521-V12DIQVHVANH  | 332   | >ZNF521-V12DIQLHVANH  | 483  | 151   |

|                       |      |                       |      |      |
|-----------------------|------|-----------------------|------|------|
| >ZNF521-V12WDIQVHVA   | 441  | >ZNF521-V12WDIQLHVA   | 221  | 220  |
| >ZNF521-V12NEWDIQVHV  | 71   | >ZNF521-V12NEWDIQLHV  | 53   | 18   |
| >ZNF521-V12NEWDIQVH   | 393  | >ZNF521-V12NEWDIQLHV  | 3037 | 2644 |
| >ZNF521-V12NEWDIQVH   | 68   | >ZNF521-V12NEWDIQLH   | 135  | 67   |
| >ZNF521-V12NEWDIQVHV  | 159  | >ZNF521-V12NEWDIQLHV  | 133  | 26   |
| >ZNF521-V12NEWDIQVHV  | 63   | >ZNF521-V12NEWDIQLHV  | 54   | 9    |
| >ZNF521-V12NEWDIQVHV  | 556  | >ZNF521-V12NEWDIQLHV  | 468  | 88   |
| >ZNF521-V12NEWDIQVHV  | 394  | >ZNF521-V12NEWDIQLHV  | 656  | 262  |
| >ZNF521-V12NEWDIQVHV  | 254  | >ZNF521-V12NEWDIQLHV  | 326  | 72   |
| >ZNF521-V12NEWDIQVHV  | 34   | >ZNF521-V12NEWDIQLHV  | 54   | 20   |
| >ZNF521-V12FYNEWDIQV  | 399  | >ZNF521-V12FYNEWDIQL  | 1852 | 1453 |
| >ZNF521-V12FYNEWDIQV  | 339  | >ZNF521-V12FYNEWDIQL  | 423  | 84   |
| >ZNF521-V12FYNEWDIQVI | 114  | >ZNF521-V12FYNEWDIQLF | 174  | 60   |
| >ZNF521-V12FYNEWDIQV  | 110  | >ZNF521-V12FYNEWDIQL  | 821  | 711  |
| >ZNF521-V12FYNEWDIQVI | 75   | >ZNF521-V12FYNEWDIQLF | 76   | 1    |
| >ZNF521-V12FYNEWDIQV  | 9    | >ZNF521-V12FYNEWDIQL  | 92   | 83   |
| >ZNF521-V12FYNEWDIQVI | 20   | >ZNF521-V12FYNEWDIQLF | 25   | 5    |
| >ZNF521-V12FYNEWDIQV  | 255  | >ZNF521-V12FYNEWDIQL  | 2457 | 2202 |
| >ZNF521-V12FYNEWDIQVI | 169  | >ZNF521-V12FYNEWDIQLF | 307  | 138  |
| >ZNF521-V12FYNEWDIQV  | 28   | >ZNF521-V12FYNEWDIQL  | 282  | 254  |
| >ZNF521-V12FYNEWDIQVI | 29   | >ZNF521-V12FYNEWDIQLF | 34   | 5    |
| >ZNF521-V12FYNEWDIQV  | 6    | >ZNF521-V12FYNEWDIQL  | 69   | 63   |
| >ZNF521-V12FYNEWDIQVI | 7    | >ZNF521-V12FYNEWDIQLF | 10   | 3    |
| >ZNF521-V12FYNEWDIQV  | 1445 | >ZNF521-V12FYNEWDIQL  | 310  | 1135 |
| >ZNF521-V12FYNEWDIQV  | 292  | >ZNF521-V12FYNEWDIQL  | 18   | 274  |
| >ZNF521-V12FYNEWDIQVI | 261  | >ZNF521-V12FYNEWDIQLF | 326  | 65   |
| >ZNF521-V12FYNEWDIQVI | 302  | >ZNF521-V12FYNEWDIQLF | 1233 | 931  |
| >ZNF521-V12VFYNEWDIQ' | 100  | >ZNF521-V12VFYNEWDIQI | 978  | 878  |
| >ZNF521-V12VFYNEWDIQ' | 116  | >ZNF521-V12VFYNEWDIQI | 1722 | 1606 |
| >ZNF521-V12VFYNEWDIQ' | 164  | >ZNF521-V12VFYNEWDIQI | 2874 | 2710 |
| >ZNF521-V12VFYNEWDIQ' | 5568 | >ZNF521-V12VFYNEWDIQI | 219  | 5349 |
